# Supplementary material for: Development of a 690 K SNP array in catfish and its application for genetic mapping and validation of the reference genome sequence
Source: PubMed Central journal article supplement (PMC5228154; doi:10.1038/srep40347), 2017-01-12
Supplement: srep40347-s1.pdf [file srep40347-s1.pdf]

**Development of a 690K SNP array in catfish and its application for genetic mapping and validation of the reference genome sequence**

Qifan Zeng<sup>1</sup>, Qiang Fu<sup>1</sup>, Yun Li<sup>1</sup>, Geoff Waldbieser<sup>2</sup>, Brian Bosworth<sup>2</sup>, Shikai Liu<sup>1</sup>, Yujia Yang<sup>1</sup>, Lisui Bao<sup>1</sup>, Zihao Yuan<sup>1</sup>, Ning Li<sup>1</sup>, and Zhanjiang Liu<sup>1\*</sup>

<sup>1</sup>The Fish Molecular Genetics and Biotechnology Laboratory, Aquatic Genomics Unit, School of Fisheries, Aquaculture and Aquatic Sciences, and Program of Cell and Molecular Biosciences, Auburn, Alabama 36832, United States of America

<sup>2</sup>USDA-ARS Warmwater Aquaculture Research Unit, Stoneville, Mississippi 38776, United States of America

\*Correspondence: E-mail: [liuzhan@auburn.edu](mailto:liuzhan@auburn.edu)

**Supplemental Figure 1.** Illustration of female-specific linkage map.

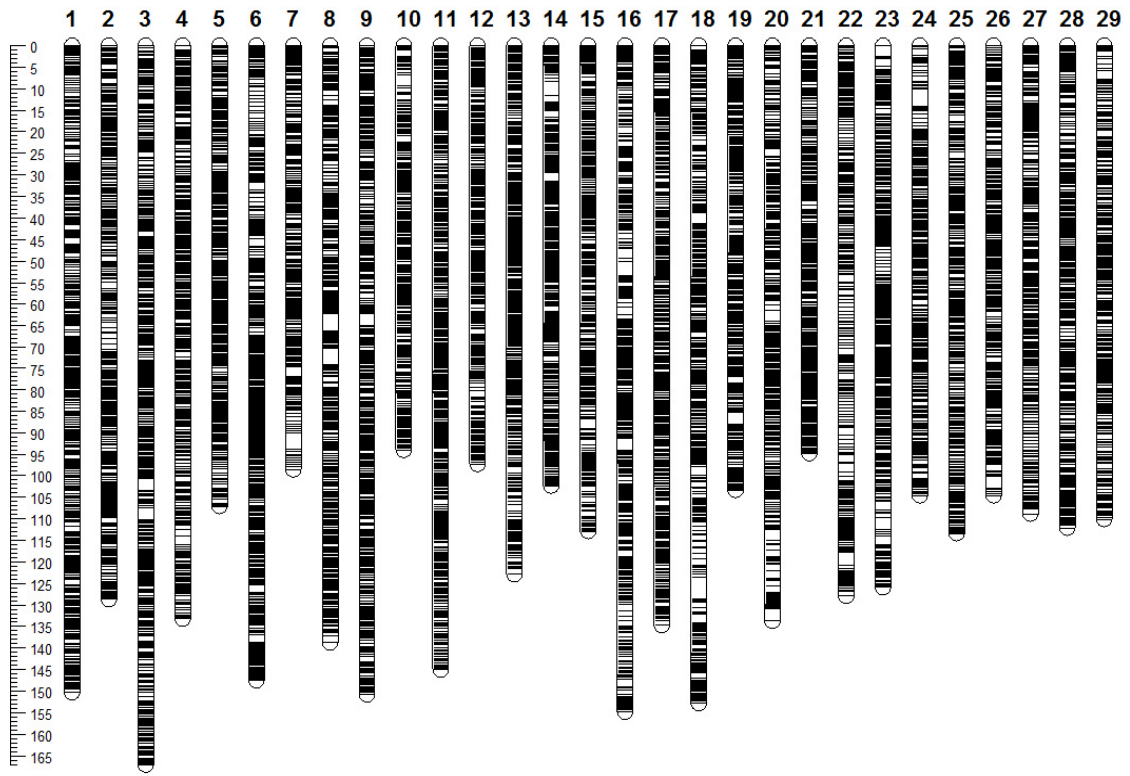

**Supplemental Figure 2.** Illustration of male-specific linkage map.

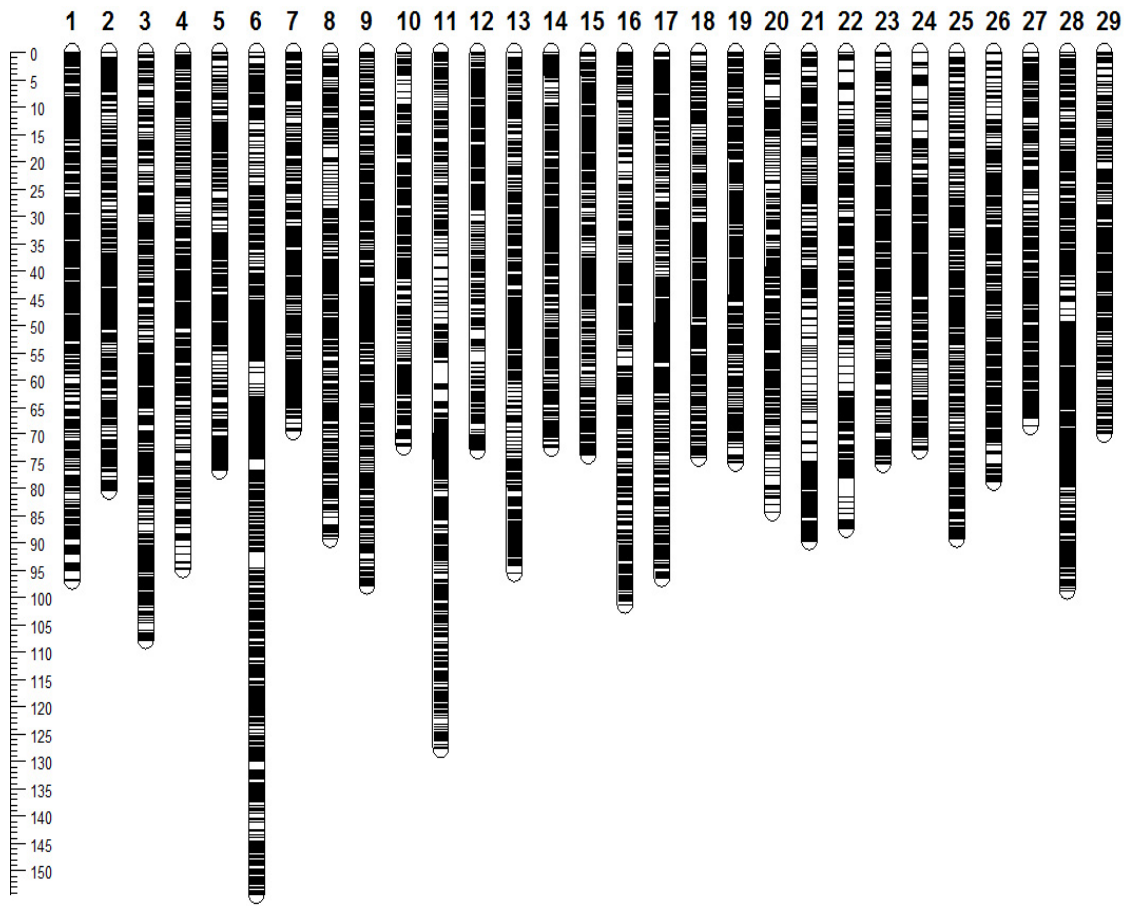

**Supplemental Table S1.**

| Marker       | Linkage group | Genetic position | Accession   | Marker Position on Scaffold | Scaffold   | Chromosome |
|--------------|---------------|------------------|-------------|-----------------------------|------------|------------|
| AX-157889335 | 1             | 0                | KV452696.1  | 768                         | 1-scf00001 | 1          |
| AX-157810099 | 1             | 0                | KV452696.1  | 13675                       | 1-scf00001 | 1          |
| AX-157889348 | 1             | 0                | KV452696.1  | 19009                       | 1-scf00001 | 1          |
| AX-157889378 | 1             | 0                | KV452696.1  | 94512                       | 1-scf00001 | 1          |
| AX-157810111 | 1             | 0                | KV452696.1  | 194391                      | 1-scf00001 | 1          |
| AX-157889490 | 1             | 0                | KV452696.1  | 255063                      | 1-scf00001 | 1          |
| AX-157890091 | 1             | 0                | KV452696.1  | 1222381                     | 1-scf00001 | 1          |
| AX-157890144 | 1             | 0                | KV452696.1  | 1304163                     | 1-scf00001 | 1          |
| AX-158376989 | 1             | 0                | KV452695.1  | 6200                        | 1-scf00598 | 1          |
| AX-157709104 | 1             | 0                | KV452695.1  | 8650                        | 1-scf00598 | 1          |
| AX-158376990 | 1             | 0                | KV452695.1  | 9182                        | 1-scf00598 | 1          |
| AX-157853360 | 1             | 0                | KV452695.1  | 12432                       | 1-scf00598 | 1          |
| AX-157720046 | 1             | 0                | KV452695.1  | 16327                       | 1-scf00598 | 1          |
| AX-158376996 | 1             | 0                | KV452695.1  | 24090                       | 1-scf00598 | 1          |
| AX-158376998 | 1             | 0                | KV452695.1  | 33689                       | 1-scf00598 | 1          |
| AX-158377000 | 1             | 0                | KV452695.1  | 56502                       | 1-scf00598 | 1          |
| AX-157772461 | 1             | 0                | KV452695.1  | 68810                       | 1-scf00598 | 1          |
| AX-158377004 | 1             | 0                | KV452695.1  | 74627                       | 1-scf00598 | 1          |
| AX-157889322 | 1             | 0                | KV452695.1  | 79314                       | 1-scf00598 | 1          |
| AX-158424003 | 1             | 0                | KV452695.1  | 81171                       | 1-scf00598 | 1          |
| AX-157853364 | 1             | 0                | KV452695.1  | 92819                       | 1-scf00598 | 1          |
| AX-158377006 | 1             | 0                | KV452695.1  | 93302                       | 1-scf00598 | 1          |
| AX-158377007 | 1             | 0                | KV452695.1  | 95855                       | 1-scf00598 | 1          |
| AX-158377008 | 1             | 0                | KV452695.1  | 97051                       | 1-scf00598 | 1          |
| AX-158379063 | 1             | 0                | KV452695.1  | 97725                       | 1-scf00598 | 1          |
| AX-157751599 | 1             | 0                | KV452695.1  | 150749                      | 1-scf00598 | 1          |
| AX-157723901 | 1             | 0                | KV452695.1  | 158105                      | 1-scf00598 | 1          |
| AX-158377036 | 1             | 0                | KV452695.1  | 170155                      | 1-scf00598 | 1          |
| AX-158377042 | 1             | 0                | KV452695.1  | 180739                      | 1-scf00598 | 1          |
| AX-158377052 | 1             | 0                | KV452695.1  | 198222                      | 1-scf00598 | 1          |
| AX-158377053 | 1             | 0                | KV452695.1  | 198977                      | 1-scf00598 | 1          |
| AX-157687664 | 1             | 0                | KV452694.1  | 686                         | 1-scf00962 | 1          |
| AX-157680241 | 1             | 0                | KV452694.1  | 2193                        | 1-scf00962 | 1          |
| AX-157687668 | 1             | 0                | KV452694.1  | 7464                        | 1-scf00962 | 1          |
| AX-157680131 | 1             | 0                | 3ML01024458 | 31133                       | scf00715_1 | UN         |
| AX-158377012 | 1             | 0.074            | KV452695.1  | 101726                      | 1-scf00598 | 1          |
| AX-157758848 | 1             | 0.126            | KV452696.1  | 101253                      | 1-scf00001 | 1          |
| AX-158377014 | 1             | 0.126            | KV452695.1  | 105509                      | 1-scf00598 | 1          |
| AX-157853366 | 1             | 0.126            | KV452695.1  | 105695                      | 1-scf00598 | 1          |
| AX-158377016 | 1             | 0.126            | KV452695.1  | 107887                      | 1-scf00598 | 1          |
| AX-157853367 | 1             | 0.126            | KV452695.1  | 115316                      | 1-scf00598 | 1          |
| AX-158377020 | 1             | 0.126            | KV452695.1  | 119746                      | 1-scf00598 | 1          |
| AX-157706029 | 1             | 0.126            | 3ML01031462 | 233                         | scf07075_1 | UN         |
| AX-157889337 | 1             | 0.252            | KV452696.1  | 2443                        | 1-scf00001 | 1          |
| AX-157810098 | 1             | 0.252            | KV452696.1  | 10510                       | 1-scf00001 | 1          |

|              |   |       |            |        |            |   |
|--------------|---|-------|------------|--------|------------|---|
| AX-157889344 | 1 | 0.252 | KV452696.1 | 14506  | 1-scf00001 | 1 |
| AX-157889346 | 1 | 0.252 | KV452696.1 | 17276  | 1-scf00001 | 1 |
| AX-157889351 | 1 | 0.252 | KV452696.1 | 22454  | 1-scf00001 | 1 |
| AX-157889352 | 1 | 0.252 | KV452696.1 | 22608  | 1-scf00001 | 1 |
| AX-157889353 | 1 | 0.252 | KV452696.1 | 24201  | 1-scf00001 | 1 |
| AX-158377011 | 1 | 0.252 | KV452695.1 | 99372  | 1-scf00598 | 1 |
| AX-158377029 | 1 | 0.252 | KV452695.1 | 157313 | 1-scf00598 | 1 |
| AX-157725922 | 1 | 0.252 | KV452695.1 | 182840 | 1-scf00598 | 1 |
| AX-158377049 | 1 | 0.252 | KV452695.1 | 195530 | 1-scf00598 | 1 |
| AX-157889369 | 1 | 0.379 | KV452696.1 | 78184  | 1-scf00001 | 1 |
| AX-157889370 | 1 | 0.379 | KV452696.1 | 79159  | 1-scf00001 | 1 |
| AX-157889371 | 1 | 0.379 | KV452696.1 | 79440  | 1-scf00001 | 1 |
| AX-157889373 | 1 | 0.379 | KV452696.1 | 81452  | 1-scf00001 | 1 |
| AX-157889377 | 1 | 0.379 | KV452696.1 | 93960  | 1-scf00001 | 1 |
| AX-157889381 | 1 | 0.379 | KV452696.1 | 100522 | 1-scf00001 | 1 |
| AX-157889388 | 1 | 0.379 | KV452696.1 | 107998 | 1-scf00001 | 1 |
| AX-157715345 | 1 | 0.379 | KV452696.1 | 108410 | 1-scf00001 | 1 |
| AX-157889390 | 1 | 0.379 | KV452696.1 | 111068 | 1-scf00001 | 1 |
| AX-157889409 | 1 | 0.379 | KV452696.1 | 131675 | 1-scf00001 | 1 |
| AX-157889410 | 1 | 0.379 | KV452696.1 | 132058 | 1-scf00001 | 1 |
| AX-157889389 | 1 | 0.484 | KV452696.1 | 109156 | 1-scf00001 | 1 |
| AX-157810106 | 1 | 0.597 | KV452696.1 | 112210 | 1-scf00001 | 1 |
| AX-157810108 | 1 | 0.597 | KV452696.1 | 114828 | 1-scf00001 | 1 |
| AX-157810109 | 1 | 0.597 | KV452696.1 | 115061 | 1-scf00001 | 1 |
| AX-157874194 | 1 | 0.597 | KV452696.1 | 115177 | 1-scf00001 | 1 |
| AX-157889393 | 1 | 0.597 | KV452696.1 | 115406 | 1-scf00001 | 1 |
| AX-157889395 | 1 | 0.597 | KV452696.1 | 116775 | 1-scf00001 | 1 |
| AX-157889398 | 1 | 0.597 | KV452696.1 | 120550 | 1-scf00001 | 1 |
| AX-157889400 | 1 | 0.597 | KV452696.1 | 121327 | 1-scf00001 | 1 |
| AX-157810110 | 1 | 0.597 | KV452696.1 | 122791 | 1-scf00001 | 1 |
| AX-157889403 | 1 | 0.597 | KV452696.1 | 123879 | 1-scf00001 | 1 |
| AX-157889404 | 1 | 0.597 | KV452696.1 | 124921 | 1-scf00001 | 1 |
| AX-157889412 | 1 | 0.597 | KV452696.1 | 134343 | 1-scf00001 | 1 |
| AX-157889413 | 1 | 0.597 | KV452696.1 | 135161 | 1-scf00001 | 1 |
| AX-157889414 | 1 | 0.597 | KV452696.1 | 136370 | 1-scf00001 | 1 |
| AX-157719822 | 1 | 0.597 | KV452696.1 | 138643 | 1-scf00001 | 1 |
| AX-158377002 | 1 | 0.597 | KV452695.1 | 66859  | 1-scf00598 | 1 |
| AX-158377027 | 1 | 0.597 | KV452695.1 | 149611 | 1-scf00598 | 1 |
| AX-158377032 | 1 | 0.597 | KV452695.1 | 162389 | 1-scf00598 | 1 |
| AX-157853371 | 1 | 0.597 | KV452695.1 | 162875 | 1-scf00598 | 1 |
| AX-157687665 | 1 | 0.597 | KV452694.1 | 1503   | 1-scf00962 | 1 |
| AX-157889418 | 1 | 0.707 | KV452696.1 | 145286 | 1-scf00001 | 1 |
| AX-157889419 | 1 | 0.707 | KV452696.1 | 145492 | 1-scf00001 | 1 |
| AX-157889421 | 1 | 0.707 | KV452696.1 | 147400 | 1-scf00001 | 1 |
| AX-157889422 | 1 | 0.707 | KV452696.1 | 147766 | 1-scf00001 | 1 |
| AX-157681017 | 1 | 0.707 | KV452694.1 | 7771   | 1-scf00962 | 1 |
| AX-157889424 | 1 | 0.708 | KV452696.1 | 150436 | 1-scf00001 | 1 |
| AX-157889427 | 1 | 1.112 | KV452696.1 | 155625 | 1-scf00001 | 1 |
| AX-157889429 | 1 | 1.112 | KV452696.1 | 160866 | 1-scf00001 | 1 |
| AX-157889430 | 1 | 1.113 | KV452696.1 | 161691 | 1-scf00001 | 1 |
| AX-157889432 | 1 | 1.115 | KV452696.1 | 164763 | 1-scf00001 | 1 |

|              |   |       |             |        |            |    |
|--------------|---|-------|-------------|--------|------------|----|
| AX-157889433 | 1 | 1.116 | KV452696.1  | 165520 | 1-scf00001 | 1  |
| AX-157745518 | 1 | 1.118 | KV452696.1  | 165747 | 1-scf00001 | 1  |
| AX-157889436 | 1 | 1.119 | KV452696.1  | 169660 | 1-scf00001 | 1  |
| AX-157714401 | 1 | 1.119 | KV452696.1  | 170217 | 1-scf00001 | 1  |
| AX-157889437 | 1 | 1.12  | KV452696.1  | 170650 | 1-scf00001 | 1  |
| AX-157889345 | 1 | 1.311 | KV452696.1  | 15068  | 1-scf00001 | 1  |
| AX-157714644 | 1 | 1.311 | KV452696.1  | 113213 | 1-scf00001 | 1  |
| AX-157889391 | 1 | 1.311 | KV452696.1  | 113880 | 1-scf00001 | 1  |
| AX-157889402 | 1 | 1.311 | KV452696.1  | 122502 | 1-scf00001 | 1  |
| AX-157889438 | 1 | 1.311 | KV452696.1  | 174265 | 1-scf00001 | 1  |
| AX-157889439 | 1 | 1.311 | KV452696.1  | 175420 | 1-scf00001 | 1  |
| AX-157889442 | 1 | 1.311 | KV452696.1  | 180968 | 1-scf00001 | 1  |
| AX-157889492 | 1 | 1.311 | KV452696.1  | 264313 | 1-scf00001 | 1  |
| AX-158376991 | 1 | 1.311 | KV452695.1  | 10948  | 1-scf00598 | 1  |
| AX-157706556 | 1 | 1.311 | 3ML01032450 | 520    | scf08071_1 | UN |
| AX-157706555 | 1 | 1.35  | 3ML01032450 | 377    | scf08071_1 | UN |
| AX-157868440 | 1 | 1.409 | KV452696.1  | 181217 | 1-scf00001 | 1  |
| AX-157715146 | 1 | 1.409 | KV452696.1  | 191389 | 1-scf00001 | 1  |
| AX-157889444 | 1 | 1.471 | KV452696.1  | 185961 | 1-scf00001 | 1  |
| AX-157889445 | 1 | 1.471 | KV452696.1  | 189173 | 1-scf00001 | 1  |
| AX-157889446 | 1 | 1.471 | KV452696.1  | 189478 | 1-scf00001 | 1  |
| AX-157889447 | 1 | 1.471 | KV452696.1  | 190487 | 1-scf00001 | 1  |
| AX-157889448 | 1 | 1.471 | KV452696.1  | 191500 | 1-scf00001 | 1  |
| AX-157889452 | 1 | 1.471 | KV452696.1  | 199229 | 1-scf00001 | 1  |
| AX-157770650 | 1 | 1.471 | KV452696.1  | 211881 | 1-scf00001 | 1  |
| AX-157889456 | 1 | 1.525 | KV452696.1  | 205397 | 1-scf00001 | 1  |
| AX-157889458 | 1 | 1.581 | KV452696.1  | 209111 | 1-scf00001 | 1  |
| AX-157889460 | 1 | 1.581 | KV452696.1  | 210774 | 1-scf00001 | 1  |
| AX-157810112 | 1 | 1.581 | KV452696.1  | 222686 | 1-scf00001 | 1  |
| AX-157746184 | 1 | 1.636 | KV452696.1  | 214757 | 1-scf00001 | 1  |
| AX-157889463 | 1 | 1.689 | KV452696.1  | 216181 | 1-scf00001 | 1  |
| AX-157889464 | 1 | 1.745 | KV452696.1  | 219261 | 1-scf00001 | 1  |
| AX-157751316 | 1 | 1.814 | KV452696.1  | 225190 | 1-scf00001 | 1  |
| AX-157889472 | 1 | 1.859 | KV452696.1  | 235803 | 1-scf00001 | 1  |
| AX-158403602 | 1 | 1.909 | KV452696.1  | 5245   | 1-scf00001 | 1  |
| AX-157889340 | 1 | 1.909 | KV452696.1  | 6405   | 1-scf00001 | 1  |
| AX-157742990 | 1 | 1.909 | KV452696.1  | 76830  | 1-scf00001 | 1  |
| AX-157889368 | 1 | 1.909 | KV452696.1  | 77144  | 1-scf00001 | 1  |
| AX-157889372 | 1 | 1.909 | KV452696.1  | 81171  | 1-scf00001 | 1  |
| AX-157889379 | 1 | 1.909 | KV452696.1  | 99163  | 1-scf00001 | 1  |
| AX-157889397 | 1 | 1.909 | KV452696.1  | 118152 | 1-scf00001 | 1  |
| AX-157756124 | 1 | 1.909 | KV452696.1  | 133715 | 1-scf00001 | 1  |
| AX-157889416 | 1 | 1.909 | KV452696.1  | 139038 | 1-scf00001 | 1  |
| AX-157868439 | 1 | 1.909 | KV452696.1  | 149537 | 1-scf00001 | 1  |
| AX-157889435 | 1 | 1.909 | KV452696.1  | 167913 | 1-scf00001 | 1  |
| AX-157889462 | 1 | 1.909 | KV452696.1  | 215470 | 1-scf00001 | 1  |
| AX-157889469 | 1 | 1.909 | KV452696.1  | 233879 | 1-scf00001 | 1  |
| AX-157889473 | 1 | 1.909 | KV452696.1  | 236107 | 1-scf00001 | 1  |
| AX-157889476 | 1 | 1.909 | KV452696.1  | 238305 | 1-scf00001 | 1  |
| AX-157810113 | 1 | 1.909 | KV452696.1  | 239495 | 1-scf00001 | 1  |
| AX-157889477 | 1 | 1.909 | KV452696.1  | 239723 | 1-scf00001 | 1  |

|              |   |       |             |        |            |    |
|--------------|---|-------|-------------|--------|------------|----|
| AX-157889479 | 1 | 1.909 | KV452696.1  | 240351 | 1-scf00001 | 1  |
| AX-157889480 | 1 | 1.909 | KV452696.1  | 240516 | 1-scf00001 | 1  |
| AX-157889481 | 1 | 1.909 | KV452696.1  | 241204 | 1-scf00001 | 1  |
| AX-157889486 | 1 | 1.909 | KV452696.1  | 247281 | 1-scf00001 | 1  |
| AX-157810115 | 1 | 1.909 | KV452696.1  | 249165 | 1-scf00001 | 1  |
| AX-157745729 | 1 | 1.909 | KV452696.1  | 249258 | 1-scf00001 | 1  |
| AX-157810116 | 1 | 1.909 | KV452696.1  | 250033 | 1-scf00001 | 1  |
| AX-158378693 | 1 | 1.909 | KV452696.1  | 360598 | 1-scf00001 | 1  |
| AX-158377003 | 1 | 1.909 | KV452695.1  | 68321  | 1-scf00598 | 1  |
| AX-158420677 | 1 | 1.909 | KV452695.1  | 80955  | 1-scf00598 | 1  |
| AX-158377013 | 1 | 1.909 | KV452695.1  | 103475 | 1-scf00598 | 1  |
| AX-158379064 | 1 | 1.909 | KV452695.1  | 117412 | 1-scf00598 | 1  |
| AX-157853372 | 1 | 1.909 | KV452695.1  | 178837 | 1-scf00598 | 1  |
| AX-157689695 | 1 | 1.909 | 3ML01031408 | 287    | scf07020_1 | UN |
| AX-157889488 | 1 | 2.018 | KV452696.1  | 252160 | 1-scf00001 | 1  |
| AX-157889493 | 1 | 2.106 | KV452696.1  | 264442 | 1-scf00001 | 1  |
| AX-157889494 | 1 | 2.182 | KV452696.1  | 265169 | 1-scf00001 | 1  |
| AX-157889499 | 1 | 2.182 | KV452696.1  | 267912 | 1-scf00001 | 1  |
| AX-157889497 | 1 | 2.238 | KV452696.1  | 266584 | 1-scf00001 | 1  |
| AX-157889455 | 1 | 2.283 | KV452696.1  | 203604 | 1-scf00001 | 1  |
| AX-157889468 | 1 | 2.283 | KV452696.1  | 232253 | 1-scf00001 | 1  |
| AX-158379081 | 1 | 2.283 | KV452696.1  | 263874 | 1-scf00001 | 1  |
| AX-157710376 | 1 | 2.283 | KV452696.1  | 270140 | 1-scf00001 | 1  |
| AX-157889505 | 1 | 2.306 | KV452696.1  | 271730 | 1-scf00001 | 1  |
| AX-157889496 | 1 | 2.316 | KV452696.1  | 266076 | 1-scf00001 | 1  |
| AX-158381854 | 1 | 2.316 | KV452696.1  | 266835 | 1-scf00001 | 1  |
| AX-157889500 | 1 | 2.316 | KV452696.1  | 268282 | 1-scf00001 | 1  |
| AX-157889501 | 1 | 2.316 | KV452696.1  | 269125 | 1-scf00001 | 1  |
| AX-157889504 | 1 | 2.316 | KV452696.1  | 271144 | 1-scf00001 | 1  |
| AX-157756012 | 1 | 2.316 | KV452696.1  | 273884 | 1-scf00001 | 1  |
| AX-157889516 | 1 | 2.316 | KV452696.1  | 286337 | 1-scf00001 | 1  |
| AX-157719435 | 1 | 2.346 | KV452696.1  | 263786 | 1-scf00001 | 1  |
| AX-157889498 | 1 | 2.346 | KV452696.1  | 267087 | 1-scf00001 | 1  |
| AX-157889502 | 1 | 2.346 | KV452696.1  | 269637 | 1-scf00001 | 1  |
| AX-157889509 | 1 | 2.346 | KV452696.1  | 279852 | 1-scf00001 | 1  |
| AX-157889510 | 1 | 2.346 | KV452696.1  | 281131 | 1-scf00001 | 1  |
| AX-157889511 | 1 | 2.346 | KV452696.1  | 282450 | 1-scf00001 | 1  |
| AX-157889514 | 1 | 2.346 | KV452696.1  | 285532 | 1-scf00001 | 1  |
| AX-157889519 | 1 | 2.564 | KV452696.1  | 288656 | 1-scf00001 | 1  |
| AX-157889521 | 1 | 2.564 | KV452696.1  | 293995 | 1-scf00001 | 1  |
| AX-157889524 | 1 | 2.564 | KV452696.1  | 295931 | 1-scf00001 | 1  |
| AX-157746161 | 1 | 2.783 | KV452696.1  | 259783 | 1-scf00001 | 1  |
| AX-157889523 | 1 | 2.783 | KV452696.1  | 295463 | 1-scf00001 | 1  |
| AX-157889526 | 1 | 2.783 | KV452696.1  | 297790 | 1-scf00001 | 1  |
| AX-157889529 | 1 | 2.783 | KV452696.1  | 302394 | 1-scf00001 | 1  |
| AX-157874198 | 1 | 2.783 | KV452696.1  | 306243 | 1-scf00001 | 1  |
| AX-157889533 | 1 | 2.783 | KV452696.1  | 308400 | 1-scf00001 | 1  |
| AX-157771493 | 1 | 2.783 | KV452696.1  | 309599 | 1-scf00001 | 1  |
| AX-157889534 | 1 | 2.783 | KV452696.1  | 313075 | 1-scf00001 | 1  |
| AX-157751748 | 1 | 2.783 | KV452696.1  | 314204 | 1-scf00001 | 1  |
| AX-157889536 | 1 | 2.783 | KV452696.1  | 314924 | 1-scf00001 | 1  |

|              |   |       |            |        |            |   |
|--------------|---|-------|------------|--------|------------|---|
| AX-157889537 | 1 | 2.783 | KV452696.1 | 316300 | 1-scf00001 | 1 |
| AX-157889538 | 1 | 2.783 | KV452696.1 | 316710 | 1-scf00001 | 1 |
| AX-157727150 | 1 | 2.783 | KV452696.1 | 317877 | 1-scf00001 | 1 |
| AX-157889540 | 1 | 2.783 | KV452696.1 | 319284 | 1-scf00001 | 1 |
| AX-158404104 | 1 | 2.783 | KV452696.1 | 322627 | 1-scf00001 | 1 |
| AX-157889541 | 1 | 2.783 | KV452696.1 | 322996 | 1-scf00001 | 1 |
| AX-157889545 | 1 | 2.783 | KV452696.1 | 325795 | 1-scf00001 | 1 |
| AX-157889547 | 1 | 2.783 | KV452696.1 | 328467 | 1-scf00001 | 1 |
| AX-157889548 | 1 | 2.783 | KV452696.1 | 330832 | 1-scf00001 | 1 |
| AX-157810119 | 1 | 2.783 | KV452696.1 | 331639 | 1-scf00001 | 1 |
| AX-157810120 | 1 | 2.783 | KV452696.1 | 333217 | 1-scf00001 | 1 |
| AX-157889552 | 1 | 2.783 | KV452696.1 | 334243 | 1-scf00001 | 1 |
| AX-157889553 | 1 | 2.783 | KV452696.1 | 334727 | 1-scf00001 | 1 |
| AX-157889554 | 1 | 2.783 | KV452696.1 | 336961 | 1-scf00001 | 1 |
| AX-157889555 | 1 | 2.783 | KV452696.1 | 338735 | 1-scf00001 | 1 |
| AX-157889556 | 1 | 2.783 | KV452696.1 | 338844 | 1-scf00001 | 1 |
| AX-157810121 | 1 | 2.783 | KV452696.1 | 342183 | 1-scf00001 | 1 |
| AX-157810122 | 1 | 2.783 | KV452696.1 | 342361 | 1-scf00001 | 1 |
| AX-157889561 | 1 | 2.783 | KV452696.1 | 342450 | 1-scf00001 | 1 |
| AX-157889563 | 1 | 2.783 | KV452696.1 | 345925 | 1-scf00001 | 1 |
| AX-157889566 | 1 | 2.783 | KV452696.1 | 357829 | 1-scf00001 | 1 |
| AX-157889567 | 1 | 2.783 | KV452696.1 | 360869 | 1-scf00001 | 1 |
| AX-157889571 | 1 | 2.783 | KV452696.1 | 368841 | 1-scf00001 | 1 |
| AX-157889573 | 1 | 2.783 | KV452696.1 | 372306 | 1-scf00001 | 1 |
| AX-157889588 | 1 | 2.783 | KV452696.1 | 396406 | 1-scf00001 | 1 |
| AX-157889565 | 1 | 3.11  | KV452696.1 | 355814 | 1-scf00001 | 1 |
| AX-157889581 | 1 | 3.11  | KV452696.1 | 385208 | 1-scf00001 | 1 |
| AX-157889583 | 1 | 3.11  | KV452696.1 | 389120 | 1-scf00001 | 1 |
| AX-157810125 | 1 | 3.11  | KV452696.1 | 389521 | 1-scf00001 | 1 |
| AX-157874201 | 1 | 3.11  | KV452696.1 | 390488 | 1-scf00001 | 1 |
| AX-157889584 | 1 | 3.11  | KV452696.1 | 391208 | 1-scf00001 | 1 |
| AX-157754048 | 1 | 3.11  | KV452696.1 | 391338 | 1-scf00001 | 1 |
| AX-157889585 | 1 | 3.11  | KV452696.1 | 392318 | 1-scf00001 | 1 |
| AX-157889586 | 1 | 3.11  | KV452696.1 | 393053 | 1-scf00001 | 1 |
| AX-157889589 | 1 | 3.11  | KV452696.1 | 396769 | 1-scf00001 | 1 |
| AX-157758291 | 1 | 3.11  | KV452696.1 | 396875 | 1-scf00001 | 1 |
| AX-157889590 | 1 | 3.11  | KV452696.1 | 399060 | 1-scf00001 | 1 |
| AX-157772256 | 1 | 3.11  | KV452696.1 | 404019 | 1-scf00001 | 1 |
| AX-157889595 | 1 | 3.11  | KV452696.1 | 404914 | 1-scf00001 | 1 |
| AX-157741017 | 1 | 3.11  | KV452696.1 | 406411 | 1-scf00001 | 1 |
| AX-157889596 | 1 | 3.11  | KV452696.1 | 407064 | 1-scf00001 | 1 |
| AX-157744835 | 1 | 3.11  | KV452696.1 | 412670 | 1-scf00001 | 1 |
| AX-157810127 | 1 | 3.11  | KV452696.1 | 413768 | 1-scf00001 | 1 |
| AX-157889598 | 1 | 3.11  | KV452696.1 | 415096 | 1-scf00001 | 1 |
| AX-157889603 | 1 | 3.11  | KV452696.1 | 443000 | 1-scf00001 | 1 |
| AX-158388940 | 1 | 3.11  | KV452696.1 | 444988 | 1-scf00001 | 1 |
| AX-157889605 | 1 | 3.11  | KV452696.1 | 447058 | 1-scf00001 | 1 |
| AX-157889607 | 1 | 3.11  | KV452696.1 | 451043 | 1-scf00001 | 1 |
| AX-157889608 | 1 | 3.11  | KV452696.1 | 451633 | 1-scf00001 | 1 |
| AX-157889609 | 1 | 3.11  | KV452696.1 | 452176 | 1-scf00001 | 1 |
| AX-157889610 | 1 | 3.11  | KV452696.1 | 452520 | 1-scf00001 | 1 |



|              |   |       |             |        |            |    |
|--------------|---|-------|-------------|--------|------------|----|
| AX-157889611 | 1 | 3.11  | KV452696.1  | 453026 | 1-scf00001 | 1  |
| AX-157889612 | 1 | 3.11  | KV452696.1  | 453512 | 1-scf00001 | 1  |
| AX-157864281 | 1 | 3.11  | KV452696.1  | 453977 | 1-scf00001 | 1  |
| AX-157889613 | 1 | 3.11  | KV452696.1  | 454853 | 1-scf00001 | 1  |
| AX-157889614 | 1 | 3.11  | KV452696.1  | 455243 | 1-scf00001 | 1  |
| AX-157716152 | 1 | 3.11  | KV452696.1  | 458402 | 1-scf00001 | 1  |
| AX-157889570 | 1 | 3.329 | KV452696.1  | 368482 | 1-scf00001 | 1  |
| AX-157889620 | 1 | 3.329 | KV452696.1  | 468871 | 1-scf00001 | 1  |
| AX-157889622 | 1 | 3.329 | KV452696.1  | 470135 | 1-scf00001 | 1  |
| AX-157748641 | 1 | 3.329 | KV452696.1  | 476383 | 1-scf00001 | 1  |
| AX-157810137 | 1 | 3.329 | KV452696.1  | 509514 | 1-scf00001 | 1  |
| AX-157774141 | 1 | 3.493 | KV452696.1  | 480231 | 1-scf00001 | 1  |
| AX-157889619 | 1 | 3.657 | KV452696.1  | 465454 | 1-scf00001 | 1  |
| AX-157810133 | 1 | 3.657 | KV452696.1  | 471962 | 1-scf00001 | 1  |
| AX-157889628 | 1 | 3.657 | KV452696.1  | 484061 | 1-scf00001 | 1  |
| AX-157889631 | 1 | 3.657 | KV452696.1  | 486206 | 1-scf00001 | 1  |
| AX-157889632 | 1 | 3.657 | KV452696.1  | 488223 | 1-scf00001 | 1  |
| AX-157810134 | 1 | 3.657 | KV452696.1  | 491318 | 1-scf00001 | 1  |
| AX-157889634 | 1 | 3.657 | KV452696.1  | 491530 | 1-scf00001 | 1  |
| AX-157889635 | 1 | 3.657 | KV452696.1  | 492649 | 1-scf00001 | 1  |
| AX-157889636 | 1 | 3.657 | KV452696.1  | 494103 | 1-scf00001 | 1  |
| AX-157889638 | 1 | 3.657 | KV452696.1  | 496040 | 1-scf00001 | 1  |
| AX-157810135 | 1 | 3.657 | KV452696.1  | 496700 | 1-scf00001 | 1  |
| AX-157889640 | 1 | 3.657 | KV452696.1  | 498302 | 1-scf00001 | 1  |
| AX-157889641 | 1 | 3.657 | KV452696.1  | 500249 | 1-scf00001 | 1  |
| AX-157721405 | 1 | 3.657 | KV452696.1  | 503025 | 1-scf00001 | 1  |
| AX-157889644 | 1 | 3.657 | KV452696.1  | 508589 | 1-scf00001 | 1  |
| AX-157889645 | 1 | 3.657 | KV452696.1  | 509811 | 1-scf00001 | 1  |
| AX-157889646 | 1 | 3.657 | KV452696.1  | 510482 | 1-scf00001 | 1  |
| AX-157889647 | 1 | 3.657 | KV452696.1  | 510841 | 1-scf00001 | 1  |
| AX-157889650 | 1 | 3.657 | KV452696.1  | 517711 | 1-scf00001 | 1  |
| AX-157889651 | 1 | 3.657 | KV452696.1  | 518788 | 1-scf00001 | 1  |
| AX-157889652 | 1 | 3.657 | KV452696.1  | 519011 | 1-scf00001 | 1  |
| AX-157889655 | 1 | 3.657 | KV452696.1  | 526301 | 1-scf00001 | 1  |
| AX-157889656 | 1 | 3.657 | KV452696.1  | 526797 | 1-scf00001 | 1  |
| AX-157889658 | 1 | 3.657 | KV452696.1  | 527711 | 1-scf00001 | 1  |
| AX-158414477 | 1 | 3.657 | KV452696.1  | 530164 | 1-scf00001 | 1  |
| AX-157810138 | 1 | 3.657 | KV452696.1  | 530759 | 1-scf00001 | 1  |
| AX-157889659 | 1 | 3.657 | KV452696.1  | 532904 | 1-scf00001 | 1  |
| AX-157889660 | 1 | 3.659 | KV452696.1  | 537125 | 1-scf00001 | 1  |
| AX-157889661 | 1 | 3.802 | KV452696.1  | 538993 | 1-scf00001 | 1  |
| AX-157889669 | 1 | 3.802 | KV452696.1  | 549268 | 1-scf00001 | 1  |
| AX-157889665 | 1 | 3.948 | KV452696.1  | 544184 | 1-scf00001 | 1  |
| AX-157889667 | 1 | 3.948 | KV452696.1  | 546164 | 1-scf00001 | 1  |
| AX-157889668 | 1 | 3.948 | KV452696.1  | 546783 | 1-scf00001 | 1  |
| AX-157889671 | 1 | 4.094 | KV452696.1  | 556171 | 1-scf00001 | 1  |
| AX-157889672 | 1 | 4.094 | KV452696.1  | 563943 | 1-scf00001 | 1  |
| AX-157889674 | 1 | 4.094 | KV452696.1  | 564979 | 1-scf00001 | 1  |
| AX-157889677 | 1 | 4.094 | KV452696.1  | 572672 | 1-scf00001 | 1  |
| AX-157889679 | 1 | 4.094 | KV452696.1  | 573895 | 1-scf00001 | 1  |
| AX-157707266 | 1 | 4.094 | 3ML01033859 | 369    | scf09525_1 | UN |

|              |   |       |            |        |            |   |
|--------------|---|-------|------------|--------|------------|---|
| AX-157889680 | 1 | 4.16  | KV452696.1 | 575302 | 1-scf00001 | 1 |
| AX-157889670 | 1 | 4.203 | KV452696.1 | 555656 | 1-scf00001 | 1 |
| AX-157714799 | 1 | 4.203 | KV452696.1 | 584693 | 1-scf00001 | 1 |
| AX-157889684 | 1 | 4.203 | KV452696.1 | 586628 | 1-scf00001 | 1 |
| AX-157889685 | 1 | 4.203 | KV452696.1 | 588010 | 1-scf00001 | 1 |
| AX-157889687 | 1 | 4.203 | KV452696.1 | 590546 | 1-scf00001 | 1 |
| AX-157889689 | 1 | 4.203 | KV452696.1 | 592522 | 1-scf00001 | 1 |
| AX-157751020 | 1 | 4.367 | KV452696.1 | 595206 | 1-scf00001 | 1 |
| AX-157889691 | 1 | 4.463 | KV452696.1 | 598593 | 1-scf00001 | 1 |
| AX-158381857 | 1 | 4.463 | KV452696.1 | 612588 | 1-scf00001 | 1 |
| AX-157853501 | 1 | 4.531 | KV452696.1 | 603185 | 1-scf00001 | 1 |
| AX-157889696 | 1 | 4.531 | KV452696.1 | 606839 | 1-scf00001 | 1 |
| AX-157756520 | 1 | 4.579 | KV452696.1 | 608887 | 1-scf00001 | 1 |
| AX-157889702 | 1 | 4.579 | KV452696.1 | 619901 | 1-scf00001 | 1 |
| AX-157889703 | 1 | 4.579 | KV452696.1 | 621982 | 1-scf00001 | 1 |
| AX-158379083 | 1 | 4.641 | KV452696.1 | 617051 | 1-scf00001 | 1 |
| AX-157745552 | 1 | 4.641 | KV452696.1 | 618418 | 1-scf00001 | 1 |
| AX-157889701 | 1 | 4.641 | KV452696.1 | 619275 | 1-scf00001 | 1 |
| AX-157745372 | 1 | 4.75  | KV452696.1 | 620843 | 1-scf00001 | 1 |
| AX-157889704 | 1 | 4.82  | KV452696.1 | 623815 | 1-scf00001 | 1 |
| AX-157747755 | 1 | 4.894 | KV452696.1 | 626051 | 1-scf00001 | 1 |
| AX-157889713 | 1 | 4.894 | KV452696.1 | 644477 | 1-scf00001 | 1 |
| AX-157889706 | 1 | 4.969 | KV452696.1 | 626217 | 1-scf00001 | 1 |
| AX-157746363 | 1 | 4.985 | KV452696.1 | 599728 | 1-scf00001 | 1 |
| AX-157889708 | 1 | 4.985 | KV452696.1 | 631038 | 1-scf00001 | 1 |
| AX-157889711 | 1 | 4.985 | KV452696.1 | 641263 | 1-scf00001 | 1 |
| AX-157889728 | 1 | 4.985 | KV452696.1 | 664140 | 1-scf00001 | 1 |
| AX-157889710 | 1 | 5.093 | KV452696.1 | 636922 | 1-scf00001 | 1 |
| AX-157889693 | 1 | 5.217 | KV452696.1 | 603581 | 1-scf00001 | 1 |
| AX-157745845 | 1 | 5.217 | KV452696.1 | 643774 | 1-scf00001 | 1 |
| AX-157889714 | 1 | 5.217 | KV452696.1 | 644905 | 1-scf00001 | 1 |
| AX-157889716 | 1 | 5.217 | KV452696.1 | 647726 | 1-scf00001 | 1 |
| AX-157889717 | 1 | 5.217 | KV452696.1 | 648099 | 1-scf00001 | 1 |
| AX-157889719 | 1 | 5.592 | KV452696.1 | 651212 | 1-scf00001 | 1 |
| AX-157889720 | 1 | 5.592 | KV452696.1 | 652508 | 1-scf00001 | 1 |
| AX-157889722 | 1 | 5.592 | KV452696.1 | 655575 | 1-scf00001 | 1 |
| AX-157889723 | 1 | 5.843 | KV452696.1 | 656418 | 1-scf00001 | 1 |
| AX-157889725 | 1 | 5.843 | KV452696.1 | 660019 | 1-scf00001 | 1 |
| AX-157889733 | 1 | 5.855 | KV452696.1 | 669952 | 1-scf00001 | 1 |
| AX-157889734 | 1 | 6.158 | KV452696.1 | 672407 | 1-scf00001 | 1 |
| AX-157889735 | 1 | 6.605 | KV452696.1 | 674082 | 1-scf00001 | 1 |
| AX-157810145 | 1 | 6.62  | KV452696.1 | 675703 | 1-scf00001 | 1 |
| AX-157889746 | 1 | 7.159 | KV452696.1 | 691482 | 1-scf00001 | 1 |
| AX-158379084 | 1 | 7.159 | KV452696.1 | 698299 | 1-scf00001 | 1 |
| AX-157889755 | 1 | 7.159 | KV452696.1 | 701135 | 1-scf00001 | 1 |
| AX-157889757 | 1 | 7.159 | KV452696.1 | 702627 | 1-scf00001 | 1 |
| AX-157889759 | 1 | 7.557 | KV452696.1 | 707649 | 1-scf00001 | 1 |
| AX-157889760 | 1 | 7.559 | KV452696.1 | 710665 | 1-scf00001 | 1 |
| AX-157883017 | 1 | 7.768 | KV452696.1 | 713871 | 1-scf00001 | 1 |
| AX-157889763 | 1 | 7.924 | KV452696.1 | 718362 | 1-scf00001 | 1 |
| AX-157889765 | 1 | 7.924 | KV452696.1 | 720720 | 1-scf00001 | 1 |

|              |   |       |            |        |            |   |
|--------------|---|-------|------------|--------|------------|---|
| AX-157889766 | 1 | 7.924 | KV452696.1 | 720936 | 1-scf00001 | 1 |
| AX-157889767 | 1 | 7.924 | KV452696.1 | 721946 | 1-scf00001 | 1 |
| AX-157810148 | 1 | 7.924 | KV452696.1 | 724066 | 1-scf00001 | 1 |
| AX-157889769 | 1 | 7.924 | KV452696.1 | 724240 | 1-scf00001 | 1 |
| AX-157889770 | 1 | 7.924 | KV452696.1 | 725555 | 1-scf00001 | 1 |
| AX-157810149 | 1 | 7.924 | KV452696.1 | 726897 | 1-scf00001 | 1 |
| AX-157889772 | 1 | 7.924 | KV452696.1 | 728294 | 1-scf00001 | 1 |
| AX-157889773 | 1 | 7.924 | KV452696.1 | 730475 | 1-scf00001 | 1 |
| AX-157810150 | 1 | 7.924 | KV452696.1 | 731115 | 1-scf00001 | 1 |
| AX-157810151 | 1 | 8.47  | KV452696.1 | 741311 | 1-scf00001 | 1 |
| AX-157889775 | 1 | 8.47  | KV452696.1 | 742530 | 1-scf00001 | 1 |
| AX-157889776 | 1 | 8.47  | KV452696.1 | 742963 | 1-scf00001 | 1 |
| AX-157889777 | 1 | 8.47  | KV452696.1 | 746931 | 1-scf00001 | 1 |
| AX-157889778 | 1 | 8.47  | KV452696.1 | 747516 | 1-scf00001 | 1 |
| AX-157722180 | 1 | 8.47  | KV452696.1 | 748053 | 1-scf00001 | 1 |
| AX-157889779 | 1 | 8.47  | KV452696.1 | 748657 | 1-scf00001 | 1 |
| AX-157810152 | 1 | 8.47  | KV452696.1 | 748818 | 1-scf00001 | 1 |
| AX-157810153 | 1 | 8.47  | KV452696.1 | 748996 | 1-scf00001 | 1 |
| AX-157810154 | 1 | 8.647 | KV452696.1 | 752686 | 1-scf00001 | 1 |
| AX-157889782 | 1 | 8.648 | KV452696.1 | 755342 | 1-scf00001 | 1 |
| AX-157889788 | 1 | 8.648 | KV452696.1 | 764041 | 1-scf00001 | 1 |
| AX-157889783 | 1 | 8.65  | KV452696.1 | 757010 | 1-scf00001 | 1 |
| AX-157772334 | 1 | 8.651 | KV452696.1 | 761413 | 1-scf00001 | 1 |
| AX-157889787 | 1 | 8.755 | KV452696.1 | 762678 | 1-scf00001 | 1 |
| AX-157889789 | 1 | 9.053 | KV452696.1 | 764455 | 1-scf00001 | 1 |
| AX-157889792 | 1 | 9.053 | KV452696.1 | 767021 | 1-scf00001 | 1 |
| AX-157889793 | 1 | 9.053 | KV452696.1 | 769435 | 1-scf00001 | 1 |
| AX-157889794 | 1 | 9.053 | KV452696.1 | 770749 | 1-scf00001 | 1 |
| AX-157714747 | 1 | 9.057 | KV452696.1 | 772703 | 1-scf00001 | 1 |
| AX-157889799 | 1 | 9.057 | KV452696.1 | 778383 | 1-scf00001 | 1 |
| AX-157889798 | 1 | 9.308 | KV452696.1 | 776762 | 1-scf00001 | 1 |
| AX-157889802 | 1 | 9.563 | KV452696.1 | 783575 | 1-scf00001 | 1 |
| AX-157889803 | 1 | 9.563 | KV452696.1 | 783794 | 1-scf00001 | 1 |
| AX-157889790 | 1 | 9.564 | KV452696.1 | 765641 | 1-scf00001 | 1 |
| AX-157889804 | 1 | 9.564 | KV452696.1 | 785388 | 1-scf00001 | 1 |
| AX-157889807 | 1 | 9.564 | KV452696.1 | 788111 | 1-scf00001 | 1 |
| AX-157889808 | 1 | 9.564 | KV452696.1 | 788564 | 1-scf00001 | 1 |
| AX-157889812 | 1 | 9.564 | KV452696.1 | 793933 | 1-scf00001 | 1 |
| AX-157889814 | 1 | 9.564 | KV452696.1 | 795350 | 1-scf00001 | 1 |
| AX-157889815 | 1 | 9.564 | KV452696.1 | 797873 | 1-scf00001 | 1 |
| AX-157889817 | 1 | 9.564 | KV452696.1 | 799171 | 1-scf00001 | 1 |
| AX-157889820 | 1 | 9.564 | KV452696.1 | 803164 | 1-scf00001 | 1 |
| AX-157889824 | 1 | 9.564 | KV452696.1 | 806618 | 1-scf00001 | 1 |
| AX-158381861 | 1 | 9.674 | KV452696.1 | 810017 | 1-scf00001 | 1 |
| AX-157889825 | 1 | 9.674 | KV452696.1 | 810880 | 1-scf00001 | 1 |
| AX-157772660 | 1 | 9.948 | KV452696.1 | 750201 | 1-scf00001 | 1 |
| AX-157752610 | 1 | 9.948 | KV452696.1 | 811832 | 1-scf00001 | 1 |
| AX-157889827 | 1 | 9.948 | KV452696.1 | 817037 | 1-scf00001 | 1 |
| AX-157889830 | 1 | 9.948 | KV452696.1 | 820162 | 1-scf00001 | 1 |
| AX-157889836 | 1 | 9.948 | KV452696.1 | 824374 | 1-scf00001 | 1 |
| AX-157750971 | 1 | 9.948 | KV452696.1 | 891116 | 1-scf00001 | 1 |

|              |   |        |            |         |            |   |
|--------------|---|--------|------------|---------|------------|---|
| AX-157889892 | 1 | 9.948  | KV452696.1 | 896228  | 1-scf00001 | 1 |
| AX-157710186 | 1 | 9.948  | KV452696.1 | 909176  | 1-scf00001 | 1 |
| AX-157889978 | 1 | 9.948  | KV452696.1 | 1020378 | 1-scf00001 | 1 |
| AX-157889984 | 1 | 9.948  | KV452696.1 | 1028606 | 1-scf00001 | 1 |
| AX-157890062 | 1 | 9.948  | KV452696.1 | 1157438 | 1-scf00001 | 1 |
| AX-157890260 | 1 | 9.948  | KV452696.1 | 1546100 | 1-scf00001 | 1 |
| AX-157890313 | 1 | 9.948  | KV452696.1 | 1630635 | 1-scf00001 | 1 |
| AX-157890316 | 1 | 9.948  | KV452696.1 | 1631642 | 1-scf00001 | 1 |
| AX-157889834 | 1 | 10.002 | KV452696.1 | 822620  | 1-scf00001 | 1 |
| AX-157889840 | 1 | 10.057 | KV452696.1 | 829630  | 1-scf00001 | 1 |
| AX-157874210 | 1 | 10.086 | KV452696.1 | 829868  | 1-scf00001 | 1 |
| AX-157889842 | 1 | 10.211 | KV452696.1 | 831204  | 1-scf00001 | 1 |
| AX-157889843 | 1 | 10.213 | KV452696.1 | 833098  | 1-scf00001 | 1 |
| AX-157889844 | 1 | 10.215 | KV452696.1 | 833535  | 1-scf00001 | 1 |
| AX-157889848 | 1 | 10.215 | KV452696.1 | 838134  | 1-scf00001 | 1 |
| AX-157889879 | 1 | 10.215 | KV452696.1 | 871600  | 1-scf00001 | 1 |
| AX-157889850 | 1 | 10.218 | KV452696.1 | 839301  | 1-scf00001 | 1 |
| AX-157889806 | 1 | 10.22  | KV452696.1 | 787304  | 1-scf00001 | 1 |
| AX-157757921 | 1 | 10.22  | KV452696.1 | 837009  | 1-scf00001 | 1 |
| AX-157889851 | 1 | 10.22  | KV452696.1 | 840049  | 1-scf00001 | 1 |
| AX-157889854 | 1 | 10.22  | KV452696.1 | 842260  | 1-scf00001 | 1 |
| AX-157738422 | 1 | 10.22  | KV452696.1 | 843708  | 1-scf00001 | 1 |
| AX-157810160 | 1 | 10.22  | KV452696.1 | 844155  | 1-scf00001 | 1 |
| AX-157889857 | 1 | 10.22  | KV452696.1 | 846400  | 1-scf00001 | 1 |
| AX-157889859 | 1 | 10.22  | KV452696.1 | 847829  | 1-scf00001 | 1 |
| AX-157719903 | 1 | 10.22  | KV452696.1 | 848061  | 1-scf00001 | 1 |
| AX-157889860 | 1 | 10.22  | KV452696.1 | 849547  | 1-scf00001 | 1 |
| AX-157889861 | 1 | 10.22  | KV452696.1 | 850640  | 1-scf00001 | 1 |
| AX-157874211 | 1 | 10.22  | KV452696.1 | 851868  | 1-scf00001 | 1 |
| AX-157889862 | 1 | 10.22  | KV452696.1 | 853048  | 1-scf00001 | 1 |
| AX-157889868 | 1 | 10.22  | KV452696.1 | 856696  | 1-scf00001 | 1 |
| AX-157889869 | 1 | 10.22  | KV452696.1 | 857859  | 1-scf00001 | 1 |
| AX-157889870 | 1 | 10.22  | KV452696.1 | 858395  | 1-scf00001 | 1 |
| AX-157889871 | 1 | 10.22  | KV452696.1 | 859985  | 1-scf00001 | 1 |
| AX-157889874 | 1 | 10.22  | KV452696.1 | 862919  | 1-scf00001 | 1 |
| AX-157889875 | 1 | 10.22  | KV452696.1 | 864142  | 1-scf00001 | 1 |
| AX-157889878 | 1 | 10.22  | KV452696.1 | 870264  | 1-scf00001 | 1 |
| AX-157889884 | 1 | 10.22  | KV452696.1 | 881196  | 1-scf00001 | 1 |
| AX-157754391 | 1 | 10.657 | KV452696.1 | 841550  | 1-scf00001 | 1 |
| AX-157810162 | 1 | 10.657 | KV452696.1 | 874395  | 1-scf00001 | 1 |
| AX-157889882 | 1 | 10.657 | KV452696.1 | 875503  | 1-scf00001 | 1 |
| AX-157889883 | 1 | 10.657 | KV452696.1 | 878486  | 1-scf00001 | 1 |
| AX-157810163 | 1 | 10.657 | KV452696.1 | 880755  | 1-scf00001 | 1 |
| AX-157774409 | 1 | 10.708 | KV452696.1 | 881690  | 1-scf00001 | 1 |
| AX-157755190 | 1 | 10.708 | KV452696.1 | 882236  | 1-scf00001 | 1 |
| AX-157889885 | 1 | 10.766 | KV452696.1 | 883878  | 1-scf00001 | 1 |
| AX-157889886 | 1 | 10.766 | KV452696.1 | 884838  | 1-scf00001 | 1 |
| AX-157889887 | 1 | 10.766 | KV452696.1 | 885390  | 1-scf00001 | 1 |
| AX-157889888 | 1 | 10.766 | KV452696.1 | 886315  | 1-scf00001 | 1 |
| AX-157775319 | 1 | 10.766 | KV452696.1 | 886818  | 1-scf00001 | 1 |
| AX-157889890 | 1 | 10.985 | KV452696.1 | 893966  | 1-scf00001 | 1 |

|              |   |        |            |         |            |   |
|--------------|---|--------|------------|---------|------------|---|
| AX-157853507 | 1 | 10.985 | KV452696.1 | 895967  | 1-scf00001 | 1 |
| AX-157889897 | 1 | 10.985 | KV452696.1 | 900739  | 1-scf00001 | 1 |
| AX-157889901 | 1 | 11.094 | KV452696.1 | 903613  | 1-scf00001 | 1 |
| AX-157889903 | 1 | 11.203 | KV452696.1 | 906571  | 1-scf00001 | 1 |
| AX-157889904 | 1 | 11.222 | KV452696.1 | 907207  | 1-scf00001 | 1 |
| AX-157889905 | 1 | 11.24  | KV452696.1 | 907587  | 1-scf00001 | 1 |
| AX-157889909 | 1 | 11.24  | KV452696.1 | 916368  | 1-scf00001 | 1 |
| AX-157889908 | 1 | 11.256 | KV452696.1 | 914932  | 1-scf00001 | 1 |
| AX-157889918 | 1 | 11.256 | KV452696.1 | 924464  | 1-scf00001 | 1 |
| AX-157889910 | 1 | 11.272 | KV452696.1 | 917206  | 1-scf00001 | 1 |
| AX-157889917 | 1 | 11.282 | KV452696.1 | 923228  | 1-scf00001 | 1 |
| AX-157889919 | 1 | 11.297 | KV452696.1 | 924756  | 1-scf00001 | 1 |
| AX-157889920 | 1 | 11.312 | KV452696.1 | 927111  | 1-scf00001 | 1 |
| AX-157889922 | 1 | 11.489 | KV452696.1 | 931710  | 1-scf00001 | 1 |
| AX-157889928 | 1 | 11.625 | KV452696.1 | 936303  | 1-scf00001 | 1 |
| AX-157889934 | 1 | 11.833 | KV452696.1 | 945965  | 1-scf00001 | 1 |
| AX-157889936 | 1 | 12.25  | KV452696.1 | 949431  | 1-scf00001 | 1 |
| AX-157889937 | 1 | 12.25  | KV452696.1 | 950359  | 1-scf00001 | 1 |
| AX-157889938 | 1 | 12.25  | KV452696.1 | 950806  | 1-scf00001 | 1 |
| AX-157889939 | 1 | 12.308 | KV452696.1 | 951324  | 1-scf00001 | 1 |
| AX-157889948 | 1 | 12.308 | KV452696.1 | 963019  | 1-scf00001 | 1 |
| AX-157889954 | 1 | 12.308 | KV452696.1 | 976884  | 1-scf00001 | 1 |
| AX-157889800 | 1 | 12.356 | KV452696.1 | 778736  | 1-scf00001 | 1 |
| AX-157889949 | 1 | 12.356 | KV452696.1 | 969001  | 1-scf00001 | 1 |
| AX-157709834 | 1 | 12.356 | KV452696.1 | 972267  | 1-scf00001 | 1 |
| AX-157889945 | 1 | 12.407 | KV452696.1 | 957480  | 1-scf00001 | 1 |
| AX-157889950 | 1 | 12.407 | KV452696.1 | 970390  | 1-scf00001 | 1 |
| AX-157740309 | 1 | 12.407 | KV452696.1 | 971747  | 1-scf00001 | 1 |
| AX-158381866 | 1 | 12.407 | KV452696.1 | 972056  | 1-scf00001 | 1 |
| AX-157889951 | 1 | 12.407 | KV452696.1 | 973845  | 1-scf00001 | 1 |
| AX-157889956 | 1 | 12.407 | KV452696.1 | 979989  | 1-scf00001 | 1 |
| AX-158379086 | 1 | 12.407 | KV452696.1 | 980860  | 1-scf00001 | 1 |
| AX-157889957 | 1 | 12.407 | KV452696.1 | 980938  | 1-scf00001 | 1 |
| AX-157889958 | 1 | 12.407 | KV452696.1 | 982909  | 1-scf00001 | 1 |
| AX-158381867 | 1 | 12.407 | KV452696.1 | 990577  | 1-scf00001 | 1 |
| AX-157889940 | 1 | 12.735 | KV452696.1 | 951777  | 1-scf00001 | 1 |
| AX-157889959 | 1 | 12.735 | KV452696.1 | 985636  | 1-scf00001 | 1 |
| AX-157722574 | 1 | 12.735 | KV452696.1 | 987219  | 1-scf00001 | 1 |
| AX-157883020 | 1 | 12.735 | KV452696.1 | 990275  | 1-scf00001 | 1 |
| AX-157890057 | 1 | 12.735 | KV452696.1 | 1142028 | 1-scf00001 | 1 |
| AX-157889967 | 1 | 12.844 | KV452696.1 | 997133  | 1-scf00001 | 1 |
| AX-157745490 | 1 | 12.844 | KV452696.1 | 997556  | 1-scf00001 | 1 |
| AX-157889972 | 1 | 12.844 | KV452696.1 | 1005580 | 1-scf00001 | 1 |
| AX-157889973 | 1 | 13.063 | KV452696.1 | 1006606 | 1-scf00001 | 1 |
| AX-157740346 | 1 | 13.063 | KV452696.1 | 1009121 | 1-scf00001 | 1 |
| AX-157889974 | 1 | 13.063 | KV452696.1 | 1009649 | 1-scf00001 | 1 |
| AX-157755170 | 1 | 13.251 | KV452696.1 | 1018652 | 1-scf00001 | 1 |
| AX-157889979 | 1 | 13.251 | KV452696.1 | 1024744 | 1-scf00001 | 1 |
| AX-157889981 | 1 | 13.251 | KV452696.1 | 1026361 | 1-scf00001 | 1 |
| AX-157738973 | 1 | 13.272 | KV452696.1 | 1027547 | 1-scf00001 | 1 |
| AX-157889987 | 1 | 13.809 | KV452696.1 | 1033921 | 1-scf00001 | 1 |

|              |   |        |            |         |            |   |
|--------------|---|--------|------------|---------|------------|---|
| AX-157889980 | 1 | 13.822 | KV452696.1 | 1025800 | 1-scf00001 | 1 |
| AX-157889988 | 1 | 13.822 | KV452696.1 | 1034861 | 1-scf00001 | 1 |
| AX-157889989 | 1 | 13.835 | KV452696.1 | 1036118 | 1-scf00001 | 1 |
| AX-157889996 | 1 | 14.18  | KV452696.1 | 1044433 | 1-scf00001 | 1 |
| AX-157751620 | 1 | 14.181 | KV452696.1 | 1048572 | 1-scf00001 | 1 |
| AX-157889998 | 1 | 14.263 | KV452696.1 | 1049000 | 1-scf00001 | 1 |
| AX-157890006 | 1 | 14.703 | KV452696.1 | 1063762 | 1-scf00001 | 1 |
| AX-157890007 | 1 | 14.705 | KV452696.1 | 1065027 | 1-scf00001 | 1 |
| AX-157890008 | 1 | 14.705 | KV452696.1 | 1065454 | 1-scf00001 | 1 |
| AX-157890009 | 1 | 14.705 | KV452696.1 | 1065972 | 1-scf00001 | 1 |
| AX-157890010 | 1 | 14.924 | KV452696.1 | 1067732 | 1-scf00001 | 1 |
| AX-157720812 | 1 | 14.927 | KV452696.1 | 1069010 | 1-scf00001 | 1 |
| AX-157890012 | 1 | 14.931 | KV452696.1 | 1071994 | 1-scf00001 | 1 |
| AX-157758700 | 1 | 15.363 | KV452696.1 | 1074442 | 1-scf00001 | 1 |
| AX-157890013 | 1 | 15.363 | KV452696.1 | 1075736 | 1-scf00001 | 1 |
| AX-157890014 | 1 | 15.363 | KV452696.1 | 1076641 | 1-scf00001 | 1 |
| AX-157890016 | 1 | 15.363 | KV452696.1 | 1078216 | 1-scf00001 | 1 |
| AX-157890017 | 1 | 15.363 | KV452696.1 | 1078618 | 1-scf00001 | 1 |
| AX-157890020 | 1 | 15.363 | KV452696.1 | 1081957 | 1-scf00001 | 1 |
| AX-157708594 | 1 | 15.363 | KV452696.1 | 1089878 | 1-scf00001 | 1 |
| AX-157752804 | 1 | 15.363 | KV452696.1 | 1091874 | 1-scf00001 | 1 |
| AX-157890022 | 1 | 15.363 | KV452696.1 | 1092919 | 1-scf00001 | 1 |
| AX-157890024 | 1 | 15.363 | KV452696.1 | 1094329 | 1-scf00001 | 1 |
| AX-158388945 | 1 | 15.363 | KV452696.1 | 1107380 | 1-scf00001 | 1 |
| AX-157890029 | 1 | 15.674 | KV452696.1 | 1099565 | 1-scf00001 | 1 |
| AX-157890037 | 1 | 15.674 | KV452696.1 | 1110772 | 1-scf00001 | 1 |
| AX-157890038 | 1 | 15.674 | KV452696.1 | 1111850 | 1-scf00001 | 1 |
| AX-157750601 | 1 | 15.831 | KV452696.1 | 1114618 | 1-scf00001 | 1 |
| AX-157890043 | 1 | 15.867 | KV452696.1 | 1122305 | 1-scf00001 | 1 |
| AX-157890044 | 1 | 16.424 | KV452696.1 | 1124570 | 1-scf00001 | 1 |
| AX-157890047 | 1 | 16.584 | KV452696.1 | 1127571 | 1-scf00001 | 1 |
| AX-157890051 | 1 | 16.584 | KV452696.1 | 1132072 | 1-scf00001 | 1 |
| AX-157744890 | 1 | 16.703 | KV452696.1 | 1128672 | 1-scf00001 | 1 |
| AX-157890052 | 1 | 16.975 | KV452696.1 | 1133023 | 1-scf00001 | 1 |
| AX-157890055 | 1 | 16.975 | KV452696.1 | 1139051 | 1-scf00001 | 1 |
| AX-157890058 | 1 | 17.653 | KV452696.1 | 1143545 | 1-scf00001 | 1 |
| AX-157710971 | 1 | 17.653 | KV452696.1 | 1143949 | 1-scf00001 | 1 |
| AX-157890061 | 1 | 17.653 | KV452696.1 | 1153614 | 1-scf00001 | 1 |
| AX-157890064 | 1 | 17.89  | KV452696.1 | 1159616 | 1-scf00001 | 1 |
| AX-157890065 | 1 | 17.89  | KV452696.1 | 1160539 | 1-scf00001 | 1 |
| AX-157890068 | 1 | 18.611 | KV452696.1 | 1169309 | 1-scf00001 | 1 |
| AX-157890070 | 1 | 18.611 | KV452696.1 | 1179812 | 1-scf00001 | 1 |
| AX-157772638 | 1 | 18.611 | KV452696.1 | 1182542 | 1-scf00001 | 1 |
| AX-157741122 | 1 | 18.756 | KV452696.1 | 1186796 | 1-scf00001 | 1 |
| AX-157890074 | 1 | 18.787 | KV452696.1 | 1187606 | 1-scf00001 | 1 |
| AX-157890075 | 1 | 18.788 | KV452696.1 | 1192363 | 1-scf00001 | 1 |
| AX-157890021 | 1 | 19.092 | KV452696.1 | 1084921 | 1-scf00001 | 1 |
| AX-158381871 | 1 | 19.092 | KV452696.1 | 1144484 | 1-scf00001 | 1 |
| AX-157752620 | 1 | 19.092 | KV452696.1 | 1198332 | 1-scf00001 | 1 |
| AX-157890077 | 1 | 19.092 | KV452696.1 | 1202057 | 1-scf00001 | 1 |
| AX-157890078 | 1 | 19.092 | KV452696.1 | 1207316 | 1-scf00001 | 1 |

|              |   |        |            |         |            |   |
|--------------|---|--------|------------|---------|------------|---|
| AX-157890079 | 1 | 19.092 | KV452696.1 | 1208339 | 1-scf00001 | 1 |
| AX-158379087 | 1 | 19.092 | KV452696.1 | 1209623 | 1-scf00001 | 1 |
| AX-157890084 | 1 | 19.092 | KV452696.1 | 1214161 | 1-scf00001 | 1 |
| AX-157890210 | 1 | 19.092 | KV452696.1 | 1459302 | 1-scf00001 | 1 |
| AX-157890085 | 1 | 19.127 | KV452696.1 | 1214488 | 1-scf00001 | 1 |
| AX-157890086 | 1 | 19.17  | KV452696.1 | 1216792 | 1-scf00001 | 1 |
| AX-157890102 | 1 | 19.17  | KV452696.1 | 1240786 | 1-scf00001 | 1 |
| AX-157890088 | 1 | 19.229 | KV452696.1 | 1217730 | 1-scf00001 | 1 |
| AX-157890093 | 1 | 19.311 | KV452696.1 | 1224560 | 1-scf00001 | 1 |
| AX-157890094 | 1 | 19.311 | KV452696.1 | 1227167 | 1-scf00001 | 1 |
| AX-157890095 | 1 | 19.311 | KV452696.1 | 1229131 | 1-scf00001 | 1 |
| AX-157890098 | 1 | 19.311 | KV452696.1 | 1234317 | 1-scf00001 | 1 |
| AX-157890103 | 1 | 19.311 | KV452696.1 | 1242934 | 1-scf00001 | 1 |
| AX-157890105 | 1 | 19.311 | KV452696.1 | 1246406 | 1-scf00001 | 1 |
| AX-157754948 | 1 | 19.337 | KV452696.1 | 1221520 | 1-scf00001 | 1 |
| AX-157774620 | 1 | 19.337 | KV452696.1 | 1233325 | 1-scf00001 | 1 |
| AX-157890108 | 1 | 19.337 | KV452696.1 | 1249077 | 1-scf00001 | 1 |
| AX-157890109 | 1 | 19.337 | KV452696.1 | 1249477 | 1-scf00001 | 1 |
| AX-157890121 | 1 | 19.337 | KV452696.1 | 1267179 | 1-scf00001 | 1 |
| AX-157890124 | 1 | 19.337 | KV452696.1 | 1270924 | 1-scf00001 | 1 |
| AX-157890160 | 1 | 19.337 | KV452696.1 | 1327956 | 1-scf00001 | 1 |
| AX-157890229 | 1 | 19.337 | KV452696.1 | 1495078 | 1-scf00001 | 1 |
| AX-157890116 | 1 | 19.475 | KV452696.1 | 1260464 | 1-scf00001 | 1 |
| AX-157890096 | 1 | 19.639 | KV452696.1 | 1230618 | 1-scf00001 | 1 |
| AX-157890117 | 1 | 19.639 | KV452696.1 | 1261810 | 1-scf00001 | 1 |
| AX-157890118 | 1 | 19.639 | KV452696.1 | 1263666 | 1-scf00001 | 1 |
| AX-157750052 | 1 | 19.639 | KV452696.1 | 1266712 | 1-scf00001 | 1 |
| AX-157890122 | 1 | 19.693 | KV452696.1 | 1268976 | 1-scf00001 | 1 |
| AX-157890123 | 1 | 19.748 | KV452696.1 | 1269779 | 1-scf00001 | 1 |
| AX-157754707 | 1 | 19.858 | KV452696.1 | 1274924 | 1-scf00001 | 1 |
| AX-157890130 | 1 | 19.858 | KV452696.1 | 1288585 | 1-scf00001 | 1 |
| AX-157890132 | 1 | 19.858 | KV452696.1 | 1289223 | 1-scf00001 | 1 |
| AX-157890133 | 1 | 19.858 | KV452696.1 | 1289563 | 1-scf00001 | 1 |
| AX-157890139 | 1 | 19.906 | KV452696.1 | 1295238 | 1-scf00001 | 1 |
| AX-157890141 | 1 | 19.967 | KV452696.1 | 1298273 | 1-scf00001 | 1 |
| AX-157890142 | 1 | 19.967 | KV452696.1 | 1299583 | 1-scf00001 | 1 |
| AX-157890145 | 1 | 19.999 | KV452696.1 | 1306067 | 1-scf00001 | 1 |
| AX-157890172 | 1 | 19.999 | KV452696.1 | 1351757 | 1-scf00001 | 1 |
| AX-157890147 | 1 | 20.016 | KV452696.1 | 1306868 | 1-scf00001 | 1 |
| AX-157890150 | 1 | 20.103 | KV452696.1 | 1308943 | 1-scf00001 | 1 |
| AX-157709458 | 1 | 20.186 | KV452696.1 | 1268814 | 1-scf00001 | 1 |
| AX-157702551 | 1 | 20.186 | KV452696.1 | 1283426 | 1-scf00001 | 1 |
| AX-157890137 | 1 | 20.186 | KV452696.1 | 1292845 | 1-scf00001 | 1 |
| AX-157890149 | 1 | 20.186 | KV452696.1 | 1308092 | 1-scf00001 | 1 |
| AX-157890151 | 1 | 20.186 | KV452696.1 | 1310670 | 1-scf00001 | 1 |
| AX-157890154 | 1 | 20.186 | KV452696.1 | 1316402 | 1-scf00001 | 1 |
| AX-157890157 | 1 | 20.186 | KV452696.1 | 1319883 | 1-scf00001 | 1 |
| AX-157890158 | 1 | 20.186 | KV452696.1 | 1320596 | 1-scf00001 | 1 |
| AX-157853513 | 1 | 20.186 | KV452696.1 | 1321660 | 1-scf00001 | 1 |
| AX-158379088 | 1 | 20.186 | KV452696.1 | 1345918 | 1-scf00001 | 1 |
| AX-157890173 | 1 | 20.186 | KV452696.1 | 1354340 | 1-scf00001 | 1 |

|              |   |        |            |         |            |   |
|--------------|---|--------|------------|---------|------------|---|
| AX-157890174 | 1 | 20.186 | KV452696.1 | 1355443 | 1-scf00001 | 1 |
| AX-157890179 | 1 | 20.186 | KV452696.1 | 1367158 | 1-scf00001 | 1 |
| AX-157890297 | 1 | 20.186 | KV452696.1 | 1614002 | 1-scf00001 | 1 |
| AX-157810166 | 1 | 20.272 | KV452696.1 | 1352408 | 1-scf00001 | 1 |
| AX-157810167 | 1 | 20.295 | KV452696.1 | 1353430 | 1-scf00001 | 1 |
| AX-157890175 | 1 | 20.295 | KV452696.1 | 1357229 | 1-scf00001 | 1 |
| AX-157890176 | 1 | 20.295 | KV452696.1 | 1360804 | 1-scf00001 | 1 |
| AX-157890178 | 1 | 20.405 | KV452696.1 | 1366400 | 1-scf00001 | 1 |
| AX-157890181 | 1 | 20.405 | KV452696.1 | 1368571 | 1-scf00001 | 1 |
| AX-157699460 | 1 | 20.405 | KV452696.1 | 1370145 | 1-scf00001 | 1 |
| AX-157890186 | 1 | 20.405 | KV452696.1 | 1378393 | 1-scf00001 | 1 |
| AX-157890187 | 1 | 20.407 | KV452696.1 | 1379742 | 1-scf00001 | 1 |
| AX-157890188 | 1 | 20.411 | KV452696.1 | 1380121 | 1-scf00001 | 1 |
| AX-157751344 | 1 | 20.621 | KV452696.1 | 1385336 | 1-scf00001 | 1 |
| AX-157890191 | 1 | 20.737 | KV452696.1 | 1383578 | 1-scf00001 | 1 |
| AX-157890193 | 1 | 20.737 | KV452696.1 | 1387257 | 1-scf00001 | 1 |
| AX-157810179 | 1 | 20.737 | KV452696.1 | 1530389 | 1-scf00001 | 1 |
| AX-157890196 | 1 | 20.842 | KV452696.1 | 1396611 | 1-scf00001 | 1 |
| AX-157890197 | 1 | 20.842 | KV452696.1 | 1399293 | 1-scf00001 | 1 |
| AX-157715478 | 1 | 20.842 | KV452696.1 | 1483353 | 1-scf00001 | 1 |
| AX-157810171 | 1 | 20.842 | KV452696.1 | 1484103 | 1-scf00001 | 1 |
| AX-157890223 | 1 | 20.842 | KV452696.1 | 1491084 | 1-scf00001 | 1 |
| AX-157890225 | 1 | 20.842 | KV452696.1 | 1493206 | 1-scf00001 | 1 |
| AX-157890226 | 1 | 20.842 | KV452696.1 | 1493969 | 1-scf00001 | 1 |
| AX-157810173 | 1 | 20.842 | KV452696.1 | 1498369 | 1-scf00001 | 1 |
| AX-157810182 | 1 | 20.842 | KV452696.1 | 1542128 | 1-scf00001 | 1 |
| AX-157890222 | 1 | 20.92  | KV452696.1 | 1489934 | 1-scf00001 | 1 |
| AX-157748550 | 1 | 20.92  | KV452696.1 | 1499086 | 1-scf00001 | 1 |
| AX-157890233 | 1 | 20.92  | KV452696.1 | 1500541 | 1-scf00001 | 1 |
| AX-157890281 | 1 | 20.92  | KV452696.1 | 1581390 | 1-scf00001 | 1 |
| AX-157890289 | 1 | 20.92  | KV452696.1 | 1596137 | 1-scf00001 | 1 |
| AX-158379090 | 1 | 20.92  | KV452696.1 | 1755386 | 1-scf00001 | 1 |
| AX-157890404 | 1 | 20.92  | KV452696.1 | 1757526 | 1-scf00001 | 1 |
| AX-157890170 | 1 | 20.932 | KV452696.1 | 1347204 | 1-scf00001 | 1 |
| AX-157890240 | 1 | 20.932 | KV452696.1 | 1510059 | 1-scf00001 | 1 |
| AX-157716217 | 1 | 20.946 | KV452696.1 | 1514599 | 1-scf00001 | 1 |
| AX-157890419 | 1 | 20.946 | KV452696.1 | 1786650 | 1-scf00001 | 1 |
| AX-157810175 | 1 | 20.952 | KV452696.1 | 1505658 | 1-scf00001 | 1 |
| AX-157890243 | 1 | 20.952 | KV452696.1 | 1517387 | 1-scf00001 | 1 |
| AX-157810181 | 1 | 20.952 | KV452696.1 | 1540871 | 1-scf00001 | 1 |
| AX-157754762 | 1 | 20.952 | KV452696.1 | 1541212 | 1-scf00001 | 1 |
| AX-157751738 | 1 | 20.952 | KV452696.1 | 1541963 | 1-scf00001 | 1 |
| AX-157810177 | 1 | 21.17  | KV452696.1 | 1522567 | 1-scf00001 | 1 |
| AX-157890250 | 1 | 21.17  | KV452696.1 | 1525623 | 1-scf00001 | 1 |
| AX-157890254 | 1 | 21.17  | KV452696.1 | 1538747 | 1-scf00001 | 1 |
| AX-157751055 | 1 | 21.17  | KV452696.1 | 1568156 | 1-scf00001 | 1 |
| AX-157890271 | 1 | 21.17  | KV452696.1 | 1571558 | 1-scf00001 | 1 |
| AX-157890272 | 1 | 21.17  | KV452696.1 | 1571837 | 1-scf00001 | 1 |
| AX-157890273 | 1 | 21.17  | KV452696.1 | 1572222 | 1-scf00001 | 1 |
| AX-157890274 | 1 | 21.17  | KV452696.1 | 1574078 | 1-scf00001 | 1 |
| AX-157890279 | 1 | 21.17  | KV452696.1 | 1577979 | 1-scf00001 | 1 |



|              |   |        |            |         |            |   |
|--------------|---|--------|------------|---------|------------|---|
| AX-157890283 | 1 | 21.17  | KV452696.1 | 1583639 | 1-scf00001 | 1 |
| AX-157890286 | 1 | 21.17  | KV452696.1 | 1592606 | 1-scf00001 | 1 |
| AX-157890290 | 1 | 21.17  | KV452696.1 | 1597062 | 1-scf00001 | 1 |
| AX-157890292 | 1 | 21.17  | KV452696.1 | 1604680 | 1-scf00001 | 1 |
| AX-157810189 | 1 | 21.17  | KV452696.1 | 1625752 | 1-scf00001 | 1 |
| AX-157890295 | 1 | 21.205 | KV452696.1 | 1612515 | 1-scf00001 | 1 |
| AX-157890169 | 1 | 21.225 | KV452696.1 | 1341096 | 1-scf00001 | 1 |
| AX-157890232 | 1 | 21.225 | KV452696.1 | 1500095 | 1-scf00001 | 1 |
| AX-157890238 | 1 | 21.225 | KV452696.1 | 1504764 | 1-scf00001 | 1 |
| AX-157890246 | 1 | 21.225 | KV452696.1 | 1519509 | 1-scf00001 | 1 |
| AX-157890293 | 1 | 21.225 | KV452696.1 | 1611632 | 1-scf00001 | 1 |
| AX-157890296 | 1 | 21.225 | KV452696.1 | 1613383 | 1-scf00001 | 1 |
| AX-157890338 | 1 | 21.225 | KV452696.1 | 1659880 | 1-scf00001 | 1 |
| AX-157890347 | 1 | 21.225 | KV452696.1 | 1676031 | 1-scf00001 | 1 |
| AX-157853518 | 1 | 21.225 | KV452696.1 | 1692487 | 1-scf00001 | 1 |
| AX-157890364 | 1 | 21.225 | KV452696.1 | 1694383 | 1-scf00001 | 1 |
| AX-157890306 | 1 | 21.245 | KV452696.1 | 1620104 | 1-scf00001 | 1 |
| AX-157890314 | 1 | 21.279 | KV452696.1 | 1631093 | 1-scf00001 | 1 |
| AX-157890315 | 1 | 21.279 | KV452696.1 | 1631329 | 1-scf00001 | 1 |
| AX-157890317 | 1 | 21.279 | KV452696.1 | 1632101 | 1-scf00001 | 1 |
| AX-157810191 | 1 | 21.279 | KV452696.1 | 1635798 | 1-scf00001 | 1 |
| AX-157890199 | 1 | 21.374 | KV452696.1 | 1400447 | 1-scf00001 | 1 |
| AX-157890320 | 1 | 21.374 | KV452696.1 | 1637003 | 1-scf00001 | 1 |
| AX-157890319 | 1 | 21.498 | KV452696.1 | 1636548 | 1-scf00001 | 1 |
| AX-157890326 | 1 | 21.498 | KV452696.1 | 1642833 | 1-scf00001 | 1 |
| AX-157890327 | 1 | 21.498 | KV452696.1 | 1643315 | 1-scf00001 | 1 |
| AX-157890330 | 1 | 21.498 | KV452696.1 | 1645520 | 1-scf00001 | 1 |
| AX-157890336 | 1 | 21.498 | KV452696.1 | 1655212 | 1-scf00001 | 1 |
| AX-157890202 | 1 | 21.612 | KV452696.1 | 1412254 | 1-scf00001 | 1 |
| AX-157890237 | 1 | 21.612 | KV452696.1 | 1504514 | 1-scf00001 | 1 |
| AX-157890256 | 1 | 21.612 | KV452696.1 | 1539747 | 1-scf00001 | 1 |
| AX-157890263 | 1 | 21.612 | KV452696.1 | 1549505 | 1-scf00001 | 1 |
| AX-157810188 | 1 | 21.612 | KV452696.1 | 1599693 | 1-scf00001 | 1 |
| AX-157747986 | 1 | 21.612 | KV452696.1 | 1668015 | 1-scf00001 | 1 |
| AX-157890402 | 1 | 21.612 | KV452696.1 | 1755968 | 1-scf00001 | 1 |
| AX-157755314 | 1 | 21.612 | KV452696.1 | 1761798 | 1-scf00001 | 1 |
| AX-157890475 | 1 | 21.612 | KV452696.1 | 1863993 | 1-scf00001 | 1 |
| AX-157890499 | 1 | 21.612 | KV452696.1 | 1919333 | 1-scf00001 | 1 |
| AX-157890825 | 1 | 21.612 | KV452696.1 | 2543426 | 1-scf00001 | 1 |
| AX-157890919 | 1 | 21.612 | KV452696.1 | 2746935 | 1-scf00001 | 1 |
| AX-158379096 | 1 | 21.612 | KV452696.1 | 2795120 | 1-scf00001 | 1 |
| AX-157890962 | 1 | 21.612 | KV452696.1 | 2828143 | 1-scf00001 | 1 |
| AX-157890966 | 1 | 21.612 | KV452696.1 | 2835233 | 1-scf00001 | 1 |
| AX-157890967 | 1 | 21.612 | KV452696.1 | 2837237 | 1-scf00001 | 1 |
| AX-157890341 | 1 | 21.717 | KV452696.1 | 1667459 | 1-scf00001 | 1 |
| AX-157853517 | 1 | 21.717 | KV452696.1 | 1668260 | 1-scf00001 | 1 |
| AX-157890344 | 1 | 21.717 | KV452696.1 | 1672200 | 1-scf00001 | 1 |
| AX-157890345 | 1 | 21.717 | KV452696.1 | 1673668 | 1-scf00001 | 1 |
| AX-157774868 | 1 | 21.717 | KV452696.1 | 1676407 | 1-scf00001 | 1 |
| AX-157890348 | 1 | 21.717 | KV452696.1 | 1676554 | 1-scf00001 | 1 |
| AX-157890349 | 1 | 21.717 | KV452696.1 | 1677547 | 1-scf00001 | 1 |

|              |   |        |            |         |            |   |
|--------------|---|--------|------------|---------|------------|---|
| AX-157890350 | 1 | 21.717 | KV452696.1 | 1678555 | 1-scf00001 | 1 |
| AX-157890354 | 1 | 21.717 | KV452696.1 | 1684696 | 1-scf00001 | 1 |
| AX-157890359 | 1 | 21.826 | KV452696.1 | 1688228 | 1-scf00001 | 1 |
| AX-157890360 | 1 | 21.826 | KV452696.1 | 1689225 | 1-scf00001 | 1 |
| AX-157890366 | 1 | 21.855 | KV452696.1 | 1698603 | 1-scf00001 | 1 |
| AX-157772973 | 1 | 21.87  | KV452696.1 | 1415924 | 1-scf00001 | 1 |
| AX-157890218 | 1 | 21.87  | KV452696.1 | 1485525 | 1-scf00001 | 1 |
| AX-157890231 | 1 | 21.87  | KV452696.1 | 1496571 | 1-scf00001 | 1 |
| AX-157890239 | 1 | 21.87  | KV452696.1 | 1509340 | 1-scf00001 | 1 |
| AX-157810186 | 1 | 21.87  | KV452696.1 | 1567008 | 1-scf00001 | 1 |
| AX-157890268 | 1 | 21.87  | KV452696.1 | 1568900 | 1-scf00001 | 1 |
| AX-157890285 | 1 | 21.87  | KV452696.1 | 1588712 | 1-scf00001 | 1 |
| AX-157890323 | 1 | 21.87  | KV452696.1 | 1641423 | 1-scf00001 | 1 |
| AX-157890331 | 1 | 21.87  | KV452696.1 | 1645734 | 1-scf00001 | 1 |
| AX-157890365 | 1 | 21.87  | KV452696.1 | 1697790 | 1-scf00001 | 1 |
| AX-157890368 | 1 | 21.87  | KV452696.1 | 1700267 | 1-scf00001 | 1 |
| AX-157890372 | 1 | 21.87  | KV452696.1 | 1707479 | 1-scf00001 | 1 |
| AX-157890377 | 1 | 21.87  | KV452696.1 | 1720435 | 1-scf00001 | 1 |
| AX-157890381 | 1 | 21.87  | KV452696.1 | 1723891 | 1-scf00001 | 1 |
| AX-157716500 | 1 | 21.898 | KV452696.1 | 1711787 | 1-scf00001 | 1 |
| AX-157890373 | 1 | 21.935 | KV452696.1 | 1712777 | 1-scf00001 | 1 |
| AX-157890376 | 1 | 21.949 | KV452696.1 | 1719072 | 1-scf00001 | 1 |
| AX-157890378 | 1 | 22.044 | KV452696.1 | 1722267 | 1-scf00001 | 1 |
| AX-157771832 | 1 | 22.132 | KV452696.1 | 1725285 | 1-scf00001 | 1 |
| AX-157890392 | 1 | 22.132 | KV452696.1 | 1738841 | 1-scf00001 | 1 |
| AX-157890382 | 1 | 22.205 | KV452696.1 | 1726073 | 1-scf00001 | 1 |
| AX-157890384 | 1 | 22.263 | KV452696.1 | 1730582 | 1-scf00001 | 1 |
| AX-157890387 | 1 | 22.263 | KV452696.1 | 1732020 | 1-scf00001 | 1 |
| AX-157890388 | 1 | 22.263 | KV452696.1 | 1732370 | 1-scf00001 | 1 |
| AX-157746839 | 1 | 22.287 | KV452696.1 | 1737563 | 1-scf00001 | 1 |
| AX-157890395 | 1 | 22.287 | KV452696.1 | 1747609 | 1-scf00001 | 1 |
| AX-157713471 | 1 | 22.287 | KV452696.1 | 1765411 | 1-scf00001 | 1 |
| AX-157810197 | 1 | 22.313 | KV452696.1 | 1748946 | 1-scf00001 | 1 |
| AX-157890394 | 1 | 22.372 | KV452696.1 | 1741711 | 1-scf00001 | 1 |
| AX-157810198 | 1 | 22.372 | KV452696.1 | 1749581 | 1-scf00001 | 1 |
| AX-157749741 | 1 | 22.405 | KV452696.1 | 1751358 | 1-scf00001 | 1 |
| AX-157890406 | 1 | 22.444 | KV452696.1 | 1759519 | 1-scf00001 | 1 |
| AX-157890407 | 1 | 22.482 | KV452696.1 | 1765956 | 1-scf00001 | 1 |
| AX-157890409 | 1 | 22.482 | KV452696.1 | 1767187 | 1-scf00001 | 1 |
| AX-157890410 | 1 | 22.482 | KV452696.1 | 1768845 | 1-scf00001 | 1 |
| AX-157890416 | 1 | 22.49  | KV452696.1 | 1779078 | 1-scf00001 | 1 |
| AX-157890417 | 1 | 22.684 | KV452696.1 | 1780200 | 1-scf00001 | 1 |
| AX-157890420 | 1 | 22.891 | KV452696.1 | 1787630 | 1-scf00001 | 1 |
| AX-157890421 | 1 | 22.891 | KV452696.1 | 1788678 | 1-scf00001 | 1 |
| AX-157890423 | 1 | 22.891 | KV452696.1 | 1789844 | 1-scf00001 | 1 |
| AX-157890428 | 1 | 22.891 | KV452696.1 | 1795049 | 1-scf00001 | 1 |
| AX-157890429 | 1 | 22.891 | KV452696.1 | 1795434 | 1-scf00001 | 1 |
| AX-157890430 | 1 | 22.891 | KV452696.1 | 1795844 | 1-scf00001 | 1 |
| AX-157890431 | 1 | 22.891 | KV452696.1 | 1796562 | 1-scf00001 | 1 |
| AX-157890399 | 1 | 23.028 | KV452696.1 | 1752191 | 1-scf00001 | 1 |
| AX-158379091 | 1 | 23.028 | KV452696.1 | 1790162 | 1-scf00001 | 1 |

|              |   |        |            |         |            |   |
|--------------|---|--------|------------|---------|------------|---|
| AX-157890425 | 1 | 23.028 | KV452696.1 | 1792122 | 1-scf00001 | 1 |
| AX-157890434 | 1 | 23.028 | KV452696.1 | 1800148 | 1-scf00001 | 1 |
| AX-157890435 | 1 | 23.028 | KV452696.1 | 1801399 | 1-scf00001 | 1 |
| AX-157883025 | 1 | 23.028 | KV452696.1 | 1801638 | 1-scf00001 | 1 |
| AX-157890436 | 1 | 23.028 | KV452696.1 | 1802019 | 1-scf00001 | 1 |
| AX-157890438 | 1 | 23.028 | KV452696.1 | 1803676 | 1-scf00001 | 1 |
| AX-157890439 | 1 | 23.028 | KV452696.1 | 1804468 | 1-scf00001 | 1 |
| AX-158404134 | 1 | 23.028 | KV452696.1 | 1807366 | 1-scf00001 | 1 |
| AX-157890442 | 1 | 23.028 | KV452696.1 | 1813283 | 1-scf00001 | 1 |
| AX-157890444 | 1 | 23.028 | KV452696.1 | 1815807 | 1-scf00001 | 1 |
| AX-157890445 | 1 | 23.028 | KV452696.1 | 1816310 | 1-scf00001 | 1 |
| AX-157890448 | 1 | 23.028 | KV452696.1 | 1821724 | 1-scf00001 | 1 |
| AX-157890450 | 1 | 23.028 | KV452696.1 | 1823285 | 1-scf00001 | 1 |
| AX-157890452 | 1 | 23.028 | KV452696.1 | 1825206 | 1-scf00001 | 1 |
| AX-157890453 | 1 | 23.028 | KV452696.1 | 1825597 | 1-scf00001 | 1 |
| AX-157890456 | 1 | 23.028 | KV452696.1 | 1828243 | 1-scf00001 | 1 |
| AX-157810199 | 1 | 23.028 | KV452696.1 | 1836655 | 1-scf00001 | 1 |
| AX-157890482 | 1 | 23.028 | KV452696.1 | 1873550 | 1-scf00001 | 1 |
| AX-157874229 | 1 | 23.028 | KV452696.1 | 1888523 | 1-scf00001 | 1 |
| AX-157890843 | 1 | 23.028 | KV452696.1 | 2594269 | 1-scf00001 | 1 |
| AX-157890470 | 1 | 23.086 | KV452696.1 | 1853177 | 1-scf00001 | 1 |
| AX-157890443 | 1 | 23.138 | KV452696.1 | 1813983 | 1-scf00001 | 1 |
| AX-157890446 | 1 | 23.138 | KV452696.1 | 1817118 | 1-scf00001 | 1 |
| AX-157890465 | 1 | 23.138 | KV452696.1 | 1847121 | 1-scf00001 | 1 |
| AX-157890471 | 1 | 23.138 | KV452696.1 | 1853837 | 1-scf00001 | 1 |
| AX-157890472 | 1 | 23.138 | KV452696.1 | 1860537 | 1-scf00001 | 1 |
| AX-157810201 | 1 | 23.138 | KV452696.1 | 1861740 | 1-scf00001 | 1 |
| AX-157890477 | 1 | 23.138 | KV452696.1 | 1865118 | 1-scf00001 | 1 |
| AX-157890478 | 1 | 23.138 | KV452696.1 | 1865328 | 1-scf00001 | 1 |
| AX-157890497 | 1 | 23.138 | KV452696.1 | 1914884 | 1-scf00001 | 1 |
| AX-157774338 | 1 | 23.516 | KV452696.1 | 1885398 | 1-scf00001 | 1 |
| AX-157890489 | 1 | 23.516 | KV452696.1 | 1888965 | 1-scf00001 | 1 |
| AX-157890490 | 1 | 23.66  | KV452696.1 | 1889709 | 1-scf00001 | 1 |
| AX-158379092 | 1 | 23.879 | KV452696.1 | 1894555 | 1-scf00001 | 1 |
| AX-157890493 | 1 | 24.232 | KV452696.1 | 1904544 | 1-scf00001 | 1 |
| AX-157890494 | 1 | 24.232 | KV452696.1 | 1906626 | 1-scf00001 | 1 |
| AX-157890503 | 1 | 24.232 | KV452696.1 | 1923799 | 1-scf00001 | 1 |
| AX-157810202 | 1 | 24.232 | KV452696.1 | 1929521 | 1-scf00001 | 1 |
| AX-157717283 | 1 | 24.232 | KV452696.1 | 1930478 | 1-scf00001 | 1 |
| AX-157890506 | 1 | 24.232 | KV452696.1 | 1932829 | 1-scf00001 | 1 |
| AX-157890510 | 1 | 24.232 | KV452696.1 | 1941222 | 1-scf00001 | 1 |
| AX-157890512 | 1 | 24.232 | KV452696.1 | 1945242 | 1-scf00001 | 1 |
| AX-157890515 | 1 | 24.232 | KV452696.1 | 1948365 | 1-scf00001 | 1 |
| AX-157890519 | 1 | 24.451 | KV452696.1 | 1952076 | 1-scf00001 | 1 |
| AX-157890522 | 1 | 24.451 | KV452696.1 | 1954983 | 1-scf00001 | 1 |
| AX-157890526 | 1 | 24.451 | KV452696.1 | 1959203 | 1-scf00001 | 1 |
| AX-157708183 | 1 | 24.451 | KV452696.1 | 1966185 | 1-scf00001 | 1 |
| AX-157708182 | 1 | 24.451 | KV452696.1 | 1966365 | 1-scf00001 | 1 |
| AX-157890532 | 1 | 24.451 | KV452696.1 | 1967942 | 1-scf00001 | 1 |
| AX-157890534 | 1 | 24.451 | KV452696.1 | 1969590 | 1-scf00001 | 1 |
| AX-157890539 | 1 | 24.451 | KV452696.1 | 1973451 | 1-scf00001 | 1 |

|              |   |        |            |         |            |   |
|--------------|---|--------|------------|---------|------------|---|
| AX-157890553 | 1 | 24.451 | KV452696.1 | 2000220 | 1-scf00001 | 1 |
| AX-157742873 | 1 | 24.459 | KV452696.1 | 1970302 | 1-scf00001 | 1 |
| AX-157890541 | 1 | 24.502 | KV452696.1 | 1976223 | 1-scf00001 | 1 |
| AX-158388950 | 1 | 24.56  | KV452696.1 | 1979431 | 1-scf00001 | 1 |
| AX-157774009 | 1 | 24.56  | KV452696.1 | 1980236 | 1-scf00001 | 1 |
| AX-157890543 | 1 | 24.778 | KV452696.1 | 1982471 | 1-scf00001 | 1 |
| AX-157710358 | 1 | 24.778 | KV452696.1 | 1986580 | 1-scf00001 | 1 |
| AX-157713314 | 1 | 24.778 | KV452696.1 | 2563658 | 1-scf00001 | 1 |
| AX-157890871 | 1 | 24.778 | KV452696.1 | 2645771 | 1-scf00001 | 1 |
| AX-158404135 | 1 | 24.888 | KV452696.1 | 1969248 | 1-scf00001 | 1 |
| AX-157890535 | 1 | 24.888 | KV452696.1 | 1971000 | 1-scf00001 | 1 |
| AX-157890546 | 1 | 24.888 | KV452696.1 | 1988325 | 1-scf00001 | 1 |
| AX-157890551 | 1 | 24.888 | KV452696.1 | 1996578 | 1-scf00001 | 1 |
| AX-157742396 | 1 | 24.888 | KV452696.1 | 1999239 | 1-scf00001 | 1 |
| AX-157810206 | 1 | 24.888 | KV452696.1 | 1999481 | 1-scf00001 | 1 |
| AX-157810207 | 1 | 24.888 | KV452696.1 | 1999520 | 1-scf00001 | 1 |
| AX-157890554 | 1 | 24.888 | KV452696.1 | 2003569 | 1-scf00001 | 1 |
| AX-157748162 | 1 | 24.888 | KV452696.1 | 2004910 | 1-scf00001 | 1 |
| AX-157890557 | 1 | 24.888 | KV452696.1 | 2006447 | 1-scf00001 | 1 |
| AX-157890560 | 1 | 24.888 | KV452696.1 | 2009116 | 1-scf00001 | 1 |
| AX-157890562 | 1 | 24.888 | KV452696.1 | 2010219 | 1-scf00001 | 1 |
| AX-157890564 | 1 | 24.888 | KV452696.1 | 2013437 | 1-scf00001 | 1 |
| AX-157890565 | 1 | 24.888 | KV452696.1 | 2014201 | 1-scf00001 | 1 |
| AX-157890566 | 1 | 24.888 | KV452696.1 | 2014971 | 1-scf00001 | 1 |
| AX-157890567 | 1 | 24.888 | KV452696.1 | 2015357 | 1-scf00001 | 1 |
| AX-157890570 | 1 | 24.888 | KV452696.1 | 2016948 | 1-scf00001 | 1 |
| AX-157890571 | 1 | 24.888 | KV452696.1 | 2017724 | 1-scf00001 | 1 |
| AX-157890572 | 1 | 24.888 | KV452696.1 | 2018437 | 1-scf00001 | 1 |
| AX-157890574 | 1 | 24.888 | KV452696.1 | 2018913 | 1-scf00001 | 1 |
| AX-157890578 | 1 | 24.888 | KV452696.1 | 2027427 | 1-scf00001 | 1 |
| AX-157890587 | 1 | 24.888 | KV452696.1 | 2042464 | 1-scf00001 | 1 |
| AX-157890588 | 1 | 24.888 | KV452696.1 | 2047006 | 1-scf00001 | 1 |
| AX-157890590 | 1 | 24.888 | KV452696.1 | 2048451 | 1-scf00001 | 1 |
| AX-157890591 | 1 | 24.888 | KV452696.1 | 2049656 | 1-scf00001 | 1 |
| AX-157890549 | 1 | 25.215 | KV452696.1 | 1994263 | 1-scf00001 | 1 |
| AX-157890595 | 1 | 25.215 | KV452696.1 | 2053251 | 1-scf00001 | 1 |
| AX-157890603 | 1 | 25.215 | KV452696.1 | 2065346 | 1-scf00001 | 1 |
| AX-157890604 | 1 | 25.215 | KV452696.1 | 2066241 | 1-scf00001 | 1 |
| AX-157890609 | 1 | 25.215 | KV452696.1 | 2069336 | 1-scf00001 | 1 |
| AX-157890610 | 1 | 25.215 | KV452696.1 | 2070140 | 1-scf00001 | 1 |
| AX-157773101 | 1 | 25.215 | KV452696.1 | 2072486 | 1-scf00001 | 1 |
| AX-157890611 | 1 | 25.215 | KV452696.1 | 2074048 | 1-scf00001 | 1 |
| AX-157890612 | 1 | 25.215 | KV452696.1 | 2075304 | 1-scf00001 | 1 |
| AX-157810209 | 1 | 25.325 | KV452696.1 | 2084896 | 1-scf00001 | 1 |
| AX-157890619 | 1 | 25.325 | KV452696.1 | 2090320 | 1-scf00001 | 1 |
| AX-157890621 | 1 | 25.325 | KV452696.1 | 2093945 | 1-scf00001 | 1 |
| AX-157746192 | 1 | 25.434 | KV452696.1 | 2088467 | 1-scf00001 | 1 |
| AX-157890627 | 1 | 25.434 | KV452696.1 | 2104356 | 1-scf00001 | 1 |
| AX-157890630 | 1 | 25.434 | KV452696.1 | 2106248 | 1-scf00001 | 1 |
| AX-157890633 | 1 | 25.434 | KV452696.1 | 2108735 | 1-scf00001 | 1 |
| AX-157890634 | 1 | 25.434 | KV452696.1 | 2109156 | 1-scf00001 | 1 |

|              |   |        |            |         |            |   |
|--------------|---|--------|------------|---------|------------|---|
| AX-157704059 | 1 | 25.434 | KV452696.1 | 2110772 | 1-scf00001 | 1 |
| AX-157890652 | 1 | 25.434 | KV452696.1 | 2128921 | 1-scf00001 | 1 |
| AX-157890656 | 1 | 25.434 | KV452696.1 | 2132090 | 1-scf00001 | 1 |
| AX-157890828 | 1 | 25.434 | KV452696.1 | 2560359 | 1-scf00001 | 1 |
| AX-158403658 | 1 | 25.463 | KV452696.1 | 2113157 | 1-scf00001 | 1 |
| AX-158403660 | 1 | 25.491 | KV452696.1 | 2113501 | 1-scf00001 | 1 |
| AX-157810211 | 1 | 25.543 | KV452696.1 | 2112719 | 1-scf00001 | 1 |
| AX-157890638 | 1 | 25.543 | KV452696.1 | 2115098 | 1-scf00001 | 1 |
| AX-157890639 | 1 | 25.543 | KV452696.1 | 2115863 | 1-scf00001 | 1 |
| AX-157890642 | 1 | 25.543 | KV452696.1 | 2117786 | 1-scf00001 | 1 |
| AX-157890643 | 1 | 25.543 | KV452696.1 | 2119252 | 1-scf00001 | 1 |
| AX-157771685 | 1 | 25.543 | KV452696.1 | 2123188 | 1-scf00001 | 1 |
| AX-157890651 | 1 | 25.543 | KV452696.1 | 2125402 | 1-scf00001 | 1 |
| AX-157890667 | 1 | 25.543 | KV452696.1 | 2141239 | 1-scf00001 | 1 |
| AX-157890670 | 1 | 25.543 | KV452696.1 | 2144197 | 1-scf00001 | 1 |
| AX-157890657 | 1 | 25.638 | KV452696.1 | 2133192 | 1-scf00001 | 1 |
| AX-157890614 | 1 | 25.652 | KV452696.1 | 2084140 | 1-scf00001 | 1 |
| AX-157890617 | 1 | 25.652 | KV452696.1 | 2087662 | 1-scf00001 | 1 |
| AX-157890653 | 1 | 25.652 | KV452696.1 | 2129091 | 1-scf00001 | 1 |
| AX-157890659 | 1 | 25.652 | KV452696.1 | 2136638 | 1-scf00001 | 1 |
| AX-157890661 | 1 | 25.652 | KV452696.1 | 2137133 | 1-scf00001 | 1 |
| AX-157890662 | 1 | 25.652 | KV452696.1 | 2137717 | 1-scf00001 | 1 |
| AX-157890663 | 1 | 25.652 | KV452696.1 | 2138176 | 1-scf00001 | 1 |
| AX-157890664 | 1 | 25.652 | KV452696.1 | 2138625 | 1-scf00001 | 1 |
| AX-157890666 | 1 | 25.652 | KV452696.1 | 2140590 | 1-scf00001 | 1 |
| AX-157890668 | 1 | 25.652 | KV452696.1 | 2142010 | 1-scf00001 | 1 |
| AX-157890669 | 1 | 25.652 | KV452696.1 | 2142351 | 1-scf00001 | 1 |
| AX-157890673 | 1 | 25.652 | KV452696.1 | 2148060 | 1-scf00001 | 1 |
| AX-157714624 | 1 | 25.652 | KV452696.1 | 2150367 | 1-scf00001 | 1 |
| AX-157890675 | 1 | 25.652 | KV452696.1 | 2152120 | 1-scf00001 | 1 |
| AX-157890676 | 1 | 25.652 | KV452696.1 | 2153737 | 1-scf00001 | 1 |
| AX-157890677 | 1 | 25.652 | KV452696.1 | 2155158 | 1-scf00001 | 1 |
| AX-157890678 | 1 | 25.652 | KV452696.1 | 2156629 | 1-scf00001 | 1 |
| AX-157890683 | 1 | 25.652 | KV452696.1 | 2165334 | 1-scf00001 | 1 |
| AX-157890684 | 1 | 25.652 | KV452696.1 | 2166004 | 1-scf00001 | 1 |
| AX-157890685 | 1 | 25.652 | KV452696.1 | 2166758 | 1-scf00001 | 1 |
| AX-157890686 | 1 | 25.652 | KV452696.1 | 2172926 | 1-scf00001 | 1 |
| AX-157754890 | 1 | 25.652 | KV452696.1 | 2180126 | 1-scf00001 | 1 |
| AX-157890692 | 1 | 25.652 | KV452696.1 | 2182636 | 1-scf00001 | 1 |
| AX-157890702 | 1 | 25.652 | KV452696.1 | 2188935 | 1-scf00001 | 1 |
| AX-157890704 | 1 | 25.652 | KV452696.1 | 2191602 | 1-scf00001 | 1 |
| AX-157890705 | 1 | 25.652 | KV452696.1 | 2192058 | 1-scf00001 | 1 |
| AX-157890708 | 1 | 25.652 | KV452696.1 | 2195971 | 1-scf00001 | 1 |
| AX-157890709 | 1 | 25.652 | KV452696.1 | 2196348 | 1-scf00001 | 1 |
| AX-157890710 | 1 | 25.652 | KV452696.1 | 2196801 | 1-scf00001 | 1 |
| AX-157890712 | 1 | 25.652 | KV452696.1 | 2198284 | 1-scf00001 | 1 |
| AX-157890714 | 1 | 25.652 | KV452696.1 | 2199150 | 1-scf00001 | 1 |
| AX-157890717 | 1 | 25.652 | KV452696.1 | 2207927 | 1-scf00001 | 1 |
| AX-157810212 | 1 | 25.652 | KV452696.1 | 2209230 | 1-scf00001 | 1 |
| AX-157748054 | 1 | 25.652 | KV452696.1 | 2214506 | 1-scf00001 | 1 |
| AX-157890720 | 1 | 25.652 | KV452696.1 | 2215437 | 1-scf00001 | 1 |

|              |   |        |            |         |            |   |
|--------------|---|--------|------------|---------|------------|---|
| AX-157810213 | 1 | 25.652 | KV452696.1 | 2216701 | 1-scf00001 | 1 |
| AX-157890723 | 1 | 25.652 | KV452696.1 | 2220155 | 1-scf00001 | 1 |
| AX-157890724 | 1 | 25.652 | KV452696.1 | 2221920 | 1-scf00001 | 1 |
| AX-157890728 | 1 | 25.652 | KV452696.1 | 2225202 | 1-scf00001 | 1 |
| AX-157890729 | 1 | 25.652 | KV452696.1 | 2226385 | 1-scf00001 | 1 |
| AX-157890731 | 1 | 25.652 | KV452696.1 | 2228688 | 1-scf00001 | 1 |
| AX-157890734 | 1 | 25.652 | KV452696.1 | 2231729 | 1-scf00001 | 1 |
| AX-158379094 | 1 | 25.652 | KV452696.1 | 2235452 | 1-scf00001 | 1 |
| AX-157810215 | 1 | 25.652 | KV452696.1 | 2235560 | 1-scf00001 | 1 |
| AX-158403664 | 1 | 25.652 | KV452696.1 | 2247519 | 1-scf00001 | 1 |
| AX-157890742 | 1 | 25.652 | KV452696.1 | 2264567 | 1-scf00001 | 1 |
| AX-157890743 | 1 | 25.652 | KV452696.1 | 2265790 | 1-scf00001 | 1 |
| AX-157890744 | 1 | 25.652 | KV452696.1 | 2266323 | 1-scf00001 | 1 |
| AX-157810216 | 1 | 25.652 | KV452696.1 | 2270201 | 1-scf00001 | 1 |
| AX-158404141 | 1 | 25.652 | KV452696.1 | 2274328 | 1-scf00001 | 1 |
| AX-157890754 | 1 | 25.652 | KV452696.1 | 2279784 | 1-scf00001 | 1 |
| AX-157890760 | 1 | 25.652 | KV452696.1 | 2293874 | 1-scf00001 | 1 |
| AX-157890803 | 1 | 25.652 | KV452696.1 | 2485895 | 1-scf00001 | 1 |
| AX-157890824 | 1 | 25.652 | KV452696.1 | 2542664 | 1-scf00001 | 1 |
| AX-157810236 | 1 | 25.652 | KV452696.1 | 2553625 | 1-scf00001 | 1 |
| AX-157810238 | 1 | 25.652 | KV452696.1 | 2600731 | 1-scf00001 | 1 |
| AX-157810239 | 1 | 25.652 | KV452696.1 | 2601382 | 1-scf00001 | 1 |
| AX-157890857 | 1 | 25.652 | KV452696.1 | 2627726 | 1-scf00001 | 1 |
| AX-157746862 | 1 | 25.652 | KV452696.1 | 2656620 | 1-scf00001 | 1 |
| AX-158404151 | 1 | 25.652 | KV452696.1 | 2661064 | 1-scf00001 | 1 |
| AX-157890876 | 1 | 25.652 | KV452696.1 | 2663617 | 1-scf00001 | 1 |
| AX-157725146 | 1 | 25.652 | KV452696.1 | 2667184 | 1-scf00001 | 1 |
| AX-157890891 | 1 | 25.652 | KV452696.1 | 2693129 | 1-scf00001 | 1 |
| AX-157810252 | 1 | 25.652 | KV452696.1 | 2741048 | 1-scf00001 | 1 |
| AX-157890940 | 1 | 25.652 | KV452696.1 | 2792482 | 1-scf00001 | 1 |
| AX-157890982 | 1 | 25.652 | KV452696.1 | 2870855 | 1-scf00001 | 1 |
| AX-157890745 | 1 | 25.762 | KV452696.1 | 2267086 | 1-scf00001 | 1 |
| AX-158388953 | 1 | 25.871 | KV452696.1 | 2055667 | 1-scf00001 | 1 |
| AX-157890749 | 1 | 25.871 | KV452696.1 | 2276586 | 1-scf00001 | 1 |
| AX-157890751 | 1 | 25.871 | KV452696.1 | 2277739 | 1-scf00001 | 1 |
| AX-157890752 | 1 | 25.871 | KV452696.1 | 2278448 | 1-scf00001 | 1 |
| AX-157890753 | 1 | 25.871 | KV452696.1 | 2279421 | 1-scf00001 | 1 |
| AX-157890755 | 1 | 25.871 | KV452696.1 | 2283934 | 1-scf00001 | 1 |
| AX-157890757 | 1 | 25.871 | KV452696.1 | 2285727 | 1-scf00001 | 1 |
| AX-157890758 | 1 | 25.871 | KV452696.1 | 2286434 | 1-scf00001 | 1 |
| AX-157890764 | 1 | 25.871 | KV452696.1 | 2299269 | 1-scf00001 | 1 |
| AX-157810219 | 1 | 25.871 | KV452696.1 | 2305834 | 1-scf00001 | 1 |
| AX-157890767 | 1 | 25.871 | KV452696.1 | 2307088 | 1-scf00001 | 1 |
| AX-157810220 | 1 | 25.871 | KV452696.1 | 2310254 | 1-scf00001 | 1 |
| AX-157890770 | 1 | 25.871 | KV452696.1 | 2315284 | 1-scf00001 | 1 |
| AX-157890771 | 1 | 25.871 | KV452696.1 | 2320462 | 1-scf00001 | 1 |
| AX-157890772 | 1 | 25.871 | KV452696.1 | 2326237 | 1-scf00001 | 1 |
| AX-157890773 | 1 | 25.871 | KV452696.1 | 2327728 | 1-scf00001 | 1 |
| AX-157890774 | 1 | 25.871 | KV452696.1 | 2332026 | 1-scf00001 | 1 |
| AX-157810223 | 1 | 25.871 | KV452696.1 | 2341275 | 1-scf00001 | 1 |
| AX-157890782 | 1 | 25.871 | KV452696.1 | 2358573 | 1-scf00001 | 1 |

|              |   |        |            |         |            |   |
|--------------|---|--------|------------|---------|------------|---|
| AX-157890783 | 1 | 25.871 | KV452696.1 | 2369579 | 1-scf00001 | 1 |
| AX-157810225 | 1 | 25.871 | KV452696.1 | 2370802 | 1-scf00001 | 1 |
| AX-157890786 | 1 | 25.871 | KV452696.1 | 2376469 | 1-scf00001 | 1 |
| AX-157810227 | 1 | 25.871 | KV452696.1 | 2376857 | 1-scf00001 | 1 |
| AX-157890787 | 1 | 25.871 | KV452696.1 | 2377576 | 1-scf00001 | 1 |
| AX-157810228 | 1 | 25.871 | KV452696.1 | 2384727 | 1-scf00001 | 1 |
| AX-158381886 | 1 | 25.871 | KV452696.1 | 2410866 | 1-scf00001 | 1 |
| AX-157890794 | 1 | 25.871 | KV452696.1 | 2411662 | 1-scf00001 | 1 |
| AX-157890795 | 1 | 25.871 | KV452696.1 | 2412258 | 1-scf00001 | 1 |
| AX-157890796 | 1 | 25.871 | KV452696.1 | 2413565 | 1-scf00001 | 1 |
| AX-157810232 | 1 | 25.871 | KV452696.1 | 2477072 | 1-scf00001 | 1 |
| AX-157810233 | 1 | 25.871 | KV452696.1 | 2477658 | 1-scf00001 | 1 |
| AX-157890802 | 1 | 25.871 | KV452696.1 | 2482288 | 1-scf00001 | 1 |
| AX-157890813 | 1 | 25.871 | KV452696.1 | 2523619 | 1-scf00001 | 1 |
| AX-157890819 | 1 | 25.871 | KV452696.1 | 2533517 | 1-scf00001 | 1 |
| AX-157890822 | 1 | 25.871 | KV452696.1 | 2540126 | 1-scf00001 | 1 |
| AX-157754178 | 1 | 25.871 | KV452696.1 | 4154421 | 1-scf00001 | 1 |
| AX-157890834 | 1 | 25.889 | KV452696.1 | 2576183 | 1-scf00001 | 1 |
| AX-157890812 | 1 | 25.941 | KV452696.1 | 2522443 | 1-scf00001 | 1 |
| AX-157890831 | 1 | 25.941 | KV452696.1 | 2567824 | 1-scf00001 | 1 |
| AX-157712959 | 1 | 25.941 | KV452696.1 | 2568589 | 1-scf00001 | 1 |
| AX-157890835 | 1 | 25.941 | KV452696.1 | 2577830 | 1-scf00001 | 1 |
| AX-157890836 | 1 | 25.941 | KV452696.1 | 2578036 | 1-scf00001 | 1 |
| AX-157890688 | 1 | 25.98  | KV452696.1 | 2173784 | 1-scf00001 | 1 |
| AX-157890718 | 1 | 25.98  | KV452696.1 | 2212568 | 1-scf00001 | 1 |
| AX-157890719 | 1 | 25.98  | KV452696.1 | 2213465 | 1-scf00001 | 1 |
| AX-157890741 | 1 | 25.98  | KV452696.1 | 2259222 | 1-scf00001 | 1 |
| AX-157890815 | 1 | 25.98  | KV452696.1 | 2526830 | 1-scf00001 | 1 |
| AX-157890823 | 1 | 25.98  | KV452696.1 | 2541478 | 1-scf00001 | 1 |
| AX-157890830 | 1 | 25.98  | KV452696.1 | 2563158 | 1-scf00001 | 1 |
| AX-157890838 | 1 | 25.98  | KV452696.1 | 2580424 | 1-scf00001 | 1 |
| AX-157720980 | 1 | 25.98  | KV452696.1 | 2583173 | 1-scf00001 | 1 |
| AX-157890839 | 1 | 25.98  | KV452696.1 | 2584025 | 1-scf00001 | 1 |
| AX-157890840 | 1 | 25.98  | KV452696.1 | 2584409 | 1-scf00001 | 1 |
| AX-157890842 | 1 | 25.98  | KV452696.1 | 2585202 | 1-scf00001 | 1 |
| AX-157890849 | 1 | 25.98  | KV452696.1 | 2602602 | 1-scf00001 | 1 |
| AX-157890851 | 1 | 25.98  | KV452696.1 | 2608769 | 1-scf00001 | 1 |
| AX-157890852 | 1 | 25.98  | KV452696.1 | 2610932 | 1-scf00001 | 1 |
| AX-157890853 | 1 | 25.98  | KV452696.1 | 2612778 | 1-scf00001 | 1 |
| AX-157713847 | 1 | 25.98  | KV452696.1 | 2621703 | 1-scf00001 | 1 |
| AX-157890856 | 1 | 25.98  | KV452696.1 | 2627039 | 1-scf00001 | 1 |
| AX-157890858 | 1 | 25.98  | KV452696.1 | 2628465 | 1-scf00001 | 1 |
| AX-157890859 | 1 | 25.98  | KV452696.1 | 2629017 | 1-scf00001 | 1 |
| AX-157890860 | 1 | 25.98  | KV452696.1 | 2629612 | 1-scf00001 | 1 |
| AX-157890861 | 1 | 25.98  | KV452696.1 | 2632490 | 1-scf00001 | 1 |
| AX-157890863 | 1 | 25.98  | KV452696.1 | 2633932 | 1-scf00001 | 1 |
| AX-157715374 | 1 | 25.98  | KV452696.1 | 2636068 | 1-scf00001 | 1 |
| AX-157890865 | 1 | 25.98  | KV452696.1 | 2636665 | 1-scf00001 | 1 |
| AX-157810245 | 1 | 25.98  | KV452696.1 | 2637584 | 1-scf00001 | 1 |
| AX-157775331 | 1 | 25.98  | KV452696.1 | 2637823 | 1-scf00001 | 1 |
| AX-157810246 | 1 | 25.98  | KV452696.1 | 2638151 | 1-scf00001 | 1 |

|              |   |        |            |         |            |   |
|--------------|---|--------|------------|---------|------------|---|
| AX-157890867 | 1 | 25.98  | KV452696.1 | 2640303 | 1-scf00001 | 1 |
| AX-157890868 | 1 | 25.98  | KV452696.1 | 2642081 | 1-scf00001 | 1 |
| AX-157890870 | 1 | 25.98  | KV452696.1 | 2644887 | 1-scf00001 | 1 |
| AX-157890888 | 1 | 25.98  | KV452696.1 | 2688942 | 1-scf00001 | 1 |
| AX-157890894 | 1 | 25.98  | KV452696.1 | 2698610 | 1-scf00001 | 1 |
| AX-157890899 | 1 | 25.98  | KV452696.1 | 2704058 | 1-scf00001 | 1 |
| AX-157890901 | 1 | 25.98  | KV452696.1 | 2707591 | 1-scf00001 | 1 |
| AX-157890902 | 1 | 25.98  | KV452696.1 | 2708541 | 1-scf00001 | 1 |
| AX-157890904 | 1 | 25.98  | KV452696.1 | 2712704 | 1-scf00001 | 1 |
| AX-157890914 | 1 | 25.98  | KV452696.1 | 2740853 | 1-scf00001 | 1 |
| AX-157890920 | 1 | 25.98  | KV452696.1 | 2750290 | 1-scf00001 | 1 |
| AX-157890950 | 1 | 25.98  | KV452696.1 | 2800657 | 1-scf00001 | 1 |
| AX-157725094 | 1 | 25.98  | KV452696.1 | 2839938 | 1-scf00001 | 1 |
| AX-157890916 | 1 | 25.988 | KV452696.1 | 2742516 | 1-scf00001 | 1 |
| AX-157874233 | 1 | 25.995 | KV452696.1 | 2273154 | 1-scf00001 | 1 |
| AX-157810222 | 1 | 25.995 | KV452696.1 | 2338034 | 1-scf00001 | 1 |
| AX-157890779 | 1 | 25.995 | KV452696.1 | 2343851 | 1-scf00001 | 1 |
| AX-157810229 | 1 | 25.995 | KV452696.1 | 2464471 | 1-scf00001 | 1 |
| AX-157810231 | 1 | 25.995 | KV452696.1 | 2465972 | 1-scf00001 | 1 |
| AX-157890814 | 1 | 25.995 | KV452696.1 | 2525306 | 1-scf00001 | 1 |
| AX-157874234 | 1 | 25.995 | KV452696.1 | 2556307 | 1-scf00001 | 1 |
| AX-157890829 | 1 | 25.995 | KV452696.1 | 2562002 | 1-scf00001 | 1 |
| AX-157890909 | 1 | 25.995 | KV452696.1 | 2732545 | 1-scf00001 | 1 |
| AX-157890917 | 1 | 25.995 | KV452696.1 | 2742820 | 1-scf00001 | 1 |
| AX-157890931 | 1 | 25.995 | KV452696.1 | 2776483 | 1-scf00001 | 1 |
| AX-157890943 | 1 | 25.995 | KV452696.1 | 2795834 | 1-scf00001 | 1 |
| AX-157890944 | 1 | 25.995 | KV452696.1 | 2796442 | 1-scf00001 | 1 |
| AX-157890918 | 1 | 26.021 | KV452696.1 | 2745330 | 1-scf00001 | 1 |
| AX-157890555 | 1 | 26.041 | KV452696.1 | 2005376 | 1-scf00001 | 1 |
| AX-157747933 | 1 | 26.041 | KV452696.1 | 2008210 | 1-scf00001 | 1 |
| AX-157890879 | 1 | 26.041 | KV452696.1 | 2669271 | 1-scf00001 | 1 |
| AX-157890893 | 1 | 26.041 | KV452696.1 | 2698358 | 1-scf00001 | 1 |
| AX-157890895 | 1 | 26.041 | KV452696.1 | 2699824 | 1-scf00001 | 1 |
| AX-157890921 | 1 | 26.041 | KV452696.1 | 2752331 | 1-scf00001 | 1 |
| AX-157890924 | 1 | 26.041 | KV452696.1 | 2753815 | 1-scf00001 | 1 |
| AX-157890655 | 1 | 26.058 | KV452696.1 | 2131205 | 1-scf00001 | 1 |
| AX-157771692 | 1 | 26.058 | KV452696.1 | 2179147 | 1-scf00001 | 1 |
| AX-157890759 | 1 | 26.058 | KV452696.1 | 2289130 | 1-scf00001 | 1 |
| AX-157890806 | 1 | 26.058 | KV452696.1 | 2500007 | 1-scf00001 | 1 |
| AX-157890844 | 1 | 26.058 | KV452696.1 | 2595421 | 1-scf00001 | 1 |
| AX-157890845 | 1 | 26.058 | KV452696.1 | 2598363 | 1-scf00001 | 1 |
| AX-157890846 | 1 | 26.058 | KV452696.1 | 2600029 | 1-scf00001 | 1 |
| AX-157890854 | 1 | 26.058 | KV452696.1 | 2613504 | 1-scf00001 | 1 |
| AX-157762851 | 1 | 26.058 | KV452696.1 | 2621345 | 1-scf00001 | 1 |
| AX-157890855 | 1 | 26.058 | KV452696.1 | 2625761 | 1-scf00001 | 1 |
| AX-157890873 | 1 | 26.058 | KV452696.1 | 2650293 | 1-scf00001 | 1 |
| AX-157716740 | 1 | 26.058 | KV452696.1 | 2652415 | 1-scf00001 | 1 |
| AX-157890878 | 1 | 26.058 | KV452696.1 | 2668679 | 1-scf00001 | 1 |
| AX-157883042 | 1 | 26.058 | KV452696.1 | 2753258 | 1-scf00001 | 1 |
| AX-157890925 | 1 | 26.058 | KV452696.1 | 2756207 | 1-scf00001 | 1 |
| AX-157890947 | 1 | 26.058 | KV452696.1 | 2798884 | 1-scf00001 | 1 |



|              |   |        |            |         |            |   |
|--------------|---|--------|------------|---------|------------|---|
| AX-157890948 | 1 | 26.058 | KV452696.1 | 2799180 | 1-scf00001 | 1 |
| AX-158421724 | 1 | 26.069 | KV452696.1 | 2767577 | 1-scf00001 | 1 |
| AX-157890540 | 1 | 26.089 | KV452696.1 | 1975652 | 1-scf00001 | 1 |
| AX-157810241 | 1 | 26.089 | KV452696.1 | 2621894 | 1-scf00001 | 1 |
| AX-157890930 | 1 | 26.089 | KV452696.1 | 2772080 | 1-scf00001 | 1 |
| AX-157746771 | 1 | 26.089 | KV452696.1 | 2774262 | 1-scf00001 | 1 |
| AX-157723341 | 1 | 26.089 | KV452696.1 | 2775790 | 1-scf00001 | 1 |
| AX-157721480 | 1 | 26.089 | KV452696.1 | 2776836 | 1-scf00001 | 1 |
| AX-157890932 | 1 | 26.089 | KV452696.1 | 2777399 | 1-scf00001 | 1 |
| AX-158404157 | 1 | 26.089 | KV452696.1 | 2778725 | 1-scf00001 | 1 |
| AX-157890933 | 1 | 26.089 | KV452696.1 | 2780231 | 1-scf00001 | 1 |
| AX-157810255 | 1 | 26.089 | KV452696.1 | 2783436 | 1-scf00001 | 1 |
| AX-157890936 | 1 | 26.089 | KV452696.1 | 2783898 | 1-scf00001 | 1 |
| AX-157810256 | 1 | 26.089 | KV452696.1 | 2784103 | 1-scf00001 | 1 |
| AX-157890937 | 1 | 26.089 | KV452696.1 | 2786913 | 1-scf00001 | 1 |
| AX-157890938 | 1 | 26.089 | KV452696.1 | 2787659 | 1-scf00001 | 1 |
| AX-157890939 | 1 | 26.089 | KV452696.1 | 2788591 | 1-scf00001 | 1 |
| AX-157890945 | 1 | 26.089 | KV452696.1 | 2797797 | 1-scf00001 | 1 |
| AX-157890949 | 1 | 26.089 | KV452696.1 | 2800424 | 1-scf00001 | 1 |
| AX-157890952 | 1 | 26.089 | KV452696.1 | 2805082 | 1-scf00001 | 1 |
| AX-157890953 | 1 | 26.089 | KV452696.1 | 2807907 | 1-scf00001 | 1 |
| AX-157744906 | 1 | 26.089 | KV452696.1 | 2808342 | 1-scf00001 | 1 |
| AX-157725223 | 1 | 26.089 | KV452696.1 | 2808710 | 1-scf00001 | 1 |
| AX-157716820 | 1 | 26.308 | KV452696.1 | 2811559 | 1-scf00001 | 1 |
| AX-157890955 | 1 | 26.308 | KV452696.1 | 2815415 | 1-scf00001 | 1 |
| AX-157890959 | 1 | 26.308 | KV452696.1 | 2821418 | 1-scf00001 | 1 |
| AX-157890963 | 1 | 26.308 | KV452696.1 | 2830056 | 1-scf00001 | 1 |
| AX-157890964 | 1 | 26.308 | KV452696.1 | 2831133 | 1-scf00001 | 1 |
| AX-157890965 | 1 | 26.308 | KV452696.1 | 2832321 | 1-scf00001 | 1 |
| AX-157890974 | 1 | 26.308 | KV452696.1 | 2864627 | 1-scf00001 | 1 |
| AX-157890979 | 1 | 26.308 | KV452696.1 | 2867965 | 1-scf00001 | 1 |
| AX-157890980 | 1 | 26.308 | KV452696.1 | 2868299 | 1-scf00001 | 1 |
| AX-157890990 | 1 | 26.308 | KV452696.1 | 2884803 | 1-scf00001 | 1 |
| AX-157890993 | 1 | 26.308 | KV452696.1 | 2888365 | 1-scf00001 | 1 |
| AX-157890960 | 1 | 26.527 | KV452696.1 | 2821785 | 1-scf00001 | 1 |
| AX-157890988 | 1 | 26.527 | KV452696.1 | 2880388 | 1-scf00001 | 1 |
| AX-157890992 | 1 | 26.527 | KV452696.1 | 2887286 | 1-scf00001 | 1 |
| AX-157890996 | 1 | 26.527 | KV452696.1 | 2891227 | 1-scf00001 | 1 |
| AX-157890998 | 1 | 26.527 | KV452696.1 | 2892448 | 1-scf00001 | 1 |
| AX-157746582 | 1 | 26.527 | KV452696.1 | 2897171 | 1-scf00001 | 1 |
| AX-157891000 | 1 | 26.527 | KV452696.1 | 2897779 | 1-scf00001 | 1 |
| AX-157891002 | 1 | 26.527 | KV452696.1 | 2900069 | 1-scf00001 | 1 |
| AX-157891003 | 1 | 26.527 | KV452696.1 | 2903503 | 1-scf00001 | 1 |
| AX-157891005 | 1 | 26.527 | KV452696.1 | 2904334 | 1-scf00001 | 1 |
| AX-157891006 | 1 | 26.527 | KV452696.1 | 2905421 | 1-scf00001 | 1 |
| AX-157891007 | 1 | 26.527 | KV452696.1 | 2906830 | 1-scf00001 | 1 |
| AX-157891010 | 1 | 26.527 | KV452696.1 | 2913005 | 1-scf00001 | 1 |
| AX-157891012 | 1 | 26.527 | KV452696.1 | 2914176 | 1-scf00001 | 1 |
| AX-157891014 | 1 | 26.527 | KV452696.1 | 2917148 | 1-scf00001 | 1 |
| AX-157891018 | 1 | 26.527 | KV452696.1 | 2921156 | 1-scf00001 | 1 |
| AX-157891021 | 1 | 26.527 | KV452696.1 | 2927043 | 1-scf00001 | 1 |

|              |   |        |            |         |            |   |
|--------------|---|--------|------------|---------|------------|---|
| AX-157891024 | 1 | 26.527 | KV452696.1 | 2928712 | 1-scf00001 | 1 |
| AX-157891030 | 1 | 26.527 | KV452696.1 | 2935427 | 1-scf00001 | 1 |
| AX-157891031 | 1 | 26.527 | KV452696.1 | 2935523 | 1-scf00001 | 1 |
| AX-157891034 | 1 | 26.527 | KV452696.1 | 2936738 | 1-scf00001 | 1 |
| AX-157891035 | 1 | 26.527 | KV452696.1 | 2936977 | 1-scf00001 | 1 |
| AX-157891038 | 1 | 26.527 | KV452696.1 | 2941558 | 1-scf00001 | 1 |
| AX-157891039 | 1 | 26.527 | KV452696.1 | 2945182 | 1-scf00001 | 1 |
| AX-157891048 | 1 | 26.527 | KV452696.1 | 2952828 | 1-scf00001 | 1 |
| AX-157891063 | 1 | 26.527 | KV452696.1 | 2978192 | 1-scf00001 | 1 |
| AX-157810272 | 1 | 26.527 | KV452696.1 | 2978648 | 1-scf00001 | 1 |
| AX-157891065 | 1 | 26.527 | KV452696.1 | 2979356 | 1-scf00001 | 1 |
| AX-157891066 | 1 | 26.527 | KV452696.1 | 2981598 | 1-scf00001 | 1 |
| AX-157891068 | 1 | 26.527 | KV452696.1 | 2987063 | 1-scf00001 | 1 |
| AX-157891082 | 1 | 26.527 | KV452696.1 | 3017202 | 1-scf00001 | 1 |
| AX-157891084 | 1 | 26.527 | KV452696.1 | 3024160 | 1-scf00001 | 1 |
| AX-158403717 | 1 | 26.527 | KV452696.1 | 4400336 | 1-scf00001 | 1 |
| AX-157892323 | 1 | 26.527 | KV452698.1 | 666489  | 1-scf00002 | 1 |
| AX-157892477 | 1 | 26.527 | KV452697.1 | 102792  | 1-scf00003 | 1 |
| AX-157891086 | 1 | 26.636 | KV452696.1 | 3028613 | 1-scf00001 | 1 |
| AX-157891087 | 1 | 26.636 | KV452696.1 | 3032316 | 1-scf00001 | 1 |
| AX-157891088 | 1 | 26.636 | KV452696.1 | 3033812 | 1-scf00001 | 1 |
| AX-157891090 | 1 | 26.636 | KV452696.1 | 3035242 | 1-scf00001 | 1 |
| AX-157891093 | 1 | 26.636 | KV452696.1 | 3039241 | 1-scf00001 | 1 |
| AX-157891094 | 1 | 26.636 | KV452696.1 | 3040175 | 1-scf00001 | 1 |
| AX-157890975 | 1 | 26.745 | KV452696.1 | 2865432 | 1-scf00001 | 1 |
| AX-157890976 | 1 | 26.745 | KV452696.1 | 2866415 | 1-scf00001 | 1 |
| AX-157890977 | 1 | 26.745 | KV452696.1 | 2866882 | 1-scf00001 | 1 |
| AX-157890994 | 1 | 26.745 | KV452696.1 | 2889269 | 1-scf00001 | 1 |
| AX-157891044 | 1 | 26.745 | KV452696.1 | 2950264 | 1-scf00001 | 1 |
| AX-157891047 | 1 | 26.745 | KV452696.1 | 2952071 | 1-scf00001 | 1 |
| AX-157723083 | 1 | 26.745 | KV452696.1 | 2953774 | 1-scf00001 | 1 |
| AX-157891049 | 1 | 26.745 | KV452696.1 | 2954287 | 1-scf00001 | 1 |
| AX-157891050 | 1 | 26.745 | KV452696.1 | 2954672 | 1-scf00001 | 1 |
| AX-157810268 | 1 | 26.745 | KV452696.1 | 2955861 | 1-scf00001 | 1 |
| AX-157810269 | 1 | 26.745 | KV452696.1 | 2956857 | 1-scf00001 | 1 |
| AX-157891053 | 1 | 26.745 | KV452696.1 | 2958544 | 1-scf00001 | 1 |
| AX-157891078 | 1 | 26.745 | KV452696.1 | 3006899 | 1-scf00001 | 1 |
| AX-157891079 | 1 | 26.745 | KV452696.1 | 3007158 | 1-scf00001 | 1 |
| AX-157891098 | 1 | 26.745 | KV452696.1 | 3046432 | 1-scf00001 | 1 |
| AX-157891101 | 1 | 26.745 | KV452696.1 | 3049934 | 1-scf00001 | 1 |
| AX-157810274 | 1 | 26.745 | KV452696.1 | 3050033 | 1-scf00001 | 1 |
| AX-157891102 | 1 | 26.745 | KV452696.1 | 3050332 | 1-scf00001 | 1 |
| AX-157891103 | 1 | 26.745 | KV452696.1 | 3050732 | 1-scf00001 | 1 |
| AX-157891115 | 1 | 26.745 | KV452696.1 | 3069089 | 1-scf00001 | 1 |
| AX-157891117 | 1 | 26.745 | KV452696.1 | 3070765 | 1-scf00001 | 1 |
| AX-157891118 | 1 | 26.745 | KV452696.1 | 3074253 | 1-scf00001 | 1 |
| AX-157891229 | 1 | 26.745 | KV452696.1 | 3302452 | 1-scf00001 | 1 |
| AX-157891279 | 1 | 26.745 | KV452696.1 | 3372223 | 1-scf00001 | 1 |
| AX-157891280 | 1 | 26.745 | KV452696.1 | 3372984 | 1-scf00001 | 1 |
| AX-157891281 | 1 | 26.745 | KV452696.1 | 3373460 | 1-scf00001 | 1 |
| AX-157891283 | 1 | 26.745 | KV452696.1 | 3374810 | 1-scf00001 | 1 |

|              |   |        |            |         |            |   |
|--------------|---|--------|------------|---------|------------|---|
| AX-157891284 | 1 | 26.745 | KV452696.1 | 3375272 | 1-scf00001 | 1 |
| AX-157891287 | 1 | 26.745 | KV452696.1 | 3379260 | 1-scf00001 | 1 |
| AX-157891311 | 1 | 26.745 | KV452696.1 | 3484315 | 1-scf00001 | 1 |
| AX-157891324 | 1 | 26.745 | KV452696.1 | 3508868 | 1-scf00001 | 1 |
| AX-157891333 | 1 | 26.745 | KV452696.1 | 3520348 | 1-scf00001 | 1 |
| AX-157891339 | 1 | 26.745 | KV452696.1 | 3526594 | 1-scf00001 | 1 |
| AX-157891366 | 1 | 26.745 | KV452696.1 | 3581574 | 1-scf00001 | 1 |
| AX-157891370 | 1 | 26.745 | KV452696.1 | 3608163 | 1-scf00001 | 1 |
| AX-157891505 | 1 | 26.745 | KV452696.1 | 3804068 | 1-scf00001 | 1 |
| AX-157891120 | 1 | 26.778 | KV452696.1 | 3075193 | 1-scf00001 | 1 |
| AX-157891128 | 1 | 26.789 | KV452696.1 | 3098196 | 1-scf00001 | 1 |
| AX-157891129 | 1 | 26.822 | KV452696.1 | 3100212 | 1-scf00001 | 1 |
| AX-157740780 | 1 | 26.854 | KV452696.1 | 3058115 | 1-scf00001 | 1 |
| AX-157891121 | 1 | 26.854 | KV452696.1 | 3078153 | 1-scf00001 | 1 |
| AX-157891132 | 1 | 26.854 | KV452696.1 | 3102460 | 1-scf00001 | 1 |
| AX-157891134 | 1 | 26.854 | KV452696.1 | 3107323 | 1-scf00001 | 1 |
| AX-157891135 | 1 | 26.854 | KV452696.1 | 3109408 | 1-scf00001 | 1 |
| AX-157891136 | 1 | 26.854 | KV452696.1 | 3109848 | 1-scf00001 | 1 |
| AX-157891139 | 1 | 26.854 | KV452696.1 | 3113734 | 1-scf00001 | 1 |
| AX-157883044 | 1 | 26.854 | KV452696.1 | 3115719 | 1-scf00001 | 1 |
| AX-157891141 | 1 | 26.854 | KV452696.1 | 3116493 | 1-scf00001 | 1 |
| AX-157746497 | 1 | 26.854 | KV452696.1 | 3119652 | 1-scf00001 | 1 |
| AX-157738938 | 1 | 26.854 | KV452696.1 | 3122154 | 1-scf00001 | 1 |
| AX-157745144 | 1 | 26.854 | KV452696.1 | 3122968 | 1-scf00001 | 1 |
| AX-157891143 | 1 | 26.854 | KV452696.1 | 3123492 | 1-scf00001 | 1 |
| AX-157891145 | 1 | 26.854 | KV452696.1 | 3128136 | 1-scf00001 | 1 |
| AX-157891146 | 1 | 26.854 | KV452696.1 | 3129373 | 1-scf00001 | 1 |
| AX-157891148 | 1 | 26.854 | KV452696.1 | 3130697 | 1-scf00001 | 1 |
| AX-157891150 | 1 | 26.854 | KV452696.1 | 3139226 | 1-scf00001 | 1 |
| AX-157891156 | 1 | 26.854 | KV452696.1 | 3145163 | 1-scf00001 | 1 |
| AX-157891157 | 1 | 26.854 | KV452696.1 | 3146997 | 1-scf00001 | 1 |
| AX-157891160 | 1 | 26.854 | KV452696.1 | 3152976 | 1-scf00001 | 1 |
| AX-157810287 | 1 | 26.854 | KV452696.1 | 3154993 | 1-scf00001 | 1 |
| AX-157891161 | 1 | 26.854 | KV452696.1 | 3155978 | 1-scf00001 | 1 |
| AX-157864311 | 1 | 26.854 | KV452696.1 | 3156990 | 1-scf00001 | 1 |
| AX-157891163 | 1 | 26.854 | KV452696.1 | 3158346 | 1-scf00001 | 1 |
| AX-157864312 | 1 | 26.854 | KV452696.1 | 3158727 | 1-scf00001 | 1 |
| AX-157864313 | 1 | 26.854 | KV452696.1 | 3159023 | 1-scf00001 | 1 |
| AX-157891164 | 1 | 26.854 | KV452696.1 | 3159706 | 1-scf00001 | 1 |
| AX-157864314 | 1 | 26.854 | KV452696.1 | 3163722 | 1-scf00001 | 1 |
| AX-157864315 | 1 | 26.854 | KV452696.1 | 3165356 | 1-scf00001 | 1 |
| AX-157891168 | 1 | 26.854 | KV452696.1 | 3175475 | 1-scf00001 | 1 |
| AX-157891169 | 1 | 26.854 | KV452696.1 | 3176813 | 1-scf00001 | 1 |
| AX-157891170 | 1 | 26.854 | KV452696.1 | 3177441 | 1-scf00001 | 1 |
| AX-157891182 | 1 | 26.854 | KV452696.1 | 3188097 | 1-scf00001 | 1 |
| AX-157891186 | 1 | 26.854 | KV452696.1 | 3193218 | 1-scf00001 | 1 |
| AX-157891190 | 1 | 26.854 | KV452696.1 | 3197028 | 1-scf00001 | 1 |
| AX-157891191 | 1 | 26.854 | KV452696.1 | 3199249 | 1-scf00001 | 1 |
| AX-157810307 | 1 | 26.854 | KV452696.1 | 3678018 | 1-scf00001 | 1 |
| AX-157891473 | 1 | 26.854 | KV452696.1 | 3760109 | 1-scf00001 | 1 |
| AX-157891635 | 1 | 26.854 | KV452696.1 | 3948943 | 1-scf00001 | 1 |

|              |   |        |            |         |            |   |
|--------------|---|--------|------------|---------|------------|---|
| AX-157891641 | 1 | 26.854 | KV452696.1 | 3961715 | 1-scf00001 | 1 |
| AX-157891662 | 1 | 26.854 | KV452696.1 | 3995361 | 1-scf00001 | 1 |
| AX-157868456 | 1 | 26.886 | KV452696.1 | 3195373 | 1-scf00001 | 1 |
| AX-157708259 | 1 | 26.919 | KV452696.1 | 2848046 | 1-scf00001 | 1 |
| AX-157891064 | 1 | 26.919 | KV452696.1 | 2978397 | 1-scf00001 | 1 |
| AX-157810277 | 1 | 26.919 | KV452696.1 | 3061832 | 1-scf00001 | 1 |
| AX-157891204 | 1 | 26.919 | KV452696.1 | 3228462 | 1-scf00001 | 1 |
| AX-157891219 | 1 | 26.919 | KV452696.1 | 3290257 | 1-scf00001 | 1 |
| AX-157891228 | 1 | 26.919 | KV452696.1 | 3301997 | 1-scf00001 | 1 |
| AX-157891233 | 1 | 26.919 | KV452696.1 | 3314414 | 1-scf00001 | 1 |
| AX-157723209 | 1 | 26.919 | KV452696.1 | 3400556 | 1-scf00001 | 1 |
| AX-157891342 | 1 | 26.919 | KV452696.1 | 3530980 | 1-scf00001 | 1 |
| AX-157891343 | 1 | 26.919 | KV452696.1 | 3533019 | 1-scf00001 | 1 |
| AX-157891348 | 1 | 26.919 | KV452696.1 | 3544228 | 1-scf00001 | 1 |
| AX-157891772 | 1 | 26.919 | KV452696.1 | 4161612 | 1-scf00001 | 1 |
| AX-157892020 | 1 | 26.919 | KV452696.1 | 4566080 | 1-scf00001 | 1 |
| AX-157892277 | 1 | 26.919 | KV452698.1 | 568104  | 1-scf00002 | 1 |
| AX-157892440 | 1 | 26.919 | KV452697.1 | 4891    | 1-scf00003 | 1 |
| AX-157892480 | 1 | 26.919 | KV452697.1 | 107494  | 1-scf00003 | 1 |
| AX-157810290 | 1 | 26.927 | KV452696.1 | 3241220 | 1-scf00001 | 1 |
| AX-157891041 | 1 | 26.963 | KV452696.1 | 2947309 | 1-scf00001 | 1 |
| AX-157891144 | 1 | 26.963 | KV452696.1 | 3127296 | 1-scf00001 | 1 |
| AX-157891153 | 1 | 26.963 | KV452696.1 | 3143772 | 1-scf00001 | 1 |
| AX-157810293 | 1 | 26.963 | KV452696.1 | 3272541 | 1-scf00001 | 1 |
| AX-157891217 | 1 | 26.963 | KV452696.1 | 3286811 | 1-scf00001 | 1 |
| AX-157716586 | 1 | 26.963 | KV452696.1 | 3295048 | 1-scf00001 | 1 |
| AX-157891224 | 1 | 26.963 | KV452696.1 | 3295740 | 1-scf00001 | 1 |
| AX-157891230 | 1 | 26.963 | KV452696.1 | 3308293 | 1-scf00001 | 1 |
| AX-157776116 | 1 | 26.963 | KV452696.1 | 3308982 | 1-scf00001 | 1 |
| AX-157810295 | 1 | 26.963 | KV452696.1 | 3310685 | 1-scf00001 | 1 |
| AX-157891232 | 1 | 26.963 | KV452696.1 | 3311647 | 1-scf00001 | 1 |
| AX-157891234 | 1 | 26.963 | KV452696.1 | 3314960 | 1-scf00001 | 1 |
| AX-157868457 | 1 | 26.963 | KV452696.1 | 3315615 | 1-scf00001 | 1 |
| AX-157868458 | 1 | 26.963 | KV452696.1 | 3315919 | 1-scf00001 | 1 |
| AX-157891236 | 1 | 26.963 | KV452696.1 | 3319742 | 1-scf00001 | 1 |
| AX-157891238 | 1 | 26.963 | KV452696.1 | 3322813 | 1-scf00001 | 1 |
| AX-157891240 | 1 | 26.963 | KV452696.1 | 3330364 | 1-scf00001 | 1 |
| AX-157810297 | 1 | 26.963 | KV452696.1 | 3330714 | 1-scf00001 | 1 |
| AX-157891241 | 1 | 26.963 | KV452696.1 | 3331435 | 1-scf00001 | 1 |
| AX-157891244 | 1 | 26.963 | KV452696.1 | 3333772 | 1-scf00001 | 1 |
| AX-157891246 | 1 | 26.963 | KV452696.1 | 3334790 | 1-scf00001 | 1 |
| AX-157891248 | 1 | 26.963 | KV452696.1 | 3336083 | 1-scf00001 | 1 |
| AX-157891250 | 1 | 26.963 | KV452696.1 | 3338915 | 1-scf00001 | 1 |
| AX-157891251 | 1 | 26.963 | KV452696.1 | 3339257 | 1-scf00001 | 1 |
| AX-157891252 | 1 | 26.963 | KV452696.1 | 3339827 | 1-scf00001 | 1 |
| AX-157891253 | 1 | 26.963 | KV452696.1 | 3341130 | 1-scf00001 | 1 |
| AX-157891254 | 1 | 26.963 | KV452696.1 | 3342250 | 1-scf00001 | 1 |
| AX-157891259 | 1 | 26.963 | KV452696.1 | 3345136 | 1-scf00001 | 1 |
| AX-157891261 | 1 | 26.963 | KV452696.1 | 3347954 | 1-scf00001 | 1 |
| AX-157891270 | 1 | 26.963 | KV452696.1 | 3356087 | 1-scf00001 | 1 |
| AX-157891276 | 1 | 26.963 | KV452696.1 | 3369967 | 1-scf00001 | 1 |

|              |   |        |            |         |            |   |
|--------------|---|--------|------------|---------|------------|---|
| AX-157891278 | 1 | 26.963 | KV452696.1 | 3371349 | 1-scf00001 | 1 |
| AX-157891282 | 1 | 26.963 | KV452696.1 | 3374229 | 1-scf00001 | 1 |
| AX-157891295 | 1 | 26.963 | KV452696.1 | 3397495 | 1-scf00001 | 1 |
| AX-157891299 | 1 | 26.963 | KV452696.1 | 3437548 | 1-scf00001 | 1 |
| AX-157891314 | 1 | 26.963 | KV452696.1 | 3494775 | 1-scf00001 | 1 |
| AX-157891318 | 1 | 26.963 | KV452696.1 | 3498442 | 1-scf00001 | 1 |
| AX-157891319 | 1 | 26.963 | KV452696.1 | 3501458 | 1-scf00001 | 1 |
| AX-157810301 | 1 | 26.963 | KV452696.1 | 3501949 | 1-scf00001 | 1 |
| AX-157891320 | 1 | 26.963 | KV452696.1 | 3503760 | 1-scf00001 | 1 |
| AX-157891323 | 1 | 26.963 | KV452696.1 | 3505998 | 1-scf00001 | 1 |
| AX-157891326 | 1 | 26.963 | KV452696.1 | 3509905 | 1-scf00001 | 1 |
| AX-157891327 | 1 | 26.963 | KV452696.1 | 3512138 | 1-scf00001 | 1 |
| AX-157810302 | 1 | 26.963 | KV452696.1 | 3512197 | 1-scf00001 | 1 |
| AX-157891331 | 1 | 26.963 | KV452696.1 | 3519023 | 1-scf00001 | 1 |
| AX-157891336 | 1 | 26.963 | KV452696.1 | 3523021 | 1-scf00001 | 1 |
| AX-157891345 | 1 | 26.963 | KV452696.1 | 3539460 | 1-scf00001 | 1 |
| AX-157810303 | 1 | 26.963 | KV452696.1 | 3546775 | 1-scf00001 | 1 |
| AX-157891349 | 1 | 26.963 | KV452696.1 | 3546921 | 1-scf00001 | 1 |
| AX-157810304 | 1 | 26.963 | KV452696.1 | 3565390 | 1-scf00001 | 1 |
| AX-157774819 | 1 | 26.963 | KV452696.1 | 3565688 | 1-scf00001 | 1 |
| AX-157891383 | 1 | 26.963 | KV452696.1 | 3625553 | 1-scf00001 | 1 |
| AX-157891398 | 1 | 26.963 | KV452696.1 | 3647385 | 1-scf00001 | 1 |
| AX-158379099 | 1 | 26.963 | KV452696.1 | 3648352 | 1-scf00001 | 1 |
| AX-157891399 | 1 | 26.963 | KV452696.1 | 3648433 | 1-scf00001 | 1 |
| AX-157891447 | 1 | 26.963 | KV452696.1 | 3713298 | 1-scf00001 | 1 |
| AX-157891449 | 1 | 26.963 | KV452696.1 | 3713929 | 1-scf00001 | 1 |
| AX-157891588 | 1 | 26.963 | KV452696.1 | 3896129 | 1-scf00001 | 1 |
| AX-157868465 | 1 | 26.963 | KV452696.1 | 4153178 | 1-scf00001 | 1 |
| AX-158388964 | 1 | 26.963 | KV452696.1 | 4163165 | 1-scf00001 | 1 |
| AX-157891354 | 1 | 26.97  | KV452696.1 | 3555819 | 1-scf00001 | 1 |
| AX-157743148 | 1 | 26.975 | KV452696.1 | 3556961 | 1-scf00001 | 1 |
| AX-157891358 | 1 | 26.978 | KV452696.1 | 3563660 | 1-scf00001 | 1 |
| AX-157891364 | 1 | 26.982 | KV452696.1 | 3578215 | 1-scf00001 | 1 |
| AX-157891040 | 1 | 26.988 | KV452696.1 | 2945639 | 1-scf00001 | 1 |
| AX-157891092 | 1 | 26.988 | KV452696.1 | 3038814 | 1-scf00001 | 1 |
| AX-157891137 | 1 | 26.988 | KV452696.1 | 3112827 | 1-scf00001 | 1 |
| AX-157891267 | 1 | 26.988 | KV452696.1 | 3353850 | 1-scf00001 | 1 |
| AX-157891293 | 1 | 26.988 | KV452696.1 | 3390355 | 1-scf00001 | 1 |
| AX-157891335 | 1 | 26.988 | KV452696.1 | 3522520 | 1-scf00001 | 1 |
| AX-157891338 | 1 | 26.988 | KV452696.1 | 3524321 | 1-scf00001 | 1 |
| AX-157891380 | 1 | 26.988 | KV452696.1 | 3623090 | 1-scf00001 | 1 |
| AX-157891381 | 1 | 26.992 | KV452696.1 | 3623824 | 1-scf00001 | 1 |
| AX-157868459 | 1 | 26.997 | KV452696.1 | 3323654 | 1-scf00001 | 1 |
| AX-157891256 | 1 | 26.997 | KV452696.1 | 3343303 | 1-scf00001 | 1 |
| AX-157891390 | 1 | 26.997 | KV452696.1 | 3633613 | 1-scf00001 | 1 |
| AX-157891392 | 1 | 27.003 | KV452696.1 | 3638036 | 1-scf00001 | 1 |
| AX-157891393 | 1 | 27.008 | KV452696.1 | 3639628 | 1-scf00001 | 1 |
| AX-157891394 | 1 | 27.04  | KV452696.1 | 3641044 | 1-scf00001 | 1 |
| AX-157891225 | 1 | 27.073 | KV452696.1 | 3297768 | 1-scf00001 | 1 |
| AX-157891227 | 1 | 27.073 | KV452696.1 | 3300651 | 1-scf00001 | 1 |
| AX-157891255 | 1 | 27.073 | KV452696.1 | 3342815 | 1-scf00001 | 1 |

|              |   |        |            |         |            |   |
|--------------|---|--------|------------|---------|------------|---|
| AX-157891321 | 1 | 27.073 | KV452696.1 | 3504704 | 1-scf00001 | 1 |
| AX-157891322 | 1 | 27.073 | KV452696.1 | 3505344 | 1-scf00001 | 1 |
| AX-158379098 | 1 | 27.073 | KV452696.1 | 3505549 | 1-scf00001 | 1 |
| AX-157707986 | 1 | 27.073 | KV452696.1 | 3520876 | 1-scf00001 | 1 |
| AX-157891356 | 1 | 27.073 | KV452696.1 | 3558641 | 1-scf00001 | 1 |
| AX-157891368 | 1 | 27.073 | KV452696.1 | 3590470 | 1-scf00001 | 1 |
| AX-157891374 | 1 | 27.073 | KV452696.1 | 3616140 | 1-scf00001 | 1 |
| AX-157891386 | 1 | 27.073 | KV452696.1 | 3630284 | 1-scf00001 | 1 |
| AX-157891396 | 1 | 27.073 | KV452696.1 | 3644066 | 1-scf00001 | 1 |
| AX-157891408 | 1 | 27.073 | KV452696.1 | 3665353 | 1-scf00001 | 1 |
| AX-157891410 | 1 | 27.073 | KV452696.1 | 3666281 | 1-scf00001 | 1 |
| AX-157874242 | 1 | 27.073 | KV452696.1 | 3668288 | 1-scf00001 | 1 |
| AX-157891411 | 1 | 27.073 | KV452696.1 | 3668324 | 1-scf00001 | 1 |
| AX-157891412 | 1 | 27.073 | KV452696.1 | 3669070 | 1-scf00001 | 1 |
| AX-157891422 | 1 | 27.073 | KV452696.1 | 3688504 | 1-scf00001 | 1 |
| AX-157740513 | 1 | 27.073 | KV452696.1 | 3693807 | 1-scf00001 | 1 |
| AX-157891425 | 1 | 27.073 | KV452696.1 | 3695914 | 1-scf00001 | 1 |
| AX-157891426 | 1 | 27.073 | KV452696.1 | 3696398 | 1-scf00001 | 1 |
| AX-157891427 | 1 | 27.073 | KV452696.1 | 3697089 | 1-scf00001 | 1 |
| AX-157891429 | 1 | 27.073 | KV452696.1 | 3697420 | 1-scf00001 | 1 |
| AX-157891430 | 1 | 27.073 | KV452696.1 | 3699228 | 1-scf00001 | 1 |
| AX-157891433 | 1 | 27.073 | KV452696.1 | 3701100 | 1-scf00001 | 1 |
| AX-157891434 | 1 | 27.073 | KV452696.1 | 3701344 | 1-scf00001 | 1 |
| AX-157810309 | 1 | 27.073 | KV452696.1 | 3701983 | 1-scf00001 | 1 |
| AX-157891439 | 1 | 27.073 | KV452696.1 | 3704621 | 1-scf00001 | 1 |
| AX-157773019 | 1 | 27.073 | KV452696.1 | 3704808 | 1-scf00001 | 1 |
| AX-157891441 | 1 | 27.073 | KV452696.1 | 3706374 | 1-scf00001 | 1 |
| AX-157891442 | 1 | 27.073 | KV452696.1 | 3707700 | 1-scf00001 | 1 |
| AX-157891443 | 1 | 27.073 | KV452696.1 | 3708235 | 1-scf00001 | 1 |
| AX-157891455 | 1 | 27.073 | KV452696.1 | 3720332 | 1-scf00001 | 1 |
| AX-157891456 | 1 | 27.073 | KV452696.1 | 3720834 | 1-scf00001 | 1 |
| AX-157891458 | 1 | 27.073 | KV452696.1 | 3721630 | 1-scf00001 | 1 |
| AX-157724487 | 1 | 27.073 | KV452696.1 | 3730998 | 1-scf00001 | 1 |
| AX-157891466 | 1 | 27.073 | KV452696.1 | 3749161 | 1-scf00001 | 1 |
| AX-157891469 | 1 | 27.073 | KV452696.1 | 3754978 | 1-scf00001 | 1 |
| AX-158388962 | 1 | 27.073 | KV452696.1 | 3766723 | 1-scf00001 | 1 |
| AX-157891478 | 1 | 27.073 | KV452696.1 | 3769325 | 1-scf00001 | 1 |
| AX-157891480 | 1 | 27.073 | KV452696.1 | 3771134 | 1-scf00001 | 1 |
| AX-157891481 | 1 | 27.073 | KV452696.1 | 3771616 | 1-scf00001 | 1 |
| AX-157891482 | 1 | 27.073 | KV452696.1 | 3773082 | 1-scf00001 | 1 |
| AX-157891483 | 1 | 27.073 | KV452696.1 | 3773579 | 1-scf00001 | 1 |
| AX-157891486 | 1 | 27.073 | KV452696.1 | 3778602 | 1-scf00001 | 1 |
| AX-157891487 | 1 | 27.073 | KV452696.1 | 3781609 | 1-scf00001 | 1 |
| AX-157891488 | 1 | 27.073 | KV452696.1 | 3782184 | 1-scf00001 | 1 |
| AX-157891489 | 1 | 27.073 | KV452696.1 | 3783154 | 1-scf00001 | 1 |
| AX-157891490 | 1 | 27.073 | KV452696.1 | 3783749 | 1-scf00001 | 1 |
| AX-158388963 | 1 | 27.073 | KV452696.1 | 3784334 | 1-scf00001 | 1 |
| AX-157891491 | 1 | 27.073 | KV452696.1 | 3784542 | 1-scf00001 | 1 |
| AX-157891492 | 1 | 27.073 | KV452696.1 | 3784843 | 1-scf00001 | 1 |
| AX-157891497 | 1 | 27.073 | KV452696.1 | 3790827 | 1-scf00001 | 1 |
| AX-157891498 | 1 | 27.073 | KV452696.1 | 3791324 | 1-scf00001 | 1 |

|              |   |        |            |         |            |   |
|--------------|---|--------|------------|---------|------------|---|
| AX-157891500 | 1 | 27.073 | KV452696.1 | 3797684 | 1-scf00001 | 1 |
| AX-157891502 | 1 | 27.073 | KV452696.1 | 3800596 | 1-scf00001 | 1 |
| AX-157891506 | 1 | 27.073 | KV452696.1 | 3804726 | 1-scf00001 | 1 |
| AX-157891508 | 1 | 27.073 | KV452696.1 | 3812295 | 1-scf00001 | 1 |
| AX-157891509 | 1 | 27.073 | KV452696.1 | 3812802 | 1-scf00001 | 1 |
| AX-157891510 | 1 | 27.073 | KV452696.1 | 3814361 | 1-scf00001 | 1 |
| AX-157709680 | 1 | 27.073 | KV452696.1 | 3817357 | 1-scf00001 | 1 |
| AX-157891516 | 1 | 27.073 | KV452696.1 | 3819829 | 1-scf00001 | 1 |
| AX-157891517 | 1 | 27.073 | KV452696.1 | 3820543 | 1-scf00001 | 1 |
| AX-157891519 | 1 | 27.073 | KV452696.1 | 3822509 | 1-scf00001 | 1 |
| AX-157891521 | 1 | 27.073 | KV452696.1 | 3826798 | 1-scf00001 | 1 |
| AX-157891522 | 1 | 27.073 | KV452696.1 | 3827107 | 1-scf00001 | 1 |
| AX-157891523 | 1 | 27.073 | KV452696.1 | 3827714 | 1-scf00001 | 1 |
| AX-157891524 | 1 | 27.073 | KV452696.1 | 3828208 | 1-scf00001 | 1 |
| AX-157891525 | 1 | 27.073 | KV452696.1 | 3830947 | 1-scf00001 | 1 |
| AX-157891526 | 1 | 27.073 | KV452696.1 | 3831109 | 1-scf00001 | 1 |
| AX-157891527 | 1 | 27.073 | KV452696.1 | 3831478 | 1-scf00001 | 1 |
| AX-157891530 | 1 | 27.073 | KV452696.1 | 3834321 | 1-scf00001 | 1 |
| AX-157891532 | 1 | 27.073 | KV452696.1 | 3835941 | 1-scf00001 | 1 |
| AX-157891535 | 1 | 27.073 | KV452696.1 | 3837524 | 1-scf00001 | 1 |
| AX-157891536 | 1 | 27.073 | KV452696.1 | 3837920 | 1-scf00001 | 1 |
| AX-157891537 | 1 | 27.073 | KV452696.1 | 3838794 | 1-scf00001 | 1 |
| AX-157891538 | 1 | 27.073 | KV452696.1 | 3841615 | 1-scf00001 | 1 |
| AX-157891539 | 1 | 27.073 | KV452696.1 | 3842053 | 1-scf00001 | 1 |
| AX-157891540 | 1 | 27.073 | KV452696.1 | 3842482 | 1-scf00001 | 1 |
| AX-157891541 | 1 | 27.073 | KV452696.1 | 3842560 | 1-scf00001 | 1 |
| AX-157891545 | 1 | 27.073 | KV452696.1 | 3845450 | 1-scf00001 | 1 |
| AX-157743206 | 1 | 27.073 | KV452696.1 | 3852574 | 1-scf00001 | 1 |
| AX-157891547 | 1 | 27.073 | KV452696.1 | 3853906 | 1-scf00001 | 1 |
| AX-157891548 | 1 | 27.073 | KV452696.1 | 3854365 | 1-scf00001 | 1 |
| AX-157891549 | 1 | 27.073 | KV452696.1 | 3854777 | 1-scf00001 | 1 |
| AX-157891550 | 1 | 27.073 | KV452696.1 | 3855267 | 1-scf00001 | 1 |
| AX-157891551 | 1 | 27.073 | KV452696.1 | 3855902 | 1-scf00001 | 1 |
| AX-157891553 | 1 | 27.073 | KV452696.1 | 3858771 | 1-scf00001 | 1 |
| AX-157891554 | 1 | 27.073 | KV452696.1 | 3859088 | 1-scf00001 | 1 |
| AX-157891556 | 1 | 27.073 | KV452696.1 | 3860911 | 1-scf00001 | 1 |
| AX-157891557 | 1 | 27.073 | KV452696.1 | 3862665 | 1-scf00001 | 1 |
| AX-157891567 | 1 | 27.073 | KV452696.1 | 3867577 | 1-scf00001 | 1 |
| AX-157891568 | 1 | 27.073 | KV452696.1 | 3868076 | 1-scf00001 | 1 |
| AX-157891570 | 1 | 27.073 | KV452696.1 | 3869784 | 1-scf00001 | 1 |
| AX-157774645 | 1 | 27.073 | KV452696.1 | 3869941 | 1-scf00001 | 1 |
| AX-157891571 | 1 | 27.073 | KV452696.1 | 3870498 | 1-scf00001 | 1 |
| AX-157891572 | 1 | 27.073 | KV452696.1 | 3873093 | 1-scf00001 | 1 |
| AX-157891575 | 1 | 27.073 | KV452696.1 | 3875366 | 1-scf00001 | 1 |
| AX-157891576 | 1 | 27.073 | KV452696.1 | 3876011 | 1-scf00001 | 1 |
| AX-157891577 | 1 | 27.073 | KV452696.1 | 3876982 | 1-scf00001 | 1 |
| AX-157891578 | 1 | 27.073 | KV452696.1 | 3881722 | 1-scf00001 | 1 |
| AX-157891581 | 1 | 27.073 | KV452696.1 | 3886512 | 1-scf00001 | 1 |
| AX-157891582 | 1 | 27.073 | KV452696.1 | 3889787 | 1-scf00001 | 1 |
| AX-157891638 | 1 | 27.073 | KV452696.1 | 3957069 | 1-scf00001 | 1 |
| AX-157891653 | 1 | 27.073 | KV452696.1 | 3978173 | 1-scf00001 | 1 |

|              |   |        |             |         |            |    |
|--------------|---|--------|-------------|---------|------------|----|
| AX-157891703 | 1 | 27.073 | KV452696.1  | 4076037 | 1-scf00001 | 1  |
| AX-157705467 | 1 | 27.073 | 3ML01029866 | 69      | scf05488_1 | UN |
| AX-157891131 | 1 | 27.093 | KV452696.1  | 3102020 | 1-scf00001 | 1  |
| AX-157891359 | 1 | 27.093 | KV452696.1  | 3569617 | 1-scf00001 | 1  |
| AX-157891377 | 1 | 27.093 | KV452696.1  | 3618193 | 1-scf00001 | 1  |
| AX-157891580 | 1 | 27.093 | KV452696.1  | 3884884 | 1-scf00001 | 1  |
| AX-157891583 | 1 | 27.093 | KV452696.1  | 3891912 | 1-scf00001 | 1  |
| AX-157891584 | 1 | 27.093 | KV452696.1  | 3892236 | 1-scf00001 | 1  |
| AX-157891618 | 1 | 27.093 | KV452696.1  | 3935037 | 1-scf00001 | 1  |
| AX-157891332 | 1 | 27.103 | KV452696.1  | 3520121 | 1-scf00001 | 1  |
| AX-157891357 | 1 | 27.103 | KV452696.1  | 3562718 | 1-scf00001 | 1  |
| AX-157748404 | 1 | 27.103 | KV452696.1  | 3643093 | 1-scf00001 | 1  |
| AX-157891503 | 1 | 27.103 | KV452696.1  | 3802781 | 1-scf00001 | 1  |
| AX-157891589 | 1 | 27.103 | KV452696.1  | 3896450 | 1-scf00001 | 1  |
| AX-157891912 | 1 | 27.103 | KV452696.1  | 4385477 | 1-scf00001 | 1  |
| AX-157810353 | 1 | 27.103 | KV452696.1  | 4433906 | 1-scf00001 | 1  |
| AX-157892437 | 1 | 27.103 | KV452697.1  | 1398    | 1-scf00003 | 1  |
| AX-157890978 | 1 | 27.123 | KV452696.1  | 2867489 | 1-scf00001 | 1  |
| AX-157891108 | 1 | 27.123 | KV452696.1  | 3058524 | 1-scf00001 | 1  |
| AX-157891187 | 1 | 27.123 | KV452696.1  | 3194985 | 1-scf00001 | 1  |
| AX-158381897 | 1 | 27.123 | KV452696.1  | 3372749 | 1-scf00001 | 1  |
| AX-158381898 | 1 | 27.123 | KV452696.1  | 3396231 | 1-scf00001 | 1  |
| AX-158381899 | 1 | 27.123 | KV452696.1  | 3430947 | 1-scf00001 | 1  |
| AX-157891310 | 1 | 27.123 | KV452696.1  | 3481049 | 1-scf00001 | 1  |
| AX-157891371 | 1 | 27.123 | KV452696.1  | 3613622 | 1-scf00001 | 1  |
| AX-157891372 | 1 | 27.123 | KV452696.1  | 3614489 | 1-scf00001 | 1  |
| AX-157891375 | 1 | 27.123 | KV452696.1  | 3617445 | 1-scf00001 | 1  |
| AX-157891378 | 1 | 27.123 | KV452696.1  | 3619104 | 1-scf00001 | 1  |
| AX-158381900 | 1 | 27.123 | KV452696.1  | 3648388 | 1-scf00001 | 1  |
| AX-157891400 | 1 | 27.123 | KV452696.1  | 3649899 | 1-scf00001 | 1  |
| AX-157755010 | 1 | 27.123 | KV452696.1  | 3702319 | 1-scf00001 | 1  |
| AX-157891495 | 1 | 27.123 | KV452696.1  | 3788276 | 1-scf00001 | 1  |
| AX-157891528 | 1 | 27.123 | KV452696.1  | 3831895 | 1-scf00001 | 1  |
| AX-158379100 | 1 | 27.123 | KV452696.1  | 3832072 | 1-scf00001 | 1  |
| AX-157749658 | 1 | 27.123 | KV452696.1  | 3832146 | 1-scf00001 | 1  |
| AX-157891529 | 1 | 27.123 | KV452696.1  | 3832704 | 1-scf00001 | 1  |
| AX-157891534 | 1 | 27.123 | KV452696.1  | 3836751 | 1-scf00001 | 1  |
| AX-157891544 | 1 | 27.123 | KV452696.1  | 3843910 | 1-scf00001 | 1  |
| AX-157891555 | 1 | 27.123 | KV452696.1  | 3860207 | 1-scf00001 | 1  |
| AX-157891579 | 1 | 27.123 | KV452696.1  | 3882916 | 1-scf00001 | 1  |
| AX-157891591 | 1 | 27.123 | KV452696.1  | 3898600 | 1-scf00001 | 1  |
| AX-157776108 | 1 | 27.182 | KV452696.1  | 3199482 | 1-scf00001 | 1  |
| AX-157891448 | 1 | 27.182 | KV452696.1  | 3713691 | 1-scf00001 | 1  |
| AX-157891459 | 1 | 27.182 | KV452696.1  | 3723660 | 1-scf00001 | 1  |
| AX-157891485 | 1 | 27.182 | KV452696.1  | 3774368 | 1-scf00001 | 1  |
| AX-157891543 | 1 | 27.182 | KV452696.1  | 3843748 | 1-scf00001 | 1  |
| AX-157891595 | 1 | 27.182 | KV452696.1  | 3901222 | 1-scf00001 | 1  |
| AX-157891599 | 1 | 27.182 | KV452696.1  | 3904640 | 1-scf00001 | 1  |
| AX-157891603 | 1 | 27.182 | KV452696.1  | 3915135 | 1-scf00001 | 1  |
| AX-157874249 | 1 | 27.182 | KV452696.1  | 3933901 | 1-scf00001 | 1  |
| AX-157891619 | 1 | 27.182 | KV452696.1  | 3935383 | 1-scf00001 | 1  |



|              |   |        |            |         |            |   |
|--------------|---|--------|------------|---------|------------|---|
| AX-157891620 | 1 | 27.182 | KV452696.1 | 3936772 | 1-scf00001 | 1 |
| AX-157891622 | 1 | 27.182 | KV452696.1 | 3938264 | 1-scf00001 | 1 |
| AX-157891624 | 1 | 27.182 | KV452696.1 | 3940666 | 1-scf00001 | 1 |
| AX-157891625 | 1 | 27.182 | KV452696.1 | 3941025 | 1-scf00001 | 1 |
| AX-157891629 | 1 | 27.182 | KV452696.1 | 3944305 | 1-scf00001 | 1 |
| AX-157891630 | 1 | 27.182 | KV452696.1 | 3944713 | 1-scf00001 | 1 |
| AX-158404187 | 1 | 27.182 | KV452696.1 | 3947147 | 1-scf00001 | 1 |
| AX-157891634 | 1 | 27.182 | KV452696.1 | 3948057 | 1-scf00001 | 1 |
| AX-157891639 | 1 | 27.182 | KV452696.1 | 3957500 | 1-scf00001 | 1 |
| AX-157891640 | 1 | 27.182 | KV452696.1 | 3957996 | 1-scf00001 | 1 |
| AX-157891642 | 1 | 27.182 | KV452696.1 | 3963537 | 1-scf00001 | 1 |
| AX-157891644 | 1 | 27.182 | KV452696.1 | 3969811 | 1-scf00001 | 1 |
| AX-157891645 | 1 | 27.182 | KV452696.1 | 3970267 | 1-scf00001 | 1 |
| AX-157891646 | 1 | 27.182 | KV452696.1 | 3971123 | 1-scf00001 | 1 |
| AX-157891647 | 1 | 27.182 | KV452696.1 | 3971384 | 1-scf00001 | 1 |
| AX-157891648 | 1 | 27.182 | KV452696.1 | 3971728 | 1-scf00001 | 1 |
| AX-157891654 | 1 | 27.182 | KV452696.1 | 3978350 | 1-scf00001 | 1 |
| AX-157891656 | 1 | 27.182 | KV452696.1 | 3979899 | 1-scf00001 | 1 |
| AX-157891659 | 1 | 27.182 | KV452696.1 | 3983118 | 1-scf00001 | 1 |
| AX-157891678 | 1 | 27.182 | KV452696.1 | 4029096 | 1-scf00001 | 1 |
| AX-157891679 | 1 | 27.182 | KV452696.1 | 4029608 | 1-scf00001 | 1 |
| AX-157891680 | 1 | 27.182 | KV452696.1 | 4030083 | 1-scf00001 | 1 |
| AX-157891681 | 1 | 27.182 | KV452696.1 | 4030561 | 1-scf00001 | 1 |
| AX-157891682 | 1 | 27.182 | KV452696.1 | 4030931 | 1-scf00001 | 1 |
| AX-157810314 | 1 | 27.182 | KV452696.1 | 4031424 | 1-scf00001 | 1 |
| AX-157891684 | 1 | 27.182 | KV452696.1 | 4034503 | 1-scf00001 | 1 |
| AX-157891688 | 1 | 27.182 | KV452696.1 | 4039910 | 1-scf00001 | 1 |
| AX-157891689 | 1 | 27.182 | KV452696.1 | 4040747 | 1-scf00001 | 1 |
| AX-157891690 | 1 | 27.182 | KV452696.1 | 4042168 | 1-scf00001 | 1 |
| AX-157810315 | 1 | 27.182 | KV452696.1 | 4048936 | 1-scf00001 | 1 |
| AX-157891695 | 1 | 27.182 | KV452696.1 | 4056457 | 1-scf00001 | 1 |
| AX-157891696 | 1 | 27.182 | KV452696.1 | 4057940 | 1-scf00001 | 1 |
| AX-157891697 | 1 | 27.182 | KV452696.1 | 4060315 | 1-scf00001 | 1 |
| AX-157810316 | 1 | 27.182 | KV452696.1 | 4067716 | 1-scf00001 | 1 |
| AX-157891701 | 1 | 27.182 | KV452696.1 | 4072102 | 1-scf00001 | 1 |
| AX-157891705 | 1 | 27.182 | KV452696.1 | 4076810 | 1-scf00001 | 1 |
| AX-157883049 | 1 | 27.182 | KV452696.1 | 4094607 | 1-scf00001 | 1 |
| AX-157891745 | 1 | 27.182 | KV452696.1 | 4120703 | 1-scf00001 | 1 |
| AX-157891765 | 1 | 27.182 | KV452696.1 | 4150122 | 1-scf00001 | 1 |
| AX-157810328 | 1 | 27.182 | KV452696.1 | 4235059 | 1-scf00001 | 1 |
| AX-157891810 | 1 | 27.182 | KV452696.1 | 4250120 | 1-scf00001 | 1 |
| AX-157891826 | 1 | 27.182 | KV452696.1 | 4272718 | 1-scf00001 | 1 |
| AX-157891838 | 1 | 27.182 | KV452696.1 | 4288694 | 1-scf00001 | 1 |
| AX-157891849 | 1 | 27.182 | KV452696.1 | 4301023 | 1-scf00001 | 1 |
| AX-157892087 | 1 | 27.182 | KV452698.1 | 53777   | 1-scf00002 | 1 |
| AX-157892102 | 1 | 27.182 | KV452698.1 | 94823   | 1-scf00002 | 1 |
| AX-157892104 | 1 | 27.182 | KV452698.1 | 99350   | 1-scf00002 | 1 |
| AX-157810419 | 1 | 27.182 | KV452697.1 | 77759   | 1-scf00003 | 1 |
| AX-157891631 | 1 | 27.219 | KV452696.1 | 3944839 | 1-scf00001 | 1 |
| AX-157891704 | 1 | 27.219 | KV452696.1 | 4076310 | 1-scf00001 | 1 |
| AX-157810294 | 1 | 27.291 | KV452696.1 | 3275931 | 1-scf00001 | 1 |

|              |   |        |            |         |            |   |
|--------------|---|--------|------------|---------|------------|---|
| AX-157891590 | 1 | 27.291 | KV452696.1 | 3896941 | 1-scf00001 | 1 |
| AX-157891592 | 1 | 27.291 | KV452696.1 | 3899052 | 1-scf00001 | 1 |
| AX-157891593 | 1 | 27.291 | KV452696.1 | 3899852 | 1-scf00001 | 1 |
| AX-157891594 | 1 | 27.291 | KV452696.1 | 3900583 | 1-scf00001 | 1 |
| AX-157891596 | 1 | 27.291 | KV452696.1 | 3901433 | 1-scf00001 | 1 |
| AX-157891608 | 1 | 27.291 | KV452696.1 | 3922704 | 1-scf00001 | 1 |
| AX-157891628 | 1 | 27.291 | KV452696.1 | 3943946 | 1-scf00001 | 1 |
| AX-157891706 | 1 | 27.291 | KV452696.1 | 4077212 | 1-scf00001 | 1 |
| AX-157891708 | 1 | 27.291 | KV452696.1 | 4079121 | 1-scf00001 | 1 |
| AX-157891709 | 1 | 27.291 | KV452696.1 | 4080359 | 1-scf00001 | 1 |
| AX-157891712 | 1 | 27.291 | KV452696.1 | 4082571 | 1-scf00001 | 1 |
| AX-157891713 | 1 | 27.291 | KV452696.1 | 4083072 | 1-scf00001 | 1 |
| AX-157891714 | 1 | 27.291 | KV452696.1 | 4084007 | 1-scf00001 | 1 |
| AX-157891715 | 1 | 27.291 | KV452696.1 | 4084719 | 1-scf00001 | 1 |
| AX-157891717 | 1 | 27.291 | KV452696.1 | 4087507 | 1-scf00001 | 1 |
| AX-157891718 | 1 | 27.291 | KV452696.1 | 4088014 | 1-scf00001 | 1 |
| AX-157891719 | 1 | 27.291 | KV452696.1 | 4089646 | 1-scf00001 | 1 |
| AX-157891720 | 1 | 27.291 | KV452696.1 | 4090330 | 1-scf00001 | 1 |
| AX-157891721 | 1 | 27.291 | KV452696.1 | 4090485 | 1-scf00001 | 1 |
| AX-157891722 | 1 | 27.291 | KV452696.1 | 4092655 | 1-scf00001 | 1 |
| AX-157891723 | 1 | 27.291 | KV452696.1 | 4094066 | 1-scf00001 | 1 |
| AX-157891725 | 1 | 27.291 | KV452696.1 | 4097669 | 1-scf00001 | 1 |
| AX-157810317 | 1 | 27.291 | KV452696.1 | 4099758 | 1-scf00001 | 1 |
| AX-157891731 | 1 | 27.291 | KV452696.1 | 4104542 | 1-scf00001 | 1 |
| AX-157891732 | 1 | 27.291 | KV452696.1 | 4107896 | 1-scf00001 | 1 |
| AX-157810318 | 1 | 27.291 | KV452696.1 | 4107959 | 1-scf00001 | 1 |
| AX-157891733 | 1 | 27.291 | KV452696.1 | 4108848 | 1-scf00001 | 1 |
| AX-157742311 | 1 | 27.291 | KV452696.1 | 4110308 | 1-scf00001 | 1 |
| AX-157891735 | 1 | 27.291 | KV452696.1 | 4110455 | 1-scf00001 | 1 |
| AX-158404192 | 1 | 27.291 | KV452696.1 | 4110978 | 1-scf00001 | 1 |
| AX-157891739 | 1 | 27.291 | KV452696.1 | 4113741 | 1-scf00001 | 1 |
| AX-157891741 | 1 | 27.291 | KV452696.1 | 4115605 | 1-scf00001 | 1 |
| AX-157891744 | 1 | 27.291 | KV452696.1 | 4119993 | 1-scf00001 | 1 |
| AX-157891747 | 1 | 27.291 | KV452696.1 | 4125374 | 1-scf00001 | 1 |
| AX-157891748 | 1 | 27.291 | KV452696.1 | 4130055 | 1-scf00001 | 1 |
| AX-157891750 | 1 | 27.291 | KV452696.1 | 4131648 | 1-scf00001 | 1 |
| AX-157891752 | 1 | 27.291 | KV452696.1 | 4133562 | 1-scf00001 | 1 |
| AX-157891755 | 1 | 27.291 | KV452696.1 | 4138822 | 1-scf00001 | 1 |
| AX-157810320 | 1 | 27.291 | KV452696.1 | 4139150 | 1-scf00001 | 1 |
| AX-158404194 | 1 | 27.291 | KV452696.1 | 4140562 | 1-scf00001 | 1 |
| AX-157891757 | 1 | 27.291 | KV452696.1 | 4142587 | 1-scf00001 | 1 |
| AX-157726307 | 1 | 27.291 | KV452696.1 | 4144238 | 1-scf00001 | 1 |
| AX-157891760 | 1 | 27.291 | KV452696.1 | 4146002 | 1-scf00001 | 1 |
| AX-157891762 | 1 | 27.291 | KV452696.1 | 4147953 | 1-scf00001 | 1 |
| AX-157891770 | 1 | 27.291 | KV452696.1 | 4159157 | 1-scf00001 | 1 |
| AX-157891771 | 1 | 27.291 | KV452696.1 | 4159705 | 1-scf00001 | 1 |
| AX-157864322 | 1 | 27.291 | KV452696.1 | 4170454 | 1-scf00001 | 1 |
| AX-157891777 | 1 | 27.291 | KV452696.1 | 4173167 | 1-scf00001 | 1 |
| AX-157810323 | 1 | 27.291 | KV452696.1 | 4177610 | 1-scf00001 | 1 |
| AX-157891783 | 1 | 27.291 | KV452696.1 | 4178447 | 1-scf00001 | 1 |
| AX-157891785 | 1 | 27.291 | KV452696.1 | 4179958 | 1-scf00001 | 1 |

|              |   |        |            |         |            |   |
|--------------|---|--------|------------|---------|------------|---|
| AX-157759031 | 1 | 27.291 | KV452696.1 | 4181534 | 1-scf00001 | 1 |
| AX-157891786 | 1 | 27.291 | KV452696.1 | 4190408 | 1-scf00001 | 1 |
| AX-157891787 | 1 | 27.291 | KV452696.1 | 4192272 | 1-scf00001 | 1 |
| AX-157810325 | 1 | 27.291 | KV452696.1 | 4194767 | 1-scf00001 | 1 |
| AX-157891796 | 1 | 27.291 | KV452696.1 | 4228793 | 1-scf00001 | 1 |
| AX-157891797 | 1 | 27.291 | KV452696.1 | 4229305 | 1-scf00001 | 1 |
| AX-157770732 | 1 | 27.291 | KV452696.1 | 4230072 | 1-scf00001 | 1 |
| AX-157891800 | 1 | 27.291 | KV452696.1 | 4232785 | 1-scf00001 | 1 |
| AX-157810327 | 1 | 27.291 | KV452696.1 | 4234082 | 1-scf00001 | 1 |
| AX-157891811 | 1 | 27.291 | KV452696.1 | 4250781 | 1-scf00001 | 1 |
| AX-157891814 | 1 | 27.291 | KV452696.1 | 4257312 | 1-scf00001 | 1 |
| AX-157891822 | 1 | 27.291 | KV452696.1 | 4265692 | 1-scf00001 | 1 |
| AX-157810336 | 1 | 27.291 | KV452696.1 | 4278719 | 1-scf00001 | 1 |
| AX-157891869 | 1 | 27.291 | KV452696.1 | 4325235 | 1-scf00001 | 1 |
| AX-157715671 | 1 | 27.291 | KV452696.1 | 4329926 | 1-scf00001 | 1 |
| AX-157891875 | 1 | 27.291 | KV452696.1 | 4335923 | 1-scf00001 | 1 |
| AX-157891804 | 1 | 27.307 | KV452696.1 | 4242308 | 1-scf00001 | 1 |
| AX-157891812 | 1 | 27.319 | KV452696.1 | 4252634 | 1-scf00001 | 1 |
| AX-157810330 | 1 | 27.345 | KV452696.1 | 4255093 | 1-scf00001 | 1 |
| AX-157891813 | 1 | 27.373 | KV452696.1 | 4255997 | 1-scf00001 | 1 |
| AX-157891401 | 1 | 27.4   | KV452696.1 | 3651956 | 1-scf00001 | 1 |
| AX-157891404 | 1 | 27.4   | KV452696.1 | 3659647 | 1-scf00001 | 1 |
| AX-157891598 | 1 | 27.4   | KV452696.1 | 3903163 | 1-scf00001 | 1 |
| AX-157891609 | 1 | 27.4   | KV452696.1 | 3922958 | 1-scf00001 | 1 |
| AX-157891610 | 1 | 27.4   | KV452696.1 | 3924320 | 1-scf00001 | 1 |
| AX-157891621 | 1 | 27.4   | KV452696.1 | 3937760 | 1-scf00001 | 1 |
| AX-157810319 | 1 | 27.4   | KV452696.1 | 4118982 | 1-scf00001 | 1 |
| AX-157810326 | 1 | 27.4   | KV452696.1 | 4226616 | 1-scf00001 | 1 |
| AX-157810329 | 1 | 27.4   | KV452696.1 | 4241270 | 1-scf00001 | 1 |
| AX-157891824 | 1 | 27.4   | KV452696.1 | 4266455 | 1-scf00001 | 1 |
| AX-157891825 | 1 | 27.4   | KV452696.1 | 4266906 | 1-scf00001 | 1 |
| AX-157810331 | 1 | 27.4   | KV452696.1 | 4269858 | 1-scf00001 | 1 |
| AX-157891827 | 1 | 27.4   | KV452696.1 | 4272946 | 1-scf00001 | 1 |
| AX-157810335 | 1 | 27.4   | KV452696.1 | 4275353 | 1-scf00001 | 1 |
| AX-157891828 | 1 | 27.4   | KV452696.1 | 4275866 | 1-scf00001 | 1 |
| AX-157891829 | 1 | 27.4   | KV452696.1 | 4276443 | 1-scf00001 | 1 |
| AX-157891835 | 1 | 27.4   | KV452696.1 | 4284483 | 1-scf00001 | 1 |
| AX-157741804 | 1 | 27.4   | KV452696.1 | 4292780 | 1-scf00001 | 1 |
| AX-157891848 | 1 | 27.4   | KV452696.1 | 4300502 | 1-scf00001 | 1 |
| AX-157745669 | 1 | 27.4   | KV452696.1 | 4327789 | 1-scf00001 | 1 |
| AX-157891830 | 1 | 27.401 | KV452696.1 | 4280250 | 1-scf00001 | 1 |
| AX-157891753 | 1 | 27.403 | KV452696.1 | 4137843 | 1-scf00001 | 1 |
| AX-157891809 | 1 | 27.403 | KV452696.1 | 4247844 | 1-scf00001 | 1 |
| AX-157726962 | 1 | 27.403 | KV452696.1 | 4301367 | 1-scf00001 | 1 |
| AX-157713554 | 1 | 27.403 | KV452696.1 | 4332537 | 1-scf00001 | 1 |
| AX-157853537 | 1 | 27.545 | KV452696.1 | 4319239 | 1-scf00001 | 1 |
| AX-157891867 | 1 | 27.545 | KV452696.1 | 4323854 | 1-scf00001 | 1 |
| AX-157874258 | 1 | 27.545 | KV452696.1 | 4330650 | 1-scf00001 | 1 |
| AX-157891876 | 1 | 27.545 | KV452696.1 | 4336682 | 1-scf00001 | 1 |
| AX-157891879 | 1 | 27.837 | KV452696.1 | 4338041 | 1-scf00001 | 1 |
| AX-157771574 | 1 | 27.837 | KV452696.1 | 4348918 | 1-scf00001 | 1 |

|              |   |        |             |         |            |    |
|--------------|---|--------|-------------|---------|------------|----|
| AX-157891885 | 1 | 27.837 | KV452696.1  | 4352048 | 1-scf00001 | 1  |
| AX-157891887 | 1 | 27.837 | KV452696.1  | 4356315 | 1-scf00001 | 1  |
| AX-157891888 | 1 | 27.837 | KV452696.1  | 4356662 | 1-scf00001 | 1  |
| AX-157810341 | 1 | 27.837 | KV452696.1  | 4363002 | 1-scf00001 | 1  |
| AX-157891915 | 1 | 27.837 | KV452696.1  | 4390448 | 1-scf00001 | 1  |
| AX-157891929 | 1 | 27.837 | KV452696.1  | 4416608 | 1-scf00001 | 1  |
| AX-157891889 | 1 | 27.855 | KV452696.1  | 4357506 | 1-scf00001 | 1  |
| AX-157891894 | 1 | 27.876 | KV452696.1  | 4361051 | 1-scf00001 | 1  |
| AX-157891901 | 1 | 27.894 | KV452696.1  | 4370771 | 1-scf00001 | 1  |
| AX-157891836 | 1 | 27.905 | KV452696.1  | 4284930 | 1-scf00001 | 1  |
| AX-157891850 | 1 | 27.905 | KV452696.1  | 4303813 | 1-scf00001 | 1  |
| AX-157891865 | 1 | 27.905 | KV452696.1  | 4321830 | 1-scf00001 | 1  |
| AX-157891902 | 1 | 27.905 | KV452696.1  | 4371576 | 1-scf00001 | 1  |
| AX-157810349 | 1 | 27.905 | KV452696.1  | 4419235 | 1-scf00001 | 1  |
| AX-157891904 | 1 | 27.921 | KV452696.1  | 4374592 | 1-scf00001 | 1  |
| AX-157810343 | 1 | 27.934 | KV452696.1  | 4378480 | 1-scf00001 | 1  |
| AX-157891905 | 1 | 27.946 | KV452696.1  | 4375988 | 1-scf00001 | 1  |
| AX-157891907 | 1 | 27.946 | KV452696.1  | 4379254 | 1-scf00001 | 1  |
| AX-157891909 | 1 | 27.946 | KV452696.1  | 4383440 | 1-scf00001 | 1  |
| AX-157810346 | 1 | 27.946 | KV452696.1  | 4387540 | 1-scf00001 | 1  |
| AX-157891914 | 1 | 27.946 | KV452696.1  | 4389095 | 1-scf00001 | 1  |
| AX-157810347 | 1 | 27.946 | KV452696.1  | 4395226 | 1-scf00001 | 1  |
| AX-158403716 | 1 | 27.946 | KV452696.1  | 4399762 | 1-scf00001 | 1  |
| AX-157891924 | 1 | 27.946 | KV452696.1  | 4405258 | 1-scf00001 | 1  |
| AX-157891925 | 1 | 27.946 | KV452696.1  | 4406956 | 1-scf00001 | 1  |
| AX-157891926 | 1 | 27.946 | KV452696.1  | 4408662 | 1-scf00001 | 1  |
| AX-157892033 | 1 | 27.946 | KV452696.1  | 4584075 | 1-scf00001 | 1  |
| AX-158379101 | 1 | 27.995 | KV452696.1  | 4269142 | 1-scf00001 | 1  |
| AX-157810338 | 1 | 27.995 | KV452696.1  | 4322222 | 1-scf00001 | 1  |
| AX-157810344 | 1 | 27.995 | KV452696.1  | 4381675 | 1-scf00001 | 1  |
| AX-157891910 | 1 | 27.995 | KV452696.1  | 4383733 | 1-scf00001 | 1  |
| AX-157742685 | 1 | 27.995 | KV452696.1  | 4426930 | 1-scf00001 | 1  |
| AX-157891934 | 1 | 28.056 | KV452696.1  | 4427249 | 1-scf00001 | 1  |
| AX-157891937 | 1 | 28.056 | KV452696.1  | 4434182 | 1-scf00001 | 1  |
| AX-157892172 | 1 | 28.056 | KV452698.1  | 324799  | 1-scf00002 | 1  |
| AX-158403738 | 1 | 28.056 | KV452697.1  | 116190  | 1-scf00003 | 1  |
| AX-158421050 | 1 | 28.056 | 3ML01025952 | 299     | scf01561_1 | UN |
| AX-157707024 | 1 | 28.056 | 3ML01034532 | 283     | scf10209_1 | UN |
| AX-157707025 | 1 | 28.056 | 3ML01034532 | 409     | scf10209_1 | UN |
| AX-157891938 | 1 | 28.201 | KV452696.1  | 4437508 | 1-scf00001 | 1  |
| AX-157891940 | 1 | 28.201 | KV452696.1  | 4441896 | 1-scf00001 | 1  |
| AX-157891945 | 1 | 28.201 | KV452696.1  | 4445590 | 1-scf00001 | 1  |
| AX-157891948 | 1 | 28.201 | KV452696.1  | 4447498 | 1-scf00001 | 1  |
| AX-157891953 | 1 | 28.201 | KV452696.1  | 4451973 | 1-scf00001 | 1  |
| AX-157891955 | 1 | 28.201 | KV452696.1  | 4455604 | 1-scf00001 | 1  |
| AX-157892132 | 1 | 28.201 | KV452698.1  | 175530  | 1-scf00002 | 1  |
| AX-157891964 | 1 | 28.347 | KV452696.1  | 4473230 | 1-scf00001 | 1  |
| AX-157891054 | 1 | 28.493 | KV452696.1  | 2961798 | 1-scf00001 | 1  |
| AX-157891060 | 1 | 28.493 | KV452696.1  | 2974417 | 1-scf00001 | 1  |
| AX-157891070 | 1 | 28.493 | KV452696.1  | 2995590 | 1-scf00001 | 1  |
| AX-157891071 | 1 | 28.493 | KV452696.1  | 3000098 | 1-scf00001 | 1  |

|              |   |        |            |         |            |   |
|--------------|---|--------|------------|---------|------------|---|
| AX-157891072 | 1 | 28.493 | KV452696.1 | 3001858 | 1-scf00001 | 1 |
| AX-157891075 | 1 | 28.493 | KV452696.1 | 3003683 | 1-scf00001 | 1 |
| AX-157891076 | 1 | 28.493 | KV452696.1 | 3004833 | 1-scf00001 | 1 |
| AX-157891175 | 1 | 28.493 | KV452696.1 | 3182006 | 1-scf00001 | 1 |
| AX-157891193 | 1 | 28.493 | KV452696.1 | 3201375 | 1-scf00001 | 1 |
| AX-157810291 | 1 | 28.493 | KV452696.1 | 3254555 | 1-scf00001 | 1 |
| AX-157891207 | 1 | 28.493 | KV452696.1 | 3254703 | 1-scf00001 | 1 |
| AX-157891215 | 1 | 28.493 | KV452696.1 | 3278872 | 1-scf00001 | 1 |
| AX-157891226 | 1 | 28.493 | KV452696.1 | 3300161 | 1-scf00001 | 1 |
| AX-157891290 | 1 | 28.493 | KV452696.1 | 3383833 | 1-scf00001 | 1 |
| AX-157891292 | 1 | 28.493 | KV452696.1 | 3386775 | 1-scf00001 | 1 |
| AX-157891301 | 1 | 28.493 | KV452696.1 | 3441835 | 1-scf00001 | 1 |
| AX-157891415 | 1 | 28.493 | KV452696.1 | 3670716 | 1-scf00001 | 1 |
| AX-157891416 | 1 | 28.493 | KV452696.1 | 3675059 | 1-scf00001 | 1 |
| AX-157891419 | 1 | 28.493 | KV452696.1 | 3683721 | 1-scf00001 | 1 |
| AX-157891467 | 1 | 28.493 | KV452696.1 | 3749707 | 1-scf00001 | 1 |
| AX-157891784 | 1 | 28.493 | KV452696.1 | 4179300 | 1-scf00001 | 1 |
| AX-157891819 | 1 | 28.493 | KV452696.1 | 4262476 | 1-scf00001 | 1 |
| AX-157745561 | 1 | 28.493 | KV452696.1 | 4314452 | 1-scf00001 | 1 |
| AX-157891878 | 1 | 28.493 | KV452696.1 | 4337576 | 1-scf00001 | 1 |
| AX-157891886 | 1 | 28.493 | KV452696.1 | 4354221 | 1-scf00001 | 1 |
| AX-157891890 | 1 | 28.493 | KV452696.1 | 4358935 | 1-scf00001 | 1 |
| AX-157891917 | 1 | 28.493 | KV452696.1 | 4392668 | 1-scf00001 | 1 |
| AX-157891931 | 1 | 28.493 | KV452696.1 | 4417631 | 1-scf00001 | 1 |
| AX-157891941 | 1 | 28.493 | KV452696.1 | 4442875 | 1-scf00001 | 1 |
| AX-157810356 | 1 | 28.493 | KV452696.1 | 4453401 | 1-scf00001 | 1 |
| AX-157891954 | 1 | 28.493 | KV452696.1 | 4453508 | 1-scf00001 | 1 |
| AX-157891966 | 1 | 28.493 | KV452696.1 | 4475134 | 1-scf00001 | 1 |
| AX-157891972 | 1 | 28.493 | KV452696.1 | 4479294 | 1-scf00001 | 1 |
| AX-157891974 | 1 | 28.493 | KV452696.1 | 4481138 | 1-scf00001 | 1 |
| AX-157723563 | 1 | 28.493 | KV452696.1 | 4492155 | 1-scf00001 | 1 |
| AX-157891984 | 1 | 28.493 | KV452696.1 | 4494687 | 1-scf00001 | 1 |
| AX-157892000 | 1 | 28.493 | KV452696.1 | 4528291 | 1-scf00001 | 1 |
| AX-157709977 | 1 | 28.493 | KV452696.1 | 4530694 | 1-scf00001 | 1 |
| AX-157892002 | 1 | 28.493 | KV452696.1 | 4534354 | 1-scf00001 | 1 |
| AX-157892004 | 1 | 28.493 | KV452696.1 | 4536917 | 1-scf00001 | 1 |
| AX-157892006 | 1 | 28.493 | KV452696.1 | 4538570 | 1-scf00001 | 1 |
| AX-157892019 | 1 | 28.493 | KV452696.1 | 4565661 | 1-scf00001 | 1 |
| AX-158381906 | 1 | 28.493 | KV452698.1 | 13370   | 1-scf00002 | 1 |
| AX-157892197 | 1 | 28.493 | KV452698.1 | 409562  | 1-scf00002 | 1 |
| AX-157892208 | 1 | 28.493 | KV452698.1 | 438961  | 1-scf00002 | 1 |
| AX-157892209 | 1 | 28.493 | KV452698.1 | 440196  | 1-scf00002 | 1 |
| AX-157892214 | 1 | 28.493 | KV452698.1 | 450366  | 1-scf00002 | 1 |
| AX-157892215 | 1 | 28.493 | KV452698.1 | 453953  | 1-scf00002 | 1 |
| AX-157892219 | 1 | 28.493 | KV452698.1 | 467276  | 1-scf00002 | 1 |
| AX-157892221 | 1 | 28.493 | KV452698.1 | 468357  | 1-scf00002 | 1 |
| AX-158414513 | 1 | 28.517 | KV452696.1 | 4539391 | 1-scf00001 | 1 |
| AX-157810292 | 1 | 28.53  | KV452696.1 | 3267461 | 1-scf00001 | 1 |
| AX-157891213 | 1 | 28.53  | KV452696.1 | 3269634 | 1-scf00001 | 1 |
| AX-157891742 | 1 | 28.53  | KV452696.1 | 4117765 | 1-scf00001 | 1 |
| AX-157742429 | 1 | 28.53  | KV452696.1 | 4222678 | 1-scf00001 | 1 |

|              |   |       |            |         |            |   |
|--------------|---|-------|------------|---------|------------|---|
| AX-157891918 | 1 | 28.53 | KV452696.1 | 4393507 | 1-scf00001 | 1 |
| AX-157891969 | 1 | 28.53 | KV452696.1 | 4476348 | 1-scf00001 | 1 |
| AX-157891975 | 1 | 28.53 | KV452696.1 | 4483170 | 1-scf00001 | 1 |
| AX-157892009 | 1 | 28.53 | KV452696.1 | 4542147 | 1-scf00001 | 1 |
| AX-157892013 | 1 | 28.53 | KV452696.1 | 4549500 | 1-scf00001 | 1 |
| AX-157810370 | 1 | 28.53 | KV452698.1 | 16555   | 1-scf00002 | 1 |
| AX-157892085 | 1 | 28.53 | KV452698.1 | 52531   | 1-scf00002 | 1 |
| AX-157892090 | 1 | 28.53 | KV452698.1 | 58935   | 1-scf00002 | 1 |
| AX-157892096 | 1 | 28.53 | KV452698.1 | 73993   | 1-scf00002 | 1 |
| AX-157892103 | 1 | 28.53 | KV452698.1 | 98721   | 1-scf00002 | 1 |
| AX-157892108 | 1 | 28.53 | KV452698.1 | 102549  | 1-scf00002 | 1 |
| AX-157892110 | 1 | 28.53 | KV452698.1 | 103777  | 1-scf00002 | 1 |
| AX-157892114 | 1 | 28.53 | KV452698.1 | 113060  | 1-scf00002 | 1 |
| AX-157892119 | 1 | 28.53 | KV452698.1 | 119369  | 1-scf00002 | 1 |
| AX-157892123 | 1 | 28.53 | KV452698.1 | 129619  | 1-scf00002 | 1 |
| AX-157892127 | 1 | 28.53 | KV452698.1 | 148555  | 1-scf00002 | 1 |
| AX-157892130 | 1 | 28.53 | KV452698.1 | 158089  | 1-scf00002 | 1 |
| AX-157892133 | 1 | 28.53 | KV452698.1 | 175893  | 1-scf00002 | 1 |
| AX-157892135 | 1 | 28.53 | KV452698.1 | 176869  | 1-scf00002 | 1 |
| AX-157892136 | 1 | 28.53 | KV452698.1 | 177114  | 1-scf00002 | 1 |
| AX-157892141 | 1 | 28.53 | KV452698.1 | 195843  | 1-scf00002 | 1 |
| AX-157892142 | 1 | 28.53 | KV452698.1 | 214451  | 1-scf00002 | 1 |
| AX-157892146 | 1 | 28.53 | KV452698.1 | 226634  | 1-scf00002 | 1 |
| AX-157892150 | 1 | 28.53 | KV452698.1 | 239834  | 1-scf00002 | 1 |
| AX-157892153 | 1 | 28.53 | KV452698.1 | 250989  | 1-scf00002 | 1 |
| AX-157892156 | 1 | 28.53 | KV452698.1 | 254087  | 1-scf00002 | 1 |
| AX-157892157 | 1 | 28.53 | KV452698.1 | 257001  | 1-scf00002 | 1 |
| AX-157892158 | 1 | 28.53 | KV452698.1 | 258298  | 1-scf00002 | 1 |
| AX-157892159 | 1 | 28.53 | KV452698.1 | 259615  | 1-scf00002 | 1 |
| AX-157892160 | 1 | 28.53 | KV452698.1 | 261381  | 1-scf00002 | 1 |
| AX-157892165 | 1 | 28.53 | KV452698.1 | 287691  | 1-scf00002 | 1 |
| AX-157892168 | 1 | 28.53 | KV452698.1 | 295938  | 1-scf00002 | 1 |
| AX-158404207 | 1 | 28.53 | KV452698.1 | 299445  | 1-scf00002 | 1 |
| AX-158403722 | 1 | 28.53 | KV452698.1 | 299779  | 1-scf00002 | 1 |
| AX-158404208 | 1 | 28.53 | KV452698.1 | 300014  | 1-scf00002 | 1 |
| AX-158421762 | 1 | 28.53 | KV452698.1 | 305253  | 1-scf00002 | 1 |
| AX-158404211 | 1 | 28.53 | KV452698.1 | 346486  | 1-scf00002 | 1 |
| AX-157892181 | 1 | 28.53 | KV452698.1 | 359513  | 1-scf00002 | 1 |
| AX-157892185 | 1 | 28.53 | KV452698.1 | 362992  | 1-scf00002 | 1 |
| AX-157892190 | 1 | 28.53 | KV452698.1 | 381385  | 1-scf00002 | 1 |
| AX-157892194 | 1 | 28.53 | KV452698.1 | 403460  | 1-scf00002 | 1 |
| AX-157892195 | 1 | 28.53 | KV452698.1 | 407045  | 1-scf00002 | 1 |
| AX-157892199 | 1 | 28.53 | KV452698.1 | 416793  | 1-scf00002 | 1 |
| AX-157892201 | 1 | 28.53 | KV452698.1 | 425616  | 1-scf00002 | 1 |
| AX-157892262 | 1 | 28.53 | KV452698.1 | 545778  | 1-scf00002 | 1 |
| AX-157892263 | 1 | 28.53 | KV452698.1 | 546388  | 1-scf00002 | 1 |
| AX-157862577 | 1 | 28.53 | KV452698.1 | 554991  | 1-scf00002 | 1 |
| AX-157883053 | 1 | 28.53 | KV452698.1 | 630712  | 1-scf00002 | 1 |
| AX-157810396 | 1 | 28.53 | KV452698.1 | 677023  | 1-scf00002 | 1 |
| AX-157892442 | 1 | 28.53 | KV452697.1 | 6633    | 1-scf00003 | 1 |
| AX-157892454 | 1 | 28.53 | KV452697.1 | 46994   | 1-scf00003 | 1 |

|              |   |        |            |         |            |   |
|--------------|---|--------|------------|---------|------------|---|
| AX-157892517 | 1 | 28.53  | KV452697.1 | 218841  | 1-scf00003 | 1 |
| AX-157772233 | 1 | 28.545 | KV452696.1 | 4412227 | 1-scf00001 | 1 |
| AX-157892050 | 1 | 28.545 | KV452696.1 | 4637172 | 1-scf00001 | 1 |
| AX-157892438 | 1 | 28.575 | KV452697.1 | 2995    | 1-scf00003 | 1 |
| AX-157890989 | 1 | 28.602 | KV452696.1 | 2882555 | 1-scf00001 | 1 |
| AX-157891016 | 1 | 28.602 | KV452696.1 | 2919304 | 1-scf00001 | 1 |
| AX-157891173 | 1 | 28.602 | KV452696.1 | 3180935 | 1-scf00001 | 1 |
| AX-157891218 | 1 | 28.602 | KV452696.1 | 3289555 | 1-scf00001 | 1 |
| AX-157891484 | 1 | 28.602 | KV452696.1 | 3773721 | 1-scf00001 | 1 |
| AX-157891496 | 1 | 28.602 | KV452696.1 | 3790520 | 1-scf00001 | 1 |
| AX-157891651 | 1 | 28.602 | KV452696.1 | 3973545 | 1-scf00001 | 1 |
| AX-157891687 | 1 | 28.602 | KV452696.1 | 4037785 | 1-scf00001 | 1 |
| AX-157891692 | 1 | 28.602 | KV452696.1 | 4050035 | 1-scf00001 | 1 |
| AX-157891699 | 1 | 28.602 | KV452696.1 | 4067297 | 1-scf00001 | 1 |
| AX-157891780 | 1 | 28.602 | KV452696.1 | 4174481 | 1-scf00001 | 1 |
| AX-157891851 | 1 | 28.602 | KV452696.1 | 4305051 | 1-scf00001 | 1 |
| AX-157810339 | 1 | 28.602 | KV452696.1 | 4335078 | 1-scf00001 | 1 |
| AX-157891884 | 1 | 28.602 | KV452696.1 | 4350529 | 1-scf00001 | 1 |
| AX-157891932 | 1 | 28.602 | KV452696.1 | 4421833 | 1-scf00001 | 1 |
| AX-157891947 | 1 | 28.602 | KV452696.1 | 4446104 | 1-scf00001 | 1 |
| AX-157891949 | 1 | 28.602 | KV452696.1 | 4448566 | 1-scf00001 | 1 |
| AX-157891958 | 1 | 28.602 | KV452696.1 | 4459544 | 1-scf00001 | 1 |
| AX-157891962 | 1 | 28.602 | KV452696.1 | 4470602 | 1-scf00001 | 1 |
| AX-157891977 | 1 | 28.602 | KV452696.1 | 4484238 | 1-scf00001 | 1 |
| AX-157891982 | 1 | 28.602 | KV452696.1 | 4489966 | 1-scf00001 | 1 |
| AX-157810361 | 1 | 28.602 | KV452696.1 | 4493939 | 1-scf00001 | 1 |
| AX-157891988 | 1 | 28.602 | KV452696.1 | 4499548 | 1-scf00001 | 1 |
| AX-157727345 | 1 | 28.602 | KV452696.1 | 4501740 | 1-scf00001 | 1 |
| AX-157891995 | 1 | 28.602 | KV452696.1 | 4517959 | 1-scf00001 | 1 |
| AX-157892008 | 1 | 28.602 | KV452696.1 | 4541288 | 1-scf00001 | 1 |
| AX-157892037 | 1 | 28.602 | KV452696.1 | 4590783 | 1-scf00001 | 1 |
| AX-157892066 | 1 | 28.602 | KV452698.1 | 11530   | 1-scf00002 | 1 |
| AX-157892067 | 1 | 28.602 | KV452698.1 | 13793   | 1-scf00002 | 1 |
| AX-157892069 | 1 | 28.602 | KV452698.1 | 15862   | 1-scf00002 | 1 |
| AX-157892072 | 1 | 28.602 | KV452698.1 | 31204   | 1-scf00002 | 1 |
| AX-157892073 | 1 | 28.602 | KV452698.1 | 32356   | 1-scf00002 | 1 |
| AX-157892075 | 1 | 28.602 | KV452698.1 | 34754   | 1-scf00002 | 1 |
| AX-158381907 | 1 | 28.602 | KV452698.1 | 36277   | 1-scf00002 | 1 |
| AX-157892076 | 1 | 28.602 | KV452698.1 | 38238   | 1-scf00002 | 1 |
| AX-157892077 | 1 | 28.602 | KV452698.1 | 39607   | 1-scf00002 | 1 |
| AX-157892078 | 1 | 28.602 | KV452698.1 | 40280   | 1-scf00002 | 1 |
| AX-157892080 | 1 | 28.602 | KV452698.1 | 47667   | 1-scf00002 | 1 |
| AX-157892081 | 1 | 28.602 | KV452698.1 | 48158   | 1-scf00002 | 1 |
| AX-157892086 | 1 | 28.602 | KV452698.1 | 53322   | 1-scf00002 | 1 |
| AX-157892089 | 1 | 28.602 | KV452698.1 | 58397   | 1-scf00002 | 1 |
| AX-157892091 | 1 | 28.602 | KV452698.1 | 59969   | 1-scf00002 | 1 |
| AX-157892092 | 1 | 28.602 | KV452698.1 | 63344   | 1-scf00002 | 1 |
| AX-157892093 | 1 | 28.602 | KV452698.1 | 70250   | 1-scf00002 | 1 |
| AX-157892101 | 1 | 28.602 | KV452698.1 | 92246   | 1-scf00002 | 1 |
| AX-157892105 | 1 | 28.602 | KV452698.1 | 101471  | 1-scf00002 | 1 |
| AX-157892106 | 1 | 28.602 | KV452698.1 | 101832  | 1-scf00002 | 1 |

|              |   |        |            |        |            |   |
|--------------|---|--------|------------|--------|------------|---|
| AX-157892109 | 1 | 28.602 | KV452698.1 | 103235 | 1-scf00002 | 1 |
| AX-157722150 | 1 | 28.602 | KV452698.1 | 105820 | 1-scf00002 | 1 |
| AX-157892118 | 1 | 28.602 | KV452698.1 | 118924 | 1-scf00002 | 1 |
| AX-157892124 | 1 | 28.602 | KV452698.1 | 133836 | 1-scf00002 | 1 |
| AX-157892125 | 1 | 28.602 | KV452698.1 | 139105 | 1-scf00002 | 1 |
| AX-157892126 | 1 | 28.602 | KV452698.1 | 147313 | 1-scf00002 | 1 |
| AX-157892129 | 1 | 28.602 | KV452698.1 | 153753 | 1-scf00002 | 1 |
| AX-157892131 | 1 | 28.602 | KV452698.1 | 174344 | 1-scf00002 | 1 |
| AX-157892138 | 1 | 28.602 | KV452698.1 | 181825 | 1-scf00002 | 1 |
| AX-157868467 | 1 | 28.602 | KV452698.1 | 184164 | 1-scf00002 | 1 |
| AX-157892143 | 1 | 28.602 | KV452698.1 | 216990 | 1-scf00002 | 1 |
| AX-157892144 | 1 | 28.602 | KV452698.1 | 219513 | 1-scf00002 | 1 |
| AX-157892145 | 1 | 28.602 | KV452698.1 | 223958 | 1-scf00002 | 1 |
| AX-157892148 | 1 | 28.602 | KV452698.1 | 236704 | 1-scf00002 | 1 |
| AX-157892154 | 1 | 28.602 | KV452698.1 | 252245 | 1-scf00002 | 1 |
| AX-157892163 | 1 | 28.602 | KV452698.1 | 279192 | 1-scf00002 | 1 |
| AX-157892171 | 1 | 28.602 | KV452698.1 | 317811 | 1-scf00002 | 1 |
| AX-157892175 | 1 | 28.602 | KV452698.1 | 333352 | 1-scf00002 | 1 |
| AX-157892189 | 1 | 28.602 | KV452698.1 | 376729 | 1-scf00002 | 1 |
| AX-157892191 | 1 | 28.602 | KV452698.1 | 382881 | 1-scf00002 | 1 |
| AX-157892192 | 1 | 28.602 | KV452698.1 | 383519 | 1-scf00002 | 1 |
| AX-157892193 | 1 | 28.602 | KV452698.1 | 389504 | 1-scf00002 | 1 |
| AX-157722409 | 1 | 28.602 | KV452698.1 | 418756 | 1-scf00002 | 1 |
| AX-157755821 | 1 | 28.602 | KV452698.1 | 433288 | 1-scf00002 | 1 |
| AX-157892206 | 1 | 28.602 | KV452698.1 | 435661 | 1-scf00002 | 1 |
| AX-157892207 | 1 | 28.602 | KV452698.1 | 438308 | 1-scf00002 | 1 |
| AX-158388969 | 1 | 28.602 | KV452698.1 | 439841 | 1-scf00002 | 1 |
| AX-157892213 | 1 | 28.602 | KV452698.1 | 449208 | 1-scf00002 | 1 |
| AX-157892217 | 1 | 28.602 | KV452698.1 | 458802 | 1-scf00002 | 1 |
| AX-157892220 | 1 | 28.602 | KV452698.1 | 467594 | 1-scf00002 | 1 |
| AX-157892222 | 1 | 28.602 | KV452698.1 | 468938 | 1-scf00002 | 1 |
| AX-157810371 | 1 | 28.602 | KV452698.1 | 473272 | 1-scf00002 | 1 |
| AX-157892225 | 1 | 28.602 | KV452698.1 | 473744 | 1-scf00002 | 1 |
| AX-157892226 | 1 | 28.602 | KV452698.1 | 474474 | 1-scf00002 | 1 |
| AX-157810372 | 1 | 28.602 | KV452698.1 | 474723 | 1-scf00002 | 1 |
| AX-157892227 | 1 | 28.602 | KV452698.1 | 475117 | 1-scf00002 | 1 |
| AX-157892228 | 1 | 28.602 | KV452698.1 | 475495 | 1-scf00002 | 1 |
| AX-157892229 | 1 | 28.602 | KV452698.1 | 476068 | 1-scf00002 | 1 |
| AX-157892232 | 1 | 28.602 | KV452698.1 | 477719 | 1-scf00002 | 1 |
| AX-157892238 | 1 | 28.602 | KV452698.1 | 488163 | 1-scf00002 | 1 |
| AX-157892240 | 1 | 28.602 | KV452698.1 | 489530 | 1-scf00002 | 1 |
| AX-157892243 | 1 | 28.602 | KV452698.1 | 497099 | 1-scf00002 | 1 |
| AX-157892246 | 1 | 28.602 | KV452698.1 | 507176 | 1-scf00002 | 1 |
| AX-157892247 | 1 | 28.602 | KV452698.1 | 508442 | 1-scf00002 | 1 |
| AX-157810373 | 1 | 28.602 | KV452698.1 | 537117 | 1-scf00002 | 1 |
| AX-157810384 | 1 | 28.602 | KV452698.1 | 609912 | 1-scf00002 | 1 |
| AX-157892301 | 1 | 28.602 | KV452698.1 | 618421 | 1-scf00002 | 1 |
| AX-157810386 | 1 | 28.602 | KV452698.1 | 622445 | 1-scf00002 | 1 |
| AX-157748491 | 1 | 28.602 | KV452698.1 | 622837 | 1-scf00002 | 1 |
| AX-157810394 | 1 | 28.602 | KV452698.1 | 672042 | 1-scf00002 | 1 |
| AX-157892329 | 1 | 28.602 | KV452698.1 | 684981 | 1-scf00002 | 1 |



|              |   |        |            |         |            |   |
|--------------|---|--------|------------|---------|------------|---|
| AX-158388971 | 1 | 28.602 | KV452698.1 | 687621  | 1-scf00002 | 1 |
| AX-157774245 | 1 | 28.602 | KV452698.1 | 723855  | 1-scf00002 | 1 |
| AX-157892365 | 1 | 28.602 | KV452698.1 | 745998  | 1-scf00002 | 1 |
| AX-157892443 | 1 | 28.602 | KV452697.1 | 7710    | 1-scf00003 | 1 |
| AX-157726116 | 1 | 28.602 | KV452697.1 | 18829   | 1-scf00003 | 1 |
| AX-157892447 | 1 | 28.602 | KV452697.1 | 22289   | 1-scf00003 | 1 |
| AX-157892448 | 1 | 28.602 | KV452697.1 | 24692   | 1-scf00003 | 1 |
| AX-157810415 | 1 | 28.602 | KV452697.1 | 49386   | 1-scf00003 | 1 |
| AX-157810417 | 1 | 28.602 | KV452697.1 | 55027   | 1-scf00003 | 1 |
| AX-157892457 | 1 | 28.602 | KV452697.1 | 58645   | 1-scf00003 | 1 |
| AX-157864330 | 1 | 28.602 | KV452697.1 | 59151   | 1-scf00003 | 1 |
| AX-157892473 | 1 | 28.602 | KV452697.1 | 96160   | 1-scf00003 | 1 |
| AX-157892474 | 1 | 28.602 | KV452697.1 | 97810   | 1-scf00003 | 1 |
| AX-157892476 | 1 | 28.602 | KV452697.1 | 101414  | 1-scf00003 | 1 |
| AX-157892483 | 1 | 28.602 | KV452697.1 | 115750  | 1-scf00003 | 1 |
| AX-157892484 | 1 | 28.602 | KV452697.1 | 120531  | 1-scf00003 | 1 |
| AX-157751146 | 1 | 28.602 | KV452697.1 | 126328  | 1-scf00003 | 1 |
| AX-157810423 | 1 | 28.602 | KV452697.1 | 161456  | 1-scf00003 | 1 |
| AX-157810424 | 1 | 28.602 | KV452697.1 | 171069  | 1-scf00003 | 1 |
| AX-157892503 | 1 | 28.602 | KV452697.1 | 172503  | 1-scf00003 | 1 |
| AX-157892504 | 1 | 28.602 | KV452697.1 | 174757  | 1-scf00003 | 1 |
| AX-157892506 | 1 | 28.602 | KV452697.1 | 179093  | 1-scf00003 | 1 |
| AX-157892507 | 1 | 28.602 | KV452697.1 | 179603  | 1-scf00003 | 1 |
| AX-157892508 | 1 | 28.602 | KV452697.1 | 179848  | 1-scf00003 | 1 |
| AX-157892509 | 1 | 28.602 | KV452697.1 | 180651  | 1-scf00003 | 1 |
| AX-157892510 | 1 | 28.602 | KV452697.1 | 182779  | 1-scf00003 | 1 |
| AX-157892511 | 1 | 28.602 | KV452697.1 | 187376  | 1-scf00003 | 1 |
| AX-157892260 | 1 | 28.656 | KV452698.1 | 535116  | 1-scf00002 | 1 |
| AX-157892472 | 1 | 28.656 | KV452697.1 | 95704   | 1-scf00003 | 1 |
| AX-157892198 | 1 | 28.711 | KV452698.1 | 412627  | 1-scf00002 | 1 |
| AX-157810374 | 1 | 28.711 | KV452698.1 | 537635  | 1-scf00002 | 1 |
| AX-157892264 | 1 | 28.711 | KV452698.1 | 547016  | 1-scf00002 | 1 |
| AX-157892269 | 1 | 28.711 | KV452698.1 | 554406  | 1-scf00002 | 1 |
| AX-157892270 | 1 | 28.711 | KV452698.1 | 554650  | 1-scf00002 | 1 |
| AX-157892349 | 1 | 28.711 | KV452698.1 | 710140  | 1-scf00002 | 1 |
| AX-157892452 | 1 | 28.711 | KV452697.1 | 33043   | 1-scf00003 | 1 |
| AX-157892272 | 1 | 28.781 | KV452698.1 | 559002  | 1-scf00002 | 1 |
| AX-157892280 | 1 | 28.781 | KV452698.1 | 577916  | 1-scf00002 | 1 |
| AX-157892284 | 1 | 28.781 | KV452698.1 | 586071  | 1-scf00002 | 1 |
| AX-157891216 | 1 | 28.82  | KV452696.1 | 3284499 | 1-scf00001 | 1 |
| AX-157892095 | 1 | 28.82  | KV452698.1 | 73271   | 1-scf00002 | 1 |
| AX-157892278 | 1 | 28.82  | KV452698.1 | 575996  | 1-scf00002 | 1 |
| AX-157742735 | 1 | 28.82  | KV452698.1 | 582228  | 1-scf00002 | 1 |
| AX-157892283 | 1 | 28.82  | KV452698.1 | 583534  | 1-scf00002 | 1 |
| AX-157746071 | 1 | 28.82  | KV452698.1 | 584713  | 1-scf00002 | 1 |
| AX-157810382 | 1 | 28.82  | KV452698.1 | 602482  | 1-scf00002 | 1 |
| AX-157892293 | 1 | 28.82  | KV452698.1 | 603969  | 1-scf00002 | 1 |
| AX-157892294 | 1 | 28.82  | KV452698.1 | 604403  | 1-scf00002 | 1 |
| AX-157892295 | 1 | 28.82  | KV452698.1 | 604731  | 1-scf00002 | 1 |
| AX-157892296 | 1 | 28.82  | KV452698.1 | 608667  | 1-scf00002 | 1 |
| AX-157810387 | 1 | 28.82  | KV452698.1 | 625665  | 1-scf00002 | 1 |

|              |   |        |             |         |            |    |
|--------------|---|--------|-------------|---------|------------|----|
| AX-157705858 | 1 | 28.82  | 3ML01031072 | 181     | scf06677_1 | UN |
| AX-157810383 | 1 | 28.854 | KV452698.1  | 609190  | 1-scf00002 | 1  |
| AX-157810358 | 1 | 28.883 | KV452696.1  | 4468726 | 1-scf00001 | 1  |
| AX-157892297 | 1 | 28.883 | KV452698.1  | 610904  | 1-scf00002 | 1  |
| AX-157892304 | 1 | 28.917 | KV452698.1  | 628173  | 1-scf00002 | 1  |
| AX-157892094 | 1 | 28.93  | KV452698.1  | 71710   | 1-scf00002 | 1  |
| AX-157810391 | 1 | 28.93  | KV452698.1  | 641242  | 1-scf00002 | 1  |
| AX-157892310 | 1 | 28.93  | KV452698.1  | 642279  | 1-scf00002 | 1  |
| AX-157810392 | 1 | 28.93  | KV452698.1  | 642667  | 1-scf00002 | 1  |
| AX-157892312 | 1 | 28.93  | KV452698.1  | 643380  | 1-scf00002 | 1  |
| AX-157810393 | 1 | 28.93  | KV452698.1  | 643698  | 1-scf00002 | 1  |
| AX-157717844 | 1 | 28.93  | KV452698.1  | 646838  | 1-scf00002 | 1  |
| AX-157892348 | 1 | 28.93  | KV452698.1  | 707046  | 1-scf00002 | 1  |
| AX-157892463 | 1 | 28.93  | KV452697.1  | 76134   | 1-scf00003 | 1  |
| AX-157891898 | 1 | 29.039 | KV452696.1  | 4365717 | 1-scf00001 | 1  |
| AX-157891943 | 1 | 29.039 | KV452696.1  | 4443480 | 1-scf00001 | 1  |
| AX-157892084 | 1 | 29.039 | KV452698.1  | 49418   | 1-scf00002 | 1  |
| AX-157892097 | 1 | 29.039 | KV452698.1  | 74454   | 1-scf00002 | 1  |
| AX-157892099 | 1 | 29.039 | KV452698.1  | 88701   | 1-scf00002 | 1  |
| AX-157892113 | 1 | 29.039 | KV452698.1  | 112112  | 1-scf00002 | 1  |
| AX-157892128 | 1 | 29.039 | KV452698.1  | 153291  | 1-scf00002 | 1  |
| AX-157892308 | 1 | 29.039 | KV452698.1  | 636148  | 1-scf00002 | 1  |
| AX-157892309 | 1 | 29.039 | KV452698.1  | 637383  | 1-scf00002 | 1  |
| AX-157892320 | 1 | 29.039 | KV452698.1  | 656628  | 1-scf00002 | 1  |
| AX-157892321 | 1 | 29.039 | KV452698.1  | 660252  | 1-scf00002 | 1  |
| AX-157751147 | 1 | 29.039 | KV452698.1  | 662294  | 1-scf00002 | 1  |
| AX-157810395 | 1 | 29.039 | KV452698.1  | 673194  | 1-scf00002 | 1  |
| AX-157892325 | 1 | 29.039 | KV452698.1  | 673704  | 1-scf00002 | 1  |
| AX-157892330 | 1 | 29.039 | KV452698.1  | 685485  | 1-scf00002 | 1  |
| AX-157892331 | 1 | 29.039 | KV452698.1  | 686019  | 1-scf00002 | 1  |
| AX-157892335 | 1 | 29.039 | KV452698.1  | 690793  | 1-scf00002 | 1  |
| AX-157892336 | 1 | 29.039 | KV452698.1  | 692439  | 1-scf00002 | 1  |
| AX-157892342 | 1 | 29.039 | KV452698.1  | 698809  | 1-scf00002 | 1  |
| AX-157718244 | 1 | 29.039 | KV452698.1  | 700023  | 1-scf00002 | 1  |
| AX-157892344 | 1 | 29.039 | KV452698.1  | 700376  | 1-scf00002 | 1  |
| AX-157892345 | 1 | 29.039 | KV452698.1  | 700927  | 1-scf00002 | 1  |
| AX-157810399 | 1 | 29.039 | KV452698.1  | 713077  | 1-scf00002 | 1  |
| AX-157883054 | 1 | 29.039 | KV452698.1  | 713184  | 1-scf00002 | 1  |
| AX-157892351 | 1 | 29.039 | KV452698.1  | 713364  | 1-scf00002 | 1  |
| AX-157892352 | 1 | 29.039 | KV452698.1  | 716484  | 1-scf00002 | 1  |
| AX-157892354 | 1 | 29.039 | KV452698.1  | 718823  | 1-scf00002 | 1  |
| AX-157892358 | 1 | 29.039 | KV452698.1  | 722397  | 1-scf00002 | 1  |
| AX-157709496 | 1 | 29.039 | KV452698.1  | 723165  | 1-scf00002 | 1  |
| AX-157771935 | 1 | 29.039 | KV452698.1  | 725981  | 1-scf00002 | 1  |
| AX-157892362 | 1 | 29.039 | KV452698.1  | 726305  | 1-scf00002 | 1  |
| AX-157744510 | 1 | 29.039 | KV452698.1  | 727459  | 1-scf00002 | 1  |
| AX-157810401 | 1 | 29.039 | KV452698.1  | 734139  | 1-scf00002 | 1  |
| AX-157892370 | 1 | 29.039 | KV452698.1  | 762996  | 1-scf00002 | 1  |
| AX-157892374 | 1 | 29.039 | KV452698.1  | 766955  | 1-scf00002 | 1  |
| AX-157773865 | 1 | 29.148 | KV452696.1  | 3688563 | 1-scf00001 | 1  |
| AX-157891444 | 1 | 29.148 | KV452696.1  | 3708988 | 1-scf00001 | 1  |

|              |   |        |            |         |            |   |
|--------------|---|--------|------------|---------|------------|---|
| AX-157891450 | 1 | 29.148 | KV452696.1 | 3714364 | 1-scf00001 | 1 |
| AX-157891452 | 1 | 29.148 | KV452696.1 | 3718487 | 1-scf00001 | 1 |
| AX-157891453 | 1 | 29.148 | KV452696.1 | 3719310 | 1-scf00001 | 1 |
| AX-157891460 | 1 | 29.148 | KV452696.1 | 3724680 | 1-scf00001 | 1 |
| AX-157891980 | 1 | 29.148 | KV452696.1 | 4486958 | 1-scf00001 | 1 |
| AX-157775123 | 1 | 29.148 | KV452696.1 | 4518875 | 1-scf00001 | 1 |
| AX-157892166 | 1 | 29.148 | KV452698.1 | 288241  | 1-scf00002 | 1 |
| AX-157892169 | 1 | 29.148 | KV452698.1 | 298431  | 1-scf00002 | 1 |
| AX-157892224 | 1 | 29.148 | KV452698.1 | 471997  | 1-scf00002 | 1 |
| AX-157892363 | 1 | 29.148 | KV452698.1 | 738369  | 1-scf00002 | 1 |
| AX-157714957 | 1 | 29.148 | KV452698.1 | 752644  | 1-scf00002 | 1 |
| AX-157892368 | 1 | 29.148 | KV452698.1 | 758608  | 1-scf00002 | 1 |
| AX-157892496 | 1 | 29.148 | KV452697.1 | 157764  | 1-scf00003 | 1 |
| AX-157892499 | 1 | 29.148 | KV452697.1 | 163679  | 1-scf00003 | 1 |
| AX-157892367 | 1 | 29.257 | KV452698.1 | 754924  | 1-scf00002 | 1 |
| AX-157715840 | 1 | 29.257 | KV452698.1 | 756043  | 1-scf00002 | 1 |
| AX-157892369 | 1 | 29.257 | KV452698.1 | 759437  | 1-scf00002 | 1 |
| AX-157892371 | 1 | 29.257 | KV452698.1 | 765342  | 1-scf00002 | 1 |
| AX-157810404 | 1 | 29.257 | KV452698.1 | 765613  | 1-scf00002 | 1 |
| AX-157892372 | 1 | 29.257 | KV452698.1 | 765994  | 1-scf00002 | 1 |
| AX-157892375 | 1 | 29.257 | KV452698.1 | 767830  | 1-scf00002 | 1 |
| AX-157810388 | 1 | 29.585 | KV452698.1 | 631082  | 1-scf00002 | 1 |
| AX-157892337 | 1 | 29.585 | KV452698.1 | 693213  | 1-scf00002 | 1 |
| AX-157892376 | 1 | 29.585 | KV452698.1 | 771286  | 1-scf00002 | 1 |
| AX-157892379 | 1 | 29.585 | KV452698.1 | 779034  | 1-scf00002 | 1 |
| AX-157892380 | 1 | 29.585 | KV452698.1 | 780554  | 1-scf00002 | 1 |
| AX-157738881 | 1 | 29.585 | KV452698.1 | 787699  | 1-scf00002 | 1 |
| AX-157892386 | 1 | 29.585 | KV452698.1 | 790787  | 1-scf00002 | 1 |
| AX-157716109 | 1 | 29.585 | KV452698.1 | 795290  | 1-scf00002 | 1 |
| AX-157892388 | 1 | 29.585 | KV452698.1 | 795380  | 1-scf00002 | 1 |
| AX-157892390 | 1 | 29.585 | KV452698.1 | 801825  | 1-scf00002 | 1 |
| AX-157723580 | 1 | 29.585 | KV452698.1 | 803623  | 1-scf00002 | 1 |
| AX-157892488 | 1 | 29.585 | KV452697.1 | 125607  | 1-scf00003 | 1 |
| AX-157892147 | 1 | 29.721 | KV452698.1 | 231369  | 1-scf00002 | 1 |
| AX-157892389 | 1 | 29.721 | KV452698.1 | 795618  | 1-scf00002 | 1 |
| AX-157892391 | 1 | 29.721 | KV452698.1 | 805757  | 1-scf00002 | 1 |
| AX-157892392 | 1 | 29.721 | KV452698.1 | 809997  | 1-scf00002 | 1 |
| AX-157892393 | 1 | 29.721 | KV452698.1 | 810948  | 1-scf00002 | 1 |
| AX-157892396 | 1 | 29.721 | KV452698.1 | 815548  | 1-scf00002 | 1 |
| AX-157892398 | 1 | 29.721 | KV452698.1 | 818177  | 1-scf00002 | 1 |
| AX-157892399 | 1 | 29.721 | KV452698.1 | 818543  | 1-scf00002 | 1 |
| AX-157892401 | 1 | 29.721 | KV452698.1 | 821813  | 1-scf00002 | 1 |
| AX-157892405 | 1 | 29.721 | KV452698.1 | 826989  | 1-scf00002 | 1 |
| AX-157892492 | 1 | 29.721 | KV452697.1 | 147559  | 1-scf00003 | 1 |
| AX-157892394 | 1 | 29.828 | KV452698.1 | 811498  | 1-scf00002 | 1 |
| AX-157892404 | 1 | 29.828 | KV452698.1 | 825017  | 1-scf00002 | 1 |
| AX-157892406 | 1 | 29.828 | KV452698.1 | 827735  | 1-scf00002 | 1 |
| AX-157892418 | 1 | 29.828 | KV452698.1 | 848329  | 1-scf00002 | 1 |
| AX-157892411 | 1 | 30.131 | KV452698.1 | 841847  | 1-scf00002 | 1 |
| AX-157892412 | 1 | 30.131 | KV452698.1 | 842361  | 1-scf00002 | 1 |
| AX-157892413 | 1 | 30.131 | KV452698.1 | 844985  | 1-scf00002 | 1 |

|              |   |        |            |        |            |   |
|--------------|---|--------|------------|--------|------------|---|
| AX-157892414 | 1 | 30.131 | KV452698.1 | 845720 | 1-scf00002 | 1 |
| AX-157892416 | 1 | 30.131 | KV452698.1 | 846671 | 1-scf00002 | 1 |
| AX-157741149 | 1 | 30.131 | KV452698.1 | 848685 | 1-scf00002 | 1 |
| AX-157744288 | 1 | 30.131 | KV452698.1 | 850102 | 1-scf00002 | 1 |
| AX-157742090 | 1 | 30.131 | KV452698.1 | 851820 | 1-scf00002 | 1 |
| AX-157810412 | 1 | 30.131 | KV452698.1 | 872822 | 1-scf00002 | 1 |
| AX-157868470 | 1 | 30.349 | KV452698.1 | 851981 | 1-scf00002 | 1 |
| AX-157892420 | 1 | 30.349 | KV452698.1 | 853830 | 1-scf00002 | 1 |
| AX-157892421 | 1 | 30.349 | KV452698.1 | 854068 | 1-scf00002 | 1 |
| AX-157810407 | 1 | 30.349 | KV452698.1 | 854278 | 1-scf00002 | 1 |
| AX-157746502 | 1 | 30.349 | KV452698.1 | 855633 | 1-scf00002 | 1 |
| AX-157746246 | 1 | 30.349 | KV452698.1 | 857162 | 1-scf00002 | 1 |
| AX-157892423 | 1 | 30.349 | KV452698.1 | 858241 | 1-scf00002 | 1 |
| AX-157892426 | 1 | 30.349 | KV452698.1 | 862539 | 1-scf00002 | 1 |
| AX-157892429 | 1 | 30.349 | KV452698.1 | 868179 | 1-scf00002 | 1 |
| AX-157715019 | 1 | 30.349 | KV452698.1 | 872617 | 1-scf00002 | 1 |
| AX-157892424 | 1 | 30.357 | KV452698.1 | 859191 | 1-scf00002 | 1 |
| AX-157892427 | 1 | 30.414 | KV452698.1 | 866654 | 1-scf00002 | 1 |
| AX-157810411 | 1 | 30.472 | KV452698.1 | 866763 | 1-scf00002 | 1 |
| AX-157892430 | 1 | 30.595 | KV452698.1 | 868607 | 1-scf00002 | 1 |
| AX-157743672 | 1 | 30.595 | KV452698.1 | 869609 | 1-scf00002 | 1 |
| AX-157714513 | 1 | 30.595 | KV452698.1 | 871375 | 1-scf00002 | 1 |
| AX-157772055 | 1 | 30.839 | KV452698.1 | 879294 | 1-scf00002 | 1 |
| AX-157726133 | 1 | 30.839 | KV452698.1 | 880093 | 1-scf00002 | 1 |
| AX-157874265 | 1 | 30.968 | KV452698.1 | 883112 | 1-scf00002 | 1 |
| AX-157724742 | 1 | 31.333 | KV452698.1 | 885383 | 1-scf00002 | 1 |
| AX-157715993 | 1 | 31.334 | KV452698.1 | 892234 | 1-scf00002 | 1 |
| AX-157741156 | 1 | 31.334 | KV452698.1 | 892711 | 1-scf00002 | 1 |
| AX-157810426 | 1 | 31.334 | KV452698.1 | 893388 | 1-scf00002 | 1 |
| AX-157892520 | 1 | 31.399 | KV452698.1 | 898583 | 1-scf00002 | 1 |
| AX-157892519 | 1 | 31.443 | KV452698.1 | 895322 | 1-scf00002 | 1 |
| AX-157892521 | 1 | 31.443 | KV452698.1 | 898953 | 1-scf00002 | 1 |
| AX-157892523 | 1 | 31.443 | KV452698.1 | 901083 | 1-scf00002 | 1 |
| AX-157892524 | 1 | 31.443 | KV452698.1 | 901701 | 1-scf00002 | 1 |
| AX-157892525 | 1 | 31.443 | KV452698.1 | 902667 | 1-scf00002 | 1 |
| AX-157892526 | 1 | 31.443 | KV452698.1 | 903676 | 1-scf00002 | 1 |
| AX-157892527 | 1 | 31.443 | KV452698.1 | 904847 | 1-scf00002 | 1 |
| AX-157892529 | 1 | 31.443 | KV452698.1 | 907479 | 1-scf00002 | 1 |
| AX-157751990 | 1 | 31.443 | KV452698.1 | 907529 | 1-scf00002 | 1 |
| AX-157892532 | 1 | 31.443 | KV452698.1 | 914021 | 1-scf00002 | 1 |
| AX-157892540 | 1 | 31.443 | KV452698.1 | 927638 | 1-scf00002 | 1 |
| AX-157892534 | 1 | 32.006 | KV452698.1 | 919440 | 1-scf00002 | 1 |
| AX-157745583 | 1 | 32.006 | KV452698.1 | 921688 | 1-scf00002 | 1 |
| AX-157892536 | 1 | 32.006 | KV452698.1 | 922506 | 1-scf00002 | 1 |
| AX-157892537 | 1 | 32.006 | KV452698.1 | 923478 | 1-scf00002 | 1 |
| AX-157750444 | 1 | 32.006 | KV452698.1 | 925332 | 1-scf00002 | 1 |
| AX-157892539 | 1 | 32.092 | KV452698.1 | 926580 | 1-scf00002 | 1 |
| AX-157892541 | 1 | 32.218 | KV452698.1 | 929062 | 1-scf00002 | 1 |
| AX-157771538 | 1 | 32.422 | KV452698.1 | 930110 | 1-scf00002 | 1 |
| AX-157892544 | 1 | 32.427 | KV452698.1 | 931636 | 1-scf00002 | 1 |
| AX-157892547 | 1 | 32.427 | KV452698.1 | 934972 | 1-scf00002 | 1 |

|              |   |        |            |         |            |   |
|--------------|---|--------|------------|---------|------------|---|
| AX-157892549 | 1 | 32.427 | KV452698.1 | 938525  | 1-scf00002 | 1 |
| AX-157892552 | 1 | 32.427 | KV452698.1 | 941752  | 1-scf00002 | 1 |
| AX-157892553 | 1 | 32.427 | KV452698.1 | 942982  | 1-scf00002 | 1 |
| AX-157892554 | 1 | 32.427 | KV452698.1 | 944326  | 1-scf00002 | 1 |
| AX-157723048 | 1 | 32.427 | KV452698.1 | 947402  | 1-scf00002 | 1 |
| AX-157755696 | 1 | 32.863 | KV452698.1 | 946419  | 1-scf00002 | 1 |
| AX-157892559 | 1 | 32.863 | KV452698.1 | 956205  | 1-scf00002 | 1 |
| AX-157892562 | 1 | 32.863 | KV452698.1 | 958003  | 1-scf00002 | 1 |
| AX-157892563 | 1 | 32.863 | KV452698.1 | 958803  | 1-scf00002 | 1 |
| AX-157892564 | 1 | 32.863 | KV452698.1 | 959447  | 1-scf00002 | 1 |
| AX-157892565 | 1 | 32.863 | KV452698.1 | 960067  | 1-scf00002 | 1 |
| AX-157892566 | 1 | 32.863 | KV452698.1 | 960983  | 1-scf00002 | 1 |
| AX-157892568 | 1 | 32.863 | KV452698.1 | 964482  | 1-scf00002 | 1 |
| AX-157892569 | 1 | 32.863 | KV452698.1 | 966056  | 1-scf00002 | 1 |
| AX-157892588 | 1 | 32.863 | KV452698.1 | 1012159 | 1-scf00002 | 1 |
| AX-157892610 | 1 | 32.863 | KV452698.1 | 1050878 | 1-scf00002 | 1 |
| AX-157892571 | 1 | 32.947 | KV452698.1 | 967856  | 1-scf00002 | 1 |
| AX-157740432 | 1 | 33.028 | KV452698.1 | 981299  | 1-scf00002 | 1 |
| AX-157892580 | 1 | 33.028 | KV452698.1 | 982249  | 1-scf00002 | 1 |
| AX-157810430 | 1 | 33.111 | KV452698.1 | 995070  | 1-scf00002 | 1 |
| AX-157892584 | 1 | 33.191 | KV452698.1 | 997934  | 1-scf00002 | 1 |
| AX-157744604 | 1 | 33.191 | KV452698.1 | 1005201 | 1-scf00002 | 1 |
| AX-157810433 | 1 | 33.191 | KV452698.1 | 1005282 | 1-scf00002 | 1 |
| AX-157892587 | 1 | 33.191 | KV452698.1 | 1007790 | 1-scf00002 | 1 |
| AX-157892589 | 1 | 33.191 | KV452698.1 | 1012571 | 1-scf00002 | 1 |
| AX-157810434 | 1 | 33.191 | KV452698.1 | 1014128 | 1-scf00002 | 1 |
| AX-157892591 | 1 | 33.191 | KV452698.1 | 1016034 | 1-scf00002 | 1 |
| AX-157892593 | 1 | 33.191 | KV452698.1 | 1017497 | 1-scf00002 | 1 |
| AX-157745771 | 1 | 33.191 | KV452698.1 | 1017584 | 1-scf00002 | 1 |
| AX-157892594 | 1 | 33.191 | KV452698.1 | 1020366 | 1-scf00002 | 1 |
| AX-157892596 | 1 | 33.191 | KV452698.1 | 1022813 | 1-scf00002 | 1 |
| AX-157892597 | 1 | 33.191 | KV452698.1 | 1028653 | 1-scf00002 | 1 |
| AX-157892598 | 1 | 33.191 | KV452698.1 | 1030641 | 1-scf00002 | 1 |
| AX-157892599 | 1 | 33.191 | KV452698.1 | 1031541 | 1-scf00002 | 1 |
| AX-157749280 | 1 | 33.191 | KV452698.1 | 1032824 | 1-scf00002 | 1 |
| AX-157892600 | 1 | 33.191 | KV452698.1 | 1033345 | 1-scf00002 | 1 |
| AX-157868475 | 1 | 33.191 | KV452698.1 | 1038015 | 1-scf00002 | 1 |
| AX-157745132 | 1 | 33.191 | KV452698.1 | 1039146 | 1-scf00002 | 1 |
| AX-157892633 | 1 | 33.191 | KV452698.1 | 1085318 | 1-scf00002 | 1 |
| AX-157892644 | 1 | 33.191 | KV452698.1 | 1105786 | 1-scf00002 | 1 |
| AX-157892690 | 1 | 33.191 | KV452698.1 | 1164255 | 1-scf00002 | 1 |
| AX-157893635 | 1 | 33.191 | KV452698.1 | 1975338 | 1-scf00002 | 1 |
| AX-157893652 | 1 | 33.191 | KV452698.1 | 2021321 | 1-scf00002 | 1 |
| AX-157723914 | 1 | 33.191 | KV452698.1 | 2050896 | 1-scf00002 | 1 |
| AX-157893040 | 1 | 33.191 | KV452700.1 | 45231   | 1-scf00005 | 1 |
| AX-157893046 | 1 | 33.191 | KV452700.1 | 54590   | 1-scf00005 | 1 |
| AX-157893059 | 1 | 33.191 | KV452700.1 | 71830   | 1-scf00005 | 1 |
| AX-157893066 | 1 | 33.191 | KV452700.1 | 76867   | 1-scf00005 | 1 |
| AX-157893070 | 1 | 33.191 | KV452700.1 | 83425   | 1-scf00005 | 1 |
| AX-157893071 | 1 | 33.191 | KV452700.1 | 83935   | 1-scf00005 | 1 |
| AX-157893073 | 1 | 33.191 | KV452700.1 | 95641   | 1-scf00005 | 1 |

|              |   |        |            |         |            |   |
|--------------|---|--------|------------|---------|------------|---|
| AX-157893074 | 1 | 33.191 | KV452700.1 | 97287   | 1-scf00005 | 1 |
| AX-157893083 | 1 | 33.191 | KV452700.1 | 108788  | 1-scf00005 | 1 |
| AX-157753148 | 1 | 33.191 | KV452700.1 | 109960  | 1-scf00005 | 1 |
| AX-157893088 | 1 | 33.191 | KV452700.1 | 113814  | 1-scf00005 | 1 |
| AX-157893090 | 1 | 33.191 | KV452700.1 | 119099  | 1-scf00005 | 1 |
| AX-157810493 | 1 | 33.191 | KV452700.1 | 120723  | 1-scf00005 | 1 |
| AX-157893091 | 1 | 33.191 | KV452700.1 | 121976  | 1-scf00005 | 1 |
| AX-157893155 | 1 | 33.191 | KV452700.1 | 197949  | 1-scf00005 | 1 |
| AX-157893177 | 1 | 33.191 | KV452700.1 | 222938  | 1-scf00005 | 1 |
| AX-157893495 | 1 | 33.191 | KV452700.1 | 711249  | 1-scf00005 | 1 |
| AX-157892603 | 1 | 33.194 | KV452698.1 | 1042167 | 1-scf00002 | 1 |
| AX-157810437 | 1 | 33.553 | KV452698.1 | 1043227 | 1-scf00002 | 1 |
| AX-157700592 | 1 | 33.555 | KV452698.1 | 1044906 | 1-scf00002 | 1 |
| AX-157892613 | 1 | 33.555 | KV452698.1 | 1056984 | 1-scf00002 | 1 |
| AX-157892625 | 1 | 33.555 | KV452698.1 | 1078937 | 1-scf00002 | 1 |
| AX-157810429 | 1 | 33.737 | KV452698.1 | 979561  | 1-scf00002 | 1 |
| AX-157892592 | 1 | 33.737 | KV452698.1 | 1016869 | 1-scf00002 | 1 |
| AX-157892626 | 1 | 33.737 | KV452698.1 | 1079461 | 1-scf00002 | 1 |
| AX-157740949 | 1 | 33.737 | KV452698.1 | 1096637 | 1-scf00002 | 1 |
| AX-157810440 | 1 | 33.737 | KV452698.1 | 1098048 | 1-scf00002 | 1 |
| AX-157892641 | 1 | 33.737 | KV452698.1 | 1098902 | 1-scf00002 | 1 |
| AX-157892642 | 1 | 33.737 | KV452698.1 | 1099487 | 1-scf00002 | 1 |
| AX-157892643 | 1 | 33.737 | KV452698.1 | 1103524 | 1-scf00002 | 1 |
| AX-157892649 | 1 | 33.737 | KV452698.1 | 1111558 | 1-scf00002 | 1 |
| AX-157892650 | 1 | 33.752 | KV452698.1 | 1112069 | 1-scf00002 | 1 |
| AX-157892655 | 1 | 33.781 | KV452698.1 | 1117260 | 1-scf00002 | 1 |
| AX-157892659 | 1 | 33.847 | KV452698.1 | 1124232 | 1-scf00002 | 1 |
| AX-157892660 | 1 | 33.847 | KV452698.1 | 1125545 | 1-scf00002 | 1 |
| AX-157892662 | 1 | 33.847 | KV452698.1 | 1128216 | 1-scf00002 | 1 |
| AX-157892663 | 1 | 33.847 | KV452698.1 | 1131056 | 1-scf00002 | 1 |
| AX-157892665 | 1 | 33.847 | KV452698.1 | 1137140 | 1-scf00002 | 1 |
| AX-157892666 | 1 | 33.847 | KV452698.1 | 1137847 | 1-scf00002 | 1 |
| AX-157892667 | 1 | 33.847 | KV452698.1 | 1138955 | 1-scf00002 | 1 |
| AX-157892670 | 1 | 33.847 | KV452698.1 | 1141893 | 1-scf00002 | 1 |
| AX-157892671 | 1 | 33.847 | KV452698.1 | 1144114 | 1-scf00002 | 1 |
| AX-157743212 | 1 | 33.847 | KV452698.1 | 1145828 | 1-scf00002 | 1 |
| AX-157892674 | 1 | 33.847 | KV452698.1 | 1147579 | 1-scf00002 | 1 |
| AX-157892678 | 1 | 33.847 | KV452698.1 | 1153920 | 1-scf00002 | 1 |
| AX-157892573 | 1 | 33.956 | KV452698.1 | 969687  | 1-scf00002 | 1 |
| AX-157892615 | 1 | 33.956 | KV452698.1 | 1059437 | 1-scf00002 | 1 |
| AX-157874268 | 1 | 33.956 | KV452698.1 | 1064356 | 1-scf00002 | 1 |
| AX-157810438 | 1 | 33.956 | KV452698.1 | 1080703 | 1-scf00002 | 1 |
| AX-157892630 | 1 | 33.956 | KV452698.1 | 1082034 | 1-scf00002 | 1 |
| AX-157892635 | 1 | 33.956 | KV452698.1 | 1088330 | 1-scf00002 | 1 |
| AX-157892638 | 1 | 33.956 | KV452698.1 | 1090945 | 1-scf00002 | 1 |
| AX-157892639 | 1 | 33.956 | KV452698.1 | 1091717 | 1-scf00002 | 1 |
| AX-157892657 | 1 | 33.956 | KV452698.1 | 1122507 | 1-scf00002 | 1 |
| AX-157892664 | 1 | 33.956 | KV452698.1 | 1131415 | 1-scf00002 | 1 |
| AX-157892668 | 1 | 33.956 | KV452698.1 | 1140113 | 1-scf00002 | 1 |
| AX-157892682 | 1 | 33.956 | KV452698.1 | 1157282 | 1-scf00002 | 1 |
| AX-157892688 | 1 | 33.956 | KV452698.1 | 1161351 | 1-scf00002 | 1 |

|              |   |        |            |         |            |   |
|--------------|---|--------|------------|---------|------------|---|
| AX-157892691 | 1 | 33.956 | KV452698.1 | 1169044 | 1-scf00002 | 1 |
| AX-157892692 | 1 | 33.956 | KV452698.1 | 1169759 | 1-scf00002 | 1 |
| AX-157892693 | 1 | 33.956 | KV452698.1 | 1170285 | 1-scf00002 | 1 |
| AX-157892695 | 1 | 33.956 | KV452698.1 | 1172141 | 1-scf00002 | 1 |
| AX-157810442 | 1 | 33.956 | KV452698.1 | 1175864 | 1-scf00002 | 1 |
| AX-157716536 | 1 | 33.956 | KV452698.1 | 1186025 | 1-scf00002 | 1 |
| AX-157892697 | 1 | 33.956 | KV452698.1 | 1189183 | 1-scf00002 | 1 |
| AX-157892698 | 1 | 33.956 | KV452698.1 | 1189528 | 1-scf00002 | 1 |
| AX-157892699 | 1 | 33.956 | KV452698.1 | 1192038 | 1-scf00002 | 1 |
| AX-157892700 | 1 | 33.956 | KV452698.1 | 1193839 | 1-scf00002 | 1 |
| AX-157892701 | 1 | 33.956 | KV452698.1 | 1198110 | 1-scf00002 | 1 |
| AX-157892702 | 1 | 33.956 | KV452698.1 | 1201697 | 1-scf00002 | 1 |
| AX-157892703 | 1 | 33.956 | KV452698.1 | 1203777 | 1-scf00002 | 1 |
| AX-157892705 | 1 | 33.956 | KV452698.1 | 1208382 | 1-scf00002 | 1 |
| AX-157892706 | 1 | 33.956 | KV452698.1 | 1211226 | 1-scf00002 | 1 |
| AX-157892710 | 1 | 33.956 | KV452698.1 | 1219890 | 1-scf00002 | 1 |
| AX-157892711 | 1 | 33.956 | KV452698.1 | 1220566 | 1-scf00002 | 1 |
| AX-157892716 | 1 | 33.956 | KV452698.1 | 1229530 | 1-scf00002 | 1 |
| AX-157892717 | 1 | 33.956 | KV452698.1 | 1230965 | 1-scf00002 | 1 |
| AX-157892718 | 1 | 33.956 | KV452698.1 | 1233967 | 1-scf00002 | 1 |
| AX-157892719 | 1 | 33.956 | KV452698.1 | 1234467 | 1-scf00002 | 1 |
| AX-157892720 | 1 | 33.956 | KV452698.1 | 1235109 | 1-scf00002 | 1 |
| AX-157892721 | 1 | 33.956 | KV452698.1 | 1236314 | 1-scf00002 | 1 |
| AX-157892722 | 1 | 33.956 | KV452698.1 | 1237148 | 1-scf00002 | 1 |
| AX-157853544 | 1 | 33.956 | KV452698.1 | 1246167 | 1-scf00002 | 1 |
| AX-157892727 | 1 | 33.956 | KV452698.1 | 1249673 | 1-scf00002 | 1 |
| AX-157810444 | 1 | 33.956 | KV452698.1 | 1279497 | 1-scf00002 | 1 |
| AX-157892739 | 1 | 33.956 | KV452698.1 | 1289240 | 1-scf00002 | 1 |
| AX-157892741 | 1 | 33.956 | KV452698.1 | 1291663 | 1-scf00002 | 1 |
| AX-157892742 | 1 | 33.956 | KV452698.1 | 1293792 | 1-scf00002 | 1 |
| AX-157892743 | 1 | 33.956 | KV452698.1 | 1295257 | 1-scf00002 | 1 |
| AX-157892744 | 1 | 33.956 | KV452698.1 | 1295723 | 1-scf00002 | 1 |
| AX-157892745 | 1 | 33.956 | KV452698.1 | 1305404 | 1-scf00002 | 1 |
| AX-157892746 | 1 | 33.956 | KV452698.1 | 1310912 | 1-scf00002 | 1 |
| AX-157892747 | 1 | 33.956 | KV452698.1 | 1311139 | 1-scf00002 | 1 |
| AX-157892748 | 1 | 33.956 | KV452698.1 | 1311961 | 1-scf00002 | 1 |
| AX-157892749 | 1 | 33.956 | KV452698.1 | 1314112 | 1-scf00002 | 1 |
| AX-157892751 | 1 | 33.956 | KV452698.1 | 1316127 | 1-scf00002 | 1 |
| AX-157892752 | 1 | 33.956 | KV452698.1 | 1316903 | 1-scf00002 | 1 |
| AX-157892757 | 1 | 33.956 | KV452698.1 | 1328536 | 1-scf00002 | 1 |
| AX-157892762 | 1 | 33.956 | KV452698.1 | 1338899 | 1-scf00002 | 1 |
| AX-158404244 | 1 | 33.956 | KV452698.1 | 1366824 | 1-scf00002 | 1 |
| AX-157892774 | 1 | 33.956 | KV452698.1 | 1378578 | 1-scf00002 | 1 |
| AX-157892775 | 1 | 33.956 | KV452698.1 | 1380191 | 1-scf00002 | 1 |
| AX-158379106 | 1 | 33.956 | KV452698.1 | 1381415 | 1-scf00002 | 1 |
| AX-157892776 | 1 | 33.956 | KV452698.1 | 1385290 | 1-scf00002 | 1 |
| AX-157892777 | 1 | 33.956 | KV452698.1 | 1386187 | 1-scf00002 | 1 |
| AX-157892778 | 1 | 33.956 | KV452698.1 | 1390435 | 1-scf00002 | 1 |
| AX-157892779 | 1 | 33.956 | KV452698.1 | 1392412 | 1-scf00002 | 1 |
| AX-157892780 | 1 | 33.956 | KV452698.1 | 1392482 | 1-scf00002 | 1 |
| AX-157892781 | 1 | 33.956 | KV452698.1 | 1392722 | 1-scf00002 | 1 |

|              |   |        |            |         |            |   |
|--------------|---|--------|------------|---------|------------|---|
| AX-157892782 | 1 | 33.956 | KV452698.1 | 1398419 | 1-scf00002 | 1 |
| AX-157892783 | 1 | 33.956 | KV452698.1 | 1400385 | 1-scf00002 | 1 |
| AX-157892784 | 1 | 33.956 | KV452698.1 | 1404949 | 1-scf00002 | 1 |
| AX-157892786 | 1 | 33.956 | KV452698.1 | 1409194 | 1-scf00002 | 1 |
| AX-157892789 | 1 | 33.956 | KV452698.1 | 1411302 | 1-scf00002 | 1 |
| AX-157892790 | 1 | 33.956 | KV452698.1 | 1414008 | 1-scf00002 | 1 |
| AX-157892791 | 1 | 33.956 | KV452698.1 | 1415029 | 1-scf00002 | 1 |
| AX-157892792 | 1 | 33.956 | KV452698.1 | 1417913 | 1-scf00002 | 1 |
| AX-157892793 | 1 | 33.956 | KV452698.1 | 1422578 | 1-scf00002 | 1 |
| AX-157810448 | 1 | 33.956 | KV452698.1 | 1424729 | 1-scf00002 | 1 |
| AX-157810449 | 1 | 33.956 | KV452698.1 | 1426861 | 1-scf00002 | 1 |
| AX-157810452 | 1 | 33.956 | KV452698.1 | 1441872 | 1-scf00002 | 1 |
| AX-157892800 | 1 | 33.956 | KV452698.1 | 1448364 | 1-scf00002 | 1 |
| AX-157892801 | 1 | 33.956 | KV452698.1 | 1465971 | 1-scf00002 | 1 |
| AX-157892802 | 1 | 33.956 | KV452698.1 | 1466395 | 1-scf00002 | 1 |
| AX-157892803 | 1 | 33.956 | KV452698.1 | 1466893 | 1-scf00002 | 1 |
| AX-157810454 | 1 | 33.956 | KV452698.1 | 1468278 | 1-scf00002 | 1 |
| AX-157810455 | 1 | 33.956 | KV452698.1 | 1470995 | 1-scf00002 | 1 |
| AX-157810456 | 1 | 33.956 | KV452698.1 | 1471591 | 1-scf00002 | 1 |
| AX-157892805 | 1 | 33.956 | KV452698.1 | 1472049 | 1-scf00002 | 1 |
| AX-157892808 | 1 | 33.956 | KV452698.1 | 1478685 | 1-scf00002 | 1 |
| AX-157892809 | 1 | 33.956 | KV452698.1 | 1482762 | 1-scf00002 | 1 |
| AX-157892810 | 1 | 33.956 | KV452698.1 | 1483636 | 1-scf00002 | 1 |
| AX-157892811 | 1 | 33.956 | KV452698.1 | 1487423 | 1-scf00002 | 1 |
| AX-157892812 | 1 | 33.956 | KV452698.1 | 1489668 | 1-scf00002 | 1 |
| AX-157892813 | 1 | 33.956 | KV452698.1 | 1491063 | 1-scf00002 | 1 |
| AX-157892816 | 1 | 33.956 | KV452698.1 | 1495768 | 1-scf00002 | 1 |
| AX-157892819 | 1 | 33.956 | KV452698.1 | 1501736 | 1-scf00002 | 1 |
| AX-157892821 | 1 | 33.956 | KV452698.1 | 1507356 | 1-scf00002 | 1 |
| AX-157892824 | 1 | 33.956 | KV452698.1 | 1515244 | 1-scf00002 | 1 |
| AX-157892826 | 1 | 33.956 | KV452698.1 | 1516550 | 1-scf00002 | 1 |
| AX-157892831 | 1 | 33.956 | KV452698.1 | 1525076 | 1-scf00002 | 1 |
| AX-157892832 | 1 | 33.956 | KV452698.1 | 1525567 | 1-scf00002 | 1 |
| AX-157892835 | 1 | 33.956 | KV452698.1 | 1530277 | 1-scf00002 | 1 |
| AX-157892836 | 1 | 33.956 | KV452698.1 | 1532275 | 1-scf00002 | 1 |
| AX-157892839 | 1 | 33.956 | KV452698.1 | 1535547 | 1-scf00002 | 1 |
| AX-157892842 | 1 | 33.956 | KV452698.1 | 1539867 | 1-scf00002 | 1 |
| AX-157810459 | 1 | 33.956 | KV452698.1 | 1562508 | 1-scf00002 | 1 |
| AX-157810461 | 1 | 33.956 | KV452698.1 | 1597029 | 1-scf00002 | 1 |
| AX-157810462 | 1 | 33.956 | KV452698.1 | 1597139 | 1-scf00002 | 1 |
| AX-157892872 | 1 | 33.956 | KV452698.1 | 1604911 | 1-scf00002 | 1 |
| AX-157892873 | 1 | 33.956 | KV452698.1 | 1605638 | 1-scf00002 | 1 |
| AX-157892874 | 1 | 33.956 | KV452698.1 | 1607950 | 1-scf00002 | 1 |
| AX-157892877 | 1 | 33.956 | KV452698.1 | 1611944 | 1-scf00002 | 1 |
| AX-157892878 | 1 | 33.956 | KV452698.1 | 1612872 | 1-scf00002 | 1 |
| AX-157892881 | 1 | 33.956 | KV452698.1 | 1616486 | 1-scf00002 | 1 |
| AX-157892882 | 1 | 33.956 | KV452698.1 | 1619209 | 1-scf00002 | 1 |
| AX-157892886 | 1 | 33.956 | KV452698.1 | 1624674 | 1-scf00002 | 1 |
| AX-157702714 | 1 | 33.956 | KV452698.1 | 1626481 | 1-scf00002 | 1 |
| AX-157892887 | 1 | 33.956 | KV452698.1 | 1629365 | 1-scf00002 | 1 |
| AX-157892888 | 1 | 33.956 | KV452698.1 | 1629519 | 1-scf00002 | 1 |



|              |   |        |            |         |            |   |
|--------------|---|--------|------------|---------|------------|---|
| AX-157892889 | 1 | 33.956 | KV452698.1 | 1631037 | 1-scf00002 | 1 |
| AX-157892898 | 1 | 33.956 | KV452698.1 | 1645821 | 1-scf00002 | 1 |
| AX-157892900 | 1 | 33.956 | KV452698.1 | 1649045 | 1-scf00002 | 1 |
| AX-157892906 | 1 | 33.956 | KV452698.1 | 1667887 | 1-scf00002 | 1 |
| AX-157892909 | 1 | 33.956 | KV452698.1 | 1671139 | 1-scf00002 | 1 |
| AX-157892910 | 1 | 33.956 | KV452698.1 | 1671799 | 1-scf00002 | 1 |
| AX-157892911 | 1 | 33.956 | KV452698.1 | 1676254 | 1-scf00002 | 1 |
| AX-157892912 | 1 | 33.956 | KV452698.1 | 1678680 | 1-scf00002 | 1 |
| AX-157892913 | 1 | 33.956 | KV452698.1 | 1681187 | 1-scf00002 | 1 |
| AX-157892916 | 1 | 33.956 | KV452698.1 | 1685050 | 1-scf00002 | 1 |
| AX-157892917 | 1 | 33.956 | KV452698.1 | 1688243 | 1-scf00002 | 1 |
| AX-157892918 | 1 | 33.956 | KV452698.1 | 1689047 | 1-scf00002 | 1 |
| AX-157742265 | 1 | 33.956 | KV452698.1 | 1689110 | 1-scf00002 | 1 |
| AX-157892919 | 1 | 33.956 | KV452698.1 | 1689815 | 1-scf00002 | 1 |
| AX-157713839 | 1 | 33.956 | KV452698.1 | 1690085 | 1-scf00002 | 1 |
| AX-157862579 | 1 | 33.956 | KV452698.1 | 1692375 | 1-scf00002 | 1 |
| AX-157892920 | 1 | 33.956 | KV452698.1 | 1693110 | 1-scf00002 | 1 |
| AX-157892921 | 1 | 33.956 | KV452698.1 | 1693575 | 1-scf00002 | 1 |
| AX-157892922 | 1 | 33.956 | KV452698.1 | 1694052 | 1-scf00002 | 1 |
| AX-157892923 | 1 | 33.956 | KV452698.1 | 1694934 | 1-scf00002 | 1 |
| AX-157892924 | 1 | 33.956 | KV452698.1 | 1695136 | 1-scf00002 | 1 |
| AX-157892925 | 1 | 33.956 | KV452698.1 | 1696468 | 1-scf00002 | 1 |
| AX-157892926 | 1 | 33.956 | KV452698.1 | 1703190 | 1-scf00002 | 1 |
| AX-157892928 | 1 | 33.956 | KV452698.1 | 1706633 | 1-scf00002 | 1 |
| AX-157892929 | 1 | 33.956 | KV452698.1 | 1707840 | 1-scf00002 | 1 |
| AX-157810470 | 1 | 33.956 | KV452698.1 | 1723900 | 1-scf00002 | 1 |
| AX-157810471 | 1 | 33.956 | KV452698.1 | 1724104 | 1-scf00002 | 1 |
| AX-157892935 | 1 | 33.956 | KV452698.1 | 1724804 | 1-scf00002 | 1 |
| AX-157810473 | 1 | 33.956 | KV452698.1 | 1727555 | 1-scf00002 | 1 |
| AX-157892936 | 1 | 33.956 | KV452698.1 | 1729170 | 1-scf00002 | 1 |
| AX-157892937 | 1 | 33.956 | KV452698.1 | 1731634 | 1-scf00002 | 1 |
| AX-157892938 | 1 | 33.956 | KV452698.1 | 1733744 | 1-scf00002 | 1 |
| AX-157810474 | 1 | 33.956 | KV452698.1 | 1733976 | 1-scf00002 | 1 |
| AX-157892940 | 1 | 33.956 | KV452698.1 | 1740002 | 1-scf00002 | 1 |
| AX-157719349 | 1 | 33.956 | KV452698.1 | 1743937 | 1-scf00002 | 1 |
| AX-157892948 | 1 | 33.956 | KV452698.1 | 1758039 | 1-scf00002 | 1 |
| AX-157892950 | 1 | 33.956 | KV452698.1 | 1760046 | 1-scf00002 | 1 |
| AX-157892952 | 1 | 33.956 | KV452698.1 | 1761007 | 1-scf00002 | 1 |
| AX-157892953 | 1 | 33.956 | KV452698.1 | 1762211 | 1-scf00002 | 1 |
| AX-157892955 | 1 | 33.956 | KV452698.1 | 1763160 | 1-scf00002 | 1 |
| AX-157892956 | 1 | 33.956 | KV452698.1 | 1763807 | 1-scf00002 | 1 |
| AX-157892957 | 1 | 33.956 | KV452698.1 | 1765547 | 1-scf00002 | 1 |
| AX-157892958 | 1 | 33.956 | KV452698.1 | 1766679 | 1-scf00002 | 1 |
| AX-157892959 | 1 | 33.956 | KV452698.1 | 1767313 | 1-scf00002 | 1 |
| AX-157726267 | 1 | 33.956 | KV452698.1 | 1767916 | 1-scf00002 | 1 |
| AX-157892960 | 1 | 33.956 | KV452698.1 | 1769317 | 1-scf00002 | 1 |
| AX-157892971 | 1 | 33.956 | KV452698.1 | 1790431 | 1-scf00002 | 1 |
| AX-157892972 | 1 | 33.956 | KV452698.1 | 1791135 | 1-scf00002 | 1 |
| AX-157892974 | 1 | 33.956 | KV452698.1 | 1794068 | 1-scf00002 | 1 |
| AX-157892977 | 1 | 33.956 | KV452698.1 | 1796888 | 1-scf00002 | 1 |
| AX-157892978 | 1 | 33.956 | KV452698.1 | 1797518 | 1-scf00002 | 1 |

|              |   |        |            |         |            |   |
|--------------|---|--------|------------|---------|------------|---|
| AX-157892984 | 1 | 33.956 | KV452698.1 | 1805698 | 1-scf00002 | 1 |
| AX-157892986 | 1 | 33.956 | KV452698.1 | 1807712 | 1-scf00002 | 1 |
| AX-157892990 | 1 | 33.956 | KV452698.1 | 1810387 | 1-scf00002 | 1 |
| AX-158388975 | 1 | 33.956 | KV452698.1 | 1811869 | 1-scf00002 | 1 |
| AX-157709623 | 1 | 33.956 | KV452698.1 | 1817424 | 1-scf00002 | 1 |
| AX-157892993 | 1 | 33.956 | KV452698.1 | 1819971 | 1-scf00002 | 1 |
| AX-157892994 | 1 | 33.956 | KV452698.1 | 1820592 | 1-scf00002 | 1 |
| AX-157892996 | 1 | 33.956 | KV452698.1 | 1827083 | 1-scf00002 | 1 |
| AX-157893003 | 1 | 33.956 | KV452698.1 | 1835491 | 1-scf00002 | 1 |
| AX-157893005 | 1 | 33.956 | KV452698.1 | 1836625 | 1-scf00002 | 1 |
| AX-157893006 | 1 | 33.956 | KV452698.1 | 1838735 | 1-scf00002 | 1 |
| AX-157893008 | 1 | 33.956 | KV452698.1 | 1841779 | 1-scf00002 | 1 |
| AX-157893009 | 1 | 33.956 | KV452698.1 | 1842345 | 1-scf00002 | 1 |
| AX-157893010 | 1 | 33.956 | KV452698.1 | 1843438 | 1-scf00002 | 1 |
| AX-157893011 | 1 | 33.956 | KV452698.1 | 1844034 | 1-scf00002 | 1 |
| AX-157810483 | 1 | 33.956 | KV452698.1 | 1845578 | 1-scf00002 | 1 |
| AX-157893012 | 1 | 33.956 | KV452698.1 | 1845735 | 1-scf00002 | 1 |
| AX-157810538 | 1 | 33.956 | KV452698.1 | 1854328 | 1-scf00002 | 1 |
| AX-157893588 | 1 | 33.956 | KV452698.1 | 1855755 | 1-scf00002 | 1 |
| AX-157893594 | 1 | 33.956 | KV452698.1 | 1869680 | 1-scf00002 | 1 |
| AX-157893597 | 1 | 33.956 | KV452698.1 | 1876047 | 1-scf00002 | 1 |
| AX-157810541 | 1 | 33.956 | KV452698.1 | 1892515 | 1-scf00002 | 1 |
| AX-157893599 | 1 | 33.956 | KV452698.1 | 1893387 | 1-scf00002 | 1 |
| AX-157893602 | 1 | 33.956 | KV452698.1 | 1900664 | 1-scf00002 | 1 |
| AX-157893603 | 1 | 33.956 | KV452698.1 | 1904806 | 1-scf00002 | 1 |
| AX-157893606 | 1 | 33.956 | KV452698.1 | 1915419 | 1-scf00002 | 1 |
| AX-157893636 | 1 | 33.956 | KV452698.1 | 1977553 | 1-scf00002 | 1 |
| AX-157893665 | 1 | 33.956 | KV452698.1 | 2058701 | 1-scf00002 | 1 |
| AX-157893675 | 1 | 33.956 | KV452698.1 | 2072439 | 1-scf00002 | 1 |
| AX-157708352 | 1 | 33.956 | KV452698.1 | 2076825 | 1-scf00002 | 1 |
| AX-157893680 | 1 | 33.956 | KV452698.1 | 2078721 | 1-scf00002 | 1 |
| AX-157893685 | 1 | 33.956 | KV452698.1 | 2091273 | 1-scf00002 | 1 |
| AX-157810551 | 1 | 33.956 | KV452698.1 | 2091327 | 1-scf00002 | 1 |
| AX-157893686 | 1 | 33.956 | KV452698.1 | 2091760 | 1-scf00002 | 1 |
| AX-157810552 | 1 | 33.956 | KV452698.1 | 2093558 | 1-scf00002 | 1 |
| AX-157893687 | 1 | 33.956 | KV452698.1 | 2096316 | 1-scf00002 | 1 |
| AX-158404274 | 1 | 33.956 | KV452698.1 | 2097286 | 1-scf00002 | 1 |
| AX-157893689 | 1 | 33.956 | KV452698.1 | 2097517 | 1-scf00002 | 1 |
| AX-157893690 | 1 | 33.956 | KV452698.1 | 2100126 | 1-scf00002 | 1 |
| AX-157893691 | 1 | 33.956 | KV452698.1 | 2103858 | 1-scf00002 | 1 |
| AX-157893692 | 1 | 33.956 | KV452698.1 | 2104084 | 1-scf00002 | 1 |
| AX-157893694 | 1 | 33.956 | KV452698.1 | 2106277 | 1-scf00002 | 1 |
| AX-157893695 | 1 | 33.956 | KV452698.1 | 2107033 | 1-scf00002 | 1 |
| AX-157893696 | 1 | 33.956 | KV452698.1 | 2109126 | 1-scf00002 | 1 |
| AX-157893698 | 1 | 33.956 | KV452698.1 | 2110738 | 1-scf00002 | 1 |
| AX-157893699 | 1 | 33.956 | KV452698.1 | 2111421 | 1-scf00002 | 1 |
| AX-157893702 | 1 | 33.956 | KV452698.1 | 2116883 | 1-scf00002 | 1 |
| AX-157893706 | 1 | 33.956 | KV452698.1 | 2120851 | 1-scf00002 | 1 |
| AX-158404275 | 1 | 33.956 | KV452698.1 | 2122494 | 1-scf00002 | 1 |
| AX-157893707 | 1 | 33.956 | KV452698.1 | 2126208 | 1-scf00002 | 1 |
| AX-157893708 | 1 | 33.956 | KV452698.1 | 2126570 | 1-scf00002 | 1 |

|              |   |        |             |         |            |    |
|--------------|---|--------|-------------|---------|------------|----|
| AX-157893709 | 1 | 33.956 | KV452698.1  | 2126977 | 1-scf00002 | 1  |
| AX-157893710 | 1 | 33.956 | KV452698.1  | 2127368 | 1-scf00002 | 1  |
| AX-157770893 | 1 | 33.956 | KV452698.1  | 2136533 | 1-scf00002 | 1  |
| AX-157893138 | 1 | 33.956 | KV452700.1  | 177449  | 1-scf00005 | 1  |
| AX-157717543 | 1 | 33.956 | KV452700.1  | 232235  | 1-scf00005 | 1  |
| AX-157893194 | 1 | 33.956 | KV452700.1  | 244115  | 1-scf00005 | 1  |
| AX-157893205 | 1 | 33.956 | KV452700.1  | 269980  | 1-scf00005 | 1  |
| AX-157893218 | 1 | 33.956 | KV452700.1  | 284764  | 1-scf00005 | 1  |
| AX-157893391 | 1 | 33.956 | KV452700.1  | 554830  | 1-scf00005 | 1  |
| AX-157893499 | 1 | 33.956 | KV452700.1  | 720592  | 1-scf00005 | 1  |
| AX-157893584 | 1 | 33.956 | KV452700.1  | 864277  | 1-scf00005 | 1  |
| AX-157893897 | 1 | 33.956 | KV452707.1  | 378107  | 1-scf00007 | 1  |
| AX-157685190 | 1 | 33.956 | KV452704.1  | 67401   | 1-scf00597 | 1  |
| AX-157753971 | 1 | 33.956 | KV452699.1  | 9483    | 1-scf00610 | 1  |
| AX-158377554 | 1 | 33.956 | KV452699.1  | 23691   | 1-scf00610 | 1  |
| AX-158377556 | 1 | 33.956 | KV452699.1  | 25796   | 1-scf00610 | 1  |
| AX-158377561 | 1 | 33.956 | KV452699.1  | 36074   | 1-scf00610 | 1  |
| AX-158377563 | 1 | 33.956 | KV452699.1  | 37343   | 1-scf00610 | 1  |
| AX-158377564 | 1 | 33.956 | KV452699.1  | 37956   | 1-scf00610 | 1  |
| AX-158377565 | 1 | 33.956 | KV452699.1  | 38499   | 1-scf00610 | 1  |
| AX-158377566 | 1 | 33.956 | KV452699.1  | 39149   | 1-scf00610 | 1  |
| AX-157755343 | 1 | 33.956 | KV452699.1  | 40367   | 1-scf00610 | 1  |
| AX-158377568 | 1 | 33.956 | KV452699.1  | 41424   | 1-scf00610 | 1  |
| AX-158377569 | 1 | 33.956 | KV452699.1  | 42044   | 1-scf00610 | 1  |
| AX-158377571 | 1 | 33.956 | KV452699.1  | 43636   | 1-scf00610 | 1  |
| AX-158377575 | 1 | 33.956 | KV452699.1  | 49094   | 1-scf00610 | 1  |
| AX-157750007 | 1 | 33.956 | KV452699.1  | 50450   | 1-scf00610 | 1  |
| AX-158377577 | 1 | 33.956 | KV452699.1  | 51161   | 1-scf00610 | 1  |
| AX-158377578 | 1 | 33.956 | KV452699.1  | 52133   | 1-scf00610 | 1  |
| AX-158377580 | 1 | 33.956 | KV452699.1  | 55029   | 1-scf00610 | 1  |
| AX-158377581 | 1 | 33.956 | KV452699.1  | 56219   | 1-scf00610 | 1  |
| AX-158377582 | 1 | 33.956 | KV452699.1  | 56522   | 1-scf00610 | 1  |
| AX-158377583 | 1 | 33.956 | KV452699.1  | 57216   | 1-scf00610 | 1  |
| AX-158377584 | 1 | 33.956 | KV452699.1  | 58169   | 1-scf00610 | 1  |
| AX-158377588 | 1 | 33.956 | KV452699.1  | 62106   | 1-scf00610 | 1  |
| AX-158377590 | 1 | 33.956 | KV452699.1  | 63571   | 1-scf00610 | 1  |
| AX-158377600 | 1 | 33.956 | KV452699.1  | 72453   | 1-scf00610 | 1  |
| AX-158377602 | 1 | 33.956 | KV452699.1  | 74723   | 1-scf00610 | 1  |
| AX-158377616 | 1 | 33.956 | KV452699.1  | 94147   | 1-scf00610 | 1  |
| AX-158377630 | 1 | 33.956 | KV452699.1  | 103629  | 1-scf00610 | 1  |
| AX-157681771 | 1 | 33.956 | KV453631.1  | 225     | scf01063   | UN |
| AX-157681802 | 1 | 33.956 | 3ML01026316 | 1245    | scf01911_1 | UN |
| AX-157705142 | 1 | 33.956 | 3ML01028779 | 201     | scf04391_1 | UN |
| AX-157689364 | 1 | 33.956 | 3ML01029325 | 574     | scf04946_1 | UN |
| AX-157707134 | 1 | 33.956 | 3ML01033571 | 494     | scf09227_1 | UN |
| AX-157893628 | 1 | 34.174 | KV452698.1  | 1959955 | 1-scf00002 | 1  |
| AX-157893629 | 1 | 34.174 | KV452698.1  | 1960688 | 1-scf00002 | 1  |
| AX-157810549 | 1 | 34.174 | KV452698.1  | 1961249 | 1-scf00002 | 1  |
| AX-157750825 | 1 | 34.174 | KV452698.1  | 1964285 | 1-scf00002 | 1  |
| AX-157893630 | 1 | 34.174 | KV452698.1  | 1967295 | 1-scf00002 | 1  |
| AX-157893632 | 1 | 34.174 | KV452698.1  | 1969706 | 1-scf00002 | 1  |

|              |   |        |            |         |            |    |
|--------------|---|--------|------------|---------|------------|----|
| AX-157893639 | 1 | 34.212 | KV452698.1 | 1982131 | 1-scf00002 | 1  |
| AX-158381932 | 1 | 34.212 | KV452698.1 | 1985839 | 1-scf00002 | 1  |
| AX-157893644 | 1 | 34.212 | KV452698.1 | 1991651 | 1-scf00002 | 1  |
| AX-157892806 | 1 | 34.239 | KV452698.1 | 1474543 | 1-scf00002 | 1  |
| AX-157893642 | 1 | 34.239 | KV452698.1 | 1986763 | 1-scf00002 | 1  |
| AX-157893677 | 1 | 34.239 | KV452698.1 | 2073787 | 1-scf00002 | 1  |
| AX-157893648 | 1 | 34.245 | KV452698.1 | 1999681 | 1-scf00002 | 1  |
| AX-157892982 | 1 | 34.284 | KV452698.1 | 1803792 | 1-scf00002 | 1  |
| AX-157892983 | 1 | 34.284 | KV452698.1 | 1804665 | 1-scf00002 | 1  |
| AX-157893000 | 1 | 34.284 | KV452698.1 | 1831914 | 1-scf00002 | 1  |
| AX-157893622 | 1 | 34.284 | KV452698.1 | 1950351 | 1-scf00002 | 1  |
| AX-157893634 | 1 | 34.284 | KV452698.1 | 1972751 | 1-scf00002 | 1  |
| AX-157893647 | 1 | 34.284 | KV452698.1 | 1997704 | 1-scf00002 | 1  |
| AX-157893657 | 1 | 34.284 | KV452698.1 | 2032610 | 1-scf00002 | 1  |
| AX-157893674 | 1 | 34.284 | KV452698.1 | 2071414 | 1-scf00002 | 1  |
| AX-157810553 | 1 | 34.284 | KV452698.1 | 2096898 | 1-scf00002 | 1  |
| AX-157893697 | 1 | 34.284 | KV452698.1 | 2110279 | 1-scf00002 | 1  |
| AX-157893704 | 1 | 34.284 | KV452698.1 | 2118794 | 1-scf00002 | 1  |
| AX-157893705 | 1 | 34.284 | KV452698.1 | 2119494 | 1-scf00002 | 1  |
| AX-157810554 | 1 | 34.284 | KV452698.1 | 2127656 | 1-scf00002 | 1  |
| AX-157740470 | 1 | 34.284 | KV452698.1 | 2129058 | 1-scf00002 | 1  |
| AX-157893711 | 1 | 34.284 | KV452698.1 | 2129198 | 1-scf00002 | 1  |
| AX-157893713 | 1 | 34.284 | KV452698.1 | 2130410 | 1-scf00002 | 1  |
| AX-157810555 | 1 | 34.284 | KV452698.1 | 2130859 | 1-scf00002 | 1  |
| AX-157893715 | 1 | 34.284 | KV452698.1 | 2131486 | 1-scf00002 | 1  |
| AX-157893716 | 1 | 34.284 | KV452698.1 | 2132441 | 1-scf00002 | 1  |
| AX-157746764 | 1 | 34.284 | KV452698.1 | 2133041 | 1-scf00002 | 1  |
| AX-157893717 | 1 | 34.284 | KV452698.1 | 2133923 | 1-scf00002 | 1  |
| AX-157893718 | 1 | 34.284 | KV452698.1 | 2134786 | 1-scf00002 | 1  |
| AX-157893720 | 1 | 34.284 | KV452698.1 | 2140577 | 1-scf00002 | 1  |
| AX-157893049 | 1 | 34.284 | KV452700.1 | 58627   | 1-scf00005 | 1  |
| AX-157893050 | 1 | 34.284 | KV452700.1 | 59462   | 1-scf00005 | 1  |
| AX-157893052 | 1 | 34.284 | KV452700.1 | 60633   | 1-scf00005 | 1  |
| AX-157893053 | 1 | 34.284 | KV452700.1 | 61495   | 1-scf00005 | 1  |
| AX-157893555 | 1 | 34.284 | KV452700.1 | 825579  | 1-scf00005 | 1  |
| AX-157893579 | 1 | 34.284 | KV452700.1 | 857604  | 1-scf00005 | 1  |
| AX-158420709 | 1 | 34.284 | KV452699.1 | 317     | 1-scf00610 | 1  |
| AX-158377555 | 1 | 34.284 | KV452699.1 | 23944   | 1-scf00610 | 1  |
| AX-158377678 | 1 | 34.284 | KV452699.1 | 159222  | 1-scf00610 | 1  |
| AX-157689621 | 1 | 34.284 | KV453829.1 | 837     | scf06466   | UN |
| AX-157689882 | 1 | 34.284 |            | 239     | scf10330   | UN |
| AX-157893661 | 1 | 34.46  | KV452698.1 | 2048303 | 1-scf00002 | 1  |
| AX-157893051 | 1 | 34.46  | KV452700.1 | 59843   | 1-scf00005 | 1  |
| AX-157893662 | 1 | 34.502 | KV452698.1 | 2050523 | 1-scf00002 | 1  |
| AX-157893055 | 1 | 34.502 | KV452700.1 | 63245   | 1-scf00005 | 1  |
| AX-157810490 | 1 | 34.502 | KV452700.1 | 65172   | 1-scf00005 | 1  |
| AX-157717740 | 1 | 34.502 | KV452700.1 | 65942   | 1-scf00005 | 1  |
| AX-157893057 | 1 | 34.502 | KV452700.1 | 68747   | 1-scf00005 | 1  |
| AX-157893065 | 1 | 34.502 | KV452700.1 | 76381   | 1-scf00005 | 1  |
| AX-157893069 | 1 | 34.502 | KV452700.1 | 82724   | 1-scf00005 | 1  |
| AX-158403760 | 1 | 34.502 | KV452700.1 | 84561   | 1-scf00005 | 1  |

|              |   |        |            |        |            |   |
|--------------|---|--------|------------|--------|------------|---|
| AX-157893078 | 1 | 34.502 | KV452700.1 | 105697 | 1-scf00005 | 1 |
| AX-157810495 | 1 | 34.502 | KV452700.1 | 121419 | 1-scf00005 | 1 |
| AX-157810497 | 1 | 34.502 | KV452700.1 | 122729 | 1-scf00005 | 1 |
| AX-157893092 | 1 | 34.502 | KV452700.1 | 123618 | 1-scf00005 | 1 |
| AX-157893093 | 1 | 34.502 | KV452700.1 | 126351 | 1-scf00005 | 1 |
| AX-157893094 | 1 | 34.502 | KV452700.1 | 126759 | 1-scf00005 | 1 |
| AX-157893095 | 1 | 34.502 | KV452700.1 | 127000 | 1-scf00005 | 1 |
| AX-157893096 | 1 | 34.502 | KV452700.1 | 127258 | 1-scf00005 | 1 |
| AX-158404259 | 1 | 34.502 | KV452700.1 | 127928 | 1-scf00005 | 1 |
| AX-157893097 | 1 | 34.502 | KV452700.1 | 128258 | 1-scf00005 | 1 |
| AX-157893098 | 1 | 34.502 | KV452700.1 | 128579 | 1-scf00005 | 1 |
| AX-157893099 | 1 | 34.502 | KV452700.1 | 129017 | 1-scf00005 | 1 |
| AX-157893100 | 1 | 34.502 | KV452700.1 | 129309 | 1-scf00005 | 1 |
| AX-157893102 | 1 | 34.502 | KV452700.1 | 131244 | 1-scf00005 | 1 |
| AX-157893103 | 1 | 34.502 | KV452700.1 | 132283 | 1-scf00005 | 1 |
| AX-157893104 | 1 | 34.502 | KV452700.1 | 132493 | 1-scf00005 | 1 |
| AX-157893105 | 1 | 34.502 | KV452700.1 | 133270 | 1-scf00005 | 1 |
| AX-157893106 | 1 | 34.502 | KV452700.1 | 133482 | 1-scf00005 | 1 |
| AX-157893107 | 1 | 34.502 | KV452700.1 | 135329 | 1-scf00005 | 1 |
| AX-157893122 | 1 | 34.502 | KV452700.1 | 151927 | 1-scf00005 | 1 |
| AX-157810500 | 1 | 34.502 | KV452700.1 | 174934 | 1-scf00005 | 1 |
| AX-157893134 | 1 | 34.611 | KV452700.1 | 172539 | 1-scf00005 | 1 |
| AX-157893137 | 1 | 34.611 | KV452700.1 | 176621 | 1-scf00005 | 1 |
| AX-157810502 | 1 | 34.611 | KV452700.1 | 176979 | 1-scf00005 | 1 |
| AX-157893150 | 1 | 34.611 | KV452700.1 | 188947 | 1-scf00005 | 1 |
| AX-157893164 | 1 | 34.611 | KV452700.1 | 209435 | 1-scf00005 | 1 |
| AX-157810505 | 1 | 34.611 | KV452700.1 | 212624 | 1-scf00005 | 1 |
| AX-157718119 | 1 | 34.611 | KV452700.1 | 215323 | 1-scf00005 | 1 |
| AX-157893171 | 1 | 34.611 | KV452700.1 | 218691 | 1-scf00005 | 1 |
| AX-157893174 | 1 | 34.611 | KV452700.1 | 221232 | 1-scf00005 | 1 |
| AX-157745264 | 1 | 34.611 | KV452700.1 | 221880 | 1-scf00005 | 1 |
| AX-157893175 | 1 | 34.611 | KV452700.1 | 222095 | 1-scf00005 | 1 |
| AX-157893176 | 1 | 34.611 | KV452700.1 | 222320 | 1-scf00005 | 1 |
| AX-157893180 | 1 | 34.611 | KV452700.1 | 227911 | 1-scf00005 | 1 |
| AX-157893181 | 1 | 34.611 | KV452700.1 | 228381 | 1-scf00005 | 1 |
| AX-157893182 | 1 | 34.611 | KV452700.1 | 228590 | 1-scf00005 | 1 |
| AX-157893184 | 1 | 34.611 | KV452700.1 | 230849 | 1-scf00005 | 1 |
| AX-157893189 | 1 | 34.611 | KV452700.1 | 238765 | 1-scf00005 | 1 |
| AX-157893190 | 1 | 34.611 | KV452700.1 | 239344 | 1-scf00005 | 1 |
| AX-158414534 | 1 | 34.611 | KV452700.1 | 240667 | 1-scf00005 | 1 |
| AX-157893199 | 1 | 34.611 | KV452700.1 | 253852 | 1-scf00005 | 1 |
| AX-157893200 | 1 | 34.611 | KV452700.1 | 254399 | 1-scf00005 | 1 |
| AX-157893201 | 1 | 34.611 | KV452700.1 | 256628 | 1-scf00005 | 1 |
| AX-157893202 | 1 | 34.611 | KV452700.1 | 257421 | 1-scf00005 | 1 |
| AX-157893216 | 1 | 34.611 | KV452700.1 | 281791 | 1-scf00005 | 1 |
| AX-157893217 | 1 | 34.611 | KV452700.1 | 283290 | 1-scf00005 | 1 |
| AX-157718475 | 1 | 34.611 | KV452700.1 | 300209 | 1-scf00005 | 1 |
| AX-158381919 | 1 | 34.611 | KV452700.1 | 300925 | 1-scf00005 | 1 |
| AX-157893229 | 1 | 34.611 | KV452700.1 | 310867 | 1-scf00005 | 1 |
| AX-157893232 | 1 | 34.611 | KV452700.1 | 315118 | 1-scf00005 | 1 |
| AX-157893237 | 1 | 34.611 | KV452700.1 | 321513 | 1-scf00005 | 1 |

|              |   |        |            |        |            |   |
|--------------|---|--------|------------|--------|------------|---|
| AX-157893238 | 1 | 34.611 | KV452700.1 | 325146 | 1-scf00005 | 1 |
| AX-157893239 | 1 | 34.611 | KV452700.1 | 325501 | 1-scf00005 | 1 |
| AX-158404263 | 1 | 34.611 | KV452700.1 | 327350 | 1-scf00005 | 1 |
| AX-157893241 | 1 | 34.611 | KV452700.1 | 327844 | 1-scf00005 | 1 |
| AX-157893243 | 1 | 34.611 | KV452700.1 | 329280 | 1-scf00005 | 1 |
| AX-157893244 | 1 | 34.611 | KV452700.1 | 329785 | 1-scf00005 | 1 |
| AX-157893245 | 1 | 34.611 | KV452700.1 | 329897 | 1-scf00005 | 1 |
| AX-157893246 | 1 | 34.611 | KV452700.1 | 330400 | 1-scf00005 | 1 |
| AX-157893248 | 1 | 34.611 | KV452700.1 | 332069 | 1-scf00005 | 1 |
| AX-157893249 | 1 | 34.611 | KV452700.1 | 332562 | 1-scf00005 | 1 |
| AX-157893250 | 1 | 34.611 | KV452700.1 | 332864 | 1-scf00005 | 1 |
| AX-157893251 | 1 | 34.611 | KV452700.1 | 333458 | 1-scf00005 | 1 |
| AX-157893252 | 1 | 34.611 | KV452700.1 | 334695 | 1-scf00005 | 1 |
| AX-158414537 | 1 | 34.611 | KV452700.1 | 348721 | 1-scf00005 | 1 |
| AX-157810511 | 1 | 34.611 | KV452700.1 | 387171 | 1-scf00005 | 1 |
| AX-157810523 | 1 | 34.611 | KV452700.1 | 546862 | 1-scf00005 | 1 |
| AX-157853547 | 1 | 34.611 | KV452700.1 | 568537 | 1-scf00005 | 1 |
| AX-157893402 | 1 | 34.611 | KV452700.1 | 571466 | 1-scf00005 | 1 |
| AX-157893444 | 1 | 34.611 | KV452700.1 | 628089 | 1-scf00005 | 1 |
| AX-157709310 | 1 | 34.611 | KV452700.1 | 652420 | 1-scf00005 | 1 |
| AX-158377608 | 1 | 34.611 | KV452699.1 | 80880  | 1-scf00610 | 1 |
| AX-157893259 | 1 | 34.638 | KV452700.1 | 341236 | 1-scf00005 | 1 |
| AX-157893192 | 1 | 34.72  | KV452700.1 | 241590 | 1-scf00005 | 1 |
| AX-157893262 | 1 | 34.72  | KV452700.1 | 345461 | 1-scf00005 | 1 |
| AX-158379109 | 1 | 34.72  | KV452700.1 | 361061 | 1-scf00005 | 1 |
| AX-157713712 | 1 | 34.72  | KV452700.1 | 363403 | 1-scf00005 | 1 |
| AX-157748364 | 1 | 34.72  | KV452700.1 | 366145 | 1-scf00005 | 1 |
| AX-157893290 | 1 | 34.72  | KV452700.1 | 404431 | 1-scf00005 | 1 |
| AX-157893311 | 1 | 34.72  | KV452700.1 | 440891 | 1-scf00005 | 1 |
| AX-157893316 | 1 | 34.72  | KV452700.1 | 452021 | 1-scf00005 | 1 |
| AX-157853545 | 1 | 34.72  | KV452700.1 | 452871 | 1-scf00005 | 1 |
| AX-157893329 | 1 | 34.72  | KV452700.1 | 470389 | 1-scf00005 | 1 |
| AX-157893342 | 1 | 34.72  | KV452700.1 | 484484 | 1-scf00005 | 1 |
| AX-157893343 | 1 | 34.72  | KV452700.1 | 485164 | 1-scf00005 | 1 |
| AX-157893344 | 1 | 34.72  | KV452700.1 | 485634 | 1-scf00005 | 1 |
| AX-157893345 | 1 | 34.72  | KV452700.1 | 487050 | 1-scf00005 | 1 |
| AX-157893265 | 1 | 34.83  | KV452700.1 | 354558 | 1-scf00005 | 1 |
| AX-157893275 | 1 | 34.83  | KV452700.1 | 384978 | 1-scf00005 | 1 |
| AX-157893330 | 1 | 34.83  | KV452700.1 | 471827 | 1-scf00005 | 1 |
| AX-157893333 | 1 | 34.83  | KV452700.1 | 474571 | 1-scf00005 | 1 |
| AX-157893335 | 1 | 34.83  | KV452700.1 | 475539 | 1-scf00005 | 1 |
| AX-157893338 | 1 | 34.83  | KV452700.1 | 478567 | 1-scf00005 | 1 |
| AX-157893346 | 1 | 34.83  | KV452700.1 | 487825 | 1-scf00005 | 1 |
| AX-157893348 | 1 | 34.83  | KV452700.1 | 490111 | 1-scf00005 | 1 |
| AX-157893349 | 1 | 34.83  | KV452700.1 | 490452 | 1-scf00005 | 1 |
| AX-157893350 | 1 | 34.83  | KV452700.1 | 490811 | 1-scf00005 | 1 |
| AX-157893351 | 1 | 34.83  | KV452700.1 | 491295 | 1-scf00005 | 1 |
| AX-157893352 | 1 | 34.83  | KV452700.1 | 491678 | 1-scf00005 | 1 |
| AX-157893353 | 1 | 34.83  | KV452700.1 | 492179 | 1-scf00005 | 1 |
| AX-157893356 | 1 | 34.83  | KV452700.1 | 495415 | 1-scf00005 | 1 |
| AX-157893363 | 1 | 34.83  | KV452700.1 | 510100 | 1-scf00005 | 1 |

|              |   |        |            |         |            |   |
|--------------|---|--------|------------|---------|------------|---|
| AX-157893367 | 1 | 34.83  | KV452700.1 | 512963  | 1-scf00005 | 1 |
| AX-157893374 | 1 | 34.83  | KV452700.1 | 523206  | 1-scf00005 | 1 |
| AX-157810518 | 1 | 34.83  | KV452700.1 | 530020  | 1-scf00005 | 1 |
| AX-157893377 | 1 | 34.83  | KV452700.1 | 530591  | 1-scf00005 | 1 |
| AX-157893384 | 1 | 34.83  | KV452700.1 | 542465  | 1-scf00005 | 1 |
| AX-157893395 | 1 | 34.83  | KV452700.1 | 560888  | 1-scf00005 | 1 |
| AX-157893400 | 1 | 34.83  | KV452700.1 | 568753  | 1-scf00005 | 1 |
| AX-157893401 | 1 | 34.83  | KV452700.1 | 570035  | 1-scf00005 | 1 |
| AX-157748785 | 1 | 34.83  | KV452700.1 | 573139  | 1-scf00005 | 1 |
| AX-157883056 | 1 | 34.83  | KV452700.1 | 574601  | 1-scf00005 | 1 |
| AX-157893427 | 1 | 34.83  | KV452700.1 | 600561  | 1-scf00005 | 1 |
| AX-157893446 | 1 | 34.83  | KV452700.1 | 630062  | 1-scf00005 | 1 |
| AX-157893491 | 1 | 34.83  | KV452700.1 | 707336  | 1-scf00005 | 1 |
| AX-157893517 | 1 | 34.83  | KV452700.1 | 743017  | 1-scf00005 | 1 |
| AX-157893419 | 1 | 34.887 | KV452700.1 | 594041  | 1-scf00005 | 1 |
| AX-157893649 | 1 | 34.939 | KV452698.1 | 2003225 | 1-scf00002 | 1 |
| AX-157893654 | 1 | 34.939 | KV452698.1 | 2027722 | 1-scf00002 | 1 |
| AX-157893054 | 1 | 34.939 | KV452700.1 | 62035   | 1-scf00005 | 1 |
| AX-157893056 | 1 | 34.939 | KV452700.1 | 65351   | 1-scf00005 | 1 |
| AX-157893085 | 1 | 34.939 | KV452700.1 | 111610  | 1-scf00005 | 1 |
| AX-157755463 | 1 | 34.939 | KV452700.1 | 152511  | 1-scf00005 | 1 |
| AX-157893151 | 1 | 34.939 | KV452700.1 | 189177  | 1-scf00005 | 1 |
| AX-157893225 | 1 | 34.939 | KV452700.1 | 293975  | 1-scf00005 | 1 |
| AX-157893236 | 1 | 34.939 | KV452700.1 | 320844  | 1-scf00005 | 1 |
| AX-157893253 | 1 | 34.939 | KV452700.1 | 335025  | 1-scf00005 | 1 |
| AX-157893261 | 1 | 34.939 | KV452700.1 | 344131  | 1-scf00005 | 1 |
| AX-157810507 | 1 | 34.939 | KV452700.1 | 355567  | 1-scf00005 | 1 |
| AX-157893268 | 1 | 34.939 | KV452700.1 | 368129  | 1-scf00005 | 1 |
| AX-157893289 | 1 | 34.939 | KV452700.1 | 402992  | 1-scf00005 | 1 |
| AX-157893295 | 1 | 34.939 | KV452700.1 | 417463  | 1-scf00005 | 1 |
| AX-157853546 | 1 | 34.939 | KV452700.1 | 453682  | 1-scf00005 | 1 |
| AX-157810515 | 1 | 34.939 | KV452700.1 | 486191  | 1-scf00005 | 1 |
| AX-157710727 | 1 | 34.939 | KV452700.1 | 524934  | 1-scf00005 | 1 |
| AX-157893392 | 1 | 34.939 | KV452700.1 | 555832  | 1-scf00005 | 1 |
| AX-157893407 | 1 | 34.939 | KV452700.1 | 579540  | 1-scf00005 | 1 |
| AX-157893410 | 1 | 34.939 | KV452700.1 | 582397  | 1-scf00005 | 1 |
| AX-157773107 | 1 | 34.939 | KV452700.1 | 587027  | 1-scf00005 | 1 |
| AX-157893421 | 1 | 34.939 | KV452700.1 | 595397  | 1-scf00005 | 1 |
| AX-157893423 | 1 | 34.939 | KV452700.1 | 596964  | 1-scf00005 | 1 |
| AX-157893425 | 1 | 34.939 | KV452700.1 | 599441  | 1-scf00005 | 1 |
| AX-157893426 | 1 | 34.939 | KV452700.1 | 599849  | 1-scf00005 | 1 |
| AX-157893430 | 1 | 34.939 | KV452700.1 | 602409  | 1-scf00005 | 1 |
| AX-157893436 | 1 | 34.939 | KV452700.1 | 609578  | 1-scf00005 | 1 |
| AX-157893440 | 1 | 34.939 | KV452700.1 | 618631  | 1-scf00005 | 1 |
| AX-157893443 | 1 | 34.939 | KV452700.1 | 625395  | 1-scf00005 | 1 |
| AX-157893445 | 1 | 34.939 | KV452700.1 | 629398  | 1-scf00005 | 1 |
| AX-157893448 | 1 | 34.939 | KV452700.1 | 631382  | 1-scf00005 | 1 |
| AX-157893449 | 1 | 34.939 | KV452700.1 | 631714  | 1-scf00005 | 1 |
| AX-157810530 | 1 | 34.939 | KV452700.1 | 631839  | 1-scf00005 | 1 |
| AX-157714942 | 1 | 34.939 | KV452700.1 | 635858  | 1-scf00005 | 1 |
| AX-157893457 | 1 | 34.939 | KV452700.1 | 644112  | 1-scf00005 | 1 |

|              |   |        |            |         |            |   |
|--------------|---|--------|------------|---------|------------|---|
| AX-157893458 | 1 | 34.939 | KV452700.1 | 645038  | 1-scf00005 | 1 |
| AX-157893459 | 1 | 34.939 | KV452700.1 | 645919  | 1-scf00005 | 1 |
| AX-157893461 | 1 | 34.939 | KV452700.1 | 649521  | 1-scf00005 | 1 |
| AX-157893464 | 1 | 34.939 | KV452700.1 | 653693  | 1-scf00005 | 1 |
| AX-157893466 | 1 | 34.939 | KV452700.1 | 662116  | 1-scf00005 | 1 |
| AX-157727571 | 1 | 34.939 | KV452700.1 | 663005  | 1-scf00005 | 1 |
| AX-157893469 | 1 | 34.939 | KV452700.1 | 664277  | 1-scf00005 | 1 |
| AX-157707844 | 1 | 34.939 | KV452700.1 | 667102  | 1-scf00005 | 1 |
| AX-157893471 | 1 | 34.939 | KV452700.1 | 668371  | 1-scf00005 | 1 |
| AX-157893472 | 1 | 34.939 | KV452700.1 | 668816  | 1-scf00005 | 1 |
| AX-157893531 | 1 | 34.939 | KV452700.1 | 772105  | 1-scf00005 | 1 |
| AX-157810532 | 1 | 34.939 | KV452700.1 | 799563  | 1-scf00005 | 1 |
| AX-157853435 | 1 | 34.939 | KV452699.1 | 25934   | 1-scf00610 | 1 |
| AX-157892949 | 1 | 35.048 | KV452698.1 | 1759812 | 1-scf00002 | 1 |
| AX-157893468 | 1 | 35.048 | KV452700.1 | 663874  | 1-scf00005 | 1 |
| AX-157893475 | 1 | 35.048 | KV452700.1 | 674954  | 1-scf00005 | 1 |
| AX-157893476 | 1 | 35.048 | KV452700.1 | 676524  | 1-scf00005 | 1 |
| AX-157745747 | 1 | 35.048 | KV452700.1 | 677296  | 1-scf00005 | 1 |
| AX-157893477 | 1 | 35.048 | KV452700.1 | 680613  | 1-scf00005 | 1 |
| AX-157893478 | 1 | 35.048 | KV452700.1 | 681645  | 1-scf00005 | 1 |
| AX-157893479 | 1 | 35.048 | KV452700.1 | 682687  | 1-scf00005 | 1 |
| AX-157893480 | 1 | 35.048 | KV452700.1 | 683442  | 1-scf00005 | 1 |
| AX-157893484 | 1 | 35.048 | KV452700.1 | 694214  | 1-scf00005 | 1 |
| AX-157810565 | 1 | 35.048 | KV452707.1 | 205291  | 1-scf00007 | 1 |
| AX-157893875 | 1 | 35.048 | KV452707.1 | 350674  | 1-scf00007 | 1 |
| AX-157893905 | 1 | 35.048 | KV452707.1 | 386504  | 1-scf00007 | 1 |
| AX-158404270 | 1 | 35.167 | KV452700.1 | 801263  | 1-scf00005 | 1 |
| AX-157874269 | 1 | 35.267 | KV452698.1 | 1067010 | 1-scf00002 | 1 |
| AX-157892696 | 1 | 35.267 | KV452698.1 | 1179214 | 1-scf00002 | 1 |
| AX-157810450 | 1 | 35.267 | KV452698.1 | 1432087 | 1-scf00002 | 1 |
| AX-157810451 | 1 | 35.267 | KV452698.1 | 1438585 | 1-scf00002 | 1 |
| AX-157892899 | 1 | 35.267 | KV452698.1 | 1648534 | 1-scf00002 | 1 |
| AX-157810481 | 1 | 35.267 | KV452698.1 | 1822403 | 1-scf00002 | 1 |
| AX-157893590 | 1 | 35.267 | KV452698.1 | 1857812 | 1-scf00002 | 1 |
| AX-157810506 | 1 | 35.267 | KV452700.1 | 213521  | 1-scf00005 | 1 |
| AX-157810525 | 1 | 35.267 | KV452700.1 | 553875  | 1-scf00005 | 1 |
| AX-157893506 | 1 | 35.267 | KV452700.1 | 730123  | 1-scf00005 | 1 |
| AX-158381926 | 1 | 35.267 | KV452700.1 | 737827  | 1-scf00005 | 1 |
| AX-157893513 | 1 | 35.267 | KV452700.1 | 740649  | 1-scf00005 | 1 |
| AX-157893558 | 1 | 35.267 | KV452700.1 | 828736  | 1-scf00005 | 1 |
| AX-157773076 | 1 | 35.267 | KV452707.1 | 227214  | 1-scf00007 | 1 |
| AX-157893910 | 1 | 35.267 | KV452707.1 | 392465  | 1-scf00007 | 1 |
| AX-157687600 | 1 | 35.267 | KV452705.1 | 2457    | 1-scf00946 | 1 |
| AX-158379111 | 1 | 35.272 | KV452700.1 | 742943  | 1-scf00005 | 1 |
| AX-157893521 | 1 | 35.277 | KV452700.1 | 754880  | 1-scf00005 | 1 |
| AX-157893523 | 1 | 35.282 | KV452700.1 | 756954  | 1-scf00005 | 1 |
| AX-157893530 | 1 | 35.289 | KV452700.1 | 770269  | 1-scf00005 | 1 |
| AX-157752919 | 1 | 35.294 | KV452700.1 | 783018  | 1-scf00005 | 1 |
| AX-158388978 | 1 | 35.303 | KV452700.1 | 363635  | 1-scf00005 | 1 |
| AX-157893284 | 1 | 35.303 | KV452700.1 | 399555  | 1-scf00005 | 1 |
| AX-158381928 | 1 | 35.303 | KV452700.1 | 788044  | 1-scf00005 | 1 |



|              |   |        |             |         |            |    |
|--------------|---|--------|-------------|---------|------------|----|
| AX-157810531 | 1 | 35.317 | KV452700.1  | 791587  | 1-scf00005 | 1  |
| AX-157893538 | 1 | 35.33  | KV452700.1  | 793643  | 1-scf00005 | 1  |
| AX-157758230 | 1 | 35.346 | KV452700.1  | 796851  | 1-scf00005 | 1  |
| AX-157893282 | 1 | 35.362 | KV452700.1  | 398337  | 1-scf00005 | 1  |
| AX-157893510 | 1 | 35.362 | KV452700.1  | 737566  | 1-scf00005 | 1  |
| AX-157893539 | 1 | 35.362 | KV452700.1  | 798199  | 1-scf00005 | 1  |
| AX-158404269 | 1 | 35.376 | KV452700.1  | 453398  | 1-scf00005 | 1  |
| AX-157893527 | 1 | 35.376 | KV452700.1  | 766889  | 1-scf00005 | 1  |
| AX-157810533 | 1 | 35.376 | KV452700.1  | 800392  | 1-scf00005 | 1  |
| AX-157893447 | 1 | 35.382 | KV452700.1  | 630713  | 1-scf00005 | 1  |
| AX-157893541 | 1 | 35.382 | KV452700.1  | 804674  | 1-scf00005 | 1  |
| AX-157893544 | 1 | 35.496 | KV452700.1  | 807917  | 1-scf00005 | 1  |
| AX-157744430 | 1 | 35.496 | KV452700.1  | 810117  | 1-scf00005 | 1  |
| AX-157893547 | 1 | 35.496 | KV452700.1  | 813073  | 1-scf00005 | 1  |
| AX-157893549 | 1 | 35.496 | KV452700.1  | 815769  | 1-scf00005 | 1  |
| AX-157893540 | 1 | 35.561 | KV452700.1  | 798751  | 1-scf00005 | 1  |
| AX-157893552 | 1 | 35.561 | KV452700.1  | 821277  | 1-scf00005 | 1  |
| AX-157810562 | 1 | 35.561 | KV452707.1  | 175848  | 1-scf00007 | 1  |
| AX-157893864 | 1 | 35.561 | KV452707.1  | 336076  | 1-scf00007 | 1  |
| AX-157893906 | 1 | 35.561 | KV452707.1  | 387159  | 1-scf00007 | 1  |
| AX-157681501 | 1 | 35.561 | 3ML01025279 | 2877    | scf01061_1 | UN |
| AX-157892798 | 1 | 35.616 | KV452698.1  | 1439991 | 1-scf00002 | 1  |
| AX-157893502 | 1 | 35.616 | KV452700.1  | 726869  | 1-scf00005 | 1  |
| AX-157893536 | 1 | 35.616 | KV452700.1  | 786598  | 1-scf00005 | 1  |
| AX-157893557 | 1 | 35.616 | KV452700.1  | 828527  | 1-scf00005 | 1  |
| AX-157893560 | 1 | 35.616 | KV452700.1  | 830099  | 1-scf00005 | 1  |
| AX-157893561 | 1 | 35.616 | KV452700.1  | 831752  | 1-scf00005 | 1  |
| AX-157893564 | 1 | 35.616 | KV452700.1  | 835236  | 1-scf00005 | 1  |
| AX-157893568 | 1 | 35.616 | KV452700.1  | 839500  | 1-scf00005 | 1  |
| AX-157893571 | 1 | 35.616 | KV452700.1  | 841815  | 1-scf00005 | 1  |
| AX-157893572 | 1 | 35.616 | KV452700.1  | 842211  | 1-scf00005 | 1  |
| AX-157810563 | 1 | 35.616 | KV452707.1  | 186656  | 1-scf00007 | 1  |
| AX-157810574 | 1 | 35.616 | KV452707.1  | 265168  | 1-scf00007 | 1  |
| AX-157893582 | 1 | 35.618 | KV452700.1  | 862679  | 1-scf00005 | 1  |
| AX-157687599 | 1 | 35.812 | KV452705.1  | 1627    | 1-scf00946 | 1  |
| AX-157893781 | 1 | 36.581 | KV452707.1  | 194745  | 1-scf00007 | 1  |
| AX-157893845 | 1 | 36.581 | KV452707.1  | 312231  | 1-scf00007 | 1  |
| AX-157893872 | 1 | 36.581 | KV452707.1  | 348216  | 1-scf00007 | 1  |
| AX-157893931 | 1 | 36.581 | KV452707.1  | 417758  | 1-scf00007 | 1  |
| AX-157893958 | 1 | 36.581 | KV452707.1  | 467051  | 1-scf00007 | 1  |
| AX-157893980 | 1 | 36.581 | KV452707.1  | 497268  | 1-scf00007 | 1  |
| AX-157893994 | 1 | 36.581 | KV452707.1  | 514233  | 1-scf00007 | 1  |
| AX-157893995 | 1 | 36.581 | KV452707.1  | 516494  | 1-scf00007 | 1  |
| AX-157893996 | 1 | 36.581 | KV452707.1  | 517113  | 1-scf00007 | 1  |
| AX-157893997 | 1 | 36.581 | KV452707.1  | 517511  | 1-scf00007 | 1  |
| AX-157893998 | 1 | 36.581 | KV452707.1  | 518710  | 1-scf00007 | 1  |
| AX-157893999 | 1 | 36.581 | KV452707.1  | 520183  | 1-scf00007 | 1  |
| AX-157810603 | 1 | 36.581 | KV452707.1  | 523970  | 1-scf00007 | 1  |
| AX-157894000 | 1 | 36.581 | KV452707.1  | 524508  | 1-scf00007 | 1  |
| AX-157883071 | 1 | 36.581 | KV452707.1  | 527964  | 1-scf00007 | 1  |
| AX-157894003 | 1 | 36.581 | KV452707.1  | 531117  | 1-scf00007 | 1  |

|              |   |        |            |        |            |   |
|--------------|---|--------|------------|--------|------------|---|
| AX-157894007 | 1 | 36.581 | KV452707.1 | 533915 | 1-scf00007 | 1 |
| AX-157719850 | 1 | 36.581 | KV452707.1 | 536015 | 1-scf00007 | 1 |
| AX-157894008 | 1 | 36.581 | KV452707.1 | 536213 | 1-scf00007 | 1 |
| AX-157810605 | 1 | 36.581 | KV452707.1 | 544330 | 1-scf00007 | 1 |
| AX-157713409 | 1 | 36.581 | KV452707.1 | 545147 | 1-scf00007 | 1 |
| AX-157894010 | 1 | 36.581 | KV452707.1 | 551097 | 1-scf00007 | 1 |
| AX-157894011 | 1 | 36.581 | KV452707.1 | 552267 | 1-scf00007 | 1 |
| AX-157810608 | 1 | 36.581 | KV452707.1 | 557922 | 1-scf00007 | 1 |
| AX-157894012 | 1 | 36.581 | KV452707.1 | 562466 | 1-scf00007 | 1 |
| AX-157810612 | 1 | 36.581 | KV452707.1 | 564465 | 1-scf00007 | 1 |
| AX-157894017 | 1 | 36.581 | KV452707.1 | 570620 | 1-scf00007 | 1 |
| AX-157810615 | 1 | 36.581 | KV452707.1 | 581317 | 1-scf00007 | 1 |
| AX-157894024 | 1 | 36.581 | KV452707.1 | 590390 | 1-scf00007 | 1 |
| AX-157894025 | 1 | 36.581 | KV452707.1 | 591562 | 1-scf00007 | 1 |
| AX-157894043 | 1 | 36.581 | KV452708.1 | 22237  | 1-scf00008 | 1 |
| AX-157893986 | 1 | 36.622 | KV452707.1 | 506759 | 1-scf00007 | 1 |
| AX-157771522 | 1 | 36.653 | KV452707.1 | 295790 | 1-scf00007 | 1 |
| AX-157893949 | 1 | 36.653 | KV452707.1 | 457587 | 1-scf00007 | 1 |
| AX-157741250 | 1 | 36.653 | KV452707.1 | 505350 | 1-scf00007 | 1 |
| AX-157893990 | 1 | 36.653 | KV452707.1 | 509209 | 1-scf00007 | 1 |
| AX-157893992 | 1 | 36.653 | KV452707.1 | 511282 | 1-scf00007 | 1 |
| AX-157893882 | 1 | 36.69  | KV452707.1 | 361279 | 1-scf00007 | 1 |
| AX-157893974 | 1 | 36.69  | KV452707.1 | 489769 | 1-scf00007 | 1 |
| AX-157893977 | 1 | 36.69  | KV452707.1 | 494350 | 1-scf00007 | 1 |
| AX-157893978 | 1 | 36.69  | KV452707.1 | 495313 | 1-scf00007 | 1 |
| AX-157893981 | 1 | 36.69  | KV452707.1 | 497985 | 1-scf00007 | 1 |
| AX-157755538 | 1 | 36.69  | KV452707.1 | 498238 | 1-scf00007 | 1 |
| AX-157893982 | 1 | 36.69  | KV452707.1 | 498694 | 1-scf00007 | 1 |
| AX-157893983 | 1 | 36.69  | KV452707.1 | 499388 | 1-scf00007 | 1 |
| AX-157893989 | 1 | 36.69  | KV452707.1 | 508200 | 1-scf00007 | 1 |
| AX-157893971 | 1 | 36.716 | KV452707.1 | 485936 | 1-scf00007 | 1 |
| AX-157893967 | 1 | 36.755 | KV452707.1 | 480672 | 1-scf00007 | 1 |
| AX-157893565 | 1 | 36.8   | KV452700.1 | 836156 | 1-scf00005 | 1 |
| AX-158403780 | 1 | 36.8   | KV452707.1 | 277782 | 1-scf00007 | 1 |
| AX-157715215 | 1 | 36.8   | KV452707.1 | 437662 | 1-scf00007 | 1 |
| AX-157893941 | 1 | 36.8   | KV452707.1 | 447300 | 1-scf00007 | 1 |
| AX-157893943 | 1 | 36.8   | KV452707.1 | 450469 | 1-scf00007 | 1 |
| AX-157893944 | 1 | 36.8   | KV452707.1 | 451219 | 1-scf00007 | 1 |
| AX-157810588 | 1 | 36.8   | KV452707.1 | 453896 | 1-scf00007 | 1 |
| AX-157810589 | 1 | 36.8   | KV452707.1 | 454891 | 1-scf00007 | 1 |
| AX-157893948 | 1 | 36.8   | KV452707.1 | 456253 | 1-scf00007 | 1 |
| AX-157893951 | 1 | 36.8   | KV452707.1 | 459295 | 1-scf00007 | 1 |
| AX-157893954 | 1 | 36.8   | KV452707.1 | 462162 | 1-scf00007 | 1 |
| AX-157810592 | 1 | 36.8   | KV452707.1 | 463340 | 1-scf00007 | 1 |
| AX-157810593 | 1 | 36.8   | KV452707.1 | 464601 | 1-scf00007 | 1 |
| AX-157810594 | 1 | 36.8   | KV452707.1 | 464826 | 1-scf00007 | 1 |
| AX-157893956 | 1 | 36.8   | KV452707.1 | 465269 | 1-scf00007 | 1 |
| AX-157893957 | 1 | 36.8   | KV452707.1 | 466039 | 1-scf00007 | 1 |
| AX-157810595 | 1 | 36.8   | KV452707.1 | 466176 | 1-scf00007 | 1 |
| AX-158388986 | 1 | 36.8   | KV452707.1 | 466736 | 1-scf00007 | 1 |
| AX-157893959 | 1 | 36.8   | KV452707.1 | 469832 | 1-scf00007 | 1 |

|              |   |        |            |         |            |   |
|--------------|---|--------|------------|---------|------------|---|
| AX-157893961 | 1 | 36.8   | KV452707.1 | 473021  | 1-scf00007 | 1 |
| AX-157810598 | 1 | 36.8   | KV452707.1 | 478804  | 1-scf00007 | 1 |
| AX-157893965 | 1 | 36.8   | KV452707.1 | 478844  | 1-scf00007 | 1 |
| AX-157893969 | 1 | 36.8   | KV452707.1 | 483242  | 1-scf00007 | 1 |
| AX-157893979 | 1 | 36.8   | KV452707.1 | 495935  | 1-scf00007 | 1 |
| AX-157893942 | 1 | 36.829 | KV452707.1 | 449913  | 1-scf00007 | 1 |
| AX-157810584 | 1 | 36.859 | KV452707.1 | 436669  | 1-scf00007 | 1 |
| AX-157893935 | 1 | 36.886 | KV452707.1 | 427375  | 1-scf00007 | 1 |
| AX-158404278 | 1 | 36.909 | KV452707.1 | 207844  | 1-scf00007 | 1 |
| AX-157893816 | 1 | 36.909 | KV452707.1 | 250354  | 1-scf00007 | 1 |
| AX-157893826 | 1 | 36.909 | KV452707.1 | 282372  | 1-scf00007 | 1 |
| AX-157893835 | 1 | 36.909 | KV452707.1 | 298092  | 1-scf00007 | 1 |
| AX-158379113 | 1 | 36.909 | KV452707.1 | 308804  | 1-scf00007 | 1 |
| AX-157893877 | 1 | 36.909 | KV452707.1 | 353364  | 1-scf00007 | 1 |
| AX-157893932 | 1 | 36.909 | KV452707.1 | 420413  | 1-scf00007 | 1 |
| AX-157893933 | 1 | 36.909 | KV452707.1 | 420810  | 1-scf00007 | 1 |
| AX-157893934 | 1 | 36.909 | KV452707.1 | 425552  | 1-scf00007 | 1 |
| AX-157774562 | 1 | 36.943 | KV452707.1 | 418625  | 1-scf00007 | 1 |
| AX-157718957 | 1 | 36.98  | KV452707.1 | 416063  | 1-scf00007 | 1 |
| AX-157810569 | 1 | 37.018 | KV452707.1 | 244995  | 1-scf00007 | 1 |
| AX-157893873 | 1 | 37.018 | KV452707.1 | 349792  | 1-scf00007 | 1 |
| AX-157893898 | 1 | 37.018 | KV452707.1 | 378606  | 1-scf00007 | 1 |
| AX-157727007 | 1 | 37.018 | KV452707.1 | 401589  | 1-scf00007 | 1 |
| AX-157893922 | 1 | 37.018 | KV452707.1 | 409405  | 1-scf00007 | 1 |
| AX-157893923 | 1 | 37.018 | KV452707.1 | 410164  | 1-scf00007 | 1 |
| AX-157893924 | 1 | 37.018 | KV452707.1 | 410691  | 1-scf00007 | 1 |
| AX-157893926 | 1 | 37.018 | KV452707.1 | 412636  | 1-scf00007 | 1 |
| AX-157893927 | 1 | 37.018 | KV452707.1 | 412746  | 1-scf00007 | 1 |
| AX-157725051 | 1 | 37.018 | KV452707.1 | 415019  | 1-scf00007 | 1 |
| AX-157893929 | 1 | 37.018 | KV452707.1 | 415559  | 1-scf00007 | 1 |
| AX-157738851 | 1 | 37.018 | KV452707.1 | 470571  | 1-scf00007 | 1 |
| AX-157893976 | 1 | 37.018 | KV452707.1 | 493672  | 1-scf00007 | 1 |
| AX-157894086 | 1 | 37.018 | KV452708.1 | 110837  | 1-scf00008 | 1 |
| AX-157892985 | 1 | 37.127 | KV452698.1 | 1806342 | 1-scf00002 | 1 |
| AX-157893714 | 1 | 37.127 | KV452698.1 | 2130560 | 1-scf00002 | 1 |
| AX-157893144 | 1 | 37.127 | KV452700.1 | 182189  | 1-scf00005 | 1 |
| AX-157893196 | 1 | 37.127 | KV452700.1 | 248952  | 1-scf00005 | 1 |
| AX-157893214 | 1 | 37.127 | KV452700.1 | 277856  | 1-scf00005 | 1 |
| AX-157893242 | 1 | 37.127 | KV452700.1 | 328007  | 1-scf00005 | 1 |
| AX-157893255 | 1 | 37.127 | KV452700.1 | 337524  | 1-scf00005 | 1 |
| AX-157893256 | 1 | 37.127 | KV452700.1 | 338738  | 1-scf00005 | 1 |
| AX-157893258 | 1 | 37.127 | KV452700.1 | 340123  | 1-scf00005 | 1 |
| AX-157893260 | 1 | 37.127 | KV452700.1 | 343499  | 1-scf00005 | 1 |
| AX-157893263 | 1 | 37.127 | KV452700.1 | 351729  | 1-scf00005 | 1 |
| AX-157746383 | 1 | 37.127 | KV452700.1 | 352918  | 1-scf00005 | 1 |
| AX-157893266 | 1 | 37.127 | KV452700.1 | 356561  | 1-scf00005 | 1 |
| AX-157893269 | 1 | 37.127 | KV452700.1 | 380953  | 1-scf00005 | 1 |
| AX-157893271 | 1 | 37.127 | KV452700.1 | 382122  | 1-scf00005 | 1 |
| AX-157893272 | 1 | 37.127 | KV452700.1 | 382670  | 1-scf00005 | 1 |
| AX-157810510 | 1 | 37.127 | KV452700.1 | 383164  | 1-scf00005 | 1 |
| AX-157893273 | 1 | 37.127 | KV452700.1 | 383590  | 1-scf00005 | 1 |

|              |   |        |            |        |            |   |
|--------------|---|--------|------------|--------|------------|---|
| AX-157893274 | 1 | 37.127 | KV452700.1 | 384054 | 1-scf00005 | 1 |
| AX-157745655 | 1 | 37.127 | KV452700.1 | 384308 | 1-scf00005 | 1 |
| AX-157893276 | 1 | 37.127 | KV452700.1 | 385959 | 1-scf00005 | 1 |
| AX-157893280 | 1 | 37.127 | KV452700.1 | 393299 | 1-scf00005 | 1 |
| AX-157893287 | 1 | 37.127 | KV452700.1 | 401514 | 1-scf00005 | 1 |
| AX-157893293 | 1 | 37.127 | KV452700.1 | 413992 | 1-scf00005 | 1 |
| AX-157893294 | 1 | 37.127 | KV452700.1 | 416733 | 1-scf00005 | 1 |
| AX-157893296 | 1 | 37.127 | KV452700.1 | 417901 | 1-scf00005 | 1 |
| AX-157893297 | 1 | 37.127 | KV452700.1 | 421326 | 1-scf00005 | 1 |
| AX-157893298 | 1 | 37.127 | KV452700.1 | 422325 | 1-scf00005 | 1 |
| AX-157893299 | 1 | 37.127 | KV452700.1 | 422866 | 1-scf00005 | 1 |
| AX-157893300 | 1 | 37.127 | KV452700.1 | 423481 | 1-scf00005 | 1 |
| AX-157893301 | 1 | 37.127 | KV452700.1 | 424361 | 1-scf00005 | 1 |
| AX-157893302 | 1 | 37.127 | KV452700.1 | 425387 | 1-scf00005 | 1 |
| AX-157893305 | 1 | 37.127 | KV452700.1 | 428005 | 1-scf00005 | 1 |
| AX-158404268 | 1 | 37.127 | KV452700.1 | 446361 | 1-scf00005 | 1 |
| AX-157893313 | 1 | 37.127 | KV452700.1 | 447455 | 1-scf00005 | 1 |
| AX-157893315 | 1 | 37.127 | KV452700.1 | 451315 | 1-scf00005 | 1 |
| AX-157893317 | 1 | 37.127 | KV452700.1 | 452677 | 1-scf00005 | 1 |
| AX-157893318 | 1 | 37.127 | KV452700.1 | 452920 | 1-scf00005 | 1 |
| AX-157893322 | 1 | 37.127 | KV452700.1 | 460010 | 1-scf00005 | 1 |
| AX-157893323 | 1 | 37.127 | KV452700.1 | 460277 | 1-scf00005 | 1 |
| AX-157893332 | 1 | 37.127 | KV452700.1 | 473002 | 1-scf00005 | 1 |
| AX-157893340 | 1 | 37.127 | KV452700.1 | 479753 | 1-scf00005 | 1 |
| AX-157893354 | 1 | 37.127 | KV452700.1 | 492786 | 1-scf00005 | 1 |
| AX-157893357 | 1 | 37.127 | KV452700.1 | 495796 | 1-scf00005 | 1 |
| AX-157893358 | 1 | 37.127 | KV452700.1 | 497347 | 1-scf00005 | 1 |
| AX-157893359 | 1 | 37.127 | KV452700.1 | 497856 | 1-scf00005 | 1 |
| AX-157893360 | 1 | 37.127 | KV452700.1 | 499967 | 1-scf00005 | 1 |
| AX-157810520 | 1 | 37.127 | KV452700.1 | 539176 | 1-scf00005 | 1 |
| AX-157893462 | 1 | 37.127 | KV452700.1 | 650319 | 1-scf00005 | 1 |
| AX-157893473 | 1 | 37.127 | KV452700.1 | 671304 | 1-scf00005 | 1 |
| AX-157893474 | 1 | 37.127 | KV452700.1 | 674172 | 1-scf00005 | 1 |
| AX-157893485 | 1 | 37.127 | KV452700.1 | 696422 | 1-scf00005 | 1 |
| AX-157893486 | 1 | 37.127 | KV452700.1 | 698662 | 1-scf00005 | 1 |
| AX-157893504 | 1 | 37.127 | KV452700.1 | 728723 | 1-scf00005 | 1 |
| AX-157810534 | 1 | 37.127 | KV452700.1 | 808847 | 1-scf00005 | 1 |
| AX-157893791 | 1 | 37.127 | KV452707.1 | 203902 | 1-scf00007 | 1 |
| AX-157893810 | 1 | 37.127 | KV452707.1 | 236508 | 1-scf00007 | 1 |
| AX-157771710 | 1 | 37.127 | KV452707.1 | 330471 | 1-scf00007 | 1 |
| AX-157893880 | 1 | 37.127 | KV452707.1 | 359817 | 1-scf00007 | 1 |
| AX-157893884 | 1 | 37.127 | KV452707.1 | 366201 | 1-scf00007 | 1 |
| AX-157893886 | 1 | 37.127 | KV452707.1 | 369158 | 1-scf00007 | 1 |
| AX-157893890 | 1 | 37.127 | KV452707.1 | 373566 | 1-scf00007 | 1 |
| AX-157893891 | 1 | 37.127 | KV452707.1 | 374009 | 1-scf00007 | 1 |
| AX-157893900 | 1 | 37.127 | KV452707.1 | 380171 | 1-scf00007 | 1 |
| AX-157893914 | 1 | 37.127 | KV452707.1 | 397461 | 1-scf00007 | 1 |
| AX-157893917 | 1 | 37.127 | KV452707.1 | 403602 | 1-scf00007 | 1 |
| AX-157862562 | 1 | 37.127 | KV452699.1 | 97086  | 1-scf00610 | 1 |
| AX-157893878 | 1 | 37.132 | KV452707.1 | 355162 | 1-scf00007 | 1 |
| AX-157893870 | 1 | 37.182 | KV452707.1 | 343762 | 1-scf00007 | 1 |

|              |   |        |            |         |            |   |
|--------------|---|--------|------------|---------|------------|---|
| AX-157893867 | 1 | 37.188 | KV452707.1 | 340345  | 1-scf00007 | 1 |
| AX-157892947 | 1 | 37.237 | KV452698.1 | 1756394 | 1-scf00002 | 1 |
| AX-157810482 | 1 | 37.237 | KV452698.1 | 1823206 | 1-scf00002 | 1 |
| AX-157892995 | 1 | 37.237 | KV452698.1 | 1825122 | 1-scf00002 | 1 |
| AX-157893605 | 1 | 37.237 | KV452698.1 | 1914017 | 1-scf00002 | 1 |
| AX-157744105 | 1 | 37.237 | KV452700.1 | 790962  | 1-scf00005 | 1 |
| AX-157893542 | 1 | 37.237 | KV452700.1 | 805070  | 1-scf00005 | 1 |
| AX-157893760 | 1 | 37.237 | KV452707.1 | 159598  | 1-scf00007 | 1 |
| AX-157810560 | 1 | 37.237 | KV452707.1 | 162670  | 1-scf00007 | 1 |
| AX-157893763 | 1 | 37.237 | KV452707.1 | 163216  | 1-scf00007 | 1 |
| AX-157893774 | 1 | 37.237 | KV452707.1 | 185633  | 1-scf00007 | 1 |
| AX-157893792 | 1 | 37.237 | KV452707.1 | 204538  | 1-scf00007 | 1 |
| AX-157893799 | 1 | 37.237 | KV452707.1 | 215357  | 1-scf00007 | 1 |
| AX-157893805 | 1 | 37.237 | KV452707.1 | 229423  | 1-scf00007 | 1 |
| AX-157893806 | 1 | 37.237 | KV452707.1 | 231076  | 1-scf00007 | 1 |
| AX-157893807 | 1 | 37.237 | KV452707.1 | 231361  | 1-scf00007 | 1 |
| AX-157776304 | 1 | 37.237 | KV452707.1 | 238610  | 1-scf00007 | 1 |
| AX-157810567 | 1 | 37.237 | KV452707.1 | 240382  | 1-scf00007 | 1 |
| AX-157893815 | 1 | 37.237 | KV452707.1 | 242924  | 1-scf00007 | 1 |
| AX-157747750 | 1 | 37.237 | KV452707.1 | 249540  | 1-scf00007 | 1 |
| AX-157810570 | 1 | 37.237 | KV452707.1 | 250691  | 1-scf00007 | 1 |
| AX-157810572 | 1 | 37.237 | KV452707.1 | 260164  | 1-scf00007 | 1 |
| AX-157893817 | 1 | 37.237 | KV452707.1 | 260269  | 1-scf00007 | 1 |
| AX-157893818 | 1 | 37.237 | KV452707.1 | 266381  | 1-scf00007 | 1 |
| AX-157810578 | 1 | 37.237 | KV452707.1 | 268040  | 1-scf00007 | 1 |
| AX-157893821 | 1 | 37.237 | KV452707.1 | 274186  | 1-scf00007 | 1 |
| AX-157893822 | 1 | 37.237 | KV452707.1 | 275971  | 1-scf00007 | 1 |
| AX-157893825 | 1 | 37.237 | KV452707.1 | 281050  | 1-scf00007 | 1 |
| AX-157893827 | 1 | 37.237 | KV452707.1 | 286358  | 1-scf00007 | 1 |
| AX-157893828 | 1 | 37.237 | KV452707.1 | 287667  | 1-scf00007 | 1 |
| AX-157725713 | 1 | 37.237 | KV452707.1 | 290742  | 1-scf00007 | 1 |
| AX-157893831 | 1 | 37.237 | KV452707.1 | 295323  | 1-scf00007 | 1 |
| AX-157741384 | 1 | 37.237 | KV452707.1 | 295423  | 1-scf00007 | 1 |
| AX-157893833 | 1 | 37.237 | KV452707.1 | 296062  | 1-scf00007 | 1 |
| AX-157752454 | 1 | 37.237 | KV452707.1 | 299230  | 1-scf00007 | 1 |
| AX-157741607 | 1 | 37.237 | KV452707.1 | 299811  | 1-scf00007 | 1 |
| AX-157893837 | 1 | 37.237 | KV452707.1 | 300152  | 1-scf00007 | 1 |
| AX-157893839 | 1 | 37.237 | KV452707.1 | 301994  | 1-scf00007 | 1 |
| AX-157893840 | 1 | 37.237 | KV452707.1 | 306938  | 1-scf00007 | 1 |
| AX-157893846 | 1 | 37.237 | KV452707.1 | 313543  | 1-scf00007 | 1 |
| AX-157893848 | 1 | 37.237 | KV452707.1 | 314937  | 1-scf00007 | 1 |
| AX-157893854 | 1 | 37.237 | KV452707.1 | 323510  | 1-scf00007 | 1 |
| AX-157893865 | 1 | 37.237 | KV452707.1 | 338182  | 1-scf00007 | 1 |
| AX-157893866 | 1 | 37.237 | KV452707.1 | 339981  | 1-scf00007 | 1 |
| AX-157893887 | 1 | 37.237 | KV452707.1 | 369485  | 1-scf00007 | 1 |
| AX-157893907 | 1 | 37.237 | KV452707.1 | 387466  | 1-scf00007 | 1 |
| AX-157893915 | 1 | 37.237 | KV452707.1 | 397764  | 1-scf00007 | 1 |
| AX-157853552 | 1 | 37.237 | KV452707.1 | 401966  | 1-scf00007 | 1 |
| AX-157893918 | 1 | 37.237 | KV452707.1 | 404546  | 1-scf00007 | 1 |
| AX-157893925 | 1 | 37.237 | KV452707.1 | 412217  | 1-scf00007 | 1 |
| AX-157756682 | 1 | 37.237 | KV452707.1 | 423627  | 1-scf00007 | 1 |

|              |   |        |            |        |            |   |
|--------------|---|--------|------------|--------|------------|---|
| AX-157864353 | 1 | 37.237 | KV452707.1 | 442930 | 1-scf00007 | 1 |
| AX-157894009 | 1 | 37.237 | KV452707.1 | 542137 | 1-scf00007 | 1 |
| AX-157894029 | 1 | 37.237 | KV452708.1 | 989    | 1-scf00008 | 1 |
| AX-157894036 | 1 | 37.237 | KV452708.1 | 10547  | 1-scf00008 | 1 |
| AX-157810568 | 1 | 37.294 | KV452707.1 | 244214 | 1-scf00007 | 1 |
| AX-157893836 | 1 | 37.294 | KV452707.1 | 298614 | 1-scf00007 | 1 |
| AX-157893968 | 1 | 37.294 | KV452707.1 | 482528 | 1-scf00007 | 1 |
| AX-157893788 | 1 | 37.346 | KV452707.1 | 201479 | 1-scf00007 | 1 |
| AX-157893796 | 1 | 37.346 | KV452707.1 | 212505 | 1-scf00007 | 1 |
| AX-157893798 | 1 | 37.346 | KV452707.1 | 214924 | 1-scf00007 | 1 |
| AX-157893800 | 1 | 37.346 | KV452707.1 | 216855 | 1-scf00007 | 1 |
| AX-157893801 | 1 | 37.346 | KV452707.1 | 218447 | 1-scf00007 | 1 |
| AX-157893808 | 1 | 37.346 | KV452707.1 | 232293 | 1-scf00007 | 1 |
| AX-157775265 | 1 | 37.346 | KV452707.1 | 235158 | 1-scf00007 | 1 |
| AX-157776303 | 1 | 37.346 | KV452707.1 | 235219 | 1-scf00007 | 1 |
| AX-157893814 | 1 | 37.346 | KV452707.1 | 241381 | 1-scf00007 | 1 |
| AX-157893844 | 1 | 37.346 | KV452707.1 | 310835 | 1-scf00007 | 1 |
| AX-157810590 | 1 | 37.346 | KV452707.1 | 455398 | 1-scf00007 | 1 |
| AX-157810561 | 1 | 37.369 | KV452707.1 | 167630 | 1-scf00007 | 1 |
| AX-157757447 | 1 | 37.369 | KV452707.1 | 178258 | 1-scf00007 | 1 |
| AX-157893794 | 1 | 37.369 | KV452707.1 | 207976 | 1-scf00007 | 1 |
| AX-157893881 | 1 | 37.369 | KV452707.1 | 360394 | 1-scf00007 | 1 |
| AX-157748161 | 1 | 37.369 | KV452707.1 | 432578 | 1-scf00007 | 1 |
| AX-157893793 | 1 | 37.39  | KV452707.1 | 205129 | 1-scf00007 | 1 |
| AX-157893786 | 1 | 37.408 | KV452707.1 | 199868 | 1-scf00007 | 1 |
| AX-157893785 | 1 | 37.423 | KV452707.1 | 197822 | 1-scf00007 | 1 |
| AX-157744036 | 1 | 37.423 | KV452707.1 | 216553 | 1-scf00007 | 1 |
| AX-157893874 | 1 | 37.423 | KV452707.1 | 350291 | 1-scf00007 | 1 |
| AX-157893780 | 1 | 37.438 | KV452707.1 | 193652 | 1-scf00007 | 1 |
| AX-157893830 | 1 | 37.438 | KV452707.1 | 293498 | 1-scf00007 | 1 |
| AX-157893518 | 1 | 37.456 | KV452700.1 | 751605 | 1-scf00005 | 1 |
| AX-157893566 | 1 | 37.456 | KV452700.1 | 837264 | 1-scf00005 | 1 |
| AX-157893766 | 1 | 37.456 | KV452707.1 | 168244 | 1-scf00007 | 1 |
| AX-157893768 | 1 | 37.456 | KV452707.1 | 175444 | 1-scf00007 | 1 |
| AX-157893769 | 1 | 37.456 | KV452707.1 | 177322 | 1-scf00007 | 1 |
| AX-157893772 | 1 | 37.456 | KV452707.1 | 182260 | 1-scf00007 | 1 |
| AX-157893773 | 1 | 37.456 | KV452707.1 | 182709 | 1-scf00007 | 1 |
| AX-157893775 | 1 | 37.456 | KV452707.1 | 186865 | 1-scf00007 | 1 |
| AX-157752337 | 1 | 37.456 | KV452707.1 | 188015 | 1-scf00007 | 1 |
| AX-157810564 | 1 | 37.456 | KV452707.1 | 191193 | 1-scf00007 | 1 |
| AX-157893779 | 1 | 37.456 | KV452707.1 | 192305 | 1-scf00007 | 1 |
| AX-157893832 | 1 | 37.456 | KV452707.1 | 295702 | 1-scf00007 | 1 |
| AX-157893852 | 1 | 37.456 | KV452707.1 | 321126 | 1-scf00007 | 1 |
| AX-157893871 | 1 | 37.456 | KV452707.1 | 346461 | 1-scf00007 | 1 |
| AX-157752044 | 1 | 37.457 | KV452707.1 | 113893 | 1-scf00007 | 1 |
| AX-157894027 | 1 | 37.726 | KV452708.1 | 494    | 1-scf00008 | 1 |
| AX-157893973 | 1 | 38.435 | KV452707.1 | 488541 | 1-scf00007 | 1 |
| AX-157893988 | 1 | 38.435 | KV452707.1 | 507919 | 1-scf00007 | 1 |
| AX-157883072 | 1 | 38.435 | KV452708.1 | 15913  | 1-scf00008 | 1 |
| AX-157810620 | 1 | 38.435 | KV452708.1 | 19896  | 1-scf00008 | 1 |
| AX-157894045 | 1 | 38.51  | KV452708.1 | 26218  | 1-scf00008 | 1 |

|              |   |        |            |        |            |   |
|--------------|---|--------|------------|--------|------------|---|
| AX-157894046 | 1 | 38.521 | KV452708.1 | 26871  | 1-scf00008 | 1 |
| AX-157894048 | 1 | 38.528 | KV452708.1 | 28355  | 1-scf00008 | 1 |
| AX-157894052 | 1 | 38.528 | KV452708.1 | 32491  | 1-scf00008 | 1 |
| AX-157894069 | 1 | 38.539 | KV452708.1 | 67731  | 1-scf00008 | 1 |
| AX-157772393 | 1 | 38.552 | KV452708.1 | 70769  | 1-scf00008 | 1 |
| AX-157894070 | 1 | 38.552 | KV452708.1 | 71456  | 1-scf00008 | 1 |
| AX-157894076 | 1 | 38.845 | KV452708.1 | 83750  | 1-scf00008 | 1 |
| AX-157894078 | 1 | 38.845 | KV452708.1 | 85214  | 1-scf00008 | 1 |
| AX-157894082 | 1 | 38.845 | KV452708.1 | 104684 | 1-scf00008 | 1 |
| AX-157810611 | 1 | 38.846 | KV452707.1 | 562099 | 1-scf00007 | 1 |
| AX-157894079 | 1 | 38.846 | KV452708.1 | 87124  | 1-scf00008 | 1 |
| AX-157810633 | 1 | 38.846 | KV452708.1 | 136765 | 1-scf00008 | 1 |
| AX-157894075 | 1 | 38.989 | KV452708.1 | 83318  | 1-scf00008 | 1 |
| AX-157773945 | 1 | 38.989 | KV452708.1 | 116047 | 1-scf00008 | 1 |
| AX-157894088 | 1 | 38.989 | KV452708.1 | 119322 | 1-scf00008 | 1 |
| AX-157894089 | 1 | 38.989 | KV452708.1 | 119966 | 1-scf00008 | 1 |
| AX-157894090 | 1 | 38.989 | KV452708.1 | 120982 | 1-scf00008 | 1 |
| AX-157894091 | 1 | 38.989 | KV452708.1 | 122104 | 1-scf00008 | 1 |
| AX-157894092 | 1 | 38.989 | KV452708.1 | 127122 | 1-scf00008 | 1 |
| AX-157748539 | 1 | 38.989 | KV452708.1 | 128397 | 1-scf00008 | 1 |
| AX-157894107 | 1 | 38.989 | KV452708.1 | 159326 | 1-scf00008 | 1 |
| AX-157894119 | 1 | 38.989 | KV452708.1 | 180650 | 1-scf00008 | 1 |
| AX-157894084 | 1 | 39.13  | KV452708.1 | 109060 | 1-scf00008 | 1 |
| AX-157810631 | 1 | 39.13  | KV452708.1 | 130630 | 1-scf00008 | 1 |
| AX-157894097 | 1 | 39.281 | KV452708.1 | 140667 | 1-scf00008 | 1 |
| AX-157810635 | 1 | 39.423 | KV452708.1 | 141369 | 1-scf00008 | 1 |
| AX-157894098 | 1 | 39.424 | KV452708.1 | 146509 | 1-scf00008 | 1 |
| AX-157810639 | 1 | 39.425 | KV452708.1 | 147582 | 1-scf00008 | 1 |
| AX-157810637 | 1 | 39.426 | KV452708.1 | 145297 | 1-scf00008 | 1 |
| AX-157894100 | 1 | 39.426 | KV452708.1 | 150426 | 1-scf00008 | 1 |
| AX-157894102 | 1 | 39.426 | KV452708.1 | 152471 | 1-scf00008 | 1 |
| AX-157894105 | 1 | 39.427 | KV452708.1 | 155213 | 1-scf00008 | 1 |
| AX-157894106 | 1 | 39.427 | KV452708.1 | 157399 | 1-scf00008 | 1 |
| AX-157894108 | 1 | 39.427 | KV452708.1 | 159689 | 1-scf00008 | 1 |
| AX-157893533 | 1 | 39.674 | KV452700.1 | 777401 | 1-scf00005 | 1 |
| AX-157894028 | 1 | 39.674 | KV452708.1 | 867    | 1-scf00008 | 1 |
| AX-157894116 | 1 | 39.674 | KV452708.1 | 175524 | 1-scf00008 | 1 |
| AX-157894120 | 1 | 39.918 | KV452708.1 | 180813 | 1-scf00008 | 1 |
| AX-157894124 | 1 | 40.69  | KV452708.1 | 193416 | 1-scf00008 | 1 |
| AX-157810641 | 1 | 41.07  | KV452708.1 | 196197 | 1-scf00008 | 1 |
| AX-157810643 | 1 | 41.071 | KV452708.1 | 197572 | 1-scf00008 | 1 |
| AX-157748602 | 1 | 41.071 | KV452708.1 | 199154 | 1-scf00008 | 1 |
| AX-157810644 | 1 | 41.071 | KV452708.1 | 199448 | 1-scf00008 | 1 |
| AX-157743025 | 1 | 41.071 | KV452708.1 | 199830 | 1-scf00008 | 1 |
| AX-157714203 | 1 | 41.397 | KV452708.1 | 202762 | 1-scf00008 | 1 |
| AX-157742218 | 1 | 41.398 | KV452708.1 | 206901 | 1-scf00008 | 1 |
| AX-157894127 | 1 | 41.398 | KV452708.1 | 206975 | 1-scf00008 | 1 |
| AX-157894128 | 1 | 41.422 | KV452708.1 | 208475 | 1-scf00008 | 1 |
| AX-157894133 | 1 | 41.422 | KV452708.1 | 221951 | 1-scf00008 | 1 |
| AX-157717355 | 1 | 41.451 | KV452708.1 | 212828 | 1-scf00008 | 1 |
| AX-157810648 | 1 | 41.476 | KV452708.1 | 218721 | 1-scf00008 | 1 |

|              |   |        |            |        |            |   |
|--------------|---|--------|------------|--------|------------|---|
| AX-157894135 | 1 | 41.476 | KV452708.1 | 225485 | 1-scf00008 | 1 |
| AX-157894132 | 1 | 41.507 | KV452708.1 | 219595 | 1-scf00008 | 1 |
| AX-157744060 | 1 | 41.507 | KV452708.1 | 222753 | 1-scf00008 | 1 |
| AX-157740986 | 1 | 41.644 | KV452708.1 | 196429 | 1-scf00008 | 1 |
| AX-157894134 | 1 | 41.644 | KV452708.1 | 224909 | 1-scf00008 | 1 |
| AX-157810630 | 1 | 41.671 | KV452708.1 | 94648  | 1-scf00008 | 1 |
| AX-157894081 | 1 | 41.671 | KV452708.1 | 100864 | 1-scf00008 | 1 |
| AX-157894136 | 1 | 41.671 | KV452708.1 | 233008 | 1-scf00008 | 1 |
| AX-157894192 | 1 | 41.671 | KV452708.1 | 329783 | 1-scf00008 | 1 |
| AX-157810650 | 1 | 41.726 | KV452708.1 | 237092 | 1-scf00008 | 1 |
| AX-157894143 | 1 | 41.726 | KV452708.1 | 243137 | 1-scf00008 | 1 |
| AX-157746042 | 1 | 41.726 | KV452708.1 | 244690 | 1-scf00008 | 1 |
| AX-157894148 | 1 | 41.726 | KV452708.1 | 249062 | 1-scf00008 | 1 |
| AX-157810651 | 1 | 41.729 | KV452708.1 | 244529 | 1-scf00008 | 1 |
| AX-157894147 | 1 | 41.729 | KV452708.1 | 247737 | 1-scf00008 | 1 |
| AX-157894151 | 1 | 42.017 | KV452708.1 | 253738 | 1-scf00008 | 1 |
| AX-157894155 | 1 | 42.017 | KV452708.1 | 268950 | 1-scf00008 | 1 |
| AX-157810653 | 1 | 42.163 | KV452708.1 | 275378 | 1-scf00008 | 1 |
| AX-157810654 | 1 | 42.163 | KV452708.1 | 278198 | 1-scf00008 | 1 |
| AX-157894158 | 1 | 42.163 | KV452708.1 | 282750 | 1-scf00008 | 1 |
| AX-157894159 | 1 | 42.163 | KV452708.1 | 284215 | 1-scf00008 | 1 |
| AX-157894161 | 1 | 42.163 | KV452708.1 | 284940 | 1-scf00008 | 1 |
| AX-157745024 | 1 | 42.163 | KV452708.1 | 288196 | 1-scf00008 | 1 |
| AX-157894168 | 1 | 42.163 | KV452708.1 | 296808 | 1-scf00008 | 1 |
| AX-157894180 | 1 | 42.163 | KV452708.1 | 313509 | 1-scf00008 | 1 |
| AX-157894169 | 1 | 42.49  | KV452708.1 | 301068 | 1-scf00008 | 1 |
| AX-157894176 | 1 | 42.49  | KV452708.1 | 306711 | 1-scf00008 | 1 |
| AX-157752861 | 1 | 42.491 | KV452708.1 | 69303  | 1-scf00008 | 1 |
| AX-157772201 | 1 | 42.491 | KV452708.1 | 307292 | 1-scf00008 | 1 |
| AX-157894178 | 1 | 42.491 | KV452708.1 | 309359 | 1-scf00008 | 1 |
| AX-157894179 | 1 | 42.491 | KV452708.1 | 311576 | 1-scf00008 | 1 |
| AX-157810660 | 1 | 42.493 | KV452708.1 | 314673 | 1-scf00008 | 1 |
| AX-157894184 | 1 | 42.495 | KV452708.1 | 317659 | 1-scf00008 | 1 |
| AX-157894186 | 1 | 42.9   | KV452708.1 | 321372 | 1-scf00008 | 1 |
| AX-157894187 | 1 | 42.9   | KV452708.1 | 321553 | 1-scf00008 | 1 |
| AX-157894188 | 1 | 42.9   | KV452708.1 | 321955 | 1-scf00008 | 1 |
| AX-157864361 | 1 | 42.9   | KV452708.1 | 334303 | 1-scf00008 | 1 |
| AX-157810663 | 1 | 42.9   | KV452708.1 | 359679 | 1-scf00008 | 1 |
| AX-157894190 | 1 | 42.901 | KV452708.1 | 328449 | 1-scf00008 | 1 |
| AX-157894195 | 1 | 42.902 | KV452708.1 | 333253 | 1-scf00008 | 1 |
| AX-157894201 | 1 | 42.903 | KV452708.1 | 339183 | 1-scf00008 | 1 |
| AX-157894212 | 1 | 43.355 | KV452708.1 | 359636 | 1-scf00008 | 1 |
| AX-157894217 | 1 | 43.584 | KV452708.1 | 371930 | 1-scf00008 | 1 |
| AX-157894218 | 1 | 43.584 | KV452708.1 | 372326 | 1-scf00008 | 1 |
| AX-157894221 | 1 | 43.584 | KV452708.1 | 376124 | 1-scf00008 | 1 |
| AX-157894223 | 1 | 43.584 | KV452708.1 | 379965 | 1-scf00008 | 1 |
| AX-157894234 | 1 | 43.584 | KV452708.1 | 395091 | 1-scf00008 | 1 |
| AX-157894233 | 1 | 43.623 | KV452708.1 | 393249 | 1-scf00008 | 1 |
| AX-157853554 | 1 | 43.694 | KV452708.1 | 220820 | 1-scf00008 | 1 |
| AX-158404287 | 1 | 43.694 | KV452708.1 | 229082 | 1-scf00008 | 1 |
| AX-157894171 | 1 | 43.694 | KV452708.1 | 303136 | 1-scf00008 | 1 |



|              |   |        |            |        |            |   |
|--------------|---|--------|------------|--------|------------|---|
| AX-157894229 | 1 | 43.694 | KV452708.1 | 388964 | 1-scf00008 | 1 |
| AX-157894235 | 1 | 43.694 | KV452708.1 | 396529 | 1-scf00008 | 1 |
| AX-157894238 | 1 | 43.694 | KV452708.1 | 400455 | 1-scf00008 | 1 |
| AX-157894239 | 1 | 43.694 | KV452708.1 | 400942 | 1-scf00008 | 1 |
| AX-157894241 | 1 | 43.694 | KV452708.1 | 401610 | 1-scf00008 | 1 |
| AX-157894240 | 1 | 43.803 | KV452708.1 | 401146 | 1-scf00008 | 1 |
| AX-157810667 | 1 | 43.803 | KV452708.1 | 404216 | 1-scf00008 | 1 |
| AX-157894242 | 1 | 43.803 | KV452708.1 | 405494 | 1-scf00008 | 1 |
| AX-157810668 | 1 | 43.803 | KV452708.1 | 410617 | 1-scf00008 | 1 |
| AX-157894200 | 1 | 44.021 | KV452708.1 | 337513 | 1-scf00008 | 1 |
| AX-157894252 | 1 | 44.021 | KV452708.1 | 418976 | 1-scf00008 | 1 |
| AX-157894257 | 1 | 44.021 | KV452708.1 | 425466 | 1-scf00008 | 1 |
| AX-157894258 | 1 | 44.021 | KV452708.1 | 426435 | 1-scf00008 | 1 |
| AX-157894260 | 1 | 44.021 | KV452708.1 | 428036 | 1-scf00008 | 1 |
| AX-157894261 | 1 | 44.021 | KV452708.1 | 428862 | 1-scf00008 | 1 |
| AX-157742409 | 1 | 44.021 | KV452708.1 | 432101 | 1-scf00008 | 1 |
| AX-157810670 | 1 | 44.021 | KV452708.1 | 433330 | 1-scf00008 | 1 |
| AX-157810671 | 1 | 44.021 | KV452708.1 | 433882 | 1-scf00008 | 1 |
| AX-157719298 | 1 | 44.021 | KV452708.1 | 434853 | 1-scf00008 | 1 |
| AX-157894262 | 1 | 44.021 | KV452708.1 | 436574 | 1-scf00008 | 1 |
| AX-157894263 | 1 | 44.021 | KV452708.1 | 438485 | 1-scf00008 | 1 |
| AX-157894264 | 1 | 44.021 | KV452708.1 | 440698 | 1-scf00008 | 1 |
| AX-157810672 | 1 | 44.021 | KV452708.1 | 443687 | 1-scf00008 | 1 |
| AX-157894268 | 1 | 44.313 | KV452708.1 | 446261 | 1-scf00008 | 1 |
| AX-157745593 | 1 | 44.313 | KV452708.1 | 447730 | 1-scf00008 | 1 |
| AX-157894269 | 1 | 44.313 | KV452708.1 | 447859 | 1-scf00008 | 1 |
| AX-157894277 | 1 | 44.313 | KV452708.1 | 468407 | 1-scf00008 | 1 |
| AX-157810646 | 1 | 44.458 | KV452708.1 | 205235 | 1-scf00008 | 1 |
| AX-157810665 | 1 | 44.458 | KV452708.1 | 365505 | 1-scf00008 | 1 |
| AX-157714780 | 1 | 44.458 | KV452708.1 | 457473 | 1-scf00008 | 1 |
| AX-157894273 | 1 | 44.458 | KV452708.1 | 460570 | 1-scf00008 | 1 |
| AX-158381941 | 1 | 44.458 | KV452708.1 | 464469 | 1-scf00008 | 1 |
| AX-157894275 | 1 | 44.458 | KV452708.1 | 465406 | 1-scf00008 | 1 |
| AX-157738363 | 1 | 44.458 | KV452708.1 | 470542 | 1-scf00008 | 1 |
| AX-157862589 | 1 | 44.458 | KV452708.1 | 472678 | 1-scf00008 | 1 |
| AX-157894280 | 1 | 44.458 | KV452708.1 | 475561 | 1-scf00008 | 1 |
| AX-157894281 | 1 | 44.458 | KV452708.1 | 476433 | 1-scf00008 | 1 |
| AX-157894282 | 1 | 44.458 | KV452708.1 | 476832 | 1-scf00008 | 1 |
| AX-157810677 | 1 | 44.458 | KV452708.1 | 497378 | 1-scf00008 | 1 |
| AX-157894288 | 1 | 44.459 | KV452708.1 | 481493 | 1-scf00008 | 1 |
| AX-157894253 | 1 | 44.46  | KV452708.1 | 420722 | 1-scf00008 | 1 |
| AX-157744986 | 1 | 44.46  | KV452708.1 | 482111 | 1-scf00008 | 1 |
| AX-157894289 | 1 | 44.786 | KV452708.1 | 486776 | 1-scf00008 | 1 |
| AX-157894290 | 1 | 44.786 | KV452708.1 | 487348 | 1-scf00008 | 1 |
| AX-157810675 | 1 | 44.786 | KV452708.1 | 490987 | 1-scf00008 | 1 |
| AX-157810676 | 1 | 44.786 | KV452708.1 | 493506 | 1-scf00008 | 1 |
| AX-157894292 | 1 | 44.786 | KV452708.1 | 494378 | 1-scf00008 | 1 |
| AX-157894293 | 1 | 44.786 | KV452708.1 | 495076 | 1-scf00008 | 1 |
| AX-157894139 | 1 | 44.847 | KV452708.1 | 236464 | 1-scf00008 | 1 |
| AX-157864360 | 1 | 44.847 | KV452708.1 | 283646 | 1-scf00008 | 1 |
| AX-157864362 | 1 | 44.847 | KV452708.1 | 343927 | 1-scf00008 | 1 |

|              |   |        |            |        |            |   |
|--------------|---|--------|------------|--------|------------|---|
| AX-157894230 | 1 | 44.847 | KV452708.1 | 389839 | 1-scf00008 | 1 |
| AX-157894295 | 1 | 44.847 | KV452708.1 | 498616 | 1-scf00008 | 1 |
| AX-157894294 | 1 | 44.919 | KV452708.1 | 497758 | 1-scf00008 | 1 |
| AX-157894296 | 1 | 44.919 | KV452708.1 | 498999 | 1-scf00008 | 1 |
| AX-157874291 | 1 | 45.004 | KV452708.1 | 502660 | 1-scf00008 | 1 |
| AX-157894297 | 1 | 45.004 | KV452708.1 | 505314 | 1-scf00008 | 1 |
| AX-157746873 | 1 | 45.004 | KV452708.1 | 505577 | 1-scf00008 | 1 |
| AX-157894298 | 1 | 45.004 | KV452708.1 | 505910 | 1-scf00008 | 1 |
| AX-157894299 | 1 | 45.004 | KV452708.1 | 508319 | 1-scf00008 | 1 |
| AX-157894300 | 1 | 45.004 | KV452708.1 | 509160 | 1-scf00008 | 1 |
| AX-157894301 | 1 | 45.004 | KV452708.1 | 509855 | 1-scf00008 | 1 |
| AX-157894305 | 1 | 45.004 | KV452708.1 | 514825 | 1-scf00008 | 1 |
| AX-157717580 | 1 | 45.004 | KV452708.1 | 515335 | 1-scf00008 | 1 |
| AX-158404300 | 1 | 45.004 | KV452708.1 | 519304 | 1-scf00008 | 1 |
| AX-157894310 | 1 | 45.004 | KV452708.1 | 526586 | 1-scf00008 | 1 |
| AX-157713083 | 1 | 45.004 | KV452708.1 | 570843 | 1-scf00008 | 1 |
| AX-157894311 | 1 | 45.223 | KV452708.1 | 529520 | 1-scf00008 | 1 |
| AX-157894314 | 1 | 45.223 | KV452708.1 | 535421 | 1-scf00008 | 1 |
| AX-157883075 | 1 | 45.223 | KV452708.1 | 535666 | 1-scf00008 | 1 |
| AX-157753568 | 1 | 45.223 | KV452708.1 | 539419 | 1-scf00008 | 1 |
| AX-157722002 | 1 | 45.223 | KV452708.1 | 540582 | 1-scf00008 | 1 |
| AX-157894322 | 1 | 45.223 | KV452708.1 | 549368 | 1-scf00008 | 1 |
| AX-157894323 | 1 | 45.223 | KV452708.1 | 549890 | 1-scf00008 | 1 |
| AX-157894325 | 1 | 45.223 | KV452708.1 | 551933 | 1-scf00008 | 1 |
| AX-157894319 | 1 | 45.504 | KV452708.1 | 543245 | 1-scf00008 | 1 |
| AX-157894332 | 1 | 45.504 | KV452708.1 | 564129 | 1-scf00008 | 1 |
| AX-158381942 | 1 | 45.504 | KV452708.1 | 570385 | 1-scf00008 | 1 |
| AX-157894334 | 1 | 45.504 | KV452708.1 | 572972 | 1-scf00008 | 1 |
| AX-157894335 | 1 | 45.504 | KV452708.1 | 575069 | 1-scf00008 | 1 |
| AX-157894336 | 1 | 45.504 | KV452708.1 | 576502 | 1-scf00008 | 1 |
| AX-157810684 | 1 | 45.504 | KV452708.1 | 577621 | 1-scf00008 | 1 |
| AX-157894338 | 1 | 45.793 | KV452708.1 | 583056 | 1-scf00008 | 1 |
| AX-157894328 | 1 | 45.918 | KV452708.1 | 555936 | 1-scf00008 | 1 |
| AX-157894340 | 1 | 45.918 | KV452708.1 | 588621 | 1-scf00008 | 1 |
| AX-157894342 | 1 | 45.925 | KV452708.1 | 590838 | 1-scf00008 | 1 |
| AX-157894343 | 1 | 45.938 | KV452708.1 | 591321 | 1-scf00008 | 1 |
| AX-157894345 | 1 | 46.206 | KV452708.1 | 593665 | 1-scf00008 | 1 |
| AX-157894346 | 1 | 46.206 | KV452708.1 | 595106 | 1-scf00008 | 1 |
| AX-158404301 | 1 | 46.207 | KV452708.1 | 595373 | 1-scf00008 | 1 |
| AX-157714029 | 1 | 46.316 | KV452708.1 | 596644 | 1-scf00008 | 1 |
| AX-157894347 | 1 | 46.316 | KV452708.1 | 600248 | 1-scf00008 | 1 |
| AX-157894348 | 1 | 46.425 | KV452708.1 | 603364 | 1-scf00008 | 1 |
| AX-157747147 | 1 | 46.486 | KV452708.1 | 604504 | 1-scf00008 | 1 |
| AX-157894349 | 1 | 46.534 | KV452708.1 | 605999 | 1-scf00008 | 1 |
| AX-157810685 | 1 | 46.534 | KV452708.1 | 606254 | 1-scf00008 | 1 |
| AX-157894351 | 1 | 46.535 | KV452708.1 | 607899 | 1-scf00008 | 1 |
| AX-157894352 | 1 | 46.535 | KV452708.1 | 608337 | 1-scf00008 | 1 |
| AX-157717501 | 1 | 46.697 | KV452708.1 | 611507 | 1-scf00008 | 1 |
| AX-157894353 | 1 | 46.761 | KV452708.1 | 610393 | 1-scf00008 | 1 |
| AX-157894355 | 1 | 46.761 | KV452708.1 | 615659 | 1-scf00008 | 1 |
| AX-157894388 | 1 | 46.761 | KV452708.1 | 660282 | 1-scf00008 | 1 |

|              |   |        |            |        |            |   |
|--------------|---|--------|------------|--------|------------|---|
| AX-157894357 | 1 | 46.97  | KV452708.1 | 620221 | 1-scf00008 | 1 |
| AX-157894356 | 1 | 47.194 | KV452708.1 | 619413 | 1-scf00008 | 1 |
| AX-157894359 | 1 | 47.194 | KV452708.1 | 622464 | 1-scf00008 | 1 |
| AX-157894360 | 1 | 47.194 | KV452708.1 | 623017 | 1-scf00008 | 1 |
| AX-157894372 | 1 | 47.194 | KV452708.1 | 641442 | 1-scf00008 | 1 |
| AX-158404304 | 1 | 47.293 | KV452708.1 | 629620 | 1-scf00008 | 1 |
| AX-157894364 | 1 | 47.52  | KV452708.1 | 630224 | 1-scf00008 | 1 |
| AX-157894365 | 1 | 47.52  | KV452708.1 | 631416 | 1-scf00008 | 1 |
| AX-157810687 | 1 | 47.52  | KV452708.1 | 631740 | 1-scf00008 | 1 |
| AX-157739123 | 1 | 47.52  | KV452708.1 | 638414 | 1-scf00008 | 1 |
| AX-157894375 | 1 | 47.52  | KV452708.1 | 642753 | 1-scf00008 | 1 |
| AX-157894376 | 1 | 47.52  | KV452708.1 | 643909 | 1-scf00008 | 1 |
| AX-157894377 | 1 | 47.52  | KV452708.1 | 644682 | 1-scf00008 | 1 |
| AX-157894379 | 1 | 47.52  | KV452708.1 | 646198 | 1-scf00008 | 1 |
| AX-157894380 | 1 | 47.52  | KV452708.1 | 648208 | 1-scf00008 | 1 |
| AX-157717518 | 1 | 47.52  | KV452708.1 | 650151 | 1-scf00008 | 1 |
| AX-157894382 | 1 | 47.52  | KV452708.1 | 653355 | 1-scf00008 | 1 |
| AX-157894383 | 1 | 47.52  | KV452708.1 | 654018 | 1-scf00008 | 1 |
| AX-157894384 | 1 | 47.52  | KV452708.1 | 655154 | 1-scf00008 | 1 |
| AX-157894403 | 1 | 47.52  | KV452708.1 | 681921 | 1-scf00008 | 1 |
| AX-157894350 | 1 | 47.629 | KV452708.1 | 607032 | 1-scf00008 | 1 |
| AX-158421772 | 1 | 47.629 | KV452708.1 | 632231 | 1-scf00008 | 1 |
| AX-158379119 | 1 | 47.629 | KV452708.1 | 657290 | 1-scf00008 | 1 |
| AX-157718264 | 1 | 47.629 | KV452708.1 | 657470 | 1-scf00008 | 1 |
| AX-157894385 | 1 | 47.629 | KV452708.1 | 657825 | 1-scf00008 | 1 |
| AX-157894391 | 1 | 47.629 | KV452708.1 | 662409 | 1-scf00008 | 1 |
| AX-157894378 | 1 | 47.738 | KV452708.1 | 645277 | 1-scf00008 | 1 |
| AX-158404309 | 1 | 47.738 | KV452708.1 | 667258 | 1-scf00008 | 1 |
| AX-157894394 | 1 | 47.738 | KV452708.1 | 668044 | 1-scf00008 | 1 |
| AX-157894395 | 1 | 47.738 | KV452708.1 | 669186 | 1-scf00008 | 1 |
| AX-157894396 | 1 | 47.738 | KV452708.1 | 670863 | 1-scf00008 | 1 |
| AX-157810688 | 1 | 47.738 | KV452708.1 | 671833 | 1-scf00008 | 1 |
| AX-157894398 | 1 | 47.738 | KV452708.1 | 672637 | 1-scf00008 | 1 |
| AX-157862590 | 1 | 47.738 | KV452708.1 | 676508 | 1-scf00008 | 1 |
| AX-157894401 | 1 | 47.738 | KV452708.1 | 676610 | 1-scf00008 | 1 |
| AX-157776381 | 1 | 47.849 | KV452708.1 | 682460 | 1-scf00008 | 1 |
| AX-157748592 | 1 | 47.911 | KV452708.1 | 675189 | 1-scf00008 | 1 |
| AX-157810690 | 1 | 47.911 | KV452708.1 | 684587 | 1-scf00008 | 1 |
| AX-157894407 | 1 | 47.911 | KV452708.1 | 686113 | 1-scf00008 | 1 |
| AX-157810691 | 1 | 47.985 | KV452708.1 | 689537 | 1-scf00008 | 1 |
| AX-157894409 | 1 | 47.991 | KV452708.1 | 689867 | 1-scf00008 | 1 |
| AX-157716394 | 1 | 48.037 | KV452708.1 | 692939 | 1-scf00008 | 1 |
| AX-157810693 | 1 | 48.037 | KV452708.1 | 693129 | 1-scf00008 | 1 |
| AX-157743585 | 1 | 48.083 | KV452708.1 | 699588 | 1-scf00008 | 1 |
| AX-158403798 | 1 | 48.083 | KV452708.1 | 701303 | 1-scf00008 | 1 |
| AX-157894413 | 1 | 48.344 | KV452708.1 | 702568 | 1-scf00008 | 1 |
| AX-157894414 | 1 | 48.344 | KV452708.1 | 703721 | 1-scf00008 | 1 |
| AX-157894417 | 1 | 48.344 | KV452708.1 | 709286 | 1-scf00008 | 1 |
| AX-157894422 | 1 | 48.815 | KV452708.1 | 715474 | 1-scf00008 | 1 |
| AX-157810694 | 1 | 49.051 | KV452708.1 | 724170 | 1-scf00008 | 1 |
| AX-157894430 | 1 | 49.051 | KV452708.1 | 729433 | 1-scf00008 | 1 |

|              |   |        |            |         |            |   |
|--------------|---|--------|------------|---------|------------|---|
| AX-157894432 | 1 | 49.051 | KV452708.1 | 732054  | 1-scf00008 | 1 |
| AX-157894438 | 1 | 49.377 | KV452708.1 | 738832  | 1-scf00008 | 1 |
| AX-157894439 | 1 | 49.377 | KV452708.1 | 739927  | 1-scf00008 | 1 |
| AX-157894429 | 1 | 49.378 | KV452708.1 | 727301  | 1-scf00008 | 1 |
| AX-157894440 | 1 | 49.378 | KV452708.1 | 741056  | 1-scf00008 | 1 |
| AX-157894442 | 1 | 49.378 | KV452708.1 | 743424  | 1-scf00008 | 1 |
| AX-157894443 | 1 | 49.378 | KV452708.1 | 745233  | 1-scf00008 | 1 |
| AX-157894444 | 1 | 49.378 | KV452708.1 | 746105  | 1-scf00008 | 1 |
| AX-157775920 | 1 | 49.488 | KV452708.1 | 748368  | 1-scf00008 | 1 |
| AX-157894445 | 1 | 49.488 | KV452708.1 | 748864  | 1-scf00008 | 1 |
| AX-157894446 | 1 | 49.488 | KV452708.1 | 752159  | 1-scf00008 | 1 |
| AX-157894448 | 1 | 49.488 | KV452708.1 | 755736  | 1-scf00008 | 1 |
| AX-157894450 | 1 | 49.488 | KV452708.1 | 756996  | 1-scf00008 | 1 |
| AX-157771278 | 1 | 49.544 | KV452708.1 | 758860  | 1-scf00008 | 1 |
| AX-157894434 | 1 | 49.597 | KV452708.1 | 734183  | 1-scf00008 | 1 |
| AX-157894452 | 1 | 49.597 | KV452708.1 | 760323  | 1-scf00008 | 1 |
| AX-157894455 | 1 | 49.597 | KV452708.1 | 763683  | 1-scf00008 | 1 |
| AX-157894456 | 1 | 49.597 | KV452708.1 | 764879  | 1-scf00008 | 1 |
| AX-157894457 | 1 | 49.597 | KV452708.1 | 766468  | 1-scf00008 | 1 |
| AX-157894463 | 1 | 49.597 | KV452708.1 | 773896  | 1-scf00008 | 1 |
| AX-157741669 | 1 | 49.597 | KV452708.1 | 774652  | 1-scf00008 | 1 |
| AX-157894465 | 1 | 49.597 | KV452708.1 | 775443  | 1-scf00008 | 1 |
| AX-157810697 | 1 | 49.908 | KV452708.1 | 778854  | 1-scf00008 | 1 |
| AX-157752983 | 1 | 49.908 | KV452708.1 | 779936  | 1-scf00008 | 1 |
| AX-157894467 | 1 | 49.908 | KV452708.1 | 784634  | 1-scf00008 | 1 |
| AX-157894454 | 1 | 49.912 | KV452708.1 | 762585  | 1-scf00008 | 1 |
| AX-157894466 | 1 | 49.912 | KV452708.1 | 782062  | 1-scf00008 | 1 |
| AX-157894468 | 1 | 50.011 | KV452708.1 | 785515  | 1-scf00008 | 1 |
| AX-157894469 | 1 | 50.122 | KV452708.1 | 786489  | 1-scf00008 | 1 |
| AX-157894471 | 1 | 50.334 | KV452708.1 | 789499  | 1-scf00008 | 1 |
| AX-157894472 | 1 | 50.336 | KV452708.1 | 789917  | 1-scf00008 | 1 |
| AX-157894474 | 1 | 50.471 | KV452708.1 | 793335  | 1-scf00008 | 1 |
| AX-157894475 | 1 | 50.471 | KV452708.1 | 793764  | 1-scf00008 | 1 |
| AX-157894480 | 1 | 50.471 | KV452708.1 | 800074  | 1-scf00008 | 1 |
| AX-157894481 | 1 | 50.471 | KV452708.1 | 800988  | 1-scf00008 | 1 |
| AX-157853557 | 1 | 50.581 | KV452708.1 | 807073  | 1-scf00008 | 1 |
| AX-157894486 | 1 | 50.581 | KV452708.1 | 810340  | 1-scf00008 | 1 |
| AX-157894488 | 1 | 50.778 | KV452708.1 | 811815  | 1-scf00008 | 1 |
| AX-157750675 | 1 | 50.966 | KV452708.1 | 815076  | 1-scf00008 | 1 |
| AX-157894492 | 1 | 51.173 | KV452708.1 | 823498  | 1-scf00008 | 1 |
| AX-157725168 | 1 | 51.173 | KV452708.1 | 824455  | 1-scf00008 | 1 |
| AX-157749973 | 1 | 51.254 | KV452708.1 | 832138  | 1-scf00008 | 1 |
| AX-158379121 | 1 | 51.261 | KV452708.1 | 833385  | 1-scf00008 | 1 |
| AX-157895193 | 1 | 51.261 | KV452708.1 | 2081142 | 1-scf00008 | 1 |
| AX-157894499 | 1 | 51.874 | KV452708.1 | 838544  | 1-scf00008 | 1 |
| AX-157894500 | 1 | 52.119 | KV452708.1 | 841736  | 1-scf00008 | 1 |
| AX-157894501 | 1 | 52.119 | KV452708.1 | 843894  | 1-scf00008 | 1 |
| AX-157894504 | 1 | 52.888 | KV452708.1 | 848753  | 1-scf00008 | 1 |
| AX-157894506 | 1 | 53.008 | KV452708.1 | 850077  | 1-scf00008 | 1 |
| AX-157894510 | 1 | 53.108 | KV452708.1 | 859050  | 1-scf00008 | 1 |
| AX-157894513 | 1 | 53.328 | KV452708.1 | 864024  | 1-scf00008 | 1 |

|              |   |        |            |         |            |    |
|--------------|---|--------|------------|---------|------------|----|
| AX-157810702 | 1 | 53.328 | KV452708.1 | 867298  | 1-scf00008 | 1  |
| AX-157894515 | 1 | 53.328 | KV452708.1 | 870076  | 1-scf00008 | 1  |
| AX-157894517 | 1 | 53.328 | KV452708.1 | 871298  | 1-scf00008 | 1  |
| AX-157894519 | 1 | 53.328 | KV452708.1 | 872434  | 1-scf00008 | 1  |
| AX-157894521 | 1 | 53.385 | KV452708.1 | 875090  | 1-scf00008 | 1  |
| AX-157894524 | 1 | 53.411 | KV452708.1 | 877024  | 1-scf00008 | 1  |
| AX-157894527 | 1 | 53.437 | KV452708.1 | 884635  | 1-scf00008 | 1  |
| AX-157894530 | 1 | 53.437 | KV452708.1 | 894540  | 1-scf00008 | 1  |
| AX-158379122 | 1 | 53.437 | KV452708.1 | 896987  | 1-scf00008 | 1  |
| AX-157894531 | 1 | 53.437 | KV452708.1 | 897918  | 1-scf00008 | 1  |
| AX-157894532 | 1 | 53.437 | KV452708.1 | 900573  | 1-scf00008 | 1  |
| AX-157810705 | 1 | 53.437 | KV452708.1 | 905882  | 1-scf00008 | 1  |
| AX-157894536 | 1 | 53.437 | KV452708.1 | 906187  | 1-scf00008 | 1  |
| AX-157810706 | 1 | 53.437 | KV452708.1 | 913889  | 1-scf00008 | 1  |
| AX-157810707 | 1 | 53.437 | KV452708.1 | 916704  | 1-scf00008 | 1  |
| AX-157894542 | 1 | 53.437 | KV452708.1 | 918116  | 1-scf00008 | 1  |
| AX-157894544 | 1 | 53.437 | KV452708.1 | 922545  | 1-scf00008 | 1  |
| AX-157725434 | 1 | 53.437 | KV452708.1 | 927508  | 1-scf00008 | 1  |
| AX-157894547 | 1 | 53.437 | KV452708.1 | 927551  | 1-scf00008 | 1  |
| AX-157894551 | 1 | 53.437 | KV452708.1 | 930929  | 1-scf00008 | 1  |
| AX-157894559 | 1 | 53.437 | KV452708.1 | 937582  | 1-scf00008 | 1  |
| AX-157894579 | 1 | 53.437 | KV452708.1 | 985475  | 1-scf00008 | 1  |
| AX-157897520 | 1 | 53.437 | KV452709.1 | 2004589 | 1-scf00009 | 1  |
| AX-157894555 | 1 | 53.479 | KV452708.1 | 934679  | 1-scf00008 | 1  |
| AX-157894557 | 1 | 53.546 | KV452708.1 | 936434  | 1-scf00008 | 1  |
| AX-157810709 | 1 | 53.546 | KV452708.1 | 938436  | 1-scf00008 | 1  |
| AX-157894562 | 1 | 53.546 | KV452708.1 | 939501  | 1-scf00008 | 1  |
| AX-157894563 | 1 | 53.546 | KV452708.1 | 940267  | 1-scf00008 | 1  |
| AX-157894565 | 1 | 53.546 | KV452708.1 | 941637  | 1-scf00008 | 1  |
| AX-157751963 | 1 | 53.655 | KV452708.1 | 887105  | 1-scf00008 | 1  |
| AX-157772437 | 1 | 53.655 | KV452708.1 | 943958  | 1-scf00008 | 1  |
| AX-157894568 | 1 | 53.655 | KV452708.1 | 945138  | 1-scf00008 | 1  |
| AX-157810711 | 1 | 53.655 | KV452708.1 | 945582  | 1-scf00008 | 1  |
| AX-157894571 | 1 | 53.655 | KV452708.1 | 951474  | 1-scf00008 | 1  |
| AX-157894573 | 1 | 53.655 | KV452708.1 | 953075  | 1-scf00008 | 1  |
| AX-157894924 | 1 | 53.655 | KV452708.1 | 1574548 | 1-scf00008 | 1  |
| AX-157689966 | 1 | 53.655 |            | 256     | scf16754   | UN |
| AX-157894574 | 1 | 53.686 | KV452708.1 | 954652  | 1-scf00008 | 1  |
| AX-157771694 | 1 | 53.713 | KV452708.1 | 974575  | 1-scf00008 | 1  |
| AX-157894512 | 1 | 53.738 | KV452708.1 | 862714  | 1-scf00008 | 1  |
| AX-157894576 | 1 | 53.738 | KV452708.1 | 974670  | 1-scf00008 | 1  |
| AX-157895151 | 1 | 53.738 | KV452708.1 | 1994256 | 1-scf00008 | 1  |
| AX-157895504 | 1 | 53.738 | KV452708.1 | 2610457 | 1-scf00008 | 1  |
| AX-157895505 | 1 | 53.738 | KV452708.1 | 2610770 | 1-scf00008 | 1  |
| AX-157894560 | 1 | 53.765 | KV452708.1 | 938008  | 1-scf00008 | 1  |
| AX-157894578 | 1 | 53.765 | KV452708.1 | 984360  | 1-scf00008 | 1  |
| AX-157894583 | 1 | 53.765 | KV452708.1 | 991602  | 1-scf00008 | 1  |
| AX-157894584 | 1 | 53.765 | KV452708.1 | 992169  | 1-scf00008 | 1  |
| AX-157810719 | 1 | 53.765 | KV452708.1 | 993263  | 1-scf00008 | 1  |
| AX-157775334 | 1 | 53.765 | KV452708.1 | 995365  | 1-scf00008 | 1  |
| AX-157894589 | 1 | 53.765 | KV452708.1 | 1001901 | 1-scf00008 | 1  |

|              |   |        |            |         |            |   |
|--------------|---|--------|------------|---------|------------|---|
| AX-157894591 | 1 | 53.765 | KV452708.1 | 1006470 | 1-scf00008 | 1 |
| AX-157894594 | 1 | 53.765 | KV452708.1 | 1008583 | 1-scf00008 | 1 |
| AX-158404313 | 1 | 53.765 | KV452708.1 | 1009591 | 1-scf00008 | 1 |
| AX-157894596 | 1 | 53.765 | KV452708.1 | 1010070 | 1-scf00008 | 1 |
| AX-157742371 | 1 | 53.765 | KV452708.1 | 1022012 | 1-scf00008 | 1 |
| AX-157894607 | 1 | 53.765 | KV452708.1 | 1028624 | 1-scf00008 | 1 |
| AX-157894608 | 1 | 53.765 | KV452708.1 | 1029073 | 1-scf00008 | 1 |
| AX-157894609 | 1 | 53.765 | KV452708.1 | 1033157 | 1-scf00008 | 1 |
| AX-157894612 | 1 | 53.765 | KV452708.1 | 1035523 | 1-scf00008 | 1 |
| AX-157894620 | 1 | 53.765 | KV452708.1 | 1045841 | 1-scf00008 | 1 |
| AX-157894621 | 1 | 53.765 | KV452708.1 | 1047058 | 1-scf00008 | 1 |
| AX-157810731 | 1 | 53.765 | KV452708.1 | 1268820 | 1-scf00008 | 1 |
| AX-157894814 | 1 | 53.765 | KV452708.1 | 1403258 | 1-scf00008 | 1 |
| AX-157810750 | 1 | 53.765 | KV452708.1 | 1423747 | 1-scf00008 | 1 |
| AX-157894911 | 1 | 53.765 | KV452708.1 | 1561799 | 1-scf00008 | 1 |
| AX-157894912 | 1 | 53.765 | KV452708.1 | 1562489 | 1-scf00008 | 1 |
| AX-157894913 | 1 | 53.765 | KV452708.1 | 1562697 | 1-scf00008 | 1 |
| AX-157810761 | 1 | 53.765 | KV452708.1 | 1562973 | 1-scf00008 | 1 |
| AX-157894914 | 1 | 53.765 | KV452708.1 | 1564462 | 1-scf00008 | 1 |
| AX-157810763 | 1 | 53.765 | KV452708.1 | 1564847 | 1-scf00008 | 1 |
| AX-157894916 | 1 | 53.765 | KV452708.1 | 1565860 | 1-scf00008 | 1 |
| AX-157894917 | 1 | 53.765 | KV452708.1 | 1566814 | 1-scf00008 | 1 |
| AX-157894918 | 1 | 53.765 | KV452708.1 | 1566988 | 1-scf00008 | 1 |
| AX-157894921 | 1 | 53.765 | KV452708.1 | 1569315 | 1-scf00008 | 1 |
| AX-157894922 | 1 | 53.765 | KV452708.1 | 1570476 | 1-scf00008 | 1 |
| AX-157810764 | 1 | 53.765 | KV452708.1 | 1571991 | 1-scf00008 | 1 |
| AX-157718608 | 1 | 53.765 | KV452708.1 | 1572194 | 1-scf00008 | 1 |
| AX-157894926 | 1 | 53.765 | KV452708.1 | 1578309 | 1-scf00008 | 1 |
| AX-157810765 | 1 | 53.765 | KV452708.1 | 1578786 | 1-scf00008 | 1 |
| AX-157894927 | 1 | 53.765 | KV452708.1 | 1579144 | 1-scf00008 | 1 |
| AX-157894928 | 1 | 53.765 | KV452708.1 | 1579880 | 1-scf00008 | 1 |
| AX-157894929 | 1 | 53.765 | KV452708.1 | 1580170 | 1-scf00008 | 1 |
| AX-157894931 | 1 | 53.765 | KV452708.1 | 1580728 | 1-scf00008 | 1 |
| AX-157894933 | 1 | 53.765 | KV452708.1 | 1582072 | 1-scf00008 | 1 |
| AX-157894934 | 1 | 53.765 | KV452708.1 | 1587951 | 1-scf00008 | 1 |
| AX-157894936 | 1 | 53.765 | KV452708.1 | 1593890 | 1-scf00008 | 1 |
| AX-157810766 | 1 | 53.765 | KV452708.1 | 1596817 | 1-scf00008 | 1 |
| AX-157714162 | 1 | 53.765 | KV452708.1 | 1609180 | 1-scf00008 | 1 |
| AX-157894945 | 1 | 53.765 | KV452708.1 | 1618708 | 1-scf00008 | 1 |
| AX-157894949 | 1 | 53.765 | KV452708.1 | 1633598 | 1-scf00008 | 1 |
| AX-157894959 | 1 | 53.765 | KV452708.1 | 1651667 | 1-scf00008 | 1 |
| AX-157746963 | 1 | 53.765 | KV452708.1 | 1962059 | 1-scf00008 | 1 |
| AX-157895177 | 1 | 53.765 | KV452708.1 | 2054360 | 1-scf00008 | 1 |
| AX-157895198 | 1 | 53.765 | KV452708.1 | 2087852 | 1-scf00008 | 1 |
| AX-157895203 | 1 | 53.765 | KV452708.1 | 2096721 | 1-scf00008 | 1 |
| AX-157895255 | 1 | 53.765 | KV452708.1 | 2180317 | 1-scf00008 | 1 |
| AX-157895269 | 1 | 53.765 | KV452708.1 | 2198223 | 1-scf00008 | 1 |
| AX-157810826 | 1 | 53.765 | KV452708.1 | 2469291 | 1-scf00008 | 1 |
| AX-157895490 | 1 | 53.765 | KV452708.1 | 2597740 | 1-scf00008 | 1 |
| AX-157895675 | 1 | 53.765 | KV452708.1 | 2833446 | 1-scf00008 | 1 |
| AX-157895676 | 1 | 53.765 | KV452708.1 | 2834729 | 1-scf00008 | 1 |

|              |   |        |            |         |                 |    |
|--------------|---|--------|------------|---------|-----------------|----|
| AX-157895699 | 1 | 53.765 | KV452708.1 | 2867585 | 1-scf00008      | 1  |
| AX-157895718 | 1 | 53.765 | KV452708.1 | 2884276 | 1-scf00008      | 1  |
| AX-157895721 | 1 | 53.765 | KV452708.1 | 2887879 | 1-scf00008      | 1  |
| AX-157895734 | 1 | 53.765 | KV452708.1 | 2907320 | 1-scf00008      | 1  |
| AX-157895735 | 1 | 53.765 | KV452708.1 | 2908504 | 1-scf00008      | 1  |
| AX-157895782 | 1 | 53.765 | KV452708.1 | 2967949 | 1-scf00008      | 1  |
| AX-157810868 | 1 | 53.765 | KV452708.1 | 2979285 | 1-scf00008      | 1  |
| AX-157699310 | 1 | 53.765 | FI899188.1 | 81      | 1-ORI212 lctalt | UN |
| AX-157894567 | 1 | 53.872 | KV452708.1 | 943855  | 1-scf00008      | 1  |
| AX-157894624 | 1 | 53.872 | KV452708.1 | 1049190 | 1-scf00008      | 1  |
| AX-157894628 | 1 | 53.872 | KV452708.1 | 1052323 | 1-scf00008      | 1  |
| AX-157810729 | 1 | 53.872 | KV452708.1 | 1261657 | 1-scf00008      | 1  |
| AX-157894836 | 1 | 53.872 | KV452708.1 | 1449265 | 1-scf00008      | 1  |
| AX-157895459 | 1 | 53.872 | KV452708.1 | 2559045 | 1-scf00008      | 1  |
| AX-157741064 | 1 | 53.872 | KV452708.1 | 2567512 | 1-scf00008      | 1  |
| AX-157895507 | 1 | 53.872 | KV452708.1 | 2614775 | 1-scf00008      | 1  |
| AX-157895726 | 1 | 53.872 | KV452708.1 | 2895722 | 1-scf00008      | 1  |
| AX-157895833 | 1 | 53.872 | KV452708.1 | 3023061 | 1-scf00008      | 1  |
| AX-157895919 | 1 | 53.872 | KV452708.1 | 3108472 | 1-scf00008      | 1  |
| AX-157896043 | 1 | 53.872 | KV452708.1 | 3239251 | 1-scf00008      | 1  |
| AX-157894502 | 1 | 53.983 | KV452708.1 | 846724  | 1-scf00008      | 1  |
| AX-157894526 | 1 | 53.983 | KV452708.1 | 884197  | 1-scf00008      | 1  |
| AX-157894537 | 1 | 53.983 | KV452708.1 | 907588  | 1-scf00008      | 1  |
| AX-157894550 | 1 | 53.983 | KV452708.1 | 929996  | 1-scf00008      | 1  |
| AX-157810720 | 1 | 53.983 | KV452708.1 | 1011976 | 1-scf00008      | 1  |
| AX-157894598 | 1 | 53.983 | KV452708.1 | 1014120 | 1-scf00008      | 1  |
| AX-157894600 | 1 | 53.983 | KV452708.1 | 1016635 | 1-scf00008      | 1  |
| AX-157894601 | 1 | 53.983 | KV452708.1 | 1020479 | 1-scf00008      | 1  |
| AX-157894606 | 1 | 53.983 | KV452708.1 | 1027463 | 1-scf00008      | 1  |
| AX-157894613 | 1 | 53.983 | KV452708.1 | 1035884 | 1-scf00008      | 1  |
| AX-157894614 | 1 | 53.983 | KV452708.1 | 1036351 | 1-scf00008      | 1  |
| AX-157894616 | 1 | 53.983 | KV452708.1 | 1038805 | 1-scf00008      | 1  |
| AX-157894619 | 1 | 53.983 | KV452708.1 | 1044544 | 1-scf00008      | 1  |
| AX-157894631 | 1 | 53.983 | KV452708.1 | 1054980 | 1-scf00008      | 1  |
| AX-157756364 | 1 | 53.983 | KV452708.1 | 1058138 | 1-scf00008      | 1  |
| AX-157894637 | 1 | 53.983 | KV452708.1 | 1068064 | 1-scf00008      | 1  |
| AX-157894639 | 1 | 53.983 | KV452708.1 | 1074709 | 1-scf00008      | 1  |
| AX-157894643 | 1 | 53.983 | KV452708.1 | 1084079 | 1-scf00008      | 1  |
| AX-157894649 | 1 | 53.983 | KV452708.1 | 1095573 | 1-scf00008      | 1  |
| AX-157894670 | 1 | 53.983 | KV452708.1 | 1132676 | 1-scf00008      | 1  |
| AX-158379123 | 1 | 53.983 | KV452708.1 | 1133108 | 1-scf00008      | 1  |
| AX-157894676 | 1 | 53.983 | KV452708.1 | 1141831 | 1-scf00008      | 1  |
| AX-157894680 | 1 | 53.983 | KV452708.1 | 1144418 | 1-scf00008      | 1  |
| AX-157894687 | 1 | 53.983 | KV452708.1 | 1158181 | 1-scf00008      | 1  |
| AX-157894689 | 1 | 53.983 | KV452708.1 | 1161612 | 1-scf00008      | 1  |
| AX-157894690 | 1 | 53.983 | KV452708.1 | 1162122 | 1-scf00008      | 1  |
| AX-157894692 | 1 | 53.983 | KV452708.1 | 1172399 | 1-scf00008      | 1  |
| AX-157894698 | 1 | 53.983 | KV452708.1 | 1187529 | 1-scf00008      | 1  |
| AX-157715407 | 1 | 53.983 | KV452708.1 | 1190030 | 1-scf00008      | 1  |
| AX-157810723 | 1 | 53.983 | KV452708.1 | 1223777 | 1-scf00008      | 1  |
| AX-157894707 | 1 | 53.983 | KV452708.1 | 1228391 | 1-scf00008      | 1  |

|              |   |        |            |         |            |   |
|--------------|---|--------|------------|---------|------------|---|
| AX-157894714 | 1 | 53.983 | KV452708.1 | 1242089 | 1-scf00008 | 1 |
| AX-157810724 | 1 | 53.983 | KV452708.1 | 1244788 | 1-scf00008 | 1 |
| AX-157894715 | 1 | 53.983 | KV452708.1 | 1245094 | 1-scf00008 | 1 |
| AX-157810725 | 1 | 53.983 | KV452708.1 | 1247696 | 1-scf00008 | 1 |
| AX-157894717 | 1 | 53.983 | KV452708.1 | 1253456 | 1-scf00008 | 1 |
| AX-157894718 | 1 | 53.983 | KV452708.1 | 1254270 | 1-scf00008 | 1 |
| AX-157715667 | 1 | 53.983 | KV452708.1 | 1254999 | 1-scf00008 | 1 |
| AX-157894720 | 1 | 53.983 | KV452708.1 | 1256645 | 1-scf00008 | 1 |
| AX-157894721 | 1 | 53.983 | KV452708.1 | 1258647 | 1-scf00008 | 1 |
| AX-157810733 | 1 | 53.983 | KV452708.1 | 1270536 | 1-scf00008 | 1 |
| AX-157894726 | 1 | 53.983 | KV452708.1 | 1271514 | 1-scf00008 | 1 |
| AX-157894727 | 1 | 53.983 | KV452708.1 | 1272190 | 1-scf00008 | 1 |
| AX-157726290 | 1 | 53.983 | KV452708.1 | 1282382 | 1-scf00008 | 1 |
| AX-157894738 | 1 | 53.983 | KV452708.1 | 1285167 | 1-scf00008 | 1 |
| AX-157810736 | 1 | 53.983 | KV452708.1 | 1286786 | 1-scf00008 | 1 |
| AX-157894748 | 1 | 53.983 | KV452708.1 | 1290394 | 1-scf00008 | 1 |
| AX-157894750 | 1 | 53.983 | KV452708.1 | 1292180 | 1-scf00008 | 1 |
| AX-157894759 | 1 | 53.983 | KV452708.1 | 1307108 | 1-scf00008 | 1 |
| AX-157810739 | 1 | 53.983 | KV452708.1 | 1309916 | 1-scf00008 | 1 |
| AX-157894763 | 1 | 53.983 | KV452708.1 | 1315253 | 1-scf00008 | 1 |
| AX-157894765 | 1 | 53.983 | KV452708.1 | 1317833 | 1-scf00008 | 1 |
| AX-157752284 | 1 | 53.983 | KV452708.1 | 1319431 | 1-scf00008 | 1 |
| AX-157747703 | 1 | 53.983 | KV452708.1 | 1320248 | 1-scf00008 | 1 |
| AX-157894767 | 1 | 53.983 | KV452708.1 | 1322712 | 1-scf00008 | 1 |
| AX-157894768 | 1 | 53.983 | KV452708.1 | 1323691 | 1-scf00008 | 1 |
| AX-157810742 | 1 | 53.983 | KV452708.1 | 1325550 | 1-scf00008 | 1 |
| AX-157894769 | 1 | 53.983 | KV452708.1 | 1325627 | 1-scf00008 | 1 |
| AX-157894770 | 1 | 53.983 | KV452708.1 | 1329115 | 1-scf00008 | 1 |
| AX-157894773 | 1 | 53.983 | KV452708.1 | 1332351 | 1-scf00008 | 1 |
| AX-157894783 | 1 | 53.983 | KV452708.1 | 1347414 | 1-scf00008 | 1 |
| AX-157883083 | 1 | 53.983 | KV452708.1 | 1361306 | 1-scf00008 | 1 |
| AX-157894793 | 1 | 53.983 | KV452708.1 | 1361973 | 1-scf00008 | 1 |
| AX-157894794 | 1 | 53.983 | KV452708.1 | 1364784 | 1-scf00008 | 1 |
| AX-157883084 | 1 | 53.983 | KV452708.1 | 1366601 | 1-scf00008 | 1 |
| AX-157894798 | 1 | 53.983 | KV452708.1 | 1373580 | 1-scf00008 | 1 |
| AX-157894800 | 1 | 53.983 | KV452708.1 | 1375747 | 1-scf00008 | 1 |
| AX-157894803 | 1 | 53.983 | KV452708.1 | 1384742 | 1-scf00008 | 1 |
| AX-157894808 | 1 | 53.983 | KV452708.1 | 1396946 | 1-scf00008 | 1 |
| AX-157894812 | 1 | 53.983 | KV452708.1 | 1400356 | 1-scf00008 | 1 |
| AX-157894818 | 1 | 53.983 | KV452708.1 | 1406323 | 1-scf00008 | 1 |
| AX-157810747 | 1 | 53.983 | KV452708.1 | 1408844 | 1-scf00008 | 1 |
| AX-157894822 | 1 | 53.983 | KV452708.1 | 1408902 | 1-scf00008 | 1 |
| AX-157894823 | 1 | 53.983 | KV452708.1 | 1409274 | 1-scf00008 | 1 |
| AX-157894824 | 1 | 53.983 | KV452708.1 | 1410367 | 1-scf00008 | 1 |
| AX-157894825 | 1 | 53.983 | KV452708.1 | 1411420 | 1-scf00008 | 1 |
| AX-157894827 | 1 | 53.983 | KV452708.1 | 1419993 | 1-scf00008 | 1 |
| AX-157894828 | 1 | 53.983 | KV452708.1 | 1420736 | 1-scf00008 | 1 |
| AX-157894829 | 1 | 53.983 | KV452708.1 | 1421033 | 1-scf00008 | 1 |
| AX-157810751 | 1 | 53.983 | KV452708.1 | 1424910 | 1-scf00008 | 1 |
| AX-157894830 | 1 | 53.983 | KV452708.1 | 1425397 | 1-scf00008 | 1 |
| AX-157810752 | 1 | 53.983 | KV452708.1 | 1430379 | 1-scf00008 | 1 |



|              |   |        |            |         |            |   |
|--------------|---|--------|------------|---------|------------|---|
| AX-157894833 | 1 | 53.983 | KV452708.1 | 1439417 | 1-scf00008 | 1 |
| AX-157894834 | 1 | 53.983 | KV452708.1 | 1443124 | 1-scf00008 | 1 |
| AX-157894837 | 1 | 53.983 | KV452708.1 | 1451243 | 1-scf00008 | 1 |
| AX-157894838 | 1 | 53.983 | KV452708.1 | 1451599 | 1-scf00008 | 1 |
| AX-157894839 | 1 | 53.983 | KV452708.1 | 1452942 | 1-scf00008 | 1 |
| AX-157894840 | 1 | 53.983 | KV452708.1 | 1453389 | 1-scf00008 | 1 |
| AX-157894841 | 1 | 53.983 | KV452708.1 | 1453916 | 1-scf00008 | 1 |
| AX-157874301 | 1 | 53.983 | KV452708.1 | 1462267 | 1-scf00008 | 1 |
| AX-157695425 | 1 | 53.983 | KV452708.1 | 1462948 | 1-scf00008 | 1 |
| AX-157894850 | 1 | 53.983 | KV452708.1 | 1465625 | 1-scf00008 | 1 |
| AX-157810754 | 1 | 53.983 | KV452708.1 | 1467549 | 1-scf00008 | 1 |
| AX-157894851 | 1 | 53.983 | KV452708.1 | 1468322 | 1-scf00008 | 1 |
| AX-157894852 | 1 | 53.983 | KV452708.1 | 1468417 | 1-scf00008 | 1 |
| AX-157894853 | 1 | 53.983 | KV452708.1 | 1470127 | 1-scf00008 | 1 |
| AX-157894854 | 1 | 53.983 | KV452708.1 | 1470695 | 1-scf00008 | 1 |
| AX-157810755 | 1 | 53.983 | KV452708.1 | 1471104 | 1-scf00008 | 1 |
| AX-157894855 | 1 | 53.983 | KV452708.1 | 1472745 | 1-scf00008 | 1 |
| AX-157894858 | 1 | 53.983 | KV452708.1 | 1476200 | 1-scf00008 | 1 |
| AX-157894859 | 1 | 53.983 | KV452708.1 | 1477848 | 1-scf00008 | 1 |
| AX-157745868 | 1 | 53.983 | KV452708.1 | 1485634 | 1-scf00008 | 1 |
| AX-157894862 | 1 | 53.983 | KV452708.1 | 1488511 | 1-scf00008 | 1 |
| AX-157894863 | 1 | 53.983 | KV452708.1 | 1492844 | 1-scf00008 | 1 |
| AX-157894864 | 1 | 53.983 | KV452708.1 | 1494570 | 1-scf00008 | 1 |
| AX-157894866 | 1 | 53.983 | KV452708.1 | 1501486 | 1-scf00008 | 1 |
| AX-157894869 | 1 | 53.983 | KV452708.1 | 1504432 | 1-scf00008 | 1 |
| AX-157894870 | 1 | 53.983 | KV452708.1 | 1506906 | 1-scf00008 | 1 |
| AX-157894871 | 1 | 53.983 | KV452708.1 | 1507063 | 1-scf00008 | 1 |
| AX-157894880 | 1 | 53.983 | KV452708.1 | 1517961 | 1-scf00008 | 1 |
| AX-157810756 | 1 | 53.983 | KV452708.1 | 1524029 | 1-scf00008 | 1 |
| AX-157894883 | 1 | 53.983 | KV452708.1 | 1525285 | 1-scf00008 | 1 |
| AX-157894884 | 1 | 53.983 | KV452708.1 | 1525642 | 1-scf00008 | 1 |
| AX-157810757 | 1 | 53.983 | KV452708.1 | 1526267 | 1-scf00008 | 1 |
| AX-157810758 | 1 | 53.983 | KV452708.1 | 1526377 | 1-scf00008 | 1 |
| AX-157894885 | 1 | 53.983 | KV452708.1 | 1526583 | 1-scf00008 | 1 |
| AX-157894886 | 1 | 53.983 | KV452708.1 | 1528084 | 1-scf00008 | 1 |
| AX-157894887 | 1 | 53.983 | KV452708.1 | 1530283 | 1-scf00008 | 1 |
| AX-157894890 | 1 | 53.983 | KV452708.1 | 1533629 | 1-scf00008 | 1 |
| AX-157894891 | 1 | 53.983 | KV452708.1 | 1533850 | 1-scf00008 | 1 |
| AX-157894893 | 1 | 53.983 | KV452708.1 | 1535856 | 1-scf00008 | 1 |
| AX-157894894 | 1 | 53.983 | KV452708.1 | 1536414 | 1-scf00008 | 1 |
| AX-157894895 | 1 | 53.983 | KV452708.1 | 1536623 | 1-scf00008 | 1 |
| AX-157894898 | 1 | 53.983 | KV452708.1 | 1539050 | 1-scf00008 | 1 |
| AX-157894899 | 1 | 53.983 | KV452708.1 | 1546444 | 1-scf00008 | 1 |
| AX-157894903 | 1 | 53.983 | KV452708.1 | 1547917 | 1-scf00008 | 1 |
| AX-157894904 | 1 | 53.983 | KV452708.1 | 1548904 | 1-scf00008 | 1 |
| AX-157894905 | 1 | 53.983 | KV452708.1 | 1549564 | 1-scf00008 | 1 |
| AX-157810760 | 1 | 53.983 | KV452708.1 | 1562180 | 1-scf00008 | 1 |
| AX-157734809 | 1 | 53.983 | KV452708.1 | 1563760 | 1-scf00008 | 1 |
| AX-157894915 | 1 | 53.983 | KV452708.1 | 1565244 | 1-scf00008 | 1 |
| AX-157894923 | 1 | 53.983 | KV452708.1 | 1573274 | 1-scf00008 | 1 |
| AX-157894925 | 1 | 53.983 | KV452708.1 | 1575403 | 1-scf00008 | 1 |

|              |   |        |            |         |            |   |
|--------------|---|--------|------------|---------|------------|---|
| AX-157894930 | 1 | 53.983 | KV452708.1 | 1580519 | 1-scf00008 | 1 |
| AX-158403820 | 1 | 53.983 | KV452708.1 | 1601046 | 1-scf00008 | 1 |
| AX-157894937 | 1 | 53.983 | KV452708.1 | 1602039 | 1-scf00008 | 1 |
| AX-157894941 | 1 | 53.983 | KV452708.1 | 1608592 | 1-scf00008 | 1 |
| AX-157810768 | 1 | 53.983 | KV452708.1 | 1614049 | 1-scf00008 | 1 |
| AX-157894943 | 1 | 53.983 | KV452708.1 | 1614503 | 1-scf00008 | 1 |
| AX-157717172 | 1 | 53.983 | KV452708.1 | 1616528 | 1-scf00008 | 1 |
| AX-157894944 | 1 | 53.983 | KV452708.1 | 1617915 | 1-scf00008 | 1 |
| AX-157894947 | 1 | 53.983 | KV452708.1 | 1624717 | 1-scf00008 | 1 |
| AX-157894951 | 1 | 53.983 | KV452708.1 | 1641195 | 1-scf00008 | 1 |
| AX-157894953 | 1 | 53.983 | KV452708.1 | 1643388 | 1-scf00008 | 1 |
| AX-157894958 | 1 | 53.983 | KV452708.1 | 1650919 | 1-scf00008 | 1 |
| AX-157894962 | 1 | 53.983 | KV452708.1 | 1656374 | 1-scf00008 | 1 |
| AX-157894963 | 1 | 53.983 | KV452708.1 | 1658650 | 1-scf00008 | 1 |
| AX-157894964 | 1 | 53.983 | KV452708.1 | 1661871 | 1-scf00008 | 1 |
| AX-157758854 | 1 | 53.983 | KV452708.1 | 1662979 | 1-scf00008 | 1 |
| AX-157775413 | 1 | 53.983 | KV452708.1 | 1664285 | 1-scf00008 | 1 |
| AX-157894965 | 1 | 53.983 | KV452708.1 | 1670037 | 1-scf00008 | 1 |
| AX-157894966 | 1 | 53.983 | KV452708.1 | 1670943 | 1-scf00008 | 1 |
| AX-157727857 | 1 | 53.983 | KV452708.1 | 1671544 | 1-scf00008 | 1 |
| AX-157694228 | 1 | 53.983 | KV452708.1 | 1677690 | 1-scf00008 | 1 |
| AX-157894973 | 1 | 53.983 | KV452708.1 | 1679154 | 1-scf00008 | 1 |
| AX-157894974 | 1 | 53.983 | KV452708.1 | 1679916 | 1-scf00008 | 1 |
| AX-157894975 | 1 | 53.983 | KV452708.1 | 1679964 | 1-scf00008 | 1 |
| AX-157894976 | 1 | 53.983 | KV452708.1 | 1682582 | 1-scf00008 | 1 |
| AX-157894977 | 1 | 53.983 | KV452708.1 | 1683224 | 1-scf00008 | 1 |
| AX-157894978 | 1 | 53.983 | KV452708.1 | 1683739 | 1-scf00008 | 1 |
| AX-157894979 | 1 | 53.983 | KV452708.1 | 1684300 | 1-scf00008 | 1 |
| AX-157894981 | 1 | 53.983 | KV452708.1 | 1685739 | 1-scf00008 | 1 |
| AX-157894982 | 1 | 53.983 | KV452708.1 | 1686257 | 1-scf00008 | 1 |
| AX-157894983 | 1 | 53.983 | KV452708.1 | 1686713 | 1-scf00008 | 1 |
| AX-157894984 | 1 | 53.983 | KV452708.1 | 1687556 | 1-scf00008 | 1 |
| AX-157894986 | 1 | 53.983 | KV452708.1 | 1689420 | 1-scf00008 | 1 |
| AX-157894987 | 1 | 53.983 | KV452708.1 | 1690465 | 1-scf00008 | 1 |
| AX-157894988 | 1 | 53.983 | KV452708.1 | 1690869 | 1-scf00008 | 1 |
| AX-157894989 | 1 | 53.983 | KV452708.1 | 1691316 | 1-scf00008 | 1 |
| AX-157894991 | 1 | 53.983 | KV452708.1 | 1693702 | 1-scf00008 | 1 |
| AX-157894993 | 1 | 53.983 | KV452708.1 | 1696120 | 1-scf00008 | 1 |
| AX-157894994 | 1 | 53.983 | KV452708.1 | 1696524 | 1-scf00008 | 1 |
| AX-157894995 | 1 | 53.983 | KV452708.1 | 1698212 | 1-scf00008 | 1 |
| AX-157894998 | 1 | 53.983 | KV452708.1 | 1706087 | 1-scf00008 | 1 |
| AX-157775504 | 1 | 53.983 | KV452708.1 | 1706701 | 1-scf00008 | 1 |
| AX-157894999 | 1 | 53.983 | KV452708.1 | 1708996 | 1-scf00008 | 1 |
| AX-157895000 | 1 | 53.983 | KV452708.1 | 1710248 | 1-scf00008 | 1 |
| AX-157895003 | 1 | 53.983 | KV452708.1 | 1715484 | 1-scf00008 | 1 |
| AX-157895004 | 1 | 53.983 | KV452708.1 | 1715669 | 1-scf00008 | 1 |
| AX-157895005 | 1 | 53.983 | KV452708.1 | 1719086 | 1-scf00008 | 1 |
| AX-157895006 | 1 | 53.983 | KV452708.1 | 1719451 | 1-scf00008 | 1 |
| AX-157895008 | 1 | 53.983 | KV452708.1 | 1720526 | 1-scf00008 | 1 |
| AX-157895009 | 1 | 53.983 | KV452708.1 | 1721152 | 1-scf00008 | 1 |
| AX-157895010 | 1 | 53.983 | KV452708.1 | 1721569 | 1-scf00008 | 1 |

|              |   |        |            |         |            |   |
|--------------|---|--------|------------|---------|------------|---|
| AX-157895011 | 1 | 53.983 | KV452708.1 | 1724085 | 1-scf00008 | 1 |
| AX-157895012 | 1 | 53.983 | KV452708.1 | 1724803 | 1-scf00008 | 1 |
| AX-157895013 | 1 | 53.983 | KV452708.1 | 1728107 | 1-scf00008 | 1 |
| AX-157895014 | 1 | 53.983 | KV452708.1 | 1728274 | 1-scf00008 | 1 |
| AX-157895015 | 1 | 53.983 | KV452708.1 | 1730740 | 1-scf00008 | 1 |
| AX-157765837 | 1 | 53.983 | KV452708.1 | 1731806 | 1-scf00008 | 1 |
| AX-157895017 | 1 | 53.983 | KV452708.1 | 1732146 | 1-scf00008 | 1 |
| AX-157810772 | 1 | 53.983 | KV452708.1 | 1732558 | 1-scf00008 | 1 |
| AX-157810773 | 1 | 53.983 | KV452708.1 | 1733014 | 1-scf00008 | 1 |
| AX-157895018 | 1 | 53.983 | KV452708.1 | 1733186 | 1-scf00008 | 1 |
| AX-157895019 | 1 | 53.983 | KV452708.1 | 1733931 | 1-scf00008 | 1 |
| AX-157895020 | 1 | 53.983 | KV452708.1 | 1734559 | 1-scf00008 | 1 |
| AX-157895022 | 1 | 53.983 | KV452708.1 | 1738080 | 1-scf00008 | 1 |
| AX-157895023 | 1 | 53.983 | KV452708.1 | 1738777 | 1-scf00008 | 1 |
| AX-157895024 | 1 | 53.983 | KV452708.1 | 1739294 | 1-scf00008 | 1 |
| AX-157895026 | 1 | 53.983 | KV452708.1 | 1741308 | 1-scf00008 | 1 |
| AX-157895027 | 1 | 53.983 | KV452708.1 | 1741869 | 1-scf00008 | 1 |
| AX-157895028 | 1 | 53.983 | KV452708.1 | 1743014 | 1-scf00008 | 1 |
| AX-157895029 | 1 | 53.983 | KV452708.1 | 1744752 | 1-scf00008 | 1 |
| AX-157895030 | 1 | 53.983 | KV452708.1 | 1747188 | 1-scf00008 | 1 |
| AX-157895031 | 1 | 53.983 | KV452708.1 | 1747554 | 1-scf00008 | 1 |
| AX-157895032 | 1 | 53.983 | KV452708.1 | 1748075 | 1-scf00008 | 1 |
| AX-157895033 | 1 | 53.983 | KV452708.1 | 1749645 | 1-scf00008 | 1 |
| AX-157895034 | 1 | 53.983 | KV452708.1 | 1750029 | 1-scf00008 | 1 |
| AX-157810774 | 1 | 53.983 | KV452708.1 | 1751007 | 1-scf00008 | 1 |
| AX-157895035 | 1 | 53.983 | KV452708.1 | 1752331 | 1-scf00008 | 1 |
| AX-157810775 | 1 | 53.983 | KV452708.1 | 1752687 | 1-scf00008 | 1 |
| AX-157895037 | 1 | 53.983 | KV452708.1 | 1754298 | 1-scf00008 | 1 |
| AX-157895038 | 1 | 53.983 | KV452708.1 | 1758816 | 1-scf00008 | 1 |
| AX-157895040 | 1 | 53.983 | KV452708.1 | 1759449 | 1-scf00008 | 1 |
| AX-157895041 | 1 | 53.983 | KV452708.1 | 1760029 | 1-scf00008 | 1 |
| AX-157895042 | 1 | 53.983 | KV452708.1 | 1760567 | 1-scf00008 | 1 |
| AX-157810776 | 1 | 53.983 | KV452708.1 | 1763583 | 1-scf00008 | 1 |
| AX-157895044 | 1 | 53.983 | KV452708.1 | 1765235 | 1-scf00008 | 1 |
| AX-157895045 | 1 | 53.983 | KV452708.1 | 1766968 | 1-scf00008 | 1 |
| AX-158404328 | 1 | 53.983 | KV452708.1 | 1768963 | 1-scf00008 | 1 |
| AX-158421778 | 1 | 53.983 | KV452708.1 | 1769923 | 1-scf00008 | 1 |
| AX-157895047 | 1 | 53.983 | KV452708.1 | 1773236 | 1-scf00008 | 1 |
| AX-157895048 | 1 | 53.983 | KV452708.1 | 1773780 | 1-scf00008 | 1 |
| AX-157895049 | 1 | 53.983 | KV452708.1 | 1774215 | 1-scf00008 | 1 |
| AX-157895050 | 1 | 53.983 | KV452708.1 | 1774574 | 1-scf00008 | 1 |
| AX-157895052 | 1 | 53.983 | KV452708.1 | 1776157 | 1-scf00008 | 1 |
| AX-157723020 | 1 | 53.983 | KV452708.1 | 1776843 | 1-scf00008 | 1 |
| AX-157895053 | 1 | 53.983 | KV452708.1 | 1779054 | 1-scf00008 | 1 |
| AX-157810777 | 1 | 53.983 | KV452708.1 | 1779949 | 1-scf00008 | 1 |
| AX-157895054 | 1 | 53.983 | KV452708.1 | 1780638 | 1-scf00008 | 1 |
| AX-157895055 | 1 | 53.983 | KV452708.1 | 1781264 | 1-scf00008 | 1 |
| AX-157895056 | 1 | 53.983 | KV452708.1 | 1781591 | 1-scf00008 | 1 |
| AX-157895057 | 1 | 53.983 | KV452708.1 | 1781953 | 1-scf00008 | 1 |
| AX-157895058 | 1 | 53.983 | KV452708.1 | 1782912 | 1-scf00008 | 1 |
| AX-157895059 | 1 | 53.983 | KV452708.1 | 1783261 | 1-scf00008 | 1 |

|              |   |        |            |         |            |   |
|--------------|---|--------|------------|---------|------------|---|
| AX-157895060 | 1 | 53.983 | KV452708.1 | 1784033 | 1-scf00008 | 1 |
| AX-157895061 | 1 | 53.983 | KV452708.1 | 1785165 | 1-scf00008 | 1 |
| AX-157895062 | 1 | 53.983 | KV452708.1 | 1786077 | 1-scf00008 | 1 |
| AX-157895063 | 1 | 53.983 | KV452708.1 | 1786796 | 1-scf00008 | 1 |
| AX-157895064 | 1 | 53.983 | KV452708.1 | 1787151 | 1-scf00008 | 1 |
| AX-157895065 | 1 | 53.983 | KV452708.1 | 1788169 | 1-scf00008 | 1 |
| AX-157895067 | 1 | 53.983 | KV452708.1 | 1789769 | 1-scf00008 | 1 |
| AX-157895068 | 1 | 53.983 | KV452708.1 | 1790532 | 1-scf00008 | 1 |
| AX-157895069 | 1 | 53.983 | KV452708.1 | 1791266 | 1-scf00008 | 1 |
| AX-157895070 | 1 | 53.983 | KV452708.1 | 1791765 | 1-scf00008 | 1 |
| AX-157810780 | 1 | 53.983 | KV452708.1 | 1792120 | 1-scf00008 | 1 |
| AX-157895071 | 1 | 53.983 | KV452708.1 | 1793768 | 1-scf00008 | 1 |
| AX-157895072 | 1 | 53.983 | KV452708.1 | 1795136 | 1-scf00008 | 1 |
| AX-157895075 | 1 | 53.983 | KV452708.1 | 1800496 | 1-scf00008 | 1 |
| AX-157895076 | 1 | 53.983 | KV452708.1 | 1801303 | 1-scf00008 | 1 |
| AX-157895077 | 1 | 53.983 | KV452708.1 | 1801756 | 1-scf00008 | 1 |
| AX-157895078 | 1 | 53.983 | KV452708.1 | 1802234 | 1-scf00008 | 1 |
| AX-157895079 | 1 | 53.983 | KV452708.1 | 1805075 | 1-scf00008 | 1 |
| AX-157895080 | 1 | 53.983 | KV452708.1 | 1805419 | 1-scf00008 | 1 |
| AX-157810781 | 1 | 53.983 | KV452708.1 | 1805841 | 1-scf00008 | 1 |
| AX-158414561 | 1 | 53.983 | KV452708.1 | 1807300 | 1-scf00008 | 1 |
| AX-157810782 | 1 | 53.983 | KV452708.1 | 1809595 | 1-scf00008 | 1 |
| AX-157895081 | 1 | 53.983 | KV452708.1 | 1809764 | 1-scf00008 | 1 |
| AX-157810783 | 1 | 53.983 | KV452708.1 | 1810263 | 1-scf00008 | 1 |
| AX-157810784 | 1 | 53.983 | KV452708.1 | 1812647 | 1-scf00008 | 1 |
| AX-157895082 | 1 | 53.983 | KV452708.1 | 1813155 | 1-scf00008 | 1 |
| AX-157895083 | 1 | 53.983 | KV452708.1 | 1813610 | 1-scf00008 | 1 |
| AX-157895084 | 1 | 53.983 | KV452708.1 | 1813950 | 1-scf00008 | 1 |
| AX-157895085 | 1 | 53.983 | KV452708.1 | 1814419 | 1-scf00008 | 1 |
| AX-157810785 | 1 | 53.983 | KV452708.1 | 1815391 | 1-scf00008 | 1 |
| AX-157895086 | 1 | 53.983 | KV452708.1 | 1816002 | 1-scf00008 | 1 |
| AX-157810786 | 1 | 53.983 | KV452708.1 | 1820456 | 1-scf00008 | 1 |
| AX-157895088 | 1 | 53.983 | KV452708.1 | 1820717 | 1-scf00008 | 1 |
| AX-157895089 | 1 | 53.983 | KV452708.1 | 1823745 | 1-scf00008 | 1 |
| AX-157895090 | 1 | 53.983 | KV452708.1 | 1824025 | 1-scf00008 | 1 |
| AX-157895091 | 1 | 53.983 | KV452708.1 | 1824705 | 1-scf00008 | 1 |
| AX-157895092 | 1 | 53.983 | KV452708.1 | 1825284 | 1-scf00008 | 1 |
| AX-157895094 | 1 | 53.983 | KV452708.1 | 1826779 | 1-scf00008 | 1 |
| AX-157895095 | 1 | 53.983 | KV452708.1 | 1828069 | 1-scf00008 | 1 |
| AX-157895096 | 1 | 53.983 | KV452708.1 | 1830420 | 1-scf00008 | 1 |
| AX-157895097 | 1 | 53.983 | KV452708.1 | 1830873 | 1-scf00008 | 1 |
| AX-157810787 | 1 | 53.983 | KV452708.1 | 1831357 | 1-scf00008 | 1 |
| AX-157895099 | 1 | 53.983 | KV452708.1 | 1832419 | 1-scf00008 | 1 |
| AX-157810789 | 1 | 53.983 | KV452708.1 | 1832671 | 1-scf00008 | 1 |
| AX-157750654 | 1 | 53.983 | KV452708.1 | 1834940 | 1-scf00008 | 1 |
| AX-157810791 | 1 | 53.983 | KV452708.1 | 1835590 | 1-scf00008 | 1 |
| AX-158414562 | 1 | 53.983 | KV452708.1 | 1838866 | 1-scf00008 | 1 |
| AX-157895100 | 1 | 53.983 | KV452708.1 | 1839468 | 1-scf00008 | 1 |
| AX-157895101 | 1 | 53.983 | KV452708.1 | 1840808 | 1-scf00008 | 1 |
| AX-157895102 | 1 | 53.983 | KV452708.1 | 1843438 | 1-scf00008 | 1 |
| AX-157895103 | 1 | 53.983 | KV452708.1 | 1844555 | 1-scf00008 | 1 |

|              |   |        |            |         |            |   |
|--------------|---|--------|------------|---------|------------|---|
| AX-157868493 | 1 | 53.983 | KV452708.1 | 1846756 | 1-scf00008 | 1 |
| AX-157810792 | 1 | 53.983 | KV452708.1 | 1846972 | 1-scf00008 | 1 |
| AX-157895105 | 1 | 53.983 | KV452708.1 | 1848038 | 1-scf00008 | 1 |
| AX-158379126 | 1 | 53.983 | KV452708.1 | 1850194 | 1-scf00008 | 1 |
| AX-157721005 | 1 | 53.983 | KV452708.1 | 1850808 | 1-scf00008 | 1 |
| AX-157895106 | 1 | 53.983 | KV452708.1 | 1850855 | 1-scf00008 | 1 |
| AX-157895107 | 1 | 53.983 | KV452708.1 | 1854041 | 1-scf00008 | 1 |
| AX-157772542 | 1 | 53.983 | KV452708.1 | 1854739 | 1-scf00008 | 1 |
| AX-157810794 | 1 | 53.983 | KV452708.1 | 1857919 | 1-scf00008 | 1 |
| AX-157895109 | 1 | 53.983 | KV452708.1 | 1861491 | 1-scf00008 | 1 |
| AX-157895110 | 1 | 53.983 | KV452708.1 | 1862563 | 1-scf00008 | 1 |
| AX-157895112 | 1 | 53.983 | KV452708.1 | 1865507 | 1-scf00008 | 1 |
| AX-157895115 | 1 | 53.983 | KV452708.1 | 1867262 | 1-scf00008 | 1 |
| AX-157895117 | 1 | 53.983 | KV452708.1 | 1871151 | 1-scf00008 | 1 |
| AX-157895118 | 1 | 53.983 | KV452708.1 | 1871538 | 1-scf00008 | 1 |
| AX-157895119 | 1 | 53.983 | KV452708.1 | 1872661 | 1-scf00008 | 1 |
| AX-157895120 | 1 | 53.983 | KV452708.1 | 1873672 | 1-scf00008 | 1 |
| AX-157895121 | 1 | 53.983 | KV452708.1 | 1874202 | 1-scf00008 | 1 |
| AX-157895122 | 1 | 53.983 | KV452708.1 | 1875075 | 1-scf00008 | 1 |
| AX-157895124 | 1 | 53.983 | KV452708.1 | 1878027 | 1-scf00008 | 1 |
| AX-157895128 | 1 | 53.983 | KV452708.1 | 1889812 | 1-scf00008 | 1 |
| AX-157895130 | 1 | 53.983 | KV452708.1 | 1893634 | 1-scf00008 | 1 |
| AX-157895133 | 1 | 53.983 | KV452708.1 | 1903324 | 1-scf00008 | 1 |
| AX-157895134 | 1 | 53.983 | KV452708.1 | 1903846 | 1-scf00008 | 1 |
| AX-157868494 | 1 | 53.983 | KV452708.1 | 1909944 | 1-scf00008 | 1 |
| AX-157810797 | 1 | 53.983 | KV452708.1 | 1923471 | 1-scf00008 | 1 |
| AX-157895140 | 1 | 53.983 | KV452708.1 | 1927960 | 1-scf00008 | 1 |
| AX-157868495 | 1 | 53.983 | KV452708.1 | 1929736 | 1-scf00008 | 1 |
| AX-158388991 | 1 | 53.983 | KV452708.1 | 1938502 | 1-scf00008 | 1 |
| AX-157895142 | 1 | 53.983 | KV452708.1 | 1944866 | 1-scf00008 | 1 |
| AX-157895143 | 1 | 53.983 | KV452708.1 | 1947400 | 1-scf00008 | 1 |
| AX-157895144 | 1 | 53.983 | KV452708.1 | 1952433 | 1-scf00008 | 1 |
| AX-157726494 | 1 | 53.983 | KV452708.1 | 1954358 | 1-scf00008 | 1 |
| AX-157756975 | 1 | 53.983 | KV452708.1 | 1956343 | 1-scf00008 | 1 |
| AX-157895146 | 1 | 53.983 | KV452708.1 | 1960158 | 1-scf00008 | 1 |
| AX-157696678 | 1 | 53.983 | KV452708.1 | 1970926 | 1-scf00008 | 1 |
| AX-157895149 | 1 | 53.983 | KV452708.1 | 1988281 | 1-scf00008 | 1 |
| AX-157853561 | 1 | 53.983 | KV452708.1 | 1989648 | 1-scf00008 | 1 |
| AX-157810801 | 1 | 53.983 | KV452708.1 | 2011061 | 1-scf00008 | 1 |
| AX-157895156 | 1 | 53.983 | KV452708.1 | 2019101 | 1-scf00008 | 1 |
| AX-157810803 | 1 | 53.983 | KV452708.1 | 2020269 | 1-scf00008 | 1 |
| AX-157895160 | 1 | 53.983 | KV452708.1 | 2023625 | 1-scf00008 | 1 |
| AX-157895161 | 1 | 53.983 | KV452708.1 | 2024430 | 1-scf00008 | 1 |
| AX-157868496 | 1 | 53.983 | KV452708.1 | 2031915 | 1-scf00008 | 1 |
| AX-157895165 | 1 | 53.983 | KV452708.1 | 2032990 | 1-scf00008 | 1 |
| AX-157895167 | 1 | 53.983 | KV452708.1 | 2039632 | 1-scf00008 | 1 |
| AX-157895168 | 1 | 53.983 | KV452708.1 | 2040620 | 1-scf00008 | 1 |
| AX-157895170 | 1 | 53.983 | KV452708.1 | 2043358 | 1-scf00008 | 1 |
| AX-157895171 | 1 | 53.983 | KV452708.1 | 2043672 | 1-scf00008 | 1 |
| AX-157810805 | 1 | 53.983 | KV452708.1 | 2047076 | 1-scf00008 | 1 |
| AX-157895172 | 1 | 53.983 | KV452708.1 | 2048397 | 1-scf00008 | 1 |

|              |   |        |            |         |            |   |
|--------------|---|--------|------------|---------|------------|---|
| AX-157895173 | 1 | 53.983 | KV452708.1 | 2050116 | 1-scf00008 | 1 |
| AX-157895174 | 1 | 53.983 | KV452708.1 | 2050429 | 1-scf00008 | 1 |
| AX-157895179 | 1 | 53.983 | KV452708.1 | 2060150 | 1-scf00008 | 1 |
| AX-157895180 | 1 | 53.983 | KV452708.1 | 2060728 | 1-scf00008 | 1 |
| AX-157895181 | 1 | 53.983 | KV452708.1 | 2063485 | 1-scf00008 | 1 |
| AX-157895184 | 1 | 53.983 | KV452708.1 | 2070493 | 1-scf00008 | 1 |
| AX-157895185 | 1 | 53.983 | KV452708.1 | 2071178 | 1-scf00008 | 1 |
| AX-157895186 | 1 | 53.983 | KV452708.1 | 2072111 | 1-scf00008 | 1 |
| AX-157895187 | 1 | 53.983 | KV452708.1 | 2074688 | 1-scf00008 | 1 |
| AX-157895188 | 1 | 53.983 | KV452708.1 | 2075085 | 1-scf00008 | 1 |
| AX-157895189 | 1 | 53.983 | KV452708.1 | 2075605 | 1-scf00008 | 1 |
| AX-157895190 | 1 | 53.983 | KV452708.1 | 2077742 | 1-scf00008 | 1 |
| AX-157895194 | 1 | 53.983 | KV452708.1 | 2083708 | 1-scf00008 | 1 |
| AX-157895195 | 1 | 53.983 | KV452708.1 | 2084790 | 1-scf00008 | 1 |
| AX-157895199 | 1 | 53.983 | KV452708.1 | 2088836 | 1-scf00008 | 1 |
| AX-157895205 | 1 | 53.983 | KV452708.1 | 2101331 | 1-scf00008 | 1 |
| AX-157895210 | 1 | 53.983 | KV452708.1 | 2111593 | 1-scf00008 | 1 |
| AX-157895212 | 1 | 53.983 | KV452708.1 | 2114972 | 1-scf00008 | 1 |
| AX-157895215 | 1 | 53.983 | KV452708.1 | 2126390 | 1-scf00008 | 1 |
| AX-157895216 | 1 | 53.983 | KV452708.1 | 2126801 | 1-scf00008 | 1 |
| AX-157895218 | 1 | 53.983 | KV452708.1 | 2132030 | 1-scf00008 | 1 |
| AX-157810807 | 1 | 53.983 | KV452708.1 | 2134218 | 1-scf00008 | 1 |
| AX-157895221 | 1 | 53.983 | KV452708.1 | 2134983 | 1-scf00008 | 1 |
| AX-157727397 | 1 | 53.983 | KV452708.1 | 2135635 | 1-scf00008 | 1 |
| AX-157895223 | 1 | 53.983 | KV452708.1 | 2137346 | 1-scf00008 | 1 |
| AX-157895224 | 1 | 53.983 | KV452708.1 | 2137771 | 1-scf00008 | 1 |
| AX-157895225 | 1 | 53.983 | KV452708.1 | 2138325 | 1-scf00008 | 1 |
| AX-157895227 | 1 | 53.983 | KV452708.1 | 2142313 | 1-scf00008 | 1 |
| AX-157895228 | 1 | 53.983 | KV452708.1 | 2143507 | 1-scf00008 | 1 |
| AX-157895229 | 1 | 53.983 | KV452708.1 | 2149236 | 1-scf00008 | 1 |
| AX-157895230 | 1 | 53.983 | KV452708.1 | 2152987 | 1-scf00008 | 1 |
| AX-157895231 | 1 | 53.983 | KV452708.1 | 2153249 | 1-scf00008 | 1 |
| AX-157895232 | 1 | 53.983 | KV452708.1 | 2154357 | 1-scf00008 | 1 |
| AX-157895235 | 1 | 53.983 | KV452708.1 | 2157564 | 1-scf00008 | 1 |
| AX-157895236 | 1 | 53.983 | KV452708.1 | 2158015 | 1-scf00008 | 1 |
| AX-157810808 | 1 | 53.983 | KV452708.1 | 2162890 | 1-scf00008 | 1 |
| AX-157895240 | 1 | 53.983 | KV452708.1 | 2167539 | 1-scf00008 | 1 |
| AX-157895242 | 1 | 53.983 | KV452708.1 | 2168527 | 1-scf00008 | 1 |
| AX-157895245 | 1 | 53.983 | KV452708.1 | 2172372 | 1-scf00008 | 1 |
| AX-157895249 | 1 | 53.983 | KV452708.1 | 2175392 | 1-scf00008 | 1 |
| AX-157895250 | 1 | 53.983 | KV452708.1 | 2177713 | 1-scf00008 | 1 |
| AX-157895251 | 1 | 53.983 | KV452708.1 | 2178330 | 1-scf00008 | 1 |
| AX-157895252 | 1 | 53.983 | KV452708.1 | 2179088 | 1-scf00008 | 1 |
| AX-157895253 | 1 | 53.983 | KV452708.1 | 2179519 | 1-scf00008 | 1 |
| AX-157895254 | 1 | 53.983 | KV452708.1 | 2179932 | 1-scf00008 | 1 |
| AX-157895257 | 1 | 53.983 | KV452708.1 | 2181911 | 1-scf00008 | 1 |
| AX-157895260 | 1 | 53.983 | KV452708.1 | 2187482 | 1-scf00008 | 1 |
| AX-157895261 | 1 | 53.983 | KV452708.1 | 2187788 | 1-scf00008 | 1 |
| AX-157895262 | 1 | 53.983 | KV452708.1 | 2188182 | 1-scf00008 | 1 |
| AX-157895265 | 1 | 53.983 | KV452708.1 | 2189203 | 1-scf00008 | 1 |
| AX-157895267 | 1 | 53.983 | KV452708.1 | 2191774 | 1-scf00008 | 1 |

|              |   |        |            |         |            |   |
|--------------|---|--------|------------|---------|------------|---|
| AX-157895270 | 1 | 53.983 | KV452708.1 | 2198751 | 1-scf00008 | 1 |
| AX-157895272 | 1 | 53.983 | KV452708.1 | 2201787 | 1-scf00008 | 1 |
| AX-157810809 | 1 | 53.983 | KV452708.1 | 2202337 | 1-scf00008 | 1 |
| AX-157895273 | 1 | 53.983 | KV452708.1 | 2202885 | 1-scf00008 | 1 |
| AX-157895275 | 1 | 53.983 | KV452708.1 | 2204929 | 1-scf00008 | 1 |
| AX-157895276 | 1 | 53.983 | KV452708.1 | 2206099 | 1-scf00008 | 1 |
| AX-157895277 | 1 | 53.983 | KV452708.1 | 2207992 | 1-scf00008 | 1 |
| AX-157895279 | 1 | 53.983 | KV452708.1 | 2209091 | 1-scf00008 | 1 |
| AX-157895282 | 1 | 53.983 | KV452708.1 | 2211874 | 1-scf00008 | 1 |
| AX-157895283 | 1 | 53.983 | KV452708.1 | 2212549 | 1-scf00008 | 1 |
| AX-157895284 | 1 | 53.983 | KV452708.1 | 2213588 | 1-scf00008 | 1 |
| AX-157895287 | 1 | 53.983 | KV452708.1 | 2221476 | 1-scf00008 | 1 |
| AX-157895289 | 1 | 53.983 | KV452708.1 | 2222660 | 1-scf00008 | 1 |
| AX-157895290 | 1 | 53.983 | KV452708.1 | 2223530 | 1-scf00008 | 1 |
| AX-157895291 | 1 | 53.983 | KV452708.1 | 2224753 | 1-scf00008 | 1 |
| AX-157895292 | 1 | 53.983 | KV452708.1 | 2227880 | 1-scf00008 | 1 |
| AX-157895293 | 1 | 53.983 | KV452708.1 | 2229569 | 1-scf00008 | 1 |
| AX-158388992 | 1 | 53.983 | KV452708.1 | 2230319 | 1-scf00008 | 1 |
| AX-157895294 | 1 | 53.983 | KV452708.1 | 2230611 | 1-scf00008 | 1 |
| AX-157895295 | 1 | 53.983 | KV452708.1 | 2231448 | 1-scf00008 | 1 |
| AX-157895297 | 1 | 53.983 | KV452708.1 | 2234906 | 1-scf00008 | 1 |
| AX-157895300 | 1 | 53.983 | KV452708.1 | 2236814 | 1-scf00008 | 1 |
| AX-157710872 | 1 | 53.983 | KV452708.1 | 2240194 | 1-scf00008 | 1 |
| AX-157895301 | 1 | 53.983 | KV452708.1 | 2246015 | 1-scf00008 | 1 |
| AX-157895302 | 1 | 53.983 | KV452708.1 | 2248371 | 1-scf00008 | 1 |
| AX-157895303 | 1 | 53.983 | KV452708.1 | 2248841 | 1-scf00008 | 1 |
| AX-157895304 | 1 | 53.983 | KV452708.1 | 2250233 | 1-scf00008 | 1 |
| AX-157895305 | 1 | 53.983 | KV452708.1 | 2250581 | 1-scf00008 | 1 |
| AX-157895307 | 1 | 53.983 | KV452708.1 | 2253074 | 1-scf00008 | 1 |
| AX-157895308 | 1 | 53.983 | KV452708.1 | 2253499 | 1-scf00008 | 1 |
| AX-157895309 | 1 | 53.983 | KV452708.1 | 2253887 | 1-scf00008 | 1 |
| AX-157895314 | 1 | 53.983 | KV452708.1 | 2258943 | 1-scf00008 | 1 |
| AX-157895318 | 1 | 53.983 | KV452708.1 | 2264955 | 1-scf00008 | 1 |
| AX-157895319 | 1 | 53.983 | KV452708.1 | 2266160 | 1-scf00008 | 1 |
| AX-157895323 | 1 | 53.983 | KV452708.1 | 2270008 | 1-scf00008 | 1 |
| AX-157895324 | 1 | 53.983 | KV452708.1 | 2270842 | 1-scf00008 | 1 |
| AX-157895327 | 1 | 53.983 | KV452708.1 | 2273276 | 1-scf00008 | 1 |
| AX-157895329 | 1 | 53.983 | KV452708.1 | 2275804 | 1-scf00008 | 1 |
| AX-157895330 | 1 | 53.983 | KV452708.1 | 2276901 | 1-scf00008 | 1 |
| AX-157895331 | 1 | 53.983 | KV452708.1 | 2279185 | 1-scf00008 | 1 |
| AX-157895332 | 1 | 53.983 | KV452708.1 | 2280797 | 1-scf00008 | 1 |
| AX-157895333 | 1 | 53.983 | KV452708.1 | 2282113 | 1-scf00008 | 1 |
| AX-157895334 | 1 | 53.983 | KV452708.1 | 2282534 | 1-scf00008 | 1 |
| AX-157895335 | 1 | 53.983 | KV452708.1 | 2283160 | 1-scf00008 | 1 |
| AX-157725659 | 1 | 53.983 | KV452708.1 | 2283816 | 1-scf00008 | 1 |
| AX-157895336 | 1 | 53.983 | KV452708.1 | 2285050 | 1-scf00008 | 1 |
| AX-157895337 | 1 | 53.983 | KV452708.1 | 2287086 | 1-scf00008 | 1 |
| AX-157895339 | 1 | 53.983 | KV452708.1 | 2288805 | 1-scf00008 | 1 |
| AX-157895342 | 1 | 53.983 | KV452708.1 | 2293586 | 1-scf00008 | 1 |
| AX-157895343 | 1 | 53.983 | KV452708.1 | 2294341 | 1-scf00008 | 1 |
| AX-157895344 | 1 | 53.983 | KV452708.1 | 2294927 | 1-scf00008 | 1 |

|              |   |        |            |         |            |   |
|--------------|---|--------|------------|---------|------------|---|
| AX-157895348 | 1 | 53.983 | KV452708.1 | 2298491 | 1-scf00008 | 1 |
| AX-157895352 | 1 | 53.983 | KV452708.1 | 2303689 | 1-scf00008 | 1 |
| AX-157810810 | 1 | 53.983 | KV452708.1 | 2307700 | 1-scf00008 | 1 |
| AX-157868497 | 1 | 53.983 | KV452708.1 | 2309320 | 1-scf00008 | 1 |
| AX-157810811 | 1 | 53.983 | KV452708.1 | 2310572 | 1-scf00008 | 1 |
| AX-157895357 | 1 | 53.983 | KV452708.1 | 2311146 | 1-scf00008 | 1 |
| AX-157895358 | 1 | 53.983 | KV452708.1 | 2311356 | 1-scf00008 | 1 |
| AX-157810812 | 1 | 53.983 | KV452708.1 | 2315993 | 1-scf00008 | 1 |
| AX-157895361 | 1 | 53.983 | KV452708.1 | 2316430 | 1-scf00008 | 1 |
| AX-157895362 | 1 | 53.983 | KV452708.1 | 2321770 | 1-scf00008 | 1 |
| AX-157895363 | 1 | 53.983 | KV452708.1 | 2322778 | 1-scf00008 | 1 |
| AX-157895364 | 1 | 53.983 | KV452708.1 | 2323914 | 1-scf00008 | 1 |
| AX-157895365 | 1 | 53.983 | KV452708.1 | 2325143 | 1-scf00008 | 1 |
| AX-157895366 | 1 | 53.983 | KV452708.1 | 2327503 | 1-scf00008 | 1 |
| AX-157895368 | 1 | 53.983 | KV452708.1 | 2329440 | 1-scf00008 | 1 |
| AX-157895370 | 1 | 53.983 | KV452708.1 | 2331119 | 1-scf00008 | 1 |
| AX-157895371 | 1 | 53.983 | KV452708.1 | 2333874 | 1-scf00008 | 1 |
| AX-157895372 | 1 | 53.983 | KV452708.1 | 2335690 | 1-scf00008 | 1 |
| AX-157895373 | 1 | 53.983 | KV452708.1 | 2336282 | 1-scf00008 | 1 |
| AX-157895374 | 1 | 53.983 | KV452708.1 | 2343454 | 1-scf00008 | 1 |
| AX-157895375 | 1 | 53.983 | KV452708.1 | 2348247 | 1-scf00008 | 1 |
| AX-157868498 | 1 | 53.983 | KV452708.1 | 2353414 | 1-scf00008 | 1 |
| AX-157868499 | 1 | 53.983 | KV452708.1 | 2354288 | 1-scf00008 | 1 |
| AX-157895378 | 1 | 53.983 | KV452708.1 | 2356347 | 1-scf00008 | 1 |
| AX-157810814 | 1 | 53.983 | KV452708.1 | 2358686 | 1-scf00008 | 1 |
| AX-157810816 | 1 | 53.983 | KV452708.1 | 2361048 | 1-scf00008 | 1 |
| AX-157895383 | 1 | 53.983 | KV452708.1 | 2371206 | 1-scf00008 | 1 |
| AX-157895384 | 1 | 53.983 | KV452708.1 | 2372281 | 1-scf00008 | 1 |
| AX-158404340 | 1 | 53.983 | KV452708.1 | 2380233 | 1-scf00008 | 1 |
| AX-157895387 | 1 | 53.983 | KV452708.1 | 2381591 | 1-scf00008 | 1 |
| AX-157895390 | 1 | 53.983 | KV452708.1 | 2383827 | 1-scf00008 | 1 |
| AX-157895391 | 1 | 53.983 | KV452708.1 | 2384883 | 1-scf00008 | 1 |
| AX-157895395 | 1 | 53.983 | KV452708.1 | 2388155 | 1-scf00008 | 1 |
| AX-157895396 | 1 | 53.983 | KV452708.1 | 2391991 | 1-scf00008 | 1 |
| AX-157810817 | 1 | 53.983 | KV452708.1 | 2393376 | 1-scf00008 | 1 |
| AX-157810818 | 1 | 53.983 | KV452708.1 | 2393530 | 1-scf00008 | 1 |
| AX-157895397 | 1 | 53.983 | KV452708.1 | 2397881 | 1-scf00008 | 1 |
| AX-157895398 | 1 | 53.983 | KV452708.1 | 2399772 | 1-scf00008 | 1 |
| AX-157895399 | 1 | 53.983 | KV452708.1 | 2403432 | 1-scf00008 | 1 |
| AX-157895400 | 1 | 53.983 | KV452708.1 | 2405118 | 1-scf00008 | 1 |
| AX-157895403 | 1 | 53.983 | KV452708.1 | 2408799 | 1-scf00008 | 1 |
| AX-157810819 | 1 | 53.983 | KV452708.1 | 2410111 | 1-scf00008 | 1 |
| AX-157810820 | 1 | 53.983 | KV452708.1 | 2412135 | 1-scf00008 | 1 |
| AX-157810821 | 1 | 53.983 | KV452708.1 | 2412621 | 1-scf00008 | 1 |
| AX-157810822 | 1 | 53.983 | KV452708.1 | 2421468 | 1-scf00008 | 1 |
| AX-157810824 | 1 | 53.983 | KV452708.1 | 2426937 | 1-scf00008 | 1 |
| AX-157895407 | 1 | 53.983 | KV452708.1 | 2429084 | 1-scf00008 | 1 |
| AX-157895408 | 1 | 53.983 | KV452708.1 | 2429527 | 1-scf00008 | 1 |
| AX-157895409 | 1 | 53.983 | KV452708.1 | 2430554 | 1-scf00008 | 1 |
| AX-157895410 | 1 | 53.983 | KV452708.1 | 2432715 | 1-scf00008 | 1 |
| AX-157720016 | 1 | 53.983 | KV452708.1 | 2436391 | 1-scf00008 | 1 |



|              |   |        |            |         |            |   |
|--------------|---|--------|------------|---------|------------|---|
| AX-157895413 | 1 | 53.983 | KV452708.1 | 2439356 | 1-scf00008 | 1 |
| AX-157895414 | 1 | 53.983 | KV452708.1 | 2440547 | 1-scf00008 | 1 |
| AX-157895415 | 1 | 53.983 | KV452708.1 | 2445829 | 1-scf00008 | 1 |
| AX-157895416 | 1 | 53.983 | KV452708.1 | 2451182 | 1-scf00008 | 1 |
| AX-157749471 | 1 | 53.983 | KV452708.1 | 2451402 | 1-scf00008 | 1 |
| AX-157895417 | 1 | 53.983 | KV452708.1 | 2452641 | 1-scf00008 | 1 |
| AX-157895418 | 1 | 53.983 | KV452708.1 | 2452943 | 1-scf00008 | 1 |
| AX-157895419 | 1 | 53.983 | KV452708.1 | 2454775 | 1-scf00008 | 1 |
| AX-157895420 | 1 | 53.983 | KV452708.1 | 2456655 | 1-scf00008 | 1 |
| AX-157810825 | 1 | 53.983 | KV452708.1 | 2459061 | 1-scf00008 | 1 |
| AX-157707783 | 1 | 53.983 | KV452708.1 | 2460472 | 1-scf00008 | 1 |
| AX-157707781 | 1 | 53.983 | KV452708.1 | 2460510 | 1-scf00008 | 1 |
| AX-157719650 | 1 | 53.983 | KV452708.1 | 2466367 | 1-scf00008 | 1 |
| AX-157895421 | 1 | 53.983 | KV452708.1 | 2467172 | 1-scf00008 | 1 |
| AX-157774578 | 1 | 53.983 | KV452708.1 | 2467281 | 1-scf00008 | 1 |
| AX-157810827 | 1 | 53.983 | KV452708.1 | 2469567 | 1-scf00008 | 1 |
| AX-157895424 | 1 | 53.983 | KV452708.1 | 2479322 | 1-scf00008 | 1 |
| AX-157895425 | 1 | 53.983 | KV452708.1 | 2482767 | 1-scf00008 | 1 |
| AX-157895427 | 1 | 53.983 | KV452708.1 | 2489294 | 1-scf00008 | 1 |
| AX-157895428 | 1 | 53.983 | KV452708.1 | 2490183 | 1-scf00008 | 1 |
| AX-157895429 | 1 | 53.983 | KV452708.1 | 2494579 | 1-scf00008 | 1 |
| AX-157715918 | 1 | 53.983 | KV452708.1 | 2503533 | 1-scf00008 | 1 |
| AX-157895431 | 1 | 53.983 | KV452708.1 | 2508653 | 1-scf00008 | 1 |
| AX-157895432 | 1 | 53.983 | KV452708.1 | 2509341 | 1-scf00008 | 1 |
| AX-157895433 | 1 | 53.983 | KV452708.1 | 2509679 | 1-scf00008 | 1 |
| AX-157895434 | 1 | 53.983 | KV452708.1 | 2512214 | 1-scf00008 | 1 |
| AX-157748837 | 1 | 53.983 | KV452708.1 | 2512650 | 1-scf00008 | 1 |
| AX-157895435 | 1 | 53.983 | KV452708.1 | 2512748 | 1-scf00008 | 1 |
| AX-157895436 | 1 | 53.983 | KV452708.1 | 2514556 | 1-scf00008 | 1 |
| AX-157895437 | 1 | 53.983 | KV452708.1 | 2515814 | 1-scf00008 | 1 |
| AX-157810831 | 1 | 53.983 | KV452708.1 | 2521607 | 1-scf00008 | 1 |
| AX-157748407 | 1 | 53.983 | KV452708.1 | 2524775 | 1-scf00008 | 1 |
| AX-158414567 | 1 | 53.983 | KV452708.1 | 2534052 | 1-scf00008 | 1 |
| AX-157895446 | 1 | 53.983 | KV452708.1 | 2540960 | 1-scf00008 | 1 |
| AX-157895447 | 1 | 53.983 | KV452708.1 | 2541624 | 1-scf00008 | 1 |
| AX-157895448 | 1 | 53.983 | KV452708.1 | 2542287 | 1-scf00008 | 1 |
| AX-157895449 | 1 | 53.983 | KV452708.1 | 2543105 | 1-scf00008 | 1 |
| AX-157720481 | 1 | 53.983 | KV452708.1 | 2543865 | 1-scf00008 | 1 |
| AX-157773240 | 1 | 53.983 | KV452708.1 | 2544894 | 1-scf00008 | 1 |
| AX-157895450 | 1 | 53.983 | KV452708.1 | 2546122 | 1-scf00008 | 1 |
| AX-157895453 | 1 | 53.983 | KV452708.1 | 2550787 | 1-scf00008 | 1 |
| AX-157895455 | 1 | 53.983 | KV452708.1 | 2552868 | 1-scf00008 | 1 |
| AX-157810833 | 1 | 53.983 | KV452708.1 | 2553138 | 1-scf00008 | 1 |
| AX-157895456 | 1 | 53.983 | KV452708.1 | 2557494 | 1-scf00008 | 1 |
| AX-157895457 | 1 | 53.983 | KV452708.1 | 2557703 | 1-scf00008 | 1 |
| AX-157895461 | 1 | 53.983 | KV452708.1 | 2560254 | 1-scf00008 | 1 |
| AX-157895462 | 1 | 53.983 | KV452708.1 | 2560477 | 1-scf00008 | 1 |
| AX-157895463 | 1 | 53.983 | KV452708.1 | 2561347 | 1-scf00008 | 1 |
| AX-157895464 | 1 | 53.983 | KV452708.1 | 2563421 | 1-scf00008 | 1 |
| AX-157895465 | 1 | 53.983 | KV452708.1 | 2567160 | 1-scf00008 | 1 |
| AX-157895466 | 1 | 53.983 | KV452708.1 | 2567894 | 1-scf00008 | 1 |

|              |   |        |            |         |            |   |
|--------------|---|--------|------------|---------|------------|---|
| AX-157810834 | 1 | 53.983 | KV452708.1 | 2570225 | 1-scf00008 | 1 |
| AX-157895467 | 1 | 53.983 | KV452708.1 | 2570940 | 1-scf00008 | 1 |
| AX-158381959 | 1 | 53.983 | KV452708.1 | 2572369 | 1-scf00008 | 1 |
| AX-157895473 | 1 | 53.983 | KV452708.1 | 2576262 | 1-scf00008 | 1 |
| AX-157895474 | 1 | 53.983 | KV452708.1 | 2576719 | 1-scf00008 | 1 |
| AX-157810835 | 1 | 53.983 | KV452708.1 | 2577785 | 1-scf00008 | 1 |
| AX-157895477 | 1 | 53.983 | KV452708.1 | 2584630 | 1-scf00008 | 1 |
| AX-157895479 | 1 | 53.983 | KV452708.1 | 2586041 | 1-scf00008 | 1 |
| AX-157895483 | 1 | 53.983 | KV452708.1 | 2589406 | 1-scf00008 | 1 |
| AX-157895484 | 1 | 53.983 | KV452708.1 | 2590051 | 1-scf00008 | 1 |
| AX-157895485 | 1 | 53.983 | KV452708.1 | 2591443 | 1-scf00008 | 1 |
| AX-157895486 | 1 | 53.983 | KV452708.1 | 2593094 | 1-scf00008 | 1 |
| AX-157895487 | 1 | 53.983 | KV452708.1 | 2593713 | 1-scf00008 | 1 |
| AX-157895488 | 1 | 53.983 | KV452708.1 | 2597005 | 1-scf00008 | 1 |
| AX-157895491 | 1 | 53.983 | KV452708.1 | 2599149 | 1-scf00008 | 1 |
| AX-157868501 | 1 | 53.983 | KV452708.1 | 2600261 | 1-scf00008 | 1 |
| AX-157895494 | 1 | 53.983 | KV452708.1 | 2601334 | 1-scf00008 | 1 |
| AX-157895497 | 1 | 53.983 | KV452708.1 | 2603418 | 1-scf00008 | 1 |
| AX-157895499 | 1 | 53.983 | KV452708.1 | 2604631 | 1-scf00008 | 1 |
| AX-157895501 | 1 | 53.983 | KV452708.1 | 2608121 | 1-scf00008 | 1 |
| AX-157895502 | 1 | 53.983 | KV452708.1 | 2609283 | 1-scf00008 | 1 |
| AX-157895503 | 1 | 53.983 | KV452708.1 | 2609526 | 1-scf00008 | 1 |
| AX-158404347 | 1 | 53.983 | KV452708.1 | 2613887 | 1-scf00008 | 1 |
| AX-158404348 | 1 | 53.983 | KV452708.1 | 2614846 | 1-scf00008 | 1 |
| AX-158404350 | 1 | 53.983 | KV452708.1 | 2615082 | 1-scf00008 | 1 |
| AX-157895509 | 1 | 53.983 | KV452708.1 | 2616561 | 1-scf00008 | 1 |
| AX-157775660 | 1 | 53.983 | KV452708.1 | 2618093 | 1-scf00008 | 1 |
| AX-157895513 | 1 | 53.983 | KV452708.1 | 2619458 | 1-scf00008 | 1 |
| AX-157895514 | 1 | 53.983 | KV452708.1 | 2622390 | 1-scf00008 | 1 |
| AX-157895519 | 1 | 53.983 | KV452708.1 | 2633804 | 1-scf00008 | 1 |
| AX-157895521 | 1 | 53.983 | KV452708.1 | 2635701 | 1-scf00008 | 1 |
| AX-157810843 | 1 | 53.983 | KV452708.1 | 2636013 | 1-scf00008 | 1 |
| AX-157895524 | 1 | 53.983 | KV452708.1 | 2644854 | 1-scf00008 | 1 |
| AX-158379128 | 1 | 53.983 | KV452708.1 | 2651850 | 1-scf00008 | 1 |
| AX-157810848 | 1 | 53.983 | KV452708.1 | 2661186 | 1-scf00008 | 1 |
| AX-157895533 | 1 | 53.983 | KV452708.1 | 2662413 | 1-scf00008 | 1 |
| AX-157895544 | 1 | 53.983 | KV452708.1 | 2677076 | 1-scf00008 | 1 |
| AX-157895554 | 1 | 53.983 | KV452708.1 | 2684778 | 1-scf00008 | 1 |
| AX-157895565 | 1 | 53.983 | KV452708.1 | 2707035 | 1-scf00008 | 1 |
| AX-157895566 | 1 | 53.983 | KV452708.1 | 2708267 | 1-scf00008 | 1 |
| AX-157895576 | 1 | 53.983 | KV452708.1 | 2722414 | 1-scf00008 | 1 |
| AX-158379129 | 1 | 53.983 | KV452708.1 | 2723402 | 1-scf00008 | 1 |
| AX-157895586 | 1 | 53.983 | KV452708.1 | 2731194 | 1-scf00008 | 1 |
| AX-157895588 | 1 | 53.983 | KV452708.1 | 2734981 | 1-scf00008 | 1 |
| AX-157895589 | 1 | 53.983 | KV452708.1 | 2736025 | 1-scf00008 | 1 |
| AX-157895600 | 1 | 53.983 | KV452708.1 | 2743179 | 1-scf00008 | 1 |
| AX-157895605 | 1 | 53.983 | KV452708.1 | 2747066 | 1-scf00008 | 1 |
| AX-157739816 | 1 | 53.983 | KV452708.1 | 2755009 | 1-scf00008 | 1 |
| AX-157895612 | 1 | 53.983 | KV452708.1 | 2755773 | 1-scf00008 | 1 |
| AX-157895613 | 1 | 53.983 | KV452708.1 | 2756388 | 1-scf00008 | 1 |
| AX-157895616 | 1 | 53.983 | KV452708.1 | 2758269 | 1-scf00008 | 1 |

|              |   |        |            |         |                |    |
|--------------|---|--------|------------|---------|----------------|----|
| AX-157895626 | 1 | 53.983 | KV452708.1 | 2769694 | 1-scf00008     | 1  |
| AX-157895633 | 1 | 53.983 | KV452708.1 | 2786808 | 1-scf00008     | 1  |
| AX-157895635 | 1 | 53.983 | KV452708.1 | 2788235 | 1-scf00008     | 1  |
| AX-157895639 | 1 | 53.983 | KV452708.1 | 2793568 | 1-scf00008     | 1  |
| AX-157895640 | 1 | 53.983 | KV452708.1 | 2795234 | 1-scf00008     | 1  |
| AX-157895650 | 1 | 53.983 | KV452708.1 | 2807578 | 1-scf00008     | 1  |
| AX-157895651 | 1 | 53.983 | KV452708.1 | 2808348 | 1-scf00008     | 1  |
| AX-157895654 | 1 | 53.983 | KV452708.1 | 2809335 | 1-scf00008     | 1  |
| AX-157895657 | 1 | 53.983 | KV452708.1 | 2811387 | 1-scf00008     | 1  |
| AX-157895665 | 1 | 53.983 | KV452708.1 | 2819450 | 1-scf00008     | 1  |
| AX-157895673 | 1 | 53.983 | KV452708.1 | 2830553 | 1-scf00008     | 1  |
| AX-157895678 | 1 | 53.983 | KV452708.1 | 2842460 | 1-scf00008     | 1  |
| AX-157895679 | 1 | 53.983 | KV452708.1 | 2844937 | 1-scf00008     | 1  |
| AX-157895681 | 1 | 53.983 | KV452708.1 | 2847183 | 1-scf00008     | 1  |
| AX-157895682 | 1 | 53.983 | KV452708.1 | 2847791 | 1-scf00008     | 1  |
| AX-157895693 | 1 | 53.983 | KV452708.1 | 2858957 | 1-scf00008     | 1  |
| AX-157895700 | 1 | 53.983 | KV452708.1 | 2868177 | 1-scf00008     | 1  |
| AX-157895708 | 1 | 53.983 | KV452708.1 | 2876244 | 1-scf00008     | 1  |
| AX-157895710 | 1 | 53.983 | KV452708.1 | 2878183 | 1-scf00008     | 1  |
| AX-157895715 | 1 | 53.983 | KV452708.1 | 2882907 | 1-scf00008     | 1  |
| AX-157895733 | 1 | 53.983 | KV452708.1 | 2905327 | 1-scf00008     | 1  |
| AX-157895741 | 1 | 53.983 | KV452708.1 | 2914327 | 1-scf00008     | 1  |
| AX-157895748 | 1 | 53.983 | KV452708.1 | 2923924 | 1-scf00008     | 1  |
| AX-157895750 | 1 | 53.983 | KV452708.1 | 2927417 | 1-scf00008     | 1  |
| AX-157810867 | 1 | 53.983 | KV452708.1 | 2939225 | 1-scf00008     | 1  |
| AX-157895764 | 1 | 53.983 | KV452708.1 | 2946506 | 1-scf00008     | 1  |
| AX-157895766 | 1 | 53.983 | KV452708.1 | 2947641 | 1-scf00008     | 1  |
| AX-157895767 | 1 | 53.983 | KV452708.1 | 2948609 | 1-scf00008     | 1  |
| AX-157895776 | 1 | 53.983 | KV452708.1 | 2961024 | 1-scf00008     | 1  |
| AX-157895798 | 1 | 53.983 | KV452708.1 | 2988842 | 1-scf00008     | 1  |
| AX-157895807 | 1 | 53.983 | KV452708.1 | 2996706 | 1-scf00008     | 1  |
| AX-157895872 | 1 | 53.983 | KV452708.1 | 3057187 | 1-scf00008     | 1  |
| AX-157895978 | 1 | 53.983 | KV452708.1 | 3171724 | 1-scf00008     | 1  |
| AX-157896307 | 1 | 53.983 | KV452709.1 | 297379  | 1-scf00009     | 1  |
| AX-157722127 | 1 | 53.983 | KV452709.1 | 3617571 | 1-scf00009     | 1  |
| AX-157902592 | 1 | 53.983 | KV452713.1 | 995134  | 1-scf00011     | 1  |
| AX-157904539 | 1 | 53.983 | KV452713.1 | 3914612 | 1-scf00011     | 1  |
| AX-157712425 | 1 | 53.983 | FI885482.1 | 593     | HORI212 lctali | UN |
| AX-157895508 | 1 | 53.992 | KV452708.1 | 2615780 | 1-scf00008     | 1  |
| AX-157895515 | 1 | 54.004 | KV452708.1 | 2622979 | 1-scf00008     | 1  |
| AX-157895517 | 1 | 54.014 | KV452708.1 | 2629215 | 1-scf00008     | 1  |
| AX-157894968 | 1 | 54.029 | KV452708.1 | 1674064 | 1-scf00008     | 1  |
| AX-157894969 | 1 | 54.029 | KV452708.1 | 1674940 | 1-scf00008     | 1  |
| AX-157895148 | 1 | 54.029 | KV452708.1 | 1987802 | 1-scf00008     | 1  |
| AX-157895152 | 1 | 54.029 | KV452708.1 | 1998438 | 1-scf00008     | 1  |
| AX-157895153 | 1 | 54.029 | KV452708.1 | 1999269 | 1-scf00008     | 1  |
| AX-157810842 | 1 | 54.029 | KV452708.1 | 2630930 | 1-scf00008     | 1  |
| AX-157895522 | 1 | 54.029 | KV452708.1 | 2638679 | 1-scf00008     | 1  |
| AX-157810845 | 1 | 54.029 | KV452708.1 | 2650796 | 1-scf00008     | 1  |
| AX-157895526 | 1 | 54.029 | KV452708.1 | 2652318 | 1-scf00008     | 1  |
| AX-157895527 | 1 | 54.029 | KV452708.1 | 2653861 | 1-scf00008     | 1  |

|              |   |        |            |         |            |   |
|--------------|---|--------|------------|---------|------------|---|
| AX-157810846 | 1 | 54.029 | KV452708.1 | 2654402 | 1-scf00008 | 1 |
| AX-157810847 | 1 | 54.029 | KV452708.1 | 2657212 | 1-scf00008 | 1 |
| AX-157895529 | 1 | 54.029 | KV452708.1 | 2658225 | 1-scf00008 | 1 |
| AX-157895531 | 1 | 54.029 | KV452708.1 | 2660595 | 1-scf00008 | 1 |
| AX-157895536 | 1 | 54.029 | KV452708.1 | 2669839 | 1-scf00008 | 1 |
| AX-157895537 | 1 | 54.029 | KV452708.1 | 2670606 | 1-scf00008 | 1 |
| AX-157895538 | 1 | 54.029 | KV452708.1 | 2671344 | 1-scf00008 | 1 |
| AX-157895541 | 1 | 54.029 | KV452708.1 | 2674491 | 1-scf00008 | 1 |
| AX-157895542 | 1 | 54.029 | KV452708.1 | 2675180 | 1-scf00008 | 1 |
| AX-157895543 | 1 | 54.029 | KV452708.1 | 2676389 | 1-scf00008 | 1 |
| AX-157895559 | 1 | 54.029 | KV452708.1 | 2693003 | 1-scf00008 | 1 |
| AX-157895582 | 1 | 54.029 | KV452708.1 | 2725989 | 1-scf00008 | 1 |
| AX-157895583 | 1 | 54.029 | KV452708.1 | 2726666 | 1-scf00008 | 1 |
| AX-157895584 | 1 | 54.029 | KV452708.1 | 2726897 | 1-scf00008 | 1 |
| AX-157895585 | 1 | 54.029 | KV452708.1 | 2730642 | 1-scf00008 | 1 |
| AX-157895597 | 1 | 54.029 | KV452708.1 | 2741520 | 1-scf00008 | 1 |
| AX-157895599 | 1 | 54.029 | KV452708.1 | 2742607 | 1-scf00008 | 1 |
| AX-157895602 | 1 | 54.029 | KV452708.1 | 2745090 | 1-scf00008 | 1 |
| AX-157895603 | 1 | 54.029 | KV452708.1 | 2745350 | 1-scf00008 | 1 |
| AX-157895607 | 1 | 54.029 | KV452708.1 | 2748876 | 1-scf00008 | 1 |
| AX-157741890 | 1 | 54.029 | KV452708.1 | 2774431 | 1-scf00008 | 1 |
| AX-157895630 | 1 | 54.029 | KV452708.1 | 2777418 | 1-scf00008 | 1 |
| AX-157895643 | 1 | 54.029 | KV452708.1 | 2798560 | 1-scf00008 | 1 |
| AX-157895568 | 1 | 54.042 | KV452708.1 | 2709779 | 1-scf00008 | 1 |
| AX-157895572 | 1 | 54.058 | KV452708.1 | 2719275 | 1-scf00008 | 1 |
| AX-157895574 | 1 | 54.075 | KV452708.1 | 2719967 | 1-scf00008 | 1 |
| AX-157810718 | 1 | 54.092 | KV452708.1 | 976821  | 1-scf00008 | 1 |
| AX-157894625 | 1 | 54.092 | KV452708.1 | 1050026 | 1-scf00008 | 1 |
| AX-157894630 | 1 | 54.092 | KV452708.1 | 1053837 | 1-scf00008 | 1 |
| AX-157895108 | 1 | 54.092 | KV452708.1 | 1855242 | 1-scf00008 | 1 |
| AX-157895123 | 1 | 54.092 | KV452708.1 | 1877369 | 1-scf00008 | 1 |
| AX-157895510 | 1 | 54.092 | KV452708.1 | 2616923 | 1-scf00008 | 1 |
| AX-157895560 | 1 | 54.092 | KV452708.1 | 2694529 | 1-scf00008 | 1 |
| AX-157895573 | 1 | 54.092 | KV452708.1 | 2719659 | 1-scf00008 | 1 |
| AX-157895575 | 1 | 54.092 | KV452708.1 | 2720151 | 1-scf00008 | 1 |
| AX-157895577 | 1 | 54.092 | KV452708.1 | 2723099 | 1-scf00008 | 1 |
| AX-157895578 | 1 | 54.092 | KV452708.1 | 2723359 | 1-scf00008 | 1 |
| AX-157895590 | 1 | 54.092 | KV452708.1 | 2736861 | 1-scf00008 | 1 |
| AX-157895592 | 1 | 54.092 | KV452708.1 | 2737641 | 1-scf00008 | 1 |
| AX-158403844 | 1 | 54.092 | KV452708.1 | 2743892 | 1-scf00008 | 1 |
| AX-157895601 | 1 | 54.092 | KV452708.1 | 2744850 | 1-scf00008 | 1 |
| AX-157895623 | 1 | 54.092 | KV452708.1 | 2767468 | 1-scf00008 | 1 |
| AX-157895625 | 1 | 54.092 | KV452708.1 | 2768962 | 1-scf00008 | 1 |
| AX-157710464 | 1 | 54.092 | KV452708.1 | 2770028 | 1-scf00008 | 1 |
| AX-157810858 | 1 | 54.092 | KV452708.1 | 2778173 | 1-scf00008 | 1 |
| AX-157895634 | 1 | 54.092 | KV452708.1 | 2787694 | 1-scf00008 | 1 |
| AX-157895637 | 1 | 54.092 | KV452708.1 | 2790645 | 1-scf00008 | 1 |
| AX-157810862 | 1 | 54.092 | KV452708.1 | 2826739 | 1-scf00008 | 1 |
| AX-157895686 | 1 | 54.092 | KV452708.1 | 2852387 | 1-scf00008 | 1 |
| AX-157895743 | 1 | 54.092 | KV452708.1 | 2920836 | 1-scf00008 | 1 |
| AX-157895779 | 1 | 54.092 | KV452708.1 | 2963970 | 1-scf00008 | 1 |

|              |   |        |            |         |            |   |
|--------------|---|--------|------------|---------|------------|---|
| AX-157810700 | 1 | 54.201 | KV452708.1 | 853695  | 1-scf00008 | 1 |
| AX-157894543 | 1 | 54.201 | KV452708.1 | 920931  | 1-scf00008 | 1 |
| AX-157894548 | 1 | 54.201 | KV452708.1 | 928308  | 1-scf00008 | 1 |
| AX-157894570 | 1 | 54.201 | KV452708.1 | 950423  | 1-scf00008 | 1 |
| AX-157894593 | 1 | 54.201 | KV452708.1 | 1007659 | 1-scf00008 | 1 |
| AX-157894595 | 1 | 54.201 | KV452708.1 | 1009263 | 1-scf00008 | 1 |
| AX-157894633 | 1 | 54.201 | KV452708.1 | 1058555 | 1-scf00008 | 1 |
| AX-157894635 | 1 | 54.201 | KV452708.1 | 1066035 | 1-scf00008 | 1 |
| AX-157708701 | 1 | 54.201 | KV452708.1 | 1068010 | 1-scf00008 | 1 |
| AX-157894658 | 1 | 54.201 | KV452708.1 | 1118228 | 1-scf00008 | 1 |
| AX-157894674 | 1 | 54.201 | KV452708.1 | 1137827 | 1-scf00008 | 1 |
| AX-157894724 | 1 | 54.201 | KV452708.1 | 1269302 | 1-scf00008 | 1 |
| AX-157894733 | 1 | 54.201 | KV452708.1 | 1280844 | 1-scf00008 | 1 |
| AX-157894745 | 1 | 54.201 | KV452708.1 | 1289685 | 1-scf00008 | 1 |
| AX-157894746 | 1 | 54.201 | KV452708.1 | 1289880 | 1-scf00008 | 1 |
| AX-157894747 | 1 | 54.201 | KV452708.1 | 1290169 | 1-scf00008 | 1 |
| AX-157894802 | 1 | 54.201 | KV452708.1 | 1381995 | 1-scf00008 | 1 |
| AX-157894826 | 1 | 54.201 | KV452708.1 | 1411887 | 1-scf00008 | 1 |
| AX-157810749 | 1 | 54.201 | KV452708.1 | 1414873 | 1-scf00008 | 1 |
| AX-157753320 | 1 | 54.201 | KV452708.1 | 1422138 | 1-scf00008 | 1 |
| AX-157894846 | 1 | 54.201 | KV452708.1 | 1459970 | 1-scf00008 | 1 |
| AX-157894865 | 1 | 54.201 | KV452708.1 | 1499395 | 1-scf00008 | 1 |
| AX-157894877 | 1 | 54.201 | KV452708.1 | 1513069 | 1-scf00008 | 1 |
| AX-157894878 | 1 | 54.201 | KV452708.1 | 1513635 | 1-scf00008 | 1 |
| AX-157894897 | 1 | 54.201 | KV452708.1 | 1538581 | 1-scf00008 | 1 |
| AX-157895007 | 1 | 54.201 | KV452708.1 | 1719908 | 1-scf00008 | 1 |
| AX-157810788 | 1 | 54.201 | KV452708.1 | 1832001 | 1-scf00008 | 1 |
| AX-157895191 | 1 | 54.201 | KV452708.1 | 2078310 | 1-scf00008 | 1 |
| AX-157895220 | 1 | 54.201 | KV452708.1 | 2133716 | 1-scf00008 | 1 |
| AX-157895244 | 1 | 54.201 | KV452708.1 | 2171899 | 1-scf00008 | 1 |
| AX-157895246 | 1 | 54.201 | KV452708.1 | 2172726 | 1-scf00008 | 1 |
| AX-157895263 | 1 | 54.201 | KV452708.1 | 2188459 | 1-scf00008 | 1 |
| AX-157895288 | 1 | 54.201 | KV452708.1 | 2221886 | 1-scf00008 | 1 |
| AX-158404338 | 1 | 54.201 | KV452708.1 | 2305878 | 1-scf00008 | 1 |
| AX-157895355 | 1 | 54.201 | KV452708.1 | 2308401 | 1-scf00008 | 1 |
| AX-157895369 | 1 | 54.201 | KV452708.1 | 2330162 | 1-scf00008 | 1 |
| AX-157895380 | 1 | 54.201 | KV452708.1 | 2365178 | 1-scf00008 | 1 |
| AX-157895441 | 1 | 54.201 | KV452708.1 | 2529462 | 1-scf00008 | 1 |
| AX-157810832 | 1 | 54.201 | KV452708.1 | 2545654 | 1-scf00008 | 1 |
| AX-157895460 | 1 | 54.201 | KV452708.1 | 2559272 | 1-scf00008 | 1 |
| AX-157810837 | 1 | 54.201 | KV452708.1 | 2598395 | 1-scf00008 | 1 |
| AX-158404351 | 1 | 54.201 | KV452708.1 | 2639076 | 1-scf00008 | 1 |
| AX-157895525 | 1 | 54.201 | KV452708.1 | 2647727 | 1-scf00008 | 1 |
| AX-157895528 | 1 | 54.201 | KV452708.1 | 2657017 | 1-scf00008 | 1 |
| AX-157895530 | 1 | 54.201 | KV452708.1 | 2659972 | 1-scf00008 | 1 |
| AX-157895547 | 1 | 54.201 | KV452708.1 | 2678980 | 1-scf00008 | 1 |
| AX-157895567 | 1 | 54.201 | KV452708.1 | 2709343 | 1-scf00008 | 1 |
| AX-157810854 | 1 | 54.201 | KV452708.1 | 2712958 | 1-scf00008 | 1 |
| AX-157895570 | 1 | 54.201 | KV452708.1 | 2716401 | 1-scf00008 | 1 |
| AX-157895571 | 1 | 54.201 | KV452708.1 | 2716614 | 1-scf00008 | 1 |
| AX-157810856 | 1 | 54.201 | KV452708.1 | 2717256 | 1-scf00008 | 1 |

|              |   |        |            |         |            |   |
|--------------|---|--------|------------|---------|------------|---|
| AX-157895598 | 1 | 54.201 | KV452708.1 | 2742115 | 1-scf00008 | 1 |
| AX-157895606 | 1 | 54.201 | KV452708.1 | 2747530 | 1-scf00008 | 1 |
| AX-157895622 | 1 | 54.201 | KV452708.1 | 2766912 | 1-scf00008 | 1 |
| AX-157895629 | 1 | 54.201 | KV452708.1 | 2773432 | 1-scf00008 | 1 |
| AX-157895631 | 1 | 54.201 | KV452708.1 | 2781875 | 1-scf00008 | 1 |
| AX-157895638 | 1 | 54.201 | KV452708.1 | 2793174 | 1-scf00008 | 1 |
| AX-157895642 | 1 | 54.201 | KV452708.1 | 2797056 | 1-scf00008 | 1 |
| AX-157895646 | 1 | 54.201 | KV452708.1 | 2802933 | 1-scf00008 | 1 |
| AX-157810859 | 1 | 54.201 | KV452708.1 | 2805053 | 1-scf00008 | 1 |
| AX-157721444 | 1 | 54.201 | KV452708.1 | 2805271 | 1-scf00008 | 1 |
| AX-157895649 | 1 | 54.201 | KV452708.1 | 2807053 | 1-scf00008 | 1 |
| AX-157895653 | 1 | 54.201 | KV452708.1 | 2809117 | 1-scf00008 | 1 |
| AX-157895658 | 1 | 54.201 | KV452708.1 | 2811763 | 1-scf00008 | 1 |
| AX-157895659 | 1 | 54.201 | KV452708.1 | 2812950 | 1-scf00008 | 1 |
| AX-157895661 | 1 | 54.201 | KV452708.1 | 2815969 | 1-scf00008 | 1 |
| AX-157895666 | 1 | 54.201 | KV452708.1 | 2819843 | 1-scf00008 | 1 |
| AX-157895667 | 1 | 54.201 | KV452708.1 | 2820595 | 1-scf00008 | 1 |
| AX-157810864 | 1 | 54.201 | KV452708.1 | 2832070 | 1-scf00008 | 1 |
| AX-157810865 | 1 | 54.201 | KV452708.1 | 2836403 | 1-scf00008 | 1 |
| AX-157895683 | 1 | 54.201 | KV452708.1 | 2850425 | 1-scf00008 | 1 |
| AX-157895685 | 1 | 54.201 | KV452708.1 | 2851193 | 1-scf00008 | 1 |
| AX-157895688 | 1 | 54.201 | KV452708.1 | 2854921 | 1-scf00008 | 1 |
| AX-157895690 | 1 | 54.201 | KV452708.1 | 2856989 | 1-scf00008 | 1 |
| AX-157895691 | 1 | 54.201 | KV452708.1 | 2857979 | 1-scf00008 | 1 |
| AX-157895696 | 1 | 54.201 | KV452708.1 | 2864437 | 1-scf00008 | 1 |
| AX-157895703 | 1 | 54.201 | KV452708.1 | 2872148 | 1-scf00008 | 1 |
| AX-157895713 | 1 | 54.201 | KV452708.1 | 2879886 | 1-scf00008 | 1 |
| AX-157895716 | 1 | 54.201 | KV452708.1 | 2883469 | 1-scf00008 | 1 |
| AX-157895719 | 1 | 54.201 | KV452708.1 | 2885188 | 1-scf00008 | 1 |
| AX-157895724 | 1 | 54.201 | KV452708.1 | 2894933 | 1-scf00008 | 1 |
| AX-157895727 | 1 | 54.201 | KV452708.1 | 2896194 | 1-scf00008 | 1 |
| AX-157895730 | 1 | 54.201 | KV452708.1 | 2901028 | 1-scf00008 | 1 |
| AX-157895736 | 1 | 54.201 | KV452708.1 | 2911221 | 1-scf00008 | 1 |
| AX-157895738 | 1 | 54.201 | KV452708.1 | 2912004 | 1-scf00008 | 1 |
| AX-157895739 | 1 | 54.201 | KV452708.1 | 2912396 | 1-scf00008 | 1 |
| AX-157853564 | 1 | 54.201 | KV452708.1 | 2912755 | 1-scf00008 | 1 |
| AX-158404358 | 1 | 54.201 | KV452708.1 | 2920078 | 1-scf00008 | 1 |
| AX-157895745 | 1 | 54.201 | KV452708.1 | 2922748 | 1-scf00008 | 1 |
| AX-157895746 | 1 | 54.201 | KV452708.1 | 2923274 | 1-scf00008 | 1 |
| AX-157895756 | 1 | 54.201 | KV452708.1 | 2936176 | 1-scf00008 | 1 |
| AX-157895850 | 1 | 54.201 | KV452708.1 | 3040572 | 1-scf00008 | 1 |
| AX-157757862 | 1 | 54.201 | KV452708.1 | 3077650 | 1-scf00008 | 1 |
| AX-157895892 | 1 | 54.201 | KV452708.1 | 3083512 | 1-scf00008 | 1 |
| AX-157895893 | 1 | 54.201 | KV452708.1 | 3084163 | 1-scf00008 | 1 |
| AX-157895895 | 1 | 54.201 | KV452708.1 | 3085169 | 1-scf00008 | 1 |
| AX-157895898 | 1 | 54.201 | KV452708.1 | 3087977 | 1-scf00008 | 1 |
| AX-157895899 | 1 | 54.201 | KV452708.1 | 3090507 | 1-scf00008 | 1 |
| AX-157895904 | 1 | 54.201 | KV452708.1 | 3096000 | 1-scf00008 | 1 |
| AX-157895906 | 1 | 54.201 | KV452708.1 | 3096950 | 1-scf00008 | 1 |
| AX-157895908 | 1 | 54.201 | KV452708.1 | 3098230 | 1-scf00008 | 1 |
| AX-157895909 | 1 | 54.201 | KV452708.1 | 3099007 | 1-scf00008 | 1 |

|              |   |        |            |         |            |   |
|--------------|---|--------|------------|---------|------------|---|
| AX-157768471 | 1 | 54.201 | KV452709.1 | 171979  | 1-scf00009 | 1 |
| AX-157896375 | 1 | 54.201 | KV452709.1 | 374083  | 1-scf00009 | 1 |
| AX-157896499 | 1 | 54.201 | KV452709.1 | 523893  | 1-scf00009 | 1 |
| AX-157896512 | 1 | 54.201 | KV452709.1 | 547202  | 1-scf00009 | 1 |
| AX-157896542 | 1 | 54.201 | KV452709.1 | 574001  | 1-scf00009 | 1 |
| AX-157896688 | 1 | 54.201 | KV452709.1 | 770424  | 1-scf00009 | 1 |
| AX-157896702 | 1 | 54.201 | KV452709.1 | 782758  | 1-scf00009 | 1 |
| AX-157896707 | 1 | 54.201 | KV452709.1 | 785629  | 1-scf00009 | 1 |
| AX-157896804 | 1 | 54.201 | KV452709.1 | 947097  | 1-scf00009 | 1 |
| AX-157896818 | 1 | 54.201 | KV452709.1 | 969469  | 1-scf00009 | 1 |
| AX-157896854 | 1 | 54.201 | KV452709.1 | 1021937 | 1-scf00009 | 1 |
| AX-157896856 | 1 | 54.201 | KV452709.1 | 1023145 | 1-scf00009 | 1 |
| AX-157897338 | 1 | 54.201 | KV452709.1 | 1725184 | 1-scf00009 | 1 |
| AX-157897605 | 1 | 54.201 | KV452709.1 | 2149268 | 1-scf00009 | 1 |
| AX-157695716 | 1 | 54.201 | KV452709.1 | 2178883 | 1-scf00009 | 1 |
| AX-157897643 | 1 | 54.201 | KV452709.1 | 2203574 | 1-scf00009 | 1 |
| AX-157897663 | 1 | 54.201 | KV452709.1 | 2232781 | 1-scf00009 | 1 |
| AX-157897709 | 1 | 54.201 | KV452709.1 | 2315135 | 1-scf00009 | 1 |
| AX-157897730 | 1 | 54.201 | KV452709.1 | 2341802 | 1-scf00009 | 1 |
| AX-157897805 | 1 | 54.201 | KV452709.1 | 2465895 | 1-scf00009 | 1 |
| AX-157751855 | 1 | 54.201 | KV452709.1 | 2470106 | 1-scf00009 | 1 |
| AX-157897824 | 1 | 54.201 | KV452709.1 | 2490400 | 1-scf00009 | 1 |
| AX-157898003 | 1 | 54.201 | KV452709.1 | 2804697 | 1-scf00009 | 1 |
| AX-157898027 | 1 | 54.201 | KV452709.1 | 2834463 | 1-scf00009 | 1 |
| AX-157898464 | 1 | 54.201 | KV452709.1 | 3735533 | 1-scf00009 | 1 |
| AX-157898467 | 1 | 54.201 | KV452709.1 | 3765348 | 1-scf00009 | 1 |
| AX-157898547 | 1 | 54.201 | KV452709.1 | 3922585 | 1-scf00009 | 1 |
| AX-157898600 | 1 | 54.201 | KV452709.1 | 3983680 | 1-scf00009 | 1 |
| AX-157898601 | 1 | 54.201 | KV452709.1 | 3987593 | 1-scf00009 | 1 |
| AX-157898602 | 1 | 54.201 | KV452709.1 | 3988707 | 1-scf00009 | 1 |
| AX-157898604 | 1 | 54.201 | KV452709.1 | 3990715 | 1-scf00009 | 1 |
| AX-157811184 | 1 | 54.201 | KV452709.1 | 3992528 | 1-scf00009 | 1 |
| AX-157898615 | 1 | 54.201 | KV452709.1 | 4009679 | 1-scf00009 | 1 |
| AX-157898641 | 1 | 54.201 | KV452709.1 | 4051777 | 1-scf00009 | 1 |
| AX-157741241 | 1 | 54.201 | KV452709.1 | 4075498 | 1-scf00009 | 1 |
| AX-157898755 | 1 | 54.201 | KV452709.1 | 4225114 | 1-scf00009 | 1 |
| AX-157898770 | 1 | 54.201 | KV452709.1 | 4244628 | 1-scf00009 | 1 |
| AX-157898834 | 1 | 54.201 | KV452709.1 | 4337503 | 1-scf00009 | 1 |
| AX-157898862 | 1 | 54.201 | KV452709.1 | 4375808 | 1-scf00009 | 1 |
| AX-157899135 | 1 | 54.201 | KV452709.1 | 4720827 | 1-scf00009 | 1 |
| AX-157899238 | 1 | 54.201 | KV452709.1 | 4909185 | 1-scf00009 | 1 |
| AX-157899252 | 1 | 54.201 | KV452709.1 | 4922067 | 1-scf00009 | 1 |
| AX-157899270 | 1 | 54.201 | KV452709.1 | 4951774 | 1-scf00009 | 1 |
| AX-157899280 | 1 | 54.201 | KV452709.1 | 4966921 | 1-scf00009 | 1 |
| AX-157899466 | 1 | 54.201 | KV452709.1 | 5215686 | 1-scf00009 | 1 |
| AX-157899467 | 1 | 54.201 | KV452709.1 | 5216046 | 1-scf00009 | 1 |
| AX-157899503 | 1 | 54.201 | KV452709.1 | 5251766 | 1-scf00009 | 1 |
| AX-157899537 | 1 | 54.201 | KV452709.1 | 5288856 | 1-scf00009 | 1 |
| AX-157899574 | 1 | 54.201 | KV452709.1 | 5329165 | 1-scf00009 | 1 |
| AX-157743848 | 1 | 54.201 | KV452709.1 | 5446494 | 1-scf00009 | 1 |
| AX-157901257 | 1 | 54.201 | KV452711.1 | 1865834 | 1-scf00010 | 1 |

|              |   |        |            |         |            |   |
|--------------|---|--------|------------|---------|------------|---|
| AX-157895753 | 1 | 54.311 | KV452708.1 | 2930805 | 1-scf00008 | 1 |
| AX-157895754 | 1 | 54.311 | KV452708.1 | 2933308 | 1-scf00008 | 1 |
| AX-157895757 | 1 | 54.311 | KV452708.1 | 2936637 | 1-scf00008 | 1 |
| AX-157895758 | 1 | 54.311 | KV452708.1 | 2936871 | 1-scf00008 | 1 |
| AX-157895759 | 1 | 54.311 | KV452708.1 | 2938625 | 1-scf00008 | 1 |
| AX-157895760 | 1 | 54.311 | KV452708.1 | 2940552 | 1-scf00008 | 1 |
| AX-157895768 | 1 | 54.311 | KV452708.1 | 2950829 | 1-scf00008 | 1 |
| AX-157895769 | 1 | 54.311 | KV452708.1 | 2951812 | 1-scf00008 | 1 |
| AX-157895773 | 1 | 54.311 | KV452708.1 | 2956360 | 1-scf00008 | 1 |
| AX-157895775 | 1 | 54.311 | KV452708.1 | 2957869 | 1-scf00008 | 1 |
| AX-157895781 | 1 | 54.311 | KV452708.1 | 2967478 | 1-scf00008 | 1 |
| AX-157708824 | 1 | 54.311 | KV452708.1 | 2967706 | 1-scf00008 | 1 |
| AX-157895786 | 1 | 54.311 | KV452708.1 | 2971281 | 1-scf00008 | 1 |
| AX-157895789 | 1 | 54.311 | KV452708.1 | 2974622 | 1-scf00008 | 1 |
| AX-157895790 | 1 | 54.42  | KV452708.1 | 2975594 | 1-scf00008 | 1 |
| AX-157895791 | 1 | 54.42  | KV452708.1 | 2976946 | 1-scf00008 | 1 |
| AX-157895793 | 1 | 54.42  | KV452708.1 | 2983946 | 1-scf00008 | 1 |
| AX-157895794 | 1 | 54.42  | KV452708.1 | 2984859 | 1-scf00008 | 1 |
| AX-157895795 | 1 | 54.42  | KV452708.1 | 2987119 | 1-scf00008 | 1 |
| AX-157895797 | 1 | 54.42  | KV452708.1 | 2988327 | 1-scf00008 | 1 |
| AX-157895800 | 1 | 54.447 | KV452708.1 | 2990005 | 1-scf00008 | 1 |
| AX-157895802 | 1 | 54.485 | KV452708.1 | 2991396 | 1-scf00008 | 1 |
| AX-157895805 | 1 | 54.529 | KV452708.1 | 2993510 | 1-scf00008 | 1 |
| AX-157810869 | 1 | 54.529 | KV452708.1 | 2993951 | 1-scf00008 | 1 |
| AX-157895806 | 1 | 54.529 | KV452708.1 | 2995500 | 1-scf00008 | 1 |
| AX-157743715 | 1 | 54.529 | KV452708.1 | 2996413 | 1-scf00008 | 1 |
| AX-157895808 | 1 | 54.584 | KV452708.1 | 2998926 | 1-scf00008 | 1 |
| AX-157895851 | 1 | 54.584 | KV452708.1 | 3041729 | 1-scf00008 | 1 |
| AX-157895811 | 1 | 54.638 | KV452708.1 | 3001393 | 1-scf00008 | 1 |
| AX-157895814 | 1 | 54.684 | KV452708.1 | 3002749 | 1-scf00008 | 1 |
| AX-157810738 | 1 | 54.725 | KV452708.1 | 1308681 | 1-scf00008 | 1 |
| AX-157895799 | 1 | 54.725 | KV452708.1 | 2989050 | 1-scf00008 | 1 |
| AX-157895801 | 1 | 54.725 | KV452708.1 | 2990396 | 1-scf00008 | 1 |
| AX-157895804 | 1 | 54.725 | KV452708.1 | 2992782 | 1-scf00008 | 1 |
| AX-157895815 | 1 | 54.725 | KV452708.1 | 3003104 | 1-scf00008 | 1 |
| AX-157895816 | 1 | 54.725 | KV452708.1 | 3003605 | 1-scf00008 | 1 |
| AX-157895822 | 1 | 54.725 | KV452708.1 | 3012518 | 1-scf00008 | 1 |
| AX-157895841 | 1 | 54.725 | KV452708.1 | 3032403 | 1-scf00008 | 1 |
| AX-157745888 | 1 | 54.748 | KV452708.1 | 1928397 | 1-scf00008 | 1 |
| AX-157895581 | 1 | 54.748 | KV452708.1 | 2725589 | 1-scf00008 | 1 |
| AX-157895817 | 1 | 54.748 | KV452708.1 | 3004957 | 1-scf00008 | 1 |
| AX-157895825 | 1 | 54.748 | KV452708.1 | 3016779 | 1-scf00008 | 1 |
| AX-157895826 | 1 | 54.748 | KV452708.1 | 3017117 | 1-scf00008 | 1 |
| AX-157895828 | 1 | 54.748 | KV452708.1 | 3018478 | 1-scf00008 | 1 |
| AX-157895830 | 1 | 54.748 | KV452708.1 | 3019511 | 1-scf00008 | 1 |
| AX-157895832 | 1 | 54.748 | KV452708.1 | 3020715 | 1-scf00008 | 1 |
| AX-157895842 | 1 | 54.748 | KV452708.1 | 3032998 | 1-scf00008 | 1 |
| AX-157810871 | 1 | 54.748 | KV452708.1 | 3040804 | 1-scf00008 | 1 |
| AX-157810872 | 1 | 54.748 | KV452708.1 | 3040895 | 1-scf00008 | 1 |
| AX-158388995 | 1 | 54.748 | KV452708.1 | 3042426 | 1-scf00008 | 1 |
| AX-157895877 | 1 | 54.748 | KV452708.1 | 3065784 | 1-scf00008 | 1 |



|              |   |        |             |         |            |    |
|--------------|---|--------|-------------|---------|------------|----|
| AX-157895903 | 1 | 54.748 | KV452708.1  | 3094920 | 1-scf00008 | 1  |
| AX-157810875 | 1 | 54.816 | KV452708.1  | 3045570 | 1-scf00008 | 1  |
| AX-157810804 | 1 | 54.857 | KV452708.1  | 2021081 | 1-scf00008 | 1  |
| AX-157895468 | 1 | 54.857 | KV452708.1  | 2571563 | 1-scf00008 | 1  |
| AX-157895818 | 1 | 54.857 | KV452708.1  | 3009695 | 1-scf00008 | 1  |
| AX-157895853 | 1 | 54.857 | KV452708.1  | 3042657 | 1-scf00008 | 1  |
| AX-157810873 | 1 | 54.857 | KV452708.1  | 3043357 | 1-scf00008 | 1  |
| AX-157810874 | 1 | 54.857 | KV452708.1  | 3043459 | 1-scf00008 | 1  |
| AX-157895854 | 1 | 54.857 | KV452708.1  | 3043868 | 1-scf00008 | 1  |
| AX-157895855 | 1 | 54.857 | KV452708.1  | 3044401 | 1-scf00008 | 1  |
| AX-157895858 | 1 | 54.857 | KV452708.1  | 3045915 | 1-scf00008 | 1  |
| AX-157895859 | 1 | 54.857 | KV452708.1  | 3046349 | 1-scf00008 | 1  |
| AX-157895860 | 1 | 54.857 | KV452708.1  | 3046522 | 1-scf00008 | 1  |
| AX-157895861 | 1 | 54.857 | KV452708.1  | 3046999 | 1-scf00008 | 1  |
| AX-157895862 | 1 | 54.857 | KV452708.1  | 3047394 | 1-scf00008 | 1  |
| AX-157895867 | 1 | 54.857 | KV452708.1  | 3052866 | 1-scf00008 | 1  |
| AX-157895868 | 1 | 54.857 | KV452708.1  | 3053814 | 1-scf00008 | 1  |
| AX-157810878 | 1 | 54.857 | KV452708.1  | 3055690 | 1-scf00008 | 1  |
| AX-157757756 | 1 | 54.857 | KV452708.1  | 3056319 | 1-scf00008 | 1  |
| AX-157895871 | 1 | 54.857 | KV452708.1  | 3056960 | 1-scf00008 | 1  |
| AX-157895873 | 1 | 54.857 | KV452708.1  | 3058324 | 1-scf00008 | 1  |
| AX-157748588 | 1 | 54.857 | KV452708.1  | 3064412 | 1-scf00008 | 1  |
| AX-157895875 | 1 | 54.857 | KV452708.1  | 3064514 | 1-scf00008 | 1  |
| AX-157895879 | 1 | 54.857 | KV452708.1  | 3067182 | 1-scf00008 | 1  |
| AX-157895882 | 1 | 54.857 | KV452708.1  | 3069179 | 1-scf00008 | 1  |
| AX-157895883 | 1 | 54.857 | KV452708.1  | 3072266 | 1-scf00008 | 1  |
| AX-157895884 | 1 | 54.857 | KV452708.1  | 3072603 | 1-scf00008 | 1  |
| AX-157895886 | 1 | 54.857 | KV452708.1  | 3073868 | 1-scf00008 | 1  |
| AX-157715991 | 1 | 54.857 | KV452708.1  | 3074219 | 1-scf00008 | 1  |
| AX-157726873 | 1 | 54.857 | KV452708.1  | 3078665 | 1-scf00008 | 1  |
| AX-157895900 | 1 | 54.857 | KV452708.1  | 3091256 | 1-scf00008 | 1  |
| AX-157895901 | 1 | 54.857 | KV452708.1  | 3092396 | 1-scf00008 | 1  |
| AX-157739691 | 1 | 54.857 | KV452708.1  | 3093121 | 1-scf00008 | 1  |
| AX-157895907 | 1 | 54.857 | KV452708.1  | 3097547 | 1-scf00008 | 1  |
| AX-157895910 | 1 | 54.857 | KV452708.1  | 3099876 | 1-scf00008 | 1  |
| AX-157895912 | 1 | 54.857 | KV452708.1  | 3101069 | 1-scf00008 | 1  |
| AX-157895949 | 1 | 54.857 | KV452708.1  | 3139689 | 1-scf00008 | 1  |
| AX-157895983 | 1 | 54.857 | KV452708.1  | 3178778 | 1-scf00008 | 1  |
| AX-157896005 | 1 | 54.857 | KV452708.1  | 3200869 | 1-scf00008 | 1  |
| AX-157896045 | 1 | 54.857 | KV452708.1  | 3240350 | 1-scf00008 | 1  |
| AX-157896092 | 1 | 54.857 | KV452708.1  | 3308065 | 1-scf00008 | 1  |
| AX-158404373 | 1 | 54.857 | KV452709.1  | 60401   | 1-scf00009 | 1  |
| AX-157706132 | 1 | 54.857 | 3ML01031818 | 76      | scf07439_1 | UN |
| AX-157895662 | 1 | 54.966 | KV452708.1  | 2816206 | 1-scf00008 | 1  |
| AX-157895762 | 1 | 54.966 | KV452708.1  | 2942236 | 1-scf00008 | 1  |
| AX-157895891 | 1 | 54.966 | KV452708.1  | 3083087 | 1-scf00008 | 1  |
| AX-157895918 | 1 | 54.966 | KV452708.1  | 3107932 | 1-scf00008 | 1  |
| AX-157895920 | 1 | 54.966 | KV452708.1  | 3109244 | 1-scf00008 | 1  |
| AX-157895921 | 1 | 54.966 | KV452708.1  | 3109476 | 1-scf00008 | 1  |
| AX-157895922 | 1 | 54.966 | KV452708.1  | 3110251 | 1-scf00008 | 1  |
| AX-157895923 | 1 | 54.966 | KV452708.1  | 3110987 | 1-scf00008 | 1  |

|              |   |        |            |         |            |   |
|--------------|---|--------|------------|---------|------------|---|
| AX-157895924 | 1 | 54.966 | KV452708.1 | 3111464 | 1-scf00008 | 1 |
| AX-157895925 | 1 | 54.966 | KV452708.1 | 3111908 | 1-scf00008 | 1 |
| AX-157895926 | 1 | 54.966 | KV452708.1 | 3112840 | 1-scf00008 | 1 |
| AX-157895927 | 1 | 54.966 | KV452708.1 | 3115416 | 1-scf00008 | 1 |
| AX-157810879 | 1 | 54.966 | KV452708.1 | 3116344 | 1-scf00008 | 1 |
| AX-157810880 | 1 | 54.966 | KV452708.1 | 3116619 | 1-scf00008 | 1 |
| AX-157810881 | 1 | 54.966 | KV452708.1 | 3117554 | 1-scf00008 | 1 |
| AX-157895928 | 1 | 54.966 | KV452708.1 | 3117812 | 1-scf00008 | 1 |
| AX-157723708 | 1 | 54.966 | KV452708.1 | 3117980 | 1-scf00008 | 1 |
| AX-157895929 | 1 | 54.966 | KV452708.1 | 3119086 | 1-scf00008 | 1 |
| AX-157774832 | 1 | 54.966 | KV452708.1 | 3119534 | 1-scf00008 | 1 |
| AX-157696222 | 1 | 54.966 | KV452708.1 | 3120581 | 1-scf00008 | 1 |
| AX-157695408 | 1 | 54.966 | KV452708.1 | 3123444 | 1-scf00008 | 1 |
| AX-157895931 | 1 | 54.966 | KV452708.1 | 3124139 | 1-scf00008 | 1 |
| AX-157722229 | 1 | 54.966 | KV452708.1 | 3125062 | 1-scf00008 | 1 |
| AX-157895933 | 1 | 54.966 | KV452708.1 | 3125239 | 1-scf00008 | 1 |
| AX-157895934 | 1 | 54.966 | KV452708.1 | 3125691 | 1-scf00008 | 1 |
| AX-157810882 | 1 | 54.966 | KV452708.1 | 3127163 | 1-scf00008 | 1 |
| AX-157895936 | 1 | 54.966 | KV452708.1 | 3127365 | 1-scf00008 | 1 |
| AX-157895937 | 1 | 54.966 | KV452708.1 | 3128240 | 1-scf00008 | 1 |
| AX-157895939 | 1 | 54.966 | KV452708.1 | 3129579 | 1-scf00008 | 1 |
| AX-157895940 | 1 | 54.966 | KV452708.1 | 3130338 | 1-scf00008 | 1 |
| AX-157895941 | 1 | 54.966 | KV452708.1 | 3131413 | 1-scf00008 | 1 |
| AX-157895942 | 1 | 54.966 | KV452708.1 | 3131834 | 1-scf00008 | 1 |
| AX-157895943 | 1 | 54.966 | KV452708.1 | 3132924 | 1-scf00008 | 1 |
| AX-157895944 | 1 | 54.966 | KV452708.1 | 3133876 | 1-scf00008 | 1 |
| AX-157895945 | 1 | 54.966 | KV452708.1 | 3134721 | 1-scf00008 | 1 |
| AX-157895947 | 1 | 54.966 | KV452708.1 | 3136646 | 1-scf00008 | 1 |
| AX-157895948 | 1 | 54.966 | KV452708.1 | 3139202 | 1-scf00008 | 1 |
| AX-157895950 | 1 | 54.966 | KV452708.1 | 3141423 | 1-scf00008 | 1 |
| AX-157895953 | 1 | 54.966 | KV452708.1 | 3142997 | 1-scf00008 | 1 |
| AX-157895955 | 1 | 54.966 | KV452708.1 | 3144037 | 1-scf00008 | 1 |
| AX-157895957 | 1 | 54.966 | KV452708.1 | 3147836 | 1-scf00008 | 1 |
| AX-157895958 | 1 | 54.966 | KV452708.1 | 3148765 | 1-scf00008 | 1 |
| AX-157895959 | 1 | 54.966 | KV452708.1 | 3150518 | 1-scf00008 | 1 |
| AX-157895960 | 1 | 54.966 | KV452708.1 | 3152382 | 1-scf00008 | 1 |
| AX-157895961 | 1 | 54.966 | KV452708.1 | 3152990 | 1-scf00008 | 1 |
| AX-157895962 | 1 | 54.966 | KV452708.1 | 3153930 | 1-scf00008 | 1 |
| AX-157853565 | 1 | 54.966 | KV452708.1 | 3153992 | 1-scf00008 | 1 |
| AX-157895963 | 1 | 54.966 | KV452708.1 | 3156574 | 1-scf00008 | 1 |
| AX-157895964 | 1 | 54.966 | KV452708.1 | 3157914 | 1-scf00008 | 1 |
| AX-157895965 | 1 | 54.966 | KV452708.1 | 3159019 | 1-scf00008 | 1 |
| AX-157726213 | 1 | 54.966 | KV452708.1 | 3159494 | 1-scf00008 | 1 |
| AX-157895968 | 1 | 54.966 | KV452708.1 | 3161608 | 1-scf00008 | 1 |
| AX-157895969 | 1 | 54.966 | KV452708.1 | 3162099 | 1-scf00008 | 1 |
| AX-157895970 | 1 | 54.966 | KV452708.1 | 3162838 | 1-scf00008 | 1 |
| AX-157895971 | 1 | 54.966 | KV452708.1 | 3163752 | 1-scf00008 | 1 |
| AX-157895972 | 1 | 54.966 | KV452708.1 | 3164650 | 1-scf00008 | 1 |
| AX-157895973 | 1 | 54.966 | KV452708.1 | 3165631 | 1-scf00008 | 1 |
| AX-157895974 | 1 | 54.966 | KV452708.1 | 3166000 | 1-scf00008 | 1 |
| AX-157895975 | 1 | 54.966 | KV452708.1 | 3168852 | 1-scf00008 | 1 |

|              |   |        |            |         |            |   |
|--------------|---|--------|------------|---------|------------|---|
| AX-157895976 | 1 | 54.966 | KV452708.1 | 3169994 | 1-scf00008 | 1 |
| AX-157895979 | 1 | 54.966 | KV452708.1 | 3172929 | 1-scf00008 | 1 |
| AX-157895980 | 1 | 54.966 | KV452708.1 | 3175838 | 1-scf00008 | 1 |
| AX-157895982 | 1 | 54.966 | KV452708.1 | 3176716 | 1-scf00008 | 1 |
| AX-157895984 | 1 | 54.966 | KV452708.1 | 3180812 | 1-scf00008 | 1 |
| AX-157895985 | 1 | 54.966 | KV452708.1 | 3181474 | 1-scf00008 | 1 |
| AX-157895986 | 1 | 54.966 | KV452708.1 | 3181807 | 1-scf00008 | 1 |
| AX-157895987 | 1 | 54.966 | KV452708.1 | 3182369 | 1-scf00008 | 1 |
| AX-157895988 | 1 | 54.966 | KV452708.1 | 3182974 | 1-scf00008 | 1 |
| AX-157895989 | 1 | 54.966 | KV452708.1 | 3184718 | 1-scf00008 | 1 |
| AX-157895990 | 1 | 54.966 | KV452708.1 | 3185583 | 1-scf00008 | 1 |
| AX-157895991 | 1 | 54.966 | KV452708.1 | 3186145 | 1-scf00008 | 1 |
| AX-157895992 | 1 | 54.966 | KV452708.1 | 3187179 | 1-scf00008 | 1 |
| AX-157895993 | 1 | 54.966 | KV452708.1 | 3188081 | 1-scf00008 | 1 |
| AX-157895994 | 1 | 54.966 | KV452708.1 | 3189127 | 1-scf00008 | 1 |
| AX-157895995 | 1 | 54.966 | KV452708.1 | 3192101 | 1-scf00008 | 1 |
| AX-157895996 | 1 | 54.966 | KV452708.1 | 3193092 | 1-scf00008 | 1 |
| AX-157895997 | 1 | 54.966 | KV452708.1 | 3194137 | 1-scf00008 | 1 |
| AX-157895998 | 1 | 54.966 | KV452708.1 | 3194910 | 1-scf00008 | 1 |
| AX-157895999 | 1 | 54.966 | KV452708.1 | 3195603 | 1-scf00008 | 1 |
| AX-157896001 | 1 | 54.966 | KV452708.1 | 3196840 | 1-scf00008 | 1 |
| AX-157896002 | 1 | 54.966 | KV452708.1 | 3197840 | 1-scf00008 | 1 |
| AX-157896003 | 1 | 54.966 | KV452708.1 | 3198760 | 1-scf00008 | 1 |
| AX-157896004 | 1 | 54.966 | KV452708.1 | 3199910 | 1-scf00008 | 1 |
| AX-158379130 | 1 | 54.966 | KV452708.1 | 3199968 | 1-scf00008 | 1 |
| AX-157896006 | 1 | 54.966 | KV452708.1 | 3201618 | 1-scf00008 | 1 |
| AX-157896007 | 1 | 54.966 | KV452708.1 | 3203208 | 1-scf00008 | 1 |
| AX-157896008 | 1 | 54.966 | KV452708.1 | 3203668 | 1-scf00008 | 1 |
| AX-157896009 | 1 | 54.966 | KV452708.1 | 3204577 | 1-scf00008 | 1 |
| AX-157896010 | 1 | 54.966 | KV452708.1 | 3205562 | 1-scf00008 | 1 |
| AX-157896011 | 1 | 54.966 | KV452708.1 | 3206330 | 1-scf00008 | 1 |
| AX-157896014 | 1 | 54.966 | KV452708.1 | 3209150 | 1-scf00008 | 1 |
| AX-157896015 | 1 | 54.966 | KV452708.1 | 3210456 | 1-scf00008 | 1 |
| AX-157896016 | 1 | 54.966 | KV452708.1 | 3211412 | 1-scf00008 | 1 |
| AX-157896017 | 1 | 54.966 | KV452708.1 | 3212724 | 1-scf00008 | 1 |
| AX-157896019 | 1 | 54.966 | KV452708.1 | 3214182 | 1-scf00008 | 1 |
| AX-157896021 | 1 | 54.966 | KV452708.1 | 3216080 | 1-scf00008 | 1 |
| AX-157896022 | 1 | 54.966 | KV452708.1 | 3216635 | 1-scf00008 | 1 |
| AX-157896023 | 1 | 54.966 | KV452708.1 | 3217419 | 1-scf00008 | 1 |
| AX-157896025 | 1 | 54.966 | KV452708.1 | 3219087 | 1-scf00008 | 1 |
| AX-157775561 | 1 | 54.966 | KV452708.1 | 3220042 | 1-scf00008 | 1 |
| AX-157896027 | 1 | 54.966 | KV452708.1 | 3222848 | 1-scf00008 | 1 |
| AX-157896028 | 1 | 54.966 | KV452708.1 | 3223513 | 1-scf00008 | 1 |
| AX-157896030 | 1 | 54.966 | KV452708.1 | 3225417 | 1-scf00008 | 1 |
| AX-157896031 | 1 | 54.966 | KV452708.1 | 3226148 | 1-scf00008 | 1 |
| AX-157775535 | 1 | 54.966 | KV452708.1 | 3227197 | 1-scf00008 | 1 |
| AX-157896034 | 1 | 54.966 | KV452708.1 | 3229305 | 1-scf00008 | 1 |
| AX-157896035 | 1 | 54.966 | KV452708.1 | 3230285 | 1-scf00008 | 1 |
| AX-157896036 | 1 | 54.966 | KV452708.1 | 3233770 | 1-scf00008 | 1 |
| AX-157896037 | 1 | 54.966 | KV452708.1 | 3234686 | 1-scf00008 | 1 |
| AX-157896038 | 1 | 54.966 | KV452708.1 | 3235288 | 1-scf00008 | 1 |

|              |   |        |            |         |            |   |
|--------------|---|--------|------------|---------|------------|---|
| AX-157896040 | 1 | 54.966 | KV452708.1 | 3236972 | 1-scf00008 | 1 |
| AX-157896041 | 1 | 54.966 | KV452708.1 | 3237582 | 1-scf00008 | 1 |
| AX-157896047 | 1 | 54.966 | KV452708.1 | 3244762 | 1-scf00008 | 1 |
| AX-158404364 | 1 | 54.966 | KV452708.1 | 3246616 | 1-scf00008 | 1 |
| AX-157810885 | 1 | 54.966 | KV452708.1 | 3252575 | 1-scf00008 | 1 |
| AX-157896056 | 1 | 54.966 | KV452708.1 | 3256307 | 1-scf00008 | 1 |
| AX-157713399 | 1 | 54.966 | KV452708.1 | 3267812 | 1-scf00008 | 1 |
| AX-157896150 | 1 | 54.966 | KV452709.1 | 87842   | 1-scf00009 | 1 |
| AX-157896202 | 1 | 54.966 | KV452709.1 | 156496  | 1-scf00009 | 1 |
| AX-157896204 | 1 | 54.966 | KV452709.1 | 158258  | 1-scf00009 | 1 |
| AX-157896044 | 1 | 55.09  | KV452708.1 | 3239902 | 1-scf00008 | 1 |
| AX-157895966 | 1 | 55.185 | KV452708.1 | 3159876 | 1-scf00008 | 1 |
| AX-157896058 | 1 | 55.185 | KV452708.1 | 3257697 | 1-scf00008 | 1 |
| AX-157719587 | 1 | 55.185 | KV452708.1 | 3257761 | 1-scf00008 | 1 |
| AX-157868506 | 1 | 55.185 | KV452708.1 | 3258305 | 1-scf00008 | 1 |
| AX-157896065 | 1 | 55.185 | KV452708.1 | 3269500 | 1-scf00008 | 1 |
| AX-157896070 | 1 | 55.185 | KV452708.1 | 3280263 | 1-scf00008 | 1 |
| AX-157896071 | 1 | 55.185 | KV452708.1 | 3282136 | 1-scf00008 | 1 |
| AX-157896072 | 1 | 55.185 | KV452708.1 | 3282777 | 1-scf00008 | 1 |
| AX-157896074 | 1 | 55.185 | KV452708.1 | 3283540 | 1-scf00008 | 1 |
| AX-157896076 | 1 | 55.185 | KV452708.1 | 3284392 | 1-scf00008 | 1 |
| AX-157896078 | 1 | 55.185 | KV452708.1 | 3288052 | 1-scf00008 | 1 |
| AX-157896080 | 1 | 55.185 | KV452708.1 | 3290620 | 1-scf00008 | 1 |
| AX-157896082 | 1 | 55.185 | KV452708.1 | 3294070 | 1-scf00008 | 1 |
| AX-157896083 | 1 | 55.185 | KV452708.1 | 3294522 | 1-scf00008 | 1 |
| AX-157810890 | 1 | 55.185 | KV452708.1 | 3296626 | 1-scf00008 | 1 |
| AX-158404365 | 1 | 55.185 | KV452708.1 | 3298281 | 1-scf00008 | 1 |
| AX-157896085 | 1 | 55.185 | KV452708.1 | 3303360 | 1-scf00008 | 1 |
| AX-157896086 | 1 | 55.185 | KV452708.1 | 3304072 | 1-scf00008 | 1 |
| AX-157896088 | 1 | 55.185 | KV452708.1 | 3304864 | 1-scf00008 | 1 |
| AX-157896089 | 1 | 55.185 | KV452708.1 | 3305342 | 1-scf00008 | 1 |
| AX-157896091 | 1 | 55.185 | KV452708.1 | 3307710 | 1-scf00008 | 1 |
| AX-157896093 | 1 | 55.185 | KV452708.1 | 3308675 | 1-scf00008 | 1 |
| AX-157896094 | 1 | 55.185 | KV452708.1 | 3311377 | 1-scf00008 | 1 |
| AX-157896099 | 1 | 55.185 | KV452709.1 | 20515   | 1-scf00009 | 1 |
| AX-157896100 | 1 | 55.185 | KV452709.1 | 20946   | 1-scf00009 | 1 |
| AX-157896101 | 1 | 55.185 | KV452709.1 | 23418   | 1-scf00009 | 1 |
| AX-157896107 | 1 | 55.185 | KV452709.1 | 28358   | 1-scf00009 | 1 |
| AX-157896108 | 1 | 55.185 | KV452709.1 | 29312   | 1-scf00009 | 1 |
| AX-157896109 | 1 | 55.185 | KV452709.1 | 30875   | 1-scf00009 | 1 |
| AX-157896110 | 1 | 55.185 | KV452709.1 | 32115   | 1-scf00009 | 1 |
| AX-157896111 | 1 | 55.185 | KV452709.1 | 32460   | 1-scf00009 | 1 |
| AX-157896113 | 1 | 55.185 | KV452709.1 | 33718   | 1-scf00009 | 1 |
| AX-157896114 | 1 | 55.185 | KV452709.1 | 33925   | 1-scf00009 | 1 |
| AX-157810892 | 1 | 55.185 | KV452709.1 | 34444   | 1-scf00009 | 1 |
| AX-157896115 | 1 | 55.185 | KV452709.1 | 36850   | 1-scf00009 | 1 |
| AX-157896119 | 1 | 55.185 | KV452709.1 | 40362   | 1-scf00009 | 1 |
| AX-157896120 | 1 | 55.185 | KV452709.1 | 41336   | 1-scf00009 | 1 |
| AX-157896123 | 1 | 55.185 | KV452709.1 | 45751   | 1-scf00009 | 1 |
| AX-157896124 | 1 | 55.185 | KV452709.1 | 46191   | 1-scf00009 | 1 |
| AX-157896125 | 1 | 55.185 | KV452709.1 | 46655   | 1-scf00009 | 1 |

|              |   |        |            |         |            |   |
|--------------|---|--------|------------|---------|------------|---|
| AX-158388996 | 1 | 55.185 | KV452709.1 | 51934   | 1-scf00009 | 1 |
| AX-157896144 | 1 | 55.185 | KV452709.1 | 80676   | 1-scf00009 | 1 |
| AX-157896254 | 1 | 55.185 | KV452709.1 | 211797  | 1-scf00009 | 1 |
| AX-157896280 | 1 | 55.185 | KV452709.1 | 245485  | 1-scf00009 | 1 |
| AX-157896583 | 1 | 55.185 | KV452709.1 | 629329  | 1-scf00009 | 1 |
| AX-157896117 | 1 | 55.292 | KV452709.1 | 38318   | 1-scf00009 | 1 |
| AX-157896118 | 1 | 55.292 | KV452709.1 | 39426   | 1-scf00009 | 1 |
| AX-157895967 | 1 | 55.509 | KV452708.1 | 3161191 | 1-scf00008 | 1 |
| AX-157716021 | 1 | 55.509 | KV452708.1 | 3249595 | 1-scf00008 | 1 |
| AX-157896068 | 1 | 55.509 | KV452708.1 | 3271838 | 1-scf00008 | 1 |
| AX-157896127 | 1 | 55.509 | KV452709.1 | 52321   | 1-scf00009 | 1 |
| AX-157896128 | 1 | 55.509 | KV452709.1 | 52876   | 1-scf00009 | 1 |
| AX-157896130 | 1 | 55.509 | KV452709.1 | 56847   | 1-scf00009 | 1 |
| AX-157896131 | 1 | 55.509 | KV452709.1 | 57261   | 1-scf00009 | 1 |
| AX-157896132 | 1 | 55.509 | KV452709.1 | 57819   | 1-scf00009 | 1 |
| AX-158403860 | 1 | 55.509 | KV452709.1 | 60277   | 1-scf00009 | 1 |
| AX-157896133 | 1 | 55.509 | KV452709.1 | 61557   | 1-scf00009 | 1 |
| AX-157896134 | 1 | 55.509 | KV452709.1 | 65551   | 1-scf00009 | 1 |
| AX-157896135 | 1 | 55.509 | KV452709.1 | 66040   | 1-scf00009 | 1 |
| AX-157896136 | 1 | 55.509 | KV452709.1 | 66241   | 1-scf00009 | 1 |
| AX-157810897 | 1 | 55.509 | KV452709.1 | 66744   | 1-scf00009 | 1 |
| AX-157810898 | 1 | 55.509 | KV452709.1 | 66959   | 1-scf00009 | 1 |
| AX-157720868 | 1 | 55.509 | KV452709.1 | 67494   | 1-scf00009 | 1 |
| AX-157896145 | 1 | 55.509 | KV452709.1 | 82622   | 1-scf00009 | 1 |
| AX-157896146 | 1 | 55.509 | KV452709.1 | 83805   | 1-scf00009 | 1 |
| AX-157896166 | 1 | 55.509 | KV452709.1 | 111752  | 1-scf00009 | 1 |
| AX-157810903 | 1 | 55.509 | KV452709.1 | 173533  | 1-scf00009 | 1 |
| AX-157810899 | 1 | 55.512 | KV452709.1 | 74156   | 1-scf00009 | 1 |
| AX-157896143 | 1 | 55.512 | KV452709.1 | 80318   | 1-scf00009 | 1 |
| AX-157896141 | 1 | 55.515 | KV452709.1 | 79303   | 1-scf00009 | 1 |
| AX-157896147 | 1 | 55.518 | KV452709.1 | 85170   | 1-scf00009 | 1 |
| AX-157724475 | 1 | 55.535 | KV452709.1 | 86680   | 1-scf00009 | 1 |
| AX-157896151 | 1 | 55.569 | KV452709.1 | 88698   | 1-scf00009 | 1 |
| AX-157896152 | 1 | 55.608 | KV452709.1 | 89851   | 1-scf00009 | 1 |
| AX-157810746 | 1 | 55.618 | KV452708.1 | 1387682 | 1-scf00008 | 1 |
| AX-157810748 | 1 | 55.618 | KV452708.1 | 1414480 | 1-scf00008 | 1 |
| AX-157894874 | 1 | 55.618 | KV452708.1 | 1511009 | 1-scf00008 | 1 |
| AX-157894875 | 1 | 55.618 | KV452708.1 | 1511707 | 1-scf00008 | 1 |
| AX-157894876 | 1 | 55.618 | KV452708.1 | 1511999 | 1-scf00008 | 1 |
| AX-157895977 | 1 | 55.618 | KV452708.1 | 3171054 | 1-scf00008 | 1 |
| AX-157853566 | 1 | 55.618 | KV452708.1 | 3236484 | 1-scf00008 | 1 |
| AX-157810893 | 1 | 55.618 | KV452709.1 | 41609   | 1-scf00009 | 1 |
| AX-157896121 | 1 | 55.618 | KV452709.1 | 42649   | 1-scf00009 | 1 |
| AX-157810894 | 1 | 55.618 | KV452709.1 | 42999   | 1-scf00009 | 1 |
| AX-157896167 | 1 | 55.618 | KV452709.1 | 114743  | 1-scf00009 | 1 |
| AX-157896171 | 1 | 55.618 | KV452709.1 | 120608  | 1-scf00009 | 1 |
| AX-157896177 | 1 | 55.618 | KV452709.1 | 126408  | 1-scf00009 | 1 |
| AX-157896178 | 1 | 55.618 | KV452709.1 | 127031  | 1-scf00009 | 1 |
| AX-157896369 | 1 | 55.618 | KV452709.1 | 366680  | 1-scf00009 | 1 |
| AX-157896506 | 1 | 55.618 | KV452709.1 | 540626  | 1-scf00009 | 1 |
| AX-157896507 | 1 | 55.618 | KV452709.1 | 541030  | 1-scf00009 | 1 |

|              |   |        |            |         |                 |    |
|--------------|---|--------|------------|---------|-----------------|----|
| AX-157896537 | 1 | 55.618 | KV452709.1 | 568688  | 1-scf00009      | 1  |
| AX-157696662 | 1 | 55.618 | FI894255.1 | 214     | 1-ORI212 lctalk | UN |
| AX-157896055 | 1 | 55.837 | KV452708.1 | 3255723 | 1-scf00008      | 1  |
| AX-157896067 | 1 | 55.837 | KV452708.1 | 3270390 | 1-scf00008      | 1  |
| AX-157896112 | 1 | 55.837 | KV452709.1 | 33469   | 1-scf00009      | 1  |
| AX-157896122 | 1 | 55.837 | KV452709.1 | 44938   | 1-scf00009      | 1  |
| AX-157896183 | 1 | 55.837 | KV452709.1 | 135409  | 1-scf00009      | 1  |
| AX-157896185 | 1 | 55.837 | KV452709.1 | 139171  | 1-scf00009      | 1  |
| AX-157896189 | 1 | 55.837 | KV452709.1 | 141734  | 1-scf00009      | 1  |
| AX-157896190 | 1 | 55.837 | KV452709.1 | 142140  | 1-scf00009      | 1  |
| AX-157896193 | 1 | 55.837 | KV452709.1 | 145258  | 1-scf00009      | 1  |
| AX-157896199 | 1 | 55.837 | KV452709.1 | 152351  | 1-scf00009      | 1  |
| AX-157896201 | 1 | 55.837 | KV452709.1 | 154327  | 1-scf00009      | 1  |
| AX-157896208 | 1 | 55.837 | KV452709.1 | 166541  | 1-scf00009      | 1  |
| AX-157896210 | 1 | 55.837 | KV452709.1 | 167904  | 1-scf00009      | 1  |
| AX-157810928 | 1 | 55.837 | KV452709.1 | 486847  | 1-scf00009      | 1  |
| AX-157896540 | 1 | 55.837 | KV452709.1 | 572632  | 1-scf00009      | 1  |
| AX-157896646 | 1 | 55.837 | KV452709.1 | 720365  | 1-scf00009      | 1  |
| AX-157810904 | 1 | 55.863 | KV452709.1 | 174113  | 1-scf00009      | 1  |
| AX-157896225 | 1 | 55.917 | KV452709.1 | 184795  | 1-scf00009      | 1  |
| AX-157896220 | 1 | 55.946 | KV452709.1 | 180960  | 1-scf00009      | 1  |
| AX-157896224 | 1 | 55.946 | KV452709.1 | 184310  | 1-scf00009      | 1  |
| AX-157896226 | 1 | 55.946 | KV452709.1 | 185418  | 1-scf00009      | 1  |
| AX-157896231 | 1 | 55.946 | KV452709.1 | 189372  | 1-scf00009      | 1  |
| AX-157896234 | 1 | 55.946 | KV452709.1 | 193420  | 1-scf00009      | 1  |
| AX-157810905 | 1 | 55.946 | KV452709.1 | 195802  | 1-scf00009      | 1  |
| AX-157896240 | 1 | 55.946 | KV452709.1 | 198197  | 1-scf00009      | 1  |
| AX-158388998 | 1 | 55.946 | KV452709.1 | 201004  | 1-scf00009      | 1  |
| AX-157810907 | 1 | 55.946 | KV452709.1 | 202260  | 1-scf00009      | 1  |
| AX-157896245 | 1 | 55.946 | KV452709.1 | 202872  | 1-scf00009      | 1  |
| AX-157896251 | 1 | 55.946 | KV452709.1 | 210508  | 1-scf00009      | 1  |
| AX-157896260 | 1 | 55.946 | KV452709.1 | 218620  | 1-scf00009      | 1  |
| AX-157896261 | 1 | 55.946 | KV452709.1 | 219716  | 1-scf00009      | 1  |
| AX-157896262 | 1 | 55.946 | KV452709.1 | 220252  | 1-scf00009      | 1  |
| AX-157810909 | 1 | 55.946 | KV452709.1 | 220953  | 1-scf00009      | 1  |
| AX-157896265 | 1 | 55.946 | KV452709.1 | 223500  | 1-scf00009      | 1  |
| AX-157896267 | 1 | 55.946 | KV452709.1 | 226553  | 1-scf00009      | 1  |
| AX-157810912 | 1 | 55.946 | KV452709.1 | 228733  | 1-scf00009      | 1  |
| AX-157748844 | 1 | 55.946 | KV452709.1 | 228920  | 1-scf00009      | 1  |
| AX-157896273 | 1 | 55.946 | KV452709.1 | 234383  | 1-scf00009      | 1  |
| AX-157810913 | 1 | 55.946 | KV452709.1 | 234885  | 1-scf00009      | 1  |
| AX-157896274 | 1 | 55.946 | KV452709.1 | 235687  | 1-scf00009      | 1  |
| AX-157810914 | 1 | 55.946 | KV452709.1 | 237684  | 1-scf00009      | 1  |
| AX-157894856 | 1 | 56.055 | KV452708.1 | 1475430 | 1-scf00008      | 1  |
| AX-157894857 | 1 | 56.055 | KV452708.1 | 1475828 | 1-scf00008      | 1  |
| AX-157895114 | 1 | 56.055 | KV452708.1 | 1866451 | 1-scf00008      | 1  |
| AX-157810851 | 1 | 56.055 | KV452708.1 | 2690214 | 1-scf00008      | 1  |
| AX-157895579 | 1 | 56.055 | KV452708.1 | 2723893 | 1-scf00008      | 1  |
| AX-157895596 | 1 | 56.055 | KV452708.1 | 2740689 | 1-scf00008      | 1  |
| AX-157895619 | 1 | 56.055 | KV452708.1 | 2761959 | 1-scf00008      | 1  |
| AX-157810886 | 1 | 56.055 | KV452708.1 | 3259584 | 1-scf00008      | 1  |

|              |   |        |            |        |            |   |
|--------------|---|--------|------------|--------|------------|---|
| AX-157896153 | 1 | 56.055 | KV452709.1 | 90215  | 1-scf00009 | 1 |
| AX-157896182 | 1 | 56.055 | KV452709.1 | 134610 | 1-scf00009 | 1 |
| AX-157896186 | 1 | 56.055 | KV452709.1 | 140257 | 1-scf00009 | 1 |
| AX-157896192 | 1 | 56.055 | KV452709.1 | 143373 | 1-scf00009 | 1 |
| AX-157896198 | 1 | 56.055 | KV452709.1 | 151430 | 1-scf00009 | 1 |
| AX-157896217 | 1 | 56.055 | KV452709.1 | 178498 | 1-scf00009 | 1 |
| AX-157896228 | 1 | 56.055 | KV452709.1 | 186496 | 1-scf00009 | 1 |
| AX-157896233 | 1 | 56.055 | KV452709.1 | 191522 | 1-scf00009 | 1 |
| AX-157896235 | 1 | 56.055 | KV452709.1 | 194185 | 1-scf00009 | 1 |
| AX-158379132 | 1 | 56.055 | KV452709.1 | 199540 | 1-scf00009 | 1 |
| AX-157896246 | 1 | 56.055 | KV452709.1 | 203120 | 1-scf00009 | 1 |
| AX-157896247 | 1 | 56.055 | KV452709.1 | 203390 | 1-scf00009 | 1 |
| AX-157896255 | 1 | 56.055 | KV452709.1 | 215222 | 1-scf00009 | 1 |
| AX-157810911 | 1 | 56.055 | KV452709.1 | 228464 | 1-scf00009 | 1 |
| AX-157748252 | 1 | 56.055 | KV452709.1 | 239469 | 1-scf00009 | 1 |
| AX-157896276 | 1 | 56.055 | KV452709.1 | 240692 | 1-scf00009 | 1 |
| AX-157896277 | 1 | 56.055 | KV452709.1 | 241384 | 1-scf00009 | 1 |
| AX-157896284 | 1 | 56.055 | KV452709.1 | 258857 | 1-scf00009 | 1 |
| AX-157896287 | 1 | 56.055 | KV452709.1 | 263094 | 1-scf00009 | 1 |
| AX-157896289 | 1 | 56.055 | KV452709.1 | 264727 | 1-scf00009 | 1 |
| AX-157896291 | 1 | 56.055 | KV452709.1 | 266720 | 1-scf00009 | 1 |
| AX-157868510 | 1 | 56.055 | KV452709.1 | 270683 | 1-scf00009 | 1 |
| AX-157896294 | 1 | 56.055 | KV452709.1 | 270894 | 1-scf00009 | 1 |
| AX-157745538 | 1 | 56.055 | KV452709.1 | 287878 | 1-scf00009 | 1 |
| AX-157896303 | 1 | 56.055 | KV452709.1 | 288848 | 1-scf00009 | 1 |
| AX-157868511 | 1 | 56.055 | KV452709.1 | 292895 | 1-scf00009 | 1 |
| AX-157810917 | 1 | 56.055 | KV452709.1 | 293404 | 1-scf00009 | 1 |
| AX-157896306 | 1 | 56.055 | KV452709.1 | 293846 | 1-scf00009 | 1 |
| AX-157896311 | 1 | 56.055 | KV452709.1 | 303085 | 1-scf00009 | 1 |
| AX-157896315 | 1 | 56.055 | KV452709.1 | 307399 | 1-scf00009 | 1 |
| AX-157896318 | 1 | 56.055 | KV452709.1 | 309792 | 1-scf00009 | 1 |
| AX-157896320 | 1 | 56.055 | KV452709.1 | 311479 | 1-scf00009 | 1 |
| AX-157896325 | 1 | 56.055 | KV452709.1 | 316836 | 1-scf00009 | 1 |
| AX-157896326 | 1 | 56.055 | KV452709.1 | 317269 | 1-scf00009 | 1 |
| AX-157722891 | 1 | 56.055 | KV452709.1 | 318824 | 1-scf00009 | 1 |
| AX-157896329 | 1 | 56.055 | KV452709.1 | 319035 | 1-scf00009 | 1 |
| AX-157896330 | 1 | 56.055 | KV452709.1 | 319574 | 1-scf00009 | 1 |
| AX-157896335 | 1 | 56.055 | KV452709.1 | 326933 | 1-scf00009 | 1 |
| AX-157896338 | 1 | 56.055 | KV452709.1 | 332311 | 1-scf00009 | 1 |
| AX-157896339 | 1 | 56.055 | KV452709.1 | 334433 | 1-scf00009 | 1 |
| AX-157896340 | 1 | 56.055 | KV452709.1 | 336222 | 1-scf00009 | 1 |
| AX-157896342 | 1 | 56.055 | KV452709.1 | 337975 | 1-scf00009 | 1 |
| AX-157853567 | 1 | 56.055 | KV452709.1 | 338756 | 1-scf00009 | 1 |
| AX-157896343 | 1 | 56.055 | KV452709.1 | 339181 | 1-scf00009 | 1 |
| AX-157896344 | 1 | 56.055 | KV452709.1 | 340775 | 1-scf00009 | 1 |
| AX-157896345 | 1 | 56.055 | KV452709.1 | 341873 | 1-scf00009 | 1 |
| AX-157896348 | 1 | 56.055 | KV452709.1 | 348765 | 1-scf00009 | 1 |
| AX-158388999 | 1 | 56.055 | KV452709.1 | 352098 | 1-scf00009 | 1 |
| AX-157896352 | 1 | 56.055 | KV452709.1 | 352850 | 1-scf00009 | 1 |
| AX-157896357 | 1 | 56.055 | KV452709.1 | 356467 | 1-scf00009 | 1 |
| AX-158421783 | 1 | 56.055 | KV452709.1 | 357596 | 1-scf00009 | 1 |

|              |   |        |            |        |            |   |
|--------------|---|--------|------------|--------|------------|---|
| AX-157896358 | 1 | 56.055 | KV452709.1 | 358051 | 1-scf00009 | 1 |
| AX-157896359 | 1 | 56.055 | KV452709.1 | 359147 | 1-scf00009 | 1 |
| AX-157896360 | 1 | 56.055 | KV452709.1 | 360185 | 1-scf00009 | 1 |
| AX-157896362 | 1 | 56.055 | KV452709.1 | 363107 | 1-scf00009 | 1 |
| AX-157896363 | 1 | 56.055 | KV452709.1 | 363232 | 1-scf00009 | 1 |
| AX-157896365 | 1 | 56.055 | KV452709.1 | 364317 | 1-scf00009 | 1 |
| AX-157896366 | 1 | 56.055 | KV452709.1 | 364801 | 1-scf00009 | 1 |
| AX-157896367 | 1 | 56.055 | KV452709.1 | 365269 | 1-scf00009 | 1 |
| AX-157896368 | 1 | 56.055 | KV452709.1 | 366254 | 1-scf00009 | 1 |
| AX-157896370 | 1 | 56.055 | KV452709.1 | 367152 | 1-scf00009 | 1 |
| AX-157701266 | 1 | 56.055 | KV452709.1 | 367743 | 1-scf00009 | 1 |
| AX-157896373 | 1 | 56.055 | KV452709.1 | 372214 | 1-scf00009 | 1 |
| AX-157696657 | 1 | 56.055 | KV452709.1 | 372869 | 1-scf00009 | 1 |
| AX-157896374 | 1 | 56.055 | KV452709.1 | 373461 | 1-scf00009 | 1 |
| AX-158389000 | 1 | 56.055 | KV452709.1 | 376385 | 1-scf00009 | 1 |
| AX-157896377 | 1 | 56.055 | KV452709.1 | 377332 | 1-scf00009 | 1 |
| AX-157896378 | 1 | 56.055 | KV452709.1 | 377926 | 1-scf00009 | 1 |
| AX-157896379 | 1 | 56.055 | KV452709.1 | 378896 | 1-scf00009 | 1 |
| AX-157896381 | 1 | 56.055 | KV452709.1 | 380607 | 1-scf00009 | 1 |
| AX-157896382 | 1 | 56.055 | KV452709.1 | 381300 | 1-scf00009 | 1 |
| AX-157896383 | 1 | 56.055 | KV452709.1 | 382778 | 1-scf00009 | 1 |
| AX-157896384 | 1 | 56.055 | KV452709.1 | 383495 | 1-scf00009 | 1 |
| AX-157896385 | 1 | 56.055 | KV452709.1 | 384736 | 1-scf00009 | 1 |
| AX-157896386 | 1 | 56.055 | KV452709.1 | 386230 | 1-scf00009 | 1 |
| AX-157896387 | 1 | 56.055 | KV452709.1 | 386978 | 1-scf00009 | 1 |
| AX-157896388 | 1 | 56.055 | KV452709.1 | 387620 | 1-scf00009 | 1 |
| AX-157896389 | 1 | 56.055 | KV452709.1 | 387895 | 1-scf00009 | 1 |
| AX-157896390 | 1 | 56.055 | KV452709.1 | 388704 | 1-scf00009 | 1 |
| AX-157896392 | 1 | 56.055 | KV452709.1 | 390151 | 1-scf00009 | 1 |
| AX-157896393 | 1 | 56.055 | KV452709.1 | 390837 | 1-scf00009 | 1 |
| AX-157896394 | 1 | 56.055 | KV452709.1 | 391839 | 1-scf00009 | 1 |
| AX-157896395 | 1 | 56.055 | KV452709.1 | 392781 | 1-scf00009 | 1 |
| AX-157896396 | 1 | 56.055 | KV452709.1 | 393700 | 1-scf00009 | 1 |
| AX-157896397 | 1 | 56.055 | KV452709.1 | 393992 | 1-scf00009 | 1 |
| AX-157896398 | 1 | 56.055 | KV452709.1 | 396348 | 1-scf00009 | 1 |
| AX-157810920 | 1 | 56.055 | KV452709.1 | 396486 | 1-scf00009 | 1 |
| AX-157896399 | 1 | 56.055 | KV452709.1 | 397922 | 1-scf00009 | 1 |
| AX-157722210 | 1 | 56.055 | KV452709.1 | 399636 | 1-scf00009 | 1 |
| AX-157896400 | 1 | 56.055 | KV452709.1 | 400481 | 1-scf00009 | 1 |
| AX-157896401 | 1 | 56.055 | KV452709.1 | 401141 | 1-scf00009 | 1 |
| AX-157718610 | 1 | 56.055 | KV452709.1 | 402276 | 1-scf00009 | 1 |
| AX-157896404 | 1 | 56.055 | KV452709.1 | 404726 | 1-scf00009 | 1 |
| AX-157896408 | 1 | 56.055 | KV452709.1 | 407926 | 1-scf00009 | 1 |
| AX-157896409 | 1 | 56.055 | KV452709.1 | 409058 | 1-scf00009 | 1 |
| AX-157896410 | 1 | 56.055 | KV452709.1 | 410564 | 1-scf00009 | 1 |
| AX-157896412 | 1 | 56.055 | KV452709.1 | 414344 | 1-scf00009 | 1 |
| AX-157896417 | 1 | 56.055 | KV452709.1 | 419383 | 1-scf00009 | 1 |
| AX-157896418 | 1 | 56.055 | KV452709.1 | 420542 | 1-scf00009 | 1 |
| AX-157896422 | 1 | 56.055 | KV452709.1 | 426499 | 1-scf00009 | 1 |
| AX-157896423 | 1 | 56.055 | KV452709.1 | 427480 | 1-scf00009 | 1 |
| AX-157896425 | 1 | 56.055 | KV452709.1 | 428044 | 1-scf00009 | 1 |



|              |   |        |            |         |            |   |
|--------------|---|--------|------------|---------|------------|---|
| AX-158404380 | 1 | 56.055 | KV452709.1 | 435434  | 1-scf00009 | 1 |
| AX-157896430 | 1 | 56.055 | KV452709.1 | 439762  | 1-scf00009 | 1 |
| AX-157896431 | 1 | 56.055 | KV452709.1 | 440068  | 1-scf00009 | 1 |
| AX-157810922 | 1 | 56.055 | KV452709.1 | 440705  | 1-scf00009 | 1 |
| AX-157810923 | 1 | 56.055 | KV452709.1 | 443522  | 1-scf00009 | 1 |
| AX-157896488 | 1 | 56.055 | KV452709.1 | 507381  | 1-scf00009 | 1 |
| AX-157896496 | 1 | 56.055 | KV452709.1 | 518997  | 1-scf00009 | 1 |
| AX-157896502 | 1 | 56.055 | KV452709.1 | 532005  | 1-scf00009 | 1 |
| AX-157896624 | 1 | 56.055 | KV452709.1 | 691488  | 1-scf00009 | 1 |
| AX-157749792 | 1 | 56.055 | KV452709.1 | 729953  | 1-scf00009 | 1 |
| AX-157896663 | 1 | 56.055 | KV452709.1 | 740750  | 1-scf00009 | 1 |
| AX-157810997 | 1 | 56.055 | KV452709.1 | 1510942 | 1-scf00009 | 1 |
| AX-157897479 | 1 | 56.055 | KV452709.1 | 1945026 | 1-scf00009 | 1 |
| AX-158404375 | 1 | 56.164 | KV452709.1 | 76045   | 1-scf00009 | 1 |
| AX-157896242 | 1 | 56.164 | KV452709.1 | 199405  | 1-scf00009 | 1 |
| AX-157896252 | 1 | 56.164 | KV452709.1 | 210826  | 1-scf00009 | 1 |
| AX-157896253 | 1 | 56.164 | KV452709.1 | 211581  | 1-scf00009 | 1 |
| AX-157896269 | 1 | 56.164 | KV452709.1 | 230930  | 1-scf00009 | 1 |
| AX-157896270 | 1 | 56.164 | KV452709.1 | 231079  | 1-scf00009 | 1 |
| AX-157896271 | 1 | 56.164 | KV452709.1 | 232073  | 1-scf00009 | 1 |
| AX-157896278 | 1 | 56.164 | KV452709.1 | 242897  | 1-scf00009 | 1 |
| AX-157896349 | 1 | 56.164 | KV452709.1 | 349156  | 1-scf00009 | 1 |
| AX-157896351 | 1 | 56.164 | KV452709.1 | 351633  | 1-scf00009 | 1 |
| AX-157896355 | 1 | 56.164 | KV452709.1 | 354812  | 1-scf00009 | 1 |
| AX-157896364 | 1 | 56.164 | KV452709.1 | 364277  | 1-scf00009 | 1 |
| AX-157896402 | 1 | 56.164 | KV452709.1 | 401806  | 1-scf00009 | 1 |
| AX-157896403 | 1 | 56.164 | KV452709.1 | 403737  | 1-scf00009 | 1 |
| AX-157896411 | 1 | 56.164 | KV452709.1 | 412068  | 1-scf00009 | 1 |
| AX-157810921 | 1 | 56.164 | KV452709.1 | 433183  | 1-scf00009 | 1 |
| AX-157810924 | 1 | 56.164 | KV452709.1 | 444063  | 1-scf00009 | 1 |
| AX-157896434 | 1 | 56.164 | KV452709.1 | 444631  | 1-scf00009 | 1 |
| AX-157896435 | 1 | 56.164 | KV452709.1 | 444946  | 1-scf00009 | 1 |
| AX-157896436 | 1 | 56.164 | KV452709.1 | 446359  | 1-scf00009 | 1 |
| AX-157896439 | 1 | 56.164 | KV452709.1 | 449920  | 1-scf00009 | 1 |
| AX-157896440 | 1 | 56.164 | KV452709.1 | 450894  | 1-scf00009 | 1 |
| AX-157896441 | 1 | 56.164 | KV452709.1 | 451823  | 1-scf00009 | 1 |
| AX-157896443 | 1 | 56.164 | KV452709.1 | 454761  | 1-scf00009 | 1 |
| AX-157896444 | 1 | 56.164 | KV452709.1 | 455473  | 1-scf00009 | 1 |
| AX-157896446 | 1 | 56.164 | KV452709.1 | 458054  | 1-scf00009 | 1 |
| AX-157896447 | 1 | 56.164 | KV452709.1 | 458465  | 1-scf00009 | 1 |
| AX-157896451 | 1 | 56.164 | KV452709.1 | 461150  | 1-scf00009 | 1 |
| AX-157853570 | 1 | 56.164 | KV452709.1 | 463233  | 1-scf00009 | 1 |
| AX-157896453 | 1 | 56.164 | KV452709.1 | 463990  | 1-scf00009 | 1 |
| AX-157896455 | 1 | 56.164 | KV452709.1 | 467937  | 1-scf00009 | 1 |
| AX-157896458 | 1 | 56.164 | KV452709.1 | 470218  | 1-scf00009 | 1 |
| AX-157896459 | 1 | 56.164 | KV452709.1 | 470967  | 1-scf00009 | 1 |
| AX-157896461 | 1 | 56.164 | KV452709.1 | 473523  | 1-scf00009 | 1 |
| AX-157896463 | 1 | 56.164 | KV452709.1 | 475208  | 1-scf00009 | 1 |
| AX-157896464 | 1 | 56.164 | KV452709.1 | 476103  | 1-scf00009 | 1 |
| AX-157896466 | 1 | 56.164 | KV452709.1 | 476824  | 1-scf00009 | 1 |
| AX-157726663 | 1 | 56.164 | KV452709.1 | 480886  | 1-scf00009 | 1 |

|              |   |        |            |        |            |   |
|--------------|---|--------|------------|--------|------------|---|
| AX-157896470 | 1 | 56.164 | KV452709.1 | 481369 | 1-scf00009 | 1 |
| AX-157896472 | 1 | 56.164 | KV452709.1 | 482922 | 1-scf00009 | 1 |
| AX-157896473 | 1 | 56.164 | KV452709.1 | 483745 | 1-scf00009 | 1 |
| AX-157896474 | 1 | 56.164 | KV452709.1 | 485000 | 1-scf00009 | 1 |
| AX-157748632 | 1 | 56.164 | KV452709.1 | 485711 | 1-scf00009 | 1 |
| AX-157896475 | 1 | 56.164 | KV452709.1 | 487274 | 1-scf00009 | 1 |
| AX-157896477 | 1 | 56.164 | KV452709.1 | 492787 | 1-scf00009 | 1 |
| AX-157810929 | 1 | 56.164 | KV452709.1 | 492823 | 1-scf00009 | 1 |
| AX-157896479 | 1 | 56.164 | KV452709.1 | 495511 | 1-scf00009 | 1 |
| AX-158404381 | 1 | 56.164 | KV452709.1 | 496119 | 1-scf00009 | 1 |
| AX-158404382 | 1 | 56.164 | KV452709.1 | 496280 | 1-scf00009 | 1 |
| AX-157896480 | 1 | 56.164 | KV452709.1 | 496846 | 1-scf00009 | 1 |
| AX-157896481 | 1 | 56.164 | KV452709.1 | 497732 | 1-scf00009 | 1 |
| AX-157896482 | 1 | 56.164 | KV452709.1 | 498016 | 1-scf00009 | 1 |
| AX-157896485 | 1 | 56.164 | KV452709.1 | 504129 | 1-scf00009 | 1 |
| AX-157896486 | 1 | 56.164 | KV452709.1 | 505886 | 1-scf00009 | 1 |
| AX-157896491 | 1 | 56.164 | KV452709.1 | 512843 | 1-scf00009 | 1 |
| AX-157896493 | 1 | 56.164 | KV452709.1 | 515844 | 1-scf00009 | 1 |
| AX-157810931 | 1 | 56.164 | KV452709.1 | 516324 | 1-scf00009 | 1 |
| AX-157896494 | 1 | 56.164 | KV452709.1 | 517801 | 1-scf00009 | 1 |
| AX-157896495 | 1 | 56.164 | KV452709.1 | 518388 | 1-scf00009 | 1 |
| AX-157896501 | 1 | 56.164 | KV452709.1 | 531349 | 1-scf00009 | 1 |
| AX-157896504 | 1 | 56.164 | KV452709.1 | 535256 | 1-scf00009 | 1 |
| AX-157896505 | 1 | 56.164 | KV452709.1 | 538326 | 1-scf00009 | 1 |
| AX-157896508 | 1 | 56.164 | KV452709.1 | 542552 | 1-scf00009 | 1 |
| AX-157896509 | 1 | 56.164 | KV452709.1 | 544696 | 1-scf00009 | 1 |
| AX-157896510 | 1 | 56.164 | KV452709.1 | 545105 | 1-scf00009 | 1 |
| AX-157896511 | 1 | 56.164 | KV452709.1 | 545470 | 1-scf00009 | 1 |
| AX-157896513 | 1 | 56.164 | KV452709.1 | 547763 | 1-scf00009 | 1 |
| AX-157896517 | 1 | 56.164 | KV452709.1 | 552610 | 1-scf00009 | 1 |
| AX-157896521 | 1 | 56.164 | KV452709.1 | 555148 | 1-scf00009 | 1 |
| AX-157896522 | 1 | 56.164 | KV452709.1 | 555372 | 1-scf00009 | 1 |
| AX-157700820 | 1 | 56.164 | KV452709.1 | 557700 | 1-scf00009 | 1 |
| AX-157896526 | 1 | 56.164 | KV452709.1 | 557882 | 1-scf00009 | 1 |
| AX-157896528 | 1 | 56.164 | KV452709.1 | 559515 | 1-scf00009 | 1 |
| AX-157896529 | 1 | 56.164 | KV452709.1 | 560352 | 1-scf00009 | 1 |
| AX-157896530 | 1 | 56.164 | KV452709.1 | 560766 | 1-scf00009 | 1 |
| AX-157896532 | 1 | 56.164 | KV452709.1 | 562121 | 1-scf00009 | 1 |
| AX-157896533 | 1 | 56.164 | KV452709.1 | 562333 | 1-scf00009 | 1 |
| AX-157758456 | 1 | 56.164 | KV452709.1 | 562448 | 1-scf00009 | 1 |
| AX-157896536 | 1 | 56.164 | KV452709.1 | 568305 | 1-scf00009 | 1 |
| AX-157896539 | 1 | 56.164 | KV452709.1 | 571621 | 1-scf00009 | 1 |
| AX-157896541 | 1 | 56.164 | KV452709.1 | 573150 | 1-scf00009 | 1 |
| AX-157896543 | 1 | 56.164 | KV452709.1 | 575532 | 1-scf00009 | 1 |
| AX-157896544 | 1 | 56.164 | KV452709.1 | 576220 | 1-scf00009 | 1 |
| AX-157896545 | 1 | 56.164 | KV452709.1 | 578545 | 1-scf00009 | 1 |
| AX-157896547 | 1 | 56.164 | KV452709.1 | 579966 | 1-scf00009 | 1 |
| AX-157896548 | 1 | 56.164 | KV452709.1 | 580670 | 1-scf00009 | 1 |
| AX-157896549 | 1 | 56.164 | KV452709.1 | 581678 | 1-scf00009 | 1 |
| AX-157896551 | 1 | 56.164 | KV452709.1 | 584299 | 1-scf00009 | 1 |
| AX-157896553 | 1 | 56.164 | KV452709.1 | 585906 | 1-scf00009 | 1 |

|              |   |        |            |        |            |   |
|--------------|---|--------|------------|--------|------------|---|
| AX-157896554 | 1 | 56.164 | KV452709.1 | 586381 | 1-scf00009 | 1 |
| AX-157896555 | 1 | 56.164 | KV452709.1 | 588474 | 1-scf00009 | 1 |
| AX-157896557 | 1 | 56.164 | KV452709.1 | 591669 | 1-scf00009 | 1 |
| AX-157896558 | 1 | 56.164 | KV452709.1 | 592362 | 1-scf00009 | 1 |
| AX-157896560 | 1 | 56.164 | KV452709.1 | 597876 | 1-scf00009 | 1 |
| AX-157896563 | 1 | 56.164 | KV452709.1 | 602412 | 1-scf00009 | 1 |
| AX-157896564 | 1 | 56.164 | KV452709.1 | 603533 | 1-scf00009 | 1 |
| AX-157896565 | 1 | 56.164 | KV452709.1 | 604405 | 1-scf00009 | 1 |
| AX-157896566 | 1 | 56.164 | KV452709.1 | 605419 | 1-scf00009 | 1 |
| AX-157896567 | 1 | 56.164 | KV452709.1 | 607692 | 1-scf00009 | 1 |
| AX-157896569 | 1 | 56.164 | KV452709.1 | 608895 | 1-scf00009 | 1 |
| AX-157896570 | 1 | 56.164 | KV452709.1 | 609290 | 1-scf00009 | 1 |
| AX-157896571 | 1 | 56.164 | KV452709.1 | 609786 | 1-scf00009 | 1 |
| AX-157896572 | 1 | 56.164 | KV452709.1 | 610801 | 1-scf00009 | 1 |
| AX-157896573 | 1 | 56.164 | KV452709.1 | 612564 | 1-scf00009 | 1 |
| AX-157896578 | 1 | 56.164 | KV452709.1 | 623135 | 1-scf00009 | 1 |
| AX-157896579 | 1 | 56.164 | KV452709.1 | 624036 | 1-scf00009 | 1 |
| AX-157896580 | 1 | 56.164 | KV452709.1 | 624886 | 1-scf00009 | 1 |
| AX-157896581 | 1 | 56.164 | KV452709.1 | 625566 | 1-scf00009 | 1 |
| AX-157896582 | 1 | 56.164 | KV452709.1 | 628511 | 1-scf00009 | 1 |
| AX-158404383 | 1 | 56.164 | KV452709.1 | 634293 | 1-scf00009 | 1 |
| AX-157896585 | 1 | 56.164 | KV452709.1 | 634840 | 1-scf00009 | 1 |
| AX-157695711 | 1 | 56.164 | KV452709.1 | 635772 | 1-scf00009 | 1 |
| AX-157695712 | 1 | 56.164 | KV452709.1 | 636195 | 1-scf00009 | 1 |
| AX-158389003 | 1 | 56.164 | KV452709.1 | 636637 | 1-scf00009 | 1 |
| AX-157896586 | 1 | 56.164 | KV452709.1 | 636723 | 1-scf00009 | 1 |
| AX-157896588 | 1 | 56.164 | KV452709.1 | 638014 | 1-scf00009 | 1 |
| AX-157896589 | 1 | 56.164 | KV452709.1 | 638502 | 1-scf00009 | 1 |
| AX-157896590 | 1 | 56.164 | KV452709.1 | 639197 | 1-scf00009 | 1 |
| AX-157896591 | 1 | 56.164 | KV452709.1 | 640206 | 1-scf00009 | 1 |
| AX-157896592 | 1 | 56.164 | KV452709.1 | 640586 | 1-scf00009 | 1 |
| AX-158389004 | 1 | 56.164 | KV452709.1 | 643729 | 1-scf00009 | 1 |
| AX-157896593 | 1 | 56.164 | KV452709.1 | 644276 | 1-scf00009 | 1 |
| AX-157896595 | 1 | 56.164 | KV452709.1 | 645324 | 1-scf00009 | 1 |
| AX-157896596 | 1 | 56.164 | KV452709.1 | 645390 | 1-scf00009 | 1 |
| AX-157853571 | 1 | 56.164 | KV452709.1 | 650770 | 1-scf00009 | 1 |
| AX-157896598 | 1 | 56.164 | KV452709.1 | 652521 | 1-scf00009 | 1 |
| AX-157896601 | 1 | 56.164 | KV452709.1 | 656344 | 1-scf00009 | 1 |
| AX-157896602 | 1 | 56.164 | KV452709.1 | 657238 | 1-scf00009 | 1 |
| AX-157896603 | 1 | 56.164 | KV452709.1 | 660454 | 1-scf00009 | 1 |
| AX-157896604 | 1 | 56.164 | KV452709.1 | 661289 | 1-scf00009 | 1 |
| AX-157896605 | 1 | 56.164 | KV452709.1 | 662292 | 1-scf00009 | 1 |
| AX-157896608 | 1 | 56.164 | KV452709.1 | 665593 | 1-scf00009 | 1 |
| AX-157896610 | 1 | 56.164 | KV452709.1 | 667989 | 1-scf00009 | 1 |
| AX-157896614 | 1 | 56.164 | KV452709.1 | 676251 | 1-scf00009 | 1 |
| AX-157896615 | 1 | 56.164 | KV452709.1 | 676761 | 1-scf00009 | 1 |
| AX-157896617 | 1 | 56.164 | KV452709.1 | 679389 | 1-scf00009 | 1 |
| AX-157810933 | 1 | 56.164 | KV452709.1 | 679530 | 1-scf00009 | 1 |
| AX-157896619 | 1 | 56.164 | KV452709.1 | 681311 | 1-scf00009 | 1 |
| AX-157896620 | 1 | 56.164 | KV452709.1 | 682220 | 1-scf00009 | 1 |
| AX-157810934 | 1 | 56.164 | KV452709.1 | 684612 | 1-scf00009 | 1 |

|              |   |        |            |         |            |   |
|--------------|---|--------|------------|---------|------------|---|
| AX-157896621 | 1 | 56.164 | KV452709.1 | 685157  | 1-scf00009 | 1 |
| AX-157896622 | 1 | 56.164 | KV452709.1 | 687117  | 1-scf00009 | 1 |
| AX-157896623 | 1 | 56.164 | KV452709.1 | 687492  | 1-scf00009 | 1 |
| AX-157896625 | 1 | 56.164 | KV452709.1 | 691956  | 1-scf00009 | 1 |
| AX-157896627 | 1 | 56.164 | KV452709.1 | 693394  | 1-scf00009 | 1 |
| AX-158379134 | 1 | 56.164 | KV452709.1 | 693839  | 1-scf00009 | 1 |
| AX-157896628 | 1 | 56.164 | KV452709.1 | 695509  | 1-scf00009 | 1 |
| AX-157896629 | 1 | 56.164 | KV452709.1 | 697127  | 1-scf00009 | 1 |
| AX-157896631 | 1 | 56.164 | KV452709.1 | 699438  | 1-scf00009 | 1 |
| AX-157896632 | 1 | 56.164 | KV452709.1 | 699712  | 1-scf00009 | 1 |
| AX-157896633 | 1 | 56.164 | KV452709.1 | 700979  | 1-scf00009 | 1 |
| AX-157896637 | 1 | 56.164 | KV452709.1 | 710288  | 1-scf00009 | 1 |
| AX-157896638 | 1 | 56.164 | KV452709.1 | 710836  | 1-scf00009 | 1 |
| AX-157756320 | 1 | 56.164 | KV452709.1 | 711260  | 1-scf00009 | 1 |
| AX-157896642 | 1 | 56.164 | KV452709.1 | 714436  | 1-scf00009 | 1 |
| AX-157896643 | 1 | 56.164 | KV452709.1 | 715708  | 1-scf00009 | 1 |
| AX-158404384 | 1 | 56.164 | KV452709.1 | 716204  | 1-scf00009 | 1 |
| AX-157883093 | 1 | 56.164 | KV452709.1 | 717501  | 1-scf00009 | 1 |
| AX-157896644 | 1 | 56.164 | KV452709.1 | 717693  | 1-scf00009 | 1 |
| AX-157810935 | 1 | 56.164 | KV452709.1 | 719648  | 1-scf00009 | 1 |
| AX-157896645 | 1 | 56.164 | KV452709.1 | 719957  | 1-scf00009 | 1 |
| AX-157896647 | 1 | 56.164 | KV452709.1 | 721244  | 1-scf00009 | 1 |
| AX-157896648 | 1 | 56.164 | KV452709.1 | 721984  | 1-scf00009 | 1 |
| AX-157896651 | 1 | 56.164 | KV452709.1 | 723966  | 1-scf00009 | 1 |
| AX-157896652 | 1 | 56.164 | KV452709.1 | 724811  | 1-scf00009 | 1 |
| AX-157896653 | 1 | 56.164 | KV452709.1 | 725801  | 1-scf00009 | 1 |
| AX-157896654 | 1 | 56.164 | KV452709.1 | 727261  | 1-scf00009 | 1 |
| AX-157896656 | 1 | 56.164 | KV452709.1 | 729082  | 1-scf00009 | 1 |
| AX-157896659 | 1 | 56.164 | KV452709.1 | 732604  | 1-scf00009 | 1 |
| AX-157896660 | 1 | 56.164 | KV452709.1 | 735752  | 1-scf00009 | 1 |
| AX-157896683 | 1 | 56.164 | KV452709.1 | 764141  | 1-scf00009 | 1 |
| AX-157896694 | 1 | 56.164 | KV452709.1 | 773319  | 1-scf00009 | 1 |
| AX-157810937 | 1 | 56.164 | KV452709.1 | 775264  | 1-scf00009 | 1 |
| AX-157743619 | 1 | 56.164 | KV452709.1 | 819260  | 1-scf00009 | 1 |
| AX-157883095 | 1 | 56.164 | KV452709.1 | 892469  | 1-scf00009 | 1 |
| AX-157896774 | 1 | 56.164 | KV452709.1 | 895867  | 1-scf00009 | 1 |
| AX-157896776 | 1 | 56.164 | KV452709.1 | 901317  | 1-scf00009 | 1 |
| AX-157810955 | 1 | 56.164 | KV452709.1 | 901368  | 1-scf00009 | 1 |
| AX-157896783 | 1 | 56.164 | KV452709.1 | 912669  | 1-scf00009 | 1 |
| AX-157897190 | 1 | 56.164 | KV452709.1 | 1518957 | 1-scf00009 | 1 |
| AX-157899014 | 1 | 56.164 | KV452709.1 | 4556640 | 1-scf00009 | 1 |
| AX-157811226 | 1 | 56.164 | KV452709.1 | 4596761 | 1-scf00009 | 1 |
| AX-157899123 | 1 | 56.164 | KV452709.1 | 4694983 | 1-scf00009 | 1 |
| AX-157810925 | 1 | 56.273 | KV452709.1 | 459755  | 1-scf00009 | 1 |
| AX-157810926 | 1 | 56.273 | KV452709.1 | 459804  | 1-scf00009 | 1 |
| AX-157896546 | 1 | 56.273 | KV452709.1 | 579363  | 1-scf00009 | 1 |
| AX-157896550 | 1 | 56.273 | KV452709.1 | 583043  | 1-scf00009 | 1 |
| AX-157896556 | 1 | 56.273 | KV452709.1 | 590968  | 1-scf00009 | 1 |
| AX-157896618 | 1 | 56.273 | KV452709.1 | 680966  | 1-scf00009 | 1 |
| AX-157896664 | 1 | 56.273 | KV452709.1 | 741163  | 1-scf00009 | 1 |
| AX-157726294 | 1 | 56.273 | KV452709.1 | 748196  | 1-scf00009 | 1 |

|              |   |        |            |         |            |   |
|--------------|---|--------|------------|---------|------------|---|
| AX-157896672 | 1 | 56.273 | KV452709.1 | 752630  | 1-scf00009 | 1 |
| AX-157896673 | 1 | 56.273 | KV452709.1 | 753161  | 1-scf00009 | 1 |
| AX-157896674 | 1 | 56.273 | KV452709.1 | 754097  | 1-scf00009 | 1 |
| AX-157896676 | 1 | 56.273 | KV452709.1 | 756790  | 1-scf00009 | 1 |
| AX-157896679 | 1 | 56.273 | KV452709.1 | 758240  | 1-scf00009 | 1 |
| AX-157810936 | 1 | 56.273 | KV452709.1 | 759860  | 1-scf00009 | 1 |
| AX-157896681 | 1 | 56.273 | KV452709.1 | 760214  | 1-scf00009 | 1 |
| AX-157864375 | 1 | 56.273 | KV452709.1 | 762290  | 1-scf00009 | 1 |
| AX-157896682 | 1 | 56.273 | KV452709.1 | 763912  | 1-scf00009 | 1 |
| AX-157896684 | 1 | 56.273 | KV452709.1 | 764401  | 1-scf00009 | 1 |
| AX-157896685 | 1 | 56.273 | KV452709.1 | 764836  | 1-scf00009 | 1 |
| AX-157896686 | 1 | 56.273 | KV452709.1 | 768388  | 1-scf00009 | 1 |
| AX-157896687 | 1 | 56.273 | KV452709.1 | 769004  | 1-scf00009 | 1 |
| AX-157896689 | 1 | 56.273 | KV452709.1 | 770633  | 1-scf00009 | 1 |
| AX-157896693 | 1 | 56.273 | KV452709.1 | 772861  | 1-scf00009 | 1 |
| AX-157896696 | 1 | 56.273 | KV452709.1 | 776674  | 1-scf00009 | 1 |
| AX-157853572 | 1 | 56.273 | KV452709.1 | 776992  | 1-scf00009 | 1 |
| AX-157896697 | 1 | 56.273 | KV452709.1 | 777115  | 1-scf00009 | 1 |
| AX-157896700 | 1 | 56.273 | KV452709.1 | 781750  | 1-scf00009 | 1 |
| AX-157896703 | 1 | 56.273 | KV452709.1 | 783444  | 1-scf00009 | 1 |
| AX-157896723 | 1 | 56.273 | KV452709.1 | 807976  | 1-scf00009 | 1 |
| AX-157894675 | 1 | 56.383 | KV452708.1 | 1139062 | 1-scf00008 | 1 |
| AX-158388997 | 1 | 56.383 | KV452709.1 | 140669  | 1-scf00009 | 1 |
| AX-157896195 | 1 | 56.383 | KV452709.1 | 148040  | 1-scf00009 | 1 |
| AX-157896670 | 1 | 56.383 | KV452709.1 | 749928  | 1-scf00009 | 1 |
| AX-157896698 | 1 | 56.383 | KV452709.1 | 778016  | 1-scf00009 | 1 |
| AX-157896704 | 1 | 56.383 | KV452709.1 | 783930  | 1-scf00009 | 1 |
| AX-157896705 | 1 | 56.383 | KV452709.1 | 784357  | 1-scf00009 | 1 |
| AX-157896706 | 1 | 56.383 | KV452709.1 | 785038  | 1-scf00009 | 1 |
| AX-157896708 | 1 | 56.383 | KV452709.1 | 786302  | 1-scf00009 | 1 |
| AX-157752575 | 1 | 56.383 | KV452709.1 | 787266  | 1-scf00009 | 1 |
| AX-157896712 | 1 | 56.383 | KV452709.1 | 789852  | 1-scf00009 | 1 |
| AX-157810938 | 1 | 56.383 | KV452709.1 | 790341  | 1-scf00009 | 1 |
| AX-157896715 | 1 | 56.383 | KV452709.1 | 793183  | 1-scf00009 | 1 |
| AX-157896716 | 1 | 56.383 | KV452709.1 | 795014  | 1-scf00009 | 1 |
| AX-157896718 | 1 | 56.383 | KV452709.1 | 796364  | 1-scf00009 | 1 |
| AX-157810939 | 1 | 56.383 | KV452709.1 | 797429  | 1-scf00009 | 1 |
| AX-157896719 | 1 | 56.383 | KV452709.1 | 798085  | 1-scf00009 | 1 |
| AX-157864376 | 1 | 56.383 | KV452709.1 | 805058  | 1-scf00009 | 1 |
| AX-157810943 | 1 | 56.383 | KV452709.1 | 808813  | 1-scf00009 | 1 |
| AX-157896726 | 1 | 56.383 | KV452709.1 | 813882  | 1-scf00009 | 1 |
| AX-157874333 | 1 | 56.383 | KV452709.1 | 820253  | 1-scf00009 | 1 |
| AX-157747623 | 1 | 56.383 | KV452709.1 | 820473  | 1-scf00009 | 1 |
| AX-157896731 | 1 | 56.383 | KV452709.1 | 822871  | 1-scf00009 | 1 |
| AX-157896733 | 1 | 56.383 | KV452709.1 | 824982  | 1-scf00009 | 1 |
| AX-157896739 | 1 | 56.383 | KV452709.1 | 836172  | 1-scf00009 | 1 |
| AX-157896741 | 1 | 56.383 | KV452709.1 | 840415  | 1-scf00009 | 1 |
| AX-157896742 | 1 | 56.383 | KV452709.1 | 840504  | 1-scf00009 | 1 |
| AX-157896743 | 1 | 56.383 | KV452709.1 | 842188  | 1-scf00009 | 1 |
| AX-157896744 | 1 | 56.383 | KV452709.1 | 844327  | 1-scf00009 | 1 |
| AX-157896745 | 1 | 56.383 | KV452709.1 | 845007  | 1-scf00009 | 1 |

|              |   |        |            |         |            |   |
|--------------|---|--------|------------|---------|------------|---|
| AX-157896747 | 1 | 56.383 | KV452709.1 | 848525  | 1-scf00009 | 1 |
| AX-157810946 | 1 | 56.383 | KV452709.1 | 849718  | 1-scf00009 | 1 |
| AX-157896750 | 1 | 56.383 | KV452709.1 | 855558  | 1-scf00009 | 1 |
| AX-157810949 | 1 | 56.383 | KV452709.1 | 858493  | 1-scf00009 | 1 |
| AX-157810950 | 1 | 56.383 | KV452709.1 | 858545  | 1-scf00009 | 1 |
| AX-157896752 | 1 | 56.383 | KV452709.1 | 858701  | 1-scf00009 | 1 |
| AX-157896769 | 1 | 56.383 | KV452709.1 | 885668  | 1-scf00009 | 1 |
| AX-157810956 | 1 | 56.383 | KV452709.1 | 907812  | 1-scf00009 | 1 |
| AX-157700938 | 1 | 56.383 | KV452709.1 | 938266  | 1-scf00009 | 1 |
| AX-157896810 | 1 | 56.383 | KV452709.1 | 954646  | 1-scf00009 | 1 |
| AX-157896811 | 1 | 56.383 | KV452709.1 | 958265  | 1-scf00009 | 1 |
| AX-157896812 | 1 | 56.383 | KV452709.1 | 961490  | 1-scf00009 | 1 |
| AX-157896814 | 1 | 56.383 | KV452709.1 | 963752  | 1-scf00009 | 1 |
| AX-157896816 | 1 | 56.383 | KV452709.1 | 966433  | 1-scf00009 | 1 |
| AX-158379135 | 1 | 56.383 | KV452709.1 | 968440  | 1-scf00009 | 1 |
| AX-157745592 | 1 | 56.383 | KV452709.1 | 980000  | 1-scf00009 | 1 |
| AX-157896843 | 1 | 56.383 | KV452709.1 | 1007765 | 1-scf00009 | 1 |
| AX-157897235 | 1 | 56.383 | KV452709.1 | 1577370 | 1-scf00009 | 1 |
| AX-157899275 | 1 | 56.383 | KV452709.1 | 4957509 | 1-scf00009 | 1 |
| AX-157895672 | 1 | 56.447 | KV452708.1 | 2823776 | 1-scf00008 | 1 |
| AX-157896232 | 1 | 56.447 | KV452709.1 | 189566  | 1-scf00009 | 1 |
| AX-157810945 | 1 | 56.447 | KV452709.1 | 845730  | 1-scf00009 | 1 |
| AX-158404688 | 1 | 56.447 | KV452713.1 | 2856576 | 1-scf00011 | 1 |
| AX-157896748 | 1 | 56.495 | KV452709.1 | 852770  | 1-scf00009 | 1 |
| AX-157896751 | 1 | 56.534 | KV452709.1 | 857818  | 1-scf00009 | 1 |
| AX-157724480 | 1 | 56.534 | KV452709.1 | 908007  | 1-scf00009 | 1 |
| AX-157810861 | 1 | 56.601 | KV452708.1 | 2823883 | 1-scf00008 | 1 |
| AX-157895687 | 1 | 56.601 | KV452708.1 | 2854424 | 1-scf00008 | 1 |
| AX-157896753 | 1 | 56.601 | KV452709.1 | 861669  | 1-scf00009 | 1 |
| AX-157896755 | 1 | 56.601 | KV452709.1 | 863495  | 1-scf00009 | 1 |
| AX-157896758 | 1 | 56.601 | KV452709.1 | 867743  | 1-scf00009 | 1 |
| AX-157896760 | 1 | 56.601 | KV452709.1 | 869737  | 1-scf00009 | 1 |
| AX-157896764 | 1 | 56.601 | KV452709.1 | 874476  | 1-scf00009 | 1 |
| AX-157896765 | 1 | 56.601 | KV452709.1 | 874978  | 1-scf00009 | 1 |
| AX-157717623 | 1 | 56.601 | KV452709.1 | 875583  | 1-scf00009 | 1 |
| AX-157810953 | 1 | 56.601 | KV452709.1 | 876270  | 1-scf00009 | 1 |
| AX-157716527 | 1 | 56.601 | KV452709.1 | 876450  | 1-scf00009 | 1 |
| AX-157896766 | 1 | 56.601 | KV452709.1 | 879533  | 1-scf00009 | 1 |
| AX-157896767 | 1 | 56.601 | KV452709.1 | 879911  | 1-scf00009 | 1 |
| AX-157746774 | 1 | 56.601 | KV452709.1 | 880679  | 1-scf00009 | 1 |
| AX-157896771 | 1 | 56.601 | KV452709.1 | 891089  | 1-scf00009 | 1 |
| AX-157896781 | 1 | 56.601 | KV452709.1 | 910984  | 1-scf00009 | 1 |
| AX-157896782 | 1 | 56.601 | KV452709.1 | 912351  | 1-scf00009 | 1 |
| AX-157896785 | 1 | 56.601 | KV452709.1 | 914842  | 1-scf00009 | 1 |
| AX-157739236 | 1 | 56.601 | KV452709.1 | 916842  | 1-scf00009 | 1 |
| AX-157896786 | 1 | 56.601 | KV452709.1 | 917730  | 1-scf00009 | 1 |
| AX-157726435 | 1 | 56.601 | KV452709.1 | 920820  | 1-scf00009 | 1 |
| AX-157810959 | 1 | 56.601 | KV452709.1 | 921534  | 1-scf00009 | 1 |
| AX-157896794 | 1 | 56.601 | KV452709.1 | 930841  | 1-scf00009 | 1 |
| AX-157896800 | 1 | 56.601 | KV452709.1 | 940104  | 1-scf00009 | 1 |
| AX-157896826 | 1 | 56.601 | KV452709.1 | 980942  | 1-scf00009 | 1 |

|              |   |        |            |         |            |   |
|--------------|---|--------|------------|---------|------------|---|
| AX-157897642 | 1 | 56.601 | KV452709.1 | 2202899 | 1-scf00009 | 1 |
| AX-157897710 | 1 | 56.601 | KV452709.1 | 2315747 | 1-scf00009 | 1 |
| AX-158379144 | 1 | 56.601 | KV452709.1 | 4556952 | 1-scf00009 | 1 |
| AX-157810961 | 1 | 56.819 | KV452709.1 | 990300  | 1-scf00009 | 1 |
| AX-157896831 | 1 | 56.819 | KV452709.1 | 992281  | 1-scf00009 | 1 |
| AX-157896832 | 1 | 56.819 | KV452709.1 | 992777  | 1-scf00009 | 1 |
| AX-157896834 | 1 | 56.819 | KV452709.1 | 995127  | 1-scf00009 | 1 |
| AX-157896835 | 1 | 56.819 | KV452709.1 | 995698  | 1-scf00009 | 1 |
| AX-157896836 | 1 | 56.819 | KV452709.1 | 998879  | 1-scf00009 | 1 |
| AX-157720282 | 1 | 56.819 | KV452709.1 | 999515  | 1-scf00009 | 1 |
| AX-157896838 | 1 | 56.819 | KV452709.1 | 1001164 | 1-scf00009 | 1 |
| AX-157896893 | 1 | 56.819 | KV452709.1 | 1062112 | 1-scf00009 | 1 |
| AX-157737484 | 1 | 56.819 | KV452709.1 | 1062338 | 1-scf00009 | 1 |
| AX-157896662 | 1 | 56.82  | KV452709.1 | 739948  | 1-scf00009 | 1 |
| AX-157896668 | 1 | 56.82  | KV452709.1 | 747982  | 1-scf00009 | 1 |
| AX-157896772 | 1 | 56.82  | KV452709.1 | 891786  | 1-scf00009 | 1 |
| AX-157896841 | 1 | 56.82  | KV452709.1 | 1004536 | 1-scf00009 | 1 |
| AX-157896845 | 1 | 56.82  | KV452709.1 | 1013156 | 1-scf00009 | 1 |
| AX-157896859 | 1 | 56.82  | KV452709.1 | 1026598 | 1-scf00009 | 1 |
| AX-157810963 | 1 | 56.881 | KV452709.1 | 1041468 | 1-scf00009 | 1 |
| AX-157896878 | 1 | 56.938 | KV452709.1 | 1045482 | 1-scf00009 | 1 |
| AX-158404461 | 1 | 56.938 | KV452709.1 | 3852443 | 1-scf00009 | 1 |
| AX-157896881 | 1 | 56.993 | KV452709.1 | 1048209 | 1-scf00009 | 1 |
| AX-157896885 | 1 | 56.993 | KV452709.1 | 1053020 | 1-scf00009 | 1 |
| AX-157896884 | 1 | 57.044 | KV452709.1 | 1052837 | 1-scf00009 | 1 |
| AX-157896322 | 1 | 57.091 | KV452709.1 | 314430  | 1-scf00009 | 1 |
| AX-157896833 | 1 | 57.091 | KV452709.1 | 993197  | 1-scf00009 | 1 |
| AX-157810962 | 1 | 57.091 | KV452709.1 | 1015826 | 1-scf00009 | 1 |
| AX-157896882 | 1 | 57.091 | KV452709.1 | 1049625 | 1-scf00009 | 1 |
| AX-157896890 | 1 | 57.091 | KV452709.1 | 1058070 | 1-scf00009 | 1 |
| AX-157896902 | 1 | 57.091 | KV452709.1 | 1070293 | 1-scf00009 | 1 |
| AX-157743881 | 1 | 57.091 | KV452709.1 | 5699551 | 1-scf00009 | 1 |
| AX-157883080 | 1 | 57.366 | KV452708.1 | 828979  | 1-scf00008 | 1 |
| AX-157894782 | 1 | 57.366 | KV452708.1 | 1347033 | 1-scf00008 | 1 |
| AX-157894786 | 1 | 57.366 | KV452708.1 | 1350937 | 1-scf00008 | 1 |
| AX-157894797 | 1 | 57.366 | KV452708.1 | 1372533 | 1-scf00008 | 1 |
| AX-157895725 | 1 | 57.366 | KV452708.1 | 2895300 | 1-scf00008 | 1 |
| AX-158404360 | 1 | 57.366 | KV452708.1 | 3016404 | 1-scf00008 | 1 |
| AX-157896432 | 1 | 57.366 | KV452709.1 | 441089  | 1-scf00009 | 1 |
| AX-157896534 | 1 | 57.366 | KV452709.1 | 563163  | 1-scf00009 | 1 |
| AX-157896815 | 1 | 57.366 | KV452709.1 | 966139  | 1-scf00009 | 1 |
| AX-157896823 | 1 | 57.366 | KV452709.1 | 974663  | 1-scf00009 | 1 |
| AX-157774979 | 1 | 57.366 | KV452709.1 | 1052291 | 1-scf00009 | 1 |
| AX-157810964 | 1 | 57.366 | KV452709.1 | 1067751 | 1-scf00009 | 1 |
| AX-157896916 | 1 | 57.366 | KV452709.1 | 1095500 | 1-scf00009 | 1 |
| AX-157810968 | 1 | 57.366 | KV452709.1 | 1096021 | 1-scf00009 | 1 |
| AX-157810969 | 1 | 57.366 | KV452709.1 | 1097128 | 1-scf00009 | 1 |
| AX-157748330 | 1 | 57.366 | KV452709.1 | 1097649 | 1-scf00009 | 1 |
| AX-157725082 | 1 | 57.366 | KV452709.1 | 1141665 | 1-scf00009 | 1 |
| AX-158404393 | 1 | 57.366 | KV452709.1 | 1144579 | 1-scf00009 | 1 |
| AX-157896972 | 1 | 57.366 | KV452709.1 | 1181239 | 1-scf00009 | 1 |

|              |   |        |            |         |            |   |
|--------------|---|--------|------------|---------|------------|---|
| AX-157896984 | 1 | 57.366 | KV452709.1 | 1203272 | 1-scf00009 | 1 |
| AX-157896985 | 1 | 57.366 | KV452709.1 | 1205252 | 1-scf00009 | 1 |
| AX-157897007 | 1 | 57.366 | KV452709.1 | 1259347 | 1-scf00009 | 1 |
| AX-158404402 | 1 | 57.366 | KV452709.1 | 1278814 | 1-scf00009 | 1 |
| AX-157700928 | 1 | 57.366 | KV452709.1 | 1286277 | 1-scf00009 | 1 |
| AX-157897021 | 1 | 57.366 | KV452709.1 | 1287302 | 1-scf00009 | 1 |
| AX-157897022 | 1 | 57.366 | KV452709.1 | 1290651 | 1-scf00009 | 1 |
| AX-157897023 | 1 | 57.366 | KV452709.1 | 1291069 | 1-scf00009 | 1 |
| AX-157868516 | 1 | 57.366 | KV452709.1 | 1294180 | 1-scf00009 | 1 |
| AX-157897045 | 1 | 57.366 | KV452709.1 | 1329153 | 1-scf00009 | 1 |
| AX-157745452 | 1 | 57.366 | KV452709.1 | 1330330 | 1-scf00009 | 1 |
| AX-157897058 | 1 | 57.366 | KV452709.1 | 1350591 | 1-scf00009 | 1 |
| AX-157897059 | 1 | 57.366 | KV452709.1 | 1350872 | 1-scf00009 | 1 |
| AX-157897060 | 1 | 57.366 | KV452709.1 | 1351433 | 1-scf00009 | 1 |
| AX-157897064 | 1 | 57.366 | KV452709.1 | 1357588 | 1-scf00009 | 1 |
| AX-157740004 | 1 | 57.366 | KV452709.1 | 1366889 | 1-scf00009 | 1 |
| AX-157810984 | 1 | 57.366 | KV452709.1 | 1367144 | 1-scf00009 | 1 |
| AX-157897075 | 1 | 57.366 | KV452709.1 | 1369330 | 1-scf00009 | 1 |
| AX-157810985 | 1 | 57.366 | KV452709.1 | 1370747 | 1-scf00009 | 1 |
| AX-157897086 | 1 | 57.366 | KV452709.1 | 1375824 | 1-scf00009 | 1 |
| AX-157897091 | 1 | 57.366 | KV452709.1 | 1385037 | 1-scf00009 | 1 |
| AX-157897093 | 1 | 57.366 | KV452709.1 | 1386524 | 1-scf00009 | 1 |
| AX-157810987 | 1 | 57.366 | KV452709.1 | 1387593 | 1-scf00009 | 1 |
| AX-157810988 | 1 | 57.366 | KV452709.1 | 1394930 | 1-scf00009 | 1 |
| AX-157810989 | 1 | 57.366 | KV452709.1 | 1396964 | 1-scf00009 | 1 |
| AX-157897100 | 1 | 57.366 | KV452709.1 | 1406897 | 1-scf00009 | 1 |
| AX-157897102 | 1 | 57.366 | KV452709.1 | 1407980 | 1-scf00009 | 1 |
| AX-157897103 | 1 | 57.366 | KV452709.1 | 1408792 | 1-scf00009 | 1 |
| AX-157897105 | 1 | 57.366 | KV452709.1 | 1411528 | 1-scf00009 | 1 |
| AX-157897111 | 1 | 57.366 | KV452709.1 | 1416869 | 1-scf00009 | 1 |
| AX-157897120 | 1 | 57.366 | KV452709.1 | 1426750 | 1-scf00009 | 1 |
| AX-157897129 | 1 | 57.366 | KV452709.1 | 1437166 | 1-scf00009 | 1 |
| AX-157897132 | 1 | 57.366 | KV452709.1 | 1440108 | 1-scf00009 | 1 |
| AX-157897134 | 1 | 57.366 | KV452709.1 | 1442724 | 1-scf00009 | 1 |
| AX-157897135 | 1 | 57.366 | KV452709.1 | 1446959 | 1-scf00009 | 1 |
| AX-157897136 | 1 | 57.366 | KV452709.1 | 1447583 | 1-scf00009 | 1 |
| AX-157897137 | 1 | 57.366 | KV452709.1 | 1448900 | 1-scf00009 | 1 |
| AX-157897138 | 1 | 57.366 | KV452709.1 | 1449055 | 1-scf00009 | 1 |
| AX-158404405 | 1 | 57.366 | KV452709.1 | 1452087 | 1-scf00009 | 1 |
| AX-157897141 | 1 | 57.366 | KV452709.1 | 1452669 | 1-scf00009 | 1 |
| AX-157897143 | 1 | 57.366 | KV452709.1 | 1454371 | 1-scf00009 | 1 |
| AX-157897144 | 1 | 57.366 | KV452709.1 | 1455571 | 1-scf00009 | 1 |
| AX-157897145 | 1 | 57.366 | KV452709.1 | 1456867 | 1-scf00009 | 1 |
| AX-157897146 | 1 | 57.366 | KV452709.1 | 1457593 | 1-scf00009 | 1 |
| AX-157897150 | 1 | 57.366 | KV452709.1 | 1464246 | 1-scf00009 | 1 |
| AX-157810994 | 1 | 57.366 | KV452709.1 | 1464672 | 1-scf00009 | 1 |
| AX-157897152 | 1 | 57.366 | KV452709.1 | 1465546 | 1-scf00009 | 1 |
| AX-157810995 | 1 | 57.366 | KV452709.1 | 1466333 | 1-scf00009 | 1 |
| AX-157897153 | 1 | 57.366 | KV452709.1 | 1466814 | 1-scf00009 | 1 |
| AX-157864383 | 1 | 57.366 | KV452709.1 | 1469735 | 1-scf00009 | 1 |
| AX-157897173 | 1 | 57.366 | KV452709.1 | 1490990 | 1-scf00009 | 1 |



|              |   |        |            |         |            |   |
|--------------|---|--------|------------|---------|------------|---|
| AX-157897174 | 1 | 57.366 | KV452709.1 | 1492590 | 1-scf00009 | 1 |
| AX-157747106 | 1 | 57.366 | KV452709.1 | 1499942 | 1-scf00009 | 1 |
| AX-157897180 | 1 | 57.366 | KV452709.1 | 1500798 | 1-scf00009 | 1 |
| AX-157897185 | 1 | 57.366 | KV452709.1 | 1508336 | 1-scf00009 | 1 |
| AX-157772134 | 1 | 57.366 | KV452709.1 | 1524100 | 1-scf00009 | 1 |
| AX-157897195 | 1 | 57.366 | KV452709.1 | 1531507 | 1-scf00009 | 1 |
| AX-157774537 | 1 | 57.366 | KV452709.1 | 1535570 | 1-scf00009 | 1 |
| AX-157897196 | 1 | 57.366 | KV452709.1 | 1536116 | 1-scf00009 | 1 |
| AX-157897197 | 1 | 57.366 | KV452709.1 | 1538068 | 1-scf00009 | 1 |
| AX-157897198 | 1 | 57.366 | KV452709.1 | 1539818 | 1-scf00009 | 1 |
| AX-157810998 | 1 | 57.366 | KV452709.1 | 1541140 | 1-scf00009 | 1 |
| AX-157897199 | 1 | 57.366 | KV452709.1 | 1542757 | 1-scf00009 | 1 |
| AX-157897200 | 1 | 57.366 | KV452709.1 | 1544434 | 1-scf00009 | 1 |
| AX-157897203 | 1 | 57.366 | KV452709.1 | 1546225 | 1-scf00009 | 1 |
| AX-157897210 | 1 | 57.366 | KV452709.1 | 1552685 | 1-scf00009 | 1 |
| AX-157897211 | 1 | 57.366 | KV452709.1 | 1553283 | 1-scf00009 | 1 |
| AX-157897212 | 1 | 57.366 | KV452709.1 | 1553685 | 1-scf00009 | 1 |
| AX-157897213 | 1 | 57.366 | KV452709.1 | 1554749 | 1-scf00009 | 1 |
| AX-157874339 | 1 | 57.366 | KV452709.1 | 1557593 | 1-scf00009 | 1 |
| AX-157897223 | 1 | 57.366 | KV452709.1 | 1564639 | 1-scf00009 | 1 |
| AX-157897232 | 1 | 57.366 | KV452709.1 | 1574442 | 1-scf00009 | 1 |
| AX-157897239 | 1 | 57.366 | KV452709.1 | 1582095 | 1-scf00009 | 1 |
| AX-157897240 | 1 | 57.366 | KV452709.1 | 1583772 | 1-scf00009 | 1 |
| AX-157897242 | 1 | 57.366 | KV452709.1 | 1585767 | 1-scf00009 | 1 |
| AX-157897249 | 1 | 57.366 | KV452709.1 | 1590169 | 1-scf00009 | 1 |
| AX-157897251 | 1 | 57.366 | KV452709.1 | 1591426 | 1-scf00009 | 1 |
| AX-157897264 | 1 | 57.366 | KV452709.1 | 1604506 | 1-scf00009 | 1 |
| AX-158379137 | 1 | 57.366 | KV452709.1 | 1632730 | 1-scf00009 | 1 |
| AX-157897283 | 1 | 57.366 | KV452709.1 | 1633913 | 1-scf00009 | 1 |
| AX-158404414 | 1 | 57.366 | KV452709.1 | 1653758 | 1-scf00009 | 1 |
| AX-157774210 | 1 | 57.366 | KV452709.1 | 1726086 | 1-scf00009 | 1 |
| AX-157897340 | 1 | 57.366 | KV452709.1 | 1726336 | 1-scf00009 | 1 |
| AX-157897341 | 1 | 57.366 | KV452709.1 | 1726907 | 1-scf00009 | 1 |
| AX-157811011 | 1 | 57.366 | KV452709.1 | 1728593 | 1-scf00009 | 1 |
| AX-157897354 | 1 | 57.366 | KV452709.1 | 1751103 | 1-scf00009 | 1 |
| AX-157897356 | 1 | 57.366 | KV452709.1 | 1754457 | 1-scf00009 | 1 |
| AX-157897357 | 1 | 57.366 | KV452709.1 | 1756890 | 1-scf00009 | 1 |
| AX-157722418 | 1 | 57.366 | KV452709.1 | 1758078 | 1-scf00009 | 1 |
| AX-157897358 | 1 | 57.366 | KV452709.1 | 1759437 | 1-scf00009 | 1 |
| AX-157897360 | 1 | 57.366 | KV452709.1 | 1764000 | 1-scf00009 | 1 |
| AX-157897362 | 1 | 57.366 | KV452709.1 | 1765888 | 1-scf00009 | 1 |
| AX-157774293 | 1 | 57.366 | KV452709.1 | 1768651 | 1-scf00009 | 1 |
| AX-157897363 | 1 | 57.366 | KV452709.1 | 1769004 | 1-scf00009 | 1 |
| AX-157897364 | 1 | 57.366 | KV452709.1 | 1770224 | 1-scf00009 | 1 |
| AX-157897365 | 1 | 57.366 | KV452709.1 | 1770747 | 1-scf00009 | 1 |
| AX-157897366 | 1 | 57.366 | KV452709.1 | 1773308 | 1-scf00009 | 1 |
| AX-157897367 | 1 | 57.366 | KV452709.1 | 1773716 | 1-scf00009 | 1 |
| AX-157897369 | 1 | 57.366 | KV452709.1 | 1776563 | 1-scf00009 | 1 |
| AX-157897370 | 1 | 57.366 | KV452709.1 | 1779630 | 1-scf00009 | 1 |
| AX-157714167 | 1 | 57.366 | KV452709.1 | 1780352 | 1-scf00009 | 1 |
| AX-157897371 | 1 | 57.366 | KV452709.1 | 1780716 | 1-scf00009 | 1 |

|              |   |        |            |         |            |   |
|--------------|---|--------|------------|---------|------------|---|
| AX-157897372 | 1 | 57.366 | KV452709.1 | 1781028 | 1-scf00009 | 1 |
| AX-157811017 | 1 | 57.366 | KV452709.1 | 1785831 | 1-scf00009 | 1 |
| AX-157897373 | 1 | 57.366 | KV452709.1 | 1786405 | 1-scf00009 | 1 |
| AX-157897376 | 1 | 57.366 | KV452709.1 | 1788808 | 1-scf00009 | 1 |
| AX-157897377 | 1 | 57.366 | KV452709.1 | 1790054 | 1-scf00009 | 1 |
| AX-157897378 | 1 | 57.366 | KV452709.1 | 1791071 | 1-scf00009 | 1 |
| AX-157897379 | 1 | 57.366 | KV452709.1 | 1792210 | 1-scf00009 | 1 |
| AX-157897381 | 1 | 57.366 | KV452709.1 | 1795624 | 1-scf00009 | 1 |
| AX-157897382 | 1 | 57.366 | KV452709.1 | 1796001 | 1-scf00009 | 1 |
| AX-157897388 | 1 | 57.366 | KV452709.1 | 1799120 | 1-scf00009 | 1 |
| AX-157811020 | 1 | 57.366 | KV452709.1 | 1802346 | 1-scf00009 | 1 |
| AX-157897392 | 1 | 57.366 | KV452709.1 | 1808863 | 1-scf00009 | 1 |
| AX-157897396 | 1 | 57.366 | KV452709.1 | 1813528 | 1-scf00009 | 1 |
| AX-157897399 | 1 | 57.366 | KV452709.1 | 1821009 | 1-scf00009 | 1 |
| AX-157897402 | 1 | 57.366 | KV452709.1 | 1822525 | 1-scf00009 | 1 |
| AX-157897405 | 1 | 57.366 | KV452709.1 | 1825886 | 1-scf00009 | 1 |
| AX-157897406 | 1 | 57.366 | KV452709.1 | 1826705 | 1-scf00009 | 1 |
| AX-157897407 | 1 | 57.366 | KV452709.1 | 1827324 | 1-scf00009 | 1 |
| AX-157897409 | 1 | 57.366 | KV452709.1 | 1829861 | 1-scf00009 | 1 |
| AX-158404420 | 1 | 57.366 | KV452709.1 | 1831122 | 1-scf00009 | 1 |
| AX-157897410 | 1 | 57.366 | KV452709.1 | 1832393 | 1-scf00009 | 1 |
| AX-157897411 | 1 | 57.366 | KV452709.1 | 1832655 | 1-scf00009 | 1 |
| AX-157897412 | 1 | 57.366 | KV452709.1 | 1832934 | 1-scf00009 | 1 |
| AX-157897413 | 1 | 57.366 | KV452709.1 | 1833037 | 1-scf00009 | 1 |
| AX-157897431 | 1 | 57.366 | KV452709.1 | 1869838 | 1-scf00009 | 1 |
| AX-157897432 | 1 | 57.366 | KV452709.1 | 1870531 | 1-scf00009 | 1 |
| AX-157897434 | 1 | 57.366 | KV452709.1 | 1872863 | 1-scf00009 | 1 |
| AX-157811024 | 1 | 57.366 | KV452709.1 | 1876649 | 1-scf00009 | 1 |
| AX-157897448 | 1 | 57.366 | KV452709.1 | 1898332 | 1-scf00009 | 1 |
| AX-157897457 | 1 | 57.366 | KV452709.1 | 1915386 | 1-scf00009 | 1 |
| AX-157868532 | 1 | 57.366 | KV452709.1 | 1917622 | 1-scf00009 | 1 |
| AX-157897459 | 1 | 57.366 | KV452709.1 | 1918463 | 1-scf00009 | 1 |
| AX-157897460 | 1 | 57.366 | KV452709.1 | 1919719 | 1-scf00009 | 1 |
| AX-157897461 | 1 | 57.366 | KV452709.1 | 1920075 | 1-scf00009 | 1 |
| AX-157897463 | 1 | 57.366 | KV452709.1 | 1922932 | 1-scf00009 | 1 |
| AX-157897465 | 1 | 57.366 | KV452709.1 | 1924556 | 1-scf00009 | 1 |
| AX-157897469 | 1 | 57.366 | KV452709.1 | 1927569 | 1-scf00009 | 1 |
| AX-157897472 | 1 | 57.366 | KV452709.1 | 1933263 | 1-scf00009 | 1 |
| AX-157751437 | 1 | 57.366 | KV452709.1 | 1967544 | 1-scf00009 | 1 |
| AX-157897489 | 1 | 57.366 | KV452709.1 | 1968206 | 1-scf00009 | 1 |
| AX-157897491 | 1 | 57.366 | KV452709.1 | 1970826 | 1-scf00009 | 1 |
| AX-157897509 | 1 | 57.366 | KV452709.1 | 1993407 | 1-scf00009 | 1 |
| AX-157897515 | 1 | 57.366 | KV452709.1 | 1997307 | 1-scf00009 | 1 |
| AX-157897546 | 1 | 57.366 | KV452709.1 | 2046693 | 1-scf00009 | 1 |
| AX-157811041 | 1 | 57.366 | KV452709.1 | 2102794 | 1-scf00009 | 1 |
| AX-157811042 | 1 | 57.366 | KV452709.1 | 2103035 | 1-scf00009 | 1 |
| AX-157874347 | 1 | 57.366 | KV452709.1 | 2129306 | 1-scf00009 | 1 |
| AX-157897628 | 1 | 57.366 | KV452709.1 | 2179505 | 1-scf00009 | 1 |
| AX-157897632 | 1 | 57.366 | KV452709.1 | 2190114 | 1-scf00009 | 1 |
| AX-157739159 | 1 | 57.366 | KV452709.1 | 2212405 | 1-scf00009 | 1 |
| AX-157897650 | 1 | 57.366 | KV452709.1 | 2215247 | 1-scf00009 | 1 |

|              |   |        |            |         |            |   |
|--------------|---|--------|------------|---------|------------|---|
| AX-157897652 | 1 | 57.366 | KV452709.1 | 2216865 | 1-scf00009 | 1 |
| AX-157897653 | 1 | 57.366 | KV452709.1 | 2217884 | 1-scf00009 | 1 |
| AX-157897684 | 1 | 57.366 | KV452709.1 | 2259992 | 1-scf00009 | 1 |
| AX-157811062 | 1 | 57.366 | KV452709.1 | 2441969 | 1-scf00009 | 1 |
| AX-157897817 | 1 | 57.366 | KV452709.1 | 2483854 | 1-scf00009 | 1 |
| AX-157897869 | 1 | 57.366 | KV452709.1 | 2551422 | 1-scf00009 | 1 |
| AX-157897886 | 1 | 57.366 | KV452709.1 | 2572921 | 1-scf00009 | 1 |
| AX-157811077 | 1 | 57.366 | KV452709.1 | 2647541 | 1-scf00009 | 1 |
| AX-157811078 | 1 | 57.366 | KV452709.1 | 2647797 | 1-scf00009 | 1 |
| AX-158379140 | 1 | 57.366 | KV452709.1 | 2713177 | 1-scf00009 | 1 |
| AX-157864392 | 1 | 57.366 | KV452709.1 | 2722964 | 1-scf00009 | 1 |
| AX-157694202 | 1 | 57.366 | KV452709.1 | 2743085 | 1-scf00009 | 1 |
| AX-157898010 | 1 | 57.366 | KV452709.1 | 2811059 | 1-scf00009 | 1 |
| AX-157898155 | 1 | 57.366 | KV452709.1 | 3090760 | 1-scf00009 | 1 |
| AX-157898160 | 1 | 57.366 | KV452709.1 | 3098198 | 1-scf00009 | 1 |
| AX-157898240 | 1 | 57.366 | KV452709.1 | 3283229 | 1-scf00009 | 1 |
| AX-157898352 | 1 | 57.366 | KV452709.1 | 3493483 | 1-scf00009 | 1 |
| AX-157898359 | 1 | 57.366 | KV452709.1 | 3513088 | 1-scf00009 | 1 |
| AX-158381995 | 1 | 57.366 | KV452709.1 | 3519050 | 1-scf00009 | 1 |
| AX-157898365 | 1 | 57.366 | KV452709.1 | 3519092 | 1-scf00009 | 1 |
| AX-158381997 | 1 | 57.366 | KV452709.1 | 3611179 | 1-scf00009 | 1 |
| AX-157741793 | 1 | 57.366 | KV452709.1 | 3622381 | 1-scf00009 | 1 |
| AX-157898459 | 1 | 57.366 | KV452709.1 | 3721709 | 1-scf00009 | 1 |
| AX-157898474 | 1 | 57.366 | KV452709.1 | 3794366 | 1-scf00009 | 1 |
| AX-157715585 | 1 | 57.366 | KV452709.1 | 3889450 | 1-scf00009 | 1 |
| AX-157898528 | 1 | 57.366 | KV452709.1 | 3892182 | 1-scf00009 | 1 |
| AX-157898607 | 1 | 57.366 | KV452709.1 | 3992968 | 1-scf00009 | 1 |
| AX-157811197 | 1 | 57.366 | KV452709.1 | 4185903 | 1-scf00009 | 1 |
| AX-157811222 | 1 | 57.366 | KV452709.1 | 4587421 | 1-scf00009 | 1 |
| AX-157899078 | 1 | 57.366 | KV452709.1 | 4643288 | 1-scf00009 | 1 |
| AX-157899139 | 1 | 57.366 | KV452709.1 | 4728318 | 1-scf00009 | 1 |
| AX-157899196 | 1 | 57.366 | KV452709.1 | 4825289 | 1-scf00009 | 1 |
| AX-157899202 | 1 | 57.366 | KV452709.1 | 4836126 | 1-scf00009 | 1 |
| AX-157899242 | 1 | 57.366 | KV452709.1 | 4913273 | 1-scf00009 | 1 |
| AX-157899306 | 1 | 57.366 | KV452709.1 | 4991351 | 1-scf00009 | 1 |
| AX-157899332 | 1 | 57.366 | KV452709.1 | 5034523 | 1-scf00009 | 1 |
| AX-157811276 | 1 | 57.366 | KV452709.1 | 5090671 | 1-scf00009 | 1 |
| AX-157899424 | 1 | 57.366 | KV452709.1 | 5152443 | 1-scf00009 | 1 |
| AX-157899566 | 1 | 57.366 | KV452709.1 | 5321331 | 1-scf00009 | 1 |
| AX-157811330 | 1 | 57.366 | KV452709.1 | 5578292 | 1-scf00009 | 1 |
| AX-157899779 | 1 | 57.366 | KV452709.1 | 5618932 | 1-scf00009 | 1 |
| AX-157899816 | 1 | 57.366 | KV452709.1 | 5654869 | 1-scf00009 | 1 |
| AX-157902457 | 1 | 57.366 | KV452713.1 | 773925  | 1-scf00011 | 1 |
| AX-157903852 | 1 | 57.366 | KV452713.1 | 2629521 | 1-scf00011 | 1 |
| AX-157903921 | 1 | 57.366 | KV452713.1 | 2701141 | 1-scf00011 | 1 |
| AX-157811795 | 1 | 57.366 | KV452713.1 | 2843194 | 1-scf00011 | 1 |
| AX-157904918 | 1 | 57.366 | KV452713.1 | 4416525 | 1-scf00011 | 1 |
| AX-157725962 | 1 | 57.377 | KV452709.1 | 1559050 | 1-scf00009 | 1 |
| AX-157897225 | 1 | 57.39  | KV452709.1 | 1567017 | 1-scf00009 | 1 |
| AX-157897233 | 1 | 57.405 | KV452709.1 | 1574926 | 1-scf00009 | 1 |
| AX-157897261 | 1 | 57.417 | KV452709.1 | 1601502 | 1-scf00009 | 1 |

|              |   |        |            |         |            |   |
|--------------|---|--------|------------|---------|------------|---|
| AX-157897281 | 1 | 57.425 | KV452709.1 | 1633024 | 1-scf00009 | 1 |
| AX-157897288 | 1 | 57.442 | KV452709.1 | 1646759 | 1-scf00009 | 1 |
| AX-157811006 | 1 | 57.458 | KV452709.1 | 1652776 | 1-scf00009 | 1 |
| AX-157894650 | 1 | 57.475 | KV452708.1 | 1096936 | 1-scf00008 | 1 |
| AX-157776573 | 1 | 57.475 | KV452708.1 | 2665252 | 1-scf00008 | 1 |
| AX-157895905 | 1 | 57.475 | KV452708.1 | 3096363 | 1-scf00008 | 1 |
| AX-157896844 | 1 | 57.475 | KV452709.1 | 1008010 | 1-scf00009 | 1 |
| AX-157810982 | 1 | 57.475 | KV452709.1 | 1355979 | 1-scf00009 | 1 |
| AX-157897079 | 1 | 57.475 | KV452709.1 | 1371562 | 1-scf00009 | 1 |
| AX-157897101 | 1 | 57.475 | KV452709.1 | 1407731 | 1-scf00009 | 1 |
| AX-157746718 | 1 | 57.475 | KV452709.1 | 1523384 | 1-scf00009 | 1 |
| AX-157897204 | 1 | 57.475 | KV452709.1 | 1546475 | 1-scf00009 | 1 |
| AX-157897247 | 1 | 57.475 | KV452709.1 | 1588926 | 1-scf00009 | 1 |
| AX-157897250 | 1 | 57.475 | KV452709.1 | 1590770 | 1-scf00009 | 1 |
| AX-157897257 | 1 | 57.475 | KV452709.1 | 1597058 | 1-scf00009 | 1 |
| AX-157868524 | 1 | 57.475 | KV452709.1 | 1613443 | 1-scf00009 | 1 |
| AX-157897306 | 1 | 57.475 | KV452709.1 | 1678154 | 1-scf00009 | 1 |
| AX-157897309 | 1 | 57.475 | KV452709.1 | 1686051 | 1-scf00009 | 1 |
| AX-157897310 | 1 | 57.475 | KV452709.1 | 1689167 | 1-scf00009 | 1 |
| AX-157811008 | 1 | 57.475 | KV452709.1 | 1690700 | 1-scf00009 | 1 |
| AX-157897314 | 1 | 57.475 | KV452709.1 | 1696920 | 1-scf00009 | 1 |
| AX-157897315 | 1 | 57.475 | KV452709.1 | 1697308 | 1-scf00009 | 1 |
| AX-157897329 | 1 | 57.475 | KV452709.1 | 1712515 | 1-scf00009 | 1 |
| AX-157747396 | 1 | 57.475 | KV452709.1 | 1750396 | 1-scf00009 | 1 |
| AX-157897359 | 1 | 57.475 | KV452709.1 | 1762678 | 1-scf00009 | 1 |
| AX-157897361 | 1 | 57.475 | KV452709.1 | 1764896 | 1-scf00009 | 1 |
| AX-157749104 | 1 | 57.475 | KV452709.1 | 1781464 | 1-scf00009 | 1 |
| AX-157897380 | 1 | 57.475 | KV452709.1 | 1792363 | 1-scf00009 | 1 |
| AX-157897386 | 1 | 57.475 | KV452709.1 | 1798527 | 1-scf00009 | 1 |
| AX-157897394 | 1 | 57.475 | KV452709.1 | 1812510 | 1-scf00009 | 1 |
| AX-157897401 | 1 | 57.475 | KV452709.1 | 1822069 | 1-scf00009 | 1 |
| AX-157868528 | 1 | 57.475 | KV452709.1 | 1834634 | 1-scf00009 | 1 |
| AX-157897416 | 1 | 57.475 | KV452709.1 | 1835869 | 1-scf00009 | 1 |
| AX-157897417 | 1 | 57.475 | KV452709.1 | 1837543 | 1-scf00009 | 1 |
| AX-157897421 | 1 | 57.475 | KV452709.1 | 1841331 | 1-scf00009 | 1 |
| AX-157897424 | 1 | 57.475 | KV452709.1 | 1842792 | 1-scf00009 | 1 |
| AX-157811025 | 1 | 57.475 | KV452709.1 | 1878583 | 1-scf00009 | 1 |
| AX-157897468 | 1 | 57.475 | KV452709.1 | 1926054 | 1-scf00009 | 1 |
| AX-157868534 | 1 | 57.475 | KV452709.1 | 1935799 | 1-scf00009 | 1 |
| AX-157897480 | 1 | 57.475 | KV452709.1 | 1949703 | 1-scf00009 | 1 |
| AX-158389021 | 1 | 57.475 | KV452709.1 | 1949948 | 1-scf00009 | 1 |
| AX-157897481 | 1 | 57.475 | KV452709.1 | 1950927 | 1-scf00009 | 1 |
| AX-158389022 | 1 | 57.475 | KV452709.1 | 1952539 | 1-scf00009 | 1 |
| AX-157897482 | 1 | 57.475 | KV452709.1 | 1953534 | 1-scf00009 | 1 |
| AX-158389023 | 1 | 57.475 | KV452709.1 | 1958860 | 1-scf00009 | 1 |
| AX-157811031 | 1 | 57.475 | KV452709.1 | 1959305 | 1-scf00009 | 1 |
| AX-157897485 | 1 | 57.475 | KV452709.1 | 1960758 | 1-scf00009 | 1 |
| AX-157811032 | 1 | 57.475 | KV452709.1 | 1960827 | 1-scf00009 | 1 |
| AX-157755107 | 1 | 57.475 | KV452709.1 | 1968809 | 1-scf00009 | 1 |
| AX-157897490 | 1 | 57.475 | KV452709.1 | 1969840 | 1-scf00009 | 1 |
| AX-157897492 | 1 | 57.475 | KV452709.1 | 1971640 | 1-scf00009 | 1 |

|              |   |        |            |         |            |   |
|--------------|---|--------|------------|---------|------------|---|
| AX-157897493 | 1 | 57.475 | KV452709.1 | 1972450 | 1-scf00009 | 1 |
| AX-157724119 | 1 | 57.475 | KV452709.1 | 1973227 | 1-scf00009 | 1 |
| AX-157897494 | 1 | 57.475 | KV452709.1 | 1973927 | 1-scf00009 | 1 |
| AX-157897495 | 1 | 57.475 | KV452709.1 | 1974313 | 1-scf00009 | 1 |
| AX-157897496 | 1 | 57.475 | KV452709.1 | 1976708 | 1-scf00009 | 1 |
| AX-157868536 | 1 | 57.475 | KV452709.1 | 1977474 | 1-scf00009 | 1 |
| AX-157897497 | 1 | 57.475 | KV452709.1 | 1978795 | 1-scf00009 | 1 |
| AX-157868537 | 1 | 57.475 | KV452709.1 | 1986007 | 1-scf00009 | 1 |
| AX-157897501 | 1 | 57.475 | KV452709.1 | 1987935 | 1-scf00009 | 1 |
| AX-157897502 | 1 | 57.475 | KV452709.1 | 1988378 | 1-scf00009 | 1 |
| AX-157897505 | 1 | 57.475 | KV452709.1 | 1990087 | 1-scf00009 | 1 |
| AX-157897508 | 1 | 57.475 | KV452709.1 | 1992990 | 1-scf00009 | 1 |
| AX-157897510 | 1 | 57.475 | KV452709.1 | 1993681 | 1-scf00009 | 1 |
| AX-157897511 | 1 | 57.475 | KV452709.1 | 1994133 | 1-scf00009 | 1 |
| AX-157897512 | 1 | 57.475 | KV452709.1 | 1995709 | 1-scf00009 | 1 |
| AX-157897513 | 1 | 57.475 | KV452709.1 | 1996156 | 1-scf00009 | 1 |
| AX-157897514 | 1 | 57.475 | KV452709.1 | 1996778 | 1-scf00009 | 1 |
| AX-157897521 | 1 | 57.475 | KV452709.1 | 2005592 | 1-scf00009 | 1 |
| AX-157897522 | 1 | 57.475 | KV452709.1 | 2006592 | 1-scf00009 | 1 |
| AX-157868538 | 1 | 57.475 | KV452709.1 | 2008440 | 1-scf00009 | 1 |
| AX-157897525 | 1 | 57.475 | KV452709.1 | 2009074 | 1-scf00009 | 1 |
| AX-157897528 | 1 | 57.475 | KV452709.1 | 2011020 | 1-scf00009 | 1 |
| AX-157897529 | 1 | 57.475 | KV452709.1 | 2012271 | 1-scf00009 | 1 |
| AX-157897530 | 1 | 57.475 | KV452709.1 | 2012733 | 1-scf00009 | 1 |
| AX-157897531 | 1 | 57.475 | KV452709.1 | 2013861 | 1-scf00009 | 1 |
| AX-157897532 | 1 | 57.475 | KV452709.1 | 2014808 | 1-scf00009 | 1 |
| AX-157897533 | 1 | 57.475 | KV452709.1 | 2015957 | 1-scf00009 | 1 |
| AX-157897534 | 1 | 57.475 | KV452709.1 | 2017243 | 1-scf00009 | 1 |
| AX-157753244 | 1 | 57.475 | KV452709.1 | 2017528 | 1-scf00009 | 1 |
| AX-157897536 | 1 | 57.475 | KV452709.1 | 2018917 | 1-scf00009 | 1 |
| AX-157897537 | 1 | 57.475 | KV452709.1 | 2019377 | 1-scf00009 | 1 |
| AX-157868540 | 1 | 57.475 | KV452709.1 | 2024726 | 1-scf00009 | 1 |
| AX-157722133 | 1 | 57.475 | KV452709.1 | 2025123 | 1-scf00009 | 1 |
| AX-157868541 | 1 | 57.475 | KV452709.1 | 2025560 | 1-scf00009 | 1 |
| AX-157868542 | 1 | 57.475 | KV452709.1 | 2032470 | 1-scf00009 | 1 |
| AX-157897539 | 1 | 57.475 | KV452709.1 | 2033074 | 1-scf00009 | 1 |
| AX-157897540 | 1 | 57.475 | KV452709.1 | 2035697 | 1-scf00009 | 1 |
| AX-157716422 | 1 | 57.475 | KV452709.1 | 2037168 | 1-scf00009 | 1 |
| AX-157713568 | 1 | 57.475 | KV452709.1 | 2037849 | 1-scf00009 | 1 |
| AX-158389025 | 1 | 57.475 | KV452709.1 | 2039588 | 1-scf00009 | 1 |
| AX-157897542 | 1 | 57.475 | KV452709.1 | 2041259 | 1-scf00009 | 1 |
| AX-158389026 | 1 | 57.475 | KV452709.1 | 2043053 | 1-scf00009 | 1 |
| AX-157897545 | 1 | 57.475 | KV452709.1 | 2045654 | 1-scf00009 | 1 |
| AX-157868543 | 1 | 57.475 | KV452709.1 | 2048666 | 1-scf00009 | 1 |
| AX-157811035 | 1 | 57.475 | KV452709.1 | 2049673 | 1-scf00009 | 1 |
| AX-157897550 | 1 | 57.475 | KV452709.1 | 2050252 | 1-scf00009 | 1 |
| AX-157897551 | 1 | 57.475 | KV452709.1 | 2051329 | 1-scf00009 | 1 |
| AX-157868545 | 1 | 57.475 | KV452709.1 | 2051781 | 1-scf00009 | 1 |
| AX-157811036 | 1 | 57.475 | KV452709.1 | 2052042 | 1-scf00009 | 1 |
| AX-157811037 | 1 | 57.475 | KV452709.1 | 2058593 | 1-scf00009 | 1 |
| AX-157868546 | 1 | 57.475 | KV452709.1 | 2060941 | 1-scf00009 | 1 |

|              |   |        |            |         |            |   |
|--------------|---|--------|------------|---------|------------|---|
| AX-157897555 | 1 | 57.475 | KV452709.1 | 2062649 | 1-scf00009 | 1 |
| AX-157811038 | 1 | 57.475 | KV452709.1 | 2064482 | 1-scf00009 | 1 |
| AX-157897557 | 1 | 57.475 | KV452709.1 | 2065811 | 1-scf00009 | 1 |
| AX-158389028 | 1 | 57.475 | KV452709.1 | 2066363 | 1-scf00009 | 1 |
| AX-157897559 | 1 | 57.475 | KV452709.1 | 2069296 | 1-scf00009 | 1 |
| AX-157868547 | 1 | 57.475 | KV452709.1 | 2069563 | 1-scf00009 | 1 |
| AX-157897560 | 1 | 57.475 | KV452709.1 | 2072587 | 1-scf00009 | 1 |
| AX-158389029 | 1 | 57.475 | KV452709.1 | 2078566 | 1-scf00009 | 1 |
| AX-157897562 | 1 | 57.475 | KV452709.1 | 2079198 | 1-scf00009 | 1 |
| AX-157897563 | 1 | 57.475 | KV452709.1 | 2079604 | 1-scf00009 | 1 |
| AX-157897564 | 1 | 57.475 | KV452709.1 | 2080778 | 1-scf00009 | 1 |
| AX-158389031 | 1 | 57.475 | KV452709.1 | 2081707 | 1-scf00009 | 1 |
| AX-157897566 | 1 | 57.475 | KV452709.1 | 2083277 | 1-scf00009 | 1 |
| AX-158389032 | 1 | 57.475 | KV452709.1 | 2084041 | 1-scf00009 | 1 |
| AX-157897567 | 1 | 57.475 | KV452709.1 | 2086231 | 1-scf00009 | 1 |
| AX-157897568 | 1 | 57.475 | KV452709.1 | 2086856 | 1-scf00009 | 1 |
| AX-157897569 | 1 | 57.475 | KV452709.1 | 2088994 | 1-scf00009 | 1 |
| AX-157897570 | 1 | 57.475 | KV452709.1 | 2091486 | 1-scf00009 | 1 |
| AX-157897571 | 1 | 57.475 | KV452709.1 | 2092335 | 1-scf00009 | 1 |
| AX-157868549 | 1 | 57.475 | KV452709.1 | 2094589 | 1-scf00009 | 1 |
| AX-157868550 | 1 | 57.475 | KV452709.1 | 2096747 | 1-scf00009 | 1 |
| AX-157811040 | 1 | 57.475 | KV452709.1 | 2098884 | 1-scf00009 | 1 |
| AX-157868551 | 1 | 57.475 | KV452709.1 | 2100456 | 1-scf00009 | 1 |
| AX-157868552 | 1 | 57.475 | KV452709.1 | 2100769 | 1-scf00009 | 1 |
| AX-157897573 | 1 | 57.475 | KV452709.1 | 2101679 | 1-scf00009 | 1 |
| AX-157897574 | 1 | 57.475 | KV452709.1 | 2101984 | 1-scf00009 | 1 |
| AX-157897575 | 1 | 57.475 | KV452709.1 | 2105325 | 1-scf00009 | 1 |
| AX-157897576 | 1 | 57.475 | KV452709.1 | 2105789 | 1-scf00009 | 1 |
| AX-157897580 | 1 | 57.475 | KV452709.1 | 2111801 | 1-scf00009 | 1 |
| AX-157868553 | 1 | 57.475 | KV452709.1 | 2113086 | 1-scf00009 | 1 |
| AX-157897583 | 1 | 57.475 | KV452709.1 | 2114773 | 1-scf00009 | 1 |
| AX-157868554 | 1 | 57.475 | KV452709.1 | 2116831 | 1-scf00009 | 1 |
| AX-157897586 | 1 | 57.475 | KV452709.1 | 2119566 | 1-scf00009 | 1 |
| AX-157897587 | 1 | 57.475 | KV452709.1 | 2119878 | 1-scf00009 | 1 |
| AX-157897591 | 1 | 57.475 | KV452709.1 | 2124433 | 1-scf00009 | 1 |
| AX-157868555 | 1 | 57.475 | KV452709.1 | 2125812 | 1-scf00009 | 1 |
| AX-157811043 | 1 | 57.475 | KV452709.1 | 2127129 | 1-scf00009 | 1 |
| AX-157897595 | 1 | 57.475 | KV452709.1 | 2127691 | 1-scf00009 | 1 |
| AX-157897596 | 1 | 57.475 | KV452709.1 | 2128746 | 1-scf00009 | 1 |
| AX-157868556 | 1 | 57.475 | KV452709.1 | 2130043 | 1-scf00009 | 1 |
| AX-157897597 | 1 | 57.475 | KV452709.1 | 2130302 | 1-scf00009 | 1 |
| AX-157811045 | 1 | 57.475 | KV452709.1 | 2130890 | 1-scf00009 | 1 |
| AX-157897599 | 1 | 57.475 | KV452709.1 | 2131606 | 1-scf00009 | 1 |
| AX-157897601 | 1 | 57.475 | KV452709.1 | 2135170 | 1-scf00009 | 1 |
| AX-157868557 | 1 | 57.475 | KV452709.1 | 2136006 | 1-scf00009 | 1 |
| AX-157811047 | 1 | 57.475 | KV452709.1 | 2138578 | 1-scf00009 | 1 |
| AX-157897613 | 1 | 57.475 | KV452709.1 | 2164113 | 1-scf00009 | 1 |
| AX-157897616 | 1 | 57.475 | KV452709.1 | 2167451 | 1-scf00009 | 1 |
| AX-157897618 | 1 | 57.475 | KV452709.1 | 2168250 | 1-scf00009 | 1 |
| AX-157897621 | 1 | 57.475 | KV452709.1 | 2170331 | 1-scf00009 | 1 |
| AX-157897626 | 1 | 57.475 | KV452709.1 | 2178435 | 1-scf00009 | 1 |

|              |   |        |             |         |            |    |
|--------------|---|--------|-------------|---------|------------|----|
| AX-157811052 | 1 | 57.475 | KV452709.1  | 2191074 | 1-scf00009 | 1  |
| AX-157897633 | 1 | 57.475 | KV452709.1  | 2191308 | 1-scf00009 | 1  |
| AX-157811053 | 1 | 57.475 | KV452709.1  | 2192441 | 1-scf00009 | 1  |
| AX-157897647 | 1 | 57.475 | KV452709.1  | 2212015 | 1-scf00009 | 1  |
| AX-157897649 | 1 | 57.475 | KV452709.1  | 2214387 | 1-scf00009 | 1  |
| AX-157897654 | 1 | 57.475 | KV452709.1  | 2218262 | 1-scf00009 | 1  |
| AX-157897655 | 1 | 57.475 | KV452709.1  | 2218987 | 1-scf00009 | 1  |
| AX-157898011 | 1 | 57.475 | KV452709.1  | 2812585 | 1-scf00009 | 1  |
| AX-157898118 | 1 | 57.475 | KV452709.1  | 3013113 | 1-scf00009 | 1  |
| AX-157898123 | 1 | 57.475 | KV452709.1  | 3027364 | 1-scf00009 | 1  |
| AX-157898204 | 1 | 57.475 | KV452709.1  | 3226215 | 1-scf00009 | 1  |
| AX-157883112 | 1 | 57.475 | KV452709.1  | 3994642 | 1-scf00009 | 1  |
| AX-157899148 | 1 | 57.475 | KV452709.1  | 4743772 | 1-scf00009 | 1  |
| AX-157899206 | 1 | 57.475 | KV452709.1  | 4841948 | 1-scf00009 | 1  |
| AX-157900017 | 1 | 57.475 | KV452709.1  | 5926800 | 1-scf00009 | 1  |
| AX-158404510 | 1 | 57.475 | KV452709.1  | 6196911 | 1-scf00009 | 1  |
| AX-157706511 | 1 | 57.475 | 3ML01032359 | 593     | scf07975_1 | UN |
| AX-157707521 | 1 | 57.475 | 3ML01034476 | 78      | scf10151_1 | UN |
| AX-157897646 | 1 | 57.547 | KV452709.1  | 2211105 | 1-scf00009 | 1  |
| AX-157897312 | 1 | 57.584 | KV452709.1  | 1693241 | 1-scf00009 | 1  |
| AX-157897319 | 1 | 57.584 | KV452709.1  | 1700817 | 1-scf00009 | 1  |
| AX-157897320 | 1 | 57.584 | KV452709.1  | 1703628 | 1-scf00009 | 1  |
| AX-157897321 | 1 | 57.584 | KV452709.1  | 1704033 | 1-scf00009 | 1  |
| AX-157897322 | 1 | 57.584 | KV452709.1  | 1704458 | 1-scf00009 | 1  |
| AX-157897414 | 1 | 57.584 | KV452709.1  | 1833420 | 1-scf00009 | 1  |
| AX-157897415 | 1 | 57.584 | KV452709.1  | 1833842 | 1-scf00009 | 1  |
| AX-157897418 | 1 | 57.584 | KV452709.1  | 1839630 | 1-scf00009 | 1  |
| AX-157897656 | 1 | 57.584 | KV452709.1  | 2219680 | 1-scf00009 | 1  |
| AX-157897660 | 1 | 57.584 | KV452709.1  | 2227188 | 1-scf00009 | 1  |
| AX-157754241 | 1 | 57.584 | KV452709.1  | 2236417 | 1-scf00009 | 1  |
| AX-157897572 | 1 | 57.649 | KV452709.1  | 2099893 | 1-scf00009 | 1  |
| AX-157897683 | 1 | 57.649 | KV452709.1  | 2259659 | 1-scf00009 | 1  |
| AX-157895902 | 1 | 57.694 | KV452708.1  | 3093682 | 1-scf00008 | 1  |
| AX-157895911 | 1 | 57.694 | KV452708.1  | 3100831 | 1-scf00008 | 1  |
| AX-157896730 | 1 | 57.694 | KV452709.1  | 821728  | 1-scf00009 | 1  |
| AX-157718071 | 1 | 57.694 | KV452709.1  | 889153  | 1-scf00009 | 1  |
| AX-157896788 | 1 | 57.694 | KV452709.1  | 923930  | 1-scf00009 | 1  |
| AX-157897110 | 1 | 57.694 | KV452709.1  | 1416191 | 1-scf00009 | 1  |
| AX-158404409 | 1 | 57.694 | KV452709.1  | 1492708 | 1-scf00009 | 1  |
| AX-157897207 | 1 | 57.694 | KV452709.1  | 1549401 | 1-scf00009 | 1  |
| AX-157897218 | 1 | 57.694 | KV452709.1  | 1560646 | 1-scf00009 | 1  |
| AX-157897263 | 1 | 57.694 | KV452709.1  | 1604285 | 1-scf00009 | 1  |
| AX-157897343 | 1 | 57.694 | KV452709.1  | 1728799 | 1-scf00009 | 1  |
| AX-157745141 | 1 | 57.694 | KV452709.1  | 1786790 | 1-scf00009 | 1  |
| AX-157897398 | 1 | 57.694 | KV452709.1  | 1820721 | 1-scf00009 | 1  |
| AX-157718955 | 1 | 57.694 | KV452709.1  | 1850244 | 1-scf00009 | 1  |
| AX-157897441 | 1 | 57.694 | KV452709.1  | 1882344 | 1-scf00009 | 1  |
| AX-157897451 | 1 | 57.694 | KV452709.1  | 1901726 | 1-scf00009 | 1  |
| AX-157897498 | 1 | 57.694 | KV452709.1  | 1979833 | 1-scf00009 | 1  |
| AX-157897504 | 1 | 57.694 | KV452709.1  | 1989541 | 1-scf00009 | 1  |
| AX-157897516 | 1 | 57.694 | KV452709.1  | 1999690 | 1-scf00009 | 1  |

|              |   |        |            |         |            |   |
|--------------|---|--------|------------|---------|------------|---|
| AX-157864389 | 1 | 57.694 | KV452709.1 | 2019551 | 1-scf00009 | 1 |
| AX-158389033 | 1 | 57.694 | KV452709.1 | 2085753 | 1-scf00009 | 1 |
| AX-157897598 | 1 | 57.694 | KV452709.1 | 2130612 | 1-scf00009 | 1 |
| AX-157897644 | 1 | 57.694 | KV452709.1 | 2203823 | 1-scf00009 | 1 |
| AX-157897681 | 1 | 57.694 | KV452709.1 | 2253864 | 1-scf00009 | 1 |
| AX-157897688 | 1 | 57.694 | KV452709.1 | 2266406 | 1-scf00009 | 1 |
| AX-157897689 | 1 | 57.694 | KV452709.1 | 2270489 | 1-scf00009 | 1 |
| AX-157897693 | 1 | 57.694 | KV452709.1 | 2276780 | 1-scf00009 | 1 |
| AX-157897708 | 1 | 57.694 | KV452709.1 | 2314216 | 1-scf00009 | 1 |
| AX-157897711 | 1 | 57.694 | KV452709.1 | 2316536 | 1-scf00009 | 1 |
| AX-157897712 | 1 | 57.694 | KV452709.1 | 2316923 | 1-scf00009 | 1 |
| AX-157897713 | 1 | 57.694 | KV452709.1 | 2317856 | 1-scf00009 | 1 |
| AX-157897716 | 1 | 57.694 | KV452709.1 | 2332257 | 1-scf00009 | 1 |
| AX-157897717 | 1 | 57.694 | KV452709.1 | 2332843 | 1-scf00009 | 1 |
| AX-157897719 | 1 | 57.694 | KV452709.1 | 2334209 | 1-scf00009 | 1 |
| AX-157897720 | 1 | 57.694 | KV452709.1 | 2334675 | 1-scf00009 | 1 |
| AX-157897722 | 1 | 57.694 | KV452709.1 | 2335721 | 1-scf00009 | 1 |
| AX-157897724 | 1 | 57.694 | KV452709.1 | 2338370 | 1-scf00009 | 1 |
| AX-157897728 | 1 | 57.694 | KV452709.1 | 2340929 | 1-scf00009 | 1 |
| AX-157897731 | 1 | 57.694 | KV452709.1 | 2342263 | 1-scf00009 | 1 |
| AX-157897734 | 1 | 57.694 | KV452709.1 | 2346570 | 1-scf00009 | 1 |
| AX-157897737 | 1 | 57.694 | KV452709.1 | 2355664 | 1-scf00009 | 1 |
| AX-157897738 | 1 | 57.694 | KV452709.1 | 2357091 | 1-scf00009 | 1 |
| AX-157897739 | 1 | 57.694 | KV452709.1 | 2358844 | 1-scf00009 | 1 |
| AX-157897740 | 1 | 57.694 | KV452709.1 | 2363371 | 1-scf00009 | 1 |
| AX-157757338 | 1 | 57.694 | KV452709.1 | 2364154 | 1-scf00009 | 1 |
| AX-158404428 | 1 | 57.694 | KV452709.1 | 2371405 | 1-scf00009 | 1 |
| AX-157897743 | 1 | 57.694 | KV452709.1 | 2371667 | 1-scf00009 | 1 |
| AX-158404429 | 1 | 57.694 | KV452709.1 | 2373702 | 1-scf00009 | 1 |
| AX-157897745 | 1 | 57.694 | KV452709.1 | 2373881 | 1-scf00009 | 1 |
| AX-157897747 | 1 | 57.694 | KV452709.1 | 2374956 | 1-scf00009 | 1 |
| AX-157897749 | 1 | 57.694 | KV452709.1 | 2381116 | 1-scf00009 | 1 |
| AX-157897751 | 1 | 57.694 | KV452709.1 | 2383993 | 1-scf00009 | 1 |
| AX-157897756 | 1 | 57.694 | KV452709.1 | 2390886 | 1-scf00009 | 1 |
| AX-157897759 | 1 | 57.694 | KV452709.1 | 2397664 | 1-scf00009 | 1 |
| AX-157897761 | 1 | 57.694 | KV452709.1 | 2401473 | 1-scf00009 | 1 |
| AX-157897764 | 1 | 57.694 | KV452709.1 | 2406592 | 1-scf00009 | 1 |
| AX-157897765 | 1 | 57.694 | KV452709.1 | 2408891 | 1-scf00009 | 1 |
| AX-157897766 | 1 | 57.694 | KV452709.1 | 2410669 | 1-scf00009 | 1 |
| AX-157897822 | 1 | 57.694 | KV452709.1 | 2487897 | 1-scf00009 | 1 |
| AX-157897837 | 1 | 57.694 | KV452709.1 | 2505883 | 1-scf00009 | 1 |
| AX-157811082 | 1 | 57.694 | KV452709.1 | 2686756 | 1-scf00009 | 1 |
| AX-157898052 | 1 | 57.694 | KV452709.1 | 2868999 | 1-scf00009 | 1 |
| AX-157754904 | 1 | 57.694 | KV452709.1 | 2903574 | 1-scf00009 | 1 |
| AX-157898921 | 1 | 57.694 | KV452709.1 | 4453022 | 1-scf00009 | 1 |
| AX-157899023 | 1 | 57.694 | KV452709.1 | 4561609 | 1-scf00009 | 1 |
| AX-157899039 | 1 | 57.694 | KV452709.1 | 4579972 | 1-scf00009 | 1 |
| AX-158379145 | 1 | 57.694 | KV452709.1 | 4589968 | 1-scf00009 | 1 |
| AX-157899049 | 1 | 57.694 | KV452709.1 | 4605087 | 1-scf00009 | 1 |
| AX-157811247 | 1 | 57.694 | KV452709.1 | 4752590 | 1-scf00009 | 1 |
| AX-157723269 | 1 | 57.694 | KV452709.1 | 4793015 | 1-scf00009 | 1 |



|              |   |        |            |         |            |   |
|--------------|---|--------|------------|---------|------------|---|
| AX-157899193 | 1 | 57.694 | KV452709.1 | 4821298 | 1-scf00009 | 1 |
| AX-157899194 | 1 | 57.694 | KV452709.1 | 4821760 | 1-scf00009 | 1 |
| AX-157899195 | 1 | 57.694 | KV452709.1 | 4822012 | 1-scf00009 | 1 |
| AX-157899247 | 1 | 57.694 | KV452709.1 | 4918277 | 1-scf00009 | 1 |
| AX-157897770 | 1 | 57.742 | KV452709.1 | 2414674 | 1-scf00009 | 1 |
| AX-157897721 | 1 | 57.803 | KV452709.1 | 2335134 | 1-scf00009 | 1 |
| AX-157897741 | 1 | 57.803 | KV452709.1 | 2364984 | 1-scf00009 | 1 |
| AX-157897760 | 1 | 57.803 | KV452709.1 | 2398740 | 1-scf00009 | 1 |
| AX-157811059 | 1 | 57.803 | KV452709.1 | 2424371 | 1-scf00009 | 1 |
| AX-157897776 | 1 | 57.803 | KV452709.1 | 2425685 | 1-scf00009 | 1 |
| AX-157897777 | 1 | 57.803 | KV452709.1 | 2426376 | 1-scf00009 | 1 |
| AX-157897778 | 1 | 57.803 | KV452709.1 | 2426907 | 1-scf00009 | 1 |
| AX-157897779 | 1 | 57.803 | KV452709.1 | 2427408 | 1-scf00009 | 1 |
| AX-157897780 | 1 | 57.803 | KV452709.1 | 2427587 | 1-scf00009 | 1 |
| AX-157897782 | 1 | 57.803 | KV452709.1 | 2428759 | 1-scf00009 | 1 |
| AX-157897784 | 1 | 57.803 | KV452709.1 | 2430383 | 1-scf00009 | 1 |
| AX-157897785 | 1 | 57.803 | KV452709.1 | 2431760 | 1-scf00009 | 1 |
| AX-157897786 | 1 | 57.803 | KV452709.1 | 2434286 | 1-scf00009 | 1 |
| AX-157897787 | 1 | 57.803 | KV452709.1 | 2437982 | 1-scf00009 | 1 |
| AX-157897790 | 1 | 57.803 | KV452709.1 | 2441156 | 1-scf00009 | 1 |
| AX-157897798 | 1 | 57.803 | KV452709.1 | 2457454 | 1-scf00009 | 1 |
| AX-157897800 | 1 | 57.803 | KV452709.1 | 2459922 | 1-scf00009 | 1 |
| AX-157897801 | 1 | 57.803 | KV452709.1 | 2461941 | 1-scf00009 | 1 |
| AX-157897803 | 1 | 57.803 | KV452709.1 | 2463633 | 1-scf00009 | 1 |
| AX-157897804 | 1 | 57.803 | KV452709.1 | 2464515 | 1-scf00009 | 1 |
| AX-157897806 | 1 | 57.803 | KV452709.1 | 2466096 | 1-scf00009 | 1 |
| AX-157897807 | 1 | 57.803 | KV452709.1 | 2467430 | 1-scf00009 | 1 |
| AX-157811063 | 1 | 57.803 | KV452709.1 | 2467831 | 1-scf00009 | 1 |
| AX-157897808 | 1 | 57.803 | KV452709.1 | 2469552 | 1-scf00009 | 1 |
| AX-157811064 | 1 | 57.803 | KV452709.1 | 2470563 | 1-scf00009 | 1 |
| AX-157811065 | 1 | 57.803 | KV452709.1 | 2471407 | 1-scf00009 | 1 |
| AX-157897818 | 1 | 57.912 | KV452709.1 | 2484242 | 1-scf00009 | 1 |
| AX-157897838 | 1 | 57.912 | KV452709.1 | 2508552 | 1-scf00009 | 1 |
| AX-157897840 | 1 | 57.967 | KV452709.1 | 2510468 | 1-scf00009 | 1 |
| AX-157897819 | 1 | 58.059 | KV452709.1 | 2484727 | 1-scf00009 | 1 |
| AX-157897845 | 1 | 58.059 | KV452709.1 | 2519751 | 1-scf00009 | 1 |
| AX-157898210 | 1 | 58.059 | KV452709.1 | 3237390 | 1-scf00009 | 1 |
| AX-157898217 | 1 | 58.059 | KV452709.1 | 3245514 | 1-scf00009 | 1 |
| AX-157898244 | 1 | 58.059 | KV452709.1 | 3288934 | 1-scf00009 | 1 |
| AX-157898246 | 1 | 58.059 | KV452709.1 | 3289531 | 1-scf00009 | 1 |
| AX-157898438 | 1 | 58.059 | KV452709.1 | 3644875 | 1-scf00009 | 1 |
| AX-157775088 | 1 | 58.131 | KV452709.1 | 2523539 | 1-scf00009 | 1 |
| AX-157897849 | 1 | 58.131 | KV452709.1 | 2527744 | 1-scf00009 | 1 |
| AX-157897851 | 1 | 58.131 | KV452709.1 | 2529798 | 1-scf00009 | 1 |
| AX-157897854 | 1 | 58.131 | KV452709.1 | 2531938 | 1-scf00009 | 1 |
| AX-157811067 | 1 | 58.131 | KV452709.1 | 2544224 | 1-scf00009 | 1 |
| AX-157897863 | 1 | 58.131 | KV452709.1 | 2546117 | 1-scf00009 | 1 |
| AX-157897865 | 1 | 58.131 | KV452709.1 | 2549911 | 1-scf00009 | 1 |
| AX-157897870 | 1 | 58.131 | KV452709.1 | 2552890 | 1-scf00009 | 1 |
| AX-157897871 | 1 | 58.131 | KV452709.1 | 2553751 | 1-scf00009 | 1 |
| AX-157898119 | 1 | 58.131 | KV452709.1 | 3019485 | 1-scf00009 | 1 |

|              |   |       |            |         |            |   |
|--------------|---|-------|------------|---------|------------|---|
| AX-157895411 | 1 | 58.24 | KV452708.1 | 2433165 | 1-scf00008 | 1 |
| AX-157895890 | 1 | 58.24 | KV452708.1 | 3082380 | 1-scf00008 | 1 |
| AX-157896137 | 1 | 58.24 | KV452709.1 | 74253   | 1-scf00009 | 1 |
| AX-157896257 | 1 | 58.24 | KV452709.1 | 216477  | 1-scf00009 | 1 |
| AX-157896285 | 1 | 58.24 | KV452709.1 | 261390  | 1-scf00009 | 1 |
| AX-157896293 | 1 | 58.24 | KV452709.1 | 270453  | 1-scf00009 | 1 |
| AX-157896296 | 1 | 58.24 | KV452709.1 | 273007  | 1-scf00009 | 1 |
| AX-157896297 | 1 | 58.24 | KV452709.1 | 273359  | 1-scf00009 | 1 |
| AX-157896298 | 1 | 58.24 | KV452709.1 | 273597  | 1-scf00009 | 1 |
| AX-157896301 | 1 | 58.24 | KV452709.1 | 281244  | 1-scf00009 | 1 |
| AX-157727783 | 1 | 58.24 | KV452709.1 | 295186  | 1-scf00009 | 1 |
| AX-157896317 | 1 | 58.24 | KV452709.1 | 309508  | 1-scf00009 | 1 |
| AX-157810918 | 1 | 58.24 | KV452709.1 | 310127  | 1-scf00009 | 1 |
| AX-157896350 | 1 | 58.24 | KV452709.1 | 349863  | 1-scf00009 | 1 |
| AX-157896714 | 1 | 58.24 | KV452709.1 | 792507  | 1-scf00009 | 1 |
| AX-157810947 | 1 | 58.24 | KV452709.1 | 851215  | 1-scf00009 | 1 |
| AX-157810990 | 1 | 58.24 | KV452709.1 | 1397028 | 1-scf00009 | 1 |
| AX-157897107 | 1 | 58.24 | KV452709.1 | 1413589 | 1-scf00009 | 1 |
| AX-157897108 | 1 | 58.24 | KV452709.1 | 1415101 | 1-scf00009 | 1 |
| AX-157897118 | 1 | 58.24 | KV452709.1 | 1425250 | 1-scf00009 | 1 |
| AX-157897230 | 1 | 58.24 | KV452709.1 | 1571986 | 1-scf00009 | 1 |
| AX-157853575 | 1 | 58.24 | KV452709.1 | 2213566 | 1-scf00009 | 1 |
| AX-157754799 | 1 | 58.24 | KV452709.1 | 2241790 | 1-scf00009 | 1 |
| AX-157897691 | 1 | 58.24 | KV452709.1 | 2274855 | 1-scf00009 | 1 |
| AX-157868571 | 1 | 58.24 | KV452709.1 | 2311406 | 1-scf00009 | 1 |
| AX-157897750 | 1 | 58.24 | KV452709.1 | 2382786 | 1-scf00009 | 1 |
| AX-157853576 | 1 | 58.24 | KV452709.1 | 2386207 | 1-scf00009 | 1 |
| AX-157897758 | 1 | 58.24 | KV452709.1 | 2392441 | 1-scf00009 | 1 |
| AX-157897771 | 1 | 58.24 | KV452709.1 | 2415367 | 1-scf00009 | 1 |
| AX-157897797 | 1 | 58.24 | KV452709.1 | 2456330 | 1-scf00009 | 1 |
| AX-158414601 | 1 | 58.24 | KV452709.1 | 2474842 | 1-scf00009 | 1 |
| AX-157897842 | 1 | 58.24 | KV452709.1 | 2512160 | 1-scf00009 | 1 |
| AX-157897848 | 1 | 58.24 | KV452709.1 | 2525265 | 1-scf00009 | 1 |
| AX-157811066 | 1 | 58.24 | KV452709.1 | 2537733 | 1-scf00009 | 1 |
| AX-157897868 | 1 | 58.24 | KV452709.1 | 2551190 | 1-scf00009 | 1 |
| AX-157897877 | 1 | 58.24 | KV452709.1 | 2564424 | 1-scf00009 | 1 |
| AX-157897885 | 1 | 58.24 | KV452709.1 | 2571600 | 1-scf00009 | 1 |
| AX-157897892 | 1 | 58.24 | KV452709.1 | 2585905 | 1-scf00009 | 1 |
| AX-157897895 | 1 | 58.24 | KV452709.1 | 2588486 | 1-scf00009 | 1 |
| AX-157811071 | 1 | 58.24 | KV452709.1 | 2595342 | 1-scf00009 | 1 |
| AX-157897900 | 1 | 58.24 | KV452709.1 | 2600810 | 1-scf00009 | 1 |
| AX-157811072 | 1 | 58.24 | KV452709.1 | 2602927 | 1-scf00009 | 1 |
| AX-157897905 | 1 | 58.24 | KV452709.1 | 2604648 | 1-scf00009 | 1 |
| AX-157897908 | 1 | 58.24 | KV452709.1 | 2613751 | 1-scf00009 | 1 |
| AX-157811074 | 1 | 58.24 | KV452709.1 | 2614232 | 1-scf00009 | 1 |
| AX-157751735 | 1 | 58.24 | KV452709.1 | 2627196 | 1-scf00009 | 1 |
| AX-157897918 | 1 | 58.24 | KV452709.1 | 2628424 | 1-scf00009 | 1 |
| AX-157897919 | 1 | 58.24 | KV452709.1 | 2631133 | 1-scf00009 | 1 |
| AX-157897925 | 1 | 58.24 | KV452709.1 | 2646533 | 1-scf00009 | 1 |
| AX-157897928 | 1 | 58.24 | KV452709.1 | 2650596 | 1-scf00009 | 1 |
| AX-157897930 | 1 | 58.24 | KV452709.1 | 2654192 | 1-scf00009 | 1 |

|              |   |       |            |         |            |   |
|--------------|---|-------|------------|---------|------------|---|
| AX-157897934 | 1 | 58.24 | KV452709.1 | 2659026 | 1-scf00009 | 1 |
| AX-157897935 | 1 | 58.24 | KV452709.1 | 2659703 | 1-scf00009 | 1 |
| AX-157897938 | 1 | 58.24 | KV452709.1 | 2665080 | 1-scf00009 | 1 |
| AX-157897939 | 1 | 58.24 | KV452709.1 | 2665919 | 1-scf00009 | 1 |
| AX-157811080 | 1 | 58.24 | KV452709.1 | 2681213 | 1-scf00009 | 1 |
| AX-157811081 | 1 | 58.24 | KV452709.1 | 2684443 | 1-scf00009 | 1 |
| AX-157868574 | 1 | 58.24 | KV452709.1 | 2685898 | 1-scf00009 | 1 |
| AX-157897948 | 1 | 58.24 | KV452709.1 | 2686343 | 1-scf00009 | 1 |
| AX-157811083 | 1 | 58.24 | KV452709.1 | 2695180 | 1-scf00009 | 1 |
| AX-157897954 | 1 | 58.24 | KV452709.1 | 2699027 | 1-scf00009 | 1 |
| AX-157811086 | 1 | 58.24 | KV452709.1 | 2705314 | 1-scf00009 | 1 |
| AX-157897956 | 1 | 58.24 | KV452709.1 | 2706709 | 1-scf00009 | 1 |
| AX-157897959 | 1 | 58.24 | KV452709.1 | 2719765 | 1-scf00009 | 1 |
| AX-157897963 | 1 | 58.24 | KV452709.1 | 2723901 | 1-scf00009 | 1 |
| AX-157897964 | 1 | 58.24 | KV452709.1 | 2724751 | 1-scf00009 | 1 |
| AX-157811088 | 1 | 58.24 | KV452709.1 | 2726203 | 1-scf00009 | 1 |
| AX-157897967 | 1 | 58.24 | KV452709.1 | 2726383 | 1-scf00009 | 1 |
| AX-157897968 | 1 | 58.24 | KV452709.1 | 2728819 | 1-scf00009 | 1 |
| AX-157897976 | 1 | 58.24 | KV452709.1 | 2742477 | 1-scf00009 | 1 |
| AX-157897978 | 1 | 58.24 | KV452709.1 | 2746455 | 1-scf00009 | 1 |
| AX-157773975 | 1 | 58.24 | KV452709.1 | 2749244 | 1-scf00009 | 1 |
| AX-157741467 | 1 | 58.24 | KV452709.1 | 2756331 | 1-scf00009 | 1 |
| AX-157897983 | 1 | 58.24 | KV452709.1 | 2757082 | 1-scf00009 | 1 |
| AX-157897985 | 1 | 58.24 | KV452709.1 | 2759942 | 1-scf00009 | 1 |
| AX-157897989 | 1 | 58.24 | KV452709.1 | 2766265 | 1-scf00009 | 1 |
| AX-157811091 | 1 | 58.24 | KV452709.1 | 2767235 | 1-scf00009 | 1 |
| AX-157897992 | 1 | 58.24 | KV452709.1 | 2772339 | 1-scf00009 | 1 |
| AX-157897994 | 1 | 58.24 | KV452709.1 | 2778379 | 1-scf00009 | 1 |
| AX-157744161 | 1 | 58.24 | KV452709.1 | 2779628 | 1-scf00009 | 1 |
| AX-157708538 | 1 | 58.24 | KV452709.1 | 2782681 | 1-scf00009 | 1 |
| AX-157898000 | 1 | 58.24 | KV452709.1 | 2798463 | 1-scf00009 | 1 |
| AX-157811093 | 1 | 58.24 | KV452709.1 | 2798654 | 1-scf00009 | 1 |
| AX-157898005 | 1 | 58.24 | KV452709.1 | 2807544 | 1-scf00009 | 1 |
| AX-157898017 | 1 | 58.24 | KV452709.1 | 2822177 | 1-scf00009 | 1 |
| AX-157898018 | 1 | 58.24 | KV452709.1 | 2824309 | 1-scf00009 | 1 |
| AX-157711283 | 1 | 58.24 | KV452709.1 | 2824806 | 1-scf00009 | 1 |
| AX-157898037 | 1 | 58.24 | KV452709.1 | 2843544 | 1-scf00009 | 1 |
| AX-158404437 | 1 | 58.24 | KV452709.1 | 3021834 | 1-scf00009 | 1 |
| AX-157898156 | 1 | 58.24 | KV452709.1 | 3090910 | 1-scf00009 | 1 |
| AX-157898190 | 1 | 58.24 | KV452709.1 | 3188390 | 1-scf00009 | 1 |
| AX-157898258 | 1 | 58.24 | KV452709.1 | 3304212 | 1-scf00009 | 1 |
| AX-157898259 | 1 | 58.24 | KV452709.1 | 3304826 | 1-scf00009 | 1 |
| AX-157723534 | 1 | 58.24 | KV452709.1 | 3310593 | 1-scf00009 | 1 |
| AX-157776804 | 1 | 58.24 | KV452709.1 | 3604662 | 1-scf00009 | 1 |
| AX-157898642 | 1 | 58.24 | KV452709.1 | 4054076 | 1-scf00009 | 1 |
| AX-157898643 | 1 | 58.24 | KV452709.1 | 4056381 | 1-scf00009 | 1 |
| AX-158381999 | 1 | 58.24 | KV452709.1 | 4167793 | 1-scf00009 | 1 |
| AX-157898749 | 1 | 58.24 | KV452709.1 | 4211826 | 1-scf00009 | 1 |
| AX-157898760 | 1 | 58.24 | KV452709.1 | 4229477 | 1-scf00009 | 1 |
| AX-157898763 | 1 | 58.24 | KV452709.1 | 4238393 | 1-scf00009 | 1 |
| AX-157898811 | 1 | 58.24 | KV452709.1 | 4300181 | 1-scf00009 | 1 |

|              |   |        |            |         |                |    |
|--------------|---|--------|------------|---------|----------------|----|
| AX-157898962 | 1 | 58.24  | KV452709.1 | 4498321 | 1-scf00009     | 1  |
| AX-157899082 | 1 | 58.24  | KV452709.1 | 4645960 | 1-scf00009     | 1  |
| AX-157899119 | 1 | 58.24  | KV452709.1 | 4693616 | 1-scf00009     | 1  |
| AX-157811265 | 1 | 58.24  | KV452709.1 | 4923867 | 1-scf00009     | 1  |
| AX-157899263 | 1 | 58.24  | KV452709.1 | 4938389 | 1-scf00009     | 1  |
| AX-157717229 | 1 | 58.24  | KV452709.1 | 5432062 | 1-scf00009     | 1  |
| AX-157899782 | 1 | 58.24  | KV452709.1 | 5620567 | 1-scf00009     | 1  |
| AX-157899917 | 1 | 58.24  | KV452709.1 | 5758385 | 1-scf00009     | 1  |
| AX-157899961 | 1 | 58.24  | KV452709.1 | 5837216 | 1-scf00009     | 1  |
| AX-157811660 | 1 | 58.24  | KV452713.1 | 650407  | 1-scf00011     | 1  |
| AX-157703670 | 1 | 58.24  | DX099789.1 | 238     | IORI212 lctalu | UN |
| AX-157895889 | 1 | 58.349 | KV452708.1 | 3080935 | 1-scf00008     | 1  |
| AX-157896175 | 1 | 58.349 | KV452709.1 | 123580  | 1-scf00009     | 1  |
| AX-157896214 | 1 | 58.349 | KV452709.1 | 173239  | 1-scf00009     | 1  |
| AX-157896241 | 1 | 58.349 | KV452709.1 | 198261  | 1-scf00009     | 1  |
| AX-157896305 | 1 | 58.349 | KV452709.1 | 292386  | 1-scf00009     | 1  |
| AX-157896611 | 1 | 58.349 | KV452709.1 | 668360  | 1-scf00009     | 1  |
| AX-157896677 | 1 | 58.349 | KV452709.1 | 757014  | 1-scf00009     | 1  |
| AX-157896691 | 1 | 58.349 | KV452709.1 | 771798  | 1-scf00009     | 1  |
| AX-157896746 | 1 | 58.349 | KV452709.1 | 848306  | 1-scf00009     | 1  |
| AX-157810958 | 1 | 58.349 | KV452709.1 | 919673  | 1-scf00009     | 1  |
| AX-157896795 | 1 | 58.349 | KV452709.1 | 931224  | 1-scf00009     | 1  |
| AX-157896801 | 1 | 58.349 | KV452709.1 | 943523  | 1-scf00009     | 1  |
| AX-157896824 | 1 | 58.349 | KV452709.1 | 975816  | 1-scf00009     | 1  |
| AX-157896855 | 1 | 58.349 | KV452709.1 | 1022671 | 1-scf00009     | 1  |
| AX-157896905 | 1 | 58.349 | KV452709.1 | 1072121 | 1-scf00009     | 1  |
| AX-157896942 | 1 | 58.349 | KV452709.1 | 1133626 | 1-scf00009     | 1  |
| AX-157897001 | 1 | 58.349 | KV452709.1 | 1253758 | 1-scf00009     | 1  |
| AX-157810980 | 1 | 58.349 | KV452709.1 | 1324880 | 1-scf00009     | 1  |
| AX-157897087 | 1 | 58.349 | KV452709.1 | 1378299 | 1-scf00009     | 1  |
| AX-157897266 | 1 | 58.349 | KV452709.1 | 1605778 | 1-scf00009     | 1  |
| AX-157897462 | 1 | 58.349 | KV452709.1 | 1921168 | 1-scf00009     | 1  |
| AX-157811034 | 1 | 58.349 | KV452709.1 | 2041324 | 1-scf00009     | 1  |
| AX-157897543 | 1 | 58.349 | KV452709.1 | 2042126 | 1-scf00009     | 1  |
| AX-157897669 | 1 | 58.349 | KV452709.1 | 2242232 | 1-scf00009     | 1  |
| AX-157897726 | 1 | 58.349 | KV452709.1 | 2340059 | 1-scf00009     | 1  |
| AX-157897767 | 1 | 58.349 | KV452709.1 | 2411817 | 1-scf00009     | 1  |
| AX-157897833 | 1 | 58.349 | KV452709.1 | 2501477 | 1-scf00009     | 1  |
| AX-157897844 | 1 | 58.349 | KV452709.1 | 2517252 | 1-scf00009     | 1  |
| AX-157693818 | 1 | 58.349 | KV452709.1 | 2522902 | 1-scf00009     | 1  |
| AX-157897874 | 1 | 58.349 | KV452709.1 | 2558509 | 1-scf00009     | 1  |
| AX-157897882 | 1 | 58.349 | KV452709.1 | 2569702 | 1-scf00009     | 1  |
| AX-157708620 | 1 | 58.349 | KV452709.1 | 2583538 | 1-scf00009     | 1  |
| AX-157897893 | 1 | 58.349 | KV452709.1 | 2586266 | 1-scf00009     | 1  |
| AX-157897894 | 1 | 58.349 | KV452709.1 | 2587040 | 1-scf00009     | 1  |
| AX-157862606 | 1 | 58.349 | KV452709.1 | 2587569 | 1-scf00009     | 1  |
| AX-157897898 | 1 | 58.349 | KV452709.1 | 2598717 | 1-scf00009     | 1  |
| AX-157897899 | 1 | 58.349 | KV452709.1 | 2599869 | 1-scf00009     | 1  |
| AX-157897903 | 1 | 58.349 | KV452709.1 | 2602799 | 1-scf00009     | 1  |
| AX-158389046 | 1 | 58.349 | KV452709.1 | 2607328 | 1-scf00009     | 1  |
| AX-157811073 | 1 | 58.349 | KV452709.1 | 2608432 | 1-scf00009     | 1  |

|              |   |        |            |         |            |   |
|--------------|---|--------|------------|---------|------------|---|
| AX-157897907 | 1 | 58.349 | KV452709.1 | 2611690 | 1-scf00009 | 1 |
| AX-157897909 | 1 | 58.349 | KV452709.1 | 2619322 | 1-scf00009 | 1 |
| AX-157897910 | 1 | 58.349 | KV452709.1 | 2619700 | 1-scf00009 | 1 |
| AX-157897911 | 1 | 58.349 | KV452709.1 | 2620743 | 1-scf00009 | 1 |
| AX-157897913 | 1 | 58.349 | KV452709.1 | 2623411 | 1-scf00009 | 1 |
| AX-157897914 | 1 | 58.349 | KV452709.1 | 2624065 | 1-scf00009 | 1 |
| AX-157811075 | 1 | 58.349 | KV452709.1 | 2624905 | 1-scf00009 | 1 |
| AX-157897915 | 1 | 58.349 | KV452709.1 | 2625132 | 1-scf00009 | 1 |
| AX-157897916 | 1 | 58.349 | KV452709.1 | 2626474 | 1-scf00009 | 1 |
| AX-157868573 | 1 | 58.349 | KV452709.1 | 2630568 | 1-scf00009 | 1 |
| AX-157897921 | 1 | 58.349 | KV452709.1 | 2633441 | 1-scf00009 | 1 |
| AX-157897922 | 1 | 58.349 | KV452709.1 | 2633754 | 1-scf00009 | 1 |
| AX-157698783 | 1 | 58.349 | KV452709.1 | 2635627 | 1-scf00009 | 1 |
| AX-158389047 | 1 | 58.349 | KV452709.1 | 2645997 | 1-scf00009 | 1 |
| AX-157897926 | 1 | 58.349 | KV452709.1 | 2646930 | 1-scf00009 | 1 |
| AX-157897931 | 1 | 58.349 | KV452709.1 | 2654547 | 1-scf00009 | 1 |
| AX-158389049 | 1 | 58.349 | KV452709.1 | 2654978 | 1-scf00009 | 1 |
| AX-157897933 | 1 | 58.349 | KV452709.1 | 2657389 | 1-scf00009 | 1 |
| AX-158389050 | 1 | 58.349 | KV452709.1 | 2664638 | 1-scf00009 | 1 |
| AX-157897945 | 1 | 58.349 | KV452709.1 | 2682267 | 1-scf00009 | 1 |
| AX-157897947 | 1 | 58.349 | KV452709.1 | 2684701 | 1-scf00009 | 1 |
| AX-157897949 | 1 | 58.349 | KV452709.1 | 2691844 | 1-scf00009 | 1 |
| AX-157897952 | 1 | 58.349 | KV452709.1 | 2694392 | 1-scf00009 | 1 |
| AX-157897953 | 1 | 58.349 | KV452709.1 | 2694657 | 1-scf00009 | 1 |
| AX-157811084 | 1 | 58.349 | KV452709.1 | 2699283 | 1-scf00009 | 1 |
| AX-157897969 | 1 | 58.349 | KV452709.1 | 2730042 | 1-scf00009 | 1 |
| AX-157897970 | 1 | 58.349 | KV452709.1 | 2730846 | 1-scf00009 | 1 |
| AX-158404432 | 1 | 58.349 | KV452709.1 | 2737830 | 1-scf00009 | 1 |
| AX-157811090 | 1 | 58.349 | KV452709.1 | 2744001 | 1-scf00009 | 1 |
| AX-157897980 | 1 | 58.349 | KV452709.1 | 2748328 | 1-scf00009 | 1 |
| AX-157897982 | 1 | 58.349 | KV452709.1 | 2750539 | 1-scf00009 | 1 |
| AX-157897986 | 1 | 58.349 | KV452709.1 | 2760752 | 1-scf00009 | 1 |
| AX-157897988 | 1 | 58.349 | KV452709.1 | 2764989 | 1-scf00009 | 1 |
| AX-157712280 | 1 | 58.349 | KV452709.1 | 2776047 | 1-scf00009 | 1 |
| AX-157897993 | 1 | 58.349 | KV452709.1 | 2777958 | 1-scf00009 | 1 |
| AX-157868575 | 1 | 58.349 | KV452709.1 | 2779557 | 1-scf00009 | 1 |
| AX-157868576 | 1 | 58.349 | KV452709.1 | 2781365 | 1-scf00009 | 1 |
| AX-157708539 | 1 | 58.349 | KV452709.1 | 2782738 | 1-scf00009 | 1 |
| AX-157897996 | 1 | 58.349 | KV452709.1 | 2784676 | 1-scf00009 | 1 |
| AX-157811092 | 1 | 58.349 | KV452709.1 | 2793815 | 1-scf00009 | 1 |
| AX-157897998 | 1 | 58.349 | KV452709.1 | 2795113 | 1-scf00009 | 1 |
| AX-158389053 | 1 | 58.349 | KV452709.1 | 2798176 | 1-scf00009 | 1 |
| AX-157898001 | 1 | 58.349 | KV452709.1 | 2799144 | 1-scf00009 | 1 |
| AX-158389054 | 1 | 58.349 | KV452709.1 | 2800693 | 1-scf00009 | 1 |
| AX-157898002 | 1 | 58.349 | KV452709.1 | 2802684 | 1-scf00009 | 1 |
| AX-157898044 | 1 | 58.349 | KV452709.1 | 2858068 | 1-scf00009 | 1 |
| AX-157898047 | 1 | 58.349 | KV452709.1 | 2862045 | 1-scf00009 | 1 |
| AX-157758226 | 1 | 58.349 | KV452709.1 | 2862624 | 1-scf00009 | 1 |
| AX-157898048 | 1 | 58.349 | KV452709.1 | 2863318 | 1-scf00009 | 1 |
| AX-158389061 | 1 | 58.349 | KV452709.1 | 2864492 | 1-scf00009 | 1 |
| AX-157898050 | 1 | 58.349 | KV452709.1 | 2864954 | 1-scf00009 | 1 |

|              |   |        |            |         |            |   |
|--------------|---|--------|------------|---------|------------|---|
| AX-158389062 | 1 | 58.349 | KV452709.1 | 2866077 | 1-scf00009 | 1 |
| AX-157898051 | 1 | 58.349 | KV452709.1 | 2866113 | 1-scf00009 | 1 |
| AX-157898053 | 1 | 58.349 | KV452709.1 | 2869596 | 1-scf00009 | 1 |
| AX-157898057 | 1 | 58.349 | KV452709.1 | 2874884 | 1-scf00009 | 1 |
| AX-157898059 | 1 | 58.349 | KV452709.1 | 2881746 | 1-scf00009 | 1 |
| AX-157898061 | 1 | 58.349 | KV452709.1 | 2883433 | 1-scf00009 | 1 |
| AX-157898062 | 1 | 58.349 | KV452709.1 | 2885047 | 1-scf00009 | 1 |
| AX-157811100 | 1 | 58.349 | KV452709.1 | 2885746 | 1-scf00009 | 1 |
| AX-157898064 | 1 | 58.349 | KV452709.1 | 2886958 | 1-scf00009 | 1 |
| AX-157898065 | 1 | 58.349 | KV452709.1 | 2888286 | 1-scf00009 | 1 |
| AX-157898066 | 1 | 58.349 | KV452709.1 | 2889911 | 1-scf00009 | 1 |
| AX-157898067 | 1 | 58.349 | KV452709.1 | 2891944 | 1-scf00009 | 1 |
| AX-157898068 | 1 | 58.349 | KV452709.1 | 2894321 | 1-scf00009 | 1 |
| AX-157898070 | 1 | 58.349 | KV452709.1 | 2904048 | 1-scf00009 | 1 |
| AX-158389064 | 1 | 58.349 | KV452709.1 | 2904371 | 1-scf00009 | 1 |
| AX-157811101 | 1 | 58.349 | KV452709.1 | 2904952 | 1-scf00009 | 1 |
| AX-157868579 | 1 | 58.349 | KV452709.1 | 2918731 | 1-scf00009 | 1 |
| AX-157898078 | 1 | 58.349 | KV452709.1 | 2919111 | 1-scf00009 | 1 |
| AX-157868580 | 1 | 58.349 | KV452709.1 | 2926666 | 1-scf00009 | 1 |
| AX-157898082 | 1 | 58.349 | KV452709.1 | 2928024 | 1-scf00009 | 1 |
| AX-157811104 | 1 | 58.349 | KV452709.1 | 2930921 | 1-scf00009 | 1 |
| AX-158389065 | 1 | 58.349 | KV452709.1 | 2934554 | 1-scf00009 | 1 |
| AX-157811105 | 1 | 58.349 | KV452709.1 | 2937210 | 1-scf00009 | 1 |
| AX-157898086 | 1 | 58.349 | KV452709.1 | 2939528 | 1-scf00009 | 1 |
| AX-157868585 | 1 | 58.349 | KV452709.1 | 2943952 | 1-scf00009 | 1 |
| AX-157898087 | 1 | 58.349 | KV452709.1 | 2944297 | 1-scf00009 | 1 |
| AX-157898089 | 1 | 58.349 | KV452709.1 | 2945793 | 1-scf00009 | 1 |
| AX-157898090 | 1 | 58.349 | KV452709.1 | 2946113 | 1-scf00009 | 1 |
| AX-157811106 | 1 | 58.349 | KV452709.1 | 2949464 | 1-scf00009 | 1 |
| AX-157898091 | 1 | 58.349 | KV452709.1 | 2950641 | 1-scf00009 | 1 |
| AX-158389066 | 1 | 58.349 | KV452709.1 | 2951467 | 1-scf00009 | 1 |
| AX-157898096 | 1 | 58.349 | KV452709.1 | 2956345 | 1-scf00009 | 1 |
| AX-157811108 | 1 | 58.349 | KV452709.1 | 2960672 | 1-scf00009 | 1 |
| AX-157811109 | 1 | 58.349 | KV452709.1 | 2961863 | 1-scf00009 | 1 |
| AX-158389069 | 1 | 58.349 | KV452709.1 | 2964301 | 1-scf00009 | 1 |
| AX-157898100 | 1 | 58.349 | KV452709.1 | 2966264 | 1-scf00009 | 1 |
| AX-158389070 | 1 | 58.349 | KV452709.1 | 2966993 | 1-scf00009 | 1 |
| AX-157898101 | 1 | 58.349 | KV452709.1 | 2972685 | 1-scf00009 | 1 |
| AX-157898102 | 1 | 58.349 | KV452709.1 | 2973095 | 1-scf00009 | 1 |
| AX-157898107 | 1 | 58.349 | KV452709.1 | 2987854 | 1-scf00009 | 1 |
| AX-157898108 | 1 | 58.349 | KV452709.1 | 2987915 | 1-scf00009 | 1 |
| AX-157898110 | 1 | 58.349 | KV452709.1 | 2992469 | 1-scf00009 | 1 |
| AX-157898115 | 1 | 58.349 | KV452709.1 | 3007351 | 1-scf00009 | 1 |
| AX-157898116 | 1 | 58.349 | KV452709.1 | 3008088 | 1-scf00009 | 1 |
| AX-157898117 | 1 | 58.349 | KV452709.1 | 3008882 | 1-scf00009 | 1 |
| AX-157898121 | 1 | 58.349 | KV452709.1 | 3022935 | 1-scf00009 | 1 |
| AX-157898122 | 1 | 58.349 | KV452709.1 | 3023701 | 1-scf00009 | 1 |
| AX-158421791 | 1 | 58.349 | KV452709.1 | 3025671 | 1-scf00009 | 1 |
| AX-157898125 | 1 | 58.349 | KV452709.1 | 3033433 | 1-scf00009 | 1 |
| AX-157898127 | 1 | 58.349 | KV452709.1 | 3034969 | 1-scf00009 | 1 |
| AX-157898130 | 1 | 58.349 | KV452709.1 | 3039053 | 1-scf00009 | 1 |

|              |   |        |            |         |            |   |
|--------------|---|--------|------------|---------|------------|---|
| AX-157898131 | 1 | 58.349 | KV452709.1 | 3041543 | 1-scf00009 | 1 |
| AX-158389076 | 1 | 58.349 | KV452709.1 | 3043833 | 1-scf00009 | 1 |
| AX-157898133 | 1 | 58.349 | KV452709.1 | 3045103 | 1-scf00009 | 1 |
| AX-157811110 | 1 | 58.349 | KV452709.1 | 3046724 | 1-scf00009 | 1 |
| AX-157898137 | 1 | 58.349 | KV452709.1 | 3051845 | 1-scf00009 | 1 |
| AX-157868589 | 1 | 58.349 | KV452709.1 | 3060593 | 1-scf00009 | 1 |
| AX-157811113 | 1 | 58.349 | KV452709.1 | 3062109 | 1-scf00009 | 1 |
| AX-157898140 | 1 | 58.349 | KV452709.1 | 3069352 | 1-scf00009 | 1 |
| AX-157898142 | 1 | 58.349 | KV452709.1 | 3072265 | 1-scf00009 | 1 |
| AX-157898144 | 1 | 58.349 | KV452709.1 | 3075380 | 1-scf00009 | 1 |
| AX-157811114 | 1 | 58.349 | KV452709.1 | 3077242 | 1-scf00009 | 1 |
| AX-157695648 | 1 | 58.349 | KV452709.1 | 3078727 | 1-scf00009 | 1 |
| AX-157898145 | 1 | 58.349 | KV452709.1 | 3079638 | 1-scf00009 | 1 |
| AX-157898146 | 1 | 58.349 | KV452709.1 | 3080993 | 1-scf00009 | 1 |
| AX-157898147 | 1 | 58.349 | KV452709.1 | 3082346 | 1-scf00009 | 1 |
| AX-157898148 | 1 | 58.349 | KV452709.1 | 3082933 | 1-scf00009 | 1 |
| AX-157898149 | 1 | 58.349 | KV452709.1 | 3083589 | 1-scf00009 | 1 |
| AX-157898150 | 1 | 58.349 | KV452709.1 | 3084312 | 1-scf00009 | 1 |
| AX-158389079 | 1 | 58.349 | KV452709.1 | 3085933 | 1-scf00009 | 1 |
| AX-157811115 | 1 | 58.349 | KV452709.1 | 3087997 | 1-scf00009 | 1 |
| AX-157898158 | 1 | 58.349 | KV452709.1 | 3095236 | 1-scf00009 | 1 |
| AX-157898161 | 1 | 58.349 | KV452709.1 | 3098426 | 1-scf00009 | 1 |
| AX-157898163 | 1 | 58.349 | KV452709.1 | 3102584 | 1-scf00009 | 1 |
| AX-157898164 | 1 | 58.349 | KV452709.1 | 3103931 | 1-scf00009 | 1 |
| AX-157898169 | 1 | 58.349 | KV452709.1 | 3109281 | 1-scf00009 | 1 |
| AX-157898170 | 1 | 58.349 | KV452709.1 | 3110156 | 1-scf00009 | 1 |
| AX-157811117 | 1 | 58.349 | KV452709.1 | 3113140 | 1-scf00009 | 1 |
| AX-157898172 | 1 | 58.349 | KV452709.1 | 3116834 | 1-scf00009 | 1 |
| AX-158389082 | 1 | 58.349 | KV452709.1 | 3119063 | 1-scf00009 | 1 |
| AX-157898174 | 1 | 58.349 | KV452709.1 | 3119617 | 1-scf00009 | 1 |
| AX-157898175 | 1 | 58.349 | KV452709.1 | 3120483 | 1-scf00009 | 1 |
| AX-158389083 | 1 | 58.349 | KV452709.1 | 3121211 | 1-scf00009 | 1 |
| AX-157898178 | 1 | 58.349 | KV452709.1 | 3123856 | 1-scf00009 | 1 |
| AX-157811120 | 1 | 58.349 | KV452709.1 | 3126570 | 1-scf00009 | 1 |
| AX-157898179 | 1 | 58.349 | KV452709.1 | 3127242 | 1-scf00009 | 1 |
| AX-157898180 | 1 | 58.349 | KV452709.1 | 3128260 | 1-scf00009 | 1 |
| AX-158389085 | 1 | 58.349 | KV452709.1 | 3130121 | 1-scf00009 | 1 |
| AX-157898181 | 1 | 58.349 | KV452709.1 | 3131406 | 1-scf00009 | 1 |
| AX-157898182 | 1 | 58.349 | KV452709.1 | 3135306 | 1-scf00009 | 1 |
| AX-157811121 | 1 | 58.349 | KV452709.1 | 3139449 | 1-scf00009 | 1 |
| AX-157811122 | 1 | 58.349 | KV452709.1 | 3143663 | 1-scf00009 | 1 |
| AX-157898184 | 1 | 58.349 | KV452709.1 | 3147990 | 1-scf00009 | 1 |
| AX-157868593 | 1 | 58.349 | KV452709.1 | 3148363 | 1-scf00009 | 1 |
| AX-157898185 | 1 | 58.349 | KV452709.1 | 3161460 | 1-scf00009 | 1 |
| AX-157868595 | 1 | 58.349 | KV452709.1 | 3164646 | 1-scf00009 | 1 |
| AX-157868596 | 1 | 58.349 | KV452709.1 | 3170753 | 1-scf00009 | 1 |
| AX-157868597 | 1 | 58.349 | KV452709.1 | 3174627 | 1-scf00009 | 1 |
| AX-157898189 | 1 | 58.349 | KV452709.1 | 3179717 | 1-scf00009 | 1 |
| AX-157868598 | 1 | 58.349 | KV452709.1 | 3184537 | 1-scf00009 | 1 |
| AX-158389089 | 1 | 58.349 | KV452709.1 | 3187912 | 1-scf00009 | 1 |
| AX-157811123 | 1 | 58.349 | KV452709.1 | 3188778 | 1-scf00009 | 1 |

|              |   |        |            |         |            |   |
|--------------|---|--------|------------|---------|------------|---|
| AX-157898191 | 1 | 58.349 | KV452709.1 | 3189031 | 1-scf00009 | 1 |
| AX-157811124 | 1 | 58.349 | KV452709.1 | 3189679 | 1-scf00009 | 1 |
| AX-157868600 | 1 | 58.349 | KV452709.1 | 3193138 | 1-scf00009 | 1 |
| AX-158403917 | 1 | 58.349 | KV452709.1 | 3195172 | 1-scf00009 | 1 |
| AX-158404439 | 1 | 58.349 | KV452709.1 | 3195242 | 1-scf00009 | 1 |
| AX-157868601 | 1 | 58.349 | KV452709.1 | 3199145 | 1-scf00009 | 1 |
| AX-157811125 | 1 | 58.349 | KV452709.1 | 3203814 | 1-scf00009 | 1 |
| AX-158389090 | 1 | 58.349 | KV452709.1 | 3205113 | 1-scf00009 | 1 |
| AX-158389091 | 1 | 58.349 | KV452709.1 | 3209115 | 1-scf00009 | 1 |
| AX-157898196 | 1 | 58.349 | KV452709.1 | 3212386 | 1-scf00009 | 1 |
| AX-157898199 | 1 | 58.349 | KV452709.1 | 3215735 | 1-scf00009 | 1 |
| AX-157868607 | 1 | 58.349 | KV452709.1 | 3220834 | 1-scf00009 | 1 |
| AX-157898202 | 1 | 58.349 | KV452709.1 | 3221956 | 1-scf00009 | 1 |
| AX-158389093 | 1 | 58.349 | KV452709.1 | 3224770 | 1-scf00009 | 1 |
| AX-158389095 | 1 | 58.349 | KV452709.1 | 3230514 | 1-scf00009 | 1 |
| AX-157898206 | 1 | 58.349 | KV452709.1 | 3231436 | 1-scf00009 | 1 |
| AX-157898207 | 1 | 58.349 | KV452709.1 | 3232280 | 1-scf00009 | 1 |
| AX-157898208 | 1 | 58.349 | KV452709.1 | 3232937 | 1-scf00009 | 1 |
| AX-157898209 | 1 | 58.349 | KV452709.1 | 3235042 | 1-scf00009 | 1 |
| AX-157898211 | 1 | 58.349 | KV452709.1 | 3238030 | 1-scf00009 | 1 |
| AX-158389098 | 1 | 58.349 | KV452709.1 | 3238756 | 1-scf00009 | 1 |
| AX-157898212 | 1 | 58.349 | KV452709.1 | 3239964 | 1-scf00009 | 1 |
| AX-158389099 | 1 | 58.349 | KV452709.1 | 3241549 | 1-scf00009 | 1 |
| AX-157898216 | 1 | 58.349 | KV452709.1 | 3244292 | 1-scf00009 | 1 |
| AX-157898218 | 1 | 58.349 | KV452709.1 | 3247681 | 1-scf00009 | 1 |
| AX-157898219 | 1 | 58.349 | KV452709.1 | 3250003 | 1-scf00009 | 1 |
| AX-157898220 | 1 | 58.349 | KV452709.1 | 3250689 | 1-scf00009 | 1 |
| AX-157898221 | 1 | 58.349 | KV452709.1 | 3253094 | 1-scf00009 | 1 |
| AX-157898223 | 1 | 58.349 | KV452709.1 | 3257959 | 1-scf00009 | 1 |
| AX-158389102 | 1 | 58.349 | KV452709.1 | 3258138 | 1-scf00009 | 1 |
| AX-157898224 | 1 | 58.349 | KV452709.1 | 3259505 | 1-scf00009 | 1 |
| AX-157898225 | 1 | 58.349 | KV452709.1 | 3260140 | 1-scf00009 | 1 |
| AX-158389105 | 1 | 58.349 | KV452709.1 | 3265741 | 1-scf00009 | 1 |
| AX-158389107 | 1 | 58.349 | KV452709.1 | 3271963 | 1-scf00009 | 1 |
| AX-157898234 | 1 | 58.349 | KV452709.1 | 3275946 | 1-scf00009 | 1 |
| AX-157898235 | 1 | 58.349 | KV452709.1 | 3278652 | 1-scf00009 | 1 |
| AX-158389109 | 1 | 58.349 | KV452709.1 | 3279301 | 1-scf00009 | 1 |
| AX-157898238 | 1 | 58.349 | KV452709.1 | 3281384 | 1-scf00009 | 1 |
| AX-157898239 | 1 | 58.349 | KV452709.1 | 3282039 | 1-scf00009 | 1 |
| AX-158389110 | 1 | 58.349 | KV452709.1 | 3283275 | 1-scf00009 | 1 |
| AX-157898245 | 1 | 58.349 | KV452709.1 | 3289014 | 1-scf00009 | 1 |
| AX-158389111 | 1 | 58.349 | KV452709.1 | 3289348 | 1-scf00009 | 1 |
| AX-158389112 | 1 | 58.349 | KV452709.1 | 3291895 | 1-scf00009 | 1 |
| AX-157898248 | 1 | 58.349 | KV452709.1 | 3292468 | 1-scf00009 | 1 |
| AX-157898249 | 1 | 58.349 | KV452709.1 | 3293411 | 1-scf00009 | 1 |
| AX-157898250 | 1 | 58.349 | KV452709.1 | 3294030 | 1-scf00009 | 1 |
| AX-157898252 | 1 | 58.349 | KV452709.1 | 3296279 | 1-scf00009 | 1 |
| AX-157898253 | 1 | 58.349 | KV452709.1 | 3296999 | 1-scf00009 | 1 |
| AX-157898256 | 1 | 58.349 | KV452709.1 | 3300324 | 1-scf00009 | 1 |
| AX-158389115 | 1 | 58.349 | KV452709.1 | 3307840 | 1-scf00009 | 1 |
| AX-157898261 | 1 | 58.349 | KV452709.1 | 3315438 | 1-scf00009 | 1 |



|              |   |        |            |         |            |   |
|--------------|---|--------|------------|---------|------------|---|
| AX-157898263 | 1 | 58.349 | KV452709.1 | 3317223 | 1-scf00009 | 1 |
| AX-158404445 | 1 | 58.349 | KV452709.1 | 3318724 | 1-scf00009 | 1 |
| AX-157898264 | 1 | 58.349 | KV452709.1 | 3321776 | 1-scf00009 | 1 |
| AX-158389118 | 1 | 58.349 | KV452709.1 | 3321918 | 1-scf00009 | 1 |
| AX-157898265 | 1 | 58.349 | KV452709.1 | 3322295 | 1-scf00009 | 1 |
| AX-157898269 | 1 | 58.349 | KV452709.1 | 3326978 | 1-scf00009 | 1 |
| AX-157898272 | 1 | 58.349 | KV452709.1 | 3331818 | 1-scf00009 | 1 |
| AX-157898275 | 1 | 58.349 | KV452709.1 | 3337439 | 1-scf00009 | 1 |
| AX-158389121 | 1 | 58.349 | KV452709.1 | 3337736 | 1-scf00009 | 1 |
| AX-157898276 | 1 | 58.349 | KV452709.1 | 3338727 | 1-scf00009 | 1 |
| AX-158389122 | 1 | 58.349 | KV452709.1 | 3342124 | 1-scf00009 | 1 |
| AX-157898283 | 1 | 58.349 | KV452709.1 | 3360662 | 1-scf00009 | 1 |
| AX-158389126 | 1 | 58.349 | KV452709.1 | 3362021 | 1-scf00009 | 1 |
| AX-157811129 | 1 | 58.349 | KV452709.1 | 3362860 | 1-scf00009 | 1 |
| AX-157811130 | 1 | 58.349 | KV452709.1 | 3363175 | 1-scf00009 | 1 |
| AX-157898284 | 1 | 58.349 | KV452709.1 | 3367106 | 1-scf00009 | 1 |
| AX-158389127 | 1 | 58.349 | KV452709.1 | 3367781 | 1-scf00009 | 1 |
| AX-157898285 | 1 | 58.349 | KV452709.1 | 3367860 | 1-scf00009 | 1 |
| AX-157898286 | 1 | 58.349 | KV452709.1 | 3368460 | 1-scf00009 | 1 |
| AX-158389128 | 1 | 58.349 | KV452709.1 | 3371002 | 1-scf00009 | 1 |
| AX-157898287 | 1 | 58.349 | KV452709.1 | 3371310 | 1-scf00009 | 1 |
| AX-157898288 | 1 | 58.349 | KV452709.1 | 3371735 | 1-scf00009 | 1 |
| AX-157898289 | 1 | 58.349 | KV452709.1 | 3372302 | 1-scf00009 | 1 |
| AX-157748824 | 1 | 58.349 | KV452709.1 | 3372946 | 1-scf00009 | 1 |
| AX-157898290 | 1 | 58.349 | KV452709.1 | 3373902 | 1-scf00009 | 1 |
| AX-157898291 | 1 | 58.349 | KV452709.1 | 3375358 | 1-scf00009 | 1 |
| AX-157898292 | 1 | 58.349 | KV452709.1 | 3376084 | 1-scf00009 | 1 |
| AX-158389129 | 1 | 58.349 | KV452709.1 | 3377101 | 1-scf00009 | 1 |
| AX-157811131 | 1 | 58.349 | KV452709.1 | 3380939 | 1-scf00009 | 1 |
| AX-158421737 | 1 | 58.349 | KV452709.1 | 3382895 | 1-scf00009 | 1 |
| AX-158389130 | 1 | 58.349 | KV452709.1 | 3384273 | 1-scf00009 | 1 |
| AX-158389131 | 1 | 58.349 | KV452709.1 | 3386015 | 1-scf00009 | 1 |
| AX-158389132 | 1 | 58.349 | KV452709.1 | 3388629 | 1-scf00009 | 1 |
| AX-157898298 | 1 | 58.349 | KV452709.1 | 3389492 | 1-scf00009 | 1 |
| AX-158389133 | 1 | 58.349 | KV452709.1 | 3390869 | 1-scf00009 | 1 |
| AX-157898300 | 1 | 58.349 | KV452709.1 | 3391916 | 1-scf00009 | 1 |
| AX-157898301 | 1 | 58.349 | KV452709.1 | 3393572 | 1-scf00009 | 1 |
| AX-158389134 | 1 | 58.349 | KV452709.1 | 3394228 | 1-scf00009 | 1 |
| AX-157898303 | 1 | 58.349 | KV452709.1 | 3396096 | 1-scf00009 | 1 |
| AX-158389135 | 1 | 58.349 | KV452709.1 | 3397879 | 1-scf00009 | 1 |
| AX-157898305 | 1 | 58.349 | KV452709.1 | 3398471 | 1-scf00009 | 1 |
| AX-157898306 | 1 | 58.349 | KV452709.1 | 3399523 | 1-scf00009 | 1 |
| AX-157898307 | 1 | 58.349 | KV452709.1 | 3399937 | 1-scf00009 | 1 |
| AX-157898309 | 1 | 58.349 | KV452709.1 | 3401873 | 1-scf00009 | 1 |
| AX-158404447 | 1 | 58.349 | KV452709.1 | 3402345 | 1-scf00009 | 1 |
| AX-158389136 | 1 | 58.349 | KV452709.1 | 3403579 | 1-scf00009 | 1 |
| AX-157898310 | 1 | 58.349 | KV452709.1 | 3403858 | 1-scf00009 | 1 |
| AX-157898311 | 1 | 58.349 | KV452709.1 | 3405828 | 1-scf00009 | 1 |
| AX-157811132 | 1 | 58.349 | KV452709.1 | 3409276 | 1-scf00009 | 1 |
| AX-157811133 | 1 | 58.349 | KV452709.1 | 3409892 | 1-scf00009 | 1 |
| AX-157898312 | 1 | 58.349 | KV452709.1 | 3412052 | 1-scf00009 | 1 |

|              |   |        |            |         |            |   |
|--------------|---|--------|------------|---------|------------|---|
| AX-158389139 | 1 | 58.349 | KV452709.1 | 3412674 | 1-scf00009 | 1 |
| AX-158389140 | 1 | 58.349 | KV452709.1 | 3415860 | 1-scf00009 | 1 |
| AX-158389141 | 1 | 58.349 | KV452709.1 | 3418903 | 1-scf00009 | 1 |
| AX-157898315 | 1 | 58.349 | KV452709.1 | 3420425 | 1-scf00009 | 1 |
| AX-158389142 | 1 | 58.349 | KV452709.1 | 3421561 | 1-scf00009 | 1 |
| AX-157898317 | 1 | 58.349 | KV452709.1 | 3425718 | 1-scf00009 | 1 |
| AX-158389143 | 1 | 58.349 | KV452709.1 | 3427379 | 1-scf00009 | 1 |
| AX-157898319 | 1 | 58.349 | KV452709.1 | 3428439 | 1-scf00009 | 1 |
| AX-157898321 | 1 | 58.349 | KV452709.1 | 3430018 | 1-scf00009 | 1 |
| AX-158389144 | 1 | 58.349 | KV452709.1 | 3430615 | 1-scf00009 | 1 |
| AX-158389145 | 1 | 58.349 | KV452709.1 | 3432937 | 1-scf00009 | 1 |
| AX-157898323 | 1 | 58.349 | KV452709.1 | 3433198 | 1-scf00009 | 1 |
| AX-157898325 | 1 | 58.349 | KV452709.1 | 3438724 | 1-scf00009 | 1 |
| AX-158389146 | 1 | 58.349 | KV452709.1 | 3438927 | 1-scf00009 | 1 |
| AX-157868611 | 1 | 58.349 | KV452709.1 | 3440282 | 1-scf00009 | 1 |
| AX-157868612 | 1 | 58.349 | KV452709.1 | 3440546 | 1-scf00009 | 1 |
| AX-157811134 | 1 | 58.349 | KV452709.1 | 3441114 | 1-scf00009 | 1 |
| AX-157868614 | 1 | 58.349 | KV452709.1 | 3442663 | 1-scf00009 | 1 |
| AX-157898327 | 1 | 58.349 | KV452709.1 | 3443095 | 1-scf00009 | 1 |
| AX-157898328 | 1 | 58.349 | KV452709.1 | 3444257 | 1-scf00009 | 1 |
| AX-157868615 | 1 | 58.349 | KV452709.1 | 3444918 | 1-scf00009 | 1 |
| AX-157898329 | 1 | 58.349 | KV452709.1 | 3445726 | 1-scf00009 | 1 |
| AX-157898330 | 1 | 58.349 | KV452709.1 | 3446494 | 1-scf00009 | 1 |
| AX-157898331 | 1 | 58.349 | KV452709.1 | 3448284 | 1-scf00009 | 1 |
| AX-157898334 | 1 | 58.349 | KV452709.1 | 3453682 | 1-scf00009 | 1 |
| AX-157868618 | 1 | 58.349 | KV452709.1 | 3454913 | 1-scf00009 | 1 |
| AX-157898335 | 1 | 58.349 | KV452709.1 | 3455375 | 1-scf00009 | 1 |
| AX-157868619 | 1 | 58.349 | KV452709.1 | 3455820 | 1-scf00009 | 1 |
| AX-157898336 | 1 | 58.349 | KV452709.1 | 3456160 | 1-scf00009 | 1 |
| AX-157868620 | 1 | 58.349 | KV452709.1 | 3458461 | 1-scf00009 | 1 |
| AX-157868621 | 1 | 58.349 | KV452709.1 | 3458843 | 1-scf00009 | 1 |
| AX-157868622 | 1 | 58.349 | KV452709.1 | 3459185 | 1-scf00009 | 1 |
| AX-157868624 | 1 | 58.349 | KV452709.1 | 3463275 | 1-scf00009 | 1 |
| AX-157898341 | 1 | 58.349 | KV452709.1 | 3466000 | 1-scf00009 | 1 |
| AX-157898342 | 1 | 58.349 | KV452709.1 | 3467348 | 1-scf00009 | 1 |
| AX-157898344 | 1 | 58.349 | KV452709.1 | 3468310 | 1-scf00009 | 1 |
| AX-157868626 | 1 | 58.349 | KV452709.1 | 3470399 | 1-scf00009 | 1 |
| AX-157868627 | 1 | 58.349 | KV452709.1 | 3470747 | 1-scf00009 | 1 |
| AX-157898346 | 1 | 58.349 | KV452709.1 | 3472154 | 1-scf00009 | 1 |
| AX-157868628 | 1 | 58.349 | KV452709.1 | 3473706 | 1-scf00009 | 1 |
| AX-157898347 | 1 | 58.349 | KV452709.1 | 3476279 | 1-scf00009 | 1 |
| AX-157868630 | 1 | 58.349 | KV452709.1 | 3478290 | 1-scf00009 | 1 |
| AX-157898349 | 1 | 58.349 | KV452709.1 | 3479296 | 1-scf00009 | 1 |
| AX-157711139 | 1 | 58.349 | KV452709.1 | 3482867 | 1-scf00009 | 1 |
| AX-157811136 | 1 | 58.349 | KV452709.1 | 3488483 | 1-scf00009 | 1 |
| AX-157898351 | 1 | 58.349 | KV452709.1 | 3493118 | 1-scf00009 | 1 |
| AX-157898354 | 1 | 58.349 | KV452709.1 | 3494867 | 1-scf00009 | 1 |
| AX-158414605 | 1 | 58.349 | KV452709.1 | 3497537 | 1-scf00009 | 1 |
| AX-158404449 | 1 | 58.349 | KV452709.1 | 3497685 | 1-scf00009 | 1 |
| AX-157898355 | 1 | 58.349 | KV452709.1 | 3497761 | 1-scf00009 | 1 |
| AX-157898356 | 1 | 58.349 | KV452709.1 | 3505584 | 1-scf00009 | 1 |

|              |   |        |            |         |            |   |
|--------------|---|--------|------------|---------|------------|---|
| AX-157898357 | 1 | 58.349 | KV452709.1 | 3506363 | 1-scf00009 | 1 |
| AX-158389149 | 1 | 58.349 | KV452709.1 | 3507108 | 1-scf00009 | 1 |
| AX-158389150 | 1 | 58.349 | KV452709.1 | 3509080 | 1-scf00009 | 1 |
| AX-157898358 | 1 | 58.349 | KV452709.1 | 3511655 | 1-scf00009 | 1 |
| AX-158389152 | 1 | 58.349 | KV452709.1 | 3513786 | 1-scf00009 | 1 |
| AX-157898360 | 1 | 58.349 | KV452709.1 | 3515008 | 1-scf00009 | 1 |
| AX-158389153 | 1 | 58.349 | KV452709.1 | 3515846 | 1-scf00009 | 1 |
| AX-157898361 | 1 | 58.349 | KV452709.1 | 3515913 | 1-scf00009 | 1 |
| AX-157898364 | 1 | 58.349 | KV452709.1 | 3518799 | 1-scf00009 | 1 |
| AX-157898366 | 1 | 58.349 | KV452709.1 | 3519582 | 1-scf00009 | 1 |
| AX-157898367 | 1 | 58.349 | KV452709.1 | 3520229 | 1-scf00009 | 1 |
| AX-158389154 | 1 | 58.349 | KV452709.1 | 3521128 | 1-scf00009 | 1 |
| AX-157898370 | 1 | 58.349 | KV452709.1 | 3522719 | 1-scf00009 | 1 |
| AX-157898371 | 1 | 58.349 | KV452709.1 | 3523339 | 1-scf00009 | 1 |
| AX-157883109 | 1 | 58.349 | KV452709.1 | 3523658 | 1-scf00009 | 1 |
| AX-157898373 | 1 | 58.349 | KV452709.1 | 3524566 | 1-scf00009 | 1 |
| AX-158389156 | 1 | 58.349 | KV452709.1 | 3526352 | 1-scf00009 | 1 |
| AX-157898377 | 1 | 58.349 | KV452709.1 | 3526509 | 1-scf00009 | 1 |
| AX-157898379 | 1 | 58.349 | KV452709.1 | 3529119 | 1-scf00009 | 1 |
| AX-157898380 | 1 | 58.349 | KV452709.1 | 3529529 | 1-scf00009 | 1 |
| AX-157898382 | 1 | 58.349 | KV452709.1 | 3530735 | 1-scf00009 | 1 |
| AX-157868631 | 1 | 58.349 | KV452709.1 | 3531395 | 1-scf00009 | 1 |
| AX-157868632 | 1 | 58.349 | KV452709.1 | 3531871 | 1-scf00009 | 1 |
| AX-158389157 | 1 | 58.349 | KV452709.1 | 3534043 | 1-scf00009 | 1 |
| AX-157898386 | 1 | 58.349 | KV452709.1 | 3541280 | 1-scf00009 | 1 |
| AX-157898387 | 1 | 58.349 | KV452709.1 | 3543470 | 1-scf00009 | 1 |
| AX-157898389 | 1 | 58.349 | KV452709.1 | 3551321 | 1-scf00009 | 1 |
| AX-157898390 | 1 | 58.349 | KV452709.1 | 3551800 | 1-scf00009 | 1 |
| AX-158389160 | 1 | 58.349 | KV452709.1 | 3552691 | 1-scf00009 | 1 |
| AX-157898391 | 1 | 58.349 | KV452709.1 | 3553876 | 1-scf00009 | 1 |
| AX-157898392 | 1 | 58.349 | KV452709.1 | 3555115 | 1-scf00009 | 1 |
| AX-158389161 | 1 | 58.349 | KV452709.1 | 3555432 | 1-scf00009 | 1 |
| AX-157898393 | 1 | 58.349 | KV452709.1 | 3555592 | 1-scf00009 | 1 |
| AX-157898394 | 1 | 58.349 | KV452709.1 | 3556214 | 1-scf00009 | 1 |
| AX-157898395 | 1 | 58.349 | KV452709.1 | 3557910 | 1-scf00009 | 1 |
| AX-157898396 | 1 | 58.349 | KV452709.1 | 3559918 | 1-scf00009 | 1 |
| AX-157811137 | 1 | 58.349 | KV452709.1 | 3563152 | 1-scf00009 | 1 |
| AX-157811139 | 1 | 58.349 | KV452709.1 | 3564783 | 1-scf00009 | 1 |
| AX-157898400 | 1 | 58.349 | KV452709.1 | 3568537 | 1-scf00009 | 1 |
| AX-157898401 | 1 | 58.349 | KV452709.1 | 3568898 | 1-scf00009 | 1 |
| AX-157898402 | 1 | 58.349 | KV452709.1 | 3569740 | 1-scf00009 | 1 |
| AX-157898403 | 1 | 58.349 | KV452709.1 | 3572235 | 1-scf00009 | 1 |
| AX-157898404 | 1 | 58.349 | KV452709.1 | 3572632 | 1-scf00009 | 1 |
| AX-158389163 | 1 | 58.349 | KV452709.1 | 3573655 | 1-scf00009 | 1 |
| AX-158389164 | 1 | 58.349 | KV452709.1 | 3575617 | 1-scf00009 | 1 |
| AX-157898405 | 1 | 58.349 | KV452709.1 | 3576529 | 1-scf00009 | 1 |
| AX-157898406 | 1 | 58.349 | KV452709.1 | 3578014 | 1-scf00009 | 1 |
| AX-157898409 | 1 | 58.349 | KV452709.1 | 3580453 | 1-scf00009 | 1 |
| AX-158389165 | 1 | 58.349 | KV452709.1 | 3582940 | 1-scf00009 | 1 |
| AX-157898411 | 1 | 58.349 | KV452709.1 | 3583596 | 1-scf00009 | 1 |
| AX-157811140 | 1 | 58.349 | KV452709.1 | 3585154 | 1-scf00009 | 1 |

|              |   |        |            |         |            |   |
|--------------|---|--------|------------|---------|------------|---|
| AX-158389167 | 1 | 58.349 | KV452709.1 | 3587414 | 1-scf00009 | 1 |
| AX-158389168 | 1 | 58.349 | KV452709.1 | 3591032 | 1-scf00009 | 1 |
| AX-158389169 | 1 | 58.349 | KV452709.1 | 3591472 | 1-scf00009 | 1 |
| AX-157898414 | 1 | 58.349 | KV452709.1 | 3593382 | 1-scf00009 | 1 |
| AX-157868635 | 1 | 58.349 | KV452709.1 | 3593640 | 1-scf00009 | 1 |
| AX-157898415 | 1 | 58.349 | KV452709.1 | 3597584 | 1-scf00009 | 1 |
| AX-157868638 | 1 | 58.349 | KV452709.1 | 3602207 | 1-scf00009 | 1 |
| AX-157898416 | 1 | 58.349 | KV452709.1 | 3605642 | 1-scf00009 | 1 |
| AX-157811141 | 1 | 58.349 | KV452709.1 | 3606823 | 1-scf00009 | 1 |
| AX-157898418 | 1 | 58.349 | KV452709.1 | 3611768 | 1-scf00009 | 1 |
| AX-157898419 | 1 | 58.349 | KV452709.1 | 3612663 | 1-scf00009 | 1 |
| AX-157868639 | 1 | 58.349 | KV452709.1 | 3613636 | 1-scf00009 | 1 |
| AX-157868640 | 1 | 58.349 | KV452709.1 | 3622617 | 1-scf00009 | 1 |
| AX-158389170 | 1 | 58.349 | KV452709.1 | 3626926 | 1-scf00009 | 1 |
| AX-157898425 | 1 | 58.349 | KV452709.1 | 3627958 | 1-scf00009 | 1 |
| AX-157898429 | 1 | 58.349 | KV452709.1 | 3633784 | 1-scf00009 | 1 |
| AX-157868641 | 1 | 58.349 | KV452709.1 | 3635168 | 1-scf00009 | 1 |
| AX-157811148 | 1 | 58.349 | KV452709.1 | 3635463 | 1-scf00009 | 1 |
| AX-157898432 | 1 | 58.349 | KV452709.1 | 3636344 | 1-scf00009 | 1 |
| AX-157811149 | 1 | 58.349 | KV452709.1 | 3636811 | 1-scf00009 | 1 |
| AX-157868642 | 1 | 58.349 | KV452709.1 | 3638374 | 1-scf00009 | 1 |
| AX-157898433 | 1 | 58.349 | KV452709.1 | 3639537 | 1-scf00009 | 1 |
| AX-157868643 | 1 | 58.349 | KV452709.1 | 3640911 | 1-scf00009 | 1 |
| AX-157898435 | 1 | 58.349 | KV452709.1 | 3642944 | 1-scf00009 | 1 |
| AX-157898436 | 1 | 58.349 | KV452709.1 | 3643499 | 1-scf00009 | 1 |
| AX-157898437 | 1 | 58.349 | KV452709.1 | 3644621 | 1-scf00009 | 1 |
| AX-157868645 | 1 | 58.349 | KV452709.1 | 3645315 | 1-scf00009 | 1 |
| AX-157898439 | 1 | 58.349 | KV452709.1 | 3646716 | 1-scf00009 | 1 |
| AX-157898440 | 1 | 58.349 | KV452709.1 | 3646855 | 1-scf00009 | 1 |
| AX-157868647 | 1 | 58.349 | KV452709.1 | 3648009 | 1-scf00009 | 1 |
| AX-157898441 | 1 | 58.349 | KV452709.1 | 3650518 | 1-scf00009 | 1 |
| AX-157898442 | 1 | 58.349 | KV452709.1 | 3653082 | 1-scf00009 | 1 |
| AX-157898443 | 1 | 58.349 | KV452709.1 | 3653392 | 1-scf00009 | 1 |
| AX-157898444 | 1 | 58.349 | KV452709.1 | 3653978 | 1-scf00009 | 1 |
| AX-157898446 | 1 | 58.349 | KV452709.1 | 3655691 | 1-scf00009 | 1 |
| AX-157898448 | 1 | 58.349 | KV452709.1 | 3664318 | 1-scf00009 | 1 |
| AX-157898449 | 1 | 58.349 | KV452709.1 | 3664802 | 1-scf00009 | 1 |
| AX-157898450 | 1 | 58.349 | KV452709.1 | 3664852 | 1-scf00009 | 1 |
| AX-158421793 | 1 | 58.349 | KV452709.1 | 3667503 | 1-scf00009 | 1 |
| AX-157898453 | 1 | 58.349 | KV452709.1 | 3668167 | 1-scf00009 | 1 |
| AX-157811151 | 1 | 58.349 | KV452709.1 | 3669509 | 1-scf00009 | 1 |
| AX-157811152 | 1 | 58.349 | KV452709.1 | 3678366 | 1-scf00009 | 1 |
| AX-157811154 | 1 | 58.349 | KV452709.1 | 3691975 | 1-scf00009 | 1 |
| AX-157898454 | 1 | 58.349 | KV452709.1 | 3702670 | 1-scf00009 | 1 |
| AX-157898456 | 1 | 58.349 | KV452709.1 | 3711806 | 1-scf00009 | 1 |
| AX-158404454 | 1 | 58.349 | KV452709.1 | 3713128 | 1-scf00009 | 1 |
| AX-157898457 | 1 | 58.349 | KV452709.1 | 3716585 | 1-scf00009 | 1 |
| AX-157898462 | 1 | 58.349 | KV452709.1 | 3730219 | 1-scf00009 | 1 |
| AX-157898463 | 1 | 58.349 | KV452709.1 | 3731017 | 1-scf00009 | 1 |
| AX-158404458 | 1 | 58.349 | KV452709.1 | 3738414 | 1-scf00009 | 1 |
| AX-157868652 | 1 | 58.349 | KV452709.1 | 3741781 | 1-scf00009 | 1 |

|              |   |        |            |         |            |   |
|--------------|---|--------|------------|---------|------------|---|
| AX-157898466 | 1 | 58.349 | KV452709.1 | 3742344 | 1-scf00009 | 1 |
| AX-157868653 | 1 | 58.349 | KV452709.1 | 3746363 | 1-scf00009 | 1 |
| AX-157811160 | 1 | 58.349 | KV452709.1 | 3755899 | 1-scf00009 | 1 |
| AX-157811161 | 1 | 58.349 | KV452709.1 | 3760387 | 1-scf00009 | 1 |
| AX-157811162 | 1 | 58.349 | KV452709.1 | 3772595 | 1-scf00009 | 1 |
| AX-158414606 | 1 | 58.349 | KV452709.1 | 3774978 | 1-scf00009 | 1 |
| AX-157898473 | 1 | 58.349 | KV452709.1 | 3793899 | 1-scf00009 | 1 |
| AX-157898475 | 1 | 58.349 | KV452709.1 | 3801639 | 1-scf00009 | 1 |
| AX-157898477 | 1 | 58.349 | KV452709.1 | 3803811 | 1-scf00009 | 1 |
| AX-157722935 | 1 | 58.349 | KV452709.1 | 3807592 | 1-scf00009 | 1 |
| AX-157898479 | 1 | 58.349 | KV452709.1 | 3812865 | 1-scf00009 | 1 |
| AX-157898480 | 1 | 58.349 | KV452709.1 | 3813568 | 1-scf00009 | 1 |
| AX-157898481 | 1 | 58.349 | KV452709.1 | 3813828 | 1-scf00009 | 1 |
| AX-157898483 | 1 | 58.349 | KV452709.1 | 3816786 | 1-scf00009 | 1 |
| AX-157898484 | 1 | 58.349 | KV452709.1 | 3823271 | 1-scf00009 | 1 |
| AX-157898485 | 1 | 58.349 | KV452709.1 | 3823600 | 1-scf00009 | 1 |
| AX-157710216 | 1 | 58.349 | KV452709.1 | 3823936 | 1-scf00009 | 1 |
| AX-157898492 | 1 | 58.349 | KV452709.1 | 3834554 | 1-scf00009 | 1 |
| AX-157811163 | 1 | 58.349 | KV452709.1 | 3834594 | 1-scf00009 | 1 |
| AX-157898495 | 1 | 58.349 | KV452709.1 | 3839992 | 1-scf00009 | 1 |
| AX-157898497 | 1 | 58.349 | KV452709.1 | 3844611 | 1-scf00009 | 1 |
| AX-157898498 | 1 | 58.349 | KV452709.1 | 3845765 | 1-scf00009 | 1 |
| AX-157898499 | 1 | 58.349 | KV452709.1 | 3847461 | 1-scf00009 | 1 |
| AX-157898500 | 1 | 58.349 | KV452709.1 | 3848814 | 1-scf00009 | 1 |
| AX-157898501 | 1 | 58.349 | KV452709.1 | 3849955 | 1-scf00009 | 1 |
| AX-157811165 | 1 | 58.349 | KV452709.1 | 3852097 | 1-scf00009 | 1 |
| AX-158404460 | 1 | 58.349 | KV452709.1 | 3852408 | 1-scf00009 | 1 |
| AX-157719203 | 1 | 58.349 | KV452709.1 | 3855758 | 1-scf00009 | 1 |
| AX-157898505 | 1 | 58.349 | KV452709.1 | 3855978 | 1-scf00009 | 1 |
| AX-158389178 | 1 | 58.349 | KV452709.1 | 3871532 | 1-scf00009 | 1 |
| AX-157811167 | 1 | 58.349 | KV452709.1 | 3872400 | 1-scf00009 | 1 |
| AX-157898513 | 1 | 58.349 | KV452709.1 | 3873136 | 1-scf00009 | 1 |
| AX-157811168 | 1 | 58.349 | KV452709.1 | 3873517 | 1-scf00009 | 1 |
| AX-157898517 | 1 | 58.349 | KV452709.1 | 3876351 | 1-scf00009 | 1 |
| AX-157898518 | 1 | 58.349 | KV452709.1 | 3877948 | 1-scf00009 | 1 |
| AX-157898519 | 1 | 58.349 | KV452709.1 | 3879324 | 1-scf00009 | 1 |
| AX-157811169 | 1 | 58.349 | KV452709.1 | 3879547 | 1-scf00009 | 1 |
| AX-157811170 | 1 | 58.349 | KV452709.1 | 3879714 | 1-scf00009 | 1 |
| AX-157868660 | 1 | 58.349 | KV452709.1 | 3880853 | 1-scf00009 | 1 |
| AX-157811172 | 1 | 58.349 | KV452709.1 | 3882080 | 1-scf00009 | 1 |
| AX-157898522 | 1 | 58.349 | KV452709.1 | 3882450 | 1-scf00009 | 1 |
| AX-157811173 | 1 | 58.349 | KV452709.1 | 3884353 | 1-scf00009 | 1 |
| AX-157868662 | 1 | 58.349 | KV452709.1 | 3884672 | 1-scf00009 | 1 |
| AX-157898523 | 1 | 58.349 | KV452709.1 | 3884938 | 1-scf00009 | 1 |
| AX-157898524 | 1 | 58.349 | KV452709.1 | 3885257 | 1-scf00009 | 1 |
| AX-157751130 | 1 | 58.349 | KV452709.1 | 3889013 | 1-scf00009 | 1 |
| AX-157811174 | 1 | 58.349 | KV452709.1 | 3893337 | 1-scf00009 | 1 |
| AX-158404462 | 1 | 58.349 | KV452709.1 | 3898463 | 1-scf00009 | 1 |
| AX-158404463 | 1 | 58.349 | KV452709.1 | 3898761 | 1-scf00009 | 1 |
| AX-157898531 | 1 | 58.349 | KV452709.1 | 3901528 | 1-scf00009 | 1 |
| AX-158389179 | 1 | 58.349 | KV452709.1 | 3901576 | 1-scf00009 | 1 |

|              |   |        |            |         |            |   |
|--------------|---|--------|------------|---------|------------|---|
| AX-157898532 | 1 | 58.349 | KV452709.1 | 3902812 | 1-scf00009 | 1 |
| AX-157898533 | 1 | 58.349 | KV452709.1 | 3904055 | 1-scf00009 | 1 |
| AX-157898534 | 1 | 58.349 | KV452709.1 | 3904972 | 1-scf00009 | 1 |
| AX-157868664 | 1 | 58.349 | KV452709.1 | 3907620 | 1-scf00009 | 1 |
| AX-157898536 | 1 | 58.349 | KV452709.1 | 3911215 | 1-scf00009 | 1 |
| AX-157898538 | 1 | 58.349 | KV452709.1 | 3911726 | 1-scf00009 | 1 |
| AX-157811176 | 1 | 58.349 | KV452709.1 | 3912202 | 1-scf00009 | 1 |
| AX-157811177 | 1 | 58.349 | KV452709.1 | 3913251 | 1-scf00009 | 1 |
| AX-157811178 | 1 | 58.349 | KV452709.1 | 3915022 | 1-scf00009 | 1 |
| AX-157898545 | 1 | 58.349 | KV452709.1 | 3921711 | 1-scf00009 | 1 |
| AX-157898546 | 1 | 58.349 | KV452709.1 | 3922189 | 1-scf00009 | 1 |
| AX-157898548 | 1 | 58.349 | KV452709.1 | 3923138 | 1-scf00009 | 1 |
| AX-157898549 | 1 | 58.349 | KV452709.1 | 3923653 | 1-scf00009 | 1 |
| AX-157898552 | 1 | 58.349 | KV452709.1 | 3926075 | 1-scf00009 | 1 |
| AX-157898555 | 1 | 58.349 | KV452709.1 | 3930105 | 1-scf00009 | 1 |
| AX-157898556 | 1 | 58.349 | KV452709.1 | 3930425 | 1-scf00009 | 1 |
| AX-157898558 | 1 | 58.349 | KV452709.1 | 3933307 | 1-scf00009 | 1 |
| AX-157811179 | 1 | 58.349 | KV452709.1 | 3933585 | 1-scf00009 | 1 |
| AX-157898559 | 1 | 58.349 | KV452709.1 | 3934830 | 1-scf00009 | 1 |
| AX-157898561 | 1 | 58.349 | KV452709.1 | 3936902 | 1-scf00009 | 1 |
| AX-157811180 | 1 | 58.349 | KV452709.1 | 3937531 | 1-scf00009 | 1 |
| AX-157811181 | 1 | 58.349 | KV452709.1 | 3938293 | 1-scf00009 | 1 |
| AX-157898562 | 1 | 58.349 | KV452709.1 | 3939714 | 1-scf00009 | 1 |
| AX-157898563 | 1 | 58.349 | KV452709.1 | 3940063 | 1-scf00009 | 1 |
| AX-157898565 | 1 | 58.349 | KV452709.1 | 3942145 | 1-scf00009 | 1 |
| AX-157898567 | 1 | 58.349 | KV452709.1 | 3943766 | 1-scf00009 | 1 |
| AX-157898568 | 1 | 58.349 | KV452709.1 | 3945291 | 1-scf00009 | 1 |
| AX-157898570 | 1 | 58.349 | KV452709.1 | 3948314 | 1-scf00009 | 1 |
| AX-157811183 | 1 | 58.349 | KV452709.1 | 3957248 | 1-scf00009 | 1 |
| AX-157898577 | 1 | 58.349 | KV452709.1 | 3958493 | 1-scf00009 | 1 |
| AX-157898578 | 1 | 58.349 | KV452709.1 | 3961753 | 1-scf00009 | 1 |
| AX-157898579 | 1 | 58.349 | KV452709.1 | 3962629 | 1-scf00009 | 1 |
| AX-157898581 | 1 | 58.349 | KV452709.1 | 3964815 | 1-scf00009 | 1 |
| AX-157898582 | 1 | 58.349 | KV452709.1 | 3965484 | 1-scf00009 | 1 |
| AX-157898585 | 1 | 58.349 | KV452709.1 | 3967922 | 1-scf00009 | 1 |
| AX-157898588 | 1 | 58.349 | KV452709.1 | 3972618 | 1-scf00009 | 1 |
| AX-157898589 | 1 | 58.349 | KV452709.1 | 3973809 | 1-scf00009 | 1 |
| AX-157898590 | 1 | 58.349 | KV452709.1 | 3974646 | 1-scf00009 | 1 |
| AX-158389182 | 1 | 58.349 | KV452709.1 | 3974682 | 1-scf00009 | 1 |
| AX-157898591 | 1 | 58.349 | KV452709.1 | 3975151 | 1-scf00009 | 1 |
| AX-157898594 | 1 | 58.349 | KV452709.1 | 3976683 | 1-scf00009 | 1 |
| AX-157898595 | 1 | 58.349 | KV452709.1 | 3977892 | 1-scf00009 | 1 |
| AX-157898596 | 1 | 58.349 | KV452709.1 | 3978287 | 1-scf00009 | 1 |
| AX-157898598 | 1 | 58.349 | KV452709.1 | 3980924 | 1-scf00009 | 1 |
| AX-157883111 | 1 | 58.349 | KV452709.1 | 3994386 | 1-scf00009 | 1 |
| AX-157868666 | 1 | 58.349 | KV452709.1 | 4003117 | 1-scf00009 | 1 |
| AX-157868667 | 1 | 58.349 | KV452709.1 | 4008041 | 1-scf00009 | 1 |
| AX-157898614 | 1 | 58.349 | KV452709.1 | 4009021 | 1-scf00009 | 1 |
| AX-157898617 | 1 | 58.349 | KV452709.1 | 4010663 | 1-scf00009 | 1 |
| AX-157898618 | 1 | 58.349 | KV452709.1 | 4010884 | 1-scf00009 | 1 |
| AX-157898619 | 1 | 58.349 | KV452709.1 | 4011208 | 1-scf00009 | 1 |

|              |   |        |            |         |            |   |
|--------------|---|--------|------------|---------|------------|---|
| AX-157898620 | 1 | 58.349 | KV452709.1 | 4011495 | 1-scf00009 | 1 |
| AX-157898621 | 1 | 58.349 | KV452709.1 | 4011601 | 1-scf00009 | 1 |
| AX-157811188 | 1 | 58.349 | KV452709.1 | 4012777 | 1-scf00009 | 1 |
| AX-157898622 | 1 | 58.349 | KV452709.1 | 4012838 | 1-scf00009 | 1 |
| AX-158389183 | 1 | 58.349 | KV452709.1 | 4012932 | 1-scf00009 | 1 |
| AX-157898624 | 1 | 58.349 | KV452709.1 | 4014334 | 1-scf00009 | 1 |
| AX-157811190 | 1 | 58.349 | KV452709.1 | 4015435 | 1-scf00009 | 1 |
| AX-157811191 | 1 | 58.349 | KV452709.1 | 4018038 | 1-scf00009 | 1 |
| AX-158389185 | 1 | 58.349 | KV452709.1 | 4018444 | 1-scf00009 | 1 |
| AX-157898629 | 1 | 58.349 | KV452709.1 | 4022493 | 1-scf00009 | 1 |
| AX-157898632 | 1 | 58.349 | KV452709.1 | 4025829 | 1-scf00009 | 1 |
| AX-157898633 | 1 | 58.349 | KV452709.1 | 4026747 | 1-scf00009 | 1 |
| AX-157898636 | 1 | 58.349 | KV452709.1 | 4034877 | 1-scf00009 | 1 |
| AX-157868669 | 1 | 58.349 | KV452709.1 | 4035298 | 1-scf00009 | 1 |
| AX-157811193 | 1 | 58.349 | KV452709.1 | 4038242 | 1-scf00009 | 1 |
| AX-157868670 | 1 | 58.349 | KV452709.1 | 4040896 | 1-scf00009 | 1 |
| AX-157898640 | 1 | 58.349 | KV452709.1 | 4050559 | 1-scf00009 | 1 |
| AX-157898646 | 1 | 58.349 | KV452709.1 | 4061009 | 1-scf00009 | 1 |
| AX-157898647 | 1 | 58.349 | KV452709.1 | 4061726 | 1-scf00009 | 1 |
| AX-157898649 | 1 | 58.349 | KV452709.1 | 4062902 | 1-scf00009 | 1 |
| AX-157898650 | 1 | 58.349 | KV452709.1 | 4063436 | 1-scf00009 | 1 |
| AX-157727346 | 1 | 58.349 | KV452709.1 | 4065107 | 1-scf00009 | 1 |
| AX-157898652 | 1 | 58.349 | KV452709.1 | 4066180 | 1-scf00009 | 1 |
| AX-157811194 | 1 | 58.349 | KV452709.1 | 4067931 | 1-scf00009 | 1 |
| AX-157898654 | 1 | 58.349 | KV452709.1 | 4069316 | 1-scf00009 | 1 |
| AX-157898658 | 1 | 58.349 | KV452709.1 | 4077437 | 1-scf00009 | 1 |
| AX-157898659 | 1 | 58.349 | KV452709.1 | 4078832 | 1-scf00009 | 1 |
| AX-157898660 | 1 | 58.349 | KV452709.1 | 4080397 | 1-scf00009 | 1 |
| AX-157898661 | 1 | 58.349 | KV452709.1 | 4082139 | 1-scf00009 | 1 |
| AX-157898664 | 1 | 58.349 | KV452709.1 | 4083796 | 1-scf00009 | 1 |
| AX-157898665 | 1 | 58.349 | KV452709.1 | 4085622 | 1-scf00009 | 1 |
| AX-157898667 | 1 | 58.349 | KV452709.1 | 4087145 | 1-scf00009 | 1 |
| AX-157898668 | 1 | 58.349 | KV452709.1 | 4088181 | 1-scf00009 | 1 |
| AX-158389188 | 1 | 58.349 | KV452709.1 | 4088457 | 1-scf00009 | 1 |
| AX-157898670 | 1 | 58.349 | KV452709.1 | 4089827 | 1-scf00009 | 1 |
| AX-157898672 | 1 | 58.349 | KV452709.1 | 4090368 | 1-scf00009 | 1 |
| AX-157898673 | 1 | 58.349 | KV452709.1 | 4090858 | 1-scf00009 | 1 |
| AX-158389189 | 1 | 58.349 | KV452709.1 | 4090901 | 1-scf00009 | 1 |
| AX-157898675 | 1 | 58.349 | KV452709.1 | 4091859 | 1-scf00009 | 1 |
| AX-157898676 | 1 | 58.349 | KV452709.1 | 4092287 | 1-scf00009 | 1 |
| AX-158389190 | 1 | 58.349 | KV452709.1 | 4093302 | 1-scf00009 | 1 |
| AX-157898679 | 1 | 58.349 | KV452709.1 | 4097449 | 1-scf00009 | 1 |
| AX-157898682 | 1 | 58.349 | KV452709.1 | 4099852 | 1-scf00009 | 1 |
| AX-158389192 | 1 | 58.349 | KV452709.1 | 4100381 | 1-scf00009 | 1 |
| AX-157772809 | 1 | 58.349 | KV452709.1 | 4101960 | 1-scf00009 | 1 |
| AX-158389193 | 1 | 58.349 | KV452709.1 | 4105229 | 1-scf00009 | 1 |
| AX-157811195 | 1 | 58.349 | KV452709.1 | 4105912 | 1-scf00009 | 1 |
| AX-157898687 | 1 | 58.349 | KV452709.1 | 4107484 | 1-scf00009 | 1 |
| AX-157898689 | 1 | 58.349 | KV452709.1 | 4111069 | 1-scf00009 | 1 |
| AX-157758469 | 1 | 58.349 | KV452709.1 | 4111483 | 1-scf00009 | 1 |
| AX-157898690 | 1 | 58.349 | KV452709.1 | 4112738 | 1-scf00009 | 1 |

|              |   |        |            |         |            |   |
|--------------|---|--------|------------|---------|------------|---|
| AX-157898691 | 1 | 58.349 | KV452709.1 | 4114269 | 1-scf00009 | 1 |
| AX-157898693 | 1 | 58.349 | KV452709.1 | 4117176 | 1-scf00009 | 1 |
| AX-157898694 | 1 | 58.349 | KV452709.1 | 4117920 | 1-scf00009 | 1 |
| AX-157898698 | 1 | 58.349 | KV452709.1 | 4124455 | 1-scf00009 | 1 |
| AX-157898705 | 1 | 58.349 | KV452709.1 | 4131603 | 1-scf00009 | 1 |
| AX-157898706 | 1 | 58.349 | KV452709.1 | 4133375 | 1-scf00009 | 1 |
| AX-157898708 | 1 | 58.349 | KV452709.1 | 4140040 | 1-scf00009 | 1 |
| AX-158389203 | 1 | 58.349 | KV452709.1 | 4144041 | 1-scf00009 | 1 |
| AX-157898710 | 1 | 58.349 | KV452709.1 | 4144362 | 1-scf00009 | 1 |
| AX-157898713 | 1 | 58.349 | KV452709.1 | 4147977 | 1-scf00009 | 1 |
| AX-158389204 | 1 | 58.349 | KV452709.1 | 4148259 | 1-scf00009 | 1 |
| AX-158389205 | 1 | 58.349 | KV452709.1 | 4150104 | 1-scf00009 | 1 |
| AX-158389206 | 1 | 58.349 | KV452709.1 | 4152152 | 1-scf00009 | 1 |
| AX-157898718 | 1 | 58.349 | KV452709.1 | 4154954 | 1-scf00009 | 1 |
| AX-157702419 | 1 | 58.349 | KV452709.1 | 4156068 | 1-scf00009 | 1 |
| AX-157898722 | 1 | 58.349 | KV452709.1 | 4159340 | 1-scf00009 | 1 |
| AX-158389207 | 1 | 58.349 | KV452709.1 | 4159399 | 1-scf00009 | 1 |
| AX-157755199 | 1 | 58.349 | KV452709.1 | 4159636 | 1-scf00009 | 1 |
| AX-157898723 | 1 | 58.349 | KV452709.1 | 4161113 | 1-scf00009 | 1 |
| AX-157898724 | 1 | 58.349 | KV452709.1 | 4163224 | 1-scf00009 | 1 |
| AX-158389208 | 1 | 58.349 | KV452709.1 | 4164335 | 1-scf00009 | 1 |
| AX-157898727 | 1 | 58.349 | KV452709.1 | 4164501 | 1-scf00009 | 1 |
| AX-157898730 | 1 | 58.349 | KV452709.1 | 4165853 | 1-scf00009 | 1 |
| AX-157898732 | 1 | 58.349 | KV452709.1 | 4168260 | 1-scf00009 | 1 |
| AX-158389209 | 1 | 58.349 | KV452709.1 | 4168451 | 1-scf00009 | 1 |
| AX-157898733 | 1 | 58.349 | KV452709.1 | 4169737 | 1-scf00009 | 1 |
| AX-158389211 | 1 | 58.349 | KV452709.1 | 4172166 | 1-scf00009 | 1 |
| AX-157898734 | 1 | 58.349 | KV452709.1 | 4175008 | 1-scf00009 | 1 |
| AX-158404467 | 1 | 58.349 | KV452709.1 | 4179130 | 1-scf00009 | 1 |
| AX-158389212 | 1 | 58.349 | KV452709.1 | 4180635 | 1-scf00009 | 1 |
| AX-157811196 | 1 | 58.349 | KV452709.1 | 4185190 | 1-scf00009 | 1 |
| AX-157868672 | 1 | 58.349 | KV452709.1 | 4186649 | 1-scf00009 | 1 |
| AX-157811198 | 1 | 58.349 | KV452709.1 | 4189432 | 1-scf00009 | 1 |
| AX-157898738 | 1 | 58.349 | KV452709.1 | 4193187 | 1-scf00009 | 1 |
| AX-157898739 | 1 | 58.349 | KV452709.1 | 4197205 | 1-scf00009 | 1 |
| AX-157898741 | 1 | 58.349 | KV452709.1 | 4199362 | 1-scf00009 | 1 |
| AX-157898742 | 1 | 58.349 | KV452709.1 | 4200547 | 1-scf00009 | 1 |
| AX-157898745 | 1 | 58.349 | KV452709.1 | 4204303 | 1-scf00009 | 1 |
| AX-158389214 | 1 | 58.349 | KV452709.1 | 4208634 | 1-scf00009 | 1 |
| AX-158389215 | 1 | 58.349 | KV452709.1 | 4210429 | 1-scf00009 | 1 |
| AX-157898758 | 1 | 58.349 | KV452709.1 | 4227173 | 1-scf00009 | 1 |
| AX-157898759 | 1 | 58.349 | KV452709.1 | 4228174 | 1-scf00009 | 1 |
| AX-157811200 | 1 | 58.349 | KV452709.1 | 4231994 | 1-scf00009 | 1 |
| AX-157898767 | 1 | 58.349 | KV452709.1 | 4241884 | 1-scf00009 | 1 |
| AX-157898769 | 1 | 58.349 | KV452709.1 | 4243665 | 1-scf00009 | 1 |
| AX-157868673 | 1 | 58.349 | KV452709.1 | 4246913 | 1-scf00009 | 1 |
| AX-157898775 | 1 | 58.349 | KV452709.1 | 4252103 | 1-scf00009 | 1 |
| AX-157898776 | 1 | 58.349 | KV452709.1 | 4254613 | 1-scf00009 | 1 |
| AX-157898783 | 1 | 58.349 | KV452709.1 | 4260542 | 1-scf00009 | 1 |
| AX-157898785 | 1 | 58.349 | KV452709.1 | 4262047 | 1-scf00009 | 1 |
| AX-157898790 | 1 | 58.349 | KV452709.1 | 4268714 | 1-scf00009 | 1 |



|              |   |        |            |         |            |   |
|--------------|---|--------|------------|---------|------------|---|
| AX-157898794 | 1 | 58.349 | KV452709.1 | 4272758 | 1-scf00009 | 1 |
| AX-157898797 | 1 | 58.349 | KV452709.1 | 4275050 | 1-scf00009 | 1 |
| AX-157811201 | 1 | 58.349 | KV452709.1 | 4276452 | 1-scf00009 | 1 |
| AX-157898800 | 1 | 58.349 | KV452709.1 | 4277024 | 1-scf00009 | 1 |
| AX-157898801 | 1 | 58.349 | KV452709.1 | 4277262 | 1-scf00009 | 1 |
| AX-157868675 | 1 | 58.349 | KV452709.1 | 4280575 | 1-scf00009 | 1 |
| AX-157898803 | 1 | 58.349 | KV452709.1 | 4284213 | 1-scf00009 | 1 |
| AX-157883113 | 1 | 58.349 | KV452709.1 | 4286504 | 1-scf00009 | 1 |
| AX-157898806 | 1 | 58.349 | KV452709.1 | 4288120 | 1-scf00009 | 1 |
| AX-157721033 | 1 | 58.349 | KV452709.1 | 4298791 | 1-scf00009 | 1 |
| AX-157898815 | 1 | 58.349 | KV452709.1 | 4301815 | 1-scf00009 | 1 |
| AX-157811202 | 1 | 58.349 | KV452709.1 | 4303008 | 1-scf00009 | 1 |
| AX-157898816 | 1 | 58.349 | KV452709.1 | 4303401 | 1-scf00009 | 1 |
| AX-157811203 | 1 | 58.349 | KV452709.1 | 4315818 | 1-scf00009 | 1 |
| AX-157868677 | 1 | 58.349 | KV452709.1 | 4321019 | 1-scf00009 | 1 |
| AX-157868678 | 1 | 58.349 | KV452709.1 | 4322366 | 1-scf00009 | 1 |
| AX-157811204 | 1 | 58.349 | KV452709.1 | 4322975 | 1-scf00009 | 1 |
| AX-157868679 | 1 | 58.349 | KV452709.1 | 4326767 | 1-scf00009 | 1 |
| AX-157811205 | 1 | 58.349 | KV452709.1 | 4327307 | 1-scf00009 | 1 |
| AX-157898827 | 1 | 58.349 | KV452709.1 | 4328545 | 1-scf00009 | 1 |
| AX-157898828 | 1 | 58.349 | KV452709.1 | 4329153 | 1-scf00009 | 1 |
| AX-157868680 | 1 | 58.349 | KV452709.1 | 4334734 | 1-scf00009 | 1 |
| AX-157898839 | 1 | 58.349 | KV452709.1 | 4342868 | 1-scf00009 | 1 |
| AX-157898841 | 1 | 58.349 | KV452709.1 | 4344805 | 1-scf00009 | 1 |
| AX-157853580 | 1 | 58.349 | KV452709.1 | 4349644 | 1-scf00009 | 1 |
| AX-157898850 | 1 | 58.349 | KV452709.1 | 4360056 | 1-scf00009 | 1 |
| AX-157898854 | 1 | 58.349 | KV452709.1 | 4363998 | 1-scf00009 | 1 |
| AX-157898859 | 1 | 58.349 | KV452709.1 | 4374313 | 1-scf00009 | 1 |
| AX-157898860 | 1 | 58.349 | KV452709.1 | 4374787 | 1-scf00009 | 1 |
| AX-157898868 | 1 | 58.349 | KV452709.1 | 4384362 | 1-scf00009 | 1 |
| AX-157898869 | 1 | 58.349 | KV452709.1 | 4385511 | 1-scf00009 | 1 |
| AX-157898884 | 1 | 58.349 | KV452709.1 | 4407867 | 1-scf00009 | 1 |
| AX-157898885 | 1 | 58.349 | KV452709.1 | 4408756 | 1-scf00009 | 1 |
| AX-157898889 | 1 | 58.349 | KV452709.1 | 4414067 | 1-scf00009 | 1 |
| AX-157898893 | 1 | 58.349 | KV452709.1 | 4416895 | 1-scf00009 | 1 |
| AX-157898897 | 1 | 58.349 | KV452709.1 | 4421089 | 1-scf00009 | 1 |
| AX-157898898 | 1 | 58.349 | KV452709.1 | 4421415 | 1-scf00009 | 1 |
| AX-157898899 | 1 | 58.349 | KV452709.1 | 4421898 | 1-scf00009 | 1 |
| AX-157811209 | 1 | 58.349 | KV452709.1 | 4435271 | 1-scf00009 | 1 |
| AX-157898906 | 1 | 58.349 | KV452709.1 | 4435807 | 1-scf00009 | 1 |
| AX-157811213 | 1 | 58.349 | KV452709.1 | 4443932 | 1-scf00009 | 1 |
| AX-157898927 | 1 | 58.349 | KV452709.1 | 4460399 | 1-scf00009 | 1 |
| AX-157811214 | 1 | 58.349 | KV452709.1 | 4466067 | 1-scf00009 | 1 |
| AX-157898938 | 1 | 58.349 | KV452709.1 | 4473589 | 1-scf00009 | 1 |
| AX-157898939 | 1 | 58.349 | KV452709.1 | 4475286 | 1-scf00009 | 1 |
| AX-157898950 | 1 | 58.349 | KV452709.1 | 4486998 | 1-scf00009 | 1 |
| AX-157898954 | 1 | 58.349 | KV452709.1 | 4489937 | 1-scf00009 | 1 |
| AX-157898956 | 1 | 58.349 | KV452709.1 | 4491237 | 1-scf00009 | 1 |
| AX-158389218 | 1 | 58.349 | KV452709.1 | 4494520 | 1-scf00009 | 1 |
| AX-157898970 | 1 | 58.349 | KV452709.1 | 4508137 | 1-scf00009 | 1 |
| AX-157898977 | 1 | 58.349 | KV452709.1 | 4518163 | 1-scf00009 | 1 |

|              |   |        |            |         |            |   |
|--------------|---|--------|------------|---------|------------|---|
| AX-157898978 | 1 | 58.349 | KV452709.1 | 4519596 | 1-scf00009 | 1 |
| AX-157898980 | 1 | 58.349 | KV452709.1 | 4522945 | 1-scf00009 | 1 |
| AX-157898981 | 1 | 58.349 | KV452709.1 | 4526159 | 1-scf00009 | 1 |
| AX-157898984 | 1 | 58.349 | KV452709.1 | 4528251 | 1-scf00009 | 1 |
| AX-157898985 | 1 | 58.349 | KV452709.1 | 4528548 | 1-scf00009 | 1 |
| AX-157898986 | 1 | 58.349 | KV452709.1 | 4531242 | 1-scf00009 | 1 |
| AX-157898992 | 1 | 58.349 | KV452709.1 | 4536562 | 1-scf00009 | 1 |
| AX-157868682 | 1 | 58.349 | KV452709.1 | 4538913 | 1-scf00009 | 1 |
| AX-157811216 | 1 | 58.349 | KV452709.1 | 4541750 | 1-scf00009 | 1 |
| AX-157898999 | 1 | 58.349 | KV452709.1 | 4544463 | 1-scf00009 | 1 |
| AX-157899001 | 1 | 58.349 | KV452709.1 | 4545339 | 1-scf00009 | 1 |
| AX-157899003 | 1 | 58.349 | KV452709.1 | 4546523 | 1-scf00009 | 1 |
| AX-157899005 | 1 | 58.349 | KV452709.1 | 4548608 | 1-scf00009 | 1 |
| AX-157899007 | 1 | 58.349 | KV452709.1 | 4551689 | 1-scf00009 | 1 |
| AX-157899029 | 1 | 58.349 | KV452709.1 | 4567875 | 1-scf00009 | 1 |
| AX-157899030 | 1 | 58.349 | KV452709.1 | 4570235 | 1-scf00009 | 1 |
| AX-157899032 | 1 | 58.349 | KV452709.1 | 4571502 | 1-scf00009 | 1 |
| AX-157899033 | 1 | 58.349 | KV452709.1 | 4572272 | 1-scf00009 | 1 |
| AX-157739479 | 1 | 58.349 | KV452709.1 | 4573576 | 1-scf00009 | 1 |
| AX-157899035 | 1 | 58.349 | KV452709.1 | 4574203 | 1-scf00009 | 1 |
| AX-157899036 | 1 | 58.349 | KV452709.1 | 4574609 | 1-scf00009 | 1 |
| AX-157811218 | 1 | 58.349 | KV452709.1 | 4580420 | 1-scf00009 | 1 |
| AX-157899043 | 1 | 58.349 | KV452709.1 | 4588212 | 1-scf00009 | 1 |
| AX-157899044 | 1 | 58.349 | KV452709.1 | 4589456 | 1-scf00009 | 1 |
| AX-157811227 | 1 | 58.349 | KV452709.1 | 4600576 | 1-scf00009 | 1 |
| AX-157899048 | 1 | 58.349 | KV452709.1 | 4604583 | 1-scf00009 | 1 |
| AX-157899053 | 1 | 58.349 | KV452709.1 | 4609058 | 1-scf00009 | 1 |
| AX-157899055 | 1 | 58.349 | KV452709.1 | 4610554 | 1-scf00009 | 1 |
| AX-157899056 | 1 | 58.349 | KV452709.1 | 4611901 | 1-scf00009 | 1 |
| AX-157899057 | 1 | 58.349 | KV452709.1 | 4612440 | 1-scf00009 | 1 |
| AX-157868684 | 1 | 58.349 | KV452709.1 | 4614521 | 1-scf00009 | 1 |
| AX-157899061 | 1 | 58.349 | KV452709.1 | 4617523 | 1-scf00009 | 1 |
| AX-157899062 | 1 | 58.349 | KV452709.1 | 4618973 | 1-scf00009 | 1 |
| AX-157899063 | 1 | 58.349 | KV452709.1 | 4619077 | 1-scf00009 | 1 |
| AX-157899064 | 1 | 58.349 | KV452709.1 | 4619519 | 1-scf00009 | 1 |
| AX-157899067 | 1 | 58.349 | KV452709.1 | 4621142 | 1-scf00009 | 1 |
| AX-157899070 | 1 | 58.349 | KV452709.1 | 4627324 | 1-scf00009 | 1 |
| AX-157899073 | 1 | 58.349 | KV452709.1 | 4629782 | 1-scf00009 | 1 |
| AX-157899076 | 1 | 58.349 | KV452709.1 | 4633975 | 1-scf00009 | 1 |
| AX-157899077 | 1 | 58.349 | KV452709.1 | 4642180 | 1-scf00009 | 1 |
| AX-157899080 | 1 | 58.349 | KV452709.1 | 4645451 | 1-scf00009 | 1 |
| AX-157811230 | 1 | 58.349 | KV452709.1 | 4647181 | 1-scf00009 | 1 |
| AX-157899092 | 1 | 58.349 | KV452709.1 | 4657638 | 1-scf00009 | 1 |
| AX-157811231 | 1 | 58.349 | KV452709.1 | 4659274 | 1-scf00009 | 1 |
| AX-157899098 | 1 | 58.349 | KV452709.1 | 4665565 | 1-scf00009 | 1 |
| AX-157899111 | 1 | 58.349 | KV452709.1 | 4686351 | 1-scf00009 | 1 |
| AX-157715046 | 1 | 58.349 | KV452709.1 | 4693306 | 1-scf00009 | 1 |
| AX-157899126 | 1 | 58.349 | KV452709.1 | 4698653 | 1-scf00009 | 1 |
| AX-157899308 | 1 | 58.349 | KV452709.1 | 4994300 | 1-scf00009 | 1 |
| AX-157899318 | 1 | 58.349 | KV452709.1 | 5010057 | 1-scf00009 | 1 |
| AX-157899334 | 1 | 58.349 | KV452709.1 | 5038930 | 1-scf00009 | 1 |

|              |   |        |            |         |            |   |
|--------------|---|--------|------------|---------|------------|---|
| AX-157899510 | 1 | 58.349 | KV452709.1 | 5261114 | 1-scf00009 | 1 |
| AX-157899559 | 1 | 58.349 | KV452709.1 | 5314200 | 1-scf00009 | 1 |
| AX-157811402 | 1 | 58.349 | KV452709.1 | 6457731 | 1-scf00009 | 1 |
| AX-157901840 | 1 | 58.349 | KV452711.1 | 3440998 | 1-scf00010 | 1 |
| AX-157902906 | 1 | 58.349 | KV452713.1 | 1446261 | 1-scf00011 | 1 |
| AX-157902926 | 1 | 58.349 | KV452713.1 | 1478512 | 1-scf00011 | 1 |
| AX-157903924 | 1 | 58.349 | KV452713.1 | 2705109 | 1-scf00011 | 1 |
| AX-158404683 | 1 | 58.349 | KV452713.1 | 2705455 | 1-scf00011 | 1 |
| AX-157903925 | 1 | 58.349 | KV452713.1 | 2708496 | 1-scf00011 | 1 |
| AX-157903926 | 1 | 58.349 | KV452713.1 | 2710620 | 1-scf00011 | 1 |
| AX-157903930 | 1 | 58.349 | KV452713.1 | 2720942 | 1-scf00011 | 1 |
| AX-157903932 | 1 | 58.349 | KV452713.1 | 2723612 | 1-scf00011 | 1 |
| AX-157903940 | 1 | 58.349 | KV452713.1 | 2730986 | 1-scf00011 | 1 |
| AX-157903944 | 1 | 58.349 | KV452713.1 | 2735642 | 1-scf00011 | 1 |
| AX-157903952 | 1 | 58.349 | KV452713.1 | 2744755 | 1-scf00011 | 1 |
| AX-157903958 | 1 | 58.349 | KV452713.1 | 2750337 | 1-scf00011 | 1 |
| AX-157903960 | 1 | 58.349 | KV452713.1 | 2753147 | 1-scf00011 | 1 |
| AX-157903963 | 1 | 58.349 | KV452713.1 | 2756861 | 1-scf00011 | 1 |
| AX-157903964 | 1 | 58.349 | KV452713.1 | 2757399 | 1-scf00011 | 1 |
| AX-157903966 | 1 | 58.349 | KV452713.1 | 2759000 | 1-scf00011 | 1 |
| AX-157903967 | 1 | 58.349 | KV452713.1 | 2759759 | 1-scf00011 | 1 |
| AX-157903968 | 1 | 58.349 | KV452713.1 | 2760956 | 1-scf00011 | 1 |
| AX-157811791 | 1 | 58.349 | KV452713.1 | 2762721 | 1-scf00011 | 1 |
| AX-157903970 | 1 | 58.349 | KV452713.1 | 2764370 | 1-scf00011 | 1 |
| AX-157903971 | 1 | 58.349 | KV452713.1 | 2765389 | 1-scf00011 | 1 |
| AX-157903972 | 1 | 58.349 | KV452713.1 | 2766244 | 1-scf00011 | 1 |
| AX-157903973 | 1 | 58.349 | KV452713.1 | 2766899 | 1-scf00011 | 1 |
| AX-157811792 | 1 | 58.349 | KV452713.1 | 2767948 | 1-scf00011 | 1 |
| AX-157903981 | 1 | 58.349 | KV452713.1 | 2792170 | 1-scf00011 | 1 |
| AX-158389445 | 1 | 58.349 | KV452713.1 | 2797269 | 1-scf00011 | 1 |
| AX-157904054 | 1 | 58.349 | KV452713.1 | 2953267 | 1-scf00011 | 1 |
| AX-157904544 | 1 | 58.349 | KV452713.1 | 3934090 | 1-scf00011 | 1 |
| AX-157904915 | 1 | 58.349 | KV452713.1 | 4412637 | 1-scf00011 | 1 |
| AX-157895701 | 1 | 58.458 | KV452708.1 | 2868998 | 1-scf00008 | 1 |
| AX-157810976 | 1 | 58.458 | KV452709.1 | 1180586 | 1-scf00009 | 1 |
| AX-157896976 | 1 | 58.458 | KV452709.1 | 1187224 | 1-scf00009 | 1 |
| AX-157897131 | 1 | 58.458 | KV452709.1 | 1439124 | 1-scf00009 | 1 |
| AX-157811000 | 1 | 58.458 | KV452709.1 | 1573405 | 1-scf00009 | 1 |
| AX-157897389 | 1 | 58.458 | KV452709.1 | 1804623 | 1-scf00009 | 1 |
| AX-157897735 | 1 | 58.458 | KV452709.1 | 2350388 | 1-scf00009 | 1 |
| AX-157897879 | 1 | 58.458 | KV452709.1 | 2566083 | 1-scf00009 | 1 |
| AX-157897902 | 1 | 58.458 | KV452709.1 | 2602419 | 1-scf00009 | 1 |
| AX-157897961 | 1 | 58.458 | KV452709.1 | 2720948 | 1-scf00009 | 1 |
| AX-157898056 | 1 | 58.458 | KV452709.1 | 2873447 | 1-scf00009 | 1 |
| AX-157898188 | 1 | 58.458 | KV452709.1 | 3179095 | 1-scf00009 | 1 |
| AX-158403920 | 1 | 58.458 | KV452709.1 | 3233767 | 1-scf00009 | 1 |
| AX-157898231 | 1 | 58.458 | KV452709.1 | 3267399 | 1-scf00009 | 1 |
| AX-157898270 | 1 | 58.458 | KV452709.1 | 3327746 | 1-scf00009 | 1 |
| AX-157898271 | 1 | 58.458 | KV452709.1 | 3330567 | 1-scf00009 | 1 |
| AX-157898277 | 1 | 58.458 | KV452709.1 | 3339049 | 1-scf00009 | 1 |
| AX-157898278 | 1 | 58.458 | KV452709.1 | 3340595 | 1-scf00009 | 1 |

|              |   |        |            |         |            |   |
|--------------|---|--------|------------|---------|------------|---|
| AX-157898468 | 1 | 58.458 | KV452709.1 | 3772304 | 1-scf00009 | 1 |
| AX-157898470 | 1 | 58.458 | KV452709.1 | 3785888 | 1-scf00009 | 1 |
| AX-157898471 | 1 | 58.458 | KV452709.1 | 3788399 | 1-scf00009 | 1 |
| AX-158381998 | 1 | 58.458 | KV452709.1 | 3831011 | 1-scf00009 | 1 |
| AX-157898721 | 1 | 58.458 | KV452709.1 | 4158850 | 1-scf00009 | 1 |
| AX-157738585 | 1 | 58.458 | KV452709.1 | 4176836 | 1-scf00009 | 1 |
| AX-157898822 | 1 | 58.458 | KV452709.1 | 4312520 | 1-scf00009 | 1 |
| AX-157898846 | 1 | 58.458 | KV452709.1 | 4356736 | 1-scf00009 | 1 |
| AX-157898848 | 1 | 58.458 | KV452709.1 | 4358777 | 1-scf00009 | 1 |
| AX-157898855 | 1 | 58.458 | KV452709.1 | 4368440 | 1-scf00009 | 1 |
| AX-158404469 | 1 | 58.458 | KV452709.1 | 4370155 | 1-scf00009 | 1 |
| AX-157898861 | 1 | 58.458 | KV452709.1 | 4375181 | 1-scf00009 | 1 |
| AX-157898863 | 1 | 58.458 | KV452709.1 | 4377013 | 1-scf00009 | 1 |
| AX-157898864 | 1 | 58.458 | KV452709.1 | 4377888 | 1-scf00009 | 1 |
| AX-157750545 | 1 | 58.458 | KV452709.1 | 4396389 | 1-scf00009 | 1 |
| AX-157898879 | 1 | 58.458 | KV452709.1 | 4403268 | 1-scf00009 | 1 |
| AX-157898882 | 1 | 58.458 | KV452709.1 | 4406725 | 1-scf00009 | 1 |
| AX-157898894 | 1 | 58.458 | KV452709.1 | 4417992 | 1-scf00009 | 1 |
| AX-157811210 | 1 | 58.458 | KV452709.1 | 4438591 | 1-scf00009 | 1 |
| AX-157811211 | 1 | 58.458 | KV452709.1 | 4439174 | 1-scf00009 | 1 |
| AX-157898913 | 1 | 58.458 | KV452709.1 | 4448240 | 1-scf00009 | 1 |
| AX-157898916 | 1 | 58.458 | KV452709.1 | 4449866 | 1-scf00009 | 1 |
| AX-157898918 | 1 | 58.458 | KV452709.1 | 4451633 | 1-scf00009 | 1 |
| AX-157898928 | 1 | 58.458 | KV452709.1 | 4461621 | 1-scf00009 | 1 |
| AX-157898929 | 1 | 58.458 | KV452709.1 | 4462335 | 1-scf00009 | 1 |
| AX-157898933 | 1 | 58.458 | KV452709.1 | 4465853 | 1-scf00009 | 1 |
| AX-157898936 | 1 | 58.458 | KV452709.1 | 4470139 | 1-scf00009 | 1 |
| AX-157898937 | 1 | 58.458 | KV452709.1 | 4470454 | 1-scf00009 | 1 |
| AX-157754333 | 1 | 58.458 | KV452709.1 | 4471619 | 1-scf00009 | 1 |
| AX-157898947 | 1 | 58.458 | KV452709.1 | 4485365 | 1-scf00009 | 1 |
| AX-157898958 | 1 | 58.458 | KV452709.1 | 4494193 | 1-scf00009 | 1 |
| AX-157898960 | 1 | 58.458 | KV452709.1 | 4495372 | 1-scf00009 | 1 |
| AX-157898967 | 1 | 58.458 | KV452709.1 | 4502201 | 1-scf00009 | 1 |
| AX-157898969 | 1 | 58.458 | KV452709.1 | 4506346 | 1-scf00009 | 1 |
| AX-157883117 | 1 | 58.458 | KV452709.1 | 4507160 | 1-scf00009 | 1 |
| AX-157898971 | 1 | 58.458 | KV452709.1 | 4511368 | 1-scf00009 | 1 |
| AX-158389219 | 1 | 58.458 | KV452709.1 | 4519292 | 1-scf00009 | 1 |
| AX-157898979 | 1 | 58.458 | KV452709.1 | 4521666 | 1-scf00009 | 1 |
| AX-157811215 | 1 | 58.458 | KV452709.1 | 4541584 | 1-scf00009 | 1 |
| AX-157899008 | 1 | 58.458 | KV452709.1 | 4552208 | 1-scf00009 | 1 |
| AX-157899010 | 1 | 58.458 | KV452709.1 | 4553887 | 1-scf00009 | 1 |
| AX-157899012 | 1 | 58.458 | KV452709.1 | 4555334 | 1-scf00009 | 1 |
| AX-157899013 | 1 | 58.458 | KV452709.1 | 4555979 | 1-scf00009 | 1 |
| AX-157899015 | 1 | 58.458 | KV452709.1 | 4557185 | 1-scf00009 | 1 |
| AX-157899019 | 1 | 58.458 | KV452709.1 | 4559137 | 1-scf00009 | 1 |
| AX-157899022 | 1 | 58.458 | KV452709.1 | 4561257 | 1-scf00009 | 1 |
| AX-157695998 | 1 | 58.458 | KV452709.1 | 4565817 | 1-scf00009 | 1 |
| AX-157899028 | 1 | 58.458 | KV452709.1 | 4567489 | 1-scf00009 | 1 |
| AX-157899031 | 1 | 58.458 | KV452709.1 | 4570961 | 1-scf00009 | 1 |
| AX-157899037 | 1 | 58.458 | KV452709.1 | 4575408 | 1-scf00009 | 1 |
| AX-157811219 | 1 | 58.458 | KV452709.1 | 4584599 | 1-scf00009 | 1 |

|              |   |        |             |         |            |    |
|--------------|---|--------|-------------|---------|------------|----|
| AX-157747063 | 1 | 58.458 | KV452709.1  | 4590178 | 1-scf00009 | 1  |
| AX-157899046 | 1 | 58.458 | KV452709.1  | 4603088 | 1-scf00009 | 1  |
| AX-158389220 | 1 | 58.458 | KV452709.1  | 4611296 | 1-scf00009 | 1  |
| AX-157899058 | 1 | 58.458 | KV452709.1  | 4615510 | 1-scf00009 | 1  |
| AX-157899059 | 1 | 58.458 | KV452709.1  | 4616092 | 1-scf00009 | 1  |
| AX-157811228 | 1 | 58.458 | KV452709.1  | 4622981 | 1-scf00009 | 1  |
| AX-158389222 | 1 | 58.458 | KV452709.1  | 4623512 | 1-scf00009 | 1  |
| AX-157899069 | 1 | 58.458 | KV452709.1  | 4624534 | 1-scf00009 | 1  |
| AX-157899071 | 1 | 58.458 | KV452709.1  | 4628276 | 1-scf00009 | 1  |
| AX-157899072 | 1 | 58.458 | KV452709.1  | 4629139 | 1-scf00009 | 1  |
| AX-157899081 | 1 | 58.458 | KV452709.1  | 4645671 | 1-scf00009 | 1  |
| AX-157811229 | 1 | 58.458 | KV452709.1  | 4647142 | 1-scf00009 | 1  |
| AX-157770993 | 1 | 58.458 | KV452709.1  | 4648313 | 1-scf00009 | 1  |
| AX-157899085 | 1 | 58.458 | KV452709.1  | 4648810 | 1-scf00009 | 1  |
| AX-157899086 | 1 | 58.458 | KV452709.1  | 4650324 | 1-scf00009 | 1  |
| AX-157899091 | 1 | 58.458 | KV452709.1  | 4657171 | 1-scf00009 | 1  |
| AX-157899096 | 1 | 58.458 | KV452709.1  | 4663268 | 1-scf00009 | 1  |
| AX-157811236 | 1 | 58.458 | KV452709.1  | 4664658 | 1-scf00009 | 1  |
| AX-157899099 | 1 | 58.458 | KV452709.1  | 4668594 | 1-scf00009 | 1  |
| AX-157713644 | 1 | 58.458 | KV452709.1  | 4684968 | 1-scf00009 | 1  |
| AX-157899110 | 1 | 58.458 | KV452709.1  | 4685637 | 1-scf00009 | 1  |
| AX-157899113 | 1 | 58.458 | KV452709.1  | 4690567 | 1-scf00009 | 1  |
| AX-157899117 | 1 | 58.458 | KV452709.1  | 4693090 | 1-scf00009 | 1  |
| AX-157899131 | 1 | 58.458 | KV452709.1  | 4711962 | 1-scf00009 | 1  |
| AX-157899137 | 1 | 58.458 | KV452709.1  | 4723637 | 1-scf00009 | 1  |
| AX-157899163 | 1 | 58.458 | KV452709.1  | 4775906 | 1-scf00009 | 1  |
| AX-157811251 | 1 | 58.458 | KV452709.1  | 4805733 | 1-scf00009 | 1  |
| AX-157899184 | 1 | 58.458 | KV452709.1  | 4808129 | 1-scf00009 | 1  |
| AX-157874371 | 1 | 58.458 | KV452709.1  | 4818336 | 1-scf00009 | 1  |
| AX-157874372 | 1 | 58.458 | KV452709.1  | 4824583 | 1-scf00009 | 1  |
| AX-157899198 | 1 | 58.458 | KV452709.1  | 4826180 | 1-scf00009 | 1  |
| AX-157899221 | 1 | 58.458 | KV452709.1  | 4878978 | 1-scf00009 | 1  |
| AX-157713677 | 1 | 58.458 | KV452709.1  | 5749464 | 1-scf00009 | 1  |
| AX-157900200 | 1 | 58.458 | KV452709.1  | 6242379 | 1-scf00009 | 1  |
| AX-157900201 | 1 | 58.458 | KV452709.1  | 6243891 | 1-scf00009 | 1  |
| AX-157900218 | 1 | 58.458 | KV452709.1  | 6270195 | 1-scf00009 | 1  |
| AX-157901069 | 1 | 58.458 | KV452711.1  | 1358560 | 1-scf00010 | 1  |
| AX-157901329 | 1 | 58.458 | KV452711.1  | 2027012 | 1-scf00010 | 1  |
| AX-157901392 | 1 | 58.458 | KV452711.1  | 2218627 | 1-scf00010 | 1  |
| AX-157901408 | 1 | 58.458 | KV452711.1  | 2241467 | 1-scf00010 | 1  |
| AX-157901434 | 1 | 58.458 | KV452711.1  | 2338013 | 1-scf00010 | 1  |
| AX-157901485 | 1 | 58.458 | KV452711.1  | 2534177 | 1-scf00010 | 1  |
| AX-157751271 | 1 | 58.458 | KV452711.1  | 2710668 | 1-scf00010 | 1  |
| AX-157901717 | 1 | 58.458 | KV452711.1  | 3079941 | 1-scf00010 | 1  |
| AX-157902453 | 1 | 58.458 | KV452713.1  | 763911  | 1-scf00011 | 1  |
| AX-157902454 | 1 | 58.458 | KV452713.1  | 764702  | 1-scf00011 | 1  |
| AX-157902591 | 1 | 58.458 | KV452713.1  | 994063  | 1-scf00011 | 1  |
| AX-158382037 | 1 | 58.458 | KV452713.1  | 1072703 | 1-scf00011 | 1  |
| AX-157682297 | 1 | 58.458 | 3ML01033942 | 190     | scf09611_1 | UN |
| AX-157899116 | 1 | 58.487 | KV452709.1  | 4692242 | 1-scf00009 | 1  |
| AX-157899128 | 1 | 58.529 | KV452709.1  | 4700577 | 1-scf00009 | 1  |

|              |   |        |            |         |            |   |
|--------------|---|--------|------------|---------|------------|---|
| AX-157894996 | 1 | 58.568 | KV452708.1 | 1701764 | 1-scf00008 | 1 |
| AX-157898151 | 1 | 58.568 | KV452709.1 | 3086006 | 1-scf00009 | 1 |
| AX-157898488 | 1 | 58.568 | KV452709.1 | 3831432 | 1-scf00009 | 1 |
| AX-157715204 | 1 | 58.568 | KV452709.1 | 4352586 | 1-scf00009 | 1 |
| AX-157898952 | 1 | 58.568 | KV452709.1 | 4488780 | 1-scf00009 | 1 |
| AX-157899093 | 1 | 58.568 | KV452709.1 | 4659543 | 1-scf00009 | 1 |
| AX-157899124 | 1 | 58.568 | KV452709.1 | 4696165 | 1-scf00009 | 1 |
| AX-157899134 | 1 | 58.568 | KV452709.1 | 4716173 | 1-scf00009 | 1 |
| AX-157899140 | 1 | 58.568 | KV452709.1 | 4728947 | 1-scf00009 | 1 |
| AX-157899147 | 1 | 58.568 | KV452709.1 | 4742860 | 1-scf00009 | 1 |
| AX-157899158 | 1 | 58.568 | KV452709.1 | 4767635 | 1-scf00009 | 1 |
| AX-157899159 | 1 | 58.568 | KV452709.1 | 4768192 | 1-scf00009 | 1 |
| AX-157899161 | 1 | 58.568 | KV452709.1 | 4770371 | 1-scf00009 | 1 |
| AX-157899162 | 1 | 58.568 | KV452709.1 | 4772034 | 1-scf00009 | 1 |
| AX-157899164 | 1 | 58.568 | KV452709.1 | 4777355 | 1-scf00009 | 1 |
| AX-157899170 | 1 | 58.568 | KV452709.1 | 4783348 | 1-scf00009 | 1 |
| AX-157899172 | 1 | 58.568 | KV452709.1 | 4786973 | 1-scf00009 | 1 |
| AX-157708938 | 1 | 58.568 | KV452709.1 | 4788907 | 1-scf00009 | 1 |
| AX-157899173 | 1 | 58.568 | KV452709.1 | 4789665 | 1-scf00009 | 1 |
| AX-157899179 | 1 | 58.568 | KV452709.1 | 4801355 | 1-scf00009 | 1 |
| AX-157772342 | 1 | 58.568 | KV452709.1 | 4802128 | 1-scf00009 | 1 |
| AX-157899182 | 1 | 58.568 | KV452709.1 | 4802588 | 1-scf00009 | 1 |
| AX-157811250 | 1 | 58.568 | KV452709.1 | 4803221 | 1-scf00009 | 1 |
| AX-157811252 | 1 | 58.568 | KV452709.1 | 4810763 | 1-scf00009 | 1 |
| AX-157694034 | 1 | 58.568 | KV452709.1 | 4816687 | 1-scf00009 | 1 |
| AX-157811253 | 1 | 58.568 | KV452709.1 | 4822614 | 1-scf00009 | 1 |
| AX-157738728 | 1 | 58.568 | KV452709.1 | 4866071 | 1-scf00009 | 1 |
| AX-157899212 | 1 | 58.568 | KV452709.1 | 4873459 | 1-scf00009 | 1 |
| AX-157899216 | 1 | 58.568 | KV452709.1 | 4875499 | 1-scf00009 | 1 |
| AX-157899222 | 1 | 58.568 | KV452709.1 | 4879645 | 1-scf00009 | 1 |
| AX-157758621 | 1 | 58.568 | KV452709.1 | 4881042 | 1-scf00009 | 1 |
| AX-157899241 | 1 | 58.568 | KV452709.1 | 4913028 | 1-scf00009 | 1 |
| AX-157755647 | 1 | 58.568 | KV452709.1 | 5296744 | 1-scf00009 | 1 |
| AX-157811474 | 1 | 58.568 | KV452711.1 | 1992316 | 1-scf00010 | 1 |
| AX-157902637 | 1 | 58.568 | KV452713.1 | 1051589 | 1-scf00011 | 1 |
| AX-157902660 | 1 | 58.568 | KV452713.1 | 1085824 | 1-scf00011 | 1 |
| AX-157902910 | 1 | 58.568 | KV452713.1 | 1450933 | 1-scf00011 | 1 |
| AX-157756922 | 1 | 58.568 | KV452713.1 | 1593732 | 1-scf00011 | 1 |
| AX-157903775 | 1 | 58.568 | KV452713.1 | 2534677 | 1-scf00011 | 1 |
| AX-157904535 | 1 | 58.568 | KV452713.1 | 3908332 | 1-scf00011 | 1 |
| AX-157904537 | 1 | 58.568 | KV452713.1 | 3913275 | 1-scf00011 | 1 |
| AX-157899224 | 1 | 58.62  | KV452709.1 | 4883474 | 1-scf00009 | 1 |
| AX-157883121 | 1 | 58.677 | KV452709.1 | 4887916 | 1-scf00009 | 1 |
| AX-157899230 | 1 | 58.677 | KV452709.1 | 4891943 | 1-scf00009 | 1 |
| AX-157899234 | 1 | 58.71  | KV452709.1 | 4895573 | 1-scf00009 | 1 |
| AX-157740114 | 1 | 58.753 | KV452709.1 | 4901005 | 1-scf00009 | 1 |
| AX-157897467 | 1 | 58.786 | KV452709.1 | 1925549 | 1-scf00009 | 1 |
| AX-157897796 | 1 | 58.786 | KV452709.1 | 2452421 | 1-scf00009 | 1 |
| AX-157899214 | 1 | 58.786 | KV452709.1 | 4874405 | 1-scf00009 | 1 |
| AX-157899228 | 1 | 58.786 | KV452709.1 | 4887095 | 1-scf00009 | 1 |
| AX-157811259 | 1 | 58.786 | KV452709.1 | 4900267 | 1-scf00009 | 1 |

|              |   |        |            |         |            |   |
|--------------|---|--------|------------|---------|------------|---|
| AX-157811261 | 1 | 58.786 | KV452709.1 | 4902183 | 1-scf00009 | 1 |
| AX-157899235 | 1 | 58.786 | KV452709.1 | 4902937 | 1-scf00009 | 1 |
| AX-157868686 | 1 | 58.786 | KV452709.1 | 4908713 | 1-scf00009 | 1 |
| AX-157899239 | 1 | 58.786 | KV452709.1 | 4909602 | 1-scf00009 | 1 |
| AX-157899240 | 1 | 58.786 | KV452709.1 | 4912622 | 1-scf00009 | 1 |
| AX-157899246 | 1 | 58.786 | KV452709.1 | 4917437 | 1-scf00009 | 1 |
| AX-157899249 | 1 | 58.786 | KV452709.1 | 4919967 | 1-scf00009 | 1 |
| AX-157899250 | 1 | 58.786 | KV452709.1 | 4920822 | 1-scf00009 | 1 |
| AX-157899253 | 1 | 58.786 | KV452709.1 | 4923968 | 1-scf00009 | 1 |
| AX-157747416 | 1 | 58.786 | KV452709.1 | 4938029 | 1-scf00009 | 1 |
| AX-157899267 | 1 | 58.786 | KV452709.1 | 4943859 | 1-scf00009 | 1 |
| AX-157899268 | 1 | 58.786 | KV452709.1 | 4949710 | 1-scf00009 | 1 |
| AX-157811267 | 1 | 58.786 | KV452709.1 | 4951178 | 1-scf00009 | 1 |
| AX-157899272 | 1 | 58.786 | KV452709.1 | 4953719 | 1-scf00009 | 1 |
| AX-157811268 | 1 | 58.786 | KV452709.1 | 4956774 | 1-scf00009 | 1 |
| AX-157746741 | 1 | 58.786 | KV452709.1 | 4956899 | 1-scf00009 | 1 |
| AX-157899279 | 1 | 58.786 | KV452709.1 | 4964345 | 1-scf00009 | 1 |
| AX-157899282 | 1 | 58.786 | KV452709.1 | 4969043 | 1-scf00009 | 1 |
| AX-157899283 | 1 | 58.786 | KV452709.1 | 4969387 | 1-scf00009 | 1 |
| AX-157899284 | 1 | 58.786 | KV452709.1 | 4969740 | 1-scf00009 | 1 |
| AX-157899290 | 1 | 58.786 | KV452709.1 | 4976437 | 1-scf00009 | 1 |
| AX-157899292 | 1 | 58.786 | KV452709.1 | 4977546 | 1-scf00009 | 1 |
| AX-157899296 | 1 | 58.786 | KV452709.1 | 4979242 | 1-scf00009 | 1 |
| AX-157899304 | 1 | 58.786 | KV452709.1 | 4989502 | 1-scf00009 | 1 |
| AX-157899311 | 1 | 58.786 | KV452709.1 | 4997477 | 1-scf00009 | 1 |
| AX-157899316 | 1 | 58.786 | KV452709.1 | 5007523 | 1-scf00009 | 1 |
| AX-157899327 | 1 | 58.786 | KV452709.1 | 5022998 | 1-scf00009 | 1 |
| AX-157899335 | 1 | 58.786 | KV452709.1 | 5039665 | 1-scf00009 | 1 |
| AX-157725602 | 1 | 58.786 | KV452709.1 | 5045779 | 1-scf00009 | 1 |
| AX-157811272 | 1 | 58.786 | KV452709.1 | 5060111 | 1-scf00009 | 1 |
| AX-157899355 | 1 | 58.786 | KV452709.1 | 5073610 | 1-scf00009 | 1 |
| AX-157899371 | 1 | 58.786 | KV452709.1 | 5098624 | 1-scf00009 | 1 |
| AX-157899623 | 1 | 58.786 | KV452709.1 | 5397969 | 1-scf00009 | 1 |
| AX-157727204 | 1 | 58.786 | KV452709.1 | 5505928 | 1-scf00009 | 1 |
| AX-157899826 | 1 | 58.786 | KV452709.1 | 5669191 | 1-scf00009 | 1 |
| AX-157811341 | 1 | 58.786 | KV452709.1 | 5730979 | 1-scf00009 | 1 |
| AX-157896918 | 1 | 58.895 | KV452709.1 | 1100935 | 1-scf00009 | 1 |
| AX-157810977 | 1 | 58.895 | KV452709.1 | 1188993 | 1-scf00009 | 1 |
| AX-157897017 | 1 | 58.895 | KV452709.1 | 1281595 | 1-scf00009 | 1 |
| AX-157704131 | 1 | 58.895 | KV452709.1 | 1469824 | 1-scf00009 | 1 |
| AX-157811005 | 1 | 58.895 | KV452709.1 | 1647649 | 1-scf00009 | 1 |
| AX-157897466 | 1 | 58.895 | KV452709.1 | 1924999 | 1-scf00009 | 1 |
| AX-157897585 | 1 | 58.895 | KV452709.1 | 2118101 | 1-scf00009 | 1 |
| AX-157897588 | 1 | 58.895 | KV452709.1 | 2120193 | 1-scf00009 | 1 |
| AX-157897634 | 1 | 58.895 | KV452709.1 | 2192087 | 1-scf00009 | 1 |
| AX-157898597 | 1 | 58.895 | KV452709.1 | 3979917 | 1-scf00009 | 1 |
| AX-157898968 | 1 | 58.895 | KV452709.1 | 4504497 | 1-scf00009 | 1 |
| AX-157723308 | 1 | 58.895 | KV452709.1 | 4699756 | 1-scf00009 | 1 |
| AX-157899133 | 1 | 58.895 | KV452709.1 | 4714940 | 1-scf00009 | 1 |
| AX-157899174 | 1 | 58.895 | KV452709.1 | 4791401 | 1-scf00009 | 1 |
| AX-157899223 | 1 | 58.895 | KV452709.1 | 4882918 | 1-scf00009 | 1 |

|              |   |        |            |         |            |   |
|--------------|---|--------|------------|---------|------------|---|
| AX-157899227 | 1 | 58.895 | KV452709.1 | 4885703 | 1-scf00009 | 1 |
| AX-157899237 | 1 | 58.895 | KV452709.1 | 4906292 | 1-scf00009 | 1 |
| AX-157853584 | 1 | 58.895 | KV452709.1 | 4917796 | 1-scf00009 | 1 |
| AX-157899294 | 1 | 58.895 | KV452709.1 | 4978279 | 1-scf00009 | 1 |
| AX-157899366 | 1 | 58.895 | KV452709.1 | 5095273 | 1-scf00009 | 1 |
| AX-157899368 | 1 | 58.895 | KV452709.1 | 5096969 | 1-scf00009 | 1 |
| AX-157899369 | 1 | 58.895 | KV452709.1 | 5097524 | 1-scf00009 | 1 |
| AX-157899370 | 1 | 58.895 | KV452709.1 | 5097730 | 1-scf00009 | 1 |
| AX-157899372 | 1 | 58.895 | KV452709.1 | 5099597 | 1-scf00009 | 1 |
| AX-157899373 | 1 | 58.895 | KV452709.1 | 5100060 | 1-scf00009 | 1 |
| AX-157883122 | 1 | 58.895 | KV452709.1 | 5102109 | 1-scf00009 | 1 |
| AX-157899374 | 1 | 58.895 | KV452709.1 | 5102818 | 1-scf00009 | 1 |
| AX-157899375 | 1 | 58.895 | KV452709.1 | 5103288 | 1-scf00009 | 1 |
| AX-157899376 | 1 | 58.895 | KV452709.1 | 5103765 | 1-scf00009 | 1 |
| AX-157899377 | 1 | 58.895 | KV452709.1 | 5105455 | 1-scf00009 | 1 |
| AX-157899378 | 1 | 58.895 | KV452709.1 | 5106112 | 1-scf00009 | 1 |
| AX-158389228 | 1 | 58.895 | KV452709.1 | 5106540 | 1-scf00009 | 1 |
| AX-157899379 | 1 | 58.895 | KV452709.1 | 5106664 | 1-scf00009 | 1 |
| AX-157899380 | 1 | 58.895 | KV452709.1 | 5107505 | 1-scf00009 | 1 |
| AX-157899381 | 1 | 58.895 | KV452709.1 | 5108190 | 1-scf00009 | 1 |
| AX-157811277 | 1 | 58.895 | KV452709.1 | 5108653 | 1-scf00009 | 1 |
| AX-157899383 | 1 | 58.895 | KV452709.1 | 5110686 | 1-scf00009 | 1 |
| AX-157899384 | 1 | 58.895 | KV452709.1 | 5111175 | 1-scf00009 | 1 |
| AX-157899385 | 1 | 58.895 | KV452709.1 | 5111732 | 1-scf00009 | 1 |
| AX-157899386 | 1 | 58.895 | KV452709.1 | 5112416 | 1-scf00009 | 1 |
| AX-157899387 | 1 | 58.895 | KV452709.1 | 5113210 | 1-scf00009 | 1 |
| AX-157899388 | 1 | 58.895 | KV452709.1 | 5113564 | 1-scf00009 | 1 |
| AX-157899389 | 1 | 58.895 | KV452709.1 | 5113962 | 1-scf00009 | 1 |
| AX-157899390 | 1 | 58.895 | KV452709.1 | 5114772 | 1-scf00009 | 1 |
| AX-157899391 | 1 | 58.895 | KV452709.1 | 5115991 | 1-scf00009 | 1 |
| AX-157899392 | 1 | 58.895 | KV452709.1 | 5117224 | 1-scf00009 | 1 |
| AX-157899393 | 1 | 58.895 | KV452709.1 | 5118092 | 1-scf00009 | 1 |
| AX-157899394 | 1 | 58.895 | KV452709.1 | 5119680 | 1-scf00009 | 1 |
| AX-157899395 | 1 | 58.895 | KV452709.1 | 5120119 | 1-scf00009 | 1 |
| AX-157899396 | 1 | 58.895 | KV452709.1 | 5120645 | 1-scf00009 | 1 |
| AX-157899397 | 1 | 58.895 | KV452709.1 | 5121137 | 1-scf00009 | 1 |
| AX-157899398 | 1 | 58.895 | KV452709.1 | 5121658 | 1-scf00009 | 1 |
| AX-157899399 | 1 | 58.895 | KV452709.1 | 5122280 | 1-scf00009 | 1 |
| AX-157899400 | 1 | 58.895 | KV452709.1 | 5123353 | 1-scf00009 | 1 |
| AX-157899401 | 1 | 58.895 | KV452709.1 | 5124516 | 1-scf00009 | 1 |
| AX-157899402 | 1 | 58.895 | KV452709.1 | 5126760 | 1-scf00009 | 1 |
| AX-157899403 | 1 | 58.895 | KV452709.1 | 5128133 | 1-scf00009 | 1 |
| AX-157899404 | 1 | 58.895 | KV452709.1 | 5128545 | 1-scf00009 | 1 |
| AX-158379148 | 1 | 58.895 | KV452709.1 | 5128725 | 1-scf00009 | 1 |
| AX-157899405 | 1 | 58.895 | KV452709.1 | 5129247 | 1-scf00009 | 1 |
| AX-157754560 | 1 | 58.895 | KV452709.1 | 5129703 | 1-scf00009 | 1 |
| AX-157899406 | 1 | 58.895 | KV452709.1 | 5130981 | 1-scf00009 | 1 |
| AX-157899408 | 1 | 58.895 | KV452709.1 | 5132788 | 1-scf00009 | 1 |
| AX-157899410 | 1 | 58.895 | KV452709.1 | 5134582 | 1-scf00009 | 1 |
| AX-157899412 | 1 | 58.895 | KV452709.1 | 5138395 | 1-scf00009 | 1 |
| AX-157899413 | 1 | 58.895 | KV452709.1 | 5138970 | 1-scf00009 | 1 |



|              |   |        |            |         |            |   |
|--------------|---|--------|------------|---------|------------|---|
| AX-157899414 | 1 | 58.895 | KV452709.1 | 5141162 | 1-scf00009 | 1 |
| AX-157899415 | 1 | 58.895 | KV452709.1 | 5141415 | 1-scf00009 | 1 |
| AX-157899416 | 1 | 58.895 | KV452709.1 | 5141635 | 1-scf00009 | 1 |
| AX-157772262 | 1 | 58.895 | KV452709.1 | 5142305 | 1-scf00009 | 1 |
| AX-157899419 | 1 | 58.895 | KV452709.1 | 5145845 | 1-scf00009 | 1 |
| AX-157700833 | 1 | 58.895 | KV452709.1 | 5147173 | 1-scf00009 | 1 |
| AX-157899420 | 1 | 58.895 | KV452709.1 | 5147606 | 1-scf00009 | 1 |
| AX-157811278 | 1 | 58.895 | KV452709.1 | 5148771 | 1-scf00009 | 1 |
| AX-157899421 | 1 | 58.895 | KV452709.1 | 5148934 | 1-scf00009 | 1 |
| AX-157899422 | 1 | 58.895 | KV452709.1 | 5149720 | 1-scf00009 | 1 |
| AX-157899423 | 1 | 58.895 | KV452709.1 | 5151883 | 1-scf00009 | 1 |
| AX-157811279 | 1 | 58.895 | KV452709.1 | 5152680 | 1-scf00009 | 1 |
| AX-157811280 | 1 | 58.895 | KV452709.1 | 5154553 | 1-scf00009 | 1 |
| AX-157899426 | 1 | 58.895 | KV452709.1 | 5155677 | 1-scf00009 | 1 |
| AX-157899427 | 1 | 58.895 | KV452709.1 | 5158045 | 1-scf00009 | 1 |
| AX-157899428 | 1 | 58.895 | KV452709.1 | 5159721 | 1-scf00009 | 1 |
| AX-157899429 | 1 | 58.895 | KV452709.1 | 5159926 | 1-scf00009 | 1 |
| AX-157811281 | 1 | 58.895 | KV452709.1 | 5161313 | 1-scf00009 | 1 |
| AX-157899430 | 1 | 58.895 | KV452709.1 | 5162130 | 1-scf00009 | 1 |
| AX-157811282 | 1 | 58.895 | KV452709.1 | 5162728 | 1-scf00009 | 1 |
| AX-157748906 | 1 | 58.895 | KV452709.1 | 5163093 | 1-scf00009 | 1 |
| AX-157899431 | 1 | 58.895 | KV452709.1 | 5163393 | 1-scf00009 | 1 |
| AX-157899432 | 1 | 58.895 | KV452709.1 | 5165944 | 1-scf00009 | 1 |
| AX-157899433 | 1 | 58.895 | KV452709.1 | 5168182 | 1-scf00009 | 1 |
| AX-157811283 | 1 | 58.895 | KV452709.1 | 5168655 | 1-scf00009 | 1 |
| AX-157899434 | 1 | 58.895 | KV452709.1 | 5169220 | 1-scf00009 | 1 |
| AX-157899435 | 1 | 58.895 | KV452709.1 | 5170831 | 1-scf00009 | 1 |
| AX-157899437 | 1 | 58.895 | KV452709.1 | 5171776 | 1-scf00009 | 1 |
| AX-157899438 | 1 | 58.895 | KV452709.1 | 5175093 | 1-scf00009 | 1 |
| AX-157899439 | 1 | 58.895 | KV452709.1 | 5175546 | 1-scf00009 | 1 |
| AX-157899440 | 1 | 58.895 | KV452709.1 | 5178910 | 1-scf00009 | 1 |
| AX-157899441 | 1 | 58.895 | KV452709.1 | 5180456 | 1-scf00009 | 1 |
| AX-157899444 | 1 | 58.895 | KV452709.1 | 5182521 | 1-scf00009 | 1 |
| AX-157899445 | 1 | 58.895 | KV452709.1 | 5183425 | 1-scf00009 | 1 |
| AX-157899447 | 1 | 58.895 | KV452709.1 | 5189782 | 1-scf00009 | 1 |
| AX-157899448 | 1 | 58.895 | KV452709.1 | 5192747 | 1-scf00009 | 1 |
| AX-157899449 | 1 | 58.895 | KV452709.1 | 5195022 | 1-scf00009 | 1 |
| AX-157899452 | 1 | 58.895 | KV452709.1 | 5196693 | 1-scf00009 | 1 |
| AX-157899454 | 1 | 58.895 | KV452709.1 | 5197246 | 1-scf00009 | 1 |
| AX-157899455 | 1 | 58.895 | KV452709.1 | 5200296 | 1-scf00009 | 1 |
| AX-157899456 | 1 | 58.895 | KV452709.1 | 5201035 | 1-scf00009 | 1 |
| AX-157899457 | 1 | 58.895 | KV452709.1 | 5202478 | 1-scf00009 | 1 |
| AX-157811284 | 1 | 58.895 | KV452709.1 | 5203882 | 1-scf00009 | 1 |
| AX-157899459 | 1 | 58.895 | KV452709.1 | 5208563 | 1-scf00009 | 1 |
| AX-157899460 | 1 | 58.895 | KV452709.1 | 5209334 | 1-scf00009 | 1 |
| AX-157899461 | 1 | 58.895 | KV452709.1 | 5209631 | 1-scf00009 | 1 |
| AX-157899462 | 1 | 58.895 | KV452709.1 | 5209863 | 1-scf00009 | 1 |
| AX-157899463 | 1 | 58.895 | KV452709.1 | 5210892 | 1-scf00009 | 1 |
| AX-157899464 | 1 | 58.895 | KV452709.1 | 5211161 | 1-scf00009 | 1 |
| AX-157811286 | 1 | 58.895 | KV452709.1 | 5211553 | 1-scf00009 | 1 |
| AX-157811287 | 1 | 58.895 | KV452709.1 | 5211800 | 1-scf00009 | 1 |

|              |   |        |            |         |            |   |
|--------------|---|--------|------------|---------|------------|---|
| AX-157899465 | 1 | 58.895 | KV452709.1 | 5212038 | 1-scf00009 | 1 |
| AX-157899468 | 1 | 58.895 | KV452709.1 | 5216750 | 1-scf00009 | 1 |
| AX-157899470 | 1 | 58.895 | KV452709.1 | 5219820 | 1-scf00009 | 1 |
| AX-157899471 | 1 | 58.895 | KV452709.1 | 5220182 | 1-scf00009 | 1 |
| AX-157811289 | 1 | 58.895 | KV452709.1 | 5220485 | 1-scf00009 | 1 |
| AX-157899472 | 1 | 58.895 | KV452709.1 | 5220834 | 1-scf00009 | 1 |
| AX-157899474 | 1 | 58.895 | KV452709.1 | 5221758 | 1-scf00009 | 1 |
| AX-157899475 | 1 | 58.895 | KV452709.1 | 5222640 | 1-scf00009 | 1 |
| AX-157899476 | 1 | 58.895 | KV452709.1 | 5223158 | 1-scf00009 | 1 |
| AX-157899478 | 1 | 58.895 | KV452709.1 | 5227129 | 1-scf00009 | 1 |
| AX-157899479 | 1 | 58.895 | KV452709.1 | 5227687 | 1-scf00009 | 1 |
| AX-157899480 | 1 | 58.895 | KV452709.1 | 5228011 | 1-scf00009 | 1 |
| AX-157899481 | 1 | 58.895 | KV452709.1 | 5229279 | 1-scf00009 | 1 |
| AX-157899482 | 1 | 58.895 | KV452709.1 | 5229693 | 1-scf00009 | 1 |
| AX-157899484 | 1 | 58.895 | KV452709.1 | 5232997 | 1-scf00009 | 1 |
| AX-157899485 | 1 | 58.895 | KV452709.1 | 5233206 | 1-scf00009 | 1 |
| AX-157899486 | 1 | 58.895 | KV452709.1 | 5233683 | 1-scf00009 | 1 |
| AX-157899488 | 1 | 58.895 | KV452709.1 | 5235724 | 1-scf00009 | 1 |
| AX-157757199 | 1 | 58.895 | KV452709.1 | 5236135 | 1-scf00009 | 1 |
| AX-157899490 | 1 | 58.895 | KV452709.1 | 5238032 | 1-scf00009 | 1 |
| AX-157899491 | 1 | 58.895 | KV452709.1 | 5238536 | 1-scf00009 | 1 |
| AX-157899492 | 1 | 58.895 | KV452709.1 | 5240313 | 1-scf00009 | 1 |
| AX-157899493 | 1 | 58.895 | KV452709.1 | 5241778 | 1-scf00009 | 1 |
| AX-157899494 | 1 | 58.895 | KV452709.1 | 5243825 | 1-scf00009 | 1 |
| AX-157899495 | 1 | 58.895 | KV452709.1 | 5244170 | 1-scf00009 | 1 |
| AX-157899496 | 1 | 58.895 | KV452709.1 | 5244491 | 1-scf00009 | 1 |
| AX-157899497 | 1 | 58.895 | KV452709.1 | 5246769 | 1-scf00009 | 1 |
| AX-157899498 | 1 | 58.895 | KV452709.1 | 5247940 | 1-scf00009 | 1 |
| AX-157773176 | 1 | 58.895 | KV452709.1 | 5248201 | 1-scf00009 | 1 |
| AX-157899501 | 1 | 58.895 | KV452709.1 | 5249636 | 1-scf00009 | 1 |
| AX-157899504 | 1 | 58.895 | KV452709.1 | 5254125 | 1-scf00009 | 1 |
| AX-158404481 | 1 | 58.895 | KV452709.1 | 5254992 | 1-scf00009 | 1 |
| AX-157899506 | 1 | 58.895 | KV452709.1 | 5256859 | 1-scf00009 | 1 |
| AX-158404482 | 1 | 58.895 | KV452709.1 | 5257357 | 1-scf00009 | 1 |
| AX-157757478 | 1 | 58.895 | KV452709.1 | 5259741 | 1-scf00009 | 1 |
| AX-157899511 | 1 | 58.895 | KV452709.1 | 5262380 | 1-scf00009 | 1 |
| AX-157899512 | 1 | 58.895 | KV452709.1 | 5263162 | 1-scf00009 | 1 |
| AX-157899513 | 1 | 58.895 | KV452709.1 | 5263977 | 1-scf00009 | 1 |
| AX-157899514 | 1 | 58.895 | KV452709.1 | 5266288 | 1-scf00009 | 1 |
| AX-157899515 | 1 | 58.895 | KV452709.1 | 5268700 | 1-scf00009 | 1 |
| AX-157899516 | 1 | 58.895 | KV452709.1 | 5269653 | 1-scf00009 | 1 |
| AX-157899518 | 1 | 58.895 | KV452709.1 | 5270776 | 1-scf00009 | 1 |
| AX-157899519 | 1 | 58.895 | KV452709.1 | 5271308 | 1-scf00009 | 1 |
| AX-157899522 | 1 | 58.895 | KV452709.1 | 5274080 | 1-scf00009 | 1 |
| AX-157899523 | 1 | 58.895 | KV452709.1 | 5274713 | 1-scf00009 | 1 |
| AX-157899526 | 1 | 58.895 | KV452709.1 | 5276486 | 1-scf00009 | 1 |
| AX-157899527 | 1 | 58.895 | KV452709.1 | 5276988 | 1-scf00009 | 1 |
| AX-157899528 | 1 | 58.895 | KV452709.1 | 5277928 | 1-scf00009 | 1 |
| AX-157899529 | 1 | 58.895 | KV452709.1 | 5280289 | 1-scf00009 | 1 |
| AX-157899532 | 1 | 58.895 | KV452709.1 | 5286527 | 1-scf00009 | 1 |
| AX-157899533 | 1 | 58.895 | KV452709.1 | 5287009 | 1-scf00009 | 1 |

|              |   |        |            |         |            |   |
|--------------|---|--------|------------|---------|------------|---|
| AX-157899534 | 1 | 58.895 | KV452709.1 | 5287570 | 1-scf00009 | 1 |
| AX-157899535 | 1 | 58.895 | KV452709.1 | 5287894 | 1-scf00009 | 1 |
| AX-157811292 | 1 | 58.895 | KV452709.1 | 5288566 | 1-scf00009 | 1 |
| AX-157899538 | 1 | 58.895 | KV452709.1 | 5289289 | 1-scf00009 | 1 |
| AX-157883123 | 1 | 58.895 | KV452709.1 | 5290276 | 1-scf00009 | 1 |
| AX-157899539 | 1 | 58.895 | KV452709.1 | 5290667 | 1-scf00009 | 1 |
| AX-157899540 | 1 | 58.895 | KV452709.1 | 5291155 | 1-scf00009 | 1 |
| AX-157899541 | 1 | 58.895 | KV452709.1 | 5291816 | 1-scf00009 | 1 |
| AX-157899542 | 1 | 58.895 | KV452709.1 | 5292657 | 1-scf00009 | 1 |
| AX-157899544 | 1 | 58.895 | KV452709.1 | 5294894 | 1-scf00009 | 1 |
| AX-157899545 | 1 | 58.895 | KV452709.1 | 5296105 | 1-scf00009 | 1 |
| AX-157899550 | 1 | 58.895 | KV452709.1 | 5302584 | 1-scf00009 | 1 |
| AX-157899556 | 1 | 58.895 | KV452709.1 | 5307371 | 1-scf00009 | 1 |
| AX-157754642 | 1 | 58.895 | KV452709.1 | 5308669 | 1-scf00009 | 1 |
| AX-157899565 | 1 | 58.895 | KV452709.1 | 5320786 | 1-scf00009 | 1 |
| AX-157899572 | 1 | 58.895 | KV452709.1 | 5327116 | 1-scf00009 | 1 |
| AX-157899575 | 1 | 58.895 | KV452709.1 | 5329782 | 1-scf00009 | 1 |
| AX-157722572 | 1 | 58.895 | KV452709.1 | 5339657 | 1-scf00009 | 1 |
| AX-157811294 | 1 | 58.895 | KV452709.1 | 5341647 | 1-scf00009 | 1 |
| AX-157899582 | 1 | 58.895 | KV452709.1 | 5341890 | 1-scf00009 | 1 |
| AX-157899584 | 1 | 58.895 | KV452709.1 | 5344395 | 1-scf00009 | 1 |
| AX-157899593 | 1 | 58.895 | KV452709.1 | 5355201 | 1-scf00009 | 1 |
| AX-157899603 | 1 | 58.895 | KV452709.1 | 5367179 | 1-scf00009 | 1 |
| AX-158379150 | 1 | 58.895 | KV452709.1 | 5386655 | 1-scf00009 | 1 |
| AX-157811296 | 1 | 58.895 | KV452709.1 | 5391689 | 1-scf00009 | 1 |
| AX-157811297 | 1 | 58.895 | KV452709.1 | 5395452 | 1-scf00009 | 1 |
| AX-157745196 | 1 | 58.895 | KV452709.1 | 5404551 | 1-scf00009 | 1 |
| AX-157811299 | 1 | 58.895 | KV452709.1 | 5414063 | 1-scf00009 | 1 |
| AX-157899634 | 1 | 58.895 | KV452709.1 | 5415724 | 1-scf00009 | 1 |
| AX-157899635 | 1 | 58.895 | KV452709.1 | 5416516 | 1-scf00009 | 1 |
| AX-157899644 | 1 | 58.895 | KV452709.1 | 5425731 | 1-scf00009 | 1 |
| AX-157811301 | 1 | 58.895 | KV452709.1 | 5427742 | 1-scf00009 | 1 |
| AX-157811302 | 1 | 58.895 | KV452709.1 | 5429557 | 1-scf00009 | 1 |
| AX-157811303 | 1 | 58.895 | KV452709.1 | 5430657 | 1-scf00009 | 1 |
| AX-157899651 | 1 | 58.895 | KV452709.1 | 5433384 | 1-scf00009 | 1 |
| AX-157899653 | 1 | 58.895 | KV452709.1 | 5435299 | 1-scf00009 | 1 |
| AX-157899654 | 1 | 58.895 | KV452709.1 | 5435666 | 1-scf00009 | 1 |
| AX-157811304 | 1 | 58.895 | KV452709.1 | 5435969 | 1-scf00009 | 1 |
| AX-157899657 | 1 | 58.895 | KV452709.1 | 5438391 | 1-scf00009 | 1 |
| AX-157899659 | 1 | 58.895 | KV452709.1 | 5443976 | 1-scf00009 | 1 |
| AX-157899661 | 1 | 58.895 | KV452709.1 | 5450436 | 1-scf00009 | 1 |
| AX-157899663 | 1 | 58.895 | KV452709.1 | 5454905 | 1-scf00009 | 1 |
| AX-158389231 | 1 | 58.895 | KV452709.1 | 5455170 | 1-scf00009 | 1 |
| AX-157899664 | 1 | 58.895 | KV452709.1 | 5455329 | 1-scf00009 | 1 |
| AX-157811308 | 1 | 58.895 | KV452709.1 | 5458613 | 1-scf00009 | 1 |
| AX-157899669 | 1 | 58.895 | KV452709.1 | 5459131 | 1-scf00009 | 1 |
| AX-157899671 | 1 | 58.895 | KV452709.1 | 5462344 | 1-scf00009 | 1 |
| AX-157899672 | 1 | 58.895 | KV452709.1 | 5462746 | 1-scf00009 | 1 |
| AX-157899673 | 1 | 58.895 | KV452709.1 | 5463110 | 1-scf00009 | 1 |
| AX-157742501 | 1 | 58.895 | KV452709.1 | 5465368 | 1-scf00009 | 1 |
| AX-157899674 | 1 | 58.895 | KV452709.1 | 5465969 | 1-scf00009 | 1 |

|              |   |        |            |         |            |   |
|--------------|---|--------|------------|---------|------------|---|
| AX-157899675 | 1 | 58.895 | KV452709.1 | 5466540 | 1-scf00009 | 1 |
| AX-157899678 | 1 | 58.895 | KV452709.1 | 5468804 | 1-scf00009 | 1 |
| AX-157899681 | 1 | 58.895 | KV452709.1 | 5471566 | 1-scf00009 | 1 |
| AX-157899682 | 1 | 58.895 | KV452709.1 | 5472016 | 1-scf00009 | 1 |
| AX-157811309 | 1 | 58.895 | KV452709.1 | 5474382 | 1-scf00009 | 1 |
| AX-157899684 | 1 | 58.895 | KV452709.1 | 5474537 | 1-scf00009 | 1 |
| AX-157899685 | 1 | 58.895 | KV452709.1 | 5474961 | 1-scf00009 | 1 |
| AX-157899686 | 1 | 58.895 | KV452709.1 | 5475292 | 1-scf00009 | 1 |
| AX-157868690 | 1 | 58.895 | KV452709.1 | 5476124 | 1-scf00009 | 1 |
| AX-157899687 | 1 | 58.895 | KV452709.1 | 5476620 | 1-scf00009 | 1 |
| AX-157899688 | 1 | 58.895 | KV452709.1 | 5477002 | 1-scf00009 | 1 |
| AX-157899690 | 1 | 58.895 | KV452709.1 | 5478937 | 1-scf00009 | 1 |
| AX-157899691 | 1 | 58.895 | KV452709.1 | 5479551 | 1-scf00009 | 1 |
| AX-157899692 | 1 | 58.895 | KV452709.1 | 5480103 | 1-scf00009 | 1 |
| AX-157899693 | 1 | 58.895 | KV452709.1 | 5480421 | 1-scf00009 | 1 |
| AX-157811310 | 1 | 58.895 | KV452709.1 | 5480858 | 1-scf00009 | 1 |
| AX-157899695 | 1 | 58.895 | KV452709.1 | 5481956 | 1-scf00009 | 1 |
| AX-157899696 | 1 | 58.895 | KV452709.1 | 5482901 | 1-scf00009 | 1 |
| AX-157899697 | 1 | 58.895 | KV452709.1 | 5483267 | 1-scf00009 | 1 |
| AX-157811311 | 1 | 58.895 | KV452709.1 | 5483386 | 1-scf00009 | 1 |
| AX-157811312 | 1 | 58.895 | KV452709.1 | 5484546 | 1-scf00009 | 1 |
| AX-157899699 | 1 | 58.895 | KV452709.1 | 5486173 | 1-scf00009 | 1 |
| AX-157899701 | 1 | 58.895 | KV452709.1 | 5487694 | 1-scf00009 | 1 |
| AX-157899702 | 1 | 58.895 | KV452709.1 | 5487969 | 1-scf00009 | 1 |
| AX-157899703 | 1 | 58.895 | KV452709.1 | 5489099 | 1-scf00009 | 1 |
| AX-157899704 | 1 | 58.895 | KV452709.1 | 5491408 | 1-scf00009 | 1 |
| AX-157811313 | 1 | 58.895 | KV452709.1 | 5492301 | 1-scf00009 | 1 |
| AX-157899705 | 1 | 58.895 | KV452709.1 | 5492630 | 1-scf00009 | 1 |
| AX-157899708 | 1 | 58.895 | KV452709.1 | 5499129 | 1-scf00009 | 1 |
| AX-157811315 | 1 | 58.895 | KV452709.1 | 5499410 | 1-scf00009 | 1 |
| AX-157899709 | 1 | 58.895 | KV452709.1 | 5500508 | 1-scf00009 | 1 |
| AX-157899710 | 1 | 58.895 | KV452709.1 | 5501703 | 1-scf00009 | 1 |
| AX-157899711 | 1 | 58.895 | KV452709.1 | 5502992 | 1-scf00009 | 1 |
| AX-157899712 | 1 | 58.895 | KV452709.1 | 5503597 | 1-scf00009 | 1 |
| AX-157899713 | 1 | 58.895 | KV452709.1 | 5503876 | 1-scf00009 | 1 |
| AX-157899714 | 1 | 58.895 | KV452709.1 | 5504590 | 1-scf00009 | 1 |
| AX-157899716 | 1 | 58.895 | KV452709.1 | 5508553 | 1-scf00009 | 1 |
| AX-157899717 | 1 | 58.895 | KV452709.1 | 5509221 | 1-scf00009 | 1 |
| AX-157899718 | 1 | 58.895 | KV452709.1 | 5509775 | 1-scf00009 | 1 |
| AX-157899719 | 1 | 58.895 | KV452709.1 | 5510371 | 1-scf00009 | 1 |
| AX-158389232 | 1 | 58.895 | KV452709.1 | 5511861 | 1-scf00009 | 1 |
| AX-157899723 | 1 | 58.895 | KV452709.1 | 5516716 | 1-scf00009 | 1 |
| AX-157899724 | 1 | 58.895 | KV452709.1 | 5517119 | 1-scf00009 | 1 |
| AX-157811316 | 1 | 58.895 | KV452709.1 | 5519741 | 1-scf00009 | 1 |
| AX-157899725 | 1 | 58.895 | KV452709.1 | 5520182 | 1-scf00009 | 1 |
| AX-157811317 | 1 | 58.895 | KV452709.1 | 5520979 | 1-scf00009 | 1 |
| AX-157811318 | 1 | 58.895 | KV452709.1 | 5521736 | 1-scf00009 | 1 |
| AX-158389233 | 1 | 58.895 | KV452709.1 | 5523936 | 1-scf00009 | 1 |
| AX-157899726 | 1 | 58.895 | KV452709.1 | 5524687 | 1-scf00009 | 1 |
| AX-157899728 | 1 | 58.895 | KV452709.1 | 5528366 | 1-scf00009 | 1 |
| AX-157811319 | 1 | 58.895 | KV452709.1 | 5528682 | 1-scf00009 | 1 |

|              |   |        |            |         |            |   |
|--------------|---|--------|------------|---------|------------|---|
| AX-157899729 | 1 | 58.895 | KV452709.1 | 5529336 | 1-scf00009 | 1 |
| AX-157899730 | 1 | 58.895 | KV452709.1 | 5530536 | 1-scf00009 | 1 |
| AX-157811323 | 1 | 58.895 | KV452709.1 | 5532850 | 1-scf00009 | 1 |
| AX-157899731 | 1 | 58.895 | KV452709.1 | 5533853 | 1-scf00009 | 1 |
| AX-157899735 | 1 | 58.895 | KV452709.1 | 5538267 | 1-scf00009 | 1 |
| AX-157811324 | 1 | 58.895 | KV452709.1 | 5544721 | 1-scf00009 | 1 |
| AX-157899736 | 1 | 58.895 | KV452709.1 | 5545513 | 1-scf00009 | 1 |
| AX-157811325 | 1 | 58.895 | KV452709.1 | 5548106 | 1-scf00009 | 1 |
| AX-157811326 | 1 | 58.895 | KV452709.1 | 5549461 | 1-scf00009 | 1 |
| AX-157899740 | 1 | 58.895 | KV452709.1 | 5553131 | 1-scf00009 | 1 |
| AX-157899743 | 1 | 58.895 | KV452709.1 | 5559418 | 1-scf00009 | 1 |
| AX-157899744 | 1 | 58.895 | KV452709.1 | 5560106 | 1-scf00009 | 1 |
| AX-157899745 | 1 | 58.895 | KV452709.1 | 5561946 | 1-scf00009 | 1 |
| AX-157811328 | 1 | 58.895 | KV452709.1 | 5563824 | 1-scf00009 | 1 |
| AX-157811329 | 1 | 58.895 | KV452709.1 | 5564575 | 1-scf00009 | 1 |
| AX-157899748 | 1 | 58.895 | KV452709.1 | 5566735 | 1-scf00009 | 1 |
| AX-157899750 | 1 | 58.895 | KV452709.1 | 5570487 | 1-scf00009 | 1 |
| AX-157899752 | 1 | 58.895 | KV452709.1 | 5574686 | 1-scf00009 | 1 |
| AX-157899754 | 1 | 58.895 | KV452709.1 | 5576951 | 1-scf00009 | 1 |
| AX-157811332 | 1 | 58.895 | KV452709.1 | 5579579 | 1-scf00009 | 1 |
| AX-157899755 | 1 | 58.895 | KV452709.1 | 5581968 | 1-scf00009 | 1 |
| AX-157899756 | 1 | 58.895 | KV452709.1 | 5582884 | 1-scf00009 | 1 |
| AX-157899757 | 1 | 58.895 | KV452709.1 | 5583471 | 1-scf00009 | 1 |
| AX-157899758 | 1 | 58.895 | KV452709.1 | 5583980 | 1-scf00009 | 1 |
| AX-157811333 | 1 | 58.895 | KV452709.1 | 5587200 | 1-scf00009 | 1 |
| AX-157899759 | 1 | 58.895 | KV452709.1 | 5589384 | 1-scf00009 | 1 |
| AX-157899760 | 1 | 58.895 | KV452709.1 | 5589741 | 1-scf00009 | 1 |
| AX-157811334 | 1 | 58.895 | KV452709.1 | 5590161 | 1-scf00009 | 1 |
| AX-157811335 | 1 | 58.895 | KV452709.1 | 5591952 | 1-scf00009 | 1 |
| AX-157899761 | 1 | 58.895 | KV452709.1 | 5592284 | 1-scf00009 | 1 |
| AX-157729591 | 1 | 58.895 | KV452709.1 | 5592365 | 1-scf00009 | 1 |
| AX-157899762 | 1 | 58.895 | KV452709.1 | 5593304 | 1-scf00009 | 1 |
| AX-157899764 | 1 | 58.895 | KV452709.1 | 5595758 | 1-scf00009 | 1 |
| AX-157899765 | 1 | 58.895 | KV452709.1 | 5599385 | 1-scf00009 | 1 |
| AX-157899766 | 1 | 58.895 | KV452709.1 | 5600858 | 1-scf00009 | 1 |
| AX-157899767 | 1 | 58.895 | KV452709.1 | 5601572 | 1-scf00009 | 1 |
| AX-157899769 | 1 | 58.895 | KV452709.1 | 5603078 | 1-scf00009 | 1 |
| AX-157899770 | 1 | 58.895 | KV452709.1 | 5603893 | 1-scf00009 | 1 |
| AX-157708200 | 1 | 58.895 | KV452709.1 | 5604111 | 1-scf00009 | 1 |
| AX-157899771 | 1 | 58.895 | KV452709.1 | 5604767 | 1-scf00009 | 1 |
| AX-158404490 | 1 | 58.895 | KV452709.1 | 5613281 | 1-scf00009 | 1 |
| AX-157899774 | 1 | 58.895 | KV452709.1 | 5615108 | 1-scf00009 | 1 |
| AX-157899776 | 1 | 58.895 | KV452709.1 | 5616573 | 1-scf00009 | 1 |
| AX-157899778 | 1 | 58.895 | KV452709.1 | 5617749 | 1-scf00009 | 1 |
| AX-158389234 | 1 | 58.895 | KV452709.1 | 5617959 | 1-scf00009 | 1 |
| AX-157899780 | 1 | 58.895 | KV452709.1 | 5619549 | 1-scf00009 | 1 |
| AX-157899781 | 1 | 58.895 | KV452709.1 | 5620271 | 1-scf00009 | 1 |
| AX-157899783 | 1 | 58.895 | KV452709.1 | 5621701 | 1-scf00009 | 1 |
| AX-157899784 | 1 | 58.895 | KV452709.1 | 5622367 | 1-scf00009 | 1 |
| AX-157899787 | 1 | 58.895 | KV452709.1 | 5624003 | 1-scf00009 | 1 |
| AX-157899789 | 1 | 58.895 | KV452709.1 | 5626101 | 1-scf00009 | 1 |

|              |   |        |            |         |            |   |
|--------------|---|--------|------------|---------|------------|---|
| AX-157899790 | 1 | 58.895 | KV452709.1 | 5626878 | 1-scf00009 | 1 |
| AX-157899792 | 1 | 58.895 | KV452709.1 | 5628460 | 1-scf00009 | 1 |
| AX-157899793 | 1 | 58.895 | KV452709.1 | 5632025 | 1-scf00009 | 1 |
| AX-157899794 | 1 | 58.895 | KV452709.1 | 5632818 | 1-scf00009 | 1 |
| AX-157899795 | 1 | 58.895 | KV452709.1 | 5634122 | 1-scf00009 | 1 |
| AX-157899798 | 1 | 58.895 | KV452709.1 | 5637712 | 1-scf00009 | 1 |
| AX-157899799 | 1 | 58.895 | KV452709.1 | 5638286 | 1-scf00009 | 1 |
| AX-157899801 | 1 | 58.895 | KV452709.1 | 5640080 | 1-scf00009 | 1 |
| AX-157899803 | 1 | 58.895 | KV452709.1 | 5640892 | 1-scf00009 | 1 |
| AX-158389237 | 1 | 58.895 | KV452709.1 | 5641314 | 1-scf00009 | 1 |
| AX-157899804 | 1 | 58.895 | KV452709.1 | 5643485 | 1-scf00009 | 1 |
| AX-157899805 | 1 | 58.895 | KV452709.1 | 5643866 | 1-scf00009 | 1 |
| AX-157899806 | 1 | 58.895 | KV452709.1 | 5645242 | 1-scf00009 | 1 |
| AX-157899807 | 1 | 58.895 | KV452709.1 | 5645613 | 1-scf00009 | 1 |
| AX-157899808 | 1 | 58.895 | KV452709.1 | 5645984 | 1-scf00009 | 1 |
| AX-157899809 | 1 | 58.895 | KV452709.1 | 5646533 | 1-scf00009 | 1 |
| AX-157899810 | 1 | 58.895 | KV452709.1 | 5647174 | 1-scf00009 | 1 |
| AX-157899812 | 1 | 58.895 | KV452709.1 | 5648568 | 1-scf00009 | 1 |
| AX-158403944 | 1 | 58.895 | KV452709.1 | 5651119 | 1-scf00009 | 1 |
| AX-158403946 | 1 | 58.895 | KV452709.1 | 5651274 | 1-scf00009 | 1 |
| AX-158414614 | 1 | 58.895 | KV452709.1 | 5651343 | 1-scf00009 | 1 |
| AX-157899815 | 1 | 58.895 | KV452709.1 | 5653899 | 1-scf00009 | 1 |
| AX-157899817 | 1 | 58.895 | KV452709.1 | 5655565 | 1-scf00009 | 1 |
| AX-157899819 | 1 | 58.895 | KV452709.1 | 5656769 | 1-scf00009 | 1 |
| AX-157899820 | 1 | 58.895 | KV452709.1 | 5657319 | 1-scf00009 | 1 |
| AX-157899822 | 1 | 58.895 | KV452709.1 | 5658833 | 1-scf00009 | 1 |
| AX-157899823 | 1 | 58.895 | KV452709.1 | 5662807 | 1-scf00009 | 1 |
| AX-157899824 | 1 | 58.895 | KV452709.1 | 5667148 | 1-scf00009 | 1 |
| AX-157899825 | 1 | 58.895 | KV452709.1 | 5668794 | 1-scf00009 | 1 |
| AX-157899828 | 1 | 58.895 | KV452709.1 | 5670437 | 1-scf00009 | 1 |
| AX-157899829 | 1 | 58.895 | KV452709.1 | 5671171 | 1-scf00009 | 1 |
| AX-157899830 | 1 | 58.895 | KV452709.1 | 5671662 | 1-scf00009 | 1 |
| AX-157899831 | 1 | 58.895 | KV452709.1 | 5671842 | 1-scf00009 | 1 |
| AX-157899832 | 1 | 58.895 | KV452709.1 | 5672296 | 1-scf00009 | 1 |
| AX-157899833 | 1 | 58.895 | KV452709.1 | 5672682 | 1-scf00009 | 1 |
| AX-158389238 | 1 | 58.895 | KV452709.1 | 5673189 | 1-scf00009 | 1 |
| AX-157899834 | 1 | 58.895 | KV452709.1 | 5673771 | 1-scf00009 | 1 |
| AX-157899836 | 1 | 58.895 | KV452709.1 | 5678577 | 1-scf00009 | 1 |
| AX-157899837 | 1 | 58.895 | KV452709.1 | 5678928 | 1-scf00009 | 1 |
| AX-157862613 | 1 | 58.895 | KV452709.1 | 5679225 | 1-scf00009 | 1 |
| AX-157899838 | 1 | 58.895 | KV452709.1 | 5681702 | 1-scf00009 | 1 |
| AX-157899839 | 1 | 58.895 | KV452709.1 | 5683115 | 1-scf00009 | 1 |
| AX-157899840 | 1 | 58.895 | KV452709.1 | 5683477 | 1-scf00009 | 1 |
| AX-157899842 | 1 | 58.895 | KV452709.1 | 5685833 | 1-scf00009 | 1 |
| AX-157899843 | 1 | 58.895 | KV452709.1 | 5686247 | 1-scf00009 | 1 |
| AX-157899845 | 1 | 58.895 | KV452709.1 | 5688160 | 1-scf00009 | 1 |
| AX-157899846 | 1 | 58.895 | KV452709.1 | 5689299 | 1-scf00009 | 1 |
| AX-157899847 | 1 | 58.895 | KV452709.1 | 5689713 | 1-scf00009 | 1 |
| AX-157899850 | 1 | 58.895 | KV452709.1 | 5692209 | 1-scf00009 | 1 |
| AX-157899851 | 1 | 58.895 | KV452709.1 | 5692717 | 1-scf00009 | 1 |
| AX-157899852 | 1 | 58.895 | KV452709.1 | 5693125 | 1-scf00009 | 1 |

|              |   |        |            |         |            |   |
|--------------|---|--------|------------|---------|------------|---|
| AX-157868692 | 1 | 58.895 | KV452709.1 | 5694128 | 1-scf00009 | 1 |
| AX-157899853 | 1 | 58.895 | KV452709.1 | 5697341 | 1-scf00009 | 1 |
| AX-157899855 | 1 | 58.895 | KV452709.1 | 5697995 | 1-scf00009 | 1 |
| AX-157899857 | 1 | 58.895 | KV452709.1 | 5700038 | 1-scf00009 | 1 |
| AX-157899858 | 1 | 58.895 | KV452709.1 | 5701405 | 1-scf00009 | 1 |
| AX-157899859 | 1 | 58.895 | KV452709.1 | 5701924 | 1-scf00009 | 1 |
| AX-157899860 | 1 | 58.895 | KV452709.1 | 5703326 | 1-scf00009 | 1 |
| AX-157899861 | 1 | 58.895 | KV452709.1 | 5703805 | 1-scf00009 | 1 |
| AX-157899862 | 1 | 58.895 | KV452709.1 | 5704180 | 1-scf00009 | 1 |
| AX-157899863 | 1 | 58.895 | KV452709.1 | 5704547 | 1-scf00009 | 1 |
| AX-157899864 | 1 | 58.895 | KV452709.1 | 5704985 | 1-scf00009 | 1 |
| AX-157899865 | 1 | 58.895 | KV452709.1 | 5705422 | 1-scf00009 | 1 |
| AX-157695270 | 1 | 58.895 | KV452709.1 | 5707246 | 1-scf00009 | 1 |
| AX-157899866 | 1 | 58.895 | KV452709.1 | 5708765 | 1-scf00009 | 1 |
| AX-157899867 | 1 | 58.895 | KV452709.1 | 5709229 | 1-scf00009 | 1 |
| AX-157811340 | 1 | 58.895 | KV452709.1 | 5710133 | 1-scf00009 | 1 |
| AX-157899868 | 1 | 58.895 | KV452709.1 | 5712306 | 1-scf00009 | 1 |
| AX-157899870 | 1 | 58.895 | KV452709.1 | 5714037 | 1-scf00009 | 1 |
| AX-157899871 | 1 | 58.895 | KV452709.1 | 5714540 | 1-scf00009 | 1 |
| AX-157755719 | 1 | 58.895 | KV452709.1 | 5714579 | 1-scf00009 | 1 |
| AX-157899872 | 1 | 58.895 | KV452709.1 | 5715221 | 1-scf00009 | 1 |
| AX-157899876 | 1 | 58.895 | KV452709.1 | 5718498 | 1-scf00009 | 1 |
| AX-157899877 | 1 | 58.895 | KV452709.1 | 5719664 | 1-scf00009 | 1 |
| AX-157899878 | 1 | 58.895 | KV452709.1 | 5720161 | 1-scf00009 | 1 |
| AX-157899879 | 1 | 58.895 | KV452709.1 | 5721159 | 1-scf00009 | 1 |
| AX-157899882 | 1 | 58.895 | KV452709.1 | 5722637 | 1-scf00009 | 1 |
| AX-157899884 | 1 | 58.895 | KV452709.1 | 5723479 | 1-scf00009 | 1 |
| AX-157899885 | 1 | 58.895 | KV452709.1 | 5724185 | 1-scf00009 | 1 |
| AX-157899888 | 1 | 58.895 | KV452709.1 | 5725729 | 1-scf00009 | 1 |
| AX-157899889 | 1 | 58.895 | KV452709.1 | 5727697 | 1-scf00009 | 1 |
| AX-157899897 | 1 | 58.895 | KV452709.1 | 5739428 | 1-scf00009 | 1 |
| AX-157899935 | 1 | 58.895 | KV452709.1 | 5791346 | 1-scf00009 | 1 |
| AX-157899941 | 1 | 58.895 | KV452709.1 | 5798837 | 1-scf00009 | 1 |
| AX-157899946 | 1 | 58.895 | KV452709.1 | 5805716 | 1-scf00009 | 1 |
| AX-157811348 | 1 | 58.895 | KV452709.1 | 5810823 | 1-scf00009 | 1 |
| AX-157775849 | 1 | 58.895 | KV452709.1 | 5834143 | 1-scf00009 | 1 |
| AX-157811351 | 1 | 58.895 | KV452709.1 | 5834581 | 1-scf00009 | 1 |
| AX-158379152 | 1 | 58.895 | KV452709.1 | 5835244 | 1-scf00009 | 1 |
| AX-157717971 | 1 | 58.895 | KV452709.1 | 5835317 | 1-scf00009 | 1 |
| AX-157899960 | 1 | 58.895 | KV452709.1 | 5836928 | 1-scf00009 | 1 |
| AX-157727172 | 1 | 58.895 | KV452709.1 | 5839890 | 1-scf00009 | 1 |
| AX-157899964 | 1 | 58.895 | KV452709.1 | 5841305 | 1-scf00009 | 1 |
| AX-157899965 | 1 | 58.895 | KV452709.1 | 5841948 | 1-scf00009 | 1 |
| AX-157899967 | 1 | 58.895 | KV452709.1 | 5843202 | 1-scf00009 | 1 |
| AX-157868696 | 1 | 58.895 | KV452709.1 | 5859495 | 1-scf00009 | 1 |
| AX-157899984 | 1 | 58.895 | KV452709.1 | 5865841 | 1-scf00009 | 1 |
| AX-157899985 | 1 | 58.895 | KV452709.1 | 5869222 | 1-scf00009 | 1 |
| AX-157899986 | 1 | 58.895 | KV452709.1 | 5870872 | 1-scf00009 | 1 |
| AX-157899988 | 1 | 58.895 | KV452709.1 | 5872132 | 1-scf00009 | 1 |
| AX-157868697 | 1 | 58.895 | KV452709.1 | 5872648 | 1-scf00009 | 1 |
| AX-157899989 | 1 | 58.895 | KV452709.1 | 5873910 | 1-scf00009 | 1 |

|              |   |        |            |         |            |   |
|--------------|---|--------|------------|---------|------------|---|
| AX-157899990 | 1 | 58.895 | KV452709.1 | 5874170 | 1-scf00009 | 1 |
| AX-157868699 | 1 | 58.895 | KV452709.1 | 5877846 | 1-scf00009 | 1 |
| AX-157868700 | 1 | 58.895 | KV452709.1 | 5879587 | 1-scf00009 | 1 |
| AX-157773213 | 1 | 58.895 | KV452709.1 | 5879646 | 1-scf00009 | 1 |
| AX-157811354 | 1 | 58.895 | KV452709.1 | 5880131 | 1-scf00009 | 1 |
| AX-157899993 | 1 | 58.895 | KV452709.1 | 5883197 | 1-scf00009 | 1 |
| AX-157868702 | 1 | 58.895 | KV452709.1 | 5885193 | 1-scf00009 | 1 |
| AX-157899995 | 1 | 58.895 | KV452709.1 | 5886396 | 1-scf00009 | 1 |
| AX-157899997 | 1 | 58.895 | KV452709.1 | 5887172 | 1-scf00009 | 1 |
| AX-157899999 | 1 | 58.895 | KV452709.1 | 5891767 | 1-scf00009 | 1 |
| AX-157900000 | 1 | 58.895 | KV452709.1 | 5892283 | 1-scf00009 | 1 |
| AX-157868704 | 1 | 58.895 | KV452709.1 | 5893369 | 1-scf00009 | 1 |
| AX-157900002 | 1 | 58.895 | KV452709.1 | 5894210 | 1-scf00009 | 1 |
| AX-157900003 | 1 | 58.895 | KV452709.1 | 5894909 | 1-scf00009 | 1 |
| AX-157900009 | 1 | 58.895 | KV452709.1 | 5913320 | 1-scf00009 | 1 |
| AX-157900010 | 1 | 58.895 | KV452709.1 | 5913528 | 1-scf00009 | 1 |
| AX-158404501 | 1 | 58.895 | KV452709.1 | 6048280 | 1-scf00009 | 1 |
| AX-157900090 | 1 | 58.895 | KV452709.1 | 6048940 | 1-scf00009 | 1 |
| AX-158389262 | 1 | 58.895 | KV452709.1 | 6050302 | 1-scf00009 | 1 |
| AX-157900091 | 1 | 58.895 | KV452709.1 | 6050703 | 1-scf00009 | 1 |
| AX-157900092 | 1 | 58.895 | KV452709.1 | 6051690 | 1-scf00009 | 1 |
| AX-157900093 | 1 | 58.895 | KV452709.1 | 6052597 | 1-scf00009 | 1 |
| AX-157900094 | 1 | 58.895 | KV452709.1 | 6056579 | 1-scf00009 | 1 |
| AX-157900095 | 1 | 58.895 | KV452709.1 | 6057336 | 1-scf00009 | 1 |
| AX-157868720 | 1 | 58.895 | KV452709.1 | 6058795 | 1-scf00009 | 1 |
| AX-157900097 | 1 | 58.895 | KV452709.1 | 6059731 | 1-scf00009 | 1 |
| AX-157900099 | 1 | 58.895 | KV452709.1 | 6062284 | 1-scf00009 | 1 |
| AX-157900100 | 1 | 58.895 | KV452709.1 | 6063433 | 1-scf00009 | 1 |
| AX-157900101 | 1 | 58.895 | KV452709.1 | 6065874 | 1-scf00009 | 1 |
| AX-157900102 | 1 | 58.895 | KV452709.1 | 6066673 | 1-scf00009 | 1 |
| AX-158389263 | 1 | 58.895 | KV452709.1 | 6069431 | 1-scf00009 | 1 |
| AX-157900106 | 1 | 58.895 | KV452709.1 | 6070314 | 1-scf00009 | 1 |
| AX-158421801 | 1 | 58.895 | KV452709.1 | 6071441 | 1-scf00009 | 1 |
| AX-157900107 | 1 | 58.895 | KV452709.1 | 6071865 | 1-scf00009 | 1 |
| AX-158389264 | 1 | 58.895 | KV452709.1 | 6074840 | 1-scf00009 | 1 |
| AX-157900111 | 1 | 58.895 | KV452709.1 | 6076268 | 1-scf00009 | 1 |
| AX-157900112 | 1 | 58.895 | KV452709.1 | 6078482 | 1-scf00009 | 1 |
| AX-158389265 | 1 | 58.895 | KV452709.1 | 6079440 | 1-scf00009 | 1 |
| AX-158389267 | 1 | 58.895 | KV452709.1 | 6087333 | 1-scf00009 | 1 |
| AX-158389268 | 1 | 58.895 | KV452709.1 | 6091179 | 1-scf00009 | 1 |
| AX-157900118 | 1 | 58.895 | KV452709.1 | 6091282 | 1-scf00009 | 1 |
| AX-157900120 | 1 | 58.895 | KV452709.1 | 6092339 | 1-scf00009 | 1 |
| AX-157900123 | 1 | 58.895 | KV452709.1 | 6094177 | 1-scf00009 | 1 |
| AX-157900124 | 1 | 58.895 | KV452709.1 | 6094580 | 1-scf00009 | 1 |
| AX-158389269 | 1 | 58.895 | KV452709.1 | 6095801 | 1-scf00009 | 1 |
| AX-158389270 | 1 | 58.895 | KV452709.1 | 6097554 | 1-scf00009 | 1 |
| AX-157900128 | 1 | 58.895 | KV452709.1 | 6104400 | 1-scf00009 | 1 |
| AX-157811364 | 1 | 58.895 | KV452709.1 | 6104622 | 1-scf00009 | 1 |
| AX-157811370 | 1 | 58.895 | KV452709.1 | 6138222 | 1-scf00009 | 1 |
| AX-157868722 | 1 | 58.895 | KV452709.1 | 6140511 | 1-scf00009 | 1 |
| AX-157811372 | 1 | 58.895 | KV452709.1 | 6144959 | 1-scf00009 | 1 |



|              |   |        |            |         |            |   |
|--------------|---|--------|------------|---------|------------|---|
| AX-157868723 | 1 | 58.895 | KV452709.1 | 6146778 | 1-scf00009 | 1 |
| AX-157900154 | 1 | 58.895 | KV452709.1 | 6154186 | 1-scf00009 | 1 |
| AX-157868726 | 1 | 58.895 | KV452709.1 | 6154669 | 1-scf00009 | 1 |
| AX-157868727 | 1 | 58.895 | KV452709.1 | 6154955 | 1-scf00009 | 1 |
| AX-157900155 | 1 | 58.895 | KV452709.1 | 6155205 | 1-scf00009 | 1 |
| AX-157868728 | 1 | 58.895 | KV452709.1 | 6156050 | 1-scf00009 | 1 |
| AX-157811374 | 1 | 58.895 | KV452709.1 | 6156588 | 1-scf00009 | 1 |
| AX-157900158 | 1 | 58.895 | KV452709.1 | 6160776 | 1-scf00009 | 1 |
| AX-157900159 | 1 | 58.895 | KV452709.1 | 6162361 | 1-scf00009 | 1 |
| AX-157900160 | 1 | 58.895 | KV452709.1 | 6165506 | 1-scf00009 | 1 |
| AX-158389273 | 1 | 58.895 | KV452709.1 | 6168170 | 1-scf00009 | 1 |
| AX-157900161 | 1 | 58.895 | KV452709.1 | 6169218 | 1-scf00009 | 1 |
| AX-157811375 | 1 | 58.895 | KV452709.1 | 6169626 | 1-scf00009 | 1 |
| AX-157900162 | 1 | 58.895 | KV452709.1 | 6171244 | 1-scf00009 | 1 |
| AX-157900163 | 1 | 58.895 | KV452709.1 | 6172854 | 1-scf00009 | 1 |
| AX-157900164 | 1 | 58.895 | KV452709.1 | 6173622 | 1-scf00009 | 1 |
| AX-157900165 | 1 | 58.895 | KV452709.1 | 6174734 | 1-scf00009 | 1 |
| AX-158389274 | 1 | 58.895 | KV452709.1 | 6175392 | 1-scf00009 | 1 |
| AX-157900167 | 1 | 58.895 | KV452709.1 | 6179667 | 1-scf00009 | 1 |
| AX-158389275 | 1 | 58.895 | KV452709.1 | 6180743 | 1-scf00009 | 1 |
| AX-157868729 | 1 | 58.895 | KV452709.1 | 6182201 | 1-scf00009 | 1 |
| AX-157900168 | 1 | 58.895 | KV452709.1 | 6183373 | 1-scf00009 | 1 |
| AX-157900169 | 1 | 58.895 | KV452709.1 | 6186883 | 1-scf00009 | 1 |
| AX-157900170 | 1 | 58.895 | KV452709.1 | 6188126 | 1-scf00009 | 1 |
| AX-157900171 | 1 | 58.895 | KV452709.1 | 6190221 | 1-scf00009 | 1 |
| AX-157900173 | 1 | 58.895 | KV452709.1 | 6192022 | 1-scf00009 | 1 |
| AX-157900174 | 1 | 58.895 | KV452709.1 | 6193136 | 1-scf00009 | 1 |
| AX-157900179 | 1 | 58.895 | KV452709.1 | 6200214 | 1-scf00009 | 1 |
| AX-157811377 | 1 | 58.895 | KV452709.1 | 6205480 | 1-scf00009 | 1 |
| AX-157900182 | 1 | 58.895 | KV452709.1 | 6209738 | 1-scf00009 | 1 |
| AX-157900185 | 1 | 58.895 | KV452709.1 | 6211724 | 1-scf00009 | 1 |
| AX-158404511 | 1 | 58.895 | KV452709.1 | 6212916 | 1-scf00009 | 1 |
| AX-158404512 | 1 | 58.895 | KV452709.1 | 6212972 | 1-scf00009 | 1 |
| AX-157900186 | 1 | 58.895 | KV452709.1 | 6213472 | 1-scf00009 | 1 |
| AX-157868731 | 1 | 58.895 | KV452709.1 | 6216055 | 1-scf00009 | 1 |
| AX-157811379 | 1 | 58.895 | KV452709.1 | 6216576 | 1-scf00009 | 1 |
| AX-157868732 | 1 | 58.895 | KV452709.1 | 6217270 | 1-scf00009 | 1 |
| AX-157900189 | 1 | 58.895 | KV452709.1 | 6223726 | 1-scf00009 | 1 |
| AX-157900190 | 1 | 58.895 | KV452709.1 | 6225631 | 1-scf00009 | 1 |
| AX-157811381 | 1 | 58.895 | KV452709.1 | 6226924 | 1-scf00009 | 1 |
| AX-157811382 | 1 | 58.895 | KV452709.1 | 6227814 | 1-scf00009 | 1 |
| AX-157868734 | 1 | 58.895 | KV452709.1 | 6228006 | 1-scf00009 | 1 |
| AX-157868735 | 1 | 58.895 | KV452709.1 | 6228941 | 1-scf00009 | 1 |
| AX-157900194 | 1 | 58.895 | KV452709.1 | 6231800 | 1-scf00009 | 1 |
| AX-157900198 | 1 | 58.895 | KV452709.1 | 6235796 | 1-scf00009 | 1 |
| AX-157900202 | 1 | 58.895 | KV452709.1 | 6251149 | 1-scf00009 | 1 |
| AX-157900204 | 1 | 58.895 | KV452709.1 | 6254087 | 1-scf00009 | 1 |
| AX-157868737 | 1 | 58.895 | KV452709.1 | 6260988 | 1-scf00009 | 1 |
| AX-157900211 | 1 | 58.895 | KV452709.1 | 6264221 | 1-scf00009 | 1 |
| AX-157900212 | 1 | 58.895 | KV452709.1 | 6267112 | 1-scf00009 | 1 |
| AX-157900215 | 1 | 58.895 | KV452709.1 | 6269326 | 1-scf00009 | 1 |

|              |   |        |            |         |                |    |
|--------------|---|--------|------------|---------|----------------|----|
| AX-157900219 | 1 | 58.895 | KV452709.1 | 6271099 | 1-scf00009     | 1  |
| AX-157900224 | 1 | 58.895 | KV452709.1 | 6276718 | 1-scf00009     | 1  |
| AX-157900225 | 1 | 58.895 | KV452709.1 | 6277748 | 1-scf00009     | 1  |
| AX-157900227 | 1 | 58.895 | KV452709.1 | 6281054 | 1-scf00009     | 1  |
| AX-157900229 | 1 | 58.895 | KV452709.1 | 6283495 | 1-scf00009     | 1  |
| AX-158389277 | 1 | 58.895 | KV452709.1 | 6283565 | 1-scf00009     | 1  |
| AX-157900230 | 1 | 58.895 | KV452709.1 | 6284326 | 1-scf00009     | 1  |
| AX-158389278 | 1 | 58.895 | KV452709.1 | 6287291 | 1-scf00009     | 1  |
| AX-157900239 | 1 | 58.895 | KV452709.1 | 6296261 | 1-scf00009     | 1  |
| AX-158389280 | 1 | 58.895 | KV452709.1 | 6297908 | 1-scf00009     | 1  |
| AX-157900242 | 1 | 58.895 | KV452709.1 | 6298930 | 1-scf00009     | 1  |
| AX-157900243 | 1 | 58.895 | KV452709.1 | 6300874 | 1-scf00009     | 1  |
| AX-157900244 | 1 | 58.895 | KV452709.1 | 6302666 | 1-scf00009     | 1  |
| AX-157853586 | 1 | 58.895 | KV452709.1 | 6306281 | 1-scf00009     | 1  |
| AX-157853587 | 1 | 58.895 | KV452709.1 | 6310456 | 1-scf00009     | 1  |
| AX-157811392 | 1 | 58.895 | KV452709.1 | 6312020 | 1-scf00009     | 1  |
| AX-158389282 | 1 | 58.895 | KV452709.1 | 6314664 | 1-scf00009     | 1  |
| AX-157811393 | 1 | 58.895 | KV452709.1 | 6316378 | 1-scf00009     | 1  |
| AX-157811394 | 1 | 58.895 | KV452709.1 | 6321011 | 1-scf00009     | 1  |
| AX-157900248 | 1 | 58.895 | KV452709.1 | 6321267 | 1-scf00009     | 1  |
| AX-157868739 | 1 | 58.895 | KV452709.1 | 6326208 | 1-scf00009     | 1  |
| AX-157811395 | 1 | 58.895 | KV452709.1 | 6327501 | 1-scf00009     | 1  |
| AX-157900249 | 1 | 58.895 | KV452709.1 | 6331469 | 1-scf00009     | 1  |
| AX-157811396 | 1 | 58.895 | KV452709.1 | 6333469 | 1-scf00009     | 1  |
| AX-157868741 | 1 | 58.895 | KV452709.1 | 6335881 | 1-scf00009     | 1  |
| AX-157900253 | 1 | 58.895 | KV452709.1 | 6342027 | 1-scf00009     | 1  |
| AX-157900254 | 1 | 58.895 | KV452709.1 | 6342267 | 1-scf00009     | 1  |
| AX-157868742 | 1 | 58.895 | KV452709.1 | 6343173 | 1-scf00009     | 1  |
| AX-157868744 | 1 | 58.895 | KV452709.1 | 6347174 | 1-scf00009     | 1  |
| AX-157900511 | 1 | 58.895 | KV452709.1 | 7219349 | 1-scf00009     | 1  |
| AX-157901058 | 1 | 58.895 | KV452711.1 | 1344274 | 1-scf00010     | 1  |
| AX-157811458 | 1 | 58.895 | KV452711.1 | 1651382 | 1-scf00010     | 1  |
| AX-157749268 | 1 | 58.895 | KV452711.1 | 1653703 | 1-scf00010     | 1  |
| AX-157901259 | 1 | 58.895 | KV452711.1 | 1867364 | 1-scf00010     | 1  |
| AX-157901285 | 1 | 58.895 | KV452711.1 | 1912300 | 1-scf00010     | 1  |
| AX-157901294 | 1 | 58.895 | KV452711.1 | 1931566 | 1-scf00010     | 1  |
| AX-157901296 | 1 | 58.895 | KV452711.1 | 1935143 | 1-scf00010     | 1  |
| AX-157811490 | 1 | 58.895 | KV452711.1 | 2204019 | 1-scf00010     | 1  |
| AX-157901390 | 1 | 58.895 | KV452711.1 | 2204587 | 1-scf00010     | 1  |
| AX-157902664 | 1 | 58.895 | KV452713.1 | 1093916 | 1-scf00011     | 1  |
| AX-157703587 | 1 | 58.895 | DX099273.1 | 48      | IORI212 Ictalu | UN |
| AX-157899994 | 1 | 58.926 | KV452709.1 | 5883914 | 1-scf00009     | 1  |
| AX-158404499 | 1 | 58.962 | KV452709.1 | 5884352 | 1-scf00009     | 1  |
| AX-157894533 | 1 | 59.005 | KV452708.1 | 901667  | 1-scf00008     | 1  |
| AX-157894586 | 1 | 59.005 | KV452708.1 | 997671  | 1-scf00008     | 1  |
| AX-157894656 | 1 | 59.005 | KV452708.1 | 1107368 | 1-scf00008     | 1  |
| AX-157894660 | 1 | 59.005 | KV452708.1 | 1119659 | 1-scf00008     | 1  |
| AX-157894672 | 1 | 59.005 | KV452708.1 | 1133889 | 1-scf00008     | 1  |
| AX-157810726 | 1 | 59.005 | KV452708.1 | 1248509 | 1-scf00008     | 1  |
| AX-157894730 | 1 | 59.005 | KV452708.1 | 1275550 | 1-scf00008     | 1  |
| AX-157894842 | 1 | 59.005 | KV452708.1 | 1454959 | 1-scf00008     | 1  |

|              |   |        |            |         |            |   |
|--------------|---|--------|------------|---------|------------|---|
| AX-157894843 | 1 | 59.005 | KV452708.1 | 1456953 | 1-scf00008 | 1 |
| AX-157810828 | 1 | 59.005 | KV452708.1 | 2469824 | 1-scf00008 | 1 |
| AX-157895451 | 1 | 59.005 | KV452708.1 | 2549009 | 1-scf00008 | 1 |
| AX-157895452 | 1 | 59.005 | KV452708.1 | 2550160 | 1-scf00008 | 1 |
| AX-157895664 | 1 | 59.005 | KV452708.1 | 2818267 | 1-scf00008 | 1 |
| AX-157895706 | 1 | 59.005 | KV452708.1 | 2874766 | 1-scf00008 | 1 |
| AX-158404359 | 1 | 59.005 | KV452708.1 | 2954021 | 1-scf00008 | 1 |
| AX-157895778 | 1 | 59.005 | KV452708.1 | 2963651 | 1-scf00008 | 1 |
| AX-157895780 | 1 | 59.005 | KV452708.1 | 2964636 | 1-scf00008 | 1 |
| AX-157895809 | 1 | 59.005 | KV452708.1 | 2999349 | 1-scf00008 | 1 |
| AX-157895821 | 1 | 59.005 | KV452708.1 | 3012240 | 1-scf00008 | 1 |
| AX-157895915 | 1 | 59.005 | KV452708.1 | 3104858 | 1-scf00008 | 1 |
| AX-157896069 | 1 | 59.005 | KV452708.1 | 3275094 | 1-scf00008 | 1 |
| AX-157896095 | 1 | 59.005 | KV452709.1 | 6090    | 1-scf00009 | 1 |
| AX-157743121 | 1 | 59.005 | KV452709.1 | 13012   | 1-scf00009 | 1 |
| AX-157896116 | 1 | 59.005 | KV452709.1 | 37437   | 1-scf00009 | 1 |
| AX-157896172 | 1 | 59.005 | KV452709.1 | 122113  | 1-scf00009 | 1 |
| AX-157897000 | 1 | 59.005 | KV452709.1 | 1253288 | 1-scf00009 | 1 |
| AX-157897030 | 1 | 59.005 | KV452709.1 | 1297581 | 1-scf00009 | 1 |
| AX-158404417 | 1 | 59.005 | KV452709.1 | 1661253 | 1-scf00009 | 1 |
| AX-157897604 | 1 | 59.005 | KV452709.1 | 2148899 | 1-scf00009 | 1 |
| AX-157897608 | 1 | 59.005 | KV452709.1 | 2159741 | 1-scf00009 | 1 |
| AX-157897617 | 1 | 59.005 | KV452709.1 | 2167624 | 1-scf00009 | 1 |
| AX-157897622 | 1 | 59.005 | KV452709.1 | 2172819 | 1-scf00009 | 1 |
| AX-157897625 | 1 | 59.005 | KV452709.1 | 2175818 | 1-scf00009 | 1 |
| AX-157897641 | 1 | 59.005 | KV452709.1 | 2199780 | 1-scf00009 | 1 |
| AX-157897665 | 1 | 59.005 | KV452709.1 | 2235035 | 1-scf00009 | 1 |
| AX-157897690 | 1 | 59.005 | KV452709.1 | 2273074 | 1-scf00009 | 1 |
| AX-157897773 | 1 | 59.005 | KV452709.1 | 2420488 | 1-scf00009 | 1 |
| AX-157897802 | 1 | 59.005 | KV452709.1 | 2463001 | 1-scf00009 | 1 |
| AX-157897835 | 1 | 59.005 | KV452709.1 | 2504257 | 1-scf00009 | 1 |
| AX-157897936 | 1 | 59.005 | KV452709.1 | 2660393 | 1-scf00009 | 1 |
| AX-157811079 | 1 | 59.005 | KV452709.1 | 2664235 | 1-scf00009 | 1 |
| AX-157744594 | 1 | 59.005 | KV452709.1 | 2690787 | 1-scf00009 | 1 |
| AX-157897987 | 1 | 59.005 | KV452709.1 | 2761696 | 1-scf00009 | 1 |
| AX-157696576 | 1 | 59.005 | KV452709.1 | 2825046 | 1-scf00009 | 1 |
| AX-157898040 | 1 | 59.005 | KV452709.1 | 2848567 | 1-scf00009 | 1 |
| AX-157898103 | 1 | 59.005 | KV452709.1 | 2973371 | 1-scf00009 | 1 |
| AX-157898266 | 1 | 59.005 | KV452709.1 | 3322651 | 1-scf00009 | 1 |
| AX-157898408 | 1 | 59.005 | KV452709.1 | 3579620 | 1-scf00009 | 1 |
| AX-157811166 | 1 | 59.005 | KV452709.1 | 3865770 | 1-scf00009 | 1 |
| AX-157898599 | 1 | 59.005 | KV452709.1 | 3982151 | 1-scf00009 | 1 |
| AX-157898657 | 1 | 59.005 | KV452709.1 | 4075999 | 1-scf00009 | 1 |
| AX-157898761 | 1 | 59.005 | KV452709.1 | 4235137 | 1-scf00009 | 1 |
| AX-157898796 | 1 | 59.005 | KV452709.1 | 4274715 | 1-scf00009 | 1 |
| AX-157898865 | 1 | 59.005 | KV452709.1 | 4379047 | 1-scf00009 | 1 |
| AX-157811207 | 1 | 59.005 | KV452709.1 | 4398123 | 1-scf00009 | 1 |
| AX-157811212 | 1 | 59.005 | KV452709.1 | 4441622 | 1-scf00009 | 1 |
| AX-157899130 | 1 | 59.005 | KV452709.1 | 4706844 | 1-scf00009 | 1 |
| AX-157742253 | 1 | 59.005 | KV452709.1 | 4761872 | 1-scf00009 | 1 |
| AX-157899165 | 1 | 59.005 | KV452709.1 | 4779363 | 1-scf00009 | 1 |

|              |   |        |            |         |            |   |
|--------------|---|--------|------------|---------|------------|---|
| AX-157899166 | 1 | 59.005 | KV452709.1 | 4779746 | 1-scf00009 | 1 |
| AX-157727651 | 1 | 59.005 | KV452709.1 | 4849149 | 1-scf00009 | 1 |
| AX-157899210 | 1 | 59.005 | KV452709.1 | 4866510 | 1-scf00009 | 1 |
| AX-157899254 | 1 | 59.005 | KV452709.1 | 4925618 | 1-scf00009 | 1 |
| AX-157899258 | 1 | 59.005 | KV452709.1 | 4931488 | 1-scf00009 | 1 |
| AX-157811270 | 1 | 59.005 | KV452709.1 | 4981015 | 1-scf00009 | 1 |
| AX-157899298 | 1 | 59.005 | KV452709.1 | 4983113 | 1-scf00009 | 1 |
| AX-157899356 | 1 | 59.005 | KV452709.1 | 5076682 | 1-scf00009 | 1 |
| AX-157899357 | 1 | 59.005 | KV452709.1 | 5079803 | 1-scf00009 | 1 |
| AX-157899358 | 1 | 59.005 | KV452709.1 | 5080279 | 1-scf00009 | 1 |
| AX-157811275 | 1 | 59.005 | KV452709.1 | 5081645 | 1-scf00009 | 1 |
| AX-157899359 | 1 | 59.005 | KV452709.1 | 5082513 | 1-scf00009 | 1 |
| AX-157899360 | 1 | 59.005 | KV452709.1 | 5084737 | 1-scf00009 | 1 |
| AX-157899361 | 1 | 59.005 | KV452709.1 | 5086060 | 1-scf00009 | 1 |
| AX-157899362 | 1 | 59.005 | KV452709.1 | 5087446 | 1-scf00009 | 1 |
| AX-157899363 | 1 | 59.005 | KV452709.1 | 5087988 | 1-scf00009 | 1 |
| AX-157899364 | 1 | 59.005 | KV452709.1 | 5088672 | 1-scf00009 | 1 |
| AX-157899365 | 1 | 59.005 | KV452709.1 | 5094231 | 1-scf00009 | 1 |
| AX-157899409 | 1 | 59.005 | KV452709.1 | 5133789 | 1-scf00009 | 1 |
| AX-157899436 | 1 | 59.005 | KV452709.1 | 5171314 | 1-scf00009 | 1 |
| AX-158389229 | 1 | 59.005 | KV452709.1 | 5176783 | 1-scf00009 | 1 |
| AX-157899443 | 1 | 59.005 | KV452709.1 | 5181907 | 1-scf00009 | 1 |
| AX-157811288 | 1 | 59.005 | KV452709.1 | 5215117 | 1-scf00009 | 1 |
| AX-157899473 | 1 | 59.005 | KV452709.1 | 5221302 | 1-scf00009 | 1 |
| AX-157899502 | 1 | 59.005 | KV452709.1 | 5250472 | 1-scf00009 | 1 |
| AX-157811291 | 1 | 59.005 | KV452709.1 | 5264211 | 1-scf00009 | 1 |
| AX-157899530 | 1 | 59.005 | KV452709.1 | 5282145 | 1-scf00009 | 1 |
| AX-157899547 | 1 | 59.005 | KV452709.1 | 5299326 | 1-scf00009 | 1 |
| AX-157899552 | 1 | 59.005 | KV452709.1 | 5305010 | 1-scf00009 | 1 |
| AX-157899553 | 1 | 59.005 | KV452709.1 | 5305461 | 1-scf00009 | 1 |
| AX-157899555 | 1 | 59.005 | KV452709.1 | 5306672 | 1-scf00009 | 1 |
| AX-157754148 | 1 | 59.005 | KV452709.1 | 5309776 | 1-scf00009 | 1 |
| AX-157899558 | 1 | 59.005 | KV452709.1 | 5311401 | 1-scf00009 | 1 |
| AX-157899560 | 1 | 59.005 | KV452709.1 | 5315648 | 1-scf00009 | 1 |
| AX-157899561 | 1 | 59.005 | KV452709.1 | 5317793 | 1-scf00009 | 1 |
| AX-157899567 | 1 | 59.005 | KV452709.1 | 5321795 | 1-scf00009 | 1 |
| AX-157899569 | 1 | 59.005 | KV452709.1 | 5323070 | 1-scf00009 | 1 |
| AX-157899570 | 1 | 59.005 | KV452709.1 | 5323768 | 1-scf00009 | 1 |
| AX-157899571 | 1 | 59.005 | KV452709.1 | 5324676 | 1-scf00009 | 1 |
| AX-157899573 | 1 | 59.005 | KV452709.1 | 5327664 | 1-scf00009 | 1 |
| AX-157899576 | 1 | 59.005 | KV452709.1 | 5331058 | 1-scf00009 | 1 |
| AX-157899577 | 1 | 59.005 | KV452709.1 | 5331632 | 1-scf00009 | 1 |
| AX-157899579 | 1 | 59.005 | KV452709.1 | 5333647 | 1-scf00009 | 1 |
| AX-157899580 | 1 | 59.005 | KV452709.1 | 5334289 | 1-scf00009 | 1 |
| AX-157899581 | 1 | 59.005 | KV452709.1 | 5335603 | 1-scf00009 | 1 |
| AX-157727037 | 1 | 59.005 | KV452709.1 | 5340517 | 1-scf00009 | 1 |
| AX-157899583 | 1 | 59.005 | KV452709.1 | 5343252 | 1-scf00009 | 1 |
| AX-157899585 | 1 | 59.005 | KV452709.1 | 5345236 | 1-scf00009 | 1 |
| AX-157899587 | 1 | 59.005 | KV452709.1 | 5347198 | 1-scf00009 | 1 |
| AX-157899588 | 1 | 59.005 | KV452709.1 | 5348623 | 1-scf00009 | 1 |
| AX-157899589 | 1 | 59.005 | KV452709.1 | 5349085 | 1-scf00009 | 1 |

|              |   |        |            |         |            |   |
|--------------|---|--------|------------|---------|------------|---|
| AX-157899590 | 1 | 59.005 | KV452709.1 | 5352100 | 1-scf00009 | 1 |
| AX-157899594 | 1 | 59.005 | KV452709.1 | 5356449 | 1-scf00009 | 1 |
| AX-157899595 | 1 | 59.005 | KV452709.1 | 5357903 | 1-scf00009 | 1 |
| AX-157899596 | 1 | 59.005 | KV452709.1 | 5358913 | 1-scf00009 | 1 |
| AX-157899597 | 1 | 59.005 | KV452709.1 | 5359617 | 1-scf00009 | 1 |
| AX-157899598 | 1 | 59.005 | KV452709.1 | 5360129 | 1-scf00009 | 1 |
| AX-157899599 | 1 | 59.005 | KV452709.1 | 5361662 | 1-scf00009 | 1 |
| AX-157899600 | 1 | 59.005 | KV452709.1 | 5363006 | 1-scf00009 | 1 |
| AX-157899601 | 1 | 59.005 | KV452709.1 | 5365514 | 1-scf00009 | 1 |
| AX-157899604 | 1 | 59.005 | KV452709.1 | 5367599 | 1-scf00009 | 1 |
| AX-157899605 | 1 | 59.005 | KV452709.1 | 5369779 | 1-scf00009 | 1 |
| AX-157899606 | 1 | 59.005 | KV452709.1 | 5372181 | 1-scf00009 | 1 |
| AX-157899608 | 1 | 59.005 | KV452709.1 | 5375446 | 1-scf00009 | 1 |
| AX-157899609 | 1 | 59.005 | KV452709.1 | 5375933 | 1-scf00009 | 1 |
| AX-157899611 | 1 | 59.005 | KV452709.1 | 5379202 | 1-scf00009 | 1 |
| AX-157899612 | 1 | 59.005 | KV452709.1 | 5380712 | 1-scf00009 | 1 |
| AX-157899614 | 1 | 59.005 | KV452709.1 | 5382552 | 1-scf00009 | 1 |
| AX-157899615 | 1 | 59.005 | KV452709.1 | 5383213 | 1-scf00009 | 1 |
| AX-157899617 | 1 | 59.005 | KV452709.1 | 5386100 | 1-scf00009 | 1 |
| AX-157899618 | 1 | 59.005 | KV452709.1 | 5387441 | 1-scf00009 | 1 |
| AX-157899619 | 1 | 59.005 | KV452709.1 | 5391438 | 1-scf00009 | 1 |
| AX-157899622 | 1 | 59.005 | KV452709.1 | 5394759 | 1-scf00009 | 1 |
| AX-157899625 | 1 | 59.005 | KV452709.1 | 5401190 | 1-scf00009 | 1 |
| AX-158389230 | 1 | 59.005 | KV452709.1 | 5401851 | 1-scf00009 | 1 |
| AX-157899626 | 1 | 59.005 | KV452709.1 | 5402221 | 1-scf00009 | 1 |
| AX-157899627 | 1 | 59.005 | KV452709.1 | 5402550 | 1-scf00009 | 1 |
| AX-157868687 | 1 | 59.005 | KV452709.1 | 5408439 | 1-scf00009 | 1 |
| AX-157899631 | 1 | 59.005 | KV452709.1 | 5409783 | 1-scf00009 | 1 |
| AX-157899633 | 1 | 59.005 | KV452709.1 | 5414516 | 1-scf00009 | 1 |
| AX-157899639 | 1 | 59.005 | KV452709.1 | 5421797 | 1-scf00009 | 1 |
| AX-157899642 | 1 | 59.005 | KV452709.1 | 5423711 | 1-scf00009 | 1 |
| AX-157811300 | 1 | 59.005 | KV452709.1 | 5424130 | 1-scf00009 | 1 |
| AX-157868688 | 1 | 59.005 | KV452709.1 | 5424822 | 1-scf00009 | 1 |
| AX-157899643 | 1 | 59.005 | KV452709.1 | 5425222 | 1-scf00009 | 1 |
| AX-157899645 | 1 | 59.005 | KV452709.1 | 5426236 | 1-scf00009 | 1 |
| AX-158404487 | 1 | 59.005 | KV452709.1 | 5428235 | 1-scf00009 | 1 |
| AX-157899650 | 1 | 59.005 | KV452709.1 | 5429858 | 1-scf00009 | 1 |
| AX-157811306 | 1 | 59.005 | KV452709.1 | 5440745 | 1-scf00009 | 1 |
| AX-157899660 | 1 | 59.005 | KV452709.1 | 5445101 | 1-scf00009 | 1 |
| AX-157899676 | 1 | 59.005 | KV452709.1 | 5466997 | 1-scf00009 | 1 |
| AX-157899679 | 1 | 59.005 | KV452709.1 | 5469585 | 1-scf00009 | 1 |
| AX-157899720 | 1 | 59.005 | KV452709.1 | 5512027 | 1-scf00009 | 1 |
| AX-157811320 | 1 | 59.005 | KV452709.1 | 5528807 | 1-scf00009 | 1 |
| AX-157811321 | 1 | 59.005 | KV452709.1 | 5529728 | 1-scf00009 | 1 |
| AX-157899734 | 1 | 59.005 | KV452709.1 | 5537303 | 1-scf00009 | 1 |
| AX-157899737 | 1 | 59.005 | KV452709.1 | 5546115 | 1-scf00009 | 1 |
| AX-157899739 | 1 | 59.005 | KV452709.1 | 5551980 | 1-scf00009 | 1 |
| AX-157899741 | 1 | 59.005 | KV452709.1 | 5554473 | 1-scf00009 | 1 |
| AX-157811331 | 1 | 59.005 | KV452709.1 | 5578892 | 1-scf00009 | 1 |
| AX-157899773 | 1 | 59.005 | KV452709.1 | 5612414 | 1-scf00009 | 1 |
| AX-158389235 | 1 | 59.005 | KV452709.1 | 5620906 | 1-scf00009 | 1 |

|              |   |        |            |         |            |   |
|--------------|---|--------|------------|---------|------------|---|
| AX-158379151 | 1 | 59.005 | KV452709.1 | 5626511 | 1-scf00009 | 1 |
| AX-157899791 | 1 | 59.005 | KV452709.1 | 5627985 | 1-scf00009 | 1 |
| AX-157899797 | 1 | 59.005 | KV452709.1 | 5635952 | 1-scf00009 | 1 |
| AX-157899811 | 1 | 59.005 | KV452709.1 | 5647622 | 1-scf00009 | 1 |
| AX-157899841 | 1 | 59.005 | KV452709.1 | 5684732 | 1-scf00009 | 1 |
| AX-157899844 | 1 | 59.005 | KV452709.1 | 5687036 | 1-scf00009 | 1 |
| AX-157899854 | 1 | 59.005 | KV452709.1 | 5697596 | 1-scf00009 | 1 |
| AX-157899856 | 1 | 59.005 | KV452709.1 | 5698749 | 1-scf00009 | 1 |
| AX-157864401 | 1 | 59.005 | KV452709.1 | 5715015 | 1-scf00009 | 1 |
| AX-157899883 | 1 | 59.005 | KV452709.1 | 5723163 | 1-scf00009 | 1 |
| AX-157752976 | 1 | 59.005 | KV452709.1 | 5783968 | 1-scf00009 | 1 |
| AX-157899966 | 1 | 59.005 | KV452709.1 | 5842693 | 1-scf00009 | 1 |
| AX-157727105 | 1 | 59.005 | KV452709.1 | 5865711 | 1-scf00009 | 1 |
| AX-157874381 | 1 | 59.005 | KV452709.1 | 5893002 | 1-scf00009 | 1 |
| AX-157900001 | 1 | 59.005 | KV452709.1 | 5893819 | 1-scf00009 | 1 |
| AX-157900005 | 1 | 59.005 | KV452709.1 | 5896878 | 1-scf00009 | 1 |
| AX-157811355 | 1 | 59.005 | KV452709.1 | 5898775 | 1-scf00009 | 1 |
| AX-157900008 | 1 | 59.005 | KV452709.1 | 5911932 | 1-scf00009 | 1 |
| AX-157900013 | 1 | 59.005 | KV452709.1 | 5919975 | 1-scf00009 | 1 |
| AX-157900018 | 1 | 59.005 | KV452709.1 | 5930235 | 1-scf00009 | 1 |
| AX-157900019 | 1 | 59.005 | KV452709.1 | 5931129 | 1-scf00009 | 1 |
| AX-157900022 | 1 | 59.005 | KV452709.1 | 5935679 | 1-scf00009 | 1 |
| AX-157900027 | 1 | 59.005 | KV452709.1 | 5943321 | 1-scf00009 | 1 |
| AX-157748279 | 1 | 59.005 | KV452709.1 | 5946047 | 1-scf00009 | 1 |
| AX-157811357 | 1 | 59.005 | KV452709.1 | 5946235 | 1-scf00009 | 1 |
| AX-158389247 | 1 | 59.005 | KV452709.1 | 5947241 | 1-scf00009 | 1 |
| AX-157900029 | 1 | 59.005 | KV452709.1 | 5948005 | 1-scf00009 | 1 |
| AX-157900030 | 1 | 59.005 | KV452709.1 | 5948373 | 1-scf00009 | 1 |
| AX-158389248 | 1 | 59.005 | KV452709.1 | 5949034 | 1-scf00009 | 1 |
| AX-157900031 | 1 | 59.005 | KV452709.1 | 5949084 | 1-scf00009 | 1 |
| AX-157900032 | 1 | 59.005 | KV452709.1 | 5949639 | 1-scf00009 | 1 |
| AX-157900034 | 1 | 59.005 | KV452709.1 | 5952999 | 1-scf00009 | 1 |
| AX-157900035 | 1 | 59.005 | KV452709.1 | 5953756 | 1-scf00009 | 1 |
| AX-157900036 | 1 | 59.005 | KV452709.1 | 5959925 | 1-scf00009 | 1 |
| AX-157900037 | 1 | 59.005 | KV452709.1 | 5960385 | 1-scf00009 | 1 |
| AX-158389249 | 1 | 59.005 | KV452709.1 | 5962883 | 1-scf00009 | 1 |
| AX-157900039 | 1 | 59.005 | KV452709.1 | 5963794 | 1-scf00009 | 1 |
| AX-157900040 | 1 | 59.005 | KV452709.1 | 5964755 | 1-scf00009 | 1 |
| AX-157900041 | 1 | 59.005 | KV452709.1 | 5970306 | 1-scf00009 | 1 |
| AX-157900042 | 1 | 59.005 | KV452709.1 | 5971241 | 1-scf00009 | 1 |
| AX-157900043 | 1 | 59.005 | KV452709.1 | 5971537 | 1-scf00009 | 1 |
| AX-158389250 | 1 | 59.005 | KV452709.1 | 5978153 | 1-scf00009 | 1 |
| AX-157900046 | 1 | 59.005 | KV452709.1 | 5980027 | 1-scf00009 | 1 |
| AX-158389251 | 1 | 59.005 | KV452709.1 | 5981818 | 1-scf00009 | 1 |
| AX-157900051 | 1 | 59.005 | KV452709.1 | 5986706 | 1-scf00009 | 1 |
| AX-157900052 | 1 | 59.005 | KV452709.1 | 5987778 | 1-scf00009 | 1 |
| AX-157900053 | 1 | 59.005 | KV452709.1 | 5990240 | 1-scf00009 | 1 |
| AX-157900054 | 1 | 59.005 | KV452709.1 | 5993245 | 1-scf00009 | 1 |
| AX-157900056 | 1 | 59.005 | KV452709.1 | 5994567 | 1-scf00009 | 1 |
| AX-158389252 | 1 | 59.005 | KV452709.1 | 5995652 | 1-scf00009 | 1 |
| AX-158389253 | 1 | 59.005 | KV452709.1 | 5999423 | 1-scf00009 | 1 |

|              |   |        |            |         |            |   |
|--------------|---|--------|------------|---------|------------|---|
| AX-158389254 | 1 | 59.005 | KV452709.1 | 6001153 | 1-scf00009 | 1 |
| AX-158389256 | 1 | 59.005 | KV452709.1 | 6003905 | 1-scf00009 | 1 |
| AX-157900062 | 1 | 59.005 | KV452709.1 | 6004478 | 1-scf00009 | 1 |
| AX-158389257 | 1 | 59.005 | KV452709.1 | 6005957 | 1-scf00009 | 1 |
| AX-158389258 | 1 | 59.005 | KV452709.1 | 6008051 | 1-scf00009 | 1 |
| AX-157900065 | 1 | 59.005 | KV452709.1 | 6008223 | 1-scf00009 | 1 |
| AX-157900066 | 1 | 59.005 | KV452709.1 | 6008649 | 1-scf00009 | 1 |
| AX-157900069 | 1 | 59.005 | KV452709.1 | 6012631 | 1-scf00009 | 1 |
| AX-158389260 | 1 | 59.005 | KV452709.1 | 6015710 | 1-scf00009 | 1 |
| AX-157900072 | 1 | 59.005 | KV452709.1 | 6021776 | 1-scf00009 | 1 |
| AX-157900074 | 1 | 59.005 | KV452709.1 | 6024832 | 1-scf00009 | 1 |
| AX-157900075 | 1 | 59.005 | KV452709.1 | 6025746 | 1-scf00009 | 1 |
| AX-157868708 | 1 | 59.005 | KV452709.1 | 6027415 | 1-scf00009 | 1 |
| AX-157811360 | 1 | 59.005 | KV452709.1 | 6027662 | 1-scf00009 | 1 |
| AX-157900077 | 1 | 59.005 | KV452709.1 | 6027869 | 1-scf00009 | 1 |
| AX-157900078 | 1 | 59.005 | KV452709.1 | 6030283 | 1-scf00009 | 1 |
| AX-157900079 | 1 | 59.005 | KV452709.1 | 6032403 | 1-scf00009 | 1 |
| AX-157868709 | 1 | 59.005 | KV452709.1 | 6033871 | 1-scf00009 | 1 |
| AX-157868710 | 1 | 59.005 | KV452709.1 | 6034795 | 1-scf00009 | 1 |
| AX-157900082 | 1 | 59.005 | KV452709.1 | 6035209 | 1-scf00009 | 1 |
| AX-157900083 | 1 | 59.005 | KV452709.1 | 6036188 | 1-scf00009 | 1 |
| AX-157900084 | 1 | 59.005 | KV452709.1 | 6036651 | 1-scf00009 | 1 |
| AX-157900086 | 1 | 59.005 | KV452709.1 | 6037714 | 1-scf00009 | 1 |
| AX-157900089 | 1 | 59.005 | KV452709.1 | 6041402 | 1-scf00009 | 1 |
| AX-158414619 | 1 | 59.005 | KV452709.1 | 6044421 | 1-scf00009 | 1 |
| AX-157811361 | 1 | 59.005 | KV452709.1 | 6045082 | 1-scf00009 | 1 |
| AX-157724287 | 1 | 59.005 | KV452709.1 | 6046458 | 1-scf00009 | 1 |
| AX-157868718 | 1 | 59.005 | KV452709.1 | 6046998 | 1-scf00009 | 1 |
| AX-158389261 | 1 | 59.005 | KV452709.1 | 6048046 | 1-scf00009 | 1 |
| AX-158404502 | 1 | 59.005 | KV452709.1 | 6048415 | 1-scf00009 | 1 |
| AX-157868719 | 1 | 59.005 | KV452709.1 | 6058131 | 1-scf00009 | 1 |
| AX-157900096 | 1 | 59.005 | KV452709.1 | 6059181 | 1-scf00009 | 1 |
| AX-158404504 | 1 | 59.005 | KV452709.1 | 6071076 | 1-scf00009 | 1 |
| AX-157900110 | 1 | 59.005 | KV452709.1 | 6074774 | 1-scf00009 | 1 |
| AX-158389266 | 1 | 59.005 | KV452709.1 | 6085428 | 1-scf00009 | 1 |
| AX-157900117 | 1 | 59.005 | KV452709.1 | 6089850 | 1-scf00009 | 1 |
| AX-157900125 | 1 | 59.005 | KV452709.1 | 6096568 | 1-scf00009 | 1 |
| AX-157900126 | 1 | 59.005 | KV452709.1 | 6097015 | 1-scf00009 | 1 |
| AX-157745437 | 1 | 59.005 | KV452709.1 | 6098333 | 1-scf00009 | 1 |
| AX-157900129 | 1 | 59.005 | KV452709.1 | 6105415 | 1-scf00009 | 1 |
| AX-158389271 | 1 | 59.005 | KV452709.1 | 6106522 | 1-scf00009 | 1 |
| AX-157811365 | 1 | 59.005 | KV452709.1 | 6107852 | 1-scf00009 | 1 |
| AX-157743590 | 1 | 59.005 | KV452709.1 | 6109032 | 1-scf00009 | 1 |
| AX-157811366 | 1 | 59.005 | KV452709.1 | 6109585 | 1-scf00009 | 1 |
| AX-157900130 | 1 | 59.005 | KV452709.1 | 6109885 | 1-scf00009 | 1 |
| AX-157811367 | 1 | 59.005 | KV452709.1 | 6111415 | 1-scf00009 | 1 |
| AX-157900131 | 1 | 59.005 | KV452709.1 | 6112814 | 1-scf00009 | 1 |
| AX-157900132 | 1 | 59.005 | KV452709.1 | 6114154 | 1-scf00009 | 1 |
| AX-157900133 | 1 | 59.005 | KV452709.1 | 6117964 | 1-scf00009 | 1 |
| AX-157900134 | 1 | 59.005 | KV452709.1 | 6118715 | 1-scf00009 | 1 |
| AX-157900135 | 1 | 59.005 | KV452709.1 | 6119653 | 1-scf00009 | 1 |

|              |   |        |            |         |            |   |
|--------------|---|--------|------------|---------|------------|---|
| AX-157900137 | 1 | 59.005 | KV452709.1 | 6121620 | 1-scf00009 | 1 |
| AX-157900138 | 1 | 59.005 | KV452709.1 | 6122548 | 1-scf00009 | 1 |
| AX-157900139 | 1 | 59.005 | KV452709.1 | 6123293 | 1-scf00009 | 1 |
| AX-157900140 | 1 | 59.005 | KV452709.1 | 6123737 | 1-scf00009 | 1 |
| AX-157900141 | 1 | 59.005 | KV452709.1 | 6124494 | 1-scf00009 | 1 |
| AX-157900142 | 1 | 59.005 | KV452709.1 | 6124838 | 1-scf00009 | 1 |
| AX-157900144 | 1 | 59.005 | KV452709.1 | 6131407 | 1-scf00009 | 1 |
| AX-157900145 | 1 | 59.005 | KV452709.1 | 6131856 | 1-scf00009 | 1 |
| AX-157900146 | 1 | 59.005 | KV452709.1 | 6132509 | 1-scf00009 | 1 |
| AX-157811368 | 1 | 59.005 | KV452709.1 | 6133901 | 1-scf00009 | 1 |
| AX-157900147 | 1 | 59.005 | KV452709.1 | 6134341 | 1-scf00009 | 1 |
| AX-157900148 | 1 | 59.005 | KV452709.1 | 6134818 | 1-scf00009 | 1 |
| AX-157811369 | 1 | 59.005 | KV452709.1 | 6135181 | 1-scf00009 | 1 |
| AX-157900149 | 1 | 59.005 | KV452709.1 | 6135480 | 1-scf00009 | 1 |
| AX-157900152 | 1 | 59.005 | KV452709.1 | 6137590 | 1-scf00009 | 1 |
| AX-158379153 | 1 | 59.005 | KV452709.1 | 6165831 | 1-scf00009 | 1 |
| AX-157811376 | 1 | 59.005 | KV452709.1 | 6172070 | 1-scf00009 | 1 |
| AX-157900166 | 1 | 59.005 | KV452709.1 | 6176712 | 1-scf00009 | 1 |
| AX-157868730 | 1 | 59.005 | KV452709.1 | 6197563 | 1-scf00009 | 1 |
| AX-157900177 | 1 | 59.005 | KV452709.1 | 6198880 | 1-scf00009 | 1 |
| AX-157717342 | 1 | 59.005 | KV452709.1 | 6199577 | 1-scf00009 | 1 |
| AX-157900180 | 1 | 59.005 | KV452709.1 | 6202088 | 1-scf00009 | 1 |
| AX-157757557 | 1 | 59.005 | KV452709.1 | 6209359 | 1-scf00009 | 1 |
| AX-157900183 | 1 | 59.005 | KV452709.1 | 6210457 | 1-scf00009 | 1 |
| AX-157811378 | 1 | 59.005 | KV452709.1 | 6211386 | 1-scf00009 | 1 |
| AX-157883131 | 1 | 59.005 | KV452709.1 | 6214305 | 1-scf00009 | 1 |
| AX-157811380 | 1 | 59.005 | KV452709.1 | 6222724 | 1-scf00009 | 1 |
| AX-157900188 | 1 | 59.005 | KV452709.1 | 6223075 | 1-scf00009 | 1 |
| AX-157751664 | 1 | 59.005 | KV452709.1 | 6223430 | 1-scf00009 | 1 |
| AX-157868733 | 1 | 59.005 | KV452709.1 | 6225146 | 1-scf00009 | 1 |
| AX-157900191 | 1 | 59.005 | KV452709.1 | 6225970 | 1-scf00009 | 1 |
| AX-157900193 | 1 | 59.005 | KV452709.1 | 6231183 | 1-scf00009 | 1 |
| AX-158389276 | 1 | 59.005 | KV452709.1 | 6231906 | 1-scf00009 | 1 |
| AX-157811388 | 1 | 59.005 | KV452709.1 | 6254729 | 1-scf00009 | 1 |
| AX-157900205 | 1 | 59.005 | KV452709.1 | 6255460 | 1-scf00009 | 1 |
| AX-157714479 | 1 | 59.005 | KV452709.1 | 6258423 | 1-scf00009 | 1 |
| AX-157900208 | 1 | 59.005 | KV452709.1 | 6258913 | 1-scf00009 | 1 |
| AX-157811391 | 1 | 59.005 | KV452709.1 | 6262026 | 1-scf00009 | 1 |
| AX-157700637 | 1 | 59.005 | KV452709.1 | 6266093 | 1-scf00009 | 1 |
| AX-157900213 | 1 | 59.005 | KV452709.1 | 6268035 | 1-scf00009 | 1 |
| AX-157900217 | 1 | 59.005 | KV452709.1 | 6270023 | 1-scf00009 | 1 |
| AX-157900233 | 1 | 59.005 | KV452709.1 | 6288634 | 1-scf00009 | 1 |
| AX-157900237 | 1 | 59.005 | KV452709.1 | 6293176 | 1-scf00009 | 1 |
| AX-157900240 | 1 | 59.005 | KV452709.1 | 6297407 | 1-scf00009 | 1 |
| AX-157900241 | 1 | 59.005 | KV452709.1 | 6298561 | 1-scf00009 | 1 |
| AX-157900245 | 1 | 59.005 | KV452709.1 | 6304165 | 1-scf00009 | 1 |
| AX-157900246 | 1 | 59.005 | KV452709.1 | 6305611 | 1-scf00009 | 1 |
| AX-157900247 | 1 | 59.005 | KV452709.1 | 6306033 | 1-scf00009 | 1 |
| AX-158389281 | 1 | 59.005 | KV452709.1 | 6312937 | 1-scf00009 | 1 |
| AX-157868743 | 1 | 59.005 | KV452709.1 | 6344848 | 1-scf00009 | 1 |
| AX-157900257 | 1 | 59.005 | KV452709.1 | 6346049 | 1-scf00009 | 1 |



|              |   |        |            |         |            |   |
|--------------|---|--------|------------|---------|------------|---|
| AX-157900259 | 1 | 59.005 | KV452709.1 | 6347514 | 1-scf00009 | 1 |
| AX-157900260 | 1 | 59.005 | KV452709.1 | 6347885 | 1-scf00009 | 1 |
| AX-157900265 | 1 | 59.005 | KV452709.1 | 6356191 | 1-scf00009 | 1 |
| AX-157900268 | 1 | 59.005 | KV452709.1 | 6362088 | 1-scf00009 | 1 |
| AX-157900269 | 1 | 59.005 | KV452709.1 | 6362981 | 1-scf00009 | 1 |
| AX-157900272 | 1 | 59.005 | KV452709.1 | 6375549 | 1-scf00009 | 1 |
| AX-157811398 | 1 | 59.005 | KV452709.1 | 6392837 | 1-scf00009 | 1 |
| AX-157900277 | 1 | 59.005 | KV452709.1 | 6395361 | 1-scf00009 | 1 |
| AX-157900278 | 1 | 59.005 | KV452709.1 | 6395931 | 1-scf00009 | 1 |
| AX-157900279 | 1 | 59.005 | KV452709.1 | 6396337 | 1-scf00009 | 1 |
| AX-157900280 | 1 | 59.005 | KV452709.1 | 6397460 | 1-scf00009 | 1 |
| AX-157900281 | 1 | 59.005 | KV452709.1 | 6400316 | 1-scf00009 | 1 |
| AX-157900283 | 1 | 59.005 | KV452709.1 | 6411062 | 1-scf00009 | 1 |
| AX-157900292 | 1 | 59.005 | KV452709.1 | 6425007 | 1-scf00009 | 1 |
| AX-157900293 | 1 | 59.005 | KV452709.1 | 6426533 | 1-scf00009 | 1 |
| AX-157900294 | 1 | 59.005 | KV452709.1 | 6434998 | 1-scf00009 | 1 |
| AX-157900297 | 1 | 59.005 | KV452709.1 | 6444214 | 1-scf00009 | 1 |
| AX-157900298 | 1 | 59.005 | KV452709.1 | 6445258 | 1-scf00009 | 1 |
| AX-157900299 | 1 | 59.005 | KV452709.1 | 6448458 | 1-scf00009 | 1 |
| AX-157811401 | 1 | 59.005 | KV452709.1 | 6456073 | 1-scf00009 | 1 |
| AX-157811403 | 1 | 59.005 | KV452709.1 | 6459138 | 1-scf00009 | 1 |
| AX-157900306 | 1 | 59.005 | KV452709.1 | 6464141 | 1-scf00009 | 1 |
| AX-157900307 | 1 | 59.005 | KV452709.1 | 6465704 | 1-scf00009 | 1 |
| AX-157811404 | 1 | 59.005 | KV452709.1 | 6468343 | 1-scf00009 | 1 |
| AX-157900311 | 1 | 59.005 | KV452709.1 | 6483073 | 1-scf00009 | 1 |
| AX-157900312 | 1 | 59.005 | KV452709.1 | 6484823 | 1-scf00009 | 1 |
| AX-157900313 | 1 | 59.005 | KV452709.1 | 6486397 | 1-scf00009 | 1 |
| AX-157900317 | 1 | 59.005 | KV452709.1 | 6497442 | 1-scf00009 | 1 |
| AX-157900318 | 1 | 59.005 | KV452709.1 | 6497853 | 1-scf00009 | 1 |
| AX-157900319 | 1 | 59.005 | KV452709.1 | 6498876 | 1-scf00009 | 1 |
| AX-157900324 | 1 | 59.005 | KV452709.1 | 6508228 | 1-scf00009 | 1 |
| AX-157900325 | 1 | 59.005 | KV452709.1 | 6509939 | 1-scf00009 | 1 |
| AX-157900326 | 1 | 59.005 | KV452709.1 | 6510480 | 1-scf00009 | 1 |
| AX-157900327 | 1 | 59.005 | KV452709.1 | 6511844 | 1-scf00009 | 1 |
| AX-157900328 | 1 | 59.005 | KV452709.1 | 6512514 | 1-scf00009 | 1 |
| AX-157900329 | 1 | 59.005 | KV452709.1 | 6514600 | 1-scf00009 | 1 |
| AX-157900330 | 1 | 59.005 | KV452709.1 | 6518846 | 1-scf00009 | 1 |
| AX-157695681 | 1 | 59.005 | KV452709.1 | 6526194 | 1-scf00009 | 1 |
| AX-157900333 | 1 | 59.005 | KV452709.1 | 6529263 | 1-scf00009 | 1 |
| AX-157900334 | 1 | 59.005 | KV452709.1 | 6532023 | 1-scf00009 | 1 |
| AX-157900338 | 1 | 59.005 | KV452709.1 | 6537912 | 1-scf00009 | 1 |
| AX-157900342 | 1 | 59.005 | KV452709.1 | 6553989 | 1-scf00009 | 1 |
| AX-157900343 | 1 | 59.005 | KV452709.1 | 6555175 | 1-scf00009 | 1 |
| AX-157900344 | 1 | 59.005 | KV452709.1 | 6555909 | 1-scf00009 | 1 |
| AX-157900345 | 1 | 59.005 | KV452709.1 | 6556334 | 1-scf00009 | 1 |
| AX-157900346 | 1 | 59.005 | KV452709.1 | 6564013 | 1-scf00009 | 1 |
| AX-157900348 | 1 | 59.005 | KV452709.1 | 6567395 | 1-scf00009 | 1 |
| AX-157900349 | 1 | 59.005 | KV452709.1 | 6568400 | 1-scf00009 | 1 |
| AX-157900350 | 1 | 59.005 | KV452709.1 | 6573380 | 1-scf00009 | 1 |
| AX-157900352 | 1 | 59.005 | KV452709.1 | 6574623 | 1-scf00009 | 1 |
| AX-157900353 | 1 | 59.005 | KV452709.1 | 6575029 | 1-scf00009 | 1 |

|              |   |        |            |         |            |   |
|--------------|---|--------|------------|---------|------------|---|
| AX-157900354 | 1 | 59.005 | KV452709.1 | 6575734 | 1-scf00009 | 1 |
| AX-157708902 | 1 | 59.005 | KV452709.1 | 6590719 | 1-scf00009 | 1 |
| AX-157900363 | 1 | 59.005 | KV452709.1 | 6593014 | 1-scf00009 | 1 |
| AX-157900373 | 1 | 59.005 | KV452709.1 | 6620787 | 1-scf00009 | 1 |
| AX-157900383 | 1 | 59.005 | KV452709.1 | 6700270 | 1-scf00009 | 1 |
| AX-157900389 | 1 | 59.005 | KV452709.1 | 6736846 | 1-scf00009 | 1 |
| AX-157900391 | 1 | 59.005 | KV452709.1 | 6755302 | 1-scf00009 | 1 |
| AX-157900395 | 1 | 59.005 | KV452709.1 | 6779758 | 1-scf00009 | 1 |
| AX-158404521 | 1 | 59.005 | KV452709.1 | 6851112 | 1-scf00009 | 1 |
| AX-157900403 | 1 | 59.005 | KV452709.1 | 6946696 | 1-scf00009 | 1 |
| AX-157874383 | 1 | 59.005 | KV452709.1 | 6948032 | 1-scf00009 | 1 |
| AX-157900404 | 1 | 59.005 | KV452709.1 | 6958565 | 1-scf00009 | 1 |
| AX-157900409 | 1 | 59.005 | KV452709.1 | 7010462 | 1-scf00009 | 1 |
| AX-157900410 | 1 | 59.005 | KV452709.1 | 7012386 | 1-scf00009 | 1 |
| AX-157900412 | 1 | 59.005 | KV452709.1 | 7020930 | 1-scf00009 | 1 |
| AX-157900418 | 1 | 59.005 | KV452709.1 | 7041963 | 1-scf00009 | 1 |
| AX-157900420 | 1 | 59.005 | KV452709.1 | 7044598 | 1-scf00009 | 1 |
| AX-157900421 | 1 | 59.005 | KV452709.1 | 7045153 | 1-scf00009 | 1 |
| AX-157900423 | 1 | 59.005 | KV452709.1 | 7047441 | 1-scf00009 | 1 |
| AX-157900436 | 1 | 59.005 | KV452709.1 | 7076275 | 1-scf00009 | 1 |
| AX-157900438 | 1 | 59.005 | KV452709.1 | 7078991 | 1-scf00009 | 1 |
| AX-157900440 | 1 | 59.005 | KV452709.1 | 7087634 | 1-scf00009 | 1 |
| AX-157900443 | 1 | 59.005 | KV452709.1 | 7101238 | 1-scf00009 | 1 |
| AX-157900444 | 1 | 59.005 | KV452709.1 | 7114433 | 1-scf00009 | 1 |
| AX-157900445 | 1 | 59.005 | KV452709.1 | 7119975 | 1-scf00009 | 1 |
| AX-157900446 | 1 | 59.005 | KV452709.1 | 7123991 | 1-scf00009 | 1 |
| AX-157900447 | 1 | 59.005 | KV452709.1 | 7127736 | 1-scf00009 | 1 |
| AX-157900452 | 1 | 59.005 | KV452709.1 | 7142311 | 1-scf00009 | 1 |
| AX-157811410 | 1 | 59.005 | KV452709.1 | 7158157 | 1-scf00009 | 1 |
| AX-157900457 | 1 | 59.005 | KV452709.1 | 7158271 | 1-scf00009 | 1 |
| AX-157900459 | 1 | 59.005 | KV452709.1 | 7160182 | 1-scf00009 | 1 |
| AX-157900460 | 1 | 59.005 | KV452709.1 | 7161273 | 1-scf00009 | 1 |
| AX-157900463 | 1 | 59.005 | KV452709.1 | 7171648 | 1-scf00009 | 1 |
| AX-157900466 | 1 | 59.005 | KV452709.1 | 7174803 | 1-scf00009 | 1 |
| AX-157900477 | 1 | 59.005 | KV452709.1 | 7193278 | 1-scf00009 | 1 |
| AX-157900479 | 1 | 59.005 | KV452709.1 | 7195666 | 1-scf00009 | 1 |
| AX-157900480 | 1 | 59.005 | KV452709.1 | 7195858 | 1-scf00009 | 1 |
| AX-157900481 | 1 | 59.005 | KV452709.1 | 7196361 | 1-scf00009 | 1 |
| AX-157900482 | 1 | 59.005 | KV452709.1 | 7197291 | 1-scf00009 | 1 |
| AX-157900484 | 1 | 59.005 | KV452709.1 | 7197980 | 1-scf00009 | 1 |
| AX-157900485 | 1 | 59.005 | KV452709.1 | 7198486 | 1-scf00009 | 1 |
| AX-157900487 | 1 | 59.005 | KV452709.1 | 7199733 | 1-scf00009 | 1 |
| AX-157900488 | 1 | 59.005 | KV452709.1 | 7201003 | 1-scf00009 | 1 |
| AX-157900489 | 1 | 59.005 | KV452709.1 | 7201930 | 1-scf00009 | 1 |
| AX-157900491 | 1 | 59.005 | KV452709.1 | 7203774 | 1-scf00009 | 1 |
| AX-157900494 | 1 | 59.005 | KV452709.1 | 7205683 | 1-scf00009 | 1 |
| AX-157900497 | 1 | 59.005 | KV452709.1 | 7207276 | 1-scf00009 | 1 |
| AX-157900499 | 1 | 59.005 | KV452709.1 | 7210060 | 1-scf00009 | 1 |
| AX-157900501 | 1 | 59.005 | KV452709.1 | 7210909 | 1-scf00009 | 1 |
| AX-157811411 | 1 | 59.005 | KV452709.1 | 7211000 | 1-scf00009 | 1 |
| AX-157900502 | 1 | 59.005 | KV452709.1 | 7211600 | 1-scf00009 | 1 |

|              |   |        |            |         |            |   |
|--------------|---|--------|------------|---------|------------|---|
| AX-157900506 | 1 | 59.005 | KV452709.1 | 7214512 | 1-scf00009 | 1 |
| AX-157900510 | 1 | 59.005 | KV452709.1 | 7217809 | 1-scf00009 | 1 |
| AX-157811413 | 1 | 59.005 | KV452709.1 | 7224057 | 1-scf00009 | 1 |
| AX-157811414 | 1 | 59.005 | KV452709.1 | 7224224 | 1-scf00009 | 1 |
| AX-157900515 | 1 | 59.005 | KV452709.1 | 7231699 | 1-scf00009 | 1 |
| AX-157900526 | 1 | 59.005 | KV452709.1 | 7295563 | 1-scf00009 | 1 |
| AX-157900556 | 1 | 59.005 | KV452709.1 | 7421681 | 1-scf00009 | 1 |
| AX-157726885 | 1 | 59.005 | KV452709.1 | 7426354 | 1-scf00009 | 1 |
| AX-157900560 | 1 | 59.005 | KV452709.1 | 7429948 | 1-scf00009 | 1 |
| AX-157900561 | 1 | 59.005 | KV452709.1 | 7441347 | 1-scf00009 | 1 |
| AX-157707657 | 1 | 59.005 | KV452709.1 | 7441465 | 1-scf00009 | 1 |
| AX-157900562 | 1 | 59.005 | KV452709.1 | 7443757 | 1-scf00009 | 1 |
| AX-157900563 | 1 | 59.005 | KV452709.1 | 7447076 | 1-scf00009 | 1 |
| AX-157900564 | 1 | 59.005 | KV452709.1 | 7448952 | 1-scf00009 | 1 |
| AX-157900565 | 1 | 59.005 | KV452709.1 | 7451755 | 1-scf00009 | 1 |
| AX-157900568 | 1 | 59.005 | KV452709.1 | 7459258 | 1-scf00009 | 1 |
| AX-157900569 | 1 | 59.005 | KV452709.1 | 7460130 | 1-scf00009 | 1 |
| AX-157900573 | 1 | 59.005 | KV452709.1 | 7465512 | 1-scf00009 | 1 |
| AX-157900574 | 1 | 59.005 | KV452709.1 | 7468935 | 1-scf00009 | 1 |
| AX-157900575 | 1 | 59.005 | KV452709.1 | 7469374 | 1-scf00009 | 1 |
| AX-157900576 | 1 | 59.005 | KV452709.1 | 7471647 | 1-scf00009 | 1 |
| AX-157900577 | 1 | 59.005 | KV452709.1 | 7473394 | 1-scf00009 | 1 |
| AX-157900584 | 1 | 59.005 | KV452709.1 | 7488657 | 1-scf00009 | 1 |
| AX-157900586 | 1 | 59.005 | KV452709.1 | 7491330 | 1-scf00009 | 1 |
| AX-157900587 | 1 | 59.005 | KV452709.1 | 7494518 | 1-scf00009 | 1 |
| AX-157900588 | 1 | 59.005 | KV452709.1 | 7503871 | 1-scf00009 | 1 |
| AX-157900589 | 1 | 59.005 | KV452709.1 | 7504131 | 1-scf00009 | 1 |
| AX-157900591 | 1 | 59.005 | KV452709.1 | 7516320 | 1-scf00009 | 1 |
| AX-157900592 | 1 | 59.005 | KV452709.1 | 7519942 | 1-scf00009 | 1 |
| AX-157900600 | 1 | 59.005 | KV452709.1 | 7546531 | 1-scf00009 | 1 |
| AX-157900602 | 1 | 59.005 | KV452709.1 | 7548995 | 1-scf00009 | 1 |
| AX-157900604 | 1 | 59.005 | KV452709.1 | 7552906 | 1-scf00009 | 1 |
| AX-157900609 | 1 | 59.005 | KV452709.1 | 7561515 | 1-scf00009 | 1 |
| AX-157900610 | 1 | 59.005 | KV452709.1 | 7568482 | 1-scf00009 | 1 |
| AX-158382010 | 1 | 59.005 | KV452709.1 | 7574028 | 1-scf00009 | 1 |
| AX-157900612 | 1 | 59.005 | KV452709.1 | 7575648 | 1-scf00009 | 1 |
| AX-157900617 | 1 | 59.005 | KV452709.1 | 7595655 | 1-scf00009 | 1 |
| AX-157900623 | 1 | 59.005 | KV452709.1 | 7608790 | 1-scf00009 | 1 |
| AX-157900626 | 1 | 59.005 | KV452709.1 | 7611649 | 1-scf00009 | 1 |
| AX-157900637 | 1 | 59.005 | KV452709.1 | 7635637 | 1-scf00009 | 1 |
| AX-157900644 | 1 | 59.005 | KV452709.1 | 7644996 | 1-scf00009 | 1 |
| AX-157900648 | 1 | 59.005 | KV452709.1 | 7661179 | 1-scf00009 | 1 |
| AX-157900650 | 1 | 59.005 | KV452709.1 | 7665773 | 1-scf00009 | 1 |
| AX-157900651 | 1 | 59.005 | KV452709.1 | 7672215 | 1-scf00009 | 1 |
| AX-157900652 | 1 | 59.005 | KV452709.1 | 7674946 | 1-scf00009 | 1 |
| AX-157900656 | 1 | 59.005 | KV452709.1 | 7687805 | 1-scf00009 | 1 |
| AX-157900663 | 1 | 59.005 | KV452709.1 | 7717978 | 1-scf00009 | 1 |
| AX-157900667 | 1 | 59.005 | KV452709.1 | 7722298 | 1-scf00009 | 1 |
| AX-157900675 | 1 | 59.005 | KV452709.1 | 7732420 | 1-scf00009 | 1 |
| AX-157900677 | 1 | 59.005 | KV452709.1 | 7734518 | 1-scf00009 | 1 |
| AX-157900679 | 1 | 59.005 | KV452709.1 | 7736095 | 1-scf00009 | 1 |

|              |   |        |            |         |            |   |
|--------------|---|--------|------------|---------|------------|---|
| AX-157900681 | 1 | 59.005 | KV452709.1 | 7743899 | 1-scf00009 | 1 |
| AX-157900682 | 1 | 59.005 | KV452709.1 | 7745961 | 1-scf00009 | 1 |
| AX-157900686 | 1 | 59.005 | KV452709.1 | 7757904 | 1-scf00009 | 1 |
| AX-157900687 | 1 | 59.005 | KV452709.1 | 7758996 | 1-scf00009 | 1 |
| AX-157707591 | 1 | 59.005 | KV452709.1 | 7764435 | 1-scf00009 | 1 |
| AX-157900691 | 1 | 59.005 | KV452709.1 | 7766155 | 1-scf00009 | 1 |
| AX-157900698 | 1 | 59.005 | KV452709.1 | 7779785 | 1-scf00009 | 1 |
| AX-157900699 | 1 | 59.005 | KV452709.1 | 7782658 | 1-scf00009 | 1 |
| AX-157900704 | 1 | 59.005 | KV452709.1 | 7787493 | 1-scf00009 | 1 |
| AX-157900705 | 1 | 59.005 | KV452709.1 | 7788786 | 1-scf00009 | 1 |
| AX-157900707 | 1 | 59.005 | KV452709.1 | 7790097 | 1-scf00009 | 1 |
| AX-157900708 | 1 | 59.005 | KV452709.1 | 7793453 | 1-scf00009 | 1 |
| AX-157900710 | 1 | 59.005 | KV452709.1 | 7795689 | 1-scf00009 | 1 |
| AX-157900711 | 1 | 59.005 | KV452709.1 | 7796888 | 1-scf00009 | 1 |
| AX-157900714 | 1 | 59.005 | KV452709.1 | 7804079 | 1-scf00009 | 1 |
| AX-158404538 | 1 | 59.005 | KV452709.1 | 7804821 | 1-scf00009 | 1 |
| AX-157900715 | 1 | 59.005 | KV452709.1 | 7811946 | 1-scf00009 | 1 |
| AX-157900716 | 1 | 59.005 | KV452709.1 | 7814041 | 1-scf00009 | 1 |
| AX-157900717 | 1 | 59.005 | KV452709.1 | 7815270 | 1-scf00009 | 1 |
| AX-157900718 | 1 | 59.005 | KV452709.1 | 7818235 | 1-scf00009 | 1 |
| AX-157900719 | 1 | 59.005 | KV452709.1 | 7823603 | 1-scf00009 | 1 |
| AX-157900720 | 1 | 59.005 | KV452709.1 | 7825919 | 1-scf00009 | 1 |
| AX-157900721 | 1 | 59.005 | KV452709.1 | 7827450 | 1-scf00009 | 1 |
| AX-157900722 | 1 | 59.005 | KV452709.1 | 7836575 | 1-scf00009 | 1 |
| AX-157900725 | 1 | 59.005 | KV452709.1 | 7855704 | 1-scf00009 | 1 |
| AX-157900726 | 1 | 59.005 | KV452709.1 | 7858090 | 1-scf00009 | 1 |
| AX-157900727 | 1 | 59.005 | KV452709.1 | 7858977 | 1-scf00009 | 1 |
| AX-157900728 | 1 | 59.005 | KV452709.1 | 7859474 | 1-scf00009 | 1 |
| AX-157900729 | 1 | 59.005 | KV452709.1 | 7871965 | 1-scf00009 | 1 |
| AX-157900730 | 1 | 59.005 | KV452709.1 | 7872357 | 1-scf00009 | 1 |
| AX-157900731 | 1 | 59.005 | KV452709.1 | 7872842 | 1-scf00009 | 1 |
| AX-157900732 | 1 | 59.005 | KV452709.1 | 7876735 | 1-scf00009 | 1 |
| AX-157900733 | 1 | 59.005 | KV452709.1 | 7880614 | 1-scf00009 | 1 |
| AX-157900734 | 1 | 59.005 | KV452709.1 | 7886434 | 1-scf00009 | 1 |
| AX-157900735 | 1 | 59.005 | KV452709.1 | 7887196 | 1-scf00009 | 1 |
| AX-157900736 | 1 | 59.005 | KV452709.1 | 7888984 | 1-scf00009 | 1 |
| AX-157900739 | 1 | 59.005 | KV452709.1 | 7897624 | 1-scf00009 | 1 |
| AX-157900742 | 1 | 59.005 | KV452711.1 | 11854   | 1-scf00010 | 1 |
| AX-157900744 | 1 | 59.005 | KV452711.1 | 14184   | 1-scf00010 | 1 |
| AX-158404540 | 1 | 59.005 | KV452711.1 | 18021   | 1-scf00010 | 1 |
| AX-157811423 | 1 | 59.005 | KV452711.1 | 38732   | 1-scf00010 | 1 |
| AX-158404544 | 1 | 59.005 | KV452711.1 | 79234   | 1-scf00010 | 1 |
| AX-157744425 | 1 | 59.005 | KV452711.1 | 125480  | 1-scf00010 | 1 |
| AX-157900758 | 1 | 59.005 | KV452711.1 | 128811  | 1-scf00010 | 1 |
| AX-157900759 | 1 | 59.005 | KV452711.1 | 129322  | 1-scf00010 | 1 |
| AX-157900760 | 1 | 59.005 | KV452711.1 | 131776  | 1-scf00010 | 1 |
| AX-157900761 | 1 | 59.005 | KV452711.1 | 139305  | 1-scf00010 | 1 |
| AX-157900763 | 1 | 59.005 | KV452711.1 | 145693  | 1-scf00010 | 1 |
| AX-157900764 | 1 | 59.005 | KV452711.1 | 161054  | 1-scf00010 | 1 |
| AX-157900765 | 1 | 59.005 | KV452711.1 | 162755  | 1-scf00010 | 1 |
| AX-157900766 | 1 | 59.005 | KV452711.1 | 170724  | 1-scf00010 | 1 |

|              |   |        |            |        |            |   |
|--------------|---|--------|------------|--------|------------|---|
| AX-157900767 | 1 | 59.005 | KV452711.1 | 171338 | 1-scf00010 | 1 |
| AX-157900768 | 1 | 59.005 | KV452711.1 | 176344 | 1-scf00010 | 1 |
| AX-157900769 | 1 | 59.005 | KV452711.1 | 177144 | 1-scf00010 | 1 |
| AX-157900770 | 1 | 59.005 | KV452711.1 | 182861 | 1-scf00010 | 1 |
| AX-157900771 | 1 | 59.005 | KV452711.1 | 186549 | 1-scf00010 | 1 |
| AX-157900773 | 1 | 59.005 | KV452711.1 | 198707 | 1-scf00010 | 1 |
| AX-157900775 | 1 | 59.005 | KV452711.1 | 208950 | 1-scf00010 | 1 |
| AX-157900777 | 1 | 59.005 | KV452711.1 | 217122 | 1-scf00010 | 1 |
| AX-157722776 | 1 | 59.005 | KV452711.1 | 221664 | 1-scf00010 | 1 |
| AX-157900778 | 1 | 59.005 | KV452711.1 | 222302 | 1-scf00010 | 1 |
| AX-157900779 | 1 | 59.005 | KV452711.1 | 222748 | 1-scf00010 | 1 |
| AX-157900780 | 1 | 59.005 | KV452711.1 | 224778 | 1-scf00010 | 1 |
| AX-157900782 | 1 | 59.005 | KV452711.1 | 229710 | 1-scf00010 | 1 |
| AX-157900783 | 1 | 59.005 | KV452711.1 | 231338 | 1-scf00010 | 1 |
| AX-157900785 | 1 | 59.005 | KV452711.1 | 243500 | 1-scf00010 | 1 |
| AX-157900786 | 1 | 59.005 | KV452711.1 | 245954 | 1-scf00010 | 1 |
| AX-157900787 | 1 | 59.005 | KV452711.1 | 249106 | 1-scf00010 | 1 |
| AX-157900788 | 1 | 59.005 | KV452711.1 | 254653 | 1-scf00010 | 1 |
| AX-157900790 | 1 | 59.005 | KV452711.1 | 261064 | 1-scf00010 | 1 |
| AX-157900791 | 1 | 59.005 | KV452711.1 | 261426 | 1-scf00010 | 1 |
| AX-157900793 | 1 | 59.005 | KV452711.1 | 264358 | 1-scf00010 | 1 |
| AX-157900794 | 1 | 59.005 | KV452711.1 | 265768 | 1-scf00010 | 1 |
| AX-157900797 | 1 | 59.005 | KV452711.1 | 270273 | 1-scf00010 | 1 |
| AX-157709165 | 1 | 59.005 | KV452711.1 | 276506 | 1-scf00010 | 1 |
| AX-157900799 | 1 | 59.005 | KV452711.1 | 277495 | 1-scf00010 | 1 |
| AX-158404546 | 1 | 59.005 | KV452711.1 | 279285 | 1-scf00010 | 1 |
| AX-157900800 | 1 | 59.005 | KV452711.1 | 282428 | 1-scf00010 | 1 |
| AX-157900801 | 1 | 59.005 | KV452711.1 | 289739 | 1-scf00010 | 1 |
| AX-157900802 | 1 | 59.005 | KV452711.1 | 291365 | 1-scf00010 | 1 |
| AX-157900804 | 1 | 59.005 | KV452711.1 | 296932 | 1-scf00010 | 1 |
| AX-157811433 | 1 | 59.005 | KV452711.1 | 305828 | 1-scf00010 | 1 |
| AX-157900805 | 1 | 59.005 | KV452711.1 | 306381 | 1-scf00010 | 1 |
| AX-157900806 | 1 | 59.005 | KV452711.1 | 308693 | 1-scf00010 | 1 |
| AX-157900807 | 1 | 59.005 | KV452711.1 | 312860 | 1-scf00010 | 1 |
| AX-157900808 | 1 | 59.005 | KV452711.1 | 314217 | 1-scf00010 | 1 |
| AX-157900810 | 1 | 59.005 | KV452711.1 | 318479 | 1-scf00010 | 1 |
| AX-157900811 | 1 | 59.005 | KV452711.1 | 319736 | 1-scf00010 | 1 |
| AX-157900812 | 1 | 59.005 | KV452711.1 | 321487 | 1-scf00010 | 1 |
| AX-157900814 | 1 | 59.005 | KV452711.1 | 323637 | 1-scf00010 | 1 |
| AX-157900815 | 1 | 59.005 | KV452711.1 | 325021 | 1-scf00010 | 1 |
| AX-157900817 | 1 | 59.005 | KV452711.1 | 328542 | 1-scf00010 | 1 |
| AX-157900818 | 1 | 59.005 | KV452711.1 | 329619 | 1-scf00010 | 1 |
| AX-157900819 | 1 | 59.005 | KV452711.1 | 331602 | 1-scf00010 | 1 |
| AX-157900820 | 1 | 59.005 | KV452711.1 | 334838 | 1-scf00010 | 1 |
| AX-157900821 | 1 | 59.005 | KV452711.1 | 337046 | 1-scf00010 | 1 |
| AX-157727171 | 1 | 59.005 | KV452711.1 | 342110 | 1-scf00010 | 1 |
| AX-157900823 | 1 | 59.005 | KV452711.1 | 343517 | 1-scf00010 | 1 |
| AX-157900824 | 1 | 59.005 | KV452711.1 | 360734 | 1-scf00010 | 1 |
| AX-157900826 | 1 | 59.005 | KV452711.1 | 368851 | 1-scf00010 | 1 |
| AX-157900827 | 1 | 59.005 | KV452711.1 | 372119 | 1-scf00010 | 1 |
| AX-157900829 | 1 | 59.005 | KV452711.1 | 374830 | 1-scf00010 | 1 |

|              |   |        |            |        |            |   |
|--------------|---|--------|------------|--------|------------|---|
| AX-157900830 | 1 | 59.005 | KV452711.1 | 377423 | 1-scf00010 | 1 |
| AX-157811436 | 1 | 59.005 | KV452711.1 | 387666 | 1-scf00010 | 1 |
| AX-157900833 | 1 | 59.005 | KV452711.1 | 390586 | 1-scf00010 | 1 |
| AX-157900835 | 1 | 59.005 | KV452711.1 | 396077 | 1-scf00010 | 1 |
| AX-157900836 | 1 | 59.005 | KV452711.1 | 397739 | 1-scf00010 | 1 |
| AX-157900837 | 1 | 59.005 | KV452711.1 | 399406 | 1-scf00010 | 1 |
| AX-157900838 | 1 | 59.005 | KV452711.1 | 403710 | 1-scf00010 | 1 |
| AX-157714794 | 1 | 59.005 | KV452711.1 | 415758 | 1-scf00010 | 1 |
| AX-157900840 | 1 | 59.005 | KV452711.1 | 417904 | 1-scf00010 | 1 |
| AX-157900842 | 1 | 59.005 | KV452711.1 | 432924 | 1-scf00010 | 1 |
| AX-157900844 | 1 | 59.005 | KV452711.1 | 445770 | 1-scf00010 | 1 |
| AX-157900845 | 1 | 59.005 | KV452711.1 | 454152 | 1-scf00010 | 1 |
| AX-157900846 | 1 | 59.005 | KV452711.1 | 456674 | 1-scf00010 | 1 |
| AX-157900847 | 1 | 59.005 | KV452711.1 | 458014 | 1-scf00010 | 1 |
| AX-157900849 | 1 | 59.005 | KV452711.1 | 466643 | 1-scf00010 | 1 |
| AX-157900850 | 1 | 59.005 | KV452711.1 | 486484 | 1-scf00010 | 1 |
| AX-157900852 | 1 | 59.005 | KV452711.1 | 491910 | 1-scf00010 | 1 |
| AX-157900853 | 1 | 59.005 | KV452711.1 | 497008 | 1-scf00010 | 1 |
| AX-157900854 | 1 | 59.005 | KV452711.1 | 511310 | 1-scf00010 | 1 |
| AX-157900856 | 1 | 59.005 | KV452711.1 | 520624 | 1-scf00010 | 1 |
| AX-158404549 | 1 | 59.005 | KV452711.1 | 523749 | 1-scf00010 | 1 |
| AX-157900857 | 1 | 59.005 | KV452711.1 | 526169 | 1-scf00010 | 1 |
| AX-157900859 | 1 | 59.005 | KV452711.1 | 539179 | 1-scf00010 | 1 |
| AX-157900860 | 1 | 59.005 | KV452711.1 | 540096 | 1-scf00010 | 1 |
| AX-157900861 | 1 | 59.005 | KV452711.1 | 556545 | 1-scf00010 | 1 |
| AX-157900863 | 1 | 59.005 | KV452711.1 | 559148 | 1-scf00010 | 1 |
| AX-157900864 | 1 | 59.005 | KV452711.1 | 565344 | 1-scf00010 | 1 |
| AX-157900866 | 1 | 59.005 | KV452711.1 | 567721 | 1-scf00010 | 1 |
| AX-157900867 | 1 | 59.005 | KV452711.1 | 568532 | 1-scf00010 | 1 |
| AX-157900868 | 1 | 59.005 | KV452711.1 | 570634 | 1-scf00010 | 1 |
| AX-157900869 | 1 | 59.005 | KV452711.1 | 571841 | 1-scf00010 | 1 |
| AX-157900870 | 1 | 59.005 | KV452711.1 | 575520 | 1-scf00010 | 1 |
| AX-157900872 | 1 | 59.005 | KV452711.1 | 598650 | 1-scf00010 | 1 |
| AX-157900875 | 1 | 59.005 | KV452711.1 | 617891 | 1-scf00010 | 1 |
| AX-157900877 | 1 | 59.005 | KV452711.1 | 622816 | 1-scf00010 | 1 |
| AX-157900878 | 1 | 59.005 | KV452711.1 | 624155 | 1-scf00010 | 1 |
| AX-157900880 | 1 | 59.005 | KV452711.1 | 641759 | 1-scf00010 | 1 |
| AX-157900882 | 1 | 59.005 | KV452711.1 | 643720 | 1-scf00010 | 1 |
| AX-157900884 | 1 | 59.005 | KV452711.1 | 647793 | 1-scf00010 | 1 |
| AX-157900885 | 1 | 59.005 | KV452711.1 | 653231 | 1-scf00010 | 1 |
| AX-157900886 | 1 | 59.005 | KV452711.1 | 653907 | 1-scf00010 | 1 |
| AX-157900888 | 1 | 59.005 | KV452711.1 | 662140 | 1-scf00010 | 1 |
| AX-157900891 | 1 | 59.005 | KV452711.1 | 685642 | 1-scf00010 | 1 |
| AX-157900893 | 1 | 59.005 | KV452711.1 | 689603 | 1-scf00010 | 1 |
| AX-157900894 | 1 | 59.005 | KV452711.1 | 691123 | 1-scf00010 | 1 |
| AX-157900896 | 1 | 59.005 | KV452711.1 | 697659 | 1-scf00010 | 1 |
| AX-157900897 | 1 | 59.005 | KV452711.1 | 699449 | 1-scf00010 | 1 |
| AX-157900899 | 1 | 59.005 | KV452711.1 | 707523 | 1-scf00010 | 1 |
| AX-157900902 | 1 | 59.005 | KV452711.1 | 719428 | 1-scf00010 | 1 |
| AX-157743942 | 1 | 59.005 | KV452711.1 | 724052 | 1-scf00010 | 1 |
| AX-157900904 | 1 | 59.005 | KV452711.1 | 742632 | 1-scf00010 | 1 |

|              |   |        |            |         |            |   |
|--------------|---|--------|------------|---------|------------|---|
| AX-157900906 | 1 | 59.005 | KV452711.1 | 747916  | 1-scf00010 | 1 |
| AX-157811437 | 1 | 59.005 | KV452711.1 | 749688  | 1-scf00010 | 1 |
| AX-157900908 | 1 | 59.005 | KV452711.1 | 754803  | 1-scf00010 | 1 |
| AX-157900910 | 1 | 59.005 | KV452711.1 | 759353  | 1-scf00010 | 1 |
| AX-157900913 | 1 | 59.005 | KV452711.1 | 776567  | 1-scf00010 | 1 |
| AX-157900914 | 1 | 59.005 | KV452711.1 | 778031  | 1-scf00010 | 1 |
| AX-157900917 | 1 | 59.005 | KV452711.1 | 788955  | 1-scf00010 | 1 |
| AX-157900918 | 1 | 59.005 | KV452711.1 | 790382  | 1-scf00010 | 1 |
| AX-157900919 | 1 | 59.005 | KV452711.1 | 795632  | 1-scf00010 | 1 |
| AX-157900924 | 1 | 59.005 | KV452711.1 | 814225  | 1-scf00010 | 1 |
| AX-157708688 | 1 | 59.005 | KV452711.1 | 820688  | 1-scf00010 | 1 |
| AX-157900929 | 1 | 59.005 | KV452711.1 | 821531  | 1-scf00010 | 1 |
| AX-157900930 | 1 | 59.005 | KV452711.1 | 822671  | 1-scf00010 | 1 |
| AX-157811440 | 1 | 59.005 | KV452711.1 | 824764  | 1-scf00010 | 1 |
| AX-157900931 | 1 | 59.005 | KV452711.1 | 825674  | 1-scf00010 | 1 |
| AX-157900933 | 1 | 59.005 | KV452711.1 | 831658  | 1-scf00010 | 1 |
| AX-157811441 | 1 | 59.005 | KV452711.1 | 834140  | 1-scf00010 | 1 |
| AX-157716990 | 1 | 59.005 | KV452711.1 | 834817  | 1-scf00010 | 1 |
| AX-157900934 | 1 | 59.005 | KV452711.1 | 843077  | 1-scf00010 | 1 |
| AX-157811442 | 1 | 59.005 | KV452711.1 | 856791  | 1-scf00010 | 1 |
| AX-157900940 | 1 | 59.005 | KV452711.1 | 863845  | 1-scf00010 | 1 |
| AX-157900941 | 1 | 59.005 | KV452711.1 | 866149  | 1-scf00010 | 1 |
| AX-157900942 | 1 | 59.005 | KV452711.1 | 870545  | 1-scf00010 | 1 |
| AX-157900944 | 1 | 59.005 | KV452711.1 | 881771  | 1-scf00010 | 1 |
| AX-157900946 | 1 | 59.005 | KV452711.1 | 901819  | 1-scf00010 | 1 |
| AX-157900947 | 1 | 59.005 | KV452711.1 | 904694  | 1-scf00010 | 1 |
| AX-157900948 | 1 | 59.005 | KV452711.1 | 906086  | 1-scf00010 | 1 |
| AX-157900950 | 1 | 59.005 | KV452711.1 | 912320  | 1-scf00010 | 1 |
| AX-157900951 | 1 | 59.005 | KV452711.1 | 914980  | 1-scf00010 | 1 |
| AX-157900953 | 1 | 59.005 | KV452711.1 | 920184  | 1-scf00010 | 1 |
| AX-157900954 | 1 | 59.005 | KV452711.1 | 922298  | 1-scf00010 | 1 |
| AX-157900957 | 1 | 59.005 | KV452711.1 | 925048  | 1-scf00010 | 1 |
| AX-157900958 | 1 | 59.005 | KV452711.1 | 936420  | 1-scf00010 | 1 |
| AX-157900959 | 1 | 59.005 | KV452711.1 | 938951  | 1-scf00010 | 1 |
| AX-157900978 | 1 | 59.005 | KV452711.1 | 1075628 | 1-scf00010 | 1 |
| AX-157900979 | 1 | 59.005 | KV452711.1 | 1076340 | 1-scf00010 | 1 |
| AX-157900980 | 1 | 59.005 | KV452711.1 | 1077980 | 1-scf00010 | 1 |
| AX-157900981 | 1 | 59.005 | KV452711.1 | 1080030 | 1-scf00010 | 1 |
| AX-157811448 | 1 | 59.005 | KV452711.1 | 1081764 | 1-scf00010 | 1 |
| AX-157900982 | 1 | 59.005 | KV452711.1 | 1086637 | 1-scf00010 | 1 |
| AX-157811449 | 1 | 59.005 | KV452711.1 | 1094084 | 1-scf00010 | 1 |
| AX-157900986 | 1 | 59.005 | KV452711.1 | 1112046 | 1-scf00010 | 1 |
| AX-157900987 | 1 | 59.005 | KV452711.1 | 1127551 | 1-scf00010 | 1 |
| AX-157900990 | 1 | 59.005 | KV452711.1 | 1131972 | 1-scf00010 | 1 |
| AX-157900993 | 1 | 59.005 | KV452711.1 | 1137073 | 1-scf00010 | 1 |
| AX-157900999 | 1 | 59.005 | KV452711.1 | 1169106 | 1-scf00010 | 1 |
| AX-157901010 | 1 | 59.005 | KV452711.1 | 1189521 | 1-scf00010 | 1 |
| AX-157901011 | 1 | 59.005 | KV452711.1 | 1196384 | 1-scf00010 | 1 |
| AX-157901016 | 1 | 59.005 | KV452711.1 | 1220918 | 1-scf00010 | 1 |
| AX-157811451 | 1 | 59.005 | KV452711.1 | 1224741 | 1-scf00010 | 1 |
| AX-157901021 | 1 | 59.005 | KV452711.1 | 1228630 | 1-scf00010 | 1 |

|              |   |        |            |         |            |   |
|--------------|---|--------|------------|---------|------------|---|
| AX-157901022 | 1 | 59.005 | KV452711.1 | 1230126 | 1-scf00010 | 1 |
| AX-157901028 | 1 | 59.005 | KV452711.1 | 1250683 | 1-scf00010 | 1 |
| AX-157901032 | 1 | 59.005 | KV452711.1 | 1257974 | 1-scf00010 | 1 |
| AX-158382016 | 1 | 59.005 | KV452711.1 | 1284920 | 1-scf00010 | 1 |
| AX-157901043 | 1 | 59.005 | KV452711.1 | 1296072 | 1-scf00010 | 1 |
| AX-157901046 | 1 | 59.005 | KV452711.1 | 1307074 | 1-scf00010 | 1 |
| AX-157901048 | 1 | 59.005 | KV452711.1 | 1312510 | 1-scf00010 | 1 |
| AX-157901053 | 1 | 59.005 | KV452711.1 | 1338103 | 1-scf00010 | 1 |
| AX-157811454 | 1 | 59.005 | KV452711.1 | 1347013 | 1-scf00010 | 1 |
| AX-157901061 | 1 | 59.005 | KV452711.1 | 1347871 | 1-scf00010 | 1 |
| AX-157901062 | 1 | 59.005 | KV452711.1 | 1348857 | 1-scf00010 | 1 |
| AX-157901063 | 1 | 59.005 | KV452711.1 | 1350420 | 1-scf00010 | 1 |
| AX-157901066 | 1 | 59.005 | KV452711.1 | 1352928 | 1-scf00010 | 1 |
| AX-157901076 | 1 | 59.005 | KV452711.1 | 1376657 | 1-scf00010 | 1 |
| AX-157901078 | 1 | 59.005 | KV452711.1 | 1378368 | 1-scf00010 | 1 |
| AX-157901079 | 1 | 59.005 | KV452711.1 | 1378984 | 1-scf00010 | 1 |
| AX-157901080 | 1 | 59.005 | KV452711.1 | 1380403 | 1-scf00010 | 1 |
| AX-157901081 | 1 | 59.005 | KV452711.1 | 1393147 | 1-scf00010 | 1 |
| AX-157901082 | 1 | 59.005 | KV452711.1 | 1395416 | 1-scf00010 | 1 |
| AX-157901083 | 1 | 59.005 | KV452711.1 | 1396642 | 1-scf00010 | 1 |
| AX-157901089 | 1 | 59.005 | KV452711.1 | 1424019 | 1-scf00010 | 1 |
| AX-157901091 | 1 | 59.005 | KV452711.1 | 1430984 | 1-scf00010 | 1 |
| AX-157901093 | 1 | 59.005 | KV452711.1 | 1434564 | 1-scf00010 | 1 |
| AX-157901094 | 1 | 59.005 | KV452711.1 | 1436202 | 1-scf00010 | 1 |
| AX-157901095 | 1 | 59.005 | KV452711.1 | 1438650 | 1-scf00010 | 1 |
| AX-157901110 | 1 | 59.005 | KV452711.1 | 1507593 | 1-scf00010 | 1 |
| AX-157901111 | 1 | 59.005 | KV452711.1 | 1511347 | 1-scf00010 | 1 |
| AX-158404574 | 1 | 59.005 | KV452711.1 | 1511908 | 1-scf00010 | 1 |
| AX-157901112 | 1 | 59.005 | KV452711.1 | 1525299 | 1-scf00010 | 1 |
| AX-157901120 | 1 | 59.005 | KV452711.1 | 1542497 | 1-scf00010 | 1 |
| AX-157901129 | 1 | 59.005 | KV452711.1 | 1586656 | 1-scf00010 | 1 |
| AX-157901130 | 1 | 59.005 | KV452711.1 | 1587681 | 1-scf00010 | 1 |
| AX-157901131 | 1 | 59.005 | KV452711.1 | 1590554 | 1-scf00010 | 1 |
| AX-157901133 | 1 | 59.005 | KV452711.1 | 1592792 | 1-scf00010 | 1 |
| AX-157901156 | 1 | 59.005 | KV452711.1 | 1643928 | 1-scf00010 | 1 |
| AX-157901159 | 1 | 59.005 | KV452711.1 | 1660473 | 1-scf00010 | 1 |
| AX-157901185 | 1 | 59.005 | KV452711.1 | 1716161 | 1-scf00010 | 1 |
| AX-157901193 | 1 | 59.005 | KV452711.1 | 1738178 | 1-scf00010 | 1 |
| AX-157754358 | 1 | 59.005 | KV452711.1 | 1739910 | 1-scf00010 | 1 |
| AX-157901194 | 1 | 59.005 | KV452711.1 | 1742032 | 1-scf00010 | 1 |
| AX-157901195 | 1 | 59.005 | KV452711.1 | 1744939 | 1-scf00010 | 1 |
| AX-157811467 | 1 | 59.005 | KV452711.1 | 1745953 | 1-scf00010 | 1 |
| AX-157901207 | 1 | 59.005 | KV452711.1 | 1774065 | 1-scf00010 | 1 |
| AX-157901208 | 1 | 59.005 | KV452711.1 | 1775214 | 1-scf00010 | 1 |
| AX-157901209 | 1 | 59.005 | KV452711.1 | 1776899 | 1-scf00010 | 1 |
| AX-157901213 | 1 | 59.005 | KV452711.1 | 1780497 | 1-scf00010 | 1 |
| AX-157901243 | 1 | 59.005 | KV452711.1 | 1823456 | 1-scf00010 | 1 |
| AX-157901256 | 1 | 59.005 | KV452711.1 | 1865257 | 1-scf00010 | 1 |
| AX-157901260 | 1 | 59.005 | KV452711.1 | 1871704 | 1-scf00010 | 1 |
| AX-157811469 | 1 | 59.005 | KV452711.1 | 1894057 | 1-scf00010 | 1 |
| AX-157811470 | 1 | 59.005 | KV452711.1 | 1894583 | 1-scf00010 | 1 |



|              |   |        |            |         |            |   |
|--------------|---|--------|------------|---------|------------|---|
| AX-157901273 | 1 | 59.005 | KV452711.1 | 1897018 | 1-scf00010 | 1 |
| AX-157901275 | 1 | 59.005 | KV452711.1 | 1898560 | 1-scf00010 | 1 |
| AX-157901276 | 1 | 59.005 | KV452711.1 | 1901689 | 1-scf00010 | 1 |
| AX-157901277 | 1 | 59.005 | KV452711.1 | 1904769 | 1-scf00010 | 1 |
| AX-157725844 | 1 | 59.005 | KV452711.1 | 1905314 | 1-scf00010 | 1 |
| AX-157901280 | 1 | 59.005 | KV452711.1 | 1907412 | 1-scf00010 | 1 |
| AX-157901282 | 1 | 59.005 | KV452711.1 | 1909553 | 1-scf00010 | 1 |
| AX-157901283 | 1 | 59.005 | KV452711.1 | 1910245 | 1-scf00010 | 1 |
| AX-157756375 | 1 | 59.005 | KV452711.1 | 1910932 | 1-scf00010 | 1 |
| AX-157722161 | 1 | 59.005 | KV452711.1 | 1926817 | 1-scf00010 | 1 |
| AX-157901295 | 1 | 59.005 | KV452711.1 | 1934390 | 1-scf00010 | 1 |
| AX-157901298 | 1 | 59.005 | KV452711.1 | 1944600 | 1-scf00010 | 1 |
| AX-157756172 | 1 | 59.005 | KV452711.1 | 1950016 | 1-scf00010 | 1 |
| AX-157901303 | 1 | 59.005 | KV452711.1 | 1953421 | 1-scf00010 | 1 |
| AX-157901305 | 1 | 59.005 | KV452711.1 | 1956224 | 1-scf00010 | 1 |
| AX-157774143 | 1 | 59.005 | KV452711.1 | 1968408 | 1-scf00010 | 1 |
| AX-157901309 | 1 | 59.005 | KV452711.1 | 1969497 | 1-scf00010 | 1 |
| AX-157901311 | 1 | 59.005 | KV452711.1 | 1971349 | 1-scf00010 | 1 |
| AX-157901312 | 1 | 59.005 | KV452711.1 | 1974071 | 1-scf00010 | 1 |
| AX-157901313 | 1 | 59.005 | KV452711.1 | 1974951 | 1-scf00010 | 1 |
| AX-157901314 | 1 | 59.005 | KV452711.1 | 1976175 | 1-scf00010 | 1 |
| AX-157901319 | 1 | 59.005 | KV452711.1 | 1990473 | 1-scf00010 | 1 |
| AX-157901321 | 1 | 59.005 | KV452711.1 | 1996394 | 1-scf00010 | 1 |
| AX-157901322 | 1 | 59.005 | KV452711.1 | 1998712 | 1-scf00010 | 1 |
| AX-157901323 | 1 | 59.005 | KV452711.1 | 1999468 | 1-scf00010 | 1 |
| AX-157901326 | 1 | 59.005 | KV452711.1 | 2011480 | 1-scf00010 | 1 |
| AX-157811475 | 1 | 59.005 | KV452711.1 | 2020260 | 1-scf00010 | 1 |
| AX-157901337 | 1 | 59.005 | KV452711.1 | 2044400 | 1-scf00010 | 1 |
| AX-157901338 | 1 | 59.005 | KV452711.1 | 2047969 | 1-scf00010 | 1 |
| AX-157901340 | 1 | 59.005 | KV452711.1 | 2052187 | 1-scf00010 | 1 |
| AX-157811478 | 1 | 59.005 | KV452711.1 | 2054370 | 1-scf00010 | 1 |
| AX-157901343 | 1 | 59.005 | KV452711.1 | 2080259 | 1-scf00010 | 1 |
| AX-157901344 | 1 | 59.005 | KV452711.1 | 2081204 | 1-scf00010 | 1 |
| AX-157901346 | 1 | 59.005 | KV452711.1 | 2084673 | 1-scf00010 | 1 |
| AX-157901347 | 1 | 59.005 | KV452711.1 | 2085305 | 1-scf00010 | 1 |
| AX-157901353 | 1 | 59.005 | KV452711.1 | 2097970 | 1-scf00010 | 1 |
| AX-157901358 | 1 | 59.005 | KV452711.1 | 2117896 | 1-scf00010 | 1 |
| AX-157901359 | 1 | 59.005 | KV452711.1 | 2122865 | 1-scf00010 | 1 |
| AX-157901360 | 1 | 59.005 | KV452711.1 | 2123432 | 1-scf00010 | 1 |
| AX-157901368 | 1 | 59.005 | KV452711.1 | 2138281 | 1-scf00010 | 1 |
| AX-157901369 | 1 | 59.005 | KV452711.1 | 2144795 | 1-scf00010 | 1 |
| AX-157811485 | 1 | 59.005 | KV452711.1 | 2153872 | 1-scf00010 | 1 |
| AX-157811486 | 1 | 59.005 | KV452711.1 | 2154297 | 1-scf00010 | 1 |
| AX-157811487 | 1 | 59.005 | KV452711.1 | 2157301 | 1-scf00010 | 1 |
| AX-158379157 | 1 | 59.005 | KV452711.1 | 2160774 | 1-scf00010 | 1 |
| AX-157901372 | 1 | 59.005 | KV452711.1 | 2162959 | 1-scf00010 | 1 |
| AX-157901377 | 1 | 59.005 | KV452711.1 | 2176466 | 1-scf00010 | 1 |
| AX-157901380 | 1 | 59.005 | KV452711.1 | 2187803 | 1-scf00010 | 1 |
| AX-157901383 | 1 | 59.005 | KV452711.1 | 2192503 | 1-scf00010 | 1 |
| AX-157901384 | 1 | 59.005 | KV452711.1 | 2193393 | 1-scf00010 | 1 |
| AX-157811489 | 1 | 59.005 | KV452711.1 | 2193665 | 1-scf00010 | 1 |

|              |   |        |            |         |            |   |
|--------------|---|--------|------------|---------|------------|---|
| AX-157864406 | 1 | 59.005 | KV452711.1 | 2194625 | 1-scf00010 | 1 |
| AX-157901385 | 1 | 59.005 | KV452711.1 | 2196714 | 1-scf00010 | 1 |
| AX-157901386 | 1 | 59.005 | KV452711.1 | 2197195 | 1-scf00010 | 1 |
| AX-157901388 | 1 | 59.005 | KV452711.1 | 2200381 | 1-scf00010 | 1 |
| AX-157864407 | 1 | 59.005 | KV452711.1 | 2203574 | 1-scf00010 | 1 |
| AX-157901391 | 1 | 59.005 | KV452711.1 | 2207647 | 1-scf00010 | 1 |
| AX-157901393 | 1 | 59.005 | KV452711.1 | 2225763 | 1-scf00010 | 1 |
| AX-157901396 | 1 | 59.005 | KV452711.1 | 2228327 | 1-scf00010 | 1 |
| AX-157901397 | 1 | 59.005 | KV452711.1 | 2228529 | 1-scf00010 | 1 |
| AX-157811495 | 1 | 59.005 | KV452711.1 | 2229162 | 1-scf00010 | 1 |
| AX-157901398 | 1 | 59.005 | KV452711.1 | 2229472 | 1-scf00010 | 1 |
| AX-157901399 | 1 | 59.005 | KV452711.1 | 2231277 | 1-scf00010 | 1 |
| AX-157901404 | 1 | 59.005 | KV452711.1 | 2237216 | 1-scf00010 | 1 |
| AX-157901409 | 1 | 59.005 | KV452711.1 | 2241869 | 1-scf00010 | 1 |
| AX-157901411 | 1 | 59.005 | KV452711.1 | 2243360 | 1-scf00010 | 1 |
| AX-157901412 | 1 | 59.005 | KV452711.1 | 2243971 | 1-scf00010 | 1 |
| AX-157901413 | 1 | 59.005 | KV452711.1 | 2247146 | 1-scf00010 | 1 |
| AX-157901414 | 1 | 59.005 | KV452711.1 | 2253159 | 1-scf00010 | 1 |
| AX-157901416 | 1 | 59.005 | KV452711.1 | 2272337 | 1-scf00010 | 1 |
| AX-157901417 | 1 | 59.005 | KV452711.1 | 2276625 | 1-scf00010 | 1 |
| AX-157901418 | 1 | 59.005 | KV452711.1 | 2278404 | 1-scf00010 | 1 |
| AX-157720748 | 1 | 59.005 | KV452711.1 | 2288357 | 1-scf00010 | 1 |
| AX-157901420 | 1 | 59.005 | KV452711.1 | 2297359 | 1-scf00010 | 1 |
| AX-157901422 | 1 | 59.005 | KV452711.1 | 2306983 | 1-scf00010 | 1 |
| AX-157901423 | 1 | 59.005 | KV452711.1 | 2307375 | 1-scf00010 | 1 |
| AX-157811498 | 1 | 59.005 | KV452711.1 | 2310528 | 1-scf00010 | 1 |
| AX-157811499 | 1 | 59.005 | KV452711.1 | 2323530 | 1-scf00010 | 1 |
| AX-157901426 | 1 | 59.005 | KV452711.1 | 2324476 | 1-scf00010 | 1 |
| AX-157901427 | 1 | 59.005 | KV452711.1 | 2325206 | 1-scf00010 | 1 |
| AX-157901429 | 1 | 59.005 | KV452711.1 | 2327287 | 1-scf00010 | 1 |
| AX-157746928 | 1 | 59.005 | KV452711.1 | 2327833 | 1-scf00010 | 1 |
| AX-157901430 | 1 | 59.005 | KV452711.1 | 2328450 | 1-scf00010 | 1 |
| AX-157901431 | 1 | 59.005 | KV452711.1 | 2333071 | 1-scf00010 | 1 |
| AX-157901432 | 1 | 59.005 | KV452711.1 | 2334896 | 1-scf00010 | 1 |
| AX-157901435 | 1 | 59.005 | KV452711.1 | 2339247 | 1-scf00010 | 1 |
| AX-157901439 | 1 | 59.005 | KV452711.1 | 2361674 | 1-scf00010 | 1 |
| AX-157901440 | 1 | 59.005 | KV452711.1 | 2364414 | 1-scf00010 | 1 |
| AX-157901441 | 1 | 59.005 | KV452711.1 | 2366886 | 1-scf00010 | 1 |
| AX-157901444 | 1 | 59.005 | KV452711.1 | 2380557 | 1-scf00010 | 1 |
| AX-157901445 | 1 | 59.005 | KV452711.1 | 2381013 | 1-scf00010 | 1 |
| AX-157901447 | 1 | 59.005 | KV452711.1 | 2389563 | 1-scf00010 | 1 |
| AX-157756760 | 1 | 59.005 | KV452711.1 | 2390382 | 1-scf00010 | 1 |
| AX-157901448 | 1 | 59.005 | KV452711.1 | 2392861 | 1-scf00010 | 1 |
| AX-157901450 | 1 | 59.005 | KV452711.1 | 2405028 | 1-scf00010 | 1 |
| AX-157901451 | 1 | 59.005 | KV452711.1 | 2407620 | 1-scf00010 | 1 |
| AX-157901452 | 1 | 59.005 | KV452711.1 | 2410387 | 1-scf00010 | 1 |
| AX-157901454 | 1 | 59.005 | KV452711.1 | 2412321 | 1-scf00010 | 1 |
| AX-157901455 | 1 | 59.005 | KV452711.1 | 2417396 | 1-scf00010 | 1 |
| AX-157901474 | 1 | 59.005 | KV452711.1 | 2486569 | 1-scf00010 | 1 |
| AX-157719525 | 1 | 59.005 | KV452711.1 | 2489604 | 1-scf00010 | 1 |
| AX-157901482 | 1 | 59.005 | KV452711.1 | 2522445 | 1-scf00010 | 1 |

|              |   |        |            |         |            |   |
|--------------|---|--------|------------|---------|------------|---|
| AX-157901488 | 1 | 59.005 | KV452711.1 | 2543655 | 1-scf00010 | 1 |
| AX-157901489 | 1 | 59.005 | KV452711.1 | 2545302 | 1-scf00010 | 1 |
| AX-157901490 | 1 | 59.005 | KV452711.1 | 2552892 | 1-scf00010 | 1 |
| AX-157901494 | 1 | 59.005 | KV452711.1 | 2563843 | 1-scf00010 | 1 |
| AX-157771452 | 1 | 59.005 | KV452711.1 | 2568722 | 1-scf00010 | 1 |
| AX-157901498 | 1 | 59.005 | KV452711.1 | 2571530 | 1-scf00010 | 1 |
| AX-157901500 | 1 | 59.005 | KV452711.1 | 2576698 | 1-scf00010 | 1 |
| AX-157901501 | 1 | 59.005 | KV452711.1 | 2579735 | 1-scf00010 | 1 |
| AX-157901508 | 1 | 59.005 | KV452711.1 | 2595040 | 1-scf00010 | 1 |
| AX-157901509 | 1 | 59.005 | KV452711.1 | 2595775 | 1-scf00010 | 1 |
| AX-157901512 | 1 | 59.005 | KV452711.1 | 2599150 | 1-scf00010 | 1 |
| AX-157811508 | 1 | 59.005 | KV452711.1 | 2601378 | 1-scf00010 | 1 |
| AX-157901514 | 1 | 59.005 | KV452711.1 | 2604768 | 1-scf00010 | 1 |
| AX-157901515 | 1 | 59.005 | KV452711.1 | 2604979 | 1-scf00010 | 1 |
| AX-157901516 | 1 | 59.005 | KV452711.1 | 2606921 | 1-scf00010 | 1 |
| AX-157901517 | 1 | 59.005 | KV452711.1 | 2607934 | 1-scf00010 | 1 |
| AX-157753671 | 1 | 59.005 | KV452711.1 | 2612919 | 1-scf00010 | 1 |
| AX-157901519 | 1 | 59.005 | KV452711.1 | 2613299 | 1-scf00010 | 1 |
| AX-157747016 | 1 | 59.005 | KV452711.1 | 2614769 | 1-scf00010 | 1 |
| AX-157713467 | 1 | 59.005 | KV452711.1 | 2630659 | 1-scf00010 | 1 |
| AX-157901532 | 1 | 59.005 | KV452711.1 | 2678533 | 1-scf00010 | 1 |
| AX-157901533 | 1 | 59.005 | KV452711.1 | 2679656 | 1-scf00010 | 1 |
| AX-157901540 | 1 | 59.005 | KV452711.1 | 2692020 | 1-scf00010 | 1 |
| AX-157901547 | 1 | 59.005 | KV452711.1 | 2703026 | 1-scf00010 | 1 |
| AX-157901552 | 1 | 59.005 | KV452711.1 | 2708635 | 1-scf00010 | 1 |
| AX-157901624 | 1 | 59.005 | KV452711.1 | 2830516 | 1-scf00010 | 1 |
| AX-157901626 | 1 | 59.005 | KV452711.1 | 2833121 | 1-scf00010 | 1 |
| AX-157901691 | 1 | 59.005 | KV452711.1 | 3004144 | 1-scf00010 | 1 |
| AX-157901701 | 1 | 59.005 | KV452711.1 | 3037185 | 1-scf00010 | 1 |
| AX-157901704 | 1 | 59.005 | KV452711.1 | 3043538 | 1-scf00010 | 1 |
| AX-157901783 | 1 | 59.005 | KV452711.1 | 3266672 | 1-scf00010 | 1 |
| AX-157901799 | 1 | 59.005 | KV452711.1 | 3298868 | 1-scf00010 | 1 |
| AX-157901805 | 1 | 59.005 | KV452711.1 | 3305209 | 1-scf00010 | 1 |
| AX-157901917 | 1 | 59.005 | KV452711.1 | 3657164 | 1-scf00010 | 1 |
| AX-157901961 | 1 | 59.005 | KV452711.1 | 3708520 | 1-scf00010 | 1 |
| AX-157715786 | 1 | 59.005 | KV452711.1 | 3717895 | 1-scf00010 | 1 |
| AX-157901985 | 1 | 59.005 | KV452711.1 | 3741554 | 1-scf00010 | 1 |
| AX-157902017 | 1 | 59.005 | KV452711.1 | 3788090 | 1-scf00010 | 1 |
| AX-157811608 | 1 | 59.005 | KV452711.1 | 3831356 | 1-scf00010 | 1 |
| AX-157811633 | 1 | 59.005 | KV452711.1 | 3974543 | 1-scf00010 | 1 |
| AX-157902217 | 1 | 59.005 | KV452711.1 | 4061483 | 1-scf00010 | 1 |
| AX-157902232 | 1 | 59.005 | KV452711.1 | 4096082 | 1-scf00010 | 1 |
| AX-157902234 | 1 | 59.005 | KV452711.1 | 4098253 | 1-scf00010 | 1 |
| AX-157902294 | 1 | 59.005 | KV452713.1 | 83523   | 1-scf00011 | 1 |
| AX-157902352 | 1 | 59.005 | KV452713.1 | 401589  | 1-scf00011 | 1 |
| AX-157902357 | 1 | 59.005 | KV452713.1 | 431085  | 1-scf00011 | 1 |
| AX-157902364 | 1 | 59.005 | KV452713.1 | 457576  | 1-scf00011 | 1 |
| AX-157902375 | 1 | 59.005 | KV452713.1 | 519262  | 1-scf00011 | 1 |
| AX-157902389 | 1 | 59.005 | KV452713.1 | 544357  | 1-scf00011 | 1 |
| AX-157902395 | 1 | 59.005 | KV452713.1 | 588506  | 1-scf00011 | 1 |
| AX-157811650 | 1 | 59.005 | KV452713.1 | 591477  | 1-scf00011 | 1 |

|              |   |        |            |         |            |   |
|--------------|---|--------|------------|---------|------------|---|
| AX-157902397 | 1 | 59.005 | KV452713.1 | 594034  | 1-scf00011 | 1 |
| AX-157853601 | 1 | 59.005 | KV452713.1 | 600518  | 1-scf00011 | 1 |
| AX-157853603 | 1 | 59.005 | KV452713.1 | 620045  | 1-scf00011 | 1 |
| AX-157902413 | 1 | 59.005 | KV452713.1 | 639062  | 1-scf00011 | 1 |
| AX-157902426 | 1 | 59.005 | KV452713.1 | 692978  | 1-scf00011 | 1 |
| AX-157902442 | 1 | 59.005 | KV452713.1 | 733680  | 1-scf00011 | 1 |
| AX-157902443 | 1 | 59.005 | KV452713.1 | 734535  | 1-scf00011 | 1 |
| AX-157755003 | 1 | 59.005 | KV452713.1 | 779395  | 1-scf00011 | 1 |
| AX-157902474 | 1 | 59.005 | KV452713.1 | 791200  | 1-scf00011 | 1 |
| AX-157902479 | 1 | 59.005 | KV452713.1 | 800345  | 1-scf00011 | 1 |
| AX-157902480 | 1 | 59.005 | KV452713.1 | 800783  | 1-scf00011 | 1 |
| AX-157902509 | 1 | 59.005 | KV452713.1 | 856065  | 1-scf00011 | 1 |
| AX-157902512 | 1 | 59.005 | KV452713.1 | 860992  | 1-scf00011 | 1 |
| AX-157902515 | 1 | 59.005 | KV452713.1 | 865498  | 1-scf00011 | 1 |
| AX-157811674 | 1 | 59.005 | KV452713.1 | 869871  | 1-scf00011 | 1 |
| AX-157902517 | 1 | 59.005 | KV452713.1 | 871513  | 1-scf00011 | 1 |
| AX-157811675 | 1 | 59.005 | KV452713.1 | 873058  | 1-scf00011 | 1 |
| AX-157902518 | 1 | 59.005 | KV452713.1 | 874337  | 1-scf00011 | 1 |
| AX-157902535 | 1 | 59.005 | KV452713.1 | 898354  | 1-scf00011 | 1 |
| AX-157902540 | 1 | 59.005 | KV452713.1 | 910570  | 1-scf00011 | 1 |
| AX-157902544 | 1 | 59.005 | KV452713.1 | 922188  | 1-scf00011 | 1 |
| AX-157902578 | 1 | 59.005 | KV452713.1 | 976431  | 1-scf00011 | 1 |
| AX-157902601 | 1 | 59.005 | KV452713.1 | 1012392 | 1-scf00011 | 1 |
| AX-157902602 | 1 | 59.005 | KV452713.1 | 1013026 | 1-scf00011 | 1 |
| AX-157902603 | 1 | 59.005 | KV452713.1 | 1015896 | 1-scf00011 | 1 |
| AX-157902631 | 1 | 59.005 | KV452713.1 | 1045189 | 1-scf00011 | 1 |
| AX-157902652 | 1 | 59.005 | KV452713.1 | 1074056 | 1-scf00011 | 1 |
| AX-157902714 | 1 | 59.005 | KV452713.1 | 1162561 | 1-scf00011 | 1 |
| AX-157902721 | 1 | 59.005 | KV452713.1 | 1168124 | 1-scf00011 | 1 |
| AX-157902776 | 1 | 59.005 | KV452713.1 | 1245708 | 1-scf00011 | 1 |
| AX-157902834 | 1 | 59.005 | KV452713.1 | 1331862 | 1-scf00011 | 1 |
| AX-157868876 | 1 | 59.005 | KV452713.1 | 1372442 | 1-scf00011 | 1 |
| AX-157883304 | 1 | 59.005 | KV452713.1 | 1472306 | 1-scf00011 | 1 |
| AX-157811715 | 1 | 59.005 | KV452713.1 | 1615666 | 1-scf00011 | 1 |
| AX-157903114 | 1 | 59.005 | KV452713.1 | 1709620 | 1-scf00011 | 1 |
| AX-157903323 | 1 | 59.005 | KV452713.1 | 1993855 | 1-scf00011 | 1 |
| AX-157903410 | 1 | 59.005 | KV452713.1 | 2099174 | 1-scf00011 | 1 |
| AX-157903469 | 1 | 59.005 | KV452713.1 | 2160143 | 1-scf00011 | 1 |
| AX-158389419 | 1 | 59.005 | KV452713.1 | 2173614 | 1-scf00011 | 1 |
| AX-158414675 | 1 | 59.005 | KV452713.1 | 2366803 | 1-scf00011 | 1 |
| AX-157903688 | 1 | 59.005 | KV452713.1 | 2396321 | 1-scf00011 | 1 |
| AX-157903718 | 1 | 59.005 | KV452713.1 | 2440813 | 1-scf00011 | 1 |
| AX-157903733 | 1 | 59.005 | KV452713.1 | 2457081 | 1-scf00011 | 1 |
| AX-157903765 | 1 | 59.005 | KV452713.1 | 2512820 | 1-scf00011 | 1 |
| AX-157903800 | 1 | 59.005 | KV452713.1 | 2574050 | 1-scf00011 | 1 |
| AX-157903878 | 1 | 59.005 | KV452713.1 | 2662386 | 1-scf00011 | 1 |
| AX-157757713 | 1 | 59.005 | KV452713.1 | 2756771 | 1-scf00011 | 1 |
| AX-157811794 | 1 | 59.005 | KV452713.1 | 2833237 | 1-scf00011 | 1 |
| AX-157874425 | 1 | 59.005 | KV452713.1 | 2842000 | 1-scf00011 | 1 |
| AX-157904003 | 1 | 59.005 | KV452713.1 | 2853318 | 1-scf00011 | 1 |
| AX-157874426 | 1 | 59.005 | KV452713.1 | 2929543 | 1-scf00011 | 1 |

|              |   |        |            |         |            |   |
|--------------|---|--------|------------|---------|------------|---|
| AX-157904047 | 1 | 59.005 | KV452713.1 | 2936482 | 1-scf00011 | 1 |
| AX-157904056 | 1 | 59.005 | KV452713.1 | 2968561 | 1-scf00011 | 1 |
| AX-157904057 | 1 | 59.005 | KV452713.1 | 2968993 | 1-scf00011 | 1 |
| AX-157904110 | 1 | 59.005 | KV452713.1 | 3055665 | 1-scf00011 | 1 |
| AX-157904169 | 1 | 59.005 | KV452713.1 | 3173978 | 1-scf00011 | 1 |
| AX-157727174 | 1 | 59.005 | KV452713.1 | 3359266 | 1-scf00011 | 1 |
| AX-157904249 | 1 | 59.005 | KV452713.1 | 3383473 | 1-scf00011 | 1 |
| AX-157904251 | 1 | 59.005 | KV452713.1 | 3386479 | 1-scf00011 | 1 |
| AX-157904255 | 1 | 59.005 | KV452713.1 | 3396528 | 1-scf00011 | 1 |
| AX-157904260 | 1 | 59.005 | KV452713.1 | 3422885 | 1-scf00011 | 1 |
| AX-157904267 | 1 | 59.005 | KV452713.1 | 3437118 | 1-scf00011 | 1 |
| AX-157904272 | 1 | 59.005 | KV452713.1 | 3447162 | 1-scf00011 | 1 |
| AX-157904274 | 1 | 59.005 | KV452713.1 | 3451075 | 1-scf00011 | 1 |
| AX-157904275 | 1 | 59.005 | KV452713.1 | 3452022 | 1-scf00011 | 1 |
| AX-157811813 | 1 | 59.005 | KV452713.1 | 3465476 | 1-scf00011 | 1 |
| AX-157904284 | 1 | 59.005 | KV452713.1 | 3470848 | 1-scf00011 | 1 |
| AX-157904302 | 1 | 59.005 | KV452713.1 | 3526454 | 1-scf00011 | 1 |
| AX-157904304 | 1 | 59.005 | KV452713.1 | 3528667 | 1-scf00011 | 1 |
| AX-157904308 | 1 | 59.005 | KV452713.1 | 3533234 | 1-scf00011 | 1 |
| AX-157904311 | 1 | 59.005 | KV452713.1 | 3537979 | 1-scf00011 | 1 |
| AX-157904312 | 1 | 59.005 | KV452713.1 | 3540623 | 1-scf00011 | 1 |
| AX-157904386 | 1 | 59.005 | KV452713.1 | 3647644 | 1-scf00011 | 1 |
| AX-157904417 | 1 | 59.005 | KV452713.1 | 3729500 | 1-scf00011 | 1 |
| AX-157904428 | 1 | 59.005 | KV452713.1 | 3738286 | 1-scf00011 | 1 |
| AX-157904429 | 1 | 59.005 | KV452713.1 | 3739147 | 1-scf00011 | 1 |
| AX-157904479 | 1 | 59.005 | KV452713.1 | 3814387 | 1-scf00011 | 1 |
| AX-157904493 | 1 | 59.005 | KV452713.1 | 3840912 | 1-scf00011 | 1 |
| AX-157904542 | 1 | 59.005 | KV452713.1 | 3924473 | 1-scf00011 | 1 |
| AX-157904595 | 1 | 59.005 | KV452713.1 | 3989786 | 1-scf00011 | 1 |
| AX-157874432 | 1 | 59.005 | KV452713.1 | 4013927 | 1-scf00011 | 1 |
| AX-157904665 | 1 | 59.005 | KV452713.1 | 4097918 | 1-scf00011 | 1 |
| AX-157904668 | 1 | 59.005 | KV452713.1 | 4101636 | 1-scf00011 | 1 |
| AX-157904700 | 1 | 59.005 | KV452713.1 | 4137711 | 1-scf00011 | 1 |
| AX-157904767 | 1 | 59.005 | KV452713.1 | 4219110 | 1-scf00011 | 1 |
| AX-157904864 | 1 | 59.005 | KV452713.1 | 4349779 | 1-scf00011 | 1 |
| AX-158389498 | 1 | 59.005 | KV452713.1 | 4349971 | 1-scf00011 | 1 |
| AX-157904889 | 1 | 59.005 | KV452713.1 | 4379517 | 1-scf00011 | 1 |
| AX-157811853 | 1 | 59.005 | KV452713.1 | 4385271 | 1-scf00011 | 1 |
| AX-158382052 | 1 | 59.005 | KV452713.1 | 4386974 | 1-scf00011 | 1 |
| AX-157710315 | 1 | 59.005 | KV452713.1 | 4530398 | 1-scf00011 | 1 |
| AX-157905107 | 1 | 59.005 | KV452713.1 | 4653336 | 1-scf00011 | 1 |
| AX-157811872 | 1 | 59.005 | KV452713.1 | 4690494 | 1-scf00011 | 1 |
| AX-158376618 | 1 | 59.005 | KV452710.1 | 30940   | 1-scf00588 | 1 |
| AX-158376622 | 1 | 59.005 | KV452710.1 | 69082   | 1-scf00588 | 1 |
| AX-158376624 | 1 | 59.005 | KV452710.1 | 101011  | 1-scf00588 | 1 |
| AX-158376627 | 1 | 59.005 | KV452710.1 | 140216  | 1-scf00588 | 1 |
| AX-158376628 | 1 | 59.005 | KV452710.1 | 156302  | 1-scf00588 | 1 |
| AX-158376631 | 1 | 59.005 | KV452710.1 | 164254  | 1-scf00588 | 1 |
| AX-158376636 | 1 | 59.005 | KV452710.1 | 176251  | 1-scf00588 | 1 |
| AX-157717465 | 1 | 59.005 | KV452710.1 | 194425  | 1-scf00588 | 1 |
| AX-157853332 | 1 | 59.005 | KV452710.1 | 196093  | 1-scf00588 | 1 |

|              |   |        |             |         |                |    |
|--------------|---|--------|-------------|---------|----------------|----|
| AX-158376639 | 1 | 59.005 | KV452710.1  | 196727  | 1-scf00588     | 1  |
| AX-158376641 | 1 | 59.005 | KV452710.1  | 208972  | 1-scf00588     | 1  |
| AX-158376642 | 1 | 59.005 | KV452710.1  | 211163  | 1-scf00588     | 1  |
| AX-158376643 | 1 | 59.005 | KV452710.1  | 211623  | 1-scf00588     | 1  |
| AX-158379060 | 1 | 59.005 | KV452710.1  | 224261  | 1-scf00588     | 1  |
| AX-158376645 | 1 | 59.005 | KV452710.1  | 227376  | 1-scf00588     | 1  |
| AX-158376646 | 1 | 59.005 | KV452710.1  | 234015  | 1-scf00588     | 1  |
| AX-158376647 | 1 | 59.005 | KV452710.1  | 237320  | 1-scf00588     | 1  |
| AX-157853333 | 1 | 59.005 | KV452710.1  | 238876  | 1-scf00588     | 1  |
| AX-158376648 | 1 | 59.005 | KV452710.1  | 240429  | 1-scf00588     | 1  |
| AX-157853334 | 1 | 59.005 | KV452710.1  | 245140  | 1-scf00588     | 1  |
| AX-158376650 | 1 | 59.005 | KV452710.1  | 250869  | 1-scf00588     | 1  |
| AX-158376651 | 1 | 59.005 | KV452710.1  | 253061  | 1-scf00588     | 1  |
| AX-158376652 | 1 | 59.005 | KV452710.1  | 260730  | 1-scf00588     | 1  |
| AX-158376653 | 1 | 59.005 | KV452710.1  | 261602  | 1-scf00588     | 1  |
| AX-158376656 | 1 | 59.005 | KV452710.1  | 270383  | 1-scf00588     | 1  |
| AX-158376657 | 1 | 59.005 | KV452710.1  | 274908  | 1-scf00588     | 1  |
| AX-158376658 | 1 | 59.005 | KV452710.1  | 278208  | 1-scf00588     | 1  |
| AX-158421736 | 1 | 59.005 | DX102434.1  | 56      | IORI212 lctalu | UN |
| AX-157695258 | 1 | 59.005 | FI869408.1  | 39      | IORI212 lctalu | UN |
| AX-157706053 | 1 | 59.005 | 3ML01031505 | 492     | scf07120_1     | UN |
| AX-157743790 | 1 | 59.114 | KV452708.1  | 978770  | 1-scf00008     | 1  |
| AX-157853562 | 1 | 59.114 | KV452708.1  | 2081260 | 1-scf00008     | 1  |
| AX-157715844 | 1 | 59.114 | KV452708.1  | 2516172 | 1-scf00008     | 1  |
| AX-157896148 | 1 | 59.114 | KV452709.1  | 86261   | 1-scf00009     | 1  |
| AX-157896194 | 1 | 59.114 | KV452709.1  | 146855  | 1-scf00009     | 1  |
| AX-157896212 | 1 | 59.114 | KV452709.1  | 170104  | 1-scf00009     | 1  |
| AX-157896286 | 1 | 59.114 | KV452709.1  | 262212  | 1-scf00009     | 1  |
| AX-157810919 | 1 | 59.114 | KV452709.1  | 352586  | 1-scf00009     | 1  |
| AX-157810930 | 1 | 59.114 | KV452709.1  | 500403  | 1-scf00009     | 1  |
| AX-157896538 | 1 | 59.114 | KV452709.1  | 570142  | 1-scf00009     | 1  |
| AX-157896680 | 1 | 59.114 | KV452709.1  | 758899  | 1-scf00009     | 1  |
| AX-157718143 | 1 | 59.114 | KV452709.1  | 840062  | 1-scf00009     | 1  |
| AX-157896775 | 1 | 59.114 | KV452709.1  | 897641  | 1-scf00009     | 1  |
| AX-157896806 | 1 | 59.114 | KV452709.1  | 950549  | 1-scf00009     | 1  |
| AX-157896849 | 1 | 59.114 | KV452709.1  | 1016230 | 1-scf00009     | 1  |
| AX-157896865 | 1 | 59.114 | KV452709.1  | 1029943 | 1-scf00009     | 1  |
| AX-157896873 | 1 | 59.114 | KV452709.1  | 1039003 | 1-scf00009     | 1  |
| AX-157896895 | 1 | 59.114 | KV452709.1  | 1064277 | 1-scf00009     | 1  |
| AX-157896898 | 1 | 59.114 | KV452709.1  | 1066104 | 1-scf00009     | 1  |
| AX-157896906 | 1 | 59.114 | KV452709.1  | 1072398 | 1-scf00009     | 1  |
| AX-157810966 | 1 | 59.114 | KV452709.1  | 1084776 | 1-scf00009     | 1  |
| AX-157896959 | 1 | 59.114 | KV452709.1  | 1160363 | 1-scf00009     | 1  |
| AX-157896967 | 1 | 59.114 | KV452709.1  | 1173998 | 1-scf00009     | 1  |
| AX-157896968 | 1 | 59.114 | KV452709.1  | 1176819 | 1-scf00009     | 1  |
| AX-157897065 | 1 | 59.114 | KV452709.1  | 1359110 | 1-scf00009     | 1  |
| AX-157897165 | 1 | 59.114 | KV452709.1  | 1480927 | 1-scf00009     | 1  |
| AX-157897186 | 1 | 59.114 | KV452709.1  | 1513041 | 1-scf00009     | 1  |
| AX-157897234 | 1 | 59.114 | KV452709.1  | 1576326 | 1-scf00009     | 1  |
| AX-157897246 | 1 | 59.114 | KV452709.1  | 1588499 | 1-scf00009     | 1  |
| AX-157897302 | 1 | 59.114 | KV452709.1  | 1666129 | 1-scf00009     | 1  |

|              |   |        |            |         |            |   |
|--------------|---|--------|------------|---------|------------|---|
| AX-157883103 | 1 | 59.114 | KV452709.1 | 1708032 | 1-scf00009 | 1 |
| AX-157897427 | 1 | 59.114 | KV452709.1 | 1848434 | 1-scf00009 | 1 |
| AX-157897429 | 1 | 59.114 | KV452709.1 | 1853024 | 1-scf00009 | 1 |
| AX-157897483 | 1 | 59.114 | KV452709.1 | 1954740 | 1-scf00009 | 1 |
| AX-157897486 | 1 | 59.114 | KV452709.1 | 1963014 | 1-scf00009 | 1 |
| AX-157811057 | 1 | 59.114 | KV452709.1 | 2289516 | 1-scf00009 | 1 |
| AX-157897794 | 1 | 59.114 | KV452709.1 | 2451110 | 1-scf00009 | 1 |
| AX-157811069 | 1 | 59.114 | KV452709.1 | 2559548 | 1-scf00009 | 1 |
| AX-157897965 | 1 | 59.114 | KV452709.1 | 2725630 | 1-scf00009 | 1 |
| AX-157897973 | 1 | 59.114 | KV452709.1 | 2738452 | 1-scf00009 | 1 |
| AX-157898254 | 1 | 59.114 | KV452709.1 | 3298066 | 1-scf00009 | 1 |
| AX-157898338 | 1 | 59.114 | KV452709.1 | 3462870 | 1-scf00009 | 1 |
| AX-157898345 | 1 | 59.114 | KV452709.1 | 3471015 | 1-scf00009 | 1 |
| AX-157714756 | 1 | 59.114 | KV452709.1 | 3473347 | 1-scf00009 | 1 |
| AX-157898384 | 1 | 59.114 | KV452709.1 | 3535919 | 1-scf00009 | 1 |
| AX-157898398 | 1 | 59.114 | KV452709.1 | 3563694 | 1-scf00009 | 1 |
| AX-157898412 | 1 | 59.114 | KV452709.1 | 3586190 | 1-scf00009 | 1 |
| AX-157725412 | 1 | 59.114 | KV452709.1 | 3712361 | 1-scf00009 | 1 |
| AX-157898508 | 1 | 59.114 | KV452709.1 | 3862553 | 1-scf00009 | 1 |
| AX-157898709 | 1 | 59.114 | KV452709.1 | 4143345 | 1-scf00009 | 1 |
| AX-157898712 | 1 | 59.114 | KV452709.1 | 4145956 | 1-scf00009 | 1 |
| AX-157898717 | 1 | 59.114 | KV452709.1 | 4154145 | 1-scf00009 | 1 |
| AX-157898787 | 1 | 59.114 | KV452709.1 | 4263968 | 1-scf00009 | 1 |
| AX-157724733 | 1 | 59.114 | KV452709.1 | 4292727 | 1-scf00009 | 1 |
| AX-157898838 | 1 | 59.114 | KV452709.1 | 4342379 | 1-scf00009 | 1 |
| AX-157811245 | 1 | 59.114 | KV452709.1 | 4733932 | 1-scf00009 | 1 |
| AX-157899186 | 1 | 59.114 | KV452709.1 | 4812643 | 1-scf00009 | 1 |
| AX-157899226 | 1 | 59.114 | KV452709.1 | 4884799 | 1-scf00009 | 1 |
| AX-157899229 | 1 | 59.114 | KV452709.1 | 4891384 | 1-scf00009 | 1 |
| AX-157811266 | 1 | 59.114 | KV452709.1 | 4949522 | 1-scf00009 | 1 |
| AX-157899312 | 1 | 59.114 | KV452709.1 | 5000788 | 1-scf00009 | 1 |
| AX-157899319 | 1 | 59.114 | KV452709.1 | 5010783 | 1-scf00009 | 1 |
| AX-157899563 | 1 | 59.114 | KV452709.1 | 5319643 | 1-scf00009 | 1 |
| AX-157899610 | 1 | 59.114 | KV452709.1 | 5376479 | 1-scf00009 | 1 |
| AX-157742844 | 1 | 59.114 | KV452709.1 | 5437391 | 1-scf00009 | 1 |
| AX-157899658 | 1 | 59.114 | KV452709.1 | 5440009 | 1-scf00009 | 1 |
| AX-157757090 | 1 | 59.114 | KV452709.1 | 5492573 | 1-scf00009 | 1 |
| AX-157899796 | 1 | 59.114 | KV452709.1 | 5635597 | 1-scf00009 | 1 |
| AX-157899892 | 1 | 59.114 | KV452709.1 | 5731399 | 1-scf00009 | 1 |
| AX-157899998 | 1 | 59.114 | KV452709.1 | 5888747 | 1-scf00009 | 1 |
| AX-157900007 | 1 | 59.114 | KV452709.1 | 5911266 | 1-scf00009 | 1 |
| AX-157900011 | 1 | 59.114 | KV452709.1 | 5914479 | 1-scf00009 | 1 |
| AX-157900012 | 1 | 59.114 | KV452709.1 | 5917322 | 1-scf00009 | 1 |
| AX-157900014 | 1 | 59.114 | KV452709.1 | 5925836 | 1-scf00009 | 1 |
| AX-157900015 | 1 | 59.114 | KV452709.1 | 5926183 | 1-scf00009 | 1 |
| AX-157900016 | 1 | 59.114 | KV452709.1 | 5926465 | 1-scf00009 | 1 |
| AX-157900021 | 1 | 59.114 | KV452709.1 | 5934638 | 1-scf00009 | 1 |
| AX-157900023 | 1 | 59.114 | KV452709.1 | 5936319 | 1-scf00009 | 1 |
| AX-157900025 | 1 | 59.114 | KV452709.1 | 5941987 | 1-scf00009 | 1 |
| AX-157900028 | 1 | 59.114 | KV452709.1 | 5946522 | 1-scf00009 | 1 |
| AX-157811358 | 1 | 59.114 | KV452709.1 | 5946898 | 1-scf00009 | 1 |

|              |   |        |            |         |            |   |
|--------------|---|--------|------------|---------|------------|---|
| AX-158404500 | 1 | 59.114 | KV452709.1 | 5996704 | 1-scf00009 | 1 |
| AX-157900076 | 1 | 59.114 | KV452709.1 | 6026537 | 1-scf00009 | 1 |
| AX-157900151 | 1 | 59.114 | KV452709.1 | 6136686 | 1-scf00009 | 1 |
| AX-157811373 | 1 | 59.114 | KV452709.1 | 6150965 | 1-scf00009 | 1 |
| AX-157724572 | 1 | 59.114 | KV452709.1 | 6229116 | 1-scf00009 | 1 |
| AX-157774468 | 1 | 59.114 | KV452709.1 | 6233505 | 1-scf00009 | 1 |
| AX-157900196 | 1 | 59.114 | KV452709.1 | 6234229 | 1-scf00009 | 1 |
| AX-157900197 | 1 | 59.114 | KV452709.1 | 6235180 | 1-scf00009 | 1 |
| AX-157900199 | 1 | 59.114 | KV452709.1 | 6237224 | 1-scf00009 | 1 |
| AX-157900238 | 1 | 59.114 | KV452709.1 | 6293744 | 1-scf00009 | 1 |
| AX-157864402 | 1 | 59.114 | KV452709.1 | 6321943 | 1-scf00009 | 1 |
| AX-157900251 | 1 | 59.114 | KV452709.1 | 6335314 | 1-scf00009 | 1 |
| AX-157900256 | 1 | 59.114 | KV452709.1 | 6343682 | 1-scf00009 | 1 |
| AX-157900258 | 1 | 59.114 | KV452709.1 | 6346481 | 1-scf00009 | 1 |
| AX-157900275 | 1 | 59.114 | KV452709.1 | 6392377 | 1-scf00009 | 1 |
| AX-158404514 | 1 | 59.114 | KV452709.1 | 6395233 | 1-scf00009 | 1 |
| AX-157900289 | 1 | 59.114 | KV452709.1 | 6421524 | 1-scf00009 | 1 |
| AX-157900296 | 1 | 59.114 | KV452709.1 | 6440791 | 1-scf00009 | 1 |
| AX-157900300 | 1 | 59.114 | KV452709.1 | 6456749 | 1-scf00009 | 1 |
| AX-157900301 | 1 | 59.114 | KV452709.1 | 6457147 | 1-scf00009 | 1 |
| AX-157900321 | 1 | 59.114 | KV452709.1 | 6501656 | 1-scf00009 | 1 |
| AX-157900322 | 1 | 59.114 | KV452709.1 | 6505236 | 1-scf00009 | 1 |
| AX-157900335 | 1 | 59.114 | KV452709.1 | 6532946 | 1-scf00009 | 1 |
| AX-157900351 | 1 | 59.114 | KV452709.1 | 6574039 | 1-scf00009 | 1 |
| AX-157900355 | 1 | 59.114 | KV452709.1 | 6577044 | 1-scf00009 | 1 |
| AX-157900411 | 1 | 59.114 | KV452709.1 | 7013461 | 1-scf00009 | 1 |
| AX-157811409 | 1 | 59.114 | KV452709.1 | 7126597 | 1-scf00009 | 1 |
| AX-157900517 | 1 | 59.114 | KV452709.1 | 7244983 | 1-scf00009 | 1 |
| AX-157900538 | 1 | 59.114 | KV452709.1 | 7363481 | 1-scf00009 | 1 |
| AX-157900570 | 1 | 59.114 | KV452709.1 | 7460994 | 1-scf00009 | 1 |
| AX-157900749 | 1 | 59.114 | KV452711.1 | 34514   | 1-scf00010 | 1 |
| AX-157900756 | 1 | 59.114 | KV452711.1 | 97383   | 1-scf00010 | 1 |
| AX-158382013 | 1 | 59.114 | KV452711.1 | 212443  | 1-scf00010 | 1 |
| AX-157900858 | 1 | 59.114 | KV452711.1 | 533570  | 1-scf00010 | 1 |
| AX-157900915 | 1 | 59.114 | KV452711.1 | 780905  | 1-scf00010 | 1 |
| AX-157811439 | 1 | 59.114 | KV452711.1 | 788698  | 1-scf00010 | 1 |
| AX-157900939 | 1 | 59.114 | KV452711.1 | 862919  | 1-scf00010 | 1 |
| AX-157811446 | 1 | 59.114 | KV452711.1 | 1038690 | 1-scf00010 | 1 |
| AX-157900975 | 1 | 59.114 | KV452711.1 | 1039782 | 1-scf00010 | 1 |
| AX-157720758 | 1 | 59.114 | KV452711.1 | 1044384 | 1-scf00010 | 1 |
| AX-158421696 | 1 | 59.114 | KV452711.1 | 1049944 | 1-scf00010 | 1 |
| AX-157811447 | 1 | 59.114 | KV452711.1 | 1064481 | 1-scf00010 | 1 |
| AX-157901000 | 1 | 59.114 | KV452711.1 | 1169754 | 1-scf00010 | 1 |
| AX-157901008 | 1 | 59.114 | KV452711.1 | 1186140 | 1-scf00010 | 1 |
| AX-157901009 | 1 | 59.114 | KV452711.1 | 1187895 | 1-scf00010 | 1 |
| AX-157901033 | 1 | 59.114 | KV452711.1 | 1258430 | 1-scf00010 | 1 |
| AX-157901037 | 1 | 59.114 | KV452711.1 | 1277604 | 1-scf00010 | 1 |
| AX-157901039 | 1 | 59.114 | KV452711.1 | 1281440 | 1-scf00010 | 1 |
| AX-157901041 | 1 | 59.114 | KV452711.1 | 1294165 | 1-scf00010 | 1 |
| AX-157901042 | 1 | 59.114 | KV452711.1 | 1295017 | 1-scf00010 | 1 |
| AX-157901044 | 1 | 59.114 | KV452711.1 | 1302205 | 1-scf00010 | 1 |



|              |   |        |            |         |            |   |
|--------------|---|--------|------------|---------|------------|---|
| AX-157901045 | 1 | 59.114 | KV452711.1 | 1304299 | 1-scf00010 | 1 |
| AX-157901052 | 1 | 59.114 | KV452711.1 | 1334887 | 1-scf00010 | 1 |
| AX-157901054 | 1 | 59.114 | KV452711.1 | 1338767 | 1-scf00010 | 1 |
| AX-157901057 | 1 | 59.114 | KV452711.1 | 1342427 | 1-scf00010 | 1 |
| AX-157901084 | 1 | 59.114 | KV452711.1 | 1400765 | 1-scf00010 | 1 |
| AX-157901099 | 1 | 59.114 | KV452711.1 | 1467497 | 1-scf00010 | 1 |
| AX-157901100 | 1 | 59.114 | KV452711.1 | 1470314 | 1-scf00010 | 1 |
| AX-157901105 | 1 | 59.114 | KV452711.1 | 1485585 | 1-scf00010 | 1 |
| AX-158382019 | 1 | 59.114 | KV452711.1 | 1506111 | 1-scf00010 | 1 |
| AX-157901121 | 1 | 59.114 | KV452711.1 | 1549541 | 1-scf00010 | 1 |
| AX-157901134 | 1 | 59.114 | KV452711.1 | 1594996 | 1-scf00010 | 1 |
| AX-157901138 | 1 | 59.114 | KV452711.1 | 1603691 | 1-scf00010 | 1 |
| AX-157901140 | 1 | 59.114 | KV452711.1 | 1605351 | 1-scf00010 | 1 |
| AX-157901142 | 1 | 59.114 | KV452711.1 | 1609659 | 1-scf00010 | 1 |
| AX-157901143 | 1 | 59.114 | KV452711.1 | 1610548 | 1-scf00010 | 1 |
| AX-157901204 | 1 | 59.114 | KV452711.1 | 1770601 | 1-scf00010 | 1 |
| AX-157901250 | 1 | 59.114 | KV452711.1 | 1850914 | 1-scf00010 | 1 |
| AX-157901292 | 1 | 59.114 | KV452711.1 | 1925879 | 1-scf00010 | 1 |
| AX-157901293 | 1 | 59.114 | KV452711.1 | 1927693 | 1-scf00010 | 1 |
| AX-157901308 | 1 | 59.114 | KV452711.1 | 1967192 | 1-scf00010 | 1 |
| AX-157901320 | 1 | 59.114 | KV452711.1 | 1991671 | 1-scf00010 | 1 |
| AX-157726845 | 1 | 59.114 | KV452711.1 | 2038649 | 1-scf00010 | 1 |
| AX-157901342 | 1 | 59.114 | KV452711.1 | 2062436 | 1-scf00010 | 1 |
| AX-157901345 | 1 | 59.114 | KV452711.1 | 2083386 | 1-scf00010 | 1 |
| AX-157901349 | 1 | 59.114 | KV452711.1 | 2092265 | 1-scf00010 | 1 |
| AX-157901355 | 1 | 59.114 | KV452711.1 | 2101590 | 1-scf00010 | 1 |
| AX-157901371 | 1 | 59.114 | KV452711.1 | 2152892 | 1-scf00010 | 1 |
| AX-157901373 | 1 | 59.114 | KV452711.1 | 2167310 | 1-scf00010 | 1 |
| AX-157811494 | 1 | 59.114 | KV452711.1 | 2224657 | 1-scf00010 | 1 |
| AX-157901394 | 1 | 59.114 | KV452711.1 | 2226950 | 1-scf00010 | 1 |
| AX-157901395 | 1 | 59.114 | KV452711.1 | 2227588 | 1-scf00010 | 1 |
| AX-157901421 | 1 | 59.114 | KV452711.1 | 2299070 | 1-scf00010 | 1 |
| AX-157724118 | 1 | 59.114 | KV452711.1 | 2355887 | 1-scf00010 | 1 |
| AX-157901453 | 1 | 59.114 | KV452711.1 | 2410780 | 1-scf00010 | 1 |
| AX-157901462 | 1 | 59.114 | KV452711.1 | 2451882 | 1-scf00010 | 1 |
| AX-157901492 | 1 | 59.114 | KV452711.1 | 2561054 | 1-scf00010 | 1 |
| AX-157746342 | 1 | 59.114 | KV452711.1 | 2561509 | 1-scf00010 | 1 |
| AX-157811507 | 1 | 59.114 | KV452711.1 | 2562229 | 1-scf00010 | 1 |
| AX-157901510 | 1 | 59.114 | KV452711.1 | 2596283 | 1-scf00010 | 1 |
| AX-157901511 | 1 | 59.114 | KV452711.1 | 2597203 | 1-scf00010 | 1 |
| AX-157901522 | 1 | 59.114 | KV452711.1 | 2634733 | 1-scf00010 | 1 |
| AX-157901545 | 1 | 59.114 | KV452711.1 | 2700620 | 1-scf00010 | 1 |
| AX-157771059 | 1 | 59.114 | KV452711.1 | 2703589 | 1-scf00010 | 1 |
| AX-157901548 | 1 | 59.114 | KV452711.1 | 2704221 | 1-scf00010 | 1 |
| AX-157901549 | 1 | 59.114 | KV452711.1 | 2706586 | 1-scf00010 | 1 |
| AX-157901551 | 1 | 59.114 | KV452711.1 | 2707711 | 1-scf00010 | 1 |
| AX-157741562 | 1 | 59.114 | KV452711.1 | 2709300 | 1-scf00010 | 1 |
| AX-157901554 | 1 | 59.114 | KV452711.1 | 2711626 | 1-scf00010 | 1 |
| AX-157901556 | 1 | 59.114 | KV452711.1 | 2713816 | 1-scf00010 | 1 |
| AX-157901557 | 1 | 59.114 | KV452711.1 | 2714942 | 1-scf00010 | 1 |
| AX-157901558 | 1 | 59.114 | KV452711.1 | 2716040 | 1-scf00010 | 1 |

|              |   |        |            |         |            |   |
|--------------|---|--------|------------|---------|------------|---|
| AX-157901559 | 1 | 59.114 | KV452711.1 | 2719039 | 1-scf00010 | 1 |
| AX-157901560 | 1 | 59.114 | KV452711.1 | 2719887 | 1-scf00010 | 1 |
| AX-157811515 | 1 | 59.114 | KV452711.1 | 2720225 | 1-scf00010 | 1 |
| AX-157811516 | 1 | 59.114 | KV452711.1 | 2721041 | 1-scf00010 | 1 |
| AX-157901562 | 1 | 59.114 | KV452711.1 | 2723797 | 1-scf00010 | 1 |
| AX-157750627 | 1 | 59.114 | KV452711.1 | 2728853 | 1-scf00010 | 1 |
| AX-157901574 | 1 | 59.114 | KV452711.1 | 2747128 | 1-scf00010 | 1 |
| AX-157721039 | 1 | 59.114 | KV452711.1 | 2763900 | 1-scf00010 | 1 |
| AX-157901586 | 1 | 59.114 | KV452711.1 | 2766179 | 1-scf00010 | 1 |
| AX-157901609 | 1 | 59.114 | KV452711.1 | 2798847 | 1-scf00010 | 1 |
| AX-157811523 | 1 | 59.114 | KV452711.1 | 2803631 | 1-scf00010 | 1 |
| AX-157811524 | 1 | 59.114 | KV452711.1 | 2804254 | 1-scf00010 | 1 |
| AX-157901613 | 1 | 59.114 | KV452711.1 | 2808352 | 1-scf00010 | 1 |
| AX-157901614 | 1 | 59.114 | KV452711.1 | 2808821 | 1-scf00010 | 1 |
| AX-157901616 | 1 | 59.114 | KV452711.1 | 2811309 | 1-scf00010 | 1 |
| AX-157811525 | 1 | 59.114 | KV452711.1 | 2811530 | 1-scf00010 | 1 |
| AX-157811526 | 1 | 59.114 | KV452711.1 | 2811634 | 1-scf00010 | 1 |
| AX-157901618 | 1 | 59.114 | KV452711.1 | 2813698 | 1-scf00010 | 1 |
| AX-157811536 | 1 | 59.114 | KV452711.1 | 2890566 | 1-scf00010 | 1 |
| AX-157901649 | 1 | 59.114 | KV452711.1 | 2894750 | 1-scf00010 | 1 |
| AX-157901661 | 1 | 59.114 | KV452711.1 | 2923256 | 1-scf00010 | 1 |
| AX-157901668 | 1 | 59.114 | KV452711.1 | 2935217 | 1-scf00010 | 1 |
| AX-157901682 | 1 | 59.114 | KV452711.1 | 2973813 | 1-scf00010 | 1 |
| AX-157901696 | 1 | 59.114 | KV452711.1 | 3019912 | 1-scf00010 | 1 |
| AX-157901700 | 1 | 59.114 | KV452711.1 | 3035521 | 1-scf00010 | 1 |
| AX-157757927 | 1 | 59.114 | KV452711.1 | 3046415 | 1-scf00010 | 1 |
| AX-157901726 | 1 | 59.114 | KV452711.1 | 3101260 | 1-scf00010 | 1 |
| AX-157901729 | 1 | 59.114 | KV452711.1 | 3104818 | 1-scf00010 | 1 |
| AX-157811553 | 1 | 59.114 | KV452711.1 | 3126277 | 1-scf00010 | 1 |
| AX-157901736 | 1 | 59.114 | KV452711.1 | 3126827 | 1-scf00010 | 1 |
| AX-157901737 | 1 | 59.114 | KV452711.1 | 3129403 | 1-scf00010 | 1 |
| AX-157901741 | 1 | 59.114 | KV452711.1 | 3143345 | 1-scf00010 | 1 |
| AX-158379159 | 1 | 59.114 | KV452711.1 | 3162914 | 1-scf00010 | 1 |
| AX-157901747 | 1 | 59.114 | KV452711.1 | 3165744 | 1-scf00010 | 1 |
| AX-157901753 | 1 | 59.114 | KV452711.1 | 3180095 | 1-scf00010 | 1 |
| AX-157901754 | 1 | 59.114 | KV452711.1 | 3180817 | 1-scf00010 | 1 |
| AX-157901755 | 1 | 59.114 | KV452711.1 | 3183588 | 1-scf00010 | 1 |
| AX-157901757 | 1 | 59.114 | KV452711.1 | 3188731 | 1-scf00010 | 1 |
| AX-157901759 | 1 | 59.114 | KV452711.1 | 3195574 | 1-scf00010 | 1 |
| AX-157901760 | 1 | 59.114 | KV452711.1 | 3196560 | 1-scf00010 | 1 |
| AX-157901762 | 1 | 59.114 | KV452711.1 | 3202536 | 1-scf00010 | 1 |
| AX-157758203 | 1 | 59.114 | KV452711.1 | 3203414 | 1-scf00010 | 1 |
| AX-157901772 | 1 | 59.114 | KV452711.1 | 3221441 | 1-scf00010 | 1 |
| AX-157901778 | 1 | 59.114 | KV452711.1 | 3245016 | 1-scf00010 | 1 |
| AX-157901785 | 1 | 59.114 | KV452711.1 | 3271796 | 1-scf00010 | 1 |
| AX-157811570 | 1 | 59.114 | KV452711.1 | 3280941 | 1-scf00010 | 1 |
| AX-157901787 | 1 | 59.114 | KV452711.1 | 3284967 | 1-scf00010 | 1 |
| AX-157811571 | 1 | 59.114 | KV452711.1 | 3285835 | 1-scf00010 | 1 |
| AX-157901788 | 1 | 59.114 | KV452711.1 | 3287245 | 1-scf00010 | 1 |
| AX-157901789 | 1 | 59.114 | KV452711.1 | 3287667 | 1-scf00010 | 1 |
| AX-157901790 | 1 | 59.114 | KV452711.1 | 3289424 | 1-scf00010 | 1 |

|              |   |        |            |         |            |   |
|--------------|---|--------|------------|---------|------------|---|
| AX-157901791 | 1 | 59.114 | KV452711.1 | 3291427 | 1-scf00010 | 1 |
| AX-157752559 | 1 | 59.114 | KV452711.1 | 3293098 | 1-scf00010 | 1 |
| AX-157901792 | 1 | 59.114 | KV452711.1 | 3293337 | 1-scf00010 | 1 |
| AX-157901793 | 1 | 59.114 | KV452711.1 | 3293944 | 1-scf00010 | 1 |
| AX-157901794 | 1 | 59.114 | KV452711.1 | 3296232 | 1-scf00010 | 1 |
| AX-157901795 | 1 | 59.114 | KV452711.1 | 3296602 | 1-scf00010 | 1 |
| AX-157901797 | 1 | 59.114 | KV452711.1 | 3296881 | 1-scf00010 | 1 |
| AX-157901798 | 1 | 59.114 | KV452711.1 | 3297683 | 1-scf00010 | 1 |
| AX-157901800 | 1 | 59.114 | KV452711.1 | 3300161 | 1-scf00010 | 1 |
| AX-157901801 | 1 | 59.114 | KV452711.1 | 3301375 | 1-scf00010 | 1 |
| AX-157901802 | 1 | 59.114 | KV452711.1 | 3302493 | 1-scf00010 | 1 |
| AX-157901803 | 1 | 59.114 | KV452711.1 | 3303196 | 1-scf00010 | 1 |
| AX-157901806 | 1 | 59.114 | KV452711.1 | 3322722 | 1-scf00010 | 1 |
| AX-157864417 | 1 | 59.114 | KV452711.1 | 3324475 | 1-scf00010 | 1 |
| AX-157901808 | 1 | 59.114 | KV452711.1 | 3347491 | 1-scf00010 | 1 |
| AX-157901809 | 1 | 59.114 | KV452711.1 | 3348449 | 1-scf00010 | 1 |
| AX-157747264 | 1 | 59.114 | KV452711.1 | 3350783 | 1-scf00010 | 1 |
| AX-157901810 | 1 | 59.114 | KV452711.1 | 3352110 | 1-scf00010 | 1 |
| AX-157811576 | 1 | 59.114 | KV452711.1 | 3352984 | 1-scf00010 | 1 |
| AX-157901811 | 1 | 59.114 | KV452711.1 | 3353088 | 1-scf00010 | 1 |
| AX-157901813 | 1 | 59.114 | KV452711.1 | 3359402 | 1-scf00010 | 1 |
| AX-157901814 | 1 | 59.114 | KV452711.1 | 3360471 | 1-scf00010 | 1 |
| AX-157901815 | 1 | 59.114 | KV452711.1 | 3361539 | 1-scf00010 | 1 |
| AX-157901816 | 1 | 59.114 | KV452711.1 | 3362420 | 1-scf00010 | 1 |
| AX-157901818 | 1 | 59.114 | KV452711.1 | 3368406 | 1-scf00010 | 1 |
| AX-157901819 | 1 | 59.114 | KV452711.1 | 3368841 | 1-scf00010 | 1 |
| AX-157901822 | 1 | 59.114 | KV452711.1 | 3374323 | 1-scf00010 | 1 |
| AX-157901823 | 1 | 59.114 | KV452711.1 | 3380238 | 1-scf00010 | 1 |
| AX-157864419 | 1 | 59.114 | KV452711.1 | 3382951 | 1-scf00010 | 1 |
| AX-157901826 | 1 | 59.114 | KV452711.1 | 3385777 | 1-scf00010 | 1 |
| AX-157901833 | 1 | 59.114 | KV452711.1 | 3409714 | 1-scf00010 | 1 |
| AX-157901834 | 1 | 59.114 | KV452711.1 | 3412499 | 1-scf00010 | 1 |
| AX-157901838 | 1 | 59.114 | KV452711.1 | 3438107 | 1-scf00010 | 1 |
| AX-157717441 | 1 | 59.114 | KV452711.1 | 3446501 | 1-scf00010 | 1 |
| AX-157901844 | 1 | 59.114 | KV452711.1 | 3454201 | 1-scf00010 | 1 |
| AX-157901849 | 1 | 59.114 | KV452711.1 | 3472104 | 1-scf00010 | 1 |
| AX-157901850 | 1 | 59.114 | KV452711.1 | 3474976 | 1-scf00010 | 1 |
| AX-157901851 | 1 | 59.114 | KV452711.1 | 3479044 | 1-scf00010 | 1 |
| AX-157901854 | 1 | 59.114 | KV452711.1 | 3503803 | 1-scf00010 | 1 |
| AX-157901855 | 1 | 59.114 | KV452711.1 | 3517488 | 1-scf00010 | 1 |
| AX-157901856 | 1 | 59.114 | KV452711.1 | 3519271 | 1-scf00010 | 1 |
| AX-157901857 | 1 | 59.114 | KV452711.1 | 3522051 | 1-scf00010 | 1 |
| AX-157901858 | 1 | 59.114 | KV452711.1 | 3522672 | 1-scf00010 | 1 |
| AX-157901859 | 1 | 59.114 | KV452711.1 | 3527454 | 1-scf00010 | 1 |
| AX-157901860 | 1 | 59.114 | KV452711.1 | 3530916 | 1-scf00010 | 1 |
| AX-157757382 | 1 | 59.114 | KV452711.1 | 3546703 | 1-scf00010 | 1 |
| AX-157901862 | 1 | 59.114 | KV452711.1 | 3557650 | 1-scf00010 | 1 |
| AX-157901866 | 1 | 59.114 | KV452711.1 | 3572091 | 1-scf00010 | 1 |
| AX-157901869 | 1 | 59.114 | KV452711.1 | 3597048 | 1-scf00010 | 1 |
| AX-157901872 | 1 | 59.114 | KV452711.1 | 3607723 | 1-scf00010 | 1 |
| AX-157755874 | 1 | 59.114 | KV452711.1 | 3613021 | 1-scf00010 | 1 |

|              |   |        |            |         |            |   |
|--------------|---|--------|------------|---------|------------|---|
| AX-157901896 | 1 | 59.114 | KV452711.1 | 3642234 | 1-scf00010 | 1 |
| AX-157901900 | 1 | 59.114 | KV452711.1 | 3643800 | 1-scf00010 | 1 |
| AX-157901903 | 1 | 59.114 | KV452711.1 | 3645524 | 1-scf00010 | 1 |
| AX-157901919 | 1 | 59.114 | KV452711.1 | 3658160 | 1-scf00010 | 1 |
| AX-157901926 | 1 | 59.114 | KV452711.1 | 3661186 | 1-scf00010 | 1 |
| AX-157901929 | 1 | 59.114 | KV452711.1 | 3665338 | 1-scf00010 | 1 |
| AX-157901933 | 1 | 59.114 | KV452711.1 | 3667268 | 1-scf00010 | 1 |
| AX-157901984 | 1 | 59.114 | KV452711.1 | 3740606 | 1-scf00010 | 1 |
| AX-157901990 | 1 | 59.114 | KV452711.1 | 3748067 | 1-scf00010 | 1 |
| AX-157902065 | 1 | 59.114 | KV452711.1 | 3841719 | 1-scf00010 | 1 |
| AX-157902072 | 1 | 59.114 | KV452711.1 | 3855787 | 1-scf00010 | 1 |
| AX-157902073 | 1 | 59.114 | KV452711.1 | 3857161 | 1-scf00010 | 1 |
| AX-157811622 | 1 | 59.114 | KV452711.1 | 3895491 | 1-scf00010 | 1 |
| AX-157811635 | 1 | 59.114 | KV452711.1 | 4005238 | 1-scf00010 | 1 |
| AX-157902182 | 1 | 59.114 | KV452711.1 | 4007299 | 1-scf00010 | 1 |
| AX-157902184 | 1 | 59.114 | KV452711.1 | 4008370 | 1-scf00010 | 1 |
| AX-157723378 | 1 | 59.114 | KV452711.1 | 4010125 | 1-scf00010 | 1 |
| AX-157902186 | 1 | 59.114 | KV452711.1 | 4012403 | 1-scf00010 | 1 |
| AX-157902192 | 1 | 59.114 | KV452711.1 | 4023238 | 1-scf00010 | 1 |
| AX-157902193 | 1 | 59.114 | KV452711.1 | 4027567 | 1-scf00010 | 1 |
| AX-157902197 | 1 | 59.114 | KV452711.1 | 4032659 | 1-scf00010 | 1 |
| AX-157902199 | 1 | 59.114 | KV452711.1 | 4035277 | 1-scf00010 | 1 |
| AX-157902200 | 1 | 59.114 | KV452711.1 | 4036900 | 1-scf00010 | 1 |
| AX-157902201 | 1 | 59.114 | KV452711.1 | 4040483 | 1-scf00010 | 1 |
| AX-157902202 | 1 | 59.114 | KV452711.1 | 4041074 | 1-scf00010 | 1 |
| AX-157902208 | 1 | 59.114 | KV452711.1 | 4049830 | 1-scf00010 | 1 |
| AX-157902218 | 1 | 59.114 | KV452711.1 | 4061811 | 1-scf00010 | 1 |
| AX-158379160 | 1 | 59.114 | KV452711.1 | 4064376 | 1-scf00010 | 1 |
| AX-157902220 | 1 | 59.114 | KV452711.1 | 4065019 | 1-scf00010 | 1 |
| AX-157902224 | 1 | 59.114 | KV452711.1 | 4070281 | 1-scf00010 | 1 |
| AX-157902225 | 1 | 59.114 | KV452711.1 | 4075990 | 1-scf00010 | 1 |
| AX-157902227 | 1 | 59.114 | KV452711.1 | 4078313 | 1-scf00010 | 1 |
| AX-157902231 | 1 | 59.114 | KV452711.1 | 4094878 | 1-scf00010 | 1 |
| AX-157902233 | 1 | 59.114 | KV452711.1 | 4096982 | 1-scf00010 | 1 |
| AX-157902235 | 1 | 59.114 | KV452711.1 | 4099250 | 1-scf00010 | 1 |
| AX-157902236 | 1 | 59.114 | KV452711.1 | 4104014 | 1-scf00010 | 1 |
| AX-157902238 | 1 | 59.114 | KV452711.1 | 4114513 | 1-scf00010 | 1 |
| AX-157902239 | 1 | 59.114 | KV452711.1 | 4116276 | 1-scf00010 | 1 |
| AX-157902241 | 1 | 59.114 | KV452711.1 | 4131455 | 1-scf00010 | 1 |
| AX-157902242 | 1 | 59.114 | KV452711.1 | 4140370 | 1-scf00010 | 1 |
| AX-157902244 | 1 | 59.114 | KV452711.1 | 4147911 | 1-scf00010 | 1 |
| AX-157902245 | 1 | 59.114 | KV452711.1 | 4149092 | 1-scf00010 | 1 |
| AX-157902248 | 1 | 59.114 | KV452711.1 | 4182494 | 1-scf00010 | 1 |
| AX-157902249 | 1 | 59.114 | KV452711.1 | 4185174 | 1-scf00010 | 1 |
| AX-157902250 | 1 | 59.114 | KV452711.1 | 4190154 | 1-scf00010 | 1 |
| AX-157902251 | 1 | 59.114 | KV452711.1 | 4212224 | 1-scf00010 | 1 |
| AX-157902252 | 1 | 59.114 | KV452711.1 | 4223944 | 1-scf00010 | 1 |
| AX-157902255 | 1 | 59.114 | KV452711.1 | 4243780 | 1-scf00010 | 1 |
| AX-157902256 | 1 | 59.114 | KV452711.1 | 4244532 | 1-scf00010 | 1 |
| AX-157902257 | 1 | 59.114 | KV452711.1 | 4258935 | 1-scf00010 | 1 |
| AX-157902258 | 1 | 59.114 | KV452711.1 | 4260659 | 1-scf00010 | 1 |

|              |   |        |            |         |            |   |
|--------------|---|--------|------------|---------|------------|---|
| AX-157902260 | 1 | 59.114 | KV452711.1 | 4267578 | 1-scf00010 | 1 |
| AX-157902261 | 1 | 59.114 | KV452711.1 | 4267880 | 1-scf00010 | 1 |
| AX-157902265 | 1 | 59.114 | KV452711.1 | 4283799 | 1-scf00010 | 1 |
| AX-157902266 | 1 | 59.114 | KV452711.1 | 4285078 | 1-scf00010 | 1 |
| AX-157902267 | 1 | 59.114 | KV452711.1 | 4286755 | 1-scf00010 | 1 |
| AX-157902268 | 1 | 59.114 | KV452711.1 | 4292191 | 1-scf00010 | 1 |
| AX-157902269 | 1 | 59.114 | KV452711.1 | 4298408 | 1-scf00010 | 1 |
| AX-157902279 | 1 | 59.114 | KV452713.1 | 9828    | 1-scf00011 | 1 |
| AX-157902280 | 1 | 59.114 | KV452713.1 | 19407   | 1-scf00011 | 1 |
| AX-157902281 | 1 | 59.114 | KV452713.1 | 19878   | 1-scf00011 | 1 |
| AX-157902284 | 1 | 59.114 | KV452713.1 | 39226   | 1-scf00011 | 1 |
| AX-157902285 | 1 | 59.114 | KV452713.1 | 41397   | 1-scf00011 | 1 |
| AX-157902286 | 1 | 59.114 | KV452713.1 | 43459   | 1-scf00011 | 1 |
| AX-157902288 | 1 | 59.114 | KV452713.1 | 48960   | 1-scf00011 | 1 |
| AX-157902289 | 1 | 59.114 | KV452713.1 | 53746   | 1-scf00011 | 1 |
| AX-157902290 | 1 | 59.114 | KV452713.1 | 55085   | 1-scf00011 | 1 |
| AX-157902291 | 1 | 59.114 | KV452713.1 | 60199   | 1-scf00011 | 1 |
| AX-157902292 | 1 | 59.114 | KV452713.1 | 61232   | 1-scf00011 | 1 |
| AX-157902293 | 1 | 59.114 | KV452713.1 | 81131   | 1-scf00011 | 1 |
| AX-157902295 | 1 | 59.114 | KV452713.1 | 104221  | 1-scf00011 | 1 |
| AX-157902298 | 1 | 59.114 | KV452713.1 | 108136  | 1-scf00011 | 1 |
| AX-157902299 | 1 | 59.114 | KV452713.1 | 121018  | 1-scf00011 | 1 |
| AX-157902300 | 1 | 59.114 | KV452713.1 | 121286  | 1-scf00011 | 1 |
| AX-157902304 | 1 | 59.114 | KV452713.1 | 140866  | 1-scf00011 | 1 |
| AX-157902305 | 1 | 59.114 | KV452713.1 | 146205  | 1-scf00011 | 1 |
| AX-157902307 | 1 | 59.114 | KV452713.1 | 148657  | 1-scf00011 | 1 |
| AX-157902309 | 1 | 59.114 | KV452713.1 | 155149  | 1-scf00011 | 1 |
| AX-157902313 | 1 | 59.114 | KV452713.1 | 173722  | 1-scf00011 | 1 |
| AX-157902314 | 1 | 59.114 | KV452713.1 | 178886  | 1-scf00011 | 1 |
| AX-157902316 | 1 | 59.114 | KV452713.1 | 207684  | 1-scf00011 | 1 |
| AX-157902319 | 1 | 59.114 | KV452713.1 | 225136  | 1-scf00011 | 1 |
| AX-157902322 | 1 | 59.114 | KV452713.1 | 245015  | 1-scf00011 | 1 |
| AX-157902324 | 1 | 59.114 | KV452713.1 | 276898  | 1-scf00011 | 1 |
| AX-157902327 | 1 | 59.114 | KV452713.1 | 296153  | 1-scf00011 | 1 |
| AX-157902328 | 1 | 59.114 | KV452713.1 | 296412  | 1-scf00011 | 1 |
| AX-157902333 | 1 | 59.114 | KV452713.1 | 319925  | 1-scf00011 | 1 |
| AX-157902334 | 1 | 59.114 | KV452713.1 | 320962  | 1-scf00011 | 1 |
| AX-157902335 | 1 | 59.114 | KV452713.1 | 322601  | 1-scf00011 | 1 |
| AX-157902336 | 1 | 59.114 | KV452713.1 | 337404  | 1-scf00011 | 1 |
| AX-157902337 | 1 | 59.114 | KV452713.1 | 340806  | 1-scf00011 | 1 |
| AX-157902338 | 1 | 59.114 | KV452713.1 | 344870  | 1-scf00011 | 1 |
| AX-157811640 | 1 | 59.114 | KV452713.1 | 358326  | 1-scf00011 | 1 |
| AX-157902342 | 1 | 59.114 | KV452713.1 | 374577  | 1-scf00011 | 1 |
| AX-157902343 | 1 | 59.114 | KV452713.1 | 380579  | 1-scf00011 | 1 |
| AX-157902344 | 1 | 59.114 | KV452713.1 | 381374  | 1-scf00011 | 1 |
| AX-157902346 | 1 | 59.114 | KV452713.1 | 382883  | 1-scf00011 | 1 |
| AX-157811641 | 1 | 59.114 | KV452713.1 | 390347  | 1-scf00011 | 1 |
| AX-157902349 | 1 | 59.114 | KV452713.1 | 391337  | 1-scf00011 | 1 |
| AX-157902350 | 1 | 59.114 | KV452713.1 | 394659  | 1-scf00011 | 1 |
| AX-157902351 | 1 | 59.114 | KV452713.1 | 398263  | 1-scf00011 | 1 |
| AX-157902358 | 1 | 59.114 | KV452713.1 | 432943  | 1-scf00011 | 1 |

|              |   |        |            |        |            |   |
|--------------|---|--------|------------|--------|------------|---|
| AX-157902359 | 1 | 59.114 | KV452713.1 | 437582 | 1-scf00011 | 1 |
| AX-157902362 | 1 | 59.114 | KV452713.1 | 455747 | 1-scf00011 | 1 |
| AX-157902368 | 1 | 59.114 | KV452713.1 | 484356 | 1-scf00011 | 1 |
| AX-157902370 | 1 | 59.114 | KV452713.1 | 491391 | 1-scf00011 | 1 |
| AX-157902371 | 1 | 59.114 | KV452713.1 | 502254 | 1-scf00011 | 1 |
| AX-158403988 | 1 | 59.114 | KV452713.1 | 507316 | 1-scf00011 | 1 |
| AX-158404631 | 1 | 59.114 | KV452713.1 | 507996 | 1-scf00011 | 1 |
| AX-157902372 | 1 | 59.114 | KV452713.1 | 512077 | 1-scf00011 | 1 |
| AX-158404633 | 1 | 59.114 | KV452713.1 | 515526 | 1-scf00011 | 1 |
| AX-157902373 | 1 | 59.114 | KV452713.1 | 515692 | 1-scf00011 | 1 |
| AX-157902374 | 1 | 59.114 | KV452713.1 | 518533 | 1-scf00011 | 1 |
| AX-157902377 | 1 | 59.114 | KV452713.1 | 521977 | 1-scf00011 | 1 |
| AX-157902378 | 1 | 59.114 | KV452713.1 | 525011 | 1-scf00011 | 1 |
| AX-158414656 | 1 | 59.114 | KV452713.1 | 526104 | 1-scf00011 | 1 |
| AX-157902380 | 1 | 59.114 | KV452713.1 | 527936 | 1-scf00011 | 1 |
| AX-157902381 | 1 | 59.114 | KV452713.1 | 529458 | 1-scf00011 | 1 |
| AX-157811643 | 1 | 59.114 | KV452713.1 | 529934 | 1-scf00011 | 1 |
| AX-157902382 | 1 | 59.114 | KV452713.1 | 531882 | 1-scf00011 | 1 |
| AX-157811644 | 1 | 59.114 | KV452713.1 | 533060 | 1-scf00011 | 1 |
| AX-157902384 | 1 | 59.114 | KV452713.1 | 533515 | 1-scf00011 | 1 |
| AX-157902385 | 1 | 59.114 | KV452713.1 | 536101 | 1-scf00011 | 1 |
| AX-157902387 | 1 | 59.114 | KV452713.1 | 538301 | 1-scf00011 | 1 |
| AX-157811645 | 1 | 59.114 | KV452713.1 | 539928 | 1-scf00011 | 1 |
| AX-157811646 | 1 | 59.114 | KV452713.1 | 540697 | 1-scf00011 | 1 |
| AX-157811647 | 1 | 59.114 | KV452713.1 | 540759 | 1-scf00011 | 1 |
| AX-157811648 | 1 | 59.114 | KV452713.1 | 542342 | 1-scf00011 | 1 |
| AX-157902388 | 1 | 59.114 | KV452713.1 | 542425 | 1-scf00011 | 1 |
| AX-157902390 | 1 | 59.114 | KV452713.1 | 545200 | 1-scf00011 | 1 |
| AX-157902391 | 1 | 59.114 | KV452713.1 | 550004 | 1-scf00011 | 1 |
| AX-157902396 | 1 | 59.114 | KV452713.1 | 589441 | 1-scf00011 | 1 |
| AX-157902402 | 1 | 59.114 | KV452713.1 | 621077 | 1-scf00011 | 1 |
| AX-157902405 | 1 | 59.114 | KV452713.1 | 624453 | 1-scf00011 | 1 |
| AX-157902407 | 1 | 59.114 | KV452713.1 | 625456 | 1-scf00011 | 1 |
| AX-157902408 | 1 | 59.114 | KV452713.1 | 626894 | 1-scf00011 | 1 |
| AX-157902409 | 1 | 59.114 | KV452713.1 | 629895 | 1-scf00011 | 1 |
| AX-157811655 | 1 | 59.114 | KV452713.1 | 639779 | 1-scf00011 | 1 |
| AX-157811657 | 1 | 59.114 | KV452713.1 | 645861 | 1-scf00011 | 1 |
| AX-157902419 | 1 | 59.114 | KV452713.1 | 668938 | 1-scf00011 | 1 |
| AX-157811665 | 1 | 59.114 | KV452713.1 | 672518 | 1-scf00011 | 1 |
| AX-157902420 | 1 | 59.114 | KV452713.1 | 676018 | 1-scf00011 | 1 |
| AX-157902424 | 1 | 59.114 | KV452713.1 | 679422 | 1-scf00011 | 1 |
| AX-158404637 | 1 | 59.114 | KV452713.1 | 697490 | 1-scf00011 | 1 |
| AX-157902430 | 1 | 59.114 | KV452713.1 | 704154 | 1-scf00011 | 1 |
| AX-157902433 | 1 | 59.114 | KV452713.1 | 711656 | 1-scf00011 | 1 |
| AX-157902434 | 1 | 59.114 | KV452713.1 | 712014 | 1-scf00011 | 1 |
| AX-157902435 | 1 | 59.114 | KV452713.1 | 712360 | 1-scf00011 | 1 |
| AX-157902436 | 1 | 59.114 | KV452713.1 | 718298 | 1-scf00011 | 1 |
| AX-157902446 | 1 | 59.114 | KV452713.1 | 739798 | 1-scf00011 | 1 |
| AX-157902447 | 1 | 59.114 | KV452713.1 | 741419 | 1-scf00011 | 1 |
| AX-157902448 | 1 | 59.114 | KV452713.1 | 742810 | 1-scf00011 | 1 |
| AX-157902449 | 1 | 59.114 | KV452713.1 | 744030 | 1-scf00011 | 1 |

|              |   |        |            |        |            |   |
|--------------|---|--------|------------|--------|------------|---|
| AX-157902450 | 1 | 59.114 | KV452713.1 | 749488 | 1-scf00011 | 1 |
| AX-157902451 | 1 | 59.114 | KV452713.1 | 758375 | 1-scf00011 | 1 |
| AX-157902463 | 1 | 59.114 | KV452713.1 | 777863 | 1-scf00011 | 1 |
| AX-157902464 | 1 | 59.114 | KV452713.1 | 778241 | 1-scf00011 | 1 |
| AX-157902471 | 1 | 59.114 | KV452713.1 | 789080 | 1-scf00011 | 1 |
| AX-157902475 | 1 | 59.114 | KV452713.1 | 794806 | 1-scf00011 | 1 |
| AX-157811670 | 1 | 59.114 | KV452713.1 | 795765 | 1-scf00011 | 1 |
| AX-157902476 | 1 | 59.114 | KV452713.1 | 795981 | 1-scf00011 | 1 |
| AX-157902477 | 1 | 59.114 | KV452713.1 | 796723 | 1-scf00011 | 1 |
| AX-157902478 | 1 | 59.114 | KV452713.1 | 797507 | 1-scf00011 | 1 |
| AX-157902486 | 1 | 59.114 | KV452713.1 | 807024 | 1-scf00011 | 1 |
| AX-157902488 | 1 | 59.114 | KV452713.1 | 808209 | 1-scf00011 | 1 |
| AX-157715021 | 1 | 59.114 | KV452713.1 | 823455 | 1-scf00011 | 1 |
| AX-157902495 | 1 | 59.114 | KV452713.1 | 825551 | 1-scf00011 | 1 |
| AX-157902496 | 1 | 59.114 | KV452713.1 | 825963 | 1-scf00011 | 1 |
| AX-157749569 | 1 | 59.114 | KV452713.1 | 830336 | 1-scf00011 | 1 |
| AX-157902498 | 1 | 59.114 | KV452713.1 | 830947 | 1-scf00011 | 1 |
| AX-157902502 | 1 | 59.114 | KV452713.1 | 833367 | 1-scf00011 | 1 |
| AX-157902505 | 1 | 59.114 | KV452713.1 | 835315 | 1-scf00011 | 1 |
| AX-157902508 | 1 | 59.114 | KV452713.1 | 852528 | 1-scf00011 | 1 |
| AX-157902511 | 1 | 59.114 | KV452713.1 | 860136 | 1-scf00011 | 1 |
| AX-157902520 | 1 | 59.114 | KV452713.1 | 878869 | 1-scf00011 | 1 |
| AX-157902521 | 1 | 59.114 | KV452713.1 | 880576 | 1-scf00011 | 1 |
| AX-157902522 | 1 | 59.114 | KV452713.1 | 882537 | 1-scf00011 | 1 |
| AX-157902523 | 1 | 59.114 | KV452713.1 | 883985 | 1-scf00011 | 1 |
| AX-157902524 | 1 | 59.114 | KV452713.1 | 885831 | 1-scf00011 | 1 |
| AX-157902527 | 1 | 59.114 | KV452713.1 | 888382 | 1-scf00011 | 1 |
| AX-157902528 | 1 | 59.114 | KV452713.1 | 889417 | 1-scf00011 | 1 |
| AX-157902533 | 1 | 59.114 | KV452713.1 | 897484 | 1-scf00011 | 1 |
| AX-157902534 | 1 | 59.114 | KV452713.1 | 897780 | 1-scf00011 | 1 |
| AX-157902537 | 1 | 59.114 | KV452713.1 | 906838 | 1-scf00011 | 1 |
| AX-157902538 | 1 | 59.114 | KV452713.1 | 908677 | 1-scf00011 | 1 |
| AX-157902539 | 1 | 59.114 | KV452713.1 | 909706 | 1-scf00011 | 1 |
| AX-157811676 | 1 | 59.114 | KV452713.1 | 917464 | 1-scf00011 | 1 |
| AX-157902546 | 1 | 59.114 | KV452713.1 | 924739 | 1-scf00011 | 1 |
| AX-157902547 | 1 | 59.114 | KV452713.1 | 931684 | 1-scf00011 | 1 |
| AX-157902548 | 1 | 59.114 | KV452713.1 | 933118 | 1-scf00011 | 1 |
| AX-157811678 | 1 | 59.114 | KV452713.1 | 936065 | 1-scf00011 | 1 |
| AX-157902552 | 1 | 59.114 | KV452713.1 | 943024 | 1-scf00011 | 1 |
| AX-157902553 | 1 | 59.114 | KV452713.1 | 943528 | 1-scf00011 | 1 |
| AX-157902554 | 1 | 59.114 | KV452713.1 | 944587 | 1-scf00011 | 1 |
| AX-157902559 | 1 | 59.114 | KV452713.1 | 954331 | 1-scf00011 | 1 |
| AX-157902562 | 1 | 59.114 | KV452713.1 | 959155 | 1-scf00011 | 1 |
| AX-157902563 | 1 | 59.114 | KV452713.1 | 961598 | 1-scf00011 | 1 |
| AX-157902565 | 1 | 59.114 | KV452713.1 | 962579 | 1-scf00011 | 1 |
| AX-157902571 | 1 | 59.114 | KV452713.1 | 970165 | 1-scf00011 | 1 |
| AX-157902572 | 1 | 59.114 | KV452713.1 | 972251 | 1-scf00011 | 1 |
| AX-157902579 | 1 | 59.114 | KV452713.1 | 977896 | 1-scf00011 | 1 |
| AX-158421823 | 1 | 59.114 | KV452713.1 | 979709 | 1-scf00011 | 1 |
| AX-157902581 | 1 | 59.114 | KV452713.1 | 981029 | 1-scf00011 | 1 |
| AX-157902586 | 1 | 59.114 | KV452713.1 | 987507 | 1-scf00011 | 1 |

|              |   |        |            |         |            |   |
|--------------|---|--------|------------|---------|------------|---|
| AX-157902587 | 1 | 59.114 | KV452713.1 | 989698  | 1-scf00011 | 1 |
| AX-157902590 | 1 | 59.114 | KV452713.1 | 992037  | 1-scf00011 | 1 |
| AX-157811680 | 1 | 59.114 | KV452713.1 | 993748  | 1-scf00011 | 1 |
| AX-157902595 | 1 | 59.114 | KV452713.1 | 1000332 | 1-scf00011 | 1 |
| AX-157902597 | 1 | 59.114 | KV452713.1 | 1004156 | 1-scf00011 | 1 |
| AX-157902599 | 1 | 59.114 | KV452713.1 | 1007697 | 1-scf00011 | 1 |
| AX-157902600 | 1 | 59.114 | KV452713.1 | 1010811 | 1-scf00011 | 1 |
| AX-157811682 | 1 | 59.114 | KV452713.1 | 1012878 | 1-scf00011 | 1 |
| AX-157902605 | 1 | 59.114 | KV452713.1 | 1021136 | 1-scf00011 | 1 |
| AX-157902610 | 1 | 59.114 | KV452713.1 | 1026339 | 1-scf00011 | 1 |
| AX-157902615 | 1 | 59.114 | KV452713.1 | 1032096 | 1-scf00011 | 1 |
| AX-157902616 | 1 | 59.114 | KV452713.1 | 1032366 | 1-scf00011 | 1 |
| AX-157902617 | 1 | 59.114 | KV452713.1 | 1032445 | 1-scf00011 | 1 |
| AX-157902618 | 1 | 59.114 | KV452713.1 | 1033486 | 1-scf00011 | 1 |
| AX-157902619 | 1 | 59.114 | KV452713.1 | 1035113 | 1-scf00011 | 1 |
| AX-157902620 | 1 | 59.114 | KV452713.1 | 1036065 | 1-scf00011 | 1 |
| AX-157902626 | 1 | 59.114 | KV452713.1 | 1042824 | 1-scf00011 | 1 |
| AX-157902628 | 1 | 59.114 | KV452713.1 | 1043601 | 1-scf00011 | 1 |
| AX-157902632 | 1 | 59.114 | KV452713.1 | 1045480 | 1-scf00011 | 1 |
| AX-157902633 | 1 | 59.114 | KV452713.1 | 1046107 | 1-scf00011 | 1 |
| AX-157902635 | 1 | 59.114 | KV452713.1 | 1048103 | 1-scf00011 | 1 |
| AX-157902638 | 1 | 59.114 | KV452713.1 | 1052245 | 1-scf00011 | 1 |
| AX-157902642 | 1 | 59.114 | KV452713.1 | 1058725 | 1-scf00011 | 1 |
| AX-157902644 | 1 | 59.114 | KV452713.1 | 1061864 | 1-scf00011 | 1 |
| AX-157902645 | 1 | 59.114 | KV452713.1 | 1063224 | 1-scf00011 | 1 |
| AX-157811685 | 1 | 59.114 | KV452713.1 | 1067960 | 1-scf00011 | 1 |
| AX-157902650 | 1 | 59.114 | KV452713.1 | 1070063 | 1-scf00011 | 1 |
| AX-157902651 | 1 | 59.114 | KV452713.1 | 1070627 | 1-scf00011 | 1 |
| AX-157902655 | 1 | 59.114 | KV452713.1 | 1079362 | 1-scf00011 | 1 |
| AX-157902656 | 1 | 59.114 | KV452713.1 | 1080537 | 1-scf00011 | 1 |
| AX-157902659 | 1 | 59.114 | KV452713.1 | 1082040 | 1-scf00011 | 1 |
| AX-157902685 | 1 | 59.114 | KV452713.1 | 1130197 | 1-scf00011 | 1 |
| AX-157902692 | 1 | 59.114 | KV452713.1 | 1139146 | 1-scf00011 | 1 |
| AX-157902707 | 1 | 59.114 | KV452713.1 | 1153597 | 1-scf00011 | 1 |
| AX-157902723 | 1 | 59.114 | KV452713.1 | 1170681 | 1-scf00011 | 1 |
| AX-157747231 | 1 | 59.114 | KV452713.1 | 1204000 | 1-scf00011 | 1 |
| AX-157902756 | 1 | 59.114 | KV452713.1 | 1216894 | 1-scf00011 | 1 |
| AX-157902800 | 1 | 59.114 | KV452713.1 | 1282202 | 1-scf00011 | 1 |
| AX-157902829 | 1 | 59.114 | KV452713.1 | 1323695 | 1-scf00011 | 1 |
| AX-157902830 | 1 | 59.114 | KV452713.1 | 1325704 | 1-scf00011 | 1 |
| AX-157902832 | 1 | 59.114 | KV452713.1 | 1328229 | 1-scf00011 | 1 |
| AX-157902835 | 1 | 59.114 | KV452713.1 | 1333297 | 1-scf00011 | 1 |
| AX-157902896 | 1 | 59.114 | KV452713.1 | 1431418 | 1-scf00011 | 1 |
| AX-157902922 | 1 | 59.114 | KV452713.1 | 1467462 | 1-scf00011 | 1 |
| AX-158389390 | 1 | 59.114 | KV452713.1 | 1494239 | 1-scf00011 | 1 |
| AX-157903004 | 1 | 59.114 | KV452713.1 | 1564414 | 1-scf00011 | 1 |
| AX-157903006 | 1 | 59.114 | KV452713.1 | 1567246 | 1-scf00011 | 1 |
| AX-157811713 | 1 | 59.114 | KV452713.1 | 1567425 | 1-scf00011 | 1 |
| AX-157903008 | 1 | 59.114 | KV452713.1 | 1569907 | 1-scf00011 | 1 |
| AX-157903010 | 1 | 59.114 | KV452713.1 | 1575407 | 1-scf00011 | 1 |
| AX-157903012 | 1 | 59.114 | KV452713.1 | 1578374 | 1-scf00011 | 1 |



|              |   |        |            |         |            |   |
|--------------|---|--------|------------|---------|------------|---|
| AX-157903013 | 1 | 59.114 | KV452713.1 | 1578968 | 1-scf00011 | 1 |
| AX-157853606 | 1 | 59.114 | KV452713.1 | 1798220 | 1-scf00011 | 1 |
| AX-157811739 | 1 | 59.114 | KV452713.1 | 1915860 | 1-scf00011 | 1 |
| AX-157903296 | 1 | 59.114 | KV452713.1 | 1959542 | 1-scf00011 | 1 |
| AX-157903355 | 1 | 59.114 | KV452713.1 | 2036865 | 1-scf00011 | 1 |
| AX-157903367 | 1 | 59.114 | KV452713.1 | 2053157 | 1-scf00011 | 1 |
| AX-157903369 | 1 | 59.114 | KV452713.1 | 2054753 | 1-scf00011 | 1 |
| AX-157903370 | 1 | 59.114 | KV452713.1 | 2055324 | 1-scf00011 | 1 |
| AX-157903372 | 1 | 59.114 | KV452713.1 | 2059692 | 1-scf00011 | 1 |
| AX-157903373 | 1 | 59.114 | KV452713.1 | 2059935 | 1-scf00011 | 1 |
| AX-157903374 | 1 | 59.114 | KV452713.1 | 2060564 | 1-scf00011 | 1 |
| AX-157903508 | 1 | 59.114 | KV452713.1 | 2198154 | 1-scf00011 | 1 |
| AX-157903540 | 1 | 59.114 | KV452713.1 | 2231164 | 1-scf00011 | 1 |
| AX-157696977 | 1 | 59.114 | KV452713.1 | 2292678 | 1-scf00011 | 1 |
| AX-157903750 | 1 | 59.114 | KV452713.1 | 2488518 | 1-scf00011 | 1 |
| AX-158414680 | 1 | 59.114 | KV452713.1 | 2597161 | 1-scf00011 | 1 |
| AX-158404677 | 1 | 59.114 | KV452713.1 | 2617743 | 1-scf00011 | 1 |
| AX-157903871 | 1 | 59.114 | KV452713.1 | 2651900 | 1-scf00011 | 1 |
| AX-157719119 | 1 | 59.114 | KV452713.1 | 2659863 | 1-scf00011 | 1 |
| AX-157903876 | 1 | 59.114 | KV452713.1 | 2660171 | 1-scf00011 | 1 |
| AX-157903901 | 1 | 59.114 | KV452713.1 | 2679748 | 1-scf00011 | 1 |
| AX-157811788 | 1 | 59.114 | KV452713.1 | 2680983 | 1-scf00011 | 1 |
| AX-157903904 | 1 | 59.114 | KV452713.1 | 2683841 | 1-scf00011 | 1 |
| AX-157868917 | 1 | 59.114 | KV452713.1 | 2683962 | 1-scf00011 | 1 |
| AX-157903908 | 1 | 59.114 | KV452713.1 | 2686391 | 1-scf00011 | 1 |
| AX-157903909 | 1 | 59.114 | KV452713.1 | 2686958 | 1-scf00011 | 1 |
| AX-157903911 | 1 | 59.114 | KV452713.1 | 2688118 | 1-scf00011 | 1 |
| AX-158404682 | 1 | 59.114 | KV452713.1 | 2694353 | 1-scf00011 | 1 |
| AX-157903919 | 1 | 59.114 | KV452713.1 | 2699784 | 1-scf00011 | 1 |
| AX-157903922 | 1 | 59.114 | KV452713.1 | 2701529 | 1-scf00011 | 1 |
| AX-157725472 | 1 | 59.114 | KV452713.1 | 2738960 | 1-scf00011 | 1 |
| AX-157868920 | 1 | 59.114 | KV452713.1 | 2742045 | 1-scf00011 | 1 |
| AX-157904000 | 1 | 59.114 | KV452713.1 | 2848737 | 1-scf00011 | 1 |
| AX-157811796 | 1 | 59.114 | KV452713.1 | 2852172 | 1-scf00011 | 1 |
| AX-157727367 | 1 | 59.114 | KV452713.1 | 2856366 | 1-scf00011 | 1 |
| AX-157904007 | 1 | 59.114 | KV452713.1 | 2865631 | 1-scf00011 | 1 |
| AX-157708854 | 1 | 59.114 | KV452713.1 | 2897046 | 1-scf00011 | 1 |
| AX-157904038 | 1 | 59.114 | KV452713.1 | 2927965 | 1-scf00011 | 1 |
| AX-157904086 | 1 | 59.114 | KV452713.1 | 3025407 | 1-scf00011 | 1 |
| AX-157904113 | 1 | 59.114 | KV452713.1 | 3064093 | 1-scf00011 | 1 |
| AX-157904467 | 1 | 59.114 | KV452713.1 | 3798955 | 1-scf00011 | 1 |
| AX-157904474 | 1 | 59.114 | KV452713.1 | 3807352 | 1-scf00011 | 1 |
| AX-157904506 | 1 | 59.114 | KV452713.1 | 3860284 | 1-scf00011 | 1 |
| AX-157904515 | 1 | 59.114 | KV452713.1 | 3874499 | 1-scf00011 | 1 |
| AX-157811832 | 1 | 59.114 | KV452713.1 | 3931841 | 1-scf00011 | 1 |
| AX-157904618 | 1 | 59.114 | KV452713.1 | 4028423 | 1-scf00011 | 1 |
| AX-157904661 | 1 | 59.114 | KV452713.1 | 4092503 | 1-scf00011 | 1 |
| AX-157904662 | 1 | 59.114 | KV452713.1 | 4093351 | 1-scf00011 | 1 |
| AX-157757259 | 1 | 59.114 | KV452713.1 | 4513621 | 1-scf00011 | 1 |
| AX-157811263 | 1 | 59.145 | KV452709.1 | 4903783 | 1-scf00009 | 1 |
| AX-157899287 | 1 | 59.145 | KV452709.1 | 4971807 | 1-scf00009 | 1 |

|              |   |        |            |         |            |   |
|--------------|---|--------|------------|---------|------------|---|
| AX-157811274 | 1 | 59.145 | KV452709.1 | 5076320 | 1-scf00009 | 1 |
| AX-157899992 | 1 | 59.145 | KV452709.1 | 5882886 | 1-scf00009 | 1 |
| AX-157901389 | 1 | 59.145 | KV452711.1 | 2203814 | 1-scf00010 | 1 |
| AX-157901419 | 1 | 59.145 | KV452711.1 | 2283339 | 1-scf00010 | 1 |
| AX-157901541 | 1 | 59.145 | KV452711.1 | 2694145 | 1-scf00010 | 1 |
| AX-157901686 | 1 | 59.145 | KV452711.1 | 2991423 | 1-scf00010 | 1 |
| AX-157747677 | 1 | 59.145 | KV452711.1 | 3157835 | 1-scf00010 | 1 |
| AX-157811658 | 1 | 59.145 | KV452713.1 | 647856  | 1-scf00011 | 1 |
| AX-157902429 | 1 | 59.145 | KV452713.1 | 701450  | 1-scf00011 | 1 |
| AX-157902530 | 1 | 59.145 | KV452713.1 | 891062  | 1-scf00011 | 1 |
| AX-157864424 | 1 | 59.145 | KV452713.1 | 893985  | 1-scf00011 | 1 |
| AX-157902564 | 1 | 59.145 | KV452713.1 | 962058  | 1-scf00011 | 1 |
| AX-157902665 | 1 | 59.145 | KV452713.1 | 1096004 | 1-scf00011 | 1 |
| AX-157902821 | 1 | 59.145 | KV452713.1 | 1313758 | 1-scf00011 | 1 |
| AX-157811783 | 1 | 59.145 | KV452713.1 | 2481904 | 1-scf00011 | 1 |
| AX-157754203 | 1 | 59.145 | KV452713.1 | 3924684 | 1-scf00011 | 1 |
| AX-157904543 | 1 | 59.145 | KV452713.1 | 3924879 | 1-scf00011 | 1 |
| AX-157902686 | 1 | 59.166 | KV452713.1 | 1132261 | 1-scf00011 | 1 |
| AX-157903088 | 1 | 59.166 | KV452713.1 | 1674792 | 1-scf00011 | 1 |
| AX-157811793 | 1 | 59.166 | KV452713.1 | 2828906 | 1-scf00011 | 1 |
| AX-157904541 | 1 | 59.166 | KV452713.1 | 3923523 | 1-scf00011 | 1 |
| AX-157719713 | 1 | 59.223 | KV452708.1 | 1045752 | 1-scf00008 | 1 |
| AX-157896913 | 1 | 59.223 | KV452709.1 | 1080831 | 1-scf00009 | 1 |
| AX-158404396 | 1 | 59.223 | KV452709.1 | 1175728 | 1-scf00009 | 1 |
| AX-157896975 | 1 | 59.223 | KV452709.1 | 1186314 | 1-scf00009 | 1 |
| AX-157896988 | 1 | 59.223 | KV452709.1 | 1214131 | 1-scf00009 | 1 |
| AX-157897214 | 1 | 59.223 | KV452709.1 | 1557166 | 1-scf00009 | 1 |
| AX-157897219 | 1 | 59.223 | KV452709.1 | 1561091 | 1-scf00009 | 1 |
| AX-157897220 | 1 | 59.223 | KV452709.1 | 1562664 | 1-scf00009 | 1 |
| AX-157897221 | 1 | 59.223 | KV452709.1 | 1563304 | 1-scf00009 | 1 |
| AX-157897245 | 1 | 59.223 | KV452709.1 | 1587930 | 1-scf00009 | 1 |
| AX-157897268 | 1 | 59.223 | KV452709.1 | 1609582 | 1-scf00009 | 1 |
| AX-157897297 | 1 | 59.223 | KV452709.1 | 1657690 | 1-scf00009 | 1 |
| AX-157811033 | 1 | 59.223 | KV452709.1 | 1998146 | 1-scf00009 | 1 |
| AX-157897594 | 1 | 59.223 | KV452709.1 | 2127405 | 1-scf00009 | 1 |
| AX-157898014 | 1 | 59.223 | KV452709.1 | 2820167 | 1-scf00009 | 1 |
| AX-157750156 | 1 | 59.223 | KV452709.1 | 3256500 | 1-scf00009 | 1 |
| AX-158403924 | 1 | 59.223 | KV452709.1 | 3909444 | 1-scf00009 | 1 |
| AX-157898551 | 1 | 59.223 | KV452709.1 | 3925691 | 1-scf00009 | 1 |
| AX-157898688 | 1 | 59.223 | KV452709.1 | 4109986 | 1-scf00009 | 1 |
| AX-157898972 | 1 | 59.223 | KV452709.1 | 4512019 | 1-scf00009 | 1 |
| AX-157899211 | 1 | 59.223 | KV452709.1 | 4870004 | 1-scf00009 | 1 |
| AX-157899265 | 1 | 59.223 | KV452709.1 | 4939373 | 1-scf00009 | 1 |
| AX-157899417 | 1 | 59.223 | KV452709.1 | 5143053 | 1-scf00009 | 1 |
| AX-157899453 | 1 | 59.223 | KV452709.1 | 5196906 | 1-scf00009 | 1 |
| AX-157899458 | 1 | 59.223 | KV452709.1 | 5204806 | 1-scf00009 | 1 |
| AX-157899507 | 1 | 59.223 | KV452709.1 | 5258365 | 1-scf00009 | 1 |
| AX-157899508 | 1 | 59.223 | KV452709.1 | 5259308 | 1-scf00009 | 1 |
| AX-157811295 | 1 | 59.223 | KV452709.1 | 5345292 | 1-scf00009 | 1 |
| AX-157899649 | 1 | 59.223 | KV452709.1 | 5429118 | 1-scf00009 | 1 |
| AX-157746131 | 1 | 59.223 | KV452709.1 | 5483884 | 1-scf00009 | 1 |

|              |   |        |            |         |            |   |
|--------------|---|--------|------------|---------|------------|---|
| AX-157811356 | 1 | 59.223 | KV452709.1 | 5921011 | 1-scf00009 | 1 |
| AX-157772457 | 1 | 59.223 | KV452709.1 | 6116915 | 1-scf00009 | 1 |
| AX-157900143 | 1 | 59.223 | KV452709.1 | 6127638 | 1-scf00009 | 1 |
| AX-158404507 | 1 | 59.223 | KV452709.1 | 6129687 | 1-scf00009 | 1 |
| AX-157900150 | 1 | 59.223 | KV452709.1 | 6136159 | 1-scf00009 | 1 |
| AX-157748739 | 1 | 59.223 | KV452709.1 | 6142507 | 1-scf00009 | 1 |
| AX-157900232 | 1 | 59.223 | KV452709.1 | 6285928 | 1-scf00009 | 1 |
| AX-157900234 | 1 | 59.223 | KV452709.1 | 6289799 | 1-scf00009 | 1 |
| AX-157754936 | 1 | 59.223 | KV452709.1 | 6363284 | 1-scf00009 | 1 |
| AX-157900378 | 1 | 59.223 | KV452709.1 | 6665898 | 1-scf00009 | 1 |
| AX-157900385 | 1 | 59.223 | KV452709.1 | 6714113 | 1-scf00009 | 1 |
| AX-157900394 | 1 | 59.223 | KV452709.1 | 6778359 | 1-scf00009 | 1 |
| AX-157864403 | 1 | 59.223 | KV452709.1 | 7265562 | 1-scf00009 | 1 |
| AX-157900557 | 1 | 59.223 | KV452709.1 | 7427312 | 1-scf00009 | 1 |
| AX-157900567 | 1 | 59.223 | KV452709.1 | 7458090 | 1-scf00009 | 1 |
| AX-157900571 | 1 | 59.223 | KV452709.1 | 7463537 | 1-scf00009 | 1 |
| AX-157900572 | 1 | 59.223 | KV452709.1 | 7464742 | 1-scf00009 | 1 |
| AX-157900578 | 1 | 59.223 | KV452709.1 | 7477057 | 1-scf00009 | 1 |
| AX-157900582 | 1 | 59.223 | KV452709.1 | 7481692 | 1-scf00009 | 1 |
| AX-157900585 | 1 | 59.223 | KV452709.1 | 7489862 | 1-scf00009 | 1 |
| AX-157900590 | 1 | 59.223 | KV452709.1 | 7504860 | 1-scf00009 | 1 |
| AX-157900593 | 1 | 59.223 | KV452709.1 | 7523134 | 1-scf00009 | 1 |
| AX-157900594 | 1 | 59.223 | KV452709.1 | 7524170 | 1-scf00009 | 1 |
| AX-157900596 | 1 | 59.223 | KV452709.1 | 7530748 | 1-scf00009 | 1 |
| AX-157900601 | 1 | 59.223 | KV452709.1 | 7547935 | 1-scf00009 | 1 |
| AX-157724383 | 1 | 59.223 | KV452709.1 | 7548297 | 1-scf00009 | 1 |
| AX-157900605 | 1 | 59.223 | KV452709.1 | 7553294 | 1-scf00009 | 1 |
| AX-157900606 | 1 | 59.223 | KV452709.1 | 7553800 | 1-scf00009 | 1 |
| AX-157900614 | 1 | 59.223 | KV452709.1 | 7576681 | 1-scf00009 | 1 |
| AX-157900615 | 1 | 59.223 | KV452709.1 | 7583499 | 1-scf00009 | 1 |
| AX-157900618 | 1 | 59.223 | KV452709.1 | 7598230 | 1-scf00009 | 1 |
| AX-157900619 | 1 | 59.223 | KV452709.1 | 7598738 | 1-scf00009 | 1 |
| AX-157900621 | 1 | 59.223 | KV452709.1 | 7605374 | 1-scf00009 | 1 |
| AX-157900624 | 1 | 59.223 | KV452709.1 | 7609556 | 1-scf00009 | 1 |
| AX-157900629 | 1 | 59.223 | KV452709.1 | 7617733 | 1-scf00009 | 1 |
| AX-157900632 | 1 | 59.223 | KV452709.1 | 7622117 | 1-scf00009 | 1 |
| AX-157900634 | 1 | 59.223 | KV452709.1 | 7625685 | 1-scf00009 | 1 |
| AX-157900640 | 1 | 59.223 | KV452709.1 | 7639340 | 1-scf00009 | 1 |
| AX-157900642 | 1 | 59.223 | KV452709.1 | 7643816 | 1-scf00009 | 1 |
| AX-157900646 | 1 | 59.223 | KV452709.1 | 7655527 | 1-scf00009 | 1 |
| AX-157900649 | 1 | 59.223 | KV452709.1 | 7661776 | 1-scf00009 | 1 |
| AX-157900653 | 1 | 59.223 | KV452709.1 | 7676927 | 1-scf00009 | 1 |
| AX-157900654 | 1 | 59.223 | KV452709.1 | 7684859 | 1-scf00009 | 1 |
| AX-157900657 | 1 | 59.223 | KV452709.1 | 7697615 | 1-scf00009 | 1 |
| AX-157900670 | 1 | 59.223 | KV452709.1 | 7723949 | 1-scf00009 | 1 |
| AX-157900673 | 1 | 59.223 | KV452709.1 | 7728109 | 1-scf00009 | 1 |
| AX-157900684 | 1 | 59.223 | KV452709.1 | 7749242 | 1-scf00009 | 1 |
| AX-157900688 | 1 | 59.223 | KV452709.1 | 7763075 | 1-scf00009 | 1 |
| AX-157900689 | 1 | 59.223 | KV452709.1 | 7763564 | 1-scf00009 | 1 |
| AX-157900693 | 1 | 59.223 | KV452709.1 | 7771067 | 1-scf00009 | 1 |
| AX-157900701 | 1 | 59.223 | KV452709.1 | 7784427 | 1-scf00009 | 1 |

|              |   |        |            |         |            |   |
|--------------|---|--------|------------|---------|------------|---|
| AX-157900703 | 1 | 59.223 | KV452709.1 | 7786351 | 1-scf00009 | 1 |
| AX-157900712 | 1 | 59.223 | KV452709.1 | 7797491 | 1-scf00009 | 1 |
| AX-157900724 | 1 | 59.223 | KV452709.1 | 7849042 | 1-scf00009 | 1 |
| AX-157900747 | 1 | 59.223 | KV452711.1 | 23344   | 1-scf00010 | 1 |
| AX-157874387 | 1 | 59.223 | KV452711.1 | 45838   | 1-scf00010 | 1 |
| AX-158382012 | 1 | 59.223 | KV452711.1 | 47526   | 1-scf00010 | 1 |
| AX-157900900 | 1 | 59.223 | KV452711.1 | 708179  | 1-scf00010 | 1 |
| AX-157901013 | 1 | 59.223 | KV452711.1 | 1216193 | 1-scf00010 | 1 |
| AX-157901027 | 1 | 59.223 | KV452711.1 | 1249758 | 1-scf00010 | 1 |
| AX-157901056 | 1 | 59.223 | KV452711.1 | 1341609 | 1-scf00010 | 1 |
| AX-157901064 | 1 | 59.223 | KV452711.1 | 1351035 | 1-scf00010 | 1 |
| AX-157901101 | 1 | 59.223 | KV452711.1 | 1477824 | 1-scf00010 | 1 |
| AX-157901103 | 1 | 59.223 | KV452711.1 | 1484065 | 1-scf00010 | 1 |
| AX-157901224 | 1 | 59.223 | KV452711.1 | 1791193 | 1-scf00010 | 1 |
| AX-157901248 | 1 | 59.223 | KV452711.1 | 1846729 | 1-scf00010 | 1 |
| AX-157901252 | 1 | 59.223 | KV452711.1 | 1854201 | 1-scf00010 | 1 |
| AX-157901263 | 1 | 59.223 | KV452711.1 | 1883789 | 1-scf00010 | 1 |
| AX-157901325 | 1 | 59.223 | KV452711.1 | 2008678 | 1-scf00010 | 1 |
| AX-157901477 | 1 | 59.223 | KV452711.1 | 2492674 | 1-scf00010 | 1 |
| AX-157901542 | 1 | 59.223 | KV452711.1 | 2696951 | 1-scf00010 | 1 |
| AX-157901610 | 1 | 59.223 | KV452711.1 | 2799219 | 1-scf00010 | 1 |
| AX-157811522 | 1 | 59.223 | KV452711.1 | 2803269 | 1-scf00010 | 1 |
| AX-157901617 | 1 | 59.223 | KV452711.1 | 2813269 | 1-scf00010 | 1 |
| AX-157901620 | 1 | 59.223 | KV452711.1 | 2822344 | 1-scf00010 | 1 |
| AX-157901623 | 1 | 59.223 | KV452711.1 | 2828611 | 1-scf00010 | 1 |
| AX-157901625 | 1 | 59.223 | KV452711.1 | 2830996 | 1-scf00010 | 1 |
| AX-157901633 | 1 | 59.223 | KV452711.1 | 2860921 | 1-scf00010 | 1 |
| AX-157901637 | 1 | 59.223 | KV452711.1 | 2866697 | 1-scf00010 | 1 |
| AX-157901665 | 1 | 59.223 | KV452711.1 | 2931942 | 1-scf00010 | 1 |
| AX-157901675 | 1 | 59.223 | KV452711.1 | 2950020 | 1-scf00010 | 1 |
| AX-157901692 | 1 | 59.223 | KV452711.1 | 3014048 | 1-scf00010 | 1 |
| AX-157901713 | 1 | 59.223 | KV452711.1 | 3065246 | 1-scf00010 | 1 |
| AX-157902277 | 1 | 59.223 | KV452713.1 | 3884    | 1-scf00011 | 1 |
| AX-157902394 | 1 | 59.223 | KV452713.1 | 585353  | 1-scf00011 | 1 |
| AX-157902411 | 1 | 59.223 | KV452713.1 | 635883  | 1-scf00011 | 1 |
| AX-157902412 | 1 | 59.223 | KV452713.1 | 637864  | 1-scf00011 | 1 |
| AX-157811659 | 1 | 59.223 | KV452713.1 | 649954  | 1-scf00011 | 1 |
| AX-157902428 | 1 | 59.223 | KV452713.1 | 697317  | 1-scf00011 | 1 |
| AX-157902529 | 1 | 59.223 | KV452713.1 | 890397  | 1-scf00011 | 1 |
| AX-158389374 | 1 | 59.223 | KV452713.1 | 972101  | 1-scf00011 | 1 |
| AX-157749938 | 1 | 59.223 | KV452713.1 | 1005551 | 1-scf00011 | 1 |
| AX-157721446 | 1 | 59.223 | KV452713.1 | 1010307 | 1-scf00011 | 1 |
| AX-158379162 | 1 | 59.223 | KV452713.1 | 1010440 | 1-scf00011 | 1 |
| AX-157864426 | 1 | 59.223 | KV452713.1 | 1038761 | 1-scf00011 | 1 |
| AX-157902622 | 1 | 59.223 | KV452713.1 | 1039073 | 1-scf00011 | 1 |
| AX-157902629 | 1 | 59.223 | KV452713.1 | 1044002 | 1-scf00011 | 1 |
| AX-157902640 | 1 | 59.223 | KV452713.1 | 1053697 | 1-scf00011 | 1 |
| AX-157902648 | 1 | 59.223 | KV452713.1 | 1067650 | 1-scf00011 | 1 |
| AX-157902654 | 1 | 59.223 | KV452713.1 | 1076418 | 1-scf00011 | 1 |
| AX-157902657 | 1 | 59.223 | KV452713.1 | 1081155 | 1-scf00011 | 1 |
| AX-158403992 | 1 | 59.223 | KV452713.1 | 1090945 | 1-scf00011 | 1 |

|              |   |        |            |         |            |   |
|--------------|---|--------|------------|---------|------------|---|
| AX-157902662 | 1 | 59.223 | KV452713.1 | 1092175 | 1-scf00011 | 1 |
| AX-157902667 | 1 | 59.223 | KV452713.1 | 1101605 | 1-scf00011 | 1 |
| AX-157902670 | 1 | 59.223 | KV452713.1 | 1107542 | 1-scf00011 | 1 |
| AX-157902680 | 1 | 59.223 | KV452713.1 | 1126176 | 1-scf00011 | 1 |
| AX-157902694 | 1 | 59.223 | KV452713.1 | 1140998 | 1-scf00011 | 1 |
| AX-157902695 | 1 | 59.223 | KV452713.1 | 1141470 | 1-scf00011 | 1 |
| AX-157902697 | 1 | 59.223 | KV452713.1 | 1142709 | 1-scf00011 | 1 |
| AX-157902703 | 1 | 59.223 | KV452713.1 | 1148763 | 1-scf00011 | 1 |
| AX-157902705 | 1 | 59.223 | KV452713.1 | 1152009 | 1-scf00011 | 1 |
| AX-157902706 | 1 | 59.223 | KV452713.1 | 1153231 | 1-scf00011 | 1 |
| AX-157902709 | 1 | 59.223 | KV452713.1 | 1155143 | 1-scf00011 | 1 |
| AX-157902712 | 1 | 59.223 | KV452713.1 | 1160010 | 1-scf00011 | 1 |
| AX-157902713 | 1 | 59.223 | KV452713.1 | 1162113 | 1-scf00011 | 1 |
| AX-157902715 | 1 | 59.223 | KV452713.1 | 1163594 | 1-scf00011 | 1 |
| AX-157902716 | 1 | 59.223 | KV452713.1 | 1164298 | 1-scf00011 | 1 |
| AX-157902717 | 1 | 59.223 | KV452713.1 | 1165409 | 1-scf00011 | 1 |
| AX-157902718 | 1 | 59.223 | KV452713.1 | 1166202 | 1-scf00011 | 1 |
| AX-157902719 | 1 | 59.223 | KV452713.1 | 1166978 | 1-scf00011 | 1 |
| AX-157902729 | 1 | 59.223 | KV452713.1 | 1178612 | 1-scf00011 | 1 |
| AX-157902731 | 1 | 59.223 | KV452713.1 | 1180711 | 1-scf00011 | 1 |
| AX-157902732 | 1 | 59.223 | KV452713.1 | 1181396 | 1-scf00011 | 1 |
| AX-157902733 | 1 | 59.223 | KV452713.1 | 1181815 | 1-scf00011 | 1 |
| AX-157902734 | 1 | 59.223 | KV452713.1 | 1182325 | 1-scf00011 | 1 |
| AX-157902735 | 1 | 59.223 | KV452713.1 | 1183255 | 1-scf00011 | 1 |
| AX-157902736 | 1 | 59.223 | KV452713.1 | 1183887 | 1-scf00011 | 1 |
| AX-157902738 | 1 | 59.223 | KV452713.1 | 1186323 | 1-scf00011 | 1 |
| AX-157902740 | 1 | 59.223 | KV452713.1 | 1187824 | 1-scf00011 | 1 |
| AX-157902742 | 1 | 59.223 | KV452713.1 | 1191343 | 1-scf00011 | 1 |
| AX-157902745 | 1 | 59.223 | KV452713.1 | 1194486 | 1-scf00011 | 1 |
| AX-157902746 | 1 | 59.223 | KV452713.1 | 1196429 | 1-scf00011 | 1 |
| AX-157902747 | 1 | 59.223 | KV452713.1 | 1197021 | 1-scf00011 | 1 |
| AX-157811690 | 1 | 59.223 | KV452713.1 | 1198346 | 1-scf00011 | 1 |
| AX-157811691 | 1 | 59.223 | KV452713.1 | 1204063 | 1-scf00011 | 1 |
| AX-157902751 | 1 | 59.223 | KV452713.1 | 1207705 | 1-scf00011 | 1 |
| AX-157902752 | 1 | 59.223 | KV452713.1 | 1208065 | 1-scf00011 | 1 |
| AX-157902755 | 1 | 59.223 | KV452713.1 | 1213771 | 1-scf00011 | 1 |
| AX-157902757 | 1 | 59.223 | KV452713.1 | 1217262 | 1-scf00011 | 1 |
| AX-157902760 | 1 | 59.223 | KV452713.1 | 1225424 | 1-scf00011 | 1 |
| AX-157902762 | 1 | 59.223 | KV452713.1 | 1226103 | 1-scf00011 | 1 |
| AX-157811692 | 1 | 59.223 | KV452713.1 | 1226393 | 1-scf00011 | 1 |
| AX-157902763 | 1 | 59.223 | KV452713.1 | 1226658 | 1-scf00011 | 1 |
| AX-157712190 | 1 | 59.223 | KV452713.1 | 1227904 | 1-scf00011 | 1 |
| AX-157902765 | 1 | 59.223 | KV452713.1 | 1229580 | 1-scf00011 | 1 |
| AX-157902766 | 1 | 59.223 | KV452713.1 | 1229784 | 1-scf00011 | 1 |
| AX-157902769 | 1 | 59.223 | KV452713.1 | 1232788 | 1-scf00011 | 1 |
| AX-157902770 | 1 | 59.223 | KV452713.1 | 1233506 | 1-scf00011 | 1 |
| AX-157902771 | 1 | 59.223 | KV452713.1 | 1234642 | 1-scf00011 | 1 |
| AX-158404650 | 1 | 59.223 | KV452713.1 | 1242268 | 1-scf00011 | 1 |
| AX-157811693 | 1 | 59.223 | KV452713.1 | 1255295 | 1-scf00011 | 1 |
| AX-157902780 | 1 | 59.223 | KV452713.1 | 1259555 | 1-scf00011 | 1 |
| AX-157717882 | 1 | 59.223 | KV452713.1 | 1259656 | 1-scf00011 | 1 |

|              |   |        |            |         |            |   |
|--------------|---|--------|------------|---------|------------|---|
| AX-157902781 | 1 | 59.223 | KV452713.1 | 1262489 | 1-scf00011 | 1 |
| AX-157902782 | 1 | 59.223 | KV452713.1 | 1263139 | 1-scf00011 | 1 |
| AX-157902783 | 1 | 59.223 | KV452713.1 | 1263935 | 1-scf00011 | 1 |
| AX-157902784 | 1 | 59.223 | KV452713.1 | 1264125 | 1-scf00011 | 1 |
| AX-157902785 | 1 | 59.223 | KV452713.1 | 1264532 | 1-scf00011 | 1 |
| AX-157902786 | 1 | 59.223 | KV452713.1 | 1265408 | 1-scf00011 | 1 |
| AX-157902787 | 1 | 59.223 | KV452713.1 | 1267280 | 1-scf00011 | 1 |
| AX-157902789 | 1 | 59.223 | KV452713.1 | 1268293 | 1-scf00011 | 1 |
| AX-157902790 | 1 | 59.223 | KV452713.1 | 1268978 | 1-scf00011 | 1 |
| AX-157902791 | 1 | 59.223 | KV452713.1 | 1269371 | 1-scf00011 | 1 |
| AX-157902792 | 1 | 59.223 | KV452713.1 | 1269769 | 1-scf00011 | 1 |
| AX-157902794 | 1 | 59.223 | KV452713.1 | 1271554 | 1-scf00011 | 1 |
| AX-157902795 | 1 | 59.223 | KV452713.1 | 1273092 | 1-scf00011 | 1 |
| AX-157902796 | 1 | 59.223 | KV452713.1 | 1273625 | 1-scf00011 | 1 |
| AX-157902797 | 1 | 59.223 | KV452713.1 | 1275217 | 1-scf00011 | 1 |
| AX-157883302 | 1 | 59.223 | KV452713.1 | 1276249 | 1-scf00011 | 1 |
| AX-157902801 | 1 | 59.223 | KV452713.1 | 1282424 | 1-scf00011 | 1 |
| AX-157902803 | 1 | 59.223 | KV452713.1 | 1283810 | 1-scf00011 | 1 |
| AX-157902805 | 1 | 59.223 | KV452713.1 | 1290636 | 1-scf00011 | 1 |
| AX-157902806 | 1 | 59.223 | KV452713.1 | 1292175 | 1-scf00011 | 1 |
| AX-157902809 | 1 | 59.223 | KV452713.1 | 1297268 | 1-scf00011 | 1 |
| AX-157902815 | 1 | 59.223 | KV452713.1 | 1304805 | 1-scf00011 | 1 |
| AX-157902818 | 1 | 59.223 | KV452713.1 | 1309018 | 1-scf00011 | 1 |
| AX-157902822 | 1 | 59.223 | KV452713.1 | 1315143 | 1-scf00011 | 1 |
| AX-157902823 | 1 | 59.223 | KV452713.1 | 1316228 | 1-scf00011 | 1 |
| AX-157902824 | 1 | 59.223 | KV452713.1 | 1316715 | 1-scf00011 | 1 |
| AX-157902826 | 1 | 59.223 | KV452713.1 | 1318254 | 1-scf00011 | 1 |
| AX-157902827 | 1 | 59.223 | KV452713.1 | 1318655 | 1-scf00011 | 1 |
| AX-157811695 | 1 | 59.223 | KV452713.1 | 1321817 | 1-scf00011 | 1 |
| AX-157902828 | 1 | 59.223 | KV452713.1 | 1321946 | 1-scf00011 | 1 |
| AX-157902831 | 1 | 59.223 | KV452713.1 | 1326216 | 1-scf00011 | 1 |
| AX-157740696 | 1 | 59.223 | KV452713.1 | 1327172 | 1-scf00011 | 1 |
| AX-157811697 | 1 | 59.223 | KV452713.1 | 1329450 | 1-scf00011 | 1 |
| AX-157902837 | 1 | 59.223 | KV452713.1 | 1334926 | 1-scf00011 | 1 |
| AX-157902838 | 1 | 59.223 | KV452713.1 | 1336427 | 1-scf00011 | 1 |
| AX-157811701 | 1 | 59.223 | KV452713.1 | 1342145 | 1-scf00011 | 1 |
| AX-157902840 | 1 | 59.223 | KV452713.1 | 1342944 | 1-scf00011 | 1 |
| AX-158404653 | 1 | 59.223 | KV452713.1 | 1351700 | 1-scf00011 | 1 |
| AX-157902968 | 1 | 59.223 | KV452713.1 | 1524862 | 1-scf00011 | 1 |
| AX-157902986 | 1 | 59.223 | KV452713.1 | 1540405 | 1-scf00011 | 1 |
| AX-157903206 | 1 | 59.223 | KV452713.1 | 1811920 | 1-scf00011 | 1 |
| AX-157811738 | 1 | 59.223 | KV452713.1 | 1892573 | 1-scf00011 | 1 |
| AX-157903267 | 1 | 59.223 | KV452713.1 | 1909840 | 1-scf00011 | 1 |
| AX-157811755 | 1 | 59.223 | KV452713.1 | 2057065 | 1-scf00011 | 1 |
| AX-157903528 | 1 | 59.223 | KV452713.1 | 2216221 | 1-scf00011 | 1 |
| AX-158414674 | 1 | 59.223 | KV452713.1 | 2231433 | 1-scf00011 | 1 |
| AX-157903747 | 1 | 59.223 | KV452713.1 | 2483902 | 1-scf00011 | 1 |
| AX-157883312 | 1 | 59.223 | KV452713.1 | 2586459 | 1-scf00011 | 1 |
| AX-157903869 | 1 | 59.223 | KV452713.1 | 2649285 | 1-scf00011 | 1 |
| AX-157903889 | 1 | 59.223 | KV452713.1 | 2670323 | 1-scf00011 | 1 |
| AX-157903902 | 1 | 59.223 | KV452713.1 | 2681469 | 1-scf00011 | 1 |

|              |   |        |             |         |            |    |
|--------------|---|--------|-------------|---------|------------|----|
| AX-157904051 | 1 | 59.223 | KV452713.1  | 2943405 | 1-scf00011 | 1  |
| AX-157904104 | 1 | 59.223 | KV452713.1  | 3044776 | 1-scf00011 | 1  |
| AX-157904147 | 1 | 59.223 | KV452713.1  | 3123235 | 1-scf00011 | 1  |
| AX-157904166 | 1 | 59.223 | KV452713.1  | 3171420 | 1-scf00011 | 1  |
| AX-157904168 | 1 | 59.223 | KV452713.1  | 3172974 | 1-scf00011 | 1  |
| AX-157904174 | 1 | 59.223 | KV452713.1  | 3183268 | 1-scf00011 | 1  |
| AX-157904245 | 1 | 59.223 | KV452713.1  | 3378892 | 1-scf00011 | 1  |
| AX-157904315 | 1 | 59.223 | KV452713.1  | 3551145 | 1-scf00011 | 1  |
| AX-157904318 | 1 | 59.223 | KV452713.1  | 3552803 | 1-scf00011 | 1  |
| AX-157904319 | 1 | 59.223 | KV452713.1  | 3553336 | 1-scf00011 | 1  |
| AX-157714746 | 1 | 59.223 | KV452713.1  | 3852292 | 1-scf00011 | 1  |
| AX-157904513 | 1 | 59.223 | KV452713.1  | 3871112 | 1-scf00011 | 1  |
| AX-157904528 | 1 | 59.223 | KV452713.1  | 3893961 | 1-scf00011 | 1  |
| AX-157904564 | 1 | 59.223 | KV452713.1  | 3957591 | 1-scf00011 | 1  |
| AX-157904632 | 1 | 59.223 | KV452713.1  | 4050943 | 1-scf00011 | 1  |
| AX-157904660 | 1 | 59.223 | KV452713.1  | 4092086 | 1-scf00011 | 1  |
| AX-157904871 | 1 | 59.223 | KV452713.1  | 4358398 | 1-scf00011 | 1  |
| AX-158376619 | 1 | 59.223 | KV452710.1  | 34009   | 1-scf00588 | 1  |
| AX-158376629 | 1 | 59.223 | KV452710.1  | 157163  | 1-scf00588 | 1  |
| AX-158376630 | 1 | 59.223 | KV452710.1  | 160804  | 1-scf00588 | 1  |
| AX-158376632 | 1 | 59.223 | KV452710.1  | 168641  | 1-scf00588 | 1  |
| AX-158376634 | 1 | 59.223 | KV452710.1  | 172850  | 1-scf00588 | 1  |
| AX-158376635 | 1 | 59.223 | KV452710.1  | 173089  | 1-scf00588 | 1  |
| AX-158379061 | 1 | 59.223 | KV452710.1  | 239382  | 1-scf00588 | 1  |
| AX-158376655 | 1 | 59.223 | KV452710.1  | 267362  | 1-scf00588 | 1  |
| AX-157726207 | 1 | 59.223 | KV452710.1  | 277597  | 1-scf00588 | 1  |
| AX-157704685 | 1 | 59.223 | 3ML01028149 | 46      | scf03754_1 | UN |
| AX-157704684 | 1 | 59.223 | 3ML01028149 | 183     | scf03754_1 | UN |
| AX-157902844 | 1 | 59.268 | KV452713.1  | 1352259 | 1-scf00011 | 1  |
| AX-157902845 | 1 | 59.32  | KV452713.1  | 1353496 | 1-scf00011 | 1  |
| AX-157902846 | 1 | 59.32  | KV452713.1  | 1354559 | 1-scf00011 | 1  |
| AX-157898819 | 1 | 59.332 | KV452709.1  | 4306365 | 1-scf00009 | 1  |
| AX-157899630 | 1 | 59.332 | KV452709.1  | 5409145 | 1-scf00009 | 1  |
| AX-157899835 | 1 | 59.332 | KV452709.1  | 5675657 | 1-scf00009 | 1  |
| AX-157902859 | 1 | 59.332 | KV452713.1  | 1376853 | 1-scf00011 | 1  |
| AX-157902861 | 1 | 59.332 | KV452713.1  | 1380074 | 1-scf00011 | 1  |
| AX-157902865 | 1 | 59.332 | KV452713.1  | 1386620 | 1-scf00011 | 1  |
| AX-157902866 | 1 | 59.332 | KV452713.1  | 1391119 | 1-scf00011 | 1  |
| AX-157752268 | 1 | 59.332 | KV452713.1  | 1391956 | 1-scf00011 | 1  |
| AX-157902870 | 1 | 59.332 | KV452713.1  | 1398730 | 1-scf00011 | 1  |
| AX-157902871 | 1 | 59.332 | KV452713.1  | 1399199 | 1-scf00011 | 1  |
| AX-157902872 | 1 | 59.332 | KV452713.1  | 1399518 | 1-scf00011 | 1  |
| AX-157902879 | 1 | 59.332 | KV452713.1  | 1408602 | 1-scf00011 | 1  |
| AX-157902880 | 1 | 59.332 | KV452713.1  | 1408751 | 1-scf00011 | 1  |
| AX-157902897 | 1 | 59.332 | KV452713.1  | 1432120 | 1-scf00011 | 1  |
| AX-158389387 | 1 | 59.332 | KV452713.1  | 1432193 | 1-scf00011 | 1  |
| AX-157903680 | 1 | 59.332 | KV452713.1  | 2387394 | 1-scf00011 | 1  |
| AX-157811771 | 1 | 59.332 | KV452713.1  | 2427957 | 1-scf00011 | 1  |
| AX-157903751 | 1 | 59.332 | KV452713.1  | 2489438 | 1-scf00011 | 1  |
| AX-157904209 | 1 | 59.332 | KV452713.1  | 3277322 | 1-scf00011 | 1  |
| AX-157902848 | 1 | 59.397 | KV452713.1  | 1356393 | 1-scf00011 | 1  |

|              |   |        |            |         |                |    |
|--------------|---|--------|------------|---------|----------------|----|
| AX-157902916 | 1 | 59.397 | KV452713.1 | 1462092 | 1-scf00011     | 1  |
| AX-157903456 | 1 | 59.397 | KV452713.1 | 2151412 | 1-scf00011     | 1  |
| AX-157902927 | 1 | 59.448 | KV452713.1 | 1479312 | 1-scf00011     | 1  |
| AX-157698129 | 1 | 59.473 | FI897710.1 | 40      | 1ORI212 lctalk | UN |
| AX-157902720 | 1 | 59.551 | KV452713.1 | 1167494 | 1-scf00011     | 1  |
| AX-157902932 | 1 | 59.551 | KV452713.1 | 1485548 | 1-scf00011     | 1  |
| AX-157902933 | 1 | 59.551 | KV452713.1 | 1486349 | 1-scf00011     | 1  |
| AX-157902934 | 1 | 59.551 | KV452713.1 | 1487209 | 1-scf00011     | 1  |
| AX-157902935 | 1 | 59.551 | KV452713.1 | 1487551 | 1-scf00011     | 1  |
| AX-157902936 | 1 | 59.551 | KV452713.1 | 1488016 | 1-scf00011     | 1  |
| AX-157902937 | 1 | 59.551 | KV452713.1 | 1488426 | 1-scf00011     | 1  |
| AX-157902938 | 1 | 59.551 | KV452713.1 | 1490351 | 1-scf00011     | 1  |
| AX-157902939 | 1 | 59.551 | KV452713.1 | 1491073 | 1-scf00011     | 1  |
| AX-157902941 | 1 | 59.551 | KV452713.1 | 1492705 | 1-scf00011     | 1  |
| AX-157902942 | 1 | 59.551 | KV452713.1 | 1493336 | 1-scf00011     | 1  |
| AX-157902948 | 1 | 59.551 | KV452713.1 | 1500016 | 1-scf00011     | 1  |
| AX-157902951 | 1 | 59.551 | KV452713.1 | 1504799 | 1-scf00011     | 1  |
| AX-157902976 | 1 | 59.551 | KV452713.1 | 1532536 | 1-scf00011     | 1  |
| AX-157902978 | 1 | 59.551 | KV452713.1 | 1533645 | 1-scf00011     | 1  |
| AX-157902979 | 1 | 59.551 | KV452713.1 | 1535460 | 1-scf00011     | 1  |
| AX-157902985 | 1 | 59.551 | KV452713.1 | 1539970 | 1-scf00011     | 1  |
| AX-157760662 | 1 | 59.551 | KV452713.1 | 1558383 | 1-scf00011     | 1  |
| AX-157753196 | 1 | 59.551 | KV452713.1 | 2197562 | 1-scf00011     | 1  |
| AX-157904902 | 1 | 59.551 | KV452713.1 | 4397943 | 1-scf00011     | 1  |
| AX-157903015 | 1 | 59.586 | KV452713.1 | 1582492 | 1-scf00011     | 1  |
| AX-157811714 | 1 | 59.619 | KV452713.1 | 1583394 | 1-scf00011     | 1  |
| AX-157895671 | 1 | 59.66  | KV452708.1 | 2822713 | 1-scf00008     | 1  |
| AX-157896487 | 1 | 59.66  | KV452709.1 | 506900  | 1-scf00009     | 1  |
| AX-157896896 | 1 | 59.66  | KV452709.1 | 1064314 | 1-scf00009     | 1  |
| AX-157897063 | 1 | 59.66  | KV452709.1 | 1353935 | 1-scf00009     | 1  |
| AX-157897272 | 1 | 59.66  | KV452709.1 | 1614551 | 1-scf00009     | 1  |
| AX-157897932 | 1 | 59.66  | KV452709.1 | 2656081 | 1-scf00009     | 1  |
| AX-157898316 | 1 | 59.66  | KV452709.1 | 3424598 | 1-scf00009     | 1  |
| AX-157898320 | 1 | 59.66  | KV452709.1 | 3428893 | 1-scf00009     | 1  |
| AX-157898427 | 1 | 59.66  | KV452709.1 | 3628959 | 1-scf00009     | 1  |
| AX-157898496 | 1 | 59.66  | KV452709.1 | 3843688 | 1-scf00009     | 1  |
| AX-157899016 | 1 | 59.66  | KV452709.1 | 4557543 | 1-scf00009     | 1  |
| AX-157899017 | 1 | 59.66  | KV452709.1 | 4557974 | 1-scf00009     | 1  |
| AX-157811220 | 1 | 59.66  | KV452709.1 | 4587146 | 1-scf00009     | 1  |
| AX-157899108 | 1 | 59.66  | KV452709.1 | 4682930 | 1-scf00009     | 1  |
| AX-157899112 | 1 | 59.66  | KV452709.1 | 4688438 | 1-scf00009     | 1  |
| AX-158404474 | 1 | 59.66  | KV452709.1 | 4857574 | 1-scf00009     | 1  |
| AX-157899225 | 1 | 59.66  | KV452709.1 | 4884071 | 1-scf00009     | 1  |
| AX-157899347 | 1 | 59.66  | KV452709.1 | 5063221 | 1-scf00009     | 1  |
| AX-157899655 | 1 | 59.66  | KV452709.1 | 5436301 | 1-scf00009     | 1  |
| AX-157745901 | 1 | 59.66  | KV452709.1 | 5593791 | 1-scf00009     | 1  |
| AX-157899827 | 1 | 59.66  | KV452709.1 | 5669851 | 1-scf00009     | 1  |
| AX-157899869 | 1 | 59.66  | KV452709.1 | 5712350 | 1-scf00009     | 1  |
| AX-157899899 | 1 | 59.66  | KV452709.1 | 5741486 | 1-scf00009     | 1  |
| AX-157725528 | 1 | 59.66  | KV452709.1 | 5772968 | 1-scf00009     | 1  |
| AX-157899944 | 1 | 59.66  | KV452709.1 | 5802606 | 1-scf00009     | 1  |



|              |   |       |            |         |            |   |
|--------------|---|-------|------------|---------|------------|---|
| AX-157900048 | 1 | 59.66 | KV452709.1 | 5981378 | 1-scf00009 | 1 |
| AX-157900080 | 1 | 59.66 | KV452709.1 | 6032610 | 1-scf00009 | 1 |
| AX-157900320 | 1 | 59.66 | KV452709.1 | 6499816 | 1-scf00009 | 1 |
| AX-157900340 | 1 | 59.66 | KV452709.1 | 6542099 | 1-scf00009 | 1 |
| AX-157900372 | 1 | 59.66 | KV452709.1 | 6610403 | 1-scf00009 | 1 |
| AX-157900380 | 1 | 59.66 | KV452709.1 | 6680393 | 1-scf00009 | 1 |
| AX-157900387 | 1 | 59.66 | KV452709.1 | 6723318 | 1-scf00009 | 1 |
| AX-157900396 | 1 | 59.66 | KV452709.1 | 6798088 | 1-scf00009 | 1 |
| AX-157900398 | 1 | 59.66 | KV452709.1 | 6843455 | 1-scf00009 | 1 |
| AX-157900399 | 1 | 59.66 | KV452709.1 | 6879953 | 1-scf00009 | 1 |
| AX-157811408 | 1 | 59.66 | KV452709.1 | 7018780 | 1-scf00009 | 1 |
| AX-157900413 | 1 | 59.66 | KV452709.1 | 7024067 | 1-scf00009 | 1 |
| AX-157900414 | 1 | 59.66 | KV452709.1 | 7033489 | 1-scf00009 | 1 |
| AX-157900415 | 1 | 59.66 | KV452709.1 | 7035831 | 1-scf00009 | 1 |
| AX-157900416 | 1 | 59.66 | KV452709.1 | 7037613 | 1-scf00009 | 1 |
| AX-157900417 | 1 | 59.66 | KV452709.1 | 7040700 | 1-scf00009 | 1 |
| AX-157900419 | 1 | 59.66 | KV452709.1 | 7042524 | 1-scf00009 | 1 |
| AX-157900422 | 1 | 59.66 | KV452709.1 | 7046000 | 1-scf00009 | 1 |
| AX-157900424 | 1 | 59.66 | KV452709.1 | 7049969 | 1-scf00009 | 1 |
| AX-157900425 | 1 | 59.66 | KV452709.1 | 7052849 | 1-scf00009 | 1 |
| AX-157900426 | 1 | 59.66 | KV452709.1 | 7053633 | 1-scf00009 | 1 |
| AX-157708064 | 1 | 59.66 | KV452709.1 | 7054200 | 1-scf00009 | 1 |
| AX-157900427 | 1 | 59.66 | KV452709.1 | 7055233 | 1-scf00009 | 1 |
| AX-157900428 | 1 | 59.66 | KV452709.1 | 7056444 | 1-scf00009 | 1 |
| AX-157900429 | 1 | 59.66 | KV452709.1 | 7058194 | 1-scf00009 | 1 |
| AX-157900431 | 1 | 59.66 | KV452709.1 | 7060581 | 1-scf00009 | 1 |
| AX-157900433 | 1 | 59.66 | KV452709.1 | 7064400 | 1-scf00009 | 1 |
| AX-157900435 | 1 | 59.66 | KV452709.1 | 7075135 | 1-scf00009 | 1 |
| AX-157900437 | 1 | 59.66 | KV452709.1 | 7078404 | 1-scf00009 | 1 |
| AX-157900439 | 1 | 59.66 | KV452709.1 | 7079657 | 1-scf00009 | 1 |
| AX-157900442 | 1 | 59.66 | KV452709.1 | 7097350 | 1-scf00009 | 1 |
| AX-157900448 | 1 | 59.66 | KV452709.1 | 7129776 | 1-scf00009 | 1 |
| AX-157900451 | 1 | 59.66 | KV452709.1 | 7140569 | 1-scf00009 | 1 |
| AX-157900453 | 1 | 59.66 | KV452709.1 | 7146766 | 1-scf00009 | 1 |
| AX-157900454 | 1 | 59.66 | KV452709.1 | 7147315 | 1-scf00009 | 1 |
| AX-157900455 | 1 | 59.66 | KV452709.1 | 7149115 | 1-scf00009 | 1 |
| AX-157755085 | 1 | 59.66 | KV452709.1 | 7163321 | 1-scf00009 | 1 |
| AX-157758519 | 1 | 59.66 | KV452709.1 | 7170469 | 1-scf00009 | 1 |
| AX-157900465 | 1 | 59.66 | KV452709.1 | 7173924 | 1-scf00009 | 1 |
| AX-157900467 | 1 | 59.66 | KV452709.1 | 7178903 | 1-scf00009 | 1 |
| AX-157900468 | 1 | 59.66 | KV452709.1 | 7182071 | 1-scf00009 | 1 |
| AX-157900469 | 1 | 59.66 | KV452709.1 | 7184496 | 1-scf00009 | 1 |
| AX-157900470 | 1 | 59.66 | KV452709.1 | 7185206 | 1-scf00009 | 1 |
| AX-157900471 | 1 | 59.66 | KV452709.1 | 7189933 | 1-scf00009 | 1 |
| AX-157900472 | 1 | 59.66 | KV452709.1 | 7190236 | 1-scf00009 | 1 |
| AX-157900473 | 1 | 59.66 | KV452709.1 | 7191328 | 1-scf00009 | 1 |
| AX-157900474 | 1 | 59.66 | KV452709.1 | 7191750 | 1-scf00009 | 1 |
| AX-157900476 | 1 | 59.66 | KV452709.1 | 7192950 | 1-scf00009 | 1 |
| AX-157900478 | 1 | 59.66 | KV452709.1 | 7194803 | 1-scf00009 | 1 |
| AX-157900486 | 1 | 59.66 | KV452709.1 | 7199191 | 1-scf00009 | 1 |
| AX-157900503 | 1 | 59.66 | KV452709.1 | 7212384 | 1-scf00009 | 1 |

|              |   |       |            |         |            |   |
|--------------|---|-------|------------|---------|------------|---|
| AX-158404525 | 1 | 59.66 | KV452709.1 | 7213185 | 1-scf00009 | 1 |
| AX-157900504 | 1 | 59.66 | KV452709.1 | 7213253 | 1-scf00009 | 1 |
| AX-157900505 | 1 | 59.66 | KV452709.1 | 7214051 | 1-scf00009 | 1 |
| AX-157900512 | 1 | 59.66 | KV452709.1 | 7220388 | 1-scf00009 | 1 |
| AX-157900513 | 1 | 59.66 | KV452709.1 | 7220839 | 1-scf00009 | 1 |
| AX-157900514 | 1 | 59.66 | KV452709.1 | 7225554 | 1-scf00009 | 1 |
| AX-157811415 | 1 | 59.66 | KV452709.1 | 7227130 | 1-scf00009 | 1 |
| AX-157900520 | 1 | 59.66 | KV452709.1 | 7272899 | 1-scf00009 | 1 |
| AX-157900540 | 1 | 59.66 | KV452709.1 | 7365874 | 1-scf00009 | 1 |
| AX-157900748 | 1 | 59.66 | KV452711.1 | 33020   | 1-scf00010 | 1 |
| AX-157811424 | 1 | 59.66 | KV452711.1 | 38901   | 1-scf00010 | 1 |
| AX-157900873 | 1 | 59.66 | KV452711.1 | 603259  | 1-scf00010 | 1 |
| AX-157811443 | 1 | 59.66 | KV452711.1 | 877941  | 1-scf00010 | 1 |
| AX-157900955 | 1 | 59.66 | KV452711.1 | 924100  | 1-scf00010 | 1 |
| AX-157901038 | 1 | 59.66 | KV452711.1 | 1279836 | 1-scf00010 | 1 |
| AX-157901049 | 1 | 59.66 | KV452711.1 | 1316489 | 1-scf00010 | 1 |
| AX-157901098 | 1 | 59.66 | KV452711.1 | 1458938 | 1-scf00010 | 1 |
| AX-157901108 | 1 | 59.66 | KV452711.1 | 1491124 | 1-scf00010 | 1 |
| AX-157901220 | 1 | 59.66 | KV452711.1 | 1786946 | 1-scf00010 | 1 |
| AX-157901225 | 1 | 59.66 | KV452711.1 | 1791549 | 1-scf00010 | 1 |
| AX-157901231 | 1 | 59.66 | KV452711.1 | 1794667 | 1-scf00010 | 1 |
| AX-157901233 | 1 | 59.66 | KV452711.1 | 1797245 | 1-scf00010 | 1 |
| AX-157901242 | 1 | 59.66 | KV452711.1 | 1822446 | 1-scf00010 | 1 |
| AX-157901382 | 1 | 59.66 | KV452711.1 | 2190313 | 1-scf00010 | 1 |
| AX-157901499 | 1 | 59.66 | KV452711.1 | 2575821 | 1-scf00010 | 1 |
| AX-157901608 | 1 | 59.66 | KV452711.1 | 2798256 | 1-scf00010 | 1 |
| AX-157901651 | 1 | 59.66 | KV452711.1 | 2898900 | 1-scf00010 | 1 |
| AX-157702280 | 1 | 59.66 | KV452711.1 | 2905495 | 1-scf00010 | 1 |
| AX-157763136 | 1 | 59.66 | KV452711.1 | 3172725 | 1-scf00010 | 1 |
| AX-157901807 | 1 | 59.66 | KV452711.1 | 3327008 | 1-scf00010 | 1 |
| AX-158404616 | 1 | 59.66 | KV452711.1 | 3507773 | 1-scf00010 | 1 |
| AX-157901873 | 1 | 59.66 | KV452711.1 | 3616515 | 1-scf00010 | 1 |
| AX-157901934 | 1 | 59.66 | KV452711.1 | 3668250 | 1-scf00010 | 1 |
| AX-157902278 | 1 | 59.66 | KV452713.1 | 9545    | 1-scf00011 | 1 |
| AX-157902326 | 1 | 59.66 | KV452713.1 | 294782  | 1-scf00011 | 1 |
| AX-157902361 | 1 | 59.66 | KV452713.1 | 450338  | 1-scf00011 | 1 |
| AX-157902386 | 1 | 59.66 | KV452713.1 | 536959  | 1-scf00011 | 1 |
| AX-157811669 | 1 | 59.66 | KV452713.1 | 757276  | 1-scf00011 | 1 |
| AX-157902458 | 1 | 59.66 | KV452713.1 | 774641  | 1-scf00011 | 1 |
| AX-157902460 | 1 | 59.66 | KV452713.1 | 775108  | 1-scf00011 | 1 |
| AX-157902462 | 1 | 59.66 | KV452713.1 | 775597  | 1-scf00011 | 1 |
| AX-157902468 | 1 | 59.66 | KV452713.1 | 788302  | 1-scf00011 | 1 |
| AX-157902470 | 1 | 59.66 | KV452713.1 | 788771  | 1-scf00011 | 1 |
| AX-157902490 | 1 | 59.66 | KV452713.1 | 812043  | 1-scf00011 | 1 |
| AX-157902510 | 1 | 59.66 | KV452713.1 | 859050  | 1-scf00011 | 1 |
| AX-157902519 | 1 | 59.66 | KV452713.1 | 875290  | 1-scf00011 | 1 |
| AX-157902612 | 1 | 59.66 | KV452713.1 | 1028322 | 1-scf00011 | 1 |
| AX-157902613 | 1 | 59.66 | KV452713.1 | 1028798 | 1-scf00011 | 1 |
| AX-157902614 | 1 | 59.66 | KV452713.1 | 1029417 | 1-scf00011 | 1 |
| AX-157902621 | 1 | 59.66 | KV452713.1 | 1037698 | 1-scf00011 | 1 |
| AX-157902627 | 1 | 59.66 | KV452713.1 | 1043302 | 1-scf00011 | 1 |

|              |   |       |            |         |            |   |
|--------------|---|-------|------------|---------|------------|---|
| AX-157902646 | 1 | 59.66 | KV452713.1 | 1065487 | 1-scf00011 | 1 |
| AX-157902647 | 1 | 59.66 | KV452713.1 | 1067181 | 1-scf00011 | 1 |
| AX-157902674 | 1 | 59.66 | KV452713.1 | 1118742 | 1-scf00011 | 1 |
| AX-157902677 | 1 | 59.66 | KV452713.1 | 1121563 | 1-scf00011 | 1 |
| AX-157902688 | 1 | 59.66 | KV452713.1 | 1134894 | 1-scf00011 | 1 |
| AX-157902728 | 1 | 59.66 | KV452713.1 | 1177641 | 1-scf00011 | 1 |
| AX-157902749 | 1 | 59.66 | KV452713.1 | 1205172 | 1-scf00011 | 1 |
| AX-157740092 | 1 | 59.66 | KV452713.1 | 1208726 | 1-scf00011 | 1 |
| AX-157902774 | 1 | 59.66 | KV452713.1 | 1238193 | 1-scf00011 | 1 |
| AX-157811699 | 1 | 59.66 | KV452713.1 | 1339296 | 1-scf00011 | 1 |
| AX-157811700 | 1 | 59.66 | KV452713.1 | 1340063 | 1-scf00011 | 1 |
| AX-158404652 | 1 | 59.66 | KV452713.1 | 1345228 | 1-scf00011 | 1 |
| AX-157902843 | 1 | 59.66 | KV452713.1 | 1348139 | 1-scf00011 | 1 |
| AX-157902849 | 1 | 59.66 | KV452713.1 | 1357140 | 1-scf00011 | 1 |
| AX-157902850 | 1 | 59.66 | KV452713.1 | 1357860 | 1-scf00011 | 1 |
| AX-157902852 | 1 | 59.66 | KV452713.1 | 1358548 | 1-scf00011 | 1 |
| AX-157902855 | 1 | 59.66 | KV452713.1 | 1361550 | 1-scf00011 | 1 |
| AX-157694874 | 1 | 59.66 | KV452713.1 | 1364237 | 1-scf00011 | 1 |
| AX-157811703 | 1 | 59.66 | KV452713.1 | 1365709 | 1-scf00011 | 1 |
| AX-157902856 | 1 | 59.66 | KV452713.1 | 1366826 | 1-scf00011 | 1 |
| AX-157902858 | 1 | 59.66 | KV452713.1 | 1374720 | 1-scf00011 | 1 |
| AX-157902860 | 1 | 59.66 | KV452713.1 | 1378815 | 1-scf00011 | 1 |
| AX-157902862 | 1 | 59.66 | KV452713.1 | 1381636 | 1-scf00011 | 1 |
| AX-157902867 | 1 | 59.66 | KV452713.1 | 1395462 | 1-scf00011 | 1 |
| AX-157902868 | 1 | 59.66 | KV452713.1 | 1397049 | 1-scf00011 | 1 |
| AX-157902869 | 1 | 59.66 | KV452713.1 | 1398113 | 1-scf00011 | 1 |
| AX-157902873 | 1 | 59.66 | KV452713.1 | 1400679 | 1-scf00011 | 1 |
| AX-157902874 | 1 | 59.66 | KV452713.1 | 1401221 | 1-scf00011 | 1 |
| AX-157902875 | 1 | 59.66 | KV452713.1 | 1403168 | 1-scf00011 | 1 |
| AX-157748454 | 1 | 59.66 | KV452713.1 | 1403376 | 1-scf00011 | 1 |
| AX-157902876 | 1 | 59.66 | KV452713.1 | 1404960 | 1-scf00011 | 1 |
| AX-157902878 | 1 | 59.66 | KV452713.1 | 1407156 | 1-scf00011 | 1 |
| AX-157902882 | 1 | 59.66 | KV452713.1 | 1413766 | 1-scf00011 | 1 |
| AX-157902883 | 1 | 59.66 | KV452713.1 | 1414704 | 1-scf00011 | 1 |
| AX-157902888 | 1 | 59.66 | KV452713.1 | 1421802 | 1-scf00011 | 1 |
| AX-157902895 | 1 | 59.66 | KV452713.1 | 1428752 | 1-scf00011 | 1 |
| AX-157902901 | 1 | 59.66 | KV452713.1 | 1436690 | 1-scf00011 | 1 |
| AX-157902903 | 1 | 59.66 | KV452713.1 | 1439600 | 1-scf00011 | 1 |
| AX-157902909 | 1 | 59.66 | KV452713.1 | 1449099 | 1-scf00011 | 1 |
| AX-157902912 | 1 | 59.66 | KV452713.1 | 1452887 | 1-scf00011 | 1 |
| AX-158389388 | 1 | 59.66 | KV452713.1 | 1457507 | 1-scf00011 | 1 |
| AX-157902917 | 1 | 59.66 | KV452713.1 | 1462776 | 1-scf00011 | 1 |
| AX-157902920 | 1 | 59.66 | KV452713.1 | 1466058 | 1-scf00011 | 1 |
| AX-157902923 | 1 | 59.66 | KV452713.1 | 1472367 | 1-scf00011 | 1 |
| AX-157902924 | 1 | 59.66 | KV452713.1 | 1476382 | 1-scf00011 | 1 |
| AX-157902940 | 1 | 59.66 | KV452713.1 | 1491552 | 1-scf00011 | 1 |
| AX-157902943 | 1 | 59.66 | KV452713.1 | 1493875 | 1-scf00011 | 1 |
| AX-157902947 | 1 | 59.66 | KV452713.1 | 1499484 | 1-scf00011 | 1 |
| AX-157883310 | 1 | 59.66 | KV452713.1 | 1501291 | 1-scf00011 | 1 |
| AX-157902949 | 1 | 59.66 | KV452713.1 | 1501641 | 1-scf00011 | 1 |
| AX-157902950 | 1 | 59.66 | KV452713.1 | 1503165 | 1-scf00011 | 1 |

|              |   |       |            |         |            |   |
|--------------|---|-------|------------|---------|------------|---|
| AX-157902953 | 1 | 59.66 | KV452713.1 | 1506048 | 1-scf00011 | 1 |
| AX-157902954 | 1 | 59.66 | KV452713.1 | 1506835 | 1-scf00011 | 1 |
| AX-157902955 | 1 | 59.66 | KV452713.1 | 1507209 | 1-scf00011 | 1 |
| AX-157902956 | 1 | 59.66 | KV452713.1 | 1508851 | 1-scf00011 | 1 |
| AX-157902957 | 1 | 59.66 | KV452713.1 | 1509172 | 1-scf00011 | 1 |
| AX-157902965 | 1 | 59.66 | KV452713.1 | 1517933 | 1-scf00011 | 1 |
| AX-157772188 | 1 | 59.66 | KV452713.1 | 1520739 | 1-scf00011 | 1 |
| AX-157902969 | 1 | 59.66 | KV452713.1 | 1525459 | 1-scf00011 | 1 |
| AX-157756610 | 1 | 59.66 | KV452713.1 | 1528928 | 1-scf00011 | 1 |
| AX-157902973 | 1 | 59.66 | KV452713.1 | 1529644 | 1-scf00011 | 1 |
| AX-157902974 | 1 | 59.66 | KV452713.1 | 1530549 | 1-scf00011 | 1 |
| AX-157902975 | 1 | 59.66 | KV452713.1 | 1531754 | 1-scf00011 | 1 |
| AX-157902981 | 1 | 59.66 | KV452713.1 | 1536308 | 1-scf00011 | 1 |
| AX-157811709 | 1 | 59.66 | KV452713.1 | 1539056 | 1-scf00011 | 1 |
| AX-157902988 | 1 | 59.66 | KV452713.1 | 1541266 | 1-scf00011 | 1 |
| AX-157902990 | 1 | 59.66 | KV452713.1 | 1543308 | 1-scf00011 | 1 |
| AX-157902992 | 1 | 59.66 | KV452713.1 | 1547698 | 1-scf00011 | 1 |
| AX-157902993 | 1 | 59.66 | KV452713.1 | 1548216 | 1-scf00011 | 1 |
| AX-157902994 | 1 | 59.66 | KV452713.1 | 1549100 | 1-scf00011 | 1 |
| AX-157811711 | 1 | 59.66 | KV452713.1 | 1550337 | 1-scf00011 | 1 |
| AX-157902998 | 1 | 59.66 | KV452713.1 | 1554701 | 1-scf00011 | 1 |
| AX-157903000 | 1 | 59.66 | KV452713.1 | 1558140 | 1-scf00011 | 1 |
| AX-157903002 | 1 | 59.66 | KV452713.1 | 1562602 | 1-scf00011 | 1 |
| AX-157903003 | 1 | 59.66 | KV452713.1 | 1563266 | 1-scf00011 | 1 |
| AX-158389393 | 1 | 59.66 | KV452713.1 | 1563943 | 1-scf00011 | 1 |
| AX-157772295 | 1 | 59.66 | KV452713.1 | 1566344 | 1-scf00011 | 1 |
| AX-157716409 | 1 | 59.66 | KV452713.1 | 1580398 | 1-scf00011 | 1 |
| AX-157868877 | 1 | 59.66 | KV452713.1 | 1582249 | 1-scf00011 | 1 |
| AX-157903018 | 1 | 59.66 | KV452713.1 | 1586245 | 1-scf00011 | 1 |
| AX-157717015 | 1 | 59.66 | KV452713.1 | 1588827 | 1-scf00011 | 1 |
| AX-157903021 | 1 | 59.66 | KV452713.1 | 1590750 | 1-scf00011 | 1 |
| AX-157903025 | 1 | 59.66 | KV452713.1 | 1592647 | 1-scf00011 | 1 |
| AX-157757796 | 1 | 59.66 | KV452713.1 | 1594980 | 1-scf00011 | 1 |
| AX-157903027 | 1 | 59.66 | KV452713.1 | 1598300 | 1-scf00011 | 1 |
| AX-157903028 | 1 | 59.66 | KV452713.1 | 1599145 | 1-scf00011 | 1 |
| AX-157903029 | 1 | 59.66 | KV452713.1 | 1601132 | 1-scf00011 | 1 |
| AX-157903034 | 1 | 59.66 | KV452713.1 | 1611344 | 1-scf00011 | 1 |
| AX-157903035 | 1 | 59.66 | KV452713.1 | 1613707 | 1-scf00011 | 1 |
| AX-157811716 | 1 | 59.66 | KV452713.1 | 1623108 | 1-scf00011 | 1 |
| AX-157811717 | 1 | 59.66 | KV452713.1 | 1624835 | 1-scf00011 | 1 |
| AX-157811718 | 1 | 59.66 | KV452713.1 | 1627745 | 1-scf00011 | 1 |
| AX-157903045 | 1 | 59.66 | KV452713.1 | 1633178 | 1-scf00011 | 1 |
| AX-157903046 | 1 | 59.66 | KV452713.1 | 1633751 | 1-scf00011 | 1 |
| AX-157903047 | 1 | 59.66 | KV452713.1 | 1634108 | 1-scf00011 | 1 |
| AX-157903051 | 1 | 59.66 | KV452713.1 | 1639682 | 1-scf00011 | 1 |
| AX-157903052 | 1 | 59.66 | KV452713.1 | 1639943 | 1-scf00011 | 1 |
| AX-157903053 | 1 | 59.66 | KV452713.1 | 1642311 | 1-scf00011 | 1 |
| AX-157903054 | 1 | 59.66 | KV452713.1 | 1642540 | 1-scf00011 | 1 |
| AX-157903056 | 1 | 59.66 | KV452713.1 | 1646611 | 1-scf00011 | 1 |
| AX-157903057 | 1 | 59.66 | KV452713.1 | 1647118 | 1-scf00011 | 1 |
| AX-157811720 | 1 | 59.66 | KV452713.1 | 1647259 | 1-scf00011 | 1 |

|              |   |       |            |         |            |   |
|--------------|---|-------|------------|---------|------------|---|
| AX-157903059 | 1 | 59.66 | KV452713.1 | 1648257 | 1-scf00011 | 1 |
| AX-157903063 | 1 | 59.66 | KV452713.1 | 1653908 | 1-scf00011 | 1 |
| AX-157903067 | 1 | 59.66 | KV452713.1 | 1656992 | 1-scf00011 | 1 |
| AX-157724979 | 1 | 59.66 | KV452713.1 | 1660349 | 1-scf00011 | 1 |
| AX-157903070 | 1 | 59.66 | KV452713.1 | 1660395 | 1-scf00011 | 1 |
| AX-157903071 | 1 | 59.66 | KV452713.1 | 1660793 | 1-scf00011 | 1 |
| AX-157725788 | 1 | 59.66 | KV452713.1 | 1661246 | 1-scf00011 | 1 |
| AX-157903081 | 1 | 59.66 | KV452713.1 | 1668820 | 1-scf00011 | 1 |
| AX-157903082 | 1 | 59.66 | KV452713.1 | 1670101 | 1-scf00011 | 1 |
| AX-157903083 | 1 | 59.66 | KV452713.1 | 1670659 | 1-scf00011 | 1 |
| AX-157903087 | 1 | 59.66 | KV452713.1 | 1674401 | 1-scf00011 | 1 |
| AX-157903090 | 1 | 59.66 | KV452713.1 | 1676274 | 1-scf00011 | 1 |
| AX-158404657 | 1 | 59.66 | KV452713.1 | 1680303 | 1-scf00011 | 1 |
| AX-158389394 | 1 | 59.66 | KV452713.1 | 1683037 | 1-scf00011 | 1 |
| AX-157903097 | 1 | 59.66 | KV452713.1 | 1689070 | 1-scf00011 | 1 |
| AX-157903098 | 1 | 59.66 | KV452713.1 | 1689568 | 1-scf00011 | 1 |
| AX-157903100 | 1 | 59.66 | KV452713.1 | 1691847 | 1-scf00011 | 1 |
| AX-158389396 | 1 | 59.66 | KV452713.1 | 1692386 | 1-scf00011 | 1 |
| AX-157903101 | 1 | 59.66 | KV452713.1 | 1692457 | 1-scf00011 | 1 |
| AX-157903102 | 1 | 59.66 | KV452713.1 | 1692915 | 1-scf00011 | 1 |
| AX-157725763 | 1 | 59.66 | KV452713.1 | 1693977 | 1-scf00011 | 1 |
| AX-157903103 | 1 | 59.66 | KV452713.1 | 1695389 | 1-scf00011 | 1 |
| AX-157903113 | 1 | 59.66 | KV452713.1 | 1708799 | 1-scf00011 | 1 |
| AX-157903117 | 1 | 59.66 | KV452713.1 | 1711873 | 1-scf00011 | 1 |
| AX-157903119 | 1 | 59.66 | KV452713.1 | 1716127 | 1-scf00011 | 1 |
| AX-157903121 | 1 | 59.66 | KV452713.1 | 1718746 | 1-scf00011 | 1 |
| AX-157903124 | 1 | 59.66 | KV452713.1 | 1720805 | 1-scf00011 | 1 |
| AX-157903125 | 1 | 59.66 | KV452713.1 | 1722280 | 1-scf00011 | 1 |
| AX-157903126 | 1 | 59.66 | KV452713.1 | 1722955 | 1-scf00011 | 1 |
| AX-157903127 | 1 | 59.66 | KV452713.1 | 1723910 | 1-scf00011 | 1 |
| AX-157903128 | 1 | 59.66 | KV452713.1 | 1724383 | 1-scf00011 | 1 |
| AX-157903130 | 1 | 59.66 | KV452713.1 | 1725140 | 1-scf00011 | 1 |
| AX-158389399 | 1 | 59.66 | KV452713.1 | 1728766 | 1-scf00011 | 1 |
| AX-157903134 | 1 | 59.66 | KV452713.1 | 1728823 | 1-scf00011 | 1 |
| AX-157903135 | 1 | 59.66 | KV452713.1 | 1729074 | 1-scf00011 | 1 |
| AX-157903137 | 1 | 59.66 | KV452713.1 | 1730239 | 1-scf00011 | 1 |
| AX-158389400 | 1 | 59.66 | KV452713.1 | 1730873 | 1-scf00011 | 1 |
| AX-158389401 | 1 | 59.66 | KV452713.1 | 1737042 | 1-scf00011 | 1 |
| AX-157903142 | 1 | 59.66 | KV452713.1 | 1741243 | 1-scf00011 | 1 |
| AX-157903143 | 1 | 59.66 | KV452713.1 | 1741705 | 1-scf00011 | 1 |
| AX-157903144 | 1 | 59.66 | KV452713.1 | 1741910 | 1-scf00011 | 1 |
| AX-157868882 | 1 | 59.66 | KV452713.1 | 1744628 | 1-scf00011 | 1 |
| AX-157903148 | 1 | 59.66 | KV452713.1 | 1745274 | 1-scf00011 | 1 |
| AX-157903150 | 1 | 59.66 | KV452713.1 | 1749577 | 1-scf00011 | 1 |
| AX-157903151 | 1 | 59.66 | KV452713.1 | 1750574 | 1-scf00011 | 1 |
| AX-157903153 | 1 | 59.66 | KV452713.1 | 1751744 | 1-scf00011 | 1 |
| AX-157903154 | 1 | 59.66 | KV452713.1 | 1756403 | 1-scf00011 | 1 |
| AX-157903156 | 1 | 59.66 | KV452713.1 | 1758511 | 1-scf00011 | 1 |
| AX-157903159 | 1 | 59.66 | KV452713.1 | 1761314 | 1-scf00011 | 1 |
| AX-157903160 | 1 | 59.66 | KV452713.1 | 1762135 | 1-scf00011 | 1 |
| AX-157903163 | 1 | 59.66 | KV452713.1 | 1765009 | 1-scf00011 | 1 |

|              |   |       |            |         |            |   |
|--------------|---|-------|------------|---------|------------|---|
| AX-157903168 | 1 | 59.66 | KV452713.1 | 1773288 | 1-scf00011 | 1 |
| AX-157903173 | 1 | 59.66 | KV452713.1 | 1775419 | 1-scf00011 | 1 |
| AX-157903176 | 1 | 59.66 | KV452713.1 | 1777828 | 1-scf00011 | 1 |
| AX-157903177 | 1 | 59.66 | KV452713.1 | 1778280 | 1-scf00011 | 1 |
| AX-157903185 | 1 | 59.66 | KV452713.1 | 1784949 | 1-scf00011 | 1 |
| AX-157714103 | 1 | 59.66 | KV452713.1 | 1785994 | 1-scf00011 | 1 |
| AX-157868884 | 1 | 59.66 | KV452713.1 | 1786344 | 1-scf00011 | 1 |
| AX-157811723 | 1 | 59.66 | KV452713.1 | 1786759 | 1-scf00011 | 1 |
| AX-157903186 | 1 | 59.66 | KV452713.1 | 1789875 | 1-scf00011 | 1 |
| AX-157811725 | 1 | 59.66 | KV452713.1 | 1794244 | 1-scf00011 | 1 |
| AX-157903189 | 1 | 59.66 | KV452713.1 | 1796353 | 1-scf00011 | 1 |
| AX-157903190 | 1 | 59.66 | KV452713.1 | 1797150 | 1-scf00011 | 1 |
| AX-157903195 | 1 | 59.66 | KV452713.1 | 1805304 | 1-scf00011 | 1 |
| AX-157903196 | 1 | 59.66 | KV452713.1 | 1805952 | 1-scf00011 | 1 |
| AX-157903197 | 1 | 59.66 | KV452713.1 | 1806175 | 1-scf00011 | 1 |
| AX-157903198 | 1 | 59.66 | KV452713.1 | 1806753 | 1-scf00011 | 1 |
| AX-157903201 | 1 | 59.66 | KV452713.1 | 1809068 | 1-scf00011 | 1 |
| AX-157903207 | 1 | 59.66 | KV452713.1 | 1812183 | 1-scf00011 | 1 |
| AX-157868886 | 1 | 59.66 | KV452713.1 | 1814151 | 1-scf00011 | 1 |
| AX-157903214 | 1 | 59.66 | KV452713.1 | 1819610 | 1-scf00011 | 1 |
| AX-157903216 | 1 | 59.66 | KV452713.1 | 1820895 | 1-scf00011 | 1 |
| AX-157903217 | 1 | 59.66 | KV452713.1 | 1822724 | 1-scf00011 | 1 |
| AX-157903219 | 1 | 59.66 | KV452713.1 | 1824754 | 1-scf00011 | 1 |
| AX-157903220 | 1 | 59.66 | KV452713.1 | 1825620 | 1-scf00011 | 1 |
| AX-157903224 | 1 | 59.66 | KV452713.1 | 1831175 | 1-scf00011 | 1 |
| AX-157811726 | 1 | 59.66 | KV452713.1 | 1831292 | 1-scf00011 | 1 |
| AX-157903226 | 1 | 59.66 | KV452713.1 | 1833818 | 1-scf00011 | 1 |
| AX-157903227 | 1 | 59.66 | KV452713.1 | 1834633 | 1-scf00011 | 1 |
| AX-157903228 | 1 | 59.66 | KV452713.1 | 1836747 | 1-scf00011 | 1 |
| AX-157903231 | 1 | 59.66 | KV452713.1 | 1840090 | 1-scf00011 | 1 |
| AX-157868888 | 1 | 59.66 | KV452713.1 | 1841631 | 1-scf00011 | 1 |
| AX-157811729 | 1 | 59.66 | KV452713.1 | 1842677 | 1-scf00011 | 1 |
| AX-157903233 | 1 | 59.66 | KV452713.1 | 1842903 | 1-scf00011 | 1 |
| AX-157903237 | 1 | 59.66 | KV452713.1 | 1847738 | 1-scf00011 | 1 |
| AX-157903238 | 1 | 59.66 | KV452713.1 | 1848939 | 1-scf00011 | 1 |
| AX-157903240 | 1 | 59.66 | KV452713.1 | 1851289 | 1-scf00011 | 1 |
| AX-157868889 | 1 | 59.66 | KV452713.1 | 1852226 | 1-scf00011 | 1 |
| AX-157811732 | 1 | 59.66 | KV452713.1 | 1853146 | 1-scf00011 | 1 |
| AX-157811734 | 1 | 59.66 | KV452713.1 | 1859995 | 1-scf00011 | 1 |
| AX-158403997 | 1 | 59.66 | KV452713.1 | 1863592 | 1-scf00011 | 1 |
| AX-157903244 | 1 | 59.66 | KV452713.1 | 1865893 | 1-scf00011 | 1 |
| AX-157903245 | 1 | 59.66 | KV452713.1 | 1866756 | 1-scf00011 | 1 |
| AX-157903249 | 1 | 59.66 | KV452713.1 | 1869942 | 1-scf00011 | 1 |
| AX-157903250 | 1 | 59.66 | KV452713.1 | 1871062 | 1-scf00011 | 1 |
| AX-157903251 | 1 | 59.66 | KV452713.1 | 1874859 | 1-scf00011 | 1 |
| AX-157903252 | 1 | 59.66 | KV452713.1 | 1875431 | 1-scf00011 | 1 |
| AX-157903254 | 1 | 59.66 | KV452713.1 | 1876234 | 1-scf00011 | 1 |
| AX-157811735 | 1 | 59.66 | KV452713.1 | 1878064 | 1-scf00011 | 1 |
| AX-157811736 | 1 | 59.66 | KV452713.1 | 1880100 | 1-scf00011 | 1 |
| AX-158389407 | 1 | 59.66 | KV452713.1 | 1883245 | 1-scf00011 | 1 |
| AX-157903260 | 1 | 59.66 | KV452713.1 | 1886047 | 1-scf00011 | 1 |

|              |   |       |            |         |            |   |
|--------------|---|-------|------------|---------|------------|---|
| AX-158389408 | 1 | 59.66 | KV452713.1 | 1886906 | 1-scf00011 | 1 |
| AX-158389409 | 1 | 59.66 | KV452713.1 | 1891239 | 1-scf00011 | 1 |
| AX-157903264 | 1 | 59.66 | KV452713.1 | 1903200 | 1-scf00011 | 1 |
| AX-157903268 | 1 | 59.66 | KV452713.1 | 1910542 | 1-scf00011 | 1 |
| AX-157903270 | 1 | 59.66 | KV452713.1 | 1911814 | 1-scf00011 | 1 |
| AX-157903271 | 1 | 59.66 | KV452713.1 | 1913704 | 1-scf00011 | 1 |
| AX-157811741 | 1 | 59.66 | KV452713.1 | 1922183 | 1-scf00011 | 1 |
| AX-157811742 | 1 | 59.66 | KV452713.1 | 1926561 | 1-scf00011 | 1 |
| AX-157903276 | 1 | 59.66 | KV452713.1 | 1931327 | 1-scf00011 | 1 |
| AX-157903278 | 1 | 59.66 | KV452713.1 | 1933515 | 1-scf00011 | 1 |
| AX-157773598 | 1 | 59.66 | KV452713.1 | 1936315 | 1-scf00011 | 1 |
| AX-157903279 | 1 | 59.66 | KV452713.1 | 1936608 | 1-scf00011 | 1 |
| AX-157868892 | 1 | 59.66 | KV452713.1 | 1937963 | 1-scf00011 | 1 |
| AX-157903282 | 1 | 59.66 | KV452713.1 | 1939098 | 1-scf00011 | 1 |
| AX-157903285 | 1 | 59.66 | KV452713.1 | 1942854 | 1-scf00011 | 1 |
| AX-157903287 | 1 | 59.66 | KV452713.1 | 1945900 | 1-scf00011 | 1 |
| AX-157811747 | 1 | 59.66 | KV452713.1 | 1951006 | 1-scf00011 | 1 |
| AX-157762597 | 1 | 59.66 | KV452713.1 | 1955979 | 1-scf00011 | 1 |
| AX-157903293 | 1 | 59.66 | KV452713.1 | 1956497 | 1-scf00011 | 1 |
| AX-157903294 | 1 | 59.66 | KV452713.1 | 1958441 | 1-scf00011 | 1 |
| AX-157903300 | 1 | 59.66 | KV452713.1 | 1965639 | 1-scf00011 | 1 |
| AX-157903301 | 1 | 59.66 | KV452713.1 | 1966026 | 1-scf00011 | 1 |
| AX-157768328 | 1 | 59.66 | KV452713.1 | 1971705 | 1-scf00011 | 1 |
| AX-157903305 | 1 | 59.66 | KV452713.1 | 1972396 | 1-scf00011 | 1 |
| AX-157811750 | 1 | 59.66 | KV452713.1 | 1986029 | 1-scf00011 | 1 |
| AX-157903316 | 1 | 59.66 | KV452713.1 | 1986662 | 1-scf00011 | 1 |
| AX-157903317 | 1 | 59.66 | KV452713.1 | 1987108 | 1-scf00011 | 1 |
| AX-157903320 | 1 | 59.66 | KV452713.1 | 1989166 | 1-scf00011 | 1 |
| AX-157721429 | 1 | 59.66 | KV452713.1 | 1990325 | 1-scf00011 | 1 |
| AX-157903321 | 1 | 59.66 | KV452713.1 | 1992561 | 1-scf00011 | 1 |
| AX-157903322 | 1 | 59.66 | KV452713.1 | 1993241 | 1-scf00011 | 1 |
| AX-157811752 | 1 | 59.66 | KV452713.1 | 1993420 | 1-scf00011 | 1 |
| AX-157903330 | 1 | 59.66 | KV452713.1 | 2003645 | 1-scf00011 | 1 |
| AX-157903333 | 1 | 59.66 | KV452713.1 | 2005240 | 1-scf00011 | 1 |
| AX-158389411 | 1 | 59.66 | KV452713.1 | 2012419 | 1-scf00011 | 1 |
| AX-157903335 | 1 | 59.66 | KV452713.1 | 2013205 | 1-scf00011 | 1 |
| AX-157903338 | 1 | 59.66 | KV452713.1 | 2016937 | 1-scf00011 | 1 |
| AX-157903341 | 1 | 59.66 | KV452713.1 | 2019036 | 1-scf00011 | 1 |
| AX-157811754 | 1 | 59.66 | KV452713.1 | 2020530 | 1-scf00011 | 1 |
| AX-157903343 | 1 | 59.66 | KV452713.1 | 2021882 | 1-scf00011 | 1 |
| AX-157903344 | 1 | 59.66 | KV452713.1 | 2026602 | 1-scf00011 | 1 |
| AX-157903356 | 1 | 59.66 | KV452713.1 | 2038190 | 1-scf00011 | 1 |
| AX-157903359 | 1 | 59.66 | KV452713.1 | 2041259 | 1-scf00011 | 1 |
| AX-157903366 | 1 | 59.66 | KV452713.1 | 2048761 | 1-scf00011 | 1 |
| AX-158389413 | 1 | 59.66 | KV452713.1 | 2052180 | 1-scf00011 | 1 |
| AX-158414672 | 1 | 59.66 | KV452713.1 | 2052553 | 1-scf00011 | 1 |
| AX-157903368 | 1 | 59.66 | KV452713.1 | 2053317 | 1-scf00011 | 1 |
| AX-157771948 | 1 | 59.66 | KV452713.1 | 2060663 | 1-scf00011 | 1 |
| AX-157903375 | 1 | 59.66 | KV452713.1 | 2061069 | 1-scf00011 | 1 |
| AX-157903376 | 1 | 59.66 | KV452713.1 | 2061326 | 1-scf00011 | 1 |
| AX-157868895 | 1 | 59.66 | KV452713.1 | 2065341 | 1-scf00011 | 1 |

|              |   |       |            |         |            |   |
|--------------|---|-------|------------|---------|------------|---|
| AX-157903382 | 1 | 59.66 | KV452713.1 | 2070411 | 1-scf00011 | 1 |
| AX-157903384 | 1 | 59.66 | KV452713.1 | 2072801 | 1-scf00011 | 1 |
| AX-157903385 | 1 | 59.66 | KV452713.1 | 2073338 | 1-scf00011 | 1 |
| AX-157903387 | 1 | 59.66 | KV452713.1 | 2076228 | 1-scf00011 | 1 |
| AX-157903388 | 1 | 59.66 | KV452713.1 | 2077968 | 1-scf00011 | 1 |
| AX-157811756 | 1 | 59.66 | KV452713.1 | 2078169 | 1-scf00011 | 1 |
| AX-157903389 | 1 | 59.66 | KV452713.1 | 2079802 | 1-scf00011 | 1 |
| AX-157903390 | 1 | 59.66 | KV452713.1 | 2080335 | 1-scf00011 | 1 |
| AX-157903392 | 1 | 59.66 | KV452713.1 | 2082124 | 1-scf00011 | 1 |
| AX-157903393 | 1 | 59.66 | KV452713.1 | 2082847 | 1-scf00011 | 1 |
| AX-157903394 | 1 | 59.66 | KV452713.1 | 2083307 | 1-scf00011 | 1 |
| AX-157903396 | 1 | 59.66 | KV452713.1 | 2085620 | 1-scf00011 | 1 |
| AX-157903397 | 1 | 59.66 | KV452713.1 | 2086126 | 1-scf00011 | 1 |
| AX-157903401 | 1 | 59.66 | KV452713.1 | 2089953 | 1-scf00011 | 1 |
| AX-157903402 | 1 | 59.66 | KV452713.1 | 2091959 | 1-scf00011 | 1 |
| AX-157903403 | 1 | 59.66 | KV452713.1 | 2092800 | 1-scf00011 | 1 |
| AX-157903407 | 1 | 59.66 | KV452713.1 | 2095575 | 1-scf00011 | 1 |
| AX-157853608 | 1 | 59.66 | KV452713.1 | 2097022 | 1-scf00011 | 1 |
| AX-158404662 | 1 | 59.66 | KV452713.1 | 2098542 | 1-scf00011 | 1 |
| AX-157903412 | 1 | 59.66 | KV452713.1 | 2100595 | 1-scf00011 | 1 |
| AX-157903414 | 1 | 59.66 | KV452713.1 | 2105916 | 1-scf00011 | 1 |
| AX-157903416 | 1 | 59.66 | KV452713.1 | 2107078 | 1-scf00011 | 1 |
| AX-157903417 | 1 | 59.66 | KV452713.1 | 2107798 | 1-scf00011 | 1 |
| AX-157903419 | 1 | 59.66 | KV452713.1 | 2110191 | 1-scf00011 | 1 |
| AX-157903421 | 1 | 59.66 | KV452713.1 | 2111487 | 1-scf00011 | 1 |
| AX-157903423 | 1 | 59.66 | KV452713.1 | 2112510 | 1-scf00011 | 1 |
| AX-158389415 | 1 | 59.66 | KV452713.1 | 2114167 | 1-scf00011 | 1 |
| AX-157740846 | 1 | 59.66 | KV452713.1 | 2117821 | 1-scf00011 | 1 |
| AX-157903429 | 1 | 59.66 | KV452713.1 | 2120045 | 1-scf00011 | 1 |
| AX-157903430 | 1 | 59.66 | KV452713.1 | 2122391 | 1-scf00011 | 1 |
| AX-157903431 | 1 | 59.66 | KV452713.1 | 2124524 | 1-scf00011 | 1 |
| AX-157903432 | 1 | 59.66 | KV452713.1 | 2124903 | 1-scf00011 | 1 |
| AX-157903435 | 1 | 59.66 | KV452713.1 | 2127274 | 1-scf00011 | 1 |
| AX-157903436 | 1 | 59.66 | KV452713.1 | 2129854 | 1-scf00011 | 1 |
| AX-157903438 | 1 | 59.66 | KV452713.1 | 2132089 | 1-scf00011 | 1 |
| AX-157903445 | 1 | 59.66 | KV452713.1 | 2139858 | 1-scf00011 | 1 |
| AX-157903447 | 1 | 59.66 | KV452713.1 | 2141316 | 1-scf00011 | 1 |
| AX-157903452 | 1 | 59.66 | KV452713.1 | 2148180 | 1-scf00011 | 1 |
| AX-157903453 | 1 | 59.66 | KV452713.1 | 2149214 | 1-scf00011 | 1 |
| AX-157903454 | 1 | 59.66 | KV452713.1 | 2149786 | 1-scf00011 | 1 |
| AX-157903457 | 1 | 59.66 | KV452713.1 | 2152671 | 1-scf00011 | 1 |
| AX-158389416 | 1 | 59.66 | KV452713.1 | 2154302 | 1-scf00011 | 1 |
| AX-157903460 | 1 | 59.66 | KV452713.1 | 2154974 | 1-scf00011 | 1 |
| AX-157903462 | 1 | 59.66 | KV452713.1 | 2155751 | 1-scf00011 | 1 |
| AX-157811760 | 1 | 59.66 | KV452713.1 | 2156179 | 1-scf00011 | 1 |
| AX-157903465 | 1 | 59.66 | KV452713.1 | 2158305 | 1-scf00011 | 1 |
| AX-157903467 | 1 | 59.66 | KV452713.1 | 2159232 | 1-scf00011 | 1 |
| AX-157903472 | 1 | 59.66 | KV452713.1 | 2162171 | 1-scf00011 | 1 |
| AX-157903473 | 1 | 59.66 | KV452713.1 | 2163417 | 1-scf00011 | 1 |
| AX-157903475 | 1 | 59.66 | KV452713.1 | 2165032 | 1-scf00011 | 1 |
| AX-157903476 | 1 | 59.66 | KV452713.1 | 2165656 | 1-scf00011 | 1 |



|              |   |       |            |         |            |   |
|--------------|---|-------|------------|---------|------------|---|
| AX-157903479 | 1 | 59.66 | KV452713.1 | 2167071 | 1-scf00011 | 1 |
| AX-157903480 | 1 | 59.66 | KV452713.1 | 2167762 | 1-scf00011 | 1 |
| AX-157903481 | 1 | 59.66 | KV452713.1 | 2169136 | 1-scf00011 | 1 |
| AX-158389418 | 1 | 59.66 | KV452713.1 | 2170113 | 1-scf00011 | 1 |
| AX-157903482 | 1 | 59.66 | KV452713.1 | 2170674 | 1-scf00011 | 1 |
| AX-157903483 | 1 | 59.66 | KV452713.1 | 2171304 | 1-scf00011 | 1 |
| AX-157777335 | 1 | 59.66 | KV452713.1 | 2171968 | 1-scf00011 | 1 |
| AX-157903484 | 1 | 59.66 | KV452713.1 | 2172321 | 1-scf00011 | 1 |
| AX-157903485 | 1 | 59.66 | KV452713.1 | 2172892 | 1-scf00011 | 1 |
| AX-157903486 | 1 | 59.66 | KV452713.1 | 2174900 | 1-scf00011 | 1 |
| AX-157903487 | 1 | 59.66 | KV452713.1 | 2175380 | 1-scf00011 | 1 |
| AX-157903488 | 1 | 59.66 | KV452713.1 | 2175818 | 1-scf00011 | 1 |
| AX-157903489 | 1 | 59.66 | KV452713.1 | 2176315 | 1-scf00011 | 1 |
| AX-157903490 | 1 | 59.66 | KV452713.1 | 2177251 | 1-scf00011 | 1 |
| AX-157903491 | 1 | 59.66 | KV452713.1 | 2178357 | 1-scf00011 | 1 |
| AX-157903493 | 1 | 59.66 | KV452713.1 | 2180041 | 1-scf00011 | 1 |
| AX-157903494 | 1 | 59.66 | KV452713.1 | 2180845 | 1-scf00011 | 1 |
| AX-158389421 | 1 | 59.66 | KV452713.1 | 2183053 | 1-scf00011 | 1 |
| AX-157903497 | 1 | 59.66 | KV452713.1 | 2183842 | 1-scf00011 | 1 |
| AX-157903498 | 1 | 59.66 | KV452713.1 | 2184578 | 1-scf00011 | 1 |
| AX-157903503 | 1 | 59.66 | KV452713.1 | 2191248 | 1-scf00011 | 1 |
| AX-157903504 | 1 | 59.66 | KV452713.1 | 2192668 | 1-scf00011 | 1 |
| AX-158389423 | 1 | 59.66 | KV452713.1 | 2195050 | 1-scf00011 | 1 |
| AX-157903506 | 1 | 59.66 | KV452713.1 | 2195236 | 1-scf00011 | 1 |
| AX-157903509 | 1 | 59.66 | KV452713.1 | 2198290 | 1-scf00011 | 1 |
| AX-157811761 | 1 | 59.66 | KV452713.1 | 2202513 | 1-scf00011 | 1 |
| AX-157903513 | 1 | 59.66 | KV452713.1 | 2203558 | 1-scf00011 | 1 |
| AX-157903514 | 1 | 59.66 | KV452713.1 | 2204139 | 1-scf00011 | 1 |
| AX-157903518 | 1 | 59.66 | KV452713.1 | 2207498 | 1-scf00011 | 1 |
| AX-157903520 | 1 | 59.66 | KV452713.1 | 2209886 | 1-scf00011 | 1 |
| AX-157903521 | 1 | 59.66 | KV452713.1 | 2210590 | 1-scf00011 | 1 |
| AX-158389424 | 1 | 59.66 | KV452713.1 | 2210738 | 1-scf00011 | 1 |
| AX-157903524 | 1 | 59.66 | KV452713.1 | 2213043 | 1-scf00011 | 1 |
| AX-157903529 | 1 | 59.66 | KV452713.1 | 2218764 | 1-scf00011 | 1 |
| AX-157903530 | 1 | 59.66 | KV452713.1 | 2219691 | 1-scf00011 | 1 |
| AX-157903532 | 1 | 59.66 | KV452713.1 | 2226348 | 1-scf00011 | 1 |
| AX-157903534 | 1 | 59.66 | KV452713.1 | 2227680 | 1-scf00011 | 1 |
| AX-157903536 | 1 | 59.66 | KV452713.1 | 2229554 | 1-scf00011 | 1 |
| AX-157903538 | 1 | 59.66 | KV452713.1 | 2230057 | 1-scf00011 | 1 |
| AX-158389427 | 1 | 59.66 | KV452713.1 | 2233419 | 1-scf00011 | 1 |
| AX-157903543 | 1 | 59.66 | KV452713.1 | 2234240 | 1-scf00011 | 1 |
| AX-157724015 | 1 | 59.66 | KV452713.1 | 2234728 | 1-scf00011 | 1 |
| AX-157903545 | 1 | 59.66 | KV452713.1 | 2236350 | 1-scf00011 | 1 |
| AX-157903546 | 1 | 59.66 | KV452713.1 | 2238207 | 1-scf00011 | 1 |
| AX-158389428 | 1 | 59.66 | KV452713.1 | 2239080 | 1-scf00011 | 1 |
| AX-157903547 | 1 | 59.66 | KV452713.1 | 2239772 | 1-scf00011 | 1 |
| AX-157903548 | 1 | 59.66 | KV452713.1 | 2240408 | 1-scf00011 | 1 |
| AX-157903549 | 1 | 59.66 | KV452713.1 | 2242304 | 1-scf00011 | 1 |
| AX-158389429 | 1 | 59.66 | KV452713.1 | 2243114 | 1-scf00011 | 1 |
| AX-157903554 | 1 | 59.66 | KV452713.1 | 2246501 | 1-scf00011 | 1 |
| AX-157903555 | 1 | 59.66 | KV452713.1 | 2246657 | 1-scf00011 | 1 |

|              |   |       |            |         |            |   |
|--------------|---|-------|------------|---------|------------|---|
| AX-157903556 | 1 | 59.66 | KV452713.1 | 2247323 | 1-scf00011 | 1 |
| AX-157903557 | 1 | 59.66 | KV452713.1 | 2249584 | 1-scf00011 | 1 |
| AX-157903558 | 1 | 59.66 | KV452713.1 | 2251949 | 1-scf00011 | 1 |
| AX-157903559 | 1 | 59.66 | KV452713.1 | 2253245 | 1-scf00011 | 1 |
| AX-157903561 | 1 | 59.66 | KV452713.1 | 2254353 | 1-scf00011 | 1 |
| AX-157868897 | 1 | 59.66 | KV452713.1 | 2254835 | 1-scf00011 | 1 |
| AX-157903563 | 1 | 59.66 | KV452713.1 | 2255513 | 1-scf00011 | 1 |
| AX-157903565 | 1 | 59.66 | KV452713.1 | 2258649 | 1-scf00011 | 1 |
| AX-157903567 | 1 | 59.66 | KV452713.1 | 2259420 | 1-scf00011 | 1 |
| AX-157903572 | 1 | 59.66 | KV452713.1 | 2265973 | 1-scf00011 | 1 |
| AX-157903575 | 1 | 59.66 | KV452713.1 | 2268255 | 1-scf00011 | 1 |
| AX-157903576 | 1 | 59.66 | KV452713.1 | 2269008 | 1-scf00011 | 1 |
| AX-157903577 | 1 | 59.66 | KV452713.1 | 2271451 | 1-scf00011 | 1 |
| AX-157903579 | 1 | 59.66 | KV452713.1 | 2273012 | 1-scf00011 | 1 |
| AX-157903580 | 1 | 59.66 | KV452713.1 | 2273214 | 1-scf00011 | 1 |
| AX-158404666 | 1 | 59.66 | KV452713.1 | 2274483 | 1-scf00011 | 1 |
| AX-157868901 | 1 | 59.66 | KV452713.1 | 2276955 | 1-scf00011 | 1 |
| AX-157903586 | 1 | 59.66 | KV452713.1 | 2277438 | 1-scf00011 | 1 |
| AX-157903589 | 1 | 59.66 | KV452713.1 | 2280248 | 1-scf00011 | 1 |
| AX-157903590 | 1 | 59.66 | KV452713.1 | 2280603 | 1-scf00011 | 1 |
| AX-157903594 | 1 | 59.66 | KV452713.1 | 2283560 | 1-scf00011 | 1 |
| AX-157903595 | 1 | 59.66 | KV452713.1 | 2284059 | 1-scf00011 | 1 |
| AX-157903596 | 1 | 59.66 | KV452713.1 | 2284887 | 1-scf00011 | 1 |
| AX-157723234 | 1 | 59.66 | KV452713.1 | 2285105 | 1-scf00011 | 1 |
| AX-157903598 | 1 | 59.66 | KV452713.1 | 2286272 | 1-scf00011 | 1 |
| AX-157903601 | 1 | 59.66 | KV452713.1 | 2289693 | 1-scf00011 | 1 |
| AX-157903603 | 1 | 59.66 | KV452713.1 | 2290180 | 1-scf00011 | 1 |
| AX-157903604 | 1 | 59.66 | KV452713.1 | 2291338 | 1-scf00011 | 1 |
| AX-157903605 | 1 | 59.66 | KV452713.1 | 2293122 | 1-scf00011 | 1 |
| AX-157903606 | 1 | 59.66 | KV452713.1 | 2293686 | 1-scf00011 | 1 |
| AX-157903607 | 1 | 59.66 | KV452713.1 | 2293905 | 1-scf00011 | 1 |
| AX-157903608 | 1 | 59.66 | KV452713.1 | 2294243 | 1-scf00011 | 1 |
| AX-157903609 | 1 | 59.66 | KV452713.1 | 2295856 | 1-scf00011 | 1 |
| AX-157903610 | 1 | 59.66 | KV452713.1 | 2296818 | 1-scf00011 | 1 |
| AX-157903611 | 1 | 59.66 | KV452713.1 | 2297643 | 1-scf00011 | 1 |
| AX-157903612 | 1 | 59.66 | KV452713.1 | 2299503 | 1-scf00011 | 1 |
| AX-157903615 | 1 | 59.66 | KV452713.1 | 2301450 | 1-scf00011 | 1 |
| AX-157903617 | 1 | 59.66 | KV452713.1 | 2303091 | 1-scf00011 | 1 |
| AX-157903618 | 1 | 59.66 | KV452713.1 | 2303940 | 1-scf00011 | 1 |
| AX-157868904 | 1 | 59.66 | KV452713.1 | 2307133 | 1-scf00011 | 1 |
| AX-157903621 | 1 | 59.66 | KV452713.1 | 2307587 | 1-scf00011 | 1 |
| AX-157903622 | 1 | 59.66 | KV452713.1 | 2308432 | 1-scf00011 | 1 |
| AX-157903623 | 1 | 59.66 | KV452713.1 | 2311291 | 1-scf00011 | 1 |
| AX-157903624 | 1 | 59.66 | KV452713.1 | 2311662 | 1-scf00011 | 1 |
| AX-157903625 | 1 | 59.66 | KV452713.1 | 2313511 | 1-scf00011 | 1 |
| AX-157903628 | 1 | 59.66 | KV452713.1 | 2327511 | 1-scf00011 | 1 |
| AX-157903630 | 1 | 59.66 | KV452713.1 | 2329466 | 1-scf00011 | 1 |
| AX-157903631 | 1 | 59.66 | KV452713.1 | 2331360 | 1-scf00011 | 1 |
| AX-157903635 | 1 | 59.66 | KV452713.1 | 2334089 | 1-scf00011 | 1 |
| AX-157903637 | 1 | 59.66 | KV452713.1 | 2336126 | 1-scf00011 | 1 |
| AX-157903638 | 1 | 59.66 | KV452713.1 | 2336612 | 1-scf00011 | 1 |

|              |   |       |            |         |            |   |
|--------------|---|-------|------------|---------|------------|---|
| AX-157903639 | 1 | 59.66 | KV452713.1 | 2337057 | 1-scf00011 | 1 |
| AX-157903640 | 1 | 59.66 | KV452713.1 | 2337494 | 1-scf00011 | 1 |
| AX-157903641 | 1 | 59.66 | KV452713.1 | 2338316 | 1-scf00011 | 1 |
| AX-157903642 | 1 | 59.66 | KV452713.1 | 2338785 | 1-scf00011 | 1 |
| AX-157903644 | 1 | 59.66 | KV452713.1 | 2341839 | 1-scf00011 | 1 |
| AX-157903645 | 1 | 59.66 | KV452713.1 | 2342852 | 1-scf00011 | 1 |
| AX-157903646 | 1 | 59.66 | KV452713.1 | 2343153 | 1-scf00011 | 1 |
| AX-157903647 | 1 | 59.66 | KV452713.1 | 2344159 | 1-scf00011 | 1 |
| AX-157903649 | 1 | 59.66 | KV452713.1 | 2345630 | 1-scf00011 | 1 |
| AX-157903652 | 1 | 59.66 | KV452713.1 | 2346908 | 1-scf00011 | 1 |
| AX-157903653 | 1 | 59.66 | KV452713.1 | 2347662 | 1-scf00011 | 1 |
| AX-157741872 | 1 | 59.66 | KV452713.1 | 2348770 | 1-scf00011 | 1 |
| AX-157811762 | 1 | 59.66 | KV452713.1 | 2350983 | 1-scf00011 | 1 |
| AX-157903656 | 1 | 59.66 | KV452713.1 | 2353505 | 1-scf00011 | 1 |
| AX-158389431 | 1 | 59.66 | KV452713.1 | 2356491 | 1-scf00011 | 1 |
| AX-157903659 | 1 | 59.66 | KV452713.1 | 2358612 | 1-scf00011 | 1 |
| AX-157903660 | 1 | 59.66 | KV452713.1 | 2359014 | 1-scf00011 | 1 |
| AX-157811763 | 1 | 59.66 | KV452713.1 | 2360691 | 1-scf00011 | 1 |
| AX-157903663 | 1 | 59.66 | KV452713.1 | 2362212 | 1-scf00011 | 1 |
| AX-157903664 | 1 | 59.66 | KV452713.1 | 2362494 | 1-scf00011 | 1 |
| AX-157903665 | 1 | 59.66 | KV452713.1 | 2362621 | 1-scf00011 | 1 |
| AX-157811765 | 1 | 59.66 | KV452713.1 | 2363476 | 1-scf00011 | 1 |
| AX-157903667 | 1 | 59.66 | KV452713.1 | 2365724 | 1-scf00011 | 1 |
| AX-158404668 | 1 | 59.66 | KV452713.1 | 2366561 | 1-scf00011 | 1 |
| AX-158404669 | 1 | 59.66 | KV452713.1 | 2366767 | 1-scf00011 | 1 |
| AX-157903668 | 1 | 59.66 | KV452713.1 | 2367518 | 1-scf00011 | 1 |
| AX-158414676 | 1 | 59.66 | KV452713.1 | 2367800 | 1-scf00011 | 1 |
| AX-157903672 | 1 | 59.66 | KV452713.1 | 2376998 | 1-scf00011 | 1 |
| AX-157903673 | 1 | 59.66 | KV452713.1 | 2377358 | 1-scf00011 | 1 |
| AX-157903675 | 1 | 59.66 | KV452713.1 | 2383708 | 1-scf00011 | 1 |
| AX-157903677 | 1 | 59.66 | KV452713.1 | 2384576 | 1-scf00011 | 1 |
| AX-158389433 | 1 | 59.66 | KV452713.1 | 2385943 | 1-scf00011 | 1 |
| AX-158389434 | 1 | 59.66 | KV452713.1 | 2393778 | 1-scf00011 | 1 |
| AX-157903694 | 1 | 59.66 | KV452713.1 | 2400632 | 1-scf00011 | 1 |
| AX-158404672 | 1 | 59.66 | KV452713.1 | 2411534 | 1-scf00011 | 1 |
| AX-157811767 | 1 | 59.66 | KV452713.1 | 2415940 | 1-scf00011 | 1 |
| AX-157903705 | 1 | 59.66 | KV452713.1 | 2416676 | 1-scf00011 | 1 |
| AX-157811768 | 1 | 59.66 | KV452713.1 | 2417652 | 1-scf00011 | 1 |
| AX-157903707 | 1 | 59.66 | KV452713.1 | 2418597 | 1-scf00011 | 1 |
| AX-157741659 | 1 | 59.66 | KV452713.1 | 2419827 | 1-scf00011 | 1 |
| AX-157811769 | 1 | 59.66 | KV452713.1 | 2421343 | 1-scf00011 | 1 |
| AX-157811770 | 1 | 59.66 | KV452713.1 | 2421382 | 1-scf00011 | 1 |
| AX-157903708 | 1 | 59.66 | KV452713.1 | 2422132 | 1-scf00011 | 1 |
| AX-157903709 | 1 | 59.66 | KV452713.1 | 2423160 | 1-scf00011 | 1 |
| AX-157903711 | 1 | 59.66 | KV452713.1 | 2426229 | 1-scf00011 | 1 |
| AX-157903712 | 1 | 59.66 | KV452713.1 | 2426962 | 1-scf00011 | 1 |
| AX-157903713 | 1 | 59.66 | KV452713.1 | 2427253 | 1-scf00011 | 1 |
| AX-157903714 | 1 | 59.66 | KV452713.1 | 2429059 | 1-scf00011 | 1 |
| AX-157903715 | 1 | 59.66 | KV452713.1 | 2432119 | 1-scf00011 | 1 |
| AX-157903717 | 1 | 59.66 | KV452713.1 | 2435688 | 1-scf00011 | 1 |
| AX-157903719 | 1 | 59.66 | KV452713.1 | 2442558 | 1-scf00011 | 1 |

|              |   |       |            |         |            |   |
|--------------|---|-------|------------|---------|------------|---|
| AX-157903722 | 1 | 59.66 | KV452713.1 | 2444994 | 1-scf00011 | 1 |
| AX-157903725 | 1 | 59.66 | KV452713.1 | 2448783 | 1-scf00011 | 1 |
| AX-157811773 | 1 | 59.66 | KV452713.1 | 2450444 | 1-scf00011 | 1 |
| AX-157903727 | 1 | 59.66 | KV452713.1 | 2451013 | 1-scf00011 | 1 |
| AX-157903729 | 1 | 59.66 | KV452713.1 | 2453205 | 1-scf00011 | 1 |
| AX-157811775 | 1 | 59.66 | KV452713.1 | 2453723 | 1-scf00011 | 1 |
| AX-157903736 | 1 | 59.66 | KV452713.1 | 2459964 | 1-scf00011 | 1 |
| AX-157868909 | 1 | 59.66 | KV452713.1 | 2460712 | 1-scf00011 | 1 |
| AX-157811776 | 1 | 59.66 | KV452713.1 | 2461432 | 1-scf00011 | 1 |
| AX-157811777 | 1 | 59.66 | KV452713.1 | 2463609 | 1-scf00011 | 1 |
| AX-157718006 | 1 | 59.66 | KV452713.1 | 2466634 | 1-scf00011 | 1 |
| AX-157811781 | 1 | 59.66 | KV452713.1 | 2470634 | 1-scf00011 | 1 |
| AX-157903739 | 1 | 59.66 | KV452713.1 | 2472413 | 1-scf00011 | 1 |
| AX-158389435 | 1 | 59.66 | KV452713.1 | 2473387 | 1-scf00011 | 1 |
| AX-157903740 | 1 | 59.66 | KV452713.1 | 2474240 | 1-scf00011 | 1 |
| AX-157903742 | 1 | 59.66 | KV452713.1 | 2477291 | 1-scf00011 | 1 |
| AX-157811782 | 1 | 59.66 | KV452713.1 | 2477510 | 1-scf00011 | 1 |
| AX-157903743 | 1 | 59.66 | KV452713.1 | 2477988 | 1-scf00011 | 1 |
| AX-157903745 | 1 | 59.66 | KV452713.1 | 2481070 | 1-scf00011 | 1 |
| AX-157903749 | 1 | 59.66 | KV452713.1 | 2487379 | 1-scf00011 | 1 |
| AX-157903753 | 1 | 59.66 | KV452713.1 | 2491606 | 1-scf00011 | 1 |
| AX-157903758 | 1 | 59.66 | KV452713.1 | 2498449 | 1-scf00011 | 1 |
| AX-157903759 | 1 | 59.66 | KV452713.1 | 2500213 | 1-scf00011 | 1 |
| AX-157903760 | 1 | 59.66 | KV452713.1 | 2500777 | 1-scf00011 | 1 |
| AX-157903762 | 1 | 59.66 | KV452713.1 | 2502648 | 1-scf00011 | 1 |
| AX-157903763 | 1 | 59.66 | KV452713.1 | 2504290 | 1-scf00011 | 1 |
| AX-157903764 | 1 | 59.66 | KV452713.1 | 2507961 | 1-scf00011 | 1 |
| AX-157811785 | 1 | 59.66 | KV452713.1 | 2511491 | 1-scf00011 | 1 |
| AX-157903766 | 1 | 59.66 | KV452713.1 | 2514232 | 1-scf00011 | 1 |
| AX-158389436 | 1 | 59.66 | KV452713.1 | 2515185 | 1-scf00011 | 1 |
| AX-157903767 | 1 | 59.66 | KV452713.1 | 2515553 | 1-scf00011 | 1 |
| AX-158404000 | 1 | 59.66 | KV452713.1 | 2520075 | 1-scf00011 | 1 |
| AX-158404001 | 1 | 59.66 | KV452713.1 | 2525027 | 1-scf00011 | 1 |
| AX-158404674 | 1 | 59.66 | KV452713.1 | 2525500 | 1-scf00011 | 1 |
| AX-157903771 | 1 | 59.66 | KV452713.1 | 2526840 | 1-scf00011 | 1 |
| AX-157903773 | 1 | 59.66 | KV452713.1 | 2531781 | 1-scf00011 | 1 |
| AX-157755387 | 1 | 59.66 | KV452713.1 | 2532675 | 1-scf00011 | 1 |
| AX-157903776 | 1 | 59.66 | KV452713.1 | 2535102 | 1-scf00011 | 1 |
| AX-157903779 | 1 | 59.66 | KV452713.1 | 2539184 | 1-scf00011 | 1 |
| AX-157868911 | 1 | 59.66 | KV452713.1 | 2557500 | 1-scf00011 | 1 |
| AX-157903787 | 1 | 59.66 | KV452713.1 | 2557947 | 1-scf00011 | 1 |
| AX-157868912 | 1 | 59.66 | KV452713.1 | 2558439 | 1-scf00011 | 1 |
| AX-157903788 | 1 | 59.66 | KV452713.1 | 2561485 | 1-scf00011 | 1 |
| AX-157903789 | 1 | 59.66 | KV452713.1 | 2562717 | 1-scf00011 | 1 |
| AX-157903790 | 1 | 59.66 | KV452713.1 | 2563177 | 1-scf00011 | 1 |
| AX-157903794 | 1 | 59.66 | KV452713.1 | 2570569 | 1-scf00011 | 1 |
| AX-157903795 | 1 | 59.66 | KV452713.1 | 2571099 | 1-scf00011 | 1 |
| AX-157903796 | 1 | 59.66 | KV452713.1 | 2571464 | 1-scf00011 | 1 |
| AX-157903797 | 1 | 59.66 | KV452713.1 | 2572086 | 1-scf00011 | 1 |
| AX-157903801 | 1 | 59.66 | KV452713.1 | 2574965 | 1-scf00011 | 1 |
| AX-157903803 | 1 | 59.66 | KV452713.1 | 2576930 | 1-scf00011 | 1 |

|              |   |       |            |         |            |   |
|--------------|---|-------|------------|---------|------------|---|
| AX-157903804 | 1 | 59.66 | KV452713.1 | 2577323 | 1-scf00011 | 1 |
| AX-157903805 | 1 | 59.66 | KV452713.1 | 2577677 | 1-scf00011 | 1 |
| AX-157903808 | 1 | 59.66 | KV452713.1 | 2580554 | 1-scf00011 | 1 |
| AX-157903810 | 1 | 59.66 | KV452713.1 | 2581869 | 1-scf00011 | 1 |
| AX-157903811 | 1 | 59.66 | KV452713.1 | 2582753 | 1-scf00011 | 1 |
| AX-157903812 | 1 | 59.66 | KV452713.1 | 2584188 | 1-scf00011 | 1 |
| AX-157903813 | 1 | 59.66 | KV452713.1 | 2584889 | 1-scf00011 | 1 |
| AX-157903815 | 1 | 59.66 | KV452713.1 | 2587026 | 1-scf00011 | 1 |
| AX-157903816 | 1 | 59.66 | KV452713.1 | 2587738 | 1-scf00011 | 1 |
| AX-157903817 | 1 | 59.66 | KV452713.1 | 2588645 | 1-scf00011 | 1 |
| AX-157903819 | 1 | 59.66 | KV452713.1 | 2590905 | 1-scf00011 | 1 |
| AX-157903820 | 1 | 59.66 | KV452713.1 | 2591621 | 1-scf00011 | 1 |
| AX-157903821 | 1 | 59.66 | KV452713.1 | 2592753 | 1-scf00011 | 1 |
| AX-157741457 | 1 | 59.66 | KV452713.1 | 2596024 | 1-scf00011 | 1 |
| AX-157726538 | 1 | 59.66 | KV452713.1 | 2597491 | 1-scf00011 | 1 |
| AX-157903826 | 1 | 59.66 | KV452713.1 | 2600597 | 1-scf00011 | 1 |
| AX-157903827 | 1 | 59.66 | KV452713.1 | 2600954 | 1-scf00011 | 1 |
| AX-157903829 | 1 | 59.66 | KV452713.1 | 2602015 | 1-scf00011 | 1 |
| AX-157903835 | 1 | 59.66 | KV452713.1 | 2613265 | 1-scf00011 | 1 |
| AX-157903837 | 1 | 59.66 | KV452713.1 | 2614275 | 1-scf00011 | 1 |
| AX-157903838 | 1 | 59.66 | KV452713.1 | 2616152 | 1-scf00011 | 1 |
| AX-157903839 | 1 | 59.66 | KV452713.1 | 2617290 | 1-scf00011 | 1 |
| AX-157903842 | 1 | 59.66 | KV452713.1 | 2619443 | 1-scf00011 | 1 |
| AX-158389442 | 1 | 59.66 | KV452713.1 | 2621828 | 1-scf00011 | 1 |
| AX-157903844 | 1 | 59.66 | KV452713.1 | 2622102 | 1-scf00011 | 1 |
| AX-157903845 | 1 | 59.66 | KV452713.1 | 2622596 | 1-scf00011 | 1 |
| AX-157903848 | 1 | 59.66 | KV452713.1 | 2625509 | 1-scf00011 | 1 |
| AX-157903849 | 1 | 59.66 | KV452713.1 | 2626968 | 1-scf00011 | 1 |
| AX-157903850 | 1 | 59.66 | KV452713.1 | 2628235 | 1-scf00011 | 1 |
| AX-157903856 | 1 | 59.66 | KV452713.1 | 2634502 | 1-scf00011 | 1 |
| AX-157903858 | 1 | 59.66 | KV452713.1 | 2635745 | 1-scf00011 | 1 |
| AX-157903859 | 1 | 59.66 | KV452713.1 | 2638408 | 1-scf00011 | 1 |
| AX-157903860 | 1 | 59.66 | KV452713.1 | 2639900 | 1-scf00011 | 1 |
| AX-157903864 | 1 | 59.66 | KV452713.1 | 2644001 | 1-scf00011 | 1 |
| AX-157903867 | 1 | 59.66 | KV452713.1 | 2647523 | 1-scf00011 | 1 |
| AX-158404680 | 1 | 59.66 | KV452713.1 | 2658549 | 1-scf00011 | 1 |
| AX-157903875 | 1 | 59.66 | KV452713.1 | 2659451 | 1-scf00011 | 1 |
| AX-157868913 | 1 | 59.66 | KV452713.1 | 2661195 | 1-scf00011 | 1 |
| AX-157903884 | 1 | 59.66 | KV452713.1 | 2666515 | 1-scf00011 | 1 |
| AX-157903885 | 1 | 59.66 | KV452713.1 | 2667629 | 1-scf00011 | 1 |
| AX-157903887 | 1 | 59.66 | KV452713.1 | 2668683 | 1-scf00011 | 1 |
| AX-157903890 | 1 | 59.66 | KV452713.1 | 2671002 | 1-scf00011 | 1 |
| AX-157903891 | 1 | 59.66 | KV452713.1 | 2671308 | 1-scf00011 | 1 |
| AX-157903892 | 1 | 59.66 | KV452713.1 | 2671817 | 1-scf00011 | 1 |
| AX-157903893 | 1 | 59.66 | KV452713.1 | 2672030 | 1-scf00011 | 1 |
| AX-157903894 | 1 | 59.66 | KV452713.1 | 2672277 | 1-scf00011 | 1 |
| AX-157903895 | 1 | 59.66 | KV452713.1 | 2673392 | 1-scf00011 | 1 |
| AX-158404681 | 1 | 59.66 | KV452713.1 | 2678134 | 1-scf00011 | 1 |
| AX-157868915 | 1 | 59.66 | KV452713.1 | 2678651 | 1-scf00011 | 1 |
| AX-157903899 | 1 | 59.66 | KV452713.1 | 2678888 | 1-scf00011 | 1 |
| AX-157903900 | 1 | 59.66 | KV452713.1 | 2679309 | 1-scf00011 | 1 |

|              |   |       |            |         |            |   |
|--------------|---|-------|------------|---------|------------|---|
| AX-157868916 | 1 | 59.66 | KV452713.1 | 2680385 | 1-scf00011 | 1 |
| AX-157724983 | 1 | 59.66 | KV452713.1 | 2684122 | 1-scf00011 | 1 |
| AX-157903906 | 1 | 59.66 | KV452713.1 | 2685229 | 1-scf00011 | 1 |
| AX-157903910 | 1 | 59.66 | KV452713.1 | 2687889 | 1-scf00011 | 1 |
| AX-157903912 | 1 | 59.66 | KV452713.1 | 2688470 | 1-scf00011 | 1 |
| AX-157903928 | 1 | 59.66 | KV452713.1 | 2718685 | 1-scf00011 | 1 |
| AX-157903929 | 1 | 59.66 | KV452713.1 | 2720293 | 1-scf00011 | 1 |
| AX-157903931 | 1 | 59.66 | KV452713.1 | 2722258 | 1-scf00011 | 1 |
| AX-157903934 | 1 | 59.66 | KV452713.1 | 2724765 | 1-scf00011 | 1 |
| AX-157903936 | 1 | 59.66 | KV452713.1 | 2728362 | 1-scf00011 | 1 |
| AX-157811790 | 1 | 59.66 | KV452713.1 | 2728719 | 1-scf00011 | 1 |
| AX-157903938 | 1 | 59.66 | KV452713.1 | 2729554 | 1-scf00011 | 1 |
| AX-157903939 | 1 | 59.66 | KV452713.1 | 2730458 | 1-scf00011 | 1 |
| AX-157903948 | 1 | 59.66 | KV452713.1 | 2740996 | 1-scf00011 | 1 |
| AX-157903954 | 1 | 59.66 | KV452713.1 | 2746022 | 1-scf00011 | 1 |
| AX-157903957 | 1 | 59.66 | KV452713.1 | 2749997 | 1-scf00011 | 1 |
| AX-158414681 | 1 | 59.66 | KV452713.1 | 2751253 | 1-scf00011 | 1 |
| AX-157903959 | 1 | 59.66 | KV452713.1 | 2752890 | 1-scf00011 | 1 |
| AX-157755517 | 1 | 59.66 | KV452713.1 | 2754099 | 1-scf00011 | 1 |
| AX-157903961 | 1 | 59.66 | KV452713.1 | 2754173 | 1-scf00011 | 1 |
| AX-157903962 | 1 | 59.66 | KV452713.1 | 2756676 | 1-scf00011 | 1 |
| AX-157903965 | 1 | 59.66 | KV452713.1 | 2757787 | 1-scf00011 | 1 |
| AX-157903969 | 1 | 59.66 | KV452713.1 | 2761444 | 1-scf00011 | 1 |
| AX-157903977 | 1 | 59.66 | KV452713.1 | 2790233 | 1-scf00011 | 1 |
| AX-157903978 | 1 | 59.66 | KV452713.1 | 2790718 | 1-scf00011 | 1 |
| AX-157903980 | 1 | 59.66 | KV452713.1 | 2791735 | 1-scf00011 | 1 |
| AX-157903982 | 1 | 59.66 | KV452713.1 | 2797033 | 1-scf00011 | 1 |
| AX-157903983 | 1 | 59.66 | KV452713.1 | 2799248 | 1-scf00011 | 1 |
| AX-157903987 | 1 | 59.66 | KV452713.1 | 2807024 | 1-scf00011 | 1 |
| AX-157903988 | 1 | 59.66 | KV452713.1 | 2809447 | 1-scf00011 | 1 |
| AX-157903991 | 1 | 59.66 | KV452713.1 | 2817500 | 1-scf00011 | 1 |
| AX-157903992 | 1 | 59.66 | KV452713.1 | 2818186 | 1-scf00011 | 1 |
| AX-157903998 | 1 | 59.66 | KV452713.1 | 2842159 | 1-scf00011 | 1 |
| AX-157811797 | 1 | 59.66 | KV452713.1 | 2857010 | 1-scf00011 | 1 |
| AX-158404690 | 1 | 59.66 | KV452713.1 | 2863292 | 1-scf00011 | 1 |
| AX-157811798 | 1 | 59.66 | KV452713.1 | 2863984 | 1-scf00011 | 1 |
| AX-157904011 | 1 | 59.66 | KV452713.1 | 2878859 | 1-scf00011 | 1 |
| AX-157744957 | 1 | 59.66 | KV452713.1 | 2880299 | 1-scf00011 | 1 |
| AX-157904012 | 1 | 59.66 | KV452713.1 | 2880776 | 1-scf00011 | 1 |
| AX-157904013 | 1 | 59.66 | KV452713.1 | 2882888 | 1-scf00011 | 1 |
| AX-158389446 | 1 | 59.66 | KV452713.1 | 2891364 | 1-scf00011 | 1 |
| AX-157811799 | 1 | 59.66 | KV452713.1 | 2891762 | 1-scf00011 | 1 |
| AX-157904015 | 1 | 59.66 | KV452713.1 | 2895689 | 1-scf00011 | 1 |
| AX-157739952 | 1 | 59.66 | KV452713.1 | 2900585 | 1-scf00011 | 1 |
| AX-157904016 | 1 | 59.66 | KV452713.1 | 2901455 | 1-scf00011 | 1 |
| AX-157904017 | 1 | 59.66 | KV452713.1 | 2902348 | 1-scf00011 | 1 |
| AX-157904018 | 1 | 59.66 | KV452713.1 | 2903507 | 1-scf00011 | 1 |
| AX-157904020 | 1 | 59.66 | KV452713.1 | 2904285 | 1-scf00011 | 1 |
| AX-157904022 | 1 | 59.66 | KV452713.1 | 2905521 | 1-scf00011 | 1 |
| AX-157904023 | 1 | 59.66 | KV452713.1 | 2908719 | 1-scf00011 | 1 |
| AX-157904024 | 1 | 59.66 | KV452713.1 | 2910205 | 1-scf00011 | 1 |

|              |   |       |            |         |            |   |
|--------------|---|-------|------------|---------|------------|---|
| AX-157904025 | 1 | 59.66 | KV452713.1 | 2913828 | 1-scf00011 | 1 |
| AX-157904030 | 1 | 59.66 | KV452713.1 | 2919024 | 1-scf00011 | 1 |
| AX-157904032 | 1 | 59.66 | KV452713.1 | 2920446 | 1-scf00011 | 1 |
| AX-157904033 | 1 | 59.66 | KV452713.1 | 2922842 | 1-scf00011 | 1 |
| AX-157904034 | 1 | 59.66 | KV452713.1 | 2923654 | 1-scf00011 | 1 |
| AX-157904035 | 1 | 59.66 | KV452713.1 | 2923966 | 1-scf00011 | 1 |
| AX-157904036 | 1 | 59.66 | KV452713.1 | 2926202 | 1-scf00011 | 1 |
| AX-157904050 | 1 | 59.66 | KV452713.1 | 2939030 | 1-scf00011 | 1 |
| AX-157904053 | 1 | 59.66 | KV452713.1 | 2952278 | 1-scf00011 | 1 |
| AX-157904055 | 1 | 59.66 | KV452713.1 | 2957700 | 1-scf00011 | 1 |
| AX-157904068 | 1 | 59.66 | KV452713.1 | 3007584 | 1-scf00011 | 1 |
| AX-158404694 | 1 | 59.66 | KV452713.1 | 3010332 | 1-scf00011 | 1 |
| AX-158414682 | 1 | 59.66 | KV452713.1 | 3010505 | 1-scf00011 | 1 |
| AX-157904069 | 1 | 59.66 | KV452713.1 | 3010995 | 1-scf00011 | 1 |
| AX-157754843 | 1 | 59.66 | KV452713.1 | 3012498 | 1-scf00011 | 1 |
| AX-157904072 | 1 | 59.66 | KV452713.1 | 3014146 | 1-scf00011 | 1 |
| AX-157904073 | 1 | 59.66 | KV452713.1 | 3014305 | 1-scf00011 | 1 |
| AX-157904074 | 1 | 59.66 | KV452713.1 | 3014952 | 1-scf00011 | 1 |
| AX-157904075 | 1 | 59.66 | KV452713.1 | 3015369 | 1-scf00011 | 1 |
| AX-157904077 | 1 | 59.66 | KV452713.1 | 3018082 | 1-scf00011 | 1 |
| AX-157904078 | 1 | 59.66 | KV452713.1 | 3018772 | 1-scf00011 | 1 |
| AX-157904080 | 1 | 59.66 | KV452713.1 | 3020087 | 1-scf00011 | 1 |
| AX-157904088 | 1 | 59.66 | KV452713.1 | 3027486 | 1-scf00011 | 1 |
| AX-157904089 | 1 | 59.66 | KV452713.1 | 3028180 | 1-scf00011 | 1 |
| AX-157904091 | 1 | 59.66 | KV452713.1 | 3029446 | 1-scf00011 | 1 |
| AX-157904092 | 1 | 59.66 | KV452713.1 | 3029894 | 1-scf00011 | 1 |
| AX-157904095 | 1 | 59.66 | KV452713.1 | 3031157 | 1-scf00011 | 1 |
| AX-157904097 | 1 | 59.66 | KV452713.1 | 3032609 | 1-scf00011 | 1 |
| AX-157904098 | 1 | 59.66 | KV452713.1 | 3035704 | 1-scf00011 | 1 |
| AX-157904100 | 1 | 59.66 | KV452713.1 | 3037319 | 1-scf00011 | 1 |
| AX-157904102 | 1 | 59.66 | KV452713.1 | 3041896 | 1-scf00011 | 1 |
| AX-157904105 | 1 | 59.66 | KV452713.1 | 3046421 | 1-scf00011 | 1 |
| AX-157904106 | 1 | 59.66 | KV452713.1 | 3048530 | 1-scf00011 | 1 |
| AX-157904107 | 1 | 59.66 | KV452713.1 | 3049858 | 1-scf00011 | 1 |
| AX-157811807 | 1 | 59.66 | KV452713.1 | 3050242 | 1-scf00011 | 1 |
| AX-157904108 | 1 | 59.66 | KV452713.1 | 3053089 | 1-scf00011 | 1 |
| AX-157904109 | 1 | 59.66 | KV452713.1 | 3054003 | 1-scf00011 | 1 |
| AX-157904111 | 1 | 59.66 | KV452713.1 | 3061129 | 1-scf00011 | 1 |
| AX-157868921 | 1 | 59.66 | KV452713.1 | 3063188 | 1-scf00011 | 1 |
| AX-157868924 | 1 | 59.66 | KV452713.1 | 3067284 | 1-scf00011 | 1 |
| AX-157904114 | 1 | 59.66 | KV452713.1 | 3067997 | 1-scf00011 | 1 |
| AX-157904117 | 1 | 59.66 | KV452713.1 | 3069766 | 1-scf00011 | 1 |
| AX-157904118 | 1 | 59.66 | KV452713.1 | 3070531 | 1-scf00011 | 1 |
| AX-157904119 | 1 | 59.66 | KV452713.1 | 3071561 | 1-scf00011 | 1 |
| AX-157868926 | 1 | 59.66 | KV452713.1 | 3072006 | 1-scf00011 | 1 |
| AX-157904122 | 1 | 59.66 | KV452713.1 | 3073357 | 1-scf00011 | 1 |
| AX-157904123 | 1 | 59.66 | KV452713.1 | 3073853 | 1-scf00011 | 1 |
| AX-157904124 | 1 | 59.66 | KV452713.1 | 3074064 | 1-scf00011 | 1 |
| AX-157904126 | 1 | 59.66 | KV452713.1 | 3077059 | 1-scf00011 | 1 |
| AX-157904127 | 1 | 59.66 | KV452713.1 | 3079209 | 1-scf00011 | 1 |
| AX-157904129 | 1 | 59.66 | KV452713.1 | 3082972 | 1-scf00011 | 1 |

|              |   |       |            |         |            |   |
|--------------|---|-------|------------|---------|------------|---|
| AX-157904130 | 1 | 59.66 | KV452713.1 | 3087447 | 1-scf00011 | 1 |
| AX-157904131 | 1 | 59.66 | KV452713.1 | 3093452 | 1-scf00011 | 1 |
| AX-157904133 | 1 | 59.66 | KV452713.1 | 3097166 | 1-scf00011 | 1 |
| AX-157904134 | 1 | 59.66 | KV452713.1 | 3099095 | 1-scf00011 | 1 |
| AX-157904135 | 1 | 59.66 | KV452713.1 | 3099470 | 1-scf00011 | 1 |
| AX-157904140 | 1 | 59.66 | KV452713.1 | 3106624 | 1-scf00011 | 1 |
| AX-157904144 | 1 | 59.66 | KV452713.1 | 3120985 | 1-scf00011 | 1 |
| AX-157904146 | 1 | 59.66 | KV452713.1 | 3122757 | 1-scf00011 | 1 |
| AX-157904148 | 1 | 59.66 | KV452713.1 | 3126095 | 1-scf00011 | 1 |
| AX-158389454 | 1 | 59.66 | KV452713.1 | 3167217 | 1-scf00011 | 1 |
| AX-157750372 | 1 | 59.66 | KV452713.1 | 3167586 | 1-scf00011 | 1 |
| AX-157904176 | 1 | 59.66 | KV452713.1 | 3186594 | 1-scf00011 | 1 |
| AX-158404701 | 1 | 59.66 | KV452713.1 | 3208231 | 1-scf00011 | 1 |
| AX-157741849 | 1 | 59.66 | KV452713.1 | 3208706 | 1-scf00011 | 1 |
| AX-157904183 | 1 | 59.66 | KV452713.1 | 3221407 | 1-scf00011 | 1 |
| AX-158379169 | 1 | 59.66 | KV452713.1 | 3224071 | 1-scf00011 | 1 |
| AX-157904189 | 1 | 59.66 | KV452713.1 | 3234832 | 1-scf00011 | 1 |
| AX-157904190 | 1 | 59.66 | KV452713.1 | 3235467 | 1-scf00011 | 1 |
| AX-157904199 | 1 | 59.66 | KV452713.1 | 3261576 | 1-scf00011 | 1 |
| AX-157904202 | 1 | 59.66 | KV452713.1 | 3268267 | 1-scf00011 | 1 |
| AX-157904206 | 1 | 59.66 | KV452713.1 | 3273995 | 1-scf00011 | 1 |
| AX-157904211 | 1 | 59.66 | KV452713.1 | 3281554 | 1-scf00011 | 1 |
| AX-157748973 | 1 | 59.66 | KV452713.1 | 3284141 | 1-scf00011 | 1 |
| AX-157904214 | 1 | 59.66 | KV452713.1 | 3287027 | 1-scf00011 | 1 |
| AX-157904215 | 1 | 59.66 | KV452713.1 | 3297294 | 1-scf00011 | 1 |
| AX-157904219 | 1 | 59.66 | KV452713.1 | 3305979 | 1-scf00011 | 1 |
| AX-157748299 | 1 | 59.66 | KV452713.1 | 3306023 | 1-scf00011 | 1 |
| AX-157904220 | 1 | 59.66 | KV452713.1 | 3307690 | 1-scf00011 | 1 |
| AX-157904221 | 1 | 59.66 | KV452713.1 | 3308383 | 1-scf00011 | 1 |
| AX-157904222 | 1 | 59.66 | KV452713.1 | 3310023 | 1-scf00011 | 1 |
| AX-157904223 | 1 | 59.66 | KV452713.1 | 3310568 | 1-scf00011 | 1 |
| AX-157904224 | 1 | 59.66 | KV452713.1 | 3311605 | 1-scf00011 | 1 |
| AX-157904225 | 1 | 59.66 | KV452713.1 | 3312552 | 1-scf00011 | 1 |
| AX-157904226 | 1 | 59.66 | KV452713.1 | 3320408 | 1-scf00011 | 1 |
| AX-157904230 | 1 | 59.66 | KV452713.1 | 3326795 | 1-scf00011 | 1 |
| AX-157904233 | 1 | 59.66 | KV452713.1 | 3330535 | 1-scf00011 | 1 |
| AX-157904234 | 1 | 59.66 | KV452713.1 | 3336424 | 1-scf00011 | 1 |
| AX-157904236 | 1 | 59.66 | KV452713.1 | 3347673 | 1-scf00011 | 1 |
| AX-157721885 | 1 | 59.66 | KV452713.1 | 3356776 | 1-scf00011 | 1 |
| AX-157904243 | 1 | 59.66 | KV452713.1 | 3374906 | 1-scf00011 | 1 |
| AX-157904259 | 1 | 59.66 | KV452713.1 | 3422257 | 1-scf00011 | 1 |
| AX-157904276 | 1 | 59.66 | KV452713.1 | 3453275 | 1-scf00011 | 1 |
| AX-157904277 | 1 | 59.66 | KV452713.1 | 3457784 | 1-scf00011 | 1 |
| AX-157904279 | 1 | 59.66 | KV452713.1 | 3461758 | 1-scf00011 | 1 |
| AX-157770780 | 1 | 59.66 | KV452713.1 | 3463441 | 1-scf00011 | 1 |
| AX-157904283 | 1 | 59.66 | KV452713.1 | 3469875 | 1-scf00011 | 1 |
| AX-157904285 | 1 | 59.66 | KV452713.1 | 3476717 | 1-scf00011 | 1 |
| AX-157904288 | 1 | 59.66 | KV452713.1 | 3486068 | 1-scf00011 | 1 |
| AX-158382045 | 1 | 59.66 | KV452713.1 | 3486674 | 1-scf00011 | 1 |
| AX-157904292 | 1 | 59.66 | KV452713.1 | 3506993 | 1-scf00011 | 1 |
| AX-157904294 | 1 | 59.66 | KV452713.1 | 3509496 | 1-scf00011 | 1 |



|              |   |       |            |         |            |   |
|--------------|---|-------|------------|---------|------------|---|
| AX-157749445 | 1 | 59.66 | KV452713.1 | 3513551 | 1-scf00011 | 1 |
| AX-157904297 | 1 | 59.66 | KV452713.1 | 3515349 | 1-scf00011 | 1 |
| AX-157904303 | 1 | 59.66 | KV452713.1 | 3528105 | 1-scf00011 | 1 |
| AX-157904307 | 1 | 59.66 | KV452713.1 | 3531950 | 1-scf00011 | 1 |
| AX-157904316 | 1 | 59.66 | KV452713.1 | 3551863 | 1-scf00011 | 1 |
| AX-157904320 | 1 | 59.66 | KV452713.1 | 3553707 | 1-scf00011 | 1 |
| AX-157753349 | 1 | 59.66 | KV452713.1 | 3555540 | 1-scf00011 | 1 |
| AX-157904322 | 1 | 59.66 | KV452713.1 | 3557937 | 1-scf00011 | 1 |
| AX-157756461 | 1 | 59.66 | KV452713.1 | 3559704 | 1-scf00011 | 1 |
| AX-157904325 | 1 | 59.66 | KV452713.1 | 3560941 | 1-scf00011 | 1 |
| AX-157749630 | 1 | 59.66 | KV452713.1 | 3565310 | 1-scf00011 | 1 |
| AX-157904330 | 1 | 59.66 | KV452713.1 | 3569356 | 1-scf00011 | 1 |
| AX-157904332 | 1 | 59.66 | KV452713.1 | 3571290 | 1-scf00011 | 1 |
| AX-157904334 | 1 | 59.66 | KV452713.1 | 3575945 | 1-scf00011 | 1 |
| AX-157904335 | 1 | 59.66 | KV452713.1 | 3576872 | 1-scf00011 | 1 |
| AX-157904336 | 1 | 59.66 | KV452713.1 | 3578305 | 1-scf00011 | 1 |
| AX-157904340 | 1 | 59.66 | KV452713.1 | 3579524 | 1-scf00011 | 1 |
| AX-157904342 | 1 | 59.66 | KV452713.1 | 3580579 | 1-scf00011 | 1 |
| AX-157904343 | 1 | 59.66 | KV452713.1 | 3580891 | 1-scf00011 | 1 |
| AX-157811816 | 1 | 59.66 | KV452713.1 | 3581696 | 1-scf00011 | 1 |
| AX-157904352 | 1 | 59.66 | KV452713.1 | 3591572 | 1-scf00011 | 1 |
| AX-157904353 | 1 | 59.66 | KV452713.1 | 3592387 | 1-scf00011 | 1 |
| AX-157904355 | 1 | 59.66 | KV452713.1 | 3596321 | 1-scf00011 | 1 |
| AX-157904356 | 1 | 59.66 | KV452713.1 | 3596790 | 1-scf00011 | 1 |
| AX-157904359 | 1 | 59.66 | KV452713.1 | 3600628 | 1-scf00011 | 1 |
| AX-157904367 | 1 | 59.66 | KV452713.1 | 3613462 | 1-scf00011 | 1 |
| AX-157883319 | 1 | 59.66 | KV452713.1 | 3613725 | 1-scf00011 | 1 |
| AX-157904369 | 1 | 59.66 | KV452713.1 | 3615671 | 1-scf00011 | 1 |
| AX-157904374 | 1 | 59.66 | KV452713.1 | 3627964 | 1-scf00011 | 1 |
| AX-157904375 | 1 | 59.66 | KV452713.1 | 3631654 | 1-scf00011 | 1 |
| AX-157904381 | 1 | 59.66 | KV452713.1 | 3642113 | 1-scf00011 | 1 |
| AX-157904382 | 1 | 59.66 | KV452713.1 | 3644002 | 1-scf00011 | 1 |
| AX-157904383 | 1 | 59.66 | KV452713.1 | 3645841 | 1-scf00011 | 1 |
| AX-157904384 | 1 | 59.66 | KV452713.1 | 3646241 | 1-scf00011 | 1 |
| AX-157904400 | 1 | 59.66 | KV452713.1 | 3690359 | 1-scf00011 | 1 |
| AX-157904409 | 1 | 59.66 | KV452713.1 | 3715734 | 1-scf00011 | 1 |
| AX-157904422 | 1 | 59.66 | KV452713.1 | 3735133 | 1-scf00011 | 1 |
| AX-157904426 | 1 | 59.66 | KV452713.1 | 3736783 | 1-scf00011 | 1 |
| AX-157904434 | 1 | 59.66 | KV452713.1 | 3752796 | 1-scf00011 | 1 |
| AX-157904440 | 1 | 59.66 | KV452713.1 | 3757580 | 1-scf00011 | 1 |
| AX-157811819 | 1 | 59.66 | KV452713.1 | 3758431 | 1-scf00011 | 1 |
| AX-157904456 | 1 | 59.66 | KV452713.1 | 3777946 | 1-scf00011 | 1 |
| AX-157811820 | 1 | 59.66 | KV452713.1 | 3778522 | 1-scf00011 | 1 |
| AX-157744673 | 1 | 59.66 | KV452713.1 | 3778590 | 1-scf00011 | 1 |
| AX-157718626 | 1 | 59.66 | KV452713.1 | 3779185 | 1-scf00011 | 1 |
| AX-157752085 | 1 | 59.66 | KV452713.1 | 3781506 | 1-scf00011 | 1 |
| AX-157716151 | 1 | 59.66 | KV452713.1 | 3782154 | 1-scf00011 | 1 |
| AX-157904461 | 1 | 59.66 | KV452713.1 | 3786480 | 1-scf00011 | 1 |
| AX-157748870 | 1 | 59.66 | KV452713.1 | 3790262 | 1-scf00011 | 1 |
| AX-157904473 | 1 | 59.66 | KV452713.1 | 3806751 | 1-scf00011 | 1 |
| AX-157904490 | 1 | 59.66 | KV452713.1 | 3835124 | 1-scf00011 | 1 |

|              |   |       |            |         |            |   |
|--------------|---|-------|------------|---------|------------|---|
| AX-157904491 | 1 | 59.66 | KV452713.1 | 3836056 | 1-scf00011 | 1 |
| AX-157904496 | 1 | 59.66 | KV452713.1 | 3848434 | 1-scf00011 | 1 |
| AX-157904497 | 1 | 59.66 | KV452713.1 | 3849092 | 1-scf00011 | 1 |
| AX-157811826 | 1 | 59.66 | KV452713.1 | 3850994 | 1-scf00011 | 1 |
| AX-157904498 | 1 | 59.66 | KV452713.1 | 3851400 | 1-scf00011 | 1 |
| AX-157904508 | 1 | 59.66 | KV452713.1 | 3861304 | 1-scf00011 | 1 |
| AX-157904511 | 1 | 59.66 | KV452713.1 | 3865427 | 1-scf00011 | 1 |
| AX-157904512 | 1 | 59.66 | KV452713.1 | 3866397 | 1-scf00011 | 1 |
| AX-157904517 | 1 | 59.66 | KV452713.1 | 3875505 | 1-scf00011 | 1 |
| AX-157904518 | 1 | 59.66 | KV452713.1 | 3876556 | 1-scf00011 | 1 |
| AX-157904519 | 1 | 59.66 | KV452713.1 | 3877033 | 1-scf00011 | 1 |
| AX-157904521 | 1 | 59.66 | KV452713.1 | 3878428 | 1-scf00011 | 1 |
| AX-157904527 | 1 | 59.66 | KV452713.1 | 3892595 | 1-scf00011 | 1 |
| AX-157738847 | 1 | 59.66 | KV452713.1 | 3901394 | 1-scf00011 | 1 |
| AX-157904533 | 1 | 59.66 | KV452713.1 | 3902819 | 1-scf00011 | 1 |
| AX-157904534 | 1 | 59.66 | KV452713.1 | 3907404 | 1-scf00011 | 1 |
| AX-157742608 | 1 | 59.66 | KV452713.1 | 3909870 | 1-scf00011 | 1 |
| AX-157904536 | 1 | 59.66 | KV452713.1 | 3912938 | 1-scf00011 | 1 |
| AX-157811829 | 1 | 59.66 | KV452713.1 | 3920296 | 1-scf00011 | 1 |
| AX-157774890 | 1 | 59.66 | KV452713.1 | 3920397 | 1-scf00011 | 1 |
| AX-157904547 | 1 | 59.66 | KV452713.1 | 3938077 | 1-scf00011 | 1 |
| AX-157904549 | 1 | 59.66 | KV452713.1 | 3939605 | 1-scf00011 | 1 |
| AX-157904551 | 1 | 59.66 | KV452713.1 | 3941661 | 1-scf00011 | 1 |
| AX-157811833 | 1 | 59.66 | KV452713.1 | 3942092 | 1-scf00011 | 1 |
| AX-157904554 | 1 | 59.66 | KV452713.1 | 3945962 | 1-scf00011 | 1 |
| AX-157904555 | 1 | 59.66 | KV452713.1 | 3946552 | 1-scf00011 | 1 |
| AX-157904559 | 1 | 59.66 | KV452713.1 | 3952319 | 1-scf00011 | 1 |
| AX-157904561 | 1 | 59.66 | KV452713.1 | 3954621 | 1-scf00011 | 1 |
| AX-157713253 | 1 | 59.66 | KV452713.1 | 3956607 | 1-scf00011 | 1 |
| AX-157904563 | 1 | 59.66 | KV452713.1 | 3957437 | 1-scf00011 | 1 |
| AX-157904565 | 1 | 59.66 | KV452713.1 | 3958061 | 1-scf00011 | 1 |
| AX-157904566 | 1 | 59.66 | KV452713.1 | 3958468 | 1-scf00011 | 1 |
| AX-157904567 | 1 | 59.66 | KV452713.1 | 3958560 | 1-scf00011 | 1 |
| AX-157904568 | 1 | 59.66 | KV452713.1 | 3959711 | 1-scf00011 | 1 |
| AX-157904570 | 1 | 59.66 | KV452713.1 | 3960457 | 1-scf00011 | 1 |
| AX-157904573 | 1 | 59.66 | KV452713.1 | 3965150 | 1-scf00011 | 1 |
| AX-157904583 | 1 | 59.66 | KV452713.1 | 3978940 | 1-scf00011 | 1 |
| AX-157904585 | 1 | 59.66 | KV452713.1 | 3980278 | 1-scf00011 | 1 |
| AX-157904588 | 1 | 59.66 | KV452713.1 | 3984034 | 1-scf00011 | 1 |
| AX-157904599 | 1 | 59.66 | KV452713.1 | 4003932 | 1-scf00011 | 1 |
| AX-157904611 | 1 | 59.66 | KV452713.1 | 4018409 | 1-scf00011 | 1 |
| AX-157904624 | 1 | 59.66 | KV452713.1 | 4033392 | 1-scf00011 | 1 |
| AX-157904631 | 1 | 59.66 | KV452713.1 | 4045019 | 1-scf00011 | 1 |
| AX-157740616 | 1 | 59.66 | KV452713.1 | 4045363 | 1-scf00011 | 1 |
| AX-157904645 | 1 | 59.66 | KV452713.1 | 4073268 | 1-scf00011 | 1 |
| AX-157751529 | 1 | 59.66 | KV452713.1 | 4082290 | 1-scf00011 | 1 |
| AX-158379171 | 1 | 59.66 | KV452713.1 | 4083243 | 1-scf00011 | 1 |
| AX-157904673 | 1 | 59.66 | KV452713.1 | 4105547 | 1-scf00011 | 1 |
| AX-157904675 | 1 | 59.66 | KV452713.1 | 4107285 | 1-scf00011 | 1 |
| AX-157904684 | 1 | 59.66 | KV452713.1 | 4118734 | 1-scf00011 | 1 |
| AX-157904692 | 1 | 59.66 | KV452713.1 | 4127292 | 1-scf00011 | 1 |

|              |   |        |             |         |            |    |
|--------------|---|--------|-------------|---------|------------|----|
| AX-157904698 | 1 | 59.66  | KV452713.1  | 4134918 | 1-scf00011 | 1  |
| AX-157904733 | 1 | 59.66  | KV452713.1  | 4175841 | 1-scf00011 | 1  |
| AX-157904750 | 1 | 59.66  | KV452713.1  | 4199483 | 1-scf00011 | 1  |
| AX-157904816 | 1 | 59.66  | KV452713.1  | 4288585 | 1-scf00011 | 1  |
| AX-157904828 | 1 | 59.66  | KV452713.1  | 4303295 | 1-scf00011 | 1  |
| AX-157811847 | 1 | 59.66  | KV452713.1  | 4324372 | 1-scf00011 | 1  |
| AX-157904867 | 1 | 59.66  | KV452713.1  | 4354625 | 1-scf00011 | 1  |
| AX-157904884 | 1 | 59.66  | KV452713.1  | 4376328 | 1-scf00011 | 1  |
| AX-157904887 | 1 | 59.66  | KV452713.1  | 4378134 | 1-scf00011 | 1  |
| AX-157904912 | 1 | 59.66  | KV452713.1  | 4410437 | 1-scf00011 | 1  |
| AX-157904950 | 1 | 59.66  | KV452713.1  | 4465216 | 1-scf00011 | 1  |
| AX-157687384 | 1 | 59.66  | 3ML01024870 | 3121    | scf00867_1 | UN |
| AX-157687391 | 1 | 59.66  | 3ML01024870 | 12672   | scf00867_1 | UN |
| AX-157687392 | 1 | 59.66  | 3ML01024870 | 14351   | scf00867_1 | UN |
| AX-157896887 | 1 | 59.769 | KV452709.1  | 1054491 | 1-scf00009 | 1  |
| AX-157747008 | 1 | 59.769 | KV452709.1  | 1099739 | 1-scf00009 | 1  |
| AX-157749391 | 1 | 59.769 | KV452709.1  | 1107958 | 1-scf00009 | 1  |
| AX-157897072 | 1 | 59.769 | KV452709.1  | 1366529 | 1-scf00009 | 1  |
| AX-157864384 | 1 | 59.769 | KV452709.1  | 1547255 | 1-scf00009 | 1  |
| AX-157897353 | 1 | 59.769 | KV452709.1  | 1749034 | 1-scf00009 | 1  |
| AX-157897458 | 1 | 59.769 | KV452709.1  | 1915842 | 1-scf00009 | 1  |
| AX-157703113 | 1 | 59.769 | KV452709.1  | 2347394 | 1-scf00009 | 1  |
| AX-157868572 | 1 | 59.769 | KV452709.1  | 2558083 | 1-scf00009 | 1  |
| AX-157899886 | 1 | 59.769 | KV452709.1  | 5724501 | 1-scf00009 | 1  |
| AX-157900207 | 1 | 59.769 | KV452709.1  | 6257302 | 1-scf00009 | 1  |
| AX-157900221 | 1 | 59.769 | KV452709.1  | 6273055 | 1-scf00009 | 1  |
| AX-157874384 | 1 | 59.769 | KV452709.1  | 7175786 | 1-scf00009 | 1  |
| AX-157901141 | 1 | 59.769 | KV452711.1  | 1606783 | 1-scf00010 | 1  |
| AX-157901229 | 1 | 59.769 | KV452711.1  | 1793707 | 1-scf00010 | 1  |
| AX-157902320 | 1 | 59.769 | KV452713.1  | 230769  | 1-scf00011 | 1  |
| AX-157811683 | 1 | 59.769 | KV452713.1  | 1016476 | 1-scf00011 | 1  |
| AX-157902699 | 1 | 59.769 | KV452713.1  | 1144582 | 1-scf00011 | 1  |
| AX-158382038 | 1 | 59.769 | KV452713.1  | 1386304 | 1-scf00011 | 1  |
| AX-157903001 | 1 | 59.769 | KV452713.1  | 1560867 | 1-scf00011 | 1  |
| AX-157903036 | 1 | 59.769 | KV452713.1  | 1614328 | 1-scf00011 | 1  |
| AX-157903055 | 1 | 59.769 | KV452713.1  | 1643264 | 1-scf00011 | 1  |
| AX-157903107 | 1 | 59.769 | KV452713.1  | 1701892 | 1-scf00011 | 1  |
| AX-157903108 | 1 | 59.769 | KV452713.1  | 1702692 | 1-scf00011 | 1  |
| AX-157853607 | 1 | 59.769 | KV452713.1  | 1833595 | 1-scf00011 | 1  |
| AX-157903284 | 1 | 59.769 | KV452713.1  | 1942408 | 1-scf00011 | 1  |
| AX-157903328 | 1 | 59.769 | KV452713.1  | 2001809 | 1-scf00011 | 1  |
| AX-157903581 | 1 | 59.769 | KV452713.1  | 2274287 | 1-scf00011 | 1  |
| AX-157903584 | 1 | 59.769 | KV452713.1  | 2276311 | 1-scf00011 | 1  |
| AX-157903585 | 1 | 59.769 | KV452713.1  | 2276676 | 1-scf00011 | 1  |
| AX-157903591 | 1 | 59.769 | KV452713.1  | 2280906 | 1-scf00011 | 1  |
| AX-157903592 | 1 | 59.769 | KV452713.1  | 2281934 | 1-scf00011 | 1  |
| AX-157811780 | 1 | 59.769 | KV452713.1  | 2467395 | 1-scf00011 | 1  |
| AX-157874423 | 1 | 59.769 | KV452713.1  | 2652637 | 1-scf00011 | 1  |
| AX-157903873 | 1 | 59.769 | KV452713.1  | 2653518 | 1-scf00011 | 1  |
| AX-157903984 | 1 | 59.769 | KV452713.1  | 2799863 | 1-scf00011 | 1  |
| AX-157904002 | 1 | 59.769 | KV452713.1  | 2850107 | 1-scf00011 | 1  |

|              |   |        |            |         |            |   |
|--------------|---|--------|------------|---------|------------|---|
| AX-157904031 | 1 | 59.769 | KV452713.1 | 2920072 | 1-scf00011 | 1 |
| AX-157904037 | 1 | 59.769 | KV452713.1 | 2926854 | 1-scf00011 | 1 |
| AX-157904046 | 1 | 59.769 | KV452713.1 | 2935768 | 1-scf00011 | 1 |
| AX-157904076 | 1 | 59.769 | KV452713.1 | 3015816 | 1-scf00011 | 1 |
| AX-157904120 | 1 | 59.769 | KV452713.1 | 3072227 | 1-scf00011 | 1 |
| AX-157904138 | 1 | 59.769 | KV452713.1 | 3104910 | 1-scf00011 | 1 |
| AX-157904139 | 1 | 59.769 | KV452713.1 | 3106235 | 1-scf00011 | 1 |
| AX-157904141 | 1 | 59.769 | KV452713.1 | 3107250 | 1-scf00011 | 1 |
| AX-157904346 | 1 | 59.769 | KV452713.1 | 3582208 | 1-scf00011 | 1 |
| AX-157904516 | 1 | 59.769 | KV452713.1 | 3875174 | 1-scf00011 | 1 |
| AX-157716189 | 1 | 59.769 | KV452713.1 | 3889347 | 1-scf00011 | 1 |
| AX-157777367 | 1 | 59.769 | KV452713.1 | 3922318 | 1-scf00011 | 1 |
| AX-157904556 | 1 | 59.769 | KV452713.1 | 3947553 | 1-scf00011 | 1 |
| AX-157904571 | 1 | 59.769 | KV452713.1 | 3963692 | 1-scf00011 | 1 |
| AX-157904579 | 1 | 59.769 | KV452713.1 | 3971950 | 1-scf00011 | 1 |
| AX-157904581 | 1 | 59.769 | KV452713.1 | 3973994 | 1-scf00011 | 1 |
| AX-157904602 | 1 | 59.769 | KV452713.1 | 4007917 | 1-scf00011 | 1 |
| AX-157754041 | 1 | 59.769 | KV452713.1 | 4015354 | 1-scf00011 | 1 |
| AX-157811838 | 1 | 59.769 | KV452713.1 | 4020875 | 1-scf00011 | 1 |
| AX-157904616 | 1 | 59.769 | KV452713.1 | 4024255 | 1-scf00011 | 1 |
| AX-157904619 | 1 | 59.769 | KV452713.1 | 4029911 | 1-scf00011 | 1 |
| AX-157904620 | 1 | 59.769 | KV452713.1 | 4030290 | 1-scf00011 | 1 |
| AX-157904621 | 1 | 59.769 | KV452713.1 | 4031492 | 1-scf00011 | 1 |
| AX-157755547 | 1 | 59.769 | KV452713.1 | 4034989 | 1-scf00011 | 1 |
| AX-157811839 | 1 | 59.769 | KV452713.1 | 4035038 | 1-scf00011 | 1 |
| AX-157904625 | 1 | 59.769 | KV452713.1 | 4035285 | 1-scf00011 | 1 |
| AX-157904628 | 1 | 59.769 | KV452713.1 | 4039820 | 1-scf00011 | 1 |
| AX-157904629 | 1 | 59.769 | KV452713.1 | 4041981 | 1-scf00011 | 1 |
| AX-157904630 | 1 | 59.769 | KV452713.1 | 4044625 | 1-scf00011 | 1 |
| AX-157904634 | 1 | 59.769 | KV452713.1 | 4051917 | 1-scf00011 | 1 |
| AX-157775615 | 1 | 59.769 | KV452713.1 | 4055129 | 1-scf00011 | 1 |
| AX-157904636 | 1 | 59.769 | KV452713.1 | 4055212 | 1-scf00011 | 1 |
| AX-157904638 | 1 | 59.769 | KV452713.1 | 4056110 | 1-scf00011 | 1 |
| AX-157811842 | 1 | 59.769 | KV452713.1 | 4058316 | 1-scf00011 | 1 |
| AX-157904642 | 1 | 59.769 | KV452713.1 | 4070359 | 1-scf00011 | 1 |
| AX-157904649 | 1 | 59.769 | KV452713.1 | 4075478 | 1-scf00011 | 1 |
| AX-157811843 | 1 | 59.769 | KV452713.1 | 4076416 | 1-scf00011 | 1 |
| AX-157756925 | 1 | 59.769 | KV452713.1 | 4077450 | 1-scf00011 | 1 |
| AX-157904652 | 1 | 59.769 | KV452713.1 | 4078108 | 1-scf00011 | 1 |
| AX-157904656 | 1 | 59.769 | KV452713.1 | 4086010 | 1-scf00011 | 1 |
| AX-157904658 | 1 | 59.769 | KV452713.1 | 4088522 | 1-scf00011 | 1 |
| AX-157904664 | 1 | 59.769 | KV452713.1 | 4097096 | 1-scf00011 | 1 |
| AX-157904666 | 1 | 59.769 | KV452713.1 | 4100099 | 1-scf00011 | 1 |
| AX-157904669 | 1 | 59.769 | KV452713.1 | 4102185 | 1-scf00011 | 1 |
| AX-157904676 | 1 | 59.769 | KV452713.1 | 4108566 | 1-scf00011 | 1 |
| AX-157904677 | 1 | 59.769 | KV452713.1 | 4110198 | 1-scf00011 | 1 |
| AX-157904678 | 1 | 59.769 | KV452713.1 | 4111093 | 1-scf00011 | 1 |
| AX-157904680 | 1 | 59.769 | KV452713.1 | 4113179 | 1-scf00011 | 1 |
| AX-157904682 | 1 | 59.769 | KV452713.1 | 4116010 | 1-scf00011 | 1 |
| AX-157904683 | 1 | 59.769 | KV452713.1 | 4116472 | 1-scf00011 | 1 |
| AX-157749619 | 1 | 59.769 | KV452713.1 | 4122156 | 1-scf00011 | 1 |

|              |   |        |            |         |            |   |
|--------------|---|--------|------------|---------|------------|---|
| AX-157904690 | 1 | 59.769 | KV452713.1 | 4124742 | 1-scf00011 | 1 |
| AX-157904691 | 1 | 59.769 | KV452713.1 | 4126641 | 1-scf00011 | 1 |
| AX-157904693 | 1 | 59.769 | KV452713.1 | 4128279 | 1-scf00011 | 1 |
| AX-157904696 | 1 | 59.769 | KV452713.1 | 4131687 | 1-scf00011 | 1 |
| AX-157904699 | 1 | 59.769 | KV452713.1 | 4135330 | 1-scf00011 | 1 |
| AX-157904709 | 1 | 59.769 | KV452713.1 | 4144926 | 1-scf00011 | 1 |
| AX-157904711 | 1 | 59.769 | KV452713.1 | 4146712 | 1-scf00011 | 1 |
| AX-157904712 | 1 | 59.769 | KV452713.1 | 4147386 | 1-scf00011 | 1 |
| AX-157904713 | 1 | 59.769 | KV452713.1 | 4148380 | 1-scf00011 | 1 |
| AX-157726504 | 1 | 59.769 | KV452713.1 | 4164083 | 1-scf00011 | 1 |
| AX-157904732 | 1 | 59.769 | KV452713.1 | 4175165 | 1-scf00011 | 1 |
| AX-157904786 | 1 | 59.769 | KV452713.1 | 4245764 | 1-scf00011 | 1 |
| AX-157904801 | 1 | 59.769 | KV452713.1 | 4266098 | 1-scf00011 | 1 |
| AX-157698925 | 1 | 59.769 | KV452713.1 | 4266636 | 1-scf00011 | 1 |
| AX-157904812 | 1 | 59.769 | KV452713.1 | 4285098 | 1-scf00011 | 1 |
| AX-157748006 | 1 | 59.769 | KV452713.1 | 4386014 | 1-scf00011 | 1 |
| AX-157904901 | 1 | 59.769 | KV452713.1 | 4396481 | 1-scf00011 | 1 |
| AX-157904909 | 1 | 59.769 | KV452713.1 | 4407015 | 1-scf00011 | 1 |
| AX-157904911 | 1 | 59.769 | KV452713.1 | 4409215 | 1-scf00011 | 1 |
| AX-157904921 | 1 | 59.769 | KV452713.1 | 4423889 | 1-scf00011 | 1 |
| AX-157904966 | 1 | 59.769 | KV452713.1 | 4485808 | 1-scf00011 | 1 |
| AX-157901761 | 1 | 59.878 | KV452711.1 | 3197693 | 1-scf00010 | 1 |
| AX-157904715 | 1 | 59.878 | KV452713.1 | 4150183 | 1-scf00011 | 1 |
| AX-157904720 | 1 | 59.878 | KV452713.1 | 4152648 | 1-scf00011 | 1 |
| AX-157904725 | 1 | 59.878 | KV452713.1 | 4166315 | 1-scf00011 | 1 |
| AX-157904727 | 1 | 59.878 | KV452713.1 | 4168030 | 1-scf00011 | 1 |
| AX-157749560 | 1 | 59.89  | KV452713.1 | 4169690 | 1-scf00011 | 1 |
| AX-157904728 | 1 | 59.907 | KV452713.1 | 4170513 | 1-scf00011 | 1 |
| AX-157904729 | 1 | 59.919 | KV452713.1 | 4171446 | 1-scf00011 | 1 |
| AX-157902921 | 1 | 59.928 | KV452713.1 | 1466930 | 1-scf00011 | 1 |
| AX-157903818 | 1 | 59.928 | KV452713.1 | 2590216 | 1-scf00011 | 1 |
| AX-157903830 | 1 | 59.928 | KV452713.1 | 2605842 | 1-scf00011 | 1 |
| AX-157904736 | 1 | 59.928 | KV452713.1 | 4180375 | 1-scf00011 | 1 |
| AX-157771035 | 1 | 59.937 | KV452713.1 | 2182243 | 1-scf00011 | 1 |
| AX-157903507 | 1 | 59.937 | KV452713.1 | 2196852 | 1-scf00011 | 1 |
| AX-157904039 | 1 | 59.937 | KV452713.1 | 2928393 | 1-scf00011 | 1 |
| AX-157904103 | 1 | 59.937 | KV452713.1 | 3042593 | 1-scf00011 | 1 |
| AX-157904738 | 1 | 59.937 | KV452713.1 | 4181879 | 1-scf00011 | 1 |
| AX-157904744 | 1 | 59.937 | KV452713.1 | 4188044 | 1-scf00011 | 1 |
| AX-157904745 | 1 | 59.937 | KV452713.1 | 4192496 | 1-scf00011 | 1 |
| AX-157904747 | 1 | 59.946 | KV452713.1 | 4196343 | 1-scf00011 | 1 |
| AX-157904758 | 1 | 59.946 | KV452713.1 | 4207452 | 1-scf00011 | 1 |
| AX-157904776 | 1 | 59.946 | KV452713.1 | 4228493 | 1-scf00011 | 1 |
| AX-157904847 | 1 | 59.946 | KV452713.1 | 4327907 | 1-scf00011 | 1 |
| AX-157904753 | 1 | 59.957 | KV452713.1 | 4203392 | 1-scf00011 | 1 |
| AX-157904756 | 1 | 59.966 | KV452713.1 | 4205988 | 1-scf00011 | 1 |
| AX-157904717 | 1 | 59.978 | KV452713.1 | 4151276 | 1-scf00011 | 1 |
| AX-157749885 | 1 | 59.978 | KV452713.1 | 4208377 | 1-scf00011 | 1 |
| AX-157904792 | 1 | 59.978 | KV452713.1 | 4252988 | 1-scf00011 | 1 |
| AX-157896279 | 1 | 59.988 | KV452709.1 | 244300  | 1-scf00009 | 1 |
| AX-157757737 | 1 | 59.988 | KV452713.1 | 4018767 | 1-scf00011 | 1 |

|              |   |        |            |         |            |   |
|--------------|---|--------|------------|---------|------------|---|
| AX-157904686 | 1 | 59.988 | KV452713.1 | 4120776 | 1-scf00011 | 1 |
| AX-157811846 | 1 | 59.988 | KV452713.1 | 4133893 | 1-scf00011 | 1 |
| AX-158379172 | 1 | 59.988 | KV452713.1 | 4214569 | 1-scf00011 | 1 |
| AX-157904764 | 1 | 59.988 | KV452713.1 | 4215320 | 1-scf00011 | 1 |
| AX-157904765 | 1 | 59.988 | KV452713.1 | 4216527 | 1-scf00011 | 1 |
| AX-157904771 | 1 | 59.988 | KV452713.1 | 4224557 | 1-scf00011 | 1 |
| AX-157904775 | 1 | 59.988 | KV452713.1 | 4227007 | 1-scf00011 | 1 |
| AX-157904778 | 1 | 59.988 | KV452713.1 | 4233155 | 1-scf00011 | 1 |
| AX-157904780 | 1 | 59.988 | KV452713.1 | 4236169 | 1-scf00011 | 1 |
| AX-157904781 | 1 | 59.988 | KV452713.1 | 4238278 | 1-scf00011 | 1 |
| AX-157904782 | 1 | 59.988 | KV452713.1 | 4238793 | 1-scf00011 | 1 |
| AX-157904783 | 1 | 59.988 | KV452713.1 | 4242166 | 1-scf00011 | 1 |
| AX-157904818 | 1 | 59.988 | KV452713.1 | 4291155 | 1-scf00011 | 1 |
| AX-157904819 | 1 | 59.988 | KV452713.1 | 4291795 | 1-scf00011 | 1 |
| AX-157904835 | 1 | 59.988 | KV452713.1 | 4312744 | 1-scf00011 | 1 |
| AX-157742642 | 1 | 59.988 | KV452713.1 | 4448607 | 1-scf00011 | 1 |
| AX-157853612 | 1 | 59.988 | KV452713.1 | 4452284 | 1-scf00011 | 1 |
| AX-157898343 | 1 | 60.097 | KV452709.1 | 3467787 | 1-scf00009 | 1 |
| AX-157904526 | 1 | 60.097 | KV452713.1 | 3890179 | 1-scf00011 | 1 |
| AX-157904651 | 1 | 60.097 | KV452713.1 | 4077303 | 1-scf00011 | 1 |
| AX-157904743 | 1 | 60.097 | KV452713.1 | 4185844 | 1-scf00011 | 1 |
| AX-157758572 | 1 | 60.097 | KV452713.1 | 4240835 | 1-scf00011 | 1 |
| AX-157904789 | 1 | 60.097 | KV452713.1 | 4250846 | 1-scf00011 | 1 |
| AX-157904790 | 1 | 60.097 | KV452713.1 | 4251302 | 1-scf00011 | 1 |
| AX-157904813 | 1 | 60.097 | KV452713.1 | 4285701 | 1-scf00011 | 1 |
| AX-157904842 | 1 | 60.097 | KV452713.1 | 4321643 | 1-scf00011 | 1 |
| AX-157904191 | 1 | 60.206 | KV452713.1 | 3236501 | 1-scf00011 | 1 |
| AX-157904193 | 1 | 60.206 | KV452713.1 | 3241040 | 1-scf00011 | 1 |
| AX-157904262 | 1 | 60.206 | KV452713.1 | 3428796 | 1-scf00011 | 1 |
| AX-157904723 | 1 | 60.206 | KV452713.1 | 4157228 | 1-scf00011 | 1 |
| AX-157726436 | 1 | 60.206 | KV452713.1 | 4173518 | 1-scf00011 | 1 |
| AX-157904739 | 1 | 60.206 | KV452713.1 | 4183091 | 1-scf00011 | 1 |
| AX-157904740 | 1 | 60.206 | KV452713.1 | 4183399 | 1-scf00011 | 1 |
| AX-157904800 | 1 | 60.206 | KV452713.1 | 4263751 | 1-scf00011 | 1 |
| AX-157904810 | 1 | 60.206 | KV452713.1 | 4280468 | 1-scf00011 | 1 |
| AX-157904811 | 1 | 60.206 | KV452713.1 | 4284569 | 1-scf00011 | 1 |
| AX-157904814 | 1 | 60.206 | KV452713.1 | 4287307 | 1-scf00011 | 1 |
| AX-157904817 | 1 | 60.206 | KV452713.1 | 4289120 | 1-scf00011 | 1 |
| AX-157904822 | 1 | 60.206 | KV452713.1 | 4295377 | 1-scf00011 | 1 |
| AX-157904823 | 1 | 60.206 | KV452713.1 | 4296954 | 1-scf00011 | 1 |
| AX-157904832 | 1 | 60.206 | KV452713.1 | 4308806 | 1-scf00011 | 1 |
| AX-157904837 | 1 | 60.206 | KV452713.1 | 4314390 | 1-scf00011 | 1 |
| AX-157904841 | 1 | 60.206 | KV452713.1 | 4320683 | 1-scf00011 | 1 |
| AX-157904843 | 1 | 60.206 | KV452713.1 | 4323572 | 1-scf00011 | 1 |
| AX-157811848 | 1 | 60.206 | KV452713.1 | 4333361 | 1-scf00011 | 1 |
| AX-157904851 | 1 | 60.206 | KV452713.1 | 4333899 | 1-scf00011 | 1 |
| AX-157811849 | 1 | 60.206 | KV452713.1 | 4334183 | 1-scf00011 | 1 |
| AX-157904852 | 1 | 60.206 | KV452713.1 | 4336060 | 1-scf00011 | 1 |
| AX-157904854 | 1 | 60.206 | KV452713.1 | 4337625 | 1-scf00011 | 1 |
| AX-157709946 | 1 | 60.206 | KV452713.1 | 4340444 | 1-scf00011 | 1 |
| AX-157904857 | 1 | 60.206 | KV452713.1 | 4340877 | 1-scf00011 | 1 |

|              |   |        |            |         |            |   |
|--------------|---|--------|------------|---------|------------|---|
| AX-157874436 | 1 | 60.206 | KV452713.1 | 4341679 | 1-scf00011 | 1 |
| AX-157721362 | 1 | 60.206 | KV452713.1 | 4344982 | 1-scf00011 | 1 |
| AX-157904878 | 1 | 60.206 | KV452713.1 | 4368366 | 1-scf00011 | 1 |
| AX-157904880 | 1 | 60.206 | KV452713.1 | 4370755 | 1-scf00011 | 1 |
| AX-157904881 | 1 | 60.206 | KV452713.1 | 4373139 | 1-scf00011 | 1 |
| AX-157904885 | 1 | 60.206 | KV452713.1 | 4377320 | 1-scf00011 | 1 |
| AX-157904894 | 1 | 60.424 | KV452713.1 | 4388507 | 1-scf00011 | 1 |
| AX-157756869 | 1 | 60.424 | KV452713.1 | 4389321 | 1-scf00011 | 1 |
| AX-157904895 | 1 | 60.424 | KV452713.1 | 4389927 | 1-scf00011 | 1 |
| AX-157904896 | 1 | 60.424 | KV452713.1 | 4392422 | 1-scf00011 | 1 |
| AX-157904897 | 1 | 60.424 | KV452713.1 | 4393573 | 1-scf00011 | 1 |
| AX-157904900 | 1 | 60.424 | KV452713.1 | 4395231 | 1-scf00011 | 1 |
| AX-157904903 | 1 | 60.564 | KV452713.1 | 4398564 | 1-scf00011 | 1 |
| AX-157904860 | 1 | 60.643 | KV452713.1 | 4345376 | 1-scf00011 | 1 |
| AX-157904904 | 1 | 60.643 | KV452713.1 | 4401234 | 1-scf00011 | 1 |
| AX-157904908 | 1 | 60.643 | KV452713.1 | 4404857 | 1-scf00011 | 1 |
| AX-157904980 | 1 | 60.643 | KV452713.1 | 4502533 | 1-scf00011 | 1 |
| AX-157904907 | 1 | 60.691 | KV452713.1 | 4404004 | 1-scf00011 | 1 |
| AX-157904641 | 1 | 60.752 | KV452713.1 | 4069414 | 1-scf00011 | 1 |
| AX-158382049 | 1 | 60.752 | KV452713.1 | 4248726 | 1-scf00011 | 1 |
| AX-157904913 | 1 | 60.752 | KV452713.1 | 4410843 | 1-scf00011 | 1 |
| AX-157904919 | 1 | 60.752 | KV452713.1 | 4417000 | 1-scf00011 | 1 |
| AX-157725230 | 1 | 60.752 | KV452713.1 | 4420792 | 1-scf00011 | 1 |
| AX-157811856 | 1 | 60.815 | KV452713.1 | 4422393 | 1-scf00011 | 1 |
| AX-157904926 | 1 | 60.891 | KV452713.1 | 4430350 | 1-scf00011 | 1 |
| AX-157904979 | 1 | 60.891 | KV452713.1 | 4501690 | 1-scf00011 | 1 |
| AX-157905012 | 1 | 60.891 | KV452713.1 | 4542178 | 1-scf00011 | 1 |
| AX-157905013 | 1 | 60.891 | KV452713.1 | 4542750 | 1-scf00011 | 1 |
| AX-157721106 | 1 | 60.891 | KV452713.1 | 4547613 | 1-scf00011 | 1 |
| AX-157904798 | 1 | 60.971 | KV452713.1 | 4257429 | 1-scf00011 | 1 |
| AX-157904846 | 1 | 60.971 | KV452713.1 | 4327334 | 1-scf00011 | 1 |
| AX-157740009 | 1 | 60.971 | KV452713.1 | 4421791 | 1-scf00011 | 1 |
| AX-157904927 | 1 | 60.971 | KV452713.1 | 4432409 | 1-scf00011 | 1 |
| AX-157904928 | 1 | 60.971 | KV452713.1 | 4433055 | 1-scf00011 | 1 |
| AX-157904930 | 1 | 60.971 | KV452713.1 | 4435935 | 1-scf00011 | 1 |
| AX-157904931 | 1 | 60.971 | KV452713.1 | 4437628 | 1-scf00011 | 1 |
| AX-157717071 | 1 | 60.971 | KV452713.1 | 4439419 | 1-scf00011 | 1 |
| AX-157904934 | 1 | 60.971 | KV452713.1 | 4444302 | 1-scf00011 | 1 |
| AX-157904935 | 1 | 60.971 | KV452713.1 | 4449270 | 1-scf00011 | 1 |
| AX-157904936 | 1 | 60.971 | KV452713.1 | 4451446 | 1-scf00011 | 1 |
| AX-157904937 | 1 | 60.971 | KV452713.1 | 4452762 | 1-scf00011 | 1 |
| AX-157904938 | 1 | 60.971 | KV452713.1 | 4453271 | 1-scf00011 | 1 |
| AX-157904939 | 1 | 60.971 | KV452713.1 | 4453681 | 1-scf00011 | 1 |
| AX-157904943 | 1 | 60.971 | KV452713.1 | 4456496 | 1-scf00011 | 1 |
| AX-157904944 | 1 | 60.971 | KV452713.1 | 4457139 | 1-scf00011 | 1 |
| AX-157775262 | 1 | 60.971 | KV452713.1 | 4471449 | 1-scf00011 | 1 |
| AX-157904962 | 1 | 60.971 | KV452713.1 | 4482700 | 1-scf00011 | 1 |
| AX-157904970 | 1 | 60.971 | KV452713.1 | 4490645 | 1-scf00011 | 1 |
| AX-157811857 | 1 | 61.085 | KV452713.1 | 4463375 | 1-scf00011 | 1 |
| AX-157904958 | 1 | 61.154 | KV452713.1 | 4474055 | 1-scf00011 | 1 |
| AX-157904959 | 1 | 61.154 | KV452713.1 | 4475477 | 1-scf00011 | 1 |

|              |   |        |            |         |            |   |
|--------------|---|--------|------------|---------|------------|---|
| AX-157904960 | 1 | 61.154 | KV452713.1 | 4477929 | 1-scf00011 | 1 |
| AX-157904961 | 1 | 61.154 | KV452713.1 | 4479064 | 1-scf00011 | 1 |
| AX-157904963 | 1 | 61.154 | KV452713.1 | 4483236 | 1-scf00011 | 1 |
| AX-157904964 | 1 | 61.154 | KV452713.1 | 4484382 | 1-scf00011 | 1 |
| AX-157904975 | 1 | 61.241 | KV452713.1 | 4495400 | 1-scf00011 | 1 |
| AX-157904976 | 1 | 61.241 | KV452713.1 | 4496493 | 1-scf00011 | 1 |
| AX-157904984 | 1 | 61.336 | KV452713.1 | 4510339 | 1-scf00011 | 1 |
| AX-157904986 | 1 | 61.336 | KV452713.1 | 4511347 | 1-scf00011 | 1 |
| AX-157904990 | 1 | 61.336 | KV452713.1 | 4515619 | 1-scf00011 | 1 |
| AX-157904995 | 1 | 61.336 | KV452713.1 | 4525130 | 1-scf00011 | 1 |
| AX-157905355 | 1 | 61.336 | KV452713.1 | 5033049 | 1-scf00011 | 1 |
| AX-157743591 | 1 | 61.336 | KV452713.1 | 5062417 | 1-scf00011 | 1 |
| AX-157905390 | 1 | 61.336 | KV452713.1 | 5091607 | 1-scf00011 | 1 |
| AX-157905893 | 1 | 61.336 | KV452713.1 | 5832868 | 1-scf00011 | 1 |
| AX-157905898 | 1 | 61.336 | KV452713.1 | 5841279 | 1-scf00011 | 1 |
| AX-157905958 | 1 | 61.336 | KV452713.1 | 5912319 | 1-scf00011 | 1 |
| AX-157904993 | 1 | 61.43  | KV452713.1 | 4521165 | 1-scf00011 | 1 |
| AX-157905001 | 1 | 61.43  | KV452713.1 | 4530110 | 1-scf00011 | 1 |
| AX-157905006 | 1 | 61.43  | KV452713.1 | 4538525 | 1-scf00011 | 1 |
| AX-157905007 | 1 | 61.43  | KV452713.1 | 4538881 | 1-scf00011 | 1 |
| AX-157905042 | 1 | 61.43  | KV452713.1 | 4576718 | 1-scf00011 | 1 |
| AX-157905103 | 1 | 61.43  | KV452713.1 | 4648141 | 1-scf00011 | 1 |
| AX-157905010 | 1 | 61.515 | KV452713.1 | 4540716 | 1-scf00011 | 1 |
| AX-157905011 | 1 | 61.515 | KV452713.1 | 4541781 | 1-scf00011 | 1 |
| AX-157905003 | 1 | 61.518 | KV452713.1 | 4536668 | 1-scf00011 | 1 |
| AX-157905008 | 1 | 61.518 | KV452713.1 | 4539524 | 1-scf00011 | 1 |
| AX-157905015 | 1 | 61.518 | KV452713.1 | 4545936 | 1-scf00011 | 1 |
| AX-157905022 | 1 | 61.871 | KV452713.1 | 4561217 | 1-scf00011 | 1 |
| AX-158382053 | 1 | 61.871 | KV452713.1 | 4562096 | 1-scf00011 | 1 |
| AX-157905026 | 1 | 61.872 | KV452713.1 | 4565348 | 1-scf00011 | 1 |
| AX-157904985 | 1 | 61.874 | KV452713.1 | 4510940 | 1-scf00011 | 1 |
| AX-157904987 | 1 | 61.874 | KV452713.1 | 4512994 | 1-scf00011 | 1 |
| AX-157811860 | 1 | 61.874 | KV452713.1 | 4523417 | 1-scf00011 | 1 |
| AX-157905023 | 1 | 61.874 | KV452713.1 | 4562051 | 1-scf00011 | 1 |
| AX-157724576 | 1 | 61.874 | KV452713.1 | 4563816 | 1-scf00011 | 1 |
| AX-157905031 | 1 | 61.874 | KV452713.1 | 4568950 | 1-scf00011 | 1 |
| AX-157905033 | 1 | 61.874 | KV452713.1 | 4570902 | 1-scf00011 | 1 |
| AX-157905038 | 1 | 61.874 | KV452713.1 | 4575022 | 1-scf00011 | 1 |
| AX-157905039 | 1 | 61.874 | KV452713.1 | 4575474 | 1-scf00011 | 1 |
| AX-157905040 | 1 | 61.874 | KV452713.1 | 4575842 | 1-scf00011 | 1 |
| AX-157905041 | 1 | 61.874 | KV452713.1 | 4576194 | 1-scf00011 | 1 |
| AX-157905043 | 1 | 61.874 | KV452713.1 | 4579277 | 1-scf00011 | 1 |
| AX-157905051 | 1 | 61.874 | KV452713.1 | 4584377 | 1-scf00011 | 1 |
| AX-157905053 | 1 | 61.874 | KV452713.1 | 4588078 | 1-scf00011 | 1 |
| AX-157905054 | 1 | 61.874 | KV452713.1 | 4588929 | 1-scf00011 | 1 |
| AX-157811866 | 1 | 61.874 | KV452713.1 | 4591126 | 1-scf00011 | 1 |
| AX-157905056 | 1 | 61.874 | KV452713.1 | 4596091 | 1-scf00011 | 1 |
| AX-157905057 | 1 | 61.874 | KV452713.1 | 4597428 | 1-scf00011 | 1 |
| AX-157905059 | 1 | 61.874 | KV452713.1 | 4599083 | 1-scf00011 | 1 |
| AX-157905071 | 1 | 61.874 | KV452713.1 | 4611658 | 1-scf00011 | 1 |
| AX-157905078 | 1 | 61.874 | KV452713.1 | 4621112 | 1-scf00011 | 1 |



|              |   |        |            |         |            |   |
|--------------|---|--------|------------|---------|------------|---|
| AX-157905095 | 1 | 61.874 | KV452713.1 | 4638295 | 1-scf00011 | 1 |
| AX-157811881 | 1 | 61.874 | KV452713.1 | 4811040 | 1-scf00011 | 1 |
| AX-157904836 | 1 | 62.053 | KV452713.1 | 4313396 | 1-scf00011 | 1 |
| AX-157904838 | 1 | 62.053 | KV452713.1 | 4315351 | 1-scf00011 | 1 |
| AX-157904965 | 1 | 62.053 | KV452713.1 | 4485349 | 1-scf00011 | 1 |
| AX-157904983 | 1 | 62.053 | KV452713.1 | 4508415 | 1-scf00011 | 1 |
| AX-158414694 | 1 | 62.053 | KV452713.1 | 4556970 | 1-scf00011 | 1 |
| AX-157905025 | 1 | 62.053 | KV452713.1 | 4564937 | 1-scf00011 | 1 |
| AX-157905027 | 1 | 62.053 | KV452713.1 | 4565871 | 1-scf00011 | 1 |
| AX-157905036 | 1 | 62.053 | KV452713.1 | 4572733 | 1-scf00011 | 1 |
| AX-157715560 | 1 | 62.053 | KV452713.1 | 4589561 | 1-scf00011 | 1 |
| AX-157905055 | 1 | 62.053 | KV452713.1 | 4594957 | 1-scf00011 | 1 |
| AX-157811868 | 1 | 62.053 | KV452713.1 | 4600364 | 1-scf00011 | 1 |
| AX-157905062 | 1 | 62.053 | KV452713.1 | 4601535 | 1-scf00011 | 1 |
| AX-157905063 | 1 | 62.053 | KV452713.1 | 4602122 | 1-scf00011 | 1 |
| AX-157905065 | 1 | 62.053 | KV452713.1 | 4604030 | 1-scf00011 | 1 |
| AX-157905072 | 1 | 62.053 | KV452713.1 | 4612610 | 1-scf00011 | 1 |
| AX-157905074 | 1 | 62.053 | KV452713.1 | 4614398 | 1-scf00011 | 1 |
| AX-157905076 | 1 | 62.053 | KV452713.1 | 4617830 | 1-scf00011 | 1 |
| AX-157905077 | 1 | 62.053 | KV452713.1 | 4620732 | 1-scf00011 | 1 |
| AX-157905081 | 1 | 62.053 | KV452713.1 | 4625512 | 1-scf00011 | 1 |
| AX-157905083 | 1 | 62.053 | KV452713.1 | 4626499 | 1-scf00011 | 1 |
| AX-157905084 | 1 | 62.053 | KV452713.1 | 4627066 | 1-scf00011 | 1 |
| AX-157714260 | 1 | 62.053 | KV452713.1 | 4628152 | 1-scf00011 | 1 |
| AX-157714075 | 1 | 62.053 | KV452713.1 | 4628616 | 1-scf00011 | 1 |
| AX-157905085 | 1 | 62.053 | KV452713.1 | 4629595 | 1-scf00011 | 1 |
| AX-157905090 | 1 | 62.053 | KV452713.1 | 4632017 | 1-scf00011 | 1 |
| AX-157905091 | 1 | 62.053 | KV452713.1 | 4633174 | 1-scf00011 | 1 |
| AX-157739760 | 1 | 62.053 | KV452713.1 | 4634048 | 1-scf00011 | 1 |
| AX-157905092 | 1 | 62.053 | KV452713.1 | 4634969 | 1-scf00011 | 1 |
| AX-157905094 | 1 | 62.053 | KV452713.1 | 4636071 | 1-scf00011 | 1 |
| AX-157905096 | 1 | 62.053 | KV452713.1 | 4639669 | 1-scf00011 | 1 |
| AX-157905098 | 1 | 62.053 | KV452713.1 | 4642311 | 1-scf00011 | 1 |
| AX-157905099 | 1 | 62.053 | KV452713.1 | 4642805 | 1-scf00011 | 1 |
| AX-157905100 | 1 | 62.053 | KV452713.1 | 4643619 | 1-scf00011 | 1 |
| AX-157905114 | 1 | 62.053 | KV452713.1 | 4668469 | 1-scf00011 | 1 |
| AX-157905131 | 1 | 62.053 | KV452713.1 | 4699203 | 1-scf00011 | 1 |
| AX-157905318 | 1 | 62.053 | KV452713.1 | 4987777 | 1-scf00011 | 1 |
| AX-158379174 | 1 | 62.054 | KV452713.1 | 4643815 | 1-scf00011 | 1 |
| AX-157905112 | 1 | 62.56  | KV452713.1 | 4664032 | 1-scf00011 | 1 |
| AX-157739647 | 1 | 62.591 | KV452713.1 | 4666773 | 1-scf00011 | 1 |
| AX-157905115 | 1 | 62.591 | KV452713.1 | 4668732 | 1-scf00011 | 1 |
| AX-157905117 | 1 | 62.591 | KV452713.1 | 4669957 | 1-scf00011 | 1 |
| AX-157905118 | 1 | 62.591 | KV452713.1 | 4673333 | 1-scf00011 | 1 |
| AX-157905119 | 1 | 62.591 | KV452713.1 | 4674327 | 1-scf00011 | 1 |
| AX-157905122 | 1 | 62.591 | KV452713.1 | 4677189 | 1-scf00011 | 1 |
| AX-157752214 | 1 | 62.591 | KV452713.1 | 4677837 | 1-scf00011 | 1 |
| AX-157905219 | 1 | 62.591 | KV452713.1 | 4835888 | 1-scf00011 | 1 |
| AX-157775082 | 1 | 62.591 | KV452713.1 | 4836574 | 1-scf00011 | 1 |
| AX-157905124 | 1 | 62.864 | KV452713.1 | 4688384 | 1-scf00011 | 1 |
| AX-157709616 | 1 | 62.864 | KV452713.1 | 4689228 | 1-scf00011 | 1 |

|              |   |        |            |         |            |   |
|--------------|---|--------|------------|---------|------------|---|
| AX-157905130 | 1 | 62.865 | KV452713.1 | 4698473 | 1-scf00011 | 1 |
| AX-157905137 | 1 | 63.118 | KV452713.1 | 4706203 | 1-scf00011 | 1 |
| AX-157905158 | 1 | 63.118 | KV452713.1 | 4738236 | 1-scf00011 | 1 |
| AX-157905138 | 1 | 63.128 | KV452713.1 | 4707206 | 1-scf00011 | 1 |
| AX-157905140 | 1 | 63.128 | KV452713.1 | 4709049 | 1-scf00011 | 1 |
| AX-157905155 | 1 | 63.128 | KV452713.1 | 4735653 | 1-scf00011 | 1 |
| AX-157905156 | 1 | 63.128 | KV452713.1 | 4736069 | 1-scf00011 | 1 |
| AX-157905157 | 1 | 63.128 | KV452713.1 | 4736459 | 1-scf00011 | 1 |
| AX-157811875 | 1 | 63.128 | KV452713.1 | 4736923 | 1-scf00011 | 1 |
| AX-157741498 | 1 | 63.128 | KV452713.1 | 4737374 | 1-scf00011 | 1 |
| AX-157905162 | 1 | 63.128 | KV452713.1 | 4751596 | 1-scf00011 | 1 |
| AX-157905164 | 1 | 63.128 | KV452713.1 | 4753369 | 1-scf00011 | 1 |
| AX-157905171 | 1 | 63.128 | KV452713.1 | 4777683 | 1-scf00011 | 1 |
| AX-157905178 | 1 | 63.128 | KV452713.1 | 4785627 | 1-scf00011 | 1 |
| AX-157905179 | 1 | 63.128 | KV452713.1 | 4788036 | 1-scf00011 | 1 |
| AX-157905181 | 1 | 63.128 | KV452713.1 | 4790928 | 1-scf00011 | 1 |
| AX-157905184 | 1 | 63.128 | KV452713.1 | 4795488 | 1-scf00011 | 1 |
| AX-157905185 | 1 | 63.128 | KV452713.1 | 4795699 | 1-scf00011 | 1 |
| AX-157905189 | 1 | 63.128 | KV452713.1 | 4797662 | 1-scf00011 | 1 |
| AX-157905190 | 1 | 63.128 | KV452713.1 | 4798527 | 1-scf00011 | 1 |
| AX-157905192 | 1 | 63.128 | KV452713.1 | 4801137 | 1-scf00011 | 1 |
| AX-157905193 | 1 | 63.128 | KV452713.1 | 4802522 | 1-scf00011 | 1 |
| AX-157811879 | 1 | 63.128 | KV452713.1 | 4802794 | 1-scf00011 | 1 |
| AX-157905194 | 1 | 63.128 | KV452713.1 | 4803847 | 1-scf00011 | 1 |
| AX-157905196 | 1 | 63.128 | KV452713.1 | 4810127 | 1-scf00011 | 1 |
| AX-157811880 | 1 | 63.128 | KV452713.1 | 4810237 | 1-scf00011 | 1 |
| AX-157746967 | 1 | 63.128 | KV452713.1 | 4812135 | 1-scf00011 | 1 |
| AX-157905197 | 1 | 63.128 | KV452713.1 | 4813022 | 1-scf00011 | 1 |
| AX-157772049 | 1 | 63.128 | KV452713.1 | 4813793 | 1-scf00011 | 1 |
| AX-157905200 | 1 | 63.128 | KV452713.1 | 4815946 | 1-scf00011 | 1 |
| AX-157905201 | 1 | 63.128 | KV452713.1 | 4816860 | 1-scf00011 | 1 |
| AX-157905203 | 1 | 63.128 | KV452713.1 | 4819351 | 1-scf00011 | 1 |
| AX-157905208 | 1 | 63.128 | KV452713.1 | 4827087 | 1-scf00011 | 1 |
| AX-157905209 | 1 | 63.128 | KV452713.1 | 4827673 | 1-scf00011 | 1 |
| AX-157905213 | 1 | 63.128 | KV452713.1 | 4831592 | 1-scf00011 | 1 |
| AX-157905220 | 1 | 63.128 | KV452713.1 | 4837721 | 1-scf00011 | 1 |
| AX-157905227 | 1 | 63.128 | KV452713.1 | 4841589 | 1-scf00011 | 1 |
| AX-157905232 | 1 | 63.128 | KV452713.1 | 4844872 | 1-scf00011 | 1 |
| AX-157905234 | 1 | 63.128 | KV452713.1 | 4846564 | 1-scf00011 | 1 |
| AX-157905237 | 1 | 63.128 | KV452713.1 | 4849336 | 1-scf00011 | 1 |
| AX-157905241 | 1 | 63.128 | KV452713.1 | 4854442 | 1-scf00011 | 1 |
| AX-157905242 | 1 | 63.128 | KV452713.1 | 4854790 | 1-scf00011 | 1 |
| AX-157811887 | 1 | 63.128 | KV452713.1 | 4861673 | 1-scf00011 | 1 |
| AX-157905246 | 1 | 63.128 | KV452713.1 | 4863682 | 1-scf00011 | 1 |
| AX-157905247 | 1 | 63.128 | KV452713.1 | 4865258 | 1-scf00011 | 1 |
| AX-157883325 | 1 | 63.128 | KV452713.1 | 4865892 | 1-scf00011 | 1 |
| AX-158379175 | 1 | 63.128 | KV452713.1 | 4866992 | 1-scf00011 | 1 |
| AX-157905249 | 1 | 63.128 | KV452713.1 | 4867630 | 1-scf00011 | 1 |
| AX-157905250 | 1 | 63.128 | KV452713.1 | 4868235 | 1-scf00011 | 1 |
| AX-157712223 | 1 | 63.128 | KV452713.1 | 4874627 | 1-scf00011 | 1 |
| AX-157905253 | 1 | 63.128 | KV452713.1 | 4876013 | 1-scf00011 | 1 |

|              |   |        |            |         |            |   |
|--------------|---|--------|------------|---------|------------|---|
| AX-157905256 | 1 | 63.128 | KV452713.1 | 4880594 | 1-scf00011 | 1 |
| AX-157746548 | 1 | 63.128 | KV452713.1 | 4883064 | 1-scf00011 | 1 |
| AX-157811891 | 1 | 63.128 | KV452713.1 | 4883143 | 1-scf00011 | 1 |
| AX-157811892 | 1 | 63.128 | KV452713.1 | 4883756 | 1-scf00011 | 1 |
| AX-157905259 | 1 | 63.128 | KV452713.1 | 4883868 | 1-scf00011 | 1 |
| AX-157905553 | 1 | 63.128 | KV452713.1 | 5339838 | 1-scf00011 | 1 |
| AX-157700384 | 1 | 63.128 | KV452713.1 | 5445675 | 1-scf00011 | 1 |
| AX-157905797 | 1 | 63.128 | KV452713.1 | 5699250 | 1-scf00011 | 1 |
| AX-157905932 | 1 | 63.128 | KV452713.1 | 5877358 | 1-scf00011 | 1 |
| AX-157905264 | 1 | 63.604 | KV452713.1 | 4896661 | 1-scf00011 | 1 |
| AX-157775723 | 1 | 63.604 | KV452713.1 | 4899512 | 1-scf00011 | 1 |
| AX-157905045 | 1 | 63.609 | KV452713.1 | 4580186 | 1-scf00011 | 1 |
| AX-157714577 | 1 | 63.609 | KV452713.1 | 4901613 | 1-scf00011 | 1 |
| AX-157905269 | 1 | 63.609 | KV452713.1 | 4903074 | 1-scf00011 | 1 |
| AX-157905270 | 1 | 63.609 | KV452713.1 | 4903515 | 1-scf00011 | 1 |
| AX-157905271 | 1 | 63.609 | KV452713.1 | 4904598 | 1-scf00011 | 1 |
| AX-157697596 | 1 | 63.609 | KV452713.1 | 4919357 | 1-scf00011 | 1 |
| AX-157905278 | 1 | 63.609 | KV452713.1 | 4926043 | 1-scf00011 | 1 |
| AX-157905290 | 1 | 63.609 | KV452713.1 | 4943040 | 1-scf00011 | 1 |
| AX-157905303 | 1 | 63.609 | KV452713.1 | 4968259 | 1-scf00011 | 1 |
| AX-157905319 | 1 | 63.609 | KV452713.1 | 4988437 | 1-scf00011 | 1 |
| AX-157811905 | 1 | 63.609 | KV452713.1 | 5042685 | 1-scf00011 | 1 |
| AX-157905366 | 1 | 63.609 | KV452713.1 | 5055916 | 1-scf00011 | 1 |
| AX-157905424 | 1 | 63.609 | KV452713.1 | 5144951 | 1-scf00011 | 1 |
| AX-157905461 | 1 | 63.609 | KV452713.1 | 5201766 | 1-scf00011 | 1 |
| AX-157905511 | 1 | 63.609 | KV452713.1 | 5275230 | 1-scf00011 | 1 |
| AX-157905517 | 1 | 63.609 | KV452713.1 | 5285768 | 1-scf00011 | 1 |
| AX-157721274 | 1 | 63.609 | KV452713.1 | 5295015 | 1-scf00011 | 1 |
| AX-157905529 | 1 | 63.609 | KV452713.1 | 5311808 | 1-scf00011 | 1 |
| AX-157905537 | 1 | 63.609 | KV452713.1 | 5319606 | 1-scf00011 | 1 |
| AX-157905541 | 1 | 63.609 | KV452713.1 | 5326808 | 1-scf00011 | 1 |
| AX-157905558 | 1 | 63.609 | KV452713.1 | 5351944 | 1-scf00011 | 1 |
| AX-158421836 | 1 | 63.609 | KV452713.1 | 5887756 | 1-scf00011 | 1 |
| AX-157905301 | 1 | 63.681 | KV452713.1 | 4962598 | 1-scf00011 | 1 |
| AX-157905312 | 1 | 63.762 | KV452713.1 | 4982506 | 1-scf00011 | 1 |
| AX-157905314 | 1 | 63.838 | KV452713.1 | 4983471 | 1-scf00011 | 1 |
| AX-157905371 | 1 | 63.838 | KV452713.1 | 5061916 | 1-scf00011 | 1 |
| AX-157897010 | 1 | 63.845 | KV452709.1 | 1261299 | 1-scf00009 | 1 |
| AX-157897015 | 1 | 63.845 | KV452709.1 | 1270337 | 1-scf00009 | 1 |
| AX-158389491 | 1 | 63.845 | KV452713.1 | 3883028 | 1-scf00011 | 1 |
| AX-157905123 | 1 | 63.845 | KV452713.1 | 4678942 | 1-scf00011 | 1 |
| AX-157905266 | 1 | 63.845 | KV452713.1 | 4897857 | 1-scf00011 | 1 |
| AX-157905272 | 1 | 63.845 | KV452713.1 | 4905588 | 1-scf00011 | 1 |
| AX-157905292 | 1 | 63.845 | KV452713.1 | 4947796 | 1-scf00011 | 1 |
| AX-157905295 | 1 | 63.845 | KV452713.1 | 4952825 | 1-scf00011 | 1 |
| AX-157905296 | 1 | 63.845 | KV452713.1 | 4953723 | 1-scf00011 | 1 |
| AX-157905310 | 1 | 63.845 | KV452713.1 | 4981024 | 1-scf00011 | 1 |
| AX-157905324 | 1 | 63.845 | KV452713.1 | 4995962 | 1-scf00011 | 1 |
| AX-157738178 | 1 | 63.845 | KV452713.1 | 4997763 | 1-scf00011 | 1 |
| AX-157905325 | 1 | 63.845 | KV452713.1 | 4997996 | 1-scf00011 | 1 |
| AX-157905330 | 1 | 63.845 | KV452713.1 | 5003122 | 1-scf00011 | 1 |

|              |   |        |            |         |            |   |
|--------------|---|--------|------------|---------|------------|---|
| AX-157905336 | 1 | 63.845 | KV452713.1 | 5008082 | 1-scf00011 | 1 |
| AX-157905338 | 1 | 63.845 | KV452713.1 | 5011224 | 1-scf00011 | 1 |
| AX-157905339 | 1 | 63.845 | KV452713.1 | 5013194 | 1-scf00011 | 1 |
| AX-157905343 | 1 | 63.845 | KV452713.1 | 5019191 | 1-scf00011 | 1 |
| AX-157905344 | 1 | 63.845 | KV452713.1 | 5019661 | 1-scf00011 | 1 |
| AX-157905348 | 1 | 63.845 | KV452713.1 | 5023284 | 1-scf00011 | 1 |
| AX-157905349 | 1 | 63.845 | KV452713.1 | 5023882 | 1-scf00011 | 1 |
| AX-157905350 | 1 | 63.845 | KV452713.1 | 5024549 | 1-scf00011 | 1 |
| AX-157905351 | 1 | 63.845 | KV452713.1 | 5027698 | 1-scf00011 | 1 |
| AX-157905353 | 1 | 63.845 | KV452713.1 | 5031401 | 1-scf00011 | 1 |
| AX-157905359 | 1 | 63.845 | KV452713.1 | 5039986 | 1-scf00011 | 1 |
| AX-157905361 | 1 | 63.845 | KV452713.1 | 5042093 | 1-scf00011 | 1 |
| AX-157905362 | 1 | 63.845 | KV452713.1 | 5047786 | 1-scf00011 | 1 |
| AX-157811906 | 1 | 63.845 | KV452713.1 | 5051786 | 1-scf00011 | 1 |
| AX-157905372 | 1 | 63.845 | KV452713.1 | 5062773 | 1-scf00011 | 1 |
| AX-157905382 | 1 | 63.845 | KV452713.1 | 5076199 | 1-scf00011 | 1 |
| AX-157905384 | 1 | 63.845 | KV452713.1 | 5081309 | 1-scf00011 | 1 |
| AX-157905385 | 1 | 63.845 | KV452713.1 | 5081757 | 1-scf00011 | 1 |
| AX-157905395 | 1 | 63.845 | KV452713.1 | 5099491 | 1-scf00011 | 1 |
| AX-157905398 | 1 | 63.845 | KV452713.1 | 5102081 | 1-scf00011 | 1 |
| AX-157905399 | 1 | 63.845 | KV452713.1 | 5104703 | 1-scf00011 | 1 |
| AX-157905400 | 1 | 63.845 | KV452713.1 | 5105117 | 1-scf00011 | 1 |
| AX-157905402 | 1 | 63.845 | KV452713.1 | 5110113 | 1-scf00011 | 1 |
| AX-157905403 | 1 | 63.845 | KV452713.1 | 5111123 | 1-scf00011 | 1 |
| AX-157905409 | 1 | 63.845 | KV452713.1 | 5116910 | 1-scf00011 | 1 |
| AX-157905411 | 1 | 63.845 | KV452713.1 | 5118438 | 1-scf00011 | 1 |
| AX-157905412 | 1 | 63.845 | KV452713.1 | 5119475 | 1-scf00011 | 1 |
| AX-157905413 | 1 | 63.845 | KV452713.1 | 5119956 | 1-scf00011 | 1 |
| AX-157905414 | 1 | 63.845 | KV452713.1 | 5120649 | 1-scf00011 | 1 |
| AX-157905416 | 1 | 63.845 | KV452713.1 | 5133842 | 1-scf00011 | 1 |
| AX-157905418 | 1 | 63.845 | KV452713.1 | 5135716 | 1-scf00011 | 1 |
| AX-157905419 | 1 | 63.845 | KV452713.1 | 5139348 | 1-scf00011 | 1 |
| AX-157905421 | 1 | 63.845 | KV452713.1 | 5140155 | 1-scf00011 | 1 |
| AX-157905427 | 1 | 63.845 | KV452713.1 | 5155644 | 1-scf00011 | 1 |
| AX-157905460 | 1 | 63.845 | KV452713.1 | 5201139 | 1-scf00011 | 1 |
| AX-158404730 | 1 | 63.845 | KV452713.1 | 5201597 | 1-scf00011 | 1 |
| AX-157905465 | 1 | 63.845 | KV452713.1 | 5208325 | 1-scf00011 | 1 |
| AX-157905466 | 1 | 63.845 | KV452713.1 | 5209430 | 1-scf00011 | 1 |
| AX-157905467 | 1 | 63.845 | KV452713.1 | 5210329 | 1-scf00011 | 1 |
| AX-157905470 | 1 | 63.845 | KV452713.1 | 5223433 | 1-scf00011 | 1 |
| AX-157905471 | 1 | 63.845 | KV452713.1 | 5224015 | 1-scf00011 | 1 |
| AX-157905473 | 1 | 63.845 | KV452713.1 | 5226699 | 1-scf00011 | 1 |
| AX-157811911 | 1 | 63.845 | KV452713.1 | 5235730 | 1-scf00011 | 1 |
| AX-157905480 | 1 | 63.845 | KV452713.1 | 5235794 | 1-scf00011 | 1 |
| AX-157811912 | 1 | 63.845 | KV452713.1 | 5236515 | 1-scf00011 | 1 |
| AX-157720843 | 1 | 63.845 | KV452713.1 | 5236985 | 1-scf00011 | 1 |
| AX-157905481 | 1 | 63.845 | KV452713.1 | 5238038 | 1-scf00011 | 1 |
| AX-157905483 | 1 | 63.845 | KV452713.1 | 5240496 | 1-scf00011 | 1 |
| AX-157905485 | 1 | 63.845 | KV452713.1 | 5241977 | 1-scf00011 | 1 |
| AX-158382057 | 1 | 63.845 | KV452713.1 | 5243025 | 1-scf00011 | 1 |
| AX-157905486 | 1 | 63.845 | KV452713.1 | 5244921 | 1-scf00011 | 1 |

|              |   |        |            |         |            |   |
|--------------|---|--------|------------|---------|------------|---|
| AX-157905488 | 1 | 63.845 | KV452713.1 | 5246951 | 1-scf00011 | 1 |
| AX-157905489 | 1 | 63.845 | KV452713.1 | 5247618 | 1-scf00011 | 1 |
| AX-157905491 | 1 | 63.845 | KV452713.1 | 5251004 | 1-scf00011 | 1 |
| AX-157811917 | 1 | 63.845 | KV452713.1 | 5254693 | 1-scf00011 | 1 |
| AX-157905499 | 1 | 63.845 | KV452713.1 | 5258883 | 1-scf00011 | 1 |
| AX-157713520 | 1 | 63.845 | KV452713.1 | 5259680 | 1-scf00011 | 1 |
| AX-157905501 | 1 | 63.845 | KV452713.1 | 5265147 | 1-scf00011 | 1 |
| AX-157905502 | 1 | 63.845 | KV452713.1 | 5266896 | 1-scf00011 | 1 |
| AX-157811920 | 1 | 63.845 | KV452713.1 | 5267691 | 1-scf00011 | 1 |
| AX-157905503 | 1 | 63.845 | KV452713.1 | 5268375 | 1-scf00011 | 1 |
| AX-157905506 | 1 | 63.845 | KV452713.1 | 5271554 | 1-scf00011 | 1 |
| AX-157905507 | 1 | 63.845 | KV452713.1 | 5272557 | 1-scf00011 | 1 |
| AX-157905508 | 1 | 63.845 | KV452713.1 | 5273224 | 1-scf00011 | 1 |
| AX-157905510 | 1 | 63.845 | KV452713.1 | 5274542 | 1-scf00011 | 1 |
| AX-157905514 | 1 | 63.845 | KV452713.1 | 5279239 | 1-scf00011 | 1 |
| AX-157905515 | 1 | 63.845 | KV452713.1 | 5282195 | 1-scf00011 | 1 |
| AX-157905516 | 1 | 63.845 | KV452713.1 | 5282613 | 1-scf00011 | 1 |
| AX-157709200 | 1 | 63.845 | KV452713.1 | 5283180 | 1-scf00011 | 1 |
| AX-157905519 | 1 | 63.845 | KV452713.1 | 5294262 | 1-scf00011 | 1 |
| AX-157905520 | 1 | 63.845 | KV452713.1 | 5294658 | 1-scf00011 | 1 |
| AX-157905522 | 1 | 63.845 | KV452713.1 | 5299268 | 1-scf00011 | 1 |
| AX-157905525 | 1 | 63.845 | KV452713.1 | 5305563 | 1-scf00011 | 1 |
| AX-157905526 | 1 | 63.845 | KV452713.1 | 5306361 | 1-scf00011 | 1 |
| AX-157811921 | 1 | 63.845 | KV452713.1 | 5308868 | 1-scf00011 | 1 |
| AX-157905528 | 1 | 63.845 | KV452713.1 | 5310762 | 1-scf00011 | 1 |
| AX-157905534 | 1 | 63.845 | KV452713.1 | 5316484 | 1-scf00011 | 1 |
| AX-157905535 | 1 | 63.845 | KV452713.1 | 5318001 | 1-scf00011 | 1 |
| AX-157905538 | 1 | 63.845 | KV452713.1 | 5320215 | 1-scf00011 | 1 |
| AX-157905544 | 1 | 63.845 | KV452713.1 | 5328292 | 1-scf00011 | 1 |
| AX-157905545 | 1 | 63.845 | KV452713.1 | 5328950 | 1-scf00011 | 1 |
| AX-157905547 | 1 | 63.845 | KV452713.1 | 5334818 | 1-scf00011 | 1 |
| AX-157905548 | 1 | 63.845 | KV452713.1 | 5336175 | 1-scf00011 | 1 |
| AX-157905549 | 1 | 63.845 | KV452713.1 | 5336804 | 1-scf00011 | 1 |
| AX-157905559 | 1 | 63.845 | KV452713.1 | 5353437 | 1-scf00011 | 1 |
| AX-157905560 | 1 | 63.845 | KV452713.1 | 5355298 | 1-scf00011 | 1 |
| AX-157905563 | 1 | 63.845 | KV452713.1 | 5359081 | 1-scf00011 | 1 |
| AX-157905605 | 1 | 63.845 | KV452713.1 | 5425263 | 1-scf00011 | 1 |
| AX-157905617 | 1 | 63.845 | KV452713.1 | 5441140 | 1-scf00011 | 1 |
| AX-157905619 | 1 | 63.845 | KV452713.1 | 5444189 | 1-scf00011 | 1 |
| AX-157905626 | 1 | 63.845 | KV452713.1 | 5453173 | 1-scf00011 | 1 |
| AX-157905634 | 1 | 63.845 | KV452713.1 | 5462660 | 1-scf00011 | 1 |
| AX-157905652 | 1 | 63.845 | KV452713.1 | 5483016 | 1-scf00011 | 1 |
| AX-157905662 | 1 | 63.845 | KV452713.1 | 5493944 | 1-scf00011 | 1 |
| AX-157905692 | 1 | 63.845 | KV452713.1 | 5540833 | 1-scf00011 | 1 |
| AX-157905708 | 1 | 63.845 | KV452713.1 | 5560154 | 1-scf00011 | 1 |
| AX-157905719 | 1 | 63.845 | KV452713.1 | 5577186 | 1-scf00011 | 1 |
| AX-157905729 | 1 | 63.845 | KV452713.1 | 5596581 | 1-scf00011 | 1 |
| AX-157905739 | 1 | 63.845 | KV452713.1 | 5609827 | 1-scf00011 | 1 |
| AX-157905749 | 1 | 63.845 | KV452713.1 | 5628296 | 1-scf00011 | 1 |
| AX-157905750 | 1 | 63.845 | KV452713.1 | 5629193 | 1-scf00011 | 1 |
| AX-157905789 | 1 | 63.845 | KV452713.1 | 5687809 | 1-scf00011 | 1 |

|              |   |        |            |         |            |   |
|--------------|---|--------|------------|---------|------------|---|
| AX-157811927 | 1 | 63.845 | KV452713.1 | 5688513 | 1-scf00011 | 1 |
| AX-157726694 | 1 | 63.845 | KV452713.1 | 5689704 | 1-scf00011 | 1 |
| AX-157905793 | 1 | 63.845 | KV452713.1 | 5696100 | 1-scf00011 | 1 |
| AX-157905798 | 1 | 63.845 | KV452713.1 | 5701027 | 1-scf00011 | 1 |
| AX-157905823 | 1 | 63.845 | KV452713.1 | 5735498 | 1-scf00011 | 1 |
| AX-157905836 | 1 | 63.845 | KV452713.1 | 5754419 | 1-scf00011 | 1 |
| AX-157905855 | 1 | 63.845 | KV452713.1 | 5784570 | 1-scf00011 | 1 |
| AX-157874443 | 1 | 63.896 | KV452713.1 | 5334137 | 1-scf00011 | 1 |
| AX-157905570 | 1 | 63.94  | KV452713.1 | 5381230 | 1-scf00011 | 1 |
| AX-157905455 | 1 | 63.974 | KV452713.1 | 5195274 | 1-scf00011 | 1 |
| AX-157905571 | 1 | 63.974 | KV452713.1 | 5382134 | 1-scf00011 | 1 |
| AX-157811371 | 1 | 64.024 | KV452709.1 | 6141152 | 1-scf00009 | 1 |
| AX-157905173 | 1 | 64.024 | KV452713.1 | 4780435 | 1-scf00011 | 1 |
| AX-157811898 | 1 | 64.024 | KV452713.1 | 4939869 | 1-scf00011 | 1 |
| AX-157811899 | 1 | 64.024 | KV452713.1 | 4945045 | 1-scf00011 | 1 |
| AX-157905305 | 1 | 64.024 | KV452713.1 | 4970737 | 1-scf00011 | 1 |
| AX-157905315 | 1 | 64.024 | KV452713.1 | 4983945 | 1-scf00011 | 1 |
| AX-157905333 | 1 | 64.024 | KV452713.1 | 5006100 | 1-scf00011 | 1 |
| AX-157905346 | 1 | 64.024 | KV452713.1 | 5021293 | 1-scf00011 | 1 |
| AX-157905363 | 1 | 64.024 | KV452713.1 | 5049338 | 1-scf00011 | 1 |
| AX-157905379 | 1 | 64.024 | KV452713.1 | 5071872 | 1-scf00011 | 1 |
| AX-157905380 | 1 | 64.024 | KV452713.1 | 5073110 | 1-scf00011 | 1 |
| AX-157905381 | 1 | 64.024 | KV452713.1 | 5073686 | 1-scf00011 | 1 |
| AX-157905386 | 1 | 64.024 | KV452713.1 | 5082811 | 1-scf00011 | 1 |
| AX-157905401 | 1 | 64.024 | KV452713.1 | 5108805 | 1-scf00011 | 1 |
| AX-157905405 | 1 | 64.024 | KV452713.1 | 5112457 | 1-scf00011 | 1 |
| AX-157719781 | 1 | 64.024 | KV452713.1 | 5177178 | 1-scf00011 | 1 |
| AX-157905476 | 1 | 64.024 | KV452713.1 | 5230699 | 1-scf00011 | 1 |
| AX-157747904 | 1 | 64.024 | KV452713.1 | 5243720 | 1-scf00011 | 1 |
| AX-157905494 | 1 | 64.024 | KV452713.1 | 5252560 | 1-scf00011 | 1 |
| AX-157905498 | 1 | 64.024 | KV452713.1 | 5257993 | 1-scf00011 | 1 |
| AX-157811919 | 1 | 64.024 | KV452713.1 | 5260826 | 1-scf00011 | 1 |
| AX-157905504 | 1 | 64.024 | KV452713.1 | 5269456 | 1-scf00011 | 1 |
| AX-157905524 | 1 | 64.024 | KV452713.1 | 5302987 | 1-scf00011 | 1 |
| AX-157905533 | 1 | 64.024 | KV452713.1 | 5316244 | 1-scf00011 | 1 |
| AX-157811922 | 1 | 64.024 | KV452713.1 | 5318501 | 1-scf00011 | 1 |
| AX-157905542 | 1 | 64.024 | KV452713.1 | 5327444 | 1-scf00011 | 1 |
| AX-157811923 | 1 | 64.024 | KV452713.1 | 5335363 | 1-scf00011 | 1 |
| AX-157905550 | 1 | 64.024 | KV452713.1 | 5337493 | 1-scf00011 | 1 |
| AX-157905554 | 1 | 64.024 | KV452713.1 | 5341429 | 1-scf00011 | 1 |
| AX-157905569 | 1 | 64.024 | KV452713.1 | 5377401 | 1-scf00011 | 1 |
| AX-157905576 | 1 | 64.024 | KV452713.1 | 5387098 | 1-scf00011 | 1 |
| AX-157811924 | 1 | 64.024 | KV452713.1 | 5388099 | 1-scf00011 | 1 |
| AX-157905578 | 1 | 64.024 | KV452713.1 | 5389509 | 1-scf00011 | 1 |
| AX-157707976 | 1 | 64.024 | KV452713.1 | 5391564 | 1-scf00011 | 1 |
| AX-157905580 | 1 | 64.024 | KV452713.1 | 5392114 | 1-scf00011 | 1 |
| AX-157905581 | 1 | 64.024 | KV452713.1 | 5393942 | 1-scf00011 | 1 |
| AX-157905582 | 1 | 64.024 | KV452713.1 | 5397564 | 1-scf00011 | 1 |
| AX-157905585 | 1 | 64.024 | KV452713.1 | 5401141 | 1-scf00011 | 1 |
| AX-157905587 | 1 | 64.024 | KV452713.1 | 5402041 | 1-scf00011 | 1 |
| AX-157905594 | 1 | 64.024 | KV452713.1 | 5409623 | 1-scf00011 | 1 |

|              |   |        |            |         |            |   |
|--------------|---|--------|------------|---------|------------|---|
| AX-158421834 | 1 | 64.024 | KV452713.1 | 5411040 | 1-scf00011 | 1 |
| AX-157905599 | 1 | 64.024 | KV452713.1 | 5420183 | 1-scf00011 | 1 |
| AX-157905600 | 1 | 64.024 | KV452713.1 | 5421081 | 1-scf00011 | 1 |
| AX-157905601 | 1 | 64.024 | KV452713.1 | 5422316 | 1-scf00011 | 1 |
| AX-157905602 | 1 | 64.024 | KV452713.1 | 5423498 | 1-scf00011 | 1 |
| AX-157905603 | 1 | 64.024 | KV452713.1 | 5424209 | 1-scf00011 | 1 |
| AX-157905604 | 1 | 64.024 | KV452713.1 | 5424707 | 1-scf00011 | 1 |
| AX-157905609 | 1 | 64.024 | KV452713.1 | 5428653 | 1-scf00011 | 1 |
| AX-157905610 | 1 | 64.024 | KV452713.1 | 5429506 | 1-scf00011 | 1 |
| AX-157905611 | 1 | 64.024 | KV452713.1 | 5430842 | 1-scf00011 | 1 |
| AX-157905612 | 1 | 64.024 | KV452713.1 | 5432243 | 1-scf00011 | 1 |
| AX-157905618 | 1 | 64.024 | KV452713.1 | 5443321 | 1-scf00011 | 1 |
| AX-157905624 | 1 | 64.024 | KV452713.1 | 5451368 | 1-scf00011 | 1 |
| AX-157905625 | 1 | 64.024 | KV452713.1 | 5451840 | 1-scf00011 | 1 |
| AX-157905630 | 1 | 64.024 | KV452713.1 | 5457624 | 1-scf00011 | 1 |
| AX-157905632 | 1 | 64.024 | KV452713.1 | 5461505 | 1-scf00011 | 1 |
| AX-157905633 | 1 | 64.024 | KV452713.1 | 5461989 | 1-scf00011 | 1 |
| AX-157905635 | 1 | 64.024 | KV452713.1 | 5463200 | 1-scf00011 | 1 |
| AX-157722538 | 1 | 64.024 | KV452713.1 | 5464087 | 1-scf00011 | 1 |
| AX-157905636 | 1 | 64.024 | KV452713.1 | 5466810 | 1-scf00011 | 1 |
| AX-157905637 | 1 | 64.024 | KV452713.1 | 5467180 | 1-scf00011 | 1 |
| AX-157905638 | 1 | 64.024 | KV452713.1 | 5469427 | 1-scf00011 | 1 |
| AX-157905640 | 1 | 64.024 | KV452713.1 | 5470893 | 1-scf00011 | 1 |
| AX-157905642 | 1 | 64.024 | KV452713.1 | 5471960 | 1-scf00011 | 1 |
| AX-157905644 | 1 | 64.024 | KV452713.1 | 5473098 | 1-scf00011 | 1 |
| AX-157905645 | 1 | 64.024 | KV452713.1 | 5475243 | 1-scf00011 | 1 |
| AX-157905649 | 1 | 64.024 | KV452713.1 | 5480015 | 1-scf00011 | 1 |
| AX-157905651 | 1 | 64.024 | KV452713.1 | 5481721 | 1-scf00011 | 1 |
| AX-157905654 | 1 | 64.024 | KV452713.1 | 5484533 | 1-scf00011 | 1 |
| AX-157905659 | 1 | 64.024 | KV452713.1 | 5490616 | 1-scf00011 | 1 |
| AX-157811925 | 1 | 64.024 | KV452713.1 | 5490826 | 1-scf00011 | 1 |
| AX-157905660 | 1 | 64.024 | KV452713.1 | 5491634 | 1-scf00011 | 1 |
| AX-157905669 | 1 | 64.024 | KV452713.1 | 5504284 | 1-scf00011 | 1 |
| AX-157905671 | 1 | 64.024 | KV452713.1 | 5507438 | 1-scf00011 | 1 |
| AX-157905679 | 1 | 64.024 | KV452713.1 | 5514379 | 1-scf00011 | 1 |
| AX-157905680 | 1 | 64.024 | KV452713.1 | 5516335 | 1-scf00011 | 1 |
| AX-157905681 | 1 | 64.024 | KV452713.1 | 5516766 | 1-scf00011 | 1 |
| AX-157905684 | 1 | 64.024 | KV452713.1 | 5521938 | 1-scf00011 | 1 |
| AX-157905685 | 1 | 64.024 | KV452713.1 | 5522906 | 1-scf00011 | 1 |
| AX-157905687 | 1 | 64.024 | KV452713.1 | 5526181 | 1-scf00011 | 1 |
| AX-157905688 | 1 | 64.024 | KV452713.1 | 5526891 | 1-scf00011 | 1 |
| AX-157905689 | 1 | 64.024 | KV452713.1 | 5533019 | 1-scf00011 | 1 |
| AX-157905694 | 1 | 64.024 | KV452713.1 | 5547254 | 1-scf00011 | 1 |
| AX-157905695 | 1 | 64.024 | KV452713.1 | 5549783 | 1-scf00011 | 1 |
| AX-157905696 | 1 | 64.024 | KV452713.1 | 5550735 | 1-scf00011 | 1 |
| AX-157905697 | 1 | 64.024 | KV452713.1 | 5551261 | 1-scf00011 | 1 |
| AX-157905699 | 1 | 64.024 | KV452713.1 | 5552728 | 1-scf00011 | 1 |
| AX-157905700 | 1 | 64.024 | KV452713.1 | 5553244 | 1-scf00011 | 1 |
| AX-157905702 | 1 | 64.024 | KV452713.1 | 5556946 | 1-scf00011 | 1 |
| AX-157905703 | 1 | 64.024 | KV452713.1 | 5557740 | 1-scf00011 | 1 |
| AX-157905705 | 1 | 64.024 | KV452713.1 | 5558543 | 1-scf00011 | 1 |

|              |   |        |            |         |               |    |
|--------------|---|--------|------------|---------|---------------|----|
| AX-157905706 | 1 | 64.024 | KV452713.1 | 5559313 | 1-scf00011    | 1  |
| AX-157905707 | 1 | 64.024 | KV452713.1 | 5559777 | 1-scf00011    | 1  |
| AX-157905712 | 1 | 64.024 | KV452713.1 | 5565618 | 1-scf00011    | 1  |
| AX-157905717 | 1 | 64.024 | KV452713.1 | 5575421 | 1-scf00011    | 1  |
| AX-157905718 | 1 | 64.024 | KV452713.1 | 5575981 | 1-scf00011    | 1  |
| AX-157905723 | 1 | 64.024 | KV452713.1 | 5585031 | 1-scf00011    | 1  |
| AX-157905724 | 1 | 64.024 | KV452713.1 | 5589117 | 1-scf00011    | 1  |
| AX-157905725 | 1 | 64.024 | KV452713.1 | 5590020 | 1-scf00011    | 1  |
| AX-157905726 | 1 | 64.024 | KV452713.1 | 5591182 | 1-scf00011    | 1  |
| AX-157905727 | 1 | 64.024 | KV452713.1 | 5592739 | 1-scf00011    | 1  |
| AX-157905733 | 1 | 64.024 | KV452713.1 | 5600238 | 1-scf00011    | 1  |
| AX-157905734 | 1 | 64.024 | KV452713.1 | 5601011 | 1-scf00011    | 1  |
| AX-157905735 | 1 | 64.024 | KV452713.1 | 5601729 | 1-scf00011    | 1  |
| AX-157905736 | 1 | 64.024 | KV452713.1 | 5602992 | 1-scf00011    | 1  |
| AX-157905738 | 1 | 64.024 | KV452713.1 | 5604663 | 1-scf00011    | 1  |
| AX-157905740 | 1 | 64.024 | KV452713.1 | 5611070 | 1-scf00011    | 1  |
| AX-157905744 | 1 | 64.024 | KV452713.1 | 5617418 | 1-scf00011    | 1  |
| AX-157905745 | 1 | 64.024 | KV452713.1 | 5618024 | 1-scf00011    | 1  |
| AX-157905747 | 1 | 64.024 | KV452713.1 | 5623833 | 1-scf00011    | 1  |
| AX-157905748 | 1 | 64.024 | KV452713.1 | 5627390 | 1-scf00011    | 1  |
| AX-157905754 | 1 | 64.024 | KV452713.1 | 5639373 | 1-scf00011    | 1  |
| AX-157905756 | 1 | 64.024 | KV452713.1 | 5642272 | 1-scf00011    | 1  |
| AX-157905757 | 1 | 64.024 | KV452713.1 | 5642417 | 1-scf00011    | 1  |
| AX-158414704 | 1 | 64.024 | KV452713.1 | 5642541 | 1-scf00011    | 1  |
| AX-158404741 | 1 | 64.024 | KV452713.1 | 5642608 | 1-scf00011    | 1  |
| AX-157905767 | 1 | 64.024 | KV452713.1 | 5652065 | 1-scf00011    | 1  |
| AX-157905769 | 1 | 64.024 | KV452713.1 | 5657446 | 1-scf00011    | 1  |
| AX-157905773 | 1 | 64.024 | KV452713.1 | 5670560 | 1-scf00011    | 1  |
| AX-157905785 | 1 | 64.024 | KV452713.1 | 5685234 | 1-scf00011    | 1  |
| AX-157905787 | 1 | 64.024 | KV452713.1 | 5686871 | 1-scf00011    | 1  |
| AX-157905790 | 1 | 64.024 | KV452713.1 | 5690255 | 1-scf00011    | 1  |
| AX-157905791 | 1 | 64.024 | KV452713.1 | 5693768 | 1-scf00011    | 1  |
| AX-158389508 | 1 | 64.024 | KV452713.1 | 5695344 | 1-scf00011    | 1  |
| AX-158404744 | 1 | 64.024 | KV452713.1 | 5714032 | 1-scf00011    | 1  |
| AX-157905822 | 1 | 64.024 | KV452713.1 | 5734848 | 1-scf00011    | 1  |
| AX-157905858 | 1 | 64.024 | KV452713.1 | 5790155 | 1-scf00011    | 1  |
| AX-157905972 | 1 | 64.024 | KV452713.1 | 5934630 | 1-scf00011    | 1  |
| AX-157905977 | 1 | 64.024 | KV452713.1 | 5943351 | 1-scf00011    | 1  |
| AX-157906001 | 1 | 64.024 | KV452713.1 | 5982225 | 1-scf00011    | 1  |
| AX-157703884 | 1 | 64.381 | DX100978.1 | 134     | ORI212 lctalu | UN |
| AX-157905323 | 1 | 64.383 | KV452713.1 | 4995640 | 1-scf00011    | 1  |
| AX-157905459 | 1 | 64.383 | KV452713.1 | 5200879 | 1-scf00011    | 1  |
| AX-157721413 | 1 | 64.383 | KV452713.1 | 5520439 | 1-scf00011    | 1  |
| AX-157905701 | 1 | 64.383 | KV452713.1 | 5556249 | 1-scf00011    | 1  |
| AX-157905743 | 1 | 64.383 | KV452713.1 | 5616781 | 1-scf00011    | 1  |
| AX-157905801 | 1 | 64.383 | KV452713.1 | 5704475 | 1-scf00011    | 1  |
| AX-157905803 | 1 | 64.383 | KV452713.1 | 5707118 | 1-scf00011    | 1  |
| AX-157905804 | 1 | 64.383 | KV452713.1 | 5709415 | 1-scf00011    | 1  |
| AX-157905810 | 1 | 64.383 | KV452713.1 | 5721116 | 1-scf00011    | 1  |
| AX-157725531 | 1 | 64.383 | KV452713.1 | 5724272 | 1-scf00011    | 1  |
| AX-157905814 | 1 | 64.383 | KV452713.1 | 5724992 | 1-scf00011    | 1  |



|              |   |        |            |         |            |   |
|--------------|---|--------|------------|---------|------------|---|
| AX-157905817 | 1 | 64.383 | KV452713.1 | 5727924 | 1-scf00011 | 1 |
| AX-157905818 | 1 | 64.383 | KV452713.1 | 5729382 | 1-scf00011 | 1 |
| AX-157905819 | 1 | 64.383 | KV452713.1 | 5731385 | 1-scf00011 | 1 |
| AX-157905820 | 1 | 64.383 | KV452713.1 | 5732876 | 1-scf00011 | 1 |
| AX-157905834 | 1 | 64.383 | KV452713.1 | 5753355 | 1-scf00011 | 1 |
| AX-157905835 | 1 | 64.383 | KV452713.1 | 5753800 | 1-scf00011 | 1 |
| AX-157905966 | 1 | 64.383 | KV452713.1 | 5925489 | 1-scf00011 | 1 |
| AX-157905982 | 1 | 64.383 | KV452713.1 | 5950868 | 1-scf00011 | 1 |
| AX-157905674 | 1 | 64.408 | KV452713.1 | 5510716 | 1-scf00011 | 1 |
| AX-157905800 | 1 | 64.408 | KV452713.1 | 5703766 | 1-scf00011 | 1 |
| AX-157905845 | 1 | 64.408 | KV452713.1 | 5766319 | 1-scf00011 | 1 |
| AX-157905847 | 1 | 64.442 | KV452713.1 | 5769339 | 1-scf00011 | 1 |
| AX-157905848 | 1 | 64.48  | KV452713.1 | 5771174 | 1-scf00011 | 1 |
| AX-157742121 | 1 | 64.519 | KV452713.1 | 4549401 | 1-scf00011 | 1 |
| AX-157905824 | 1 | 64.519 | KV452713.1 | 5736339 | 1-scf00011 | 1 |
| AX-157905849 | 1 | 64.519 | KV452713.1 | 5776278 | 1-scf00011 | 1 |
| AX-157905861 | 1 | 64.519 | KV452713.1 | 5793922 | 1-scf00011 | 1 |
| AX-157905806 | 1 | 64.562 | KV452713.1 | 5710968 | 1-scf00011 | 1 |
| AX-157905838 | 1 | 64.562 | KV452713.1 | 5757790 | 1-scf00011 | 1 |
| AX-157905856 | 1 | 64.562 | KV452713.1 | 5785436 | 1-scf00011 | 1 |
| AX-157905857 | 1 | 64.562 | KV452713.1 | 5789422 | 1-scf00011 | 1 |
| AX-157905423 | 1 | 64.741 | KV452713.1 | 5143716 | 1-scf00011 | 1 |
| AX-157905454 | 1 | 64.741 | KV452713.1 | 5194866 | 1-scf00011 | 1 |
| AX-157905556 | 1 | 64.741 | KV452713.1 | 5347977 | 1-scf00011 | 1 |
| AX-157905584 | 1 | 64.741 | KV452713.1 | 5400690 | 1-scf00011 | 1 |
| AX-157905595 | 1 | 64.741 | KV452713.1 | 5411931 | 1-scf00011 | 1 |
| AX-157905710 | 1 | 64.741 | KV452713.1 | 5563757 | 1-scf00011 | 1 |
| AX-157905842 | 1 | 64.741 | KV452713.1 | 5761159 | 1-scf00011 | 1 |
| AX-157905843 | 1 | 64.741 | KV452713.1 | 5762484 | 1-scf00011 | 1 |
| AX-157905852 | 1 | 64.741 | KV452713.1 | 5780339 | 1-scf00011 | 1 |
| AX-157905853 | 1 | 64.741 | KV452713.1 | 5780905 | 1-scf00011 | 1 |
| AX-157905860 | 1 | 64.741 | KV452713.1 | 5792998 | 1-scf00011 | 1 |
| AX-157905862 | 1 | 64.741 | KV452713.1 | 5794419 | 1-scf00011 | 1 |
| AX-157713308 | 1 | 64.741 | KV452713.1 | 5795316 | 1-scf00011 | 1 |
| AX-157905865 | 1 | 64.741 | KV452713.1 | 5797547 | 1-scf00011 | 1 |
| AX-157905868 | 1 | 64.741 | KV452713.1 | 5800298 | 1-scf00011 | 1 |
| AX-157811934 | 1 | 64.741 | KV452713.1 | 5801322 | 1-scf00011 | 1 |
| AX-157905873 | 1 | 64.741 | KV452713.1 | 5812085 | 1-scf00011 | 1 |
| AX-157905878 | 1 | 64.741 | KV452713.1 | 5814367 | 1-scf00011 | 1 |
| AX-157905879 | 1 | 64.741 | KV452713.1 | 5814759 | 1-scf00011 | 1 |
| AX-157905881 | 1 | 64.741 | KV452713.1 | 5815844 | 1-scf00011 | 1 |
| AX-157905886 | 1 | 64.741 | KV452713.1 | 5822567 | 1-scf00011 | 1 |
| AX-157905891 | 1 | 64.741 | KV452713.1 | 5829640 | 1-scf00011 | 1 |
| AX-158379179 | 1 | 64.741 | KV452713.1 | 5830296 | 1-scf00011 | 1 |
| AX-157719321 | 1 | 64.741 | KV452713.1 | 5832501 | 1-scf00011 | 1 |
| AX-157905897 | 1 | 64.741 | KV452713.1 | 5840717 | 1-scf00011 | 1 |
| AX-157905900 | 1 | 64.741 | KV452713.1 | 5845805 | 1-scf00011 | 1 |
| AX-157905902 | 1 | 64.741 | KV452713.1 | 5847423 | 1-scf00011 | 1 |
| AX-157811937 | 1 | 64.741 | KV452713.1 | 5847482 | 1-scf00011 | 1 |
| AX-157905907 | 1 | 64.741 | KV452713.1 | 5850466 | 1-scf00011 | 1 |
| AX-157905913 | 1 | 64.741 | KV452713.1 | 5855161 | 1-scf00011 | 1 |

|              |   |        |            |         |                 |    |
|--------------|---|--------|------------|---------|-----------------|----|
| AX-157905929 | 1 | 64.741 | KV452713.1 | 5874228 | 1-scf00011      | 1  |
| AX-157905930 | 1 | 64.741 | KV452713.1 | 5875976 | 1-scf00011      | 1  |
| AX-157905934 | 1 | 64.741 | KV452713.1 | 5883487 | 1-scf00011      | 1  |
| AX-157905935 | 1 | 64.741 | KV452713.1 | 5883989 | 1-scf00011      | 1  |
| AX-157905943 | 1 | 64.741 | KV452713.1 | 5894356 | 1-scf00011      | 1  |
| AX-157905946 | 1 | 64.741 | KV452713.1 | 5896066 | 1-scf00011      | 1  |
| AX-157905950 | 1 | 64.741 | KV452713.1 | 5899982 | 1-scf00011      | 1  |
| AX-157905951 | 1 | 64.741 | KV452713.1 | 5900889 | 1-scf00011      | 1  |
| AX-157905952 | 1 | 64.741 | KV452713.1 | 5903051 | 1-scf00011      | 1  |
| AX-157905964 | 1 | 64.741 | KV452713.1 | 5923307 | 1-scf00011      | 1  |
| AX-157905965 | 1 | 64.741 | KV452713.1 | 5924166 | 1-scf00011      | 1  |
| AX-157905967 | 1 | 64.741 | KV452713.1 | 5926181 | 1-scf00011      | 1  |
| AX-157905968 | 1 | 64.741 | KV452713.1 | 5926862 | 1-scf00011      | 1  |
| AX-157720965 | 1 | 64.741 | KV452713.1 | 5927244 | 1-scf00011      | 1  |
| AX-157905970 | 1 | 64.741 | KV452713.1 | 5931733 | 1-scf00011      | 1  |
| AX-157905975 | 1 | 64.741 | KV452713.1 | 5939011 | 1-scf00011      | 1  |
| AX-157905976 | 1 | 64.741 | KV452713.1 | 5941910 | 1-scf00011      | 1  |
| AX-157905979 | 1 | 64.741 | KV452713.1 | 5947796 | 1-scf00011      | 1  |
| AX-157883328 | 1 | 64.741 | KV452713.1 | 5951018 | 1-scf00011      | 1  |
| AX-157905996 | 1 | 64.741 | KV452713.1 | 5973170 | 1-scf00011      | 1  |
| AX-157906005 | 1 | 64.741 | KV452713.1 | 5986515 | 1-scf00011      | 1  |
| AX-157906011 | 1 | 64.741 | KV452713.1 | 5993475 | 1-scf00011      | 1  |
| AX-157699337 | 1 | 64.741 | KV452713.1 | 6003317 | 1-scf00011      | 1  |
| AX-157906026 | 1 | 64.741 | KV452713.1 | 6019726 | 1-scf00011      | 1  |
| AX-157906028 | 1 | 64.741 | KV452713.1 | 6024255 | 1-scf00011      | 1  |
| AX-157906054 | 1 | 64.741 | KV452713.1 | 6055682 | 1-scf00011      | 1  |
| AX-157906055 | 1 | 64.741 | KV452713.1 | 6056165 | 1-scf00011      | 1  |
| AX-157906082 | 1 | 64.741 | KV452713.1 | 6087905 | 1-scf00011      | 1  |
| AX-157699092 | 1 | 64.741 | FI899105.1 | 780     | 1-ORI212 lctalt | UN |
| AX-157905983 | 1 | 64.92  | KV452713.1 | 5952777 | 1-scf00011      | 1  |
| AX-157755596 | 1 | 64.92  | KV452713.1 | 5954168 | 1-scf00011      | 1  |
| AX-157811939 | 1 | 64.92  | KV452713.1 | 5962169 | 1-scf00011      | 1  |
| AX-157905988 | 1 | 64.92  | KV452713.1 | 5963865 | 1-scf00011      | 1  |
| AX-157905991 | 1 | 64.92  | KV452713.1 | 5969693 | 1-scf00011      | 1  |
| AX-157905994 | 1 | 64.92  | KV452713.1 | 5972077 | 1-scf00011      | 1  |
| AX-157699047 | 1 | 65.1   | KV452713.1 | 5810836 | 1-scf00011      | 1  |
| AX-157905876 | 1 | 65.1   | KV452713.1 | 5813210 | 1-scf00011      | 1  |
| AX-157811936 | 1 | 65.1   | KV452713.1 | 5837882 | 1-scf00011      | 1  |
| AX-157905947 | 1 | 65.1   | KV452713.1 | 5897798 | 1-scf00011      | 1  |
| AX-158382070 | 1 | 65.1   | KV452713.1 | 5923364 | 1-scf00011      | 1  |
| AX-157811942 | 1 | 65.1   | KV452713.1 | 5978612 | 1-scf00011      | 1  |
| AX-157906000 | 1 | 65.1   | KV452713.1 | 5981635 | 1-scf00011      | 1  |
| AX-157906004 | 1 | 65.1   | KV452713.1 | 5984832 | 1-scf00011      | 1  |
| AX-157906006 | 1 | 65.1   | KV452713.1 | 5987350 | 1-scf00011      | 1  |
| AX-157906012 | 1 | 65.1   | KV452713.1 | 5994981 | 1-scf00011      | 1  |
| AX-157906014 | 1 | 65.1   | KV452713.1 | 6000819 | 1-scf00011      | 1  |
| AX-157906015 | 1 | 65.1   | KV452713.1 | 6001348 | 1-scf00011      | 1  |
| AX-157906017 | 1 | 65.1   | KV452713.1 | 6004078 | 1-scf00011      | 1  |
| AX-158404751 | 1 | 65.1   | KV452713.1 | 6009071 | 1-scf00011      | 1  |
| AX-157811944 | 1 | 65.1   | KV452713.1 | 6009838 | 1-scf00011      | 1  |
| AX-157906023 | 1 | 65.1   | KV452713.1 | 6012435 | 1-scf00011      | 1  |

|              |   |        |            |         |            |   |
|--------------|---|--------|------------|---------|------------|---|
| AX-157726776 | 1 | 65.1   | KV452713.1 | 6017309 | 1-scf00011 | 1 |
| AX-157906030 | 1 | 65.1   | KV452713.1 | 6025100 | 1-scf00011 | 1 |
| AX-157906044 | 1 | 65.1   | KV452713.1 | 6045917 | 1-scf00011 | 1 |
| AX-157906049 | 1 | 65.1   | KV452713.1 | 6050876 | 1-scf00011 | 1 |
| AX-157906154 | 1 | 65.1   | KV452713.1 | 6182119 | 1-scf00011 | 1 |
| AX-157811940 | 1 | 65.279 | KV452713.1 | 5962362 | 1-scf00011 | 1 |
| AX-157811941 | 1 | 65.279 | KV452713.1 | 5977504 | 1-scf00011 | 1 |
| AX-157755635 | 1 | 65.279 | KV452713.1 | 6030597 | 1-scf00011 | 1 |
| AX-157906032 | 1 | 65.279 | KV452713.1 | 6031920 | 1-scf00011 | 1 |
| AX-157906033 | 1 | 65.279 | KV452713.1 | 6033296 | 1-scf00011 | 1 |
| AX-157811947 | 1 | 65.279 | KV452713.1 | 6034884 | 1-scf00011 | 1 |
| AX-157811949 | 1 | 65.279 | KV452713.1 | 6038688 | 1-scf00011 | 1 |
| AX-157906037 | 1 | 65.279 | KV452713.1 | 6039798 | 1-scf00011 | 1 |
| AX-157906038 | 1 | 65.279 | KV452713.1 | 6041778 | 1-scf00011 | 1 |
| AX-157906043 | 1 | 65.326 | KV452713.1 | 6045178 | 1-scf00011 | 1 |
| AX-157905332 | 1 | 65.458 | KV452713.1 | 5004585 | 1-scf00011 | 1 |
| AX-157905358 | 1 | 65.458 | KV452713.1 | 5039516 | 1-scf00011 | 1 |
| AX-157874441 | 1 | 65.458 | KV452713.1 | 5178456 | 1-scf00011 | 1 |
| AX-157905539 | 1 | 65.458 | KV452713.1 | 5321749 | 1-scf00011 | 1 |
| AX-157905565 | 1 | 65.458 | KV452713.1 | 5362284 | 1-scf00011 | 1 |
| AX-157905591 | 1 | 65.458 | KV452713.1 | 5404727 | 1-scf00011 | 1 |
| AX-157905598 | 1 | 65.458 | KV452713.1 | 5417549 | 1-scf00011 | 1 |
| AX-157905607 | 1 | 65.458 | KV452713.1 | 5426961 | 1-scf00011 | 1 |
| AX-157905672 | 1 | 65.458 | KV452713.1 | 5508572 | 1-scf00011 | 1 |
| AX-157869039 | 1 | 65.458 | KV452713.1 | 5809451 | 1-scf00011 | 1 |
| AX-157905941 | 1 | 65.458 | KV452713.1 | 5892628 | 1-scf00011 | 1 |
| AX-157905949 | 1 | 65.458 | KV452713.1 | 5899253 | 1-scf00011 | 1 |
| AX-157906018 | 1 | 65.458 | KV452713.1 | 6006220 | 1-scf00011 | 1 |
| AX-157906053 | 1 | 65.458 | KV452713.1 | 6055088 | 1-scf00011 | 1 |
| AX-157906057 | 1 | 65.458 | KV452713.1 | 6058859 | 1-scf00011 | 1 |
| AX-157906060 | 1 | 65.458 | KV452713.1 | 6061764 | 1-scf00011 | 1 |
| AX-157906062 | 1 | 65.458 | KV452713.1 | 6063724 | 1-scf00011 | 1 |
| AX-157906063 | 1 | 65.458 | KV452713.1 | 6064862 | 1-scf00011 | 1 |
| AX-157906064 | 1 | 65.458 | KV452713.1 | 6067046 | 1-scf00011 | 1 |
| AX-157772224 | 1 | 65.458 | KV452713.1 | 6067848 | 1-scf00011 | 1 |
| AX-157906067 | 1 | 65.458 | KV452713.1 | 6071295 | 1-scf00011 | 1 |
| AX-158404752 | 1 | 65.522 | KV452713.1 | 6069096 | 1-scf00011 | 1 |
| AX-157906065 | 1 | 65.577 | KV452713.1 | 6069839 | 1-scf00011 | 1 |
| AX-157905377 | 1 | 65.637 | KV452713.1 | 5070358 | 1-scf00011 | 1 |
| AX-157905837 | 1 | 65.637 | KV452713.1 | 5756858 | 1-scf00011 | 1 |
| AX-157905928 | 1 | 65.637 | KV452713.1 | 5871774 | 1-scf00011 | 1 |
| AX-157905954 | 1 | 65.637 | KV452713.1 | 5905797 | 1-scf00011 | 1 |
| AX-157906066 | 1 | 65.637 | KV452713.1 | 6070525 | 1-scf00011 | 1 |
| AX-157906069 | 1 | 65.637 | KV452713.1 | 6074969 | 1-scf00011 | 1 |
| AX-157906071 | 1 | 65.637 | KV452713.1 | 6076643 | 1-scf00011 | 1 |
| AX-157906072 | 1 | 65.637 | KV452713.1 | 6077038 | 1-scf00011 | 1 |
| AX-157906073 | 1 | 65.637 | KV452713.1 | 6077810 | 1-scf00011 | 1 |
| AX-157906074 | 1 | 65.637 | KV452713.1 | 6079635 | 1-scf00011 | 1 |
| AX-157906076 | 1 | 65.637 | KV452713.1 | 6081742 | 1-scf00011 | 1 |
| AX-157906077 | 1 | 65.637 | KV452713.1 | 6082453 | 1-scf00011 | 1 |
| AX-157906079 | 1 | 65.637 | KV452713.1 | 6083673 | 1-scf00011 | 1 |

|              |   |        |            |         |            |   |
|--------------|---|--------|------------|---------|------------|---|
| AX-157906084 | 1 | 65.637 | KV452713.1 | 6091154 | 1-scf00011 | 1 |
| AX-157906086 | 1 | 65.637 | KV452713.1 | 6092197 | 1-scf00011 | 1 |
| AX-157906088 | 1 | 65.637 | KV452713.1 | 6095734 | 1-scf00011 | 1 |
| AX-157906100 | 1 | 65.637 | KV452713.1 | 6110015 | 1-scf00011 | 1 |
| AX-157905885 | 1 | 65.816 | KV452713.1 | 5821900 | 1-scf00011 | 1 |
| AX-157905904 | 1 | 65.816 | KV452713.1 | 5848758 | 1-scf00011 | 1 |
| AX-157905953 | 1 | 65.816 | KV452713.1 | 5904560 | 1-scf00011 | 1 |
| AX-157905956 | 1 | 65.816 | KV452713.1 | 5907724 | 1-scf00011 | 1 |
| AX-158379180 | 1 | 65.816 | KV452713.1 | 5986829 | 1-scf00011 | 1 |
| AX-157906090 | 1 | 65.816 | KV452713.1 | 6098839 | 1-scf00011 | 1 |
| AX-157906092 | 1 | 65.816 | KV452713.1 | 6101039 | 1-scf00011 | 1 |
| AX-157906094 | 1 | 65.816 | KV452713.1 | 6102650 | 1-scf00011 | 1 |
| AX-157906095 | 1 | 65.816 | KV452713.1 | 6104299 | 1-scf00011 | 1 |
| AX-157906096 | 1 | 65.816 | KV452713.1 | 6106755 | 1-scf00011 | 1 |
| AX-157906101 | 1 | 65.816 | KV452713.1 | 6110665 | 1-scf00011 | 1 |
| AX-157906102 | 1 | 65.816 | KV452713.1 | 6111444 | 1-scf00011 | 1 |
| AX-157906103 | 1 | 65.816 | KV452713.1 | 6111856 | 1-scf00011 | 1 |
| AX-157906105 | 1 | 65.816 | KV452713.1 | 6112969 | 1-scf00011 | 1 |
| AX-157906106 | 1 | 65.816 | KV452713.1 | 6114972 | 1-scf00011 | 1 |
| AX-157906107 | 1 | 65.816 | KV452713.1 | 6115678 | 1-scf00011 | 1 |
| AX-157906108 | 1 | 65.816 | KV452713.1 | 6116726 | 1-scf00011 | 1 |
| AX-157906109 | 1 | 65.816 | KV452713.1 | 6117172 | 1-scf00011 | 1 |
| AX-157906110 | 1 | 65.816 | KV452713.1 | 6119944 | 1-scf00011 | 1 |
| AX-158379181 | 1 | 65.907 | KV452713.1 | 6127241 | 1-scf00011 | 1 |
| AX-157906091 | 1 | 65.995 | KV452713.1 | 6100491 | 1-scf00011 | 1 |
| AX-157906115 | 1 | 65.995 | KV452713.1 | 6128616 | 1-scf00011 | 1 |
| AX-157906119 | 1 | 65.995 | KV452713.1 | 6133864 | 1-scf00011 | 1 |
| AX-157906145 | 1 | 65.995 | KV452713.1 | 6164729 | 1-scf00011 | 1 |
| AX-157906152 | 1 | 65.995 | KV452713.1 | 6175783 | 1-scf00011 | 1 |
| AX-157883326 | 1 | 66.061 | KV452713.1 | 5018229 | 1-scf00011 | 1 |
| AX-157905367 | 1 | 66.061 | KV452713.1 | 5056202 | 1-scf00011 | 1 |
| AX-157905397 | 1 | 66.061 | KV452713.1 | 5101341 | 1-scf00011 | 1 |
| AX-157905487 | 1 | 66.061 | KV452713.1 | 5246572 | 1-scf00011 | 1 |
| AX-157905593 | 1 | 66.061 | KV452713.1 | 5406417 | 1-scf00011 | 1 |
| AX-157905686 | 1 | 66.061 | KV452713.1 | 5524143 | 1-scf00011 | 1 |
| AX-157905742 | 1 | 66.061 | KV452713.1 | 5616152 | 1-scf00011 | 1 |
| AX-157905909 | 1 | 66.061 | KV452713.1 | 5852137 | 1-scf00011 | 1 |
| AX-157744511 | 1 | 66.061 | KV452713.1 | 6026746 | 1-scf00011 | 1 |
| AX-157709067 | 1 | 66.061 | KV452713.1 | 6085794 | 1-scf00011 | 1 |
| AX-157906097 | 1 | 66.061 | KV452713.1 | 6107431 | 1-scf00011 | 1 |
| AX-157906099 | 1 | 66.061 | KV452713.1 | 6109369 | 1-scf00011 | 1 |
| AX-157906117 | 1 | 66.061 | KV452713.1 | 6130190 | 1-scf00011 | 1 |
| AX-157906130 | 1 | 66.061 | KV452713.1 | 6144941 | 1-scf00011 | 1 |
| AX-157906121 | 1 | 66.109 | KV452713.1 | 6136425 | 1-scf00011 | 1 |
| AX-157906081 | 1 | 66.174 | KV452713.1 | 6085017 | 1-scf00011 | 1 |
| AX-157699014 | 1 | 66.174 | KV452713.1 | 6137801 | 1-scf00011 | 1 |
| AX-157906124 | 1 | 66.174 | KV452713.1 | 6138596 | 1-scf00011 | 1 |
| AX-157906125 | 1 | 66.174 | KV452713.1 | 6139205 | 1-scf00011 | 1 |
| AX-157906126 | 1 | 66.174 | KV452713.1 | 6140164 | 1-scf00011 | 1 |
| AX-157906127 | 1 | 66.174 | KV452713.1 | 6141729 | 1-scf00011 | 1 |
| AX-157906128 | 1 | 66.174 | KV452713.1 | 6142138 | 1-scf00011 | 1 |

|              |   |        |            |         |            |   |
|--------------|---|--------|------------|---------|------------|---|
| AX-157906131 | 1 | 66.174 | KV452713.1 | 6145610 | 1-scf00011 | 1 |
| AX-157906137 | 1 | 66.353 | KV452713.1 | 6150601 | 1-scf00011 | 1 |
| AX-157906139 | 1 | 66.353 | KV452713.1 | 6153248 | 1-scf00011 | 1 |
| AX-157906140 | 1 | 66.353 | KV452713.1 | 6154221 | 1-scf00011 | 1 |
| AX-157739044 | 1 | 66.353 | KV452713.1 | 6155632 | 1-scf00011 | 1 |
| AX-157906144 | 1 | 66.532 | KV452713.1 | 6162854 | 1-scf00011 | 1 |
| AX-157906147 | 1 | 66.532 | KV452713.1 | 6166078 | 1-scf00011 | 1 |
| AX-157906158 | 1 | 66.532 | KV452713.1 | 6185491 | 1-scf00011 | 1 |
| AX-157756797 | 1 | 66.532 | KV452713.1 | 6186937 | 1-scf00011 | 1 |
| AX-157906162 | 1 | 66.711 | KV452713.1 | 6191825 | 1-scf00011 | 1 |
| AX-157906164 | 1 | 66.711 | KV452713.1 | 6193963 | 1-scf00011 | 1 |
| AX-157906165 | 1 | 66.711 | KV452713.1 | 6195180 | 1-scf00011 | 1 |
| AX-157906166 | 1 | 66.711 | KV452713.1 | 6196061 | 1-scf00011 | 1 |
| AX-157906142 | 1 | 66.89  | KV452713.1 | 6156584 | 1-scf00011 | 1 |
| AX-157906151 | 1 | 66.89  | KV452713.1 | 6175038 | 1-scf00011 | 1 |
| AX-157721681 | 1 | 66.89  | KV452713.1 | 6190985 | 1-scf00011 | 1 |
| AX-157906168 | 1 | 66.89  | KV452713.1 | 6199273 | 1-scf00011 | 1 |
| AX-157906170 | 1 | 66.89  | KV452713.1 | 6200718 | 1-scf00011 | 1 |
| AX-157906171 | 1 | 66.89  | KV452713.1 | 6201292 | 1-scf00011 | 1 |
| AX-157750105 | 1 | 66.89  | KV452713.1 | 6203708 | 1-scf00011 | 1 |
| AX-157906173 | 1 | 66.89  | KV452713.1 | 6204569 | 1-scf00011 | 1 |
| AX-157906180 | 1 | 66.89  | KV452713.1 | 6213469 | 1-scf00011 | 1 |
| AX-158382082 | 1 | 66.89  | KV452713.1 | 6218403 | 1-scf00011 | 1 |
| AX-157906182 | 1 | 66.89  | KV452713.1 | 6218566 | 1-scf00011 | 1 |
| AX-157906184 | 1 | 66.89  | KV452713.1 | 6219626 | 1-scf00011 | 1 |
| AX-157906190 | 1 | 66.89  | KV452713.1 | 6226680 | 1-scf00011 | 1 |
| AX-157906191 | 1 | 66.89  | KV452713.1 | 6229178 | 1-scf00011 | 1 |
| AX-157906194 | 1 | 66.89  | KV452713.1 | 6232712 | 1-scf00011 | 1 |
| AX-157811951 | 1 | 66.89  | KV452713.1 | 6235852 | 1-scf00011 | 1 |
| AX-157906198 | 1 | 66.89  | KV452713.1 | 6237413 | 1-scf00011 | 1 |
| AX-157906199 | 1 | 66.89  | KV452713.1 | 6238632 | 1-scf00011 | 1 |
| AX-157906202 | 1 | 66.89  | KV452713.1 | 6242294 | 1-scf00011 | 1 |
| AX-157906204 | 1 | 66.89  | KV452713.1 | 6245052 | 1-scf00011 | 1 |
| AX-157906206 | 1 | 66.89  | KV452713.1 | 6248943 | 1-scf00011 | 1 |
| AX-157906207 | 1 | 66.89  | KV452713.1 | 6250648 | 1-scf00011 | 1 |
| AX-157906208 | 1 | 66.89  | KV452713.1 | 6250987 | 1-scf00011 | 1 |
| AX-157906210 | 1 | 66.89  | KV452713.1 | 6253362 | 1-scf00011 | 1 |
| AX-157906212 | 1 | 66.89  | KV452713.1 | 6255082 | 1-scf00011 | 1 |
| AX-157906220 | 1 | 66.89  | KV452713.1 | 6266572 | 1-scf00011 | 1 |
| AX-157906222 | 1 | 66.89  | KV452713.1 | 6268462 | 1-scf00011 | 1 |
| AX-157906224 | 1 | 66.89  | KV452713.1 | 6269527 | 1-scf00011 | 1 |
| AX-157906225 | 1 | 66.89  | KV452713.1 | 6271337 | 1-scf00011 | 1 |
| AX-157906227 | 1 | 66.89  | KV452713.1 | 6274511 | 1-scf00011 | 1 |
| AX-157906237 | 1 | 66.89  | KV452713.1 | 6284643 | 1-scf00011 | 1 |
| AX-157906238 | 1 | 66.89  | KV452713.1 | 6287466 | 1-scf00011 | 1 |
| AX-157906239 | 1 | 66.89  | KV452713.1 | 6288301 | 1-scf00011 | 1 |
| AX-157758032 | 1 | 66.89  | KV452713.1 | 6288694 | 1-scf00011 | 1 |
| AX-157906241 | 1 | 66.89  | KV452713.1 | 6289686 | 1-scf00011 | 1 |
| AX-158382084 | 1 | 66.89  | KV452713.1 | 6290070 | 1-scf00011 | 1 |
| AX-157906242 | 1 | 66.89  | KV452713.1 | 6291715 | 1-scf00011 | 1 |
| AX-157906244 | 1 | 66.89  | KV452713.1 | 6292974 | 1-scf00011 | 1 |

|              |   |        |            |         |            |   |
|--------------|---|--------|------------|---------|------------|---|
| AX-157906246 | 1 | 66.89  | KV452713.1 | 6294282 | 1-scf00011 | 1 |
| AX-157906257 | 1 | 66.89  | KV452713.1 | 6312656 | 1-scf00011 | 1 |
| AX-157906271 | 1 | 66.89  | KV452713.1 | 6328504 | 1-scf00011 | 1 |
| AX-157906616 | 1 | 66.89  | KV452713.1 | 6917782 | 1-scf00011 | 1 |
| AX-157726279 | 1 | 66.89  | KV452713.1 | 6919710 | 1-scf00011 | 1 |
| AX-157906247 | 1 | 66.974 | KV452713.1 | 6294871 | 1-scf00011 | 1 |
| AX-157906167 | 1 | 67.069 | KV452713.1 | 6197401 | 1-scf00011 | 1 |
| AX-157906175 | 1 | 67.069 | KV452713.1 | 6207602 | 1-scf00011 | 1 |
| AX-157906187 | 1 | 67.069 | KV452713.1 | 6222043 | 1-scf00011 | 1 |
| AX-157906189 | 1 | 67.069 | KV452713.1 | 6223598 | 1-scf00011 | 1 |
| AX-157906223 | 1 | 67.069 | KV452713.1 | 6269015 | 1-scf00011 | 1 |
| AX-157906232 | 1 | 67.069 | KV452713.1 | 6280701 | 1-scf00011 | 1 |
| AX-157906250 | 1 | 67.069 | KV452713.1 | 6301019 | 1-scf00011 | 1 |
| AX-157906252 | 1 | 67.069 | KV452713.1 | 6303248 | 1-scf00011 | 1 |
| AX-157906253 | 1 | 67.069 | KV452713.1 | 6304468 | 1-scf00011 | 1 |
| AX-157906255 | 1 | 67.069 | KV452713.1 | 6310836 | 1-scf00011 | 1 |
| AX-157906256 | 1 | 67.069 | KV452713.1 | 6311658 | 1-scf00011 | 1 |
| AX-157906258 | 1 | 67.069 | KV452713.1 | 6313526 | 1-scf00011 | 1 |
| AX-157906261 | 1 | 67.069 | KV452713.1 | 6317402 | 1-scf00011 | 1 |
| AX-157906264 | 1 | 67.069 | KV452713.1 | 6319871 | 1-scf00011 | 1 |
| AX-157906266 | 1 | 67.069 | KV452713.1 | 6321989 | 1-scf00011 | 1 |
| AX-157906267 | 1 | 67.069 | KV452713.1 | 6323585 | 1-scf00011 | 1 |
| AX-157906269 | 1 | 67.069 | KV452713.1 | 6327280 | 1-scf00011 | 1 |
| AX-157906272 | 1 | 67.069 | KV452713.1 | 6328757 | 1-scf00011 | 1 |
| AX-157906273 | 1 | 67.069 | KV452713.1 | 6335308 | 1-scf00011 | 1 |
| AX-157906281 | 1 | 67.069 | KV452713.1 | 6343078 | 1-scf00011 | 1 |
| AX-157811952 | 1 | 67.15  | KV452713.1 | 6335393 | 1-scf00011 | 1 |
| AX-157906275 | 1 | 67.249 | KV452713.1 | 6337058 | 1-scf00011 | 1 |
| AX-157906277 | 1 | 67.249 | KV452713.1 | 6338915 | 1-scf00011 | 1 |
| AX-157906279 | 1 | 67.249 | KV452713.1 | 6340776 | 1-scf00011 | 1 |
| AX-157906280 | 1 | 67.249 | KV452713.1 | 6342073 | 1-scf00011 | 1 |
| AX-157906282 | 1 | 67.249 | KV452713.1 | 6344152 | 1-scf00011 | 1 |
| AX-157906285 | 1 | 67.249 | KV452713.1 | 6346056 | 1-scf00011 | 1 |
| AX-157883330 | 1 | 67.249 | KV452713.1 | 6350648 | 1-scf00011 | 1 |
| AX-157906274 | 1 | 67.258 | KV452713.1 | 6336608 | 1-scf00011 | 1 |
| AX-157906287 | 1 | 67.258 | KV452713.1 | 6347642 | 1-scf00011 | 1 |
| AX-157811954 | 1 | 67.258 | KV452713.1 | 6353980 | 1-scf00011 | 1 |
| AX-157906291 | 1 | 67.259 | KV452713.1 | 6350443 | 1-scf00011 | 1 |
| AX-157906293 | 1 | 67.609 | KV452713.1 | 6360565 | 1-scf00011 | 1 |
| AX-157906295 | 1 | 67.609 | KV452713.1 | 6361799 | 1-scf00011 | 1 |
| AX-157906296 | 1 | 67.609 | KV452713.1 | 6363778 | 1-scf00011 | 1 |
| AX-157906297 | 1 | 67.609 | KV452713.1 | 6364064 | 1-scf00011 | 1 |
| AX-157906298 | 1 | 67.609 | KV452713.1 | 6365956 | 1-scf00011 | 1 |
| AX-157905709 | 1 | 67.823 | KV452713.1 | 5560856 | 1-scf00011 | 1 |
| AX-157905728 | 1 | 67.823 | KV452713.1 | 5595668 | 1-scf00011 | 1 |
| AX-157905759 | 1 | 67.823 | KV452713.1 | 5644140 | 1-scf00011 | 1 |
| AX-157905774 | 1 | 67.823 | KV452713.1 | 5671060 | 1-scf00011 | 1 |
| AX-157772094 | 1 | 67.823 | KV452713.1 | 6202608 | 1-scf00011 | 1 |
| AX-157811953 | 1 | 67.823 | KV452713.1 | 6353873 | 1-scf00011 | 1 |
| AX-157752153 | 1 | 67.823 | KV452713.1 | 6372379 | 1-scf00011 | 1 |
| AX-157906574 | 1 | 67.823 | KV452713.1 | 6849583 | 1-scf00011 | 1 |

|              |   |        |            |         |            |   |
|--------------|---|--------|------------|---------|------------|---|
| AX-157906588 | 1 | 67.823 | KV452713.1 | 6877607 | 1-scf00011 | 1 |
| AX-157874469 | 1 | 67.823 | KV452713.1 | 7026393 | 1-scf00011 | 1 |
| AX-157906697 | 1 | 67.823 | KV452713.1 | 7031101 | 1-scf00011 | 1 |
| AX-157751560 | 1 | 67.967 | KV452713.1 | 6378034 | 1-scf00011 | 1 |
| AX-157906305 | 1 | 67.969 | KV452713.1 | 6378649 | 1-scf00011 | 1 |
| AX-158404760 | 1 | 67.969 | KV452713.1 | 6379885 | 1-scf00011 | 1 |
| AX-157906306 | 1 | 67.97  | KV452713.1 | 6381197 | 1-scf00011 | 1 |
| AX-157906307 | 1 | 67.971 | KV452713.1 | 6384738 | 1-scf00011 | 1 |
| AX-157906308 | 1 | 68.322 | KV452713.1 | 6388029 | 1-scf00011 | 1 |
| AX-157906309 | 1 | 68.324 | KV452713.1 | 6388586 | 1-scf00011 | 1 |
| AX-157905614 | 1 | 68.326 | KV452713.1 | 5435816 | 1-scf00011 | 1 |
| AX-157906310 | 1 | 68.326 | KV452713.1 | 6391152 | 1-scf00011 | 1 |
| AX-157739655 | 1 | 68.326 | KV452713.1 | 6392374 | 1-scf00011 | 1 |
| AX-158382087 | 1 | 68.326 | KV452713.1 | 6393293 | 1-scf00011 | 1 |
| AX-157758620 | 1 | 68.326 | KV452713.1 | 6393471 | 1-scf00011 | 1 |
| AX-157906322 | 1 | 68.328 | KV452713.1 | 6407709 | 1-scf00011 | 1 |
| AX-157906317 | 1 | 68.681 | KV452713.1 | 6401149 | 1-scf00011 | 1 |
| AX-157906326 | 1 | 68.681 | KV452713.1 | 6413869 | 1-scf00011 | 1 |
| AX-157906213 | 1 | 68.682 | KV452713.1 | 6260517 | 1-scf00011 | 1 |
| AX-157906327 | 1 | 68.682 | KV452713.1 | 6414719 | 1-scf00011 | 1 |
| AX-157906349 | 1 | 68.682 | KV452713.1 | 6440584 | 1-scf00011 | 1 |
| AX-157906356 | 1 | 68.682 | KV452713.1 | 6448252 | 1-scf00011 | 1 |
| AX-157906363 | 1 | 68.682 | KV452713.1 | 6461704 | 1-scf00011 | 1 |
| AX-157906366 | 1 | 68.682 | KV452713.1 | 6464845 | 1-scf00011 | 1 |
| AX-157906325 | 1 | 68.684 | KV452713.1 | 6412287 | 1-scf00011 | 1 |
| AX-157906335 | 1 | 68.684 | KV452713.1 | 6424621 | 1-scf00011 | 1 |
| AX-157906336 | 1 | 68.684 | KV452713.1 | 6425202 | 1-scf00011 | 1 |
| AX-157906339 | 1 | 68.684 | KV452713.1 | 6427229 | 1-scf00011 | 1 |
| AX-157906340 | 1 | 68.684 | KV452713.1 | 6429721 | 1-scf00011 | 1 |
| AX-157883334 | 1 | 68.684 | KV452713.1 | 6432300 | 1-scf00011 | 1 |
| AX-157906342 | 1 | 68.684 | KV452713.1 | 6433088 | 1-scf00011 | 1 |
| AX-157906346 | 1 | 68.684 | KV452713.1 | 6438275 | 1-scf00011 | 1 |
| AX-157906347 | 1 | 68.776 | KV452713.1 | 6439397 | 1-scf00011 | 1 |
| AX-157811956 | 1 | 68.863 | KV452713.1 | 6397840 | 1-scf00011 | 1 |
| AX-157724049 | 1 | 68.863 | KV452713.1 | 6441282 | 1-scf00011 | 1 |
| AX-157906352 | 1 | 68.863 | KV452713.1 | 6443674 | 1-scf00011 | 1 |
| AX-157906353 | 1 | 68.863 | KV452713.1 | 6445227 | 1-scf00011 | 1 |
| AX-157906354 | 1 | 68.863 | KV452713.1 | 6446112 | 1-scf00011 | 1 |
| AX-157906365 | 1 | 68.863 | KV452713.1 | 6464282 | 1-scf00011 | 1 |
| AX-157906355 | 1 | 68.95  | KV452713.1 | 6447809 | 1-scf00011 | 1 |
| AX-157906358 | 1 | 69.042 | KV452713.1 | 6453066 | 1-scf00011 | 1 |
| AX-157906315 | 1 | 69.047 | KV452713.1 | 6398437 | 1-scf00011 | 1 |
| AX-157906348 | 1 | 69.047 | KV452713.1 | 6439982 | 1-scf00011 | 1 |
| AX-157906362 | 1 | 69.047 | KV452713.1 | 6460783 | 1-scf00011 | 1 |
| AX-157811959 | 1 | 69.572 | KV452713.1 | 6474525 | 1-scf00011 | 1 |
| AX-157906422 | 1 | 69.572 | KV452713.1 | 6540873 | 1-scf00011 | 1 |
| AX-157906429 | 1 | 69.572 | KV452713.1 | 6551636 | 1-scf00011 | 1 |
| AX-157906437 | 1 | 69.572 | KV452713.1 | 6567099 | 1-scf00011 | 1 |
| AX-157906357 | 1 | 69.58  | KV452713.1 | 6452169 | 1-scf00011 | 1 |
| AX-157906378 | 1 | 69.58  | KV452713.1 | 6487084 | 1-scf00011 | 1 |
| AX-157906379 | 1 | 69.58  | KV452713.1 | 6487398 | 1-scf00011 | 1 |

|              |   |        |            |         |            |   |
|--------------|---|--------|------------|---------|------------|---|
| AX-157906386 | 1 | 69.58  | KV452713.1 | 6494873 | 1-scf00011 | 1 |
| AX-157906389 | 1 | 69.58  | KV452713.1 | 6498585 | 1-scf00011 | 1 |
| AX-157906391 | 1 | 69.58  | KV452713.1 | 6499556 | 1-scf00011 | 1 |
| AX-157906394 | 1 | 69.58  | KV452713.1 | 6502145 | 1-scf00011 | 1 |
| AX-157906800 | 1 | 69.58  | KV452713.1 | 7159374 | 1-scf00011 | 1 |
| AX-157906376 | 1 | 69.668 | KV452713.1 | 6484919 | 1-scf00011 | 1 |
| AX-157906395 | 1 | 69.668 | KV452713.1 | 6502539 | 1-scf00011 | 1 |
| AX-157906132 | 1 | 69.759 | KV452713.1 | 6146249 | 1-scf00011 | 1 |
| AX-157906369 | 1 | 69.759 | KV452713.1 | 6471477 | 1-scf00011 | 1 |
| AX-157906370 | 1 | 69.759 | KV452713.1 | 6473807 | 1-scf00011 | 1 |
| AX-157906380 | 1 | 69.759 | KV452713.1 | 6488478 | 1-scf00011 | 1 |
| AX-157906400 | 1 | 69.759 | KV452713.1 | 6508120 | 1-scf00011 | 1 |
| AX-157906403 | 1 | 69.759 | KV452713.1 | 6511187 | 1-scf00011 | 1 |
| AX-157906405 | 1 | 69.759 | KV452713.1 | 6514828 | 1-scf00011 | 1 |
| AX-157906408 | 1 | 69.759 | KV452713.1 | 6518123 | 1-scf00011 | 1 |
| AX-157906410 | 1 | 69.759 | KV452713.1 | 6520906 | 1-scf00011 | 1 |
| AX-157906415 | 1 | 69.759 | KV452713.1 | 6529447 | 1-scf00011 | 1 |
| AX-157719326 | 1 | 69.759 | KV452713.1 | 6533114 | 1-scf00011 | 1 |
| AX-157906418 | 1 | 69.759 | KV452713.1 | 6536215 | 1-scf00011 | 1 |
| AX-157906419 | 1 | 69.759 | KV452713.1 | 6537101 | 1-scf00011 | 1 |
| AX-157906421 | 1 | 69.759 | KV452713.1 | 6539731 | 1-scf00011 | 1 |
| AX-157906423 | 1 | 69.759 | KV452713.1 | 6541389 | 1-scf00011 | 1 |
| AX-157906427 | 1 | 69.759 | KV452713.1 | 6549252 | 1-scf00011 | 1 |
| AX-157906430 | 1 | 69.759 | KV452713.1 | 6552126 | 1-scf00011 | 1 |
| AX-157906432 | 1 | 69.759 | KV452713.1 | 6553740 | 1-scf00011 | 1 |
| AX-157906436 | 1 | 69.759 | KV452713.1 | 6563362 | 1-scf00011 | 1 |
| AX-157906439 | 1 | 69.759 | KV452713.1 | 6570750 | 1-scf00011 | 1 |
| AX-157906440 | 1 | 69.759 | KV452713.1 | 6571802 | 1-scf00011 | 1 |
| AX-157906707 | 1 | 69.759 | KV452713.1 | 7037811 | 1-scf00011 | 1 |
| AX-158389514 | 1 | 69.938 | KV452713.1 | 6523002 | 1-scf00011 | 1 |
| AX-157906425 | 1 | 69.938 | KV452713.1 | 6543215 | 1-scf00011 | 1 |
| AX-157906428 | 1 | 69.938 | KV452713.1 | 6551084 | 1-scf00011 | 1 |
| AX-157742740 | 1 | 69.938 | KV452713.1 | 6560366 | 1-scf00011 | 1 |
| AX-157906443 | 1 | 69.938 | KV452713.1 | 6579112 | 1-scf00011 | 1 |
| AX-157906444 | 1 | 69.938 | KV452713.1 | 6580328 | 1-scf00011 | 1 |
| AX-157906446 | 1 | 69.938 | KV452713.1 | 6582832 | 1-scf00011 | 1 |
| AX-157906448 | 1 | 69.938 | KV452713.1 | 6585065 | 1-scf00011 | 1 |
| AX-157751506 | 1 | 69.938 | KV452713.1 | 6595614 | 1-scf00011 | 1 |
| AX-157906451 | 1 | 69.938 | KV452713.1 | 6597428 | 1-scf00011 | 1 |
| AX-157906452 | 1 | 69.938 | KV452713.1 | 6598211 | 1-scf00011 | 1 |
| AX-157906454 | 1 | 69.938 | KV452713.1 | 6600612 | 1-scf00011 | 1 |
| AX-157906459 | 1 | 69.938 | KV452713.1 | 6611757 | 1-scf00011 | 1 |
| AX-157906460 | 1 | 69.938 | KV452713.1 | 6612134 | 1-scf00011 | 1 |
| AX-157906462 | 1 | 69.938 | KV452713.1 | 6613331 | 1-scf00011 | 1 |
| AX-157906464 | 1 | 69.938 | KV452713.1 | 6614790 | 1-scf00011 | 1 |
| AX-157906465 | 1 | 69.938 | KV452713.1 | 6615699 | 1-scf00011 | 1 |
| AX-157811967 | 1 | 69.938 | KV452713.1 | 6778933 | 1-scf00011 | 1 |
| AX-157906553 | 1 | 69.938 | KV452713.1 | 6785409 | 1-scf00011 | 1 |
| AX-157906324 | 1 | 69.992 | KV452713.1 | 6409876 | 1-scf00011 | 1 |
| AX-157811957 | 1 | 69.992 | KV452713.1 | 6432525 | 1-scf00011 | 1 |
| AX-157906466 | 1 | 69.992 | KV452713.1 | 6619407 | 1-scf00011 | 1 |



|              |   |        |            |         |            |   |
|--------------|---|--------|------------|---------|------------|---|
| AX-157906548 | 1 | 69.992 | KV452713.1 | 6776963 | 1-scf00011 | 1 |
| AX-157906467 | 1 | 70.047 | KV452713.1 | 6628115 | 1-scf00011 | 1 |
| AX-157906480 | 1 | 70.063 | KV452713.1 | 6641547 | 1-scf00011 | 1 |
| AX-157906148 | 1 | 70.117 | KV452713.1 | 6167772 | 1-scf00011 | 1 |
| AX-157906300 | 1 | 70.117 | KV452713.1 | 6366668 | 1-scf00011 | 1 |
| AX-157724048 | 1 | 70.117 | KV452713.1 | 6385713 | 1-scf00011 | 1 |
| AX-157906411 | 1 | 70.117 | KV452713.1 | 6522910 | 1-scf00011 | 1 |
| AX-157906469 | 1 | 70.117 | KV452713.1 | 6629660 | 1-scf00011 | 1 |
| AX-157906471 | 1 | 70.117 | KV452713.1 | 6633431 | 1-scf00011 | 1 |
| AX-157906475 | 1 | 70.117 | KV452713.1 | 6635905 | 1-scf00011 | 1 |
| AX-157906483 | 1 | 70.117 | KV452713.1 | 6644214 | 1-scf00011 | 1 |
| AX-157874459 | 1 | 70.117 | KV452713.1 | 6656762 | 1-scf00011 | 1 |
| AX-157906490 | 1 | 70.117 | KV452713.1 | 6660591 | 1-scf00011 | 1 |
| AX-157906491 | 1 | 70.117 | KV452713.1 | 6661098 | 1-scf00011 | 1 |
| AX-157906492 | 1 | 70.117 | KV452713.1 | 6662498 | 1-scf00011 | 1 |
| AX-157906493 | 1 | 70.117 | KV452713.1 | 6662853 | 1-scf00011 | 1 |
| AX-157906494 | 1 | 70.117 | KV452713.1 | 6663809 | 1-scf00011 | 1 |
| AX-157906495 | 1 | 70.117 | KV452713.1 | 6664841 | 1-scf00011 | 1 |
| AX-157906496 | 1 | 70.117 | KV452713.1 | 6665707 | 1-scf00011 | 1 |
| AX-157906500 | 1 | 70.117 | KV452713.1 | 6672973 | 1-scf00011 | 1 |
| AX-157906504 | 1 | 70.117 | KV452713.1 | 6681578 | 1-scf00011 | 1 |
| AX-157906505 | 1 | 70.117 | KV452713.1 | 6687699 | 1-scf00011 | 1 |
| AX-158389517 | 1 | 70.117 | KV452713.1 | 6689339 | 1-scf00011 | 1 |
| AX-157906508 | 1 | 70.117 | KV452713.1 | 6693122 | 1-scf00011 | 1 |
| AX-157906514 | 1 | 70.117 | KV452713.1 | 6704687 | 1-scf00011 | 1 |
| AX-158379185 | 1 | 70.117 | KV452713.1 | 6704844 | 1-scf00011 | 1 |
| AX-157906515 | 1 | 70.117 | KV452713.1 | 6705334 | 1-scf00011 | 1 |
| AX-157906517 | 1 | 70.117 | KV452713.1 | 6707964 | 1-scf00011 | 1 |
| AX-157906519 | 1 | 70.117 | KV452713.1 | 6710338 | 1-scf00011 | 1 |
| AX-157906520 | 1 | 70.117 | KV452713.1 | 6712929 | 1-scf00011 | 1 |
| AX-157906525 | 1 | 70.117 | KV452713.1 | 6722714 | 1-scf00011 | 1 |
| AX-157906526 | 1 | 70.117 | KV452713.1 | 6724230 | 1-scf00011 | 1 |
| AX-157906528 | 1 | 70.117 | KV452713.1 | 6730723 | 1-scf00011 | 1 |
| AX-157906529 | 1 | 70.117 | KV452713.1 | 6732176 | 1-scf00011 | 1 |
| AX-157906531 | 1 | 70.117 | KV452713.1 | 6735224 | 1-scf00011 | 1 |
| AX-157906532 | 1 | 70.117 | KV452713.1 | 6738455 | 1-scf00011 | 1 |
| AX-157906533 | 1 | 70.117 | KV452713.1 | 6739670 | 1-scf00011 | 1 |
| AX-157811964 | 1 | 70.117 | KV452713.1 | 6753940 | 1-scf00011 | 1 |
| AX-157906537 | 1 | 70.117 | KV452713.1 | 6754986 | 1-scf00011 | 1 |
| AX-157906538 | 1 | 70.117 | KV452713.1 | 6755335 | 1-scf00011 | 1 |
| AX-157906541 | 1 | 70.117 | KV452713.1 | 6758964 | 1-scf00011 | 1 |
| AX-157906542 | 1 | 70.117 | KV452713.1 | 6759504 | 1-scf00011 | 1 |
| AX-157906547 | 1 | 70.117 | KV452713.1 | 6768396 | 1-scf00011 | 1 |
| AX-157906550 | 1 | 70.117 | KV452713.1 | 6777735 | 1-scf00011 | 1 |
| AX-157906587 | 1 | 70.117 | KV452713.1 | 6875409 | 1-scf00011 | 1 |
| AX-157906603 | 1 | 70.117 | KV452713.1 | 6898332 | 1-scf00011 | 1 |
| AX-157906612 | 1 | 70.117 | KV452713.1 | 6910449 | 1-scf00011 | 1 |
| AX-157770940 | 1 | 70.117 | KV452713.1 | 6912707 | 1-scf00011 | 1 |
| AX-157906614 | 1 | 70.117 | KV452713.1 | 6914681 | 1-scf00011 | 1 |
| AX-157906620 | 1 | 70.117 | KV452713.1 | 6926153 | 1-scf00011 | 1 |
| AX-157753110 | 1 | 70.117 | KV452713.1 | 6927202 | 1-scf00011 | 1 |

|              |   |        |            |         |            |   |
|--------------|---|--------|------------|---------|------------|---|
| AX-157906623 | 1 | 70.117 | KV452713.1 | 6928120 | 1-scf00011 | 1 |
| AX-157906625 | 1 | 70.117 | KV452713.1 | 6929043 | 1-scf00011 | 1 |
| AX-157906626 | 1 | 70.117 | KV452713.1 | 6929542 | 1-scf00011 | 1 |
| AX-157906628 | 1 | 70.117 | KV452713.1 | 6930487 | 1-scf00011 | 1 |
| AX-157906629 | 1 | 70.117 | KV452713.1 | 6931190 | 1-scf00011 | 1 |
| AX-157906630 | 1 | 70.117 | KV452713.1 | 6936559 | 1-scf00011 | 1 |
| AX-157906631 | 1 | 70.117 | KV452713.1 | 6937648 | 1-scf00011 | 1 |
| AX-157906632 | 1 | 70.117 | KV452713.1 | 6938492 | 1-scf00011 | 1 |
| AX-157709758 | 1 | 70.117 | KV452713.1 | 6939300 | 1-scf00011 | 1 |
| AX-157906633 | 1 | 70.117 | KV452713.1 | 6939875 | 1-scf00011 | 1 |
| AX-157906634 | 1 | 70.117 | KV452713.1 | 6940139 | 1-scf00011 | 1 |
| AX-157906636 | 1 | 70.117 | KV452713.1 | 6941848 | 1-scf00011 | 1 |
| AX-157906637 | 1 | 70.117 | KV452713.1 | 6942430 | 1-scf00011 | 1 |
| AX-157906640 | 1 | 70.117 | KV452713.1 | 6950785 | 1-scf00011 | 1 |
| AX-158382100 | 1 | 70.117 | KV452713.1 | 6952651 | 1-scf00011 | 1 |
| AX-157906641 | 1 | 70.117 | KV452713.1 | 6954105 | 1-scf00011 | 1 |
| AX-157906643 | 1 | 70.117 | KV452713.1 | 6957194 | 1-scf00011 | 1 |
| AX-157906651 | 1 | 70.117 | KV452713.1 | 6972008 | 1-scf00011 | 1 |
| AX-157753038 | 1 | 70.117 | KV452713.1 | 6975935 | 1-scf00011 | 1 |
| AX-157811969 | 1 | 70.117 | KV452713.1 | 6986981 | 1-scf00011 | 1 |
| AX-157906678 | 1 | 70.117 | KV452713.1 | 6999481 | 1-scf00011 | 1 |
| AX-157906679 | 1 | 70.117 | KV452713.1 | 7001111 | 1-scf00011 | 1 |
| AX-157906681 | 1 | 70.117 | KV452713.1 | 7008500 | 1-scf00011 | 1 |
| AX-157906682 | 1 | 70.117 | KV452713.1 | 7008860 | 1-scf00011 | 1 |
| AX-157719872 | 1 | 70.117 | KV452713.1 | 7014476 | 1-scf00011 | 1 |
| AX-157811970 | 1 | 70.117 | KV452713.1 | 7019185 | 1-scf00011 | 1 |
| AX-157906693 | 1 | 70.117 | KV452713.1 | 7024775 | 1-scf00011 | 1 |
| AX-157906706 | 1 | 70.117 | KV452713.1 | 7037176 | 1-scf00011 | 1 |
| AX-157906714 | 1 | 70.117 | KV452713.1 | 7051870 | 1-scf00011 | 1 |
| AX-157906717 | 1 | 70.117 | KV452713.1 | 7056443 | 1-scf00011 | 1 |
| AX-157906719 | 1 | 70.117 | KV452713.1 | 7058931 | 1-scf00011 | 1 |
| AX-157906720 | 1 | 70.117 | KV452713.1 | 7060456 | 1-scf00011 | 1 |
| AX-157906721 | 1 | 70.117 | KV452713.1 | 7061500 | 1-scf00011 | 1 |
| AX-157906722 | 1 | 70.117 | KV452713.1 | 7061878 | 1-scf00011 | 1 |
| AX-157906730 | 1 | 70.117 | KV452713.1 | 7072300 | 1-scf00011 | 1 |
| AX-157906750 | 1 | 70.117 | KV452713.1 | 7105437 | 1-scf00011 | 1 |
| AX-157906798 | 1 | 70.117 | KV452713.1 | 7157785 | 1-scf00011 | 1 |
| AX-157906851 | 1 | 70.117 | KV452713.1 | 7224061 | 1-scf00011 | 1 |
| AX-157906409 | 1 | 70.12  | KV452713.1 | 6520275 | 1-scf00011 | 1 |
| AX-157906726 | 1 | 70.12  | KV452713.1 | 7067308 | 1-scf00011 | 1 |
| AX-157906396 | 1 | 70.471 | KV452713.1 | 6506099 | 1-scf00011 | 1 |
| AX-157906735 | 1 | 70.471 | KV452713.1 | 7081488 | 1-scf00011 | 1 |
| AX-157906736 | 1 | 70.472 | KV452713.1 | 7083045 | 1-scf00011 | 1 |
| AX-157906417 | 1 | 70.473 | KV452713.1 | 6531138 | 1-scf00011 | 1 |
| AX-157906739 | 1 | 70.473 | KV452713.1 | 7086084 | 1-scf00011 | 1 |
| AX-157724777 | 1 | 70.474 | KV452713.1 | 7092126 | 1-scf00011 | 1 |
| AX-157906744 | 1 | 70.475 | KV452713.1 | 7094081 | 1-scf00011 | 1 |
| AX-157906746 | 1 | 70.475 | KV452713.1 | 7099780 | 1-scf00011 | 1 |
| AX-157906747 | 1 | 70.475 | KV452713.1 | 7100853 | 1-scf00011 | 1 |
| AX-157906710 | 1 | 70.573 | KV452713.1 | 7046156 | 1-scf00011 | 1 |
| AX-157906732 | 1 | 70.573 | KV452713.1 | 7074180 | 1-scf00011 | 1 |

|              |   |        |            |         |            |   |
|--------------|---|--------|------------|---------|------------|---|
| AX-157906749 | 1 | 70.573 | KV452713.1 | 7104350 | 1-scf00011 | 1 |
| AX-157721703 | 1 | 70.573 | KV452713.1 | 7120035 | 1-scf00011 | 1 |
| AX-157906764 | 1 | 70.573 | KV452713.1 | 7122188 | 1-scf00011 | 1 |
| AX-157906768 | 1 | 70.573 | KV452713.1 | 7126505 | 1-scf00011 | 1 |
| AX-157906816 | 1 | 70.573 | KV452713.1 | 7176439 | 1-scf00011 | 1 |
| AX-157853621 | 1 | 70.573 | KV452713.1 | 7202172 | 1-scf00011 | 1 |
| AX-157906861 | 1 | 70.573 | KV452713.1 | 7238870 | 1-scf00011 | 1 |
| AX-157906756 | 1 | 70.654 | KV452713.1 | 7110950 | 1-scf00011 | 1 |
| AX-157906759 | 1 | 70.654 | KV452713.1 | 7114969 | 1-scf00011 | 1 |
| AX-157906760 | 1 | 70.654 | KV452713.1 | 7116694 | 1-scf00011 | 1 |
| AX-157906767 | 1 | 70.654 | KV452713.1 | 7126034 | 1-scf00011 | 1 |
| AX-157906769 | 1 | 70.654 | KV452713.1 | 7127214 | 1-scf00011 | 1 |
| AX-157906774 | 1 | 70.654 | KV452713.1 | 7131542 | 1-scf00011 | 1 |
| AX-157906779 | 1 | 70.701 | KV452713.1 | 7136351 | 1-scf00011 | 1 |
| AX-157906901 | 1 | 70.701 | KV452713.1 | 7306042 | 1-scf00011 | 1 |
| AX-157906780 | 1 | 70.749 | KV452713.1 | 7137671 | 1-scf00011 | 1 |
| AX-157906463 | 1 | 70.792 | KV452713.1 | 6613947 | 1-scf00011 | 1 |
| AX-157906777 | 1 | 70.792 | KV452713.1 | 7134572 | 1-scf00011 | 1 |
| AX-157906782 | 1 | 70.792 | KV452713.1 | 7139113 | 1-scf00011 | 1 |
| AX-157906865 | 1 | 70.792 | KV452713.1 | 7249246 | 1-scf00011 | 1 |
| AX-157906304 | 1 | 70.833 | KV452713.1 | 6376769 | 1-scf00011 | 1 |
| AX-157906372 | 1 | 70.833 | KV452713.1 | 6476614 | 1-scf00011 | 1 |
| AX-157906373 | 1 | 70.833 | KV452713.1 | 6478173 | 1-scf00011 | 1 |
| AX-157728211 | 1 | 70.833 | KV452713.1 | 6621821 | 1-scf00011 | 1 |
| AX-157906530 | 1 | 70.833 | KV452713.1 | 6734574 | 1-scf00011 | 1 |
| AX-157906552 | 1 | 70.833 | KV452713.1 | 6782374 | 1-scf00011 | 1 |
| AX-157906602 | 1 | 70.833 | KV452713.1 | 6897463 | 1-scf00011 | 1 |
| AX-157906696 | 1 | 70.833 | KV452713.1 | 7029594 | 1-scf00011 | 1 |
| AX-157906729 | 1 | 70.833 | KV452713.1 | 7070692 | 1-scf00011 | 1 |
| AX-157906734 | 1 | 70.833 | KV452713.1 | 7079816 | 1-scf00011 | 1 |
| AX-157906743 | 1 | 70.833 | KV452713.1 | 7093589 | 1-scf00011 | 1 |
| AX-157715705 | 1 | 70.833 | KV452713.1 | 7102904 | 1-scf00011 | 1 |
| AX-157906770 | 1 | 70.833 | KV452713.1 | 7128301 | 1-scf00011 | 1 |
| AX-157906786 | 1 | 70.833 | KV452713.1 | 7141236 | 1-scf00011 | 1 |
| AX-157906795 | 1 | 70.833 | KV452713.1 | 7148358 | 1-scf00011 | 1 |
| AX-157723172 | 1 | 70.833 | KV452713.1 | 7150254 | 1-scf00011 | 1 |
| AX-157749441 | 1 | 70.833 | KV452713.1 | 7152310 | 1-scf00011 | 1 |
| AX-157738537 | 1 | 70.833 | KV452713.1 | 7172959 | 1-scf00011 | 1 |
| AX-157770633 | 1 | 70.833 | KV452713.1 | 7205229 | 1-scf00011 | 1 |
| AX-157906858 | 1 | 70.833 | KV452713.1 | 7236327 | 1-scf00011 | 1 |
| AX-157741897 | 1 | 70.833 | KV452713.1 | 7242567 | 1-scf00011 | 1 |
| AX-157906864 | 1 | 70.833 | KV452713.1 | 7246453 | 1-scf00011 | 1 |
| AX-157906869 | 1 | 70.833 | KV452713.1 | 7263842 | 1-scf00011 | 1 |
| AX-157906874 | 1 | 70.833 | KV452713.1 | 7270463 | 1-scf00011 | 1 |
| AX-157906761 | 1 | 71.019 | KV452713.1 | 7118206 | 1-scf00011 | 1 |
| AX-157906796 | 1 | 71.019 | KV452713.1 | 7151071 | 1-scf00011 | 1 |
| AX-157906805 | 1 | 71.019 | KV452713.1 | 7164590 | 1-scf00011 | 1 |
| AX-157906806 | 1 | 71.191 | KV452713.1 | 7165370 | 1-scf00011 | 1 |
| AX-157906809 | 1 | 71.191 | KV452713.1 | 7167765 | 1-scf00011 | 1 |
| AX-157906811 | 1 | 71.191 | KV452713.1 | 7171371 | 1-scf00011 | 1 |
| AX-158404066 | 1 | 71.191 | KV452713.1 | 7171504 | 1-scf00011 | 1 |

|              |   |        |            |         |            |   |
|--------------|---|--------|------------|---------|------------|---|
| AX-158404768 | 1 | 71.191 | KV452713.1 | 7171630 | 1-scf00011 | 1 |
| AX-157906812 | 1 | 71.193 | KV452713.1 | 7172437 | 1-scf00011 | 1 |
| AX-157906815 | 1 | 71.548 | KV452713.1 | 7174984 | 1-scf00011 | 1 |
| AX-157906783 | 1 | 71.55  | KV452713.1 | 7139534 | 1-scf00011 | 1 |
| AX-157906797 | 1 | 71.55  | KV452713.1 | 7157288 | 1-scf00011 | 1 |
| AX-157906821 | 1 | 71.55  | KV452713.1 | 7187153 | 1-scf00011 | 1 |
| AX-157906824 | 1 | 71.55  | KV452713.1 | 7190742 | 1-scf00011 | 1 |
| AX-157906826 | 1 | 71.55  | KV452713.1 | 7192250 | 1-scf00011 | 1 |
| AX-157906835 | 1 | 71.55  | KV452713.1 | 7201076 | 1-scf00011 | 1 |
| AX-157906839 | 1 | 71.55  | KV452713.1 | 7207499 | 1-scf00011 | 1 |
| AX-157906840 | 1 | 71.55  | KV452713.1 | 7207946 | 1-scf00011 | 1 |
| AX-157906844 | 1 | 71.55  | KV452713.1 | 7215206 | 1-scf00011 | 1 |
| AX-157906847 | 1 | 71.55  | KV452713.1 | 7217866 | 1-scf00011 | 1 |
| AX-158382104 | 1 | 71.55  | KV452713.1 | 7218174 | 1-scf00011 | 1 |
| AX-157906848 | 1 | 71.55  | KV452713.1 | 7218328 | 1-scf00011 | 1 |
| AX-157906875 | 1 | 71.55  | KV452713.1 | 7271107 | 1-scf00011 | 1 |
| AX-157906946 | 1 | 71.55  | KV452713.1 | 7388458 | 1-scf00011 | 1 |
| AX-157757752 | 1 | 71.601 | KV452713.1 | 7229751 | 1-scf00011 | 1 |
| AX-157906813 | 1 | 71.664 | KV452713.1 | 7173702 | 1-scf00011 | 1 |
| AX-157719191 | 1 | 71.664 | KV452713.1 | 7265036 | 1-scf00011 | 1 |
| AX-157906882 | 1 | 71.664 | KV452713.1 | 7280709 | 1-scf00011 | 1 |
| AX-157874464 | 1 | 71.729 | KV452713.1 | 6893182 | 1-scf00011 | 1 |
| AX-157874465 | 1 | 71.729 | KV452713.1 | 6901698 | 1-scf00011 | 1 |
| AX-157906753 | 1 | 71.729 | KV452713.1 | 7108765 | 1-scf00011 | 1 |
| AX-157906754 | 1 | 71.729 | KV452713.1 | 7109251 | 1-scf00011 | 1 |
| AX-157906823 | 1 | 71.729 | KV452713.1 | 7189075 | 1-scf00011 | 1 |
| AX-157906828 | 1 | 71.729 | KV452713.1 | 7193419 | 1-scf00011 | 1 |
| AX-157906831 | 1 | 71.729 | KV452713.1 | 7197501 | 1-scf00011 | 1 |
| AX-157906833 | 1 | 71.729 | KV452713.1 | 7198413 | 1-scf00011 | 1 |
| AX-157906838 | 1 | 71.729 | KV452713.1 | 7206416 | 1-scf00011 | 1 |
| AX-157906842 | 1 | 71.729 | KV452713.1 | 7210930 | 1-scf00011 | 1 |
| AX-157906845 | 1 | 71.729 | KV452713.1 | 7215859 | 1-scf00011 | 1 |
| AX-157853623 | 1 | 71.729 | KV452713.1 | 7263933 | 1-scf00011 | 1 |
| AX-157906871 | 1 | 71.729 | KV452713.1 | 7267995 | 1-scf00011 | 1 |
| AX-157906872 | 1 | 71.729 | KV452713.1 | 7269049 | 1-scf00011 | 1 |
| AX-157906876 | 1 | 71.729 | KV452713.1 | 7271888 | 1-scf00011 | 1 |
| AX-157906877 | 1 | 71.729 | KV452713.1 | 7274153 | 1-scf00011 | 1 |
| AX-157811974 | 1 | 71.729 | KV452713.1 | 7275045 | 1-scf00011 | 1 |
| AX-157906879 | 1 | 71.729 | KV452713.1 | 7276443 | 1-scf00011 | 1 |
| AX-157764040 | 1 | 71.729 | KV452713.1 | 7277442 | 1-scf00011 | 1 |
| AX-157874472 | 1 | 71.729 | KV452713.1 | 7278740 | 1-scf00011 | 1 |
| AX-158382106 | 1 | 71.729 | KV452713.1 | 7281735 | 1-scf00011 | 1 |
| AX-157906887 | 1 | 71.729 | KV452713.1 | 7286412 | 1-scf00011 | 1 |
| AX-157906889 | 1 | 71.729 | KV452713.1 | 7287468 | 1-scf00011 | 1 |
| AX-157906891 | 1 | 71.729 | KV452713.1 | 7290096 | 1-scf00011 | 1 |
| AX-157906935 | 1 | 71.729 | KV452713.1 | 7370628 | 1-scf00011 | 1 |
| AX-157906853 | 1 | 71.73  | KV452713.1 | 7228107 | 1-scf00011 | 1 |
| AX-157906905 | 1 | 71.73  | KV452713.1 | 7312538 | 1-scf00011 | 1 |
| AX-157906906 | 1 | 71.73  | KV452713.1 | 7316611 | 1-scf00011 | 1 |
| AX-157906447 | 1 | 72.087 | KV452713.1 | 6584168 | 1-scf00011 | 1 |
| AX-157811973 | 1 | 72.087 | KV452713.1 | 7273504 | 1-scf00011 | 1 |

|              |   |        |            |         |            |   |
|--------------|---|--------|------------|---------|------------|---|
| AX-157906884 | 1 | 72.087 | KV452713.1 | 7282802 | 1-scf00011 | 1 |
| AX-157906892 | 1 | 72.087 | KV452713.1 | 7290341 | 1-scf00011 | 1 |
| AX-157906897 | 1 | 72.087 | KV452713.1 | 7300038 | 1-scf00011 | 1 |
| AX-157906907 | 1 | 72.087 | KV452713.1 | 7319567 | 1-scf00011 | 1 |
| AX-157906910 | 1 | 72.087 | KV452713.1 | 7321200 | 1-scf00011 | 1 |
| AX-157853624 | 1 | 72.087 | KV452713.1 | 7321447 | 1-scf00011 | 1 |
| AX-157753642 | 1 | 72.087 | KV452713.1 | 7331997 | 1-scf00011 | 1 |
| AX-157906913 | 1 | 72.087 | KV452713.1 | 7332403 | 1-scf00011 | 1 |
| AX-157906915 | 1 | 72.087 | KV452713.1 | 7333292 | 1-scf00011 | 1 |
| AX-157906924 | 1 | 72.087 | KV452713.1 | 7348763 | 1-scf00011 | 1 |
| AX-157906925 | 1 | 72.087 | KV452713.1 | 7352456 | 1-scf00011 | 1 |
| AX-157811975 | 1 | 72.087 | KV452713.1 | 7355670 | 1-scf00011 | 1 |
| AX-157906927 | 1 | 72.087 | KV452713.1 | 7356669 | 1-scf00011 | 1 |
| AX-157906928 | 1 | 72.087 | KV452713.1 | 7358482 | 1-scf00011 | 1 |
| AX-157906929 | 1 | 72.087 | KV452713.1 | 7359710 | 1-scf00011 | 1 |
| AX-157740149 | 1 | 72.087 | KV452713.1 | 7359843 | 1-scf00011 | 1 |
| AX-157906930 | 1 | 72.087 | KV452713.1 | 7360728 | 1-scf00011 | 1 |
| AX-157738522 | 1 | 72.087 | KV452713.1 | 7363485 | 1-scf00011 | 1 |
| AX-157716298 | 1 | 72.087 | KV452713.1 | 7385999 | 1-scf00011 | 1 |
| AX-157811979 | 1 | 72.087 | KV452713.1 | 7394233 | 1-scf00011 | 1 |
| AX-157906939 | 1 | 72.266 | KV452713.1 | 7376648 | 1-scf00011 | 1 |
| AX-157906941 | 1 | 72.266 | KV452713.1 | 7380003 | 1-scf00011 | 1 |
| AX-157906949 | 1 | 72.266 | KV452713.1 | 7395821 | 1-scf00011 | 1 |
| AX-157883341 | 1 | 72.266 | KV452713.1 | 7409622 | 1-scf00011 | 1 |
| AX-157906911 | 1 | 72.267 | KV452713.1 | 7327297 | 1-scf00011 | 1 |
| AX-157906933 | 1 | 72.267 | KV452713.1 | 7366711 | 1-scf00011 | 1 |
| AX-157743557 | 1 | 72.267 | KV452713.1 | 7389688 | 1-scf00011 | 1 |
| AX-157703916 | 1 | 72.269 | KV452713.1 | 7254437 | 1-scf00011 | 1 |
| AX-157906873 | 1 | 72.269 | KV452713.1 | 7269454 | 1-scf00011 | 1 |
| AX-157906888 | 1 | 72.269 | KV452713.1 | 7287117 | 1-scf00011 | 1 |
| AX-157906940 | 1 | 72.269 | KV452713.1 | 7377883 | 1-scf00011 | 1 |
| AX-157906951 | 1 | 72.591 | KV452713.1 | 7398892 | 1-scf00011 | 1 |
| AX-157906898 | 1 | 72.657 | KV452713.1 | 7301159 | 1-scf00011 | 1 |
| AX-157744315 | 1 | 72.657 | KV452713.1 | 7400070 | 1-scf00011 | 1 |
| AX-157811980 | 1 | 72.658 | KV452713.1 | 7405785 | 1-scf00011 | 1 |
| AX-157906956 | 1 | 72.983 | KV452713.1 | 7410044 | 1-scf00011 | 1 |
| AX-157906958 | 1 | 72.983 | KV452713.1 | 7412873 | 1-scf00011 | 1 |
| AX-157906961 | 1 | 72.983 | KV452713.1 | 7415214 | 1-scf00011 | 1 |
| AX-157906962 | 1 | 72.984 | KV452713.1 | 7421007 | 1-scf00011 | 1 |
| AX-157906950 | 1 | 73.148 | KV452713.1 | 7397215 | 1-scf00011 | 1 |
| AX-157750018 | 1 | 73.148 | KV452713.1 | 7421971 | 1-scf00011 | 1 |
| AX-157811984 | 1 | 73.148 | KV452713.1 | 7425195 | 1-scf00011 | 1 |
| AX-157906964 | 1 | 73.341 | KV452713.1 | 7427092 | 1-scf00011 | 1 |
| AX-157906908 | 1 | 73.342 | KV452713.1 | 7319991 | 1-scf00011 | 1 |
| AX-157906954 | 1 | 73.342 | KV452713.1 | 7408788 | 1-scf00011 | 1 |
| AX-157750988 | 1 | 73.342 | KV452713.1 | 7418045 | 1-scf00011 | 1 |
| AX-157906965 | 1 | 73.342 | KV452713.1 | 7428480 | 1-scf00011 | 1 |
| AX-157906966 | 1 | 73.342 | KV452713.1 | 7432252 | 1-scf00011 | 1 |
| AX-157811988 | 1 | 73.342 | KV452713.1 | 7434332 | 1-scf00011 | 1 |
| AX-157811989 | 1 | 73.342 | KV452713.1 | 7435311 | 1-scf00011 | 1 |
| AX-157906968 | 1 | 73.342 | KV452713.1 | 7435515 | 1-scf00011 | 1 |

|              |   |        |            |         |            |   |
|--------------|---|--------|------------|---------|------------|---|
| AX-157739299 | 1 | 73.342 | KV452713.1 | 7436401 | 1-scf00011 | 1 |
| AX-157744273 | 1 | 73.342 | KV452713.1 | 7437538 | 1-scf00011 | 1 |
| AX-157906970 | 1 | 73.342 | KV452713.1 | 7438202 | 1-scf00011 | 1 |
| AX-157906972 | 1 | 73.342 | KV452713.1 | 7439803 | 1-scf00011 | 1 |
| AX-157853629 | 1 | 73.342 | KV452713.1 | 7458128 | 1-scf00011 | 1 |
| AX-157906989 | 1 | 73.342 | KV452713.1 | 7477320 | 1-scf00011 | 1 |
| AX-157773972 | 1 | 73.342 | KV452713.1 | 7487760 | 1-scf00011 | 1 |
| AX-157907003 | 1 | 73.342 | KV452713.1 | 7500164 | 1-scf00011 | 1 |
| AX-157713642 | 1 | 73.492 | KV452713.1 | 7439202 | 1-scf00011 | 1 |
| AX-157906978 | 1 | 73.683 | KV452713.1 | 7456610 | 1-scf00011 | 1 |
| AX-157906973 | 1 | 73.701 | KV452713.1 | 7443060 | 1-scf00011 | 1 |
| AX-157906977 | 1 | 73.701 | KV452713.1 | 7455224 | 1-scf00011 | 1 |
| AX-157906979 | 1 | 73.701 | KV452713.1 | 7456893 | 1-scf00011 | 1 |
| AX-157906981 | 1 | 73.701 | KV452713.1 | 7462392 | 1-scf00011 | 1 |
| AX-157906982 | 1 | 73.701 | KV452713.1 | 7464443 | 1-scf00011 | 1 |
| AX-157906983 | 1 | 73.701 | KV452713.1 | 7466189 | 1-scf00011 | 1 |
| AX-157906984 | 1 | 73.701 | KV452713.1 | 7468392 | 1-scf00011 | 1 |
| AX-157717147 | 1 | 73.744 | KV452713.1 | 7471330 | 1-scf00011 | 1 |
| AX-157906986 | 1 | 73.788 | KV452713.1 | 7474301 | 1-scf00011 | 1 |
| AX-157906990 | 1 | 73.788 | KV452713.1 | 7479932 | 1-scf00011 | 1 |
| AX-157906987 | 1 | 73.835 | KV452713.1 | 7474913 | 1-scf00011 | 1 |
| AX-157906988 | 1 | 73.88  | KV452713.1 | 7475370 | 1-scf00011 | 1 |
| AX-157906995 | 1 | 73.88  | KV452713.1 | 7489241 | 1-scf00011 | 1 |
| AX-157906996 | 1 | 73.88  | KV452713.1 | 7490193 | 1-scf00011 | 1 |
| AX-158404773 | 1 | 73.88  | KV452713.1 | 7491271 | 1-scf00011 | 1 |
| AX-157907000 | 1 | 73.88  | KV452713.1 | 7495996 | 1-scf00011 | 1 |
| AX-157907002 | 1 | 73.88  | KV452713.1 | 7499167 | 1-scf00011 | 1 |
| AX-157907004 | 1 | 73.88  | KV452713.1 | 7501548 | 1-scf00011 | 1 |
| AX-157907006 | 1 | 73.905 | KV452713.1 | 7503115 | 1-scf00011 | 1 |
| AX-157907014 | 1 | 74.059 | KV452713.1 | 7511713 | 1-scf00011 | 1 |
| AX-157907018 | 1 | 74.059 | KV452713.1 | 7518236 | 1-scf00011 | 1 |
| AX-157906991 | 1 | 74.06  | KV452713.1 | 7481110 | 1-scf00011 | 1 |
| AX-157907023 | 1 | 74.06  | KV452713.1 | 7528118 | 1-scf00011 | 1 |
| AX-157907159 | 1 | 74.06  | KV452713.1 | 7738308 | 1-scf00011 | 1 |
| AX-157907029 | 1 | 74.416 | KV452713.1 | 7539152 | 1-scf00011 | 1 |
| AX-157907031 | 1 | 74.417 | KV452713.1 | 7539885 | 1-scf00011 | 1 |
| AX-157907033 | 1 | 74.417 | KV452713.1 | 7543726 | 1-scf00011 | 1 |
| AX-158404774 | 1 | 74.417 | KV452713.1 | 7552454 | 1-scf00011 | 1 |
| AX-157907040 | 1 | 74.417 | KV452713.1 | 7552540 | 1-scf00011 | 1 |
| AX-157907052 | 1 | 74.417 | KV452713.1 | 7565325 | 1-scf00011 | 1 |
| AX-157907054 | 1 | 74.417 | KV452713.1 | 7566786 | 1-scf00011 | 1 |
| AX-157907057 | 1 | 74.417 | KV452713.1 | 7571400 | 1-scf00011 | 1 |
| AX-157907058 | 1 | 74.417 | KV452713.1 | 7572046 | 1-scf00011 | 1 |
| AX-157907064 | 1 | 74.417 | KV452713.1 | 7581476 | 1-scf00011 | 1 |
| AX-157907075 | 1 | 74.417 | KV452713.1 | 7592466 | 1-scf00011 | 1 |
| AX-157907061 | 1 | 74.418 | KV452713.1 | 7575080 | 1-scf00011 | 1 |
| AX-157723478 | 1 | 74.418 | KV452713.1 | 7575903 | 1-scf00011 | 1 |
| AX-157907063 | 1 | 74.418 | KV452713.1 | 7580529 | 1-scf00011 | 1 |
| AX-158404784 | 1 | 74.418 | KV452713.1 | 7669529 | 1-scf00011 | 1 |
| AX-158404786 | 1 | 74.418 | KV452713.1 | 7669770 | 1-scf00011 | 1 |
| AX-157907126 | 1 | 74.418 | KV452713.1 | 7680341 | 1-scf00011 | 1 |

|              |   |        |            |         |            |   |
|--------------|---|--------|------------|---------|------------|---|
| AX-157907070 | 1 | 74.773 | KV452713.1 | 7586575 | 1-scf00011 | 1 |
| AX-157907036 | 1 | 74.775 | KV452713.1 | 7547556 | 1-scf00011 | 1 |
| AX-157907056 | 1 | 74.775 | KV452713.1 | 7570795 | 1-scf00011 | 1 |
| AX-157907072 | 1 | 74.775 | KV452713.1 | 7589677 | 1-scf00011 | 1 |
| AX-157907073 | 1 | 74.775 | KV452713.1 | 7590531 | 1-scf00011 | 1 |
| AX-157907076 | 1 | 74.775 | KV452713.1 | 7597385 | 1-scf00011 | 1 |
| AX-157907078 | 1 | 74.775 | KV452713.1 | 7601565 | 1-scf00011 | 1 |
| AX-157907079 | 1 | 74.775 | KV452713.1 | 7602185 | 1-scf00011 | 1 |
| AX-157907080 | 1 | 74.775 | KV452713.1 | 7602982 | 1-scf00011 | 1 |
| AX-157907143 | 1 | 74.775 | KV452713.1 | 7714962 | 1-scf00011 | 1 |
| AX-157907145 | 1 | 74.775 | KV452713.1 | 7716309 | 1-scf00011 | 1 |
| AX-157907149 | 1 | 74.775 | KV452713.1 | 7722887 | 1-scf00011 | 1 |
| AX-157907229 | 1 | 74.775 | KV452713.1 | 7840844 | 1-scf00011 | 1 |
| AX-157907231 | 1 | 74.775 | KV452713.1 | 7843937 | 1-scf00011 | 1 |
| AX-157907232 | 1 | 74.775 | KV452713.1 | 7844385 | 1-scf00011 | 1 |
| AX-157907251 | 1 | 74.775 | KV452713.1 | 7869090 | 1-scf00011 | 1 |
| AX-157906980 | 1 | 74.954 | KV452713.1 | 7461719 | 1-scf00011 | 1 |
| AX-157906992 | 1 | 74.954 | KV452713.1 | 7482454 | 1-scf00011 | 1 |
| AX-157740894 | 1 | 74.954 | KV452713.1 | 7489840 | 1-scf00011 | 1 |
| AX-157906997 | 1 | 74.954 | KV452713.1 | 7492665 | 1-scf00011 | 1 |
| AX-157907013 | 1 | 74.954 | KV452713.1 | 7510105 | 1-scf00011 | 1 |
| AX-157869043 | 1 | 74.954 | KV452713.1 | 7542711 | 1-scf00011 | 1 |
| AX-157907062 | 1 | 74.954 | KV452713.1 | 7578444 | 1-scf00011 | 1 |
| AX-157907082 | 1 | 74.954 | KV452713.1 | 7604469 | 1-scf00011 | 1 |
| AX-157757146 | 1 | 74.954 | KV452713.1 | 7605633 | 1-scf00011 | 1 |
| AX-157907087 | 1 | 74.954 | KV452713.1 | 7611586 | 1-scf00011 | 1 |
| AX-157907093 | 1 | 74.954 | KV452713.1 | 7620002 | 1-scf00011 | 1 |
| AX-157907095 | 1 | 74.954 | KV452713.1 | 7621738 | 1-scf00011 | 1 |
| AX-157907097 | 1 | 74.954 | KV452713.1 | 7624126 | 1-scf00011 | 1 |
| AX-157907099 | 1 | 74.954 | KV452713.1 | 7626656 | 1-scf00011 | 1 |
| AX-157907155 | 1 | 74.954 | KV452713.1 | 7734845 | 1-scf00011 | 1 |
| AX-157907184 | 1 | 74.954 | KV452713.1 | 7773316 | 1-scf00011 | 1 |
| AX-157907074 | 1 | 75.133 | KV452713.1 | 7591468 | 1-scf00011 | 1 |
| AX-157907100 | 1 | 75.133 | KV452713.1 | 7628045 | 1-scf00011 | 1 |
| AX-157907101 | 1 | 75.133 | KV452713.1 | 7629649 | 1-scf00011 | 1 |
| AX-157722197 | 1 | 75.133 | KV452713.1 | 7635194 | 1-scf00011 | 1 |
| AX-157907105 | 1 | 75.133 | KV452713.1 | 7636712 | 1-scf00011 | 1 |
| AX-157907107 | 1 | 75.133 | KV452713.1 | 7641625 | 1-scf00011 | 1 |
| AX-157907108 | 1 | 75.133 | KV452713.1 | 7643327 | 1-scf00011 | 1 |
| AX-157811998 | 1 | 75.133 | KV452713.1 | 7649886 | 1-scf00011 | 1 |
| AX-157907111 | 1 | 75.133 | KV452713.1 | 7650295 | 1-scf00011 | 1 |
| AX-157907114 | 1 | 75.133 | KV452713.1 | 7652245 | 1-scf00011 | 1 |
| AX-157907116 | 1 | 75.222 | KV452713.1 | 7659329 | 1-scf00011 | 1 |
| AX-158404779 | 1 | 75.241 | KV452713.1 | 7667808 | 1-scf00011 | 1 |
| AX-157811990 | 1 | 75.329 | KV452713.1 | 7446792 | 1-scf00011 | 1 |
| AX-157907067 | 1 | 75.329 | KV452713.1 | 7584970 | 1-scf00011 | 1 |
| AX-158404782 | 1 | 75.329 | KV452713.1 | 7668716 | 1-scf00011 | 1 |
| AX-158404783 | 1 | 75.329 | KV452713.1 | 7668886 | 1-scf00011 | 1 |
| AX-157811994 | 1 | 75.402 | KV452713.1 | 7472742 | 1-scf00011 | 1 |
| AX-157874477 | 1 | 75.402 | KV452713.1 | 7514895 | 1-scf00011 | 1 |
| AX-157907027 | 1 | 75.402 | KV452713.1 | 7536130 | 1-scf00011 | 1 |

|              |   |        |             |         |            |    |
|--------------|---|--------|-------------|---------|------------|----|
| AX-157907066 | 1 | 75.402 | KV452713.1  | 7584430 | 1-scf00011 | 1  |
| AX-157907122 | 1 | 75.402 | KV452713.1  | 7675015 | 1-scf00011 | 1  |
| AX-157907124 | 1 | 75.402 | KV452713.1  | 7678696 | 1-scf00011 | 1  |
| AX-157907127 | 1 | 75.402 | KV452713.1  | 7682294 | 1-scf00011 | 1  |
| AX-157907128 | 1 | 75.402 | KV452713.1  | 7684461 | 1-scf00011 | 1  |
| AX-157907131 | 1 | 75.402 | KV452713.1  | 7688321 | 1-scf00011 | 1  |
| AX-157907135 | 1 | 75.402 | KV452713.1  | 7693119 | 1-scf00011 | 1  |
| AX-157907136 | 1 | 75.402 | KV452713.1  | 7696354 | 1-scf00011 | 1  |
| AX-157907138 | 1 | 75.402 | KV452713.1  | 7706782 | 1-scf00011 | 1  |
| AX-157907139 | 1 | 75.402 | KV452713.1  | 7708684 | 1-scf00011 | 1  |
| AX-157874484 | 1 | 75.513 | KV452713.1  | 7709468 | 1-scf00011 | 1  |
| AX-157907141 | 1 | 75.609 | KV452713.1  | 7711270 | 1-scf00011 | 1  |
| AX-157907035 | 1 | 75.673 | KV452713.1  | 7546513 | 1-scf00011 | 1  |
| AX-157907081 | 1 | 75.673 | KV452713.1  | 7603877 | 1-scf00011 | 1  |
| AX-157907084 | 1 | 75.673 | KV452713.1  | 7607520 | 1-scf00011 | 1  |
| AX-157907106 | 1 | 75.673 | KV452713.1  | 7640701 | 1-scf00011 | 1  |
| AX-157907142 | 1 | 75.673 | KV452713.1  | 7712809 | 1-scf00011 | 1  |
| AX-157907146 | 1 | 75.673 | KV452713.1  | 7717636 | 1-scf00011 | 1  |
| AX-157907148 | 1 | 75.673 | KV452713.1  | 7720619 | 1-scf00011 | 1  |
| AX-157907150 | 1 | 75.673 | KV452713.1  | 7723566 | 1-scf00011 | 1  |
| AX-157907151 | 1 | 75.673 | KV452713.1  | 7728102 | 1-scf00011 | 1  |
| AX-157907154 | 1 | 75.673 | KV452713.1  | 7734221 | 1-scf00011 | 1  |
| AX-157907156 | 1 | 75.673 | KV452713.1  | 7735214 | 1-scf00011 | 1  |
| AX-157907158 | 1 | 75.673 | KV452713.1  | 7737493 | 1-scf00011 | 1  |
| AX-157706430 | 1 | 75.673 | 3ML01032225 | 280     | scf07841_1 | UN |
| AX-157907015 | 1 | 75.814 | KV452713.1  | 7514181 | 1-scf00011 | 1  |
| AX-157907115 | 1 | 75.814 | KV452713.1  | 7655465 | 1-scf00011 | 1  |
| AX-157907121 | 1 | 75.814 | KV452713.1  | 7674295 | 1-scf00011 | 1  |
| AX-157907125 | 1 | 75.814 | KV452713.1  | 7679759 | 1-scf00011 | 1  |
| AX-157907161 | 1 | 75.814 | KV452713.1  | 7744386 | 1-scf00011 | 1  |
| AX-157907162 | 1 | 75.814 | KV452713.1  | 7745668 | 1-scf00011 | 1  |
| AX-157907167 | 1 | 75.814 | KV452713.1  | 7752654 | 1-scf00011 | 1  |
| AX-157907176 | 1 | 75.814 | KV452713.1  | 7764989 | 1-scf00011 | 1  |
| AX-157907190 | 1 | 75.814 | KV452713.1  | 7780676 | 1-scf00011 | 1  |
| AX-157907068 | 1 | 75.942 | KV452713.1  | 7585634 | 1-scf00011 | 1  |
| AX-157811999 | 1 | 75.942 | KV452713.1  | 7746121 | 1-scf00011 | 1  |
| AX-157907168 | 1 | 75.942 | KV452713.1  | 7753170 | 1-scf00011 | 1  |
| AX-157907178 | 1 | 75.942 | KV452713.1  | 7767539 | 1-scf00011 | 1  |
| AX-157907179 | 1 | 76.075 | KV452713.1  | 7768636 | 1-scf00011 | 1  |
| AX-157907181 | 1 | 76.211 | KV452713.1  | 7771406 | 1-scf00011 | 1  |
| AX-157907182 | 1 | 76.211 | KV452713.1  | 7772102 | 1-scf00011 | 1  |
| AX-157907188 | 1 | 76.211 | KV452713.1  | 7776620 | 1-scf00011 | 1  |
| AX-157907191 | 1 | 76.211 | KV452713.1  | 7783871 | 1-scf00011 | 1  |
| AX-157907445 | 1 | 76.211 | KV452713.1  | 8104285 | 1-scf00011 | 1  |
| AX-157907163 | 1 | 76.256 | KV452713.1  | 7746478 | 1-scf00011 | 1  |
| AX-158404788 | 1 | 76.256 | KV452713.1  | 7825809 | 1-scf00011 | 1  |
| AX-157907262 | 1 | 76.256 | KV452713.1  | 7876888 | 1-scf00011 | 1  |
| AX-157720836 | 1 | 76.313 | KV452713.1  | 7838905 | 1-scf00011 | 1  |
| AX-157907185 | 1 | 76.39  | KV452713.1  | 7774029 | 1-scf00011 | 1  |
| AX-157907222 | 1 | 76.39  | KV452713.1  | 7823629 | 1-scf00011 | 1  |
| AX-157907225 | 1 | 76.39  | KV452713.1  | 7832524 | 1-scf00011 | 1  |



|              |   |        |            |         |            |   |
|--------------|---|--------|------------|---------|------------|---|
| AX-157907228 | 1 | 76.39  | KV452713.1 | 7840593 | 1-scf00011 | 1 |
| AX-157907230 | 1 | 76.39  | KV452713.1 | 7841342 | 1-scf00011 | 1 |
| AX-157907233 | 1 | 76.39  | KV452713.1 | 7844782 | 1-scf00011 | 1 |
| AX-157907234 | 1 | 76.39  | KV452713.1 | 7846487 | 1-scf00011 | 1 |
| AX-157907235 | 1 | 76.39  | KV452713.1 | 7849517 | 1-scf00011 | 1 |
| AX-157907236 | 1 | 76.39  | KV452713.1 | 7851755 | 1-scf00011 | 1 |
| AX-157907238 | 1 | 76.39  | KV452713.1 | 7853673 | 1-scf00011 | 1 |
| AX-157907242 | 1 | 76.39  | KV452713.1 | 7857691 | 1-scf00011 | 1 |
| AX-158389522 | 1 | 76.39  | KV452713.1 | 7858659 | 1-scf00011 | 1 |
| AX-157907245 | 1 | 76.39  | KV452713.1 | 7860135 | 1-scf00011 | 1 |
| AX-157907246 | 1 | 76.39  | KV452713.1 | 7860545 | 1-scf00011 | 1 |
| AX-157907255 | 1 | 76.39  | KV452713.1 | 7871845 | 1-scf00011 | 1 |
| AX-157907256 | 1 | 76.39  | KV452713.1 | 7872742 | 1-scf00011 | 1 |
| AX-157907260 | 1 | 76.39  | KV452713.1 | 7874629 | 1-scf00011 | 1 |
| AX-157755882 | 1 | 76.39  | KV452713.1 | 7875255 | 1-scf00011 | 1 |
| AX-157907259 | 1 | 76.651 | KV452713.1 | 7874006 | 1-scf00011 | 1 |
| AX-157907266 | 1 | 76.929 | KV452713.1 | 7883290 | 1-scf00011 | 1 |
| AX-157907267 | 1 | 76.929 | KV452713.1 | 7884101 | 1-scf00011 | 1 |
| AX-157907270 | 1 | 76.929 | KV452713.1 | 7886676 | 1-scf00011 | 1 |
| AX-157907271 | 1 | 76.929 | KV452713.1 | 7888100 | 1-scf00011 | 1 |
| AX-157907273 | 1 | 76.929 | KV452713.1 | 7888888 | 1-scf00011 | 1 |
| AX-157869044 | 1 | 76.929 | KV452713.1 | 7891465 | 1-scf00011 | 1 |
| AX-157907277 | 1 | 76.929 | KV452713.1 | 7893846 | 1-scf00011 | 1 |
| AX-157907274 | 1 | 77.015 | KV452713.1 | 7889607 | 1-scf00011 | 1 |
| AX-157907280 | 1 | 77.015 | KV452713.1 | 7897256 | 1-scf00011 | 1 |
| AX-157907278 | 1 | 77.037 | KV452713.1 | 7895630 | 1-scf00011 | 1 |
| AX-157907279 | 1 | 77.108 | KV452713.1 | 7896805 | 1-scf00011 | 1 |
| AX-157907281 | 1 | 77.108 | KV452713.1 | 7897771 | 1-scf00011 | 1 |
| AX-157907282 | 1 | 77.108 | KV452713.1 | 7898115 | 1-scf00011 | 1 |
| AX-157869045 | 1 | 77.108 | KV452713.1 | 7898561 | 1-scf00011 | 1 |
| AX-157907283 | 1 | 77.108 | KV452713.1 | 7898945 | 1-scf00011 | 1 |
| AX-157907285 | 1 | 77.108 | KV452713.1 | 7899842 | 1-scf00011 | 1 |
| AX-157907286 | 1 | 77.108 | KV452713.1 | 7900228 | 1-scf00011 | 1 |
| AX-157907289 | 1 | 77.108 | KV452713.1 | 7904447 | 1-scf00011 | 1 |
| AX-157907291 | 1 | 77.108 | KV452713.1 | 7909433 | 1-scf00011 | 1 |
| AX-157907292 | 1 | 77.108 | KV452713.1 | 7910855 | 1-scf00011 | 1 |
| AX-157907293 | 1 | 77.108 | KV452713.1 | 7912062 | 1-scf00011 | 1 |
| AX-157812003 | 1 | 77.108 | KV452713.1 | 7914500 | 1-scf00011 | 1 |
| AX-157907294 | 1 | 77.108 | KV452713.1 | 7915410 | 1-scf00011 | 1 |
| AX-157907295 | 1 | 77.108 | KV452713.1 | 7916040 | 1-scf00011 | 1 |
| AX-157812004 | 1 | 77.108 | KV452713.1 | 7917253 | 1-scf00011 | 1 |
| AX-157907297 | 1 | 77.108 | KV452713.1 | 7918606 | 1-scf00011 | 1 |
| AX-157907298 | 1 | 77.108 | KV452713.1 | 7919487 | 1-scf00011 | 1 |
| AX-157722722 | 1 | 77.108 | KV452713.1 | 7922395 | 1-scf00011 | 1 |
| AX-157907300 | 1 | 77.108 | KV452713.1 | 7924159 | 1-scf00011 | 1 |
| AX-157907301 | 1 | 77.108 | KV452713.1 | 7924752 | 1-scf00011 | 1 |
| AX-157907302 | 1 | 77.108 | KV452713.1 | 7925262 | 1-scf00011 | 1 |
| AX-157907304 | 1 | 77.108 | KV452713.1 | 7926933 | 1-scf00011 | 1 |
| AX-158379191 | 1 | 77.108 | KV452713.1 | 7927425 | 1-scf00011 | 1 |
| AX-157907305 | 1 | 77.108 | KV452713.1 | 7927867 | 1-scf00011 | 1 |
| AX-157907306 | 1 | 77.108 | KV452713.1 | 7929879 | 1-scf00011 | 1 |

|              |   |        |            |         |            |   |
|--------------|---|--------|------------|---------|------------|---|
| AX-157907308 | 1 | 77.108 | KV452713.1 | 7932332 | 1-scf00011 | 1 |
| AX-157907309 | 1 | 77.108 | KV452713.1 | 7933060 | 1-scf00011 | 1 |
| AX-157907312 | 1 | 77.108 | KV452713.1 | 7936812 | 1-scf00011 | 1 |
| AX-157907313 | 1 | 77.108 | KV452713.1 | 7937172 | 1-scf00011 | 1 |
| AX-157907314 | 1 | 77.108 | KV452713.1 | 7937872 | 1-scf00011 | 1 |
| AX-157907316 | 1 | 77.108 | KV452713.1 | 7942223 | 1-scf00011 | 1 |
| AX-157907317 | 1 | 77.108 | KV452713.1 | 7942532 | 1-scf00011 | 1 |
| AX-157907318 | 1 | 77.108 | KV452713.1 | 7946020 | 1-scf00011 | 1 |
| AX-157907324 | 1 | 77.108 | KV452713.1 | 7953421 | 1-scf00011 | 1 |
| AX-157907325 | 1 | 77.108 | KV452713.1 | 7953789 | 1-scf00011 | 1 |
| AX-157907334 | 1 | 77.108 | KV452713.1 | 7959896 | 1-scf00011 | 1 |
| AX-157907338 | 1 | 77.108 | KV452713.1 | 7963449 | 1-scf00011 | 1 |
| AX-157907345 | 1 | 77.108 | KV452713.1 | 7977096 | 1-scf00011 | 1 |
| AX-157907354 | 1 | 77.108 | KV452713.1 | 7991238 | 1-scf00011 | 1 |
| AX-157869047 | 1 | 77.287 | KV452713.1 | 7916417 | 1-scf00011 | 1 |
| AX-157907320 | 1 | 77.287 | KV452713.1 | 7948156 | 1-scf00011 | 1 |
| AX-157907321 | 1 | 77.287 | KV452713.1 | 7948512 | 1-scf00011 | 1 |
| AX-157907323 | 1 | 77.287 | KV452713.1 | 7952399 | 1-scf00011 | 1 |
| AX-157907326 | 1 | 77.287 | KV452713.1 | 7954202 | 1-scf00011 | 1 |
| AX-157907328 | 1 | 77.287 | KV452713.1 | 7955563 | 1-scf00011 | 1 |
| AX-157907329 | 1 | 77.287 | KV452713.1 | 7956000 | 1-scf00011 | 1 |
| AX-157907333 | 1 | 77.287 | KV452713.1 | 7959055 | 1-scf00011 | 1 |
| AX-157907337 | 1 | 77.287 | KV452713.1 | 7962113 | 1-scf00011 | 1 |
| AX-157907340 | 1 | 77.287 | KV452713.1 | 7969460 | 1-scf00011 | 1 |
| AX-157907341 | 1 | 77.287 | KV452713.1 | 7972994 | 1-scf00011 | 1 |
| AX-157907342 | 1 | 77.287 | KV452713.1 | 7973813 | 1-scf00011 | 1 |
| AX-157907343 | 1 | 77.287 | KV452713.1 | 7974478 | 1-scf00011 | 1 |
| AX-157907346 | 1 | 77.287 | KV452713.1 | 7977541 | 1-scf00011 | 1 |
| AX-157907351 | 1 | 77.287 | KV452713.1 | 7987947 | 1-scf00011 | 1 |
| AX-157907352 | 1 | 77.287 | KV452713.1 | 7988885 | 1-scf00011 | 1 |
| AX-158404790 | 1 | 77.287 | KV452713.1 | 7989468 | 1-scf00011 | 1 |
| AX-157907361 | 1 | 77.287 | KV452713.1 | 7997412 | 1-scf00011 | 1 |
| AX-157907355 | 1 | 77.292 | KV452713.1 | 7992424 | 1-scf00011 | 1 |
| AX-157907360 | 1 | 77.597 | KV452713.1 | 7997191 | 1-scf00011 | 1 |
| AX-157907364 | 1 | 77.89  | KV452713.1 | 8003365 | 1-scf00011 | 1 |
| AX-157907374 | 1 | 78.184 | KV452713.1 | 8014552 | 1-scf00011 | 1 |
| AX-157907380 | 1 | 78.184 | KV452713.1 | 8025780 | 1-scf00011 | 1 |
| AX-157907375 | 1 | 78.188 | KV452713.1 | 8016324 | 1-scf00011 | 1 |
| AX-157907376 | 1 | 78.188 | KV452713.1 | 8017446 | 1-scf00011 | 1 |
| AX-157907379 | 1 | 78.188 | KV452713.1 | 8022885 | 1-scf00011 | 1 |
| AX-157907382 | 1 | 78.276 | KV452713.1 | 8030969 | 1-scf00011 | 1 |
| AX-157757060 | 1 | 78.289 | KV452713.1 | 8034842 | 1-scf00011 | 1 |
| AX-157721770 | 1 | 78.367 | KV452713.1 | 8030088 | 1-scf00011 | 1 |
| AX-157907386 | 1 | 78.367 | KV452713.1 | 8035934 | 1-scf00011 | 1 |
| AX-157907387 | 1 | 78.367 | KV452713.1 | 8036767 | 1-scf00011 | 1 |
| AX-157907388 | 1 | 78.367 | KV452713.1 | 8037322 | 1-scf00011 | 1 |
| AX-157907389 | 1 | 78.367 | KV452713.1 | 8037769 | 1-scf00011 | 1 |
| AX-157907391 | 1 | 78.367 | KV452713.1 | 8038718 | 1-scf00011 | 1 |
| AX-157907392 | 1 | 78.367 | KV452713.1 | 8039435 | 1-scf00011 | 1 |
| AX-157907394 | 1 | 78.367 | KV452713.1 | 8040774 | 1-scf00011 | 1 |
| AX-157907395 | 1 | 78.367 | KV452713.1 | 8043263 | 1-scf00011 | 1 |

|              |   |        |            |         |            |   |
|--------------|---|--------|------------|---------|------------|---|
| AX-157907397 | 1 | 78.367 | KV452713.1 | 8044916 | 1-scf00011 | 1 |
| AX-157907400 | 1 | 78.367 | KV452713.1 | 8048800 | 1-scf00011 | 1 |
| AX-157907402 | 1 | 78.367 | KV452713.1 | 8050527 | 1-scf00011 | 1 |
| AX-157907390 | 1 | 78.546 | KV452713.1 | 8038435 | 1-scf00011 | 1 |
| AX-157907404 | 1 | 78.546 | KV452713.1 | 8052128 | 1-scf00011 | 1 |
| AX-157907406 | 1 | 78.546 | KV452713.1 | 8053741 | 1-scf00011 | 1 |
| AX-157907407 | 1 | 78.726 | KV452713.1 | 8054678 | 1-scf00011 | 1 |
| AX-157907409 | 1 | 78.817 | KV452713.1 | 8056031 | 1-scf00011 | 1 |
| AX-157907408 | 1 | 78.905 | KV452713.1 | 8054935 | 1-scf00011 | 1 |
| AX-157907416 | 1 | 78.905 | KV452713.1 | 8064544 | 1-scf00011 | 1 |
| AX-157907420 | 1 | 78.905 | KV452713.1 | 8071978 | 1-scf00011 | 1 |
| AX-158382131 | 1 | 78.905 | KV452713.1 | 8080359 | 1-scf00011 | 1 |
| AX-157907414 | 1 | 79.084 | KV452713.1 | 8063698 | 1-scf00011 | 1 |
| AX-157907421 | 1 | 79.084 | KV452713.1 | 8074780 | 1-scf00011 | 1 |
| AX-157907422 | 1 | 79.084 | KV452713.1 | 8074876 | 1-scf00011 | 1 |
| AX-157907423 | 1 | 79.084 | KV452713.1 | 8075371 | 1-scf00011 | 1 |
| AX-157907426 | 1 | 79.084 | KV452713.1 | 8080977 | 1-scf00011 | 1 |
| AX-158404075 | 1 | 79.084 | KV452713.1 | 8084972 | 1-scf00011 | 1 |
| AX-157907429 | 1 | 79.084 | KV452713.1 | 8085725 | 1-scf00011 | 1 |
| AX-158379192 | 1 | 79.084 | KV452713.1 | 8085926 | 1-scf00011 | 1 |
| AX-157907430 | 1 | 79.084 | KV452713.1 | 8086094 | 1-scf00011 | 1 |
| AX-157907431 | 1 | 79.084 | KV452713.1 | 8086635 | 1-scf00011 | 1 |
| AX-157907432 | 1 | 79.084 | KV452713.1 | 8087323 | 1-scf00011 | 1 |
| AX-157742909 | 1 | 79.084 | KV452713.1 | 8088321 | 1-scf00011 | 1 |
| AX-157907433 | 1 | 79.084 | KV452713.1 | 8090526 | 1-scf00011 | 1 |
| AX-157907434 | 1 | 79.084 | KV452713.1 | 8091039 | 1-scf00011 | 1 |
| AX-157907435 | 1 | 79.084 | KV452713.1 | 8091560 | 1-scf00011 | 1 |
| AX-157907437 | 1 | 79.084 | KV452713.1 | 8095570 | 1-scf00011 | 1 |
| AX-157907438 | 1 | 79.084 | KV452713.1 | 8096454 | 1-scf00011 | 1 |
| AX-157907439 | 1 | 79.084 | KV452713.1 | 8097175 | 1-scf00011 | 1 |
| AX-157907440 | 1 | 79.084 | KV452713.1 | 8097831 | 1-scf00011 | 1 |
| AX-157907441 | 1 | 79.084 | KV452713.1 | 8099151 | 1-scf00011 | 1 |
| AX-157724857 | 1 | 79.084 | KV452713.1 | 8100844 | 1-scf00011 | 1 |
| AX-157907443 | 1 | 79.084 | KV452713.1 | 8103130 | 1-scf00011 | 1 |
| AX-157907444 | 1 | 79.084 | KV452713.1 | 8103523 | 1-scf00011 | 1 |
| AX-157907462 | 1 | 79.084 | KV452713.1 | 8129176 | 1-scf00011 | 1 |
| AX-157907469 | 1 | 79.084 | KV452713.1 | 8138568 | 1-scf00011 | 1 |
| AX-157907405 | 1 | 79.265 | KV452713.1 | 8053370 | 1-scf00011 | 1 |
| AX-157907417 | 1 | 79.265 | KV452713.1 | 8065118 | 1-scf00011 | 1 |
| AX-157907448 | 1 | 79.265 | KV452713.1 | 8110741 | 1-scf00011 | 1 |
| AX-157907450 | 1 | 79.265 | KV452713.1 | 8113071 | 1-scf00011 | 1 |
| AX-157907452 | 1 | 79.265 | KV452713.1 | 8114954 | 1-scf00011 | 1 |
| AX-157907456 | 1 | 79.265 | KV452713.1 | 8120760 | 1-scf00011 | 1 |
| AX-157751998 | 1 | 79.265 | KV452713.1 | 8122269 | 1-scf00011 | 1 |
| AX-157724596 | 1 | 79.265 | KV452713.1 | 8143117 | 1-scf00011 | 1 |
| AX-157907480 | 1 | 79.265 | KV452713.1 | 8151237 | 1-scf00011 | 1 |
| AX-157907496 | 1 | 79.265 | KV452713.1 | 8178910 | 1-scf00011 | 1 |
| AX-157907458 | 1 | 79.337 | KV452713.1 | 8124269 | 1-scf00011 | 1 |
| AX-157907427 | 1 | 79.353 | KV452713.1 | 8084244 | 1-scf00011 | 1 |
| AX-157907459 | 1 | 79.353 | KV452713.1 | 8126875 | 1-scf00011 | 1 |
| AX-157907467 | 1 | 79.353 | KV452713.1 | 8133897 | 1-scf00011 | 1 |

|              |   |        |            |         |            |   |
|--------------|---|--------|------------|---------|------------|---|
| AX-157739050 | 1 | 79.353 | KV452713.1 | 8135489 | 1-scf00011 | 1 |
| AX-157907454 | 1 | 79.446 | KV452713.1 | 8119175 | 1-scf00011 | 1 |
| AX-157907468 | 1 | 79.446 | KV452713.1 | 8134594 | 1-scf00011 | 1 |
| AX-158404794 | 1 | 79.446 | KV452713.1 | 8139839 | 1-scf00011 | 1 |
| AX-157907470 | 1 | 79.446 | KV452713.1 | 8140356 | 1-scf00011 | 1 |
| AX-157907476 | 1 | 79.446 | KV452713.1 | 8147929 | 1-scf00011 | 1 |
| AX-157907477 | 1 | 79.446 | KV452713.1 | 8148768 | 1-scf00011 | 1 |
| AX-157907473 | 1 | 79.626 | KV452713.1 | 8145353 | 1-scf00011 | 1 |
| AX-157907483 | 1 | 79.626 | KV452713.1 | 8154077 | 1-scf00011 | 1 |
| AX-157718445 | 1 | 79.626 | KV452713.1 | 8159379 | 1-scf00011 | 1 |
| AX-157770999 | 1 | 79.626 | KV452713.1 | 8163560 | 1-scf00011 | 1 |
| AX-157907492 | 1 | 79.626 | KV452713.1 | 8165608 | 1-scf00011 | 1 |
| AX-157907502 | 1 | 79.626 | KV452713.1 | 8186063 | 1-scf00011 | 1 |
| AX-157723811 | 1 | 79.634 | KV452713.1 | 8169053 | 1-scf00011 | 1 |
| AX-157907494 | 1 | 79.642 | KV452713.1 | 8170671 | 1-scf00011 | 1 |
| AX-157907498 | 1 | 79.651 | KV452713.1 | 8181224 | 1-scf00011 | 1 |
| AX-157907500 | 1 | 80.169 | KV452713.1 | 8184401 | 1-scf00011 | 1 |
| AX-157907504 | 1 | 80.169 | KV452713.1 | 8188015 | 1-scf00011 | 1 |
| AX-157907507 | 1 | 80.17  | KV452713.1 | 8193493 | 1-scf00011 | 1 |
| AX-157907503 | 1 | 80.351 | KV452713.1 | 8187538 | 1-scf00011 | 1 |
| AX-157907510 | 1 | 80.351 | KV452713.1 | 8197052 | 1-scf00011 | 1 |
| AX-157723369 | 1 | 80.351 | KV452713.1 | 8200928 | 1-scf00011 | 1 |
| AX-158404799 | 1 | 80.351 | KV452713.1 | 8203208 | 1-scf00011 | 1 |
| AX-157907514 | 1 | 80.351 | KV452713.1 | 8206797 | 1-scf00011 | 1 |
| AX-157907518 | 1 | 80.351 | KV452713.1 | 8210451 | 1-scf00011 | 1 |
| AX-157907520 | 1 | 80.351 | KV452713.1 | 8212485 | 1-scf00011 | 1 |
| AX-157907521 | 1 | 80.351 | KV452713.1 | 8214193 | 1-scf00011 | 1 |
| AX-157907522 | 1 | 80.351 | KV452713.1 | 8216003 | 1-scf00011 | 1 |
| AX-157907523 | 1 | 80.351 | KV452713.1 | 8216672 | 1-scf00011 | 1 |
| AX-157907528 | 1 | 80.351 | KV452713.1 | 8222758 | 1-scf00011 | 1 |
| AX-157907532 | 1 | 80.351 | KV452713.1 | 8226163 | 1-scf00011 | 1 |
| AX-157907549 | 1 | 80.351 | KV452713.1 | 8242895 | 1-scf00011 | 1 |
| AX-157907428 | 1 | 80.531 | KV452713.1 | 8085245 | 1-scf00011 | 1 |
| AX-157874494 | 1 | 80.531 | KV452713.1 | 8131755 | 1-scf00011 | 1 |
| AX-157907466 | 1 | 80.531 | KV452713.1 | 8132872 | 1-scf00011 | 1 |
| AX-157907472 | 1 | 80.531 | KV452713.1 | 8144598 | 1-scf00011 | 1 |
| AX-157907474 | 1 | 80.531 | KV452713.1 | 8145743 | 1-scf00011 | 1 |
| AX-157752041 | 1 | 80.531 | KV452713.1 | 8146171 | 1-scf00011 | 1 |
| AX-157907479 | 1 | 80.531 | KV452713.1 | 8150884 | 1-scf00011 | 1 |
| AX-157907481 | 1 | 80.531 | KV452713.1 | 8152309 | 1-scf00011 | 1 |
| AX-157907485 | 1 | 80.531 | KV452713.1 | 8156188 | 1-scf00011 | 1 |
| AX-157907505 | 1 | 80.531 | KV452713.1 | 8189748 | 1-scf00011 | 1 |
| AX-157874495 | 1 | 80.531 | KV452713.1 | 8225016 | 1-scf00011 | 1 |
| AX-157907534 | 1 | 80.531 | KV452713.1 | 8227438 | 1-scf00011 | 1 |
| AX-157907536 | 1 | 80.531 | KV452713.1 | 8228557 | 1-scf00011 | 1 |
| AX-157907537 | 1 | 80.531 | KV452713.1 | 8231950 | 1-scf00011 | 1 |
| AX-157907539 | 1 | 80.531 | KV452713.1 | 8234661 | 1-scf00011 | 1 |
| AX-157907540 | 1 | 80.531 | KV452713.1 | 8235139 | 1-scf00011 | 1 |
| AX-157907542 | 1 | 80.531 | KV452713.1 | 8236573 | 1-scf00011 | 1 |
| AX-157771227 | 1 | 80.531 | KV452713.1 | 8237836 | 1-scf00011 | 1 |
| AX-157907544 | 1 | 80.531 | KV452713.1 | 8238506 | 1-scf00011 | 1 |

|              |   |        |            |         |            |   |
|--------------|---|--------|------------|---------|------------|---|
| AX-157907546 | 1 | 80.531 | KV452713.1 | 8239943 | 1-scf00011 | 1 |
| AX-157907547 | 1 | 80.531 | KV452713.1 | 8240665 | 1-scf00011 | 1 |
| AX-157720493 | 1 | 80.531 | KV452713.1 | 8258741 | 1-scf00011 | 1 |
| AX-157907548 | 1 | 80.632 | KV452713.1 | 8241243 | 1-scf00011 | 1 |
| AX-157907550 | 1 | 80.712 | KV452713.1 | 8244549 | 1-scf00011 | 1 |
| AX-157907551 | 1 | 80.712 | KV452713.1 | 8246103 | 1-scf00011 | 1 |
| AX-157907552 | 1 | 80.734 | KV452713.1 | 8248058 | 1-scf00011 | 1 |
| AX-157907564 | 1 | 80.734 | KV452713.1 | 8267975 | 1-scf00011 | 1 |
| AX-157907553 | 1 | 80.761 | KV452713.1 | 8248415 | 1-scf00011 | 1 |
| AX-157907554 | 1 | 80.795 | KV452713.1 | 8248934 | 1-scf00011 | 1 |
| AX-157907555 | 1 | 80.809 | KV452713.1 | 8250364 | 1-scf00011 | 1 |
| AX-157907557 | 1 | 80.843 | KV452713.1 | 8252757 | 1-scf00011 | 1 |
| AX-158382134 | 1 | 80.869 | KV452713.1 | 8245849 | 1-scf00011 | 1 |
| AX-157907559 | 1 | 80.869 | KV452713.1 | 8255630 | 1-scf00011 | 1 |
| AX-157907561 | 1 | 80.893 | KV452713.1 | 8263060 | 1-scf00011 | 1 |
| AX-157907562 | 1 | 80.893 | KV452713.1 | 8265892 | 1-scf00011 | 1 |
| AX-157907563 | 1 | 80.893 | KV452713.1 | 8266203 | 1-scf00011 | 1 |
| AX-157907567 | 1 | 80.895 | KV452713.1 | 8270220 | 1-scf00011 | 1 |
| AX-157907568 | 1 | 81.253 | KV452713.1 | 8271278 | 1-scf00011 | 1 |
| AX-157907569 | 1 | 81.255 | KV452713.1 | 8271409 | 1-scf00011 | 1 |
| AX-157907572 | 1 | 81.992 | KV452713.1 | 8274897 | 1-scf00011 | 1 |
| AX-157907573 | 1 | 82.339 | KV452713.1 | 8279442 | 1-scf00011 | 1 |
| AX-157907575 | 1 | 82.346 | KV452713.1 | 8285492 | 1-scf00011 | 1 |
| AX-157907576 | 1 | 82.347 | KV452713.1 | 8289067 | 1-scf00011 | 1 |
| AX-157907587 | 1 | 82.347 | KV452713.1 | 8299443 | 1-scf00011 | 1 |
| AX-157907590 | 1 | 82.355 | KV452713.1 | 8303502 | 1-scf00011 | 1 |
| AX-157907591 | 1 | 82.527 | KV452713.1 | 8304197 | 1-scf00011 | 1 |
| AX-157907595 | 1 | 82.527 | KV452713.1 | 8309910 | 1-scf00011 | 1 |
| AX-157907597 | 1 | 82.569 | KV452713.1 | 8316564 | 1-scf00011 | 1 |
| AX-157907596 | 1 | 82.637 | KV452713.1 | 8314275 | 1-scf00011 | 1 |
| AX-157907599 | 1 | 82.637 | KV452713.1 | 8317584 | 1-scf00011 | 1 |
| AX-157907601 | 1 | 82.637 | KV452713.1 | 8318984 | 1-scf00011 | 1 |
| AX-158404801 | 1 | 82.637 | KV452713.1 | 8319329 | 1-scf00011 | 1 |
| AX-157743070 | 1 | 82.637 | KV452713.1 | 8319843 | 1-scf00011 | 1 |
| AX-157907603 | 1 | 82.637 | KV452713.1 | 8324390 | 1-scf00011 | 1 |
| AX-157727463 | 1 | 82.637 | KV452713.1 | 8325442 | 1-scf00011 | 1 |
| AX-157907605 | 1 | 82.637 | KV452713.1 | 8327573 | 1-scf00011 | 1 |
| AX-157907606 | 1 | 82.637 | KV452713.1 | 8328476 | 1-scf00011 | 1 |
| AX-157907607 | 1 | 82.637 | KV452713.1 | 8328800 | 1-scf00011 | 1 |
| AX-157907608 | 1 | 82.637 | KV452713.1 | 8329460 | 1-scf00011 | 1 |
| AX-157907609 | 1 | 82.637 | KV452713.1 | 8329967 | 1-scf00011 | 1 |
| AX-157907610 | 1 | 82.637 | KV452713.1 | 8332423 | 1-scf00011 | 1 |
| AX-157907611 | 1 | 83.001 | KV452713.1 | 8336953 | 1-scf00011 | 1 |
| AX-157907614 | 1 | 83.063 | KV452713.1 | 8339406 | 1-scf00011 | 1 |
| AX-158404800 | 1 | 83.12  | KV452713.1 | 8302390 | 1-scf00011 | 1 |
| AX-157907612 | 1 | 83.12  | KV452713.1 | 8338051 | 1-scf00011 | 1 |
| AX-157907615 | 1 | 83.12  | KV452713.1 | 8339598 | 1-scf00011 | 1 |
| AX-157907616 | 1 | 83.12  | KV452713.1 | 8340191 | 1-scf00011 | 1 |
| AX-157907629 | 1 | 83.12  | KV452713.1 | 8362715 | 1-scf00011 | 1 |
| AX-157907545 | 1 | 83.183 | KV452713.1 | 8239253 | 1-scf00011 | 1 |
| AX-157907558 | 1 | 83.183 | KV452713.1 | 8253429 | 1-scf00011 | 1 |

|              |   |        |             |         |            |    |
|--------------|---|--------|-------------|---------|------------|----|
| AX-157907618 | 1 | 83.183 | KV452713.1  | 8342772 | 1-scf00011 | 1  |
| AX-158379194 | 1 | 83.183 | KV452713.1  | 8342877 | 1-scf00011 | 1  |
| AX-157907619 | 1 | 83.183 | KV452713.1  | 8343155 | 1-scf00011 | 1  |
| AX-157907621 | 1 | 83.183 | KV452713.1  | 8347350 | 1-scf00011 | 1  |
| AX-157751872 | 1 | 83.183 | KV452713.1  | 8348844 | 1-scf00011 | 1  |
| AX-157907623 | 1 | 83.183 | KV452713.1  | 8350181 | 1-scf00011 | 1  |
| AX-157907624 | 1 | 83.183 | KV452713.1  | 8350779 | 1-scf00011 | 1  |
| AX-158421842 | 1 | 83.183 | KV452713.1  | 8354392 | 1-scf00011 | 1  |
| AX-157907626 | 1 | 83.183 | KV452713.1  | 8357874 | 1-scf00011 | 1  |
| AX-157907628 | 1 | 83.183 | KV452713.1  | 8360513 | 1-scf00011 | 1  |
| AX-157907633 | 1 | 83.183 | KV452713.1  | 8366436 | 1-scf00011 | 1  |
| AX-157706333 | 1 | 83.183 | 3ML01032078 | 436     | scf07691_1 | UN |
| AX-157907630 | 1 | 83.474 | KV452713.1  | 8364503 | 1-scf00011 | 1  |
| AX-157907631 | 1 | 83.474 | KV452713.1  | 8365467 | 1-scf00011 | 1  |
| AX-157907637 | 1 | 83.548 | KV452713.1  | 8372522 | 1-scf00011 | 1  |
| AX-157907638 | 1 | 83.62  | KV452713.1  | 8373543 | 1-scf00011 | 1  |
| AX-157907641 | 1 | 83.62  | KV452713.1  | 8376107 | 1-scf00011 | 1  |
| AX-157907642 | 1 | 83.62  | KV452713.1  | 8376994 | 1-scf00011 | 1  |
| AX-157756483 | 1 | 83.62  | KV452713.1  | 8378978 | 1-scf00011 | 1  |
| AX-157907643 | 1 | 83.62  | KV452713.1  | 8379857 | 1-scf00011 | 1  |
| AX-157907647 | 1 | 83.62  | KV452713.1  | 8382278 | 1-scf00011 | 1  |
| AX-157714989 | 1 | 83.668 | KV452713.1  | 8388962 | 1-scf00011 | 1  |
| AX-157907651 | 1 | 83.729 | KV452713.1  | 8393895 | 1-scf00011 | 1  |
| AX-157907653 | 1 | 83.729 | KV452713.1  | 8399036 | 1-scf00011 | 1  |
| AX-157907654 | 1 | 83.729 | KV452713.1  | 8399785 | 1-scf00011 | 1  |
| AX-157772386 | 1 | 83.729 | KV452713.1  | 8400737 | 1-scf00011 | 1  |
| AX-157907659 | 1 | 83.729 | KV452713.1  | 8404174 | 1-scf00011 | 1  |
| AX-157907661 | 1 | 83.729 | KV452713.1  | 8405231 | 1-scf00011 | 1  |
| AX-157907663 | 1 | 83.729 | KV452713.1  | 8405974 | 1-scf00011 | 1  |
| AX-157907664 | 1 | 83.729 | KV452713.1  | 8408302 | 1-scf00011 | 1  |
| AX-157907665 | 1 | 83.729 | KV452713.1  | 8408432 | 1-scf00011 | 1  |
| AX-157907671 | 1 | 83.729 | KV452713.1  | 8418343 | 1-scf00011 | 1  |
| AX-157907646 | 1 | 83.79  | KV452713.1  | 8381414 | 1-scf00011 | 1  |
| AX-157907670 | 1 | 83.79  | KV452713.1  | 8415687 | 1-scf00011 | 1  |
| AX-157907674 | 1 | 83.838 | KV452713.1  | 8421092 | 1-scf00011 | 1  |
| AX-157907675 | 1 | 83.948 | KV452713.1  | 8422035 | 1-scf00011 | 1  |
| AX-157907676 | 1 | 83.948 | KV452713.1  | 8423041 | 1-scf00011 | 1  |
| AX-157907678 | 1 | 83.948 | KV452713.1  | 8425687 | 1-scf00011 | 1  |
| AX-157907685 | 1 | 84.111 | KV452713.1  | 8439230 | 1-scf00011 | 1  |
| AX-157907686 | 1 | 84.275 | KV452713.1  | 8439772 | 1-scf00011 | 1  |
| AX-158389528 | 1 | 84.275 | KV452713.1  | 8440638 | 1-scf00011 | 1  |
| AX-157907687 | 1 | 84.275 | KV452713.1  | 8440999 | 1-scf00011 | 1  |
| AX-157907691 | 1 | 84.275 | KV452713.1  | 8448708 | 1-scf00011 | 1  |
| AX-157907692 | 1 | 84.275 | KV452713.1  | 8449734 | 1-scf00011 | 1  |
| AX-157907693 | 1 | 84.275 | KV452713.1  | 8450199 | 1-scf00011 | 1  |
| AX-157907694 | 1 | 84.275 | KV452713.1  | 8453909 | 1-scf00011 | 1  |
| AX-157720865 | 1 | 84.275 | KV452713.1  | 8454860 | 1-scf00011 | 1  |
| AX-158414744 | 1 | 84.275 | KV452713.1  | 8455825 | 1-scf00011 | 1  |
| AX-157907695 | 1 | 84.275 | KV452713.1  | 8458940 | 1-scf00011 | 1  |
| AX-157907696 | 1 | 84.275 | KV452713.1  | 8459341 | 1-scf00011 | 1  |
| AX-157907699 | 1 | 84.275 | KV452713.1  | 8465871 | 1-scf00011 | 1  |

|              |   |        |            |         |            |   |
|--------------|---|--------|------------|---------|------------|---|
| AX-157907702 | 1 | 84.275 | KV452713.1 | 8468719 | 1-scf00011 | 1 |
| AX-157907703 | 1 | 84.275 | KV452713.1 | 8470278 | 1-scf00011 | 1 |
| AX-157907704 | 1 | 84.275 | KV452713.1 | 8472536 | 1-scf00011 | 1 |
| AX-157907706 | 1 | 84.275 | KV452713.1 | 8474139 | 1-scf00011 | 1 |
| AX-157907711 | 1 | 84.275 | KV452713.1 | 8480182 | 1-scf00011 | 1 |
| AX-157907712 | 1 | 84.275 | KV452713.1 | 8480828 | 1-scf00011 | 1 |
| AX-157907713 | 1 | 84.275 | KV452713.1 | 8482980 | 1-scf00011 | 1 |
| AX-157907714 | 1 | 84.275 | KV452713.1 | 8484985 | 1-scf00011 | 1 |
| AX-157907752 | 1 | 84.275 | KV452713.1 | 8527232 | 1-scf00011 | 1 |
| AX-157907715 | 1 | 84.334 | KV452713.1 | 8487026 | 1-scf00011 | 1 |
| AX-157907681 | 1 | 84.384 | KV452713.1 | 8428625 | 1-scf00011 | 1 |
| AX-157907709 | 1 | 84.384 | KV452713.1 | 8478573 | 1-scf00011 | 1 |
| AX-157907717 | 1 | 84.384 | KV452713.1 | 8488745 | 1-scf00011 | 1 |
| AX-157907718 | 1 | 84.384 | KV452713.1 | 8489088 | 1-scf00011 | 1 |
| AX-157907719 | 1 | 84.384 | KV452713.1 | 8490182 | 1-scf00011 | 1 |
| AX-157907720 | 1 | 84.384 | KV452713.1 | 8491336 | 1-scf00011 | 1 |
| AX-157907721 | 1 | 84.384 | KV452713.1 | 8491637 | 1-scf00011 | 1 |
| AX-157907722 | 1 | 84.384 | KV452713.1 | 8494110 | 1-scf00011 | 1 |
| AX-157907723 | 1 | 84.384 | KV452713.1 | 8494399 | 1-scf00011 | 1 |
| AX-157907724 | 1 | 84.485 | KV452713.1 | 8495174 | 1-scf00011 | 1 |
| AX-157907729 | 1 | 84.603 | KV452713.1 | 8500617 | 1-scf00011 | 1 |
| AX-157727831 | 1 | 84.603 | KV452713.1 | 8502225 | 1-scf00011 | 1 |
| AX-157907730 | 1 | 84.603 | KV452713.1 | 8502318 | 1-scf00011 | 1 |
| AX-157907734 | 1 | 84.603 | KV452713.1 | 8508543 | 1-scf00011 | 1 |
| AX-157907735 | 1 | 84.603 | KV452713.1 | 8509030 | 1-scf00011 | 1 |
| AX-157773102 | 1 | 84.603 | KV452713.1 | 8510283 | 1-scf00011 | 1 |
| AX-157907737 | 1 | 84.603 | KV452713.1 | 8510503 | 1-scf00011 | 1 |
| AX-157907738 | 1 | 84.603 | KV452713.1 | 8511320 | 1-scf00011 | 1 |
| AX-157907739 | 1 | 84.603 | KV452713.1 | 8511696 | 1-scf00011 | 1 |
| AX-157907740 | 1 | 84.603 | KV452713.1 | 8511929 | 1-scf00011 | 1 |
| AX-157739131 | 1 | 84.603 | KV452713.1 | 8515260 | 1-scf00011 | 1 |
| AX-157907743 | 1 | 84.603 | KV452713.1 | 8515410 | 1-scf00011 | 1 |
| AX-157907748 | 1 | 84.603 | KV452713.1 | 8523250 | 1-scf00011 | 1 |
| AX-157741065 | 1 | 84.603 | KV452713.1 | 8525573 | 1-scf00011 | 1 |
| AX-157907750 | 1 | 84.603 | KV452713.1 | 8526221 | 1-scf00011 | 1 |
| AX-157907751 | 1 | 84.603 | KV452713.1 | 8526925 | 1-scf00011 | 1 |
| AX-157907753 | 1 | 84.603 | KV452713.1 | 8528994 | 1-scf00011 | 1 |
| AX-157907757 | 1 | 84.603 | KV452713.1 | 8530861 | 1-scf00011 | 1 |
| AX-157812006 | 1 | 84.645 | KV452713.1 | 8531252 | 1-scf00011 | 1 |
| AX-157732146 | 1 | 84.645 | KV452713.1 | 8538446 | 1-scf00011 | 1 |
| AX-157907758 | 1 | 84.688 | KV452713.1 | 8532495 | 1-scf00011 | 1 |
| AX-157864440 | 1 | 84.688 | KV452713.1 | 8539668 | 1-scf00011 | 1 |
| AX-157907759 | 1 | 84.712 | KV452713.1 | 8533944 | 1-scf00011 | 1 |
| AX-157907760 | 1 | 84.712 | KV452713.1 | 8540279 | 1-scf00011 | 1 |
| AX-157907761 | 1 | 84.712 | KV452713.1 | 8540428 | 1-scf00011 | 1 |
| AX-157812007 | 1 | 84.712 | KV452713.1 | 8542794 | 1-scf00011 | 1 |
| AX-157907763 | 1 | 84.712 | KV452713.1 | 8545226 | 1-scf00011 | 1 |
| AX-157907764 | 1 | 84.93  | KV452713.1 | 8546131 | 1-scf00011 | 1 |
| AX-157907766 | 1 | 84.93  | KV452713.1 | 8547062 | 1-scf00011 | 1 |
| AX-157745708 | 1 | 84.93  | KV452713.1 | 8548613 | 1-scf00011 | 1 |
| AX-157907772 | 1 | 84.93  | KV452713.1 | 8554831 | 1-scf00011 | 1 |

|              |   |        |            |         |            |   |
|--------------|---|--------|------------|---------|------------|---|
| AX-157907773 | 1 | 84.93  | KV452713.1 | 8555651 | 1-scf00011 | 1 |
| AX-157907775 | 1 | 84.93  | KV452713.1 | 8556925 | 1-scf00011 | 1 |
| AX-157907776 | 1 | 84.93  | KV452713.1 | 8557831 | 1-scf00011 | 1 |
| AX-157812012 | 1 | 84.93  | KV452713.1 | 8558529 | 1-scf00011 | 1 |
| AX-157907777 | 1 | 84.93  | KV452713.1 | 8558654 | 1-scf00011 | 1 |
| AX-157853633 | 1 | 84.93  | KV452713.1 | 8559670 | 1-scf00011 | 1 |
| AX-157907780 | 1 | 85.149 | KV452713.1 | 8563685 | 1-scf00011 | 1 |
| AX-158404806 | 1 | 85.149 | KV452713.1 | 8563960 | 1-scf00011 | 1 |
| AX-158404807 | 1 | 85.149 | KV452713.1 | 8564132 | 1-scf00011 | 1 |
| AX-157907781 | 1 | 85.149 | KV452713.1 | 8565697 | 1-scf00011 | 1 |
| AX-157907783 | 1 | 85.198 | KV452713.1 | 8567885 | 1-scf00011 | 1 |
| AX-157751117 | 1 | 85.239 | KV452713.1 | 8568352 | 1-scf00011 | 1 |
| AX-157907785 | 1 | 85.239 | KV452713.1 | 8571016 | 1-scf00011 | 1 |
| AX-157907791 | 1 | 85.239 | KV452713.1 | 8578108 | 1-scf00011 | 1 |
| AX-157907767 | 1 | 85.258 | KV452713.1 | 8547997 | 1-scf00011 | 1 |
| AX-157907774 | 1 | 85.258 | KV452713.1 | 8556014 | 1-scf00011 | 1 |
| AX-157812013 | 1 | 85.258 | KV452713.1 | 8561702 | 1-scf00011 | 1 |
| AX-157907784 | 1 | 85.258 | KV452713.1 | 8568887 | 1-scf00011 | 1 |
| AX-157907786 | 1 | 85.258 | KV452713.1 | 8572075 | 1-scf00011 | 1 |
| AX-157907787 | 1 | 85.258 | KV452713.1 | 8572650 | 1-scf00011 | 1 |
| AX-157907788 | 1 | 85.258 | KV452713.1 | 8574905 | 1-scf00011 | 1 |
| AX-157907789 | 1 | 85.258 | KV452713.1 | 8576353 | 1-scf00011 | 1 |
| AX-157726212 | 1 | 85.258 | KV452713.1 | 8576682 | 1-scf00011 | 1 |
| AX-157907797 | 1 | 85.258 | KV452713.1 | 8586511 | 1-scf00011 | 1 |
| AX-157907769 | 1 | 85.259 | KV452713.1 | 8550237 | 1-scf00011 | 1 |
| AX-157907793 | 1 | 85.259 | KV452713.1 | 8580652 | 1-scf00011 | 1 |
| AX-157907794 | 1 | 85.259 | KV452713.1 | 8581647 | 1-scf00011 | 1 |
| AX-157907800 | 1 | 85.668 | KV452713.1 | 8603160 | 1-scf00011 | 1 |
| AX-157721740 | 1 | 85.668 | KV452713.1 | 8610374 | 1-scf00011 | 1 |
| AX-157907802 | 1 | 85.668 | KV452713.1 | 8611969 | 1-scf00011 | 1 |
| AX-157907803 | 1 | 85.668 | KV452713.1 | 8615514 | 1-scf00011 | 1 |
| AX-157907804 | 1 | 85.713 | KV452713.1 | 8617430 | 1-scf00011 | 1 |
| AX-157716618 | 1 | 85.804 | KV452713.1 | 8619983 | 1-scf00011 | 1 |
| AX-157812019 | 1 | 85.804 | KV452713.1 | 8622954 | 1-scf00011 | 1 |
| AX-157907809 | 1 | 85.804 | KV452713.1 | 8623896 | 1-scf00011 | 1 |
| AX-157907810 | 1 | 85.804 | KV452713.1 | 8626513 | 1-scf00011 | 1 |
| AX-157907812 | 1 | 85.804 | KV452713.1 | 8629240 | 1-scf00011 | 1 |
| AX-157907815 | 1 | 85.804 | KV452713.1 | 8634207 | 1-scf00011 | 1 |
| AX-157907807 | 1 | 86.023 | KV452713.1 | 8622216 | 1-scf00011 | 1 |
| AX-157715258 | 1 | 86.023 | KV452713.1 | 8631783 | 1-scf00011 | 1 |
| AX-157907817 | 1 | 86.023 | KV452713.1 | 8635269 | 1-scf00011 | 1 |
| AX-157907819 | 1 | 86.023 | KV452713.1 | 8637325 | 1-scf00011 | 1 |
| AX-157907820 | 1 | 86.023 | KV452713.1 | 8639287 | 1-scf00011 | 1 |
| AX-157812024 | 1 | 86.023 | KV452713.1 | 8639982 | 1-scf00011 | 1 |
| AX-157743676 | 1 | 86.023 | KV452713.1 | 8640624 | 1-scf00011 | 1 |
| AX-157812025 | 1 | 86.023 | KV452713.1 | 8640736 | 1-scf00011 | 1 |
| AX-157812026 | 1 | 86.023 | KV452713.1 | 8642964 | 1-scf00011 | 1 |
| AX-157907821 | 1 | 86.023 | KV452713.1 | 8644036 | 1-scf00011 | 1 |
| AX-157907822 | 1 | 86.023 | KV452713.1 | 8644604 | 1-scf00011 | 1 |
| AX-157907823 | 1 | 86.023 | KV452713.1 | 8645147 | 1-scf00011 | 1 |
| AX-157713598 | 1 | 86.241 | KV452713.1 | 8656802 | 1-scf00011 | 1 |



|              |   |        |            |         |            |   |
|--------------|---|--------|------------|---------|------------|---|
| AX-157907831 | 1 | 86.46  | KV452713.1 | 8657281 | 1-scf00011 | 1 |
| AX-157907832 | 1 | 86.46  | KV452713.1 | 8659063 | 1-scf00011 | 1 |
| AX-157812027 | 1 | 86.46  | KV452713.1 | 8659966 | 1-scf00011 | 1 |
| AX-157907806 | 1 | 86.787 | KV452713.1 | 8619672 | 1-scf00011 | 1 |
| AX-157748507 | 1 | 86.787 | KV452713.1 | 8665179 | 1-scf00011 | 1 |
| AX-157907836 | 1 | 86.787 | KV452713.1 | 8670714 | 1-scf00011 | 1 |
| AX-157907838 | 1 | 86.787 | KV452713.1 | 8673235 | 1-scf00011 | 1 |
| AX-157907841 | 1 | 86.787 | KV452713.1 | 8677855 | 1-scf00011 | 1 |
| AX-157907848 | 1 | 86.787 | KV452713.1 | 8684534 | 1-scf00011 | 1 |
| AX-157907849 | 1 | 86.787 | KV452713.1 | 8686748 | 1-scf00011 | 1 |
| AX-157713517 | 1 | 86.835 | KV452713.1 | 8660743 | 1-scf00011 | 1 |
| AX-157907839 | 1 | 86.835 | KV452713.1 | 8674527 | 1-scf00011 | 1 |
| AX-157874503 | 1 | 86.835 | KV452713.1 | 8681447 | 1-scf00011 | 1 |
| AX-157907851 | 1 | 86.835 | KV452713.1 | 8687384 | 1-scf00011 | 1 |
| AX-157812028 | 1 | 86.863 | KV452713.1 | 8669753 | 1-scf00011 | 1 |
| AX-157722220 | 1 | 86.863 | KV452713.1 | 8693183 | 1-scf00011 | 1 |
| AX-157907854 | 1 | 86.896 | KV452713.1 | 8697541 | 1-scf00011 | 1 |
| AX-157907857 | 1 | 86.896 | KV452713.1 | 8700828 | 1-scf00011 | 1 |
| AX-157907860 | 1 | 86.896 | KV452713.1 | 8702986 | 1-scf00011 | 1 |
| AX-158389532 | 1 | 86.896 | KV452713.1 | 8704200 | 1-scf00011 | 1 |
| AX-157907865 | 1 | 87.115 | KV452713.1 | 8712358 | 1-scf00011 | 1 |
| AX-157743349 | 1 | 87.145 | KV452713.1 | 8713373 | 1-scf00011 | 1 |
| AX-157907866 | 1 | 87.174 | KV452713.1 | 8714488 | 1-scf00011 | 1 |
| AX-157907870 | 1 | 87.2   | KV452713.1 | 8720796 | 1-scf00011 | 1 |
| AX-157907871 | 1 | 87.224 | KV452713.1 | 8721628 | 1-scf00011 | 1 |
| AX-157907876 | 1 | 87.271 | KV452713.1 | 8727982 | 1-scf00011 | 1 |
| AX-157907877 | 1 | 87.293 | KV452713.1 | 8729469 | 1-scf00011 | 1 |
| AX-157907878 | 1 | 87.333 | KV452713.1 | 8733308 | 1-scf00011 | 1 |
| AX-157907879 | 1 | 87.333 | KV452713.1 | 8735043 | 1-scf00011 | 1 |
| AX-157907881 | 1 | 87.333 | KV452713.1 | 8736055 | 1-scf00011 | 1 |
| AX-157907883 | 1 | 87.333 | KV452713.1 | 8738425 | 1-scf00011 | 1 |
| AX-157907884 | 1 | 87.333 | KV452713.1 | 8739849 | 1-scf00011 | 1 |
| AX-157907887 | 1 | 87.333 | KV452713.1 | 8743018 | 1-scf00011 | 1 |
| AX-157907889 | 1 | 87.333 | KV452713.1 | 8751086 | 1-scf00011 | 1 |
| AX-157907890 | 1 | 87.333 | KV452713.1 | 8751483 | 1-scf00011 | 1 |
| AX-158379197 | 1 | 87.333 | KV452713.1 | 8755215 | 1-scf00011 | 1 |
| AX-157742017 | 1 | 87.333 | KV452713.1 | 8755360 | 1-scf00011 | 1 |
| AX-157907896 | 1 | 87.333 | KV452713.1 | 8758730 | 1-scf00011 | 1 |
| AX-157907898 | 1 | 87.333 | KV452713.1 | 8759611 | 1-scf00011 | 1 |
| AX-157907900 | 1 | 87.34  | KV452713.1 | 8762890 | 1-scf00011 | 1 |
| AX-157907927 | 1 | 87.34  | KV452713.1 | 8791794 | 1-scf00011 | 1 |
| AX-157747173 | 1 | 87.371 | KV452713.1 | 8765674 | 1-scf00011 | 1 |
| AX-157907902 | 1 | 87.371 | KV452713.1 | 8768115 | 1-scf00011 | 1 |
| AX-157907904 | 1 | 87.408 | KV452713.1 | 8771731 | 1-scf00011 | 1 |
| AX-157907862 | 1 | 87.443 | KV452713.1 | 8704569 | 1-scf00011 | 1 |
| AX-157907874 | 1 | 87.443 | KV452713.1 | 8725659 | 1-scf00011 | 1 |
| AX-157907891 | 1 | 87.443 | KV452713.1 | 8752230 | 1-scf00011 | 1 |
| AX-157907908 | 1 | 87.443 | KV452713.1 | 8773855 | 1-scf00011 | 1 |
| AX-157907912 | 1 | 87.443 | KV452713.1 | 8777744 | 1-scf00011 | 1 |
| AX-157907913 | 1 | 87.443 | KV452713.1 | 8779642 | 1-scf00011 | 1 |
| AX-157907914 | 1 | 87.443 | KV452713.1 | 8779852 | 1-scf00011 | 1 |

|              |   |        |            |         |            |   |
|--------------|---|--------|------------|---------|------------|---|
| AX-157907880 | 1 | 87.77  | KV452713.1 | 8735393 | 1-scf00011 | 1 |
| AX-157907894 | 1 | 87.77  | KV452713.1 | 8758007 | 1-scf00011 | 1 |
| AX-157744893 | 1 | 87.77  | KV452713.1 | 8764809 | 1-scf00011 | 1 |
| AX-157907911 | 1 | 87.77  | KV452713.1 | 8777250 | 1-scf00011 | 1 |
| AX-157907917 | 1 | 87.77  | KV452713.1 | 8781973 | 1-scf00011 | 1 |
| AX-157907919 | 1 | 87.77  | KV452713.1 | 8782482 | 1-scf00011 | 1 |
| AX-157907920 | 1 | 87.77  | KV452713.1 | 8783408 | 1-scf00011 | 1 |
| AX-157907921 | 1 | 87.77  | KV452713.1 | 8783795 | 1-scf00011 | 1 |
| AX-157907923 | 1 | 87.77  | KV452713.1 | 8786810 | 1-scf00011 | 1 |
| AX-157907924 | 1 | 87.77  | KV452713.1 | 8790616 | 1-scf00011 | 1 |
| AX-157907926 | 1 | 88     | KV452713.1 | 8791371 | 1-scf00011 | 1 |
| AX-157907949 | 1 | 88     | KV452713.1 | 8821226 | 1-scf00011 | 1 |
| AX-157907929 | 1 | 88.098 | KV452713.1 | 8792809 | 1-scf00011 | 1 |
| AX-157907932 | 1 | 88.099 | KV452713.1 | 8796275 | 1-scf00011 | 1 |
| AX-157907933 | 1 | 88.099 | KV452713.1 | 8796422 | 1-scf00011 | 1 |
| AX-157907934 | 1 | 88.099 | KV452713.1 | 8797643 | 1-scf00011 | 1 |
| AX-157907936 | 1 | 88.099 | KV452713.1 | 8798505 | 1-scf00011 | 1 |
| AX-157907938 | 1 | 88.099 | KV452713.1 | 8802213 | 1-scf00011 | 1 |
| AX-157883357 | 1 | 88.099 | KV452713.1 | 8802449 | 1-scf00011 | 1 |
| AX-157756056 | 1 | 88.099 | KV452713.1 | 8804881 | 1-scf00011 | 1 |
| AX-157907940 | 1 | 88.099 | KV452713.1 | 8806538 | 1-scf00011 | 1 |
| AX-157907941 | 1 | 88.099 | KV452713.1 | 8809130 | 1-scf00011 | 1 |
| AX-157907943 | 1 | 88.099 | KV452713.1 | 8811396 | 1-scf00011 | 1 |
| AX-157770970 | 1 | 88.099 | KV452713.1 | 8811812 | 1-scf00011 | 1 |
| AX-157907944 | 1 | 88.099 | KV452713.1 | 8812343 | 1-scf00011 | 1 |
| AX-157907963 | 1 | 88.099 | KV452713.1 | 8841309 | 1-scf00011 | 1 |
| AX-157907945 | 1 | 88.244 | KV452713.1 | 8817184 | 1-scf00011 | 1 |
| AX-157750674 | 1 | 88.245 | KV452713.1 | 8803396 | 1-scf00011 | 1 |
| AX-157907942 | 1 | 88.245 | KV452713.1 | 8810659 | 1-scf00011 | 1 |
| AX-157907946 | 1 | 88.245 | KV452713.1 | 8818080 | 1-scf00011 | 1 |
| AX-157907951 | 1 | 88.356 | KV452713.1 | 8822424 | 1-scf00011 | 1 |
| AX-157907953 | 1 | 88.532 | KV452713.1 | 8826030 | 1-scf00011 | 1 |
| AX-157907895 | 1 | 88.534 | KV452713.1 | 8758454 | 1-scf00011 | 1 |
| AX-157907955 | 1 | 88.534 | KV452713.1 | 8828095 | 1-scf00011 | 1 |
| AX-157907899 | 1 | 88.536 | KV452713.1 | 8762667 | 1-scf00011 | 1 |
| AX-157907922 | 1 | 88.536 | KV452713.1 | 8785497 | 1-scf00011 | 1 |
| AX-157907956 | 1 | 88.536 | KV452713.1 | 8829949 | 1-scf00011 | 1 |
| AX-157907957 | 1 | 88.536 | KV452713.1 | 8832972 | 1-scf00011 | 1 |
| AX-157775584 | 1 | 88.536 | KV452713.1 | 8834786 | 1-scf00011 | 1 |
| AX-157907958 | 1 | 88.536 | KV452713.1 | 8836519 | 1-scf00011 | 1 |
| AX-157907961 | 1 | 88.548 | KV452713.1 | 8838883 | 1-scf00011 | 1 |
| AX-157907965 | 1 | 89.076 | KV452713.1 | 8842975 | 1-scf00011 | 1 |
| AX-157907966 | 1 | 89.076 | KV452713.1 | 8843746 | 1-scf00011 | 1 |
| AX-157907968 | 1 | 89.077 | KV452713.1 | 8847080 | 1-scf00011 | 1 |
| AX-157907969 | 1 | 89.1   | KV452713.1 | 8847456 | 1-scf00011 | 1 |
| AX-157907972 | 1 | 89.228 | KV452713.1 | 8851446 | 1-scf00011 | 1 |
| AX-157757991 | 1 | 89.228 | KV452713.1 | 8853050 | 1-scf00011 | 1 |
| AX-157907975 | 1 | 89.434 | KV452713.1 | 8856598 | 1-scf00011 | 1 |
| AX-157907976 | 1 | 89.55  | KV452713.1 | 8857977 | 1-scf00011 | 1 |
| AX-157812031 | 1 | 89.848 | KV452713.1 | 8862161 | 1-scf00011 | 1 |
| AX-157907979 | 1 | 89.848 | KV452713.1 | 8863124 | 1-scf00011 | 1 |

|              |   |        |            |         |            |   |
|--------------|---|--------|------------|---------|------------|---|
| AX-157746769 | 1 | 89.848 | KV452713.1 | 8863499 | 1-scf00011 | 1 |
| AX-157853635 | 1 | 89.919 | KV452713.1 | 8867991 | 1-scf00011 | 1 |
| AX-157907983 | 1 | 90.177 | KV452713.1 | 8870236 | 1-scf00011 | 1 |
| AX-157740449 | 1 | 90.177 | KV452713.1 | 8876006 | 1-scf00011 | 1 |
| AX-157907985 | 1 | 90.177 | KV452713.1 | 8880205 | 1-scf00011 | 1 |
| AX-157907986 | 1 | 90.177 | KV452713.1 | 8880616 | 1-scf00011 | 1 |
| AX-157907996 | 1 | 90.177 | KV452713.1 | 8892653 | 1-scf00011 | 1 |
| AX-157907997 | 1 | 90.177 | KV452713.1 | 8892762 | 1-scf00011 | 1 |
| AX-157907987 | 1 | 90.179 | KV452713.1 | 8881288 | 1-scf00011 | 1 |
| AX-157907992 | 1 | 90.329 | KV452713.1 | 8886281 | 1-scf00011 | 1 |
| AX-157907989 | 1 | 90.458 | KV452713.1 | 8882760 | 1-scf00011 | 1 |
| AX-157907993 | 1 | 90.458 | KV452713.1 | 8887728 | 1-scf00011 | 1 |
| AX-157725188 | 1 | 90.458 | KV452713.1 | 8890549 | 1-scf00011 | 1 |
| AX-157907995 | 1 | 90.458 | KV452713.1 | 8891186 | 1-scf00011 | 1 |
| AX-158382142 | 1 | 90.458 | KV452713.1 | 8892304 | 1-scf00011 | 1 |
| AX-157908000 | 1 | 90.458 | KV452713.1 | 8898109 | 1-scf00011 | 1 |
| AX-157707156 | 1 | 90.547 | KV452713.1 | 8865023 | 1-scf00011 | 1 |
| AX-157907981 | 1 | 90.547 | KV452713.1 | 8868904 | 1-scf00011 | 1 |
| AX-157750112 | 1 | 90.547 | KV452713.1 | 8889254 | 1-scf00011 | 1 |
| AX-157908013 | 1 | 90.547 | KV452713.1 | 8913314 | 1-scf00011 | 1 |
| AX-157812038 | 1 | 90.547 | KV452713.1 | 8913470 | 1-scf00011 | 1 |
| AX-157908021 | 1 | 90.547 | KV452713.1 | 8921286 | 1-scf00011 | 1 |
| AX-157908002 | 1 | 90.66  | KV452713.1 | 8902887 | 1-scf00011 | 1 |
| AX-157812037 | 1 | 90.753 | KV452713.1 | 8903460 | 1-scf00011 | 1 |
| AX-157907998 | 1 | 90.801 | KV452713.1 | 8895873 | 1-scf00011 | 1 |
| AX-157907999 | 1 | 90.801 | KV452713.1 | 8897026 | 1-scf00011 | 1 |
| AX-157908003 | 1 | 90.801 | KV452713.1 | 8905339 | 1-scf00011 | 1 |
| AX-157908010 | 1 | 90.825 | KV452713.1 | 8911197 | 1-scf00011 | 1 |
| AX-157908012 | 1 | 90.912 | KV452713.1 | 8912487 | 1-scf00011 | 1 |
| AX-157908014 | 1 | 90.943 | KV452713.1 | 8914067 | 1-scf00011 | 1 |
| AX-157721234 | 1 | 90.943 | KV452713.1 | 8915948 | 1-scf00011 | 1 |
| AX-157908017 | 1 | 90.943 | KV452713.1 | 8917120 | 1-scf00011 | 1 |
| AX-157908020 | 1 | 90.943 | KV452713.1 | 8919433 | 1-scf00011 | 1 |
| AX-157908022 | 1 | 90.943 | KV452713.1 | 8921957 | 1-scf00011 | 1 |
| AX-157908023 | 1 | 90.943 | KV452713.1 | 8922606 | 1-scf00011 | 1 |
| AX-157908025 | 1 | 91.278 | KV452713.1 | 8924189 | 1-scf00011 | 1 |
| AX-157908028 | 1 | 91.293 | KV452713.1 | 8933869 | 1-scf00011 | 1 |
| AX-157908030 | 1 | 91.538 | KV452713.1 | 8934829 | 1-scf00011 | 1 |
| AX-157908031 | 1 | 91.539 | KV452713.1 | 8935819 | 1-scf00011 | 1 |
| AX-157908033 | 1 | 91.86  | KV452713.1 | 8938498 | 1-scf00011 | 1 |
| AX-157908037 | 1 | 92.313 | KV452713.1 | 8943721 | 1-scf00011 | 1 |
| AX-157715304 | 1 | 92.34  | KV452713.1 | 8945136 | 1-scf00011 | 1 |
| AX-157908039 | 1 | 92.389 | KV452713.1 | 8948925 | 1-scf00011 | 1 |
| AX-157908042 | 1 | 92.389 | KV452713.1 | 8952555 | 1-scf00011 | 1 |
| AX-157908043 | 1 | 92.389 | KV452713.1 | 8954165 | 1-scf00011 | 1 |
| AX-157908044 | 1 | 92.573 | KV452713.1 | 8954719 | 1-scf00011 | 1 |
| AX-157908056 | 1 | 92.573 | KV452713.1 | 8970151 | 1-scf00011 | 1 |
| AX-157726401 | 1 | 92.778 | KV452713.1 | 8957252 | 1-scf00011 | 1 |
| AX-157908045 | 1 | 92.778 | KV452713.1 | 8959625 | 1-scf00011 | 1 |
| AX-157908046 | 1 | 92.778 | KV452713.1 | 8960067 | 1-scf00011 | 1 |
| AX-157908049 | 1 | 92.778 | KV452713.1 | 8962418 | 1-scf00011 | 1 |

|              |   |        |            |         |            |   |
|--------------|---|--------|------------|---------|------------|---|
| AX-157908050 | 1 | 92.778 | KV452713.1 | 8963691 | 1-scf00011 | 1 |
| AX-157908051 | 1 | 92.778 | KV452713.1 | 8964858 | 1-scf00011 | 1 |
| AX-157908057 | 1 | 92.969 | KV452713.1 | 8971239 | 1-scf00011 | 1 |
| AX-157908058 | 1 | 93.165 | KV452713.1 | 8973159 | 1-scf00011 | 1 |
| AX-157853636 | 1 | 93.173 | KV452713.1 | 8975233 | 1-scf00011 | 1 |
| AX-157908059 | 1 | 93.173 | KV452713.1 | 8975355 | 1-scf00011 | 1 |
| AX-157908061 | 1 | 93.437 | KV452713.1 | 8978675 | 1-scf00011 | 1 |
| AX-157908053 | 1 | 93.662 | KV452713.1 | 8968808 | 1-scf00011 | 1 |
| AX-157853638 | 1 | 93.662 | KV452713.1 | 8979929 | 1-scf00011 | 1 |
| AX-157908064 | 1 | 93.662 | KV452713.1 | 8983167 | 1-scf00011 | 1 |
| AX-157719036 | 1 | 93.662 | KV452713.1 | 8984125 | 1-scf00011 | 1 |
| AX-157908066 | 1 | 93.662 | KV452713.1 | 8987076 | 1-scf00011 | 1 |
| AX-157908067 | 1 | 94.006 | KV452713.1 | 8987834 | 1-scf00011 | 1 |
| AX-157908073 | 1 | 94.025 | KV452713.1 | 8995416 | 1-scf00011 | 1 |
| AX-157908085 | 1 | 94.716 | KV452713.1 | 9011773 | 1-scf00011 | 1 |
| AX-157908089 | 1 | 94.89  | KV452713.1 | 9019890 | 1-scf00011 | 1 |
| AX-157908090 | 1 | 94.89  | KV452713.1 | 9020554 | 1-scf00011 | 1 |
| AX-157908096 | 1 | 94.891 | KV452713.1 | 9027277 | 1-scf00011 | 1 |
| AX-157874511 | 1 | 95.054 | KV452713.1 | 9009959 | 1-scf00011 | 1 |
| AX-157908095 | 1 | 95.054 | KV452713.1 | 9026867 | 1-scf00011 | 1 |
| AX-157908097 | 1 | 95.054 | KV452713.1 | 9028087 | 1-scf00011 | 1 |
| AX-157908100 | 1 | 95.09  | KV452713.1 | 9032343 | 1-scf00011 | 1 |
| AX-157908102 | 1 | 95.218 | KV452713.1 | 9036590 | 1-scf00011 | 1 |
| AX-157746531 | 1 | 95.218 | KV452713.1 | 9037113 | 1-scf00011 | 1 |
| AX-157908107 | 1 | 95.218 | KV452713.1 | 9050819 | 1-scf00011 | 1 |
| AX-157908111 | 1 | 95.218 | KV452713.1 | 9056857 | 1-scf00011 | 1 |
| AX-157774213 | 1 | 95.218 | KV452713.1 | 9060588 | 1-scf00011 | 1 |
| AX-157908116 | 1 | 95.218 | KV452713.1 | 9067862 | 1-scf00011 | 1 |
| AX-157862641 | 1 | 95.218 | KV452713.1 | 9070679 | 1-scf00011 | 1 |
| AX-157812041 | 1 | 95.218 | KV452713.1 | 9072005 | 1-scf00011 | 1 |
| AX-157908103 | 1 | 95.437 | KV452713.1 | 9042706 | 1-scf00011 | 1 |
| AX-157908119 | 1 | 95.437 | KV452713.1 | 9076021 | 1-scf00011 | 1 |
| AX-157812042 | 1 | 95.437 | KV452713.1 | 9076615 | 1-scf00011 | 1 |
| AX-157908120 | 1 | 95.437 | KV452713.1 | 9076754 | 1-scf00011 | 1 |
| AX-157908121 | 1 | 95.437 | KV452713.1 | 9077670 | 1-scf00011 | 1 |
| AX-157812043 | 1 | 95.437 | KV452713.1 | 9079123 | 1-scf00011 | 1 |
| AX-157908123 | 1 | 95.437 | KV452713.1 | 9079791 | 1-scf00011 | 1 |
| AX-157908125 | 1 | 95.498 | KV452713.1 | 9081904 | 1-scf00011 | 1 |
| AX-157908118 | 1 | 95.546 | KV452713.1 | 9074772 | 1-scf00011 | 1 |
| AX-157752088 | 1 | 95.546 | KV452713.1 | 9084953 | 1-scf00011 | 1 |
| AX-157812044 | 1 | 95.546 | KV452713.1 | 9085482 | 1-scf00011 | 1 |
| AX-157908127 | 1 | 95.546 | KV452713.1 | 9086848 | 1-scf00011 | 1 |
| AX-157874516 | 1 | 95.546 | KV452713.1 | 9090122 | 1-scf00011 | 1 |
| AX-157812045 | 1 | 95.546 | KV452713.1 | 9090726 | 1-scf00011 | 1 |
| AX-157908130 | 1 | 95.546 | KV452713.1 | 9091331 | 1-scf00011 | 1 |
| AX-157908131 | 1 | 95.546 | KV452713.1 | 9091874 | 1-scf00011 | 1 |
| AX-157908132 | 1 | 95.546 | KV452713.1 | 9098075 | 1-scf00011 | 1 |
| AX-157908133 | 1 | 95.546 | KV452713.1 | 9099346 | 1-scf00011 | 1 |
| AX-157908134 | 1 | 95.546 | KV452713.1 | 9100530 | 1-scf00011 | 1 |
| AX-157908135 | 1 | 95.546 | KV452713.1 | 9101007 | 1-scf00011 | 1 |
| AX-158379200 | 1 | 95.546 | KV452713.1 | 9115499 | 1-scf00011 | 1 |

|              |   |        |             |         |            |    |
|--------------|---|--------|-------------|---------|------------|----|
| AX-157908138 | 1 | 95.764 | KV452713.1  | 9106114 | 1-scf00011 | 1  |
| AX-157908139 | 1 | 95.764 | KV452713.1  | 9106349 | 1-scf00011 | 1  |
| AX-157908140 | 1 | 95.764 | KV452713.1  | 9106748 | 1-scf00011 | 1  |
| AX-157741691 | 1 | 96.092 | KV452713.1  | 9114106 | 1-scf00011 | 1  |
| AX-157713151 | 1 | 96.092 | KV452713.1  | 9120129 | 1-scf00011 | 1  |
| AX-157719373 | 1 | 96.102 | KV452713.1  | 9134414 | 1-scf00011 | 1  |
| AX-157908151 | 1 | 96.102 | KV452713.1  | 9147113 | 1-scf00011 | 1  |
| AX-157908156 | 1 | 96.102 | KV452713.1  | 9154423 | 1-scf00011 | 1  |
| AX-157908147 | 1 | 96.106 | KV452713.1  | 9136763 | 1-scf00011 | 1  |
| AX-157883359 | 1 | 96.106 | KV452713.1  | 9160547 | 1-scf00011 | 1  |
| AX-157908148 | 1 | 96.11  | KV452713.1  | 9137682 | 1-scf00011 | 1  |
| AX-157713439 | 1 | 96.127 | KV452713.1  | 9138644 | 1-scf00011 | 1  |
| AX-157908149 | 1 | 96.138 | KV452713.1  | 9141057 | 1-scf00011 | 1  |
| AX-157908150 | 1 | 96.169 | KV452713.1  | 9145529 | 1-scf00011 | 1  |
| AX-157908152 | 1 | 96.201 | KV452713.1  | 9148406 | 1-scf00011 | 1  |
| AX-157908157 | 1 | 96.201 | KV452713.1  | 9155575 | 1-scf00011 | 1  |
| AX-157908161 | 1 | 96.31  | KV452713.1  | 9165837 | 1-scf00011 | 1  |
| AX-157908163 | 1 | 96.389 | KV452713.1  | 9168196 | 1-scf00011 | 1  |
| AX-157908164 | 1 | 96.419 | KV452713.1  | 9168548 | 1-scf00011 | 1  |
| AX-157908165 | 1 | 96.443 | KV452713.1  | 9169321 | 1-scf00011 | 1  |
| AX-157908167 | 1 | 96.466 | KV452713.1  | 9170850 | 1-scf00011 | 1  |
| AX-157908168 | 1 | 96.485 | KV452713.1  | 9171618 | 1-scf00011 | 1  |
| AX-157751083 | 1 | 96.505 | KV452713.1  | 9184077 | 1-scf00011 | 1  |
| AX-157908172 | 1 | 96.529 | KV452713.1  | 9187284 | 1-scf00011 | 1  |
| AX-157908173 | 1 | 96.529 | KV452713.1  | 9188571 | 1-scf00011 | 1  |
| AX-157775878 | 1 | 96.614 | KV452713.1  | 9194199 | 1-scf00011 | 1  |
| AX-157756463 | 1 | 96.747 | KV452713.1  | 9199661 | 1-scf00011 | 1  |
| AX-157908177 | 1 | 96.747 | KV452713.1  | 9202751 | 1-scf00011 | 1  |
| AX-158382146 | 1 | 97.18  | KV452713.1  | 9208862 | 1-scf00011 | 1  |
| AX-157741723 | 1 | 97.184 | KV452713.1  | 9219052 | 1-scf00011 | 1  |
| AX-157908185 | 1 | 97.294 | KV452713.1  | 9223226 | 1-scf00011 | 1  |
| AX-157908186 | 1 | 97.393 | KV452713.1  | 9223891 | 1-scf00011 | 1  |
| AX-158379201 | 1 | 97.513 | KV452713.1  | 9214138 | 1-scf00011 | 1  |
| AX-157719162 | 1 | 97.513 | KV452713.1  | 9228392 | 1-scf00011 | 1  |
| AX-157908189 | 1 | 97.513 | KV452713.1  | 9232981 | 1-scf00011 | 1  |
| AX-157908191 | 1 | 97.513 | KV452713.1  | 9234449 | 1-scf00011 | 1  |
| AX-157908193 | 1 | 97.513 | KV452713.1  | 9235519 | 1-scf00011 | 1  |
| AX-157908194 | 1 | 97.513 | KV452713.1  | 9236816 | 1-scf00011 | 1  |
| AX-157774919 | 1 | 97.731 | KV452713.1  | 9161536 | 1-scf00011 | 1  |
| AX-157741279 | 1 | 97.731 | KV452713.1  | 9199226 | 1-scf00011 | 1  |
| AX-157908179 | 1 | 97.731 | KV452713.1  | 9210529 | 1-scf00011 | 1  |
| AX-157908184 | 1 | 97.731 | KV452713.1  | 9222737 | 1-scf00011 | 1  |
| AX-157908190 | 1 | 97.731 | KV452713.1  | 9233801 | 1-scf00011 | 1  |
| AX-157908196 | 1 | 97.731 | KV452713.1  | 9241301 | 1-scf00011 | 1  |
| AX-157908197 | 1 | 97.731 | KV452713.1  | 9241586 | 1-scf00011 | 1  |
| AX-157908198 | 1 | 97.731 | KV452713.1  | 9245265 | 1-scf00011 | 1  |
| AX-157908199 | 1 | 97.731 | KV452713.1  | 9245907 | 1-scf00011 | 1  |
| AX-157908200 | 1 | 97.731 | KV452713.1  | 9246333 | 1-scf00011 | 1  |
| AX-157908203 | 1 | 97.731 | KV452713.1  | 9252203 | 1-scf00011 | 1  |
| AX-157908204 | 1 | 97.731 | KV452713.1  | 9252863 | 1-scf00011 | 1  |
| AX-157706586 | 1 | 97.731 | 3ML01032524 | 371     | scf08146_1 | UN |

|              |   |        |            |         |            |   |
|--------------|---|--------|------------|---------|------------|---|
| AX-157908201 | 1 | 97.804 | KV452713.1 | 9249368 | 1-scf00011 | 1 |
| AX-157908206 | 1 | 97.804 | KV452713.1 | 9257288 | 1-scf00011 | 1 |
| AX-157908207 | 1 | 97.804 | KV452713.1 | 9258023 | 1-scf00011 | 1 |
| AX-157908219 | 1 | 97.804 | KV452713.1 | 9274010 | 1-scf00011 | 1 |
| AX-158382147 | 1 | 97.95  | KV452713.1 | 9257957 | 1-scf00011 | 1 |
| AX-157908209 | 1 | 97.95  | KV452713.1 | 9259129 | 1-scf00011 | 1 |
| AX-157908210 | 1 | 97.95  | KV452713.1 | 9260609 | 1-scf00011 | 1 |
| AX-157716619 | 1 | 97.95  | KV452713.1 | 9261620 | 1-scf00011 | 1 |
| AX-157908213 | 1 | 97.95  | KV452713.1 | 9263986 | 1-scf00011 | 1 |
| AX-157757758 | 1 | 97.95  | KV452713.1 | 9271140 | 1-scf00011 | 1 |
| AX-157812053 | 1 | 97.95  | KV452713.1 | 9341792 | 1-scf00011 | 1 |
| AX-157908217 | 1 | 98.277 | KV452713.1 | 9272130 | 1-scf00011 | 1 |
| AX-157908218 | 1 | 98.277 | KV452713.1 | 9272384 | 1-scf00011 | 1 |
| AX-157908215 | 1 | 98.387 | KV452713.1 | 9269628 | 1-scf00011 | 1 |
| AX-157908221 | 1 | 98.387 | KV452713.1 | 9276113 | 1-scf00011 | 1 |
| AX-157724421 | 1 | 98.387 | KV452713.1 | 9282709 | 1-scf00011 | 1 |
| AX-157874520 | 1 | 98.387 | KV452713.1 | 9284965 | 1-scf00011 | 1 |
| AX-157908227 | 1 | 98.387 | KV452713.1 | 9287978 | 1-scf00011 | 1 |
| AX-157812052 | 1 | 98.387 | KV452713.1 | 9294229 | 1-scf00011 | 1 |
| AX-157908230 | 1 | 98.387 | KV452713.1 | 9294752 | 1-scf00011 | 1 |
| AX-157908232 | 1 | 98.387 | KV452713.1 | 9309602 | 1-scf00011 | 1 |
| AX-157908233 | 1 | 98.387 | KV452713.1 | 9310796 | 1-scf00011 | 1 |
| AX-157693250 | 1 | 98.387 | KV452713.1 | 9339145 | 1-scf00011 | 1 |
| AX-157908236 | 1 | 98.389 | KV452713.1 | 9333237 | 1-scf00011 | 1 |
| AX-157908238 | 1 | 98.78  | KV452713.1 | 9343757 | 1-scf00011 | 1 |
| AX-157908239 | 1 | 98.78  | KV452713.1 | 9358557 | 1-scf00011 | 1 |
| AX-157908240 | 1 | 98.78  | KV452713.1 | 9359352 | 1-scf00011 | 1 |
| AX-157908241 | 1 | 98.912 | KV452713.1 | 9363887 | 1-scf00011 | 1 |
| AX-157908242 | 1 | 98.912 | KV452713.1 | 9364652 | 1-scf00011 | 1 |
| AX-157750852 | 1 | 98.912 | KV452713.1 | 9369352 | 1-scf00011 | 1 |
| AX-157908246 | 1 | 99.043 | KV452713.1 | 9370249 | 1-scf00011 | 1 |
| AX-157908247 | 1 | 99.043 | KV452713.1 | 9371488 | 1-scf00011 | 1 |
| AX-157908248 | 1 | 99.043 | KV452713.1 | 9371990 | 1-scf00011 | 1 |
| AX-157908249 | 1 | 99.043 | KV452713.1 | 9372954 | 1-scf00011 | 1 |
| AX-157908254 | 1 | 99.371 | KV452713.1 | 9383192 | 1-scf00011 | 1 |
| AX-157908255 | 1 | 99.371 | KV452713.1 | 9383576 | 1-scf00011 | 1 |
| AX-157908257 | 1 | 99.371 | KV452713.1 | 9385528 | 1-scf00011 | 1 |
| AX-157908280 | 1 | 99.371 | KV452713.1 | 9414648 | 1-scf00011 | 1 |
| AX-157908260 | 1 | 99.395 | KV452713.1 | 9389209 | 1-scf00011 | 1 |
| AX-157908262 | 1 | 99.433 | KV452713.1 | 9391071 | 1-scf00011 | 1 |
| AX-157908263 | 1 | 99.455 | KV452713.1 | 9393342 | 1-scf00011 | 1 |
| AX-157908265 | 1 | 99.48  | KV452713.1 | 9399709 | 1-scf00011 | 1 |
| AX-157908266 | 1 | 99.626 | KV452713.1 | 9400389 | 1-scf00011 | 1 |
| AX-157908268 | 1 | 99.699 | KV452713.1 | 9402426 | 1-scf00011 | 1 |
| AX-157908270 | 1 | 99.699 | KV452713.1 | 9403772 | 1-scf00011 | 1 |
| AX-157908271 | 1 | 99.726 | KV452713.1 | 9406196 | 1-scf00011 | 1 |
| AX-157908272 | 1 | 99.785 | KV452713.1 | 9407167 | 1-scf00011 | 1 |
| AX-157908273 | 1 | 99.841 | KV452713.1 | 9407631 | 1-scf00011 | 1 |
| AX-157908275 | 1 | 99.885 | KV452713.1 | 9409800 | 1-scf00011 | 1 |
| AX-157908277 | 1 | 99.885 | KV452713.1 | 9412686 | 1-scf00011 | 1 |
| AX-157908278 | 1 | 99.917 | KV452713.1 | 9413554 | 1-scf00011 | 1 |

|              |   |         |            |         |            |   |
|--------------|---|---------|------------|---------|------------|---|
| AX-157908281 | 1 | 99.917  | KV452713.1 | 9415271 | 1-scf00011 | 1 |
| AX-157908287 | 1 | 99.917  | KV452713.1 | 9421393 | 1-scf00011 | 1 |
| AX-157908285 | 1 | 99.918  | KV452713.1 | 9420091 | 1-scf00011 | 1 |
| AX-157908291 | 1 | 99.921  | KV452713.1 | 9426794 | 1-scf00011 | 1 |
| AX-157908294 | 1 | 99.923  | KV452713.1 | 9429107 | 1-scf00011 | 1 |
| AX-157908296 | 1 | 99.926  | KV452713.1 | 9430775 | 1-scf00011 | 1 |
| AX-157773967 | 1 | 100.354 | KV452713.1 | 9393795 | 1-scf00011 | 1 |
| AX-157908299 | 1 | 100.354 | KV452713.1 | 9434977 | 1-scf00011 | 1 |
| AX-157738961 | 1 | 100.354 | KV452713.1 | 9441771 | 1-scf00011 | 1 |
| AX-157908302 | 1 | 100.354 | KV452713.1 | 9442410 | 1-scf00011 | 1 |
| AX-157908304 | 1 | 100.354 | KV452713.1 | 9444052 | 1-scf00011 | 1 |
| AX-157908306 | 1 | 100.354 | KV452713.1 | 9446188 | 1-scf00011 | 1 |
| AX-157853640 | 1 | 100.354 | KV452713.1 | 9446242 | 1-scf00011 | 1 |
| AX-157908308 | 1 | 100.354 | KV452713.1 | 9448634 | 1-scf00011 | 1 |
| AX-157908309 | 1 | 100.355 | KV452713.1 | 9450057 | 1-scf00011 | 1 |
| AX-158379202 | 1 | 100.626 | KV452713.1 | 9454087 | 1-scf00011 | 1 |
| AX-157908311 | 1 | 100.626 | KV452713.1 | 9454284 | 1-scf00011 | 1 |
| AX-157908313 | 1 | 100.901 | KV452713.1 | 9457704 | 1-scf00011 | 1 |
| AX-157908314 | 1 | 100.901 | KV452713.1 | 9458551 | 1-scf00011 | 1 |
| AX-157908316 | 1 | 100.901 | KV452713.1 | 9460713 | 1-scf00011 | 1 |
| AX-157908318 | 1 | 101.01  | KV452713.1 | 9462045 | 1-scf00011 | 1 |
| AX-157908319 | 1 | 101.01  | KV452713.1 | 9463489 | 1-scf00011 | 1 |
| AX-157908320 | 1 | 101.049 | KV452713.1 | 9468249 | 1-scf00011 | 1 |
| AX-157908325 | 1 | 101.175 | KV452713.1 | 9478305 | 1-scf00011 | 1 |
| AX-157812054 | 1 | 101.274 | KV452713.1 | 9480129 | 1-scf00011 | 1 |
| AX-157908321 | 1 | 101.337 | KV452713.1 | 9470350 | 1-scf00011 | 1 |
| AX-157908322 | 1 | 101.337 | KV452713.1 | 9473184 | 1-scf00011 | 1 |
| AX-157908326 | 1 | 101.337 | KV452713.1 | 9480869 | 1-scf00011 | 1 |
| AX-157715587 | 1 | 101.337 | KV452713.1 | 9480947 | 1-scf00011 | 1 |
| AX-157812057 | 1 | 101.337 | KV452713.1 | 9544770 | 1-scf00011 | 1 |
| AX-157908327 | 1 | 101.338 | KV452713.1 | 9481458 | 1-scf00011 | 1 |
| AX-157775225 | 1 | 101.338 | KV452713.1 | 9487637 | 1-scf00011 | 1 |
| AX-157908330 | 1 | 101.557 | KV452713.1 | 9488204 | 1-scf00011 | 1 |
| AX-157908335 | 1 | 101.557 | KV452713.1 | 9492241 | 1-scf00011 | 1 |
| AX-157908338 | 1 | 101.557 | KV452713.1 | 9494224 | 1-scf00011 | 1 |
| AX-157908339 | 1 | 101.557 | KV452713.1 | 9495783 | 1-scf00011 | 1 |
| AX-157908357 | 1 | 101.557 | KV452713.1 | 9523505 | 1-scf00011 | 1 |
| AX-157908332 | 1 | 101.666 | KV452713.1 | 9489855 | 1-scf00011 | 1 |
| AX-157908345 | 1 | 101.666 | KV452713.1 | 9504952 | 1-scf00011 | 1 |
| AX-157908348 | 1 | 101.666 | KV452713.1 | 9507634 | 1-scf00011 | 1 |
| AX-157908349 | 1 | 101.666 | KV452713.1 | 9510261 | 1-scf00011 | 1 |
| AX-157908351 | 1 | 101.666 | KV452713.1 | 9512444 | 1-scf00011 | 1 |
| AX-157908352 | 1 | 101.666 | KV452713.1 | 9512880 | 1-scf00011 | 1 |
| AX-157908353 | 1 | 101.718 | KV452713.1 | 9513222 | 1-scf00011 | 1 |
| AX-157908356 | 1 | 101.775 | KV452713.1 | 9521060 | 1-scf00011 | 1 |
| AX-157908358 | 1 | 101.856 | KV452713.1 | 9524760 | 1-scf00011 | 1 |
| AX-157908363 | 1 | 101.94  | KV452713.1 | 9529922 | 1-scf00011 | 1 |
| AX-157908364 | 1 | 102.102 | KV452713.1 | 9530346 | 1-scf00011 | 1 |
| AX-157908365 | 1 | 102.102 | KV452713.1 | 9530830 | 1-scf00011 | 1 |
| AX-157908366 | 1 | 102.102 | KV452713.1 | 9533518 | 1-scf00011 | 1 |
| AX-157754376 | 1 | 102.102 | KV452713.1 | 9562974 | 1-scf00011 | 1 |

|              |   |         |            |         |            |   |
|--------------|---|---------|------------|---------|------------|---|
| AX-157908354 | 1 | 102.103 | KV452713.1 | 9514607 | 1-scf00011 | 1 |
| AX-157908360 | 1 | 102.103 | KV452713.1 | 9527229 | 1-scf00011 | 1 |
| AX-157721168 | 1 | 102.103 | KV452713.1 | 9534213 | 1-scf00011 | 1 |
| AX-157908368 | 1 | 102.103 | KV452713.1 | 9536196 | 1-scf00011 | 1 |
| AX-157908369 | 1 | 102.103 | KV452713.1 | 9537206 | 1-scf00011 | 1 |
| AX-157853644 | 1 | 102.103 | KV452713.1 | 9538675 | 1-scf00011 | 1 |
| AX-157908371 | 1 | 102.103 | KV452713.1 | 9539939 | 1-scf00011 | 1 |
| AX-157908372 | 1 | 102.103 | KV452713.1 | 9540755 | 1-scf00011 | 1 |
| AX-157812058 | 1 | 102.103 | KV452713.1 | 9545393 | 1-scf00011 | 1 |
| AX-157812059 | 1 | 102.103 | KV452713.1 | 9546843 | 1-scf00011 | 1 |
| AX-157908376 | 1 | 102.322 | KV452713.1 | 9553922 | 1-scf00011 | 1 |
| AX-157741338 | 1 | 102.322 | KV452713.1 | 9554606 | 1-scf00011 | 1 |
| AX-157708399 | 1 | 102.322 | KV452713.1 | 9557220 | 1-scf00011 | 1 |
| AX-157908379 | 1 | 102.361 | KV452713.1 | 9558589 | 1-scf00011 | 1 |
| AX-157908380 | 1 | 102.392 | KV452713.1 | 9559548 | 1-scf00011 | 1 |
| AX-157771508 | 1 | 102.431 | KV452713.1 | 9563423 | 1-scf00011 | 1 |
| AX-157753411 | 1 | 102.65  | KV452713.1 | 9585657 | 1-scf00011 | 1 |
| AX-157908394 | 1 | 102.671 | KV452713.1 | 9598679 | 1-scf00011 | 1 |
| AX-157812063 | 1 | 102.691 | KV452713.1 | 9599303 | 1-scf00011 | 1 |
| AX-157908395 | 1 | 102.729 | KV452713.1 | 9599793 | 1-scf00011 | 1 |
| AX-157771004 | 1 | 102.759 | KV452713.1 | 9565264 | 1-scf00011 | 1 |
| AX-157908390 | 1 | 102.759 | KV452713.1 | 9584358 | 1-scf00011 | 1 |
| AX-157908396 | 1 | 102.759 | KV452713.1 | 9600677 | 1-scf00011 | 1 |
| AX-157721315 | 1 | 102.759 | KV452713.1 | 9601479 | 1-scf00011 | 1 |
| AX-157908397 | 1 | 102.759 | KV452713.1 | 9602382 | 1-scf00011 | 1 |
| AX-157812064 | 1 | 102.759 | KV452713.1 | 9602577 | 1-scf00011 | 1 |
| AX-157746701 | 1 | 102.977 | KV452713.1 | 9607673 | 1-scf00011 | 1 |
| AX-157908398 | 1 | 102.977 | KV452713.1 | 9607901 | 1-scf00011 | 1 |
| AX-157908399 | 1 | 102.977 | KV452713.1 | 9608189 | 1-scf00011 | 1 |
| AX-157908400 | 1 | 102.977 | KV452713.1 | 9608565 | 1-scf00011 | 1 |
| AX-157908402 | 1 | 102.978 | KV452713.1 | 9615688 | 1-scf00011 | 1 |
| AX-157812068 | 1 | 102.979 | KV452713.1 | 9616116 | 1-scf00011 | 1 |
| AX-157908403 | 1 | 103.051 | KV452713.1 | 9616903 | 1-scf00011 | 1 |
| AX-157743068 | 1 | 103.133 | KV452713.1 | 9620089 | 1-scf00011 | 1 |
| AX-158379204 | 1 | 103.133 | KV452713.1 | 9620485 | 1-scf00011 | 1 |
| AX-157908405 | 1 | 103.153 | KV452713.1 | 9625115 | 1-scf00011 | 1 |
| AX-157712204 | 1 | 103.331 | KV452713.1 | 9605352 | 1-scf00011 | 1 |
| AX-157908406 | 1 | 103.331 | KV452713.1 | 9625519 | 1-scf00011 | 1 |
| AX-157812069 | 1 | 103.331 | KV452713.1 | 9628453 | 1-scf00011 | 1 |
| AX-157772119 | 1 | 103.331 | KV452713.1 | 9628798 | 1-scf00011 | 1 |
| AX-157908407 | 1 | 103.335 | KV452713.1 | 9627656 | 1-scf00011 | 1 |
| AX-157908413 | 1 | 103.335 | KV452713.1 | 9634788 | 1-scf00011 | 1 |
| AX-157726895 | 1 | 103.408 | KV452713.1 | 9640679 | 1-scf00011 | 1 |
| AX-157908408 | 1 | 103.471 | KV452713.1 | 9628232 | 1-scf00011 | 1 |
| AX-157908415 | 1 | 103.471 | KV452713.1 | 9641996 | 1-scf00011 | 1 |
| AX-157908416 | 1 | 103.71  | KV452713.1 | 9642801 | 1-scf00011 | 1 |
| AX-157908417 | 1 | 103.714 | KV452713.1 | 9643872 | 1-scf00011 | 1 |
| AX-157908418 | 1 | 103.714 | KV452713.1 | 9645082 | 1-scf00011 | 1 |
| AX-157908421 | 1 | 103.779 | KV452713.1 | 9647379 | 1-scf00011 | 1 |
| AX-157908424 | 1 | 103.841 | KV452713.1 | 9649914 | 1-scf00011 | 1 |
| AX-157908425 | 1 | 103.968 | KV452713.1 | 9650457 | 1-scf00011 | 1 |



|              |   |         |            |         |            |   |
|--------------|---|---------|------------|---------|------------|---|
| AX-157908426 | 1 | 103.968 | KV452713.1 | 9651235 | 1-scf00011 | 1 |
| AX-157908427 | 1 | 103.968 | KV452713.1 | 9652249 | 1-scf00011 | 1 |
| AX-157908429 | 1 | 104.095 | KV452713.1 | 9653929 | 1-scf00011 | 1 |
| AX-157908431 | 1 | 104.095 | KV452713.1 | 9654885 | 1-scf00011 | 1 |
| AX-157752029 | 1 | 104.095 | KV452713.1 | 9655452 | 1-scf00011 | 1 |
| AX-157908433 | 1 | 104.095 | KV452713.1 | 9659526 | 1-scf00011 | 1 |
| AX-157742312 | 1 | 104.095 | KV452713.1 | 9660034 | 1-scf00011 | 1 |
| AX-157740596 | 1 | 104.222 | KV452713.1 | 9664558 | 1-scf00011 | 1 |
| AX-157908436 | 1 | 104.412 | KV452713.1 | 9665670 | 1-scf00011 | 1 |
| AX-157908442 | 1 | 104.603 | KV452713.1 | 9685589 | 1-scf00011 | 1 |
| AX-157908444 | 1 | 104.603 | KV452713.1 | 9688359 | 1-scf00011 | 1 |
| AX-157908446 | 1 | 104.603 | KV452713.1 | 9690263 | 1-scf00011 | 1 |
| AX-157908449 | 1 | 104.603 | KV452713.1 | 9694950 | 1-scf00011 | 1 |
| AX-157908477 | 1 | 104.603 | KV452713.1 | 9734499 | 1-scf00011 | 1 |
| AX-157908478 | 1 | 104.603 | KV452713.1 | 9736054 | 1-scf00011 | 1 |
| AX-157908448 | 1 | 104.647 | KV452713.1 | 9694739 | 1-scf00011 | 1 |
| AX-157908453 | 1 | 104.725 | KV452713.1 | 9699316 | 1-scf00011 | 1 |
| AX-157908445 | 1 | 104.729 | KV452713.1 | 9689534 | 1-scf00011 | 1 |
| AX-157908450 | 1 | 104.729 | KV452713.1 | 9696345 | 1-scf00011 | 1 |
| AX-157908454 | 1 | 104.729 | KV452713.1 | 9703922 | 1-scf00011 | 1 |
| AX-157908455 | 1 | 104.729 | KV452713.1 | 9704534 | 1-scf00011 | 1 |
| AX-157908457 | 1 | 104.729 | KV452713.1 | 9706172 | 1-scf00011 | 1 |
| AX-157908458 | 1 | 104.729 | KV452713.1 | 9707034 | 1-scf00011 | 1 |
| AX-157908460 | 1 | 104.729 | KV452713.1 | 9708070 | 1-scf00011 | 1 |
| AX-157908461 | 1 | 104.729 | KV452713.1 | 9708312 | 1-scf00011 | 1 |
| AX-157908462 | 1 | 104.729 | KV452713.1 | 9709808 | 1-scf00011 | 1 |
| AX-157908464 | 1 | 104.729 | KV452713.1 | 9711309 | 1-scf00011 | 1 |
| AX-157908465 | 1 | 104.947 | KV452713.1 | 9712868 | 1-scf00011 | 1 |
| AX-157908463 | 1 | 105.083 | KV452713.1 | 9710272 | 1-scf00011 | 1 |
| AX-157908467 | 1 | 105.083 | KV452713.1 | 9715500 | 1-scf00011 | 1 |
| AX-157908468 | 1 | 105.083 | KV452713.1 | 9718300 | 1-scf00011 | 1 |
| AX-157812073 | 1 | 105.083 | KV452713.1 | 9718391 | 1-scf00011 | 1 |
| AX-157908469 | 1 | 105.474 | KV452713.1 | 9722329 | 1-scf00011 | 1 |
| AX-157812075 | 1 | 105.493 | KV452713.1 | 9737095 | 1-scf00011 | 1 |
| AX-157908482 | 1 | 105.82  | KV452713.1 | 9739953 | 1-scf00011 | 1 |
| AX-157908483 | 1 | 105.82  | KV452713.1 | 9740203 | 1-scf00011 | 1 |
| AX-157908486 | 1 | 105.82  | KV452713.1 | 9744948 | 1-scf00011 | 1 |
| AX-157908488 | 1 | 105.821 | KV452713.1 | 9747799 | 1-scf00011 | 1 |
| AX-157908489 | 1 | 105.821 | KV452713.1 | 9750109 | 1-scf00011 | 1 |
| AX-157908491 | 1 | 105.821 | KV452713.1 | 9751030 | 1-scf00011 | 1 |
| AX-157908495 | 1 | 106.081 | KV452713.1 | 9761990 | 1-scf00011 | 1 |
| AX-157751315 | 1 | 106.26  | KV452713.1 | 9768128 | 1-scf00011 | 1 |
| AX-158379205 | 1 | 106.26  | KV452713.1 | 9769271 | 1-scf00011 | 1 |
| AX-157908497 | 1 | 106.26  | KV452713.1 | 9769473 | 1-scf00011 | 1 |
| AX-157908500 | 1 | 106.369 | KV452713.1 | 9772826 | 1-scf00011 | 1 |
| AX-157908501 | 1 | 106.369 | KV452713.1 | 9773393 | 1-scf00011 | 1 |
| AX-157908502 | 1 | 106.369 | KV452713.1 | 9775651 | 1-scf00011 | 1 |
| AX-157908504 | 1 | 106.393 | KV452713.1 | 9783291 | 1-scf00011 | 1 |
| AX-157908506 | 1 | 106.434 | KV452713.1 | 9784492 | 1-scf00011 | 1 |
| AX-157750077 | 1 | 106.479 | KV452713.1 | 9785148 | 1-scf00011 | 1 |
| AX-157908509 | 1 | 106.479 | KV452713.1 | 9792076 | 1-scf00011 | 1 |

|              |   |         |             |         |            |    |
|--------------|---|---------|-------------|---------|------------|----|
| AX-157754566 | 1 | 106.479 | KV452713.1  | 9792774 | 1-scf00011 | 1  |
| AX-157908510 | 1 | 106.806 | KV452713.1  | 9794868 | 1-scf00011 | 1  |
| AX-157908515 | 1 | 106.806 | KV452713.1  | 9804616 | 1-scf00011 | 1  |
| AX-157908516 | 1 | 106.849 | KV452713.1  | 9807934 | 1-scf00011 | 1  |
| AX-157908526 | 1 | 106.849 | KV452713.1  | 9819458 | 1-scf00011 | 1  |
| AX-157908518 | 1 | 106.888 | KV452713.1  | 9809266 | 1-scf00011 | 1  |
| AX-157908522 | 1 | 106.931 | KV452713.1  | 9814256 | 1-scf00011 | 1  |
| AX-157908527 | 1 | 106.974 | KV452713.1  | 9820834 | 1-scf00011 | 1  |
| AX-157908546 | 1 | 106.974 | KV452713.1  | 9844965 | 1-scf00011 | 1  |
| AX-158404820 | 1 | 107.025 | KV452713.1  | 9821168 | 1-scf00011 | 1  |
| AX-157908528 | 1 | 107.025 | KV452713.1  | 9822753 | 1-scf00011 | 1  |
| AX-157908529 | 1 | 107.134 | KV452713.1  | 9823666 | 1-scf00011 | 1  |
| AX-157908530 | 1 | 107.134 | KV452713.1  | 9824232 | 1-scf00011 | 1  |
| AX-157908534 | 1 | 107.134 | KV452713.1  | 9829312 | 1-scf00011 | 1  |
| AX-157908540 | 1 | 107.134 | KV452713.1  | 9834681 | 1-scf00011 | 1  |
| AX-157755157 | 1 | 107.171 | KV452713.1  | 9838768 | 1-scf00011 | 1  |
| AX-157908543 | 1 | 107.244 | KV452713.1  | 9840608 | 1-scf00011 | 1  |
| AX-157908550 | 1 | 107.244 | KV452713.1  | 9848523 | 1-scf00011 | 1  |
| AX-157908553 | 1 | 107.395 | KV452713.1  | 9850346 | 1-scf00011 | 1  |
| AX-157706535 | 1 | 107.636 | 3ML01032399 | 274     | scf08018_1 | UN |
| AX-157908559 | 1 | 107.639 | KV452713.1  | 9868410 | 1-scf00011 | 1  |
| AX-157738524 | 1 | 107.639 | KV452713.1  | 9870819 | 1-scf00011 | 1  |
| AX-157708223 | 1 | 107.639 | KV452713.1  | 9871099 | 1-scf00011 | 1  |
| AX-157908565 | 1 | 107.639 | KV452713.1  | 9879709 | 1-scf00011 | 1  |
| AX-157908566 | 1 | 107.639 | KV452713.1  | 9880266 | 1-scf00011 | 1  |
| AX-157908571 | 1 | 107.639 | KV452713.1  | 9883964 | 1-scf00011 | 1  |
| AX-157908562 | 1 | 107.678 | KV452713.1  | 9872040 | 1-scf00011 | 1  |
| AX-157908570 | 1 | 107.678 | KV452713.1  | 9883206 | 1-scf00011 | 1  |
| AX-157908572 | 1 | 107.79  | KV452713.1  | 9884785 | 1-scf00011 | 1  |
| AX-157908573 | 1 | 107.79  | KV452713.1  | 9885324 | 1-scf00011 | 1  |
| AX-157908575 | 1 | 107.9   | KV452713.1  | 9886723 | 1-scf00011 | 1  |
| AX-157908576 | 1 | 107.9   | KV452713.1  | 9892211 | 1-scf00011 | 1  |
| AX-157741678 | 1 | 108.064 | KV452713.1  | 9895189 | 1-scf00011 | 1  |
| AX-157908579 | 1 | 108.228 | KV452713.1  | 9896884 | 1-scf00011 | 1  |
| AX-157740853 | 1 | 108.228 | KV452713.1  | 9897273 | 1-scf00011 | 1  |
| AX-157908583 | 1 | 108.228 | KV452713.1  | 9902519 | 1-scf00011 | 1  |
| AX-157908584 | 1 | 108.228 | KV452713.1  | 9903542 | 1-scf00011 | 1  |
| AX-157908586 | 1 | 108.228 | KV452713.1  | 9906407 | 1-scf00011 | 1  |
| AX-157812077 | 1 | 108.228 | KV452713.1  | 9907994 | 1-scf00011 | 1  |
| AX-157708524 | 1 | 108.228 | KV452713.1  | 9908447 | 1-scf00011 | 1  |
| AX-157908588 | 1 | 108.228 | KV452713.1  | 9908858 | 1-scf00011 | 1  |
| AX-157908589 | 1 | 108.228 | KV452713.1  | 9910430 | 1-scf00011 | 1  |
| AX-157908591 | 1 | 108.228 | KV452713.1  | 9912642 | 1-scf00011 | 1  |
| AX-157908597 | 1 | 108.757 | KV452713.1  | 9919237 | 1-scf00011 | 1  |
| AX-157908603 | 1 | 108.757 | KV452713.1  | 9923549 | 1-scf00011 | 1  |
| AX-157864445 | 1 | 108.776 | KV452713.1  | 9920695 | 1-scf00011 | 1  |
| AX-157908601 | 1 | 108.776 | KV452713.1  | 9921457 | 1-scf00011 | 1  |
| AX-157908618 | 1 | 108.776 | KV452713.1  | 9943594 | 1-scf00011 | 1  |
| AX-157908606 | 1 | 109.43  | KV452713.1  | 9927472 | 1-scf00011 | 1  |
| AX-157908607 | 1 | 109.43  | KV452713.1  | 9929257 | 1-scf00011 | 1  |
| AX-157908609 | 1 | 109.43  | KV452713.1  | 9931897 | 1-scf00011 | 1  |

|              |   |         |            |          |            |   |
|--------------|---|---------|------------|----------|------------|---|
| AX-157908610 | 1 | 109.43  | KV452713.1 | 9933674  | 1-scf00011 | 1 |
| AX-157908611 | 1 | 109.43  | KV452713.1 | 9935025  | 1-scf00011 | 1 |
| AX-157694127 | 1 | 109.43  | KV452713.1 | 9935315  | 1-scf00011 | 1 |
| AX-157908612 | 1 | 109.43  | KV452713.1 | 9938221  | 1-scf00011 | 1 |
| AX-157908617 | 1 | 109.43  | KV452713.1 | 9942764  | 1-scf00011 | 1 |
| AX-157853645 | 1 | 109.43  | KV452713.1 | 9945220  | 1-scf00011 | 1 |
| AX-157697396 | 1 | 109.43  | KV452713.1 | 9947262  | 1-scf00011 | 1 |
| AX-157908620 | 1 | 109.43  | KV452713.1 | 9949312  | 1-scf00011 | 1 |
| AX-157908623 | 1 | 109.43  | KV452713.1 | 9954895  | 1-scf00011 | 1 |
| AX-157743347 | 1 | 109.43  | KV452713.1 | 9955232  | 1-scf00011 | 1 |
| AX-157908631 | 1 | 109.43  | KV452713.1 | 9969679  | 1-scf00011 | 1 |
| AX-157908613 | 1 | 109.431 | KV452713.1 | 9938899  | 1-scf00011 | 1 |
| AX-157908621 | 1 | 109.431 | KV452713.1 | 9949827  | 1-scf00011 | 1 |
| AX-157740895 | 1 | 109.431 | KV452713.1 | 9951763  | 1-scf00011 | 1 |
| AX-157908622 | 1 | 109.434 | KV452713.1 | 9952471  | 1-scf00011 | 1 |
| AX-157908624 | 1 | 109.887 | KV452713.1 | 9957481  | 1-scf00011 | 1 |
| AX-157874530 | 1 | 109.89  | KV452713.1 | 9962336  | 1-scf00011 | 1 |
| AX-157908627 | 1 | 109.964 | KV452713.1 | 9963098  | 1-scf00011 | 1 |
| AX-157908629 | 1 | 109.966 | KV452713.1 | 9964260  | 1-scf00011 | 1 |
| AX-157908630 | 1 | 110.023 | KV452713.1 | 9966640  | 1-scf00011 | 1 |
| AX-157908634 | 1 | 110.116 | KV452713.1 | 9972022  | 1-scf00011 | 1 |
| AX-157908638 | 1 | 110.116 | KV452713.1 | 9976611  | 1-scf00011 | 1 |
| AX-157908642 | 1 | 110.116 | KV452713.1 | 9980884  | 1-scf00011 | 1 |
| AX-157908643 | 1 | 110.116 | KV452713.1 | 9981530  | 1-scf00011 | 1 |
| AX-157908645 | 1 | 110.116 | KV452713.1 | 9983031  | 1-scf00011 | 1 |
| AX-157908646 | 1 | 110.118 | KV452713.1 | 9986287  | 1-scf00011 | 1 |
| AX-157724378 | 1 | 110.523 | KV452713.1 | 9987477  | 1-scf00011 | 1 |
| AX-157908647 | 1 | 110.523 | KV452713.1 | 9990104  | 1-scf00011 | 1 |
| AX-157908649 | 1 | 110.523 | KV452713.1 | 9990950  | 1-scf00011 | 1 |
| AX-157725039 | 1 | 110.523 | KV452713.1 | 9991609  | 1-scf00011 | 1 |
| AX-157908650 | 1 | 110.523 | KV452713.1 | 9992717  | 1-scf00011 | 1 |
| AX-157908654 | 1 | 110.523 | KV452713.1 | 9996510  | 1-scf00011 | 1 |
| AX-157908656 | 1 | 110.523 | KV452713.1 | 10001690 | 1-scf00011 | 1 |
| AX-157883365 | 1 | 110.523 | KV452713.1 | 10002913 | 1-scf00011 | 1 |
| AX-157908660 | 1 | 110.554 | KV452713.1 | 10005971 | 1-scf00011 | 1 |
| AX-157908661 | 1 | 110.566 | KV452713.1 | 10006331 | 1-scf00011 | 1 |
| AX-157908662 | 1 | 110.633 | KV452713.1 | 10007523 | 1-scf00011 | 1 |
| AX-157908664 | 1 | 110.633 | KV452713.1 | 10008566 | 1-scf00011 | 1 |
| AX-157908665 | 1 | 110.633 | KV452713.1 | 10009235 | 1-scf00011 | 1 |
| AX-157908666 | 1 | 110.662 | KV452713.1 | 10010264 | 1-scf00011 | 1 |
| AX-157774741 | 1 | 110.702 | KV452713.1 | 10011691 | 1-scf00011 | 1 |
| AX-157908668 | 1 | 110.742 | KV452713.1 | 10013600 | 1-scf00011 | 1 |
| AX-157908672 | 1 | 110.742 | KV452713.1 | 10019236 | 1-scf00011 | 1 |
| AX-157908673 | 1 | 110.742 | KV452713.1 | 10021217 | 1-scf00011 | 1 |
| AX-157908651 | 1 | 110.851 | KV452713.1 | 9993982  | 1-scf00011 | 1 |
| AX-157908670 | 1 | 110.851 | KV452713.1 | 10017270 | 1-scf00011 | 1 |
| AX-157908676 | 1 | 110.851 | KV452713.1 | 10025436 | 1-scf00011 | 1 |
| AX-157710534 | 1 | 110.851 | KV452713.1 | 10026955 | 1-scf00011 | 1 |
| AX-157908677 | 1 | 110.851 | KV452713.1 | 10027541 | 1-scf00011 | 1 |
| AX-157908678 | 1 | 110.851 | KV452713.1 | 10028303 | 1-scf00011 | 1 |
| AX-157908680 | 1 | 110.851 | KV452713.1 | 10031127 | 1-scf00011 | 1 |

|              |   |         |             |          |            |    |
|--------------|---|---------|-------------|----------|------------|----|
| AX-157908681 | 1 | 110.851 | KV452713.1  | 10031226 | 1-scf00011 | 1  |
| AX-157908685 | 1 | 110.851 | KV452713.1  | 10034824 | 1-scf00011 | 1  |
| AX-157908688 | 1 | 110.851 | KV452713.1  | 10040776 | 1-scf00011 | 1  |
| AX-157908689 | 1 | 110.861 | KV452713.1  | 10041272 | 1-scf00011 | 1  |
| AX-157908691 | 1 | 111.397 | KV452713.1  | 10042678 | 1-scf00011 | 1  |
| AX-157908695 | 1 | 111.397 | KV452713.1  | 10047448 | 1-scf00011 | 1  |
| AX-157908697 | 1 | 111.397 | KV452713.1  | 10048160 | 1-scf00011 | 1  |
| AX-157708799 | 1 | 111.397 | KV452713.1  | 10048510 | 1-scf00011 | 1  |
| AX-157708800 | 1 | 111.397 | KV452713.1  | 10048602 | 1-scf00011 | 1  |
| AX-157908699 | 1 | 111.397 | KV452713.1  | 10049894 | 1-scf00011 | 1  |
| AX-157908701 | 1 | 111.397 | KV452713.1  | 10052311 | 1-scf00011 | 1  |
| AX-157908703 | 1 | 111.397 | KV452713.1  | 10054064 | 1-scf00011 | 1  |
| AX-157908704 | 1 | 111.397 | KV452713.1  | 10055092 | 1-scf00011 | 1  |
| AX-157908705 | 1 | 111.397 | KV452713.1  | 10057243 | 1-scf00011 | 1  |
| AX-157908707 | 1 | 111.398 | KV452713.1  | 10061365 | 1-scf00011 | 1  |
| AX-157908709 | 1 | 111.398 | KV452713.1  | 10062658 | 1-scf00011 | 1  |
| AX-157908711 | 1 | 111.725 | KV452713.1  | 10065472 | 1-scf00011 | 1  |
| AX-157908715 | 1 | 111.769 | KV452713.1  | 10068078 | 1-scf00011 | 1  |
| AX-157812078 | 1 | 111.769 | KV452713.1  | 10087078 | 1-scf00011 | 1  |
| AX-157908712 | 1 | 111.834 | KV452713.1  | 10066758 | 1-scf00011 | 1  |
| AX-157908717 | 1 | 111.834 | KV452713.1  | 10073389 | 1-scf00011 | 1  |
| AX-157908718 | 1 | 111.834 | KV452713.1  | 10074237 | 1-scf00011 | 1  |
| AX-157908719 | 1 | 111.834 | KV452713.1  | 10074547 | 1-scf00011 | 1  |
| AX-157908720 | 1 | 111.834 | KV452713.1  | 10075299 | 1-scf00011 | 1  |
| AX-157908723 | 1 | 111.834 | KV452713.1  | 10079227 | 1-scf00011 | 1  |
| AX-157908724 | 1 | 111.834 | KV452713.1  | 10079545 | 1-scf00011 | 1  |
| AX-157908725 | 1 | 111.834 | KV452713.1  | 10080131 | 1-scf00011 | 1  |
| AX-157908726 | 1 | 111.834 | KV452713.1  | 10081053 | 1-scf00011 | 1  |
| AX-157908727 | 1 | 111.834 | KV452713.1  | 10081735 | 1-scf00011 | 1  |
| AX-157908728 | 1 | 111.834 | KV452713.1  | 10082354 | 1-scf00011 | 1  |
| AX-157908731 | 1 | 111.834 | KV452713.1  | 10084739 | 1-scf00011 | 1  |
| AX-157713446 | 1 | 111.834 | KV452713.1  | 10085742 | 1-scf00011 | 1  |
| AX-157746433 | 1 | 111.834 | KV452713.1  | 10086822 | 1-scf00011 | 1  |
| AX-157908735 | 1 | 112.052 | KV452713.1  | 10093457 | 1-scf00011 | 1  |
| AX-157908736 | 1 | 112.052 | KV452713.1  | 10094008 | 1-scf00011 | 1  |
| AX-157908737 | 1 | 112.052 | KV452713.1  | 10094510 | 1-scf00011 | 1  |
| AX-157908740 | 1 | 112.052 | KV452713.1  | 10101653 | 1-scf00011 | 1  |
| AX-157908743 | 1 | 112.052 | KV452713.1  | 10104240 | 1-scf00011 | 1  |
| AX-157908747 | 1 | 112.052 | KV452713.1  | 10109025 | 1-scf00011 | 1  |
| AX-157908750 | 1 | 112.052 | KV452713.1  | 10112540 | 1-scf00011 | 1  |
| AX-157908751 | 1 | 112.052 | KV452713.1  | 10114663 | 1-scf00011 | 1  |
| AX-157908753 | 1 | 112.052 | KV452713.1  | 10117433 | 1-scf00011 | 1  |
| AX-157908754 | 1 | 112.052 | KV452713.1  | 10118593 | 1-scf00011 | 1  |
| AX-157908756 | 1 | 112.353 | KV452713.1  | 10120773 | 1-scf00011 | 1  |
| AX-157908760 | 1 | 112.372 | KV452713.1  | 10129495 | 1-scf00011 | 1  |
| AX-157705776 | 1 | 112.372 | 3ML01030844 | 820      | scf06448_1 | UN |
| AX-157908763 | 1 | 112.767 | KV452713.1  | 10140186 | 1-scf00011 | 1  |
| AX-157908765 | 1 | 112.818 | KV452713.1  | 10142724 | 1-scf00011 | 1  |
| AX-157749275 | 1 | 112.818 | KV452713.1  | 10150683 | 1-scf00011 | 1  |
| AX-157908773 | 1 | 112.818 | KV452713.1  | 10151284 | 1-scf00011 | 1  |
| AX-157908774 | 1 | 112.818 | KV452713.1  | 10152648 | 1-scf00011 | 1  |

|              |   |         |            |          |            |   |
|--------------|---|---------|------------|----------|------------|---|
| AX-157908775 | 1 | 112.818 | KV452713.1 | 10155823 | 1-scf00011 | 1 |
| AX-157883368 | 1 | 112.818 | KV452713.1 | 10155957 | 1-scf00011 | 1 |
| AX-157908776 | 1 | 112.818 | KV452713.1 | 10156010 | 1-scf00011 | 1 |
| AX-157908777 | 1 | 112.818 | KV452713.1 | 10157179 | 1-scf00011 | 1 |
| AX-157908778 | 1 | 112.818 | KV452713.1 | 10158436 | 1-scf00011 | 1 |
| AX-157908780 | 1 | 112.818 | KV452713.1 | 10158958 | 1-scf00011 | 1 |
| AX-157908781 | 1 | 112.818 | KV452713.1 | 10159165 | 1-scf00011 | 1 |
| AX-157908785 | 1 | 112.818 | KV452713.1 | 10162490 | 1-scf00011 | 1 |
| AX-157726700 | 1 | 112.818 | KV452713.1 | 10165464 | 1-scf00011 | 1 |
| AX-157908788 | 1 | 112.818 | KV452713.1 | 10168953 | 1-scf00011 | 1 |
| AX-157908792 | 1 | 112.818 | KV452713.1 | 10171889 | 1-scf00011 | 1 |
| AX-157908789 | 1 | 112.927 | KV452713.1 | 10169385 | 1-scf00011 | 1 |
| AX-157908790 | 1 | 112.927 | KV452713.1 | 10169958 | 1-scf00011 | 1 |
| AX-157775562 | 1 | 112.927 | KV452713.1 | 10172004 | 1-scf00011 | 1 |
| AX-157908793 | 1 | 112.927 | KV452713.1 | 10172362 | 1-scf00011 | 1 |
| AX-157908794 | 1 | 112.927 | KV452713.1 | 10175136 | 1-scf00011 | 1 |
| AX-157908795 | 1 | 112.944 | KV452713.1 | 10176292 | 1-scf00011 | 1 |
| AX-157908796 | 1 | 112.978 | KV452713.1 | 10178062 | 1-scf00011 | 1 |
| AX-157908797 | 1 | 112.991 | KV452713.1 | 10178460 | 1-scf00011 | 1 |
| AX-157908815 | 1 | 112.991 | KV452713.1 | 10194010 | 1-scf00011 | 1 |
| AX-157874537 | 1 | 112.991 | KV452713.1 | 10197885 | 1-scf00011 | 1 |
| AX-157908802 | 1 | 113.002 | KV452713.1 | 10184542 | 1-scf00011 | 1 |
| AX-157908805 | 1 | 113.002 | KV452713.1 | 10186684 | 1-scf00011 | 1 |
| AX-157908806 | 1 | 113.019 | KV452713.1 | 10187166 | 1-scf00011 | 1 |
| AX-157908807 | 1 | 113.036 | KV452713.1 | 10189352 | 1-scf00011 | 1 |
| AX-157908808 | 1 | 113.036 | KV452713.1 | 10189968 | 1-scf00011 | 1 |
| AX-157908810 | 1 | 113.036 | KV452713.1 | 10191083 | 1-scf00011 | 1 |
| AX-157908812 | 1 | 113.085 | KV452713.1 | 10191713 | 1-scf00011 | 1 |
| AX-158414761 | 1 | 113.105 | KV452713.1 | 10192101 | 1-scf00011 | 1 |
| AX-157908787 | 1 | 113.132 | KV452713.1 | 10165747 | 1-scf00011 | 1 |
| AX-157908817 | 1 | 113.132 | KV452713.1 | 10194765 | 1-scf00011 | 1 |
| AX-157908798 | 1 | 113.146 | KV452713.1 | 10178910 | 1-scf00011 | 1 |
| AX-157908823 | 1 | 113.146 | KV452713.1 | 10198694 | 1-scf00011 | 1 |
| AX-157908824 | 1 | 113.146 | KV452713.1 | 10199702 | 1-scf00011 | 1 |
| AX-157908825 | 1 | 113.146 | KV452713.1 | 10202437 | 1-scf00011 | 1 |
| AX-157908826 | 1 | 113.146 | KV452713.1 | 10202719 | 1-scf00011 | 1 |
| AX-157908831 | 1 | 113.539 | KV452713.1 | 10212513 | 1-scf00011 | 1 |
| AX-158404827 | 1 | 113.671 | KV452713.1 | 10213207 | 1-scf00011 | 1 |
| AX-157908833 | 1 | 113.802 | KV452713.1 | 10214784 | 1-scf00011 | 1 |
| AX-157741278 | 1 | 113.803 | KV452713.1 | 10216646 | 1-scf00011 | 1 |
| AX-157908835 | 1 | 113.803 | KV452713.1 | 10217203 | 1-scf00011 | 1 |
| AX-157908838 | 1 | 113.907 | KV452713.1 | 10221243 | 1-scf00011 | 1 |
| AX-157908840 | 1 | 113.907 | KV452713.1 | 10222296 | 1-scf00011 | 1 |
| AX-157908841 | 1 | 114.021 | KV452713.1 | 10222972 | 1-scf00011 | 1 |
| AX-157908843 | 1 | 114.24  | KV452713.1 | 10224608 | 1-scf00011 | 1 |
| AX-157908844 | 1 | 114.24  | KV452713.1 | 10224948 | 1-scf00011 | 1 |
| AX-157739622 | 1 | 114.24  | KV452713.1 | 10225357 | 1-scf00011 | 1 |
| AX-157908845 | 1 | 114.24  | KV452713.1 | 10225488 | 1-scf00011 | 1 |
| AX-157908847 | 1 | 114.349 | KV452713.1 | 10226051 | 1-scf00011 | 1 |
| AX-157908848 | 1 | 114.349 | KV452713.1 | 10226855 | 1-scf00011 | 1 |
| AX-157908849 | 1 | 114.349 | KV452713.1 | 10227721 | 1-scf00011 | 1 |

|              |   |         |            |          |            |   |
|--------------|---|---------|------------|----------|------------|---|
| AX-157908851 | 1 | 114.349 | KV452713.1 | 10228948 | 1-scf00011 | 1 |
| AX-157908852 | 1 | 114.349 | KV452713.1 | 10230796 | 1-scf00011 | 1 |
| AX-157908853 | 1 | 114.349 | KV452713.1 | 10231716 | 1-scf00011 | 1 |
| AX-157908890 | 1 | 114.349 | KV452713.1 | 10275499 | 1-scf00011 | 1 |
| AX-157908854 | 1 | 114.379 | KV452713.1 | 10232569 | 1-scf00011 | 1 |
| AX-157908858 | 1 | 114.409 | KV452713.1 | 10236167 | 1-scf00011 | 1 |
| AX-157772453 | 1 | 114.459 | KV452713.1 | 10238800 | 1-scf00011 | 1 |
| AX-157908861 | 1 | 114.459 | KV452713.1 | 10239161 | 1-scf00011 | 1 |
| AX-157908865 | 1 | 114.459 | KV452713.1 | 10244755 | 1-scf00011 | 1 |
| AX-157908866 | 1 | 114.459 | KV452713.1 | 10245474 | 1-scf00011 | 1 |
| AX-157908867 | 1 | 114.568 | KV452713.1 | 10247995 | 1-scf00011 | 1 |
| AX-157908870 | 1 | 114.677 | KV452713.1 | 10252047 | 1-scf00011 | 1 |
| AX-157908871 | 1 | 114.677 | KV452713.1 | 10257603 | 1-scf00011 | 1 |
| AX-157739364 | 1 | 114.677 | KV452713.1 | 10258338 | 1-scf00011 | 1 |
| AX-157755932 | 1 | 114.677 | KV452713.1 | 10259111 | 1-scf00011 | 1 |
| AX-157750330 | 1 | 114.677 | KV452713.1 | 10259798 | 1-scf00011 | 1 |
| AX-157908872 | 1 | 114.677 | KV452713.1 | 10260446 | 1-scf00011 | 1 |
| AX-157908873 | 1 | 114.677 | KV452713.1 | 10260987 | 1-scf00011 | 1 |
| AX-157908876 | 1 | 114.677 | KV452713.1 | 10262948 | 1-scf00011 | 1 |
| AX-157908877 | 1 | 114.677 | KV452713.1 | 10263459 | 1-scf00011 | 1 |
| AX-157908903 | 1 | 114.677 | KV452713.1 | 10287740 | 1-scf00011 | 1 |
| AX-157908879 | 1 | 114.786 | KV452713.1 | 10266175 | 1-scf00011 | 1 |
| AX-157908882 | 1 | 114.786 | KV452713.1 | 10269078 | 1-scf00011 | 1 |
| AX-157908886 | 1 | 114.786 | KV452713.1 | 10271864 | 1-scf00011 | 1 |
| AX-157908887 | 1 | 114.786 | KV452713.1 | 10273112 | 1-scf00011 | 1 |
| AX-157908891 | 1 | 114.786 | KV452713.1 | 10275616 | 1-scf00011 | 1 |
| AX-157908892 | 1 | 114.786 | KV452713.1 | 10277599 | 1-scf00011 | 1 |
| AX-157908895 | 1 | 114.786 | KV452713.1 | 10280193 | 1-scf00011 | 1 |
| AX-157908896 | 1 | 114.786 | KV452713.1 | 10282235 | 1-scf00011 | 1 |
| AX-157908897 | 1 | 114.786 | KV452713.1 | 10282690 | 1-scf00011 | 1 |
| AX-157908898 | 1 | 114.786 | KV452713.1 | 10283204 | 1-scf00011 | 1 |
| AX-157908902 | 1 | 114.786 | KV452713.1 | 10286700 | 1-scf00011 | 1 |
| AX-157908908 | 1 | 114.786 | KV452713.1 | 10293659 | 1-scf00011 | 1 |
| AX-157908909 | 1 | 114.786 | KV452713.1 | 10294546 | 1-scf00011 | 1 |
| AX-157908910 | 1 | 114.786 | KV452713.1 | 10296275 | 1-scf00011 | 1 |
| AX-157908915 | 1 | 114.786 | KV452713.1 | 10302497 | 1-scf00011 | 1 |
| AX-157908936 | 1 | 114.786 | KV452713.1 | 10327570 | 1-scf00011 | 1 |
| AX-157908850 | 1 | 115.005 | KV452713.1 | 10228277 | 1-scf00011 | 1 |
| AX-157908900 | 1 | 115.005 | KV452713.1 | 10285469 | 1-scf00011 | 1 |
| AX-157908906 | 1 | 115.005 | KV452713.1 | 10291931 | 1-scf00011 | 1 |
| AX-157908907 | 1 | 115.005 | KV452713.1 | 10292686 | 1-scf00011 | 1 |
| AX-157908922 | 1 | 115.005 | KV452713.1 | 10311707 | 1-scf00011 | 1 |
| AX-157758598 | 1 | 115.005 | KV452713.1 | 10315037 | 1-scf00011 | 1 |
| AX-157908924 | 1 | 115.005 | KV452713.1 | 10316899 | 1-scf00011 | 1 |
| AX-157908925 | 1 | 115.005 | KV452713.1 | 10317526 | 1-scf00011 | 1 |
| AX-157908929 | 1 | 115.005 | KV452713.1 | 10322091 | 1-scf00011 | 1 |
| AX-157908930 | 1 | 115.005 | KV452713.1 | 10322806 | 1-scf00011 | 1 |
| AX-157908934 | 1 | 115.005 | KV452713.1 | 10325519 | 1-scf00011 | 1 |
| AX-157908937 | 1 | 115.005 | KV452713.1 | 10329717 | 1-scf00011 | 1 |
| AX-157908938 | 1 | 115.005 | KV452713.1 | 10330843 | 1-scf00011 | 1 |
| AX-157908943 | 1 | 115.005 | KV452713.1 | 10338827 | 1-scf00011 | 1 |

|              |   |         |            |          |            |   |
|--------------|---|---------|------------|----------|------------|---|
| AX-157908889 | 1 | 115.114 | KV452713.1 | 10274858 | 1-scf00011 | 1 |
| AX-157908940 | 1 | 115.114 | KV452713.1 | 10334394 | 1-scf00011 | 1 |
| AX-157908942 | 1 | 115.114 | KV452713.1 | 10337606 | 1-scf00011 | 1 |
| AX-157908949 | 1 | 115.22  | KV452713.1 | 10344856 | 1-scf00011 | 1 |
| AX-157908916 | 1 | 115.333 | KV452713.1 | 10303303 | 1-scf00011 | 1 |
| AX-157774455 | 1 | 115.333 | KV452713.1 | 10328796 | 1-scf00011 | 1 |
| AX-157883372 | 1 | 115.333 | KV452713.1 | 10346350 | 1-scf00011 | 1 |
| AX-157908955 | 1 | 115.333 | KV452713.1 | 10356352 | 1-scf00011 | 1 |
| AX-157908957 | 1 | 115.333 | KV452713.1 | 10357215 | 1-scf00011 | 1 |
| AX-157908958 | 1 | 115.333 | KV452713.1 | 10359008 | 1-scf00011 | 1 |
| AX-157908959 | 1 | 115.333 | KV452713.1 | 10359506 | 1-scf00011 | 1 |
| AX-157908960 | 1 | 115.333 | KV452713.1 | 10360126 | 1-scf00011 | 1 |
| AX-158389540 | 1 | 115.333 | KV452713.1 | 10361516 | 1-scf00011 | 1 |
| AX-157908969 | 1 | 115.333 | KV452713.1 | 10370797 | 1-scf00011 | 1 |
| AX-157908961 | 1 | 115.396 | KV452713.1 | 10361557 | 1-scf00011 | 1 |
| AX-157908964 | 1 | 115.442 | KV452713.1 | 10363404 | 1-scf00011 | 1 |
| AX-157908965 | 1 | 115.442 | KV452713.1 | 10365584 | 1-scf00011 | 1 |
| AX-157908968 | 1 | 115.442 | KV452713.1 | 10370134 | 1-scf00011 | 1 |
| AX-157770946 | 1 | 115.442 | KV452713.1 | 10379615 | 1-scf00011 | 1 |
| AX-157864446 | 1 | 115.442 | KV452713.1 | 10397587 | 1-scf00011 | 1 |
| AX-157909005 | 1 | 115.442 | KV452713.1 | 10414925 | 1-scf00011 | 1 |
| AX-157909013 | 1 | 115.442 | KV452713.1 | 10423727 | 1-scf00011 | 1 |
| AX-157908976 | 1 | 115.465 | KV452713.1 | 10379087 | 1-scf00011 | 1 |
| AX-157908980 | 1 | 115.511 | KV452713.1 | 10385980 | 1-scf00011 | 1 |
| AX-157908981 | 1 | 115.551 | KV452713.1 | 10386371 | 1-scf00011 | 1 |
| AX-157908982 | 1 | 115.686 | KV452713.1 | 10387494 | 1-scf00011 | 1 |
| AX-157747484 | 1 | 115.686 | KV452713.1 | 10413676 | 1-scf00011 | 1 |
| AX-157908945 | 1 | 115.77  | KV452713.1 | 10341286 | 1-scf00011 | 1 |
| AX-157908962 | 1 | 115.77  | KV452713.1 | 10362174 | 1-scf00011 | 1 |
| AX-157908987 | 1 | 115.77  | KV452713.1 | 10393910 | 1-scf00011 | 1 |
| AX-157908989 | 1 | 115.77  | KV452713.1 | 10395993 | 1-scf00011 | 1 |
| AX-157908993 | 1 | 115.77  | KV452713.1 | 10398914 | 1-scf00011 | 1 |
| AX-157874539 | 1 | 115.77  | KV452713.1 | 10399319 | 1-scf00011 | 1 |
| AX-157908994 | 1 | 115.77  | KV452713.1 | 10400577 | 1-scf00011 | 1 |
| AX-157874540 | 1 | 115.77  | KV452713.1 | 10404326 | 1-scf00011 | 1 |
| AX-157908999 | 1 | 115.77  | KV452713.1 | 10405679 | 1-scf00011 | 1 |
| AX-157909000 | 1 | 115.77  | KV452713.1 | 10407987 | 1-scf00011 | 1 |
| AX-157909001 | 1 | 115.77  | KV452713.1 | 10411178 | 1-scf00011 | 1 |
| AX-157909002 | 1 | 115.77  | KV452713.1 | 10411843 | 1-scf00011 | 1 |
| AX-157909003 | 1 | 115.77  | KV452713.1 | 10412216 | 1-scf00011 | 1 |
| AX-157909004 | 1 | 115.77  | KV452713.1 | 10413250 | 1-scf00011 | 1 |
| AX-157909006 | 1 | 115.77  | KV452713.1 | 10415644 | 1-scf00011 | 1 |
| AX-157909008 | 1 | 115.77  | KV452713.1 | 10416456 | 1-scf00011 | 1 |
| AX-157909009 | 1 | 115.77  | KV452713.1 | 10420337 | 1-scf00011 | 1 |
| AX-157812082 | 1 | 115.77  | KV452713.1 | 10427838 | 1-scf00011 | 1 |
| AX-157812086 | 1 | 115.77  | KV452713.1 | 10441535 | 1-scf00011 | 1 |
| AX-157909027 | 1 | 115.77  | KV452713.1 | 10442613 | 1-scf00011 | 1 |
| AX-157909030 | 1 | 115.77  | KV452713.1 | 10446980 | 1-scf00011 | 1 |
| AX-157909036 | 1 | 115.77  | KV452713.1 | 10451278 | 1-scf00011 | 1 |
| AX-157909010 | 1 | 115.921 | KV452713.1 | 10420687 | 1-scf00011 | 1 |
| AX-157908983 | 1 | 115.969 | KV452713.1 | 10388932 | 1-scf00011 | 1 |

|              |   |         |            |          |            |   |
|--------------|---|---------|------------|----------|------------|---|
| AX-157909012 | 1 | 115.969 | KV452713.1 | 10422410 | 1-scf00011 | 1 |
| AX-157756039 | 1 | 116.036 | KV452713.1 | 10425227 | 1-scf00011 | 1 |
| AX-157909021 | 1 | 116.081 | KV452713.1 | 10432012 | 1-scf00011 | 1 |
| AX-157909023 | 1 | 116.135 | KV452713.1 | 10435330 | 1-scf00011 | 1 |
| AX-157777486 | 1 | 116.135 | KV452713.1 | 10463469 | 1-scf00011 | 1 |
| AX-157773008 | 1 | 116.135 | KV452713.1 | 10486182 | 1-scf00011 | 1 |
| AX-157909024 | 1 | 116.136 | KV452713.1 | 10438838 | 1-scf00011 | 1 |
| AX-157909028 | 1 | 116.45  | KV452713.1 | 10444162 | 1-scf00011 | 1 |
| AX-157909034 | 1 | 116.451 | KV452713.1 | 10450476 | 1-scf00011 | 1 |
| AX-157909040 | 1 | 116.451 | KV452713.1 | 10457358 | 1-scf00011 | 1 |
| AX-157909041 | 1 | 116.451 | KV452713.1 | 10458056 | 1-scf00011 | 1 |
| AX-157909042 | 1 | 116.451 | KV452713.1 | 10458534 | 1-scf00011 | 1 |
| AX-157909044 | 1 | 116.451 | KV452713.1 | 10461133 | 1-scf00011 | 1 |
| AX-157909045 | 1 | 116.451 | KV452713.1 | 10462548 | 1-scf00011 | 1 |
| AX-157909053 | 1 | 116.451 | KV452713.1 | 10471379 | 1-scf00011 | 1 |
| AX-157812090 | 1 | 116.451 | KV452713.1 | 10471611 | 1-scf00011 | 1 |
| AX-157750876 | 1 | 116.671 | KV452713.1 | 10463624 | 1-scf00011 | 1 |
| AX-157812089 | 1 | 116.765 | KV452713.1 | 10469708 | 1-scf00011 | 1 |
| AX-158379210 | 1 | 116.828 | KV452713.1 | 10487710 | 1-scf00011 | 1 |
| AX-157909061 | 1 | 116.852 | KV452713.1 | 10488375 | 1-scf00011 | 1 |
| AX-157812088 | 1 | 116.915 | KV452713.1 | 10463505 | 1-scf00011 | 1 |
| AX-157745509 | 1 | 116.915 | KV452713.1 | 10489301 | 1-scf00011 | 1 |
| AX-157909063 | 1 | 116.915 | KV452713.1 | 10493107 | 1-scf00011 | 1 |
| AX-157909019 | 1 | 117.008 | KV452713.1 | 10429052 | 1-scf00011 | 1 |
| AX-157909067 | 1 | 117.008 | KV452713.1 | 10497422 | 1-scf00011 | 1 |
| AX-157717728 | 1 | 117.008 | KV452713.1 | 10537684 | 1-scf00011 | 1 |
| AX-157909068 | 1 | 117.082 | KV452713.1 | 10499246 | 1-scf00011 | 1 |
| AX-157909069 | 1 | 117.082 | KV452713.1 | 10501268 | 1-scf00011 | 1 |
| AX-157909070 | 1 | 117.082 | KV452713.1 | 10501530 | 1-scf00011 | 1 |
| AX-157909071 | 1 | 117.082 | KV452713.1 | 10503924 | 1-scf00011 | 1 |
| AX-157909072 | 1 | 117.082 | KV452713.1 | 10504562 | 1-scf00011 | 1 |
| AX-157909074 | 1 | 117.082 | KV452713.1 | 10506414 | 1-scf00011 | 1 |
| AX-157909080 | 1 | 117.082 | KV452713.1 | 10514084 | 1-scf00011 | 1 |
| AX-157909150 | 1 | 117.082 | KV452713.1 | 10588020 | 1-scf00011 | 1 |
| AX-157908918 | 1 | 117.191 | KV452713.1 | 10304830 | 1-scf00011 | 1 |
| AX-157909054 | 1 | 117.191 | KV452713.1 | 10473327 | 1-scf00011 | 1 |
| AX-157909084 | 1 | 117.191 | KV452713.1 | 10517585 | 1-scf00011 | 1 |
| AX-157909086 | 1 | 117.191 | KV452713.1 | 10519007 | 1-scf00011 | 1 |
| AX-157909087 | 1 | 117.191 | KV452713.1 | 10519908 | 1-scf00011 | 1 |
| AX-157744451 | 1 | 117.191 | KV452713.1 | 10521100 | 1-scf00011 | 1 |
| AX-157909088 | 1 | 117.191 | KV452713.1 | 10523751 | 1-scf00011 | 1 |
| AX-157739371 | 1 | 117.298 | KV452713.1 | 10529310 | 1-scf00011 | 1 |
| AX-157909159 | 1 | 117.298 | KV452713.1 | 10596714 | 1-scf00011 | 1 |
| AX-157812094 | 1 | 117.41  | KV452713.1 | 10533493 | 1-scf00011 | 1 |
| AX-157909096 | 1 | 117.41  | KV452713.1 | 10535297 | 1-scf00011 | 1 |
| AX-157722901 | 1 | 117.519 | KV452713.1 | 10540802 | 1-scf00011 | 1 |
| AX-157909101 | 1 | 117.519 | KV452713.1 | 10542687 | 1-scf00011 | 1 |
| AX-157909102 | 1 | 117.519 | KV452713.1 | 10543367 | 1-scf00011 | 1 |
| AX-157909140 | 1 | 117.769 | KV452713.1 | 10582110 | 1-scf00011 | 1 |
| AX-157909051 | 1 | 117.956 | KV452713.1 | 10470187 | 1-scf00011 | 1 |
| AX-157909052 | 1 | 117.956 | KV452713.1 | 10470800 | 1-scf00011 | 1 |



|              |   |         |            |          |            |   |
|--------------|---|---------|------------|----------|------------|---|
| AX-157812091 | 1 | 117.956 | KV452713.1 | 10472126 | 1-scf00011 | 1 |
| AX-157909057 | 1 | 117.956 | KV452713.1 | 10477260 | 1-scf00011 | 1 |
| AX-157909104 | 1 | 117.956 | KV452713.1 | 10544808 | 1-scf00011 | 1 |
| AX-157909141 | 1 | 117.956 | KV452713.1 | 10582587 | 1-scf00011 | 1 |
| AX-157909149 | 1 | 117.956 | KV452713.1 | 10587028 | 1-scf00011 | 1 |
| AX-157874545 | 1 | 117.956 | KV452713.1 | 10587328 | 1-scf00011 | 1 |
| AX-157909152 | 1 | 117.956 | KV452713.1 | 10589181 | 1-scf00011 | 1 |
| AX-157909154 | 1 | 117.956 | KV452713.1 | 10590261 | 1-scf00011 | 1 |
| AX-157909156 | 1 | 117.956 | KV452713.1 | 10592264 | 1-scf00011 | 1 |
| AX-157909157 | 1 | 117.956 | KV452713.1 | 10593918 | 1-scf00011 | 1 |
| AX-157909158 | 1 | 117.956 | KV452713.1 | 10594734 | 1-scf00011 | 1 |
| AX-157812095 | 1 | 117.956 | KV452713.1 | 10601601 | 1-scf00011 | 1 |
| AX-157745829 | 1 | 117.956 | KV452713.1 | 10602840 | 1-scf00011 | 1 |
| AX-157812096 | 1 | 117.956 | KV452713.1 | 10603070 | 1-scf00011 | 1 |
| AX-157812098 | 1 | 117.956 | KV452713.1 | 10605736 | 1-scf00011 | 1 |
| AX-157909162 | 1 | 117.956 | KV452713.1 | 10606235 | 1-scf00011 | 1 |
| AX-157909163 | 1 | 117.956 | KV452713.1 | 10606750 | 1-scf00011 | 1 |
| AX-157869057 | 1 | 117.956 | KV452713.1 | 10607463 | 1-scf00011 | 1 |
| AX-157909095 | 1 | 118.066 | KV452713.1 | 10534737 | 1-scf00011 | 1 |
| AX-157909146 | 1 | 118.066 | KV452713.1 | 10584729 | 1-scf00011 | 1 |
| AX-157775072 | 1 | 118.066 | KV452713.1 | 10609199 | 1-scf00011 | 1 |
| AX-157909169 | 1 | 118.066 | KV452713.1 | 10613585 | 1-scf00011 | 1 |
| AX-157909172 | 1 | 118.066 | KV452713.1 | 10616798 | 1-scf00011 | 1 |
| AX-158421843 | 1 | 118.066 | KV452713.1 | 10620932 | 1-scf00011 | 1 |
| AX-158404834 | 1 | 118.066 | KV452713.1 | 10620970 | 1-scf00011 | 1 |
| AX-157812099 | 1 | 118.066 | KV452713.1 | 10621643 | 1-scf00011 | 1 |
| AX-157812100 | 1 | 118.066 | KV452713.1 | 10626180 | 1-scf00011 | 1 |
| AX-157909177 | 1 | 118.066 | KV452713.1 | 10627917 | 1-scf00011 | 1 |
| AX-157909178 | 1 | 118.066 | KV452713.1 | 10629335 | 1-scf00011 | 1 |
| AX-157909181 | 1 | 118.066 | KV452713.1 | 10631629 | 1-scf00011 | 1 |
| AX-157909183 | 1 | 118.066 | KV452713.1 | 10633462 | 1-scf00011 | 1 |
| AX-157909186 | 1 | 118.066 | KV452713.1 | 10644985 | 1-scf00011 | 1 |
| AX-157772362 | 1 | 118.175 | KV452713.1 | 10646032 | 1-scf00011 | 1 |
| AX-157909189 | 1 | 118.175 | KV452713.1 | 10653015 | 1-scf00011 | 1 |
| AX-157909191 | 1 | 118.284 | KV452713.1 | 10657799 | 1-scf00011 | 1 |
| AX-157909194 | 1 | 118.284 | KV452713.1 | 10661102 | 1-scf00011 | 1 |
| AX-157909195 | 1 | 118.393 | KV452713.1 | 10661529 | 1-scf00011 | 1 |
| AX-157909202 | 1 | 118.461 | KV452713.1 | 10672278 | 1-scf00011 | 1 |
| AX-158389544 | 1 | 118.461 | KV452715.1 | 53120    | 1-scf00013 | 1 |
| AX-157682307 | 1 | 118.461 | KV452714.1 | 5209     | 1-scf00014 | 1 |
| AX-157682314 | 1 | 118.461 | KV452714.1 | 9821     | 1-scf00014 | 1 |
| AX-157909200 | 1 | 118.503 | KV452713.1 | 10670989 | 1-scf00011 | 1 |
| AX-157909205 | 1 | 118.503 | KV452715.1 | 1961     | 1-scf00013 | 1 |
| AX-157909207 | 1 | 118.503 | KV452715.1 | 3708     | 1-scf00013 | 1 |
| AX-157909208 | 1 | 118.503 | KV452715.1 | 5577     | 1-scf00013 | 1 |
| AX-157909213 | 1 | 118.503 | KV452715.1 | 10537    | 1-scf00013 | 1 |
| AX-157909221 | 1 | 118.503 | KV452715.1 | 16462    | 1-scf00013 | 1 |
| AX-157812103 | 1 | 118.503 | KV452715.1 | 27088    | 1-scf00013 | 1 |
| AX-157682308 | 1 | 118.503 | KV452714.1 | 5806     | 1-scf00014 | 1 |
| AX-157682309 | 1 | 118.503 | KV452714.1 | 5984     | 1-scf00014 | 1 |
| AX-157682310 | 1 | 118.503 | KV452714.1 | 7542     | 1-scf00014 | 1 |

|              |   |         |            |        |            |   |
|--------------|---|---------|------------|--------|------------|---|
| AX-157682313 | 1 | 118.503 | KV452714.1 | 9165   | 1-scf00014 | 1 |
| AX-157682316 | 1 | 118.503 | KV452714.1 | 10384  | 1-scf00014 | 1 |
| AX-157909973 | 1 | 118.503 | KV452717.1 | 443169 | 1-scf00018 | 1 |
| AX-157909216 | 1 | 118.52  | KV452715.1 | 12702  | 1-scf00013 | 1 |
| AX-157909222 | 1 | 118.539 | KV452715.1 | 16688  | 1-scf00013 | 1 |
| AX-157909223 | 1 | 118.558 | KV452715.1 | 17161  | 1-scf00013 | 1 |
| AX-157909225 | 1 | 118.582 | KV452715.1 | 21230  | 1-scf00013 | 1 |
| AX-157753994 | 1 | 118.612 | KV452715.1 | 1375   | 1-scf00013 | 1 |
| AX-157909215 | 1 | 118.612 | KV452715.1 | 12117  | 1-scf00013 | 1 |
| AX-157909227 | 1 | 118.612 | KV452715.1 | 25085  | 1-scf00013 | 1 |
| AX-157909230 | 1 | 118.612 | KV452715.1 | 26511  | 1-scf00013 | 1 |
| AX-157909233 | 1 | 118.612 | KV452715.1 | 28340  | 1-scf00013 | 1 |
| AX-157909234 | 1 | 118.612 | KV452715.1 | 30287  | 1-scf00013 | 1 |
| AX-157812104 | 1 | 118.612 | KV452715.1 | 30990  | 1-scf00013 | 1 |
| AX-157883373 | 1 | 118.612 | KV452715.1 | 31644  | 1-scf00013 | 1 |
| AX-157909244 | 1 | 118.612 | KV452715.1 | 39167  | 1-scf00013 | 1 |
| AX-157909246 | 1 | 118.612 | KV452715.1 | 41083  | 1-scf00013 | 1 |
| AX-157909247 | 1 | 118.612 | KV452715.1 | 41805  | 1-scf00013 | 1 |
| AX-157756718 | 1 | 118.612 | KV452715.1 | 46790  | 1-scf00013 | 1 |
| AX-157909249 | 1 | 118.612 | KV452715.1 | 50522  | 1-scf00013 | 1 |
| AX-157909250 | 1 | 118.612 | KV452715.1 | 51151  | 1-scf00013 | 1 |
| AX-157749761 | 1 | 118.612 | KV452715.1 | 57151  | 1-scf00013 | 1 |
| AX-157909255 | 1 | 118.629 | KV452715.1 | 59141  | 1-scf00013 | 1 |
| AX-158389545 | 1 | 118.646 | KV452715.1 | 69523  | 1-scf00013 | 1 |
| AX-157909211 | 1 | 118.728 | KV452715.1 | 8545   | 1-scf00013 | 1 |
| AX-157909232 | 1 | 118.728 | KV452715.1 | 27940  | 1-scf00013 | 1 |
| AX-157909264 | 1 | 118.728 | KV452715.1 | 70505  | 1-scf00013 | 1 |
| AX-157909265 | 1 | 118.728 | KV452715.1 | 70946  | 1-scf00013 | 1 |
| AX-157909266 | 1 | 118.728 | KV452715.1 | 71596  | 1-scf00013 | 1 |
| AX-157909268 | 1 | 118.728 | KV452715.1 | 76189  | 1-scf00013 | 1 |
| AX-157909269 | 1 | 118.728 | KV452715.1 | 76922  | 1-scf00013 | 1 |
| AX-157909270 | 1 | 118.728 | KV452715.1 | 80009  | 1-scf00013 | 1 |
| AX-157682312 | 1 | 118.728 | KV452714.1 | 8431   | 1-scf00014 | 1 |
| AX-157710678 | 1 | 118.867 | KV452715.1 | 80185  | 1-scf00013 | 1 |
| AX-157909334 | 1 | 119.925 | KV452716.1 | 153172 | 1-scf00015 | 1 |
| AX-157883378 | 1 | 119.925 | KV452719.1 | 137859 | 1-scf00016 | 1 |
| AX-157909654 | 1 | 119.925 | KV452718.1 | 263453 | 1-scf00017 | 1 |
| AX-157909676 | 1 | 119.925 | KV452717.1 | 21000  | 1-scf00018 | 1 |
| AX-157909678 | 1 | 119.925 | KV452717.1 | 23754  | 1-scf00018 | 1 |
| AX-157909679 | 1 | 119.925 | KV452717.1 | 28733  | 1-scf00018 | 1 |
| AX-157909687 | 1 | 119.925 | KV452717.1 | 50816  | 1-scf00018 | 1 |
| AX-157909688 | 1 | 119.925 | KV452717.1 | 51378  | 1-scf00018 | 1 |
| AX-157909689 | 1 | 119.925 | KV452717.1 | 52411  | 1-scf00018 | 1 |
| AX-157716888 | 1 | 119.925 | KV452717.1 | 52503  | 1-scf00018 | 1 |
| AX-157909691 | 1 | 119.925 | KV452717.1 | 54150  | 1-scf00018 | 1 |
| AX-157909694 | 1 | 119.925 | KV452717.1 | 61543  | 1-scf00018 | 1 |
| AX-157909695 | 1 | 119.925 | KV452717.1 | 65374  | 1-scf00018 | 1 |
| AX-157909697 | 1 | 119.925 | KV452717.1 | 66170  | 1-scf00018 | 1 |
| AX-157909698 | 1 | 119.925 | KV452717.1 | 66813  | 1-scf00018 | 1 |
| AX-157909701 | 1 | 119.925 | KV452717.1 | 71172  | 1-scf00018 | 1 |
| AX-157812149 | 1 | 119.925 | KV452717.1 | 71583  | 1-scf00018 | 1 |

|              |   |         |             |        |            |    |
|--------------|---|---------|-------------|--------|------------|----|
| AX-157909702 | 1 | 119.925 | KV452717.1  | 75218  | 1-scf00018 | 1  |
| AX-157909703 | 1 | 119.925 | KV452717.1  | 75655  | 1-scf00018 | 1  |
| AX-157909706 | 1 | 119.925 | KV452717.1  | 78535  | 1-scf00018 | 1  |
| AX-157689653 | 1 | 119.925 | 3ML01031131 | 736    | scf06737_1 | UN |
| AX-157853658 | 1 | 119.981 | KV452717.1  | 89094  | 1-scf00018 | 1  |
| AX-157909712 | 1 | 120.035 | KV452717.1  | 90541  | 1-scf00018 | 1  |
| AX-157909715 | 1 | 120.035 | KV452717.1  | 93343  | 1-scf00018 | 1  |
| AX-157869063 | 1 | 120.035 | KV452717.1  | 93583  | 1-scf00018 | 1  |
| AX-157909716 | 1 | 120.035 | KV452717.1  | 95035  | 1-scf00018 | 1  |
| AX-157909717 | 1 | 120.035 | KV452717.1  | 95472  | 1-scf00018 | 1  |
| AX-157909718 | 1 | 120.035 | KV452717.1  | 96563  | 1-scf00018 | 1  |
| AX-157909719 | 1 | 120.035 | KV452717.1  | 97017  | 1-scf00018 | 1  |
| AX-157909729 | 1 | 120.035 | KV452717.1  | 116137 | 1-scf00018 | 1  |
| AX-157909732 | 1 | 120.035 | KV452717.1  | 118867 | 1-scf00018 | 1  |
| AX-157909733 | 1 | 120.035 | KV452717.1  | 120724 | 1-scf00018 | 1  |
| AX-157909734 | 1 | 120.035 | KV452717.1  | 122792 | 1-scf00018 | 1  |
| AX-157909735 | 1 | 120.035 | KV452717.1  | 124269 | 1-scf00018 | 1  |
| AX-157771411 | 1 | 120.035 | KV452717.1  | 125350 | 1-scf00018 | 1  |
| AX-157909737 | 1 | 120.035 | KV452717.1  | 127184 | 1-scf00018 | 1  |
| AX-157909738 | 1 | 120.035 | KV452717.1  | 127680 | 1-scf00018 | 1  |
| AX-157909739 | 1 | 120.035 | KV452717.1  | 128646 | 1-scf00018 | 1  |
| AX-157909740 | 1 | 120.035 | KV452717.1  | 132330 | 1-scf00018 | 1  |
| AX-157724602 | 1 | 120.035 | KV452717.1  | 134548 | 1-scf00018 | 1  |
| AX-157864455 | 1 | 120.035 | KV452717.1  | 135073 | 1-scf00018 | 1  |
| AX-157909743 | 1 | 120.035 | KV452717.1  | 136216 | 1-scf00018 | 1  |
| AX-157773634 | 1 | 120.035 | KV452717.1  | 136771 | 1-scf00018 | 1  |
| AX-157909746 | 1 | 120.035 | KV452717.1  | 137765 | 1-scf00018 | 1  |
| AX-157909792 | 1 | 120.035 | KV452717.1  | 224929 | 1-scf00018 | 1  |
| AX-157909793 | 1 | 120.035 | KV452717.1  | 225280 | 1-scf00018 | 1  |
| AX-157812165 | 1 | 120.035 | KV452717.1  | 237934 | 1-scf00018 | 1  |
| AX-157909749 | 1 | 120.065 | KV452717.1  | 140754 | 1-scf00018 | 1  |
| AX-157909751 | 1 | 120.094 | KV452717.1  | 142259 | 1-scf00018 | 1  |
| AX-157909754 | 1 | 120.122 | KV452717.1  | 152415 | 1-scf00018 | 1  |
| AX-157812153 | 1 | 120.144 | KV452717.1  | 155415 | 1-scf00018 | 1  |
| AX-157909758 | 1 | 120.144 | KV452717.1  | 162936 | 1-scf00018 | 1  |
| AX-157853659 | 1 | 120.144 | KV452717.1  | 167071 | 1-scf00018 | 1  |
| AX-157909759 | 1 | 120.144 | KV452717.1  | 167283 | 1-scf00018 | 1  |
| AX-157909760 | 1 | 120.144 | KV452717.1  | 172770 | 1-scf00018 | 1  |
| AX-157909761 | 1 | 120.144 | KV452717.1  | 178620 | 1-scf00018 | 1  |
| AX-157812155 | 1 | 120.144 | KV452717.1  | 186612 | 1-scf00018 | 1  |
| AX-157909776 | 1 | 120.144 | KV452717.1  | 204295 | 1-scf00018 | 1  |
| AX-157909783 | 1 | 120.144 | KV452717.1  | 213236 | 1-scf00018 | 1  |
| AX-157909787 | 1 | 120.144 | KV452717.1  | 218357 | 1-scf00018 | 1  |
| AX-157909788 | 1 | 120.144 | KV452717.1  | 219627 | 1-scf00018 | 1  |
| AX-157909791 | 1 | 120.144 | KV452717.1  | 222862 | 1-scf00018 | 1  |
| AX-157812160 | 1 | 120.144 | KV452717.1  | 224882 | 1-scf00018 | 1  |
| AX-157812161 | 1 | 120.144 | KV452717.1  | 224967 | 1-scf00018 | 1  |
| AX-157812162 | 1 | 120.144 | KV452717.1  | 225031 | 1-scf00018 | 1  |
| AX-157909795 | 1 | 120.144 | KV452717.1  | 233312 | 1-scf00018 | 1  |
| AX-157751950 | 1 | 120.144 | KV452717.1  | 234981 | 1-scf00018 | 1  |
| AX-157909799 | 1 | 120.144 | KV452717.1  | 245874 | 1-scf00018 | 1  |

|              |   |         |            |        |            |   |
|--------------|---|---------|------------|--------|------------|---|
| AX-157909886 | 1 | 120.144 | KV452717.1 | 331166 | 1-scf00018 | 1 |
| AX-157909898 | 1 | 120.144 | KV452717.1 | 344850 | 1-scf00018 | 1 |
| AX-157812168 | 1 | 120.144 | KV452717.1 | 346280 | 1-scf00018 | 1 |
| AX-157909909 | 1 | 120.144 | KV452717.1 | 359369 | 1-scf00018 | 1 |
| AX-157680518 | 1 | 120.253 | KV452714.1 | 518    | 1-scf00014 | 1 |
| AX-157721864 | 1 | 120.253 | KV452716.1 | 42666  | 1-scf00015 | 1 |
| AX-157909343 | 1 | 120.253 | KV452716.1 | 172773 | 1-scf00015 | 1 |
| AX-157909392 | 1 | 120.253 | KV452716.1 | 272820 | 1-scf00015 | 1 |
| AX-157909416 | 1 | 120.253 | KV452719.1 | 110873 | 1-scf00016 | 1 |
| AX-157909419 | 1 | 120.253 | KV452719.1 | 117506 | 1-scf00016 | 1 |
| AX-157909436 | 1 | 120.253 | KV452719.1 | 140491 | 1-scf00016 | 1 |
| AX-157771125 | 1 | 120.253 | KV452719.1 | 146989 | 1-scf00016 | 1 |
| AX-157864451 | 1 | 120.253 | KV452719.1 | 299549 | 1-scf00016 | 1 |
| AX-157909510 | 1 | 120.253 | KV452719.1 | 384261 | 1-scf00016 | 1 |
| AX-157909511 | 1 | 120.253 | KV452719.1 | 390647 | 1-scf00016 | 1 |
| AX-157710703 | 1 | 120.253 | KV452719.1 | 391004 | 1-scf00016 | 1 |
| AX-157909542 | 1 | 120.253 | KV452719.1 | 507740 | 1-scf00016 | 1 |
| AX-157909550 | 1 | 120.253 | KV452719.1 | 540344 | 1-scf00016 | 1 |
| AX-157909557 | 1 | 120.253 | KV452719.1 | 560675 | 1-scf00016 | 1 |
| AX-157909565 | 1 | 120.253 | KV452719.1 | 623033 | 1-scf00016 | 1 |
| AX-157909566 | 1 | 120.253 | KV452719.1 | 624985 | 1-scf00016 | 1 |
| AX-157909570 | 1 | 120.253 | KV452719.1 | 633141 | 1-scf00016 | 1 |
| AX-157909576 | 1 | 120.253 | KV452719.1 | 654169 | 1-scf00016 | 1 |
| AX-157812134 | 1 | 120.253 | KV452719.1 | 663198 | 1-scf00016 | 1 |
| AX-157909748 | 1 | 120.253 | KV452717.1 | 139912 | 1-scf00018 | 1 |
| AX-157909780 | 1 | 120.253 | KV452717.1 | 210995 | 1-scf00018 | 1 |
| AX-157812158 | 1 | 120.253 | KV452717.1 | 212483 | 1-scf00018 | 1 |
| AX-157909785 | 1 | 120.253 | KV452717.1 | 215889 | 1-scf00018 | 1 |
| AX-157909786 | 1 | 120.253 | KV452717.1 | 217101 | 1-scf00018 | 1 |
| AX-157812163 | 1 | 120.253 | KV452717.1 | 232401 | 1-scf00018 | 1 |
| AX-157909796 | 1 | 120.253 | KV452717.1 | 236784 | 1-scf00018 | 1 |
| AX-157715715 | 1 | 120.253 | KV452717.1 | 244352 | 1-scf00018 | 1 |
| AX-157772818 | 1 | 120.253 | KV452717.1 | 249182 | 1-scf00018 | 1 |
| AX-157909804 | 1 | 120.253 | KV452717.1 | 249825 | 1-scf00018 | 1 |
| AX-157909806 | 1 | 120.253 | KV452717.1 | 252705 | 1-scf00018 | 1 |
| AX-157909808 | 1 | 120.253 | KV452717.1 | 255844 | 1-scf00018 | 1 |
| AX-157812166 | 1 | 120.253 | KV452717.1 | 259186 | 1-scf00018 | 1 |
| AX-157909812 | 1 | 120.253 | KV452717.1 | 259303 | 1-scf00018 | 1 |
| AX-157909813 | 1 | 120.253 | KV452717.1 | 259744 | 1-scf00018 | 1 |
| AX-157909816 | 1 | 120.253 | KV452717.1 | 262018 | 1-scf00018 | 1 |
| AX-157909817 | 1 | 120.253 | KV452717.1 | 263672 | 1-scf00018 | 1 |
| AX-157909820 | 1 | 120.253 | KV452717.1 | 266125 | 1-scf00018 | 1 |
| AX-157909822 | 1 | 120.253 | KV452717.1 | 267881 | 1-scf00018 | 1 |
| AX-157909824 | 1 | 120.253 | KV452717.1 | 269168 | 1-scf00018 | 1 |
| AX-157909826 | 1 | 120.253 | KV452717.1 | 270119 | 1-scf00018 | 1 |
| AX-157909828 | 1 | 120.253 | KV452717.1 | 271385 | 1-scf00018 | 1 |
| AX-157909835 | 1 | 120.253 | KV452717.1 | 274906 | 1-scf00018 | 1 |
| AX-157752702 | 1 | 120.253 | KV452717.1 | 278050 | 1-scf00018 | 1 |
| AX-157909837 | 1 | 120.253 | KV452717.1 | 278255 | 1-scf00018 | 1 |
| AX-157909838 | 1 | 120.253 | KV452717.1 | 279256 | 1-scf00018 | 1 |
| AX-157909839 | 1 | 120.253 | KV452717.1 | 279498 | 1-scf00018 | 1 |

|              |   |         |             |        |            |    |
|--------------|---|---------|-------------|--------|------------|----|
| AX-157909840 | 1 | 120.253 | KV452717.1  | 279893 | 1-scf00018 | 1  |
| AX-157909841 | 1 | 120.253 | KV452717.1  | 280470 | 1-scf00018 | 1  |
| AX-157909842 | 1 | 120.253 | KV452717.1  | 282992 | 1-scf00018 | 1  |
| AX-157909844 | 1 | 120.253 | KV452717.1  | 285129 | 1-scf00018 | 1  |
| AX-157909845 | 1 | 120.253 | KV452717.1  | 286854 | 1-scf00018 | 1  |
| AX-157909846 | 1 | 120.253 | KV452717.1  | 287160 | 1-scf00018 | 1  |
| AX-157909847 | 1 | 120.253 | KV452717.1  | 288445 | 1-scf00018 | 1  |
| AX-157909848 | 1 | 120.253 | KV452717.1  | 289500 | 1-scf00018 | 1  |
| AX-157909851 | 1 | 120.253 | KV452717.1  | 292233 | 1-scf00018 | 1  |
| AX-157909852 | 1 | 120.253 | KV452717.1  | 292514 | 1-scf00018 | 1  |
| AX-157909858 | 1 | 120.253 | KV452717.1  | 295942 | 1-scf00018 | 1  |
| AX-157725914 | 1 | 120.253 | KV452717.1  | 299235 | 1-scf00018 | 1  |
| AX-157909861 | 1 | 120.253 | KV452717.1  | 299331 | 1-scf00018 | 1  |
| AX-157909862 | 1 | 120.253 | KV452717.1  | 299649 | 1-scf00018 | 1  |
| AX-157883381 | 1 | 120.253 | KV452717.1  | 300135 | 1-scf00018 | 1  |
| AX-157909865 | 1 | 120.253 | KV452717.1  | 304806 | 1-scf00018 | 1  |
| AX-157909867 | 1 | 120.253 | KV452717.1  | 308418 | 1-scf00018 | 1  |
| AX-157909868 | 1 | 120.253 | KV452717.1  | 309050 | 1-scf00018 | 1  |
| AX-157909869 | 1 | 120.253 | KV452717.1  | 310430 | 1-scf00018 | 1  |
| AX-157909871 | 1 | 120.253 | KV452717.1  | 311560 | 1-scf00018 | 1  |
| AX-157740083 | 1 | 120.253 | KV452717.1  | 312544 | 1-scf00018 | 1  |
| AX-157812167 | 1 | 120.253 | KV452717.1  | 312962 | 1-scf00018 | 1  |
| AX-157909872 | 1 | 120.253 | KV452717.1  | 313395 | 1-scf00018 | 1  |
| AX-157909873 | 1 | 120.253 | KV452717.1  | 313880 | 1-scf00018 | 1  |
| AX-157909877 | 1 | 120.253 | KV452717.1  | 320046 | 1-scf00018 | 1  |
| AX-157909881 | 1 | 120.253 | KV452717.1  | 322319 | 1-scf00018 | 1  |
| AX-157909884 | 1 | 120.253 | KV452717.1  | 328948 | 1-scf00018 | 1  |
| AX-157909887 | 1 | 120.253 | KV452717.1  | 334048 | 1-scf00018 | 1  |
| AX-157909888 | 1 | 120.253 | KV452717.1  | 335893 | 1-scf00018 | 1  |
| AX-157909889 | 1 | 120.253 | KV452717.1  | 336645 | 1-scf00018 | 1  |
| AX-157909890 | 1 | 120.253 | KV452717.1  | 337141 | 1-scf00018 | 1  |
| AX-157909893 | 1 | 120.253 | KV452717.1  | 340401 | 1-scf00018 | 1  |
| AX-157909895 | 1 | 120.253 | KV452717.1  | 340895 | 1-scf00018 | 1  |
| AX-157909901 | 1 | 120.253 | KV452717.1  | 345861 | 1-scf00018 | 1  |
| AX-157909903 | 1 | 120.253 | KV452717.1  | 348155 | 1-scf00018 | 1  |
| AX-157909906 | 1 | 120.253 | KV452717.1  | 355337 | 1-scf00018 | 1  |
| AX-157909928 | 1 | 120.253 | KV452717.1  | 381182 | 1-scf00018 | 1  |
| AX-157909957 | 1 | 120.253 | KV452717.1  | 416137 | 1-scf00018 | 1  |
| AX-157909958 | 1 | 120.253 | KV452717.1  | 416556 | 1-scf00018 | 1  |
| AX-157909961 | 1 | 120.253 | KV452717.1  | 419117 | 1-scf00018 | 1  |
| AX-158421180 | 1 | 120.253 | 3ML01031455 | 182    | scf07068_1 | UN |
| AX-157909900 | 1 | 120.306 | KV452717.1  | 345427 | 1-scf00018 | 1  |
| AX-157909908 | 1 | 120.36  | KV452717.1  | 357238 | 1-scf00018 | 1  |
| AX-157909913 | 1 | 120.361 | KV452717.1  | 364629 | 1-scf00018 | 1  |
| AX-157909954 | 1 | 120.361 | KV452717.1  | 411420 | 1-scf00018 | 1  |
| AX-157909914 | 1 | 120.362 | KV452717.1  | 366000 | 1-scf00018 | 1  |
| AX-157909916 | 1 | 120.362 | KV452717.1  | 367406 | 1-scf00018 | 1  |
| AX-157909917 | 1 | 120.362 | KV452717.1  | 368110 | 1-scf00018 | 1  |
| AX-157909919 | 1 | 120.362 | KV452717.1  | 371151 | 1-scf00018 | 1  |
| AX-157812169 | 1 | 120.362 | KV452717.1  | 371827 | 1-scf00018 | 1  |
| AX-157909921 | 1 | 120.362 | KV452717.1  | 373186 | 1-scf00018 | 1  |

|              |   |         |             |          |            |    |
|--------------|---|---------|-------------|----------|------------|----|
| AX-157909923 | 1 | 120.362 | KV452717.1  | 375131   | 1-scf00018 | 1  |
| AX-157909925 | 1 | 120.362 | KV452717.1  | 377419   | 1-scf00018 | 1  |
| AX-157909931 | 1 | 120.362 | KV452717.1  | 384565   | 1-scf00018 | 1  |
| AX-157909932 | 1 | 120.362 | KV452717.1  | 385058   | 1-scf00018 | 1  |
| AX-157909934 | 1 | 120.362 | KV452717.1  | 386633   | 1-scf00018 | 1  |
| AX-157909935 | 1 | 120.362 | KV452717.1  | 387024   | 1-scf00018 | 1  |
| AX-157909937 | 1 | 120.362 | KV452717.1  | 389298   | 1-scf00018 | 1  |
| AX-157722621 | 1 | 120.362 | KV452717.1  | 391815   | 1-scf00018 | 1  |
| AX-157909951 | 1 | 120.362 | KV452717.1  | 406926   | 1-scf00018 | 1  |
| AX-157909942 | 1 | 120.451 | KV452717.1  | 394357   | 1-scf00018 | 1  |
| AX-157909918 | 1 | 120.472 | KV452717.1  | 370748   | 1-scf00018 | 1  |
| AX-157909924 | 1 | 120.472 | KV452717.1  | 376281   | 1-scf00018 | 1  |
| AX-157909946 | 1 | 120.472 | KV452717.1  | 403800   | 1-scf00018 | 1  |
| AX-157909949 | 1 | 120.472 | KV452717.1  | 405839   | 1-scf00018 | 1  |
| AX-157689159 | 1 | 120.472 | 3ML01028406 | 518      | scf04013_1 | UN |
| AX-157909953 | 1 | 120.581 | KV452717.1  | 409800   | 1-scf00018 | 1  |
| AX-157909955 | 1 | 120.581 | KV452717.1  | 412761   | 1-scf00018 | 1  |
| AX-157909956 | 1 | 120.683 | KV452717.1  | 413572   | 1-scf00018 | 1  |
| AX-157909943 | 1 | 120.799 | KV452717.1  | 395770   | 1-scf00018 | 1  |
| AX-157909959 | 1 | 120.799 | KV452717.1  | 417595   | 1-scf00018 | 1  |
| AX-157909962 | 1 | 120.799 | KV452717.1  | 419791   | 1-scf00018 | 1  |
| AX-157909967 | 1 | 120.799 | KV452717.1  | 431448   | 1-scf00018 | 1  |
| AX-157909968 | 1 | 120.799 | KV452717.1  | 432929   | 1-scf00018 | 1  |
| AX-157909972 | 1 | 120.922 | KV452717.1  | 442209   | 1-scf00018 | 1  |
| AX-157909161 | 1 | 121.018 | KV452713.1  | 10605274 | 1-scf00011 | 1  |
| AX-157909192 | 1 | 121.018 | KV452713.1  | 10658696 | 1-scf00011 | 1  |
| AX-157909193 | 1 | 121.018 | KV452713.1  | 10660701 | 1-scf00011 | 1  |
| AX-157909219 | 1 | 121.018 | KV452715.1  | 14730    | 1-scf00013 | 1  |
| AX-157909260 | 1 | 121.018 | KV452715.1  | 67052    | 1-scf00013 | 1  |
| AX-157909882 | 1 | 121.018 | KV452717.1  | 322877   | 1-scf00018 | 1  |
| AX-157909979 | 1 | 121.018 | KV452717.1  | 453886   | 1-scf00018 | 1  |
| AX-157909980 | 1 | 121.018 | KV452717.1  | 454605   | 1-scf00018 | 1  |
| AX-157710523 | 1 | 121.018 | KV452717.1  | 454738   | 1-scf00018 | 1  |
| AX-157909983 | 1 | 121.018 | KV452717.1  | 461239   | 1-scf00018 | 1  |
| AX-157909985 | 1 | 121.018 | KV452717.1  | 462763   | 1-scf00018 | 1  |
| AX-157909986 | 1 | 121.018 | KV452717.1  | 462988   | 1-scf00018 | 1  |
| AX-157909994 | 1 | 121.018 | KV452717.1  | 474114   | 1-scf00018 | 1  |
| AX-157909236 | 1 | 121.075 | KV452715.1  | 32478    | 1-scf00013 | 1  |
| AX-157909988 | 1 | 121.075 | KV452717.1  | 466717   | 1-scf00018 | 1  |
| AX-157909212 | 1 | 121.127 | KV452715.1  | 8680     | 1-scf00013 | 1  |
| AX-157909241 | 1 | 121.127 | KV452715.1  | 37384    | 1-scf00013 | 1  |
| AX-157909242 | 1 | 121.127 | KV452715.1  | 38287    | 1-scf00013 | 1  |
| AX-157909243 | 1 | 121.127 | KV452715.1  | 38497    | 1-scf00013 | 1  |
| AX-157909263 | 1 | 121.127 | KV452715.1  | 69892    | 1-scf00013 | 1  |
| AX-157909970 | 1 | 121.127 | KV452717.1  | 438147   | 1-scf00018 | 1  |
| AX-157770704 | 1 | 121.127 | KV452717.1  | 464299   | 1-scf00018 | 1  |
| AX-157909989 | 1 | 121.127 | KV452717.1  | 467035   | 1-scf00018 | 1  |
| AX-157909990 | 1 | 121.127 | KV452717.1  | 470116   | 1-scf00018 | 1  |
| AX-157909992 | 1 | 121.127 | KV452717.1  | 471827   | 1-scf00018 | 1  |
| AX-157910000 | 1 | 121.127 | KV452717.1  | 480275   | 1-scf00018 | 1  |
| AX-157910001 | 1 | 121.127 | KV452717.1  | 481194   | 1-scf00018 | 1  |

|              |   |         |            |        |            |   |
|--------------|---|---------|------------|--------|------------|---|
| AX-157910002 | 1 | 121.127 | KV452717.1 | 482106 | 1-scf00018 | 1 |
| AX-157874562 | 1 | 121.588 | KV452718.1 | 58614  | 1-scf00017 | 1 |
| AX-157909237 | 1 | 122.335 | KV452715.1 | 33176  | 1-scf00013 | 1 |
| AX-157909272 | 1 | 122.335 | KV452716.1 | 1912   | 1-scf00015 | 1 |
| AX-157909273 | 1 | 122.335 | KV452716.1 | 2039   | 1-scf00015 | 1 |
| AX-157812105 | 1 | 122.335 | KV452716.1 | 10605  | 1-scf00015 | 1 |
| AX-157909274 | 1 | 122.335 | KV452716.1 | 13186  | 1-scf00015 | 1 |
| AX-157909275 | 1 | 122.335 | KV452716.1 | 13616  | 1-scf00015 | 1 |
| AX-157909277 | 1 | 122.335 | KV452716.1 | 16075  | 1-scf00015 | 1 |
| AX-157909278 | 1 | 122.335 | KV452716.1 | 21251  | 1-scf00015 | 1 |
| AX-157722132 | 1 | 122.335 | KV452716.1 | 22276  | 1-scf00015 | 1 |
| AX-157772309 | 1 | 122.335 | KV452716.1 | 22818  | 1-scf00015 | 1 |
| AX-157909281 | 1 | 122.335 | KV452716.1 | 31824  | 1-scf00015 | 1 |
| AX-157909282 | 1 | 122.335 | KV452716.1 | 32959  | 1-scf00015 | 1 |
| AX-157909286 | 1 | 122.335 | KV452716.1 | 51367  | 1-scf00015 | 1 |
| AX-157909287 | 1 | 122.335 | KV452716.1 | 53655  | 1-scf00015 | 1 |
| AX-157909289 | 1 | 122.335 | KV452716.1 | 60476  | 1-scf00015 | 1 |
| AX-157812109 | 1 | 122.335 | KV452716.1 | 60511  | 1-scf00015 | 1 |
| AX-157749768 | 1 | 122.335 | KV452716.1 | 104559 | 1-scf00015 | 1 |
| AX-157741123 | 1 | 122.335 | KV452716.1 | 104945 | 1-scf00015 | 1 |
| AX-157909299 | 1 | 122.335 | KV452716.1 | 105035 | 1-scf00015 | 1 |
| AX-157909300 | 1 | 122.335 | KV452716.1 | 105202 | 1-scf00015 | 1 |
| AX-157812113 | 1 | 122.335 | KV452716.1 | 105506 | 1-scf00015 | 1 |
| AX-157812115 | 1 | 122.335 | KV452716.1 | 111221 | 1-scf00015 | 1 |
| AX-157909303 | 1 | 122.335 | KV452716.1 | 111828 | 1-scf00015 | 1 |
| AX-157909305 | 1 | 122.335 | KV452716.1 | 114128 | 1-scf00015 | 1 |
| AX-157909307 | 1 | 122.335 | KV452716.1 | 115707 | 1-scf00015 | 1 |
| AX-157909308 | 1 | 122.335 | KV452716.1 | 118262 | 1-scf00015 | 1 |
| AX-157727213 | 1 | 122.335 | KV452716.1 | 119524 | 1-scf00015 | 1 |
| AX-157909309 | 1 | 122.335 | KV452716.1 | 119642 | 1-scf00015 | 1 |
| AX-157719930 | 1 | 122.335 | KV452716.1 | 122509 | 1-scf00015 | 1 |
| AX-157909312 | 1 | 122.335 | KV452716.1 | 125310 | 1-scf00015 | 1 |
| AX-157909313 | 1 | 122.335 | KV452716.1 | 125689 | 1-scf00015 | 1 |
| AX-157909315 | 1 | 122.335 | KV452716.1 | 128952 | 1-scf00015 | 1 |
| AX-157909317 | 1 | 122.335 | KV452716.1 | 129417 | 1-scf00015 | 1 |
| AX-157757909 | 1 | 122.335 | KV452716.1 | 131881 | 1-scf00015 | 1 |
| AX-157909321 | 1 | 122.335 | KV452716.1 | 134240 | 1-scf00015 | 1 |
| AX-158379212 | 1 | 122.335 | KV452716.1 | 136947 | 1-scf00015 | 1 |
| AX-157909325 | 1 | 122.335 | KV452716.1 | 138783 | 1-scf00015 | 1 |
| AX-157869060 | 1 | 122.335 | KV452716.1 | 142986 | 1-scf00015 | 1 |
| AX-157909328 | 1 | 122.335 | KV452716.1 | 143795 | 1-scf00015 | 1 |
| AX-157909331 | 1 | 122.335 | KV452716.1 | 149829 | 1-scf00015 | 1 |
| AX-157909332 | 1 | 122.335 | KV452716.1 | 150502 | 1-scf00015 | 1 |
| AX-157740023 | 1 | 122.335 | KV452716.1 | 158157 | 1-scf00015 | 1 |
| AX-157742363 | 1 | 122.335 | KV452716.1 | 158862 | 1-scf00015 | 1 |
| AX-157909336 | 1 | 122.335 | KV452716.1 | 159254 | 1-scf00015 | 1 |
| AX-157909337 | 1 | 122.335 | KV452716.1 | 159996 | 1-scf00015 | 1 |
| AX-157909338 | 1 | 122.335 | KV452716.1 | 160239 | 1-scf00015 | 1 |
| AX-157909339 | 1 | 122.335 | KV452716.1 | 161018 | 1-scf00015 | 1 |
| AX-157909340 | 1 | 122.335 | KV452716.1 | 162992 | 1-scf00015 | 1 |
| AX-157909341 | 1 | 122.335 | KV452716.1 | 164975 | 1-scf00015 | 1 |

|              |   |         |            |        |            |   |
|--------------|---|---------|------------|--------|------------|---|
| AX-157909344 | 1 | 122.335 | KV452716.1 | 173138 | 1-scf00015 | 1 |
| AX-157909347 | 1 | 122.335 | KV452716.1 | 180363 | 1-scf00015 | 1 |
| AX-157909348 | 1 | 122.335 | KV452716.1 | 181237 | 1-scf00015 | 1 |
| AX-157909350 | 1 | 122.335 | KV452716.1 | 182178 | 1-scf00015 | 1 |
| AX-157812120 | 1 | 122.335 | KV452716.1 | 182978 | 1-scf00015 | 1 |
| AX-158404840 | 1 | 122.335 | KV452716.1 | 183687 | 1-scf00015 | 1 |
| AX-157909353 | 1 | 122.335 | KV452716.1 | 187156 | 1-scf00015 | 1 |
| AX-157909354 | 1 | 122.335 | KV452716.1 | 187461 | 1-scf00015 | 1 |
| AX-157883376 | 1 | 122.335 | KV452716.1 | 188066 | 1-scf00015 | 1 |
| AX-157909357 | 1 | 122.335 | KV452716.1 | 195139 | 1-scf00015 | 1 |
| AX-157909358 | 1 | 122.335 | KV452716.1 | 195949 | 1-scf00015 | 1 |
| AX-157909359 | 1 | 122.335 | KV452716.1 | 198287 | 1-scf00015 | 1 |
| AX-157909360 | 1 | 122.335 | KV452716.1 | 198972 | 1-scf00015 | 1 |
| AX-157909363 | 1 | 122.335 | KV452716.1 | 200517 | 1-scf00015 | 1 |
| AX-157909365 | 1 | 122.335 | KV452716.1 | 201954 | 1-scf00015 | 1 |
| AX-157909366 | 1 | 122.335 | KV452716.1 | 204749 | 1-scf00015 | 1 |
| AX-157909368 | 1 | 122.335 | KV452716.1 | 209035 | 1-scf00015 | 1 |
| AX-157909373 | 1 | 122.335 | KV452716.1 | 214322 | 1-scf00015 | 1 |
| AX-157909374 | 1 | 122.335 | KV452716.1 | 215184 | 1-scf00015 | 1 |
| AX-157909377 | 1 | 122.335 | KV452716.1 | 222853 | 1-scf00015 | 1 |
| AX-157909406 | 1 | 122.335 | KV452719.1 | 75602  | 1-scf00016 | 1 |
| AX-157909409 | 1 | 122.335 | KV452719.1 | 78321  | 1-scf00016 | 1 |
| AX-157909412 | 1 | 122.335 | KV452719.1 | 96812  | 1-scf00016 | 1 |
| AX-158404849 | 1 | 122.335 | KV452719.1 | 100008 | 1-scf00016 | 1 |
| AX-157909418 | 1 | 122.335 | KV452719.1 | 115919 | 1-scf00016 | 1 |
| AX-157909420 | 1 | 122.335 | KV452719.1 | 118593 | 1-scf00016 | 1 |
| AX-157909421 | 1 | 122.335 | KV452719.1 | 119414 | 1-scf00016 | 1 |
| AX-157909422 | 1 | 122.335 | KV452719.1 | 120296 | 1-scf00016 | 1 |
| AX-157909428 | 1 | 122.335 | KV452719.1 | 128967 | 1-scf00016 | 1 |
| AX-157909429 | 1 | 122.335 | KV452719.1 | 129809 | 1-scf00016 | 1 |
| AX-157812126 | 1 | 122.335 | KV452719.1 | 132462 | 1-scf00016 | 1 |
| AX-157909430 | 1 | 122.335 | KV452719.1 | 133887 | 1-scf00016 | 1 |
| AX-157909431 | 1 | 122.335 | KV452719.1 | 134718 | 1-scf00016 | 1 |
| AX-157909433 | 1 | 122.335 | KV452719.1 | 135451 | 1-scf00016 | 1 |
| AX-157909434 | 1 | 122.335 | KV452719.1 | 137967 | 1-scf00016 | 1 |
| AX-157909435 | 1 | 122.335 | KV452719.1 | 139079 | 1-scf00016 | 1 |
| AX-157771777 | 1 | 122.335 | KV452719.1 | 141067 | 1-scf00016 | 1 |
| AX-157752184 | 1 | 122.335 | KV452719.1 | 143417 | 1-scf00016 | 1 |
| AX-157812128 | 1 | 122.335 | KV452719.1 | 152547 | 1-scf00016 | 1 |
| AX-157812129 | 1 | 122.335 | KV452719.1 | 152954 | 1-scf00016 | 1 |
| AX-157909440 | 1 | 122.335 | KV452719.1 | 154866 | 1-scf00016 | 1 |
| AX-157874554 | 1 | 122.335 | KV452719.1 | 160644 | 1-scf00016 | 1 |
| AX-157909443 | 1 | 122.335 | KV452719.1 | 165322 | 1-scf00016 | 1 |
| AX-157742300 | 1 | 122.335 | KV452719.1 | 170078 | 1-scf00016 | 1 |
| AX-157909444 | 1 | 122.335 | KV452719.1 | 171038 | 1-scf00016 | 1 |
| AX-157909445 | 1 | 122.335 | KV452719.1 | 171767 | 1-scf00016 | 1 |
| AX-157909448 | 1 | 122.335 | KV452719.1 | 182511 | 1-scf00016 | 1 |
| AX-157909449 | 1 | 122.335 | KV452719.1 | 182980 | 1-scf00016 | 1 |
| AX-157909450 | 1 | 122.335 | KV452719.1 | 183625 | 1-scf00016 | 1 |
| AX-157874556 | 1 | 122.335 | KV452719.1 | 187648 | 1-scf00016 | 1 |
| AX-157909454 | 1 | 122.335 | KV452719.1 | 192691 | 1-scf00016 | 1 |



|              |   |         |            |        |            |   |
|--------------|---|---------|------------|--------|------------|---|
| AX-157909455 | 1 | 122.335 | KV452719.1 | 194392 | 1-scf00016 | 1 |
| AX-157909456 | 1 | 122.335 | KV452719.1 | 195802 | 1-scf00016 | 1 |
| AX-157909457 | 1 | 122.335 | KV452719.1 | 197559 | 1-scf00016 | 1 |
| AX-157883379 | 1 | 122.335 | KV452719.1 | 200107 | 1-scf00016 | 1 |
| AX-157765875 | 1 | 122.335 | KV452719.1 | 201143 | 1-scf00016 | 1 |
| AX-157909460 | 1 | 122.335 | KV452719.1 | 202962 | 1-scf00016 | 1 |
| AX-157909461 | 1 | 122.335 | KV452719.1 | 209746 | 1-scf00016 | 1 |
| AX-157909463 | 1 | 122.335 | KV452719.1 | 218509 | 1-scf00016 | 1 |
| AX-157909464 | 1 | 122.335 | KV452719.1 | 225789 | 1-scf00016 | 1 |
| AX-157909465 | 1 | 122.335 | KV452719.1 | 226167 | 1-scf00016 | 1 |
| AX-157909470 | 1 | 122.335 | KV452719.1 | 236838 | 1-scf00016 | 1 |
| AX-157909472 | 1 | 122.335 | KV452719.1 | 238952 | 1-scf00016 | 1 |
| AX-157909475 | 1 | 122.335 | KV452719.1 | 252876 | 1-scf00016 | 1 |
| AX-157909476 | 1 | 122.335 | KV452719.1 | 253236 | 1-scf00016 | 1 |
| AX-157743163 | 1 | 122.335 | KV452719.1 | 264241 | 1-scf00016 | 1 |
| AX-157757175 | 1 | 122.335 | KV452719.1 | 272464 | 1-scf00016 | 1 |
| AX-157909483 | 1 | 122.335 | KV452719.1 | 272901 | 1-scf00016 | 1 |
| AX-157909484 | 1 | 122.335 | KV452719.1 | 273370 | 1-scf00016 | 1 |
| AX-157909485 | 1 | 122.335 | KV452719.1 | 274371 | 1-scf00016 | 1 |
| AX-157909488 | 1 | 122.335 | KV452719.1 | 288153 | 1-scf00016 | 1 |
| AX-157909490 | 1 | 122.335 | KV452719.1 | 306468 | 1-scf00016 | 1 |
| AX-157909491 | 1 | 122.335 | KV452719.1 | 309158 | 1-scf00016 | 1 |
| AX-157909492 | 1 | 122.335 | KV452719.1 | 319343 | 1-scf00016 | 1 |
| AX-157909494 | 1 | 122.335 | KV452719.1 | 323085 | 1-scf00016 | 1 |
| AX-157909495 | 1 | 122.335 | KV452719.1 | 325552 | 1-scf00016 | 1 |
| AX-157909496 | 1 | 122.335 | KV452719.1 | 325917 | 1-scf00016 | 1 |
| AX-157909497 | 1 | 122.335 | KV452719.1 | 331499 | 1-scf00016 | 1 |
| AX-157909498 | 1 | 122.335 | KV452719.1 | 335058 | 1-scf00016 | 1 |
| AX-158404854 | 1 | 122.335 | KV452719.1 | 338305 | 1-scf00016 | 1 |
| AX-157909500 | 1 | 122.335 | KV452719.1 | 340258 | 1-scf00016 | 1 |
| AX-157909503 | 1 | 122.335 | KV452719.1 | 344860 | 1-scf00016 | 1 |
| AX-157909509 | 1 | 122.335 | KV452719.1 | 382490 | 1-scf00016 | 1 |
| AX-157909512 | 1 | 122.335 | KV452719.1 | 407164 | 1-scf00016 | 1 |
| AX-157909514 | 1 | 122.335 | KV452719.1 | 421238 | 1-scf00016 | 1 |
| AX-158382167 | 1 | 122.335 | KV452719.1 | 429097 | 1-scf00016 | 1 |
| AX-157909517 | 1 | 122.335 | KV452719.1 | 434376 | 1-scf00016 | 1 |
| AX-157909518 | 1 | 122.335 | KV452719.1 | 436483 | 1-scf00016 | 1 |
| AX-157909519 | 1 | 122.335 | KV452719.1 | 437153 | 1-scf00016 | 1 |
| AX-157909520 | 1 | 122.335 | KV452719.1 | 437978 | 1-scf00016 | 1 |
| AX-157909521 | 1 | 122.335 | KV452719.1 | 438677 | 1-scf00016 | 1 |
| AX-157812131 | 1 | 122.335 | KV452719.1 | 439935 | 1-scf00016 | 1 |
| AX-157909523 | 1 | 122.335 | KV452719.1 | 445996 | 1-scf00016 | 1 |
| AX-157909524 | 1 | 122.335 | KV452719.1 | 449982 | 1-scf00016 | 1 |
| AX-157909525 | 1 | 122.335 | KV452719.1 | 452696 | 1-scf00016 | 1 |
| AX-157909526 | 1 | 122.335 | KV452719.1 | 455860 | 1-scf00016 | 1 |
| AX-157909527 | 1 | 122.335 | KV452719.1 | 457552 | 1-scf00016 | 1 |
| AX-158404855 | 1 | 122.335 | KV452719.1 | 473225 | 1-scf00016 | 1 |
| AX-157909529 | 1 | 122.335 | KV452719.1 | 476138 | 1-scf00016 | 1 |
| AX-157909530 | 1 | 122.335 | KV452719.1 | 476855 | 1-scf00016 | 1 |
| AX-157909531 | 1 | 122.335 | KV452719.1 | 477658 | 1-scf00016 | 1 |
| AX-157909532 | 1 | 122.335 | KV452719.1 | 478617 | 1-scf00016 | 1 |

|              |   |         |            |        |            |   |
|--------------|---|---------|------------|--------|------------|---|
| AX-157909538 | 1 | 122.335 | KV452719.1 | 495599 | 1-scf00016 | 1 |
| AX-157909539 | 1 | 122.335 | KV452719.1 | 498180 | 1-scf00016 | 1 |
| AX-157909541 | 1 | 122.335 | KV452719.1 | 507056 | 1-scf00016 | 1 |
| AX-157812132 | 1 | 122.335 | KV452719.1 | 512419 | 1-scf00016 | 1 |
| AX-157909543 | 1 | 122.335 | KV452719.1 | 518731 | 1-scf00016 | 1 |
| AX-158404860 | 1 | 122.335 | KV452719.1 | 524376 | 1-scf00016 | 1 |
| AX-157909547 | 1 | 122.335 | KV452719.1 | 529982 | 1-scf00016 | 1 |
| AX-157909551 | 1 | 122.335 | KV452719.1 | 541422 | 1-scf00016 | 1 |
| AX-157909554 | 1 | 122.335 | KV452719.1 | 546078 | 1-scf00016 | 1 |
| AX-157909556 | 1 | 122.335 | KV452719.1 | 558512 | 1-scf00016 | 1 |
| AX-157909559 | 1 | 122.335 | KV452719.1 | 564429 | 1-scf00016 | 1 |
| AX-157909569 | 1 | 122.335 | KV452719.1 | 630473 | 1-scf00016 | 1 |
| AX-157909572 | 1 | 122.335 | KV452719.1 | 639605 | 1-scf00016 | 1 |
| AX-157909575 | 1 | 122.335 | KV452719.1 | 646610 | 1-scf00016 | 1 |
| AX-157812135 | 1 | 122.335 | KV452719.1 | 677657 | 1-scf00016 | 1 |
| AX-157909580 | 1 | 122.335 | KV452719.1 | 683134 | 1-scf00016 | 1 |
| AX-158382168 | 1 | 122.335 | KV452718.1 | 55105  | 1-scf00017 | 1 |
| AX-157909594 | 1 | 122.335 | KV452718.1 | 61065  | 1-scf00017 | 1 |
| AX-157739670 | 1 | 122.335 | KV452718.1 | 150352 | 1-scf00017 | 1 |
| AX-157909626 | 1 | 122.335 | KV452718.1 | 194989 | 1-scf00017 | 1 |
| AX-157909628 | 1 | 122.335 | KV452718.1 | 199041 | 1-scf00017 | 1 |
| AX-157909630 | 1 | 122.335 | KV452718.1 | 201235 | 1-scf00017 | 1 |
| AX-157909631 | 1 | 122.335 | KV452718.1 | 202352 | 1-scf00017 | 1 |
| AX-157909632 | 1 | 122.335 | KV452718.1 | 202629 | 1-scf00017 | 1 |
| AX-157909633 | 1 | 122.335 | KV452718.1 | 204334 | 1-scf00017 | 1 |
| AX-157909634 | 1 | 122.335 | KV452718.1 | 208520 | 1-scf00017 | 1 |
| AX-157909639 | 1 | 122.335 | KV452718.1 | 218278 | 1-scf00017 | 1 |
| AX-157812138 | 1 | 122.335 | KV452718.1 | 228210 | 1-scf00017 | 1 |
| AX-157812140 | 1 | 122.335 | KV452718.1 | 235274 | 1-scf00017 | 1 |
| AX-157909646 | 1 | 122.335 | KV452718.1 | 235741 | 1-scf00017 | 1 |
| AX-157717006 | 1 | 122.335 | KV452718.1 | 235881 | 1-scf00017 | 1 |
| AX-157909647 | 1 | 122.335 | KV452718.1 | 236468 | 1-scf00017 | 1 |
| AX-157740956 | 1 | 122.335 | KV452718.1 | 237176 | 1-scf00017 | 1 |
| AX-158379214 | 1 | 122.335 | KV452718.1 | 237482 | 1-scf00017 | 1 |
| AX-157715370 | 1 | 122.335 | KV452718.1 | 237829 | 1-scf00017 | 1 |
| AX-157812144 | 1 | 122.335 | KV452718.1 | 261511 | 1-scf00017 | 1 |
| AX-157745879 | 1 | 122.335 | KV452718.1 | 262270 | 1-scf00017 | 1 |
| AX-157909656 | 1 | 122.335 | KV452718.1 | 267962 | 1-scf00017 | 1 |
| AX-157748685 | 1 | 122.335 | KV452718.1 | 269096 | 1-scf00017 | 1 |
| AX-157716849 | 1 | 122.335 | KV452718.1 | 270718 | 1-scf00017 | 1 |
| AX-157909660 | 1 | 122.335 | KV452718.1 | 276795 | 1-scf00017 | 1 |
| AX-157909661 | 1 | 122.335 | KV452718.1 | 277474 | 1-scf00017 | 1 |
| AX-157874564 | 1 | 122.335 | KV452718.1 | 278226 | 1-scf00017 | 1 |
| AX-157909667 | 1 | 122.335 | KV452718.1 | 285697 | 1-scf00017 | 1 |
| AX-157909671 | 1 | 122.335 | KV452717.1 | 13153  | 1-scf00018 | 1 |
| AX-157909673 | 1 | 122.335 | KV452717.1 | 16490  | 1-scf00018 | 1 |
| AX-157909680 | 1 | 122.335 | KV452717.1 | 37454  | 1-scf00018 | 1 |
| AX-157909681 | 1 | 122.335 | KV452717.1 | 40904  | 1-scf00018 | 1 |
| AX-157909682 | 1 | 122.335 | KV452717.1 | 41618  | 1-scf00018 | 1 |
| AX-157909683 | 1 | 122.335 | KV452717.1 | 43289  | 1-scf00018 | 1 |
| AX-157909684 | 1 | 122.335 | KV452717.1 | 45368  | 1-scf00018 | 1 |

|              |   |         |             |        |             |    |
|--------------|---|---------|-------------|--------|-------------|----|
| AX-158382172 | 1 | 122.335 | KV452717.1  | 47103  | 1-scf00018  | 1  |
| AX-157909690 | 1 | 122.335 | KV452717.1  | 53211  | 1-scf00018  | 1  |
| AX-157909696 | 1 | 122.335 | KV452717.1  | 65752  | 1-scf00018  | 1  |
| AX-157909709 | 1 | 122.335 | KV452717.1  | 83044  | 1-scf00018  | 1  |
| AX-157909726 | 1 | 122.335 | KV452717.1  | 110873 | 1-scf00018  | 1  |
| AX-157909747 | 1 | 122.335 | KV452717.1  | 139459 | 1-scf00018  | 1  |
| AX-157909750 | 1 | 122.335 | KV452717.1  | 141339 | 1-scf00018  | 1  |
| AX-157909766 | 1 | 122.335 | KV452717.1  | 188074 | 1-scf00018  | 1  |
| AX-157909772 | 1 | 122.335 | KV452717.1  | 197279 | 1-scf00018  | 1  |
| AX-157909810 | 1 | 122.335 | KV452717.1  | 258317 | 1-scf00018  | 1  |
| AX-157909831 | 1 | 122.335 | KV452717.1  | 272322 | 1-scf00018  | 1  |
| AX-157909843 | 1 | 122.335 | KV452717.1  | 283862 | 1-scf00018  | 1  |
| AX-157909874 | 1 | 122.335 | KV452717.1  | 315948 | 1-scf00018  | 1  |
| AX-157722927 | 1 | 122.335 | KV452717.1  | 447631 | 1-scf00018  | 1  |
| AX-157687751 | 1 | 122.335 | KV453595.1  | 5937   | scf00999    | UN |
| AX-157909552 | 1 | 122.345 | KV452719.1  | 542896 | 1-scf00016  | 1  |
| AX-157909553 | 1 | 122.345 | KV452719.1  | 544730 | 1-scf00016  | 1  |
| AX-157909560 | 1 | 122.345 | KV452719.1  | 565597 | 1-scf00016  | 1  |
| AX-157689701 | 1 | 122.48  | 3ML01031455 | 744    | scf07068_1  | UN |
| AX-157910010 | 2 | 0       | KV453182.1  | 7839   | 20-scf00019 | 20 |
| AX-157864457 | 2 | 0.296   | KV453182.1  | 22246  | 20-scf00019 | 20 |
| AX-157910006 | 2 | 0.301   | KV453182.1  | 4841   | 20-scf00019 | 20 |
| AX-157910007 | 2 | 0.301   | KV453182.1  | 4892   | 20-scf00019 | 20 |
| AX-157910008 | 2 | 0.301   | KV453182.1  | 5643   | 20-scf00019 | 20 |
| AX-157910011 | 2 | 0.301   | KV453182.1  | 8037   | 20-scf00019 | 20 |
| AX-157910012 | 2 | 0.301   | KV453182.1  | 9100   | 20-scf00019 | 20 |
| AX-157910013 | 2 | 0.301   | KV453182.1  | 9614   | 20-scf00019 | 20 |
| AX-157812171 | 2 | 0.301   | KV453182.1  | 12229  | 20-scf00019 | 20 |
| AX-157910014 | 2 | 0.301   | KV453182.1  | 16843  | 20-scf00019 | 20 |
| AX-157910017 | 2 | 0.301   | KV453182.1  | 19336  | 20-scf00019 | 20 |
| AX-157910018 | 2 | 0.301   | KV453182.1  | 23769  | 20-scf00019 | 20 |
| AX-157910019 | 2 | 0.301   | KV453182.1  | 24661  | 20-scf00019 | 20 |
| AX-157910022 | 2 | 0.301   | KV453182.1  | 28094  | 20-scf00019 | 20 |
| AX-157812176 | 2 | 0.301   | KV453182.1  | 30086  | 20-scf00019 | 20 |
| AX-157910023 | 2 | 0.301   | KV453182.1  | 33651  | 20-scf00019 | 20 |
| AX-157910024 | 2 | 0.301   | KV453182.1  | 35663  | 20-scf00019 | 20 |
| AX-157910025 | 2 | 0.301   | KV453182.1  | 36702  | 20-scf00019 | 20 |
| AX-157910026 | 2 | 0.301   | KV453182.1  | 39185  | 20-scf00019 | 20 |
| AX-157910027 | 2 | 0.301   | KV453182.1  | 39574  | 20-scf00019 | 20 |
| AX-157910031 | 2 | 0.301   | KV453182.1  | 43769  | 20-scf00019 | 20 |
| AX-157910032 | 2 | 0.301   | KV453182.1  | 45897  | 20-scf00019 | 20 |
| AX-157910034 | 2 | 0.301   | KV453182.1  | 47893  | 20-scf00019 | 20 |
| AX-157910036 | 2 | 0.301   | KV453182.1  | 49231  | 20-scf00019 | 20 |
| AX-158382178 | 2 | 0.301   | KV453182.1  | 49802  | 20-scf00019 | 20 |
| AX-157910038 | 2 | 0.301   | KV453182.1  | 50994  | 20-scf00019 | 20 |
| AX-157910040 | 2 | 0.301   | KV453182.1  | 52364  | 20-scf00019 | 20 |
| AX-157910041 | 2 | 0.301   | KV453182.1  | 52659  | 20-scf00019 | 20 |
| AX-157910042 | 2 | 0.301   | KV453182.1  | 55425  | 20-scf00019 | 20 |
| AX-157910046 | 2 | 0.301   | KV453182.1  | 61042  | 20-scf00019 | 20 |
| AX-157910047 | 2 | 0.301   | KV453182.1  | 61809  | 20-scf00019 | 20 |
| AX-157910049 | 2 | 0.301   | KV453182.1  | 64923  | 20-scf00019 | 20 |

|              |   |       |            |        |             |    |
|--------------|---|-------|------------|--------|-------------|----|
| AX-157910052 | 2 | 0.301 | KV453182.1 | 71439  | 20-scf00019 | 20 |
| AX-157725436 | 2 | 0.301 | KV453182.1 | 72683  | 20-scf00019 | 20 |
| AX-157910055 | 2 | 0.301 | KV453182.1 | 77008  | 20-scf00019 | 20 |
| AX-157910056 | 2 | 0.301 | KV453182.1 | 79388  | 20-scf00019 | 20 |
| AX-157910057 | 2 | 0.301 | KV453182.1 | 79995  | 20-scf00019 | 20 |
| AX-158382180 | 2 | 0.301 | KV453182.1 | 92777  | 20-scf00019 | 20 |
| AX-157812180 | 2 | 0.301 | KV453182.1 | 104900 | 20-scf00019 | 20 |
| AX-157910067 | 2 | 0.301 | KV453182.1 | 105672 | 20-scf00019 | 20 |
| AX-157853663 | 2 | 0.301 | KV453182.1 | 110957 | 20-scf00019 | 20 |
| AX-157910070 | 2 | 0.301 | KV453182.1 | 111408 | 20-scf00019 | 20 |
| AX-158382181 | 2 | 0.301 | KV453182.1 | 116442 | 20-scf00019 | 20 |
| AX-157910075 | 2 | 0.301 | KV453182.1 | 117864 | 20-scf00019 | 20 |
| AX-157874574 | 2 | 0.301 | KV453182.1 | 119087 | 20-scf00019 | 20 |
| AX-157726115 | 2 | 0.301 | KV453182.1 | 119855 | 20-scf00019 | 20 |
| AX-157910078 | 2 | 0.301 | KV453182.1 | 121918 | 20-scf00019 | 20 |
| AX-157910079 | 2 | 0.301 | KV453182.1 | 122546 | 20-scf00019 | 20 |
| AX-157910081 | 2 | 0.301 | KV453182.1 | 126335 | 20-scf00019 | 20 |
| AX-157910083 | 2 | 0.301 | KV453182.1 | 127812 | 20-scf00019 | 20 |
| AX-158382182 | 2 | 0.301 | KV453182.1 | 133063 | 20-scf00019 | 20 |
| AX-157910087 | 2 | 0.301 | KV453182.1 | 137397 | 20-scf00019 | 20 |
| AX-157883384 | 2 | 0.301 | KV453182.1 | 139284 | 20-scf00019 | 20 |
| AX-157910090 | 2 | 0.301 | KV453182.1 | 140171 | 20-scf00019 | 20 |
| AX-157812183 | 2 | 0.301 | KV453182.1 | 145829 | 20-scf00019 | 20 |
| AX-157812185 | 2 | 0.301 | KV453182.1 | 161770 | 20-scf00019 | 20 |
| AX-157714843 | 2 | 0.301 | KV453182.1 | 163247 | 20-scf00019 | 20 |
| AX-157910097 | 2 | 0.301 | KV453182.1 | 164399 | 20-scf00019 | 20 |
| AX-157910098 | 2 | 0.301 | KV453182.1 | 165841 | 20-scf00019 | 20 |
| AX-157726823 | 2 | 0.301 | KV453182.1 | 171868 | 20-scf00019 | 20 |
| AX-157910103 | 2 | 0.301 | KV453182.1 | 171904 | 20-scf00019 | 20 |
| AX-157910105 | 2 | 0.301 | KV453182.1 | 174177 | 20-scf00019 | 20 |
| AX-158404877 | 2 | 0.301 | KV453182.1 | 183500 | 20-scf00019 | 20 |
| AX-157910109 | 2 | 0.301 | KV453182.1 | 186403 | 20-scf00019 | 20 |
| AX-157812187 | 2 | 0.301 | KV453182.1 | 186800 | 20-scf00019 | 20 |
| AX-157720122 | 2 | 0.301 | KV453182.1 | 200240 | 20-scf00019 | 20 |
| AX-157910111 | 2 | 0.301 | KV453182.1 | 200372 | 20-scf00019 | 20 |
| AX-157910113 | 2 | 0.301 | KV453182.1 | 204453 | 20-scf00019 | 20 |
| AX-157910115 | 2 | 0.301 | KV453182.1 | 205570 | 20-scf00019 | 20 |
| AX-157864458 | 2 | 0.301 | KV453182.1 | 209533 | 20-scf00019 | 20 |
| AX-157742227 | 2 | 0.301 | KV453182.1 | 209906 | 20-scf00019 | 20 |
| AX-157748635 | 2 | 0.301 | KV453182.1 | 210636 | 20-scf00019 | 20 |
| AX-157910120 | 2 | 0.301 | KV453182.1 | 213015 | 20-scf00019 | 20 |
| AX-157723371 | 2 | 0.301 | KV453182.1 | 213399 | 20-scf00019 | 20 |
| AX-157910125 | 2 | 0.301 | KV453182.1 | 224971 | 20-scf00019 | 20 |
| AX-157910130 | 2 | 0.301 | KV453182.1 | 228864 | 20-scf00019 | 20 |
| AX-157910132 | 2 | 0.301 | KV453182.1 | 231518 | 20-scf00019 | 20 |
| AX-157853664 | 2 | 0.301 | KV453182.1 | 232290 | 20-scf00019 | 20 |
| AX-157910133 | 2 | 0.301 | KV453182.1 | 232327 | 20-scf00019 | 20 |
| AX-157747669 | 2 | 0.301 | KV453182.1 | 240384 | 20-scf00019 | 20 |
| AX-157910138 | 2 | 0.301 | KV453182.1 | 245817 | 20-scf00019 | 20 |
| AX-157910139 | 2 | 0.301 | KV453182.1 | 246749 | 20-scf00019 | 20 |
| AX-157864460 | 2 | 0.301 | KV453182.1 | 249032 | 20-scf00019 | 20 |

|              |   |       |             |        |             |    |
|--------------|---|-------|-------------|--------|-------------|----|
| AX-157910147 | 2 | 0.301 | KV453182.1  | 265843 | 20-scf00019 | 20 |
| AX-157910148 | 2 | 0.301 | KV453182.1  | 269083 | 20-scf00019 | 20 |
| AX-157864461 | 2 | 0.301 | KV453182.1  | 269624 | 20-scf00019 | 20 |
| AX-157910156 | 2 | 0.301 | KV453182.1  | 278833 | 20-scf00019 | 20 |
| AX-157910158 | 2 | 0.301 | KV453182.1  | 282143 | 20-scf00019 | 20 |
| AX-157910172 | 2 | 0.301 | KV453182.1  | 297926 | 20-scf00019 | 20 |
| AX-157910174 | 2 | 0.301 | KV453182.1  | 300616 | 20-scf00019 | 20 |
| AX-157910190 | 2 | 0.301 | KV453182.1  | 328242 | 20-scf00019 | 20 |
| AX-157910202 | 2 | 0.301 | KV453182.1  | 340920 | 20-scf00019 | 20 |
| AX-157910203 | 2 | 0.301 | KV453182.1  | 342323 | 20-scf00019 | 20 |
| AX-157812199 | 2 | 0.301 | KV453182.1  | 373799 | 20-scf00019 | 20 |
| AX-157910244 | 2 | 0.301 | KV453182.1  | 419007 | 20-scf00019 | 20 |
| AX-157710576 | 2 | 0.301 | KV453182.1  | 436905 | 20-scf00019 | 20 |
| AX-157716383 | 2 | 0.301 | KV453182.1  | 443828 | 20-scf00019 | 20 |
| AX-157812206 | 2 | 0.301 | KV453182.1  | 494042 | 20-scf00019 | 20 |
| AX-157704694 | 2 | 0.301 | 3ML01027054 | 772    | scf02658_1  | UN |
| AX-157874577 | 2 | 0.317 | KV453182.1  | 239219 | 20-scf00019 | 20 |
| AX-157910135 | 2 | 0.317 | KV453182.1  | 243087 | 20-scf00019 | 20 |
| AX-157910149 | 2 | 0.317 | KV453182.1  | 269916 | 20-scf00019 | 20 |
| AX-157910249 | 2 | 0.317 | KV453182.1  | 429791 | 20-scf00019 | 20 |
| AX-157910252 | 2 | 0.317 | KV453182.1  | 435728 | 20-scf00019 | 20 |
| AX-157910259 | 2 | 0.317 | KV453182.1  | 448321 | 20-scf00019 | 20 |
| AX-157910266 | 2 | 0.317 | KV453182.1  | 456859 | 20-scf00019 | 20 |
| AX-157910137 | 2 | 0.364 | KV453182.1  | 245102 | 20-scf00019 | 20 |
| AX-157910150 | 2 | 0.411 | KV453182.1  | 270488 | 20-scf00019 | 20 |
| AX-157910152 | 2 | 0.411 | KV453182.1  | 273174 | 20-scf00019 | 20 |
| AX-157812177 | 2 | 0.52  | KV453182.1  | 34447  | 20-scf00019 | 20 |
| AX-157812178 | 2 | 0.52  | KV453182.1  | 34648  | 20-scf00019 | 20 |
| AX-157910029 | 2 | 0.52  | KV453182.1  | 42055  | 20-scf00019 | 20 |
| AX-157910037 | 2 | 0.52  | KV453182.1  | 49863  | 20-scf00019 | 20 |
| AX-157853661 | 2 | 0.52  | KV453182.1  | 53536  | 20-scf00019 | 20 |
| AX-157910045 | 2 | 0.52  | KV453182.1  | 59011  | 20-scf00019 | 20 |
| AX-157910051 | 2 | 0.52  | KV453182.1  | 66977  | 20-scf00019 | 20 |
| AX-157910089 | 2 | 0.52  | KV453182.1  | 139201 | 20-scf00019 | 20 |
| AX-158421856 | 2 | 0.52  | KV453182.1  | 184522 | 20-scf00019 | 20 |
| AX-157910112 | 2 | 0.52  | KV453182.1  | 203359 | 20-scf00019 | 20 |
| AX-157864459 | 2 | 0.52  | KV453182.1  | 212171 | 20-scf00019 | 20 |
| AX-157910143 | 2 | 0.52  | KV453182.1  | 258401 | 20-scf00019 | 20 |
| AX-157910163 | 2 | 0.52  | KV453182.1  | 286826 | 20-scf00019 | 20 |
| AX-157910164 | 2 | 0.52  | KV453182.1  | 287932 | 20-scf00019 | 20 |
| AX-157910167 | 2 | 0.52  | KV453182.1  | 290021 | 20-scf00019 | 20 |
| AX-157910178 | 2 | 0.52  | KV453182.1  | 307579 | 20-scf00019 | 20 |
| AX-157726129 | 2 | 0.52  | KV453182.1  | 333018 | 20-scf00019 | 20 |
| AX-157910205 | 2 | 0.52  | KV453182.1  | 344386 | 20-scf00019 | 20 |
| AX-157812197 | 2 | 0.52  | KV453182.1  | 355191 | 20-scf00019 | 20 |
| AX-157738392 | 2 | 0.52  | KV453182.1  | 356848 | 20-scf00019 | 20 |
| AX-157910213 | 2 | 0.52  | KV453182.1  | 361125 | 20-scf00019 | 20 |
| AX-157812198 | 2 | 0.52  | KV453182.1  | 372937 | 20-scf00019 | 20 |
| AX-157910230 | 2 | 0.52  | KV453182.1  | 401475 | 20-scf00019 | 20 |
| AX-157910232 | 2 | 0.52  | KV453182.1  | 404298 | 20-scf00019 | 20 |
| AX-157910234 | 2 | 0.52  | KV453182.1  | 406705 | 20-scf00019 | 20 |

|              |   |       |            |        |             |    |
|--------------|---|-------|------------|--------|-------------|----|
| AX-157910239 | 2 | 0.52  | KV453182.1 | 415432 | 20-scf00019 | 20 |
| AX-157910241 | 2 | 0.52  | KV453182.1 | 417089 | 20-scf00019 | 20 |
| AX-157910242 | 2 | 0.52  | KV453182.1 | 417534 | 20-scf00019 | 20 |
| AX-157864462 | 2 | 0.52  | KV453182.1 | 420180 | 20-scf00019 | 20 |
| AX-157910246 | 2 | 0.52  | KV453182.1 | 422268 | 20-scf00019 | 20 |
| AX-157709185 | 2 | 0.52  | KV453182.1 | 437435 | 20-scf00019 | 20 |
| AX-157910254 | 2 | 0.52  | KV453182.1 | 437665 | 20-scf00019 | 20 |
| AX-157910255 | 2 | 0.52  | KV453182.1 | 440225 | 20-scf00019 | 20 |
| AX-157713245 | 2 | 0.52  | KV453182.1 | 442323 | 20-scf00019 | 20 |
| AX-157910265 | 2 | 0.629 | KV453182.1 | 456434 | 20-scf00019 | 20 |
| AX-157910297 | 2 | 0.629 | KV453182.1 | 506590 | 20-scf00019 | 20 |
| AX-157910269 | 2 | 0.739 | KV453182.1 | 460685 | 20-scf00019 | 20 |
| AX-157812204 | 2 | 0.848 | KV453182.1 | 448984 | 20-scf00019 | 20 |
| AX-157910263 | 2 | 0.848 | KV453182.1 | 454888 | 20-scf00019 | 20 |
| AX-157910270 | 2 | 0.848 | KV453182.1 | 461077 | 20-scf00019 | 20 |
| AX-157910272 | 2 | 0.848 | KV453182.1 | 462911 | 20-scf00019 | 20 |
| AX-157742855 | 2 | 0.848 | KV453182.1 | 462966 | 20-scf00019 | 20 |
| AX-158379217 | 2 | 0.848 | KV453182.1 | 471348 | 20-scf00019 | 20 |
| AX-157910277 | 2 | 0.848 | KV453182.1 | 471789 | 20-scf00019 | 20 |
| AX-157910281 | 2 | 0.848 | KV453182.1 | 481990 | 20-scf00019 | 20 |
| AX-157910282 | 2 | 0.848 | KV453182.1 | 483099 | 20-scf00019 | 20 |
| AX-157910284 | 2 | 0.848 | KV453182.1 | 486797 | 20-scf00019 | 20 |
| AX-157910285 | 2 | 0.848 | KV453182.1 | 488416 | 20-scf00019 | 20 |
| AX-157910318 | 2 | 0.848 | KV453182.1 | 536589 | 20-scf00019 | 20 |
| AX-157910385 | 2 | 0.848 | KV453182.1 | 624287 | 20-scf00019 | 20 |
| AX-157910394 | 2 | 0.848 | KV453182.1 | 641696 | 20-scf00019 | 20 |
| AX-157910397 | 2 | 0.848 | KV453182.1 | 645165 | 20-scf00019 | 20 |
| AX-157910434 | 2 | 0.848 | KV453182.1 | 698322 | 20-scf00019 | 20 |
| AX-157812215 | 2 | 0.848 | KV453182.1 | 771496 | 20-scf00019 | 20 |
| AX-157910515 | 2 | 0.848 | KV453182.1 | 803754 | 20-scf00019 | 20 |
| AX-157910554 | 2 | 0.848 | KV453182.1 | 870318 | 20-scf00019 | 20 |
| AX-157812207 | 2 | 1.012 | KV453182.1 | 513797 | 20-scf00019 | 20 |
| AX-158404882 | 2 | 1.012 | KV453182.1 | 514567 | 20-scf00019 | 20 |
| AX-157910304 | 2 | 1.012 | KV453182.1 | 518985 | 20-scf00019 | 20 |
| AX-157910309 | 2 | 1.012 | KV453182.1 | 523429 | 20-scf00019 | 20 |
| AX-157910310 | 2 | 1.012 | KV453182.1 | 523838 | 20-scf00019 | 20 |
| AX-157910312 | 2 | 1.012 | KV453182.1 | 527651 | 20-scf00019 | 20 |
| AX-157910030 | 2 | 1.175 | KV453182.1 | 42396  | 20-scf00019 | 20 |
| AX-157874572 | 2 | 1.175 | KV453182.1 | 81544  | 20-scf00019 | 20 |
| AX-157910068 | 2 | 1.175 | KV453182.1 | 109449 | 20-scf00019 | 20 |
| AX-157874573 | 2 | 1.175 | KV453182.1 | 111473 | 20-scf00019 | 20 |
| AX-157910072 | 2 | 1.175 | KV453182.1 | 115889 | 20-scf00019 | 20 |
| AX-157910076 | 2 | 1.175 | KV453182.1 | 118603 | 20-scf00019 | 20 |
| AX-157812181 | 2 | 1.175 | KV453182.1 | 128463 | 20-scf00019 | 20 |
| AX-158404878 | 2 | 1.175 | KV453182.1 | 184353 | 20-scf00019 | 20 |
| AX-157910260 | 2 | 1.175 | KV453182.1 | 451308 | 20-scf00019 | 20 |
| AX-157910315 | 2 | 1.175 | KV453182.1 | 531551 | 20-scf00019 | 20 |
| AX-157812208 | 2 | 1.175 | KV453182.1 | 533297 | 20-scf00019 | 20 |
| AX-157910335 | 2 | 1.175 | KV453182.1 | 559007 | 20-scf00019 | 20 |
| AX-157910340 | 2 | 1.175 | KV453182.1 | 563107 | 20-scf00019 | 20 |
| AX-157910342 | 2 | 1.175 | KV453182.1 | 566709 | 20-scf00019 | 20 |

|              |   |       |            |        |             |    |
|--------------|---|-------|------------|--------|-------------|----|
| AX-157910347 | 2 | 1.175 | KV453182.1 | 573345 | 20-scf00019 | 20 |
| AX-157740783 | 2 | 1.175 | KV453182.1 | 574942 | 20-scf00019 | 20 |
| AX-157910351 | 2 | 1.175 | KV453182.1 | 576629 | 20-scf00019 | 20 |
| AX-157910352 | 2 | 1.175 | KV453182.1 | 579454 | 20-scf00019 | 20 |
| AX-157910353 | 2 | 1.175 | KV453182.1 | 582939 | 20-scf00019 | 20 |
| AX-157910356 | 2 | 1.175 | KV453182.1 | 584997 | 20-scf00019 | 20 |
| AX-157910357 | 2 | 1.175 | KV453182.1 | 586435 | 20-scf00019 | 20 |
| AX-157910359 | 2 | 1.175 | KV453182.1 | 587867 | 20-scf00019 | 20 |
| AX-157910361 | 2 | 1.175 | KV453182.1 | 590487 | 20-scf00019 | 20 |
| AX-157910365 | 2 | 1.175 | KV453182.1 | 597494 | 20-scf00019 | 20 |
| AX-157910367 | 2 | 1.175 | KV453182.1 | 600599 | 20-scf00019 | 20 |
| AX-157910370 | 2 | 1.175 | KV453182.1 | 602804 | 20-scf00019 | 20 |
| AX-157910405 | 2 | 1.175 | KV453182.1 | 651415 | 20-scf00019 | 20 |
| AX-157910537 | 2 | 1.175 | KV453182.1 | 842124 | 20-scf00019 | 20 |
| AX-157910547 | 2 | 1.175 | KV453182.1 | 852457 | 20-scf00019 | 20 |
| AX-157713930 | 2 | 1.206 | KV453182.1 | 483585 | 20-scf00019 | 20 |
| AX-157910355 | 2 | 1.206 | KV453182.1 | 584676 | 20-scf00019 | 20 |
| AX-157910371 | 2 | 1.206 | KV453182.1 | 603215 | 20-scf00019 | 20 |
| AX-157812209 | 2 | 1.206 | KV453182.1 | 603910 | 20-scf00019 | 20 |
| AX-158379220 | 2 | 1.206 | KV453182.1 | 848823 | 20-scf00019 | 20 |
| AX-157910552 | 2 | 1.206 | KV453182.1 | 865499 | 20-scf00019 | 20 |
| AX-157745912 | 2 | 1.285 | KV453182.1 | 620227 | 20-scf00019 | 20 |
| AX-157812213 | 2 | 1.285 | KV453182.1 | 620411 | 20-scf00019 | 20 |
| AX-157910386 | 2 | 1.285 | KV453182.1 | 624978 | 20-scf00019 | 20 |
| AX-157910388 | 2 | 1.285 | KV453182.1 | 627261 | 20-scf00019 | 20 |
| AX-157717115 | 2 | 1.285 | KV453182.1 | 631938 | 20-scf00019 | 20 |
| AX-157910390 | 2 | 1.285 | KV453182.1 | 634618 | 20-scf00019 | 20 |
| AX-157853669 | 2 | 1.285 | KV453182.1 | 638522 | 20-scf00019 | 20 |
| AX-157910393 | 2 | 1.285 | KV453182.1 | 640111 | 20-scf00019 | 20 |
| AX-157910333 | 2 | 1.503 | KV453182.1 | 557770 | 20-scf00019 | 20 |
| AX-157910338 | 2 | 1.503 | KV453182.1 | 561002 | 20-scf00019 | 20 |
| AX-158389551 | 2 | 1.503 | KV453182.1 | 567517 | 20-scf00019 | 20 |
| AX-157910400 | 2 | 1.503 | KV453182.1 | 648178 | 20-scf00019 | 20 |
| AX-157910401 | 2 | 1.503 | KV453182.1 | 648702 | 20-scf00019 | 20 |
| AX-157910404 | 2 | 1.503 | KV453182.1 | 650646 | 20-scf00019 | 20 |
| AX-157910408 | 2 | 1.503 | KV453182.1 | 654136 | 20-scf00019 | 20 |
| AX-157910415 | 2 | 1.503 | KV453182.1 | 667384 | 20-scf00019 | 20 |
| AX-157910416 | 2 | 1.503 | KV453182.1 | 668587 | 20-scf00019 | 20 |
| AX-157910418 | 2 | 1.503 | KV453182.1 | 671006 | 20-scf00019 | 20 |
| AX-157910421 | 2 | 1.503 | KV453182.1 | 674289 | 20-scf00019 | 20 |
| AX-157910423 | 2 | 1.503 | KV453182.1 | 675867 | 20-scf00019 | 20 |
| AX-157744215 | 2 | 1.503 | KV453182.1 | 678404 | 20-scf00019 | 20 |
| AX-157910459 | 2 | 1.503 | KV453182.1 | 727183 | 20-scf00019 | 20 |
| AX-157910426 | 2 | 1.545 | KV453182.1 | 680016 | 20-scf00019 | 20 |
| AX-157910440 | 2 | 1.612 | KV453182.1 | 705569 | 20-scf00019 | 20 |
| AX-157910441 | 2 | 1.612 | KV453182.1 | 706737 | 20-scf00019 | 20 |
| AX-157910444 | 2 | 1.612 | KV453182.1 | 709215 | 20-scf00019 | 20 |
| AX-157910446 | 2 | 1.612 | KV453182.1 | 713757 | 20-scf00019 | 20 |
| AX-157910447 | 2 | 1.612 | KV453182.1 | 715222 | 20-scf00019 | 20 |
| AX-157910451 | 2 | 1.612 | KV453182.1 | 719021 | 20-scf00019 | 20 |
| AX-157910453 | 2 | 1.612 | KV453182.1 | 719704 | 20-scf00019 | 20 |

|              |   |       |            |         |             |    |
|--------------|---|-------|------------|---------|-------------|----|
| AX-157910471 | 2 | 1.612 | KV453182.1 | 746161  | 20-scf00019 | 20 |
| AX-157910437 | 2 | 1.722 | KV453182.1 | 700812  | 20-scf00019 | 20 |
| AX-157910461 | 2 | 1.722 | KV453182.1 | 732377  | 20-scf00019 | 20 |
| AX-157910462 | 2 | 1.722 | KV453182.1 | 733046  | 20-scf00019 | 20 |
| AX-157910464 | 2 | 1.722 | KV453182.1 | 735967  | 20-scf00019 | 20 |
| AX-157910465 | 2 | 1.722 | KV453182.1 | 736343  | 20-scf00019 | 20 |
| AX-157910472 | 2 | 1.722 | KV453182.1 | 746692  | 20-scf00019 | 20 |
| AX-157910474 | 2 | 1.722 | KV453182.1 | 749875  | 20-scf00019 | 20 |
| AX-157910475 | 2 | 1.722 | KV453182.1 | 751169  | 20-scf00019 | 20 |
| AX-157910476 | 2 | 1.722 | KV453182.1 | 751869  | 20-scf00019 | 20 |
| AX-157910483 | 2 | 1.722 | KV453182.1 | 760511  | 20-scf00019 | 20 |
| AX-157812214 | 2 | 1.722 | KV453182.1 | 765686  | 20-scf00019 | 20 |
| AX-157774029 | 2 | 1.722 | KV453182.1 | 807815  | 20-scf00019 | 20 |
| AX-157910599 | 2 | 1.722 | KV453182.1 | 918723  | 20-scf00019 | 20 |
| AX-157812235 | 2 | 1.722 | KV453182.1 | 1030165 | 20-scf00019 | 20 |
| AX-157739872 | 2 | 1.722 | KV453182.1 | 1035359 | 20-scf00019 | 20 |
| AX-157910493 | 2 | 1.78  | KV453182.1 | 771031  | 20-scf00019 | 20 |
| AX-157910082 | 2 | 1.838 | KV453182.1 | 127198  | 20-scf00019 | 20 |
| AX-157910151 | 2 | 1.838 | KV453182.1 | 270825  | 20-scf00019 | 20 |
| AX-157910161 | 2 | 1.838 | KV453182.1 | 284014  | 20-scf00019 | 20 |
| AX-157910177 | 2 | 1.838 | KV453182.1 | 306992  | 20-scf00019 | 20 |
| AX-157910316 | 2 | 1.838 | KV453182.1 | 533818  | 20-scf00019 | 20 |
| AX-157910336 | 2 | 1.838 | KV453182.1 | 559607  | 20-scf00019 | 20 |
| AX-157743795 | 2 | 1.838 | KV453182.1 | 612885  | 20-scf00019 | 20 |
| AX-157883389 | 2 | 1.838 | KV453182.1 | 656509  | 20-scf00019 | 20 |
| AX-157910480 | 2 | 1.838 | KV453182.1 | 758885  | 20-scf00019 | 20 |
| AX-157883392 | 2 | 1.838 | KV453182.1 | 762086  | 20-scf00019 | 20 |
| AX-157910494 | 2 | 1.838 | KV453182.1 | 772002  | 20-scf00019 | 20 |
| AX-157910562 | 2 | 1.838 | KV453182.1 | 879577  | 20-scf00019 | 20 |
| AX-157910625 | 2 | 1.838 | KV453182.1 | 957590  | 20-scf00019 | 20 |
| AX-157812173 | 2 | 1.886 | KV453182.1 | 24060   | 20-scf00019 | 20 |
| AX-157910054 | 2 | 1.886 | KV453182.1 | 73814   | 20-scf00019 | 20 |
| AX-157812193 | 2 | 1.886 | KV453182.1 | 222861  | 20-scf00019 | 20 |
| AX-157910129 | 2 | 1.886 | KV453182.1 | 228282  | 20-scf00019 | 20 |
| AX-157910136 | 2 | 1.886 | KV453182.1 | 243581  | 20-scf00019 | 20 |
| AX-157910154 | 2 | 1.886 | KV453182.1 | 276376  | 20-scf00019 | 20 |
| AX-157910195 | 2 | 1.886 | KV453182.1 | 333483  | 20-scf00019 | 20 |
| AX-157910216 | 2 | 1.886 | KV453182.1 | 363927  | 20-scf00019 | 20 |
| AX-157910219 | 2 | 1.886 | KV453182.1 | 369170  | 20-scf00019 | 20 |
| AX-157758150 | 2 | 1.886 | KV453182.1 | 407932  | 20-scf00019 | 20 |
| AX-157812201 | 2 | 1.886 | KV453182.1 | 408313  | 20-scf00019 | 20 |
| AX-157910236 | 2 | 1.886 | KV453182.1 | 413196  | 20-scf00019 | 20 |
| AX-157910238 | 2 | 1.886 | KV453182.1 | 415148  | 20-scf00019 | 20 |
| AX-157910250 | 2 | 1.886 | KV453182.1 | 430297  | 20-scf00019 | 20 |
| AX-157910251 | 2 | 1.886 | KV453182.1 | 431748  | 20-scf00019 | 20 |
| AX-157910273 | 2 | 1.886 | KV453182.1 | 464058  | 20-scf00019 | 20 |
| AX-157910278 | 2 | 1.886 | KV453182.1 | 472424  | 20-scf00019 | 20 |
| AX-157910280 | 2 | 1.886 | KV453182.1 | 476573  | 20-scf00019 | 20 |
| AX-157910287 | 2 | 1.886 | KV453182.1 | 494813  | 20-scf00019 | 20 |
| AX-157910295 | 2 | 1.886 | KV453182.1 | 504624  | 20-scf00019 | 20 |
| AX-157910306 | 2 | 1.886 | KV453182.1 | 521875  | 20-scf00019 | 20 |



|              |   |       |            |         |             |    |
|--------------|---|-------|------------|---------|-------------|----|
| AX-157910327 | 2 | 1.886 | KV453182.1 | 550780  | 20-scf00019 | 20 |
| AX-157910372 | 2 | 1.886 | KV453182.1 | 604229  | 20-scf00019 | 20 |
| AX-157910427 | 2 | 1.886 | KV453182.1 | 681026  | 20-scf00019 | 20 |
| AX-157864464 | 2 | 1.886 | KV453182.1 | 693323  | 20-scf00019 | 20 |
| AX-157910467 | 2 | 1.886 | KV453182.1 | 740462  | 20-scf00019 | 20 |
| AX-157910468 | 2 | 1.886 | KV453182.1 | 741022  | 20-scf00019 | 20 |
| AX-157910469 | 2 | 1.886 | KV453182.1 | 742483  | 20-scf00019 | 20 |
| AX-157910473 | 2 | 1.886 | KV453182.1 | 748910  | 20-scf00019 | 20 |
| AX-157910491 | 2 | 1.886 | KV453182.1 | 765436  | 20-scf00019 | 20 |
| AX-157910495 | 2 | 1.886 | KV453182.1 | 773136  | 20-scf00019 | 20 |
| AX-157812216 | 2 | 1.886 | KV453182.1 | 779856  | 20-scf00019 | 20 |
| AX-158404887 | 2 | 1.886 | KV453182.1 | 785130  | 20-scf00019 | 20 |
| AX-157853673 | 2 | 1.886 | KV453182.1 | 802687  | 20-scf00019 | 20 |
| AX-157910522 | 2 | 1.886 | KV453182.1 | 817518  | 20-scf00019 | 20 |
| AX-157910523 | 2 | 1.886 | KV453182.1 | 819293  | 20-scf00019 | 20 |
| AX-157910526 | 2 | 1.886 | KV453182.1 | 823560  | 20-scf00019 | 20 |
| AX-157910528 | 2 | 1.886 | KV453182.1 | 824768  | 20-scf00019 | 20 |
| AX-157720043 | 2 | 1.886 | KV453182.1 | 829746  | 20-scf00019 | 20 |
| AX-157812222 | 2 | 1.886 | KV453182.1 | 851321  | 20-scf00019 | 20 |
| AX-157910548 | 2 | 1.886 | KV453182.1 | 858370  | 20-scf00019 | 20 |
| AX-157910556 | 2 | 1.886 | KV453182.1 | 871183  | 20-scf00019 | 20 |
| AX-157775495 | 2 | 1.886 | KV453182.1 | 877102  | 20-scf00019 | 20 |
| AX-158404889 | 2 | 1.886 | KV453182.1 | 895800  | 20-scf00019 | 20 |
| AX-157910606 | 2 | 1.886 | KV453182.1 | 929606  | 20-scf00019 | 20 |
| AX-157910615 | 2 | 1.886 | KV453182.1 | 941839  | 20-scf00019 | 20 |
| AX-157910617 | 2 | 1.886 | KV453182.1 | 944889  | 20-scf00019 | 20 |
| AX-157910648 | 2 | 1.886 | KV453182.1 | 976955  | 20-scf00019 | 20 |
| AX-157910660 | 2 | 1.886 | KV453182.1 | 991833  | 20-scf00019 | 20 |
| AX-157910667 | 2 | 1.886 | KV453182.1 | 1000230 | 20-scf00019 | 20 |
| AX-157910499 | 2 | 2.049 | KV453182.1 | 779054  | 20-scf00019 | 20 |
| AX-157754541 | 2 | 2.049 | KV453182.1 | 805427  | 20-scf00019 | 20 |
| AX-157910534 | 2 | 2.049 | KV453182.1 | 835388  | 20-scf00019 | 20 |
| AX-157910549 | 2 | 2.049 | KV453182.1 | 859866  | 20-scf00019 | 20 |
| AX-157751049 | 2 | 2.049 | KV453182.1 | 862559  | 20-scf00019 | 20 |
| AX-157910557 | 2 | 2.049 | KV453182.1 | 873745  | 20-scf00019 | 20 |
| AX-157751035 | 2 | 2.049 | KV453182.1 | 883410  | 20-scf00019 | 20 |
| AX-157910569 | 2 | 2.049 | KV453182.1 | 884576  | 20-scf00019 | 20 |
| AX-157910570 | 2 | 2.049 | KV453182.1 | 886852  | 20-scf00019 | 20 |
| AX-157910574 | 2 | 2.049 | KV453182.1 | 890020  | 20-scf00019 | 20 |
| AX-157910576 | 2 | 2.049 | KV453182.1 | 891310  | 20-scf00019 | 20 |
| AX-157910584 | 2 | 2.049 | KV453182.1 | 899480  | 20-scf00019 | 20 |
| AX-157910586 | 2 | 2.049 | KV453182.1 | 901866  | 20-scf00019 | 20 |
| AX-157910590 | 2 | 2.049 | KV453182.1 | 908304  | 20-scf00019 | 20 |
| AX-157910592 | 2 | 2.049 | KV453182.1 | 910055  | 20-scf00019 | 20 |
| AX-157910602 | 2 | 2.049 | KV453182.1 | 923424  | 20-scf00019 | 20 |
| AX-157739660 | 2 | 2.049 | KV453182.1 | 925368  | 20-scf00019 | 20 |
| AX-157910603 | 2 | 2.049 | KV453182.1 | 925756  | 20-scf00019 | 20 |
| AX-157724646 | 2 | 2.049 | KV453182.1 | 935956  | 20-scf00019 | 20 |
| AX-157910633 | 2 | 2.049 | KV453182.1 | 962042  | 20-scf00019 | 20 |
| AX-157910641 | 2 | 2.049 | KV453182.1 | 970980  | 20-scf00019 | 20 |
| AX-157910652 | 2 | 2.049 | KV453182.1 | 980722  | 20-scf00019 | 20 |

|              |   |       |             |         |             |    |
|--------------|---|-------|-------------|---------|-------------|----|
| AX-157910659 | 2 | 2.049 | KV453182.1  | 990587  | 20-scf00019 | 20 |
| AX-157706940 | 2 | 2.049 | 3ML01033190 | 196     | scf08830_1  | UN |
| AX-157910593 | 2 | 2.074 | KV453182.1  | 911120  | 20-scf00019 | 20 |
| AX-157910454 | 2 | 2.096 | KV453182.1  | 720661  | 20-scf00019 | 20 |
| AX-157910567 | 2 | 2.096 | KV453182.1  | 882915  | 20-scf00019 | 20 |
| AX-157910595 | 2 | 2.096 | KV453182.1  | 912647  | 20-scf00019 | 20 |
| AX-157910604 | 2 | 2.096 | KV453182.1  | 927628  | 20-scf00019 | 20 |
| AX-157910610 | 2 | 2.096 | KV453182.1  | 934209  | 20-scf00019 | 20 |
| AX-157910689 | 2 | 2.096 | KV453182.1  | 1037528 | 20-scf00019 | 20 |
| AX-157910613 | 2 | 2.115 | KV453182.1  | 937909  | 20-scf00019 | 20 |
| AX-157910573 | 2 | 2.129 | KV453182.1  | 889140  | 20-scf00019 | 20 |
| AX-157910575 | 2 | 2.129 | KV453182.1  | 890545  | 20-scf00019 | 20 |
| AX-158382187 | 2 | 2.129 | KV453182.1  | 943611  | 20-scf00019 | 20 |
| AX-157910609 | 2 | 2.147 | KV453182.1  | 933865  | 20-scf00019 | 20 |
| AX-157910616 | 2 | 2.147 | KV453182.1  | 943957  | 20-scf00019 | 20 |
| AX-157812227 | 2 | 2.159 | KV453182.1  | 868346  | 20-scf00019 | 20 |
| AX-157910558 | 2 | 2.159 | KV453182.1  | 875529  | 20-scf00019 | 20 |
| AX-157910619 | 2 | 2.159 | KV453182.1  | 947899  | 20-scf00019 | 20 |
| AX-157910620 | 2 | 2.159 | KV453182.1  | 949482  | 20-scf00019 | 20 |
| AX-157772238 | 2 | 2.159 | KV453182.1  | 952198  | 20-scf00019 | 20 |
| AX-157910622 | 2 | 2.159 | KV453182.1  | 952399  | 20-scf00019 | 20 |
| AX-157910623 | 2 | 2.159 | KV453182.1  | 955534  | 20-scf00019 | 20 |
| AX-157910628 | 2 | 2.159 | KV453182.1  | 959625  | 20-scf00019 | 20 |
| AX-157910630 | 2 | 2.159 | KV453182.1  | 960678  | 20-scf00019 | 20 |
| AX-157910635 | 2 | 2.159 | KV453182.1  | 963864  | 20-scf00019 | 20 |
| AX-157910636 | 2 | 2.159 | KV453182.1  | 966564  | 20-scf00019 | 20 |
| AX-157910639 | 2 | 2.159 | KV453182.1  | 968879  | 20-scf00019 | 20 |
| AX-157910642 | 2 | 2.159 | KV453182.1  | 971451  | 20-scf00019 | 20 |
| AX-157910535 | 2 | 2.377 | KV453182.1  | 836646  | 20-scf00019 | 20 |
| AX-157739000 | 2 | 2.377 | KV453182.1  | 975615  | 20-scf00019 | 20 |
| AX-157910649 | 2 | 2.377 | KV453182.1  | 978772  | 20-scf00019 | 20 |
| AX-157910651 | 2 | 2.377 | KV453182.1  | 980134  | 20-scf00019 | 20 |
| AX-157910653 | 2 | 2.377 | KV453182.1  | 981405  | 20-scf00019 | 20 |
| AX-157883396 | 2 | 2.377 | KV453182.1  | 991289  | 20-scf00019 | 20 |
| AX-157910662 | 2 | 2.377 | KV453182.1  | 995739  | 20-scf00019 | 20 |
| AX-157910668 | 2 | 2.442 | KV453182.1  | 1001119 | 20-scf00019 | 20 |
| AX-157910669 | 2 | 2.511 | KV453182.1  | 1002193 | 20-scf00019 | 20 |
| AX-157910673 | 2 | 2.568 | KV453182.1  | 1004790 | 20-scf00019 | 20 |
| AX-157883397 | 2 | 2.891 | KV453182.1  | 1014070 | 20-scf00019 | 20 |
| AX-157910168 | 2 | 2.899 | KV453182.1  | 291258  | 20-scf00019 | 20 |
| AX-157910678 | 2 | 2.899 | KV453182.1  | 1014549 | 20-scf00019 | 20 |
| AX-157910672 | 2 | 2.937 | KV453182.1  | 1004386 | 20-scf00019 | 20 |
| AX-157910679 | 2 | 2.937 | KV453182.1  | 1024813 | 20-scf00019 | 20 |
| AX-157910681 | 2 | 2.937 | KV453182.1  | 1027885 | 20-scf00019 | 20 |
| AX-157812233 | 2 | 2.937 | KV453182.1  | 1028094 | 20-scf00019 | 20 |
| AX-157910682 | 2 | 2.937 | KV453182.1  | 1028322 | 20-scf00019 | 20 |
| AX-157910687 | 2 | 2.937 | KV453182.1  | 1035767 | 20-scf00019 | 20 |
| AX-157910705 | 2 | 3.265 | KV453182.1  | 1062494 | 20-scf00019 | 20 |
| AX-157910704 | 2 | 3.266 | KV453182.1  | 1061985 | 20-scf00019 | 20 |
| AX-157910706 | 2 | 3.266 | KV453182.1  | 1063315 | 20-scf00019 | 20 |
| AX-157910710 | 2 | 3.578 | KV453182.1  | 1068502 | 20-scf00019 | 20 |

|              |   |       |            |         |             |    |
|--------------|---|-------|------------|---------|-------------|----|
| AX-157910664 | 2 | 3.581 | KV453182.1 | 997316  | 20-scf00019 | 20 |
| AX-157910684 | 2 | 3.581 | KV453182.1 | 1031844 | 20-scf00019 | 20 |
| AX-157742827 | 2 | 3.581 | KV453182.1 | 1036399 | 20-scf00019 | 20 |
| AX-157910691 | 2 | 3.581 | KV453182.1 | 1042115 | 20-scf00019 | 20 |
| AX-157771968 | 2 | 3.581 | KV453182.1 | 1043825 | 20-scf00019 | 20 |
| AX-157910711 | 2 | 3.581 | KV453182.1 | 1069074 | 20-scf00019 | 20 |
| AX-157910713 | 2 | 3.581 | KV453182.1 | 1075625 | 20-scf00019 | 20 |
| AX-157755039 | 2 | 3.581 | KV453182.1 | 1076951 | 20-scf00019 | 20 |
| AX-157910716 | 2 | 3.581 | KV453182.1 | 1078539 | 20-scf00019 | 20 |
| AX-157910720 | 2 | 3.581 | KV453182.1 | 1082891 | 20-scf00019 | 20 |
| AX-157910723 | 2 | 3.581 | KV453182.1 | 1086252 | 20-scf00019 | 20 |
| AX-157720572 | 2 | 3.581 | KV453182.1 | 1093786 | 20-scf00019 | 20 |
| AX-157910724 | 2 | 3.607 | KV453182.1 | 1088989 | 20-scf00019 | 20 |
| AX-157772560 | 2 | 3.635 | KV453182.1 | 1092844 | 20-scf00019 | 20 |
| AX-158379222 | 2 | 3.661 | KV453182.1 | 1099730 | 20-scf00019 | 20 |
| AX-157910735 | 2 | 3.69  | KV453182.1 | 1100831 | 20-scf00019 | 20 |
| AX-157910736 | 2 | 3.69  | KV453182.1 | 1101752 | 20-scf00019 | 20 |
| AX-157910739 | 2 | 3.69  | KV453182.1 | 1105039 | 20-scf00019 | 20 |
| AX-157910708 | 2 | 3.76  | KV453182.1 | 1064895 | 20-scf00019 | 20 |
| AX-157910722 | 2 | 3.76  | KV453182.1 | 1083592 | 20-scf00019 | 20 |
| AX-157910727 | 2 | 3.76  | KV453182.1 | 1093568 | 20-scf00019 | 20 |
| AX-157910734 | 2 | 3.76  | KV453182.1 | 1099770 | 20-scf00019 | 20 |
| AX-157910743 | 2 | 3.76  | KV453182.1 | 1108263 | 20-scf00019 | 20 |
| AX-157910769 | 2 | 3.76  | KV453182.1 | 1143898 | 20-scf00019 | 20 |
| AX-157910773 | 2 | 3.76  | KV453182.1 | 1152962 | 20-scf00019 | 20 |
| AX-157910778 | 2 | 3.76  | KV453182.1 | 1158671 | 20-scf00019 | 20 |
| AX-157910728 | 2 | 3.799 | KV453182.1 | 1094096 | 20-scf00019 | 20 |
| AX-157910738 | 2 | 3.799 | KV453182.1 | 1104629 | 20-scf00019 | 20 |
| AX-157910744 | 2 | 3.799 | KV453182.1 | 1110039 | 20-scf00019 | 20 |
| AX-157910745 | 2 | 3.799 | KV453182.1 | 1110459 | 20-scf00019 | 20 |
| AX-157910746 | 2 | 3.799 | KV453182.1 | 1112942 | 20-scf00019 | 20 |
| AX-157910752 | 2 | 3.873 | KV453182.1 | 1120135 | 20-scf00019 | 20 |
| AX-157910757 | 2 | 3.958 | KV453182.1 | 1128663 | 20-scf00019 | 20 |
| AX-157910764 | 2 | 4.047 | KV453182.1 | 1137715 | 20-scf00019 | 20 |
| AX-158382189 | 2 | 4.145 | KV453182.1 | 1120884 | 20-scf00019 | 20 |
| AX-157910755 | 2 | 4.145 | KV453182.1 | 1124542 | 20-scf00019 | 20 |
| AX-157910756 | 2 | 4.145 | KV453182.1 | 1126879 | 20-scf00019 | 20 |
| AX-157910768 | 2 | 4.145 | KV453182.1 | 1142841 | 20-scf00019 | 20 |
| AX-157910771 | 2 | 4.237 | KV453182.1 | 1149461 | 20-scf00019 | 20 |
| AX-157910747 | 2 | 4.456 | KV453182.1 | 1113631 | 20-scf00019 | 20 |
| AX-157910774 | 2 | 4.456 | KV453182.1 | 1153407 | 20-scf00019 | 20 |
| AX-157910775 | 2 | 4.456 | KV453182.1 | 1154582 | 20-scf00019 | 20 |
| AX-157910777 | 2 | 4.456 | KV453182.1 | 1157213 | 20-scf00019 | 20 |
| AX-157910783 | 2 | 4.456 | KV453182.1 | 1166110 | 20-scf00019 | 20 |
| AX-157910785 | 2 | 4.456 | KV453182.1 | 1167922 | 20-scf00019 | 20 |
| AX-157910748 | 2 | 4.711 | KV453182.1 | 1114010 | 20-scf00019 | 20 |
| AX-157910786 | 2 | 4.711 | KV453182.1 | 1170223 | 20-scf00019 | 20 |
| AX-157910790 | 2 | 4.711 | KV453182.1 | 1177396 | 20-scf00019 | 20 |
| AX-157910810 | 2 | 4.711 | KV453182.1 | 1211598 | 20-scf00019 | 20 |
| AX-157910792 | 2 | 4.717 | KV453182.1 | 1180149 | 20-scf00019 | 20 |
| AX-157910794 | 2 | 5.221 | KV453182.1 | 1181901 | 20-scf00019 | 20 |

|              |   |       |            |         |             |    |
|--------------|---|-------|------------|---------|-------------|----|
| AX-157910797 | 2 | 5.221 | KV453182.1 | 1185520 | 20-scf00019 | 20 |
| AX-157910798 | 2 | 5.221 | KV453182.1 | 1187696 | 20-scf00019 | 20 |
| AX-157910800 | 2 | 5.221 | KV453182.1 | 1189054 | 20-scf00019 | 20 |
| AX-157910801 | 2 | 5.221 | KV453182.1 | 1194114 | 20-scf00019 | 20 |
| AX-157720186 | 2 | 5.506 | KV453182.1 | 1202736 | 20-scf00019 | 20 |
| AX-157910808 | 2 | 5.693 | KV453182.1 | 1208009 | 20-scf00019 | 20 |
| AX-157754933 | 2 | 5.695 | KV453182.1 | 1208538 | 20-scf00019 | 20 |
| AX-157910820 | 2 | 5.91  | KV453182.1 | 1224221 | 20-scf00019 | 20 |
| AX-157910802 | 2 | 6.095 | KV453182.1 | 1194333 | 20-scf00019 | 20 |
| AX-157910815 | 2 | 6.095 | KV453182.1 | 1218118 | 20-scf00019 | 20 |
| AX-158379223 | 2 | 6.095 | KV453182.1 | 1229642 | 20-scf00019 | 20 |
| AX-157910842 | 2 | 6.095 | KV453182.1 | 1252491 | 20-scf00019 | 20 |
| AX-157910826 | 2 | 6.096 | KV453182.1 | 1229759 | 20-scf00019 | 20 |
| AX-157910831 | 2 | 6.096 | KV453182.1 | 1240014 | 20-scf00019 | 20 |
| AX-157910833 | 2 | 6.096 | KV453182.1 | 1242595 | 20-scf00019 | 20 |
| AX-157910835 | 2 | 6.096 | KV453182.1 | 1245617 | 20-scf00019 | 20 |
| AX-157883401 | 2 | 6.096 | KV453182.1 | 1247446 | 20-scf00019 | 20 |
| AX-157910837 | 2 | 6.096 | KV453182.1 | 1247745 | 20-scf00019 | 20 |
| AX-157910839 | 2 | 6.096 | KV453182.1 | 1250387 | 20-scf00019 | 20 |
| AX-157910840 | 2 | 6.096 | KV453182.1 | 1251412 | 20-scf00019 | 20 |
| AX-157910829 | 2 | 6.307 | KV453182.1 | 1232934 | 20-scf00019 | 20 |
| AX-157910841 | 2 | 6.307 | KV453182.1 | 1252381 | 20-scf00019 | 20 |
| AX-157910844 | 2 | 6.307 | KV453182.1 | 1255448 | 20-scf00019 | 20 |
| AX-157874589 | 2 | 6.307 | KV453182.1 | 1257855 | 20-scf00019 | 20 |
| AX-157812236 | 2 | 6.313 | KV453182.1 | 1263141 | 20-scf00019 | 20 |
| AX-157910851 | 2 | 6.32  | KV453182.1 | 1265292 | 20-scf00019 | 20 |
| AX-157910853 | 2 | 6.638 | KV453182.1 | 1269317 | 20-scf00019 | 20 |
| AX-157726774 | 2 | 6.638 | KV453182.1 | 1291325 | 20-scf00019 | 20 |
| AX-157910856 | 2 | 6.64  | KV453182.1 | 1271852 | 20-scf00019 | 20 |
| AX-157910854 | 2 | 6.642 | KV453182.1 | 1269788 | 20-scf00019 | 20 |
| AX-157910857 | 2 | 6.642 | KV453182.1 | 1272405 | 20-scf00019 | 20 |
| AX-157772910 | 2 | 6.642 | KV453182.1 | 1272577 | 20-scf00019 | 20 |
| AX-157910858 | 2 | 6.642 | KV453182.1 | 1273606 | 20-scf00019 | 20 |
| AX-157910860 | 2 | 6.642 | KV453182.1 | 1274572 | 20-scf00019 | 20 |
| AX-157910861 | 2 | 6.642 | KV453182.1 | 1274776 | 20-scf00019 | 20 |
| AX-157910862 | 2 | 6.642 | KV453182.1 | 1275471 | 20-scf00019 | 20 |
| AX-157910863 | 2 | 6.752 | KV453182.1 | 1278779 | 20-scf00019 | 20 |
| AX-157910864 | 2 | 6.838 | KV453182.1 | 1279379 | 20-scf00019 | 20 |
| AX-157910866 | 2 | 6.838 | KV453182.1 | 1280796 | 20-scf00019 | 20 |
| AX-157910867 | 2 | 6.919 | KV453182.1 | 1281068 | 20-scf00019 | 20 |
| AX-157910868 | 2 | 7.11  | KV453182.1 | 1281481 | 20-scf00019 | 20 |
| AX-157910849 | 2 | 7.253 | KV453182.1 | 1260792 | 20-scf00019 | 20 |
| AX-157812237 | 2 | 7.253 | KV453182.1 | 1287516 | 20-scf00019 | 20 |
| AX-157910873 | 2 | 7.253 | KV453182.1 | 1290225 | 20-scf00019 | 20 |
| AX-157910875 | 2 | 7.253 | KV453182.1 | 1291837 | 20-scf00019 | 20 |
| AX-157910877 | 2 | 7.253 | KV453182.1 | 1293362 | 20-scf00019 | 20 |
| AX-157910878 | 2 | 7.253 | KV453182.1 | 1294547 | 20-scf00019 | 20 |
| AX-157910884 | 2 | 7.253 | KV453182.1 | 1301382 | 20-scf00019 | 20 |
| AX-157751152 | 2 | 7.253 | KV453182.1 | 1305489 | 20-scf00019 | 20 |
| AX-157722214 | 2 | 7.253 | KV453182.1 | 1309385 | 20-scf00019 | 20 |
| AX-158404893 | 2 | 7.253 | KV453182.1 | 1311562 | 20-scf00019 | 20 |

|              |   |       |            |         |             |    |
|--------------|---|-------|------------|---------|-------------|----|
| AX-158404894 | 2 | 7.253 | KV453182.1 | 1311818 | 20-scf00019 | 20 |
| AX-157910889 | 2 | 7.253 | KV453182.1 | 1312164 | 20-scf00019 | 20 |
| AX-157910890 | 2 | 7.253 | KV453182.1 | 1312411 | 20-scf00019 | 20 |
| AX-157910894 | 2 | 7.253 | KV453182.1 | 1323495 | 20-scf00019 | 20 |
| AX-157910906 | 2 | 7.253 | KV453182.1 | 1337464 | 20-scf00019 | 20 |
| AX-157910882 | 2 | 7.292 | KV453182.1 | 1297647 | 20-scf00019 | 20 |
| AX-157910891 | 2 | 7.292 | KV453182.1 | 1316384 | 20-scf00019 | 20 |
| AX-157853675 | 2 | 7.292 | KV453182.1 | 1319472 | 20-scf00019 | 20 |
| AX-157910896 | 2 | 7.292 | KV453182.1 | 1325471 | 20-scf00019 | 20 |
| AX-157910895 | 2 | 7.362 | KV453182.1 | 1323766 | 20-scf00019 | 20 |
| AX-157740103 | 2 | 7.362 | KV453182.1 | 1329843 | 20-scf00019 | 20 |
| AX-157910899 | 2 | 7.362 | KV453182.1 | 1330566 | 20-scf00019 | 20 |
| AX-157910892 | 2 | 7.471 | KV453182.1 | 1318214 | 20-scf00019 | 20 |
| AX-157910904 | 2 | 7.471 | KV453182.1 | 1334264 | 20-scf00019 | 20 |
| AX-157910908 | 2 | 7.471 | KV453182.1 | 1339683 | 20-scf00019 | 20 |
| AX-157910912 | 2 | 7.471 | KV453182.1 | 1342142 | 20-scf00019 | 20 |
| AX-157910913 | 2 | 7.471 | KV453182.1 | 1343302 | 20-scf00019 | 20 |
| AX-157772274 | 2 | 7.471 | KV453182.1 | 1344821 | 20-scf00019 | 20 |
| AX-157910915 | 2 | 7.471 | KV453182.1 | 1346292 | 20-scf00019 | 20 |
| AX-157910919 | 2 | 7.471 | KV453182.1 | 1350948 | 20-scf00019 | 20 |
| AX-157910921 | 2 | 7.471 | KV453182.1 | 1353300 | 20-scf00019 | 20 |
| AX-157910924 | 2 | 8.083 | KV453182.1 | 1358243 | 20-scf00019 | 20 |
| AX-157910925 | 2 | 8.083 | KV453182.1 | 1359168 | 20-scf00019 | 20 |
| AX-157910930 | 2 | 8.136 | KV453182.1 | 1363402 | 20-scf00019 | 20 |
| AX-157910910 | 2 | 8.237 | KV453182.1 | 1341194 | 20-scf00019 | 20 |
| AX-157910933 | 2 | 8.237 | KV453182.1 | 1366924 | 20-scf00019 | 20 |
| AX-157910934 | 2 | 8.237 | KV453182.1 | 1368185 | 20-scf00019 | 20 |
| AX-157910935 | 2 | 8.338 | KV453182.1 | 1369805 | 20-scf00019 | 20 |
| AX-157910936 | 2 | 8.367 | KV453182.1 | 1371157 | 20-scf00019 | 20 |
| AX-157910937 | 2 | 8.449 | KV453182.1 | 1372248 | 20-scf00019 | 20 |
| AX-157910939 | 2 | 8.449 | KV453182.1 | 1374431 | 20-scf00019 | 20 |
| AX-157910946 | 2 | 8.449 | KV453182.1 | 1383980 | 20-scf00019 | 20 |
| AX-157721375 | 2 | 8.449 | KV453182.1 | 1385591 | 20-scf00019 | 20 |
| AX-157910940 | 2 | 8.455 | KV453182.1 | 1375114 | 20-scf00019 | 20 |
| AX-157910943 | 2 | 8.46  | KV453182.1 | 1380289 | 20-scf00019 | 20 |
| AX-157910948 | 2 | 8.461 | KV453182.1 | 1386173 | 20-scf00019 | 20 |
| AX-158379224 | 2 | 8.76  | KV453182.1 | 1391058 | 20-scf00019 | 20 |
| AX-157910954 | 2 | 8.771 | KV453182.1 | 1391193 | 20-scf00019 | 20 |
| AX-157910955 | 2 | 8.774 | KV453182.1 | 1391917 | 20-scf00019 | 20 |
| AX-157910957 | 2 | 8.774 | KV453182.1 | 1395461 | 20-scf00019 | 20 |
| AX-157911007 | 2 | 9.516 | KV453182.1 | 1452916 | 20-scf00019 | 20 |
| AX-157911009 | 2 | 9.517 | KV453182.1 | 1458737 | 20-scf00019 | 20 |
| AX-157911012 | 2 | 9.646 | KV453182.1 | 1460144 | 20-scf00019 | 20 |
| AX-157911013 | 2 | 9.657 | KV453182.1 | 1460692 | 20-scf00019 | 20 |
| AX-157911014 | 2 | 9.66  | KV453182.1 | 1463061 | 20-scf00019 | 20 |
| AX-157911015 | 2 | 9.66  | KV453182.1 | 1464163 | 20-scf00019 | 20 |
| AX-157911017 | 2 | 9.66  | KV453182.1 | 1468812 | 20-scf00019 | 20 |
| AX-157911018 | 2 | 9.66  | KV453182.1 | 1469817 | 20-scf00019 | 20 |
| AX-157911019 | 2 | 9.66  | KV453182.1 | 1470332 | 20-scf00019 | 20 |
| AX-157911020 | 2 | 9.66  | KV453182.1 | 1470777 | 20-scf00019 | 20 |
| AX-157911021 | 2 | 9.66  | KV453182.1 | 1472893 | 20-scf00019 | 20 |

|              |   |        |            |         |             |    |
|--------------|---|--------|------------|---------|-------------|----|
| AX-157911022 | 2 | 9.66   | KV453182.1 | 1473455 | 20-scf00019 | 20 |
| AX-157911023 | 2 | 9.66   | KV453182.1 | 1473817 | 20-scf00019 | 20 |
| AX-157911027 | 2 | 10.314 | KV453182.1 | 1483949 | 20-scf00019 | 20 |
| AX-157911036 | 2 | 10.314 | KV453182.1 | 1503413 | 20-scf00019 | 20 |
| AX-157753787 | 2 | 10.315 | KV453182.1 | 1485133 | 20-scf00019 | 20 |
| AX-157911028 | 2 | 10.315 | KV453182.1 | 1491339 | 20-scf00019 | 20 |
| AX-157911029 | 2 | 10.315 | KV453182.1 | 1493169 | 20-scf00019 | 20 |
| AX-157911030 | 2 | 10.315 | KV453182.1 | 1493639 | 20-scf00019 | 20 |
| AX-157911031 | 2 | 10.315 | KV453182.1 | 1497532 | 20-scf00019 | 20 |
| AX-157911032 | 2 | 10.315 | KV453182.1 | 1498582 | 20-scf00019 | 20 |
| AX-157911034 | 2 | 10.429 | KV453182.1 | 1502127 | 20-scf00019 | 20 |
| AX-157911038 | 2 | 10.534 | KV453182.1 | 1504499 | 20-scf00019 | 20 |
| AX-157911039 | 2 | 10.534 | KV453182.1 | 1507493 | 20-scf00019 | 20 |
| AX-157911040 | 2 | 10.534 | KV453182.1 | 1508628 | 20-scf00019 | 20 |
| AX-157911042 | 2 | 10.534 | KV453182.1 | 1509919 | 20-scf00019 | 20 |
| AX-157812240 | 2 | 10.534 | KV453182.1 | 1510126 | 20-scf00019 | 20 |
| AX-157911045 | 2 | 10.815 | KV453182.1 | 1515375 | 20-scf00019 | 20 |
| AX-157911046 | 2 | 10.924 | KV453182.1 | 1516763 | 20-scf00019 | 20 |
| AX-157911057 | 2 | 10.924 | KV453182.1 | 1533638 | 20-scf00019 | 20 |
| AX-157911049 | 2 | 11.027 | KV453182.1 | 1518884 | 20-scf00019 | 20 |
| AX-157911050 | 2 | 11.029 | KV453182.1 | 1521733 | 20-scf00019 | 20 |
| AX-158404895 | 2 | 11.03  | KV453182.1 | 1522439 | 20-scf00019 | 20 |
| AX-157911054 | 2 | 11.031 | KV453182.1 | 1529446 | 20-scf00019 | 20 |
| AX-157911066 | 2 | 11.031 | KV453182.1 | 1554169 | 20-scf00019 | 20 |
| AX-157911055 | 2 | 11.092 | KV453182.1 | 1531518 | 20-scf00019 | 20 |
| AX-157911059 | 2 | 11.181 | KV453182.1 | 1540018 | 20-scf00019 | 20 |
| AX-157911060 | 2 | 11.21  | KV453182.1 | 1542116 | 20-scf00019 | 20 |
| AX-157911047 | 2 | 11.518 | KV453182.1 | 1517312 | 20-scf00019 | 20 |
| AX-157911062 | 2 | 11.518 | KV453182.1 | 1548890 | 20-scf00019 | 20 |
| AX-157911064 | 2 | 11.518 | KV453182.1 | 1550256 | 20-scf00019 | 20 |
| AX-157911068 | 2 | 11.518 | KV453182.1 | 1562751 | 20-scf00019 | 20 |
| AX-157753662 | 2 | 11.518 | KV453182.1 | 1564897 | 20-scf00019 | 20 |
| AX-157911072 | 2 | 11.518 | KV453182.1 | 1567005 | 20-scf00019 | 20 |
| AX-157911073 | 2 | 11.518 | KV453182.1 | 1567354 | 20-scf00019 | 20 |
| AX-157911074 | 2 | 11.518 | KV453182.1 | 1567722 | 20-scf00019 | 20 |
| AX-157812242 | 2 | 11.518 | KV453182.1 | 1568771 | 20-scf00019 | 20 |
| AX-157911076 | 2 | 11.518 | KV453182.1 | 1571797 | 20-scf00019 | 20 |
| AX-157812244 | 2 | 11.518 | KV453182.1 | 1573088 | 20-scf00019 | 20 |
| AX-157911077 | 2 | 11.518 | KV453182.1 | 1575254 | 20-scf00019 | 20 |
| AX-157911078 | 2 | 11.518 | KV453182.1 | 1576930 | 20-scf00019 | 20 |
| AX-158421861 | 2 | 11.518 | KV453182.1 | 1583279 | 20-scf00019 | 20 |
| AX-157911107 | 2 | 11.518 | KV453182.1 | 1624140 | 20-scf00019 | 20 |
| AX-158421862 | 2 | 11.521 | KV453182.1 | 1583435 | 20-scf00019 | 20 |
| AX-157911085 | 2 | 11.521 | KV453182.1 | 1589376 | 20-scf00019 | 20 |
| AX-157911101 | 2 | 11.521 | KV453182.1 | 1617921 | 20-scf00019 | 20 |
| AX-157775100 | 2 | 11.521 | KV453182.1 | 1680173 | 20-scf00019 | 20 |
| AX-157911146 | 2 | 11.521 | KV453182.1 | 1682001 | 20-scf00019 | 20 |
| AX-157911084 | 2 | 11.955 | KV453182.1 | 1587582 | 20-scf00019 | 20 |
| AX-157911088 | 2 | 11.955 | KV453182.1 | 1593352 | 20-scf00019 | 20 |
| AX-157911090 | 2 | 11.955 | KV453182.1 | 1597920 | 20-scf00019 | 20 |
| AX-157742973 | 2 | 11.955 | KV453182.1 | 1606727 | 20-scf00019 | 20 |

|              |   |        |            |         |             |    |
|--------------|---|--------|------------|---------|-------------|----|
| AX-157911131 | 2 | 11.955 | KV453182.1 | 1660108 | 20-scf00019 | 20 |
| AX-157911079 | 2 | 12.11  | KV453182.1 | 1578197 | 20-scf00019 | 20 |
| AX-157812245 | 2 | 12.11  | KV453182.1 | 1602461 | 20-scf00019 | 20 |
| AX-157777594 | 2 | 12.11  | KV453182.1 | 1606146 | 20-scf00019 | 20 |
| AX-157911094 | 2 | 12.11  | KV453182.1 | 1607601 | 20-scf00019 | 20 |
| AX-157812246 | 2 | 12.11  | KV453182.1 | 1613366 | 20-scf00019 | 20 |
| AX-157911122 | 2 | 12.11  | KV453182.1 | 1647228 | 20-scf00019 | 20 |
| AX-157911123 | 2 | 12.11  | KV453182.1 | 1648194 | 20-scf00019 | 20 |
| AX-157911124 | 2 | 12.11  | KV453182.1 | 1652052 | 20-scf00019 | 20 |
| AX-158404898 | 2 | 12.232 | KV453182.1 | 1615460 | 20-scf00019 | 20 |
| AX-157812248 | 2 | 12.325 | KV453182.1 | 1620543 | 20-scf00019 | 20 |
| AX-157911104 | 2 | 12.325 | KV453182.1 | 1621682 | 20-scf00019 | 20 |
| AX-157911106 | 2 | 12.325 | KV453182.1 | 1623022 | 20-scf00019 | 20 |
| AX-157911110 | 2 | 12.325 | KV453182.1 | 1625710 | 20-scf00019 | 20 |
| AX-157911115 | 2 | 12.325 | KV453182.1 | 1629819 | 20-scf00019 | 20 |
| AX-157740378 | 2 | 12.325 | KV453182.1 | 1634625 | 20-scf00019 | 20 |
| AX-157911116 | 2 | 12.325 | KV453182.1 | 1634994 | 20-scf00019 | 20 |
| AX-157911117 | 2 | 12.325 | KV453182.1 | 1637203 | 20-scf00019 | 20 |
| AX-157911125 | 2 | 12.325 | KV453182.1 | 1653677 | 20-scf00019 | 20 |
| AX-157911127 | 2 | 12.539 | KV453182.1 | 1655409 | 20-scf00019 | 20 |
| AX-157911129 | 2 | 12.754 | KV453182.1 | 1657831 | 20-scf00019 | 20 |
| AX-157911128 | 2 | 12.88  | KV453182.1 | 1657265 | 20-scf00019 | 20 |
| AX-157911130 | 2 | 12.88  | KV453182.1 | 1658594 | 20-scf00019 | 20 |
| AX-157716080 | 2 | 12.88  | KV453182.1 | 1664954 | 20-scf00019 | 20 |
| AX-158389556 | 2 | 12.88  | KV453182.1 | 1674655 | 20-scf00019 | 20 |
| AX-157911135 | 2 | 13.183 | KV453182.1 | 1668684 | 20-scf00019 | 20 |
| AX-157911137 | 2 | 13.183 | KV453182.1 | 1669923 | 20-scf00019 | 20 |
| AX-157911141 | 2 | 13.183 | KV453182.1 | 1674386 | 20-scf00019 | 20 |
| AX-157911144 | 2 | 13.184 | KV453182.1 | 1677095 | 20-scf00019 | 20 |
| AX-157911149 | 2 | 13.185 | KV453182.1 | 1685388 | 20-scf00019 | 20 |
| AX-157911151 | 2 | 13.794 | KV453182.1 | 1687550 | 20-scf00019 | 20 |
| AX-157911152 | 2 | 13.806 | KV453182.1 | 1689646 | 20-scf00019 | 20 |
| AX-157911155 | 2 | 13.827 | KV453182.1 | 1694782 | 20-scf00019 | 20 |
| AX-157911156 | 2 | 13.827 | KV453182.1 | 1695539 | 20-scf00019 | 20 |
| AX-157812251 | 2 | 13.934 | KV453182.1 | 1678885 | 20-scf00019 | 20 |
| AX-157812252 | 2 | 13.934 | KV453182.1 | 1694029 | 20-scf00019 | 20 |
| AX-157911160 | 2 | 13.934 | KV453182.1 | 1705124 | 20-scf00019 | 20 |
| AX-157911162 | 2 | 13.988 | KV453182.1 | 1707432 | 20-scf00019 | 20 |
| AX-157812254 | 2 | 13.988 | KV453182.1 | 1708677 | 20-scf00019 | 20 |
| AX-157911164 | 2 | 13.988 | KV453182.1 | 1712600 | 20-scf00019 | 20 |
| AX-157911167 | 2 | 14.146 | KV453182.1 | 1717257 | 20-scf00019 | 20 |
| AX-157911158 | 2 | 14.147 | KV453182.1 | 1700824 | 20-scf00019 | 20 |
| AX-157750432 | 2 | 14.147 | KV453182.1 | 1717477 | 20-scf00019 | 20 |
| AX-157738362 | 2 | 14.147 | KV453182.1 | 1720255 | 20-scf00019 | 20 |
| AX-157911169 | 2 | 14.147 | KV453182.1 | 1722035 | 20-scf00019 | 20 |
| AX-157911170 | 2 | 14.147 | KV453182.1 | 1722557 | 20-scf00019 | 20 |
| AX-158382196 | 2 | 14.147 | KV453182.1 | 1722602 | 20-scf00019 | 20 |
| AX-157911171 | 2 | 14.147 | KV453182.1 | 1723308 | 20-scf00019 | 20 |
| AX-157812256 | 2 | 14.147 | KV453182.1 | 1725059 | 20-scf00019 | 20 |
| AX-157911173 | 2 | 14.147 | KV453182.1 | 1726429 | 20-scf00019 | 20 |
| AX-157744058 | 2 | 14.147 | KV453182.1 | 1728741 | 20-scf00019 | 20 |

|              |   |        |            |         |             |    |
|--------------|---|--------|------------|---------|-------------|----|
| AX-157911175 | 2 | 14.147 | KV453182.1 | 1732582 | 20-scf00019 | 20 |
| AX-157911176 | 2 | 14.147 | KV453182.1 | 1732891 | 20-scf00019 | 20 |
| AX-157715337 | 2 | 14.147 | KV453182.1 | 1733969 | 20-scf00019 | 20 |
| AX-157911177 | 2 | 14.147 | KV453182.1 | 1735364 | 20-scf00019 | 20 |
| AX-158379227 | 2 | 14.147 | KV453182.1 | 1735641 | 20-scf00019 | 20 |
| AX-157911180 | 2 | 14.147 | KV453182.1 | 1738919 | 20-scf00019 | 20 |
| AX-157911183 | 2 | 14.147 | KV453182.1 | 1741498 | 20-scf00019 | 20 |
| AX-157911184 | 2 | 14.147 | KV453182.1 | 1741667 | 20-scf00019 | 20 |
| AX-157869072 | 2 | 14.147 | KV453182.1 | 1742082 | 20-scf00019 | 20 |
| AX-157911186 | 2 | 14.147 | KV453182.1 | 1744568 | 20-scf00019 | 20 |
| AX-157911187 | 2 | 14.147 | KV453182.1 | 1745418 | 20-scf00019 | 20 |
| AX-157911189 | 2 | 14.147 | KV453182.1 | 1747963 | 20-scf00019 | 20 |
| AX-157911191 | 2 | 14.147 | KV453182.1 | 1757349 | 20-scf00019 | 20 |
| AX-157911192 | 2 | 14.147 | KV453182.1 | 1758386 | 20-scf00019 | 20 |
| AX-157911193 | 2 | 14.147 | KV453182.1 | 1759782 | 20-scf00019 | 20 |
| AX-157754943 | 2 | 14.147 | KV453182.1 | 1760239 | 20-scf00019 | 20 |
| AX-157911194 | 2 | 14.147 | KV453182.1 | 1760847 | 20-scf00019 | 20 |
| AX-157911195 | 2 | 14.147 | KV453182.1 | 1763302 | 20-scf00019 | 20 |
| AX-157911196 | 2 | 14.147 | KV453182.1 | 1765405 | 20-scf00019 | 20 |
| AX-157911197 | 2 | 14.147 | KV453182.1 | 1772502 | 20-scf00019 | 20 |
| AX-157812260 | 2 | 14.147 | KV453182.1 | 1776996 | 20-scf00019 | 20 |
| AX-157911198 | 2 | 14.147 | KV453182.1 | 1782589 | 20-scf00019 | 20 |
| AX-157911199 | 2 | 14.147 | KV453182.1 | 1786202 | 20-scf00019 | 20 |
| AX-158404139 | 2 | 14.366 | KV453182.1 | 1737011 | 20-scf00019 | 20 |
| AX-157911202 | 2 | 14.366 | KV453182.1 | 1791029 | 20-scf00019 | 20 |
| AX-157911206 | 2 | 14.366 | KV453182.1 | 1796809 | 20-scf00019 | 20 |
| AX-157911208 | 2 | 14.366 | KV453182.1 | 1799980 | 20-scf00019 | 20 |
| AX-157911209 | 2 | 14.366 | KV453182.1 | 1801685 | 20-scf00019 | 20 |
| AX-157911213 | 2 | 14.366 | KV453182.1 | 1804671 | 20-scf00019 | 20 |
| AX-157911161 | 2 | 14.693 | KV453182.1 | 1705688 | 20-scf00019 | 20 |
| AX-157911172 | 2 | 14.693 | KV453182.1 | 1725813 | 20-scf00019 | 20 |
| AX-157911174 | 2 | 14.693 | KV453182.1 | 1729808 | 20-scf00019 | 20 |
| AX-157812258 | 2 | 14.693 | KV453182.1 | 1762304 | 20-scf00019 | 20 |
| AX-157812259 | 2 | 14.693 | KV453182.1 | 1762433 | 20-scf00019 | 20 |
| AX-157703363 | 2 | 14.693 | KV453182.1 | 1771818 | 20-scf00019 | 20 |
| AX-157911203 | 2 | 14.693 | KV453182.1 | 1791430 | 20-scf00019 | 20 |
| AX-157911214 | 2 | 14.693 | KV453182.1 | 1806225 | 20-scf00019 | 20 |
| AX-157911217 | 2 | 14.693 | KV453182.1 | 1810520 | 20-scf00019 | 20 |
| AX-157911218 | 2 | 14.693 | KV453182.1 | 1811009 | 20-scf00019 | 20 |
| AX-157911219 | 2 | 14.693 | KV453182.1 | 1811505 | 20-scf00019 | 20 |
| AX-157911220 | 2 | 14.693 | KV453182.1 | 1811864 | 20-scf00019 | 20 |
| AX-157812261 | 2 | 14.693 | KV453182.1 | 1814828 | 20-scf00019 | 20 |
| AX-157911221 | 2 | 14.693 | KV453182.1 | 1816458 | 20-scf00019 | 20 |
| AX-157911222 | 2 | 14.693 | KV453182.1 | 1817660 | 20-scf00019 | 20 |
| AX-157911223 | 2 | 14.693 | KV453182.1 | 1818687 | 20-scf00019 | 20 |
| AX-157812263 | 2 | 14.693 | KV453182.1 | 1822570 | 20-scf00019 | 20 |
| AX-157746031 | 2 | 15.021 | KV453182.1 | 1827462 | 20-scf00019 | 20 |
| AX-157911229 | 2 | 15.021 | KV453182.1 | 1831565 | 20-scf00019 | 20 |
| AX-157911230 | 2 | 15.021 | KV453182.1 | 1832405 | 20-scf00019 | 20 |
| AX-157722909 | 2 | 15.021 | KV453182.1 | 1834332 | 20-scf00019 | 20 |
| AX-157751630 | 2 | 15.032 | KV453182.1 | 1846054 | 20-scf00019 | 20 |



|              |   |        |            |         |             |    |
|--------------|---|--------|------------|---------|-------------|----|
| AX-157911239 | 2 | 15.13  | KV453182.1 | 1852590 | 20-scf00019 | 20 |
| AX-157911240 | 2 | 15.13  | KV453182.1 | 1853480 | 20-scf00019 | 20 |
| AX-157911241 | 2 | 15.13  | KV453182.1 | 1853833 | 20-scf00019 | 20 |
| AX-157738691 | 2 | 15.13  | KV453182.1 | 1854319 | 20-scf00019 | 20 |
| AX-157911242 | 2 | 15.13  | KV453182.1 | 1854372 | 20-scf00019 | 20 |
| AX-157750368 | 2 | 15.13  | KV453182.1 | 1856472 | 20-scf00019 | 20 |
| AX-157864470 | 2 | 15.13  | KV453182.1 | 1864373 | 20-scf00019 | 20 |
| AX-157911250 | 2 | 15.13  | KV453182.1 | 1865315 | 20-scf00019 | 20 |
| AX-157812272 | 2 | 15.537 | KV453182.1 | 1873774 | 20-scf00019 | 20 |
| AX-158379229 | 2 | 15.54  | KV453182.1 | 1874447 | 20-scf00019 | 20 |
| AX-157812273 | 2 | 15.54  | KV453182.1 | 1876578 | 20-scf00019 | 20 |
| AX-157812274 | 2 | 15.54  | KV453182.1 | 1877697 | 20-scf00019 | 20 |
| AX-157744333 | 2 | 15.54  | KV453182.1 | 1877949 | 20-scf00019 | 20 |
| AX-157911253 | 2 | 15.711 | KV453182.1 | 1879834 | 20-scf00019 | 20 |
| AX-157727619 | 2 | 16.225 | KV453182.1 | 1901172 | 20-scf00019 | 20 |
| AX-157911266 | 2 | 16.225 | KV453182.1 | 1902941 | 20-scf00019 | 20 |
| AX-157911267 | 2 | 16.225 | KV453182.1 | 1903699 | 20-scf00019 | 20 |
| AX-157911277 | 2 | 16.225 | KV453182.1 | 1915756 | 20-scf00019 | 20 |
| AX-157774221 | 2 | 16.225 | KV453182.1 | 1926729 | 20-scf00019 | 20 |
| AX-157911271 | 2 | 16.335 | KV453182.1 | 1907626 | 20-scf00019 | 20 |
| AX-157911272 | 2 | 16.335 | KV453182.1 | 1908846 | 20-scf00019 | 20 |
| AX-157911273 | 2 | 16.335 | KV453182.1 | 1909944 | 20-scf00019 | 20 |
| AX-157911274 | 2 | 16.335 | KV453182.1 | 1910634 | 20-scf00019 | 20 |
| AX-157911275 | 2 | 16.444 | KV453182.1 | 1912049 | 20-scf00019 | 20 |
| AX-157812275 | 2 | 16.553 | KV453182.1 | 1924235 | 20-scf00019 | 20 |
| AX-157911285 | 2 | 16.553 | KV453182.1 | 1924578 | 20-scf00019 | 20 |
| AX-157911286 | 2 | 16.553 | KV453182.1 | 1924998 | 20-scf00019 | 20 |
| AX-157911287 | 2 | 16.553 | KV453182.1 | 1927448 | 20-scf00019 | 20 |
| AX-157911290 | 2 | 16.554 | KV453182.1 | 1931342 | 20-scf00019 | 20 |
| AX-157911292 | 2 | 16.653 | KV453182.1 | 1933232 | 20-scf00019 | 20 |
| AX-157911284 | 2 | 16.717 | KV453182.1 | 1924083 | 20-scf00019 | 20 |
| AX-157911294 | 2 | 16.717 | KV453182.1 | 1937979 | 20-scf00019 | 20 |
| AX-157853679 | 2 | 16.881 | KV453182.1 | 1938630 | 20-scf00019 | 20 |
| AX-157911295 | 2 | 16.881 | KV453182.1 | 1938684 | 20-scf00019 | 20 |
| AX-157911297 | 2 | 16.881 | KV453182.1 | 1941520 | 20-scf00019 | 20 |
| AX-157911300 | 2 | 16.881 | KV453182.1 | 1945604 | 20-scf00019 | 20 |
| AX-157721313 | 2 | 16.881 | KV453182.1 | 1945979 | 20-scf00019 | 20 |
| AX-157911301 | 2 | 16.881 | KV453182.1 | 1946361 | 20-scf00019 | 20 |
| AX-157754823 | 2 | 16.882 | KV453182.1 | 1946782 | 20-scf00019 | 20 |
| AX-157911303 | 2 | 16.992 | KV453182.1 | 1948375 | 20-scf00019 | 20 |
| AX-157911304 | 2 | 17.045 | KV453182.1 | 1949690 | 20-scf00019 | 20 |
| AX-157911306 | 2 | 17.045 | KV453182.1 | 1950581 | 20-scf00019 | 20 |
| AX-157911311 | 2 | 17.208 | KV453182.1 | 1954496 | 20-scf00019 | 20 |
| AX-157911313 | 2 | 17.209 | KV453182.1 | 1955789 | 20-scf00019 | 20 |
| AX-157911315 | 2 | 17.209 | KV453182.1 | 1960379 | 20-scf00019 | 20 |
| AX-158382202 | 2 | 17.209 | KV453182.1 | 1963902 | 20-scf00019 | 20 |
| AX-157911320 | 2 | 17.209 | KV453182.1 | 1966963 | 20-scf00019 | 20 |
| AX-157911321 | 2 | 17.209 | KV453182.1 | 1967355 | 20-scf00019 | 20 |
| AX-157911322 | 2 | 17.209 | KV453182.1 | 1968374 | 20-scf00019 | 20 |
| AX-158382203 | 2 | 17.209 | KV453182.1 | 1969089 | 20-scf00019 | 20 |
| AX-157911324 | 2 | 17.209 | KV453182.1 | 1969475 | 20-scf00019 | 20 |

|              |   |        |            |         |             |    |
|--------------|---|--------|------------|---------|-------------|----|
| AX-157743939 | 2 | 17.215 | KV453182.1 | 1970738 | 20-scf00019 | 20 |
| AX-157911327 | 2 | 17.64  | KV453182.1 | 1978923 | 20-scf00019 | 20 |
| AX-157911329 | 2 | 17.643 | KV453182.1 | 1984427 | 20-scf00019 | 20 |
| AX-157911330 | 2 | 17.643 | KV453182.1 | 1984774 | 20-scf00019 | 20 |
| AX-157911332 | 2 | 17.646 | KV453182.1 | 1985497 | 20-scf00019 | 20 |
| AX-157911335 | 2 | 17.646 | KV453182.1 | 1988663 | 20-scf00019 | 20 |
| AX-157864471 | 2 | 17.646 | KV453182.1 | 1988982 | 20-scf00019 | 20 |
| AX-157911339 | 2 | 17.646 | KV453182.1 | 1992887 | 20-scf00019 | 20 |
| AX-157911343 | 2 | 17.646 | KV453182.1 | 1994719 | 20-scf00019 | 20 |
| AX-157911379 | 2 | 17.646 | KV453182.1 | 2031939 | 20-scf00019 | 20 |
| AX-157911342 | 2 | 17.788 | KV453182.1 | 1994276 | 20-scf00019 | 20 |
| AX-157911331 | 2 | 17.908 | KV453182.1 | 1985287 | 20-scf00019 | 20 |
| AX-157911338 | 2 | 17.908 | KV453182.1 | 1991986 | 20-scf00019 | 20 |
| AX-157911341 | 2 | 17.908 | KV453182.1 | 1993894 | 20-scf00019 | 20 |
| AX-157911349 | 2 | 17.908 | KV453182.1 | 1999089 | 20-scf00019 | 20 |
| AX-157911350 | 2 | 17.908 | KV453182.1 | 1999474 | 20-scf00019 | 20 |
| AX-157911354 | 2 | 17.908 | KV453182.1 | 2005511 | 20-scf00019 | 20 |
| AX-157911357 | 2 | 17.908 | KV453182.1 | 2008150 | 20-scf00019 | 20 |
| AX-157911361 | 2 | 18.039 | KV453182.1 | 2010827 | 20-scf00019 | 20 |
| AX-157911358 | 2 | 18.302 | KV453182.1 | 2009145 | 20-scf00019 | 20 |
| AX-157755518 | 2 | 18.302 | KV453182.1 | 2022513 | 20-scf00019 | 20 |
| AX-157772719 | 2 | 18.302 | KV453182.1 | 2024362 | 20-scf00019 | 20 |
| AX-157911374 | 2 | 18.302 | KV453182.1 | 2025338 | 20-scf00019 | 20 |
| AX-157911375 | 2 | 18.302 | KV453182.1 | 2026268 | 20-scf00019 | 20 |
| AX-157726676 | 2 | 18.302 | KV453182.1 | 2028282 | 20-scf00019 | 20 |
| AX-157911376 | 2 | 18.326 | KV453182.1 | 2029508 | 20-scf00019 | 20 |
| AX-157911377 | 2 | 18.369 | KV453182.1 | 2030075 | 20-scf00019 | 20 |
| AX-157911380 | 2 | 18.411 | KV453182.1 | 2032709 | 20-scf00019 | 20 |
| AX-157911367 | 2 | 18.456 | KV453182.1 | 2016660 | 20-scf00019 | 20 |
| AX-157864473 | 2 | 18.456 | KV453182.1 | 2028142 | 20-scf00019 | 20 |
| AX-158404906 | 2 | 18.456 | KV453182.1 | 2038120 | 20-scf00019 | 20 |
| AX-157911402 | 2 | 18.456 | KV453182.1 | 2066761 | 20-scf00019 | 20 |
| AX-157911384 | 2 | 18.493 | KV453182.1 | 2040237 | 20-scf00019 | 20 |
| AX-157753464 | 2 | 18.576 | KV453182.1 | 2044258 | 20-scf00019 | 20 |
| AX-157911389 | 2 | 18.651 | KV453182.1 | 2046666 | 20-scf00019 | 20 |
| AX-157911391 | 2 | 18.74  | KV453182.1 | 2048918 | 20-scf00019 | 20 |
| AX-157753589 | 2 | 18.74  | KV453182.1 | 2054684 | 20-scf00019 | 20 |
| AX-157911398 | 2 | 18.74  | KV453182.1 | 2060740 | 20-scf00019 | 20 |
| AX-157911401 | 2 | 18.742 | KV453182.1 | 2064602 | 20-scf00019 | 20 |
| AX-157911406 | 2 | 19.063 | KV453182.1 | 2073004 | 20-scf00019 | 20 |
| AX-157911413 | 2 | 19.067 | KV453182.1 | 2084696 | 20-scf00019 | 20 |
| AX-157911414 | 2 | 19.067 | KV453182.1 | 2085481 | 20-scf00019 | 20 |
| AX-157775366 | 2 | 19.067 | KV453182.1 | 2085896 | 20-scf00019 | 20 |
| AX-157911417 | 2 | 19.067 | KV453182.1 | 2088147 | 20-scf00019 | 20 |
| AX-157911418 | 2 | 19.067 | KV453182.1 | 2090934 | 20-scf00019 | 20 |
| AX-157740388 | 2 | 19.34  | KV453182.1 | 2012332 | 20-scf00019 | 20 |
| AX-158404910 | 2 | 19.34  | KV453182.1 | 2092922 | 20-scf00019 | 20 |
| AX-157911421 | 2 | 19.34  | KV453182.1 | 2094509 | 20-scf00019 | 20 |
| AX-157911481 | 2 | 19.34  | KV453182.1 | 2191295 | 20-scf00019 | 20 |
| AX-157911499 | 2 | 19.34  | KV453182.1 | 2218012 | 20-scf00019 | 20 |
| AX-157911424 | 2 | 19.613 | KV453182.1 | 2102090 | 20-scf00019 | 20 |

|              |   |        |            |         |             |    |
|--------------|---|--------|------------|---------|-------------|----|
| AX-157911425 | 2 | 19.613 | KV453182.1 | 2103213 | 20-scf00019 | 20 |
| AX-157911428 | 2 | 19.613 | KV453182.1 | 2106036 | 20-scf00019 | 20 |
| AX-157911429 | 2 | 19.613 | KV453182.1 | 2108593 | 20-scf00019 | 20 |
| AX-157911433 | 2 | 19.613 | KV453182.1 | 2113850 | 20-scf00019 | 20 |
| AX-157911435 | 2 | 19.759 | KV453182.1 | 2116934 | 20-scf00019 | 20 |
| AX-157911436 | 2 | 20.05  | KV453182.1 | 2119101 | 20-scf00019 | 20 |
| AX-157911437 | 2 | 20.05  | KV453182.1 | 2121077 | 20-scf00019 | 20 |
| AX-157911438 | 2 | 20.05  | KV453182.1 | 2122200 | 20-scf00019 | 20 |
| AX-157883407 | 2 | 20.05  | KV453182.1 | 2125213 | 20-scf00019 | 20 |
| AX-157911442 | 2 | 20.05  | KV453182.1 | 2125611 | 20-scf00019 | 20 |
| AX-157911443 | 2 | 20.05  | KV453182.1 | 2127682 | 20-scf00019 | 20 |
| AX-157721623 | 2 | 20.05  | KV453182.1 | 2129111 | 20-scf00019 | 20 |
| AX-157911444 | 2 | 20.05  | KV453182.1 | 2130327 | 20-scf00019 | 20 |
| AX-157721917 | 2 | 20.05  | KV453182.1 | 2131715 | 20-scf00019 | 20 |
| AX-157738508 | 2 | 20.05  | KV453182.1 | 2133968 | 20-scf00019 | 20 |
| AX-157911447 | 2 | 20.487 | KV453182.1 | 2137434 | 20-scf00019 | 20 |
| AX-157911450 | 2 | 20.487 | KV453182.1 | 2140917 | 20-scf00019 | 20 |
| AX-158404144 | 2 | 20.487 | KV453182.1 | 2144189 | 20-scf00019 | 20 |
| AX-158404911 | 2 | 20.487 | KV453182.1 | 2144243 | 20-scf00019 | 20 |
| AX-157911459 | 2 | 20.487 | KV453182.1 | 2156146 | 20-scf00019 | 20 |
| AX-157911463 | 2 | 20.487 | KV453182.1 | 2161116 | 20-scf00019 | 20 |
| AX-157911454 | 2 | 20.596 | KV453182.1 | 2151491 | 20-scf00019 | 20 |
| AX-157911457 | 2 | 20.596 | KV453182.1 | 2154388 | 20-scf00019 | 20 |
| AX-157911458 | 2 | 20.596 | KV453182.1 | 2155134 | 20-scf00019 | 20 |
| AX-157911464 | 2 | 20.596 | KV453182.1 | 2162464 | 20-scf00019 | 20 |
| AX-157753399 | 2 | 20.596 | KV453182.1 | 2164469 | 20-scf00019 | 20 |
| AX-157911467 | 2 | 20.596 | KV453182.1 | 2164947 | 20-scf00019 | 20 |
| AX-157874600 | 2 | 20.596 | KV453182.1 | 2168366 | 20-scf00019 | 20 |
| AX-157710812 | 2 | 20.596 | KV453182.1 | 2170780 | 20-scf00019 | 20 |
| AX-157911470 | 2 | 20.596 | KV453182.1 | 2171193 | 20-scf00019 | 20 |
| AX-157758628 | 2 | 20.596 | KV453182.1 | 2173451 | 20-scf00019 | 20 |
| AX-157911471 | 2 | 20.596 | KV453182.1 | 2174375 | 20-scf00019 | 20 |
| AX-157911472 | 2 | 20.596 | KV453182.1 | 2176930 | 20-scf00019 | 20 |
| AX-157812278 | 2 | 20.705 | KV453182.1 | 2183637 | 20-scf00019 | 20 |
| AX-157911474 | 2 | 20.705 | KV453182.1 | 2184215 | 20-scf00019 | 20 |
| AX-157812279 | 2 | 20.705 | KV453182.1 | 2187728 | 20-scf00019 | 20 |
| AX-157911477 | 2 | 20.705 | KV453182.1 | 2188156 | 20-scf00019 | 20 |
| AX-157911480 | 2 | 20.815 | KV453182.1 | 2190383 | 20-scf00019 | 20 |
| AX-157812280 | 2 | 21.033 | KV453182.1 | 2192039 | 20-scf00019 | 20 |
| AX-157812281 | 2 | 21.033 | KV453182.1 | 2195999 | 20-scf00019 | 20 |
| AX-157911483 | 2 | 21.033 | KV453182.1 | 2197204 | 20-scf00019 | 20 |
| AX-157911484 | 2 | 21.033 | KV453182.1 | 2197633 | 20-scf00019 | 20 |
| AX-157911485 | 2 | 21.033 | KV453182.1 | 2198237 | 20-scf00019 | 20 |
| AX-157722892 | 2 | 21.033 | KV453182.1 | 2215292 | 20-scf00019 | 20 |
| AX-157911487 | 2 | 21.088 | KV453182.1 | 2201435 | 20-scf00019 | 20 |
| AX-157708496 | 2 | 21.143 | KV453182.1 | 2207223 | 20-scf00019 | 20 |
| AX-157911494 | 2 | 21.143 | KV453182.1 | 2209191 | 20-scf00019 | 20 |
| AX-157911496 | 2 | 21.143 | KV453182.1 | 2213726 | 20-scf00019 | 20 |
| AX-157911498 | 2 | 21.143 | KV453182.1 | 2216207 | 20-scf00019 | 20 |
| AX-157883409 | 2 | 21.143 | KV453182.1 | 2217974 | 20-scf00019 | 20 |
| AX-157911430 | 2 | 21.17  | KV453182.1 | 2109696 | 20-scf00019 | 20 |

|              |   |        |            |         |             |    |
|--------------|---|--------|------------|---------|-------------|----|
| AX-157911493 | 2 | 21.17  | KV453182.1 | 2205938 | 20-scf00019 | 20 |
| AX-157750881 | 2 | 21.237 | KV453182.1 | 2218590 | 20-scf00019 | 20 |
| AX-157911502 | 2 | 21.294 | KV453182.1 | 2221040 | 20-scf00019 | 20 |
| AX-157911503 | 2 | 21.534 | KV453182.1 | 2222040 | 20-scf00019 | 20 |
| AX-157911508 | 2 | 21.536 | KV453182.1 | 2227684 | 20-scf00019 | 20 |
| AX-157911506 | 2 | 21.538 | KV453182.1 | 2224494 | 20-scf00019 | 20 |
| AX-157755835 | 2 | 21.538 | KV453182.1 | 2232320 | 20-scf00019 | 20 |
| AX-157911515 | 2 | 21.689 | KV453182.1 | 2239586 | 20-scf00019 | 20 |
| AX-158404913 | 2 | 21.689 | KV453182.1 | 2240832 | 20-scf00019 | 20 |
| AX-158421866 | 2 | 21.689 | KV453182.1 | 2241522 | 20-scf00019 | 20 |
| AX-157911516 | 2 | 21.689 | KV453182.1 | 2242946 | 20-scf00019 | 20 |
| AX-157717259 | 2 | 21.689 | KV453182.1 | 2244061 | 20-scf00019 | 20 |
| AX-157911518 | 2 | 21.689 | KV453182.1 | 2244808 | 20-scf00019 | 20 |
| AX-158389560 | 2 | 21.689 | KV453182.1 | 2248449 | 20-scf00019 | 20 |
| AX-157812285 | 2 | 21.689 | KV453182.1 | 2249610 | 20-scf00019 | 20 |
| AX-157869075 | 2 | 21.689 | KV453182.1 | 2256507 | 20-scf00019 | 20 |
| AX-157874602 | 2 | 21.689 | KV453182.1 | 2260281 | 20-scf00019 | 20 |
| AX-157739420 | 2 | 21.689 | KV453182.1 | 2261928 | 20-scf00019 | 20 |
| AX-157911522 | 2 | 21.735 | KV453182.1 | 2260436 | 20-scf00019 | 20 |
| AX-157911524 | 2 | 21.82  | KV453182.1 | 2263847 | 20-scf00019 | 20 |
| AX-157911525 | 2 | 21.82  | KV453182.1 | 2264553 | 20-scf00019 | 20 |
| AX-157911526 | 2 | 21.832 | KV453182.1 | 2265510 | 20-scf00019 | 20 |
| AX-157911540 | 2 | 22.344 | KV453182.1 | 2285350 | 20-scf00019 | 20 |
| AX-157749613 | 2 | 22.344 | KV453182.1 | 2286177 | 20-scf00019 | 20 |
| AX-157911541 | 2 | 22.344 | KV453182.1 | 2286822 | 20-scf00019 | 20 |
| AX-157911542 | 2 | 22.344 | KV453182.1 | 2290804 | 20-scf00019 | 20 |
| AX-157911543 | 2 | 22.344 | KV453182.1 | 2292284 | 20-scf00019 | 20 |
| AX-157911547 | 2 | 22.344 | KV453182.1 | 2296364 | 20-scf00019 | 20 |
| AX-157911549 | 2 | 22.344 | KV453182.1 | 2297354 | 20-scf00019 | 20 |
| AX-157911557 | 2 | 22.344 | KV453182.1 | 2314121 | 20-scf00019 | 20 |
| AX-157812287 | 2 | 22.344 | KV453182.1 | 2343172 | 20-scf00019 | 20 |
| AX-157911580 | 2 | 22.344 | KV453182.1 | 2346021 | 20-scf00019 | 20 |
| AX-157911550 | 2 | 22.569 | KV453182.1 | 2297583 | 20-scf00019 | 20 |
| AX-157911559 | 2 | 22.671 | KV453182.1 | 2318836 | 20-scf00019 | 20 |
| AX-157911565 | 2 | 22.671 | KV453182.1 | 2326948 | 20-scf00019 | 20 |
| AX-157911553 | 2 | 22.672 | KV453182.1 | 2310810 | 20-scf00019 | 20 |
| AX-157911563 | 2 | 22.672 | KV453182.1 | 2323366 | 20-scf00019 | 20 |
| AX-157911566 | 2 | 22.672 | KV453182.1 | 2327785 | 20-scf00019 | 20 |
| AX-157911569 | 2 | 22.672 | KV453182.1 | 2329816 | 20-scf00019 | 20 |
| AX-157744259 | 2 | 22.672 | KV453182.1 | 2330950 | 20-scf00019 | 20 |
| AX-157911570 | 2 | 22.672 | KV453182.1 | 2332351 | 20-scf00019 | 20 |
| AX-157911574 | 2 | 22.672 | KV453182.1 | 2337583 | 20-scf00019 | 20 |
| AX-157812286 | 2 | 22.672 | KV453182.1 | 2339213 | 20-scf00019 | 20 |
| AX-157911576 | 2 | 22.672 | KV453182.1 | 2339841 | 20-scf00019 | 20 |
| AX-157911578 | 2 | 22.672 | KV453182.1 | 2344298 | 20-scf00019 | 20 |
| AX-157746098 | 2 | 22.672 | KV453182.1 | 2344617 | 20-scf00019 | 20 |
| AX-157911582 | 2 | 22.672 | KV453182.1 | 2355676 | 20-scf00019 | 20 |
| AX-157719594 | 2 | 22.672 | KV453182.1 | 2365032 | 20-scf00019 | 20 |
| AX-157812293 | 2 | 22.672 | KV453182.1 | 2365267 | 20-scf00019 | 20 |
| AX-157911589 | 2 | 22.672 | KV453182.1 | 2367934 | 20-scf00019 | 20 |
| AX-157911585 | 2 | 22.781 | KV453182.1 | 2361524 | 20-scf00019 | 20 |

|              |   |        |             |         |             |    |
|--------------|---|--------|-------------|---------|-------------|----|
| AX-157911587 | 2 | 22.781 | KV453182.1  | 2363611 | 20-scf00019 | 20 |
| AX-157911590 | 2 | 22.781 | KV453182.1  | 2368296 | 20-scf00019 | 20 |
| AX-157707537 | 2 | 22.781 | 3ML01034512 | 388     | scf10188_1  | UN |
| AX-157911545 | 2 | 22.925 | KV453182.1  | 2295025 | 20-scf00019 | 20 |
| AX-157911555 | 2 | 22.925 | KV453182.1  | 2313311 | 20-scf00019 | 20 |
| AX-157911562 | 2 | 22.925 | KV453182.1  | 2321886 | 20-scf00019 | 20 |
| AX-157911594 | 2 | 22.925 | KV453182.1  | 2370688 | 20-scf00019 | 20 |
| AX-157911595 | 2 | 22.925 | KV453182.1  | 2372327 | 20-scf00019 | 20 |
| AX-157911596 | 2 | 22.925 | KV453182.1  | 2373902 | 20-scf00019 | 20 |
| AX-157911599 | 2 | 22.925 | KV453182.1  | 2377877 | 20-scf00019 | 20 |
| AX-157725026 | 2 | 22.925 | KV453182.1  | 2378818 | 20-scf00019 | 20 |
| AX-157911602 | 2 | 22.925 | KV453182.1  | 2380267 | 20-scf00019 | 20 |
| AX-157911604 | 2 | 22.925 | KV453182.1  | 2381785 | 20-scf00019 | 20 |
| AX-157911605 | 2 | 22.925 | KV453182.1  | 2382849 | 20-scf00019 | 20 |
| AX-157911606 | 2 | 22.925 | KV453182.1  | 2383339 | 20-scf00019 | 20 |
| AX-157812297 | 2 | 22.925 | KV453182.1  | 2383706 | 20-scf00019 | 20 |
| AX-157911607 | 2 | 22.925 | KV453182.1  | 2383948 | 20-scf00019 | 20 |
| AX-157741883 | 2 | 22.925 | KV453182.1  | 2384406 | 20-scf00019 | 20 |
| AX-157911608 | 2 | 22.925 | KV453182.1  | 2384759 | 20-scf00019 | 20 |
| AX-157775338 | 2 | 22.925 | KV453182.1  | 2387049 | 20-scf00019 | 20 |
| AX-157812298 | 2 | 22.925 | KV453182.1  | 2387132 | 20-scf00019 | 20 |
| AX-157812301 | 2 | 22.925 | KV453182.1  | 2390811 | 20-scf00019 | 20 |
| AX-157812302 | 2 | 22.925 | KV453182.1  | 2392585 | 20-scf00019 | 20 |
| AX-157911560 | 2 | 23.052 | KV453182.1  | 2320498 | 20-scf00019 | 20 |
| AX-157911598 | 2 | 23.052 | KV453182.1  | 2375037 | 20-scf00019 | 20 |
| AX-157869078 | 2 | 23.052 | KV453182.1  | 2393720 | 20-scf00019 | 20 |
| AX-157727768 | 2 | 23.069 | KV453182.1  | 2396751 | 20-scf00019 | 20 |
| AX-157911610 | 2 | 23.069 | KV453182.1  | 2399867 | 20-scf00019 | 20 |
| AX-157911613 | 2 | 23.276 | KV453182.1  | 2404070 | 20-scf00019 | 20 |
| AX-157911614 | 2 | 23.492 | KV453182.1  | 2404326 | 20-scf00019 | 20 |
| AX-157911615 | 2 | 23.494 | KV453182.1  | 2404724 | 20-scf00019 | 20 |
| AX-157911616 | 2 | 23.494 | KV453182.1  | 2407003 | 20-scf00019 | 20 |
| AX-157911619 | 2 | 23.494 | KV453182.1  | 2408441 | 20-scf00019 | 20 |
| AX-157911622 | 2 | 23.494 | KV453182.1  | 2411912 | 20-scf00019 | 20 |
| AX-157911620 | 2 | 23.506 | KV453182.1  | 2409034 | 20-scf00019 | 20 |
| AX-157911621 | 2 | 23.509 | KV453182.1  | 2411029 | 20-scf00019 | 20 |
| AX-157740559 | 2 | 23.787 | KV453182.1  | 2414476 | 20-scf00019 | 20 |
| AX-157911624 | 2 | 23.787 | KV453182.1  | 2414972 | 20-scf00019 | 20 |
| AX-157812305 | 2 | 23.787 | KV453182.1  | 2415250 | 20-scf00019 | 20 |
| AX-157714223 | 2 | 23.787 | KV453182.1  | 2417460 | 20-scf00019 | 20 |
| AX-157771622 | 2 | 23.787 | KV453182.1  | 2418418 | 20-scf00019 | 20 |
| AX-157911626 | 2 | 23.787 | KV453182.1  | 2420007 | 20-scf00019 | 20 |
| AX-157911627 | 2 | 23.787 | KV453182.1  | 2420341 | 20-scf00019 | 20 |
| AX-157911652 | 2 | 23.787 | KV453182.1  | 2455268 | 20-scf00019 | 20 |
| AX-157773418 | 2 | 23.88  | KV453182.1  | 2421134 | 20-scf00019 | 20 |
| AX-157812306 | 2 | 24.075 | KV453182.1  | 2425232 | 20-scf00019 | 20 |
| AX-157911629 | 2 | 24.075 | KV453182.1  | 2426553 | 20-scf00019 | 20 |
| AX-157911631 | 2 | 24.075 | KV453182.1  | 2430654 | 20-scf00019 | 20 |
| AX-157911633 | 2 | 24.075 | KV453182.1  | 2432134 | 20-scf00019 | 20 |
| AX-157911634 | 2 | 24.075 | KV453182.1  | 2432531 | 20-scf00019 | 20 |
| AX-157911635 | 2 | 24.075 | KV453182.1  | 2434019 | 20-scf00019 | 20 |

|              |   |        |            |         |             |    |
|--------------|---|--------|------------|---------|-------------|----|
| AX-157911657 | 2 | 24.075 | KV453182.1 | 2460943 | 20-scf00019 | 20 |
| AX-157911666 | 2 | 24.075 | KV453182.1 | 2477554 | 20-scf00019 | 20 |
| AX-157911675 | 2 | 24.075 | KV453182.1 | 2494349 | 20-scf00019 | 20 |
| AX-157911692 | 2 | 24.075 | KV453182.1 | 2525374 | 20-scf00019 | 20 |
| AX-157911639 | 2 | 24.12  | KV453182.1 | 2437161 | 20-scf00019 | 20 |
| AX-157812308 | 2 | 24.173 | KV453182.1 | 2441212 | 20-scf00019 | 20 |
| AX-157911648 | 2 | 24.173 | KV453182.1 | 2450647 | 20-scf00019 | 20 |
| AX-157812311 | 2 | 24.173 | KV453182.1 | 2475500 | 20-scf00019 | 20 |
| AX-157911637 | 2 | 24.219 | KV453182.1 | 2435095 | 20-scf00019 | 20 |
| AX-157812310 | 2 | 24.219 | KV453182.1 | 2447468 | 20-scf00019 | 20 |
| AX-157911655 | 2 | 24.219 | KV453182.1 | 2458257 | 20-scf00019 | 20 |
| AX-157911658 | 2 | 24.219 | KV453182.1 | 2462603 | 20-scf00019 | 20 |
| AX-157911661 | 2 | 24.219 | KV453182.1 | 2468484 | 20-scf00019 | 20 |
| AX-157911662 | 2 | 24.219 | KV453182.1 | 2469467 | 20-scf00019 | 20 |
| AX-157911663 | 2 | 24.219 | KV453182.1 | 2470990 | 20-scf00019 | 20 |
| AX-157777625 | 2 | 24.219 | KV453182.1 | 2474454 | 20-scf00019 | 20 |
| AX-157911665 | 2 | 24.219 | KV453182.1 | 2475799 | 20-scf00019 | 20 |
| AX-158379234 | 2 | 24.219 | KV453182.1 | 2479495 | 20-scf00019 | 20 |
| AX-157696588 | 2 | 24.219 | KV453182.1 | 2486179 | 20-scf00019 | 20 |
| AX-157911693 | 2 | 24.219 | KV453182.1 | 2528914 | 20-scf00019 | 20 |
| AX-157911716 | 2 | 24.219 | KV453182.1 | 2568728 | 20-scf00019 | 20 |
| AX-157911670 | 2 | 24.506 | KV453182.1 | 2483750 | 20-scf00019 | 20 |
| AX-157812312 | 2 | 24.506 | KV453182.1 | 2484248 | 20-scf00019 | 20 |
| AX-157911678 | 2 | 24.578 | KV453182.1 | 2498291 | 20-scf00019 | 20 |
| AX-157911727 | 2 | 24.578 | KV453182.1 | 2588450 | 20-scf00019 | 20 |
| AX-157911642 | 2 | 24.65  | KV453182.1 | 2442497 | 20-scf00019 | 20 |
| AX-157911643 | 2 | 24.65  | KV453182.1 | 2443095 | 20-scf00019 | 20 |
| AX-157723393 | 2 | 24.65  | KV453182.1 | 2489607 | 20-scf00019 | 20 |
| AX-157911676 | 2 | 24.65  | KV453182.1 | 2495138 | 20-scf00019 | 20 |
| AX-157911679 | 2 | 24.65  | KV453182.1 | 2498923 | 20-scf00019 | 20 |
| AX-157911681 | 2 | 24.65  | KV453182.1 | 2500742 | 20-scf00019 | 20 |
| AX-157911682 | 2 | 24.65  | KV453182.1 | 2503551 | 20-scf00019 | 20 |
| AX-157911683 | 2 | 24.65  | KV453182.1 | 2503956 | 20-scf00019 | 20 |
| AX-157911686 | 2 | 24.65  | KV453182.1 | 2509349 | 20-scf00019 | 20 |
| AX-157911687 | 2 | 24.65  | KV453182.1 | 2511226 | 20-scf00019 | 20 |
| AX-157770891 | 2 | 24.65  | KV453182.1 | 2512247 | 20-scf00019 | 20 |
| AX-157911688 | 2 | 24.65  | KV453182.1 | 2512320 | 20-scf00019 | 20 |
| AX-158404917 | 2 | 24.65  | KV453182.1 | 2521672 | 20-scf00019 | 20 |
| AX-157771521 | 2 | 24.65  | KV453182.1 | 2524122 | 20-scf00019 | 20 |
| AX-157812317 | 2 | 24.65  | KV453182.1 | 2533426 | 20-scf00019 | 20 |
| AX-157911695 | 2 | 24.65  | KV453182.1 | 2536901 | 20-scf00019 | 20 |
| AX-157911696 | 2 | 24.65  | KV453182.1 | 2540377 | 20-scf00019 | 20 |
| AX-157727075 | 2 | 24.65  | KV453182.1 | 2546297 | 20-scf00019 | 20 |
| AX-157911698 | 2 | 24.794 | KV453182.1 | 2542177 | 20-scf00019 | 20 |
| AX-157911699 | 2 | 24.794 | KV453182.1 | 2542339 | 20-scf00019 | 20 |
| AX-157911702 | 2 | 24.831 | KV453182.1 | 2546475 | 20-scf00019 | 20 |
| AX-157911703 | 2 | 24.831 | KV453182.1 | 2547517 | 20-scf00019 | 20 |
| AX-157911706 | 2 | 24.831 | KV453182.1 | 2556303 | 20-scf00019 | 20 |
| AX-157812319 | 2 | 24.866 | KV453182.1 | 2546851 | 20-scf00019 | 20 |
| AX-157911737 | 2 | 24.866 | KV453182.1 | 2603706 | 20-scf00019 | 20 |
| AX-157911704 | 2 | 24.91  | KV453182.1 | 2547831 | 20-scf00019 | 20 |

|              |   |        |            |         |             |    |
|--------------|---|--------|------------|---------|-------------|----|
| AX-157719706 | 2 | 24.938 | KV453182.1 | 2555922 | 20-scf00019 | 20 |
| AX-157911708 | 2 | 24.938 | KV453182.1 | 2557467 | 20-scf00019 | 20 |
| AX-157911709 | 2 | 24.938 | KV453182.1 | 2558329 | 20-scf00019 | 20 |
| AX-158389563 | 2 | 24.978 | KV453182.1 | 2558729 | 20-scf00019 | 20 |
| AX-157911711 | 2 | 25.018 | KV453182.1 | 2561273 | 20-scf00019 | 20 |
| AX-157812320 | 2 | 25.042 | KV453182.1 | 2563439 | 20-scf00019 | 20 |
| AX-157911714 | 2 | 25.082 | KV453182.1 | 2566411 | 20-scf00019 | 20 |
| AX-157911715 | 2 | 25.082 | KV453182.1 | 2567383 | 20-scf00019 | 20 |
| AX-157864479 | 2 | 25.082 | KV453182.1 | 2578807 | 20-scf00019 | 20 |
| AX-157911723 | 2 | 25.082 | KV453182.1 | 2581434 | 20-scf00019 | 20 |
| AX-158379235 | 2 | 25.191 | KV453182.1 | 2593460 | 20-scf00019 | 20 |
| AX-157911731 | 2 | 25.191 | KV453182.1 | 2594227 | 20-scf00019 | 20 |
| AX-157911735 | 2 | 25.205 | KV453182.1 | 2599526 | 20-scf00019 | 20 |
| AX-157911741 | 2 | 25.605 | KV453182.1 | 2609651 | 20-scf00019 | 20 |
| AX-157911742 | 2 | 25.605 | KV453182.1 | 2611630 | 20-scf00019 | 20 |
| AX-157911744 | 2 | 25.609 | KV453182.1 | 2613537 | 20-scf00019 | 20 |
| AX-157911745 | 2 | 25.819 | KV453182.1 | 2614367 | 20-scf00019 | 20 |
| AX-157911764 | 2 | 26.393 | KV453182.1 | 2642086 | 20-scf00019 | 20 |
| AX-157911765 | 2 | 26.445 | KV453182.1 | 2642706 | 20-scf00019 | 20 |
| AX-157911768 | 2 | 26.585 | KV453182.1 | 2647184 | 20-scf00019 | 20 |
| AX-157911769 | 2 | 26.725 | KV453182.1 | 2649088 | 20-scf00019 | 20 |
| AX-157911771 | 2 | 26.725 | KV453182.1 | 2654040 | 20-scf00019 | 20 |
| AX-157883414 | 2 | 26.725 | KV453182.1 | 2654874 | 20-scf00019 | 20 |
| AX-157911773 | 2 | 26.725 | KV453182.1 | 2655327 | 20-scf00019 | 20 |
| AX-157911777 | 2 | 26.725 | KV453182.1 | 2658709 | 20-scf00019 | 20 |
| AX-157911776 | 2 | 26.888 | KV453182.1 | 2657514 | 20-scf00019 | 20 |
| AX-157911779 | 2 | 26.977 | KV453182.1 | 2662176 | 20-scf00019 | 20 |
| AX-157911782 | 2 | 26.977 | KV453182.1 | 2665178 | 20-scf00019 | 20 |
| AX-157911778 | 2 | 27.052 | KV453182.1 | 2660320 | 20-scf00019 | 20 |
| AX-157911780 | 2 | 27.052 | KV453182.1 | 2663180 | 20-scf00019 | 20 |
| AX-157911784 | 2 | 27.052 | KV453182.1 | 2668672 | 20-scf00019 | 20 |
| AX-157911786 | 2 | 27.052 | KV453182.1 | 2670131 | 20-scf00019 | 20 |
| AX-157911794 | 2 | 27.052 | KV453182.1 | 2680733 | 20-scf00019 | 20 |
| AX-157911790 | 2 | 27.053 | KV453182.1 | 2677023 | 20-scf00019 | 20 |
| AX-157911793 | 2 | 27.053 | KV453182.1 | 2680063 | 20-scf00019 | 20 |
| AX-157911796 | 2 | 27.053 | KV453182.1 | 2685149 | 20-scf00019 | 20 |
| AX-158379236 | 2 | 27.065 | KV453182.1 | 2686068 | 20-scf00019 | 20 |
| AX-157911799 | 2 | 27.42  | KV453182.1 | 2690999 | 20-scf00019 | 20 |
| AX-157911800 | 2 | 27.584 | KV453182.1 | 2692497 | 20-scf00019 | 20 |
| AX-157883416 | 2 | 27.584 | KV453182.1 | 2733395 | 20-scf00019 | 20 |
| AX-157911806 | 2 | 27.599 | KV453182.1 | 2704920 | 20-scf00019 | 20 |
| AX-157911807 | 2 | 27.599 | KV453182.1 | 2706865 | 20-scf00019 | 20 |
| AX-157911809 | 2 | 27.599 | KV453182.1 | 2709053 | 20-scf00019 | 20 |
| AX-157911810 | 2 | 27.599 | KV453182.1 | 2710026 | 20-scf00019 | 20 |
| AX-157911811 | 2 | 27.599 | KV453182.1 | 2710767 | 20-scf00019 | 20 |
| AX-157911813 | 2 | 27.599 | KV453182.1 | 2716309 | 20-scf00019 | 20 |
| AX-157911812 | 2 | 27.763 | KV453182.1 | 2712473 | 20-scf00019 | 20 |
| AX-157911815 | 2 | 27.927 | KV453182.1 | 2718278 | 20-scf00019 | 20 |
| AX-157752048 | 2 | 27.927 | KV453182.1 | 2732518 | 20-scf00019 | 20 |
| AX-157911819 | 2 | 27.942 | KV453182.1 | 2733435 | 20-scf00019 | 20 |
| AX-157911822 | 2 | 27.958 | KV453182.1 | 2738867 | 20-scf00019 | 20 |

|              |   |        |            |         |             |    |
|--------------|---|--------|------------|---------|-------------|----|
| AX-157911823 | 2 | 28.083 | KV453182.1 | 2739353 | 20-scf00019 | 20 |
| AX-157911804 | 2 | 28.127 | KV453182.1 | 2699599 | 20-scf00019 | 20 |
| AX-157911826 | 2 | 28.246 | KV453182.1 | 2746652 | 20-scf00019 | 20 |
| AX-157723080 | 2 | 28.246 | KV453182.1 | 2750716 | 20-scf00019 | 20 |
| AX-157738457 | 2 | 28.438 | KV453182.1 | 2752331 | 20-scf00019 | 20 |
| AX-158382219 | 2 | 28.911 | KV453182.1 | 2754793 | 20-scf00019 | 20 |
| AX-157727268 | 2 | 28.911 | KV453182.1 | 2757712 | 20-scf00019 | 20 |
| AX-158389569 | 2 | 28.911 | KV453182.1 | 2759200 | 20-scf00019 | 20 |
| AX-157721805 | 2 | 29.021 | KV453182.1 | 2759744 | 20-scf00019 | 20 |
| AX-157911834 | 2 | 29.021 | KV453182.1 | 2761623 | 20-scf00019 | 20 |
| AX-157911734 | 2 | 29.03  | KV453182.1 | 2599109 | 20-scf00019 | 20 |
| AX-157911835 | 2 | 29.03  | KV453182.1 | 2767020 | 20-scf00019 | 20 |
| AX-157725743 | 2 | 29.03  | KV453182.1 | 2768802 | 20-scf00019 | 20 |
| AX-157911836 | 2 | 29.03  | KV453182.1 | 2770021 | 20-scf00019 | 20 |
| AX-157911837 | 2 | 29.183 | KV453182.1 | 2770456 | 20-scf00019 | 20 |
| AX-157726935 | 2 | 29.348 | KV453182.1 | 2777857 | 20-scf00019 | 20 |
| AX-157911829 | 2 | 29.677 | KV453182.1 | 2752865 | 20-scf00019 | 20 |
| AX-157753129 | 2 | 29.677 | KV453182.1 | 2767523 | 20-scf00019 | 20 |
| AX-157911845 | 2 | 29.677 | KV453182.1 | 2782781 | 20-scf00019 | 20 |
| AX-157911846 | 2 | 29.677 | KV453182.1 | 2785860 | 20-scf00019 | 20 |
| AX-157911848 | 2 | 29.677 | KV453182.1 | 2789910 | 20-scf00019 | 20 |
| AX-157911849 | 2 | 29.677 | KV453182.1 | 2790670 | 20-scf00019 | 20 |
| AX-157911852 | 2 | 29.677 | KV453182.1 | 2793281 | 20-scf00019 | 20 |
| AX-157911855 | 2 | 29.677 | KV453182.1 | 2796640 | 20-scf00019 | 20 |
| AX-157750800 | 2 | 29.677 | KV453182.1 | 2799150 | 20-scf00019 | 20 |
| AX-157756444 | 2 | 29.677 | KV453182.1 | 2801784 | 20-scf00019 | 20 |
| AX-157911856 | 2 | 29.677 | KV453182.1 | 2804434 | 20-scf00019 | 20 |
| AX-157911857 | 2 | 29.677 | KV453182.1 | 2804589 | 20-scf00019 | 20 |
| AX-157911859 | 2 | 29.677 | KV453182.1 | 2805571 | 20-scf00019 | 20 |
| AX-157911860 | 2 | 29.677 | KV453182.1 | 2805932 | 20-scf00019 | 20 |
| AX-157911861 | 2 | 29.677 | KV453182.1 | 2809386 | 20-scf00019 | 20 |
| AX-157911862 | 2 | 29.677 | KV453182.1 | 2819202 | 20-scf00019 | 20 |
| AX-157911863 | 2 | 29.677 | KV453182.1 | 2820911 | 20-scf00019 | 20 |
| AX-157911866 | 2 | 29.677 | KV453182.1 | 2822590 | 20-scf00019 | 20 |
| AX-157773838 | 2 | 29.677 | KV453182.1 | 2827649 | 20-scf00019 | 20 |
| AX-157911870 | 2 | 29.677 | KV453182.1 | 2829269 | 20-scf00019 | 20 |
| AX-157911871 | 2 | 29.677 | KV453182.1 | 2830328 | 20-scf00019 | 20 |
| AX-157911875 | 2 | 29.677 | KV453182.1 | 2835423 | 20-scf00019 | 20 |
| AX-157911876 | 2 | 29.677 | KV453182.1 | 2835783 | 20-scf00019 | 20 |
| AX-157911881 | 2 | 29.677 | KV453182.1 | 2841727 | 20-scf00019 | 20 |
| AX-157911883 | 2 | 29.677 | KV453182.1 | 2843346 | 20-scf00019 | 20 |
| AX-157874619 | 2 | 29.677 | KV453182.1 | 2844181 | 20-scf00019 | 20 |
| AX-157911885 | 2 | 29.677 | KV453182.1 | 2846645 | 20-scf00019 | 20 |
| AX-157911886 | 2 | 29.677 | KV453182.1 | 2850208 | 20-scf00019 | 20 |
| AX-157755138 | 2 | 29.677 | KV453182.1 | 2852575 | 20-scf00019 | 20 |
| AX-157911887 | 2 | 29.677 | KV453182.1 | 2854222 | 20-scf00019 | 20 |
| AX-157911888 | 2 | 29.677 | KV453182.1 | 2854996 | 20-scf00019 | 20 |
| AX-157911889 | 2 | 29.677 | KV453182.1 | 2855855 | 20-scf00019 | 20 |
| AX-157911897 | 2 | 29.677 | KV453182.1 | 2863956 | 20-scf00019 | 20 |
| AX-157911891 | 2 | 29.888 | KV453182.1 | 2858956 | 20-scf00019 | 20 |
| AX-157911896 | 2 | 29.906 | KV453182.1 | 2862514 | 20-scf00019 | 20 |



|              |   |        |            |         |             |    |
|--------------|---|--------|------------|---------|-------------|----|
| AX-157911907 | 2 | 30.166 | KV453182.1 | 2879553 | 20-scf00019 | 20 |
| AX-157911909 | 2 | 30.176 | KV453182.1 | 2883333 | 20-scf00019 | 20 |
| AX-157911912 | 2 | 30.179 | KV453182.1 | 2886739 | 20-scf00019 | 20 |
| AX-157911910 | 2 | 30.553 | KV453182.1 | 2884543 | 20-scf00019 | 20 |
| AX-157755409 | 2 | 30.553 | KV453182.1 | 2887921 | 20-scf00019 | 20 |
| AX-157911915 | 2 | 30.553 | KV453182.1 | 2890808 | 20-scf00019 | 20 |
| AX-157911917 | 2 | 30.553 | KV453182.1 | 2892424 | 20-scf00019 | 20 |
| AX-158382221 | 2 | 30.553 | KV453182.1 | 2893749 | 20-scf00019 | 20 |
| AX-157911918 | 2 | 30.662 | KV453182.1 | 2895670 | 20-scf00019 | 20 |
| AX-157911921 | 2 | 30.662 | KV453182.1 | 2898122 | 20-scf00019 | 20 |
| AX-157721326 | 2 | 30.662 | KV453182.1 | 2900404 | 20-scf00019 | 20 |
| AX-157754548 | 2 | 30.662 | KV453182.1 | 2902160 | 20-scf00019 | 20 |
| AX-157911926 | 2 | 30.662 | KV453182.1 | 2903789 | 20-scf00019 | 20 |
| AX-157911927 | 2 | 30.668 | KV453182.1 | 2904664 | 20-scf00019 | 20 |
| AX-157911920 | 2 | 31.186 | KV453182.1 | 2897176 | 20-scf00019 | 20 |
| AX-157911938 | 2 | 31.186 | KV453182.1 | 2919604 | 20-scf00019 | 20 |
| AX-157911939 | 2 | 31.186 | KV453182.1 | 2921009 | 20-scf00019 | 20 |
| AX-157756004 | 2 | 31.186 | KV453182.1 | 2921816 | 20-scf00019 | 20 |
| AX-157911941 | 2 | 31.186 | KV453182.1 | 2924441 | 20-scf00019 | 20 |
| AX-157911944 | 2 | 31.186 | KV453182.1 | 2935144 | 20-scf00019 | 20 |
| AX-157911956 | 2 | 31.186 | KV453182.1 | 2949919 | 20-scf00019 | 20 |
| AX-157864481 | 2 | 31.186 | KV453182.1 | 2955781 | 20-scf00019 | 20 |
| AX-157911972 | 2 | 31.186 | KV453182.1 | 2963010 | 20-scf00019 | 20 |
| AX-157911943 | 2 | 31.224 | KV453182.1 | 2932269 | 20-scf00019 | 20 |
| AX-157911945 | 2 | 31.224 | KV453182.1 | 2936758 | 20-scf00019 | 20 |
| AX-157911946 | 2 | 31.224 | KV453182.1 | 2937187 | 20-scf00019 | 20 |
| AX-157911948 | 2 | 31.224 | KV453182.1 | 2940450 | 20-scf00019 | 20 |
| AX-157911949 | 2 | 31.224 | KV453182.1 | 2941711 | 20-scf00019 | 20 |
| AX-157911951 | 2 | 31.224 | KV453182.1 | 2943149 | 20-scf00019 | 20 |
| AX-157911953 | 2 | 31.224 | KV453182.1 | 2945502 | 20-scf00019 | 20 |
| AX-157911955 | 2 | 31.224 | KV453182.1 | 2947548 | 20-scf00019 | 20 |
| AX-157911957 | 2 | 31.224 | KV453182.1 | 2950318 | 20-scf00019 | 20 |
| AX-157911958 | 2 | 31.224 | KV453182.1 | 2950904 | 20-scf00019 | 20 |
| AX-157911959 | 2 | 31.224 | KV453182.1 | 2951336 | 20-scf00019 | 20 |
| AX-157911964 | 2 | 31.224 | KV453182.1 | 2954115 | 20-scf00019 | 20 |
| AX-157911975 | 2 | 31.224 | KV453182.1 | 2967639 | 20-scf00019 | 20 |
| AX-157911960 | 2 | 31.459 | KV453182.1 | 2952360 | 20-scf00019 | 20 |
| AX-157911963 | 2 | 31.618 | KV453182.1 | 2953613 | 20-scf00019 | 20 |
| AX-157911968 | 2 | 31.782 | KV453182.1 | 2960264 | 20-scf00019 | 20 |
| AX-157911969 | 2 | 31.782 | KV453182.1 | 2960519 | 20-scf00019 | 20 |
| AX-157911970 | 2 | 31.783 | KV453182.1 | 2960967 | 20-scf00019 | 20 |
| AX-157911973 | 2 | 31.783 | KV453182.1 | 2964557 | 20-scf00019 | 20 |
| AX-157812321 | 2 | 31.783 | KV453182.1 | 2970385 | 20-scf00019 | 20 |
| AX-157721782 | 2 | 32.05  | KV453182.1 | 2965141 | 20-scf00019 | 20 |
| AX-157911974 | 2 | 32.085 | KV453182.1 | 2966566 | 20-scf00019 | 20 |
| AX-157911976 | 2 | 32.085 | KV453182.1 | 2968765 | 20-scf00019 | 20 |
| AX-157911977 | 2 | 32.085 | KV453182.1 | 2968961 | 20-scf00019 | 20 |
| AX-157911978 | 2 | 32.085 | KV453182.1 | 2969596 | 20-scf00019 | 20 |
| AX-157911980 | 2 | 32.085 | KV453182.1 | 2971289 | 20-scf00019 | 20 |
| AX-157911982 | 2 | 32.085 | KV453182.1 | 2974897 | 20-scf00019 | 20 |
| AX-157812323 | 2 | 32.086 | KV453182.1 | 2981336 | 20-scf00019 | 20 |

|              |   |        |            |         |             |    |
|--------------|---|--------|------------|---------|-------------|----|
| AX-157911986 | 2 | 32.086 | KV453182.1 | 2983582 | 20-scf00019 | 20 |
| AX-157911987 | 2 | 32.413 | KV453182.1 | 2984562 | 20-scf00019 | 20 |
| AX-157911991 | 2 | 32.413 | KV453182.1 | 2988980 | 20-scf00019 | 20 |
| AX-158404922 | 2 | 32.413 | KV453182.1 | 2993140 | 20-scf00019 | 20 |
| AX-158404923 | 2 | 32.413 | KV453182.1 | 2993729 | 20-scf00019 | 20 |
| AX-157911995 | 2 | 32.413 | KV453182.1 | 2997583 | 20-scf00019 | 20 |
| AX-157911997 | 2 | 32.413 | KV453182.1 | 2999698 | 20-scf00019 | 20 |
| AX-157912000 | 2 | 32.413 | KV453182.1 | 3001740 | 20-scf00019 | 20 |
| AX-157912001 | 2 | 32.413 | KV453182.1 | 3002305 | 20-scf00019 | 20 |
| AX-157748481 | 2 | 32.414 | KV453182.1 | 3003168 | 20-scf00019 | 20 |
| AX-157912002 | 2 | 32.414 | KV453182.1 | 3003680 | 20-scf00019 | 20 |
| AX-157912006 | 2 | 32.741 | KV453182.1 | 3014904 | 20-scf00019 | 20 |
| AX-157912007 | 2 | 32.741 | KV453182.1 | 3015224 | 20-scf00019 | 20 |
| AX-157714131 | 2 | 32.741 | KV453182.1 | 3016589 | 20-scf00019 | 20 |
| AX-157750995 | 2 | 32.741 | KV453182.1 | 3017258 | 20-scf00019 | 20 |
| AX-157745253 | 2 | 32.741 | KV453182.1 | 3017963 | 20-scf00019 | 20 |
| AX-157912008 | 2 | 32.741 | KV453182.1 | 3018501 | 20-scf00019 | 20 |
| AX-157812326 | 2 | 32.959 | KV453182.1 | 3028033 | 20-scf00019 | 20 |
| AX-157912016 | 2 | 32.959 | KV453182.1 | 3031732 | 20-scf00019 | 20 |
| AX-157912018 | 2 | 32.974 | KV453182.1 | 3035499 | 20-scf00019 | 20 |
| AX-157912020 | 2 | 33.147 | KV453182.1 | 3038327 | 20-scf00019 | 20 |
| AX-157869083 | 2 | 33.198 | KV453182.1 | 3041379 | 20-scf00019 | 20 |
| AX-157912023 | 2 | 33.34  | KV453182.1 | 3043067 | 20-scf00019 | 20 |
| AX-157912029 | 2 | 33.725 | KV453182.1 | 3055495 | 20-scf00019 | 20 |
| AX-157912034 | 2 | 33.725 | KV453182.1 | 3060304 | 20-scf00019 | 20 |
| AX-157750532 | 2 | 33.725 | KV453182.1 | 3060775 | 20-scf00019 | 20 |
| AX-157912036 | 2 | 33.725 | KV453182.1 | 3061838 | 20-scf00019 | 20 |
| AX-157912037 | 2 | 33.725 | KV453182.1 | 3062484 | 20-scf00019 | 20 |
| AX-158379239 | 2 | 33.725 | KV453182.1 | 3065179 | 20-scf00019 | 20 |
| AX-157912040 | 2 | 33.749 | KV453182.1 | 3066456 | 20-scf00019 | 20 |
| AX-158389573 | 2 | 33.749 | KV453182.1 | 3066497 | 20-scf00019 | 20 |
| AX-157722172 | 2 | 33.794 | KV453182.1 | 3067656 | 20-scf00019 | 20 |
| AX-157911988 | 2 | 33.834 | KV453182.1 | 2986354 | 20-scf00019 | 20 |
| AX-157912045 | 2 | 33.834 | KV453182.1 | 3073017 | 20-scf00019 | 20 |
| AX-157912048 | 2 | 33.872 | KV453182.1 | 3075479 | 20-scf00019 | 20 |
| AX-157912049 | 2 | 33.906 | KV453182.1 | 3077434 | 20-scf00019 | 20 |
| AX-157720553 | 2 | 33.944 | KV453182.1 | 3051281 | 20-scf00019 | 20 |
| AX-157912028 | 2 | 33.944 | KV453182.1 | 3055023 | 20-scf00019 | 20 |
| AX-157912032 | 2 | 33.944 | KV453182.1 | 3058353 | 20-scf00019 | 20 |
| AX-157912042 | 2 | 33.944 | KV453182.1 | 3068577 | 20-scf00019 | 20 |
| AX-157912051 | 2 | 33.944 | KV453182.1 | 3079011 | 20-scf00019 | 20 |
| AX-157912052 | 2 | 33.944 | KV453182.1 | 3080397 | 20-scf00019 | 20 |
| AX-157912053 | 2 | 33.944 | KV453182.1 | 3080847 | 20-scf00019 | 20 |
| AX-157912055 | 2 | 33.944 | KV453182.1 | 3083679 | 20-scf00019 | 20 |
| AX-157912056 | 2 | 33.944 | KV453182.1 | 3084363 | 20-scf00019 | 20 |
| AX-157912058 | 2 | 33.944 | KV453182.1 | 3086729 | 20-scf00019 | 20 |
| AX-157912061 | 2 | 33.944 | KV453182.1 | 3089136 | 20-scf00019 | 20 |
| AX-157912062 | 2 | 33.944 | KV453182.1 | 3089801 | 20-scf00019 | 20 |
| AX-157912063 | 2 | 33.944 | KV453182.1 | 3090620 | 20-scf00019 | 20 |
| AX-157874627 | 2 | 33.944 | KV453182.1 | 3096509 | 20-scf00019 | 20 |
| AX-157912079 | 2 | 33.944 | KV453182.1 | 3113135 | 20-scf00019 | 20 |

|              |   |        |             |         |               |    |
|--------------|---|--------|-------------|---------|---------------|----|
| AX-157912066 | 2 | 33.946 | KV453182.1  | 3096586 | 20-scf00019   | 20 |
| AX-157912074 | 2 | 34.271 | KV453182.1  | 3107188 | 20-scf00019   | 20 |
| AX-157912069 | 2 | 34.6   | KV453182.1  | 3098036 | 20-scf00019   | 20 |
| AX-157912070 | 2 | 34.6   | KV453182.1  | 3099634 | 20-scf00019   | 20 |
| AX-157912071 | 2 | 34.6   | KV453182.1  | 3100961 | 20-scf00019   | 20 |
| AX-157912076 | 2 | 34.6   | KV453182.1  | 3109988 | 20-scf00019   | 20 |
| AX-157912078 | 2 | 34.6   | KV453182.1  | 3112126 | 20-scf00019   | 20 |
| AX-157912083 | 2 | 34.6   | KV453182.1  | 3119830 | 20-scf00019   | 20 |
| AX-157752086 | 2 | 34.6   | KV453182.1  | 3121156 | 20-scf00019   | 20 |
| AX-157721443 | 2 | 34.6   | KV453182.1  | 3129052 | 20-scf00019   | 20 |
| AX-157912088 | 2 | 34.6   | KV453182.1  | 3132895 | 20-scf00019   | 20 |
| AX-157739642 | 2 | 34.6   | KV453182.1  | 3134533 | 20-scf00019   | 20 |
| AX-157912089 | 2 | 34.6   | KV453182.1  | 3136121 | 20-scf00019   | 20 |
| AX-157912092 | 2 | 34.6   | KV453182.1  | 3137692 | 20-scf00019   | 20 |
| AX-157912094 | 2 | 34.6   | KV453182.1  | 3140587 | 20-scf00019   | 20 |
| AX-157912095 | 2 | 34.6   | KV453182.1  | 3141014 | 20-scf00019   | 20 |
| AX-157733184 | 2 | 34.6   | KV453182.1  | 3143108 | 20-scf00019   | 20 |
| AX-157693393 | 2 | 34.6   | FI859113.1  | 541     | ORI212 lctalu | UN |
| AX-157707301 | 2 | 34.6   | 3ML01033955 | 237     | scf09624_1    | UN |
| AX-157721677 | 2 | 34.711 | KV453182.1  | 3094390 | 20-scf00019   | 20 |
| AX-157746025 | 2 | 34.711 | KV453182.1  | 3149476 | 20-scf00019   | 20 |
| AX-157812329 | 2 | 34.819 | KV453182.1  | 3122422 | 20-scf00019   | 20 |
| AX-157812334 | 2 | 34.819 | KV453182.1  | 3137945 | 20-scf00019   | 20 |
| AX-157912099 | 2 | 34.819 | KV453182.1  | 3149811 | 20-scf00019   | 20 |
| AX-157912100 | 2 | 34.819 | KV453182.1  | 3150260 | 20-scf00019   | 20 |
| AX-157912102 | 2 | 34.819 | KV453182.1  | 3154228 | 20-scf00019   | 20 |
| AX-157912104 | 2 | 34.819 | KV453182.1  | 3155043 | 20-scf00019   | 20 |
| AX-157912105 | 2 | 34.819 | KV453182.1  | 3155574 | 20-scf00019   | 20 |
| AX-157912107 | 2 | 34.819 | KV453182.1  | 3159165 | 20-scf00019   | 20 |
| AX-157912108 | 2 | 34.819 | KV453182.1  | 3162714 | 20-scf00019   | 20 |
| AX-157912111 | 2 | 34.819 | KV453182.1  | 3168147 | 20-scf00019   | 20 |
| AX-157706828 | 2 | 34.819 | 3ML01032992 | 520     | scf08626_1    | UN |
| AX-157912112 | 2 | 34.998 | KV453182.1  | 3171268 | 20-scf00019   | 20 |
| AX-157912114 | 2 | 35.146 | KV453182.1  | 3172329 | 20-scf00019   | 20 |
| AX-157912115 | 2 | 35.146 | KV453182.1  | 3174879 | 20-scf00019   | 20 |
| AX-157693912 | 2 | 35.147 | KV453182.1  | 3171757 | 20-scf00019   | 20 |
| AX-157701843 | 2 | 35.147 | KV453182.1  | 3174164 | 20-scf00019   | 20 |
| AX-157695724 | 2 | 35.147 | KV453182.1  | 3177980 | 20-scf00019   | 20 |
| AX-157912119 | 2 | 35.147 | KV453182.1  | 3179756 | 20-scf00019   | 20 |
| AX-157719461 | 2 | 35.147 | KV453182.1  | 3182118 | 20-scf00019   | 20 |
| AX-157812339 | 2 | 35.147 | KV453182.1  | 3182754 | 20-scf00019   | 20 |
| AX-157912123 | 2 | 35.147 | KV453182.1  | 3185794 | 20-scf00019   | 20 |
| AX-157912125 | 2 | 35.147 | KV453182.1  | 3189470 | 20-scf00019   | 20 |
| AX-157912129 | 2 | 35.147 | KV453182.1  | 3195004 | 20-scf00019   | 20 |
| AX-157912130 | 2 | 35.147 | KV453182.1  | 3199104 | 20-scf00019   | 20 |
| AX-158379240 | 2 | 35.169 | KV453182.1  | 3203263 | 20-scf00019   | 20 |
| AX-157912134 | 2 | 35.253 | KV453182.1  | 3205615 | 20-scf00019   | 20 |
| AX-157912135 | 2 | 35.338 | KV453182.1  | 3207129 | 20-scf00019   | 20 |
| AX-157912136 | 2 | 35.366 | KV453182.1  | 3208130 | 20-scf00019   | 20 |
| AX-157912139 | 2 | 35.474 | KV453182.1  | 3212029 | 20-scf00019   | 20 |
| AX-157912141 | 2 | 35.531 | KV453182.1  | 3213672 | 20-scf00019   | 20 |

|              |   |        |            |         |             |    |
|--------------|---|--------|------------|---------|-------------|----|
| AX-157912142 | 2 | 35.583 | KV453182.1 | 3215211 | 20-scf00019 | 20 |
| AX-157773823 | 2 | 35.583 | KV453182.1 | 3223581 | 20-scf00019 | 20 |
| AX-157912117 | 2 | 35.635 | KV453182.1 | 3177103 | 20-scf00019 | 20 |
| AX-157912128 | 2 | 35.635 | KV453182.1 | 3194392 | 20-scf00019 | 20 |
| AX-157912147 | 2 | 35.635 | KV453182.1 | 3226627 | 20-scf00019 | 20 |
| AX-157912149 | 2 | 35.635 | KV453182.1 | 3227683 | 20-scf00019 | 20 |
| AX-157912152 | 2 | 35.635 | KV453182.1 | 3231787 | 20-scf00019 | 20 |
| AX-157912148 | 2 | 35.693 | KV453182.1 | 3227096 | 20-scf00019 | 20 |
| AX-157912150 | 2 | 35.693 | KV453182.1 | 3230347 | 20-scf00019 | 20 |
| AX-157874632 | 2 | 35.693 | KV453182.1 | 3230925 | 20-scf00019 | 20 |
| AX-157912154 | 2 | 35.693 | KV453182.1 | 3234400 | 20-scf00019 | 20 |
| AX-157912155 | 2 | 35.927 | KV453182.1 | 3235622 | 20-scf00019 | 20 |
| AX-157912156 | 2 | 36.02  | KV453182.1 | 3236746 | 20-scf00019 | 20 |
| AX-157912144 | 2 | 36.021 | KV453182.1 | 3219296 | 20-scf00019 | 20 |
| AX-157883423 | 2 | 36.021 | KV453182.1 | 3222981 | 20-scf00019 | 20 |
| AX-157912158 | 2 | 36.021 | KV453182.1 | 3237604 | 20-scf00019 | 20 |
| AX-157912159 | 2 | 36.021 | KV453182.1 | 3239088 | 20-scf00019 | 20 |
| AX-157912161 | 2 | 36.021 | KV453182.1 | 3246683 | 20-scf00019 | 20 |
| AX-157912165 | 2 | 36.021 | KV453182.1 | 3250196 | 20-scf00019 | 20 |
| AX-157912167 | 2 | 36.021 | KV453182.1 | 3252010 | 20-scf00019 | 20 |
| AX-157912168 | 2 | 36.021 | KV453182.1 | 3252156 | 20-scf00019 | 20 |
| AX-157912172 | 2 | 36.021 | KV453182.1 | 3255773 | 20-scf00019 | 20 |
| AX-157912173 | 2 | 36.021 | KV453182.1 | 3256258 | 20-scf00019 | 20 |
| AX-157912174 | 2 | 36.021 | KV453182.1 | 3260327 | 20-scf00019 | 20 |
| AX-157912178 | 2 | 36.021 | KV453182.1 | 3263786 | 20-scf00019 | 20 |
| AX-157912170 | 2 | 36.22  | KV453182.1 | 3254122 | 20-scf00019 | 20 |
| AX-157912175 | 2 | 36.22  | KV453182.1 | 3261475 | 20-scf00019 | 20 |
| AX-157912176 | 2 | 36.22  | KV453182.1 | 3262225 | 20-scf00019 | 20 |
| AX-157912184 | 2 | 36.22  | KV453182.1 | 3270103 | 20-scf00019 | 20 |
| AX-157869086 | 2 | 36.22  | KV453182.1 | 3296801 | 20-scf00019 | 20 |
| AX-157912234 | 2 | 36.22  | KV453182.1 | 3344277 | 20-scf00019 | 20 |
| AX-157912235 | 2 | 36.22  | KV453182.1 | 3344983 | 20-scf00019 | 20 |
| AX-157912243 | 2 | 36.22  | KV453182.1 | 3353120 | 20-scf00019 | 20 |
| AX-157864487 | 2 | 36.22  | KV453182.1 | 3360599 | 20-scf00019 | 20 |
| AX-157912253 | 2 | 36.22  | KV453182.1 | 3363590 | 20-scf00019 | 20 |
| AX-157912260 | 2 | 36.22  | KV453182.1 | 3377449 | 20-scf00019 | 20 |
| AX-157912157 | 2 | 36.459 | KV453182.1 | 3237177 | 20-scf00019 | 20 |
| AX-157912180 | 2 | 36.459 | KV453182.1 | 3265535 | 20-scf00019 | 20 |
| AX-157912181 | 2 | 36.459 | KV453182.1 | 3267660 | 20-scf00019 | 20 |
| AX-157775398 | 2 | 36.459 | KV453182.1 | 3269804 | 20-scf00019 | 20 |
| AX-157912188 | 2 | 36.459 | KV453182.1 | 3273172 | 20-scf00019 | 20 |
| AX-157912189 | 2 | 36.459 | KV453182.1 | 3274098 | 20-scf00019 | 20 |
| AX-157912192 | 2 | 36.459 | KV453182.1 | 3276246 | 20-scf00019 | 20 |
| AX-157912193 | 2 | 36.459 | KV453182.1 | 3276705 | 20-scf00019 | 20 |
| AX-157912194 | 2 | 36.459 | KV453182.1 | 3276958 | 20-scf00019 | 20 |
| AX-157912199 | 2 | 36.459 | KV453182.1 | 3282520 | 20-scf00019 | 20 |
| AX-157912201 | 2 | 36.495 | KV453182.1 | 3285928 | 20-scf00019 | 20 |
| AX-157912202 | 2 | 36.533 | KV453182.1 | 3287069 | 20-scf00019 | 20 |
| AX-157912203 | 2 | 36.568 | KV453182.1 | 3288820 | 20-scf00019 | 20 |
| AX-157912204 | 2 | 36.568 | KV453182.1 | 3290995 | 20-scf00019 | 20 |
| AX-157758771 | 2 | 36.568 | KV453182.1 | 3291205 | 20-scf00019 | 20 |

|              |   |        |            |         |             |    |
|--------------|---|--------|------------|---------|-------------|----|
| AX-157912220 | 2 | 36.568 | KV453182.1 | 3326229 | 20-scf00019 | 20 |
| AX-157812349 | 2 | 36.568 | KV453182.1 | 3326273 | 20-scf00019 | 20 |
| AX-157912221 | 2 | 36.568 | KV453182.1 | 3328836 | 20-scf00019 | 20 |
| AX-157747006 | 2 | 36.568 | KV453182.1 | 3330972 | 20-scf00019 | 20 |
| AX-158379241 | 2 | 36.568 | KV453182.1 | 3333078 | 20-scf00019 | 20 |
| AX-157883425 | 2 | 36.568 | KV453182.1 | 3333874 | 20-scf00019 | 20 |
| AX-157748596 | 2 | 36.677 | KV453182.1 | 3335465 | 20-scf00019 | 20 |
| AX-157912229 | 2 | 36.677 | KV453182.1 | 3338401 | 20-scf00019 | 20 |
| AX-157912230 | 2 | 36.677 | KV453182.1 | 3338759 | 20-scf00019 | 20 |
| AX-158421868 | 2 | 36.677 | KV453182.1 | 3338959 | 20-scf00019 | 20 |
| AX-157912233 | 2 | 36.677 | KV453182.1 | 3343917 | 20-scf00019 | 20 |
| AX-157912231 | 2 | 36.799 | KV453182.1 | 3342441 | 20-scf00019 | 20 |
| AX-157912236 | 2 | 36.841 | KV453182.1 | 3345879 | 20-scf00019 | 20 |
| AX-157912241 | 2 | 36.841 | KV453182.1 | 3351650 | 20-scf00019 | 20 |
| AX-157912259 | 2 | 36.841 | KV453182.1 | 3376555 | 20-scf00019 | 20 |
| AX-157912222 | 2 | 37.005 | KV453182.1 | 3329530 | 20-scf00019 | 20 |
| AX-157912245 | 2 | 37.005 | KV453182.1 | 3356891 | 20-scf00019 | 20 |
| AX-157912246 | 2 | 37.005 | KV453182.1 | 3357355 | 20-scf00019 | 20 |
| AX-157912247 | 2 | 37.005 | KV453182.1 | 3358318 | 20-scf00019 | 20 |
| AX-157912250 | 2 | 37.005 | KV453182.1 | 3360818 | 20-scf00019 | 20 |
| AX-157912251 | 2 | 37.005 | KV453182.1 | 3361188 | 20-scf00019 | 20 |
| AX-157912252 | 2 | 37.005 | KV453182.1 | 3362808 | 20-scf00019 | 20 |
| AX-157912264 | 2 | 37.005 | KV453182.1 | 3381387 | 20-scf00019 | 20 |
| AX-157912267 | 2 | 37.005 | KV453182.1 | 3383920 | 20-scf00019 | 20 |
| AX-157755368 | 2 | 37.005 | KV453182.1 | 3395554 | 20-scf00019 | 20 |
| AX-157774565 | 2 | 37.005 | KV453182.1 | 3403469 | 20-scf00019 | 20 |
| AX-157812357 | 2 | 37.005 | KV453182.1 | 3420236 | 20-scf00019 | 20 |
| AX-157912272 | 2 | 37.114 | KV453182.1 | 3389549 | 20-scf00019 | 20 |
| AX-157812351 | 2 | 37.169 | KV453182.1 | 3396861 | 20-scf00019 | 20 |
| AX-157748763 | 2 | 37.169 | KV453182.1 | 3397305 | 20-scf00019 | 20 |
| AX-157812352 | 2 | 37.169 | KV453182.1 | 3397449 | 20-scf00019 | 20 |
| AX-157912279 | 2 | 37.169 | KV453182.1 | 3409221 | 20-scf00019 | 20 |
| AX-157912282 | 2 | 37.169 | KV453182.1 | 3410351 | 20-scf00019 | 20 |
| AX-157722280 | 2 | 37.169 | KV453182.1 | 3411288 | 20-scf00019 | 20 |
| AX-157912283 | 2 | 37.169 | KV453182.1 | 3411896 | 20-scf00019 | 20 |
| AX-157812355 | 2 | 37.169 | KV453182.1 | 3412310 | 20-scf00019 | 20 |
| AX-157812356 | 2 | 37.333 | KV453182.1 | 3413744 | 20-scf00019 | 20 |
| AX-157912285 | 2 | 37.442 | KV453182.1 | 3416994 | 20-scf00019 | 20 |
| AX-157912287 | 2 | 37.442 | KV453182.1 | 3418599 | 20-scf00019 | 20 |
| AX-157912288 | 2 | 37.466 | KV453182.1 | 3420017 | 20-scf00019 | 20 |
| AX-157912291 | 2 | 37.466 | KV453182.1 | 3423604 | 20-scf00019 | 20 |
| AX-157912294 | 2 | 37.506 | KV453182.1 | 3434560 | 20-scf00019 | 20 |
| AX-157912297 | 2 | 37.551 | KV453182.1 | 3438731 | 20-scf00019 | 20 |
| AX-157812359 | 2 | 37.552 | KV453182.1 | 3442675 | 20-scf00019 | 20 |
| AX-157912301 | 2 | 37.552 | KV453182.1 | 3444328 | 20-scf00019 | 20 |
| AX-157912303 | 2 | 37.552 | KV453182.1 | 3446726 | 20-scf00019 | 20 |
| AX-157743823 | 2 | 37.552 | KV453182.1 | 3447997 | 20-scf00019 | 20 |
| AX-157812361 | 2 | 37.552 | KV453182.1 | 3450380 | 20-scf00019 | 20 |
| AX-157912306 | 2 | 37.552 | KV453182.1 | 3451078 | 20-scf00019 | 20 |
| AX-157812362 | 2 | 37.552 | KV453182.1 | 3451428 | 20-scf00019 | 20 |
| AX-157912308 | 2 | 37.552 | KV453182.1 | 3456256 | 20-scf00019 | 20 |

|              |   |        |            |         |             |    |
|--------------|---|--------|------------|---------|-------------|----|
| AX-157912307 | 2 | 37.553 | KV453182.1 | 3454331 | 20-scf00019 | 20 |
| AX-157750698 | 2 | 37.553 | KV453182.1 | 3454634 | 20-scf00019 | 20 |
| AX-158389575 | 2 | 37.715 | KV453182.1 | 3436272 | 20-scf00019 | 20 |
| AX-157812364 | 2 | 37.715 | KV453182.1 | 3458173 | 20-scf00019 | 20 |
| AX-157912309 | 2 | 37.715 | KV453182.1 | 3459043 | 20-scf00019 | 20 |
| AX-157912310 | 2 | 37.715 | KV453182.1 | 3461433 | 20-scf00019 | 20 |
| AX-157912313 | 2 | 37.715 | KV453182.1 | 3464833 | 20-scf00019 | 20 |
| AX-157812365 | 2 | 37.715 | KV453182.1 | 3465049 | 20-scf00019 | 20 |
| AX-157747664 | 2 | 37.879 | KV453182.1 | 3495290 | 20-scf00019 | 20 |
| AX-157912326 | 2 | 37.879 | KV453182.1 | 3497887 | 20-scf00019 | 20 |
| AX-157912328 | 2 | 37.903 | KV453182.1 | 3499921 | 20-scf00019 | 20 |
| AX-157912331 | 2 | 37.93  | KV453182.1 | 3504430 | 20-scf00019 | 20 |
| AX-157912299 | 2 | 37.961 | KV453182.1 | 3441847 | 20-scf00019 | 20 |
| AX-157912332 | 2 | 37.961 | KV453182.1 | 3505421 | 20-scf00019 | 20 |
| AX-157912334 | 2 | 37.988 | KV453182.1 | 3508209 | 20-scf00019 | 20 |
| AX-157812368 | 2 | 37.988 | KV453182.1 | 3509424 | 20-scf00019 | 20 |
| AX-157912327 | 2 | 38.18  | KV453182.1 | 3498754 | 20-scf00019 | 20 |
| AX-157912336 | 2 | 38.18  | KV453182.1 | 3511444 | 20-scf00019 | 20 |
| AX-157912339 | 2 | 38.18  | KV453182.1 | 3515139 | 20-scf00019 | 20 |
| AX-157912340 | 2 | 38.18  | KV453182.1 | 3516470 | 20-scf00019 | 20 |
| AX-157912341 | 2 | 38.18  | KV453182.1 | 3517554 | 20-scf00019 | 20 |
| AX-157912344 | 2 | 38.18  | KV453182.1 | 3519959 | 20-scf00019 | 20 |
| AX-157714236 | 2 | 38.234 | KV453182.1 | 3363436 | 20-scf00019 | 20 |
| AX-157912323 | 2 | 38.234 | KV453182.1 | 3490499 | 20-scf00019 | 20 |
| AX-157912347 | 2 | 38.234 | KV453182.1 | 3523489 | 20-scf00019 | 20 |
| AX-157764025 | 2 | 38.234 | KV453182.1 | 3523875 | 20-scf00019 | 20 |
| AX-157812372 | 2 | 38.234 | KV453182.1 | 3529954 | 20-scf00019 | 20 |
| AX-157812373 | 2 | 38.234 | KV453182.1 | 3531642 | 20-scf00019 | 20 |
| AX-157812374 | 2 | 38.234 | KV453182.1 | 3538425 | 20-scf00019 | 20 |
| AX-157912355 | 2 | 38.234 | KV453182.1 | 3543955 | 20-scf00019 | 20 |
| AX-157912362 | 2 | 38.234 | KV453182.1 | 3554426 | 20-scf00019 | 20 |
| AX-157912370 | 2 | 38.234 | KV453182.1 | 3563952 | 20-scf00019 | 20 |
| AX-157912371 | 2 | 38.234 | KV453182.1 | 3564633 | 20-scf00019 | 20 |
| AX-157912385 | 2 | 38.234 | KV453182.1 | 3583789 | 20-scf00019 | 20 |
| AX-157912388 | 2 | 38.234 | KV453182.1 | 3588603 | 20-scf00019 | 20 |
| AX-157912337 | 2 | 38.425 | KV453182.1 | 3512531 | 20-scf00019 | 20 |
| AX-157912354 | 2 | 38.425 | KV453182.1 | 3541677 | 20-scf00019 | 20 |
| AX-157756336 | 2 | 38.425 | KV453182.1 | 3542445 | 20-scf00019 | 20 |
| AX-157912358 | 2 | 38.425 | KV453182.1 | 3547344 | 20-scf00019 | 20 |
| AX-157812376 | 2 | 38.425 | KV453182.1 | 3550343 | 20-scf00019 | 20 |
| AX-157912372 | 2 | 38.425 | KV453182.1 | 3566098 | 20-scf00019 | 20 |
| AX-157912373 | 2 | 38.425 | KV453182.1 | 3567127 | 20-scf00019 | 20 |
| AX-157912375 | 2 | 38.425 | KV453182.1 | 3569968 | 20-scf00019 | 20 |
| AX-157912376 | 2 | 38.425 | KV453182.1 | 3571468 | 20-scf00019 | 20 |
| AX-157912377 | 2 | 38.425 | KV453182.1 | 3573630 | 20-scf00019 | 20 |
| AX-157912391 | 2 | 38.425 | KV453182.1 | 3595704 | 20-scf00019 | 20 |
| AX-157912402 | 2 | 38.425 | KV453182.1 | 3610715 | 20-scf00019 | 20 |
| AX-157912381 | 2 | 38.534 | KV453182.1 | 3578527 | 20-scf00019 | 20 |
| AX-157774792 | 2 | 38.534 | KV453182.1 | 3593890 | 20-scf00019 | 20 |
| AX-157912390 | 2 | 38.534 | KV453182.1 | 3594277 | 20-scf00019 | 20 |
| AX-157912360 | 2 | 38.611 | KV453182.1 | 3549879 | 20-scf00019 | 20 |

|              |   |        |            |         |             |    |
|--------------|---|--------|------------|---------|-------------|----|
| AX-157912361 | 2 | 38.611 | KV453182.1 | 3551319 | 20-scf00019 | 20 |
| AX-157912398 | 2 | 38.611 | KV453182.1 | 3607189 | 20-scf00019 | 20 |
| AX-157912379 | 2 | 38.644 | KV453182.1 | 3576538 | 20-scf00019 | 20 |
| AX-157912401 | 2 | 38.644 | KV453182.1 | 3610308 | 20-scf00019 | 20 |
| AX-158404935 | 2 | 38.644 | KV453182.1 | 3614331 | 20-scf00019 | 20 |
| AX-157912405 | 2 | 38.644 | KV453182.1 | 3615151 | 20-scf00019 | 20 |
| AX-157912407 | 2 | 38.644 | KV453182.1 | 3617747 | 20-scf00019 | 20 |
| AX-157912406 | 2 | 38.686 | KV453182.1 | 3616133 | 20-scf00019 | 20 |
| AX-157693955 | 2 | 38.753 | KV453182.1 | 3620984 | 20-scf00019 | 20 |
| AX-158404938 | 2 | 38.761 | KV453182.1 | 3624370 | 20-scf00019 | 20 |
| AX-157912412 | 2 | 38.778 | KV453182.1 | 3625598 | 20-scf00019 | 20 |
| AX-157912413 | 2 | 38.778 | KV453182.1 | 3626195 | 20-scf00019 | 20 |
| AX-157912414 | 2 | 38.778 | KV453182.1 | 3628144 | 20-scf00019 | 20 |
| AX-157770879 | 2 | 38.799 | KV453182.1 | 3634487 | 20-scf00019 | 20 |
| AX-157912420 | 2 | 38.828 | KV453182.1 | 3635760 | 20-scf00019 | 20 |
| AX-157912425 | 2 | 38.828 | KV453182.1 | 3641366 | 20-scf00019 | 20 |
| AX-157912429 | 2 | 38.828 | KV453182.1 | 3645269 | 20-scf00019 | 20 |
| AX-157912430 | 2 | 38.828 | KV453182.1 | 3648316 | 20-scf00019 | 20 |
| AX-157912421 | 2 | 38.862 | KV453182.1 | 3636486 | 20-scf00019 | 20 |
| AX-157812379 | 2 | 38.862 | KV453182.1 | 3638090 | 20-scf00019 | 20 |
| AX-157912423 | 2 | 38.862 | KV453182.1 | 3638665 | 20-scf00019 | 20 |
| AX-157912460 | 2 | 38.862 | KV453182.1 | 3681596 | 20-scf00019 | 20 |
| AX-157912403 | 2 | 39.026 | KV453182.1 | 3612063 | 20-scf00019 | 20 |
| AX-157912417 | 2 | 39.026 | KV453182.1 | 3630335 | 20-scf00019 | 20 |
| AX-157912424 | 2 | 39.026 | KV453182.1 | 3640493 | 20-scf00019 | 20 |
| AX-157912427 | 2 | 39.026 | KV453182.1 | 3643579 | 20-scf00019 | 20 |
| AX-157912433 | 2 | 39.026 | KV453182.1 | 3654622 | 20-scf00019 | 20 |
| AX-157912434 | 2 | 39.026 | KV453182.1 | 3656993 | 20-scf00019 | 20 |
| AX-157912435 | 2 | 39.026 | KV453182.1 | 3657463 | 20-scf00019 | 20 |
| AX-157912451 | 2 | 39.026 | KV453182.1 | 3672826 | 20-scf00019 | 20 |
| AX-157912459 | 2 | 39.026 | KV453182.1 | 3680059 | 20-scf00019 | 20 |
| AX-157912509 | 2 | 39.026 | KV453182.1 | 3735063 | 20-scf00019 | 20 |
| AX-157912580 | 2 | 39.026 | KV453182.1 | 3858320 | 20-scf00019 | 20 |
| AX-157752843 | 2 | 39.189 | KV453182.1 | 3650007 | 20-scf00019 | 20 |
| AX-157708810 | 2 | 39.189 | KV453182.1 | 3659984 | 20-scf00019 | 20 |
| AX-157912441 | 2 | 39.19  | KV453182.1 | 3663498 | 20-scf00019 | 20 |
| AX-157912443 | 2 | 39.19  | KV453182.1 | 3665533 | 20-scf00019 | 20 |
| AX-157722276 | 2 | 39.19  | KV453182.1 | 3670909 | 20-scf00019 | 20 |
| AX-157912449 | 2 | 39.19  | KV453182.1 | 3671613 | 20-scf00019 | 20 |
| AX-157912450 | 2 | 39.19  | KV453182.1 | 3672269 | 20-scf00019 | 20 |
| AX-157912453 | 2 | 39.19  | KV453182.1 | 3674278 | 20-scf00019 | 20 |
| AX-157912454 | 2 | 39.19  | KV453182.1 | 3675171 | 20-scf00019 | 20 |
| AX-157912456 | 2 | 39.19  | KV453182.1 | 3676611 | 20-scf00019 | 20 |
| AX-157812382 | 2 | 39.19  | KV453182.1 | 3687224 | 20-scf00019 | 20 |
| AX-157727955 | 2 | 39.19  | KV453182.1 | 3687605 | 20-scf00019 | 20 |
| AX-157912465 | 2 | 39.19  | KV453182.1 | 3690821 | 20-scf00019 | 20 |
| AX-157912470 | 2 | 39.19  | KV453182.1 | 3694823 | 20-scf00019 | 20 |
| AX-157912481 | 2 | 39.19  | KV453182.1 | 3706257 | 20-scf00019 | 20 |
| AX-157912489 | 2 | 39.19  | KV453182.1 | 3715618 | 20-scf00019 | 20 |
| AX-157912490 | 2 | 39.19  | KV453182.1 | 3716403 | 20-scf00019 | 20 |
| AX-157912491 | 2 | 39.19  | KV453182.1 | 3716749 | 20-scf00019 | 20 |

|              |   |        |             |         |             |    |
|--------------|---|--------|-------------|---------|-------------|----|
| AX-157912492 | 2 | 39.19  | KV453182.1  | 3717438 | 20-scf00019 | 20 |
| AX-157912494 | 2 | 39.19  | KV453182.1  | 3718791 | 20-scf00019 | 20 |
| AX-157912495 | 2 | 39.19  | KV453182.1  | 3719780 | 20-scf00019 | 20 |
| AX-157812386 | 2 | 39.19  | KV453182.1  | 3719910 | 20-scf00019 | 20 |
| AX-157812388 | 2 | 39.19  | KV453182.1  | 3724459 | 20-scf00019 | 20 |
| AX-157912498 | 2 | 39.19  | KV453182.1  | 3725429 | 20-scf00019 | 20 |
| AX-157812390 | 2 | 39.19  | KV453182.1  | 3726428 | 20-scf00019 | 20 |
| AX-157912499 | 2 | 39.19  | KV453182.1  | 3726682 | 20-scf00019 | 20 |
| AX-157912500 | 2 | 39.19  | KV453182.1  | 3727241 | 20-scf00019 | 20 |
| AX-157912503 | 2 | 39.19  | KV453182.1  | 3729483 | 20-scf00019 | 20 |
| AX-157912505 | 2 | 39.19  | KV453182.1  | 3731363 | 20-scf00019 | 20 |
| AX-157912508 | 2 | 39.19  | KV453182.1  | 3734145 | 20-scf00019 | 20 |
| AX-157812392 | 2 | 39.19  | KV453182.1  | 3739361 | 20-scf00019 | 20 |
| AX-157775033 | 2 | 39.19  | KV453182.1  | 3753067 | 20-scf00019 | 20 |
| AX-157912515 | 2 | 39.408 | KV453182.1  | 3750031 | 20-scf00019 | 20 |
| AX-157912517 | 2 | 39.408 | KV453182.1  | 3752306 | 20-scf00019 | 20 |
| AX-157812396 | 2 | 39.408 | KV453182.1  | 3753603 | 20-scf00019 | 20 |
| AX-157912520 | 2 | 39.408 | KV453182.1  | 3757045 | 20-scf00019 | 20 |
| AX-157912468 | 2 | 39.554 | KV453182.1  | 3692793 | 20-scf00019 | 20 |
| AX-157912474 | 2 | 39.554 | KV453182.1  | 3698247 | 20-scf00019 | 20 |
| AX-157912525 | 2 | 39.554 | KV453182.1  | 3762510 | 20-scf00019 | 20 |
| AX-157771923 | 2 | 39.554 | KV453182.1  | 3762604 | 20-scf00019 | 20 |
| AX-157912527 | 2 | 39.554 | KV453182.1  | 3763835 | 20-scf00019 | 20 |
| AX-157912531 | 2 | 39.7   | KV453182.1  | 3771880 | 20-scf00019 | 20 |
| AX-157912532 | 2 | 39.791 | KV453182.1  | 3775387 | 20-scf00019 | 20 |
| AX-157912522 | 2 | 39.846 | KV453182.1  | 3759188 | 20-scf00019 | 20 |
| AX-157912529 | 2 | 39.846 | KV453182.1  | 3770026 | 20-scf00019 | 20 |
| AX-157912535 | 2 | 39.846 | KV453182.1  | 3778440 | 20-scf00019 | 20 |
| AX-157912537 | 2 | 39.846 | KV453182.1  | 3780821 | 20-scf00019 | 20 |
| AX-157912541 | 2 | 39.846 | KV453182.1  | 3788251 | 20-scf00019 | 20 |
| AX-157912543 | 2 | 39.846 | KV453182.1  | 3790454 | 20-scf00019 | 20 |
| AX-157883430 | 2 | 39.846 | KV453182.1  | 3792674 | 20-scf00019 | 20 |
| AX-157912545 | 2 | 39.846 | KV453182.1  | 3794517 | 20-scf00019 | 20 |
| AX-157743226 | 2 | 39.846 | KV453182.1  | 3797283 | 20-scf00019 | 20 |
| AX-157912547 | 2 | 39.846 | KV453182.1  | 3798641 | 20-scf00019 | 20 |
| AX-157912551 | 2 | 39.846 | KV453182.1  | 3804182 | 20-scf00019 | 20 |
| AX-157912553 | 2 | 39.846 | KV453182.1  | 3807923 | 20-scf00019 | 20 |
| AX-157812406 | 2 | 39.846 | KV453182.1  | 3833199 | 20-scf00019 | 20 |
| AX-157912594 | 2 | 39.846 | KV453182.1  | 3888442 | 20-scf00019 | 20 |
| AX-157707495 | 2 | 39.848 | 3ML01034540 | 172     | scf10217_1  | UN |
| AX-157753839 | 2 | 39.85  | KV453182.1  | 3816725 | 20-scf00019 | 20 |
| AX-157715998 | 2 | 39.85  | KV453182.1  | 3880412 | 20-scf00019 | 20 |
| AX-157912616 | 2 | 39.85  | KV453182.1  | 3938583 | 20-scf00019 | 20 |
| AX-157771763 | 2 | 39.99  | KV453182.1  | 3783985 | 20-scf00019 | 20 |
| AX-157912558 | 2 | 39.99  | KV453182.1  | 3817841 | 20-scf00019 | 20 |
| AX-157912559 | 2 | 39.99  | KV453182.1  | 3818686 | 20-scf00019 | 20 |
| AX-157912562 | 2 | 39.99  | KV453182.1  | 3825602 | 20-scf00019 | 20 |
| AX-157812403 | 2 | 39.99  | KV453182.1  | 3826557 | 20-scf00019 | 20 |
| AX-157812405 | 2 | 39.99  | KV453182.1  | 3830776 | 20-scf00019 | 20 |
| AX-157912566 | 2 | 39.99  | KV453182.1  | 3831740 | 20-scf00019 | 20 |
| AX-157912568 | 2 | 39.99  | KV453182.1  | 3834237 | 20-scf00019 | 20 |



|              |   |        |            |         |             |    |
|--------------|---|--------|------------|---------|-------------|----|
| AX-157912569 | 2 | 39.99  | KV453182.1 | 3835178 | 20-scf00019 | 20 |
| AX-157912570 | 2 | 39.99  | KV453182.1 | 3843068 | 20-scf00019 | 20 |
| AX-157912575 | 2 | 39.99  | KV453182.1 | 3848887 | 20-scf00019 | 20 |
| AX-157912602 | 2 | 39.99  | KV453182.1 | 3900291 | 20-scf00019 | 20 |
| AX-157717274 | 2 | 39.99  | KV453182.1 | 3986101 | 20-scf00019 | 20 |
| AX-157912579 | 2 | 40.082 | KV453182.1 | 3854212 | 20-scf00019 | 20 |
| AX-157715124 | 2 | 40.283 | KV453182.1 | 3745555 | 20-scf00019 | 20 |
| AX-157741699 | 2 | 40.283 | KV453182.1 | 3793733 | 20-scf00019 | 20 |
| AX-157774530 | 2 | 40.283 | KV453182.1 | 3838988 | 20-scf00019 | 20 |
| AX-157912582 | 2 | 40.283 | KV453182.1 | 3863027 | 20-scf00019 | 20 |
| AX-157912584 | 2 | 40.283 | KV453182.1 | 3867309 | 20-scf00019 | 20 |
| AX-157912586 | 2 | 40.283 | KV453182.1 | 3870700 | 20-scf00019 | 20 |
| AX-157912588 | 2 | 40.283 | KV453182.1 | 3876774 | 20-scf00019 | 20 |
| AX-157853692 | 2 | 40.283 | KV453182.1 | 3877405 | 20-scf00019 | 20 |
| AX-157912591 | 2 | 40.283 | KV453182.1 | 3879796 | 20-scf00019 | 20 |
| AX-157744770 | 2 | 40.283 | KV453182.1 | 3882512 | 20-scf00019 | 20 |
| AX-157912593 | 2 | 40.283 | KV453182.1 | 3883408 | 20-scf00019 | 20 |
| AX-157912595 | 2 | 40.283 | KV453182.1 | 3888949 | 20-scf00019 | 20 |
| AX-157912596 | 2 | 40.283 | KV453182.1 | 3890045 | 20-scf00019 | 20 |
| AX-157912597 | 2 | 40.283 | KV453182.1 | 3891222 | 20-scf00019 | 20 |
| AX-157912599 | 2 | 40.283 | KV453182.1 | 3893955 | 20-scf00019 | 20 |
| AX-157912605 | 2 | 40.283 | KV453182.1 | 3905916 | 20-scf00019 | 20 |
| AX-157753694 | 2 | 40.283 | KV453182.1 | 3938840 | 20-scf00019 | 20 |
| AX-157912618 | 2 | 40.283 | KV453182.1 | 3941908 | 20-scf00019 | 20 |
| AX-157718197 | 2 | 40.567 | KV453182.1 | 3805682 | 20-scf00019 | 20 |
| AX-157912613 | 2 | 40.567 | KV453182.1 | 3932996 | 20-scf00019 | 20 |
| AX-157912615 | 2 | 40.568 | KV453182.1 | 3938379 | 20-scf00019 | 20 |
| AX-157912621 | 2 | 40.568 | KV453182.1 | 3947178 | 20-scf00019 | 20 |
| AX-157912623 | 2 | 40.711 | KV453182.1 | 3949103 | 20-scf00019 | 20 |
| AX-157912629 | 2 | 40.779 | KV453182.1 | 3956586 | 20-scf00019 | 20 |
| AX-157912512 | 2 | 40.854 | KV453182.1 | 3743466 | 20-scf00019 | 20 |
| AX-157812401 | 2 | 40.854 | KV453182.1 | 3790089 | 20-scf00019 | 20 |
| AX-157912626 | 2 | 40.854 | KV453182.1 | 3952199 | 20-scf00019 | 20 |
| AX-157912628 | 2 | 40.854 | KV453182.1 | 3954411 | 20-scf00019 | 20 |
| AX-157912633 | 2 | 40.854 | KV453182.1 | 3960444 | 20-scf00019 | 20 |
| AX-157912634 | 2 | 40.854 | KV453182.1 | 3961532 | 20-scf00019 | 20 |
| AX-157912635 | 2 | 40.854 | KV453182.1 | 3963631 | 20-scf00019 | 20 |
| AX-157912636 | 2 | 40.854 | KV453182.1 | 3966062 | 20-scf00019 | 20 |
| AX-157812413 | 2 | 40.854 | KV453182.1 | 3971147 | 20-scf00019 | 20 |
| AX-157912645 | 2 | 40.854 | KV453182.1 | 3990544 | 20-scf00019 | 20 |
| AX-157715218 | 2 | 40.854 | KV453182.1 | 3992797 | 20-scf00019 | 20 |
| AX-157812414 | 2 | 40.997 | KV453182.1 | 3976134 | 20-scf00019 | 20 |
| AX-157912638 | 2 | 40.997 | KV453182.1 | 3982288 | 20-scf00019 | 20 |
| AX-157912639 | 2 | 41.281 | KV453182.1 | 3983173 | 20-scf00019 | 20 |
| AX-157775492 | 2 | 41.282 | KV453182.1 | 3985137 | 20-scf00019 | 20 |
| AX-157812416 | 2 | 41.282 | KV453182.1 | 3985616 | 20-scf00019 | 20 |
| AX-157912646 | 2 | 41.569 | KV453182.1 | 3992300 | 20-scf00019 | 20 |
| AX-157912649 | 2 | 41.57  | KV453182.1 | 3996734 | 20-scf00019 | 20 |
| AX-157912651 | 2 | 41.57  | KV453182.1 | 4000291 | 20-scf00019 | 20 |
| AX-157912696 | 2 | 41.57  | KV453182.1 | 4064010 | 20-scf00019 | 20 |
| AX-157912655 | 2 | 41.711 | KV453182.1 | 4003852 | 20-scf00019 | 20 |

|              |   |        |            |         |             |    |
|--------------|---|--------|------------|---------|-------------|----|
| AX-157912657 | 2 | 41.711 | KV453182.1 | 4005815 | 20-scf00019 | 20 |
| AX-157912664 | 2 | 41.711 | KV453182.1 | 4016271 | 20-scf00019 | 20 |
| AX-157912668 | 2 | 41.711 | KV453182.1 | 4026379 | 20-scf00019 | 20 |
| AX-157912667 | 2 | 41.72  | KV453182.1 | 4018997 | 20-scf00019 | 20 |
| AX-157853698 | 2 | 41.72  | KV453182.1 | 4252967 | 20-scf00019 | 20 |
| AX-157912842 | 2 | 41.72  | KV453182.1 | 4265189 | 20-scf00019 | 20 |
| AX-157912669 | 2 | 41.753 | KV453182.1 | 4026864 | 20-scf00019 | 20 |
| AX-157716542 | 2 | 41.77  | KV453182.1 | 4030192 | 20-scf00019 | 20 |
| AX-158389577 | 2 | 41.801 | KV453182.1 | 4030693 | 20-scf00019 | 20 |
| AX-157812426 | 2 | 41.801 | KV453182.1 | 4031247 | 20-scf00019 | 20 |
| AX-157912672 | 2 | 41.804 | KV453182.1 | 4035987 | 20-scf00019 | 20 |
| AX-157912659 | 2 | 41.813 | KV453182.1 | 4008412 | 20-scf00019 | 20 |
| AX-157912676 | 2 | 41.813 | KV453182.1 | 4038782 | 20-scf00019 | 20 |
| AX-157812423 | 2 | 41.815 | KV453182.1 | 4026303 | 20-scf00019 | 20 |
| AX-157775251 | 2 | 41.815 | KV453182.1 | 4030905 | 20-scf00019 | 20 |
| AX-157912681 | 2 | 41.815 | KV453182.1 | 4046463 | 20-scf00019 | 20 |
| AX-157912702 | 2 | 41.815 | KV453182.1 | 4073968 | 20-scf00019 | 20 |
| AX-157912726 | 2 | 41.815 | KV453182.1 | 4110797 | 20-scf00019 | 20 |
| AX-157912686 | 2 | 41.826 | KV453182.1 | 4052678 | 20-scf00019 | 20 |
| AX-157912688 | 2 | 41.84  | KV453182.1 | 4056759 | 20-scf00019 | 20 |
| AX-157912523 | 2 | 41.855 | KV453182.1 | 3761272 | 20-scf00019 | 20 |
| AX-157912692 | 2 | 41.855 | KV453182.1 | 4061414 | 20-scf00019 | 20 |
| AX-157912695 | 2 | 41.855 | KV453182.1 | 4062921 | 20-scf00019 | 20 |
| AX-157912704 | 2 | 41.896 | KV453182.1 | 4077072 | 20-scf00019 | 20 |
| AX-158404949 | 2 | 41.937 | KV453182.1 | 4078855 | 20-scf00019 | 20 |
| AX-157812429 | 2 | 41.997 | KV453182.1 | 4094179 | 20-scf00019 | 20 |
| AX-157749170 | 2 | 41.997 | KV453182.1 | 4095840 | 20-scf00019 | 20 |
| AX-157912716 | 2 | 41.997 | KV453182.1 | 4097456 | 20-scf00019 | 20 |
| AX-157912717 | 2 | 41.997 | KV453182.1 | 4098308 | 20-scf00019 | 20 |
| AX-157912719 | 2 | 41.997 | KV453182.1 | 4101416 | 20-scf00019 | 20 |
| AX-157912722 | 2 | 41.997 | KV453182.1 | 4106096 | 20-scf00019 | 20 |
| AX-157912724 | 2 | 41.997 | KV453182.1 | 4108838 | 20-scf00019 | 20 |
| AX-157912727 | 2 | 41.997 | KV453182.1 | 4112652 | 20-scf00019 | 20 |
| AX-157912733 | 2 | 41.997 | KV453182.1 | 4118931 | 20-scf00019 | 20 |
| AX-157774531 | 2 | 41.997 | KV453182.1 | 4659380 | 20-scf00019 | 20 |
| AX-157727719 | 2 | 42.14  | KV453182.1 | 4120668 | 20-scf00019 | 20 |
| AX-157912735 | 2 | 42.161 | KV453182.1 | 4122153 | 20-scf00019 | 20 |
| AX-157912757 | 2 | 42.161 | KV453182.1 | 4147482 | 20-scf00019 | 20 |
| AX-157762272 | 2 | 42.189 | KV453182.1 | 4123957 | 20-scf00019 | 20 |
| AX-157912737 | 2 | 42.218 | KV453182.1 | 4124859 | 20-scf00019 | 20 |
| AX-157912749 | 2 | 42.251 | KV453182.1 | 4138794 | 20-scf00019 | 20 |
| AX-157707721 | 2 | 42.283 | KV453182.1 | 4123382 | 20-scf00019 | 20 |
| AX-157912754 | 2 | 42.283 | KV453182.1 | 4146165 | 20-scf00019 | 20 |
| AX-157912756 | 2 | 42.283 | KV453182.1 | 4146913 | 20-scf00019 | 20 |
| AX-157912758 | 2 | 42.283 | KV453182.1 | 4149323 | 20-scf00019 | 20 |
| AX-157912759 | 2 | 42.283 | KV453182.1 | 4150341 | 20-scf00019 | 20 |
| AX-157912760 | 2 | 42.283 | KV453182.1 | 4151648 | 20-scf00019 | 20 |
| AX-157912765 | 2 | 42.283 | KV453182.1 | 4155455 | 20-scf00019 | 20 |
| AX-157912768 | 2 | 42.283 | KV453182.1 | 4158985 | 20-scf00019 | 20 |
| AX-157724652 | 2 | 42.283 | KV453182.1 | 4173785 | 20-scf00019 | 20 |
| AX-157912778 | 2 | 42.283 | KV453182.1 | 4173905 | 20-scf00019 | 20 |

|              |   |        |            |         |             |    |
|--------------|---|--------|------------|---------|-------------|----|
| AX-157912780 | 2 | 42.283 | KV453182.1 | 4177998 | 20-scf00019 | 20 |
| AX-157912781 | 2 | 42.283 | KV453182.1 | 4179746 | 20-scf00019 | 20 |
| AX-157912832 | 2 | 42.283 | KV453182.1 | 4248596 | 20-scf00019 | 20 |
| AX-157912773 | 2 | 42.569 | KV453182.1 | 4170113 | 20-scf00019 | 20 |
| AX-157912774 | 2 | 42.625 | KV453182.1 | 4170868 | 20-scf00019 | 20 |
| AX-157812436 | 2 | 42.678 | KV453182.1 | 4182647 | 20-scf00019 | 20 |
| AX-157853697 | 2 | 42.678 | KV453182.1 | 4237065 | 20-scf00019 | 20 |
| AX-158404952 | 2 | 42.712 | KV453182.1 | 4081327 | 20-scf00019 | 20 |
| AX-157812437 | 2 | 42.712 | KV453182.1 | 4185654 | 20-scf00019 | 20 |
| AX-157912791 | 2 | 42.712 | KV453182.1 | 4194418 | 20-scf00019 | 20 |
| AX-157883435 | 2 | 42.712 | KV453182.1 | 4491617 | 20-scf00019 | 20 |
| AX-157913076 | 2 | 42.712 | KV453182.1 | 4600944 | 20-scf00019 | 20 |
| AX-157913100 | 2 | 42.712 | KV453182.1 | 4636157 | 20-scf00019 | 20 |
| AX-157912786 | 2 | 42.725 | KV453182.1 | 4186680 | 20-scf00019 | 20 |
| AX-157869090 | 2 | 42.736 | KV453182.1 | 4177134 | 20-scf00019 | 20 |
| AX-157912793 | 2 | 42.736 | KV453182.1 | 4197404 | 20-scf00019 | 20 |
| AX-157912794 | 2 | 42.775 | KV453182.1 | 4202560 | 20-scf00019 | 20 |
| AX-157912799 | 2 | 42.814 | KV453182.1 | 4208587 | 20-scf00019 | 20 |
| AX-157912776 | 2 | 42.855 | KV453182.1 | 4172487 | 20-scf00019 | 20 |
| AX-157812438 | 2 | 42.855 | KV453182.1 | 4190314 | 20-scf00019 | 20 |
| AX-157912802 | 2 | 42.855 | KV453182.1 | 4214910 | 20-scf00019 | 20 |
| AX-157912805 | 2 | 42.855 | KV453182.1 | 4217239 | 20-scf00019 | 20 |
| AX-157912807 | 2 | 42.855 | KV453182.1 | 4219366 | 20-scf00019 | 20 |
| AX-157912810 | 2 | 42.855 | KV453182.1 | 4221349 | 20-scf00019 | 20 |
| AX-157912811 | 2 | 42.855 | KV453182.1 | 4221986 | 20-scf00019 | 20 |
| AX-157912814 | 2 | 42.855 | KV453182.1 | 4225337 | 20-scf00019 | 20 |
| AX-157912815 | 2 | 42.855 | KV453182.1 | 4226814 | 20-scf00019 | 20 |
| AX-157912824 | 2 | 42.855 | KV453182.1 | 4236873 | 20-scf00019 | 20 |
| AX-157912825 | 2 | 42.855 | KV453182.1 | 4237832 | 20-scf00019 | 20 |
| AX-157912827 | 2 | 42.855 | KV453182.1 | 4240059 | 20-scf00019 | 20 |
| AX-157912835 | 2 | 42.855 | KV453182.1 | 4251651 | 20-scf00019 | 20 |
| AX-157912838 | 2 | 42.855 | KV453182.1 | 4259281 | 20-scf00019 | 20 |
| AX-157912790 | 2 | 42.971 | KV453182.1 | 4193568 | 20-scf00019 | 20 |
| AX-157812440 | 2 | 42.971 | KV453182.1 | 4258976 | 20-scf00019 | 20 |
| AX-157812441 | 2 | 42.998 | KV453182.1 | 4262988 | 20-scf00019 | 20 |
| AX-157912847 | 2 | 42.998 | KV453182.1 | 4272666 | 20-scf00019 | 20 |
| AX-157912848 | 2 | 42.998 | KV453182.1 | 4273518 | 20-scf00019 | 20 |
| AX-157912849 | 2 | 42.998 | KV453182.1 | 4273905 | 20-scf00019 | 20 |
| AX-157912839 | 2 | 43.08  | KV453182.1 | 4261098 | 20-scf00019 | 20 |
| AX-157912841 | 2 | 43.08  | KV453182.1 | 4262022 | 20-scf00019 | 20 |
| AX-157912850 | 2 | 43.08  | KV453182.1 | 4275007 | 20-scf00019 | 20 |
| AX-157912804 | 2 | 43.141 | KV453182.1 | 4216436 | 20-scf00019 | 20 |
| AX-157912817 | 2 | 43.141 | KV453182.1 | 4228627 | 20-scf00019 | 20 |
| AX-157912818 | 2 | 43.141 | KV453182.1 | 4229597 | 20-scf00019 | 20 |
| AX-157912846 | 2 | 43.141 | KV453182.1 | 4271758 | 20-scf00019 | 20 |
| AX-157912852 | 2 | 43.141 | KV453182.1 | 4276576 | 20-scf00019 | 20 |
| AX-157912855 | 2 | 43.141 | KV453182.1 | 4283021 | 20-scf00019 | 20 |
| AX-157912860 | 2 | 43.141 | KV453182.1 | 4287827 | 20-scf00019 | 20 |
| AX-157912861 | 2 | 43.141 | KV453182.1 | 4288709 | 20-scf00019 | 20 |
| AX-157912863 | 2 | 43.141 | KV453182.1 | 4290544 | 20-scf00019 | 20 |
| AX-157912864 | 2 | 43.141 | KV453182.1 | 4291380 | 20-scf00019 | 20 |

|              |   |        |            |         |             |    |
|--------------|---|--------|------------|---------|-------------|----|
| AX-157912865 | 2 | 43.141 | KV453182.1 | 4291727 | 20-scf00019 | 20 |
| AX-157812443 | 2 | 43.141 | KV453182.1 | 4294585 | 20-scf00019 | 20 |
| AX-157912872 | 2 | 43.141 | KV453182.1 | 4306243 | 20-scf00019 | 20 |
| AX-157912874 | 2 | 43.141 | KV453182.1 | 4311936 | 20-scf00019 | 20 |
| AX-157912875 | 2 | 43.141 | KV453182.1 | 4312425 | 20-scf00019 | 20 |
| AX-157912876 | 2 | 43.141 | KV453182.1 | 4314264 | 20-scf00019 | 20 |
| AX-157912880 | 2 | 43.141 | KV453182.1 | 4318645 | 20-scf00019 | 20 |
| AX-157912881 | 2 | 43.141 | KV453182.1 | 4319796 | 20-scf00019 | 20 |
| AX-157912883 | 2 | 43.141 | KV453182.1 | 4320904 | 20-scf00019 | 20 |
| AX-157912893 | 2 | 43.141 | KV453182.1 | 4333423 | 20-scf00019 | 20 |
| AX-158404959 | 2 | 43.141 | KV453182.1 | 4335761 | 20-scf00019 | 20 |
| AX-157912898 | 2 | 43.141 | KV453182.1 | 4338625 | 20-scf00019 | 20 |
| AX-157912901 | 2 | 43.141 | KV453182.1 | 4341920 | 20-scf00019 | 20 |
| AX-157912905 | 2 | 43.141 | KV453182.1 | 4349285 | 20-scf00019 | 20 |
| AX-157912911 | 2 | 43.141 | KV453182.1 | 4356692 | 20-scf00019 | 20 |
| AX-157812447 | 2 | 43.141 | KV453182.1 | 4363598 | 20-scf00019 | 20 |
| AX-157716524 | 2 | 43.141 | KV453182.1 | 4368254 | 20-scf00019 | 20 |
| AX-157912930 | 2 | 43.141 | KV453182.1 | 4385375 | 20-scf00019 | 20 |
| AX-157912939 | 2 | 43.141 | KV453182.1 | 4398715 | 20-scf00019 | 20 |
| AX-157912946 | 2 | 43.141 | KV453182.1 | 4407845 | 20-scf00019 | 20 |
| AX-158389583 | 2 | 43.141 | KV453182.1 | 4413287 | 20-scf00019 | 20 |
| AX-157912958 | 2 | 43.141 | KV453182.1 | 4425512 | 20-scf00019 | 20 |
| AX-157775591 | 2 | 43.141 | KV453182.1 | 4426474 | 20-scf00019 | 20 |
| AX-157913019 | 2 | 43.141 | KV453182.1 | 4528554 | 20-scf00019 | 20 |
| AX-157874651 | 2 | 43.141 | KV453182.1 | 4535854 | 20-scf00019 | 20 |
| AX-157913051 | 2 | 43.141 | KV453182.1 | 4565614 | 20-scf00019 | 20 |
| AX-157913117 | 2 | 43.141 | KV453182.1 | 4653652 | 20-scf00019 | 20 |
| AX-157912918 | 2 | 43.199 | KV453182.1 | 4365208 | 20-scf00019 | 20 |
| AX-157758651 | 2 | 43.259 | KV453182.1 | 4273055 | 20-scf00019 | 20 |
| AX-157912892 | 2 | 43.259 | KV453182.1 | 4330660 | 20-scf00019 | 20 |
| AX-157912894 | 2 | 43.259 | KV453182.1 | 4334104 | 20-scf00019 | 20 |
| AX-157912914 | 2 | 43.259 | KV453182.1 | 4360663 | 20-scf00019 | 20 |
| AX-157812445 | 2 | 43.259 | KV453182.1 | 4360980 | 20-scf00019 | 20 |
| AX-157912921 | 2 | 43.259 | KV453182.1 | 4369407 | 20-scf00019 | 20 |
| AX-157853699 | 2 | 43.283 | KV453182.1 | 4282905 | 20-scf00019 | 20 |
| AX-157912870 | 2 | 43.283 | KV453182.1 | 4300031 | 20-scf00019 | 20 |
| AX-157912891 | 2 | 43.283 | KV453182.1 | 4329867 | 20-scf00019 | 20 |
| AX-157912910 | 2 | 43.283 | KV453182.1 | 4354916 | 20-scf00019 | 20 |
| AX-157812449 | 2 | 43.283 | KV453182.1 | 4373740 | 20-scf00019 | 20 |
| AX-157812453 | 2 | 43.283 | KV453182.1 | 4385304 | 20-scf00019 | 20 |
| AX-157912931 | 2 | 43.283 | KV453182.1 | 4385804 | 20-scf00019 | 20 |
| AX-157912932 | 2 | 43.283 | KV453182.1 | 4386876 | 20-scf00019 | 20 |
| AX-157912934 | 2 | 43.283 | KV453182.1 | 4390419 | 20-scf00019 | 20 |
| AX-157812456 | 2 | 43.283 | KV453182.1 | 4392466 | 20-scf00019 | 20 |
| AX-157912935 | 2 | 43.283 | KV453182.1 | 4393037 | 20-scf00019 | 20 |
| AX-157812458 | 2 | 43.283 | KV453182.1 | 4399806 | 20-scf00019 | 20 |
| AX-157912952 | 2 | 43.283 | KV453182.1 | 4418129 | 20-scf00019 | 20 |
| AX-157912953 | 2 | 43.283 | KV453182.1 | 4419702 | 20-scf00019 | 20 |
| AX-157912955 | 2 | 43.283 | KV453182.1 | 4420205 | 20-scf00019 | 20 |
| AX-157912957 | 2 | 43.283 | KV453182.1 | 4423793 | 20-scf00019 | 20 |
| AX-157912960 | 2 | 43.283 | KV453182.1 | 4432747 | 20-scf00019 | 20 |

|              |   |        |            |         |             |    |
|--------------|---|--------|------------|---------|-------------|----|
| AX-157912972 | 2 | 43.283 | KV453182.1 | 4446182 | 20-scf00019 | 20 |
| AX-157912974 | 2 | 43.283 | KV453182.1 | 4447357 | 20-scf00019 | 20 |
| AX-157912975 | 2 | 43.283 | KV453182.1 | 4449012 | 20-scf00019 | 20 |
| AX-157812460 | 2 | 43.283 | KV453182.1 | 4484023 | 20-scf00019 | 20 |
| AX-157874650 | 2 | 43.283 | KV453182.1 | 4534576 | 20-scf00019 | 20 |
| AX-157746532 | 2 | 43.283 | KV453182.1 | 4569479 | 20-scf00019 | 20 |
| AX-157913068 | 2 | 43.283 | KV453182.1 | 4588346 | 20-scf00019 | 20 |
| AX-158414797 | 2 | 43.283 | KV453182.1 | 4633009 | 20-scf00019 | 20 |
| AX-157912862 | 2 | 43.426 | KV453182.1 | 4289539 | 20-scf00019 | 20 |
| AX-157712154 | 2 | 43.426 | KV453182.1 | 4386177 | 20-scf00019 | 20 |
| AX-157864492 | 2 | 43.426 | KV453182.1 | 4433374 | 20-scf00019 | 20 |
| AX-157912963 | 2 | 43.426 | KV453182.1 | 4436847 | 20-scf00019 | 20 |
| AX-157912968 | 2 | 43.426 | KV453182.1 | 4441084 | 20-scf00019 | 20 |
| AX-157912971 | 2 | 43.426 | KV453182.1 | 4445201 | 20-scf00019 | 20 |
| AX-157724151 | 2 | 43.426 | KV453182.1 | 4447205 | 20-scf00019 | 20 |
| AX-157912977 | 2 | 43.426 | KV453182.1 | 4453196 | 20-scf00019 | 20 |
| AX-157912978 | 2 | 43.426 | KV453182.1 | 4453890 | 20-scf00019 | 20 |
| AX-157912981 | 2 | 43.426 | KV453182.1 | 4456789 | 20-scf00019 | 20 |
| AX-157912982 | 2 | 43.426 | KV453182.1 | 4458778 | 20-scf00019 | 20 |
| AX-157912983 | 2 | 43.426 | KV453182.1 | 4458926 | 20-scf00019 | 20 |
| AX-157912991 | 2 | 43.426 | KV453182.1 | 4472008 | 20-scf00019 | 20 |
| AX-157874648 | 2 | 43.426 | KV453182.1 | 4473723 | 20-scf00019 | 20 |
| AX-157912999 | 2 | 43.426 | KV453182.1 | 4481423 | 20-scf00019 | 20 |
| AX-157913005 | 2 | 43.426 | KV453182.1 | 4487908 | 20-scf00019 | 20 |
| AX-157913017 | 2 | 43.426 | KV453182.1 | 4521370 | 20-scf00019 | 20 |
| AX-157913018 | 2 | 43.426 | KV453182.1 | 4523328 | 20-scf00019 | 20 |
| AX-157913049 | 2 | 43.426 | KV453182.1 | 4562382 | 20-scf00019 | 20 |
| AX-157812471 | 2 | 43.426 | KV453182.1 | 4591795 | 20-scf00019 | 20 |
| AX-157913118 | 2 | 43.426 | KV453182.1 | 4654799 | 20-scf00019 | 20 |
| AX-157715389 | 2 | 43.426 | KV453182.1 | 4761397 | 20-scf00019 | 20 |
| AX-157913183 | 2 | 43.426 | KV453182.1 | 4764495 | 20-scf00019 | 20 |
| AX-157913199 | 2 | 43.426 | KV453182.1 | 4782323 | 20-scf00019 | 20 |
| AX-157812459 | 2 | 43.468 | KV453182.1 | 4415936 | 20-scf00019 | 20 |
| AX-157912992 | 2 | 43.468 | KV453182.1 | 4472701 | 20-scf00019 | 20 |
| AX-157913030 | 2 | 43.468 | KV453182.1 | 4538694 | 20-scf00019 | 20 |
| AX-157748246 | 2 | 43.468 | KV453182.1 | 4543620 | 20-scf00019 | 20 |
| AX-157912993 | 2 | 43.506 | KV453182.1 | 4474201 | 20-scf00019 | 20 |
| AX-157913020 | 2 | 43.506 | KV453182.1 | 4529555 | 20-scf00019 | 20 |
| AX-157913031 | 2 | 43.506 | KV453182.1 | 4540187 | 20-scf00019 | 20 |
| AX-157913185 | 2 | 43.506 | KV453182.1 | 4766062 | 20-scf00019 | 20 |
| AX-157912995 | 2 | 43.52  | KV453182.1 | 4476091 | 20-scf00019 | 20 |
| AX-157912851 | 2 | 43.569 | KV453182.1 | 4276128 | 20-scf00019 | 20 |
| AX-157912895 | 2 | 43.569 | KV453182.1 | 4334812 | 20-scf00019 | 20 |
| AX-157912902 | 2 | 43.569 | KV453182.1 | 4344246 | 20-scf00019 | 20 |
| AX-158404960 | 2 | 43.569 | KV453182.1 | 4347984 | 20-scf00019 | 20 |
| AX-157912949 | 2 | 43.569 | KV453182.1 | 4413489 | 20-scf00019 | 20 |
| AX-157912956 | 2 | 43.569 | KV453182.1 | 4423097 | 20-scf00019 | 20 |
| AX-157912964 | 2 | 43.569 | KV453182.1 | 4437872 | 20-scf00019 | 20 |
| AX-157912973 | 2 | 43.569 | KV453182.1 | 4446545 | 20-scf00019 | 20 |
| AX-157912979 | 2 | 43.569 | KV453182.1 | 4454011 | 20-scf00019 | 20 |
| AX-157912985 | 2 | 43.569 | KV453182.1 | 4461388 | 20-scf00019 | 20 |

|              |   |        |            |         |             |    |
|--------------|---|--------|------------|---------|-------------|----|
| AX-157912997 | 2 | 43.569 | KV453182.1 | 4477222 | 20-scf00019 | 20 |
| AX-157912998 | 2 | 43.569 | KV453182.1 | 4478922 | 20-scf00019 | 20 |
| AX-157913009 | 2 | 43.569 | KV453182.1 | 4497343 | 20-scf00019 | 20 |
| AX-157913012 | 2 | 43.569 | KV453182.1 | 4508976 | 20-scf00019 | 20 |
| AX-157913013 | 2 | 43.569 | KV453182.1 | 4512911 | 20-scf00019 | 20 |
| AX-157714807 | 2 | 43.569 | KV453182.1 | 4523961 | 20-scf00019 | 20 |
| AX-157913025 | 2 | 43.569 | KV453182.1 | 4532176 | 20-scf00019 | 20 |
| AX-157874649 | 2 | 43.569 | KV453182.1 | 4533250 | 20-scf00019 | 20 |
| AX-157913028 | 2 | 43.569 | KV453182.1 | 4535221 | 20-scf00019 | 20 |
| AX-157771897 | 2 | 43.569 | KV453182.1 | 4537967 | 20-scf00019 | 20 |
| AX-157913033 | 2 | 43.569 | KV453182.1 | 4541254 | 20-scf00019 | 20 |
| AX-157713181 | 2 | 43.569 | KV453182.1 | 4547413 | 20-scf00019 | 20 |
| AX-157913040 | 2 | 43.569 | KV453182.1 | 4550684 | 20-scf00019 | 20 |
| AX-158404961 | 2 | 43.569 | KV453182.1 | 4551304 | 20-scf00019 | 20 |
| AX-157913041 | 2 | 43.569 | KV453182.1 | 4552689 | 20-scf00019 | 20 |
| AX-157913042 | 2 | 43.569 | KV453182.1 | 4553395 | 20-scf00019 | 20 |
| AX-157724189 | 2 | 43.569 | KV453182.1 | 4554866 | 20-scf00019 | 20 |
| AX-157913044 | 2 | 43.569 | KV453182.1 | 4556807 | 20-scf00019 | 20 |
| AX-157913047 | 2 | 43.569 | KV453182.1 | 4559584 | 20-scf00019 | 20 |
| AX-157913050 | 2 | 43.569 | KV453182.1 | 4563648 | 20-scf00019 | 20 |
| AX-157812469 | 2 | 43.569 | KV453182.1 | 4564859 | 20-scf00019 | 20 |
| AX-157812470 | 2 | 43.569 | KV453182.1 | 4566812 | 20-scf00019 | 20 |
| AX-157913055 | 2 | 43.569 | KV453182.1 | 4569814 | 20-scf00019 | 20 |
| AX-157913058 | 2 | 43.569 | KV453182.1 | 4572770 | 20-scf00019 | 20 |
| AX-158379248 | 2 | 43.569 | KV453182.1 | 4573153 | 20-scf00019 | 20 |
| AX-157913059 | 2 | 43.569 | KV453182.1 | 4573345 | 20-scf00019 | 20 |
| AX-157913062 | 2 | 43.569 | KV453182.1 | 4576482 | 20-scf00019 | 20 |
| AX-157913065 | 2 | 43.569 | KV453182.1 | 4584248 | 20-scf00019 | 20 |
| AX-157913067 | 2 | 43.569 | KV453182.1 | 4587015 | 20-scf00019 | 20 |
| AX-157913069 | 2 | 43.569 | KV453182.1 | 4589309 | 20-scf00019 | 20 |
| AX-157699847 | 2 | 43.569 | KV453182.1 | 4596735 | 20-scf00019 | 20 |
| AX-157913073 | 2 | 43.569 | KV453182.1 | 4598442 | 20-scf00019 | 20 |
| AX-157913081 | 2 | 43.569 | KV453182.1 | 4608838 | 20-scf00019 | 20 |
| AX-157913086 | 2 | 43.569 | KV453182.1 | 4612328 | 20-scf00019 | 20 |
| AX-157913092 | 2 | 43.569 | KV453182.1 | 4628322 | 20-scf00019 | 20 |
| AX-157913097 | 2 | 43.569 | KV453182.1 | 4633530 | 20-scf00019 | 20 |
| AX-157913106 | 2 | 43.569 | KV453182.1 | 4642594 | 20-scf00019 | 20 |
| AX-157913114 | 2 | 43.569 | KV453182.1 | 4650166 | 20-scf00019 | 20 |
| AX-157912967 | 2 | 43.712 | KV453182.1 | 4440174 | 20-scf00019 | 20 |
| AX-157913039 | 2 | 43.712 | KV453182.1 | 4549731 | 20-scf00019 | 20 |
| AX-157913082 | 2 | 43.712 | KV453182.1 | 4609058 | 20-scf00019 | 20 |
| AX-157913084 | 2 | 43.712 | KV453182.1 | 4610993 | 20-scf00019 | 20 |
| AX-157913085 | 2 | 43.712 | KV453182.1 | 4611627 | 20-scf00019 | 20 |
| AX-157812473 | 2 | 43.712 | KV453182.1 | 4625719 | 20-scf00019 | 20 |
| AX-157913107 | 2 | 43.712 | KV453182.1 | 4643382 | 20-scf00019 | 20 |
| AX-157913116 | 2 | 43.712 | KV453182.1 | 4652247 | 20-scf00019 | 20 |
| AX-157913109 | 2 | 43.713 | KV453182.1 | 4645043 | 20-scf00019 | 20 |
| AX-157913112 | 2 | 43.713 | KV453182.1 | 4648390 | 20-scf00019 | 20 |
| AX-157913010 | 2 | 43.997 | KV453182.1 | 4499871 | 20-scf00019 | 20 |
| AX-157722192 | 2 | 43.997 | KV453182.1 | 4657428 | 20-scf00019 | 20 |
| AX-157812474 | 2 | 43.997 | KV453182.1 | 4659199 | 20-scf00019 | 20 |

|              |   |        |            |         |             |    |
|--------------|---|--------|------------|---------|-------------|----|
| AX-157913127 | 2 | 43.997 | KV453182.1 | 4666067 | 20-scf00019 | 20 |
| AX-157913133 | 2 | 43.997 | KV453182.1 | 4674386 | 20-scf00019 | 20 |
| AX-157913186 | 2 | 43.997 | KV453182.1 | 4766658 | 20-scf00019 | 20 |
| AX-157913267 | 2 | 43.997 | KV453182.1 | 4883679 | 20-scf00019 | 20 |
| AX-157742866 | 2 | 43.997 | KV453182.1 | 4931484 | 20-scf00019 | 20 |
| AX-157913477 | 2 | 43.997 | KV453182.1 | 5146750 | 20-scf00019 | 20 |
| AX-157812502 | 2 | 43.997 | KV453182.1 | 5242236 | 20-scf00019 | 20 |
| AX-157913559 | 2 | 43.997 | KV453182.1 | 5245119 | 20-scf00019 | 20 |
| AX-157912859 | 2 | 44.14  | KV453182.1 | 4287436 | 20-scf00019 | 20 |
| AX-157912879 | 2 | 44.14  | KV453182.1 | 4316261 | 20-scf00019 | 20 |
| AX-157912886 | 2 | 44.14  | KV453182.1 | 4323484 | 20-scf00019 | 20 |
| AX-157912908 | 2 | 44.14  | KV453182.1 | 4352777 | 20-scf00019 | 20 |
| AX-158414796 | 2 | 44.14  | KV453182.1 | 4488712 | 20-scf00019 | 20 |
| AX-157913078 | 2 | 44.14  | KV453182.1 | 4606527 | 20-scf00019 | 20 |
| AX-157913119 | 2 | 44.14  | KV453182.1 | 4656763 | 20-scf00019 | 20 |
| AX-157913134 | 2 | 44.14  | KV453182.1 | 4678040 | 20-scf00019 | 20 |
| AX-157717941 | 2 | 44.14  | KV453182.1 | 4686170 | 20-scf00019 | 20 |
| AX-157913141 | 2 | 44.14  | KV453182.1 | 4696489 | 20-scf00019 | 20 |
| AX-157913142 | 2 | 44.14  | KV453182.1 | 4696963 | 20-scf00019 | 20 |
| AX-157812478 | 2 | 44.14  | KV453182.1 | 4699880 | 20-scf00019 | 20 |
| AX-157812479 | 2 | 44.14  | KV453182.1 | 4699994 | 20-scf00019 | 20 |
| AX-157913147 | 2 | 44.14  | KV453182.1 | 4705984 | 20-scf00019 | 20 |
| AX-157913148 | 2 | 44.14  | KV453182.1 | 4706279 | 20-scf00019 | 20 |
| AX-157869092 | 2 | 44.14  | KV453182.1 | 4706628 | 20-scf00019 | 20 |
| AX-157913149 | 2 | 44.14  | KV453182.1 | 4709072 | 20-scf00019 | 20 |
| AX-157913150 | 2 | 44.14  | KV453182.1 | 4709665 | 20-scf00019 | 20 |
| AX-157913152 | 2 | 44.14  | KV453182.1 | 4714463 | 20-scf00019 | 20 |
| AX-157913157 | 2 | 44.14  | KV453182.1 | 4725700 | 20-scf00019 | 20 |
| AX-157913163 | 2 | 44.14  | KV453182.1 | 4738006 | 20-scf00019 | 20 |
| AX-157913170 | 2 | 44.14  | KV453182.1 | 4745371 | 20-scf00019 | 20 |
| AX-157913177 | 2 | 44.14  | KV453182.1 | 4755684 | 20-scf00019 | 20 |
| AX-157913181 | 2 | 44.14  | KV453182.1 | 4759445 | 20-scf00019 | 20 |
| AX-157913254 | 2 | 44.14  | KV453182.1 | 4869608 | 20-scf00019 | 20 |
| AX-157913169 | 2 | 44.141 | KV453182.1 | 4744961 | 20-scf00019 | 20 |
| AX-157913180 | 2 | 44.141 | KV453182.1 | 4757297 | 20-scf00019 | 20 |
| AX-157913201 | 2 | 44.141 | KV453182.1 | 4784484 | 20-scf00019 | 20 |
| AX-157913205 | 2 | 44.361 | KV453182.1 | 4792850 | 20-scf00019 | 20 |
| AX-157913206 | 2 | 44.425 | KV453182.1 | 4793038 | 20-scf00019 | 20 |
| AX-157913207 | 2 | 44.426 | KV453182.1 | 4793813 | 20-scf00019 | 20 |
| AX-157913208 | 2 | 44.426 | KV453182.1 | 4794896 | 20-scf00019 | 20 |
| AX-157741963 | 2 | 44.426 | KV453182.1 | 4798608 | 20-scf00019 | 20 |
| AX-157912671 | 2 | 44.569 | KV453182.1 | 4031943 | 20-scf00019 | 20 |
| AX-157912683 | 2 | 44.569 | KV453182.1 | 4048124 | 20-scf00019 | 20 |
| AX-157912697 | 2 | 44.569 | KV453182.1 | 4065278 | 20-scf00019 | 20 |
| AX-157912714 | 2 | 44.569 | KV453182.1 | 4091967 | 20-scf00019 | 20 |
| AX-157912723 | 2 | 44.569 | KV453182.1 | 4106425 | 20-scf00019 | 20 |
| AX-157912736 | 2 | 44.569 | KV453182.1 | 4124137 | 20-scf00019 | 20 |
| AX-157912741 | 2 | 44.569 | KV453182.1 | 4128716 | 20-scf00019 | 20 |
| AX-157812433 | 2 | 44.569 | KV453182.1 | 4161208 | 20-scf00019 | 20 |
| AX-157912858 | 2 | 44.569 | KV453182.1 | 4286363 | 20-scf00019 | 20 |
| AX-157912877 | 2 | 44.569 | KV453182.1 | 4314808 | 20-scf00019 | 20 |

|              |   |        |            |         |             |    |
|--------------|---|--------|------------|---------|-------------|----|
| AX-157912878 | 2 | 44.569 | KV453182.1 | 4315883 | 20-scf00019 | 20 |
| AX-157912882 | 2 | 44.569 | KV453182.1 | 4320427 | 20-scf00019 | 20 |
| AX-157912884 | 2 | 44.569 | KV453182.1 | 4321158 | 20-scf00019 | 20 |
| AX-157912919 | 2 | 44.569 | KV453182.1 | 4365929 | 20-scf00019 | 20 |
| AX-157853702 | 2 | 44.569 | KV453182.1 | 4369833 | 20-scf00019 | 20 |
| AX-157913007 | 2 | 44.569 | KV453182.1 | 4492080 | 20-scf00019 | 20 |
| AX-157913022 | 2 | 44.569 | KV453182.1 | 4531252 | 20-scf00019 | 20 |
| AX-157913023 | 2 | 44.569 | KV453182.1 | 4531735 | 20-scf00019 | 20 |
| AX-157913053 | 2 | 44.569 | KV453182.1 | 4568286 | 20-scf00019 | 20 |
| AX-157913064 | 2 | 44.569 | KV453182.1 | 4581503 | 20-scf00019 | 20 |
| AX-157699848 | 2 | 44.569 | KV453182.1 | 4596596 | 20-scf00019 | 20 |
| AX-157913075 | 2 | 44.569 | KV453182.1 | 4599549 | 20-scf00019 | 20 |
| AX-157913093 | 2 | 44.569 | KV453182.1 | 4628967 | 20-scf00019 | 20 |
| AX-157913108 | 2 | 44.569 | KV453182.1 | 4643535 | 20-scf00019 | 20 |
| AX-157913115 | 2 | 44.569 | KV453182.1 | 4651823 | 20-scf00019 | 20 |
| AX-157913129 | 2 | 44.569 | KV453182.1 | 4671158 | 20-scf00019 | 20 |
| AX-157812476 | 2 | 44.569 | KV453182.1 | 4675404 | 20-scf00019 | 20 |
| AX-157913156 | 2 | 44.569 | KV453182.1 | 4725298 | 20-scf00019 | 20 |
| AX-157913175 | 2 | 44.569 | KV453182.1 | 4752222 | 20-scf00019 | 20 |
| AX-157913212 | 2 | 44.569 | KV453182.1 | 4798678 | 20-scf00019 | 20 |
| AX-157738423 | 2 | 44.569 | KV453182.1 | 4811018 | 20-scf00019 | 20 |
| AX-157913226 | 2 | 44.569 | KV453182.1 | 4817122 | 20-scf00019 | 20 |
| AX-157913227 | 2 | 44.569 | KV453182.1 | 4820761 | 20-scf00019 | 20 |
| AX-157913228 | 2 | 44.569 | KV453182.1 | 4821414 | 20-scf00019 | 20 |
| AX-157913230 | 2 | 44.569 | KV453182.1 | 4823331 | 20-scf00019 | 20 |
| AX-157913231 | 2 | 44.569 | KV453182.1 | 4825312 | 20-scf00019 | 20 |
| AX-157913237 | 2 | 44.569 | KV453182.1 | 4830587 | 20-scf00019 | 20 |
| AX-157812485 | 2 | 44.569 | KV453182.1 | 4837727 | 20-scf00019 | 20 |
| AX-157812486 | 2 | 44.569 | KV453182.1 | 4839122 | 20-scf00019 | 20 |
| AX-157913241 | 2 | 44.569 | KV453182.1 | 4839353 | 20-scf00019 | 20 |
| AX-157812487 | 2 | 44.569 | KV453182.1 | 4839736 | 20-scf00019 | 20 |
| AX-157913242 | 2 | 44.569 | KV453182.1 | 4840680 | 20-scf00019 | 20 |
| AX-157913243 | 2 | 44.569 | KV453182.1 | 4841870 | 20-scf00019 | 20 |
| AX-157913245 | 2 | 44.569 | KV453182.1 | 4846881 | 20-scf00019 | 20 |
| AX-157812490 | 2 | 44.569 | KV453182.1 | 4847757 | 20-scf00019 | 20 |
| AX-157913247 | 2 | 44.569 | KV453182.1 | 4853606 | 20-scf00019 | 20 |
| AX-157913250 | 2 | 44.569 | KV453182.1 | 4857269 | 20-scf00019 | 20 |
| AX-157913251 | 2 | 44.569 | KV453182.1 | 4859609 | 20-scf00019 | 20 |
| AX-157913252 | 2 | 44.569 | KV453182.1 | 4860392 | 20-scf00019 | 20 |
| AX-157812492 | 2 | 44.569 | KV453182.1 | 4862163 | 20-scf00019 | 20 |
| AX-157812494 | 2 | 44.569 | KV453182.1 | 4863387 | 20-scf00019 | 20 |
| AX-157913258 | 2 | 44.569 | KV453182.1 | 4874944 | 20-scf00019 | 20 |
| AX-157913262 | 2 | 44.569 | KV453182.1 | 4879949 | 20-scf00019 | 20 |
| AX-157913263 | 2 | 44.569 | KV453182.1 | 4880535 | 20-scf00019 | 20 |
| AX-157913265 | 2 | 44.569 | KV453182.1 | 4881709 | 20-scf00019 | 20 |
| AX-157913268 | 2 | 44.569 | KV453182.1 | 4888422 | 20-scf00019 | 20 |
| AX-157913270 | 2 | 44.569 | KV453182.1 | 4890939 | 20-scf00019 | 20 |
| AX-157913272 | 2 | 44.569 | KV453182.1 | 4895672 | 20-scf00019 | 20 |
| AX-157913273 | 2 | 44.569 | KV453182.1 | 4896374 | 20-scf00019 | 20 |
| AX-157913275 | 2 | 44.569 | KV453182.1 | 4898454 | 20-scf00019 | 20 |
| AX-157913276 | 2 | 44.569 | KV453182.1 | 4899358 | 20-scf00019 | 20 |



|              |   |        |            |         |             |    |
|--------------|---|--------|------------|---------|-------------|----|
| AX-157913277 | 2 | 44.569 | KV453182.1 | 4900993 | 20-scf00019 | 20 |
| AX-157913279 | 2 | 44.569 | KV453182.1 | 4905238 | 20-scf00019 | 20 |
| AX-157743560 | 2 | 44.699 | KV453182.1 | 4865420 | 20-scf00019 | 20 |
| AX-157913285 | 2 | 44.699 | KV453182.1 | 4921921 | 20-scf00019 | 20 |
| AX-157913286 | 2 | 44.699 | KV453182.1 | 4922772 | 20-scf00019 | 20 |
| AX-157913287 | 2 | 44.699 | KV453182.1 | 4923294 | 20-scf00019 | 20 |
| AX-157913288 | 2 | 44.699 | KV453182.1 | 4923495 | 20-scf00019 | 20 |
| AX-157913289 | 2 | 44.699 | KV453182.1 | 4925316 | 20-scf00019 | 20 |
| AX-157913295 | 2 | 44.75  | KV453182.1 | 4932664 | 20-scf00019 | 20 |
| AX-157913298 | 2 | 44.789 | KV453182.1 | 4935595 | 20-scf00019 | 20 |
| AX-157913234 | 2 | 44.83  | KV453182.1 | 4827378 | 20-scf00019 | 20 |
| AX-157913253 | 2 | 44.83  | KV453182.1 | 4869034 | 20-scf00019 | 20 |
| AX-157913299 | 2 | 44.83  | KV453182.1 | 4936637 | 20-scf00019 | 20 |
| AX-157913301 | 2 | 44.83  | KV453182.1 | 4943313 | 20-scf00019 | 20 |
| AX-157913305 | 2 | 44.83  | KV453182.1 | 4947168 | 20-scf00019 | 20 |
| AX-157913308 | 2 | 44.83  | KV453182.1 | 4951263 | 20-scf00019 | 20 |
| AX-157914530 | 2 | 44.83  | KV453182.1 | 7074571 | 20-scf00019 | 20 |
| AX-157914901 | 2 | 44.83  | KV453193.1 | 21807   | 20-scf00021 | 20 |
| AX-157914953 | 2 | 44.83  | KV453193.1 | 102558  | 20-scf00021 | 20 |
| AX-157913266 | 2 | 45.09  | KV453182.1 | 4882205 | 20-scf00019 | 20 |
| AX-157913311 | 2 | 45.09  | KV453182.1 | 4954193 | 20-scf00019 | 20 |
| AX-157913313 | 2 | 45.09  | KV453182.1 | 4955682 | 20-scf00019 | 20 |
| AX-157913314 | 2 | 45.09  | KV453182.1 | 4956537 | 20-scf00019 | 20 |
| AX-157913315 | 2 | 45.09  | KV453182.1 | 4957160 | 20-scf00019 | 20 |
| AX-157913316 | 2 | 45.09  | KV453182.1 | 4958299 | 20-scf00019 | 20 |
| AX-157913318 | 2 | 45.09  | KV453182.1 | 4961909 | 20-scf00019 | 20 |
| AX-157874656 | 2 | 45.09  | KV453182.1 | 4962635 | 20-scf00019 | 20 |
| AX-157913321 | 2 | 45.09  | KV453182.1 | 4964486 | 20-scf00019 | 20 |
| AX-157913323 | 2 | 45.09  | KV453182.1 | 4967028 | 20-scf00019 | 20 |
| AX-157913325 | 2 | 45.09  | KV453182.1 | 4968247 | 20-scf00019 | 20 |
| AX-157913335 | 2 | 45.09  | KV453182.1 | 4976201 | 20-scf00019 | 20 |
| AX-157913339 | 2 | 45.09  | KV453182.1 | 4979890 | 20-scf00019 | 20 |
| AX-157913343 | 2 | 45.09  | KV453182.1 | 4983777 | 20-scf00019 | 20 |
| AX-157913350 | 2 | 45.09  | KV453182.1 | 4991145 | 20-scf00019 | 20 |
| AX-157853709 | 2 | 45.09  | KV453182.1 | 4998155 | 20-scf00019 | 20 |
| AX-157913365 | 2 | 45.09  | KV453182.1 | 5011412 | 20-scf00019 | 20 |
| AX-157750067 | 2 | 45.09  | KV453182.1 | 5013471 | 20-scf00019 | 20 |
| AX-157913366 | 2 | 45.09  | KV453182.1 | 5014017 | 20-scf00019 | 20 |
| AX-157913382 | 2 | 45.09  | KV453182.1 | 5028928 | 20-scf00019 | 20 |
| AX-157913387 | 2 | 45.09  | KV453182.1 | 5032810 | 20-scf00019 | 20 |
| AX-157913389 | 2 | 45.09  | KV453182.1 | 5034101 | 20-scf00019 | 20 |
| AX-157913404 | 2 | 45.09  | KV453182.1 | 5052990 | 20-scf00019 | 20 |
| AX-157913424 | 2 | 45.09  | KV453182.1 | 5080530 | 20-scf00019 | 20 |
| AX-157913452 | 2 | 45.09  | KV453182.1 | 5122204 | 20-scf00019 | 20 |
| AX-157913460 | 2 | 45.09  | KV453182.1 | 5129338 | 20-scf00019 | 20 |
| AX-157913461 | 2 | 45.09  | KV453182.1 | 5129856 | 20-scf00019 | 20 |
| AX-157738750 | 2 | 45.09  | KV453182.1 | 5198075 | 20-scf00019 | 20 |
| AX-157913535 | 2 | 45.09  | KV453182.1 | 5219353 | 20-scf00019 | 20 |
| AX-158382243 | 2 | 45.09  | KV453182.1 | 5220132 | 20-scf00019 | 20 |
| AX-157913548 | 2 | 45.09  | KV453182.1 | 5237636 | 20-scf00019 | 20 |
| AX-157913317 | 2 | 45.152 | KV453182.1 | 4959965 | 20-scf00019 | 20 |

|              |   |        |             |         |             |    |
|--------------|---|--------|-------------|---------|-------------|----|
| AX-157913338 | 2 | 45.152 | KV453182.1  | 4978658 | 20-scf00019 | 20 |
| AX-157695124 | 2 | 45.152 | KV453182.1  | 5014744 | 20-scf00019 | 20 |
| AX-157913213 | 2 | 45.22  | KV453182.1  | 4800192 | 20-scf00019 | 20 |
| AX-157913214 | 2 | 45.22  | KV453182.1  | 4800581 | 20-scf00019 | 20 |
| AX-157913290 | 2 | 45.22  | KV453182.1  | 4926317 | 20-scf00019 | 20 |
| AX-157913342 | 2 | 45.22  | KV453182.1  | 4982538 | 20-scf00019 | 20 |
| AX-157913344 | 2 | 45.22  | KV453182.1  | 4984579 | 20-scf00019 | 20 |
| AX-157913353 | 2 | 45.22  | KV453182.1  | 4993439 | 20-scf00019 | 20 |
| AX-157913354 | 2 | 45.22  | KV453182.1  | 4995519 | 20-scf00019 | 20 |
| AX-157913358 | 2 | 45.22  | KV453182.1  | 5000493 | 20-scf00019 | 20 |
| AX-157913364 | 2 | 45.22  | KV453182.1  | 5008913 | 20-scf00019 | 20 |
| AX-157741401 | 2 | 45.22  | KV453182.1  | 5014670 | 20-scf00019 | 20 |
| AX-157913371 | 2 | 45.22  | KV453182.1  | 5018103 | 20-scf00019 | 20 |
| AX-157913380 | 2 | 45.22  | KV453182.1  | 5026898 | 20-scf00019 | 20 |
| AX-157913385 | 2 | 45.22  | KV453182.1  | 5031618 | 20-scf00019 | 20 |
| AX-157913386 | 2 | 45.22  | KV453182.1  | 5032230 | 20-scf00019 | 20 |
| AX-157913388 | 2 | 45.22  | KV453182.1  | 5033492 | 20-scf00019 | 20 |
| AX-157913390 | 2 | 45.22  | KV453182.1  | 5034697 | 20-scf00019 | 20 |
| AX-158382238 | 2 | 45.22  | KV453182.1  | 5091144 | 20-scf00019 | 20 |
| AX-157913478 | 2 | 45.22  | KV453182.1  | 5147313 | 20-scf00019 | 20 |
| AX-157913518 | 2 | 45.22  | KV453182.1  | 5196989 | 20-scf00019 | 20 |
| AX-157913526 | 2 | 45.22  | KV453182.1  | 5209654 | 20-scf00019 | 20 |
| AX-157913532 | 2 | 45.22  | KV453182.1  | 5215564 | 20-scf00019 | 20 |
| AX-157913605 | 2 | 45.22  | KV453182.1  | 5310299 | 20-scf00019 | 20 |
| AX-157705742 | 2 | 45.22  | 3ML01030766 | 516     | scf06368_1  | UN |
| AX-157913396 | 2 | 45.29  | KV453182.1  | 5046888 | 20-scf00019 | 20 |
| AX-157915433 | 2 | 45.29  | KV453193.1  | 715053  | 20-scf00021 | 20 |
| AX-157920156 | 2 | 45.29  | KV453183.1  | 913603  | 20-scf00571 | 20 |
| AX-157913402 | 2 | 45.349 | KV453182.1  | 5051411 | 20-scf00019 | 20 |
| AX-157913376 | 2 | 45.411 | KV453182.1  | 5023450 | 20-scf00019 | 20 |
| AX-157913407 | 2 | 45.411 | KV453182.1  | 5055396 | 20-scf00019 | 20 |
| AX-157913408 | 2 | 45.411 | KV453182.1  | 5055848 | 20-scf00019 | 20 |
| AX-157913569 | 2 | 45.411 | KV453182.1  | 5261076 | 20-scf00019 | 20 |
| AX-157913570 | 2 | 45.411 | KV453182.1  | 5261381 | 20-scf00019 | 20 |
| AX-157812509 | 2 | 45.411 | KV453182.1  | 5261493 | 20-scf00019 | 20 |
| AX-157913624 | 2 | 45.411 | KV453182.1  | 5338310 | 20-scf00019 | 20 |
| AX-157913415 | 2 | 45.481 | KV453182.1  | 5073558 | 20-scf00019 | 20 |
| AX-157853710 | 2 | 45.481 | KV453182.1  | 5083287 | 20-scf00019 | 20 |
| AX-157913300 | 2 | 45.529 | KV453182.1  | 4941108 | 20-scf00019 | 20 |
| AX-157744873 | 2 | 45.529 | KV453182.1  | 5086580 | 20-scf00019 | 20 |
| AX-157913428 | 2 | 45.529 | KV453182.1  | 5088172 | 20-scf00019 | 20 |
| AX-157913455 | 2 | 45.529 | KV453182.1  | 5125493 | 20-scf00019 | 20 |
| AX-157913482 | 2 | 45.529 | KV453182.1  | 5151600 | 20-scf00019 | 20 |
| AX-157913446 | 2 | 45.572 | KV453182.1  | 5113422 | 20-scf00019 | 20 |
| AX-157913246 | 2 | 45.611 | KV453182.1  | 4853151 | 20-scf00019 | 20 |
| AX-157913330 | 2 | 45.611 | KV453182.1  | 4971975 | 20-scf00019 | 20 |
| AX-157913378 | 2 | 45.611 | KV453182.1  | 5024508 | 20-scf00019 | 20 |
| AX-157913405 | 2 | 45.611 | KV453182.1  | 5054475 | 20-scf00019 | 20 |
| AX-157913417 | 2 | 45.611 | KV453182.1  | 5074766 | 20-scf00019 | 20 |
| AX-157913421 | 2 | 45.611 | KV453182.1  | 5077483 | 20-scf00019 | 20 |
| AX-157913422 | 2 | 45.611 | KV453182.1  | 5078588 | 20-scf00019 | 20 |

|              |   |        |            |         |             |    |
|--------------|---|--------|------------|---------|-------------|----|
| AX-157723218 | 2 | 45.611 | KV453182.1 | 5115110 | 20-scf00019 | 20 |
| AX-157913449 | 2 | 45.611 | KV453182.1 | 5117085 | 20-scf00019 | 20 |
| AX-157913450 | 2 | 45.611 | KV453182.1 | 5119012 | 20-scf00019 | 20 |
| AX-157913459 | 2 | 45.611 | KV453182.1 | 5127425 | 20-scf00019 | 20 |
| AX-157913462 | 2 | 45.611 | KV453182.1 | 5131478 | 20-scf00019 | 20 |
| AX-157913465 | 2 | 45.611 | KV453182.1 | 5134579 | 20-scf00019 | 20 |
| AX-157913470 | 2 | 45.611 | KV453182.1 | 5141270 | 20-scf00019 | 20 |
| AX-157913474 | 2 | 45.611 | KV453182.1 | 5144339 | 20-scf00019 | 20 |
| AX-157913476 | 2 | 45.611 | KV453182.1 | 5146189 | 20-scf00019 | 20 |
| AX-157913483 | 2 | 45.611 | KV453182.1 | 5152196 | 20-scf00019 | 20 |
| AX-157913484 | 2 | 45.611 | KV453182.1 | 5156066 | 20-scf00019 | 20 |
| AX-157913487 | 2 | 45.611 | KV453182.1 | 5159144 | 20-scf00019 | 20 |
| AX-157913490 | 2 | 45.611 | KV453182.1 | 5164180 | 20-scf00019 | 20 |
| AX-157913492 | 2 | 45.611 | KV453182.1 | 5165934 | 20-scf00019 | 20 |
| AX-157913493 | 2 | 45.611 | KV453182.1 | 5169203 | 20-scf00019 | 20 |
| AX-157913494 | 2 | 45.611 | KV453182.1 | 5170313 | 20-scf00019 | 20 |
| AX-157913498 | 2 | 45.611 | KV453182.1 | 5177126 | 20-scf00019 | 20 |
| AX-158404973 | 2 | 45.611 | KV453182.1 | 5186343 | 20-scf00019 | 20 |
| AX-157709871 | 2 | 45.611 | KV453182.1 | 5187752 | 20-scf00019 | 20 |
| AX-157913511 | 2 | 45.611 | KV453182.1 | 5191348 | 20-scf00019 | 20 |
| AX-157913516 | 2 | 45.611 | KV453182.1 | 5195409 | 20-scf00019 | 20 |
| AX-157913519 | 2 | 45.611 | KV453182.1 | 5197420 | 20-scf00019 | 20 |
| AX-157913522 | 2 | 45.611 | KV453182.1 | 5205877 | 20-scf00019 | 20 |
| AX-157913524 | 2 | 45.611 | KV453182.1 | 5208491 | 20-scf00019 | 20 |
| AX-157913528 | 2 | 45.611 | KV453182.1 | 5211875 | 20-scf00019 | 20 |
| AX-157913541 | 2 | 45.611 | KV453182.1 | 5226210 | 20-scf00019 | 20 |
| AX-157913543 | 2 | 45.611 | KV453182.1 | 5231986 | 20-scf00019 | 20 |
| AX-157913544 | 2 | 45.611 | KV453182.1 | 5233464 | 20-scf00019 | 20 |
| AX-157913167 | 2 | 45.742 | KV453182.1 | 4741099 | 20-scf00019 | 20 |
| AX-157913557 | 2 | 45.742 | KV453182.1 | 5243685 | 20-scf00019 | 20 |
| AX-157913561 | 2 | 45.742 | KV453182.1 | 5247268 | 20-scf00019 | 20 |
| AX-157913562 | 2 | 45.742 | KV453182.1 | 5250399 | 20-scf00019 | 20 |
| AX-157913563 | 2 | 45.742 | KV453182.1 | 5251460 | 20-scf00019 | 20 |
| AX-157812504 | 2 | 45.742 | KV453182.1 | 5251770 | 20-scf00019 | 20 |
| AX-157812505 | 2 | 45.742 | KV453182.1 | 5252303 | 20-scf00019 | 20 |
| AX-157812506 | 2 | 45.742 | KV453182.1 | 5255113 | 20-scf00019 | 20 |
| AX-157913565 | 2 | 45.742 | KV453182.1 | 5256286 | 20-scf00019 | 20 |
| AX-157913618 | 2 | 45.742 | KV453182.1 | 5327048 | 20-scf00019 | 20 |
| AX-157812507 | 2 | 45.779 | KV453182.1 | 5256823 | 20-scf00019 | 20 |
| AX-157913566 | 2 | 45.805 | KV453182.1 | 5257055 | 20-scf00019 | 20 |
| AX-157745615 | 2 | 45.805 | KV453182.1 | 5257453 | 20-scf00019 | 20 |
| AX-157812508 | 2 | 45.805 | KV453182.1 | 5259318 | 20-scf00019 | 20 |
| AX-157913567 | 2 | 45.81  | KV453182.1 | 5260210 | 20-scf00019 | 20 |
| AX-157913571 | 2 | 45.81  | KV453182.1 | 5266507 | 20-scf00019 | 20 |
| AX-157913576 | 2 | 45.81  | KV453182.1 | 5268864 | 20-scf00019 | 20 |
| AX-157913620 | 2 | 45.81  | KV453182.1 | 5330062 | 20-scf00019 | 20 |
| AX-157913662 | 2 | 45.81  | KV453182.1 | 5402247 | 20-scf00019 | 20 |
| AX-157913746 | 2 | 45.81  | KV453182.1 | 5537531 | 20-scf00019 | 20 |
| AX-157913507 | 2 | 45.841 | KV453182.1 | 5188278 | 20-scf00019 | 20 |
| AX-157913580 | 2 | 45.841 | KV453182.1 | 5271822 | 20-scf00019 | 20 |
| AX-157913581 | 2 | 45.872 | KV453182.1 | 5272186 | 20-scf00019 | 20 |

|              |   |        |            |         |             |    |
|--------------|---|--------|------------|---------|-------------|----|
| AX-157913583 | 2 | 45.872 | KV453182.1 | 5273663 | 20-scf00019 | 20 |
| AX-157913587 | 2 | 45.872 | KV453182.1 | 5279177 | 20-scf00019 | 20 |
| AX-157913588 | 2 | 45.872 | KV453182.1 | 5282895 | 20-scf00019 | 20 |
| AX-157913590 | 2 | 45.872 | KV453182.1 | 5284746 | 20-scf00019 | 20 |
| AX-157913597 | 2 | 45.872 | KV453182.1 | 5298024 | 20-scf00019 | 20 |
| AX-157913607 | 2 | 45.872 | KV453182.1 | 5312609 | 20-scf00019 | 20 |
| AX-157913630 | 2 | 45.872 | KV453182.1 | 5346717 | 20-scf00019 | 20 |
| AX-157913603 | 2 | 45.882 | KV453182.1 | 5308497 | 20-scf00019 | 20 |
| AX-157913609 | 2 | 45.882 | KV453182.1 | 5315702 | 20-scf00019 | 20 |
| AX-157913610 | 2 | 45.882 | KV453182.1 | 5318391 | 20-scf00019 | 20 |
| AX-157913663 | 2 | 45.882 | KV453182.1 | 5402686 | 20-scf00019 | 20 |
| AX-157913612 | 2 | 45.913 | KV453182.1 | 5319481 | 20-scf00019 | 20 |
| AX-157913616 | 2 | 45.946 | KV453182.1 | 5321989 | 20-scf00019 | 20 |
| AX-157913619 | 2 | 45.988 | KV453182.1 | 5327458 | 20-scf00019 | 20 |
| AX-157913626 | 2 | 46.002 | KV453182.1 | 5341396 | 20-scf00019 | 20 |
| AX-157913629 | 2 | 46.002 | KV453182.1 | 5345936 | 20-scf00019 | 20 |
| AX-157913803 | 2 | 46.002 | KV453182.1 | 5604894 | 20-scf00019 | 20 |
| AX-157914421 | 2 | 46.002 | KV453182.1 | 6613100 | 20-scf00019 | 20 |
| AX-157702170 | 2 | 46.002 | KV453189.1 | 1513647 | 20-scf00020 | 20 |
| AX-158375408 | 2 | 46.002 | KV453187.1 | 502035  | 20-scf00563 | 20 |
| AX-158375413 | 2 | 46.002 | KV453187.1 | 527634  | 20-scf00563 | 20 |
| AX-157913634 | 2 | 46.245 | KV453182.1 | 5350197 | 20-scf00019 | 20 |
| AX-157913336 | 2 | 46.251 | KV453182.1 | 4977289 | 20-scf00019 | 20 |
| AX-157913410 | 2 | 46.251 | KV453182.1 | 5059104 | 20-scf00019 | 20 |
| AX-157709319 | 2 | 46.251 | KV453182.1 | 5327351 | 20-scf00019 | 20 |
| AX-157913622 | 2 | 46.251 | KV453182.1 | 5332487 | 20-scf00019 | 20 |
| AX-157913635 | 2 | 46.251 | KV453182.1 | 5351064 | 20-scf00019 | 20 |
| AX-157913637 | 2 | 46.251 | KV453182.1 | 5358807 | 20-scf00019 | 20 |
| AX-157812515 | 2 | 46.251 | KV453182.1 | 5368953 | 20-scf00019 | 20 |
| AX-157913645 | 2 | 46.251 | KV453182.1 | 5372789 | 20-scf00019 | 20 |
| AX-157812516 | 2 | 46.251 | KV453182.1 | 5378195 | 20-scf00019 | 20 |
| AX-157752786 | 2 | 46.251 | KV453182.1 | 5378572 | 20-scf00019 | 20 |
| AX-157913654 | 2 | 46.251 | KV453182.1 | 5387205 | 20-scf00019 | 20 |
| AX-157913660 | 2 | 46.251 | KV453182.1 | 5399988 | 20-scf00019 | 20 |
| AX-157914366 | 2 | 46.251 | KV453182.1 | 6248243 | 20-scf00019 | 20 |
| AX-157741556 | 2 | 46.374 | KV453182.1 | 5314813 | 20-scf00019 | 20 |
| AX-157913657 | 2 | 46.374 | KV453182.1 | 5392767 | 20-scf00019 | 20 |
| AX-157913666 | 2 | 46.374 | KV453182.1 | 5408140 | 20-scf00019 | 20 |
| AX-157913667 | 2 | 46.374 | KV453182.1 | 5409109 | 20-scf00019 | 20 |
| AX-157913696 | 2 | 46.374 | KV453182.1 | 5465186 | 20-scf00019 | 20 |
| AX-157693618 | 2 | 46.374 | KV453182.1 | 5515457 | 20-scf00019 | 20 |
| AX-157913573 | 2 | 46.495 | KV453182.1 | 5267516 | 20-scf00019 | 20 |
| AX-157913664 | 2 | 46.495 | KV453182.1 | 5404101 | 20-scf00019 | 20 |
| AX-157913672 | 2 | 46.495 | KV453182.1 | 5424806 | 20-scf00019 | 20 |
| AX-157913686 | 2 | 46.495 | KV453182.1 | 5449445 | 20-scf00019 | 20 |
| AX-157913695 | 2 | 46.495 | KV453182.1 | 5464474 | 20-scf00019 | 20 |
| AX-157812523 | 2 | 46.495 | KV453182.1 | 5467717 | 20-scf00019 | 20 |
| AX-157913725 | 2 | 46.495 | KV453182.1 | 5505999 | 20-scf00019 | 20 |
| AX-157915030 | 2 | 46.495 | KV453193.1 | 194168  | 20-scf00021 | 20 |
| AX-157747048 | 2 | 46.495 | KV453193.1 | 440762  | 20-scf00021 | 20 |
| AX-157915644 | 2 | 46.495 | KV453193.1 | 1040526 | 20-scf00021 | 20 |

|              |   |        |            |         |             |    |
|--------------|---|--------|------------|---------|-------------|----|
| AX-157915720 | 2 | 46.495 | KV453193.1 | 1148575 | 20-scf00021 | 20 |
| AX-157913591 | 2 | 46.496 | KV453182.1 | 5286003 | 20-scf00019 | 20 |
| AX-157913596 | 2 | 46.496 | KV453182.1 | 5295163 | 20-scf00019 | 20 |
| AX-157913602 | 2 | 46.496 | KV453182.1 | 5308329 | 20-scf00019 | 20 |
| AX-157913614 | 2 | 46.496 | KV453182.1 | 5320050 | 20-scf00019 | 20 |
| AX-157913633 | 2 | 46.496 | KV453182.1 | 5349035 | 20-scf00019 | 20 |
| AX-157710689 | 2 | 46.496 | KV453182.1 | 5393834 | 20-scf00019 | 20 |
| AX-157717773 | 2 | 46.496 | KV453182.1 | 5405852 | 20-scf00019 | 20 |
| AX-157913671 | 2 | 46.496 | KV453182.1 | 5421526 | 20-scf00019 | 20 |
| AX-157913676 | 2 | 46.496 | KV453182.1 | 5434492 | 20-scf00019 | 20 |
| AX-157812522 | 2 | 46.496 | KV453182.1 | 5438151 | 20-scf00019 | 20 |
| AX-157913680 | 2 | 46.496 | KV453182.1 | 5441803 | 20-scf00019 | 20 |
| AX-157913683 | 2 | 46.496 | KV453182.1 | 5444981 | 20-scf00019 | 20 |
| AX-157913684 | 2 | 46.496 | KV453182.1 | 5447356 | 20-scf00019 | 20 |
| AX-157913692 | 2 | 46.496 | KV453182.1 | 5461391 | 20-scf00019 | 20 |
| AX-157726905 | 2 | 46.496 | KV453182.1 | 5464028 | 20-scf00019 | 20 |
| AX-157913703 | 2 | 46.496 | KV453182.1 | 5477323 | 20-scf00019 | 20 |
| AX-157913704 | 2 | 46.496 | KV453182.1 | 5477793 | 20-scf00019 | 20 |
| AX-157913706 | 2 | 46.496 | KV453182.1 | 5479057 | 20-scf00019 | 20 |
| AX-157913708 | 2 | 46.496 | KV453182.1 | 5481674 | 20-scf00019 | 20 |
| AX-157913710 | 2 | 46.496 | KV453182.1 | 5483306 | 20-scf00019 | 20 |
| AX-157913715 | 2 | 46.496 | KV453182.1 | 5495448 | 20-scf00019 | 20 |
| AX-157913717 | 2 | 46.496 | KV453182.1 | 5496292 | 20-scf00019 | 20 |
| AX-157913738 | 2 | 46.496 | KV453182.1 | 5521569 | 20-scf00019 | 20 |
| AX-157913745 | 2 | 46.496 | KV453182.1 | 5537018 | 20-scf00019 | 20 |
| AX-157913756 | 2 | 46.496 | KV453182.1 | 5550538 | 20-scf00019 | 20 |
| AX-157913761 | 2 | 46.496 | KV453182.1 | 5554376 | 20-scf00019 | 20 |
| AX-157913762 | 2 | 46.496 | KV453182.1 | 5559031 | 20-scf00019 | 20 |
| AX-157913767 | 2 | 46.496 | KV453182.1 | 5566491 | 20-scf00019 | 20 |
| AX-157913769 | 2 | 46.496 | KV453182.1 | 5568756 | 20-scf00019 | 20 |
| AX-157913771 | 2 | 46.496 | KV453182.1 | 5570067 | 20-scf00019 | 20 |
| AX-157913772 | 2 | 46.496 | KV453182.1 | 5570981 | 20-scf00019 | 20 |
| AX-157913774 | 2 | 46.496 | KV453182.1 | 5573549 | 20-scf00019 | 20 |
| AX-157812525 | 2 | 46.496 | KV453182.1 | 5577489 | 20-scf00019 | 20 |
| AX-157913779 | 2 | 46.496 | KV453182.1 | 5577642 | 20-scf00019 | 20 |
| AX-157913780 | 2 | 46.496 | KV453182.1 | 5578416 | 20-scf00019 | 20 |
| AX-157913781 | 2 | 46.496 | KV453182.1 | 5578931 | 20-scf00019 | 20 |
| AX-157913785 | 2 | 46.496 | KV453182.1 | 5587606 | 20-scf00019 | 20 |
| AX-157913786 | 2 | 46.496 | KV453182.1 | 5588583 | 20-scf00019 | 20 |
| AX-157913787 | 2 | 46.496 | KV453182.1 | 5589439 | 20-scf00019 | 20 |
| AX-157913789 | 2 | 46.496 | KV453182.1 | 5590564 | 20-scf00019 | 20 |
| AX-157913790 | 2 | 46.496 | KV453182.1 | 5591319 | 20-scf00019 | 20 |
| AX-157913791 | 2 | 46.496 | KV453182.1 | 5591882 | 20-scf00019 | 20 |
| AX-157913792 | 2 | 46.496 | KV453182.1 | 5592391 | 20-scf00019 | 20 |
| AX-157913794 | 2 | 46.496 | KV453182.1 | 5595427 | 20-scf00019 | 20 |
| AX-157812526 | 2 | 46.496 | KV453182.1 | 5596350 | 20-scf00019 | 20 |
| AX-157913795 | 2 | 46.496 | KV453182.1 | 5596806 | 20-scf00019 | 20 |
| AX-157913796 | 2 | 46.496 | KV453182.1 | 5597348 | 20-scf00019 | 20 |
| AX-157913798 | 2 | 46.496 | KV453182.1 | 5599037 | 20-scf00019 | 20 |
| AX-157913799 | 2 | 46.496 | KV453182.1 | 5599393 | 20-scf00019 | 20 |
| AX-157913801 | 2 | 46.496 | KV453182.1 | 5603484 | 20-scf00019 | 20 |

|              |   |        |            |         |             |    |
|--------------|---|--------|------------|---------|-------------|----|
| AX-157913804 | 2 | 46.496 | KV453182.1 | 5606427 | 20-scf00019 | 20 |
| AX-157913805 | 2 | 46.496 | KV453182.1 | 5609073 | 20-scf00019 | 20 |
| AX-157913806 | 2 | 46.496 | KV453182.1 | 5609470 | 20-scf00019 | 20 |
| AX-157913808 | 2 | 46.496 | KV453182.1 | 5610061 | 20-scf00019 | 20 |
| AX-157913810 | 2 | 46.496 | KV453182.1 | 5613624 | 20-scf00019 | 20 |
| AX-157913813 | 2 | 46.496 | KV453182.1 | 5616326 | 20-scf00019 | 20 |
| AX-157913817 | 2 | 46.496 | KV453182.1 | 5620083 | 20-scf00019 | 20 |
| AX-157913822 | 2 | 46.496 | KV453182.1 | 5624511 | 20-scf00019 | 20 |
| AX-157913823 | 2 | 46.496 | KV453182.1 | 5627379 | 20-scf00019 | 20 |
| AX-157913824 | 2 | 46.496 | KV453182.1 | 5627909 | 20-scf00019 | 20 |
| AX-157913825 | 2 | 46.496 | KV453182.1 | 5628271 | 20-scf00019 | 20 |
| AX-157812527 | 2 | 46.496 | KV453182.1 | 5629965 | 20-scf00019 | 20 |
| AX-157913827 | 2 | 46.496 | KV453182.1 | 5630640 | 20-scf00019 | 20 |
| AX-157913828 | 2 | 46.496 | KV453182.1 | 5631269 | 20-scf00019 | 20 |
| AX-157913829 | 2 | 46.496 | KV453182.1 | 5631629 | 20-scf00019 | 20 |
| AX-157913830 | 2 | 46.496 | KV453182.1 | 5631984 | 20-scf00019 | 20 |
| AX-157812528 | 2 | 46.496 | KV453182.1 | 5633672 | 20-scf00019 | 20 |
| AX-157812529 | 2 | 46.496 | KV453182.1 | 5634140 | 20-scf00019 | 20 |
| AX-157913831 | 2 | 46.496 | KV453182.1 | 5634330 | 20-scf00019 | 20 |
| AX-157913832 | 2 | 46.496 | KV453182.1 | 5636005 | 20-scf00019 | 20 |
| AX-157913833 | 2 | 46.496 | KV453182.1 | 5637340 | 20-scf00019 | 20 |
| AX-157913834 | 2 | 46.496 | KV453182.1 | 5639098 | 20-scf00019 | 20 |
| AX-157913835 | 2 | 46.496 | KV453182.1 | 5640533 | 20-scf00019 | 20 |
| AX-157913836 | 2 | 46.496 | KV453182.1 | 5641232 | 20-scf00019 | 20 |
| AX-157913837 | 2 | 46.496 | KV453182.1 | 5642162 | 20-scf00019 | 20 |
| AX-157716014 | 2 | 46.496 | KV453182.1 | 5642490 | 20-scf00019 | 20 |
| AX-157913838 | 2 | 46.496 | KV453182.1 | 5642768 | 20-scf00019 | 20 |
| AX-157739827 | 2 | 46.496 | KV453182.1 | 5645888 | 20-scf00019 | 20 |
| AX-157913840 | 2 | 46.496 | KV453182.1 | 5646221 | 20-scf00019 | 20 |
| AX-157913841 | 2 | 46.496 | KV453182.1 | 5646628 | 20-scf00019 | 20 |
| AX-157913843 | 2 | 46.496 | KV453182.1 | 5648234 | 20-scf00019 | 20 |
| AX-157913844 | 2 | 46.496 | KV453182.1 | 5648726 | 20-scf00019 | 20 |
| AX-157913846 | 2 | 46.496 | KV453182.1 | 5649754 | 20-scf00019 | 20 |
| AX-157913847 | 2 | 46.496 | KV453182.1 | 5650614 | 20-scf00019 | 20 |
| AX-157913849 | 2 | 46.496 | KV453182.1 | 5654862 | 20-scf00019 | 20 |
| AX-157913850 | 2 | 46.496 | KV453182.1 | 5655649 | 20-scf00019 | 20 |
| AX-157740485 | 2 | 46.496 | KV453182.1 | 5658311 | 20-scf00019 | 20 |
| AX-157812531 | 2 | 46.496 | KV453182.1 | 5660463 | 20-scf00019 | 20 |
| AX-157913855 | 2 | 46.496 | KV453182.1 | 5660774 | 20-scf00019 | 20 |
| AX-157913857 | 2 | 46.496 | KV453182.1 | 5662915 | 20-scf00019 | 20 |
| AX-157913858 | 2 | 46.496 | KV453182.1 | 5664431 | 20-scf00019 | 20 |
| AX-157913859 | 2 | 46.496 | KV453182.1 | 5668186 | 20-scf00019 | 20 |
| AX-157812552 | 2 | 46.496 | KV453182.1 | 5864372 | 20-scf00019 | 20 |
| AX-157914080 | 2 | 46.496 | KV453182.1 | 5911807 | 20-scf00019 | 20 |
| AX-157915325 | 2 | 46.496 | KV453193.1 | 579024  | 20-scf00021 | 20 |
| AX-157920238 | 2 | 46.496 | KV453183.1 | 1205658 | 20-scf00571 | 20 |
| AX-157920264 | 2 | 46.496 | KV453183.1 | 1293065 | 20-scf00571 | 20 |
| AX-157913860 | 2 | 46.513 | KV453182.1 | 5669337 | 20-scf00019 | 20 |
| AX-157913747 | 2 | 46.53  | KV453182.1 | 5538134 | 20-scf00019 | 20 |
| AX-157913793 | 2 | 46.53  | KV453182.1 | 5594229 | 20-scf00019 | 20 |
| AX-157913861 | 2 | 46.53  | KV453182.1 | 5670578 | 20-scf00019 | 20 |

|              |   |        |            |         |             |    |
|--------------|---|--------|------------|---------|-------------|----|
| AX-157913877 | 2 | 46.53  | KV453182.1 | 5687895 | 20-scf00019 | 20 |
| AX-157914145 | 2 | 46.53  | KV453182.1 | 5974050 | 20-scf00019 | 20 |
| AX-157914243 | 2 | 46.53  | KV453182.1 | 6093399 | 20-scf00019 | 20 |
| AX-157812570 | 2 | 46.53  | KV453182.1 | 6117179 | 20-scf00019 | 20 |
| AX-157914259 | 2 | 46.53  | KV453182.1 | 6118111 | 20-scf00019 | 20 |
| AX-157914260 | 2 | 46.53  | KV453182.1 | 6118444 | 20-scf00019 | 20 |
| AX-157812571 | 2 | 46.53  | KV453182.1 | 6119139 | 20-scf00019 | 20 |
| AX-157914348 | 2 | 46.53  | KV453182.1 | 6208749 | 20-scf00019 | 20 |
| AX-157726428 | 2 | 46.53  | KV453182.1 | 6221293 | 20-scf00019 | 20 |
| AX-157812578 | 2 | 46.53  | KV453182.1 | 6296629 | 20-scf00019 | 20 |
| AX-157914392 | 2 | 46.53  | KV453182.1 | 6343259 | 20-scf00019 | 20 |
| AX-158404223 | 2 | 46.53  | KV453182.1 | 6487229 | 20-scf00019 | 20 |
| AX-157914413 | 2 | 46.53  | KV453182.1 | 6546603 | 20-scf00019 | 20 |
| AX-158404994 | 2 | 46.53  | KV453182.1 | 6846495 | 20-scf00019 | 20 |
| AX-157914481 | 2 | 46.53  | KV453182.1 | 6907238 | 20-scf00019 | 20 |
| AX-157914483 | 2 | 46.53  | KV453182.1 | 6908689 | 20-scf00019 | 20 |
| AX-157914487 | 2 | 46.53  | KV453182.1 | 6923325 | 20-scf00019 | 20 |
| AX-158404998 | 2 | 46.53  | KV453182.1 | 6924875 | 20-scf00019 | 20 |
| AX-157722019 | 2 | 46.53  | KV453182.1 | 6946617 | 20-scf00019 | 20 |
| AX-157914513 | 2 | 46.53  | KV453182.1 | 7022451 | 20-scf00019 | 20 |
| AX-157914531 | 2 | 46.53  | KV453182.1 | 7075282 | 20-scf00019 | 20 |
| AX-157914564 | 2 | 46.53  | KV453182.1 | 7176308 | 20-scf00019 | 20 |
| AX-157914574 | 2 | 46.53  | KV453182.1 | 7219617 | 20-scf00019 | 20 |
| AX-157914581 | 2 | 46.53  | KV453182.1 | 7259741 | 20-scf00019 | 20 |
| AX-157914583 | 2 | 46.53  | KV453182.1 | 7263912 | 20-scf00019 | 20 |
| AX-157914589 | 2 | 46.53  | KV453182.1 | 7360780 | 20-scf00019 | 20 |
| AX-158375425 | 2 | 46.53  | KV453187.1 | 613363  | 20-scf00563 | 20 |
| AX-158375479 | 2 | 46.53  | KV453187.1 | 1230543 | 20-scf00563 | 20 |
| AX-157913698 | 2 | 46.57  | KV453182.1 | 5467044 | 20-scf00019 | 20 |
| AX-157913864 | 2 | 46.57  | KV453182.1 | 5678581 | 20-scf00019 | 20 |
| AX-157913869 | 2 | 46.57  | KV453182.1 | 5682847 | 20-scf00019 | 20 |
| AX-157913870 | 2 | 46.57  | KV453182.1 | 5683411 | 20-scf00019 | 20 |
| AX-157914149 | 2 | 46.57  | KV453182.1 | 5980392 | 20-scf00019 | 20 |
| AX-157913862 | 2 | 46.636 | KV453182.1 | 5672303 | 20-scf00019 | 20 |
| AX-157913863 | 2 | 46.636 | KV453182.1 | 5676613 | 20-scf00019 | 20 |
| AX-157913866 | 2 | 46.636 | KV453182.1 | 5679947 | 20-scf00019 | 20 |
| AX-157913871 | 2 | 46.636 | KV453182.1 | 5684065 | 20-scf00019 | 20 |
| AX-157913872 | 2 | 46.636 | KV453182.1 | 5684288 | 20-scf00019 | 20 |
| AX-157913873 | 2 | 46.636 | KV453182.1 | 5685479 | 20-scf00019 | 20 |
| AX-157913875 | 2 | 46.636 | KV453182.1 | 5686742 | 20-scf00019 | 20 |
| AX-157913879 | 2 | 46.636 | KV453182.1 | 5692326 | 20-scf00019 | 20 |
| AX-157913882 | 2 | 46.636 | KV453182.1 | 5696461 | 20-scf00019 | 20 |
| AX-157913883 | 2 | 46.636 | KV453182.1 | 5696695 | 20-scf00019 | 20 |
| AX-157913884 | 2 | 46.636 | KV453182.1 | 5697132 | 20-scf00019 | 20 |
| AX-157913885 | 2 | 46.636 | KV453182.1 | 5698043 | 20-scf00019 | 20 |
| AX-157913886 | 2 | 46.636 | KV453182.1 | 5698432 | 20-scf00019 | 20 |
| AX-157913887 | 2 | 46.636 | KV453182.1 | 5699166 | 20-scf00019 | 20 |
| AX-157913888 | 2 | 46.636 | KV453182.1 | 5701586 | 20-scf00019 | 20 |
| AX-157746362 | 2 | 46.636 | KV453182.1 | 5704582 | 20-scf00019 | 20 |
| AX-157913889 | 2 | 46.636 | KV453182.1 | 5707343 | 20-scf00019 | 20 |
| AX-157913890 | 2 | 46.636 | KV453182.1 | 5707895 | 20-scf00019 | 20 |

|              |   |        |            |         |             |    |
|--------------|---|--------|------------|---------|-------------|----|
| AX-157913891 | 2 | 46.636 | KV453182.1 | 5708603 | 20-scf00019 | 20 |
| AX-157913894 | 2 | 46.636 | KV453182.1 | 5710332 | 20-scf00019 | 20 |
| AX-157913895 | 2 | 46.636 | KV453182.1 | 5711565 | 20-scf00019 | 20 |
| AX-158389594 | 2 | 46.636 | KV453182.1 | 5711904 | 20-scf00019 | 20 |
| AX-157913896 | 2 | 46.636 | KV453182.1 | 5712226 | 20-scf00019 | 20 |
| AX-157913897 | 2 | 46.636 | KV453182.1 | 5712961 | 20-scf00019 | 20 |
| AX-157913898 | 2 | 46.636 | KV453182.1 | 5713524 | 20-scf00019 | 20 |
| AX-157913899 | 2 | 46.636 | KV453182.1 | 5714145 | 20-scf00019 | 20 |
| AX-157913900 | 2 | 46.636 | KV453182.1 | 5715894 | 20-scf00019 | 20 |
| AX-157913902 | 2 | 46.636 | KV453182.1 | 5718143 | 20-scf00019 | 20 |
| AX-157913903 | 2 | 46.636 | KV453182.1 | 5718852 | 20-scf00019 | 20 |
| AX-157913904 | 2 | 46.636 | KV453182.1 | 5719649 | 20-scf00019 | 20 |
| AX-157913905 | 2 | 46.636 | KV453182.1 | 5719762 | 20-scf00019 | 20 |
| AX-157913906 | 2 | 46.636 | KV453182.1 | 5720125 | 20-scf00019 | 20 |
| AX-157913907 | 2 | 46.636 | KV453182.1 | 5721313 | 20-scf00019 | 20 |
| AX-157913909 | 2 | 46.636 | KV453182.1 | 5723725 | 20-scf00019 | 20 |
| AX-157913911 | 2 | 46.636 | KV453182.1 | 5727578 | 20-scf00019 | 20 |
| AX-157812533 | 2 | 46.636 | KV453182.1 | 5727694 | 20-scf00019 | 20 |
| AX-157913912 | 2 | 46.636 | KV453182.1 | 5731588 | 20-scf00019 | 20 |
| AX-157913915 | 2 | 46.636 | KV453182.1 | 5732739 | 20-scf00019 | 20 |
| AX-157913917 | 2 | 46.636 | KV453182.1 | 5733621 | 20-scf00019 | 20 |
| AX-157913918 | 2 | 46.636 | KV453182.1 | 5734062 | 20-scf00019 | 20 |
| AX-157913920 | 2 | 46.636 | KV453182.1 | 5734938 | 20-scf00019 | 20 |
| AX-157812534 | 2 | 46.636 | KV453182.1 | 5735209 | 20-scf00019 | 20 |
| AX-157913921 | 2 | 46.636 | KV453182.1 | 5735512 | 20-scf00019 | 20 |
| AX-157913923 | 2 | 46.636 | KV453182.1 | 5737848 | 20-scf00019 | 20 |
| AX-157913924 | 2 | 46.636 | KV453182.1 | 5738583 | 20-scf00019 | 20 |
| AX-158404975 | 2 | 46.636 | KV453182.1 | 5738987 | 20-scf00019 | 20 |
| AX-157812535 | 2 | 46.636 | KV453182.1 | 5739127 | 20-scf00019 | 20 |
| AX-157913926 | 2 | 46.636 | KV453182.1 | 5741287 | 20-scf00019 | 20 |
| AX-157812538 | 2 | 46.636 | KV453182.1 | 5741768 | 20-scf00019 | 20 |
| AX-157913927 | 2 | 46.636 | KV453182.1 | 5742169 | 20-scf00019 | 20 |
| AX-157913928 | 2 | 46.636 | KV453182.1 | 5742635 | 20-scf00019 | 20 |
| AX-157913931 | 2 | 46.636 | KV453182.1 | 5745682 | 20-scf00019 | 20 |
| AX-157913933 | 2 | 46.636 | KV453182.1 | 5747119 | 20-scf00019 | 20 |
| AX-157913934 | 2 | 46.636 | KV453182.1 | 5748638 | 20-scf00019 | 20 |
| AX-157913935 | 2 | 46.636 | KV453182.1 | 5749811 | 20-scf00019 | 20 |
| AX-157913937 | 2 | 46.636 | KV453182.1 | 5751342 | 20-scf00019 | 20 |
| AX-157913938 | 2 | 46.636 | KV453182.1 | 5753058 | 20-scf00019 | 20 |
| AX-157913939 | 2 | 46.636 | KV453182.1 | 5754269 | 20-scf00019 | 20 |
| AX-157913942 | 2 | 46.636 | KV453182.1 | 5755478 | 20-scf00019 | 20 |
| AX-157812539 | 2 | 46.636 | KV453182.1 | 5756475 | 20-scf00019 | 20 |
| AX-157913944 | 2 | 46.636 | KV453182.1 | 5757195 | 20-scf00019 | 20 |
| AX-157913945 | 2 | 46.636 | KV453182.1 | 5757869 | 20-scf00019 | 20 |
| AX-157748075 | 2 | 46.636 | KV453182.1 | 5759570 | 20-scf00019 | 20 |
| AX-157913946 | 2 | 46.636 | KV453182.1 | 5760552 | 20-scf00019 | 20 |
| AX-157913947 | 2 | 46.636 | KV453182.1 | 5760767 | 20-scf00019 | 20 |
| AX-157716884 | 2 | 46.636 | KV453182.1 | 5760920 | 20-scf00019 | 20 |
| AX-157812540 | 2 | 46.636 | KV453182.1 | 5761393 | 20-scf00019 | 20 |
| AX-157913948 | 2 | 46.636 | KV453182.1 | 5762812 | 20-scf00019 | 20 |
| AX-157716738 | 2 | 46.636 | KV453182.1 | 5765359 | 20-scf00019 | 20 |



|              |   |        |            |         |             |    |
|--------------|---|--------|------------|---------|-------------|----|
| AX-157750528 | 2 | 46.636 | KV453182.1 | 5767021 | 20-scf00019 | 20 |
| AX-157913951 | 2 | 46.636 | KV453182.1 | 5768887 | 20-scf00019 | 20 |
| AX-157913953 | 2 | 46.636 | KV453182.1 | 5775086 | 20-scf00019 | 20 |
| AX-157913954 | 2 | 46.636 | KV453182.1 | 5775353 | 20-scf00019 | 20 |
| AX-157812544 | 2 | 46.636 | KV453182.1 | 5775639 | 20-scf00019 | 20 |
| AX-157913956 | 2 | 46.636 | KV453182.1 | 5777330 | 20-scf00019 | 20 |
| AX-157913961 | 2 | 46.636 | KV453182.1 | 5780451 | 20-scf00019 | 20 |
| AX-157913963 | 2 | 46.636 | KV453182.1 | 5781169 | 20-scf00019 | 20 |
| AX-157913967 | 2 | 46.636 | KV453182.1 | 5786412 | 20-scf00019 | 20 |
| AX-157913968 | 2 | 46.636 | KV453182.1 | 5787276 | 20-scf00019 | 20 |
| AX-158404977 | 2 | 46.636 | KV453182.1 | 5788580 | 20-scf00019 | 20 |
| AX-157913969 | 2 | 46.636 | KV453182.1 | 5789163 | 20-scf00019 | 20 |
| AX-157913970 | 2 | 46.636 | KV453182.1 | 5789654 | 20-scf00019 | 20 |
| AX-157913971 | 2 | 46.636 | KV453182.1 | 5789905 | 20-scf00019 | 20 |
| AX-157913974 | 2 | 46.636 | KV453182.1 | 5791949 | 20-scf00019 | 20 |
| AX-157913976 | 2 | 46.636 | KV453182.1 | 5793264 | 20-scf00019 | 20 |
| AX-157727814 | 2 | 46.636 | KV453182.1 | 5793513 | 20-scf00019 | 20 |
| AX-157913977 | 2 | 46.636 | KV453182.1 | 5794049 | 20-scf00019 | 20 |
| AX-157913982 | 2 | 46.636 | KV453182.1 | 5799763 | 20-scf00019 | 20 |
| AX-157913984 | 2 | 46.636 | KV453182.1 | 5802495 | 20-scf00019 | 20 |
| AX-157913985 | 2 | 46.636 | KV453182.1 | 5802899 | 20-scf00019 | 20 |
| AX-157913986 | 2 | 46.636 | KV453182.1 | 5803820 | 20-scf00019 | 20 |
| AX-157913988 | 2 | 46.636 | KV453182.1 | 5804791 | 20-scf00019 | 20 |
| AX-157913990 | 2 | 46.636 | KV453182.1 | 5812048 | 20-scf00019 | 20 |
| AX-157913991 | 2 | 46.636 | KV453182.1 | 5812743 | 20-scf00019 | 20 |
| AX-157913992 | 2 | 46.636 | KV453182.1 | 5816734 | 20-scf00019 | 20 |
| AX-157913994 | 2 | 46.636 | KV453182.1 | 5819070 | 20-scf00019 | 20 |
| AX-157913995 | 2 | 46.636 | KV453182.1 | 5819391 | 20-scf00019 | 20 |
| AX-157913996 | 2 | 46.636 | KV453182.1 | 5821542 | 20-scf00019 | 20 |
| AX-157913997 | 2 | 46.636 | KV453182.1 | 5822084 | 20-scf00019 | 20 |
| AX-157913998 | 2 | 46.636 | KV453182.1 | 5822536 | 20-scf00019 | 20 |
| AX-157913999 | 2 | 46.636 | KV453182.1 | 5823827 | 20-scf00019 | 20 |
| AX-157914000 | 2 | 46.636 | KV453182.1 | 5824162 | 20-scf00019 | 20 |
| AX-157914002 | 2 | 46.636 | KV453182.1 | 5828195 | 20-scf00019 | 20 |
| AX-158404979 | 2 | 46.636 | KV453182.1 | 5829232 | 20-scf00019 | 20 |
| AX-157914006 | 2 | 46.636 | KV453182.1 | 5831020 | 20-scf00019 | 20 |
| AX-157719608 | 2 | 46.636 | KV453182.1 | 5831641 | 20-scf00019 | 20 |
| AX-157914008 | 2 | 46.636 | KV453182.1 | 5833141 | 20-scf00019 | 20 |
| AX-157812546 | 2 | 46.636 | KV453182.1 | 5833697 | 20-scf00019 | 20 |
| AX-157914009 | 2 | 46.636 | KV453182.1 | 5834190 | 20-scf00019 | 20 |
| AX-157914010 | 2 | 46.636 | KV453182.1 | 5834480 | 20-scf00019 | 20 |
| AX-157914012 | 2 | 46.636 | KV453182.1 | 5839862 | 20-scf00019 | 20 |
| AX-157914014 | 2 | 46.636 | KV453182.1 | 5840948 | 20-scf00019 | 20 |
| AX-157914015 | 2 | 46.636 | KV453182.1 | 5841972 | 20-scf00019 | 20 |
| AX-157914016 | 2 | 46.636 | KV453182.1 | 5842497 | 20-scf00019 | 20 |
| AX-157914017 | 2 | 46.636 | KV453182.1 | 5842793 | 20-scf00019 | 20 |
| AX-157914018 | 2 | 46.636 | KV453182.1 | 5843586 | 20-scf00019 | 20 |
| AX-157914019 | 2 | 46.636 | KV453182.1 | 5844949 | 20-scf00019 | 20 |
| AX-157914020 | 2 | 46.636 | KV453182.1 | 5845928 | 20-scf00019 | 20 |
| AX-157914021 | 2 | 46.636 | KV453182.1 | 5846936 | 20-scf00019 | 20 |
| AX-157914022 | 2 | 46.636 | KV453182.1 | 5847698 | 20-scf00019 | 20 |

|              |   |        |            |         |             |    |
|--------------|---|--------|------------|---------|-------------|----|
| AX-157914023 | 2 | 46.636 | KV453182.1 | 5848257 | 20-scf00019 | 20 |
| AX-157914024 | 2 | 46.636 | KV453182.1 | 5848941 | 20-scf00019 | 20 |
| AX-157812549 | 2 | 46.636 | KV453182.1 | 5849702 | 20-scf00019 | 20 |
| AX-157914025 | 2 | 46.636 | KV453182.1 | 5850332 | 20-scf00019 | 20 |
| AX-157756648 | 2 | 46.636 | KV453182.1 | 5852032 | 20-scf00019 | 20 |
| AX-157914027 | 2 | 46.636 | KV453182.1 | 5855718 | 20-scf00019 | 20 |
| AX-157914028 | 2 | 46.636 | KV453182.1 | 5856445 | 20-scf00019 | 20 |
| AX-157914029 | 2 | 46.636 | KV453182.1 | 5856712 | 20-scf00019 | 20 |
| AX-157914031 | 2 | 46.636 | KV453182.1 | 5859176 | 20-scf00019 | 20 |
| AX-157914033 | 2 | 46.636 | KV453182.1 | 5860344 | 20-scf00019 | 20 |
| AX-157914034 | 2 | 46.636 | KV453182.1 | 5860952 | 20-scf00019 | 20 |
| AX-157914035 | 2 | 46.636 | KV453182.1 | 5861679 | 20-scf00019 | 20 |
| AX-157914036 | 2 | 46.636 | KV453182.1 | 5863714 | 20-scf00019 | 20 |
| AX-157914038 | 2 | 46.636 | KV453182.1 | 5866115 | 20-scf00019 | 20 |
| AX-157914039 | 2 | 46.636 | KV453182.1 | 5866724 | 20-scf00019 | 20 |
| AX-157914040 | 2 | 46.636 | KV453182.1 | 5867723 | 20-scf00019 | 20 |
| AX-157812554 | 2 | 46.636 | KV453182.1 | 5867768 | 20-scf00019 | 20 |
| AX-157914041 | 2 | 46.636 | KV453182.1 | 5868376 | 20-scf00019 | 20 |
| AX-157914042 | 2 | 46.636 | KV453182.1 | 5869781 | 20-scf00019 | 20 |
| AX-157914043 | 2 | 46.636 | KV453182.1 | 5871785 | 20-scf00019 | 20 |
| AX-157914044 | 2 | 46.636 | KV453182.1 | 5873117 | 20-scf00019 | 20 |
| AX-157914048 | 2 | 46.636 | KV453182.1 | 5878385 | 20-scf00019 | 20 |
| AX-157773414 | 2 | 46.636 | KV453182.1 | 5878861 | 20-scf00019 | 20 |
| AX-157914049 | 2 | 46.636 | KV453182.1 | 5879383 | 20-scf00019 | 20 |
| AX-157914050 | 2 | 46.636 | KV453182.1 | 5882993 | 20-scf00019 | 20 |
| AX-157914055 | 2 | 46.636 | KV453182.1 | 5889876 | 20-scf00019 | 20 |
| AX-157914056 | 2 | 46.636 | KV453182.1 | 5893396 | 20-scf00019 | 20 |
| AX-157914057 | 2 | 46.636 | KV453182.1 | 5893946 | 20-scf00019 | 20 |
| AX-157914058 | 2 | 46.636 | KV453182.1 | 5894260 | 20-scf00019 | 20 |
| AX-157914059 | 2 | 46.636 | KV453182.1 | 5894463 | 20-scf00019 | 20 |
| AX-157914060 | 2 | 46.636 | KV453182.1 | 5895441 | 20-scf00019 | 20 |
| AX-157914063 | 2 | 46.636 | KV453182.1 | 5896792 | 20-scf00019 | 20 |
| AX-157914064 | 2 | 46.636 | KV453182.1 | 5896957 | 20-scf00019 | 20 |
| AX-157914066 | 2 | 46.636 | KV453182.1 | 5898681 | 20-scf00019 | 20 |
| AX-157812558 | 2 | 46.636 | KV453182.1 | 5899534 | 20-scf00019 | 20 |
| AX-157914067 | 2 | 46.636 | KV453182.1 | 5900044 | 20-scf00019 | 20 |
| AX-157914069 | 2 | 46.636 | KV453182.1 | 5902576 | 20-scf00019 | 20 |
| AX-157755791 | 2 | 46.636 | KV453182.1 | 5902878 | 20-scf00019 | 20 |
| AX-157914070 | 2 | 46.636 | KV453182.1 | 5903177 | 20-scf00019 | 20 |
| AX-158404985 | 2 | 46.636 | KV453182.1 | 5903670 | 20-scf00019 | 20 |
| AX-157869095 | 2 | 46.636 | KV453182.1 | 5905453 | 20-scf00019 | 20 |
| AX-157914072 | 2 | 46.636 | KV453182.1 | 5906226 | 20-scf00019 | 20 |
| AX-157914073 | 2 | 46.636 | KV453182.1 | 5907285 | 20-scf00019 | 20 |
| AX-157914074 | 2 | 46.636 | KV453182.1 | 5907991 | 20-scf00019 | 20 |
| AX-157914075 | 2 | 46.636 | KV453182.1 | 5908560 | 20-scf00019 | 20 |
| AX-157914076 | 2 | 46.636 | KV453182.1 | 5909731 | 20-scf00019 | 20 |
| AX-157914077 | 2 | 46.636 | KV453182.1 | 5910228 | 20-scf00019 | 20 |
| AX-157914081 | 2 | 46.636 | KV453182.1 | 5912843 | 20-scf00019 | 20 |
| AX-157812559 | 2 | 46.636 | KV453182.1 | 5913019 | 20-scf00019 | 20 |
| AX-157914082 | 2 | 46.636 | KV453182.1 | 5913509 | 20-scf00019 | 20 |
| AX-157914083 | 2 | 46.636 | KV453182.1 | 5913953 | 20-scf00019 | 20 |

|              |   |        |            |         |             |    |
|--------------|---|--------|------------|---------|-------------|----|
| AX-157914084 | 2 | 46.636 | KV453182.1 | 5914721 | 20-scf00019 | 20 |
| AX-157914085 | 2 | 46.636 | KV453182.1 | 5915353 | 20-scf00019 | 20 |
| AX-157914086 | 2 | 46.636 | KV453182.1 | 5915789 | 20-scf00019 | 20 |
| AX-157914087 | 2 | 46.636 | KV453182.1 | 5916112 | 20-scf00019 | 20 |
| AX-157914089 | 2 | 46.636 | KV453182.1 | 5917368 | 20-scf00019 | 20 |
| AX-157914090 | 2 | 46.636 | KV453182.1 | 5918813 | 20-scf00019 | 20 |
| AX-157914091 | 2 | 46.636 | KV453182.1 | 5919126 | 20-scf00019 | 20 |
| AX-157914092 | 2 | 46.636 | KV453182.1 | 5919689 | 20-scf00019 | 20 |
| AX-157914093 | 2 | 46.636 | KV453182.1 | 5920957 | 20-scf00019 | 20 |
| AX-157914094 | 2 | 46.636 | KV453182.1 | 5925351 | 20-scf00019 | 20 |
| AX-157914095 | 2 | 46.636 | KV453182.1 | 5925842 | 20-scf00019 | 20 |
| AX-157914099 | 2 | 46.636 | KV453182.1 | 5930176 | 20-scf00019 | 20 |
| AX-157914100 | 2 | 46.636 | KV453182.1 | 5930989 | 20-scf00019 | 20 |
| AX-157914101 | 2 | 46.636 | KV453182.1 | 5931410 | 20-scf00019 | 20 |
| AX-157914102 | 2 | 46.636 | KV453182.1 | 5932347 | 20-scf00019 | 20 |
| AX-157914103 | 2 | 46.636 | KV453182.1 | 5933815 | 20-scf00019 | 20 |
| AX-157914104 | 2 | 46.636 | KV453182.1 | 5934656 | 20-scf00019 | 20 |
| AX-157914106 | 2 | 46.636 | KV453182.1 | 5936827 | 20-scf00019 | 20 |
| AX-157914107 | 2 | 46.636 | KV453182.1 | 5937402 | 20-scf00019 | 20 |
| AX-157914108 | 2 | 46.636 | KV453182.1 | 5938589 | 20-scf00019 | 20 |
| AX-157914109 | 2 | 46.636 | KV453182.1 | 5939707 | 20-scf00019 | 20 |
| AX-157914112 | 2 | 46.636 | KV453182.1 | 5942278 | 20-scf00019 | 20 |
| AX-157914114 | 2 | 46.636 | KV453182.1 | 5943718 | 20-scf00019 | 20 |
| AX-157914115 | 2 | 46.636 | KV453182.1 | 5944659 | 20-scf00019 | 20 |
| AX-157914116 | 2 | 46.636 | KV453182.1 | 5946780 | 20-scf00019 | 20 |
| AX-157914117 | 2 | 46.636 | KV453182.1 | 5947335 | 20-scf00019 | 20 |
| AX-157914118 | 2 | 46.636 | KV453182.1 | 5948072 | 20-scf00019 | 20 |
| AX-157914120 | 2 | 46.636 | KV453182.1 | 5950225 | 20-scf00019 | 20 |
| AX-157914124 | 2 | 46.636 | KV453182.1 | 5956659 | 20-scf00019 | 20 |
| AX-157914125 | 2 | 46.636 | KV453182.1 | 5957779 | 20-scf00019 | 20 |
| AX-157914126 | 2 | 46.636 | KV453182.1 | 5957905 | 20-scf00019 | 20 |
| AX-157812560 | 2 | 46.636 | KV453182.1 | 5958612 | 20-scf00019 | 20 |
| AX-157914128 | 2 | 46.636 | KV453182.1 | 5958890 | 20-scf00019 | 20 |
| AX-157716225 | 2 | 46.636 | KV453182.1 | 5960225 | 20-scf00019 | 20 |
| AX-157703700 | 2 | 46.636 | KV453182.1 | 5961557 | 20-scf00019 | 20 |
| AX-157914129 | 2 | 46.636 | KV453182.1 | 5961997 | 20-scf00019 | 20 |
| AX-157914130 | 2 | 46.636 | KV453182.1 | 5962765 | 20-scf00019 | 20 |
| AX-157914132 | 2 | 46.636 | KV453182.1 | 5963399 | 20-scf00019 | 20 |
| AX-157914134 | 2 | 46.636 | KV453182.1 | 5965147 | 20-scf00019 | 20 |
| AX-157914136 | 2 | 46.636 | KV453182.1 | 5968635 | 20-scf00019 | 20 |
| AX-157914137 | 2 | 46.636 | KV453182.1 | 5969566 | 20-scf00019 | 20 |
| AX-157914138 | 2 | 46.636 | KV453182.1 | 5969890 | 20-scf00019 | 20 |
| AX-157914139 | 2 | 46.636 | KV453182.1 | 5970173 | 20-scf00019 | 20 |
| AX-157914140 | 2 | 46.636 | KV453182.1 | 5970597 | 20-scf00019 | 20 |
| AX-157812562 | 2 | 46.636 | KV453182.1 | 5978023 | 20-scf00019 | 20 |
| AX-158404986 | 2 | 46.636 | KV453182.1 | 5978411 | 20-scf00019 | 20 |
| AX-157914148 | 2 | 46.636 | KV453182.1 | 5979755 | 20-scf00019 | 20 |
| AX-157914150 | 2 | 46.636 | KV453182.1 | 5981290 | 20-scf00019 | 20 |
| AX-157914151 | 2 | 46.636 | KV453182.1 | 5982058 | 20-scf00019 | 20 |
| AX-157914152 | 2 | 46.636 | KV453182.1 | 5983572 | 20-scf00019 | 20 |
| AX-157914153 | 2 | 46.636 | KV453182.1 | 5984150 | 20-scf00019 | 20 |

|              |   |        |            |         |             |    |
|--------------|---|--------|------------|---------|-------------|----|
| AX-158404987 | 2 | 46.636 | KV453182.1 | 5985500 | 20-scf00019 | 20 |
| AX-157914154 | 2 | 46.636 | KV453182.1 | 5985633 | 20-scf00019 | 20 |
| AX-157914157 | 2 | 46.636 | KV453182.1 | 5987572 | 20-scf00019 | 20 |
| AX-157914158 | 2 | 46.636 | KV453182.1 | 5987954 | 20-scf00019 | 20 |
| AX-157914161 | 2 | 46.636 | KV453182.1 | 5991321 | 20-scf00019 | 20 |
| AX-157914164 | 2 | 46.636 | KV453182.1 | 5994308 | 20-scf00019 | 20 |
| AX-157914166 | 2 | 46.636 | KV453182.1 | 5995762 | 20-scf00019 | 20 |
| AX-158414802 | 2 | 46.636 | KV453182.1 | 5997142 | 20-scf00019 | 20 |
| AX-157914168 | 2 | 46.636 | KV453182.1 | 5998564 | 20-scf00019 | 20 |
| AX-157914170 | 2 | 46.636 | KV453182.1 | 6000197 | 20-scf00019 | 20 |
| AX-157914173 | 2 | 46.636 | KV453182.1 | 6002460 | 20-scf00019 | 20 |
| AX-157914174 | 2 | 46.636 | KV453182.1 | 6003174 | 20-scf00019 | 20 |
| AX-157914175 | 2 | 46.636 | KV453182.1 | 6003313 | 20-scf00019 | 20 |
| AX-157914178 | 2 | 46.636 | KV453182.1 | 6004935 | 20-scf00019 | 20 |
| AX-157914180 | 2 | 46.636 | KV453182.1 | 6010475 | 20-scf00019 | 20 |
| AX-157914181 | 2 | 46.636 | KV453182.1 | 6013052 | 20-scf00019 | 20 |
| AX-157914182 | 2 | 46.636 | KV453182.1 | 6016513 | 20-scf00019 | 20 |
| AX-157914188 | 2 | 46.636 | KV453182.1 | 6022422 | 20-scf00019 | 20 |
| AX-157914192 | 2 | 46.636 | KV453182.1 | 6029543 | 20-scf00019 | 20 |
| AX-157914205 | 2 | 46.636 | KV453182.1 | 6042081 | 20-scf00019 | 20 |
| AX-157914209 | 2 | 46.636 | KV453182.1 | 6055428 | 20-scf00019 | 20 |
| AX-157914218 | 2 | 46.636 | KV453182.1 | 6062464 | 20-scf00019 | 20 |
| AX-157914221 | 2 | 46.636 | KV453182.1 | 6066169 | 20-scf00019 | 20 |
| AX-157914224 | 2 | 46.636 | KV453182.1 | 6071130 | 20-scf00019 | 20 |
| AX-158389596 | 2 | 46.636 | KV453182.1 | 6072067 | 20-scf00019 | 20 |
| AX-157914225 | 2 | 46.636 | KV453182.1 | 6072290 | 20-scf00019 | 20 |
| AX-157914226 | 2 | 46.636 | KV453182.1 | 6074119 | 20-scf00019 | 20 |
| AX-157914227 | 2 | 46.636 | KV453182.1 | 6074996 | 20-scf00019 | 20 |
| AX-157914229 | 2 | 46.636 | KV453182.1 | 6076826 | 20-scf00019 | 20 |
| AX-158404989 | 2 | 46.636 | KV453182.1 | 6077821 | 20-scf00019 | 20 |
| AX-157914237 | 2 | 46.636 | KV453182.1 | 6085402 | 20-scf00019 | 20 |
| AX-157914239 | 2 | 46.636 | KV453182.1 | 6087436 | 20-scf00019 | 20 |
| AX-157812567 | 2 | 46.636 | KV453182.1 | 6090094 | 20-scf00019 | 20 |
| AX-157914240 | 2 | 46.636 | KV453182.1 | 6090610 | 20-scf00019 | 20 |
| AX-157914241 | 2 | 46.636 | KV453182.1 | 6091690 | 20-scf00019 | 20 |
| AX-157914242 | 2 | 46.636 | KV453182.1 | 6092591 | 20-scf00019 | 20 |
| AX-157914244 | 2 | 46.636 | KV453182.1 | 6093941 | 20-scf00019 | 20 |
| AX-157914246 | 2 | 46.636 | KV453182.1 | 6094798 | 20-scf00019 | 20 |
| AX-157914247 | 2 | 46.636 | KV453182.1 | 6095591 | 20-scf00019 | 20 |
| AX-157914248 | 2 | 46.636 | KV453182.1 | 6096173 | 20-scf00019 | 20 |
| AX-157914249 | 2 | 46.636 | KV453182.1 | 6096821 | 20-scf00019 | 20 |
| AX-157914250 | 2 | 46.636 | KV453182.1 | 6097959 | 20-scf00019 | 20 |
| AX-157914251 | 2 | 46.636 | KV453182.1 | 6106614 | 20-scf00019 | 20 |
| AX-157914255 | 2 | 46.636 | KV453182.1 | 6112425 | 20-scf00019 | 20 |
| AX-157914262 | 2 | 46.636 | KV453182.1 | 6120825 | 20-scf00019 | 20 |
| AX-157914264 | 2 | 46.636 | KV453182.1 | 6124856 | 20-scf00019 | 20 |
| AX-158379255 | 2 | 46.636 | KV453182.1 | 6128653 | 20-scf00019 | 20 |
| AX-157914266 | 2 | 46.636 | KV453182.1 | 6133639 | 20-scf00019 | 20 |
| AX-157914267 | 2 | 46.636 | KV453182.1 | 6134206 | 20-scf00019 | 20 |
| AX-157914271 | 2 | 46.636 | KV453182.1 | 6136171 | 20-scf00019 | 20 |
| AX-157914272 | 2 | 46.636 | KV453182.1 | 6137257 | 20-scf00019 | 20 |

|              |   |        |            |         |             |    |
|--------------|---|--------|------------|---------|-------------|----|
| AX-157914276 | 2 | 46.636 | KV453182.1 | 6139547 | 20-scf00019 | 20 |
| AX-157914278 | 2 | 46.636 | KV453182.1 | 6141845 | 20-scf00019 | 20 |
| AX-157914279 | 2 | 46.636 | KV453182.1 | 6143806 | 20-scf00019 | 20 |
| AX-157914282 | 2 | 46.636 | KV453182.1 | 6148030 | 20-scf00019 | 20 |
| AX-157914283 | 2 | 46.636 | KV453182.1 | 6148131 | 20-scf00019 | 20 |
| AX-157914285 | 2 | 46.636 | KV453182.1 | 6149277 | 20-scf00019 | 20 |
| AX-157914286 | 2 | 46.636 | KV453182.1 | 6149565 | 20-scf00019 | 20 |
| AX-157869098 | 2 | 46.636 | KV453182.1 | 6150577 | 20-scf00019 | 20 |
| AX-157914288 | 2 | 46.636 | KV453182.1 | 6153600 | 20-scf00019 | 20 |
| AX-157812572 | 2 | 46.636 | KV453182.1 | 6155616 | 20-scf00019 | 20 |
| AX-157914289 | 2 | 46.636 | KV453182.1 | 6156638 | 20-scf00019 | 20 |
| AX-157914290 | 2 | 46.636 | KV453182.1 | 6157832 | 20-scf00019 | 20 |
| AX-157914292 | 2 | 46.636 | KV453182.1 | 6159409 | 20-scf00019 | 20 |
| AX-157914293 | 2 | 46.636 | KV453182.1 | 6159939 | 20-scf00019 | 20 |
| AX-157914294 | 2 | 46.636 | KV453182.1 | 6161562 | 20-scf00019 | 20 |
| AX-157914295 | 2 | 46.636 | KV453182.1 | 6163138 | 20-scf00019 | 20 |
| AX-157914296 | 2 | 46.636 | KV453182.1 | 6165060 | 20-scf00019 | 20 |
| AX-157812573 | 2 | 46.636 | KV453182.1 | 6165847 | 20-scf00019 | 20 |
| AX-157914297 | 2 | 46.636 | KV453182.1 | 6166201 | 20-scf00019 | 20 |
| AX-157914298 | 2 | 46.636 | KV453182.1 | 6166365 | 20-scf00019 | 20 |
| AX-157914300 | 2 | 46.636 | KV453182.1 | 6169420 | 20-scf00019 | 20 |
| AX-157914308 | 2 | 46.636 | KV453182.1 | 6174948 | 20-scf00019 | 20 |
| AX-157914309 | 2 | 46.636 | KV453182.1 | 6175385 | 20-scf00019 | 20 |
| AX-157812574 | 2 | 46.636 | KV453182.1 | 6180094 | 20-scf00019 | 20 |
| AX-157914313 | 2 | 46.636 | KV453182.1 | 6180281 | 20-scf00019 | 20 |
| AX-157709432 | 2 | 46.636 | KV453182.1 | 6184129 | 20-scf00019 | 20 |
| AX-157914316 | 2 | 46.636 | KV453182.1 | 6185305 | 20-scf00019 | 20 |
| AX-157914317 | 2 | 46.636 | KV453182.1 | 6186304 | 20-scf00019 | 20 |
| AX-157914318 | 2 | 46.636 | KV453182.1 | 6186760 | 20-scf00019 | 20 |
| AX-157914322 | 2 | 46.636 | KV453182.1 | 6190942 | 20-scf00019 | 20 |
| AX-157914323 | 2 | 46.636 | KV453182.1 | 6191319 | 20-scf00019 | 20 |
| AX-157812576 | 2 | 46.636 | KV453182.1 | 6191694 | 20-scf00019 | 20 |
| AX-157914324 | 2 | 46.636 | KV453182.1 | 6191959 | 20-scf00019 | 20 |
| AX-157914326 | 2 | 46.636 | KV453182.1 | 6192891 | 20-scf00019 | 20 |
| AX-157914327 | 2 | 46.636 | KV453182.1 | 6193199 | 20-scf00019 | 20 |
| AX-157914328 | 2 | 46.636 | KV453182.1 | 6193265 | 20-scf00019 | 20 |
| AX-157738801 | 2 | 46.636 | KV453182.1 | 6195018 | 20-scf00019 | 20 |
| AX-157914331 | 2 | 46.636 | KV453182.1 | 6195117 | 20-scf00019 | 20 |
| AX-157914332 | 2 | 46.636 | KV453182.1 | 6195640 | 20-scf00019 | 20 |
| AX-157914334 | 2 | 46.636 | KV453182.1 | 6196731 | 20-scf00019 | 20 |
| AX-157914338 | 2 | 46.636 | KV453182.1 | 6199519 | 20-scf00019 | 20 |
| AX-157914340 | 2 | 46.636 | KV453182.1 | 6202333 | 20-scf00019 | 20 |
| AX-157914341 | 2 | 46.636 | KV453182.1 | 6202854 | 20-scf00019 | 20 |
| AX-157914343 | 2 | 46.636 | KV453182.1 | 6204246 | 20-scf00019 | 20 |
| AX-157914344 | 2 | 46.636 | KV453182.1 | 6204960 | 20-scf00019 | 20 |
| AX-157914345 | 2 | 46.636 | KV453182.1 | 6206479 | 20-scf00019 | 20 |
| AX-157914346 | 2 | 46.636 | KV453182.1 | 6206797 | 20-scf00019 | 20 |
| AX-157914347 | 2 | 46.636 | KV453182.1 | 6207723 | 20-scf00019 | 20 |
| AX-157914350 | 2 | 46.636 | KV453182.1 | 6211431 | 20-scf00019 | 20 |
| AX-158382250 | 2 | 46.636 | KV453182.1 | 6211773 | 20-scf00019 | 20 |
| AX-157723671 | 2 | 46.636 | KV453182.1 | 6214268 | 20-scf00019 | 20 |

|              |   |        |             |         |               |    |
|--------------|---|--------|-------------|---------|---------------|----|
| AX-157914352 | 2 | 46.636 | KV453182.1  | 6214732 | 20-scf00019   | 20 |
| AX-157914353 | 2 | 46.636 | KV453182.1  | 6215091 | 20-scf00019   | 20 |
| AX-157914354 | 2 | 46.636 | KV453182.1  | 6215596 | 20-scf00019   | 20 |
| AX-157914355 | 2 | 46.636 | KV453182.1  | 6217313 | 20-scf00019   | 20 |
| AX-157914356 | 2 | 46.636 | KV453182.1  | 6218585 | 20-scf00019   | 20 |
| AX-157914357 | 2 | 46.636 | KV453182.1  | 6219320 | 20-scf00019   | 20 |
| AX-157914358 | 2 | 46.636 | KV453182.1  | 6221847 | 20-scf00019   | 20 |
| AX-157914359 | 2 | 46.636 | KV453182.1  | 6223213 | 20-scf00019   | 20 |
| AX-157914362 | 2 | 46.636 | KV453182.1  | 6234709 | 20-scf00019   | 20 |
| AX-157914430 | 2 | 46.636 | KV453182.1  | 6676046 | 20-scf00019   | 20 |
| AX-157914460 | 2 | 46.636 | KV453182.1  | 6866461 | 20-scf00019   | 20 |
| AX-157812583 | 2 | 46.636 | KV453182.1  | 6867129 | 20-scf00019   | 20 |
| AX-157914467 | 2 | 46.636 | KV453182.1  | 6890844 | 20-scf00019   | 20 |
| AX-157874664 | 2 | 46.636 | KV453182.1  | 6892539 | 20-scf00019   | 20 |
| AX-157914472 | 2 | 46.636 | KV453182.1  | 6899945 | 20-scf00019   | 20 |
| AX-157914475 | 2 | 46.636 | KV453182.1  | 6900921 | 20-scf00019   | 20 |
| AX-157914478 | 2 | 46.636 | KV453182.1  | 6904588 | 20-scf00019   | 20 |
| AX-157914499 | 2 | 46.636 | KV453182.1  | 6957864 | 20-scf00019   | 20 |
| AX-157812591 | 2 | 46.636 | KV453182.1  | 6979017 | 20-scf00019   | 20 |
| AX-157914550 | 2 | 46.636 | KV453182.1  | 7148707 | 20-scf00019   | 20 |
| AX-157914557 | 2 | 46.636 | KV453182.1  | 7158725 | 20-scf00019   | 20 |
| AX-157914560 | 2 | 46.636 | KV453182.1  | 7169597 | 20-scf00019   | 20 |
| AX-158375388 | 2 | 46.636 | KV453187.1  | 161065  | 20-scf00563   | 20 |
| AX-158375456 | 2 | 46.636 | KV453187.1  | 887468  | 20-scf00563   | 20 |
| AX-157920119 | 2 | 46.636 | KV453183.1  | 758216  | 20-scf00571   | 20 |
| AX-157920140 | 2 | 46.636 | KV453183.1  | 817709  | 20-scf00571   | 20 |
| AX-157920149 | 2 | 46.636 | KV453183.1  | 888010  | 20-scf00571   | 20 |
| AX-157726087 | 2 | 46.636 | KV453183.1  | 891710  | 20-scf00571   | 20 |
| AX-157920154 | 2 | 46.636 | KV453183.1  | 904944  | 20-scf00571   | 20 |
| AX-157679959 | 2 | 46.636 | KV453185.1  | 155635  | 20-scf00994   | 20 |
| AX-157685170 | 2 | 46.636 | KV453185.1  | 167588  | 20-scf00994   | 20 |
| AX-157697809 | 2 | 46.636 | FI873218.1  | 157     | ORI212 lctalu | UN |
| AX-157705834 | 2 | 46.636 | 3ML01031009 | 86      | scf06613_1    | UN |
| AX-157706397 | 2 | 46.636 | 3ML01032184 | 230     | scf07800_1    | UN |
| AX-157913842 | 2 | 46.637 | KV453182.1  | 5647522 | 20-scf00019   | 20 |
| AX-157913845 | 2 | 46.637 | KV453182.1  | 5649242 | 20-scf00019   | 20 |
| AX-157913851 | 2 | 46.637 | KV453182.1  | 5655948 | 20-scf00019   | 20 |
| AX-157913865 | 2 | 46.637 | KV453182.1  | 5679345 | 20-scf00019   | 20 |
| AX-157913867 | 2 | 46.637 | KV453182.1  | 5680616 | 20-scf00019   | 20 |
| AX-157913868 | 2 | 46.637 | KV453182.1  | 5681755 | 20-scf00019   | 20 |
| AX-157913876 | 2 | 46.637 | KV453182.1  | 5687457 | 20-scf00019   | 20 |
| AX-157913880 | 2 | 46.637 | KV453182.1  | 5695352 | 20-scf00019   | 20 |
| AX-157774742 | 2 | 46.637 | KV453182.1  | 5703171 | 20-scf00019   | 20 |
| AX-157913901 | 2 | 46.637 | KV453182.1  | 5717154 | 20-scf00019   | 20 |
| AX-157913908 | 2 | 46.637 | KV453182.1  | 5721462 | 20-scf00019   | 20 |
| AX-157913913 | 2 | 46.637 | KV453182.1  | 5732280 | 20-scf00019   | 20 |
| AX-157913914 | 2 | 46.637 | KV453182.1  | 5732617 | 20-scf00019   | 20 |
| AX-157913919 | 2 | 46.637 | KV453182.1  | 5734564 | 20-scf00019   | 20 |
| AX-157913922 | 2 | 46.637 | KV453182.1  | 5736689 | 20-scf00019   | 20 |
| AX-157913925 | 2 | 46.637 | KV453182.1  | 5738920 | 20-scf00019   | 20 |
| AX-157812536 | 2 | 46.637 | KV453182.1  | 5739551 | 20-scf00019   | 20 |

|              |   |        |            |         |             |    |
|--------------|---|--------|------------|---------|-------------|----|
| AX-157913929 | 2 | 46.637 | KV453182.1 | 5744226 | 20-scf00019 | 20 |
| AX-157913932 | 2 | 46.637 | KV453182.1 | 5746760 | 20-scf00019 | 20 |
| AX-157913936 | 2 | 46.637 | KV453182.1 | 5750598 | 20-scf00019 | 20 |
| AX-157913943 | 2 | 46.637 | KV453182.1 | 5756670 | 20-scf00019 | 20 |
| AX-157812541 | 2 | 46.637 | KV453182.1 | 5767127 | 20-scf00019 | 20 |
| AX-157812542 | 2 | 46.637 | KV453182.1 | 5767490 | 20-scf00019 | 20 |
| AX-157913952 | 2 | 46.637 | KV453182.1 | 5774388 | 20-scf00019 | 20 |
| AX-157913960 | 2 | 46.637 | KV453182.1 | 5779068 | 20-scf00019 | 20 |
| AX-157913972 | 2 | 46.637 | KV453182.1 | 5790112 | 20-scf00019 | 20 |
| AX-157913973 | 2 | 46.637 | KV453182.1 | 5790792 | 20-scf00019 | 20 |
| AX-157714597 | 2 | 46.637 | KV453182.1 | 5791102 | 20-scf00019 | 20 |
| AX-157913975 | 2 | 46.637 | KV453182.1 | 5792850 | 20-scf00019 | 20 |
| AX-157913978 | 2 | 46.637 | KV453182.1 | 5795718 | 20-scf00019 | 20 |
| AX-157913979 | 2 | 46.637 | KV453182.1 | 5797284 | 20-scf00019 | 20 |
| AX-157747431 | 2 | 46.637 | KV453182.1 | 5798388 | 20-scf00019 | 20 |
| AX-157913981 | 2 | 46.637 | KV453182.1 | 5798600 | 20-scf00019 | 20 |
| AX-157913987 | 2 | 46.637 | KV453182.1 | 5804435 | 20-scf00019 | 20 |
| AX-157913989 | 2 | 46.637 | KV453182.1 | 5806038 | 20-scf00019 | 20 |
| AX-157913993 | 2 | 46.637 | KV453182.1 | 5818837 | 20-scf00019 | 20 |
| AX-157740049 | 2 | 46.637 | KV453182.1 | 5823132 | 20-scf00019 | 20 |
| AX-157914003 | 2 | 46.637 | KV453182.1 | 5828750 | 20-scf00019 | 20 |
| AX-158404980 | 2 | 46.637 | KV453182.1 | 5829430 | 20-scf00019 | 20 |
| AX-157914004 | 2 | 46.637 | KV453182.1 | 5829789 | 20-scf00019 | 20 |
| AX-157914005 | 2 | 46.637 | KV453182.1 | 5830474 | 20-scf00019 | 20 |
| AX-157914007 | 2 | 46.637 | KV453182.1 | 5832624 | 20-scf00019 | 20 |
| AX-157812547 | 2 | 46.637 | KV453182.1 | 5836200 | 20-scf00019 | 20 |
| AX-157812548 | 2 | 46.637 | KV453182.1 | 5837597 | 20-scf00019 | 20 |
| AX-157914011 | 2 | 46.637 | KV453182.1 | 5839354 | 20-scf00019 | 20 |
| AX-158389595 | 2 | 46.637 | KV453182.1 | 5847642 | 20-scf00019 | 20 |
| AX-157812551 | 2 | 46.637 | KV453182.1 | 5851096 | 20-scf00019 | 20 |
| AX-157914030 | 2 | 46.637 | KV453182.1 | 5858073 | 20-scf00019 | 20 |
| AX-157914032 | 2 | 46.637 | KV453182.1 | 5859608 | 20-scf00019 | 20 |
| AX-157914037 | 2 | 46.637 | KV453182.1 | 5864759 | 20-scf00019 | 20 |
| AX-157812553 | 2 | 46.637 | KV453182.1 | 5867462 | 20-scf00019 | 20 |
| AX-158404983 | 2 | 46.637 | KV453182.1 | 5870713 | 20-scf00019 | 20 |
| AX-157914047 | 2 | 46.637 | KV453182.1 | 5877682 | 20-scf00019 | 20 |
| AX-157724366 | 2 | 46.637 | KV453182.1 | 5881487 | 20-scf00019 | 20 |
| AX-157914051 | 2 | 46.637 | KV453182.1 | 5884313 | 20-scf00019 | 20 |
| AX-157914052 | 2 | 46.637 | KV453182.1 | 5885049 | 20-scf00019 | 20 |
| AX-157812555 | 2 | 46.637 | KV453182.1 | 5888047 | 20-scf00019 | 20 |
| AX-157812557 | 2 | 46.637 | KV453182.1 | 5889410 | 20-scf00019 | 20 |
| AX-157715005 | 2 | 46.637 | KV453182.1 | 5891535 | 20-scf00019 | 20 |
| AX-157914061 | 2 | 46.637 | KV453182.1 | 5895724 | 20-scf00019 | 20 |
| AX-157914062 | 2 | 46.637 | KV453182.1 | 5896216 | 20-scf00019 | 20 |
| AX-157914065 | 2 | 46.637 | KV453182.1 | 5898054 | 20-scf00019 | 20 |
| AX-157914068 | 2 | 46.637 | KV453182.1 | 5902004 | 20-scf00019 | 20 |
| AX-157914071 | 2 | 46.637 | KV453182.1 | 5904959 | 20-scf00019 | 20 |
| AX-157914078 | 2 | 46.637 | KV453182.1 | 5910653 | 20-scf00019 | 20 |
| AX-157914079 | 2 | 46.637 | KV453182.1 | 5911653 | 20-scf00019 | 20 |
| AX-157914088 | 2 | 46.637 | KV453182.1 | 5916614 | 20-scf00019 | 20 |
| AX-157914096 | 2 | 46.637 | KV453182.1 | 5926351 | 20-scf00019 | 20 |

|              |   |        |            |         |             |    |
|--------------|---|--------|------------|---------|-------------|----|
| AX-157914097 | 2 | 46.637 | KV453182.1 | 5927602 | 20-scf00019 | 20 |
| AX-157914098 | 2 | 46.637 | KV453182.1 | 5928892 | 20-scf00019 | 20 |
| AX-157914113 | 2 | 46.637 | KV453182.1 | 5942856 | 20-scf00019 | 20 |
| AX-157914122 | 2 | 46.637 | KV453182.1 | 5951512 | 20-scf00019 | 20 |
| AX-157914127 | 2 | 46.637 | KV453182.1 | 5958287 | 20-scf00019 | 20 |
| AX-157717144 | 2 | 46.637 | KV453182.1 | 5961742 | 20-scf00019 | 20 |
| AX-157914131 | 2 | 46.637 | KV453182.1 | 5963084 | 20-scf00019 | 20 |
| AX-157869096 | 2 | 46.637 | KV453182.1 | 5967687 | 20-scf00019 | 20 |
| AX-157914141 | 2 | 46.637 | KV453182.1 | 5971403 | 20-scf00019 | 20 |
| AX-157914142 | 2 | 46.637 | KV453182.1 | 5971845 | 20-scf00019 | 20 |
| AX-157914143 | 2 | 46.637 | KV453182.1 | 5972891 | 20-scf00019 | 20 |
| AX-157914144 | 2 | 46.637 | KV453182.1 | 5973479 | 20-scf00019 | 20 |
| AX-157914146 | 2 | 46.637 | KV453182.1 | 5975292 | 20-scf00019 | 20 |
| AX-157914147 | 2 | 46.637 | KV453182.1 | 5977472 | 20-scf00019 | 20 |
| AX-157812563 | 2 | 46.637 | KV453182.1 | 5982439 | 20-scf00019 | 20 |
| AX-157914155 | 2 | 46.637 | KV453182.1 | 5986186 | 20-scf00019 | 20 |
| AX-157914156 | 2 | 46.637 | KV453182.1 | 5986964 | 20-scf00019 | 20 |
| AX-157914159 | 2 | 46.637 | KV453182.1 | 5988818 | 20-scf00019 | 20 |
| AX-157914163 | 2 | 46.637 | KV453182.1 | 5993158 | 20-scf00019 | 20 |
| AX-157914167 | 2 | 46.637 | KV453182.1 | 5996468 | 20-scf00019 | 20 |
| AX-157914172 | 2 | 46.637 | KV453182.1 | 6002172 | 20-scf00019 | 20 |
| AX-157752752 | 2 | 46.637 | KV453182.1 | 6002510 | 20-scf00019 | 20 |
| AX-157812565 | 2 | 46.637 | KV453182.1 | 6003622 | 20-scf00019 | 20 |
| AX-157914176 | 2 | 46.637 | KV453182.1 | 6003992 | 20-scf00019 | 20 |
| AX-157914177 | 2 | 46.637 | KV453182.1 | 6004412 | 20-scf00019 | 20 |
| AX-157914184 | 2 | 46.637 | KV453182.1 | 6018522 | 20-scf00019 | 20 |
| AX-157914185 | 2 | 46.637 | KV453182.1 | 6019083 | 20-scf00019 | 20 |
| AX-157869097 | 2 | 46.637 | KV453182.1 | 6021074 | 20-scf00019 | 20 |
| AX-157914189 | 2 | 46.637 | KV453182.1 | 6025196 | 20-scf00019 | 20 |
| AX-157914190 | 2 | 46.637 | KV453182.1 | 6027386 | 20-scf00019 | 20 |
| AX-157914191 | 2 | 46.637 | KV453182.1 | 6028884 | 20-scf00019 | 20 |
| AX-157914200 | 2 | 46.637 | KV453182.1 | 6038162 | 20-scf00019 | 20 |
| AX-157914202 | 2 | 46.637 | KV453182.1 | 6039062 | 20-scf00019 | 20 |
| AX-157812566 | 2 | 46.637 | KV453182.1 | 6054953 | 20-scf00019 | 20 |
| AX-157914214 | 2 | 46.637 | KV453182.1 | 6059446 | 20-scf00019 | 20 |
| AX-157914217 | 2 | 46.637 | KV453182.1 | 6062062 | 20-scf00019 | 20 |
| AX-157914219 | 2 | 46.637 | KV453182.1 | 6063890 | 20-scf00019 | 20 |
| AX-157914220 | 2 | 46.637 | KV453182.1 | 6064644 | 20-scf00019 | 20 |
| AX-157914223 | 2 | 46.637 | KV453182.1 | 6070918 | 20-scf00019 | 20 |
| AX-157750068 | 2 | 46.637 | KV453182.1 | 6071733 | 20-scf00019 | 20 |
| AX-157914232 | 2 | 46.637 | KV453182.1 | 6079037 | 20-scf00019 | 20 |
| AX-157914233 | 2 | 46.637 | KV453182.1 | 6082199 | 20-scf00019 | 20 |
| AX-157914235 | 2 | 46.637 | KV453182.1 | 6083074 | 20-scf00019 | 20 |
| AX-157914245 | 2 | 46.637 | KV453182.1 | 6094248 | 20-scf00019 | 20 |
| AX-157914253 | 2 | 46.637 | KV453182.1 | 6110224 | 20-scf00019 | 20 |
| AX-157914258 | 2 | 46.637 | KV453182.1 | 6117835 | 20-scf00019 | 20 |
| AX-157914261 | 2 | 46.637 | KV453182.1 | 6118961 | 20-scf00019 | 20 |
| AX-157715457 | 2 | 46.637 | KV453182.1 | 6128251 | 20-scf00019 | 20 |
| AX-157914265 | 2 | 46.637 | KV453182.1 | 6130368 | 20-scf00019 | 20 |
| AX-158404991 | 2 | 46.637 | KV453182.1 | 6131432 | 20-scf00019 | 20 |
| AX-157914268 | 2 | 46.637 | KV453182.1 | 6134478 | 20-scf00019 | 20 |



|              |   |        |            |         |             |    |
|--------------|---|--------|------------|---------|-------------|----|
| AX-157914269 | 2 | 46.637 | KV453182.1 | 6134991 | 20-scf00019 | 20 |
| AX-157914273 | 2 | 46.637 | KV453182.1 | 6137477 | 20-scf00019 | 20 |
| AX-157914280 | 2 | 46.637 | KV453182.1 | 6144527 | 20-scf00019 | 20 |
| AX-157914281 | 2 | 46.637 | KV453182.1 | 6147198 | 20-scf00019 | 20 |
| AX-157914284 | 2 | 46.637 | KV453182.1 | 6148840 | 20-scf00019 | 20 |
| AX-157914291 | 2 | 46.637 | KV453182.1 | 6159151 | 20-scf00019 | 20 |
| AX-157914306 | 2 | 46.637 | KV453182.1 | 6173620 | 20-scf00019 | 20 |
| AX-157914329 | 2 | 46.637 | KV453182.1 | 6193573 | 20-scf00019 | 20 |
| AX-157914330 | 2 | 46.637 | KV453182.1 | 6194302 | 20-scf00019 | 20 |
| AX-157914333 | 2 | 46.637 | KV453182.1 | 6196308 | 20-scf00019 | 20 |
| AX-157914335 | 2 | 46.637 | KV453182.1 | 6197275 | 20-scf00019 | 20 |
| AX-157914336 | 2 | 46.637 | KV453182.1 | 6198238 | 20-scf00019 | 20 |
| AX-157914339 | 2 | 46.637 | KV453182.1 | 6201080 | 20-scf00019 | 20 |
| AX-157914351 | 2 | 46.637 | KV453182.1 | 6213118 | 20-scf00019 | 20 |
| AX-157914361 | 2 | 46.637 | KV453182.1 | 6232667 | 20-scf00019 | 20 |
| AX-157914363 | 2 | 46.637 | KV453182.1 | 6246205 | 20-scf00019 | 20 |
| AX-157914364 | 2 | 46.637 | KV453182.1 | 6246657 | 20-scf00019 | 20 |
| AX-157914365 | 2 | 46.637 | KV453182.1 | 6246769 | 20-scf00019 | 20 |
| AX-157812577 | 2 | 46.637 | KV453182.1 | 6292467 | 20-scf00019 | 20 |
| AX-157914381 | 2 | 46.637 | KV453182.1 | 6294330 | 20-scf00019 | 20 |
| AX-157914389 | 2 | 46.637 | KV453182.1 | 6315751 | 20-scf00019 | 20 |
| AX-157914405 | 2 | 46.637 | KV453182.1 | 6474043 | 20-scf00019 | 20 |
| AX-157914419 | 2 | 46.637 | KV453182.1 | 6596355 | 20-scf00019 | 20 |
| AX-157914420 | 2 | 46.637 | KV453182.1 | 6596889 | 20-scf00019 | 20 |
| AX-157914424 | 2 | 46.637 | KV453182.1 | 6650813 | 20-scf00019 | 20 |
| AX-157914425 | 2 | 46.637 | KV453182.1 | 6651805 | 20-scf00019 | 20 |
| AX-157914436 | 2 | 46.637 | KV453182.1 | 6739213 | 20-scf00019 | 20 |
| AX-157914437 | 2 | 46.637 | KV453182.1 | 6740338 | 20-scf00019 | 20 |
| AX-157914440 | 2 | 46.637 | KV453182.1 | 6763009 | 20-scf00019 | 20 |
| AX-157914441 | 2 | 46.637 | KV453182.1 | 6771933 | 20-scf00019 | 20 |
| AX-157812581 | 2 | 46.637 | KV453182.1 | 6778662 | 20-scf00019 | 20 |
| AX-157914442 | 2 | 46.637 | KV453182.1 | 6804226 | 20-scf00019 | 20 |
| AX-157914444 | 2 | 46.637 | KV453182.1 | 6807265 | 20-scf00019 | 20 |
| AX-157914445 | 2 | 46.637 | KV453182.1 | 6822174 | 20-scf00019 | 20 |
| AX-157914446 | 2 | 46.637 | KV453182.1 | 6823881 | 20-scf00019 | 20 |
| AX-157914447 | 2 | 46.637 | KV453182.1 | 6826283 | 20-scf00019 | 20 |
| AX-157914451 | 2 | 46.637 | KV453182.1 | 6856092 | 20-scf00019 | 20 |
| AX-157914452 | 2 | 46.637 | KV453182.1 | 6858368 | 20-scf00019 | 20 |
| AX-157914459 | 2 | 46.637 | KV453182.1 | 6865959 | 20-scf00019 | 20 |
| AX-157914462 | 2 | 46.637 | KV453182.1 | 6869330 | 20-scf00019 | 20 |
| AX-157812584 | 2 | 46.637 | KV453182.1 | 6869413 | 20-scf00019 | 20 |
| AX-157812585 | 2 | 46.637 | KV453182.1 | 6869558 | 20-scf00019 | 20 |
| AX-157914463 | 2 | 46.637 | KV453182.1 | 6870142 | 20-scf00019 | 20 |
| AX-157883445 | 2 | 46.637 | KV453182.1 | 6988474 | 20-scf00019 | 20 |
| AX-157914539 | 2 | 46.637 | KV453182.1 | 7107179 | 20-scf00019 | 20 |
| AX-157914541 | 2 | 46.637 | KV453182.1 | 7112124 | 20-scf00019 | 20 |
| AX-158414809 | 2 | 46.637 | KV453182.1 | 7113176 | 20-scf00019 | 20 |
| AX-157914543 | 2 | 46.637 | KV453182.1 | 7117235 | 20-scf00019 | 20 |
| AX-157914562 | 2 | 46.637 | KV453182.1 | 7173777 | 20-scf00019 | 20 |
| AX-157914563 | 2 | 46.637 | KV453182.1 | 7176225 | 20-scf00019 | 20 |
| AX-157914565 | 2 | 46.637 | KV453182.1 | 7177497 | 20-scf00019 | 20 |

|              |   |        |            |         |             |    |
|--------------|---|--------|------------|---------|-------------|----|
| AX-157914601 | 2 | 46.637 | KV453182.1 | 7410766 | 20-scf00019 | 20 |
| AX-157914664 | 2 | 46.637 | KV453189.1 | 1217935 | 20-scf00020 | 20 |
| AX-157914647 | 2 | 46.637 | KV453189.1 | 1299282 | 20-scf00020 | 20 |
| AX-157853781 | 2 | 46.637 | KV453189.1 | 1790791 | 20-scf00020 | 20 |
| AX-157914948 | 2 | 46.637 | KV453193.1 | 99100   | 20-scf00021 | 20 |
| AX-157812668 | 2 | 46.637 | KV453193.1 | 1018094 | 20-scf00021 | 20 |
| AX-158375397 | 2 | 46.637 | KV453187.1 | 316478  | 20-scf00563 | 20 |
| AX-158375401 | 2 | 46.637 | KV453187.1 | 458049  | 20-scf00563 | 20 |
| AX-158375402 | 2 | 46.637 | KV453187.1 | 460598  | 20-scf00563 | 20 |
| AX-158375403 | 2 | 46.637 | KV453187.1 | 464400  | 20-scf00563 | 20 |
| AX-158375404 | 2 | 46.637 | KV453187.1 | 473702  | 20-scf00563 | 20 |
| AX-158375405 | 2 | 46.637 | KV453187.1 | 479894  | 20-scf00563 | 20 |
| AX-158375406 | 2 | 46.637 | KV453187.1 | 483214  | 20-scf00563 | 20 |
| AX-158420373 | 2 | 46.637 | KV453187.1 | 513924  | 20-scf00563 | 20 |
| AX-158375426 | 2 | 46.637 | KV453187.1 | 633754  | 20-scf00563 | 20 |
| AX-158375428 | 2 | 46.637 | KV453187.1 | 635820  | 20-scf00563 | 20 |
| AX-158375432 | 2 | 46.637 | KV453187.1 | 677808  | 20-scf00563 | 20 |
| AX-158375440 | 2 | 46.637 | KV453187.1 | 714430  | 20-scf00563 | 20 |
| AX-158375457 | 2 | 46.637 | KV453187.1 | 898081  | 20-scf00563 | 20 |
| AX-157748177 | 2 | 46.637 | KV453187.1 | 1029804 | 20-scf00563 | 20 |
| AX-158375462 | 2 | 46.637 | KV453187.1 | 1029971 | 20-scf00563 | 20 |
| AX-158375464 | 2 | 46.637 | KV453187.1 | 1035454 | 20-scf00563 | 20 |
| AX-158375477 | 2 | 46.637 | KV453187.1 | 1204784 | 20-scf00563 | 20 |
| AX-157687888 | 2 | 46.637 | KV453187.1 | 1265457 | 20-scf00563 | 20 |
| AX-157680870 | 2 | 46.637 | KV453187.1 | 1369581 | 20-scf00563 | 20 |
| AX-158376085 | 2 | 46.637 | KV453183.1 | 5064    | 20-scf00571 | 20 |
| AX-158376108 | 2 | 46.637 | KV453183.1 | 257575  | 20-scf00571 | 20 |
| AX-158376111 | 2 | 46.637 | KV453183.1 | 288359  | 20-scf00571 | 20 |
| AX-158376121 | 2 | 46.637 | KV453183.1 | 412422  | 20-scf00571 | 20 |
| AX-157864546 | 2 | 46.637 | KV453183.1 | 597603  | 20-scf00571 | 20 |
| AX-157920091 | 2 | 46.637 | KV453183.1 | 633301  | 20-scf00571 | 20 |
| AX-157920094 | 2 | 46.637 | KV453183.1 | 644744  | 20-scf00571 | 20 |
| AX-158403385 | 2 | 46.637 | KV453183.1 | 670871  | 20-scf00571 | 20 |
| AX-157920103 | 2 | 46.637 | KV453183.1 | 693857  | 20-scf00571 | 20 |
| AX-157920104 | 2 | 46.637 | KV453183.1 | 696101  | 20-scf00571 | 20 |
| AX-157920105 | 2 | 46.637 | KV453183.1 | 698316  | 20-scf00571 | 20 |
| AX-157813128 | 2 | 46.637 | KV453183.1 | 699556  | 20-scf00571 | 20 |
| AX-157920106 | 2 | 46.637 | KV453183.1 | 701067  | 20-scf00571 | 20 |
| AX-157920107 | 2 | 46.637 | KV453183.1 | 706896  | 20-scf00571 | 20 |
| AX-157920109 | 2 | 46.637 | KV453183.1 | 729375  | 20-scf00571 | 20 |
| AX-157813129 | 2 | 46.637 | KV453183.1 | 740869  | 20-scf00571 | 20 |
| AX-157716776 | 2 | 46.637 | KV453183.1 | 746048  | 20-scf00571 | 20 |
| AX-157920113 | 2 | 46.637 | KV453183.1 | 747621  | 20-scf00571 | 20 |
| AX-157920116 | 2 | 46.637 | KV453183.1 | 755758  | 20-scf00571 | 20 |
| AX-157920117 | 2 | 46.637 | KV453183.1 | 756763  | 20-scf00571 | 20 |
| AX-157920118 | 2 | 46.637 | KV453183.1 | 757049  | 20-scf00571 | 20 |
| AX-157920122 | 2 | 46.637 | KV453183.1 | 762537  | 20-scf00571 | 20 |
| AX-157920123 | 2 | 46.637 | KV453183.1 | 764206  | 20-scf00571 | 20 |
| AX-157920125 | 2 | 46.637 | KV453183.1 | 774250  | 20-scf00571 | 20 |
| AX-157920126 | 2 | 46.637 | KV453183.1 | 775219  | 20-scf00571 | 20 |
| AX-157920127 | 2 | 46.637 | KV453183.1 | 777863  | 20-scf00571 | 20 |

|              |   |        |             |         |             |    |
|--------------|---|--------|-------------|---------|-------------|----|
| AX-157920128 | 2 | 46.637 | KV453183.1  | 784696  | 20-scf00571 | 20 |
| AX-157920129 | 2 | 46.637 | KV453183.1  | 786765  | 20-scf00571 | 20 |
| AX-157920132 | 2 | 46.637 | KV453183.1  | 793236  | 20-scf00571 | 20 |
| AX-157920135 | 2 | 46.637 | KV453183.1  | 800287  | 20-scf00571 | 20 |
| AX-157920143 | 2 | 46.637 | KV453183.1  | 836615  | 20-scf00571 | 20 |
| AX-157920145 | 2 | 46.637 | KV453183.1  | 842968  | 20-scf00571 | 20 |
| AX-157920146 | 2 | 46.637 | KV453183.1  | 869363  | 20-scf00571 | 20 |
| AX-157920147 | 2 | 46.637 | KV453183.1  | 871717  | 20-scf00571 | 20 |
| AX-157920155 | 2 | 46.637 | KV453183.1  | 908030  | 20-scf00571 | 20 |
| AX-157716174 | 2 | 46.637 | KV453183.1  | 908979  | 20-scf00571 | 20 |
| AX-157741947 | 2 | 46.637 | KV453183.1  | 910520  | 20-scf00571 | 20 |
| AX-157920158 | 2 | 46.637 | KV453183.1  | 921625  | 20-scf00571 | 20 |
| AX-157813135 | 2 | 46.637 | KV453183.1  | 926117  | 20-scf00571 | 20 |
| AX-158376166 | 2 | 46.637 | KV453190.1  | 345966  | 20-scf00573 | 20 |
| AX-158376169 | 2 | 46.637 | KV453190.1  | 356042  | 20-scf00573 | 20 |
| AX-157685024 | 2 | 46.637 | KV453191.1  | 93468   | 20-scf00582 | 20 |
| AX-158420974 | 2 | 46.637 | KV453188.1  | 6907    | 20-scf00886 | 20 |
| AX-157685179 | 2 | 46.637 | KV453185.1  | 28411   | 20-scf00994 | 20 |
| AX-157685177 | 2 | 46.637 | KV453185.1  | 65869   | 20-scf00994 | 20 |
| AX-157685172 | 2 | 46.637 | KV453185.1  | 141854  | 20-scf00994 | 20 |
| AX-157685169 | 2 | 46.637 | KV453185.1  | 170653  | 20-scf00994 | 20 |
| AX-157682201 | 2 | 46.637 | KV453185.1  | 254087  | 20-scf00994 | 20 |
| AX-157685920 | 2 | 46.637 | KV453185.1  | 255164  | 20-scf00994 | 20 |
| AX-157685921 | 2 | 46.637 | KV453185.1  | 267294  | 20-scf00994 | 20 |
| AX-157681178 | 2 | 46.637 | KV453359.1  | 48623   | scf00584    | UN |
| AX-157704865 | 2 | 46.637 | 3ML01027692 | 957     | scf03298_1  | UN |
| AX-157813132 | 2 | 46.789 | KV453183.1  | 885147  | 20-scf00571 | 20 |
| AX-157716475 | 2 | 46.789 | KV453183.1  | 886390  | 20-scf00571 | 20 |
| AX-157920150 | 2 | 46.789 | KV453183.1  | 888441  | 20-scf00571 | 20 |
| AX-157913674 | 2 | 46.812 | KV453182.1  | 5432053 | 20-scf00019 | 20 |
| AX-157913689 | 2 | 46.812 | KV453182.1  | 5459129 | 20-scf00019 | 20 |
| AX-157913777 | 2 | 46.812 | KV453182.1  | 5576087 | 20-scf00019 | 20 |
| AX-157914429 | 2 | 46.812 | KV453182.1  | 6667387 | 20-scf00019 | 20 |
| AX-157812594 | 2 | 46.812 | KV453182.1  | 7121503 | 20-scf00019 | 20 |
| AX-157914545 | 2 | 46.812 | KV453182.1  | 7125918 | 20-scf00019 | 20 |
| AX-157723318 | 2 | 46.812 | KV453189.1  | 2046823 | 20-scf00020 | 20 |
| AX-157914926 | 2 | 46.812 | KV453193.1  | 64431   | 20-scf00021 | 20 |
| AX-157915102 | 2 | 46.812 | KV453193.1  | 272008  | 20-scf00021 | 20 |
| AX-157915149 | 2 | 46.812 | KV453193.1  | 322575  | 20-scf00021 | 20 |
| AX-157915178 | 2 | 46.812 | KV453193.1  | 350375  | 20-scf00021 | 20 |
| AX-157915180 | 2 | 46.812 | KV453193.1  | 352502  | 20-scf00021 | 20 |
| AX-157915188 | 2 | 46.812 | KV453193.1  | 362238  | 20-scf00021 | 20 |
| AX-157853721 | 2 | 46.812 | KV453193.1  | 437661  | 20-scf00021 | 20 |
| AX-157915247 | 2 | 46.812 | KV453193.1  | 439902  | 20-scf00021 | 20 |
| AX-158375419 | 2 | 46.812 | KV453187.1  | 582108  | 20-scf00563 | 20 |
| AX-157920096 | 2 | 46.812 | KV453183.1  | 651929  | 20-scf00571 | 20 |
| AX-157920098 | 2 | 46.812 | KV453183.1  | 658261  | 20-scf00571 | 20 |
| AX-157813133 | 2 | 46.812 | KV453183.1  | 907308  | 20-scf00571 | 20 |
| AX-157920160 | 2 | 46.812 | KV453183.1  | 938862  | 20-scf00571 | 20 |
| AX-157920162 | 2 | 46.812 | KV453183.1  | 944320  | 20-scf00571 | 20 |
| AX-157914817 | 2 | 46.823 | KV453189.1  | 428233  | 20-scf00020 | 20 |

|              |   |        |            |         |             |    |
|--------------|---|--------|------------|---------|-------------|----|
| AX-157920489 | 2 | 46.823 | KV453189.1 | 1998846 | 20-scf00020 | 20 |
| AX-157812612 | 2 | 46.823 | KV453193.1 | 70296   | 20-scf00021 | 20 |
| AX-157920163 | 2 | 46.823 | KV453183.1 | 945080  | 20-scf00571 | 20 |
| AX-157920270 | 2 | 46.823 | KV453183.1 | 1316318 | 20-scf00571 | 20 |
| AX-157920164 | 2 | 46.832 | KV453183.1 | 947511  | 20-scf00571 | 20 |
| AX-157920203 | 2 | 46.832 | KV453183.1 | 1081011 | 20-scf00571 | 20 |
| AX-157920206 | 2 | 46.846 | KV453183.1 | 1084807 | 20-scf00571 | 20 |
| AX-157920209 | 2 | 46.861 | KV453183.1 | 1086182 | 20-scf00571 | 20 |
| AX-157920214 | 2 | 46.876 | KV453183.1 | 1089503 | 20-scf00571 | 20 |
| AX-157920369 | 2 | 46.891 | KV453189.1 | 1586527 | 20-scf00020 | 20 |
| AX-157813144 | 2 | 46.891 | KV453183.1 | 1090621 | 20-scf00571 | 20 |
| AX-157920223 | 2 | 46.912 | KV453183.1 | 1133580 | 20-scf00571 | 20 |
| AX-157920293 | 2 | 46.931 | KV453183.1 | 1493617 | 20-scf00571 | 20 |
| AX-157812500 | 2 | 46.942 | KV453182.1 | 5179495 | 20-scf00019 | 20 |
| AX-157812521 | 2 | 46.942 | KV453182.1 | 5410326 | 20-scf00019 | 20 |
| AX-157913735 | 2 | 46.942 | KV453182.1 | 5518255 | 20-scf00019 | 20 |
| AX-157913782 | 2 | 46.942 | KV453182.1 | 5581084 | 20-scf00019 | 20 |
| AX-157913783 | 2 | 46.942 | KV453182.1 | 5584936 | 20-scf00019 | 20 |
| AX-157914274 | 2 | 46.942 | KV453182.1 | 6138347 | 20-scf00019 | 20 |
| AX-157914315 | 2 | 46.942 | KV453182.1 | 6182655 | 20-scf00019 | 20 |
| AX-157914374 | 2 | 46.942 | KV453182.1 | 6280108 | 20-scf00019 | 20 |
| AX-157914383 | 2 | 46.942 | KV453182.1 | 6298990 | 20-scf00019 | 20 |
| AX-157914407 | 2 | 46.942 | KV453182.1 | 6475972 | 20-scf00019 | 20 |
| AX-157914414 | 2 | 46.942 | KV453182.1 | 6557873 | 20-scf00019 | 20 |
| AX-157914428 | 2 | 46.942 | KV453182.1 | 6656207 | 20-scf00019 | 20 |
| AX-157914498 | 2 | 46.942 | KV453182.1 | 6953623 | 20-scf00019 | 20 |
| AX-157914511 | 2 | 46.942 | KV453182.1 | 7019026 | 20-scf00019 | 20 |
| AX-157914514 | 2 | 46.942 | KV453182.1 | 7025492 | 20-scf00019 | 20 |
| AX-157914570 | 2 | 46.942 | KV453182.1 | 7197240 | 20-scf00019 | 20 |
| AX-157914580 | 2 | 46.942 | KV453182.1 | 7257641 | 20-scf00019 | 20 |
| AX-157914892 | 2 | 46.942 | KV453189.1 | 6177    | 20-scf00020 | 20 |
| AX-157914889 | 2 | 46.942 | KV453189.1 | 24699   | 20-scf00020 | 20 |
| AX-157914886 | 2 | 46.942 | KV453189.1 | 59006   | 20-scf00020 | 20 |
| AX-157914883 | 2 | 46.942 | KV453189.1 | 74729   | 20-scf00020 | 20 |
| AX-157914882 | 2 | 46.942 | KV453189.1 | 76419   | 20-scf00020 | 20 |
| AX-157914879 | 2 | 46.942 | KV453189.1 | 102338  | 20-scf00020 | 20 |
| AX-157914878 | 2 | 46.942 | KV453189.1 | 119057  | 20-scf00020 | 20 |
| AX-157914876 | 2 | 46.942 | KV453189.1 | 135460  | 20-scf00020 | 20 |
| AX-157914871 | 2 | 46.942 | KV453189.1 | 192593  | 20-scf00020 | 20 |
| AX-157914869 | 2 | 46.942 | KV453189.1 | 211779  | 20-scf00020 | 20 |
| AX-157914868 | 2 | 46.942 | KV453189.1 | 240483  | 20-scf00020 | 20 |
| AX-157914866 | 2 | 46.942 | KV453189.1 | 254932  | 20-scf00020 | 20 |
| AX-157914864 | 2 | 46.942 | KV453189.1 | 257721  | 20-scf00020 | 20 |
| AX-157914863 | 2 | 46.942 | KV453189.1 | 258458  | 20-scf00020 | 20 |
| AX-157914862 | 2 | 46.942 | KV453189.1 | 260117  | 20-scf00020 | 20 |
| AX-158405010 | 2 | 46.942 | KV453189.1 | 265415  | 20-scf00020 | 20 |
| AX-157914861 | 2 | 46.942 | KV453189.1 | 266509  | 20-scf00020 | 20 |
| AX-157914860 | 2 | 46.942 | KV453189.1 | 277168  | 20-scf00020 | 20 |
| AX-157914859 | 2 | 46.942 | KV453189.1 | 277644  | 20-scf00020 | 20 |
| AX-157914858 | 2 | 46.942 | KV453189.1 | 279859  | 20-scf00020 | 20 |
| AX-157914856 | 2 | 46.942 | KV453189.1 | 284635  | 20-scf00020 | 20 |

|              |   |        |            |        |             |    |
|--------------|---|--------|------------|--------|-------------|----|
| AX-157914855 | 2 | 46.942 | KV453189.1 | 286638 | 20-scf00020 | 20 |
| AX-157914854 | 2 | 46.942 | KV453189.1 | 288632 | 20-scf00020 | 20 |
| AX-157914853 | 2 | 46.942 | KV453189.1 | 290029 | 20-scf00020 | 20 |
| AX-157914852 | 2 | 46.942 | KV453189.1 | 290423 | 20-scf00020 | 20 |
| AX-157914850 | 2 | 46.942 | KV453189.1 | 298215 | 20-scf00020 | 20 |
| AX-157914849 | 2 | 46.942 | KV453189.1 | 299482 | 20-scf00020 | 20 |
| AX-157914848 | 2 | 46.942 | KV453189.1 | 300644 | 20-scf00020 | 20 |
| AX-157914847 | 2 | 46.942 | KV453189.1 | 303891 | 20-scf00020 | 20 |
| AX-157914846 | 2 | 46.942 | KV453189.1 | 304994 | 20-scf00020 | 20 |
| AX-157914844 | 2 | 46.942 | KV453189.1 | 328551 | 20-scf00020 | 20 |
| AX-157914843 | 2 | 46.942 | KV453189.1 | 331238 | 20-scf00020 | 20 |
| AX-157914840 | 2 | 46.942 | KV453189.1 | 356934 | 20-scf00020 | 20 |
| AX-157914839 | 2 | 46.942 | KV453189.1 | 361278 | 20-scf00020 | 20 |
| AX-157914837 | 2 | 46.942 | KV453189.1 | 364806 | 20-scf00020 | 20 |
| AX-157914834 | 2 | 46.942 | KV453189.1 | 387686 | 20-scf00020 | 20 |
| AX-157914833 | 2 | 46.942 | KV453189.1 | 388355 | 20-scf00020 | 20 |
| AX-157914832 | 2 | 46.942 | KV453189.1 | 389343 | 20-scf00020 | 20 |
| AX-157914830 | 2 | 46.942 | KV453189.1 | 401198 | 20-scf00020 | 20 |
| AX-157914829 | 2 | 46.942 | KV453189.1 | 402446 | 20-scf00020 | 20 |
| AX-158404241 | 2 | 46.942 | KV453189.1 | 405262 | 20-scf00020 | 20 |
| AX-157914827 | 2 | 46.942 | KV453189.1 | 407825 | 20-scf00020 | 20 |
| AX-157914826 | 2 | 46.942 | KV453189.1 | 408991 | 20-scf00020 | 20 |
| AX-157914824 | 2 | 46.942 | KV453189.1 | 418377 | 20-scf00020 | 20 |
| AX-157914822 | 2 | 46.942 | KV453189.1 | 421270 | 20-scf00020 | 20 |
| AX-157914820 | 2 | 46.942 | KV453189.1 | 424738 | 20-scf00020 | 20 |
| AX-157914819 | 2 | 46.942 | KV453189.1 | 425440 | 20-scf00020 | 20 |
| AX-157914818 | 2 | 46.942 | KV453189.1 | 426632 | 20-scf00020 | 20 |
| AX-157914816 | 2 | 46.942 | KV453189.1 | 431668 | 20-scf00020 | 20 |
| AX-157914815 | 2 | 46.942 | KV453189.1 | 432735 | 20-scf00020 | 20 |
| AX-157914814 | 2 | 46.942 | KV453189.1 | 441734 | 20-scf00020 | 20 |
| AX-157914813 | 2 | 46.942 | KV453189.1 | 444056 | 20-scf00020 | 20 |
| AX-157914812 | 2 | 46.942 | KV453189.1 | 444953 | 20-scf00020 | 20 |
| AX-157914811 | 2 | 46.942 | KV453189.1 | 445322 | 20-scf00020 | 20 |
| AX-157914810 | 2 | 46.942 | KV453189.1 | 456648 | 20-scf00020 | 20 |
| AX-157914809 | 2 | 46.942 | KV453189.1 | 457415 | 20-scf00020 | 20 |
| AX-157914808 | 2 | 46.942 | KV453189.1 | 460165 | 20-scf00020 | 20 |
| AX-157914807 | 2 | 46.942 | KV453189.1 | 460998 | 20-scf00020 | 20 |
| AX-157914806 | 2 | 46.942 | KV453189.1 | 462766 | 20-scf00020 | 20 |
| AX-157914805 | 2 | 46.942 | KV453189.1 | 472190 | 20-scf00020 | 20 |
| AX-157914804 | 2 | 46.942 | KV453189.1 | 480714 | 20-scf00020 | 20 |
| AX-157914803 | 2 | 46.942 | KV453189.1 | 485086 | 20-scf00020 | 20 |
| AX-157914801 | 2 | 46.942 | KV453189.1 | 495329 | 20-scf00020 | 20 |
| AX-157914799 | 2 | 46.942 | KV453189.1 | 497911 | 20-scf00020 | 20 |
| AX-157914798 | 2 | 46.942 | KV453189.1 | 498380 | 20-scf00020 | 20 |
| AX-157914797 | 2 | 46.942 | KV453189.1 | 499933 | 20-scf00020 | 20 |
| AX-157883448 | 2 | 46.942 | KV453189.1 | 500667 | 20-scf00020 | 20 |
| AX-157914796 | 2 | 46.942 | KV453189.1 | 504290 | 20-scf00020 | 20 |
| AX-157914795 | 2 | 46.942 | KV453189.1 | 505993 | 20-scf00020 | 20 |
| AX-157914794 | 2 | 46.942 | KV453189.1 | 508456 | 20-scf00020 | 20 |
| AX-157914793 | 2 | 46.942 | KV453189.1 | 512704 | 20-scf00020 | 20 |
| AX-157742419 | 2 | 46.942 | KV453189.1 | 517737 | 20-scf00020 | 20 |

|              |   |        |            |        |             |    |
|--------------|---|--------|------------|--------|-------------|----|
| AX-157914792 | 2 | 46.942 | KV453189.1 | 521579 | 20-scf00020 | 20 |
| AX-157914791 | 2 | 46.942 | KV453189.1 | 522005 | 20-scf00020 | 20 |
| AX-157725475 | 2 | 46.942 | KV453189.1 | 526523 | 20-scf00020 | 20 |
| AX-157914788 | 2 | 46.942 | KV453189.1 | 527908 | 20-scf00020 | 20 |
| AX-157914787 | 2 | 46.942 | KV453189.1 | 529716 | 20-scf00020 | 20 |
| AX-157914786 | 2 | 46.942 | KV453189.1 | 531245 | 20-scf00020 | 20 |
| AX-157914785 | 2 | 46.942 | KV453189.1 | 533808 | 20-scf00020 | 20 |
| AX-157914783 | 2 | 46.942 | KV453189.1 | 540259 | 20-scf00020 | 20 |
| AX-157914782 | 2 | 46.942 | KV453189.1 | 541150 | 20-scf00020 | 20 |
| AX-157914781 | 2 | 46.942 | KV453189.1 | 544568 | 20-scf00020 | 20 |
| AX-157914779 | 2 | 46.942 | KV453189.1 | 548899 | 20-scf00020 | 20 |
| AX-157914778 | 2 | 46.942 | KV453189.1 | 551617 | 20-scf00020 | 20 |
| AX-157883447 | 2 | 46.942 | KV453189.1 | 556583 | 20-scf00020 | 20 |
| AX-157914777 | 2 | 46.942 | KV453189.1 | 558113 | 20-scf00020 | 20 |
| AX-157914776 | 2 | 46.942 | KV453189.1 | 561017 | 20-scf00020 | 20 |
| AX-157914775 | 2 | 46.942 | KV453189.1 | 574094 | 20-scf00020 | 20 |
| AX-157914773 | 2 | 46.942 | KV453189.1 | 578900 | 20-scf00020 | 20 |
| AX-157914771 | 2 | 46.942 | KV453189.1 | 588196 | 20-scf00020 | 20 |
| AX-157914770 | 2 | 46.942 | KV453189.1 | 590241 | 20-scf00020 | 20 |
| AX-157914768 | 2 | 46.942 | KV453189.1 | 594241 | 20-scf00020 | 20 |
| AX-157914767 | 2 | 46.942 | KV453189.1 | 600564 | 20-scf00020 | 20 |
| AX-157914766 | 2 | 46.942 | KV453189.1 | 602323 | 20-scf00020 | 20 |
| AX-157914765 | 2 | 46.942 | KV453189.1 | 602458 | 20-scf00020 | 20 |
| AX-157914764 | 2 | 46.942 | KV453189.1 | 603633 | 20-scf00020 | 20 |
| AX-157914763 | 2 | 46.942 | KV453189.1 | 609212 | 20-scf00020 | 20 |
| AX-157914762 | 2 | 46.942 | KV453189.1 | 612903 | 20-scf00020 | 20 |
| AX-157914761 | 2 | 46.942 | KV453189.1 | 617245 | 20-scf00020 | 20 |
| AX-157914760 | 2 | 46.942 | KV453189.1 | 619223 | 20-scf00020 | 20 |
| AX-157914759 | 2 | 46.942 | KV453189.1 | 620061 | 20-scf00020 | 20 |
| AX-157914757 | 2 | 46.942 | KV453189.1 | 629617 | 20-scf00020 | 20 |
| AX-157914754 | 2 | 46.942 | KV453189.1 | 637806 | 20-scf00020 | 20 |
| AX-157883446 | 2 | 46.942 | KV453189.1 | 638957 | 20-scf00020 | 20 |
| AX-157914752 | 2 | 46.942 | KV453189.1 | 653381 | 20-scf00020 | 20 |
| AX-157914750 | 2 | 46.942 | KV453189.1 | 657906 | 20-scf00020 | 20 |
| AX-157914749 | 2 | 46.942 | KV453189.1 | 659213 | 20-scf00020 | 20 |
| AX-157914748 | 2 | 46.942 | KV453189.1 | 660115 | 20-scf00020 | 20 |
| AX-157914747 | 2 | 46.942 | KV453189.1 | 665347 | 20-scf00020 | 20 |
| AX-157914746 | 2 | 46.942 | KV453189.1 | 667137 | 20-scf00020 | 20 |
| AX-158405009 | 2 | 46.942 | KV453189.1 | 672689 | 20-scf00020 | 20 |
| AX-158405008 | 2 | 46.942 | KV453189.1 | 674706 | 20-scf00020 | 20 |
| AX-157914744 | 2 | 46.942 | KV453189.1 | 679509 | 20-scf00020 | 20 |
| AX-157914742 | 2 | 46.942 | KV453189.1 | 699715 | 20-scf00020 | 20 |
| AX-157914741 | 2 | 46.942 | KV453189.1 | 701037 | 20-scf00020 | 20 |
| AX-157914740 | 2 | 46.942 | KV453189.1 | 730594 | 20-scf00020 | 20 |
| AX-157874684 | 2 | 46.942 | KV453189.1 | 740222 | 20-scf00020 | 20 |
| AX-157874683 | 2 | 46.942 | KV453189.1 | 751387 | 20-scf00020 | 20 |
| AX-157914735 | 2 | 46.942 | KV453189.1 | 753325 | 20-scf00020 | 20 |
| AX-157914733 | 2 | 46.942 | KV453189.1 | 760186 | 20-scf00020 | 20 |
| AX-157914731 | 2 | 46.942 | KV453189.1 | 764127 | 20-scf00020 | 20 |
| AX-157914730 | 2 | 46.942 | KV453189.1 | 764924 | 20-scf00020 | 20 |
| AX-157914729 | 2 | 46.942 | KV453189.1 | 766126 | 20-scf00020 | 20 |

|              |   |        |            |         |             |    |
|--------------|---|--------|------------|---------|-------------|----|
| AX-157914726 | 2 | 46.942 | KV453189.1 | 782285  | 20-scf00020 | 20 |
| AX-157874682 | 2 | 46.942 | KV453189.1 | 805875  | 20-scf00020 | 20 |
| AX-157914725 | 2 | 46.942 | KV453189.1 | 807137  | 20-scf00020 | 20 |
| AX-157914724 | 2 | 46.942 | KV453189.1 | 810077  | 20-scf00020 | 20 |
| AX-157914723 | 2 | 46.942 | KV453189.1 | 810694  | 20-scf00020 | 20 |
| AX-157914722 | 2 | 46.942 | KV453189.1 | 812216  | 20-scf00020 | 20 |
| AX-157914717 | 2 | 46.942 | KV453189.1 | 836377  | 20-scf00020 | 20 |
| AX-157914715 | 2 | 46.942 | KV453189.1 | 856762  | 20-scf00020 | 20 |
| AX-157914714 | 2 | 46.942 | KV453189.1 | 863161  | 20-scf00020 | 20 |
| AX-157914712 | 2 | 46.942 | KV453189.1 | 876557  | 20-scf00020 | 20 |
| AX-157914710 | 2 | 46.942 | KV453189.1 | 893007  | 20-scf00020 | 20 |
| AX-157914708 | 2 | 46.942 | KV453189.1 | 947334  | 20-scf00020 | 20 |
| AX-157914706 | 2 | 46.942 | KV453189.1 | 955916  | 20-scf00020 | 20 |
| AX-157914705 | 2 | 46.942 | KV453189.1 | 957261  | 20-scf00020 | 20 |
| AX-157751821 | 2 | 46.942 | KV453189.1 | 963072  | 20-scf00020 | 20 |
| AX-157914704 | 2 | 46.942 | KV453189.1 | 973886  | 20-scf00020 | 20 |
| AX-157914703 | 2 | 46.942 | KV453189.1 | 976448  | 20-scf00020 | 20 |
| AX-157914702 | 2 | 46.942 | KV453189.1 | 988784  | 20-scf00020 | 20 |
| AX-157874681 | 2 | 46.942 | KV453189.1 | 1011108 | 20-scf00020 | 20 |
| AX-158405007 | 2 | 46.942 | KV453189.1 | 1017994 | 20-scf00020 | 20 |
| AX-158405006 | 2 | 46.942 | KV453189.1 | 1026143 | 20-scf00020 | 20 |
| AX-158382256 | 2 | 46.942 | KV453189.1 | 1036230 | 20-scf00020 | 20 |
| AX-157914698 | 2 | 46.942 | KV453189.1 | 1042576 | 20-scf00020 | 20 |
| AX-157874679 | 2 | 46.942 | KV453189.1 | 1054581 | 20-scf00020 | 20 |
| AX-157914695 | 2 | 46.942 | KV453189.1 | 1055544 | 20-scf00020 | 20 |
| AX-158382255 | 2 | 46.942 | KV453189.1 | 1055948 | 20-scf00020 | 20 |
| AX-157914694 | 2 | 46.942 | KV453189.1 | 1061995 | 20-scf00020 | 20 |
| AX-157914693 | 2 | 46.942 | KV453189.1 | 1063163 | 20-scf00020 | 20 |
| AX-157914691 | 2 | 46.942 | KV453189.1 | 1077147 | 20-scf00020 | 20 |
| AX-158382254 | 2 | 46.942 | KV453189.1 | 1081061 | 20-scf00020 | 20 |
| AX-157914690 | 2 | 46.942 | KV453189.1 | 1081453 | 20-scf00020 | 20 |
| AX-157914688 | 2 | 46.942 | KV453189.1 | 1083418 | 20-scf00020 | 20 |
| AX-157914687 | 2 | 46.942 | KV453189.1 | 1087987 | 20-scf00020 | 20 |
| AX-157914684 | 2 | 46.942 | KV453189.1 | 1112447 | 20-scf00020 | 20 |
| AX-157914683 | 2 | 46.942 | KV453189.1 | 1114565 | 20-scf00020 | 20 |
| AX-157914681 | 2 | 46.942 | KV453189.1 | 1128093 | 20-scf00020 | 20 |
| AX-157914679 | 2 | 46.942 | KV453189.1 | 1145303 | 20-scf00020 | 20 |
| AX-157914676 | 2 | 46.942 | KV453189.1 | 1156573 | 20-scf00020 | 20 |
| AX-157914673 | 2 | 46.942 | KV453189.1 | 1173265 | 20-scf00020 | 20 |
| AX-157874678 | 2 | 46.942 | KV453189.1 | 1189953 | 20-scf00020 | 20 |
| AX-157914670 | 2 | 46.942 | KV453189.1 | 1190136 | 20-scf00020 | 20 |
| AX-157914669 | 2 | 46.942 | KV453189.1 | 1192660 | 20-scf00020 | 20 |
| AX-157914668 | 2 | 46.942 | KV453189.1 | 1194044 | 20-scf00020 | 20 |
| AX-157752965 | 2 | 46.942 | KV453189.1 | 1212707 | 20-scf00020 | 20 |
| AX-157914666 | 2 | 46.942 | KV453189.1 | 1215748 | 20-scf00020 | 20 |
| AX-157874677 | 2 | 46.942 | KV453189.1 | 1239377 | 20-scf00020 | 20 |
| AX-157914663 | 2 | 46.942 | KV453189.1 | 1240336 | 20-scf00020 | 20 |
| AX-157914662 | 2 | 46.942 | KV453189.1 | 1245229 | 20-scf00020 | 20 |
| AX-157727342 | 2 | 46.942 | KV453189.1 | 1247855 | 20-scf00020 | 20 |
| AX-157874676 | 2 | 46.942 | KV453189.1 | 1257939 | 20-scf00020 | 20 |
| AX-157914660 | 2 | 46.942 | KV453189.1 | 1258923 | 20-scf00020 | 20 |

|              |   |        |            |         |             |    |
|--------------|---|--------|------------|---------|-------------|----|
| AX-157914658 | 2 | 46.942 | KV453189.1 | 1262815 | 20-scf00020 | 20 |
| AX-157874675 | 2 | 46.942 | KV453189.1 | 1265199 | 20-scf00020 | 20 |
| AX-157914656 | 2 | 46.942 | KV453189.1 | 1265708 | 20-scf00020 | 20 |
| AX-157874674 | 2 | 46.942 | KV453189.1 | 1266792 | 20-scf00020 | 20 |
| AX-157914654 | 2 | 46.942 | KV453189.1 | 1276013 | 20-scf00020 | 20 |
| AX-157914653 | 2 | 46.942 | KV453189.1 | 1277395 | 20-scf00020 | 20 |
| AX-157914649 | 2 | 46.942 | KV453189.1 | 1285286 | 20-scf00020 | 20 |
| AX-157914646 | 2 | 46.942 | KV453189.1 | 1307090 | 20-scf00020 | 20 |
| AX-157914640 | 2 | 46.942 | KV453189.1 | 1317545 | 20-scf00020 | 20 |
| AX-157914639 | 2 | 46.942 | KV453189.1 | 1329498 | 20-scf00020 | 20 |
| AX-157874672 | 2 | 46.942 | KV453189.1 | 1332729 | 20-scf00020 | 20 |
| AX-157914636 | 2 | 46.942 | KV453189.1 | 1344908 | 20-scf00020 | 20 |
| AX-157914635 | 2 | 46.942 | KV453189.1 | 1345942 | 20-scf00020 | 20 |
| AX-157914634 | 2 | 46.942 | KV453189.1 | 1351166 | 20-scf00020 | 20 |
| AX-157914633 | 2 | 46.942 | KV453189.1 | 1353311 | 20-scf00020 | 20 |
| AX-157914632 | 2 | 46.942 | KV453189.1 | 1354719 | 20-scf00020 | 20 |
| AX-157914629 | 2 | 46.942 | KV453189.1 | 1385529 | 20-scf00020 | 20 |
| AX-157914628 | 2 | 46.942 | KV453189.1 | 1389178 | 20-scf00020 | 20 |
| AX-157812603 | 2 | 46.942 | KV453189.1 | 1394089 | 20-scf00020 | 20 |
| AX-157914626 | 2 | 46.942 | KV453189.1 | 1395464 | 20-scf00020 | 20 |
| AX-157874670 | 2 | 46.942 | KV453189.1 | 1409646 | 20-scf00020 | 20 |
| AX-157914621 | 2 | 46.942 | KV453189.1 | 1417878 | 20-scf00020 | 20 |
| AX-157914616 | 2 | 46.942 | KV453189.1 | 1436848 | 20-scf00020 | 20 |
| AX-157874668 | 2 | 46.942 | KV453189.1 | 1436975 | 20-scf00020 | 20 |
| AX-157914615 | 2 | 46.942 | KV453189.1 | 1439940 | 20-scf00020 | 20 |
| AX-157920346 | 2 | 46.942 | KV453189.1 | 1508259 | 20-scf00020 | 20 |
| AX-157920348 | 2 | 46.942 | KV453189.1 | 1520873 | 20-scf00020 | 20 |
| AX-157920355 | 2 | 46.942 | KV453189.1 | 1538904 | 20-scf00020 | 20 |
| AX-157920356 | 2 | 46.942 | KV453189.1 | 1540662 | 20-scf00020 | 20 |
| AX-157920359 | 2 | 46.942 | KV453189.1 | 1551836 | 20-scf00020 | 20 |
| AX-157744186 | 2 | 46.942 | KV453189.1 | 1560318 | 20-scf00020 | 20 |
| AX-157920361 | 2 | 46.942 | KV453189.1 | 1564292 | 20-scf00020 | 20 |
| AX-157920365 | 2 | 46.942 | KV453189.1 | 1576325 | 20-scf00020 | 20 |
| AX-157920370 | 2 | 46.942 | KV453189.1 | 1589702 | 20-scf00020 | 20 |
| AX-158405224 | 2 | 46.942 | KV453189.1 | 1619753 | 20-scf00020 | 20 |
| AX-157920380 | 2 | 46.942 | KV453189.1 | 1621414 | 20-scf00020 | 20 |
| AX-157813163 | 2 | 46.942 | KV453189.1 | 1622164 | 20-scf00020 | 20 |
| AX-157753717 | 2 | 46.942 | KV453189.1 | 1626038 | 20-scf00020 | 20 |
| AX-157920381 | 2 | 46.942 | KV453189.1 | 1627980 | 20-scf00020 | 20 |
| AX-157920382 | 2 | 46.942 | KV453189.1 | 1636341 | 20-scf00020 | 20 |
| AX-157920385 | 2 | 46.942 | KV453189.1 | 1647845 | 20-scf00020 | 20 |
| AX-157920392 | 2 | 46.942 | KV453189.1 | 1675333 | 20-scf00020 | 20 |
| AX-157920395 | 2 | 46.942 | KV453189.1 | 1679561 | 20-scf00020 | 20 |
| AX-157920397 | 2 | 46.942 | KV453189.1 | 1680925 | 20-scf00020 | 20 |
| AX-157920409 | 2 | 46.942 | KV453189.1 | 1735975 | 20-scf00020 | 20 |
| AX-157920411 | 2 | 46.942 | KV453189.1 | 1742979 | 20-scf00020 | 20 |
| AX-157920412 | 2 | 46.942 | KV453189.1 | 1745858 | 20-scf00020 | 20 |
| AX-157920414 | 2 | 46.942 | KV453189.1 | 1750423 | 20-scf00020 | 20 |
| AX-157920417 | 2 | 46.942 | KV453189.1 | 1758060 | 20-scf00020 | 20 |
| AX-157920418 | 2 | 46.942 | KV453189.1 | 1759111 | 20-scf00020 | 20 |
| AX-157920426 | 2 | 46.942 | KV453189.1 | 1788447 | 20-scf00020 | 20 |



|              |   |        |            |         |             |    |
|--------------|---|--------|------------|---------|-------------|----|
| AX-157920432 | 2 | 46.942 | KV453189.1 | 1832666 | 20-scf00020 | 20 |
| AX-157920442 | 2 | 46.942 | KV453189.1 | 1862006 | 20-scf00020 | 20 |
| AX-157920447 | 2 | 46.942 | KV453189.1 | 1870282 | 20-scf00020 | 20 |
| AX-157920448 | 2 | 46.942 | KV453189.1 | 1871789 | 20-scf00020 | 20 |
| AX-157920455 | 2 | 46.942 | KV453189.1 | 1883973 | 20-scf00020 | 20 |
| AX-157920483 | 2 | 46.942 | KV453189.1 | 1984917 | 20-scf00020 | 20 |
| AX-157920484 | 2 | 46.942 | KV453189.1 | 1986260 | 20-scf00020 | 20 |
| AX-157914899 | 2 | 46.942 | KV453193.1 | 17101   | 20-scf00021 | 20 |
| AX-157914902 | 2 | 46.942 | KV453193.1 | 24733   | 20-scf00021 | 20 |
| AX-157812609 | 2 | 46.942 | KV453193.1 | 39222   | 20-scf00021 | 20 |
| AX-157914916 | 2 | 46.942 | KV453193.1 | 53206   | 20-scf00021 | 20 |
| AX-157914991 | 2 | 46.942 | KV453193.1 | 149375  | 20-scf00021 | 20 |
| AX-157915077 | 2 | 46.942 | KV453193.1 | 246412  | 20-scf00021 | 20 |
| AX-157915095 | 2 | 46.942 | KV453193.1 | 264146  | 20-scf00021 | 20 |
| AX-157915243 | 2 | 46.942 | KV453193.1 | 434983  | 20-scf00021 | 20 |
| AX-157915262 | 2 | 46.942 | KV453193.1 | 470307  | 20-scf00021 | 20 |
| AX-157915267 | 2 | 46.942 | KV453193.1 | 489490  | 20-scf00021 | 20 |
| AX-157915281 | 2 | 46.942 | KV453193.1 | 506940  | 20-scf00021 | 20 |
| AX-157915294 | 2 | 46.942 | KV453193.1 | 536503  | 20-scf00021 | 20 |
| AX-157915307 | 2 | 46.942 | KV453193.1 | 551550  | 20-scf00021 | 20 |
| AX-157915318 | 2 | 46.942 | KV453193.1 | 565496  | 20-scf00021 | 20 |
| AX-157915324 | 2 | 46.942 | KV453193.1 | 578512  | 20-scf00021 | 20 |
| AX-157772040 | 2 | 46.942 | KV453193.1 | 592062  | 20-scf00021 | 20 |
| AX-157915384 | 2 | 46.942 | KV453193.1 | 655493  | 20-scf00021 | 20 |
| AX-157915398 | 2 | 46.942 | KV453193.1 | 678485  | 20-scf00021 | 20 |
| AX-157812650 | 2 | 46.942 | KV453193.1 | 709396  | 20-scf00021 | 20 |
| AX-157915430 | 2 | 46.942 | KV453193.1 | 711546  | 20-scf00021 | 20 |
| AX-157915494 | 2 | 46.942 | KV453193.1 | 780350  | 20-scf00021 | 20 |
| AX-157915569 | 2 | 46.942 | KV453193.1 | 943168  | 20-scf00021 | 20 |
| AX-157915604 | 2 | 46.942 | KV453193.1 | 987786  | 20-scf00021 | 20 |
| AX-158405046 | 2 | 46.942 | KV453193.1 | 1024410 | 20-scf00021 | 20 |
| AX-157915663 | 2 | 46.942 | KV453193.1 | 1084556 | 20-scf00021 | 20 |
| AX-157682324 | 2 | 46.942 | KV453186.1 | 42167   | 20-scf00024 | 20 |
| AX-158375412 | 2 | 46.942 | KV453187.1 | 520712  | 20-scf00563 | 20 |
| AX-158375415 | 2 | 46.942 | KV453187.1 | 555942  | 20-scf00563 | 20 |
| AX-158375424 | 2 | 46.942 | KV453187.1 | 605857  | 20-scf00563 | 20 |
| AX-157920114 | 2 | 46.942 | KV453183.1 | 748515  | 20-scf00571 | 20 |
| AX-157920133 | 2 | 46.942 | KV453183.1 | 795109  | 20-scf00571 | 20 |
| AX-157920148 | 2 | 46.942 | KV453183.1 | 872560  | 20-scf00571 | 20 |
| AX-157920165 | 2 | 46.942 | KV453183.1 | 949038  | 20-scf00571 | 20 |
| AX-157920170 | 2 | 46.942 | KV453183.1 | 963793  | 20-scf00571 | 20 |
| AX-157920172 | 2 | 46.942 | KV453183.1 | 965517  | 20-scf00571 | 20 |
| AX-157813138 | 2 | 46.942 | KV453183.1 | 973334  | 20-scf00571 | 20 |
| AX-157920188 | 2 | 46.942 | KV453183.1 | 1032416 | 20-scf00571 | 20 |
| AX-157920193 | 2 | 46.942 | KV453183.1 | 1053102 | 20-scf00571 | 20 |
| AX-157920194 | 2 | 46.942 | KV453183.1 | 1056603 | 20-scf00571 | 20 |
| AX-157920195 | 2 | 46.942 | KV453183.1 | 1058212 | 20-scf00571 | 20 |
| AX-157920196 | 2 | 46.942 | KV453183.1 | 1065150 | 20-scf00571 | 20 |
| AX-157920198 | 2 | 46.942 | KV453183.1 | 1071967 | 20-scf00571 | 20 |
| AX-157920199 | 2 | 46.942 | KV453183.1 | 1073144 | 20-scf00571 | 20 |
| AX-157920200 | 2 | 46.942 | KV453183.1 | 1074207 | 20-scf00571 | 20 |

|              |   |        |            |         |             |    |
|--------------|---|--------|------------|---------|-------------|----|
| AX-157920201 | 2 | 46.942 | KV453183.1 | 1074747 | 20-scf00571 | 20 |
| AX-157920202 | 2 | 46.942 | KV453183.1 | 1075929 | 20-scf00571 | 20 |
| AX-157813141 | 2 | 46.942 | KV453183.1 | 1076370 | 20-scf00571 | 20 |
| AX-157813142 | 2 | 46.942 | KV453183.1 | 1078384 | 20-scf00571 | 20 |
| AX-157920207 | 2 | 46.942 | KV453183.1 | 1085304 | 20-scf00571 | 20 |
| AX-157920208 | 2 | 46.942 | KV453183.1 | 1085814 | 20-scf00571 | 20 |
| AX-157920211 | 2 | 46.942 | KV453183.1 | 1087651 | 20-scf00571 | 20 |
| AX-157920212 | 2 | 46.942 | KV453183.1 | 1087882 | 20-scf00571 | 20 |
| AX-157920215 | 2 | 46.942 | KV453183.1 | 1090479 | 20-scf00571 | 20 |
| AX-157920221 | 2 | 46.942 | KV453183.1 | 1105399 | 20-scf00571 | 20 |
| AX-157813150 | 2 | 46.942 | KV453183.1 | 1167142 | 20-scf00571 | 20 |
| AX-157813151 | 2 | 46.942 | KV453183.1 | 1175054 | 20-scf00571 | 20 |
| AX-157920233 | 2 | 46.942 | KV453183.1 | 1182909 | 20-scf00571 | 20 |
| AX-157920236 | 2 | 46.942 | KV453183.1 | 1196631 | 20-scf00571 | 20 |
| AX-157920237 | 2 | 46.942 | KV453183.1 | 1205299 | 20-scf00571 | 20 |
| AX-157920239 | 2 | 46.942 | KV453183.1 | 1212020 | 20-scf00571 | 20 |
| AX-157920241 | 2 | 46.942 | KV453183.1 | 1218998 | 20-scf00571 | 20 |
| AX-157920247 | 2 | 46.942 | KV453183.1 | 1235584 | 20-scf00571 | 20 |
| AX-157920249 | 2 | 46.942 | KV453183.1 | 1243446 | 20-scf00571 | 20 |
| AX-157920254 | 2 | 46.942 | KV453183.1 | 1252168 | 20-scf00571 | 20 |
| AX-157920258 | 2 | 46.942 | KV453183.1 | 1264815 | 20-scf00571 | 20 |
| AX-157920259 | 2 | 46.942 | KV453183.1 | 1266885 | 20-scf00571 | 20 |
| AX-157813153 | 2 | 46.942 | KV453183.1 | 1268068 | 20-scf00571 | 20 |
| AX-157920260 | 2 | 46.942 | KV453183.1 | 1276279 | 20-scf00571 | 20 |
| AX-157920263 | 2 | 46.942 | KV453183.1 | 1284190 | 20-scf00571 | 20 |
| AX-157920265 | 2 | 46.942 | KV453183.1 | 1296052 | 20-scf00571 | 20 |
| AX-157920266 | 2 | 46.942 | KV453183.1 | 1296326 | 20-scf00571 | 20 |
| AX-157920268 | 2 | 46.942 | KV453183.1 | 1301293 | 20-scf00571 | 20 |
| AX-157723246 | 2 | 46.942 | KV453183.1 | 1311610 | 20-scf00571 | 20 |
| AX-157920283 | 2 | 46.942 | KV453183.1 | 1374699 | 20-scf00571 | 20 |
| AX-157920284 | 2 | 46.942 | KV453183.1 | 1386219 | 20-scf00571 | 20 |
| AX-157883527 | 2 | 46.942 | KV453183.1 | 1414565 | 20-scf00571 | 20 |
| AX-157883528 | 2 | 46.942 | KV453183.1 | 1467574 | 20-scf00571 | 20 |
| AX-157920289 | 2 | 46.942 | KV453183.1 | 1469300 | 20-scf00571 | 20 |
| AX-157920290 | 2 | 46.942 | KV453183.1 | 1469829 | 20-scf00571 | 20 |
| AX-157920291 | 2 | 46.942 | KV453183.1 | 1470777 | 20-scf00571 | 20 |
| AX-157920294 | 2 | 46.942 | KV453183.1 | 1494424 | 20-scf00571 | 20 |
| AX-157727968 | 2 | 46.942 | KV453183.1 | 1502138 | 20-scf00571 | 20 |
| AX-157718462 | 2 | 46.942 | KV453183.1 | 1502491 | 20-scf00571 | 20 |
| AX-157920297 | 2 | 46.942 | KV453183.1 | 1514531 | 20-scf00571 | 20 |
| AX-157883530 | 2 | 46.942 | KV453183.1 | 1529723 | 20-scf00571 | 20 |
| AX-157920302 | 2 | 46.942 | KV453183.1 | 1538029 | 20-scf00571 | 20 |
| AX-157920303 | 2 | 46.942 | KV453183.1 | 1540729 | 20-scf00571 | 20 |
| AX-157920305 | 2 | 46.942 | KV453183.1 | 1571133 | 20-scf00571 | 20 |
| AX-157920306 | 2 | 46.942 | KV453183.1 | 1578413 | 20-scf00571 | 20 |
| AX-157883531 | 2 | 46.942 | KV453183.1 | 1596264 | 20-scf00571 | 20 |
| AX-157920310 | 2 | 46.942 | KV453183.1 | 1599771 | 20-scf00571 | 20 |
| AX-157920311 | 2 | 46.942 | KV453183.1 | 1605859 | 20-scf00571 | 20 |
| AX-157883533 | 2 | 46.942 | KV453183.1 | 1616747 | 20-scf00571 | 20 |
| AX-157920315 | 2 | 46.942 | KV453183.1 | 1663735 | 20-scf00571 | 20 |
| AX-157920316 | 2 | 46.942 | KV453183.1 | 1676866 | 20-scf00571 | 20 |

|              |   |        |             |         |             |    |
|--------------|---|--------|-------------|---------|-------------|----|
| AX-157920317 | 2 | 46.942 | KV453183.1  | 1680577 | 20-scf00571 | 20 |
| AX-157920318 | 2 | 46.942 | KV453183.1  | 1685787 | 20-scf00571 | 20 |
| AX-157920320 | 2 | 46.942 | KV453183.1  | 1705160 | 20-scf00571 | 20 |
| AX-157920321 | 2 | 46.942 | KV453183.1  | 1707548 | 20-scf00571 | 20 |
| AX-157920322 | 2 | 46.942 | KV453183.1  | 1722671 | 20-scf00571 | 20 |
| AX-157920323 | 2 | 46.942 | KV453183.1  | 1725855 | 20-scf00571 | 20 |
| AX-157883536 | 2 | 46.942 | KV453183.1  | 1742086 | 20-scf00571 | 20 |
| AX-158377164 | 2 | 46.942 | KV453184.1  | 32349   | 20-scf00601 | 20 |
| AX-158377168 | 2 | 46.942 | KV453184.1  | 60764   | 20-scf00601 | 20 |
| AX-157686610 | 2 | 46.942 | KV453409.1  | 31660   | scf00709    | UN |
| AX-157686611 | 2 | 46.942 | KV453409.1  | 32719   | scf00709    | UN |
| AX-157704366 | 2 | 46.942 | 3ML01025786 | 1083    | scf01402_1  | UN |
| AX-157705259 | 2 | 46.942 | 3ML01029205 | 1024    | scf04826_1  | UN |
| AX-157920451 | 2 | 47.095 | KV453189.1  | 1879605 | 20-scf00020 | 20 |
| AX-157914555 | 2 | 47.246 | KV453182.1  | 7155786 | 20-scf00019 | 20 |
| AX-158405019 | 2 | 47.246 | KV453193.1  | 130294  | 20-scf00021 | 20 |
| AX-157913430 | 2 | 47.247 | KV453182.1  | 5096055 | 20-scf00019 | 20 |
| AX-157913718 | 2 | 47.247 | KV453182.1  | 5497767 | 20-scf00019 | 20 |
| AX-157913765 | 2 | 47.247 | KV453182.1  | 5562912 | 20-scf00019 | 20 |
| AX-157913856 | 2 | 47.247 | KV453182.1  | 5662641 | 20-scf00019 | 20 |
| AX-157914236 | 2 | 47.247 | KV453182.1  | 6084059 | 20-scf00019 | 20 |
| AX-157914372 | 2 | 47.247 | KV453182.1  | 6266861 | 20-scf00019 | 20 |
| AX-157914431 | 2 | 47.247 | KV453182.1  | 6692106 | 20-scf00019 | 20 |
| AX-157914453 | 2 | 47.247 | KV453182.1  | 6859783 | 20-scf00019 | 20 |
| AX-157914474 | 2 | 47.247 | KV453182.1  | 6900617 | 20-scf00019 | 20 |
| AX-157914535 | 2 | 47.247 | KV453182.1  | 7085101 | 20-scf00019 | 20 |
| AX-157914536 | 2 | 47.247 | KV453182.1  | 7086621 | 20-scf00019 | 20 |
| AX-157914552 | 2 | 47.247 | KV453182.1  | 7149868 | 20-scf00019 | 20 |
| AX-157914577 | 2 | 47.247 | KV453182.1  | 7233262 | 20-scf00019 | 20 |
| AX-157920386 | 2 | 47.247 | KV453189.1  | 1653249 | 20-scf00020 | 20 |
| AX-157813164 | 2 | 47.247 | KV453189.1  | 1671815 | 20-scf00020 | 20 |
| AX-157915020 | 2 | 47.247 | KV453193.1  | 186339  | 20-scf00021 | 20 |
| AX-157915033 | 2 | 47.247 | KV453193.1  | 200697  | 20-scf00021 | 20 |
| AX-157883451 | 2 | 47.247 | KV453193.1  | 295956  | 20-scf00021 | 20 |
| AX-157915339 | 2 | 47.247 | KV453193.1  | 593465  | 20-scf00021 | 20 |
| AX-157746117 | 2 | 47.247 | KV453193.1  | 635841  | 20-scf00021 | 20 |
| AX-157915377 | 2 | 47.247 | KV453193.1  | 644821  | 20-scf00021 | 20 |
| AX-157915796 | 2 | 47.247 | KV453193.1  | 1261124 | 20-scf00021 | 20 |
| AX-157682317 | 2 | 47.247 | KV453186.1  | 4626    | 20-scf00024 | 20 |
| AX-158375399 | 2 | 47.247 | KV453187.1  | 421624  | 20-scf00563 | 20 |
| AX-158375411 | 2 | 47.247 | KV453187.1  | 516877  | 20-scf00563 | 20 |
| AX-158375414 | 2 | 47.247 | KV453187.1  | 555041  | 20-scf00563 | 20 |
| AX-158375435 | 2 | 47.247 | KV453187.1  | 694590  | 20-scf00563 | 20 |
| AX-157853229 | 2 | 47.247 | KV453187.1  | 710906  | 20-scf00563 | 20 |
| AX-158375442 | 2 | 47.247 | KV453187.1  | 752403  | 20-scf00563 | 20 |
| AX-158375458 | 2 | 47.247 | KV453187.1  | 917997  | 20-scf00563 | 20 |
| AX-158375463 | 2 | 47.247 | KV453187.1  | 1031489 | 20-scf00563 | 20 |
| AX-158375465 | 2 | 47.247 | KV453187.1  | 1049960 | 20-scf00563 | 20 |
| AX-158375466 | 2 | 47.247 | KV453187.1  | 1055674 | 20-scf00563 | 20 |
| AX-158375478 | 2 | 47.247 | KV453187.1  | 1208657 | 20-scf00563 | 20 |
| AX-157687889 | 2 | 47.247 | KV453187.1  | 1269031 | 20-scf00563 | 20 |

|              |   |        |            |         |             |    |
|--------------|---|--------|------------|---------|-------------|----|
| AX-158376092 | 2 | 47.247 | KV453183.1 | 92751   | 20-scf00571 | 20 |
| AX-158376103 | 2 | 47.247 | KV453183.1 | 184655  | 20-scf00571 | 20 |
| AX-158376104 | 2 | 47.247 | KV453183.1 | 196068  | 20-scf00571 | 20 |
| AX-158376106 | 2 | 47.247 | KV453183.1 | 251669  | 20-scf00571 | 20 |
| AX-158376133 | 2 | 47.247 | KV453183.1 | 538350  | 20-scf00571 | 20 |
| AX-157920088 | 2 | 47.247 | KV453183.1 | 614876  | 20-scf00571 | 20 |
| AX-157920089 | 2 | 47.247 | KV453183.1 | 624805  | 20-scf00571 | 20 |
| AX-157920093 | 2 | 47.247 | KV453183.1 | 638342  | 20-scf00571 | 20 |
| AX-157920099 | 2 | 47.247 | KV453183.1 | 660512  | 20-scf00571 | 20 |
| AX-157920100 | 2 | 47.247 | KV453183.1 | 668344  | 20-scf00571 | 20 |
| AX-157920151 | 2 | 47.247 | KV453183.1 | 892146  | 20-scf00571 | 20 |
| AX-158376141 | 2 | 47.247 | KV453190.1 | 89060   | 20-scf00573 | 20 |
| AX-158376149 | 2 | 47.247 | KV453190.1 | 146237  | 20-scf00573 | 20 |
| AX-158376152 | 2 | 47.247 | KV453190.1 | 173383  | 20-scf00573 | 20 |
| AX-157746392 | 2 | 47.247 | KV453190.1 | 262312  | 20-scf00573 | 20 |
| AX-158376165 | 2 | 47.247 | KV453190.1 | 342580  | 20-scf00573 | 20 |
| AX-158376167 | 2 | 47.247 | KV453190.1 | 346807  | 20-scf00573 | 20 |
| AX-158376168 | 2 | 47.247 | KV453190.1 | 355185  | 20-scf00573 | 20 |
| AX-158376172 | 2 | 47.247 | KV453190.1 | 369478  | 20-scf00573 | 20 |
| AX-158376178 | 2 | 47.247 | KV453190.1 | 411945  | 20-scf00573 | 20 |
| AX-157685018 | 2 | 47.247 | KV453191.1 | 27152   | 20-scf00582 | 20 |
| AX-157685020 | 2 | 47.247 | KV453191.1 | 34516   | 20-scf00582 | 20 |
| AX-157685026 | 2 | 47.247 | KV453191.1 | 100767  | 20-scf00582 | 20 |
| AX-157685032 | 2 | 47.247 | KV453191.1 | 168644  | 20-scf00582 | 20 |
| AX-157685045 | 2 | 47.247 | KV453191.1 | 255762  | 20-scf00582 | 20 |
| AX-157685367 | 2 | 47.247 | KV453188.1 | 25819   | 20-scf00886 | 20 |
| AX-157685375 | 2 | 47.247 | KV453188.1 | 124505  | 20-scf00886 | 20 |
| AX-157685376 | 2 | 47.247 | KV453188.1 | 126929  | 20-scf00886 | 20 |
| AX-157685377 | 2 | 47.247 | KV453188.1 | 129952  | 20-scf00886 | 20 |
| AX-157685379 | 2 | 47.247 | KV453188.1 | 155769  | 20-scf00886 | 20 |
| AX-157685173 | 2 | 47.247 | KV453185.1 | 138406  | 20-scf00994 | 20 |
| AX-157685918 | 2 | 47.247 | KV453185.1 | 248553  | 20-scf00994 | 20 |
| AX-157685065 | 2 | 47.247 | KV453359.1 | 62686   | scf00584    | UN |
| AX-157685081 | 2 | 47.247 | KV453359.1 | 233990  | scf00584    | UN |
| AX-157685083 | 2 | 47.247 | KV453359.1 | 248652  | scf00584    | UN |
| AX-157685102 | 2 | 47.247 | KV453360.1 | 190342  | scf00585    | UN |
| AX-157913592 | 2 | 47.551 | KV453182.1 | 5286973 | 20-scf00019 | 20 |
| AX-157913748 | 2 | 47.551 | KV453182.1 | 5538660 | 20-scf00019 | 20 |
| AX-157914394 | 2 | 47.551 | KV453182.1 | 6364142 | 20-scf00019 | 20 |
| AX-157914397 | 2 | 47.551 | KV453182.1 | 6386624 | 20-scf00019 | 20 |
| AX-157914587 | 2 | 47.551 | KV453182.1 | 7337856 | 20-scf00019 | 20 |
| AX-157914592 | 2 | 47.551 | KV453182.1 | 7374826 | 20-scf00019 | 20 |
| AX-157914772 | 2 | 47.551 | KV453189.1 | 580738  | 20-scf00020 | 20 |
| AX-157914739 | 2 | 47.551 | KV453189.1 | 738346  | 20-scf00020 | 20 |
| AX-157914614 | 2 | 47.551 | KV453189.1 | 1441027 | 20-scf00020 | 20 |
| AX-157920353 | 2 | 47.551 | KV453189.1 | 1537295 | 20-scf00020 | 20 |
| AX-157920358 | 2 | 47.551 | KV453189.1 | 1549293 | 20-scf00020 | 20 |
| AX-157920374 | 2 | 47.551 | KV453189.1 | 1597748 | 20-scf00020 | 20 |
| AX-157920384 | 2 | 47.551 | KV453189.1 | 1643021 | 20-scf00020 | 20 |
| AX-157920410 | 2 | 47.551 | KV453189.1 | 1739107 | 20-scf00020 | 20 |
| AX-157920420 | 2 | 47.551 | KV453189.1 | 1768783 | 20-scf00020 | 20 |

|              |   |        |            |         |             |    |
|--------------|---|--------|------------|---------|-------------|----|
| AX-157694501 | 2 | 47.551 | KV453189.1 | 1799953 | 20-scf00020 | 20 |
| AX-157920430 | 2 | 47.551 | KV453189.1 | 1811645 | 20-scf00020 | 20 |
| AX-157883542 | 2 | 47.551 | KV453189.1 | 1833382 | 20-scf00020 | 20 |
| AX-157920438 | 2 | 47.551 | KV453189.1 | 1854902 | 20-scf00020 | 20 |
| AX-157920452 | 2 | 47.551 | KV453189.1 | 1880241 | 20-scf00020 | 20 |
| AX-157920453 | 2 | 47.551 | KV453189.1 | 1881679 | 20-scf00020 | 20 |
| AX-157813172 | 2 | 47.551 | KV453189.1 | 1882310 | 20-scf00020 | 20 |
| AX-157920454 | 2 | 47.551 | KV453189.1 | 1883190 | 20-scf00020 | 20 |
| AX-157920457 | 2 | 47.551 | KV453189.1 | 1888894 | 20-scf00020 | 20 |
| AX-157920469 | 2 | 47.551 | KV453189.1 | 1929977 | 20-scf00020 | 20 |
| AX-157813175 | 2 | 47.551 | KV453189.1 | 1959082 | 20-scf00020 | 20 |
| AX-157813177 | 2 | 47.551 | KV453189.1 | 1968705 | 20-scf00020 | 20 |
| AX-157760127 | 2 | 47.551 | KV453189.1 | 1978743 | 20-scf00020 | 20 |
| AX-157920523 | 2 | 47.551 | KV453189.1 | 2113881 | 20-scf00020 | 20 |
| AX-157914913 | 2 | 47.551 | KV453193.1 | 51522   | 20-scf00021 | 20 |
| AX-157914919 | 2 | 47.551 | KV453193.1 | 57241   | 20-scf00021 | 20 |
| AX-157914921 | 2 | 47.551 | KV453193.1 | 61431   | 20-scf00021 | 20 |
| AX-157914922 | 2 | 47.551 | KV453193.1 | 61772   | 20-scf00021 | 20 |
| AX-157914923 | 2 | 47.551 | KV453193.1 | 62176   | 20-scf00021 | 20 |
| AX-157914924 | 2 | 47.551 | KV453193.1 | 62418   | 20-scf00021 | 20 |
| AX-157914925 | 2 | 47.551 | KV453193.1 | 62674   | 20-scf00021 | 20 |
| AX-157914929 | 2 | 47.551 | KV453193.1 | 69050   | 20-scf00021 | 20 |
| AX-157812613 | 2 | 47.551 | KV453193.1 | 71830   | 20-scf00021 | 20 |
| AX-157914939 | 2 | 47.551 | KV453193.1 | 82312   | 20-scf00021 | 20 |
| AX-157914940 | 2 | 47.551 | KV453193.1 | 83114   | 20-scf00021 | 20 |
| AX-157914941 | 2 | 47.551 | KV453193.1 | 83554   | 20-scf00021 | 20 |
| AX-158389598 | 2 | 47.551 | KV453193.1 | 84633   | 20-scf00021 | 20 |
| AX-157914947 | 2 | 47.551 | KV453193.1 | 98347   | 20-scf00021 | 20 |
| AX-157914949 | 2 | 47.551 | KV453193.1 | 100713  | 20-scf00021 | 20 |
| AX-157914951 | 2 | 47.551 | KV453193.1 | 101743  | 20-scf00021 | 20 |
| AX-157914961 | 2 | 47.551 | KV453193.1 | 109018  | 20-scf00021 | 20 |
| AX-157914963 | 2 | 47.551 | KV453193.1 | 110604  | 20-scf00021 | 20 |
| AX-157914964 | 2 | 47.551 | KV453193.1 | 111509  | 20-scf00021 | 20 |
| AX-157914971 | 2 | 47.551 | KV453193.1 | 119968  | 20-scf00021 | 20 |
| AX-157914976 | 2 | 47.551 | KV453193.1 | 125616  | 20-scf00021 | 20 |
| AX-157914980 | 2 | 47.551 | KV453193.1 | 129079  | 20-scf00021 | 20 |
| AX-157914981 | 2 | 47.551 | KV453193.1 | 129585  | 20-scf00021 | 20 |
| AX-158405018 | 2 | 47.551 | KV453193.1 | 129822  | 20-scf00021 | 20 |
| AX-157914982 | 2 | 47.551 | KV453193.1 | 130475  | 20-scf00021 | 20 |
| AX-157914983 | 2 | 47.551 | KV453193.1 | 131265  | 20-scf00021 | 20 |
| AX-158405024 | 2 | 47.551 | KV453193.1 | 148368  | 20-scf00021 | 20 |
| AX-157915004 | 2 | 47.551 | KV453193.1 | 167930  | 20-scf00021 | 20 |
| AX-157915006 | 2 | 47.551 | KV453193.1 | 169687  | 20-scf00021 | 20 |
| AX-157915007 | 2 | 47.551 | KV453193.1 | 170343  | 20-scf00021 | 20 |
| AX-157915009 | 2 | 47.551 | KV453193.1 | 172190  | 20-scf00021 | 20 |
| AX-157915010 | 2 | 47.551 | KV453193.1 | 173180  | 20-scf00021 | 20 |
| AX-157915080 | 2 | 47.551 | KV453193.1 | 248491  | 20-scf00021 | 20 |
| AX-157915084 | 2 | 47.551 | KV453193.1 | 252977  | 20-scf00021 | 20 |
| AX-157915103 | 2 | 47.551 | KV453193.1 | 272221  | 20-scf00021 | 20 |
| AX-157915114 | 2 | 47.551 | KV453193.1 | 286273  | 20-scf00021 | 20 |
| AX-157812628 | 2 | 47.551 | KV453193.1 | 287687  | 20-scf00021 | 20 |

|              |   |        |            |         |             |    |
|--------------|---|--------|------------|---------|-------------|----|
| AX-157915117 | 2 | 47.551 | KV453193.1 | 290147  | 20-scf00021 | 20 |
| AX-157812629 | 2 | 47.551 | KV453193.1 | 290456  | 20-scf00021 | 20 |
| AX-157915122 | 2 | 47.551 | KV453193.1 | 295701  | 20-scf00021 | 20 |
| AX-157915129 | 2 | 47.551 | KV453193.1 | 302253  | 20-scf00021 | 20 |
| AX-157915130 | 2 | 47.551 | KV453193.1 | 302609  | 20-scf00021 | 20 |
| AX-157915132 | 2 | 47.551 | KV453193.1 | 303214  | 20-scf00021 | 20 |
| AX-157915135 | 2 | 47.551 | KV453193.1 | 310618  | 20-scf00021 | 20 |
| AX-157915137 | 2 | 47.551 | KV453193.1 | 312135  | 20-scf00021 | 20 |
| AX-157915147 | 2 | 47.551 | KV453193.1 | 321487  | 20-scf00021 | 20 |
| AX-158405029 | 2 | 47.551 | KV453193.1 | 333144  | 20-scf00021 | 20 |
| AX-157915187 | 2 | 47.551 | KV453193.1 | 361878  | 20-scf00021 | 20 |
| AX-157915189 | 2 | 47.551 | KV453193.1 | 364302  | 20-scf00021 | 20 |
| AX-157757975 | 2 | 47.551 | KV453193.1 | 368402  | 20-scf00021 | 20 |
| AX-157915195 | 2 | 47.551 | KV453193.1 | 376147  | 20-scf00021 | 20 |
| AX-157915220 | 2 | 47.551 | KV453193.1 | 402801  | 20-scf00021 | 20 |
| AX-157915228 | 2 | 47.551 | KV453193.1 | 408431  | 20-scf00021 | 20 |
| AX-157915232 | 2 | 47.551 | KV453193.1 | 412328  | 20-scf00021 | 20 |
| AX-157915235 | 2 | 47.551 | KV453193.1 | 421150  | 20-scf00021 | 20 |
| AX-157915236 | 2 | 47.551 | KV453193.1 | 423921  | 20-scf00021 | 20 |
| AX-157915240 | 2 | 47.551 | KV453193.1 | 430879  | 20-scf00021 | 20 |
| AX-157915242 | 2 | 47.551 | KV453193.1 | 432381  | 20-scf00021 | 20 |
| AX-157915244 | 2 | 47.551 | KV453193.1 | 435520  | 20-scf00021 | 20 |
| AX-157915245 | 2 | 47.551 | KV453193.1 | 436410  | 20-scf00021 | 20 |
| AX-157749240 | 2 | 47.551 | KV453193.1 | 450606  | 20-scf00021 | 20 |
| AX-157812638 | 2 | 47.551 | KV453193.1 | 456886  | 20-scf00021 | 20 |
| AX-157915256 | 2 | 47.551 | KV453193.1 | 463467  | 20-scf00021 | 20 |
| AX-157812639 | 2 | 47.551 | KV453193.1 | 464218  | 20-scf00021 | 20 |
| AX-157915257 | 2 | 47.551 | KV453193.1 | 464486  | 20-scf00021 | 20 |
| AX-157915264 | 2 | 47.551 | KV453193.1 | 485948  | 20-scf00021 | 20 |
| AX-157812642 | 2 | 47.551 | KV453193.1 | 585575  | 20-scf00021 | 20 |
| AX-157874691 | 2 | 47.551 | KV453193.1 | 594759  | 20-scf00021 | 20 |
| AX-157812644 | 2 | 47.551 | KV453193.1 | 603608  | 20-scf00021 | 20 |
| AX-157915364 | 2 | 47.551 | KV453193.1 | 625774  | 20-scf00021 | 20 |
| AX-157915370 | 2 | 47.551 | KV453193.1 | 633064  | 20-scf00021 | 20 |
| AX-157740863 | 2 | 47.551 | KV453193.1 | 658460  | 20-scf00021 | 20 |
| AX-157915389 | 2 | 47.551 | KV453193.1 | 666122  | 20-scf00021 | 20 |
| AX-157915427 | 2 | 47.551 | KV453193.1 | 710001  | 20-scf00021 | 20 |
| AX-157915457 | 2 | 47.551 | KV453193.1 | 744239  | 20-scf00021 | 20 |
| AX-157915477 | 2 | 47.551 | KV453193.1 | 766844  | 20-scf00021 | 20 |
| AX-158405035 | 2 | 47.551 | KV453193.1 | 828551  | 20-scf00021 | 20 |
| AX-157915528 | 2 | 47.551 | KV453193.1 | 894094  | 20-scf00021 | 20 |
| AX-157915551 | 2 | 47.551 | KV453193.1 | 918300  | 20-scf00021 | 20 |
| AX-157915561 | 2 | 47.551 | KV453193.1 | 935701  | 20-scf00021 | 20 |
| AX-157915565 | 2 | 47.551 | KV453193.1 | 939938  | 20-scf00021 | 20 |
| AX-157915610 | 2 | 47.551 | KV453193.1 | 998336  | 20-scf00021 | 20 |
| AX-157915611 | 2 | 47.551 | KV453193.1 | 999972  | 20-scf00021 | 20 |
| AX-157915613 | 2 | 47.551 | KV453193.1 | 1001569 | 20-scf00021 | 20 |
| AX-157915615 | 2 | 47.551 | KV453193.1 | 1005079 | 20-scf00021 | 20 |
| AX-157915623 | 2 | 47.551 | KV453193.1 | 1017758 | 20-scf00021 | 20 |
| AX-157915626 | 2 | 47.551 | KV453193.1 | 1022125 | 20-scf00021 | 20 |
| AX-157915652 | 2 | 47.551 | KV453193.1 | 1062222 | 20-scf00021 | 20 |

|              |   |        |             |         |             |    |
|--------------|---|--------|-------------|---------|-------------|----|
| AX-157915668 | 2 | 47.551 | KV453193.1  | 1095109 | 20-scf00021 | 20 |
| AX-157915674 | 2 | 47.551 | KV453193.1  | 1099670 | 20-scf00021 | 20 |
| AX-157915682 | 2 | 47.551 | KV453193.1  | 1112380 | 20-scf00021 | 20 |
| AX-157753544 | 2 | 47.551 | KV453193.1  | 1118827 | 20-scf00021 | 20 |
| AX-157915758 | 2 | 47.551 | KV453193.1  | 1204652 | 20-scf00021 | 20 |
| AX-157915777 | 2 | 47.551 | KV453193.1  | 1231464 | 20-scf00021 | 20 |
| AX-157915990 | 2 | 47.551 | KV453193.1  | 1496051 | 20-scf00021 | 20 |
| AX-157915991 | 2 | 47.551 | KV453193.1  | 1499644 | 20-scf00021 | 20 |
| AX-157709950 | 2 | 47.551 | KV453187.1  | 785190  | 20-scf00563 | 20 |
| AX-157920144 | 2 | 47.551 | KV453183.1  | 837806  | 20-scf00571 | 20 |
| AX-157920231 | 2 | 47.551 | KV453183.1  | 1165538 | 20-scf00571 | 20 |
| AX-157920246 | 2 | 47.551 | KV453183.1  | 1234890 | 20-scf00571 | 20 |
| AX-157920256 | 2 | 47.551 | KV453183.1  | 1259230 | 20-scf00571 | 20 |
| AX-158376181 | 2 | 47.551 | KV453190.1  | 460470  | 20-scf00573 | 20 |
| AX-157689772 | 2 | 47.551 | 3ML01032180 | 276     | scf07796_1  | UN |
| AX-157914906 | 2 | 47.583 | KV453193.1  | 36009   | 20-scf00021 | 20 |
| AX-157915260 | 2 | 47.583 | KV453193.1  | 468438  | 20-scf00021 | 20 |
| AX-157920095 | 2 | 47.583 | KV453183.1  | 648226  | 20-scf00571 | 20 |
| AX-157685029 | 2 | 47.583 | KV453191.1  | 133343  | 20-scf00582 | 20 |
| AX-157920388 | 2 | 47.616 | KV453189.1  | 1659303 | 20-scf00020 | 20 |
| AX-157920479 | 2 | 47.616 | KV453189.1  | 1974469 | 20-scf00020 | 20 |
| AX-157920500 | 2 | 47.616 | KV453189.1  | 2018077 | 20-scf00020 | 20 |
| AX-157914928 | 2 | 47.616 | KV453193.1  | 68745   | 20-scf00021 | 20 |
| AX-157915101 | 2 | 47.616 | KV453193.1  | 270499  | 20-scf00021 | 20 |
| AX-157915261 | 2 | 47.616 | KV453193.1  | 469674  | 20-scf00021 | 20 |
| AX-157915269 | 2 | 47.616 | KV453193.1  | 491677  | 20-scf00021 | 20 |
| AX-157915291 | 2 | 47.649 | KV453193.1  | 532134  | 20-scf00021 | 20 |
| AX-157915456 | 2 | 47.649 | KV453193.1  | 743287  | 20-scf00021 | 20 |
| AX-157914320 | 2 | 47.696 | KV453182.1  | 6190403 | 20-scf00019 | 20 |
| AX-157914485 | 2 | 47.696 | KV453182.1  | 6911357 | 20-scf00019 | 20 |
| AX-158376091 | 2 | 47.696 | KV453183.1  | 67989   | 20-scf00571 | 20 |
| AX-157920157 | 2 | 47.696 | KV453183.1  | 919615  | 20-scf00571 | 20 |
| AX-157685034 | 2 | 47.696 | KV453191.1  | 181939  | 20-scf00582 | 20 |
| AX-157685058 | 2 | 47.696 | KV453359.1  | 39338   | scf00584    | UN |
| AX-157685060 | 2 | 47.696 | KV453359.1  | 45069   | scf00584    | UN |
| AX-157685107 | 2 | 47.696 | KV453360.1  | 284023  | scf00585    | UN |
| AX-157913739 | 2 | 47.993 | KV453182.1  | 5525301 | 20-scf00019 | 20 |
| AX-157914187 | 2 | 47.993 | KV453182.1  | 6021718 | 20-scf00019 | 20 |
| AX-157914195 | 2 | 47.993 | KV453182.1  | 6031968 | 20-scf00019 | 20 |
| AX-157914196 | 2 | 47.993 | KV453182.1  | 6032526 | 20-scf00019 | 20 |
| AX-157771590 | 2 | 47.993 | KV453182.1  | 6040146 | 20-scf00019 | 20 |
| AX-157914203 | 2 | 47.993 | KV453182.1  | 6040455 | 20-scf00019 | 20 |
| AX-157914222 | 2 | 47.993 | KV453182.1  | 6068332 | 20-scf00019 | 20 |
| AX-157914484 | 2 | 47.993 | KV453182.1  | 6910977 | 20-scf00019 | 20 |
| AX-157914504 | 2 | 47.993 | KV453182.1  | 6980734 | 20-scf00019 | 20 |
| AX-157914517 | 2 | 47.993 | KV453182.1  | 7035383 | 20-scf00019 | 20 |
| AX-157914525 | 2 | 47.993 | KV453182.1  | 7059782 | 20-scf00019 | 20 |
| AX-157914529 | 2 | 47.993 | KV453182.1  | 7066903 | 20-scf00019 | 20 |
| AX-157914534 | 2 | 47.993 | KV453182.1  | 7083652 | 20-scf00019 | 20 |
| AX-157914537 | 2 | 47.993 | KV453182.1  | 7087405 | 20-scf00019 | 20 |
| AX-157914538 | 2 | 47.993 | KV453182.1  | 7093532 | 20-scf00019 | 20 |

|              |   |        |            |         |             |    |
|--------------|---|--------|------------|---------|-------------|----|
| AX-157914561 | 2 | 47.993 | KV453182.1 | 7170345 | 20-scf00019 | 20 |
| AX-157914567 | 2 | 47.993 | KV453182.1 | 7188854 | 20-scf00019 | 20 |
| AX-157914568 | 2 | 47.993 | KV453182.1 | 7196002 | 20-scf00019 | 20 |
| AX-157914569 | 2 | 47.993 | KV453182.1 | 7196758 | 20-scf00019 | 20 |
| AX-157914571 | 2 | 47.993 | KV453182.1 | 7204737 | 20-scf00019 | 20 |
| AX-157914575 | 2 | 47.993 | KV453182.1 | 7222738 | 20-scf00019 | 20 |
| AX-158404224 | 2 | 47.993 | KV453182.1 | 7238780 | 20-scf00019 | 20 |
| AX-158389597 | 2 | 47.993 | KV453182.1 | 7359333 | 20-scf00019 | 20 |
| AX-157914590 | 2 | 47.993 | KV453182.1 | 7361794 | 20-scf00019 | 20 |
| AX-157914596 | 2 | 47.993 | KV453182.1 | 7395581 | 20-scf00019 | 20 |
| AX-157914599 | 2 | 47.993 | KV453182.1 | 7401425 | 20-scf00019 | 20 |
| AX-157914600 | 2 | 47.993 | KV453182.1 | 7406451 | 20-scf00019 | 20 |
| AX-157914881 | 2 | 47.993 | KV453189.1 | 89957   | 20-scf00020 | 20 |
| AX-157914835 | 2 | 47.993 | KV453189.1 | 376953  | 20-scf00020 | 20 |
| AX-157914789 | 2 | 47.993 | KV453189.1 | 527191  | 20-scf00020 | 20 |
| AX-157914769 | 2 | 47.993 | KV453189.1 | 592617  | 20-scf00020 | 20 |
| AX-157914758 | 2 | 47.993 | KV453189.1 | 629226  | 20-scf00020 | 20 |
| AX-157914745 | 2 | 47.993 | KV453189.1 | 678615  | 20-scf00020 | 20 |
| AX-157914736 | 2 | 47.993 | KV453189.1 | 751161  | 20-scf00020 | 20 |
| AX-157914734 | 2 | 47.993 | KV453189.1 | 756330  | 20-scf00020 | 20 |
| AX-157914732 | 2 | 47.993 | KV453189.1 | 763392  | 20-scf00020 | 20 |
| AX-157914728 | 2 | 47.993 | KV453189.1 | 769061  | 20-scf00020 | 20 |
| AX-157914727 | 2 | 47.993 | KV453189.1 | 778596  | 20-scf00020 | 20 |
| AX-157914719 | 2 | 47.993 | KV453189.1 | 828556  | 20-scf00020 | 20 |
| AX-157914713 | 2 | 47.993 | KV453189.1 | 873032  | 20-scf00020 | 20 |
| AX-157914699 | 2 | 47.993 | KV453189.1 | 1029314 | 20-scf00020 | 20 |
| AX-157812606 | 2 | 47.993 | KV453189.1 | 1136574 | 20-scf00020 | 20 |
| AX-157914674 | 2 | 47.993 | KV453189.1 | 1168024 | 20-scf00020 | 20 |
| AX-157914672 | 2 | 47.993 | KV453189.1 | 1179118 | 20-scf00020 | 20 |
| AX-157914641 | 2 | 47.993 | KV453189.1 | 1317177 | 20-scf00020 | 20 |
| AX-157771518 | 2 | 47.993 | KV453189.1 | 1538185 | 20-scf00020 | 20 |
| AX-157920379 | 2 | 47.993 | KV453189.1 | 1619148 | 20-scf00020 | 20 |
| AX-157920415 | 2 | 47.993 | KV453189.1 | 1755329 | 20-scf00020 | 20 |
| AX-158405227 | 2 | 47.993 | KV453189.1 | 1767616 | 20-scf00020 | 20 |
| AX-157920422 | 2 | 47.993 | KV453189.1 | 1782330 | 20-scf00020 | 20 |
| AX-157920427 | 2 | 47.993 | KV453189.1 | 1794947 | 20-scf00020 | 20 |
| AX-157920436 | 2 | 47.993 | KV453189.1 | 1846340 | 20-scf00020 | 20 |
| AX-157920437 | 2 | 47.993 | KV453189.1 | 1849252 | 20-scf00020 | 20 |
| AX-157920441 | 2 | 47.993 | KV453189.1 | 1860029 | 20-scf00020 | 20 |
| AX-157813171 | 2 | 47.993 | KV453189.1 | 1869530 | 20-scf00020 | 20 |
| AX-157920460 | 2 | 47.993 | KV453189.1 | 1899576 | 20-scf00020 | 20 |
| AX-157920461 | 2 | 47.993 | KV453189.1 | 1908143 | 20-scf00020 | 20 |
| AX-157920465 | 2 | 47.993 | KV453189.1 | 1917948 | 20-scf00020 | 20 |
| AX-157920466 | 2 | 47.993 | KV453189.1 | 1919759 | 20-scf00020 | 20 |
| AX-157813173 | 2 | 47.993 | KV453189.1 | 1943017 | 20-scf00020 | 20 |
| AX-157920474 | 2 | 47.993 | KV453189.1 | 1944100 | 20-scf00020 | 20 |
| AX-157749101 | 2 | 47.993 | KV453189.1 | 1951068 | 20-scf00020 | 20 |
| AX-157920475 | 2 | 47.993 | KV453189.1 | 1955774 | 20-scf00020 | 20 |
| AX-157813174 | 2 | 47.993 | KV453189.1 | 1956619 | 20-scf00020 | 20 |
| AX-157920476 | 2 | 47.993 | KV453189.1 | 1959485 | 20-scf00020 | 20 |
| AX-157920478 | 2 | 47.993 | KV453189.1 | 1963479 | 20-scf00020 | 20 |



|              |   |        |            |         |             |    |
|--------------|---|--------|------------|---------|-------------|----|
| AX-157813176 | 2 | 47.993 | KV453189.1 | 1964578 | 20-scf00020 | 20 |
| AX-157920491 | 2 | 47.993 | KV453189.1 | 1999447 | 20-scf00020 | 20 |
| AX-157812610 | 2 | 47.993 | KV453193.1 | 45138   | 20-scf00021 | 20 |
| AX-157914914 | 2 | 47.993 | KV453193.1 | 52189   | 20-scf00021 | 20 |
| AX-157812614 | 2 | 47.993 | KV453193.1 | 78594   | 20-scf00021 | 20 |
| AX-157914937 | 2 | 47.993 | KV453193.1 | 78849   | 20-scf00021 | 20 |
| AX-157914938 | 2 | 47.993 | KV453193.1 | 80707   | 20-scf00021 | 20 |
| AX-157914944 | 2 | 47.993 | KV453193.1 | 93932   | 20-scf00021 | 20 |
| AX-157914970 | 2 | 47.993 | KV453193.1 | 117025  | 20-scf00021 | 20 |
| AX-157914978 | 2 | 47.993 | KV453193.1 | 127345  | 20-scf00021 | 20 |
| AX-157914987 | 2 | 47.993 | KV453193.1 | 141206  | 20-scf00021 | 20 |
| AX-157915081 | 2 | 47.993 | KV453193.1 | 249694  | 20-scf00021 | 20 |
| AX-157915148 | 2 | 47.993 | KV453193.1 | 322045  | 20-scf00021 | 20 |
| AX-157915305 | 2 | 47.993 | KV453193.1 | 548164  | 20-scf00021 | 20 |
| AX-157915326 | 2 | 47.993 | KV453193.1 | 579668  | 20-scf00021 | 20 |
| AX-157915328 | 2 | 47.993 | KV453193.1 | 582417  | 20-scf00021 | 20 |
| AX-157915343 | 2 | 47.993 | KV453193.1 | 598261  | 20-scf00021 | 20 |
| AX-157915344 | 2 | 47.993 | KV453193.1 | 598651  | 20-scf00021 | 20 |
| AX-157915345 | 2 | 47.993 | KV453193.1 | 599400  | 20-scf00021 | 20 |
| AX-157915351 | 2 | 47.993 | KV453193.1 | 603811  | 20-scf00021 | 20 |
| AX-157915352 | 2 | 47.993 | KV453193.1 | 605926  | 20-scf00021 | 20 |
| AX-157915358 | 2 | 47.993 | KV453193.1 | 612963  | 20-scf00021 | 20 |
| AX-157775436 | 2 | 47.993 | KV453193.1 | 620564  | 20-scf00021 | 20 |
| AX-157812646 | 2 | 47.993 | KV453193.1 | 622151  | 20-scf00021 | 20 |
| AX-157915363 | 2 | 47.993 | KV453193.1 | 624918  | 20-scf00021 | 20 |
| AX-157725340 | 2 | 47.993 | KV453193.1 | 625096  | 20-scf00021 | 20 |
| AX-157915365 | 2 | 47.993 | KV453193.1 | 627819  | 20-scf00021 | 20 |
| AX-157915369 | 2 | 47.993 | KV453193.1 | 631139  | 20-scf00021 | 20 |
| AX-157915371 | 2 | 47.993 | KV453193.1 | 634464  | 20-scf00021 | 20 |
| AX-157915382 | 2 | 47.993 | KV453193.1 | 654214  | 20-scf00021 | 20 |
| AX-157915388 | 2 | 47.993 | KV453193.1 | 663123  | 20-scf00021 | 20 |
| AX-157915487 | 2 | 47.993 | KV453193.1 | 774652  | 20-scf00021 | 20 |
| AX-157915587 | 2 | 47.993 | KV453193.1 | 965408  | 20-scf00021 | 20 |
| AX-157915606 | 2 | 47.993 | KV453193.1 | 991346  | 20-scf00021 | 20 |
| AX-157915736 | 2 | 47.993 | KV453193.1 | 1173059 | 20-scf00021 | 20 |
| AX-158375380 | 2 | 47.993 | KV453187.1 | 45791   | 20-scf00563 | 20 |
| AX-158375384 | 2 | 47.993 | KV453187.1 | 111152  | 20-scf00563 | 20 |
| AX-158375385 | 2 | 47.993 | KV453187.1 | 133325  | 20-scf00563 | 20 |
| AX-158375386 | 2 | 47.993 | KV453187.1 | 134905  | 20-scf00563 | 20 |
| AX-158375387 | 2 | 47.993 | KV453187.1 | 155629  | 20-scf00563 | 20 |
| AX-158375389 | 2 | 47.993 | KV453187.1 | 166569  | 20-scf00563 | 20 |
| AX-158375449 | 2 | 47.993 | KV453187.1 | 833890  | 20-scf00563 | 20 |
| AX-158375453 | 2 | 47.993 | KV453187.1 | 865109  | 20-scf00563 | 20 |
| AX-158375470 | 2 | 47.993 | KV453187.1 | 1114836 | 20-scf00563 | 20 |
| AX-158376098 | 2 | 47.993 | KV453183.1 | 151617  | 20-scf00571 | 20 |
| AX-158376115 | 2 | 47.993 | KV453183.1 | 333626  | 20-scf00571 | 20 |
| AX-157813130 | 2 | 47.993 | KV453183.1 | 744142  | 20-scf00571 | 20 |
| AX-157920224 | 2 | 47.993 | KV453183.1 | 1135678 | 20-scf00571 | 20 |
| AX-157920267 | 2 | 47.993 | KV453183.1 | 1297342 | 20-scf00571 | 20 |
| AX-157920271 | 2 | 47.993 | KV453183.1 | 1318310 | 20-scf00571 | 20 |
| AX-157920272 | 2 | 47.993 | KV453183.1 | 1320046 | 20-scf00571 | 20 |

|              |   |        |             |         |             |    |
|--------------|---|--------|-------------|---------|-------------|----|
| AX-157920278 | 2 | 47.993 | KV453183.1  | 1346609 | 20-scf00571 | 20 |
| AX-157695780 | 2 | 47.993 | KV453183.1  | 1380167 | 20-scf00571 | 20 |
| AX-157920296 | 2 | 47.993 | KV453183.1  | 1512093 | 20-scf00571 | 20 |
| AX-157920299 | 2 | 47.993 | KV453183.1  | 1526273 | 20-scf00571 | 20 |
| AX-157920312 | 2 | 47.993 | KV453183.1  | 1639348 | 20-scf00571 | 20 |
| AX-157920324 | 2 | 47.993 | KV453183.1  | 1730239 | 20-scf00571 | 20 |
| AX-158376138 | 2 | 47.993 | KV453190.1  | 1044    | 20-scf00573 | 20 |
| AX-158376147 | 2 | 47.993 | KV453190.1  | 134212  | 20-scf00573 | 20 |
| AX-158376157 | 2 | 47.993 | KV453190.1  | 213859  | 20-scf00573 | 20 |
| AX-157685030 | 2 | 47.993 | KV453191.1  | 136605  | 20-scf00582 | 20 |
| AX-157685378 | 2 | 47.993 | KV453188.1  | 144436  | 20-scf00886 | 20 |
| AX-157685062 | 2 | 47.993 | KV453359.1  | 57595   | scf00584    | UN |
| AX-157685066 | 2 | 47.993 | KV453359.1  | 74384   | scf00584    | UN |
| AX-158420586 | 2 | 47.993 | KV453360.1  | 4131    | scf00585    | UN |
| AX-157705855 | 2 | 47.993 | 3ML01031065 | 369     | scf06670_1  | UN |
| AX-157915391 | 2 | 48.145 | KV453193.1  | 670400  | 20-scf00021 | 20 |
| AX-157914301 | 2 | 48.297 | KV453182.1  | 6170337 | 20-scf00019 | 20 |
| AX-157914551 | 2 | 48.297 | KV453182.1  | 7148960 | 20-scf00019 | 20 |
| AX-157914558 | 2 | 48.297 | KV453182.1  | 7159593 | 20-scf00019 | 20 |
| AX-157914576 | 2 | 48.297 | KV453182.1  | 7230878 | 20-scf00019 | 20 |
| AX-157914605 | 2 | 48.297 | KV453182.1  | 7483195 | 20-scf00019 | 20 |
| AX-157920376 | 2 | 48.297 | KV453189.1  | 1599803 | 20-scf00020 | 20 |
| AX-157813162 | 2 | 48.297 | KV453189.1  | 1605796 | 20-scf00020 | 20 |
| AX-157920383 | 2 | 48.297 | KV453189.1  | 1640068 | 20-scf00020 | 20 |
| AX-157920402 | 2 | 48.297 | KV453189.1  | 1703415 | 20-scf00020 | 20 |
| AX-157920406 | 2 | 48.297 | KV453189.1  | 1715845 | 20-scf00020 | 20 |
| AX-157920440 | 2 | 48.297 | KV453189.1  | 1858334 | 20-scf00020 | 20 |
| AX-157812611 | 2 | 48.297 | KV453193.1  | 60637   | 20-scf00021 | 20 |
| AX-157914962 | 2 | 48.297 | KV453193.1  | 109477  | 20-scf00021 | 20 |
| AX-157915002 | 2 | 48.297 | KV453193.1  | 162939  | 20-scf00021 | 20 |
| AX-157915005 | 2 | 48.297 | KV453193.1  | 168878  | 20-scf00021 | 20 |
| AX-157746441 | 2 | 48.297 | KV453193.1  | 291351  | 20-scf00021 | 20 |
| AX-157812630 | 2 | 48.297 | KV453193.1  | 293552  | 20-scf00021 | 20 |
| AX-157915125 | 2 | 48.297 | KV453193.1  | 298606  | 20-scf00021 | 20 |
| AX-157915126 | 2 | 48.297 | KV453193.1  | 299263  | 20-scf00021 | 20 |
| AX-157915127 | 2 | 48.297 | KV453193.1  | 300524  | 20-scf00021 | 20 |
| AX-157915133 | 2 | 48.297 | KV453193.1  | 306713  | 20-scf00021 | 20 |
| AX-157915166 | 2 | 48.297 | KV453193.1  | 337411  | 20-scf00021 | 20 |
| AX-157915167 | 2 | 48.297 | KV453193.1  | 337928  | 20-scf00021 | 20 |
| AX-157915168 | 2 | 48.297 | KV453193.1  | 339146  | 20-scf00021 | 20 |
| AX-157915169 | 2 | 48.297 | KV453193.1  | 339813  | 20-scf00021 | 20 |
| AX-157915170 | 2 | 48.297 | KV453193.1  | 340357  | 20-scf00021 | 20 |
| AX-157915171 | 2 | 48.297 | KV453193.1  | 340660  | 20-scf00021 | 20 |
| AX-157915174 | 2 | 48.297 | KV453193.1  | 343660  | 20-scf00021 | 20 |
| AX-157915179 | 2 | 48.297 | KV453193.1  | 351580  | 20-scf00021 | 20 |
| AX-157915183 | 2 | 48.297 | KV453193.1  | 353825  | 20-scf00021 | 20 |
| AX-157812631 | 2 | 48.297 | KV453193.1  | 354855  | 20-scf00021 | 20 |
| AX-157915184 | 2 | 48.297 | KV453193.1  | 356141  | 20-scf00021 | 20 |
| AX-158379257 | 2 | 48.297 | KV453193.1  | 357089  | 20-scf00021 | 20 |
| AX-157727381 | 2 | 48.297 | KV453193.1  | 357843  | 20-scf00021 | 20 |
| AX-157719764 | 2 | 48.297 | KV453193.1  | 358908  | 20-scf00021 | 20 |

|              |   |        |            |        |             |    |
|--------------|---|--------|------------|--------|-------------|----|
| AX-157915186 | 2 | 48.297 | KV453193.1 | 361380 | 20-scf00021 | 20 |
| AX-157915191 | 2 | 48.297 | KV453193.1 | 365818 | 20-scf00021 | 20 |
| AX-157812633 | 2 | 48.297 | KV453193.1 | 366073 | 20-scf00021 | 20 |
| AX-157915192 | 2 | 48.297 | KV453193.1 | 369794 | 20-scf00021 | 20 |
| AX-157915196 | 2 | 48.297 | KV453193.1 | 376684 | 20-scf00021 | 20 |
| AX-157915197 | 2 | 48.297 | KV453193.1 | 378605 | 20-scf00021 | 20 |
| AX-157915204 | 2 | 48.297 | KV453193.1 | 390859 | 20-scf00021 | 20 |
| AX-158405031 | 2 | 48.297 | KV453193.1 | 395126 | 20-scf00021 | 20 |
| AX-157915210 | 2 | 48.297 | KV453193.1 | 395936 | 20-scf00021 | 20 |
| AX-157915211 | 2 | 48.297 | KV453193.1 | 396356 | 20-scf00021 | 20 |
| AX-157915213 | 2 | 48.297 | KV453193.1 | 396954 | 20-scf00021 | 20 |
| AX-157915216 | 2 | 48.297 | KV453193.1 | 399928 | 20-scf00021 | 20 |
| AX-157725624 | 2 | 48.297 | KV453193.1 | 400500 | 20-scf00021 | 20 |
| AX-157915230 | 2 | 48.297 | KV453193.1 | 410879 | 20-scf00021 | 20 |
| AX-157777949 | 2 | 48.297 | KV453193.1 | 411137 | 20-scf00021 | 20 |
| AX-157915231 | 2 | 48.297 | KV453193.1 | 411410 | 20-scf00021 | 20 |
| AX-157812636 | 2 | 48.297 | KV453193.1 | 411937 | 20-scf00021 | 20 |
| AX-157915233 | 2 | 48.297 | KV453193.1 | 414474 | 20-scf00021 | 20 |
| AX-157915317 | 2 | 48.297 | KV453193.1 | 564246 | 20-scf00021 | 20 |
| AX-157915327 | 2 | 48.297 | KV453193.1 | 580470 | 20-scf00021 | 20 |
| AX-157915331 | 2 | 48.297 | KV453193.1 | 586776 | 20-scf00021 | 20 |
| AX-157915355 | 2 | 48.297 | KV453193.1 | 609787 | 20-scf00021 | 20 |
| AX-157915361 | 2 | 48.297 | KV453193.1 | 623919 | 20-scf00021 | 20 |
| AX-157915362 | 2 | 48.297 | KV453193.1 | 624405 | 20-scf00021 | 20 |
| AX-157915368 | 2 | 48.297 | KV453193.1 | 630862 | 20-scf00021 | 20 |
| AX-157915376 | 2 | 48.297 | KV453193.1 | 643065 | 20-scf00021 | 20 |
| AX-157915385 | 2 | 48.297 | KV453193.1 | 656761 | 20-scf00021 | 20 |
| AX-157915386 | 2 | 48.297 | KV453193.1 | 657297 | 20-scf00021 | 20 |
| AX-157915393 | 2 | 48.297 | KV453193.1 | 673413 | 20-scf00021 | 20 |
| AX-157724786 | 2 | 48.297 | KV453193.1 | 675030 | 20-scf00021 | 20 |
| AX-157915394 | 2 | 48.297 | KV453193.1 | 675775 | 20-scf00021 | 20 |
| AX-157915395 | 2 | 48.297 | KV453193.1 | 676342 | 20-scf00021 | 20 |
| AX-157915396 | 2 | 48.297 | KV453193.1 | 676856 | 20-scf00021 | 20 |
| AX-157915410 | 2 | 48.297 | KV453193.1 | 689509 | 20-scf00021 | 20 |
| AX-157915411 | 2 | 48.297 | KV453193.1 | 691377 | 20-scf00021 | 20 |
| AX-157915412 | 2 | 48.297 | KV453193.1 | 693586 | 20-scf00021 | 20 |
| AX-157915413 | 2 | 48.297 | KV453193.1 | 694439 | 20-scf00021 | 20 |
| AX-157915416 | 2 | 48.297 | KV453193.1 | 698670 | 20-scf00021 | 20 |
| AX-157915418 | 2 | 48.297 | KV453193.1 | 700307 | 20-scf00021 | 20 |
| AX-157915421 | 2 | 48.297 | KV453193.1 | 702943 | 20-scf00021 | 20 |
| AX-157915422 | 2 | 48.297 | KV453193.1 | 703777 | 20-scf00021 | 20 |
| AX-157915428 | 2 | 48.297 | KV453193.1 | 710474 | 20-scf00021 | 20 |
| AX-157915429 | 2 | 48.297 | KV453193.1 | 710693 | 20-scf00021 | 20 |
| AX-157915439 | 2 | 48.297 | KV453193.1 | 721447 | 20-scf00021 | 20 |
| AX-157915441 | 2 | 48.297 | KV453193.1 | 725523 | 20-scf00021 | 20 |
| AX-157915442 | 2 | 48.297 | KV453193.1 | 727622 | 20-scf00021 | 20 |
| AX-157812652 | 2 | 48.297 | KV453193.1 | 727836 | 20-scf00021 | 20 |
| AX-157915443 | 2 | 48.297 | KV453193.1 | 728647 | 20-scf00021 | 20 |
| AX-157915445 | 2 | 48.297 | KV453193.1 | 729753 | 20-scf00021 | 20 |
| AX-157915448 | 2 | 48.297 | KV453193.1 | 737233 | 20-scf00021 | 20 |
| AX-157915449 | 2 | 48.297 | KV453193.1 | 738096 | 20-scf00021 | 20 |

|              |   |        |            |         |             |    |
|--------------|---|--------|------------|---------|-------------|----|
| AX-157915453 | 2 | 48.297 | KV453193.1 | 741223  | 20-scf00021 | 20 |
| AX-157915454 | 2 | 48.297 | KV453193.1 | 741532  | 20-scf00021 | 20 |
| AX-157915455 | 2 | 48.297 | KV453193.1 | 742228  | 20-scf00021 | 20 |
| AX-157915466 | 2 | 48.297 | KV453193.1 | 750484  | 20-scf00021 | 20 |
| AX-157812655 | 2 | 48.297 | KV453193.1 | 755685  | 20-scf00021 | 20 |
| AX-157812656 | 2 | 48.297 | KV453193.1 | 756084  | 20-scf00021 | 20 |
| AX-157915474 | 2 | 48.297 | KV453193.1 | 760480  | 20-scf00021 | 20 |
| AX-157915485 | 2 | 48.297 | KV453193.1 | 774029  | 20-scf00021 | 20 |
| AX-157915486 | 2 | 48.297 | KV453193.1 | 774305  | 20-scf00021 | 20 |
| AX-157915490 | 2 | 48.297 | KV453193.1 | 777473  | 20-scf00021 | 20 |
| AX-157915491 | 2 | 48.297 | KV453193.1 | 777891  | 20-scf00021 | 20 |
| AX-157812661 | 2 | 48.297 | KV453193.1 | 784801  | 20-scf00021 | 20 |
| AX-157915498 | 2 | 48.297 | KV453193.1 | 795152  | 20-scf00021 | 20 |
| AX-157915501 | 2 | 48.297 | KV453193.1 | 800246  | 20-scf00021 | 20 |
| AX-157915506 | 2 | 48.297 | KV453193.1 | 806021  | 20-scf00021 | 20 |
| AX-158414820 | 2 | 48.297 | KV453193.1 | 871273  | 20-scf00021 | 20 |
| AX-157915566 | 2 | 48.297 | KV453193.1 | 940683  | 20-scf00021 | 20 |
| AX-157915572 | 2 | 48.297 | KV453193.1 | 946671  | 20-scf00021 | 20 |
| AX-157915573 | 2 | 48.297 | KV453193.1 | 947783  | 20-scf00021 | 20 |
| AX-157771664 | 2 | 48.297 | KV453193.1 | 949438  | 20-scf00021 | 20 |
| AX-157915575 | 2 | 48.297 | KV453193.1 | 949523  | 20-scf00021 | 20 |
| AX-157915576 | 2 | 48.297 | KV453193.1 | 951244  | 20-scf00021 | 20 |
| AX-157915584 | 2 | 48.297 | KV453193.1 | 961210  | 20-scf00021 | 20 |
| AX-157915595 | 2 | 48.297 | KV453193.1 | 980500  | 20-scf00021 | 20 |
| AX-157883453 | 2 | 48.297 | KV453193.1 | 981149  | 20-scf00021 | 20 |
| AX-157915600 | 2 | 48.297 | KV453193.1 | 984467  | 20-scf00021 | 20 |
| AX-157915608 | 2 | 48.297 | KV453193.1 | 996902  | 20-scf00021 | 20 |
| AX-157915609 | 2 | 48.297 | KV453193.1 | 997923  | 20-scf00021 | 20 |
| AX-157915612 | 2 | 48.297 | KV453193.1 | 1000639 | 20-scf00021 | 20 |
| AX-157915614 | 2 | 48.297 | KV453193.1 | 1003982 | 20-scf00021 | 20 |
| AX-157915616 | 2 | 48.297 | KV453193.1 | 1007269 | 20-scf00021 | 20 |
| AX-157915619 | 2 | 48.297 | KV453193.1 | 1010710 | 20-scf00021 | 20 |
| AX-157915620 | 2 | 48.297 | KV453193.1 | 1011593 | 20-scf00021 | 20 |
| AX-157915621 | 2 | 48.297 | KV453193.1 | 1013113 | 20-scf00021 | 20 |
| AX-158405045 | 2 | 48.297 | KV453193.1 | 1024375 | 20-scf00021 | 20 |
| AX-157915635 | 2 | 48.297 | KV453193.1 | 1033747 | 20-scf00021 | 20 |
| AX-157915641 | 2 | 48.297 | KV453193.1 | 1037906 | 20-scf00021 | 20 |
| AX-157915643 | 2 | 48.297 | KV453193.1 | 1040092 | 20-scf00021 | 20 |
| AX-157915646 | 2 | 48.297 | KV453193.1 | 1045136 | 20-scf00021 | 20 |
| AX-157742703 | 2 | 48.297 | KV453193.1 | 1045857 | 20-scf00021 | 20 |
| AX-158405048 | 2 | 48.297 | KV453193.1 | 1045920 | 20-scf00021 | 20 |
| AX-157915647 | 2 | 48.297 | KV453193.1 | 1048116 | 20-scf00021 | 20 |
| AX-157915662 | 2 | 48.297 | KV453193.1 | 1084259 | 20-scf00021 | 20 |
| AX-157915692 | 2 | 48.297 | KV453193.1 | 1122104 | 20-scf00021 | 20 |
| AX-157915706 | 2 | 48.297 | KV453193.1 | 1135797 | 20-scf00021 | 20 |
| AX-157915718 | 2 | 48.297 | KV453193.1 | 1147011 | 20-scf00021 | 20 |
| AX-157915760 | 2 | 48.297 | KV453193.1 | 1207946 | 20-scf00021 | 20 |
| AX-157915850 | 2 | 48.297 | KV453193.1 | 1332674 | 20-scf00021 | 20 |
| AX-157915903 | 2 | 48.297 | KV453193.1 | 1393542 | 20-scf00021 | 20 |
| AX-158375448 | 2 | 48.297 | KV453187.1 | 810624  | 20-scf00563 | 20 |
| AX-158376093 | 2 | 48.297 | KV453183.1 | 107313  | 20-scf00571 | 20 |

|              |   |        |            |         |             |    |
|--------------|---|--------|------------|---------|-------------|----|
| AX-158376094 | 2 | 48.297 | KV453183.1 | 108852  | 20-scf00571 | 20 |
| AX-158414822 | 2 | 48.298 | KV453193.1 | 1045963 | 20-scf00021 | 20 |
| AX-157915650 | 2 | 48.298 | KV453193.1 | 1051455 | 20-scf00021 | 20 |
| AX-157915656 | 2 | 48.31  | KV453193.1 | 1075421 | 20-scf00021 | 20 |
| AX-157915493 | 2 | 48.467 | KV453193.1 | 779949  | 20-scf00021 | 20 |
| AX-157915655 | 2 | 48.467 | KV453193.1 | 1073194 | 20-scf00021 | 20 |
| AX-157915657 | 2 | 48.467 | KV453193.1 | 1078215 | 20-scf00021 | 20 |
| AX-157915677 | 2 | 48.636 | KV453193.1 | 1107357 | 20-scf00021 | 20 |
| AX-157915679 | 2 | 48.636 | KV453193.1 | 1109401 | 20-scf00021 | 20 |
| AX-157915680 | 2 | 48.636 | KV453193.1 | 1111284 | 20-scf00021 | 20 |
| AX-157915681 | 2 | 48.636 | KV453193.1 | 1111955 | 20-scf00021 | 20 |
| AX-157915684 | 2 | 48.636 | KV453193.1 | 1115383 | 20-scf00021 | 20 |
| AX-157915685 | 2 | 48.636 | KV453193.1 | 1115653 | 20-scf00021 | 20 |
| AX-157915686 | 2 | 48.636 | KV453193.1 | 1115974 | 20-scf00021 | 20 |
| AX-157915688 | 2 | 48.636 | KV453193.1 | 1117529 | 20-scf00021 | 20 |
| AX-157915696 | 2 | 48.636 | KV453193.1 | 1123822 | 20-scf00021 | 20 |
| AX-157915697 | 2 | 48.636 | KV453193.1 | 1124693 | 20-scf00021 | 20 |
| AX-157883456 | 2 | 48.636 | KV453193.1 | 1125940 | 20-scf00021 | 20 |
| AX-157915699 | 2 | 48.636 | KV453193.1 | 1126240 | 20-scf00021 | 20 |
| AX-157915719 | 2 | 48.636 | KV453193.1 | 1148141 | 20-scf00021 | 20 |
| AX-157915725 | 2 | 48.636 | KV453193.1 | 1153514 | 20-scf00021 | 20 |
| AX-157915726 | 2 | 48.636 | KV453193.1 | 1154345 | 20-scf00021 | 20 |
| AX-157915728 | 2 | 48.636 | KV453193.1 | 1157821 | 20-scf00021 | 20 |
| AX-157727189 | 2 | 48.636 | KV453193.1 | 1167122 | 20-scf00021 | 20 |
| AX-157915278 | 2 | 48.94  | KV453193.1 | 504213  | 20-scf00021 | 20 |
| AX-157915279 | 2 | 48.94  | KV453193.1 | 505492  | 20-scf00021 | 20 |
| AX-157915426 | 2 | 48.94  | KV453193.1 | 706860  | 20-scf00021 | 20 |
| AX-157915602 | 2 | 48.94  | KV453193.1 | 985263  | 20-scf00021 | 20 |
| AX-157915730 | 2 | 48.94  | KV453193.1 | 1162117 | 20-scf00021 | 20 |
| AX-157915732 | 2 | 48.94  | KV453193.1 | 1169280 | 20-scf00021 | 20 |
| AX-157920352 | 2 | 49.143 | KV453189.1 | 1528013 | 20-scf00020 | 20 |
| AX-157915037 | 2 | 49.143 | KV453193.1 | 202523  | 20-scf00021 | 20 |
| AX-157915068 | 2 | 49.143 | KV453193.1 | 236208  | 20-scf00021 | 20 |
| AX-157719937 | 2 | 49.143 | KV453193.1 | 665363  | 20-scf00021 | 20 |
| AX-157915518 | 2 | 49.143 | KV453193.1 | 862459  | 20-scf00021 | 20 |
| AX-158389603 | 2 | 49.143 | KV453193.1 | 883805  | 20-scf00021 | 20 |
| AX-157915532 | 2 | 49.143 | KV453193.1 | 898934  | 20-scf00021 | 20 |
| AX-157915538 | 2 | 49.143 | KV453193.1 | 903406  | 20-scf00021 | 20 |
| AX-157915543 | 2 | 49.143 | KV453193.1 | 908225  | 20-scf00021 | 20 |
| AX-157915563 | 2 | 49.143 | KV453193.1 | 937084  | 20-scf00021 | 20 |
| AX-157915577 | 2 | 49.143 | KV453193.1 | 952196  | 20-scf00021 | 20 |
| AX-157915752 | 2 | 49.143 | KV453193.1 | 1194019 | 20-scf00021 | 20 |
| AX-157915756 | 2 | 49.143 | KV453193.1 | 1199221 | 20-scf00021 | 20 |
| AX-157915848 | 2 | 49.143 | KV453193.1 | 1329545 | 20-scf00021 | 20 |
| AX-157920279 | 2 | 49.143 | KV453183.1 | 1350976 | 20-scf00571 | 20 |
| AX-157920298 | 2 | 49.143 | KV453183.1 | 1519201 | 20-scf00571 | 20 |
| AX-157920314 | 2 | 49.143 | KV453183.1 | 1651684 | 20-scf00571 | 20 |
| AX-157920325 | 2 | 49.143 | KV453183.1 | 1766040 | 20-scf00571 | 20 |
| AX-157749420 | 2 | 49.144 | KV453193.1 | 1177155 | 20-scf00021 | 20 |
| AX-157915747 | 2 | 49.144 | KV453193.1 | 1185862 | 20-scf00021 | 20 |
| AX-157915764 | 2 | 49.144 | KV453193.1 | 1212265 | 20-scf00021 | 20 |

|              |   |        |            |         |             |    |
|--------------|---|--------|------------|---------|-------------|----|
| AX-157915767 | 2 | 49.144 | KV453193.1 | 1217302 | 20-scf00021 | 20 |
| AX-157915768 | 2 | 49.144 | KV453193.1 | 1217940 | 20-scf00021 | 20 |
| AX-157915769 | 2 | 49.144 | KV453193.1 | 1218800 | 20-scf00021 | 20 |
| AX-157915789 | 2 | 49.144 | KV453193.1 | 1253792 | 20-scf00021 | 20 |
| AX-157915911 | 2 | 49.144 | KV453193.1 | 1400484 | 20-scf00021 | 20 |
| AX-157812692 | 2 | 49.144 | KV453193.1 | 1441868 | 20-scf00021 | 20 |
| AX-157915974 | 2 | 49.144 | KV453193.1 | 1474525 | 20-scf00021 | 20 |
| AX-157915742 | 2 | 49.313 | KV453193.1 | 1179464 | 20-scf00021 | 20 |
| AX-157708660 | 2 | 49.313 | KV453193.1 | 1193026 | 20-scf00021 | 20 |
| AX-157915778 | 2 | 49.313 | KV453193.1 | 1233881 | 20-scf00021 | 20 |
| AX-157915779 | 2 | 49.313 | KV453193.1 | 1236328 | 20-scf00021 | 20 |
| AX-157883459 | 2 | 49.313 | KV453193.1 | 1237544 | 20-scf00021 | 20 |
| AX-157915781 | 2 | 49.313 | KV453193.1 | 1239387 | 20-scf00021 | 20 |
| AX-157745433 | 2 | 49.313 | KV453193.1 | 1242846 | 20-scf00021 | 20 |
| AX-157741242 | 2 | 49.313 | KV453193.1 | 1252446 | 20-scf00021 | 20 |
| AX-157915788 | 2 | 49.313 | KV453193.1 | 1252619 | 20-scf00021 | 20 |
| AX-157774441 | 2 | 49.532 | KV453193.1 | 1246132 | 20-scf00021 | 20 |
| AX-157915795 | 2 | 49.532 | KV453193.1 | 1259840 | 20-scf00021 | 20 |
| AX-157812677 | 2 | 49.532 | KV453193.1 | 1261891 | 20-scf00021 | 20 |
| AX-157915829 | 2 | 49.532 | KV453193.1 | 1310391 | 20-scf00021 | 20 |
| AX-157915799 | 2 | 49.57  | KV453193.1 | 1264736 | 20-scf00021 | 20 |
| AX-157915801 | 2 | 49.57  | KV453193.1 | 1267333 | 20-scf00021 | 20 |
| AX-157915802 | 2 | 49.57  | KV453193.1 | 1268423 | 20-scf00021 | 20 |
| AX-157915808 | 2 | 49.57  | KV453193.1 | 1280417 | 20-scf00021 | 20 |
| AX-157853725 | 2 | 49.57  | KV453193.1 | 1311442 | 20-scf00021 | 20 |
| AX-157915806 | 2 | 49.619 | KV453193.1 | 1275375 | 20-scf00021 | 20 |
| AX-157915836 | 2 | 49.663 | KV453193.1 | 1317683 | 20-scf00021 | 20 |
| AX-157915839 | 2 | 49.698 | KV453193.1 | 1319741 | 20-scf00021 | 20 |
| AX-158405054 | 2 | 49.739 | KV453193.1 | 1320113 | 20-scf00021 | 20 |
| AX-157915841 | 2 | 49.779 | KV453193.1 | 1321184 | 20-scf00021 | 20 |
| AX-157915845 | 2 | 49.808 | KV453193.1 | 1324386 | 20-scf00021 | 20 |
| AX-157743484 | 2 | 49.832 | KV453193.1 | 1163899 | 20-scf00021 | 20 |
| AX-157915854 | 2 | 49.832 | KV453193.1 | 1338132 | 20-scf00021 | 20 |
| AX-157812672 | 2 | 49.86  | KV453193.1 | 1164071 | 20-scf00021 | 20 |
| AX-157722905 | 2 | 49.86  | KV453193.1 | 1178033 | 20-scf00021 | 20 |
| AX-157915754 | 2 | 49.86  | KV453193.1 | 1197086 | 20-scf00021 | 20 |
| AX-157915774 | 2 | 49.86  | KV453193.1 | 1222905 | 20-scf00021 | 20 |
| AX-157915786 | 2 | 49.86  | KV453193.1 | 1245259 | 20-scf00021 | 20 |
| AX-157915791 | 2 | 49.86  | KV453193.1 | 1257277 | 20-scf00021 | 20 |
| AX-157915803 | 2 | 49.86  | KV453193.1 | 1272098 | 20-scf00021 | 20 |
| AX-157774503 | 2 | 49.86  | KV453193.1 | 1306441 | 20-scf00021 | 20 |
| AX-157915855 | 2 | 49.86  | KV453193.1 | 1339850 | 20-scf00021 | 20 |
| AX-157915856 | 2 | 49.86  | KV453193.1 | 1340637 | 20-scf00021 | 20 |
| AX-157915857 | 2 | 49.86  | KV453193.1 | 1341143 | 20-scf00021 | 20 |
| AX-157915858 | 2 | 49.86  | KV453193.1 | 1342799 | 20-scf00021 | 20 |
| AX-157915887 | 2 | 49.86  | KV453193.1 | 1378226 | 20-scf00021 | 20 |
| AX-157915936 | 2 | 49.86  | KV453193.1 | 1422848 | 20-scf00021 | 20 |
| AX-157915945 | 2 | 49.86  | KV453193.1 | 1435725 | 20-scf00021 | 20 |
| AX-157915946 | 2 | 49.86  | KV453193.1 | 1436013 | 20-scf00021 | 20 |
| AX-157915948 | 2 | 49.86  | KV453193.1 | 1439455 | 20-scf00021 | 20 |
| AX-157915951 | 2 | 49.86  | KV453193.1 | 1445235 | 20-scf00021 | 20 |

|              |   |        |            |         |             |    |
|--------------|---|--------|------------|---------|-------------|----|
| AX-157916073 | 2 | 49.86  | KV453193.1 | 1627814 | 20-scf00021 | 20 |
| AX-157853782 | 2 | 49.915 | KV453189.1 | 1798676 | 20-scf00020 | 20 |
| AX-157920429 | 2 | 49.915 | KV453189.1 | 1805463 | 20-scf00020 | 20 |
| AX-158382312 | 2 | 49.915 | KV453189.1 | 1824225 | 20-scf00020 | 20 |
| AX-157853783 | 2 | 49.915 | KV453189.1 | 1824438 | 20-scf00020 | 20 |
| AX-157813170 | 2 | 49.915 | KV453189.1 | 1845943 | 20-scf00020 | 20 |
| AX-157915093 | 2 | 49.915 | KV453193.1 | 263158  | 20-scf00021 | 20 |
| AX-157915096 | 2 | 49.915 | KV453193.1 | 264749  | 20-scf00021 | 20 |
| AX-157915097 | 2 | 49.915 | KV453193.1 | 265445  | 20-scf00021 | 20 |
| AX-157915098 | 2 | 49.915 | KV453193.1 | 266288  | 20-scf00021 | 20 |
| AX-157915099 | 2 | 49.915 | KV453193.1 | 267224  | 20-scf00021 | 20 |
| AX-158389599 | 2 | 49.915 | KV453193.1 | 267946  | 20-scf00021 | 20 |
| AX-157915121 | 2 | 49.915 | KV453193.1 | 293022  | 20-scf00021 | 20 |
| AX-157915176 | 2 | 49.915 | KV453193.1 | 347347  | 20-scf00021 | 20 |
| AX-157915181 | 2 | 49.915 | KV453193.1 | 352863  | 20-scf00021 | 20 |
| AX-157812632 | 2 | 49.915 | KV453193.1 | 355345  | 20-scf00021 | 20 |
| AX-157723698 | 2 | 49.915 | KV453193.1 | 356955  | 20-scf00021 | 20 |
| AX-157915190 | 2 | 49.915 | KV453193.1 | 365250  | 20-scf00021 | 20 |
| AX-157915219 | 2 | 49.915 | KV453193.1 | 402064  | 20-scf00021 | 20 |
| AX-157853720 | 2 | 49.915 | KV453193.1 | 403578  | 20-scf00021 | 20 |
| AX-157915226 | 2 | 49.915 | KV453193.1 | 407218  | 20-scf00021 | 20 |
| AX-157915227 | 2 | 49.915 | KV453193.1 | 407818  | 20-scf00021 | 20 |
| AX-157915285 | 2 | 49.915 | KV453193.1 | 514936  | 20-scf00021 | 20 |
| AX-157812659 | 2 | 49.915 | KV453193.1 | 778386  | 20-scf00021 | 20 |
| AX-157915505 | 2 | 49.915 | KV453193.1 | 805222  | 20-scf00021 | 20 |
| AX-157915582 | 2 | 49.915 | KV453193.1 | 958061  | 20-scf00021 | 20 |
| AX-157915599 | 2 | 49.915 | KV453193.1 | 984110  | 20-scf00021 | 20 |
| AX-157812667 | 2 | 49.915 | KV453193.1 | 1014595 | 20-scf00021 | 20 |
| AX-157883454 | 2 | 49.915 | KV453193.1 | 1032285 | 20-scf00021 | 20 |
| AX-157915700 | 2 | 49.915 | KV453193.1 | 1128188 | 20-scf00021 | 20 |
| AX-157915714 | 2 | 49.915 | KV453193.1 | 1144232 | 20-scf00021 | 20 |
| AX-157758998 | 2 | 49.915 | KV453193.1 | 1245611 | 20-scf00021 | 20 |
| AX-157915804 | 2 | 49.915 | KV453193.1 | 1272910 | 20-scf00021 | 20 |
| AX-157739374 | 2 | 49.915 | KV453193.1 | 1324577 | 20-scf00021 | 20 |
| AX-157915859 | 2 | 49.915 | KV453193.1 | 1343250 | 20-scf00021 | 20 |
| AX-157751254 | 2 | 49.915 | KV453193.1 | 1353814 | 20-scf00021 | 20 |
| AX-157812684 | 2 | 49.915 | KV453193.1 | 1355082 | 20-scf00021 | 20 |
| AX-157812691 | 2 | 49.915 | KV453193.1 | 1437519 | 20-scf00021 | 20 |
| AX-157915866 | 2 | 49.969 | KV453193.1 | 1356473 | 20-scf00021 | 20 |
| AX-157915314 | 2 | 50.078 | KV453193.1 | 561509  | 20-scf00021 | 20 |
| AX-157759069 | 2 | 50.078 | KV453193.1 | 1343966 | 20-scf00021 | 20 |
| AX-157915872 | 2 | 50.078 | KV453193.1 | 1362697 | 20-scf00021 | 20 |
| AX-157915875 | 2 | 50.078 | KV453193.1 | 1364528 | 20-scf00021 | 20 |
| AX-157915876 | 2 | 50.078 | KV453193.1 | 1366713 | 20-scf00021 | 20 |
| AX-157915877 | 2 | 50.078 | KV453193.1 | 1367207 | 20-scf00021 | 20 |
| AX-157915878 | 2 | 50.078 | KV453193.1 | 1367569 | 20-scf00021 | 20 |
| AX-157812685 | 2 | 50.078 | KV453193.1 | 1368421 | 20-scf00021 | 20 |
| AX-157915881 | 2 | 50.078 | KV453193.1 | 1370157 | 20-scf00021 | 20 |
| AX-157915882 | 2 | 50.078 | KV453193.1 | 1371366 | 20-scf00021 | 20 |
| AX-157915883 | 2 | 50.078 | KV453193.1 | 1373503 | 20-scf00021 | 20 |
| AX-157915885 | 2 | 50.078 | KV453193.1 | 1376390 | 20-scf00021 | 20 |

|              |   |        |            |         |             |    |
|--------------|---|--------|------------|---------|-------------|----|
| AX-157812686 | 2 | 50.078 | KV453193.1 | 1379865 | 20-scf00021 | 20 |
| AX-157915889 | 2 | 50.078 | KV453193.1 | 1380080 | 20-scf00021 | 20 |
| AX-157915892 | 2 | 50.078 | KV453193.1 | 1382239 | 20-scf00021 | 20 |
| AX-157915893 | 2 | 50.078 | KV453193.1 | 1382884 | 20-scf00021 | 20 |
| AX-157915897 | 2 | 50.078 | KV453193.1 | 1387270 | 20-scf00021 | 20 |
| AX-157915898 | 2 | 50.078 | KV453193.1 | 1388775 | 20-scf00021 | 20 |
| AX-157915901 | 2 | 50.078 | KV453193.1 | 1391297 | 20-scf00021 | 20 |
| AX-157915928 | 2 | 50.078 | KV453193.1 | 1413201 | 20-scf00021 | 20 |
| AX-157915944 | 2 | 50.078 | KV453193.1 | 1434875 | 20-scf00021 | 20 |
| AX-157915999 | 2 | 50.078 | KV453193.1 | 1512362 | 20-scf00021 | 20 |
| AX-157916013 | 2 | 50.078 | KV453193.1 | 1530289 | 20-scf00021 | 20 |
| AX-157915902 | 2 | 50.103 | KV453193.1 | 1392407 | 20-scf00021 | 20 |
| AX-157739905 | 2 | 50.136 | KV453193.1 | 1392537 | 20-scf00021 | 20 |
| AX-157915510 | 2 | 50.188 | KV453193.1 | 813739  | 20-scf00021 | 20 |
| AX-157915675 | 2 | 50.188 | KV453193.1 | 1100293 | 20-scf00021 | 20 |
| AX-157812670 | 2 | 50.188 | KV453193.1 | 1105357 | 20-scf00021 | 20 |
| AX-157915784 | 2 | 50.188 | KV453193.1 | 1243498 | 20-scf00021 | 20 |
| AX-157915843 | 2 | 50.188 | KV453193.1 | 1322012 | 20-scf00021 | 20 |
| AX-157915906 | 2 | 50.188 | KV453193.1 | 1394366 | 20-scf00021 | 20 |
| AX-157915907 | 2 | 50.188 | KV453193.1 | 1394983 | 20-scf00021 | 20 |
| AX-157915910 | 2 | 50.188 | KV453193.1 | 1400062 | 20-scf00021 | 20 |
| AX-157915913 | 2 | 50.188 | KV453193.1 | 1401538 | 20-scf00021 | 20 |
| AX-157915915 | 2 | 50.188 | KV453193.1 | 1402590 | 20-scf00021 | 20 |
| AX-157713003 | 2 | 50.188 | KV453193.1 | 1403454 | 20-scf00021 | 20 |
| AX-157874699 | 2 | 50.188 | KV453193.1 | 1403722 | 20-scf00021 | 20 |
| AX-157915919 | 2 | 50.188 | KV453193.1 | 1405196 | 20-scf00021 | 20 |
| AX-157915920 | 2 | 50.188 | KV453193.1 | 1406160 | 20-scf00021 | 20 |
| AX-157915930 | 2 | 50.188 | KV453193.1 | 1417300 | 20-scf00021 | 20 |
| AX-157715078 | 2 | 50.188 | KV453193.1 | 1419451 | 20-scf00021 | 20 |
| AX-157915938 | 2 | 50.188 | KV453193.1 | 1425548 | 20-scf00021 | 20 |
| AX-157812689 | 2 | 50.188 | KV453193.1 | 1426960 | 20-scf00021 | 20 |
| AX-157812690 | 2 | 50.188 | KV453193.1 | 1430259 | 20-scf00021 | 20 |
| AX-157915943 | 2 | 50.188 | KV453193.1 | 1434270 | 20-scf00021 | 20 |
| AX-157915947 | 2 | 50.188 | KV453193.1 | 1438071 | 20-scf00021 | 20 |
| AX-157812693 | 2 | 50.188 | KV453193.1 | 1443429 | 20-scf00021 | 20 |
| AX-157915952 | 2 | 50.188 | KV453193.1 | 1446185 | 20-scf00021 | 20 |
| AX-157915953 | 2 | 50.188 | KV453193.1 | 1448765 | 20-scf00021 | 20 |
| AX-157915954 | 2 | 50.188 | KV453193.1 | 1449784 | 20-scf00021 | 20 |
| AX-157915956 | 2 | 50.188 | KV453193.1 | 1450655 | 20-scf00021 | 20 |
| AX-157915960 | 2 | 50.188 | KV453193.1 | 1453952 | 20-scf00021 | 20 |
| AX-157915961 | 2 | 50.188 | KV453193.1 | 1454520 | 20-scf00021 | 20 |
| AX-157874702 | 2 | 50.188 | KV453193.1 | 1461320 | 20-scf00021 | 20 |
| AX-157915985 | 2 | 50.515 | KV453193.1 | 1488290 | 20-scf00021 | 20 |
| AX-157915986 | 2 | 50.515 | KV453193.1 | 1489798 | 20-scf00021 | 20 |
| AX-157915996 | 2 | 50.515 | KV453193.1 | 1505857 | 20-scf00021 | 20 |
| AX-157915997 | 2 | 50.515 | KV453193.1 | 1509540 | 20-scf00021 | 20 |
| AX-157916001 | 2 | 50.842 | KV453193.1 | 1516753 | 20-scf00021 | 20 |
| AX-157916004 | 2 | 50.842 | KV453193.1 | 1520279 | 20-scf00021 | 20 |
| AX-157916017 | 2 | 50.842 | KV453193.1 | 1533563 | 20-scf00021 | 20 |
| AX-157916019 | 2 | 50.842 | KV453193.1 | 1534718 | 20-scf00021 | 20 |
| AX-157916049 | 2 | 50.842 | KV453193.1 | 1575263 | 20-scf00021 | 20 |



|              |   |        |            |         |             |    |
|--------------|---|--------|------------|---------|-------------|----|
| AX-157915891 | 2 | 50.843 | KV453193.1 | 1381680 | 20-scf00021 | 20 |
| AX-157916002 | 2 | 50.843 | KV453193.1 | 1519396 | 20-scf00021 | 20 |
| AX-157853727 | 2 | 50.843 | KV453193.1 | 1520503 | 20-scf00021 | 20 |
| AX-157916007 | 2 | 50.843 | KV453193.1 | 1522248 | 20-scf00021 | 20 |
| AX-157916010 | 2 | 50.843 | KV453193.1 | 1526216 | 20-scf00021 | 20 |
| AX-157916033 | 2 | 50.843 | KV453193.1 | 1554759 | 20-scf00021 | 20 |
| AX-157916012 | 2 | 50.875 | KV453193.1 | 1529775 | 20-scf00021 | 20 |
| AX-157916026 | 2 | 50.875 | KV453193.1 | 1542829 | 20-scf00021 | 20 |
| AX-157732739 | 2 | 50.875 | KV453193.1 | 1553784 | 20-scf00021 | 20 |
| AX-157916018 | 2 | 50.893 | KV453193.1 | 1533989 | 20-scf00021 | 20 |
| AX-157916020 | 2 | 50.952 | KV453193.1 | 1537196 | 20-scf00021 | 20 |
| AX-157916022 | 2 | 50.952 | KV453193.1 | 1538731 | 20-scf00021 | 20 |
| AX-157916025 | 2 | 50.952 | KV453193.1 | 1541259 | 20-scf00021 | 20 |
| AX-157916030 | 2 | 50.952 | KV453193.1 | 1548907 | 20-scf00021 | 20 |
| AX-157812696 | 2 | 50.952 | KV453193.1 | 1549142 | 20-scf00021 | 20 |
| AX-157916034 | 2 | 51.061 | KV453193.1 | 1555530 | 20-scf00021 | 20 |
| AX-157916037 | 2 | 51.061 | KV453193.1 | 1559974 | 20-scf00021 | 20 |
| AX-157916038 | 2 | 51.061 | KV453193.1 | 1561531 | 20-scf00021 | 20 |
| AX-157916040 | 2 | 51.067 | KV453193.1 | 1562743 | 20-scf00021 | 20 |
| AX-157916024 | 2 | 51.071 | KV453193.1 | 1540761 | 20-scf00021 | 20 |
| AX-157916041 | 2 | 51.071 | KV453193.1 | 1565447 | 20-scf00021 | 20 |
| AX-157916005 | 2 | 51.076 | KV453193.1 | 1520705 | 20-scf00021 | 20 |
| AX-157916042 | 2 | 51.076 | KV453193.1 | 1567749 | 20-scf00021 | 20 |
| AX-157916043 | 2 | 51.076 | KV453193.1 | 1569437 | 20-scf00021 | 20 |
| AX-157916045 | 2 | 51.076 | KV453193.1 | 1571129 | 20-scf00021 | 20 |
| AX-157916047 | 2 | 51.078 | KV453193.1 | 1573281 | 20-scf00021 | 20 |
| AX-157916048 | 2 | 51.214 | KV453193.1 | 1574151 | 20-scf00021 | 20 |
| AX-157916050 | 2 | 51.314 | KV453193.1 | 1576116 | 20-scf00021 | 20 |
| AX-157916028 | 2 | 51.329 | KV453193.1 | 1544010 | 20-scf00021 | 20 |
| AX-157751695 | 2 | 51.329 | KV453193.1 | 1577588 | 20-scf00021 | 20 |
| AX-157916053 | 2 | 51.703 | KV453193.1 | 1587219 | 20-scf00021 | 20 |
| AX-157812699 | 2 | 51.718 | KV453193.1 | 1588513 | 20-scf00021 | 20 |
| AX-157916055 | 2 | 51.718 | KV453193.1 | 1589370 | 20-scf00021 | 20 |
| AX-157916058 | 2 | 51.718 | KV453193.1 | 1595852 | 20-scf00021 | 20 |
| AX-157715653 | 2 | 51.718 | KV453193.1 | 1598148 | 20-scf00021 | 20 |
| AX-157916061 | 2 | 51.718 | KV453193.1 | 1600856 | 20-scf00021 | 20 |
| AX-157916063 | 2 | 51.718 | KV453193.1 | 1602076 | 20-scf00021 | 20 |
| AX-157916064 | 2 | 51.718 | KV453193.1 | 1604551 | 20-scf00021 | 20 |
| AX-158379262 | 2 | 51.718 | KV453193.1 | 1605768 | 20-scf00021 | 20 |
| AX-157812701 | 2 | 51.718 | KV453193.1 | 1605864 | 20-scf00021 | 20 |
| AX-157916065 | 2 | 51.718 | KV453193.1 | 1609259 | 20-scf00021 | 20 |
| AX-157812702 | 2 | 51.718 | KV453193.1 | 1611610 | 20-scf00021 | 20 |
| AX-157916066 | 2 | 51.854 | KV453193.1 | 1612641 | 20-scf00021 | 20 |
| AX-157709338 | 2 | 51.854 | KV453193.1 | 1614099 | 20-scf00021 | 20 |
| AX-157916068 | 2 | 51.856 | KV453193.1 | 1617154 | 20-scf00021 | 20 |
| AX-157916071 | 2 | 52.264 | KV453193.1 | 1625196 | 20-scf00021 | 20 |
| AX-157916076 | 2 | 52.264 | KV453193.1 | 1636125 | 20-scf00021 | 20 |
| AX-157916081 | 2 | 52.264 | KV453193.1 | 1644703 | 20-scf00021 | 20 |
| AX-157916084 | 2 | 52.264 | KV453193.1 | 1650606 | 20-scf00021 | 20 |
| AX-157916085 | 2 | 52.264 | KV453193.1 | 1651091 | 20-scf00021 | 20 |
| AX-157719287 | 2 | 52.264 | KV453193.1 | 1652063 | 20-scf00021 | 20 |

|              |   |        |             |         |             |    |
|--------------|---|--------|-------------|---------|-------------|----|
| AX-157916086 | 2 | 52.264 | KV453193.1  | 1654389 | 20-scf00021 | 20 |
| AX-157745268 | 2 | 52.264 | KV453193.1  | 1657922 | 20-scf00021 | 20 |
| AX-157916095 | 2 | 52.264 | KV453193.1  | 1662156 | 20-scf00021 | 20 |
| AX-157916097 | 2 | 52.264 | KV453193.1  | 1663722 | 20-scf00021 | 20 |
| AX-157916099 | 2 | 52.264 | KV453193.1  | 1670404 | 20-scf00021 | 20 |
| AX-157916100 | 2 | 52.264 | KV453193.1  | 1671022 | 20-scf00021 | 20 |
| AX-157916103 | 2 | 52.264 | KV453193.1  | 1678160 | 20-scf00021 | 20 |
| AX-157916108 | 2 | 52.264 | KV453193.1  | 1688433 | 20-scf00021 | 20 |
| AX-157916109 | 2 | 52.264 | KV453193.1  | 1689941 | 20-scf00021 | 20 |
| AX-157916111 | 2 | 52.264 | KV453193.1  | 1692954 | 20-scf00021 | 20 |
| AX-157812710 | 2 | 52.264 | KV453193.1  | 1698280 | 20-scf00021 | 20 |
| AX-157750268 | 2 | 52.264 | KV453193.1  | 1700759 | 20-scf00021 | 20 |
| AX-157916121 | 2 | 52.264 | KV453193.1  | 1710772 | 20-scf00021 | 20 |
| AX-157916150 | 2 | 52.264 | KV453193.1  | 1750661 | 20-scf00021 | 20 |
| AX-157707079 | 2 | 52.264 | 3ML01033465 | 263     | scf09116_1  | UN |
| AX-157916117 | 2 | 52.482 | KV453193.1  | 1705271 | 20-scf00021 | 20 |
| AX-157916115 | 2 | 52.514 | KV453193.1  | 1703524 | 20-scf00021 | 20 |
| AX-157916122 | 2 | 52.514 | KV453193.1  | 1712105 | 20-scf00021 | 20 |
| AX-157916130 | 2 | 52.514 | KV453193.1  | 1724409 | 20-scf00021 | 20 |
| AX-157916201 | 2 | 52.514 | KV453193.1  | 1812883 | 20-scf00021 | 20 |
| AX-157916123 | 2 | 52.663 | KV453193.1  | 1712407 | 20-scf00021 | 20 |
| AX-157916126 | 2 | 52.81  | KV453193.1  | 1719032 | 20-scf00021 | 20 |
| AX-157772466 | 2 | 52.81  | KV453193.1  | 1719465 | 20-scf00021 | 20 |
| AX-157916127 | 2 | 52.81  | KV453193.1  | 1720393 | 20-scf00021 | 20 |
| AX-157916132 | 2 | 52.81  | KV453193.1  | 1725745 | 20-scf00021 | 20 |
| AX-157725969 | 2 | 52.81  | KV453193.1  | 1730944 | 20-scf00021 | 20 |
| AX-157812713 | 2 | 52.81  | KV453193.1  | 1731960 | 20-scf00021 | 20 |
| AX-157916136 | 2 | 52.81  | KV453193.1  | 1733742 | 20-scf00021 | 20 |
| AX-157812716 | 2 | 52.81  | KV453193.1  | 1734458 | 20-scf00021 | 20 |
| AX-157916138 | 2 | 52.81  | KV453193.1  | 1736249 | 20-scf00021 | 20 |
| AX-157916140 | 2 | 52.81  | KV453193.1  | 1737752 | 20-scf00021 | 20 |
| AX-157755524 | 2 | 52.81  | KV453193.1  | 1739650 | 20-scf00021 | 20 |
| AX-157916154 | 2 | 52.81  | KV453193.1  | 1753246 | 20-scf00021 | 20 |
| AX-157916155 | 2 | 52.81  | KV453193.1  | 1754112 | 20-scf00021 | 20 |
| AX-157748971 | 2 | 52.81  | KV453193.1  | 1794269 | 20-scf00021 | 20 |
| AX-157916268 | 2 | 52.81  | KV453193.1  | 1877707 | 20-scf00021 | 20 |
| AX-157916128 | 2 | 52.92  | KV453193.1  | 1720959 | 20-scf00021 | 20 |
| AX-157916145 | 2 | 52.92  | KV453193.1  | 1745762 | 20-scf00021 | 20 |
| AX-157916146 | 2 | 52.92  | KV453193.1  | 1746858 | 20-scf00021 | 20 |
| AX-157916148 | 2 | 52.938 | KV453193.1  | 1749537 | 20-scf00021 | 20 |
| AX-157812719 | 2 | 52.938 | KV453193.1  | 1751504 | 20-scf00021 | 20 |
| AX-157916149 | 2 | 52.986 | KV453193.1  | 1749689 | 20-scf00021 | 20 |
| AX-157916158 | 2 | 53.029 | KV453193.1  | 1756525 | 20-scf00021 | 20 |
| AX-157812720 | 2 | 53.051 | KV453193.1  | 1762002 | 20-scf00021 | 20 |
| AX-157812725 | 2 | 53.071 | KV453193.1  | 1772328 | 20-scf00021 | 20 |
| AX-157812718 | 2 | 53.094 | KV453193.1  | 1748077 | 20-scf00021 | 20 |
| AX-157916168 | 2 | 53.094 | KV453193.1  | 1774625 | 20-scf00021 | 20 |
| AX-157916254 | 2 | 53.094 | KV453193.1  | 1855948 | 20-scf00021 | 20 |
| AX-157916170 | 2 | 53.118 | KV453193.1  | 1775621 | 20-scf00021 | 20 |
| AX-157916183 | 2 | 53.118 | KV453193.1  | 1793378 | 20-scf00021 | 20 |
| AX-157916192 | 2 | 53.118 | KV453193.1  | 1802765 | 20-scf00021 | 20 |

|              |   |        |            |         |             |    |
|--------------|---|--------|------------|---------|-------------|----|
| AX-157916330 | 2 | 53.118 | KV453193.1 | 1969214 | 20-scf00021 | 20 |
| AX-157916178 | 2 | 53.125 | KV453193.1 | 1785766 | 20-scf00021 | 20 |
| AX-157812717 | 2 | 53.138 | KV453193.1 | 1746456 | 20-scf00021 | 20 |
| AX-157812721 | 2 | 53.138 | KV453193.1 | 1762806 | 20-scf00021 | 20 |
| AX-157812722 | 2 | 53.138 | KV453193.1 | 1762880 | 20-scf00021 | 20 |
| AX-157916164 | 2 | 53.138 | KV453193.1 | 1769709 | 20-scf00021 | 20 |
| AX-157916167 | 2 | 53.138 | KV453193.1 | 1773470 | 20-scf00021 | 20 |
| AX-157812726 | 2 | 53.138 | KV453193.1 | 1775445 | 20-scf00021 | 20 |
| AX-157916171 | 2 | 53.138 | KV453193.1 | 1776480 | 20-scf00021 | 20 |
| AX-157812729 | 2 | 53.138 | KV453193.1 | 1790819 | 20-scf00021 | 20 |
| AX-157916184 | 2 | 53.138 | KV453193.1 | 1796013 | 20-scf00021 | 20 |
| AX-157916189 | 2 | 53.138 | KV453193.1 | 1799564 | 20-scf00021 | 20 |
| AX-157916191 | 2 | 53.138 | KV453193.1 | 1800903 | 20-scf00021 | 20 |
| AX-157916193 | 2 | 53.138 | KV453193.1 | 1803168 | 20-scf00021 | 20 |
| AX-157916194 | 2 | 53.138 | KV453193.1 | 1803860 | 20-scf00021 | 20 |
| AX-157916195 | 2 | 53.138 | KV453193.1 | 1803967 | 20-scf00021 | 20 |
| AX-157916206 | 2 | 53.138 | KV453193.1 | 1816615 | 20-scf00021 | 20 |
| AX-157916207 | 2 | 53.138 | KV453193.1 | 1816826 | 20-scf00021 | 20 |
| AX-157916210 | 2 | 53.138 | KV453193.1 | 1818439 | 20-scf00021 | 20 |
| AX-157916212 | 2 | 53.138 | KV453193.1 | 1819887 | 20-scf00021 | 20 |
| AX-157753331 | 2 | 53.138 | KV453193.1 | 1820329 | 20-scf00021 | 20 |
| AX-157916216 | 2 | 53.138 | KV453193.1 | 1823246 | 20-scf00021 | 20 |
| AX-157916217 | 2 | 53.138 | KV453193.1 | 1823647 | 20-scf00021 | 20 |
| AX-157916218 | 2 | 53.138 | KV453193.1 | 1824247 | 20-scf00021 | 20 |
| AX-157916220 | 2 | 53.138 | KV453193.1 | 1825776 | 20-scf00021 | 20 |
| AX-157916222 | 2 | 53.138 | KV453193.1 | 1826386 | 20-scf00021 | 20 |
| AX-157916223 | 2 | 53.138 | KV453193.1 | 1827558 | 20-scf00021 | 20 |
| AX-157916224 | 2 | 53.138 | KV453193.1 | 1827806 | 20-scf00021 | 20 |
| AX-157758917 | 2 | 53.138 | KV453193.1 | 1827880 | 20-scf00021 | 20 |
| AX-157916225 | 2 | 53.138 | KV453193.1 | 1828075 | 20-scf00021 | 20 |
| AX-157916227 | 2 | 53.138 | KV453193.1 | 1828984 | 20-scf00021 | 20 |
| AX-157916228 | 2 | 53.138 | KV453193.1 | 1829401 | 20-scf00021 | 20 |
| AX-157721905 | 2 | 53.138 | KV453193.1 | 1830243 | 20-scf00021 | 20 |
| AX-157916229 | 2 | 53.138 | KV453193.1 | 1831338 | 20-scf00021 | 20 |
| AX-157869102 | 2 | 53.138 | KV453193.1 | 1832225 | 20-scf00021 | 20 |
| AX-157719098 | 2 | 53.138 | KV453193.1 | 1832736 | 20-scf00021 | 20 |
| AX-157916231 | 2 | 53.138 | KV453193.1 | 1833402 | 20-scf00021 | 20 |
| AX-157756370 | 2 | 53.138 | KV453193.1 | 1833764 | 20-scf00021 | 20 |
| AX-157916232 | 2 | 53.138 | KV453193.1 | 1834221 | 20-scf00021 | 20 |
| AX-157740784 | 2 | 53.138 | KV453193.1 | 1834260 | 20-scf00021 | 20 |
| AX-157916235 | 2 | 53.138 | KV453193.1 | 1836776 | 20-scf00021 | 20 |
| AX-157916237 | 2 | 53.138 | KV453193.1 | 1838547 | 20-scf00021 | 20 |
| AX-157916238 | 2 | 53.138 | KV453193.1 | 1838742 | 20-scf00021 | 20 |
| AX-157916239 | 2 | 53.138 | KV453193.1 | 1839173 | 20-scf00021 | 20 |
| AX-157916241 | 2 | 53.138 | KV453193.1 | 1841440 | 20-scf00021 | 20 |
| AX-157916242 | 2 | 53.138 | KV453193.1 | 1842008 | 20-scf00021 | 20 |
| AX-157709210 | 2 | 53.138 | KV453193.1 | 1842866 | 20-scf00021 | 20 |
| AX-157916244 | 2 | 53.138 | KV453193.1 | 1844189 | 20-scf00021 | 20 |
| AX-157812731 | 2 | 53.138 | KV453193.1 | 1847037 | 20-scf00021 | 20 |
| AX-157916260 | 2 | 53.138 | KV453193.1 | 1866608 | 20-scf00021 | 20 |
| AX-157726486 | 2 | 53.138 | KV453193.1 | 1935245 | 20-scf00021 | 20 |

|              |   |        |            |         |             |    |
|--------------|---|--------|------------|---------|-------------|----|
| AX-157916627 | 2 | 53.138 | KV453193.1 | 2358752 | 20-scf00021 | 20 |
| AX-157916782 | 2 | 53.138 | KV453193.1 | 2657911 | 20-scf00021 | 20 |
| AX-157916836 | 2 | 53.138 | KV453193.1 | 2789031 | 20-scf00021 | 20 |
| AX-157916258 | 2 | 53.247 | KV453193.1 | 1864558 | 20-scf00021 | 20 |
| AX-157916263 | 2 | 53.247 | KV453193.1 | 1869752 | 20-scf00021 | 20 |
| AX-157916264 | 2 | 53.247 | KV453193.1 | 1870477 | 20-scf00021 | 20 |
| AX-157916273 | 2 | 53.266 | KV453193.1 | 1884070 | 20-scf00021 | 20 |
| AX-157916281 | 2 | 53.289 | KV453193.1 | 1901104 | 20-scf00021 | 20 |
| AX-157916286 | 2 | 53.311 | KV453193.1 | 1907430 | 20-scf00021 | 20 |
| AX-157916252 | 2 | 53.34  | KV453193.1 | 1853144 | 20-scf00021 | 20 |
| AX-157812735 | 2 | 53.34  | KV453193.1 | 1913139 | 20-scf00021 | 20 |
| AX-157757230 | 2 | 53.407 | KV453193.1 | 1915889 | 20-scf00021 | 20 |
| AX-157916205 | 2 | 53.466 | KV453193.1 | 1816353 | 20-scf00021 | 20 |
| AX-157916261 | 2 | 53.466 | KV453193.1 | 1867237 | 20-scf00021 | 20 |
| AX-157812733 | 2 | 53.466 | KV453193.1 | 1875435 | 20-scf00021 | 20 |
| AX-157869104 | 2 | 53.466 | KV453193.1 | 1876987 | 20-scf00021 | 20 |
| AX-157727502 | 2 | 53.466 | KV453193.1 | 1888329 | 20-scf00021 | 20 |
| AX-157916284 | 2 | 53.466 | KV453193.1 | 1903005 | 20-scf00021 | 20 |
| AX-157916289 | 2 | 53.466 | KV453193.1 | 1911244 | 20-scf00021 | 20 |
| AX-157916294 | 2 | 53.466 | KV453193.1 | 1926793 | 20-scf00021 | 20 |
| AX-157916296 | 2 | 53.466 | KV453193.1 | 1931053 | 20-scf00021 | 20 |
| AX-157916298 | 2 | 53.466 | KV453193.1 | 1935357 | 20-scf00021 | 20 |
| AX-157916299 | 2 | 53.466 | KV453193.1 | 1935869 | 20-scf00021 | 20 |
| AX-157916302 | 2 | 53.466 | KV453193.1 | 1938519 | 20-scf00021 | 20 |
| AX-157916303 | 2 | 53.466 | KV453193.1 | 1939361 | 20-scf00021 | 20 |
| AX-157916304 | 2 | 53.466 | KV453193.1 | 1939716 | 20-scf00021 | 20 |
| AX-157916306 | 2 | 53.466 | KV453193.1 | 1941990 | 20-scf00021 | 20 |
| AX-157916308 | 2 | 53.466 | KV453193.1 | 1945600 | 20-scf00021 | 20 |
| AX-157916310 | 2 | 53.466 | KV453193.1 | 1947771 | 20-scf00021 | 20 |
| AX-157916311 | 2 | 53.466 | KV453193.1 | 1949384 | 20-scf00021 | 20 |
| AX-157916315 | 2 | 53.466 | KV453193.1 | 1952816 | 20-scf00021 | 20 |
| AX-157916322 | 2 | 53.466 | KV453193.1 | 1962579 | 20-scf00021 | 20 |
| AX-157916332 | 2 | 53.466 | KV453193.1 | 1970291 | 20-scf00021 | 20 |
| AX-157916451 | 2 | 53.466 | KV453193.1 | 2119527 | 20-scf00021 | 20 |
| AX-157916452 | 2 | 53.466 | KV453193.1 | 2120441 | 20-scf00021 | 20 |
| AX-157916453 | 2 | 53.466 | KV453193.1 | 2122482 | 20-scf00021 | 20 |
| AX-157916648 | 2 | 53.466 | KV453193.1 | 2427356 | 20-scf00021 | 20 |
| AX-157916675 | 2 | 53.466 | KV453193.1 | 2487484 | 20-scf00021 | 20 |
| AX-157812791 | 2 | 53.466 | KV453193.1 | 2835950 | 20-scf00021 | 20 |
| AX-157916323 | 2 | 53.599 | KV453193.1 | 1963739 | 20-scf00021 | 20 |
| AX-157874707 | 2 | 53.684 | KV453193.1 | 1971331 | 20-scf00021 | 20 |
| AX-157916334 | 2 | 53.684 | KV453193.1 | 1972157 | 20-scf00021 | 20 |
| AX-157916335 | 2 | 53.684 | KV453193.1 | 1975286 | 20-scf00021 | 20 |
| AX-157916343 | 2 | 53.721 | KV453193.1 | 1988711 | 20-scf00021 | 20 |
| AX-157916348 | 2 | 53.757 | KV453193.1 | 1995359 | 20-scf00021 | 20 |
| AX-157916351 | 2 | 53.757 | KV453193.1 | 1998982 | 20-scf00021 | 20 |
| AX-157812754 | 2 | 53.757 | KV453193.1 | 2208106 | 20-scf00021 | 20 |
| AX-157916253 | 2 | 53.794 | KV453193.1 | 1855507 | 20-scf00021 | 20 |
| AX-157916318 | 2 | 53.794 | KV453193.1 | 1956494 | 20-scf00021 | 20 |
| AX-157916320 | 2 | 53.794 | KV453193.1 | 1960314 | 20-scf00021 | 20 |
| AX-157916326 | 2 | 53.794 | KV453193.1 | 1965803 | 20-scf00021 | 20 |

|              |   |        |            |         |             |    |
|--------------|---|--------|------------|---------|-------------|----|
| AX-157916336 | 2 | 53.794 | KV453193.1 | 1978155 | 20-scf00021 | 20 |
| AX-157916360 | 2 | 53.794 | KV453193.1 | 2007217 | 20-scf00021 | 20 |
| AX-157916361 | 2 | 53.794 | KV453193.1 | 2007572 | 20-scf00021 | 20 |
| AX-157916364 | 2 | 53.794 | KV453193.1 | 2012630 | 20-scf00021 | 20 |
| AX-157916367 | 2 | 53.794 | KV453193.1 | 2015960 | 20-scf00021 | 20 |
| AX-157916368 | 2 | 53.794 | KV453193.1 | 2016775 | 20-scf00021 | 20 |
| AX-157916370 | 2 | 53.794 | KV453193.1 | 2018529 | 20-scf00021 | 20 |
| AX-157916375 | 2 | 53.794 | KV453193.1 | 2022539 | 20-scf00021 | 20 |
| AX-157916382 | 2 | 53.794 | KV453193.1 | 2032862 | 20-scf00021 | 20 |
| AX-157916384 | 2 | 53.794 | KV453193.1 | 2034610 | 20-scf00021 | 20 |
| AX-157916391 | 2 | 53.794 | KV453193.1 | 2047256 | 20-scf00021 | 20 |
| AX-157916392 | 2 | 53.794 | KV453193.1 | 2047670 | 20-scf00021 | 20 |
| AX-157916394 | 2 | 53.794 | KV453193.1 | 2052551 | 20-scf00021 | 20 |
| AX-157916402 | 2 | 53.794 | KV453193.1 | 2061980 | 20-scf00021 | 20 |
| AX-157916407 | 2 | 53.794 | KV453193.1 | 2069254 | 20-scf00021 | 20 |
| AX-157916408 | 2 | 53.794 | KV453193.1 | 2069915 | 20-scf00021 | 20 |
| AX-157916449 | 2 | 53.794 | KV453193.1 | 2117677 | 20-scf00021 | 20 |
| AX-157916418 | 2 | 53.847 | KV453193.1 | 2079284 | 20-scf00021 | 20 |
| AX-157720223 | 2 | 53.903 | KV453193.1 | 1607294 | 20-scf00021 | 20 |
| AX-157916067 | 2 | 53.903 | KV453193.1 | 1616409 | 20-scf00021 | 20 |
| AX-157916125 | 2 | 53.903 | KV453193.1 | 1717848 | 20-scf00021 | 20 |
| AX-157812712 | 2 | 53.903 | KV453193.1 | 1724093 | 20-scf00021 | 20 |
| AX-157916291 | 2 | 53.903 | KV453193.1 | 1920488 | 20-scf00021 | 20 |
| AX-157916331 | 2 | 53.903 | KV453193.1 | 1969688 | 20-scf00021 | 20 |
| AX-157916373 | 2 | 53.903 | KV453193.1 | 2020666 | 20-scf00021 | 20 |
| AX-157916374 | 2 | 53.903 | KV453193.1 | 2021425 | 20-scf00021 | 20 |
| AX-157916376 | 2 | 53.903 | KV453193.1 | 2023284 | 20-scf00021 | 20 |
| AX-157916377 | 2 | 53.903 | KV453193.1 | 2023665 | 20-scf00021 | 20 |
| AX-157916389 | 2 | 53.903 | KV453193.1 | 2043532 | 20-scf00021 | 20 |
| AX-157741059 | 2 | 53.903 | KV453193.1 | 2054623 | 20-scf00021 | 20 |
| AX-157916397 | 2 | 53.903 | KV453193.1 | 2055658 | 20-scf00021 | 20 |
| AX-157916412 | 2 | 53.903 | KV453193.1 | 2074767 | 20-scf00021 | 20 |
| AX-157916414 | 2 | 53.903 | KV453193.1 | 2076573 | 20-scf00021 | 20 |
| AX-157916421 | 2 | 53.903 | KV453193.1 | 2081642 | 20-scf00021 | 20 |
| AX-157916423 | 2 | 53.903 | KV453193.1 | 2083394 | 20-scf00021 | 20 |
| AX-157916426 | 2 | 53.903 | KV453193.1 | 2084726 | 20-scf00021 | 20 |
| AX-157916430 | 2 | 53.903 | KV453193.1 | 2088858 | 20-scf00021 | 20 |
| AX-157916431 | 2 | 53.903 | KV453193.1 | 2090182 | 20-scf00021 | 20 |
| AX-157916433 | 2 | 53.903 | KV453193.1 | 2092560 | 20-scf00021 | 20 |
| AX-157916435 | 2 | 53.903 | KV453193.1 | 2093940 | 20-scf00021 | 20 |
| AX-157916436 | 2 | 53.903 | KV453193.1 | 2096765 | 20-scf00021 | 20 |
| AX-157916437 | 2 | 53.903 | KV453193.1 | 2097578 | 20-scf00021 | 20 |
| AX-157916438 | 2 | 53.903 | KV453193.1 | 2098122 | 20-scf00021 | 20 |
| AX-157812739 | 2 | 53.903 | KV453193.1 | 2103587 | 20-scf00021 | 20 |
| AX-157916440 | 2 | 53.903 | KV453193.1 | 2105660 | 20-scf00021 | 20 |
| AX-157916446 | 2 | 53.903 | KV453193.1 | 2113313 | 20-scf00021 | 20 |
| AX-157916447 | 2 | 53.903 | KV453193.1 | 2115161 | 20-scf00021 | 20 |
| AX-157916450 | 2 | 53.903 | KV453193.1 | 2118187 | 20-scf00021 | 20 |
| AX-157916457 | 2 | 53.903 | KV453193.1 | 2128448 | 20-scf00021 | 20 |
| AX-157916460 | 2 | 53.903 | KV453193.1 | 2132835 | 20-scf00021 | 20 |
| AX-157916461 | 2 | 53.903 | KV453193.1 | 2133504 | 20-scf00021 | 20 |

|              |   |        |             |         |             |    |
|--------------|---|--------|-------------|---------|-------------|----|
| AX-157916462 | 2 | 53.903 | KV453193.1  | 2134012 | 20-scf00021 | 20 |
| AX-158405064 | 2 | 53.903 | KV453193.1  | 2136412 | 20-scf00021 | 20 |
| AX-157916464 | 2 | 53.903 | KV453193.1  | 2137673 | 20-scf00021 | 20 |
| AX-158389608 | 2 | 53.903 | KV453193.1  | 2140185 | 20-scf00021 | 20 |
| AX-157916466 | 2 | 53.903 | KV453193.1  | 2140909 | 20-scf00021 | 20 |
| AX-157812745 | 2 | 53.903 | KV453193.1  | 2161171 | 20-scf00021 | 20 |
| AX-157916480 | 2 | 53.903 | KV453193.1  | 2165862 | 20-scf00021 | 20 |
| AX-157916482 | 2 | 53.903 | KV453193.1  | 2168697 | 20-scf00021 | 20 |
| AX-157916495 | 2 | 53.903 | KV453193.1  | 2182660 | 20-scf00021 | 20 |
| AX-157916498 | 2 | 53.903 | KV453193.1  | 2185097 | 20-scf00021 | 20 |
| AX-157916504 | 2 | 53.903 | KV453193.1  | 2191857 | 20-scf00021 | 20 |
| AX-157916508 | 2 | 53.903 | KV453193.1  | 2196159 | 20-scf00021 | 20 |
| AX-157916517 | 2 | 53.903 | KV453193.1  | 2205054 | 20-scf00021 | 20 |
| AX-158382271 | 2 | 53.903 | KV453193.1  | 2903266 | 20-scf00021 | 20 |
| AX-157706587 | 2 | 53.903 | 3ML01032525 | 348     | scf08147_1  | UN |
| AX-157916259 | 2 | 54.012 | KV453193.1  | 1865715 | 20-scf00021 | 20 |
| AX-157753731 | 2 | 54.012 | KV453193.1  | 2098776 | 20-scf00021 | 20 |
| AX-157916476 | 2 | 54.012 | KV453193.1  | 2156642 | 20-scf00021 | 20 |
| AX-157718164 | 2 | 54.012 | KV453193.1  | 2156794 | 20-scf00021 | 20 |
| AX-157812743 | 2 | 54.012 | KV453193.1  | 2159188 | 20-scf00021 | 20 |
| AX-157916478 | 2 | 54.012 | KV453193.1  | 2163268 | 20-scf00021 | 20 |
| AX-157916479 | 2 | 54.012 | KV453193.1  | 2164553 | 20-scf00021 | 20 |
| AX-157742347 | 2 | 54.027 | KV453193.1  | 2166714 | 20-scf00021 | 20 |
| AX-157916333 | 2 | 54.072 | KV453193.1  | 1970415 | 20-scf00021 | 20 |
| AX-157916338 | 2 | 54.072 | KV453193.1  | 1981015 | 20-scf00021 | 20 |
| AX-157916442 | 2 | 54.072 | KV453193.1  | 2108173 | 20-scf00021 | 20 |
| AX-157916484 | 2 | 54.072 | KV453193.1  | 2170069 | 20-scf00021 | 20 |
| AX-157916505 | 2 | 54.072 | KV453193.1  | 2192895 | 20-scf00021 | 20 |
| AX-157916269 | 2 | 54.121 | KV453193.1  | 1878405 | 20-scf00021 | 20 |
| AX-157916316 | 2 | 54.121 | KV453193.1  | 1954828 | 20-scf00021 | 20 |
| AX-157916387 | 2 | 54.121 | KV453193.1  | 2040576 | 20-scf00021 | 20 |
| AX-157916455 | 2 | 54.121 | KV453193.1  | 2126906 | 20-scf00021 | 20 |
| AX-157916488 | 2 | 54.121 | KV453193.1  | 2176190 | 20-scf00021 | 20 |
| AX-157916490 | 2 | 54.121 | KV453193.1  | 2177071 | 20-scf00021 | 20 |
| AX-157916493 | 2 | 54.121 | KV453193.1  | 2179549 | 20-scf00021 | 20 |
| AX-157916494 | 2 | 54.121 | KV453193.1  | 2181973 | 20-scf00021 | 20 |
| AX-157916496 | 2 | 54.121 | KV453193.1  | 2182805 | 20-scf00021 | 20 |
| AX-157916497 | 2 | 54.121 | KV453193.1  | 2184738 | 20-scf00021 | 20 |
| AX-157916502 | 2 | 54.121 | KV453193.1  | 2191314 | 20-scf00021 | 20 |
| AX-157916503 | 2 | 54.121 | KV453193.1  | 2191753 | 20-scf00021 | 20 |
| AX-157916507 | 2 | 54.121 | KV453193.1  | 2195438 | 20-scf00021 | 20 |
| AX-157916509 | 2 | 54.121 | KV453193.1  | 2196996 | 20-scf00021 | 20 |
| AX-157748078 | 2 | 54.121 | KV453193.1  | 2199087 | 20-scf00021 | 20 |
| AX-157916512 | 2 | 54.121 | KV453193.1  | 2201293 | 20-scf00021 | 20 |
| AX-157916513 | 2 | 54.121 | KV453193.1  | 2202808 | 20-scf00021 | 20 |
| AX-157916514 | 2 | 54.121 | KV453193.1  | 2203253 | 20-scf00021 | 20 |
| AX-157916516 | 2 | 54.121 | KV453193.1  | 2204287 | 20-scf00021 | 20 |
| AX-157812753 | 2 | 54.121 | KV453193.1  | 2204842 | 20-scf00021 | 20 |
| AX-157916523 | 2 | 54.233 | KV453193.1  | 2213392 | 20-scf00021 | 20 |
| AX-157916528 | 2 | 54.233 | KV453193.1  | 2218484 | 20-scf00021 | 20 |
| AX-157812756 | 2 | 54.328 | KV453193.1  | 2215405 | 20-scf00021 | 20 |

|              |   |        |             |         |             |    |
|--------------|---|--------|-------------|---------|-------------|----|
| AX-157916535 | 2 | 54.328 | KV453193.1  | 2228451 | 20-scf00021 | 20 |
| AX-157710914 | 2 | 54.351 | KV453193.1  | 2093365 | 20-scf00021 | 20 |
| AX-157812760 | 2 | 54.351 | KV453193.1  | 2232824 | 20-scf00021 | 20 |
| AX-157916159 | 2 | 54.558 | KV453193.1  | 1759773 | 20-scf00021 | 20 |
| AX-157916410 | 2 | 54.558 | KV453193.1  | 2073115 | 20-scf00021 | 20 |
| AX-158389610 | 2 | 54.558 | KV453193.1  | 2179384 | 20-scf00021 | 20 |
| AX-157916530 | 2 | 54.558 | KV453193.1  | 2219810 | 20-scf00021 | 20 |
| AX-157916546 | 2 | 54.558 | KV453193.1  | 2246586 | 20-scf00021 | 20 |
| AX-157916547 | 2 | 54.558 | KV453193.1  | 2249668 | 20-scf00021 | 20 |
| AX-157916552 | 2 | 54.558 | KV453193.1  | 2253893 | 20-scf00021 | 20 |
| AX-157916555 | 2 | 54.558 | KV453193.1  | 2256377 | 20-scf00021 | 20 |
| AX-157916556 | 2 | 54.558 | KV453193.1  | 2257418 | 20-scf00021 | 20 |
| AX-157916557 | 2 | 54.558 | KV453193.1  | 2258834 | 20-scf00021 | 20 |
| AX-157916558 | 2 | 54.558 | KV453193.1  | 2259735 | 20-scf00021 | 20 |
| AX-157916559 | 2 | 54.558 | KV453193.1  | 2260016 | 20-scf00021 | 20 |
| AX-158389611 | 2 | 54.558 | KV453193.1  | 2260942 | 20-scf00021 | 20 |
| AX-157916560 | 2 | 54.558 | KV453193.1  | 2261257 | 20-scf00021 | 20 |
| AX-157916561 | 2 | 54.558 | KV453193.1  | 2262431 | 20-scf00021 | 20 |
| AX-157916562 | 2 | 54.558 | KV453193.1  | 2262796 | 20-scf00021 | 20 |
| AX-157916571 | 2 | 54.558 | KV453193.1  | 2269296 | 20-scf00021 | 20 |
| AX-157916575 | 2 | 54.558 | KV453193.1  | 2275393 | 20-scf00021 | 20 |
| AX-157916578 | 2 | 54.558 | KV453193.1  | 2278456 | 20-scf00021 | 20 |
| AX-157916591 | 2 | 54.558 | KV453193.1  | 2304021 | 20-scf00021 | 20 |
| AX-157773514 | 2 | 54.558 | KV453193.1  | 2482249 | 20-scf00021 | 20 |
| AX-157916681 | 2 | 54.558 | KV453193.1  | 2499087 | 20-scf00021 | 20 |
| AX-157916707 | 2 | 54.558 | KV453193.1  | 2537565 | 20-scf00021 | 20 |
| AX-157916724 | 2 | 54.558 | KV453193.1  | 2555722 | 20-scf00021 | 20 |
| AX-157916828 | 2 | 54.558 | KV453193.1  | 2778714 | 20-scf00021 | 20 |
| AX-157916894 | 2 | 54.558 | KV453193.1  | 2869842 | 20-scf00021 | 20 |
| AX-157916582 | 2 | 54.559 | KV453193.1  | 2281409 | 20-scf00021 | 20 |
| AX-157916282 | 2 | 54.56  | KV453193.1  | 1901584 | 20-scf00021 | 20 |
| AX-157916327 | 2 | 54.56  | KV453193.1  | 1966251 | 20-scf00021 | 20 |
| AX-157916434 | 2 | 54.56  | KV453193.1  | 2093815 | 20-scf00021 | 20 |
| AX-157916456 | 2 | 54.56  | KV453193.1  | 2127369 | 20-scf00021 | 20 |
| AX-157916587 | 2 | 54.56  | KV453193.1  | 2291754 | 20-scf00021 | 20 |
| AX-157916606 | 2 | 54.56  | KV453193.1  | 2329479 | 20-scf00021 | 20 |
| AX-157916607 | 2 | 54.56  | KV453193.1  | 2330119 | 20-scf00021 | 20 |
| AX-157916610 | 2 | 54.56  | KV453193.1  | 2333437 | 20-scf00021 | 20 |
| AX-157916615 | 2 | 54.56  | KV453193.1  | 2341142 | 20-scf00021 | 20 |
| AX-157916616 | 2 | 54.56  | KV453193.1  | 2341840 | 20-scf00021 | 20 |
| AX-157916617 | 2 | 54.56  | KV453193.1  | 2342391 | 20-scf00021 | 20 |
| AX-157705649 | 2 | 54.56  | 3ML01030519 | 363     | scf06119_1  | UN |
| AX-157916678 | 2 | 54.562 | KV453193.1  | 2494753 | 20-scf00021 | 20 |
| AX-158405079 | 2 | 54.563 | KV453193.1  | 2496073 | 20-scf00021 | 20 |
| AX-157916689 | 2 | 54.565 | KV453193.1  | 2511803 | 20-scf00021 | 20 |
| AX-157748651 | 2 | 54.628 | KV453193.1  | 2229547 | 20-scf00021 | 20 |
| AX-157916538 | 2 | 54.628 | KV453193.1  | 2231934 | 20-scf00021 | 20 |
| AX-157916573 | 2 | 54.628 | KV453193.1  | 2272478 | 20-scf00021 | 20 |
| AX-157812769 | 2 | 54.628 | KV453193.1  | 2337747 | 20-scf00021 | 20 |
| AX-157717553 | 2 | 54.628 | KV453193.1  | 2347320 | 20-scf00021 | 20 |
| AX-157916621 | 2 | 54.628 | KV453193.1  | 2347474 | 20-scf00021 | 20 |

|              |   |        |            |         |             |    |
|--------------|---|--------|------------|---------|-------------|----|
| AX-157916635 | 2 | 54.628 | KV453193.1 | 2405622 | 20-scf00021 | 20 |
| AX-158405071 | 2 | 54.628 | KV453193.1 | 2446026 | 20-scf00021 | 20 |
| AX-158405073 | 2 | 54.628 | KV453193.1 | 2446820 | 20-scf00021 | 20 |
| AX-157916657 | 2 | 54.628 | KV453193.1 | 2451314 | 20-scf00021 | 20 |
| AX-157745133 | 2 | 54.628 | KV453193.1 | 2452390 | 20-scf00021 | 20 |
| AX-157916658 | 2 | 54.628 | KV453193.1 | 2452607 | 20-scf00021 | 20 |
| AX-157916660 | 2 | 54.628 | KV453193.1 | 2458035 | 20-scf00021 | 20 |
| AX-157754250 | 2 | 54.628 | KV453193.1 | 2467216 | 20-scf00021 | 20 |
| AX-157916690 | 2 | 54.628 | KV453193.1 | 2515382 | 20-scf00021 | 20 |
| AX-157916691 | 2 | 54.628 | KV453193.1 | 2515936 | 20-scf00021 | 20 |
| AX-157916697 | 2 | 54.628 | KV453193.1 | 2524358 | 20-scf00021 | 20 |
| AX-157916762 | 2 | 54.628 | KV453193.1 | 2630839 | 20-scf00021 | 20 |
| AX-157916766 | 2 | 54.628 | KV453193.1 | 2638371 | 20-scf00021 | 20 |
| AX-157916769 | 2 | 54.628 | KV453193.1 | 2642943 | 20-scf00021 | 20 |
| AX-157916772 | 2 | 54.628 | KV453193.1 | 2645557 | 20-scf00021 | 20 |
| AX-157916698 | 2 | 54.637 | KV453193.1 | 2526284 | 20-scf00021 | 20 |
| AX-158405080 | 2 | 54.648 | KV453193.1 | 2534611 | 20-scf00021 | 20 |
| AX-157916737 | 2 | 54.658 | KV453193.1 | 2584038 | 20-scf00021 | 20 |
| AX-157916694 | 2 | 54.661 | KV453193.1 | 2521013 | 20-scf00021 | 20 |
| AX-157916736 | 2 | 54.661 | KV453193.1 | 2582327 | 20-scf00021 | 20 |
| AX-157916738 | 2 | 54.661 | KV453193.1 | 2586472 | 20-scf00021 | 20 |
| AX-157916742 | 2 | 54.661 | KV453193.1 | 2595070 | 20-scf00021 | 20 |
| AX-158405083 | 2 | 54.661 | KV453193.1 | 2612954 | 20-scf00021 | 20 |
| AX-157916763 | 2 | 54.661 | KV453193.1 | 2632635 | 20-scf00021 | 20 |
| AX-157916739 | 2 | 54.665 | KV453193.1 | 2588512 | 20-scf00021 | 20 |
| AX-157916312 | 2 | 54.667 | KV453193.1 | 1950779 | 20-scf00021 | 20 |
| AX-157916344 | 2 | 54.667 | KV453193.1 | 1990671 | 20-scf00021 | 20 |
| AX-157916399 | 2 | 54.667 | KV453193.1 | 2058330 | 20-scf00021 | 20 |
| AX-157916404 | 2 | 54.667 | KV453193.1 | 2064717 | 20-scf00021 | 20 |
| AX-157916506 | 2 | 54.667 | KV453193.1 | 2193674 | 20-scf00021 | 20 |
| AX-157916524 | 2 | 54.667 | KV453193.1 | 2214219 | 20-scf00021 | 20 |
| AX-157916542 | 2 | 54.667 | KV453193.1 | 2240275 | 20-scf00021 | 20 |
| AX-157723257 | 2 | 54.667 | KV453193.1 | 2241744 | 20-scf00021 | 20 |
| AX-157916544 | 2 | 54.667 | KV453193.1 | 2242727 | 20-scf00021 | 20 |
| AX-157916550 | 2 | 54.667 | KV453193.1 | 2252579 | 20-scf00021 | 20 |
| AX-157916551 | 2 | 54.667 | KV453193.1 | 2253295 | 20-scf00021 | 20 |
| AX-157916564 | 2 | 54.667 | KV453193.1 | 2264345 | 20-scf00021 | 20 |
| AX-157916568 | 2 | 54.667 | KV453193.1 | 2267023 | 20-scf00021 | 20 |
| AX-157916572 | 2 | 54.667 | KV453193.1 | 2269944 | 20-scf00021 | 20 |
| AX-157916579 | 2 | 54.667 | KV453193.1 | 2279281 | 20-scf00021 | 20 |
| AX-157916580 | 2 | 54.667 | KV453193.1 | 2279504 | 20-scf00021 | 20 |
| AX-157916595 | 2 | 54.667 | KV453193.1 | 2309042 | 20-scf00021 | 20 |
| AX-157916601 | 2 | 54.667 | KV453193.1 | 2318309 | 20-scf00021 | 20 |
| AX-157812768 | 2 | 54.667 | KV453193.1 | 2337461 | 20-scf00021 | 20 |
| AX-157812770 | 2 | 54.667 | KV453193.1 | 2355021 | 20-scf00021 | 20 |
| AX-157916643 | 2 | 54.667 | KV453193.1 | 2412468 | 20-scf00021 | 20 |
| AX-157744325 | 2 | 54.667 | KV453193.1 | 2417024 | 20-scf00021 | 20 |
| AX-157773305 | 2 | 54.667 | KV453193.1 | 2418664 | 20-scf00021 | 20 |
| AX-157916644 | 2 | 54.667 | KV453193.1 | 2419990 | 20-scf00021 | 20 |
| AX-157750389 | 2 | 54.667 | KV453193.1 | 2421143 | 20-scf00021 | 20 |
| AX-157916646 | 2 | 54.667 | KV453193.1 | 2422385 | 20-scf00021 | 20 |



|              |   |        |            |         |             |    |
|--------------|---|--------|------------|---------|-------------|----|
| AX-157916647 | 2 | 54.667 | KV453193.1 | 2422749 | 20-scf00021 | 20 |
| AX-157774472 | 2 | 54.667 | KV453193.1 | 2423177 | 20-scf00021 | 20 |
| AX-157812778 | 2 | 54.667 | KV453193.1 | 2423479 | 20-scf00021 | 20 |
| AX-157916662 | 2 | 54.667 | KV453193.1 | 2460301 | 20-scf00021 | 20 |
| AX-157916669 | 2 | 54.667 | KV453193.1 | 2473886 | 20-scf00021 | 20 |
| AX-157916670 | 2 | 54.667 | KV453193.1 | 2474579 | 20-scf00021 | 20 |
| AX-157883468 | 2 | 54.667 | KV453193.1 | 2482859 | 20-scf00021 | 20 |
| AX-157916680 | 2 | 54.667 | KV453193.1 | 2497566 | 20-scf00021 | 20 |
| AX-157916682 | 2 | 54.667 | KV453193.1 | 2500206 | 20-scf00021 | 20 |
| AX-157812784 | 2 | 54.667 | KV453193.1 | 2508006 | 20-scf00021 | 20 |
| AX-157916710 | 2 | 54.667 | KV453193.1 | 2539568 | 20-scf00021 | 20 |
| AX-157916711 | 2 | 54.667 | KV453193.1 | 2540610 | 20-scf00021 | 20 |
| AX-157916718 | 2 | 54.667 | KV453193.1 | 2551552 | 20-scf00021 | 20 |
| AX-157916725 | 2 | 54.667 | KV453193.1 | 2556096 | 20-scf00021 | 20 |
| AX-157916734 | 2 | 54.667 | KV453193.1 | 2577419 | 20-scf00021 | 20 |
| AX-157916745 | 2 | 54.667 | KV453193.1 | 2596852 | 20-scf00021 | 20 |
| AX-157916747 | 2 | 54.667 | KV453193.1 | 2601651 | 20-scf00021 | 20 |
| AX-157916750 | 2 | 54.667 | KV453193.1 | 2603861 | 20-scf00021 | 20 |
| AX-157916751 | 2 | 54.667 | KV453193.1 | 2604717 | 20-scf00021 | 20 |
| AX-157916752 | 2 | 54.667 | KV453193.1 | 2606064 | 20-scf00021 | 20 |
| AX-157916755 | 2 | 54.667 | KV453193.1 | 2620314 | 20-scf00021 | 20 |
| AX-157916756 | 2 | 54.667 | KV453193.1 | 2621312 | 20-scf00021 | 20 |
| AX-157916774 | 2 | 54.667 | KV453193.1 | 2650135 | 20-scf00021 | 20 |
| AX-157916778 | 2 | 54.667 | KV453193.1 | 2653697 | 20-scf00021 | 20 |
| AX-157916779 | 2 | 54.667 | KV453193.1 | 2654759 | 20-scf00021 | 20 |
| AX-157916790 | 2 | 54.667 | KV453193.1 | 2673839 | 20-scf00021 | 20 |
| AX-157812787 | 2 | 54.667 | KV453193.1 | 2678579 | 20-scf00021 | 20 |
| AX-157812788 | 2 | 54.667 | KV453193.1 | 2682671 | 20-scf00021 | 20 |
| AX-157916798 | 2 | 54.667 | KV453193.1 | 2703239 | 20-scf00021 | 20 |
| AX-157916799 | 2 | 54.667 | KV453193.1 | 2703946 | 20-scf00021 | 20 |
| AX-157916800 | 2 | 54.667 | KV453193.1 | 2704462 | 20-scf00021 | 20 |
| AX-157916801 | 2 | 54.667 | KV453193.1 | 2705116 | 20-scf00021 | 20 |
| AX-157745631 | 2 | 54.667 | KV453193.1 | 2708259 | 20-scf00021 | 20 |
| AX-157916807 | 2 | 54.667 | KV453193.1 | 2728884 | 20-scf00021 | 20 |
| AX-158405084 | 2 | 54.667 | KV453193.1 | 2754723 | 20-scf00021 | 20 |
| AX-157916814 | 2 | 54.667 | KV453193.1 | 2765110 | 20-scf00021 | 20 |
| AX-157916817 | 2 | 54.667 | KV453193.1 | 2768367 | 20-scf00021 | 20 |
| AX-157916822 | 2 | 54.667 | KV453193.1 | 2773639 | 20-scf00021 | 20 |
| AX-157916826 | 2 | 54.667 | KV453193.1 | 2777447 | 20-scf00021 | 20 |
| AX-157812789 | 2 | 54.667 | KV453193.1 | 2777660 | 20-scf00021 | 20 |
| AX-157916830 | 2 | 54.667 | KV453193.1 | 2781681 | 20-scf00021 | 20 |
| AX-157916832 | 2 | 54.667 | KV453193.1 | 2784127 | 20-scf00021 | 20 |
| AX-157916838 | 2 | 54.667 | KV453193.1 | 2795546 | 20-scf00021 | 20 |
| AX-157916843 | 2 | 54.667 | KV453193.1 | 2798901 | 20-scf00021 | 20 |
| AX-157916847 | 2 | 54.667 | KV453193.1 | 2802414 | 20-scf00021 | 20 |
| AX-157916848 | 2 | 54.667 | KV453193.1 | 2802857 | 20-scf00021 | 20 |
| AX-157916849 | 2 | 54.667 | KV453193.1 | 2803611 | 20-scf00021 | 20 |
| AX-157916852 | 2 | 54.667 | KV453193.1 | 2804382 | 20-scf00021 | 20 |
| AX-157916853 | 2 | 54.667 | KV453193.1 | 2805380 | 20-scf00021 | 20 |
| AX-157916854 | 2 | 54.667 | KV453193.1 | 2807376 | 20-scf00021 | 20 |
| AX-157916858 | 2 | 54.667 | KV453193.1 | 2814604 | 20-scf00021 | 20 |

|              |   |        |            |         |               |    |
|--------------|---|--------|------------|---------|---------------|----|
| AX-157916861 | 2 | 54.667 | KV453193.1 | 2819359 | 20-scf00021   | 20 |
| AX-157916866 | 2 | 54.667 | KV453193.1 | 2827612 | 20-scf00021   | 20 |
| AX-157916870 | 2 | 54.667 | KV453193.1 | 2833365 | 20-scf00021   | 20 |
| AX-157916873 | 2 | 54.667 | KV453193.1 | 2835218 | 20-scf00021   | 20 |
| AX-157742446 | 2 | 54.667 | KV453193.1 | 3015351 | 20-scf00021   | 20 |
| AX-157695028 | 2 | 54.667 | FI864260.1 | 599     | ORI212 lctalu | UN |
| AX-157916180 | 2 | 54.777 | KV453193.1 | 1787995 | 20-scf00021   | 20 |
| AX-157916347 | 2 | 54.777 | KV453193.1 | 1993890 | 20-scf00021   | 20 |
| AX-157916622 | 2 | 54.777 | KV453193.1 | 2353698 | 20-scf00021   | 20 |
| AX-157916626 | 2 | 54.777 | KV453193.1 | 2358351 | 20-scf00021   | 20 |
| AX-157916641 | 2 | 54.777 | KV453193.1 | 2410562 | 20-scf00021   | 20 |
| AX-157916728 | 2 | 54.777 | KV453193.1 | 2567132 | 20-scf00021   | 20 |
| AX-157916735 | 2 | 54.777 | KV453193.1 | 2579601 | 20-scf00021   | 20 |
| AX-157916770 | 2 | 54.777 | KV453193.1 | 2644120 | 20-scf00021   | 20 |
| AX-157916794 | 2 | 54.777 | KV453193.1 | 2685605 | 20-scf00021   | 20 |
| AX-157916813 | 2 | 54.777 | KV453193.1 | 2752869 | 20-scf00021   | 20 |
| AX-157916856 | 2 | 54.777 | KV453193.1 | 2812566 | 20-scf00021   | 20 |
| AX-157916869 | 2 | 54.777 | KV453193.1 | 2832319 | 20-scf00021   | 20 |
| AX-157916879 | 2 | 54.777 | KV453193.1 | 2846845 | 20-scf00021   | 20 |
| AX-157916808 | 2 | 54.886 | KV453193.1 | 2732622 | 20-scf00021   | 20 |
| AX-157916882 | 2 | 54.886 | KV453193.1 | 2852012 | 20-scf00021   | 20 |
| AX-157916883 | 2 | 54.886 | KV453193.1 | 2852231 | 20-scf00021   | 20 |
| AX-157717852 | 2 | 54.886 | KV453193.1 | 2855899 | 20-scf00021   | 20 |
| AX-157717002 | 2 | 54.886 | KV453193.1 | 2857736 | 20-scf00021   | 20 |
| AX-157916888 | 2 | 54.886 | KV453193.1 | 2861307 | 20-scf00021   | 20 |
| AX-157916889 | 2 | 54.886 | KV453193.1 | 2861826 | 20-scf00021   | 20 |
| AX-157916890 | 2 | 54.886 | KV453193.1 | 2862382 | 20-scf00021   | 20 |
| AX-157916892 | 2 | 54.886 | KV453193.1 | 2868459 | 20-scf00021   | 20 |
| AX-157916893 | 2 | 54.886 | KV453193.1 | 2869159 | 20-scf00021   | 20 |
| AX-157916933 | 2 | 54.886 | KV453193.1 | 2928027 | 20-scf00021   | 20 |
| AX-157916363 | 2 | 54.94  | KV453193.1 | 2011516 | 20-scf00021   | 20 |
| AX-157916365 | 2 | 54.94  | KV453193.1 | 2014138 | 20-scf00021   | 20 |
| AX-157916625 | 2 | 54.94  | KV453193.1 | 2356074 | 20-scf00021   | 20 |
| AX-157916761 | 2 | 54.94  | KV453193.1 | 2628851 | 20-scf00021   | 20 |
| AX-157916875 | 2 | 54.94  | KV453193.1 | 2840176 | 20-scf00021   | 20 |
| AX-157916897 | 2 | 54.94  | KV453193.1 | 2873482 | 20-scf00021   | 20 |
| AX-157916902 | 2 | 54.94  | KV453193.1 | 2881957 | 20-scf00021   | 20 |
| AX-157916567 | 2 | 54.995 | KV453193.1 | 2266079 | 20-scf00021   | 20 |
| AX-157812763 | 2 | 54.995 | KV453193.1 | 2278959 | 20-scf00021   | 20 |
| AX-157916589 | 2 | 54.995 | KV453193.1 | 2300401 | 20-scf00021   | 20 |
| AX-157916703 | 2 | 54.995 | KV453193.1 | 2529814 | 20-scf00021   | 20 |
| AX-157916705 | 2 | 54.995 | KV453193.1 | 2531434 | 20-scf00021   | 20 |
| AX-157916708 | 2 | 54.995 | KV453193.1 | 2537918 | 20-scf00021   | 20 |
| AX-157916709 | 2 | 54.995 | KV453193.1 | 2538504 | 20-scf00021   | 20 |
| AX-157916899 | 2 | 54.995 | KV453193.1 | 2877160 | 20-scf00021   | 20 |
| AX-157812793 | 2 | 54.995 | KV453193.1 | 2883358 | 20-scf00021   | 20 |
| AX-157916907 | 2 | 54.995 | KV453193.1 | 2888912 | 20-scf00021   | 20 |
| AX-157812794 | 2 | 54.995 | KV453193.1 | 2889723 | 20-scf00021   | 20 |
| AX-157916908 | 2 | 54.995 | KV453193.1 | 2893319 | 20-scf00021   | 20 |
| AX-157916909 | 2 | 54.995 | KV453193.1 | 2894901 | 20-scf00021   | 20 |
| AX-157916910 | 2 | 54.995 | KV453193.1 | 2896983 | 20-scf00021   | 20 |

|              |   |        |            |         |             |    |
|--------------|---|--------|------------|---------|-------------|----|
| AX-157916912 | 2 | 54.995 | KV453193.1 | 2898721 | 20-scf00021 | 20 |
| AX-157916922 | 2 | 54.995 | KV453193.1 | 2911817 | 20-scf00021 | 20 |
| AX-157916926 | 2 | 54.995 | KV453193.1 | 2918713 | 20-scf00021 | 20 |
| AX-157917000 | 2 | 54.995 | KV453193.1 | 2992689 | 20-scf00021 | 20 |
| AX-157917022 | 2 | 54.995 | KV453193.1 | 3014426 | 20-scf00021 | 20 |
| AX-157917036 | 2 | 54.995 | KV453193.1 | 3028604 | 20-scf00021 | 20 |
| AX-157916913 | 2 | 55.097 | KV453193.1 | 2900356 | 20-scf00021 | 20 |
| AX-157812742 | 2 | 55.199 | KV453193.1 | 2153992 | 20-scf00021 | 20 |
| AX-157916916 | 2 | 55.199 | KV453193.1 | 2903488 | 20-scf00021 | 20 |
| AX-157916917 | 2 | 55.199 | KV453193.1 | 2904060 | 20-scf00021 | 20 |
| AX-157916919 | 2 | 55.199 | KV453193.1 | 2905498 | 20-scf00021 | 20 |
| AX-157916923 | 2 | 55.199 | KV453193.1 | 2915229 | 20-scf00021 | 20 |
| AX-157916957 | 2 | 55.199 | KV453193.1 | 2954362 | 20-scf00021 | 20 |
| AX-157723609 | 2 | 55.208 | KV453193.1 | 2915771 | 20-scf00021 | 20 |
| AX-157916918 | 2 | 55.218 | KV453193.1 | 2904878 | 20-scf00021 | 20 |
| AX-157916924 | 2 | 55.218 | KV453193.1 | 2916669 | 20-scf00021 | 20 |
| AX-157916914 | 2 | 55.228 | KV453193.1 | 2901389 | 20-scf00021 | 20 |
| AX-157703245 | 2 | 55.228 | KV453193.1 | 2919244 | 20-scf00021 | 20 |
| AX-157916928 | 2 | 55.228 | KV453193.1 | 2920969 | 20-scf00021 | 20 |
| AX-157916932 | 2 | 55.281 | KV453193.1 | 2926329 | 20-scf00021 | 20 |
| AX-157916935 | 2 | 55.432 | KV453193.1 | 2929521 | 20-scf00021 | 20 |
| AX-157916936 | 2 | 55.432 | KV453193.1 | 2930796 | 20-scf00021 | 20 |
| AX-157743562 | 2 | 55.432 | KV453193.1 | 2933006 | 20-scf00021 | 20 |
| AX-157916938 | 2 | 55.432 | KV453193.1 | 2933603 | 20-scf00021 | 20 |
| AX-157916939 | 2 | 55.432 | KV453193.1 | 2934831 | 20-scf00021 | 20 |
| AX-157916940 | 2 | 55.432 | KV453193.1 | 2935904 | 20-scf00021 | 20 |
| AX-157916941 | 2 | 55.432 | KV453193.1 | 2937505 | 20-scf00021 | 20 |
| AX-157916944 | 2 | 55.432 | KV453193.1 | 2940841 | 20-scf00021 | 20 |
| AX-157916945 | 2 | 55.432 | KV453193.1 | 2941777 | 20-scf00021 | 20 |
| AX-157916955 | 2 | 55.432 | KV453193.1 | 2952872 | 20-scf00021 | 20 |
| AX-157916960 | 2 | 55.432 | KV453193.1 | 2955503 | 20-scf00021 | 20 |
| AX-157916942 | 2 | 55.462 | KV453193.1 | 2939152 | 20-scf00021 | 20 |
| AX-157916948 | 2 | 55.462 | KV453193.1 | 2944563 | 20-scf00021 | 20 |
| AX-157916949 | 2 | 55.462 | KV453193.1 | 2945909 | 20-scf00021 | 20 |
| AX-158405092 | 2 | 55.462 | KV453193.1 | 2961878 | 20-scf00021 | 20 |
| AX-157917021 | 2 | 55.462 | KV453193.1 | 3012709 | 20-scf00021 | 20 |
| AX-157916931 | 2 | 55.501 | KV453193.1 | 2925835 | 20-scf00021 | 20 |
| AX-157883472 | 2 | 55.501 | KV453193.1 | 2950153 | 20-scf00021 | 20 |
| AX-157916952 | 2 | 55.501 | KV453193.1 | 2951058 | 20-scf00021 | 20 |
| AX-157916953 | 2 | 55.541 | KV453193.1 | 2951617 | 20-scf00021 | 20 |
| AX-157916958 | 2 | 55.541 | KV453193.1 | 2954522 | 20-scf00021 | 20 |
| AX-157916959 | 2 | 55.541 | KV453193.1 | 2954966 | 20-scf00021 | 20 |
| AX-157916961 | 2 | 55.541 | KV453193.1 | 2955893 | 20-scf00021 | 20 |
| AX-157916962 | 2 | 55.541 | KV453193.1 | 2957531 | 20-scf00021 | 20 |
| AX-157916963 | 2 | 55.541 | KV453193.1 | 2961151 | 20-scf00021 | 20 |
| AX-157916964 | 2 | 55.541 | KV453193.1 | 2963020 | 20-scf00021 | 20 |
| AX-157916966 | 2 | 55.541 | KV453193.1 | 2965004 | 20-scf00021 | 20 |
| AX-157916969 | 2 | 55.65  | KV453193.1 | 2967030 | 20-scf00021 | 20 |
| AX-157916970 | 2 | 55.677 | KV453193.1 | 2967525 | 20-scf00021 | 20 |
| AX-157916973 | 2 | 55.714 | KV453193.1 | 2970085 | 20-scf00021 | 20 |
| AX-157916975 | 2 | 55.714 | KV453193.1 | 2972482 | 20-scf00021 | 20 |

|              |   |        |            |         |             |    |
|--------------|---|--------|------------|---------|-------------|----|
| AX-157916992 | 2 | 55.714 | KV453193.1 | 2986860 | 20-scf00021 | 20 |
| AX-157916993 | 2 | 55.714 | KV453193.1 | 2987139 | 20-scf00021 | 20 |
| AX-157916995 | 2 | 55.714 | KV453193.1 | 2989187 | 20-scf00021 | 20 |
| AX-157917017 | 2 | 55.714 | KV453193.1 | 3006944 | 20-scf00021 | 20 |
| AX-157916978 | 2 | 55.76  | KV453193.1 | 2974033 | 20-scf00021 | 20 |
| AX-157916930 | 2 | 55.839 | KV453193.1 | 2924965 | 20-scf00021 | 20 |
| AX-157916981 | 2 | 55.839 | KV453193.1 | 2976959 | 20-scf00021 | 20 |
| AX-157916988 | 2 | 55.839 | KV453193.1 | 2983530 | 20-scf00021 | 20 |
| AX-157916989 | 2 | 55.978 | KV453193.1 | 2984109 | 20-scf00021 | 20 |
| AX-157916997 | 2 | 55.978 | KV453193.1 | 2990429 | 20-scf00021 | 20 |
| AX-157916991 | 2 | 56.088 | KV453193.1 | 2986339 | 20-scf00021 | 20 |
| AX-157916999 | 2 | 56.088 | KV453193.1 | 2992441 | 20-scf00021 | 20 |
| AX-157917011 | 2 | 56.088 | KV453193.1 | 3003928 | 20-scf00021 | 20 |
| AX-157917014 | 2 | 56.088 | KV453193.1 | 3005927 | 20-scf00021 | 20 |
| AX-157917015 | 2 | 56.088 | KV453193.1 | 3006361 | 20-scf00021 | 20 |
| AX-157917019 | 2 | 56.088 | KV453193.1 | 3008300 | 20-scf00021 | 20 |
| AX-157917025 | 2 | 56.088 | KV453193.1 | 3017213 | 20-scf00021 | 20 |
| AX-157917030 | 2 | 56.088 | KV453193.1 | 3022974 | 20-scf00021 | 20 |
| AX-157917031 | 2 | 56.201 | KV453193.1 | 3023481 | 20-scf00021 | 20 |
| AX-157714067 | 2 | 56.306 | KV453193.1 | 3033452 | 20-scf00021 | 20 |
| AX-157917038 | 2 | 56.306 | KV453193.1 | 3035027 | 20-scf00021 | 20 |
| AX-157917054 | 2 | 56.306 | KV453193.1 | 3055795 | 20-scf00021 | 20 |
| AX-157717676 | 2 | 56.306 | KV453193.1 | 3089269 | 20-scf00021 | 20 |
| AX-157812808 | 2 | 56.306 | KV453193.1 | 3119039 | 20-scf00021 | 20 |
| AX-157917099 | 2 | 56.306 | KV453193.1 | 3119483 | 20-scf00021 | 20 |
| AX-157917046 | 2 | 56.349 | KV453193.1 | 3046877 | 20-scf00021 | 20 |
| AX-157917051 | 2 | 56.382 | KV453193.1 | 3052348 | 20-scf00021 | 20 |
| AX-157917086 | 2 | 56.382 | KV453193.1 | 3099047 | 20-scf00021 | 20 |
| AX-157812709 | 2 | 56.415 | KV453193.1 | 1693675 | 20-scf00021 | 20 |
| AX-157916147 | 2 | 56.415 | KV453193.1 | 1748533 | 20-scf00021 | 20 |
| AX-157916531 | 2 | 56.415 | KV453193.1 | 2220226 | 20-scf00021 | 20 |
| AX-157916614 | 2 | 56.415 | KV453193.1 | 2339956 | 20-scf00021 | 20 |
| AX-157916686 | 2 | 56.415 | KV453193.1 | 2503161 | 20-scf00021 | 20 |
| AX-157812792 | 2 | 56.415 | KV453193.1 | 2842562 | 20-scf00021 | 20 |
| AX-157916895 | 2 | 56.415 | KV453193.1 | 2870750 | 20-scf00021 | 20 |
| AX-157917016 | 2 | 56.415 | KV453193.1 | 3006742 | 20-scf00021 | 20 |
| AX-157917028 | 2 | 56.415 | KV453193.1 | 3019209 | 20-scf00021 | 20 |
| AX-157917034 | 2 | 56.415 | KV453193.1 | 3026755 | 20-scf00021 | 20 |
| AX-157917040 | 2 | 56.415 | KV453193.1 | 3040137 | 20-scf00021 | 20 |
| AX-157917041 | 2 | 56.415 | KV453193.1 | 3040520 | 20-scf00021 | 20 |
| AX-157917045 | 2 | 56.415 | KV453193.1 | 3045550 | 20-scf00021 | 20 |
| AX-157812797 | 2 | 56.415 | KV453193.1 | 3046970 | 20-scf00021 | 20 |
| AX-157917050 | 2 | 56.415 | KV453193.1 | 3051649 | 20-scf00021 | 20 |
| AX-157917052 | 2 | 56.415 | KV453193.1 | 3054374 | 20-scf00021 | 20 |
| AX-157917053 | 2 | 56.415 | KV453193.1 | 3054607 | 20-scf00021 | 20 |
| AX-157917056 | 2 | 56.415 | KV453193.1 | 3060178 | 20-scf00021 | 20 |
| AX-157917057 | 2 | 56.415 | KV453193.1 | 3060440 | 20-scf00021 | 20 |
| AX-157917058 | 2 | 56.415 | KV453193.1 | 3060653 | 20-scf00021 | 20 |
| AX-157812799 | 2 | 56.415 | KV453193.1 | 3062310 | 20-scf00021 | 20 |
| AX-157917060 | 2 | 56.415 | KV453193.1 | 3062926 | 20-scf00021 | 20 |
| AX-157917061 | 2 | 56.415 | KV453193.1 | 3063315 | 20-scf00021 | 20 |

|              |   |        |            |         |             |    |
|--------------|---|--------|------------|---------|-------------|----|
| AX-157812801 | 2 | 56.415 | KV453193.1 | 3065041 | 20-scf00021 | 20 |
| AX-157917062 | 2 | 56.415 | KV453193.1 | 3065548 | 20-scf00021 | 20 |
| AX-157917063 | 2 | 56.415 | KV453193.1 | 3065703 | 20-scf00021 | 20 |
| AX-157917064 | 2 | 56.415 | KV453193.1 | 3066574 | 20-scf00021 | 20 |
| AX-157917065 | 2 | 56.415 | KV453193.1 | 3067686 | 20-scf00021 | 20 |
| AX-157917067 | 2 | 56.415 | KV453193.1 | 3071561 | 20-scf00021 | 20 |
| AX-157917068 | 2 | 56.415 | KV453193.1 | 3072024 | 20-scf00021 | 20 |
| AX-157917071 | 2 | 56.415 | KV453193.1 | 3074751 | 20-scf00021 | 20 |
| AX-157917072 | 2 | 56.415 | KV453193.1 | 3075174 | 20-scf00021 | 20 |
| AX-157917075 | 2 | 56.415 | KV453193.1 | 3076083 | 20-scf00021 | 20 |
| AX-157812802 | 2 | 56.415 | KV453193.1 | 3076396 | 20-scf00021 | 20 |
| AX-158379267 | 2 | 56.415 | KV453193.1 | 3080869 | 20-scf00021 | 20 |
| AX-157917083 | 2 | 56.415 | KV453193.1 | 3091761 | 20-scf00021 | 20 |
| AX-157812804 | 2 | 56.415 | KV453193.1 | 3098602 | 20-scf00021 | 20 |
| AX-157812805 | 2 | 56.415 | KV453193.1 | 3098778 | 20-scf00021 | 20 |
| AX-157812806 | 2 | 56.415 | KV453193.1 | 3101065 | 20-scf00021 | 20 |
| AX-157715427 | 2 | 56.415 | KV453193.1 | 3106771 | 20-scf00021 | 20 |
| AX-157917093 | 2 | 56.415 | KV453193.1 | 3113160 | 20-scf00021 | 20 |
| AX-157812807 | 2 | 56.415 | KV453193.1 | 3114534 | 20-scf00021 | 20 |
| AX-157917097 | 2 | 56.415 | KV453193.1 | 3117543 | 20-scf00021 | 20 |
| AX-157917098 | 2 | 56.415 | KV453193.1 | 3118480 | 20-scf00021 | 20 |
| AX-157713713 | 2 | 56.415 | KV453193.1 | 3122162 | 20-scf00021 | 20 |
| AX-157812810 | 2 | 56.415 | KV453193.1 | 3124364 | 20-scf00021 | 20 |
| AX-157917104 | 2 | 56.415 | KV453193.1 | 3129837 | 20-scf00021 | 20 |
| AX-157853736 | 2 | 56.415 | KV453193.1 | 3130239 | 20-scf00021 | 20 |
| AX-157917105 | 2 | 56.415 | KV453193.1 | 3130498 | 20-scf00021 | 20 |
| AX-157741795 | 2 | 56.415 | KV453193.1 | 3132615 | 20-scf00021 | 20 |
| AX-157812811 | 2 | 56.415 | KV453193.1 | 3134975 | 20-scf00021 | 20 |
| AX-157751678 | 2 | 56.415 | KV453193.1 | 3135312 | 20-scf00021 | 20 |
| AX-157917106 | 2 | 56.415 | KV453193.1 | 3135694 | 20-scf00021 | 20 |
| AX-157812812 | 2 | 56.415 | KV453193.1 | 3136888 | 20-scf00021 | 20 |
| AX-157917108 | 2 | 56.415 | KV453193.1 | 3137517 | 20-scf00021 | 20 |
| AX-157917110 | 2 | 56.415 | KV453193.1 | 3140258 | 20-scf00021 | 20 |
| AX-157917133 | 2 | 56.415 | KV453193.1 | 3166009 | 20-scf00021 | 20 |
| AX-157917181 | 2 | 56.415 | KV453193.1 | 3224616 | 20-scf00021 | 20 |
| AX-157716125 | 2 | 56.634 | KV453193.1 | 3091036 | 20-scf00021 | 20 |
| AX-157917111 | 2 | 56.634 | KV453193.1 | 3142063 | 20-scf00021 | 20 |
| AX-157917112 | 2 | 56.634 | KV453193.1 | 3143326 | 20-scf00021 | 20 |
| AX-157714884 | 2 | 56.634 | KV453193.1 | 3143962 | 20-scf00021 | 20 |
| AX-157917113 | 2 | 56.634 | KV453193.1 | 3144139 | 20-scf00021 | 20 |
| AX-157917118 | 2 | 56.634 | KV453193.1 | 3149279 | 20-scf00021 | 20 |
| AX-157917120 | 2 | 56.634 | KV453193.1 | 3150409 | 20-scf00021 | 20 |
| AX-157917130 | 2 | 56.634 | KV453193.1 | 3164012 | 20-scf00021 | 20 |
| AX-157917121 | 2 | 56.743 | KV453193.1 | 3152536 | 20-scf00021 | 20 |
| AX-157917122 | 2 | 56.743 | KV453193.1 | 3154303 | 20-scf00021 | 20 |
| AX-157917128 | 2 | 56.743 | KV453193.1 | 3163038 | 20-scf00021 | 20 |
| AX-157917129 | 2 | 56.743 | KV453193.1 | 3163802 | 20-scf00021 | 20 |
| AX-157917131 | 2 | 56.743 | KV453193.1 | 3164375 | 20-scf00021 | 20 |
| AX-157917137 | 2 | 56.743 | KV453193.1 | 3169034 | 20-scf00021 | 20 |
| AX-157917153 | 2 | 56.743 | KV453193.1 | 3180701 | 20-scf00021 | 20 |
| AX-157917187 | 2 | 56.743 | KV453193.1 | 3232553 | 20-scf00021 | 20 |

|              |   |        |             |         |             |    |
|--------------|---|--------|-------------|---------|-------------|----|
| AX-157917138 | 2 | 56.785 | KV453193.1  | 3169818 | 20-scf00021 | 20 |
| AX-157917140 | 2 | 56.818 | KV453193.1  | 3170612 | 20-scf00021 | 20 |
| AX-157874709 | 2 | 56.818 | KV453193.1  | 3171985 | 20-scf00021 | 20 |
| AX-157917215 | 2 | 56.818 | KV453193.1  | 3262394 | 20-scf00021 | 20 |
| AX-157917146 | 2 | 56.852 | KV453193.1  | 3174833 | 20-scf00021 | 20 |
| AX-157917154 | 2 | 56.881 | KV453193.1  | 3181369 | 20-scf00021 | 20 |
| AX-157917160 | 2 | 56.917 | KV453193.1  | 3197178 | 20-scf00021 | 20 |
| AX-157916173 | 2 | 56.962 | KV453193.1  | 1781469 | 20-scf00021 | 20 |
| AX-157917066 | 2 | 56.962 | KV453193.1  | 3070580 | 20-scf00021 | 20 |
| AX-157917074 | 2 | 56.962 | KV453193.1  | 3075762 | 20-scf00021 | 20 |
| AX-157917089 | 2 | 56.962 | KV453193.1  | 3100481 | 20-scf00021 | 20 |
| AX-157917119 | 2 | 56.962 | KV453193.1  | 3149997 | 20-scf00021 | 20 |
| AX-157917162 | 2 | 56.962 | KV453193.1  | 3197881 | 20-scf00021 | 20 |
| AX-157812817 | 2 | 56.962 | KV453193.1  | 3200248 | 20-scf00021 | 20 |
| AX-157917167 | 2 | 56.962 | KV453193.1  | 3205813 | 20-scf00021 | 20 |
| AX-157917170 | 2 | 56.962 | KV453193.1  | 3209639 | 20-scf00021 | 20 |
| AX-158379268 | 2 | 56.962 | KV453193.1  | 3210721 | 20-scf00021 | 20 |
| AX-157917172 | 2 | 56.962 | KV453193.1  | 3210787 | 20-scf00021 | 20 |
| AX-157750870 | 2 | 56.962 | KV453193.1  | 3212282 | 20-scf00021 | 20 |
| AX-157917174 | 2 | 56.962 | KV453193.1  | 3213464 | 20-scf00021 | 20 |
| AX-157917175 | 2 | 56.962 | KV453193.1  | 3214567 | 20-scf00021 | 20 |
| AX-157917176 | 2 | 56.962 | KV453193.1  | 3215147 | 20-scf00021 | 20 |
| AX-158382272 | 2 | 56.962 | KV453193.1  | 3215541 | 20-scf00021 | 20 |
| AX-157720697 | 2 | 56.962 | KV453193.1  | 3220687 | 20-scf00021 | 20 |
| AX-157812818 | 2 | 56.962 | KV453193.1  | 3220982 | 20-scf00021 | 20 |
| AX-157917182 | 2 | 56.962 | KV453193.1  | 3226036 | 20-scf00021 | 20 |
| AX-157917184 | 2 | 56.962 | KV453193.1  | 3230942 | 20-scf00021 | 20 |
| AX-157917185 | 2 | 56.962 | KV453193.1  | 3231292 | 20-scf00021 | 20 |
| AX-157917197 | 2 | 56.962 | KV453193.1  | 3246145 | 20-scf00021 | 20 |
| AX-157917201 | 2 | 56.962 | KV453193.1  | 3250685 | 20-scf00021 | 20 |
| AX-157917203 | 2 | 56.962 | KV453193.1  | 3252542 | 20-scf00021 | 20 |
| AX-157917206 | 2 | 56.962 | KV453193.1  | 3254782 | 20-scf00021 | 20 |
| AX-157917207 | 2 | 56.962 | KV453193.1  | 3256725 | 20-scf00021 | 20 |
| AX-157917212 | 2 | 56.962 | KV453193.1  | 3259436 | 20-scf00021 | 20 |
| AX-157917213 | 2 | 56.962 | KV453193.1  | 3259778 | 20-scf00021 | 20 |
| AX-157917220 | 2 | 56.962 | KV453193.1  | 3268121 | 20-scf00021 | 20 |
| AX-157917275 | 2 | 56.962 | KV453193.1  | 3366706 | 20-scf00021 | 20 |
| AX-157917366 | 2 | 56.962 | KV453193.1  | 3476605 | 20-scf00021 | 20 |
| AX-157917396 | 2 | 56.962 | KV453193.1  | 3512845 | 20-scf00021 | 20 |
| AX-157706518 | 2 | 56.962 | 3ML01032367 | 348     | scf07984_1  | UN |
| AX-157917217 | 2 | 57.003 | KV453193.1  | 3263461 | 20-scf00021 | 20 |
| AX-157812825 | 2 | 57.021 | KV453193.1  | 3275675 | 20-scf00021 | 20 |
| AX-157917232 | 2 | 57.052 | KV453193.1  | 3288872 | 20-scf00021 | 20 |
| AX-157917135 | 2 | 57.071 | KV453193.1  | 3167704 | 20-scf00021 | 20 |
| AX-157917155 | 2 | 57.071 | KV453193.1  | 3183045 | 20-scf00021 | 20 |
| AX-157917183 | 2 | 57.071 | KV453193.1  | 3226667 | 20-scf00021 | 20 |
| AX-157812824 | 2 | 57.071 | KV453193.1  | 3263105 | 20-scf00021 | 20 |
| AX-157853739 | 2 | 57.071 | KV453193.1  | 3266138 | 20-scf00021 | 20 |
| AX-157917233 | 2 | 57.071 | KV453193.1  | 3290131 | 20-scf00021 | 20 |
| AX-157812828 | 2 | 57.071 | KV453193.1  | 3295057 | 20-scf00021 | 20 |
| AX-157917236 | 2 | 57.071 | KV453193.1  | 3296412 | 20-scf00021 | 20 |

|              |   |        |             |         |             |    |
|--------------|---|--------|-------------|---------|-------------|----|
| AX-157917147 | 2 | 57.18  | KV453193.1  | 3175379 | 20-scf00021 | 20 |
| AX-157917179 | 2 | 57.18  | KV453193.1  | 3221664 | 20-scf00021 | 20 |
| AX-157917204 | 2 | 57.18  | KV453193.1  | 3253385 | 20-scf00021 | 20 |
| AX-157917239 | 2 | 57.18  | KV453193.1  | 3306703 | 20-scf00021 | 20 |
| AX-157917240 | 2 | 57.18  | KV453193.1  | 3307317 | 20-scf00021 | 20 |
| AX-157917242 | 2 | 57.18  | KV453193.1  | 3312103 | 20-scf00021 | 20 |
| AX-158405096 | 2 | 57.18  | KV453193.1  | 3313375 | 20-scf00021 | 20 |
| AX-157917243 | 2 | 57.18  | KV453193.1  | 3313514 | 20-scf00021 | 20 |
| AX-157917246 | 2 | 57.18  | KV453193.1  | 3317146 | 20-scf00021 | 20 |
| AX-157917249 | 2 | 57.18  | KV453193.1  | 3322254 | 20-scf00021 | 20 |
| AX-157917250 | 2 | 57.18  | KV453193.1  | 3323694 | 20-scf00021 | 20 |
| AX-157917254 | 2 | 57.18  | KV453193.1  | 3331801 | 20-scf00021 | 20 |
| AX-157917255 | 2 | 57.18  | KV453193.1  | 3333579 | 20-scf00021 | 20 |
| AX-157917257 | 2 | 57.18  | KV453193.1  | 3334566 | 20-scf00021 | 20 |
| AX-157753313 | 2 | 57.18  | KV453193.1  | 3336925 | 20-scf00021 | 20 |
| AX-157917262 | 2 | 57.18  | KV453193.1  | 3344007 | 20-scf00021 | 20 |
| AX-157917287 | 2 | 57.18  | KV453193.1  | 3374442 | 20-scf00021 | 20 |
| AX-157917294 | 2 | 57.18  | KV453193.1  | 3385019 | 20-scf00021 | 20 |
| AX-157917300 | 2 | 57.18  | KV453193.1  | 3391401 | 20-scf00021 | 20 |
| AX-156402670 | 2 | 57.18  | KV453193.1  | 3461640 | 20-scf00021 | 20 |
| AX-157917219 | 2 | 57.199 | KV453193.1  | 3264631 | 20-scf00021 | 20 |
| AX-157812832 | 2 | 57.199 | KV453193.1  | 3350376 | 20-scf00021 | 20 |
| AX-157812833 | 2 | 57.199 | KV453193.1  | 3350867 | 20-scf00021 | 20 |
| AX-157917272 | 2 | 57.199 | KV453193.1  | 3362031 | 20-scf00021 | 20 |
| AX-158379269 | 2 | 57.199 | KV453193.1  | 3372995 | 20-scf00021 | 20 |
| AX-157917271 | 2 | 57.23  | KV453193.1  | 3359812 | 20-scf00021 | 20 |
| AX-157917259 | 2 | 57.25  | KV453193.1  | 3337648 | 20-scf00021 | 20 |
| AX-157917268 | 2 | 57.25  | KV453193.1  | 3355991 | 20-scf00021 | 20 |
| AX-157917276 | 2 | 57.25  | KV453193.1  | 3367334 | 20-scf00021 | 20 |
| AX-157689636 | 2 | 57.25  | 3ML01030984 | 391     | scf06588_1  | UN |
| AX-157917277 | 2 | 57.269 | KV453193.1  | 3367735 | 20-scf00021 | 20 |
| AX-157917152 | 2 | 57.289 | KV453193.1  | 3179939 | 20-scf00021 | 20 |
| AX-157917171 | 2 | 57.289 | KV453193.1  | 3210408 | 20-scf00021 | 20 |
| AX-157812823 | 2 | 57.289 | KV453193.1  | 3256354 | 20-scf00021 | 20 |
| AX-157812837 | 2 | 57.289 | KV453193.1  | 3358951 | 20-scf00021 | 20 |
| AX-157917274 | 2 | 57.289 | KV453193.1  | 3363411 | 20-scf00021 | 20 |
| AX-157917280 | 2 | 57.289 | KV453193.1  | 3369387 | 20-scf00021 | 20 |
| AX-157917283 | 2 | 57.289 | KV453193.1  | 3370469 | 20-scf00021 | 20 |
| AX-157917285 | 2 | 57.289 | KV453193.1  | 3371906 | 20-scf00021 | 20 |
| AX-157724536 | 2 | 57.289 | KV453193.1  | 3372283 | 20-scf00021 | 20 |
| AX-157917289 | 2 | 57.289 | KV453193.1  | 3378852 | 20-scf00021 | 20 |
| AX-157695260 | 2 | 57.289 | KV453193.1  | 3379673 | 20-scf00021 | 20 |
| AX-157917293 | 2 | 57.289 | KV453193.1  | 3382641 | 20-scf00021 | 20 |
| AX-158405097 | 2 | 57.289 | KV453193.1  | 3383867 | 20-scf00021 | 20 |
| AX-157917297 | 2 | 57.289 | KV453193.1  | 3388662 | 20-scf00021 | 20 |
| AX-158421899 | 2 | 57.289 | KV453193.1  | 3416218 | 20-scf00021 | 20 |
| AX-157917344 | 2 | 57.289 | KV453193.1  | 3443770 | 20-scf00021 | 20 |
| AX-157917350 | 2 | 57.289 | KV453193.1  | 3459048 | 20-scf00021 | 20 |
| AX-157917354 | 2 | 57.289 | KV453193.1  | 3466738 | 20-scf00021 | 20 |
| AX-157917301 | 2 | 57.339 | KV453193.1  | 3391871 | 20-scf00021 | 20 |
| AX-157757068 | 2 | 57.383 | KV453193.1  | 3214085 | 20-scf00021 | 20 |

|              |   |        |            |         |             |    |
|--------------|---|--------|------------|---------|-------------|----|
| AX-157917305 | 2 | 57.383 | KV453193.1 | 3394338 | 20-scf00021 | 20 |
| AX-157917327 | 2 | 57.383 | KV453193.1 | 3425962 | 20-scf00021 | 20 |
| AX-157917224 | 2 | 57.425 | KV453193.1 | 3273622 | 20-scf00021 | 20 |
| AX-157917282 | 2 | 57.425 | KV453193.1 | 3370311 | 20-scf00021 | 20 |
| AX-157917299 | 2 | 57.425 | KV453193.1 | 3389797 | 20-scf00021 | 20 |
| AX-157917308 | 2 | 57.425 | KV453193.1 | 3398149 | 20-scf00021 | 20 |
| AX-157917309 | 2 | 57.464 | KV453193.1 | 3399150 | 20-scf00021 | 20 |
| AX-157917340 | 2 | 57.464 | KV453193.1 | 3441109 | 20-scf00021 | 20 |
| AX-157812820 | 2 | 57.508 | KV453193.1 | 3233073 | 20-scf00021 | 20 |
| AX-157917198 | 2 | 57.508 | KV453193.1 | 3247321 | 20-scf00021 | 20 |
| AX-157721996 | 2 | 57.508 | KV453193.1 | 3268982 | 20-scf00021 | 20 |
| AX-157917310 | 2 | 57.508 | KV453193.1 | 3399536 | 20-scf00021 | 20 |
| AX-157917311 | 2 | 57.508 | KV453193.1 | 3401298 | 20-scf00021 | 20 |
| AX-157917312 | 2 | 57.508 | KV453193.1 | 3401990 | 20-scf00021 | 20 |
| AX-157917313 | 2 | 57.508 | KV453193.1 | 3403073 | 20-scf00021 | 20 |
| AX-157917314 | 2 | 57.508 | KV453193.1 | 3404188 | 20-scf00021 | 20 |
| AX-157812839 | 2 | 57.508 | KV453193.1 | 3405706 | 20-scf00021 | 20 |
| AX-157917315 | 2 | 57.508 | KV453193.1 | 3406018 | 20-scf00021 | 20 |
| AX-157812840 | 2 | 57.508 | KV453193.1 | 3407350 | 20-scf00021 | 20 |
| AX-157917316 | 2 | 57.508 | KV453193.1 | 3407814 | 20-scf00021 | 20 |
| AX-157917318 | 2 | 57.508 | KV453193.1 | 3409350 | 20-scf00021 | 20 |
| AX-157853741 | 2 | 57.508 | KV453193.1 | 3410806 | 20-scf00021 | 20 |
| AX-158405098 | 2 | 57.508 | KV453193.1 | 3413450 | 20-scf00021 | 20 |
| AX-157917321 | 2 | 57.508 | KV453193.1 | 3413618 | 20-scf00021 | 20 |
| AX-157917322 | 2 | 57.508 | KV453193.1 | 3416513 | 20-scf00021 | 20 |
| AX-157917324 | 2 | 57.508 | KV453193.1 | 3417285 | 20-scf00021 | 20 |
| AX-157917328 | 2 | 57.508 | KV453193.1 | 3426314 | 20-scf00021 | 20 |
| AX-157917329 | 2 | 57.508 | KV453193.1 | 3426750 | 20-scf00021 | 20 |
| AX-157917333 | 2 | 57.508 | KV453193.1 | 3432853 | 20-scf00021 | 20 |
| AX-157917334 | 2 | 57.508 | KV453193.1 | 3433779 | 20-scf00021 | 20 |
| AX-157812841 | 2 | 57.508 | KV453193.1 | 3435430 | 20-scf00021 | 20 |
| AX-157917335 | 2 | 57.508 | KV453193.1 | 3435971 | 20-scf00021 | 20 |
| AX-157917336 | 2 | 57.508 | KV453193.1 | 3436277 | 20-scf00021 | 20 |
| AX-157812842 | 2 | 57.508 | KV453193.1 | 3438137 | 20-scf00021 | 20 |
| AX-157917338 | 2 | 57.508 | KV453193.1 | 3438512 | 20-scf00021 | 20 |
| AX-157746154 | 2 | 57.508 | KV453193.1 | 3439137 | 20-scf00021 | 20 |
| AX-157917341 | 2 | 57.508 | KV453193.1 | 3441351 | 20-scf00021 | 20 |
| AX-157917345 | 2 | 57.508 | KV453193.1 | 3448264 | 20-scf00021 | 20 |
| AX-157917347 | 2 | 57.508 | KV453193.1 | 3456892 | 20-scf00021 | 20 |
| AX-157812845 | 2 | 57.508 | KV453193.1 | 3457377 | 20-scf00021 | 20 |
| AX-157917348 | 2 | 57.508 | KV453193.1 | 3457623 | 20-scf00021 | 20 |
| AX-157917349 | 2 | 57.508 | KV453193.1 | 3458339 | 20-scf00021 | 20 |
| AX-157917351 | 2 | 57.508 | KV453193.1 | 3459531 | 20-scf00021 | 20 |
| AX-157917352 | 2 | 57.508 | KV453193.1 | 3460690 | 20-scf00021 | 20 |
| AX-157917356 | 2 | 57.508 | KV453193.1 | 3467661 | 20-scf00021 | 20 |
| AX-157917357 | 2 | 57.508 | KV453193.1 | 3468507 | 20-scf00021 | 20 |
| AX-157917359 | 2 | 57.508 | KV453193.1 | 3471171 | 20-scf00021 | 20 |
| AX-157917361 | 2 | 57.508 | KV453193.1 | 3472970 | 20-scf00021 | 20 |
| AX-157917364 | 2 | 57.508 | KV453193.1 | 3475325 | 20-scf00021 | 20 |
| AX-157917365 | 2 | 57.671 | KV453193.1 | 3475818 | 20-scf00021 | 20 |
| AX-157917368 | 2 | 57.731 | KV453193.1 | 3477611 | 20-scf00021 | 20 |



|              |   |        |            |         |             |    |
|--------------|---|--------|------------|---------|-------------|----|
| AX-157917370 | 2 | 57.78  | KV453193.1 | 3478335 | 20-scf00021 | 20 |
| AX-157812850 | 2 | 57.78  | KV453193.1 | 3558779 | 20-scf00021 | 20 |
| AX-157812868 | 2 | 57.78  | KV453193.1 | 3764794 | 20-scf00021 | 20 |
| AX-157917372 | 2 | 57.835 | KV453193.1 | 3486966 | 20-scf00021 | 20 |
| AX-157917373 | 2 | 57.835 | KV453193.1 | 3488054 | 20-scf00021 | 20 |
| AX-157917374 | 2 | 57.835 | KV453193.1 | 3488991 | 20-scf00021 | 20 |
| AX-157917358 | 2 | 57.945 | KV453193.1 | 3470107 | 20-scf00021 | 20 |
| AX-157917376 | 2 | 57.945 | KV453193.1 | 3491292 | 20-scf00021 | 20 |
| AX-157917377 | 2 | 57.945 | KV453193.1 | 3492804 | 20-scf00021 | 20 |
| AX-157738498 | 2 | 58.054 | KV453193.1 | 3488477 | 20-scf00021 | 20 |
| AX-157917379 | 2 | 58.054 | KV453193.1 | 3494471 | 20-scf00021 | 20 |
| AX-157917380 | 2 | 58.054 | KV453193.1 | 3495526 | 20-scf00021 | 20 |
| AX-157917382 | 2 | 58.054 | KV453193.1 | 3498250 | 20-scf00021 | 20 |
| AX-157917383 | 2 | 58.054 | KV453193.1 | 3498743 | 20-scf00021 | 20 |
| AX-157917385 | 2 | 58.054 | KV453193.1 | 3499973 | 20-scf00021 | 20 |
| AX-157917387 | 2 | 58.054 | KV453193.1 | 3502165 | 20-scf00021 | 20 |
| AX-157917388 | 2 | 58.054 | KV453193.1 | 3503350 | 20-scf00021 | 20 |
| AX-157917389 | 2 | 58.054 | KV453193.1 | 3504373 | 20-scf00021 | 20 |
| AX-157917390 | 2 | 58.054 | KV453193.1 | 3507290 | 20-scf00021 | 20 |
| AX-157917391 | 2 | 58.054 | KV453193.1 | 3508348 | 20-scf00021 | 20 |
| AX-157917393 | 2 | 58.054 | KV453193.1 | 3509044 | 20-scf00021 | 20 |
| AX-157917395 | 2 | 58.054 | KV453193.1 | 3512018 | 20-scf00021 | 20 |
| AX-157917397 | 2 | 58.054 | KV453193.1 | 3513554 | 20-scf00021 | 20 |
| AX-157917410 | 2 | 58.054 | KV453193.1 | 3524962 | 20-scf00021 | 20 |
| AX-157917422 | 2 | 58.054 | KV453193.1 | 3534827 | 20-scf00021 | 20 |
| AX-157917425 | 2 | 58.054 | KV453193.1 | 3540213 | 20-scf00021 | 20 |
| AX-157917429 | 2 | 58.054 | KV453193.1 | 3548286 | 20-scf00021 | 20 |
| AX-157917400 | 2 | 58.163 | KV453193.1 | 3516020 | 20-scf00021 | 20 |
| AX-157917403 | 2 | 58.163 | KV453193.1 | 3518184 | 20-scf00021 | 20 |
| AX-157917409 | 2 | 58.252 | KV453193.1 | 3524610 | 20-scf00021 | 20 |
| AX-157917416 | 2 | 58.328 | KV453193.1 | 3529390 | 20-scf00021 | 20 |
| AX-157917420 | 2 | 58.328 | KV453193.1 | 3533134 | 20-scf00021 | 20 |
| AX-157917426 | 2 | 58.328 | KV453193.1 | 3542365 | 20-scf00021 | 20 |
| AX-157853744 | 2 | 58.328 | KV453193.1 | 3545422 | 20-scf00021 | 20 |
| AX-157917427 | 2 | 58.328 | KV453193.1 | 3546932 | 20-scf00021 | 20 |
| AX-158405104 | 2 | 58.328 | KV453193.1 | 3547401 | 20-scf00021 | 20 |
| AX-157812847 | 2 | 58.49  | KV453193.1 | 3550547 | 20-scf00021 | 20 |
| AX-157812849 | 2 | 58.491 | KV453193.1 | 3552895 | 20-scf00021 | 20 |
| AX-157715690 | 2 | 58.491 | KV453193.1 | 3552984 | 20-scf00021 | 20 |
| AX-157917434 | 2 | 58.491 | KV453193.1 | 3555504 | 20-scf00021 | 20 |
| AX-157812852 | 2 | 58.491 | KV453193.1 | 3584173 | 20-scf00021 | 20 |
| AX-157812855 | 2 | 58.491 | KV453193.1 | 3613187 | 20-scf00021 | 20 |
| AX-157917488 | 2 | 58.491 | KV453193.1 | 3621925 | 20-scf00021 | 20 |
| AX-157917437 | 2 | 58.54  | KV453193.1 | 3557294 | 20-scf00021 | 20 |
| AX-157812865 | 2 | 58.54  | KV453193.1 | 3668997 | 20-scf00021 | 20 |
| AX-157917441 | 2 | 58.6   | KV453193.1 | 3563311 | 20-scf00021 | 20 |
| AX-157917442 | 2 | 58.6   | KV453193.1 | 3566113 | 20-scf00021 | 20 |
| AX-157917460 | 2 | 58.6   | KV453193.1 | 3590259 | 20-scf00021 | 20 |
| AX-157917448 | 2 | 58.627 | KV453193.1 | 3575174 | 20-scf00021 | 20 |
| AX-157727883 | 2 | 58.627 | KV453193.1 | 3854117 | 20-scf00021 | 20 |
| AX-157917469 | 2 | 58.649 | KV453193.1 | 3598531 | 20-scf00021 | 20 |

|              |   |        |            |         |             |    |
|--------------|---|--------|------------|---------|-------------|----|
| AX-157757879 | 2 | 58.649 | KV453193.1 | 3613914 | 20-scf00021 | 20 |
| AX-157812854 | 2 | 58.673 | KV453193.1 | 3603597 | 20-scf00021 | 20 |
| AX-157917475 | 2 | 58.695 | KV453193.1 | 3606736 | 20-scf00021 | 20 |
| AX-157917462 | 2 | 58.71  | KV453193.1 | 3591228 | 20-scf00021 | 20 |
| AX-157917472 | 2 | 58.71  | KV453193.1 | 3603036 | 20-scf00021 | 20 |
| AX-157917476 | 2 | 58.71  | KV453193.1 | 3607035 | 20-scf00021 | 20 |
| AX-157917478 | 2 | 58.71  | KV453193.1 | 3608005 | 20-scf00021 | 20 |
| AX-157917479 | 2 | 58.71  | KV453193.1 | 3608243 | 20-scf00021 | 20 |
| AX-157917480 | 2 | 58.71  | KV453193.1 | 3609251 | 20-scf00021 | 20 |
| AX-157742093 | 2 | 58.71  | KV453193.1 | 3611262 | 20-scf00021 | 20 |
| AX-157917484 | 2 | 58.71  | KV453193.1 | 3614302 | 20-scf00021 | 20 |
| AX-157917493 | 2 | 58.817 | KV453193.1 | 3629080 | 20-scf00021 | 20 |
| AX-157917494 | 2 | 58.928 | KV453193.1 | 3629776 | 20-scf00021 | 20 |
| AX-157917496 | 2 | 58.928 | KV453193.1 | 3633872 | 20-scf00021 | 20 |
| AX-157917500 | 2 | 58.928 | KV453193.1 | 3637141 | 20-scf00021 | 20 |
| AX-157917501 | 2 | 58.966 | KV453193.1 | 3637897 | 20-scf00021 | 20 |
| AX-157917503 | 2 | 58.992 | KV453193.1 | 3638945 | 20-scf00021 | 20 |
| AX-157917412 | 2 | 59.038 | KV453193.1 | 3527147 | 20-scf00021 | 20 |
| AX-157917430 | 2 | 59.038 | KV453193.1 | 3550237 | 20-scf00021 | 20 |
| AX-157917495 | 2 | 59.038 | KV453193.1 | 3631914 | 20-scf00021 | 20 |
| AX-157917499 | 2 | 59.038 | KV453193.1 | 3636471 | 20-scf00021 | 20 |
| AX-157917504 | 2 | 59.038 | KV453193.1 | 3639568 | 20-scf00021 | 20 |
| AX-157917505 | 2 | 59.038 | KV453193.1 | 3639898 | 20-scf00021 | 20 |
| AX-157917507 | 2 | 59.038 | KV453193.1 | 3641208 | 20-scf00021 | 20 |
| AX-157917508 | 2 | 59.038 | KV453193.1 | 3641775 | 20-scf00021 | 20 |
| AX-157812858 | 2 | 59.038 | KV453193.1 | 3649006 | 20-scf00021 | 20 |
| AX-157812859 | 2 | 59.038 | KV453193.1 | 3649392 | 20-scf00021 | 20 |
| AX-157917514 | 2 | 59.038 | KV453193.1 | 3651112 | 20-scf00021 | 20 |
| AX-157917521 | 2 | 59.038 | KV453193.1 | 3663643 | 20-scf00021 | 20 |
| AX-157812863 | 2 | 59.038 | KV453193.1 | 3667680 | 20-scf00021 | 20 |
| AX-157812864 | 2 | 59.038 | KV453193.1 | 3668509 | 20-scf00021 | 20 |
| AX-157917524 | 2 | 59.038 | KV453193.1 | 3671260 | 20-scf00021 | 20 |
| AX-157917560 | 2 | 59.038 | KV453193.1 | 3740895 | 20-scf00021 | 20 |
| AX-157917707 | 2 | 59.038 | KV453193.1 | 3964690 | 20-scf00021 | 20 |
| AX-157746995 | 2 | 59.057 | KV453193.1 | 3681145 | 20-scf00021 | 20 |
| AX-157812857 | 2 | 59.075 | KV453193.1 | 3644911 | 20-scf00021 | 20 |
| AX-157917534 | 2 | 59.075 | KV453193.1 | 3690434 | 20-scf00021 | 20 |
| AX-157917543 | 2 | 59.075 | KV453193.1 | 3709137 | 20-scf00021 | 20 |
| AX-157917405 | 2 | 59.086 | KV453193.1 | 3520408 | 20-scf00021 | 20 |
| AX-157917423 | 2 | 59.086 | KV453193.1 | 3535372 | 20-scf00021 | 20 |
| AX-157748590 | 2 | 59.086 | KV453193.1 | 3656079 | 20-scf00021 | 20 |
| AX-157917528 | 2 | 59.086 | KV453193.1 | 3678146 | 20-scf00021 | 20 |
| AX-157917531 | 2 | 59.086 | KV453193.1 | 3683608 | 20-scf00021 | 20 |
| AX-157754487 | 2 | 59.086 | KV453193.1 | 3690481 | 20-scf00021 | 20 |
| AX-157917538 | 2 | 59.086 | KV453193.1 | 3696055 | 20-scf00021 | 20 |
| AX-157744267 | 2 | 59.105 | KV453193.1 | 3581691 | 20-scf00021 | 20 |
| AX-157864513 | 2 | 59.105 | KV453193.1 | 3584889 | 20-scf00021 | 20 |
| AX-157917539 | 2 | 59.105 | KV453193.1 | 3697552 | 20-scf00021 | 20 |
| AX-157917540 | 2 | 59.105 | KV453193.1 | 3706380 | 20-scf00021 | 20 |
| AX-157917554 | 2 | 59.105 | KV453193.1 | 3729205 | 20-scf00021 | 20 |
| AX-157883489 | 2 | 59.105 | KV453193.1 | 4299911 | 20-scf00021 | 20 |

|              |   |        |            |         |             |    |
|--------------|---|--------|------------|---------|-------------|----|
| AX-157917548 | 2 | 59.119 | KV453193.1 | 3722754 | 20-scf00021 | 20 |
| AX-157917556 | 2 | 59.147 | KV453193.1 | 3731458 | 20-scf00021 | 20 |
| AX-157917557 | 2 | 59.147 | KV453193.1 | 3734057 | 20-scf00021 | 20 |
| AX-157917563 | 2 | 59.147 | KV453193.1 | 3745515 | 20-scf00021 | 20 |
| AX-157917564 | 2 | 59.147 | KV453193.1 | 3747719 | 20-scf00021 | 20 |
| AX-157917570 | 2 | 59.173 | KV453193.1 | 3754972 | 20-scf00021 | 20 |
| AX-157917581 | 2 | 59.173 | KV453193.1 | 3774812 | 20-scf00021 | 20 |
| AX-157917574 | 2 | 59.198 | KV453193.1 | 3759782 | 20-scf00021 | 20 |
| AX-157917572 | 2 | 59.223 | KV453193.1 | 3756886 | 20-scf00021 | 20 |
| AX-157917575 | 2 | 59.223 | KV453193.1 | 3760909 | 20-scf00021 | 20 |
| AX-157917473 | 2 | 59.24  | KV453193.1 | 3604399 | 20-scf00021 | 20 |
| AX-157917578 | 2 | 59.24  | KV453193.1 | 3769921 | 20-scf00021 | 20 |
| AX-157917421 | 2 | 59.256 | KV453193.1 | 3533499 | 20-scf00021 | 20 |
| AX-157917523 | 2 | 59.256 | KV453193.1 | 3668937 | 20-scf00021 | 20 |
| AX-157717942 | 2 | 59.256 | KV453193.1 | 3780899 | 20-scf00021 | 20 |
| AX-157917584 | 2 | 59.256 | KV453193.1 | 3782563 | 20-scf00021 | 20 |
| AX-157917585 | 2 | 59.323 | KV453193.1 | 3783728 | 20-scf00021 | 20 |
| AX-158405108 | 2 | 59.365 | KV453193.1 | 3711731 | 20-scf00021 | 20 |
| AX-157744021 | 2 | 59.365 | KV453193.1 | 3715842 | 20-scf00021 | 20 |
| AX-157917579 | 2 | 59.365 | KV453193.1 | 3771682 | 20-scf00021 | 20 |
| AX-157917582 | 2 | 59.365 | KV453193.1 | 3776694 | 20-scf00021 | 20 |
| AX-157917586 | 2 | 59.365 | KV453193.1 | 3784594 | 20-scf00021 | 20 |
| AX-157917587 | 2 | 59.365 | KV453193.1 | 3788617 | 20-scf00021 | 20 |
| AX-157917589 | 2 | 59.365 | KV453193.1 | 3794177 | 20-scf00021 | 20 |
| AX-157917596 | 2 | 59.365 | KV453193.1 | 3802455 | 20-scf00021 | 20 |
| AX-157772771 | 2 | 59.365 | KV453193.1 | 3802870 | 20-scf00021 | 20 |
| AX-157917597 | 2 | 59.365 | KV453193.1 | 3804918 | 20-scf00021 | 20 |
| AX-157917599 | 2 | 59.365 | KV453193.1 | 3805905 | 20-scf00021 | 20 |
| AX-157853746 | 2 | 59.365 | KV453193.1 | 3810393 | 20-scf00021 | 20 |
| AX-157812869 | 2 | 59.365 | KV453193.1 | 3826198 | 20-scf00021 | 20 |
| AX-157917611 | 2 | 59.365 | KV453193.1 | 3827536 | 20-scf00021 | 20 |
| AX-157741615 | 2 | 59.365 | KV453193.1 | 3828895 | 20-scf00021 | 20 |
| AX-157917614 | 2 | 59.365 | KV453193.1 | 3833787 | 20-scf00021 | 20 |
| AX-157917616 | 2 | 59.365 | KV453193.1 | 3837597 | 20-scf00021 | 20 |
| AX-157812870 | 2 | 59.365 | KV453193.1 | 3838499 | 20-scf00021 | 20 |
| AX-157812871 | 2 | 59.365 | KV453193.1 | 3848851 | 20-scf00021 | 20 |
| AX-157812872 | 2 | 59.365 | KV453193.1 | 3850845 | 20-scf00021 | 20 |
| AX-157917623 | 2 | 59.365 | KV453193.1 | 3851484 | 20-scf00021 | 20 |
| AX-157812873 | 2 | 59.365 | KV453193.1 | 3852598 | 20-scf00021 | 20 |
| AX-157748792 | 2 | 59.365 | KV453193.1 | 3852885 | 20-scf00021 | 20 |
| AX-157812874 | 2 | 59.365 | KV453193.1 | 3852926 | 20-scf00021 | 20 |
| AX-157812875 | 2 | 59.365 | KV453193.1 | 3853030 | 20-scf00021 | 20 |
| AX-157917624 | 2 | 59.365 | KV453193.1 | 3853920 | 20-scf00021 | 20 |
| AX-157751838 | 2 | 59.365 | KV453193.1 | 3858130 | 20-scf00021 | 20 |
| AX-157917626 | 2 | 59.365 | KV453193.1 | 3861408 | 20-scf00021 | 20 |
| AX-157917627 | 2 | 59.365 | KV453193.1 | 3861725 | 20-scf00021 | 20 |
| AX-157917630 | 2 | 59.365 | KV453193.1 | 3864374 | 20-scf00021 | 20 |
| AX-157917631 | 2 | 59.365 | KV453193.1 | 3866528 | 20-scf00021 | 20 |
| AX-158405114 | 2 | 59.365 | KV453193.1 | 3867744 | 20-scf00021 | 20 |
| AX-157917634 | 2 | 59.365 | KV453193.1 | 3869298 | 20-scf00021 | 20 |
| AX-157917641 | 2 | 59.365 | KV453193.1 | 3878832 | 20-scf00021 | 20 |

|              |   |        |            |         |             |    |
|--------------|---|--------|------------|---------|-------------|----|
| AX-157917642 | 2 | 59.365 | KV453193.1 | 3879306 | 20-scf00021 | 20 |
| AX-157917644 | 2 | 59.365 | KV453193.1 | 3881525 | 20-scf00021 | 20 |
| AX-157917645 | 2 | 59.365 | KV453193.1 | 3882177 | 20-scf00021 | 20 |
| AX-157917646 | 2 | 59.365 | KV453193.1 | 3883509 | 20-scf00021 | 20 |
| AX-157917647 | 2 | 59.365 | KV453193.1 | 3884525 | 20-scf00021 | 20 |
| AX-157917693 | 2 | 59.365 | KV453193.1 | 3946503 | 20-scf00021 | 20 |
| AX-157812881 | 2 | 59.365 | KV453193.1 | 3948498 | 20-scf00021 | 20 |
| AX-157719658 | 2 | 59.365 | KV453193.1 | 4012229 | 20-scf00021 | 20 |
| AX-157917801 | 2 | 59.365 | KV453193.1 | 4183722 | 20-scf00021 | 20 |
| AX-157917655 | 2 | 59.399 | KV453193.1 | 3897358 | 20-scf00021 | 20 |
| AX-157917657 | 2 | 59.43  | KV453193.1 | 3898671 | 20-scf00021 | 20 |
| AX-157917466 | 2 | 59.474 | KV453193.1 | 3596105 | 20-scf00021 | 20 |
| AX-157917467 | 2 | 59.474 | KV453193.1 | 3597202 | 20-scf00021 | 20 |
| AX-157864514 | 2 | 59.474 | KV453193.1 | 3609956 | 20-scf00021 | 20 |
| AX-157917512 | 2 | 59.474 | KV453193.1 | 3646827 | 20-scf00021 | 20 |
| AX-157696578 | 2 | 59.474 | KV453193.1 | 3691216 | 20-scf00021 | 20 |
| AX-157917536 | 2 | 59.474 | KV453193.1 | 3691800 | 20-scf00021 | 20 |
| AX-157717550 | 2 | 59.474 | KV453193.1 | 3705451 | 20-scf00021 | 20 |
| AX-157874713 | 2 | 59.474 | KV453193.1 | 3709215 | 20-scf00021 | 20 |
| AX-157917555 | 2 | 59.474 | KV453193.1 | 3730481 | 20-scf00021 | 20 |
| AX-157917559 | 2 | 59.474 | KV453193.1 | 3738441 | 20-scf00021 | 20 |
| AX-157883482 | 2 | 59.474 | KV453193.1 | 3752968 | 20-scf00021 | 20 |
| AX-157917603 | 2 | 59.474 | KV453193.1 | 3810739 | 20-scf00021 | 20 |
| AX-157917615 | 2 | 59.474 | KV453193.1 | 3837057 | 20-scf00021 | 20 |
| AX-157917639 | 2 | 59.474 | KV453193.1 | 3875869 | 20-scf00021 | 20 |
| AX-157917648 | 2 | 59.474 | KV453193.1 | 3884870 | 20-scf00021 | 20 |
| AX-157812877 | 2 | 59.474 | KV453193.1 | 3891385 | 20-scf00021 | 20 |
| AX-157917660 | 2 | 59.474 | KV453193.1 | 3904881 | 20-scf00021 | 20 |
| AX-157917661 | 2 | 59.474 | KV453193.1 | 3907716 | 20-scf00021 | 20 |
| AX-157917665 | 2 | 59.474 | KV453193.1 | 3912960 | 20-scf00021 | 20 |
| AX-157917666 | 2 | 59.474 | KV453193.1 | 3914780 | 20-scf00021 | 20 |
| AX-157917668 | 2 | 59.474 | KV453193.1 | 3917885 | 20-scf00021 | 20 |
| AX-157917669 | 2 | 59.474 | KV453193.1 | 3918383 | 20-scf00021 | 20 |
| AX-157917670 | 2 | 59.474 | KV453193.1 | 3919288 | 20-scf00021 | 20 |
| AX-157917672 | 2 | 59.474 | KV453193.1 | 3922614 | 20-scf00021 | 20 |
| AX-157917676 | 2 | 59.474 | KV453193.1 | 3927185 | 20-scf00021 | 20 |
| AX-157917677 | 2 | 59.474 | KV453193.1 | 3929725 | 20-scf00021 | 20 |
| AX-157917682 | 2 | 59.474 | KV453193.1 | 3934676 | 20-scf00021 | 20 |
| AX-157812879 | 2 | 59.474 | KV453193.1 | 3937135 | 20-scf00021 | 20 |
| AX-157812880 | 2 | 59.474 | KV453193.1 | 3938239 | 20-scf00021 | 20 |
| AX-157716003 | 2 | 59.474 | KV453193.1 | 3938299 | 20-scf00021 | 20 |
| AX-157917687 | 2 | 59.474 | KV453193.1 | 3942671 | 20-scf00021 | 20 |
| AX-157917691 | 2 | 59.474 | KV453193.1 | 3945555 | 20-scf00021 | 20 |
| AX-157917692 | 2 | 59.474 | KV453193.1 | 3946134 | 20-scf00021 | 20 |
| AX-157917695 | 2 | 59.474 | KV453193.1 | 3949033 | 20-scf00021 | 20 |
| AX-157917696 | 2 | 59.474 | KV453193.1 | 3950004 | 20-scf00021 | 20 |
| AX-157917697 | 2 | 59.474 | KV453193.1 | 3952498 | 20-scf00021 | 20 |
| AX-158404294 | 2 | 59.474 | KV453193.1 | 3954616 | 20-scf00021 | 20 |
| AX-157917698 | 2 | 59.474 | KV453193.1 | 3954878 | 20-scf00021 | 20 |
| AX-157717539 | 2 | 59.474 | KV453193.1 | 3955284 | 20-scf00021 | 20 |
| AX-157917700 | 2 | 59.474 | KV453193.1 | 3956588 | 20-scf00021 | 20 |

|              |   |        |            |         |             |    |
|--------------|---|--------|------------|---------|-------------|----|
| AX-157917702 | 2 | 59.474 | KV453193.1 | 3960219 | 20-scf00021 | 20 |
| AX-157812887 | 2 | 59.474 | KV453193.1 | 3964131 | 20-scf00021 | 20 |
| AX-157917708 | 2 | 59.474 | KV453193.1 | 3964932 | 20-scf00021 | 20 |
| AX-157917712 | 2 | 59.474 | KV453193.1 | 3968839 | 20-scf00021 | 20 |
| AX-157772160 | 2 | 59.474 | KV453193.1 | 3970249 | 20-scf00021 | 20 |
| AX-157812888 | 2 | 59.474 | KV453193.1 | 3970614 | 20-scf00021 | 20 |
| AX-157917719 | 2 | 59.474 | KV453193.1 | 3992023 | 20-scf00021 | 20 |
| AX-157749354 | 2 | 59.474 | KV453193.1 | 4004770 | 20-scf00021 | 20 |
| AX-157917731 | 2 | 59.474 | KV453193.1 | 4012664 | 20-scf00021 | 20 |
| AX-157917741 | 2 | 59.474 | KV453193.1 | 4091307 | 20-scf00021 | 20 |
| AX-157713823 | 2 | 59.474 | KV453193.1 | 4183481 | 20-scf00021 | 20 |
| AX-157917820 | 2 | 59.474 | KV453193.1 | 4209033 | 20-scf00021 | 20 |
| AX-158405123 | 2 | 59.474 | KV453193.1 | 4238219 | 20-scf00021 | 20 |
| AX-157917865 | 2 | 59.474 | KV453193.1 | 4264763 | 20-scf00021 | 20 |
| AX-157742170 | 2 | 59.547 | KV453193.1 | 3984515 | 20-scf00021 | 20 |
| AX-157917418 | 2 | 59.584 | KV453193.1 | 3531449 | 20-scf00021 | 20 |
| AX-157917550 | 2 | 59.584 | KV453193.1 | 3724557 | 20-scf00021 | 20 |
| AX-157917640 | 2 | 59.584 | KV453193.1 | 3876468 | 20-scf00021 | 20 |
| AX-157917688 | 2 | 59.584 | KV453193.1 | 3943542 | 20-scf00021 | 20 |
| AX-157812884 | 2 | 59.584 | KV453193.1 | 3961140 | 20-scf00021 | 20 |
| AX-157812889 | 2 | 59.584 | KV453193.1 | 3986067 | 20-scf00021 | 20 |
| AX-157812890 | 2 | 59.584 | KV453193.1 | 3990208 | 20-scf00021 | 20 |
| AX-157775717 | 2 | 59.584 | KV453193.1 | 4005731 | 20-scf00021 | 20 |
| AX-157917723 | 2 | 59.584 | KV453193.1 | 4007016 | 20-scf00021 | 20 |
| AX-157917724 | 2 | 59.584 | KV453193.1 | 4007403 | 20-scf00021 | 20 |
| AX-157812891 | 2 | 59.584 | KV453193.1 | 4007738 | 20-scf00021 | 20 |
| AX-157917725 | 2 | 59.584 | KV453193.1 | 4007994 | 20-scf00021 | 20 |
| AX-157917727 | 2 | 59.584 | KV453193.1 | 4009298 | 20-scf00021 | 20 |
| AX-157917728 | 2 | 59.584 | KV453193.1 | 4009584 | 20-scf00021 | 20 |
| AX-157917737 | 2 | 59.584 | KV453193.1 | 4086658 | 20-scf00021 | 20 |
| AX-157917740 | 2 | 59.584 | KV453193.1 | 4089183 | 20-scf00021 | 20 |
| AX-158405117 | 2 | 59.584 | KV453193.1 | 4090643 | 20-scf00021 | 20 |
| AX-157917742 | 2 | 59.584 | KV453193.1 | 4091681 | 20-scf00021 | 20 |
| AX-157745295 | 2 | 59.584 | KV453193.1 | 4092210 | 20-scf00021 | 20 |
| AX-157812893 | 2 | 59.584 | KV453193.1 | 4092511 | 20-scf00021 | 20 |
| AX-157917744 | 2 | 59.723 | KV453193.1 | 4096411 | 20-scf00021 | 20 |
| AX-157917654 | 2 | 59.802 | KV453193.1 | 3894277 | 20-scf00021 | 20 |
| AX-157917658 | 2 | 59.802 | KV453193.1 | 3898833 | 20-scf00021 | 20 |
| AX-157917662 | 2 | 59.802 | KV453193.1 | 3908700 | 20-scf00021 | 20 |
| AX-157917680 | 2 | 59.802 | KV453193.1 | 3932639 | 20-scf00021 | 20 |
| AX-157718247 | 2 | 59.802 | KV453193.1 | 4009240 | 20-scf00021 | 20 |
| AX-157917736 | 2 | 59.802 | KV453193.1 | 4086320 | 20-scf00021 | 20 |
| AX-157917743 | 2 | 59.802 | KV453193.1 | 4095432 | 20-scf00021 | 20 |
| AX-157917746 | 2 | 59.802 | KV453193.1 | 4098870 | 20-scf00021 | 20 |
| AX-158405120 | 2 | 59.802 | KV453193.1 | 4099654 | 20-scf00021 | 20 |
| AX-157917748 | 2 | 59.802 | KV453193.1 | 4103324 | 20-scf00021 | 20 |
| AX-157917751 | 2 | 59.802 | KV453193.1 | 4108915 | 20-scf00021 | 20 |
| AX-157917752 | 2 | 59.802 | KV453193.1 | 4109339 | 20-scf00021 | 20 |
| AX-157917755 | 2 | 59.802 | KV453193.1 | 4111344 | 20-scf00021 | 20 |
| AX-157917757 | 2 | 59.802 | KV453193.1 | 4112540 | 20-scf00021 | 20 |
| AX-157917759 | 2 | 59.802 | KV453193.1 | 4114801 | 20-scf00021 | 20 |

|              |   |        |             |         |             |    |
|--------------|---|--------|-------------|---------|-------------|----|
| AX-157917761 | 2 | 59.802 | KV453193.1  | 4118200 | 20-scf00021 | 20 |
| AX-157917762 | 2 | 59.802 | KV453193.1  | 4119624 | 20-scf00021 | 20 |
| AX-157725438 | 2 | 59.802 | KV453193.1  | 4120604 | 20-scf00021 | 20 |
| AX-157917765 | 2 | 59.802 | KV453193.1  | 4123580 | 20-scf00021 | 20 |
| AX-157853748 | 2 | 59.802 | KV453193.1  | 4129126 | 20-scf00021 | 20 |
| AX-157917769 | 2 | 59.802 | KV453193.1  | 4132127 | 20-scf00021 | 20 |
| AX-157917772 | 2 | 59.802 | KV453193.1  | 4134219 | 20-scf00021 | 20 |
| AX-157917773 | 2 | 59.802 | KV453193.1  | 4135006 | 20-scf00021 | 20 |
| AX-157917774 | 2 | 59.802 | KV453193.1  | 4135357 | 20-scf00021 | 20 |
| AX-157917775 | 2 | 59.802 | KV453193.1  | 4136852 | 20-scf00021 | 20 |
| AX-157749677 | 2 | 59.802 | KV453193.1  | 4164024 | 20-scf00021 | 20 |
| AX-157917791 | 2 | 59.802 | KV453193.1  | 4169081 | 20-scf00021 | 20 |
| AX-157917794 | 2 | 59.802 | KV453193.1  | 4171963 | 20-scf00021 | 20 |
| AX-157917799 | 2 | 59.802 | KV453193.1  | 4180403 | 20-scf00021 | 20 |
| AX-157752266 | 2 | 59.802 | KV453193.1  | 4192273 | 20-scf00021 | 20 |
| AX-157917822 | 2 | 59.802 | KV453193.1  | 4210177 | 20-scf00021 | 20 |
| AX-157812901 | 2 | 59.802 | KV453193.1  | 4218803 | 20-scf00021 | 20 |
| AX-157812907 | 2 | 59.802 | KV453193.1  | 4321110 | 20-scf00021 | 20 |
| AX-157917913 | 2 | 59.802 | KV453193.1  | 4335212 | 20-scf00021 | 20 |
| AX-157917928 | 2 | 59.802 | KV453193.1  | 4359259 | 20-scf00021 | 20 |
| AX-157680314 | 2 | 59.802 | 3ML01030984 | 188     | scf06588_1  | UN |
| AX-157917659 | 2 | 60.021 | KV453193.1  | 3902527 | 20-scf00021 | 20 |
| AX-157917771 | 2 | 60.021 | KV453193.1  | 4133838 | 20-scf00021 | 20 |
| AX-157716169 | 2 | 60.021 | KV453193.1  | 4191618 | 20-scf00021 | 20 |
| AX-157917812 | 2 | 60.021 | KV453193.1  | 4203576 | 20-scf00021 | 20 |
| AX-157758359 | 2 | 60.021 | KV453193.1  | 4205180 | 20-scf00021 | 20 |
| AX-157917814 | 2 | 60.021 | KV453193.1  | 4205225 | 20-scf00021 | 20 |
| AX-157917816 | 2 | 60.021 | KV453193.1  | 4205883 | 20-scf00021 | 20 |
| AX-157917819 | 2 | 60.021 | KV453193.1  | 4207776 | 20-scf00021 | 20 |
| AX-157917821 | 2 | 60.021 | KV453193.1  | 4209475 | 20-scf00021 | 20 |
| AX-157917823 | 2 | 60.021 | KV453193.1  | 4211520 | 20-scf00021 | 20 |
| AX-157917824 | 2 | 60.021 | KV453193.1  | 4212230 | 20-scf00021 | 20 |
| AX-157917825 | 2 | 60.021 | KV453193.1  | 4213587 | 20-scf00021 | 20 |
| AX-157738349 | 2 | 60.021 | KV453193.1  | 4216003 | 20-scf00021 | 20 |
| AX-157917828 | 2 | 60.021 | KV453193.1  | 4216661 | 20-scf00021 | 20 |
| AX-157917830 | 2 | 60.021 | KV453193.1  | 4218241 | 20-scf00021 | 20 |
| AX-157917831 | 2 | 60.021 | KV453193.1  | 4219333 | 20-scf00021 | 20 |
| AX-157716040 | 2 | 60.021 | KV453193.1  | 4221217 | 20-scf00021 | 20 |
| AX-157917835 | 2 | 60.021 | KV453193.1  | 4226266 | 20-scf00021 | 20 |
| AX-157917846 | 2 | 60.021 | KV453193.1  | 4236698 | 20-scf00021 | 20 |
| AX-157917887 | 2 | 60.021 | KV453193.1  | 4308200 | 20-scf00021 | 20 |
| AX-157917894 | 2 | 60.021 | KV453193.1  | 4316797 | 20-scf00021 | 20 |
| AX-157917839 | 2 | 60.077 | KV453193.1  | 4230805 | 20-scf00021 | 20 |
| AX-157917840 | 2 | 60.077 | KV453193.1  | 4231176 | 20-scf00021 | 20 |
| AX-157917841 | 2 | 60.13  | KV453193.1  | 4232604 | 20-scf00021 | 20 |
| AX-157917458 | 2 | 60.348 | KV453193.1  | 3589166 | 20-scf00021 | 20 |
| AX-157917516 | 2 | 60.348 | KV453193.1  | 3653201 | 20-scf00021 | 20 |
| AX-157917549 | 2 | 60.348 | KV453193.1  | 3723901 | 20-scf00021 | 20 |
| AX-157917602 | 2 | 60.348 | KV453193.1  | 3810100 | 20-scf00021 | 20 |
| AX-158389619 | 2 | 60.348 | KV453193.1  | 3862926 | 20-scf00021 | 20 |
| AX-157917632 | 2 | 60.348 | KV453193.1  | 3868490 | 20-scf00021 | 20 |

|              |   |        |             |         |             |    |
|--------------|---|--------|-------------|---------|-------------|----|
| AX-157917689 | 2 | 60.348 | KV453193.1  | 3944507 | 20-scf00021 | 20 |
| AX-157917711 | 2 | 60.348 | KV453193.1  | 3967560 | 20-scf00021 | 20 |
| AX-157917749 | 2 | 60.348 | KV453193.1  | 4105684 | 20-scf00021 | 20 |
| AX-157917750 | 2 | 60.348 | KV453193.1  | 4108507 | 20-scf00021 | 20 |
| AX-157778196 | 2 | 60.348 | KV453193.1  | 4179013 | 20-scf00021 | 20 |
| AX-157720514 | 2 | 60.348 | KV453193.1  | 4182659 | 20-scf00021 | 20 |
| AX-157917817 | 2 | 60.348 | KV453193.1  | 4206632 | 20-scf00021 | 20 |
| AX-157917829 | 2 | 60.348 | KV453193.1  | 4217603 | 20-scf00021 | 20 |
| AX-157917844 | 2 | 60.348 | KV453193.1  | 4235328 | 20-scf00021 | 20 |
| AX-157917845 | 2 | 60.348 | KV453193.1  | 4236451 | 20-scf00021 | 20 |
| AX-157720926 | 2 | 60.348 | KV453193.1  | 4239126 | 20-scf00021 | 20 |
| AX-157917850 | 2 | 60.348 | KV453193.1  | 4242794 | 20-scf00021 | 20 |
| AX-157917851 | 2 | 60.348 | KV453193.1  | 4244889 | 20-scf00021 | 20 |
| AX-157917855 | 2 | 60.348 | KV453193.1  | 4248250 | 20-scf00021 | 20 |
| AX-157917856 | 2 | 60.348 | KV453193.1  | 4250338 | 20-scf00021 | 20 |
| AX-157917860 | 2 | 60.348 | KV453193.1  | 4255178 | 20-scf00021 | 20 |
| AX-157812902 | 2 | 60.348 | KV453193.1  | 4265174 | 20-scf00021 | 20 |
| AX-157917866 | 2 | 60.348 | KV453193.1  | 4265216 | 20-scf00021 | 20 |
| AX-158414846 | 2 | 60.348 | KV453193.1  | 4268364 | 20-scf00021 | 20 |
| AX-157917868 | 2 | 60.348 | KV453193.1  | 4268777 | 20-scf00021 | 20 |
| AX-158389623 | 2 | 60.348 | KV453193.1  | 4269213 | 20-scf00021 | 20 |
| AX-157719614 | 2 | 60.348 | KV453193.1  | 4270382 | 20-scf00021 | 20 |
| AX-157917871 | 2 | 60.348 | KV453193.1  | 4274604 | 20-scf00021 | 20 |
| AX-157917872 | 2 | 60.348 | KV453193.1  | 4275225 | 20-scf00021 | 20 |
| AX-157917874 | 2 | 60.348 | KV453193.1  | 4276761 | 20-scf00021 | 20 |
| AX-157917877 | 2 | 60.348 | KV453193.1  | 4280116 | 20-scf00021 | 20 |
| AX-157713258 | 2 | 60.348 | KV453193.1  | 4282559 | 20-scf00021 | 20 |
| AX-157917892 | 2 | 60.348 | KV453193.1  | 4315456 | 20-scf00021 | 20 |
| AX-157706276 | 2 | 60.348 | 3ML01031978 | 90      | scf07595_1  | UN |
| AX-157706681 | 2 | 60.348 | 3ML01032730 | 101     | scf08357_1  | UN |
| AX-157706682 | 2 | 60.348 | 3ML01032730 | 258     | scf08357_1  | UN |
| AX-157718422 | 2 | 60.457 | KV453193.1  | 4292171 | 20-scf00021 | 20 |
| AX-157917883 | 2 | 60.457 | KV453193.1  | 4294704 | 20-scf00021 | 20 |
| AX-157917886 | 2 | 60.457 | KV453193.1  | 4305117 | 20-scf00021 | 20 |
| AX-157749990 | 2 | 60.457 | KV453193.1  | 4307215 | 20-scf00021 | 20 |
| AX-157812906 | 2 | 60.457 | KV453193.1  | 4309706 | 20-scf00021 | 20 |
| AX-158405127 | 2 | 60.457 | KV453193.1  | 4316062 | 20-scf00021 | 20 |
| AX-157917896 | 2 | 60.457 | KV453193.1  | 4317935 | 20-scf00021 | 20 |
| AX-157917903 | 2 | 60.457 | KV453193.1  | 4326562 | 20-scf00021 | 20 |
| AX-157917912 | 2 | 60.457 | KV453193.1  | 4334935 | 20-scf00021 | 20 |
| AX-157917848 | 2 | 60.56  | KV453193.1  | 4239866 | 20-scf00021 | 20 |
| AX-157917849 | 2 | 60.56  | KV453193.1  | 4240217 | 20-scf00021 | 20 |
| AX-157917918 | 2 | 60.56  | KV453193.1  | 4340064 | 20-scf00021 | 20 |
| AX-157917923 | 2 | 60.56  | KV453193.1  | 4346303 | 20-scf00021 | 20 |
| AX-157918048 | 2 | 60.56  | KV453193.1  | 4503485 | 20-scf00021 | 20 |
| AX-157748314 | 2 | 60.676 | KV453193.1  | 4309392 | 20-scf00021 | 20 |
| AX-157917920 | 2 | 60.676 | KV453193.1  | 4340818 | 20-scf00021 | 20 |
| AX-157917922 | 2 | 60.676 | KV453193.1  | 4344316 | 20-scf00021 | 20 |
| AX-157917925 | 2 | 60.676 | KV453193.1  | 4350717 | 20-scf00021 | 20 |
| AX-157917927 | 2 | 60.676 | KV453193.1  | 4356508 | 20-scf00021 | 20 |
| AX-157752089 | 2 | 60.676 | KV453193.1  | 4358191 | 20-scf00021 | 20 |

|              |   |        |            |         |             |    |
|--------------|---|--------|------------|---------|-------------|----|
| AX-157917929 | 2 | 60.676 | KV453193.1 | 4367261 | 20-scf00021 | 20 |
| AX-157917930 | 2 | 60.676 | KV453193.1 | 4367364 | 20-scf00021 | 20 |
| AX-157917936 | 2 | 60.676 | KV453193.1 | 4371047 | 20-scf00021 | 20 |
| AX-157812912 | 2 | 60.676 | KV453193.1 | 4374083 | 20-scf00021 | 20 |
| AX-157917942 | 2 | 60.676 | KV453193.1 | 4376016 | 20-scf00021 | 20 |
| AX-157917944 | 2 | 60.676 | KV453193.1 | 4376460 | 20-scf00021 | 20 |
| AX-157917947 | 2 | 60.676 | KV453193.1 | 4379161 | 20-scf00021 | 20 |
| AX-157917951 | 2 | 60.7   | KV453193.1 | 4383304 | 20-scf00021 | 20 |
| AX-157917945 | 2 | 60.709 | KV453193.1 | 4377674 | 20-scf00021 | 20 |
| AX-157883493 | 2 | 60.709 | KV453193.1 | 4379784 | 20-scf00021 | 20 |
| AX-157917958 | 2 | 60.709 | KV453193.1 | 4392575 | 20-scf00021 | 20 |
| AX-157917961 | 2 | 60.747 | KV453193.1 | 4396478 | 20-scf00021 | 20 |
| AX-157917965 | 2 | 60.785 | KV453193.1 | 4400478 | 20-scf00021 | 20 |
| AX-157917967 | 2 | 60.82  | KV453193.1 | 4402476 | 20-scf00021 | 20 |
| AX-157753986 | 2 | 60.855 | KV453193.1 | 4259868 | 20-scf00021 | 20 |
| AX-157917904 | 2 | 60.855 | KV453193.1 | 4328531 | 20-scf00021 | 20 |
| AX-157917937 | 2 | 60.855 | KV453193.1 | 4371683 | 20-scf00021 | 20 |
| AX-157714745 | 2 | 60.855 | KV453193.1 | 4403562 | 20-scf00021 | 20 |
| AX-157812914 | 2 | 60.855 | KV453193.1 | 4403658 | 20-scf00021 | 20 |
| AX-157812915 | 2 | 60.855 | KV453193.1 | 4406367 | 20-scf00021 | 20 |
| AX-157917941 | 2 | 60.894 | KV453193.1 | 4374453 | 20-scf00021 | 20 |
| AX-157864519 | 2 | 60.894 | KV453193.1 | 4380312 | 20-scf00021 | 20 |
| AX-157917966 | 2 | 60.894 | KV453193.1 | 4401838 | 20-scf00021 | 20 |
| AX-157917968 | 2 | 60.894 | KV453193.1 | 4406753 | 20-scf00021 | 20 |
| AX-157917969 | 2 | 60.894 | KV453193.1 | 4407498 | 20-scf00021 | 20 |
| AX-157917973 | 2 | 60.894 | KV453193.1 | 4415199 | 20-scf00021 | 20 |
| AX-157917974 | 2 | 60.894 | KV453193.1 | 4416244 | 20-scf00021 | 20 |
| AX-157917975 | 2 | 60.894 | KV453193.1 | 4419260 | 20-scf00021 | 20 |
| AX-157917976 | 2 | 60.894 | KV453193.1 | 4420395 | 20-scf00021 | 20 |
| AX-157917979 | 2 | 60.894 | KV453193.1 | 4422818 | 20-scf00021 | 20 |
| AX-157917980 | 2 | 60.894 | KV453193.1 | 4425710 | 20-scf00021 | 20 |
| AX-157917982 | 2 | 60.894 | KV453193.1 | 4426830 | 20-scf00021 | 20 |
| AX-157917983 | 2 | 60.894 | KV453193.1 | 4427317 | 20-scf00021 | 20 |
| AX-157917984 | 2 | 60.894 | KV453193.1 | 4427754 | 20-scf00021 | 20 |
| AX-157917985 | 2 | 60.953 | KV453193.1 | 4431544 | 20-scf00021 | 20 |
| AX-157917962 | 2 | 61.004 | KV453193.1 | 4397313 | 20-scf00021 | 20 |
| AX-157917988 | 2 | 61.004 | KV453193.1 | 4434493 | 20-scf00021 | 20 |
| AX-157917990 | 2 | 61.004 | KV453193.1 | 4437586 | 20-scf00021 | 20 |
| AX-157752115 | 2 | 61.004 | KV453193.1 | 4438478 | 20-scf00021 | 20 |
| AX-157917991 | 2 | 61.004 | KV453193.1 | 4439331 | 20-scf00021 | 20 |
| AX-157918004 | 2 | 61.004 | KV453193.1 | 4451739 | 20-scf00021 | 20 |
| AX-158405132 | 2 | 61.004 | KV453193.1 | 4495446 | 20-scf00021 | 20 |
| AX-157853751 | 2 | 61.044 | KV453193.1 | 4334225 | 20-scf00021 | 20 |
| AX-157917939 | 2 | 61.044 | KV453193.1 | 4372439 | 20-scf00021 | 20 |
| AX-157917957 | 2 | 61.044 | KV453193.1 | 4392129 | 20-scf00021 | 20 |
| AX-157917986 | 2 | 61.044 | KV453193.1 | 4433142 | 20-scf00021 | 20 |
| AX-157917992 | 2 | 61.044 | KV453193.1 | 4439997 | 20-scf00021 | 20 |
| AX-157918014 | 2 | 61.044 | KV453193.1 | 4463890 | 20-scf00021 | 20 |
| AX-157917607 | 2 | 61.113 | KV453193.1 | 3815129 | 20-scf00021 | 20 |
| AX-157917622 | 2 | 61.113 | KV453193.1 | 3848377 | 20-scf00021 | 20 |
| AX-157917993 | 2 | 61.113 | KV453193.1 | 4440710 | 20-scf00021 | 20 |



|              |   |        |             |         |             |    |
|--------------|---|--------|-------------|---------|-------------|----|
| AX-157917994 | 2 | 61.113 | KV453193.1  | 4441090 | 20-scf00021 | 20 |
| AX-157917997 | 2 | 61.113 | KV453193.1  | 4444744 | 20-scf00021 | 20 |
| AX-157917998 | 2 | 61.113 | KV453193.1  | 4446534 | 20-scf00021 | 20 |
| AX-157918005 | 2 | 61.113 | KV453193.1  | 4452465 | 20-scf00021 | 20 |
| AX-157918006 | 2 | 61.113 | KV453193.1  | 4454927 | 20-scf00021 | 20 |
| AX-157918007 | 2 | 61.113 | KV453193.1  | 4455349 | 20-scf00021 | 20 |
| AX-157918008 | 2 | 61.113 | KV453193.1  | 4455938 | 20-scf00021 | 20 |
| AX-158404302 | 2 | 61.113 | KV453193.1  | 4457576 | 20-scf00021 | 20 |
| AX-157918012 | 2 | 61.113 | KV453193.1  | 4461599 | 20-scf00021 | 20 |
| AX-157918013 | 2 | 61.113 | KV453193.1  | 4463068 | 20-scf00021 | 20 |
| AX-157812918 | 2 | 61.113 | KV453193.1  | 4465827 | 20-scf00021 | 20 |
| AX-157918016 | 2 | 61.113 | KV453193.1  | 4472654 | 20-scf00021 | 20 |
| AX-157918018 | 2 | 61.113 | KV453193.1  | 4473679 | 20-scf00021 | 20 |
| AX-157918019 | 2 | 61.113 | KV453193.1  | 4474170 | 20-scf00021 | 20 |
| AX-157918030 | 2 | 61.113 | KV453193.1  | 4488484 | 20-scf00021 | 20 |
| AX-157812920 | 2 | 61.113 | KV453193.1  | 4499154 | 20-scf00021 | 20 |
| AX-157918162 | 2 | 61.113 | KV453193.1  | 4669112 | 20-scf00021 | 20 |
| AX-157917893 | 2 | 61.222 | KV453193.1  | 4316446 | 20-scf00021 | 20 |
| AX-157722647 | 2 | 61.222 | KV453193.1  | 4334161 | 20-scf00021 | 20 |
| AX-157918022 | 2 | 61.222 | KV453193.1  | 4480123 | 20-scf00021 | 20 |
| AX-157918026 | 2 | 61.222 | KV453193.1  | 4483474 | 20-scf00021 | 20 |
| AX-157918027 | 2 | 61.222 | KV453193.1  | 4485770 | 20-scf00021 | 20 |
| AX-157918028 | 2 | 61.222 | KV453193.1  | 4487510 | 20-scf00021 | 20 |
| AX-157918029 | 2 | 61.222 | KV453193.1  | 4487898 | 20-scf00021 | 20 |
| AX-157750712 | 2 | 61.222 | KV453193.1  | 4490059 | 20-scf00021 | 20 |
| AX-157918032 | 2 | 61.222 | KV453193.1  | 4492439 | 20-scf00021 | 20 |
| AX-157918033 | 2 | 61.222 | KV453193.1  | 4492589 | 20-scf00021 | 20 |
| AX-157918036 | 2 | 61.222 | KV453193.1  | 4495365 | 20-scf00021 | 20 |
| AX-157918037 | 2 | 61.222 | KV453193.1  | 4496249 | 20-scf00021 | 20 |
| AX-157864522 | 2 | 61.222 | KV453193.1  | 4496557 | 20-scf00021 | 20 |
| AX-157918038 | 2 | 61.222 | KV453193.1  | 4497266 | 20-scf00021 | 20 |
| AX-157918040 | 2 | 61.222 | KV453193.1  | 4498336 | 20-scf00021 | 20 |
| AX-157918041 | 2 | 61.222 | KV453193.1  | 4499599 | 20-scf00021 | 20 |
| AX-157716431 | 2 | 61.222 | KV453193.1  | 4508958 | 20-scf00021 | 20 |
| AX-157918044 | 2 | 61.223 | KV453193.1  | 4501524 | 20-scf00021 | 20 |
| AX-157918062 | 2 | 61.466 | KV453193.1  | 4535140 | 20-scf00021 | 20 |
| AX-157918063 | 2 | 61.466 | KV453193.1  | 4536164 | 20-scf00021 | 20 |
| AX-157918064 | 2 | 61.466 | KV453193.1  | 4536533 | 20-scf00021 | 20 |
| AX-157812921 | 2 | 61.466 | KV453193.1  | 4540092 | 20-scf00021 | 20 |
| AX-157918151 | 2 | 61.466 | KV453193.1  | 4660009 | 20-scf00021 | 20 |
| AX-157918200 | 2 | 61.466 | KV453193.1  | 4726672 | 20-scf00021 | 20 |
| AX-157714360 | 2 | 61.466 | KV453193.1  | 4736232 | 20-scf00021 | 20 |
| AX-157707452 | 2 | 61.466 | 3ML01034314 | 196     | scf09986_1  | UN |
| AX-157812922 | 2 | 61.525 | KV453193.1  | 4542037 | 20-scf00021 | 20 |
| AX-157918066 | 2 | 61.768 | KV453193.1  | 4543414 | 20-scf00021 | 20 |
| AX-157918068 | 2 | 61.768 | KV453193.1  | 4544797 | 20-scf00021 | 20 |
| AX-157918074 | 2 | 61.768 | KV453193.1  | 4554897 | 20-scf00021 | 20 |
| AX-157812933 | 2 | 61.768 | KV453193.1  | 4670210 | 20-scf00021 | 20 |
| AX-157918070 | 2 | 61.769 | KV453193.1  | 4550258 | 20-scf00021 | 20 |
| AX-157918075 | 2 | 61.769 | KV453193.1  | 4555569 | 20-scf00021 | 20 |
| AX-158405133 | 2 | 61.769 | KV453193.1  | 4557003 | 20-scf00021 | 20 |

|              |   |        |             |         |             |    |
|--------------|---|--------|-------------|---------|-------------|----|
| AX-157869122 | 2 | 61.769 | KV453193.1  | 4559410 | 20-scf00021 | 20 |
| AX-157918080 | 2 | 61.769 | KV453193.1  | 4560644 | 20-scf00021 | 20 |
| AX-157918081 | 2 | 61.769 | KV453193.1  | 4560701 | 20-scf00021 | 20 |
| AX-157918082 | 2 | 61.769 | KV453193.1  | 4561765 | 20-scf00021 | 20 |
| AX-157918083 | 2 | 61.769 | KV453193.1  | 4563462 | 20-scf00021 | 20 |
| AX-157774673 | 2 | 61.769 | KV453193.1  | 4566354 | 20-scf00021 | 20 |
| AX-157918087 | 2 | 61.769 | KV453193.1  | 4566566 | 20-scf00021 | 20 |
| AX-157918089 | 2 | 61.769 | KV453193.1  | 4571350 | 20-scf00021 | 20 |
| AX-157918104 | 2 | 61.769 | KV453193.1  | 4589346 | 20-scf00021 | 20 |
| AX-157812934 | 2 | 61.769 | KV453193.1  | 4676739 | 20-scf00021 | 20 |
| AX-157707545 | 2 | 61.769 | 3ML01034524 | 437     | scf10201_1  | UN |
| AX-157918079 | 2 | 61.878 | KV453193.1  | 4560217 | 20-scf00021 | 20 |
| AX-157918085 | 2 | 61.878 | KV453193.1  | 4565512 | 20-scf00021 | 20 |
| AX-157918088 | 2 | 61.878 | KV453193.1  | 4567701 | 20-scf00021 | 20 |
| AX-157918091 | 2 | 61.878 | KV453193.1  | 4572743 | 20-scf00021 | 20 |
| AX-157771287 | 2 | 61.878 | KV453193.1  | 4574059 | 20-scf00021 | 20 |
| AX-157918092 | 2 | 61.878 | KV453193.1  | 4574118 | 20-scf00021 | 20 |
| AX-157918095 | 2 | 61.878 | KV453193.1  | 4576532 | 20-scf00021 | 20 |
| AX-157918096 | 2 | 61.878 | KV453193.1  | 4577139 | 20-scf00021 | 20 |
| AX-157918099 | 2 | 61.878 | KV453193.1  | 4583386 | 20-scf00021 | 20 |
| AX-157918100 | 2 | 61.878 | KV453193.1  | 4584375 | 20-scf00021 | 20 |
| AX-157918102 | 2 | 61.878 | KV453193.1  | 4586436 | 20-scf00021 | 20 |
| AX-157918103 | 2 | 61.918 | KV453193.1  | 4587449 | 20-scf00021 | 20 |
| AX-157918106 | 2 | 61.918 | KV453193.1  | 4592461 | 20-scf00021 | 20 |
| AX-157918184 | 2 | 61.918 | KV453193.1  | 4696683 | 20-scf00021 | 20 |
| AX-157918105 | 2 | 61.957 | KV453193.1  | 4590705 | 20-scf00021 | 20 |
| AX-157714921 | 2 | 61.987 | KV453193.1  | 4594680 | 20-scf00021 | 20 |
| AX-157812923 | 2 | 62.03  | KV453193.1  | 4597766 | 20-scf00021 | 20 |
| AX-157918110 | 2 | 62.03  | KV453193.1  | 4606960 | 20-scf00021 | 20 |
| AX-157918109 | 2 | 62.097 | KV453193.1  | 4606113 | 20-scf00021 | 20 |
| AX-157918111 | 2 | 62.097 | KV453193.1  | 4607269 | 20-scf00021 | 20 |
| AX-157918112 | 2 | 62.097 | KV453193.1  | 4607490 | 20-scf00021 | 20 |
| AX-157812926 | 2 | 62.097 | KV453193.1  | 4607974 | 20-scf00021 | 20 |
| AX-157918114 | 2 | 62.097 | KV453193.1  | 4610114 | 20-scf00021 | 20 |
| AX-157918115 | 2 | 62.097 | KV453193.1  | 4611477 | 20-scf00021 | 20 |
| AX-158382281 | 2 | 62.097 | KV453193.1  | 4624721 | 20-scf00021 | 20 |
| AX-157812929 | 2 | 62.097 | KV453193.1  | 4628753 | 20-scf00021 | 20 |
| AX-157918174 | 2 | 62.097 | KV453193.1  | 4686529 | 20-scf00021 | 20 |
| AX-157918204 | 2 | 62.097 | KV453193.1  | 4734819 | 20-scf00021 | 20 |
| AX-157918078 | 2 | 62.098 | KV453193.1  | 4559122 | 20-scf00021 | 20 |
| AX-157918101 | 2 | 62.098 | KV453193.1  | 4585813 | 20-scf00021 | 20 |
| AX-157812927 | 2 | 62.098 | KV453193.1  | 4616592 | 20-scf00021 | 20 |
| AX-157715382 | 2 | 62.098 | KV453193.1  | 4617265 | 20-scf00021 | 20 |
| AX-157918143 | 2 | 62.098 | KV453193.1  | 4651814 | 20-scf00021 | 20 |
| AX-157720507 | 2 | 62.099 | KV453193.1  | 4623264 | 20-scf00021 | 20 |
| AX-157918121 | 2 | 62.099 | KV453193.1  | 4628563 | 20-scf00021 | 20 |
| AX-157918125 | 2 | 62.099 | KV453193.1  | 4633403 | 20-scf00021 | 20 |
| AX-157771765 | 2 | 62.099 | KV453193.1  | 4656995 | 20-scf00021 | 20 |
| AX-158405137 | 2 | 62.099 | KV453193.1  | 4687731 | 20-scf00021 | 20 |
| AX-157918183 | 2 | 62.099 | KV453193.1  | 4696114 | 20-scf00021 | 20 |
| AX-157918187 | 2 | 62.099 | KV453193.1  | 4703272 | 20-scf00021 | 20 |

|              |   |        |            |         |             |    |
|--------------|---|--------|------------|---------|-------------|----|
| AX-157918189 | 2 | 62.099 | KV453193.1 | 4704848 | 20-scf00021 | 20 |
| AX-157918215 | 2 | 62.099 | KV453193.1 | 4747762 | 20-scf00021 | 20 |
| AX-157918127 | 2 | 62.26  | KV453193.1 | 4636956 | 20-scf00021 | 20 |
| AX-157918129 | 2 | 62.305 | KV453193.1 | 4637934 | 20-scf00021 | 20 |
| AX-157918132 | 2 | 62.425 | KV453193.1 | 4640675 | 20-scf00021 | 20 |
| AX-157918141 | 2 | 62.425 | KV453193.1 | 4649955 | 20-scf00021 | 20 |
| AX-157918142 | 2 | 62.425 | KV453193.1 | 4650521 | 20-scf00021 | 20 |
| AX-157918144 | 2 | 62.425 | KV453193.1 | 4653042 | 20-scf00021 | 20 |
| AX-157918148 | 2 | 62.425 | KV453193.1 | 4656419 | 20-scf00021 | 20 |
| AX-157918150 | 2 | 62.425 | KV453193.1 | 4659025 | 20-scf00021 | 20 |
| AX-157751791 | 2 | 62.425 | KV453193.1 | 4659645 | 20-scf00021 | 20 |
| AX-157918153 | 2 | 62.425 | KV453193.1 | 4661402 | 20-scf00021 | 20 |
| AX-157918155 | 2 | 62.425 | KV453193.1 | 4664783 | 20-scf00021 | 20 |
| AX-157918161 | 2 | 62.425 | KV453193.1 | 4668689 | 20-scf00021 | 20 |
| AX-157918172 | 2 | 62.425 | KV453193.1 | 4683286 | 20-scf00021 | 20 |
| AX-157918177 | 2 | 62.425 | KV453193.1 | 4689109 | 20-scf00021 | 20 |
| AX-157918178 | 2 | 62.425 | KV453193.1 | 4690930 | 20-scf00021 | 20 |
| AX-157918202 | 2 | 62.425 | KV453193.1 | 4728535 | 20-scf00021 | 20 |
| AX-157710065 | 2 | 62.444 | KV453193.1 | 4608342 | 20-scf00021 | 20 |
| AX-158405136 | 2 | 62.47  | KV453193.1 | 4686880 | 20-scf00021 | 20 |
| AX-157918181 | 2 | 62.47  | KV453193.1 | 4694276 | 20-scf00021 | 20 |
| AX-157869124 | 2 | 62.534 | KV453193.1 | 4699907 | 20-scf00021 | 20 |
| AX-157707453 | 2 | 62.534 | KV453193.1 | 4701005 | 20-scf00021 | 20 |
| AX-157918191 | 2 | 62.535 | KV453193.1 | 4706480 | 20-scf00021 | 20 |
| AX-157918194 | 2 | 62.535 | KV453193.1 | 4715153 | 20-scf00021 | 20 |
| AX-158405142 | 2 | 62.535 | KV453193.1 | 4729296 | 20-scf00021 | 20 |
| AX-157918197 | 2 | 62.536 | KV453193.1 | 4719345 | 20-scf00021 | 20 |
| AX-157918201 | 2 | 62.537 | KV453193.1 | 4728177 | 20-scf00021 | 20 |
| AX-158405145 | 2 | 62.61  | KV453193.1 | 4729875 | 20-scf00021 | 20 |
| AX-157918210 | 2 | 62.61  | KV453193.1 | 4742474 | 20-scf00021 | 20 |
| AX-157812939 | 2 | 62.681 | KV453193.1 | 4731401 | 20-scf00021 | 20 |
| AX-157918203 | 2 | 62.681 | KV453193.1 | 4732905 | 20-scf00021 | 20 |
| AX-157918206 | 2 | 62.681 | KV453193.1 | 4737892 | 20-scf00021 | 20 |
| AX-157918207 | 2 | 62.685 | KV453193.1 | 4738442 | 20-scf00021 | 20 |
| AX-157744041 | 2 | 62.902 | KV453193.1 | 4740752 | 20-scf00021 | 20 |
| AX-157918219 | 2 | 63.127 | KV453193.1 | 4753608 | 20-scf00021 | 20 |
| AX-158379277 | 2 | 63.127 | KV453193.1 | 4754599 | 20-scf00021 | 20 |
| AX-157918223 | 2 | 63.127 | KV453193.1 | 4756672 | 20-scf00021 | 20 |
| AX-157918226 | 2 | 63.127 | KV453193.1 | 4761294 | 20-scf00021 | 20 |
| AX-157918227 | 2 | 63.128 | KV453193.1 | 4761860 | 20-scf00021 | 20 |
| AX-157918229 | 2 | 63.128 | KV453193.1 | 4763180 | 20-scf00021 | 20 |
| AX-157918230 | 2 | 63.368 | KV453193.1 | 4766466 | 20-scf00021 | 20 |
| AX-157918232 | 2 | 63.368 | KV453193.1 | 4767274 | 20-scf00021 | 20 |
| AX-157918235 | 2 | 63.515 | KV453193.1 | 4770020 | 20-scf00021 | 20 |
| AX-157918237 | 2 | 63.516 | KV453193.1 | 4772343 | 20-scf00021 | 20 |
| AX-157812941 | 2 | 63.516 | KV453193.1 | 4772402 | 20-scf00021 | 20 |
| AX-157812942 | 2 | 63.517 | KV453193.1 | 4772763 | 20-scf00021 | 20 |
| AX-157812943 | 2 | 63.517 | KV453193.1 | 4773408 | 20-scf00021 | 20 |
| AX-157918238 | 2 | 63.518 | KV453193.1 | 4775075 | 20-scf00021 | 20 |
| AX-157918086 | 2 | 63.627 | KV453193.1 | 4566221 | 20-scf00021 | 20 |
| AX-157918117 | 2 | 63.627 | KV453193.1 | 4614588 | 20-scf00021 | 20 |

|              |   |        |            |         |             |    |
|--------------|---|--------|------------|---------|-------------|----|
| AX-157918122 | 2 | 63.627 | KV453193.1 | 4628911 | 20-scf00021 | 20 |
| AX-157918159 | 2 | 63.627 | KV453193.1 | 4667772 | 20-scf00021 | 20 |
| AX-157883498 | 2 | 63.627 | KV453193.1 | 4668085 | 20-scf00021 | 20 |
| AX-157918171 | 2 | 63.627 | KV453193.1 | 4681621 | 20-scf00021 | 20 |
| AX-157812935 | 2 | 63.627 | KV453193.1 | 4699702 | 20-scf00021 | 20 |
| AX-157918196 | 2 | 63.627 | KV453193.1 | 4718976 | 20-scf00021 | 20 |
| AX-157918212 | 2 | 63.627 | KV453193.1 | 4743538 | 20-scf00021 | 20 |
| AX-157918242 | 2 | 63.627 | KV453193.1 | 4778720 | 20-scf00021 | 20 |
| AX-157775904 | 2 | 63.627 | KV453193.1 | 4778758 | 20-scf00021 | 20 |
| AX-157918244 | 2 | 63.627 | KV453193.1 | 4779330 | 20-scf00021 | 20 |
| AX-157918246 | 2 | 63.627 | KV453193.1 | 4783447 | 20-scf00021 | 20 |
| AX-157918247 | 2 | 63.627 | KV453193.1 | 4785223 | 20-scf00021 | 20 |
| AX-157812944 | 2 | 63.627 | KV453193.1 | 4787002 | 20-scf00021 | 20 |
| AX-157918251 | 2 | 63.627 | KV453193.1 | 4791780 | 20-scf00021 | 20 |
| AX-157918252 | 2 | 63.627 | KV453193.1 | 4792861 | 20-scf00021 | 20 |
| AX-157918268 | 2 | 63.627 | KV453193.1 | 4819993 | 20-scf00021 | 20 |
| AX-157918269 | 2 | 63.627 | KV453193.1 | 4820394 | 20-scf00021 | 20 |
| AX-157918254 | 2 | 63.737 | KV453193.1 | 4794208 | 20-scf00021 | 20 |
| AX-157740230 | 2 | 63.737 | KV453193.1 | 4801403 | 20-scf00021 | 20 |
| AX-157918263 | 2 | 63.737 | KV453193.1 | 4806733 | 20-scf00021 | 20 |
| AX-157918264 | 2 | 63.737 | KV453193.1 | 4807437 | 20-scf00021 | 20 |
| AX-157918265 | 2 | 63.737 | KV453193.1 | 4812434 | 20-scf00021 | 20 |
| AX-157771097 | 2 | 63.738 | KV453193.1 | 4811318 | 20-scf00021 | 20 |
| AX-157812946 | 2 | 63.996 | KV453193.1 | 4817111 | 20-scf00021 | 20 |
| AX-157748280 | 2 | 64.034 | KV453193.1 | 4821007 | 20-scf00021 | 20 |
| AX-157918270 | 2 | 64.034 | KV453193.1 | 4821918 | 20-scf00021 | 20 |
| AX-157758804 | 2 | 64.063 | KV453193.1 | 4823382 | 20-scf00021 | 20 |
| AX-157918271 | 2 | 64.11  | KV453193.1 | 4824285 | 20-scf00021 | 20 |
| AX-157812949 | 2 | 64.273 | KV453193.1 | 4829312 | 20-scf00021 | 20 |
| AX-157918278 | 2 | 64.273 | KV453193.1 | 4832203 | 20-scf00021 | 20 |
| AX-157918279 | 2 | 64.64  | KV453193.1 | 4833220 | 20-scf00021 | 20 |
| AX-157918282 | 2 | 64.65  | KV453193.1 | 4836026 | 20-scf00021 | 20 |
| AX-157918283 | 2 | 64.65  | KV453193.1 | 4836439 | 20-scf00021 | 20 |
| AX-157918284 | 2 | 64.65  | KV453193.1 | 4836731 | 20-scf00021 | 20 |
| AX-157918286 | 2 | 64.65  | KV453193.1 | 4838340 | 20-scf00021 | 20 |
| AX-157812951 | 2 | 64.65  | KV453193.1 | 4841971 | 20-scf00021 | 20 |
| AX-157918281 | 2 | 64.696 | KV453193.1 | 4834943 | 20-scf00021 | 20 |
| AX-157918290 | 2 | 64.696 | KV453193.1 | 4842678 | 20-scf00021 | 20 |
| AX-157918370 | 2 | 64.696 | KV453193.1 | 4959119 | 20-scf00021 | 20 |
| AX-157862663 | 2 | 64.83  | KV453193.1 | 4868115 | 20-scf00021 | 20 |
| AX-157754521 | 2 | 64.83  | KV453193.1 | 4872183 | 20-scf00021 | 20 |
| AX-157918313 | 2 | 64.83  | KV453193.1 | 4877984 | 20-scf00021 | 20 |
| AX-157714735 | 2 | 64.83  | KV453193.1 | 4878162 | 20-scf00021 | 20 |
| AX-157918316 | 2 | 64.83  | KV453193.1 | 4880270 | 20-scf00021 | 20 |
| AX-157918317 | 2 | 64.83  | KV453193.1 | 4882802 | 20-scf00021 | 20 |
| AX-157918318 | 2 | 64.83  | KV453193.1 | 4883933 | 20-scf00021 | 20 |
| AX-157918319 | 2 | 64.83  | KV453193.1 | 4884274 | 20-scf00021 | 20 |
| AX-157812956 | 2 | 64.83  | KV453193.1 | 4884964 | 20-scf00021 | 20 |
| AX-157918323 | 2 | 64.83  | KV453193.1 | 4889861 | 20-scf00021 | 20 |
| AX-157812957 | 2 | 64.83  | KV453193.1 | 4890930 | 20-scf00021 | 20 |
| AX-157746162 | 2 | 64.83  | KV453193.1 | 4891743 | 20-scf00021 | 20 |

|              |   |        |            |         |             |    |
|--------------|---|--------|------------|---------|-------------|----|
| AX-157918325 | 2 | 64.83  | KV453193.1 | 4892145 | 20-scf00021 | 20 |
| AX-157918327 | 2 | 64.83  | KV453193.1 | 4895146 | 20-scf00021 | 20 |
| AX-157918328 | 2 | 64.83  | KV453193.1 | 4895625 | 20-scf00021 | 20 |
| AX-157719948 | 2 | 64.889 | KV453193.1 | 4898723 | 20-scf00021 | 20 |
| AX-157812958 | 2 | 64.939 | KV453193.1 | 4898766 | 20-scf00021 | 20 |
| AX-157738889 | 2 | 65.158 | KV453193.1 | 4906085 | 20-scf00021 | 20 |
| AX-157918330 | 2 | 65.158 | KV453193.1 | 4906659 | 20-scf00021 | 20 |
| AX-157918331 | 2 | 65.158 | KV453193.1 | 4909092 | 20-scf00021 | 20 |
| AX-157918333 | 2 | 65.158 | KV453193.1 | 4910097 | 20-scf00021 | 20 |
| AX-157812960 | 2 | 65.158 | KV453193.1 | 4913364 | 20-scf00021 | 20 |
| AX-157918334 | 2 | 65.158 | KV453193.1 | 4914903 | 20-scf00021 | 20 |
| AX-157918335 | 2 | 65.158 | KV453193.1 | 4915752 | 20-scf00021 | 20 |
| AX-157772133 | 2 | 65.158 | KV453193.1 | 4917752 | 20-scf00021 | 20 |
| AX-158379278 | 2 | 65.158 | KV453193.1 | 4920668 | 20-scf00021 | 20 |
| AX-157918338 | 2 | 65.158 | KV453193.1 | 4921237 | 20-scf00021 | 20 |
| AX-157918343 | 2 | 65.158 | KV453193.1 | 4929598 | 20-scf00021 | 20 |
| AX-157918345 | 2 | 65.158 | KV453193.1 | 4931649 | 20-scf00021 | 20 |
| AX-157918350 | 2 | 65.158 | KV453193.1 | 4935489 | 20-scf00021 | 20 |
| AX-158389629 | 2 | 65.158 | KV453193.1 | 4960475 | 20-scf00021 | 20 |
| AX-157918375 | 2 | 65.158 | KV453193.1 | 4964482 | 20-scf00021 | 20 |
| AX-157918381 | 2 | 65.158 | KV453193.1 | 4976724 | 20-scf00021 | 20 |
| AX-157812961 | 2 | 65.377 | KV453193.1 | 4921994 | 20-scf00021 | 20 |
| AX-157918339 | 2 | 65.377 | KV453193.1 | 4922811 | 20-scf00021 | 20 |
| AX-157918340 | 2 | 65.377 | KV453193.1 | 4923353 | 20-scf00021 | 20 |
| AX-157918341 | 2 | 65.377 | KV453193.1 | 4928497 | 20-scf00021 | 20 |
| AX-157918342 | 2 | 65.377 | KV453193.1 | 4928905 | 20-scf00021 | 20 |
| AX-157918344 | 2 | 65.377 | KV453193.1 | 4930884 | 20-scf00021 | 20 |
| AX-157742518 | 2 | 65.377 | KV453193.1 | 4931249 | 20-scf00021 | 20 |
| AX-157918349 | 2 | 65.377 | KV453193.1 | 4934596 | 20-scf00021 | 20 |
| AX-157918353 | 2 | 65.377 | KV453193.1 | 4937047 | 20-scf00021 | 20 |
| AX-157918352 | 2 | 65.497 | KV453193.1 | 4936678 | 20-scf00021 | 20 |
| AX-157918357 | 2 | 65.595 | KV453193.1 | 4941960 | 20-scf00021 | 20 |
| AX-157918358 | 2 | 65.595 | KV453193.1 | 4945393 | 20-scf00021 | 20 |
| AX-157918359 | 2 | 65.595 | KV453193.1 | 4946980 | 20-scf00021 | 20 |
| AX-157918360 | 2 | 65.595 | KV453193.1 | 4947789 | 20-scf00021 | 20 |
| AX-157918361 | 2 | 65.595 | KV453193.1 | 4948006 | 20-scf00021 | 20 |
| AX-157918362 | 2 | 65.645 | KV453193.1 | 4949384 | 20-scf00021 | 20 |
| AX-157918374 | 2 | 65.645 | KV453193.1 | 4963753 | 20-scf00021 | 20 |
| AX-157918367 | 2 | 65.926 | KV453193.1 | 4956603 | 20-scf00021 | 20 |
| AX-157918369 | 2 | 66.253 | KV453193.1 | 4957898 | 20-scf00021 | 20 |
| AX-157703269 | 2 | 66.253 | KV453193.1 | 4960193 | 20-scf00021 | 20 |
| AX-157918371 | 2 | 66.358 | KV453193.1 | 4960412 | 20-scf00021 | 20 |
| AX-157918365 | 2 | 66.472 | KV453193.1 | 4954368 | 20-scf00021 | 20 |
| AX-157918376 | 2 | 66.472 | KV453193.1 | 4965624 | 20-scf00021 | 20 |
| AX-157750639 | 2 | 66.472 | KV453193.1 | 4978557 | 20-scf00021 | 20 |
| AX-157918383 | 2 | 66.472 | KV453193.1 | 4980920 | 20-scf00021 | 20 |
| AX-157918385 | 2 | 66.473 | KV453193.1 | 4982685 | 20-scf00021 | 20 |
| AX-157918387 | 2 | 66.473 | KV453193.1 | 4984117 | 20-scf00021 | 20 |
| AX-157918388 | 2 | 66.635 | KV453193.1 | 4984563 | 20-scf00021 | 20 |
| AX-157918390 | 2 | 66.8   | KV453193.1 | 4986651 | 20-scf00021 | 20 |
| AX-157918392 | 2 | 66.8   | KV453193.1 | 4987848 | 20-scf00021 | 20 |

|              |   |        |            |         |             |    |
|--------------|---|--------|------------|---------|-------------|----|
| AX-157918394 | 2 | 66.8   | KV453193.1 | 4990139 | 20-scf00021 | 20 |
| AX-157918395 | 2 | 66.8   | KV453193.1 | 4990945 | 20-scf00021 | 20 |
| AX-157918402 | 2 | 66.8   | KV453193.1 | 5000933 | 20-scf00021 | 20 |
| AX-157918396 | 2 | 66.909 | KV453193.1 | 4994056 | 20-scf00021 | 20 |
| AX-157918397 | 2 | 66.909 | KV453193.1 | 4994593 | 20-scf00021 | 20 |
| AX-157918400 | 2 | 66.909 | KV453193.1 | 4999591 | 20-scf00021 | 20 |
| AX-157918401 | 2 | 66.909 | KV453193.1 | 5000418 | 20-scf00021 | 20 |
| AX-157752118 | 2 | 66.909 | KV453193.1 | 5002026 | 20-scf00021 | 20 |
| AX-157918403 | 2 | 66.909 | KV453193.1 | 5003486 | 20-scf00021 | 20 |
| AX-157918404 | 2 | 66.909 | KV453193.1 | 5004432 | 20-scf00021 | 20 |
| AX-157723316 | 2 | 66.909 | KV453193.1 | 5006130 | 20-scf00021 | 20 |
| AX-157918405 | 2 | 66.909 | KV453193.1 | 5008384 | 20-scf00021 | 20 |
| AX-157918406 | 2 | 66.909 | KV453193.1 | 5008927 | 20-scf00021 | 20 |
| AX-157918407 | 2 | 66.909 | KV453193.1 | 5009381 | 20-scf00021 | 20 |
| AX-157714872 | 2 | 66.909 | KV453193.1 | 5011438 | 20-scf00021 | 20 |
| AX-157918411 | 2 | 67.208 | KV453193.1 | 5016320 | 20-scf00021 | 20 |
| AX-157709379 | 2 | 67.25  | KV453193.1 | 5019373 | 20-scf00021 | 20 |
| AX-157918416 | 2 | 67.25  | KV453193.1 | 5025584 | 20-scf00021 | 20 |
| AX-158379279 | 2 | 67.25  | KV453193.1 | 5034411 | 20-scf00021 | 20 |
| AX-157918471 | 2 | 67.25  | KV453193.1 | 5119138 | 20-scf00021 | 20 |
| AX-157812967 | 2 | 67.294 | KV453193.1 | 5033734 | 20-scf00021 | 20 |
| AX-157747358 | 2 | 67.322 | KV453193.1 | 5035096 | 20-scf00021 | 20 |
| AX-157918422 | 2 | 67.365 | KV453193.1 | 5042445 | 20-scf00021 | 20 |
| AX-157720573 | 2 | 67.408 | KV453193.1 | 5048057 | 20-scf00021 | 20 |
| AX-157918425 | 2 | 67.408 | KV453193.1 | 5048288 | 20-scf00021 | 20 |
| AX-157918451 | 2 | 67.408 | KV453193.1 | 5096861 | 20-scf00021 | 20 |
| AX-157812974 | 2 | 67.408 | KV453193.1 | 5098310 | 20-scf00021 | 20 |
| AX-157709378 | 2 | 67.565 | KV453193.1 | 5019446 | 20-scf00021 | 20 |
| AX-157719229 | 2 | 67.565 | KV453193.1 | 5045590 | 20-scf00021 | 20 |
| AX-157918428 | 2 | 67.565 | KV453193.1 | 5054388 | 20-scf00021 | 20 |
| AX-157918432 | 2 | 67.565 | KV453193.1 | 5056826 | 20-scf00021 | 20 |
| AX-157812969 | 2 | 67.565 | KV453193.1 | 5059766 | 20-scf00021 | 20 |
| AX-157918433 | 2 | 67.565 | KV453193.1 | 5060495 | 20-scf00021 | 20 |
| AX-157918434 | 2 | 67.565 | KV453193.1 | 5062040 | 20-scf00021 | 20 |
| AX-158405149 | 2 | 67.565 | KV453193.1 | 5062852 | 20-scf00021 | 20 |
| AX-157918437 | 2 | 67.565 | KV453193.1 | 5063974 | 20-scf00021 | 20 |
| AX-157918438 | 2 | 67.565 | KV453193.1 | 5064458 | 20-scf00021 | 20 |
| AX-157918439 | 2 | 67.565 | KV453193.1 | 5067888 | 20-scf00021 | 20 |
| AX-157918440 | 2 | 67.589 | KV453193.1 | 5068758 | 20-scf00021 | 20 |
| AX-157775044 | 2 | 67.62  | KV453193.1 | 5069114 | 20-scf00021 | 20 |
| AX-157918412 | 2 | 67.674 | KV453193.1 | 5020442 | 20-scf00021 | 20 |
| AX-157753675 | 2 | 67.674 | KV453193.1 | 5075476 | 20-scf00021 | 20 |
| AX-157745153 | 2 | 67.674 | KV453193.1 | 5078241 | 20-scf00021 | 20 |
| AX-157918442 | 2 | 67.674 | KV453193.1 | 5080813 | 20-scf00021 | 20 |
| AX-157874724 | 2 | 67.674 | KV453193.1 | 5083026 | 20-scf00021 | 20 |
| AX-157812971 | 2 | 67.674 | KV453193.1 | 5090008 | 20-scf00021 | 20 |
| AX-157715649 | 2 | 67.674 | KV453193.1 | 5091068 | 20-scf00021 | 20 |
| AX-157918449 | 2 | 67.674 | KV453193.1 | 5092617 | 20-scf00021 | 20 |
| AX-157812972 | 2 | 67.674 | KV453193.1 | 5094727 | 20-scf00021 | 20 |
| AX-157918452 | 2 | 67.674 | KV453193.1 | 5097778 | 20-scf00021 | 20 |
| AX-157918453 | 2 | 67.675 | KV453193.1 | 5098575 | 20-scf00021 | 20 |

|              |   |        |            |         |             |    |
|--------------|---|--------|------------|---------|-------------|----|
| AX-157695471 | 2 | 67.893 | KV453193.1 | 5099309 | 20-scf00021 | 20 |
| AX-157812975 | 2 | 67.893 | KV453193.1 | 5099892 | 20-scf00021 | 20 |
| AX-157812976 | 2 | 67.893 | KV453193.1 | 5100623 | 20-scf00021 | 20 |
| AX-157918457 | 2 | 68.305 | KV453193.1 | 5104878 | 20-scf00021 | 20 |
| AX-157918458 | 2 | 68.364 | KV453193.1 | 5105595 | 20-scf00021 | 20 |
| AX-157918459 | 2 | 68.365 | KV453193.1 | 5106812 | 20-scf00021 | 20 |
| AX-157918460 | 2 | 68.606 | KV453193.1 | 5109084 | 20-scf00021 | 20 |
| AX-157918463 | 2 | 68.607 | KV453193.1 | 5111824 | 20-scf00021 | 20 |
| AX-157918464 | 2 | 68.607 | KV453193.1 | 5113389 | 20-scf00021 | 20 |
| AX-157918465 | 2 | 68.607 | KV453193.1 | 5113645 | 20-scf00021 | 20 |
| AX-157918466 | 2 | 68.607 | KV453193.1 | 5114067 | 20-scf00021 | 20 |
| AX-157918467 | 2 | 68.607 | KV453193.1 | 5114567 | 20-scf00021 | 20 |
| AX-157918470 | 2 | 68.685 | KV453193.1 | 5117632 | 20-scf00021 | 20 |
| AX-157750070 | 2 | 68.867 | KV453193.1 | 5123867 | 20-scf00021 | 20 |
| AX-157918475 | 2 | 68.876 | KV453193.1 | 5125028 | 20-scf00021 | 20 |
| AX-157918476 | 2 | 69.242 | KV453193.1 | 5129151 | 20-scf00021 | 20 |
| AX-157740674 | 2 | 69.242 | KV453193.1 | 5130071 | 20-scf00021 | 20 |
| AX-157918477 | 2 | 69.244 | KV453193.1 | 5130457 | 20-scf00021 | 20 |
| AX-157918481 | 2 | 69.269 | KV453193.1 | 5133018 | 20-scf00021 | 20 |
| AX-157918478 | 2 | 69.33  | KV453193.1 | 5131861 | 20-scf00021 | 20 |
| AX-157918482 | 2 | 69.33  | KV453193.1 | 5133531 | 20-scf00021 | 20 |
| AX-157741631 | 2 | 69.33  | KV453193.1 | 5160926 | 20-scf00021 | 20 |
| AX-157918490 | 2 | 69.545 | KV453193.1 | 5144483 | 20-scf00021 | 20 |
| AX-157918493 | 2 | 69.748 | KV453193.1 | 5148484 | 20-scf00021 | 20 |
| AX-157773742 | 2 | 69.754 | KV453193.1 | 5148675 | 20-scf00021 | 20 |
| AX-157918496 | 2 | 70.517 | KV453193.1 | 5154224 | 20-scf00021 | 20 |
| AX-157710193 | 2 | 70.517 | KV453193.1 | 5154691 | 20-scf00021 | 20 |
| AX-157918504 | 2 | 70.517 | KV453193.1 | 5166455 | 20-scf00021 | 20 |
| AX-157918505 | 2 | 70.517 | KV453193.1 | 5167230 | 20-scf00021 | 20 |
| AX-157918507 | 2 | 70.517 | KV453193.1 | 5169780 | 20-scf00021 | 20 |
| AX-157918511 | 2 | 70.517 | KV453193.1 | 5173216 | 20-scf00021 | 20 |
| AX-157918514 | 2 | 70.569 | KV453193.1 | 5174661 | 20-scf00021 | 20 |
| AX-157918516 | 2 | 70.605 | KV453193.1 | 5177597 | 20-scf00021 | 20 |
| AX-157918519 | 2 | 70.627 | KV453193.1 | 5179918 | 20-scf00021 | 20 |
| AX-157918520 | 2 | 70.627 | KV453193.1 | 5181703 | 20-scf00021 | 20 |
| AX-157918484 | 2 | 70.628 | KV453193.1 | 5138322 | 20-scf00021 | 20 |
| AX-157918522 | 2 | 70.628 | KV453193.1 | 5185562 | 20-scf00021 | 20 |
| AX-157918523 | 2 | 70.628 | KV453193.1 | 5186152 | 20-scf00021 | 20 |
| AX-157918525 | 2 | 70.628 | KV453193.1 | 5191859 | 20-scf00021 | 20 |
| AX-157918524 | 2 | 70.634 | KV453193.1 | 5191508 | 20-scf00021 | 20 |
| AX-157918528 | 2 | 70.726 | KV453193.1 | 5197594 | 20-scf00021 | 20 |
| AX-158405151 | 2 | 70.736 | KV453193.1 | 5202116 | 20-scf00021 | 20 |
| AX-158405152 | 2 | 70.736 | KV453193.1 | 5202264 | 20-scf00021 | 20 |
| AX-158404315 | 2 | 70.736 | KV453193.1 | 5202869 | 20-scf00021 | 20 |
| AX-157812980 | 2 | 70.88  | KV453193.1 | 5209468 | 20-scf00021 | 20 |
| AX-157918534 | 2 | 70.895 | KV453193.1 | 5212621 | 20-scf00021 | 20 |
| AX-157918506 | 2 | 71.029 | KV453193.1 | 5169210 | 20-scf00021 | 20 |
| AX-157918537 | 2 | 71.029 | KV453193.1 | 5214911 | 20-scf00021 | 20 |
| AX-157918538 | 2 | 71.029 | KV453193.1 | 5215707 | 20-scf00021 | 20 |
| AX-157918546 | 2 | 71.029 | KV453193.1 | 5223778 | 20-scf00021 | 20 |
| AX-157918539 | 2 | 71.171 | KV453193.1 | 5216756 | 20-scf00021 | 20 |

|              |   |        |            |         |             |    |
|--------------|---|--------|------------|---------|-------------|----|
| AX-157918542 | 2 | 71.174 | KV453193.1 | 5219905 | 20-scf00021 | 20 |
| AX-157812982 | 2 | 71.392 | KV453193.1 | 5222551 | 20-scf00021 | 20 |
| AX-157918548 | 2 | 71.392 | KV453193.1 | 5226606 | 20-scf00021 | 20 |
| AX-157918549 | 2 | 71.392 | KV453193.1 | 5227801 | 20-scf00021 | 20 |
| AX-157918551 | 2 | 71.392 | KV453193.1 | 5231820 | 20-scf00021 | 20 |
| AX-157756979 | 2 | 71.392 | KV453193.1 | 5232340 | 20-scf00021 | 20 |
| AX-157740022 | 2 | 71.392 | KV453193.1 | 5232745 | 20-scf00021 | 20 |
| AX-157918555 | 2 | 71.829 | KV453193.1 | 5238950 | 20-scf00021 | 20 |
| AX-157918556 | 2 | 71.829 | KV453193.1 | 5239432 | 20-scf00021 | 20 |
| AX-157918557 | 2 | 71.829 | KV453193.1 | 5240500 | 20-scf00021 | 20 |
| AX-157918559 | 2 | 71.829 | KV453193.1 | 5243909 | 20-scf00021 | 20 |
| AX-157918563 | 2 | 71.829 | KV453193.1 | 5245800 | 20-scf00021 | 20 |
| AX-157918558 | 2 | 71.927 | KV453193.1 | 5241909 | 20-scf00021 | 20 |
| AX-157918564 | 2 | 72.094 | KV453193.1 | 5248294 | 20-scf00021 | 20 |
| AX-157918565 | 2 | 72.267 | KV453193.1 | 5249572 | 20-scf00021 | 20 |
| AX-157918566 | 2 | 72.346 | KV453193.1 | 5250336 | 20-scf00021 | 20 |
| AX-157918561 | 2 | 72.431 | KV453193.1 | 5244796 | 20-scf00021 | 20 |
| AX-157918568 | 2 | 72.431 | KV453193.1 | 5252183 | 20-scf00021 | 20 |
| AX-157918570 | 2 | 72.455 | KV453193.1 | 5253245 | 20-scf00021 | 20 |
| AX-157725122 | 2 | 72.594 | KV453193.1 | 5254554 | 20-scf00021 | 20 |
| AX-157918571 | 2 | 72.594 | KV453193.1 | 5255188 | 20-scf00021 | 20 |
| AX-157918572 | 2 | 72.595 | KV453193.1 | 5255686 | 20-scf00021 | 20 |
| AX-157918576 | 2 | 72.595 | KV453193.1 | 5260096 | 20-scf00021 | 20 |
| AX-157918585 | 2 | 72.704 | KV453193.1 | 5267280 | 20-scf00021 | 20 |
| AX-157918588 | 2 | 72.85  | KV453193.1 | 5273284 | 20-scf00021 | 20 |
| AX-157918595 | 2 | 72.85  | KV453193.1 | 5281805 | 20-scf00021 | 20 |
| AX-157771813 | 2 | 73.141 | KV453193.1 | 5268283 | 20-scf00021 | 20 |
| AX-157918598 | 2 | 73.141 | KV453193.1 | 5287743 | 20-scf00021 | 20 |
| AX-157918600 | 2 | 73.141 | KV453193.1 | 5290237 | 20-scf00021 | 20 |
| AX-157918601 | 2 | 73.141 | KV453193.1 | 5291009 | 20-scf00021 | 20 |
| AX-157918602 | 2 | 73.141 | KV453193.1 | 5291220 | 20-scf00021 | 20 |
| AX-157918604 | 2 | 73.141 | KV453193.1 | 5295099 | 20-scf00021 | 20 |
| AX-157918605 | 2 | 73.141 | KV453193.1 | 5296590 | 20-scf00021 | 20 |
| AX-157918612 | 2 | 73.141 | KV453193.1 | 5304179 | 20-scf00021 | 20 |
| AX-157812995 | 2 | 73.141 | KV453193.1 | 5407408 | 20-scf00021 | 20 |
| AX-157754377 | 2 | 73.141 | KV453193.1 | 5434425 | 20-scf00021 | 20 |
| AX-157918608 | 2 | 73.225 | KV453193.1 | 5300384 | 20-scf00021 | 20 |
| AX-157918610 | 2 | 73.292 | KV453193.1 | 5302924 | 20-scf00021 | 20 |
| AX-157918611 | 2 | 73.36  | KV453193.1 | 5303683 | 20-scf00021 | 20 |
| AX-157918626 | 2 | 73.36  | KV453193.1 | 5317601 | 20-scf00021 | 20 |
| AX-157918628 | 2 | 73.36  | KV453193.1 | 5318749 | 20-scf00021 | 20 |
| AX-157918631 | 2 | 73.578 | KV453193.1 | 5320640 | 20-scf00021 | 20 |
| AX-157918633 | 2 | 73.578 | KV453193.1 | 5322949 | 20-scf00021 | 20 |
| AX-157918634 | 2 | 73.578 | KV453193.1 | 5324043 | 20-scf00021 | 20 |
| AX-157918636 | 2 | 73.578 | KV453193.1 | 5324699 | 20-scf00021 | 20 |
| AX-157918637 | 2 | 73.797 | KV453193.1 | 5325901 | 20-scf00021 | 20 |
| AX-157812986 | 2 | 73.86  | KV453193.1 | 5328640 | 20-scf00021 | 20 |
| AX-157918593 | 2 | 73.906 | KV453193.1 | 5279326 | 20-scf00021 | 20 |
| AX-157812987 | 2 | 73.906 | KV453193.1 | 5329527 | 20-scf00021 | 20 |
| AX-157918638 | 2 | 73.906 | KV453193.1 | 5331571 | 20-scf00021 | 20 |
| AX-157918641 | 2 | 73.906 | KV453193.1 | 5339281 | 20-scf00021 | 20 |



|              |   |        |            |         |             |    |
|--------------|---|--------|------------|---------|-------------|----|
| AX-157918642 | 2 | 73.906 | KV453193.1 | 5342112 | 20-scf00021 | 20 |
| AX-157812988 | 2 | 73.906 | KV453193.1 | 5342587 | 20-scf00021 | 20 |
| AX-157812989 | 2 | 73.906 | KV453193.1 | 5344536 | 20-scf00021 | 20 |
| AX-157918644 | 2 | 73.906 | KV453193.1 | 5348399 | 20-scf00021 | 20 |
| AX-157714190 | 2 | 73.906 | KV453193.1 | 5353238 | 20-scf00021 | 20 |
| AX-157918648 | 2 | 73.906 | KV453193.1 | 5355168 | 20-scf00021 | 20 |
| AX-157918661 | 2 | 73.906 | KV453193.1 | 5372049 | 20-scf00021 | 20 |
| AX-157918666 | 2 | 73.906 | KV453193.1 | 5380723 | 20-scf00021 | 20 |
| AX-157720658 | 2 | 74.124 | KV453193.1 | 5354484 | 20-scf00021 | 20 |
| AX-157751720 | 2 | 74.124 | KV453193.1 | 5356394 | 20-scf00021 | 20 |
| AX-157918650 | 2 | 74.124 | KV453193.1 | 5359558 | 20-scf00021 | 20 |
| AX-157918653 | 2 | 74.124 | KV453193.1 | 5363856 | 20-scf00021 | 20 |
| AX-157918654 | 2 | 74.124 | KV453193.1 | 5365209 | 20-scf00021 | 20 |
| AX-157918655 | 2 | 74.124 | KV453193.1 | 5367192 | 20-scf00021 | 20 |
| AX-157918658 | 2 | 74.124 | KV453193.1 | 5369581 | 20-scf00021 | 20 |
| AX-157918662 | 2 | 74.124 | KV453193.1 | 5373122 | 20-scf00021 | 20 |
| AX-157918664 | 2 | 74.124 | KV453193.1 | 5374172 | 20-scf00021 | 20 |
| AX-157812990 | 2 | 74.124 | KV453193.1 | 5374422 | 20-scf00021 | 20 |
| AX-157918687 | 2 | 74.124 | KV453193.1 | 5422998 | 20-scf00021 | 20 |
| AX-157918672 | 2 | 74.288 | KV453193.1 | 5390088 | 20-scf00021 | 20 |
| AX-157812993 | 2 | 74.288 | KV453193.1 | 5392519 | 20-scf00021 | 20 |
| AX-157918693 | 2 | 74.288 | KV453193.1 | 5431061 | 20-scf00021 | 20 |
| AX-157918673 | 2 | 74.37  | KV453193.1 | 5393560 | 20-scf00021 | 20 |
| AX-157773474 | 2 | 74.452 | KV453193.1 | 5394598 | 20-scf00021 | 20 |
| AX-157812994 | 2 | 74.452 | KV453193.1 | 5397980 | 20-scf00021 | 20 |
| AX-157918676 | 2 | 74.452 | KV453193.1 | 5399051 | 20-scf00021 | 20 |
| AX-157748384 | 2 | 74.452 | KV453193.1 | 5400456 | 20-scf00021 | 20 |
| AX-157918677 | 2 | 74.452 | KV453193.1 | 5401941 | 20-scf00021 | 20 |
| AX-157918679 | 2 | 74.452 | KV453193.1 | 5406065 | 20-scf00021 | 20 |
| AX-157918681 | 2 | 74.511 | KV453193.1 | 5410807 | 20-scf00021 | 20 |
| AX-157918689 | 2 | 74.511 | KV453193.1 | 5426126 | 20-scf00021 | 20 |
| AX-157918682 | 2 | 74.561 | KV453193.1 | 5413247 | 20-scf00021 | 20 |
| AX-157918685 | 2 | 74.561 | KV453193.1 | 5420154 | 20-scf00021 | 20 |
| AX-157918686 | 2 | 74.561 | KV453193.1 | 5422379 | 20-scf00021 | 20 |
| AX-157812997 | 2 | 74.561 | KV453193.1 | 5423442 | 20-scf00021 | 20 |
| AX-157918688 | 2 | 74.561 | KV453193.1 | 5423751 | 20-scf00021 | 20 |
| AX-157812998 | 2 | 74.561 | KV453193.1 | 5424692 | 20-scf00021 | 20 |
| AX-157918694 | 2 | 74.561 | KV453193.1 | 5433400 | 20-scf00021 | 20 |
| AX-157918695 | 2 | 74.561 | KV453193.1 | 5435456 | 20-scf00021 | 20 |
| AX-157716120 | 2 | 74.561 | KV453193.1 | 5439082 | 20-scf00021 | 20 |
| AX-157918698 | 2 | 74.561 | KV453193.1 | 5441094 | 20-scf00021 | 20 |
| AX-157918699 | 2 | 74.561 | KV453193.1 | 5442137 | 20-scf00021 | 20 |
| AX-157918700 | 2 | 74.561 | KV453193.1 | 5443043 | 20-scf00021 | 20 |
| AX-157812991 | 2 | 74.707 | KV453193.1 | 5382061 | 20-scf00021 | 20 |
| AX-157710424 | 2 | 74.707 | KV453193.1 | 5444665 | 20-scf00021 | 20 |
| AX-157918702 | 2 | 74.888 | KV453193.1 | 5446243 | 20-scf00021 | 20 |
| AX-157812996 | 2 | 74.998 | KV453193.1 | 5420965 | 20-scf00021 | 20 |
| AX-157918705 | 2 | 74.998 | KV453193.1 | 5449407 | 20-scf00021 | 20 |
| AX-157918706 | 2 | 74.998 | KV453193.1 | 5450302 | 20-scf00021 | 20 |
| AX-157918707 | 2 | 74.998 | KV453193.1 | 5451112 | 20-scf00021 | 20 |
| AX-157703235 | 2 | 74.998 | KV453193.1 | 5464770 | 20-scf00021 | 20 |

|              |   |        |            |         |             |    |
|--------------|---|--------|------------|---------|-------------|----|
| AX-157918714 | 2 | 74.998 | KV453193.1 | 5465568 | 20-scf00021 | 20 |
| AX-157918715 | 2 | 74.998 | KV453193.1 | 5465632 | 20-scf00021 | 20 |
| AX-157918716 | 2 | 74.998 | KV453193.1 | 5466297 | 20-scf00021 | 20 |
| AX-157918717 | 2 | 74.998 | KV453193.1 | 5467153 | 20-scf00021 | 20 |
| AX-157918718 | 2 | 74.998 | KV453193.1 | 5467775 | 20-scf00021 | 20 |
| AX-157714241 | 2 | 74.998 | KV453193.1 | 5469619 | 20-scf00021 | 20 |
| AX-157918720 | 2 | 74.998 | KV453193.1 | 5470211 | 20-scf00021 | 20 |
| AX-157918723 | 2 | 75.144 | KV453193.1 | 5472340 | 20-scf00021 | 20 |
| AX-157918771 | 2 | 75.435 | KV453193.1 | 5526142 | 20-scf00021 | 20 |
| AX-157918772 | 2 | 75.435 | KV453193.1 | 5526690 | 20-scf00021 | 20 |
| AX-157918773 | 2 | 75.435 | KV453193.1 | 5528958 | 20-scf00021 | 20 |
| AX-158405162 | 2 | 75.435 | KV453193.1 | 5530997 | 20-scf00021 | 20 |
| AX-157918777 | 2 | 75.435 | KV453193.1 | 5532847 | 20-scf00021 | 20 |
| AX-157918779 | 2 | 75.435 | KV453193.1 | 5537727 | 20-scf00021 | 20 |
| AX-157918780 | 2 | 75.435 | KV453193.1 | 5538625 | 20-scf00021 | 20 |
| AX-157918781 | 2 | 75.435 | KV453193.1 | 5539435 | 20-scf00021 | 20 |
| AX-157918782 | 2 | 75.435 | KV453193.1 | 5540054 | 20-scf00021 | 20 |
| AX-157918783 | 2 | 75.435 | KV453193.1 | 5540662 | 20-scf00021 | 20 |
| AX-157918786 | 2 | 75.435 | KV453193.1 | 5546810 | 20-scf00021 | 20 |
| AX-157918788 | 2 | 75.435 | KV453193.1 | 5550200 | 20-scf00021 | 20 |
| AX-158379283 | 2 | 75.435 | KV453193.1 | 5550866 | 20-scf00021 | 20 |
| AX-157918789 | 2 | 75.435 | KV453193.1 | 5550954 | 20-scf00021 | 20 |
| AX-157918790 | 2 | 75.435 | KV453193.1 | 5553132 | 20-scf00021 | 20 |
| AX-157918794 | 2 | 75.435 | KV453193.1 | 5557659 | 20-scf00021 | 20 |
| AX-157739204 | 2 | 75.435 | KV453193.1 | 5558920 | 20-scf00021 | 20 |
| AX-157918796 | 2 | 75.435 | KV453193.1 | 5559490 | 20-scf00021 | 20 |
| AX-157918797 | 2 | 75.435 | KV453193.1 | 5560390 | 20-scf00021 | 20 |
| AX-157918798 | 2 | 75.435 | KV453193.1 | 5560886 | 20-scf00021 | 20 |
| AX-157918802 | 2 | 75.435 | KV453193.1 | 5566608 | 20-scf00021 | 20 |
| AX-157918803 | 2 | 75.435 | KV453193.1 | 5566877 | 20-scf00021 | 20 |
| AX-157918805 | 2 | 75.435 | KV453193.1 | 5569187 | 20-scf00021 | 20 |
| AX-157918806 | 2 | 75.435 | KV453193.1 | 5571467 | 20-scf00021 | 20 |
| AX-157918808 | 2 | 75.435 | KV453193.1 | 5575579 | 20-scf00021 | 20 |
| AX-157918861 | 2 | 75.435 | KV453193.1 | 5644884 | 20-scf00021 | 20 |
| AX-157918775 | 2 | 75.436 | KV453193.1 | 5531286 | 20-scf00021 | 20 |
| AX-157813005 | 2 | 75.436 | KV453193.1 | 5543116 | 20-scf00021 | 20 |
| AX-157918792 | 2 | 75.436 | KV453193.1 | 5554732 | 20-scf00021 | 20 |
| AX-157714320 | 2 | 75.436 | KV453193.1 | 5580292 | 20-scf00021 | 20 |
| AX-157918811 | 2 | 75.436 | KV453193.1 | 5580705 | 20-scf00021 | 20 |
| AX-157918812 | 2 | 75.599 | KV453193.1 | 5581153 | 20-scf00021 | 20 |
| AX-157918815 | 2 | 75.686 | KV453193.1 | 5583779 | 20-scf00021 | 20 |
| AX-157918817 | 2 | 75.763 | KV453193.1 | 5588008 | 20-scf00021 | 20 |
| AX-157918820 | 2 | 75.763 | KV453193.1 | 5592679 | 20-scf00021 | 20 |
| AX-157918821 | 2 | 75.763 | KV453193.1 | 5594321 | 20-scf00021 | 20 |
| AX-157918822 | 2 | 75.763 | KV453193.1 | 5595970 | 20-scf00021 | 20 |
| AX-157724520 | 2 | 75.785 | KV453193.1 | 5600737 | 20-scf00021 | 20 |
| AX-157918825 | 2 | 75.81  | KV453193.1 | 5602105 | 20-scf00021 | 20 |
| AX-157918827 | 2 | 75.836 | KV453193.1 | 5604794 | 20-scf00021 | 20 |
| AX-157918828 | 2 | 75.856 | KV453193.1 | 5605932 | 20-scf00021 | 20 |
| AX-157741322 | 2 | 75.873 | KV453193.1 | 5611005 | 20-scf00021 | 20 |
| AX-157918835 | 2 | 75.896 | KV453193.1 | 5611420 | 20-scf00021 | 20 |

|              |   |        |            |         |             |    |
|--------------|---|--------|------------|---------|-------------|----|
| AX-157918850 | 2 | 75.896 | KV453193.1 | 5631495 | 20-scf00021 | 20 |
| AX-157918873 | 2 | 75.896 | KV453193.1 | 5666045 | 20-scf00021 | 20 |
| AX-157918900 | 2 | 75.896 | KV453193.1 | 5713168 | 20-scf00021 | 20 |
| AX-157709857 | 2 | 75.938 | KV453193.1 | 5612002 | 20-scf00021 | 20 |
| AX-157918837 | 2 | 75.982 | KV453193.1 | 5614668 | 20-scf00021 | 20 |
| AX-157725138 | 2 | 75.982 | KV453193.1 | 5615487 | 20-scf00021 | 20 |
| AX-157918838 | 2 | 75.982 | KV453193.1 | 5615775 | 20-scf00021 | 20 |
| AX-157853766 | 2 | 75.982 | KV453193.1 | 5618640 | 20-scf00021 | 20 |
| AX-157918842 | 2 | 76.022 | KV453193.1 | 5622262 | 20-scf00021 | 20 |
| AX-157918836 | 2 | 76.061 | KV453193.1 | 5613688 | 20-scf00021 | 20 |
| AX-157918847 | 2 | 76.061 | KV453193.1 | 5625159 | 20-scf00021 | 20 |
| AX-157918857 | 2 | 76.061 | KV453193.1 | 5638280 | 20-scf00021 | 20 |
| AX-157918839 | 2 | 76.091 | KV453193.1 | 5618981 | 20-scf00021 | 20 |
| AX-157918845 | 2 | 76.091 | KV453193.1 | 5624374 | 20-scf00021 | 20 |
| AX-157918849 | 2 | 76.091 | KV453193.1 | 5628254 | 20-scf00021 | 20 |
| AX-158379284 | 2 | 76.091 | KV453193.1 | 5631783 | 20-scf00021 | 20 |
| AX-157918854 | 2 | 76.091 | KV453193.1 | 5634989 | 20-scf00021 | 20 |
| AX-157918855 | 2 | 76.091 | KV453193.1 | 5636842 | 20-scf00021 | 20 |
| AX-157741019 | 2 | 76.091 | KV453193.1 | 5636964 | 20-scf00021 | 20 |
| AX-157869130 | 2 | 76.091 | KV453193.1 | 5650730 | 20-scf00021 | 20 |
| AX-157918864 | 2 | 76.091 | KV453193.1 | 5651789 | 20-scf00021 | 20 |
| AX-157918866 | 2 | 76.091 | KV453193.1 | 5653792 | 20-scf00021 | 20 |
| AX-157918867 | 2 | 76.091 | KV453193.1 | 5657301 | 20-scf00021 | 20 |
| AX-157918869 | 2 | 76.091 | KV453193.1 | 5660132 | 20-scf00021 | 20 |
| AX-157918870 | 2 | 76.091 | KV453193.1 | 5660752 | 20-scf00021 | 20 |
| AX-157813011 | 2 | 76.091 | KV453193.1 | 5662243 | 20-scf00021 | 20 |
| AX-157918871 | 2 | 76.091 | KV453193.1 | 5662702 | 20-scf00021 | 20 |
| AX-157813013 | 2 | 76.091 | KV453193.1 | 5675023 | 20-scf00021 | 20 |
| AX-157918878 | 2 | 76.091 | KV453193.1 | 5675482 | 20-scf00021 | 20 |
| AX-157813015 | 2 | 76.091 | KV453193.1 | 5677905 | 20-scf00021 | 20 |
| AX-157813019 | 2 | 76.153 | KV453193.1 | 5689598 | 20-scf00021 | 20 |
| AX-157918886 | 2 | 76.222 | KV453193.1 | 5695622 | 20-scf00021 | 20 |
| AX-157918816 | 2 | 76.31  | KV453193.1 | 5585501 | 20-scf00021 | 20 |
| AX-157918824 | 2 | 76.31  | KV453193.1 | 5600975 | 20-scf00021 | 20 |
| AX-157739385 | 2 | 76.31  | KV453193.1 | 5601549 | 20-scf00021 | 20 |
| AX-157918846 | 2 | 76.31  | KV453193.1 | 5624623 | 20-scf00021 | 20 |
| AX-158389631 | 2 | 76.31  | KV453193.1 | 5665766 | 20-scf00021 | 20 |
| AX-157745026 | 2 | 76.31  | KV453193.1 | 5677574 | 20-scf00021 | 20 |
| AX-157918891 | 2 | 76.31  | KV453193.1 | 5699611 | 20-scf00021 | 20 |
| AX-157918892 | 2 | 76.31  | KV453193.1 | 5700436 | 20-scf00021 | 20 |
| AX-157918893 | 2 | 76.31  | KV453193.1 | 5700741 | 20-scf00021 | 20 |
| AX-157918896 | 2 | 76.31  | KV453193.1 | 5702529 | 20-scf00021 | 20 |
| AX-157813022 | 2 | 76.31  | KV453193.1 | 5702940 | 20-scf00021 | 20 |
| AX-157918899 | 2 | 76.31  | KV453193.1 | 5707815 | 20-scf00021 | 20 |
| AX-157752942 | 2 | 76.31  | KV453193.1 | 5711472 | 20-scf00021 | 20 |
| AX-157918901 | 2 | 76.31  | KV453193.1 | 5713688 | 20-scf00021 | 20 |
| AX-157918904 | 2 | 76.31  | KV453193.1 | 5716707 | 20-scf00021 | 20 |
| AX-157918908 | 2 | 76.31  | KV453193.1 | 5719431 | 20-scf00021 | 20 |
| AX-157918910 | 2 | 76.31  | KV453193.1 | 5720578 | 20-scf00021 | 20 |
| AX-157918912 | 2 | 76.31  | KV453193.1 | 5721627 | 20-scf00021 | 20 |
| AX-157918880 | 2 | 76.362 | KV453193.1 | 5684085 | 20-scf00021 | 20 |

|              |   |        |            |         |             |    |
|--------------|---|--------|------------|---------|-------------|----|
| AX-157918882 | 2 | 76.362 | KV453193.1 | 5687308 | 20-scf00021 | 20 |
| AX-157918915 | 2 | 76.362 | KV453193.1 | 5722764 | 20-scf00021 | 20 |
| AX-157918922 | 2 | 76.362 | KV453193.1 | 5727778 | 20-scf00021 | 20 |
| AX-157918877 | 2 | 76.414 | KV453193.1 | 5674619 | 20-scf00021 | 20 |
| AX-157918916 | 2 | 76.414 | KV453193.1 | 5724285 | 20-scf00021 | 20 |
| AX-157715648 | 2 | 76.414 | KV453193.1 | 5732859 | 20-scf00021 | 20 |
| AX-157918934 | 2 | 76.414 | KV453193.1 | 5738893 | 20-scf00021 | 20 |
| AX-157918918 | 2 | 76.473 | KV453193.1 | 5725379 | 20-scf00021 | 20 |
| AX-157918907 | 2 | 76.528 | KV453193.1 | 5718996 | 20-scf00021 | 20 |
| AX-157918913 | 2 | 76.528 | KV453193.1 | 5721893 | 20-scf00021 | 20 |
| AX-157918920 | 2 | 76.528 | KV453193.1 | 5726627 | 20-scf00021 | 20 |
| AX-157918921 | 2 | 76.528 | KV453193.1 | 5727457 | 20-scf00021 | 20 |
| AX-157918926 | 2 | 76.528 | KV453193.1 | 5729642 | 20-scf00021 | 20 |
| AX-157710989 | 2 | 76.529 | KV453193.1 | 5674260 | 20-scf00021 | 20 |
| AX-157918927 | 2 | 76.529 | KV453193.1 | 5730674 | 20-scf00021 | 20 |
| AX-157813023 | 2 | 76.529 | KV453193.1 | 5734254 | 20-scf00021 | 20 |
| AX-157918931 | 2 | 76.855 | KV453193.1 | 5735509 | 20-scf00021 | 20 |
| AX-157918932 | 2 | 76.856 | KV453193.1 | 5736198 | 20-scf00021 | 20 |
| AX-157918933 | 2 | 76.856 | KV453193.1 | 5736707 | 20-scf00021 | 20 |
| AX-157918937 | 2 | 76.856 | KV453193.1 | 5740644 | 20-scf00021 | 20 |
| AX-157918938 | 2 | 76.856 | KV453193.1 | 5741225 | 20-scf00021 | 20 |
| AX-157813024 | 2 | 76.856 | KV453193.1 | 5741559 | 20-scf00021 | 20 |
| AX-157918939 | 2 | 76.87  | KV453193.1 | 5743992 | 20-scf00021 | 20 |
| AX-157869132 | 2 | 76.894 | KV453193.1 | 5746305 | 20-scf00021 | 20 |
| AX-157853767 | 2 | 77.189 | KV453193.1 | 5754323 | 20-scf00021 | 20 |
| AX-157714776 | 2 | 77.189 | KV453193.1 | 5755259 | 20-scf00021 | 20 |
| AX-157918947 | 2 | 77.191 | KV453193.1 | 5760206 | 20-scf00021 | 20 |
| AX-157771024 | 2 | 77.364 | KV453193.1 | 5766738 | 20-scf00021 | 20 |
| AX-157918950 | 2 | 77.364 | KV453193.1 | 5767567 | 20-scf00021 | 20 |
| AX-157918953 | 2 | 77.452 | KV453193.1 | 5774301 | 20-scf00021 | 20 |
| AX-157918943 | 2 | 77.622 | KV453193.1 | 5748917 | 20-scf00021 | 20 |
| AX-157918946 | 2 | 77.622 | KV453193.1 | 5759802 | 20-scf00021 | 20 |
| AX-157918956 | 2 | 77.622 | KV453193.1 | 5776434 | 20-scf00021 | 20 |
| AX-157918959 | 2 | 77.622 | KV453193.1 | 5778604 | 20-scf00021 | 20 |
| AX-157918961 | 2 | 77.622 | KV453193.1 | 5781166 | 20-scf00021 | 20 |
| AX-157918963 | 2 | 77.779 | KV453193.1 | 5789132 | 20-scf00021 | 20 |
| AX-157918952 | 2 | 77.91  | KV453193.1 | 5773589 | 20-scf00021 | 20 |
| AX-157813026 | 2 | 77.91  | KV453193.1 | 5791836 | 20-scf00021 | 20 |
| AX-157918949 | 2 | 77.984 | KV453193.1 | 5763612 | 20-scf00021 | 20 |
| AX-157918967 | 2 | 77.984 | KV453193.1 | 5794807 | 20-scf00021 | 20 |
| AX-157757567 | 2 | 78.054 | KV453193.1 | 5796535 | 20-scf00021 | 20 |
| AX-157918986 | 2 | 78.063 | KV453193.1 | 5819351 | 20-scf00021 | 20 |
| AX-157918972 | 2 | 78.075 | KV453193.1 | 5801598 | 20-scf00021 | 20 |
| AX-157918973 | 2 | 78.147 | KV453193.1 | 5804335 | 20-scf00021 | 20 |
| AX-157918974 | 2 | 78.219 | KV453193.1 | 5807433 | 20-scf00021 | 20 |
| AX-157918975 | 2 | 78.3   | KV453193.1 | 5808935 | 20-scf00021 | 20 |
| AX-157918964 | 2 | 78.387 | KV453193.1 | 5793333 | 20-scf00021 | 20 |
| AX-157918977 | 2 | 78.387 | KV453193.1 | 5812453 | 20-scf00021 | 20 |
| AX-157918979 | 2 | 78.387 | KV453193.1 | 5815138 | 20-scf00021 | 20 |
| AX-157918980 | 2 | 78.387 | KV453193.1 | 5816233 | 20-scf00021 | 20 |
| AX-157918982 | 2 | 78.387 | KV453193.1 | 5817368 | 20-scf00021 | 20 |

|              |   |        |            |         |             |    |
|--------------|---|--------|------------|---------|-------------|----|
| AX-157918987 | 2 | 78.387 | KV453193.1 | 5819959 | 20-scf00021 | 20 |
| AX-157918988 | 2 | 78.388 | KV453193.1 | 5820243 | 20-scf00021 | 20 |
| AX-157918991 | 2 | 79.125 | KV453193.1 | 5824471 | 20-scf00021 | 20 |
| AX-157918992 | 2 | 79.175 | KV453193.1 | 5827413 | 20-scf00021 | 20 |
| AX-157718293 | 2 | 79.268 | KV453193.1 | 5828488 | 20-scf00021 | 20 |
| AX-157918994 | 2 | 79.372 | KV453193.1 | 5831931 | 20-scf00021 | 20 |
| AX-157918995 | 2 | 79.372 | KV453193.1 | 5832935 | 20-scf00021 | 20 |
| AX-157918996 | 2 | 79.59  | KV453193.1 | 5833925 | 20-scf00021 | 20 |
| AX-157813027 | 2 | 79.59  | KV453193.1 | 5835585 | 20-scf00021 | 20 |
| AX-157918997 | 2 | 79.59  | KV453193.1 | 5836442 | 20-scf00021 | 20 |
| AX-157918998 | 2 | 79.59  | KV453193.1 | 5838164 | 20-scf00021 | 20 |
| AX-157918999 | 2 | 79.59  | KV453193.1 | 5839434 | 20-scf00021 | 20 |
| AX-157853768 | 2 | 79.59  | KV453193.1 | 5839932 | 20-scf00021 | 20 |
| AX-157919000 | 2 | 79.59  | KV453193.1 | 5840298 | 20-scf00021 | 20 |
| AX-157919001 | 2 | 79.59  | KV453193.1 | 5841392 | 20-scf00021 | 20 |
| AX-157919002 | 2 | 79.59  | KV453193.1 | 5841662 | 20-scf00021 | 20 |
| AX-157758604 | 2 | 79.59  | KV453193.1 | 5843123 | 20-scf00021 | 20 |
| AX-157919003 | 2 | 79.59  | KV453193.1 | 5843660 | 20-scf00021 | 20 |
| AX-157727464 | 2 | 79.59  | KV453193.1 | 5844464 | 20-scf00021 | 20 |
| AX-157919006 | 2 | 79.59  | KV453193.1 | 5845079 | 20-scf00021 | 20 |
| AX-157919009 | 2 | 79.59  | KV453193.1 | 5847705 | 20-scf00021 | 20 |
| AX-157919010 | 2 | 79.809 | KV453193.1 | 5848821 | 20-scf00021 | 20 |
| AX-157919011 | 2 | 79.809 | KV453193.1 | 5849387 | 20-scf00021 | 20 |
| AX-157919012 | 2 | 79.809 | KV453193.1 | 5849990 | 20-scf00021 | 20 |
| AX-157919013 | 2 | 79.809 | KV453193.1 | 5852034 | 20-scf00021 | 20 |
| AX-157919015 | 2 | 79.809 | KV453193.1 | 5853557 | 20-scf00021 | 20 |
| AX-157919017 | 2 | 79.809 | KV453193.1 | 5854310 | 20-scf00021 | 20 |
| AX-157919018 | 2 | 79.843 | KV453193.1 | 5854765 | 20-scf00021 | 20 |
| AX-157919019 | 2 | 79.881 | KV453193.1 | 5855073 | 20-scf00021 | 20 |
| AX-157720086 | 2 | 79.918 | KV453193.1 | 5858734 | 20-scf00021 | 20 |
| AX-157919023 | 2 | 79.918 | KV453193.1 | 5859913 | 20-scf00021 | 20 |
| AX-157919028 | 2 | 79.918 | KV453193.1 | 5865121 | 20-scf00021 | 20 |
| AX-157919030 | 2 | 79.918 | KV453193.1 | 5867968 | 20-scf00021 | 20 |
| AX-157919033 | 2 | 80.082 | KV453193.1 | 5871685 | 20-scf00021 | 20 |
| AX-157869133 | 2 | 80.123 | KV453193.1 | 5875927 | 20-scf00021 | 20 |
| AX-157919048 | 2 | 80.123 | KV453193.1 | 5886331 | 20-scf00021 | 20 |
| AX-157755038 | 2 | 80.162 | KV453193.1 | 5876427 | 20-scf00021 | 20 |
| AX-157919039 | 2 | 80.207 | KV453193.1 | 5878449 | 20-scf00021 | 20 |
| AX-157919140 | 2 | 80.207 | KV453193.1 | 6016537 | 20-scf00021 | 20 |
| AX-157919038 | 2 | 80.246 | KV453193.1 | 5877722 | 20-scf00021 | 20 |
| AX-157919040 | 2 | 80.246 | KV453193.1 | 5878693 | 20-scf00021 | 20 |
| AX-157919041 | 2 | 80.246 | KV453193.1 | 5879309 | 20-scf00021 | 20 |
| AX-157919042 | 2 | 80.246 | KV453193.1 | 5879939 | 20-scf00021 | 20 |
| AX-157919043 | 2 | 80.246 | KV453193.1 | 5880501 | 20-scf00021 | 20 |
| AX-157919044 | 2 | 80.246 | KV453193.1 | 5880639 | 20-scf00021 | 20 |
| AX-157919045 | 2 | 80.246 | KV453193.1 | 5882281 | 20-scf00021 | 20 |
| AX-157919050 | 2 | 80.246 | KV453193.1 | 5887739 | 20-scf00021 | 20 |
| AX-157919051 | 2 | 80.246 | KV453193.1 | 5888977 | 20-scf00021 | 20 |
| AX-157726894 | 2 | 80.246 | KV453193.1 | 5889333 | 20-scf00021 | 20 |
| AX-157919052 | 2 | 80.246 | KV453193.1 | 5892679 | 20-scf00021 | 20 |
| AX-157919053 | 2 | 80.246 | KV453193.1 | 5893974 | 20-scf00021 | 20 |

|              |   |        |            |         |             |    |
|--------------|---|--------|------------|---------|-------------|----|
| AX-157919054 | 2 | 80.246 | KV453193.1 | 5896246 | 20-scf00021 | 20 |
| AX-157919055 | 2 | 80.246 | KV453193.1 | 5896499 | 20-scf00021 | 20 |
| AX-157813030 | 2 | 80.246 | KV453193.1 | 5930161 | 20-scf00021 | 20 |
| AX-157919135 | 2 | 80.246 | KV453193.1 | 6008719 | 20-scf00021 | 20 |
| AX-157919059 | 2 | 80.247 | KV453193.1 | 5902651 | 20-scf00021 | 20 |
| AX-157919063 | 2 | 80.574 | KV453193.1 | 5908941 | 20-scf00021 | 20 |
| AX-157919066 | 2 | 80.574 | KV453193.1 | 5911816 | 20-scf00021 | 20 |
| AX-157919083 | 2 | 80.574 | KV453193.1 | 5934661 | 20-scf00021 | 20 |
| AX-157919068 | 2 | 80.584 | KV453193.1 | 5916113 | 20-scf00021 | 20 |
| AX-157757511 | 2 | 80.635 | KV453193.1 | 5916600 | 20-scf00021 | 20 |
| AX-157919073 | 2 | 80.635 | KV453193.1 | 5924849 | 20-scf00021 | 20 |
| AX-157919086 | 2 | 80.635 | KV453193.1 | 5941998 | 20-scf00021 | 20 |
| AX-158389634 | 2 | 80.646 | KV453193.1 | 5917932 | 20-scf00021 | 20 |
| AX-157919069 | 2 | 80.683 | KV453193.1 | 5918339 | 20-scf00021 | 20 |
| AX-157919076 | 2 | 80.683 | KV453193.1 | 5926569 | 20-scf00021 | 20 |
| AX-157919077 | 2 | 80.683 | KV453193.1 | 5926837 | 20-scf00021 | 20 |
| AX-157919079 | 2 | 80.683 | KV453193.1 | 5928200 | 20-scf00021 | 20 |
| AX-157748251 | 2 | 80.683 | KV453193.1 | 5930770 | 20-scf00021 | 20 |
| AX-157919081 | 2 | 80.683 | KV453193.1 | 5933366 | 20-scf00021 | 20 |
| AX-157919088 | 2 | 80.683 | KV453193.1 | 5942924 | 20-scf00021 | 20 |
| AX-157919090 | 2 | 80.683 | KV453193.1 | 5943956 | 20-scf00021 | 20 |
| AX-157919094 | 2 | 80.683 | KV453193.1 | 5947018 | 20-scf00021 | 20 |
| AX-157919106 | 2 | 80.683 | KV453193.1 | 5961205 | 20-scf00021 | 20 |
| AX-157919070 | 2 | 81.065 | KV453193.1 | 5919406 | 20-scf00021 | 20 |
| AX-157919097 | 2 | 81.065 | KV453193.1 | 5950538 | 20-scf00021 | 20 |
| AX-157919108 | 2 | 81.449 | KV453193.1 | 5964722 | 20-scf00021 | 20 |
| AX-157919109 | 2 | 81.449 | KV453193.1 | 5964977 | 20-scf00021 | 20 |
| AX-157919110 | 2 | 81.449 | KV453193.1 | 5965239 | 20-scf00021 | 20 |
| AX-157919114 | 2 | 81.614 | KV453193.1 | 5969717 | 20-scf00021 | 20 |
| AX-157919115 | 2 | 81.614 | KV453193.1 | 5970066 | 20-scf00021 | 20 |
| AX-157919116 | 2 | 81.778 | KV453193.1 | 5971383 | 20-scf00021 | 20 |
| AX-157813031 | 2 | 81.778 | KV453193.1 | 5975622 | 20-scf00021 | 20 |
| AX-157919118 | 2 | 81.778 | KV453193.1 | 5975849 | 20-scf00021 | 20 |
| AX-157919119 | 2 | 81.778 | KV453193.1 | 5980281 | 20-scf00021 | 20 |
| AX-157919089 | 2 | 82.044 | KV453193.1 | 5943410 | 20-scf00021 | 20 |
| AX-157919112 | 2 | 82.044 | KV453193.1 | 5969034 | 20-scf00021 | 20 |
| AX-157919121 | 2 | 82.044 | KV453193.1 | 5985593 | 20-scf00021 | 20 |
| AX-157919122 | 2 | 82.044 | KV453193.1 | 5986204 | 20-scf00021 | 20 |
| AX-157919123 | 2 | 82.044 | KV453193.1 | 5991636 | 20-scf00021 | 20 |
| AX-157919124 | 2 | 82.044 | KV453193.1 | 5993336 | 20-scf00021 | 20 |
| AX-157919126 | 2 | 82.145 | KV453193.1 | 5993991 | 20-scf00021 | 20 |
| AX-157919130 | 2 | 82.324 | KV453193.1 | 5997673 | 20-scf00021 | 20 |
| AX-157919132 | 2 | 82.324 | KV453193.1 | 6001013 | 20-scf00021 | 20 |
| AX-157919133 | 2 | 82.424 | KV453193.1 | 6003436 | 20-scf00021 | 20 |
| AX-157813033 | 2 | 82.488 | KV453193.1 | 6010703 | 20-scf00021 | 20 |
| AX-157919137 | 2 | 82.542 | KV453193.1 | 6011141 | 20-scf00021 | 20 |
| AX-157919138 | 2 | 82.542 | KV453193.1 | 6011995 | 20-scf00021 | 20 |
| AX-157813034 | 2 | 82.542 | KV453193.1 | 6016175 | 20-scf00021 | 20 |
| AX-157919141 | 2 | 82.652 | KV453193.1 | 6017295 | 20-scf00021 | 20 |
| AX-157919142 | 2 | 82.652 | KV453193.1 | 6017695 | 20-scf00021 | 20 |
| AX-157919143 | 2 | 82.652 | KV453193.1 | 6018828 | 20-scf00021 | 20 |

|              |   |        |            |         |               |    |
|--------------|---|--------|------------|---------|---------------|----|
| AX-157813036 | 2 | 82.652 | KV453193.1 | 6022359 | 20-scf00021   | 20 |
| AX-157813037 | 2 | 82.761 | KV453193.1 | 6024281 | 20-scf00021   | 20 |
| AX-157699065 | 2 | 82.761 | KV453193.1 | 6025481 | 20-scf00021   | 20 |
| AX-157724874 | 2 | 82.87  | KV453193.1 | 6030078 | 20-scf00021   | 20 |
| AX-157720784 | 2 | 82.87  | KV453193.1 | 6030400 | 20-scf00021   | 20 |
| AX-157919148 | 2 | 82.87  | KV453193.1 | 6031973 | 20-scf00021   | 20 |
| AX-157919149 | 2 | 82.87  | KV453193.1 | 6032472 | 20-scf00021   | 20 |
| AX-157702971 | 2 | 82.87  | DX095465.1 | 158     | ORI212 lctalu | UN |
| AX-157919152 | 2 | 82.978 | KV453193.1 | 6040385 | 20-scf00021   | 20 |
| AX-157919150 | 2 | 83.089 | KV453193.1 | 6037113 | 20-scf00021   | 20 |
| AX-157919154 | 2 | 83.089 | KV453193.1 | 6041327 | 20-scf00021   | 20 |
| AX-157919157 | 2 | 83.089 | KV453193.1 | 6043197 | 20-scf00021   | 20 |
| AX-157919158 | 2 | 83.089 | KV453193.1 | 6044458 | 20-scf00021   | 20 |
| AX-157919159 | 2 | 83.089 | KV453193.1 | 6044981 | 20-scf00021   | 20 |
| AX-157708490 | 2 | 83.089 | KV453193.1 | 6115050 | 20-scf00021   | 20 |
| AX-157919301 | 2 | 83.089 | KV453193.1 | 6242750 | 20-scf00021   | 20 |
| AX-157919162 | 2 | 83.198 | KV453193.1 | 6048435 | 20-scf00021   | 20 |
| AX-157919164 | 2 | 83.217 | KV453193.1 | 6052180 | 20-scf00021   | 20 |
| AX-157919168 | 2 | 83.244 | KV453193.1 | 6054913 | 20-scf00021   | 20 |
| AX-157919169 | 2 | 83.271 | KV453193.1 | 6055512 | 20-scf00021   | 20 |
| AX-157919171 | 2 | 83.307 | KV453193.1 | 6056697 | 20-scf00021   | 20 |
| AX-157919160 | 2 | 83.398 | KV453193.1 | 6047476 | 20-scf00021   | 20 |
| AX-157919173 | 2 | 83.398 | KV453193.1 | 6058260 | 20-scf00021   | 20 |
| AX-157919174 | 2 | 83.398 | KV453193.1 | 6059709 | 20-scf00021   | 20 |
| AX-157919189 | 2 | 83.398 | KV453193.1 | 6078312 | 20-scf00021   | 20 |
| AX-157919198 | 2 | 83.398 | KV453193.1 | 6082738 | 20-scf00021   | 20 |
| AX-157919209 | 2 | 83.398 | KV453193.1 | 6099500 | 20-scf00021   | 20 |
| AX-157919175 | 2 | 83.437 | KV453193.1 | 6060614 | 20-scf00021   | 20 |
| AX-157919172 | 2 | 83.526 | KV453193.1 | 6057828 | 20-scf00021   | 20 |
| AX-157919177 | 2 | 83.526 | KV453193.1 | 6062629 | 20-scf00021   | 20 |
| AX-157775300 | 2 | 83.526 | KV453193.1 | 6063679 | 20-scf00021   | 20 |
| AX-158405176 | 2 | 83.526 | KV453193.1 | 6064836 | 20-scf00021   | 20 |
| AX-157919181 | 2 | 83.526 | KV453193.1 | 6069783 | 20-scf00021   | 20 |
| AX-157813041 | 2 | 83.526 | KV453193.1 | 6070008 | 20-scf00021   | 20 |
| AX-157919182 | 2 | 83.526 | KV453193.1 | 6070394 | 20-scf00021   | 20 |
| AX-157919183 | 2 | 83.526 | KV453193.1 | 6071259 | 20-scf00021   | 20 |
| AX-157919187 | 2 | 83.526 | KV453193.1 | 6075159 | 20-scf00021   | 20 |
| AX-157919188 | 2 | 83.526 | KV453193.1 | 6077689 | 20-scf00021   | 20 |
| AX-157919190 | 2 | 83.526 | KV453193.1 | 6079024 | 20-scf00021   | 20 |
| AX-158379287 | 2 | 83.526 | KV453193.1 | 6079132 | 20-scf00021   | 20 |
| AX-157919191 | 2 | 83.526 | KV453193.1 | 6079267 | 20-scf00021   | 20 |
| AX-157919195 | 2 | 83.526 | KV453193.1 | 6080766 | 20-scf00021   | 20 |
| AX-157919196 | 2 | 83.526 | KV453193.1 | 6081343 | 20-scf00021   | 20 |
| AX-157919197 | 2 | 83.526 | KV453193.1 | 6081858 | 20-scf00021   | 20 |
| AX-157919199 | 2 | 83.526 | KV453193.1 | 6082962 | 20-scf00021   | 20 |
| AX-157919200 | 2 | 83.526 | KV453193.1 | 6083769 | 20-scf00021   | 20 |
| AX-157919202 | 2 | 83.526 | KV453193.1 | 6085185 | 20-scf00021   | 20 |
| AX-157919205 | 2 | 83.526 | KV453193.1 | 6096160 | 20-scf00021   | 20 |
| AX-157919206 | 2 | 83.526 | KV453193.1 | 6097129 | 20-scf00021   | 20 |
| AX-157919207 | 2 | 83.526 | KV453193.1 | 6098211 | 20-scf00021   | 20 |
| AX-157919210 | 2 | 83.526 | KV453193.1 | 6099917 | 20-scf00021   | 20 |

|              |   |        |            |         |             |    |
|--------------|---|--------|------------|---------|-------------|----|
| AX-157919213 | 2 | 83.526 | KV453193.1 | 6103276 | 20-scf00021 | 20 |
| AX-157919216 | 2 | 83.526 | KV453193.1 | 6106131 | 20-scf00021 | 20 |
| AX-157743875 | 2 | 83.526 | KV453193.1 | 6107584 | 20-scf00021 | 20 |
| AX-157708048 | 2 | 83.526 | KV453193.1 | 6118468 | 20-scf00021 | 20 |
| AX-157758957 | 2 | 83.526 | KV453193.1 | 6125525 | 20-scf00021 | 20 |
| AX-157716011 | 2 | 83.853 | KV453193.1 | 6105229 | 20-scf00021 | 20 |
| AX-157813049 | 2 | 83.853 | KV453193.1 | 6121652 | 20-scf00021 | 20 |
| AX-157723881 | 2 | 83.853 | KV453193.1 | 6123046 | 20-scf00021 | 20 |
| AX-157919224 | 2 | 83.853 | KV453193.1 | 6123935 | 20-scf00021 | 20 |
| AX-157742407 | 2 | 83.853 | KV453193.1 | 6123998 | 20-scf00021 | 20 |
| AX-157919225 | 2 | 83.853 | KV453193.1 | 6125482 | 20-scf00021 | 20 |
| AX-157919226 | 2 | 83.853 | KV453193.1 | 6127196 | 20-scf00021 | 20 |
| AX-157720976 | 2 | 83.853 | KV453193.1 | 6129279 | 20-scf00021 | 20 |
| AX-157919227 | 2 | 83.853 | KV453193.1 | 6130580 | 20-scf00021 | 20 |
| AX-157758944 | 2 | 83.853 | KV453193.1 | 6132746 | 20-scf00021 | 20 |
| AX-157919229 | 2 | 83.853 | KV453193.1 | 6133225 | 20-scf00021 | 20 |
| AX-157919230 | 2 | 83.853 | KV453193.1 | 6134314 | 20-scf00021 | 20 |
| AX-157919253 | 2 | 83.853 | KV453193.1 | 6171617 | 20-scf00021 | 20 |
| AX-157919263 | 2 | 83.853 | KV453193.1 | 6184315 | 20-scf00021 | 20 |
| AX-157919232 | 2 | 83.89  | KV453193.1 | 6137856 | 20-scf00021 | 20 |
| AX-157919235 | 2 | 83.933 | KV453193.1 | 6141032 | 20-scf00021 | 20 |
| AX-157919220 | 2 | 83.962 | KV453193.1 | 6117508 | 20-scf00021 | 20 |
| AX-157919231 | 2 | 83.962 | KV453193.1 | 6135676 | 20-scf00021 | 20 |
| AX-157773796 | 2 | 83.962 | KV453193.1 | 6142875 | 20-scf00021 | 20 |
| AX-157919237 | 2 | 83.962 | KV453193.1 | 6144525 | 20-scf00021 | 20 |
| AX-157919238 | 2 | 83.962 | KV453193.1 | 6145651 | 20-scf00021 | 20 |
| AX-157919240 | 2 | 83.962 | KV453193.1 | 6146663 | 20-scf00021 | 20 |
| AX-157864537 | 2 | 83.962 | KV453193.1 | 6147843 | 20-scf00021 | 20 |
| AX-157919241 | 2 | 83.962 | KV453193.1 | 6148301 | 20-scf00021 | 20 |
| AX-157919243 | 2 | 83.962 | KV453193.1 | 6149105 | 20-scf00021 | 20 |
| AX-157813053 | 2 | 83.962 | KV453193.1 | 6153455 | 20-scf00021 | 20 |
| AX-157919246 | 2 | 84.181 | KV453193.1 | 6158239 | 20-scf00021 | 20 |
| AX-157919247 | 2 | 84.181 | KV453193.1 | 6162741 | 20-scf00021 | 20 |
| AX-157919249 | 2 | 84.181 | KV453193.1 | 6164597 | 20-scf00021 | 20 |
| AX-157919250 | 2 | 84.181 | KV453193.1 | 6164902 | 20-scf00021 | 20 |
| AX-157919251 | 2 | 84.181 | KV453193.1 | 6165391 | 20-scf00021 | 20 |
| AX-157813054 | 2 | 84.181 | KV453193.1 | 6166119 | 20-scf00021 | 20 |
| AX-157919254 | 2 | 84.181 | KV453193.1 | 6172310 | 20-scf00021 | 20 |
| AX-157919256 | 2 | 84.181 | KV453193.1 | 6177015 | 20-scf00021 | 20 |
| AX-157919257 | 2 | 84.181 | KV453193.1 | 6178317 | 20-scf00021 | 20 |
| AX-157919259 | 2 | 84.181 | KV453193.1 | 6180430 | 20-scf00021 | 20 |
| AX-157919260 | 2 | 84.181 | KV453193.1 | 6182433 | 20-scf00021 | 20 |
| AX-157724838 | 2 | 84.181 | KV453193.1 | 6183697 | 20-scf00021 | 20 |
| AX-157919262 | 2 | 84.181 | KV453193.1 | 6183799 | 20-scf00021 | 20 |
| AX-157919286 | 2 | 84.181 | KV453193.1 | 6219853 | 20-scf00021 | 20 |
| AX-157771387 | 2 | 84.181 | KV453193.1 | 6223841 | 20-scf00021 | 20 |
| AX-157919264 | 2 | 84.4   | KV453193.1 | 6185845 | 20-scf00021 | 20 |
| AX-157919266 | 2 | 84.4   | KV453193.1 | 6187090 | 20-scf00021 | 20 |
| AX-157919269 | 2 | 84.4   | KV453193.1 | 6192216 | 20-scf00021 | 20 |
| AX-157919282 | 2 | 84.4   | KV453193.1 | 6215956 | 20-scf00021 | 20 |
| AX-157919267 | 2 | 84.509 | KV453193.1 | 6188353 | 20-scf00021 | 20 |



|              |   |        |            |         |             |    |
|--------------|---|--------|------------|---------|-------------|----|
| AX-157773923 | 2 | 84.509 | KV453193.1 | 6199532 | 20-scf00021 | 20 |
| AX-157778281 | 2 | 84.509 | KV453193.1 | 6201619 | 20-scf00021 | 20 |
| AX-157919274 | 2 | 84.509 | KV453193.1 | 6202307 | 20-scf00021 | 20 |
| AX-157919275 | 2 | 84.509 | KV453193.1 | 6206289 | 20-scf00021 | 20 |
| AX-157919277 | 2 | 84.509 | KV453193.1 | 6207740 | 20-scf00021 | 20 |
| AX-157919279 | 2 | 84.509 | KV453193.1 | 6208846 | 20-scf00021 | 20 |
| AX-157869136 | 2 | 84.509 | KV453193.1 | 6213239 | 20-scf00021 | 20 |
| AX-157919281 | 2 | 84.509 | KV453193.1 | 6215216 | 20-scf00021 | 20 |
| AX-157919287 | 2 | 84.509 | KV453193.1 | 6220625 | 20-scf00021 | 20 |
| AX-157919288 | 2 | 84.509 | KV453193.1 | 6224013 | 20-scf00021 | 20 |
| AX-157919289 | 2 | 84.509 | KV453193.1 | 6225043 | 20-scf00021 | 20 |
| AX-157919290 | 2 | 84.509 | KV453193.1 | 6225476 | 20-scf00021 | 20 |
| AX-157813058 | 2 | 84.525 | KV453193.1 | 6227252 | 20-scf00021 | 20 |
| AX-157813059 | 2 | 84.525 | KV453193.1 | 6229006 | 20-scf00021 | 20 |
| AX-157919305 | 2 | 84.525 | KV453193.1 | 6246692 | 20-scf00021 | 20 |
| AX-157919291 | 2 | 84.618 | KV453193.1 | 6225967 | 20-scf00021 | 20 |
| AX-157919293 | 2 | 84.618 | KV453193.1 | 6230419 | 20-scf00021 | 20 |
| AX-157919294 | 2 | 84.618 | KV453193.1 | 6230836 | 20-scf00021 | 20 |
| AX-157919295 | 2 | 84.618 | KV453193.1 | 6232589 | 20-scf00021 | 20 |
| AX-157919300 | 2 | 84.618 | KV453193.1 | 6241897 | 20-scf00021 | 20 |
| AX-157919302 | 2 | 84.618 | KV453193.1 | 6243186 | 20-scf00021 | 20 |
| AX-157919303 | 2 | 84.618 | KV453193.1 | 6243642 | 20-scf00021 | 20 |
| AX-157745462 | 2 | 84.618 | KV453193.1 | 6244862 | 20-scf00021 | 20 |
| AX-157758367 | 2 | 84.618 | KV453193.1 | 6247587 | 20-scf00021 | 20 |
| AX-157813061 | 2 | 84.618 | KV453193.1 | 6250940 | 20-scf00021 | 20 |
| AX-157713493 | 2 | 84.618 | KV453193.1 | 6251145 | 20-scf00021 | 20 |
| AX-157919307 | 2 | 84.618 | KV453193.1 | 6252575 | 20-scf00021 | 20 |
| AX-157919384 | 2 | 84.618 | KV453193.1 | 6358062 | 20-scf00021 | 20 |
| AX-157919306 | 2 | 84.644 | KV453193.1 | 6248749 | 20-scf00021 | 20 |
| AX-157919308 | 2 | 84.644 | KV453193.1 | 6253309 | 20-scf00021 | 20 |
| AX-157919311 | 2 | 84.644 | KV453193.1 | 6257837 | 20-scf00021 | 20 |
| AX-157813063 | 2 | 84.644 | KV453193.1 | 6268473 | 20-scf00021 | 20 |
| AX-157919310 | 2 | 84.781 | KV453193.1 | 6257185 | 20-scf00021 | 20 |
| AX-157919315 | 2 | 84.945 | KV453193.1 | 6265582 | 20-scf00021 | 20 |
| AX-157714238 | 2 | 84.945 | KV453193.1 | 6269042 | 20-scf00021 | 20 |
| AX-157919316 | 2 | 84.945 | KV453193.1 | 6272163 | 20-scf00021 | 20 |
| AX-157813064 | 2 | 84.945 | KV453193.1 | 6273969 | 20-scf00021 | 20 |
| AX-157919317 | 2 | 84.945 | KV453193.1 | 6274048 | 20-scf00021 | 20 |
| AX-157813065 | 2 | 84.945 | KV453193.1 | 6274290 | 20-scf00021 | 20 |
| AX-157919319 | 2 | 84.945 | KV453193.1 | 6276182 | 20-scf00021 | 20 |
| AX-157919321 | 2 | 84.945 | KV453193.1 | 6277695 | 20-scf00021 | 20 |
| AX-157919323 | 2 | 84.945 | KV453193.1 | 6280256 | 20-scf00021 | 20 |
| AX-157813066 | 2 | 84.945 | KV453193.1 | 6280538 | 20-scf00021 | 20 |
| AX-157754570 | 2 | 84.945 | KV453193.1 | 6281284 | 20-scf00021 | 20 |
| AX-157919324 | 2 | 84.945 | KV453193.1 | 6282746 | 20-scf00021 | 20 |
| AX-157919329 | 2 | 84.945 | KV453193.1 | 6289186 | 20-scf00021 | 20 |
| AX-157919336 | 2 | 84.945 | KV453193.1 | 6304965 | 20-scf00021 | 20 |
| AX-157919339 | 2 | 84.945 | KV453193.1 | 6309427 | 20-scf00021 | 20 |
| AX-157919347 | 2 | 84.945 | KV453193.1 | 6315459 | 20-scf00021 | 20 |
| AX-158405178 | 2 | 84.945 | KV453193.1 | 6354083 | 20-scf00021 | 20 |
| AX-157919404 | 2 | 84.945 | KV453193.1 | 6382347 | 20-scf00021 | 20 |

|              |   |        |             |         |               |    |
|--------------|---|--------|-------------|---------|---------------|----|
| AX-157919325 | 2 | 84.98  | KV453193.1  | 6283193 | 20-scf00021   | 20 |
| AX-157919326 | 2 | 85.012 | KV453193.1  | 6284269 | 20-scf00021   | 20 |
| AX-157919327 | 2 | 85.027 | KV453193.1  | 6285190 | 20-scf00021   | 20 |
| AX-157919332 | 2 | 85.027 | KV453193.1  | 6294627 | 20-scf00021   | 20 |
| AX-157813068 | 2 | 85.027 | KV453193.1  | 6300376 | 20-scf00021   | 20 |
| AX-157727577 | 2 | 85.027 | KV453193.1  | 6356958 | 20-scf00021   | 20 |
| AX-157919330 | 2 | 85.031 | KV453193.1  | 6289971 | 20-scf00021   | 20 |
| AX-157919333 | 2 | 85.055 | KV453193.1  | 6303033 | 20-scf00021   | 20 |
| AX-157919340 | 2 | 85.112 | KV453193.1  | 6310372 | 20-scf00021   | 20 |
| AX-157919342 | 2 | 85.164 | KV453193.1  | 6312423 | 20-scf00021   | 20 |
| AX-157919343 | 2 | 85.164 | KV453193.1  | 6312824 | 20-scf00021   | 20 |
| AX-157813069 | 2 | 85.164 | KV453193.1  | 6313385 | 20-scf00021   | 20 |
| AX-157919344 | 2 | 85.164 | KV453193.1  | 6313810 | 20-scf00021   | 20 |
| AX-157919345 | 2 | 85.164 | KV453193.1  | 6314109 | 20-scf00021   | 20 |
| AX-157919349 | 2 | 85.164 | KV453193.1  | 6316462 | 20-scf00021   | 20 |
| AX-157919350 | 2 | 85.164 | KV453193.1  | 6316822 | 20-scf00021   | 20 |
| AX-157919351 | 2 | 85.164 | KV453193.1  | 6317307 | 20-scf00021   | 20 |
| AX-157919352 | 2 | 85.164 | KV453193.1  | 6317570 | 20-scf00021   | 20 |
| AX-157919353 | 2 | 85.164 | KV453193.1  | 6318093 | 20-scf00021   | 20 |
| AX-157716871 | 2 | 85.164 | KV453193.1  | 6319323 | 20-scf00021   | 20 |
| AX-157919356 | 2 | 85.164 | KV453193.1  | 6321609 | 20-scf00021   | 20 |
| AX-157919358 | 2 | 85.164 | KV453193.1  | 6324067 | 20-scf00021   | 20 |
| AX-157919361 | 2 | 85.164 | KV453193.1  | 6325489 | 20-scf00021   | 20 |
| AX-157919362 | 2 | 85.164 | KV453193.1  | 6330859 | 20-scf00021   | 20 |
| AX-157694378 | 2 | 85.164 | FI877934.1  | 384     | ORI212 lctalu | UN |
| AX-157689824 | 2 | 85.164 | 3ML01033034 | 298     | scf08671_1    | UN |
| AX-157919363 | 2 | 85.261 | KV453193.1  | 6331426 | 20-scf00021   | 20 |
| AX-157724624 | 2 | 85.382 | KV453193.1  | 6335550 | 20-scf00021   | 20 |
| AX-157919368 | 2 | 85.382 | KV453193.1  | 6336424 | 20-scf00021   | 20 |
| AX-157919371 | 2 | 85.382 | KV453193.1  | 6339428 | 20-scf00021   | 20 |
| AX-157919372 | 2 | 85.382 | KV453193.1  | 6341190 | 20-scf00021   | 20 |
| AX-157919373 | 2 | 85.382 | KV453193.1  | 6342307 | 20-scf00021   | 20 |
| AX-157919374 | 2 | 85.382 | KV453193.1  | 6343978 | 20-scf00021   | 20 |
| AX-157919377 | 2 | 85.382 | KV453193.1  | 6347914 | 20-scf00021   | 20 |
| AX-157919379 | 2 | 85.382 | KV453193.1  | 6350472 | 20-scf00021   | 20 |
| AX-157919385 | 2 | 85.382 | KV453193.1  | 6359309 | 20-scf00021   | 20 |
| AX-157919312 | 2 | 85.6   | KV453193.1  | 6259368 | 20-scf00021   | 20 |
| AX-157919383 | 2 | 85.6   | KV453193.1  | 6353687 | 20-scf00021   | 20 |
| AX-157919400 | 2 | 85.6   | KV453193.1  | 6376761 | 20-scf00021   | 20 |
| AX-157919402 | 2 | 85.6   | KV453193.1  | 6380854 | 20-scf00021   | 20 |
| AX-157919409 | 2 | 85.6   | KV453193.1  | 6387350 | 20-scf00021   | 20 |
| AX-157919389 | 2 | 85.817 | KV453193.1  | 6364530 | 20-scf00021   | 20 |
| AX-157919391 | 2 | 85.822 | KV453193.1  | 6366376 | 20-scf00021   | 20 |
| AX-157919392 | 2 | 85.822 | KV453193.1  | 6366772 | 20-scf00021   | 20 |
| AX-157919399 | 2 | 85.822 | KV453193.1  | 6375694 | 20-scf00021   | 20 |
| AX-157919405 | 2 | 85.985 | KV453193.1  | 6382935 | 20-scf00021   | 20 |
| AX-157919407 | 2 | 85.985 | KV453193.1  | 6384544 | 20-scf00021   | 20 |
| AX-157919408 | 2 | 85.985 | KV453193.1  | 6385546 | 20-scf00021   | 20 |
| AX-157757704 | 2 | 86.147 | KV453193.1  | 6389270 | 20-scf00021   | 20 |
| AX-158379290 | 2 | 86.147 | KV453193.1  | 6391508 | 20-scf00021   | 20 |
| AX-157919415 | 2 | 86.147 | KV453193.1  | 6397368 | 20-scf00021   | 20 |

|              |   |        |            |         |             |    |
|--------------|---|--------|------------|---------|-------------|----|
| AX-158382296 | 2 | 86.147 | KV453193.1 | 6398680 | 20-scf00021 | 20 |
| AX-157919418 | 2 | 86.147 | KV453193.1 | 6400231 | 20-scf00021 | 20 |
| AX-157738976 | 2 | 86.147 | KV453193.1 | 6405767 | 20-scf00021 | 20 |
| AX-157919423 | 2 | 86.147 | KV453193.1 | 6406906 | 20-scf00021 | 20 |
| AX-157740245 | 2 | 86.147 | KV453193.1 | 6408287 | 20-scf00021 | 20 |
| AX-157919425 | 2 | 86.147 | KV453193.1 | 6409351 | 20-scf00021 | 20 |
| AX-157919438 | 2 | 86.147 | KV453193.1 | 6429311 | 20-scf00021 | 20 |
| AX-157919440 | 2 | 86.147 | KV453193.1 | 6430654 | 20-scf00021 | 20 |
| AX-157746978 | 2 | 86.257 | KV453193.1 | 6413065 | 20-scf00021 | 20 |
| AX-157883513 | 2 | 86.257 | KV453193.1 | 6414565 | 20-scf00021 | 20 |
| AX-157864539 | 2 | 86.257 | KV453193.1 | 6416801 | 20-scf00021 | 20 |
| AX-157919432 | 2 | 86.257 | KV453193.1 | 6422414 | 20-scf00021 | 20 |
| AX-157719682 | 2 | 86.257 | KV453193.1 | 6423514 | 20-scf00021 | 20 |
| AX-157919433 | 2 | 86.257 | KV453193.1 | 6424625 | 20-scf00021 | 20 |
| AX-157919434 | 2 | 86.257 | KV453193.1 | 6425675 | 20-scf00021 | 20 |
| AX-157919436 | 2 | 86.257 | KV453193.1 | 6427089 | 20-scf00021 | 20 |
| AX-157749730 | 2 | 86.257 | KV453193.1 | 6428893 | 20-scf00021 | 20 |
| AX-157919439 | 2 | 86.257 | KV453193.1 | 6430123 | 20-scf00021 | 20 |
| AX-157919446 | 2 | 86.269 | KV453193.1 | 6435850 | 20-scf00021 | 20 |
| AX-157919428 | 2 | 86.289 | KV453193.1 | 6417769 | 20-scf00021 | 20 |
| AX-157853770 | 2 | 86.289 | KV453193.1 | 6436548 | 20-scf00021 | 20 |
| AX-157919447 | 2 | 86.685 | KV453193.1 | 6436686 | 20-scf00021 | 20 |
| AX-157744629 | 2 | 86.688 | KV453193.1 | 6439678 | 20-scf00021 | 20 |
| AX-157710611 | 2 | 86.688 | KV453193.1 | 6441229 | 20-scf00021 | 20 |
| AX-157919450 | 2 | 86.913 | KV453193.1 | 6442796 | 20-scf00021 | 20 |
| AX-157919453 | 2 | 86.913 | KV453193.1 | 6447765 | 20-scf00021 | 20 |
| AX-157919454 | 2 | 86.913 | KV453193.1 | 6447807 | 20-scf00021 | 20 |
| AX-157853771 | 2 | 86.913 | KV453193.1 | 6448204 | 20-scf00021 | 20 |
| AX-157919455 | 2 | 86.913 | KV453193.1 | 6448496 | 20-scf00021 | 20 |
| AX-157919457 | 2 | 86.913 | KV453193.1 | 6450728 | 20-scf00021 | 20 |
| AX-157919459 | 2 | 86.913 | KV453193.1 | 6451706 | 20-scf00021 | 20 |
| AX-157919462 | 2 | 87.022 | KV453193.1 | 6453630 | 20-scf00021 | 20 |
| AX-157919463 | 2 | 87.022 | KV453193.1 | 6454299 | 20-scf00021 | 20 |
| AX-157919464 | 2 | 87.022 | KV453193.1 | 6455583 | 20-scf00021 | 20 |
| AX-157919466 | 2 | 87.131 | KV453193.1 | 6457721 | 20-scf00021 | 20 |
| AX-157747734 | 2 | 87.131 | KV453193.1 | 6458320 | 20-scf00021 | 20 |
| AX-157919467 | 2 | 87.131 | KV453193.1 | 6460976 | 20-scf00021 | 20 |
| AX-157919469 | 2 | 87.131 | KV453193.1 | 6463066 | 20-scf00021 | 20 |
| AX-157919470 | 2 | 87.131 | KV453193.1 | 6464068 | 20-scf00021 | 20 |
| AX-157919475 | 2 | 87.131 | KV453193.1 | 6471793 | 20-scf00021 | 20 |
| AX-157919476 | 2 | 87.131 | KV453193.1 | 6472644 | 20-scf00021 | 20 |
| AX-157919472 | 2 | 87.206 | KV453193.1 | 6466734 | 20-scf00021 | 20 |
| AX-157723611 | 2 | 87.274 | KV453193.1 | 6468029 | 20-scf00021 | 20 |
| AX-157919474 | 2 | 87.315 | KV453193.1 | 6471253 | 20-scf00021 | 20 |
| AX-157919477 | 2 | 87.35  | KV453193.1 | 6473791 | 20-scf00021 | 20 |
| AX-157919478 | 2 | 87.35  | KV453193.1 | 6473968 | 20-scf00021 | 20 |
| AX-157720679 | 2 | 87.35  | KV453193.1 | 6478657 | 20-scf00021 | 20 |
| AX-157718213 | 2 | 87.35  | KV453193.1 | 6479290 | 20-scf00021 | 20 |
| AX-157919480 | 2 | 87.539 | KV453193.1 | 6479712 | 20-scf00021 | 20 |
| AX-157919481 | 2 | 87.539 | KV453193.1 | 6480868 | 20-scf00021 | 20 |
| AX-157720111 | 2 | 87.539 | KV453193.1 | 6484264 | 20-scf00021 | 20 |

|              |   |        |            |         |             |    |
|--------------|---|--------|------------|---------|-------------|----|
| AX-157773337 | 2 | 87.773 | KV453193.1 | 6488407 | 20-scf00021 | 20 |
| AX-157753265 | 2 | 87.773 | KV453193.1 | 6491128 | 20-scf00021 | 20 |
| AX-157919483 | 2 | 87.773 | KV453193.1 | 6491625 | 20-scf00021 | 20 |
| AX-157919499 | 2 | 88.526 | KV453193.1 | 6519720 | 20-scf00021 | 20 |
| AX-157754349 | 2 | 88.526 | KV453193.1 | 6526784 | 20-scf00021 | 20 |
| AX-157919506 | 2 | 88.53  | KV453193.1 | 6538118 | 20-scf00021 | 20 |
| AX-157919507 | 2 | 88.535 | KV453193.1 | 6539016 | 20-scf00021 | 20 |
| AX-157813077 | 2 | 88.692 | KV453193.1 | 6535015 | 20-scf00021 | 20 |
| AX-157919508 | 2 | 88.692 | KV453193.1 | 6541471 | 20-scf00021 | 20 |
| AX-157919511 | 2 | 89.099 | KV453193.1 | 6545918 | 20-scf00021 | 20 |
| AX-157919512 | 2 | 89.099 | KV453193.1 | 6549326 | 20-scf00021 | 20 |
| AX-158389640 | 2 | 89.099 | KV453193.1 | 6553385 | 20-scf00021 | 20 |
| AX-157813079 | 2 | 89.099 | KV453193.1 | 6559268 | 20-scf00021 | 20 |
| AX-157919515 | 2 | 89.099 | KV453193.1 | 6561286 | 20-scf00021 | 20 |
| AX-157919516 | 2 | 89.099 | KV453193.1 | 6562430 | 20-scf00021 | 20 |
| AX-157919517 | 2 | 89.099 | KV453193.1 | 6563486 | 20-scf00021 | 20 |
| AX-157919518 | 2 | 89.099 | KV453193.1 | 6563841 | 20-scf00021 | 20 |
| AX-157919533 | 2 | 89.099 | KV453193.1 | 6597724 | 20-scf00021 | 20 |
| AX-157919543 | 2 | 89.099 | KV453193.1 | 6610593 | 20-scf00021 | 20 |
| AX-157757054 | 2 | 89.205 | KV453193.1 | 6565585 | 20-scf00021 | 20 |
| AX-157919513 | 2 | 89.318 | KV453193.1 | 6551628 | 20-scf00021 | 20 |
| AX-157919520 | 2 | 89.318 | KV453193.1 | 6565160 | 20-scf00021 | 20 |
| AX-157755976 | 2 | 89.318 | KV453193.1 | 6567193 | 20-scf00021 | 20 |
| AX-157919521 | 2 | 89.318 | KV453193.1 | 6570472 | 20-scf00021 | 20 |
| AX-157919523 | 2 | 89.318 | KV453193.1 | 6571929 | 20-scf00021 | 20 |
| AX-157713232 | 2 | 89.318 | KV453193.1 | 6576794 | 20-scf00021 | 20 |
| AX-157919526 | 2 | 89.318 | KV453193.1 | 6584114 | 20-scf00021 | 20 |
| AX-157919527 | 2 | 89.318 | KV453193.1 | 6586975 | 20-scf00021 | 20 |
| AX-157919528 | 2 | 89.318 | KV453193.1 | 6590196 | 20-scf00021 | 20 |
| AX-157919529 | 2 | 89.318 | KV453193.1 | 6591088 | 20-scf00021 | 20 |
| AX-157919530 | 2 | 89.318 | KV453193.1 | 6591694 | 20-scf00021 | 20 |
| AX-157919531 | 2 | 89.318 | KV453193.1 | 6593075 | 20-scf00021 | 20 |
| AX-157919532 | 2 | 89.318 | KV453193.1 | 6596247 | 20-scf00021 | 20 |
| AX-157919534 | 2 | 89.318 | KV453193.1 | 6599700 | 20-scf00021 | 20 |
| AX-157919535 | 2 | 89.318 | KV453193.1 | 6600249 | 20-scf00021 | 20 |
| AX-157722235 | 2 | 89.318 | KV453193.1 | 6603394 | 20-scf00021 | 20 |
| AX-157727420 | 2 | 89.318 | KV453193.1 | 6607207 | 20-scf00021 | 20 |
| AX-157813080 | 2 | 89.318 | KV453193.1 | 6608442 | 20-scf00021 | 20 |
| AX-157919544 | 2 | 89.318 | KV453193.1 | 6610803 | 20-scf00021 | 20 |
| AX-157919546 | 2 | 89.318 | KV453193.1 | 6614304 | 20-scf00021 | 20 |
| AX-157725768 | 2 | 89.318 | KV453193.1 | 6622306 | 20-scf00021 | 20 |
| AX-157813082 | 2 | 89.318 | KV453193.1 | 6629540 | 20-scf00021 | 20 |
| AX-157919558 | 2 | 89.318 | KV453193.1 | 6640643 | 20-scf00021 | 20 |
| AX-157919552 | 2 | 89.646 | KV453193.1 | 6631579 | 20-scf00021 | 20 |
| AX-157919553 | 2 | 89.646 | KV453193.1 | 6632164 | 20-scf00021 | 20 |
| AX-157919554 | 2 | 89.755 | KV453193.1 | 6634815 | 20-scf00021 | 20 |
| AX-157919555 | 2 | 89.757 | KV453193.1 | 6636061 | 20-scf00021 | 20 |
| AX-157869138 | 2 | 90.079 | KV453193.1 | 6637561 | 20-scf00021 | 20 |
| AX-157714152 | 2 | 90.082 | KV453193.1 | 6639671 | 20-scf00021 | 20 |
| AX-157919557 | 2 | 90.082 | KV453193.1 | 6640350 | 20-scf00021 | 20 |
| AX-157919551 | 2 | 90.083 | KV453193.1 | 6628645 | 20-scf00021 | 20 |

|              |   |        |            |         |             |    |
|--------------|---|--------|------------|---------|-------------|----|
| AX-157919560 | 2 | 90.083 | KV453193.1 | 6650440 | 20-scf00021 | 20 |
| AX-157813083 | 2 | 90.083 | KV453193.1 | 6677766 | 20-scf00021 | 20 |
| AX-157919579 | 2 | 90.083 | KV453193.1 | 6682366 | 20-scf00021 | 20 |
| AX-157713305 | 2 | 90.084 | KV453193.1 | 6652515 | 20-scf00021 | 20 |
| AX-157919547 | 2 | 90.361 | KV453193.1 | 6615656 | 20-scf00021 | 20 |
| AX-157919565 | 2 | 90.361 | KV453193.1 | 6663116 | 20-scf00021 | 20 |
| AX-157919566 | 2 | 90.361 | KV453193.1 | 6663834 | 20-scf00021 | 20 |
| AX-158405187 | 2 | 90.442 | KV453193.1 | 6668448 | 20-scf00021 | 20 |
| AX-157919569 | 2 | 90.467 | KV453193.1 | 6670506 | 20-scf00021 | 20 |
| AX-157919574 | 2 | 90.467 | KV453193.1 | 6675004 | 20-scf00021 | 20 |
| AX-157919571 | 2 | 90.489 | KV453193.1 | 6671916 | 20-scf00021 | 20 |
| AX-157919572 | 2 | 90.513 | KV453193.1 | 6672790 | 20-scf00021 | 20 |
| AX-157919580 | 2 | 90.513 | KV453193.1 | 6685635 | 20-scf00021 | 20 |
| AX-157919575 | 2 | 90.531 | KV453193.1 | 6675589 | 20-scf00021 | 20 |
| AX-157752206 | 2 | 90.554 | KV453193.1 | 6677802 | 20-scf00021 | 20 |
| AX-157919582 | 2 | 90.584 | KV453193.1 | 6687785 | 20-scf00021 | 20 |
| AX-157919586 | 2 | 90.584 | KV453193.1 | 6694014 | 20-scf00021 | 20 |
| AX-157919592 | 2 | 90.584 | KV453193.1 | 6699692 | 20-scf00021 | 20 |
| AX-157719981 | 2 | 90.62  | KV453193.1 | 6688154 | 20-scf00021 | 20 |
| AX-157919588 | 2 | 90.641 | KV453193.1 | 6696188 | 20-scf00021 | 20 |
| AX-157919593 | 2 | 90.641 | KV453193.1 | 6701116 | 20-scf00021 | 20 |
| AX-157919594 | 2 | 90.641 | KV453193.1 | 6701478 | 20-scf00021 | 20 |
| AX-157919596 | 2 | 90.641 | KV453193.1 | 6703630 | 20-scf00021 | 20 |
| AX-157919598 | 2 | 91.066 | KV453193.1 | 6706097 | 20-scf00021 | 20 |
| AX-157919601 | 2 | 91.066 | KV453193.1 | 6711660 | 20-scf00021 | 20 |
| AX-157919602 | 2 | 91.066 | KV453193.1 | 6712752 | 20-scf00021 | 20 |
| AX-157919604 | 2 | 91.066 | KV453193.1 | 6713966 | 20-scf00021 | 20 |
| AX-157919606 | 2 | 91.066 | KV453193.1 | 6715150 | 20-scf00021 | 20 |
| AX-157919608 | 2 | 91.066 | KV453193.1 | 6716644 | 20-scf00021 | 20 |
| AX-157919611 | 2 | 91.066 | KV453193.1 | 6719730 | 20-scf00021 | 20 |
| AX-157919612 | 2 | 91.066 | KV453193.1 | 6720393 | 20-scf00021 | 20 |
| AX-157919614 | 2 | 91.066 | KV453193.1 | 6723660 | 20-scf00021 | 20 |
| AX-157919621 | 2 | 91.066 | KV453193.1 | 6737343 | 20-scf00021 | 20 |
| AX-157919599 | 2 | 91.067 | KV453193.1 | 6708419 | 20-scf00021 | 20 |
| AX-158379293 | 2 | 91.067 | KV453193.1 | 6722625 | 20-scf00021 | 20 |
| AX-157919622 | 2 | 91.067 | KV453193.1 | 6738026 | 20-scf00021 | 20 |
| AX-157738302 | 2 | 91.067 | KV453193.1 | 6740533 | 20-scf00021 | 20 |
| AX-157919626 | 2 | 91.067 | KV453193.1 | 6741093 | 20-scf00021 | 20 |
| AX-157919631 | 2 | 91.067 | KV453193.1 | 6747266 | 20-scf00021 | 20 |
| AX-157741476 | 2 | 91.266 | KV453193.1 | 6745052 | 20-scf00021 | 20 |
| AX-157919632 | 2 | 91.394 | KV453193.1 | 6748748 | 20-scf00021 | 20 |
| AX-157709177 | 2 | 91.394 | KV453193.1 | 6750172 | 20-scf00021 | 20 |
| AX-157919636 | 2 | 91.436 | KV453193.1 | 6755405 | 20-scf00021 | 20 |
| AX-157919615 | 2 | 91.503 | KV453193.1 | 6724380 | 20-scf00021 | 20 |
| AX-157919633 | 2 | 91.503 | KV453193.1 | 6750799 | 20-scf00021 | 20 |
| AX-157919637 | 2 | 91.503 | KV453193.1 | 6755895 | 20-scf00021 | 20 |
| AX-157919641 | 2 | 91.503 | KV453193.1 | 6761136 | 20-scf00021 | 20 |
| AX-157919643 | 2 | 91.503 | KV453193.1 | 6763352 | 20-scf00021 | 20 |
| AX-157919644 | 2 | 91.503 | KV453193.1 | 6764434 | 20-scf00021 | 20 |
| AX-157919651 | 2 | 91.503 | KV453193.1 | 6773277 | 20-scf00021 | 20 |
| AX-157919653 | 2 | 91.584 | KV453193.1 | 6777042 | 20-scf00021 | 20 |

|              |   |        |             |         |             |    |
|--------------|---|--------|-------------|---------|-------------|----|
| AX-157919656 | 2 | 91.646 | KV453193.1  | 6780273 | 20-scf00021 | 20 |
| AX-157919652 | 2 | 91.722 | KV453193.1  | 6776326 | 20-scf00021 | 20 |
| AX-157755330 | 2 | 91.722 | KV453193.1  | 6777533 | 20-scf00021 | 20 |
| AX-157919657 | 2 | 91.722 | KV453193.1  | 6780966 | 20-scf00021 | 20 |
| AX-157919658 | 2 | 91.722 | KV453193.1  | 6781748 | 20-scf00021 | 20 |
| AX-157919660 | 2 | 91.722 | KV453193.1  | 6784966 | 20-scf00021 | 20 |
| AX-158379294 | 2 | 91.723 | KV453193.1  | 6785300 | 20-scf00021 | 20 |
| AX-157919664 | 2 | 91.723 | KV453193.1  | 6788099 | 20-scf00021 | 20 |
| AX-157919667 | 2 | 92.05  | KV453193.1  | 6790476 | 20-scf00021 | 20 |
| AX-157883514 | 2 | 92.05  | KV453193.1  | 6790913 | 20-scf00021 | 20 |
| AX-157919668 | 2 | 92.06  | KV453193.1  | 6792736 | 20-scf00021 | 20 |
| AX-157919673 | 2 | 92.596 | KV453193.1  | 6796291 | 20-scf00021 | 20 |
| AX-157919675 | 2 | 92.596 | KV453193.1  | 6798205 | 20-scf00021 | 20 |
| AX-157919680 | 2 | 92.596 | KV453193.1  | 6805375 | 20-scf00021 | 20 |
| AX-157726766 | 2 | 92.596 | KV453193.1  | 6806689 | 20-scf00021 | 20 |
| AX-157919683 | 2 | 92.596 | KV453193.1  | 6819761 | 20-scf00021 | 20 |
| AX-157919685 | 2 | 92.596 | KV453193.1  | 6820689 | 20-scf00021 | 20 |
| AX-157919724 | 2 | 92.596 | KV453193.1  | 6881568 | 20-scf00021 | 20 |
| AX-157706996 | 2 | 92.596 | 3ML01033304 | 400     | scf08948_1  | UN |
| AX-158389641 | 2 | 92.641 | KV453193.1  | 6821221 | 20-scf00021 | 20 |
| AX-157919686 | 2 | 92.669 | KV453193.1  | 6823434 | 20-scf00021 | 20 |
| AX-157919701 | 2 | 92.669 | KV453193.1  | 6842297 | 20-scf00021 | 20 |
| AX-157725312 | 2 | 92.677 | KV453193.1  | 6826106 | 20-scf00021 | 20 |
| AX-157919688 | 2 | 92.705 | KV453193.1  | 6826714 | 20-scf00021 | 20 |
| AX-157919689 | 2 | 92.705 | KV453193.1  | 6827565 | 20-scf00021 | 20 |
| AX-157919690 | 2 | 92.705 | KV453193.1  | 6828429 | 20-scf00021 | 20 |
| AX-157919692 | 2 | 92.705 | KV453193.1  | 6829918 | 20-scf00021 | 20 |
| AX-157919693 | 2 | 92.747 | KV453193.1  | 6832406 | 20-scf00021 | 20 |
| AX-157919629 | 2 | 92.815 | KV453193.1  | 6743893 | 20-scf00021 | 20 |
| AX-157919676 | 2 | 92.815 | KV453193.1  | 6798747 | 20-scf00021 | 20 |
| AX-157919682 | 2 | 92.815 | KV453193.1  | 6810824 | 20-scf00021 | 20 |
| AX-157853774 | 2 | 92.815 | KV453193.1  | 6824642 | 20-scf00021 | 20 |
| AX-157919695 | 2 | 92.815 | KV453193.1  | 6834274 | 20-scf00021 | 20 |
| AX-157772600 | 2 | 92.815 | KV453193.1  | 6837021 | 20-scf00021 | 20 |
| AX-157919697 | 2 | 92.815 | KV453193.1  | 6838261 | 20-scf00021 | 20 |
| AX-157874732 | 2 | 92.815 | KV453193.1  | 6838329 | 20-scf00021 | 20 |
| AX-157919699 | 2 | 92.815 | KV453193.1  | 6839675 | 20-scf00021 | 20 |
| AX-157919703 | 2 | 92.815 | KV453193.1  | 6843797 | 20-scf00021 | 20 |
| AX-157919704 | 2 | 92.815 | KV453193.1  | 6844294 | 20-scf00021 | 20 |
| AX-157919707 | 2 | 92.815 | KV453193.1  | 6847534 | 20-scf00021 | 20 |
| AX-157919708 | 2 | 92.815 | KV453193.1  | 6848438 | 20-scf00021 | 20 |
| AX-157722989 | 2 | 92.815 | KV453193.1  | 6848729 | 20-scf00021 | 20 |
| AX-157919709 | 2 | 92.815 | KV453193.1  | 6849818 | 20-scf00021 | 20 |
| AX-157919712 | 2 | 92.815 | KV453193.1  | 6853329 | 20-scf00021 | 20 |
| AX-157770718 | 2 | 92.815 | KV453193.1  | 6872413 | 20-scf00021 | 20 |
| AX-157740856 | 2 | 92.815 | KV453193.1  | 6873017 | 20-scf00021 | 20 |
| AX-157919735 | 2 | 92.815 | KV453193.1  | 6896415 | 20-scf00021 | 20 |
| AX-157919736 | 2 | 92.815 | KV453193.1  | 6896823 | 20-scf00021 | 20 |
| AX-157919737 | 2 | 92.815 | KV453193.1  | 6897296 | 20-scf00021 | 20 |
| AX-157813087 | 2 | 92.924 | KV453193.1  | 6857329 | 20-scf00021 | 20 |
| AX-157919713 | 2 | 92.924 | KV453193.1  | 6857702 | 20-scf00021 | 20 |

|              |   |        |             |         |             |    |
|--------------|---|--------|-------------|---------|-------------|----|
| AX-157770977 | 2 | 92.924 | KV453193.1  | 6858322 | 20-scf00021 | 20 |
| AX-157919714 | 2 | 92.924 | KV453193.1  | 6861610 | 20-scf00021 | 20 |
| AX-157919715 | 2 | 92.924 | KV453193.1  | 6863815 | 20-scf00021 | 20 |
| AX-157919717 | 2 | 92.924 | KV453193.1  | 6866969 | 20-scf00021 | 20 |
| AX-157919719 | 2 | 92.924 | KV453193.1  | 6871029 | 20-scf00021 | 20 |
| AX-157752373 | 2 | 92.924 | KV453193.1  | 6883777 | 20-scf00021 | 20 |
| AX-157919745 | 2 | 92.924 | KV453193.1  | 6907892 | 20-scf00021 | 20 |
| AX-157919789 | 2 | 92.924 | KV453193.1  | 6986699 | 20-scf00021 | 20 |
| AX-157680402 | 2 | 92.924 | 3ML01032679 | 296     | scf08306_1  | UN |
| AX-157919728 | 2 | 93.008 | KV453193.1  | 6889689 | 20-scf00021 | 20 |
| AX-157773974 | 2 | 93.142 | KV453193.1  | 6894324 | 20-scf00021 | 20 |
| AX-157919731 | 2 | 93.142 | KV453193.1  | 6894838 | 20-scf00021 | 20 |
| AX-157919739 | 2 | 93.142 | KV453193.1  | 6899789 | 20-scf00021 | 20 |
| AX-157919742 | 2 | 93.142 | KV453193.1  | 6905022 | 20-scf00021 | 20 |
| AX-157919744 | 2 | 93.142 | KV453193.1  | 6907010 | 20-scf00021 | 20 |
| AX-157919747 | 2 | 93.143 | KV453193.1  | 6912541 | 20-scf00021 | 20 |
| AX-157919749 | 2 | 93.143 | KV453193.1  | 6915008 | 20-scf00021 | 20 |
| AX-157724799 | 2 | 93.467 | KV453193.1  | 6928695 | 20-scf00021 | 20 |
| AX-157726108 | 2 | 93.467 | KV453193.1  | 6933280 | 20-scf00021 | 20 |
| AX-157919755 | 2 | 93.467 | KV453193.1  | 6935144 | 20-scf00021 | 20 |
| AX-157709449 | 2 | 93.468 | KV453193.1  | 6939552 | 20-scf00021 | 20 |
| AX-157919756 | 2 | 93.468 | KV453193.1  | 6940134 | 20-scf00021 | 20 |
| AX-157919758 | 2 | 93.468 | KV453193.1  | 6942807 | 20-scf00021 | 20 |
| AX-157919760 | 2 | 93.472 | KV453193.1  | 6943996 | 20-scf00021 | 20 |
| AX-157919761 | 2 | 93.472 | KV453193.1  | 6947100 | 20-scf00021 | 20 |
| AX-157919764 | 2 | 93.472 | KV453193.1  | 6950041 | 20-scf00021 | 20 |
| AX-157689764 | 2 | 93.472 | 3ML01032028 | 389     | scf07645_1  | UN |
| AX-157919768 | 2 | 93.688 | KV453193.1  | 6956518 | 20-scf00021 | 20 |
| AX-158382302 | 2 | 93.688 | KV453193.1  | 6956880 | 20-scf00021 | 20 |
| AX-157919769 | 2 | 93.688 | KV453193.1  | 6957325 | 20-scf00021 | 20 |
| AX-157772535 | 2 | 93.688 | KV453193.1  | 6959687 | 20-scf00021 | 20 |
| AX-157919774 | 2 | 93.688 | KV453193.1  | 6963498 | 20-scf00021 | 20 |
| AX-157883515 | 2 | 93.688 | KV453193.1  | 6964504 | 20-scf00021 | 20 |
| AX-157919776 | 2 | 93.688 | KV453193.1  | 6965568 | 20-scf00021 | 20 |
| AX-157919777 | 2 | 93.688 | KV453193.1  | 6968479 | 20-scf00021 | 20 |
| AX-157919784 | 2 | 93.688 | KV453193.1  | 6979758 | 20-scf00021 | 20 |
| AX-157752882 | 2 | 93.688 | KV453193.1  | 6990170 | 20-scf00021 | 20 |
| AX-157919778 | 2 | 93.712 | KV453193.1  | 6970107 | 20-scf00021 | 20 |
| AX-157919779 | 2 | 93.736 | KV453193.1  | 6972969 | 20-scf00021 | 20 |
| AX-157919782 | 2 | 93.756 | KV453193.1  | 6974948 | 20-scf00021 | 20 |
| AX-157919783 | 2 | 93.78  | KV453193.1  | 6976976 | 20-scf00021 | 20 |
| AX-157919741 | 2 | 93.797 | KV453193.1  | 6904599 | 20-scf00021 | 20 |
| AX-157919786 | 2 | 93.797 | KV453193.1  | 6983907 | 20-scf00021 | 20 |
| AX-157739166 | 2 | 93.797 | KV453193.1  | 6986483 | 20-scf00021 | 20 |
| AX-157919793 | 2 | 93.797 | KV453193.1  | 6993177 | 20-scf00021 | 20 |
| AX-157919794 | 2 | 93.797 | KV453193.1  | 6994099 | 20-scf00021 | 20 |
| AX-157751167 | 2 | 93.797 | KV453193.1  | 6994695 | 20-scf00021 | 20 |
| AX-157919802 | 2 | 93.797 | KV453193.1  | 7013595 | 20-scf00021 | 20 |
| AX-157919795 | 2 | 93.831 | KV453193.1  | 6995816 | 20-scf00021 | 20 |
| AX-157721594 | 2 | 93.907 | KV453193.1  | 6997245 | 20-scf00021 | 20 |
| AX-157919796 | 2 | 93.907 | KV453193.1  | 6998539 | 20-scf00021 | 20 |

|              |   |        |            |         |             |    |
|--------------|---|--------|------------|---------|-------------|----|
| AX-157813089 | 2 | 93.907 | KV453193.1 | 7000871 | 20-scf00021 | 20 |
| AX-157714972 | 2 | 93.907 | KV453193.1 | 7001574 | 20-scf00021 | 20 |
| AX-157919798 | 2 | 94.016 | KV453193.1 | 7004779 | 20-scf00021 | 20 |
| AX-157726438 | 2 | 94.083 | KV453193.1 | 7006535 | 20-scf00021 | 20 |
| AX-158404346 | 2 | 94.235 | KV453193.1 | 7011098 | 20-scf00021 | 20 |
| AX-157919803 | 2 | 94.235 | KV453193.1 | 7014490 | 20-scf00021 | 20 |
| AX-157919807 | 2 | 94.235 | KV453193.1 | 7016736 | 20-scf00021 | 20 |
| AX-157919810 | 2 | 94.235 | KV453193.1 | 7018770 | 20-scf00021 | 20 |
| AX-158379296 | 2 | 94.235 | KV453193.1 | 7023214 | 20-scf00021 | 20 |
| AX-157813090 | 2 | 94.399 | KV453193.1 | 7035542 | 20-scf00021 | 20 |
| AX-157919826 | 2 | 94.471 | KV453193.1 | 7038787 | 20-scf00021 | 20 |
| AX-157751123 | 2 | 94.563 | KV453193.1 | 7041182 | 20-scf00021 | 20 |
| AX-157919828 | 2 | 94.563 | KV453193.1 | 7043116 | 20-scf00021 | 20 |
| AX-157919829 | 2 | 94.563 | KV453193.1 | 7043997 | 20-scf00021 | 20 |
| AX-157727700 | 2 | 94.563 | KV453193.1 | 7044371 | 20-scf00021 | 20 |
| AX-157919832 | 2 | 94.563 | KV453193.1 | 7049913 | 20-scf00021 | 20 |
| AX-157919839 | 2 | 94.563 | KV453193.1 | 7061925 | 20-scf00021 | 20 |
| AX-157874735 | 2 | 94.563 | KV453193.1 | 7062520 | 20-scf00021 | 20 |
| AX-157920072 | 2 | 94.563 | KV453193.1 | 7460499 | 20-scf00021 | 20 |
| AX-157919835 | 2 | 94.616 | KV453193.1 | 7059392 | 20-scf00021 | 20 |
| AX-157919824 | 2 | 94.672 | KV453193.1 | 7037877 | 20-scf00021 | 20 |
| AX-157919834 | 2 | 94.672 | KV453193.1 | 7054433 | 20-scf00021 | 20 |
| AX-157919836 | 2 | 94.672 | KV453193.1 | 7059980 | 20-scf00021 | 20 |
| AX-157919837 | 2 | 94.672 | KV453193.1 | 7060955 | 20-scf00021 | 20 |
| AX-157753177 | 2 | 94.672 | KV453193.1 | 7066593 | 20-scf00021 | 20 |
| AX-157813091 | 2 | 94.672 | KV453193.1 | 7068251 | 20-scf00021 | 20 |
| AX-157853776 | 2 | 94.672 | KV453193.1 | 7068831 | 20-scf00021 | 20 |
| AX-157813092 | 2 | 94.672 | KV453193.1 | 7069940 | 20-scf00021 | 20 |
| AX-157715230 | 2 | 94.672 | KV453193.1 | 7070416 | 20-scf00021 | 20 |
| AX-157813093 | 2 | 94.672 | KV453193.1 | 7072018 | 20-scf00021 | 20 |
| AX-157919846 | 2 | 94.672 | KV453193.1 | 7076150 | 20-scf00021 | 20 |
| AX-157919849 | 2 | 94.672 | KV453193.1 | 7086124 | 20-scf00021 | 20 |
| AX-157919922 | 2 | 94.672 | KV453193.1 | 7193643 | 20-scf00021 | 20 |
| AX-157813109 | 2 | 94.672 | KV453193.1 | 7268948 | 20-scf00021 | 20 |
| AX-157919973 | 2 | 94.672 | KV453193.1 | 7274387 | 20-scf00021 | 20 |
| AX-157750887 | 2 | 94.672 | KV453193.1 | 7438166 | 20-scf00021 | 20 |
| AX-157682408 | 2 | 94.672 | KV453196.1 | 17673   | 20-scf00028 | 20 |
| AX-157919813 | 2 | 94.721 | KV453193.1 | 7023072 | 20-scf00021 | 20 |
| AX-157919817 | 2 | 94.721 | KV453193.1 | 7029423 | 20-scf00021 | 20 |
| AX-157919847 | 2 | 94.721 | KV453193.1 | 7076609 | 20-scf00021 | 20 |
| AX-157919850 | 2 | 94.721 | KV453193.1 | 7086492 | 20-scf00021 | 20 |
| AX-157713353 | 2 | 94.818 | KV453193.1 | 7093533 | 20-scf00021 | 20 |
| AX-157919854 | 2 | 94.859 | KV453193.1 | 7096942 | 20-scf00021 | 20 |
| AX-157813098 | 2 | 94.908 | KV453193.1 | 7097992 | 20-scf00021 | 20 |
| AX-157919860 | 2 | 94.964 | KV453193.1 | 7106231 | 20-scf00021 | 20 |
| AX-157919861 | 2 | 94.964 | KV453193.1 | 7108194 | 20-scf00021 | 20 |
| AX-157813100 | 2 | 94.964 | KV453193.1 | 7111220 | 20-scf00021 | 20 |
| AX-158405191 | 2 | 94.964 | KV453193.1 | 7112981 | 20-scf00021 | 20 |
| AX-157919864 | 2 | 94.964 | KV453193.1 | 7114776 | 20-scf00021 | 20 |
| AX-158389643 | 2 | 94.964 | KV453193.1 | 7115711 | 20-scf00021 | 20 |
| AX-157919865 | 2 | 94.964 | KV453193.1 | 7115888 | 20-scf00021 | 20 |



|              |   |        |            |         |             |    |
|--------------|---|--------|------------|---------|-------------|----|
| AX-157743784 | 2 | 94.964 | KV453193.1 | 7116798 | 20-scf00021 | 20 |
| AX-157919869 | 2 | 94.964 | KV453193.1 | 7119259 | 20-scf00021 | 20 |
| AX-157716923 | 2 | 95.014 | KV453193.1 | 7116328 | 20-scf00021 | 20 |
| AX-157919867 | 2 | 95.056 | KV453193.1 | 7117686 | 20-scf00021 | 20 |
| AX-157919872 | 2 | 95.07  | KV453193.1 | 7122745 | 20-scf00021 | 20 |
| AX-157919863 | 2 | 95.108 | KV453193.1 | 7112207 | 20-scf00021 | 20 |
| AX-157919874 | 2 | 95.108 | KV453193.1 | 7126990 | 20-scf00021 | 20 |
| AX-157919876 | 2 | 95.108 | KV453193.1 | 7128810 | 20-scf00021 | 20 |
| AX-157813102 | 2 | 95.108 | KV453193.1 | 7163983 | 20-scf00021 | 20 |
| AX-157919938 | 2 | 95.108 | KV453193.1 | 7219136 | 20-scf00021 | 20 |
| AX-157919877 | 2 | 95.109 | KV453193.1 | 7129282 | 20-scf00021 | 20 |
| AX-157919878 | 2 | 95.111 | KV453193.1 | 7130874 | 20-scf00021 | 20 |
| AX-157919879 | 2 | 95.113 | KV453193.1 | 7133904 | 20-scf00021 | 20 |
| AX-157919933 | 2 | 95.113 | KV453193.1 | 7212305 | 20-scf00021 | 20 |
| AX-157744247 | 2 | 95.113 | KV453193.1 | 7413478 | 20-scf00021 | 20 |
| AX-157920586 | 2 | 95.113 | KV453198.1 | 119712  | 20-scf00025 | 20 |
| AX-157920587 | 2 | 95.113 | KV453198.1 | 120154  | 20-scf00025 | 20 |
| AX-157920592 | 2 | 95.113 | KV453198.1 | 130251  | 20-scf00025 | 20 |
| AX-157682366 | 2 | 95.113 | KV453195.1 | 59160   | 20-scf00026 | 20 |
| AX-157680600 | 2 | 95.113 | KV453195.1 | 71514   | 20-scf00026 | 20 |
| AX-157680399 | 2 | 95.113 | KV453196.1 | 9500    | 20-scf00028 | 20 |
| AX-157919886 | 2 | 95.253 | KV453193.1 | 7143418 | 20-scf00021 | 20 |
| AX-157919887 | 2 | 95.4   | KV453193.1 | 7148287 | 20-scf00021 | 20 |
| AX-157919880 | 2 | 95.546 | KV453193.1 | 7134444 | 20-scf00021 | 20 |
| AX-157919889 | 2 | 95.546 | KV453193.1 | 7152121 | 20-scf00021 | 20 |
| AX-157919890 | 2 | 95.546 | KV453193.1 | 7152563 | 20-scf00021 | 20 |
| AX-157919897 | 2 | 95.546 | KV453193.1 | 7156104 | 20-scf00021 | 20 |
| AX-157919898 | 2 | 95.546 | KV453193.1 | 7156330 | 20-scf00021 | 20 |
| AX-157919903 | 2 | 95.694 | KV453193.1 | 7162102 | 20-scf00021 | 20 |
| AX-157919905 | 2 | 95.694 | KV453193.1 | 7163829 | 20-scf00021 | 20 |
| AX-157813110 | 2 | 95.694 | KV453193.1 | 7289618 | 20-scf00021 | 20 |
| AX-157919899 | 2 | 95.765 | KV453193.1 | 7157544 | 20-scf00021 | 20 |
| AX-157778299 | 2 | 95.765 | KV453193.1 | 7164680 | 20-scf00021 | 20 |
| AX-157919908 | 2 | 95.765 | KV453193.1 | 7167231 | 20-scf00021 | 20 |
| AX-157720169 | 2 | 95.765 | KV453193.1 | 7179478 | 20-scf00021 | 20 |
| AX-157919966 | 2 | 95.765 | KV453193.1 | 7264346 | 20-scf00021 | 20 |
| AX-157813101 | 2 | 95.874 | KV453193.1 | 7156994 | 20-scf00021 | 20 |
| AX-157919913 | 2 | 95.874 | KV453193.1 | 7180726 | 20-scf00021 | 20 |
| AX-157743160 | 2 | 95.874 | KV453193.1 | 7181863 | 20-scf00021 | 20 |
| AX-157919916 | 2 | 95.874 | KV453193.1 | 7188542 | 20-scf00021 | 20 |
| AX-157919918 | 2 | 95.874 | KV453193.1 | 7190207 | 20-scf00021 | 20 |
| AX-157919919 | 2 | 95.874 | KV453193.1 | 7192219 | 20-scf00021 | 20 |
| AX-157919920 | 2 | 95.874 | KV453193.1 | 7192545 | 20-scf00021 | 20 |
| AX-157919921 | 2 | 95.874 | KV453193.1 | 7193453 | 20-scf00021 | 20 |
| AX-157919923 | 2 | 95.874 | KV453193.1 | 7194252 | 20-scf00021 | 20 |
| AX-157919927 | 2 | 95.874 | KV453193.1 | 7200622 | 20-scf00021 | 20 |
| AX-157919928 | 2 | 95.874 | KV453193.1 | 7200893 | 20-scf00021 | 20 |
| AX-157919935 | 2 | 95.874 | KV453193.1 | 7215028 | 20-scf00021 | 20 |
| AX-157919936 | 2 | 95.874 | KV453193.1 | 7217408 | 20-scf00021 | 20 |
| AX-157919937 | 2 | 95.874 | KV453193.1 | 7217778 | 20-scf00021 | 20 |
| AX-157919940 | 2 | 95.874 | KV453193.1 | 7220612 | 20-scf00021 | 20 |

|              |   |        |            |         |             |    |
|--------------|---|--------|------------|---------|-------------|----|
| AX-157919943 | 2 | 95.874 | KV453193.1 | 7223033 | 20-scf00021 | 20 |
| AX-157919944 | 2 | 95.874 | KV453193.1 | 7223827 | 20-scf00021 | 20 |
| AX-157919945 | 2 | 95.874 | KV453193.1 | 7224217 | 20-scf00021 | 20 |
| AX-157919946 | 2 | 95.874 | KV453193.1 | 7224594 | 20-scf00021 | 20 |
| AX-157919947 | 2 | 95.874 | KV453193.1 | 7228217 | 20-scf00021 | 20 |
| AX-157919953 | 2 | 95.874 | KV453193.1 | 7239817 | 20-scf00021 | 20 |
| AX-157919959 | 2 | 95.874 | KV453193.1 | 7252324 | 20-scf00021 | 20 |
| AX-157745386 | 2 | 95.874 | KV453193.1 | 7268739 | 20-scf00021 | 20 |
| AX-157919970 | 2 | 95.874 | KV453193.1 | 7272486 | 20-scf00021 | 20 |
| AX-157919978 | 2 | 95.874 | KV453193.1 | 7276670 | 20-scf00021 | 20 |
| AX-157919983 | 2 | 95.874 | KV453193.1 | 7293101 | 20-scf00021 | 20 |
| AX-157919984 | 2 | 95.874 | KV453193.1 | 7293324 | 20-scf00021 | 20 |
| AX-157919990 | 2 | 95.874 | KV453193.1 | 7299729 | 20-scf00021 | 20 |
| AX-157919993 | 2 | 95.874 | KV453193.1 | 7305896 | 20-scf00021 | 20 |
| AX-157919998 | 2 | 95.874 | KV453193.1 | 7311318 | 20-scf00021 | 20 |
| AX-157813114 | 2 | 95.874 | KV453193.1 | 7311868 | 20-scf00021 | 20 |
| AX-157919999 | 2 | 95.874 | KV453193.1 | 7314724 | 20-scf00021 | 20 |
| AX-157920001 | 2 | 95.874 | KV453193.1 | 7321628 | 20-scf00021 | 20 |
| AX-157723749 | 2 | 95.874 | KV453193.1 | 7325923 | 20-scf00021 | 20 |
| AX-158404356 | 2 | 95.874 | KV453193.1 | 7341128 | 20-scf00021 | 20 |
| AX-157920027 | 2 | 95.874 | KV453193.1 | 7372943 | 20-scf00021 | 20 |
| AX-157919967 | 2 | 96.033 | KV453193.1 | 7264866 | 20-scf00021 | 20 |
| AX-157813108 | 2 | 96.033 | KV453193.1 | 7265730 | 20-scf00021 | 20 |
| AX-157715015 | 2 | 96.033 | KV453193.1 | 7288343 | 20-scf00021 | 20 |
| AX-157919971 | 2 | 96.28  | KV453193.1 | 7273244 | 20-scf00021 | 20 |
| AX-157919974 | 2 | 96.361 | KV453193.1 | 7274788 | 20-scf00021 | 20 |
| AX-157813111 | 2 | 96.439 | KV453193.1 | 7290009 | 20-scf00021 | 20 |
| AX-157717869 | 2 | 96.439 | KV453193.1 | 7312066 | 20-scf00021 | 20 |
| AX-157919992 | 2 | 96.597 | KV453193.1 | 7303378 | 20-scf00021 | 20 |
| AX-157919995 | 2 | 96.613 | KV453193.1 | 7309478 | 20-scf00021 | 20 |
| AX-157919996 | 2 | 96.627 | KV453193.1 | 7309808 | 20-scf00021 | 20 |
| AX-157773344 | 2 | 96.641 | KV453193.1 | 7099184 | 20-scf00021 | 20 |
| AX-157919914 | 2 | 96.641 | KV453193.1 | 7182273 | 20-scf00021 | 20 |
| AX-157920010 | 2 | 96.641 | KV453193.1 | 7331824 | 20-scf00021 | 20 |
| AX-157920011 | 2 | 96.641 | KV453193.1 | 7333145 | 20-scf00021 | 20 |
| AX-158379298 | 2 | 96.641 | KV453193.1 | 7338523 | 20-scf00021 | 20 |
| AX-158404355 | 2 | 96.641 | KV453193.1 | 7340326 | 20-scf00021 | 20 |
| AX-157920577 | 2 | 96.641 | KV453198.1 | 90643   | 20-scf00025 | 20 |
| AX-157721041 | 2 | 96.641 | KV453198.1 | 97334   | 20-scf00025 | 20 |
| AX-157920012 | 2 | 96.75  | KV453193.1 | 7337460 | 20-scf00021 | 20 |
| AX-157920016 | 2 | 96.75  | KV453193.1 | 7344197 | 20-scf00021 | 20 |
| AX-157920020 | 2 | 96.75  | KV453193.1 | 7353228 | 20-scf00021 | 20 |
| AX-157748198 | 2 | 96.75  | KV453193.1 | 7357378 | 20-scf00021 | 20 |
| AX-157920022 | 2 | 96.75  | KV453193.1 | 7364386 | 20-scf00021 | 20 |
| AX-157920023 | 2 | 96.75  | KV453193.1 | 7367640 | 20-scf00021 | 20 |
| AX-157716107 | 2 | 96.75  | KV453193.1 | 7368366 | 20-scf00021 | 20 |
| AX-157920025 | 2 | 96.75  | KV453193.1 | 7371671 | 20-scf00021 | 20 |
| AX-157920047 | 2 | 96.75  | KV453193.1 | 7406365 | 20-scf00021 | 20 |
| AX-157920030 | 2 | 96.79  | KV453193.1 | 7376972 | 20-scf00021 | 20 |
| AX-157920031 | 2 | 96.805 | KV453193.1 | 7379889 | 20-scf00021 | 20 |
| AX-157920026 | 2 | 96.841 | KV453193.1 | 7372063 | 20-scf00021 | 20 |

|              |   |        |             |         |             |    |
|--------------|---|--------|-------------|---------|-------------|----|
| AX-157813115 | 2 | 96.841 | KV453193.1  | 7384404 | 20-scf00021 | 20 |
| AX-157743217 | 2 | 96.859 | KV453193.1  | 7378877 | 20-scf00021 | 20 |
| AX-157920032 | 2 | 96.859 | KV453193.1  | 7382801 | 20-scf00021 | 20 |
| AX-157920037 | 2 | 96.859 | KV453193.1  | 7391625 | 20-scf00021 | 20 |
| AX-157920038 | 2 | 96.859 | KV453193.1  | 7392686 | 20-scf00021 | 20 |
| AX-157813116 | 2 | 96.859 | KV453193.1  | 7393649 | 20-scf00021 | 20 |
| AX-157920039 | 2 | 96.859 | KV453193.1  | 7394462 | 20-scf00021 | 20 |
| AX-157920040 | 2 | 96.859 | KV453193.1  | 7395301 | 20-scf00021 | 20 |
| AX-157920044 | 2 | 96.859 | KV453193.1  | 7403233 | 20-scf00021 | 20 |
| AX-157920045 | 2 | 96.859 | KV453193.1  | 7403851 | 20-scf00021 | 20 |
| AX-157920051 | 2 | 96.859 | KV453193.1  | 7417047 | 20-scf00021 | 20 |
| AX-157745200 | 2 | 96.859 | KV453193.1  | 7420264 | 20-scf00021 | 20 |
| AX-157920054 | 2 | 96.859 | KV453193.1  | 7422533 | 20-scf00021 | 20 |
| AX-157920055 | 2 | 96.859 | KV453193.1  | 7425773 | 20-scf00021 | 20 |
| AX-157813121 | 2 | 96.859 | KV453193.1  | 7427460 | 20-scf00021 | 20 |
| AX-157813122 | 2 | 96.859 | KV453193.1  | 7429186 | 20-scf00021 | 20 |
| AX-157682341 | 2 | 96.859 | KV453195.1  | 25233   | 20-scf00026 | 20 |
| AX-157682363 | 2 | 96.859 | KV453195.1  | 51649   | 20-scf00026 | 20 |
| AX-157680599 | 2 | 96.859 | KV453195.1  | 57368   | 20-scf00026 | 20 |
| AX-157681316 | 2 | 96.859 | KV453195.1  | 62793   | 20-scf00026 | 20 |
| AX-157682388 | 2 | 96.859 | KV453197.1  | 32196   | 20-scf00027 | 20 |
| AX-157682403 | 2 | 96.859 | KV453196.1  | 15253   | 20-scf00028 | 20 |
| AX-157706256 | 2 | 96.859 | 3ML01031912 | 84      | scf07535_1  | UN |
| AX-157727652 | 2 | 96.936 | KV453193.1  | 7284112 | 20-scf00021 | 20 |
| AX-157920046 | 2 | 96.936 | KV453193.1  | 7405958 | 20-scf00021 | 20 |
| AX-157920060 | 2 | 96.936 | KV453193.1  | 7432363 | 20-scf00021 | 20 |
| AX-157771183 | 2 | 96.936 | KV453193.1  | 7478199 | 20-scf00021 | 20 |
| AX-157682336 | 2 | 96.936 | KV453195.1  | 16503   | 20-scf00026 | 20 |
| AX-157682405 | 2 | 96.936 | KV453196.1  | 16537   | 20-scf00028 | 20 |
| AX-157712141 | 2 | 96.981 | KV453193.1  | 7439164 | 20-scf00021 | 20 |
| AX-157883524 | 2 | 97.03  | KV453193.1  | 7430802 | 20-scf00021 | 20 |
| AX-157757243 | 2 | 97.03  | KV453193.1  | 7440097 | 20-scf00021 | 20 |
| AX-157682398 | 2 | 97.03  | KV453196.1  | 10419   | 20-scf00028 | 20 |
| AX-157813126 | 2 | 97.078 | KV453193.1  | 7445600 | 20-scf00021 | 20 |
| AX-157920066 | 2 | 97.078 | KV453193.1  | 7447377 | 20-scf00021 | 20 |
| AX-157869139 | 2 | 97.078 | KV453193.1  | 7451092 | 20-scf00021 | 20 |
| AX-157920005 | 2 | 97.187 | KV453193.1  | 7324913 | 20-scf00021 | 20 |
| AX-157920029 | 2 | 97.187 | KV453193.1  | 7375687 | 20-scf00021 | 20 |
| AX-157920053 | 2 | 97.187 | KV453193.1  | 7419896 | 20-scf00021 | 20 |
| AX-157920069 | 2 | 97.187 | KV453193.1  | 7455001 | 20-scf00021 | 20 |
| AX-157710434 | 2 | 97.187 | KV453193.1  | 7461209 | 20-scf00021 | 20 |
| AX-157920074 | 2 | 97.187 | KV453193.1  | 7463289 | 20-scf00021 | 20 |
| AX-157920079 | 2 | 97.187 | KV453193.1  | 7472561 | 20-scf00021 | 20 |
| AX-157874739 | 2 | 97.187 | KV453193.1  | 7475138 | 20-scf00021 | 20 |
| AX-157920081 | 2 | 97.187 | KV453193.1  | 7476748 | 20-scf00021 | 20 |
| AX-157920085 | 2 | 97.187 | KV453193.1  | 7479122 | 20-scf00021 | 20 |
| AX-157750991 | 2 | 97.187 | KV453193.1  | 7480159 | 20-scf00021 | 20 |
| AX-157920562 | 2 | 97.187 | KV453198.1  | 55730   | 20-scf00025 | 20 |
| AX-157682381 | 2 | 97.187 | KV453197.1  | 18295   | 20-scf00027 | 20 |
| AX-157682382 | 2 | 97.187 | KV453197.1  | 23763   | 20-scf00027 | 20 |
| AX-157682390 | 2 | 97.187 | KV453196.1  | 876     | 20-scf00028 | 20 |

|              |   |        |             |         |             |    |
|--------------|---|--------|-------------|---------|-------------|----|
| AX-157682393 | 2 | 97.187 | KV453196.1  | 4231    | 20-scf00028 | 20 |
| AX-157682397 | 2 | 97.187 | KV453196.1  | 9059    | 20-scf00028 | 20 |
| AX-157682401 | 2 | 97.187 | KV453196.1  | 13334   | 20-scf00028 | 20 |
| AX-157682407 | 2 | 97.187 | KV453196.1  | 17133   | 20-scf00028 | 20 |
| AX-157681259 | 2 | 97.187 | 3ML01030031 | 335     | scf05653_1  | UN |
| AX-157919843 | 2 | 97.248 | KV453193.1  | 7071164 | 20-scf00021 | 20 |
| AX-157689178 | 2 | 97.248 | KV453194.1  | 88      | 20-scf04092 | 20 |
| AX-157920077 | 2 | 97.296 | KV453193.1  | 7468521 | 20-scf00021 | 20 |
| AX-157682337 | 2 | 97.296 | KV453195.1  | 18911   | 20-scf00026 | 20 |
| AX-157682340 | 2 | 97.296 | KV453195.1  | 22742   | 20-scf00026 | 20 |
| AX-157682343 | 2 | 97.296 | KV453195.1  | 28587   | 20-scf00026 | 20 |
| AX-157682346 | 2 | 97.296 | KV453195.1  | 30269   | 20-scf00026 | 20 |
| AX-157682347 | 2 | 97.296 | KV453195.1  | 30460   | 20-scf00026 | 20 |
| AX-157680086 | 2 | 97.296 | KV453195.1  | 30900   | 20-scf00026 | 20 |
| AX-157682349 | 2 | 97.296 | KV453195.1  | 31829   | 20-scf00026 | 20 |
| AX-157682351 | 2 | 97.296 | KV453195.1  | 35793   | 20-scf00026 | 20 |
| AX-157682354 | 2 | 97.296 | KV453195.1  | 39468   | 20-scf00026 | 20 |
| AX-157682355 | 2 | 97.296 | KV453195.1  | 41188   | 20-scf00026 | 20 |
| AX-157682358 | 2 | 97.296 | KV453195.1  | 45452   | 20-scf00026 | 20 |
| AX-157682359 | 2 | 97.296 | KV453195.1  | 46472   | 20-scf00026 | 20 |
| AX-157682365 | 2 | 97.296 | KV453195.1  | 55564   | 20-scf00026 | 20 |
| AX-157712135 | 2 | 97.296 | KV453195.1  | 61513   | 20-scf00026 | 20 |
| AX-157682376 | 2 | 97.296 | KV453197.1  | 9543    | 20-scf00027 | 20 |
| AX-157682385 | 2 | 97.296 | KV453197.1  | 29418   | 20-scf00027 | 20 |
| AX-157706138 | 2 | 97.296 | 3ML01031693 | 184     | scf07312_1  | UN |
| AX-157682391 | 2 | 97.405 | KV453196.1  | 2121    | 20-scf00028 | 20 |
| AX-157682400 | 2 | 97.405 | KV453196.1  | 11593   | 20-scf00028 | 20 |
| AX-157682411 | 2 | 97.405 | KV453196.1  | 22314   | 20-scf00028 | 20 |
| AX-157680509 | 2 | 97.405 | KV453196.1  | 22649   | 20-scf00028 | 20 |
| AX-157682374 | 2 | 97.515 | KV453197.1  | 3268    | 20-scf00027 | 20 |
| AX-157682375 | 2 | 97.515 | KV453197.1  | 7799    | 20-scf00027 | 20 |
| AX-157682377 | 2 | 97.515 | KV453197.1  | 10565   | 20-scf00027 | 20 |
| AX-157680492 | 2 | 97.515 | KV453197.1  | 13083   | 20-scf00027 | 20 |
| AX-157682379 | 2 | 97.515 | KV453197.1  | 13549   | 20-scf00027 | 20 |
| AX-157682384 | 2 | 97.515 | KV453197.1  | 27395   | 20-scf00027 | 20 |
| AX-157920028 | 2 | 97.624 | KV453193.1  | 7375202 | 20-scf00021 | 20 |
| AX-157920035 | 2 | 97.624 | KV453193.1  | 7389144 | 20-scf00021 | 20 |
| AX-157920041 | 2 | 97.624 | KV453193.1  | 7398713 | 20-scf00021 | 20 |
| AX-157920538 | 2 | 97.624 | KV453198.1  | 16414   | 20-scf00025 | 20 |
| AX-157853787 | 2 | 97.624 | KV453198.1  | 46244   | 20-scf00025 | 20 |
| AX-157920556 | 2 | 97.624 | KV453198.1  | 48341   | 20-scf00025 | 20 |
| AX-157920565 | 2 | 97.624 | KV453198.1  | 58837   | 20-scf00025 | 20 |
| AX-157920571 | 2 | 97.624 | KV453198.1  | 66128   | 20-scf00025 | 20 |
| AX-157920572 | 2 | 97.624 | KV453198.1  | 67076   | 20-scf00025 | 20 |
| AX-157713902 | 2 | 97.624 | KV453198.1  | 67157   | 20-scf00025 | 20 |
| AX-157920573 | 2 | 97.624 | KV453198.1  | 68117   | 20-scf00025 | 20 |
| AX-157920574 | 2 | 97.624 | KV453198.1  | 69792   | 20-scf00025 | 20 |
| AX-157742938 | 2 | 97.624 | KV453198.1  | 75996   | 20-scf00025 | 20 |
| AX-157813203 | 2 | 97.624 | KV453198.1  | 82343   | 20-scf00025 | 20 |
| AX-157920578 | 2 | 97.624 | KV453198.1  | 93095   | 20-scf00025 | 20 |
| AX-157920590 | 2 | 97.624 | KV453198.1  | 127618  | 20-scf00025 | 20 |

|              |   |        |             |        |             |    |
|--------------|---|--------|-------------|--------|-------------|----|
| AX-157920591 | 2 | 97.624 | KV453198.1  | 128267 | 20-scf00025 | 20 |
| AX-157753212 | 2 | 97.624 | KV453198.1  | 128960 | 20-scf00025 | 20 |
| AX-157745250 | 2 | 97.624 | KV453198.1  | 129629 | 20-scf00025 | 20 |
| AX-157920595 | 2 | 97.624 | KV453198.1  | 144554 | 20-scf00025 | 20 |
| AX-157920597 | 2 | 97.624 | KV453198.1  | 145117 | 20-scf00025 | 20 |
| AX-157680477 | 2 | 97.624 | KV453195.1  | 50451  | 20-scf00026 | 20 |
| AX-157682367 | 2 | 97.624 | KV453195.1  | 61086  | 20-scf00026 | 20 |
| AX-157708139 | 2 | 97.624 | KV453195.1  | 61720  | 20-scf00026 | 20 |
| AX-157682372 | 2 | 97.624 | KV453195.1  | 70555  | 20-scf00026 | 20 |
| AX-157682387 | 2 | 97.624 | KV453197.1  | 31324  | 20-scf00027 | 20 |
| AX-157682416 | 2 | 97.624 | KV453199.1  | 14138  | 20-scf00029 | 20 |
| AX-157682427 | 2 | 97.624 | KV453199.1  | 28242  | 20-scf00029 | 20 |
| AX-157682439 | 2 | 97.624 | KV453199.1  | 38499  | 20-scf00029 | 20 |
| AX-157681258 | 2 | 97.624 | 3ML01030031 | 239    | scf05653_1  | UN |
| AX-157705978 | 2 | 97.624 | 3ML01031356 | 309    | scf06967_1  | UN |
| AX-157920667 | 3 | 0      | KV452720.1  | 8217   | 2-scf00030  | 2  |
| AX-157920666 | 3 | 0      | KV452720.1  | 10579  | 2-scf00030  | 2  |
| AX-157920664 | 3 | 0      | KV452720.1  | 15576  | 2-scf00030  | 2  |
| AX-157920663 | 3 | 0      | KV452720.1  | 15780  | 2-scf00030  | 2  |
| AX-157920662 | 3 | 0      | KV452720.1  | 16072  | 2-scf00030  | 2  |
| AX-157920661 | 3 | 0      | KV452720.1  | 17725  | 2-scf00030  | 2  |
| AX-157920660 | 3 | 0      | KV452720.1  | 20184  | 2-scf00030  | 2  |
| AX-157920659 | 3 | 0      | KV452720.1  | 21076  | 2-scf00030  | 2  |
| AX-157920658 | 3 | 0      | KV452720.1  | 21700  | 2-scf00030  | 2  |
| AX-157920656 | 3 | 0      | KV452720.1  | 31446  | 2-scf00030  | 2  |
| AX-157920655 | 3 | 0      | KV452720.1  | 36847  | 2-scf00030  | 2  |
| AX-157920654 | 3 | 0      | KV452720.1  | 39162  | 2-scf00030  | 2  |
| AX-157920653 | 3 | 0      | KV452720.1  | 39297  | 2-scf00030  | 2  |
| AX-157920652 | 3 | 0      | KV452720.1  | 40547  | 2-scf00030  | 2  |
| AX-157920651 | 3 | 0      | KV452720.1  | 42028  | 2-scf00030  | 2  |
| AX-157813213 | 3 | 0      | KV452720.1  | 44232  | 2-scf00030  | 2  |
| AX-157920648 | 3 | 0      | KV452720.1  | 46856  | 2-scf00030  | 2  |
| AX-157920646 | 3 | 0      | KV452720.1  | 48937  | 2-scf00030  | 2  |
| AX-157920645 | 3 | 0      | KV452720.1  | 50583  | 2-scf00030  | 2  |
| AX-157920644 | 3 | 0      | KV452720.1  | 51383  | 2-scf00030  | 2  |
| AX-157920643 | 3 | 0      | KV452720.1  | 52209  | 2-scf00030  | 2  |
| AX-157920641 | 3 | 0      | KV452720.1  | 55196  | 2-scf00030  | 2  |
| AX-157813212 | 3 | 0      | KV452720.1  | 55600  | 2-scf00030  | 2  |
| AX-157740266 | 3 | 0      | KV452720.1  | 57165  | 2-scf00030  | 2  |
| AX-157920639 | 3 | 0      | KV452720.1  | 58422  | 2-scf00030  | 2  |
| AX-157813211 | 3 | 0      | KV452720.1  | 61227  | 2-scf00030  | 2  |
| AX-157813210 | 3 | 0      | KV452720.1  | 61588  | 2-scf00030  | 2  |
| AX-157920638 | 3 | 0      | KV452720.1  | 63251  | 2-scf00030  | 2  |
| AX-157750488 | 3 | 0      | KV452720.1  | 64018  | 2-scf00030  | 2  |
| AX-157920637 | 3 | 0      | KV452720.1  | 65628  | 2-scf00030  | 2  |
| AX-157920636 | 3 | 0      | KV452720.1  | 71159  | 2-scf00030  | 2  |
| AX-157920635 | 3 | 0      | KV452720.1  | 75011  | 2-scf00030  | 2  |
| AX-157920634 | 3 | 0      | KV452720.1  | 78013  | 2-scf00030  | 2  |
| AX-157920633 | 3 | 0      | KV452720.1  | 78539  | 2-scf00030  | 2  |
| AX-157920632 | 3 | 0      | KV452720.1  | 79021  | 2-scf00030  | 2  |
| AX-157920631 | 3 | 0      | KV452720.1  | 83423  | 2-scf00030  | 2  |

|              |   |   |            |        |            |   |
|--------------|---|---|------------|--------|------------|---|
| AX-157813209 | 3 | 0 | KV452720.1 | 84296  | 2-scf00030 | 2 |
| AX-157920630 | 3 | 0 | KV452720.1 | 84679  | 2-scf00030 | 2 |
| AX-157920629 | 3 | 0 | KV452720.1 | 85364  | 2-scf00030 | 2 |
| AX-157920627 | 3 | 0 | KV452720.1 | 93968  | 2-scf00030 | 2 |
| AX-157920626 | 3 | 0 | KV452720.1 | 95582  | 2-scf00030 | 2 |
| AX-157748858 | 3 | 0 | KV452720.1 | 97135  | 2-scf00030 | 2 |
| AX-157920625 | 3 | 0 | KV452720.1 | 99106  | 2-scf00030 | 2 |
| AX-157813206 | 3 | 0 | KV452720.1 | 106681 | 2-scf00030 | 2 |
| AX-157744463 | 3 | 0 | KV452720.1 | 106815 | 2-scf00030 | 2 |
| AX-157920624 | 3 | 0 | KV452720.1 | 107429 | 2-scf00030 | 2 |
| AX-157920623 | 3 | 0 | KV452720.1 | 108961 | 2-scf00030 | 2 |
| AX-157920622 | 3 | 0 | KV452720.1 | 113357 | 2-scf00030 | 2 |
| AX-157920621 | 3 | 0 | KV452720.1 | 115542 | 2-scf00030 | 2 |
| AX-157920620 | 3 | 0 | KV452720.1 | 119161 | 2-scf00030 | 2 |
| AX-157920618 | 3 | 0 | KV452720.1 | 120813 | 2-scf00030 | 2 |
| AX-157920615 | 3 | 0 | KV452720.1 | 123881 | 2-scf00030 | 2 |
| AX-157813205 | 3 | 0 | KV452720.1 | 123978 | 2-scf00030 | 2 |
| AX-157920614 | 3 | 0 | KV452720.1 | 124525 | 2-scf00030 | 2 |
| AX-157920613 | 3 | 0 | KV452720.1 | 125472 | 2-scf00030 | 2 |
| AX-157920612 | 3 | 0 | KV452720.1 | 126812 | 2-scf00030 | 2 |
| AX-157920611 | 3 | 0 | KV452720.1 | 127497 | 2-scf00030 | 2 |
| AX-157920610 | 3 | 0 | KV452720.1 | 128957 | 2-scf00030 | 2 |
| AX-157813204 | 3 | 0 | KV452720.1 | 134801 | 2-scf00030 | 2 |
| AX-157920606 | 3 | 0 | KV452720.1 | 141972 | 2-scf00030 | 2 |
| AX-157920605 | 3 | 0 | KV452720.1 | 144079 | 2-scf00030 | 2 |
| AX-157920604 | 3 | 0 | KV452720.1 | 149686 | 2-scf00030 | 2 |
| AX-157920601 | 3 | 0 | KV452720.1 | 152361 | 2-scf00030 | 2 |
| AX-157920599 | 3 | 0 | KV452720.1 | 153759 | 2-scf00030 | 2 |
| AX-157920598 | 3 | 0 | KV452720.1 | 154370 | 2-scf00030 | 2 |
| AX-157920669 | 3 | 0 | KV452720.1 | 156871 | 2-scf00030 | 2 |
| AX-157920675 | 3 | 0 | KV452720.1 | 182046 | 2-scf00030 | 2 |
| AX-157920676 | 3 | 0 | KV452720.1 | 183480 | 2-scf00030 | 2 |
| AX-157920677 | 3 | 0 | KV452720.1 | 183851 | 2-scf00030 | 2 |
| AX-157920679 | 3 | 0 | KV452720.1 | 188970 | 2-scf00030 | 2 |
| AX-157920689 | 3 | 0 | KV452720.1 | 204531 | 2-scf00030 | 2 |
| AX-157920694 | 3 | 0 | KV452720.1 | 221088 | 2-scf00030 | 2 |
| AX-157813217 | 3 | 0 | KV452720.1 | 236128 | 2-scf00030 | 2 |
| AX-157920700 | 3 | 0 | KV452720.1 | 239045 | 2-scf00030 | 2 |
| AX-157920704 | 3 | 0 | KV452720.1 | 260022 | 2-scf00030 | 2 |
| AX-157920708 | 3 | 0 | KV452720.1 | 290587 | 2-scf00030 | 2 |
| AX-157920712 | 3 | 0 | KV452720.1 | 298887 | 2-scf00030 | 2 |
| AX-157920713 | 3 | 0 | KV452720.1 | 299025 | 2-scf00030 | 2 |
| AX-157920791 | 3 | 0 | KV452720.1 | 312812 | 2-scf00030 | 2 |
| AX-157920786 | 3 | 0 | KV452720.1 | 318850 | 2-scf00030 | 2 |
| AX-157920782 | 3 | 0 | KV452720.1 | 327975 | 2-scf00030 | 2 |
| AX-157920780 | 3 | 0 | KV452720.1 | 330959 | 2-scf00030 | 2 |
| AX-157920778 | 3 | 0 | KV452720.1 | 333586 | 2-scf00030 | 2 |
| AX-157853791 | 3 | 0 | KV452720.1 | 346648 | 2-scf00030 | 2 |
| AX-157920758 | 3 | 0 | KV452720.1 | 374515 | 2-scf00030 | 2 |
| AX-157920741 | 3 | 0 | KV452720.1 | 404630 | 2-scf00030 | 2 |
| AX-157920732 | 3 | 0 | KV452720.1 | 421548 | 2-scf00030 | 2 |

|              |   |       |             |        |            |    |
|--------------|---|-------|-------------|--------|------------|----|
| AX-157813219 | 3 | 0     | KV452720.1  | 422374 | 2-scf00030 | 2  |
| AX-157869145 | 3 | 0     | KV452720.1  | 430341 | 2-scf00030 | 2  |
| AX-157920880 | 3 | 0     | KV452722.1  | 2657   | 2-scf00034 | 2  |
| AX-157920881 | 3 | 0     | KV452722.1  | 4481   | 2-scf00034 | 2  |
| AX-158389649 | 3 | 0     | KV452722.1  | 7846   | 2-scf00034 | 2  |
| AX-157920739 | 3 | 0.218 | KV452720.1  | 407400 | 2-scf00030 | 2  |
| AX-157920738 | 3 | 0.218 | KV452720.1  | 408972 | 2-scf00030 | 2  |
| AX-157920737 | 3 | 0.218 | KV452720.1  | 410961 | 2-scf00030 | 2  |
| AX-157920735 | 3 | 0.218 | KV452720.1  | 416072 | 2-scf00030 | 2  |
| AX-157920727 | 3 | 0.218 | KV452720.1  | 432410 | 2-scf00030 | 2  |
| AX-157920726 | 3 | 0.218 | KV452720.1  | 434619 | 2-scf00030 | 2  |
| AX-157920725 | 3 | 0.218 | KV452720.1  | 434966 | 2-scf00030 | 2  |
| AX-157920723 | 3 | 0.218 | KV452720.1  | 437028 | 2-scf00030 | 2  |
| AX-157853789 | 3 | 0.218 | KV452720.1  | 441960 | 2-scf00030 | 2  |
| AX-157738987 | 3 | 0.218 | KV452722.1  | 27232  | 2-scf00034 | 2  |
| AX-157920709 | 3 | 0.253 | KV452720.1  | 291348 | 2-scf00030 | 2  |
| AX-157813221 | 3 | 0.253 | KV452720.1  | 391816 | 2-scf00030 | 2  |
| AX-157920748 | 3 | 0.292 | KV452720.1  | 390889 | 2-scf00030 | 2  |
| AX-157920764 | 3 | 0.328 | KV452720.1  | 354748 | 2-scf00030 | 2  |
| AX-157920762 | 3 | 0.328 | KV452720.1  | 356248 | 2-scf00030 | 2  |
| AX-157920754 | 3 | 0.328 | KV452720.1  | 381760 | 2-scf00030 | 2  |
| AX-157920750 | 3 | 0.328 | KV452720.1  | 389083 | 2-scf00030 | 2  |
| AX-157813228 | 3 | 0.328 | KV452721.1  | 12899  | 2-scf00033 | 2  |
| AX-157774481 | 3 | 0.328 | KV452721.1  | 18710  | 2-scf00033 | 2  |
| AX-157920917 | 3 | 0.328 | KV452722.1  | 73057  | 2-scf00034 | 2  |
| AX-157705926 | 3 | 0.328 | 3ML01031248 | 585    | scf06855_1 | UN |
| AX-157853790 | 3 | 0.359 | KV452720.1  | 359197 | 2-scf00030 | 2  |
| AX-157920788 | 3 | 0.383 | KV452720.1  | 315911 | 2-scf00030 | 2  |
| AX-157920792 | 3 | 0.409 | KV452720.1  | 302988 | 2-scf00030 | 2  |
| AX-157920790 | 3 | 0.409 | KV452720.1  | 313923 | 2-scf00030 | 2  |
| AX-157920784 | 3 | 0.409 | KV452720.1  | 324482 | 2-scf00030 | 2  |
| AX-157883547 | 3 | 0.409 | KV452720.1  | 352109 | 2-scf00030 | 2  |
| AX-157920751 | 3 | 0.409 | KV452720.1  | 388392 | 2-scf00030 | 2  |
| AX-157920745 | 3 | 0.409 | KV452720.1  | 393823 | 2-scf00030 | 2  |
| AX-157853788 | 3 | 0.437 | KV452720.1  | 141495 | 2-scf00030 | 2  |
| AX-157920602 | 3 | 0.437 | KV452720.1  | 152237 | 2-scf00030 | 2  |
| AX-157920668 | 3 | 0.437 | KV452720.1  | 156570 | 2-scf00030 | 2  |
| AX-157813216 | 3 | 0.437 | KV452720.1  | 187660 | 2-scf00030 | 2  |
| AX-157920681 | 3 | 0.437 | KV452720.1  | 193388 | 2-scf00030 | 2  |
| AX-157920683 | 3 | 0.437 | KV452720.1  | 194634 | 2-scf00030 | 2  |
| AX-157920685 | 3 | 0.437 | KV452720.1  | 197556 | 2-scf00030 | 2  |
| AX-157920702 | 3 | 0.437 | KV452720.1  | 246173 | 2-scf00030 | 2  |
| AX-157920705 | 3 | 0.437 | KV452720.1  | 261293 | 2-scf00030 | 2  |
| AX-157864556 | 3 | 0.437 | KV452720.1  | 263232 | 2-scf00030 | 2  |
| AX-157813224 | 3 | 0.437 | KV452720.1  | 306904 | 2-scf00030 | 2  |
| AX-157920781 | 3 | 0.437 | KV452720.1  | 330683 | 2-scf00030 | 2  |
| AX-157920793 | 3 | 1.092 | KV452721.1  | 2726   | 2-scf00033 | 2  |
| AX-157920797 | 3 | 1.092 | KV452721.1  | 11230  | 2-scf00033 | 2  |
| AX-157813231 | 3 | 1.092 | KV452721.1  | 30831  | 2-scf00033 | 2  |
| AX-157813232 | 3 | 1.092 | KV452721.1  | 31448  | 2-scf00033 | 2  |
| AX-157920804 | 3 | 1.092 | KV452721.1  | 32324  | 2-scf00033 | 2  |

|              |   |       |             |        |            |    |
|--------------|---|-------|-------------|--------|------------|----|
| AX-157920805 | 3 | 1.092 | KV452721.1  | 32896  | 2-scf00033 | 2  |
| AX-157920807 | 3 | 1.092 | KV452721.1  | 34839  | 2-scf00033 | 2  |
| AX-157920809 | 3 | 1.092 | KV452721.1  | 39343  | 2-scf00033 | 2  |
| AX-157920810 | 3 | 1.092 | KV452721.1  | 39911  | 2-scf00033 | 2  |
| AX-157920815 | 3 | 1.092 | KV452721.1  | 44350  | 2-scf00033 | 2  |
| AX-157725027 | 3 | 1.092 | KV452721.1  | 49384  | 2-scf00033 | 2  |
| AX-157920820 | 3 | 1.092 | KV452721.1  | 50815  | 2-scf00033 | 2  |
| AX-157920831 | 3 | 1.092 | KV452721.1  | 65107  | 2-scf00033 | 2  |
| AX-157920848 | 3 | 1.092 | KV452721.1  | 98921  | 2-scf00033 | 2  |
| AX-157920898 | 3 | 1.092 | KV452722.1  | 30806  | 2-scf00034 | 2  |
| AX-157920902 | 3 | 1.092 | KV452722.1  | 36391  | 2-scf00034 | 2  |
| AX-157920910 | 3 | 1.092 | KV452722.1  | 59668  | 2-scf00034 | 2  |
| AX-157920833 | 3 | 1.126 | KV452721.1  | 71891  | 2-scf00033 | 2  |
| AX-157721508 | 3 | 1.126 | KV452721.1  | 73888  | 2-scf00033 | 2  |
| AX-157874750 | 3 | 1.158 | KV452721.1  | 79121  | 2-scf00033 | 2  |
| AX-157920835 | 3 | 1.18  | KV452721.1  | 80473  | 2-scf00033 | 2  |
| AX-157920819 | 3 | 1.201 | KV452721.1  | 50349  | 2-scf00033 | 2  |
| AX-157920836 | 3 | 1.201 | KV452721.1  | 80822  | 2-scf00033 | 2  |
| AX-157920838 | 3 | 1.201 | KV452721.1  | 83438  | 2-scf00033 | 2  |
| AX-157745541 | 3 | 1.201 | KV452721.1  | 83669  | 2-scf00033 | 2  |
| AX-157920900 | 3 | 1.201 | KV452722.1  | 32808  | 2-scf00034 | 2  |
| AX-157920832 | 3 | 1.227 | KV452721.1  | 67808  | 2-scf00033 | 2  |
| AX-157920839 | 3 | 1.227 | KV452721.1  | 88631  | 2-scf00033 | 2  |
| AX-157920841 | 3 | 1.227 | KV452721.1  | 89810  | 2-scf00033 | 2  |
| AX-157920849 | 3 | 1.227 | KV452721.1  | 99176  | 2-scf00033 | 2  |
| AX-157920854 | 3 | 1.268 | KV452721.1  | 105960 | 2-scf00033 | 2  |
| AX-157748570 | 3 | 1.268 | KV452722.1  | 62392  | 2-scf00034 | 2  |
| AX-157920858 | 3 | 1.308 | KV452721.1  | 123532 | 2-scf00033 | 2  |
| AX-157920859 | 3 | 1.308 | KV452721.1  | 124219 | 2-scf00033 | 2  |
| AX-157920862 | 3 | 1.308 | KV452721.1  | 127647 | 2-scf00033 | 2  |
| AX-157920870 | 3 | 1.384 | KV452721.1  | 141987 | 2-scf00033 | 2  |
| AX-157920872 | 3 | 1.384 | KV452721.1  | 143512 | 2-scf00033 | 2  |
| AX-158405249 | 3 | 1.384 | KV452723.1  | 241275 | 2-scf00035 | 2  |
| AX-157688215 | 3 | 1.384 | 3ML01025761 | 524    | scf01379_1 | UN |
| AX-157920876 | 3 | 1.385 | KV452721.1  | 150528 | 2-scf00033 | 2  |
| AX-157920730 | 3 | 1.976 | KV452720.1  | 423133 | 2-scf00030 | 2  |
| AX-157920879 | 3 | 1.976 | KV452722.1  | 815    | 2-scf00034 | 2  |
| AX-157920882 | 3 | 1.976 | KV452722.1  | 4957   | 2-scf00034 | 2  |
| AX-157920884 | 3 | 1.976 | KV452722.1  | 6295   | 2-scf00034 | 2  |
| AX-157920885 | 3 | 1.976 | KV452722.1  | 6963   | 2-scf00034 | 2  |
| AX-157920888 | 3 | 1.976 | KV452722.1  | 18111  | 2-scf00034 | 2  |
| AX-157920891 | 3 | 1.976 | KV452722.1  | 20064  | 2-scf00034 | 2  |
| AX-157920892 | 3 | 1.976 | KV452722.1  | 20441  | 2-scf00034 | 2  |
| AX-157717961 | 3 | 1.976 | KV452722.1  | 22124  | 2-scf00034 | 2  |
| AX-157813244 | 3 | 1.976 | KV452722.1  | 24396  | 2-scf00034 | 2  |
| AX-157717763 | 3 | 2.085 | KV452722.1  | 29535  | 2-scf00034 | 2  |
| AX-157920897 | 3 | 2.085 | KV452722.1  | 29927  | 2-scf00034 | 2  |
| AX-157920801 | 3 | 2.302 | KV452721.1  | 25388  | 2-scf00033 | 2  |
| AX-157920903 | 3 | 2.302 | KV452722.1  | 38655  | 2-scf00034 | 2  |
| AX-157920905 | 3 | 2.302 | KV452722.1  | 46966  | 2-scf00034 | 2  |
| AX-157920906 | 3 | 2.302 | KV452722.1  | 48658  | 2-scf00034 | 2  |



|              |   |       |            |        |            |   |
|--------------|---|-------|------------|--------|------------|---|
| AX-157920909 | 3 | 2.303 | KV452722.1 | 56760  | 2-scf00034 | 2 |
| AX-157920914 | 3 | 2.303 | KV452722.1 | 67154  | 2-scf00034 | 2 |
| AX-157920915 | 3 | 2.304 | KV452722.1 | 67970  | 2-scf00034 | 2 |
| AX-157920922 | 3 | 2.714 | KV452723.1 | 8559   | 2-scf00035 | 2 |
| AX-157920925 | 3 | 2.714 | KV452723.1 | 11205  | 2-scf00035 | 2 |
| AX-157920926 | 3 | 2.714 | KV452723.1 | 11491  | 2-scf00035 | 2 |
| AX-157920927 | 3 | 2.714 | KV452723.1 | 11860  | 2-scf00035 | 2 |
| AX-157709115 | 3 | 2.714 | KV452723.1 | 12629  | 2-scf00035 | 2 |
| AX-157920798 | 3 | 3.124 | KV452721.1 | 19573  | 2-scf00033 | 2 |
| AX-157920938 | 3 | 3.124 | KV452723.1 | 29748  | 2-scf00035 | 2 |
| AX-157920939 | 3 | 3.124 | KV452723.1 | 32451  | 2-scf00035 | 2 |
| AX-157920946 | 3 | 3.124 | KV452723.1 | 42316  | 2-scf00035 | 2 |
| AX-157920947 | 3 | 3.124 | KV452723.1 | 44166  | 2-scf00035 | 2 |
| AX-157920948 | 3 | 3.124 | KV452723.1 | 45265  | 2-scf00035 | 2 |
| AX-157920949 | 3 | 3.124 | KV452723.1 | 45666  | 2-scf00035 | 2 |
| AX-157738580 | 3 | 3.124 | KV452723.1 | 47638  | 2-scf00035 | 2 |
| AX-157920950 | 3 | 3.124 | KV452723.1 | 48229  | 2-scf00035 | 2 |
| AX-157775086 | 3 | 3.124 | KV452723.1 | 53126  | 2-scf00035 | 2 |
| AX-157715533 | 3 | 3.124 | KV452723.1 | 56124  | 2-scf00035 | 2 |
| AX-157869152 | 3 | 3.124 | KV452723.1 | 57709  | 2-scf00035 | 2 |
| AX-157920953 | 3 | 3.124 | KV452723.1 | 59597  | 2-scf00035 | 2 |
| AX-157725114 | 3 | 3.124 | KV452723.1 | 60360  | 2-scf00035 | 2 |
| AX-157725690 | 3 | 3.261 | KV452723.1 | 14850  | 2-scf00035 | 2 |
| AX-157920955 | 3 | 3.261 | KV452723.1 | 67088  | 2-scf00035 | 2 |
| AX-157920957 | 3 | 3.261 | KV452723.1 | 70446  | 2-scf00035 | 2 |
| AX-157920962 | 3 | 3.261 | KV452723.1 | 80376  | 2-scf00035 | 2 |
| AX-158404389 | 3 | 3.261 | KV452723.1 | 225655 | 2-scf00035 | 2 |
| AX-157920964 | 3 | 3.392 | KV452723.1 | 90605  | 2-scf00035 | 2 |
| AX-157920972 | 3 | 3.392 | KV452723.1 | 110295 | 2-scf00035 | 2 |
| AX-157920987 | 3 | 3.392 | KV452723.1 | 133768 | 2-scf00035 | 2 |
| AX-157740623 | 3 | 3.396 | KV452723.1 | 92982  | 2-scf00035 | 2 |
| AX-157920970 | 3 | 3.396 | KV452723.1 | 102334 | 2-scf00035 | 2 |
| AX-157920971 | 3 | 3.396 | KV452723.1 | 109591 | 2-scf00035 | 2 |
| AX-157920974 | 3 | 3.396 | KV452723.1 | 114138 | 2-scf00035 | 2 |
| AX-157813252 | 3 | 3.396 | KV452723.1 | 124338 | 2-scf00035 | 2 |
| AX-157813253 | 3 | 3.396 | KV452723.1 | 124612 | 2-scf00035 | 2 |
| AX-157813254 | 3 | 3.396 | KV452723.1 | 125806 | 2-scf00035 | 2 |
| AX-157920982 | 3 | 3.396 | KV452723.1 | 128078 | 2-scf00035 | 2 |
| AX-157813255 | 3 | 3.396 | KV452723.1 | 132118 | 2-scf00035 | 2 |
| AX-157813257 | 3 | 3.396 | KV452723.1 | 154186 | 2-scf00035 | 2 |
| AX-157921026 | 3 | 3.396 | KV452723.1 | 198980 | 2-scf00035 | 2 |
| AX-157921027 | 3 | 3.396 | KV452723.1 | 199443 | 2-scf00035 | 2 |
| AX-157921058 | 3 | 3.396 | KV452723.1 | 284162 | 2-scf00035 | 2 |
| AX-157720610 | 3 | 3.412 | KV452723.1 | 127670 | 2-scf00035 | 2 |
| AX-157920988 | 3 | 3.429 | KV452723.1 | 134238 | 2-scf00035 | 2 |
| AX-158389650 | 3 | 3.45  | KV452723.1 | 134435 | 2-scf00035 | 2 |
| AX-157920992 | 3 | 3.454 | KV452723.1 | 141155 | 2-scf00035 | 2 |
| AX-157920996 | 3 | 3.468 | KV452723.1 | 147562 | 2-scf00035 | 2 |
| AX-157921004 | 3 | 3.489 | KV452723.1 | 160152 | 2-scf00035 | 2 |
| AX-157813251 | 3 | 3.505 | KV452723.1 | 123728 | 2-scf00035 | 2 |
| AX-157920984 | 3 | 3.505 | KV452723.1 | 130041 | 2-scf00035 | 2 |

|              |   |       |            |        |            |   |
|--------------|---|-------|------------|--------|------------|---|
| AX-157920989 | 3 | 3.505 | KV452723.1 | 138983 | 2-scf00035 | 2 |
| AX-157920993 | 3 | 3.505 | KV452723.1 | 141561 | 2-scf00035 | 2 |
| AX-157921007 | 3 | 3.505 | KV452723.1 | 163895 | 2-scf00035 | 2 |
| AX-157921012 | 3 | 3.505 | KV452723.1 | 168996 | 2-scf00035 | 2 |
| AX-157921015 | 3 | 3.505 | KV452723.1 | 173187 | 2-scf00035 | 2 |
| AX-157813259 | 3 | 3.505 | KV452723.1 | 187162 | 2-scf00035 | 2 |
| AX-157921019 | 3 | 3.505 | KV452723.1 | 188592 | 2-scf00035 | 2 |
| AX-157813260 | 3 | 3.505 | KV452723.1 | 205803 | 2-scf00035 | 2 |
| AX-158405247 | 3 | 3.505 | KV452723.1 | 225609 | 2-scf00035 | 2 |
| AX-157740670 | 3 | 3.505 | KV452723.1 | 237604 | 2-scf00035 | 2 |
| AX-158405248 | 3 | 3.505 | KV452723.1 | 240855 | 2-scf00035 | 2 |
| AX-158405256 | 3 | 3.505 | KV452723.1 | 258871 | 2-scf00035 | 2 |
| AX-157921044 | 3 | 3.505 | KV452723.1 | 267223 | 2-scf00035 | 2 |
| AX-157921043 | 3 | 3.589 | KV452723.1 | 266782 | 2-scf00035 | 2 |
| AX-157921046 | 3 | 3.656 | KV452723.1 | 268265 | 2-scf00035 | 2 |
| AX-157921050 | 3 | 3.724 | KV452723.1 | 269745 | 2-scf00035 | 2 |
| AX-157813263 | 3 | 3.942 | KV452723.1 | 276852 | 2-scf00035 | 2 |
| AX-157921053 | 3 | 3.942 | KV452723.1 | 280651 | 2-scf00035 | 2 |
| AX-157921057 | 3 | 3.942 | KV452723.1 | 283546 | 2-scf00035 | 2 |
| AX-157714642 | 3 | 3.943 | KV452723.1 | 289902 | 2-scf00035 | 2 |
| AX-157921061 | 3 | 3.943 | KV452723.1 | 294047 | 2-scf00035 | 2 |
| AX-157719596 | 3 | 3.984 | KV452723.1 | 299524 | 2-scf00035 | 2 |
| AX-157921065 | 3 | 4.161 | KV452723.1 | 304281 | 2-scf00035 | 2 |
| AX-157813266 | 3 | 4.161 | KV452723.1 | 310557 | 2-scf00035 | 2 |
| AX-157719160 | 3 | 4.161 | KV452723.1 | 311288 | 2-scf00035 | 2 |
| AX-157921071 | 3 | 4.161 | KV452723.1 | 312801 | 2-scf00035 | 2 |
| AX-157921072 | 3 | 4.161 | KV452723.1 | 313631 | 2-scf00035 | 2 |
| AX-157921073 | 3 | 4.261 | KV452723.1 | 314448 | 2-scf00035 | 2 |
| AX-157921074 | 3 | 4.379 | KV452723.1 | 315126 | 2-scf00035 | 2 |
| AX-157921076 | 3 | 4.379 | KV452723.1 | 316035 | 2-scf00035 | 2 |
| AX-157813268 | 3 | 4.379 | KV452723.1 | 319990 | 2-scf00035 | 2 |
| AX-157921077 | 3 | 4.379 | KV452723.1 | 320568 | 2-scf00035 | 2 |
| AX-157771251 | 3 | 4.379 | KV452723.1 | 322956 | 2-scf00035 | 2 |
| AX-157921088 | 3 | 4.379 | KV452723.1 | 337595 | 2-scf00035 | 2 |
| AX-157921089 | 3 | 4.379 | KV452723.1 | 340807 | 2-scf00035 | 2 |
| AX-157743714 | 3 | 4.379 | KV452723.1 | 346241 | 2-scf00035 | 2 |
| AX-157921064 | 3 | 4.489 | KV452723.1 | 303104 | 2-scf00035 | 2 |
| AX-157921066 | 3 | 4.489 | KV452723.1 | 304773 | 2-scf00035 | 2 |
| AX-157721330 | 3 | 4.489 | KV452723.1 | 326708 | 2-scf00035 | 2 |
| AX-157778477 | 3 | 4.489 | KV452723.1 | 329168 | 2-scf00035 | 2 |
| AX-157921086 | 3 | 4.489 | KV452723.1 | 334517 | 2-scf00035 | 2 |
| AX-157921087 | 3 | 4.489 | KV452723.1 | 335190 | 2-scf00035 | 2 |
| AX-157813271 | 3 | 4.489 | KV452723.1 | 350851 | 2-scf00035 | 2 |
| AX-157921092 | 3 | 4.489 | KV452723.1 | 352059 | 2-scf00035 | 2 |
| AX-157921169 | 3 | 4.489 | KV452723.1 | 462594 | 2-scf00035 | 2 |
| AX-157754789 | 3 | 4.515 | KV452723.1 | 343986 | 2-scf00035 | 2 |
| AX-157750017 | 3 | 4.598 | KV452723.1 | 102659 | 2-scf00035 | 2 |
| AX-157714016 | 3 | 4.598 | KV452723.1 | 322551 | 2-scf00035 | 2 |
| AX-157921085 | 3 | 4.598 | KV452723.1 | 333449 | 2-scf00035 | 2 |
| AX-157921091 | 3 | 4.598 | KV452723.1 | 351661 | 2-scf00035 | 2 |
| AX-157921093 | 3 | 4.598 | KV452723.1 | 354131 | 2-scf00035 | 2 |

|              |   |       |            |        |            |   |
|--------------|---|-------|------------|--------|------------|---|
| AX-157921096 | 3 | 4.598 | KV452723.1 | 359110 | 2-scf00035 | 2 |
| AX-157921097 | 3 | 4.598 | KV452723.1 | 359601 | 2-scf00035 | 2 |
| AX-157921098 | 3 | 4.598 | KV452723.1 | 360306 | 2-scf00035 | 2 |
| AX-157921101 | 3 | 4.598 | KV452723.1 | 365028 | 2-scf00035 | 2 |
| AX-157921102 | 3 | 4.598 | KV452723.1 | 365740 | 2-scf00035 | 2 |
| AX-157719329 | 3 | 4.598 | KV452723.1 | 379136 | 2-scf00035 | 2 |
| AX-157921109 | 3 | 4.598 | KV452723.1 | 383006 | 2-scf00035 | 2 |
| AX-157921110 | 3 | 4.598 | KV452723.1 | 384491 | 2-scf00035 | 2 |
| AX-157921113 | 3 | 4.598 | KV452723.1 | 387292 | 2-scf00035 | 2 |
| AX-157921115 | 3 | 4.598 | KV452723.1 | 389862 | 2-scf00035 | 2 |
| AX-157921116 | 3 | 4.598 | KV452723.1 | 390377 | 2-scf00035 | 2 |
| AX-157921123 | 3 | 4.598 | KV452723.1 | 404797 | 2-scf00035 | 2 |
| AX-157921124 | 3 | 4.598 | KV452723.1 | 405424 | 2-scf00035 | 2 |
| AX-157755144 | 3 | 4.598 | KV452723.1 | 412060 | 2-scf00035 | 2 |
| AX-157921128 | 3 | 4.598 | KV452723.1 | 413701 | 2-scf00035 | 2 |
| AX-157921132 | 3 | 4.598 | KV452723.1 | 419011 | 2-scf00035 | 2 |
| AX-157921135 | 3 | 4.598 | KV452723.1 | 420529 | 2-scf00035 | 2 |
| AX-157921141 | 3 | 4.598 | KV452723.1 | 423799 | 2-scf00035 | 2 |
| AX-157921144 | 3 | 4.598 | KV452723.1 | 428452 | 2-scf00035 | 2 |
| AX-157921147 | 3 | 4.598 | KV452723.1 | 432333 | 2-scf00035 | 2 |
| AX-157921122 | 3 | 4.823 | KV452723.1 | 404021 | 2-scf00035 | 2 |
| AX-157921148 | 3 | 4.823 | KV452723.1 | 433312 | 2-scf00035 | 2 |
| AX-157921152 | 3 | 4.823 | KV452723.1 | 437237 | 2-scf00035 | 2 |
| AX-157921158 | 3 | 4.826 | KV452723.1 | 450238 | 2-scf00035 | 2 |
| AX-157921160 | 3 | 4.832 | KV452723.1 | 451532 | 2-scf00035 | 2 |
| AX-157921162 | 3 | 5.235 | KV452723.1 | 453207 | 2-scf00035 | 2 |
| AX-157741007 | 3 | 5.237 | KV452723.1 | 366886 | 2-scf00035 | 2 |
| AX-157874754 | 3 | 5.237 | KV452723.1 | 374467 | 2-scf00035 | 2 |
| AX-157921126 | 3 | 5.237 | KV452723.1 | 411622 | 2-scf00035 | 2 |
| AX-157921166 | 3 | 5.237 | KV452723.1 | 459836 | 2-scf00035 | 2 |
| AX-157921167 | 3 | 5.237 | KV452723.1 | 460247 | 2-scf00035 | 2 |
| AX-157921175 | 3 | 5.237 | KV452723.1 | 473735 | 2-scf00035 | 2 |
| AX-157744444 | 3 | 5.237 | KV452723.1 | 479955 | 2-scf00035 | 2 |
| AX-157921177 | 3 | 5.237 | KV452723.1 | 482950 | 2-scf00035 | 2 |
| AX-157921179 | 3 | 5.237 | KV452723.1 | 486340 | 2-scf00035 | 2 |
| AX-157813273 | 3 | 5.237 | KV452723.1 | 501553 | 2-scf00035 | 2 |
| AX-157921184 | 3 | 5.237 | KV452723.1 | 502601 | 2-scf00035 | 2 |
| AX-157709016 | 3 | 5.238 | KV452723.1 | 494656 | 2-scf00035 | 2 |
| AX-157921183 | 3 | 5.238 | KV452723.1 | 501393 | 2-scf00035 | 2 |
| AX-157921189 | 3 | 5.8   | KV452723.1 | 507393 | 2-scf00035 | 2 |
| AX-157921192 | 3 | 5.8   | KV452723.1 | 514045 | 2-scf00035 | 2 |
| AX-157921197 | 3 | 5.8   | KV452723.1 | 518694 | 2-scf00035 | 2 |
| AX-157921200 | 3 | 5.8   | KV452723.1 | 522279 | 2-scf00035 | 2 |
| AX-157921204 | 3 | 5.8   | KV452723.1 | 526923 | 2-scf00035 | 2 |
| AX-157921206 | 3 | 5.8   | KV452723.1 | 530041 | 2-scf00035 | 2 |
| AX-157921207 | 3 | 5.8   | KV452723.1 | 532038 | 2-scf00035 | 2 |
| AX-157921208 | 3 | 5.946 | KV452723.1 | 533643 | 2-scf00035 | 2 |
| AX-157921214 | 3 | 5.99  | KV452723.1 | 547885 | 2-scf00035 | 2 |
| AX-157921215 | 3 | 6.062 | KV452723.1 | 548493 | 2-scf00035 | 2 |
| AX-158382324 | 3 | 6.092 | KV452723.1 | 548981 | 2-scf00035 | 2 |
| AX-157921216 | 3 | 6.092 | KV452723.1 | 550772 | 2-scf00035 | 2 |

|              |   |       |            |        |            |   |
|--------------|---|-------|------------|--------|------------|---|
| AX-157921194 | 3 | 6.238 | KV452723.1 | 514797 | 2-scf00035 | 2 |
| AX-157921196 | 3 | 6.238 | KV452723.1 | 517177 | 2-scf00035 | 2 |
| AX-157921205 | 3 | 6.238 | KV452723.1 | 527291 | 2-scf00035 | 2 |
| AX-157921221 | 3 | 6.238 | KV452723.1 | 557236 | 2-scf00035 | 2 |
| AX-157921222 | 3 | 6.238 | KV452723.1 | 558123 | 2-scf00035 | 2 |
| AX-157921223 | 3 | 6.238 | KV452723.1 | 560434 | 2-scf00035 | 2 |
| AX-157921225 | 3 | 6.238 | KV452723.1 | 564570 | 2-scf00035 | 2 |
| AX-157921224 | 3 | 6.326 | KV452723.1 | 561015 | 2-scf00035 | 2 |
| AX-157813276 | 3 | 6.408 | KV452723.1 | 566486 | 2-scf00035 | 2 |
| AX-157742718 | 3 | 6.454 | KV452723.1 | 566999 | 2-scf00035 | 2 |
| AX-157921229 | 3 | 6.5   | KV452723.1 | 567517 | 2-scf00035 | 2 |
| AX-157921230 | 3 | 6.539 | KV452723.1 | 571341 | 2-scf00035 | 2 |
| AX-157722931 | 3 | 6.539 | KV452723.1 | 573778 | 2-scf00035 | 2 |
| AX-157770683 | 3 | 6.539 | KV452723.1 | 575468 | 2-scf00035 | 2 |
| AX-157725269 | 3 | 6.539 | KV452723.1 | 577080 | 2-scf00035 | 2 |
| AX-157751736 | 3 | 6.539 | KV452723.1 | 578626 | 2-scf00035 | 2 |
| AX-157741062 | 3 | 6.539 | KV452723.1 | 579909 | 2-scf00035 | 2 |
| AX-157921235 | 3 | 6.77  | KV452723.1 | 584170 | 2-scf00035 | 2 |
| AX-157874756 | 3 | 6.77  | KV452723.1 | 588523 | 2-scf00035 | 2 |
| AX-157921239 | 3 | 6.77  | KV452723.1 | 588948 | 2-scf00035 | 2 |
| AX-157921240 | 3 | 6.77  | KV452723.1 | 589985 | 2-scf00035 | 2 |
| AX-157853795 | 3 | 6.801 | KV452723.1 | 600269 | 2-scf00035 | 2 |
| AX-157921245 | 3 | 7.003 | KV452723.1 | 606080 | 2-scf00035 | 2 |
| AX-157921247 | 3 | 7.003 | KV452723.1 | 608517 | 2-scf00035 | 2 |
| AX-157921249 | 3 | 7.003 | KV452723.1 | 610223 | 2-scf00035 | 2 |
| AX-157921251 | 3 | 7.003 | KV452723.1 | 613270 | 2-scf00035 | 2 |
| AX-157921255 | 3 | 7.254 | KV452723.1 | 622340 | 2-scf00035 | 2 |
| AX-157921257 | 3 | 7.254 | KV452723.1 | 624560 | 2-scf00035 | 2 |
| AX-157874758 | 3 | 7.254 | KV452723.1 | 626064 | 2-scf00035 | 2 |
| AX-157921258 | 3 | 7.254 | KV452723.1 | 627172 | 2-scf00035 | 2 |
| AX-157921260 | 3 | 7.254 | KV452723.1 | 630266 | 2-scf00035 | 2 |
| AX-157749986 | 3 | 7.254 | KV452723.1 | 633871 | 2-scf00035 | 2 |
| AX-157921264 | 3 | 7.639 | KV452723.1 | 637217 | 2-scf00035 | 2 |
| AX-157921284 | 3 | 7.639 | KV452723.1 | 662178 | 2-scf00035 | 2 |
| AX-157921286 | 3 | 7.639 | KV452723.1 | 664668 | 2-scf00035 | 2 |
| AX-157813280 | 3 | 7.639 | KV452723.1 | 674966 | 2-scf00035 | 2 |
| AX-157757812 | 3 | 7.64  | KV452723.1 | 639145 | 2-scf00035 | 2 |
| AX-157921265 | 3 | 7.642 | KV452723.1 | 639954 | 2-scf00035 | 2 |
| AX-157921266 | 3 | 7.642 | KV452723.1 | 642154 | 2-scf00035 | 2 |
| AX-157921268 | 3 | 7.642 | KV452723.1 | 643287 | 2-scf00035 | 2 |
| AX-157921269 | 3 | 7.878 | KV452723.1 | 643971 | 2-scf00035 | 2 |
| AX-157921273 | 3 | 7.974 | KV452723.1 | 650481 | 2-scf00035 | 2 |
| AX-157750691 | 3 | 7.993 | KV452723.1 | 651112 | 2-scf00035 | 2 |
| AX-157921275 | 3 | 7.993 | KV452723.1 | 652505 | 2-scf00035 | 2 |
| AX-157921278 | 3 | 8.128 | KV452723.1 | 655808 | 2-scf00035 | 2 |
| AX-157921281 | 3 | 8.207 | KV452723.1 | 659646 | 2-scf00035 | 2 |
| AX-157741544 | 3 | 8.208 | KV452723.1 | 661071 | 2-scf00035 | 2 |
| AX-157921285 | 3 | 8.305 | KV452723.1 | 663053 | 2-scf00035 | 2 |
| AX-158405259 | 3 | 8.398 | KV452723.1 | 665554 | 2-scf00035 | 2 |
| AX-157921289 | 3 | 8.436 | KV452723.1 | 671378 | 2-scf00035 | 2 |
| AX-158389654 | 3 | 8.536 | KV452723.1 | 673592 | 2-scf00035 | 2 |

|              |   |        |            |        |            |    |
|--------------|---|--------|------------|--------|------------|----|
| AX-157921291 | 3 | 8.536  | KV452723.1 | 675086 | 2-scf00035 | 2  |
| AX-157921292 | 3 | 8.536  | KV452723.1 | 677619 | 2-scf00035 | 2  |
| AX-157921294 | 3 | 8.536  | KV452723.1 | 679491 | 2-scf00035 | 2  |
| AX-157921297 | 3 | 8.536  | KV452723.1 | 683456 | 2-scf00035 | 2  |
| AX-157853796 | 3 | 8.536  | KV452723.1 | 685962 | 2-scf00035 | 2  |
| AX-157719848 | 3 | 8.536  | KV452723.1 | 687086 | 2-scf00035 | 2  |
| AX-157921307 | 3 | 8.552  | KV452723.1 | 703532 | 2-scf00035 | 2  |
| AX-157921309 | 3 | 9.039  | KV452723.1 | 706748 | 2-scf00035 | 2  |
| AX-157921299 | 3 | 9.053  | KV452723.1 | 686695 | 2-scf00035 | 2  |
| AX-157921311 | 3 | 9.053  | KV452723.1 | 708848 | 2-scf00035 | 2  |
| AX-157921313 | 3 | 9.053  | KV452723.1 | 713371 | 2-scf00035 | 2  |
| AX-157921314 | 3 | 9.053  | KV452723.1 | 714389 | 2-scf00035 | 2  |
| AX-157921316 | 3 | 9.239  | KV452723.1 | 716268 | 2-scf00035 | 2  |
| AX-157921317 | 3 | 9.259  | KV452723.1 | 718154 | 2-scf00035 | 2  |
| AX-157921322 | 3 | 9.482  | KV452724.1 | 9922   | 2-scf00036 | 2  |
| AX-157921324 | 3 | 9.482  | KV452724.1 | 16166  | 2-scf00036 | 2  |
| AX-157921327 | 3 | 9.599  | KV452724.1 | 23220  | 2-scf00036 | 2  |
| AX-157921328 | 3 | 9.73   | KV452724.1 | 25249  | 2-scf00036 | 2  |
| AX-157921333 | 3 | 9.73   | KV452724.1 | 33101  | 2-scf00036 | 2  |
| AX-157921325 | 3 | 9.959  | KV452724.1 | 17723  | 2-scf00036 | 2  |
| AX-157921329 | 3 | 9.959  | KV452724.1 | 25730  | 2-scf00036 | 2  |
| AX-157921332 | 3 | 9.959  | KV452724.1 | 31953  | 2-scf00036 | 2  |
| AX-157921334 | 3 | 9.959  | KV452724.1 | 34081  | 2-scf00036 | 2  |
| AX-157921337 | 3 | 9.959  | KV452724.1 | 37681  | 2-scf00036 | 2  |
| AX-157921339 | 3 | 9.959  | KV452724.1 | 40226  | 2-scf00036 | 2  |
| AX-157921340 | 3 | 9.959  | KV452724.1 | 41470  | 2-scf00036 | 2  |
| AX-157921342 | 3 | 9.959  | KV452724.1 | 44654  | 2-scf00036 | 2  |
| AX-157921345 | 3 | 9.959  | KV452724.1 | 46358  | 2-scf00036 | 2  |
| AX-157921347 | 3 | 9.959  | KV452724.1 | 48921  | 2-scf00036 | 2  |
| AX-157921370 | 3 | 9.959  | KV452724.1 | 73848  | 2-scf00036 | 2  |
| AX-157921389 | 3 | 9.959  | KV452724.1 | 106723 | 2-scf00036 | 2  |
| AX-157921450 | 3 | 9.959  | KV452724.1 | 229934 | 2-scf00036 | 2  |
| AX-157921462 | 3 | 9.959  | KV452724.1 | 244158 | 2-scf00036 | 2  |
| AX-157921476 | 3 | 9.959  | KV452724.1 | 265194 | 2-scf00036 | 2  |
| AX-157921497 | 3 | 9.959  | KV452724.1 | 295496 | 2-scf00036 | 2  |
| AX-157689905 | 3 | 9.959  |            | 298    | scf11685   | UN |
| AX-157921352 | 3 | 10.063 | KV452724.1 | 53650  | 2-scf00036 | 2  |
| AX-157921335 | 3 | 10.105 | KV452724.1 | 34486  | 2-scf00036 | 2  |
| AX-157921357 | 3 | 10.105 | KV452724.1 | 59207  | 2-scf00036 | 2  |
| AX-158382325 | 3 | 10.105 | KV452724.1 | 59430  | 2-scf00036 | 2  |
| AX-157921358 | 3 | 10.105 | KV452724.1 | 59520  | 2-scf00036 | 2  |
| AX-157921359 | 3 | 10.105 | KV452724.1 | 60192  | 2-scf00036 | 2  |
| AX-157921360 | 3 | 10.105 | KV452724.1 | 61678  | 2-scf00036 | 2  |
| AX-157921362 | 3 | 10.105 | KV452724.1 | 62672  | 2-scf00036 | 2  |
| AX-157921367 | 3 | 10.105 | KV452724.1 | 70798  | 2-scf00036 | 2  |
| AX-157921371 | 3 | 10.105 | KV452724.1 | 74532  | 2-scf00036 | 2  |
| AX-157746223 | 3 | 10.105 | KV452724.1 | 83054  | 2-scf00036 | 2  |
| AX-157921363 | 3 | 10.542 | KV452724.1 | 63675  | 2-scf00036 | 2  |
| AX-157921381 | 3 | 10.542 | KV452724.1 | 92924  | 2-scf00036 | 2  |
| AX-157813285 | 3 | 10.542 | KV452724.1 | 94642  | 2-scf00036 | 2  |
| AX-157921383 | 3 | 10.542 | KV452724.1 | 94832  | 2-scf00036 | 2  |

|              |   |        |             |        |            |    |
|--------------|---|--------|-------------|--------|------------|----|
| AX-157752799 | 3 | 10.542 | KV452724.1  | 180780 | 2-scf00036 | 2  |
| AX-157921386 | 3 | 10.834 | KV452724.1  | 103905 | 2-scf00036 | 2  |
| AX-157921388 | 3 | 10.834 | KV452724.1  | 105738 | 2-scf00036 | 2  |
| AX-157751711 | 3 | 10.942 | KV452724.1  | 121492 | 2-scf00036 | 2  |
| AX-157813289 | 3 | 10.942 | KV452724.1  | 122946 | 2-scf00036 | 2  |
| AX-157752678 | 3 | 11.162 | KV452724.1  | 127539 | 2-scf00036 | 2  |
| AX-158421922 | 3 | 11.162 | KV452724.1  | 129120 | 2-scf00036 | 2  |
| AX-157921398 | 3 | 11.162 | KV452724.1  | 129491 | 2-scf00036 | 2  |
| AX-157921399 | 3 | 11.162 | KV452724.1  | 132427 | 2-scf00036 | 2  |
| AX-157921402 | 3 | 11.162 | KV452724.1  | 134962 | 2-scf00036 | 2  |
| AX-157813291 | 3 | 11.162 | KV452724.1  | 135065 | 2-scf00036 | 2  |
| AX-157921406 | 3 | 11.162 | KV452724.1  | 147538 | 2-scf00036 | 2  |
| AX-157921409 | 3 | 11.162 | KV452724.1  | 150078 | 2-scf00036 | 2  |
| AX-157921412 | 3 | 11.162 | KV452724.1  | 159227 | 2-scf00036 | 2  |
| AX-157707832 | 3 | 11.162 | KV452724.1  | 234900 | 2-scf00036 | 2  |
| AX-157921404 | 3 | 11.163 | KV452724.1  | 143825 | 2-scf00036 | 2  |
| AX-157921414 | 3 | 11.163 | KV452724.1  | 160820 | 2-scf00036 | 2  |
| AX-157771275 | 3 | 11.163 | KV452724.1  | 161208 | 2-scf00036 | 2  |
| AX-157921433 | 3 | 11.163 | KV452724.1  | 196151 | 2-scf00036 | 2  |
| AX-157921471 | 3 | 11.163 | KV452724.1  | 257115 | 2-scf00036 | 2  |
| AX-157921656 | 3 | 11.163 | KV452724.1  | 598150 | 2-scf00036 | 2  |
| AX-157757928 | 3 | 11.489 | KV452724.1  | 137116 | 2-scf00036 | 2  |
| AX-157921418 | 3 | 11.489 | KV452724.1  | 174870 | 2-scf00036 | 2  |
| AX-157921421 | 3 | 11.489 | KV452724.1  | 177594 | 2-scf00036 | 2  |
| AX-157813293 | 3 | 11.489 | KV452724.1  | 182981 | 2-scf00036 | 2  |
| AX-157921428 | 3 | 11.489 | KV452724.1  | 190221 | 2-scf00036 | 2  |
| AX-157921429 | 3 | 11.489 | KV452724.1  | 191510 | 2-scf00036 | 2  |
| AX-157921430 | 3 | 11.489 | KV452724.1  | 191835 | 2-scf00036 | 2  |
| AX-157921431 | 3 | 11.489 | KV452724.1  | 193619 | 2-scf00036 | 2  |
| AX-157775412 | 3 | 11.489 | KV452724.1  | 194165 | 2-scf00036 | 2  |
| AX-157921432 | 3 | 11.489 | KV452724.1  | 194696 | 2-scf00036 | 2  |
| AX-157709581 | 3 | 11.489 | KV452724.1  | 203495 | 2-scf00036 | 2  |
| AX-157921436 | 3 | 11.489 | KV452724.1  | 203908 | 2-scf00036 | 2  |
| AX-157921440 | 3 | 11.489 | KV452724.1  | 210824 | 2-scf00036 | 2  |
| AX-157921445 | 3 | 11.489 | KV452724.1  | 221599 | 2-scf00036 | 2  |
| AX-157921478 | 3 | 11.489 | KV452724.1  | 269471 | 2-scf00036 | 2  |
| AX-157921479 | 3 | 11.489 | KV452724.1  | 270871 | 2-scf00036 | 2  |
| AX-158405268 | 3 | 11.489 | KV452724.1  | 286754 | 2-scf00036 | 2  |
| AX-157707404 | 3 | 11.489 | 3ML01034210 | 257    | scf09880_1 | UN |
| AX-157921437 | 3 | 11.598 | KV452724.1  | 204676 | 2-scf00036 | 2  |
| AX-157813294 | 3 | 11.598 | KV452724.1  | 208490 | 2-scf00036 | 2  |
| AX-157921438 | 3 | 11.598 | KV452724.1  | 208539 | 2-scf00036 | 2  |
| AX-157921439 | 3 | 11.598 | KV452724.1  | 209978 | 2-scf00036 | 2  |
| AX-157921441 | 3 | 11.598 | KV452724.1  | 212277 | 2-scf00036 | 2  |
| AX-157921447 | 3 | 11.598 | KV452724.1  | 225897 | 2-scf00036 | 2  |
| AX-157921454 | 3 | 11.598 | KV452724.1  | 235213 | 2-scf00036 | 2  |
| AX-157921458 | 3 | 11.598 | KV452724.1  | 239491 | 2-scf00036 | 2  |
| AX-157921460 | 3 | 11.598 | KV452724.1  | 241232 | 2-scf00036 | 2  |
| AX-157921461 | 3 | 11.598 | KV452724.1  | 242316 | 2-scf00036 | 2  |
| AX-157921467 | 3 | 11.598 | KV452724.1  | 249388 | 2-scf00036 | 2  |
| AX-157921475 | 3 | 11.598 | KV452724.1  | 264147 | 2-scf00036 | 2  |

|              |   |        |            |        |            |   |
|--------------|---|--------|------------|--------|------------|---|
| AX-157755011 | 3 | 11.598 | KV452724.1 | 267506 | 2-scf00036 | 2 |
| AX-157921482 | 3 | 12.144 | KV452724.1 | 275353 | 2-scf00036 | 2 |
| AX-157813295 | 3 | 12.144 | KV452724.1 | 278089 | 2-scf00036 | 2 |
| AX-157921484 | 3 | 12.144 | KV452724.1 | 278588 | 2-scf00036 | 2 |
| AX-157813296 | 3 | 12.144 | KV452724.1 | 279646 | 2-scf00036 | 2 |
| AX-158405264 | 3 | 12.184 | KV452724.1 | 281268 | 2-scf00036 | 2 |
| AX-157921486 | 3 | 12.224 | KV452724.1 | 282651 | 2-scf00036 | 2 |
| AX-157921488 | 3 | 12.306 | KV452724.1 | 285521 | 2-scf00036 | 2 |
| AX-158405266 | 3 | 12.383 | KV452724.1 | 286373 | 2-scf00036 | 2 |
| AX-157921491 | 3 | 12.472 | KV452724.1 | 288789 | 2-scf00036 | 2 |
| AX-157921495 | 3 | 12.472 | KV452724.1 | 293083 | 2-scf00036 | 2 |
| AX-157921496 | 3 | 12.472 | KV452724.1 | 293754 | 2-scf00036 | 2 |
| AX-157774336 | 3 | 12.483 | KV452724.1 | 295449 | 2-scf00036 | 2 |
| AX-157921498 | 3 | 12.733 | KV452724.1 | 299821 | 2-scf00036 | 2 |
| AX-157921499 | 3 | 12.797 | KV452724.1 | 300788 | 2-scf00036 | 2 |
| AX-157757304 | 3 | 12.865 | KV452724.1 | 304322 | 2-scf00036 | 2 |
| AX-157921503 | 3 | 12.865 | KV452724.1 | 305940 | 2-scf00036 | 2 |
| AX-157921504 | 3 | 12.865 | KV452724.1 | 307550 | 2-scf00036 | 2 |
| AX-157813299 | 3 | 12.865 | KV452724.1 | 308234 | 2-scf00036 | 2 |
| AX-157751639 | 3 | 13.128 | KV452724.1 | 321241 | 2-scf00036 | 2 |
| AX-157921508 | 3 | 13.128 | KV452724.1 | 321561 | 2-scf00036 | 2 |
| AX-157921506 | 3 | 13.129 | KV452724.1 | 311548 | 2-scf00036 | 2 |
| AX-157813301 | 3 | 13.129 | KV452724.1 | 313803 | 2-scf00036 | 2 |
| AX-157921516 | 3 | 13.129 | KV452724.1 | 332134 | 2-scf00036 | 2 |
| AX-157813303 | 3 | 13.129 | KV452724.1 | 336003 | 2-scf00036 | 2 |
| AX-157717925 | 3 | 13.129 | KV452724.1 | 337005 | 2-scf00036 | 2 |
| AX-157921524 | 3 | 13.129 | KV452724.1 | 348482 | 2-scf00036 | 2 |
| AX-157921526 | 3 | 13.129 | KV452724.1 | 350595 | 2-scf00036 | 2 |
| AX-157921529 | 3 | 13.129 | KV452724.1 | 358081 | 2-scf00036 | 2 |
| AX-157921530 | 3 | 13.129 | KV452724.1 | 358708 | 2-scf00036 | 2 |
| AX-157744458 | 3 | 13.129 | KV452724.1 | 368890 | 2-scf00036 | 2 |
| AX-157813307 | 3 | 13.129 | KV452724.1 | 383161 | 2-scf00036 | 2 |
| AX-158389656 | 3 | 13.129 | KV452724.1 | 404219 | 2-scf00036 | 2 |
| AX-157771066 | 3 | 13.129 | KV452724.1 | 524550 | 2-scf00036 | 2 |
| AX-157921518 | 3 | 13.162 | KV452724.1 | 334082 | 2-scf00036 | 2 |
| AX-157749259 | 3 | 13.162 | KV452724.1 | 359056 | 2-scf00036 | 2 |
| AX-157813309 | 3 | 13.162 | KV452724.1 | 386573 | 2-scf00036 | 2 |
| AX-157921559 | 3 | 13.162 | KV452724.1 | 412327 | 2-scf00036 | 2 |
| AX-157921563 | 3 | 13.162 | KV452724.1 | 417248 | 2-scf00036 | 2 |
| AX-157921565 | 3 | 13.162 | KV452724.1 | 426537 | 2-scf00036 | 2 |
| AX-157921571 | 3 | 13.162 | KV452724.1 | 430544 | 2-scf00036 | 2 |
| AX-157755492 | 3 | 13.162 | KV452724.1 | 437115 | 2-scf00036 | 2 |
| AX-157921588 | 3 | 13.162 | KV452724.1 | 447531 | 2-scf00036 | 2 |
| AX-157874764 | 3 | 13.162 | KV452724.1 | 484495 | 2-scf00036 | 2 |
| AX-158405274 | 3 | 13.162 | KV452724.1 | 509224 | 2-scf00036 | 2 |
| AX-157921623 | 3 | 13.162 | KV452724.1 | 516497 | 2-scf00036 | 2 |
| AX-157921635 | 3 | 13.162 | KV452724.1 | 537262 | 2-scf00036 | 2 |
| AX-157921637 | 3 | 13.162 | KV452724.1 | 541666 | 2-scf00036 | 2 |
| AX-157921531 | 3 | 13.177 | KV452724.1 | 361371 | 2-scf00036 | 2 |
| AX-157720357 | 3 | 13.177 | KV452724.1 | 362475 | 2-scf00036 | 2 |
| AX-157813306 | 3 | 13.177 | KV452724.1 | 381857 | 2-scf00036 | 2 |

|              |   |        |             |        |            |    |
|--------------|---|--------|-------------|--------|------------|----|
| AX-157921548 | 3 | 13.177 | KV452724.1  | 397783 | 2-scf00036 | 2  |
| AX-157813316 | 3 | 13.177 | KV452724.1  | 521329 | 2-scf00036 | 2  |
| AX-157921519 | 3 | 13.21  | KV452724.1  | 335653 | 2-scf00036 | 2  |
| AX-157921533 | 3 | 13.21  | KV452724.1  | 364606 | 2-scf00036 | 2  |
| AX-157682472 | 3 | 13.21  | KV452727.1  | 59031  | 2-scf00038 | 2  |
| AX-157921540 | 3 | 13.242 | KV452724.1  | 383277 | 2-scf00036 | 2  |
| AX-157813310 | 3 | 13.242 | KV452724.1  | 399059 | 2-scf00036 | 2  |
| AX-157921561 | 3 | 13.242 | KV452724.1  | 413412 | 2-scf00036 | 2  |
| AX-157813308 | 3 | 13.271 | KV452724.1  | 385477 | 2-scf00036 | 2  |
| AX-157921544 | 3 | 13.293 | KV452724.1  | 393960 | 2-scf00036 | 2  |
| AX-157921545 | 3 | 13.293 | KV452724.1  | 395974 | 2-scf00036 | 2  |
| AX-157712049 | 3 | 13.293 | 3ML01032515 | 259    | scf08136_1 | UN |
| AX-157921507 | 3 | 13.456 | KV452724.1  | 315075 | 2-scf00036 | 2  |
| AX-157921549 | 3 | 13.456 | KV452724.1  | 398914 | 2-scf00036 | 2  |
| AX-157921550 | 3 | 13.456 | KV452724.1  | 399437 | 2-scf00036 | 2  |
| AX-157921552 | 3 | 13.456 | KV452724.1  | 402664 | 2-scf00036 | 2  |
| AX-157813311 | 3 | 13.456 | KV452724.1  | 405894 | 2-scf00036 | 2  |
| AX-157747130 | 3 | 13.456 | KV452724.1  | 408147 | 2-scf00036 | 2  |
| AX-157921557 | 3 | 13.456 | KV452724.1  | 410052 | 2-scf00036 | 2  |
| AX-157853800 | 3 | 13.456 | KV452724.1  | 415242 | 2-scf00036 | 2  |
| AX-157775092 | 3 | 13.456 | KV452724.1  | 415522 | 2-scf00036 | 2  |
| AX-157921567 | 3 | 13.456 | KV452724.1  | 427435 | 2-scf00036 | 2  |
| AX-157921570 | 3 | 13.456 | KV452724.1  | 429392 | 2-scf00036 | 2  |
| AX-157921586 | 3 | 13.456 | KV452724.1  | 447066 | 2-scf00036 | 2  |
| AX-157921595 | 3 | 13.456 | KV452724.1  | 453624 | 2-scf00036 | 2  |
| AX-157921599 | 3 | 13.456 | KV452724.1  | 457957 | 2-scf00036 | 2  |
| AX-157921600 | 3 | 13.456 | KV452724.1  | 458360 | 2-scf00036 | 2  |
| AX-157921601 | 3 | 13.456 | KV452724.1  | 459524 | 2-scf00036 | 2  |
| AX-157921602 | 3 | 13.456 | KV452724.1  | 465681 | 2-scf00036 | 2  |
| AX-157921603 | 3 | 13.456 | KV452724.1  | 469753 | 2-scf00036 | 2  |
| AX-157921604 | 3 | 13.456 | KV452724.1  | 470698 | 2-scf00036 | 2  |
| AX-157921606 | 3 | 13.456 | KV452724.1  | 480347 | 2-scf00036 | 2  |
| AX-157921610 | 3 | 13.456 | KV452724.1  | 485618 | 2-scf00036 | 2  |
| AX-157921613 | 3 | 13.456 | KV452724.1  | 494851 | 2-scf00036 | 2  |
| AX-157921624 | 3 | 13.456 | KV452724.1  | 520877 | 2-scf00036 | 2  |
| AX-157921625 | 3 | 13.456 | KV452724.1  | 522451 | 2-scf00036 | 2  |
| AX-157921629 | 3 | 13.456 | KV452724.1  | 527421 | 2-scf00036 | 2  |
| AX-157921634 | 3 | 13.456 | KV452724.1  | 535513 | 2-scf00036 | 2  |
| AX-157921642 | 3 | 13.456 | KV452724.1  | 559425 | 2-scf00036 | 2  |
| AX-157813318 | 3 | 13.456 | KV452724.1  | 559931 | 2-scf00036 | 2  |
| AX-157921644 | 3 | 13.456 | KV452724.1  | 560703 | 2-scf00036 | 2  |
| AX-157921645 | 3 | 13.456 | KV452724.1  | 565539 | 2-scf00036 | 2  |
| AX-157921650 | 3 | 13.456 | KV452724.1  | 577599 | 2-scf00036 | 2  |
| AX-157682452 | 3 | 13.456 | KV452726.1  | 10352  | 2-scf00037 | 2  |
| AX-157682461 | 3 | 13.456 | KV452726.1  | 33724  | 2-scf00037 | 2  |
| AX-157687303 | 3 | 13.456 | KV452727.1  | 98950  | 2-scf00038 | 2  |
| AX-157679947 | 3 | 13.676 | KV452727.1  | 80560  | 2-scf00038 | 2  |
| AX-157681587 | 3 | 14.222 | KV452727.1  | 61324  | 2-scf00038 | 2  |
| AX-157680499 | 3 | 14.226 | KV452727.1  | 60841  | 2-scf00038 | 2  |
| AX-157682481 | 3 | 14.481 | KV452727.1  | 42347  | 2-scf00038 | 2  |
| AX-157682476 | 3 | 14.481 | KV452727.1  | 55380  | 2-scf00038 | 2  |



|              |   |        |            |        |            |   |
|--------------|---|--------|------------|--------|------------|---|
| AX-157682474 | 3 | 14.481 | KV452727.1 | 56949  | 2-scf00038 | 2 |
| AX-157682471 | 3 | 14.481 | KV452727.1 | 59695  | 2-scf00038 | 2 |
| AX-157681320 | 3 | 14.481 | KV452727.1 | 60131  | 2-scf00038 | 2 |
| AX-157682477 | 3 | 15.188 | KV452727.1 | 54577  | 2-scf00038 | 2 |
| AX-157682483 | 3 | 15.549 | KV452727.1 | 36356  | 2-scf00038 | 2 |
| AX-157682484 | 3 | 15.669 | KV452727.1 | 29560  | 2-scf00038 | 2 |
| AX-157682486 | 3 | 15.677 | KV452727.1 | 26330  | 2-scf00038 | 2 |
| AX-157682490 | 3 | 15.805 | KV452727.1 | 16564  | 2-scf00038 | 2 |
| AX-157681321 | 3 | 15.805 | KV452727.1 | 31313  | 2-scf00038 | 2 |
| AX-157682491 | 3 | 15.951 | KV452727.1 | 13356  | 2-scf00038 | 2 |
| AX-157687301 | 3 | 16.278 | KV452727.1 | 95736  | 2-scf00038 | 2 |
| AX-157682502 | 3 | 16.278 | KV452729.1 | 2135   | 2-scf00039 | 2 |
| AX-157705956 | 3 | 16.356 | KV452729.1 | 4234   | 2-scf00039 | 2 |
| AX-157921657 | 3 | 16.513 | KV452730.1 | 579    | 2-scf00040 | 2 |
| AX-158421929 | 3 | 16.513 | KV452730.1 | 2505   | 2-scf00040 | 2 |
| AX-157813319 | 3 | 16.613 | KV452730.1 | 2668   | 2-scf00040 | 2 |
| AX-157921663 | 3 | 16.649 | KV452730.1 | 3495   | 2-scf00040 | 2 |
| AX-157921664 | 3 | 16.97  | KV452730.1 | 7148   | 2-scf00040 | 2 |
| AX-157719839 | 3 | 16.97  | KV452730.1 | 26479  | 2-scf00040 | 2 |
| AX-157921723 | 3 | 16.97  | KV452730.1 | 77572  | 2-scf00040 | 2 |
| AX-157921668 | 3 | 16.976 | KV452730.1 | 12667  | 2-scf00040 | 2 |
| AX-157921672 | 3 | 16.976 | KV452730.1 | 15403  | 2-scf00040 | 2 |
| AX-157921682 | 3 | 17.135 | KV452730.1 | 26946  | 2-scf00040 | 2 |
| AX-158405280 | 3 | 17.135 | KV452730.1 | 27571  | 2-scf00040 | 2 |
| AX-157921684 | 3 | 17.173 | KV452730.1 | 28298  | 2-scf00040 | 2 |
| AX-157921687 | 3 | 17.295 | KV452730.1 | 32008  | 2-scf00040 | 2 |
| AX-157921693 | 3 | 17.295 | KV452730.1 | 35358  | 2-scf00040 | 2 |
| AX-157750723 | 3 | 17.295 | KV452730.1 | 38249  | 2-scf00040 | 2 |
| AX-157718314 | 3 | 17.295 | KV452730.1 | 38894  | 2-scf00040 | 2 |
| AX-157921698 | 3 | 17.295 | KV452730.1 | 47620  | 2-scf00040 | 2 |
| AX-157773208 | 3 | 17.55  | KV452730.1 | 57651  | 2-scf00040 | 2 |
| AX-157813320 | 3 | 17.55  | KV452730.1 | 58753  | 2-scf00040 | 2 |
| AX-157713100 | 3 | 17.55  | KV452730.1 | 61248  | 2-scf00040 | 2 |
| AX-157682504 | 3 | 17.644 | KV452729.1 | 5863   | 2-scf00039 | 2 |
| AX-157748444 | 3 | 17.644 | KV452730.1 | 57073  | 2-scf00040 | 2 |
| AX-157752306 | 3 | 17.644 | KV452730.1 | 64815  | 2-scf00040 | 2 |
| AX-157921726 | 3 | 17.644 | KV452730.1 | 82094  | 2-scf00040 | 2 |
| AX-157921731 | 3 | 17.644 | KV452730.1 | 87099  | 2-scf00040 | 2 |
| AX-157921719 | 3 | 17.934 | KV452730.1 | 75378  | 2-scf00040 | 2 |
| AX-157921721 | 3 | 17.934 | KV452730.1 | 76657  | 2-scf00040 | 2 |
| AX-157921727 | 3 | 18.061 | KV452730.1 | 82518  | 2-scf00040 | 2 |
| AX-157921732 | 3 | 18.061 | KV452730.1 | 87997  | 2-scf00040 | 2 |
| AX-157696702 | 3 | 18.061 | KV452730.1 | 88240  | 2-scf00040 | 2 |
| AX-157921735 | 3 | 18.061 | KV452730.1 | 92612  | 2-scf00040 | 2 |
| AX-157921738 | 3 | 18.061 | KV452730.1 | 95916  | 2-scf00040 | 2 |
| AX-157921740 | 3 | 18.061 | KV452730.1 | 103040 | 2-scf00040 | 2 |
| AX-157921741 | 3 | 18.061 | KV452730.1 | 103299 | 2-scf00040 | 2 |
| AX-157921744 | 3 | 18.089 | KV452730.1 | 105742 | 2-scf00040 | 2 |
| AX-157921749 | 3 | 18.122 | KV452730.1 | 108210 | 2-scf00040 | 2 |
| AX-157921750 | 3 | 18.171 | KV452730.1 | 108998 | 2-scf00040 | 2 |
| AX-157921754 | 3 | 18.171 | KV452730.1 | 111682 | 2-scf00040 | 2 |

|              |   |        |            |        |                |    |
|--------------|---|--------|------------|--------|----------------|----|
| AX-157883558 | 3 | 18.171 | KV452730.1 | 155654 | 2-scf00040     | 2  |
| AX-157813323 | 3 | 18.171 | KV452730.1 | 170703 | 2-scf00040     | 2  |
| AX-158382336 | 3 | 18.172 | KV452730.1 | 107609 | 2-scf00040     | 2  |
| AX-157921762 | 3 | 18.172 | KV452730.1 | 118323 | 2-scf00040     | 2  |
| AX-157921763 | 3 | 18.172 | KV452730.1 | 118843 | 2-scf00040     | 2  |
| AX-157740456 | 3 | 18.172 | KV452730.1 | 196717 | 2-scf00040     | 2  |
| AX-157921768 | 3 | 18.173 | KV452730.1 | 123177 | 2-scf00040     | 2  |
| AX-157921775 | 3 | 18.496 | KV452730.1 | 136199 | 2-scf00040     | 2  |
| AX-157921778 | 3 | 18.496 | KV452730.1 | 139127 | 2-scf00040     | 2  |
| AX-157921788 | 3 | 18.502 | KV452730.1 | 148209 | 2-scf00040     | 2  |
| AX-157921791 | 3 | 18.502 | KV452730.1 | 150685 | 2-scf00040     | 2  |
| AX-157921795 | 3 | 18.502 | KV452730.1 | 153436 | 2-scf00040     | 2  |
| AX-157874768 | 3 | 18.692 | KV452730.1 | 159602 | 2-scf00040     | 2  |
| AX-157921805 | 3 | 18.883 | KV452730.1 | 161604 | 2-scf00040     | 2  |
| AX-157921809 | 3 | 18.883 | KV452730.1 | 164374 | 2-scf00040     | 2  |
| AX-157921812 | 3 | 18.883 | KV452730.1 | 166721 | 2-scf00040     | 2  |
| AX-157770923 | 3 | 18.883 | KV452730.1 | 170070 | 2-scf00040     | 2  |
| AX-157921821 | 3 | 18.883 | KV452730.1 | 181428 | 2-scf00040     | 2  |
| AX-157921824 | 3 | 19.263 | KV452730.1 | 201994 | 2-scf00040     | 2  |
| AX-157813322 | 3 | 19.264 | KV452730.1 | 168366 | 2-scf00040     | 2  |
| AX-157921825 | 3 | 19.264 | KV452730.1 | 202218 | 2-scf00040     | 2  |
| AX-157921831 | 3 | 19.264 | KV452730.1 | 207310 | 2-scf00040     | 2  |
| AX-157921833 | 3 | 19.264 | KV452730.1 | 212283 | 2-scf00040     | 2  |
| AX-157921834 | 3 | 19.264 | KV452730.1 | 212831 | 2-scf00040     | 2  |
| AX-157921835 | 3 | 19.264 | KV452730.1 | 213557 | 2-scf00040     | 2  |
| AX-157813329 | 3 | 19.264 | KV452730.1 | 214145 | 2-scf00040     | 2  |
| AX-157754974 | 3 | 19.264 | KV452730.1 | 219519 | 2-scf00040     | 2  |
| AX-157715963 | 3 | 19.264 | KV452730.1 | 220411 | 2-scf00040     | 2  |
| AX-157921842 | 3 | 19.264 | KV452730.1 | 226542 | 2-scf00040     | 2  |
| AX-157813334 | 3 | 19.264 | KV452730.1 | 241183 | 2-scf00040     | 2  |
| AX-157813336 | 3 | 19.264 | KV452730.1 | 243616 | 2-scf00040     | 2  |
| AX-157921865 | 3 | 19.264 | KV452730.1 | 245386 | 2-scf00040     | 2  |
| AX-157921886 | 3 | 19.264 | KV452730.1 | 264867 | 2-scf00040     | 2  |
| AX-157735700 | 3 | 19.264 | KV452730.1 | 264947 | 2-scf00040     | 2  |
| AX-157921839 | 3 | 19.289 | KV452730.1 | 225247 | 2-scf00040     | 2  |
| AX-157921854 | 3 | 19.335 | KV452730.1 | 238015 | 2-scf00040     | 2  |
| AX-157874770 | 3 | 19.335 | KV452730.1 | 238464 | 2-scf00040     | 2  |
| AX-157921856 | 3 | 19.335 | KV452730.1 | 242261 | 2-scf00040     | 2  |
| AX-157921860 | 3 | 19.373 | KV452730.1 | 243570 | 2-scf00040     | 2  |
| AX-157813337 | 3 | 19.373 | KV452730.1 | 244186 | 2-scf00040     | 2  |
| AX-157921862 | 3 | 19.373 | KV452730.1 | 244845 | 2-scf00040     | 2  |
| AX-156906872 | 3 | 19.373 | KV452730.1 | 252361 | 2-scf00040     | 2  |
| AX-157813338 | 3 | 19.458 | KV452730.1 | 247463 | 2-scf00040     | 2  |
| AX-157921872 | 3 | 19.543 | KV452730.1 | 252405 | 2-scf00040     | 2  |
| AX-157921875 | 3 | 19.59  | KV452730.1 | 256363 | 2-scf00040     | 2  |
| AX-157921879 | 3 | 19.59  | KV452730.1 | 259507 | 2-scf00040     | 2  |
| AX-157921888 | 3 | 19.59  | KV452730.1 | 265486 | 2-scf00040     | 2  |
| AX-157921889 | 3 | 19.59  | KV452730.1 | 266412 | 2-scf00040     | 2  |
| AX-157700819 | 3 | 19.59  | FI872934.1 | 60     | IORI212 Ictalu | UN |
| AX-157921891 | 3 | 19.7   | KV452730.1 | 269591 | 2-scf00040     | 2  |
| AX-157921894 | 3 | 19.81  | KV452730.1 | 273896 | 2-scf00040     | 2  |

|              |   |        |            |        |            |   |
|--------------|---|--------|------------|--------|------------|---|
| AX-157699907 | 3 | 19.811 | KV452730.1 | 277144 | 2-scf00040 | 2 |
| AX-157813343 | 3 | 19.812 | KV452730.1 | 277401 | 2-scf00040 | 2 |
| AX-157921898 | 3 | 19.914 | KV452730.1 | 278200 | 2-scf00040 | 2 |
| AX-157921899 | 3 | 19.955 | KV452730.1 | 280236 | 2-scf00040 | 2 |
| AX-157724930 | 3 | 19.955 | KV452730.1 | 283427 | 2-scf00040 | 2 |
| AX-157921901 | 3 | 19.955 | KV452730.1 | 284528 | 2-scf00040 | 2 |
| AX-157921904 | 3 | 19.955 | KV452730.1 | 286721 | 2-scf00040 | 2 |
| AX-157921905 | 3 | 19.955 | KV452730.1 | 287287 | 2-scf00040 | 2 |
| AX-157753180 | 3 | 19.955 | KV452730.1 | 287514 | 2-scf00040 | 2 |
| AX-157921919 | 3 | 19.955 | KV452730.1 | 310336 | 2-scf00040 | 2 |
| AX-157921869 | 3 | 19.956 | KV452730.1 | 248603 | 2-scf00040 | 2 |
| AX-157921902 | 3 | 19.956 | KV452730.1 | 284808 | 2-scf00040 | 2 |
| AX-157921909 | 3 | 19.956 | KV452730.1 | 289738 | 2-scf00040 | 2 |
| AX-157719985 | 3 | 20.246 | KV452730.1 | 291347 | 2-scf00040 | 2 |
| AX-157714225 | 3 | 20.246 | KV452730.1 | 333445 | 2-scf00040 | 2 |
| AX-157921873 | 3 | 20.247 | KV452730.1 | 254363 | 2-scf00040 | 2 |
| AX-157723031 | 3 | 20.247 | KV452730.1 | 263268 | 2-scf00040 | 2 |
| AX-157715865 | 3 | 20.247 | KV452730.1 | 294542 | 2-scf00040 | 2 |
| AX-157813344 | 3 | 20.247 | KV452730.1 | 308981 | 2-scf00040 | 2 |
| AX-157813345 | 3 | 20.247 | KV452730.1 | 310976 | 2-scf00040 | 2 |
| AX-157921921 | 3 | 20.247 | KV452730.1 | 311281 | 2-scf00040 | 2 |
| AX-157921931 | 3 | 20.247 | KV452730.1 | 318128 | 2-scf00040 | 2 |
| AX-157921933 | 3 | 20.247 | KV452730.1 | 318594 | 2-scf00040 | 2 |
| AX-157921939 | 3 | 20.247 | KV452730.1 | 321440 | 2-scf00040 | 2 |
| AX-157921941 | 3 | 20.247 | KV452730.1 | 322266 | 2-scf00040 | 2 |
| AX-157921946 | 3 | 20.247 | KV452730.1 | 326209 | 2-scf00040 | 2 |
| AX-157921947 | 3 | 20.247 | KV452730.1 | 326865 | 2-scf00040 | 2 |
| AX-157724188 | 3 | 20.247 | KV452730.1 | 327867 | 2-scf00040 | 2 |
| AX-157921949 | 3 | 20.247 | KV452730.1 | 328805 | 2-scf00040 | 2 |
| AX-157921951 | 3 | 20.247 | KV452730.1 | 329680 | 2-scf00040 | 2 |
| AX-157921954 | 3 | 20.247 | KV452730.1 | 330707 | 2-scf00040 | 2 |
| AX-157921956 | 3 | 20.247 | KV452730.1 | 332451 | 2-scf00040 | 2 |
| AX-157721704 | 3 | 20.247 | KV452730.1 | 332957 | 2-scf00040 | 2 |
| AX-157921962 | 3 | 20.247 | KV452730.1 | 334749 | 2-scf00040 | 2 |
| AX-157921965 | 3 | 20.247 | KV452730.1 | 336001 | 2-scf00040 | 2 |
| AX-157921967 | 3 | 20.247 | KV452730.1 | 337130 | 2-scf00040 | 2 |
| AX-157921969 | 3 | 20.247 | KV452730.1 | 338117 | 2-scf00040 | 2 |
| AX-157921972 | 3 | 20.247 | KV452730.1 | 339310 | 2-scf00040 | 2 |
| AX-158389660 | 3 | 20.247 | KV452730.1 | 447529 | 2-scf00040 | 2 |
| AX-157921978 | 3 | 20.466 | KV452730.1 | 346106 | 2-scf00040 | 2 |
| AX-157739939 | 3 | 20.466 | KV452730.1 | 349447 | 2-scf00040 | 2 |
| AX-157726124 | 3 | 20.466 | KV452730.1 | 353951 | 2-scf00040 | 2 |
| AX-157921982 | 3 | 20.466 | KV452730.1 | 356229 | 2-scf00040 | 2 |
| AX-157921983 | 3 | 20.684 | KV452730.1 | 356564 | 2-scf00040 | 2 |
| AX-157921986 | 3 | 20.684 | KV452730.1 | 358398 | 2-scf00040 | 2 |
| AX-157773636 | 3 | 20.684 | KV452730.1 | 364839 | 2-scf00040 | 2 |
| AX-157921988 | 3 | 20.79  | KV452730.1 | 367704 | 2-scf00040 | 2 |
| AX-157813346 | 3 | 21.012 | KV452730.1 | 311104 | 2-scf00040 | 2 |
| AX-158382339 | 3 | 21.012 | KV452730.1 | 322815 | 2-scf00040 | 2 |
| AX-157921970 | 3 | 21.012 | KV452730.1 | 338392 | 2-scf00040 | 2 |
| AX-158379303 | 3 | 21.012 | KV452730.1 | 365034 | 2-scf00040 | 2 |

|              |   |        |            |        |            |   |
|--------------|---|--------|------------|--------|------------|---|
| AX-157745556 | 3 | 21.012 | KV452730.1 | 374596 | 2-scf00040 | 2 |
| AX-157921993 | 3 | 21.012 | KV452730.1 | 384957 | 2-scf00040 | 2 |
| AX-157921995 | 3 | 21.012 | KV452730.1 | 386916 | 2-scf00040 | 2 |
| AX-157921999 | 3 | 21.012 | KV452730.1 | 389052 | 2-scf00040 | 2 |
| AX-157922001 | 3 | 21.012 | KV452730.1 | 389759 | 2-scf00040 | 2 |
| AX-157922003 | 3 | 21.012 | KV452730.1 | 390383 | 2-scf00040 | 2 |
| AX-157922007 | 3 | 21.012 | KV452730.1 | 394521 | 2-scf00040 | 2 |
| AX-157716426 | 3 | 21.012 | KV452730.1 | 401072 | 2-scf00040 | 2 |
| AX-157714467 | 3 | 21.012 | KV452730.1 | 415504 | 2-scf00040 | 2 |
| AX-157922030 | 3 | 21.012 | KV452730.1 | 415905 | 2-scf00040 | 2 |
| AX-158379304 | 3 | 21.012 | KV452730.1 | 420344 | 2-scf00040 | 2 |
| AX-157922055 | 3 | 21.012 | KV452730.1 | 450909 | 2-scf00040 | 2 |
| AX-157813357 | 3 | 21.012 | KV452730.1 | 453550 | 2-scf00040 | 2 |
| AX-157813351 | 3 | 21.121 | KV452730.1 | 427878 | 2-scf00040 | 2 |
| AX-157813352 | 3 | 21.121 | KV452730.1 | 428349 | 2-scf00040 | 2 |
| AX-157743934 | 3 | 21.149 | KV452730.1 | 429775 | 2-scf00040 | 2 |
| AX-157813353 | 3 | 21.179 | KV452730.1 | 430204 | 2-scf00040 | 2 |
| AX-157922043 | 3 | 21.186 | KV452730.1 | 431968 | 2-scf00040 | 2 |
| AX-157751391 | 3 | 21.21  | KV452730.1 | 370879 | 2-scf00040 | 2 |
| AX-157921990 | 3 | 21.21  | KV452730.1 | 376604 | 2-scf00040 | 2 |
| AX-157922045 | 3 | 21.21  | KV452730.1 | 433550 | 2-scf00040 | 2 |
| AX-157922046 | 3 | 21.21  | KV452730.1 | 435789 | 2-scf00040 | 2 |
| AX-157718139 | 3 | 21.231 | KV452730.1 | 444679 | 2-scf00040 | 2 |
| AX-157922050 | 3 | 21.231 | KV452730.1 | 445311 | 2-scf00040 | 2 |
| AX-157813356 | 3 | 21.231 | KV452730.1 | 445625 | 2-scf00040 | 2 |
| AX-157922060 | 3 | 21.449 | KV452730.1 | 455700 | 2-scf00040 | 2 |
| AX-157922065 | 3 | 21.668 | KV452730.1 | 457611 | 2-scf00040 | 2 |
| AX-157813359 | 3 | 21.668 | KV452730.1 | 463399 | 2-scf00040 | 2 |
| AX-157922078 | 3 | 21.668 | KV452730.1 | 474354 | 2-scf00040 | 2 |
| AX-157922079 | 3 | 21.668 | KV452730.1 | 474933 | 2-scf00040 | 2 |
| AX-157758335 | 3 | 21.668 | KV452730.1 | 479657 | 2-scf00040 | 2 |
| AX-157922089 | 3 | 21.668 | KV452730.1 | 487405 | 2-scf00040 | 2 |
| AX-157922095 | 3 | 21.832 | KV452730.1 | 490459 | 2-scf00040 | 2 |
| AX-157922097 | 3 | 21.832 | KV452730.1 | 492370 | 2-scf00040 | 2 |
| AX-157922100 | 3 | 21.832 | KV452730.1 | 494680 | 2-scf00040 | 2 |
| AX-157922101 | 3 | 21.832 | KV452730.1 | 495303 | 2-scf00040 | 2 |
| AX-157922104 | 3 | 21.908 | KV452730.1 | 498599 | 2-scf00040 | 2 |
| AX-157922105 | 3 | 21.908 | KV452730.1 | 500631 | 2-scf00040 | 2 |
| AX-157922109 | 3 | 21.94  | KV452730.1 | 502733 | 2-scf00040 | 2 |
| AX-157922110 | 3 | 21.996 | KV452730.1 | 503254 | 2-scf00040 | 2 |
| AX-157922112 | 3 | 22.106 | KV452730.1 | 503623 | 2-scf00040 | 2 |
| AX-157922114 | 3 | 22.106 | KV452730.1 | 507164 | 2-scf00040 | 2 |
| AX-157922116 | 3 | 22.106 | KV452730.1 | 507784 | 2-scf00040 | 2 |
| AX-157922117 | 3 | 22.106 | KV452730.1 | 508238 | 2-scf00040 | 2 |
| AX-157922124 | 3 | 22.106 | KV452730.1 | 510392 | 2-scf00040 | 2 |
| AX-157922125 | 3 | 22.106 | KV452730.1 | 512335 | 2-scf00040 | 2 |
| AX-157922147 | 3 | 22.106 | KV452730.1 | 538066 | 2-scf00040 | 2 |
| AX-158405290 | 3 | 22.106 | KV452730.1 | 550005 | 2-scf00040 | 2 |
| AX-157813364 | 3 | 22.324 | KV452730.1 | 517476 | 2-scf00040 | 2 |
| AX-157922128 | 3 | 22.324 | KV452730.1 | 519591 | 2-scf00040 | 2 |
| AX-157922133 | 3 | 22.324 | KV452730.1 | 522209 | 2-scf00040 | 2 |

|              |   |        |            |        |            |   |
|--------------|---|--------|------------|--------|------------|---|
| AX-157922137 | 3 | 22.324 | KV452730.1 | 525181 | 2-scf00040 | 2 |
| AX-158379305 | 3 | 22.324 | KV452730.1 | 527509 | 2-scf00040 | 2 |
| AX-157922141 | 3 | 22.324 | KV452730.1 | 532219 | 2-scf00040 | 2 |
| AX-157922142 | 3 | 22.324 | KV452730.1 | 532690 | 2-scf00040 | 2 |
| AX-157922145 | 3 | 22.429 | KV452730.1 | 537621 | 2-scf00040 | 2 |
| AX-157922148 | 3 | 22.525 | KV452730.1 | 538593 | 2-scf00040 | 2 |
| AX-157922155 | 3 | 22.821 | KV452730.1 | 540350 | 2-scf00040 | 2 |
| AX-157922157 | 3 | 22.824 | KV452730.1 | 544234 | 2-scf00040 | 2 |
| AX-157922169 | 3 | 23.053 | KV452730.1 | 559647 | 2-scf00040 | 2 |
| AX-157922174 | 3 | 23.747 | KV452730.1 | 563813 | 2-scf00040 | 2 |
| AX-157922180 | 3 | 23.77  | KV452730.1 | 569216 | 2-scf00040 | 2 |
| AX-157922181 | 3 | 23.783 | KV452730.1 | 571704 | 2-scf00040 | 2 |
| AX-157922166 | 3 | 23.788 | KV452730.1 | 558384 | 2-scf00040 | 2 |
| AX-157922185 | 3 | 23.788 | KV452730.1 | 574992 | 2-scf00040 | 2 |
| AX-157922198 | 3 | 24.364 | KV452730.1 | 587998 | 2-scf00040 | 2 |
| AX-157922199 | 3 | 24.364 | KV452730.1 | 588486 | 2-scf00040 | 2 |
| AX-157922202 | 3 | 24.364 | KV452730.1 | 589412 | 2-scf00040 | 2 |
| AX-157922213 | 3 | 24.982 | KV452730.1 | 600117 | 2-scf00040 | 2 |
| AX-157744614 | 3 | 24.982 | KV452730.1 | 600550 | 2-scf00040 | 2 |
| AX-157709769 | 3 | 24.982 | KV452730.1 | 603910 | 2-scf00040 | 2 |
| AX-157922215 | 3 | 24.982 | KV452730.1 | 604807 | 2-scf00040 | 2 |
| AX-157922217 | 3 | 24.982 | KV452730.1 | 607834 | 2-scf00040 | 2 |
| AX-157922219 | 3 | 24.982 | KV452730.1 | 608204 | 2-scf00040 | 2 |
| AX-157922230 | 3 | 24.985 | KV452730.1 | 615318 | 2-scf00040 | 2 |
| AX-157922232 | 3 | 24.988 | KV452730.1 | 615801 | 2-scf00040 | 2 |
| AX-158389661 | 3 | 24.991 | KV452730.1 | 623037 | 2-scf00040 | 2 |
| AX-157922240 | 3 | 25.184 | KV452730.1 | 628740 | 2-scf00040 | 2 |
| AX-157775628 | 3 | 25.184 | KV452730.1 | 630353 | 2-scf00040 | 2 |
| AX-157922239 | 3 | 25.395 | KV452730.1 | 627207 | 2-scf00040 | 2 |
| AX-157922246 | 3 | 25.395 | KV452730.1 | 637730 | 2-scf00040 | 2 |
| AX-157922247 | 3 | 25.395 | KV452730.1 | 638199 | 2-scf00040 | 2 |
| AX-157922249 | 3 | 25.395 | KV452730.1 | 638657 | 2-scf00040 | 2 |
| AX-157813367 | 3 | 25.395 | KV452730.1 | 638840 | 2-scf00040 | 2 |
| AX-157922252 | 3 | 25.395 | KV452730.1 | 641585 | 2-scf00040 | 2 |
| AX-157720153 | 3 | 25.825 | KV452730.1 | 644563 | 2-scf00040 | 2 |
| AX-157922253 | 3 | 25.829 | KV452730.1 | 645061 | 2-scf00040 | 2 |
| AX-157922255 | 3 | 25.831 | KV452730.1 | 645916 | 2-scf00040 | 2 |
| AX-157922257 | 3 | 25.832 | KV452730.1 | 649409 | 2-scf00040 | 2 |
| AX-157741436 | 3 | 25.832 | KV452730.1 | 654240 | 2-scf00040 | 2 |
| AX-157922261 | 3 | 25.832 | KV452730.1 | 656094 | 2-scf00040 | 2 |
| AX-157853807 | 3 | 25.832 | KV452730.1 | 658366 | 2-scf00040 | 2 |
| AX-157922262 | 3 | 25.969 | KV452730.1 | 658961 | 2-scf00040 | 2 |
| AX-157922264 | 3 | 26.084 | KV452730.1 | 659231 | 2-scf00040 | 2 |
| AX-157922265 | 3 | 26.217 | KV452730.1 | 662087 | 2-scf00040 | 2 |
| AX-157813368 | 3 | 26.218 | KV452730.1 | 665145 | 2-scf00040 | 2 |
| AX-157922270 | 3 | 26.597 | KV452730.1 | 668496 | 2-scf00040 | 2 |
| AX-157922276 | 3 | 26.599 | KV452730.1 | 670997 | 2-scf00040 | 2 |
| AX-157922278 | 3 | 26.602 | KV452730.1 | 671526 | 2-scf00040 | 2 |
| AX-157725301 | 3 | 26.604 | KV452730.1 | 671857 | 2-scf00040 | 2 |
| AX-157922280 | 3 | 26.721 | KV452730.1 | 673370 | 2-scf00040 | 2 |
| AX-157813369 | 3 | 26.801 | KV452730.1 | 677079 | 2-scf00040 | 2 |

|              |   |        |            |        |            |   |
|--------------|---|--------|------------|--------|------------|---|
| AX-157922288 | 3 | 26.858 | KV452730.1 | 684433 | 2-scf00040 | 2 |
| AX-157922293 | 3 | 26.858 | KV452730.1 | 687925 | 2-scf00040 | 2 |
| AX-157922294 | 3 | 26.858 | KV452730.1 | 689275 | 2-scf00040 | 2 |
| AX-157922295 | 3 | 26.862 | KV452730.1 | 690717 | 2-scf00040 | 2 |
| AX-157922298 | 3 | 27.12  | KV452730.1 | 693286 | 2-scf00040 | 2 |
| AX-157922299 | 3 | 27.382 | KV452730.1 | 694651 | 2-scf00040 | 2 |
| AX-157922301 | 3 | 27.387 | KV452730.1 | 694901 | 2-scf00040 | 2 |
| AX-157922303 | 3 | 27.387 | KV452730.1 | 695746 | 2-scf00040 | 2 |
| AX-157922307 | 3 | 27.422 | KV452730.1 | 699612 | 2-scf00040 | 2 |
| AX-157922312 | 3 | 27.422 | KV452730.1 | 702834 | 2-scf00040 | 2 |
| AX-157922322 | 3 | 27.422 | KV452730.1 | 715552 | 2-scf00040 | 2 |
| AX-157750956 | 3 | 27.422 | KV452730.1 | 723835 | 2-scf00040 | 2 |
| AX-157922318 | 3 | 27.648 | KV452730.1 | 708048 | 2-scf00040 | 2 |
| AX-157922328 | 3 | 27.648 | KV452730.1 | 726376 | 2-scf00040 | 2 |
| AX-157756246 | 3 | 27.733 | KV452730.1 | 708408 | 2-scf00040 | 2 |
| AX-157922323 | 3 | 27.814 | KV452730.1 | 721160 | 2-scf00040 | 2 |
| AX-157922325 | 3 | 27.911 | KV452730.1 | 722584 | 2-scf00040 | 2 |
| AX-157922327 | 3 | 27.911 | KV452730.1 | 725368 | 2-scf00040 | 2 |
| AX-157755001 | 3 | 27.911 | KV452730.1 | 728183 | 2-scf00040 | 2 |
| AX-157922330 | 3 | 28.085 | KV452730.1 | 729100 | 2-scf00040 | 2 |
| AX-157744516 | 3 | 28.085 | KV452730.1 | 733734 | 2-scf00040 | 2 |
| AX-157883565 | 3 | 28.085 | KV452730.1 | 740087 | 2-scf00040 | 2 |
| AX-157717484 | 3 | 28.086 | KV452730.1 | 740370 | 2-scf00040 | 2 |
| AX-157922338 | 3 | 28.435 | KV452730.1 | 742229 | 2-scf00040 | 2 |
| AX-157922342 | 3 | 28.436 | KV452730.1 | 745264 | 2-scf00040 | 2 |
| AX-157922339 | 3 | 28.785 | KV452730.1 | 743308 | 2-scf00040 | 2 |
| AX-157922344 | 3 | 28.785 | KV452730.1 | 746874 | 2-scf00040 | 2 |
| AX-157717275 | 3 | 28.785 | KV452730.1 | 756360 | 2-scf00040 | 2 |
| AX-157771089 | 3 | 28.785 | KV452730.1 | 758544 | 2-scf00040 | 2 |
| AX-157922347 | 3 | 28.785 | KV452730.1 | 759312 | 2-scf00040 | 2 |
| AX-157741154 | 3 | 28.785 | KV452730.1 | 760384 | 2-scf00040 | 2 |
| AX-157922350 | 3 | 28.785 | KV452730.1 | 761474 | 2-scf00040 | 2 |
| AX-157813377 | 3 | 28.785 | KV452730.1 | 764637 | 2-scf00040 | 2 |
| AX-157922358 | 3 | 28.785 | KV452730.1 | 776723 | 2-scf00040 | 2 |
| AX-157922360 | 3 | 28.785 | KV452730.1 | 776990 | 2-scf00040 | 2 |
| AX-157922364 | 3 | 28.785 | KV452730.1 | 777890 | 2-scf00040 | 2 |
| AX-157922429 | 3 | 28.785 | KV452730.1 | 875065 | 2-scf00040 | 2 |
| AX-157751521 | 3 | 29.003 | KV452730.1 | 745652 | 2-scf00040 | 2 |
| AX-157715922 | 3 | 29.003 | KV452730.1 | 772144 | 2-scf00040 | 2 |
| AX-157741174 | 3 | 29.003 | KV452730.1 | 777582 | 2-scf00040 | 2 |
| AX-157750200 | 3 | 29.003 | KV452730.1 | 779384 | 2-scf00040 | 2 |
| AX-157922367 | 3 | 29.003 | KV452730.1 | 786708 | 2-scf00040 | 2 |
| AX-157922368 | 3 | 29.003 | KV452730.1 | 787811 | 2-scf00040 | 2 |
| AX-157922369 | 3 | 29.003 | KV452730.1 | 790315 | 2-scf00040 | 2 |
| AX-157813381 | 3 | 29.003 | KV452730.1 | 791447 | 2-scf00040 | 2 |
| AX-157922371 | 3 | 29.003 | KV452730.1 | 793267 | 2-scf00040 | 2 |
| AX-157864573 | 3 | 29.003 | KV452730.1 | 795099 | 2-scf00040 | 2 |
| AX-157922374 | 3 | 29.003 | KV452730.1 | 795758 | 2-scf00040 | 2 |
| AX-157775894 | 3 | 29.374 | KV452730.1 | 823313 | 2-scf00040 | 2 |
| AX-157853809 | 3 | 29.374 | KV452730.1 | 828206 | 2-scf00040 | 2 |
| AX-157813383 | 3 | 29.534 | KV452730.1 | 828854 | 2-scf00040 | 2 |

|              |   |        |            |        |            |   |
|--------------|---|--------|------------|--------|------------|---|
| AX-157813384 | 3 | 29.635 | KV452730.1 | 833179 | 2-scf00040 | 2 |
| AX-157853810 | 3 | 29.756 | KV452730.1 | 836885 | 2-scf00040 | 2 |
| AX-157922398 | 3 | 29.756 | KV452730.1 | 837792 | 2-scf00040 | 2 |
| AX-157922402 | 3 | 29.763 | KV452730.1 | 844387 | 2-scf00040 | 2 |
| AX-157922427 | 3 | 29.763 | KV452730.1 | 873288 | 2-scf00040 | 2 |
| AX-157922444 | 3 | 29.763 | KV452730.1 | 886831 | 2-scf00040 | 2 |
| AX-157813382 | 3 | 29.771 | KV452730.1 | 810340 | 2-scf00040 | 2 |
| AX-157922404 | 3 | 29.771 | KV452730.1 | 845465 | 2-scf00040 | 2 |
| AX-157813386 | 3 | 29.771 | KV452730.1 | 885006 | 2-scf00040 | 2 |
| AX-157922456 | 3 | 29.771 | KV452730.1 | 892671 | 2-scf00040 | 2 |
| AX-157922405 | 3 | 29.782 | KV452730.1 | 845777 | 2-scf00040 | 2 |
| AX-157922411 | 3 | 29.988 | KV452730.1 | 857360 | 2-scf00040 | 2 |
| AX-157922413 | 3 | 29.988 | KV452730.1 | 859631 | 2-scf00040 | 2 |
| AX-157922414 | 3 | 29.988 | KV452730.1 | 862594 | 2-scf00040 | 2 |
| AX-158405294 | 3 | 29.988 | KV452730.1 | 885855 | 2-scf00040 | 2 |
| AX-157922454 | 3 | 29.988 | KV452730.1 | 891932 | 2-scf00040 | 2 |
| AX-157922464 | 3 | 29.988 | KV452730.1 | 906757 | 2-scf00040 | 2 |
| AX-157922422 | 3 | 30.097 | KV452730.1 | 870163 | 2-scf00040 | 2 |
| AX-157922426 | 3 | 30.097 | KV452730.1 | 872470 | 2-scf00040 | 2 |
| AX-157922428 | 3 | 30.097 | KV452730.1 | 874639 | 2-scf00040 | 2 |
| AX-157922430 | 3 | 30.097 | KV452730.1 | 875975 | 2-scf00040 | 2 |
| AX-157716214 | 3 | 30.097 | KV452730.1 | 904744 | 2-scf00040 | 2 |
| AX-157922432 | 3 | 30.106 | KV452730.1 | 879994 | 2-scf00040 | 2 |
| AX-157922434 | 3 | 30.11  | KV452730.1 | 881423 | 2-scf00040 | 2 |
| AX-157922441 | 3 | 30.116 | KV452730.1 | 885455 | 2-scf00040 | 2 |
| AX-157922445 | 3 | 30.119 | KV452730.1 | 888005 | 2-scf00040 | 2 |
| AX-157922417 | 3 | 30.121 | KV452730.1 | 865308 | 2-scf00040 | 2 |
| AX-157922421 | 3 | 30.121 | KV452730.1 | 869668 | 2-scf00040 | 2 |
| AX-157922424 | 3 | 30.121 | KV452730.1 | 871598 | 2-scf00040 | 2 |
| AX-157922433 | 3 | 30.121 | KV452730.1 | 880541 | 2-scf00040 | 2 |
| AX-157724498 | 3 | 30.121 | KV452730.1 | 888774 | 2-scf00040 | 2 |
| AX-157741705 | 3 | 30.121 | KV452730.1 | 901174 | 2-scf00040 | 2 |
| AX-157922440 | 3 | 30.223 | KV452730.1 | 884962 | 2-scf00040 | 2 |
| AX-157922458 | 3 | 30.223 | KV452730.1 | 895192 | 2-scf00040 | 2 |
| AX-157742768 | 3 | 30.224 | KV452730.1 | 903951 | 2-scf00040 | 2 |
| AX-157922467 | 3 | 30.224 | KV452730.1 | 909721 | 2-scf00040 | 2 |
| AX-157773128 | 3 | 30.228 | KV452730.1 | 916135 | 2-scf00040 | 2 |
| AX-157714363 | 3 | 30.42  | KV452730.1 | 916510 | 2-scf00040 | 2 |
| AX-157813388 | 3 | 30.749 | KV452730.1 | 918807 | 2-scf00040 | 2 |
| AX-157813389 | 3 | 30.754 | KV452730.1 | 918966 | 2-scf00040 | 2 |
| AX-157722875 | 3 | 30.754 | KV452730.1 | 939377 | 2-scf00040 | 2 |
| AX-158389662 | 3 | 30.754 | KV452730.1 | 939444 | 2-scf00040 | 2 |
| AX-157922475 | 3 | 30.754 | KV452730.1 | 941556 | 2-scf00040 | 2 |
| AX-157922478 | 3 | 30.754 | KV452730.1 | 945540 | 2-scf00040 | 2 |
| AX-157922482 | 3 | 30.754 | KV452730.1 | 947256 | 2-scf00040 | 2 |
| AX-157922490 | 3 | 30.754 | KV452730.1 | 951802 | 2-scf00040 | 2 |
| AX-157720141 | 3 | 30.754 | KV452730.1 | 954325 | 2-scf00040 | 2 |
| AX-157922495 | 3 | 30.754 | KV452730.1 | 958247 | 2-scf00040 | 2 |
| AX-157813390 | 3 | 30.852 | KV452730.1 | 961144 | 2-scf00040 | 2 |
| AX-157733966 | 3 | 30.936 | KV452730.1 | 918641 | 2-scf00040 | 2 |
| AX-157738619 | 3 | 30.936 | KV452730.1 | 962446 | 2-scf00040 | 2 |

|              |   |        |            |         |            |   |
|--------------|---|--------|------------|---------|------------|---|
| AX-157922503 | 3 | 30.936 | KV452730.1 | 967843  | 2-scf00040 | 2 |
| AX-157922509 | 3 | 30.936 | KV452730.1 | 973611  | 2-scf00040 | 2 |
| AX-157922507 | 3 | 31.027 | KV452730.1 | 973235  | 2-scf00040 | 2 |
| AX-157922525 | 3 | 31.305 | KV452730.1 | 981359  | 2-scf00040 | 2 |
| AX-157922529 | 3 | 31.305 | KV452730.1 | 983887  | 2-scf00040 | 2 |
| AX-157922531 | 3 | 31.305 | KV452730.1 | 987409  | 2-scf00040 | 2 |
| AX-157922535 | 3 | 31.306 | KV452730.1 | 990172  | 2-scf00040 | 2 |
| AX-157922547 | 3 | 31.474 | KV452730.1 | 996694  | 2-scf00040 | 2 |
| AX-157922548 | 3 | 31.532 | KV452730.1 | 997240  | 2-scf00040 | 2 |
| AX-157922556 | 3 | 31.532 | KV452730.1 | 1008415 | 2-scf00040 | 2 |
| AX-157922569 | 3 | 31.532 | KV452730.1 | 1021769 | 2-scf00040 | 2 |
| AX-157922572 | 3 | 31.532 | KV452730.1 | 1024634 | 2-scf00040 | 2 |
| AX-157922557 | 3 | 31.587 | KV452730.1 | 1009374 | 2-scf00040 | 2 |
| AX-157922521 | 3 | 31.847 | KV452730.1 | 979205  | 2-scf00040 | 2 |
| AX-157922538 | 3 | 31.847 | KV452730.1 | 991759  | 2-scf00040 | 2 |
| AX-157922559 | 3 | 31.847 | KV452730.1 | 1010163 | 2-scf00040 | 2 |
| AX-157922560 | 3 | 31.847 | KV452730.1 | 1010730 | 2-scf00040 | 2 |
| AX-157755150 | 3 | 31.847 | KV452730.1 | 1011881 | 2-scf00040 | 2 |
| AX-157922562 | 3 | 31.847 | KV452730.1 | 1014237 | 2-scf00040 | 2 |
| AX-157756932 | 3 | 31.847 | KV452730.1 | 1018212 | 2-scf00040 | 2 |
| AX-157922566 | 3 | 31.847 | KV452730.1 | 1018687 | 2-scf00040 | 2 |
| AX-157922568 | 3 | 31.847 | KV452730.1 | 1021075 | 2-scf00040 | 2 |
| AX-157720197 | 3 | 31.847 | KV452730.1 | 1026278 | 2-scf00040 | 2 |
| AX-157922575 | 3 | 31.847 | KV452730.1 | 1026753 | 2-scf00040 | 2 |
| AX-157922577 | 3 | 31.847 | KV452730.1 | 1027988 | 2-scf00040 | 2 |
| AX-157922579 | 3 | 31.847 | KV452730.1 | 1030055 | 2-scf00040 | 2 |
| AX-157922580 | 3 | 31.847 | KV452730.1 | 1030503 | 2-scf00040 | 2 |
| AX-157758386 | 3 | 31.847 | KV452730.1 | 1033077 | 2-scf00040 | 2 |
| AX-157748188 | 3 | 31.847 | KV452730.1 | 1034400 | 2-scf00040 | 2 |
| AX-157922585 | 3 | 31.847 | KV452730.1 | 1035588 | 2-scf00040 | 2 |
| AX-157922588 | 3 | 31.847 | KV452730.1 | 1037572 | 2-scf00040 | 2 |
| AX-157922593 | 3 | 31.847 | KV452730.1 | 1042260 | 2-scf00040 | 2 |
| AX-157922599 | 3 | 31.847 | KV452730.1 | 1047827 | 2-scf00040 | 2 |
| AX-157922600 | 3 | 31.847 | KV452730.1 | 1048399 | 2-scf00040 | 2 |
| AX-157922603 | 3 | 31.847 | KV452730.1 | 1050010 | 2-scf00040 | 2 |
| AX-157922617 | 3 | 31.847 | KV452730.1 | 1065803 | 2-scf00040 | 2 |
| AX-157922639 | 3 | 31.847 | KV452730.1 | 1082620 | 2-scf00040 | 2 |
| AX-158389663 | 3 | 31.907 | KV452730.1 | 1043067 | 2-scf00040 | 2 |
| AX-157922596 | 3 | 31.907 | KV452730.1 | 1046648 | 2-scf00040 | 2 |
| AX-157922607 | 3 | 31.907 | KV452730.1 | 1053006 | 2-scf00040 | 2 |
| AX-157922501 | 3 | 31.956 | KV452730.1 | 963755  | 2-scf00040 | 2 |
| AX-157755244 | 3 | 31.956 | KV452730.1 | 1055458 | 2-scf00040 | 2 |
| AX-157922610 | 3 | 31.956 | KV452730.1 | 1056177 | 2-scf00040 | 2 |
| AX-157922611 | 3 | 31.956 | KV452730.1 | 1057736 | 2-scf00040 | 2 |
| AX-158405297 | 3 | 31.956 | KV452730.1 | 1060655 | 2-scf00040 | 2 |
| AX-158405298 | 3 | 31.956 | KV452730.1 | 1062123 | 2-scf00040 | 2 |
| AX-157753214 | 3 | 31.956 | KV452730.1 | 1063260 | 2-scf00040 | 2 |
| AX-157813392 | 3 | 31.956 | KV452730.1 | 1065284 | 2-scf00040 | 2 |
| AX-157922620 | 3 | 31.956 | KV452730.1 | 1069112 | 2-scf00040 | 2 |
| AX-157922622 | 3 | 31.956 | KV452730.1 | 1069725 | 2-scf00040 | 2 |
| AX-157922625 | 3 | 31.956 | KV452730.1 | 1071601 | 2-scf00040 | 2 |



|              |   |        |            |         |            |   |
|--------------|---|--------|------------|---------|------------|---|
| AX-158378696 | 3 | 31.956 | KV452730.1 | 1081865 | 2-scf00040 | 2 |
| AX-157922641 | 3 | 31.956 | KV452730.1 | 1084383 | 2-scf00040 | 2 |
| AX-157922654 | 3 | 31.956 | KV452730.1 | 1093098 | 2-scf00040 | 2 |
| AX-157922545 | 3 | 32.21  | KV452730.1 | 995531  | 2-scf00040 | 2 |
| AX-157922646 | 3 | 32.21  | KV452730.1 | 1090992 | 2-scf00040 | 2 |
| AX-157716466 | 3 | 32.21  | KV452730.1 | 1091467 | 2-scf00040 | 2 |
| AX-157922652 | 3 | 32.21  | KV452730.1 | 1092342 | 2-scf00040 | 2 |
| AX-157922657 | 3 | 32.476 | KV452730.1 | 1098162 | 2-scf00040 | 2 |
| AX-158382342 | 3 | 32.722 | KV452730.1 | 1003064 | 2-scf00040 | 2 |
| AX-157862674 | 3 | 32.722 | KV452730.1 | 1076675 | 2-scf00040 | 2 |
| AX-157922659 | 3 | 32.722 | KV452730.1 | 1099702 | 2-scf00040 | 2 |
| AX-157922662 | 3 | 32.722 | KV452730.1 | 1104767 | 2-scf00040 | 2 |
| AX-158382347 | 3 | 32.722 | KV452730.1 | 1105762 | 2-scf00040 | 2 |
| AX-157723270 | 3 | 32.722 | KV452730.1 | 1107539 | 2-scf00040 | 2 |
| AX-157922670 | 3 | 32.722 | KV452730.1 | 1113426 | 2-scf00040 | 2 |
| AX-157922673 | 3 | 32.722 | KV452730.1 | 1114350 | 2-scf00040 | 2 |
| AX-157922680 | 3 | 32.722 | KV452730.1 | 1118511 | 2-scf00040 | 2 |
| AX-157922726 | 3 | 32.722 | KV452730.1 | 1146507 | 2-scf00040 | 2 |
| AX-157883576 | 3 | 32.94  | KV452730.1 | 1120530 | 2-scf00040 | 2 |
| AX-157922684 | 3 | 32.94  | KV452730.1 | 1120570 | 2-scf00040 | 2 |
| AX-157922695 | 3 | 32.94  | KV452730.1 | 1124691 | 2-scf00040 | 2 |
| AX-158382348 | 3 | 32.94  | KV452730.1 | 1127201 | 2-scf00040 | 2 |
| AX-157922699 | 3 | 32.94  | KV452730.1 | 1128180 | 2-scf00040 | 2 |
| AX-157922700 | 3 | 32.94  | KV452730.1 | 1128280 | 2-scf00040 | 2 |
| AX-157922702 | 3 | 32.94  | KV452730.1 | 1131523 | 2-scf00040 | 2 |
| AX-157922706 | 3 | 32.94  | KV452730.1 | 1134505 | 2-scf00040 | 2 |
| AX-157922707 | 3 | 32.94  | KV452730.1 | 1135322 | 2-scf00040 | 2 |
| AX-157922710 | 3 | 32.94  | KV452730.1 | 1136518 | 2-scf00040 | 2 |
| AX-157922712 | 3 | 32.94  | KV452730.1 | 1136891 | 2-scf00040 | 2 |
| AX-157922719 | 3 | 32.94  | KV452730.1 | 1142276 | 2-scf00040 | 2 |
| AX-157853822 | 3 | 32.94  | KV452730.1 | 1173759 | 2-scf00040 | 2 |
| AX-157922721 | 3 | 33.267 | KV452730.1 | 1142829 | 2-scf00040 | 2 |
| AX-157883578 | 3 | 33.267 | KV452730.1 | 1159049 | 2-scf00040 | 2 |
| AX-157922760 | 3 | 33.267 | KV452730.1 | 1178425 | 2-scf00040 | 2 |
| AX-157922742 | 3 | 33.268 | KV452730.1 | 1161908 | 2-scf00040 | 2 |
| AX-157922745 | 3 | 33.268 | KV452730.1 | 1163543 | 2-scf00040 | 2 |
| AX-157883579 | 3 | 33.268 | KV452730.1 | 1165172 | 2-scf00040 | 2 |
| AX-157922747 | 3 | 33.268 | KV452730.1 | 1166092 | 2-scf00040 | 2 |
| AX-157922750 | 3 | 33.268 | KV452730.1 | 1168193 | 2-scf00040 | 2 |
| AX-157922751 | 3 | 33.268 | KV452730.1 | 1168566 | 2-scf00040 | 2 |
| AX-157922754 | 3 | 33.268 | KV452730.1 | 1169244 | 2-scf00040 | 2 |
| AX-157922757 | 3 | 33.268 | KV452730.1 | 1175335 | 2-scf00040 | 2 |
| AX-158382352 | 3 | 33.34  | KV452730.1 | 1169032 | 2-scf00040 | 2 |
| AX-157922762 | 3 | 33.34  | KV452730.1 | 1179167 | 2-scf00040 | 2 |
| AX-157922783 | 3 | 33.34  | KV452730.1 | 1192279 | 2-scf00040 | 2 |
| AX-157922786 | 3 | 33.34  | KV452730.1 | 1195235 | 2-scf00040 | 2 |
| AX-157853824 | 3 | 33.477 | KV452730.1 | 1185164 | 2-scf00040 | 2 |
| AX-157922772 | 3 | 33.499 | KV452730.1 | 1185916 | 2-scf00040 | 2 |
| AX-157922774 | 3 | 33.617 | KV452730.1 | 1186965 | 2-scf00040 | 2 |
| AX-157922777 | 3 | 33.705 | KV452730.1 | 1188668 | 2-scf00040 | 2 |
| AX-157922779 | 3 | 33.705 | KV452730.1 | 1190092 | 2-scf00040 | 2 |

|              |   |        |            |         |            |   |
|--------------|---|--------|------------|---------|------------|---|
| AX-157922780 | 3 | 33.705 | KV452730.1 | 1190666 | 2-scf00040 | 2 |
| AX-157922785 | 3 | 33.705 | KV452730.1 | 1194774 | 2-scf00040 | 2 |
| AX-157922789 | 3 | 33.705 | KV452730.1 | 1196178 | 2-scf00040 | 2 |
| AX-157922791 | 3 | 33.705 | KV452730.1 | 1197410 | 2-scf00040 | 2 |
| AX-157853825 | 3 | 33.705 | KV452730.1 | 1199862 | 2-scf00040 | 2 |
| AX-157922795 | 3 | 33.705 | KV452730.1 | 1200241 | 2-scf00040 | 2 |
| AX-157922798 | 3 | 33.705 | KV452730.1 | 1205219 | 2-scf00040 | 2 |
| AX-157922834 | 3 | 33.705 | KV452730.1 | 1227181 | 2-scf00040 | 2 |
| AX-157922836 | 3 | 33.705 | KV452730.1 | 1227756 | 2-scf00040 | 2 |
| AX-157922842 | 3 | 33.705 | KV452730.1 | 1231199 | 2-scf00040 | 2 |
| AX-157922802 | 3 | 33.918 | KV452730.1 | 1208965 | 2-scf00040 | 2 |
| AX-157922817 | 3 | 33.923 | KV452730.1 | 1217990 | 2-scf00040 | 2 |
| AX-157922832 | 3 | 34.034 | KV452730.1 | 1226748 | 2-scf00040 | 2 |
| AX-157922838 | 3 | 34.149 | KV452730.1 | 1228770 | 2-scf00040 | 2 |
| AX-157922844 | 3 | 34.255 | KV452730.1 | 1232101 | 2-scf00040 | 2 |
| AX-157922849 | 3 | 34.258 | KV452730.1 | 1235812 | 2-scf00040 | 2 |
| AX-157922804 | 3 | 34.471 | KV452730.1 | 1209631 | 2-scf00040 | 2 |
| AX-157922852 | 3 | 34.471 | KV452730.1 | 1237405 | 2-scf00040 | 2 |
| AX-157922855 | 3 | 34.471 | KV452730.1 | 1238385 | 2-scf00040 | 2 |
| AX-157922857 | 3 | 34.471 | KV452730.1 | 1238828 | 2-scf00040 | 2 |
| AX-157922858 | 3 | 34.471 | KV452730.1 | 1239553 | 2-scf00040 | 2 |
| AX-157922860 | 3 | 34.471 | KV452730.1 | 1240649 | 2-scf00040 | 2 |
| AX-157922865 | 3 | 34.471 | KV452730.1 | 1245624 | 2-scf00040 | 2 |
| AX-157922867 | 3 | 34.471 | KV452730.1 | 1246341 | 2-scf00040 | 2 |
| AX-157922869 | 3 | 34.471 | KV452730.1 | 1247893 | 2-scf00040 | 2 |
| AX-157922872 | 3 | 34.471 | KV452730.1 | 1249215 | 2-scf00040 | 2 |
| AX-157922874 | 3 | 34.471 | KV452730.1 | 1249572 | 2-scf00040 | 2 |
| AX-157813398 | 3 | 34.471 | KV452730.1 | 1253812 | 2-scf00040 | 2 |
| AX-157922878 | 3 | 34.471 | KV452730.1 | 1255421 | 2-scf00040 | 2 |
| AX-157922882 | 3 | 34.471 | KV452730.1 | 1258022 | 2-scf00040 | 2 |
| AX-157922887 | 3 | 34.471 | KV452730.1 | 1259484 | 2-scf00040 | 2 |
| AX-157869162 | 3 | 34.471 | KV452730.1 | 1260188 | 2-scf00040 | 2 |
| AX-157723979 | 3 | 34.471 | KV452730.1 | 1264495 | 2-scf00040 | 2 |
| AX-157922896 | 3 | 34.471 | KV452730.1 | 1269243 | 2-scf00040 | 2 |
| AX-157922897 | 3 | 34.471 | KV452730.1 | 1270676 | 2-scf00040 | 2 |
| AX-157922903 | 3 | 34.471 | KV452730.1 | 1276764 | 2-scf00040 | 2 |
| AX-157853828 | 3 | 34.471 | KV452730.1 | 1290421 | 2-scf00040 | 2 |
| AX-157922910 | 3 | 34.689 | KV452730.1 | 1281365 | 2-scf00040 | 2 |
| AX-157741302 | 3 | 34.799 | KV452730.1 | 1283724 | 2-scf00040 | 2 |
| AX-157883586 | 3 | 34.799 | KV452730.1 | 1284439 | 2-scf00040 | 2 |
| AX-157853827 | 3 | 34.799 | KV452730.1 | 1285472 | 2-scf00040 | 2 |
| AX-157922919 | 3 | 34.799 | KV452730.1 | 1285823 | 2-scf00040 | 2 |
| AX-157922921 | 3 | 34.799 | KV452730.1 | 1287264 | 2-scf00040 | 2 |
| AX-157922923 | 3 | 34.799 | KV452730.1 | 1287991 | 2-scf00040 | 2 |
| AX-157922925 | 3 | 34.799 | KV452730.1 | 1289326 | 2-scf00040 | 2 |
| AX-157922926 | 3 | 34.799 | KV452730.1 | 1290124 | 2-scf00040 | 2 |
| AX-157755081 | 3 | 34.799 | KV452730.1 | 1292828 | 2-scf00040 | 2 |
| AX-157922930 | 3 | 34.799 | KV452730.1 | 1295289 | 2-scf00040 | 2 |
| AX-157922935 | 3 | 34.799 | KV452730.1 | 1298084 | 2-scf00040 | 2 |
| AX-157922938 | 3 | 34.799 | KV452730.1 | 1300977 | 2-scf00040 | 2 |
| AX-157883587 | 3 | 34.799 | KV452730.1 | 1312929 | 2-scf00040 | 2 |

|              |   |        |            |         |            |   |
|--------------|---|--------|------------|---------|------------|---|
| AX-158378698 | 3 | 35.147 | KV452730.1 | 1309774 | 2-scf00040 | 2 |
| AX-157744301 | 3 | 35.147 | KV452730.1 | 1309974 | 2-scf00040 | 2 |
| AX-157778575 | 3 | 35.269 | KV452730.1 | 1310116 | 2-scf00040 | 2 |
| AX-157739339 | 3 | 35.269 | KV452730.1 | 1311686 | 2-scf00040 | 2 |
| AX-158378699 | 3 | 35.269 | KV452730.1 | 1315799 | 2-scf00040 | 2 |
| AX-157922975 | 3 | 35.281 | KV452730.1 | 1332196 | 2-scf00040 | 2 |
| AX-157922982 | 3 | 35.415 | KV452730.1 | 1337917 | 2-scf00040 | 2 |
| AX-157922985 | 3 | 35.562 | KV452730.1 | 1340019 | 2-scf00040 | 2 |
| AX-157922988 | 3 | 35.562 | KV452730.1 | 1340957 | 2-scf00040 | 2 |
| AX-157853831 | 3 | 35.562 | KV452730.1 | 1345293 | 2-scf00040 | 2 |
| AX-157813404 | 3 | 35.562 | KV452730.1 | 1353120 | 2-scf00040 | 2 |
| AX-157922995 | 3 | 35.608 | KV452730.1 | 1356137 | 2-scf00040 | 2 |
| AX-158378701 | 3 | 35.614 | KV452730.1 | 1379338 | 2-scf00040 | 2 |
| AX-157778591 | 3 | 35.65  | KV452730.1 | 1385538 | 2-scf00040 | 2 |
| AX-157922949 | 3 | 35.68  | KV452730.1 | 1311642 | 2-scf00040 | 2 |
| AX-157922989 | 3 | 35.68  | KV452730.1 | 1344800 | 2-scf00040 | 2 |
| AX-157923010 | 3 | 35.68  | KV452730.1 | 1375104 | 2-scf00040 | 2 |
| AX-157778592 | 3 | 35.68  | KV452730.1 | 1387043 | 2-scf00040 | 2 |
| AX-157727523 | 3 | 35.68  | KV452730.1 | 1387484 | 2-scf00040 | 2 |
| AX-157923021 | 3 | 35.68  | KV452730.1 | 1395115 | 2-scf00040 | 2 |
| AX-157923023 | 3 | 35.68  | KV452730.1 | 1397108 | 2-scf00040 | 2 |
| AX-157923098 | 3 | 35.68  | KV452730.1 | 1492859 | 2-scf00040 | 2 |
| AX-157923025 | 3 | 35.709 | KV452730.1 | 1400932 | 2-scf00040 | 2 |
| AX-157923028 | 3 | 35.834 | KV452730.1 | 1402461 | 2-scf00040 | 2 |
| AX-157744037 | 3 | 35.856 | KV452730.1 | 1404785 | 2-scf00040 | 2 |
| AX-157923033 | 3 | 35.856 | KV452730.1 | 1408277 | 2-scf00040 | 2 |
| AX-157813416 | 3 | 35.856 | KV452730.1 | 1409711 | 2-scf00040 | 2 |
| AX-157923034 | 3 | 35.982 | KV452730.1 | 1411622 | 2-scf00040 | 2 |
| AX-157923030 | 3 | 36.002 | KV452730.1 | 1405209 | 2-scf00040 | 2 |
| AX-157717701 | 3 | 36.002 | KV452730.1 | 1415226 | 2-scf00040 | 2 |
| AX-157923040 | 3 | 36.002 | KV452730.1 | 1419812 | 2-scf00040 | 2 |
| AX-157923046 | 3 | 36.002 | KV452730.1 | 1422660 | 2-scf00040 | 2 |
| AX-157713283 | 3 | 36.002 | KV452730.1 | 1423993 | 2-scf00040 | 2 |
| AX-157923050 | 3 | 36.002 | KV452730.1 | 1424768 | 2-scf00040 | 2 |
| AX-157923053 | 3 | 36.002 | KV452730.1 | 1426155 | 2-scf00040 | 2 |
| AX-157923056 | 3 | 36.002 | KV452730.1 | 1429390 | 2-scf00040 | 2 |
| AX-157923059 | 3 | 36.002 | KV452730.1 | 1431761 | 2-scf00040 | 2 |
| AX-157754513 | 3 | 36.002 | KV452730.1 | 1433363 | 2-scf00040 | 2 |
| AX-157923068 | 3 | 36.002 | KV452730.1 | 1439762 | 2-scf00040 | 2 |
| AX-157813418 | 3 | 36.002 | KV452730.1 | 1440231 | 2-scf00040 | 2 |
| AX-157714526 | 3 | 36.002 | KV452730.1 | 1440323 | 2-scf00040 | 2 |
| AX-157923069 | 3 | 36.002 | KV452730.1 | 1445890 | 2-scf00040 | 2 |
| AX-157923071 | 3 | 36.002 | KV452730.1 | 1448086 | 2-scf00040 | 2 |
| AX-157853832 | 3 | 36.002 | KV452730.1 | 1450386 | 2-scf00040 | 2 |
| AX-157883591 | 3 | 36.439 | KV452730.1 | 1457323 | 2-scf00040 | 2 |
| AX-157923083 | 3 | 36.439 | KV452730.1 | 1460233 | 2-scf00040 | 2 |
| AX-157748142 | 3 | 36.439 | KV452730.1 | 1464036 | 2-scf00040 | 2 |
| AX-157813422 | 3 | 36.439 | KV452730.1 | 1468350 | 2-scf00040 | 2 |
| AX-157923086 | 3 | 36.439 | KV452730.1 | 1471611 | 2-scf00040 | 2 |
| AX-157923089 | 3 | 36.439 | KV452730.1 | 1474541 | 2-scf00040 | 2 |
| AX-157715588 | 3 | 36.439 | KV452730.1 | 1475814 | 2-scf00040 | 2 |

|              |   |        |            |         |            |   |
|--------------|---|--------|------------|---------|------------|---|
| AX-157923091 | 3 | 36.439 | KV452730.1 | 1479791 | 2-scf00040 | 2 |
| AX-157874786 | 3 | 36.439 | KV452730.1 | 1480921 | 2-scf00040 | 2 |
| AX-157923092 | 3 | 36.439 | KV452730.1 | 1481466 | 2-scf00040 | 2 |
| AX-157719484 | 3 | 36.439 | KV452730.1 | 1487802 | 2-scf00040 | 2 |
| AX-157713405 | 3 | 36.439 | KV452730.1 | 1488685 | 2-scf00040 | 2 |
| AX-157712237 | 3 | 36.439 | KV452730.1 | 1489811 | 2-scf00040 | 2 |
| AX-157923107 | 3 | 36.439 | KV452730.1 | 1507769 | 2-scf00040 | 2 |
| AX-157813424 | 3 | 36.526 | KV452730.1 | 1476365 | 2-scf00040 | 2 |
| AX-157712238 | 3 | 36.526 | KV452730.1 | 1489969 | 2-scf00040 | 2 |
| AX-157813425 | 3 | 36.526 | KV452730.1 | 1491727 | 2-scf00040 | 2 |
| AX-157923110 | 3 | 36.526 | KV452730.1 | 1510513 | 2-scf00040 | 2 |
| AX-157813429 | 3 | 36.526 | KV452730.1 | 1511482 | 2-scf00040 | 2 |
| AX-157813430 | 3 | 36.526 | KV452730.1 | 1512372 | 2-scf00040 | 2 |
| AX-157922966 | 3 | 36.549 | KV452730.1 | 1322927 | 2-scf00040 | 2 |
| AX-157923015 | 3 | 36.549 | KV452730.1 | 1381450 | 2-scf00040 | 2 |
| AX-157923081 | 3 | 36.549 | KV452730.1 | 1455965 | 2-scf00040 | 2 |
| AX-157720090 | 3 | 36.549 | KV452730.1 | 1480159 | 2-scf00040 | 2 |
| AX-157923101 | 3 | 36.549 | KV452730.1 | 1496578 | 2-scf00040 | 2 |
| AX-157923104 | 3 | 36.549 | KV452730.1 | 1498848 | 2-scf00040 | 2 |
| AX-157923105 | 3 | 36.549 | KV452730.1 | 1505849 | 2-scf00040 | 2 |
| AX-157923109 | 3 | 36.549 | KV452730.1 | 1509032 | 2-scf00040 | 2 |
| AX-157923113 | 3 | 36.634 | KV452730.1 | 1513600 | 2-scf00040 | 2 |
| AX-157923115 | 3 | 36.67  | KV452730.1 | 1514221 | 2-scf00040 | 2 |
| AX-157923117 | 3 | 36.713 | KV452730.1 | 1518359 | 2-scf00040 | 2 |
| AX-157923119 | 3 | 36.758 | KV452730.1 | 1519201 | 2-scf00040 | 2 |
| AX-157923272 | 3 | 36.758 | KV452730.1 | 1697505 | 2-scf00040 | 2 |
| AX-157923121 | 3 | 36.77  | KV452730.1 | 1521390 | 2-scf00040 | 2 |
| AX-157923130 | 3 | 36.77  | KV452730.1 | 1529370 | 2-scf00040 | 2 |
| AX-157923145 | 3 | 36.77  | KV452730.1 | 1556246 | 2-scf00040 | 2 |
| AX-157923133 | 3 | 36.787 | KV452730.1 | 1540540 | 2-scf00040 | 2 |
| AX-158389676 | 3 | 36.814 | KV452730.1 | 1525178 | 2-scf00040 | 2 |
| AX-157923131 | 3 | 36.814 | KV452730.1 | 1529931 | 2-scf00040 | 2 |
| AX-157923141 | 3 | 36.814 | KV452730.1 | 1552350 | 2-scf00040 | 2 |
| AX-157923148 | 3 | 36.814 | KV452730.1 | 1559155 | 2-scf00040 | 2 |
| AX-157869163 | 3 | 36.814 | KV452730.1 | 1560124 | 2-scf00040 | 2 |
| AX-157923159 | 3 | 36.814 | KV452730.1 | 1570727 | 2-scf00040 | 2 |
| AX-157923163 | 3 | 36.814 | KV452730.1 | 1576829 | 2-scf00040 | 2 |
| AX-157755060 | 3 | 36.814 | KV452730.1 | 1584270 | 2-scf00040 | 2 |
| AX-157869164 | 3 | 36.814 | KV452730.1 | 1584897 | 2-scf00040 | 2 |
| AX-157923177 | 3 | 36.814 | KV452730.1 | 1589649 | 2-scf00040 | 2 |
| AX-157923185 | 3 | 36.814 | KV452730.1 | 1599166 | 2-scf00040 | 2 |
| AX-157923174 | 3 | 36.846 | KV452730.1 | 1586339 | 2-scf00040 | 2 |
| AX-157923186 | 3 | 36.846 | KV452730.1 | 1603603 | 2-scf00040 | 2 |
| AX-157713601 | 3 | 36.877 | KV452730.1 | 1599481 | 2-scf00040 | 2 |
| AX-157755501 | 3 | 36.981 | KV452730.1 | 1611350 | 2-scf00040 | 2 |
| AX-157923199 | 3 | 37.095 | KV452730.1 | 1611513 | 2-scf00040 | 2 |
| AX-157923202 | 3 | 37.095 | KV452730.1 | 1613138 | 2-scf00040 | 2 |
| AX-157923203 | 3 | 37.095 | KV452730.1 | 1614351 | 2-scf00040 | 2 |
| AX-157869165 | 3 | 37.095 | KV452730.1 | 1615239 | 2-scf00040 | 2 |
| AX-157923206 | 3 | 37.095 | KV452730.1 | 1615884 | 2-scf00040 | 2 |
| AX-157923210 | 3 | 37.095 | KV452730.1 | 1621943 | 2-scf00040 | 2 |

|              |   |        |            |         |            |   |
|--------------|---|--------|------------|---------|------------|---|
| AX-157923277 | 3 | 37.095 | KV452730.1 | 1701516 | 2-scf00040 | 2 |
| AX-157923212 | 3 | 37.204 | KV452730.1 | 1623071 | 2-scf00040 | 2 |
| AX-157923214 | 3 | 37.204 | KV452730.1 | 1624648 | 2-scf00040 | 2 |
| AX-157923215 | 3 | 37.204 | KV452730.1 | 1626185 | 2-scf00040 | 2 |
| AX-157923217 | 3 | 37.204 | KV452730.1 | 1627462 | 2-scf00040 | 2 |
| AX-157923220 | 3 | 37.204 | KV452730.1 | 1633754 | 2-scf00040 | 2 |
| AX-157813434 | 3 | 37.204 | KV452730.1 | 1637162 | 2-scf00040 | 2 |
| AX-157869168 | 3 | 37.204 | KV452730.1 | 1643664 | 2-scf00040 | 2 |
| AX-157923219 | 3 | 37.423 | KV452730.1 | 1633105 | 2-scf00040 | 2 |
| AX-157923222 | 3 | 37.423 | KV452730.1 | 1634803 | 2-scf00040 | 2 |
| AX-157874790 | 3 | 37.423 | KV452730.1 | 1635862 | 2-scf00040 | 2 |
| AX-157923224 | 3 | 37.423 | KV452730.1 | 1635995 | 2-scf00040 | 2 |
| AX-157813435 | 3 | 37.423 | KV452730.1 | 1637459 | 2-scf00040 | 2 |
| AX-157923226 | 3 | 37.423 | KV452730.1 | 1638617 | 2-scf00040 | 2 |
| AX-157923230 | 3 | 37.423 | KV452730.1 | 1640463 | 2-scf00040 | 2 |
| AX-157923236 | 3 | 37.423 | KV452730.1 | 1644987 | 2-scf00040 | 2 |
| AX-157813436 | 3 | 37.423 | KV452730.1 | 1647583 | 2-scf00040 | 2 |
| AX-157813438 | 3 | 37.423 | KV452730.1 | 1658938 | 2-scf00040 | 2 |
| AX-157923239 | 3 | 37.423 | KV452730.1 | 1660435 | 2-scf00040 | 2 |
| AX-157923264 | 3 | 37.423 | KV452730.1 | 1693215 | 2-scf00040 | 2 |
| AX-157923335 | 3 | 37.423 | KV452730.1 | 1746082 | 2-scf00040 | 2 |
| AX-157923243 | 3 | 37.492 | KV452730.1 | 1667067 | 2-scf00040 | 2 |
| AX-157923246 | 3 | 37.532 | KV452730.1 | 1671058 | 2-scf00040 | 2 |
| AX-157923249 | 3 | 37.532 | KV452730.1 | 1676354 | 2-scf00040 | 2 |
| AX-157724443 | 3 | 37.532 | KV452730.1 | 1679913 | 2-scf00040 | 2 |
| AX-157923248 | 3 | 37.714 | KV452730.1 | 1675631 | 2-scf00040 | 2 |
| AX-157923253 | 3 | 37.714 | KV452730.1 | 1681070 | 2-scf00040 | 2 |
| AX-157923254 | 3 | 37.714 | KV452730.1 | 1682870 | 2-scf00040 | 2 |
| AX-157923256 | 3 | 37.714 | KV452730.1 | 1683831 | 2-scf00040 | 2 |
| AX-157883600 | 3 | 37.714 | KV452730.1 | 1714563 | 2-scf00040 | 2 |
| AX-157813440 | 3 | 37.716 | KV452730.1 | 1688786 | 2-scf00040 | 2 |
| AX-157874792 | 3 | 38.078 | KV452730.1 | 1710846 | 2-scf00040 | 2 |
| AX-157813446 | 3 | 38.078 | KV452730.1 | 1715225 | 2-scf00040 | 2 |
| AX-157717076 | 3 | 38.078 | KV452730.1 | 1718004 | 2-scf00040 | 2 |
| AX-157923298 | 3 | 38.078 | KV452730.1 | 1718454 | 2-scf00040 | 2 |
| AX-157923311 | 3 | 38.078 | KV452730.1 | 1729053 | 2-scf00040 | 2 |
| AX-157923313 | 3 | 38.078 | KV452730.1 | 1731243 | 2-scf00040 | 2 |
| AX-157923314 | 3 | 38.078 | KV452730.1 | 1731706 | 2-scf00040 | 2 |
| AX-157923316 | 3 | 38.078 | KV452730.1 | 1732109 | 2-scf00040 | 2 |
| AX-157923329 | 3 | 38.078 | KV452730.1 | 1739645 | 2-scf00040 | 2 |
| AX-157694581 | 3 | 38.217 | KV452730.1 | 1735292 | 2-scf00040 | 2 |
| AX-157923339 | 3 | 38.217 | KV452730.1 | 1750751 | 2-scf00040 | 2 |
| AX-157923395 | 3 | 38.217 | KV452730.1 | 1807995 | 2-scf00040 | 2 |
| AX-157853840 | 3 | 38.287 | KV452730.1 | 1739752 | 2-scf00040 | 2 |
| AX-157883601 | 3 | 38.91  | KV452730.1 | 1752202 | 2-scf00040 | 2 |
| AX-157923346 | 3 | 38.91  | KV452730.1 | 1761172 | 2-scf00040 | 2 |
| AX-157923341 | 3 | 38.918 | KV452730.1 | 1753002 | 2-scf00040 | 2 |
| AX-157923342 | 3 | 38.918 | KV452730.1 | 1753927 | 2-scf00040 | 2 |
| AX-157923345 | 3 | 38.918 | KV452730.1 | 1760349 | 2-scf00040 | 2 |
| AX-157923347 | 3 | 38.918 | KV452730.1 | 1761692 | 2-scf00040 | 2 |
| AX-157923344 | 3 | 39.225 | KV452730.1 | 1755431 | 2-scf00040 | 2 |

|              |   |        |            |         |            |   |
|--------------|---|--------|------------|---------|------------|---|
| AX-157751057 | 3 | 39.225 | KV452730.1 | 1762716 | 2-scf00040 | 2 |
| AX-157923350 | 3 | 39.225 | KV452730.1 | 1763141 | 2-scf00040 | 2 |
| AX-157813452 | 3 | 39.225 | KV452730.1 | 1789450 | 2-scf00040 | 2 |
| AX-157923381 | 3 | 39.225 | KV452730.1 | 1801422 | 2-scf00040 | 2 |
| AX-157813447 | 3 | 39.473 | KV452730.1 | 1765062 | 2-scf00040 | 2 |
| AX-157754538 | 3 | 39.473 | KV452730.1 | 1789957 | 2-scf00040 | 2 |
| AX-158382371 | 3 | 39.473 | KV452730.1 | 1804353 | 2-scf00040 | 2 |
| AX-157923355 | 3 | 39.487 | KV452730.1 | 1768263 | 2-scf00040 | 2 |
| AX-157923391 | 3 | 39.487 | KV452730.1 | 1806245 | 2-scf00040 | 2 |
| AX-157923356 | 3 | 39.502 | KV452730.1 | 1769358 | 2-scf00040 | 2 |
| AX-157813450 | 3 | 39.502 | KV452730.1 | 1774070 | 2-scf00040 | 2 |
| AX-157923359 | 3 | 39.502 | KV452730.1 | 1774962 | 2-scf00040 | 2 |
| AX-157813451 | 3 | 39.503 | KV452730.1 | 1780516 | 2-scf00040 | 2 |
| AX-157923363 | 3 | 39.666 | KV452730.1 | 1788585 | 2-scf00040 | 2 |
| AX-157813453 | 3 | 39.713 | KV452730.1 | 1789904 | 2-scf00040 | 2 |
| AX-157923366 | 3 | 39.83  | KV452730.1 | 1792422 | 2-scf00040 | 2 |
| AX-157744353 | 3 | 39.83  | KV452730.1 | 1793633 | 2-scf00040 | 2 |
| AX-158404448 | 3 | 39.83  | KV452730.1 | 1794538 | 2-scf00040 | 2 |
| AX-157923372 | 3 | 39.83  | KV452730.1 | 1795420 | 2-scf00040 | 2 |
| AX-157923375 | 3 | 39.83  | KV452730.1 | 1797199 | 2-scf00040 | 2 |
| AX-157923376 | 3 | 39.83  | KV452730.1 | 1798346 | 2-scf00040 | 2 |
| AX-157923377 | 3 | 39.83  | KV452730.1 | 1799982 | 2-scf00040 | 2 |
| AX-157923382 | 3 | 39.83  | KV452730.1 | 1802608 | 2-scf00040 | 2 |
| AX-157923387 | 3 | 39.83  | KV452730.1 | 1805106 | 2-scf00040 | 2 |
| AX-157923402 | 3 | 39.83  | KV452730.1 | 1816934 | 2-scf00040 | 2 |
| AX-157923405 | 3 | 39.83  | KV452730.1 | 1817932 | 2-scf00040 | 2 |
| AX-157923409 | 3 | 39.83  | KV452730.1 | 1820332 | 2-scf00040 | 2 |
| AX-157923412 | 3 | 39.83  | KV452730.1 | 1825529 | 2-scf00040 | 2 |
| AX-157923416 | 3 | 39.83  | KV452730.1 | 1829126 | 2-scf00040 | 2 |
| AX-157923418 | 3 | 39.86  | KV452730.1 | 1830379 | 2-scf00040 | 2 |
| AX-157923422 | 3 | 39.941 | KV452730.1 | 1844216 | 2-scf00040 | 2 |
| AX-157743029 | 3 | 39.941 | KV452730.1 | 1845516 | 2-scf00040 | 2 |
| AX-157813462 | 3 | 39.941 | KV452730.1 | 1898505 | 2-scf00040 | 2 |
| AX-157923479 | 3 | 39.941 | KV452730.1 | 1924591 | 2-scf00040 | 2 |
| AX-157874797 | 3 | 39.996 | KV452730.1 | 1845976 | 2-scf00040 | 2 |
| AX-157813456 | 3 | 40.049 | KV452730.1 | 1846590 | 2-scf00040 | 2 |
| AX-157813457 | 3 | 40.049 | KV452730.1 | 1846849 | 2-scf00040 | 2 |
| AX-157923424 | 3 | 40.109 | KV452730.1 | 1847758 | 2-scf00040 | 2 |
| AX-157923429 | 3 | 40.158 | KV452730.1 | 1854762 | 2-scf00040 | 2 |
| AX-157923432 | 3 | 40.158 | KV452730.1 | 1858760 | 2-scf00040 | 2 |
| AX-157923433 | 3 | 40.158 | KV452730.1 | 1859201 | 2-scf00040 | 2 |
| AX-157923436 | 3 | 40.158 | KV452730.1 | 1863450 | 2-scf00040 | 2 |
| AX-157739275 | 3 | 40.485 | KV452730.1 | 1865256 | 2-scf00040 | 2 |
| AX-157923437 | 3 | 40.486 | KV452730.1 | 1867463 | 2-scf00040 | 2 |
| AX-157923438 | 3 | 40.486 | KV452730.1 | 1868426 | 2-scf00040 | 2 |
| AX-157714398 | 3 | 40.486 | KV452730.1 | 1947888 | 2-scf00040 | 2 |
| AX-157923442 | 3 | 40.541 | KV452730.1 | 1875519 | 2-scf00040 | 2 |
| AX-157923443 | 3 | 40.596 | KV452730.1 | 1876075 | 2-scf00040 | 2 |
| AX-157923444 | 3 | 40.596 | KV452730.1 | 1876507 | 2-scf00040 | 2 |
| AX-157923446 | 3 | 40.596 | KV452730.1 | 1877218 | 2-scf00040 | 2 |
| AX-157923451 | 3 | 40.596 | KV452730.1 | 1883441 | 2-scf00040 | 2 |

|              |   |        |            |         |            |   |
|--------------|---|--------|------------|---------|------------|---|
| AX-157923457 | 3 | 40.596 | KV452730.1 | 1896491 | 2-scf00040 | 2 |
| AX-157923460 | 3 | 40.596 | KV452730.1 | 1898130 | 2-scf00040 | 2 |
| AX-157923482 | 3 | 40.596 | KV452730.1 | 1930774 | 2-scf00040 | 2 |
| AX-157923506 | 3 | 40.596 | KV452730.1 | 1953607 | 2-scf00040 | 2 |
| AX-157923547 | 3 | 40.596 | KV452730.1 | 2037675 | 2-scf00040 | 2 |
| AX-157748392 | 3 | 40.657 | KV452730.1 | 1885240 | 2-scf00040 | 2 |
| AX-157755565 | 3 | 40.704 | KV452730.1 | 1889136 | 2-scf00040 | 2 |
| AX-157923456 | 3 | 40.704 | KV452730.1 | 1896144 | 2-scf00040 | 2 |
| AX-157923459 | 3 | 40.704 | KV452730.1 | 1897492 | 2-scf00040 | 2 |
| AX-157923462 | 3 | 40.704 | KV452730.1 | 1898987 | 2-scf00040 | 2 |
| AX-157720949 | 3 | 40.704 | KV452730.1 | 1900987 | 2-scf00040 | 2 |
| AX-157923465 | 3 | 40.704 | KV452730.1 | 1902795 | 2-scf00040 | 2 |
| AX-157714442 | 3 | 40.704 | KV452730.1 | 1903092 | 2-scf00040 | 2 |
| AX-157923468 | 3 | 40.704 | KV452730.1 | 1904381 | 2-scf00040 | 2 |
| AX-157923484 | 3 | 40.704 | KV452730.1 | 1932232 | 2-scf00040 | 2 |
| AX-157923466 | 3 | 40.923 | KV452730.1 | 1903232 | 2-scf00040 | 2 |
| AX-157923469 | 3 | 40.923 | KV452730.1 | 1904906 | 2-scf00040 | 2 |
| AX-157883609 | 3 | 40.923 | KV452730.1 | 1910437 | 2-scf00040 | 2 |
| AX-157813466 | 3 | 40.923 | KV452730.1 | 1912057 | 2-scf00040 | 2 |
| AX-157923474 | 3 | 40.923 | KV452730.1 | 1916255 | 2-scf00040 | 2 |
| AX-157740951 | 3 | 40.923 | KV452730.1 | 1921378 | 2-scf00040 | 2 |
| AX-157813470 | 3 | 40.923 | KV452730.1 | 1961388 | 2-scf00040 | 2 |
| AX-157923529 | 3 | 40.923 | KV452730.1 | 1984805 | 2-scf00040 | 2 |
| AX-157864585 | 3 | 40.958 | KV452730.1 | 1922562 | 2-scf00040 | 2 |
| AX-157923487 | 3 | 41.005 | KV452730.1 | 1934148 | 2-scf00040 | 2 |
| AX-157923489 | 3 | 41.052 | KV452730.1 | 1935936 | 2-scf00040 | 2 |
| AX-157923512 | 3 | 41.052 | KV452730.1 | 1960048 | 2-scf00040 | 2 |
| AX-157813468 | 3 | 41.088 | KV452730.1 | 1936066 | 2-scf00040 | 2 |
| AX-157923490 | 3 | 41.088 | KV452730.1 | 1936308 | 2-scf00040 | 2 |
| AX-157741009 | 3 | 41.088 | KV452730.1 | 1941831 | 2-scf00040 | 2 |
| AX-157853841 | 3 | 41.248 | KV452730.1 | 1942328 | 2-scf00040 | 2 |
| AX-157813469 | 3 | 41.249 | KV452730.1 | 1936438 | 2-scf00040 | 2 |
| AX-157923499 | 3 | 41.249 | KV452730.1 | 1945417 | 2-scf00040 | 2 |
| AX-157853842 | 3 | 41.249 | KV452730.1 | 1945694 | 2-scf00040 | 2 |
| AX-157923500 | 3 | 41.249 | KV452730.1 | 1945843 | 2-scf00040 | 2 |
| AX-157923530 | 3 | 41.249 | KV452730.1 | 1986045 | 2-scf00040 | 2 |
| AX-157773668 | 3 | 41.249 | KV452730.1 | 2013004 | 2-scf00040 | 2 |
| AX-157923501 | 3 | 41.25  | KV452730.1 | 1949984 | 2-scf00040 | 2 |
| AX-157923504 | 3 | 41.251 | KV452730.1 | 1951869 | 2-scf00040 | 2 |
| AX-157923505 | 3 | 41.291 | KV452730.1 | 1953118 | 2-scf00040 | 2 |
| AX-157923511 | 3 | 41.333 | KV452730.1 | 1958929 | 2-scf00040 | 2 |
| AX-157923514 | 3 | 41.36  | KV452730.1 | 1964548 | 2-scf00040 | 2 |
| AX-157923515 | 3 | 41.36  | KV452730.1 | 1964971 | 2-scf00040 | 2 |
| AX-157923516 | 3 | 41.36  | KV452730.1 | 1965197 | 2-scf00040 | 2 |
| AX-157813473 | 3 | 41.36  | KV452730.1 | 1966149 | 2-scf00040 | 2 |
| AX-157745897 | 3 | 41.407 | KV452730.1 | 1966805 | 2-scf00040 | 2 |
| AX-157923454 | 3 | 41.469 | KV452730.1 | 1890406 | 2-scf00040 | 2 |
| AX-157773895 | 3 | 41.469 | KV452730.1 | 1927285 | 2-scf00040 | 2 |
| AX-157813474 | 3 | 41.469 | KV452730.1 | 1969949 | 2-scf00040 | 2 |
| AX-157923523 | 3 | 41.469 | KV452730.1 | 1977586 | 2-scf00040 | 2 |
| AX-157923525 | 3 | 41.469 | KV452730.1 | 1978337 | 2-scf00040 | 2 |

|              |   |        |            |         |            |   |
|--------------|---|--------|------------|---------|------------|---|
| AX-157754117 | 3 | 41.469 | KV452730.1 | 1982286 | 2-scf00040 | 2 |
| AX-157853844 | 3 | 41.469 | KV452730.1 | 1982904 | 2-scf00040 | 2 |
| AX-157745693 | 3 | 41.469 | KV452730.1 | 1988026 | 2-scf00040 | 2 |
| AX-157719154 | 3 | 41.469 | KV452730.1 | 1993995 | 2-scf00040 | 2 |
| AX-157813477 | 3 | 41.469 | KV452730.1 | 1994144 | 2-scf00040 | 2 |
| AX-157923532 | 3 | 41.469 | KV452730.1 | 1994782 | 2-scf00040 | 2 |
| AX-157923535 | 3 | 41.469 | KV452730.1 | 1997465 | 2-scf00040 | 2 |
| AX-157813478 | 3 | 41.469 | KV452730.1 | 2000441 | 2-scf00040 | 2 |
| AX-157813480 | 3 | 41.469 | KV452730.1 | 2006927 | 2-scf00040 | 2 |
| AX-157813481 | 3 | 41.469 | KV452730.1 | 2008073 | 2-scf00040 | 2 |
| AX-158405309 | 3 | 41.469 | KV452730.1 | 2009221 | 2-scf00040 | 2 |
| AX-157747886 | 3 | 41.469 | KV452730.1 | 2024319 | 2-scf00040 | 2 |
| AX-157813483 | 3 | 41.469 | KV452730.1 | 2024855 | 2-scf00040 | 2 |
| AX-157813485 | 3 | 41.469 | KV452730.1 | 2044164 | 2-scf00040 | 2 |
| AX-157813486 | 3 | 41.469 | KV452730.1 | 2044508 | 2-scf00040 | 2 |
| AX-157813490 | 3 | 41.469 | KV452730.1 | 2046923 | 2-scf00040 | 2 |
| AX-157813491 | 3 | 41.469 | KV452730.1 | 2047218 | 2-scf00040 | 2 |
| AX-157923548 | 3 | 41.469 | KV452730.1 | 2047532 | 2-scf00040 | 2 |
| AX-157923550 | 3 | 41.469 | KV452730.1 | 2050292 | 2-scf00040 | 2 |
| AX-157813492 | 3 | 41.469 | KV452730.1 | 2051514 | 2-scf00040 | 2 |
| AX-157923553 | 3 | 41.469 | KV452730.1 | 2053925 | 2-scf00040 | 2 |
| AX-157923557 | 3 | 41.469 | KV452730.1 | 2055611 | 2-scf00040 | 2 |
| AX-157923564 | 3 | 41.469 | KV452730.1 | 2060016 | 2-scf00040 | 2 |
| AX-157923528 | 3 | 41.687 | KV452730.1 | 1983307 | 2-scf00040 | 2 |
| AX-157883612 | 3 | 41.687 | KV452730.1 | 1992832 | 2-scf00040 | 2 |
| AX-157869172 | 3 | 41.687 | KV452730.1 | 1995540 | 2-scf00040 | 2 |
| AX-157719526 | 3 | 41.687 | KV452730.1 | 2014760 | 2-scf00040 | 2 |
| AX-157813482 | 3 | 41.687 | KV452730.1 | 2019851 | 2-scf00040 | 2 |
| AX-157813484 | 3 | 41.687 | KV452730.1 | 2033978 | 2-scf00040 | 2 |
| AX-157813487 | 3 | 41.687 | KV452730.1 | 2045927 | 2-scf00040 | 2 |
| AX-157923559 | 3 | 41.687 | KV452730.1 | 2055870 | 2-scf00040 | 2 |
| AX-157869174 | 3 | 41.687 | KV452730.1 | 2056578 | 2-scf00040 | 2 |
| AX-157923566 | 3 | 41.687 | KV452730.1 | 2060292 | 2-scf00040 | 2 |
| AX-157923570 | 3 | 41.687 | KV452730.1 | 2065507 | 2-scf00040 | 2 |
| AX-157923572 | 3 | 41.687 | KV452730.1 | 2066000 | 2-scf00040 | 2 |
| AX-157923574 | 3 | 41.687 | KV452730.1 | 2068982 | 2-scf00040 | 2 |
| AX-157923576 | 3 | 41.687 | KV452730.1 | 2069531 | 2-scf00040 | 2 |
| AX-157923577 | 3 | 41.687 | KV452730.1 | 2069690 | 2-scf00040 | 2 |
| AX-157923579 | 3 | 41.687 | KV452730.1 | 2070385 | 2-scf00040 | 2 |
| AX-157923583 | 3 | 41.687 | KV452730.1 | 2073614 | 2-scf00040 | 2 |
| AX-157923586 | 3 | 41.687 | KV452730.1 | 2074784 | 2-scf00040 | 2 |
| AX-157923587 | 3 | 41.687 | KV452730.1 | 2075207 | 2-scf00040 | 2 |
| AX-157923588 | 3 | 41.687 | KV452730.1 | 2078534 | 2-scf00040 | 2 |
| AX-157923589 | 3 | 41.687 | KV452730.1 | 2079873 | 2-scf00040 | 2 |
| AX-157923592 | 3 | 41.687 | KV452730.1 | 2082466 | 2-scf00040 | 2 |
| AX-157923596 | 3 | 41.687 | KV452730.1 | 2086369 | 2-scf00040 | 2 |
| AX-157923597 | 3 | 41.687 | KV452730.1 | 2086599 | 2-scf00040 | 2 |
| AX-157923608 | 3 | 41.824 | KV452730.1 | 2095694 | 2-scf00040 | 2 |
| AX-157923609 | 3 | 41.824 | KV452730.1 | 2095821 | 2-scf00040 | 2 |
| AX-157923610 | 3 | 41.824 | KV452730.1 | 2099516 | 2-scf00040 | 2 |
| AX-157923612 | 3 | 42.234 | KV452730.1 | 2103965 | 2-scf00040 | 2 |



|              |   |        |            |         |            |   |
|--------------|---|--------|------------|---------|------------|---|
| AX-157923614 | 3 | 42.234 | KV452730.1 | 2107997 | 2-scf00040 | 2 |
| AX-158382376 | 3 | 42.234 | KV452730.1 | 2109302 | 2-scf00040 | 2 |
| AX-157923615 | 3 | 42.234 | KV452730.1 | 2109343 | 2-scf00040 | 2 |
| AX-157923619 | 3 | 42.234 | KV452730.1 | 2113432 | 2-scf00040 | 2 |
| AX-157923622 | 3 | 42.234 | KV452730.1 | 2114582 | 2-scf00040 | 2 |
| AX-157923623 | 3 | 42.234 | KV452730.1 | 2116257 | 2-scf00040 | 2 |
| AX-157923626 | 3 | 42.234 | KV452730.1 | 2118188 | 2-scf00040 | 2 |
| AX-157923628 | 3 | 42.234 | KV452730.1 | 2119317 | 2-scf00040 | 2 |
| AX-157813495 | 3 | 42.277 | KV452730.1 | 2125521 | 2-scf00040 | 2 |
| AX-157923631 | 3 | 42.315 | KV452730.1 | 2123179 | 2-scf00040 | 2 |
| AX-157923632 | 3 | 42.315 | KV452730.1 | 2125874 | 2-scf00040 | 2 |
| AX-157813497 | 3 | 42.343 | KV452730.1 | 2134124 | 2-scf00040 | 2 |
| AX-157813498 | 3 | 42.343 | KV452730.1 | 2136123 | 2-scf00040 | 2 |
| AX-157923640 | 3 | 42.343 | KV452730.1 | 2137534 | 2-scf00040 | 2 |
| AX-157923641 | 3 | 42.343 | KV452730.1 | 2138231 | 2-scf00040 | 2 |
| AX-157813500 | 3 | 42.343 | KV452730.1 | 2143815 | 2-scf00040 | 2 |
| AX-157923654 | 3 | 42.343 | KV452730.1 | 2165793 | 2-scf00040 | 2 |
| AX-158379315 | 3 | 42.343 | KV452730.1 | 2184898 | 2-scf00040 | 2 |
| AX-157746906 | 3 | 42.343 | KV452730.1 | 2222035 | 2-scf00040 | 2 |
| AX-157923701 | 3 | 42.343 | KV452730.1 | 2254386 | 2-scf00040 | 2 |
| AX-157923762 | 3 | 42.343 | KV452730.1 | 2313982 | 2-scf00040 | 2 |
| AX-157745719 | 3 | 42.452 | KV452730.1 | 2150586 | 2-scf00040 | 2 |
| AX-157813502 | 3 | 42.562 | KV452730.1 | 2157222 | 2-scf00040 | 2 |
| AX-157923648 | 3 | 42.562 | KV452730.1 | 2158204 | 2-scf00040 | 2 |
| AX-157813503 | 3 | 42.562 | KV452730.1 | 2158411 | 2-scf00040 | 2 |
| AX-157923650 | 3 | 42.562 | KV452730.1 | 2159011 | 2-scf00040 | 2 |
| AX-157923651 | 3 | 42.671 | KV452730.1 | 2161745 | 2-scf00040 | 2 |
| AX-157747964 | 3 | 42.728 | KV452730.1 | 2162198 | 2-scf00040 | 2 |
| AX-157923656 | 3 | 42.728 | KV452730.1 | 2170444 | 2-scf00040 | 2 |
| AX-157923655 | 3 | 42.78  | KV452730.1 | 2167147 | 2-scf00040 | 2 |
| AX-157710068 | 3 | 42.78  | KV452730.1 | 2169933 | 2-scf00040 | 2 |
| AX-157923657 | 3 | 42.78  | KV452730.1 | 2172217 | 2-scf00040 | 2 |
| AX-157923661 | 3 | 42.78  | KV452730.1 | 2174273 | 2-scf00040 | 2 |
| AX-157923664 | 3 | 42.78  | KV452730.1 | 2176821 | 2-scf00040 | 2 |
| AX-157923666 | 3 | 42.78  | KV452730.1 | 2177286 | 2-scf00040 | 2 |
| AX-157813505 | 3 | 42.78  | KV452730.1 | 2179105 | 2-scf00040 | 2 |
| AX-157714600 | 3 | 42.78  | KV452730.1 | 2179265 | 2-scf00040 | 2 |
| AX-157813506 | 3 | 42.78  | KV452730.1 | 2183948 | 2-scf00040 | 2 |
| AX-158405315 | 3 | 42.78  | KV452730.1 | 2242640 | 2-scf00040 | 2 |
| AX-157765037 | 3 | 42.933 | KV452730.1 | 2180482 | 2-scf00040 | 2 |
| AX-157713940 | 3 | 43.064 | KV452730.1 | 2191375 | 2-scf00040 | 2 |
| AX-157813509 | 3 | 43.218 | KV452730.1 | 2195881 | 2-scf00040 | 2 |
| AX-157923677 | 3 | 43.218 | KV452730.1 | 2197879 | 2-scf00040 | 2 |
| AX-157923696 | 3 | 43.218 | KV452730.1 | 2251603 | 2-scf00040 | 2 |
| AX-157923700 | 3 | 43.218 | KV452730.1 | 2253797 | 2-scf00040 | 2 |
| AX-157923726 | 3 | 43.218 | KV452730.1 | 2288160 | 2-scf00040 | 2 |
| AX-157923764 | 3 | 43.218 | KV452730.1 | 2314629 | 2-scf00040 | 2 |
| AX-157923697 | 3 | 43.222 | KV452730.1 | 2252634 | 2-scf00040 | 2 |
| AX-157719297 | 3 | 43.226 | KV452730.1 | 2264423 | 2-scf00040 | 2 |
| AX-157813511 | 3 | 43.23  | KV452730.1 | 2264978 | 2-scf00040 | 2 |
| AX-157709173 | 3 | 43.23  | KV452730.1 | 2284893 | 2-scf00040 | 2 |

|              |   |        |             |         |            |    |
|--------------|---|--------|-------------|---------|------------|----|
| AX-157923716 | 3 | 43.236 | KV452730.1  | 2279658 | 2-scf00040 | 2  |
| AX-157923719 | 3 | 43.241 | KV452730.1  | 2282390 | 2-scf00040 | 2  |
| AX-157923745 | 3 | 43.241 | KV452730.1  | 2298425 | 2-scf00040 | 2  |
| AX-157704710 | 3 | 43.241 | 3ML01027109 | 880     | scf02712_1 | UN |
| AX-157923720 | 3 | 43.243 | KV452730.1  | 2283314 | 2-scf00040 | 2  |
| AX-157923729 | 3 | 43.247 | KV452730.1  | 2289782 | 2-scf00040 | 2  |
| AX-157923730 | 3 | 43.251 | KV452730.1  | 2290304 | 2-scf00040 | 2  |
| AX-157923731 | 3 | 43.259 | KV452730.1  | 2290790 | 2-scf00040 | 2  |
| AX-157923755 | 3 | 43.259 | KV452730.1  | 2309424 | 2-scf00040 | 2  |
| AX-158405311 | 3 | 43.339 | KV452730.1  | 2201717 | 2-scf00040 | 2  |
| AX-157923710 | 3 | 43.339 | KV452730.1  | 2274209 | 2-scf00040 | 2  |
| AX-157883614 | 3 | 43.339 | KV452730.1  | 2300851 | 2-scf00040 | 2  |
| AX-157923748 | 3 | 43.339 | KV452730.1  | 2301364 | 2-scf00040 | 2  |
| AX-157923756 | 3 | 43.339 | KV452730.1  | 2310659 | 2-scf00040 | 2  |
| AX-157923771 | 3 | 43.548 | KV452730.1  | 2317953 | 2-scf00040 | 2  |
| AX-157923782 | 3 | 43.672 | KV452730.1  | 2325541 | 2-scf00040 | 2  |
| AX-157923791 | 3 | 43.672 | KV452730.1  | 2328635 | 2-scf00040 | 2  |
| AX-158389684 | 3 | 43.672 | KV452730.1  | 2333106 | 2-scf00040 | 2  |
| AX-157923799 | 3 | 43.672 | KV452730.1  | 2334456 | 2-scf00040 | 2  |
| AX-158382386 | 3 | 43.672 | KV452730.1  | 2337401 | 2-scf00040 | 2  |
| AX-157874803 | 3 | 43.672 | KV452730.1  | 2374530 | 2-scf00040 | 2  |
| AX-157923793 | 3 | 43.983 | KV452730.1  | 2329676 | 2-scf00040 | 2  |
| AX-157923795 | 3 | 43.983 | KV452730.1  | 2331669 | 2-scf00040 | 2  |
| AX-157923805 | 3 | 43.983 | KV452730.1  | 2338086 | 2-scf00040 | 2  |
| AX-157923806 | 3 | 43.983 | KV452730.1  | 2339230 | 2-scf00040 | 2  |
| AX-157923809 | 3 | 43.983 | KV452730.1  | 2341480 | 2-scf00040 | 2  |
| AX-157923813 | 3 | 43.983 | KV452730.1  | 2345376 | 2-scf00040 | 2  |
| AX-157923819 | 3 | 43.983 | KV452730.1  | 2350083 | 2-scf00040 | 2  |
| AX-157923821 | 3 | 43.983 | KV452730.1  | 2351124 | 2-scf00040 | 2  |
| AX-157923823 | 3 | 43.983 | KV452730.1  | 2353098 | 2-scf00040 | 2  |
| AX-157883616 | 3 | 43.983 | KV452730.1  | 2357980 | 2-scf00040 | 2  |
| AX-157923832 | 3 | 43.983 | KV452730.1  | 2358488 | 2-scf00040 | 2  |
| AX-157923837 | 3 | 43.983 | KV452730.1  | 2360728 | 2-scf00040 | 2  |
| AX-157853851 | 3 | 43.983 | KV452730.1  | 2361100 | 2-scf00040 | 2  |
| AX-157923838 | 3 | 43.983 | KV452730.1  | 2362466 | 2-scf00040 | 2  |
| AX-157923839 | 3 | 43.983 | KV452730.1  | 2364384 | 2-scf00040 | 2  |
| AX-157923841 | 3 | 43.983 | KV452730.1  | 2365299 | 2-scf00040 | 2  |
| AX-157923842 | 3 | 43.983 | KV452730.1  | 2366402 | 2-scf00040 | 2  |
| AX-157923851 | 3 | 43.983 | KV452730.1  | 2371104 | 2-scf00040 | 2  |
| AX-157923855 | 3 | 43.984 | KV452730.1  | 2373448 | 2-scf00040 | 2  |
| AX-157923859 | 3 | 44.04  | KV452730.1  | 2379264 | 2-scf00040 | 2  |
| AX-157923865 | 3 | 44.04  | KV452730.1  | 2383228 | 2-scf00040 | 2  |
| AX-157883618 | 3 | 44.085 | KV452730.1  | 2380070 | 2-scf00040 | 2  |
| AX-157923888 | 3 | 44.085 | KV452730.1  | 2395391 | 2-scf00040 | 2  |
| AX-157923870 | 3 | 44.114 | KV452730.1  | 2385830 | 2-scf00040 | 2  |
| AX-157923871 | 3 | 44.147 | KV452730.1  | 2387437 | 2-scf00040 | 2  |
| AX-157923868 | 3 | 44.311 | KV452730.1  | 2385438 | 2-scf00040 | 2  |
| AX-157923874 | 3 | 44.311 | KV452730.1  | 2388474 | 2-scf00040 | 2  |
| AX-157923876 | 3 | 44.311 | KV452730.1  | 2389643 | 2-scf00040 | 2  |
| AX-157923881 | 3 | 44.311 | KV452730.1  | 2391576 | 2-scf00040 | 2  |
| AX-157923884 | 3 | 44.311 | KV452730.1  | 2393174 | 2-scf00040 | 2  |

|              |   |        |            |         |            |   |
|--------------|---|--------|------------|---------|------------|---|
| AX-157923886 | 3 | 44.311 | KV452730.1 | 2393896 | 2-scf00040 | 2 |
| AX-157883619 | 3 | 44.311 | KV452730.1 | 2394599 | 2-scf00040 | 2 |
| AX-157923894 | 3 | 44.316 | KV452730.1 | 2400925 | 2-scf00040 | 2 |
| AX-157923825 | 3 | 44.498 | KV452730.1 | 2353689 | 2-scf00040 | 2 |
| AX-157923895 | 3 | 44.498 | KV452730.1 | 2402087 | 2-scf00040 | 2 |
| AX-157923879 | 3 | 44.747 | KV452730.1 | 2391230 | 2-scf00040 | 2 |
| AX-157756783 | 3 | 44.747 | KV452730.1 | 2407711 | 2-scf00040 | 2 |
| AX-157923948 | 3 | 44.747 | KV452730.1 | 2451183 | 2-scf00040 | 2 |
| AX-157924032 | 3 | 44.747 | KV452730.1 | 2515221 | 2-scf00040 | 2 |
| AX-157923906 | 3 | 44.75  | KV452730.1 | 2413934 | 2-scf00040 | 2 |
| AX-157923911 | 3 | 44.75  | KV452730.1 | 2416914 | 2-scf00040 | 2 |
| AX-157923913 | 3 | 44.75  | KV452730.1 | 2418228 | 2-scf00040 | 2 |
| AX-157923917 | 3 | 44.75  | KV452730.1 | 2420767 | 2-scf00040 | 2 |
| AX-157923900 | 3 | 44.751 | KV452730.1 | 2410734 | 2-scf00040 | 2 |
| AX-157923916 | 3 | 44.751 | KV452730.1 | 2419259 | 2-scf00040 | 2 |
| AX-157923935 | 3 | 44.982 | KV452730.1 | 2433676 | 2-scf00040 | 2 |
| AX-157923926 | 3 | 44.993 | KV452730.1 | 2426474 | 2-scf00040 | 2 |
| AX-157883621 | 3 | 44.993 | KV452730.1 | 2434807 | 2-scf00040 | 2 |
| AX-158379317 | 3 | 44.993 | KV452730.1 | 2474710 | 2-scf00040 | 2 |
| AX-157739809 | 3 | 44.993 | KV452730.1 | 2526005 | 2-scf00040 | 2 |
| AX-157923940 | 3 | 45.003 | KV452730.1 | 2439322 | 2-scf00040 | 2 |
| AX-157923941 | 3 | 45.016 | KV452730.1 | 2439932 | 2-scf00040 | 2 |
| AX-157923945 | 3 | 45.028 | KV452730.1 | 2444612 | 2-scf00040 | 2 |
| AX-157923955 | 3 | 45.036 | KV452730.1 | 2457107 | 2-scf00040 | 2 |
| AX-157923965 | 3 | 45.036 | KV452730.1 | 2461824 | 2-scf00040 | 2 |
| AX-157923961 | 3 | 45.055 | KV452730.1 | 2457941 | 2-scf00040 | 2 |
| AX-157923971 | 3 | 45.218 | KV452730.1 | 2466755 | 2-scf00040 | 2 |
| AX-158404466 | 3 | 45.218 | KV452730.1 | 2466979 | 2-scf00040 | 2 |
| AX-157923972 | 3 | 45.223 | KV452730.1 | 2468161 | 2-scf00040 | 2 |
| AX-157923977 | 3 | 45.341 | KV452730.1 | 2471740 | 2-scf00040 | 2 |
| AX-157923994 | 3 | 45.341 | KV452730.1 | 2485572 | 2-scf00040 | 2 |
| AX-157924000 | 3 | 45.341 | KV452730.1 | 2489585 | 2-scf00040 | 2 |
| AX-157923985 | 3 | 45.482 | KV452730.1 | 2480902 | 2-scf00040 | 2 |
| AX-157741266 | 3 | 45.482 | KV452730.1 | 2490189 | 2-scf00040 | 2 |
| AX-157923990 | 3 | 45.803 | KV452730.1 | 2482030 | 2-scf00040 | 2 |
| AX-157923995 | 3 | 46.099 | KV452730.1 | 2487347 | 2-scf00040 | 2 |
| AX-157924005 | 3 | 46.117 | KV452730.1 | 2494491 | 2-scf00040 | 2 |
| AX-157924011 | 3 | 46.167 | KV452730.1 | 2497914 | 2-scf00040 | 2 |
| AX-157924010 | 3 | 46.174 | KV452730.1 | 2497263 | 2-scf00040 | 2 |
| AX-157725781 | 3 | 46.174 | KV452730.1 | 2511133 | 2-scf00040 | 2 |
| AX-157924029 | 3 | 46.174 | KV452730.1 | 2514027 | 2-scf00040 | 2 |
| AX-157924039 | 3 | 46.174 | KV452730.1 | 2520815 | 2-scf00040 | 2 |
| AX-157924058 | 3 | 46.33  | KV452730.1 | 2533741 | 2-scf00040 | 2 |
| AX-157750369 | 3 | 46.33  | KV452730.1 | 2534829 | 2-scf00040 | 2 |
| AX-157924062 | 3 | 46.33  | KV452730.1 | 2536714 | 2-scf00040 | 2 |
| AX-157924096 | 3 | 46.789 | KV452730.1 | 2579178 | 2-scf00040 | 2 |
| AX-157924100 | 3 | 47.049 | KV452730.1 | 2587362 | 2-scf00040 | 2 |
| AX-157924104 | 3 | 47.049 | KV452730.1 | 2588625 | 2-scf00040 | 2 |
| AX-157924106 | 3 | 47.049 | KV452730.1 | 2590461 | 2-scf00040 | 2 |
| AX-157924107 | 3 | 47.049 | KV452730.1 | 2593189 | 2-scf00040 | 2 |
| AX-157924108 | 3 | 47.049 | KV452730.1 | 2594454 | 2-scf00040 | 2 |

|              |   |        |            |         |            |   |
|--------------|---|--------|------------|---------|------------|---|
| AX-157862678 | 3 | 47.049 | KV452730.1 | 2605019 | 2-scf00040 | 2 |
| AX-157775650 | 3 | 47.049 | KV452730.1 | 2605349 | 2-scf00040 | 2 |
| AX-157924125 | 3 | 47.049 | KV452730.1 | 2612595 | 2-scf00040 | 2 |
| AX-157924127 | 3 | 47.049 | KV452730.1 | 2615778 | 2-scf00040 | 2 |
| AX-157924128 | 3 | 47.049 | KV452730.1 | 2616547 | 2-scf00040 | 2 |
| AX-157924143 | 3 | 47.049 | KV452730.1 | 2631937 | 2-scf00040 | 2 |
| AX-157924151 | 3 | 47.049 | KV452730.1 | 2637628 | 2-scf00040 | 2 |
| AX-157924163 | 3 | 47.049 | KV452730.1 | 2647820 | 2-scf00040 | 2 |
| AX-158405323 | 3 | 47.049 | KV452730.1 | 2648769 | 2-scf00040 | 2 |
| AX-157924184 | 3 | 47.049 | KV452730.1 | 2664911 | 2-scf00040 | 2 |
| AX-157924244 | 3 | 47.049 | KV452730.1 | 2726286 | 2-scf00040 | 2 |
| AX-157924249 | 3 | 47.049 | KV452730.1 | 2733923 | 2-scf00040 | 2 |
| AX-157924130 | 3 | 47.115 | KV452730.1 | 2617988 | 2-scf00040 | 2 |
| AX-157718556 | 3 | 47.115 | KV452730.1 | 2618504 | 2-scf00040 | 2 |
| AX-157923920 | 3 | 47.159 | KV452730.1 | 2422835 | 2-scf00040 | 2 |
| AX-157923942 | 3 | 47.159 | KV452730.1 | 2440259 | 2-scf00040 | 2 |
| AX-157771485 | 3 | 47.159 | KV452730.1 | 2492228 | 2-scf00040 | 2 |
| AX-157924014 | 3 | 47.159 | KV452730.1 | 2498930 | 2-scf00040 | 2 |
| AX-157924026 | 3 | 47.159 | KV452730.1 | 2508130 | 2-scf00040 | 2 |
| AX-157924034 | 3 | 47.159 | KV452730.1 | 2518102 | 2-scf00040 | 2 |
| AX-157924043 | 3 | 47.159 | KV452730.1 | 2521941 | 2-scf00040 | 2 |
| AX-157924047 | 3 | 47.159 | KV452730.1 | 2523906 | 2-scf00040 | 2 |
| AX-157924111 | 3 | 47.159 | KV452730.1 | 2595683 | 2-scf00040 | 2 |
| AX-157924118 | 3 | 47.159 | KV452730.1 | 2607731 | 2-scf00040 | 2 |
| AX-157924133 | 3 | 47.159 | KV452730.1 | 2627637 | 2-scf00040 | 2 |
| AX-157924141 | 3 | 47.159 | KV452730.1 | 2630836 | 2-scf00040 | 2 |
| AX-157924147 | 3 | 47.159 | KV452730.1 | 2633595 | 2-scf00040 | 2 |
| AX-157924149 | 3 | 47.159 | KV452730.1 | 2635342 | 2-scf00040 | 2 |
| AX-157924150 | 3 | 47.159 | KV452730.1 | 2636147 | 2-scf00040 | 2 |
| AX-157924153 | 3 | 47.159 | KV452730.1 | 2639170 | 2-scf00040 | 2 |
| AX-157924158 | 3 | 47.159 | KV452730.1 | 2642578 | 2-scf00040 | 2 |
| AX-157924160 | 3 | 47.159 | KV452730.1 | 2645722 | 2-scf00040 | 2 |
| AX-157924166 | 3 | 47.159 | KV452730.1 | 2648948 | 2-scf00040 | 2 |
| AX-157924168 | 3 | 47.159 | KV452730.1 | 2650056 | 2-scf00040 | 2 |
| AX-157924169 | 3 | 47.159 | KV452730.1 | 2650325 | 2-scf00040 | 2 |
| AX-157721142 | 3 | 47.159 | KV452730.1 | 2650895 | 2-scf00040 | 2 |
| AX-157924172 | 3 | 47.159 | KV452730.1 | 2651650 | 2-scf00040 | 2 |
| AX-157813520 | 3 | 47.159 | KV452730.1 | 2653668 | 2-scf00040 | 2 |
| AX-157924175 | 3 | 47.159 | KV452730.1 | 2654059 | 2-scf00040 | 2 |
| AX-157924177 | 3 | 47.159 | KV452730.1 | 2657945 | 2-scf00040 | 2 |
| AX-157924180 | 3 | 47.159 | KV452730.1 | 2660417 | 2-scf00040 | 2 |
| AX-158379318 | 3 | 47.159 | KV452730.1 | 2662571 | 2-scf00040 | 2 |
| AX-157924183 | 3 | 47.159 | KV452730.1 | 2664054 | 2-scf00040 | 2 |
| AX-157924187 | 3 | 47.159 | KV452730.1 | 2669447 | 2-scf00040 | 2 |
| AX-157813521 | 3 | 47.159 | KV452730.1 | 2671161 | 2-scf00040 | 2 |
| AX-157924194 | 3 | 47.159 | KV452730.1 | 2674002 | 2-scf00040 | 2 |
| AX-157924202 | 3 | 47.159 | KV452730.1 | 2680904 | 2-scf00040 | 2 |
| AX-157924191 | 3 | 47.257 | KV452730.1 | 2671683 | 2-scf00040 | 2 |
| AX-157924197 | 3 | 47.341 | KV452730.1 | 2675673 | 2-scf00040 | 2 |
| AX-157924212 | 3 | 47.705 | KV452730.1 | 2688204 | 2-scf00040 | 2 |
| AX-157924215 | 3 | 47.705 | KV452730.1 | 2689358 | 2-scf00040 | 2 |

|              |   |        |            |         |            |   |
|--------------|---|--------|------------|---------|------------|---|
| AX-157719289 | 3 | 47.705 | KV452730.1 | 2722337 | 2-scf00040 | 2 |
| AX-157853855 | 3 | 47.813 | KV452730.1 | 2703906 | 2-scf00040 | 2 |
| AX-157924228 | 3 | 47.813 | KV452730.1 | 2705111 | 2-scf00040 | 2 |
| AX-157924232 | 3 | 47.813 | KV452730.1 | 2710224 | 2-scf00040 | 2 |
| AX-157924234 | 3 | 47.867 | KV452730.1 | 2712519 | 2-scf00040 | 2 |
| AX-157924207 | 3 | 47.924 | KV452730.1 | 2685545 | 2-scf00040 | 2 |
| AX-157924220 | 3 | 47.924 | KV452730.1 | 2691707 | 2-scf00040 | 2 |
| AX-157924230 | 3 | 47.924 | KV452730.1 | 2708089 | 2-scf00040 | 2 |
| AX-157924236 | 3 | 47.924 | KV452730.1 | 2714263 | 2-scf00040 | 2 |
| AX-157924237 | 3 | 47.924 | KV452730.1 | 2715437 | 2-scf00040 | 2 |
| AX-157924238 | 3 | 47.924 | KV452730.1 | 2715974 | 2-scf00040 | 2 |
| AX-157924245 | 3 | 47.924 | KV452730.1 | 2727137 | 2-scf00040 | 2 |
| AX-157924246 | 3 | 47.924 | KV452730.1 | 2728457 | 2-scf00040 | 2 |
| AX-157772855 | 3 | 47.924 | KV452730.1 | 2731922 | 2-scf00040 | 2 |
| AX-157924257 | 3 | 47.924 | KV452730.1 | 2738925 | 2-scf00040 | 2 |
| AX-157924262 | 3 | 47.924 | KV452730.1 | 2740595 | 2-scf00040 | 2 |
| AX-157754038 | 3 | 47.924 | KV452730.1 | 2741346 | 2-scf00040 | 2 |
| AX-157924263 | 3 | 47.924 | KV452730.1 | 2742041 | 2-scf00040 | 2 |
| AX-157924269 | 3 | 48.142 | KV452730.1 | 2748392 | 2-scf00040 | 2 |
| AX-157924271 | 3 | 48.142 | KV452730.1 | 2749687 | 2-scf00040 | 2 |
| AX-158414927 | 3 | 48.142 | KV452730.1 | 2751782 | 2-scf00040 | 2 |
| AX-157924296 | 3 | 48.142 | KV452730.1 | 2767664 | 2-scf00040 | 2 |
| AX-157924301 | 3 | 48.142 | KV452730.1 | 2771206 | 2-scf00040 | 2 |
| AX-157924319 | 3 | 48.142 | KV452730.1 | 2781726 | 2-scf00040 | 2 |
| AX-157924324 | 3 | 48.142 | KV452730.1 | 2783636 | 2-scf00040 | 2 |
| AX-157924404 | 3 | 48.142 | KV452730.1 | 2845223 | 2-scf00040 | 2 |
| AX-157924426 | 3 | 48.142 | KV452730.1 | 2870040 | 2-scf00040 | 2 |
| AX-157924450 | 3 | 48.142 | KV452730.1 | 2900550 | 2-scf00040 | 2 |
| AX-157924455 | 3 | 48.142 | KV452730.1 | 2904777 | 2-scf00040 | 2 |
| AX-157924456 | 3 | 48.142 | KV452730.1 | 2906308 | 2-scf00040 | 2 |
| AX-157924484 | 3 | 48.142 | KV452730.1 | 2935901 | 2-scf00040 | 2 |
| AX-157924495 | 3 | 48.142 | KV452730.1 | 2944864 | 2-scf00040 | 2 |
| AX-157924526 | 3 | 48.142 | KV452730.1 | 2966871 | 2-scf00040 | 2 |
| AX-157924549 | 3 | 48.142 | KV452730.1 | 2992851 | 2-scf00040 | 2 |
| AX-157924560 | 3 | 48.142 | KV452730.1 | 3018961 | 2-scf00040 | 2 |
| AX-158382397 | 3 | 48.142 | KV452730.1 | 3024541 | 2-scf00040 | 2 |
| AX-157753485 | 3 | 48.142 | KV452730.1 | 3080384 | 2-scf00040 | 2 |
| AX-157924625 | 3 | 48.142 | KV452730.1 | 3082772 | 2-scf00040 | 2 |
| AX-157924665 | 3 | 48.142 | KV452730.1 | 3115593 | 2-scf00040 | 2 |
| AX-157924679 | 3 | 48.142 | KV452730.1 | 3125283 | 2-scf00040 | 2 |
| AX-157924703 | 3 | 48.142 | KV452730.1 | 3136588 | 2-scf00040 | 2 |
| AX-157924791 | 3 | 48.142 | KV452730.1 | 3200282 | 2-scf00040 | 2 |
| AX-157924807 | 3 | 48.142 | KV452730.1 | 3219827 | 2-scf00040 | 2 |
| AX-157924889 | 3 | 48.142 | KV452730.1 | 3298459 | 2-scf00040 | 2 |
| AX-157924930 | 3 | 48.142 | KV452730.1 | 3343376 | 2-scf00040 | 2 |
| AX-157924954 | 3 | 48.142 | KV452730.1 | 3374503 | 2-scf00040 | 2 |
| AX-157924961 | 3 | 48.142 | KV452730.1 | 3379032 | 2-scf00040 | 2 |
| AX-157925262 | 3 | 48.142 | KV452730.1 | 3730405 | 2-scf00040 | 2 |
| AX-157924275 | 3 | 48.215 | KV452730.1 | 2753440 | 2-scf00040 | 2 |
| AX-157924282 | 3 | 48.252 | KV452730.1 | 2758182 | 2-scf00040 | 2 |
| AX-157924295 | 3 | 48.29  | KV452730.1 | 2766983 | 2-scf00040 | 2 |

|              |   |        |            |         |            |   |
|--------------|---|--------|------------|---------|------------|---|
| AX-157924298 | 3 | 48.361 | KV452730.1 | 2769480 | 2-scf00040 | 2 |
| AX-157924303 | 3 | 48.47  | KV452730.1 | 2771614 | 2-scf00040 | 2 |
| AX-157924304 | 3 | 48.47  | KV452730.1 | 2772098 | 2-scf00040 | 2 |
| AX-157747932 | 3 | 48.47  | KV452730.1 | 2778189 | 2-scf00040 | 2 |
| AX-157924311 | 3 | 48.47  | KV452730.1 | 2778608 | 2-scf00040 | 2 |
| AX-157924313 | 3 | 48.47  | KV452730.1 | 2779128 | 2-scf00040 | 2 |
| AX-157924315 | 3 | 48.47  | KV452730.1 | 2779713 | 2-scf00040 | 2 |
| AX-157924316 | 3 | 48.47  | KV452730.1 | 2780203 | 2-scf00040 | 2 |
| AX-157924318 | 3 | 48.47  | KV452730.1 | 2781007 | 2-scf00040 | 2 |
| AX-157924323 | 3 | 48.47  | KV452730.1 | 2782972 | 2-scf00040 | 2 |
| AX-157924327 | 3 | 48.47  | KV452730.1 | 2787190 | 2-scf00040 | 2 |
| AX-157924328 | 3 | 48.47  | KV452730.1 | 2789921 | 2-scf00040 | 2 |
| AX-157924333 | 3 | 48.47  | KV452730.1 | 2793326 | 2-scf00040 | 2 |
| AX-157924337 | 3 | 48.47  | KV452730.1 | 2794766 | 2-scf00040 | 2 |
| AX-157924342 | 3 | 48.47  | KV452730.1 | 2796680 | 2-scf00040 | 2 |
| AX-157924343 | 3 | 48.47  | KV452730.1 | 2797375 | 2-scf00040 | 2 |
| AX-157924344 | 3 | 48.47  | KV452730.1 | 2798087 | 2-scf00040 | 2 |
| AX-158414928 | 3 | 48.47  | KV452730.1 | 2800119 | 2-scf00040 | 2 |
| AX-157924362 | 3 | 48.47  | KV452730.1 | 2816731 | 2-scf00040 | 2 |
| AX-157924366 | 3 | 48.47  | KV452730.1 | 2818385 | 2-scf00040 | 2 |
| AX-157924374 | 3 | 48.47  | KV452730.1 | 2824344 | 2-scf00040 | 2 |
| AX-157924398 | 3 | 48.47  | KV452730.1 | 2838658 | 2-scf00040 | 2 |
| AX-157853857 | 3 | 48.47  | KV452730.1 | 2882196 | 2-scf00040 | 2 |
| AX-157924542 | 3 | 48.47  | KV452730.1 | 2988990 | 2-scf00040 | 2 |
| AX-157924907 | 3 | 48.47  | KV452730.1 | 3316443 | 2-scf00040 | 2 |
| AX-157924912 | 3 | 48.47  | KV452730.1 | 3321755 | 2-scf00040 | 2 |
| AX-157924340 | 3 | 48.688 | KV452730.1 | 2795843 | 2-scf00040 | 2 |
| AX-157924364 | 3 | 48.688 | KV452730.1 | 2817378 | 2-scf00040 | 2 |
| AX-157924370 | 3 | 48.688 | KV452730.1 | 2820199 | 2-scf00040 | 2 |
| AX-157924371 | 3 | 48.688 | KV452730.1 | 2822554 | 2-scf00040 | 2 |
| AX-157924377 | 3 | 48.688 | KV452730.1 | 2827012 | 2-scf00040 | 2 |
| AX-158389687 | 3 | 48.688 | KV452730.1 | 2828987 | 2-scf00040 | 2 |
| AX-157924380 | 3 | 48.688 | KV452730.1 | 2830774 | 2-scf00040 | 2 |
| AX-157924387 | 3 | 48.688 | KV452730.1 | 2832754 | 2-scf00040 | 2 |
| AX-157924390 | 3 | 48.688 | KV452730.1 | 2834672 | 2-scf00040 | 2 |
| AX-158405330 | 3 | 48.688 | KV452730.1 | 2835276 | 2-scf00040 | 2 |
| AX-157924393 | 3 | 48.688 | KV452730.1 | 2837116 | 2-scf00040 | 2 |
| AX-157924394 | 3 | 48.688 | KV452730.1 | 2837630 | 2-scf00040 | 2 |
| AX-157924396 | 3 | 48.688 | KV452730.1 | 2837949 | 2-scf00040 | 2 |
| AX-157924402 | 3 | 48.688 | KV452730.1 | 2842864 | 2-scf00040 | 2 |
| AX-157924425 | 3 | 48.688 | KV452730.1 | 2869300 | 2-scf00040 | 2 |
| AX-157924789 | 3 | 48.688 | KV452730.1 | 3199261 | 2-scf00040 | 2 |
| AX-157924227 | 3 | 48.893 | KV452730.1 | 2699239 | 2-scf00040 | 2 |
| AX-157924240 | 3 | 48.893 | KV452730.1 | 2717417 | 2-scf00040 | 2 |
| AX-157924388 | 3 | 48.893 | KV452730.1 | 2833977 | 2-scf00040 | 2 |
| AX-157924397 | 3 | 48.893 | KV452730.1 | 2838446 | 2-scf00040 | 2 |
| AX-157924416 | 3 | 48.893 | KV452730.1 | 2861537 | 2-scf00040 | 2 |
| AX-157924418 | 3 | 48.893 | KV452730.1 | 2862701 | 2-scf00040 | 2 |
| AX-157924422 | 3 | 48.893 | KV452730.1 | 2867180 | 2-scf00040 | 2 |
| AX-157924423 | 3 | 48.893 | KV452730.1 | 2867650 | 2-scf00040 | 2 |
| AX-157924431 | 3 | 48.893 | KV452730.1 | 2875618 | 2-scf00040 | 2 |

|              |   |        |            |         |            |   |
|--------------|---|--------|------------|---------|------------|---|
| AX-157924436 | 3 | 48.893 | KV452730.1 | 2882848 | 2-scf00040 | 2 |
| AX-157924467 | 3 | 48.893 | KV452730.1 | 2917892 | 2-scf00040 | 2 |
| AX-157924468 | 3 | 48.893 | KV452730.1 | 2919339 | 2-scf00040 | 2 |
| AX-157924517 | 3 | 48.893 | KV452730.1 | 2960402 | 2-scf00040 | 2 |
| AX-157924557 | 3 | 48.893 | KV452730.1 | 3018509 | 2-scf00040 | 2 |
| AX-157864590 | 3 | 48.893 | KV452730.1 | 3052595 | 2-scf00040 | 2 |
| AX-157924634 | 3 | 48.893 | KV452730.1 | 3090570 | 2-scf00040 | 2 |
| AX-157924861 | 3 | 48.893 | KV452730.1 | 3274547 | 2-scf00040 | 2 |
| AX-157813564 | 3 | 48.893 | KV452730.1 | 3361309 | 2-scf00040 | 2 |
| AX-157813565 | 3 | 48.893 | KV452730.1 | 3363823 | 2-scf00040 | 2 |
| AX-157924998 | 3 | 48.893 | KV452730.1 | 3412518 | 2-scf00040 | 2 |
| AX-157925007 | 3 | 48.893 | KV452730.1 | 3420680 | 2-scf00040 | 2 |
| AX-157925287 | 3 | 48.893 | KV452730.1 | 3762163 | 2-scf00040 | 2 |
| AX-157745428 | 3 | 48.893 | KV452730.1 | 3764070 | 2-scf00040 | 2 |
| AX-157925291 | 3 | 48.893 | KV452730.1 | 3771096 | 2-scf00040 | 2 |
| AX-157925339 | 3 | 48.893 | KV452730.1 | 3825728 | 2-scf00040 | 2 |
| AX-157925343 | 3 | 48.893 | KV452730.1 | 3832579 | 2-scf00040 | 2 |
| AX-157924430 | 3 | 48.921 | KV452730.1 | 2875323 | 2-scf00040 | 2 |
| AX-157924216 | 3 | 49.125 | KV452730.1 | 2690260 | 2-scf00040 | 2 |
| AX-157772068 | 3 | 49.125 | KV452730.1 | 2884485 | 2-scf00040 | 2 |
| AX-157924444 | 3 | 49.125 | KV452730.1 | 2895242 | 2-scf00040 | 2 |
| AX-157924445 | 3 | 49.125 | KV452730.1 | 2895906 | 2-scf00040 | 2 |
| AX-157924448 | 3 | 49.125 | KV452730.1 | 2897735 | 2-scf00040 | 2 |
| AX-157924461 | 3 | 49.125 | KV452730.1 | 2909656 | 2-scf00040 | 2 |
| AX-157741712 | 3 | 49.125 | KV452730.1 | 2918959 | 2-scf00040 | 2 |
| AX-157924473 | 3 | 49.125 | KV452730.1 | 2924390 | 2-scf00040 | 2 |
| AX-157813529 | 3 | 49.125 | KV452730.1 | 2926799 | 2-scf00040 | 2 |
| AX-157924480 | 3 | 49.125 | KV452730.1 | 2930586 | 2-scf00040 | 2 |
| AX-157924489 | 3 | 49.125 | KV452730.1 | 2939663 | 2-scf00040 | 2 |
| AX-157924493 | 3 | 49.125 | KV452730.1 | 2941079 | 2-scf00040 | 2 |
| AX-157924496 | 3 | 49.125 | KV452730.1 | 2945240 | 2-scf00040 | 2 |
| AX-157924501 | 3 | 49.125 | KV452730.1 | 2947893 | 2-scf00040 | 2 |
| AX-157924502 | 3 | 49.125 | KV452730.1 | 2948672 | 2-scf00040 | 2 |
| AX-157924505 | 3 | 49.125 | KV452730.1 | 2950636 | 2-scf00040 | 2 |
| AX-157924507 | 3 | 49.125 | KV452730.1 | 2952546 | 2-scf00040 | 2 |
| AX-157924515 | 3 | 49.125 | KV452730.1 | 2959594 | 2-scf00040 | 2 |
| AX-157924520 | 3 | 49.125 | KV452730.1 | 2962550 | 2-scf00040 | 2 |
| AX-157924525 | 3 | 49.125 | KV452730.1 | 2965640 | 2-scf00040 | 2 |
| AX-157924527 | 3 | 49.125 | KV452730.1 | 2968351 | 2-scf00040 | 2 |
| AX-157813531 | 3 | 49.125 | KV452730.1 | 2973612 | 2-scf00040 | 2 |
| AX-157864589 | 3 | 49.125 | KV452730.1 | 2981545 | 2-scf00040 | 2 |
| AX-157924539 | 3 | 49.125 | KV452730.1 | 2986647 | 2-scf00040 | 2 |
| AX-157924547 | 3 | 49.125 | KV452730.1 | 2990695 | 2-scf00040 | 2 |
| AX-157743595 | 3 | 49.125 | KV452730.1 | 2995369 | 2-scf00040 | 2 |
| AX-157813534 | 3 | 49.125 | KV452730.1 | 3006553 | 2-scf00040 | 2 |
| AX-157924563 | 3 | 49.125 | KV452730.1 | 3023649 | 2-scf00040 | 2 |
| AX-157924565 | 3 | 49.125 | KV452730.1 | 3025009 | 2-scf00040 | 2 |
| AX-157924568 | 3 | 49.125 | KV452730.1 | 3025361 | 2-scf00040 | 2 |
| AX-157924571 | 3 | 49.125 | KV452730.1 | 3026553 | 2-scf00040 | 2 |
| AX-157753492 | 3 | 49.125 | KV452730.1 | 3029313 | 2-scf00040 | 2 |
| AX-157924613 | 3 | 49.125 | KV452730.1 | 3076983 | 2-scf00040 | 2 |

|              |   |        |             |         |            |    |
|--------------|---|--------|-------------|---------|------------|----|
| AX-157924616 | 3 | 49.125 | KV452730.1  | 3077819 | 2-scf00040 | 2  |
| AX-157924686 | 3 | 49.125 | KV452730.1  | 3129188 | 2-scf00040 | 2  |
| AX-157924699 | 3 | 49.125 | KV452730.1  | 3134011 | 2-scf00040 | 2  |
| AX-157924709 | 3 | 49.125 | KV452730.1  | 3139905 | 2-scf00040 | 2  |
| AX-157924726 | 3 | 49.125 | KV452730.1  | 3147025 | 2-scf00040 | 2  |
| AX-157924727 | 3 | 49.125 | KV452730.1  | 3147542 | 2-scf00040 | 2  |
| AX-157924749 | 3 | 49.125 | KV452730.1  | 3163132 | 2-scf00040 | 2  |
| AX-157924754 | 3 | 49.125 | KV452730.1  | 3166904 | 2-scf00040 | 2  |
| AX-157924758 | 3 | 49.125 | KV452730.1  | 3170742 | 2-scf00040 | 2  |
| AX-157924770 | 3 | 49.125 | KV452730.1  | 3180257 | 2-scf00040 | 2  |
| AX-157924910 | 3 | 49.125 | KV452730.1  | 3319542 | 2-scf00040 | 2  |
| AX-157813554 | 3 | 49.125 | KV452730.1  | 3339644 | 2-scf00040 | 2  |
| AX-157924946 | 3 | 49.125 | KV452730.1  | 3358935 | 2-scf00040 | 2  |
| AX-157924972 | 3 | 49.125 | KV452730.1  | 3399862 | 2-scf00040 | 2  |
| AX-157925049 | 3 | 49.125 | KV452730.1  | 3469565 | 2-scf00040 | 2  |
| AX-157925121 | 3 | 49.125 | KV452730.1  | 3554153 | 2-scf00040 | 2  |
| AX-157925145 | 3 | 49.125 | KV452730.1  | 3586100 | 2-scf00040 | 2  |
| AX-157813594 | 3 | 49.125 | KV452730.1  | 3679611 | 2-scf00040 | 2  |
| AX-157925274 | 3 | 49.125 | KV452730.1  | 3747207 | 2-scf00040 | 2  |
| AX-157925278 | 3 | 49.125 | KV452730.1  | 3752893 | 2-scf00040 | 2  |
| AX-157925295 | 3 | 49.125 | KV452730.1  | 3772239 | 2-scf00040 | 2  |
| AX-157706369 | 3 | 49.125 | 3ML01032142 | 299     | scf07755_1 | UN |
| AX-157924561 | 3 | 49.344 | KV452730.1  | 3022298 | 2-scf00040 | 2  |
| AX-157924572 | 3 | 49.344 | KV452730.1  | 3027077 | 2-scf00040 | 2  |
| AX-157924580 | 3 | 49.344 | KV452730.1  | 3037050 | 2-scf00040 | 2  |
| AX-157924582 | 3 | 49.344 | KV452730.1  | 3037926 | 2-scf00040 | 2  |
| AX-157924588 | 3 | 49.344 | KV452730.1  | 3047782 | 2-scf00040 | 2  |
| AX-157924591 | 3 | 49.344 | KV452730.1  | 3048333 | 2-scf00040 | 2  |
| AX-157924594 | 3 | 49.344 | KV452730.1  | 3048954 | 2-scf00040 | 2  |
| AX-157924598 | 3 | 49.344 | KV452730.1  | 3057186 | 2-scf00040 | 2  |
| AX-157924604 | 3 | 49.344 | KV452730.1  | 3067830 | 2-scf00040 | 2  |
| AX-157924607 | 3 | 49.344 | KV452730.1  | 3068970 | 2-scf00040 | 2  |
| AX-157924609 | 3 | 49.344 | KV452730.1  | 3069465 | 2-scf00040 | 2  |
| AX-157924615 | 3 | 49.344 | KV452730.1  | 3077408 | 2-scf00040 | 2  |
| AX-157924637 | 3 | 49.344 | KV452730.1  | 3094916 | 2-scf00040 | 2  |
| AX-157924650 | 3 | 49.344 | KV452730.1  | 3103754 | 2-scf00040 | 2  |
| AX-157813538 | 3 | 49.344 | KV452730.1  | 3107639 | 2-scf00040 | 2  |
| AX-157924658 | 3 | 49.344 | KV452730.1  | 3111263 | 2-scf00040 | 2  |
| AX-157924669 | 3 | 49.344 | KV452730.1  | 3117850 | 2-scf00040 | 2  |
| AX-157924767 | 3 | 49.344 | KV452730.1  | 3178658 | 2-scf00040 | 2  |
| AX-157746616 | 3 | 49.344 | KV452730.1  | 3178873 | 2-scf00040 | 2  |
| AX-157924813 | 3 | 49.344 | KV452730.1  | 3224420 | 2-scf00040 | 2  |
| AX-157924834 | 3 | 49.344 | KV452730.1  | 3251849 | 2-scf00040 | 2  |
| AX-157924836 | 3 | 49.344 | KV452730.1  | 3253707 | 2-scf00040 | 2  |
| AX-157813547 | 3 | 49.344 | KV452730.1  | 3258832 | 2-scf00040 | 2  |
| AX-157924855 | 3 | 49.344 | KV452730.1  | 3268350 | 2-scf00040 | 2  |
| AX-157924884 | 3 | 49.344 | KV452730.1  | 3294250 | 2-scf00040 | 2  |
| AX-157925172 | 3 | 49.344 | KV452730.1  | 3634763 | 2-scf00040 | 2  |
| AX-157924642 | 3 | 49.432 | KV452730.1  | 3096361 | 2-scf00040 | 2  |
| AX-157924993 | 3 | 49.432 | KV452730.1  | 3409645 | 2-scf00040 | 2  |
| AX-158379323 | 3 | 49.432 | KV452730.1  | 3514270 | 2-scf00040 | 2  |



|              |   |        |            |         |            |   |
|--------------|---|--------|------------|---------|------------|---|
| AX-157924644 | 3 | 49.495 | KV452730.1 | 3098581 | 2-scf00040 | 2 |
| AX-157853858 | 3 | 49.562 | KV452730.1 | 2905034 | 2-scf00040 | 2 |
| AX-157924466 | 3 | 49.562 | KV452730.1 | 2916724 | 2-scf00040 | 2 |
| AX-157924541 | 3 | 49.562 | KV452730.1 | 2988009 | 2-scf00040 | 2 |
| AX-157924575 | 3 | 49.562 | KV452730.1 | 3030688 | 2-scf00040 | 2 |
| AX-157853859 | 3 | 49.562 | KV452730.1 | 3033240 | 2-scf00040 | 2 |
| AX-157924576 | 3 | 49.562 | KV452730.1 | 3035235 | 2-scf00040 | 2 |
| AX-157924584 | 3 | 49.562 | KV452730.1 | 3041899 | 2-scf00040 | 2 |
| AX-157924629 | 3 | 49.562 | KV452730.1 | 3085645 | 2-scf00040 | 2 |
| AX-157727673 | 3 | 49.562 | KV452730.1 | 3102441 | 2-scf00040 | 2 |
| AX-157924654 | 3 | 49.562 | KV452730.1 | 3109306 | 2-scf00040 | 2 |
| AX-157924660 | 3 | 49.562 | KV452730.1 | 3112428 | 2-scf00040 | 2 |
| AX-157924667 | 3 | 49.562 | KV452730.1 | 3117223 | 2-scf00040 | 2 |
| AX-157924670 | 3 | 49.562 | KV452730.1 | 3119547 | 2-scf00040 | 2 |
| AX-157853860 | 3 | 49.562 | KV452730.1 | 3120095 | 2-scf00040 | 2 |
| AX-157853861 | 3 | 49.562 | KV452730.1 | 3122116 | 2-scf00040 | 2 |
| AX-157874817 | 3 | 49.562 | KV452730.1 | 3123149 | 2-scf00040 | 2 |
| AX-157924677 | 3 | 49.562 | KV452730.1 | 3123379 | 2-scf00040 | 2 |
| AX-157924681 | 3 | 49.562 | KV452730.1 | 3125732 | 2-scf00040 | 2 |
| AX-157756502 | 3 | 49.562 | KV452730.1 | 3128436 | 2-scf00040 | 2 |
| AX-157924688 | 3 | 49.562 | KV452730.1 | 3130083 | 2-scf00040 | 2 |
| AX-157924689 | 3 | 49.562 | KV452730.1 | 3130478 | 2-scf00040 | 2 |
| AX-157924692 | 3 | 49.562 | KV452730.1 | 3131069 | 2-scf00040 | 2 |
| AX-157924696 | 3 | 49.562 | KV452730.1 | 3132382 | 2-scf00040 | 2 |
| AX-157924697 | 3 | 49.562 | KV452730.1 | 3132776 | 2-scf00040 | 2 |
| AX-157924701 | 3 | 49.562 | KV452730.1 | 3135183 | 2-scf00040 | 2 |
| AX-157924702 | 3 | 49.562 | KV452730.1 | 3135972 | 2-scf00040 | 2 |
| AX-157924705 | 3 | 49.562 | KV452730.1 | 3137100 | 2-scf00040 | 2 |
| AX-157924706 | 3 | 49.562 | KV452730.1 | 3137649 | 2-scf00040 | 2 |
| AX-157924707 | 3 | 49.562 | KV452730.1 | 3138259 | 2-scf00040 | 2 |
| AX-157924708 | 3 | 49.562 | KV452730.1 | 3139402 | 2-scf00040 | 2 |
| AX-157723285 | 3 | 49.562 | KV452730.1 | 3140276 | 2-scf00040 | 2 |
| AX-157853862 | 3 | 49.562 | KV452730.1 | 3140962 | 2-scf00040 | 2 |
| AX-157724788 | 3 | 49.562 | KV452730.1 | 3141742 | 2-scf00040 | 2 |
| AX-157924719 | 3 | 49.562 | KV452730.1 | 3143733 | 2-scf00040 | 2 |
| AX-157924729 | 3 | 49.562 | KV452730.1 | 3149163 | 2-scf00040 | 2 |
| AX-157924731 | 3 | 49.562 | KV452730.1 | 3149922 | 2-scf00040 | 2 |
| AX-157727054 | 3 | 49.562 | KV452730.1 | 3150601 | 2-scf00040 | 2 |
| AX-157924736 | 3 | 49.562 | KV452730.1 | 3154909 | 2-scf00040 | 2 |
| AX-157924737 | 3 | 49.562 | KV452730.1 | 3155416 | 2-scf00040 | 2 |
| AX-157924741 | 3 | 49.562 | KV452730.1 | 3157763 | 2-scf00040 | 2 |
| AX-157924757 | 3 | 49.562 | KV452730.1 | 3168182 | 2-scf00040 | 2 |
| AX-157746291 | 3 | 49.562 | KV452730.1 | 3170875 | 2-scf00040 | 2 |
| AX-157924760 | 3 | 49.562 | KV452730.1 | 3171822 | 2-scf00040 | 2 |
| AX-157924768 | 3 | 49.562 | KV452730.1 | 3180099 | 2-scf00040 | 2 |
| AX-157924771 | 3 | 49.562 | KV452730.1 | 3181545 | 2-scf00040 | 2 |
| AX-157924773 | 3 | 49.562 | KV452730.1 | 3182093 | 2-scf00040 | 2 |
| AX-157813541 | 3 | 49.562 | KV452730.1 | 3183442 | 2-scf00040 | 2 |
| AX-157924778 | 3 | 49.562 | KV452730.1 | 3185642 | 2-scf00040 | 2 |
| AX-157924787 | 3 | 49.562 | KV452730.1 | 3196030 | 2-scf00040 | 2 |
| AX-157924788 | 3 | 49.562 | KV452730.1 | 3197072 | 2-scf00040 | 2 |

|              |   |        |            |         |            |   |
|--------------|---|--------|------------|---------|------------|---|
| AX-157924793 | 3 | 49.562 | KV452730.1 | 3201656 | 2-scf00040 | 2 |
| AX-157924794 | 3 | 49.562 | KV452730.1 | 3202918 | 2-scf00040 | 2 |
| AX-157924795 | 3 | 49.562 | KV452730.1 | 3204250 | 2-scf00040 | 2 |
| AX-157717176 | 3 | 49.562 | KV452730.1 | 3204335 | 2-scf00040 | 2 |
| AX-157924798 | 3 | 49.562 | KV452730.1 | 3207039 | 2-scf00040 | 2 |
| AX-157924803 | 3 | 49.562 | KV452730.1 | 3216131 | 2-scf00040 | 2 |
| AX-157774164 | 3 | 49.562 | KV452730.1 | 3223797 | 2-scf00040 | 2 |
| AX-157924816 | 3 | 49.562 | KV452730.1 | 3224921 | 2-scf00040 | 2 |
| AX-157924818 | 3 | 49.562 | KV452730.1 | 3226835 | 2-scf00040 | 2 |
| AX-157743435 | 3 | 49.562 | KV452730.1 | 3229680 | 2-scf00040 | 2 |
| AX-157813545 | 3 | 49.562 | KV452730.1 | 3231892 | 2-scf00040 | 2 |
| AX-157924823 | 3 | 49.562 | KV452730.1 | 3232416 | 2-scf00040 | 2 |
| AX-157924826 | 3 | 49.562 | KV452730.1 | 3236989 | 2-scf00040 | 2 |
| AX-157924828 | 3 | 49.562 | KV452730.1 | 3242769 | 2-scf00040 | 2 |
| AX-157924837 | 3 | 49.562 | KV452730.1 | 3256534 | 2-scf00040 | 2 |
| AX-157924848 | 3 | 49.562 | KV452730.1 | 3263295 | 2-scf00040 | 2 |
| AX-157924853 | 3 | 49.562 | KV452730.1 | 3266544 | 2-scf00040 | 2 |
| AX-157723530 | 3 | 49.562 | KV452730.1 | 3280601 | 2-scf00040 | 2 |
| AX-157924866 | 3 | 49.562 | KV452730.1 | 3280768 | 2-scf00040 | 2 |
| AX-157924878 | 3 | 49.562 | KV452730.1 | 3285474 | 2-scf00040 | 2 |
| AX-157924882 | 3 | 49.562 | KV452730.1 | 3289200 | 2-scf00040 | 2 |
| AX-157771770 | 3 | 49.562 | KV452730.1 | 3297835 | 2-scf00040 | 2 |
| AX-157924890 | 3 | 49.562 | KV452730.1 | 3299068 | 2-scf00040 | 2 |
| AX-157924902 | 3 | 49.562 | KV452730.1 | 3312113 | 2-scf00040 | 2 |
| AX-157924918 | 3 | 49.562 | KV452730.1 | 3325921 | 2-scf00040 | 2 |
| AX-157924923 | 3 | 49.562 | KV452730.1 | 3329605 | 2-scf00040 | 2 |
| AX-157813553 | 3 | 49.562 | KV452730.1 | 3329944 | 2-scf00040 | 2 |
| AX-157813563 | 3 | 49.562 | KV452730.1 | 3349339 | 2-scf00040 | 2 |
| AX-157924957 | 3 | 49.562 | KV452730.1 | 3377224 | 2-scf00040 | 2 |
| AX-157925004 | 3 | 49.562 | KV452730.1 | 3414671 | 2-scf00040 | 2 |
| AX-157925060 | 3 | 49.562 | KV452730.1 | 3487273 | 2-scf00040 | 2 |
| AX-157813592 | 3 | 49.562 | KV452730.1 | 3544878 | 2-scf00040 | 2 |
| AX-157925128 | 3 | 49.562 | KV452730.1 | 3566369 | 2-scf00040 | 2 |
| AX-157925192 | 3 | 49.562 | KV452730.1 | 3670940 | 2-scf00040 | 2 |
| AX-157925249 | 3 | 49.562 | KV452730.1 | 3718906 | 2-scf00040 | 2 |
| AX-157704209 | 3 | 49.612 | KV452730.1 | 3320347 | 2-scf00040 | 2 |
| AX-157924470 | 3 | 49.672 | KV452730.1 | 2922356 | 2-scf00040 | 2 |
| AX-157719340 | 3 | 49.672 | KV452730.1 | 2951205 | 2-scf00040 | 2 |
| AX-157924514 | 3 | 49.672 | KV452730.1 | 2954805 | 2-scf00040 | 2 |
| AX-157924645 | 3 | 49.672 | KV452730.1 | 3100312 | 2-scf00040 | 2 |
| AX-157924721 | 3 | 49.672 | KV452730.1 | 3144352 | 2-scf00040 | 2 |
| AX-157924724 | 3 | 49.672 | KV452730.1 | 3145876 | 2-scf00040 | 2 |
| AX-157924746 | 3 | 49.672 | KV452730.1 | 3160858 | 2-scf00040 | 2 |
| AX-157924796 | 3 | 49.672 | KV452730.1 | 3204681 | 2-scf00040 | 2 |
| AX-157924870 | 3 | 49.672 | KV452730.1 | 3282235 | 2-scf00040 | 2 |
| AX-157924895 | 3 | 49.672 | KV452730.1 | 3305913 | 2-scf00040 | 2 |
| AX-157924897 | 3 | 49.672 | KV452730.1 | 3308586 | 2-scf00040 | 2 |
| AX-157813555 | 3 | 49.672 | KV452730.1 | 3340057 | 2-scf00040 | 2 |
| AX-157813556 | 3 | 49.672 | KV452730.1 | 3342413 | 2-scf00040 | 2 |
| AX-157813558 | 3 | 49.672 | KV452730.1 | 3343551 | 2-scf00040 | 2 |
| AX-157813560 | 3 | 49.672 | KV452730.1 | 3345446 | 2-scf00040 | 2 |

|              |   |        |            |         |            |   |
|--------------|---|--------|------------|---------|------------|---|
| AX-157717940 | 3 | 49.672 | KV452730.1 | 3345543 | 2-scf00040 | 2 |
| AX-157813561 | 3 | 49.672 | KV452730.1 | 3345932 | 2-scf00040 | 2 |
| AX-157813562 | 3 | 49.672 | KV452730.1 | 3346414 | 2-scf00040 | 2 |
| AX-157924933 | 3 | 49.672 | KV452730.1 | 3349115 | 2-scf00040 | 2 |
| AX-157924935 | 3 | 49.672 | KV452730.1 | 3351462 | 2-scf00040 | 2 |
| AX-157924936 | 3 | 49.672 | KV452730.1 | 3353014 | 2-scf00040 | 2 |
| AX-157924937 | 3 | 49.672 | KV452730.1 | 3353806 | 2-scf00040 | 2 |
| AX-157924953 | 3 | 49.672 | KV452730.1 | 3373668 | 2-scf00040 | 2 |
| AX-157924963 | 3 | 49.672 | KV452730.1 | 3381186 | 2-scf00040 | 2 |
| AX-157708032 | 3 | 49.672 | KV452730.1 | 3381750 | 2-scf00040 | 2 |
| AX-157924966 | 3 | 49.672 | KV452730.1 | 3383037 | 2-scf00040 | 2 |
| AX-157924967 | 3 | 49.672 | KV452730.1 | 3384864 | 2-scf00040 | 2 |
| AX-157925006 | 3 | 49.672 | KV452730.1 | 3417609 | 2-scf00040 | 2 |
| AX-157925023 | 3 | 49.672 | KV452730.1 | 3443346 | 2-scf00040 | 2 |
| AX-157813575 | 3 | 49.672 | KV452730.1 | 3444624 | 2-scf00040 | 2 |
| AX-157925031 | 3 | 49.672 | KV452730.1 | 3448499 | 2-scf00040 | 2 |
| AX-157925194 | 3 | 49.672 | KV452730.1 | 3673592 | 2-scf00040 | 2 |
| AX-157925230 | 3 | 49.672 | KV452730.1 | 3698477 | 2-scf00040 | 2 |
| AX-157925233 | 3 | 49.672 | KV452730.1 | 3705233 | 2-scf00040 | 2 |
| AX-157925255 | 3 | 49.672 | KV452730.1 | 3725722 | 2-scf00040 | 2 |
| AX-157874824 | 3 | 49.672 | KV452730.1 | 3756718 | 2-scf00040 | 2 |
| AX-157813604 | 3 | 49.672 | KV452730.1 | 3769722 | 2-scf00040 | 2 |
| AX-157925309 | 3 | 49.672 | KV452730.1 | 3784194 | 2-scf00040 | 2 |
| AX-157770774 | 3 | 49.781 | KV452730.1 | 3108936 | 2-scf00040 | 2 |
| AX-157883628 | 3 | 49.781 | KV452730.1 | 3157103 | 2-scf00040 | 2 |
| AX-157924952 | 3 | 49.781 | KV452730.1 | 3371235 | 2-scf00040 | 2 |
| AX-157924975 | 3 | 49.781 | KV452730.1 | 3400857 | 2-scf00040 | 2 |
| AX-157924977 | 3 | 49.781 | KV452730.1 | 3402254 | 2-scf00040 | 2 |
| AX-157924978 | 3 | 49.781 | KV452730.1 | 3402660 | 2-scf00040 | 2 |
| AX-157924982 | 3 | 49.781 | KV452730.1 | 3403571 | 2-scf00040 | 2 |
| AX-157924988 | 3 | 49.781 | KV452730.1 | 3407430 | 2-scf00040 | 2 |
| AX-157924994 | 3 | 49.781 | KV452730.1 | 3410181 | 2-scf00040 | 2 |
| AX-157924995 | 3 | 49.781 | KV452730.1 | 3411335 | 2-scf00040 | 2 |
| AX-157813569 | 3 | 49.781 | KV452730.1 | 3415098 | 2-scf00040 | 2 |
| AX-157925009 | 3 | 49.781 | KV452730.1 | 3422400 | 2-scf00040 | 2 |
| AX-157925011 | 3 | 49.781 | KV452730.1 | 3423289 | 2-scf00040 | 2 |
| AX-157813570 | 3 | 49.781 | KV452730.1 | 3425286 | 2-scf00040 | 2 |
| AX-157925014 | 3 | 49.781 | KV452730.1 | 3427496 | 2-scf00040 | 2 |
| AX-157925015 | 3 | 49.781 | KV452730.1 | 3428081 | 2-scf00040 | 2 |
| AX-157925017 | 3 | 49.781 | KV452730.1 | 3429522 | 2-scf00040 | 2 |
| AX-157925021 | 3 | 49.781 | KV452730.1 | 3441422 | 2-scf00040 | 2 |
| AX-157925028 | 3 | 49.781 | KV452730.1 | 3445203 | 2-scf00040 | 2 |
| AX-157925030 | 3 | 49.781 | KV452730.1 | 3446852 | 2-scf00040 | 2 |
| AX-157813577 | 3 | 49.781 | KV452730.1 | 3462942 | 2-scf00040 | 2 |
| AX-157741653 | 3 | 49.781 | KV452730.1 | 3465191 | 2-scf00040 | 2 |
| AX-157925040 | 3 | 49.781 | KV452730.1 | 3465759 | 2-scf00040 | 2 |
| AX-157925042 | 3 | 49.781 | KV452730.1 | 3466585 | 2-scf00040 | 2 |
| AX-157813579 | 3 | 49.781 | KV452730.1 | 3470319 | 2-scf00040 | 2 |
| AX-157925050 | 3 | 49.781 | KV452730.1 | 3471296 | 2-scf00040 | 2 |
| AX-157813581 | 3 | 49.781 | KV452730.1 | 3479070 | 2-scf00040 | 2 |
| AX-157925057 | 3 | 49.781 | KV452730.1 | 3480789 | 2-scf00040 | 2 |

|              |   |        |            |         |            |   |
|--------------|---|--------|------------|---------|------------|---|
| AX-157813584 | 3 | 49.781 | KV452730.1 | 3487386 | 2-scf00040 | 2 |
| AX-157813585 | 3 | 49.781 | KV452730.1 | 3498127 | 2-scf00040 | 2 |
| AX-157813587 | 3 | 49.781 | KV452730.1 | 3501122 | 2-scf00040 | 2 |
| AX-157925073 | 3 | 49.781 | KV452730.1 | 3510508 | 2-scf00040 | 2 |
| AX-157750390 | 3 | 49.781 | KV452730.1 | 3512362 | 2-scf00040 | 2 |
| AX-157813589 | 3 | 49.781 | KV452730.1 | 3515123 | 2-scf00040 | 2 |
| AX-157925077 | 3 | 49.781 | KV452730.1 | 3519929 | 2-scf00040 | 2 |
| AX-157925081 | 3 | 49.781 | KV452730.1 | 3522018 | 2-scf00040 | 2 |
| AX-157813591 | 3 | 49.781 | KV452730.1 | 3524016 | 2-scf00040 | 2 |
| AX-157925085 | 3 | 49.781 | KV452730.1 | 3524305 | 2-scf00040 | 2 |
| AX-157925089 | 3 | 49.781 | KV452730.1 | 3525138 | 2-scf00040 | 2 |
| AX-157864592 | 3 | 49.781 | KV452730.1 | 3529801 | 2-scf00040 | 2 |
| AX-157925099 | 3 | 49.781 | KV452730.1 | 3533579 | 2-scf00040 | 2 |
| AX-157925101 | 3 | 49.781 | KV452730.1 | 3534359 | 2-scf00040 | 2 |
| AX-157925102 | 3 | 49.781 | KV452730.1 | 3535013 | 2-scf00040 | 2 |
| AX-157925103 | 3 | 49.781 | KV452730.1 | 3535395 | 2-scf00040 | 2 |
| AX-157925104 | 3 | 49.781 | KV452730.1 | 3535907 | 2-scf00040 | 2 |
| AX-157925106 | 3 | 49.781 | KV452730.1 | 3537928 | 2-scf00040 | 2 |
| AX-157925109 | 3 | 49.781 | KV452730.1 | 3541137 | 2-scf00040 | 2 |
| AX-157925111 | 3 | 49.781 | KV452730.1 | 3543937 | 2-scf00040 | 2 |
| AX-157925113 | 3 | 49.781 | KV452730.1 | 3544107 | 2-scf00040 | 2 |
| AX-157925116 | 3 | 49.781 | KV452730.1 | 3549367 | 2-scf00040 | 2 |
| AX-157925119 | 3 | 49.781 | KV452730.1 | 3553042 | 2-scf00040 | 2 |
| AX-157925131 | 3 | 49.781 | KV452730.1 | 3569707 | 2-scf00040 | 2 |
| AX-157925133 | 3 | 49.781 | KV452730.1 | 3572024 | 2-scf00040 | 2 |
| AX-157925146 | 3 | 49.781 | KV452730.1 | 3595920 | 2-scf00040 | 2 |
| AX-157925204 | 3 | 49.781 | KV452730.1 | 3679547 | 2-scf00040 | 2 |
| AX-157925215 | 3 | 49.781 | KV452730.1 | 3684948 | 2-scf00040 | 2 |
| AX-157813595 | 3 | 49.781 | KV452730.1 | 3686517 | 2-scf00040 | 2 |
| AX-157813599 | 3 | 49.781 | KV452730.1 | 3713493 | 2-scf00040 | 2 |
| AX-157925246 | 3 | 49.781 | KV452730.1 | 3717559 | 2-scf00040 | 2 |
| AX-158379324 | 3 | 49.781 | KV452730.1 | 3724451 | 2-scf00040 | 2 |
| AX-157925257 | 3 | 49.781 | KV452730.1 | 3726746 | 2-scf00040 | 2 |
| AX-157925259 | 3 | 49.781 | KV452730.1 | 3729852 | 2-scf00040 | 2 |
| AX-157925261 | 3 | 49.781 | KV452730.1 | 3729903 | 2-scf00040 | 2 |
| AX-157718163 | 3 | 49.781 | KV452730.1 | 3732407 | 2-scf00040 | 2 |
| AX-157925288 | 3 | 49.781 | KV452730.1 | 3762809 | 2-scf00040 | 2 |
| AX-157925290 | 3 | 49.781 | KV452730.1 | 3770591 | 2-scf00040 | 2 |
| AX-157925294 | 3 | 49.781 | KV452730.1 | 3771752 | 2-scf00040 | 2 |
| AX-157925304 | 3 | 49.781 | KV452730.1 | 3778514 | 2-scf00040 | 2 |
| AX-157925087 | 3 | 49.89  | KV452730.1 | 3524637 | 2-scf00040 | 2 |
| AX-157925130 | 3 | 49.89  | KV452730.1 | 3568066 | 2-scf00040 | 2 |
| AX-157925136 | 3 | 49.89  | KV452730.1 | 3573076 | 2-scf00040 | 2 |
| AX-157925137 | 3 | 49.89  | KV452730.1 | 3573501 | 2-scf00040 | 2 |
| AX-157925138 | 3 | 49.89  | KV452730.1 | 3575040 | 2-scf00040 | 2 |
| AX-157925167 | 3 | 49.89  | KV452730.1 | 3632126 | 2-scf00040 | 2 |
| AX-157925171 | 3 | 49.89  | KV452730.1 | 3634263 | 2-scf00040 | 2 |
| AX-157925175 | 3 | 49.89  | KV452730.1 | 3662793 | 2-scf00040 | 2 |
| AX-157925180 | 3 | 49.89  | KV452730.1 | 3664409 | 2-scf00040 | 2 |
| AX-157925182 | 3 | 49.89  | KV452730.1 | 3664833 | 2-scf00040 | 2 |
| AX-157925183 | 3 | 49.89  | KV452730.1 | 3665294 | 2-scf00040 | 2 |

|              |   |        |            |         |            |   |
|--------------|---|--------|------------|---------|------------|---|
| AX-157925188 | 3 | 49.89  | KV452730.1 | 3666295 | 2-scf00040 | 2 |
| AX-157925201 | 3 | 49.89  | KV452730.1 | 3677747 | 2-scf00040 | 2 |
| AX-157925217 | 3 | 49.89  | KV452730.1 | 3685409 | 2-scf00040 | 2 |
| AX-157925302 | 3 | 49.89  | KV452730.1 | 3777970 | 2-scf00040 | 2 |
| AX-157925219 | 3 | 49.911 | KV452730.1 | 3690162 | 2-scf00040 | 2 |
| AX-157925220 | 3 | 49.936 | KV452730.1 | 3691091 | 2-scf00040 | 2 |
| AX-157925222 | 3 | 49.968 | KV452730.1 | 3693210 | 2-scf00040 | 2 |
| AX-157925162 | 3 | 49.999 | KV452730.1 | 3630167 | 2-scf00040 | 2 |
| AX-157745710 | 3 | 49.999 | KV452730.1 | 3713985 | 2-scf00040 | 2 |
| AX-157772562 | 3 | 49.999 | KV452730.1 | 3715385 | 2-scf00040 | 2 |
| AX-157925254 | 3 | 49.999 | KV452730.1 | 3725365 | 2-scf00040 | 2 |
| AX-157713610 | 3 | 49.999 | KV452730.1 | 3735609 | 2-scf00040 | 2 |
| AX-157925263 | 3 | 49.999 | KV452730.1 | 3736116 | 2-scf00040 | 2 |
| AX-157925301 | 3 | 49.999 | KV452730.1 | 3776670 | 2-scf00040 | 2 |
| AX-157925266 | 3 | 50.027 | KV452730.1 | 3736636 | 2-scf00040 | 2 |
| AX-157925286 | 3 | 50.074 | KV452730.1 | 3761563 | 2-scf00040 | 2 |
| AX-157813586 | 3 | 50.108 | KV452730.1 | 3500836 | 2-scf00040 | 2 |
| AX-157925123 | 3 | 50.108 | KV452730.1 | 3560558 | 2-scf00040 | 2 |
| AX-157925297 | 3 | 50.108 | KV452730.1 | 3774481 | 2-scf00040 | 2 |
| AX-157925305 | 3 | 50.108 | KV452730.1 | 3782080 | 2-scf00040 | 2 |
| AX-157925314 | 3 | 50.108 | KV452730.1 | 3790701 | 2-scf00040 | 2 |
| AX-157925316 | 3 | 50.108 | KV452730.1 | 3791031 | 2-scf00040 | 2 |
| AX-157925319 | 3 | 50.108 | KV452730.1 | 3791353 | 2-scf00040 | 2 |
| AX-158405336 | 3 | 50.108 | KV452730.1 | 3792367 | 2-scf00040 | 2 |
| AX-157924481 | 3 | 50.109 | KV452730.1 | 2931789 | 2-scf00040 | 2 |
| AX-158405333 | 3 | 50.109 | KV452730.1 | 3060961 | 2-scf00040 | 2 |
| AX-157924743 | 3 | 50.109 | KV452730.1 | 3158398 | 2-scf00040 | 2 |
| AX-157924986 | 3 | 50.109 | KV452730.1 | 3405634 | 2-scf00040 | 2 |
| AX-157925001 | 3 | 50.109 | KV452730.1 | 3413792 | 2-scf00040 | 2 |
| AX-157925034 | 3 | 50.109 | KV452730.1 | 3457373 | 2-scf00040 | 2 |
| AX-157925062 | 3 | 50.109 | KV452730.1 | 3492150 | 2-scf00040 | 2 |
| AX-157925092 | 3 | 50.109 | KV452730.1 | 3528784 | 2-scf00040 | 2 |
| AX-157925095 | 3 | 50.109 | KV452730.1 | 3529184 | 2-scf00040 | 2 |
| AX-157925153 | 3 | 50.109 | KV452730.1 | 3618813 | 2-scf00040 | 2 |
| AX-157925160 | 3 | 50.109 | KV452730.1 | 3629801 | 2-scf00040 | 2 |
| AX-157925173 | 3 | 50.109 | KV452730.1 | 3635725 | 2-scf00040 | 2 |
| AX-157925191 | 3 | 50.109 | KV452730.1 | 3669596 | 2-scf00040 | 2 |
| AX-157925231 | 3 | 50.109 | KV452730.1 | 3699983 | 2-scf00040 | 2 |
| AX-157813600 | 3 | 50.109 | KV452730.1 | 3720799 | 2-scf00040 | 2 |
| AX-157813601 | 3 | 50.109 | KV452730.1 | 3723461 | 2-scf00040 | 2 |
| AX-157925298 | 3 | 50.109 | KV452730.1 | 3775106 | 2-scf00040 | 2 |
| AX-157853865 | 3 | 50.109 | KV452730.1 | 3775712 | 2-scf00040 | 2 |
| AX-157925320 | 3 | 50.109 | KV452730.1 | 3792556 | 2-scf00040 | 2 |
| AX-157925065 | 3 | 50.417 | KV452730.1 | 3501336 | 2-scf00040 | 2 |
| AX-157925223 | 3 | 50.417 | KV452730.1 | 3694056 | 2-scf00040 | 2 |
| AX-157925323 | 3 | 50.417 | KV452730.1 | 3798255 | 2-scf00040 | 2 |
| AX-157925324 | 3 | 50.417 | KV452730.1 | 3799063 | 2-scf00040 | 2 |
| AX-157925329 | 3 | 50.865 | KV452730.1 | 3810401 | 2-scf00040 | 2 |
| AX-157724876 | 3 | 50.865 | KV452730.1 | 3816444 | 2-scf00040 | 2 |
| AX-157925239 | 3 | 50.868 | KV452730.1 | 3709877 | 2-scf00040 | 2 |
| AX-157925332 | 3 | 50.868 | KV452730.1 | 3811878 | 2-scf00040 | 2 |

|              |   |        |            |         |            |   |
|--------------|---|--------|------------|---------|------------|---|
| AX-157925353 | 3 | 50.868 | KV452730.1 | 3840052 | 2-scf00040 | 2 |
| AX-157925360 | 3 | 50.868 | KV452730.1 | 3846590 | 2-scf00040 | 2 |
| AX-157925338 | 3 | 50.871 | KV452730.1 | 3824709 | 2-scf00040 | 2 |
| AX-157771877 | 3 | 50.874 | KV452730.1 | 3833730 | 2-scf00040 | 2 |
| AX-157925346 | 3 | 50.874 | KV452730.1 | 3834562 | 2-scf00040 | 2 |
| AX-157925347 | 3 | 50.874 | KV452730.1 | 3835266 | 2-scf00040 | 2 |
| AX-157925350 | 3 | 50.874 | KV452730.1 | 3837101 | 2-scf00040 | 2 |
| AX-157925352 | 3 | 50.874 | KV452730.1 | 3838670 | 2-scf00040 | 2 |
| AX-158389695 | 3 | 51.092 | KV452730.1 | 3851585 | 2-scf00040 | 2 |
| AX-157720876 | 3 | 51.092 | KV452730.1 | 3852000 | 2-scf00040 | 2 |
| AX-157925368 | 3 | 51.092 | KV452730.1 | 3853158 | 2-scf00040 | 2 |
| AX-157925369 | 3 | 51.092 | KV452730.1 | 3855965 | 2-scf00040 | 2 |
| AX-158379325 | 3 | 51.092 | KV452730.1 | 3856281 | 2-scf00040 | 2 |
| AX-157925371 | 3 | 51.092 | KV452730.1 | 3857954 | 2-scf00040 | 2 |
| AX-157925372 | 3 | 51.092 | KV452730.1 | 3859333 | 2-scf00040 | 2 |
| AX-157925374 | 3 | 51.092 | KV452730.1 | 3860034 | 2-scf00040 | 2 |
| AX-157925375 | 3 | 51.092 | KV452730.1 | 3862676 | 2-scf00040 | 2 |
| AX-157925377 | 3 | 51.092 | KV452730.1 | 3862921 | 2-scf00040 | 2 |
| AX-157925378 | 3 | 51.092 | KV452730.1 | 3863805 | 2-scf00040 | 2 |
| AX-157925380 | 3 | 51.092 | KV452730.1 | 3864579 | 2-scf00040 | 2 |
| AX-157925381 | 3 | 51.092 | KV452730.1 | 3864787 | 2-scf00040 | 2 |
| AX-157713725 | 3 | 51.092 | KV452730.1 | 3865253 | 2-scf00040 | 2 |
| AX-157925386 | 3 | 51.092 | KV452730.1 | 3871097 | 2-scf00040 | 2 |
| AX-157925388 | 3 | 51.092 | KV452730.1 | 3871732 | 2-scf00040 | 2 |
| AX-157925389 | 3 | 51.092 | KV452730.1 | 3871961 | 2-scf00040 | 2 |
| AX-157740719 | 3 | 51.092 | KV452730.1 | 3872798 | 2-scf00040 | 2 |
| AX-157925390 | 3 | 51.092 | KV452730.1 | 3873160 | 2-scf00040 | 2 |
| AX-157925391 | 3 | 51.092 | KV452730.1 | 3873789 | 2-scf00040 | 2 |
| AX-157925394 | 3 | 51.092 | KV452730.1 | 3874452 | 2-scf00040 | 2 |
| AX-157925397 | 3 | 51.092 | KV452730.1 | 3875070 | 2-scf00040 | 2 |
| AX-157749971 | 3 | 51.092 | KV452730.1 | 3902165 | 2-scf00040 | 2 |
| AX-157925407 | 3 | 51.215 | KV452730.1 | 3887921 | 2-scf00040 | 2 |
| AX-157925410 | 3 | 51.455 | KV452730.1 | 3891754 | 2-scf00040 | 2 |
| AX-157719369 | 3 | 51.456 | KV452730.1 | 3818067 | 2-scf00040 | 2 |
| AX-157925405 | 3 | 51.456 | KV452730.1 | 3882311 | 2-scf00040 | 2 |
| AX-157925411 | 3 | 51.456 | KV452730.1 | 3892368 | 2-scf00040 | 2 |
| AX-157925434 | 3 | 51.456 | KV452730.1 | 3914996 | 2-scf00040 | 2 |
| AX-157925451 | 3 | 51.456 | KV452730.1 | 3937702 | 2-scf00040 | 2 |
| AX-157925452 | 3 | 51.456 | KV452730.1 | 3938510 | 2-scf00040 | 2 |
| AX-157925413 | 3 | 51.638 | KV452730.1 | 3896758 | 2-scf00040 | 2 |
| AX-157925414 | 3 | 51.638 | KV452730.1 | 3898040 | 2-scf00040 | 2 |
| AX-157813610 | 3 | 51.638 | KV452730.1 | 3900297 | 2-scf00040 | 2 |
| AX-157925417 | 3 | 51.638 | KV452730.1 | 3901535 | 2-scf00040 | 2 |
| AX-157813611 | 3 | 51.638 | KV452730.1 | 3901741 | 2-scf00040 | 2 |
| AX-157717850 | 3 | 51.638 | KV452730.1 | 3904538 | 2-scf00040 | 2 |
| AX-157925420 | 3 | 51.638 | KV452730.1 | 3904991 | 2-scf00040 | 2 |
| AX-157925421 | 3 | 51.638 | KV452730.1 | 3905546 | 2-scf00040 | 2 |
| AX-157925428 | 3 | 51.638 | KV452730.1 | 3908928 | 2-scf00040 | 2 |
| AX-157775691 | 3 | 51.721 | KV452730.1 | 3907245 | 2-scf00040 | 2 |
| AX-157925427 | 3 | 51.806 | KV452730.1 | 3908375 | 2-scf00040 | 2 |
| AX-157925419 | 3 | 51.857 | KV452730.1 | 3904465 | 2-scf00040 | 2 |

|              |   |        |            |         |            |   |
|--------------|---|--------|------------|---------|------------|---|
| AX-157925424 | 3 | 51.857 | KV452730.1 | 3907056 | 2-scf00040 | 2 |
| AX-157813612 | 3 | 51.857 | KV452730.1 | 3912048 | 2-scf00040 | 2 |
| AX-157925432 | 3 | 51.857 | KV452730.1 | 3913820 | 2-scf00040 | 2 |
| AX-157925439 | 3 | 51.857 | KV452730.1 | 3919306 | 2-scf00040 | 2 |
| AX-157741264 | 3 | 51.857 | KV452730.1 | 3922519 | 2-scf00040 | 2 |
| AX-157925444 | 3 | 51.857 | KV452730.1 | 3926785 | 2-scf00040 | 2 |
| AX-157925445 | 3 | 51.857 | KV452730.1 | 3929314 | 2-scf00040 | 2 |
| AX-157925447 | 3 | 51.857 | KV452730.1 | 3929749 | 2-scf00040 | 2 |
| AX-157925450 | 3 | 51.857 | KV452730.1 | 3935978 | 2-scf00040 | 2 |
| AX-157925456 | 3 | 51.857 | KV452730.1 | 3944815 | 2-scf00040 | 2 |
| AX-157925457 | 3 | 51.857 | KV452730.1 | 3945958 | 2-scf00040 | 2 |
| AX-157925459 | 3 | 51.857 | KV452730.1 | 3949194 | 2-scf00040 | 2 |
| AX-157925460 | 3 | 51.857 | KV452730.1 | 3949529 | 2-scf00040 | 2 |
| AX-157925467 | 3 | 52.289 | KV452730.1 | 3959455 | 2-scf00040 | 2 |
| AX-157925465 | 3 | 52.294 | KV452730.1 | 3955122 | 2-scf00040 | 2 |
| AX-157724456 | 3 | 52.294 | KV452730.1 | 3959714 | 2-scf00040 | 2 |
| AX-157925468 | 3 | 52.294 | KV452730.1 | 3960023 | 2-scf00040 | 2 |
| AX-157813617 | 3 | 52.294 | KV452730.1 | 3960719 | 2-scf00040 | 2 |
| AX-157925469 | 3 | 52.294 | KV452730.1 | 3961861 | 2-scf00040 | 2 |
| AX-157723674 | 3 | 52.294 | KV452730.1 | 3964029 | 2-scf00040 | 2 |
| AX-157925475 | 3 | 52.294 | KV452730.1 | 3966647 | 2-scf00040 | 2 |
| AX-157925476 | 3 | 52.294 | KV452730.1 | 3967609 | 2-scf00040 | 2 |
| AX-157722092 | 3 | 52.294 | KV452730.1 | 3968672 | 2-scf00040 | 2 |
| AX-157874830 | 3 | 52.294 | KV452730.1 | 3969243 | 2-scf00040 | 2 |
| AX-157925479 | 3 | 52.294 | KV452730.1 | 3971573 | 2-scf00040 | 2 |
| AX-157925480 | 3 | 52.294 | KV452730.1 | 3972808 | 2-scf00040 | 2 |
| AX-157925481 | 3 | 52.294 | KV452730.1 | 3974250 | 2-scf00040 | 2 |
| AX-157925484 | 3 | 52.294 | KV452730.1 | 3976611 | 2-scf00040 | 2 |
| AX-157925485 | 3 | 52.294 | KV452730.1 | 3978587 | 2-scf00040 | 2 |
| AX-157925486 | 3 | 52.512 | KV452730.1 | 3980200 | 2-scf00040 | 2 |
| AX-157925487 | 3 | 52.622 | KV452730.1 | 3980858 | 2-scf00040 | 2 |
| AX-157925489 | 3 | 52.627 | KV452730.1 | 3981243 | 2-scf00040 | 2 |
| AX-157925491 | 3 | 52.634 | KV452730.1 | 3981926 | 2-scf00040 | 2 |
| AX-157925492 | 3 | 52.641 | KV452730.1 | 3983127 | 2-scf00040 | 2 |
| AX-157925493 | 3 | 52.656 | KV452730.1 | 3983978 | 2-scf00040 | 2 |
| AX-157925494 | 3 | 52.892 | KV452730.1 | 3984986 | 2-scf00040 | 2 |
| AX-157925500 | 3 | 52.892 | KV452730.1 | 3990130 | 2-scf00040 | 2 |
| AX-157925515 | 3 | 52.892 | KV452730.1 | 4003624 | 2-scf00040 | 2 |
| AX-157925526 | 3 | 52.892 | KV452730.1 | 4010822 | 2-scf00040 | 2 |
| AX-157925507 | 3 | 52.963 | KV452730.1 | 3998080 | 2-scf00040 | 2 |
| AX-157925509 | 3 | 53.031 | KV452730.1 | 3998811 | 2-scf00040 | 2 |
| AX-157813619 | 3 | 53.09  | KV452730.1 | 3999640 | 2-scf00040 | 2 |
| AX-157925513 | 3 | 53.13  | KV452730.1 | 4002218 | 2-scf00040 | 2 |
| AX-157925463 | 3 | 53.168 | KV452730.1 | 3950767 | 2-scf00040 | 2 |
| AX-157925478 | 3 | 53.168 | KV452730.1 | 3969526 | 2-scf00040 | 2 |
| AX-157925510 | 3 | 53.168 | KV452730.1 | 4000461 | 2-scf00040 | 2 |
| AX-157813620 | 3 | 53.168 | KV452730.1 | 4003449 | 2-scf00040 | 2 |
| AX-157925529 | 3 | 53.168 | KV452730.1 | 4012887 | 2-scf00040 | 2 |
| AX-157925531 | 3 | 53.168 | KV452730.1 | 4014426 | 2-scf00040 | 2 |
| AX-157925533 | 3 | 53.168 | KV452730.1 | 4014789 | 2-scf00040 | 2 |
| AX-157925543 | 3 | 53.168 | KV452730.1 | 4025903 | 2-scf00040 | 2 |

|              |   |        |            |         |            |   |
|--------------|---|--------|------------|---------|------------|---|
| AX-157925552 | 3 | 53.168 | KV452730.1 | 4039403 | 2-scf00040 | 2 |
| AX-157813623 | 3 | 53.278 | KV452730.1 | 4023123 | 2-scf00040 | 2 |
| AX-157925546 | 3 | 53.286 | KV452730.1 | 4034268 | 2-scf00040 | 2 |
| AX-157925534 | 3 | 53.332 | KV452730.1 | 4015371 | 2-scf00040 | 2 |
| AX-157925542 | 3 | 53.402 | KV452730.1 | 4025193 | 2-scf00040 | 2 |
| AX-157925545 | 3 | 53.402 | KV452730.1 | 4030462 | 2-scf00040 | 2 |
| AX-157925554 | 3 | 53.402 | KV452730.1 | 4042282 | 2-scf00040 | 2 |
| AX-157925556 | 3 | 53.402 | KV452730.1 | 4045217 | 2-scf00040 | 2 |
| AX-157723258 | 3 | 53.402 | KV452730.1 | 4046324 | 2-scf00040 | 2 |
| AX-157925561 | 3 | 53.402 | KV452730.1 | 4050714 | 2-scf00040 | 2 |
| AX-157813626 | 3 | 54.134 | KV452730.1 | 4056419 | 2-scf00040 | 2 |
| AX-157813627 | 3 | 54.135 | KV452730.1 | 4059421 | 2-scf00040 | 2 |
| AX-157925579 | 3 | 54.135 | KV452730.1 | 4080168 | 2-scf00040 | 2 |
| AX-157925566 | 3 | 54.137 | KV452730.1 | 4060001 | 2-scf00040 | 2 |
| AX-157925570 | 3 | 54.137 | KV452730.1 | 4065026 | 2-scf00040 | 2 |
| AX-157749825 | 3 | 54.274 | KV452730.1 | 4069345 | 2-scf00040 | 2 |
| AX-157925571 | 3 | 54.439 | KV452730.1 | 4069574 | 2-scf00040 | 2 |
| AX-157925572 | 3 | 54.439 | KV452730.1 | 4070089 | 2-scf00040 | 2 |
| AX-157925573 | 3 | 54.59  | KV452730.1 | 4071153 | 2-scf00040 | 2 |
| AX-157771210 | 3 | 54.59  | KV452730.1 | 4071751 | 2-scf00040 | 2 |
| AX-157813630 | 3 | 54.59  | KV452730.1 | 4073995 | 2-scf00040 | 2 |
| AX-157813631 | 3 | 54.59  | KV452730.1 | 4075862 | 2-scf00040 | 2 |
| AX-157925578 | 3 | 54.59  | KV452730.1 | 4075908 | 2-scf00040 | 2 |
| AX-157743393 | 3 | 54.59  | KV452730.1 | 4076262 | 2-scf00040 | 2 |
| AX-157925581 | 3 | 54.59  | KV452730.1 | 4082809 | 2-scf00040 | 2 |
| AX-157925584 | 3 | 54.59  | KV452730.1 | 4083901 | 2-scf00040 | 2 |
| AX-157925586 | 3 | 54.59  | KV452730.1 | 4085511 | 2-scf00040 | 2 |
| AX-157925585 | 3 | 54.663 | KV452730.1 | 4084808 | 2-scf00040 | 2 |
| AX-157813632 | 3 | 54.689 | KV452730.1 | 4087135 | 2-scf00040 | 2 |
| AX-157925588 | 3 | 54.735 | KV452730.1 | 4087235 | 2-scf00040 | 2 |
| AX-157813634 | 3 | 55.019 | KV452730.1 | 4092398 | 2-scf00040 | 2 |
| AX-157710120 | 3 | 55.019 | KV452730.1 | 4093407 | 2-scf00040 | 2 |
| AX-157925590 | 3 | 55.03  | KV452730.1 | 4090061 | 2-scf00040 | 2 |
| AX-157925599 | 3 | 55.03  | KV452730.1 | 4096374 | 2-scf00040 | 2 |
| AX-157723596 | 3 | 55.03  | KV452730.1 | 4104957 | 2-scf00040 | 2 |
| AX-157925603 | 3 | 55.03  | KV452730.1 | 4105498 | 2-scf00040 | 2 |
| AX-157925608 | 3 | 55.03  | KV452730.1 | 4107292 | 2-scf00040 | 2 |
| AX-157925609 | 3 | 55.03  | KV452730.1 | 4108176 | 2-scf00040 | 2 |
| AX-157925610 | 3 | 55.03  | KV452730.1 | 4108779 | 2-scf00040 | 2 |
| AX-157751785 | 3 | 55.03  | KV452730.1 | 4112825 | 2-scf00040 | 2 |
| AX-157710719 | 3 | 55.031 | KV452730.1 | 4102410 | 2-scf00040 | 2 |
| AX-157925616 | 3 | 55.155 | KV452730.1 | 4119677 | 2-scf00040 | 2 |
| AX-157925624 | 3 | 55.155 | KV452730.1 | 4122556 | 2-scf00040 | 2 |
| AX-157925619 | 3 | 55.302 | KV452730.1 | 4121034 | 2-scf00040 | 2 |
| AX-157925626 | 3 | 55.465 | KV452730.1 | 4122882 | 2-scf00040 | 2 |
| AX-157925627 | 3 | 55.465 | KV452730.1 | 4123141 | 2-scf00040 | 2 |
| AX-157925629 | 3 | 55.497 | KV452730.1 | 4124383 | 2-scf00040 | 2 |
| AX-157749910 | 3 | 55.574 | KV452730.1 | 4126494 | 2-scf00040 | 2 |
| AX-157925633 | 3 | 55.574 | KV452730.1 | 4129795 | 2-scf00040 | 2 |
| AX-157925634 | 3 | 55.574 | KV452730.1 | 4132424 | 2-scf00040 | 2 |
| AX-157925638 | 3 | 55.793 | KV452730.1 | 4134064 | 2-scf00040 | 2 |



|              |   |        |            |         |            |   |
|--------------|---|--------|------------|---------|------------|---|
| AX-157925644 | 3 | 55.793 | KV452730.1 | 4139927 | 2-scf00040 | 2 |
| AX-157717781 | 3 | 55.793 | KV452730.1 | 4140515 | 2-scf00040 | 2 |
| AX-157710555 | 3 | 55.793 | KV452730.1 | 4140815 | 2-scf00040 | 2 |
| AX-157925646 | 3 | 55.793 | KV452730.1 | 4141998 | 2-scf00040 | 2 |
| AX-157925649 | 3 | 55.934 | KV452730.1 | 4146007 | 2-scf00040 | 2 |
| AX-157925651 | 3 | 55.937 | KV452730.1 | 4147113 | 2-scf00040 | 2 |
| AX-157925654 | 3 | 56.06  | KV452730.1 | 4148762 | 2-scf00040 | 2 |
| AX-157813637 | 3 | 56.132 | KV452730.1 | 4149476 | 2-scf00040 | 2 |
| AX-157925655 | 3 | 56.132 | KV452730.1 | 4151638 | 2-scf00040 | 2 |
| AX-157925647 | 3 | 56.279 | KV452730.1 | 4145391 | 2-scf00040 | 2 |
| AX-157925657 | 3 | 56.279 | KV452730.1 | 4152389 | 2-scf00040 | 2 |
| AX-157925665 | 3 | 56.42  | KV452730.1 | 4160651 | 2-scf00040 | 2 |
| AX-157925667 | 3 | 56.42  | KV452730.1 | 4161253 | 2-scf00040 | 2 |
| AX-158379327 | 3 | 56.777 | KV452730.1 | 4169008 | 2-scf00040 | 2 |
| AX-157813638 | 3 | 56.777 | KV452730.1 | 4169435 | 2-scf00040 | 2 |
| AX-157925672 | 3 | 56.777 | KV452730.1 | 4169498 | 2-scf00040 | 2 |
| AX-157853868 | 3 | 56.777 | KV452730.1 | 4176947 | 2-scf00040 | 2 |
| AX-157739467 | 3 | 56.779 | KV452730.1 | 4171804 | 2-scf00040 | 2 |
| AX-157744274 | 3 | 57.159 | KV452730.1 | 4164020 | 2-scf00040 | 2 |
| AX-157925674 | 3 | 57.159 | KV452730.1 | 4172757 | 2-scf00040 | 2 |
| AX-157925675 | 3 | 57.159 | KV452730.1 | 4173027 | 2-scf00040 | 2 |
| AX-157925676 | 3 | 57.159 | KV452730.1 | 4174327 | 2-scf00040 | 2 |
| AX-157925678 | 3 | 57.159 | KV452730.1 | 4175275 | 2-scf00040 | 2 |
| AX-157925679 | 3 | 57.159 | KV452730.1 | 4176071 | 2-scf00040 | 2 |
| AX-157925681 | 3 | 57.159 | KV452730.1 | 4176714 | 2-scf00040 | 2 |
| AX-157713630 | 3 | 57.286 | KV452730.1 | 4178221 | 2-scf00040 | 2 |
| AX-157925683 | 3 | 57.286 | KV452730.1 | 4179613 | 2-scf00040 | 2 |
| AX-157925686 | 3 | 57.286 | KV452730.1 | 4180613 | 2-scf00040 | 2 |
| AX-157925687 | 3 | 57.286 | KV452730.1 | 4181235 | 2-scf00040 | 2 |
| AX-157925688 | 3 | 57.286 | KV452730.1 | 4182384 | 2-scf00040 | 2 |
| AX-157925695 | 3 | 57.286 | KV452730.1 | 4185816 | 2-scf00040 | 2 |
| AX-157925692 | 3 | 57.54  | KV452730.1 | 4185130 | 2-scf00040 | 2 |
| AX-157770931 | 3 | 57.554 | KV452730.1 | 4194932 | 2-scf00040 | 2 |
| AX-158379328 | 3 | 57.683 | KV452730.1 | 4186594 | 2-scf00040 | 2 |
| AX-157925704 | 3 | 57.683 | KV452730.1 | 4198949 | 2-scf00040 | 2 |
| AX-157925706 | 3 | 57.683 | KV452730.1 | 4202443 | 2-scf00040 | 2 |
| AX-157925708 | 3 | 57.683 | KV452730.1 | 4202909 | 2-scf00040 | 2 |
| AX-157925762 | 3 | 57.916 | KV452730.1 | 4261320 | 2-scf00040 | 2 |
| AX-157925766 | 3 | 57.916 | KV452730.1 | 4263233 | 2-scf00040 | 2 |
| AX-157925767 | 3 | 57.916 | KV452730.1 | 4263472 | 2-scf00040 | 2 |
| AX-157773629 | 3 | 57.916 | KV452730.1 | 4264102 | 2-scf00040 | 2 |
| AX-157925750 | 3 | 58.198 | KV452730.1 | 4248683 | 2-scf00040 | 2 |
| AX-157925772 | 3 | 58.198 | KV452730.1 | 4264976 | 2-scf00040 | 2 |
| AX-157925774 | 3 | 58.198 | KV452730.1 | 4267425 | 2-scf00040 | 2 |
| AX-157813652 | 3 | 58.198 | KV452730.1 | 4268804 | 2-scf00040 | 2 |
| AX-158379329 | 3 | 58.198 | KV452730.1 | 4269210 | 2-scf00040 | 2 |
| AX-157925777 | 3 | 58.198 | KV452730.1 | 4270846 | 2-scf00040 | 2 |
| AX-157925780 | 3 | 58.198 | KV452730.1 | 4272383 | 2-scf00040 | 2 |
| AX-157721346 | 3 | 58.198 | KV452730.1 | 4272638 | 2-scf00040 | 2 |
| AX-157753275 | 3 | 58.198 | KV452730.1 | 4273179 | 2-scf00040 | 2 |
| AX-157703546 | 3 | 58.198 | KV452730.1 | 4273325 | 2-scf00040 | 2 |

|              |   |        |            |         |            |   |
|--------------|---|--------|------------|---------|------------|---|
| AX-157748523 | 3 | 58.198 | KV452730.1 | 4279156 | 2-scf00040 | 2 |
| AX-157925782 | 3 | 58.198 | KV452730.1 | 4280921 | 2-scf00040 | 2 |
| AX-157747315 | 3 | 58.198 | KV452730.1 | 4288054 | 2-scf00040 | 2 |
| AX-157925794 | 3 | 58.198 | KV452730.1 | 4290264 | 2-scf00040 | 2 |
| AX-157925795 | 3 | 58.198 | KV452730.1 | 4290658 | 2-scf00040 | 2 |
| AX-157925800 | 3 | 58.198 | KV452730.1 | 4296742 | 2-scf00040 | 2 |
| AX-157770030 | 3 | 58.198 | KV452730.1 | 4297657 | 2-scf00040 | 2 |
| AX-157925802 | 3 | 58.198 | KV452730.1 | 4299172 | 2-scf00040 | 2 |
| AX-157925804 | 3 | 58.198 | KV452730.1 | 4300076 | 2-scf00040 | 2 |
| AX-157925807 | 3 | 58.198 | KV452730.1 | 4303153 | 2-scf00040 | 2 |
| AX-157925815 | 3 | 58.198 | KV452730.1 | 4309860 | 2-scf00040 | 2 |
| AX-157925816 | 3 | 58.198 | KV452730.1 | 4312187 | 2-scf00040 | 2 |
| AX-157925822 | 3 | 58.198 | KV452730.1 | 4322722 | 2-scf00040 | 2 |
| AX-157925824 | 3 | 58.198 | KV452730.1 | 4325741 | 2-scf00040 | 2 |
| AX-157925826 | 3 | 58.198 | KV452730.1 | 4328084 | 2-scf00040 | 2 |
| AX-157925849 | 3 | 58.198 | KV452730.1 | 4349224 | 2-scf00040 | 2 |
| AX-157925857 | 3 | 58.198 | KV452730.1 | 4357057 | 2-scf00040 | 2 |
| AX-158389698 | 3 | 58.198 | KV452730.1 | 4376195 | 2-scf00040 | 2 |
| AX-157925881 | 3 | 58.198 | KV452730.1 | 4383433 | 2-scf00040 | 2 |
| AX-157925827 | 3 | 58.416 | KV452730.1 | 4330930 | 2-scf00040 | 2 |
| AX-157925831 | 3 | 58.416 | KV452730.1 | 4334005 | 2-scf00040 | 2 |
| AX-157925833 | 3 | 58.416 | KV452730.1 | 4335440 | 2-scf00040 | 2 |
| AX-157925840 | 3 | 58.416 | KV452730.1 | 4340038 | 2-scf00040 | 2 |
| AX-157925843 | 3 | 58.416 | KV452730.1 | 4342317 | 2-scf00040 | 2 |
| AX-157813658 | 3 | 58.416 | KV452730.1 | 4342735 | 2-scf00040 | 2 |
| AX-157925858 | 3 | 58.416 | KV452730.1 | 4358235 | 2-scf00040 | 2 |
| AX-157925865 | 3 | 58.416 | KV452730.1 | 4364142 | 2-scf00040 | 2 |
| AX-157925872 | 3 | 58.416 | KV452730.1 | 4369664 | 2-scf00040 | 2 |
| AX-157813661 | 3 | 58.416 | KV452730.1 | 4388890 | 2-scf00040 | 2 |
| AX-157753044 | 3 | 58.626 | KV452730.1 | 4387569 | 2-scf00040 | 2 |
| AX-157925883 | 3 | 58.626 | KV452730.1 | 4387863 | 2-scf00040 | 2 |
| AX-157925888 | 3 | 58.644 | KV452730.1 | 4392715 | 2-scf00040 | 2 |
| AX-157925891 | 3 | 58.644 | KV452730.1 | 4394296 | 2-scf00040 | 2 |
| AX-157925892 | 3 | 58.685 | KV452730.1 | 4395001 | 2-scf00040 | 2 |
| AX-157925914 | 3 | 58.722 | KV452730.1 | 4418603 | 2-scf00040 | 2 |
| AX-157725021 | 3 | 58.853 | KV452730.1 | 4422055 | 2-scf00040 | 2 |
| AX-157925920 | 3 | 58.853 | KV452730.1 | 4425147 | 2-scf00040 | 2 |
| AX-157925926 | 3 | 58.853 | KV452730.1 | 4426643 | 2-scf00040 | 2 |
| AX-157925938 | 3 | 58.853 | KV452730.1 | 4438719 | 2-scf00040 | 2 |
| AX-157925941 | 3 | 58.853 | KV452730.1 | 4440525 | 2-scf00040 | 2 |
| AX-157926074 | 3 | 58.853 | KV452730.1 | 4582327 | 2-scf00040 | 2 |
| AX-157926356 | 3 | 58.853 | KV452730.1 | 4904344 | 2-scf00040 | 2 |
| AX-157925905 | 3 | 58.909 | KV452730.1 | 4406221 | 2-scf00040 | 2 |
| AX-157925924 | 3 | 58.909 | KV452730.1 | 4426304 | 2-scf00040 | 2 |
| AX-157925942 | 3 | 58.909 | KV452730.1 | 4441144 | 2-scf00040 | 2 |
| AX-157925953 | 3 | 58.909 | KV452730.1 | 4454001 | 2-scf00040 | 2 |
| AX-157925959 | 3 | 58.909 | KV452730.1 | 4460833 | 2-scf00040 | 2 |
| AX-157926019 | 3 | 58.909 | KV452730.1 | 4526534 | 2-scf00040 | 2 |
| AX-157926066 | 3 | 58.909 | KV452730.1 | 4577555 | 2-scf00040 | 2 |
| AX-157926092 | 3 | 58.909 | KV452730.1 | 4597990 | 2-scf00040 | 2 |
| AX-157926094 | 3 | 58.909 | KV452730.1 | 4599414 | 2-scf00040 | 2 |

|              |   |        |            |         |            |   |
|--------------|---|--------|------------|---------|------------|---|
| AX-157926165 | 3 | 58.909 | KV452730.1 | 4661834 | 2-scf00040 | 2 |
| AX-157926232 | 3 | 58.909 | KV452730.1 | 4740069 | 2-scf00040 | 2 |
| AX-157926314 | 3 | 58.909 | KV452730.1 | 4855852 | 2-scf00040 | 2 |
| AX-157926349 | 3 | 58.909 | KV452730.1 | 4899222 | 2-scf00040 | 2 |
| AX-157926355 | 3 | 58.909 | KV452730.1 | 4903911 | 2-scf00040 | 2 |
| AX-157926459 | 3 | 58.909 | KV452730.1 | 5002544 | 2-scf00040 | 2 |
| AX-157874835 | 3 | 58.909 | KV452730.1 | 5315245 | 2-scf00040 | 2 |
| AX-157927154 | 3 | 58.909 | KV452730.1 | 5589687 | 2-scf00040 | 2 |
| AX-157927156 | 3 | 58.909 | KV452730.1 | 5589984 | 2-scf00040 | 2 |
| AX-157927157 | 3 | 58.909 | KV452730.1 | 5591289 | 2-scf00040 | 2 |
| AX-157927206 | 3 | 58.909 | KV452730.1 | 5625704 | 2-scf00040 | 2 |
| AX-157853877 | 3 | 58.909 | KV452730.1 | 5802140 | 2-scf00040 | 2 |
| AX-157927480 | 3 | 58.909 | KV452730.1 | 5873705 | 2-scf00040 | 2 |
| AX-157927481 | 3 | 58.909 | KV452730.1 | 5873839 | 2-scf00040 | 2 |
| AX-157927488 | 3 | 58.909 | KV452730.1 | 5882290 | 2-scf00040 | 2 |
| AX-157927489 | 3 | 58.909 | KV452730.1 | 5882971 | 2-scf00040 | 2 |
| AX-157927491 | 3 | 58.909 | KV452730.1 | 5885031 | 2-scf00040 | 2 |
| AX-157927563 | 3 | 58.909 | KV452730.1 | 5964387 | 2-scf00040 | 2 |
| AX-157813776 | 3 | 58.909 | KV452730.1 | 6001935 | 2-scf00040 | 2 |
| AX-157927623 | 3 | 58.909 | KV452730.1 | 6011017 | 2-scf00040 | 2 |
| AX-157927688 | 3 | 58.909 | KV452730.1 | 6068418 | 2-scf00040 | 2 |
| AX-157927720 | 3 | 58.909 | KV452730.1 | 6088646 | 2-scf00040 | 2 |
| AX-157925850 | 3 | 58.963 | KV452730.1 | 4350530 | 2-scf00040 | 2 |
| AX-157925875 | 3 | 58.963 | KV452730.1 | 4375811 | 2-scf00040 | 2 |
| AX-157925913 | 3 | 58.963 | KV452730.1 | 4416133 | 2-scf00040 | 2 |
| AX-157925918 | 3 | 58.963 | KV452730.1 | 4419894 | 2-scf00040 | 2 |
| AX-157925945 | 3 | 58.963 | KV452730.1 | 4442872 | 2-scf00040 | 2 |
| AX-157925954 | 3 | 58.963 | KV452730.1 | 4455839 | 2-scf00040 | 2 |
| AX-157760818 | 3 | 58.963 | KV452730.1 | 4457718 | 2-scf00040 | 2 |
| AX-157925956 | 3 | 58.963 | KV452730.1 | 4459721 | 2-scf00040 | 2 |
| AX-157925961 | 3 | 58.963 | KV452730.1 | 4463234 | 2-scf00040 | 2 |
| AX-157925965 | 3 | 58.963 | KV452730.1 | 4469858 | 2-scf00040 | 2 |
| AX-157925968 | 3 | 58.963 | KV452730.1 | 4474143 | 2-scf00040 | 2 |
| AX-157925970 | 3 | 58.963 | KV452730.1 | 4479314 | 2-scf00040 | 2 |
| AX-157925973 | 3 | 58.963 | KV452730.1 | 4482179 | 2-scf00040 | 2 |
| AX-157925976 | 3 | 58.963 | KV452730.1 | 4484212 | 2-scf00040 | 2 |
| AX-157925978 | 3 | 58.963 | KV452730.1 | 4485166 | 2-scf00040 | 2 |
| AX-157925981 | 3 | 58.963 | KV452730.1 | 4486435 | 2-scf00040 | 2 |
| AX-157925982 | 3 | 58.963 | KV452730.1 | 4487968 | 2-scf00040 | 2 |
| AX-157813670 | 3 | 58.963 | KV452730.1 | 4488437 | 2-scf00040 | 2 |
| AX-157925985 | 3 | 58.963 | KV452730.1 | 4490850 | 2-scf00040 | 2 |
| AX-157925992 | 3 | 58.963 | KV452730.1 | 4496536 | 2-scf00040 | 2 |
| AX-157925993 | 3 | 58.963 | KV452730.1 | 4496945 | 2-scf00040 | 2 |
| AX-157925994 | 3 | 58.963 | KV452730.1 | 4498107 | 2-scf00040 | 2 |
| AX-157925997 | 3 | 58.963 | KV452730.1 | 4500938 | 2-scf00040 | 2 |
| AX-157926004 | 3 | 58.963 | KV452730.1 | 4505967 | 2-scf00040 | 2 |
| AX-157746766 | 3 | 58.963 | KV452730.1 | 4522970 | 2-scf00040 | 2 |
| AX-157926016 | 3 | 58.963 | KV452730.1 | 4524482 | 2-scf00040 | 2 |
| AX-157926018 | 3 | 58.963 | KV452730.1 | 4525949 | 2-scf00040 | 2 |
| AX-157869181 | 3 | 58.963 | KV452730.1 | 4532369 | 2-scf00040 | 2 |
| AX-157869182 | 3 | 58.963 | KV452730.1 | 4541411 | 2-scf00040 | 2 |

|              |   |        |            |         |            |   |
|--------------|---|--------|------------|---------|------------|---|
| AX-157926032 | 3 | 58.963 | KV452730.1 | 4544747 | 2-scf00040 | 2 |
| AX-157883638 | 3 | 58.963 | KV452730.1 | 4553804 | 2-scf00040 | 2 |
| AX-157813675 | 3 | 58.963 | KV452730.1 | 4561684 | 2-scf00040 | 2 |
| AX-157813677 | 3 | 58.963 | KV452730.1 | 4596669 | 2-scf00040 | 2 |
| AX-157926104 | 3 | 58.963 | KV452730.1 | 4604858 | 2-scf00040 | 2 |
| AX-157813678 | 3 | 58.963 | KV452730.1 | 4611272 | 2-scf00040 | 2 |
| AX-157926113 | 3 | 58.963 | KV452730.1 | 4616199 | 2-scf00040 | 2 |
| AX-157926136 | 3 | 58.963 | KV452730.1 | 4638250 | 2-scf00040 | 2 |
| AX-157926199 | 3 | 58.963 | KV452730.1 | 4692308 | 2-scf00040 | 2 |
| AX-157926202 | 3 | 58.963 | KV452730.1 | 4695104 | 2-scf00040 | 2 |
| AX-157926226 | 3 | 58.963 | KV452730.1 | 4733716 | 2-scf00040 | 2 |
| AX-158404494 | 3 | 58.963 | KV452730.1 | 4941229 | 2-scf00040 | 2 |
| AX-157927499 | 3 | 58.963 | KV452730.1 | 5898765 | 2-scf00040 | 2 |
| AX-157926015 | 3 | 58.998 | KV452730.1 | 4524016 | 2-scf00040 | 2 |
| AX-157926017 | 3 | 59.024 | KV452730.1 | 4525493 | 2-scf00040 | 2 |
| AX-157757942 | 3 | 59.052 | KV452730.1 | 4527215 | 2-scf00040 | 2 |
| AX-157813671 | 3 | 59.072 | KV452730.1 | 4534965 | 2-scf00040 | 2 |
| AX-157926025 | 3 | 59.072 | KV452730.1 | 4536313 | 2-scf00040 | 2 |
| AX-157926026 | 3 | 59.072 | KV452730.1 | 4540252 | 2-scf00040 | 2 |
| AX-157926085 | 3 | 59.072 | KV452730.1 | 4590333 | 2-scf00040 | 2 |
| AX-157926090 | 3 | 59.072 | KV452730.1 | 4595557 | 2-scf00040 | 2 |
| AX-157926029 | 3 | 59.079 | KV452730.1 | 4542100 | 2-scf00040 | 2 |
| AX-157926030 | 3 | 59.079 | KV452730.1 | 4542769 | 2-scf00040 | 2 |
| AX-157926034 | 3 | 59.086 | KV452730.1 | 4545904 | 2-scf00040 | 2 |
| AX-158421943 | 3 | 59.088 | KV452730.1 | 4562615 | 2-scf00040 | 2 |
| AX-157925711 | 3 | 59.098 | KV452730.1 | 4205960 | 2-scf00040 | 2 |
| AX-157926056 | 3 | 59.098 | KV452730.1 | 4568012 | 2-scf00040 | 2 |
| AX-157926194 | 3 | 59.098 | KV452730.1 | 4686013 | 2-scf00040 | 2 |
| AX-157926060 | 3 | 59.109 | KV452730.1 | 4574412 | 2-scf00040 | 2 |
| AX-157926069 | 3 | 59.119 | KV452730.1 | 4578697 | 2-scf00040 | 2 |
| AX-157926071 | 3 | 59.129 | KV452730.1 | 4580757 | 2-scf00040 | 2 |
| AX-157926080 | 3 | 59.139 | KV452730.1 | 4589081 | 2-scf00040 | 2 |
| AX-157926091 | 3 | 59.153 | KV452730.1 | 4596515 | 2-scf00040 | 2 |
| AX-157926098 | 3 | 59.166 | KV452730.1 | 4600471 | 2-scf00040 | 2 |
| AX-157926167 | 3 | 59.166 | KV452730.1 | 4664145 | 2-scf00040 | 2 |
| AX-157739356 | 3 | 59.176 | KV452730.1 | 4615110 | 2-scf00040 | 2 |
| AX-157925934 | 3 | 59.181 | KV452730.1 | 4433784 | 2-scf00040 | 2 |
| AX-157813666 | 3 | 59.181 | KV452730.1 | 4458370 | 2-scf00040 | 2 |
| AX-157925958 | 3 | 59.181 | KV452730.1 | 4460449 | 2-scf00040 | 2 |
| AX-157813667 | 3 | 59.181 | KV452730.1 | 4464892 | 2-scf00040 | 2 |
| AX-157813669 | 3 | 59.181 | KV452730.1 | 4478994 | 2-scf00040 | 2 |
| AX-157925983 | 3 | 59.181 | KV452730.1 | 4489442 | 2-scf00040 | 2 |
| AX-157925998 | 3 | 59.181 | KV452730.1 | 4502192 | 2-scf00040 | 2 |
| AX-157926007 | 3 | 59.181 | KV452730.1 | 4507336 | 2-scf00040 | 2 |
| AX-157926020 | 3 | 59.181 | KV452730.1 | 4531096 | 2-scf00040 | 2 |
| AX-157926031 | 3 | 59.181 | KV452730.1 | 4543103 | 2-scf00040 | 2 |
| AX-157926078 | 3 | 59.181 | KV452730.1 | 4586475 | 2-scf00040 | 2 |
| AX-157926081 | 3 | 59.181 | KV452730.1 | 4589671 | 2-scf00040 | 2 |
| AX-157926086 | 3 | 59.181 | KV452730.1 | 4591277 | 2-scf00040 | 2 |
| AX-157813676 | 3 | 59.181 | KV452730.1 | 4591516 | 2-scf00040 | 2 |
| AX-157926114 | 3 | 59.181 | KV452730.1 | 4616618 | 2-scf00040 | 2 |

|              |   |        |            |         |            |   |
|--------------|---|--------|------------|---------|------------|---|
| AX-157926119 | 3 | 59.181 | KV452730.1 | 4622330 | 2-scf00040 | 2 |
| AX-157926123 | 3 | 59.181 | KV452730.1 | 4625742 | 2-scf00040 | 2 |
| AX-157926127 | 3 | 59.181 | KV452730.1 | 4631347 | 2-scf00040 | 2 |
| AX-157926128 | 3 | 59.181 | KV452730.1 | 4631895 | 2-scf00040 | 2 |
| AX-157926135 | 3 | 59.181 | KV452730.1 | 4637178 | 2-scf00040 | 2 |
| AX-157926138 | 3 | 59.181 | KV452730.1 | 4638501 | 2-scf00040 | 2 |
| AX-158405347 | 3 | 59.181 | KV452730.1 | 4640631 | 2-scf00040 | 2 |
| AX-158405348 | 3 | 59.181 | KV452730.1 | 4640718 | 2-scf00040 | 2 |
| AX-158405349 | 3 | 59.181 | KV452730.1 | 4640769 | 2-scf00040 | 2 |
| AX-157767968 | 3 | 59.181 | KV452730.1 | 4643660 | 2-scf00040 | 2 |
| AX-157772682 | 3 | 59.181 | KV452730.1 | 4644870 | 2-scf00040 | 2 |
| AX-157926147 | 3 | 59.181 | KV452730.1 | 4648435 | 2-scf00040 | 2 |
| AX-157926149 | 3 | 59.181 | KV452730.1 | 4650668 | 2-scf00040 | 2 |
| AX-157926152 | 3 | 59.181 | KV452730.1 | 4652042 | 2-scf00040 | 2 |
| AX-157926158 | 3 | 59.181 | KV452730.1 | 4655616 | 2-scf00040 | 2 |
| AX-157926159 | 3 | 59.181 | KV452730.1 | 4657906 | 2-scf00040 | 2 |
| AX-157926163 | 3 | 59.181 | KV452730.1 | 4661574 | 2-scf00040 | 2 |
| AX-157926168 | 3 | 59.181 | KV452730.1 | 4664751 | 2-scf00040 | 2 |
| AX-157926172 | 3 | 59.181 | KV452730.1 | 4666247 | 2-scf00040 | 2 |
| AX-157926175 | 3 | 59.181 | KV452730.1 | 4671259 | 2-scf00040 | 2 |
| AX-157926177 | 3 | 59.181 | KV452730.1 | 4672272 | 2-scf00040 | 2 |
| AX-157926179 | 3 | 59.181 | KV452730.1 | 4672697 | 2-scf00040 | 2 |
| AX-157926181 | 3 | 59.181 | KV452730.1 | 4673377 | 2-scf00040 | 2 |
| AX-157753769 | 3 | 59.181 | KV452730.1 | 4675365 | 2-scf00040 | 2 |
| AX-157926184 | 3 | 59.181 | KV452730.1 | 4677207 | 2-scf00040 | 2 |
| AX-157926185 | 3 | 59.181 | KV452730.1 | 4680529 | 2-scf00040 | 2 |
| AX-157926187 | 3 | 59.181 | KV452730.1 | 4681469 | 2-scf00040 | 2 |
| AX-157926188 | 3 | 59.181 | KV452730.1 | 4681800 | 2-scf00040 | 2 |
| AX-157813681 | 3 | 59.181 | KV452730.1 | 4699686 | 2-scf00040 | 2 |
| AX-157813682 | 3 | 59.181 | KV452730.1 | 4700628 | 2-scf00040 | 2 |
| AX-157926209 | 3 | 59.181 | KV452730.1 | 4708903 | 2-scf00040 | 2 |
| AX-158405350 | 3 | 59.181 | KV452730.1 | 4710154 | 2-scf00040 | 2 |
| AX-157926211 | 3 | 59.181 | KV452730.1 | 4711791 | 2-scf00040 | 2 |
| AX-157926215 | 3 | 59.181 | KV452730.1 | 4719761 | 2-scf00040 | 2 |
| AX-157926216 | 3 | 59.181 | KV452730.1 | 4720855 | 2-scf00040 | 2 |
| AX-157926222 | 3 | 59.181 | KV452730.1 | 4732846 | 2-scf00040 | 2 |
| AX-157926224 | 3 | 59.181 | KV452730.1 | 4733272 | 2-scf00040 | 2 |
| AX-157926227 | 3 | 59.181 | KV452730.1 | 4734125 | 2-scf00040 | 2 |
| AX-157926229 | 3 | 59.181 | KV452730.1 | 4735589 | 2-scf00040 | 2 |
| AX-157926231 | 3 | 59.181 | KV452730.1 | 4737612 | 2-scf00040 | 2 |
| AX-157813686 | 3 | 59.181 | KV452730.1 | 4781185 | 2-scf00040 | 2 |
| AX-157926248 | 3 | 59.181 | KV452730.1 | 4781976 | 2-scf00040 | 2 |
| AX-157926257 | 3 | 59.181 | KV452730.1 | 4791310 | 2-scf00040 | 2 |
| AX-157926262 | 3 | 59.181 | KV452730.1 | 4794780 | 2-scf00040 | 2 |
| AX-157926324 | 3 | 59.181 | KV452730.1 | 4868323 | 2-scf00040 | 2 |
| AX-157926339 | 3 | 59.181 | KV452730.1 | 4889426 | 2-scf00040 | 2 |
| AX-157927447 | 3 | 59.181 | KV452730.1 | 5826166 | 2-scf00040 | 2 |
| AX-157813767 | 3 | 59.181 | KV452730.1 | 5861102 | 2-scf00040 | 2 |
| AX-157927590 | 3 | 59.181 | KV452730.1 | 5986177 | 2-scf00040 | 2 |
| AX-157926251 | 3 | 59.29  | KV452730.1 | 4785834 | 2-scf00040 | 2 |
| AX-157926101 | 3 | 59.399 | KV452730.1 | 4602197 | 2-scf00040 | 2 |

|              |   |        |            |         |            |   |
|--------------|---|--------|------------|---------|------------|---|
| AX-157774895 | 3 | 59.399 | KV452730.1 | 4790109 | 2-scf00040 | 2 |
| AX-157926253 | 3 | 59.399 | KV452730.1 | 4790226 | 2-scf00040 | 2 |
| AX-157926260 | 3 | 59.399 | KV452730.1 | 4793418 | 2-scf00040 | 2 |
| AX-157926263 | 3 | 59.399 | KV452730.1 | 4795262 | 2-scf00040 | 2 |
| AX-157926282 | 3 | 59.399 | KV452730.1 | 4815061 | 2-scf00040 | 2 |
| AX-157709287 | 3 | 59.399 | KV452730.1 | 4818146 | 2-scf00040 | 2 |
| AX-157926290 | 3 | 59.399 | KV452730.1 | 4827818 | 2-scf00040 | 2 |
| AX-158414941 | 3 | 59.399 | KV452730.1 | 4831998 | 2-scf00040 | 2 |
| AX-157813689 | 3 | 59.399 | KV452730.1 | 4838818 | 2-scf00040 | 2 |
| AX-157926298 | 3 | 59.399 | KV452730.1 | 4839788 | 2-scf00040 | 2 |
| AX-157927706 | 3 | 59.399 | KV452730.1 | 6077639 | 2-scf00040 | 2 |
| AX-157926320 | 3 | 59.405 | KV452730.1 | 4863311 | 2-scf00040 | 2 |
| AX-157926322 | 3 | 59.41  | KV452730.1 | 4864752 | 2-scf00040 | 2 |
| AX-157926338 | 3 | 59.41  | KV452730.1 | 4888892 | 2-scf00040 | 2 |
| AX-157744225 | 3 | 59.41  | KV452730.1 | 4918439 | 2-scf00040 | 2 |
| AX-157813730 | 3 | 59.41  | KV452730.1 | 5607088 | 2-scf00040 | 2 |
| AX-157927692 | 3 | 59.41  | KV452730.1 | 6071683 | 2-scf00040 | 2 |
| AX-157926254 | 3 | 59.433 | KV452730.1 | 4790672 | 2-scf00040 | 2 |
| AX-157853874 | 3 | 59.433 | KV452730.1 | 4835980 | 2-scf00040 | 2 |
| AX-157926335 | 3 | 59.433 | KV452730.1 | 4883521 | 2-scf00040 | 2 |
| AX-157813698 | 3 | 59.433 | KV452730.1 | 4911176 | 2-scf00040 | 2 |
| AX-157813699 | 3 | 59.433 | KV452730.1 | 4911524 | 2-scf00040 | 2 |
| AX-157926359 | 3 | 59.433 | KV452730.1 | 4912617 | 2-scf00040 | 2 |
| AX-158405358 | 3 | 59.433 | KV452730.1 | 4941375 | 2-scf00040 | 2 |
| AX-157927429 | 3 | 59.433 | KV452730.1 | 5798072 | 2-scf00040 | 2 |
| AX-157926341 | 3 | 59.471 | KV452730.1 | 4891296 | 2-scf00040 | 2 |
| AX-157926350 | 3 | 59.471 | KV452730.1 | 4902568 | 2-scf00040 | 2 |
| AX-157927635 | 3 | 59.471 | KV452730.1 | 6025603 | 2-scf00040 | 2 |
| AX-157926395 | 3 | 59.509 | KV452730.1 | 4950746 | 2-scf00040 | 2 |
| AX-157926399 | 3 | 59.509 | KV452730.1 | 4954182 | 2-scf00040 | 2 |
| AX-157926416 | 3 | 59.509 | KV452730.1 | 4970429 | 2-scf00040 | 2 |
| AX-157926419 | 3 | 59.509 | KV452730.1 | 4971763 | 2-scf00040 | 2 |
| AX-157926420 | 3 | 59.509 | KV452730.1 | 4972132 | 2-scf00040 | 2 |
| AX-157926435 | 3 | 59.509 | KV452730.1 | 4977794 | 2-scf00040 | 2 |
| AX-157926444 | 3 | 59.509 | KV452730.1 | 4984140 | 2-scf00040 | 2 |
| AX-157926452 | 3 | 59.509 | KV452730.1 | 4992648 | 2-scf00040 | 2 |
| AX-157926478 | 3 | 59.509 | KV452730.1 | 5025549 | 2-scf00040 | 2 |
| AX-157926479 | 3 | 59.509 | KV452730.1 | 5025955 | 2-scf00040 | 2 |
| AX-157813704 | 3 | 59.509 | KV452730.1 | 5044987 | 2-scf00040 | 2 |
| AX-157813705 | 3 | 59.509 | KV452730.1 | 5048832 | 2-scf00040 | 2 |
| AX-157926522 | 3 | 59.509 | KV452730.1 | 5067912 | 2-scf00040 | 2 |
| AX-157926530 | 3 | 59.509 | KV452730.1 | 5071011 | 2-scf00040 | 2 |
| AX-157813707 | 3 | 59.509 | KV452730.1 | 5071684 | 2-scf00040 | 2 |
| AX-157813708 | 3 | 59.509 | KV452730.1 | 5071953 | 2-scf00040 | 2 |
| AX-157926546 | 3 | 59.509 | KV452730.1 | 5076614 | 2-scf00040 | 2 |
| AX-157869187 | 3 | 59.509 | KV452730.1 | 5078900 | 2-scf00040 | 2 |
| AX-157869188 | 3 | 59.509 | KV452730.1 | 5083653 | 2-scf00040 | 2 |
| AX-157926581 | 3 | 59.509 | KV452730.1 | 5107179 | 2-scf00040 | 2 |
| AX-157926589 | 3 | 59.509 | KV452730.1 | 5114871 | 2-scf00040 | 2 |
| AX-157926660 | 3 | 59.509 | KV452730.1 | 5176260 | 2-scf00040 | 2 |
| AX-157926662 | 3 | 59.509 | KV452730.1 | 5177499 | 2-scf00040 | 2 |

|              |   |        |            |         |            |   |
|--------------|---|--------|------------|---------|------------|---|
| AX-157926672 | 3 | 59.509 | KV452730.1 | 5186528 | 2-scf00040 | 2 |
| AX-157926673 | 3 | 59.509 | KV452730.1 | 5187476 | 2-scf00040 | 2 |
| AX-157926681 | 3 | 59.509 | KV452730.1 | 5193068 | 2-scf00040 | 2 |
| AX-158389712 | 3 | 59.509 | KV452730.1 | 5194710 | 2-scf00040 | 2 |
| AX-157926686 | 3 | 59.509 | KV452730.1 | 5196159 | 2-scf00040 | 2 |
| AX-157926982 | 3 | 59.509 | KV452730.1 | 5427143 | 2-scf00040 | 2 |
| AX-157926984 | 3 | 59.509 | KV452730.1 | 5429636 | 2-scf00040 | 2 |
| AX-157926986 | 3 | 59.509 | KV452730.1 | 5430803 | 2-scf00040 | 2 |
| AX-157926988 | 3 | 59.509 | KV452730.1 | 5432728 | 2-scf00040 | 2 |
| AX-157869189 | 3 | 59.509 | KV452730.1 | 5442690 | 2-scf00040 | 2 |
| AX-157927075 | 3 | 59.509 | KV452730.1 | 5523554 | 2-scf00040 | 2 |
| AX-157927093 | 3 | 59.509 | KV452730.1 | 5538318 | 2-scf00040 | 2 |
| AX-157927106 | 3 | 59.509 | KV452730.1 | 5544715 | 2-scf00040 | 2 |
| AX-157813725 | 3 | 59.509 | KV452730.1 | 5572943 | 2-scf00040 | 2 |
| AX-157927134 | 3 | 59.509 | KV452730.1 | 5575207 | 2-scf00040 | 2 |
| AX-157927145 | 3 | 59.509 | KV452730.1 | 5582682 | 2-scf00040 | 2 |
| AX-157869194 | 3 | 59.509 | KV452730.1 | 5647788 | 2-scf00040 | 2 |
| AX-157927243 | 3 | 59.509 | KV452730.1 | 5653135 | 2-scf00040 | 2 |
| AX-157927248 | 3 | 59.509 | KV452730.1 | 5655061 | 2-scf00040 | 2 |
| AX-157869195 | 3 | 59.509 | KV452730.1 | 5668943 | 2-scf00040 | 2 |
| AX-157927521 | 3 | 59.509 | KV452730.1 | 5927346 | 2-scf00040 | 2 |
| AX-157813772 | 3 | 59.509 | KV452730.1 | 5952388 | 2-scf00040 | 2 |
| AX-157926738 | 3 | 59.541 | KV452730.1 | 5236485 | 2-scf00040 | 2 |
| AX-157926761 | 3 | 59.572 | KV452730.1 | 5250634 | 2-scf00040 | 2 |
| AX-157853869 | 3 | 59.618 | KV452730.1 | 4256792 | 2-scf00040 | 2 |
| AX-157925896 | 3 | 59.618 | KV452730.1 | 4396307 | 2-scf00040 | 2 |
| AX-157926204 | 3 | 59.618 | KV452730.1 | 4695985 | 2-scf00040 | 2 |
| AX-157926252 | 3 | 59.618 | KV452730.1 | 4788434 | 2-scf00040 | 2 |
| AX-157926261 | 3 | 59.618 | KV452730.1 | 4793881 | 2-scf00040 | 2 |
| AX-157718746 | 3 | 59.618 | KV452730.1 | 4797379 | 2-scf00040 | 2 |
| AX-157753120 | 3 | 59.618 | KV452730.1 | 4800258 | 2-scf00040 | 2 |
| AX-157813687 | 3 | 59.618 | KV452730.1 | 4819301 | 2-scf00040 | 2 |
| AX-157926288 | 3 | 59.618 | KV452730.1 | 4827323 | 2-scf00040 | 2 |
| AX-157926302 | 3 | 59.618 | KV452730.1 | 4846213 | 2-scf00040 | 2 |
| AX-157813690 | 3 | 59.618 | KV452730.1 | 4849790 | 2-scf00040 | 2 |
| AX-157926329 | 3 | 59.618 | KV452730.1 | 4874841 | 2-scf00040 | 2 |
| AX-157715253 | 3 | 59.618 | KV452730.1 | 4878703 | 2-scf00040 | 2 |
| AX-157813694 | 3 | 59.618 | KV452730.1 | 4879423 | 2-scf00040 | 2 |
| AX-157926333 | 3 | 59.618 | KV452730.1 | 4879837 | 2-scf00040 | 2 |
| AX-157721952 | 3 | 59.618 | KV452730.1 | 4884966 | 2-scf00040 | 2 |
| AX-157926343 | 3 | 59.618 | KV452730.1 | 4891713 | 2-scf00040 | 2 |
| AX-158389702 | 3 | 59.618 | KV452730.1 | 4894159 | 2-scf00040 | 2 |
| AX-157926357 | 3 | 59.618 | KV452730.1 | 4910789 | 2-scf00040 | 2 |
| AX-157926363 | 3 | 59.618 | KV452730.1 | 4914432 | 2-scf00040 | 2 |
| AX-157926364 | 3 | 59.618 | KV452730.1 | 4921756 | 2-scf00040 | 2 |
| AX-157926367 | 3 | 59.618 | KV452730.1 | 4925774 | 2-scf00040 | 2 |
| AX-157926369 | 3 | 59.618 | KV452730.1 | 4926078 | 2-scf00040 | 2 |
| AX-157813700 | 3 | 59.618 | KV452730.1 | 4926834 | 2-scf00040 | 2 |
| AX-157926370 | 3 | 59.618 | KV452730.1 | 4927528 | 2-scf00040 | 2 |
| AX-157926371 | 3 | 59.618 | KV452730.1 | 4927771 | 2-scf00040 | 2 |
| AX-157926372 | 3 | 59.618 | KV452730.1 | 4929502 | 2-scf00040 | 2 |

|              |   |        |            |         |            |   |
|--------------|---|--------|------------|---------|------------|---|
| AX-157926373 | 3 | 59.618 | KV452730.1 | 4929928 | 2-scf00040 | 2 |
| AX-157926374 | 3 | 59.618 | KV452730.1 | 4931360 | 2-scf00040 | 2 |
| AX-157926375 | 3 | 59.618 | KV452730.1 | 4932873 | 2-scf00040 | 2 |
| AX-157926376 | 3 | 59.618 | KV452730.1 | 4933395 | 2-scf00040 | 2 |
| AX-157926379 | 3 | 59.618 | KV452730.1 | 4935358 | 2-scf00040 | 2 |
| AX-157926380 | 3 | 59.618 | KV452730.1 | 4936202 | 2-scf00040 | 2 |
| AX-157926381 | 3 | 59.618 | KV452730.1 | 4936992 | 2-scf00040 | 2 |
| AX-157710837 | 3 | 59.618 | KV452730.1 | 4938571 | 2-scf00040 | 2 |
| AX-157926382 | 3 | 59.618 | KV452730.1 | 4939128 | 2-scf00040 | 2 |
| AX-157926384 | 3 | 59.618 | KV452730.1 | 4942821 | 2-scf00040 | 2 |
| AX-157926385 | 3 | 59.618 | KV452730.1 | 4943943 | 2-scf00040 | 2 |
| AX-157926388 | 3 | 59.618 | KV452730.1 | 4947067 | 2-scf00040 | 2 |
| AX-157926391 | 3 | 59.618 | KV452730.1 | 4948351 | 2-scf00040 | 2 |
| AX-157926392 | 3 | 59.618 | KV452730.1 | 4949196 | 2-scf00040 | 2 |
| AX-157926394 | 3 | 59.618 | KV452730.1 | 4950317 | 2-scf00040 | 2 |
| AX-157733232 | 3 | 59.618 | KV452730.1 | 4953404 | 2-scf00040 | 2 |
| AX-157926398 | 3 | 59.618 | KV452730.1 | 4953512 | 2-scf00040 | 2 |
| AX-157926400 | 3 | 59.618 | KV452730.1 | 4954471 | 2-scf00040 | 2 |
| AX-157926401 | 3 | 59.618 | KV452730.1 | 4956937 | 2-scf00040 | 2 |
| AX-157926408 | 3 | 59.618 | KV452730.1 | 4962109 | 2-scf00040 | 2 |
| AX-157926410 | 3 | 59.618 | KV452730.1 | 4964387 | 2-scf00040 | 2 |
| AX-157926411 | 3 | 59.618 | KV452730.1 | 4964738 | 2-scf00040 | 2 |
| AX-157926412 | 3 | 59.618 | KV452730.1 | 4965631 | 2-scf00040 | 2 |
| AX-157869186 | 3 | 59.618 | KV452730.1 | 4966657 | 2-scf00040 | 2 |
| AX-157926413 | 3 | 59.618 | KV452730.1 | 4967831 | 2-scf00040 | 2 |
| AX-157926414 | 3 | 59.618 | KV452730.1 | 4970025 | 2-scf00040 | 2 |
| AX-157926418 | 3 | 59.618 | KV452730.1 | 4970889 | 2-scf00040 | 2 |
| AX-157926424 | 3 | 59.618 | KV452730.1 | 4972960 | 2-scf00040 | 2 |
| AX-157926425 | 3 | 59.618 | KV452730.1 | 4973202 | 2-scf00040 | 2 |
| AX-157926428 | 3 | 59.618 | KV452730.1 | 4973499 | 2-scf00040 | 2 |
| AX-157926429 | 3 | 59.618 | KV452730.1 | 4973855 | 2-scf00040 | 2 |
| AX-157926431 | 3 | 59.618 | KV452730.1 | 4975081 | 2-scf00040 | 2 |
| AX-157926434 | 3 | 59.618 | KV452730.1 | 4976262 | 2-scf00040 | 2 |
| AX-157926436 | 3 | 59.618 | KV452730.1 | 4978300 | 2-scf00040 | 2 |
| AX-157926437 | 3 | 59.618 | KV452730.1 | 4979065 | 2-scf00040 | 2 |
| AX-157926438 | 3 | 59.618 | KV452730.1 | 4980240 | 2-scf00040 | 2 |
| AX-157926439 | 3 | 59.618 | KV452730.1 | 4980649 | 2-scf00040 | 2 |
| AX-157695063 | 3 | 59.618 | KV452730.1 | 4981296 | 2-scf00040 | 2 |
| AX-157926440 | 3 | 59.618 | KV452730.1 | 4982027 | 2-scf00040 | 2 |
| AX-157926441 | 3 | 59.618 | KV452730.1 | 4982396 | 2-scf00040 | 2 |
| AX-157926442 | 3 | 59.618 | KV452730.1 | 4983285 | 2-scf00040 | 2 |
| AX-157926443 | 3 | 59.618 | KV452730.1 | 4983548 | 2-scf00040 | 2 |
| AX-157926450 | 3 | 59.618 | KV452730.1 | 4989508 | 2-scf00040 | 2 |
| AX-157926451 | 3 | 59.618 | KV452730.1 | 4991622 | 2-scf00040 | 2 |
| AX-158389704 | 3 | 59.618 | KV452730.1 | 4992776 | 2-scf00040 | 2 |
| AX-157926454 | 3 | 59.618 | KV452730.1 | 4994481 | 2-scf00040 | 2 |
| AX-157813703 | 3 | 59.618 | KV452730.1 | 4996482 | 2-scf00040 | 2 |
| AX-157926457 | 3 | 59.618 | KV452730.1 | 5000890 | 2-scf00040 | 2 |
| AX-157755508 | 3 | 59.618 | KV452730.1 | 5004236 | 2-scf00040 | 2 |
| AX-157926460 | 3 | 59.618 | KV452730.1 | 5005472 | 2-scf00040 | 2 |
| AX-157700540 | 3 | 59.618 | KV452730.1 | 5007624 | 2-scf00040 | 2 |



|              |   |        |            |         |            |   |
|--------------|---|--------|------------|---------|------------|---|
| AX-157926462 | 3 | 59.618 | KV452730.1 | 5008544 | 2-scf00040 | 2 |
| AX-157926463 | 3 | 59.618 | KV452730.1 | 5009359 | 2-scf00040 | 2 |
| AX-157926465 | 3 | 59.618 | KV452730.1 | 5010753 | 2-scf00040 | 2 |
| AX-157926466 | 3 | 59.618 | KV452730.1 | 5011206 | 2-scf00040 | 2 |
| AX-157926468 | 3 | 59.618 | KV452730.1 | 5011773 | 2-scf00040 | 2 |
| AX-158389705 | 3 | 59.618 | KV452730.1 | 5013206 | 2-scf00040 | 2 |
| AX-157926470 | 3 | 59.618 | KV452730.1 | 5013999 | 2-scf00040 | 2 |
| AX-157926471 | 3 | 59.618 | KV452730.1 | 5015918 | 2-scf00040 | 2 |
| AX-157926473 | 3 | 59.618 | KV452730.1 | 5017634 | 2-scf00040 | 2 |
| AX-157926474 | 3 | 59.618 | KV452730.1 | 5018466 | 2-scf00040 | 2 |
| AX-157926475 | 3 | 59.618 | KV452730.1 | 5021465 | 2-scf00040 | 2 |
| AX-157926476 | 3 | 59.618 | KV452730.1 | 5021908 | 2-scf00040 | 2 |
| AX-157926477 | 3 | 59.618 | KV452730.1 | 5024697 | 2-scf00040 | 2 |
| AX-157926480 | 3 | 59.618 | KV452730.1 | 5026637 | 2-scf00040 | 2 |
| AX-157926481 | 3 | 59.618 | KV452730.1 | 5028503 | 2-scf00040 | 2 |
| AX-157926482 | 3 | 59.618 | KV452730.1 | 5029309 | 2-scf00040 | 2 |
| AX-157926483 | 3 | 59.618 | KV452730.1 | 5029830 | 2-scf00040 | 2 |
| AX-157926484 | 3 | 59.618 | KV452730.1 | 5030190 | 2-scf00040 | 2 |
| AX-157926485 | 3 | 59.618 | KV452730.1 | 5031033 | 2-scf00040 | 2 |
| AX-157926486 | 3 | 59.618 | KV452730.1 | 5033004 | 2-scf00040 | 2 |
| AX-157926487 | 3 | 59.618 | KV452730.1 | 5033593 | 2-scf00040 | 2 |
| AX-157926488 | 3 | 59.618 | KV452730.1 | 5034111 | 2-scf00040 | 2 |
| AX-157926489 | 3 | 59.618 | KV452730.1 | 5034322 | 2-scf00040 | 2 |
| AX-157926490 | 3 | 59.618 | KV452730.1 | 5038024 | 2-scf00040 | 2 |
| AX-157926491 | 3 | 59.618 | KV452730.1 | 5039093 | 2-scf00040 | 2 |
| AX-157926493 | 3 | 59.618 | KV452730.1 | 5041539 | 2-scf00040 | 2 |
| AX-157926495 | 3 | 59.618 | KV452730.1 | 5046792 | 2-scf00040 | 2 |
| AX-157926496 | 3 | 59.618 | KV452730.1 | 5048387 | 2-scf00040 | 2 |
| AX-157926498 | 3 | 59.618 | KV452730.1 | 5049008 | 2-scf00040 | 2 |
| AX-157926500 | 3 | 59.618 | KV452730.1 | 5051045 | 2-scf00040 | 2 |
| AX-157926502 | 3 | 59.618 | KV452730.1 | 5051708 | 2-scf00040 | 2 |
| AX-157926503 | 3 | 59.618 | KV452730.1 | 5052538 | 2-scf00040 | 2 |
| AX-157926505 | 3 | 59.618 | KV452730.1 | 5052946 | 2-scf00040 | 2 |
| AX-158389706 | 3 | 59.618 | KV452730.1 | 5053321 | 2-scf00040 | 2 |
| AX-157926507 | 3 | 59.618 | KV452730.1 | 5054680 | 2-scf00040 | 2 |
| AX-157926508 | 3 | 59.618 | KV452730.1 | 5055340 | 2-scf00040 | 2 |
| AX-157926510 | 3 | 59.618 | KV452730.1 | 5055864 | 2-scf00040 | 2 |
| AX-158389707 | 3 | 59.618 | KV452730.1 | 5056198 | 2-scf00040 | 2 |
| AX-157926511 | 3 | 59.618 | KV452730.1 | 5060412 | 2-scf00040 | 2 |
| AX-157926513 | 3 | 59.618 | KV452730.1 | 5061212 | 2-scf00040 | 2 |
| AX-157726810 | 3 | 59.618 | KV452730.1 | 5062598 | 2-scf00040 | 2 |
| AX-157926514 | 3 | 59.618 | KV452730.1 | 5063424 | 2-scf00040 | 2 |
| AX-157926515 | 3 | 59.618 | KV452730.1 | 5064400 | 2-scf00040 | 2 |
| AX-157813706 | 3 | 59.618 | KV452730.1 | 5065792 | 2-scf00040 | 2 |
| AX-157926517 | 3 | 59.618 | KV452730.1 | 5066091 | 2-scf00040 | 2 |
| AX-157926519 | 3 | 59.618 | KV452730.1 | 5066373 | 2-scf00040 | 2 |
| AX-157926520 | 3 | 59.618 | KV452730.1 | 5066777 | 2-scf00040 | 2 |
| AX-157926521 | 3 | 59.618 | KV452730.1 | 5067208 | 2-scf00040 | 2 |
| AX-157926524 | 3 | 59.618 | KV452730.1 | 5068340 | 2-scf00040 | 2 |
| AX-157926525 | 3 | 59.618 | KV452730.1 | 5068570 | 2-scf00040 | 2 |
| AX-157926527 | 3 | 59.618 | KV452730.1 | 5070174 | 2-scf00040 | 2 |

|              |   |        |            |         |            |   |
|--------------|---|--------|------------|---------|------------|---|
| AX-157926528 | 3 | 59.618 | KV452730.1 | 5070633 | 2-scf00040 | 2 |
| AX-157926531 | 3 | 59.618 | KV452730.1 | 5071288 | 2-scf00040 | 2 |
| AX-157926533 | 3 | 59.618 | KV452730.1 | 5072316 | 2-scf00040 | 2 |
| AX-157813709 | 3 | 59.618 | KV452730.1 | 5073471 | 2-scf00040 | 2 |
| AX-157926534 | 3 | 59.618 | KV452730.1 | 5073769 | 2-scf00040 | 2 |
| AX-157926537 | 3 | 59.618 | KV452730.1 | 5074181 | 2-scf00040 | 2 |
| AX-157926538 | 3 | 59.618 | KV452730.1 | 5074489 | 2-scf00040 | 2 |
| AX-157926540 | 3 | 59.618 | KV452730.1 | 5075248 | 2-scf00040 | 2 |
| AX-157926541 | 3 | 59.618 | KV452730.1 | 5075502 | 2-scf00040 | 2 |
| AX-157926544 | 3 | 59.618 | KV452730.1 | 5076246 | 2-scf00040 | 2 |
| AX-157926547 | 3 | 59.618 | KV452730.1 | 5077464 | 2-scf00040 | 2 |
| AX-157926550 | 3 | 59.618 | KV452730.1 | 5078486 | 2-scf00040 | 2 |
| AX-157926552 | 3 | 59.618 | KV452730.1 | 5079413 | 2-scf00040 | 2 |
| AX-157926555 | 3 | 59.618 | KV452730.1 | 5080466 | 2-scf00040 | 2 |
| AX-157926556 | 3 | 59.618 | KV452730.1 | 5081141 | 2-scf00040 | 2 |
| AX-157926558 | 3 | 59.618 | KV452730.1 | 5081420 | 2-scf00040 | 2 |
| AX-157926559 | 3 | 59.618 | KV452730.1 | 5081638 | 2-scf00040 | 2 |
| AX-157926560 | 3 | 59.618 | KV452730.1 | 5082313 | 2-scf00040 | 2 |
| AX-157853876 | 3 | 59.618 | KV452730.1 | 5083856 | 2-scf00040 | 2 |
| AX-157926562 | 3 | 59.618 | KV452730.1 | 5083930 | 2-scf00040 | 2 |
| AX-157926563 | 3 | 59.618 | KV452730.1 | 5084357 | 2-scf00040 | 2 |
| AX-157926566 | 3 | 59.618 | KV452730.1 | 5087152 | 2-scf00040 | 2 |
| AX-157926568 | 3 | 59.618 | KV452730.1 | 5088377 | 2-scf00040 | 2 |
| AX-157926569 | 3 | 59.618 | KV452730.1 | 5090361 | 2-scf00040 | 2 |
| AX-157926571 | 3 | 59.618 | KV452730.1 | 5092655 | 2-scf00040 | 2 |
| AX-157926573 | 3 | 59.618 | KV452730.1 | 5095506 | 2-scf00040 | 2 |
| AX-157926574 | 3 | 59.618 | KV452730.1 | 5096421 | 2-scf00040 | 2 |
| AX-157926577 | 3 | 59.618 | KV452730.1 | 5098042 | 2-scf00040 | 2 |
| AX-157926578 | 3 | 59.618 | KV452730.1 | 5100518 | 2-scf00040 | 2 |
| AX-157926579 | 3 | 59.618 | KV452730.1 | 5101440 | 2-scf00040 | 2 |
| AX-157926580 | 3 | 59.618 | KV452730.1 | 5101892 | 2-scf00040 | 2 |
| AX-158405359 | 3 | 59.618 | KV452730.1 | 5102007 | 2-scf00040 | 2 |
| AX-157926583 | 3 | 59.618 | KV452730.1 | 5109701 | 2-scf00040 | 2 |
| AX-158389709 | 3 | 59.618 | KV452730.1 | 5109803 | 2-scf00040 | 2 |
| AX-157926586 | 3 | 59.618 | KV452730.1 | 5111724 | 2-scf00040 | 2 |
| AX-157926587 | 3 | 59.618 | KV452730.1 | 5112726 | 2-scf00040 | 2 |
| AX-157926588 | 3 | 59.618 | KV452730.1 | 5113827 | 2-scf00040 | 2 |
| AX-157693379 | 3 | 59.618 | KV452730.1 | 5114635 | 2-scf00040 | 2 |
| AX-157926590 | 3 | 59.618 | KV452730.1 | 5117444 | 2-scf00040 | 2 |
| AX-157926595 | 3 | 59.618 | KV452730.1 | 5119677 | 2-scf00040 | 2 |
| AX-157926597 | 3 | 59.618 | KV452730.1 | 5120621 | 2-scf00040 | 2 |
| AX-157926598 | 3 | 59.618 | KV452730.1 | 5121297 | 2-scf00040 | 2 |
| AX-157926602 | 3 | 59.618 | KV452730.1 | 5122340 | 2-scf00040 | 2 |
| AX-157926603 | 3 | 59.618 | KV452730.1 | 5123981 | 2-scf00040 | 2 |
| AX-157926609 | 3 | 59.618 | KV452730.1 | 5128292 | 2-scf00040 | 2 |
| AX-157718852 | 3 | 59.618 | KV452730.1 | 5129230 | 2-scf00040 | 2 |
| AX-157926616 | 3 | 59.618 | KV452730.1 | 5132919 | 2-scf00040 | 2 |
| AX-157926622 | 3 | 59.618 | KV452730.1 | 5135335 | 2-scf00040 | 2 |
| AX-157926625 | 3 | 59.618 | KV452730.1 | 5138131 | 2-scf00040 | 2 |
| AX-157926627 | 3 | 59.618 | KV452730.1 | 5140390 | 2-scf00040 | 2 |
| AX-157926629 | 3 | 59.618 | KV452730.1 | 5140657 | 2-scf00040 | 2 |

|              |   |        |            |         |            |   |
|--------------|---|--------|------------|---------|------------|---|
| AX-158389710 | 3 | 59.618 | KV452730.1 | 5141852 | 2-scf00040 | 2 |
| AX-157926631 | 3 | 59.618 | KV452730.1 | 5142346 | 2-scf00040 | 2 |
| AX-157926633 | 3 | 59.618 | KV452730.1 | 5146154 | 2-scf00040 | 2 |
| AX-157926634 | 3 | 59.618 | KV452730.1 | 5146314 | 2-scf00040 | 2 |
| AX-157926635 | 3 | 59.618 | KV452730.1 | 5150123 | 2-scf00040 | 2 |
| AX-157926636 | 3 | 59.618 | KV452730.1 | 5150596 | 2-scf00040 | 2 |
| AX-157708119 | 3 | 59.618 | KV452730.1 | 5152177 | 2-scf00040 | 2 |
| AX-157926638 | 3 | 59.618 | KV452730.1 | 5152444 | 2-scf00040 | 2 |
| AX-157926639 | 3 | 59.618 | KV452730.1 | 5152915 | 2-scf00040 | 2 |
| AX-157926641 | 3 | 59.618 | KV452730.1 | 5158204 | 2-scf00040 | 2 |
| AX-158389711 | 3 | 59.618 | KV452730.1 | 5159465 | 2-scf00040 | 2 |
| AX-157926642 | 3 | 59.618 | KV452730.1 | 5159889 | 2-scf00040 | 2 |
| AX-157926646 | 3 | 59.618 | KV452730.1 | 5164551 | 2-scf00040 | 2 |
| AX-157926648 | 3 | 59.618 | KV452730.1 | 5165986 | 2-scf00040 | 2 |
| AX-157926649 | 3 | 59.618 | KV452730.1 | 5167307 | 2-scf00040 | 2 |
| AX-157926651 | 3 | 59.618 | KV452730.1 | 5168098 | 2-scf00040 | 2 |
| AX-157926655 | 3 | 59.618 | KV452730.1 | 5171915 | 2-scf00040 | 2 |
| AX-157926659 | 3 | 59.618 | KV452730.1 | 5175743 | 2-scf00040 | 2 |
| AX-157813711 | 3 | 59.618 | KV452730.1 | 5178234 | 2-scf00040 | 2 |
| AX-157926663 | 3 | 59.618 | KV452730.1 | 5178627 | 2-scf00040 | 2 |
| AX-157926664 | 3 | 59.618 | KV452730.1 | 5180768 | 2-scf00040 | 2 |
| AX-157926667 | 3 | 59.618 | KV452730.1 | 5183953 | 2-scf00040 | 2 |
| AX-157926668 | 3 | 59.618 | KV452730.1 | 5184287 | 2-scf00040 | 2 |
| AX-157926669 | 3 | 59.618 | KV452730.1 | 5185441 | 2-scf00040 | 2 |
| AX-157926674 | 3 | 59.618 | KV452730.1 | 5187896 | 2-scf00040 | 2 |
| AX-157926676 | 3 | 59.618 | KV452730.1 | 5188287 | 2-scf00040 | 2 |
| AX-157926677 | 3 | 59.618 | KV452730.1 | 5189613 | 2-scf00040 | 2 |
| AX-157926679 | 3 | 59.618 | KV452730.1 | 5190116 | 2-scf00040 | 2 |
| AX-157813712 | 3 | 59.618 | KV452730.1 | 5193542 | 2-scf00040 | 2 |
| AX-157926684 | 3 | 59.618 | KV452730.1 | 5194761 | 2-scf00040 | 2 |
| AX-157749093 | 3 | 59.618 | KV452730.1 | 5196630 | 2-scf00040 | 2 |
| AX-157926687 | 3 | 59.618 | KV452730.1 | 5198297 | 2-scf00040 | 2 |
| AX-157813713 | 3 | 59.618 | KV452730.1 | 5198445 | 2-scf00040 | 2 |
| AX-157926689 | 3 | 59.618 | KV452730.1 | 5199328 | 2-scf00040 | 2 |
| AX-157926693 | 3 | 59.618 | KV452730.1 | 5203027 | 2-scf00040 | 2 |
| AX-157926695 | 3 | 59.618 | KV452730.1 | 5203448 | 2-scf00040 | 2 |
| AX-157711713 | 3 | 59.618 | KV452730.1 | 5204459 | 2-scf00040 | 2 |
| AX-157926697 | 3 | 59.618 | KV452730.1 | 5205629 | 2-scf00040 | 2 |
| AX-158389713 | 3 | 59.618 | KV452730.1 | 5207134 | 2-scf00040 | 2 |
| AX-158389714 | 3 | 59.618 | KV452730.1 | 5208912 | 2-scf00040 | 2 |
| AX-157926698 | 3 | 59.618 | KV452730.1 | 5209321 | 2-scf00040 | 2 |
| AX-157926701 | 3 | 59.618 | KV452730.1 | 5210683 | 2-scf00040 | 2 |
| AX-157926703 | 3 | 59.618 | KV452730.1 | 5211132 | 2-scf00040 | 2 |
| AX-157926704 | 3 | 59.618 | KV452730.1 | 5211684 | 2-scf00040 | 2 |
| AX-157926706 | 3 | 59.618 | KV452730.1 | 5215271 | 2-scf00040 | 2 |
| AX-157926707 | 3 | 59.618 | KV452730.1 | 5216496 | 2-scf00040 | 2 |
| AX-157926710 | 3 | 59.618 | KV452730.1 | 5217362 | 2-scf00040 | 2 |
| AX-157926712 | 3 | 59.618 | KV452730.1 | 5218060 | 2-scf00040 | 2 |
| AX-157926713 | 3 | 59.618 | KV452730.1 | 5218970 | 2-scf00040 | 2 |
| AX-157926714 | 3 | 59.618 | KV452730.1 | 5220901 | 2-scf00040 | 2 |
| AX-157926716 | 3 | 59.618 | KV452730.1 | 5222210 | 2-scf00040 | 2 |

|              |   |        |            |         |            |   |
|--------------|---|--------|------------|---------|------------|---|
| AX-157926717 | 3 | 59.618 | KV452730.1 | 5222963 | 2-scf00040 | 2 |
| AX-157926719 | 3 | 59.618 | KV452730.1 | 5223531 | 2-scf00040 | 2 |
| AX-157926720 | 3 | 59.618 | KV452730.1 | 5224505 | 2-scf00040 | 2 |
| AX-157926721 | 3 | 59.618 | KV452730.1 | 5225899 | 2-scf00040 | 2 |
| AX-157926723 | 3 | 59.618 | KV452730.1 | 5226287 | 2-scf00040 | 2 |
| AX-157926724 | 3 | 59.618 | KV452730.1 | 5227027 | 2-scf00040 | 2 |
| AX-157926725 | 3 | 59.618 | KV452730.1 | 5227894 | 2-scf00040 | 2 |
| AX-157926728 | 3 | 59.618 | KV452730.1 | 5228727 | 2-scf00040 | 2 |
| AX-157926730 | 3 | 59.618 | KV452730.1 | 5230224 | 2-scf00040 | 2 |
| AX-157926732 | 3 | 59.618 | KV452730.1 | 5233255 | 2-scf00040 | 2 |
| AX-157926733 | 3 | 59.618 | KV452730.1 | 5233808 | 2-scf00040 | 2 |
| AX-157926734 | 3 | 59.618 | KV452730.1 | 5234730 | 2-scf00040 | 2 |
| AX-157926736 | 3 | 59.618 | KV452730.1 | 5235244 | 2-scf00040 | 2 |
| AX-157926737 | 3 | 59.618 | KV452730.1 | 5235751 | 2-scf00040 | 2 |
| AX-157926739 | 3 | 59.618 | KV452730.1 | 5237322 | 2-scf00040 | 2 |
| AX-157926740 | 3 | 59.618 | KV452730.1 | 5237977 | 2-scf00040 | 2 |
| AX-158405362 | 3 | 59.618 | KV452730.1 | 5239178 | 2-scf00040 | 2 |
| AX-157926743 | 3 | 59.618 | KV452730.1 | 5239881 | 2-scf00040 | 2 |
| AX-157926744 | 3 | 59.618 | KV452730.1 | 5241066 | 2-scf00040 | 2 |
| AX-157926746 | 3 | 59.618 | KV452730.1 | 5241838 | 2-scf00040 | 2 |
| AX-157926747 | 3 | 59.618 | KV452730.1 | 5242709 | 2-scf00040 | 2 |
| AX-157926749 | 3 | 59.618 | KV452730.1 | 5243626 | 2-scf00040 | 2 |
| AX-157926750 | 3 | 59.618 | KV452730.1 | 5244182 | 2-scf00040 | 2 |
| AX-157926752 | 3 | 59.618 | KV452730.1 | 5245469 | 2-scf00040 | 2 |
| AX-157926754 | 3 | 59.618 | KV452730.1 | 5247126 | 2-scf00040 | 2 |
| AX-157926762 | 3 | 59.618 | KV452730.1 | 5251383 | 2-scf00040 | 2 |
| AX-157926764 | 3 | 59.618 | KV452730.1 | 5254785 | 2-scf00040 | 2 |
| AX-157727234 | 3 | 59.618 | KV452730.1 | 5255277 | 2-scf00040 | 2 |
| AX-157926768 | 3 | 59.618 | KV452730.1 | 5259825 | 2-scf00040 | 2 |
| AX-157926769 | 3 | 59.618 | KV452730.1 | 5260496 | 2-scf00040 | 2 |
| AX-157739468 | 3 | 59.618 | KV452730.1 | 5261192 | 2-scf00040 | 2 |
| AX-157926771 | 3 | 59.618 | KV452730.1 | 5262259 | 2-scf00040 | 2 |
| AX-157926773 | 3 | 59.618 | KV452730.1 | 5265059 | 2-scf00040 | 2 |
| AX-157708932 | 3 | 59.618 | KV452730.1 | 5265903 | 2-scf00040 | 2 |
| AX-157926780 | 3 | 59.618 | KV452730.1 | 5267699 | 2-scf00040 | 2 |
| AX-157926784 | 3 | 59.618 | KV452730.1 | 5268989 | 2-scf00040 | 2 |
| AX-157926785 | 3 | 59.618 | KV452730.1 | 5269391 | 2-scf00040 | 2 |
| AX-157926787 | 3 | 59.618 | KV452730.1 | 5270189 | 2-scf00040 | 2 |
| AX-157926789 | 3 | 59.618 | KV452730.1 | 5272467 | 2-scf00040 | 2 |
| AX-157926790 | 3 | 59.618 | KV452730.1 | 5272920 | 2-scf00040 | 2 |
| AX-157926792 | 3 | 59.618 | KV452730.1 | 5274332 | 2-scf00040 | 2 |
| AX-157926793 | 3 | 59.618 | KV452730.1 | 5274839 | 2-scf00040 | 2 |
| AX-157926794 | 3 | 59.618 | KV452730.1 | 5275391 | 2-scf00040 | 2 |
| AX-157926796 | 3 | 59.618 | KV452730.1 | 5276376 | 2-scf00040 | 2 |
| AX-157926797 | 3 | 59.618 | KV452730.1 | 5277261 | 2-scf00040 | 2 |
| AX-157926799 | 3 | 59.618 | KV452730.1 | 5277550 | 2-scf00040 | 2 |
| AX-157926810 | 3 | 59.618 | KV452730.1 | 5286798 | 2-scf00040 | 2 |
| AX-157926811 | 3 | 59.618 | KV452730.1 | 5288636 | 2-scf00040 | 2 |
| AX-157926813 | 3 | 59.618 | KV452730.1 | 5291578 | 2-scf00040 | 2 |
| AX-157926815 | 3 | 59.618 | KV452730.1 | 5293039 | 2-scf00040 | 2 |
| AX-158389716 | 3 | 59.618 | KV452730.1 | 5293114 | 2-scf00040 | 2 |

|              |   |        |            |         |            |   |
|--------------|---|--------|------------|---------|------------|---|
| AX-157926816 | 3 | 59.618 | KV452730.1 | 5294607 | 2-scf00040 | 2 |
| AX-158405363 | 3 | 59.618 | KV452730.1 | 5295460 | 2-scf00040 | 2 |
| AX-158405364 | 3 | 59.618 | KV452730.1 | 5295499 | 2-scf00040 | 2 |
| AX-157926817 | 3 | 59.618 | KV452730.1 | 5296212 | 2-scf00040 | 2 |
| AX-157926819 | 3 | 59.618 | KV452730.1 | 5297289 | 2-scf00040 | 2 |
| AX-157926820 | 3 | 59.618 | KV452730.1 | 5298638 | 2-scf00040 | 2 |
| AX-157926822 | 3 | 59.618 | KV452730.1 | 5299116 | 2-scf00040 | 2 |
| AX-157926824 | 3 | 59.618 | KV452730.1 | 5299961 | 2-scf00040 | 2 |
| AX-157926827 | 3 | 59.618 | KV452730.1 | 5300787 | 2-scf00040 | 2 |
| AX-157926828 | 3 | 59.618 | KV452730.1 | 5301159 | 2-scf00040 | 2 |
| AX-157926830 | 3 | 59.618 | KV452730.1 | 5301527 | 2-scf00040 | 2 |
| AX-157926832 | 3 | 59.618 | KV452730.1 | 5302084 | 2-scf00040 | 2 |
| AX-157926834 | 3 | 59.618 | KV452730.1 | 5302572 | 2-scf00040 | 2 |
| AX-157926836 | 3 | 59.618 | KV452730.1 | 5306084 | 2-scf00040 | 2 |
| AX-157926837 | 3 | 59.618 | KV452730.1 | 5306740 | 2-scf00040 | 2 |
| AX-157926840 | 3 | 59.618 | KV452730.1 | 5308556 | 2-scf00040 | 2 |
| AX-157926842 | 3 | 59.618 | KV452730.1 | 5309019 | 2-scf00040 | 2 |
| AX-157926843 | 3 | 59.618 | KV452730.1 | 5310582 | 2-scf00040 | 2 |
| AX-157926845 | 3 | 59.618 | KV452730.1 | 5311601 | 2-scf00040 | 2 |
| AX-157926847 | 3 | 59.618 | KV452730.1 | 5312271 | 2-scf00040 | 2 |
| AX-157926849 | 3 | 59.618 | KV452730.1 | 5313046 | 2-scf00040 | 2 |
| AX-157926850 | 3 | 59.618 | KV452730.1 | 5314002 | 2-scf00040 | 2 |
| AX-157926851 | 3 | 59.618 | KV452730.1 | 5314593 | 2-scf00040 | 2 |
| AX-157926852 | 3 | 59.618 | KV452730.1 | 5315994 | 2-scf00040 | 2 |
| AX-157926854 | 3 | 59.618 | KV452730.1 | 5316407 | 2-scf00040 | 2 |
| AX-158389717 | 3 | 59.618 | KV452730.1 | 5316644 | 2-scf00040 | 2 |
| AX-157926856 | 3 | 59.618 | KV452730.1 | 5320061 | 2-scf00040 | 2 |
| AX-157926857 | 3 | 59.618 | KV452730.1 | 5321016 | 2-scf00040 | 2 |
| AX-157813714 | 3 | 59.618 | KV452730.1 | 5321371 | 2-scf00040 | 2 |
| AX-157926858 | 3 | 59.618 | KV452730.1 | 5321715 | 2-scf00040 | 2 |
| AX-157926860 | 3 | 59.618 | KV452730.1 | 5322381 | 2-scf00040 | 2 |
| AX-157926861 | 3 | 59.618 | KV452730.1 | 5322891 | 2-scf00040 | 2 |
| AX-157926863 | 3 | 59.618 | KV452730.1 | 5323457 | 2-scf00040 | 2 |
| AX-157926865 | 3 | 59.618 | KV452730.1 | 5326914 | 2-scf00040 | 2 |
| AX-157926866 | 3 | 59.618 | KV452730.1 | 5327948 | 2-scf00040 | 2 |
| AX-157926867 | 3 | 59.618 | KV452730.1 | 5328584 | 2-scf00040 | 2 |
| AX-157926869 | 3 | 59.618 | KV452730.1 | 5330221 | 2-scf00040 | 2 |
| AX-158389718 | 3 | 59.618 | KV452730.1 | 5331597 | 2-scf00040 | 2 |
| AX-157926873 | 3 | 59.618 | KV452730.1 | 5334210 | 2-scf00040 | 2 |
| AX-157926874 | 3 | 59.618 | KV452730.1 | 5334999 | 2-scf00040 | 2 |
| AX-157926876 | 3 | 59.618 | KV452730.1 | 5335499 | 2-scf00040 | 2 |
| AX-157926877 | 3 | 59.618 | KV452730.1 | 5335802 | 2-scf00040 | 2 |
| AX-157926879 | 3 | 59.618 | KV452730.1 | 5336337 | 2-scf00040 | 2 |
| AX-158389719 | 3 | 59.618 | KV452730.1 | 5336536 | 2-scf00040 | 2 |
| AX-157926880 | 3 | 59.618 | KV452730.1 | 5337867 | 2-scf00040 | 2 |
| AX-157926882 | 3 | 59.618 | KV452730.1 | 5338649 | 2-scf00040 | 2 |
| AX-157926883 | 3 | 59.618 | KV452730.1 | 5340563 | 2-scf00040 | 2 |
| AX-157926885 | 3 | 59.618 | KV452730.1 | 5341248 | 2-scf00040 | 2 |
| AX-157926886 | 3 | 59.618 | KV452730.1 | 5341831 | 2-scf00040 | 2 |
| AX-157926888 | 3 | 59.618 | KV452730.1 | 5342676 | 2-scf00040 | 2 |
| AX-158389720 | 3 | 59.618 | KV452730.1 | 5343728 | 2-scf00040 | 2 |

|              |   |        |            |         |            |   |
|--------------|---|--------|------------|---------|------------|---|
| AX-157926890 | 3 | 59.618 | KV452730.1 | 5343823 | 2-scf00040 | 2 |
| AX-157926892 | 3 | 59.618 | KV452730.1 | 5344548 | 2-scf00040 | 2 |
| AX-157926893 | 3 | 59.618 | KV452730.1 | 5345895 | 2-scf00040 | 2 |
| AX-157926894 | 3 | 59.618 | KV452730.1 | 5346807 | 2-scf00040 | 2 |
| AX-157926895 | 3 | 59.618 | KV452730.1 | 5347276 | 2-scf00040 | 2 |
| AX-157926898 | 3 | 59.618 | KV452730.1 | 5348113 | 2-scf00040 | 2 |
| AX-157926899 | 3 | 59.618 | KV452730.1 | 5348730 | 2-scf00040 | 2 |
| AX-158405365 | 3 | 59.618 | KV452730.1 | 5353887 | 2-scf00040 | 2 |
| AX-157926901 | 3 | 59.618 | KV452730.1 | 5356144 | 2-scf00040 | 2 |
| AX-157926904 | 3 | 59.618 | KV452730.1 | 5357973 | 2-scf00040 | 2 |
| AX-157926906 | 3 | 59.618 | KV452730.1 | 5359170 | 2-scf00040 | 2 |
| AX-157926907 | 3 | 59.618 | KV452730.1 | 5361026 | 2-scf00040 | 2 |
| AX-157926908 | 3 | 59.618 | KV452730.1 | 5361655 | 2-scf00040 | 2 |
| AX-157926910 | 3 | 59.618 | KV452730.1 | 5363390 | 2-scf00040 | 2 |
| AX-157926911 | 3 | 59.618 | KV452730.1 | 5363704 | 2-scf00040 | 2 |
| AX-157926913 | 3 | 59.618 | KV452730.1 | 5364628 | 2-scf00040 | 2 |
| AX-157926915 | 3 | 59.618 | KV452730.1 | 5365142 | 2-scf00040 | 2 |
| AX-157926918 | 3 | 59.618 | KV452730.1 | 5365709 | 2-scf00040 | 2 |
| AX-157926920 | 3 | 59.618 | KV452730.1 | 5366390 | 2-scf00040 | 2 |
| AX-157926921 | 3 | 59.618 | KV452730.1 | 5366805 | 2-scf00040 | 2 |
| AX-157926923 | 3 | 59.618 | KV452730.1 | 5367319 | 2-scf00040 | 2 |
| AX-157926924 | 3 | 59.618 | KV452730.1 | 5367819 | 2-scf00040 | 2 |
| AX-157926927 | 3 | 59.618 | KV452730.1 | 5372711 | 2-scf00040 | 2 |
| AX-157926931 | 3 | 59.618 | KV452730.1 | 5382159 | 2-scf00040 | 2 |
| AX-157926933 | 3 | 59.618 | KV452730.1 | 5383976 | 2-scf00040 | 2 |
| AX-157926936 | 3 | 59.618 | KV452730.1 | 5385343 | 2-scf00040 | 2 |
| AX-157926940 | 3 | 59.618 | KV452730.1 | 5386227 | 2-scf00040 | 2 |
| AX-157926941 | 3 | 59.618 | KV452730.1 | 5387131 | 2-scf00040 | 2 |
| AX-157926943 | 3 | 59.618 | KV452730.1 | 5387833 | 2-scf00040 | 2 |
| AX-158405366 | 3 | 59.618 | KV452730.1 | 5391411 | 2-scf00040 | 2 |
| AX-157926946 | 3 | 59.618 | KV452730.1 | 5396858 | 2-scf00040 | 2 |
| AX-157926948 | 3 | 59.618 | KV452730.1 | 5398325 | 2-scf00040 | 2 |
| AX-157926950 | 3 | 59.618 | KV452730.1 | 5400668 | 2-scf00040 | 2 |
| AX-157926951 | 3 | 59.618 | KV452730.1 | 5402289 | 2-scf00040 | 2 |
| AX-157926953 | 3 | 59.618 | KV452730.1 | 5403208 | 2-scf00040 | 2 |
| AX-157926956 | 3 | 59.618 | KV452730.1 | 5404185 | 2-scf00040 | 2 |
| AX-157926959 | 3 | 59.618 | KV452730.1 | 5408276 | 2-scf00040 | 2 |
| AX-157926961 | 3 | 59.618 | KV452730.1 | 5409810 | 2-scf00040 | 2 |
| AX-157926963 | 3 | 59.618 | KV452730.1 | 5410254 | 2-scf00040 | 2 |
| AX-157926965 | 3 | 59.618 | KV452730.1 | 5411263 | 2-scf00040 | 2 |
| AX-157926967 | 3 | 59.618 | KV452730.1 | 5411737 | 2-scf00040 | 2 |
| AX-157926970 | 3 | 59.618 | KV452730.1 | 5413849 | 2-scf00040 | 2 |
| AX-157926972 | 3 | 59.618 | KV452730.1 | 5415140 | 2-scf00040 | 2 |
| AX-157926974 | 3 | 59.618 | KV452730.1 | 5416895 | 2-scf00040 | 2 |
| AX-157926975 | 3 | 59.618 | KV452730.1 | 5417397 | 2-scf00040 | 2 |
| AX-157926976 | 3 | 59.618 | KV452730.1 | 5417905 | 2-scf00040 | 2 |
| AX-157926977 | 3 | 59.618 | KV452730.1 | 5419340 | 2-scf00040 | 2 |
| AX-157813716 | 3 | 59.618 | KV452730.1 | 5421542 | 2-scf00040 | 2 |
| AX-157926978 | 3 | 59.618 | KV452730.1 | 5424331 | 2-scf00040 | 2 |
| AX-157926979 | 3 | 59.618 | KV452730.1 | 5425824 | 2-scf00040 | 2 |
| AX-157926980 | 3 | 59.618 | KV452730.1 | 5426342 | 2-scf00040 | 2 |

|              |   |        |            |         |            |   |
|--------------|---|--------|------------|---------|------------|---|
| AX-157926983 | 3 | 59.618 | KV452730.1 | 5429069 | 2-scf00040 | 2 |
| AX-157926985 | 3 | 59.618 | KV452730.1 | 5430066 | 2-scf00040 | 2 |
| AX-157926987 | 3 | 59.618 | KV452730.1 | 5432650 | 2-scf00040 | 2 |
| AX-157926989 | 3 | 59.618 | KV452730.1 | 5433362 | 2-scf00040 | 2 |
| AX-157721160 | 3 | 59.618 | KV452730.1 | 5433632 | 2-scf00040 | 2 |
| AX-157926991 | 3 | 59.618 | KV452730.1 | 5436602 | 2-scf00040 | 2 |
| AX-157926993 | 3 | 59.618 | KV452730.1 | 5439562 | 2-scf00040 | 2 |
| AX-157926994 | 3 | 59.618 | KV452730.1 | 5440503 | 2-scf00040 | 2 |
| AX-157926996 | 3 | 59.618 | KV452730.1 | 5441934 | 2-scf00040 | 2 |
| AX-157926998 | 3 | 59.618 | KV452730.1 | 5443785 | 2-scf00040 | 2 |
| AX-157926999 | 3 | 59.618 | KV452730.1 | 5444300 | 2-scf00040 | 2 |
| AX-157869190 | 3 | 59.618 | KV452730.1 | 5445041 | 2-scf00040 | 2 |
| AX-157927002 | 3 | 59.618 | KV452730.1 | 5445480 | 2-scf00040 | 2 |
| AX-157710237 | 3 | 59.618 | KV452730.1 | 5446046 | 2-scf00040 | 2 |
| AX-157927003 | 3 | 59.618 | KV452730.1 | 5446286 | 2-scf00040 | 2 |
| AX-157927006 | 3 | 59.618 | KV452730.1 | 5447742 | 2-scf00040 | 2 |
| AX-157927007 | 3 | 59.618 | KV452730.1 | 5448725 | 2-scf00040 | 2 |
| AX-158405368 | 3 | 59.618 | KV452730.1 | 5449390 | 2-scf00040 | 2 |
| AX-157927011 | 3 | 59.618 | KV452730.1 | 5450403 | 2-scf00040 | 2 |
| AX-157927012 | 3 | 59.618 | KV452730.1 | 5451078 | 2-scf00040 | 2 |
| AX-157927014 | 3 | 59.618 | KV452730.1 | 5452590 | 2-scf00040 | 2 |
| AX-157718200 | 3 | 59.618 | KV452730.1 | 5453079 | 2-scf00040 | 2 |
| AX-157927015 | 3 | 59.618 | KV452730.1 | 5454940 | 2-scf00040 | 2 |
| AX-158405369 | 3 | 59.618 | KV452730.1 | 5455196 | 2-scf00040 | 2 |
| AX-157927019 | 3 | 59.618 | KV452730.1 | 5457821 | 2-scf00040 | 2 |
| AX-157927021 | 3 | 59.618 | KV452730.1 | 5458355 | 2-scf00040 | 2 |
| AX-157927023 | 3 | 59.618 | KV452730.1 | 5460906 | 2-scf00040 | 2 |
| AX-157813717 | 3 | 59.618 | KV452730.1 | 5460946 | 2-scf00040 | 2 |
| AX-157813718 | 3 | 59.618 | KV452730.1 | 5462260 | 2-scf00040 | 2 |
| AX-157927024 | 3 | 59.618 | KV452730.1 | 5463424 | 2-scf00040 | 2 |
| AX-157927026 | 3 | 59.618 | KV452730.1 | 5463847 | 2-scf00040 | 2 |
| AX-157927030 | 3 | 59.618 | KV452730.1 | 5465382 | 2-scf00040 | 2 |
| AX-157927031 | 3 | 59.618 | KV452730.1 | 5465741 | 2-scf00040 | 2 |
| AX-158389722 | 3 | 59.618 | KV452730.1 | 5466014 | 2-scf00040 | 2 |
| AX-157927033 | 3 | 59.618 | KV452730.1 | 5467433 | 2-scf00040 | 2 |
| AX-157927037 | 3 | 59.618 | KV452730.1 | 5469827 | 2-scf00040 | 2 |
| AX-157927039 | 3 | 59.618 | KV452730.1 | 5470454 | 2-scf00040 | 2 |
| AX-157927040 | 3 | 59.618 | KV452730.1 | 5471060 | 2-scf00040 | 2 |
| AX-157927041 | 3 | 59.618 | KV452730.1 | 5471588 | 2-scf00040 | 2 |
| AX-157927042 | 3 | 59.618 | KV452730.1 | 5472295 | 2-scf00040 | 2 |
| AX-157927044 | 3 | 59.618 | KV452730.1 | 5472768 | 2-scf00040 | 2 |
| AX-157927045 | 3 | 59.618 | KV452730.1 | 5473921 | 2-scf00040 | 2 |
| AX-157927047 | 3 | 59.618 | KV452730.1 | 5475156 | 2-scf00040 | 2 |
| AX-157927049 | 3 | 59.618 | KV452730.1 | 5475615 | 2-scf00040 | 2 |
| AX-157869191 | 3 | 59.618 | KV452730.1 | 5476717 | 2-scf00040 | 2 |
| AX-157813719 | 3 | 59.618 | KV452730.1 | 5478167 | 2-scf00040 | 2 |
| AX-157813720 | 3 | 59.618 | KV452730.1 | 5481798 | 2-scf00040 | 2 |
| AX-157927052 | 3 | 59.618 | KV452730.1 | 5482830 | 2-scf00040 | 2 |
| AX-157927055 | 3 | 59.618 | KV452730.1 | 5485491 | 2-scf00040 | 2 |
| AX-158404508 | 3 | 59.618 | KV452730.1 | 5486191 | 2-scf00040 | 2 |
| AX-157927068 | 3 | 59.618 | KV452730.1 | 5501063 | 2-scf00040 | 2 |

|              |   |        |            |         |            |   |
|--------------|---|--------|------------|---------|------------|---|
| AX-157813722 | 3 | 59.618 | KV452730.1 | 5501717 | 2-scf00040 | 2 |
| AX-157927070 | 3 | 59.618 | KV452730.1 | 5503895 | 2-scf00040 | 2 |
| AX-157927071 | 3 | 59.618 | KV452730.1 | 5506365 | 2-scf00040 | 2 |
| AX-157927076 | 3 | 59.618 | KV452730.1 | 5526558 | 2-scf00040 | 2 |
| AX-157927078 | 3 | 59.618 | KV452730.1 | 5526949 | 2-scf00040 | 2 |
| AX-157927079 | 3 | 59.618 | KV452730.1 | 5527622 | 2-scf00040 | 2 |
| AX-157927081 | 3 | 59.618 | KV452730.1 | 5528100 | 2-scf00040 | 2 |
| AX-157723410 | 3 | 59.618 | KV452730.1 | 5528895 | 2-scf00040 | 2 |
| AX-157927082 | 3 | 59.618 | KV452730.1 | 5529720 | 2-scf00040 | 2 |
| AX-157927083 | 3 | 59.618 | KV452730.1 | 5531361 | 2-scf00040 | 2 |
| AX-157927085 | 3 | 59.618 | KV452730.1 | 5532600 | 2-scf00040 | 2 |
| AX-158389723 | 3 | 59.618 | KV452730.1 | 5533042 | 2-scf00040 | 2 |
| AX-157927086 | 3 | 59.618 | KV452730.1 | 5533275 | 2-scf00040 | 2 |
| AX-157927089 | 3 | 59.618 | KV452730.1 | 5536491 | 2-scf00040 | 2 |
| AX-157927091 | 3 | 59.618 | KV452730.1 | 5538013 | 2-scf00040 | 2 |
| AX-157927096 | 3 | 59.618 | KV452730.1 | 5538916 | 2-scf00040 | 2 |
| AX-157927098 | 3 | 59.618 | KV452730.1 | 5539375 | 2-scf00040 | 2 |
| AX-158405374 | 3 | 59.618 | KV452730.1 | 5540837 | 2-scf00040 | 2 |
| AX-158404509 | 3 | 59.618 | KV452730.1 | 5541105 | 2-scf00040 | 2 |
| AX-158405376 | 3 | 59.618 | KV452730.1 | 5541146 | 2-scf00040 | 2 |
| AX-157927099 | 3 | 59.618 | KV452730.1 | 5541313 | 2-scf00040 | 2 |
| AX-158389724 | 3 | 59.618 | KV452730.1 | 5542346 | 2-scf00040 | 2 |
| AX-157927102 | 3 | 59.618 | KV452730.1 | 5543025 | 2-scf00040 | 2 |
| AX-157927103 | 3 | 59.618 | KV452730.1 | 5543494 | 2-scf00040 | 2 |
| AX-157927105 | 3 | 59.618 | KV452730.1 | 5544056 | 2-scf00040 | 2 |
| AX-157927109 | 3 | 59.618 | KV452730.1 | 5545820 | 2-scf00040 | 2 |
| AX-157927110 | 3 | 59.618 | KV452730.1 | 5546310 | 2-scf00040 | 2 |
| AX-157927111 | 3 | 59.618 | KV452730.1 | 5546758 | 2-scf00040 | 2 |
| AX-157927113 | 3 | 59.618 | KV452730.1 | 5553329 | 2-scf00040 | 2 |
| AX-157927114 | 3 | 59.618 | KV452730.1 | 5555024 | 2-scf00040 | 2 |
| AX-157927117 | 3 | 59.618 | KV452730.1 | 5555325 | 2-scf00040 | 2 |
| AX-157927119 | 3 | 59.618 | KV452730.1 | 5555636 | 2-scf00040 | 2 |
| AX-157927120 | 3 | 59.618 | KV452730.1 | 5555858 | 2-scf00040 | 2 |
| AX-157813723 | 3 | 59.618 | KV452730.1 | 5557984 | 2-scf00040 | 2 |
| AX-157927121 | 3 | 59.618 | KV452730.1 | 5560079 | 2-scf00040 | 2 |
| AX-157927125 | 3 | 59.618 | KV452730.1 | 5564157 | 2-scf00040 | 2 |
| AX-157927126 | 3 | 59.618 | KV452730.1 | 5568098 | 2-scf00040 | 2 |
| AX-157927129 | 3 | 59.618 | KV452730.1 | 5569540 | 2-scf00040 | 2 |
| AX-157927132 | 3 | 59.618 | KV452730.1 | 5570778 | 2-scf00040 | 2 |
| AX-157813726 | 3 | 59.618 | KV452730.1 | 5577134 | 2-scf00040 | 2 |
| AX-157813727 | 3 | 59.618 | KV452730.1 | 5577501 | 2-scf00040 | 2 |
| AX-157927137 | 3 | 59.618 | KV452730.1 | 5577901 | 2-scf00040 | 2 |
| AX-157927139 | 3 | 59.618 | KV452730.1 | 5578376 | 2-scf00040 | 2 |
| AX-158389726 | 3 | 59.618 | KV452730.1 | 5578507 | 2-scf00040 | 2 |
| AX-157927140 | 3 | 59.618 | KV452730.1 | 5579365 | 2-scf00040 | 2 |
| AX-157927143 | 3 | 59.618 | KV452730.1 | 5580389 | 2-scf00040 | 2 |
| AX-157927144 | 3 | 59.618 | KV452730.1 | 5580970 | 2-scf00040 | 2 |
| AX-157927147 | 3 | 59.618 | KV452730.1 | 5583089 | 2-scf00040 | 2 |
| AX-157927148 | 3 | 59.618 | KV452730.1 | 5583522 | 2-scf00040 | 2 |
| AX-157869192 | 3 | 59.618 | KV452730.1 | 5584903 | 2-scf00040 | 2 |
| AX-157927149 | 3 | 59.618 | KV452730.1 | 5585129 | 2-scf00040 | 2 |



|              |   |        |            |         |            |   |
|--------------|---|--------|------------|---------|------------|---|
| AX-157813728 | 3 | 59.618 | KV452730.1 | 5585446 | 2-scf00040 | 2 |
| AX-157927151 | 3 | 59.618 | KV452730.1 | 5588490 | 2-scf00040 | 2 |
| AX-157927153 | 3 | 59.618 | KV452730.1 | 5589463 | 2-scf00040 | 2 |
| AX-157927158 | 3 | 59.618 | KV452730.1 | 5592862 | 2-scf00040 | 2 |
| AX-157927159 | 3 | 59.618 | KV452730.1 | 5594170 | 2-scf00040 | 2 |
| AX-157927166 | 3 | 59.618 | KV452730.1 | 5597681 | 2-scf00040 | 2 |
| AX-157927169 | 3 | 59.618 | KV452730.1 | 5597936 | 2-scf00040 | 2 |
| AX-157927170 | 3 | 59.618 | KV452730.1 | 5598271 | 2-scf00040 | 2 |
| AX-157927172 | 3 | 59.618 | KV452730.1 | 5600062 | 2-scf00040 | 2 |
| AX-157927173 | 3 | 59.618 | KV452730.1 | 5601694 | 2-scf00040 | 2 |
| AX-157718317 | 3 | 59.618 | KV452730.1 | 5602071 | 2-scf00040 | 2 |
| AX-157927175 | 3 | 59.618 | KV452730.1 | 5602706 | 2-scf00040 | 2 |
| AX-157927176 | 3 | 59.618 | KV452730.1 | 5603429 | 2-scf00040 | 2 |
| AX-157927178 | 3 | 59.618 | KV452730.1 | 5604811 | 2-scf00040 | 2 |
| AX-157813729 | 3 | 59.618 | KV452730.1 | 5605981 | 2-scf00040 | 2 |
| AX-157927180 | 3 | 59.618 | KV452730.1 | 5606508 | 2-scf00040 | 2 |
| AX-157927181 | 3 | 59.618 | KV452730.1 | 5607718 | 2-scf00040 | 2 |
| AX-157869193 | 3 | 59.618 | KV452730.1 | 5608705 | 2-scf00040 | 2 |
| AX-157927182 | 3 | 59.618 | KV452730.1 | 5609613 | 2-scf00040 | 2 |
| AX-157927186 | 3 | 59.618 | KV452730.1 | 5611027 | 2-scf00040 | 2 |
| AX-157927188 | 3 | 59.618 | KV452730.1 | 5611961 | 2-scf00040 | 2 |
| AX-157927191 | 3 | 59.618 | KV452730.1 | 5612572 | 2-scf00040 | 2 |
| AX-157927192 | 3 | 59.618 | KV452730.1 | 5612878 | 2-scf00040 | 2 |
| AX-157745219 | 3 | 59.618 | KV452730.1 | 5613305 | 2-scf00040 | 2 |
| AX-158405377 | 3 | 59.618 | KV452730.1 | 5613507 | 2-scf00040 | 2 |
| AX-157927193 | 3 | 59.618 | KV452730.1 | 5617008 | 2-scf00040 | 2 |
| AX-157927198 | 3 | 59.618 | KV452730.1 | 5618845 | 2-scf00040 | 2 |
| AX-157927199 | 3 | 59.618 | KV452730.1 | 5619380 | 2-scf00040 | 2 |
| AX-157754534 | 3 | 59.618 | KV452730.1 | 5620570 | 2-scf00040 | 2 |
| AX-157927201 | 3 | 59.618 | KV452730.1 | 5621298 | 2-scf00040 | 2 |
| AX-157927203 | 3 | 59.618 | KV452730.1 | 5624059 | 2-scf00040 | 2 |
| AX-157927207 | 3 | 59.618 | KV452730.1 | 5626255 | 2-scf00040 | 2 |
| AX-157927209 | 3 | 59.618 | KV452730.1 | 5628597 | 2-scf00040 | 2 |
| AX-157927210 | 3 | 59.618 | KV452730.1 | 5629033 | 2-scf00040 | 2 |
| AX-157927212 | 3 | 59.618 | KV452730.1 | 5631192 | 2-scf00040 | 2 |
| AX-157927213 | 3 | 59.618 | KV452730.1 | 5632321 | 2-scf00040 | 2 |
| AX-157927219 | 3 | 59.618 | KV452730.1 | 5635337 | 2-scf00040 | 2 |
| AX-157927220 | 3 | 59.618 | KV452730.1 | 5635777 | 2-scf00040 | 2 |
| AX-157927224 | 3 | 59.618 | KV452730.1 | 5638164 | 2-scf00040 | 2 |
| AX-157927232 | 3 | 59.618 | KV452730.1 | 5643687 | 2-scf00040 | 2 |
| AX-157927233 | 3 | 59.618 | KV452730.1 | 5644155 | 2-scf00040 | 2 |
| AX-157927235 | 3 | 59.618 | KV452730.1 | 5644410 | 2-scf00040 | 2 |
| AX-157927238 | 3 | 59.618 | KV452730.1 | 5647021 | 2-scf00040 | 2 |
| AX-157813732 | 3 | 59.618 | KV452730.1 | 5650478 | 2-scf00040 | 2 |
| AX-157927239 | 3 | 59.618 | KV452730.1 | 5651518 | 2-scf00040 | 2 |
| AX-157927240 | 3 | 59.618 | KV452730.1 | 5651898 | 2-scf00040 | 2 |
| AX-157927241 | 3 | 59.618 | KV452730.1 | 5652421 | 2-scf00040 | 2 |
| AX-157927245 | 3 | 59.618 | KV452730.1 | 5653361 | 2-scf00040 | 2 |
| AX-157927246 | 3 | 59.618 | KV452730.1 | 5653882 | 2-scf00040 | 2 |
| AX-157927249 | 3 | 59.618 | KV452730.1 | 5656627 | 2-scf00040 | 2 |
| AX-157813733 | 3 | 59.618 | KV452730.1 | 5657118 | 2-scf00040 | 2 |

|              |   |        |            |         |            |   |
|--------------|---|--------|------------|---------|------------|---|
| AX-157752613 | 3 | 59.618 | KV452730.1 | 5659917 | 2-scf00040 | 2 |
| AX-157927252 | 3 | 59.618 | KV452730.1 | 5661832 | 2-scf00040 | 2 |
| AX-157927254 | 3 | 59.618 | KV452730.1 | 5662819 | 2-scf00040 | 2 |
| AX-157927258 | 3 | 59.618 | KV452730.1 | 5665257 | 2-scf00040 | 2 |
| AX-157927259 | 3 | 59.618 | KV452730.1 | 5667959 | 2-scf00040 | 2 |
| AX-157927261 | 3 | 59.618 | KV452730.1 | 5670708 | 2-scf00040 | 2 |
| AX-157813734 | 3 | 59.618 | KV452730.1 | 5671001 | 2-scf00040 | 2 |
| AX-157927262 | 3 | 59.618 | KV452730.1 | 5671510 | 2-scf00040 | 2 |
| AX-157927263 | 3 | 59.618 | KV452730.1 | 5671597 | 2-scf00040 | 2 |
| AX-157927265 | 3 | 59.618 | KV452730.1 | 5672131 | 2-scf00040 | 2 |
| AX-157927267 | 3 | 59.618 | KV452730.1 | 5674145 | 2-scf00040 | 2 |
| AX-157927268 | 3 | 59.618 | KV452730.1 | 5674764 | 2-scf00040 | 2 |
| AX-157927270 | 3 | 59.618 | KV452730.1 | 5679579 | 2-scf00040 | 2 |
| AX-157927273 | 3 | 59.618 | KV452730.1 | 5682019 | 2-scf00040 | 2 |
| AX-157927275 | 3 | 59.618 | KV452730.1 | 5682782 | 2-scf00040 | 2 |
| AX-157927276 | 3 | 59.618 | KV452730.1 | 5683370 | 2-scf00040 | 2 |
| AX-157927279 | 3 | 59.618 | KV452730.1 | 5683789 | 2-scf00040 | 2 |
| AX-157927281 | 3 | 59.618 | KV452730.1 | 5687587 | 2-scf00040 | 2 |
| AX-157927283 | 3 | 59.618 | KV452730.1 | 5688755 | 2-scf00040 | 2 |
| AX-157927285 | 3 | 59.618 | KV452730.1 | 5690359 | 2-scf00040 | 2 |
| AX-157927286 | 3 | 59.618 | KV452730.1 | 5690788 | 2-scf00040 | 2 |
| AX-157927288 | 3 | 59.618 | KV452730.1 | 5691276 | 2-scf00040 | 2 |
| AX-157927289 | 3 | 59.618 | KV452730.1 | 5691846 | 2-scf00040 | 2 |
| AX-157927292 | 3 | 59.618 | KV452730.1 | 5692442 | 2-scf00040 | 2 |
| AX-158389727 | 3 | 59.618 | KV452730.1 | 5693123 | 2-scf00040 | 2 |
| AX-157927294 | 3 | 59.618 | KV452730.1 | 5695388 | 2-scf00040 | 2 |
| AX-157927303 | 3 | 59.618 | KV452730.1 | 5701416 | 2-scf00040 | 2 |
| AX-157927308 | 3 | 59.618 | KV452730.1 | 5704017 | 2-scf00040 | 2 |
| AX-157813735 | 3 | 59.618 | KV452730.1 | 5714969 | 2-scf00040 | 2 |
| AX-157927332 | 3 | 59.618 | KV452730.1 | 5723006 | 2-scf00040 | 2 |
| AX-157927360 | 3 | 59.618 | KV452730.1 | 5742055 | 2-scf00040 | 2 |
| AX-157753987 | 3 | 59.618 | KV452730.1 | 5743756 | 2-scf00040 | 2 |
| AX-157927409 | 3 | 59.618 | KV452730.1 | 5776849 | 2-scf00040 | 2 |
| AX-157813748 | 3 | 59.618 | KV452730.1 | 5781642 | 2-scf00040 | 2 |
| AX-157927412 | 3 | 59.618 | KV452730.1 | 5783065 | 2-scf00040 | 2 |
| AX-157813750 | 3 | 59.618 | KV452730.1 | 5785361 | 2-scf00040 | 2 |
| AX-158405383 | 3 | 59.618 | KV452730.1 | 5785426 | 2-scf00040 | 2 |
| AX-157927423 | 3 | 59.618 | KV452730.1 | 5793744 | 2-scf00040 | 2 |
| AX-157927425 | 3 | 59.618 | KV452730.1 | 5795465 | 2-scf00040 | 2 |
| AX-157927428 | 3 | 59.618 | KV452730.1 | 5796987 | 2-scf00040 | 2 |
| AX-157927432 | 3 | 59.618 | KV452730.1 | 5800430 | 2-scf00040 | 2 |
| AX-158405385 | 3 | 59.618 | KV452730.1 | 5803013 | 2-scf00040 | 2 |
| AX-158405386 | 3 | 59.618 | KV452730.1 | 5803110 | 2-scf00040 | 2 |
| AX-158404516 | 3 | 59.618 | KV452730.1 | 5803298 | 2-scf00040 | 2 |
| AX-157724521 | 3 | 59.618 | KV452730.1 | 5810595 | 2-scf00040 | 2 |
| AX-157927439 | 3 | 59.618 | KV452730.1 | 5817345 | 2-scf00040 | 2 |
| AX-157927453 | 3 | 59.618 | KV452730.1 | 5835514 | 2-scf00040 | 2 |
| AX-157927454 | 3 | 59.618 | KV452730.1 | 5838269 | 2-scf00040 | 2 |
| AX-157813764 | 3 | 59.618 | KV452730.1 | 5844882 | 2-scf00040 | 2 |
| AX-158379334 | 3 | 59.618 | KV452730.1 | 5845441 | 2-scf00040 | 2 |
| AX-157813765 | 3 | 59.618 | KV452730.1 | 5848600 | 2-scf00040 | 2 |

|              |   |        |            |         |            |   |
|--------------|---|--------|------------|---------|------------|---|
| AX-157927463 | 3 | 59.618 | KV452730.1 | 5849276 | 2-scf00040 | 2 |
| AX-157927468 | 3 | 59.618 | KV452730.1 | 5854927 | 2-scf00040 | 2 |
| AX-157813766 | 3 | 59.618 | KV452730.1 | 5855517 | 2-scf00040 | 2 |
| AX-157927472 | 3 | 59.618 | KV452730.1 | 5859906 | 2-scf00040 | 2 |
| AX-157927473 | 3 | 59.618 | KV452730.1 | 5860786 | 2-scf00040 | 2 |
| AX-157927475 | 3 | 59.618 | KV452730.1 | 5867175 | 2-scf00040 | 2 |
| AX-157927476 | 3 | 59.618 | KV452730.1 | 5867595 | 2-scf00040 | 2 |
| AX-157927477 | 3 | 59.618 | KV452730.1 | 5871532 | 2-scf00040 | 2 |
| AX-157927479 | 3 | 59.618 | KV452730.1 | 5873152 | 2-scf00040 | 2 |
| AX-157927483 | 3 | 59.618 | KV452730.1 | 5878524 | 2-scf00040 | 2 |
| AX-157927485 | 3 | 59.618 | KV452730.1 | 5879585 | 2-scf00040 | 2 |
| AX-157927487 | 3 | 59.618 | KV452730.1 | 5880752 | 2-scf00040 | 2 |
| AX-157927490 | 3 | 59.618 | KV452730.1 | 5883365 | 2-scf00040 | 2 |
| AX-157927493 | 3 | 59.618 | KV452730.1 | 5887282 | 2-scf00040 | 2 |
| AX-157853878 | 3 | 59.618 | KV452730.1 | 5888673 | 2-scf00040 | 2 |
| AX-157927497 | 3 | 59.618 | KV452730.1 | 5897550 | 2-scf00040 | 2 |
| AX-157927498 | 3 | 59.618 | KV452730.1 | 5898293 | 2-scf00040 | 2 |
| AX-157927507 | 3 | 59.618 | KV452730.1 | 5907260 | 2-scf00040 | 2 |
| AX-157927508 | 3 | 59.618 | KV452730.1 | 5908308 | 2-scf00040 | 2 |
| AX-157773098 | 3 | 59.618 | KV452730.1 | 5912195 | 2-scf00040 | 2 |
| AX-157927509 | 3 | 59.618 | KV452730.1 | 5914429 | 2-scf00040 | 2 |
| AX-157927510 | 3 | 59.618 | KV452730.1 | 5915358 | 2-scf00040 | 2 |
| AX-157927511 | 3 | 59.618 | KV452730.1 | 5916241 | 2-scf00040 | 2 |
| AX-157927512 | 3 | 59.618 | KV452730.1 | 5919291 | 2-scf00040 | 2 |
| AX-157927516 | 3 | 59.618 | KV452730.1 | 5923961 | 2-scf00040 | 2 |
| AX-157718798 | 3 | 59.618 | KV452730.1 | 5924877 | 2-scf00040 | 2 |
| AX-157927518 | 3 | 59.618 | KV452730.1 | 5925697 | 2-scf00040 | 2 |
| AX-157927519 | 3 | 59.618 | KV452730.1 | 5926550 | 2-scf00040 | 2 |
| AX-157927522 | 3 | 59.618 | KV452730.1 | 5931400 | 2-scf00040 | 2 |
| AX-157722825 | 3 | 59.618 | KV452730.1 | 5934012 | 2-scf00040 | 2 |
| AX-157927528 | 3 | 59.618 | KV452730.1 | 5936892 | 2-scf00040 | 2 |
| AX-157927539 | 3 | 59.618 | KV452730.1 | 5946632 | 2-scf00040 | 2 |
| AX-157927541 | 3 | 59.618 | KV452730.1 | 5947406 | 2-scf00040 | 2 |
| AX-157927542 | 3 | 59.618 | KV452730.1 | 5947984 | 2-scf00040 | 2 |
| AX-157927543 | 3 | 59.618 | KV452730.1 | 5951360 | 2-scf00040 | 2 |
| AX-157927548 | 3 | 59.618 | KV452730.1 | 5953991 | 2-scf00040 | 2 |
| AX-157927549 | 3 | 59.618 | KV452730.1 | 5954547 | 2-scf00040 | 2 |
| AX-157927551 | 3 | 59.618 | KV452730.1 | 5954753 | 2-scf00040 | 2 |
| AX-157752554 | 3 | 59.618 | KV452730.1 | 5961515 | 2-scf00040 | 2 |
| AX-157927565 | 3 | 59.618 | KV452730.1 | 5965025 | 2-scf00040 | 2 |
| AX-157927567 | 3 | 59.618 | KV452730.1 | 5966403 | 2-scf00040 | 2 |
| AX-157927568 | 3 | 59.618 | KV452730.1 | 5968490 | 2-scf00040 | 2 |
| AX-157927573 | 3 | 59.618 | KV452730.1 | 5972284 | 2-scf00040 | 2 |
| AX-157927576 | 3 | 59.618 | KV452730.1 | 5974968 | 2-scf00040 | 2 |
| AX-157927577 | 3 | 59.618 | KV452730.1 | 5975350 | 2-scf00040 | 2 |
| AX-157813774 | 3 | 59.618 | KV452730.1 | 5982452 | 2-scf00040 | 2 |
| AX-157927584 | 3 | 59.618 | KV452730.1 | 5983023 | 2-scf00040 | 2 |
| AX-157927594 | 3 | 59.618 | KV452730.1 | 5991975 | 2-scf00040 | 2 |
| AX-157754867 | 3 | 59.618 | KV452730.1 | 5992483 | 2-scf00040 | 2 |
| AX-157927599 | 3 | 59.618 | KV452730.1 | 5993608 | 2-scf00040 | 2 |
| AX-157775759 | 3 | 59.618 | KV452730.1 | 5994810 | 2-scf00040 | 2 |

|              |   |        |            |         |            |   |
|--------------|---|--------|------------|---------|------------|---|
| AX-157927601 | 3 | 59.618 | KV452730.1 | 5995250 | 2-scf00040 | 2 |
| AX-157927603 | 3 | 59.618 | KV452730.1 | 5995967 | 2-scf00040 | 2 |
| AX-157927606 | 3 | 59.618 | KV452730.1 | 5997385 | 2-scf00040 | 2 |
| AX-157927607 | 3 | 59.618 | KV452730.1 | 5998168 | 2-scf00040 | 2 |
| AX-157927608 | 3 | 59.618 | KV452730.1 | 5998931 | 2-scf00040 | 2 |
| AX-157927609 | 3 | 59.618 | KV452730.1 | 6000092 | 2-scf00040 | 2 |
| AX-157927618 | 3 | 59.618 | KV452730.1 | 6005750 | 2-scf00040 | 2 |
| AX-157927621 | 3 | 59.618 | KV452730.1 | 6010375 | 2-scf00040 | 2 |
| AX-157927624 | 3 | 59.618 | KV452730.1 | 6015915 | 2-scf00040 | 2 |
| AX-157927627 | 3 | 59.618 | KV452730.1 | 6017147 | 2-scf00040 | 2 |
| AX-157927630 | 3 | 59.618 | KV452730.1 | 6020676 | 2-scf00040 | 2 |
| AX-157927633 | 3 | 59.618 | KV452730.1 | 6023698 | 2-scf00040 | 2 |
| AX-157927636 | 3 | 59.618 | KV452730.1 | 6026274 | 2-scf00040 | 2 |
| AX-157927639 | 3 | 59.618 | KV452730.1 | 6027901 | 2-scf00040 | 2 |
| AX-157927642 | 3 | 59.618 | KV452730.1 | 6029373 | 2-scf00040 | 2 |
| AX-158389732 | 3 | 59.618 | KV452730.1 | 6029934 | 2-scf00040 | 2 |
| AX-157927643 | 3 | 59.618 | KV452730.1 | 6031700 | 2-scf00040 | 2 |
| AX-157927645 | 3 | 59.618 | KV452730.1 | 6032023 | 2-scf00040 | 2 |
| AX-157927649 | 3 | 59.618 | KV452730.1 | 6033518 | 2-scf00040 | 2 |
| AX-157927652 | 3 | 59.618 | KV452730.1 | 6035590 | 2-scf00040 | 2 |
| AX-157927653 | 3 | 59.618 | KV452730.1 | 6036178 | 2-scf00040 | 2 |
| AX-157927655 | 3 | 59.618 | KV452730.1 | 6039881 | 2-scf00040 | 2 |
| AX-157927658 | 3 | 59.618 | KV452730.1 | 6041216 | 2-scf00040 | 2 |
| AX-157927660 | 3 | 59.618 | KV452730.1 | 6042930 | 2-scf00040 | 2 |
| AX-157927661 | 3 | 59.618 | KV452730.1 | 6043590 | 2-scf00040 | 2 |
| AX-157927665 | 3 | 59.618 | KV452730.1 | 6046872 | 2-scf00040 | 2 |
| AX-157927666 | 3 | 59.618 | KV452730.1 | 6047274 | 2-scf00040 | 2 |
| AX-157927672 | 3 | 59.618 | KV452730.1 | 6055022 | 2-scf00040 | 2 |
| AX-157927676 | 3 | 59.618 | KV452730.1 | 6056826 | 2-scf00040 | 2 |
| AX-157927685 | 3 | 59.618 | KV452730.1 | 6059988 | 2-scf00040 | 2 |
| AX-157717747 | 3 | 59.618 | KV452730.1 | 6060788 | 2-scf00040 | 2 |
| AX-158379335 | 3 | 59.618 | KV452730.1 | 6070271 | 2-scf00040 | 2 |
| AX-157927693 | 3 | 59.618 | KV452730.1 | 6071839 | 2-scf00040 | 2 |
| AX-157927695 | 3 | 59.618 | KV452730.1 | 6072270 | 2-scf00040 | 2 |
| AX-157927703 | 3 | 59.618 | KV452730.1 | 6074999 | 2-scf00040 | 2 |
| AX-157927709 | 3 | 59.618 | KV452730.1 | 6078674 | 2-scf00040 | 2 |
| AX-157740527 | 3 | 59.618 | KV452730.1 | 6079198 | 2-scf00040 | 2 |
| AX-157927710 | 3 | 59.618 | KV452730.1 | 6079705 | 2-scf00040 | 2 |
| AX-157927715 | 3 | 59.618 | KV452730.1 | 6086205 | 2-scf00040 | 2 |
| AX-157742457 | 3 | 59.618 | KV452730.1 | 6087439 | 2-scf00040 | 2 |
| AX-157927723 | 3 | 59.618 | KV452730.1 | 6090868 | 2-scf00040 | 2 |
| AX-157813777 | 3 | 59.618 | KV452730.1 | 6094049 | 2-scf00040 | 2 |
| AX-157927725 | 3 | 59.618 | KV452730.1 | 6094302 | 2-scf00040 | 2 |
| AX-157727825 | 3 | 59.618 | KV452730.1 | 6101825 | 2-scf00040 | 2 |
| AX-157927735 | 3 | 59.618 | KV452730.1 | 6102607 | 2-scf00040 | 2 |
| AX-157773365 | 3 | 59.618 | KV452730.1 | 6104551 | 2-scf00040 | 2 |
| AX-157927740 | 3 | 59.618 | KV452730.1 | 6106441 | 2-scf00040 | 2 |
| AX-157927745 | 3 | 59.618 | KV452730.1 | 6109891 | 2-scf00040 | 2 |
| AX-157927746 | 3 | 59.618 | KV452730.1 | 6110705 | 2-scf00040 | 2 |
| AX-157927749 | 3 | 59.618 | KV452730.1 | 6112317 | 2-scf00040 | 2 |
| AX-157927752 | 3 | 59.618 | KV452730.1 | 6114485 | 2-scf00040 | 2 |

|              |   |        |             |         |               |    |
|--------------|---|--------|-------------|---------|---------------|----|
| AX-157927758 | 3 | 59.618 | KV452730.1  | 6116628 | 2-scf00040    | 2  |
| AX-157927761 | 3 | 59.618 | KV452730.1  | 6118419 | 2-scf00040    | 2  |
| AX-157927767 | 3 | 59.618 | KV452730.1  | 6123403 | 2-scf00040    | 2  |
| AX-157927769 | 3 | 59.618 | KV452730.1  | 6124524 | 2-scf00040    | 2  |
| AX-157927770 | 3 | 59.618 | KV452730.1  | 6124998 | 2-scf00040    | 2  |
| AX-157726982 | 3 | 59.618 | KV452730.1  | 6129298 | 2-scf00040    | 2  |
| AX-157927781 | 3 | 59.618 | KV452730.1  | 6139185 | 2-scf00040    | 2  |
| AX-157927783 | 3 | 59.618 | KV452730.1  | 6140360 | 2-scf00040    | 2  |
| AX-157927786 | 3 | 59.618 | KV452730.1  | 6142294 | 2-scf00040    | 2  |
| AX-157927818 | 3 | 59.618 | KV452730.1  | 6172663 | 2-scf00040    | 2  |
| AX-157928182 | 3 | 59.618 | KV452730.1  | 6566368 | 2-scf00040    | 2  |
| AX-157700539 | 3 | 59.618 | FI862025.1  | 375     | ORI212 Ictalu | UN |
| AX-157695484 | 3 | 59.618 | FI884222.1  | 51      | ORI212 Ictalu | UN |
| AX-157706473 | 3 | 59.618 | 3ML01032305 | 212     | scf07921_1    | UN |
| AX-157706474 | 3 | 59.618 | 3ML01032305 | 484     | scf07921_1    | UN |
| AX-157707005 | 3 | 59.618 | 3ML01033325 | 265     | scf08971_1    | UN |
| AX-157707494 | 3 | 59.618 | 3ML01034396 | 346     | scf10070_1    | UN |
| AX-157925900 | 3 | 59.836 | KV452730.1  | 4400650 | 2-scf00040    | 2  |
| AX-157926279 | 3 | 59.836 | KV452730.1  | 4808342 | 2-scf00040    | 2  |
| AX-157927272 | 3 | 59.836 | KV452730.1  | 5680302 | 2-scf00040    | 2  |
| AX-157927317 | 3 | 59.836 | KV452730.1  | 5709574 | 2-scf00040    | 2  |
| AX-157927503 | 3 | 59.836 | KV452730.1  | 5901785 | 2-scf00040    | 2  |
| AX-157927611 | 3 | 59.836 | KV452730.1  | 6001141 | 2-scf00040    | 2  |
| AX-157927775 | 3 | 59.836 | KV452730.1  | 6131064 | 2-scf00040    | 2  |
| AX-157773841 | 3 | 59.836 | KV452730.1  | 6137217 | 2-scf00040    | 2  |
| AX-157927779 | 3 | 59.836 | KV452730.1  | 6138532 | 2-scf00040    | 2  |
| AX-157741031 | 3 | 59.836 | KV452730.1  | 6142628 | 2-scf00040    | 2  |
| AX-157927788 | 3 | 59.836 | KV452730.1  | 6144363 | 2-scf00040    | 2  |
| AX-157927795 | 3 | 59.836 | KV452730.1  | 6150346 | 2-scf00040    | 2  |
| AX-157927799 | 3 | 59.836 | KV452730.1  | 6156187 | 2-scf00040    | 2  |
| AX-157927846 | 3 | 59.836 | KV452730.1  | 6203304 | 2-scf00040    | 2  |
| AX-157927849 | 3 | 59.836 | KV452730.1  | 6205217 | 2-scf00040    | 2  |
| AX-157927878 | 3 | 59.836 | KV452730.1  | 6231281 | 2-scf00040    | 2  |
| AX-157756115 | 3 | 59.836 | KV452730.1  | 6237767 | 2-scf00040    | 2  |
| AX-157927886 | 3 | 59.836 | KV452730.1  | 6247261 | 2-scf00040    | 2  |
| AX-157927887 | 3 | 59.836 | KV452730.1  | 6247753 | 2-scf00040    | 2  |
| AX-157927941 | 3 | 59.836 | KV452730.1  | 6291523 | 2-scf00040    | 2  |
| AX-157927942 | 3 | 59.836 | KV452730.1  | 6292763 | 2-scf00040    | 2  |
| AX-157927954 | 3 | 59.836 | KV452730.1  | 6313210 | 2-scf00040    | 2  |
| AX-158379337 | 3 | 59.836 | KV452730.1  | 6337437 | 2-scf00040    | 2  |
| AX-157928001 | 3 | 59.836 | KV452730.1  | 6352538 | 2-scf00040    | 2  |
| AX-157928002 | 3 | 59.836 | KV452730.1  | 6353662 | 2-scf00040    | 2  |
| AX-157928043 | 3 | 59.836 | KV452730.1  | 6387679 | 2-scf00040    | 2  |
| AX-157928052 | 3 | 59.836 | KV452730.1  | 6396273 | 2-scf00040    | 2  |
| AX-157928076 | 3 | 59.836 | KV452730.1  | 6414508 | 2-scf00040    | 2  |
| AX-157928106 | 3 | 59.836 | KV452730.1  | 6460040 | 2-scf00040    | 2  |
| AX-157928219 | 3 | 59.836 | KV452730.1  | 6637286 | 2-scf00040    | 2  |
| AX-157928271 | 3 | 59.836 | KV452730.1  | 6731409 | 2-scf00040    | 2  |
| AX-157883650 | 3 | 59.836 | KV452730.1  | 6769793 | 2-scf00040    | 2  |
| AX-157928507 | 3 | 59.836 | KV452730.1  | 7057840 | 2-scf00040    | 2  |
| AX-157928526 | 3 | 59.836 | KV452730.1  | 7088050 | 2-scf00040    | 2  |

|              |   |        |            |         |            |   |
|--------------|---|--------|------------|---------|------------|---|
| AX-157928696 | 3 | 59.836 | KV452730.1 | 7349726 | 2-scf00040 | 2 |
| AX-157928774 | 3 | 59.836 | KV452730.1 | 7502660 | 2-scf00040 | 2 |
| AX-157928835 | 3 | 59.836 | KV452730.1 | 7655867 | 2-scf00040 | 2 |
| AX-157813847 | 3 | 59.836 | KV452730.1 | 7706174 | 2-scf00040 | 2 |
| AX-157928918 | 3 | 59.836 | KV452730.1 | 7792648 | 2-scf00040 | 2 |
| AX-157813885 | 3 | 59.836 | KV452730.1 | 8227444 | 2-scf00040 | 2 |
| AX-157929325 | 3 | 59.836 | KV452730.1 | 8389524 | 2-scf00040 | 2 |
| AX-157813905 | 3 | 59.836 | KV452730.1 | 8899308 | 2-scf00040 | 2 |
| AX-157927790 | 3 | 59.858 | KV452730.1 | 6145614 | 2-scf00040 | 2 |
| AX-157927796 | 3 | 59.878 | KV452730.1 | 6151417 | 2-scf00040 | 2 |
| AX-157927798 | 3 | 59.899 | KV452730.1 | 6155262 | 2-scf00040 | 2 |
| AX-157927817 | 3 | 59.899 | KV452730.1 | 6170909 | 2-scf00040 | 2 |
| AX-157739773 | 3 | 59.922 | KV452730.1 | 6165305 | 2-scf00040 | 2 |
| AX-157927811 | 3 | 59.946 | KV452730.1 | 6168173 | 2-scf00040 | 2 |
| AX-157927812 | 3 | 59.946 | KV452730.1 | 6168316 | 2-scf00040 | 2 |
| AX-157927816 | 3 | 59.946 | KV452730.1 | 6169561 | 2-scf00040 | 2 |
| AX-157927964 | 3 | 59.946 | KV452730.1 | 6320162 | 2-scf00040 | 2 |
| AX-157928086 | 3 | 59.946 | KV452730.1 | 6433309 | 2-scf00040 | 2 |
| AX-157757163 | 3 | 59.946 | KV452730.1 | 6557269 | 2-scf00040 | 2 |
| AX-157928187 | 3 | 59.946 | KV452730.1 | 6578030 | 2-scf00040 | 2 |
| AX-157928334 | 3 | 59.946 | KV452730.1 | 6825258 | 2-scf00040 | 2 |
| AX-157928501 | 3 | 59.946 | KV452730.1 | 7050132 | 2-scf00040 | 2 |
| AX-157813833 | 3 | 59.946 | KV452730.1 | 7082878 | 2-scf00040 | 2 |
| AX-157928756 | 3 | 59.946 | KV452730.1 | 7465966 | 2-scf00040 | 2 |
| AX-157928762 | 3 | 59.946 | KV452730.1 | 7472389 | 2-scf00040 | 2 |
| AX-158405429 | 3 | 59.946 | KV452730.1 | 7481726 | 2-scf00040 | 2 |
| AX-157928825 | 3 | 59.946 | KV452730.1 | 7632225 | 2-scf00040 | 2 |
| AX-157928924 | 3 | 59.946 | KV452730.1 | 7798464 | 2-scf00040 | 2 |
| AX-157928935 | 3 | 59.946 | KV452730.1 | 7819668 | 2-scf00040 | 2 |
| AX-157928945 | 3 | 59.946 | KV452730.1 | 7832834 | 2-scf00040 | 2 |
| AX-157927825 | 3 | 60.02  | KV452730.1 | 6180907 | 2-scf00040 | 2 |
| AX-157927828 | 3 | 60.092 | KV452730.1 | 6181958 | 2-scf00040 | 2 |
| AX-157927838 | 3 | 60.157 | KV452730.1 | 6190841 | 2-scf00040 | 2 |
| AX-157755182 | 3 | 60.201 | KV452730.1 | 6187566 | 2-scf00040 | 2 |
| AX-157927842 | 3 | 60.201 | KV452730.1 | 6195036 | 2-scf00040 | 2 |
| AX-157739777 | 3 | 60.201 | KV452730.1 | 6199057 | 2-scf00040 | 2 |
| AX-157745679 | 3 | 60.201 | KV452730.1 | 6200931 | 2-scf00040 | 2 |
| AX-157927854 | 3 | 60.705 | KV452730.1 | 6207167 | 2-scf00040 | 2 |
| AX-157927858 | 3 | 60.712 | KV452730.1 | 6209709 | 2-scf00040 | 2 |
| AX-157928030 | 3 | 60.712 | KV452730.1 | 6378967 | 2-scf00040 | 2 |
| AX-157928525 | 3 | 60.712 | KV452730.1 | 7087455 | 2-scf00040 | 2 |
| AX-157928543 | 3 | 60.712 | KV452730.1 | 7113985 | 2-scf00040 | 2 |
| AX-157927859 | 3 | 60.734 | KV452730.1 | 6212143 | 2-scf00040 | 2 |
| AX-157927864 | 3 | 60.783 | KV452730.1 | 6216698 | 2-scf00040 | 2 |
| AX-157927868 | 3 | 60.839 | KV452730.1 | 6219327 | 2-scf00040 | 2 |
| AX-157927870 | 3 | 60.839 | KV452730.1 | 6220567 | 2-scf00040 | 2 |
| AX-157722219 | 3 | 61.146 | KV452730.1 | 6223503 | 2-scf00040 | 2 |
| AX-157927879 | 3 | 61.477 | KV452730.1 | 6234166 | 2-scf00040 | 2 |
| AX-157927881 | 3 | 61.477 | KV452730.1 | 6234675 | 2-scf00040 | 2 |
| AX-157927882 | 3 | 61.477 | KV452730.1 | 6237080 | 2-scf00040 | 2 |
| AX-157741118 | 3 | 61.477 | KV452730.1 | 6240184 | 2-scf00040 | 2 |

|              |   |        |            |         |            |   |
|--------------|---|--------|------------|---------|------------|---|
| AX-157813780 | 3 | 62.132 | KV452730.1 | 6254676 | 2-scf00040 | 2 |
| AX-157927894 | 3 | 62.132 | KV452730.1 | 6256440 | 2-scf00040 | 2 |
| AX-157927895 | 3 | 62.132 | KV452730.1 | 6257138 | 2-scf00040 | 2 |
| AX-157927896 | 3 | 62.132 | KV452730.1 | 6257548 | 2-scf00040 | 2 |
| AX-157927899 | 3 | 62.132 | KV452730.1 | 6260667 | 2-scf00040 | 2 |
| AX-157927904 | 3 | 62.132 | KV452730.1 | 6264246 | 2-scf00040 | 2 |
| AX-157927906 | 3 | 62.132 | KV452730.1 | 6264603 | 2-scf00040 | 2 |
| AX-157927918 | 3 | 62.132 | KV452730.1 | 6270842 | 2-scf00040 | 2 |
| AX-157813781 | 3 | 62.132 | KV452730.1 | 6275493 | 2-scf00040 | 2 |
| AX-157927934 | 3 | 62.132 | KV452730.1 | 6287247 | 2-scf00040 | 2 |
| AX-157927927 | 3 | 62.394 | KV452730.1 | 6278726 | 2-scf00040 | 2 |
| AX-157717653 | 3 | 62.504 | KV452730.1 | 6283539 | 2-scf00040 | 2 |
| AX-157927937 | 3 | 62.505 | KV452730.1 | 6288278 | 2-scf00040 | 2 |
| AX-157927939 | 3 | 62.511 | KV452730.1 | 6290417 | 2-scf00040 | 2 |
| AX-157927940 | 3 | 62.518 | KV452730.1 | 6291015 | 2-scf00040 | 2 |
| AX-157927930 | 3 | 63.411 | KV452730.1 | 6279314 | 2-scf00040 | 2 |
| AX-157927956 | 3 | 63.411 | KV452730.1 | 6313731 | 2-scf00040 | 2 |
| AX-157813859 | 3 | 63.411 | KV452730.1 | 7853378 | 2-scf00040 | 2 |
| AX-157928967 | 3 | 63.411 | KV452730.1 | 7858067 | 2-scf00040 | 2 |
| AX-157929244 | 3 | 63.411 | KV452730.1 | 8270413 | 2-scf00040 | 2 |
| AX-157929263 | 3 | 63.411 | KV452730.1 | 8294103 | 2-scf00040 | 2 |
| AX-157742741 | 3 | 63.411 | KV452730.1 | 8877828 | 2-scf00040 | 2 |
| AX-157927965 | 3 | 63.412 | KV452730.1 | 6321955 | 2-scf00040 | 2 |
| AX-157927979 | 3 | 63.493 | KV452730.1 | 6333329 | 2-scf00040 | 2 |
| AX-157927980 | 3 | 63.493 | KV452730.1 | 6334177 | 2-scf00040 | 2 |
| AX-157927984 | 3 | 63.588 | KV452730.1 | 6336598 | 2-scf00040 | 2 |
| AX-157927988 | 3 | 63.588 | KV452730.1 | 6340369 | 2-scf00040 | 2 |
| AX-157927990 | 3 | 63.588 | KV452730.1 | 6341288 | 2-scf00040 | 2 |
| AX-157927993 | 3 | 64.098 | KV452730.1 | 6346811 | 2-scf00040 | 2 |
| AX-157927997 | 3 | 64.098 | KV452730.1 | 6348902 | 2-scf00040 | 2 |
| AX-157927994 | 3 | 64.099 | KV452730.1 | 6347237 | 2-scf00040 | 2 |
| AX-157927998 | 3 | 64.099 | KV452730.1 | 6350052 | 2-scf00040 | 2 |
| AX-157927999 | 3 | 64.099 | KV452730.1 | 6351175 | 2-scf00040 | 2 |
| AX-157928003 | 3 | 64.099 | KV452730.1 | 6354719 | 2-scf00040 | 2 |
| AX-157928004 | 3 | 64.099 | KV452730.1 | 6355911 | 2-scf00040 | 2 |
| AX-157928005 | 3 | 64.099 | KV452730.1 | 6356673 | 2-scf00040 | 2 |
| AX-157928007 | 3 | 64.099 | KV452730.1 | 6357144 | 2-scf00040 | 2 |
| AX-157928026 | 3 | 64.168 | KV452730.1 | 6370873 | 2-scf00040 | 2 |
| AX-157928027 | 3 | 64.194 | KV452730.1 | 6375284 | 2-scf00040 | 2 |
| AX-157928044 | 3 | 64.194 | KV452730.1 | 6390023 | 2-scf00040 | 2 |
| AX-157928032 | 3 | 64.245 | KV452730.1 | 6379631 | 2-scf00040 | 2 |
| AX-157928038 | 3 | 64.295 | KV452730.1 | 6385776 | 2-scf00040 | 2 |
| AX-157928041 | 3 | 64.446 | KV452730.1 | 6386588 | 2-scf00040 | 2 |
| AX-157928054 | 3 | 64.446 | KV452730.1 | 6396642 | 2-scf00040 | 2 |
| AX-157928075 | 3 | 64.446 | KV452730.1 | 6413872 | 2-scf00040 | 2 |
| AX-157928024 | 3 | 64.537 | KV452730.1 | 6368145 | 2-scf00040 | 2 |
| AX-157928035 | 3 | 64.537 | KV452730.1 | 6381468 | 2-scf00040 | 2 |
| AX-157928046 | 3 | 64.537 | KV452730.1 | 6393399 | 2-scf00040 | 2 |
| AX-157928050 | 3 | 64.537 | KV452730.1 | 6394663 | 2-scf00040 | 2 |
| AX-157928055 | 3 | 64.537 | KV452730.1 | 6397783 | 2-scf00040 | 2 |
| AX-157928057 | 3 | 64.537 | KV452730.1 | 6400940 | 2-scf00040 | 2 |

|              |   |        |             |         |            |    |
|--------------|---|--------|-------------|---------|------------|----|
| AX-157928058 | 3 | 64.537 | KV452730.1  | 6401378 | 2-scf00040 | 2  |
| AX-157928062 | 3 | 64.537 | KV452730.1  | 6404915 | 2-scf00040 | 2  |
| AX-157928064 | 3 | 64.537 | KV452730.1  | 6405645 | 2-scf00040 | 2  |
| AX-157928077 | 3 | 64.537 | KV452730.1  | 6416949 | 2-scf00040 | 2  |
| AX-157928082 | 3 | 64.537 | KV452730.1  | 6422850 | 2-scf00040 | 2  |
| AX-157813791 | 3 | 64.537 | KV452730.1  | 6426744 | 2-scf00040 | 2  |
| AX-157928084 | 3 | 64.537 | KV452730.1  | 6429129 | 2-scf00040 | 2  |
| AX-157928087 | 3 | 64.537 | KV452730.1  | 6435227 | 2-scf00040 | 2  |
| AX-157928089 | 3 | 64.537 | KV452730.1  | 6435615 | 2-scf00040 | 2  |
| AX-157928090 | 3 | 64.537 | KV452730.1  | 6436272 | 2-scf00040 | 2  |
| AX-157813793 | 3 | 64.537 | KV452730.1  | 6436500 | 2-scf00040 | 2  |
| AX-158405400 | 3 | 64.537 | KV452730.1  | 6437227 | 2-scf00040 | 2  |
| AX-157928098 | 3 | 64.537 | KV452730.1  | 6443379 | 2-scf00040 | 2  |
| AX-157928100 | 3 | 64.537 | KV452730.1  | 6452074 | 2-scf00040 | 2  |
| AX-157724669 | 3 | 64.537 | KV452730.1  | 6454990 | 2-scf00040 | 2  |
| AX-157928103 | 3 | 64.537 | KV452730.1  | 6456817 | 2-scf00040 | 2  |
| AX-157928104 | 3 | 64.537 | KV452730.1  | 6458029 | 2-scf00040 | 2  |
| AX-157862685 | 3 | 64.537 | KV452730.1  | 6458907 | 2-scf00040 | 2  |
| AX-157928105 | 3 | 64.537 | KV452730.1  | 6458982 | 2-scf00040 | 2  |
| AX-157928107 | 3 | 64.537 | KV452730.1  | 6462145 | 2-scf00040 | 2  |
| AX-157928108 | 3 | 64.537 | KV452730.1  | 6463144 | 2-scf00040 | 2  |
| AX-157928112 | 3 | 64.537 | KV452730.1  | 6466519 | 2-scf00040 | 2  |
| AX-157928113 | 3 | 64.537 | KV452730.1  | 6466896 | 2-scf00040 | 2  |
| AX-157928115 | 3 | 64.537 | KV452730.1  | 6467219 | 2-scf00040 | 2  |
| AX-157928117 | 3 | 64.537 | KV452730.1  | 6467722 | 2-scf00040 | 2  |
| AX-157928122 | 3 | 64.537 | KV452730.1  | 6478548 | 2-scf00040 | 2  |
| AX-157813796 | 3 | 64.537 | KV452730.1  | 6478849 | 2-scf00040 | 2  |
| AX-158421949 | 3 | 64.537 | KV452730.1  | 6648070 | 2-scf00040 | 2  |
| AX-157928235 | 3 | 64.537 | KV452730.1  | 6649862 | 2-scf00040 | 2  |
| AX-157928255 | 3 | 64.537 | KV452730.1  | 6674540 | 2-scf00040 | 2  |
| AX-157928266 | 3 | 64.537 | KV452730.1  | 6705292 | 2-scf00040 | 2  |
| AX-157928769 | 3 | 64.537 | KV452730.1  | 7490896 | 2-scf00040 | 2  |
| AX-157928814 | 3 | 64.537 | KV452730.1  | 7613387 | 2-scf00040 | 2  |
| AX-157929088 | 3 | 64.537 | KV452730.1  | 7989372 | 2-scf00040 | 2  |
| AX-157706732 | 3 | 64.537 | 3ML01032815 | 277     | scf08445_1 | UN |
| AX-157928125 | 3 | 64.574 | KV452730.1  | 6483991 | 2-scf00040 | 2  |
| AX-157928129 | 3 | 64.601 | KV452730.1  | 6493789 | 2-scf00040 | 2  |
| AX-157813808 | 3 | 64.601 | KV452730.1  | 6593242 | 2-scf00040 | 2  |
| AX-157813789 | 3 | 64.646 | KV452730.1  | 6388666 | 2-scf00040 | 2  |
| AX-157813794 | 3 | 64.646 | KV452730.1  | 6443629 | 2-scf00040 | 2  |
| AX-157928131 | 3 | 64.646 | KV452730.1  | 6494613 | 2-scf00040 | 2  |
| AX-157928133 | 3 | 64.646 | KV452730.1  | 6494985 | 2-scf00040 | 2  |
| AX-157928134 | 3 | 64.646 | KV452730.1  | 6498514 | 2-scf00040 | 2  |
| AX-157853880 | 3 | 64.646 | KV452730.1  | 6498650 | 2-scf00040 | 2  |
| AX-157813798 | 3 | 64.646 | KV452730.1  | 6501041 | 2-scf00040 | 2  |
| AX-157928144 | 3 | 64.646 | KV452730.1  | 6515114 | 2-scf00040 | 2  |
| AX-157813799 | 3 | 64.646 | KV452730.1  | 6516983 | 2-scf00040 | 2  |
| AX-157813800 | 3 | 64.646 | KV452730.1  | 6517194 | 2-scf00040 | 2  |
| AX-157928148 | 3 | 64.646 | KV452730.1  | 6517335 | 2-scf00040 | 2  |
| AX-157813801 | 3 | 64.646 | KV452730.1  | 6519410 | 2-scf00040 | 2  |
| AX-157928152 | 3 | 64.646 | KV452730.1  | 6520971 | 2-scf00040 | 2  |



|              |   |        |            |         |            |   |
|--------------|---|--------|------------|---------|------------|---|
| AX-157813803 | 3 | 64.646 | KV452730.1 | 6522719 | 2-scf00040 | 2 |
| AX-157928159 | 3 | 64.646 | KV452730.1 | 6526075 | 2-scf00040 | 2 |
| AX-158405402 | 3 | 64.646 | KV452730.1 | 6535589 | 2-scf00040 | 2 |
| AX-158405404 | 3 | 64.646 | KV452730.1 | 6535979 | 2-scf00040 | 2 |
| AX-157928176 | 3 | 64.646 | KV452730.1 | 6555345 | 2-scf00040 | 2 |
| AX-157813806 | 3 | 64.646 | KV452730.1 | 6557355 | 2-scf00040 | 2 |
| AX-157928190 | 3 | 64.646 | KV452730.1 | 6582949 | 2-scf00040 | 2 |
| AX-157928194 | 3 | 64.646 | KV452730.1 | 6593664 | 2-scf00040 | 2 |
| AX-157813810 | 3 | 64.646 | KV452730.1 | 6607828 | 2-scf00040 | 2 |
| AX-157702684 | 3 | 64.646 | KV452730.1 | 6731254 | 2-scf00040 | 2 |
| AX-157928382 | 3 | 64.646 | KV452730.1 | 6892280 | 2-scf00040 | 2 |
| AX-157813826 | 3 | 64.646 | KV452730.1 | 6943550 | 2-scf00040 | 2 |
| AX-157927943 | 3 | 64.755 | KV452730.1 | 6295012 | 2-scf00040 | 2 |
| AX-157927972 | 3 | 64.755 | KV452730.1 | 6327083 | 2-scf00040 | 2 |
| AX-157928137 | 3 | 64.755 | KV452730.1 | 6502639 | 2-scf00040 | 2 |
| AX-157928179 | 3 | 64.755 | KV452730.1 | 6564325 | 2-scf00040 | 2 |
| AX-158405406 | 3 | 64.755 | KV452730.1 | 6609235 | 2-scf00040 | 2 |
| AX-157928204 | 3 | 64.755 | KV452730.1 | 6609957 | 2-scf00040 | 2 |
| AX-157928205 | 3 | 64.755 | KV452730.1 | 6610578 | 2-scf00040 | 2 |
| AX-157813811 | 3 | 64.755 | KV452730.1 | 6612155 | 2-scf00040 | 2 |
| AX-157928213 | 3 | 64.755 | KV452730.1 | 6626344 | 2-scf00040 | 2 |
| AX-157928248 | 3 | 64.755 | KV452730.1 | 6662054 | 2-scf00040 | 2 |
| AX-157928249 | 3 | 64.755 | KV452730.1 | 6666171 | 2-scf00040 | 2 |
| AX-157928254 | 3 | 64.755 | KV452730.1 | 6672324 | 2-scf00040 | 2 |
| AX-157928257 | 3 | 64.755 | KV452730.1 | 6675880 | 2-scf00040 | 2 |
| AX-157928263 | 3 | 64.755 | KV452730.1 | 6703407 | 2-scf00040 | 2 |
| AX-157928268 | 3 | 64.755 | KV452730.1 | 6708765 | 2-scf00040 | 2 |
| AX-157717223 | 3 | 64.755 | KV452730.1 | 6709360 | 2-scf00040 | 2 |
| AX-157928289 | 3 | 64.755 | KV452730.1 | 6751653 | 2-scf00040 | 2 |
| AX-157928361 | 3 | 64.755 | KV452730.1 | 6867357 | 2-scf00040 | 2 |
| AX-157928444 | 3 | 64.755 | KV452730.1 | 6975131 | 2-scf00040 | 2 |
| AX-157928470 | 3 | 64.755 | KV452730.1 | 7012127 | 2-scf00040 | 2 |
| AX-157928476 | 3 | 64.755 | KV452730.1 | 7019292 | 2-scf00040 | 2 |
| AX-157928504 | 3 | 64.755 | KV452730.1 | 7055907 | 2-scf00040 | 2 |
| AX-157813834 | 3 | 64.755 | KV452730.1 | 7090419 | 2-scf00040 | 2 |
| AX-157928548 | 3 | 64.755 | KV452730.1 | 7119998 | 2-scf00040 | 2 |
| AX-157928555 | 3 | 64.755 | KV452730.1 | 7127303 | 2-scf00040 | 2 |
| AX-157928590 | 3 | 64.755 | KV452730.1 | 7176215 | 2-scf00040 | 2 |
| AX-157928656 | 3 | 64.755 | KV452730.1 | 7263365 | 2-scf00040 | 2 |
| AX-157813841 | 3 | 64.755 | KV452730.1 | 7270095 | 2-scf00040 | 2 |
| AX-157928727 | 3 | 64.755 | KV452730.1 | 7412432 | 2-scf00040 | 2 |
| AX-157928732 | 3 | 64.755 | KV452730.1 | 7418932 | 2-scf00040 | 2 |
| AX-157928734 | 3 | 64.755 | KV452730.1 | 7427422 | 2-scf00040 | 2 |
| AX-157928771 | 3 | 64.755 | KV452730.1 | 7499100 | 2-scf00040 | 2 |
| AX-157928773 | 3 | 64.755 | KV452730.1 | 7501661 | 2-scf00040 | 2 |
| AX-158405431 | 3 | 64.755 | KV452730.1 | 7517573 | 2-scf00040 | 2 |
| AX-157928784 | 3 | 64.755 | KV452730.1 | 7545722 | 2-scf00040 | 2 |
| AX-157928801 | 3 | 64.755 | KV452730.1 | 7572687 | 2-scf00040 | 2 |
| AX-157928812 | 3 | 64.755 | KV452730.1 | 7608516 | 2-scf00040 | 2 |
| AX-157928816 | 3 | 64.755 | KV452730.1 | 7619054 | 2-scf00040 | 2 |
| AX-157928817 | 3 | 64.755 | KV452730.1 | 7620917 | 2-scf00040 | 2 |

|              |   |        |            |         |            |   |
|--------------|---|--------|------------|---------|------------|---|
| AX-157928820 | 3 | 64.755 | KV452730.1 | 7623912 | 2-scf00040 | 2 |
| AX-157928822 | 3 | 64.755 | KV452730.1 | 7624589 | 2-scf00040 | 2 |
| AX-157928845 | 3 | 64.755 | KV452730.1 | 7688629 | 2-scf00040 | 2 |
| AX-157928847 | 3 | 64.755 | KV452730.1 | 7693080 | 2-scf00040 | 2 |
| AX-157928880 | 3 | 64.755 | KV452730.1 | 7747801 | 2-scf00040 | 2 |
| AX-157928883 | 3 | 64.755 | KV452730.1 | 7750339 | 2-scf00040 | 2 |
| AX-157928300 | 3 | 64.756 | KV452730.1 | 6766410 | 2-scf00040 | 2 |
| AX-157928466 | 3 | 64.756 | KV452730.1 | 7006664 | 2-scf00040 | 2 |
| AX-157928302 | 3 | 64.865 | KV452730.1 | 6767368 | 2-scf00040 | 2 |
| AX-157928560 | 3 | 64.865 | KV452730.1 | 7135300 | 2-scf00040 | 2 |
| AX-157928304 | 3 | 64.919 | KV452730.1 | 6771465 | 2-scf00040 | 2 |
| AX-157928483 | 3 | 64.919 | KV452730.1 | 7022548 | 2-scf00040 | 2 |
| AX-157928224 | 3 | 64.975 | KV452730.1 | 6638614 | 2-scf00040 | 2 |
| AX-157928229 | 3 | 64.975 | KV452730.1 | 6642164 | 2-scf00040 | 2 |
| AX-157928244 | 3 | 64.975 | KV452730.1 | 6660407 | 2-scf00040 | 2 |
| AX-157928298 | 3 | 64.975 | KV452730.1 | 6765511 | 2-scf00040 | 2 |
| AX-157928318 | 3 | 64.975 | KV452730.1 | 6805729 | 2-scf00040 | 2 |
| AX-157928321 | 3 | 64.975 | KV452730.1 | 6808182 | 2-scf00040 | 2 |
| AX-157928340 | 3 | 64.975 | KV452730.1 | 6842167 | 2-scf00040 | 2 |
| AX-157928457 | 3 | 64.975 | KV452730.1 | 6995700 | 2-scf00040 | 2 |
| AX-157928493 | 3 | 64.975 | KV452730.1 | 7030349 | 2-scf00040 | 2 |
| AX-157813837 | 3 | 64.975 | KV452730.1 | 7102480 | 2-scf00040 | 2 |
| AX-157928561 | 3 | 64.975 | KV452730.1 | 7136360 | 2-scf00040 | 2 |
| AX-157928861 | 3 | 64.975 | KV452730.1 | 7712160 | 2-scf00040 | 2 |
| AX-157928864 | 3 | 64.975 | KV452730.1 | 7717601 | 2-scf00040 | 2 |
| AX-157929099 | 3 | 64.975 | KV452730.1 | 8011334 | 2-scf00040 | 2 |
| AX-157772339 | 3 | 64.975 | KV452730.1 | 8040308 | 2-scf00040 | 2 |
| AX-157929131 | 3 | 64.975 | KV452730.1 | 8042603 | 2-scf00040 | 2 |
| AX-157813871 | 3 | 64.975 | KV452730.1 | 8055800 | 2-scf00040 | 2 |
| AX-157929142 | 3 | 64.975 | KV452730.1 | 8060462 | 2-scf00040 | 2 |
| AX-157853890 | 3 | 64.975 | KV452730.1 | 8062205 | 2-scf00040 | 2 |
| AX-157929144 | 3 | 64.975 | KV452730.1 | 8064557 | 2-scf00040 | 2 |
| AX-157929148 | 3 | 64.975 | KV452730.1 | 8076171 | 2-scf00040 | 2 |
| AX-157853891 | 3 | 64.975 | KV452730.1 | 8077177 | 2-scf00040 | 2 |
| AX-157929149 | 3 | 64.975 | KV452730.1 | 8077861 | 2-scf00040 | 2 |
| AX-157813875 | 3 | 64.975 | KV452730.1 | 8104456 | 2-scf00040 | 2 |
| AX-157929158 | 3 | 64.975 | KV452730.1 | 8107715 | 2-scf00040 | 2 |
| AX-157929159 | 3 | 64.975 | KV452730.1 | 8110286 | 2-scf00040 | 2 |
| AX-157853893 | 3 | 64.975 | KV452730.1 | 8127805 | 2-scf00040 | 2 |
| AX-157753157 | 3 | 64.975 | KV452730.1 | 8139319 | 2-scf00040 | 2 |
| AX-157929181 | 3 | 64.975 | KV452730.1 | 8140589 | 2-scf00040 | 2 |
| AX-157929185 | 3 | 64.975 | KV452730.1 | 8147747 | 2-scf00040 | 2 |
| AX-157929188 | 3 | 64.975 | KV452730.1 | 8152713 | 2-scf00040 | 2 |
| AX-157929189 | 3 | 64.975 | KV452730.1 | 8153138 | 2-scf00040 | 2 |
| AX-157929295 | 3 | 64.975 | KV452730.1 | 8345730 | 2-scf00040 | 2 |
| AX-157929297 | 3 | 64.975 | KV452730.1 | 8346216 | 2-scf00040 | 2 |
| AX-157813893 | 3 | 64.975 | KV452730.1 | 8384250 | 2-scf00040 | 2 |
| AX-157929627 | 3 | 64.975 | KV452730.1 | 8855965 | 2-scf00040 | 2 |
| AX-158405471 | 3 | 64.975 | KV452730.1 | 8967435 | 2-scf00040 | 2 |
| AX-157813920 | 3 | 64.975 | KV452730.1 | 9053471 | 2-scf00040 | 2 |
| AX-157928325 | 3 | 65.022 | KV452730.1 | 6817677 | 2-scf00040 | 2 |

|              |   |        |            |         |            |   |
|--------------|---|--------|------------|---------|------------|---|
| AX-157928022 | 3 | 65.083 | KV452730.1 | 6366608 | 2-scf00040 | 2 |
| AX-157874842 | 3 | 65.083 | KV452730.1 | 6449015 | 2-scf00040 | 2 |
| AX-157928161 | 3 | 65.083 | KV452730.1 | 6526760 | 2-scf00040 | 2 |
| AX-157813804 | 3 | 65.083 | KV452730.1 | 6527077 | 2-scf00040 | 2 |
| AX-157928189 | 3 | 65.083 | KV452730.1 | 6581924 | 2-scf00040 | 2 |
| AX-157928232 | 3 | 65.083 | KV452730.1 | 6648116 | 2-scf00040 | 2 |
| AX-157928238 | 3 | 65.083 | KV452730.1 | 6651998 | 2-scf00040 | 2 |
| AX-157928240 | 3 | 65.083 | KV452730.1 | 6653579 | 2-scf00040 | 2 |
| AX-158405411 | 3 | 65.083 | KV452730.1 | 6655093 | 2-scf00040 | 2 |
| AX-157744007 | 3 | 65.083 | KV452730.1 | 6668603 | 2-scf00040 | 2 |
| AX-157928258 | 3 | 65.083 | KV452730.1 | 6676848 | 2-scf00040 | 2 |
| AX-157813818 | 3 | 65.083 | KV452730.1 | 6703753 | 2-scf00040 | 2 |
| AX-157928277 | 3 | 65.083 | KV452730.1 | 6736670 | 2-scf00040 | 2 |
| AX-157928278 | 3 | 65.083 | KV452730.1 | 6737023 | 2-scf00040 | 2 |
| AX-157928279 | 3 | 65.083 | KV452730.1 | 6743054 | 2-scf00040 | 2 |
| AX-157883651 | 3 | 65.083 | KV452730.1 | 6818830 | 2-scf00040 | 2 |
| AX-157928326 | 3 | 65.083 | KV452730.1 | 6820424 | 2-scf00040 | 2 |
| AX-157928341 | 3 | 65.083 | KV452730.1 | 6842718 | 2-scf00040 | 2 |
| AX-157928347 | 3 | 65.083 | KV452730.1 | 6853056 | 2-scf00040 | 2 |
| AX-157928349 | 3 | 65.083 | KV452730.1 | 6854412 | 2-scf00040 | 2 |
| AX-157928383 | 3 | 65.083 | KV452730.1 | 6896153 | 2-scf00040 | 2 |
| AX-157813824 | 3 | 65.083 | KV452730.1 | 6898693 | 2-scf00040 | 2 |
| AX-157763927 | 3 | 65.083 | KV452730.1 | 6898956 | 2-scf00040 | 2 |
| AX-157928396 | 3 | 65.083 | KV452730.1 | 6912389 | 2-scf00040 | 2 |
| AX-157928401 | 3 | 65.083 | KV452730.1 | 6919621 | 2-scf00040 | 2 |
| AX-157928405 | 3 | 65.083 | KV452730.1 | 6925374 | 2-scf00040 | 2 |
| AX-157928407 | 3 | 65.083 | KV452730.1 | 6925721 | 2-scf00040 | 2 |
| AX-157928424 | 3 | 65.083 | KV452730.1 | 6951366 | 2-scf00040 | 2 |
| AX-157928425 | 3 | 65.083 | KV452730.1 | 6952192 | 2-scf00040 | 2 |
| AX-157928431 | 3 | 65.083 | KV452730.1 | 6957170 | 2-scf00040 | 2 |
| AX-157928433 | 3 | 65.083 | KV452730.1 | 6958157 | 2-scf00040 | 2 |
| AX-157928434 | 3 | 65.083 | KV452730.1 | 6959567 | 2-scf00040 | 2 |
| AX-157928435 | 3 | 65.083 | KV452730.1 | 6960591 | 2-scf00040 | 2 |
| AX-157928439 | 3 | 65.083 | KV452730.1 | 6966530 | 2-scf00040 | 2 |
| AX-157928453 | 3 | 65.083 | KV452730.1 | 6987286 | 2-scf00040 | 2 |
| AX-157813828 | 3 | 65.083 | KV452730.1 | 6990559 | 2-scf00040 | 2 |
| AX-157813829 | 3 | 65.083 | KV452730.1 | 6992460 | 2-scf00040 | 2 |
| AX-157928464 | 3 | 65.083 | KV452730.1 | 7004331 | 2-scf00040 | 2 |
| AX-157928468 | 3 | 65.083 | KV452730.1 | 7008369 | 2-scf00040 | 2 |
| AX-157928474 | 3 | 65.083 | KV452730.1 | 7018079 | 2-scf00040 | 2 |
| AX-157928496 | 3 | 65.083 | KV452730.1 | 7042177 | 2-scf00040 | 2 |
| AX-157928552 | 3 | 65.083 | KV452730.1 | 7123728 | 2-scf00040 | 2 |
| AX-157767841 | 3 | 65.083 | KV452730.1 | 7177133 | 2-scf00040 | 2 |
| AX-157928625 | 3 | 65.083 | KV452730.1 | 7208084 | 2-scf00040 | 2 |
| AX-157928626 | 3 | 65.083 | KV452730.1 | 7210543 | 2-scf00040 | 2 |
| AX-157928627 | 3 | 65.083 | KV452730.1 | 7213091 | 2-scf00040 | 2 |
| AX-157928631 | 3 | 65.083 | KV452730.1 | 7214298 | 2-scf00040 | 2 |
| AX-157928636 | 3 | 65.083 | KV452730.1 | 7219175 | 2-scf00040 | 2 |
| AX-157813840 | 3 | 65.083 | KV452730.1 | 7268948 | 2-scf00040 | 2 |
| AX-157813843 | 3 | 65.083 | KV452730.1 | 7277215 | 2-scf00040 | 2 |
| AX-157928703 | 3 | 65.083 | KV452730.1 | 7362578 | 2-scf00040 | 2 |

|              |   |        |             |         |            |    |
|--------------|---|--------|-------------|---------|------------|----|
| AX-157928783 | 3 | 65.083 | KV452730.1  | 7522936 | 2-scf00040 | 2  |
| AX-157928787 | 3 | 65.083 | KV452730.1  | 7552355 | 2-scf00040 | 2  |
| AX-157853886 | 3 | 65.083 | KV452730.1  | 7650291 | 2-scf00040 | 2  |
| AX-158405438 | 3 | 65.083 | KV452730.1  | 7728607 | 2-scf00040 | 2  |
| AX-157928872 | 3 | 65.083 | KV452730.1  | 7742560 | 2-scf00040 | 2  |
| AX-157712756 | 3 | 65.083 | KV452730.1  | 7754380 | 2-scf00040 | 2  |
| AX-157928886 | 3 | 65.083 | KV452730.1  | 7761043 | 2-scf00040 | 2  |
| AX-157928899 | 3 | 65.083 | KV452730.1  | 7770015 | 2-scf00040 | 2  |
| AX-157813853 | 3 | 65.083 | KV452730.1  | 7819548 | 2-scf00040 | 2  |
| AX-157813855 | 3 | 65.083 | KV452730.1  | 7823160 | 2-scf00040 | 2  |
| AX-157928965 | 3 | 65.083 | KV452730.1  | 7857441 | 2-scf00040 | 2  |
| AX-157928971 | 3 | 65.083 | KV452730.1  | 7860381 | 2-scf00040 | 2  |
| AX-157712647 | 3 | 65.083 | KV452730.1  | 7893145 | 2-scf00040 | 2  |
| AX-158405443 | 3 | 65.083 | KV452730.1  | 7895779 | 2-scf00040 | 2  |
| AX-157853888 | 3 | 65.083 | KV452730.1  | 7901783 | 2-scf00040 | 2  |
| AX-157929013 | 3 | 65.083 | KV452730.1  | 7910867 | 2-scf00040 | 2  |
| AX-157929030 | 3 | 65.083 | KV452730.1  | 7932194 | 2-scf00040 | 2  |
| AX-157929035 | 3 | 65.083 | KV452730.1  | 7936904 | 2-scf00040 | 2  |
| AX-157755979 | 3 | 65.083 | KV452730.1  | 7965070 | 2-scf00040 | 2  |
| AX-157929070 | 3 | 65.083 | KV452730.1  | 7967161 | 2-scf00040 | 2  |
| AX-157929092 | 3 | 65.083 | KV452730.1  | 7993082 | 2-scf00040 | 2  |
| AX-157929097 | 3 | 65.083 | KV452730.1  | 8003659 | 2-scf00040 | 2  |
| AX-157722812 | 3 | 65.083 | KV452730.1  | 8006300 | 2-scf00040 | 2  |
| AX-157853889 | 3 | 65.083 | KV452730.1  | 8023672 | 2-scf00040 | 2  |
| AX-157768714 | 3 | 65.083 | KV452730.1  | 8027724 | 2-scf00040 | 2  |
| AX-157883656 | 3 | 65.083 | KV452730.1  | 8031856 | 2-scf00040 | 2  |
| AX-157708284 | 3 | 65.083 | KV452730.1  | 8054434 | 2-scf00040 | 2  |
| AX-157929154 | 3 | 65.083 | KV452730.1  | 8085495 | 2-scf00040 | 2  |
| AX-157929161 | 3 | 65.083 | KV452730.1  | 8119880 | 2-scf00040 | 2  |
| AX-157929162 | 3 | 65.083 | KV452730.1  | 8120384 | 2-scf00040 | 2  |
| AX-157929331 | 3 | 65.083 | KV452730.1  | 8406007 | 2-scf00040 | 2  |
| AX-157929417 | 3 | 65.083 | KV452730.1  | 8529787 | 2-scf00040 | 2  |
| AX-157929429 | 3 | 65.083 | KV452730.1  | 8565055 | 2-scf00040 | 2  |
| AX-157929433 | 3 | 65.083 | KV452730.1  | 8569229 | 2-scf00040 | 2  |
| AX-157929437 | 3 | 65.083 | KV452730.1  | 8576688 | 2-scf00040 | 2  |
| AX-157929442 | 3 | 65.083 | KV452730.1  | 8587284 | 2-scf00040 | 2  |
| AX-157929444 | 3 | 65.083 | KV452730.1  | 8594582 | 2-scf00040 | 2  |
| AX-157929446 | 3 | 65.083 | KV452730.1  | 8598650 | 2-scf00040 | 2  |
| AX-157929450 | 3 | 65.083 | KV452730.1  | 8604946 | 2-scf00040 | 2  |
| AX-157929456 | 3 | 65.083 | KV452730.1  | 8611777 | 2-scf00040 | 2  |
| AX-157929475 | 3 | 65.083 | KV452730.1  | 8637415 | 2-scf00040 | 2  |
| AX-157929637 | 3 | 65.083 | KV452730.1  | 8874274 | 2-scf00040 | 2  |
| AX-157929840 | 3 | 65.083 | KV452730.1  | 9122258 | 2-scf00040 | 2  |
| AX-157704623 | 3 | 65.083 | 3ML01026798 | 1271    | scf02400_1 | UN |
| AX-157928497 | 3 | 65.105 | KV452730.1  | 7044061 | 2-scf00040 | 2  |
| AX-157928477 | 3 | 65.15  | KV452730.1  | 7019844 | 2-scf00040 | 2  |
| AX-157853882 | 3 | 65.15  | KV452730.1  | 7052205 | 2-scf00040 | 2  |
| AX-157928502 | 3 | 65.15  | KV452730.1  | 7052326 | 2-scf00040 | 2  |
| AX-157928503 | 3 | 65.15  | KV452730.1  | 7052757 | 2-scf00040 | 2  |
| AX-157928517 | 3 | 65.15  | KV452730.1  | 7072539 | 2-scf00040 | 2  |
| AX-157928588 | 3 | 65.15  | KV452730.1  | 7169481 | 2-scf00040 | 2  |

|              |   |        |             |         |            |    |
|--------------|---|--------|-------------|---------|------------|----|
| AX-158405419 | 3 | 65.192 | KV452730.1  | 7060722 | 2-scf00040 | 2  |
| AX-157813830 | 3 | 65.192 | KV452730.1  | 7065980 | 2-scf00040 | 2  |
| AX-157928515 | 3 | 65.192 | KV452730.1  | 7067672 | 2-scf00040 | 2  |
| AX-157928516 | 3 | 65.192 | KV452730.1  | 7069826 | 2-scf00040 | 2  |
| AX-157813831 | 3 | 65.192 | KV452730.1  | 7074044 | 2-scf00040 | 2  |
| AX-157928467 | 3 | 65.235 | KV452730.1  | 7007614 | 2-scf00040 | 2  |
| AX-157928536 | 3 | 65.235 | KV452730.1  | 7109907 | 2-scf00040 | 2  |
| AX-157928549 | 3 | 65.249 | KV452730.1  | 7122733 | 2-scf00040 | 2  |
| AX-157704962 | 3 | 65.249 | 3ML01028083 | 991     | scf03688_1 | UN |
| AX-157928556 | 3 | 65.273 | KV452730.1  | 7128043 | 2-scf00040 | 2  |
| AX-157928518 | 3 | 65.301 | KV452730.1  | 7073063 | 2-scf00040 | 2  |
| AX-157928558 | 3 | 65.301 | KV452730.1  | 7131385 | 2-scf00040 | 2  |
| AX-157710617 | 3 | 65.301 | KV452730.1  | 7137840 | 2-scf00040 | 2  |
| AX-157928563 | 3 | 65.301 | KV452730.1  | 7139107 | 2-scf00040 | 2  |
| AX-157928564 | 3 | 65.301 | KV452730.1  | 7143394 | 2-scf00040 | 2  |
| AX-157928573 | 3 | 65.301 | KV452730.1  | 7147900 | 2-scf00040 | 2  |
| AX-157928622 | 3 | 65.301 | KV452730.1  | 7205521 | 2-scf00040 | 2  |
| AX-157928583 | 3 | 65.324 | KV452730.1  | 7162656 | 2-scf00040 | 2  |
| AX-157928836 | 3 | 65.324 | KV452730.1  | 7657129 | 2-scf00040 | 2  |
| AX-157928118 | 3 | 65.351 | KV452730.1  | 6468979 | 2-scf00040 | 2  |
| AX-157928589 | 3 | 65.351 | KV452730.1  | 7171081 | 2-scf00040 | 2  |
| AX-157715558 | 3 | 65.351 | KV452730.1  | 7861329 | 2-scf00040 | 2  |
| AX-157928989 | 3 | 65.351 | KV452730.1  | 7888978 | 2-scf00040 | 2  |
| AX-157929089 | 3 | 65.351 | KV452730.1  | 7990053 | 2-scf00040 | 2  |
| AX-157813870 | 3 | 65.351 | KV452730.1  | 8053241 | 2-scf00040 | 2  |
| AX-157929327 | 3 | 65.351 | KV452730.1  | 8397122 | 2-scf00040 | 2  |
| AX-157929771 | 3 | 65.351 | KV452730.1  | 9041996 | 2-scf00040 | 2  |
| AX-157929933 | 3 | 65.351 | KV452730.1  | 9193441 | 2-scf00040 | 2  |
| AX-157930009 | 3 | 65.351 | KV452730.1  | 9247353 | 2-scf00040 | 2  |
| AX-157928608 | 3 | 65.37  | KV452730.1  | 7189417 | 2-scf00040 | 2  |
| AX-157928638 | 3 | 65.392 | KV452730.1  | 7223045 | 2-scf00040 | 2  |
| AX-157813795 | 3 | 65.41  | KV452730.1  | 6458343 | 2-scf00040 | 2  |
| AX-157813817 | 3 | 65.41  | KV452730.1  | 6699116 | 2-scf00040 | 2  |
| AX-157928305 | 3 | 65.41  | KV452730.1  | 6779144 | 2-scf00040 | 2  |
| AX-157928545 | 3 | 65.41  | KV452730.1  | 7115700 | 2-scf00040 | 2  |
| AX-157928577 | 3 | 65.41  | KV452730.1  | 7153018 | 2-scf00040 | 2  |
| AX-157928578 | 3 | 65.41  | KV452730.1  | 7153608 | 2-scf00040 | 2  |
| AX-157928586 | 3 | 65.41  | KV452730.1  | 7167021 | 2-scf00040 | 2  |
| AX-157928649 | 3 | 65.41  | KV452730.1  | 7249876 | 2-scf00040 | 2  |
| AX-157759011 | 3 | 65.41  | KV452730.1  | 7254928 | 2-scf00040 | 2  |
| AX-157928664 | 3 | 65.41  | KV452730.1  | 7294462 | 2-scf00040 | 2  |
| AX-157928673 | 3 | 65.41  | KV452730.1  | 7311312 | 2-scf00040 | 2  |
| AX-157928679 | 3 | 65.41  | KV452730.1  | 7317489 | 2-scf00040 | 2  |
| AX-157928687 | 3 | 65.41  | KV452730.1  | 7331292 | 2-scf00040 | 2  |
| AX-157928708 | 3 | 65.41  | KV452730.1  | 7372370 | 2-scf00040 | 2  |
| AX-157928715 | 3 | 65.41  | KV452730.1  | 7384083 | 2-scf00040 | 2  |
| AX-157928717 | 3 | 65.41  | KV452730.1  | 7384846 | 2-scf00040 | 2  |
| AX-157928718 | 3 | 65.41  | KV452730.1  | 7386399 | 2-scf00040 | 2  |
| AX-157928721 | 3 | 65.41  | KV452730.1  | 7388430 | 2-scf00040 | 2  |
| AX-157928722 | 3 | 65.41  | KV452730.1  | 7389650 | 2-scf00040 | 2  |
| AX-157928733 | 3 | 65.41  | KV452730.1  | 7424949 | 2-scf00040 | 2  |

|              |   |       |             |         |            |    |
|--------------|---|-------|-------------|---------|------------|----|
| AX-157928745 | 3 | 65.41 | KV452730.1  | 7447930 | 2-scf00040 | 2  |
| AX-157928781 | 3 | 65.41 | KV452730.1  | 7521850 | 2-scf00040 | 2  |
| AX-157928785 | 3 | 65.41 | KV452730.1  | 7547173 | 2-scf00040 | 2  |
| AX-157928807 | 3 | 65.41 | KV452730.1  | 7604811 | 2-scf00040 | 2  |
| AX-157928815 | 3 | 65.41 | KV452730.1  | 7618003 | 2-scf00040 | 2  |
| AX-157928834 | 3 | 65.41 | KV452730.1  | 7655196 | 2-scf00040 | 2  |
| AX-157928848 | 3 | 65.41 | KV452730.1  | 7695070 | 2-scf00040 | 2  |
| AX-157928850 | 3 | 65.41 | KV452730.1  | 7696468 | 2-scf00040 | 2  |
| AX-157928857 | 3 | 65.41 | KV452730.1  | 7699265 | 2-scf00040 | 2  |
| AX-157698333 | 3 | 65.41 | KV452730.1  | 7718025 | 2-scf00040 | 2  |
| AX-157928871 | 3 | 65.41 | KV452730.1  | 7742186 | 2-scf00040 | 2  |
| AX-157928874 | 3 | 65.41 | KV452730.1  | 7743240 | 2-scf00040 | 2  |
| AX-157928876 | 3 | 65.41 | KV452730.1  | 7744666 | 2-scf00040 | 2  |
| AX-157928877 | 3 | 65.41 | KV452730.1  | 7746313 | 2-scf00040 | 2  |
| AX-157928885 | 3 | 65.41 | KV452730.1  | 7755665 | 2-scf00040 | 2  |
| AX-157708734 | 3 | 65.41 | KV452730.1  | 7762373 | 2-scf00040 | 2  |
| AX-157928900 | 3 | 65.41 | KV452730.1  | 7772159 | 2-scf00040 | 2  |
| AX-157928903 | 3 | 65.41 | KV452730.1  | 7775583 | 2-scf00040 | 2  |
| AX-157874857 | 3 | 65.41 | KV452730.1  | 7798035 | 2-scf00040 | 2  |
| AX-157745951 | 3 | 65.41 | KV452730.1  | 7799187 | 2-scf00040 | 2  |
| AX-157928927 | 3 | 65.41 | KV452730.1  | 7799629 | 2-scf00040 | 2  |
| AX-157928929 | 3 | 65.41 | KV452730.1  | 7808046 | 2-scf00040 | 2  |
| AX-157716167 | 3 | 65.41 | KV452730.1  | 7814861 | 2-scf00040 | 2  |
| AX-157813852 | 3 | 65.41 | KV452730.1  | 7816545 | 2-scf00040 | 2  |
| AX-157813856 | 3 | 65.41 | KV452730.1  | 7823609 | 2-scf00040 | 2  |
| AX-157853887 | 3 | 65.41 | KV452730.1  | 7829983 | 2-scf00040 | 2  |
| AX-157928952 | 3 | 65.41 | KV452730.1  | 7841304 | 2-scf00040 | 2  |
| AX-157928982 | 3 | 65.41 | KV452730.1  | 7870240 | 2-scf00040 | 2  |
| AX-157929002 | 3 | 65.41 | KV452730.1  | 7900148 | 2-scf00040 | 2  |
| AX-157929043 | 3 | 65.41 | KV452730.1  | 7941209 | 2-scf00040 | 2  |
| AX-157929044 | 3 | 65.41 | KV452730.1  | 7942863 | 2-scf00040 | 2  |
| AX-157929061 | 3 | 65.41 | KV452730.1  | 7952990 | 2-scf00040 | 2  |
| AX-157929063 | 3 | 65.41 | KV452730.1  | 7954949 | 2-scf00040 | 2  |
| AX-157929086 | 3 | 65.41 | KV452730.1  | 7988855 | 2-scf00040 | 2  |
| AX-157741244 | 3 | 65.41 | KV452730.1  | 7990986 | 2-scf00040 | 2  |
| AX-157929094 | 3 | 65.41 | KV452730.1  | 7997262 | 2-scf00040 | 2  |
| AX-157929133 | 3 | 65.41 | KV452730.1  | 8047953 | 2-scf00040 | 2  |
| AX-157929146 | 3 | 65.41 | KV452730.1  | 8074820 | 2-scf00040 | 2  |
| AX-157929422 | 3 | 65.41 | KV452730.1  | 8559106 | 2-scf00040 | 2  |
| AX-157929460 | 3 | 65.41 | KV452730.1  | 8620074 | 2-scf00040 | 2  |
| AX-158405466 | 3 | 65.41 | KV452730.1  | 8723837 | 2-scf00040 | 2  |
| AX-157929682 | 3 | 65.41 | KV452730.1  | 8944640 | 2-scf00040 | 2  |
| AX-157704961 | 3 | 65.41 | 3ML01028083 | 458     | scf03688_1 | UN |
| AX-157928676 | 3 | 65.56 | KV452730.1  | 7312548 | 2-scf00040 | 2  |
| AX-157928705 | 3 | 65.56 | KV452730.1  | 7367090 | 2-scf00040 | 2  |
| AX-157928711 | 3 | 65.56 | KV452730.1  | 7380024 | 2-scf00040 | 2  |
| AX-157928737 | 3 | 65.56 | KV452730.1  | 7442301 | 2-scf00040 | 2  |
| AX-157928739 | 3 | 65.56 | KV452730.1  | 7443322 | 2-scf00040 | 2  |
| AX-157928957 | 3 | 65.56 | KV452730.1  | 7843889 | 2-scf00040 | 2  |
| AX-157749834 | 3 | 65.56 | KV452730.1  | 7858797 | 2-scf00040 | 2  |
| AX-157715849 | 3 | 65.56 | KV452730.1  | 7859384 | 2-scf00040 | 2  |

|              |   |        |            |         |            |   |
|--------------|---|--------|------------|---------|------------|---|
| AX-157883655 | 3 | 65.56  | KV452730.1 | 7880370 | 2-scf00040 | 2 |
| AX-157813863 | 3 | 65.56  | KV452730.1 | 7885998 | 2-scf00040 | 2 |
| AX-157928985 | 3 | 65.56  | KV452730.1 | 7886347 | 2-scf00040 | 2 |
| AX-157928994 | 3 | 65.56  | KV452730.1 | 7891792 | 2-scf00040 | 2 |
| AX-157929000 | 3 | 65.56  | KV452730.1 | 7896940 | 2-scf00040 | 2 |
| AX-157929011 | 3 | 65.56  | KV452730.1 | 7909965 | 2-scf00040 | 2 |
| AX-157929040 | 3 | 65.56  | KV452730.1 | 7940289 | 2-scf00040 | 2 |
| AX-157929041 | 3 | 65.56  | KV452730.1 | 7940649 | 2-scf00040 | 2 |
| AX-157750660 | 3 | 65.56  | KV452730.1 | 7996733 | 2-scf00040 | 2 |
| AX-157929096 | 3 | 65.56  | KV452730.1 | 7999101 | 2-scf00040 | 2 |
| AX-157749060 | 3 | 65.56  | KV452730.1 | 8000438 | 2-scf00040 | 2 |
| AX-157929108 | 3 | 65.56  | KV452730.1 | 8014613 | 2-scf00040 | 2 |
| AX-157714407 | 3 | 65.56  | KV452730.1 | 8067421 | 2-scf00040 | 2 |
| AX-157929157 | 3 | 65.56  | KV452730.1 | 8107288 | 2-scf00040 | 2 |
| AX-157929247 | 3 | 65.56  | KV452730.1 | 8271028 | 2-scf00040 | 2 |
| AX-157929254 | 3 | 65.56  | KV452730.1 | 8277349 | 2-scf00040 | 2 |
| AX-157929274 | 3 | 65.56  | KV452730.1 | 8307305 | 2-scf00040 | 2 |
| AX-157929412 | 3 | 65.56  | KV452730.1 | 8525628 | 2-scf00040 | 2 |
| AX-157929566 | 3 | 65.56  | KV452730.1 | 8773479 | 2-scf00040 | 2 |
| AX-157929607 | 3 | 65.56  | KV452730.1 | 8818803 | 2-scf00040 | 2 |
| AX-157929611 | 3 | 65.56  | KV452730.1 | 8825183 | 2-scf00040 | 2 |
| AX-157714749 | 3 | 65.56  | KV452730.1 | 8894331 | 2-scf00040 | 2 |
| AX-157929670 | 3 | 65.56  | KV452730.1 | 8934443 | 2-scf00040 | 2 |
| AX-157929735 | 3 | 65.56  | KV452730.1 | 8992717 | 2-scf00040 | 2 |
| AX-157929109 | 3 | 65.636 | KV452730.1 | 8016664 | 2-scf00040 | 2 |
| AX-157928898 | 3 | 65.71  | KV452730.1 | 7769482 | 2-scf00040 | 2 |
| AX-157813854 | 3 | 65.71  | KV452730.1 | 7821883 | 2-scf00040 | 2 |
| AX-157928948 | 3 | 65.71  | KV452730.1 | 7838409 | 2-scf00040 | 2 |
| AX-157929115 | 3 | 65.71  | KV452730.1 | 8025783 | 2-scf00040 | 2 |
| AX-157929116 | 3 | 65.71  | KV452730.1 | 8026575 | 2-scf00040 | 2 |
| AX-157929121 | 3 | 65.71  | KV452730.1 | 8029179 | 2-scf00040 | 2 |
| AX-157929125 | 3 | 65.71  | KV452730.1 | 8036562 | 2-scf00040 | 2 |
| AX-157929443 | 3 | 65.71  | KV452730.1 | 8588175 | 2-scf00040 | 2 |
| AX-157929467 | 3 | 65.71  | KV452730.1 | 8628420 | 2-scf00040 | 2 |
| AX-157929470 | 3 | 65.71  | KV452730.1 | 8630081 | 2-scf00040 | 2 |
| AX-157929474 | 3 | 65.71  | KV452730.1 | 8636431 | 2-scf00040 | 2 |
| AX-157929478 | 3 | 65.71  | KV452730.1 | 8639802 | 2-scf00040 | 2 |
| AX-157929484 | 3 | 65.71  | KV452730.1 | 8646892 | 2-scf00040 | 2 |
| AX-157929494 | 3 | 65.71  | KV452730.1 | 8656582 | 2-scf00040 | 2 |
| AX-157929511 | 3 | 65.71  | KV452730.1 | 8696881 | 2-scf00040 | 2 |
| AX-157929513 | 3 | 65.71  | KV452730.1 | 8701004 | 2-scf00040 | 2 |
| AX-157929515 | 3 | 65.71  | KV452730.1 | 8707300 | 2-scf00040 | 2 |
| AX-157929520 | 3 | 65.71  | KV452730.1 | 8733161 | 2-scf00040 | 2 |
| AX-157929535 | 3 | 65.71  | KV452730.1 | 8742034 | 2-scf00040 | 2 |
| AX-157929536 | 3 | 65.71  | KV452730.1 | 8742890 | 2-scf00040 | 2 |
| AX-157929547 | 3 | 65.71  | KV452730.1 | 8752126 | 2-scf00040 | 2 |
| AX-157929616 | 3 | 65.71  | KV452730.1 | 8834248 | 2-scf00040 | 2 |
| AX-157929621 | 3 | 65.71  | KV452730.1 | 8845532 | 2-scf00040 | 2 |
| AX-157813914 | 3 | 65.71  | KV452730.1 | 8988709 | 2-scf00040 | 2 |
| AX-157869201 | 3 | 65.71  | KV452730.1 | 8996440 | 2-scf00040 | 2 |
| AX-157929752 | 3 | 65.71  | KV452730.1 | 9020230 | 2-scf00040 | 2 |

|              |   |        |            |         |            |   |
|--------------|---|--------|------------|---------|------------|---|
| AX-157929772 | 3 | 65.71  | KV452730.1 | 9042761 | 2-scf00040 | 2 |
| AX-157701502 | 3 | 65.71  | KV452730.1 | 9090561 | 2-scf00040 | 2 |
| AX-157929132 | 3 | 65.725 | KV452730.1 | 8046707 | 2-scf00040 | 2 |
| AX-157929139 | 3 | 65.798 | KV452730.1 | 8053907 | 2-scf00040 | 2 |
| AX-157708285 | 3 | 65.828 | KV452730.1 | 8054358 | 2-scf00040 | 2 |
| AX-157928011 | 3 | 65.86  | KV452730.1 | 6359479 | 2-scf00040 | 2 |
| AX-157928307 | 3 | 65.86  | KV452730.1 | 6779563 | 2-scf00040 | 2 |
| AX-157928580 | 3 | 65.86  | KV452730.1 | 7154734 | 2-scf00040 | 2 |
| AX-157928629 | 3 | 65.86  | KV452730.1 | 7213733 | 2-scf00040 | 2 |
| AX-157928819 | 3 | 65.86  | KV452730.1 | 7621992 | 2-scf00040 | 2 |
| AX-157928907 | 3 | 65.86  | KV452730.1 | 7780400 | 2-scf00040 | 2 |
| AX-157929053 | 3 | 65.86  | KV452730.1 | 7948545 | 2-scf00040 | 2 |
| AX-157929091 | 3 | 65.86  | KV452730.1 | 7992049 | 2-scf00040 | 2 |
| AX-157813868 | 3 | 65.86  | KV452730.1 | 8044327 | 2-scf00040 | 2 |
| AX-157813872 | 3 | 65.86  | KV452730.1 | 8059890 | 2-scf00040 | 2 |
| AX-157745759 | 3 | 65.86  | KV452730.1 | 8064208 | 2-scf00040 | 2 |
| AX-157929147 | 3 | 65.86  | KV452730.1 | 8075265 | 2-scf00040 | 2 |
| AX-157853892 | 3 | 65.86  | KV452730.1 | 8077456 | 2-scf00040 | 2 |
| AX-157813873 | 3 | 65.86  | KV452730.1 | 8096097 | 2-scf00040 | 2 |
| AX-158382440 | 3 | 65.86  | KV452730.1 | 8151675 | 2-scf00040 | 2 |
| AX-157929192 | 3 | 65.86  | KV452730.1 | 8154451 | 2-scf00040 | 2 |
| AX-157929196 | 3 | 65.86  | KV452730.1 | 8159581 | 2-scf00040 | 2 |
| AX-157813881 | 3 | 65.86  | KV452730.1 | 8200826 | 2-scf00040 | 2 |
| AX-157929214 | 3 | 65.86  | KV452730.1 | 8202073 | 2-scf00040 | 2 |
| AX-157929227 | 3 | 65.86  | KV452730.1 | 8239701 | 2-scf00040 | 2 |
| AX-157929233 | 3 | 65.86  | KV452730.1 | 8252680 | 2-scf00040 | 2 |
| AX-157708332 | 3 | 65.86  | KV452730.1 | 8257674 | 2-scf00040 | 2 |
| AX-157929239 | 3 | 65.86  | KV452730.1 | 8263102 | 2-scf00040 | 2 |
| AX-157929242 | 3 | 65.86  | KV452730.1 | 8268596 | 2-scf00040 | 2 |
| AX-157929248 | 3 | 65.86  | KV452730.1 | 8275247 | 2-scf00040 | 2 |
| AX-157853908 | 3 | 65.86  | KV452730.1 | 8316835 | 2-scf00040 | 2 |
| AX-157929279 | 3 | 65.86  | KV452730.1 | 8316879 | 2-scf00040 | 2 |
| AX-157929282 | 3 | 65.86  | KV452730.1 | 8317690 | 2-scf00040 | 2 |
| AX-157813889 | 3 | 65.86  | KV452730.1 | 8318542 | 2-scf00040 | 2 |
| AX-157746406 | 3 | 65.86  | KV452730.1 | 8320037 | 2-scf00040 | 2 |
| AX-157929283 | 3 | 65.86  | KV452730.1 | 8321185 | 2-scf00040 | 2 |
| AX-157741182 | 3 | 65.86  | KV452730.1 | 8322346 | 2-scf00040 | 2 |
| AX-157929306 | 3 | 65.86  | KV452730.1 | 8366490 | 2-scf00040 | 2 |
| AX-157929307 | 3 | 65.86  | KV452730.1 | 8368553 | 2-scf00040 | 2 |
| AX-157929309 | 3 | 65.86  | KV452730.1 | 8371762 | 2-scf00040 | 2 |
| AX-157929317 | 3 | 65.86  | KV452730.1 | 8381426 | 2-scf00040 | 2 |
| AX-157929318 | 3 | 65.86  | KV452730.1 | 8382301 | 2-scf00040 | 2 |
| AX-157929329 | 3 | 65.86  | KV452730.1 | 8400408 | 2-scf00040 | 2 |
| AX-157813894 | 3 | 65.86  | KV452730.1 | 8402301 | 2-scf00040 | 2 |
| AX-157929337 | 3 | 65.86  | KV452730.1 | 8411710 | 2-scf00040 | 2 |
| AX-157929374 | 3 | 65.86  | KV452730.1 | 8483354 | 2-scf00040 | 2 |
| AX-157929378 | 3 | 65.86  | KV452730.1 | 8489324 | 2-scf00040 | 2 |
| AX-157929382 | 3 | 65.86  | KV452730.1 | 8492784 | 2-scf00040 | 2 |
| AX-158405455 | 3 | 65.86  | KV452730.1 | 8495420 | 2-scf00040 | 2 |
| AX-157929384 | 3 | 65.86  | KV452730.1 | 8496098 | 2-scf00040 | 2 |
| AX-157929386 | 3 | 65.86  | KV452730.1 | 8497229 | 2-scf00040 | 2 |



|              |   |        |            |         |            |   |
|--------------|---|--------|------------|---------|------------|---|
| AX-157883664 | 3 | 65.86  | KV452730.1 | 8589110 | 2-scf00040 | 2 |
| AX-157929453 | 3 | 65.86  | KV452730.1 | 8608217 | 2-scf00040 | 2 |
| AX-157929753 | 3 | 65.86  | KV452730.1 | 9020712 | 2-scf00040 | 2 |
| AX-157928960 | 3 | 65.861 | KV452730.1 | 7852544 | 2-scf00040 | 2 |
| AX-157928968 | 3 | 65.861 | KV452730.1 | 7858330 | 2-scf00040 | 2 |
| AX-157929014 | 3 | 65.861 | KV452730.1 | 7913884 | 2-scf00040 | 2 |
| AX-157929020 | 3 | 65.861 | KV452730.1 | 7925109 | 2-scf00040 | 2 |
| AX-157929023 | 3 | 65.861 | KV452730.1 | 7926204 | 2-scf00040 | 2 |
| AX-157929038 | 3 | 65.861 | KV452730.1 | 7939335 | 2-scf00040 | 2 |
| AX-157929049 | 3 | 65.861 | KV452730.1 | 7944650 | 2-scf00040 | 2 |
| AX-157718287 | 3 | 65.861 | KV452730.1 | 7956610 | 2-scf00040 | 2 |
| AX-157813866 | 3 | 65.861 | KV452730.1 | 7965556 | 2-scf00040 | 2 |
| AX-157929113 | 3 | 65.861 | KV452730.1 | 8019429 | 2-scf00040 | 2 |
| AX-157929151 | 3 | 65.861 | KV452730.1 | 8079119 | 2-scf00040 | 2 |
| AX-157929160 | 3 | 65.861 | KV452730.1 | 8110720 | 2-scf00040 | 2 |
| AX-157929209 | 3 | 65.861 | KV452730.1 | 8177225 | 2-scf00040 | 2 |
| AX-157929215 | 3 | 65.861 | KV452730.1 | 8203466 | 2-scf00040 | 2 |
| AX-157929240 | 3 | 65.861 | KV452730.1 | 8265477 | 2-scf00040 | 2 |
| AX-157883658 | 3 | 65.861 | KV452730.1 | 8361678 | 2-scf00040 | 2 |
| AX-157929334 | 3 | 65.861 | KV452730.1 | 8409958 | 2-scf00040 | 2 |
| AX-157929385 | 3 | 65.861 | KV452730.1 | 8496923 | 2-scf00040 | 2 |
| AX-157929387 | 3 | 65.861 | KV452730.1 | 8498624 | 2-scf00040 | 2 |
| AX-157929389 | 3 | 65.861 | KV452730.1 | 8499511 | 2-scf00040 | 2 |
| AX-157929392 | 3 | 65.861 | KV452730.1 | 8501601 | 2-scf00040 | 2 |
| AX-157929399 | 3 | 65.861 | KV452730.1 | 8509772 | 2-scf00040 | 2 |
| AX-157929405 | 3 | 65.861 | KV452730.1 | 8516644 | 2-scf00040 | 2 |
| AX-157929408 | 3 | 65.861 | KV452730.1 | 8519298 | 2-scf00040 | 2 |
| AX-157929411 | 3 | 65.861 | KV452730.1 | 8522256 | 2-scf00040 | 2 |
| AX-157929414 | 3 | 65.861 | KV452730.1 | 8527910 | 2-scf00040 | 2 |
| AX-157929415 | 3 | 65.861 | KV452730.1 | 8528965 | 2-scf00040 | 2 |
| AX-157929418 | 3 | 65.861 | KV452730.1 | 8533124 | 2-scf00040 | 2 |
| AX-157929461 | 3 | 65.861 | KV452730.1 | 8623939 | 2-scf00040 | 2 |
| AX-157929469 | 3 | 65.861 | KV452730.1 | 8628606 | 2-scf00040 | 2 |
| AX-157929477 | 3 | 65.861 | KV452730.1 | 8638890 | 2-scf00040 | 2 |
| AX-157929500 | 3 | 65.861 | KV452730.1 | 8663714 | 2-scf00040 | 2 |
| AX-157929502 | 3 | 65.861 | KV452730.1 | 8664066 | 2-scf00040 | 2 |
| AX-158405464 | 3 | 65.861 | KV452730.1 | 8700249 | 2-scf00040 | 2 |
| AX-158405465 | 3 | 65.861 | KV452730.1 | 8700388 | 2-scf00040 | 2 |
| AX-157929514 | 3 | 65.861 | KV452730.1 | 8704560 | 2-scf00040 | 2 |
| AX-157883666 | 3 | 65.861 | KV452730.1 | 8714198 | 2-scf00040 | 2 |
| AX-157929531 | 3 | 65.861 | KV452730.1 | 8738845 | 2-scf00040 | 2 |
| AX-157929539 | 3 | 65.861 | KV452730.1 | 8743889 | 2-scf00040 | 2 |
| AX-157929553 | 3 | 65.861 | KV452730.1 | 8758504 | 2-scf00040 | 2 |
| AX-158382446 | 3 | 65.861 | KV452730.1 | 8764247 | 2-scf00040 | 2 |
| AX-157929560 | 3 | 65.861 | KV452730.1 | 8768437 | 2-scf00040 | 2 |
| AX-157929580 | 3 | 65.861 | KV452730.1 | 8790723 | 2-scf00040 | 2 |
| AX-157929582 | 3 | 65.861 | KV452730.1 | 8790949 | 2-scf00040 | 2 |
| AX-157929587 | 3 | 65.861 | KV452730.1 | 8796184 | 2-scf00040 | 2 |
| AX-157929590 | 3 | 65.861 | KV452730.1 | 8797363 | 2-scf00040 | 2 |
| AX-157929643 | 3 | 65.861 | KV452730.1 | 8882322 | 2-scf00040 | 2 |
| AX-157929668 | 3 | 65.861 | KV452730.1 | 8932802 | 2-scf00040 | 2 |

|              |   |        |             |         |            |    |
|--------------|---|--------|-------------|---------|------------|----|
| AX-157929728 | 3 | 65.861 | KV452730.1  | 8990414 | 2-scf00040 | 2  |
| AX-157929729 | 3 | 65.861 | KV452730.1  | 8990732 | 2-scf00040 | 2  |
| AX-157706547 | 3 | 65.861 | 3ML01032430 | 172     | scf08050_1 | UN |
| AX-157929428 | 3 | 65.88  | KV452730.1  | 8563086 | 2-scf00040 | 2  |
| AX-157929449 | 3 | 65.898 | KV452730.1  | 8604334 | 2-scf00040 | 2  |
| AX-157929525 | 3 | 65.905 | KV452730.1  | 8735624 | 2-scf00040 | 2  |
| AX-157929589 | 3 | 65.914 | KV452730.1  | 8796667 | 2-scf00040 | 2  |
| AX-157813819 | 3 | 66.017 | KV452730.1  | 6709541 | 2-scf00040 | 2  |
| AX-157928280 | 3 | 66.017 | KV452730.1  | 6743700 | 2-scf00040 | 2  |
| AX-157928284 | 3 | 66.017 | KV452730.1  | 6748755 | 2-scf00040 | 2  |
| AX-157928287 | 3 | 66.017 | KV452730.1  | 6749015 | 2-scf00040 | 2  |
| AX-157928313 | 3 | 66.017 | KV452730.1  | 6794552 | 2-scf00040 | 2  |
| AX-157928388 | 3 | 66.017 | KV452730.1  | 6902766 | 2-scf00040 | 2  |
| AX-157754236 | 3 | 66.017 | KV452730.1  | 6967090 | 2-scf00040 | 2  |
| AX-157874847 | 3 | 66.017 | KV452730.1  | 6982133 | 2-scf00040 | 2  |
| AX-157928535 | 3 | 66.017 | KV452730.1  | 7103686 | 2-scf00040 | 2  |
| AX-157853883 | 3 | 66.017 | KV452730.1  | 7243025 | 2-scf00040 | 2  |
| AX-157928648 | 3 | 66.017 | KV452730.1  | 7249423 | 2-scf00040 | 2  |
| AX-157813845 | 3 | 66.017 | KV452730.1  | 7286033 | 2-scf00040 | 2  |
| AX-157928666 | 3 | 66.017 | KV452730.1  | 7295479 | 2-scf00040 | 2  |
| AX-157928672 | 3 | 66.017 | KV452730.1  | 7304276 | 2-scf00040 | 2  |
| AX-157928683 | 3 | 66.017 | KV452730.1  | 7321748 | 2-scf00040 | 2  |
| AX-157928695 | 3 | 66.017 | KV452730.1  | 7346780 | 2-scf00040 | 2  |
| AX-157928849 | 3 | 66.017 | KV452730.1  | 7696293 | 2-scf00040 | 2  |
| AX-157928860 | 3 | 66.017 | KV452730.1  | 7709774 | 2-scf00040 | 2  |
| AX-157813848 | 3 | 66.017 | KV452730.1  | 7730944 | 2-scf00040 | 2  |
| AX-157813861 | 3 | 66.017 | KV452730.1  | 7880513 | 2-scf00040 | 2  |
| AX-157928996 | 3 | 66.017 | KV452730.1  | 7892694 | 2-scf00040 | 2  |
| AX-157929010 | 3 | 66.017 | KV452730.1  | 7909029 | 2-scf00040 | 2  |
| AX-157813867 | 3 | 66.017 | KV452730.1  | 8018639 | 2-scf00040 | 2  |
| AX-157929261 | 3 | 66.017 | KV452730.1  | 8293269 | 2-scf00040 | 2  |
| AX-157929427 | 3 | 66.017 | KV452730.1  | 8562540 | 2-scf00040 | 2  |
| AX-157929432 | 3 | 66.017 | KV452730.1  | 8568693 | 2-scf00040 | 2  |
| AX-158405459 | 3 | 66.017 | KV452730.1  | 8584111 | 2-scf00040 | 2  |
| AX-157929440 | 3 | 66.017 | KV452730.1  | 8585328 | 2-scf00040 | 2  |
| AX-157929447 | 3 | 66.017 | KV452730.1  | 8600377 | 2-scf00040 | 2  |
| AX-157929448 | 3 | 66.017 | KV452730.1  | 8601627 | 2-scf00040 | 2  |
| AX-157929569 | 3 | 66.017 | KV452730.1  | 8778593 | 2-scf00040 | 2  |
| AX-157929594 | 3 | 66.017 | KV452730.1  | 8803726 | 2-scf00040 | 2  |
| AX-157929596 | 3 | 66.017 | KV452730.1  | 8804889 | 2-scf00040 | 2  |
| AX-157929597 | 3 | 66.017 | KV452730.1  | 8806557 | 2-scf00040 | 2  |
| AX-157929599 | 3 | 66.017 | KV452730.1  | 8807871 | 2-scf00040 | 2  |
| AX-157929605 | 3 | 66.017 | KV452730.1  | 8812901 | 2-scf00040 | 2  |
| AX-157929619 | 3 | 66.017 | KV452730.1  | 8843235 | 2-scf00040 | 2  |
| AX-157929620 | 3 | 66.017 | KV452730.1  | 8843788 | 2-scf00040 | 2  |
| AX-157929623 | 3 | 66.017 | KV452730.1  | 8846245 | 2-scf00040 | 2  |
| AX-157929645 | 3 | 66.017 | KV452730.1  | 8885417 | 2-scf00040 | 2  |
| AX-157813906 | 3 | 66.017 | KV452730.1  | 8900743 | 2-scf00040 | 2  |
| AX-157813907 | 3 | 66.017 | KV452730.1  | 8904456 | 2-scf00040 | 2  |
| AX-157929657 | 3 | 66.017 | KV452730.1  | 8911679 | 2-scf00040 | 2  |
| AX-157929663 | 3 | 66.017 | KV452730.1  | 8922407 | 2-scf00040 | 2  |

|              |   |        |            |         |            |   |
|--------------|---|--------|------------|---------|------------|---|
| AX-157929672 | 3 | 66.017 | KV452730.1 | 8935589 | 2-scf00040 | 2 |
| AX-157813912 | 3 | 66.017 | KV452730.1 | 8980665 | 2-scf00040 | 2 |
| AX-157718615 | 3 | 66.017 | KV452730.1 | 8980764 | 2-scf00040 | 2 |
| AX-157813913 | 3 | 66.017 | KV452730.1 | 8981385 | 2-scf00040 | 2 |
| AX-157929718 | 3 | 66.017 | KV452730.1 | 8981589 | 2-scf00040 | 2 |
| AX-157929721 | 3 | 66.017 | KV452730.1 | 8986555 | 2-scf00040 | 2 |
| AX-157929724 | 3 | 66.017 | KV452730.1 | 8989025 | 2-scf00040 | 2 |
| AX-157929730 | 3 | 66.017 | KV452730.1 | 8991145 | 2-scf00040 | 2 |
| AX-157929733 | 3 | 66.017 | KV452730.1 | 8992013 | 2-scf00040 | 2 |
| AX-157929736 | 3 | 66.017 | KV452730.1 | 8993292 | 2-scf00040 | 2 |
| AX-157713019 | 3 | 66.017 | KV452730.1 | 8996966 | 2-scf00040 | 2 |
| AX-157813915 | 3 | 66.017 | KV452730.1 | 8997017 | 2-scf00040 | 2 |
| AX-157929740 | 3 | 66.017 | KV452730.1 | 9000744 | 2-scf00040 | 2 |
| AX-157929770 | 3 | 66.017 | KV452730.1 | 9041081 | 2-scf00040 | 2 |
| AX-157929809 | 3 | 66.017 | KV452730.1 | 9078952 | 2-scf00040 | 2 |
| AX-158404582 | 3 | 66.017 | KV452730.1 | 9092192 | 2-scf00040 | 2 |
| AX-157929825 | 3 | 66.017 | KV452730.1 | 9094660 | 2-scf00040 | 2 |
| AX-157929827 | 3 | 66.017 | KV452730.1 | 9095409 | 2-scf00040 | 2 |
| AX-157929828 | 3 | 66.017 | KV452730.1 | 9095730 | 2-scf00040 | 2 |
| AX-157929830 | 3 | 66.017 | KV452730.1 | 9097061 | 2-scf00040 | 2 |
| AX-157869203 | 3 | 66.017 | KV452730.1 | 9106655 | 2-scf00040 | 2 |
| AX-157813923 | 3 | 66.017 | KV452730.1 | 9112672 | 2-scf00040 | 2 |
| AX-157929901 | 3 | 66.017 | KV452730.1 | 9166587 | 2-scf00040 | 2 |
| AX-157929989 | 3 | 66.017 | KV452730.1 | 9236968 | 2-scf00040 | 2 |
| AX-157930034 | 3 | 66.017 | KV452730.1 | 9273037 | 2-scf00040 | 2 |
| AX-157930044 | 3 | 66.017 | KV452730.1 | 9279715 | 2-scf00040 | 2 |
| AX-157928291 | 3 | 66.176 | KV452730.1 | 6752170 | 2-scf00040 | 2 |
| AX-157928660 | 3 | 66.176 | KV452730.1 | 7265907 | 2-scf00040 | 2 |
| AX-157928724 | 3 | 66.176 | KV452730.1 | 7400984 | 2-scf00040 | 2 |
| AX-157929234 | 3 | 66.176 | KV452730.1 | 8257038 | 2-scf00040 | 2 |
| AX-157929570 | 3 | 66.176 | KV452730.1 | 8779021 | 2-scf00040 | 2 |
| AX-157929612 | 3 | 66.176 | KV452730.1 | 8827309 | 2-scf00040 | 2 |
| AX-157929662 | 3 | 66.176 | KV452730.1 | 8922179 | 2-scf00040 | 2 |
| AX-157813908 | 3 | 66.176 | KV452730.1 | 8946129 | 2-scf00040 | 2 |
| AX-157929746 | 3 | 66.176 | KV452730.1 | 9007144 | 2-scf00040 | 2 |
| AX-157929748 | 3 | 66.176 | KV452730.1 | 9019384 | 2-scf00040 | 2 |
| AX-157853934 | 3 | 66.176 | KV452730.1 | 9027632 | 2-scf00040 | 2 |
| AX-157929758 | 3 | 66.176 | KV452730.1 | 9027974 | 2-scf00040 | 2 |
| AX-157929759 | 3 | 66.176 | KV452730.1 | 9030574 | 2-scf00040 | 2 |
| AX-157929760 | 3 | 66.176 | KV452730.1 | 9031480 | 2-scf00040 | 2 |
| AX-157929762 | 3 | 66.176 | KV452730.1 | 9031777 | 2-scf00040 | 2 |
| AX-157929763 | 3 | 66.176 | KV452730.1 | 9031967 | 2-scf00040 | 2 |
| AX-157813916 | 3 | 66.176 | KV452730.1 | 9032886 | 2-scf00040 | 2 |
| AX-157929764 | 3 | 66.176 | KV452730.1 | 9034758 | 2-scf00040 | 2 |
| AX-157929765 | 3 | 66.176 | KV452730.1 | 9035980 | 2-scf00040 | 2 |
| AX-157929769 | 3 | 66.176 | KV452730.1 | 9039964 | 2-scf00040 | 2 |
| AX-157813917 | 3 | 66.176 | KV452730.1 | 9041267 | 2-scf00040 | 2 |
| AX-157929776 | 3 | 66.176 | KV452730.1 | 9047589 | 2-scf00040 | 2 |
| AX-157929780 | 3 | 66.176 | KV452730.1 | 9050281 | 2-scf00040 | 2 |
| AX-157813922 | 3 | 66.176 | KV452730.1 | 9054967 | 2-scf00040 | 2 |
| AX-157929788 | 3 | 66.176 | KV452730.1 | 9061435 | 2-scf00040 | 2 |

|              |   |        |            |         |            |   |
|--------------|---|--------|------------|---------|------------|---|
| AX-157929789 | 3 | 66.176 | KV452730.1 | 9062995 | 2-scf00040 | 2 |
| AX-157929791 | 3 | 66.176 | KV452730.1 | 9063712 | 2-scf00040 | 2 |
| AX-157929792 | 3 | 66.176 | KV452730.1 | 9064364 | 2-scf00040 | 2 |
| AX-157929794 | 3 | 66.176 | KV452730.1 | 9065465 | 2-scf00040 | 2 |
| AX-157929799 | 3 | 66.176 | KV452730.1 | 9067582 | 2-scf00040 | 2 |
| AX-157929800 | 3 | 66.176 | KV452730.1 | 9068827 | 2-scf00040 | 2 |
| AX-157929802 | 3 | 66.176 | KV452730.1 | 9071643 | 2-scf00040 | 2 |
| AX-157753934 | 3 | 66.176 | KV452730.1 | 9074340 | 2-scf00040 | 2 |
| AX-157929805 | 3 | 66.176 | KV452730.1 | 9074923 | 2-scf00040 | 2 |
| AX-157929806 | 3 | 66.176 | KV452730.1 | 9075102 | 2-scf00040 | 2 |
| AX-157929813 | 3 | 66.176 | KV452730.1 | 9080782 | 2-scf00040 | 2 |
| AX-157929817 | 3 | 66.176 | KV452730.1 | 9085047 | 2-scf00040 | 2 |
| AX-157929818 | 3 | 66.176 | KV452730.1 | 9085619 | 2-scf00040 | 2 |
| AX-157929820 | 3 | 66.176 | KV452730.1 | 9087445 | 2-scf00040 | 2 |
| AX-157929831 | 3 | 66.176 | KV452730.1 | 9098850 | 2-scf00040 | 2 |
| AX-157929838 | 3 | 66.176 | KV452730.1 | 9113886 | 2-scf00040 | 2 |
| AX-157715208 | 3 | 66.176 | KV452730.1 | 9115889 | 2-scf00040 | 2 |
| AX-157738372 | 3 | 66.176 | KV452730.1 | 9123773 | 2-scf00040 | 2 |
| AX-157929852 | 3 | 66.176 | KV452730.1 | 9131228 | 2-scf00040 | 2 |
| AX-157929902 | 3 | 66.176 | KV452730.1 | 9168143 | 2-scf00040 | 2 |
| AX-157930053 | 3 | 66.176 | KV452730.1 | 9284873 | 2-scf00040 | 2 |
| AX-157929866 | 3 | 66.363 | KV452730.1 | 9135098 | 2-scf00040 | 2 |
| AX-157929870 | 3 | 66.394 | KV452730.1 | 9136314 | 2-scf00040 | 2 |
| AX-157929871 | 3 | 66.394 | KV452730.1 | 9138024 | 2-scf00040 | 2 |
| AX-157929874 | 3 | 66.394 | KV452730.1 | 9140717 | 2-scf00040 | 2 |
| AX-157929876 | 3 | 66.394 | KV452730.1 | 9142655 | 2-scf00040 | 2 |
| AX-157929879 | 3 | 66.394 | KV452730.1 | 9143697 | 2-scf00040 | 2 |
| AX-157929882 | 3 | 66.394 | KV452730.1 | 9144271 | 2-scf00040 | 2 |
| AX-157813926 | 3 | 66.394 | KV452730.1 | 9146343 | 2-scf00040 | 2 |
| AX-157929884 | 3 | 66.394 | KV452730.1 | 9146592 | 2-scf00040 | 2 |
| AX-157929886 | 3 | 66.394 | KV452730.1 | 9150144 | 2-scf00040 | 2 |
| AX-158405483 | 3 | 66.394 | KV452730.1 | 9150582 | 2-scf00040 | 2 |
| AX-157929888 | 3 | 66.394 | KV452730.1 | 9153526 | 2-scf00040 | 2 |
| AX-157813927 | 3 | 66.394 | KV452730.1 | 9163262 | 2-scf00040 | 2 |
| AX-157929889 | 3 | 66.425 | KV452730.1 | 9154968 | 2-scf00040 | 2 |
| AX-157710114 | 3 | 66.454 | KV452730.1 | 9157241 | 2-scf00040 | 2 |
| AX-157929890 | 3 | 66.503 | KV452730.1 | 9155496 | 2-scf00040 | 2 |
| AX-157929897 | 3 | 66.503 | KV452730.1 | 9160158 | 2-scf00040 | 2 |
| AX-157929898 | 3 | 66.503 | KV452730.1 | 9161858 | 2-scf00040 | 2 |
| AX-157813928 | 3 | 66.503 | KV452730.1 | 9168757 | 2-scf00040 | 2 |
| AX-157929904 | 3 | 66.503 | KV452730.1 | 9169252 | 2-scf00040 | 2 |
| AX-157929915 | 3 | 66.503 | KV452730.1 | 9174851 | 2-scf00040 | 2 |
| AX-157929918 | 3 | 66.503 | KV452730.1 | 9176582 | 2-scf00040 | 2 |
| AX-157929919 | 3 | 66.503 | KV452730.1 | 9177329 | 2-scf00040 | 2 |
| AX-157929921 | 3 | 66.503 | KV452730.1 | 9179322 | 2-scf00040 | 2 |
| AX-157757023 | 3 | 66.503 | KV452730.1 | 9181233 | 2-scf00040 | 2 |
| AX-157751041 | 3 | 66.503 | KV452730.1 | 9181587 | 2-scf00040 | 2 |
| AX-157929924 | 3 | 66.503 | KV452730.1 | 9186218 | 2-scf00040 | 2 |
| AX-157929928 | 3 | 66.503 | KV452730.1 | 9189351 | 2-scf00040 | 2 |
| AX-157929981 | 3 | 66.503 | KV452730.1 | 9229853 | 2-scf00040 | 2 |
| AX-157930001 | 3 | 66.503 | KV452730.1 | 9243070 | 2-scf00040 | 2 |

|              |   |        |            |         |            |   |
|--------------|---|--------|------------|---------|------------|---|
| AX-157930040 | 3 | 66.503 | KV452730.1 | 9275943 | 2-scf00040 | 2 |
| AX-157853937 | 3 | 66.503 | KV452730.1 | 9279180 | 2-scf00040 | 2 |
| AX-157853938 | 3 | 66.503 | KV452730.1 | 9279944 | 2-scf00040 | 2 |
| AX-157930051 | 3 | 66.503 | KV452730.1 | 9284328 | 2-scf00040 | 2 |
| AX-157930055 | 3 | 66.503 | KV452730.1 | 9286335 | 2-scf00040 | 2 |
| AX-157853939 | 3 | 66.503 | KV452730.1 | 9287039 | 2-scf00040 | 2 |
| AX-157930057 | 3 | 66.503 | KV452730.1 | 9287182 | 2-scf00040 | 2 |
| AX-157930058 | 3 | 66.503 | KV452730.1 | 9287850 | 2-scf00040 | 2 |
| AX-157930077 | 3 | 66.503 | KV452730.1 | 9305978 | 2-scf00040 | 2 |
| AX-157930085 | 3 | 66.503 | KV452730.1 | 9313900 | 2-scf00040 | 2 |
| AX-157929930 | 3 | 66.576 | KV452730.1 | 9190952 | 2-scf00040 | 2 |
| AX-157929937 | 3 | 66.692 | KV452730.1 | 9202120 | 2-scf00040 | 2 |
| AX-157713512 | 3 | 66.722 | KV452730.1 | 6644050 | 2-scf00040 | 2 |
| AX-157928346 | 3 | 66.722 | KV452730.1 | 6850316 | 2-scf00040 | 2 |
| AX-157928469 | 3 | 66.722 | KV452730.1 | 7010113 | 2-scf00040 | 2 |
| AX-157928726 | 3 | 66.722 | KV452730.1 | 7408202 | 2-scf00040 | 2 |
| AX-157928831 | 3 | 66.722 | KV452730.1 | 7649098 | 2-scf00040 | 2 |
| AX-157773174 | 3 | 66.722 | KV452730.1 | 7809754 | 2-scf00040 | 2 |
| AX-157929016 | 3 | 66.722 | KV452730.1 | 7918862 | 2-scf00040 | 2 |
| AX-157929822 | 3 | 66.722 | KV452730.1 | 9088501 | 2-scf00040 | 2 |
| AX-157929823 | 3 | 66.722 | KV452730.1 | 9088876 | 2-scf00040 | 2 |
| AX-157929849 | 3 | 66.722 | KV452730.1 | 9129508 | 2-scf00040 | 2 |
| AX-157929935 | 3 | 66.722 | KV452730.1 | 9201546 | 2-scf00040 | 2 |
| AX-157929943 | 3 | 66.722 | KV452730.1 | 9204447 | 2-scf00040 | 2 |
| AX-157929946 | 3 | 66.722 | KV452730.1 | 9209533 | 2-scf00040 | 2 |
| AX-157929948 | 3 | 66.722 | KV452730.1 | 9209954 | 2-scf00040 | 2 |
| AX-157929951 | 3 | 66.722 | KV452730.1 | 9212291 | 2-scf00040 | 2 |
| AX-157929957 | 3 | 66.722 | KV452730.1 | 9216998 | 2-scf00040 | 2 |
| AX-157929959 | 3 | 66.722 | KV452730.1 | 9218012 | 2-scf00040 | 2 |
| AX-157929960 | 3 | 66.722 | KV452730.1 | 9218546 | 2-scf00040 | 2 |
| AX-157929963 | 3 | 66.722 | KV452730.1 | 9220668 | 2-scf00040 | 2 |
| AX-157929966 | 3 | 66.722 | KV452730.1 | 9221995 | 2-scf00040 | 2 |
| AX-157929977 | 3 | 66.722 | KV452730.1 | 9227470 | 2-scf00040 | 2 |
| AX-157929983 | 3 | 66.722 | KV452730.1 | 9230554 | 2-scf00040 | 2 |
| AX-157722770 | 3 | 66.722 | KV452730.1 | 9239628 | 2-scf00040 | 2 |
| AX-157929993 | 3 | 66.722 | KV452730.1 | 9239754 | 2-scf00040 | 2 |
| AX-157929994 | 3 | 66.722 | KV452730.1 | 9240025 | 2-scf00040 | 2 |
| AX-157929998 | 3 | 66.722 | KV452730.1 | 9241678 | 2-scf00040 | 2 |
| AX-157930005 | 3 | 66.722 | KV452730.1 | 9244814 | 2-scf00040 | 2 |
| AX-157930007 | 3 | 66.722 | KV452730.1 | 9245085 | 2-scf00040 | 2 |
| AX-157930014 | 3 | 66.722 | KV452730.1 | 9251937 | 2-scf00040 | 2 |
| AX-157853936 | 3 | 66.722 | KV452730.1 | 9254083 | 2-scf00040 | 2 |
| AX-157930016 | 3 | 66.722 | KV452730.1 | 9254385 | 2-scf00040 | 2 |
| AX-157930020 | 3 | 66.722 | KV452730.1 | 9256667 | 2-scf00040 | 2 |
| AX-157930022 | 3 | 66.722 | KV452730.1 | 9257851 | 2-scf00040 | 2 |
| AX-157930023 | 3 | 66.722 | KV452730.1 | 9258574 | 2-scf00040 | 2 |
| AX-157930024 | 3 | 66.722 | KV452730.1 | 9260101 | 2-scf00040 | 2 |
| AX-157930027 | 3 | 66.722 | KV452730.1 | 9262863 | 2-scf00040 | 2 |
| AX-157930028 | 3 | 66.722 | KV452730.1 | 9263455 | 2-scf00040 | 2 |
| AX-157930036 | 3 | 66.722 | KV452730.1 | 9273556 | 2-scf00040 | 2 |
| AX-157930038 | 3 | 66.722 | KV452730.1 | 9274189 | 2-scf00040 | 2 |

|              |   |        |            |          |            |   |
|--------------|---|--------|------------|----------|------------|---|
| AX-157930043 | 3 | 66.722 | KV452730.1 | 9279015  | 2-scf00040 | 2 |
| AX-157930047 | 3 | 66.722 | KV452730.1 | 9280746  | 2-scf00040 | 2 |
| AX-157930048 | 3 | 66.722 | KV452730.1 | 9281818  | 2-scf00040 | 2 |
| AX-158389737 | 3 | 66.722 | KV452730.1 | 9285261  | 2-scf00040 | 2 |
| AX-157930060 | 3 | 66.722 | KV452730.1 | 9290258  | 2-scf00040 | 2 |
| AX-157930063 | 3 | 66.722 | KV452730.1 | 9292124  | 2-scf00040 | 2 |
| AX-157930068 | 3 | 66.9   | KV452730.1 | 9296313  | 2-scf00040 | 2 |
| AX-157929945 | 3 | 67.05  | KV452730.1 | 9207282  | 2-scf00040 | 2 |
| AX-157929954 | 3 | 67.05  | KV452730.1 | 9215196  | 2-scf00040 | 2 |
| AX-157929999 | 3 | 67.05  | KV452730.1 | 9242263  | 2-scf00040 | 2 |
| AX-157874878 | 3 | 67.05  | KV452730.1 | 9300039  | 2-scf00040 | 2 |
| AX-157930074 | 3 | 67.05  | KV452730.1 | 9303631  | 2-scf00040 | 2 |
| AX-157930075 | 3 | 67.05  | KV452730.1 | 9303983  | 2-scf00040 | 2 |
| AX-157930080 | 3 | 67.05  | KV452730.1 | 9308847  | 2-scf00040 | 2 |
| AX-157930089 | 3 | 67.05  | KV452730.1 | 9316875  | 2-scf00040 | 2 |
| AX-157930092 | 3 | 67.05  | KV452730.1 | 9318246  | 2-scf00040 | 2 |
| AX-157813934 | 3 | 67.05  | KV452730.1 | 9326621  | 2-scf00040 | 2 |
| AX-157930099 | 3 | 67.05  | KV452730.1 | 9327369  | 2-scf00040 | 2 |
| AX-157930100 | 3 | 67.05  | KV452730.1 | 9329078  | 2-scf00040 | 2 |
| AX-158379344 | 3 | 67.05  | KV452730.1 | 9329735  | 2-scf00040 | 2 |
| AX-157930101 | 3 | 67.05  | KV452730.1 | 9329865  | 2-scf00040 | 2 |
| AX-157930102 | 3 | 67.05  | KV452730.1 | 9330462  | 2-scf00040 | 2 |
| AX-157720173 | 3 | 67.05  | KV452730.1 | 9331638  | 2-scf00040 | 2 |
| AX-157930125 | 3 | 67.05  | KV452730.1 | 9356865  | 2-scf00040 | 2 |
| AX-157930138 | 3 | 67.05  | KV452730.1 | 9368345  | 2-scf00040 | 2 |
| AX-157930173 | 3 | 67.05  | KV452730.1 | 9396815  | 2-scf00040 | 2 |
| AX-157930239 | 3 | 67.05  | KV452730.1 | 9456443  | 2-scf00040 | 2 |
| AX-157930241 | 3 | 67.05  | KV452730.1 | 9458435  | 2-scf00040 | 2 |
| AX-157930353 | 3 | 67.05  | KV452730.1 | 9616690  | 2-scf00040 | 2 |
| AX-157930354 | 3 | 67.05  | KV452730.1 | 9617417  | 2-scf00040 | 2 |
| AX-158389752 | 3 | 67.05  | KV452730.1 | 10559891 | 2-scf00040 | 2 |
| AX-157930989 | 3 | 67.05  | KV452730.1 | 10560466 | 2-scf00040 | 2 |
| AX-157930996 | 3 | 67.05  | KV452730.1 | 10564580 | 2-scf00040 | 2 |
| AX-157930997 | 3 | 67.05  | KV452730.1 | 10566997 | 2-scf00040 | 2 |
| AX-157931007 | 3 | 67.05  | KV452730.1 | 10573592 | 2-scf00040 | 2 |
| AX-157869224 | 3 | 67.05  | KV452730.1 | 10580115 | 2-scf00040 | 2 |
| AX-157931016 | 3 | 67.05  | KV452730.1 | 10581864 | 2-scf00040 | 2 |
| AX-158389753 | 3 | 67.05  | KV452730.1 | 10591218 | 2-scf00040 | 2 |
| AX-157931036 | 3 | 67.05  | KV452730.1 | 10598572 | 2-scf00040 | 2 |
| AX-157931039 | 3 | 67.05  | KV452730.1 | 10600576 | 2-scf00040 | 2 |
| AX-157931043 | 3 | 67.05  | KV452730.1 | 10606553 | 2-scf00040 | 2 |
| AX-157931051 | 3 | 67.05  | KV452730.1 | 10611754 | 2-scf00040 | 2 |
| AX-157931052 | 3 | 67.05  | KV452730.1 | 10612395 | 2-scf00040 | 2 |
| AX-157931054 | 3 | 67.05  | KV452730.1 | 10613752 | 2-scf00040 | 2 |
| AX-157854027 | 3 | 67.05  | KV452730.1 | 10615901 | 2-scf00040 | 2 |
| AX-157931061 | 3 | 67.05  | KV452730.1 | 10618392 | 2-scf00040 | 2 |
| AX-157931065 | 3 | 67.05  | KV452730.1 | 10619934 | 2-scf00040 | 2 |
| AX-157931075 | 3 | 67.05  | KV452730.1 | 10628483 | 2-scf00040 | 2 |
| AX-157931078 | 3 | 67.05  | KV452730.1 | 10629801 | 2-scf00040 | 2 |
| AX-158389756 | 3 | 67.05  | KV452730.1 | 10640923 | 2-scf00040 | 2 |
| AX-157931108 | 3 | 67.05  | KV452730.1 | 10656206 | 2-scf00040 | 2 |

|              |   |       |            |          |            |   |
|--------------|---|-------|------------|----------|------------|---|
| AX-157869225 | 3 | 67.05 | KV452730.1 | 10659261 | 2-scf00040 | 2 |
| AX-157869226 | 3 | 67.05 | KV452730.1 | 10659557 | 2-scf00040 | 2 |
| AX-157931111 | 3 | 67.05 | KV452730.1 | 10662582 | 2-scf00040 | 2 |
| AX-157931116 | 3 | 67.05 | KV452730.1 | 10668061 | 2-scf00040 | 2 |
| AX-157869229 | 3 | 67.05 | KV452730.1 | 10669626 | 2-scf00040 | 2 |
| AX-158389757 | 3 | 67.05 | KV452730.1 | 10670327 | 2-scf00040 | 2 |
| AX-157931119 | 3 | 67.05 | KV452730.1 | 10670872 | 2-scf00040 | 2 |
| AX-157931120 | 3 | 67.05 | KV452730.1 | 10673169 | 2-scf00040 | 2 |
| AX-157862713 | 3 | 67.05 | KV452730.1 | 10673935 | 2-scf00040 | 2 |
| AX-158389760 | 3 | 67.05 | KV452730.1 | 10682101 | 2-scf00040 | 2 |
| AX-157931127 | 3 | 67.05 | KV452730.1 | 10683169 | 2-scf00040 | 2 |
| AX-157931131 | 3 | 67.05 | KV452730.1 | 10684062 | 2-scf00040 | 2 |
| AX-157814025 | 3 | 67.05 | KV452730.1 | 10691485 | 2-scf00040 | 2 |
| AX-157931137 | 3 | 67.05 | KV452730.1 | 10691533 | 2-scf00040 | 2 |
| AX-157931146 | 3 | 67.05 | KV452730.1 | 10696936 | 2-scf00040 | 2 |
| AX-157931147 | 3 | 67.05 | KV452730.1 | 10698824 | 2-scf00040 | 2 |
| AX-157931150 | 3 | 67.05 | KV452730.1 | 10700967 | 2-scf00040 | 2 |
| AX-158389761 | 3 | 67.05 | KV452730.1 | 10704193 | 2-scf00040 | 2 |
| AX-157931154 | 3 | 67.05 | KV452730.1 | 10704738 | 2-scf00040 | 2 |
| AX-157814046 | 3 | 67.05 | KV452730.1 | 10813947 | 2-scf00040 | 2 |
| AX-157717479 | 3 | 67.05 | KV452730.1 | 10888595 | 2-scf00040 | 2 |
| AX-157814064 | 3 | 67.05 | KV452730.1 | 11082266 | 2-scf00040 | 2 |
| AX-157814065 | 3 | 67.05 | KV452730.1 | 11084114 | 2-scf00040 | 2 |
| AX-157869262 | 3 | 67.05 | KV452730.1 | 11208534 | 2-scf00040 | 2 |
| AX-157814083 | 3 | 67.05 | KV452730.1 | 11209206 | 2-scf00040 | 2 |
| AX-157869263 | 3 | 67.05 | KV452730.1 | 11209588 | 2-scf00040 | 2 |
| AX-157931594 | 3 | 67.05 | KV452730.1 | 11209846 | 2-scf00040 | 2 |
| AX-157862720 | 3 | 67.05 | KV452730.1 | 11210074 | 2-scf00040 | 2 |
| AX-157931595 | 3 | 67.05 | KV452730.1 | 11213009 | 2-scf00040 | 2 |
| AX-157854053 | 3 | 67.05 | KV452730.1 | 11220232 | 2-scf00040 | 2 |
| AX-157931599 | 3 | 67.05 | KV452730.1 | 11220392 | 2-scf00040 | 2 |
| AX-157931600 | 3 | 67.05 | KV452730.1 | 11221042 | 2-scf00040 | 2 |
| AX-157931605 | 3 | 67.05 | KV452730.1 | 11224114 | 2-scf00040 | 2 |
| AX-157931610 | 3 | 67.05 | KV452730.1 | 11227331 | 2-scf00040 | 2 |
| AX-157814084 | 3 | 67.05 | KV452730.1 | 11228067 | 2-scf00040 | 2 |
| AX-157931612 | 3 | 67.05 | KV452730.1 | 11230802 | 2-scf00040 | 2 |
| AX-157931644 | 3 | 67.05 | KV452730.1 | 11273383 | 2-scf00040 | 2 |
| AX-157931831 | 3 | 67.05 | KV452730.1 | 11506027 | 2-scf00040 | 2 |
| AX-157854116 | 3 | 67.05 | KV452730.1 | 11638433 | 2-scf00040 | 2 |
| AX-157854127 | 3 | 67.05 | KV452730.1 | 11659007 | 2-scf00040 | 2 |
| AX-157854142 | 3 | 67.05 | KV452730.1 | 11713140 | 2-scf00040 | 2 |
| AX-157854153 | 3 | 67.05 | KV452730.1 | 11741191 | 2-scf00040 | 2 |
| AX-157854158 | 3 | 67.05 | KV452730.1 | 11751917 | 2-scf00040 | 2 |
| AX-157814123 | 3 | 67.05 | KV452730.1 | 11756739 | 2-scf00040 | 2 |
| AX-157854160 | 3 | 67.05 | KV452730.1 | 11769586 | 2-scf00040 | 2 |
| AX-157854161 | 3 | 67.05 | KV452730.1 | 11777456 | 2-scf00040 | 2 |
| AX-157854162 | 3 | 67.05 | KV452730.1 | 11777575 | 2-scf00040 | 2 |
| AX-157932013 | 3 | 67.05 | KV452730.1 | 11797566 | 2-scf00040 | 2 |
| AX-157854166 | 3 | 67.05 | KV452730.1 | 11809319 | 2-scf00040 | 2 |
| AX-157862730 | 3 | 67.05 | KV452730.1 | 11819121 | 2-scf00040 | 2 |
| AX-157814128 | 3 | 67.05 | KV452730.1 | 11820816 | 2-scf00040 | 2 |

|              |   |       |            |          |            |   |
|--------------|---|-------|------------|----------|------------|---|
| AX-157932020 | 3 | 67.05 | KV452730.1 | 11826139 | 2-scf00040 | 2 |
| AX-157854172 | 3 | 67.05 | KV452730.1 | 11832546 | 2-scf00040 | 2 |
| AX-157854174 | 3 | 67.05 | KV452730.1 | 11839387 | 2-scf00040 | 2 |
| AX-157814135 | 3 | 67.05 | KV452730.1 | 11885860 | 2-scf00040 | 2 |
| AX-157932096 | 3 | 67.05 | KV452730.1 | 11904137 | 2-scf00040 | 2 |
| AX-157932097 | 3 | 67.05 | KV452730.1 | 11905460 | 2-scf00040 | 2 |
| AX-157932100 | 3 | 67.05 | KV452730.1 | 11906625 | 2-scf00040 | 2 |
| AX-157932102 | 3 | 67.05 | KV452730.1 | 11907610 | 2-scf00040 | 2 |
| AX-157932104 | 3 | 67.05 | KV452730.1 | 11908315 | 2-scf00040 | 2 |
| AX-157932148 | 3 | 67.05 | KV452730.1 | 11933356 | 2-scf00040 | 2 |
| AX-157932181 | 3 | 67.05 | KV452730.1 | 11952742 | 2-scf00040 | 2 |
| AX-157932184 | 3 | 67.05 | KV452730.1 | 11953212 | 2-scf00040 | 2 |
| AX-157932203 | 3 | 67.05 | KV452730.1 | 11968412 | 2-scf00040 | 2 |
| AX-157932210 | 3 | 67.05 | KV452730.1 | 11972392 | 2-scf00040 | 2 |
| AX-157932214 | 3 | 67.05 | KV452730.1 | 11973958 | 2-scf00040 | 2 |
| AX-157933520 | 3 | 67.05 | KV452730.1 | 14011544 | 2-scf00040 | 2 |
| AX-158390023 | 3 | 67.05 | KV452732.1 | 392087   | 2-scf00042 | 2 |
| AX-157813931 | 3 | 67.38 | KV452730.1 | 9294633  | 2-scf00040 | 2 |
| AX-157930117 | 3 | 67.38 | KV452730.1 | 9349667  | 2-scf00040 | 2 |
| AX-157930121 | 3 | 67.38 | KV452730.1 | 9354359  | 2-scf00040 | 2 |
| AX-157930122 | 3 | 67.38 | KV452730.1 | 9355164  | 2-scf00040 | 2 |
| AX-157930129 | 3 | 67.38 | KV452730.1 | 9360702  | 2-scf00040 | 2 |
| AX-157930132 | 3 | 67.38 | KV452730.1 | 9362747  | 2-scf00040 | 2 |
| AX-157930135 | 3 | 67.38 | KV452730.1 | 9364924  | 2-scf00040 | 2 |
| AX-158389738 | 3 | 67.38 | KV452730.1 | 9366071  | 2-scf00040 | 2 |
| AX-157930136 | 3 | 67.38 | KV452730.1 | 9366317  | 2-scf00040 | 2 |
| AX-157930137 | 3 | 67.38 | KV452730.1 | 9367929  | 2-scf00040 | 2 |
| AX-157930160 | 3 | 67.38 | KV452730.1 | 9390999  | 2-scf00040 | 2 |
| AX-157930161 | 3 | 67.38 | KV452730.1 | 9391631  | 2-scf00040 | 2 |
| AX-157930169 | 3 | 67.38 | KV452730.1 | 9393612  | 2-scf00040 | 2 |
| AX-157930171 | 3 | 67.38 | KV452730.1 | 9394654  | 2-scf00040 | 2 |
| AX-157930174 | 3 | 67.38 | KV452730.1 | 9399706  | 2-scf00040 | 2 |
| AX-157930175 | 3 | 67.38 | KV452730.1 | 9400898  | 2-scf00040 | 2 |
| AX-157930177 | 3 | 67.38 | KV452730.1 | 9402117  | 2-scf00040 | 2 |
| AX-157930178 | 3 | 67.38 | KV452730.1 | 9403804  | 2-scf00040 | 2 |
| AX-157930181 | 3 | 67.38 | KV452730.1 | 9408888  | 2-scf00040 | 2 |
| AX-157813936 | 3 | 67.38 | KV452730.1 | 9424162  | 2-scf00040 | 2 |
| AX-157930200 | 3 | 67.38 | KV452730.1 | 9427407  | 2-scf00040 | 2 |
| AX-157930201 | 3 | 67.38 | KV452730.1 | 9427998  | 2-scf00040 | 2 |
| AX-157930204 | 3 | 67.38 | KV452730.1 | 9431091  | 2-scf00040 | 2 |
| AX-157930207 | 3 | 67.38 | KV452730.1 | 9435851  | 2-scf00040 | 2 |
| AX-157930213 | 3 | 67.38 | KV452730.1 | 9436372  | 2-scf00040 | 2 |
| AX-157930214 | 3 | 67.38 | KV452730.1 | 9437692  | 2-scf00040 | 2 |
| AX-157930215 | 3 | 67.38 | KV452730.1 | 9438081  | 2-scf00040 | 2 |
| AX-157930217 | 3 | 67.38 | KV452730.1 | 9439879  | 2-scf00040 | 2 |
| AX-157930222 | 3 | 67.38 | KV452730.1 | 9442746  | 2-scf00040 | 2 |
| AX-157930231 | 3 | 67.38 | KV452730.1 | 9452524  | 2-scf00040 | 2 |
| AX-157930232 | 3 | 67.38 | KV452730.1 | 9452843  | 2-scf00040 | 2 |
| AX-157930237 | 3 | 67.38 | KV452730.1 | 9454739  | 2-scf00040 | 2 |
| AX-157874882 | 3 | 67.38 | KV452730.1 | 9470763  | 2-scf00040 | 2 |
| AX-157930250 | 3 | 67.38 | KV452730.1 | 9473484  | 2-scf00040 | 2 |



|              |   |       |            |          |            |   |
|--------------|---|-------|------------|----------|------------|---|
| AX-157930255 | 3 | 67.38 | KV452730.1 | 9483225  | 2-scf00040 | 2 |
| AX-158389740 | 3 | 67.38 | KV452730.1 | 9488137  | 2-scf00040 | 2 |
| AX-157930269 | 3 | 67.38 | KV452730.1 | 9505857  | 2-scf00040 | 2 |
| AX-157930286 | 3 | 67.38 | KV452730.1 | 9538945  | 2-scf00040 | 2 |
| AX-157930301 | 3 | 67.38 | KV452730.1 | 9560386  | 2-scf00040 | 2 |
| AX-157930311 | 3 | 67.38 | KV452730.1 | 9582459  | 2-scf00040 | 2 |
| AX-157930312 | 3 | 67.38 | KV452730.1 | 9583024  | 2-scf00040 | 2 |
| AX-157930313 | 3 | 67.38 | KV452730.1 | 9583525  | 2-scf00040 | 2 |
| AX-157930316 | 3 | 67.38 | KV452730.1 | 9584952  | 2-scf00040 | 2 |
| AX-157930323 | 3 | 67.38 | KV452730.1 | 9589251  | 2-scf00040 | 2 |
| AX-157930325 | 3 | 67.38 | KV452730.1 | 9589690  | 2-scf00040 | 2 |
| AX-157930327 | 3 | 67.38 | KV452730.1 | 9590523  | 2-scf00040 | 2 |
| AX-157930336 | 3 | 67.38 | KV452730.1 | 9598103  | 2-scf00040 | 2 |
| AX-157930341 | 3 | 67.38 | KV452730.1 | 9608605  | 2-scf00040 | 2 |
| AX-157930345 | 3 | 67.38 | KV452730.1 | 9611510  | 2-scf00040 | 2 |
| AX-157930346 | 3 | 67.38 | KV452730.1 | 9612908  | 2-scf00040 | 2 |
| AX-157930350 | 3 | 67.38 | KV452730.1 | 9616207  | 2-scf00040 | 2 |
| AX-157930359 | 3 | 67.38 | KV452730.1 | 9630606  | 2-scf00040 | 2 |
| AX-158414982 | 3 | 67.38 | KV452730.1 | 9661144  | 2-scf00040 | 2 |
| AX-157930451 | 3 | 67.38 | KV452730.1 | 9822012  | 2-scf00040 | 2 |
| AX-157930452 | 3 | 67.38 | KV452730.1 | 9822417  | 2-scf00040 | 2 |
| AX-157813966 | 3 | 67.38 | KV452730.1 | 9832251  | 2-scf00040 | 2 |
| AX-157930459 | 3 | 67.38 | KV452730.1 | 9847883  | 2-scf00040 | 2 |
| AX-157930462 | 3 | 67.38 | KV452730.1 | 9858227  | 2-scf00040 | 2 |
| AX-157930484 | 3 | 67.38 | KV452730.1 | 9892610  | 2-scf00040 | 2 |
| AX-157930515 | 3 | 67.38 | KV452730.1 | 9956128  | 2-scf00040 | 2 |
| AX-157930554 | 3 | 67.38 | KV452730.1 | 10016148 | 2-scf00040 | 2 |
| AX-157874889 | 3 | 67.38 | KV452730.1 | 10018671 | 2-scf00040 | 2 |
| AX-157930558 | 3 | 67.38 | KV452730.1 | 10019373 | 2-scf00040 | 2 |
| AX-157930560 | 3 | 67.38 | KV452730.1 | 10019799 | 2-scf00040 | 2 |
| AX-157930609 | 3 | 67.38 | KV452730.1 | 10077291 | 2-scf00040 | 2 |
| AX-157930686 | 3 | 67.38 | KV452730.1 | 10176519 | 2-scf00040 | 2 |
| AX-157930699 | 3 | 67.38 | KV452730.1 | 10196947 | 2-scf00040 | 2 |
| AX-157930763 | 3 | 67.38 | KV452730.1 | 10291903 | 2-scf00040 | 2 |
| AX-157930772 | 3 | 67.38 | KV452730.1 | 10309729 | 2-scf00040 | 2 |
| AX-157930778 | 3 | 67.38 | KV452730.1 | 10314331 | 2-scf00040 | 2 |
| AX-157717741 | 3 | 67.38 | KV452730.1 | 10324911 | 2-scf00040 | 2 |
| AX-157930794 | 3 | 67.38 | KV452730.1 | 10325744 | 2-scf00040 | 2 |
| AX-157930846 | 3 | 67.38 | KV452730.1 | 10377001 | 2-scf00040 | 2 |
| AX-157930870 | 3 | 67.38 | KV452730.1 | 10428512 | 2-scf00040 | 2 |
| AX-157930871 | 3 | 67.38 | KV452730.1 | 10429213 | 2-scf00040 | 2 |
| AX-157930986 | 3 | 67.38 | KV452730.1 | 10556998 | 2-scf00040 | 2 |
| AX-157814018 | 3 | 67.38 | KV452730.1 | 10560567 | 2-scf00040 | 2 |
| AX-157931031 | 3 | 67.38 | KV452730.1 | 10589932 | 2-scf00040 | 2 |
| AX-158405506 | 3 | 67.38 | KV452730.1 | 10604797 | 2-scf00040 | 2 |
| AX-157931080 | 3 | 67.38 | KV452730.1 | 10630284 | 2-scf00040 | 2 |
| AX-157931136 | 3 | 67.38 | KV452730.1 | 10691038 | 2-scf00040 | 2 |
| AX-157931138 | 3 | 67.38 | KV452730.1 | 10692051 | 2-scf00040 | 2 |
| AX-157931149 | 3 | 67.38 | KV452730.1 | 10699599 | 2-scf00040 | 2 |
| AX-157931162 | 3 | 67.38 | KV452730.1 | 10715077 | 2-scf00040 | 2 |
| AX-157883714 | 3 | 67.38 | KV452730.1 | 10727863 | 2-scf00040 | 2 |

|              |   |       |            |          |            |   |
|--------------|---|-------|------------|----------|------------|---|
| AX-157931203 | 3 | 67.38 | KV452730.1 | 10763375 | 2-scf00040 | 2 |
| AX-157869246 | 3 | 67.38 | KV452730.1 | 10810153 | 2-scf00040 | 2 |
| AX-157931248 | 3 | 67.38 | KV452730.1 | 10811977 | 2-scf00040 | 2 |
| AX-157869247 | 3 | 67.38 | KV452730.1 | 10812985 | 2-scf00040 | 2 |
| AX-157814045 | 3 | 67.38 | KV452730.1 | 10813511 | 2-scf00040 | 2 |
| AX-157931336 | 3 | 67.38 | KV452730.1 | 10939516 | 2-scf00040 | 2 |
| AX-157931419 | 3 | 67.38 | KV452730.1 | 11012607 | 2-scf00040 | 2 |
| AX-157931601 | 3 | 67.38 | KV452730.1 | 11221829 | 2-scf00040 | 2 |
| AX-157931616 | 3 | 67.38 | KV452730.1 | 11241564 | 2-scf00040 | 2 |
| AX-157931674 | 3 | 67.38 | KV452730.1 | 11292209 | 2-scf00040 | 2 |
| AX-157931680 | 3 | 67.38 | KV452730.1 | 11298969 | 2-scf00040 | 2 |
| AX-157931827 | 3 | 67.38 | KV452730.1 | 11499417 | 2-scf00040 | 2 |
| AX-157931937 | 3 | 67.38 | KV452730.1 | 11683334 | 2-scf00040 | 2 |
| AX-157814120 | 3 | 67.38 | KV452730.1 | 11749770 | 2-scf00040 | 2 |
| AX-157854171 | 3 | 67.38 | KV452730.1 | 11832050 | 2-scf00040 | 2 |
| AX-157932030 | 3 | 67.38 | KV452730.1 | 11839679 | 2-scf00040 | 2 |
| AX-157814129 | 3 | 67.38 | KV452730.1 | 11843976 | 2-scf00040 | 2 |
| AX-157932073 | 3 | 67.38 | KV452730.1 | 11870186 | 2-scf00040 | 2 |
| AX-157932149 | 3 | 67.38 | KV452730.1 | 11933855 | 2-scf00040 | 2 |
| AX-157932155 | 3 | 67.38 | KV452730.1 | 11937340 | 2-scf00040 | 2 |
| AX-157932156 | 3 | 67.38 | KV452730.1 | 11938520 | 2-scf00040 | 2 |
| AX-157932168 | 3 | 67.38 | KV452730.1 | 11943475 | 2-scf00040 | 2 |
| AX-157932186 | 3 | 67.38 | KV452730.1 | 11957160 | 2-scf00040 | 2 |
| AX-157932192 | 3 | 67.38 | KV452730.1 | 11959758 | 2-scf00040 | 2 |
| AX-157932224 | 3 | 67.38 | KV452730.1 | 11979854 | 2-scf00040 | 2 |
| AX-157814140 | 3 | 67.38 | KV452730.1 | 11993850 | 2-scf00040 | 2 |
| AX-157932295 | 3 | 67.38 | KV452730.1 | 12057501 | 2-scf00040 | 2 |
| AX-158405540 | 3 | 67.38 | KV452730.1 | 12068882 | 2-scf00040 | 2 |
| AX-157932343 | 3 | 67.38 | KV452730.1 | 12141694 | 2-scf00040 | 2 |
| AX-157932372 | 3 | 67.38 | KV452730.1 | 12183831 | 2-scf00040 | 2 |
| AX-157932373 | 3 | 67.38 | KV452730.1 | 12184253 | 2-scf00040 | 2 |
| AX-157932549 | 3 | 67.38 | KV452730.1 | 12374930 | 2-scf00040 | 2 |
| AX-157932606 | 3 | 67.38 | KV452730.1 | 12444688 | 2-scf00040 | 2 |
| AX-157932607 | 3 | 67.38 | KV452730.1 | 12449419 | 2-scf00040 | 2 |
| AX-157932623 | 3 | 67.38 | KV452730.1 | 12464304 | 2-scf00040 | 2 |
| AX-157932627 | 3 | 67.38 | KV452730.1 | 12483178 | 2-scf00040 | 2 |
| AX-157932839 | 3 | 67.38 | KV452730.1 | 12918080 | 2-scf00040 | 2 |
| AX-157874966 | 3 | 67.38 | KV452730.1 | 13005166 | 2-scf00040 | 2 |
| AX-157757920 | 3 | 67.38 | KV452730.1 | 13040744 | 2-scf00040 | 2 |
| AX-157932954 | 3 | 67.38 | KV452730.1 | 13114179 | 2-scf00040 | 2 |
| AX-157932960 | 3 | 67.38 | KV452730.1 | 13124392 | 2-scf00040 | 2 |
| AX-157932963 | 3 | 67.38 | KV452730.1 | 13129167 | 2-scf00040 | 2 |
| AX-158389914 | 3 | 67.38 | KV452730.1 | 13186684 | 2-scf00040 | 2 |
| AX-157933021 | 3 | 67.38 | KV452730.1 | 13209953 | 2-scf00040 | 2 |
| AX-157933203 | 3 | 67.38 | KV452730.1 | 13529417 | 2-scf00040 | 2 |
| AX-157933208 | 3 | 67.38 | KV452730.1 | 13539379 | 2-scf00040 | 2 |
| AX-157933218 | 3 | 67.38 | KV452730.1 | 13546742 | 2-scf00040 | 2 |
| AX-157933258 | 3 | 67.38 | KV452730.1 | 13673377 | 2-scf00040 | 2 |
| AX-157933262 | 3 | 67.38 | KV452730.1 | 13678268 | 2-scf00040 | 2 |
| AX-157933278 | 3 | 67.38 | KV452730.1 | 13701229 | 2-scf00040 | 2 |
| AX-157874980 | 3 | 67.38 | KV452730.1 | 13776757 | 2-scf00040 | 2 |

|              |   |       |            |          |            |   |
|--------------|---|-------|------------|----------|------------|---|
| AX-157874981 | 3 | 67.38 | KV452730.1 | 13788625 | 2-scf00040 | 2 |
| AX-157933343 | 3 | 67.38 | KV452730.1 | 13788772 | 2-scf00040 | 2 |
| AX-157874982 | 3 | 67.38 | KV452730.1 | 13792099 | 2-scf00040 | 2 |
| AX-157933360 | 3 | 67.38 | KV452730.1 | 13820815 | 2-scf00040 | 2 |
| AX-157933365 | 3 | 67.38 | KV452730.1 | 13829913 | 2-scf00040 | 2 |
| AX-157933369 | 3 | 67.38 | KV452730.1 | 13837185 | 2-scf00040 | 2 |
| AX-157933479 | 3 | 67.38 | KV452730.1 | 13972922 | 2-scf00040 | 2 |
| AX-157933503 | 3 | 67.38 | KV452730.1 | 13994585 | 2-scf00040 | 2 |
| AX-158382507 | 3 | 67.38 | KV452730.1 | 14050442 | 2-scf00040 | 2 |
| AX-157883790 | 3 | 67.38 | KV452730.1 | 14079658 | 2-scf00040 | 2 |
| AX-157933578 | 3 | 67.38 | KV452730.1 | 14090162 | 2-scf00040 | 2 |
| AX-157933611 | 3 | 67.38 | KV452730.1 | 14139137 | 2-scf00040 | 2 |
| AX-157933616 | 3 | 67.38 | KV452730.1 | 14140627 | 2-scf00040 | 2 |
| AX-157933619 | 3 | 67.38 | KV452730.1 | 14143896 | 2-scf00040 | 2 |
| AX-157933620 | 3 | 67.38 | KV452730.1 | 14145530 | 2-scf00040 | 2 |
| AX-157933645 | 3 | 67.38 | KV452730.1 | 14163930 | 2-scf00040 | 2 |
| AX-157933685 | 3 | 67.38 | KV452730.1 | 14225391 | 2-scf00040 | 2 |
| AX-157933687 | 3 | 67.38 | KV452730.1 | 14229602 | 2-scf00040 | 2 |
| AX-157933720 | 3 | 67.38 | KV452730.1 | 14291684 | 2-scf00040 | 2 |
| AX-157933726 | 3 | 67.38 | KV452730.1 | 14301886 | 2-scf00040 | 2 |
| AX-157933728 | 3 | 67.38 | KV452730.1 | 14303803 | 2-scf00040 | 2 |
| AX-157933735 | 3 | 67.38 | KV452730.1 | 14342817 | 2-scf00040 | 2 |
| AX-157933736 | 3 | 67.38 | KV452730.1 | 14343780 | 2-scf00040 | 2 |
| AX-157933745 | 3 | 67.38 | KV452730.1 | 14365168 | 2-scf00040 | 2 |
| AX-157933749 | 3 | 67.38 | KV452730.1 | 14414923 | 2-scf00040 | 2 |
| AX-157933751 | 3 | 67.38 | KV452730.1 | 14415871 | 2-scf00040 | 2 |
| AX-157933752 | 3 | 67.38 | KV452730.1 | 14416944 | 2-scf00040 | 2 |
| AX-157933806 | 3 | 67.38 | KV452730.1 | 14527397 | 2-scf00040 | 2 |
| AX-157933808 | 3 | 67.38 | KV452730.1 | 14529379 | 2-scf00040 | 2 |
| AX-157933812 | 3 | 67.38 | KV452730.1 | 14537076 | 2-scf00040 | 2 |
| AX-157933818 | 3 | 67.38 | KV452730.1 | 14551097 | 2-scf00040 | 2 |
| AX-157933825 | 3 | 67.38 | KV452730.1 | 14572490 | 2-scf00040 | 2 |
| AX-157933828 | 3 | 67.38 | KV452730.1 | 14573363 | 2-scf00040 | 2 |
| AX-157933831 | 3 | 67.38 | KV452730.1 | 14575490 | 2-scf00040 | 2 |
| AX-157933837 | 3 | 67.38 | KV452730.1 | 14589780 | 2-scf00040 | 2 |
| AX-157933839 | 3 | 67.38 | KV452730.1 | 14596323 | 2-scf00040 | 2 |
| AX-157933841 | 3 | 67.38 | KV452730.1 | 14599004 | 2-scf00040 | 2 |
| AX-157933842 | 3 | 67.38 | KV452730.1 | 14604536 | 2-scf00040 | 2 |
| AX-157933843 | 3 | 67.38 | KV452730.1 | 14609823 | 2-scf00040 | 2 |
| AX-157933845 | 3 | 67.38 | KV452730.1 | 14611158 | 2-scf00040 | 2 |
| AX-157933847 | 3 | 67.38 | KV452730.1 | 14613544 | 2-scf00040 | 2 |
| AX-157933850 | 3 | 67.38 | KV452730.1 | 14620512 | 2-scf00040 | 2 |
| AX-157933851 | 3 | 67.38 | KV452730.1 | 14621067 | 2-scf00040 | 2 |
| AX-157933860 | 3 | 67.38 | KV452730.1 | 14633724 | 2-scf00040 | 2 |
| AX-157814266 | 3 | 67.38 | KV452730.1 | 14634425 | 2-scf00040 | 2 |
| AX-157933865 | 3 | 67.38 | KV452730.1 | 14644491 | 2-scf00040 | 2 |
| AX-157933870 | 3 | 67.38 | KV452730.1 | 14670146 | 2-scf00040 | 2 |
| AX-157933871 | 3 | 67.38 | KV452730.1 | 14672986 | 2-scf00040 | 2 |
| AX-157933874 | 3 | 67.38 | KV452730.1 | 14675055 | 2-scf00040 | 2 |
| AX-157933876 | 3 | 67.38 | KV452730.1 | 14682056 | 2-scf00040 | 2 |
| AX-157933905 | 3 | 67.38 | KV452733.1 | 30604    | 2-scf00041 | 2 |

|              |   |       |            |         |            |   |
|--------------|---|-------|------------|---------|------------|---|
| AX-157933942 | 3 | 67.38 | KV452733.1 | 69365   | 2-scf00041 | 2 |
| AX-157933949 | 3 | 67.38 | KV452733.1 | 74854   | 2-scf00041 | 2 |
| AX-157934074 | 3 | 67.38 | KV452733.1 | 196203  | 2-scf00041 | 2 |
| AX-157934077 | 3 | 67.38 | KV452733.1 | 197989  | 2-scf00041 | 2 |
| AX-157934319 | 3 | 67.38 | KV452733.1 | 456261  | 2-scf00041 | 2 |
| AX-157934337 | 3 | 67.38 | KV452733.1 | 474219  | 2-scf00041 | 2 |
| AX-157744913 | 3 | 67.38 | KV452733.1 | 475611  | 2-scf00041 | 2 |
| AX-157934341 | 3 | 67.38 | KV452733.1 | 482156  | 2-scf00041 | 2 |
| AX-157934372 | 3 | 67.38 | KV452733.1 | 500655  | 2-scf00041 | 2 |
| AX-157934385 | 3 | 67.38 | KV452733.1 | 520760  | 2-scf00041 | 2 |
| AX-157934514 | 3 | 67.38 | KV452733.1 | 634912  | 2-scf00041 | 2 |
| AX-157934563 | 3 | 67.38 | KV452733.1 | 687355  | 2-scf00041 | 2 |
| AX-157934624 | 3 | 67.38 | KV452733.1 | 762432  | 2-scf00041 | 2 |
| AX-157740775 | 3 | 67.38 | KV452733.1 | 892984  | 2-scf00041 | 2 |
| AX-157934869 | 3 | 67.38 | KV452733.1 | 999839  | 2-scf00041 | 2 |
| AX-157883805 | 3 | 67.38 | KV452733.1 | 1010692 | 2-scf00041 | 2 |
| AX-157935005 | 3 | 67.38 | KV452733.1 | 1123198 | 2-scf00041 | 2 |
| AX-157745560 | 3 | 67.38 | KV452733.1 | 1123824 | 2-scf00041 | 2 |
| AX-157713147 | 3 | 67.38 | KV452733.1 | 1205561 | 2-scf00041 | 2 |
| AX-157883812 | 3 | 67.38 | KV452733.1 | 1225009 | 2-scf00041 | 2 |
| AX-158390005 | 3 | 67.38 | KV452733.1 | 1266407 | 2-scf00041 | 2 |
| AX-157814326 | 3 | 67.38 | KV452733.1 | 1281162 | 2-scf00041 | 2 |
| AX-157935165 | 3 | 67.38 | KV452733.1 | 1287497 | 2-scf00041 | 2 |
| AX-157935188 | 3 | 67.38 | KV452733.1 | 1319796 | 2-scf00041 | 2 |
| AX-157935189 | 3 | 67.38 | KV452733.1 | 1320003 | 2-scf00041 | 2 |
| AX-157935210 | 3 | 67.38 | KV452733.1 | 1341323 | 2-scf00041 | 2 |
| AX-157935223 | 3 | 67.38 | KV452733.1 | 1357860 | 2-scf00041 | 2 |
| AX-157709972 | 3 | 67.38 | KV452733.1 | 1360839 | 2-scf00041 | 2 |
| AX-157935343 | 3 | 67.38 | KV452733.1 | 1476011 | 2-scf00041 | 2 |
| AX-157935647 | 3 | 67.38 | KV452733.1 | 1851442 | 2-scf00041 | 2 |
| AX-157883820 | 3 | 67.38 | KV452733.1 | 1920214 | 2-scf00041 | 2 |
| AX-157935716 | 3 | 67.38 | KV452733.1 | 1957766 | 2-scf00041 | 2 |
| AX-157935800 | 3 | 67.38 | KV452733.1 | 2086757 | 2-scf00041 | 2 |
| AX-157710735 | 3 | 67.38 | KV452733.1 | 2182019 | 2-scf00041 | 2 |
| AX-158382549 | 3 | 67.38 | KV452733.1 | 2287208 | 2-scf00041 | 2 |
| AX-157814374 | 3 | 67.38 | KV452733.1 | 2299453 | 2-scf00041 | 2 |
| AX-157935922 | 3 | 67.38 | KV452733.1 | 2309447 | 2-scf00041 | 2 |
| AX-157935929 | 3 | 67.38 | KV452733.1 | 2314053 | 2-scf00041 | 2 |
| AX-157935938 | 3 | 67.38 | KV452733.1 | 2333083 | 2-scf00041 | 2 |
| AX-157936017 | 3 | 67.38 | KV452733.1 | 2412650 | 2-scf00041 | 2 |
| AX-157875089 | 3 | 67.38 | KV452733.1 | 2420869 | 2-scf00041 | 2 |
| AX-157869439 | 3 | 67.38 | KV452733.1 | 2465770 | 2-scf00041 | 2 |
| AX-157936138 | 3 | 67.38 | KV452733.1 | 2521736 | 2-scf00041 | 2 |
| AX-157936146 | 3 | 67.38 | KV452733.1 | 2528450 | 2-scf00041 | 2 |
| AX-157698550 | 3 | 67.38 | KV452733.1 | 2530950 | 2-scf00041 | 2 |
| AX-157936152 | 3 | 67.38 | KV452733.1 | 2542408 | 2-scf00041 | 2 |
| AX-157936180 | 3 | 67.38 | KV452733.1 | 2571331 | 2-scf00041 | 2 |
| AX-157936276 | 3 | 67.38 | KV452733.1 | 2660607 | 2-scf00041 | 2 |
| AX-157775122 | 3 | 67.38 | KV452733.1 | 2706832 | 2-scf00041 | 2 |
| AX-157936360 | 3 | 67.38 | KV452733.1 | 2736158 | 2-scf00041 | 2 |
| AX-157936408 | 3 | 67.38 | KV452733.1 | 2779290 | 2-scf00041 | 2 |

|              |   |       |            |         |            |   |
|--------------|---|-------|------------|---------|------------|---|
| AX-157936430 | 3 | 67.38 | KV452733.1 | 2798183 | 2-scf00041 | 2 |
| AX-157936456 | 3 | 67.38 | KV452733.1 | 2825189 | 2-scf00041 | 2 |
| AX-157814400 | 3 | 67.38 | KV452733.1 | 2873063 | 2-scf00041 | 2 |
| AX-157936532 | 3 | 67.38 | KV452733.1 | 2912003 | 2-scf00041 | 2 |
| AX-157814408 | 3 | 67.38 | KV452733.1 | 2965872 | 2-scf00041 | 2 |
| AX-157936608 | 3 | 67.38 | KV452733.1 | 3000052 | 2-scf00041 | 2 |
| AX-157936710 | 3 | 67.38 | KV452733.1 | 3101952 | 2-scf00041 | 2 |
| AX-157936718 | 3 | 67.38 | KV452733.1 | 3109729 | 2-scf00041 | 2 |
| AX-157875102 | 3 | 67.38 | KV452733.1 | 3126745 | 2-scf00041 | 2 |
| AX-157936745 | 3 | 67.38 | KV452733.1 | 3140061 | 2-scf00041 | 2 |
| AX-157936775 | 3 | 67.38 | KV452733.1 | 3172990 | 2-scf00041 | 2 |
| AX-158382568 | 3 | 67.38 | KV452733.1 | 3251989 | 2-scf00041 | 2 |
| AX-158382569 | 3 | 67.38 | KV452733.1 | 3284437 | 2-scf00041 | 2 |
| AX-157936990 | 3 | 67.38 | KV452733.1 | 3360106 | 2-scf00041 | 2 |
| AX-157937028 | 3 | 67.38 | KV452733.1 | 3390995 | 2-scf00041 | 2 |
| AX-157937064 | 3 | 67.38 | KV452733.1 | 3420750 | 2-scf00041 | 2 |
| AX-157937076 | 3 | 67.38 | KV452733.1 | 3430778 | 2-scf00041 | 2 |
| AX-157864719 | 3 | 67.38 | KV452733.1 | 3487637 | 2-scf00041 | 2 |
| AX-157937136 | 3 | 67.38 | KV452733.1 | 3488577 | 2-scf00041 | 2 |
| AX-157937196 | 3 | 67.38 | KV452733.1 | 3541527 | 2-scf00041 | 2 |
| AX-157937199 | 3 | 67.38 | KV452733.1 | 3545734 | 2-scf00041 | 2 |
| AX-157750580 | 3 | 67.38 | KV452733.1 | 3675484 | 2-scf00041 | 2 |
| AX-157937319 | 3 | 67.38 | KV452733.1 | 3687578 | 2-scf00041 | 2 |
| AX-157937329 | 3 | 67.38 | KV452733.1 | 3702553 | 2-scf00041 | 2 |
| AX-157864720 | 3 | 67.38 | KV452733.1 | 3713931 | 2-scf00041 | 2 |
| AX-157937448 | 3 | 67.38 | KV452732.1 | 2140    | 2-scf00042 | 2 |
| AX-157937450 | 3 | 67.38 | KV452732.1 | 5857    | 2-scf00042 | 2 |
| AX-157937451 | 3 | 67.38 | KV452732.1 | 7653    | 2-scf00042 | 2 |
| AX-157937453 | 3 | 67.38 | KV452732.1 | 11965   | 2-scf00042 | 2 |
| AX-157883846 | 3 | 67.38 | KV452732.1 | 32498   | 2-scf00042 | 2 |
| AX-157937478 | 3 | 67.38 | KV452732.1 | 71791   | 2-scf00042 | 2 |
| AX-157937521 | 3 | 67.38 | KV452732.1 | 234056  | 2-scf00042 | 2 |
| AX-158405657 | 3 | 67.38 | KV452732.1 | 272362  | 2-scf00042 | 2 |
| AX-157937548 | 3 | 67.38 | KV452732.1 | 295552  | 2-scf00042 | 2 |
| AX-157937561 | 3 | 67.38 | KV452732.1 | 312260  | 2-scf00042 | 2 |
| AX-157937610 | 3 | 67.38 | KV452732.1 | 395193  | 2-scf00042 | 2 |
| AX-157937755 | 3 | 67.38 | KV452732.1 | 680904  | 2-scf00042 | 2 |
| AX-157937761 | 3 | 67.38 | KV452732.1 | 693499  | 2-scf00042 | 2 |
| AX-157814477 | 3 | 67.38 | KV452732.1 | 711655  | 2-scf00042 | 2 |
| AX-157937800 | 3 | 67.38 | KV452732.1 | 780910  | 2-scf00042 | 2 |
| AX-157814491 | 3 | 67.38 | KV452732.1 | 847350  | 2-scf00042 | 2 |
| AX-157814514 | 3 | 67.38 | KV452732.1 | 1167176 | 2-scf00042 | 2 |
| AX-157938162 | 3 | 67.38 | KV452732.1 | 1443134 | 2-scf00042 | 2 |
| AX-157938164 | 3 | 67.38 | KV452732.1 | 1449434 | 2-scf00042 | 2 |
| AX-157938276 | 3 | 67.38 | KV452735.1 | 33583   | 2-scf00044 | 2 |
| AX-157722904 | 3 | 67.38 | KV452735.1 | 36758   | 2-scf00044 | 2 |
| AX-157938378 | 3 | 67.38 | KV452735.1 | 118888  | 2-scf00044 | 2 |
| AX-157814567 | 3 | 67.38 | KV452742.1 | 142179  | 2-scf00046 | 2 |
| AX-157869451 | 3 | 67.38 | KV452742.1 | 142601  | 2-scf00046 | 2 |
| AX-157814568 | 3 | 67.38 | KV452742.1 | 143320  | 2-scf00046 | 2 |
| AX-157938557 | 3 | 67.38 | KV452742.1 | 146600  | 2-scf00046 | 2 |

|              |   |       |            |         |            |   |
|--------------|---|-------|------------|---------|------------|---|
| AX-157712337 | 3 | 67.38 | KV452742.1 | 156701  | 2-scf00046 | 2 |
| AX-157938616 | 3 | 67.38 | KV452742.1 | 206914  | 2-scf00046 | 2 |
| AX-157938629 | 3 | 67.38 | KV452742.1 | 220006  | 2-scf00046 | 2 |
| AX-157938630 | 3 | 67.38 | KV452742.1 | 221187  | 2-scf00046 | 2 |
| AX-157938803 | 3 | 67.38 | KV452742.1 | 452598  | 2-scf00046 | 2 |
| AX-157938813 | 3 | 67.38 | KV452742.1 | 465241  | 2-scf00046 | 2 |
| AX-157938819 | 3 | 67.38 | KV452742.1 | 470998  | 2-scf00046 | 2 |
| AX-157938879 | 3 | 67.38 | KV452742.1 | 521633  | 2-scf00046 | 2 |
| AX-157814616 | 3 | 67.38 | KV452742.1 | 541489  | 2-scf00046 | 2 |
| AX-157938901 | 3 | 67.38 | KV452742.1 | 550759  | 2-scf00046 | 2 |
| AX-157774387 | 3 | 67.38 | KV452742.1 | 563881  | 2-scf00046 | 2 |
| AX-157938972 | 3 | 67.38 | KV452742.1 | 615919  | 2-scf00046 | 2 |
| AX-157938981 | 3 | 67.38 | KV452742.1 | 625945  | 2-scf00046 | 2 |
| AX-157939070 | 3 | 67.38 | KV452742.1 | 766286  | 2-scf00046 | 2 |
| AX-157939075 | 3 | 67.38 | KV452742.1 | 780853  | 2-scf00046 | 2 |
| AX-157939127 | 3 | 67.38 | KV452742.1 | 911246  | 2-scf00046 | 2 |
| AX-157939144 | 3 | 67.38 | KV452742.1 | 956926  | 2-scf00046 | 2 |
| AX-157875142 | 3 | 67.38 | KV452742.1 | 1034416 | 2-scf00046 | 2 |
| AX-157939180 | 3 | 67.38 | KV452742.1 | 1077791 | 2-scf00046 | 2 |
| AX-157875143 | 3 | 67.38 | KV452742.1 | 1082676 | 2-scf00046 | 2 |
| AX-157939411 | 3 | 67.38 | KV452742.1 | 1379519 | 2-scf00046 | 2 |
| AX-158382607 | 3 | 67.38 | KV452742.1 | 1398805 | 2-scf00046 | 2 |
| AX-157939433 | 3 | 67.38 | KV452742.1 | 1402044 | 2-scf00046 | 2 |
| AX-158382608 | 3 | 67.38 | KV452742.1 | 1405300 | 2-scf00046 | 2 |
| AX-157939541 | 3 | 67.38 | KV452742.1 | 1512084 | 2-scf00046 | 2 |
| AX-158382609 | 3 | 67.38 | KV452742.1 | 1517240 | 2-scf00046 | 2 |
| AX-157749580 | 3 | 67.38 | KV452742.1 | 1527681 | 2-scf00046 | 2 |
| AX-158382610 | 3 | 67.38 | KV452742.1 | 1587119 | 2-scf00046 | 2 |
| AX-158382611 | 3 | 67.38 | KV452742.1 | 1590454 | 2-scf00046 | 2 |
| AX-157939616 | 3 | 67.38 | KV452742.1 | 1610110 | 2-scf00046 | 2 |
| AX-157941332 | 3 | 67.38 | KV452742.1 | 1690485 | 2-scf00046 | 2 |
| AX-157751251 | 3 | 67.38 | KV452742.1 | 1713582 | 2-scf00046 | 2 |
| AX-157941253 | 3 | 67.38 | KV452742.1 | 1755767 | 2-scf00046 | 2 |
| AX-157939743 | 3 | 67.38 | KV452742.1 | 2639166 | 2-scf00046 | 2 |
| AX-157749400 | 3 | 67.38 | KV452742.1 | 2787431 | 2-scf00046 | 2 |
| AX-157939784 | 3 | 67.38 | KV452742.1 | 2803161 | 2-scf00046 | 2 |
| AX-157712264 | 3 | 67.38 | KV452742.1 | 2912141 | 2-scf00046 | 2 |
| AX-157939913 | 3 | 67.38 | KV452742.1 | 2994629 | 2-scf00046 | 2 |
| AX-157939939 | 3 | 67.38 | KV452742.1 | 3017665 | 2-scf00046 | 2 |
| AX-157939942 | 3 | 67.38 | KV452742.1 | 3019520 | 2-scf00046 | 2 |
| AX-157939985 | 3 | 67.38 | KV452742.1 | 3057092 | 2-scf00046 | 2 |
| AX-157939993 | 3 | 67.38 | KV452742.1 | 3069906 | 2-scf00046 | 2 |
| AX-157940100 | 3 | 67.38 | KV452742.1 | 3173731 | 2-scf00046 | 2 |
| AX-157940124 | 3 | 67.38 | KV452742.1 | 3197817 | 2-scf00046 | 2 |
| AX-158390047 | 3 | 67.38 | KV452742.1 | 3204616 | 2-scf00046 | 2 |
| AX-157940334 | 3 | 67.38 | KV452742.1 | 3440808 | 2-scf00046 | 2 |
| AX-157940349 | 3 | 67.38 | KV452742.1 | 3474368 | 2-scf00046 | 2 |
| AX-157940426 | 3 | 67.38 | KV452742.1 | 3576805 | 2-scf00046 | 2 |
| AX-157814733 | 3 | 67.38 | KV452742.1 | 3621509 | 2-scf00046 | 2 |
| AX-157940465 | 3 | 67.38 | KV452742.1 | 3626820 | 2-scf00046 | 2 |
| AX-158405756 | 3 | 67.38 | KV452742.1 | 3794114 | 2-scf00046 | 2 |

|              |   |        |             |         |                |    |
|--------------|---|--------|-------------|---------|----------------|----|
| AX-157940581 | 3 | 67.38  | KV452742.1  | 3800341 | 2-scf00046     | 2  |
| AX-158405762 | 3 | 67.38  | KV452742.1  | 4070953 | 2-scf00046     | 2  |
| AX-158390053 | 3 | 67.38  | KV452742.1  | 4096639 | 2-scf00046     | 2  |
| AX-157940703 | 3 | 67.38  | KV452742.1  | 4097275 | 2-scf00046     | 2  |
| AX-157875169 | 3 | 67.38  | KV452742.1  | 4296579 | 2-scf00046     | 2  |
| AX-157940875 | 3 | 67.38  | KV452742.1  | 4388229 | 2-scf00046     | 2  |
| AX-157940916 | 3 | 67.38  | KV452742.1  | 4440797 | 2-scf00046     | 2  |
| AX-157941405 | 3 | 67.38  | KV452743.1  | 53712   | 2-scf00050     | 2  |
| AX-157941512 | 3 | 67.38  | KV452745.1  | 1894    | 2-scf00051     | 2  |
| AX-157941556 | 3 | 67.38  | KV452745.1  | 45873   | 2-scf00051     | 2  |
| AX-157941657 | 3 | 67.38  | KV452745.1  | 164286  | 2-scf00051     | 2  |
| AX-157941662 | 3 | 67.38  | KV452745.1  | 167085  | 2-scf00051     | 2  |
| AX-157941735 | 3 | 67.38  | KV452745.1  | 217258  | 2-scf00051     | 2  |
| AX-157941942 | 3 | 67.38  | KV452745.1  | 377673  | 2-scf00051     | 2  |
| AX-157941996 | 3 | 67.38  | KV452745.1  | 417566  | 2-scf00051     | 2  |
| AX-157883903 | 3 | 67.38  | KV452745.1  | 689776  | 2-scf00051     | 2  |
| AX-157942433 | 3 | 67.38  | KV452745.1  | 828059  | 2-scf00051     | 2  |
| AX-157942591 | 3 | 67.38  | KV452745.1  | 997191  | 2-scf00051     | 2  |
| AX-157942597 | 3 | 67.38  | KV452745.1  | 1002890 | 2-scf00051     | 2  |
| AX-157875196 | 3 | 67.38  | KV452745.1  | 1029398 | 2-scf00051     | 2  |
| AX-157942615 | 3 | 67.38  | KV452745.1  | 1037803 | 2-scf00051     | 2  |
| AX-157942952 | 3 | 67.38  | KV452744.1  | 19212   | 2-scf00052     | 2  |
| AX-157942953 | 3 | 67.38  | KV452744.1  | 19500   | 2-scf00052     | 2  |
| AX-157943056 | 3 | 67.38  | KV452744.1  | 184891  | 2-scf00052     | 2  |
| AX-158390128 | 3 | 67.38  | KV452747.1  | 521694  | 2-scf00053     | 2  |
| AX-157943562 | 3 | 67.38  | KV452747.1  | 525426  | 2-scf00053     | 2  |
| AX-157814947 | 3 | 67.38  | KV452747.1  | 533002  | 2-scf00053     | 2  |
| AX-157943682 | 3 | 67.38  | KV452747.1  | 639985  | 2-scf00053     | 2  |
| AX-157943714 | 3 | 67.38  | KV452747.1  | 684154  | 2-scf00053     | 2  |
| AX-157943716 | 3 | 67.38  | KV452747.1  | 687905  | 2-scf00053     | 2  |
| AX-157814960 | 3 | 67.38  | KV452747.1  | 688456  | 2-scf00053     | 2  |
| AX-157943759 | 3 | 67.38  | KV452747.1  | 749973  | 2-scf00053     | 2  |
| AX-157943773 | 3 | 67.38  | KV452747.1  | 774961  | 2-scf00053     | 2  |
| AX-157943808 | 3 | 67.38  | KV452747.1  | 812357  | 2-scf00053     | 2  |
| AX-157943827 | 3 | 67.38  | KV452747.1  | 824769  | 2-scf00053     | 2  |
| AX-157943897 | 3 | 67.38  | KV452747.1  | 888218  | 2-scf00053     | 2  |
| AX-157943901 | 3 | 67.38  | KV452747.1  | 893460  | 2-scf00053     | 2  |
| AX-157945321 | 3 | 67.38  | KV452746.1  | 173856  | 2-scf00054     | 2  |
| AX-157889309 | 3 | 67.38  | KV452740.1  | 286173  | 2-scf00586     | 2  |
| AX-157703201 | 3 | 67.38  | DX096831.1  | 75      | IORI212 lctalu | UN |
| AX-157704550 | 3 | 67.38  | 3ML01026525 | 342     | scf02122_1     | UN |
| AX-157706110 | 3 | 67.38  | 3ML01031624 | 73      | scf07241_1     | UN |
| AX-157706023 | 3 | 67.38  | 3ML01033587 | 256     | scf09244_1     | UN |
| AX-157930220 | 3 | 67.436 | KV452730.1  | 9441544 | 2-scf00040     | 2  |
| AX-157930113 | 3 | 67.487 | KV452730.1  | 9347896 | 2-scf00040     | 2  |
| AX-157930149 | 3 | 67.487 | KV452730.1  | 9377450 | 2-scf00040     | 2  |
| AX-158389739 | 3 | 67.487 | KV452730.1  | 9408169 | 2-scf00040     | 2  |
| AX-157930182 | 3 | 67.487 | KV452730.1  | 9410347 | 2-scf00040     | 2  |
| AX-157930189 | 3 | 67.487 | KV452730.1  | 9416275 | 2-scf00040     | 2  |
| AX-157930205 | 3 | 67.487 | KV452730.1  | 9433264 | 2-scf00040     | 2  |
| AX-157874881 | 3 | 67.487 | KV452730.1  | 9445865 | 2-scf00040     | 2  |

|              |   |        |            |          |            |   |
|--------------|---|--------|------------|----------|------------|---|
| AX-157930227 | 3 | 67.487 | KV452730.1 | 9449253  | 2-scf00040 | 2 |
| AX-157930229 | 3 | 67.487 | KV452730.1 | 9451814  | 2-scf00040 | 2 |
| AX-157930230 | 3 | 67.487 | KV452730.1 | 9452298  | 2-scf00040 | 2 |
| AX-157930234 | 3 | 67.487 | KV452730.1 | 9453609  | 2-scf00040 | 2 |
| AX-157930248 | 3 | 67.487 | KV452730.1 | 9470465  | 2-scf00040 | 2 |
| AX-157709596 | 3 | 67.487 | KV452730.1 | 9472110  | 2-scf00040 | 2 |
| AX-157930251 | 3 | 67.487 | KV452730.1 | 9475553  | 2-scf00040 | 2 |
| AX-157930256 | 3 | 67.487 | KV452730.1 | 9485905  | 2-scf00040 | 2 |
| AX-157813938 | 3 | 67.487 | KV452730.1 | 9486036  | 2-scf00040 | 2 |
| AX-157813939 | 3 | 67.487 | KV452730.1 | 9486152  | 2-scf00040 | 2 |
| AX-157813940 | 3 | 67.487 | KV452730.1 | 9486279  | 2-scf00040 | 2 |
| AX-157930257 | 3 | 67.487 | KV452730.1 | 9486381  | 2-scf00040 | 2 |
| AX-157930260 | 3 | 67.487 | KV452730.1 | 9491614  | 2-scf00040 | 2 |
| AX-157930261 | 3 | 67.487 | KV452730.1 | 9492428  | 2-scf00040 | 2 |
| AX-157930264 | 3 | 67.487 | KV452730.1 | 9495798  | 2-scf00040 | 2 |
| AX-157813943 | 3 | 67.487 | KV452730.1 | 9496195  | 2-scf00040 | 2 |
| AX-157813944 | 3 | 67.487 | KV452730.1 | 9497371  | 2-scf00040 | 2 |
| AX-157745330 | 3 | 67.487 | KV452730.1 | 9499479  | 2-scf00040 | 2 |
| AX-157930267 | 3 | 67.487 | KV452730.1 | 9502772  | 2-scf00040 | 2 |
| AX-157930268 | 3 | 67.487 | KV452730.1 | 9503636  | 2-scf00040 | 2 |
| AX-157930270 | 3 | 67.487 | KV452730.1 | 9506115  | 2-scf00040 | 2 |
| AX-157813945 | 3 | 67.487 | KV452730.1 | 9506959  | 2-scf00040 | 2 |
| AX-157930328 | 3 | 67.487 | KV452730.1 | 9591144  | 2-scf00040 | 2 |
| AX-157757772 | 3 | 67.487 | KV452730.1 | 10038557 | 2-scf00040 | 2 |
| AX-157813970 | 3 | 67.487 | KV452730.1 | 10041729 | 2-scf00040 | 2 |
| AX-157930582 | 3 | 67.487 | KV452730.1 | 10047414 | 2-scf00040 | 2 |
| AX-157930945 | 3 | 67.487 | KV452730.1 | 10506470 | 2-scf00040 | 2 |
| AX-157814026 | 3 | 67.487 | KV452730.1 | 10700687 | 2-scf00040 | 2 |
| AX-157709380 | 3 | 67.487 | KV452730.1 | 10717161 | 2-scf00040 | 2 |
| AX-157874926 | 3 | 67.487 | KV452730.1 | 11572351 | 2-scf00040 | 2 |
| AX-157854147 | 3 | 67.487 | KV452730.1 | 11726461 | 2-scf00040 | 2 |
| AX-157931996 | 3 | 67.487 | KV452730.1 | 11777330 | 2-scf00040 | 2 |
| AX-157932209 | 3 | 67.487 | KV452730.1 | 11971791 | 2-scf00040 | 2 |
| AX-157874984 | 3 | 67.487 | KV452730.1 | 13867996 | 2-scf00040 | 2 |
| AX-157934821 | 3 | 67.487 | KV452733.1 | 946311   | 2-scf00041 | 2 |
| AX-157937129 | 3 | 67.487 | KV452733.1 | 3483063  | 2-scf00041 | 2 |
| AX-157941074 | 3 | 67.487 | KV452742.1 | 1966523  | 2-scf00046 | 2 |
| AX-157930184 | 3 | 67.498 | KV452730.1 | 9411068  | 2-scf00040 | 2 |
| AX-157930235 | 3 | 67.498 | KV452730.1 | 9454480  | 2-scf00040 | 2 |
| AX-157930275 | 3 | 67.498 | KV452730.1 | 9516016  | 2-scf00040 | 2 |
| AX-157930334 | 3 | 67.498 | KV452730.1 | 9597301  | 2-scf00040 | 2 |
| AX-157813949 | 3 | 67.498 | KV452730.1 | 9618329  | 2-scf00040 | 2 |
| AX-157930910 | 3 | 67.498 | KV452730.1 | 10475711 | 2-scf00040 | 2 |
| AX-157930277 | 3 | 67.511 | KV452730.1 | 9518427  | 2-scf00040 | 2 |
| AX-157930284 | 3 | 67.528 | KV452730.1 | 9537168  | 2-scf00040 | 2 |
| AX-157930288 | 3 | 67.546 | KV452730.1 | 9541141  | 2-scf00040 | 2 |
| AX-157930296 | 3 | 67.562 | KV452730.1 | 9552493  | 2-scf00040 | 2 |
| AX-157930314 | 3 | 67.576 | KV452730.1 | 9583992  | 2-scf00040 | 2 |
| AX-157930508 | 3 | 67.576 | KV452730.1 | 9942020  | 2-scf00040 | 2 |
| AX-157930319 | 3 | 67.586 | KV452730.1 | 9585499  | 2-scf00040 | 2 |
| AX-157930331 | 3 | 67.596 | KV452730.1 | 9592143  | 2-scf00040 | 2 |



|              |   |        |            |          |            |   |
|--------------|---|--------|------------|----------|------------|---|
| AX-157930337 | 3 | 67.596 | KV452730.1 | 9599032  | 2-scf00040 | 2 |
| AX-157930339 | 3 | 67.596 | KV452730.1 | 9605027  | 2-scf00040 | 2 |
| AX-157930340 | 3 | 67.596 | KV452730.1 | 9606589  | 2-scf00040 | 2 |
| AX-157930343 | 3 | 67.596 | KV452730.1 | 9611301  | 2-scf00040 | 2 |
| AX-157931901 | 3 | 67.596 | KV452730.1 | 11610243 | 2-scf00040 | 2 |
| AX-157940497 | 3 | 67.596 | KV452742.1 | 3658194  | 2-scf00046 | 2 |
| AX-157930287 | 3 | 67.62  | KV452730.1 | 9540415  | 2-scf00040 | 2 |
| AX-157930347 | 3 | 67.62  | KV452730.1 | 9614034  | 2-scf00040 | 2 |
| AX-157930463 | 3 | 67.62  | KV452730.1 | 9858551  | 2-scf00040 | 2 |
| AX-157930464 | 3 | 67.62  | KV452730.1 | 9859211  | 2-scf00040 | 2 |
| AX-157930845 | 3 | 67.62  | KV452730.1 | 10375524 | 2-scf00040 | 2 |
| AX-157930960 | 3 | 67.62  | KV452730.1 | 10533652 | 2-scf00040 | 2 |
| AX-157930369 | 3 | 67.662 | KV452730.1 | 9659657  | 2-scf00040 | 2 |
| AX-157929971 | 3 | 67.705 | KV452730.1 | 9223401  | 2-scf00040 | 2 |
| AX-157930104 | 3 | 67.705 | KV452730.1 | 9338689  | 2-scf00040 | 2 |
| AX-157930141 | 3 | 67.705 | KV452730.1 | 9368839  | 2-scf00040 | 2 |
| AX-157813935 | 3 | 67.705 | KV452730.1 | 9412129  | 2-scf00040 | 2 |
| AX-157738293 | 3 | 67.705 | KV452730.1 | 9458524  | 2-scf00040 | 2 |
| AX-157930252 | 3 | 67.705 | KV452730.1 | 9477230  | 2-scf00040 | 2 |
| AX-157930253 | 3 | 67.705 | KV452730.1 | 9479037  | 2-scf00040 | 2 |
| AX-157721256 | 3 | 67.705 | KV452730.1 | 9487984  | 2-scf00040 | 2 |
| AX-157724552 | 3 | 67.705 | KV452730.1 | 9563471  | 2-scf00040 | 2 |
| AX-157930322 | 3 | 67.705 | KV452730.1 | 9588651  | 2-scf00040 | 2 |
| AX-157930357 | 3 | 67.705 | KV452730.1 | 9620678  | 2-scf00040 | 2 |
| AX-157813950 | 3 | 67.705 | KV452730.1 | 9625510  | 2-scf00040 | 2 |
| AX-157930362 | 3 | 67.705 | KV452730.1 | 9644426  | 2-scf00040 | 2 |
| AX-157930366 | 3 | 67.705 | KV452730.1 | 9650500  | 2-scf00040 | 2 |
| AX-157930370 | 3 | 67.705 | KV452730.1 | 9663303  | 2-scf00040 | 2 |
| AX-157930372 | 3 | 67.705 | KV452730.1 | 9663523  | 2-scf00040 | 2 |
| AX-157930374 | 3 | 67.705 | KV452730.1 | 9664424  | 2-scf00040 | 2 |
| AX-157930375 | 3 | 67.705 | KV452730.1 | 9665144  | 2-scf00040 | 2 |
| AX-157930378 | 3 | 67.705 | KV452730.1 | 9673334  | 2-scf00040 | 2 |
| AX-157930384 | 3 | 67.705 | KV452730.1 | 9683435  | 2-scf00040 | 2 |
| AX-157930390 | 3 | 67.705 | KV452730.1 | 9689790  | 2-scf00040 | 2 |
| AX-157930391 | 3 | 67.705 | KV452730.1 | 9690586  | 2-scf00040 | 2 |
| AX-157930392 | 3 | 67.705 | KV452730.1 | 9697008  | 2-scf00040 | 2 |
| AX-157930393 | 3 | 67.705 | KV452730.1 | 9700877  | 2-scf00040 | 2 |
| AX-157930396 | 3 | 67.705 | KV452730.1 | 9703872  | 2-scf00040 | 2 |
| AX-157930397 | 3 | 67.705 | KV452730.1 | 9706136  | 2-scf00040 | 2 |
| AX-157930401 | 3 | 67.705 | KV452730.1 | 9717301  | 2-scf00040 | 2 |
| AX-157930404 | 3 | 67.705 | KV452730.1 | 9721473  | 2-scf00040 | 2 |
| AX-157930406 | 3 | 67.705 | KV452730.1 | 9722792  | 2-scf00040 | 2 |
| AX-157930407 | 3 | 67.705 | KV452730.1 | 9728673  | 2-scf00040 | 2 |
| AX-157930408 | 3 | 67.705 | KV452730.1 | 9729883  | 2-scf00040 | 2 |
| AX-157813959 | 3 | 67.705 | KV452730.1 | 9734949  | 2-scf00040 | 2 |
| AX-157813962 | 3 | 67.705 | KV452730.1 | 9782423  | 2-scf00040 | 2 |
| AX-157930419 | 3 | 67.705 | KV452730.1 | 9790006  | 2-scf00040 | 2 |
| AX-157930420 | 3 | 67.705 | KV452730.1 | 9790944  | 2-scf00040 | 2 |
| AX-157813963 | 3 | 67.705 | KV452730.1 | 9791086  | 2-scf00040 | 2 |
| AX-157930421 | 3 | 67.705 | KV452730.1 | 9791558  | 2-scf00040 | 2 |
| AX-157930422 | 3 | 67.705 | KV452730.1 | 9793125  | 2-scf00040 | 2 |

|              |   |        |            |          |            |   |
|--------------|---|--------|------------|----------|------------|---|
| AX-157930424 | 3 | 67.705 | KV452730.1 | 9794722  | 2-scf00040 | 2 |
| AX-157748265 | 3 | 67.705 | KV452730.1 | 9795112  | 2-scf00040 | 2 |
| AX-157930425 | 3 | 67.705 | KV452730.1 | 9796535  | 2-scf00040 | 2 |
| AX-157930428 | 3 | 67.705 | KV452730.1 | 9798475  | 2-scf00040 | 2 |
| AX-157930430 | 3 | 67.705 | KV452730.1 | 9798924  | 2-scf00040 | 2 |
| AX-157771982 | 3 | 67.705 | KV452730.1 | 9799737  | 2-scf00040 | 2 |
| AX-157930431 | 3 | 67.705 | KV452730.1 | 9801852  | 2-scf00040 | 2 |
| AX-157930433 | 3 | 67.705 | KV452730.1 | 9802296  | 2-scf00040 | 2 |
| AX-157930435 | 3 | 67.705 | KV452730.1 | 9803726  | 2-scf00040 | 2 |
| AX-157930436 | 3 | 67.705 | KV452730.1 | 9805587  | 2-scf00040 | 2 |
| AX-157930438 | 3 | 67.705 | KV452730.1 | 9806055  | 2-scf00040 | 2 |
| AX-157930439 | 3 | 67.705 | KV452730.1 | 9806849  | 2-scf00040 | 2 |
| AX-157813964 | 3 | 67.705 | KV452730.1 | 9808142  | 2-scf00040 | 2 |
| AX-157930441 | 3 | 67.705 | KV452730.1 | 9809105  | 2-scf00040 | 2 |
| AX-157930444 | 3 | 67.705 | KV452730.1 | 9810862  | 2-scf00040 | 2 |
| AX-157930445 | 3 | 67.705 | KV452730.1 | 9811131  | 2-scf00040 | 2 |
| AX-157813965 | 3 | 67.705 | KV452730.1 | 9815427  | 2-scf00040 | 2 |
| AX-157930450 | 3 | 67.705 | KV452730.1 | 9821199  | 2-scf00040 | 2 |
| AX-157930453 | 3 | 67.705 | KV452730.1 | 9825257  | 2-scf00040 | 2 |
| AX-157930455 | 3 | 67.705 | KV452730.1 | 9829929  | 2-scf00040 | 2 |
| AX-157930456 | 3 | 67.705 | KV452730.1 | 9833726  | 2-scf00040 | 2 |
| AX-157930457 | 3 | 67.705 | KV452730.1 | 9837136  | 2-scf00040 | 2 |
| AX-157930460 | 3 | 67.705 | KV452730.1 | 9857046  | 2-scf00040 | 2 |
| AX-157930466 | 3 | 67.705 | KV452730.1 | 9859703  | 2-scf00040 | 2 |
| AX-157930470 | 3 | 67.705 | KV452730.1 | 9876934  | 2-scf00040 | 2 |
| AX-157930471 | 3 | 67.705 | KV452730.1 | 9880275  | 2-scf00040 | 2 |
| AX-157930473 | 3 | 67.705 | KV452730.1 | 9881142  | 2-scf00040 | 2 |
| AX-157930492 | 3 | 67.705 | KV452730.1 | 9903463  | 2-scf00040 | 2 |
| AX-157930511 | 3 | 67.705 | KV452730.1 | 9947140  | 2-scf00040 | 2 |
| AX-157930525 | 3 | 67.705 | KV452730.1 | 9968735  | 2-scf00040 | 2 |
| AX-157813967 | 3 | 67.705 | KV452730.1 | 9979879  | 2-scf00040 | 2 |
| AX-157930531 | 3 | 67.705 | KV452730.1 | 9981173  | 2-scf00040 | 2 |
| AX-157930533 | 3 | 67.705 | KV452730.1 | 9985210  | 2-scf00040 | 2 |
| AX-157930542 | 3 | 67.705 | KV452730.1 | 9995422  | 2-scf00040 | 2 |
| AX-157930550 | 3 | 67.705 | KV452730.1 | 10005084 | 2-scf00040 | 2 |
| AX-157930562 | 3 | 67.705 | KV452730.1 | 10021695 | 2-scf00040 | 2 |
| AX-157930563 | 3 | 67.705 | KV452730.1 | 10023952 | 2-scf00040 | 2 |
| AX-157930575 | 3 | 67.705 | KV452730.1 | 10043625 | 2-scf00040 | 2 |
| AX-157930577 | 3 | 67.705 | KV452730.1 | 10044810 | 2-scf00040 | 2 |
| AX-157930584 | 3 | 67.705 | KV452730.1 | 10047928 | 2-scf00040 | 2 |
| AX-157930592 | 3 | 67.705 | KV452730.1 | 10052295 | 2-scf00040 | 2 |
| AX-157930593 | 3 | 67.705 | KV452730.1 | 10053978 | 2-scf00040 | 2 |
| AX-157930595 | 3 | 67.705 | KV452730.1 | 10055416 | 2-scf00040 | 2 |
| AX-157930596 | 3 | 67.705 | KV452730.1 | 10057438 | 2-scf00040 | 2 |
| AX-157930601 | 3 | 67.705 | KV452730.1 | 10067718 | 2-scf00040 | 2 |
| AX-157813974 | 3 | 67.705 | KV452730.1 | 10074624 | 2-scf00040 | 2 |
| AX-157930607 | 3 | 67.705 | KV452730.1 | 10075148 | 2-scf00040 | 2 |
| AX-157930612 | 3 | 67.705 | KV452730.1 | 10079214 | 2-scf00040 | 2 |
| AX-157930613 | 3 | 67.705 | KV452730.1 | 10082537 | 2-scf00040 | 2 |
| AX-157930615 | 3 | 67.705 | KV452730.1 | 10083704 | 2-scf00040 | 2 |
| AX-157930619 | 3 | 67.705 | KV452730.1 | 10094194 | 2-scf00040 | 2 |

|              |   |        |            |          |            |   |
|--------------|---|--------|------------|----------|------------|---|
| AX-157930620 | 3 | 67.705 | KV452730.1 | 10096069 | 2-scf00040 | 2 |
| AX-157813979 | 3 | 67.705 | KV452730.1 | 10121091 | 2-scf00040 | 2 |
| AX-157930651 | 3 | 67.705 | KV452730.1 | 10128261 | 2-scf00040 | 2 |
| AX-157813985 | 3 | 67.705 | KV452730.1 | 10155518 | 2-scf00040 | 2 |
| AX-157930700 | 3 | 67.705 | KV452730.1 | 10199397 | 2-scf00040 | 2 |
| AX-157750874 | 3 | 67.705 | KV452730.1 | 10231783 | 2-scf00040 | 2 |
| AX-157930726 | 3 | 67.705 | KV452730.1 | 10255191 | 2-scf00040 | 2 |
| AX-157757104 | 3 | 67.705 | KV452730.1 | 10280419 | 2-scf00040 | 2 |
| AX-157930751 | 3 | 67.705 | KV452730.1 | 10286523 | 2-scf00040 | 2 |
| AX-157930758 | 3 | 67.705 | KV452730.1 | 10289934 | 2-scf00040 | 2 |
| AX-157813994 | 3 | 67.705 | KV452730.1 | 10290362 | 2-scf00040 | 2 |
| AX-157930760 | 3 | 67.705 | KV452730.1 | 10290570 | 2-scf00040 | 2 |
| AX-157930762 | 3 | 67.705 | KV452730.1 | 10291120 | 2-scf00040 | 2 |
| AX-157930765 | 3 | 67.705 | KV452730.1 | 10293118 | 2-scf00040 | 2 |
| AX-157930785 | 3 | 67.705 | KV452730.1 | 10320087 | 2-scf00040 | 2 |
| AX-157813997 | 3 | 67.705 | KV452730.1 | 10327189 | 2-scf00040 | 2 |
| AX-157930798 | 3 | 67.705 | KV452730.1 | 10329023 | 2-scf00040 | 2 |
| AX-157930799 | 3 | 67.705 | KV452730.1 | 10330008 | 2-scf00040 | 2 |
| AX-157930809 | 3 | 67.705 | KV452730.1 | 10342743 | 2-scf00040 | 2 |
| AX-157930810 | 3 | 67.705 | KV452730.1 | 10343375 | 2-scf00040 | 2 |
| AX-157930812 | 3 | 67.705 | KV452730.1 | 10345537 | 2-scf00040 | 2 |
| AX-157703018 | 3 | 67.705 | KV452730.1 | 10347973 | 2-scf00040 | 2 |
| AX-157930818 | 3 | 67.705 | KV452730.1 | 10349265 | 2-scf00040 | 2 |
| AX-157930822 | 3 | 67.705 | KV452730.1 | 10353607 | 2-scf00040 | 2 |
| AX-157930824 | 3 | 67.705 | KV452730.1 | 10354582 | 2-scf00040 | 2 |
| AX-157814000 | 3 | 67.705 | KV452730.1 | 10354628 | 2-scf00040 | 2 |
| AX-157930828 | 3 | 67.705 | KV452730.1 | 10358581 | 2-scf00040 | 2 |
| AX-157814002 | 3 | 67.705 | KV452730.1 | 10358993 | 2-scf00040 | 2 |
| AX-157930830 | 3 | 67.705 | KV452730.1 | 10359524 | 2-scf00040 | 2 |
| AX-157930831 | 3 | 67.705 | KV452730.1 | 10362452 | 2-scf00040 | 2 |
| AX-157930834 | 3 | 67.705 | KV452730.1 | 10365060 | 2-scf00040 | 2 |
| AX-157930835 | 3 | 67.705 | KV452730.1 | 10366725 | 2-scf00040 | 2 |
| AX-157930838 | 3 | 67.705 | KV452730.1 | 10367266 | 2-scf00040 | 2 |
| AX-158389745 | 3 | 67.705 | KV452730.1 | 10367306 | 2-scf00040 | 2 |
| AX-157930839 | 3 | 67.705 | KV452730.1 | 10368105 | 2-scf00040 | 2 |
| AX-157930840 | 3 | 67.705 | KV452730.1 | 10370409 | 2-scf00040 | 2 |
| AX-157930841 | 3 | 67.705 | KV452730.1 | 10370850 | 2-scf00040 | 2 |
| AX-157930843 | 3 | 67.705 | KV452730.1 | 10371720 | 2-scf00040 | 2 |
| AX-157930859 | 3 | 67.705 | KV452730.1 | 10409443 | 2-scf00040 | 2 |
| AX-157930860 | 3 | 67.705 | KV452730.1 | 10411738 | 2-scf00040 | 2 |
| AX-157930864 | 3 | 67.705 | KV452730.1 | 10423602 | 2-scf00040 | 2 |
| AX-157930866 | 3 | 67.705 | KV452730.1 | 10424594 | 2-scf00040 | 2 |
| AX-157930868 | 3 | 67.705 | KV452730.1 | 10427739 | 2-scf00040 | 2 |
| AX-157930874 | 3 | 67.705 | KV452730.1 | 10431009 | 2-scf00040 | 2 |
| AX-158379346 | 3 | 67.705 | KV452730.1 | 10442125 | 2-scf00040 | 2 |
| AX-157864641 | 3 | 67.705 | KV452730.1 | 10451908 | 2-scf00040 | 2 |
| AX-157930904 | 3 | 67.705 | KV452730.1 | 10467031 | 2-scf00040 | 2 |
| AX-157742761 | 3 | 67.705 | KV452730.1 | 10476688 | 2-scf00040 | 2 |
| AX-157930914 | 3 | 67.705 | KV452730.1 | 10480094 | 2-scf00040 | 2 |
| AX-157930918 | 3 | 67.705 | KV452730.1 | 10484293 | 2-scf00040 | 2 |
| AX-157930927 | 3 | 67.705 | KV452730.1 | 10488746 | 2-scf00040 | 2 |

|              |   |        |            |          |            |   |
|--------------|---|--------|------------|----------|------------|---|
| AX-157814008 | 3 | 67.705 | KV452730.1 | 10490745 | 2-scf00040 | 2 |
| AX-157757309 | 3 | 67.705 | KV452730.1 | 10491947 | 2-scf00040 | 2 |
| AX-157864642 | 3 | 67.705 | KV452730.1 | 10496663 | 2-scf00040 | 2 |
| AX-157930934 | 3 | 67.705 | KV452730.1 | 10500743 | 2-scf00040 | 2 |
| AX-157814010 | 3 | 67.705 | KV452730.1 | 10506604 | 2-scf00040 | 2 |
| AX-157930957 | 3 | 67.705 | KV452730.1 | 10530510 | 2-scf00040 | 2 |
| AX-157814013 | 3 | 67.705 | KV452730.1 | 10532533 | 2-scf00040 | 2 |
| AX-157930973 | 3 | 67.705 | KV452730.1 | 10543082 | 2-scf00040 | 2 |
| AX-157930978 | 3 | 67.705 | KV452730.1 | 10548828 | 2-scf00040 | 2 |
| AX-157930980 | 3 | 67.705 | KV452730.1 | 10549414 | 2-scf00040 | 2 |
| AX-157930981 | 3 | 67.705 | KV452730.1 | 10549993 | 2-scf00040 | 2 |
| AX-157930985 | 3 | 67.705 | KV452730.1 | 10554623 | 2-scf00040 | 2 |
| AX-157930990 | 3 | 67.705 | KV452730.1 | 10561564 | 2-scf00040 | 2 |
| AX-157931009 | 3 | 67.705 | KV452730.1 | 10574805 | 2-scf00040 | 2 |
| AX-157931010 | 3 | 67.705 | KV452730.1 | 10575082 | 2-scf00040 | 2 |
| AX-157814019 | 3 | 67.705 | KV452730.1 | 10578014 | 2-scf00040 | 2 |
| AX-157931033 | 3 | 67.705 | KV452730.1 | 10593639 | 2-scf00040 | 2 |
| AX-157931045 | 3 | 67.705 | KV452730.1 | 10607948 | 2-scf00040 | 2 |
| AX-157931100 | 3 | 67.705 | KV452730.1 | 10646664 | 2-scf00040 | 2 |
| AX-158389758 | 3 | 67.705 | KV452730.1 | 10673631 | 2-scf00040 | 2 |
| AX-157814029 | 3 | 67.705 | KV452730.1 | 10722193 | 2-scf00040 | 2 |
| AX-157814033 | 3 | 67.705 | KV452730.1 | 10772712 | 2-scf00040 | 2 |
| AX-157931231 | 3 | 67.705 | KV452730.1 | 10793041 | 2-scf00040 | 2 |
| AX-157931233 | 3 | 67.705 | KV452730.1 | 10794124 | 2-scf00040 | 2 |
| AX-157931251 | 3 | 67.705 | KV452730.1 | 10817033 | 2-scf00040 | 2 |
| AX-157931252 | 3 | 67.705 | KV452730.1 | 10817488 | 2-scf00040 | 2 |
| AX-157931275 | 3 | 67.705 | KV452730.1 | 10831249 | 2-scf00040 | 2 |
| AX-157814054 | 3 | 67.705 | KV452730.1 | 10857164 | 2-scf00040 | 2 |
| AX-157931325 | 3 | 67.705 | KV452730.1 | 10916320 | 2-scf00040 | 2 |
| AX-157931328 | 3 | 67.705 | KV452730.1 | 10927405 | 2-scf00040 | 2 |
| AX-157931329 | 3 | 67.705 | KV452730.1 | 10928671 | 2-scf00040 | 2 |
| AX-157931368 | 3 | 67.705 | KV452730.1 | 10967141 | 2-scf00040 | 2 |
| AX-157931440 | 3 | 67.705 | KV452730.1 | 11025683 | 2-scf00040 | 2 |
| AX-157723159 | 3 | 67.705 | KV452730.1 | 11083246 | 2-scf00040 | 2 |
| AX-157854051 | 3 | 67.705 | KV452730.1 | 11216035 | 2-scf00040 | 2 |
| AX-157854052 | 3 | 67.705 | KV452730.1 | 11220185 | 2-scf00040 | 2 |
| AX-158389778 | 3 | 67.705 | KV452730.1 | 11225497 | 2-scf00040 | 2 |
| AX-157814085 | 3 | 67.705 | KV452730.1 | 11229503 | 2-scf00040 | 2 |
| AX-157814087 | 3 | 67.705 | KV452730.1 | 11235918 | 2-scf00040 | 2 |
| AX-157869266 | 3 | 67.705 | KV452730.1 | 11239764 | 2-scf00040 | 2 |
| AX-157931723 | 3 | 67.705 | KV452730.1 | 11359045 | 2-scf00040 | 2 |
| AX-157931830 | 3 | 67.705 | KV452730.1 | 11505213 | 2-scf00040 | 2 |
| AX-157814112 | 3 | 67.705 | KV452730.1 | 11566420 | 2-scf00040 | 2 |
| AX-157931864 | 3 | 67.705 | KV452730.1 | 11568850 | 2-scf00040 | 2 |
| AX-157814116 | 3 | 67.705 | KV452730.1 | 11724451 | 2-scf00040 | 2 |
| AX-157854149 | 3 | 67.705 | KV452730.1 | 11728628 | 2-scf00040 | 2 |
| AX-157854157 | 3 | 67.705 | KV452730.1 | 11747139 | 2-scf00040 | 2 |
| AX-157854159 | 3 | 67.705 | KV452730.1 | 11766405 | 2-scf00040 | 2 |
| AX-157854163 | 3 | 67.705 | KV452730.1 | 11781557 | 2-scf00040 | 2 |
| AX-157862729 | 3 | 67.705 | KV452730.1 | 11812824 | 2-scf00040 | 2 |
| AX-157932085 | 3 | 67.705 | KV452730.1 | 11880413 | 2-scf00040 | 2 |

|              |   |        |             |          |                |    |
|--------------|---|--------|-------------|----------|----------------|----|
| AX-157932087 | 3 | 67.705 | KV452730.1  | 11885020 | 2-scf00040     | 2  |
| AX-157854178 | 3 | 67.705 | KV452730.1  | 11886718 | 2-scf00040     | 2  |
| AX-157932151 | 3 | 67.705 | KV452730.1  | 11934249 | 2-scf00040     | 2  |
| AX-157932164 | 3 | 67.705 | KV452730.1  | 11942096 | 2-scf00040     | 2  |
| AX-157932180 | 3 | 67.705 | KV452730.1  | 11952364 | 2-scf00040     | 2  |
| AX-157932187 | 3 | 67.705 | KV452730.1  | 11957424 | 2-scf00040     | 2  |
| AX-157932193 | 3 | 67.705 | KV452730.1  | 11960558 | 2-scf00040     | 2  |
| AX-157932264 | 3 | 67.705 | KV452730.1  | 12022944 | 2-scf00040     | 2  |
| AX-157932318 | 3 | 67.705 | KV452730.1  | 12088717 | 2-scf00040     | 2  |
| AX-157814146 | 3 | 67.705 | KV452730.1  | 12120368 | 2-scf00040     | 2  |
| AX-157932595 | 3 | 67.705 | KV452730.1  | 12438329 | 2-scf00040     | 2  |
| AX-157932997 | 3 | 67.705 | KV452730.1  | 13168269 | 2-scf00040     | 2  |
| AX-157933521 | 3 | 67.705 | KV452730.1  | 14011774 | 2-scf00040     | 2  |
| AX-157933622 | 3 | 67.705 | KV452730.1  | 14146487 | 2-scf00040     | 2  |
| AX-157934163 | 3 | 67.705 | KV452733.1  | 272753   | 2-scf00041     | 2  |
| AX-157936147 | 3 | 67.705 | KV452733.1  | 2530633  | 2-scf00041     | 2  |
| AX-157937628 | 3 | 67.705 | KV452732.1  | 441892   | 2-scf00042     | 2  |
| AX-158421983 | 3 | 67.705 | KV452732.1  | 470228   | 2-scf00042     | 2  |
| AX-157937756 | 3 | 67.705 | KV452732.1  | 682721   | 2-scf00042     | 2  |
| AX-157937908 | 3 | 67.705 | KV452732.1  | 926247   | 2-scf00042     | 2  |
| AX-157937987 | 3 | 67.705 | KV452732.1  | 1094682  | 2-scf00042     | 2  |
| AX-157945324 | 3 | 67.705 | KV452746.1  | 176832   | 2-scf00054     | 2  |
| AX-157703088 | 3 | 67.705 | DX096210.1  | 331      | IORI212 Ictalu | UN |
| AX-157707544 | 3 | 67.705 | 3ML01034543 | 267      | scf10220_1     | UN |
| AX-157930522 | 3 | 67.814 | KV452730.1  | 9964213  | 2-scf00040     | 2  |
| AX-157930967 | 3 | 67.814 | KV452730.1  | 10540416 | 2-scf00040     | 2  |
| AX-157930975 | 3 | 67.814 | KV452730.1  | 10543834 | 2-scf00040     | 2  |
| AX-157930983 | 3 | 67.814 | KV452730.1  | 10554120 | 2-scf00040     | 2  |
| AX-157814017 | 3 | 67.814 | KV452730.1  | 10559644 | 2-scf00040     | 2  |
| AX-157931021 | 3 | 67.814 | KV452730.1  | 10583899 | 2-scf00040     | 2  |
| AX-157931023 | 3 | 67.814 | KV452730.1  | 10584899 | 2-scf00040     | 2  |
| AX-157931024 | 3 | 67.814 | KV452730.1  | 10585689 | 2-scf00040     | 2  |
| AX-157931027 | 3 | 67.814 | KV452730.1  | 10586351 | 2-scf00040     | 2  |
| AX-157931038 | 3 | 67.814 | KV452730.1  | 10599331 | 2-scf00040     | 2  |
| AX-157931040 | 3 | 67.814 | KV452730.1  | 10602039 | 2-scf00040     | 2  |
| AX-157814021 | 3 | 67.814 | KV452730.1  | 10606609 | 2-scf00040     | 2  |
| AX-157931059 | 3 | 67.814 | KV452730.1  | 10617060 | 2-scf00040     | 2  |
| AX-157931077 | 3 | 67.814 | KV452730.1  | 10629317 | 2-scf00040     | 2  |
| AX-157931081 | 3 | 67.814 | KV452730.1  | 10633112 | 2-scf00040     | 2  |
| AX-157931087 | 3 | 67.814 | KV452730.1  | 10635604 | 2-scf00040     | 2  |
| AX-157931089 | 3 | 67.814 | KV452730.1  | 10637782 | 2-scf00040     | 2  |
| AX-157931092 | 3 | 67.814 | KV452730.1  | 10639546 | 2-scf00040     | 2  |
| AX-157931095 | 3 | 67.814 | KV452730.1  | 10642559 | 2-scf00040     | 2  |
| AX-157931096 | 3 | 67.814 | KV452730.1  | 10645403 | 2-scf00040     | 2  |
| AX-157931098 | 3 | 67.814 | KV452730.1  | 10646126 | 2-scf00040     | 2  |
| AX-157931102 | 3 | 67.814 | KV452730.1  | 10650521 | 2-scf00040     | 2  |
| AX-157931114 | 3 | 67.814 | KV452730.1  | 10666363 | 2-scf00040     | 2  |
| AX-157862714 | 3 | 67.814 | KV452730.1  | 10676910 | 2-scf00040     | 2  |
| AX-157931124 | 3 | 67.814 | KV452730.1  | 10677845 | 2-scf00040     | 2  |
| AX-157931134 | 3 | 67.814 | KV452730.1  | 10689051 | 2-scf00040     | 2  |
| AX-157931152 | 3 | 67.814 | KV452730.1  | 10703609 | 2-scf00040     | 2  |

|              |   |        |            |          |            |   |
|--------------|---|--------|------------|----------|------------|---|
| AX-157931160 | 3 | 67.814 | KV452730.1 | 10709424 | 2-scf00040 | 2 |
| AX-157931164 | 3 | 67.814 | KV452730.1 | 10715429 | 2-scf00040 | 2 |
| AX-157931170 | 3 | 67.814 | KV452730.1 | 10721018 | 2-scf00040 | 2 |
| AX-157931174 | 3 | 67.814 | KV452730.1 | 10729378 | 2-scf00040 | 2 |
| AX-157814031 | 3 | 67.814 | KV452730.1 | 10734467 | 2-scf00040 | 2 |
| AX-157931183 | 3 | 67.814 | KV452730.1 | 10747932 | 2-scf00040 | 2 |
| AX-157931185 | 3 | 67.814 | KV452730.1 | 10748176 | 2-scf00040 | 2 |
| AX-157931193 | 3 | 67.814 | KV452730.1 | 10752423 | 2-scf00040 | 2 |
| AX-157931205 | 3 | 67.814 | KV452730.1 | 10764312 | 2-scf00040 | 2 |
| AX-157766648 | 3 | 67.814 | KV452730.1 | 10764900 | 2-scf00040 | 2 |
| AX-157931209 | 3 | 67.814 | KV452730.1 | 10771435 | 2-scf00040 | 2 |
| AX-157869239 | 3 | 67.814 | KV452730.1 | 10787963 | 2-scf00040 | 2 |
| AX-157931227 | 3 | 67.814 | KV452730.1 | 10791261 | 2-scf00040 | 2 |
| AX-157931230 | 3 | 67.814 | KV452730.1 | 10792313 | 2-scf00040 | 2 |
| AX-157931247 | 3 | 67.814 | KV452730.1 | 10809172 | 2-scf00040 | 2 |
| AX-157869245 | 3 | 67.814 | KV452730.1 | 10809488 | 2-scf00040 | 2 |
| AX-157931255 | 3 | 67.814 | KV452730.1 | 10819889 | 2-scf00040 | 2 |
| AX-157931277 | 3 | 67.814 | KV452730.1 | 10832227 | 2-scf00040 | 2 |
| AX-157931280 | 3 | 67.814 | KV452730.1 | 10833266 | 2-scf00040 | 2 |
| AX-157931288 | 3 | 67.814 | KV452730.1 | 10847689 | 2-scf00040 | 2 |
| AX-157931295 | 3 | 67.814 | KV452730.1 | 10851489 | 2-scf00040 | 2 |
| AX-157814053 | 3 | 67.814 | KV452730.1 | 10853460 | 2-scf00040 | 2 |
| AX-157747998 | 3 | 67.814 | KV452730.1 | 10880400 | 2-scf00040 | 2 |
| AX-157931305 | 3 | 67.814 | KV452730.1 | 10881826 | 2-scf00040 | 2 |
| AX-157864644 | 3 | 67.814 | KV452730.1 | 10889972 | 2-scf00040 | 2 |
| AX-157931307 | 3 | 67.814 | KV452730.1 | 10896626 | 2-scf00040 | 2 |
| AX-157931310 | 3 | 67.814 | KV452730.1 | 10900063 | 2-scf00040 | 2 |
| AX-157931311 | 3 | 67.814 | KV452730.1 | 10900552 | 2-scf00040 | 2 |
| AX-157864645 | 3 | 67.814 | KV452730.1 | 10903258 | 2-scf00040 | 2 |
| AX-157931319 | 3 | 67.814 | KV452730.1 | 10910160 | 2-scf00040 | 2 |
| AX-157814055 | 3 | 67.814 | KV452730.1 | 10912979 | 2-scf00040 | 2 |
| AX-157931326 | 3 | 67.814 | KV452730.1 | 10919204 | 2-scf00040 | 2 |
| AX-157931332 | 3 | 67.814 | KV452730.1 | 10934624 | 2-scf00040 | 2 |
| AX-157931333 | 3 | 67.814 | KV452730.1 | 10935469 | 2-scf00040 | 2 |
| AX-157931337 | 3 | 67.814 | KV452730.1 | 10941030 | 2-scf00040 | 2 |
| AX-157931365 | 3 | 67.814 | KV452730.1 | 10965437 | 2-scf00040 | 2 |
| AX-157883719 | 3 | 67.814 | KV452730.1 | 10972089 | 2-scf00040 | 2 |
| AX-157931377 | 3 | 67.814 | KV452730.1 | 10974101 | 2-scf00040 | 2 |
| AX-157931385 | 3 | 67.814 | KV452730.1 | 10977891 | 2-scf00040 | 2 |
| AX-157814059 | 3 | 67.814 | KV452730.1 | 10978067 | 2-scf00040 | 2 |
| AX-157707778 | 3 | 67.814 | KV452730.1 | 11254225 | 2-scf00040 | 2 |
| AX-157931670 | 3 | 67.814 | KV452730.1 | 11291406 | 2-scf00040 | 2 |
| AX-157931728 | 3 | 67.814 | KV452730.1 | 11365064 | 2-scf00040 | 2 |
| AX-157931765 | 3 | 67.814 | KV452730.1 | 11412891 | 2-scf00040 | 2 |
| AX-157931828 | 3 | 67.814 | KV452730.1 | 11501973 | 2-scf00040 | 2 |
| AX-157931838 | 3 | 67.814 | KV452730.1 | 11515664 | 2-scf00040 | 2 |
| AX-157931974 | 3 | 67.814 | KV452730.1 | 11742656 | 2-scf00040 | 2 |
| AX-157931982 | 3 | 67.814 | KV452730.1 | 11759002 | 2-scf00040 | 2 |
| AX-157931990 | 3 | 67.814 | KV452730.1 | 11768805 | 2-scf00040 | 2 |
| AX-157932032 | 3 | 67.814 | KV452730.1 | 11841525 | 2-scf00040 | 2 |
| AX-157874938 | 3 | 67.814 | KV452730.1 | 11898981 | 2-scf00040 | 2 |

|              |   |        |            |          |            |   |
|--------------|---|--------|------------|----------|------------|---|
| AX-157932121 | 3 | 67.814 | KV452730.1 | 11923156 | 2-scf00040 | 2 |
| AX-157932413 | 3 | 67.814 | KV452730.1 | 12226260 | 2-scf00040 | 2 |
| AX-157932414 | 3 | 67.814 | KV452730.1 | 12229411 | 2-scf00040 | 2 |
| AX-157932416 | 3 | 67.814 | KV452730.1 | 12230483 | 2-scf00040 | 2 |
| AX-157932466 | 3 | 67.814 | KV452730.1 | 12287415 | 2-scf00040 | 2 |
| AX-157932501 | 3 | 67.814 | KV452730.1 | 12309091 | 2-scf00040 | 2 |
| AX-157932515 | 3 | 67.814 | KV452730.1 | 12326275 | 2-scf00040 | 2 |
| AX-157932578 | 3 | 67.814 | KV452730.1 | 12420107 | 2-scf00040 | 2 |
| AX-157883760 | 3 | 67.814 | KV452730.1 | 12423059 | 2-scf00040 | 2 |
| AX-157932616 | 3 | 67.814 | KV452730.1 | 12457803 | 2-scf00040 | 2 |
| AX-157932830 | 3 | 67.814 | KV452730.1 | 12893736 | 2-scf00040 | 2 |
| AX-157932835 | 3 | 67.814 | KV452730.1 | 12910233 | 2-scf00040 | 2 |
| AX-157933014 | 3 | 67.814 | KV452730.1 | 13203394 | 2-scf00040 | 2 |
| AX-157934003 | 3 | 67.814 | KV452733.1 | 121823   | 2-scf00041 | 2 |
| AX-157934027 | 3 | 67.814 | KV452733.1 | 133000   | 2-scf00041 | 2 |
| AX-157938049 | 3 | 67.814 | KV452732.1 | 1240915  | 2-scf00042 | 2 |
| AX-157938056 | 3 | 67.814 | KV452732.1 | 1253684  | 2-scf00042 | 2 |
| AX-157938057 | 3 | 67.814 | KV452732.1 | 1265269  | 2-scf00042 | 2 |
| AX-157938157 | 3 | 67.814 | KV452732.1 | 1435947  | 2-scf00042 | 2 |
| AX-157938168 | 3 | 67.814 | KV452732.1 | 1459099  | 2-scf00042 | 2 |
| AX-157945389 | 3 | 67.814 | KV452746.1 | 243316   | 2-scf00054 | 2 |
| AX-157945445 | 3 | 67.814 | KV452746.1 | 294442   | 2-scf00054 | 2 |
| AX-157945517 | 3 | 67.814 | KV452746.1 | 374298   | 2-scf00054 | 2 |
| AX-157931386 | 3 | 67.877 | KV452730.1 | 10978721 | 2-scf00040 | 2 |
| AX-157813842 | 3 | 68.033 | KV452730.1 | 7274837  | 2-scf00040 | 2 |
| AX-157928912 | 3 | 68.033 | KV452730.1 | 7789365  | 2-scf00040 | 2 |
| AX-157929548 | 3 | 68.033 | KV452730.1 | 8754272  | 2-scf00040 | 2 |
| AX-157743522 | 3 | 68.033 | KV452730.1 | 8868435  | 2-scf00040 | 2 |
| AX-157929676 | 3 | 68.033 | KV452730.1 | 8939806  | 2-scf00040 | 2 |
| AX-157929984 | 3 | 68.033 | KV452730.1 | 9231574  | 2-scf00040 | 2 |
| AX-157930084 | 3 | 68.033 | KV452730.1 | 9311409  | 2-scf00040 | 2 |
| AX-157930897 | 3 | 68.033 | KV452730.1 | 10462991 | 2-scf00040 | 2 |
| AX-157930966 | 3 | 68.033 | KV452730.1 | 10539858 | 2-scf00040 | 2 |
| AX-157931012 | 3 | 68.033 | KV452730.1 | 10576307 | 2-scf00040 | 2 |
| AX-157931013 | 3 | 68.033 | KV452730.1 | 10579375 | 2-scf00040 | 2 |
| AX-157931030 | 3 | 68.033 | KV452730.1 | 10587940 | 2-scf00040 | 2 |
| AX-157931056 | 3 | 68.033 | KV452730.1 | 10614534 | 2-scf00040 | 2 |
| AX-157931067 | 3 | 68.033 | KV452730.1 | 10621587 | 2-scf00040 | 2 |
| AX-157931113 | 3 | 68.033 | KV452730.1 | 10665868 | 2-scf00040 | 2 |
| AX-157931123 | 3 | 68.033 | KV452730.1 | 10676464 | 2-scf00040 | 2 |
| AX-157931173 | 3 | 68.033 | KV452730.1 | 10725109 | 2-scf00040 | 2 |
| AX-157931278 | 3 | 68.033 | KV452730.1 | 10832583 | 2-scf00040 | 2 |
| AX-157814060 | 3 | 68.033 | KV452730.1 | 10978797 | 2-scf00040 | 2 |
| AX-157757321 | 3 | 68.033 | KV452730.1 | 10981580 | 2-scf00040 | 2 |
| AX-157931401 | 3 | 68.033 | KV452730.1 | 10993541 | 2-scf00040 | 2 |
| AX-157746205 | 3 | 68.033 | KV452730.1 | 10995166 | 2-scf00040 | 2 |
| AX-157931409 | 3 | 68.033 | KV452730.1 | 11001446 | 2-scf00040 | 2 |
| AX-158389771 | 3 | 68.033 | KV452730.1 | 11007836 | 2-scf00040 | 2 |
| AX-157931415 | 3 | 68.033 | KV452730.1 | 11010040 | 2-scf00040 | 2 |
| AX-157931425 | 3 | 68.033 | KV452730.1 | 11015140 | 2-scf00040 | 2 |
| AX-157931445 | 3 | 68.033 | KV452730.1 | 11029955 | 2-scf00040 | 2 |

|              |   |        |            |          |            |   |
|--------------|---|--------|------------|----------|------------|---|
| AX-157931449 | 3 | 68.033 | KV452730.1 | 11032977 | 2-scf00040 | 2 |
| AX-157931457 | 3 | 68.033 | KV452730.1 | 11056375 | 2-scf00040 | 2 |
| AX-157931460 | 3 | 68.033 | KV452730.1 | 11059208 | 2-scf00040 | 2 |
| AX-157931462 | 3 | 68.033 | KV452730.1 | 11061515 | 2-scf00040 | 2 |
| AX-157931464 | 3 | 68.033 | KV452730.1 | 11066973 | 2-scf00040 | 2 |
| AX-158389773 | 3 | 68.033 | KV452730.1 | 11069003 | 2-scf00040 | 2 |
| AX-157931482 | 3 | 68.033 | KV452730.1 | 11081817 | 2-scf00040 | 2 |
| AX-157931486 | 3 | 68.033 | KV452730.1 | 11088656 | 2-scf00040 | 2 |
| AX-157931487 | 3 | 68.033 | KV452730.1 | 11089843 | 2-scf00040 | 2 |
| AX-157931488 | 3 | 68.033 | KV452730.1 | 11091292 | 2-scf00040 | 2 |
| AX-157931498 | 3 | 68.033 | KV452730.1 | 11099298 | 2-scf00040 | 2 |
| AX-157814066 | 3 | 68.033 | KV452730.1 | 11101218 | 2-scf00040 | 2 |
| AX-157931507 | 3 | 68.033 | KV452730.1 | 11106235 | 2-scf00040 | 2 |
| AX-157931509 | 3 | 68.033 | KV452730.1 | 11106475 | 2-scf00040 | 2 |
| AX-157814069 | 3 | 68.033 | KV452730.1 | 11133169 | 2-scf00040 | 2 |
| AX-157931533 | 3 | 68.033 | KV452730.1 | 11133649 | 2-scf00040 | 2 |
| AX-157741435 | 3 | 68.033 | KV452730.1 | 11140324 | 2-scf00040 | 2 |
| AX-157814070 | 3 | 68.033 | KV452730.1 | 11140638 | 2-scf00040 | 2 |
| AX-157931555 | 3 | 68.033 | KV452730.1 | 11154696 | 2-scf00040 | 2 |
| AX-158405517 | 3 | 68.033 | KV452730.1 | 11156289 | 2-scf00040 | 2 |
| AX-157814072 | 3 | 68.033 | KV452730.1 | 11158788 | 2-scf00040 | 2 |
| AX-157814076 | 3 | 68.033 | KV452730.1 | 11170839 | 2-scf00040 | 2 |
| AX-157814077 | 3 | 68.033 | KV452730.1 | 11172274 | 2-scf00040 | 2 |
| AX-157814078 | 3 | 68.033 | KV452730.1 | 11173809 | 2-scf00040 | 2 |
| AX-157931568 | 3 | 68.033 | KV452730.1 | 11174260 | 2-scf00040 | 2 |
| AX-157931569 | 3 | 68.033 | KV452730.1 | 11175349 | 2-scf00040 | 2 |
| AX-157931574 | 3 | 68.033 | KV452730.1 | 11185075 | 2-scf00040 | 2 |
| AX-157814088 | 3 | 68.033 | KV452730.1 | 11242027 | 2-scf00040 | 2 |
| AX-157864651 | 3 | 68.033 | KV452730.1 | 11245912 | 2-scf00040 | 2 |
| AX-157931628 | 3 | 68.033 | KV452730.1 | 11256764 | 2-scf00040 | 2 |
| AX-157931636 | 3 | 68.033 | KV452730.1 | 11264772 | 2-scf00040 | 2 |
| AX-157931683 | 3 | 68.033 | KV452730.1 | 11300059 | 2-scf00040 | 2 |
| AX-157931698 | 3 | 68.033 | KV452730.1 | 11309888 | 2-scf00040 | 2 |
| AX-157756180 | 3 | 68.033 | KV452730.1 | 11311229 | 2-scf00040 | 2 |
| AX-157931762 | 3 | 68.033 | KV452730.1 | 11411005 | 2-scf00040 | 2 |
| AX-158389810 | 3 | 68.033 | KV452730.1 | 11427692 | 2-scf00040 | 2 |
| AX-157931817 | 3 | 68.033 | KV452730.1 | 11490469 | 2-scf00040 | 2 |
| AX-157931821 | 3 | 68.033 | KV452730.1 | 11494315 | 2-scf00040 | 2 |
| AX-157755910 | 3 | 68.033 | KV452730.1 | 11496134 | 2-scf00040 | 2 |
| AX-157931835 | 3 | 68.033 | KV452730.1 | 11510001 | 2-scf00040 | 2 |
| AX-157931839 | 3 | 68.033 | KV452730.1 | 11516636 | 2-scf00040 | 2 |
| AX-157931849 | 3 | 68.033 | KV452730.1 | 11541511 | 2-scf00040 | 2 |
| AX-157931861 | 3 | 68.033 | KV452730.1 | 11564315 | 2-scf00040 | 2 |
| AX-157931867 | 3 | 68.033 | KV452730.1 | 11575770 | 2-scf00040 | 2 |
| AX-157931869 | 3 | 68.033 | KV452730.1 | 11576264 | 2-scf00040 | 2 |
| AX-158405528 | 3 | 68.033 | KV452730.1 | 11578899 | 2-scf00040 | 2 |
| AX-157931872 | 3 | 68.033 | KV452730.1 | 11578979 | 2-scf00040 | 2 |
| AX-157931874 | 3 | 68.033 | KV452730.1 | 11582794 | 2-scf00040 | 2 |
| AX-157814113 | 3 | 68.033 | KV452730.1 | 11584060 | 2-scf00040 | 2 |
| AX-157931877 | 3 | 68.033 | KV452730.1 | 11589225 | 2-scf00040 | 2 |
| AX-157931900 | 3 | 68.033 | KV452730.1 | 11607587 | 2-scf00040 | 2 |



|              |   |        |             |          |            |    |
|--------------|---|--------|-------------|----------|------------|----|
| AX-157931926 | 3 | 68.033 | KV452730.1  | 11650775 | 2-scf00040 | 2  |
| AX-157931930 | 3 | 68.033 | KV452730.1  | 11661827 | 2-scf00040 | 2  |
| AX-157931934 | 3 | 68.033 | KV452730.1  | 11676904 | 2-scf00040 | 2  |
| AX-157931948 | 3 | 68.033 | KV452730.1  | 11696806 | 2-scf00040 | 2  |
| AX-157814121 | 3 | 68.033 | KV452730.1  | 11752566 | 2-scf00040 | 2  |
| AX-157814122 | 3 | 68.033 | KV452730.1  | 11754913 | 2-scf00040 | 2  |
| AX-157932000 | 3 | 68.033 | KV452730.1  | 11783933 | 2-scf00040 | 2  |
| AX-157854175 | 3 | 68.033 | KV452730.1  | 11842561 | 2-scf00040 | 2  |
| AX-157814134 | 3 | 68.033 | KV452730.1  | 11883820 | 2-scf00040 | 2  |
| AX-157932144 | 3 | 68.033 | KV452730.1  | 11930729 | 2-scf00040 | 2  |
| AX-157932211 | 3 | 68.033 | KV452730.1  | 11972821 | 2-scf00040 | 2  |
| AX-157932215 | 3 | 68.033 | KV452730.1  | 11974638 | 2-scf00040 | 2  |
| AX-157932228 | 3 | 68.033 | KV452730.1  | 11982418 | 2-scf00040 | 2  |
| AX-157932229 | 3 | 68.033 | KV452730.1  | 11983659 | 2-scf00040 | 2  |
| AX-157937812 | 3 | 68.033 | KV452732.1  | 785915   | 2-scf00042 | 2  |
| AX-157937840 | 3 | 68.033 | KV452732.1  | 819018   | 2-scf00042 | 2  |
| AX-157938126 | 3 | 68.033 | KV452732.1  | 1397289  | 2-scf00042 | 2  |
| AX-157938210 | 3 | 68.033 | KV452732.1  | 1485347  | 2-scf00042 | 2  |
| AX-157938212 | 3 | 68.033 | KV452732.1  | 1487779  | 2-scf00042 | 2  |
| AX-157704805 | 3 | 68.033 | 3ML01027464 | 1366     | scf03070_1 | UN |
| AX-157706823 | 3 | 68.033 | 3ML01032981 | 543      | scf08614_1 | UN |
| AX-157874886 | 3 | 68.075 | KV452730.1  | 9899707  | 2-scf00040 | 2  |
| AX-157814092 | 3 | 68.075 | KV452730.1  | 11288092 | 2-scf00040 | 2  |
| AX-157931693 | 3 | 68.075 | KV452730.1  | 11307010 | 2-scf00040 | 2  |
| AX-157758380 | 3 | 68.075 | KV452730.1  | 11349863 | 2-scf00040 | 2  |
| AX-157814097 | 3 | 68.075 | KV452730.1  | 11407949 | 2-scf00040 | 2  |
| AX-157931857 | 3 | 68.075 | KV452730.1  | 11556210 | 2-scf00040 | 2  |
| AX-157931936 | 3 | 68.075 | KV452730.1  | 11680670 | 2-scf00040 | 2  |
| AX-157940905 | 3 | 68.075 | KV452742.1  | 4431125  | 2-scf00046 | 2  |
| AX-157931677 | 3 | 68.083 | KV452730.1  | 11297961 | 2-scf00040 | 2  |
| AX-157883751 | 3 | 68.083 | KV452730.1  | 12070363 | 2-scf00040 | 2  |
| AX-157930732 | 3 | 68.142 | KV452730.1  | 10268031 | 2-scf00040 | 2  |
| AX-157931133 | 3 | 68.142 | KV452730.1  | 10685961 | 2-scf00040 | 2  |
| AX-157931299 | 3 | 68.142 | KV452730.1  | 10854794 | 2-scf00040 | 2  |
| AX-157931306 | 3 | 68.142 | KV452730.1  | 10890809 | 2-scf00040 | 2  |
| AX-157931343 | 3 | 68.142 | KV452730.1  | 10948431 | 2-scf00040 | 2  |
| AX-157814071 | 3 | 68.142 | KV452730.1  | 11142916 | 2-scf00040 | 2  |
| AX-157931542 | 3 | 68.142 | KV452730.1  | 11143611 | 2-scf00040 | 2  |
| AX-157931546 | 3 | 68.142 | KV452730.1  | 11145942 | 2-scf00040 | 2  |
| AX-157931550 | 3 | 68.142 | KV452730.1  | 11149878 | 2-scf00040 | 2  |
| AX-157931639 | 3 | 68.142 | KV452730.1  | 11267839 | 2-scf00040 | 2  |
| AX-157931661 | 3 | 68.142 | KV452730.1  | 11285639 | 2-scf00040 | 2  |
| AX-157931705 | 3 | 68.142 | KV452730.1  | 11313712 | 2-scf00040 | 2  |
| AX-157931722 | 3 | 68.142 | KV452730.1  | 11358692 | 2-scf00040 | 2  |
| AX-157931725 | 3 | 68.142 | KV452730.1  | 11360841 | 2-scf00040 | 2  |
| AX-157931727 | 3 | 68.142 | KV452730.1  | 11363658 | 2-scf00040 | 2  |
| AX-157883730 | 3 | 68.142 | KV452730.1  | 11414960 | 2-scf00040 | 2  |
| AX-157854088 | 3 | 68.142 | KV452730.1  | 11427745 | 2-scf00040 | 2  |
| AX-157931778 | 3 | 68.142 | KV452730.1  | 11429253 | 2-scf00040 | 2  |
| AX-157931799 | 3 | 68.142 | KV452730.1  | 11455043 | 2-scf00040 | 2  |
| AX-157726906 | 3 | 68.142 | KV452730.1  | 11491564 | 2-scf00040 | 2  |

|              |   |        |            |          |            |   |
|--------------|---|--------|------------|----------|------------|---|
| AX-157931823 | 3 | 68.142 | KV452730.1 | 11495967 | 2-scf00040 | 2 |
| AX-157931846 | 3 | 68.142 | KV452730.1 | 11532952 | 2-scf00040 | 2 |
| AX-157931850 | 3 | 68.142 | KV452730.1 | 11545123 | 2-scf00040 | 2 |
| AX-157931854 | 3 | 68.142 | KV452730.1 | 11554477 | 2-scf00040 | 2 |
| AX-157931866 | 3 | 68.142 | KV452730.1 | 11575379 | 2-scf00040 | 2 |
| AX-157931879 | 3 | 68.142 | KV452730.1 | 11592030 | 2-scf00040 | 2 |
| AX-157854117 | 3 | 68.142 | KV452730.1 | 11638540 | 2-scf00040 | 2 |
| AX-157854125 | 3 | 68.142 | KV452730.1 | 11656804 | 2-scf00040 | 2 |
| AX-157931928 | 3 | 68.142 | KV452730.1 | 11661119 | 2-scf00040 | 2 |
| AX-157931951 | 3 | 68.142 | KV452730.1 | 11699215 | 2-scf00040 | 2 |
| AX-157854141 | 3 | 68.142 | KV452730.1 | 11703105 | 2-scf00040 | 2 |
| AX-157931959 | 3 | 68.142 | KV452730.1 | 11712301 | 2-scf00040 | 2 |
| AX-157931967 | 3 | 68.142 | KV452730.1 | 11727917 | 2-scf00040 | 2 |
| AX-157932005 | 3 | 68.142 | KV452730.1 | 11791413 | 2-scf00040 | 2 |
| AX-157932014 | 3 | 68.142 | KV452730.1 | 11797952 | 2-scf00040 | 2 |
| AX-157932174 | 3 | 68.142 | KV452730.1 | 11950848 | 2-scf00040 | 2 |
| AX-157932212 | 3 | 68.142 | KV452730.1 | 11973272 | 2-scf00040 | 2 |
| AX-157932232 | 3 | 68.142 | KV452730.1 | 11985147 | 2-scf00040 | 2 |
| AX-157932270 | 3 | 68.142 | KV452730.1 | 12032295 | 2-scf00040 | 2 |
| AX-157932437 | 3 | 68.142 | KV452730.1 | 12259475 | 2-scf00040 | 2 |
| AX-157933101 | 3 | 68.142 | KV452730.1 | 13336110 | 2-scf00040 | 2 |
| AX-157933430 | 3 | 68.142 | KV452730.1 | 13906288 | 2-scf00040 | 2 |
| AX-157933903 | 3 | 68.142 | KV452733.1 | 25382    | 2-scf00041 | 2 |
| AX-157933938 | 3 | 68.142 | KV452733.1 | 66383    | 2-scf00041 | 2 |
| AX-157937482 | 3 | 68.142 | KV452732.1 | 79265    | 2-scf00042 | 2 |
| AX-157930127 | 3 | 68.361 | KV452730.1 | 9357612  | 2-scf00040 | 2 |
| AX-157930367 | 3 | 68.361 | KV452730.1 | 9654986  | 2-scf00040 | 2 |
| AX-157930495 | 3 | 68.361 | KV452730.1 | 9905280  | 2-scf00040 | 2 |
| AX-157930512 | 3 | 68.361 | KV452730.1 | 9948530  | 2-scf00040 | 2 |
| AX-157930703 | 3 | 68.361 | KV452730.1 | 10206633 | 2-scf00040 | 2 |
| AX-157930887 | 3 | 68.361 | KV452730.1 | 10454395 | 2-scf00040 | 2 |
| AX-157930889 | 3 | 68.361 | KV452730.1 | 10454936 | 2-scf00040 | 2 |
| AX-157814016 | 3 | 68.361 | KV452730.1 | 10554530 | 2-scf00040 | 2 |
| AX-157814023 | 3 | 68.361 | KV452730.1 | 10651229 | 2-scf00040 | 2 |
| AX-157752245 | 3 | 68.361 | KV452730.1 | 10867022 | 2-scf00040 | 2 |
| AX-157814056 | 3 | 68.361 | KV452730.1 | 10926370 | 2-scf00040 | 2 |
| AX-157775385 | 3 | 68.361 | KV452730.1 | 10972415 | 2-scf00040 | 2 |
| AX-157883722 | 3 | 68.361 | KV452730.1 | 11054480 | 2-scf00040 | 2 |
| AX-157931472 | 3 | 68.361 | KV452730.1 | 11074698 | 2-scf00040 | 2 |
| AX-158414992 | 3 | 68.361 | KV452730.1 | 11100620 | 2-scf00040 | 2 |
| AX-157931655 | 3 | 68.361 | KV452730.1 | 11282595 | 2-scf00040 | 2 |
| AX-157931706 | 3 | 68.361 | KV452730.1 | 11314691 | 2-scf00040 | 2 |
| AX-157931733 | 3 | 68.361 | KV452730.1 | 11368641 | 2-scf00040 | 2 |
| AX-157931847 | 3 | 68.361 | KV452730.1 | 11533858 | 2-scf00040 | 2 |
| AX-157931950 | 3 | 68.361 | KV452730.1 | 11698821 | 2-scf00040 | 2 |
| AX-157931978 | 3 | 68.361 | KV452730.1 | 11743915 | 2-scf00040 | 2 |
| AX-157931985 | 3 | 68.361 | KV452730.1 | 11759415 | 2-scf00040 | 2 |
| AX-157814124 | 3 | 68.361 | KV452730.1 | 11762499 | 2-scf00040 | 2 |
| AX-157814125 | 3 | 68.361 | KV452730.1 | 11763063 | 2-scf00040 | 2 |
| AX-157931986 | 3 | 68.361 | KV452730.1 | 11763751 | 2-scf00040 | 2 |
| AX-157931995 | 3 | 68.361 | KV452730.1 | 11775407 | 2-scf00040 | 2 |

|              |   |        |            |          |            |   |
|--------------|---|--------|------------|----------|------------|---|
| AX-157931998 | 3 | 68.361 | KV452730.1 | 11780804 | 2-scf00040 | 2 |
| AX-157932011 | 3 | 68.361 | KV452730.1 | 11796914 | 2-scf00040 | 2 |
| AX-157719649 | 3 | 68.361 | KV452730.1 | 11804413 | 2-scf00040 | 2 |
| AX-157932019 | 3 | 68.361 | KV452730.1 | 11825058 | 2-scf00040 | 2 |
| AX-157854170 | 3 | 68.361 | KV452730.1 | 11831816 | 2-scf00040 | 2 |
| AX-157932023 | 3 | 68.361 | KV452730.1 | 11833708 | 2-scf00040 | 2 |
| AX-157932028 | 3 | 68.361 | KV452730.1 | 11838172 | 2-scf00040 | 2 |
| AX-157932034 | 3 | 68.361 | KV452730.1 | 11842247 | 2-scf00040 | 2 |
| AX-157932036 | 3 | 68.361 | KV452730.1 | 11844689 | 2-scf00040 | 2 |
| AX-157814130 | 3 | 68.361 | KV452730.1 | 11845077 | 2-scf00040 | 2 |
| AX-157854176 | 3 | 68.361 | KV452730.1 | 11847693 | 2-scf00040 | 2 |
| AX-157932042 | 3 | 68.361 | KV452730.1 | 11848879 | 2-scf00040 | 2 |
| AX-157932043 | 3 | 68.361 | KV452730.1 | 11849131 | 2-scf00040 | 2 |
| AX-157932044 | 3 | 68.361 | KV452730.1 | 11849693 | 2-scf00040 | 2 |
| AX-157932045 | 3 | 68.361 | KV452730.1 | 11849911 | 2-scf00040 | 2 |
| AX-157932047 | 3 | 68.361 | KV452730.1 | 11850821 | 2-scf00040 | 2 |
| AX-157932049 | 3 | 68.361 | KV452730.1 | 11851039 | 2-scf00040 | 2 |
| AX-157932051 | 3 | 68.361 | KV452730.1 | 11852028 | 2-scf00040 | 2 |
| AX-157932053 | 3 | 68.361 | KV452730.1 | 11853703 | 2-scf00040 | 2 |
| AX-157814131 | 3 | 68.361 | KV452730.1 | 11856044 | 2-scf00040 | 2 |
| AX-157932054 | 3 | 68.361 | KV452730.1 | 11857303 | 2-scf00040 | 2 |
| AX-157932055 | 3 | 68.361 | KV452730.1 | 11858093 | 2-scf00040 | 2 |
| AX-157932058 | 3 | 68.361 | KV452730.1 | 11861962 | 2-scf00040 | 2 |
| AX-157854177 | 3 | 68.361 | KV452730.1 | 11862257 | 2-scf00040 | 2 |
| AX-157814132 | 3 | 68.361 | KV452730.1 | 11862926 | 2-scf00040 | 2 |
| AX-157932059 | 3 | 68.361 | KV452730.1 | 11863628 | 2-scf00040 | 2 |
| AX-157932060 | 3 | 68.361 | KV452730.1 | 11865668 | 2-scf00040 | 2 |
| AX-157932065 | 3 | 68.361 | KV452730.1 | 11866681 | 2-scf00040 | 2 |
| AX-157932069 | 3 | 68.361 | KV452730.1 | 11867851 | 2-scf00040 | 2 |
| AX-157932072 | 3 | 68.361 | KV452730.1 | 11869730 | 2-scf00040 | 2 |
| AX-157932078 | 3 | 68.361 | KV452730.1 | 11872736 | 2-scf00040 | 2 |
| AX-157932081 | 3 | 68.361 | KV452730.1 | 11875057 | 2-scf00040 | 2 |
| AX-157932082 | 3 | 68.361 | KV452730.1 | 11875597 | 2-scf00040 | 2 |
| AX-157932083 | 3 | 68.361 | KV452730.1 | 11877349 | 2-scf00040 | 2 |
| AX-157932088 | 3 | 68.361 | KV452730.1 | 11885779 | 2-scf00040 | 2 |
| AX-157932094 | 3 | 68.361 | KV452730.1 | 11902367 | 2-scf00040 | 2 |
| AX-157932101 | 3 | 68.361 | KV452730.1 | 11907385 | 2-scf00040 | 2 |
| AX-157932107 | 3 | 68.361 | KV452730.1 | 11911194 | 2-scf00040 | 2 |
| AX-157932109 | 3 | 68.361 | KV452730.1 | 11912339 | 2-scf00040 | 2 |
| AX-157932112 | 3 | 68.361 | KV452730.1 | 11914383 | 2-scf00040 | 2 |
| AX-157932117 | 3 | 68.361 | KV452730.1 | 11920695 | 2-scf00040 | 2 |
| AX-157932120 | 3 | 68.361 | KV452730.1 | 11922668 | 2-scf00040 | 2 |
| AX-157932124 | 3 | 68.361 | KV452730.1 | 11925126 | 2-scf00040 | 2 |
| AX-157932126 | 3 | 68.361 | KV452730.1 | 11925383 | 2-scf00040 | 2 |
| AX-157932132 | 3 | 68.361 | KV452730.1 | 11926839 | 2-scf00040 | 2 |
| AX-157932137 | 3 | 68.361 | KV452730.1 | 11928372 | 2-scf00040 | 2 |
| AX-157932139 | 3 | 68.361 | KV452730.1 | 11929220 | 2-scf00040 | 2 |
| AX-157932160 | 3 | 68.361 | KV452730.1 | 11940375 | 2-scf00040 | 2 |
| AX-157932162 | 3 | 68.361 | KV452730.1 | 11940829 | 2-scf00040 | 2 |
| AX-157932165 | 3 | 68.361 | KV452730.1 | 11942742 | 2-scf00040 | 2 |
| AX-157932169 | 3 | 68.361 | KV452730.1 | 11944582 | 2-scf00040 | 2 |

|              |   |        |            |          |            |   |
|--------------|---|--------|------------|----------|------------|---|
| AX-157932170 | 3 | 68.361 | KV452730.1 | 11949186 | 2-scf00040 | 2 |
| AX-157932171 | 3 | 68.361 | KV452730.1 | 11949398 | 2-scf00040 | 2 |
| AX-157932175 | 3 | 68.361 | KV452730.1 | 11951235 | 2-scf00040 | 2 |
| AX-157932178 | 3 | 68.361 | KV452730.1 | 11951579 | 2-scf00040 | 2 |
| AX-157932195 | 3 | 68.361 | KV452730.1 | 11964690 | 2-scf00040 | 2 |
| AX-157932207 | 3 | 68.361 | KV452730.1 | 11970036 | 2-scf00040 | 2 |
| AX-157932208 | 3 | 68.361 | KV452730.1 | 11970867 | 2-scf00040 | 2 |
| AX-157932223 | 3 | 68.361 | KV452730.1 | 11976803 | 2-scf00040 | 2 |
| AX-157932226 | 3 | 68.361 | KV452730.1 | 11981318 | 2-scf00040 | 2 |
| AX-157932238 | 3 | 68.361 | KV452730.1 | 11990193 | 2-scf00040 | 2 |
| AX-158405536 | 3 | 68.361 | KV452730.1 | 12003258 | 2-scf00040 | 2 |
| AX-157932251 | 3 | 68.361 | KV452730.1 | 12004194 | 2-scf00040 | 2 |
| AX-157883749 | 3 | 68.361 | KV452730.1 | 12044271 | 2-scf00040 | 2 |
| AX-157932302 | 3 | 68.361 | KV452730.1 | 12066513 | 2-scf00040 | 2 |
| AX-157874949 | 3 | 68.361 | KV452730.1 | 12071648 | 2-scf00040 | 2 |
| AX-157932312 | 3 | 68.361 | KV452730.1 | 12083400 | 2-scf00040 | 2 |
| AX-157932328 | 3 | 68.361 | KV452730.1 | 12121313 | 2-scf00040 | 2 |
| AX-157932344 | 3 | 68.361 | KV452730.1 | 12142321 | 2-scf00040 | 2 |
| AX-157932347 | 3 | 68.361 | KV452730.1 | 12149681 | 2-scf00040 | 2 |
| AX-157932349 | 3 | 68.361 | KV452730.1 | 12154512 | 2-scf00040 | 2 |
| AX-157932352 | 3 | 68.361 | KV452730.1 | 12163649 | 2-scf00040 | 2 |
| AX-157932354 | 3 | 68.361 | KV452730.1 | 12165621 | 2-scf00040 | 2 |
| AX-157713722 | 3 | 68.361 | KV452730.1 | 12199127 | 2-scf00040 | 2 |
| AX-157932400 | 3 | 68.361 | KV452730.1 | 12215725 | 2-scf00040 | 2 |
| AX-157932408 | 3 | 68.361 | KV452730.1 | 12221236 | 2-scf00040 | 2 |
| AX-157758419 | 3 | 68.361 | KV452730.1 | 12870415 | 2-scf00040 | 2 |
| AX-157932834 | 3 | 68.361 | KV452730.1 | 12907938 | 2-scf00040 | 2 |
| AX-157932890 | 3 | 68.361 | KV452730.1 | 12993127 | 2-scf00040 | 2 |
| AX-157932937 | 3 | 68.361 | KV452730.1 | 13092064 | 2-scf00040 | 2 |
| AX-157717633 | 3 | 68.361 | KV452730.1 | 13279660 | 2-scf00040 | 2 |
| AX-157933087 | 3 | 68.361 | KV452730.1 | 13286191 | 2-scf00040 | 2 |
| AX-157933200 | 3 | 68.361 | KV452730.1 | 13526918 | 2-scf00040 | 2 |
| AX-157933226 | 3 | 68.361 | KV452730.1 | 13583609 | 2-scf00040 | 2 |
| AX-157933414 | 3 | 68.361 | KV452730.1 | 13892557 | 2-scf00040 | 2 |
| AX-157874992 | 3 | 68.361 | KV452730.1 | 14038553 | 2-scf00040 | 2 |
| AX-157814261 | 3 | 68.361 | KV452730.1 | 14268042 | 2-scf00040 | 2 |
| AX-157933774 | 3 | 68.361 | KV452730.1 | 14463423 | 2-scf00040 | 2 |
| AX-157933895 | 3 | 68.361 | KV452733.1 | 17078    | 2-scf00041 | 2 |
| AX-157934035 | 3 | 68.361 | KV452733.1 | 147888   | 2-scf00041 | 2 |
| AX-157934094 | 3 | 68.361 | KV452733.1 | 217324   | 2-scf00041 | 2 |
| AX-157934251 | 3 | 68.361 | KV452733.1 | 349079   | 2-scf00041 | 2 |
| AX-157934445 | 3 | 68.361 | KV452733.1 | 585769   | 2-scf00041 | 2 |
| AX-157934473 | 3 | 68.361 | KV452733.1 | 602654   | 2-scf00041 | 2 |
| AX-157934554 | 3 | 68.361 | KV452733.1 | 674351   | 2-scf00041 | 2 |
| AX-157934587 | 3 | 68.361 | KV452733.1 | 714712   | 2-scf00041 | 2 |
| AX-157934598 | 3 | 68.361 | KV452733.1 | 727872   | 2-scf00041 | 2 |
| AX-157694707 | 3 | 68.361 | KV452733.1 | 933439   | 2-scf00041 | 2 |
| AX-157714629 | 3 | 68.361 | KV452733.1 | 1064769  | 2-scf00041 | 2 |
| AX-157742914 | 3 | 68.361 | KV452733.1 | 1206889  | 2-scf00041 | 2 |
| AX-157875090 | 3 | 68.361 | KV452733.1 | 2425352  | 2-scf00041 | 2 |
| AX-157709460 | 3 | 68.361 | KV452733.1 | 2548839  | 2-scf00041 | 2 |

|              |   |        |             |          |               |    |
|--------------|---|--------|-------------|----------|---------------|----|
| AX-158405650 | 3 | 68.361 | KV452733.1  | 3459928  | 2-scf00041    | 2  |
| AX-157937172 | 3 | 68.361 | KV452733.1  | 3516192  | 2-scf00041    | 2  |
| AX-157937287 | 3 | 68.361 | KV452733.1  | 3643213  | 2-scf00041    | 2  |
| AX-157937689 | 3 | 68.361 | KV452732.1  | 553577   | 2-scf00042    | 2  |
| AX-157937749 | 3 | 68.361 | KV452732.1  | 656516   | 2-scf00042    | 2  |
| AX-157937759 | 3 | 68.361 | KV452732.1  | 691640   | 2-scf00042    | 2  |
| AX-157937774 | 3 | 68.361 | KV452732.1  | 723526   | 2-scf00042    | 2  |
| AX-157937842 | 3 | 68.361 | KV452732.1  | 828699   | 2-scf00042    | 2  |
| AX-157694576 | 3 | 68.361 | KV452732.1  | 850137   | 2-scf00042    | 2  |
| AX-158405673 | 3 | 68.361 | KV452732.1  | 935660   | 2-scf00042    | 2  |
| AX-157937938 | 3 | 68.361 | KV452732.1  | 989176   | 2-scf00042    | 2  |
| AX-157937939 | 3 | 68.361 | KV452732.1  | 989821   | 2-scf00042    | 2  |
| AX-157937949 | 3 | 68.361 | KV452732.1  | 998693   | 2-scf00042    | 2  |
| AX-157937978 | 3 | 68.361 | KV452732.1  | 1070953  | 2-scf00042    | 2  |
| AX-157937994 | 3 | 68.361 | KV452732.1  | 1111002  | 2-scf00042    | 2  |
| AX-157938006 | 3 | 68.361 | KV452732.1  | 1139936  | 2-scf00042    | 2  |
| AX-157938059 | 3 | 68.361 | KV452732.1  | 1271569  | 2-scf00042    | 2  |
| AX-157938170 | 3 | 68.361 | KV452732.1  | 1461170  | 2-scf00042    | 2  |
| AX-157938338 | 3 | 68.361 | KV452735.1  | 84840    | 2-scf00044    | 2  |
| AX-157742901 | 3 | 68.361 | KV452742.1  | 526061   | 2-scf00046    | 2  |
| AX-157939773 | 3 | 68.361 | KV452742.1  | 2768818  | 2-scf00046    | 2  |
| AX-157939908 | 3 | 68.361 | KV452742.1  | 2990196  | 2-scf00046    | 2  |
| AX-157939934 | 3 | 68.361 | KV452742.1  | 3008841  | 2-scf00046    | 2  |
| AX-157940084 | 3 | 68.361 | KV452742.1  | 3159294  | 2-scf00046    | 2  |
| AX-157940130 | 3 | 68.361 | KV452742.1  | 3208440  | 2-scf00046    | 2  |
| AX-157940347 | 3 | 68.361 | KV452742.1  | 3473977  | 2-scf00046    | 2  |
| AX-157940355 | 3 | 68.361 | KV452742.1  | 3488776  | 2-scf00046    | 2  |
| AX-157940501 | 3 | 68.361 | KV452742.1  | 3666534  | 2-scf00046    | 2  |
| AX-157940531 | 3 | 68.361 | KV452742.1  | 3729290  | 2-scf00046    | 2  |
| AX-157721774 | 3 | 68.361 | KV452742.1  | 3745922  | 2-scf00046    | 2  |
| AX-157753193 | 3 | 68.361 | KV452742.1  | 3769801  | 2-scf00046    | 2  |
| AX-157940882 | 3 | 68.361 | KV452742.1  | 4407192  | 2-scf00046    | 2  |
| AX-157941387 | 3 | 68.361 | KV452743.1  | 38275    | 2-scf00050    | 2  |
| AX-157941523 | 3 | 68.361 | KV452745.1  | 19148    | 2-scf00051    | 2  |
| AX-158382650 | 3 | 68.361 | KV452745.1  | 599540   | 2-scf00051    | 2  |
| AX-157942316 | 3 | 68.361 | KV452745.1  | 717041   | 2-scf00051    | 2  |
| AX-158390087 | 3 | 68.361 | KV452745.1  | 1048315  | 2-scf00051    | 2  |
| AX-157943077 | 3 | 68.361 | KV452747.1  | 12898    | 2-scf00053    | 2  |
| AX-157943129 | 3 | 68.361 | KV452747.1  | 75025    | 2-scf00053    | 2  |
| AX-157943174 | 3 | 68.361 | KV452747.1  | 132158   | 2-scf00053    | 2  |
| AX-158376538 | 3 | 68.361 | KV452740.1  | 287438   | 2-scf00586    | 2  |
| AX-157696629 | 3 | 68.361 | FI871124.1  | 141      | ORI212 Ictalu | UN |
| AX-157693895 | 3 | 68.361 | FI875480.1  | 131      | ORI212 Ictalu | UN |
| AX-157705355 | 3 | 68.361 | 3ML01029487 | 603      | scf05110_1    | UN |
| AX-157930290 | 3 | 68.47  | KV452730.1  | 9543460  | 2-scf00040    | 2  |
| AX-157931058 | 3 | 68.47  | KV452730.1  | 10616477 | 2-scf00040    | 2  |
| AX-157931355 | 3 | 68.47  | KV452730.1  | 10958257 | 2-scf00040    | 2  |
| AX-157715469 | 3 | 68.47  | KV452730.1  | 11869101 | 2-scf00040    | 2  |
| AX-157932237 | 3 | 68.47  | KV452730.1  | 11989662 | 2-scf00040    | 2  |
| AX-157854181 | 3 | 68.47  | KV452730.1  | 11993238 | 2-scf00040    | 2  |
| AX-157932242 | 3 | 68.47  | KV452730.1  | 11994601 | 2-scf00040    | 2  |

|              |   |       |            |          |            |   |
|--------------|---|-------|------------|----------|------------|---|
| AX-158389821 | 3 | 68.47 | KV452730.1 | 11997010 | 2-scf00040 | 2 |
| AX-157932245 | 3 | 68.47 | KV452730.1 | 11997543 | 2-scf00040 | 2 |
| AX-157932246 | 3 | 68.47 | KV452730.1 | 11999412 | 2-scf00040 | 2 |
| AX-157932247 | 3 | 68.47 | KV452730.1 | 12000496 | 2-scf00040 | 2 |
| AX-157932260 | 3 | 68.47 | KV452730.1 | 12018048 | 2-scf00040 | 2 |
| AX-157932261 | 3 | 68.47 | KV452730.1 | 12019155 | 2-scf00040 | 2 |
| AX-157932263 | 3 | 68.47 | KV452730.1 | 12022515 | 2-scf00040 | 2 |
| AX-157932288 | 3 | 68.47 | KV452730.1 | 12052364 | 2-scf00040 | 2 |
| AX-157854202 | 3 | 68.47 | KV452730.1 | 12053825 | 2-scf00040 | 2 |
| AX-157854204 | 3 | 68.47 | KV452730.1 | 12065914 | 2-scf00040 | 2 |
| AX-157854205 | 3 | 68.47 | KV452730.1 | 12066071 | 2-scf00040 | 2 |
| AX-158389824 | 3 | 68.47 | KV452730.1 | 12069016 | 2-scf00040 | 2 |
| AX-157932304 | 3 | 68.47 | KV452730.1 | 12069784 | 2-scf00040 | 2 |
| AX-157932305 | 3 | 68.47 | KV452730.1 | 12071448 | 2-scf00040 | 2 |
| AX-157814141 | 3 | 68.47 | KV452730.1 | 12072727 | 2-scf00040 | 2 |
| AX-157932313 | 3 | 68.47 | KV452730.1 | 12084045 | 2-scf00040 | 2 |
| AX-157932315 | 3 | 68.47 | KV452730.1 | 12084744 | 2-scf00040 | 2 |
| AX-157932317 | 3 | 68.47 | KV452730.1 | 12087924 | 2-scf00040 | 2 |
| AX-157932335 | 3 | 68.47 | KV452730.1 | 12129829 | 2-scf00040 | 2 |
| AX-157854213 | 3 | 68.47 | KV452730.1 | 12134975 | 2-scf00040 | 2 |
| AX-157932338 | 3 | 68.47 | KV452730.1 | 12135365 | 2-scf00040 | 2 |
| AX-157932339 | 3 | 68.47 | KV452730.1 | 12135681 | 2-scf00040 | 2 |
| AX-157932342 | 3 | 68.47 | KV452730.1 | 12141197 | 2-scf00040 | 2 |
| AX-157932355 | 3 | 68.47 | KV452730.1 | 12166002 | 2-scf00040 | 2 |
| AX-157932360 | 3 | 68.47 | KV452730.1 | 12168192 | 2-scf00040 | 2 |
| AX-157854216 | 3 | 68.47 | KV452730.1 | 12171671 | 2-scf00040 | 2 |
| AX-157854217 | 3 | 68.47 | KV452730.1 | 12173904 | 2-scf00040 | 2 |
| AX-157854219 | 3 | 68.47 | KV452730.1 | 12196254 | 2-scf00040 | 2 |
| AX-157814151 | 3 | 68.47 | KV452730.1 | 12196576 | 2-scf00040 | 2 |
| AX-157814152 | 3 | 68.47 | KV452730.1 | 12196874 | 2-scf00040 | 2 |
| AX-157932381 | 3 | 68.47 | KV452730.1 | 12200332 | 2-scf00040 | 2 |
| AX-157779631 | 3 | 68.47 | KV452730.1 | 12200667 | 2-scf00040 | 2 |
| AX-157932382 | 3 | 68.47 | KV452730.1 | 12202657 | 2-scf00040 | 2 |
| AX-157779635 | 3 | 68.47 | KV452730.1 | 12202750 | 2-scf00040 | 2 |
| AX-157932389 | 3 | 68.47 | KV452730.1 | 12207768 | 2-scf00040 | 2 |
| AX-157779636 | 3 | 68.47 | KV452730.1 | 12208795 | 2-scf00040 | 2 |
| AX-157932394 | 3 | 68.47 | KV452730.1 | 12210189 | 2-scf00040 | 2 |
| AX-157932395 | 3 | 68.47 | KV452730.1 | 12211551 | 2-scf00040 | 2 |
| AX-157932396 | 3 | 68.47 | KV452730.1 | 12212198 | 2-scf00040 | 2 |
| AX-158389826 | 3 | 68.47 | KV452730.1 | 12212324 | 2-scf00040 | 2 |
| AX-158389827 | 3 | 68.47 | KV452730.1 | 12224940 | 2-scf00040 | 2 |
| AX-157932412 | 3 | 68.47 | KV452730.1 | 12226044 | 2-scf00040 | 2 |
| AX-157869293 | 3 | 68.47 | KV452730.1 | 12229957 | 2-scf00040 | 2 |
| AX-157932417 | 3 | 68.47 | KV452730.1 | 12232051 | 2-scf00040 | 2 |
| AX-157814154 | 3 | 68.47 | KV452730.1 | 12233653 | 2-scf00040 | 2 |
| AX-157745632 | 3 | 68.47 | KV452730.1 | 12234598 | 2-scf00040 | 2 |
| AX-157932419 | 3 | 68.47 | KV452730.1 | 12234686 | 2-scf00040 | 2 |
| AX-157869294 | 3 | 68.47 | KV452730.1 | 12235742 | 2-scf00040 | 2 |
| AX-157814155 | 3 | 68.47 | KV452730.1 | 12236001 | 2-scf00040 | 2 |
| AX-157932422 | 3 | 68.47 | KV452730.1 | 12239335 | 2-scf00040 | 2 |
| AX-157932428 | 3 | 68.47 | KV452730.1 | 12246009 | 2-scf00040 | 2 |

|              |   |       |            |          |            |   |
|--------------|---|-------|------------|----------|------------|---|
| AX-157883757 | 3 | 68.47 | KV452730.1 | 12249291 | 2-scf00040 | 2 |
| AX-157932432 | 3 | 68.47 | KV452730.1 | 12249414 | 2-scf00040 | 2 |
| AX-157932433 | 3 | 68.47 | KV452730.1 | 12250621 | 2-scf00040 | 2 |
| AX-157932436 | 3 | 68.47 | KV452730.1 | 12251259 | 2-scf00040 | 2 |
| AX-157814156 | 3 | 68.47 | KV452730.1 | 12251852 | 2-scf00040 | 2 |
| AX-157854220 | 3 | 68.47 | KV452730.1 | 12252667 | 2-scf00040 | 2 |
| AX-157854221 | 3 | 68.47 | KV452730.1 | 12256254 | 2-scf00040 | 2 |
| AX-158389828 | 3 | 68.47 | KV452730.1 | 12256983 | 2-scf00040 | 2 |
| AX-157854222 | 3 | 68.47 | KV452730.1 | 12257954 | 2-scf00040 | 2 |
| AX-158389830 | 3 | 68.47 | KV452730.1 | 12260469 | 2-scf00040 | 2 |
| AX-157932441 | 3 | 68.47 | KV452730.1 | 12263474 | 2-scf00040 | 2 |
| AX-157854223 | 3 | 68.47 | KV452730.1 | 12264967 | 2-scf00040 | 2 |
| AX-157854224 | 3 | 68.47 | KV452730.1 | 12265126 | 2-scf00040 | 2 |
| AX-157869295 | 3 | 68.47 | KV452730.1 | 12279676 | 2-scf00040 | 2 |
| AX-158389835 | 3 | 68.47 | KV452730.1 | 12326019 | 2-scf00040 | 2 |
| AX-158389839 | 3 | 68.47 | KV452730.1 | 12420387 | 2-scf00040 | 2 |
| AX-157767278 | 3 | 68.47 | KV452730.1 | 12444212 | 2-scf00040 | 2 |
| AX-157854254 | 3 | 68.47 | KV452730.1 | 12705807 | 2-scf00040 | 2 |
| AX-157854255 | 3 | 68.47 | KV452730.1 | 12708912 | 2-scf00040 | 2 |
| AX-157814184 | 3 | 68.47 | KV452730.1 | 12758478 | 2-scf00040 | 2 |
| AX-157932742 | 3 | 68.47 | KV452730.1 | 12767695 | 2-scf00040 | 2 |
| AX-157932837 | 3 | 68.47 | KV452730.1 | 12913242 | 2-scf00040 | 2 |
| AX-157932856 | 3 | 68.47 | KV452730.1 | 12947163 | 2-scf00040 | 2 |
| AX-157932874 | 3 | 68.47 | KV452730.1 | 12967512 | 2-scf00040 | 2 |
| AX-157932915 | 3 | 68.47 | KV452730.1 | 13051188 | 2-scf00040 | 2 |
| AX-157932926 | 3 | 68.47 | KV452730.1 | 13070604 | 2-scf00040 | 2 |
| AX-158389907 | 3 | 68.47 | KV452730.1 | 13089417 | 2-scf00040 | 2 |
| AX-157814203 | 3 | 68.47 | KV452730.1 | 13096941 | 2-scf00040 | 2 |
| AX-157932947 | 3 | 68.47 | KV452730.1 | 13100024 | 2-scf00040 | 2 |
| AX-158389909 | 3 | 68.47 | KV452730.1 | 13101988 | 2-scf00040 | 2 |
| AX-157933093 | 3 | 68.47 | KV452730.1 | 13294747 | 2-scf00040 | 2 |
| AX-157854341 | 3 | 68.47 | KV452730.1 | 13375455 | 2-scf00040 | 2 |
| AX-158389941 | 3 | 68.47 | KV452730.1 | 13405988 | 2-scf00040 | 2 |
| AX-157862760 | 3 | 68.47 | KV452730.1 | 13472700 | 2-scf00040 | 2 |
| AX-157937522 | 3 | 68.47 | KV452732.1 | 234675   | 2-scf00042 | 2 |
| AX-157937527 | 3 | 68.47 | KV452732.1 | 244153   | 2-scf00042 | 2 |
| AX-157937528 | 3 | 68.47 | KV452732.1 | 247012   | 2-scf00042 | 2 |
| AX-157937535 | 3 | 68.47 | KV452732.1 | 266740   | 2-scf00042 | 2 |
| AX-157937542 | 3 | 68.47 | KV452732.1 | 279514   | 2-scf00042 | 2 |
| AX-157937546 | 3 | 68.47 | KV452732.1 | 294205   | 2-scf00042 | 2 |
| AX-157937547 | 3 | 68.47 | KV452732.1 | 294763   | 2-scf00042 | 2 |
| AX-157937550 | 3 | 68.47 | KV452732.1 | 296714   | 2-scf00042 | 2 |
| AX-157937553 | 3 | 68.47 | KV452732.1 | 298630   | 2-scf00042 | 2 |
| AX-157937555 | 3 | 68.47 | KV452732.1 | 300134   | 2-scf00042 | 2 |
| AX-157937563 | 3 | 68.47 | KV452732.1 | 312871   | 2-scf00042 | 2 |
| AX-157937575 | 3 | 68.47 | KV452732.1 | 333505   | 2-scf00042 | 2 |
| AX-157937579 | 3 | 68.47 | KV452732.1 | 339152   | 2-scf00042 | 2 |
| AX-157937580 | 3 | 68.47 | KV452732.1 | 339981   | 2-scf00042 | 2 |
| AX-157937581 | 3 | 68.47 | KV452732.1 | 341125   | 2-scf00042 | 2 |
| AX-157937584 | 3 | 68.47 | KV452732.1 | 343793   | 2-scf00042 | 2 |
| AX-157937589 | 3 | 68.47 | KV452732.1 | 355724   | 2-scf00042 | 2 |

|              |   |        |            |         |            |   |
|--------------|---|--------|------------|---------|------------|---|
| AX-157937594 | 3 | 68.47  | KV452732.1 | 363472  | 2-scf00042 | 2 |
| AX-157937597 | 3 | 68.47  | KV452732.1 | 367835  | 2-scf00042 | 2 |
| AX-158390022 | 3 | 68.47  | KV452732.1 | 374547  | 2-scf00042 | 2 |
| AX-157937612 | 3 | 68.47  | KV452732.1 | 398925  | 2-scf00042 | 2 |
| AX-157757835 | 3 | 68.47  | KV452732.1 | 413238  | 2-scf00042 | 2 |
| AX-157937619 | 3 | 68.47  | KV452732.1 | 424420  | 2-scf00042 | 2 |
| AX-157937624 | 3 | 68.47  | KV452732.1 | 440475  | 2-scf00042 | 2 |
| AX-157883847 | 3 | 68.47  | KV452732.1 | 448370  | 2-scf00042 | 2 |
| AX-157937638 | 3 | 68.47  | KV452732.1 | 462665  | 2-scf00042 | 2 |
| AX-157883848 | 3 | 68.47  | KV452732.1 | 465691  | 2-scf00042 | 2 |
| AX-157937639 | 3 | 68.47  | KV452732.1 | 465946  | 2-scf00042 | 2 |
| AX-157937640 | 3 | 68.47  | KV452732.1 | 466331  | 2-scf00042 | 2 |
| AX-158405662 | 3 | 68.47  | KV452732.1 | 471642  | 2-scf00042 | 2 |
| AX-157937643 | 3 | 68.47  | KV452732.1 | 476309  | 2-scf00042 | 2 |
| AX-157937647 | 3 | 68.47  | KV452732.1 | 482895  | 2-scf00042 | 2 |
| AX-157937649 | 3 | 68.47  | KV452732.1 | 486128  | 2-scf00042 | 2 |
| AX-157937652 | 3 | 68.47  | KV452732.1 | 495394  | 2-scf00042 | 2 |
| AX-157937653 | 3 | 68.47  | KV452732.1 | 496886  | 2-scf00042 | 2 |
| AX-157814469 | 3 | 68.47  | KV452732.1 | 498485  | 2-scf00042 | 2 |
| AX-157937662 | 3 | 68.47  | KV452732.1 | 509778  | 2-scf00042 | 2 |
| AX-157937668 | 3 | 68.47  | KV452732.1 | 522137  | 2-scf00042 | 2 |
| AX-157937669 | 3 | 68.47  | KV452732.1 | 523438  | 2-scf00042 | 2 |
| AX-157937670 | 3 | 68.47  | KV452732.1 | 525064  | 2-scf00042 | 2 |
| AX-157937672 | 3 | 68.47  | KV452732.1 | 526150  | 2-scf00042 | 2 |
| AX-157937674 | 3 | 68.47  | KV452732.1 | 528047  | 2-scf00042 | 2 |
| AX-157937675 | 3 | 68.47  | KV452732.1 | 531500  | 2-scf00042 | 2 |
| AX-157937678 | 3 | 68.47  | KV452732.1 | 532034  | 2-scf00042 | 2 |
| AX-157937691 | 3 | 68.47  | KV452732.1 | 555800  | 2-scf00042 | 2 |
| AX-157937693 | 3 | 68.47  | KV452732.1 | 556497  | 2-scf00042 | 2 |
| AX-157937694 | 3 | 68.47  | KV452732.1 | 558130  | 2-scf00042 | 2 |
| AX-157937698 | 3 | 68.47  | KV452732.1 | 559461  | 2-scf00042 | 2 |
| AX-157937701 | 3 | 68.47  | KV452732.1 | 571285  | 2-scf00042 | 2 |
| AX-157937708 | 3 | 68.47  | KV452732.1 | 582453  | 2-scf00042 | 2 |
| AX-157937713 | 3 | 68.47  | KV452732.1 | 585096  | 2-scf00042 | 2 |
| AX-157937716 | 3 | 68.47  | KV452732.1 | 586138  | 2-scf00042 | 2 |
| AX-157937718 | 3 | 68.47  | KV452732.1 | 594897  | 2-scf00042 | 2 |
| AX-157883849 | 3 | 68.47  | KV452732.1 | 599201  | 2-scf00042 | 2 |
| AX-157937724 | 3 | 68.47  | KV452732.1 | 600955  | 2-scf00042 | 2 |
| AX-157937725 | 3 | 68.47  | KV452732.1 | 605014  | 2-scf00042 | 2 |
| AX-157937731 | 3 | 68.47  | KV452732.1 | 615447  | 2-scf00042 | 2 |
| AX-157937737 | 3 | 68.47  | KV452732.1 | 634240  | 2-scf00042 | 2 |
| AX-157937747 | 3 | 68.47  | KV452732.1 | 650107  | 2-scf00042 | 2 |
| AX-157938198 | 3 | 68.47  | KV452732.1 | 1476772 | 2-scf00042 | 2 |
| AX-157944424 | 3 | 68.47  | KV452747.1 | 1397809 | 2-scf00053 | 2 |
| AX-157928472 | 3 | 68.579 | KV452730.1 | 7013431 | 2-scf00040 | 2 |
| AX-157929600 | 3 | 68.579 | KV452730.1 | 8808492 | 2-scf00040 | 2 |
| AX-157929906 | 3 | 68.579 | KV452730.1 | 9169735 | 2-scf00040 | 2 |
| AX-157930188 | 3 | 68.579 | KV452730.1 | 9413005 | 2-scf00040 | 2 |
| AX-158405486 | 3 | 68.579 | KV452730.1 | 9414056 | 2-scf00040 | 2 |
| AX-157813946 | 3 | 68.579 | KV452730.1 | 9516097 | 2-scf00040 | 2 |
| AX-157813954 | 3 | 68.579 | KV452730.1 | 9651698 | 2-scf00040 | 2 |



|              |   |        |            |          |            |   |
|--------------|---|--------|------------|----------|------------|---|
| AX-157930409 | 3 | 68.579 | KV452730.1 | 9755218  | 2-scf00040 | 2 |
| AX-157930447 | 3 | 68.579 | KV452730.1 | 9812707  | 2-scf00040 | 2 |
| AX-157930490 | 3 | 68.579 | KV452730.1 | 9902038  | 2-scf00040 | 2 |
| AX-157930506 | 3 | 68.579 | KV452730.1 | 9935137  | 2-scf00040 | 2 |
| AX-157930572 | 3 | 68.579 | KV452730.1 | 10041312 | 2-scf00040 | 2 |
| AX-157813987 | 3 | 68.579 | KV452730.1 | 10226175 | 2-scf00040 | 2 |
| AX-157930717 | 3 | 68.579 | KV452730.1 | 10236869 | 2-scf00040 | 2 |
| AX-157930720 | 3 | 68.579 | KV452730.1 | 10242503 | 2-scf00040 | 2 |
| AX-157930779 | 3 | 68.579 | KV452730.1 | 10314558 | 2-scf00040 | 2 |
| AX-157930780 | 3 | 68.579 | KV452730.1 | 10315758 | 2-scf00040 | 2 |
| AX-157930856 | 3 | 68.579 | KV452730.1 | 10402681 | 2-scf00040 | 2 |
| AX-157930873 | 3 | 68.579 | KV452730.1 | 10430211 | 2-scf00040 | 2 |
| AX-157930882 | 3 | 68.579 | KV452730.1 | 10444755 | 2-scf00040 | 2 |
| AX-157814007 | 3 | 68.579 | KV452730.1 | 10445528 | 2-scf00040 | 2 |
| AX-157869215 | 3 | 68.579 | KV452730.1 | 10458246 | 2-scf00040 | 2 |
| AX-157930905 | 3 | 68.579 | KV452730.1 | 10467328 | 2-scf00040 | 2 |
| AX-157854018 | 3 | 68.579 | KV452730.1 | 10480156 | 2-scf00040 | 2 |
| AX-157930922 | 3 | 68.579 | KV452730.1 | 10486904 | 2-scf00040 | 2 |
| AX-157814009 | 3 | 68.579 | KV452730.1 | 10492856 | 2-scf00040 | 2 |
| AX-157930954 | 3 | 68.579 | KV452730.1 | 10526756 | 2-scf00040 | 2 |
| AX-157931019 | 3 | 68.579 | KV452730.1 | 10583221 | 2-scf00040 | 2 |
| AX-157931034 | 3 | 68.579 | KV452730.1 | 10596297 | 2-scf00040 | 2 |
| AX-158389759 | 3 | 68.579 | KV452730.1 | 10678271 | 2-scf00040 | 2 |
| AX-157931143 | 3 | 68.579 | KV452730.1 | 10694670 | 2-scf00040 | 2 |
| AX-157883715 | 3 | 68.579 | KV452730.1 | 10736135 | 2-scf00040 | 2 |
| AX-157931250 | 3 | 68.579 | KV452730.1 | 10812564 | 2-scf00040 | 2 |
| AX-157931297 | 3 | 68.579 | KV452730.1 | 10852745 | 2-scf00040 | 2 |
| AX-157931322 | 3 | 68.579 | KV452730.1 | 10911723 | 2-scf00040 | 2 |
| AX-157931324 | 3 | 68.579 | KV452730.1 | 10915315 | 2-scf00040 | 2 |
| AX-157931330 | 3 | 68.579 | KV452730.1 | 10929309 | 2-scf00040 | 2 |
| AX-157931334 | 3 | 68.579 | KV452730.1 | 10937772 | 2-scf00040 | 2 |
| AX-157931340 | 3 | 68.579 | KV452730.1 | 10944167 | 2-scf00040 | 2 |
| AX-157931342 | 3 | 68.579 | KV452730.1 | 10946036 | 2-scf00040 | 2 |
| AX-157931344 | 3 | 68.579 | KV452730.1 | 10949517 | 2-scf00040 | 2 |
| AX-157814057 | 3 | 68.579 | KV452730.1 | 10950768 | 2-scf00040 | 2 |
| AX-157931348 | 3 | 68.579 | KV452730.1 | 10951669 | 2-scf00040 | 2 |
| AX-157931350 | 3 | 68.579 | KV452730.1 | 10952070 | 2-scf00040 | 2 |
| AX-157931367 | 3 | 68.579 | KV452730.1 | 10966016 | 2-scf00040 | 2 |
| AX-157931373 | 3 | 68.579 | KV452730.1 | 10970963 | 2-scf00040 | 2 |
| AX-157931374 | 3 | 68.579 | KV452730.1 | 10972864 | 2-scf00040 | 2 |
| AX-157931405 | 3 | 68.579 | KV452730.1 | 10997520 | 2-scf00040 | 2 |
| AX-157931437 | 3 | 68.579 | KV452730.1 | 11024504 | 2-scf00040 | 2 |
| AX-157931549 | 3 | 68.579 | KV452730.1 | 11148199 | 2-scf00040 | 2 |
| AX-157931638 | 3 | 68.579 | KV452730.1 | 11267027 | 2-scf00040 | 2 |
| AX-157874921 | 3 | 68.579 | KV452730.1 | 11380409 | 2-scf00040 | 2 |
| AX-157931775 | 3 | 68.579 | KV452730.1 | 11425307 | 2-scf00040 | 2 |
| AX-158405525 | 3 | 68.579 | KV452730.1 | 11426164 | 2-scf00040 | 2 |
| AX-157931780 | 3 | 68.579 | KV452730.1 | 11431335 | 2-scf00040 | 2 |
| AX-157931781 | 3 | 68.579 | KV452730.1 | 11433359 | 2-scf00040 | 2 |
| AX-158389811 | 3 | 68.579 | KV452730.1 | 11437184 | 2-scf00040 | 2 |
| AX-157854089 | 3 | 68.579 | KV452730.1 | 11437444 | 2-scf00040 | 2 |

|              |   |        |            |          |            |   |
|--------------|---|--------|------------|----------|------------|---|
| AX-157931820 | 3 | 68.579 | KV452730.1 | 11492994 | 2-scf00040 | 2 |
| AX-157883731 | 3 | 68.579 | KV452730.1 | 11496552 | 2-scf00040 | 2 |
| AX-157931851 | 3 | 68.579 | KV452730.1 | 11546018 | 2-scf00040 | 2 |
| AX-157931852 | 3 | 68.579 | KV452730.1 | 11549530 | 2-scf00040 | 2 |
| AX-157738845 | 3 | 68.579 | KV452730.1 | 11549834 | 2-scf00040 | 2 |
| AX-158414998 | 3 | 68.579 | KV452730.1 | 11552892 | 2-scf00040 | 2 |
| AX-158379349 | 3 | 68.579 | KV452730.1 | 11553723 | 2-scf00040 | 2 |
| AX-157715977 | 3 | 68.579 | KV452730.1 | 11553766 | 2-scf00040 | 2 |
| AX-157931903 | 3 | 68.579 | KV452730.1 | 11613800 | 2-scf00040 | 2 |
| AX-157931973 | 3 | 68.579 | KV452730.1 | 11738025 | 2-scf00040 | 2 |
| AX-157931992 | 3 | 68.579 | KV452730.1 | 11771154 | 2-scf00040 | 2 |
| AX-157932004 | 3 | 68.579 | KV452730.1 | 11788631 | 2-scf00040 | 2 |
| AX-157932056 | 3 | 68.579 | KV452730.1 | 11861263 | 2-scf00040 | 2 |
| AX-157932145 | 3 | 68.579 | KV452730.1 | 11931249 | 2-scf00040 | 2 |
| AX-157932152 | 3 | 68.579 | KV452730.1 | 11935587 | 2-scf00040 | 2 |
| AX-157932230 | 3 | 68.579 | KV452730.1 | 11984005 | 2-scf00040 | 2 |
| AX-157932233 | 3 | 68.579 | KV452730.1 | 11985502 | 2-scf00040 | 2 |
| AX-157854180 | 3 | 68.579 | KV452730.1 | 11988113 | 2-scf00040 | 2 |
| AX-157932240 | 3 | 68.579 | KV452730.1 | 11992265 | 2-scf00040 | 2 |
| AX-157932241 | 3 | 68.579 | KV452730.1 | 11993984 | 2-scf00040 | 2 |
| AX-157932243 | 3 | 68.579 | KV452730.1 | 11995211 | 2-scf00040 | 2 |
| AX-157932248 | 3 | 68.579 | KV452730.1 | 12001356 | 2-scf00040 | 2 |
| AX-157932249 | 3 | 68.579 | KV452730.1 | 12001835 | 2-scf00040 | 2 |
| AX-157932250 | 3 | 68.579 | KV452730.1 | 12003697 | 2-scf00040 | 2 |
| AX-157932253 | 3 | 68.579 | KV452730.1 | 12007499 | 2-scf00040 | 2 |
| AX-157932254 | 3 | 68.579 | KV452730.1 | 12014112 | 2-scf00040 | 2 |
| AX-157932255 | 3 | 68.579 | KV452730.1 | 12014566 | 2-scf00040 | 2 |
| AX-157932258 | 3 | 68.579 | KV452730.1 | 12016383 | 2-scf00040 | 2 |
| AX-157854183 | 3 | 68.579 | KV452730.1 | 12017121 | 2-scf00040 | 2 |
| AX-157932259 | 3 | 68.579 | KV452730.1 | 12017358 | 2-scf00040 | 2 |
| AX-157854184 | 3 | 68.579 | KV452730.1 | 12017512 | 2-scf00040 | 2 |
| AX-157854185 | 3 | 68.579 | KV452730.1 | 12018477 | 2-scf00040 | 2 |
| AX-157854186 | 3 | 68.579 | KV452730.1 | 12018687 | 2-scf00040 | 2 |
| AX-157932262 | 3 | 68.579 | KV452730.1 | 12020873 | 2-scf00040 | 2 |
| AX-157854187 | 3 | 68.579 | KV452730.1 | 12021448 | 2-scf00040 | 2 |
| AX-157854188 | 3 | 68.579 | KV452730.1 | 12023564 | 2-scf00040 | 2 |
| AX-157854189 | 3 | 68.579 | KV452730.1 | 12025534 | 2-scf00040 | 2 |
| AX-157932266 | 3 | 68.579 | KV452730.1 | 12025667 | 2-scf00040 | 2 |
| AX-157932267 | 3 | 68.579 | KV452730.1 | 12027556 | 2-scf00040 | 2 |
| AX-157751757 | 3 | 68.579 | KV452730.1 | 12028766 | 2-scf00040 | 2 |
| AX-157932268 | 3 | 68.579 | KV452730.1 | 12030036 | 2-scf00040 | 2 |
| AX-157854191 | 3 | 68.579 | KV452730.1 | 12030351 | 2-scf00040 | 2 |
| AX-157932269 | 3 | 68.579 | KV452730.1 | 12030787 | 2-scf00040 | 2 |
| AX-157932272 | 3 | 68.579 | KV452730.1 | 12033578 | 2-scf00040 | 2 |
| AX-157854192 | 3 | 68.579 | KV452730.1 | 12034048 | 2-scf00040 | 2 |
| AX-157932274 | 3 | 68.579 | KV452730.1 | 12034715 | 2-scf00040 | 2 |
| AX-157854193 | 3 | 68.579 | KV452730.1 | 12038891 | 2-scf00040 | 2 |
| AX-157854194 | 3 | 68.579 | KV452730.1 | 12039256 | 2-scf00040 | 2 |
| AX-157854195 | 3 | 68.579 | KV452730.1 | 12041924 | 2-scf00040 | 2 |
| AX-157854196 | 3 | 68.579 | KV452730.1 | 12042828 | 2-scf00040 | 2 |
| AX-157854198 | 3 | 68.579 | KV452730.1 | 12045832 | 2-scf00040 | 2 |

|              |   |        |            |          |            |   |
|--------------|---|--------|------------|----------|------------|---|
| AX-157854199 | 3 | 68.579 | KV452730.1 | 12046695 | 2-scf00040 | 2 |
| AX-157862733 | 3 | 68.579 | KV452730.1 | 12049594 | 2-scf00040 | 2 |
| AX-157932285 | 3 | 68.579 | KV452730.1 | 12049878 | 2-scf00040 | 2 |
| AX-157854201 | 3 | 68.579 | KV452730.1 | 12053784 | 2-scf00040 | 2 |
| AX-157932294 | 3 | 68.579 | KV452730.1 | 12055964 | 2-scf00040 | 2 |
| AX-157932301 | 3 | 68.579 | KV452730.1 | 12063971 | 2-scf00040 | 2 |
| AX-157932306 | 3 | 68.579 | KV452730.1 | 12073339 | 2-scf00040 | 2 |
| AX-157932321 | 3 | 68.579 | KV452730.1 | 12104912 | 2-scf00040 | 2 |
| AX-157814144 | 3 | 68.579 | KV452730.1 | 12109171 | 2-scf00040 | 2 |
| AX-157814147 | 3 | 68.579 | KV452730.1 | 12123490 | 2-scf00040 | 2 |
| AX-157932331 | 3 | 68.579 | KV452730.1 | 12123644 | 2-scf00040 | 2 |
| AX-157932333 | 3 | 68.579 | KV452730.1 | 12126510 | 2-scf00040 | 2 |
| AX-157932348 | 3 | 68.579 | KV452730.1 | 12152000 | 2-scf00040 | 2 |
| AX-157779615 | 3 | 68.579 | KV452730.1 | 12152429 | 2-scf00040 | 2 |
| AX-157932361 | 3 | 68.579 | KV452730.1 | 12172812 | 2-scf00040 | 2 |
| AX-157932405 | 3 | 68.579 | KV452730.1 | 12218168 | 2-scf00040 | 2 |
| AX-157773989 | 3 | 68.579 | KV452730.1 | 12222314 | 2-scf00040 | 2 |
| AX-157932418 | 3 | 68.579 | KV452730.1 | 12233362 | 2-scf00040 | 2 |
| AX-157932421 | 3 | 68.579 | KV452730.1 | 12238127 | 2-scf00040 | 2 |
| AX-157932440 | 3 | 68.579 | KV452730.1 | 12261951 | 2-scf00040 | 2 |
| AX-157814157 | 3 | 68.579 | KV452730.1 | 12265631 | 2-scf00040 | 2 |
| AX-157932445 | 3 | 68.579 | KV452730.1 | 12266382 | 2-scf00040 | 2 |
| AX-157932447 | 3 | 68.579 | KV452730.1 | 12266917 | 2-scf00040 | 2 |
| AX-157932449 | 3 | 68.579 | KV452730.1 | 12267854 | 2-scf00040 | 2 |
| AX-157932450 | 3 | 68.579 | KV452730.1 | 12268546 | 2-scf00040 | 2 |
| AX-157932451 | 3 | 68.579 | KV452730.1 | 12269650 | 2-scf00040 | 2 |
| AX-157932453 | 3 | 68.579 | KV452730.1 | 12270059 | 2-scf00040 | 2 |
| AX-157932455 | 3 | 68.579 | KV452730.1 | 12272161 | 2-scf00040 | 2 |
| AX-157932459 | 3 | 68.579 | KV452730.1 | 12273295 | 2-scf00040 | 2 |
| AX-157727408 | 3 | 68.579 | KV452730.1 | 12274186 | 2-scf00040 | 2 |
| AX-157932460 | 3 | 68.579 | KV452730.1 | 12276325 | 2-scf00040 | 2 |
| AX-157744625 | 3 | 68.579 | KV452730.1 | 12278008 | 2-scf00040 | 2 |
| AX-157932462 | 3 | 68.579 | KV452730.1 | 12279030 | 2-scf00040 | 2 |
| AX-157932464 | 3 | 68.579 | KV452730.1 | 12285029 | 2-scf00040 | 2 |
| AX-157932473 | 3 | 68.579 | KV452730.1 | 12294559 | 2-scf00040 | 2 |
| AX-157932475 | 3 | 68.579 | KV452730.1 | 12294890 | 2-scf00040 | 2 |
| AX-157932477 | 3 | 68.579 | KV452730.1 | 12295118 | 2-scf00040 | 2 |
| AX-157932479 | 3 | 68.579 | KV452730.1 | 12295814 | 2-scf00040 | 2 |
| AX-157932482 | 3 | 68.579 | KV452730.1 | 12297204 | 2-scf00040 | 2 |
| AX-157932485 | 3 | 68.579 | KV452730.1 | 12297737 | 2-scf00040 | 2 |
| AX-157932487 | 3 | 68.579 | KV452730.1 | 12298188 | 2-scf00040 | 2 |
| AX-157932488 | 3 | 68.579 | KV452730.1 | 12298295 | 2-scf00040 | 2 |
| AX-157932492 | 3 | 68.579 | KV452730.1 | 12300252 | 2-scf00040 | 2 |
| AX-157932493 | 3 | 68.579 | KV452730.1 | 12302095 | 2-scf00040 | 2 |
| AX-157932494 | 3 | 68.579 | KV452730.1 | 12302476 | 2-scf00040 | 2 |
| AX-157854226 | 3 | 68.579 | KV452730.1 | 12303733 | 2-scf00040 | 2 |
| AX-157854227 | 3 | 68.579 | KV452730.1 | 12304557 | 2-scf00040 | 2 |
| AX-157883759 | 3 | 68.579 | KV452730.1 | 12305377 | 2-scf00040 | 2 |
| AX-157932497 | 3 | 68.579 | KV452730.1 | 12305617 | 2-scf00040 | 2 |
| AX-157932500 | 3 | 68.579 | KV452730.1 | 12307023 | 2-scf00040 | 2 |
| AX-158389832 | 3 | 68.579 | KV452730.1 | 12307955 | 2-scf00040 | 2 |

|              |   |        |            |          |            |   |
|--------------|---|--------|------------|----------|------------|---|
| AX-157932502 | 3 | 68.579 | KV452730.1 | 12313399 | 2-scf00040 | 2 |
| AX-157932505 | 3 | 68.579 | KV452730.1 | 12314317 | 2-scf00040 | 2 |
| AX-157932516 | 3 | 68.579 | KV452730.1 | 12327139 | 2-scf00040 | 2 |
| AX-157932521 | 3 | 68.579 | KV452730.1 | 12329497 | 2-scf00040 | 2 |
| AX-157771706 | 3 | 68.579 | KV452730.1 | 12340016 | 2-scf00040 | 2 |
| AX-157932533 | 3 | 68.579 | KV452730.1 | 12348146 | 2-scf00040 | 2 |
| AX-157932535 | 3 | 68.579 | KV452730.1 | 12349303 | 2-scf00040 | 2 |
| AX-157932538 | 3 | 68.579 | KV452730.1 | 12350235 | 2-scf00040 | 2 |
| AX-157932541 | 3 | 68.579 | KV452730.1 | 12352641 | 2-scf00040 | 2 |
| AX-157932542 | 3 | 68.579 | KV452730.1 | 12359548 | 2-scf00040 | 2 |
| AX-157814161 | 3 | 68.579 | KV452730.1 | 12364408 | 2-scf00040 | 2 |
| AX-157932548 | 3 | 68.579 | KV452730.1 | 12369122 | 2-scf00040 | 2 |
| AX-157932556 | 3 | 68.579 | KV452730.1 | 12379185 | 2-scf00040 | 2 |
| AX-157747418 | 3 | 68.579 | KV452730.1 | 12382951 | 2-scf00040 | 2 |
| AX-157869302 | 3 | 68.579 | KV452730.1 | 12385299 | 2-scf00040 | 2 |
| AX-157932559 | 3 | 68.579 | KV452730.1 | 12387651 | 2-scf00040 | 2 |
| AX-157932560 | 3 | 68.579 | KV452730.1 | 12391257 | 2-scf00040 | 2 |
| AX-157932561 | 3 | 68.579 | KV452730.1 | 12391663 | 2-scf00040 | 2 |
| AX-157932564 | 3 | 68.579 | KV452730.1 | 12393290 | 2-scf00040 | 2 |
| AX-157932567 | 3 | 68.579 | KV452730.1 | 12397915 | 2-scf00040 | 2 |
| AX-157702002 | 3 | 68.579 | KV452730.1 | 12399690 | 2-scf00040 | 2 |
| AX-157814166 | 3 | 68.579 | KV452730.1 | 12408564 | 2-scf00040 | 2 |
| AX-157932569 | 3 | 68.579 | KV452730.1 | 12409700 | 2-scf00040 | 2 |
| AX-157932572 | 3 | 68.579 | KV452730.1 | 12411182 | 2-scf00040 | 2 |
| AX-157932573 | 3 | 68.579 | KV452730.1 | 12411684 | 2-scf00040 | 2 |
| AX-157932576 | 3 | 68.579 | KV452730.1 | 12418880 | 2-scf00040 | 2 |
| AX-157932580 | 3 | 68.579 | KV452730.1 | 12422002 | 2-scf00040 | 2 |
| AX-157932581 | 3 | 68.579 | KV452730.1 | 12422383 | 2-scf00040 | 2 |
| AX-157932582 | 3 | 68.579 | KV452730.1 | 12424140 | 2-scf00040 | 2 |
| AX-157869307 | 3 | 68.579 | KV452730.1 | 12425967 | 2-scf00040 | 2 |
| AX-157932602 | 3 | 68.579 | KV452730.1 | 12442947 | 2-scf00040 | 2 |
| AX-157932603 | 3 | 68.579 | KV452730.1 | 12443577 | 2-scf00040 | 2 |
| AX-157932604 | 3 | 68.579 | KV452730.1 | 12443796 | 2-scf00040 | 2 |
| AX-157814167 | 3 | 68.579 | KV452730.1 | 12447564 | 2-scf00040 | 2 |
| AX-157932614 | 3 | 68.579 | KV452730.1 | 12455454 | 2-scf00040 | 2 |
| AX-157932615 | 3 | 68.579 | KV452730.1 | 12455959 | 2-scf00040 | 2 |
| AX-157814169 | 3 | 68.579 | KV452730.1 | 12463456 | 2-scf00040 | 2 |
| AX-157869310 | 3 | 68.579 | KV452730.1 | 12473238 | 2-scf00040 | 2 |
| AX-157814170 | 3 | 68.579 | KV452730.1 | 12479791 | 2-scf00040 | 2 |
| AX-157814172 | 3 | 68.579 | KV452730.1 | 12480590 | 2-scf00040 | 2 |
| AX-157932631 | 3 | 68.579 | KV452730.1 | 12491444 | 2-scf00040 | 2 |
| AX-157932634 | 3 | 68.579 | KV452730.1 | 12496825 | 2-scf00040 | 2 |
| AX-157932639 | 3 | 68.579 | KV452730.1 | 12503131 | 2-scf00040 | 2 |
| AX-157932641 | 3 | 68.579 | KV452730.1 | 12508936 | 2-scf00040 | 2 |
| AX-157814174 | 3 | 68.579 | KV452730.1 | 12516142 | 2-scf00040 | 2 |
| AX-157932649 | 3 | 68.579 | KV452730.1 | 12519453 | 2-scf00040 | 2 |
| AX-157932654 | 3 | 68.579 | KV452730.1 | 12524837 | 2-scf00040 | 2 |
| AX-157932656 | 3 | 68.579 | KV452730.1 | 12525478 | 2-scf00040 | 2 |
| AX-157932658 | 3 | 68.579 | KV452730.1 | 12528749 | 2-scf00040 | 2 |
| AX-157695025 | 3 | 68.579 | KV452730.1 | 12530894 | 2-scf00040 | 2 |
| AX-157814175 | 3 | 68.579 | KV452730.1 | 12533152 | 2-scf00040 | 2 |

|              |   |        |            |          |            |   |
|--------------|---|--------|------------|----------|------------|---|
| AX-157854231 | 3 | 68.579 | KV452730.1 | 12535581 | 2-scf00040 | 2 |
| AX-157932662 | 3 | 68.579 | KV452730.1 | 12539140 | 2-scf00040 | 2 |
| AX-158389842 | 3 | 68.579 | KV452730.1 | 12542968 | 2-scf00040 | 2 |
| AX-157932671 | 3 | 68.579 | KV452730.1 | 12556039 | 2-scf00040 | 2 |
| AX-157779736 | 3 | 68.579 | KV452730.1 | 12582374 | 2-scf00040 | 2 |
| AX-157854236 | 3 | 68.579 | KV452730.1 | 12584679 | 2-scf00040 | 2 |
| AX-157932677 | 3 | 68.579 | KV452730.1 | 12584892 | 2-scf00040 | 2 |
| AX-157932681 | 3 | 68.579 | KV452730.1 | 12590783 | 2-scf00040 | 2 |
| AX-157854237 | 3 | 68.579 | KV452730.1 | 12596506 | 2-scf00040 | 2 |
| AX-157932686 | 3 | 68.579 | KV452730.1 | 12599043 | 2-scf00040 | 2 |
| AX-157932689 | 3 | 68.579 | KV452730.1 | 12605334 | 2-scf00040 | 2 |
| AX-158389847 | 3 | 68.579 | KV452730.1 | 12612642 | 2-scf00040 | 2 |
| AX-158389848 | 3 | 68.579 | KV452730.1 | 12616554 | 2-scf00040 | 2 |
| AX-157932691 | 3 | 68.579 | KV452730.1 | 12616665 | 2-scf00040 | 2 |
| AX-158389849 | 3 | 68.579 | KV452730.1 | 12618732 | 2-scf00040 | 2 |
| AX-157869319 | 3 | 68.579 | KV452730.1 | 12620434 | 2-scf00040 | 2 |
| AX-157932693 | 3 | 68.579 | KV452730.1 | 12623046 | 2-scf00040 | 2 |
| AX-157932694 | 3 | 68.579 | KV452730.1 | 12625416 | 2-scf00040 | 2 |
| AX-157854242 | 3 | 68.579 | KV452730.1 | 12627013 | 2-scf00040 | 2 |
| AX-157932695 | 3 | 68.579 | KV452730.1 | 12627211 | 2-scf00040 | 2 |
| AX-158389851 | 3 | 68.579 | KV452730.1 | 12630795 | 2-scf00040 | 2 |
| AX-157704206 | 3 | 68.579 | KV452730.1 | 12638737 | 2-scf00040 | 2 |
| AX-158389854 | 3 | 68.579 | KV452730.1 | 12644846 | 2-scf00040 | 2 |
| AX-157932699 | 3 | 68.579 | KV452730.1 | 12646651 | 2-scf00040 | 2 |
| AX-158389857 | 3 | 68.579 | KV452730.1 | 12662726 | 2-scf00040 | 2 |
| AX-157854245 | 3 | 68.579 | KV452730.1 | 12663104 | 2-scf00040 | 2 |
| AX-158389858 | 3 | 68.579 | KV452730.1 | 12663699 | 2-scf00040 | 2 |
| AX-157932708 | 3 | 68.579 | KV452730.1 | 12664144 | 2-scf00040 | 2 |
| AX-157854247 | 3 | 68.579 | KV452730.1 | 12668194 | 2-scf00040 | 2 |
| AX-157932712 | 3 | 68.579 | KV452730.1 | 12680151 | 2-scf00040 | 2 |
| AX-158389861 | 3 | 68.579 | KV452730.1 | 12684361 | 2-scf00040 | 2 |
| AX-158389862 | 3 | 68.579 | KV452730.1 | 12687372 | 2-scf00040 | 2 |
| AX-157932719 | 3 | 68.579 | KV452730.1 | 12692087 | 2-scf00040 | 2 |
| AX-157932725 | 3 | 68.579 | KV452730.1 | 12705093 | 2-scf00040 | 2 |
| AX-157854253 | 3 | 68.579 | KV452730.1 | 12705564 | 2-scf00040 | 2 |
| AX-158421965 | 3 | 68.579 | KV452730.1 | 12710043 | 2-scf00040 | 2 |
| AX-157854256 | 3 | 68.579 | KV452730.1 | 12716187 | 2-scf00040 | 2 |
| AX-158389870 | 3 | 68.579 | KV452730.1 | 12726960 | 2-scf00040 | 2 |
| AX-157932733 | 3 | 68.579 | KV452730.1 | 12742458 | 2-scf00040 | 2 |
| AX-157814183 | 3 | 68.579 | KV452730.1 | 12756834 | 2-scf00040 | 2 |
| AX-157814185 | 3 | 68.579 | KV452730.1 | 12759166 | 2-scf00040 | 2 |
| AX-157854265 | 3 | 68.579 | KV452730.1 | 12761549 | 2-scf00040 | 2 |
| AX-157932744 | 3 | 68.579 | KV452730.1 | 12768830 | 2-scf00040 | 2 |
| AX-157814188 | 3 | 68.579 | KV452730.1 | 12776803 | 2-scf00040 | 2 |
| AX-157854269 | 3 | 68.579 | KV452730.1 | 12783009 | 2-scf00040 | 2 |
| AX-158389875 | 3 | 68.579 | KV452730.1 | 12797207 | 2-scf00040 | 2 |
| AX-157854271 | 3 | 68.579 | KV452730.1 | 12798498 | 2-scf00040 | 2 |
| AX-157932765 | 3 | 68.579 | KV452730.1 | 12812104 | 2-scf00040 | 2 |
| AX-158389877 | 3 | 68.579 | KV452730.1 | 12821221 | 2-scf00040 | 2 |
| AX-157932773 | 3 | 68.579 | KV452730.1 | 12827057 | 2-scf00040 | 2 |
| AX-157932777 | 3 | 68.579 | KV452730.1 | 12832148 | 2-scf00040 | 2 |

|              |   |        |            |          |            |   |
|--------------|---|--------|------------|----------|------------|---|
| AX-157854273 | 3 | 68.579 | KV452730.1 | 12833479 | 2-scf00040 | 2 |
| AX-158389878 | 3 | 68.579 | KV452730.1 | 12834455 | 2-scf00040 | 2 |
| AX-157932781 | 3 | 68.579 | KV452730.1 | 12838417 | 2-scf00040 | 2 |
| AX-158389879 | 3 | 68.579 | KV452730.1 | 12842187 | 2-scf00040 | 2 |
| AX-157932785 | 3 | 68.579 | KV452730.1 | 12843027 | 2-scf00040 | 2 |
| AX-157854275 | 3 | 68.579 | KV452730.1 | 12849213 | 2-scf00040 | 2 |
| AX-157854276 | 3 | 68.579 | KV452730.1 | 12849359 | 2-scf00040 | 2 |
| AX-157932794 | 3 | 68.579 | KV452730.1 | 12850176 | 2-scf00040 | 2 |
| AX-157932797 | 3 | 68.579 | KV452730.1 | 12851248 | 2-scf00040 | 2 |
| AX-157932799 | 3 | 68.579 | KV452730.1 | 12852238 | 2-scf00040 | 2 |
| AX-157932807 | 3 | 68.579 | KV452730.1 | 12861989 | 2-scf00040 | 2 |
| AX-157932808 | 3 | 68.579 | KV452730.1 | 12862911 | 2-scf00040 | 2 |
| AX-157932812 | 3 | 68.579 | KV452730.1 | 12865332 | 2-scf00040 | 2 |
| AX-158389883 | 3 | 68.579 | KV452730.1 | 12869236 | 2-scf00040 | 2 |
| AX-157932817 | 3 | 68.579 | KV452730.1 | 12873699 | 2-scf00040 | 2 |
| AX-157932818 | 3 | 68.579 | KV452730.1 | 12874063 | 2-scf00040 | 2 |
| AX-157932819 | 3 | 68.579 | KV452730.1 | 12875207 | 2-scf00040 | 2 |
| AX-157932821 | 3 | 68.579 | KV452730.1 | 12876012 | 2-scf00040 | 2 |
| AX-157854279 | 3 | 68.579 | KV452730.1 | 12879790 | 2-scf00040 | 2 |
| AX-157932824 | 3 | 68.579 | KV452730.1 | 12879853 | 2-scf00040 | 2 |
| AX-157932829 | 3 | 68.579 | KV452730.1 | 12885609 | 2-scf00040 | 2 |
| AX-157854280 | 3 | 68.579 | KV452730.1 | 12890656 | 2-scf00040 | 2 |
| AX-157869334 | 3 | 68.579 | KV452730.1 | 12898661 | 2-scf00040 | 2 |
| AX-157854281 | 3 | 68.579 | KV452730.1 | 12899933 | 2-scf00040 | 2 |
| AX-157869336 | 3 | 68.579 | KV452730.1 | 12901439 | 2-scf00040 | 2 |
| AX-157932836 | 3 | 68.579 | KV452730.1 | 12912100 | 2-scf00040 | 2 |
| AX-157854283 | 3 | 68.579 | KV452730.1 | 12914595 | 2-scf00040 | 2 |
| AX-157932842 | 3 | 68.579 | KV452730.1 | 12921876 | 2-scf00040 | 2 |
| AX-157883763 | 3 | 68.579 | KV452730.1 | 12927757 | 2-scf00040 | 2 |
| AX-157854284 | 3 | 68.579 | KV452730.1 | 12928243 | 2-scf00040 | 2 |
| AX-157814192 | 3 | 68.579 | KV452730.1 | 12928722 | 2-scf00040 | 2 |
| AX-158405552 | 3 | 68.579 | KV452730.1 | 12945713 | 2-scf00040 | 2 |
| AX-157932858 | 3 | 68.579 | KV452730.1 | 12952319 | 2-scf00040 | 2 |
| AX-157932859 | 3 | 68.579 | KV452730.1 | 12953048 | 2-scf00040 | 2 |
| AX-157932861 | 3 | 68.579 | KV452730.1 | 12953705 | 2-scf00040 | 2 |
| AX-157779759 | 3 | 68.579 | KV452730.1 | 12955457 | 2-scf00040 | 2 |
| AX-157932866 | 3 | 68.579 | KV452730.1 | 12958686 | 2-scf00040 | 2 |
| AX-157932869 | 3 | 68.579 | KV452730.1 | 12961159 | 2-scf00040 | 2 |
| AX-157932872 | 3 | 68.579 | KV452730.1 | 12965412 | 2-scf00040 | 2 |
| AX-157932876 | 3 | 68.579 | KV452730.1 | 12969043 | 2-scf00040 | 2 |
| AX-157932878 | 3 | 68.579 | KV452730.1 | 12971486 | 2-scf00040 | 2 |
| AX-157932881 | 3 | 68.579 | KV452730.1 | 12974472 | 2-scf00040 | 2 |
| AX-157932882 | 3 | 68.579 | KV452730.1 | 12977800 | 2-scf00040 | 2 |
| AX-157752286 | 3 | 68.579 | KV452730.1 | 12984196 | 2-scf00040 | 2 |
| AX-157932884 | 3 | 68.579 | KV452730.1 | 12984641 | 2-scf00040 | 2 |
| AX-157854290 | 3 | 68.579 | KV452730.1 | 12986243 | 2-scf00040 | 2 |
| AX-158404659 | 3 | 68.579 | KV452730.1 | 12992181 | 2-scf00040 | 2 |
| AX-157932896 | 3 | 68.579 | KV452730.1 | 13005428 | 2-scf00040 | 2 |
| AX-157854291 | 3 | 68.579 | KV452730.1 | 13010749 | 2-scf00040 | 2 |
| AX-157814193 | 3 | 68.579 | KV452730.1 | 13010832 | 2-scf00040 | 2 |
| AX-157869348 | 3 | 68.579 | KV452730.1 | 13012174 | 2-scf00040 | 2 |

|              |   |        |            |          |            |   |
|--------------|---|--------|------------|----------|------------|---|
| AX-157932903 | 3 | 68.579 | KV452730.1 | 13014888 | 2-scf00040 | 2 |
| AX-157814196 | 3 | 68.579 | KV452730.1 | 13034176 | 2-scf00040 | 2 |
| AX-157869351 | 3 | 68.579 | KV452730.1 | 13039158 | 2-scf00040 | 2 |
| AX-157869352 | 3 | 68.579 | KV452730.1 | 13041795 | 2-scf00040 | 2 |
| AX-157932912 | 3 | 68.579 | KV452730.1 | 13047125 | 2-scf00040 | 2 |
| AX-157712376 | 3 | 68.579 | KV452730.1 | 13058725 | 2-scf00040 | 2 |
| AX-157862752 | 3 | 68.579 | KV452730.1 | 13060085 | 2-scf00040 | 2 |
| AX-157814198 | 3 | 68.579 | KV452730.1 | 13063462 | 2-scf00040 | 2 |
| AX-158389904 | 3 | 68.579 | KV452730.1 | 13074769 | 2-scf00040 | 2 |
| AX-157932932 | 3 | 68.579 | KV452730.1 | 13079867 | 2-scf00040 | 2 |
| AX-157854301 | 3 | 68.579 | KV452730.1 | 13080897 | 2-scf00040 | 2 |
| AX-158415016 | 3 | 68.579 | KV452730.1 | 13090667 | 2-scf00040 | 2 |
| AX-157814199 | 3 | 68.579 | KV452730.1 | 13094890 | 2-scf00040 | 2 |
| AX-157932942 | 3 | 68.579 | KV452730.1 | 13097031 | 2-scf00040 | 2 |
| AX-157854305 | 3 | 68.579 | KV452730.1 | 13098035 | 2-scf00040 | 2 |
| AX-157932944 | 3 | 68.579 | KV452730.1 | 13098862 | 2-scf00040 | 2 |
| AX-157932952 | 3 | 68.579 | KV452730.1 | 13104342 | 2-scf00040 | 2 |
| AX-157932957 | 3 | 68.579 | KV452730.1 | 13118313 | 2-scf00040 | 2 |
| AX-157932961 | 3 | 68.579 | KV452730.1 | 13124995 | 2-scf00040 | 2 |
| AX-157932970 | 3 | 68.579 | KV452730.1 | 13136339 | 2-scf00040 | 2 |
| AX-157932971 | 3 | 68.579 | KV452730.1 | 13138009 | 2-scf00040 | 2 |
| AX-157932972 | 3 | 68.579 | KV452730.1 | 13138611 | 2-scf00040 | 2 |
| AX-157932978 | 3 | 68.579 | KV452730.1 | 13145832 | 2-scf00040 | 2 |
| AX-157932980 | 3 | 68.579 | KV452730.1 | 13146702 | 2-scf00040 | 2 |
| AX-157932984 | 3 | 68.579 | KV452730.1 | 13148844 | 2-scf00040 | 2 |
| AX-157932990 | 3 | 68.579 | KV452730.1 | 13157989 | 2-scf00040 | 2 |
| AX-157932993 | 3 | 68.579 | KV452730.1 | 13160863 | 2-scf00040 | 2 |
| AX-157814205 | 3 | 68.579 | KV452730.1 | 13169259 | 2-scf00040 | 2 |
| AX-157854316 | 3 | 68.579 | KV452730.1 | 13172934 | 2-scf00040 | 2 |
| AX-157933004 | 3 | 68.579 | KV452730.1 | 13176055 | 2-scf00040 | 2 |
| AX-157933007 | 3 | 68.579 | KV452730.1 | 13183491 | 2-scf00040 | 2 |
| AX-157779803 | 3 | 68.579 | KV452730.1 | 13184007 | 2-scf00040 | 2 |
| AX-157933008 | 3 | 68.579 | KV452730.1 | 13185978 | 2-scf00040 | 2 |
| AX-157814212 | 3 | 68.579 | KV452730.1 | 13199600 | 2-scf00040 | 2 |
| AX-157933012 | 3 | 68.579 | KV452730.1 | 13201528 | 2-scf00040 | 2 |
| AX-157854319 | 3 | 68.579 | KV452730.1 | 13202286 | 2-scf00040 | 2 |
| AX-157854320 | 3 | 68.579 | KV452730.1 | 13203737 | 2-scf00040 | 2 |
| AX-157854321 | 3 | 68.579 | KV452730.1 | 13206314 | 2-scf00040 | 2 |
| AX-157933020 | 3 | 68.579 | KV452730.1 | 13208580 | 2-scf00040 | 2 |
| AX-157731412 | 3 | 68.579 | KV452730.1 | 13213560 | 2-scf00040 | 2 |
| AX-157814214 | 3 | 68.579 | KV452730.1 | 13216561 | 2-scf00040 | 2 |
| AX-157933036 | 3 | 68.579 | KV452730.1 | 13217490 | 2-scf00040 | 2 |
| AX-157933039 | 3 | 68.579 | KV452730.1 | 13219871 | 2-scf00040 | 2 |
| AX-157748175 | 3 | 68.579 | KV452730.1 | 13226978 | 2-scf00040 | 2 |
| AX-157933040 | 3 | 68.579 | KV452730.1 | 13227267 | 2-scf00040 | 2 |
| AX-157933041 | 3 | 68.579 | KV452730.1 | 13229057 | 2-scf00040 | 2 |
| AX-157814215 | 3 | 68.579 | KV452730.1 | 13230147 | 2-scf00040 | 2 |
| AX-157814216 | 3 | 68.579 | KV452730.1 | 13230832 | 2-scf00040 | 2 |
| AX-157814217 | 3 | 68.579 | KV452730.1 | 13233349 | 2-scf00040 | 2 |
| AX-157933046 | 3 | 68.579 | KV452730.1 | 13233583 | 2-scf00040 | 2 |
| AX-157933047 | 3 | 68.579 | KV452730.1 | 13233899 | 2-scf00040 | 2 |

|              |   |        |            |          |            |   |
|--------------|---|--------|------------|----------|------------|---|
| AX-157933048 | 3 | 68.579 | KV452730.1 | 13234366 | 2-scf00040 | 2 |
| AX-157933052 | 3 | 68.579 | KV452730.1 | 13236586 | 2-scf00040 | 2 |
| AX-157814218 | 3 | 68.579 | KV452730.1 | 13246073 | 2-scf00040 | 2 |
| AX-158389919 | 3 | 68.579 | KV452730.1 | 13248495 | 2-scf00040 | 2 |
| AX-158389922 | 3 | 68.579 | KV452730.1 | 13262811 | 2-scf00040 | 2 |
| AX-157933069 | 3 | 68.579 | KV452730.1 | 13263035 | 2-scf00040 | 2 |
| AX-158389923 | 3 | 68.579 | KV452730.1 | 13265962 | 2-scf00040 | 2 |
| AX-157756163 | 3 | 68.579 | KV452730.1 | 13270621 | 2-scf00040 | 2 |
| AX-157933073 | 3 | 68.579 | KV452730.1 | 13271198 | 2-scf00040 | 2 |
| AX-157933075 | 3 | 68.579 | KV452730.1 | 13272002 | 2-scf00040 | 2 |
| AX-157933077 | 3 | 68.579 | KV452730.1 | 13275294 | 2-scf00040 | 2 |
| AX-157933079 | 3 | 68.579 | KV452730.1 | 13276399 | 2-scf00040 | 2 |
| AX-158389928 | 3 | 68.579 | KV452730.1 | 13285681 | 2-scf00040 | 2 |
| AX-158389929 | 3 | 68.579 | KV452730.1 | 13286750 | 2-scf00040 | 2 |
| AX-158389930 | 3 | 68.579 | KV452730.1 | 13296876 | 2-scf00040 | 2 |
| AX-157933095 | 3 | 68.579 | KV452730.1 | 13300284 | 2-scf00040 | 2 |
| AX-157779830 | 3 | 68.579 | KV452730.1 | 13302268 | 2-scf00040 | 2 |
| AX-158389934 | 3 | 68.579 | KV452730.1 | 13317996 | 2-scf00040 | 2 |
| AX-157933100 | 3 | 68.579 | KV452730.1 | 13330038 | 2-scf00040 | 2 |
| AX-158405560 | 3 | 68.579 | KV452730.1 | 13339097 | 2-scf00040 | 2 |
| AX-157779832 | 3 | 68.579 | KV452730.1 | 13341609 | 2-scf00040 | 2 |
| AX-157854336 | 3 | 68.579 | KV452730.1 | 13351495 | 2-scf00040 | 2 |
| AX-157933111 | 3 | 68.579 | KV452730.1 | 13353170 | 2-scf00040 | 2 |
| AX-157854338 | 3 | 68.579 | KV452730.1 | 13359364 | 2-scf00040 | 2 |
| AX-158389939 | 3 | 68.579 | KV452730.1 | 13373495 | 2-scf00040 | 2 |
| AX-157933130 | 3 | 68.579 | KV452730.1 | 13376176 | 2-scf00040 | 2 |
| AX-157869369 | 3 | 68.579 | KV452730.1 | 13378376 | 2-scf00040 | 2 |
| AX-157933136 | 3 | 68.579 | KV452730.1 | 13379550 | 2-scf00040 | 2 |
| AX-157933139 | 3 | 68.579 | KV452730.1 | 13381081 | 2-scf00040 | 2 |
| AX-157933142 | 3 | 68.579 | KV452730.1 | 13384145 | 2-scf00040 | 2 |
| AX-157862755 | 3 | 68.579 | KV452730.1 | 13407602 | 2-scf00040 | 2 |
| AX-158389943 | 3 | 68.579 | KV452730.1 | 13411629 | 2-scf00040 | 2 |
| AX-158389944 | 3 | 68.579 | KV452730.1 | 13412224 | 2-scf00040 | 2 |
| AX-157933158 | 3 | 68.579 | KV452730.1 | 13417133 | 2-scf00040 | 2 |
| AX-157869370 | 3 | 68.579 | KV452730.1 | 13420719 | 2-scf00040 | 2 |
| AX-157933159 | 3 | 68.579 | KV452730.1 | 13431980 | 2-scf00040 | 2 |
| AX-157854344 | 3 | 68.579 | KV452730.1 | 13435358 | 2-scf00040 | 2 |
| AX-157779845 | 3 | 68.579 | KV452730.1 | 13436671 | 2-scf00040 | 2 |
| AX-157862758 | 3 | 68.579 | KV452730.1 | 13443983 | 2-scf00040 | 2 |
| AX-157933166 | 3 | 68.579 | KV452730.1 | 13451263 | 2-scf00040 | 2 |
| AX-157814225 | 3 | 68.579 | KV452730.1 | 13455207 | 2-scf00040 | 2 |
| AX-158389947 | 3 | 68.579 | KV452730.1 | 13462381 | 2-scf00040 | 2 |
| AX-157933170 | 3 | 68.579 | KV452730.1 | 13462653 | 2-scf00040 | 2 |
| AX-157854349 | 3 | 68.579 | KV452730.1 | 13463240 | 2-scf00040 | 2 |
| AX-157779858 | 3 | 68.579 | KV452730.1 | 13476551 | 2-scf00040 | 2 |
| AX-157854351 | 3 | 68.579 | KV452730.1 | 13483047 | 2-scf00040 | 2 |
| AX-157933177 | 3 | 68.579 | KV452730.1 | 13491268 | 2-scf00040 | 2 |
| AX-157933182 | 3 | 68.579 | KV452730.1 | 13496066 | 2-scf00040 | 2 |
| AX-157933183 | 3 | 68.579 | KV452730.1 | 13501861 | 2-scf00040 | 2 |
| AX-157933186 | 3 | 68.579 | KV452730.1 | 13504093 | 2-scf00040 | 2 |
| AX-158389950 | 3 | 68.579 | KV452730.1 | 13507412 | 2-scf00040 | 2 |



|              |   |        |            |          |            |   |
|--------------|---|--------|------------|----------|------------|---|
| AX-157933202 | 3 | 68.579 | KV452730.1 | 13528590 | 2-scf00040 | 2 |
| AX-157933205 | 3 | 68.579 | KV452730.1 | 13532872 | 2-scf00040 | 2 |
| AX-157854356 | 3 | 68.579 | KV452730.1 | 13541744 | 2-scf00040 | 2 |
| AX-157869376 | 3 | 68.579 | KV452730.1 | 13544571 | 2-scf00040 | 2 |
| AX-157933217 | 3 | 68.579 | KV452730.1 | 13544818 | 2-scf00040 | 2 |
| AX-157869378 | 3 | 68.579 | KV452730.1 | 13548953 | 2-scf00040 | 2 |
| AX-157697977 | 3 | 68.579 | KV452730.1 | 13552701 | 2-scf00040 | 2 |
| AX-157869384 | 3 | 68.579 | KV452730.1 | 13563176 | 2-scf00040 | 2 |
| AX-157869385 | 3 | 68.579 | KV452730.1 | 13564495 | 2-scf00040 | 2 |
| AX-157854359 | 3 | 68.579 | KV452730.1 | 13568864 | 2-scf00040 | 2 |
| AX-157933223 | 3 | 68.579 | KV452730.1 | 13574004 | 2-scf00040 | 2 |
| AX-157933224 | 3 | 68.579 | KV452730.1 | 13575643 | 2-scf00040 | 2 |
| AX-157869386 | 3 | 68.579 | KV452730.1 | 13576606 | 2-scf00040 | 2 |
| AX-157854360 | 3 | 68.579 | KV452730.1 | 13577811 | 2-scf00040 | 2 |
| AX-157779874 | 3 | 68.579 | KV452730.1 | 13578706 | 2-scf00040 | 2 |
| AX-157814229 | 3 | 68.579 | KV452730.1 | 13579178 | 2-scf00040 | 2 |
| AX-157814230 | 3 | 68.579 | KV452730.1 | 13579685 | 2-scf00040 | 2 |
| AX-158389953 | 3 | 68.579 | KV452730.1 | 13581292 | 2-scf00040 | 2 |
| AX-158389954 | 3 | 68.579 | KV452730.1 | 13583569 | 2-scf00040 | 2 |
| AX-157933229 | 3 | 68.579 | KV452730.1 | 13588931 | 2-scf00040 | 2 |
| AX-157814231 | 3 | 68.579 | KV452730.1 | 13592333 | 2-scf00040 | 2 |
| AX-157862764 | 3 | 68.579 | KV452730.1 | 13592514 | 2-scf00040 | 2 |
| AX-158405564 | 3 | 68.579 | KV452730.1 | 13594434 | 2-scf00040 | 2 |
| AX-157933233 | 3 | 68.579 | KV452730.1 | 13595901 | 2-scf00040 | 2 |
| AX-157814232 | 3 | 68.579 | KV452730.1 | 13601571 | 2-scf00040 | 2 |
| AX-158389955 | 3 | 68.579 | KV452730.1 | 13604704 | 2-scf00040 | 2 |
| AX-157854364 | 3 | 68.579 | KV452730.1 | 13606014 | 2-scf00040 | 2 |
| AX-157814234 | 3 | 68.579 | KV452730.1 | 13606146 | 2-scf00040 | 2 |
| AX-157933238 | 3 | 68.579 | KV452730.1 | 13606225 | 2-scf00040 | 2 |
| AX-157692540 | 3 | 68.579 | KV452730.1 | 13606937 | 2-scf00040 | 2 |
| AX-157814235 | 3 | 68.579 | KV452730.1 | 13610520 | 2-scf00040 | 2 |
| AX-158389956 | 3 | 68.579 | KV452730.1 | 13612046 | 2-scf00040 | 2 |
| AX-157854365 | 3 | 68.579 | KV452730.1 | 13613250 | 2-scf00040 | 2 |
| AX-157854366 | 3 | 68.579 | KV452730.1 | 13618584 | 2-scf00040 | 2 |
| AX-157854367 | 3 | 68.579 | KV452730.1 | 13619351 | 2-scf00040 | 2 |
| AX-157869387 | 3 | 68.579 | KV452730.1 | 13619575 | 2-scf00040 | 2 |
| AX-157933244 | 3 | 68.579 | KV452730.1 | 13621136 | 2-scf00040 | 2 |
| AX-157933245 | 3 | 68.579 | KV452730.1 | 13621670 | 2-scf00040 | 2 |
| AX-157869390 | 3 | 68.579 | KV452730.1 | 13623273 | 2-scf00040 | 2 |
| AX-157933246 | 3 | 68.579 | KV452730.1 | 13625384 | 2-scf00040 | 2 |
| AX-157854368 | 3 | 68.579 | KV452730.1 | 13626049 | 2-scf00040 | 2 |
| AX-157933247 | 3 | 68.579 | KV452730.1 | 13627367 | 2-scf00040 | 2 |
| AX-158389957 | 3 | 68.579 | KV452730.1 | 13628884 | 2-scf00040 | 2 |
| AX-158389958 | 3 | 68.579 | KV452730.1 | 13632186 | 2-scf00040 | 2 |
| AX-157854370 | 3 | 68.579 | KV452730.1 | 13632441 | 2-scf00040 | 2 |
| AX-157933250 | 3 | 68.579 | KV452730.1 | 13634327 | 2-scf00040 | 2 |
| AX-157933251 | 3 | 68.579 | KV452730.1 | 13638299 | 2-scf00040 | 2 |
| AX-157854371 | 3 | 68.579 | KV452730.1 | 13638769 | 2-scf00040 | 2 |
| AX-157933252 | 3 | 68.579 | KV452730.1 | 13640054 | 2-scf00040 | 2 |
| AX-157814236 | 3 | 68.579 | KV452730.1 | 13640151 | 2-scf00040 | 2 |
| AX-157854372 | 3 | 68.579 | KV452730.1 | 13641829 | 2-scf00040 | 2 |

|              |   |        |            |          |            |   |
|--------------|---|--------|------------|----------|------------|---|
| AX-157854373 | 3 | 68.579 | KV452730.1 | 13643839 | 2-scf00040 | 2 |
| AX-157854374 | 3 | 68.579 | KV452730.1 | 13644623 | 2-scf00040 | 2 |
| AX-157814237 | 3 | 68.579 | KV452730.1 | 13645135 | 2-scf00040 | 2 |
| AX-157779890 | 3 | 68.579 | KV452730.1 | 13645316 | 2-scf00040 | 2 |
| AX-157779891 | 3 | 68.579 | KV452730.1 | 13645381 | 2-scf00040 | 2 |
| AX-157814238 | 3 | 68.579 | KV452730.1 | 13648877 | 2-scf00040 | 2 |
| AX-157933253 | 3 | 68.579 | KV452730.1 | 13654514 | 2-scf00040 | 2 |
| AX-157702052 | 3 | 68.579 | KV452730.1 | 13658031 | 2-scf00040 | 2 |
| AX-157854376 | 3 | 68.579 | KV452730.1 | 13660715 | 2-scf00040 | 2 |
| AX-157854377 | 3 | 68.579 | KV452730.1 | 13660789 | 2-scf00040 | 2 |
| AX-157933255 | 3 | 68.579 | KV452730.1 | 13661789 | 2-scf00040 | 2 |
| AX-157854378 | 3 | 68.579 | KV452730.1 | 13662737 | 2-scf00040 | 2 |
| AX-158389960 | 3 | 68.579 | KV452730.1 | 13666458 | 2-scf00040 | 2 |
| AX-157933257 | 3 | 68.579 | KV452730.1 | 13667332 | 2-scf00040 | 2 |
| AX-157854379 | 3 | 68.579 | KV452730.1 | 13670714 | 2-scf00040 | 2 |
| AX-157854380 | 3 | 68.579 | KV452730.1 | 13672798 | 2-scf00040 | 2 |
| AX-157854381 | 3 | 68.579 | KV452730.1 | 13675557 | 2-scf00040 | 2 |
| AX-157933259 | 3 | 68.579 | KV452730.1 | 13675599 | 2-scf00040 | 2 |
| AX-157933261 | 3 | 68.579 | KV452730.1 | 13676957 | 2-scf00040 | 2 |
| AX-157814239 | 3 | 68.579 | KV452730.1 | 13677961 | 2-scf00040 | 2 |
| AX-157933263 | 3 | 68.579 | KV452730.1 | 13679738 | 2-scf00040 | 2 |
| AX-157933265 | 3 | 68.579 | KV452730.1 | 13680397 | 2-scf00040 | 2 |
| AX-158389962 | 3 | 68.579 | KV452730.1 | 13682173 | 2-scf00040 | 2 |
| AX-157854382 | 3 | 68.579 | KV452730.1 | 13683655 | 2-scf00040 | 2 |
| AX-157933268 | 3 | 68.579 | KV452730.1 | 13684330 | 2-scf00040 | 2 |
| AX-157933269 | 3 | 68.579 | KV452730.1 | 13687022 | 2-scf00040 | 2 |
| AX-157933271 | 3 | 68.579 | KV452730.1 | 13688598 | 2-scf00040 | 2 |
| AX-157933272 | 3 | 68.579 | KV452730.1 | 13689024 | 2-scf00040 | 2 |
| AX-157869394 | 3 | 68.579 | KV452730.1 | 13689352 | 2-scf00040 | 2 |
| AX-157854383 | 3 | 68.579 | KV452730.1 | 13690457 | 2-scf00040 | 2 |
| AX-157854384 | 3 | 68.579 | KV452730.1 | 13692043 | 2-scf00040 | 2 |
| AX-157854385 | 3 | 68.579 | KV452730.1 | 13692864 | 2-scf00040 | 2 |
| AX-157869396 | 3 | 68.579 | KV452730.1 | 13698679 | 2-scf00040 | 2 |
| AX-158389963 | 3 | 68.579 | KV452730.1 | 13709092 | 2-scf00040 | 2 |
| AX-157854386 | 3 | 68.579 | KV452730.1 | 13713794 | 2-scf00040 | 2 |
| AX-157854387 | 3 | 68.579 | KV452730.1 | 13714924 | 2-scf00040 | 2 |
| AX-157933287 | 3 | 68.579 | KV452730.1 | 13720954 | 2-scf00040 | 2 |
| AX-157869397 | 3 | 68.579 | KV452730.1 | 13722484 | 2-scf00040 | 2 |
| AX-157854388 | 3 | 68.579 | KV452730.1 | 13723417 | 2-scf00040 | 2 |
| AX-158389965 | 3 | 68.579 | KV452730.1 | 13725230 | 2-scf00040 | 2 |
| AX-157933289 | 3 | 68.579 | KV452730.1 | 13727396 | 2-scf00040 | 2 |
| AX-157854389 | 3 | 68.579 | KV452730.1 | 13728798 | 2-scf00040 | 2 |
| AX-157814240 | 3 | 68.579 | KV452730.1 | 13729308 | 2-scf00040 | 2 |
| AX-157814241 | 3 | 68.579 | KV452730.1 | 13729436 | 2-scf00040 | 2 |
| AX-157933291 | 3 | 68.579 | KV452730.1 | 13729682 | 2-scf00040 | 2 |
| AX-157933292 | 3 | 68.579 | KV452730.1 | 13730275 | 2-scf00040 | 2 |
| AX-157862766 | 3 | 68.579 | KV452730.1 | 13731625 | 2-scf00040 | 2 |
| AX-157869398 | 3 | 68.579 | KV452730.1 | 13732684 | 2-scf00040 | 2 |
| AX-157869399 | 3 | 68.579 | KV452730.1 | 13734119 | 2-scf00040 | 2 |
| AX-157933293 | 3 | 68.579 | KV452730.1 | 13737534 | 2-scf00040 | 2 |
| AX-157933297 | 3 | 68.579 | KV452730.1 | 13740428 | 2-scf00040 | 2 |

|              |   |        |            |          |            |   |
|--------------|---|--------|------------|----------|------------|---|
| AX-157933298 | 3 | 68.579 | KV452730.1 | 13740740 | 2-scf00040 | 2 |
| AX-157869403 | 3 | 68.579 | KV452730.1 | 13741865 | 2-scf00040 | 2 |
| AX-157933301 | 3 | 68.579 | KV452730.1 | 13743204 | 2-scf00040 | 2 |
| AX-157869404 | 3 | 68.579 | KV452730.1 | 13745163 | 2-scf00040 | 2 |
| AX-157869405 | 3 | 68.579 | KV452730.1 | 13745377 | 2-scf00040 | 2 |
| AX-157933303 | 3 | 68.579 | KV452730.1 | 13746144 | 2-scf00040 | 2 |
| AX-157933304 | 3 | 68.579 | KV452730.1 | 13746881 | 2-scf00040 | 2 |
| AX-157869409 | 3 | 68.579 | KV452730.1 | 13748649 | 2-scf00040 | 2 |
| AX-157933311 | 3 | 68.579 | KV452730.1 | 13750324 | 2-scf00040 | 2 |
| AX-157854390 | 3 | 68.579 | KV452730.1 | 13750823 | 2-scf00040 | 2 |
| AX-157854391 | 3 | 68.579 | KV452730.1 | 13752557 | 2-scf00040 | 2 |
| AX-157854392 | 3 | 68.579 | KV452730.1 | 13752855 | 2-scf00040 | 2 |
| AX-157933313 | 3 | 68.579 | KV452730.1 | 13754225 | 2-scf00040 | 2 |
| AX-157933315 | 3 | 68.579 | KV452730.1 | 13755749 | 2-scf00040 | 2 |
| AX-157933321 | 3 | 68.579 | KV452730.1 | 13758032 | 2-scf00040 | 2 |
| AX-157933325 | 3 | 68.579 | KV452730.1 | 13762184 | 2-scf00040 | 2 |
| AX-157933327 | 3 | 68.579 | KV452730.1 | 13763032 | 2-scf00040 | 2 |
| AX-157933328 | 3 | 68.579 | KV452730.1 | 13763805 | 2-scf00040 | 2 |
| AX-157854394 | 3 | 68.579 | KV452730.1 | 13764826 | 2-scf00040 | 2 |
| AX-158389966 | 3 | 68.579 | KV452730.1 | 13764913 | 2-scf00040 | 2 |
| AX-157814243 | 3 | 68.579 | KV452730.1 | 13767091 | 2-scf00040 | 2 |
| AX-158389967 | 3 | 68.579 | KV452730.1 | 13767319 | 2-scf00040 | 2 |
| AX-157933330 | 3 | 68.579 | KV452730.1 | 13772777 | 2-scf00040 | 2 |
| AX-157933331 | 3 | 68.579 | KV452730.1 | 13773341 | 2-scf00040 | 2 |
| AX-157933335 | 3 | 68.579 | KV452730.1 | 13776599 | 2-scf00040 | 2 |
| AX-158389968 | 3 | 68.579 | KV452730.1 | 13788038 | 2-scf00040 | 2 |
| AX-157854396 | 3 | 68.579 | KV452730.1 | 13789237 | 2-scf00040 | 2 |
| AX-157933344 | 3 | 68.579 | KV452730.1 | 13789464 | 2-scf00040 | 2 |
| AX-157854397 | 3 | 68.579 | KV452730.1 | 13790009 | 2-scf00040 | 2 |
| AX-157933346 | 3 | 68.579 | KV452730.1 | 13791807 | 2-scf00040 | 2 |
| AX-157933347 | 3 | 68.579 | KV452730.1 | 13794932 | 2-scf00040 | 2 |
| AX-157933348 | 3 | 68.579 | KV452730.1 | 13796180 | 2-scf00040 | 2 |
| AX-157933349 | 3 | 68.579 | KV452730.1 | 13796942 | 2-scf00040 | 2 |
| AX-158389969 | 3 | 68.579 | KV452730.1 | 13797321 | 2-scf00040 | 2 |
| AX-157704058 | 3 | 68.579 | KV452730.1 | 13797836 | 2-scf00040 | 2 |
| AX-157814244 | 3 | 68.579 | KV452730.1 | 13798430 | 2-scf00040 | 2 |
| AX-157862767 | 3 | 68.579 | KV452730.1 | 13798539 | 2-scf00040 | 2 |
| AX-157854398 | 3 | 68.579 | KV452730.1 | 13802300 | 2-scf00040 | 2 |
| AX-158389970 | 3 | 68.579 | KV452730.1 | 13806960 | 2-scf00040 | 2 |
| AX-158389971 | 3 | 68.579 | KV452730.1 | 13808914 | 2-scf00040 | 2 |
| AX-157854399 | 3 | 68.579 | KV452730.1 | 13809224 | 2-scf00040 | 2 |
| AX-157854400 | 3 | 68.579 | KV452730.1 | 13811306 | 2-scf00040 | 2 |
| AX-157933352 | 3 | 68.579 | KV452730.1 | 13811412 | 2-scf00040 | 2 |
| AX-157854401 | 3 | 68.579 | KV452730.1 | 13815660 | 2-scf00040 | 2 |
| AX-157933357 | 3 | 68.579 | KV452730.1 | 13816265 | 2-scf00040 | 2 |
| AX-158389972 | 3 | 68.579 | KV452730.1 | 13819296 | 2-scf00040 | 2 |
| AX-157854404 | 3 | 68.579 | KV452730.1 | 13819367 | 2-scf00040 | 2 |
| AX-157779930 | 3 | 68.579 | KV452730.1 | 13823279 | 2-scf00040 | 2 |
| AX-157933361 | 3 | 68.579 | KV452730.1 | 13824209 | 2-scf00040 | 2 |
| AX-158389973 | 3 | 68.579 | KV452730.1 | 13824428 | 2-scf00040 | 2 |
| AX-157933362 | 3 | 68.579 | KV452730.1 | 13827118 | 2-scf00040 | 2 |

|              |   |        |            |          |            |   |
|--------------|---|--------|------------|----------|------------|---|
| AX-157862768 | 3 | 68.579 | KV452730.1 | 13827628 | 2-scf00040 | 2 |
| AX-157933363 | 3 | 68.579 | KV452730.1 | 13828494 | 2-scf00040 | 2 |
| AX-157933364 | 3 | 68.579 | KV452730.1 | 13828945 | 2-scf00040 | 2 |
| AX-157874983 | 3 | 68.579 | KV452730.1 | 13829796 | 2-scf00040 | 2 |
| AX-158405567 | 3 | 68.579 | KV452730.1 | 13830771 | 2-scf00040 | 2 |
| AX-158405568 | 3 | 68.579 | KV452730.1 | 13831056 | 2-scf00040 | 2 |
| AX-158389975 | 3 | 68.579 | KV452730.1 | 13834536 | 2-scf00040 | 2 |
| AX-157933366 | 3 | 68.579 | KV452730.1 | 13834676 | 2-scf00040 | 2 |
| AX-157933368 | 3 | 68.579 | KV452730.1 | 13836713 | 2-scf00040 | 2 |
| AX-157933370 | 3 | 68.579 | KV452730.1 | 13839085 | 2-scf00040 | 2 |
| AX-157933371 | 3 | 68.579 | KV452730.1 | 13839598 | 2-scf00040 | 2 |
| AX-157933372 | 3 | 68.579 | KV452730.1 | 13840035 | 2-scf00040 | 2 |
| AX-157933373 | 3 | 68.579 | KV452730.1 | 13840561 | 2-scf00040 | 2 |
| AX-157933374 | 3 | 68.579 | KV452730.1 | 13841154 | 2-scf00040 | 2 |
| AX-157854407 | 3 | 68.579 | KV452730.1 | 13841924 | 2-scf00040 | 2 |
| AX-158389976 | 3 | 68.579 | KV452730.1 | 13842204 | 2-scf00040 | 2 |
| AX-157933377 | 3 | 68.579 | KV452730.1 | 13846888 | 2-scf00040 | 2 |
| AX-157754343 | 3 | 68.579 | KV452730.1 | 13850000 | 2-scf00040 | 2 |
| AX-157933384 | 3 | 68.579 | KV452730.1 | 13851916 | 2-scf00040 | 2 |
| AX-158415026 | 3 | 68.579 | KV452730.1 | 13852704 | 2-scf00040 | 2 |
| AX-157854408 | 3 | 68.579 | KV452730.1 | 13855760 | 2-scf00040 | 2 |
| AX-158389977 | 3 | 68.579 | KV452730.1 | 13856211 | 2-scf00040 | 2 |
| AX-157933387 | 3 | 68.579 | KV452730.1 | 13859648 | 2-scf00040 | 2 |
| AX-157933392 | 3 | 68.579 | KV452730.1 | 13865189 | 2-scf00040 | 2 |
| AX-158389978 | 3 | 68.579 | KV452730.1 | 13865910 | 2-scf00040 | 2 |
| AX-157933396 | 3 | 68.579 | KV452730.1 | 13868370 | 2-scf00040 | 2 |
| AX-157933398 | 3 | 68.579 | KV452730.1 | 13869150 | 2-scf00040 | 2 |
| AX-158389979 | 3 | 68.579 | KV452730.1 | 13870416 | 2-scf00040 | 2 |
| AX-158389980 | 3 | 68.579 | KV452730.1 | 13872761 | 2-scf00040 | 2 |
| AX-157854410 | 3 | 68.579 | KV452730.1 | 13873722 | 2-scf00040 | 2 |
| AX-157933400 | 3 | 68.579 | KV452730.1 | 13873951 | 2-scf00040 | 2 |
| AX-158389981 | 3 | 68.579 | KV452730.1 | 13875320 | 2-scf00040 | 2 |
| AX-157814245 | 3 | 68.579 | KV452730.1 | 13877730 | 2-scf00040 | 2 |
| AX-157933406 | 3 | 68.579 | KV452730.1 | 13881553 | 2-scf00040 | 2 |
| AX-158389983 | 3 | 68.579 | KV452730.1 | 13882512 | 2-scf00040 | 2 |
| AX-157779935 | 3 | 68.579 | KV452730.1 | 13884184 | 2-scf00040 | 2 |
| AX-157933407 | 3 | 68.579 | KV452730.1 | 13884334 | 2-scf00040 | 2 |
| AX-157933409 | 3 | 68.579 | KV452730.1 | 13888044 | 2-scf00040 | 2 |
| AX-157854411 | 3 | 68.579 | KV452730.1 | 13889135 | 2-scf00040 | 2 |
| AX-157854412 | 3 | 68.579 | KV452730.1 | 13889288 | 2-scf00040 | 2 |
| AX-157933411 | 3 | 68.579 | KV452730.1 | 13890441 | 2-scf00040 | 2 |
| AX-157854413 | 3 | 68.579 | KV452730.1 | 13890769 | 2-scf00040 | 2 |
| AX-157933416 | 3 | 68.579 | KV452730.1 | 13893616 | 2-scf00040 | 2 |
| AX-158389984 | 3 | 68.579 | KV452730.1 | 13897846 | 2-scf00040 | 2 |
| AX-157933421 | 3 | 68.579 | KV452730.1 | 13898195 | 2-scf00040 | 2 |
| AX-157933424 | 3 | 68.579 | KV452730.1 | 13899573 | 2-scf00040 | 2 |
| AX-157933425 | 3 | 68.579 | KV452730.1 | 13901381 | 2-scf00040 | 2 |
| AX-157933428 | 3 | 68.579 | KV452730.1 | 13903882 | 2-scf00040 | 2 |
| AX-158389985 | 3 | 68.579 | KV452730.1 | 13904022 | 2-scf00040 | 2 |
| AX-157854415 | 3 | 68.579 | KV452730.1 | 13906098 | 2-scf00040 | 2 |
| AX-157862769 | 3 | 68.579 | KV452730.1 | 13906370 | 2-scf00040 | 2 |

|              |   |        |            |          |            |   |
|--------------|---|--------|------------|----------|------------|---|
| AX-157754179 | 3 | 68.579 | KV452730.1 | 13908203 | 2-scf00040 | 2 |
| AX-157933433 | 3 | 68.579 | KV452730.1 | 13911181 | 2-scf00040 | 2 |
| AX-157933435 | 3 | 68.579 | KV452730.1 | 13912227 | 2-scf00040 | 2 |
| AX-157933439 | 3 | 68.579 | KV452730.1 | 13918623 | 2-scf00040 | 2 |
| AX-157933440 | 3 | 68.579 | KV452730.1 | 13923235 | 2-scf00040 | 2 |
| AX-157779941 | 3 | 68.579 | KV452730.1 | 13923939 | 2-scf00040 | 2 |
| AX-158389987 | 3 | 68.579 | KV452730.1 | 13924147 | 2-scf00040 | 2 |
| AX-157933442 | 3 | 68.579 | KV452730.1 | 13925048 | 2-scf00040 | 2 |
| AX-157933443 | 3 | 68.579 | KV452730.1 | 13925639 | 2-scf00040 | 2 |
| AX-157933444 | 3 | 68.579 | KV452730.1 | 13929423 | 2-scf00040 | 2 |
| AX-157933445 | 3 | 68.579 | KV452730.1 | 13930271 | 2-scf00040 | 2 |
| AX-157933447 | 3 | 68.579 | KV452730.1 | 13930466 | 2-scf00040 | 2 |
| AX-157854418 | 3 | 68.579 | KV452730.1 | 13933299 | 2-scf00040 | 2 |
| AX-157933448 | 3 | 68.579 | KV452730.1 | 13933611 | 2-scf00040 | 2 |
| AX-157854419 | 3 | 68.579 | KV452730.1 | 13936056 | 2-scf00040 | 2 |
| AX-157933449 | 3 | 68.579 | KV452730.1 | 13940272 | 2-scf00040 | 2 |
| AX-157854420 | 3 | 68.579 | KV452730.1 | 13942330 | 2-scf00040 | 2 |
| AX-157933452 | 3 | 68.579 | KV452730.1 | 13942422 | 2-scf00040 | 2 |
| AX-157933458 | 3 | 68.579 | KV452730.1 | 13943903 | 2-scf00040 | 2 |
| AX-157933460 | 3 | 68.579 | KV452730.1 | 13944380 | 2-scf00040 | 2 |
| AX-157933465 | 3 | 68.579 | KV452730.1 | 13945879 | 2-scf00040 | 2 |
| AX-157869410 | 3 | 68.579 | KV452730.1 | 13946272 | 2-scf00040 | 2 |
| AX-157933466 | 3 | 68.579 | KV452730.1 | 13946947 | 2-scf00040 | 2 |
| AX-157814246 | 3 | 68.579 | KV452730.1 | 13947325 | 2-scf00040 | 2 |
| AX-157869412 | 3 | 68.579 | KV452730.1 | 13955197 | 2-scf00040 | 2 |
| AX-157933470 | 3 | 68.579 | KV452730.1 | 13956836 | 2-scf00040 | 2 |
| AX-157814247 | 3 | 68.579 | KV452730.1 | 13958039 | 2-scf00040 | 2 |
| AX-157730187 | 3 | 68.579 | KV452730.1 | 13958600 | 2-scf00040 | 2 |
| AX-157869414 | 3 | 68.579 | KV452730.1 | 13964484 | 2-scf00040 | 2 |
| AX-157869416 | 3 | 68.579 | KV452730.1 | 13967633 | 2-scf00040 | 2 |
| AX-157814248 | 3 | 68.579 | KV452730.1 | 13975155 | 2-scf00040 | 2 |
| AX-157933482 | 3 | 68.579 | KV452730.1 | 13977123 | 2-scf00040 | 2 |
| AX-157854422 | 3 | 68.579 | KV452730.1 | 13978284 | 2-scf00040 | 2 |
| AX-157854423 | 3 | 68.579 | KV452730.1 | 13979241 | 2-scf00040 | 2 |
| AX-157933485 | 3 | 68.579 | KV452730.1 | 13982939 | 2-scf00040 | 2 |
| AX-157869417 | 3 | 68.579 | KV452730.1 | 13983253 | 2-scf00040 | 2 |
| AX-157933490 | 3 | 68.579 | KV452730.1 | 13984591 | 2-scf00040 | 2 |
| AX-157854424 | 3 | 68.579 | KV452730.1 | 13987213 | 2-scf00040 | 2 |
| AX-157933494 | 3 | 68.579 | KV452730.1 | 13989112 | 2-scf00040 | 2 |
| AX-157933499 | 3 | 68.579 | KV452730.1 | 13993057 | 2-scf00040 | 2 |
| AX-157933500 | 3 | 68.579 | KV452730.1 | 13993197 | 2-scf00040 | 2 |
| AX-157862771 | 3 | 68.579 | KV452730.1 | 13994259 | 2-scf00040 | 2 |
| AX-157854425 | 3 | 68.579 | KV452730.1 | 13997551 | 2-scf00040 | 2 |
| AX-157869419 | 3 | 68.579 | KV452730.1 | 13999770 | 2-scf00040 | 2 |
| AX-157933506 | 3 | 68.579 | KV452730.1 | 13999929 | 2-scf00040 | 2 |
| AX-157933507 | 3 | 68.579 | KV452730.1 | 14000830 | 2-scf00040 | 2 |
| AX-157933509 | 3 | 68.579 | KV452730.1 | 14002115 | 2-scf00040 | 2 |
| AX-157933512 | 3 | 68.579 | KV452730.1 | 14004799 | 2-scf00040 | 2 |
| AX-157933516 | 3 | 68.579 | KV452730.1 | 14007828 | 2-scf00040 | 2 |
| AX-157869420 | 3 | 68.579 | KV452730.1 | 14008211 | 2-scf00040 | 2 |
| AX-157854427 | 3 | 68.579 | KV452730.1 | 14010112 | 2-scf00040 | 2 |

|              |   |        |            |          |            |   |
|--------------|---|--------|------------|----------|------------|---|
| AX-157869421 | 3 | 68.579 | KV452730.1 | 14013159 | 2-scf00040 | 2 |
| AX-158405572 | 3 | 68.579 | KV452730.1 | 14014565 | 2-scf00040 | 2 |
| AX-157854428 | 3 | 68.579 | KV452730.1 | 14015571 | 2-scf00040 | 2 |
| AX-157933529 | 3 | 68.579 | KV452730.1 | 14017365 | 2-scf00040 | 2 |
| AX-157854429 | 3 | 68.579 | KV452730.1 | 14020119 | 2-scf00040 | 2 |
| AX-157702632 | 3 | 68.579 | KV452730.1 | 14022147 | 2-scf00040 | 2 |
| AX-157854430 | 3 | 68.579 | KV452730.1 | 14026121 | 2-scf00040 | 2 |
| AX-157869424 | 3 | 68.579 | KV452730.1 | 14028201 | 2-scf00040 | 2 |
| AX-157933534 | 3 | 68.579 | KV452730.1 | 14028303 | 2-scf00040 | 2 |
| AX-157869425 | 3 | 68.579 | KV452730.1 | 14028692 | 2-scf00040 | 2 |
| AX-157854431 | 3 | 68.579 | KV452730.1 | 14029133 | 2-scf00040 | 2 |
| AX-157869426 | 3 | 68.579 | KV452730.1 | 14029551 | 2-scf00040 | 2 |
| AX-157933535 | 3 | 68.579 | KV452730.1 | 14030707 | 2-scf00040 | 2 |
| AX-157869427 | 3 | 68.579 | KV452730.1 | 14031842 | 2-scf00040 | 2 |
| AX-157933537 | 3 | 68.579 | KV452730.1 | 14032424 | 2-scf00040 | 2 |
| AX-157696693 | 3 | 68.579 | KV452730.1 | 14035074 | 2-scf00040 | 2 |
| AX-157933539 | 3 | 68.579 | KV452730.1 | 14037505 | 2-scf00040 | 2 |
| AX-157933549 | 3 | 68.579 | KV452730.1 | 14043877 | 2-scf00040 | 2 |
| AX-157933550 | 3 | 68.579 | KV452730.1 | 14045514 | 2-scf00040 | 2 |
| AX-157933565 | 3 | 68.579 | KV452730.1 | 14065959 | 2-scf00040 | 2 |
| AX-157933566 | 3 | 68.579 | KV452730.1 | 14069014 | 2-scf00040 | 2 |
| AX-158389990 | 3 | 68.579 | KV452730.1 | 14076144 | 2-scf00040 | 2 |
| AX-157814252 | 3 | 68.579 | KV452730.1 | 14076910 | 2-scf00040 | 2 |
| AX-157933593 | 3 | 68.579 | KV452730.1 | 14114702 | 2-scf00040 | 2 |
| AX-157933596 | 3 | 68.579 | KV452730.1 | 14120994 | 2-scf00040 | 2 |
| AX-157933607 | 3 | 68.579 | KV452730.1 | 14135696 | 2-scf00040 | 2 |
| AX-157933608 | 3 | 68.579 | KV452730.1 | 14136814 | 2-scf00040 | 2 |
| AX-157933609 | 3 | 68.579 | KV452730.1 | 14137633 | 2-scf00040 | 2 |
| AX-157933623 | 3 | 68.579 | KV452730.1 | 14147346 | 2-scf00040 | 2 |
| AX-157933626 | 3 | 68.579 | KV452730.1 | 14149801 | 2-scf00040 | 2 |
| AX-157933635 | 3 | 68.579 | KV452730.1 | 14155843 | 2-scf00040 | 2 |
| AX-157933648 | 3 | 68.579 | KV452730.1 | 14167268 | 2-scf00040 | 2 |
| AX-157933650 | 3 | 68.579 | KV452730.1 | 14168604 | 2-scf00040 | 2 |
| AX-157933651 | 3 | 68.579 | KV452730.1 | 14169511 | 2-scf00040 | 2 |
| AX-157814254 | 3 | 68.579 | KV452730.1 | 14171413 | 2-scf00040 | 2 |
| AX-157814255 | 3 | 68.579 | KV452730.1 | 14172125 | 2-scf00040 | 2 |
| AX-157874999 | 3 | 68.579 | KV452730.1 | 14173588 | 2-scf00040 | 2 |
| AX-157814256 | 3 | 68.579 | KV452730.1 | 14175355 | 2-scf00040 | 2 |
| AX-157933656 | 3 | 68.579 | KV452730.1 | 14177904 | 2-scf00040 | 2 |
| AX-157933667 | 3 | 68.579 | KV452730.1 | 14194968 | 2-scf00040 | 2 |
| AX-157933668 | 3 | 68.579 | KV452730.1 | 14196359 | 2-scf00040 | 2 |
| AX-157933670 | 3 | 68.579 | KV452730.1 | 14197251 | 2-scf00040 | 2 |
| AX-157933673 | 3 | 68.579 | KV452730.1 | 14202407 | 2-scf00040 | 2 |
| AX-157933676 | 3 | 68.579 | KV452730.1 | 14207942 | 2-scf00040 | 2 |
| AX-157875000 | 3 | 68.579 | KV452730.1 | 14213977 | 2-scf00040 | 2 |
| AX-157933681 | 3 | 68.579 | KV452730.1 | 14218041 | 2-scf00040 | 2 |
| AX-157933684 | 3 | 68.579 | KV452730.1 | 14222615 | 2-scf00040 | 2 |
| AX-157933688 | 3 | 68.579 | KV452730.1 | 14230534 | 2-scf00040 | 2 |
| AX-157933690 | 3 | 68.579 | KV452730.1 | 14231668 | 2-scf00040 | 2 |
| AX-158405573 | 3 | 68.579 | KV452730.1 | 14236805 | 2-scf00040 | 2 |
| AX-157933694 | 3 | 68.579 | KV452730.1 | 14245035 | 2-scf00040 | 2 |

|              |   |        |            |          |            |   |
|--------------|---|--------|------------|----------|------------|---|
| AX-157933695 | 3 | 68.579 | KV452730.1 | 14247479 | 2-scf00040 | 2 |
| AX-157933697 | 3 | 68.579 | KV452730.1 | 14251133 | 2-scf00040 | 2 |
| AX-157933699 | 3 | 68.579 | KV452730.1 | 14257428 | 2-scf00040 | 2 |
| AX-157933701 | 3 | 68.579 | KV452730.1 | 14258110 | 2-scf00040 | 2 |
| AX-157933702 | 3 | 68.579 | KV452730.1 | 14258822 | 2-scf00040 | 2 |
| AX-157933704 | 3 | 68.579 | KV452730.1 | 14263231 | 2-scf00040 | 2 |
| AX-157933705 | 3 | 68.579 | KV452730.1 | 14263455 | 2-scf00040 | 2 |
| AX-157933707 | 3 | 68.579 | KV452730.1 | 14268156 | 2-scf00040 | 2 |
| AX-157933711 | 3 | 68.579 | KV452730.1 | 14276110 | 2-scf00040 | 2 |
| AX-157933712 | 3 | 68.579 | KV452730.1 | 14276706 | 2-scf00040 | 2 |
| AX-157933727 | 3 | 68.579 | KV452730.1 | 14302488 | 2-scf00040 | 2 |
| AX-157933729 | 3 | 68.579 | KV452730.1 | 14304407 | 2-scf00040 | 2 |
| AX-157814262 | 3 | 68.579 | KV452730.1 | 14342882 | 2-scf00040 | 2 |
| AX-157933740 | 3 | 68.579 | KV452730.1 | 14358849 | 2-scf00040 | 2 |
| AX-157933741 | 3 | 68.579 | KV452730.1 | 14360440 | 2-scf00040 | 2 |
| AX-157933743 | 3 | 68.579 | KV452730.1 | 14364000 | 2-scf00040 | 2 |
| AX-157933748 | 3 | 68.579 | KV452730.1 | 14406226 | 2-scf00040 | 2 |
| AX-157933753 | 3 | 68.579 | KV452730.1 | 14418815 | 2-scf00040 | 2 |
| AX-157933755 | 3 | 68.579 | KV452730.1 | 14419482 | 2-scf00040 | 2 |
| AX-157933756 | 3 | 68.579 | KV452730.1 | 14421385 | 2-scf00040 | 2 |
| AX-157814264 | 3 | 68.579 | KV452730.1 | 14422554 | 2-scf00040 | 2 |
| AX-157933757 | 3 | 68.579 | KV452730.1 | 14422995 | 2-scf00040 | 2 |
| AX-157933761 | 3 | 68.579 | KV452730.1 | 14431416 | 2-scf00040 | 2 |
| AX-157933762 | 3 | 68.579 | KV452730.1 | 14436190 | 2-scf00040 | 2 |
| AX-157933764 | 3 | 68.579 | KV452730.1 | 14440246 | 2-scf00040 | 2 |
| AX-157933766 | 3 | 68.579 | KV452730.1 | 14442023 | 2-scf00040 | 2 |
| AX-157933771 | 3 | 68.579 | KV452730.1 | 14457714 | 2-scf00040 | 2 |
| AX-157933772 | 3 | 68.579 | KV452730.1 | 14457870 | 2-scf00040 | 2 |
| AX-157933775 | 3 | 68.579 | KV452730.1 | 14467546 | 2-scf00040 | 2 |
| AX-157933776 | 3 | 68.579 | KV452730.1 | 14468756 | 2-scf00040 | 2 |
| AX-157933779 | 3 | 68.579 | KV452730.1 | 14474085 | 2-scf00040 | 2 |
| AX-157933781 | 3 | 68.579 | KV452730.1 | 14476227 | 2-scf00040 | 2 |
| AX-157933782 | 3 | 68.579 | KV452730.1 | 14481404 | 2-scf00040 | 2 |
| AX-157933785 | 3 | 68.579 | KV452730.1 | 14494271 | 2-scf00040 | 2 |
| AX-157933786 | 3 | 68.579 | KV452730.1 | 14496289 | 2-scf00040 | 2 |
| AX-157933788 | 3 | 68.579 | KV452730.1 | 14496761 | 2-scf00040 | 2 |
| AX-157933792 | 3 | 68.579 | KV452730.1 | 14498213 | 2-scf00040 | 2 |
| AX-157933794 | 3 | 68.579 | KV452730.1 | 14503797 | 2-scf00040 | 2 |
| AX-157933798 | 3 | 68.579 | KV452730.1 | 14507685 | 2-scf00040 | 2 |
| AX-157933799 | 3 | 68.579 | KV452730.1 | 14508591 | 2-scf00040 | 2 |
| AX-157933800 | 3 | 68.579 | KV452730.1 | 14514301 | 2-scf00040 | 2 |
| AX-157854448 | 3 | 68.579 | KV452730.1 | 14521663 | 2-scf00040 | 2 |
| AX-157933809 | 3 | 68.579 | KV452730.1 | 14532375 | 2-scf00040 | 2 |
| AX-157933814 | 3 | 68.579 | KV452730.1 | 14542059 | 2-scf00040 | 2 |
| AX-157933815 | 3 | 68.579 | KV452730.1 | 14543613 | 2-scf00040 | 2 |
| AX-157933817 | 3 | 68.579 | KV452730.1 | 14550525 | 2-scf00040 | 2 |
| AX-157933822 | 3 | 68.579 | KV452730.1 | 14563512 | 2-scf00040 | 2 |
| AX-157933835 | 3 | 68.579 | KV452730.1 | 14587825 | 2-scf00040 | 2 |
| AX-157933838 | 3 | 68.579 | KV452730.1 | 14590417 | 2-scf00040 | 2 |
| AX-157854449 | 3 | 68.579 | KV452730.1 | 14615108 | 2-scf00040 | 2 |
| AX-157933848 | 3 | 68.579 | KV452730.1 | 14616032 | 2-scf00040 | 2 |

|              |   |        |            |          |            |   |
|--------------|---|--------|------------|----------|------------|---|
| AX-157933853 | 3 | 68.579 | KV452730.1 | 14624221 | 2-scf00040 | 2 |
| AX-157933859 | 3 | 68.579 | KV452730.1 | 14628526 | 2-scf00040 | 2 |
| AX-157933866 | 3 | 68.579 | KV452730.1 | 14655287 | 2-scf00040 | 2 |
| AX-157933869 | 3 | 68.579 | KV452730.1 | 14661058 | 2-scf00040 | 2 |
| AX-157933873 | 3 | 68.579 | KV452730.1 | 14673413 | 2-scf00040 | 2 |
| AX-157933875 | 3 | 68.579 | KV452730.1 | 14676317 | 2-scf00040 | 2 |
| AX-157933885 | 3 | 68.579 | KV452733.1 | 7590     | 2-scf00041 | 2 |
| AX-157933899 | 3 | 68.579 | KV452733.1 | 21642    | 2-scf00041 | 2 |
| AX-157933902 | 3 | 68.579 | KV452733.1 | 24590    | 2-scf00041 | 2 |
| AX-157933907 | 3 | 68.579 | KV452733.1 | 32827    | 2-scf00041 | 2 |
| AX-157933908 | 3 | 68.579 | KV452733.1 | 34347    | 2-scf00041 | 2 |
| AX-157933910 | 3 | 68.579 | KV452733.1 | 36044    | 2-scf00041 | 2 |
| AX-157933911 | 3 | 68.579 | KV452733.1 | 37744    | 2-scf00041 | 2 |
| AX-157933912 | 3 | 68.579 | KV452733.1 | 38808    | 2-scf00041 | 2 |
| AX-157933915 | 3 | 68.579 | KV452733.1 | 42517    | 2-scf00041 | 2 |
| AX-157933916 | 3 | 68.579 | KV452733.1 | 43184    | 2-scf00041 | 2 |
| AX-157933918 | 3 | 68.579 | KV452733.1 | 44791    | 2-scf00041 | 2 |
| AX-157933930 | 3 | 68.579 | KV452733.1 | 54294    | 2-scf00041 | 2 |
| AX-157933932 | 3 | 68.579 | KV452733.1 | 55705    | 2-scf00041 | 2 |
| AX-157933933 | 3 | 68.579 | KV452733.1 | 56426    | 2-scf00041 | 2 |
| AX-157933935 | 3 | 68.579 | KV452733.1 | 60052    | 2-scf00041 | 2 |
| AX-157933936 | 3 | 68.579 | KV452733.1 | 60722    | 2-scf00041 | 2 |
| AX-157933937 | 3 | 68.579 | KV452733.1 | 65013    | 2-scf00041 | 2 |
| AX-157933944 | 3 | 68.579 | KV452733.1 | 70244    | 2-scf00041 | 2 |
| AX-157933947 | 3 | 68.579 | KV452733.1 | 72617    | 2-scf00041 | 2 |
| AX-157933960 | 3 | 68.579 | KV452733.1 | 84462    | 2-scf00041 | 2 |
| AX-157814276 | 3 | 68.579 | KV452733.1 | 85438    | 2-scf00041 | 2 |
| AX-157814277 | 3 | 68.579 | KV452733.1 | 87713    | 2-scf00041 | 2 |
| AX-157751010 | 3 | 68.579 | KV452733.1 | 89968    | 2-scf00041 | 2 |
| AX-157933973 | 3 | 68.579 | KV452733.1 | 98715    | 2-scf00041 | 2 |
| AX-157933978 | 3 | 68.579 | KV452733.1 | 99519    | 2-scf00041 | 2 |
| AX-157933986 | 3 | 68.579 | KV452733.1 | 107180   | 2-scf00041 | 2 |
| AX-157814282 | 3 | 68.579 | KV452733.1 | 107605   | 2-scf00041 | 2 |
| AX-157933993 | 3 | 68.579 | KV452733.1 | 113092   | 2-scf00041 | 2 |
| AX-157869430 | 3 | 68.579 | KV452733.1 | 115734   | 2-scf00041 | 2 |
| AX-157740801 | 3 | 68.579 | KV452733.1 | 120954   | 2-scf00041 | 2 |
| AX-157814284 | 3 | 68.579 | KV452733.1 | 122689   | 2-scf00041 | 2 |
| AX-157713581 | 3 | 68.579 | KV452733.1 | 124275   | 2-scf00041 | 2 |
| AX-157744461 | 3 | 68.579 | KV452733.1 | 125084   | 2-scf00041 | 2 |
| AX-157934008 | 3 | 68.579 | KV452733.1 | 128400   | 2-scf00041 | 2 |
| AX-157934009 | 3 | 68.579 | KV452733.1 | 128812   | 2-scf00041 | 2 |
| AX-157934030 | 3 | 68.579 | KV452733.1 | 139280   | 2-scf00041 | 2 |
| AX-157934036 | 3 | 68.579 | KV452733.1 | 154040   | 2-scf00041 | 2 |
| AX-157755953 | 3 | 68.579 | KV452733.1 | 166761   | 2-scf00041 | 2 |
| AX-157753209 | 3 | 68.579 | KV452733.1 | 178148   | 2-scf00041 | 2 |
| AX-157709254 | 3 | 68.579 | KV452733.1 | 180656   | 2-scf00041 | 2 |
| AX-157934079 | 3 | 68.579 | KV452733.1 | 199530   | 2-scf00041 | 2 |
| AX-157934083 | 3 | 68.579 | KV452733.1 | 205093   | 2-scf00041 | 2 |
| AX-157934088 | 3 | 68.579 | KV452733.1 | 211503   | 2-scf00041 | 2 |
| AX-157934109 | 3 | 68.579 | KV452733.1 | 229180   | 2-scf00041 | 2 |
| AX-157934153 | 3 | 68.579 | KV452733.1 | 262733   | 2-scf00041 | 2 |



|              |   |        |            |         |            |   |
|--------------|---|--------|------------|---------|------------|---|
| AX-157934173 | 3 | 68.579 | KV452733.1 | 283805  | 2-scf00041 | 2 |
| AX-157934226 | 3 | 68.579 | KV452733.1 | 321171  | 2-scf00041 | 2 |
| AX-157934227 | 3 | 68.579 | KV452733.1 | 322919  | 2-scf00041 | 2 |
| AX-157934241 | 3 | 68.579 | KV452733.1 | 327410  | 2-scf00041 | 2 |
| AX-157814291 | 3 | 68.579 | KV452733.1 | 327893  | 2-scf00041 | 2 |
| AX-157934245 | 3 | 68.579 | KV452733.1 | 334532  | 2-scf00041 | 2 |
| AX-157726192 | 3 | 68.579 | KV452733.1 | 339418  | 2-scf00041 | 2 |
| AX-157934267 | 3 | 68.579 | KV452733.1 | 374739  | 2-scf00041 | 2 |
| AX-157934268 | 3 | 68.579 | KV452733.1 | 375349  | 2-scf00041 | 2 |
| AX-157934278 | 3 | 68.579 | KV452733.1 | 390392  | 2-scf00041 | 2 |
| AX-157934340 | 3 | 68.579 | KV452733.1 | 480570  | 2-scf00041 | 2 |
| AX-157934391 | 3 | 68.579 | KV452733.1 | 524776  | 2-scf00041 | 2 |
| AX-157934547 | 3 | 68.579 | KV452733.1 | 666547  | 2-scf00041 | 2 |
| AX-157934549 | 3 | 68.579 | KV452733.1 | 666885  | 2-scf00041 | 2 |
| AX-157934605 | 3 | 68.579 | KV452733.1 | 732357  | 2-scf00041 | 2 |
| AX-157934610 | 3 | 68.579 | KV452733.1 | 740761  | 2-scf00041 | 2 |
| AX-157935267 | 3 | 68.579 | KV452733.1 | 1407920 | 2-scf00041 | 2 |
| AX-157935550 | 3 | 68.579 | KV452733.1 | 1729670 | 2-scf00041 | 2 |
| AX-157935711 | 3 | 68.579 | KV452733.1 | 1952123 | 2-scf00041 | 2 |
| AX-157935924 | 3 | 68.579 | KV452733.1 | 2311358 | 2-scf00041 | 2 |
| AX-157814376 | 3 | 68.579 | KV452733.1 | 2314617 | 2-scf00041 | 2 |
| AX-157936393 | 3 | 68.579 | KV452733.1 | 2767800 | 2-scf00041 | 2 |
| AX-157936984 | 3 | 68.579 | KV452733.1 | 3351701 | 2-scf00041 | 2 |
| AX-157936985 | 3 | 68.579 | KV452733.1 | 3354449 | 2-scf00041 | 2 |
| AX-157937097 | 3 | 68.579 | KV452733.1 | 3449018 | 2-scf00041 | 2 |
| AX-157710815 | 3 | 68.579 | KV452733.1 | 3476503 | 2-scf00041 | 2 |
| AX-157937158 | 3 | 68.579 | KV452733.1 | 3506442 | 2-scf00041 | 2 |
| AX-157814440 | 3 | 68.579 | KV452733.1 | 3572432 | 2-scf00041 | 2 |
| AX-157937452 | 3 | 68.579 | KV452732.1 | 9141    | 2-scf00042 | 2 |
| AX-157937454 | 3 | 68.579 | KV452732.1 | 12980   | 2-scf00042 | 2 |
| AX-157937457 | 3 | 68.579 | KV452732.1 | 14074   | 2-scf00042 | 2 |
| AX-157937458 | 3 | 68.579 | KV452732.1 | 16229   | 2-scf00042 | 2 |
| AX-157937460 | 3 | 68.579 | KV452732.1 | 22197   | 2-scf00042 | 2 |
| AX-157937462 | 3 | 68.579 | KV452732.1 | 23563   | 2-scf00042 | 2 |
| AX-157937470 | 3 | 68.579 | KV452732.1 | 39230   | 2-scf00042 | 2 |
| AX-157937492 | 3 | 68.579 | KV452732.1 | 119281  | 2-scf00042 | 2 |
| AX-157937495 | 3 | 68.579 | KV452732.1 | 140448  | 2-scf00042 | 2 |
| AX-157937496 | 3 | 68.579 | KV452732.1 | 149285  | 2-scf00042 | 2 |
| AX-157814466 | 3 | 68.579 | KV452732.1 | 156852  | 2-scf00042 | 2 |
| AX-158405656 | 3 | 68.579 | KV452732.1 | 161247  | 2-scf00042 | 2 |
| AX-157937502 | 3 | 68.579 | KV452732.1 | 166399  | 2-scf00042 | 2 |
| AX-157814467 | 3 | 68.579 | KV452732.1 | 173782  | 2-scf00042 | 2 |
| AX-157937505 | 3 | 68.579 | KV452732.1 | 177507  | 2-scf00042 | 2 |
| AX-157937506 | 3 | 68.579 | KV452732.1 | 180452  | 2-scf00042 | 2 |
| AX-157937510 | 3 | 68.579 | KV452732.1 | 193377  | 2-scf00042 | 2 |
| AX-157937511 | 3 | 68.579 | KV452732.1 | 195395  | 2-scf00042 | 2 |
| AX-157937512 | 3 | 68.579 | KV452732.1 | 198856  | 2-scf00042 | 2 |
| AX-157937513 | 3 | 68.579 | KV452732.1 | 203787  | 2-scf00042 | 2 |
| AX-157714512 | 3 | 68.579 | KV452732.1 | 210173  | 2-scf00042 | 2 |
| AX-157937515 | 3 | 68.579 | KV452732.1 | 214335  | 2-scf00042 | 2 |
| AX-157937516 | 3 | 68.579 | KV452732.1 | 217448  | 2-scf00042 | 2 |

|              |   |        |            |        |            |   |
|--------------|---|--------|------------|--------|------------|---|
| AX-157937517 | 3 | 68.579 | KV452732.1 | 218684 | 2-scf00042 | 2 |
| AX-157937518 | 3 | 68.579 | KV452732.1 | 224126 | 2-scf00042 | 2 |
| AX-157937519 | 3 | 68.579 | KV452732.1 | 226453 | 2-scf00042 | 2 |
| AX-157937520 | 3 | 68.579 | KV452732.1 | 229434 | 2-scf00042 | 2 |
| AX-157937525 | 3 | 68.579 | KV452732.1 | 239213 | 2-scf00042 | 2 |
| AX-157937526 | 3 | 68.579 | KV452732.1 | 242912 | 2-scf00042 | 2 |
| AX-157937529 | 3 | 68.579 | KV452732.1 | 255532 | 2-scf00042 | 2 |
| AX-157937531 | 3 | 68.579 | KV452732.1 | 258525 | 2-scf00042 | 2 |
| AX-157937532 | 3 | 68.579 | KV452732.1 | 264033 | 2-scf00042 | 2 |
| AX-157937536 | 3 | 68.579 | KV452732.1 | 268483 | 2-scf00042 | 2 |
| AX-157937545 | 3 | 68.579 | KV452732.1 | 290932 | 2-scf00042 | 2 |
| AX-157937552 | 3 | 68.579 | KV452732.1 | 297835 | 2-scf00042 | 2 |
| AX-157937564 | 3 | 68.579 | KV452732.1 | 313459 | 2-scf00042 | 2 |
| AX-157937569 | 3 | 68.579 | KV452732.1 | 318085 | 2-scf00042 | 2 |
| AX-157937570 | 3 | 68.579 | KV452732.1 | 326984 | 2-scf00042 | 2 |
| AX-157937572 | 3 | 68.579 | KV452732.1 | 327642 | 2-scf00042 | 2 |
| AX-157937582 | 3 | 68.579 | KV452732.1 | 342587 | 2-scf00042 | 2 |
| AX-158390021 | 3 | 68.579 | KV452732.1 | 346299 | 2-scf00042 | 2 |
| AX-157937586 | 3 | 68.579 | KV452732.1 | 346672 | 2-scf00042 | 2 |
| AX-157937592 | 3 | 68.579 | KV452732.1 | 361299 | 2-scf00042 | 2 |
| AX-157937595 | 3 | 68.579 | KV452732.1 | 364518 | 2-scf00042 | 2 |
| AX-157937598 | 3 | 68.579 | KV452732.1 | 373402 | 2-scf00042 | 2 |
| AX-157937600 | 3 | 68.579 | KV452732.1 | 375684 | 2-scf00042 | 2 |
| AX-157937605 | 3 | 68.579 | KV452732.1 | 388512 | 2-scf00042 | 2 |
| AX-157937607 | 3 | 68.579 | KV452732.1 | 389376 | 2-scf00042 | 2 |
| AX-157937615 | 3 | 68.579 | KV452732.1 | 417992 | 2-scf00042 | 2 |
| AX-157937620 | 3 | 68.579 | KV452732.1 | 426892 | 2-scf00042 | 2 |
| AX-157937621 | 3 | 68.579 | KV452732.1 | 437133 | 2-scf00042 | 2 |
| AX-157937623 | 3 | 68.579 | KV452732.1 | 438402 | 2-scf00042 | 2 |
| AX-157937630 | 3 | 68.579 | KV452732.1 | 442810 | 2-scf00042 | 2 |
| AX-157937631 | 3 | 68.579 | KV452732.1 | 446363 | 2-scf00042 | 2 |
| AX-157937637 | 3 | 68.579 | KV452732.1 | 460246 | 2-scf00042 | 2 |
| AX-157937656 | 3 | 68.579 | KV452732.1 | 500177 | 2-scf00042 | 2 |
| AX-157937658 | 3 | 68.579 | KV452732.1 | 503176 | 2-scf00042 | 2 |
| AX-157937666 | 3 | 68.579 | KV452732.1 | 519947 | 2-scf00042 | 2 |
| AX-157937680 | 3 | 68.579 | KV452732.1 | 533537 | 2-scf00042 | 2 |
| AX-157937681 | 3 | 68.579 | KV452732.1 | 537705 | 2-scf00042 | 2 |
| AX-157937683 | 3 | 68.579 | KV452732.1 | 546205 | 2-scf00042 | 2 |
| AX-157937686 | 3 | 68.579 | KV452732.1 | 547757 | 2-scf00042 | 2 |
| AX-157937696 | 3 | 68.579 | KV452732.1 | 558723 | 2-scf00042 | 2 |
| AX-157937700 | 3 | 68.579 | KV452732.1 | 563977 | 2-scf00042 | 2 |
| AX-157814470 | 3 | 68.579 | KV452732.1 | 570778 | 2-scf00042 | 2 |
| AX-157814471 | 3 | 68.579 | KV452732.1 | 576695 | 2-scf00042 | 2 |
| AX-157718588 | 3 | 68.579 | KV452732.1 | 580423 | 2-scf00042 | 2 |
| AX-157937712 | 3 | 68.579 | KV452732.1 | 584773 | 2-scf00042 | 2 |
| AX-157937717 | 3 | 68.579 | KV452732.1 | 589900 | 2-scf00042 | 2 |
| AX-157937719 | 3 | 68.579 | KV452732.1 | 596652 | 2-scf00042 | 2 |
| AX-157937720 | 3 | 68.579 | KV452732.1 | 599685 | 2-scf00042 | 2 |
| AX-157937728 | 3 | 68.579 | KV452732.1 | 607753 | 2-scf00042 | 2 |
| AX-157937735 | 3 | 68.579 | KV452732.1 | 633202 | 2-scf00042 | 2 |
| AX-157937739 | 3 | 68.579 | KV452732.1 | 634561 | 2-scf00042 | 2 |

|              |   |        |            |        |            |   |
|--------------|---|--------|------------|--------|------------|---|
| AX-157937740 | 3 | 68.579 | KV452732.1 | 641648 | 2-scf00042 | 2 |
| AX-157937742 | 3 | 68.579 | KV452732.1 | 642178 | 2-scf00042 | 2 |
| AX-157937743 | 3 | 68.579 | KV452732.1 | 643555 | 2-scf00042 | 2 |
| AX-157937744 | 3 | 68.579 | KV452732.1 | 643626 | 2-scf00042 | 2 |
| AX-157937745 | 3 | 68.579 | KV452732.1 | 645624 | 2-scf00042 | 2 |
| AX-157937746 | 3 | 68.579 | KV452732.1 | 646409 | 2-scf00042 | 2 |
| AX-157814473 | 3 | 68.579 | KV452732.1 | 652076 | 2-scf00042 | 2 |
| AX-157937750 | 3 | 68.579 | KV452732.1 | 660102 | 2-scf00042 | 2 |
| AX-157937751 | 3 | 68.579 | KV452732.1 | 661196 | 2-scf00042 | 2 |
| AX-157937754 | 3 | 68.579 | KV452732.1 | 666937 | 2-scf00042 | 2 |
| AX-157814475 | 3 | 68.579 | KV452732.1 | 687670 | 2-scf00042 | 2 |
| AX-157937758 | 3 | 68.579 | KV452732.1 | 689897 | 2-scf00042 | 2 |
| AX-157937762 | 3 | 68.579 | KV452732.1 | 697052 | 2-scf00042 | 2 |
| AX-157937764 | 3 | 68.579 | KV452732.1 | 697639 | 2-scf00042 | 2 |
| AX-157937766 | 3 | 68.579 | KV452732.1 | 702436 | 2-scf00042 | 2 |
| AX-157814478 | 3 | 68.579 | KV452732.1 | 722918 | 2-scf00042 | 2 |
| AX-157709171 | 3 | 68.579 | KV452732.1 | 724651 | 2-scf00042 | 2 |
| AX-157937778 | 3 | 68.579 | KV452732.1 | 741083 | 2-scf00042 | 2 |
| AX-157937780 | 3 | 68.579 | KV452732.1 | 742150 | 2-scf00042 | 2 |
| AX-157937781 | 3 | 68.579 | KV452732.1 | 743464 | 2-scf00042 | 2 |
| AX-157937782 | 3 | 68.579 | KV452732.1 | 744112 | 2-scf00042 | 2 |
| AX-157937788 | 3 | 68.579 | KV452732.1 | 753385 | 2-scf00042 | 2 |
| AX-157814481 | 3 | 68.579 | KV452732.1 | 754517 | 2-scf00042 | 2 |
| AX-157937790 | 3 | 68.579 | KV452732.1 | 757447 | 2-scf00042 | 2 |
| AX-157814482 | 3 | 68.579 | KV452732.1 | 760524 | 2-scf00042 | 2 |
| AX-157937793 | 3 | 68.579 | KV452732.1 | 764085 | 2-scf00042 | 2 |
| AX-158379368 | 3 | 68.579 | KV452732.1 | 766365 | 2-scf00042 | 2 |
| AX-157746272 | 3 | 68.579 | KV452732.1 | 766914 | 2-scf00042 | 2 |
| AX-157744676 | 3 | 68.579 | KV452732.1 | 769321 | 2-scf00042 | 2 |
| AX-157814483 | 3 | 68.579 | KV452732.1 | 769586 | 2-scf00042 | 2 |
| AX-157701603 | 3 | 68.579 | KV452732.1 | 772015 | 2-scf00042 | 2 |
| AX-157937798 | 3 | 68.579 | KV452732.1 | 776226 | 2-scf00042 | 2 |
| AX-157937799 | 3 | 68.579 | KV452732.1 | 776373 | 2-scf00042 | 2 |
| AX-157937801 | 3 | 68.579 | KV452732.1 | 781481 | 2-scf00042 | 2 |
| AX-157937803 | 3 | 68.579 | KV452732.1 | 782137 | 2-scf00042 | 2 |
| AX-157937806 | 3 | 68.579 | KV452732.1 | 784441 | 2-scf00042 | 2 |
| AX-157937808 | 3 | 68.579 | KV452732.1 | 784895 | 2-scf00042 | 2 |
| AX-157937809 | 3 | 68.579 | KV452732.1 | 785131 | 2-scf00042 | 2 |
| AX-157937813 | 3 | 68.579 | KV452732.1 | 794296 | 2-scf00042 | 2 |
| AX-157814484 | 3 | 68.579 | KV452732.1 | 796464 | 2-scf00042 | 2 |
| AX-157937817 | 3 | 68.579 | KV452732.1 | 796634 | 2-scf00042 | 2 |
| AX-157774459 | 3 | 68.579 | KV452732.1 | 796766 | 2-scf00042 | 2 |
| AX-157937818 | 3 | 68.579 | KV452732.1 | 796903 | 2-scf00042 | 2 |
| AX-157937822 | 3 | 68.579 | KV452732.1 | 798113 | 2-scf00042 | 2 |
| AX-157814486 | 3 | 68.579 | KV452732.1 | 799877 | 2-scf00042 | 2 |
| AX-157814487 | 3 | 68.579 | KV452732.1 | 801433 | 2-scf00042 | 2 |
| AX-157718145 | 3 | 68.579 | KV452732.1 | 801647 | 2-scf00042 | 2 |
| AX-157937832 | 3 | 68.579 | KV452732.1 | 810617 | 2-scf00042 | 2 |
| AX-157937835 | 3 | 68.579 | KV452732.1 | 811997 | 2-scf00042 | 2 |
| AX-157937836 | 3 | 68.579 | KV452732.1 | 813809 | 2-scf00042 | 2 |
| AX-157937839 | 3 | 68.579 | KV452732.1 | 815348 | 2-scf00042 | 2 |

|              |   |        |            |        |            |   |
|--------------|---|--------|------------|--------|------------|---|
| AX-157937845 | 3 | 68.579 | KV452732.1 | 838561 | 2-scf00042 | 2 |
| AX-157937850 | 3 | 68.579 | KV452732.1 | 850944 | 2-scf00042 | 2 |
| AX-157709216 | 3 | 68.579 | KV452732.1 | 859828 | 2-scf00042 | 2 |
| AX-157937853 | 3 | 68.579 | KV452732.1 | 860803 | 2-scf00042 | 2 |
| AX-157814492 | 3 | 68.579 | KV452732.1 | 862569 | 2-scf00042 | 2 |
| AX-157937854 | 3 | 68.579 | KV452732.1 | 863708 | 2-scf00042 | 2 |
| AX-157937860 | 3 | 68.579 | KV452732.1 | 875991 | 2-scf00042 | 2 |
| AX-157937861 | 3 | 68.579 | KV452732.1 | 879266 | 2-scf00042 | 2 |
| AX-157814494 | 3 | 68.579 | KV452732.1 | 880047 | 2-scf00042 | 2 |
| AX-157937867 | 3 | 68.579 | KV452732.1 | 883165 | 2-scf00042 | 2 |
| AX-157937868 | 3 | 68.579 | KV452732.1 | 884216 | 2-scf00042 | 2 |
| AX-157937870 | 3 | 68.579 | KV452732.1 | 884850 | 2-scf00042 | 2 |
| AX-157937871 | 3 | 68.579 | KV452732.1 | 886006 | 2-scf00042 | 2 |
| AX-157937873 | 3 | 68.579 | KV452732.1 | 886580 | 2-scf00042 | 2 |
| AX-157937875 | 3 | 68.579 | KV452732.1 | 887842 | 2-scf00042 | 2 |
| AX-157814495 | 3 | 68.579 | KV452732.1 | 888173 | 2-scf00042 | 2 |
| AX-157937876 | 3 | 68.579 | KV452732.1 | 888314 | 2-scf00042 | 2 |
| AX-157814496 | 3 | 68.579 | KV452732.1 | 889075 | 2-scf00042 | 2 |
| AX-157937881 | 3 | 68.579 | KV452732.1 | 893543 | 2-scf00042 | 2 |
| AX-157937883 | 3 | 68.579 | KV452732.1 | 896546 | 2-scf00042 | 2 |
| AX-157814497 | 3 | 68.579 | KV452732.1 | 897064 | 2-scf00042 | 2 |
| AX-157937884 | 3 | 68.579 | KV452732.1 | 897614 | 2-scf00042 | 2 |
| AX-157937887 | 3 | 68.579 | KV452732.1 | 899408 | 2-scf00042 | 2 |
| AX-157937888 | 3 | 68.579 | KV452732.1 | 899977 | 2-scf00042 | 2 |
| AX-157937890 | 3 | 68.579 | KV452732.1 | 900597 | 2-scf00042 | 2 |
| AX-157937891 | 3 | 68.579 | KV452732.1 | 900993 | 2-scf00042 | 2 |
| AX-157814498 | 3 | 68.579 | KV452732.1 | 905522 | 2-scf00042 | 2 |
| AX-157937894 | 3 | 68.579 | KV452732.1 | 910061 | 2-scf00042 | 2 |
| AX-157814500 | 3 | 68.579 | KV452732.1 | 911119 | 2-scf00042 | 2 |
| AX-157814502 | 3 | 68.579 | KV452732.1 | 912286 | 2-scf00042 | 2 |
| AX-157740353 | 3 | 68.579 | KV452732.1 | 913953 | 2-scf00042 | 2 |
| AX-157717500 | 3 | 68.579 | KV452732.1 | 915053 | 2-scf00042 | 2 |
| AX-158405671 | 3 | 68.579 | KV452732.1 | 919023 | 2-scf00042 | 2 |
| AX-157937897 | 3 | 68.579 | KV452732.1 | 919258 | 2-scf00042 | 2 |
| AX-157937899 | 3 | 68.579 | KV452732.1 | 921475 | 2-scf00042 | 2 |
| AX-157937902 | 3 | 68.579 | KV452732.1 | 922096 | 2-scf00042 | 2 |
| AX-157937905 | 3 | 68.579 | KV452732.1 | 922683 | 2-scf00042 | 2 |
| AX-158390026 | 3 | 68.579 | KV452732.1 | 923149 | 2-scf00042 | 2 |
| AX-157937910 | 3 | 68.579 | KV452732.1 | 931960 | 2-scf00042 | 2 |
| AX-157937911 | 3 | 68.579 | KV452732.1 | 932367 | 2-scf00042 | 2 |
| AX-157937913 | 3 | 68.579 | KV452732.1 | 937572 | 2-scf00042 | 2 |
| AX-157714129 | 3 | 68.579 | KV452732.1 | 938232 | 2-scf00042 | 2 |
| AX-157937915 | 3 | 68.579 | KV452732.1 | 939391 | 2-scf00042 | 2 |
| AX-157718596 | 3 | 68.579 | KV452732.1 | 940245 | 2-scf00042 | 2 |
| AX-157937916 | 3 | 68.579 | KV452732.1 | 940785 | 2-scf00042 | 2 |
| AX-158405675 | 3 | 68.579 | KV452732.1 | 943405 | 2-scf00042 | 2 |
| AX-157937917 | 3 | 68.579 | KV452732.1 | 944079 | 2-scf00042 | 2 |
| AX-157937918 | 3 | 68.579 | KV452732.1 | 946178 | 2-scf00042 | 2 |
| AX-157937919 | 3 | 68.579 | KV452732.1 | 946657 | 2-scf00042 | 2 |
| AX-157937921 | 3 | 68.579 | KV452732.1 | 947009 | 2-scf00042 | 2 |
| AX-157814503 | 3 | 68.579 | KV452732.1 | 950094 | 2-scf00042 | 2 |

|              |   |        |            |         |            |   |
|--------------|---|--------|------------|---------|------------|---|
| AX-157937924 | 3 | 68.579 | KV452732.1 | 950786  | 2-scf00042 | 2 |
| AX-157937925 | 3 | 68.579 | KV452732.1 | 951219  | 2-scf00042 | 2 |
| AX-157937926 | 3 | 68.579 | KV452732.1 | 951550  | 2-scf00042 | 2 |
| AX-157937927 | 3 | 68.579 | KV452732.1 | 955260  | 2-scf00042 | 2 |
| AX-157937929 | 3 | 68.579 | KV452732.1 | 955580  | 2-scf00042 | 2 |
| AX-157937930 | 3 | 68.579 | KV452732.1 | 955863  | 2-scf00042 | 2 |
| AX-157937932 | 3 | 68.579 | KV452732.1 | 956064  | 2-scf00042 | 2 |
| AX-157814506 | 3 | 68.579 | KV452732.1 | 974818  | 2-scf00042 | 2 |
| AX-157937936 | 3 | 68.579 | KV452732.1 | 979856  | 2-scf00042 | 2 |
| AX-157814508 | 3 | 68.579 | KV452732.1 | 979940  | 2-scf00042 | 2 |
| AX-157937944 | 3 | 68.579 | KV452732.1 | 994242  | 2-scf00042 | 2 |
| AX-157937945 | 3 | 68.579 | KV452732.1 | 995746  | 2-scf00042 | 2 |
| AX-157814509 | 3 | 68.579 | KV452732.1 | 996097  | 2-scf00042 | 2 |
| AX-157937946 | 3 | 68.579 | KV452732.1 | 996749  | 2-scf00042 | 2 |
| AX-157937948 | 3 | 68.579 | KV452732.1 | 997905  | 2-scf00042 | 2 |
| AX-157937950 | 3 | 68.579 | KV452732.1 | 1007173 | 2-scf00042 | 2 |
| AX-157937951 | 3 | 68.579 | KV452732.1 | 1008344 | 2-scf00042 | 2 |
| AX-157937954 | 3 | 68.579 | KV452732.1 | 1020635 | 2-scf00042 | 2 |
| AX-157937956 | 3 | 68.579 | KV452732.1 | 1031878 | 2-scf00042 | 2 |
| AX-157883851 | 3 | 68.579 | KV452732.1 | 1032442 | 2-scf00042 | 2 |
| AX-157937958 | 3 | 68.579 | KV452732.1 | 1035420 | 2-scf00042 | 2 |
| AX-157937966 | 3 | 68.579 | KV452732.1 | 1054755 | 2-scf00042 | 2 |
| AX-157937968 | 3 | 68.579 | KV452732.1 | 1055235 | 2-scf00042 | 2 |
| AX-157937971 | 3 | 68.579 | KV452732.1 | 1063868 | 2-scf00042 | 2 |
| AX-157937973 | 3 | 68.579 | KV452732.1 | 1067977 | 2-scf00042 | 2 |
| AX-157937975 | 3 | 68.579 | KV452732.1 | 1069563 | 2-scf00042 | 2 |
| AX-157937980 | 3 | 68.579 | KV452732.1 | 1079425 | 2-scf00042 | 2 |
| AX-157937984 | 3 | 68.579 | KV452732.1 | 1082828 | 2-scf00042 | 2 |
| AX-157814511 | 3 | 68.579 | KV452732.1 | 1101937 | 2-scf00042 | 2 |
| AX-157937992 | 3 | 68.579 | KV452732.1 | 1110014 | 2-scf00042 | 2 |
| AX-157938000 | 3 | 68.579 | KV452732.1 | 1126968 | 2-scf00042 | 2 |
| AX-157938003 | 3 | 68.579 | KV452732.1 | 1134582 | 2-scf00042 | 2 |
| AX-157938010 | 3 | 68.579 | KV452732.1 | 1145349 | 2-scf00042 | 2 |
| AX-157938011 | 3 | 68.579 | KV452732.1 | 1146130 | 2-scf00042 | 2 |
| AX-157938013 | 3 | 68.579 | KV452732.1 | 1147955 | 2-scf00042 | 2 |
| AX-157938026 | 3 | 68.579 | KV452732.1 | 1182873 | 2-scf00042 | 2 |
| AX-157864729 | 3 | 68.579 | KV452732.1 | 1191338 | 2-scf00042 | 2 |
| AX-157938029 | 3 | 68.579 | KV452732.1 | 1194126 | 2-scf00042 | 2 |
| AX-157938031 | 3 | 68.579 | KV452732.1 | 1194560 | 2-scf00042 | 2 |
| AX-158405686 | 3 | 68.579 | KV452732.1 | 1196749 | 2-scf00042 | 2 |
| AX-157938036 | 3 | 68.579 | KV452732.1 | 1208931 | 2-scf00042 | 2 |
| AX-157938037 | 3 | 68.579 | KV452732.1 | 1214257 | 2-scf00042 | 2 |
| AX-157938039 | 3 | 68.579 | KV452732.1 | 1218565 | 2-scf00042 | 2 |
| AX-157938040 | 3 | 68.579 | KV452732.1 | 1220163 | 2-scf00042 | 2 |
| AX-158405690 | 3 | 68.579 | KV452732.1 | 1224763 | 2-scf00042 | 2 |
| AX-158405691 | 3 | 68.579 | KV452732.1 | 1224800 | 2-scf00042 | 2 |
| AX-157938043 | 3 | 68.579 | KV452732.1 | 1226131 | 2-scf00042 | 2 |
| AX-157814515 | 3 | 68.579 | KV452732.1 | 1227380 | 2-scf00042 | 2 |
| AX-157780232 | 3 | 68.579 | KV452732.1 | 1229495 | 2-scf00042 | 2 |
| AX-157869449 | 3 | 68.579 | KV452732.1 | 1234832 | 2-scf00042 | 2 |
| AX-157938048 | 3 | 68.579 | KV452732.1 | 1236463 | 2-scf00042 | 2 |

|              |   |        |            |         |            |   |
|--------------|---|--------|------------|---------|------------|---|
| AX-157938050 | 3 | 68.579 | KV452732.1 | 1242533 | 2-scf00042 | 2 |
| AX-157938055 | 3 | 68.579 | KV452732.1 | 1248210 | 2-scf00042 | 2 |
| AX-157814516 | 3 | 68.579 | KV452732.1 | 1263977 | 2-scf00042 | 2 |
| AX-157814517 | 3 | 68.579 | KV452732.1 | 1270222 | 2-scf00042 | 2 |
| AX-157862783 | 3 | 68.579 | KV452732.1 | 1270314 | 2-scf00042 | 2 |
| AX-157757114 | 3 | 68.579 | KV452732.1 | 1270524 | 2-scf00042 | 2 |
| AX-157938066 | 3 | 68.579 | KV452732.1 | 1296277 | 2-scf00042 | 2 |
| AX-157869450 | 3 | 68.579 | KV452732.1 | 1298975 | 2-scf00042 | 2 |
| AX-157938069 | 3 | 68.579 | KV452732.1 | 1302163 | 2-scf00042 | 2 |
| AX-157938072 | 3 | 68.579 | KV452732.1 | 1311927 | 2-scf00042 | 2 |
| AX-157938074 | 3 | 68.579 | KV452732.1 | 1315406 | 2-scf00042 | 2 |
| AX-157938075 | 3 | 68.579 | KV452732.1 | 1315672 | 2-scf00042 | 2 |
| AX-157938080 | 3 | 68.579 | KV452732.1 | 1338057 | 2-scf00042 | 2 |
| AX-157814519 | 3 | 68.579 | KV452732.1 | 1342114 | 2-scf00042 | 2 |
| AX-157938082 | 3 | 68.579 | KV452732.1 | 1342302 | 2-scf00042 | 2 |
| AX-157938085 | 3 | 68.579 | KV452732.1 | 1347887 | 2-scf00042 | 2 |
| AX-157938086 | 3 | 68.579 | KV452732.1 | 1350959 | 2-scf00042 | 2 |
| AX-158405693 | 3 | 68.579 | KV452732.1 | 1354400 | 2-scf00042 | 2 |
| AX-157938089 | 3 | 68.579 | KV452732.1 | 1357083 | 2-scf00042 | 2 |
| AX-157938091 | 3 | 68.579 | KV452732.1 | 1357506 | 2-scf00042 | 2 |
| AX-157854497 | 3 | 68.579 | KV452732.1 | 1360311 | 2-scf00042 | 2 |
| AX-157938096 | 3 | 68.579 | KV452732.1 | 1366537 | 2-scf00042 | 2 |
| AX-157938097 | 3 | 68.579 | KV452732.1 | 1367470 | 2-scf00042 | 2 |
| AX-157938099 | 3 | 68.579 | KV452732.1 | 1368567 | 2-scf00042 | 2 |
| AX-157938106 | 3 | 68.579 | KV452732.1 | 1375475 | 2-scf00042 | 2 |
| AX-157938107 | 3 | 68.579 | KV452732.1 | 1376432 | 2-scf00042 | 2 |
| AX-157938108 | 3 | 68.579 | KV452732.1 | 1377551 | 2-scf00042 | 2 |
| AX-157938111 | 3 | 68.579 | KV452732.1 | 1378485 | 2-scf00042 | 2 |
| AX-157938112 | 3 | 68.579 | KV452732.1 | 1378913 | 2-scf00042 | 2 |
| AX-157938116 | 3 | 68.579 | KV452732.1 | 1385742 | 2-scf00042 | 2 |
| AX-157938117 | 3 | 68.579 | KV452732.1 | 1386536 | 2-scf00042 | 2 |
| AX-157938125 | 3 | 68.579 | KV452732.1 | 1396868 | 2-scf00042 | 2 |
| AX-157938128 | 3 | 68.579 | KV452732.1 | 1397755 | 2-scf00042 | 2 |
| AX-157938134 | 3 | 68.579 | KV452732.1 | 1403649 | 2-scf00042 | 2 |
| AX-157938135 | 3 | 68.579 | KV452732.1 | 1404451 | 2-scf00042 | 2 |
| AX-157938137 | 3 | 68.579 | KV452732.1 | 1407110 | 2-scf00042 | 2 |
| AX-157938138 | 3 | 68.579 | KV452732.1 | 1407674 | 2-scf00042 | 2 |
| AX-157938139 | 3 | 68.579 | KV452732.1 | 1414493 | 2-scf00042 | 2 |
| AX-157938146 | 3 | 68.579 | KV452732.1 | 1419550 | 2-scf00042 | 2 |
| AX-157938148 | 3 | 68.579 | KV452732.1 | 1421790 | 2-scf00042 | 2 |
| AX-157938149 | 3 | 68.579 | KV452732.1 | 1426129 | 2-scf00042 | 2 |
| AX-157754107 | 3 | 68.579 | KV452732.1 | 1430875 | 2-scf00042 | 2 |
| AX-157938155 | 3 | 68.579 | KV452732.1 | 1432068 | 2-scf00042 | 2 |
| AX-157938158 | 3 | 68.579 | KV452732.1 | 1437244 | 2-scf00042 | 2 |
| AX-157938171 | 3 | 68.579 | KV452732.1 | 1466544 | 2-scf00042 | 2 |
| AX-157938173 | 3 | 68.579 | KV452732.1 | 1466969 | 2-scf00042 | 2 |
| AX-157702292 | 3 | 68.579 | KV452732.1 | 1467069 | 2-scf00042 | 2 |
| AX-157938189 | 3 | 68.579 | KV452732.1 | 1468601 | 2-scf00042 | 2 |
| AX-157938191 | 3 | 68.579 | KV452732.1 | 1469698 | 2-scf00042 | 2 |
| AX-157938192 | 3 | 68.579 | KV452732.1 | 1472171 | 2-scf00042 | 2 |
| AX-157938194 | 3 | 68.579 | KV452732.1 | 1474511 | 2-scf00042 | 2 |

|              |   |        |             |         |            |    |
|--------------|---|--------|-------------|---------|------------|----|
| AX-157938196 | 3 | 68.579 | KV452732.1  | 1475169 | 2-scf00042 | 2  |
| AX-157938197 | 3 | 68.579 | KV452732.1  | 1475615 | 2-scf00042 | 2  |
| AX-157756532 | 3 | 68.579 | KV452732.1  | 1477444 | 2-scf00042 | 2  |
| AX-157938200 | 3 | 68.579 | KV452732.1  | 1477957 | 2-scf00042 | 2  |
| AX-157938201 | 3 | 68.579 | KV452732.1  | 1478461 | 2-scf00042 | 2  |
| AX-157938206 | 3 | 68.579 | KV452732.1  | 1483495 | 2-scf00042 | 2  |
| AX-157938207 | 3 | 68.579 | KV452732.1  | 1483890 | 2-scf00042 | 2  |
| AX-157938208 | 3 | 68.579 | KV452732.1  | 1484337 | 2-scf00042 | 2  |
| AX-157938211 | 3 | 68.579 | KV452732.1  | 1486988 | 2-scf00042 | 2  |
| AX-157938215 | 3 | 68.579 | KV452732.1  | 1489700 | 2-scf00042 | 2  |
| AX-157938217 | 3 | 68.579 | KV452732.1  | 1494766 | 2-scf00042 | 2  |
| AX-157938218 | 3 | 68.579 | KV452732.1  | 1496615 | 2-scf00042 | 2  |
| AX-157938224 | 3 | 68.579 | KV452732.1  | 1500826 | 2-scf00042 | 2  |
| AX-157938225 | 3 | 68.579 | KV452732.1  | 1504566 | 2-scf00042 | 2  |
| AX-157744739 | 3 | 68.579 | KV452732.1  | 1504804 | 2-scf00042 | 2  |
| AX-157938229 | 3 | 68.579 | KV452732.1  | 1519689 | 2-scf00042 | 2  |
| AX-157814523 | 3 | 68.579 | KV452732.1  | 1521751 | 2-scf00042 | 2  |
| AX-157814524 | 3 | 68.579 | KV452732.1  | 1523554 | 2-scf00042 | 2  |
| AX-157938232 | 3 | 68.579 | KV452732.1  | 1527127 | 2-scf00042 | 2  |
| AX-157938235 | 3 | 68.579 | KV452732.1  | 1529708 | 2-scf00042 | 2  |
| AX-157814527 | 3 | 68.579 | KV452732.1  | 1543758 | 2-scf00042 | 2  |
| AX-157938241 | 3 | 68.579 | KV452732.1  | 1544828 | 2-scf00042 | 2  |
| AX-157938242 | 3 | 68.579 | KV452732.1  | 1546578 | 2-scf00042 | 2  |
| AX-157682505 | 3 | 68.579 | KV452731.1  | 2217    | 2-scf00043 | 2  |
| AX-157938902 | 3 | 68.579 | KV452742.1  | 551810  | 2-scf00046 | 2  |
| AX-157875141 | 3 | 68.579 | KV452742.1  | 976140  | 2-scf00046 | 2  |
| AX-157941354 | 3 | 68.579 | KV452742.1  | 1659747 | 2-scf00046 | 2  |
| AX-157755810 | 3 | 68.579 | KV452742.1  | 1660129 | 2-scf00046 | 2  |
| AX-157941352 | 3 | 68.579 | KV452742.1  | 1660623 | 2-scf00046 | 2  |
| AX-157941095 | 3 | 68.579 | KV452742.1  | 1940917 | 2-scf00046 | 2  |
| AX-157939795 | 3 | 68.579 | KV452742.1  | 2838003 | 2-scf00046 | 2  |
| AX-157939992 | 3 | 68.579 | KV452742.1  | 3068654 | 2-scf00046 | 2  |
| AX-157814694 | 3 | 68.579 | KV452742.1  | 3120336 | 2-scf00046 | 2  |
| AX-158390048 | 3 | 68.579 | KV452742.1  | 3235019 | 2-scf00046 | 2  |
| AX-157940190 | 3 | 68.579 | KV452742.1  | 3284013 | 2-scf00046 | 2  |
| AX-157940205 | 3 | 68.579 | KV452742.1  | 3298705 | 2-scf00046 | 2  |
| AX-157940246 | 3 | 68.579 | KV452742.1  | 3349094 | 2-scf00046 | 2  |
| AX-158382627 | 3 | 68.579 | KV452742.1  | 3656711 | 2-scf00046 | 2  |
| AX-157814742 | 3 | 68.579 | KV452742.1  | 3853542 | 2-scf00046 | 2  |
| AX-157726411 | 3 | 68.579 | KV452745.1  | 107676  | 2-scf00051 | 2  |
| AX-157942347 | 3 | 68.579 | KV452745.1  | 754305  | 2-scf00051 | 2  |
| AX-157942504 | 3 | 68.579 | KV452745.1  | 891848  | 2-scf00051 | 2  |
| AX-157942584 | 3 | 68.579 | KV452745.1  | 984823  | 2-scf00051 | 2  |
| AX-157942682 | 3 | 68.579 | KV452745.1  | 1160601 | 2-scf00051 | 2  |
| AX-157943467 | 3 | 68.579 | KV452747.1  | 440996  | 2-scf00053 | 2  |
| AX-157943855 | 3 | 68.579 | KV452747.1  | 845736  | 2-scf00053 | 2  |
| AX-157945373 | 3 | 68.579 | KV452746.1  | 229392  | 2-scf00054 | 2  |
| AX-158405893 | 3 | 68.579 | KV452746.1  | 334862  | 2-scf00054 | 2  |
| AX-157706100 | 3 | 68.579 | 3ML01031607 | 202     | scf07224_1 | UN |
| AX-157706872 | 3 | 68.579 | 3ML01033060 | 151     | scf08697_1 | UN |
| AX-157707078 | 3 | 68.579 | 3ML01033463 | 59      | scf09114_1 | UN |

|              |   |        |            |          |            |   |
|--------------|---|--------|------------|----------|------------|---|
| AX-157746094 | 3 | 68.688 | KV452730.1 | 10588023 | 2-scf00040 | 2 |
| AX-157931855 | 3 | 68.688 | KV452730.1 | 11555076 | 2-scf00040 | 2 |
| AX-157814127 | 3 | 68.688 | KV452730.1 | 11807901 | 2-scf00040 | 2 |
| AX-157932398 | 3 | 68.688 | KV452730.1 | 12213459 | 2-scf00040 | 2 |
| AX-157933584 | 3 | 68.688 | KV452730.1 | 14098103 | 2-scf00040 | 2 |
| AX-157814265 | 3 | 68.688 | KV452730.1 | 14425579 | 2-scf00040 | 2 |
| AX-157933801 | 3 | 68.688 | KV452730.1 | 14515963 | 2-scf00040 | 2 |
| AX-157933922 | 3 | 68.688 | KV452733.1 | 48039    | 2-scf00041 | 2 |
| AX-157933923 | 3 | 68.688 | KV452733.1 | 49732    | 2-scf00041 | 2 |
| AX-157933925 | 3 | 68.688 | KV452733.1 | 50219    | 2-scf00041 | 2 |
| AX-157814275 | 3 | 68.688 | KV452733.1 | 76567    | 2-scf00041 | 2 |
| AX-157933951 | 3 | 68.688 | KV452733.1 | 78591    | 2-scf00041 | 2 |
| AX-157933956 | 3 | 68.688 | KV452733.1 | 80397    | 2-scf00041 | 2 |
| AX-158379354 | 3 | 68.688 | KV452733.1 | 83975    | 2-scf00041 | 2 |
| AX-157814278 | 3 | 68.688 | KV452733.1 | 87992    | 2-scf00041 | 2 |
| AX-157933961 | 3 | 68.688 | KV452733.1 | 89060    | 2-scf00041 | 2 |
| AX-157933968 | 3 | 68.688 | KV452733.1 | 95800    | 2-scf00041 | 2 |
| AX-157933970 | 3 | 68.688 | KV452733.1 | 97512    | 2-scf00041 | 2 |
| AX-157933974 | 3 | 68.688 | KV452733.1 | 98998    | 2-scf00041 | 2 |
| AX-157933980 | 3 | 68.688 | KV452733.1 | 99824    | 2-scf00041 | 2 |
| AX-157933982 | 3 | 68.688 | KV452733.1 | 100873   | 2-scf00041 | 2 |
| AX-157933983 | 3 | 68.688 | KV452733.1 | 103414   | 2-scf00041 | 2 |
| AX-157757048 | 3 | 68.688 | KV452733.1 | 106995   | 2-scf00041 | 2 |
| AX-157934000 | 3 | 68.688 | KV452733.1 | 118243   | 2-scf00041 | 2 |
| AX-157935718 | 3 | 68.688 | KV452733.1 | 1958678  | 2-scf00041 | 2 |
| AX-157937821 | 3 | 68.688 | KV452732.1 | 797308   | 2-scf00042 | 2 |
| AX-157814485 | 3 | 68.688 | KV452732.1 | 797807   | 2-scf00042 | 2 |
| AX-157814283 | 3 | 68.797 | KV452733.1 | 121126   | 2-scf00041 | 2 |
| AX-157874948 | 3 | 68.907 | KV452730.1 | 12061345 | 2-scf00040 | 2 |
| AX-157934006 | 3 | 68.907 | KV452733.1 | 125952   | 2-scf00041 | 2 |
| AX-157814285 | 3 | 68.907 | KV452733.1 | 127253   | 2-scf00041 | 2 |
| AX-157934011 | 3 | 68.907 | KV452733.1 | 129111   | 2-scf00041 | 2 |
| AX-157934025 | 3 | 68.907 | KV452733.1 | 132279   | 2-scf00041 | 2 |
| AX-157720477 | 3 | 68.907 | KV452733.1 | 140809   | 2-scf00041 | 2 |
| AX-157934031 | 3 | 68.907 | KV452733.1 | 141570   | 2-scf00041 | 2 |
| AX-157934033 | 3 | 68.907 | KV452733.1 | 145772   | 2-scf00041 | 2 |
| AX-157934034 | 3 | 68.907 | KV452733.1 | 145956   | 2-scf00041 | 2 |
| AX-157934050 | 3 | 68.907 | KV452733.1 | 164185   | 2-scf00041 | 2 |
| AX-157934052 | 3 | 68.907 | KV452733.1 | 170013   | 2-scf00041 | 2 |
| AX-157934062 | 3 | 68.907 | KV452733.1 | 188118   | 2-scf00041 | 2 |
| AX-157752708 | 3 | 68.999 | KV452733.1 | 182290   | 2-scf00041 | 2 |
| AX-157934071 | 3 | 69.234 | KV452733.1 | 193451   | 2-scf00041 | 2 |
| AX-157875012 | 3 | 69.235 | KV452733.1 | 194875   | 2-scf00041 | 2 |
| AX-157934073 | 3 | 69.235 | KV452733.1 | 195164   | 2-scf00041 | 2 |
| AX-157934082 | 3 | 69.235 | KV452733.1 | 203072   | 2-scf00041 | 2 |
| AX-157932651 | 3 | 69.453 | KV452730.1 | 12520403 | 2-scf00040 | 2 |
| AX-157932895 | 3 | 69.453 | KV452730.1 | 13004023 | 2-scf00040 | 2 |
| AX-157933276 | 3 | 69.453 | KV452730.1 | 13695269 | 2-scf00040 | 2 |
| AX-157933355 | 3 | 69.453 | KV452730.1 | 13815215 | 2-scf00040 | 2 |
| AX-157933525 | 3 | 69.453 | KV452730.1 | 14013369 | 2-scf00040 | 2 |
| AX-157934085 | 3 | 69.453 | KV452733.1 | 206112   | 2-scf00041 | 2 |



|              |   |        |            |          |            |   |
|--------------|---|--------|------------|----------|------------|---|
| AX-157934089 | 3 | 69.453 | KV452733.1 | 212929   | 2-scf00041 | 2 |
| AX-157937914 | 3 | 69.453 | KV452732.1 | 938852   | 2-scf00042 | 2 |
| AX-157938165 | 3 | 69.453 | KV452732.1 | 1450717  | 2-scf00042 | 2 |
| AX-157814521 | 3 | 69.453 | KV452732.1 | 1452161  | 2-scf00042 | 2 |
| AX-157758721 | 3 | 69.453 | KV452732.1 | 1556308  | 2-scf00042 | 2 |
| AX-157934092 | 3 | 69.563 | KV452733.1 | 215187   | 2-scf00041 | 2 |
| AX-157928986 | 3 | 69.672 | KV452730.1 | 7887753  | 2-scf00040 | 2 |
| AX-157929152 | 3 | 69.672 | KV452730.1 | 8079473  | 2-scf00040 | 2 |
| AX-157929609 | 3 | 69.672 | KV452730.1 | 8821104  | 2-scf00040 | 2 |
| AX-157930597 | 3 | 69.672 | KV452730.1 | 10061018 | 2-scf00040 | 2 |
| AX-157703711 | 3 | 69.672 | KV452730.1 | 10425095 | 2-scf00040 | 2 |
| AX-157931206 | 3 | 69.672 | KV452730.1 | 10765526 | 2-scf00040 | 2 |
| AX-157931952 | 3 | 69.672 | KV452730.1 | 11699439 | 2-scf00040 | 2 |
| AX-157709765 | 3 | 69.672 | KV452730.1 | 12079845 | 2-scf00040 | 2 |
| AX-157933683 | 3 | 69.672 | KV452730.1 | 14221957 | 2-scf00040 | 2 |
| AX-157710698 | 3 | 69.672 | KV452733.1 | 215908   | 2-scf00041 | 2 |
| AX-157934097 | 3 | 69.672 | KV452733.1 | 218866   | 2-scf00041 | 2 |
| AX-157934099 | 3 | 69.672 | KV452733.1 | 220045   | 2-scf00041 | 2 |
| AX-157755217 | 3 | 69.672 | KV452733.1 | 221695   | 2-scf00041 | 2 |
| AX-157934104 | 3 | 69.672 | KV452733.1 | 225685   | 2-scf00041 | 2 |
| AX-157934113 | 3 | 69.672 | KV452733.1 | 231852   | 2-scf00041 | 2 |
| AX-157934116 | 3 | 69.672 | KV452733.1 | 234549   | 2-scf00041 | 2 |
| AX-157934117 | 3 | 69.672 | KV452733.1 | 235693   | 2-scf00041 | 2 |
| AX-157934120 | 3 | 69.672 | KV452733.1 | 236073   | 2-scf00041 | 2 |
| AX-157934123 | 3 | 69.672 | KV452733.1 | 237526   | 2-scf00041 | 2 |
| AX-157709905 | 3 | 69.672 | KV452733.1 | 253974   | 2-scf00041 | 2 |
| AX-157814288 | 3 | 69.672 | KV452733.1 | 260943   | 2-scf00041 | 2 |
| AX-157934151 | 3 | 69.672 | KV452733.1 | 261863   | 2-scf00041 | 2 |
| AX-157883796 | 3 | 69.672 | KV452733.1 | 267811   | 2-scf00041 | 2 |
| AX-157937794 | 3 | 69.672 | KV452732.1 | 769748   | 2-scf00042 | 2 |
| AX-157934132 | 3 | 69.703 | KV452733.1 | 243416   | 2-scf00041 | 2 |
| AX-157934115 | 3 | 69.732 | KV452733.1 | 232647   | 2-scf00041 | 2 |
| AX-157934135 | 3 | 69.732 | KV452733.1 | 245011   | 2-scf00041 | 2 |
| AX-157934139 | 3 | 69.763 | KV452733.1 | 247735   | 2-scf00041 | 2 |
| AX-157934147 | 3 | 69.763 | KV452733.1 | 256116   | 2-scf00041 | 2 |
| AX-157771165 | 3 | 69.763 | KV452733.1 | 271933   | 2-scf00041 | 2 |
| AX-157934297 | 3 | 69.763 | KV452733.1 | 426495   | 2-scf00041 | 2 |
| AX-157934141 | 3 | 69.781 | KV452733.1 | 250548   | 2-scf00041 | 2 |
| AX-157934142 | 3 | 69.781 | KV452733.1 | 254221   | 2-scf00041 | 2 |
| AX-157934146 | 3 | 69.781 | KV452733.1 | 255319   | 2-scf00041 | 2 |
| AX-157934150 | 3 | 69.781 | KV452733.1 | 260883   | 2-scf00041 | 2 |
| AX-157814289 | 3 | 69.781 | KV452733.1 | 262832   | 2-scf00041 | 2 |
| AX-157934160 | 3 | 69.781 | KV452733.1 | 267934   | 2-scf00041 | 2 |
| AX-157934162 | 3 | 69.781 | KV452733.1 | 268376   | 2-scf00041 | 2 |
| AX-157934166 | 3 | 69.89  | KV452733.1 | 279083   | 2-scf00041 | 2 |
| AX-157934167 | 3 | 69.89  | KV452733.1 | 280497   | 2-scf00041 | 2 |
| AX-157934169 | 3 | 69.89  | KV452733.1 | 281762   | 2-scf00041 | 2 |
| AX-157934171 | 3 | 69.89  | KV452733.1 | 282758   | 2-scf00041 | 2 |
| AX-157772566 | 3 | 69.891 | KV452733.1 | 285153   | 2-scf00041 | 2 |
| AX-157934176 | 3 | 69.891 | KV452733.1 | 286699   | 2-scf00041 | 2 |
| AX-157934179 | 3 | 69.891 | KV452733.1 | 294692   | 2-scf00041 | 2 |

|              |   |        |            |          |            |   |
|--------------|---|--------|------------|----------|------------|---|
| AX-158405445 | 3 | 70.109 | KV452730.1 | 7900826  | 2-scf00040 | 2 |
| AX-157929019 | 3 | 70.109 | KV452730.1 | 7919865  | 2-scf00040 | 2 |
| AX-157929122 | 3 | 70.109 | KV452730.1 | 8032202  | 2-scf00040 | 2 |
| AX-157929556 | 3 | 70.109 | KV452730.1 | 8764681  | 2-scf00040 | 2 |
| AX-157929571 | 3 | 70.109 | KV452730.1 | 8784318  | 2-scf00040 | 2 |
| AX-157929574 | 3 | 70.109 | KV452730.1 | 8785409  | 2-scf00040 | 2 |
| AX-157748654 | 3 | 70.109 | KV452730.1 | 8894849  | 2-scf00040 | 2 |
| AX-157929656 | 3 | 70.109 | KV452730.1 | 8911118  | 2-scf00040 | 2 |
| AX-157930114 | 3 | 70.109 | KV452730.1 | 9348846  | 2-scf00040 | 2 |
| AX-157930152 | 3 | 70.109 | KV452730.1 | 9377883  | 2-scf00040 | 2 |
| AX-157930242 | 3 | 70.109 | KV452730.1 | 9460141  | 2-scf00040 | 2 |
| AX-157931144 | 3 | 70.109 | KV452730.1 | 10695377 | 2-scf00040 | 2 |
| AX-157931145 | 3 | 70.109 | KV452730.1 | 10695931 | 2-scf00040 | 2 |
| AX-157931400 | 3 | 70.109 | KV452730.1 | 10989120 | 2-scf00040 | 2 |
| AX-157931434 | 3 | 70.109 | KV452730.1 | 11022670 | 2-scf00040 | 2 |
| AX-157814089 | 3 | 70.109 | KV452730.1 | 11244264 | 2-scf00040 | 2 |
| AX-157749845 | 3 | 70.109 | KV452730.1 | 11733715 | 2-scf00040 | 2 |
| AX-157854152 | 3 | 70.109 | KV452730.1 | 11740956 | 2-scf00040 | 2 |
| AX-157932154 | 3 | 70.109 | KV452730.1 | 11935673 | 2-scf00040 | 2 |
| AX-157933945 | 3 | 70.109 | KV452733.1 | 70682    | 2-scf00041 | 2 |
| AX-157934129 | 3 | 70.109 | KV452733.1 | 241630   | 2-scf00041 | 2 |
| AX-157934144 | 3 | 70.109 | KV452733.1 | 254795   | 2-scf00041 | 2 |
| AX-157934184 | 3 | 70.109 | KV452733.1 | 301109   | 2-scf00041 | 2 |
| AX-157934189 | 3 | 70.109 | KV452733.1 | 304558   | 2-scf00041 | 2 |
| AX-157934207 | 3 | 70.109 | KV452733.1 | 311393   | 2-scf00041 | 2 |
| AX-157738473 | 3 | 70.109 | KV452733.1 | 312171   | 2-scf00041 | 2 |
| AX-157934212 | 3 | 70.109 | KV452733.1 | 312474   | 2-scf00041 | 2 |
| AX-157934218 | 3 | 70.109 | KV452733.1 | 314286   | 2-scf00041 | 2 |
| AX-157934219 | 3 | 70.109 | KV452733.1 | 317825   | 2-scf00041 | 2 |
| AX-157934223 | 3 | 70.109 | KV452733.1 | 319607   | 2-scf00041 | 2 |
| AX-157934232 | 3 | 70.109 | KV452733.1 | 324335   | 2-scf00041 | 2 |
| AX-157934249 | 3 | 70.109 | KV452733.1 | 342368   | 2-scf00041 | 2 |
| AX-157814292 | 3 | 70.109 | KV452733.1 | 344146   | 2-scf00041 | 2 |
| AX-157934252 | 3 | 70.109 | KV452733.1 | 351742   | 2-scf00041 | 2 |
| AX-157934254 | 3 | 70.109 | KV452733.1 | 352517   | 2-scf00041 | 2 |
| AX-158405588 | 3 | 70.109 | KV452733.1 | 353169   | 2-scf00041 | 2 |
| AX-157756144 | 3 | 70.109 | KV452733.1 | 353533   | 2-scf00041 | 2 |
| AX-157934256 | 3 | 70.109 | KV452733.1 | 355627   | 2-scf00041 | 2 |
| AX-157934259 | 3 | 70.109 | KV452733.1 | 360019   | 2-scf00041 | 2 |
| AX-157814293 | 3 | 70.109 | KV452733.1 | 363587   | 2-scf00041 | 2 |
| AX-157934262 | 3 | 70.109 | KV452733.1 | 367174   | 2-scf00041 | 2 |
| AX-157814294 | 3 | 70.109 | KV452733.1 | 367229   | 2-scf00041 | 2 |
| AX-157934264 | 3 | 70.109 | KV452733.1 | 368312   | 2-scf00041 | 2 |
| AX-157934272 | 3 | 70.109 | KV452733.1 | 382113   | 2-scf00041 | 2 |
| AX-157934273 | 3 | 70.109 | KV452733.1 | 382474   | 2-scf00041 | 2 |
| AX-157934277 | 3 | 70.109 | KV452733.1 | 389540   | 2-scf00041 | 2 |
| AX-157934284 | 3 | 70.109 | KV452733.1 | 409580   | 2-scf00041 | 2 |
| AX-157934285 | 3 | 70.109 | KV452733.1 | 409951   | 2-scf00041 | 2 |
| AX-157934295 | 3 | 70.109 | KV452733.1 | 425576   | 2-scf00041 | 2 |
| AX-157934296 | 3 | 70.109 | KV452733.1 | 425959   | 2-scf00041 | 2 |
| AX-157934298 | 3 | 70.109 | KV452733.1 | 427108   | 2-scf00041 | 2 |

|              |   |        |             |         |            |    |
|--------------|---|--------|-------------|---------|------------|----|
| AX-157814296 | 3 | 70.109 | KV452733.1  | 427457  | 2-scf00041 | 2  |
| AX-158389997 | 3 | 70.109 | KV452733.1  | 429305  | 2-scf00041 | 2  |
| AX-157934299 | 3 | 70.109 | KV452733.1  | 429837  | 2-scf00041 | 2  |
| AX-157934302 | 3 | 70.109 | KV452733.1  | 438072  | 2-scf00041 | 2  |
| AX-157814297 | 3 | 70.109 | KV452733.1  | 438942  | 2-scf00041 | 2  |
| AX-157774646 | 3 | 70.109 | KV452733.1  | 448096  | 2-scf00041 | 2  |
| AX-157934308 | 3 | 70.109 | KV452733.1  | 448177  | 2-scf00041 | 2  |
| AX-157934311 | 3 | 70.109 | KV452733.1  | 450219  | 2-scf00041 | 2  |
| AX-157934313 | 3 | 70.109 | KV452733.1  | 451310  | 2-scf00041 | 2  |
| AX-157934314 | 3 | 70.109 | KV452733.1  | 452067  | 2-scf00041 | 2  |
| AX-157934325 | 3 | 70.109 | KV452733.1  | 463452  | 2-scf00041 | 2  |
| AX-157934326 | 3 | 70.109 | KV452733.1  | 464219  | 2-scf00041 | 2  |
| AX-157934328 | 3 | 70.109 | KV452733.1  | 464880  | 2-scf00041 | 2  |
| AX-157934330 | 3 | 70.109 | KV452733.1  | 467036  | 2-scf00041 | 2  |
| AX-157708124 | 3 | 70.109 | KV452733.1  | 467691  | 2-scf00041 | 2  |
| AX-157934333 | 3 | 70.109 | KV452733.1  | 469084  | 2-scf00041 | 2  |
| AX-157934336 | 3 | 70.109 | KV452733.1  | 473615  | 2-scf00041 | 2  |
| AX-157934349 | 3 | 70.109 | KV452733.1  | 485053  | 2-scf00041 | 2  |
| AX-157934350 | 3 | 70.109 | KV452733.1  | 486371  | 2-scf00041 | 2  |
| AX-157934352 | 3 | 70.109 | KV452733.1  | 486937  | 2-scf00041 | 2  |
| AX-157934354 | 3 | 70.109 | KV452733.1  | 489108  | 2-scf00041 | 2  |
| AX-157934361 | 3 | 70.109 | KV452733.1  | 492107  | 2-scf00041 | 2  |
| AX-157934395 | 3 | 70.109 | KV452733.1  | 527792  | 2-scf00041 | 2  |
| AX-157934396 | 3 | 70.109 | KV452733.1  | 529155  | 2-scf00041 | 2  |
| AX-157934398 | 3 | 70.109 | KV452733.1  | 530120  | 2-scf00041 | 2  |
| AX-157934401 | 3 | 70.109 | KV452733.1  | 532728  | 2-scf00041 | 2  |
| AX-157934406 | 3 | 70.109 | KV452733.1  | 534967  | 2-scf00041 | 2  |
| AX-157814300 | 3 | 70.109 | KV452733.1  | 564202  | 2-scf00041 | 2  |
| AX-157934464 | 3 | 70.109 | KV452733.1  | 596369  | 2-scf00041 | 2  |
| AX-157814480 | 3 | 70.109 | KV452732.1  | 747524  | 2-scf00042 | 2  |
| AX-157938045 | 3 | 70.109 | KV452732.1  | 1232521 | 2-scf00042 | 2  |
| AX-157943101 | 3 | 70.109 | KV452747.1  | 31083   | 2-scf00053 | 2  |
| AX-157945484 | 3 | 70.109 | KV452746.1  | 339638  | 2-scf00054 | 2  |
| AX-157934343 | 3 | 70.134 | KV452733.1  | 483608  | 2-scf00041 | 2  |
| AX-157727300 | 3 | 70.162 | KV452733.1  | 490494  | 2-scf00041 | 2  |
| AX-157934371 | 3 | 70.189 | KV452733.1  | 499980  | 2-scf00041 | 2  |
| AX-157814286 | 3 | 70.218 | KV452733.1  | 239523  | 2-scf00041 | 2  |
| AX-157934186 | 3 | 70.218 | KV452733.1  | 301656  | 2-scf00041 | 2  |
| AX-157934363 | 3 | 70.218 | KV452733.1  | 492624  | 2-scf00041 | 2  |
| AX-157934377 | 3 | 70.218 | KV452733.1  | 503383  | 2-scf00041 | 2  |
| AX-157934379 | 3 | 70.218 | KV452733.1  | 505154  | 2-scf00041 | 2  |
| AX-157934382 | 3 | 70.218 | KV452733.1  | 510006  | 2-scf00041 | 2  |
| AX-157934400 | 3 | 70.218 | KV452733.1  | 532501  | 2-scf00041 | 2  |
| AX-157775577 | 3 | 70.218 | KV452733.1  | 533027  | 2-scf00041 | 2  |
| AX-157934403 | 3 | 70.218 | KV452733.1  | 533952  | 2-scf00041 | 2  |
| AX-157934457 | 3 | 70.218 | KV452733.1  | 592124  | 2-scf00041 | 2  |
| AX-157937286 | 3 | 70.218 | KV452733.1  | 3642746 | 2-scf00041 | 2  |
| AX-157945344 | 3 | 70.218 | KV452746.1  | 196018  | 2-scf00054 | 2  |
| AX-157705697 | 3 | 70.218 | 3ML01030637 | 261     | scf06237_1 | UN |
| AX-157934413 | 3 | 70.436 | KV452733.1  | 540919  | 2-scf00041 | 2  |
| AX-157934418 | 3 | 70.436 | KV452733.1  | 547243  | 2-scf00041 | 2  |

|              |   |        |             |          |            |    |
|--------------|---|--------|-------------|----------|------------|----|
| AX-157934420 | 3 | 70.436 | KV452733.1  | 548559   | 2-scf00041 | 2  |
| AX-157934422 | 3 | 70.436 | KV452733.1  | 552838   | 2-scf00041 | 2  |
| AX-157934433 | 3 | 70.436 | KV452733.1  | 564813   | 2-scf00041 | 2  |
| AX-157934435 | 3 | 70.436 | KV452733.1  | 570439   | 2-scf00041 | 2  |
| AX-157934436 | 3 | 70.436 | KV452733.1  | 571095   | 2-scf00041 | 2  |
| AX-157934439 | 3 | 70.535 | KV452733.1  | 575880   | 2-scf00041 | 2  |
| AX-157814287 | 3 | 70.655 | KV452733.1  | 251364   | 2-scf00041 | 2  |
| AX-157934440 | 3 | 70.655 | KV452733.1  | 576951   | 2-scf00041 | 2  |
| AX-157934441 | 3 | 70.655 | KV452733.1  | 579968   | 2-scf00041 | 2  |
| AX-157724753 | 3 | 70.655 | KV452733.1  | 584998   | 2-scf00041 | 2  |
| AX-157934451 | 3 | 70.655 | KV452733.1  | 589840   | 2-scf00041 | 2  |
| AX-157934456 | 3 | 70.655 | KV452733.1  | 591681   | 2-scf00041 | 2  |
| AX-157934459 | 3 | 70.655 | KV452733.1  | 593912   | 2-scf00041 | 2  |
| AX-157934462 | 3 | 70.655 | KV452733.1  | 594531   | 2-scf00041 | 2  |
| AX-157934465 | 3 | 70.655 | KV452733.1  | 596590   | 2-scf00041 | 2  |
| AX-157934467 | 3 | 70.655 | KV452733.1  | 596947   | 2-scf00041 | 2  |
| AX-157934475 | 3 | 70.655 | KV452733.1  | 603316   | 2-scf00041 | 2  |
| AX-157934478 | 3 | 70.655 | KV452733.1  | 605037   | 2-scf00041 | 2  |
| AX-157934482 | 3 | 70.655 | KV452733.1  | 609186   | 2-scf00041 | 2  |
| AX-157934485 | 3 | 70.655 | KV452733.1  | 611086   | 2-scf00041 | 2  |
| AX-157934501 | 3 | 70.658 | KV452733.1  | 620632   | 2-scf00041 | 2  |
| AX-157723458 | 3 | 70.804 | KV452733.1  | 624965   | 2-scf00041 | 2  |
| AX-157723632 | 3 | 70.947 | KV452733.1  | 630592   | 2-scf00041 | 2  |
| AX-157934524 | 3 | 71.093 | KV452733.1  | 644137   | 2-scf00041 | 2  |
| AX-157934526 | 3 | 71.093 | KV452733.1  | 648173   | 2-scf00041 | 2  |
| AX-157934527 | 3 | 71.148 | KV452733.1  | 649157   | 2-scf00041 | 2  |
| AX-157934531 | 3 | 71.186 | KV452733.1  | 650451   | 2-scf00041 | 2  |
| AX-157934534 | 3 | 71.186 | KV452733.1  | 661103   | 2-scf00041 | 2  |
| AX-157934584 | 3 | 71.186 | KV452733.1  | 713535   | 2-scf00041 | 2  |
| AX-157814359 | 3 | 71.186 | KV452733.1  | 1793213  | 2-scf00041 | 2  |
| AX-157936046 | 3 | 71.186 | KV452733.1  | 2434681  | 2-scf00041 | 2  |
| AX-157941087 | 3 | 71.186 | KV452742.1  | 1946881  | 2-scf00046 | 2  |
| AX-157941081 | 3 | 71.186 | KV452742.1  | 1953980  | 2-scf00046 | 2  |
| AX-157814798 | 3 | 71.186 | KV452742.1  | 1957291  | 2-scf00046 | 2  |
| AX-157704687 | 3 | 71.186 | 3ML01027027 | 1138     | scf02631_1 | UN |
| AX-157706590 | 3 | 71.186 | 3ML01032531 | 263      | scf08153_1 | UN |
| AX-157932512 | 3 | 71.202 | KV452730.1  | 12322939 | 2-scf00040 | 2  |
| AX-157814253 | 3 | 71.202 | KV452730.1  | 14164782 | 2-scf00040 | 2  |
| AX-157934511 | 3 | 71.202 | KV452733.1  | 631809   | 2-scf00041 | 2  |
| AX-157934537 | 3 | 71.202 | KV452733.1  | 663141   | 2-scf00041 | 2  |
| AX-157934538 | 3 | 71.202 | KV452733.1  | 663361   | 2-scf00041 | 2  |
| AX-157934551 | 3 | 71.202 | KV452733.1  | 667861   | 2-scf00041 | 2  |
| AX-157757394 | 3 | 71.202 | KV452733.1  | 668437   | 2-scf00041 | 2  |
| AX-157934552 | 3 | 71.202 | KV452733.1  | 671927   | 2-scf00041 | 2  |
| AX-157934562 | 3 | 71.202 | KV452733.1  | 686923   | 2-scf00041 | 2  |
| AX-157936410 | 3 | 71.202 | KV452733.1  | 2782043  | 2-scf00041 | 2  |
| AX-157938533 | 3 | 71.202 | KV452742.1  | 126032   | 2-scf00046 | 2  |
| AX-157814776 | 3 | 71.202 | KV452742.1  | 4430534  | 2-scf00046 | 2  |
| AX-157883801 | 3 | 71.203 | KV452733.1  | 682944   | 2-scf00041 | 2  |
| AX-157934560 | 3 | 71.203 | KV452733.1  | 684593   | 2-scf00041 | 2  |
| AX-157934486 | 3 | 71.367 | KV452733.1  | 611367   | 2-scf00041 | 2  |

|              |   |        |            |          |            |   |
|--------------|---|--------|------------|----------|------------|---|
| AX-157934564 | 3 | 71.367 | KV452733.1 | 688847   | 2-scf00041 | 2 |
| AX-157933967 | 3 | 71.53  | KV452733.1 | 94902    | 2-scf00041 | 2 |
| AX-157934579 | 3 | 71.53  | KV452733.1 | 710775   | 2-scf00041 | 2 |
| AX-157934581 | 3 | 71.53  | KV452733.1 | 711705   | 2-scf00041 | 2 |
| AX-157934582 | 3 | 71.53  | KV452733.1 | 712375   | 2-scf00041 | 2 |
| AX-157943812 | 3 | 71.53  | KV452747.1 | 816993   | 2-scf00053 | 2 |
| AX-157934572 | 3 | 71.639 | KV452733.1 | 702047   | 2-scf00041 | 2 |
| AX-157934583 | 3 | 71.639 | KV452733.1 | 713167   | 2-scf00041 | 2 |
| AX-157934590 | 3 | 71.639 | KV452733.1 | 719228   | 2-scf00041 | 2 |
| AX-157934591 | 3 | 71.639 | KV452733.1 | 719893   | 2-scf00041 | 2 |
| AX-157934594 | 3 | 71.639 | KV452733.1 | 720860   | 2-scf00041 | 2 |
| AX-157934595 | 3 | 71.639 | KV452733.1 | 725183   | 2-scf00041 | 2 |
| AX-157723406 | 3 | 71.639 | KV452733.1 | 725761   | 2-scf00041 | 2 |
| AX-157934601 | 3 | 71.639 | KV452733.1 | 729405   | 2-scf00041 | 2 |
| AX-157934602 | 3 | 71.639 | KV452733.1 | 730568   | 2-scf00041 | 2 |
| AX-157934637 | 3 | 71.639 | KV452733.1 | 775530   | 2-scf00041 | 2 |
| AX-157934656 | 3 | 71.639 | KV452733.1 | 798781   | 2-scf00041 | 2 |
| AX-157934304 | 3 | 71.803 | KV452733.1 | 441050   | 2-scf00041 | 2 |
| AX-157934513 | 3 | 71.803 | KV452733.1 | 633738   | 2-scf00041 | 2 |
| AX-157934603 | 3 | 71.803 | KV452733.1 | 731923   | 2-scf00041 | 2 |
| AX-157934632 | 3 | 71.803 | KV452733.1 | 771214   | 2-scf00041 | 2 |
| AX-157934641 | 3 | 71.803 | KV452733.1 | 782607   | 2-scf00041 | 2 |
| AX-157934643 | 3 | 71.803 | KV452733.1 | 783568   | 2-scf00041 | 2 |
| AX-157934650 | 3 | 71.803 | KV452733.1 | 791551   | 2-scf00041 | 2 |
| AX-157934660 | 3 | 71.803 | KV452733.1 | 800185   | 2-scf00041 | 2 |
| AX-157934668 | 3 | 71.803 | KV452733.1 | 805255   | 2-scf00041 | 2 |
| AX-157854451 | 3 | 71.803 | KV452733.1 | 819438   | 2-scf00041 | 2 |
| AX-157934734 | 3 | 71.803 | KV452733.1 | 876581   | 2-scf00041 | 2 |
| AX-157719048 | 3 | 71.967 | KV452733.1 | 745284   | 2-scf00041 | 2 |
| AX-157934613 | 3 | 71.967 | KV452733.1 | 745366   | 2-scf00041 | 2 |
| AX-157934619 | 3 | 71.967 | KV452733.1 | 753396   | 2-scf00041 | 2 |
| AX-158382525 | 3 | 71.967 | KV452733.1 | 798692   | 2-scf00041 | 2 |
| AX-157934628 | 3 | 71.968 | KV452733.1 | 769047   | 2-scf00041 | 2 |
| AX-157934635 | 3 | 72.077 | KV452733.1 | 771843   | 2-scf00041 | 2 |
| AX-157934636 | 3 | 72.128 | KV452733.1 | 773363   | 2-scf00041 | 2 |
| AX-157934645 | 3 | 72.186 | KV452733.1 | 785910   | 2-scf00041 | 2 |
| AX-157934649 | 3 | 72.186 | KV452733.1 | 790987   | 2-scf00041 | 2 |
| AX-157934655 | 3 | 72.186 | KV452733.1 | 796445   | 2-scf00041 | 2 |
| AX-157934657 | 3 | 72.186 | KV452733.1 | 799188   | 2-scf00041 | 2 |
| AX-157934670 | 3 | 72.186 | KV452733.1 | 809026   | 2-scf00041 | 2 |
| AX-157934676 | 3 | 72.186 | KV452733.1 | 819591   | 2-scf00041 | 2 |
| AX-157934661 | 3 | 72.295 | KV452733.1 | 801535   | 2-scf00041 | 2 |
| AX-157934665 | 3 | 72.295 | KV452733.1 | 803297   | 2-scf00041 | 2 |
| AX-157940001 | 3 | 72.295 | KV452742.1 | 3076801  | 2-scf00046 | 2 |
| AX-157934667 | 3 | 72.338 | KV452733.1 | 804530   | 2-scf00041 | 2 |
| AX-157933123 | 3 | 72.405 | KV452730.1 | 13363470 | 2-scf00040 | 2 |
| AX-157814306 | 3 | 72.405 | KV452733.1 | 822059   | 2-scf00041 | 2 |
| AX-157934680 | 3 | 72.405 | KV452733.1 | 824446   | 2-scf00041 | 2 |
| AX-157937474 | 3 | 72.405 | KV452732.1 | 58276    | 2-scf00042 | 2 |
| AX-157937490 | 3 | 72.405 | KV452732.1 | 104041   | 2-scf00042 | 2 |
| AX-157939386 | 3 | 72.405 | KV452742.1 | 1358206  | 2-scf00046 | 2 |

|              |   |        |            |         |            |   |
|--------------|---|--------|------------|---------|------------|---|
| AX-157942501 | 3 | 72.405 | KV452745.1 | 888938  | 2-scf00051 | 2 |
| AX-157934683 | 3 | 72.624 | KV452733.1 | 832963  | 2-scf00041 | 2 |
| AX-157934688 | 3 | 72.711 | KV452733.1 | 837099  | 2-scf00041 | 2 |
| AX-157934692 | 3 | 72.847 | KV452733.1 | 840744  | 2-scf00041 | 2 |
| AX-157934693 | 3 | 72.847 | KV452733.1 | 841657  | 2-scf00041 | 2 |
| AX-157741461 | 3 | 72.847 | KV452733.1 | 843351  | 2-scf00041 | 2 |
| AX-157934696 | 3 | 72.847 | KV452733.1 | 844091  | 2-scf00041 | 2 |
| AX-157934265 | 3 | 72.964 | KV452733.1 | 369198  | 2-scf00041 | 2 |
| AX-157934697 | 3 | 72.964 | KV452733.1 | 846326  | 2-scf00041 | 2 |
| AX-157934720 | 3 | 72.996 | KV452733.1 | 867555  | 2-scf00041 | 2 |
| AX-157934723 | 3 | 72.996 | KV452733.1 | 871555  | 2-scf00041 | 2 |
| AX-157934724 | 3 | 73.114 | KV452733.1 | 873067  | 2-scf00041 | 2 |
| AX-157934740 | 3 | 73.114 | KV452733.1 | 879995  | 2-scf00041 | 2 |
| AX-157934727 | 3 | 73.225 | KV452733.1 | 874145  | 2-scf00041 | 2 |
| AX-157934733 | 3 | 73.225 | KV452733.1 | 875560  | 2-scf00041 | 2 |
| AX-157814308 | 3 | 73.368 | KV452733.1 | 884514  | 2-scf00041 | 2 |
| AX-157934745 | 3 | 73.511 | KV452733.1 | 887029  | 2-scf00041 | 2 |
| AX-157934746 | 3 | 73.511 | KV452733.1 | 887876  | 2-scf00041 | 2 |
| AX-157934748 | 3 | 73.511 | KV452733.1 | 888323  | 2-scf00041 | 2 |
| AX-157934752 | 3 | 73.934 | KV452733.1 | 890873  | 2-scf00041 | 2 |
| AX-157934754 | 3 | 73.939 | KV452733.1 | 891742  | 2-scf00041 | 2 |
| AX-157934758 | 3 | 73.939 | KV452733.1 | 894024  | 2-scf00041 | 2 |
| AX-157934759 | 3 | 73.939 | KV452733.1 | 894383  | 2-scf00041 | 2 |
| AX-157943757 | 3 | 73.939 | KV452747.1 | 747721  | 2-scf00053 | 2 |
| AX-157934769 | 3 | 74.23  | KV452733.1 | 901402  | 2-scf00041 | 2 |
| AX-157934773 | 3 | 74.23  | KV452733.1 | 904481  | 2-scf00041 | 2 |
| AX-157934799 | 3 | 74.23  | KV452733.1 | 928974  | 2-scf00041 | 2 |
| AX-157934807 | 3 | 74.23  | KV452733.1 | 935849  | 2-scf00041 | 2 |
| AX-157934781 | 3 | 74.376 | KV452733.1 | 913510  | 2-scf00041 | 2 |
| AX-157934785 | 3 | 74.704 | KV452733.1 | 918354  | 2-scf00041 | 2 |
| AX-157934787 | 3 | 74.704 | KV452733.1 | 918754  | 2-scf00041 | 2 |
| AX-157934788 | 3 | 74.733 | KV452733.1 | 919994  | 2-scf00041 | 2 |
| AX-157934797 | 3 | 74.733 | KV452733.1 | 927526  | 2-scf00041 | 2 |
| AX-157934790 | 3 | 74.753 | KV452733.1 | 920521  | 2-scf00041 | 2 |
| AX-157934791 | 3 | 74.774 | KV452733.1 | 921605  | 2-scf00041 | 2 |
| AX-157934792 | 3 | 74.793 | KV452733.1 | 922455  | 2-scf00041 | 2 |
| AX-157934806 | 3 | 74.793 | KV452733.1 | 934276  | 2-scf00041 | 2 |
| AX-157940202 | 3 | 74.793 | KV452742.1 | 3297246 | 2-scf00046 | 2 |
| AX-157723932 | 3 | 74.814 | KV452733.1 | 924185  | 2-scf00041 | 2 |
| AX-157934800 | 3 | 74.814 | KV452733.1 | 930032  | 2-scf00041 | 2 |
| AX-157934804 | 3 | 74.814 | KV452733.1 | 932595  | 2-scf00041 | 2 |
| AX-157934815 | 3 | 75.033 | KV452733.1 | 939464  | 2-scf00041 | 2 |
| AX-157934827 | 3 | 75.142 | KV452733.1 | 953752  | 2-scf00041 | 2 |
| AX-157934829 | 3 | 75.142 | KV452733.1 | 958031  | 2-scf00041 | 2 |
| AX-157720738 | 3 | 75.142 | KV452733.1 | 967080  | 2-scf00041 | 2 |
| AX-157756137 | 3 | 75.142 | KV452733.1 | 967965  | 2-scf00041 | 2 |
| AX-157934834 | 3 | 75.142 | KV452733.1 | 969304  | 2-scf00041 | 2 |
| AX-157934836 | 3 | 75.142 | KV452733.1 | 972685  | 2-scf00041 | 2 |
| AX-157934837 | 3 | 75.167 | KV452733.1 | 974074  | 2-scf00041 | 2 |
| AX-157934840 | 3 | 75.205 | KV452733.1 | 977328  | 2-scf00041 | 2 |
| AX-157934845 | 3 | 75.251 | KV452733.1 | 978939  | 2-scf00041 | 2 |

|              |   |        |            |         |            |   |
|--------------|---|--------|------------|---------|------------|---|
| AX-157934850 | 3 | 75.251 | KV452733.1 | 981540  | 2-scf00041 | 2 |
| AX-157934852 | 3 | 75.251 | KV452733.1 | 982598  | 2-scf00041 | 2 |
| AX-157934853 | 3 | 75.251 | KV452733.1 | 984445  | 2-scf00041 | 2 |
| AX-157934860 | 3 | 75.251 | KV452733.1 | 988269  | 2-scf00041 | 2 |
| AX-157854456 | 3 | 75.251 | KV452733.1 | 995881  | 2-scf00041 | 2 |
| AX-157934883 | 3 | 75.251 | KV452733.1 | 1008128 | 2-scf00041 | 2 |
| AX-157934892 | 3 | 75.251 | KV452733.1 | 1018813 | 2-scf00041 | 2 |
| AX-157939610 | 3 | 75.251 | KV452742.1 | 1607245 | 2-scf00046 | 2 |
| AX-157941998 | 3 | 75.251 | KV452745.1 | 417941  | 2-scf00051 | 2 |
| AX-157934861 | 3 | 75.36  | KV452733.1 | 991321  | 2-scf00041 | 2 |
| AX-157934888 | 3 | 75.36  | KV452733.1 | 1017052 | 2-scf00041 | 2 |
| AX-157934893 | 3 | 75.36  | KV452733.1 | 1019249 | 2-scf00041 | 2 |
| AX-157934895 | 3 | 75.36  | KV452733.1 | 1020255 | 2-scf00041 | 2 |
| AX-157934897 | 3 | 75.36  | KV452733.1 | 1021007 | 2-scf00041 | 2 |
| AX-158405597 | 3 | 75.36  | KV452733.1 | 1021987 | 2-scf00041 | 2 |
| AX-157752508 | 3 | 75.36  | KV452733.1 | 1024951 | 2-scf00041 | 2 |
| AX-157934914 | 3 | 75.426 | KV452733.1 | 1039483 | 2-scf00041 | 2 |
| AX-157934916 | 3 | 75.47  | KV452733.1 | 1041290 | 2-scf00041 | 2 |
| AX-157934917 | 3 | 75.508 | KV452733.1 | 1042216 | 2-scf00041 | 2 |
| AX-157934920 | 3 | 75.55  | KV452733.1 | 1045792 | 2-scf00041 | 2 |
| AX-157934922 | 3 | 75.579 | KV452733.1 | 1047422 | 2-scf00041 | 2 |
| AX-157725816 | 3 | 75.579 | KV452733.1 | 1047736 | 2-scf00041 | 2 |
| AX-157934933 | 3 | 75.579 | KV452733.1 | 1054758 | 2-scf00041 | 2 |
| AX-157934941 | 3 | 75.579 | KV452733.1 | 1057316 | 2-scf00041 | 2 |
| AX-157934943 | 3 | 75.579 | KV452733.1 | 1058153 | 2-scf00041 | 2 |
| AX-157934944 | 3 | 75.579 | KV452733.1 | 1059032 | 2-scf00041 | 2 |
| AX-157934946 | 3 | 75.579 | KV452733.1 | 1059864 | 2-scf00041 | 2 |
| AX-157934947 | 3 | 75.579 | KV452733.1 | 1060136 | 2-scf00041 | 2 |
| AX-157934948 | 3 | 75.579 | KV452733.1 | 1061740 | 2-scf00041 | 2 |
| AX-157934961 | 3 | 75.579 | KV452733.1 | 1076055 | 2-scf00041 | 2 |
| AX-157934973 | 3 | 75.579 | KV452733.1 | 1092626 | 2-scf00041 | 2 |
| AX-157934982 | 3 | 75.579 | KV452733.1 | 1106100 | 2-scf00041 | 2 |
| AX-157935035 | 3 | 75.579 | KV452733.1 | 1148044 | 2-scf00041 | 2 |
| AX-157935076 | 3 | 75.579 | KV452733.1 | 1185742 | 2-scf00041 | 2 |
| AX-157935113 | 3 | 75.579 | KV452733.1 | 1236287 | 2-scf00041 | 2 |
| AX-157935120 | 3 | 75.579 | KV452733.1 | 1245178 | 2-scf00041 | 2 |
| AX-157935122 | 3 | 75.579 | KV452733.1 | 1245714 | 2-scf00041 | 2 |
| AX-157935136 | 3 | 75.579 | KV452733.1 | 1263043 | 2-scf00041 | 2 |
| AX-157864682 | 3 | 75.59  | KV452733.1 | 1060498 | 2-scf00041 | 2 |
| AX-157814311 | 3 | 75.59  | KV452733.1 | 1061471 | 2-scf00041 | 2 |
| AX-157934958 | 3 | 75.59  | KV452733.1 | 1074436 | 2-scf00041 | 2 |
| AX-157934964 | 3 | 75.59  | KV452733.1 | 1079648 | 2-scf00041 | 2 |
| AX-157934966 | 3 | 75.59  | KV452733.1 | 1080079 | 2-scf00041 | 2 |
| AX-157934975 | 3 | 75.59  | KV452733.1 | 1095606 | 2-scf00041 | 2 |
| AX-157742589 | 3 | 75.59  | KV452733.1 | 1151649 | 2-scf00041 | 2 |
| AX-157935044 | 3 | 75.59  | KV452733.1 | 1154938 | 2-scf00041 | 2 |
| AX-157935138 | 3 | 75.59  | KV452733.1 | 1263412 | 2-scf00041 | 2 |
| AX-157814313 | 3 | 75.609 | KV452733.1 | 1091328 | 2-scf00041 | 2 |
| AX-157934969 | 3 | 75.632 | KV452733.1 | 1091559 | 2-scf00041 | 2 |
| AX-157934980 | 3 | 75.65  | KV452733.1 | 1104313 | 2-scf00041 | 2 |
| AX-157934987 | 3 | 75.678 | KV452733.1 | 1112217 | 2-scf00041 | 2 |

|              |   |        |            |          |            |   |
|--------------|---|--------|------------|----------|------------|---|
| AX-157934991 | 3 | 75.712 | KV452733.1 | 1113445  | 2-scf00041 | 2 |
| AX-157934993 | 3 | 75.758 | KV452733.1 | 1114478  | 2-scf00041 | 2 |
| AX-157934976 | 3 | 75.798 | KV452733.1 | 1096115  | 2-scf00041 | 2 |
| AX-157935003 | 3 | 75.798 | KV452733.1 | 1121139  | 2-scf00041 | 2 |
| AX-157935011 | 3 | 75.798 | KV452733.1 | 1129083  | 2-scf00041 | 2 |
| AX-157935013 | 3 | 75.798 | KV452733.1 | 1129943  | 2-scf00041 | 2 |
| AX-157935019 | 3 | 75.798 | KV452733.1 | 1133021  | 2-scf00041 | 2 |
| AX-157935031 | 3 | 75.798 | KV452733.1 | 1144962  | 2-scf00041 | 2 |
| AX-157935034 | 3 | 75.798 | KV452733.1 | 1147741  | 2-scf00041 | 2 |
| AX-157935039 | 3 | 75.798 | KV452733.1 | 1151943  | 2-scf00041 | 2 |
| AX-157935046 | 3 | 75.798 | KV452733.1 | 1155864  | 2-scf00041 | 2 |
| AX-157935052 | 3 | 75.798 | KV452733.1 | 1158547  | 2-scf00041 | 2 |
| AX-157717682 | 3 | 75.798 | KV452733.1 | 1158861  | 2-scf00041 | 2 |
| AX-157935060 | 3 | 75.798 | KV452733.1 | 1162389  | 2-scf00041 | 2 |
| AX-157935062 | 3 | 75.798 | KV452733.1 | 1163944  | 2-scf00041 | 2 |
| AX-157935063 | 3 | 75.846 | KV452733.1 | 1164155  | 2-scf00041 | 2 |
| AX-157935064 | 3 | 75.879 | KV452733.1 | 1165843  | 2-scf00041 | 2 |
| AX-157719264 | 3 | 75.907 | KV452733.1 | 958847   | 2-scf00041 | 2 |
| AX-157883806 | 3 | 75.907 | KV452733.1 | 1063189  | 2-scf00041 | 2 |
| AX-157883808 | 3 | 75.907 | KV452733.1 | 1156410  | 2-scf00041 | 2 |
| AX-157935050 | 3 | 75.907 | KV452733.1 | 1158196  | 2-scf00041 | 2 |
| AX-157814315 | 3 | 75.907 | KV452733.1 | 1174791  | 2-scf00041 | 2 |
| AX-157935067 | 3 | 75.907 | KV452733.1 | 1176133  | 2-scf00041 | 2 |
| AX-157935069 | 3 | 75.907 | KV452733.1 | 1177892  | 2-scf00041 | 2 |
| AX-157814317 | 3 | 75.907 | KV452733.1 | 1178793  | 2-scf00041 | 2 |
| AX-157935072 | 3 | 75.907 | KV452733.1 | 1179905  | 2-scf00041 | 2 |
| AX-157935073 | 3 | 75.907 | KV452733.1 | 1180771  | 2-scf00041 | 2 |
| AX-157935074 | 3 | 75.907 | KV452733.1 | 1181177  | 2-scf00041 | 2 |
| AX-157935075 | 3 | 75.907 | KV452733.1 | 1183934  | 2-scf00041 | 2 |
| AX-157740599 | 3 | 75.907 | KV452733.1 | 1191093  | 2-scf00041 | 2 |
| AX-157715250 | 3 | 75.907 | KV452733.1 | 1196155  | 2-scf00041 | 2 |
| AX-157935083 | 3 | 75.907 | KV452733.1 | 1201155  | 2-scf00041 | 2 |
| AX-157935085 | 3 | 75.907 | KV452733.1 | 1202287  | 2-scf00041 | 2 |
| AX-157714163 | 3 | 75.907 | KV452733.1 | 1203142  | 2-scf00041 | 2 |
| AX-157935089 | 3 | 75.907 | KV452733.1 | 1205925  | 2-scf00041 | 2 |
| AX-157935090 | 3 | 75.907 | KV452733.1 | 1206184  | 2-scf00041 | 2 |
| AX-157814320 | 3 | 75.907 | KV452733.1 | 1207631  | 2-scf00041 | 2 |
| AX-157714198 | 3 | 75.907 | KV452733.1 | 1208303  | 2-scf00041 | 2 |
| AX-157935092 | 3 | 75.907 | KV452733.1 | 1209826  | 2-scf00041 | 2 |
| AX-157935106 | 3 | 75.907 | KV452733.1 | 1228858  | 2-scf00041 | 2 |
| AX-157935108 | 3 | 75.907 | KV452733.1 | 1230145  | 2-scf00041 | 2 |
| AX-157935130 | 3 | 75.907 | KV452733.1 | 1253348  | 2-scf00041 | 2 |
| AX-157936370 | 3 | 75.907 | KV452733.1 | 2740134  | 2-scf00041 | 2 |
| AX-157741783 | 3 | 75.907 | KV452742.1 | 935892   | 2-scf00046 | 2 |
| AX-157883810 | 3 | 75.985 | KV452733.1 | 1208562  | 2-scf00041 | 2 |
| AX-157814323 | 3 | 76.052 | KV452733.1 | 1215824  | 2-scf00041 | 2 |
| AX-157717352 | 3 | 76.052 | KV452733.1 | 1221096  | 2-scf00041 | 2 |
| AX-157745876 | 3 | 76.125 | KV452730.1 | 9844438  | 2-scf00040 | 2 |
| AX-157814011 | 3 | 76.125 | KV452730.1 | 10526212 | 2-scf00040 | 2 |
| AX-157931171 | 3 | 76.125 | KV452730.1 | 10723779 | 2-scf00040 | 2 |
| AX-157934402 | 3 | 76.125 | KV452733.1 | 533496   | 2-scf00041 | 2 |



|              |   |        |            |         |            |   |
|--------------|---|--------|------------|---------|------------|---|
| AX-157934495 | 3 | 76.125 | KV452733.1 | 616228  | 2-scf00041 | 2 |
| AX-157934951 | 3 | 76.125 | KV452733.1 | 1070313 | 2-scf00041 | 2 |
| AX-157935042 | 3 | 76.125 | KV452733.1 | 1154144 | 2-scf00041 | 2 |
| AX-157814319 | 3 | 76.125 | KV452733.1 | 1198665 | 2-scf00041 | 2 |
| AX-157814324 | 3 | 76.125 | KV452733.1 | 1219837 | 2-scf00041 | 2 |
| AX-157935100 | 3 | 76.125 | KV452733.1 | 1219873 | 2-scf00041 | 2 |
| AX-157935101 | 3 | 76.125 | KV452733.1 | 1221674 | 2-scf00041 | 2 |
| AX-157697653 | 3 | 76.125 | KV452733.1 | 1221997 | 2-scf00041 | 2 |
| AX-157935102 | 3 | 76.125 | KV452733.1 | 1222059 | 2-scf00041 | 2 |
| AX-157935103 | 3 | 76.125 | KV452733.1 | 1222418 | 2-scf00041 | 2 |
| AX-157935104 | 3 | 76.125 | KV452733.1 | 1223557 | 2-scf00041 | 2 |
| AX-157935105 | 3 | 76.125 | KV452733.1 | 1224502 | 2-scf00041 | 2 |
| AX-157935107 | 3 | 76.125 | KV452733.1 | 1229772 | 2-scf00041 | 2 |
| AX-157935110 | 3 | 76.125 | KV452733.1 | 1231512 | 2-scf00041 | 2 |
| AX-157719337 | 3 | 76.125 | KV452733.1 | 1240284 | 2-scf00041 | 2 |
| AX-157935117 | 3 | 76.125 | KV452733.1 | 1241417 | 2-scf00041 | 2 |
| AX-157935119 | 3 | 76.125 | KV452733.1 | 1244635 | 2-scf00041 | 2 |
| AX-157935296 | 3 | 76.125 | KV452733.1 | 1429590 | 2-scf00041 | 2 |
| AX-157935814 | 3 | 76.125 | KV452733.1 | 2105781 | 2-scf00041 | 2 |
| AX-157936452 | 3 | 76.125 | KV452733.1 | 2823678 | 2-scf00041 | 2 |
| AX-158404759 | 3 | 76.125 | KV452742.1 | 491635  | 2-scf00046 | 2 |
| AX-157939835 | 3 | 76.125 | KV452742.1 | 2893921 | 2-scf00046 | 2 |
| AX-157727027 | 3 | 76.125 | KV452742.1 | 2962905 | 2-scf00046 | 2 |
| AX-157940326 | 3 | 76.125 | KV452742.1 | 3422244 | 2-scf00046 | 2 |
| AX-157943151 | 3 | 76.125 | KV452747.1 | 99492   | 2-scf00053 | 2 |
| AX-157935124 | 3 | 76.278 | KV452733.1 | 1248183 | 2-scf00041 | 2 |
| AX-157934968 | 3 | 76.344 | KV452733.1 | 1086062 | 2-scf00041 | 2 |
| AX-157715118 | 3 | 76.344 | KV452733.1 | 1124743 | 2-scf00041 | 2 |
| AX-157739766 | 3 | 76.344 | KV452733.1 | 1188184 | 2-scf00041 | 2 |
| AX-157935114 | 3 | 76.344 | KV452733.1 | 1237241 | 2-scf00041 | 2 |
| AX-157935126 | 3 | 76.344 | KV452733.1 | 1251332 | 2-scf00041 | 2 |
| AX-157935140 | 3 | 76.344 | KV452733.1 | 1267641 | 2-scf00041 | 2 |
| AX-157935143 | 3 | 76.344 | KV452733.1 | 1268203 | 2-scf00041 | 2 |
| AX-157935144 | 3 | 76.344 | KV452733.1 | 1270230 | 2-scf00041 | 2 |
| AX-157935148 | 3 | 76.344 | KV452733.1 | 1271175 | 2-scf00041 | 2 |
| AX-157935149 | 3 | 76.344 | KV452733.1 | 1271697 | 2-scf00041 | 2 |
| AX-157935151 | 3 | 76.344 | KV452733.1 | 1275263 | 2-scf00041 | 2 |
| AX-158405602 | 3 | 76.344 | KV452733.1 | 1277561 | 2-scf00041 | 2 |
| AX-157771415 | 3 | 76.344 | KV452733.1 | 1280897 | 2-scf00041 | 2 |
| AX-157935183 | 3 | 76.344 | KV452733.1 | 1318179 | 2-scf00041 | 2 |
| AX-157936264 | 3 | 76.344 | KV452733.1 | 2643797 | 2-scf00041 | 2 |
| AX-157773035 | 3 | 76.344 | KV452733.1 | 2854279 | 2-scf00041 | 2 |
| AX-157700662 | 3 | 76.344 | KV452733.1 | 2953843 | 2-scf00041 | 2 |
| AX-157935158 | 3 | 76.366 | KV452733.1 | 1280261 | 2-scf00041 | 2 |
| AX-157935159 | 3 | 76.393 | KV452733.1 | 1281643 | 2-scf00041 | 2 |
| AX-157814327 | 3 | 76.416 | KV452733.1 | 1285598 | 2-scf00041 | 2 |
| AX-157935163 | 3 | 76.453 | KV452733.1 | 1286541 | 2-scf00041 | 2 |
| AX-157935164 | 3 | 76.453 | KV452733.1 | 1286911 | 2-scf00041 | 2 |
| AX-157935168 | 3 | 76.453 | KV452733.1 | 1292571 | 2-scf00041 | 2 |
| AX-157935169 | 3 | 76.453 | KV452733.1 | 1294033 | 2-scf00041 | 2 |
| AX-157935179 | 3 | 76.453 | KV452733.1 | 1310422 | 2-scf00041 | 2 |

|              |   |        |             |         |            |    |
|--------------|---|--------|-------------|---------|------------|----|
| AX-157935180 | 3 | 76.453 | KV452733.1  | 1312716 | 2-scf00041 | 2  |
| AX-157935185 | 3 | 76.453 | KV452733.1  | 1318502 | 2-scf00041 | 2  |
| AX-157935303 | 3 | 76.453 | KV452733.1  | 1431597 | 2-scf00041 | 2  |
| AX-157705726 | 3 | 76.453 | 3ML01030716 | 590     | scf06316_1 | UN |
| AX-157935196 | 3 | 76.562 | KV452733.1  | 1326239 | 2-scf00041 | 2  |
| AX-157935207 | 3 | 76.562 | KV452733.1  | 1337594 | 2-scf00041 | 2  |
| AX-157935208 | 3 | 76.562 | KV452733.1  | 1340351 | 2-scf00041 | 2  |
| AX-157935215 | 3 | 76.562 | KV452733.1  | 1343802 | 2-scf00041 | 2  |
| AX-157935217 | 3 | 76.562 | KV452733.1  | 1344705 | 2-scf00041 | 2  |
| AX-157935218 | 3 | 76.562 | KV452733.1  | 1345283 | 2-scf00041 | 2  |
| AX-157814330 | 3 | 76.562 | KV452733.1  | 1346390 | 2-scf00041 | 2  |
| AX-157935219 | 3 | 76.562 | KV452733.1  | 1349175 | 2-scf00041 | 2  |
| AX-157935220 | 3 | 76.562 | KV452733.1  | 1352450 | 2-scf00041 | 2  |
| AX-157935249 | 3 | 76.562 | KV452733.1  | 1390202 | 2-scf00041 | 2  |
| AX-157935250 | 3 | 76.562 | KV452733.1  | 1390517 | 2-scf00041 | 2  |
| AX-157935260 | 3 | 76.562 | KV452733.1  | 1399797 | 2-scf00041 | 2  |
| AX-157935268 | 3 | 76.562 | KV452733.1  | 1408305 | 2-scf00041 | 2  |
| AX-157935288 | 3 | 76.562 | KV452733.1  | 1420470 | 2-scf00041 | 2  |
| AX-157935310 | 3 | 76.562 | KV452733.1  | 1436406 | 2-scf00041 | 2  |
| AX-157935385 | 3 | 76.562 | KV452733.1  | 1536886 | 2-scf00041 | 2  |
| AX-157705688 | 3 | 76.562 | 3ML01030612 | 577     | scf06212_1 | UN |
| AX-157935225 | 3 | 76.616 | KV452733.1  | 1359077 | 2-scf00041 | 2  |
| AX-157935227 | 3 | 76.671 | KV452733.1  | 1360392 | 2-scf00041 | 2  |
| AX-157935228 | 3 | 76.671 | KV452733.1  | 1361770 | 2-scf00041 | 2  |
| AX-157935231 | 3 | 76.671 | KV452733.1  | 1364857 | 2-scf00041 | 2  |
| AX-157935241 | 3 | 76.671 | KV452733.1  | 1380252 | 2-scf00041 | 2  |
| AX-157935258 | 3 | 76.671 | KV452733.1  | 1397129 | 2-scf00041 | 2  |
| AX-157935271 | 3 | 76.671 | KV452733.1  | 1409698 | 2-scf00041 | 2  |
| AX-157935546 | 3 | 76.671 | KV452733.1  | 1727790 | 2-scf00041 | 2  |
| AX-157935600 | 3 | 76.671 | KV452733.1  | 1813768 | 2-scf00041 | 2  |
| AX-157935604 | 3 | 76.671 | KV452733.1  | 1815580 | 2-scf00041 | 2  |
| AX-157935610 | 3 | 76.671 | KV452733.1  | 1819512 | 2-scf00041 | 2  |
| AX-157935243 | 3 | 76.707 | KV452733.1  | 1382310 | 2-scf00041 | 2  |
| AX-157935244 | 3 | 76.741 | KV452733.1  | 1382934 | 2-scf00041 | 2  |
| AX-157945499 | 3 | 76.741 | KV452746.1  | 357192  | 2-scf00054 | 2  |
| AX-157935252 | 3 | 76.781 | KV452733.1  | 1392413 | 2-scf00041 | 2  |
| AX-157935255 | 3 | 76.781 | KV452733.1  | 1396038 | 2-scf00041 | 2  |
| AX-157935257 | 3 | 76.781 | KV452733.1  | 1396764 | 2-scf00041 | 2  |
| AX-157935270 | 3 | 76.781 | KV452733.1  | 1409184 | 2-scf00041 | 2  |
| AX-157935275 | 3 | 76.781 | KV452733.1  | 1410617 | 2-scf00041 | 2  |
| AX-157935276 | 3 | 76.781 | KV452733.1  | 1411541 | 2-scf00041 | 2  |
| AX-157935279 | 3 | 76.781 | KV452733.1  | 1412438 | 2-scf00041 | 2  |
| AX-157935285 | 3 | 76.781 | KV452733.1  | 1417159 | 2-scf00041 | 2  |
| AX-157935317 | 3 | 76.781 | KV452733.1  | 1439261 | 2-scf00041 | 2  |
| AX-157935616 | 3 | 76.781 | KV452733.1  | 1821668 | 2-scf00041 | 2  |
| AX-157935618 | 3 | 76.781 | KV452733.1  | 1823121 | 2-scf00041 | 2  |
| AX-157935623 | 3 | 76.781 | KV452733.1  | 1826226 | 2-scf00041 | 2  |
| AX-157935300 | 3 | 76.999 | KV452733.1  | 1431147 | 2-scf00041 | 2  |
| AX-157935331 | 3 | 76.999 | KV452733.1  | 1460347 | 2-scf00041 | 2  |
| AX-157935342 | 3 | 76.999 | KV452733.1  | 1475026 | 2-scf00041 | 2  |
| AX-157935354 | 3 | 76.999 | KV452733.1  | 1503065 | 2-scf00041 | 2  |

|              |   |        |            |         |            |   |
|--------------|---|--------|------------|---------|------------|---|
| AX-157935359 | 3 | 76.999 | KV452733.1 | 1512194 | 2-scf00041 | 2 |
| AX-157935381 | 3 | 76.999 | KV452733.1 | 1533841 | 2-scf00041 | 2 |
| AX-157935382 | 3 | 76.999 | KV452733.1 | 1535745 | 2-scf00041 | 2 |
| AX-157935394 | 3 | 76.999 | KV452733.1 | 1546105 | 2-scf00041 | 2 |
| AX-157935400 | 3 | 76.999 | KV452733.1 | 1552731 | 2-scf00041 | 2 |
| AX-157935416 | 3 | 76.999 | KV452733.1 | 1562473 | 2-scf00041 | 2 |
| AX-157814341 | 3 | 76.999 | KV452733.1 | 1652455 | 2-scf00041 | 2 |
| AX-157935552 | 3 | 76.999 | KV452733.1 | 1730512 | 2-scf00041 | 2 |
| AX-157935566 | 3 | 76.999 | KV452733.1 | 1761051 | 2-scf00041 | 2 |
| AX-157935606 | 3 | 76.999 | KV452733.1 | 1818632 | 2-scf00041 | 2 |
| AX-157935660 | 3 | 76.999 | KV452733.1 | 1874610 | 2-scf00041 | 2 |
| AX-157723102 | 3 | 76.999 | KV452733.1 | 1895995 | 2-scf00041 | 2 |
| AX-157935686 | 3 | 76.999 | KV452733.1 | 1896335 | 2-scf00041 | 2 |
| AX-157935724 | 3 | 76.999 | KV452733.1 | 1965658 | 2-scf00041 | 2 |
| AX-157935735 | 3 | 76.999 | KV452733.1 | 1992455 | 2-scf00041 | 2 |
| AX-157935765 | 3 | 76.999 | KV452733.1 | 2039981 | 2-scf00041 | 2 |
| AX-157935417 | 3 | 77.108 | KV452733.1 | 1564839 | 2-scf00041 | 2 |
| AX-157935424 | 3 | 77.108 | KV452733.1 | 1579224 | 2-scf00041 | 2 |
| AX-157935442 | 3 | 77.108 | KV452733.1 | 1594634 | 2-scf00041 | 2 |
| AX-157935445 | 3 | 77.108 | KV452733.1 | 1597483 | 2-scf00041 | 2 |
| AX-157935451 | 3 | 77.108 | KV452733.1 | 1602506 | 2-scf00041 | 2 |
| AX-157935314 | 3 | 77.218 | KV452733.1 | 1438225 | 2-scf00041 | 2 |
| AX-157935341 | 3 | 77.218 | KV452733.1 | 1472853 | 2-scf00041 | 2 |
| AX-157758002 | 3 | 77.218 | KV452733.1 | 1528763 | 2-scf00041 | 2 |
| AX-157935376 | 3 | 77.218 | KV452733.1 | 1530670 | 2-scf00041 | 2 |
| AX-157708731 | 3 | 77.218 | KV452733.1 | 1532769 | 2-scf00041 | 2 |
| AX-157935392 | 3 | 77.218 | KV452733.1 | 1543394 | 2-scf00041 | 2 |
| AX-157875048 | 3 | 77.218 | KV452733.1 | 1543455 | 2-scf00041 | 2 |
| AX-157935398 | 3 | 77.218 | KV452733.1 | 1549718 | 2-scf00041 | 2 |
| AX-157935399 | 3 | 77.218 | KV452733.1 | 1550397 | 2-scf00041 | 2 |
| AX-157875050 | 3 | 77.218 | KV452733.1 | 1553578 | 2-scf00041 | 2 |
| AX-157935401 | 3 | 77.218 | KV452733.1 | 1554113 | 2-scf00041 | 2 |
| AX-157935406 | 3 | 77.218 | KV452733.1 | 1556531 | 2-scf00041 | 2 |
| AX-157935408 | 3 | 77.218 | KV452733.1 | 1558696 | 2-scf00041 | 2 |
| AX-157935411 | 3 | 77.218 | KV452733.1 | 1559369 | 2-scf00041 | 2 |
| AX-157875052 | 3 | 77.218 | KV452733.1 | 1561467 | 2-scf00041 | 2 |
| AX-157935414 | 3 | 77.218 | KV452733.1 | 1561794 | 2-scf00041 | 2 |
| AX-157935420 | 3 | 77.218 | KV452733.1 | 1565471 | 2-scf00041 | 2 |
| AX-158404712 | 3 | 77.218 | KV452733.1 | 1576928 | 2-scf00041 | 2 |
| AX-157935423 | 3 | 77.218 | KV452733.1 | 1578800 | 2-scf00041 | 2 |
| AX-157935426 | 3 | 77.218 | KV452733.1 | 1580290 | 2-scf00041 | 2 |
| AX-157935429 | 3 | 77.218 | KV452733.1 | 1582610 | 2-scf00041 | 2 |
| AX-157814331 | 3 | 77.218 | KV452733.1 | 1589658 | 2-scf00041 | 2 |
| AX-157875057 | 3 | 77.218 | KV452733.1 | 1594428 | 2-scf00041 | 2 |
| AX-157935444 | 3 | 77.218 | KV452733.1 | 1595745 | 2-scf00041 | 2 |
| AX-157935446 | 3 | 77.218 | KV452733.1 | 1599937 | 2-scf00041 | 2 |
| AX-157935448 | 3 | 77.218 | KV452733.1 | 1600355 | 2-scf00041 | 2 |
| AX-157814333 | 3 | 77.218 | KV452733.1 | 1604645 | 2-scf00041 | 2 |
| AX-157935453 | 3 | 77.218 | KV452733.1 | 1605175 | 2-scf00041 | 2 |
| AX-157935456 | 3 | 77.218 | KV452733.1 | 1605607 | 2-scf00041 | 2 |
| AX-157814334 | 3 | 77.218 | KV452733.1 | 1605981 | 2-scf00041 | 2 |

|              |   |        |            |         |            |   |
|--------------|---|--------|------------|---------|------------|---|
| AX-157875058 | 3 | 77.218 | KV452733.1 | 1607071 | 2-scf00041 | 2 |
| AX-157814335 | 3 | 77.218 | KV452733.1 | 1607804 | 2-scf00041 | 2 |
| AX-157935458 | 3 | 77.218 | KV452733.1 | 1609419 | 2-scf00041 | 2 |
| AX-157875059 | 3 | 77.218 | KV452733.1 | 1609873 | 2-scf00041 | 2 |
| AX-157814336 | 3 | 77.218 | KV452733.1 | 1612154 | 2-scf00041 | 2 |
| AX-157935464 | 3 | 77.218 | KV452733.1 | 1613246 | 2-scf00041 | 2 |
| AX-157935468 | 3 | 77.218 | KV452733.1 | 1614250 | 2-scf00041 | 2 |
| AX-157935469 | 3 | 77.218 | KV452733.1 | 1615216 | 2-scf00041 | 2 |
| AX-157935471 | 3 | 77.218 | KV452733.1 | 1615698 | 2-scf00041 | 2 |
| AX-157935472 | 3 | 77.218 | KV452733.1 | 1615982 | 2-scf00041 | 2 |
| AX-157935474 | 3 | 77.218 | KV452733.1 | 1616516 | 2-scf00041 | 2 |
| AX-157935475 | 3 | 77.218 | KV452733.1 | 1618156 | 2-scf00041 | 2 |
| AX-157935477 | 3 | 77.218 | KV452733.1 | 1618653 | 2-scf00041 | 2 |
| AX-157814337 | 3 | 77.218 | KV452733.1 | 1619153 | 2-scf00041 | 2 |
| AX-157875060 | 3 | 77.218 | KV452733.1 | 1619604 | 2-scf00041 | 2 |
| AX-157814338 | 3 | 77.218 | KV452733.1 | 1620232 | 2-scf00041 | 2 |
| AX-157875061 | 3 | 77.218 | KV452733.1 | 1622402 | 2-scf00041 | 2 |
| AX-157935481 | 3 | 77.218 | KV452733.1 | 1624179 | 2-scf00041 | 2 |
| AX-157814339 | 3 | 77.218 | KV452733.1 | 1624221 | 2-scf00041 | 2 |
| AX-157935482 | 3 | 77.218 | KV452733.1 | 1625434 | 2-scf00041 | 2 |
| AX-158405607 | 3 | 77.218 | KV452733.1 | 1627311 | 2-scf00041 | 2 |
| AX-157935483 | 3 | 77.218 | KV452733.1 | 1628610 | 2-scf00041 | 2 |
| AX-157814340 | 3 | 77.218 | KV452733.1 | 1628889 | 2-scf00041 | 2 |
| AX-157935484 | 3 | 77.218 | KV452733.1 | 1631061 | 2-scf00041 | 2 |
| AX-157875062 | 3 | 77.218 | KV452733.1 | 1637124 | 2-scf00041 | 2 |
| AX-157935488 | 3 | 77.218 | KV452733.1 | 1637454 | 2-scf00041 | 2 |
| AX-157935489 | 3 | 77.218 | KV452733.1 | 1638466 | 2-scf00041 | 2 |
| AX-157935495 | 3 | 77.218 | KV452733.1 | 1653674 | 2-scf00041 | 2 |
| AX-157935496 | 3 | 77.218 | KV452733.1 | 1654926 | 2-scf00041 | 2 |
| AX-157935497 | 3 | 77.218 | KV452733.1 | 1656251 | 2-scf00041 | 2 |
| AX-157814343 | 3 | 77.218 | KV452733.1 | 1671567 | 2-scf00041 | 2 |
| AX-157935523 | 3 | 77.218 | KV452733.1 | 1699036 | 2-scf00041 | 2 |
| AX-157814349 | 3 | 77.218 | KV452733.1 | 1701692 | 2-scf00041 | 2 |
| AX-157935536 | 3 | 77.218 | KV452733.1 | 1718568 | 2-scf00041 | 2 |
| AX-157935538 | 3 | 77.218 | KV452733.1 | 1718808 | 2-scf00041 | 2 |
| AX-157935545 | 3 | 77.218 | KV452733.1 | 1727486 | 2-scf00041 | 2 |
| AX-158379360 | 3 | 77.218 | KV452733.1 | 1727649 | 2-scf00041 | 2 |
| AX-157935547 | 3 | 77.218 | KV452733.1 | 1728519 | 2-scf00041 | 2 |
| AX-157935558 | 3 | 77.218 | KV452733.1 | 1744184 | 2-scf00041 | 2 |
| AX-157935559 | 3 | 77.218 | KV452733.1 | 1745234 | 2-scf00041 | 2 |
| AX-157935560 | 3 | 77.218 | KV452733.1 | 1748662 | 2-scf00041 | 2 |
| AX-157814355 | 3 | 77.218 | KV452733.1 | 1750778 | 2-scf00041 | 2 |
| AX-157935563 | 3 | 77.218 | KV452733.1 | 1752404 | 2-scf00041 | 2 |
| AX-157935565 | 3 | 77.218 | KV452733.1 | 1760655 | 2-scf00041 | 2 |
| AX-157883817 | 3 | 77.218 | KV452733.1 | 1762261 | 2-scf00041 | 2 |
| AX-157935567 | 3 | 77.218 | KV452733.1 | 1762542 | 2-scf00041 | 2 |
| AX-157935569 | 3 | 77.218 | KV452733.1 | 1763687 | 2-scf00041 | 2 |
| AX-157935571 | 3 | 77.218 | KV452733.1 | 1769132 | 2-scf00041 | 2 |
| AX-157935574 | 3 | 77.218 | KV452733.1 | 1772074 | 2-scf00041 | 2 |
| AX-157935575 | 3 | 77.218 | KV452733.1 | 1773411 | 2-scf00041 | 2 |
| AX-157745214 | 3 | 77.218 | KV452733.1 | 1784162 | 2-scf00041 | 2 |

|              |   |        |            |         |            |   |
|--------------|---|--------|------------|---------|------------|---|
| AX-157935589 | 3 | 77.218 | KV452733.1 | 1799169 | 2-scf00041 | 2 |
| AX-157935617 | 3 | 77.218 | KV452733.1 | 1822516 | 2-scf00041 | 2 |
| AX-157935619 | 3 | 77.218 | KV452733.1 | 1823879 | 2-scf00041 | 2 |
| AX-157935622 | 3 | 77.218 | KV452733.1 | 1825812 | 2-scf00041 | 2 |
| AX-157935628 | 3 | 77.218 | KV452733.1 | 1827544 | 2-scf00041 | 2 |
| AX-157814361 | 3 | 77.218 | KV452733.1 | 1838983 | 2-scf00041 | 2 |
| AX-157935638 | 3 | 77.218 | KV452733.1 | 1839407 | 2-scf00041 | 2 |
| AX-157935641 | 3 | 77.218 | KV452733.1 | 1840416 | 2-scf00041 | 2 |
| AX-157935645 | 3 | 77.218 | KV452733.1 | 1850671 | 2-scf00041 | 2 |
| AX-157935646 | 3 | 77.218 | KV452733.1 | 1851041 | 2-scf00041 | 2 |
| AX-157814362 | 3 | 77.218 | KV452733.1 | 1851125 | 2-scf00041 | 2 |
| AX-157935648 | 3 | 77.218 | KV452733.1 | 1851832 | 2-scf00041 | 2 |
| AX-157935655 | 3 | 77.218 | KV452733.1 | 1865048 | 2-scf00041 | 2 |
| AX-157864690 | 3 | 77.218 | KV452733.1 | 1868793 | 2-scf00041 | 2 |
| AX-157739737 | 3 | 77.218 | KV452733.1 | 1873117 | 2-scf00041 | 2 |
| AX-157720787 | 3 | 77.218 | KV452733.1 | 1877173 | 2-scf00041 | 2 |
| AX-157935666 | 3 | 77.218 | KV452733.1 | 1877576 | 2-scf00041 | 2 |
| AX-157935678 | 3 | 77.218 | KV452733.1 | 1886131 | 2-scf00041 | 2 |
| AX-157935688 | 3 | 77.218 | KV452733.1 | 1898765 | 2-scf00041 | 2 |
| AX-157854463 | 3 | 77.218 | KV452733.1 | 1908783 | 2-scf00041 | 2 |
| AX-157935700 | 3 | 77.218 | KV452733.1 | 1910431 | 2-scf00041 | 2 |
| AX-157935701 | 3 | 77.218 | KV452733.1 | 1910678 | 2-scf00041 | 2 |
| AX-157757943 | 3 | 77.218 | KV452733.1 | 1911240 | 2-scf00041 | 2 |
| AX-157935702 | 3 | 77.218 | KV452733.1 | 1911656 | 2-scf00041 | 2 |
| AX-157864703 | 3 | 77.218 | KV452733.1 | 1920786 | 2-scf00041 | 2 |
| AX-157935708 | 3 | 77.218 | KV452733.1 | 1927315 | 2-scf00041 | 2 |
| AX-157935710 | 3 | 77.218 | KV452733.1 | 1948572 | 2-scf00041 | 2 |
| AX-157883822 | 3 | 77.218 | KV452733.1 | 1951095 | 2-scf00041 | 2 |
| AX-157935719 | 3 | 77.218 | KV452733.1 | 1959520 | 2-scf00041 | 2 |
| AX-157814365 | 3 | 77.218 | KV452733.1 | 1959851 | 2-scf00041 | 2 |
| AX-157935721 | 3 | 77.218 | KV452733.1 | 1960892 | 2-scf00041 | 2 |
| AX-157935722 | 3 | 77.218 | KV452733.1 | 1961631 | 2-scf00041 | 2 |
| AX-157775546 | 3 | 77.218 | KV452733.1 | 1969433 | 2-scf00041 | 2 |
| AX-157935726 | 3 | 77.218 | KV452733.1 | 1970149 | 2-scf00041 | 2 |
| AX-157935728 | 3 | 77.218 | KV452733.1 | 1977610 | 2-scf00041 | 2 |
| AX-157935730 | 3 | 77.218 | KV452733.1 | 1979553 | 2-scf00041 | 2 |
| AX-157712213 | 3 | 77.218 | KV452733.1 | 1987004 | 2-scf00041 | 2 |
| AX-157935734 | 3 | 77.218 | KV452733.1 | 1988668 | 2-scf00041 | 2 |
| AX-157935741 | 3 | 77.218 | KV452733.1 | 1997571 | 2-scf00041 | 2 |
| AX-157935743 | 3 | 77.218 | KV452733.1 | 1998009 | 2-scf00041 | 2 |
| AX-157935755 | 3 | 77.218 | KV452733.1 | 2023101 | 2-scf00041 | 2 |
| AX-158405613 | 3 | 77.218 | KV452733.1 | 2028191 | 2-scf00041 | 2 |
| AX-157935783 | 3 | 77.218 | KV452733.1 | 2060920 | 2-scf00041 | 2 |
| AX-157935792 | 3 | 77.218 | KV452733.1 | 2078242 | 2-scf00041 | 2 |
| AX-157935863 | 3 | 77.218 | KV452733.1 | 2206739 | 2-scf00041 | 2 |
| AX-158415035 | 3 | 77.218 | KV452733.1 | 2226676 | 2-scf00041 | 2 |
| AX-157758054 | 3 | 77.218 | KV452733.1 | 2461472 | 2-scf00041 | 2 |
| AX-157939955 | 3 | 77.218 | KV452742.1 | 3026440 | 2-scf00046 | 2 |
| AX-157814366 | 3 | 77.545 | KV452733.1 | 2006866 | 2-scf00041 | 2 |
| AX-157935759 | 3 | 77.545 | KV452733.1 | 2032356 | 2-scf00041 | 2 |
| AX-157935760 | 3 | 77.545 | KV452733.1 | 2033922 | 2-scf00041 | 2 |

|              |   |        |            |         |                |    |
|--------------|---|--------|------------|---------|----------------|----|
| AX-157935918 | 3 | 77.545 | KV452733.1 | 2298792 | 2-scf00041     | 2  |
| AX-157935761 | 3 | 77.559 | KV452733.1 | 2035981 | 2-scf00041     | 2  |
| AX-157935763 | 3 | 77.575 | KV452733.1 | 2038786 | 2-scf00041     | 2  |
| AX-157935764 | 3 | 77.593 | KV452733.1 | 2039409 | 2-scf00041     | 2  |
| AX-157935767 | 3 | 77.607 | KV452733.1 | 2042687 | 2-scf00041     | 2  |
| AX-157936257 | 3 | 77.607 | KV452733.1 | 2637147 | 2-scf00041     | 2  |
| AX-157814769 | 3 | 77.607 | KV452742.1 | 4300426 | 2-scf00046     | 2  |
| AX-157750912 | 3 | 77.619 | KV452733.1 | 1477967 | 2-scf00041     | 2  |
| AX-157935775 | 3 | 77.619 | KV452733.1 | 2051447 | 2-scf00041     | 2  |
| AX-157935886 | 3 | 77.619 | KV452733.1 | 2247230 | 2-scf00041     | 2  |
| AX-157935977 | 3 | 77.619 | KV452733.1 | 2369356 | 2-scf00041     | 2  |
| AX-157693906 | 3 | 77.619 | FI892229.1 | 383     | FORI212 lctalk | UN |
| AX-157935777 | 3 | 77.628 | KV452733.1 | 2051880 | 2-scf00041     | 2  |
| AX-157935704 | 3 | 77.639 | KV452733.1 | 1913914 | 2-scf00041     | 2  |
| AX-157935779 | 3 | 77.639 | KV452733.1 | 2052330 | 2-scf00041     | 2  |
| AX-157935431 | 3 | 77.654 | KV452733.1 | 1583220 | 2-scf00041     | 2  |
| AX-157935435 | 3 | 77.654 | KV452733.1 | 1585169 | 2-scf00041     | 2  |
| AX-157935762 | 3 | 77.654 | KV452733.1 | 2038406 | 2-scf00041     | 2  |
| AX-157935769 | 3 | 77.654 | KV452733.1 | 2046716 | 2-scf00041     | 2  |
| AX-157935781 | 3 | 77.654 | KV452733.1 | 2058109 | 2-scf00041     | 2  |
| AX-157935785 | 3 | 77.654 | KV452733.1 | 2071658 | 2-scf00041     | 2  |
| AX-157935787 | 3 | 77.654 | KV452733.1 | 2072202 | 2-scf00041     | 2  |
| AX-157935788 | 3 | 77.654 | KV452733.1 | 2074158 | 2-scf00041     | 2  |
| AX-157935789 | 3 | 77.654 | KV452733.1 | 2075870 | 2-scf00041     | 2  |
| AX-157935791 | 3 | 77.654 | KV452733.1 | 2077001 | 2-scf00041     | 2  |
| AX-157935796 | 3 | 77.654 | KV452733.1 | 2079769 | 2-scf00041     | 2  |
| AX-157935846 | 3 | 77.654 | KV452733.1 | 2159636 | 2-scf00041     | 2  |
| AX-157935802 | 3 | 77.69  | KV452733.1 | 2091930 | 2-scf00041     | 2  |
| AX-157935808 | 3 | 77.714 | KV452733.1 | 2100792 | 2-scf00041     | 2  |
| AX-157935810 | 3 | 77.722 | KV452733.1 | 2101325 | 2-scf00041     | 2  |
| AX-158390010 | 3 | 77.749 | KV452733.1 | 2129715 | 2-scf00041     | 2  |
| AX-157935963 | 3 | 77.749 | KV452733.1 | 2361582 | 2-scf00041     | 2  |
| AX-157935835 | 3 | 77.764 | KV452733.1 | 2151493 | 2-scf00041     | 2  |
| AX-157935836 | 3 | 77.764 | KV452733.1 | 2153235 | 2-scf00041     | 2  |
| AX-157935853 | 3 | 77.764 | KV452733.1 | 2181742 | 2-scf00041     | 2  |
| AX-157935854 | 3 | 77.764 | KV452733.1 | 2182575 | 2-scf00041     | 2  |
| AX-157935930 | 3 | 77.764 | KV452733.1 | 2316535 | 2-scf00041     | 2  |
| AX-157936004 | 3 | 77.764 | KV452733.1 | 2399038 | 2-scf00041     | 2  |
| AX-157936026 | 3 | 77.764 | KV452733.1 | 2426585 | 2-scf00041     | 2  |
| AX-157936030 | 3 | 77.764 | KV452733.1 | 2427339 | 2-scf00041     | 2  |
| AX-158382552 | 3 | 77.764 | KV452733.1 | 2427868 | 2-scf00041     | 2  |
| AX-157936031 | 3 | 77.764 | KV452733.1 | 2428167 | 2-scf00041     | 2  |
| AX-157936033 | 3 | 77.764 | KV452733.1 | 2428752 | 2-scf00041     | 2  |
| AX-157751541 | 3 | 77.764 | KV452733.1 | 2444843 | 2-scf00041     | 2  |
| AX-158382553 | 3 | 77.764 | KV452733.1 | 2447289 | 2-scf00041     | 2  |
| AX-157936075 | 3 | 77.764 | KV452733.1 | 2458212 | 2-scf00041     | 2  |
| AX-157936088 | 3 | 77.764 | KV452733.1 | 2470205 | 2-scf00041     | 2  |
| AX-157936106 | 3 | 77.764 | KV452733.1 | 2492063 | 2-scf00041     | 2  |
| AX-157936469 | 3 | 77.764 | KV452733.1 | 2833865 | 2-scf00041     | 2  |
| AX-157935874 | 3 | 77.795 | KV452733.1 | 2221199 | 2-scf00041     | 2  |
| AX-157935921 | 3 | 77.795 | KV452733.1 | 2300951 | 2-scf00041     | 2  |

|              |   |        |            |         |            |   |
|--------------|---|--------|------------|---------|------------|---|
| AX-157935951 | 3 | 77.795 | KV452733.1 | 2346955 | 2-scf00041 | 2 |
| AX-157936067 | 3 | 77.795 | KV452733.1 | 2452628 | 2-scf00041 | 2 |
| AX-157936068 | 3 | 77.795 | KV452733.1 | 2452874 | 2-scf00041 | 2 |
| AX-157936128 | 3 | 77.795 | KV452733.1 | 2514733 | 2-scf00041 | 2 |
| AX-158382555 | 3 | 77.795 | KV452733.1 | 2562478 | 2-scf00041 | 2 |
| AX-157936229 | 3 | 77.795 | KV452733.1 | 2615580 | 2-scf00041 | 2 |
| AX-157936245 | 3 | 77.795 | KV452733.1 | 2629837 | 2-scf00041 | 2 |
| AX-157935883 | 3 | 77.821 | KV452733.1 | 2240781 | 2-scf00041 | 2 |
| AX-157935754 | 3 | 77.873 | KV452733.1 | 2019430 | 2-scf00041 | 2 |
| AX-157935768 | 3 | 77.873 | KV452733.1 | 2044101 | 2-scf00041 | 2 |
| AX-157935812 | 3 | 77.873 | KV452733.1 | 2103288 | 2-scf00041 | 2 |
| AX-157935830 | 3 | 77.873 | KV452733.1 | 2147669 | 2-scf00041 | 2 |
| AX-157935852 | 3 | 77.873 | KV452733.1 | 2179683 | 2-scf00041 | 2 |
| AX-157935878 | 3 | 77.873 | KV452733.1 | 2232175 | 2-scf00041 | 2 |
| AX-157935884 | 3 | 77.873 | KV452733.1 | 2241938 | 2-scf00041 | 2 |
| AX-157935889 | 3 | 77.873 | KV452733.1 | 2254811 | 2-scf00041 | 2 |
| AX-157935901 | 3 | 77.873 | KV452733.1 | 2279831 | 2-scf00041 | 2 |
| AX-157935903 | 3 | 77.873 | KV452733.1 | 2280591 | 2-scf00041 | 2 |
| AX-157814370 | 3 | 77.873 | KV452733.1 | 2282208 | 2-scf00041 | 2 |
| AX-157935905 | 3 | 77.873 | KV452733.1 | 2283395 | 2-scf00041 | 2 |
| AX-157935908 | 3 | 77.873 | KV452733.1 | 2288656 | 2-scf00041 | 2 |
| AX-157701281 | 3 | 77.873 | KV452733.1 | 2293175 | 2-scf00041 | 2 |
| AX-157935915 | 3 | 77.873 | KV452733.1 | 2297104 | 2-scf00041 | 2 |
| AX-157935926 | 3 | 77.873 | KV452733.1 | 2312345 | 2-scf00041 | 2 |
| AX-157744862 | 3 | 77.873 | KV452733.1 | 2317885 | 2-scf00041 | 2 |
| AX-157935932 | 3 | 77.873 | KV452733.1 | 2319925 | 2-scf00041 | 2 |
| AX-157814379 | 3 | 77.873 | KV452733.1 | 2325759 | 2-scf00041 | 2 |
| AX-157935942 | 3 | 77.873 | KV452733.1 | 2335405 | 2-scf00041 | 2 |
| AX-157935945 | 3 | 77.873 | KV452733.1 | 2337795 | 2-scf00041 | 2 |
| AX-157935947 | 3 | 77.873 | KV452733.1 | 2338604 | 2-scf00041 | 2 |
| AX-157935948 | 3 | 77.873 | KV452733.1 | 2338850 | 2-scf00041 | 2 |
| AX-157935953 | 3 | 77.873 | KV452733.1 | 2351945 | 2-scf00041 | 2 |
| AX-157935957 | 3 | 77.873 | KV452733.1 | 2356033 | 2-scf00041 | 2 |
| AX-157935959 | 3 | 77.873 | KV452733.1 | 2356849 | 2-scf00041 | 2 |
| AX-157935961 | 3 | 77.873 | KV452733.1 | 2360384 | 2-scf00041 | 2 |
| AX-157935980 | 3 | 77.873 | KV452733.1 | 2370715 | 2-scf00041 | 2 |
| AX-157935983 | 3 | 77.873 | KV452733.1 | 2373619 | 2-scf00041 | 2 |
| AX-157935992 | 3 | 77.873 | KV452733.1 | 2384238 | 2-scf00041 | 2 |
| AX-157935994 | 3 | 77.873 | KV452733.1 | 2385413 | 2-scf00041 | 2 |
| AX-157936000 | 3 | 77.873 | KV452733.1 | 2394042 | 2-scf00041 | 2 |
| AX-157936001 | 3 | 77.873 | KV452733.1 | 2394454 | 2-scf00041 | 2 |
| AX-157936003 | 3 | 77.873 | KV452733.1 | 2397547 | 2-scf00041 | 2 |
| AX-157936006 | 3 | 77.873 | KV452733.1 | 2400133 | 2-scf00041 | 2 |
| AX-157936008 | 3 | 77.873 | KV452733.1 | 2400630 | 2-scf00041 | 2 |
| AX-157936012 | 3 | 77.873 | KV452733.1 | 2409126 | 2-scf00041 | 2 |
| AX-157936014 | 3 | 77.873 | KV452733.1 | 2411848 | 2-scf00041 | 2 |
| AX-157724356 | 3 | 77.873 | KV452733.1 | 2423830 | 2-scf00041 | 2 |
| AX-157936044 | 3 | 77.873 | KV452733.1 | 2433756 | 2-scf00041 | 2 |
| AX-157936053 | 3 | 77.873 | KV452733.1 | 2438615 | 2-scf00041 | 2 |
| AX-157936054 | 3 | 77.873 | KV452733.1 | 2439049 | 2-scf00041 | 2 |
| AX-157936055 | 3 | 77.873 | KV452733.1 | 2439432 | 2-scf00041 | 2 |

|              |   |        |            |         |            |   |
|--------------|---|--------|------------|---------|------------|---|
| AX-157936058 | 3 | 77.873 | KV452733.1 | 2440580 | 2-scf00041 | 2 |
| AX-157936059 | 3 | 77.873 | KV452733.1 | 2441197 | 2-scf00041 | 2 |
| AX-157936060 | 3 | 77.873 | KV452733.1 | 2442001 | 2-scf00041 | 2 |
| AX-157936062 | 3 | 77.873 | KV452733.1 | 2446145 | 2-scf00041 | 2 |
| AX-157936063 | 3 | 77.873 | KV452733.1 | 2446413 | 2-scf00041 | 2 |
| AX-157936065 | 3 | 77.873 | KV452733.1 | 2447367 | 2-scf00041 | 2 |
| AX-157697612 | 3 | 77.873 | KV452733.1 | 2449699 | 2-scf00041 | 2 |
| AX-157936069 | 3 | 77.873 | KV452733.1 | 2454825 | 2-scf00041 | 2 |
| AX-157936072 | 3 | 77.873 | KV452733.1 | 2456798 | 2-scf00041 | 2 |
| AX-157936073 | 3 | 77.873 | KV452733.1 | 2457109 | 2-scf00041 | 2 |
| AX-157743054 | 3 | 77.873 | KV452733.1 | 2457433 | 2-scf00041 | 2 |
| AX-157936076 | 3 | 77.873 | KV452733.1 | 2458455 | 2-scf00041 | 2 |
| AX-157936078 | 3 | 77.873 | KV452733.1 | 2458889 | 2-scf00041 | 2 |
| AX-157936079 | 3 | 77.873 | KV452733.1 | 2460404 | 2-scf00041 | 2 |
| AX-157772710 | 3 | 77.873 | KV452733.1 | 2493689 | 2-scf00041 | 2 |
| AX-157936118 | 3 | 77.873 | KV452733.1 | 2500494 | 2-scf00041 | 2 |
| AX-157936119 | 3 | 77.873 | KV452733.1 | 2502476 | 2-scf00041 | 2 |
| AX-157936179 | 3 | 77.873 | KV452733.1 | 2563260 | 2-scf00041 | 2 |
| AX-157936222 | 3 | 77.873 | KV452733.1 | 2607964 | 2-scf00041 | 2 |
| AX-157721732 | 3 | 77.873 | KV452733.1 | 2612919 | 2-scf00041 | 2 |
| AX-157936265 | 3 | 77.873 | KV452733.1 | 2647742 | 2-scf00041 | 2 |
| AX-157936319 | 3 | 77.873 | KV452733.1 | 2700957 | 2-scf00041 | 2 |
| AX-157936320 | 3 | 77.873 | KV452733.1 | 2702135 | 2-scf00041 | 2 |
| AX-157774663 | 3 | 77.873 | KV452733.1 | 3780441 | 2-scf00041 | 2 |
| AX-157941099 | 3 | 77.873 | KV452742.1 | 1934326 | 2-scf00046 | 2 |
| AX-157939873 | 3 | 77.873 | KV452742.1 | 2945770 | 2-scf00046 | 2 |
| AX-157943216 | 3 | 77.873 | KV452747.1 | 175779  | 2-scf00053 | 2 |
| AX-157936090 | 3 | 77.982 | KV452733.1 | 2472422 | 2-scf00041 | 2 |
| AX-157936091 | 3 | 77.982 | KV452733.1 | 2475809 | 2-scf00041 | 2 |
| AX-157936096 | 3 | 77.982 | KV452733.1 | 2477044 | 2-scf00041 | 2 |
| AX-157757747 | 3 | 77.982 | KV452733.1 | 2479716 | 2-scf00041 | 2 |
| AX-157936098 | 3 | 77.982 | KV452733.1 | 2481113 | 2-scf00041 | 2 |
| AX-157936103 | 3 | 77.982 | KV452733.1 | 2491268 | 2-scf00041 | 2 |
| AX-157936104 | 3 | 77.982 | KV452733.1 | 2491797 | 2-scf00041 | 2 |
| AX-157936109 | 3 | 77.982 | KV452733.1 | 2493062 | 2-scf00041 | 2 |
| AX-157814385 | 3 | 77.982 | KV452733.1 | 2493505 | 2-scf00041 | 2 |
| AX-157936113 | 3 | 77.982 | KV452733.1 | 2496513 | 2-scf00041 | 2 |
| AX-157745704 | 3 | 77.982 | KV452733.1 | 2497034 | 2-scf00041 | 2 |
| AX-157936195 | 3 | 77.982 | KV452733.1 | 2583042 | 2-scf00041 | 2 |
| AX-157936196 | 3 | 77.982 | KV452733.1 | 2583801 | 2-scf00041 | 2 |
| AX-157936197 | 3 | 77.982 | KV452733.1 | 2584427 | 2-scf00041 | 2 |
| AX-157936262 | 3 | 77.982 | KV452733.1 | 2642487 | 2-scf00041 | 2 |
| AX-157936314 | 3 | 77.982 | KV452733.1 | 2696661 | 2-scf00041 | 2 |
| AX-157814393 | 3 | 77.982 | KV452733.1 | 2850116 | 2-scf00041 | 2 |
| AX-157875093 | 3 | 78.013 | KV452733.1 | 2497073 | 2-scf00041 | 2 |
| AX-157936126 | 3 | 78.062 | KV452733.1 | 2512877 | 2-scf00041 | 2 |
| AX-157699473 | 3 | 78.062 | KV452733.1 | 2513002 | 2-scf00041 | 2 |
| AX-157935318 | 3 | 78.091 | KV452733.1 | 1440003 | 2-scf00041 | 2 |
| AX-157935319 | 3 | 78.091 | KV452733.1 | 1440489 | 2-scf00041 | 2 |
| AX-157935323 | 3 | 78.091 | KV452733.1 | 1450068 | 2-scf00041 | 2 |
| AX-157935325 | 3 | 78.091 | KV452733.1 | 1451525 | 2-scf00041 | 2 |



|              |   |        |            |         |                |    |
|--------------|---|--------|------------|---------|----------------|----|
| AX-157935327 | 3 | 78.091 | KV452733.1 | 1454617 | 2-scf00041     | 2  |
| AX-157935329 | 3 | 78.091 | KV452733.1 | 1458515 | 2-scf00041     | 2  |
| AX-157935407 | 3 | 78.091 | KV452733.1 | 1557070 | 2-scf00041     | 2  |
| AX-157935561 | 3 | 78.091 | KV452733.1 | 1750126 | 2-scf00041     | 2  |
| AX-157814356 | 3 | 78.091 | KV452733.1 | 1779383 | 2-scf00041     | 2  |
| AX-157935694 | 3 | 78.091 | KV452733.1 | 1906394 | 2-scf00041     | 2  |
| AX-157936116 | 3 | 78.091 | KV452733.1 | 2499378 | 2-scf00041     | 2  |
| AX-157936145 | 3 | 78.091 | KV452733.1 | 2527481 | 2-scf00041     | 2  |
| AX-157814388 | 3 | 78.091 | KV452733.1 | 2529023 | 2-scf00041     | 2  |
| AX-157814389 | 3 | 78.091 | KV452733.1 | 2533710 | 2-scf00041     | 2  |
| AX-157936175 | 3 | 78.091 | KV452733.1 | 2561917 | 2-scf00041     | 2  |
| AX-157936177 | 3 | 78.091 | KV452733.1 | 2562932 | 2-scf00041     | 2  |
| AX-157936181 | 3 | 78.091 | KV452733.1 | 2572045 | 2-scf00041     | 2  |
| AX-157936185 | 3 | 78.091 | KV452733.1 | 2577857 | 2-scf00041     | 2  |
| AX-157936192 | 3 | 78.091 | KV452733.1 | 2581801 | 2-scf00041     | 2  |
| AX-157936193 | 3 | 78.091 | KV452733.1 | 2582522 | 2-scf00041     | 2  |
| AX-157726065 | 3 | 78.091 | KV452733.1 | 2586343 | 2-scf00041     | 2  |
| AX-157936208 | 3 | 78.091 | KV452733.1 | 2595221 | 2-scf00041     | 2  |
| AX-157936211 | 3 | 78.091 | KV452733.1 | 2597394 | 2-scf00041     | 2  |
| AX-157936214 | 3 | 78.091 | KV452733.1 | 2599118 | 2-scf00041     | 2  |
| AX-157754578 | 3 | 78.091 | KV452733.1 | 2601947 | 2-scf00041     | 2  |
| AX-157936218 | 3 | 78.091 | KV452733.1 | 2604357 | 2-scf00041     | 2  |
| AX-157936219 | 3 | 78.091 | KV452733.1 | 2605167 | 2-scf00041     | 2  |
| AX-157936224 | 3 | 78.091 | KV452733.1 | 2612706 | 2-scf00041     | 2  |
| AX-157936227 | 3 | 78.091 | KV452733.1 | 2614395 | 2-scf00041     | 2  |
| AX-157936228 | 3 | 78.091 | KV452733.1 | 2614550 | 2-scf00041     | 2  |
| AX-157936232 | 3 | 78.091 | KV452733.1 | 2618175 | 2-scf00041     | 2  |
| AX-157936238 | 3 | 78.091 | KV452733.1 | 2623289 | 2-scf00041     | 2  |
| AX-157753773 | 3 | 78.091 | KV452733.1 | 2632158 | 2-scf00041     | 2  |
| AX-157936254 | 3 | 78.091 | KV452733.1 | 2635952 | 2-scf00041     | 2  |
| AX-157936255 | 3 | 78.091 | KV452733.1 | 2636552 | 2-scf00041     | 2  |
| AX-157936267 | 3 | 78.091 | KV452733.1 | 2648440 | 2-scf00041     | 2  |
| AX-157936270 | 3 | 78.091 | KV452733.1 | 2652857 | 2-scf00041     | 2  |
| AX-157936274 | 3 | 78.091 | KV452733.1 | 2656448 | 2-scf00041     | 2  |
| AX-157936281 | 3 | 78.091 | KV452733.1 | 2667766 | 2-scf00041     | 2  |
| AX-157936284 | 3 | 78.091 | KV452733.1 | 2671949 | 2-scf00041     | 2  |
| AX-157936295 | 3 | 78.091 | KV452733.1 | 2681275 | 2-scf00041     | 2  |
| AX-157706171 | 3 | 78.091 | KV452733.1 | 2681316 | 2-scf00041     | 2  |
| AX-157936300 | 3 | 78.091 | KV452733.1 | 2684716 | 2-scf00041     | 2  |
| AX-157936317 | 3 | 78.091 | KV452733.1 | 2699781 | 2-scf00041     | 2  |
| AX-157936413 | 3 | 78.091 | KV452733.1 | 2784230 | 2-scf00041     | 2  |
| AX-157698254 | 3 | 78.091 | FI894969.1 | 285     | 4ORI212 lctalt | UN |
| AX-157936323 | 3 | 78.2   | KV452733.1 | 2705265 | 2-scf00041     | 2  |
| AX-157936336 | 3 | 78.2   | KV452733.1 | 2712031 | 2-scf00041     | 2  |
| AX-157936131 | 3 | 78.31  | KV452733.1 | 2518078 | 2-scf00041     | 2  |
| AX-157740121 | 3 | 78.31  | KV452733.1 | 2528314 | 2-scf00041     | 2  |
| AX-157936242 | 3 | 78.31  | KV452733.1 | 2625762 | 2-scf00041     | 2  |
| AX-157936324 | 3 | 78.31  | KV452733.1 | 2705857 | 2-scf00041     | 2  |
| AX-157936328 | 3 | 78.31  | KV452733.1 | 2708869 | 2-scf00041     | 2  |
| AX-157936334 | 3 | 78.31  | KV452733.1 | 2711277 | 2-scf00041     | 2  |
| AX-157936339 | 3 | 78.31  | KV452733.1 | 2713974 | 2-scf00041     | 2  |

|              |   |       |            |         |            |   |
|--------------|---|-------|------------|---------|------------|---|
| AX-157936340 | 3 | 78.31 | KV452733.1 | 2714457 | 2-scf00041 | 2 |
| AX-157936348 | 3 | 78.31 | KV452733.1 | 2728056 | 2-scf00041 | 2 |
| AX-157936351 | 3 | 78.31 | KV452733.1 | 2730651 | 2-scf00041 | 2 |
| AX-157936353 | 3 | 78.31 | KV452733.1 | 2731461 | 2-scf00041 | 2 |
| AX-157936355 | 3 | 78.31 | KV452733.1 | 2733550 | 2-scf00041 | 2 |
| AX-157936359 | 3 | 78.31 | KV452733.1 | 2735736 | 2-scf00041 | 2 |
| AX-157936362 | 3 | 78.31 | KV452733.1 | 2736941 | 2-scf00041 | 2 |
| AX-157936363 | 3 | 78.31 | KV452733.1 | 2737550 | 2-scf00041 | 2 |
| AX-157936366 | 3 | 78.31 | KV452733.1 | 2737863 | 2-scf00041 | 2 |
| AX-157936367 | 3 | 78.31 | KV452733.1 | 2738328 | 2-scf00041 | 2 |
| AX-157936372 | 3 | 78.31 | KV452733.1 | 2740881 | 2-scf00041 | 2 |
| AX-157936373 | 3 | 78.31 | KV452733.1 | 2741723 | 2-scf00041 | 2 |
| AX-157936374 | 3 | 78.31 | KV452733.1 | 2743564 | 2-scf00041 | 2 |
| AX-157936375 | 3 | 78.31 | KV452733.1 | 2744198 | 2-scf00041 | 2 |
| AX-157936376 | 3 | 78.31 | KV452733.1 | 2745584 | 2-scf00041 | 2 |
| AX-157936377 | 3 | 78.31 | KV452733.1 | 2745742 | 2-scf00041 | 2 |
| AX-157936390 | 3 | 78.31 | KV452733.1 | 2766493 | 2-scf00041 | 2 |
| AX-157936398 | 3 | 78.31 | KV452733.1 | 2773308 | 2-scf00041 | 2 |
| AX-157936401 | 3 | 78.31 | KV452733.1 | 2774198 | 2-scf00041 | 2 |
| AX-157936411 | 3 | 78.31 | KV452733.1 | 2782976 | 2-scf00041 | 2 |
| AX-157936415 | 3 | 78.31 | KV452733.1 | 2785801 | 2-scf00041 | 2 |
| AX-157724050 | 3 | 78.31 | KV452733.1 | 2789134 | 2-scf00041 | 2 |
| AX-157936419 | 3 | 78.31 | KV452733.1 | 2789516 | 2-scf00041 | 2 |
| AX-157936420 | 3 | 78.31 | KV452733.1 | 2791149 | 2-scf00041 | 2 |
| AX-157741887 | 3 | 78.31 | KV452733.1 | 2793617 | 2-scf00041 | 2 |
| AX-157936436 | 3 | 78.31 | KV452733.1 | 2803217 | 2-scf00041 | 2 |
| AX-157936441 | 3 | 78.31 | KV452733.1 | 2808936 | 2-scf00041 | 2 |
| AX-157936448 | 3 | 78.31 | KV452733.1 | 2818268 | 2-scf00041 | 2 |
| AX-157936450 | 3 | 78.31 | KV452733.1 | 2821471 | 2-scf00041 | 2 |
| AX-157936457 | 3 | 78.31 | KV452733.1 | 2825796 | 2-scf00041 | 2 |
| AX-157936461 | 3 | 78.31 | KV452733.1 | 2828029 | 2-scf00041 | 2 |
| AX-157936475 | 3 | 78.31 | KV452733.1 | 2842515 | 2-scf00041 | 2 |
| AX-157814392 | 3 | 78.31 | KV452733.1 | 2842566 | 2-scf00041 | 2 |
| AX-157936477 | 3 | 78.31 | KV452733.1 | 2845724 | 2-scf00041 | 2 |
| AX-157726733 | 3 | 78.31 | KV452733.1 | 2848322 | 2-scf00041 | 2 |
| AX-157701923 | 3 | 78.31 | KV452733.1 | 2849346 | 2-scf00041 | 2 |
| AX-157936481 | 3 | 78.31 | KV452733.1 | 2851513 | 2-scf00041 | 2 |
| AX-157936483 | 3 | 78.31 | KV452733.1 | 2852044 | 2-scf00041 | 2 |
| AX-157814397 | 3 | 78.31 | KV452733.1 | 2858607 | 2-scf00041 | 2 |
| AX-157743640 | 3 | 78.31 | KV452733.1 | 2861693 | 2-scf00041 | 2 |
| AX-157814398 | 3 | 78.31 | KV452733.1 | 2861778 | 2-scf00041 | 2 |
| AX-157936493 | 3 | 78.31 | KV452733.1 | 2862210 | 2-scf00041 | 2 |
| AX-157854469 | 3 | 78.31 | KV452733.1 | 2865342 | 2-scf00041 | 2 |
| AX-157936544 | 3 | 78.31 | KV452733.1 | 2921321 | 2-scf00041 | 2 |
| AX-157814410 | 3 | 78.31 | KV452733.1 | 2971008 | 2-scf00041 | 2 |
| AX-157744419 | 3 | 78.31 | KV452733.1 | 2972273 | 2-scf00041 | 2 |
| AX-157936594 | 3 | 78.31 | KV452733.1 | 2974943 | 2-scf00041 | 2 |
| AX-157936740 | 3 | 78.31 | KV452733.1 | 3137206 | 2-scf00041 | 2 |
| AX-157936747 | 3 | 78.31 | KV452733.1 | 3140611 | 2-scf00041 | 2 |
| AX-157936754 | 3 | 78.31 | KV452733.1 | 3145705 | 2-scf00041 | 2 |
| AX-157936892 | 3 | 78.31 | KV452733.1 | 3299001 | 2-scf00041 | 2 |

|              |   |        |            |          |            |   |
|--------------|---|--------|------------|----------|------------|---|
| AX-157936902 | 3 | 78.31  | KV452733.1 | 3304607  | 2-scf00041 | 2 |
| AX-157936993 | 3 | 78.31  | KV452733.1 | 3360975  | 2-scf00041 | 2 |
| AX-157938549 | 3 | 78.31  | KV452742.1 | 136343   | 2-scf00046 | 2 |
| AX-157938655 | 3 | 78.31  | KV452742.1 | 264814   | 2-scf00046 | 2 |
| AX-157941030 | 3 | 78.31  | KV452742.1 | 2069936  | 2-scf00046 | 2 |
| AX-157936499 | 3 | 78.419 | KV452733.1 | 2873753  | 2-scf00041 | 2 |
| AX-158379364 | 3 | 78.419 | KV452733.1 | 2874725  | 2-scf00041 | 2 |
| AX-157936502 | 3 | 78.419 | KV452733.1 | 2875452  | 2-scf00041 | 2 |
| AX-157934819 | 3 | 78.516 | KV452733.1 | 944144   | 2-scf00041 | 2 |
| AX-157814312 | 3 | 78.516 | KV452733.1 | 1088637  | 2-scf00041 | 2 |
| AX-157936141 | 3 | 78.516 | KV452733.1 | 2524298  | 2-scf00041 | 2 |
| AX-157814401 | 3 | 78.516 | KV452733.1 | 2880990  | 2-scf00041 | 2 |
| AX-157930933 | 3 | 78.637 | KV452730.1 | 10497754 | 2-scf00040 | 2 |
| AX-158379347 | 3 | 78.637 | KV452730.1 | 10724050 | 2-scf00040 | 2 |
| AX-157933737 | 3 | 78.637 | KV452730.1 | 14351813 | 2-scf00040 | 2 |
| AX-157935950 | 3 | 78.637 | KV452733.1 | 2340358  | 2-scf00041 | 2 |
| AX-157936446 | 3 | 78.637 | KV452733.1 | 2817726  | 2-scf00041 | 2 |
| AX-158405624 | 3 | 78.637 | KV452733.1 | 2885114  | 2-scf00041 | 2 |
| AX-157936520 | 3 | 78.637 | KV452733.1 | 2895521  | 2-scf00041 | 2 |
| AX-157936521 | 3 | 78.637 | KV452733.1 | 2898094  | 2-scf00041 | 2 |
| AX-157814403 | 3 | 78.637 | KV452733.1 | 2902109  | 2-scf00041 | 2 |
| AX-158404719 | 3 | 78.637 | KV452733.1 | 2905561  | 2-scf00041 | 2 |
| AX-157875100 | 3 | 78.637 | KV452733.1 | 2906918  | 2-scf00041 | 2 |
| AX-157936530 | 3 | 78.637 | KV452733.1 | 2911415  | 2-scf00041 | 2 |
| AX-157936536 | 3 | 78.637 | KV452733.1 | 2914552  | 2-scf00041 | 2 |
| AX-157936537 | 3 | 78.637 | KV452733.1 | 2914881  | 2-scf00041 | 2 |
| AX-157746929 | 3 | 78.637 | KV452733.1 | 2916384  | 2-scf00041 | 2 |
| AX-157936539 | 3 | 78.637 | KV452733.1 | 2916635  | 2-scf00041 | 2 |
| AX-157936541 | 3 | 78.637 | KV452733.1 | 2919163  | 2-scf00041 | 2 |
| AX-157936542 | 3 | 78.637 | KV452733.1 | 2920526  | 2-scf00041 | 2 |
| AX-157936547 | 3 | 78.637 | KV452733.1 | 2923852  | 2-scf00041 | 2 |
| AX-157936549 | 3 | 78.637 | KV452733.1 | 2925076  | 2-scf00041 | 2 |
| AX-157747381 | 3 | 78.637 | KV452733.1 | 2940562  | 2-scf00041 | 2 |
| AX-157936565 | 3 | 78.637 | KV452733.1 | 2944046  | 2-scf00041 | 2 |
| AX-157936567 | 3 | 78.637 | KV452733.1 | 2944139  | 2-scf00041 | 2 |
| AX-157936569 | 3 | 78.637 | KV452733.1 | 2944879  | 2-scf00041 | 2 |
| AX-157936572 | 3 | 78.637 | KV452733.1 | 2946737  | 2-scf00041 | 2 |
| AX-157936573 | 3 | 78.637 | KV452733.1 | 2947180  | 2-scf00041 | 2 |
| AX-157936574 | 3 | 78.637 | KV452733.1 | 2947832  | 2-scf00041 | 2 |
| AX-157936586 | 3 | 78.637 | KV452733.1 | 2963141  | 2-scf00041 | 2 |
| AX-157814406 | 3 | 78.637 | KV452733.1 | 2964868  | 2-scf00041 | 2 |
| AX-157814407 | 3 | 78.637 | KV452733.1 | 2965218  | 2-scf00041 | 2 |
| AX-157936588 | 3 | 78.637 | KV452733.1 | 2966457  | 2-scf00041 | 2 |
| AX-157936591 | 3 | 78.637 | KV452733.1 | 2970625  | 2-scf00041 | 2 |
| AX-157814411 | 3 | 78.637 | KV452733.1 | 2972327  | 2-scf00041 | 2 |
| AX-157936600 | 3 | 78.637 | KV452733.1 | 2977230  | 2-scf00041 | 2 |
| AX-157864718 | 3 | 78.637 | KV452733.1 | 3294167  | 2-scf00041 | 2 |
| AX-157936891 | 3 | 78.637 | KV452733.1 | 3294867  | 2-scf00041 | 2 |
| AX-157936894 | 3 | 78.637 | KV452733.1 | 3300348  | 2-scf00041 | 2 |
| AX-157936895 | 3 | 78.637 | KV452733.1 | 3300769  | 2-scf00041 | 2 |
| AX-157936982 | 3 | 78.637 | KV452733.1 | 3350633  | 2-scf00041 | 2 |

|              |   |        |             |         |            |    |
|--------------|---|--------|-------------|---------|------------|----|
| AX-157937050 | 3 | 78.637 | KV452733.1  | 3413135 | 2-scf00041 | 2  |
| AX-157937429 | 3 | 78.637 | KV452733.1  | 3818299 | 2-scf00041 | 2  |
| AX-157937487 | 3 | 78.637 | KV452732.1  | 92670   | 2-scf00042 | 2  |
| AX-157938377 | 3 | 78.637 | KV452735.1  | 117796  | 2-scf00044 | 2  |
| AX-157941040 | 3 | 78.637 | KV452742.1  | 2043368 | 2-scf00046 | 2  |
| AX-157940475 | 3 | 78.637 | KV452742.1  | 3638069 | 2-scf00046 | 2  |
| AX-157940548 | 3 | 78.637 | KV452742.1  | 3756567 | 2-scf00046 | 2  |
| AX-157941001 | 3 | 78.637 | KV452742.1  | 4535366 | 2-scf00046 | 2  |
| AX-157722644 | 3 | 78.637 | KV452745.1  | 585317  | 2-scf00051 | 2  |
| AX-157943131 | 3 | 78.637 | KV452747.1  | 75538   | 2-scf00053 | 2  |
| AX-157943800 | 3 | 78.637 | KV452747.1  | 805445  | 2-scf00053 | 2  |
| AX-157706757 | 3 | 78.637 | 3ML01032860 | 550     | scf08491_1 | UN |
| AX-157814413 | 3 | 78.701 | KV452733.1  | 2991495 | 2-scf00041 | 2  |
| AX-157936888 | 3 | 78.701 | KV452733.1  | 3290746 | 2-scf00041 | 2  |
| AX-157938286 | 3 | 78.701 | KV452735.1  | 44156   | 2-scf00044 | 2  |
| AX-157938288 | 3 | 78.701 | KV452735.1  | 44942   | 2-scf00044 | 2  |
| AX-157742985 | 3 | 78.746 | KV452733.1  | 961590  | 2-scf00041 | 2  |
| AX-157936335 | 3 | 78.746 | KV452733.1  | 2711871 | 2-scf00041 | 2  |
| AX-157936391 | 3 | 78.746 | KV452733.1  | 2767516 | 2-scf00041 | 2  |
| AX-157936472 | 3 | 78.746 | KV452733.1  | 2834844 | 2-scf00041 | 2  |
| AX-157936506 | 3 | 78.746 | KV452733.1  | 2883137 | 2-scf00041 | 2  |
| AX-157936508 | 3 | 78.746 | KV452733.1  | 2886036 | 2-scf00041 | 2  |
| AX-157936511 | 3 | 78.746 | KV452733.1  | 2888336 | 2-scf00041 | 2  |
| AX-157936515 | 3 | 78.746 | KV452733.1  | 2890441 | 2-scf00041 | 2  |
| AX-157936529 | 3 | 78.746 | KV452733.1  | 2910420 | 2-scf00041 | 2  |
| AX-157936535 | 3 | 78.746 | KV452733.1  | 2912933 | 2-scf00041 | 2  |
| AX-157936550 | 3 | 78.746 | KV452733.1  | 2926140 | 2-scf00041 | 2  |
| AX-157936560 | 3 | 78.746 | KV452733.1  | 2936765 | 2-scf00041 | 2  |
| AX-157936563 | 3 | 78.746 | KV452733.1  | 2943499 | 2-scf00041 | 2  |
| AX-157936570 | 3 | 78.746 | KV452733.1  | 2945905 | 2-scf00041 | 2  |
| AX-157936578 | 3 | 78.746 | KV452733.1  | 2949985 | 2-scf00041 | 2  |
| AX-157869442 | 3 | 78.746 | KV452733.1  | 2963403 | 2-scf00041 | 2  |
| AX-157814409 | 3 | 78.746 | KV452733.1  | 2969455 | 2-scf00041 | 2  |
| AX-157869443 | 3 | 78.746 | KV452733.1  | 2972042 | 2-scf00041 | 2  |
| AX-157936598 | 3 | 78.746 | KV452733.1  | 2976107 | 2-scf00041 | 2  |
| AX-157936601 | 3 | 78.746 | KV452733.1  | 2977996 | 2-scf00041 | 2  |
| AX-157869444 | 3 | 78.746 | KV452733.1  | 2978453 | 2-scf00041 | 2  |
| AX-157869445 | 3 | 78.746 | KV452733.1  | 2988656 | 2-scf00041 | 2  |
| AX-158404723 | 3 | 78.746 | KV452733.1  | 2989670 | 2-scf00041 | 2  |
| AX-157936605 | 3 | 78.746 | KV452733.1  | 2995732 | 2-scf00041 | 2  |
| AX-157814415 | 3 | 78.746 | KV452733.1  | 2997347 | 2-scf00041 | 2  |
| AX-157936610 | 3 | 78.746 | KV452733.1  | 3000693 | 2-scf00041 | 2  |
| AX-157814416 | 3 | 78.746 | KV452733.1  | 3007853 | 2-scf00041 | 2  |
| AX-157695368 | 3 | 78.746 | KV452733.1  | 3009036 | 2-scf00041 | 2  |
| AX-157936618 | 3 | 78.746 | KV452733.1  | 3011443 | 2-scf00041 | 2  |
| AX-157814417 | 3 | 78.746 | KV452733.1  | 3014432 | 2-scf00041 | 2  |
| AX-157814418 | 3 | 78.746 | KV452733.1  | 3014705 | 2-scf00041 | 2  |
| AX-157936623 | 3 | 78.746 | KV452733.1  | 3016105 | 2-scf00041 | 2  |
| AX-158405631 | 3 | 78.746 | KV452733.1  | 3017431 | 2-scf00041 | 2  |
| AX-157936640 | 3 | 78.746 | KV452733.1  | 3030026 | 2-scf00041 | 2  |
| AX-157936641 | 3 | 78.746 | KV452733.1  | 3030912 | 2-scf00041 | 2  |

|              |   |        |            |         |            |   |
|--------------|---|--------|------------|---------|------------|---|
| AX-157936644 | 3 | 78.746 | KV452733.1 | 3035906 | 2-scf00041 | 2 |
| AX-157936652 | 3 | 78.746 | KV452733.1 | 3041166 | 2-scf00041 | 2 |
| AX-157936654 | 3 | 78.746 | KV452733.1 | 3042178 | 2-scf00041 | 2 |
| AX-157936657 | 3 | 78.746 | KV452733.1 | 3043356 | 2-scf00041 | 2 |
| AX-157936660 | 3 | 78.746 | KV452733.1 | 3050811 | 2-scf00041 | 2 |
| AX-157936666 | 3 | 78.746 | KV452733.1 | 3055305 | 2-scf00041 | 2 |
| AX-157936673 | 3 | 78.746 | KV452733.1 | 3061395 | 2-scf00041 | 2 |
| AX-157936682 | 3 | 78.746 | KV452733.1 | 3068020 | 2-scf00041 | 2 |
| AX-157854470 | 3 | 78.746 | KV452733.1 | 3069273 | 2-scf00041 | 2 |
| AX-157936685 | 3 | 78.746 | KV452733.1 | 3070439 | 2-scf00041 | 2 |
| AX-157936686 | 3 | 78.746 | KV452733.1 | 3070904 | 2-scf00041 | 2 |
| AX-157936688 | 3 | 78.746 | KV452733.1 | 3073377 | 2-scf00041 | 2 |
| AX-157936695 | 3 | 78.746 | KV452733.1 | 3081182 | 2-scf00041 | 2 |
| AX-157740528 | 3 | 78.746 | KV452733.1 | 3084367 | 2-scf00041 | 2 |
| AX-157709400 | 3 | 78.746 | KV452733.1 | 3085735 | 2-scf00041 | 2 |
| AX-157936698 | 3 | 78.746 | KV452733.1 | 3086719 | 2-scf00041 | 2 |
| AX-158404725 | 3 | 78.746 | KV452733.1 | 3095058 | 2-scf00041 | 2 |
| AX-157936709 | 3 | 78.746 | KV452733.1 | 3100288 | 2-scf00041 | 2 |
| AX-157936711 | 3 | 78.746 | KV452733.1 | 3103226 | 2-scf00041 | 2 |
| AX-157936713 | 3 | 78.746 | KV452733.1 | 3103880 | 2-scf00041 | 2 |
| AX-157936714 | 3 | 78.746 | KV452733.1 | 3106231 | 2-scf00041 | 2 |
| AX-157854472 | 3 | 78.746 | KV452733.1 | 3106792 | 2-scf00041 | 2 |
| AX-157936716 | 3 | 78.746 | KV452733.1 | 3106949 | 2-scf00041 | 2 |
| AX-158390019 | 3 | 78.746 | KV452733.1 | 3111273 | 2-scf00041 | 2 |
| AX-157936722 | 3 | 78.746 | KV452733.1 | 3120704 | 2-scf00041 | 2 |
| AX-157936723 | 3 | 78.746 | KV452733.1 | 3124567 | 2-scf00041 | 2 |
| AX-158382562 | 3 | 78.746 | KV452733.1 | 3129719 | 2-scf00041 | 2 |
| AX-157936731 | 3 | 78.746 | KV452733.1 | 3132601 | 2-scf00041 | 2 |
| AX-157936733 | 3 | 78.746 | KV452733.1 | 3133684 | 2-scf00041 | 2 |
| AX-157936734 | 3 | 78.746 | KV452733.1 | 3134907 | 2-scf00041 | 2 |
| AX-157936735 | 3 | 78.746 | KV452733.1 | 3135739 | 2-scf00041 | 2 |
| AX-157936739 | 3 | 78.746 | KV452733.1 | 3136154 | 2-scf00041 | 2 |
| AX-157936742 | 3 | 78.746 | KV452733.1 | 3137975 | 2-scf00041 | 2 |
| AX-157936744 | 3 | 78.746 | KV452733.1 | 3138497 | 2-scf00041 | 2 |
| AX-157814420 | 3 | 78.746 | KV452733.1 | 3139805 | 2-scf00041 | 2 |
| AX-157936749 | 3 | 78.746 | KV452733.1 | 3141454 | 2-scf00041 | 2 |
| AX-157936756 | 3 | 78.746 | KV452733.1 | 3146642 | 2-scf00041 | 2 |
| AX-157936771 | 3 | 78.746 | KV452733.1 | 3171170 | 2-scf00041 | 2 |
| AX-157936774 | 3 | 78.746 | KV452733.1 | 3172125 | 2-scf00041 | 2 |
| AX-157883837 | 3 | 78.746 | KV452733.1 | 3172913 | 2-scf00041 | 2 |
| AX-157936778 | 3 | 78.746 | KV452733.1 | 3174612 | 2-scf00041 | 2 |
| AX-157854476 | 3 | 78.746 | KV452733.1 | 3174984 | 2-scf00041 | 2 |
| AX-158379365 | 3 | 78.746 | KV452733.1 | 3180815 | 2-scf00041 | 2 |
| AX-157936783 | 3 | 78.746 | KV452733.1 | 3182453 | 2-scf00041 | 2 |
| AX-157757910 | 3 | 78.746 | KV452733.1 | 3183076 | 2-scf00041 | 2 |
| AX-158405642 | 3 | 78.746 | KV452733.1 | 3183552 | 2-scf00041 | 2 |
| AX-157936784 | 3 | 78.746 | KV452733.1 | 3183668 | 2-scf00041 | 2 |
| AX-158405643 | 3 | 78.746 | KV452733.1 | 3185617 | 2-scf00041 | 2 |
| AX-157854478 | 3 | 78.746 | KV452733.1 | 3187607 | 2-scf00041 | 2 |
| AX-158421976 | 3 | 78.746 | KV452733.1 | 3189998 | 2-scf00041 | 2 |
| AX-157936788 | 3 | 78.746 | KV452733.1 | 3193606 | 2-scf00041 | 2 |

|              |   |        |            |         |            |   |
|--------------|---|--------|------------|---------|------------|---|
| AX-157936790 | 3 | 78.746 | KV452733.1 | 3195930 | 2-scf00041 | 2 |
| AX-157854480 | 3 | 78.746 | KV452733.1 | 3197328 | 2-scf00041 | 2 |
| AX-157936793 | 3 | 78.746 | KV452733.1 | 3201719 | 2-scf00041 | 2 |
| AX-157746024 | 3 | 78.746 | KV452733.1 | 3203073 | 2-scf00041 | 2 |
| AX-157854481 | 3 | 78.746 | KV452733.1 | 3203388 | 2-scf00041 | 2 |
| AX-157936796 | 3 | 78.746 | KV452733.1 | 3203677 | 2-scf00041 | 2 |
| AX-157936798 | 3 | 78.746 | KV452733.1 | 3203989 | 2-scf00041 | 2 |
| AX-157936799 | 3 | 78.746 | KV452733.1 | 3204950 | 2-scf00041 | 2 |
| AX-157854482 | 3 | 78.746 | KV452733.1 | 3205129 | 2-scf00041 | 2 |
| AX-157753366 | 3 | 78.746 | KV452733.1 | 3206928 | 2-scf00041 | 2 |
| AX-157936805 | 3 | 78.746 | KV452733.1 | 3208929 | 2-scf00041 | 2 |
| AX-157936807 | 3 | 78.746 | KV452733.1 | 3215194 | 2-scf00041 | 2 |
| AX-157936809 | 3 | 78.746 | KV452733.1 | 3216152 | 2-scf00041 | 2 |
| AX-157936810 | 3 | 78.746 | KV452733.1 | 3216935 | 2-scf00041 | 2 |
| AX-157936812 | 3 | 78.746 | KV452733.1 | 3217768 | 2-scf00041 | 2 |
| AX-157854483 | 3 | 78.746 | KV452733.1 | 3219249 | 2-scf00041 | 2 |
| AX-157936823 | 3 | 78.746 | KV452733.1 | 3226086 | 2-scf00041 | 2 |
| AX-157936824 | 3 | 78.746 | KV452733.1 | 3226722 | 2-scf00041 | 2 |
| AX-157936826 | 3 | 78.746 | KV452733.1 | 3228762 | 2-scf00041 | 2 |
| AX-157936827 | 3 | 78.746 | KV452733.1 | 3229353 | 2-scf00041 | 2 |
| AX-157936829 | 3 | 78.746 | KV452733.1 | 3230409 | 2-scf00041 | 2 |
| AX-157936831 | 3 | 78.746 | KV452733.1 | 3231182 | 2-scf00041 | 2 |
| AX-157936832 | 3 | 78.746 | KV452733.1 | 3232687 | 2-scf00041 | 2 |
| AX-157854484 | 3 | 78.746 | KV452733.1 | 3233471 | 2-scf00041 | 2 |
| AX-157854485 | 3 | 78.746 | KV452733.1 | 3235601 | 2-scf00041 | 2 |
| AX-157936837 | 3 | 78.746 | KV452733.1 | 3235737 | 2-scf00041 | 2 |
| AX-157936838 | 3 | 78.746 | KV452733.1 | 3240050 | 2-scf00041 | 2 |
| AX-157854486 | 3 | 78.746 | KV452733.1 | 3241673 | 2-scf00041 | 2 |
| AX-157936839 | 3 | 78.746 | KV452733.1 | 3241734 | 2-scf00041 | 2 |
| AX-158382565 | 3 | 78.746 | KV452733.1 | 3242782 | 2-scf00041 | 2 |
| AX-157936841 | 3 | 78.746 | KV452733.1 | 3243964 | 2-scf00041 | 2 |
| AX-157936842 | 3 | 78.746 | KV452733.1 | 3244986 | 2-scf00041 | 2 |
| AX-157936844 | 3 | 78.746 | KV452733.1 | 3245754 | 2-scf00041 | 2 |
| AX-157936847 | 3 | 78.746 | KV452733.1 | 3247748 | 2-scf00041 | 2 |
| AX-157936850 | 3 | 78.746 | KV452733.1 | 3248375 | 2-scf00041 | 2 |
| AX-157936852 | 3 | 78.746 | KV452733.1 | 3251123 | 2-scf00041 | 2 |
| AX-157936854 | 3 | 78.746 | KV452733.1 | 3256272 | 2-scf00041 | 2 |
| AX-157936857 | 3 | 78.746 | KV452733.1 | 3264596 | 2-scf00041 | 2 |
| AX-157936860 | 3 | 78.746 | KV452733.1 | 3266872 | 2-scf00041 | 2 |
| AX-157936862 | 3 | 78.746 | KV452733.1 | 3267416 | 2-scf00041 | 2 |
| AX-157708012 | 3 | 78.746 | KV452733.1 | 3268410 | 2-scf00041 | 2 |
| AX-157936867 | 3 | 78.746 | KV452733.1 | 3271951 | 2-scf00041 | 2 |
| AX-157936873 | 3 | 78.746 | KV452733.1 | 3276903 | 2-scf00041 | 2 |
| AX-157936875 | 3 | 78.746 | KV452733.1 | 3277550 | 2-scf00041 | 2 |
| AX-157936876 | 3 | 78.746 | KV452733.1 | 3278201 | 2-scf00041 | 2 |
| AX-157936878 | 3 | 78.746 | KV452733.1 | 3278845 | 2-scf00041 | 2 |
| AX-157936880 | 3 | 78.746 | KV452733.1 | 3282007 | 2-scf00041 | 2 |
| AX-157936882 | 3 | 78.746 | KV452733.1 | 3282227 | 2-scf00041 | 2 |
| AX-157936883 | 3 | 78.746 | KV452733.1 | 3283956 | 2-scf00041 | 2 |
| AX-157936885 | 3 | 78.746 | KV452733.1 | 3284278 | 2-scf00041 | 2 |
| AX-157936886 | 3 | 78.746 | KV452733.1 | 3287509 | 2-scf00041 | 2 |

|              |   |        |            |         |            |    |
|--------------|---|--------|------------|---------|------------|----|
| AX-157936887 | 3 | 78.746 | KV452733.1 | 3289294 | 2-scf00041 | 2  |
| AX-157936893 | 3 | 78.746 | KV452733.1 | 3299753 | 2-scf00041 | 2  |
| AX-157936897 | 3 | 78.746 | KV452733.1 | 3302012 | 2-scf00041 | 2  |
| AX-157936898 | 3 | 78.746 | KV452733.1 | 3303141 | 2-scf00041 | 2  |
| AX-157936904 | 3 | 78.746 | KV452733.1 | 3306412 | 2-scf00041 | 2  |
| AX-157936923 | 3 | 78.746 | KV452733.1 | 3316521 | 2-scf00041 | 2  |
| AX-157936931 | 3 | 78.746 | KV452733.1 | 3321391 | 2-scf00041 | 2  |
| AX-157936936 | 3 | 78.746 | KV452733.1 | 3327515 | 2-scf00041 | 2  |
| AX-157936937 | 3 | 78.746 | KV452733.1 | 3328904 | 2-scf00041 | 2  |
| AX-157936940 | 3 | 78.746 | KV452733.1 | 3330239 | 2-scf00041 | 2  |
| AX-157936946 | 3 | 78.746 | KV452733.1 | 3333763 | 2-scf00041 | 2  |
| AX-157936948 | 3 | 78.746 | KV452733.1 | 3334913 | 2-scf00041 | 2  |
| AX-157936949 | 3 | 78.746 | KV452733.1 | 3335432 | 2-scf00041 | 2  |
| AX-157936951 | 3 | 78.746 | KV452733.1 | 3336648 | 2-scf00041 | 2  |
| AX-157936955 | 3 | 78.746 | KV452733.1 | 3337867 | 2-scf00041 | 2  |
| AX-157936958 | 3 | 78.746 | KV452733.1 | 3339721 | 2-scf00041 | 2  |
| AX-157936960 | 3 | 78.746 | KV452733.1 | 3340483 | 2-scf00041 | 2  |
| AX-157936961 | 3 | 78.746 | KV452733.1 | 3340845 | 2-scf00041 | 2  |
| AX-157936965 | 3 | 78.746 | KV452733.1 | 3341772 | 2-scf00041 | 2  |
| AX-157775069 | 3 | 78.746 | KV452733.1 | 3341981 | 2-scf00041 | 2  |
| AX-157936967 | 3 | 78.746 | KV452733.1 | 3342517 | 2-scf00041 | 2  |
| AX-157936972 | 3 | 78.746 | KV452733.1 | 3344168 | 2-scf00041 | 2  |
| AX-157936974 | 3 | 78.746 | KV452733.1 | 3344724 | 2-scf00041 | 2  |
| AX-157936977 | 3 | 78.746 | KV452733.1 | 3347063 | 2-scf00041 | 2  |
| AX-157936979 | 3 | 78.746 | KV452733.1 | 3348298 | 2-scf00041 | 2  |
| AX-157936981 | 3 | 78.746 | KV452733.1 | 3349610 | 2-scf00041 | 2  |
| AX-157722090 | 3 | 78.746 | KV452733.1 | 3364086 | 2-scf00041 | 2  |
| AX-157937000 | 3 | 78.746 | KV452733.1 | 3366466 | 2-scf00041 | 2  |
| AX-157937002 | 3 | 78.746 | KV452733.1 | 3367630 | 2-scf00041 | 2  |
| AX-157937043 | 3 | 78.746 | KV452733.1 | 3403931 | 2-scf00041 | 2  |
| AX-157937044 | 3 | 78.746 | KV452733.1 | 3404988 | 2-scf00041 | 2  |
| AX-157937049 | 3 | 78.746 | KV452733.1 | 3412485 | 2-scf00041 | 2  |
| AX-157937056 | 3 | 78.746 | KV452733.1 | 3415347 | 2-scf00041 | 2  |
| AX-157937063 | 3 | 78.746 | KV452733.1 | 3419955 | 2-scf00041 | 2  |
| AX-157937068 | 3 | 78.746 | KV452733.1 | 3422517 | 2-scf00041 | 2  |
| AX-157883841 | 3 | 78.746 | KV452733.1 | 3426706 | 2-scf00041 | 2  |
| AX-157937099 | 3 | 78.746 | KV452733.1 | 3455841 | 2-scf00041 | 2  |
| AX-157854492 | 3 | 78.746 | KV452733.1 | 3456602 | 2-scf00041 | 2  |
| AX-157937105 | 3 | 78.746 | KV452733.1 | 3461339 | 2-scf00041 | 2  |
| AX-157938431 | 3 | 78.746 | KV452735.1 | 214753  | 2-scf00044 | 2  |
| AX-157939020 | 3 | 78.746 | KV452742.1 | 672912  | 2-scf00046 | 2  |
| AX-157943298 | 3 | 78.746 | KV452747.1 | 261140  | 2-scf00053 | 2  |
| AX-157815022 | 3 | 78.746 | KV452747.1 | 1387989 | 2-scf00053 | 2  |
| AX-157944438 | 3 | 78.746 | KV452747.1 | 1407070 | 2-scf00053 | 2  |
| AX-157689961 | 3 | 78.746 |            | 168     | scf16407   | UN |
| AX-157935749 | 3 | 78.856 | KV452733.1 | 2009093 | 2-scf00041 | 2  |
| AX-157936546 | 3 | 78.856 | KV452733.1 | 2922053 | 2-scf00041 | 2  |
| AX-157936579 | 3 | 78.856 | KV452733.1 | 2950761 | 2-scf00041 | 2  |
| AX-157936987 | 3 | 78.856 | KV452733.1 | 3357500 | 2-scf00041 | 2  |
| AX-157936994 | 3 | 78.856 | KV452733.1 | 3362171 | 2-scf00041 | 2  |
| AX-157937005 | 3 | 78.856 | KV452733.1 | 3369292 | 2-scf00041 | 2  |

|              |   |        |            |         |            |   |
|--------------|---|--------|------------|---------|------------|---|
| AX-157937006 | 3 | 78.856 | KV452733.1 | 3370006 | 2-scf00041 | 2 |
| AX-157937007 | 3 | 78.856 | KV452733.1 | 3371469 | 2-scf00041 | 2 |
| AX-157937008 | 3 | 78.856 | KV452733.1 | 3372520 | 2-scf00041 | 2 |
| AX-157715859 | 3 | 78.856 | KV452733.1 | 3372871 | 2-scf00041 | 2 |
| AX-158415044 | 3 | 78.856 | KV452733.1 | 3375114 | 2-scf00041 | 2 |
| AX-157937009 | 3 | 78.856 | KV452733.1 | 3375175 | 2-scf00041 | 2 |
| AX-157854489 | 3 | 78.856 | KV452733.1 | 3375759 | 2-scf00041 | 2 |
| AX-157937010 | 3 | 78.856 | KV452733.1 | 3376199 | 2-scf00041 | 2 |
| AX-157937017 | 3 | 78.856 | KV452733.1 | 3384307 | 2-scf00041 | 2 |
| AX-157937020 | 3 | 78.856 | KV452733.1 | 3386214 | 2-scf00041 | 2 |
| AX-157937022 | 3 | 78.856 | KV452733.1 | 3386977 | 2-scf00041 | 2 |
| AX-157755110 | 3 | 78.856 | KV452733.1 | 3393443 | 2-scf00041 | 2 |
| AX-157937037 | 3 | 78.856 | KV452733.1 | 3398468 | 2-scf00041 | 2 |
| AX-157741602 | 3 | 78.856 | KV452733.1 | 3399332 | 2-scf00041 | 2 |
| AX-157937040 | 3 | 78.856 | KV452733.1 | 3400431 | 2-scf00041 | 2 |
| AX-157937041 | 3 | 78.856 | KV452733.1 | 3400849 | 2-scf00041 | 2 |
| AX-157937045 | 3 | 78.856 | KV452733.1 | 3408083 | 2-scf00041 | 2 |
| AX-157937048 | 3 | 78.856 | KV452733.1 | 3409977 | 2-scf00041 | 2 |
| AX-157937053 | 3 | 78.856 | KV452733.1 | 3414309 | 2-scf00041 | 2 |
| AX-157937055 | 3 | 78.856 | KV452733.1 | 3414983 | 2-scf00041 | 2 |
| AX-157937062 | 3 | 78.856 | KV452733.1 | 3419274 | 2-scf00041 | 2 |
| AX-157937067 | 3 | 78.856 | KV452733.1 | 3421788 | 2-scf00041 | 2 |
| AX-157937070 | 3 | 78.856 | KV452733.1 | 3423397 | 2-scf00041 | 2 |
| AX-157937071 | 3 | 78.856 | KV452733.1 | 3424645 | 2-scf00041 | 2 |
| AX-157937073 | 3 | 78.856 | KV452733.1 | 3426138 | 2-scf00041 | 2 |
| AX-158405648 | 3 | 78.856 | KV452733.1 | 3427152 | 2-scf00041 | 2 |
| AX-158405649 | 3 | 78.856 | KV452733.1 | 3427258 | 2-scf00041 | 2 |
| AX-157757232 | 3 | 78.856 | KV452733.1 | 3438282 | 2-scf00041 | 2 |
| AX-158379366 | 3 | 78.856 | KV452733.1 | 3471234 | 2-scf00041 | 2 |
| AX-157937119 | 3 | 78.856 | KV452733.1 | 3473787 | 2-scf00041 | 2 |
| AX-157937157 | 3 | 78.856 | KV452733.1 | 3505665 | 2-scf00041 | 2 |
| AX-157937160 | 3 | 78.856 | KV452733.1 | 3506809 | 2-scf00041 | 2 |
| AX-157854494 | 3 | 78.856 | KV452733.1 | 3508027 | 2-scf00041 | 2 |
| AX-157937162 | 3 | 78.856 | KV452733.1 | 3509385 | 2-scf00041 | 2 |
| AX-157937165 | 3 | 78.856 | KV452733.1 | 3511411 | 2-scf00041 | 2 |
| AX-157937168 | 3 | 78.856 | KV452733.1 | 3513039 | 2-scf00041 | 2 |
| AX-157937169 | 3 | 78.856 | KV452733.1 | 3514398 | 2-scf00041 | 2 |
| AX-157937220 | 3 | 78.856 | KV452733.1 | 3563720 | 2-scf00041 | 2 |
| AX-157937254 | 3 | 78.856 | KV452733.1 | 3602978 | 2-scf00041 | 2 |
| AX-157937263 | 3 | 78.856 | KV452733.1 | 3614892 | 2-scf00041 | 2 |
| AX-157937264 | 3 | 78.856 | KV452733.1 | 3615949 | 2-scf00041 | 2 |
| AX-157937272 | 3 | 78.856 | KV452733.1 | 3630954 | 2-scf00041 | 2 |
| AX-157814454 | 3 | 78.856 | KV452733.1 | 3639482 | 2-scf00041 | 2 |
| AX-157937284 | 3 | 78.856 | KV452733.1 | 3642314 | 2-scf00041 | 2 |
| AX-157937295 | 3 | 78.856 | KV452733.1 | 3649563 | 2-scf00041 | 2 |
| AX-157937304 | 3 | 78.856 | KV452733.1 | 3661282 | 2-scf00041 | 2 |
| AX-157937308 | 3 | 78.856 | KV452733.1 | 3666491 | 2-scf00041 | 2 |
| AX-157938425 | 3 | 78.856 | KV452735.1 | 210939  | 2-scf00044 | 2 |
| AX-157682512 | 3 | 78.856 | KV452734.1 | 8002    | 2-scf00045 | 2 |
| AX-157938693 | 3 | 78.856 | KV452742.1 | 323554  | 2-scf00046 | 2 |
| AX-157938904 | 3 | 78.856 | KV452742.1 | 553003  | 2-scf00046 | 2 |



|              |   |        |             |         |            |    |
|--------------|---|--------|-------------|---------|------------|----|
| AX-157814725 | 3 | 78.856 | KV452742.1  | 3460301 | 2-scf00046 | 2  |
| AX-157934823 | 3 | 78.922 | KV452733.1  | 946921  | 2-scf00041 | 2  |
| AX-157937074 | 3 | 78.922 | KV452733.1  | 3427534 | 2-scf00041 | 2  |
| AX-157689884 | 3 | 78.922 |             | 111     | scf10483   | UN |
| AX-157937091 | 3 | 78.965 | KV452733.1  | 3442390 | 2-scf00041 | 2  |
| AX-157937095 | 3 | 78.965 | KV452733.1  | 3448224 | 2-scf00041 | 2  |
| AX-157814424 | 3 | 78.965 | KV452733.1  | 3450446 | 2-scf00041 | 2  |
| AX-157937098 | 3 | 78.965 | KV452733.1  | 3451299 | 2-scf00041 | 2  |
| AX-157743256 | 3 | 78.965 | KV452733.1  | 3452887 | 2-scf00041 | 2  |
| AX-157814426 | 3 | 78.965 | KV452733.1  | 3523930 | 2-scf00041 | 2  |
| AX-157814428 | 3 | 78.965 | KV452733.1  | 3525055 | 2-scf00041 | 2  |
| AX-157814430 | 3 | 78.965 | KV452733.1  | 3528168 | 2-scf00041 | 2  |
| AX-157937226 | 3 | 78.965 | KV452733.1  | 3570490 | 2-scf00041 | 2  |
| AX-157937245 | 3 | 78.965 | KV452733.1  | 3594213 | 2-scf00041 | 2  |
| AX-157937280 | 3 | 78.965 | KV452733.1  | 3638863 | 2-scf00041 | 2  |
| AX-157937283 | 3 | 78.965 | KV452733.1  | 3641817 | 2-scf00041 | 2  |
| AX-157937323 | 3 | 78.965 | KV452733.1  | 3695439 | 2-scf00041 | 2  |
| AX-157937336 | 3 | 78.965 | KV452733.1  | 3708248 | 2-scf00041 | 2  |
| AX-157937395 | 3 | 78.965 | KV452733.1  | 3779719 | 2-scf00041 | 2  |
| AX-157780263 | 3 | 78.965 | KV452735.1  | 94484   | 2-scf00044 | 2  |
| AX-157938357 | 3 | 78.965 | KV452735.1  | 106661  | 2-scf00044 | 2  |
| AX-157938359 | 3 | 78.965 | KV452735.1  | 107542  | 2-scf00044 | 2  |
| AX-157682507 | 3 | 78.965 | KV452734.1  | 5292    | 2-scf00045 | 2  |
| AX-157682515 | 3 | 78.965 | KV452734.1  | 12678   | 2-scf00045 | 2  |
| AX-157814562 | 3 | 78.965 | KV452742.1  | 121403  | 2-scf00046 | 2  |
| AX-157938737 | 3 | 78.965 | KV452742.1  | 398772  | 2-scf00046 | 2  |
| AX-157814603 | 3 | 78.965 | KV452742.1  | 458419  | 2-scf00046 | 2  |
| AX-157938966 | 3 | 78.965 | KV452742.1  | 614370  | 2-scf00046 | 2  |
| AX-157939175 | 3 | 78.965 | KV452742.1  | 1068021 | 2-scf00046 | 2  |
| AX-157939515 | 3 | 78.965 | KV452742.1  | 1486668 | 2-scf00046 | 2  |
| AX-157939545 | 3 | 78.965 | KV452742.1  | 1515446 | 2-scf00046 | 2  |
| AX-157814647 | 3 | 78.965 | KV452742.1  | 1548603 | 2-scf00046 | 2  |
| AX-157939778 | 3 | 78.965 | KV452742.1  | 2786751 | 2-scf00046 | 2  |
| AX-157854528 | 3 | 78.965 | KV452742.1  | 2794700 | 2-scf00046 | 2  |
| AX-158405744 | 3 | 78.965 | KV452742.1  | 2878788 | 2-scf00046 | 2  |
| AX-157814667 | 3 | 78.965 | KV452742.1  | 2892449 | 2-scf00046 | 2  |
| AX-157939864 | 3 | 78.965 | KV452742.1  | 2933951 | 2-scf00046 | 2  |
| AX-158390044 | 3 | 78.965 | KV452742.1  | 2941985 | 2-scf00046 | 2  |
| AX-157939886 | 3 | 78.965 | KV452742.1  | 2967705 | 2-scf00046 | 2  |
| AX-157939972 | 3 | 78.965 | KV452742.1  | 3043077 | 2-scf00046 | 2  |
| AX-157940195 | 3 | 78.965 | KV452742.1  | 3291067 | 2-scf00046 | 2  |
| AX-157682526 | 3 | 78.965 | KV452737.1  | 12511   | 2-scf00047 | 2  |
| AX-157682538 | 3 | 78.965 | KV452737.1  | 28426   | 2-scf00047 | 2  |
| AX-157945422 | 3 | 78.965 | KV452746.1  | 272511  | 2-scf00054 | 2  |
| AX-158420600 | 3 | 78.965 | KV452740.1  | 140166  | 2-scf00586 | 2  |
| AX-157685757 | 3 | 78.965 | KV452764.1  | 4804    | 2-scf00639 | 2  |
| AX-157685760 | 3 | 78.965 | KV452764.1  | 9835    | 2-scf00639 | 2  |
| AX-157705050 | 3 | 78.965 | 3ML01028415 | 492     | scf04022_1 | UN |
| AX-157937115 | 3 | 79.074 | KV452733.1  | 3469016 | 2-scf00041 | 2  |
| AX-157937127 | 3 | 79.074 | KV452733.1  | 3481904 | 2-scf00041 | 2  |
| AX-157937133 | 3 | 79.074 | KV452733.1  | 3486770 | 2-scf00041 | 2  |

|              |   |        |            |          |            |   |
|--------------|---|--------|------------|----------|------------|---|
| AX-157937138 | 3 | 79.074 | KV452733.1 | 3489053  | 2-scf00041 | 2 |
| AX-157755732 | 3 | 79.074 | KV452733.1 | 3489692  | 2-scf00041 | 2 |
| AX-157937141 | 3 | 79.074 | KV452733.1 | 3493260  | 2-scf00041 | 2 |
| AX-157937144 | 3 | 79.074 | KV452733.1 | 3494252  | 2-scf00041 | 2 |
| AX-157937149 | 3 | 79.074 | KV452733.1 | 3501077  | 2-scf00041 | 2 |
| AX-157937156 | 3 | 79.074 | KV452733.1 | 3505218  | 2-scf00041 | 2 |
| AX-157937219 | 3 | 79.074 | KV452733.1 | 3562531  | 2-scf00041 | 2 |
| AX-157937351 | 3 | 79.074 | KV452733.1 | 3723899  | 2-scf00041 | 2 |
| AX-157937353 | 3 | 79.074 | KV452733.1 | 3724387  | 2-scf00041 | 2 |
| AX-157937389 | 3 | 79.074 | KV452733.1 | 3770685  | 2-scf00041 | 2 |
| AX-157937396 | 3 | 79.074 | KV452733.1 | 3782072  | 2-scf00041 | 2 |
| AX-157937398 | 3 | 79.074 | KV452733.1 | 3782896  | 2-scf00041 | 2 |
| AX-157937403 | 3 | 79.074 | KV452733.1 | 3786250  | 2-scf00041 | 2 |
| AX-157937404 | 3 | 79.074 | KV452733.1 | 3786709  | 2-scf00041 | 2 |
| AX-157814530 | 3 | 79.074 | KV452735.1 | 29671    | 2-scf00044 | 2 |
| AX-157938393 | 3 | 79.074 | KV452735.1 | 142977   | 2-scf00044 | 2 |
| AX-157938394 | 3 | 79.074 | KV452735.1 | 143667   | 2-scf00044 | 2 |
| AX-157938396 | 3 | 79.074 | KV452735.1 | 145459   | 2-scf00044 | 2 |
| AX-157938397 | 3 | 79.074 | KV452735.1 | 146084   | 2-scf00044 | 2 |
| AX-157814600 | 3 | 79.074 | KV452742.1 | 388875   | 2-scf00046 | 2 |
| AX-157938729 | 3 | 79.074 | KV452742.1 | 389048   | 2-scf00046 | 2 |
| AX-157814601 | 3 | 79.074 | KV452742.1 | 389217   | 2-scf00046 | 2 |
| AX-158376457 | 3 | 79.074 | KV452740.1 | 129075   | 2-scf00586 | 2 |
| AX-158376459 | 3 | 79.074 | KV452740.1 | 129920   | 2-scf00586 | 2 |
| AX-158376466 | 3 | 79.074 | KV452740.1 | 138478   | 2-scf00586 | 2 |
| AX-157749082 | 3 | 79.074 | KV452740.1 | 140967   | 2-scf00586 | 2 |
| AX-158376509 | 3 | 79.074 | KV452740.1 | 245610   | 2-scf00586 | 2 |
| AX-158376510 | 3 | 79.074 | KV452740.1 | 247552   | 2-scf00586 | 2 |
| AX-157853324 | 3 | 79.074 | KV452740.1 | 254517   | 2-scf00586 | 2 |
| AX-158405651 | 3 | 79.292 | KV452733.1 | 3520236  | 2-scf00041 | 2 |
| AX-157937400 | 3 | 79.292 | KV452733.1 | 3785001  | 2-scf00041 | 2 |
| AX-157938615 | 3 | 79.292 | KV452742.1 | 206533   | 2-scf00046 | 2 |
| AX-157938644 | 3 | 79.292 | KV452742.1 | 242414   | 2-scf00046 | 2 |
| AX-157869452 | 3 | 79.292 | KV452742.1 | 243414   | 2-scf00046 | 2 |
| AX-157814582 | 3 | 79.292 | KV452742.1 | 271350   | 2-scf00046 | 2 |
| AX-158405722 | 3 | 79.292 | KV452742.1 | 491959   | 2-scf00046 | 2 |
| AX-157937179 | 3 | 79.293 | KV452733.1 | 3521024  | 2-scf00041 | 2 |
| AX-157753119 | 3 | 79.293 | KV452742.1 | 320495   | 2-scf00046 | 2 |
| AX-157937185 | 3 | 79.402 | KV452733.1 | 3530662  | 2-scf00041 | 2 |
| AX-157716250 | 3 | 79.402 | KV452733.1 | 3531742  | 2-scf00041 | 2 |
| AX-157937190 | 3 | 79.402 | KV452733.1 | 3533218  | 2-scf00041 | 2 |
| AX-157931394 | 3 | 79.511 | KV452730.1 | 10982369 | 2-scf00040 | 2 |
| AX-157932543 | 3 | 79.511 | KV452730.1 | 12359825 | 2-scf00040 | 2 |
| AX-157935028 | 3 | 79.511 | KV452733.1 | 1143589  | 2-scf00041 | 2 |
| AX-157935289 | 3 | 79.511 | KV452733.1 | 1421544  | 2-scf00041 | 2 |
| AX-157935298 | 3 | 79.511 | KV452733.1 | 1430400  | 2-scf00041 | 2 |
| AX-157935693 | 3 | 79.511 | KV452733.1 | 1901815  | 2-scf00041 | 2 |
| AX-157935998 | 3 | 79.511 | KV452733.1 | 2390109  | 2-scf00041 | 2 |
| AX-157814412 | 3 | 79.511 | KV452733.1 | 2984594  | 2-scf00041 | 2 |
| AX-157936624 | 3 | 79.511 | KV452733.1 | 3018338  | 2-scf00041 | 2 |
| AX-157936772 | 3 | 79.511 | KV452733.1 | 3171971  | 2-scf00041 | 2 |

|              |   |        |            |         |            |   |
|--------------|---|--------|------------|---------|------------|---|
| AX-157936820 | 3 | 79.511 | KV452733.1 | 3224712 | 2-scf00041 | 2 |
| AX-157749766 | 3 | 79.511 | KV452733.1 | 3242568 | 2-scf00041 | 2 |
| AX-157936905 | 3 | 79.511 | KV452733.1 | 3307194 | 2-scf00041 | 2 |
| AX-157937026 | 3 | 79.511 | KV452733.1 | 3389776 | 2-scf00041 | 2 |
| AX-157937114 | 3 | 79.511 | KV452733.1 | 3466746 | 2-scf00041 | 2 |
| AX-157814433 | 3 | 79.511 | KV452733.1 | 3537188 | 2-scf00041 | 2 |
| AX-157747104 | 3 | 79.511 | KV452733.1 | 3537309 | 2-scf00041 | 2 |
| AX-157714052 | 3 | 79.511 | KV452733.1 | 3540330 | 2-scf00041 | 2 |
| AX-157814435 | 3 | 79.511 | KV452733.1 | 3541488 | 2-scf00041 | 2 |
| AX-157937204 | 3 | 79.511 | KV452733.1 | 3548673 | 2-scf00041 | 2 |
| AX-157937212 | 3 | 79.511 | KV452733.1 | 3553684 | 2-scf00041 | 2 |
| AX-157937216 | 3 | 79.511 | KV452733.1 | 3559795 | 2-scf00041 | 2 |
| AX-157714938 | 3 | 79.511 | KV452733.1 | 3563201 | 2-scf00041 | 2 |
| AX-157937223 | 3 | 79.511 | KV452733.1 | 3565025 | 2-scf00041 | 2 |
| AX-157937224 | 3 | 79.511 | KV452733.1 | 3569930 | 2-scf00041 | 2 |
| AX-157937233 | 3 | 79.511 | KV452733.1 | 3582822 | 2-scf00041 | 2 |
| AX-157937252 | 3 | 79.511 | KV452733.1 | 3602369 | 2-scf00041 | 2 |
| AX-157937270 | 3 | 79.511 | KV452733.1 | 3625775 | 2-scf00041 | 2 |
| AX-157937282 | 3 | 79.511 | KV452733.1 | 3640261 | 2-scf00041 | 2 |
| AX-157937289 | 3 | 79.511 | KV452733.1 | 3645498 | 2-scf00041 | 2 |
| AX-157937297 | 3 | 79.511 | KV452733.1 | 3652630 | 2-scf00041 | 2 |
| AX-157937299 | 3 | 79.511 | KV452733.1 | 3653053 | 2-scf00041 | 2 |
| AX-157937300 | 3 | 79.511 | KV452733.1 | 3653461 | 2-scf00041 | 2 |
| AX-157814457 | 3 | 79.511 | KV452733.1 | 3654300 | 2-scf00041 | 2 |
| AX-157937301 | 3 | 79.511 | KV452733.1 | 3656484 | 2-scf00041 | 2 |
| AX-157814458 | 3 | 79.511 | KV452733.1 | 3656989 | 2-scf00041 | 2 |
| AX-157713085 | 3 | 79.511 | KV452733.1 | 3658294 | 2-scf00041 | 2 |
| AX-157937303 | 3 | 79.511 | KV452733.1 | 3660964 | 2-scf00041 | 2 |
| AX-157937305 | 3 | 79.511 | KV452733.1 | 3662667 | 2-scf00041 | 2 |
| AX-158405652 | 3 | 79.511 | KV452733.1 | 3665309 | 2-scf00041 | 2 |
| AX-157937310 | 3 | 79.511 | KV452733.1 | 3669225 | 2-scf00041 | 2 |
| AX-157937311 | 3 | 79.511 | KV452733.1 | 3673508 | 2-scf00041 | 2 |
| AX-157937314 | 3 | 79.511 | KV452733.1 | 3675100 | 2-scf00041 | 2 |
| AX-157937315 | 3 | 79.511 | KV452733.1 | 3681446 | 2-scf00041 | 2 |
| AX-157814461 | 3 | 79.511 | KV452733.1 | 3689147 | 2-scf00041 | 2 |
| AX-157937321 | 3 | 79.511 | KV452733.1 | 3694687 | 2-scf00041 | 2 |
| AX-157937327 | 3 | 79.511 | KV452733.1 | 3697842 | 2-scf00041 | 2 |
| AX-158390020 | 3 | 79.511 | KV452733.1 | 3704175 | 2-scf00041 | 2 |
| AX-157937335 | 3 | 79.511 | KV452733.1 | 3706697 | 2-scf00041 | 2 |
| AX-157937346 | 3 | 79.511 | KV452733.1 | 3715702 | 2-scf00041 | 2 |
| AX-157937355 | 3 | 79.511 | KV452733.1 | 3727510 | 2-scf00041 | 2 |
| AX-157937364 | 3 | 79.511 | KV452733.1 | 3732050 | 2-scf00041 | 2 |
| AX-157937366 | 3 | 79.511 | KV452733.1 | 3734735 | 2-scf00041 | 2 |
| AX-157937370 | 3 | 79.511 | KV452733.1 | 3737457 | 2-scf00041 | 2 |
| AX-157937372 | 3 | 79.511 | KV452733.1 | 3738996 | 2-scf00041 | 2 |
| AX-157937382 | 3 | 79.511 | KV452733.1 | 3760787 | 2-scf00041 | 2 |
| AX-157937383 | 3 | 79.511 | KV452733.1 | 3762376 | 2-scf00041 | 2 |
| AX-157937401 | 3 | 79.511 | KV452733.1 | 3785556 | 2-scf00041 | 2 |
| AX-157937405 | 3 | 79.511 | KV452733.1 | 3787854 | 2-scf00041 | 2 |
| AX-157937407 | 3 | 79.511 | KV452733.1 | 3796680 | 2-scf00041 | 2 |
| AX-157937408 | 3 | 79.511 | KV452733.1 | 3798367 | 2-scf00041 | 2 |

|              |   |        |            |         |            |   |
|--------------|---|--------|------------|---------|------------|---|
| AX-157937412 | 3 | 79.511 | KV452733.1 | 3799216 | 2-scf00041 | 2 |
| AX-157937414 | 3 | 79.511 | KV452733.1 | 3801361 | 2-scf00041 | 2 |
| AX-157937415 | 3 | 79.511 | KV452733.1 | 3801692 | 2-scf00041 | 2 |
| AX-157708619 | 3 | 79.511 | KV452733.1 | 3802216 | 2-scf00041 | 2 |
| AX-157708618 | 3 | 79.511 | KV452733.1 | 3802342 | 2-scf00041 | 2 |
| AX-157937416 | 3 | 79.511 | KV452733.1 | 3802607 | 2-scf00041 | 2 |
| AX-157937417 | 3 | 79.511 | KV452733.1 | 3803958 | 2-scf00041 | 2 |
| AX-157937418 | 3 | 79.511 | KV452733.1 | 3804333 | 2-scf00041 | 2 |
| AX-157937419 | 3 | 79.511 | KV452733.1 | 3805177 | 2-scf00041 | 2 |
| AX-157937420 | 3 | 79.511 | KV452733.1 | 3807223 | 2-scf00041 | 2 |
| AX-157937421 | 3 | 79.511 | KV452733.1 | 3807606 | 2-scf00041 | 2 |
| AX-157937422 | 3 | 79.511 | KV452733.1 | 3811380 | 2-scf00041 | 2 |
| AX-157937424 | 3 | 79.511 | KV452733.1 | 3814031 | 2-scf00041 | 2 |
| AX-157937426 | 3 | 79.511 | KV452733.1 | 3814682 | 2-scf00041 | 2 |
| AX-157883845 | 3 | 79.511 | KV452733.1 | 3814894 | 2-scf00041 | 2 |
| AX-157937427 | 3 | 79.511 | KV452733.1 | 3816311 | 2-scf00041 | 2 |
| AX-157937428 | 3 | 79.511 | KV452733.1 | 3817482 | 2-scf00041 | 2 |
| AX-157937432 | 3 | 79.511 | KV452733.1 | 3864277 | 2-scf00041 | 2 |
| AX-157937433 | 3 | 79.511 | KV452733.1 | 3865450 | 2-scf00041 | 2 |
| AX-157937434 | 3 | 79.511 | KV452733.1 | 3868930 | 2-scf00041 | 2 |
| AX-157937439 | 3 | 79.511 | KV452733.1 | 3876162 | 2-scf00041 | 2 |
| AX-157937443 | 3 | 79.511 | KV452733.1 | 3880715 | 2-scf00041 | 2 |
| AX-157937544 | 3 | 79.511 | KV452732.1 | 282913  | 2-scf00042 | 2 |
| AX-157937614 | 3 | 79.511 | KV452732.1 | 404300  | 2-scf00042 | 2 |
| AX-157937796 | 3 | 79.511 | KV452732.1 | 773907  | 2-scf00042 | 2 |
| AX-157937847 | 3 | 79.511 | KV452732.1 | 841111  | 2-scf00042 | 2 |
| AX-157938220 | 3 | 79.511 | KV452732.1 | 1499855 | 2-scf00042 | 2 |
| AX-157772830 | 3 | 79.511 | KV452735.1 | 31460   | 2-scf00044 | 2 |
| AX-157744120 | 3 | 79.511 | KV452735.1 | 32335   | 2-scf00044 | 2 |
| AX-157938280 | 3 | 79.511 | KV452735.1 | 36312   | 2-scf00044 | 2 |
| AX-157938290 | 3 | 79.511 | KV452735.1 | 45918   | 2-scf00044 | 2 |
| AX-158390028 | 3 | 79.511 | KV452735.1 | 49370   | 2-scf00044 | 2 |
| AX-157938294 | 3 | 79.511 | KV452735.1 | 54813   | 2-scf00044 | 2 |
| AX-157814535 | 3 | 79.511 | KV452735.1 | 56026   | 2-scf00044 | 2 |
| AX-157938298 | 3 | 79.511 | KV452735.1 | 57489   | 2-scf00044 | 2 |
| AX-157938303 | 3 | 79.511 | KV452735.1 | 59214   | 2-scf00044 | 2 |
| AX-157938304 | 3 | 79.511 | KV452735.1 | 60394   | 2-scf00044 | 2 |
| AX-157938315 | 3 | 79.511 | KV452735.1 | 67756   | 2-scf00044 | 2 |
| AX-157938316 | 3 | 79.511 | KV452735.1 | 68274   | 2-scf00044 | 2 |
| AX-157938318 | 3 | 79.511 | KV452735.1 | 69542   | 2-scf00044 | 2 |
| AX-157938320 | 3 | 79.511 | KV452735.1 | 72654   | 2-scf00044 | 2 |
| AX-157938323 | 3 | 79.511 | KV452735.1 | 74957   | 2-scf00044 | 2 |
| AX-157938325 | 3 | 79.511 | KV452735.1 | 77215   | 2-scf00044 | 2 |
| AX-157814537 | 3 | 79.511 | KV452735.1 | 77622   | 2-scf00044 | 2 |
| AX-157938334 | 3 | 79.511 | KV452735.1 | 82727   | 2-scf00044 | 2 |
| AX-157938337 | 3 | 79.511 | KV452735.1 | 84227   | 2-scf00044 | 2 |
| AX-157814538 | 3 | 79.511 | KV452735.1 | 86830   | 2-scf00044 | 2 |
| AX-157938341 | 3 | 79.511 | KV452735.1 | 87174   | 2-scf00044 | 2 |
| AX-157814539 | 3 | 79.511 | KV452735.1 | 89876   | 2-scf00044 | 2 |
| AX-157938344 | 3 | 79.511 | KV452735.1 | 90083   | 2-scf00044 | 2 |
| AX-157938350 | 3 | 79.511 | KV452735.1 | 100086  | 2-scf00044 | 2 |

|              |   |        |            |        |            |   |
|--------------|---|--------|------------|--------|------------|---|
| AX-157938355 | 3 | 79.511 | KV452735.1 | 106365 | 2-scf00044 | 2 |
| AX-157938360 | 3 | 79.511 | KV452735.1 | 107954 | 2-scf00044 | 2 |
| AX-157938362 | 3 | 79.511 | KV452735.1 | 109791 | 2-scf00044 | 2 |
| AX-157938363 | 3 | 79.511 | KV452735.1 | 110080 | 2-scf00044 | 2 |
| AX-157938367 | 3 | 79.511 | KV452735.1 | 113279 | 2-scf00044 | 2 |
| AX-157938368 | 3 | 79.511 | KV452735.1 | 113745 | 2-scf00044 | 2 |
| AX-157938370 | 3 | 79.511 | KV452735.1 | 113973 | 2-scf00044 | 2 |
| AX-157938372 | 3 | 79.511 | KV452735.1 | 114348 | 2-scf00044 | 2 |
| AX-157938373 | 3 | 79.511 | KV452735.1 | 114812 | 2-scf00044 | 2 |
| AX-157814541 | 3 | 79.511 | KV452735.1 | 118628 | 2-scf00044 | 2 |
| AX-157938383 | 3 | 79.511 | KV452735.1 | 127102 | 2-scf00044 | 2 |
| AX-157938386 | 3 | 79.511 | KV452735.1 | 131060 | 2-scf00044 | 2 |
| AX-157938390 | 3 | 79.511 | KV452735.1 | 131687 | 2-scf00044 | 2 |
| AX-157938391 | 3 | 79.511 | KV452735.1 | 132947 | 2-scf00044 | 2 |
| AX-157814545 | 3 | 79.511 | KV452735.1 | 138229 | 2-scf00044 | 2 |
| AX-157814547 | 3 | 79.511 | KV452735.1 | 139863 | 2-scf00044 | 2 |
| AX-157814548 | 3 | 79.511 | KV452735.1 | 140084 | 2-scf00044 | 2 |
| AX-157814549 | 3 | 79.511 | KV452735.1 | 140488 | 2-scf00044 | 2 |
| AX-157938399 | 3 | 79.511 | KV452735.1 | 147551 | 2-scf00044 | 2 |
| AX-157938422 | 3 | 79.511 | KV452735.1 | 210313 | 2-scf00044 | 2 |
| AX-157726532 | 3 | 79.511 | KV452735.1 | 212570 | 2-scf00044 | 2 |
| AX-157814550 | 3 | 79.511 | KV452735.1 | 212980 | 2-scf00044 | 2 |
| AX-157938427 | 3 | 79.511 | KV452735.1 | 213486 | 2-scf00044 | 2 |
| AX-157938436 | 3 | 79.511 | KV452735.1 | 228015 | 2-scf00044 | 2 |
| AX-157938441 | 3 | 79.511 | KV452735.1 | 231348 | 2-scf00044 | 2 |
| AX-157938442 | 3 | 79.511 | KV452735.1 | 232283 | 2-scf00044 | 2 |
| AX-157938446 | 3 | 79.511 | KV452735.1 | 233294 | 2-scf00044 | 2 |
| AX-157938450 | 3 | 79.511 | KV452735.1 | 237168 | 2-scf00044 | 2 |
| AX-157938451 | 3 | 79.511 | KV452735.1 | 237615 | 2-scf00044 | 2 |
| AX-157938453 | 3 | 79.511 | KV452735.1 | 241481 | 2-scf00044 | 2 |
| AX-157938461 | 3 | 79.511 | KV452735.1 | 256275 | 2-scf00044 | 2 |
| AX-157938464 | 3 | 79.511 | KV452735.1 | 260493 | 2-scf00044 | 2 |
| AX-157938466 | 3 | 79.511 | KV452742.1 | 19694  | 2-scf00046 | 2 |
| AX-157938476 | 3 | 79.511 | KV452742.1 | 41344  | 2-scf00046 | 2 |
| AX-157938486 | 3 | 79.511 | KV452742.1 | 48289  | 2-scf00046 | 2 |
| AX-157938555 | 3 | 79.511 | KV452742.1 | 144028 | 2-scf00046 | 2 |
| AX-157938589 | 3 | 79.511 | KV452742.1 | 177728 | 2-scf00046 | 2 |
| AX-157938592 | 3 | 79.511 | KV452742.1 | 184529 | 2-scf00046 | 2 |
| AX-157938676 | 3 | 79.511 | KV452742.1 | 293701 | 2-scf00046 | 2 |
| AX-157938685 | 3 | 79.511 | KV452742.1 | 303273 | 2-scf00046 | 2 |
| AX-157938692 | 3 | 79.511 | KV452742.1 | 316240 | 2-scf00046 | 2 |
| AX-157938718 | 3 | 79.511 | KV452742.1 | 366322 | 2-scf00046 | 2 |
| AX-157715303 | 3 | 79.511 | KV452742.1 | 373903 | 2-scf00046 | 2 |
| AX-157938774 | 3 | 79.511 | KV452742.1 | 432096 | 2-scf00046 | 2 |
| AX-157938780 | 3 | 79.511 | KV452742.1 | 437193 | 2-scf00046 | 2 |
| AX-157938798 | 3 | 79.511 | KV452742.1 | 449568 | 2-scf00046 | 2 |
| AX-157938809 | 3 | 79.511 | KV452742.1 | 459248 | 2-scf00046 | 2 |
| AX-157883862 | 3 | 79.511 | KV452742.1 | 483484 | 2-scf00046 | 2 |
| AX-157938831 | 3 | 79.511 | KV452742.1 | 485741 | 2-scf00046 | 2 |
| AX-157938934 | 3 | 79.511 | KV452742.1 | 575963 | 2-scf00046 | 2 |
| AX-157939091 | 3 | 79.511 | KV452742.1 | 811952 | 2-scf00046 | 2 |

|              |   |        |             |         |            |    |
|--------------|---|--------|-------------|---------|------------|----|
| AX-157939153 | 3 | 79.511 | KV452742.1  | 976221  | 2-scf00046 | 2  |
| AX-157939325 | 3 | 79.511 | KV452742.1  | 1295633 | 2-scf00046 | 2  |
| AX-157939738 | 3 | 79.511 | KV452742.1  | 2611485 | 2-scf00046 | 2  |
| AX-157869455 | 3 | 79.511 | KV452742.1  | 3015743 | 2-scf00046 | 2  |
| AX-157940071 | 3 | 79.511 | KV452742.1  | 3147988 | 2-scf00046 | 2  |
| AX-157753433 | 3 | 79.511 | KV452742.1  | 3535613 | 2-scf00046 | 2  |
| AX-157680197 | 3 | 79.511 | KV452737.1  | 34392   | 2-scf00047 | 2  |
| AX-157943002 | 3 | 79.511 | KV452744.1  | 91199   | 2-scf00052 | 2  |
| AX-157943008 | 3 | 79.511 | KV452744.1  | 96621   | 2-scf00052 | 2  |
| AX-157943260 | 3 | 79.511 | KV452747.1  | 221526  | 2-scf00053 | 2  |
| AX-157943295 | 3 | 79.511 | KV452747.1  | 254657  | 2-scf00053 | 2  |
| AX-157944344 | 3 | 79.511 | KV452747.1  | 1327732 | 2-scf00053 | 2  |
| AX-157945364 | 3 | 79.511 | KV452746.1  | 217391  | 2-scf00054 | 2  |
| AX-157945683 | 3 | 79.511 | KV452746.1  | 576326  | 2-scf00054 | 2  |
| AX-157772882 | 3 | 79.511 | KV452740.1  | 118783  | 2-scf00586 | 2  |
| AX-158376458 | 3 | 79.511 | KV452740.1  | 129330  | 2-scf00586 | 2  |
| AX-158376462 | 3 | 79.511 | KV452740.1  | 132186  | 2-scf00586 | 2  |
| AX-158376513 | 3 | 79.511 | KV452740.1  | 248881  | 2-scf00586 | 2  |
| AX-158376515 | 3 | 79.511 | KV452740.1  | 249600  | 2-scf00586 | 2  |
| AX-158376517 | 3 | 79.511 | KV452740.1  | 255805  | 2-scf00586 | 2  |
| AX-158376518 | 3 | 79.511 | KV452740.1  | 256971  | 2-scf00586 | 2  |
| AX-158376519 | 3 | 79.511 | KV452740.1  | 258117  | 2-scf00586 | 2  |
| AX-158376520 | 3 | 79.511 | KV452740.1  | 259100  | 2-scf00586 | 2  |
| AX-157771061 | 3 | 79.511 | KV452740.1  | 261636  | 2-scf00586 | 2  |
| AX-157853325 | 3 | 79.511 | KV452740.1  | 262084  | 2-scf00586 | 2  |
| AX-158376521 | 3 | 79.511 | KV452740.1  | 262373  | 2-scf00586 | 2  |
| AX-158376522 | 3 | 79.511 | KV452740.1  | 263123  | 2-scf00586 | 2  |
| AX-158376523 | 3 | 79.511 | KV452740.1  | 263655  | 2-scf00586 | 2  |
| AX-157749390 | 3 | 79.511 | KV452740.1  | 264023  | 2-scf00586 | 2  |
| AX-158376525 | 3 | 79.511 | KV452740.1  | 268823  | 2-scf00586 | 2  |
| AX-157853329 | 3 | 79.511 | KV452740.1  | 270553  | 2-scf00586 | 2  |
| AX-158376528 | 3 | 79.511 | KV452740.1  | 275739  | 2-scf00586 | 2  |
| AX-158376530 | 3 | 79.511 | KV452740.1  | 276955  | 2-scf00586 | 2  |
| AX-158376531 | 3 | 79.511 | KV452740.1  | 277452  | 2-scf00586 | 2  |
| AX-158376533 | 3 | 79.511 | KV452740.1  | 280640  | 2-scf00586 | 2  |
| AX-157770867 | 3 | 79.511 | KV452740.1  | 282409  | 2-scf00586 | 2  |
| AX-158376534 | 3 | 79.511 | KV452740.1  | 282806  | 2-scf00586 | 2  |
| AX-158376535 | 3 | 79.511 | KV452740.1  | 283627  | 2-scf00586 | 2  |
| AX-157685764 | 3 | 79.511 | KV452764.1  | 15356   | 2-scf00639 | 2  |
| AX-157686776 | 3 | 79.511 | KV452741.1  | 35497   | 2-scf00732 | 2  |
| AX-157694834 | 3 | 79.511 | KV452738.1  | 10732   | 2-scf00933 | 2  |
| AX-157688581 | 3 | 79.511 | 3ML01026492 | 1735    | scf02089_1 | UN |
| AX-157708065 | 3 | 79.511 |             | 335     | scf11527   | UN |
| AX-157937027 | 3 | 79.554 | KV452733.1  | 3389982 | 2-scf00041 | 2  |
| AX-157937089 | 3 | 79.554 | KV452733.1  | 3437630 | 2-scf00041 | 2  |
| AX-157814555 | 3 | 79.554 | KV452742.1  | 103523  | 2-scf00046 | 2  |
| AX-158405709 | 3 | 79.567 | KV452742.1  | 107290  | 2-scf00046 | 2  |
| AX-157930158 | 3 | 79.62  | KV452730.1  | 9383778 | 2-scf00040 | 2  |
| AX-157854460 | 3 | 79.62  | KV452733.1  | 1400088 | 2-scf00041 | 2  |
| AX-157935935 | 3 | 79.62  | KV452733.1  | 2326668 | 2-scf00041 | 2  |
| AX-157725679 | 3 | 79.62  | KV452733.1  | 2657599 | 2-scf00041 | 2  |

|              |   |       |            |         |            |   |
|--------------|---|-------|------------|---------|------------|---|
| AX-157936555 | 3 | 79.62 | KV452733.1 | 2930778 | 2-scf00041 | 2 |
| AX-157937312 | 3 | 79.62 | KV452733.1 | 3674741 | 2-scf00041 | 2 |
| AX-157814459 | 3 | 79.62 | KV452733.1 | 3680468 | 2-scf00041 | 2 |
| AX-157937344 | 3 | 79.62 | KV452733.1 | 3715334 | 2-scf00041 | 2 |
| AX-157937352 | 3 | 79.62 | KV452733.1 | 3724176 | 2-scf00041 | 2 |
| AX-157937447 | 3 | 79.62 | KV452733.1 | 3885674 | 2-scf00041 | 2 |
| AX-157938505 | 3 | 79.62 | KV452742.1 | 91630   | 2-scf00046 | 2 |
| AX-157938509 | 3 | 79.62 | KV452742.1 | 97140   | 2-scf00046 | 2 |
| AX-157938513 | 3 | 79.62 | KV452742.1 | 99907   | 2-scf00046 | 2 |
| AX-157814557 | 3 | 79.62 | KV452742.1 | 108884  | 2-scf00046 | 2 |
| AX-157814559 | 3 | 79.62 | KV452742.1 | 109527  | 2-scf00046 | 2 |
| AX-157938521 | 3 | 79.62 | KV452742.1 | 113781  | 2-scf00046 | 2 |
| AX-157938525 | 3 | 79.62 | KV452742.1 | 116684  | 2-scf00046 | 2 |
| AX-157714628 | 3 | 79.62 | KV452742.1 | 118528  | 2-scf00046 | 2 |
| AX-157938527 | 3 | 79.62 | KV452742.1 | 118931  | 2-scf00046 | 2 |
| AX-157938538 | 3 | 79.62 | KV452742.1 | 126592  | 2-scf00046 | 2 |
| AX-157938540 | 3 | 79.62 | KV452742.1 | 127235  | 2-scf00046 | 2 |
| AX-157938542 | 3 | 79.62 | KV452742.1 | 127489  | 2-scf00046 | 2 |
| AX-157938544 | 3 | 79.62 | KV452742.1 | 128059  | 2-scf00046 | 2 |
| AX-157746324 | 3 | 79.62 | KV452742.1 | 131405  | 2-scf00046 | 2 |
| AX-157814564 | 3 | 79.62 | KV452742.1 | 131493  | 2-scf00046 | 2 |
| AX-157938546 | 3 | 79.62 | KV452742.1 | 132493  | 2-scf00046 | 2 |
| AX-157814566 | 3 | 79.62 | KV452742.1 | 141651  | 2-scf00046 | 2 |
| AX-157938563 | 3 | 79.62 | KV452742.1 | 150198  | 2-scf00046 | 2 |
| AX-157938573 | 3 | 79.62 | KV452742.1 | 164813  | 2-scf00046 | 2 |
| AX-158390031 | 3 | 79.62 | KV452742.1 | 165414  | 2-scf00046 | 2 |
| AX-157938579 | 3 | 79.62 | KV452742.1 | 167178  | 2-scf00046 | 2 |
| AX-157723133 | 3 | 79.62 | KV452742.1 | 169918  | 2-scf00046 | 2 |
| AX-157938581 | 3 | 79.62 | KV452742.1 | 172085  | 2-scf00046 | 2 |
| AX-157938590 | 3 | 79.62 | KV452742.1 | 178386  | 2-scf00046 | 2 |
| AX-158405712 | 3 | 79.62 | KV452742.1 | 190281  | 2-scf00046 | 2 |
| AX-157938595 | 3 | 79.62 | KV452742.1 | 190851  | 2-scf00046 | 2 |
| AX-157938602 | 3 | 79.62 | KV452742.1 | 200823  | 2-scf00046 | 2 |
| AX-157938604 | 3 | 79.62 | KV452742.1 | 201380  | 2-scf00046 | 2 |
| AX-157938613 | 3 | 79.62 | KV452742.1 | 205818  | 2-scf00046 | 2 |
| AX-157938618 | 3 | 79.62 | KV452742.1 | 207411  | 2-scf00046 | 2 |
| AX-157938622 | 3 | 79.62 | KV452742.1 | 209192  | 2-scf00046 | 2 |
| AX-157938626 | 3 | 79.62 | KV452742.1 | 217665  | 2-scf00046 | 2 |
| AX-157938634 | 3 | 79.62 | KV452742.1 | 223390  | 2-scf00046 | 2 |
| AX-158390032 | 3 | 79.62 | KV452742.1 | 233282  | 2-scf00046 | 2 |
| AX-157938647 | 3 | 79.62 | KV452742.1 | 244132  | 2-scf00046 | 2 |
| AX-157938648 | 3 | 79.62 | KV452742.1 | 249597  | 2-scf00046 | 2 |
| AX-157938649 | 3 | 79.62 | KV452742.1 | 252389  | 2-scf00046 | 2 |
| AX-157938667 | 3 | 79.62 | KV452742.1 | 287810  | 2-scf00046 | 2 |
| AX-157938669 | 3 | 79.62 | KV452742.1 | 288677  | 2-scf00046 | 2 |
| AX-157938671 | 3 | 79.62 | KV452742.1 | 289316  | 2-scf00046 | 2 |
| AX-157814585 | 3 | 79.62 | KV452742.1 | 289867  | 2-scf00046 | 2 |
| AX-157938674 | 3 | 79.62 | KV452742.1 | 292040  | 2-scf00046 | 2 |
| AX-157938678 | 3 | 79.62 | KV452742.1 | 297766  | 2-scf00046 | 2 |
| AX-157883861 | 3 | 79.62 | KV452742.1 | 299719  | 2-scf00046 | 2 |
| AX-157938682 | 3 | 79.62 | KV452742.1 | 300287  | 2-scf00046 | 2 |

|              |   |       |            |        |            |   |
|--------------|---|-------|------------|--------|------------|---|
| AX-157938689 | 3 | 79.62 | KV452742.1 | 309807 | 2-scf00046 | 2 |
| AX-157735086 | 3 | 79.62 | KV452742.1 | 312784 | 2-scf00046 | 2 |
| AX-157780290 | 3 | 79.62 | KV452742.1 | 313986 | 2-scf00046 | 2 |
| AX-157938690 | 3 | 79.62 | KV452742.1 | 315117 | 2-scf00046 | 2 |
| AX-157814587 | 3 | 79.62 | KV452742.1 | 315322 | 2-scf00046 | 2 |
| AX-157814588 | 3 | 79.62 | KV452742.1 | 317517 | 2-scf00046 | 2 |
| AX-158405717 | 3 | 79.62 | KV452742.1 | 325097 | 2-scf00046 | 2 |
| AX-157938695 | 3 | 79.62 | KV452742.1 | 325574 | 2-scf00046 | 2 |
| AX-157938701 | 3 | 79.62 | KV452742.1 | 328422 | 2-scf00046 | 2 |
| AX-157938703 | 3 | 79.62 | KV452742.1 | 328720 | 2-scf00046 | 2 |
| AX-157938705 | 3 | 79.62 | KV452742.1 | 330288 | 2-scf00046 | 2 |
| AX-157938710 | 3 | 79.62 | KV452742.1 | 337290 | 2-scf00046 | 2 |
| AX-157938711 | 3 | 79.62 | KV452742.1 | 340094 | 2-scf00046 | 2 |
| AX-157938712 | 3 | 79.62 | KV452742.1 | 342700 | 2-scf00046 | 2 |
| AX-157814593 | 3 | 79.62 | KV452742.1 | 343239 | 2-scf00046 | 2 |
| AX-157938714 | 3 | 79.62 | KV452742.1 | 357962 | 2-scf00046 | 2 |
| AX-157938717 | 3 | 79.62 | KV452742.1 | 361718 | 2-scf00046 | 2 |
| AX-158405719 | 3 | 79.62 | KV452742.1 | 389847 | 2-scf00046 | 2 |
| AX-157938733 | 3 | 79.62 | KV452742.1 | 393112 | 2-scf00046 | 2 |
| AX-158390034 | 3 | 79.62 | KV452742.1 | 410859 | 2-scf00046 | 2 |
| AX-157938760 | 3 | 79.62 | KV452742.1 | 417910 | 2-scf00046 | 2 |
| AX-157938765 | 3 | 79.62 | KV452742.1 | 423455 | 2-scf00046 | 2 |
| AX-157938770 | 3 | 79.62 | KV452742.1 | 426908 | 2-scf00046 | 2 |
| AX-157938778 | 3 | 79.62 | KV452742.1 | 435965 | 2-scf00046 | 2 |
| AX-157938783 | 3 | 79.62 | KV452742.1 | 437908 | 2-scf00046 | 2 |
| AX-157938789 | 3 | 79.62 | KV452742.1 | 441064 | 2-scf00046 | 2 |
| AX-157938792 | 3 | 79.62 | KV452742.1 | 443686 | 2-scf00046 | 2 |
| AX-157938794 | 3 | 79.62 | KV452742.1 | 446984 | 2-scf00046 | 2 |
| AX-157938796 | 3 | 79.62 | KV452742.1 | 447586 | 2-scf00046 | 2 |
| AX-157938797 | 3 | 79.62 | KV452742.1 | 449318 | 2-scf00046 | 2 |
| AX-157938800 | 3 | 79.62 | KV452742.1 | 451036 | 2-scf00046 | 2 |
| AX-157938802 | 3 | 79.62 | KV452742.1 | 451804 | 2-scf00046 | 2 |
| AX-157938806 | 3 | 79.62 | KV452742.1 | 455474 | 2-scf00046 | 2 |
| AX-157938807 | 3 | 79.62 | KV452742.1 | 457332 | 2-scf00046 | 2 |
| AX-157938810 | 3 | 79.62 | KV452742.1 | 460558 | 2-scf00046 | 2 |
| AX-157938812 | 3 | 79.62 | KV452742.1 | 463006 | 2-scf00046 | 2 |
| AX-157938822 | 3 | 79.62 | KV452742.1 | 476785 | 2-scf00046 | 2 |
| AX-157938824 | 3 | 79.62 | KV452742.1 | 480401 | 2-scf00046 | 2 |
| AX-157938835 | 3 | 79.62 | KV452742.1 | 488435 | 2-scf00046 | 2 |
| AX-157938838 | 3 | 79.62 | KV452742.1 | 490805 | 2-scf00046 | 2 |
| AX-157814606 | 3 | 79.62 | KV452742.1 | 493534 | 2-scf00046 | 2 |
| AX-157938841 | 3 | 79.62 | KV452742.1 | 494843 | 2-scf00046 | 2 |
| AX-157938844 | 3 | 79.62 | KV452742.1 | 495435 | 2-scf00046 | 2 |
| AX-157938845 | 3 | 79.62 | KV452742.1 | 495885 | 2-scf00046 | 2 |
| AX-157938850 | 3 | 79.62 | KV452742.1 | 497247 | 2-scf00046 | 2 |
| AX-157814610 | 3 | 79.62 | KV452742.1 | 504940 | 2-scf00046 | 2 |
| AX-157938862 | 3 | 79.62 | KV452742.1 | 508151 | 2-scf00046 | 2 |
| AX-157938867 | 3 | 79.62 | KV452742.1 | 512811 | 2-scf00046 | 2 |
| AX-157938870 | 3 | 79.62 | KV452742.1 | 515921 | 2-scf00046 | 2 |
| AX-157938873 | 3 | 79.62 | KV452742.1 | 518473 | 2-scf00046 | 2 |
| AX-157938876 | 3 | 79.62 | KV452742.1 | 519391 | 2-scf00046 | 2 |



|              |   |        |            |         |            |   |
|--------------|---|--------|------------|---------|------------|---|
| AX-157938877 | 3 | 79.62  | KV452742.1 | 519784  | 2-scf00046 | 2 |
| AX-157938880 | 3 | 79.62  | KV452742.1 | 522081  | 2-scf00046 | 2 |
| AX-157938881 | 3 | 79.62  | KV452742.1 | 522626  | 2-scf00046 | 2 |
| AX-157755640 | 3 | 79.62  | KV452742.1 | 544056  | 2-scf00046 | 2 |
| AX-157938893 | 3 | 79.62  | KV452742.1 | 544980  | 2-scf00046 | 2 |
| AX-157938898 | 3 | 79.62  | KV452742.1 | 546511  | 2-scf00046 | 2 |
| AX-157938912 | 3 | 79.62  | KV452742.1 | 557328  | 2-scf00046 | 2 |
| AX-157938938 | 3 | 79.62  | KV452742.1 | 580784  | 2-scf00046 | 2 |
| AX-157938969 | 3 | 79.62  | KV452742.1 | 615464  | 2-scf00046 | 2 |
| AX-157939012 | 3 | 79.62  | KV452742.1 | 662926  | 2-scf00046 | 2 |
| AX-157719209 | 3 | 79.62  | KV452742.1 | 4032551 | 2-scf00046 | 2 |
| AX-157943149 | 3 | 79.62  | KV452747.1 | 96790   | 2-scf00053 | 2 |
| AX-157945712 | 3 | 79.62  | KV452746.1 | 614894  | 2-scf00054 | 2 |
| AX-157938882 | 3 | 79.693 | KV452742.1 | 525759  | 2-scf00046 | 2 |
| AX-157935673 | 3 | 79.73  | KV452733.1 | 1881784 | 2-scf00041 | 2 |
| AX-157935681 | 3 | 79.73  | KV452733.1 | 1888014 | 2-scf00041 | 2 |
| AX-157935894 | 3 | 79.73  | KV452733.1 | 2258005 | 2-scf00041 | 2 |
| AX-157936379 | 3 | 79.73  | KV452733.1 | 2747312 | 2-scf00041 | 2 |
| AX-157936386 | 3 | 79.73  | KV452733.1 | 2756528 | 2-scf00041 | 2 |
| AX-157937348 | 3 | 79.73  | KV452733.1 | 3720417 | 2-scf00041 | 2 |
| AX-158405687 | 3 | 79.73  | KV452732.1 | 1204572 | 2-scf00042 | 2 |
| AX-157814528 | 3 | 79.73  | KV452735.1 | 18247   | 2-scf00044 | 2 |
| AX-157938430 | 3 | 79.73  | KV452735.1 | 213708  | 2-scf00044 | 2 |
| AX-157938432 | 3 | 79.73  | KV452735.1 | 217537  | 2-scf00044 | 2 |
| AX-157938571 | 3 | 79.73  | KV452742.1 | 162810  | 2-scf00046 | 2 |
| AX-157938572 | 3 | 79.73  | KV452742.1 | 163315  | 2-scf00046 | 2 |
| AX-157938575 | 3 | 79.73  | KV452742.1 | 165364  | 2-scf00046 | 2 |
| AX-157814575 | 3 | 79.73  | KV452742.1 | 165680  | 2-scf00046 | 2 |
| AX-157938576 | 3 | 79.73  | KV452742.1 | 165820  | 2-scf00046 | 2 |
| AX-157695764 | 3 | 79.73  | KV452742.1 | 274335  | 2-scf00046 | 2 |
| AX-157938665 | 3 | 79.73  | KV452742.1 | 286973  | 2-scf00046 | 2 |
| AX-157938670 | 3 | 79.73  | KV452742.1 | 289042  | 2-scf00046 | 2 |
| AX-157938839 | 3 | 79.73  | KV452742.1 | 492722  | 2-scf00046 | 2 |
| AX-157718091 | 3 | 79.73  | KV452742.1 | 503151  | 2-scf00046 | 2 |
| AX-157938863 | 3 | 79.73  | KV452742.1 | 509416  | 2-scf00046 | 2 |
| AX-157938900 | 3 | 79.73  | KV452742.1 | 547665  | 2-scf00046 | 2 |
| AX-157938908 | 3 | 79.73  | KV452742.1 | 555574  | 2-scf00046 | 2 |
| AX-157938910 | 3 | 79.73  | KV452742.1 | 555873  | 2-scf00046 | 2 |
| AX-157814619 | 3 | 79.73  | KV452742.1 | 566243  | 2-scf00046 | 2 |
| AX-157938922 | 3 | 79.73  | KV452742.1 | 569664  | 2-scf00046 | 2 |
| AX-157938930 | 3 | 79.73  | KV452742.1 | 574330  | 2-scf00046 | 2 |
| AX-157938932 | 3 | 79.73  | KV452742.1 | 575596  | 2-scf00046 | 2 |
| AX-158390036 | 3 | 79.73  | KV452742.1 | 585898  | 2-scf00046 | 2 |
| AX-157938948 | 3 | 79.73  | KV452742.1 | 591163  | 2-scf00046 | 2 |
| AX-157940689 | 3 | 79.73  | KV452742.1 | 4040417 | 2-scf00046 | 2 |
| AX-157941566 | 3 | 79.73  | KV452745.1 | 58413   | 2-scf00051 | 2 |
| AX-157941697 | 3 | 79.73  | KV452745.1 | 193911  | 2-scf00051 | 2 |
| AX-157938528 | 3 | 79.737 | KV452742.1 | 119531  | 2-scf00046 | 2 |
| AX-157938594 | 3 | 79.737 | KV452742.1 | 187955  | 2-scf00046 | 2 |
| AX-157938639 | 3 | 79.737 | KV452742.1 | 232960  | 2-scf00046 | 2 |
| AX-157938826 | 3 | 79.737 | KV452742.1 | 480821  | 2-scf00046 | 2 |

|              |   |        |             |          |            |    |
|--------------|---|--------|-------------|----------|------------|----|
| AX-157938896 | 3 | 79.737 | KV452742.1  | 545740   | 2-scf00046 | 2  |
| AX-157814618 | 3 | 79.737 | KV452742.1  | 546852   | 2-scf00046 | 2  |
| AX-157938931 | 3 | 79.737 | KV452742.1  | 575202   | 2-scf00046 | 2  |
| AX-157938939 | 3 | 79.737 | KV452742.1  | 581270   | 2-scf00046 | 2  |
| AX-157711937 | 3 | 79.771 | 3ML01028415 | 847      | scf04022_1 | UN |
| AX-157705049 | 3 | 79.785 | 3ML01028415 | 411      | scf04022_1 | UN |
| AX-157937406 | 3 | 79.839 | KV452733.1  | 3791387  | 2-scf00041 | 2  |
| AX-157938564 | 3 | 79.839 | KV452742.1  | 150657   | 2-scf00046 | 2  |
| AX-157814570 | 3 | 79.839 | KV452742.1  | 151960   | 2-scf00046 | 2  |
| AX-157938661 | 3 | 79.839 | KV452742.1  | 280863   | 2-scf00046 | 2  |
| AX-157938943 | 3 | 79.839 | KV452742.1  | 586594   | 2-scf00046 | 2  |
| AX-157938949 | 3 | 79.839 | KV452742.1  | 592851   | 2-scf00046 | 2  |
| AX-157938957 | 3 | 79.839 | KV452742.1  | 602241   | 2-scf00046 | 2  |
| AX-157814622 | 3 | 79.839 | KV452742.1  | 627167   | 2-scf00046 | 2  |
| AX-157814624 | 3 | 79.839 | KV452742.1  | 634663   | 2-scf00046 | 2  |
| AX-157685755 | 3 | 79.839 | KV452764.1  | 4276     | 2-scf00639 | 2  |
| AX-157938992 | 3 | 79.924 | KV452742.1  | 640789   | 2-scf00046 | 2  |
| AX-157717401 | 3 | 80.003 | KV452742.1  | 644764   | 2-scf00046 | 2  |
| AX-157939010 | 3 | 80.003 | KV452742.1  | 661789   | 2-scf00046 | 2  |
| AX-157939014 | 3 | 80.003 | KV452742.1  | 664103   | 2-scf00046 | 2  |
| AX-157939015 | 3 | 80.003 | KV452742.1  | 665099   | 2-scf00046 | 2  |
| AX-157939027 | 3 | 80.003 | KV452742.1  | 693189   | 2-scf00046 | 2  |
| AX-157939604 | 3 | 80.003 | KV452742.1  | 1591469  | 2-scf00046 | 2  |
| AX-157939041 | 3 | 80.091 | KV452742.1  | 710560   | 2-scf00046 | 2  |
| AX-157930032 | 3 | 80.167 | KV452730.1  | 9268513  | 2-scf00040 | 2  |
| AX-158405510 | 3 | 80.167 | KV452730.1  | 11044680 | 2-scf00040 | 2  |
| AX-157931941 | 3 | 80.167 | KV452730.1  | 11685381 | 2-scf00040 | 2  |
| AX-157932750 | 3 | 80.167 | KV452730.1  | 12778905 | 2-scf00040 | 2  |
| AX-157933628 | 3 | 80.167 | KV452730.1  | 14150384 | 2-scf00040 | 2  |
| AX-157933864 | 3 | 80.167 | KV452730.1  | 14636347 | 2-scf00040 | 2  |
| AX-157814267 | 3 | 80.167 | KV452730.1  | 14668177 | 2-scf00040 | 2  |
| AX-157936220 | 3 | 80.167 | KV452733.1  | 2607031  | 2-scf00041 | 2  |
| AX-157938597 | 3 | 80.167 | KV452742.1  | 192396   | 2-scf00046 | 2  |
| AX-157938959 | 3 | 80.167 | KV452742.1  | 605161   | 2-scf00046 | 2  |
| AX-157939002 | 3 | 80.167 | KV452742.1  | 650630   | 2-scf00046 | 2  |
| AX-157939006 | 3 | 80.167 | KV452742.1  | 654055   | 2-scf00046 | 2  |
| AX-157939018 | 3 | 80.167 | KV452742.1  | 669030   | 2-scf00046 | 2  |
| AX-157939019 | 3 | 80.167 | KV452742.1  | 670737   | 2-scf00046 | 2  |
| AX-157939022 | 3 | 80.167 | KV452742.1  | 680615   | 2-scf00046 | 2  |
| AX-157939029 | 3 | 80.167 | KV452742.1  | 695878   | 2-scf00046 | 2  |
| AX-157939038 | 3 | 80.167 | KV452742.1  | 705620   | 2-scf00046 | 2  |
| AX-157939043 | 3 | 80.167 | KV452742.1  | 711830   | 2-scf00046 | 2  |
| AX-157939046 | 3 | 80.167 | KV452742.1  | 720452   | 2-scf00046 | 2  |
| AX-157939047 | 3 | 80.167 | KV452742.1  | 721988   | 2-scf00046 | 2  |
| AX-157939048 | 3 | 80.167 | KV452742.1  | 722828   | 2-scf00046 | 2  |
| AX-157939049 | 3 | 80.167 | KV452742.1  | 726320   | 2-scf00046 | 2  |
| AX-157883865 | 3 | 80.167 | KV452742.1  | 736895   | 2-scf00046 | 2  |
| AX-157939056 | 3 | 80.167 | KV452742.1  | 737305   | 2-scf00046 | 2  |
| AX-157939061 | 3 | 80.167 | KV452742.1  | 752167   | 2-scf00046 | 2  |
| AX-157939067 | 3 | 80.167 | KV452742.1  | 760692   | 2-scf00046 | 2  |
| AX-157939095 | 3 | 80.167 | KV452742.1  | 829378   | 2-scf00046 | 2  |

|              |   |        |            |         |            |   |
|--------------|---|--------|------------|---------|------------|---|
| AX-157939108 | 3 | 80.167 | KV452742.1 | 850849  | 2-scf00046 | 2 |
| AX-157752350 | 3 | 80.167 | KV452742.1 | 852589  | 2-scf00046 | 2 |
| AX-157939109 | 3 | 80.167 | KV452742.1 | 854049  | 2-scf00046 | 2 |
| AX-157939112 | 3 | 80.167 | KV452742.1 | 856327  | 2-scf00046 | 2 |
| AX-157939117 | 3 | 80.167 | KV452742.1 | 864803  | 2-scf00046 | 2 |
| AX-157939124 | 3 | 80.167 | KV452742.1 | 881644  | 2-scf00046 | 2 |
| AX-157939136 | 3 | 80.167 | KV452742.1 | 945200  | 2-scf00046 | 2 |
| AX-157939139 | 3 | 80.167 | KV452742.1 | 951870  | 2-scf00046 | 2 |
| AX-157939140 | 3 | 80.167 | KV452742.1 | 954985  | 2-scf00046 | 2 |
| AX-157939146 | 3 | 80.167 | KV452742.1 | 962942  | 2-scf00046 | 2 |
| AX-157939149 | 3 | 80.167 | KV452742.1 | 969089  | 2-scf00046 | 2 |
| AX-157939150 | 3 | 80.167 | KV452742.1 | 972660  | 2-scf00046 | 2 |
| AX-157939151 | 3 | 80.167 | KV452742.1 | 973281  | 2-scf00046 | 2 |
| AX-157939152 | 3 | 80.167 | KV452742.1 | 974164  | 2-scf00046 | 2 |
| AX-157939157 | 3 | 80.167 | KV452742.1 | 998814  | 2-scf00046 | 2 |
| AX-157939158 | 3 | 80.167 | KV452742.1 | 1000286 | 2-scf00046 | 2 |
| AX-157939160 | 3 | 80.167 | KV452742.1 | 1011514 | 2-scf00046 | 2 |
| AX-157939173 | 3 | 80.167 | KV452742.1 | 1061330 | 2-scf00046 | 2 |
| AX-157939182 | 3 | 80.167 | KV452742.1 | 1088270 | 2-scf00046 | 2 |
| AX-157939183 | 3 | 80.167 | KV452742.1 | 1090666 | 2-scf00046 | 2 |
| AX-157939188 | 3 | 80.167 | KV452742.1 | 1096954 | 2-scf00046 | 2 |
| AX-157939192 | 3 | 80.167 | KV452742.1 | 1110859 | 2-scf00046 | 2 |
| AX-157939200 | 3 | 80.167 | KV452742.1 | 1119546 | 2-scf00046 | 2 |
| AX-157939201 | 3 | 80.167 | KV452742.1 | 1123741 | 2-scf00046 | 2 |
| AX-157939206 | 3 | 80.167 | KV452742.1 | 1129055 | 2-scf00046 | 2 |
| AX-157939218 | 3 | 80.167 | KV452742.1 | 1140763 | 2-scf00046 | 2 |
| AX-157939220 | 3 | 80.167 | KV452742.1 | 1141331 | 2-scf00046 | 2 |
| AX-157939227 | 3 | 80.167 | KV452742.1 | 1147296 | 2-scf00046 | 2 |
| AX-157939228 | 3 | 80.167 | KV452742.1 | 1148010 | 2-scf00046 | 2 |
| AX-157939230 | 3 | 80.167 | KV452742.1 | 1148745 | 2-scf00046 | 2 |
| AX-157939242 | 3 | 80.167 | KV452742.1 | 1154793 | 2-scf00046 | 2 |
| AX-157939251 | 3 | 80.167 | KV452742.1 | 1165244 | 2-scf00046 | 2 |
| AX-157939256 | 3 | 80.167 | KV452742.1 | 1184212 | 2-scf00046 | 2 |
| AX-157745726 | 3 | 80.167 | KV452742.1 | 1210138 | 2-scf00046 | 2 |
| AX-157939295 | 3 | 80.167 | KV452742.1 | 1251384 | 2-scf00046 | 2 |
| AX-157939302 | 3 | 80.167 | KV452742.1 | 1267384 | 2-scf00046 | 2 |
| AX-157939306 | 3 | 80.167 | KV452742.1 | 1277845 | 2-scf00046 | 2 |
| AX-157939315 | 3 | 80.167 | KV452742.1 | 1280455 | 2-scf00046 | 2 |
| AX-157854515 | 3 | 80.167 | KV452742.1 | 1283077 | 2-scf00046 | 2 |
| AX-157939319 | 3 | 80.167 | KV452742.1 | 1287152 | 2-scf00046 | 2 |
| AX-157939323 | 3 | 80.167 | KV452742.1 | 1294959 | 2-scf00046 | 2 |
| AX-157939327 | 3 | 80.167 | KV452742.1 | 1296511 | 2-scf00046 | 2 |
| AX-157939329 | 3 | 80.167 | KV452742.1 | 1297779 | 2-scf00046 | 2 |
| AX-157939336 | 3 | 80.167 | KV452742.1 | 1299986 | 2-scf00046 | 2 |
| AX-157939385 | 3 | 80.167 | KV452742.1 | 1355936 | 2-scf00046 | 2 |
| AX-157939387 | 3 | 80.167 | KV452742.1 | 1360665 | 2-scf00046 | 2 |
| AX-157939392 | 3 | 80.167 | KV452742.1 | 1365171 | 2-scf00046 | 2 |
| AX-157939402 | 3 | 80.167 | KV452742.1 | 1374569 | 2-scf00046 | 2 |
| AX-157939403 | 3 | 80.167 | KV452742.1 | 1375594 | 2-scf00046 | 2 |
| AX-157745597 | 3 | 80.167 | KV452742.1 | 1377430 | 2-scf00046 | 2 |
| AX-157939417 | 3 | 80.167 | KV452742.1 | 1385430 | 2-scf00046 | 2 |

|              |   |        |            |         |            |   |
|--------------|---|--------|------------|---------|------------|---|
| AX-157939420 | 3 | 80.167 | KV452742.1 | 1387741 | 2-scf00046 | 2 |
| AX-157939424 | 3 | 80.167 | KV452742.1 | 1396355 | 2-scf00046 | 2 |
| AX-157939430 | 3 | 80.167 | KV452742.1 | 1399542 | 2-scf00046 | 2 |
| AX-157939443 | 3 | 80.167 | KV452742.1 | 1407771 | 2-scf00046 | 2 |
| AX-157939453 | 3 | 80.167 | KV452742.1 | 1417247 | 2-scf00046 | 2 |
| AX-157939464 | 3 | 80.167 | KV452742.1 | 1424259 | 2-scf00046 | 2 |
| AX-157939467 | 3 | 80.167 | KV452742.1 | 1432770 | 2-scf00046 | 2 |
| AX-157814638 | 3 | 80.167 | KV452742.1 | 1454967 | 2-scf00046 | 2 |
| AX-157939490 | 3 | 80.167 | KV452742.1 | 1461397 | 2-scf00046 | 2 |
| AX-157939495 | 3 | 80.167 | KV452742.1 | 1463599 | 2-scf00046 | 2 |
| AX-157939496 | 3 | 80.167 | KV452742.1 | 1463866 | 2-scf00046 | 2 |
| AX-157939498 | 3 | 80.167 | KV452742.1 | 1465770 | 2-scf00046 | 2 |
| AX-157939504 | 3 | 80.167 | KV452742.1 | 1471106 | 2-scf00046 | 2 |
| AX-157727401 | 3 | 80.167 | KV452742.1 | 1471731 | 2-scf00046 | 2 |
| AX-157939507 | 3 | 80.167 | KV452742.1 | 1473390 | 2-scf00046 | 2 |
| AX-157814640 | 3 | 80.167 | KV452742.1 | 1476613 | 2-scf00046 | 2 |
| AX-157939511 | 3 | 80.167 | KV452742.1 | 1476802 | 2-scf00046 | 2 |
| AX-157717353 | 3 | 80.167 | KV452742.1 | 1481725 | 2-scf00046 | 2 |
| AX-157814643 | 3 | 80.167 | KV452742.1 | 1482430 | 2-scf00046 | 2 |
| AX-157814644 | 3 | 80.167 | KV452742.1 | 1482626 | 2-scf00046 | 2 |
| AX-157747477 | 3 | 80.167 | KV452742.1 | 1484224 | 2-scf00046 | 2 |
| AX-157939523 | 3 | 80.167 | KV452742.1 | 1492414 | 2-scf00046 | 2 |
| AX-157939549 | 3 | 80.167 | KV452742.1 | 1534153 | 2-scf00046 | 2 |
| AX-157939552 | 3 | 80.167 | KV452742.1 | 1536566 | 2-scf00046 | 2 |
| AX-157939554 | 3 | 80.167 | KV452742.1 | 1537525 | 2-scf00046 | 2 |
| AX-157939559 | 3 | 80.167 | KV452742.1 | 1542546 | 2-scf00046 | 2 |
| AX-157939563 | 3 | 80.167 | KV452742.1 | 1547313 | 2-scf00046 | 2 |
| AX-157939564 | 3 | 80.167 | KV452742.1 | 1548423 | 2-scf00046 | 2 |
| AX-157939566 | 3 | 80.167 | KV452742.1 | 1549785 | 2-scf00046 | 2 |
| AX-157939567 | 3 | 80.167 | KV452742.1 | 1553686 | 2-scf00046 | 2 |
| AX-157939569 | 3 | 80.167 | KV452742.1 | 1555691 | 2-scf00046 | 2 |
| AX-157939570 | 3 | 80.167 | KV452742.1 | 1558187 | 2-scf00046 | 2 |
| AX-157939571 | 3 | 80.167 | KV452742.1 | 1558541 | 2-scf00046 | 2 |
| AX-157939572 | 3 | 80.167 | KV452742.1 | 1559679 | 2-scf00046 | 2 |
| AX-157939574 | 3 | 80.167 | KV452742.1 | 1562367 | 2-scf00046 | 2 |
| AX-157814649 | 3 | 80.167 | KV452742.1 | 1563059 | 2-scf00046 | 2 |
| AX-157854523 | 3 | 80.167 | KV452742.1 | 1563713 | 2-scf00046 | 2 |
| AX-157939575 | 3 | 80.167 | KV452742.1 | 1564675 | 2-scf00046 | 2 |
| AX-157939576 | 3 | 80.167 | KV452742.1 | 1575273 | 2-scf00046 | 2 |
| AX-157939577 | 3 | 80.167 | KV452742.1 | 1576270 | 2-scf00046 | 2 |
| AX-157939578 | 3 | 80.167 | KV452742.1 | 1578648 | 2-scf00046 | 2 |
| AX-157939582 | 3 | 80.167 | KV452742.1 | 1580228 | 2-scf00046 | 2 |
| AX-157939583 | 3 | 80.167 | KV452742.1 | 1580857 | 2-scf00046 | 2 |
| AX-157939585 | 3 | 80.167 | KV452742.1 | 1582082 | 2-scf00046 | 2 |
| AX-157939587 | 3 | 80.167 | KV452742.1 | 1583536 | 2-scf00046 | 2 |
| AX-157814650 | 3 | 80.167 | KV452742.1 | 1586979 | 2-scf00046 | 2 |
| AX-157939594 | 3 | 80.167 | KV452742.1 | 1587179 | 2-scf00046 | 2 |
| AX-157939596 | 3 | 80.167 | KV452742.1 | 1587760 | 2-scf00046 | 2 |
| AX-157939599 | 3 | 80.167 | KV452742.1 | 1589415 | 2-scf00046 | 2 |
| AX-157939600 | 3 | 80.167 | KV452742.1 | 1589921 | 2-scf00046 | 2 |
| AX-157939602 | 3 | 80.167 | KV452742.1 | 1590926 | 2-scf00046 | 2 |

|              |   |        |            |         |            |   |
|--------------|---|--------|------------|---------|------------|---|
| AX-157939609 | 3 | 80.167 | KV452742.1 | 1605551 | 2-scf00046 | 2 |
| AX-157939611 | 3 | 80.167 | KV452742.1 | 1607727 | 2-scf00046 | 2 |
| AX-157939614 | 3 | 80.167 | KV452742.1 | 1608174 | 2-scf00046 | 2 |
| AX-157939617 | 3 | 80.167 | KV452742.1 | 1610652 | 2-scf00046 | 2 |
| AX-157939618 | 3 | 80.167 | KV452742.1 | 1613313 | 2-scf00046 | 2 |
| AX-157939620 | 3 | 80.167 | KV452742.1 | 1614219 | 2-scf00046 | 2 |
| AX-157939621 | 3 | 80.167 | KV452742.1 | 1614554 | 2-scf00046 | 2 |
| AX-157939623 | 3 | 80.167 | KV452742.1 | 1615311 | 2-scf00046 | 2 |
| AX-157939624 | 3 | 80.167 | KV452742.1 | 1615591 | 2-scf00046 | 2 |
| AX-157939625 | 3 | 80.167 | KV452742.1 | 1615669 | 2-scf00046 | 2 |
| AX-157939627 | 3 | 80.167 | KV452742.1 | 1616105 | 2-scf00046 | 2 |
| AX-157939629 | 3 | 80.167 | KV452742.1 | 1618525 | 2-scf00046 | 2 |
| AX-157939630 | 3 | 80.167 | KV452742.1 | 1619220 | 2-scf00046 | 2 |
| AX-157939633 | 3 | 80.167 | KV452742.1 | 1619426 | 2-scf00046 | 2 |
| AX-157939634 | 3 | 80.167 | KV452742.1 | 1624627 | 2-scf00046 | 2 |
| AX-157939636 | 3 | 80.167 | KV452742.1 | 1625124 | 2-scf00046 | 2 |
| AX-157939639 | 3 | 80.167 | KV452742.1 | 1628413 | 2-scf00046 | 2 |
| AX-157939640 | 3 | 80.167 | KV452742.1 | 1629771 | 2-scf00046 | 2 |
| AX-157939641 | 3 | 80.167 | KV452742.1 | 1630070 | 2-scf00046 | 2 |
| AX-157939642 | 3 | 80.167 | KV452742.1 | 1630568 | 2-scf00046 | 2 |
| AX-157939645 | 3 | 80.167 | KV452742.1 | 1631716 | 2-scf00046 | 2 |
| AX-157939646 | 3 | 80.167 | KV452742.1 | 1632353 | 2-scf00046 | 2 |
| AX-157939648 | 3 | 80.167 | KV452742.1 | 1632872 | 2-scf00046 | 2 |
| AX-157939652 | 3 | 80.167 | KV452742.1 | 1638872 | 2-scf00046 | 2 |
| AX-157939653 | 3 | 80.167 | KV452742.1 | 1639793 | 2-scf00046 | 2 |
| AX-157814653 | 3 | 80.167 | KV452742.1 | 1641952 | 2-scf00046 | 2 |
| AX-157939657 | 3 | 80.167 | KV452742.1 | 1644826 | 2-scf00046 | 2 |
| AX-157941342 | 3 | 80.167 | KV452742.1 | 1678582 | 2-scf00046 | 2 |
| AX-157941302 | 3 | 80.167 | KV452742.1 | 1723238 | 2-scf00046 | 2 |
| AX-157941299 | 3 | 80.167 | KV452742.1 | 1726020 | 2-scf00046 | 2 |
| AX-157941298 | 3 | 80.167 | KV452742.1 | 1727294 | 2-scf00046 | 2 |
| AX-157941294 | 3 | 80.167 | KV452742.1 | 1729998 | 2-scf00046 | 2 |
| AX-157941280 | 3 | 80.167 | KV452742.1 | 1736748 | 2-scf00046 | 2 |
| AX-157814811 | 3 | 80.167 | KV452742.1 | 1749935 | 2-scf00046 | 2 |
| AX-157941254 | 3 | 80.167 | KV452742.1 | 1754236 | 2-scf00046 | 2 |
| AX-157941250 | 3 | 80.167 | KV452742.1 | 1756263 | 2-scf00046 | 2 |
| AX-157941248 | 3 | 80.167 | KV452742.1 | 1759207 | 2-scf00046 | 2 |
| AX-157941243 | 3 | 80.167 | KV452742.1 | 1762368 | 2-scf00046 | 2 |
| AX-157941226 | 3 | 80.167 | KV452742.1 | 1778659 | 2-scf00046 | 2 |
| AX-157941216 | 3 | 80.167 | KV452742.1 | 1796633 | 2-scf00046 | 2 |
| AX-157716237 | 3 | 80.167 | KV452742.1 | 1798188 | 2-scf00046 | 2 |
| AX-157941213 | 3 | 80.167 | KV452742.1 | 1798272 | 2-scf00046 | 2 |
| AX-157941212 | 3 | 80.167 | KV452742.1 | 1798779 | 2-scf00046 | 2 |
| AX-157750207 | 3 | 80.167 | KV452742.1 | 1799743 | 2-scf00046 | 2 |
| AX-157941204 | 3 | 80.167 | KV452742.1 | 1805544 | 2-scf00046 | 2 |
| AX-157941181 | 3 | 80.167 | KV452742.1 | 1847692 | 2-scf00046 | 2 |
| AX-157941179 | 3 | 80.167 | KV452742.1 | 1848719 | 2-scf00046 | 2 |
| AX-157941173 | 3 | 80.167 | KV452742.1 | 1852833 | 2-scf00046 | 2 |
| AX-157941161 | 3 | 80.167 | KV452742.1 | 1865503 | 2-scf00046 | 2 |
| AX-157941160 | 3 | 80.167 | KV452742.1 | 1870447 | 2-scf00046 | 2 |
| AX-157941159 | 3 | 80.167 | KV452742.1 | 1878350 | 2-scf00046 | 2 |

|              |   |        |            |         |            |   |
|--------------|---|--------|------------|---------|------------|---|
| AX-157941148 | 3 | 80.167 | KV452742.1 | 1888460 | 2-scf00046 | 2 |
| AX-157941136 | 3 | 80.167 | KV452742.1 | 1896424 | 2-scf00046 | 2 |
| AX-157941119 | 3 | 80.167 | KV452742.1 | 1909629 | 2-scf00046 | 2 |
| AX-157757228 | 3 | 80.167 | KV452742.1 | 1910783 | 2-scf00046 | 2 |
| AX-157941109 | 3 | 80.167 | KV452742.1 | 1922820 | 2-scf00046 | 2 |
| AX-157941105 | 3 | 80.167 | KV452742.1 | 1926448 | 2-scf00046 | 2 |
| AX-157814794 | 3 | 80.167 | KV452742.1 | 2008354 | 2-scf00046 | 2 |
| AX-158405739 | 3 | 80.167 | KV452742.1 | 2219680 | 2-scf00046 | 2 |
| AX-157939682 | 3 | 80.167 | KV452742.1 | 2337233 | 2-scf00046 | 2 |
| AX-157939693 | 3 | 80.167 | KV452742.1 | 2384963 | 2-scf00046 | 2 |
| AX-157939695 | 3 | 80.167 | KV452742.1 | 2386071 | 2-scf00046 | 2 |
| AX-157939711 | 3 | 80.167 | KV452742.1 | 2460709 | 2-scf00046 | 2 |
| AX-157939719 | 3 | 80.167 | KV452742.1 | 2494978 | 2-scf00046 | 2 |
| AX-157939723 | 3 | 80.167 | KV452742.1 | 2498835 | 2-scf00046 | 2 |
| AX-157939726 | 3 | 80.167 | KV452742.1 | 2540711 | 2-scf00046 | 2 |
| AX-157939727 | 3 | 80.167 | KV452742.1 | 2548760 | 2-scf00046 | 2 |
| AX-157939732 | 3 | 80.167 | KV452742.1 | 2558507 | 2-scf00046 | 2 |
| AX-157939737 | 3 | 80.167 | KV452742.1 | 2607849 | 2-scf00046 | 2 |
| AX-157939739 | 3 | 80.167 | KV452742.1 | 2613843 | 2-scf00046 | 2 |
| AX-157814657 | 3 | 80.167 | KV452742.1 | 2638737 | 2-scf00046 | 2 |
| AX-158404764 | 3 | 80.167 | KV452742.1 | 2722600 | 2-scf00046 | 2 |
| AX-157939751 | 3 | 80.167 | KV452742.1 | 2726928 | 2-scf00046 | 2 |
| AX-157939753 | 3 | 80.167 | KV452742.1 | 2733181 | 2-scf00046 | 2 |
| AX-157939762 | 3 | 80.167 | KV452742.1 | 2758216 | 2-scf00046 | 2 |
| AX-157939774 | 3 | 80.167 | KV452742.1 | 2778371 | 2-scf00046 | 2 |
| AX-157939776 | 3 | 80.167 | KV452742.1 | 2783103 | 2-scf00046 | 2 |
| AX-157939779 | 3 | 80.167 | KV452742.1 | 2792558 | 2-scf00046 | 2 |
| AX-157939787 | 3 | 80.167 | KV452742.1 | 2816262 | 2-scf00046 | 2 |
| AX-157814664 | 3 | 80.167 | KV452742.1 | 2844413 | 2-scf00046 | 2 |
| AX-157939871 | 3 | 80.167 | KV452742.1 | 2944869 | 2-scf00046 | 2 |
| AX-157939881 | 3 | 80.167 | KV452742.1 | 2958640 | 2-scf00046 | 2 |
| AX-157939888 | 3 | 80.167 | KV452742.1 | 2971668 | 2-scf00046 | 2 |
| AX-157939891 | 3 | 80.167 | KV452742.1 | 2978985 | 2-scf00046 | 2 |
| AX-157939897 | 3 | 80.167 | KV452742.1 | 2983217 | 2-scf00046 | 2 |
| AX-157939902 | 3 | 80.167 | KV452742.1 | 2987888 | 2-scf00046 | 2 |
| AX-157939929 | 3 | 80.167 | KV452742.1 | 3004158 | 2-scf00046 | 2 |
| AX-157814675 | 3 | 80.167 | KV452742.1 | 3005070 | 2-scf00046 | 2 |
| AX-157939930 | 3 | 80.167 | KV452742.1 | 3005340 | 2-scf00046 | 2 |
| AX-157707838 | 3 | 80.167 | KV452742.1 | 3009154 | 2-scf00046 | 2 |
| AX-157939935 | 3 | 80.167 | KV452742.1 | 3009985 | 2-scf00046 | 2 |
| AX-157940014 | 3 | 80.167 | KV452742.1 | 3085425 | 2-scf00046 | 2 |
| AX-157940041 | 3 | 80.167 | KV452742.1 | 3117460 | 2-scf00046 | 2 |
| AX-157940102 | 3 | 80.167 | KV452742.1 | 3174090 | 2-scf00046 | 2 |
| AX-157940122 | 3 | 80.167 | KV452742.1 | 3193981 | 2-scf00046 | 2 |
| AX-157814709 | 3 | 80.167 | KV452742.1 | 3236432 | 2-scf00046 | 2 |
| AX-157940235 | 3 | 80.167 | KV452742.1 | 3336329 | 2-scf00046 | 2 |
| AX-157814726 | 3 | 80.167 | KV452742.1 | 3466812 | 2-scf00046 | 2 |
| AX-157814727 | 3 | 80.167 | KV452742.1 | 3470777 | 2-scf00046 | 2 |
| AX-157940345 | 3 | 80.167 | KV452742.1 | 3471904 | 2-scf00046 | 2 |
| AX-157940351 | 3 | 80.167 | KV452742.1 | 3479041 | 2-scf00046 | 2 |
| AX-157940368 | 3 | 80.167 | KV452742.1 | 3501856 | 2-scf00046 | 2 |

|              |   |        |             |         |            |    |
|--------------|---|--------|-------------|---------|------------|----|
| AX-157940376 | 3 | 80.167 | KV452742.1  | 3515955 | 2-scf00046 | 2  |
| AX-157940448 | 3 | 80.167 | KV452742.1  | 3613266 | 2-scf00046 | 2  |
| AX-157814737 | 3 | 80.167 | KV452742.1  | 3661106 | 2-scf00046 | 2  |
| AX-157940504 | 3 | 80.167 | KV452742.1  | 3667562 | 2-scf00046 | 2  |
| AX-157940557 | 3 | 80.167 | KV452742.1  | 3781032 | 2-scf00046 | 2  |
| AX-157940590 | 3 | 80.167 | KV452742.1  | 3814037 | 2-scf00046 | 2  |
| AX-157940591 | 3 | 80.167 | KV452742.1  | 3815363 | 2-scf00046 | 2  |
| AX-157940691 | 3 | 80.167 | KV452742.1  | 4055898 | 2-scf00046 | 2  |
| AX-157940754 | 3 | 80.167 | KV452742.1  | 4193155 | 2-scf00046 | 2  |
| AX-157940755 | 3 | 80.167 | KV452742.1  | 4194691 | 2-scf00046 | 2  |
| AX-157940758 | 3 | 80.167 | KV452742.1  | 4204615 | 2-scf00046 | 2  |
| AX-157942232 | 3 | 80.167 | KV452745.1  | 627279  | 2-scf00051 | 2  |
| AX-157943792 | 3 | 80.167 | KV452747.1  | 799895  | 2-scf00053 | 2  |
| AX-157945358 | 3 | 80.167 | KV452746.1  | 211276  | 2-scf00054 | 2  |
| AX-157945526 | 3 | 80.167 | KV452746.1  | 388062  | 2-scf00054 | 2  |
| AX-157706064 | 3 | 80.167 | 3ML01031524 | 649     | scf07139_1 | UN |
| AX-157936613 | 3 | 80.276 | KV452733.1  | 3002288 | 2-scf00041 | 2  |
| AX-157936751 | 3 | 80.276 | KV452733.1  | 3144732 | 2-scf00041 | 2  |
| AX-157937376 | 3 | 80.276 | KV452733.1  | 3750212 | 2-scf00041 | 2  |
| AX-157938410 | 3 | 80.276 | KV452735.1  | 192008  | 2-scf00044 | 2  |
| AX-157938414 | 3 | 80.276 | KV452735.1  | 199031  | 2-scf00044 | 2  |
| AX-157938418 | 3 | 80.276 | KV452735.1  | 202644  | 2-scf00044 | 2  |
| AX-157938449 | 3 | 80.276 | KV452735.1  | 235654  | 2-scf00044 | 2  |
| AX-157938762 | 3 | 80.276 | KV452742.1  | 419313  | 2-scf00046 | 2  |
| AX-157939034 | 3 | 80.276 | KV452742.1  | 703378  | 2-scf00046 | 2  |
| AX-157939110 | 3 | 80.276 | KV452742.1  | 855387  | 2-scf00046 | 2  |
| AX-157939119 | 3 | 80.276 | KV452742.1  | 869553  | 2-scf00046 | 2  |
| AX-157814630 | 3 | 80.276 | KV452742.1  | 891914  | 2-scf00046 | 2  |
| AX-157939128 | 3 | 80.276 | KV452742.1  | 912440  | 2-scf00046 | 2  |
| AX-157939129 | 3 | 80.276 | KV452742.1  | 913829  | 2-scf00046 | 2  |
| AX-157939130 | 3 | 80.276 | KV452742.1  | 916472  | 2-scf00046 | 2  |
| AX-157939134 | 3 | 80.276 | KV452742.1  | 929189  | 2-scf00046 | 2  |
| AX-157939169 | 3 | 80.276 | KV452742.1  | 1057201 | 2-scf00046 | 2  |
| AX-157939181 | 3 | 80.276 | KV452742.1  | 1080448 | 2-scf00046 | 2  |
| AX-157757026 | 3 | 80.276 | KV452742.1  | 1084835 | 2-scf00046 | 2  |
| AX-157939185 | 3 | 80.276 | KV452742.1  | 1091066 | 2-scf00046 | 2  |
| AX-157939186 | 3 | 80.276 | KV452742.1  | 1091982 | 2-scf00046 | 2  |
| AX-157939198 | 3 | 80.276 | KV452742.1  | 1118827 | 2-scf00046 | 2  |
| AX-157939266 | 3 | 80.276 | KV452742.1  | 1200459 | 2-scf00046 | 2  |
| AX-157939301 | 3 | 80.276 | KV452742.1  | 1263832 | 2-scf00046 | 2  |
| AX-157939337 | 3 | 80.276 | KV452742.1  | 1304515 | 2-scf00046 | 2  |
| AX-157939349 | 3 | 80.276 | KV452742.1  | 1316330 | 2-scf00046 | 2  |
| AX-157939398 | 3 | 80.276 | KV452742.1  | 1371841 | 2-scf00046 | 2  |
| AX-157939465 | 3 | 80.276 | KV452742.1  | 1429530 | 2-scf00046 | 2  |
| AX-157939482 | 3 | 80.276 | KV452742.1  | 1458082 | 2-scf00046 | 2  |
| AX-157939598 | 3 | 80.276 | KV452742.1  | 1588750 | 2-scf00046 | 2  |
| AX-157939637 | 3 | 80.276 | KV452742.1  | 1626188 | 2-scf00046 | 2  |
| AX-157941357 | 3 | 80.276 | KV452742.1  | 1654921 | 2-scf00046 | 2  |
| AX-157941356 | 3 | 80.276 | KV452742.1  | 1657812 | 2-scf00046 | 2  |
| AX-157941355 | 3 | 80.276 | KV452742.1  | 1658178 | 2-scf00046 | 2  |
| AX-157941347 | 3 | 80.276 | KV452742.1  | 1673352 | 2-scf00046 | 2  |

|              |   |        |            |         |            |   |
|--------------|---|--------|------------|---------|------------|---|
| AX-157941345 | 3 | 80.276 | KV452742.1 | 1675970 | 2-scf00046 | 2 |
| AX-157941341 | 3 | 80.276 | KV452742.1 | 1679684 | 2-scf00046 | 2 |
| AX-157941340 | 3 | 80.276 | KV452742.1 | 1682151 | 2-scf00046 | 2 |
| AX-157941337 | 3 | 80.276 | KV452742.1 | 1683304 | 2-scf00046 | 2 |
| AX-157941314 | 3 | 80.276 | KV452742.1 | 1706539 | 2-scf00046 | 2 |
| AX-157941291 | 3 | 80.276 | KV452742.1 | 1730643 | 2-scf00046 | 2 |
| AX-158382639 | 3 | 80.276 | KV452742.1 | 1737581 | 2-scf00046 | 2 |
| AX-157941270 | 3 | 80.276 | KV452742.1 | 1744338 | 2-scf00046 | 2 |
| AX-157941251 | 3 | 80.276 | KV452742.1 | 1755900 | 2-scf00046 | 2 |
| AX-157941237 | 3 | 80.276 | KV452742.1 | 1766008 | 2-scf00046 | 2 |
| AX-157941236 | 3 | 80.276 | KV452742.1 | 1766992 | 2-scf00046 | 2 |
| AX-157941230 | 3 | 80.276 | KV452742.1 | 1774916 | 2-scf00046 | 2 |
| AX-157941225 | 3 | 80.276 | KV452742.1 | 1779101 | 2-scf00046 | 2 |
| AX-157941224 | 3 | 80.276 | KV452742.1 | 1782351 | 2-scf00046 | 2 |
| AX-157941214 | 3 | 80.276 | KV452742.1 | 1798033 | 2-scf00046 | 2 |
| AX-157941203 | 3 | 80.276 | KV452742.1 | 1807805 | 2-scf00046 | 2 |
| AX-157941200 | 3 | 80.276 | KV452742.1 | 1808803 | 2-scf00046 | 2 |
| AX-158405776 | 3 | 80.276 | KV452742.1 | 1810128 | 2-scf00046 | 2 |
| AX-158404792 | 3 | 80.276 | KV452742.1 | 1810642 | 2-scf00046 | 2 |
| AX-157941188 | 3 | 80.276 | KV452742.1 | 1830373 | 2-scf00046 | 2 |
| AX-157814801 | 3 | 80.276 | KV452742.1 | 1833134 | 2-scf00046 | 2 |
| AX-157883889 | 3 | 80.276 | KV452742.1 | 1848168 | 2-scf00046 | 2 |
| AX-157941156 | 3 | 80.276 | KV452742.1 | 1881057 | 2-scf00046 | 2 |
| AX-157941153 | 3 | 80.276 | KV452742.1 | 1883505 | 2-scf00046 | 2 |
| AX-157941152 | 3 | 80.276 | KV452742.1 | 1884261 | 2-scf00046 | 2 |
| AX-157710853 | 3 | 80.276 | KV452742.1 | 1887051 | 2-scf00046 | 2 |
| AX-157941135 | 3 | 80.276 | KV452742.1 | 1896825 | 2-scf00046 | 2 |
| AX-157941125 | 3 | 80.276 | KV452742.1 | 1903734 | 2-scf00046 | 2 |
| AX-157941123 | 3 | 80.276 | KV452742.1 | 1906088 | 2-scf00046 | 2 |
| AX-157709521 | 3 | 80.276 | KV452742.1 | 1909716 | 2-scf00046 | 2 |
| AX-157941107 | 3 | 80.276 | KV452742.1 | 1924466 | 2-scf00046 | 2 |
| AX-157941094 | 3 | 80.276 | KV452742.1 | 1941258 | 2-scf00046 | 2 |
| AX-157941092 | 3 | 80.276 | KV452742.1 | 1943674 | 2-scf00046 | 2 |
| AX-157941091 | 3 | 80.276 | KV452742.1 | 1944533 | 2-scf00046 | 2 |
| AX-157941083 | 3 | 80.276 | KV452742.1 | 1949018 | 2-scf00046 | 2 |
| AX-157941071 | 3 | 80.276 | KV452742.1 | 1966968 | 2-scf00046 | 2 |
| AX-157941070 | 3 | 80.276 | KV452742.1 | 1967601 | 2-scf00046 | 2 |
| AX-157941058 | 3 | 80.276 | KV452742.1 | 1983538 | 2-scf00046 | 2 |
| AX-157941056 | 3 | 80.276 | KV452742.1 | 1985565 | 2-scf00046 | 2 |
| AX-157941054 | 3 | 80.276 | KV452742.1 | 1993349 | 2-scf00046 | 2 |
| AX-157814795 | 3 | 80.276 | KV452742.1 | 1993805 | 2-scf00046 | 2 |
| AX-157941045 | 3 | 80.276 | KV452742.1 | 2012334 | 2-scf00046 | 2 |
| AX-157941043 | 3 | 80.276 | KV452742.1 | 2018367 | 2-scf00046 | 2 |
| AX-157941037 | 3 | 80.276 | KV452742.1 | 2049844 | 2-scf00046 | 2 |
| AX-157941032 | 3 | 80.276 | KV452742.1 | 2061390 | 2-scf00046 | 2 |
| AX-157941028 | 3 | 80.276 | KV452742.1 | 2072773 | 2-scf00046 | 2 |
| AX-157941026 | 3 | 80.276 | KV452742.1 | 2075035 | 2-scf00046 | 2 |
| AX-157941023 | 3 | 80.276 | KV452742.1 | 2089217 | 2-scf00046 | 2 |
| AX-157941021 | 3 | 80.276 | KV452742.1 | 2096692 | 2-scf00046 | 2 |
| AX-157941020 | 3 | 80.276 | KV452742.1 | 2100628 | 2-scf00046 | 2 |
| AX-157941017 | 3 | 80.276 | KV452742.1 | 2102700 | 2-scf00046 | 2 |



|              |   |        |            |         |            |   |
|--------------|---|--------|------------|---------|------------|---|
| AX-157941015 | 3 | 80.276 | KV452742.1 | 2104240 | 2-scf00046 | 2 |
| AX-157941011 | 3 | 80.276 | KV452742.1 | 2116204 | 2-scf00046 | 2 |
| AX-157941010 | 3 | 80.276 | KV452742.1 | 2136269 | 2-scf00046 | 2 |
| AX-157941007 | 3 | 80.276 | KV452742.1 | 2150718 | 2-scf00046 | 2 |
| AX-157864762 | 3 | 80.276 | KV452742.1 | 2166110 | 2-scf00046 | 2 |
| AX-157939663 | 3 | 80.276 | KV452742.1 | 2222411 | 2-scf00046 | 2 |
| AX-157939678 | 3 | 80.276 | KV452742.1 | 2322384 | 2-scf00046 | 2 |
| AX-157939697 | 3 | 80.276 | KV452742.1 | 2412655 | 2-scf00046 | 2 |
| AX-157939700 | 3 | 80.276 | KV452742.1 | 2415860 | 2-scf00046 | 2 |
| AX-157939713 | 3 | 80.276 | KV452742.1 | 2481115 | 2-scf00046 | 2 |
| AX-157939714 | 3 | 80.276 | KV452742.1 | 2483094 | 2-scf00046 | 2 |
| AX-157939715 | 3 | 80.276 | KV452742.1 | 2483772 | 2-scf00046 | 2 |
| AX-157939716 | 3 | 80.276 | KV452742.1 | 2488998 | 2-scf00046 | 2 |
| AX-157939724 | 3 | 80.276 | KV452742.1 | 2517614 | 2-scf00046 | 2 |
| AX-157939729 | 3 | 80.276 | KV452742.1 | 2549414 | 2-scf00046 | 2 |
| AX-157939733 | 3 | 80.276 | KV452742.1 | 2568466 | 2-scf00046 | 2 |
| AX-158390043 | 3 | 80.276 | KV452742.1 | 2632197 | 2-scf00046 | 2 |
| AX-157883868 | 3 | 80.276 | KV452742.1 | 2710186 | 2-scf00046 | 2 |
| AX-157939750 | 3 | 80.276 | KV452742.1 | 2720645 | 2-scf00046 | 2 |
| AX-157939760 | 3 | 80.276 | KV452742.1 | 2756727 | 2-scf00046 | 2 |
| AX-157939766 | 3 | 80.276 | KV452742.1 | 2763609 | 2-scf00046 | 2 |
| AX-157814659 | 3 | 80.276 | KV452742.1 | 2777965 | 2-scf00046 | 2 |
| AX-157939789 | 3 | 80.276 | KV452742.1 | 2831021 | 2-scf00046 | 2 |
| AX-157814662 | 3 | 80.276 | KV452742.1 | 2841387 | 2-scf00046 | 2 |
| AX-157814663 | 3 | 80.276 | KV452742.1 | 2842374 | 2-scf00046 | 2 |
| AX-157715430 | 3 | 80.276 | KV452742.1 | 2842487 | 2-scf00046 | 2 |
| AX-158379370 | 3 | 80.276 | KV452742.1 | 2852159 | 2-scf00046 | 2 |
| AX-157939807 | 3 | 80.276 | KV452742.1 | 2856539 | 2-scf00046 | 2 |
| AX-157939808 | 3 | 80.276 | KV452742.1 | 2859484 | 2-scf00046 | 2 |
| AX-157939811 | 3 | 80.276 | KV452742.1 | 2860772 | 2-scf00046 | 2 |
| AX-157939813 | 3 | 80.276 | KV452742.1 | 2861435 | 2-scf00046 | 2 |
| AX-157939827 | 3 | 80.276 | KV452742.1 | 2878372 | 2-scf00046 | 2 |
| AX-157939836 | 3 | 80.276 | KV452742.1 | 2900308 | 2-scf00046 | 2 |
| AX-157939840 | 3 | 80.276 | KV452742.1 | 2908983 | 2-scf00046 | 2 |
| AX-157939842 | 3 | 80.276 | KV452742.1 | 2910705 | 2-scf00046 | 2 |
| AX-157939843 | 3 | 80.276 | KV452742.1 | 2911393 | 2-scf00046 | 2 |
| AX-157939848 | 3 | 80.276 | KV452742.1 | 2921198 | 2-scf00046 | 2 |
| AX-157939858 | 3 | 80.276 | KV452742.1 | 2930297 | 2-scf00046 | 2 |
| AX-157814670 | 3 | 80.276 | KV452742.1 | 2948689 | 2-scf00046 | 2 |
| AX-157814671 | 3 | 80.276 | KV452742.1 | 2955046 | 2-scf00046 | 2 |
| AX-157742118 | 3 | 80.276 | KV452742.1 | 2955770 | 2-scf00046 | 2 |
| AX-157939883 | 3 | 80.276 | KV452742.1 | 2966868 | 2-scf00046 | 2 |
| AX-157939884 | 3 | 80.276 | KV452742.1 | 2967264 | 2-scf00046 | 2 |
| AX-157747672 | 3 | 80.276 | KV452742.1 | 2975619 | 2-scf00046 | 2 |
| AX-157939889 | 3 | 80.276 | KV452742.1 | 2977996 | 2-scf00046 | 2 |
| AX-157939893 | 3 | 80.276 | KV452742.1 | 2979861 | 2-scf00046 | 2 |
| AX-157939895 | 3 | 80.276 | KV452742.1 | 2981131 | 2-scf00046 | 2 |
| AX-157939919 | 3 | 80.276 | KV452742.1 | 2998378 | 2-scf00046 | 2 |
| AX-157939920 | 3 | 80.276 | KV452742.1 | 3000440 | 2-scf00046 | 2 |
| AX-157939936 | 3 | 80.276 | KV452742.1 | 3011862 | 2-scf00046 | 2 |
| AX-157939958 | 3 | 80.276 | KV452742.1 | 3028654 | 2-scf00046 | 2 |

|              |   |        |            |         |            |   |
|--------------|---|--------|------------|---------|------------|---|
| AX-157939983 | 3 | 80.276 | KV452742.1 | 3055903 | 2-scf00046 | 2 |
| AX-157940007 | 3 | 80.276 | KV452742.1 | 3080563 | 2-scf00046 | 2 |
| AX-157745532 | 3 | 80.276 | KV452742.1 | 3131288 | 2-scf00046 | 2 |
| AX-157940064 | 3 | 80.276 | KV452742.1 | 3140871 | 2-scf00046 | 2 |
| AX-157940112 | 3 | 80.276 | KV452742.1 | 3178741 | 2-scf00046 | 2 |
| AX-157814700 | 3 | 80.276 | KV452742.1 | 3182896 | 2-scf00046 | 2 |
| AX-157940129 | 3 | 80.276 | KV452742.1 | 3205200 | 2-scf00046 | 2 |
| AX-157814710 | 3 | 80.276 | KV452742.1 | 3236573 | 2-scf00046 | 2 |
| AX-157940506 | 3 | 80.276 | KV452742.1 | 3684859 | 2-scf00046 | 2 |
| AX-157940603 | 3 | 80.276 | KV452742.1 | 3833017 | 2-scf00046 | 2 |
| AX-157940686 | 3 | 80.276 | KV452742.1 | 4023350 | 2-scf00046 | 2 |
| AX-158405764 | 3 | 80.276 | KV452742.1 | 4159442 | 2-scf00046 | 2 |
| AX-157814766 | 3 | 80.276 | KV452742.1 | 4246322 | 2-scf00046 | 2 |
| AX-157940848 | 3 | 80.276 | KV452742.1 | 4343695 | 2-scf00046 | 2 |
| AX-158376539 | 3 | 80.276 | KV452740.1 | 297621  | 2-scf00586 | 2 |
| AX-157680074 | 3 | 80.276 | KV452741.1 | 11761   | 2-scf00732 | 2 |
| AX-157686775 | 3 | 80.276 | KV452741.1 | 35408   | 2-scf00732 | 2 |
| AX-157939941 | 3 | 80.386 | KV452742.1 | 3018632 | 2-scf00046 | 2 |
| AX-157939945 | 3 | 80.386 | KV452742.1 | 3021102 | 2-scf00046 | 2 |
| AX-157939950 | 3 | 80.386 | KV452742.1 | 3022562 | 2-scf00046 | 2 |
| AX-157939948 | 3 | 80.495 | KV452742.1 | 3022098 | 2-scf00046 | 2 |
| AX-157939953 | 3 | 80.495 | KV452742.1 | 3025962 | 2-scf00046 | 2 |
| AX-157939962 | 3 | 80.495 | KV452742.1 | 3030686 | 2-scf00046 | 2 |
| AX-157939956 | 3 | 80.604 | KV452742.1 | 3026887 | 2-scf00046 | 2 |
| AX-157939967 | 3 | 80.604 | KV452742.1 | 3033953 | 2-scf00046 | 2 |
| AX-157814676 | 3 | 80.604 | KV452742.1 | 3036293 | 2-scf00046 | 2 |
| AX-157814697 | 3 | 80.604 | KV452742.1 | 3180927 | 2-scf00046 | 2 |
| AX-157939971 | 3 | 80.624 | KV452742.1 | 3039557 | 2-scf00046 | 2 |
| AX-157939973 | 3 | 80.639 | KV452742.1 | 3046023 | 2-scf00046 | 2 |
| AX-157743361 | 3 | 80.653 | KV452742.1 | 3048691 | 2-scf00046 | 2 |
| AX-157937123 | 3 | 80.68  | KV452733.1 | 3477427 | 2-scf00041 | 2 |
| AX-157939980 | 3 | 80.68  | KV452742.1 | 3054650 | 2-scf00046 | 2 |
| AX-157940000 | 3 | 80.68  | KV452742.1 | 3076734 | 2-scf00046 | 2 |
| AX-157940085 | 3 | 80.68  | KV452742.1 | 3159563 | 2-scf00046 | 2 |
| AX-157940213 | 3 | 80.68  | KV452742.1 | 3310289 | 2-scf00046 | 2 |
| AX-157940332 | 3 | 80.68  | KV452742.1 | 3439065 | 2-scf00046 | 2 |
| AX-157814732 | 3 | 80.68  | KV452742.1 | 3618751 | 2-scf00046 | 2 |
| AX-157940454 | 3 | 80.68  | KV452742.1 | 3619005 | 2-scf00046 | 2 |
| AX-157940615 | 3 | 80.68  | KV452742.1 | 3887489 | 2-scf00046 | 2 |
| AX-157814744 | 3 | 80.68  | KV452742.1 | 3889641 | 2-scf00046 | 2 |
| AX-157940639 | 3 | 80.68  | KV452742.1 | 3957159 | 2-scf00046 | 2 |
| AX-157940645 | 3 | 80.68  | KV452742.1 | 3968845 | 2-scf00046 | 2 |
| AX-157940650 | 3 | 80.68  | KV452742.1 | 3979437 | 2-scf00046 | 2 |
| AX-157940670 | 3 | 80.68  | KV452742.1 | 4004862 | 2-scf00046 | 2 |
| AX-157814755 | 3 | 80.68  | KV452742.1 | 4078826 | 2-scf00046 | 2 |
| AX-157940782 | 3 | 80.68  | KV452742.1 | 4253074 | 2-scf00046 | 2 |
| AX-157940824 | 3 | 80.68  | KV452742.1 | 4313160 | 2-scf00046 | 2 |
| AX-157940861 | 3 | 80.68  | KV452742.1 | 4354208 | 2-scf00046 | 2 |
| AX-157940877 | 3 | 80.68  | KV452742.1 | 4393226 | 2-scf00046 | 2 |
| AX-157814785 | 3 | 80.68  | KV452742.1 | 4470598 | 2-scf00046 | 2 |
| AX-157940945 | 3 | 80.68  | KV452742.1 | 4471256 | 2-scf00046 | 2 |

|              |   |        |            |         |            |   |
|--------------|---|--------|------------|---------|------------|---|
| AX-157940946 | 3 | 80.68  | KV452742.1 | 4471647 | 2-scf00046 | 2 |
| AX-157814786 | 3 | 80.68  | KV452742.1 | 4473755 | 2-scf00046 | 2 |
| AX-157940947 | 3 | 80.68  | KV452742.1 | 4474746 | 2-scf00046 | 2 |
| AX-157939986 | 3 | 80.713 | KV452742.1 | 3060758 | 2-scf00046 | 2 |
| AX-157814681 | 3 | 80.713 | KV452742.1 | 3066274 | 2-scf00046 | 2 |
| AX-157939996 | 3 | 80.713 | KV452742.1 | 3071390 | 2-scf00046 | 2 |
| AX-157940008 | 3 | 80.713 | KV452742.1 | 3082119 | 2-scf00046 | 2 |
| AX-157939007 | 3 | 80.823 | KV452742.1 | 656804  | 2-scf00046 | 2 |
| AX-157939122 | 3 | 80.823 | KV452742.1 | 878910  | 2-scf00046 | 2 |
| AX-157939208 | 3 | 80.823 | KV452742.1 | 1129466 | 2-scf00046 | 2 |
| AX-157939226 | 3 | 80.823 | KV452742.1 | 1146620 | 2-scf00046 | 2 |
| AX-157939379 | 3 | 80.823 | KV452742.1 | 1350535 | 2-scf00046 | 2 |
| AX-157708174 | 3 | 80.823 | KV452742.1 | 1353628 | 2-scf00046 | 2 |
| AX-157939384 | 3 | 80.823 | KV452742.1 | 1355298 | 2-scf00046 | 2 |
| AX-157708022 | 3 | 80.823 | KV452742.1 | 1356373 | 2-scf00046 | 2 |
| AX-157939388 | 3 | 80.823 | KV452742.1 | 1361466 | 2-scf00046 | 2 |
| AX-157939389 | 3 | 80.823 | KV452742.1 | 1362702 | 2-scf00046 | 2 |
| AX-157939391 | 3 | 80.823 | KV452742.1 | 1364144 | 2-scf00046 | 2 |
| AX-157939393 | 3 | 80.823 | KV452742.1 | 1365525 | 2-scf00046 | 2 |
| AX-157939394 | 3 | 80.823 | KV452742.1 | 1366849 | 2-scf00046 | 2 |
| AX-157939396 | 3 | 80.823 | KV452742.1 | 1368597 | 2-scf00046 | 2 |
| AX-157939397 | 3 | 80.823 | KV452742.1 | 1371161 | 2-scf00046 | 2 |
| AX-157939399 | 3 | 80.823 | KV452742.1 | 1373457 | 2-scf00046 | 2 |
| AX-157939401 | 3 | 80.823 | KV452742.1 | 1374015 | 2-scf00046 | 2 |
| AX-157939405 | 3 | 80.823 | KV452742.1 | 1375773 | 2-scf00046 | 2 |
| AX-157939408 | 3 | 80.823 | KV452742.1 | 1376573 | 2-scf00046 | 2 |
| AX-157939410 | 3 | 80.823 | KV452742.1 | 1377661 | 2-scf00046 | 2 |
| AX-157939412 | 3 | 80.823 | KV452742.1 | 1381069 | 2-scf00046 | 2 |
| AX-157939414 | 3 | 80.823 | KV452742.1 | 1381778 | 2-scf00046 | 2 |
| AX-157939415 | 3 | 80.823 | KV452742.1 | 1382572 | 2-scf00046 | 2 |
| AX-157939418 | 3 | 80.823 | KV452742.1 | 1386141 | 2-scf00046 | 2 |
| AX-157939419 | 3 | 80.823 | KV452742.1 | 1386663 | 2-scf00046 | 2 |
| AX-157939423 | 3 | 80.823 | KV452742.1 | 1395635 | 2-scf00046 | 2 |
| AX-157939426 | 3 | 80.823 | KV452742.1 | 1397425 | 2-scf00046 | 2 |
| AX-157939427 | 3 | 80.823 | KV452742.1 | 1397787 | 2-scf00046 | 2 |
| AX-157939429 | 3 | 80.823 | KV452742.1 | 1398665 | 2-scf00046 | 2 |
| AX-157939434 | 3 | 80.823 | KV452742.1 | 1403907 | 2-scf00046 | 2 |
| AX-157939436 | 3 | 80.823 | KV452742.1 | 1404850 | 2-scf00046 | 2 |
| AX-157939439 | 3 | 80.823 | KV452742.1 | 1406174 | 2-scf00046 | 2 |
| AX-157939440 | 3 | 80.823 | KV452742.1 | 1406783 | 2-scf00046 | 2 |
| AX-157939444 | 3 | 80.823 | KV452742.1 | 1408466 | 2-scf00046 | 2 |
| AX-157939447 | 3 | 80.823 | KV452742.1 | 1410478 | 2-scf00046 | 2 |
| AX-157939452 | 3 | 80.823 | KV452742.1 | 1416576 | 2-scf00046 | 2 |
| AX-157939454 | 3 | 80.823 | KV452742.1 | 1417856 | 2-scf00046 | 2 |
| AX-157939470 | 3 | 80.823 | KV452742.1 | 1438815 | 2-scf00046 | 2 |
| AX-157939472 | 3 | 80.823 | KV452742.1 | 1443171 | 2-scf00046 | 2 |
| AX-157939473 | 3 | 80.823 | KV452742.1 | 1443579 | 2-scf00046 | 2 |
| AX-157939475 | 3 | 80.823 | KV452742.1 | 1450024 | 2-scf00046 | 2 |
| AX-157814637 | 3 | 80.823 | KV452742.1 | 1453761 | 2-scf00046 | 2 |
| AX-157939477 | 3 | 80.823 | KV452742.1 | 1454090 | 2-scf00046 | 2 |
| AX-157814639 | 3 | 80.823 | KV452742.1 | 1455071 | 2-scf00046 | 2 |

|              |   |        |            |         |            |   |
|--------------|---|--------|------------|---------|------------|---|
| AX-157939479 | 3 | 80.823 | KV452742.1 | 1456706 | 2-scf00046 | 2 |
| AX-157939480 | 3 | 80.823 | KV452742.1 | 1457254 | 2-scf00046 | 2 |
| AX-157939488 | 3 | 80.823 | KV452742.1 | 1460385 | 2-scf00046 | 2 |
| AX-157939492 | 3 | 80.823 | KV452742.1 | 1462168 | 2-scf00046 | 2 |
| AX-157939497 | 3 | 80.823 | KV452742.1 | 1464444 | 2-scf00046 | 2 |
| AX-157939501 | 3 | 80.823 | KV452742.1 | 1470498 | 2-scf00046 | 2 |
| AX-157939506 | 3 | 80.823 | KV452742.1 | 1471772 | 2-scf00046 | 2 |
| AX-158390041 | 3 | 80.823 | KV452742.1 | 1475257 | 2-scf00046 | 2 |
| AX-157939509 | 3 | 80.823 | KV452742.1 | 1476296 | 2-scf00046 | 2 |
| AX-157814641 | 3 | 80.823 | KV452742.1 | 1477577 | 2-scf00046 | 2 |
| AX-157939512 | 3 | 80.823 | KV452742.1 | 1486274 | 2-scf00046 | 2 |
| AX-157854520 | 3 | 80.823 | KV452742.1 | 1488520 | 2-scf00046 | 2 |
| AX-157854521 | 3 | 80.823 | KV452742.1 | 1491502 | 2-scf00046 | 2 |
| AX-157939522 | 3 | 80.823 | KV452742.1 | 1491651 | 2-scf00046 | 2 |
| AX-157939531 | 3 | 80.823 | KV452742.1 | 1503695 | 2-scf00046 | 2 |
| AX-157854522 | 3 | 80.823 | KV452742.1 | 1505697 | 2-scf00046 | 2 |
| AX-157939532 | 3 | 80.823 | KV452742.1 | 1506091 | 2-scf00046 | 2 |
| AX-157939533 | 3 | 80.823 | KV452742.1 | 1507072 | 2-scf00046 | 2 |
| AX-157939538 | 3 | 80.823 | KV452742.1 | 1510380 | 2-scf00046 | 2 |
| AX-157939546 | 3 | 80.823 | KV452742.1 | 1523416 | 2-scf00046 | 2 |
| AX-157939651 | 3 | 80.823 | KV452742.1 | 1638508 | 2-scf00046 | 2 |
| AX-157941351 | 3 | 80.823 | KV452742.1 | 1666757 | 2-scf00046 | 2 |
| AX-157854566 | 3 | 80.823 | KV452742.1 | 1704870 | 2-scf00046 | 2 |
| AX-157854565 | 3 | 80.823 | KV452742.1 | 1705027 | 2-scf00046 | 2 |
| AX-157854564 | 3 | 80.823 | KV452742.1 | 1705642 | 2-scf00046 | 2 |
| AX-157854563 | 3 | 80.823 | KV452742.1 | 1705908 | 2-scf00046 | 2 |
| AX-157854561 | 3 | 80.823 | KV452742.1 | 1712693 | 2-scf00046 | 2 |
| AX-157941310 | 3 | 80.823 | KV452742.1 | 1716144 | 2-scf00046 | 2 |
| AX-157854560 | 3 | 80.823 | KV452742.1 | 1717302 | 2-scf00046 | 2 |
| AX-157941306 | 3 | 80.823 | KV452742.1 | 1719942 | 2-scf00046 | 2 |
| AX-157941305 | 3 | 80.823 | KV452742.1 | 1720731 | 2-scf00046 | 2 |
| AX-157941303 | 3 | 80.823 | KV452742.1 | 1721213 | 2-scf00046 | 2 |
| AX-157941300 | 3 | 80.823 | KV452742.1 | 1724817 | 2-scf00046 | 2 |
| AX-157941296 | 3 | 80.823 | KV452742.1 | 1728108 | 2-scf00046 | 2 |
| AX-157941290 | 3 | 80.823 | KV452742.1 | 1731099 | 2-scf00046 | 2 |
| AX-157941286 | 3 | 80.823 | KV452742.1 | 1732046 | 2-scf00046 | 2 |
| AX-157941282 | 3 | 80.823 | KV452742.1 | 1734727 | 2-scf00046 | 2 |
| AX-157941281 | 3 | 80.823 | KV452742.1 | 1735671 | 2-scf00046 | 2 |
| AX-157941279 | 3 | 80.823 | KV452742.1 | 1737300 | 2-scf00046 | 2 |
| AX-157941278 | 3 | 80.823 | KV452742.1 | 1737844 | 2-scf00046 | 2 |
| AX-157941275 | 3 | 80.823 | KV452742.1 | 1739407 | 2-scf00046 | 2 |
| AX-157941272 | 3 | 80.823 | KV452742.1 | 1740691 | 2-scf00046 | 2 |
| AX-157941267 | 3 | 80.823 | KV452742.1 | 1746943 | 2-scf00046 | 2 |
| AX-157941266 | 3 | 80.823 | KV452742.1 | 1747323 | 2-scf00046 | 2 |
| AX-157941263 | 3 | 80.823 | KV452742.1 | 1749444 | 2-scf00046 | 2 |
| AX-157941259 | 3 | 80.823 | KV452742.1 | 1751899 | 2-scf00046 | 2 |
| AX-157941257 | 3 | 80.823 | KV452742.1 | 1752796 | 2-scf00046 | 2 |
| AX-157941242 | 3 | 80.823 | KV452742.1 | 1763092 | 2-scf00046 | 2 |
| AX-157941240 | 3 | 80.823 | KV452742.1 | 1765017 | 2-scf00046 | 2 |
| AX-157941239 | 3 | 80.823 | KV452742.1 | 1765803 | 2-scf00046 | 2 |
| AX-157941227 | 3 | 80.823 | KV452742.1 | 1777204 | 2-scf00046 | 2 |

|              |   |        |            |         |            |   |
|--------------|---|--------|------------|---------|------------|---|
| AX-157814807 | 3 | 80.823 | KV452742.1 | 1780901 | 2-scf00046 | 2 |
| AX-157814806 | 3 | 80.823 | KV452742.1 | 1781586 | 2-scf00046 | 2 |
| AX-157941221 | 3 | 80.823 | KV452742.1 | 1784481 | 2-scf00046 | 2 |
| AX-157941219 | 3 | 80.823 | KV452742.1 | 1784743 | 2-scf00046 | 2 |
| AX-157941118 | 3 | 80.823 | KV452742.1 | 1911307 | 2-scf00046 | 2 |
| AX-157941052 | 3 | 80.823 | KV452742.1 | 1994456 | 2-scf00046 | 2 |
| AX-157941006 | 3 | 80.823 | KV452742.1 | 2158240 | 2-scf00046 | 2 |
| AX-157939998 | 3 | 80.823 | KV452742.1 | 3073008 | 2-scf00046 | 2 |
| AX-157939999 | 3 | 80.823 | KV452742.1 | 3076004 | 2-scf00046 | 2 |
| AX-157725791 | 3 | 80.823 | KV452742.1 | 3076933 | 2-scf00046 | 2 |
| AX-157814683 | 3 | 80.823 | KV452742.1 | 3078093 | 2-scf00046 | 2 |
| AX-157722000 | 3 | 80.823 | KV452742.1 | 3078183 | 2-scf00046 | 2 |
| AX-157940015 | 3 | 80.823 | KV452742.1 | 3087708 | 2-scf00046 | 2 |
| AX-157940022 | 3 | 80.823 | KV452742.1 | 3095074 | 2-scf00046 | 2 |
| AX-157814687 | 3 | 80.823 | KV452742.1 | 3099444 | 2-scf00046 | 2 |
| AX-157940025 | 3 | 80.823 | KV452742.1 | 3100496 | 2-scf00046 | 2 |
| AX-157940027 | 3 | 80.823 | KV452742.1 | 3101230 | 2-scf00046 | 2 |
| AX-157814689 | 3 | 80.823 | KV452742.1 | 3105079 | 2-scf00046 | 2 |
| AX-157814690 | 3 | 80.823 | KV452742.1 | 3112583 | 2-scf00046 | 2 |
| AX-157814691 | 3 | 80.823 | KV452742.1 | 3113252 | 2-scf00046 | 2 |
| AX-157883872 | 3 | 80.823 | KV452742.1 | 3113970 | 2-scf00046 | 2 |
| AX-157940037 | 3 | 80.823 | KV452742.1 | 3116466 | 2-scf00046 | 2 |
| AX-157940044 | 3 | 80.823 | KV452742.1 | 3119610 | 2-scf00046 | 2 |
| AX-157940045 | 3 | 80.823 | KV452742.1 | 3120641 | 2-scf00046 | 2 |
| AX-157714367 | 3 | 80.823 | KV452742.1 | 3120719 | 2-scf00046 | 2 |
| AX-157940046 | 3 | 80.823 | KV452742.1 | 3121934 | 2-scf00046 | 2 |
| AX-157814695 | 3 | 80.823 | KV452742.1 | 3124308 | 2-scf00046 | 2 |
| AX-157940051 | 3 | 80.823 | KV452742.1 | 3128223 | 2-scf00046 | 2 |
| AX-157940052 | 3 | 80.823 | KV452742.1 | 3128975 | 2-scf00046 | 2 |
| AX-157940053 | 3 | 80.823 | KV452742.1 | 3129200 | 2-scf00046 | 2 |
| AX-157940065 | 3 | 80.823 | KV452742.1 | 3142009 | 2-scf00046 | 2 |
| AX-157940086 | 3 | 80.823 | KV452742.1 | 3162167 | 2-scf00046 | 2 |
| AX-157940091 | 3 | 80.823 | KV452742.1 | 3168498 | 2-scf00046 | 2 |
| AX-157940019 | 3 | 80.852 | KV452742.1 | 3092861 | 2-scf00046 | 2 |
| AX-157714702 | 3 | 80.852 | KV452742.1 | 3133125 | 2-scf00046 | 2 |
| AX-157940060 | 3 | 80.906 | KV452742.1 | 3139504 | 2-scf00046 | 2 |
| AX-157940196 | 3 | 80.906 | KV452742.1 | 3291432 | 2-scf00046 | 2 |
| AX-157940870 | 3 | 80.906 | KV452742.1 | 4366609 | 2-scf00046 | 2 |
| AX-157753531 | 3 | 80.932 | KV452742.1 | 3047424 | 2-scf00046 | 2 |
| AX-157939989 | 3 | 80.932 | KV452742.1 | 3065321 | 2-scf00046 | 2 |
| AX-157940074 | 3 | 80.932 | KV452742.1 | 3149251 | 2-scf00046 | 2 |
| AX-157940075 | 3 | 80.932 | KV452742.1 | 3151468 | 2-scf00046 | 2 |
| AX-157940080 | 3 | 80.932 | KV452742.1 | 3154014 | 2-scf00046 | 2 |
| AX-157940093 | 3 | 80.932 | KV452742.1 | 3169619 | 2-scf00046 | 2 |
| AX-157940111 | 3 | 80.932 | KV452742.1 | 3178479 | 2-scf00046 | 2 |
| AX-157940103 | 3 | 80.973 | KV452742.1 | 3174688 | 2-scf00046 | 2 |
| AX-157940107 | 3 | 81.017 | KV452742.1 | 3176291 | 2-scf00046 | 2 |
| AX-157939529 | 3 | 81.041 | KV452742.1 | 1502926 | 2-scf00046 | 2 |
| AX-157939791 | 3 | 81.041 | KV452742.1 | 2832328 | 2-scf00046 | 2 |
| AX-157940116 | 3 | 81.041 | KV452742.1 | 3183988 | 2-scf00046 | 2 |
| AX-157940117 | 3 | 81.041 | KV452742.1 | 3185202 | 2-scf00046 | 2 |

|              |   |        |            |         |            |   |
|--------------|---|--------|------------|---------|------------|---|
| AX-157938817 | 3 | 81.26  | KV452742.1 | 468461  | 2-scf00046 | 2 |
| AX-157939039 | 3 | 81.26  | KV452742.1 | 706316  | 2-scf00046 | 2 |
| AX-157941312 | 3 | 81.26  | KV452742.1 | 1710868 | 2-scf00046 | 2 |
| AX-157814668 | 3 | 81.26  | KV452742.1 | 2913035 | 2-scf00046 | 2 |
| AX-157854535 | 3 | 81.26  | KV452742.1 | 3192252 | 2-scf00046 | 2 |
| AX-157940121 | 3 | 81.26  | KV452742.1 | 3192904 | 2-scf00046 | 2 |
| AX-157940126 | 3 | 81.26  | KV452742.1 | 3200300 | 2-scf00046 | 2 |
| AX-157940131 | 3 | 81.26  | KV452742.1 | 3209462 | 2-scf00046 | 2 |
| AX-157725353 | 3 | 81.26  | KV452742.1 | 3215179 | 2-scf00046 | 2 |
| AX-157940137 | 3 | 81.26  | KV452742.1 | 3215512 | 2-scf00046 | 2 |
| AX-157940140 | 3 | 81.26  | KV452742.1 | 3215980 | 2-scf00046 | 2 |
| AX-157814702 | 3 | 81.26  | KV452742.1 | 3216508 | 2-scf00046 | 2 |
| AX-157940142 | 3 | 81.26  | KV452742.1 | 3219217 | 2-scf00046 | 2 |
| AX-157940145 | 3 | 81.26  | KV452742.1 | 3231463 | 2-scf00046 | 2 |
| AX-157814706 | 3 | 81.26  | KV452742.1 | 3232296 | 2-scf00046 | 2 |
| AX-157940148 | 3 | 81.26  | KV452742.1 | 3232543 | 2-scf00046 | 2 |
| AX-157940153 | 3 | 81.26  | KV452742.1 | 3234777 | 2-scf00046 | 2 |
| AX-157814708 | 3 | 81.26  | KV452742.1 | 3234922 | 2-scf00046 | 2 |
| AX-157940157 | 3 | 81.26  | KV452742.1 | 3237720 | 2-scf00046 | 2 |
| AX-157940167 | 3 | 81.26  | KV452742.1 | 3243103 | 2-scf00046 | 2 |
| AX-158379372 | 3 | 81.26  | KV452742.1 | 3247619 | 2-scf00046 | 2 |
| AX-157814711 | 3 | 81.26  | KV452742.1 | 3247952 | 2-scf00046 | 2 |
| AX-157716940 | 3 | 81.26  | KV452742.1 | 3257861 | 2-scf00046 | 2 |
| AX-157940176 | 3 | 81.26  | KV452742.1 | 3264728 | 2-scf00046 | 2 |
| AX-157814715 | 3 | 81.26  | KV452742.1 | 3296323 | 2-scf00046 | 2 |
| AX-157854538 | 3 | 81.26  | KV452742.1 | 3336186 | 2-scf00046 | 2 |
| AX-157940238 | 3 | 81.26  | KV452742.1 | 3343218 | 2-scf00046 | 2 |
| AX-157940239 | 3 | 81.26  | KV452742.1 | 3344480 | 2-scf00046 | 2 |
| AX-157940242 | 3 | 81.26  | KV452742.1 | 3345693 | 2-scf00046 | 2 |
| AX-157940293 | 3 | 81.26  | KV452742.1 | 3393977 | 2-scf00046 | 2 |
| AX-157940328 | 3 | 81.26  | KV452742.1 | 3432067 | 2-scf00046 | 2 |
| AX-157814721 | 3 | 81.26  | KV452742.1 | 3432405 | 2-scf00046 | 2 |
| AX-157814722 | 3 | 81.26  | KV452742.1 | 3433125 | 2-scf00046 | 2 |
| AX-157940336 | 3 | 81.26  | KV452742.1 | 3442913 | 2-scf00046 | 2 |
| AX-157940337 | 3 | 81.26  | KV452742.1 | 3443552 | 2-scf00046 | 2 |
| AX-157875166 | 3 | 81.26  | KV452742.1 | 3806483 | 2-scf00046 | 2 |
| AX-157940613 | 3 | 81.26  | KV452742.1 | 3871103 | 2-scf00046 | 2 |
| AX-157940659 | 3 | 81.26  | KV452742.1 | 3998187 | 2-scf00046 | 2 |
| AX-157940660 | 3 | 81.26  | KV452742.1 | 3998825 | 2-scf00046 | 2 |
| AX-157940666 | 3 | 81.26  | KV452742.1 | 4002409 | 2-scf00046 | 2 |
| AX-157940667 | 3 | 81.26  | KV452742.1 | 4003681 | 2-scf00046 | 2 |
| AX-157773398 | 3 | 81.26  | KV452742.1 | 4250949 | 2-scf00046 | 2 |
| AX-157940779 | 3 | 81.26  | KV452742.1 | 4251558 | 2-scf00046 | 2 |
| AX-157940815 | 3 | 81.26  | KV452742.1 | 4305443 | 2-scf00046 | 2 |
| AX-158379375 | 3 | 81.26  | KV452742.1 | 4423449 | 2-scf00046 | 2 |
| AX-157940968 | 3 | 81.26  | KV452742.1 | 4501620 | 2-scf00046 | 2 |
| AX-157940983 | 3 | 81.26  | KV452742.1 | 4516391 | 2-scf00046 | 2 |
| AX-157940993 | 3 | 81.26  | KV452742.1 | 4524003 | 2-scf00046 | 2 |
| AX-157773685 | 3 | 81.273 | KV452742.1 | 3260841 | 2-scf00046 | 2 |
| AX-157814713 | 3 | 81.284 | KV452742.1 | 3261392 | 2-scf00046 | 2 |
| AX-157940174 | 3 | 81.319 | KV452742.1 | 3263124 | 2-scf00046 | 2 |

|              |   |        |             |          |            |    |
|--------------|---|--------|-------------|----------|------------|----|
| AX-157854526 | 3 | 81.369 | KV452742.1  | 2785473  | 2-scf00046 | 2  |
| AX-157854527 | 3 | 81.369 | KV452742.1  | 2786457  | 2-scf00046 | 2  |
| AX-157814660 | 3 | 81.369 | KV452742.1  | 2802541  | 2-scf00046 | 2  |
| AX-157854529 | 3 | 81.369 | KV452742.1  | 2820008  | 2-scf00046 | 2  |
| AX-157854530 | 3 | 81.369 | KV452742.1  | 2840934  | 2-scf00046 | 2  |
| AX-157939804 | 3 | 81.369 | KV452742.1  | 2853078  | 2-scf00046 | 2  |
| AX-157939826 | 3 | 81.369 | KV452742.1  | 2875940  | 2-scf00046 | 2  |
| AX-158405745 | 3 | 81.369 | KV452742.1  | 2878845  | 2-scf00046 | 2  |
| AX-157814665 | 3 | 81.369 | KV452742.1  | 2889600  | 2-scf00046 | 2  |
| AX-157939833 | 3 | 81.369 | KV452742.1  | 2892162  | 2-scf00046 | 2  |
| AX-157939846 | 3 | 81.369 | KV452742.1  | 2920480  | 2-scf00046 | 2  |
| AX-157939849 | 3 | 81.369 | KV452742.1  | 2923447  | 2-scf00046 | 2  |
| AX-157939850 | 3 | 81.369 | KV452742.1  | 2924325  | 2-scf00046 | 2  |
| AX-157939851 | 3 | 81.369 | KV452742.1  | 2924892  | 2-scf00046 | 2  |
| AX-157939855 | 3 | 81.369 | KV452742.1  | 2925621  | 2-scf00046 | 2  |
| AX-157939865 | 3 | 81.369 | KV452742.1  | 2935009  | 2-scf00046 | 2  |
| AX-157939866 | 3 | 81.369 | KV452742.1  | 2935826  | 2-scf00046 | 2  |
| AX-157939868 | 3 | 81.369 | KV452742.1  | 2936657  | 2-scf00046 | 2  |
| AX-157939878 | 3 | 81.369 | KV452742.1  | 2953862  | 2-scf00046 | 2  |
| AX-157814682 | 3 | 81.369 | KV452742.1  | 3077593  | 2-scf00046 | 2  |
| AX-157940178 | 3 | 81.369 | KV452742.1  | 3272126  | 2-scf00046 | 2  |
| AX-157940179 | 3 | 81.369 | KV452742.1  | 3275982  | 2-scf00046 | 2  |
| AX-157940181 | 3 | 81.369 | KV452742.1  | 3277685  | 2-scf00046 | 2  |
| AX-157940183 | 3 | 81.369 | KV452742.1  | 3278192  | 2-scf00046 | 2  |
| AX-157940185 | 3 | 81.369 | KV452742.1  | 3282076  | 2-scf00046 | 2  |
| AX-157940186 | 3 | 81.369 | KV452742.1  | 3282601  | 2-scf00046 | 2  |
| AX-157940187 | 3 | 81.369 | KV452742.1  | 3283687  | 2-scf00046 | 2  |
| AX-157940204 | 3 | 81.369 | KV452742.1  | 3298427  | 2-scf00046 | 2  |
| AX-157814750 | 3 | 81.369 | KV452742.1  | 4018108  | 2-scf00046 | 2  |
| AX-157706731 | 3 | 81.369 | 3ML01032813 | 300      | scf08443_1 | UN |
| AX-157767591 | 3 | 81.404 | KV452742.1  | 3300594  | 2-scf00046 | 2  |
| AX-157814716 | 3 | 81.443 | KV452742.1  | 3302629  | 2-scf00046 | 2  |
| AX-157933568 | 3 | 81.478 | KV452730.1  | 14069288 | 2-scf00040 | 2  |
| AX-157933610 | 3 | 81.478 | KV452730.1  | 14138003 | 2-scf00040 | 2  |
| AX-157814299 | 3 | 81.478 | KV452733.1  | 520410   | 2-scf00041 | 2  |
| AX-157875127 | 3 | 81.478 | KV452742.1  | 179870   | 2-scf00046 | 2  |
| AX-157758471 | 3 | 81.478 | KV452742.1  | 226963   | 2-scf00046 | 2  |
| AX-157940211 | 3 | 81.478 | KV452742.1  | 3306923  | 2-scf00046 | 2  |
| AX-157940221 | 3 | 81.478 | KV452742.1  | 3316598  | 2-scf00046 | 2  |
| AX-157940223 | 3 | 81.478 | KV452742.1  | 3317589  | 2-scf00046 | 2  |
| AX-157940224 | 3 | 81.478 | KV452742.1  | 3318543  | 2-scf00046 | 2  |
| AX-157940245 | 3 | 81.478 | KV452742.1  | 3348462  | 2-scf00046 | 2  |
| AX-157854542 | 3 | 81.478 | KV452742.1  | 3915617  | 2-scf00046 | 2  |
| AX-157943221 | 3 | 81.478 | KV452747.1  | 179574   | 2-scf00053 | 2  |
| AX-157940264 | 3 | 81.488 | KV452742.1  | 3367890  | 2-scf00046 | 2  |
| AX-157814719 | 3 | 81.496 | KV452742.1  | 3380365  | 2-scf00046 | 2  |
| AX-157940649 | 3 | 81.496 | KV452742.1  | 3978776  | 2-scf00046 | 2  |
| AX-157940307 | 3 | 81.504 | KV452742.1  | 3400838  | 2-scf00046 | 2  |
| AX-157940387 | 3 | 81.504 | KV452742.1  | 3526589  | 2-scf00046 | 2  |
| AX-157725177 | 3 | 81.504 | KV452742.1  | 4381395  | 2-scf00046 | 2  |
| AX-157940992 | 3 | 81.504 | KV452742.1  | 4523651  | 2-scf00046 | 2  |

|              |   |        |             |          |            |    |
|--------------|---|--------|-------------|----------|------------|----|
| AX-157941000 | 3 | 81.504 | KV452742.1  | 4529642  | 2-scf00046 | 2  |
| AX-157718125 | 3 | 81.518 | KV452742.1  | 3401656  | 2-scf00046 | 2  |
| AX-157940313 | 3 | 81.531 | KV452742.1  | 3402582  | 2-scf00046 | 2  |
| AX-157939053 | 3 | 81.545 | KV452742.1  | 728574   | 2-scf00046 | 2  |
| AX-157939135 | 3 | 81.545 | KV452742.1  | 937831   | 2-scf00046 | 2  |
| AX-157940298 | 3 | 81.545 | KV452742.1  | 3394961  | 2-scf00046 | 2  |
| AX-157940338 | 3 | 81.545 | KV452742.1  | 3444743  | 2-scf00046 | 2  |
| AX-157941598 | 3 | 81.545 | KV452745.1  | 91238    | 2-scf00051 | 2  |
| AX-157942943 | 3 | 81.545 | KV452744.1  | 6496     | 2-scf00052 | 2  |
| AX-157940353 | 3 | 81.552 | KV452742.1  | 3486392  | 2-scf00046 | 2  |
| AX-157940308 | 3 | 81.561 | KV452742.1  | 3401105  | 2-scf00046 | 2  |
| AX-157940366 | 3 | 81.561 | KV452742.1  | 3498271  | 2-scf00046 | 2  |
| AX-157741972 | 3 | 81.561 | KV452742.1  | 3565658  | 2-scf00046 | 2  |
| AX-157726581 | 3 | 81.57  | KV452742.1  | 3504082  | 2-scf00046 | 2  |
| AX-157774033 | 3 | 81.58  | KV452742.1  | 3315703  | 2-scf00046 | 2  |
| AX-157940226 | 3 | 81.58  | KV452742.1  | 3326313  | 2-scf00046 | 2  |
| AX-157940253 | 3 | 81.58  | KV452742.1  | 3357719  | 2-scf00046 | 2  |
| AX-157771894 | 3 | 81.58  | KV452742.1  | 3381870  | 2-scf00046 | 2  |
| AX-157940281 | 3 | 81.58  | KV452742.1  | 3384126  | 2-scf00046 | 2  |
| AX-157940296 | 3 | 81.58  | KV452742.1  | 3394353  | 2-scf00046 | 2  |
| AX-157940300 | 3 | 81.58  | KV452742.1  | 3395641  | 2-scf00046 | 2  |
| AX-157940301 | 3 | 81.58  | KV452742.1  | 3396576  | 2-scf00046 | 2  |
| AX-157940331 | 3 | 81.58  | KV452742.1  | 3437723  | 2-scf00046 | 2  |
| AX-157940340 | 3 | 81.58  | KV452742.1  | 3452668  | 2-scf00046 | 2  |
| AX-157940373 | 3 | 81.58  | KV452742.1  | 3514501  | 2-scf00046 | 2  |
| AX-157940389 | 3 | 81.58  | KV452742.1  | 3526989  | 2-scf00046 | 2  |
| AX-157940397 | 3 | 81.58  | KV452742.1  | 3534630  | 2-scf00046 | 2  |
| AX-157940400 | 3 | 81.58  | KV452742.1  | 3536217  | 2-scf00046 | 2  |
| AX-157814731 | 3 | 81.58  | KV452742.1  | 3578262  | 2-scf00046 | 2  |
| AX-157940443 | 3 | 81.58  | KV452742.1  | 3605044  | 2-scf00046 | 2  |
| AX-157940479 | 3 | 81.58  | KV452742.1  | 3648636  | 2-scf00046 | 2  |
| AX-157940820 | 3 | 81.58  | KV452742.1  | 4308899  | 2-scf00046 | 2  |
| AX-157940892 | 3 | 81.58  | KV452742.1  | 4419442  | 2-scf00046 | 2  |
| AX-157940898 | 3 | 81.58  | KV452742.1  | 4423721  | 2-scf00046 | 2  |
| AX-157940901 | 3 | 81.58  | KV452742.1  | 4424072  | 2-scf00046 | 2  |
| AX-157749869 | 3 | 81.587 | KV452742.1  | 714153   | 2-scf00046 | 2  |
| AX-157940378 | 3 | 81.587 | KV452742.1  | 3516859  | 2-scf00046 | 2  |
| AX-157940380 | 3 | 81.587 | KV452742.1  | 3523586  | 2-scf00046 | 2  |
| AX-157694374 | 3 | 81.587 | KV452742.1  | 3544279  | 2-scf00046 | 2  |
| AX-157940409 | 3 | 81.587 | KV452742.1  | 3549374  | 2-scf00046 | 2  |
| AX-157940419 | 3 | 81.587 | KV452742.1  | 3563357  | 2-scf00046 | 2  |
| AX-157940427 | 3 | 81.587 | KV452742.1  | 3578630  | 2-scf00046 | 2  |
| AX-157940429 | 3 | 81.587 | KV452742.1  | 3579738  | 2-scf00046 | 2  |
| AX-157940436 | 3 | 81.587 | KV452742.1  | 3596555  | 2-scf00046 | 2  |
| AX-157707050 | 3 | 81.587 | 3ML01033403 | 476      | scf09052_1 | UN |
| AX-157940487 | 3 | 81.686 | KV452742.1  | 3653359  | 2-scf00046 | 2  |
| AX-157931283 | 3 | 81.806 | KV452730.1  | 10837686 | 2-scf00040 | 2  |
| AX-157862728 | 3 | 81.806 | KV452730.1  | 11714974 | 2-scf00040 | 2  |
| AX-157932076 | 3 | 81.806 | KV452730.1  | 11871117 | 2-scf00040 | 2  |
| AX-157937634 | 3 | 81.806 | KV452732.1  | 448136   | 2-scf00042 | 2  |
| AX-157938715 | 3 | 81.806 | KV452742.1  | 361057   | 2-scf00046 | 2  |



|              |   |        |            |         |            |   |
|--------------|---|--------|------------|---------|------------|---|
| AX-157939087 | 3 | 81.806 | KV452742.1 | 805135  | 2-scf00046 | 2 |
| AX-157939094 | 3 | 81.806 | KV452742.1 | 823264  | 2-scf00046 | 2 |
| AX-157939105 | 3 | 81.806 | KV452742.1 | 847804  | 2-scf00046 | 2 |
| AX-157939171 | 3 | 81.806 | KV452742.1 | 1059464 | 2-scf00046 | 2 |
| AX-157939172 | 3 | 81.806 | KV452742.1 | 1060159 | 2-scf00046 | 2 |
| AX-157744933 | 3 | 81.806 | KV452742.1 | 1772198 | 2-scf00046 | 2 |
| AX-157814809 | 3 | 81.806 | KV452742.1 | 1772871 | 2-scf00046 | 2 |
| AX-157814661 | 3 | 81.806 | KV452742.1 | 2808157 | 2-scf00046 | 2 |
| AX-157939904 | 3 | 81.806 | KV452742.1 | 2988611 | 2-scf00046 | 2 |
| AX-157940132 | 3 | 81.806 | KV452742.1 | 3209872 | 2-scf00046 | 2 |
| AX-157940227 | 3 | 81.806 | KV452742.1 | 3328164 | 2-scf00046 | 2 |
| AX-157940284 | 3 | 81.806 | KV452742.1 | 3385572 | 2-scf00046 | 2 |
| AX-157940322 | 3 | 81.806 | KV452742.1 | 3417978 | 2-scf00046 | 2 |
| AX-157940379 | 3 | 81.806 | KV452742.1 | 3518461 | 2-scf00046 | 2 |
| AX-157940438 | 3 | 81.806 | KV452742.1 | 3599938 | 2-scf00046 | 2 |
| AX-157940492 | 3 | 81.806 | KV452742.1 | 3655727 | 2-scf00046 | 2 |
| AX-157940494 | 3 | 81.806 | KV452742.1 | 3656312 | 2-scf00046 | 2 |
| AX-157940496 | 3 | 81.806 | KV452742.1 | 3657362 | 2-scf00046 | 2 |
| AX-157940498 | 3 | 81.806 | KV452742.1 | 3659132 | 2-scf00046 | 2 |
| AX-158379374 | 3 | 81.806 | KV452742.1 | 3662883 | 2-scf00046 | 2 |
| AX-157814738 | 3 | 81.806 | KV452742.1 | 3664278 | 2-scf00046 | 2 |
| AX-158382628 | 3 | 81.806 | KV452742.1 | 3681026 | 2-scf00046 | 2 |
| AX-157940508 | 3 | 81.806 | KV452742.1 | 3685750 | 2-scf00046 | 2 |
| AX-157940512 | 3 | 81.806 | KV452742.1 | 3687630 | 2-scf00046 | 2 |
| AX-157814739 | 3 | 81.806 | KV452742.1 | 3708117 | 2-scf00046 | 2 |
| AX-157854540 | 3 | 81.806 | KV452742.1 | 3735431 | 2-scf00046 | 2 |
| AX-157940538 | 3 | 81.806 | KV452742.1 | 3746288 | 2-scf00046 | 2 |
| AX-157940539 | 3 | 81.806 | KV452742.1 | 3748081 | 2-scf00046 | 2 |
| AX-157940555 | 3 | 81.806 | KV452742.1 | 3775091 | 2-scf00046 | 2 |
| AX-157940559 | 3 | 81.806 | KV452742.1 | 3781418 | 2-scf00046 | 2 |
| AX-157940560 | 3 | 81.806 | KV452742.1 | 3782856 | 2-scf00046 | 2 |
| AX-157940562 | 3 | 81.806 | KV452742.1 | 3783606 | 2-scf00046 | 2 |
| AX-157940565 | 3 | 81.806 | KV452742.1 | 3786723 | 2-scf00046 | 2 |
| AX-157940572 | 3 | 81.806 | KV452742.1 | 3787119 | 2-scf00046 | 2 |
| AX-157940574 | 3 | 81.806 | KV452742.1 | 3787540 | 2-scf00046 | 2 |
| AX-157940577 | 3 | 81.806 | KV452742.1 | 3788116 | 2-scf00046 | 2 |
| AX-157940578 | 3 | 81.806 | KV452742.1 | 3789277 | 2-scf00046 | 2 |
| AX-157755123 | 3 | 81.806 | KV452742.1 | 3792406 | 2-scf00046 | 2 |
| AX-157940587 | 3 | 81.806 | KV452742.1 | 3810157 | 2-scf00046 | 2 |
| AX-157940589 | 3 | 81.806 | KV452742.1 | 3811220 | 2-scf00046 | 2 |
| AX-157940592 | 3 | 81.806 | KV452742.1 | 3816263 | 2-scf00046 | 2 |
| AX-157940594 | 3 | 81.806 | KV452742.1 | 3820848 | 2-scf00046 | 2 |
| AX-157940598 | 3 | 81.806 | KV452742.1 | 3826682 | 2-scf00046 | 2 |
| AX-157940607 | 3 | 81.806 | KV452742.1 | 3846913 | 2-scf00046 | 2 |
| AX-157940610 | 3 | 81.806 | KV452742.1 | 3860685 | 2-scf00046 | 2 |
| AX-157940614 | 3 | 81.806 | KV452742.1 | 3881447 | 2-scf00046 | 2 |
| AX-157940618 | 3 | 81.806 | KV452742.1 | 3898095 | 2-scf00046 | 2 |
| AX-157940620 | 3 | 81.806 | KV452742.1 | 3900922 | 2-scf00046 | 2 |
| AX-157940628 | 3 | 81.806 | KV452742.1 | 3938674 | 2-scf00046 | 2 |
| AX-157940630 | 3 | 81.806 | KV452742.1 | 3941177 | 2-scf00046 | 2 |
| AX-157940634 | 3 | 81.806 | KV452742.1 | 3945489 | 2-scf00046 | 2 |

|              |   |        |            |         |            |   |
|--------------|---|--------|------------|---------|------------|---|
| AX-157814747 | 3 | 81.806 | KV452742.1 | 3954635 | 2-scf00046 | 2 |
| AX-157940644 | 3 | 81.806 | KV452742.1 | 3963659 | 2-scf00046 | 2 |
| AX-157940648 | 3 | 81.806 | KV452742.1 | 3974981 | 2-scf00046 | 2 |
| AX-157940651 | 3 | 81.806 | KV452742.1 | 3982700 | 2-scf00046 | 2 |
| AX-157940652 | 3 | 81.806 | KV452742.1 | 3984150 | 2-scf00046 | 2 |
| AX-157940681 | 3 | 81.806 | KV452742.1 | 4019992 | 2-scf00046 | 2 |
| AX-157719802 | 3 | 81.806 | KV452742.1 | 4029451 | 2-scf00046 | 2 |
| AX-157940687 | 3 | 81.806 | KV452742.1 | 4030706 | 2-scf00046 | 2 |
| AX-157814751 | 3 | 81.806 | KV452742.1 | 4032094 | 2-scf00046 | 2 |
| AX-157725344 | 3 | 81.806 | KV452742.1 | 4037739 | 2-scf00046 | 2 |
| AX-157814752 | 3 | 81.806 | KV452742.1 | 4039575 | 2-scf00046 | 2 |
| AX-157814758 | 3 | 81.806 | KV452742.1 | 4117411 | 2-scf00046 | 2 |
| AX-157940713 | 3 | 81.806 | KV452742.1 | 4117618 | 2-scf00046 | 2 |
| AX-157714434 | 3 | 81.806 | KV452742.1 | 4119522 | 2-scf00046 | 2 |
| AX-157940716 | 3 | 81.806 | KV452742.1 | 4120117 | 2-scf00046 | 2 |
| AX-157940724 | 3 | 81.806 | KV452742.1 | 4133125 | 2-scf00046 | 2 |
| AX-157814761 | 3 | 81.806 | KV452742.1 | 4135907 | 2-scf00046 | 2 |
| AX-158390055 | 3 | 81.806 | KV452742.1 | 4139111 | 2-scf00046 | 2 |
| AX-157854550 | 3 | 81.806 | KV452742.1 | 4139312 | 2-scf00046 | 2 |
| AX-157854551 | 3 | 81.806 | KV452742.1 | 4140500 | 2-scf00046 | 2 |
| AX-157940728 | 3 | 81.806 | KV452742.1 | 4141510 | 2-scf00046 | 2 |
| AX-157940731 | 3 | 81.806 | KV452742.1 | 4143259 | 2-scf00046 | 2 |
| AX-157854554 | 3 | 81.806 | KV452742.1 | 4145834 | 2-scf00046 | 2 |
| AX-157940733 | 3 | 81.806 | KV452742.1 | 4146755 | 2-scf00046 | 2 |
| AX-157940734 | 3 | 81.806 | KV452742.1 | 4148184 | 2-scf00046 | 2 |
| AX-157940736 | 3 | 81.806 | KV452742.1 | 4149389 | 2-scf00046 | 2 |
| AX-157883884 | 3 | 81.806 | KV452742.1 | 4161900 | 2-scf00046 | 2 |
| AX-157940742 | 3 | 81.806 | KV452742.1 | 4169172 | 2-scf00046 | 2 |
| AX-157940745 | 3 | 81.806 | KV452742.1 | 4173062 | 2-scf00046 | 2 |
| AX-157883885 | 3 | 81.806 | KV452742.1 | 4187300 | 2-scf00046 | 2 |
| AX-157854555 | 3 | 81.806 | KV452742.1 | 4203960 | 2-scf00046 | 2 |
| AX-157940762 | 3 | 81.806 | KV452742.1 | 4215996 | 2-scf00046 | 2 |
| AX-157940764 | 3 | 81.806 | KV452742.1 | 4216361 | 2-scf00046 | 2 |
| AX-157940766 | 3 | 81.806 | KV452742.1 | 4216735 | 2-scf00046 | 2 |
| AX-157940767 | 3 | 81.806 | KV452742.1 | 4217350 | 2-scf00046 | 2 |
| AX-157940768 | 3 | 81.806 | KV452742.1 | 4218062 | 2-scf00046 | 2 |
| AX-157940769 | 3 | 81.806 | KV452742.1 | 4218347 | 2-scf00046 | 2 |
| AX-157940770 | 3 | 81.806 | KV452742.1 | 4222227 | 2-scf00046 | 2 |
| AX-157814765 | 3 | 81.806 | KV452742.1 | 4239075 | 2-scf00046 | 2 |
| AX-157940775 | 3 | 81.806 | KV452742.1 | 4239221 | 2-scf00046 | 2 |
| AX-157940783 | 3 | 81.806 | KV452742.1 | 4253626 | 2-scf00046 | 2 |
| AX-157814767 | 3 | 81.806 | KV452742.1 | 4256802 | 2-scf00046 | 2 |
| AX-157758666 | 3 | 81.806 | KV452742.1 | 4257828 | 2-scf00046 | 2 |
| AX-157940786 | 3 | 81.806 | KV452742.1 | 4258141 | 2-scf00046 | 2 |
| AX-157940787 | 3 | 81.806 | KV452742.1 | 4262938 | 2-scf00046 | 2 |
| AX-157940789 | 3 | 81.806 | KV452742.1 | 4264058 | 2-scf00046 | 2 |
| AX-157940791 | 3 | 81.806 | KV452742.1 | 4266222 | 2-scf00046 | 2 |
| AX-157940798 | 3 | 81.806 | KV452742.1 | 4285646 | 2-scf00046 | 2 |
| AX-157940801 | 3 | 81.806 | KV452742.1 | 4288869 | 2-scf00046 | 2 |
| AX-157940804 | 3 | 81.806 | KV452742.1 | 4290842 | 2-scf00046 | 2 |
| AX-157940808 | 3 | 81.806 | KV452742.1 | 4297539 | 2-scf00046 | 2 |

|              |   |        |             |         |            |    |
|--------------|---|--------|-------------|---------|------------|----|
| AX-157940810 | 3 | 81.806 | KV452742.1  | 4298054 | 2-scf00046 | 2  |
| AX-157940826 | 3 | 81.806 | KV452742.1  | 4317567 | 2-scf00046 | 2  |
| AX-157940827 | 3 | 81.806 | KV452742.1  | 4318164 | 2-scf00046 | 2  |
| AX-158405771 | 3 | 81.806 | KV452742.1  | 4325527 | 2-scf00046 | 2  |
| AX-157940832 | 3 | 81.806 | KV452742.1  | 4328027 | 2-scf00046 | 2  |
| AX-157940834 | 3 | 81.806 | KV452742.1  | 4334613 | 2-scf00046 | 2  |
| AX-157869472 | 3 | 81.806 | KV452742.1  | 4335141 | 2-scf00046 | 2  |
| AX-157940836 | 3 | 81.806 | KV452742.1  | 4335368 | 2-scf00046 | 2  |
| AX-157940838 | 3 | 81.806 | KV452742.1  | 4337602 | 2-scf00046 | 2  |
| AX-157739667 | 3 | 81.806 | KV452742.1  | 4338973 | 2-scf00046 | 2  |
| AX-157940841 | 3 | 81.806 | KV452742.1  | 4339632 | 2-scf00046 | 2  |
| AX-157940842 | 3 | 81.806 | KV452742.1  | 4339833 | 2-scf00046 | 2  |
| AX-157940855 | 3 | 81.806 | KV452742.1  | 4349375 | 2-scf00046 | 2  |
| AX-157940856 | 3 | 81.806 | KV452742.1  | 4350801 | 2-scf00046 | 2  |
| AX-157869473 | 3 | 81.806 | KV452742.1  | 4351780 | 2-scf00046 | 2  |
| AX-157940860 | 3 | 81.806 | KV452742.1  | 4353679 | 2-scf00046 | 2  |
| AX-157814771 | 3 | 81.806 | KV452742.1  | 4361871 | 2-scf00046 | 2  |
| AX-157940865 | 3 | 81.806 | KV452742.1  | 4362332 | 2-scf00046 | 2  |
| AX-157940866 | 3 | 81.806 | KV452742.1  | 4363351 | 2-scf00046 | 2  |
| AX-157940871 | 3 | 81.806 | KV452742.1  | 4371681 | 2-scf00046 | 2  |
| AX-157940876 | 3 | 81.806 | KV452742.1  | 4392503 | 2-scf00046 | 2  |
| AX-157940954 | 3 | 81.806 | KV452742.1  | 4486568 | 2-scf00046 | 2  |
| AX-157941412 | 3 | 81.806 | KV452743.1  | 58793   | 2-scf00050 | 2  |
| AX-157941687 | 3 | 81.806 | KV452745.1  | 180783  | 2-scf00051 | 2  |
| AX-157747451 | 3 | 81.806 | KV452745.1  | 210798  | 2-scf00051 | 2  |
| AX-157942231 | 3 | 81.806 | KV452745.1  | 626275  | 2-scf00051 | 2  |
| AX-157942323 | 3 | 81.806 | KV452745.1  | 728358  | 2-scf00051 | 2  |
| AX-157943171 | 3 | 81.806 | KV452747.1  | 130480  | 2-scf00053 | 2  |
| AX-157706730 | 3 | 81.806 | 3ML01032813 | 232     | scf08443_1 | UN |
| AX-157814773 | 3 | 81.998 | KV452742.1  | 4391738 | 2-scf00046 | 2  |
| AX-157940887 | 3 | 82.134 | KV452742.1  | 4414942 | 2-scf00046 | 2  |
| AX-157940889 | 3 | 82.134 | KV452742.1  | 4415569 | 2-scf00046 | 2  |
| AX-157940894 | 3 | 82.134 | KV452742.1  | 4420261 | 2-scf00046 | 2  |
| AX-157940908 | 3 | 82.134 | KV452742.1  | 4433476 | 2-scf00046 | 2  |
| AX-157940914 | 3 | 82.176 | KV452742.1  | 4438880 | 2-scf00046 | 2  |
| AX-157940917 | 3 | 82.199 | KV452742.1  | 4441824 | 2-scf00046 | 2  |
| AX-157940924 | 3 | 82.243 | KV452742.1  | 4448286 | 2-scf00046 | 2  |
| AX-157940944 | 3 | 82.243 | KV452742.1  | 4470426 | 2-scf00046 | 2  |
| AX-157940965 | 3 | 82.243 | KV452742.1  | 4499457 | 2-scf00046 | 2  |
| AX-157940966 | 3 | 82.243 | KV452742.1  | 4500714 | 2-scf00046 | 2  |
| AX-157940990 | 3 | 82.243 | KV452742.1  | 4522135 | 2-scf00046 | 2  |
| AX-157707151 | 3 | 82.243 | 3ML01033603 | 305     | scf09261_1 | UN |
| AX-157712078 | 3 | 82.243 | 3ML01033603 | 344     | scf09261_1 | UN |
| AX-157941365 | 3 | 82.353 | KV452743.1  | 12539   | 2-scf00050 | 2  |
| AX-157814814 | 3 | 82.353 | KV452743.1  | 14359   | 2-scf00050 | 2  |
| AX-157941384 | 3 | 82.353 | KV452743.1  | 36859   | 2-scf00050 | 2  |
| AX-157941373 | 3 | 82.428 | KV452743.1  | 25239   | 2-scf00050 | 2  |
| AX-157941374 | 3 | 82.502 | KV452743.1  | 26079   | 2-scf00050 | 2  |
| AX-157935239 | 3 | 82.571 | KV452733.1  | 1373699 | 2-scf00041 | 2  |
| AX-157936344 | 3 | 82.571 | KV452733.1  | 2716251 | 2-scf00041 | 2  |
| AX-157936459 | 3 | 82.571 | KV452733.1  | 2826183 | 2-scf00041 | 2  |

|              |   |        |            |         |            |   |
|--------------|---|--------|------------|---------|------------|---|
| AX-157936584 | 3 | 82.571 | KV452733.1 | 2957203 | 2-scf00041 | 2 |
| AX-157883839 | 3 | 82.571 | KV452733.1 | 3233151 | 2-scf00041 | 2 |
| AX-157941329 | 3 | 82.571 | KV452742.1 | 1695341 | 2-scf00046 | 2 |
| AX-157869469 | 3 | 82.571 | KV452742.1 | 4119715 | 2-scf00046 | 2 |
| AX-158390054 | 3 | 82.571 | KV452742.1 | 4137319 | 2-scf00046 | 2 |
| AX-157814774 | 3 | 82.571 | KV452742.1 | 4413939 | 2-scf00046 | 2 |
| AX-157940891 | 3 | 82.571 | KV452742.1 | 4417865 | 2-scf00046 | 2 |
| AX-157814777 | 3 | 82.571 | KV452742.1 | 4431492 | 2-scf00046 | 2 |
| AX-157814778 | 3 | 82.571 | KV452742.1 | 4435466 | 2-scf00046 | 2 |
| AX-157940912 | 3 | 82.571 | KV452742.1 | 4438101 | 2-scf00046 | 2 |
| AX-157940998 | 3 | 82.571 | KV452742.1 | 4528678 | 2-scf00046 | 2 |
| AX-157883888 | 3 | 82.571 | KV452742.1 | 4528960 | 2-scf00046 | 2 |
| AX-157747797 | 3 | 82.571 | KV452743.1 | 14483   | 2-scf00050 | 2 |
| AX-157941377 | 3 | 82.571 | KV452743.1 | 28114   | 2-scf00050 | 2 |
| AX-157941382 | 3 | 82.571 | KV452743.1 | 32091   | 2-scf00050 | 2 |
| AX-157814815 | 3 | 82.571 | KV452743.1 | 32382   | 2-scf00050 | 2 |
| AX-157726374 | 3 | 82.571 | KV452743.1 | 34776   | 2-scf00050 | 2 |
| AX-157941389 | 3 | 82.571 | KV452743.1 | 44351   | 2-scf00050 | 2 |
| AX-157724095 | 3 | 82.571 | KV452743.1 | 45957   | 2-scf00050 | 2 |
| AX-157941395 | 3 | 82.571 | KV452743.1 | 48982   | 2-scf00050 | 2 |
| AX-157941397 | 3 | 82.571 | KV452743.1 | 49368   | 2-scf00050 | 2 |
| AX-157814817 | 3 | 82.571 | KV452743.1 | 53430   | 2-scf00050 | 2 |
| AX-157941416 | 3 | 82.571 | KV452743.1 | 64437   | 2-scf00050 | 2 |
| AX-157941418 | 3 | 82.571 | KV452743.1 | 65265   | 2-scf00050 | 2 |
| AX-157941419 | 3 | 82.571 | KV452743.1 | 66409   | 2-scf00050 | 2 |
| AX-157941422 | 3 | 82.571 | KV452743.1 | 67633   | 2-scf00050 | 2 |
| AX-157941424 | 3 | 82.571 | KV452743.1 | 69956   | 2-scf00050 | 2 |
| AX-157774529 | 3 | 82.571 | KV452743.1 | 70180   | 2-scf00050 | 2 |
| AX-157941431 | 3 | 82.571 | KV452743.1 | 73193   | 2-scf00050 | 2 |
| AX-157941435 | 3 | 82.571 | KV452743.1 | 77462   | 2-scf00050 | 2 |
| AX-157941440 | 3 | 82.571 | KV452743.1 | 79347   | 2-scf00050 | 2 |
| AX-157941443 | 3 | 82.571 | KV452743.1 | 81766   | 2-scf00050 | 2 |
| AX-157941445 | 3 | 82.571 | KV452743.1 | 82240   | 2-scf00050 | 2 |
| AX-157814821 | 3 | 82.571 | KV452743.1 | 83449   | 2-scf00050 | 2 |
| AX-157814823 | 3 | 82.571 | KV452743.1 | 85973   | 2-scf00050 | 2 |
| AX-157753541 | 3 | 82.571 | KV452743.1 | 90848   | 2-scf00050 | 2 |
| AX-157941452 | 3 | 82.571 | KV452743.1 | 94473   | 2-scf00050 | 2 |
| AX-157941455 | 3 | 82.571 | KV452743.1 | 97348   | 2-scf00050 | 2 |
| AX-157941457 | 3 | 82.571 | KV452743.1 | 97568   | 2-scf00050 | 2 |
| AX-157941459 | 3 | 82.571 | KV452743.1 | 99761   | 2-scf00050 | 2 |
| AX-157941460 | 3 | 82.571 | KV452743.1 | 100988  | 2-scf00050 | 2 |
| AX-157941462 | 3 | 82.571 | KV452743.1 | 101315  | 2-scf00050 | 2 |
| AX-157941467 | 3 | 82.571 | KV452743.1 | 103009  | 2-scf00050 | 2 |
| AX-157941470 | 3 | 82.571 | KV452743.1 | 106621  | 2-scf00050 | 2 |
| AX-157941472 | 3 | 82.571 | KV452743.1 | 112626  | 2-scf00050 | 2 |
| AX-157814826 | 3 | 82.571 | KV452743.1 | 119056  | 2-scf00050 | 2 |
| AX-157941480 | 3 | 82.571 | KV452743.1 | 122415  | 2-scf00050 | 2 |
| AX-157941482 | 3 | 82.571 | KV452743.1 | 126326  | 2-scf00050 | 2 |
| AX-157854569 | 3 | 82.571 | KV452743.1 | 128026  | 2-scf00050 | 2 |
| AX-157941485 | 3 | 82.571 | KV452743.1 | 136831  | 2-scf00050 | 2 |
| AX-157941487 | 3 | 82.571 | KV452743.1 | 137954  | 2-scf00050 | 2 |

|              |   |        |             |        |            |    |
|--------------|---|--------|-------------|--------|------------|----|
| AX-157941489 | 3 | 82.571 | KV452743.1  | 140876 | 2-scf00050 | 2  |
| AX-157941494 | 3 | 82.571 | KV452743.1  | 145923 | 2-scf00050 | 2  |
| AX-157814829 | 3 | 82.571 | KV452743.1  | 148501 | 2-scf00050 | 2  |
| AX-157941501 | 3 | 82.571 | KV452743.1  | 156794 | 2-scf00050 | 2  |
| AX-158390062 | 3 | 82.571 | KV452745.1  | 111939 | 2-scf00051 | 2  |
| AX-157941774 | 3 | 82.571 | KV452745.1  | 241923 | 2-scf00051 | 2  |
| AX-157942292 | 3 | 82.571 | KV452745.1  | 683902 | 2-scf00051 | 2  |
| AX-157942431 | 3 | 82.571 | KV452745.1  | 827371 | 2-scf00051 | 2  |
| AX-158390119 | 3 | 82.571 | KV452747.1  | 263968 | 2-scf00053 | 2  |
| AX-157941491 | 3 | 82.633 | KV452743.1  | 141175 | 2-scf00050 | 2  |
| AX-157746270 | 3 | 82.693 | KV452743.1  | 154029 | 2-scf00050 | 2  |
| AX-157941500 | 3 | 82.693 | KV452743.1  | 154729 | 2-scf00050 | 2  |
| AX-157938757 | 3 | 82.788 | KV452742.1  | 412617 | 2-scf00046 | 2  |
| AX-157680951 | 3 | 82.788 | KV452741.1  | 4102   | 2-scf00732 | 2  |
| AX-157941516 | 3 | 84.721 | KV452745.1  | 10246  | 2-scf00051 | 2  |
| AX-157941540 | 3 | 84.721 | KV452745.1  | 33531  | 2-scf00051 | 2  |
| AX-157941517 | 3 | 84.722 | KV452745.1  | 12000  | 2-scf00051 | 2  |
| AX-157941529 | 3 | 84.984 | KV452745.1  | 24776  | 2-scf00051 | 2  |
| AX-157941536 | 3 | 84.986 | KV452745.1  | 29773  | 2-scf00051 | 2  |
| AX-157814835 | 3 | 84.986 | KV452745.1  | 33663  | 2-scf00051 | 2  |
| AX-157941542 | 3 | 84.986 | KV452745.1  | 34600  | 2-scf00051 | 2  |
| AX-157941543 | 3 | 84.986 | KV452745.1  | 37076  | 2-scf00051 | 2  |
| AX-157941544 | 3 | 84.986 | KV452745.1  | 37599  | 2-scf00051 | 2  |
| AX-157941546 | 3 | 84.986 | KV452745.1  | 38946  | 2-scf00051 | 2  |
| AX-157814837 | 3 | 84.986 | KV452745.1  | 46741  | 2-scf00051 | 2  |
| AX-157941560 | 3 | 84.986 | KV452745.1  | 53879  | 2-scf00051 | 2  |
| AX-157941561 | 3 | 84.986 | KV452745.1  | 55364  | 2-scf00051 | 2  |
| AX-157941588 | 3 | 84.986 | KV452745.1  | 83281  | 2-scf00051 | 2  |
| AX-157883893 | 3 | 84.988 | KV452745.1  | 56960  | 2-scf00051 | 2  |
| AX-157941570 | 3 | 84.988 | KV452745.1  | 64779  | 2-scf00051 | 2  |
| AX-157941514 | 3 | 84.989 | KV452745.1  | 8705   | 2-scf00051 | 2  |
| AX-157941573 | 3 | 84.989 | KV452745.1  | 65886  | 2-scf00051 | 2  |
| AX-157814911 | 3 | 84.989 | KV452744.1  | 15836  | 2-scf00052 | 2  |
| AX-157707308 | 3 | 84.989 | 3ML01033976 | 167    | scf09645_1 | UN |
| AX-157814839 | 3 | 85     | KV452745.1  | 68058  | 2-scf00051 | 2  |
| AX-157941576 | 3 | 85.013 | KV452745.1  | 68356  | 2-scf00051 | 2  |
| AX-157771159 | 3 | 85.026 | KV452745.1  | 76370  | 2-scf00051 | 2  |
| AX-157941585 | 3 | 85.026 | KV452745.1  | 79128  | 2-scf00051 | 2  |
| AX-157745147 | 3 | 85.049 | KV452745.1  | 82371  | 2-scf00051 | 2  |
| AX-157941586 | 3 | 85.053 | KV452745.1  | 82523  | 2-scf00051 | 2  |
| AX-157814845 | 3 | 85.079 | KV452745.1  | 82728  | 2-scf00051 | 2  |
| AX-157941594 | 3 | 85.095 | KV452745.1  | 86896  | 2-scf00051 | 2  |
| AX-157941596 | 3 | 85.095 | KV452745.1  | 88433  | 2-scf00051 | 2  |
| AX-157941574 | 3 | 85.135 | KV452745.1  | 66237  | 2-scf00051 | 2  |
| AX-157941597 | 3 | 85.135 | KV452745.1  | 90086  | 2-scf00051 | 2  |
| AX-157941602 | 3 | 85.135 | KV452745.1  | 97158  | 2-scf00051 | 2  |
| AX-157941603 | 3 | 85.163 | KV452745.1  | 98477  | 2-scf00051 | 2  |
| AX-157854571 | 3 | 85.615 | KV452745.1  | 102990 | 2-scf00051 | 2  |
| AX-157756697 | 3 | 85.615 | KV452745.1  | 108363 | 2-scf00051 | 2  |
| AX-157941609 | 3 | 85.616 | KV452745.1  | 103816 | 2-scf00051 | 2  |
| AX-157941612 | 3 | 85.616 | KV452745.1  | 108449 | 2-scf00051 | 2  |

|              |   |        |             |         |            |    |
|--------------|---|--------|-------------|---------|------------|----|
| AX-157940675 | 3 | 85.691 | KV452742.1  | 4013598 | 2-scf00046 | 2  |
| AX-157941622 | 3 | 85.691 | KV452745.1  | 118472  | 2-scf00051 | 2  |
| AX-157814847 | 3 | 85.691 | KV452745.1  | 120871  | 2-scf00051 | 2  |
| AX-157941627 | 3 | 85.749 | KV452745.1  | 123413  | 2-scf00051 | 2  |
| AX-157875188 | 3 | 85.749 | KV452745.1  | 735279  | 2-scf00051 | 2  |
| AX-157706744 | 3 | 85.75  | 3ML01032837 | 60      | scf08468_1 | UN |
| AX-157940333 | 3 | 85.751 | KV452742.1  | 3439530 | 2-scf00046 | 2  |
| AX-157941614 | 3 | 85.751 | KV452745.1  | 109872  | 2-scf00051 | 2  |
| AX-157941628 | 3 | 85.751 | KV452745.1  | 127304  | 2-scf00051 | 2  |
| AX-157714875 | 3 | 85.751 | KV452745.1  | 129578  | 2-scf00051 | 2  |
| AX-157941633 | 3 | 85.751 | KV452745.1  | 135272  | 2-scf00051 | 2  |
| AX-157941635 | 3 | 85.751 | KV452745.1  | 137817  | 2-scf00051 | 2  |
| AX-157941640 | 3 | 85.751 | KV452745.1  | 140642  | 2-scf00051 | 2  |
| AX-157941642 | 3 | 85.751 | KV452745.1  | 147870  | 2-scf00051 | 2  |
| AX-158390064 | 3 | 85.751 | KV452745.1  | 150617  | 2-scf00051 | 2  |
| AX-157714385 | 3 | 85.751 | KV452745.1  | 151725  | 2-scf00051 | 2  |
| AX-157941649 | 3 | 85.751 | KV452745.1  | 155044  | 2-scf00051 | 2  |
| AX-157941656 | 3 | 85.86  | KV452745.1  | 162442  | 2-scf00051 | 2  |
| AX-157941661 | 3 | 85.86  | KV452745.1  | 166789  | 2-scf00051 | 2  |
| AX-157943039 | 3 | 85.86  | KV452744.1  | 145179  | 2-scf00052 | 2  |
| AX-157706437 | 3 | 85.86  | 3ML01032236 | 299     | scf07852_1 | UN |
| AX-157940314 | 3 | 85.969 | KV452742.1  | 3404391 | 2-scf00046 | 2  |
| AX-157940319 | 3 | 85.969 | KV452742.1  | 3415887 | 2-scf00046 | 2  |
| AX-157940432 | 3 | 85.969 | KV452742.1  | 3587014 | 2-scf00046 | 2  |
| AX-157940596 | 3 | 85.969 | KV452742.1  | 3825232 | 2-scf00046 | 2  |
| AX-157941671 | 3 | 85.969 | KV452745.1  | 171014  | 2-scf00051 | 2  |
| AX-157941672 | 3 | 85.969 | KV452745.1  | 171218  | 2-scf00051 | 2  |
| AX-157941683 | 3 | 85.969 | KV452745.1  | 175624  | 2-scf00051 | 2  |
| AX-157941616 | 3 | 86.049 | KV452745.1  | 116579  | 2-scf00051 | 2  |
| AX-157941686 | 3 | 86.049 | KV452745.1  | 180438  | 2-scf00051 | 2  |
| AX-157941689 | 3 | 86.049 | KV452745.1  | 180871  | 2-scf00051 | 2  |
| AX-157814853 | 3 | 86.188 | KV452745.1  | 185091  | 2-scf00051 | 2  |
| AX-157941690 | 3 | 86.188 | KV452745.1  | 185757  | 2-scf00051 | 2  |
| AX-157941694 | 3 | 86.188 | KV452745.1  | 191777  | 2-scf00051 | 2  |
| AX-157942974 | 3 | 86.188 | KV452744.1  | 52582   | 2-scf00052 | 2  |
| AX-157941707 | 3 | 86.218 | KV452745.1  | 199900  | 2-scf00051 | 2  |
| AX-157941715 | 3 | 86.229 | KV452745.1  | 205072  | 2-scf00051 | 2  |
| AX-157941708 | 3 | 86.263 | KV452745.1  | 200341  | 2-scf00051 | 2  |
| AX-157941716 | 3 | 86.263 | KV452745.1  | 207343  | 2-scf00051 | 2  |
| AX-157941741 | 3 | 86.263 | KV452745.1  | 220171  | 2-scf00051 | 2  |
| AX-157941755 | 3 | 86.263 | KV452745.1  | 225860  | 2-scf00051 | 2  |
| AX-157941393 | 3 | 86.297 | KV452743.1  | 48436   | 2-scf00050 | 2  |
| AX-157941406 | 3 | 86.297 | KV452743.1  | 54659   | 2-scf00050 | 2  |
| AX-157941437 | 3 | 86.297 | KV452743.1  | 78512   | 2-scf00050 | 2  |
| AX-157941475 | 3 | 86.297 | KV452743.1  | 114464  | 2-scf00050 | 2  |
| AX-157941476 | 3 | 86.297 | KV452743.1  | 114805  | 2-scf00050 | 2  |
| AX-157941502 | 3 | 86.297 | KV452743.1  | 160180  | 2-scf00050 | 2  |
| AX-157941725 | 3 | 86.297 | KV452745.1  | 209351  | 2-scf00051 | 2  |
| AX-157750117 | 3 | 86.297 | KV452745.1  | 210382  | 2-scf00051 | 2  |
| AX-158382641 | 3 | 86.297 | KV452745.1  | 210592  | 2-scf00051 | 2  |
| AX-157814856 | 3 | 86.297 | KV452745.1  | 210649  | 2-scf00051 | 2  |

|              |   |        |            |         |            |   |
|--------------|---|--------|------------|---------|------------|---|
| AX-157941727 | 3 | 86.297 | KV452745.1 | 211448  | 2-scf00051 | 2 |
| AX-157814857 | 3 | 86.297 | KV452745.1 | 212441  | 2-scf00051 | 2 |
| AX-157714041 | 3 | 86.297 | KV452745.1 | 215334  | 2-scf00051 | 2 |
| AX-157941734 | 3 | 86.297 | KV452745.1 | 217122  | 2-scf00051 | 2 |
| AX-157941740 | 3 | 86.297 | KV452745.1 | 219550  | 2-scf00051 | 2 |
| AX-157941742 | 3 | 86.297 | KV452745.1 | 221110  | 2-scf00051 | 2 |
| AX-157941744 | 3 | 86.297 | KV452745.1 | 222127  | 2-scf00051 | 2 |
| AX-157941751 | 3 | 86.297 | KV452745.1 | 224035  | 2-scf00051 | 2 |
| AX-157941754 | 3 | 86.297 | KV452745.1 | 225673  | 2-scf00051 | 2 |
| AX-157814861 | 3 | 86.297 | KV452745.1 | 239228  | 2-scf00051 | 2 |
| AX-157941747 | 3 | 86.339 | KV452745.1 | 223511  | 2-scf00051 | 2 |
| AX-157742778 | 3 | 86.339 | KV452745.1 | 227214  | 2-scf00051 | 2 |
| AX-157939797 | 3 | 86.381 | KV452742.1 | 2843979 | 2-scf00046 | 2 |
| AX-157940583 | 3 | 86.381 | KV452742.1 | 3806239 | 2-scf00046 | 2 |
| AX-157940688 | 3 | 86.381 | KV452742.1 | 4036583 | 2-scf00046 | 2 |
| AX-157941410 | 3 | 86.381 | KV452743.1 | 58318   | 2-scf00050 | 2 |
| AX-157941506 | 3 | 86.381 | KV452743.1 | 160669  | 2-scf00050 | 2 |
| AX-157941528 | 3 | 86.381 | KV452745.1 | 23919   | 2-scf00051 | 2 |
| AX-157941571 | 3 | 86.381 | KV452745.1 | 65193   | 2-scf00051 | 2 |
| AX-157941760 | 3 | 86.381 | KV452745.1 | 228117  | 2-scf00051 | 2 |
| AX-157941766 | 3 | 86.381 | KV452745.1 | 232118  | 2-scf00051 | 2 |
| AX-157715028 | 3 | 86.381 | KV452745.1 | 344690  | 2-scf00051 | 2 |
| AX-157752259 | 3 | 86.381 | KV452745.1 | 346192  | 2-scf00051 | 2 |
| AX-157941922 | 3 | 86.381 | KV452745.1 | 353724  | 2-scf00051 | 2 |
| AX-157942994 | 3 | 86.381 | KV452744.1 | 85276   | 2-scf00052 | 2 |
| AX-157941764 | 3 | 86.428 | KV452745.1 | 229464  | 2-scf00051 | 2 |
| AX-157941769 | 3 | 86.691 | KV452745.1 | 235750  | 2-scf00051 | 2 |
| AX-157941403 | 3 | 86.953 | KV452743.1 | 53103   | 2-scf00050 | 2 |
| AX-157941447 | 3 | 86.953 | KV452743.1 | 83338   | 2-scf00050 | 2 |
| AX-157941458 | 3 | 86.953 | KV452743.1 | 98722   | 2-scf00050 | 2 |
| AX-157774536 | 3 | 86.953 | KV452745.1 | 240460  | 2-scf00051 | 2 |
| AX-157883895 | 3 | 86.953 | KV452745.1 | 246510  | 2-scf00051 | 2 |
| AX-157941782 | 3 | 86.953 | KV452745.1 | 249578  | 2-scf00051 | 2 |
| AX-157941783 | 3 | 86.953 | KV452745.1 | 249987  | 2-scf00051 | 2 |
| AX-157941786 | 3 | 86.953 | KV452745.1 | 251487  | 2-scf00051 | 2 |
| AX-157941794 | 3 | 86.953 | KV452745.1 | 258478  | 2-scf00051 | 2 |
| AX-157941796 | 3 | 86.953 | KV452745.1 | 262486  | 2-scf00051 | 2 |
| AX-157941798 | 3 | 86.953 | KV452745.1 | 264287  | 2-scf00051 | 2 |
| AX-157941799 | 3 | 86.953 | KV452745.1 | 264873  | 2-scf00051 | 2 |
| AX-157941804 | 3 | 86.953 | KV452745.1 | 271355  | 2-scf00051 | 2 |
| AX-157941810 | 3 | 86.977 | KV452745.1 | 274327  | 2-scf00051 | 2 |
| AX-157814908 | 3 | 89.244 | KV452744.1 | 5839    | 2-scf00052 | 2 |
| AX-157942950 | 3 | 89.244 | KV452744.1 | 18804   | 2-scf00052 | 2 |
| AX-157942945 | 3 | 89.245 | KV452744.1 | 14432   | 2-scf00052 | 2 |
| AX-157942946 | 3 | 89.246 | KV452744.1 | 14645   | 2-scf00052 | 2 |
| AX-157726728 | 3 | 89.247 | KV452744.1 | 17428   | 2-scf00052 | 2 |
| AX-157942965 | 3 | 89.249 | KV452744.1 | 34169   | 2-scf00052 | 2 |
| AX-157942966 | 3 | 89.249 | KV452744.1 | 35004   | 2-scf00052 | 2 |
| AX-157942970 | 3 | 89.249 | KV452744.1 | 41712   | 2-scf00052 | 2 |
| AX-157746871 | 3 | 89.249 | KV452744.1 | 42450   | 2-scf00052 | 2 |
| AX-157942971 | 3 | 89.249 | KV452744.1 | 43195   | 2-scf00052 | 2 |

|              |   |        |            |          |            |   |
|--------------|---|--------|------------|----------|------------|---|
| AX-157942976 | 3 | 89.249 | KV452744.1 | 62647    | 2-scf00052 | 2 |
| AX-157814831 | 3 | 89.31  | KV452745.1 | 13262    | 2-scf00051 | 2 |
| AX-157942972 | 3 | 89.31  | KV452744.1 | 46075    | 2-scf00052 | 2 |
| AX-157814912 | 3 | 89.37  | KV452744.1 | 50791    | 2-scf00052 | 2 |
| AX-157942979 | 3 | 89.409 | KV452744.1 | 67147    | 2-scf00052 | 2 |
| AX-157715170 | 3 | 89.447 | KV452744.1 | 69564    | 2-scf00052 | 2 |
| AX-157942977 | 3 | 89.467 | KV452744.1 | 63049    | 2-scf00052 | 2 |
| AX-157814914 | 3 | 89.467 | KV452744.1 | 70492    | 2-scf00052 | 2 |
| AX-157942980 | 3 | 89.467 | KV452744.1 | 70533    | 2-scf00052 | 2 |
| AX-157814915 | 3 | 89.467 | KV452744.1 | 70573    | 2-scf00052 | 2 |
| AX-158382664 | 3 | 89.467 | KV452744.1 | 101636   | 2-scf00052 | 2 |
| AX-157943012 | 3 | 89.467 | KV452744.1 | 101815   | 2-scf00052 | 2 |
| AX-157942981 | 3 | 89.566 | KV452744.1 | 72147    | 2-scf00052 | 2 |
| AX-157933778 | 3 | 89.686 | KV452730.1 | 14469361 | 2-scf00040 | 2 |
| AX-157934978 | 3 | 89.686 | KV452733.1 | 1096641  | 2-scf00041 | 2 |
| AX-157937734 | 3 | 89.686 | KV452732.1 | 622497   | 2-scf00042 | 2 |
| AX-157940672 | 3 | 89.686 | KV452742.1 | 4009482  | 2-scf00046 | 2 |
| AX-157940737 | 3 | 89.686 | KV452742.1 | 4150975  | 2-scf00046 | 2 |
| AX-157940752 | 3 | 89.686 | KV452742.1 | 4189664  | 2-scf00046 | 2 |
| AX-157940800 | 3 | 89.686 | KV452742.1 | 4288595  | 2-scf00046 | 2 |
| AX-157940922 | 3 | 89.686 | KV452742.1 | 4446397  | 2-scf00046 | 2 |
| AX-157941429 | 3 | 89.686 | KV452743.1 | 70853    | 2-scf00050 | 2 |
| AX-157942162 | 3 | 89.686 | KV452745.1 | 572298   | 2-scf00051 | 2 |
| AX-157942318 | 3 | 89.686 | KV452745.1 | 719429   | 2-scf00051 | 2 |
| AX-157942982 | 3 | 89.686 | KV452744.1 | 72837    | 2-scf00052 | 2 |
| AX-157942983 | 3 | 89.686 | KV452744.1 | 77060    | 2-scf00052 | 2 |
| AX-157942984 | 3 | 89.686 | KV452744.1 | 77546    | 2-scf00052 | 2 |
| AX-157942988 | 3 | 89.686 | KV452744.1 | 81024    | 2-scf00052 | 2 |
| AX-157942989 | 3 | 89.686 | KV452744.1 | 82835    | 2-scf00052 | 2 |
| AX-157942990 | 3 | 89.686 | KV452744.1 | 83511    | 2-scf00052 | 2 |
| AX-157942992 | 3 | 89.686 | KV452744.1 | 84311    | 2-scf00052 | 2 |
| AX-157942995 | 3 | 89.686 | KV452744.1 | 85862    | 2-scf00052 | 2 |
| AX-157942997 | 3 | 89.686 | KV452744.1 | 86869    | 2-scf00052 | 2 |
| AX-157751341 | 3 | 89.686 | KV452744.1 | 89201    | 2-scf00052 | 2 |
| AX-157942999 | 3 | 89.686 | KV452744.1 | 90961    | 2-scf00052 | 2 |
| AX-157943022 | 3 | 89.686 | KV452744.1 | 108677   | 2-scf00052 | 2 |
| AX-157943024 | 3 | 89.686 | KV452744.1 | 111381   | 2-scf00052 | 2 |
| AX-157943029 | 3 | 90.012 | KV452744.1 | 127789   | 2-scf00052 | 2 |
| AX-157943033 | 3 | 90.012 | KV452744.1 | 137994   | 2-scf00052 | 2 |
| AX-157943035 | 3 | 90.013 | KV452744.1 | 140998   | 2-scf00052 | 2 |
| AX-157943036 | 3 | 90.013 | KV452744.1 | 142391   | 2-scf00052 | 2 |
| AX-157943037 | 3 | 90.013 | KV452744.1 | 142762   | 2-scf00052 | 2 |
| AX-157941871 | 3 | 90.014 | KV452745.1 | 318517   | 2-scf00051 | 2 |
| AX-157943017 | 3 | 90.014 | KV452744.1 | 105483   | 2-scf00052 | 2 |
| AX-157943043 | 3 | 90.014 | KV452744.1 | 159387   | 2-scf00052 | 2 |
| AX-157943046 | 3 | 90.014 | KV452744.1 | 163426   | 2-scf00052 | 2 |
| AX-157943047 | 3 | 90.014 | KV452744.1 | 163729   | 2-scf00052 | 2 |
| AX-157943048 | 3 | 90.014 | KV452744.1 | 178778   | 2-scf00052 | 2 |
| AX-157814921 | 3 | 90.093 | KV452744.1 | 175682   | 2-scf00052 | 2 |
| AX-157936025 | 3 | 90.123 | KV452733.1 | 2426121  | 2-scf00041 | 2 |
| AX-157941812 | 3 | 90.123 | KV452745.1 | 277500   | 2-scf00051 | 2 |



|              |   |        |            |        |            |   |
|--------------|---|--------|------------|--------|------------|---|
| AX-157941814 | 3 | 90.123 | KV452745.1 | 278185 | 2-scf00051 | 2 |
| AX-157941816 | 3 | 90.123 | KV452745.1 | 280623 | 2-scf00051 | 2 |
| AX-157941821 | 3 | 90.123 | KV452745.1 | 286481 | 2-scf00051 | 2 |
| AX-157814863 | 3 | 90.123 | KV452745.1 | 288164 | 2-scf00051 | 2 |
| AX-157941827 | 3 | 90.123 | KV452745.1 | 290120 | 2-scf00051 | 2 |
| AX-157883896 | 3 | 90.123 | KV452745.1 | 291044 | 2-scf00051 | 2 |
| AX-157941830 | 3 | 90.123 | KV452745.1 | 292019 | 2-scf00051 | 2 |
| AX-157941831 | 3 | 90.123 | KV452745.1 | 292390 | 2-scf00051 | 2 |
| AX-157941833 | 3 | 90.123 | KV452745.1 | 292892 | 2-scf00051 | 2 |
| AX-157941834 | 3 | 90.123 | KV452745.1 | 294124 | 2-scf00051 | 2 |
| AX-157941835 | 3 | 90.123 | KV452745.1 | 300212 | 2-scf00051 | 2 |
| AX-157941839 | 3 | 90.123 | KV452745.1 | 301366 | 2-scf00051 | 2 |
| AX-158390065 | 3 | 90.123 | KV452745.1 | 302572 | 2-scf00051 | 2 |
| AX-157941842 | 3 | 90.123 | KV452745.1 | 303478 | 2-scf00051 | 2 |
| AX-157883897 | 3 | 90.123 | KV452745.1 | 303520 | 2-scf00051 | 2 |
| AX-157941846 | 3 | 90.123 | KV452745.1 | 305010 | 2-scf00051 | 2 |
| AX-157941847 | 3 | 90.123 | KV452745.1 | 305724 | 2-scf00051 | 2 |
| AX-157941848 | 3 | 90.123 | KV452745.1 | 307095 | 2-scf00051 | 2 |
| AX-157941851 | 3 | 90.123 | KV452745.1 | 308507 | 2-scf00051 | 2 |
| AX-157941853 | 3 | 90.123 | KV452745.1 | 308968 | 2-scf00051 | 2 |
| AX-158390066 | 3 | 90.123 | KV452745.1 | 309199 | 2-scf00051 | 2 |
| AX-157814864 | 3 | 90.123 | KV452745.1 | 309506 | 2-scf00051 | 2 |
| AX-157941855 | 3 | 90.123 | KV452745.1 | 310219 | 2-scf00051 | 2 |
| AX-157941856 | 3 | 90.123 | KV452745.1 | 310588 | 2-scf00051 | 2 |
| AX-157941857 | 3 | 90.123 | KV452745.1 | 311135 | 2-scf00051 | 2 |
| AX-157941863 | 3 | 90.123 | KV452745.1 | 311465 | 2-scf00051 | 2 |
| AX-157941864 | 3 | 90.123 | KV452745.1 | 314763 | 2-scf00051 | 2 |
| AX-157941865 | 3 | 90.123 | KV452745.1 | 315415 | 2-scf00051 | 2 |
| AX-157941867 | 3 | 90.123 | KV452745.1 | 315865 | 2-scf00051 | 2 |
| AX-157941870 | 3 | 90.123 | KV452745.1 | 317382 | 2-scf00051 | 2 |
| AX-157941872 | 3 | 90.123 | KV452745.1 | 319723 | 2-scf00051 | 2 |
| AX-157941874 | 3 | 90.123 | KV452745.1 | 320884 | 2-scf00051 | 2 |
| AX-157941875 | 3 | 90.123 | KV452745.1 | 322324 | 2-scf00051 | 2 |
| AX-157941876 | 3 | 90.123 | KV452745.1 | 322528 | 2-scf00051 | 2 |
| AX-157941877 | 3 | 90.123 | KV452745.1 | 323332 | 2-scf00051 | 2 |
| AX-157941879 | 3 | 90.123 | KV452745.1 | 325575 | 2-scf00051 | 2 |
| AX-157941882 | 3 | 90.123 | KV452745.1 | 326011 | 2-scf00051 | 2 |
| AX-157941883 | 3 | 90.123 | KV452745.1 | 326588 | 2-scf00051 | 2 |
| AX-157941885 | 3 | 90.123 | KV452745.1 | 326977 | 2-scf00051 | 2 |
| AX-157941887 | 3 | 90.123 | KV452745.1 | 328905 | 2-scf00051 | 2 |
| AX-157941888 | 3 | 90.123 | KV452745.1 | 329419 | 2-scf00051 | 2 |
| AX-157941890 | 3 | 90.123 | KV452745.1 | 329756 | 2-scf00051 | 2 |
| AX-157941891 | 3 | 90.123 | KV452745.1 | 330787 | 2-scf00051 | 2 |
| AX-157941892 | 3 | 90.123 | KV452745.1 | 331777 | 2-scf00051 | 2 |
| AX-157941893 | 3 | 90.123 | KV452745.1 | 332838 | 2-scf00051 | 2 |
| AX-157941894 | 3 | 90.123 | KV452745.1 | 333276 | 2-scf00051 | 2 |
| AX-157941895 | 3 | 90.123 | KV452745.1 | 333485 | 2-scf00051 | 2 |
| AX-157712191 | 3 | 90.123 | KV452745.1 | 335500 | 2-scf00051 | 2 |
| AX-157765656 | 3 | 90.123 | KV452745.1 | 336723 | 2-scf00051 | 2 |
| AX-157941897 | 3 | 90.123 | KV452745.1 | 337138 | 2-scf00051 | 2 |
| AX-157941898 | 3 | 90.123 | KV452745.1 | 338501 | 2-scf00051 | 2 |

|              |   |        |            |        |            |   |
|--------------|---|--------|------------|--------|------------|---|
| AX-157941899 | 3 | 90.123 | KV452745.1 | 339180 | 2-scf00051 | 2 |
| AX-157941901 | 3 | 90.123 | KV452745.1 | 339932 | 2-scf00051 | 2 |
| AX-157941903 | 3 | 90.123 | KV452745.1 | 340683 | 2-scf00051 | 2 |
| AX-157941904 | 3 | 90.123 | KV452745.1 | 341500 | 2-scf00051 | 2 |
| AX-157941906 | 3 | 90.123 | KV452745.1 | 343690 | 2-scf00051 | 2 |
| AX-157941907 | 3 | 90.123 | KV452745.1 | 343919 | 2-scf00051 | 2 |
| AX-157941909 | 3 | 90.123 | KV452745.1 | 345121 | 2-scf00051 | 2 |
| AX-157941910 | 3 | 90.123 | KV452745.1 | 345818 | 2-scf00051 | 2 |
| AX-157941911 | 3 | 90.123 | KV452745.1 | 348112 | 2-scf00051 | 2 |
| AX-157941912 | 3 | 90.123 | KV452745.1 | 348698 | 2-scf00051 | 2 |
| AX-157941913 | 3 | 90.123 | KV452745.1 | 349880 | 2-scf00051 | 2 |
| AX-157941916 | 3 | 90.123 | KV452745.1 | 350362 | 2-scf00051 | 2 |
| AX-157941920 | 3 | 90.123 | KV452745.1 | 352410 | 2-scf00051 | 2 |
| AX-157941923 | 3 | 90.123 | KV452745.1 | 356351 | 2-scf00051 | 2 |
| AX-157941924 | 3 | 90.123 | KV452745.1 | 357405 | 2-scf00051 | 2 |
| AX-157941928 | 3 | 90.123 | KV452745.1 | 358575 | 2-scf00051 | 2 |
| AX-157941931 | 3 | 90.123 | KV452745.1 | 364391 | 2-scf00051 | 2 |
| AX-157941932 | 3 | 90.123 | KV452745.1 | 369592 | 2-scf00051 | 2 |
| AX-157941934 | 3 | 90.123 | KV452745.1 | 371792 | 2-scf00051 | 2 |
| AX-157941935 | 3 | 90.123 | KV452745.1 | 372725 | 2-scf00051 | 2 |
| AX-157941936 | 3 | 90.123 | KV452745.1 | 374280 | 2-scf00051 | 2 |
| AX-157941937 | 3 | 90.123 | KV452745.1 | 375067 | 2-scf00051 | 2 |
| AX-157941939 | 3 | 90.123 | KV452745.1 | 375704 | 2-scf00051 | 2 |
| AX-157883898 | 3 | 90.123 | KV452745.1 | 379413 | 2-scf00051 | 2 |
| AX-157941943 | 3 | 90.123 | KV452745.1 | 380495 | 2-scf00051 | 2 |
| AX-158405784 | 3 | 90.123 | KV452745.1 | 381022 | 2-scf00051 | 2 |
| AX-157941944 | 3 | 90.123 | KV452745.1 | 381087 | 2-scf00051 | 2 |
| AX-157941946 | 3 | 90.123 | KV452745.1 | 381523 | 2-scf00051 | 2 |
| AX-157883899 | 3 | 90.123 | KV452745.1 | 382074 | 2-scf00051 | 2 |
| AX-157941949 | 3 | 90.123 | KV452745.1 | 382197 | 2-scf00051 | 2 |
| AX-157941951 | 3 | 90.123 | KV452745.1 | 383026 | 2-scf00051 | 2 |
| AX-157941953 | 3 | 90.123 | KV452745.1 | 383699 | 2-scf00051 | 2 |
| AX-157941955 | 3 | 90.123 | KV452745.1 | 384453 | 2-scf00051 | 2 |
| AX-157941956 | 3 | 90.123 | KV452745.1 | 385167 | 2-scf00051 | 2 |
| AX-157941958 | 3 | 90.123 | KV452745.1 | 385785 | 2-scf00051 | 2 |
| AX-157941959 | 3 | 90.123 | KV452745.1 | 386369 | 2-scf00051 | 2 |
| AX-157941964 | 3 | 90.123 | KV452745.1 | 391401 | 2-scf00051 | 2 |
| AX-157941965 | 3 | 90.123 | KV452745.1 | 394875 | 2-scf00051 | 2 |
| AX-157941966 | 3 | 90.123 | KV452745.1 | 395724 | 2-scf00051 | 2 |
| AX-158390067 | 3 | 90.123 | KV452745.1 | 396657 | 2-scf00051 | 2 |
| AX-157941968 | 3 | 90.123 | KV452745.1 | 396849 | 2-scf00051 | 2 |
| AX-157941969 | 3 | 90.123 | KV452745.1 | 397270 | 2-scf00051 | 2 |
| AX-157941971 | 3 | 90.123 | KV452745.1 | 397760 | 2-scf00051 | 2 |
| AX-157941972 | 3 | 90.123 | KV452745.1 | 397951 | 2-scf00051 | 2 |
| AX-157941974 | 3 | 90.123 | KV452745.1 | 398441 | 2-scf00051 | 2 |
| AX-157941977 | 3 | 90.123 | KV452745.1 | 400213 | 2-scf00051 | 2 |
| AX-157941979 | 3 | 90.123 | KV452745.1 | 402402 | 2-scf00051 | 2 |
| AX-157814866 | 3 | 90.123 | KV452745.1 | 402639 | 2-scf00051 | 2 |
| AX-157941980 | 3 | 90.123 | KV452745.1 | 404314 | 2-scf00051 | 2 |
| AX-158390068 | 3 | 90.123 | KV452745.1 | 405559 | 2-scf00051 | 2 |
| AX-157941982 | 3 | 90.123 | KV452745.1 | 405638 | 2-scf00051 | 2 |

|              |   |        |            |        |            |   |
|--------------|---|--------|------------|--------|------------|---|
| AX-157941983 | 3 | 90.123 | KV452745.1 | 408049 | 2-scf00051 | 2 |
| AX-157941984 | 3 | 90.123 | KV452745.1 | 409089 | 2-scf00051 | 2 |
| AX-157941986 | 3 | 90.123 | KV452745.1 | 409754 | 2-scf00051 | 2 |
| AX-157941988 | 3 | 90.123 | KV452745.1 | 411118 | 2-scf00051 | 2 |
| AX-157941989 | 3 | 90.123 | KV452745.1 | 413089 | 2-scf00051 | 2 |
| AX-157941991 | 3 | 90.123 | KV452745.1 | 414179 | 2-scf00051 | 2 |
| AX-157941992 | 3 | 90.123 | KV452745.1 | 414940 | 2-scf00051 | 2 |
| AX-157941995 | 3 | 90.123 | KV452745.1 | 417065 | 2-scf00051 | 2 |
| AX-157942000 | 3 | 90.123 | KV452745.1 | 420090 | 2-scf00051 | 2 |
| AX-157942003 | 3 | 90.123 | KV452745.1 | 424046 | 2-scf00051 | 2 |
| AX-157942005 | 3 | 90.123 | KV452745.1 | 425218 | 2-scf00051 | 2 |
| AX-157942008 | 3 | 90.123 | KV452745.1 | 427021 | 2-scf00051 | 2 |
| AX-157942010 | 3 | 90.123 | KV452745.1 | 427516 | 2-scf00051 | 2 |
| AX-157942012 | 3 | 90.123 | KV452745.1 | 428913 | 2-scf00051 | 2 |
| AX-157942014 | 3 | 90.123 | KV452745.1 | 429386 | 2-scf00051 | 2 |
| AX-157942016 | 3 | 90.123 | KV452745.1 | 431100 | 2-scf00051 | 2 |
| AX-157942017 | 3 | 90.123 | KV452745.1 | 432037 | 2-scf00051 | 2 |
| AX-157942019 | 3 | 90.123 | KV452745.1 | 433344 | 2-scf00051 | 2 |
| AX-158405786 | 3 | 90.123 | KV452745.1 | 434955 | 2-scf00051 | 2 |
| AX-157942020 | 3 | 90.123 | KV452745.1 | 437537 | 2-scf00051 | 2 |
| AX-157883900 | 3 | 90.123 | KV452745.1 | 437923 | 2-scf00051 | 2 |
| AX-157942022 | 3 | 90.123 | KV452745.1 | 438326 | 2-scf00051 | 2 |
| AX-157942023 | 3 | 90.123 | KV452745.1 | 438747 | 2-scf00051 | 2 |
| AX-157942024 | 3 | 90.123 | KV452745.1 | 441737 | 2-scf00051 | 2 |
| AX-157942025 | 3 | 90.123 | KV452745.1 | 442509 | 2-scf00051 | 2 |
| AX-157942027 | 3 | 90.123 | KV452745.1 | 446942 | 2-scf00051 | 2 |
| AX-157942029 | 3 | 90.123 | KV452745.1 | 447698 | 2-scf00051 | 2 |
| AX-157942030 | 3 | 90.123 | KV452745.1 | 448136 | 2-scf00051 | 2 |
| AX-157942031 | 3 | 90.123 | KV452745.1 | 449361 | 2-scf00051 | 2 |
| AX-157942036 | 3 | 90.123 | KV452745.1 | 451281 | 2-scf00051 | 2 |
| AX-157942037 | 3 | 90.123 | KV452745.1 | 452053 | 2-scf00051 | 2 |
| AX-157942038 | 3 | 90.123 | KV452745.1 | 452914 | 2-scf00051 | 2 |
| AX-157942039 | 3 | 90.123 | KV452745.1 | 454469 | 2-scf00051 | 2 |
| AX-157942040 | 3 | 90.123 | KV452745.1 | 459078 | 2-scf00051 | 2 |
| AX-157942041 | 3 | 90.123 | KV452745.1 | 463230 | 2-scf00051 | 2 |
| AX-158404808 | 3 | 90.123 | KV452745.1 | 469495 | 2-scf00051 | 2 |
| AX-157942048 | 3 | 90.123 | KV452745.1 | 470739 | 2-scf00051 | 2 |
| AX-157942049 | 3 | 90.123 | KV452745.1 | 471506 | 2-scf00051 | 2 |
| AX-157942050 | 3 | 90.123 | KV452745.1 | 472462 | 2-scf00051 | 2 |
| AX-157942052 | 3 | 90.123 | KV452745.1 | 472618 | 2-scf00051 | 2 |
| AX-157942053 | 3 | 90.123 | KV452745.1 | 473298 | 2-scf00051 | 2 |
| AX-157942056 | 3 | 90.123 | KV452745.1 | 475675 | 2-scf00051 | 2 |
| AX-157942058 | 3 | 90.123 | KV452745.1 | 476872 | 2-scf00051 | 2 |
| AX-157942059 | 3 | 90.123 | KV452745.1 | 477742 | 2-scf00051 | 2 |
| AX-157942060 | 3 | 90.123 | KV452745.1 | 478464 | 2-scf00051 | 2 |
| AX-157942061 | 3 | 90.123 | KV452745.1 | 478828 | 2-scf00051 | 2 |
| AX-158390069 | 3 | 90.123 | KV452745.1 | 480942 | 2-scf00051 | 2 |
| AX-157942064 | 3 | 90.123 | KV452745.1 | 481312 | 2-scf00051 | 2 |
| AX-157757672 | 3 | 90.123 | KV452745.1 | 482633 | 2-scf00051 | 2 |
| AX-157942066 | 3 | 90.123 | KV452745.1 | 484144 | 2-scf00051 | 2 |
| AX-158390070 | 3 | 90.123 | KV452745.1 | 484695 | 2-scf00051 | 2 |

|              |   |        |            |        |            |   |
|--------------|---|--------|------------|--------|------------|---|
| AX-157942067 | 3 | 90.123 | KV452745.1 | 484736 | 2-scf00051 | 2 |
| AX-157942069 | 3 | 90.123 | KV452745.1 | 485260 | 2-scf00051 | 2 |
| AX-157942072 | 3 | 90.123 | KV452745.1 | 485634 | 2-scf00051 | 2 |
| AX-157701677 | 3 | 90.123 | KV452745.1 | 486677 | 2-scf00051 | 2 |
| AX-157942073 | 3 | 90.123 | KV452745.1 | 487113 | 2-scf00051 | 2 |
| AX-157942074 | 3 | 90.123 | KV452745.1 | 487162 | 2-scf00051 | 2 |
| AX-157942076 | 3 | 90.123 | KV452745.1 | 487890 | 2-scf00051 | 2 |
| AX-157942077 | 3 | 90.123 | KV452745.1 | 488606 | 2-scf00051 | 2 |
| AX-157942080 | 3 | 90.123 | KV452745.1 | 491881 | 2-scf00051 | 2 |
| AX-158404809 | 3 | 90.123 | KV452745.1 | 492990 | 2-scf00051 | 2 |
| AX-158415112 | 3 | 90.123 | KV452745.1 | 493159 | 2-scf00051 | 2 |
| AX-158405789 | 3 | 90.123 | KV452745.1 | 493637 | 2-scf00051 | 2 |
| AX-157942081 | 3 | 90.123 | KV452745.1 | 495386 | 2-scf00051 | 2 |
| AX-157942083 | 3 | 90.123 | KV452745.1 | 496177 | 2-scf00051 | 2 |
| AX-158421995 | 3 | 90.123 | KV452745.1 | 496986 | 2-scf00051 | 2 |
| AX-157942085 | 3 | 90.123 | KV452745.1 | 498541 | 2-scf00051 | 2 |
| AX-157942086 | 3 | 90.123 | KV452745.1 | 498863 | 2-scf00051 | 2 |
| AX-157942088 | 3 | 90.123 | KV452745.1 | 500121 | 2-scf00051 | 2 |
| AX-157942089 | 3 | 90.123 | KV452745.1 | 500316 | 2-scf00051 | 2 |
| AX-157942091 | 3 | 90.123 | KV452745.1 | 501210 | 2-scf00051 | 2 |
| AX-157942093 | 3 | 90.123 | KV452745.1 | 501357 | 2-scf00051 | 2 |
| AX-157942094 | 3 | 90.123 | KV452745.1 | 501958 | 2-scf00051 | 2 |
| AX-157942099 | 3 | 90.123 | KV452745.1 | 503273 | 2-scf00051 | 2 |
| AX-157942100 | 3 | 90.123 | KV452745.1 | 504849 | 2-scf00051 | 2 |
| AX-157942104 | 3 | 90.123 | KV452745.1 | 508324 | 2-scf00051 | 2 |
| AX-158390072 | 3 | 90.123 | KV452745.1 | 516388 | 2-scf00051 | 2 |
| AX-157942115 | 3 | 90.123 | KV452745.1 | 518878 | 2-scf00051 | 2 |
| AX-157942117 | 3 | 90.123 | KV452745.1 | 521108 | 2-scf00051 | 2 |
| AX-157942120 | 3 | 90.123 | KV452745.1 | 523171 | 2-scf00051 | 2 |
| AX-157942122 | 3 | 90.123 | KV452745.1 | 526044 | 2-scf00051 | 2 |
| AX-157942123 | 3 | 90.123 | KV452745.1 | 526941 | 2-scf00051 | 2 |
| AX-158390073 | 3 | 90.123 | KV452745.1 | 526989 | 2-scf00051 | 2 |
| AX-157942124 | 3 | 90.123 | KV452745.1 | 527728 | 2-scf00051 | 2 |
| AX-157942125 | 3 | 90.123 | KV452745.1 | 528566 | 2-scf00051 | 2 |
| AX-157942126 | 3 | 90.123 | KV452745.1 | 529833 | 2-scf00051 | 2 |
| AX-157942127 | 3 | 90.123 | KV452745.1 | 537272 | 2-scf00051 | 2 |
| AX-157942129 | 3 | 90.123 | KV452745.1 | 540077 | 2-scf00051 | 2 |
| AX-157942130 | 3 | 90.123 | KV452745.1 | 545953 | 2-scf00051 | 2 |
| AX-157942131 | 3 | 90.123 | KV452745.1 | 546325 | 2-scf00051 | 2 |
| AX-157942133 | 3 | 90.123 | KV452745.1 | 548277 | 2-scf00051 | 2 |
| AX-157942136 | 3 | 90.123 | KV452745.1 | 549272 | 2-scf00051 | 2 |
| AX-157942139 | 3 | 90.123 | KV452745.1 | 550120 | 2-scf00051 | 2 |
| AX-157942140 | 3 | 90.123 | KV452745.1 | 550483 | 2-scf00051 | 2 |
| AX-157942141 | 3 | 90.123 | KV452745.1 | 551149 | 2-scf00051 | 2 |
| AX-157942142 | 3 | 90.123 | KV452745.1 | 551881 | 2-scf00051 | 2 |
| AX-157942143 | 3 | 90.123 | KV452745.1 | 552946 | 2-scf00051 | 2 |
| AX-157942145 | 3 | 90.123 | KV452745.1 | 553395 | 2-scf00051 | 2 |
| AX-157942146 | 3 | 90.123 | KV452745.1 | 553595 | 2-scf00051 | 2 |
| AX-157942147 | 3 | 90.123 | KV452745.1 | 555525 | 2-scf00051 | 2 |
| AX-157942148 | 3 | 90.123 | KV452745.1 | 557531 | 2-scf00051 | 2 |
| AX-157942149 | 3 | 90.123 | KV452745.1 | 558120 | 2-scf00051 | 2 |

|              |   |        |            |        |            |   |
|--------------|---|--------|------------|--------|------------|---|
| AX-157942151 | 3 | 90.123 | KV452745.1 | 563632 | 2-scf00051 | 2 |
| AX-157942156 | 3 | 90.123 | KV452745.1 | 567526 | 2-scf00051 | 2 |
| AX-158379378 | 3 | 90.123 | KV452745.1 | 567710 | 2-scf00051 | 2 |
| AX-157942158 | 3 | 90.123 | KV452745.1 | 568697 | 2-scf00051 | 2 |
| AX-157942159 | 3 | 90.123 | KV452745.1 | 570069 | 2-scf00051 | 2 |
| AX-157942160 | 3 | 90.123 | KV452745.1 | 571701 | 2-scf00051 | 2 |
| AX-157942163 | 3 | 90.123 | KV452745.1 | 573698 | 2-scf00051 | 2 |
| AX-157942164 | 3 | 90.123 | KV452745.1 | 574245 | 2-scf00051 | 2 |
| AX-158390075 | 3 | 90.123 | KV452745.1 | 574364 | 2-scf00051 | 2 |
| AX-157942166 | 3 | 90.123 | KV452745.1 | 574914 | 2-scf00051 | 2 |
| AX-157942168 | 3 | 90.123 | KV452745.1 | 578545 | 2-scf00051 | 2 |
| AX-157942169 | 3 | 90.123 | KV452745.1 | 579224 | 2-scf00051 | 2 |
| AX-157942170 | 3 | 90.123 | KV452745.1 | 579560 | 2-scf00051 | 2 |
| AX-157942171 | 3 | 90.123 | KV452745.1 | 580166 | 2-scf00051 | 2 |
| AX-157942172 | 3 | 90.123 | KV452745.1 | 581479 | 2-scf00051 | 2 |
| AX-157942174 | 3 | 90.123 | KV452745.1 | 581815 | 2-scf00051 | 2 |
| AX-157942175 | 3 | 90.123 | KV452745.1 | 582535 | 2-scf00051 | 2 |
| AX-157942178 | 3 | 90.123 | KV452745.1 | 584651 | 2-scf00051 | 2 |
| AX-158390076 | 3 | 90.123 | KV452745.1 | 585936 | 2-scf00051 | 2 |
| AX-157942181 | 3 | 90.123 | KV452745.1 | 586070 | 2-scf00051 | 2 |
| AX-157942182 | 3 | 90.123 | KV452745.1 | 586772 | 2-scf00051 | 2 |
| AX-157942184 | 3 | 90.123 | KV452745.1 | 587400 | 2-scf00051 | 2 |
| AX-157942186 | 3 | 90.123 | KV452745.1 | 587957 | 2-scf00051 | 2 |
| AX-157942188 | 3 | 90.123 | KV452745.1 | 588350 | 2-scf00051 | 2 |
| AX-157942192 | 3 | 90.123 | KV452745.1 | 591119 | 2-scf00051 | 2 |
| AX-157942194 | 3 | 90.123 | KV452745.1 | 591859 | 2-scf00051 | 2 |
| AX-157814867 | 3 | 90.123 | KV452745.1 | 592642 | 2-scf00051 | 2 |
| AX-157814868 | 3 | 90.123 | KV452745.1 | 592830 | 2-scf00051 | 2 |
| AX-157942197 | 3 | 90.123 | KV452745.1 | 594184 | 2-scf00051 | 2 |
| AX-157942198 | 3 | 90.123 | KV452745.1 | 595683 | 2-scf00051 | 2 |
| AX-158390077 | 3 | 90.123 | KV452745.1 | 596168 | 2-scf00051 | 2 |
| AX-157942200 | 3 | 90.123 | KV452745.1 | 596790 | 2-scf00051 | 2 |
| AX-157942201 | 3 | 90.123 | KV452745.1 | 597021 | 2-scf00051 | 2 |
| AX-157942204 | 3 | 90.123 | KV452745.1 | 599177 | 2-scf00051 | 2 |
| AX-157942205 | 3 | 90.123 | KV452745.1 | 599626 | 2-scf00051 | 2 |
| AX-157942209 | 3 | 90.123 | KV452745.1 | 601557 | 2-scf00051 | 2 |
| AX-157942212 | 3 | 90.123 | KV452745.1 | 604247 | 2-scf00051 | 2 |
| AX-158390078 | 3 | 90.123 | KV452745.1 | 607281 | 2-scf00051 | 2 |
| AX-158390079 | 3 | 90.123 | KV452745.1 | 609741 | 2-scf00051 | 2 |
| AX-157942221 | 3 | 90.123 | KV452745.1 | 611610 | 2-scf00051 | 2 |
| AX-157942225 | 3 | 90.123 | KV452745.1 | 616035 | 2-scf00051 | 2 |
| AX-157942228 | 3 | 90.123 | KV452745.1 | 617983 | 2-scf00051 | 2 |
| AX-157942229 | 3 | 90.123 | KV452745.1 | 619819 | 2-scf00051 | 2 |
| AX-157942244 | 3 | 90.123 | KV452745.1 | 632679 | 2-scf00051 | 2 |
| AX-157942246 | 3 | 90.123 | KV452745.1 | 633197 | 2-scf00051 | 2 |
| AX-158390081 | 3 | 90.123 | KV452745.1 | 633792 | 2-scf00051 | 2 |
| AX-157942247 | 3 | 90.123 | KV452745.1 | 633946 | 2-scf00051 | 2 |
| AX-157942249 | 3 | 90.123 | KV452745.1 | 635315 | 2-scf00051 | 2 |
| AX-157708659 | 3 | 90.123 | KV452745.1 | 638663 | 2-scf00051 | 2 |
| AX-157942252 | 3 | 90.123 | KV452745.1 | 639003 | 2-scf00051 | 2 |
| AX-157942253 | 3 | 90.123 | KV452745.1 | 643084 | 2-scf00051 | 2 |

|              |   |        |             |        |            |    |
|--------------|---|--------|-------------|--------|------------|----|
| AX-157869480 | 3 | 90.123 | KV452745.1  | 646287 | 2-scf00051 | 2  |
| AX-157942265 | 3 | 90.123 | KV452745.1  | 648645 | 2-scf00051 | 2  |
| AX-158404811 | 3 | 90.123 | KV452745.1  | 649543 | 2-scf00051 | 2  |
| AX-158415114 | 3 | 90.123 | KV452745.1  | 649586 | 2-scf00051 | 2  |
| AX-158405793 | 3 | 90.123 | KV452745.1  | 649785 | 2-scf00051 | 2  |
| AX-158390082 | 3 | 90.123 | KV452745.1  | 655938 | 2-scf00051 | 2  |
| AX-157942271 | 3 | 90.123 | KV452745.1  | 657387 | 2-scf00051 | 2  |
| AX-157942277 | 3 | 90.123 | KV452745.1  | 660400 | 2-scf00051 | 2  |
| AX-157942278 | 3 | 90.123 | KV452745.1  | 660962 | 2-scf00051 | 2  |
| AX-157942279 | 3 | 90.123 | KV452745.1  | 662391 | 2-scf00051 | 2  |
| AX-157942281 | 3 | 90.123 | KV452745.1  | 663711 | 2-scf00051 | 2  |
| AX-157942283 | 3 | 90.123 | KV452745.1  | 664943 | 2-scf00051 | 2  |
| AX-157942287 | 3 | 90.123 | KV452745.1  | 669557 | 2-scf00051 | 2  |
| AX-157942291 | 3 | 90.123 | KV452745.1  | 680465 | 2-scf00051 | 2  |
| AX-157854577 | 3 | 90.123 | KV452745.1  | 687175 | 2-scf00051 | 2  |
| AX-157942297 | 3 | 90.123 | KV452745.1  | 687967 | 2-scf00051 | 2  |
| AX-157942968 | 3 | 90.123 | KV452744.1  | 35906  | 2-scf00052 | 2  |
| AX-157943030 | 3 | 90.123 | KV452744.1  | 129690 | 2-scf00052 | 2  |
| AX-157943049 | 3 | 90.123 | KV452744.1  | 180350 | 2-scf00052 | 2  |
| AX-157943054 | 3 | 90.123 | KV452744.1  | 184584 | 2-scf00052 | 2  |
| AX-157705241 | 3 | 90.123 | 3ML01029144 | 786    | scf04764_1 | UN |
| AX-157942300 | 3 | 90.341 | KV452745.1  | 692975 | 2-scf00051 | 2  |
| AX-157942303 | 3 | 90.341 | KV452745.1  | 703751 | 2-scf00051 | 2  |
| AX-157942305 | 3 | 90.341 | KV452745.1  | 706921 | 2-scf00051 | 2  |
| AX-157941843 | 3 | 90.451 | KV452745.1  | 304626 | 2-scf00051 | 2  |
| AX-158382643 | 3 | 90.451 | KV452745.1  | 354679 | 2-scf00051 | 2  |
| AX-157942273 | 3 | 90.451 | KV452745.1  | 658348 | 2-scf00051 | 2  |
| AX-157725885 | 3 | 90.451 | KV452745.1  | 658647 | 2-scf00051 | 2  |
| AX-157942274 | 3 | 90.451 | KV452745.1  | 659518 | 2-scf00051 | 2  |
| AX-157942295 | 3 | 90.451 | KV452745.1  | 686407 | 2-scf00051 | 2  |
| AX-157942309 | 3 | 90.451 | KV452745.1  | 708866 | 2-scf00051 | 2  |
| AX-157942311 | 3 | 90.451 | KV452745.1  | 710858 | 2-scf00051 | 2  |
| AX-157942312 | 3 | 90.451 | KV452745.1  | 713132 | 2-scf00051 | 2  |
| AX-157715210 | 3 | 90.451 | KV452745.1  | 713807 | 2-scf00051 | 2  |
| AX-157942321 | 3 | 90.451 | KV452745.1  | 725774 | 2-scf00051 | 2  |
| AX-157942324 | 3 | 90.451 | KV452745.1  | 729169 | 2-scf00051 | 2  |
| AX-157942325 | 3 | 90.451 | KV452745.1  | 730586 | 2-scf00051 | 2  |
| AX-157942335 | 3 | 90.451 | KV452745.1  | 744322 | 2-scf00051 | 2  |
| AX-157942503 | 3 | 90.451 | KV452745.1  | 891645 | 2-scf00051 | 2  |
| AX-157814917 | 3 | 90.451 | KV452744.1  | 117238 | 2-scf00052 | 2  |
| AX-157943025 | 3 | 90.451 | KV452744.1  | 117534 | 2-scf00052 | 2  |
| AX-157943052 | 3 | 90.451 | KV452744.1  | 182980 | 2-scf00052 | 2  |
| AX-157945390 | 3 | 90.451 | KV452746.1  | 245183 | 2-scf00054 | 2  |
| AX-157942331 | 3 | 90.777 | KV452745.1  | 738451 | 2-scf00051 | 2  |
| AX-157814302 | 3 | 90.778 | KV452733.1  | 570230 | 2-scf00041 | 2  |
| AX-157942334 | 3 | 90.778 | KV452745.1  | 742860 | 2-scf00051 | 2  |
| AX-157745044 | 3 | 90.778 | KV452745.1  | 758228 | 2-scf00051 | 2  |
| AX-157942356 | 3 | 90.778 | KV452745.1  | 765068 | 2-scf00051 | 2  |
| AX-157942357 | 3 | 90.778 | KV452745.1  | 765914 | 2-scf00051 | 2  |
| AX-157942358 | 3 | 90.778 | KV452745.1  | 766329 | 2-scf00051 | 2  |
| AX-157942359 | 3 | 90.778 | KV452745.1  | 766724 | 2-scf00051 | 2  |

|              |   |        |            |         |            |   |
|--------------|---|--------|------------|---------|------------|---|
| AX-157942364 | 3 | 90.778 | KV452745.1 | 768109  | 2-scf00051 | 2 |
| AX-157942367 | 3 | 90.778 | KV452745.1 | 773605  | 2-scf00051 | 2 |
| AX-157726551 | 3 | 90.778 | KV452745.1 | 1012975 | 2-scf00051 | 2 |
| AX-157943098 | 3 | 90.778 | KV452747.1 | 24882   | 2-scf00053 | 2 |
| AX-158379379 | 3 | 90.942 | KV452745.1 | 771495  | 2-scf00051 | 2 |
| AX-157942376 | 3 | 90.942 | KV452745.1 | 780168  | 2-scf00051 | 2 |
| AX-157942382 | 3 | 90.942 | KV452745.1 | 783822  | 2-scf00051 | 2 |
| AX-157942435 | 3 | 90.942 | KV452745.1 | 828428  | 2-scf00051 | 2 |
| AX-157942508 | 3 | 90.942 | KV452745.1 | 895977  | 2-scf00051 | 2 |
| AX-157942381 | 3 | 91.106 | KV452745.1 | 782331  | 2-scf00051 | 2 |
| AX-157749858 | 3 | 91.106 | KV452745.1 | 782993  | 2-scf00051 | 2 |
| AX-157750929 | 3 | 91.106 | KV452745.1 | 783380  | 2-scf00051 | 2 |
| AX-157942391 | 3 | 91.106 | KV452745.1 | 793063  | 2-scf00051 | 2 |
| AX-157942411 | 3 | 91.106 | KV452745.1 | 808419  | 2-scf00051 | 2 |
| AX-157942415 | 3 | 91.106 | KV452745.1 | 810316  | 2-scf00051 | 2 |
| AX-157942455 | 3 | 91.106 | KV452745.1 | 843678  | 2-scf00051 | 2 |
| AX-157815063 | 3 | 91.106 | KV452746.1 | 226285  | 2-scf00054 | 2 |
| AX-157942395 | 3 | 91.325 | KV452745.1 | 794664  | 2-scf00051 | 2 |
| AX-157942397 | 3 | 91.325 | KV452745.1 | 795856  | 2-scf00051 | 2 |
| AX-158382656 | 3 | 91.325 | KV452745.1 | 797767  | 2-scf00051 | 2 |
| AX-157942405 | 3 | 91.325 | KV452745.1 | 804636  | 2-scf00051 | 2 |
| AX-157942421 | 3 | 91.325 | KV452745.1 | 813273  | 2-scf00051 | 2 |
| AX-157942412 | 3 | 91.326 | KV452745.1 | 808822  | 2-scf00051 | 2 |
| AX-157942414 | 3 | 91.326 | KV452745.1 | 809332  | 2-scf00051 | 2 |
| AX-157942419 | 3 | 91.488 | KV452745.1 | 812082  | 2-scf00051 | 2 |
| AX-157942422 | 3 | 91.488 | KV452745.1 | 814993  | 2-scf00051 | 2 |
| AX-157942423 | 3 | 91.488 | KV452745.1 | 819665  | 2-scf00051 | 2 |
| AX-157942428 | 3 | 91.576 | KV452745.1 | 825108  | 2-scf00051 | 2 |
| AX-157716707 | 3 | 91.576 | KV452745.1 | 924634  | 2-scf00051 | 2 |
| AX-157942534 | 3 | 91.576 | KV452745.1 | 925889  | 2-scf00051 | 2 |
| AX-157942449 | 3 | 91.652 | KV452745.1 | 839918  | 2-scf00051 | 2 |
| AX-157942450 | 3 | 91.652 | KV452745.1 | 840676  | 2-scf00051 | 2 |
| AX-157942456 | 3 | 91.691 | KV452745.1 | 845732  | 2-scf00051 | 2 |
| AX-157942457 | 3 | 91.716 | KV452745.1 | 847056  | 2-scf00051 | 2 |
| AX-157942465 | 3 | 91.731 | KV452745.1 | 851024  | 2-scf00051 | 2 |
| AX-157942607 | 3 | 91.731 | KV452745.1 | 1016181 | 2-scf00051 | 2 |
| AX-157942468 | 3 | 91.762 | KV452745.1 | 851812  | 2-scf00051 | 2 |
| AX-157942469 | 3 | 91.762 | KV452745.1 | 852252  | 2-scf00051 | 2 |
| AX-157942471 | 3 | 91.763 | KV452745.1 | 852713  | 2-scf00051 | 2 |
| AX-157814352 | 3 | 91.926 | KV452733.1 | 1730669 | 2-scf00041 | 2 |
| AX-157937080 | 3 | 91.926 | KV452733.1 | 3432609 | 2-scf00041 | 2 |
| AX-157757442 | 3 | 91.926 | KV452732.1 | 1315619 | 2-scf00042 | 2 |
| AX-157940822 | 3 | 91.926 | KV452742.1 | 4309774 | 2-scf00046 | 2 |
| AX-157942475 | 3 | 91.926 | KV452745.1 | 866270  | 2-scf00051 | 2 |
| AX-157942448 | 3 | 92.086 | KV452745.1 | 839607  | 2-scf00051 | 2 |
| AX-157942483 | 3 | 92.086 | KV452745.1 | 873208  | 2-scf00051 | 2 |
| AX-157942485 | 3 | 92.086 | KV452745.1 | 874682  | 2-scf00051 | 2 |
| AX-157942492 | 3 | 92.086 | KV452745.1 | 880303  | 2-scf00051 | 2 |
| AX-157942495 | 3 | 92.086 | KV452745.1 | 881357  | 2-scf00051 | 2 |
| AX-157942496 | 3 | 92.086 | KV452745.1 | 882441  | 2-scf00051 | 2 |
| AX-157717197 | 3 | 92.086 | KV452745.1 | 902052  | 2-scf00051 | 2 |

|              |   |        |            |         |            |   |
|--------------|---|--------|------------|---------|------------|---|
| AX-157942512 | 3 | 92.086 | KV452745.1 | 905111  | 2-scf00051 | 2 |
| AX-157942513 | 3 | 92.086 | KV452745.1 | 905518  | 2-scf00051 | 2 |
| AX-157814922 | 3 | 92.086 | KV452744.1 | 184453  | 2-scf00052 | 2 |
| AX-157942516 | 3 | 92.417 | KV452745.1 | 910448  | 2-scf00051 | 2 |
| AX-157942517 | 3 | 92.417 | KV452745.1 | 912134  | 2-scf00051 | 2 |
| AX-157942532 | 3 | 92.463 | KV452745.1 | 924809  | 2-scf00051 | 2 |
| AX-157942537 | 3 | 92.527 | KV452745.1 | 936309  | 2-scf00051 | 2 |
| AX-157942538 | 3 | 92.527 | KV452745.1 | 937744  | 2-scf00051 | 2 |
| AX-157942540 | 3 | 92.527 | KV452745.1 | 938430  | 2-scf00051 | 2 |
| AX-157937227 | 3 | 92.557 | KV452733.1 | 3570774 | 2-scf00041 | 2 |
| AX-157942542 | 3 | 92.557 | KV452745.1 | 939108  | 2-scf00051 | 2 |
| AX-157942547 | 3 | 92.588 | KV452745.1 | 944835  | 2-scf00051 | 2 |
| AX-157942551 | 3 | 92.896 | KV452745.1 | 947090  | 2-scf00051 | 2 |
| AX-157942557 | 3 | 92.896 | KV452745.1 | 955276  | 2-scf00051 | 2 |
| AX-157942558 | 3 | 92.896 | KV452745.1 | 955764  | 2-scf00051 | 2 |
| AX-157942561 | 3 | 92.896 | KV452745.1 | 958568  | 2-scf00051 | 2 |
| AX-157942563 | 3 | 92.974 | KV452745.1 | 960203  | 2-scf00051 | 2 |
| AX-157942579 | 3 | 92.974 | KV452745.1 | 981318  | 2-scf00051 | 2 |
| AX-157942565 | 3 | 93.065 | KV452745.1 | 964604  | 2-scf00051 | 2 |
| AX-157758547 | 3 | 93.065 | KV452745.1 | 972860  | 2-scf00051 | 2 |
| AX-157942572 | 3 | 93.065 | KV452745.1 | 976387  | 2-scf00051 | 2 |
| AX-157942576 | 3 | 93.065 | KV452745.1 | 980343  | 2-scf00051 | 2 |
| AX-157942578 | 3 | 93.065 | KV452745.1 | 980899  | 2-scf00051 | 2 |
| AX-157942592 | 3 | 93.234 | KV452745.1 | 998796  | 2-scf00051 | 2 |
| AX-157942593 | 3 | 93.234 | KV452745.1 | 1000206 | 2-scf00051 | 2 |
| AX-157942603 | 3 | 93.234 | KV452745.1 | 1011521 | 2-scf00051 | 2 |
| AX-157942606 | 3 | 93.234 | KV452745.1 | 1013581 | 2-scf00051 | 2 |
| AX-157942608 | 3 | 93.234 | KV452745.1 | 1016294 | 2-scf00051 | 2 |
| AX-157942632 | 3 | 93.234 | KV452745.1 | 1070697 | 2-scf00051 | 2 |
| AX-157883909 | 3 | 93.234 | KV452745.1 | 1294855 | 2-scf00051 | 2 |
| AX-157744830 | 3 | 93.234 | KV452745.1 | 1483803 | 2-scf00051 | 2 |
| AX-157815092 | 3 | 93.234 | KV452746.1 | 412150  | 2-scf00054 | 2 |
| AX-157945597 | 3 | 93.234 | KV452746.1 | 477317  | 2-scf00054 | 2 |
| AX-157942596 | 3 | 93.258 | KV452745.1 | 1002518 | 2-scf00051 | 2 |
| AX-158421997 | 3 | 93.258 | KV452745.1 | 1020815 | 2-scf00051 | 2 |
| AX-157942640 | 3 | 93.258 | KV452745.1 | 1086867 | 2-scf00051 | 2 |
| AX-157942740 | 3 | 93.258 | KV452745.1 | 1243057 | 2-scf00051 | 2 |
| AX-157942902 | 3 | 93.258 | KV452745.1 | 1495241 | 2-scf00051 | 2 |
| AX-157943717 | 3 | 93.258 | KV452747.1 | 689953  | 2-scf00053 | 2 |
| AX-157942622 | 3 | 93.273 | KV452745.1 | 1055888 | 2-scf00051 | 2 |
| AX-157943747 | 3 | 93.273 | KV452747.1 | 737112  | 2-scf00053 | 2 |
| AX-157943760 | 3 | 93.273 | KV452747.1 | 750460  | 2-scf00053 | 2 |
| AX-157942797 | 3 | 93.332 | KV452745.1 | 1339968 | 2-scf00051 | 2 |
| AX-157942837 | 3 | 93.394 | KV452745.1 | 1429460 | 2-scf00051 | 2 |
| AX-157942839 | 3 | 93.398 | KV452745.1 | 1432193 | 2-scf00051 | 2 |
| AX-157942407 | 3 | 93.401 | KV452745.1 | 804992  | 2-scf00051 | 2 |
| AX-157942602 | 3 | 93.401 | KV452745.1 | 1008350 | 2-scf00051 | 2 |
| AX-157942857 | 3 | 93.401 | KV452745.1 | 1450977 | 2-scf00051 | 2 |
| AX-157942860 | 3 | 93.401 | KV452745.1 | 1454500 | 2-scf00051 | 2 |
| AX-157942865 | 3 | 93.401 | KV452745.1 | 1460167 | 2-scf00051 | 2 |
| AX-157942919 | 3 | 93.401 | KV452745.1 | 1539274 | 2-scf00051 | 2 |



|              |   |        |            |         |            |   |
|--------------|---|--------|------------|---------|------------|---|
| AX-157942920 | 3 | 93.401 | KV452745.1 | 1548731 | 2-scf00051 | 2 |
| AX-157942923 | 3 | 93.401 | KV452745.1 | 1560125 | 2-scf00051 | 2 |
| AX-157943803 | 3 | 93.401 | KV452747.1 | 809299  | 2-scf00053 | 2 |
| AX-157942925 | 3 | 93.413 | KV452745.1 | 1569705 | 2-scf00051 | 2 |
| AX-157942931 | 3 | 93.423 | KV452745.1 | 1574657 | 2-scf00051 | 2 |
| AX-157869495 | 3 | 93.443 | KV452745.1 | 1579477 | 2-scf00051 | 2 |
| AX-157945595 | 3 | 93.443 | KV452746.1 | 476196  | 2-scf00054 | 2 |
| AX-157945628 | 3 | 93.443 | KV452746.1 | 511475  | 2-scf00054 | 2 |
| AX-157869493 | 3 | 93.462 | KV452745.1 | 1572380 | 2-scf00051 | 2 |
| AX-157942927 | 3 | 93.462 | KV452745.1 | 1572808 | 2-scf00051 | 2 |
| AX-157942929 | 3 | 93.462 | KV452745.1 | 1573981 | 2-scf00051 | 2 |
| AX-157942932 | 3 | 93.462 | KV452745.1 | 1575844 | 2-scf00051 | 2 |
| AX-157942933 | 3 | 93.462 | KV452745.1 | 1576075 | 2-scf00051 | 2 |
| AX-157869494 | 3 | 93.462 | KV452745.1 | 1577693 | 2-scf00051 | 2 |
| AX-157942936 | 3 | 93.462 | KV452745.1 | 1579145 | 2-scf00051 | 2 |
| AX-157869496 | 3 | 93.462 | KV452745.1 | 1579646 | 2-scf00051 | 2 |
| AX-157942938 | 3 | 93.462 | KV452745.1 | 1580229 | 2-scf00051 | 2 |
| AX-157814904 | 3 | 93.462 | KV452745.1 | 1581508 | 2-scf00051 | 2 |
| AX-157943480 | 3 | 93.462 | KV452747.1 | 458322  | 2-scf00053 | 2 |
| AX-157943521 | 3 | 93.462 | KV452747.1 | 490459  | 2-scf00053 | 2 |
| AX-157943573 | 3 | 93.462 | KV452747.1 | 540264  | 2-scf00053 | 2 |
| AX-157943575 | 3 | 93.462 | KV452747.1 | 541292  | 2-scf00053 | 2 |
| AX-157943661 | 3 | 93.462 | KV452747.1 | 612241  | 2-scf00053 | 2 |
| AX-157814955 | 3 | 93.462 | KV452747.1 | 617162  | 2-scf00053 | 2 |
| AX-157943835 | 3 | 93.462 | KV452747.1 | 830325  | 2-scf00053 | 2 |
| AX-157943837 | 3 | 93.462 | KV452747.1 | 830672  | 2-scf00053 | 2 |
| AX-157945260 | 3 | 93.462 | KV452746.1 | 2215    | 2-scf00054 | 2 |
| AX-157945261 | 3 | 93.462 | KV452746.1 | 2707    | 2-scf00054 | 2 |
| AX-157815047 | 3 | 93.462 | KV452746.1 | 3198    | 2-scf00054 | 2 |
| AX-157945263 | 3 | 93.462 | KV452746.1 | 6122    | 2-scf00054 | 2 |
| AX-157945265 | 3 | 93.462 | KV452746.1 | 8985    | 2-scf00054 | 2 |
| AX-157945266 | 3 | 93.462 | KV452746.1 | 10263   | 2-scf00054 | 2 |
| AX-157945267 | 3 | 93.462 | KV452746.1 | 12921   | 2-scf00054 | 2 |
| AX-157945269 | 3 | 93.462 | KV452746.1 | 21284   | 2-scf00054 | 2 |
| AX-157815048 | 3 | 93.462 | KV452746.1 | 24344   | 2-scf00054 | 2 |
| AX-157945270 | 3 | 93.462 | KV452746.1 | 25050   | 2-scf00054 | 2 |
| AX-157945272 | 3 | 93.462 | KV452746.1 | 27647   | 2-scf00054 | 2 |
| AX-157945273 | 3 | 93.462 | KV452746.1 | 28285   | 2-scf00054 | 2 |
| AX-157945274 | 3 | 93.462 | KV452746.1 | 28567   | 2-scf00054 | 2 |
| AX-157945275 | 3 | 93.462 | KV452746.1 | 30399   | 2-scf00054 | 2 |
| AX-157945276 | 3 | 93.462 | KV452746.1 | 30901   | 2-scf00054 | 2 |
| AX-157945277 | 3 | 93.462 | KV452746.1 | 31658   | 2-scf00054 | 2 |
| AX-157945279 | 3 | 93.462 | KV452746.1 | 34401   | 2-scf00054 | 2 |
| AX-157945280 | 3 | 93.462 | KV452746.1 | 45157   | 2-scf00054 | 2 |
| AX-157945281 | 3 | 93.462 | KV452746.1 | 45965   | 2-scf00054 | 2 |
| AX-157945282 | 3 | 93.462 | KV452746.1 | 48054   | 2-scf00054 | 2 |
| AX-157945283 | 3 | 93.462 | KV452746.1 | 48293   | 2-scf00054 | 2 |
| AX-157945535 | 3 | 93.462 | KV452746.1 | 396703  | 2-scf00054 | 2 |
| AX-157945536 | 3 | 93.462 | KV452746.1 | 397399  | 2-scf00054 | 2 |
| AX-157945538 | 3 | 93.462 | KV452746.1 | 402531  | 2-scf00054 | 2 |
| AX-157945539 | 3 | 93.462 | KV452746.1 | 402957  | 2-scf00054 | 2 |

|              |   |        |            |        |            |   |
|--------------|---|--------|------------|--------|------------|---|
| AX-158390140 | 3 | 93.462 | KV452746.1 | 404223 | 2-scf00054 | 2 |
| AX-157945540 | 3 | 93.462 | KV452746.1 | 404422 | 2-scf00054 | 2 |
| AX-157945541 | 3 | 93.462 | KV452746.1 | 405442 | 2-scf00054 | 2 |
| AX-157945543 | 3 | 93.462 | KV452746.1 | 409248 | 2-scf00054 | 2 |
| AX-157945544 | 3 | 93.462 | KV452746.1 | 409534 | 2-scf00054 | 2 |
| AX-157945545 | 3 | 93.462 | KV452746.1 | 409809 | 2-scf00054 | 2 |
| AX-157945546 | 3 | 93.462 | KV452746.1 | 413164 | 2-scf00054 | 2 |
| AX-157945547 | 3 | 93.462 | KV452746.1 | 414538 | 2-scf00054 | 2 |
| AX-157945548 | 3 | 93.462 | KV452746.1 | 415662 | 2-scf00054 | 2 |
| AX-157945550 | 3 | 93.462 | KV452746.1 | 419750 | 2-scf00054 | 2 |
| AX-157815093 | 3 | 93.462 | KV452746.1 | 421284 | 2-scf00054 | 2 |
| AX-157945551 | 3 | 93.462 | KV452746.1 | 422921 | 2-scf00054 | 2 |
| AX-157945552 | 3 | 93.462 | KV452746.1 | 426207 | 2-scf00054 | 2 |
| AX-157945553 | 3 | 93.462 | KV452746.1 | 429536 | 2-scf00054 | 2 |
| AX-157945557 | 3 | 93.462 | KV452746.1 | 436166 | 2-scf00054 | 2 |
| AX-157945560 | 3 | 93.462 | KV452746.1 | 438360 | 2-scf00054 | 2 |
| AX-157869518 | 3 | 93.462 | KV452746.1 | 439503 | 2-scf00054 | 2 |
| AX-157945561 | 3 | 93.462 | KV452746.1 | 441845 | 2-scf00054 | 2 |
| AX-157945563 | 3 | 93.462 | KV452746.1 | 443731 | 2-scf00054 | 2 |
| AX-157945564 | 3 | 93.462 | KV452746.1 | 445184 | 2-scf00054 | 2 |
| AX-157945565 | 3 | 93.462 | KV452746.1 | 446342 | 2-scf00054 | 2 |
| AX-157945566 | 3 | 93.462 | KV452746.1 | 447973 | 2-scf00054 | 2 |
| AX-157945568 | 3 | 93.462 | KV452746.1 | 449437 | 2-scf00054 | 2 |
| AX-157945569 | 3 | 93.462 | KV452746.1 | 449895 | 2-scf00054 | 2 |
| AX-157945570 | 3 | 93.462 | KV452746.1 | 450125 | 2-scf00054 | 2 |
| AX-157945572 | 3 | 93.462 | KV452746.1 | 453638 | 2-scf00054 | 2 |
| AX-157945574 | 3 | 93.462 | KV452746.1 | 454488 | 2-scf00054 | 2 |
| AX-157945575 | 3 | 93.462 | KV452746.1 | 454776 | 2-scf00054 | 2 |
| AX-157945577 | 3 | 93.462 | KV452746.1 | 456376 | 2-scf00054 | 2 |
| AX-157945578 | 3 | 93.462 | KV452746.1 | 456819 | 2-scf00054 | 2 |
| AX-157945581 | 3 | 93.462 | KV452746.1 | 458538 | 2-scf00054 | 2 |
| AX-157945583 | 3 | 93.462 | KV452746.1 | 460424 | 2-scf00054 | 2 |
| AX-157945584 | 3 | 93.462 | KV452746.1 | 461928 | 2-scf00054 | 2 |
| AX-157945585 | 3 | 93.462 | KV452746.1 | 462755 | 2-scf00054 | 2 |
| AX-157945587 | 3 | 93.462 | KV452746.1 | 464253 | 2-scf00054 | 2 |
| AX-157945589 | 3 | 93.462 | KV452746.1 | 469948 | 2-scf00054 | 2 |
| AX-158390143 | 3 | 93.462 | KV452746.1 | 470361 | 2-scf00054 | 2 |
| AX-157945593 | 3 | 93.462 | KV452746.1 | 474749 | 2-scf00054 | 2 |
| AX-157945598 | 3 | 93.462 | KV452746.1 | 478089 | 2-scf00054 | 2 |
| AX-157945602 | 3 | 93.462 | KV452746.1 | 484641 | 2-scf00054 | 2 |
| AX-157945603 | 3 | 93.462 | KV452746.1 | 485516 | 2-scf00054 | 2 |
| AX-157945609 | 3 | 93.462 | KV452746.1 | 490201 | 2-scf00054 | 2 |
| AX-157815096 | 3 | 93.462 | KV452746.1 | 491562 | 2-scf00054 | 2 |
| AX-157945611 | 3 | 93.462 | KV452746.1 | 491834 | 2-scf00054 | 2 |
| AX-157945613 | 3 | 93.462 | KV452746.1 | 495381 | 2-scf00054 | 2 |
| AX-157945614 | 3 | 93.462 | KV452746.1 | 496278 | 2-scf00054 | 2 |
| AX-157945616 | 3 | 93.462 | KV452746.1 | 501566 | 2-scf00054 | 2 |
| AX-157869520 | 3 | 93.462 | KV452746.1 | 502691 | 2-scf00054 | 2 |
| AX-157945618 | 3 | 93.462 | KV452746.1 | 503750 | 2-scf00054 | 2 |
| AX-157945619 | 3 | 93.462 | KV452746.1 | 504385 | 2-scf00054 | 2 |
| AX-157945620 | 3 | 93.462 | KV452746.1 | 505435 | 2-scf00054 | 2 |

|              |   |        |            |         |            |   |
|--------------|---|--------|------------|---------|------------|---|
| AX-157945621 | 3 | 93.462 | KV452746.1 | 507272  | 2-scf00054 | 2 |
| AX-157945623 | 3 | 93.462 | KV452746.1 | 507729  | 2-scf00054 | 2 |
| AX-157815098 | 3 | 93.462 | KV452746.1 | 508318  | 2-scf00054 | 2 |
| AX-157815100 | 3 | 93.462 | KV452746.1 | 509418  | 2-scf00054 | 2 |
| AX-157945625 | 3 | 93.462 | KV452746.1 | 509744  | 2-scf00054 | 2 |
| AX-157945626 | 3 | 93.462 | KV452746.1 | 510706  | 2-scf00054 | 2 |
| AX-157945629 | 3 | 93.462 | KV452746.1 | 511908  | 2-scf00054 | 2 |
| AX-157869523 | 3 | 93.462 | KV452746.1 | 512338  | 2-scf00054 | 2 |
| AX-157940761 | 3 | 93.511 | KV452742.1 | 4215500 | 2-scf00046 | 2 |
| AX-157942822 | 3 | 93.511 | KV452745.1 | 1394049 | 2-scf00051 | 2 |
| AX-157943090 | 3 | 93.511 | KV452747.1 | 22093   | 2-scf00053 | 2 |
| AX-158405830 | 3 | 93.511 | KV452747.1 | 41941   | 2-scf00053 | 2 |
| AX-157943113 | 3 | 93.511 | KV452747.1 | 48810   | 2-scf00053 | 2 |
| AX-157943161 | 3 | 93.511 | KV452747.1 | 116513  | 2-scf00053 | 2 |
| AX-158390103 | 3 | 93.511 | KV452747.1 | 117588  | 2-scf00053 | 2 |
| AX-157943170 | 3 | 93.511 | KV452747.1 | 126531  | 2-scf00053 | 2 |
| AX-157943187 | 3 | 93.511 | KV452747.1 | 140697  | 2-scf00053 | 2 |
| AX-157943215 | 3 | 93.511 | KV452747.1 | 174637  | 2-scf00053 | 2 |
| AX-157943234 | 3 | 93.511 | KV452747.1 | 200645  | 2-scf00053 | 2 |
| AX-157943293 | 3 | 93.511 | KV452747.1 | 253382  | 2-scf00053 | 2 |
| AX-157943466 | 3 | 93.511 | KV452747.1 | 439061  | 2-scf00053 | 2 |
| AX-157943469 | 3 | 93.511 | KV452747.1 | 442653  | 2-scf00053 | 2 |
| AX-157943636 | 3 | 93.511 | KV452747.1 | 591067  | 2-scf00053 | 2 |
| AX-157943710 | 3 | 93.511 | KV452747.1 | 674644  | 2-scf00053 | 2 |
| AX-157814959 | 3 | 93.511 | KV452747.1 | 676865  | 2-scf00053 | 2 |
| AX-157751234 | 3 | 93.511 | KV452747.1 | 677671  | 2-scf00053 | 2 |
| AX-157943713 | 3 | 93.511 | KV452747.1 | 679456  | 2-scf00053 | 2 |
| AX-157943856 | 3 | 93.511 | KV452747.1 | 847804  | 2-scf00053 | 2 |
| AX-157945289 | 3 | 93.511 | KV452746.1 | 121676  | 2-scf00054 | 2 |
| AX-157945291 | 3 | 93.511 | KV452746.1 | 126305  | 2-scf00054 | 2 |
| AX-157945292 | 3 | 93.511 | KV452746.1 | 127058  | 2-scf00054 | 2 |
| AX-157945293 | 3 | 93.511 | KV452746.1 | 128356  | 2-scf00054 | 2 |
| AX-157945294 | 3 | 93.511 | KV452746.1 | 128874  | 2-scf00054 | 2 |
| AX-157945295 | 3 | 93.511 | KV452746.1 | 131555  | 2-scf00054 | 2 |
| AX-157945296 | 3 | 93.511 | KV452746.1 | 131990  | 2-scf00054 | 2 |
| AX-158405886 | 3 | 93.511 | KV452746.1 | 139048  | 2-scf00054 | 2 |
| AX-157945305 | 3 | 93.511 | KV452746.1 | 159329  | 2-scf00054 | 2 |
| AX-157945310 | 3 | 93.511 | KV452746.1 | 163966  | 2-scf00054 | 2 |
| AX-157945311 | 3 | 93.511 | KV452746.1 | 164614  | 2-scf00054 | 2 |
| AX-157945312 | 3 | 93.511 | KV452746.1 | 165693  | 2-scf00054 | 2 |
| AX-157945313 | 3 | 93.511 | KV452746.1 | 166655  | 2-scf00054 | 2 |
| AX-157945315 | 3 | 93.511 | KV452746.1 | 168867  | 2-scf00054 | 2 |
| AX-157945316 | 3 | 93.511 | KV452746.1 | 169618  | 2-scf00054 | 2 |
| AX-157945319 | 3 | 93.511 | KV452746.1 | 172099  | 2-scf00054 | 2 |
| AX-157869510 | 3 | 93.511 | KV452746.1 | 173475  | 2-scf00054 | 2 |
| AX-157945323 | 3 | 93.511 | KV452746.1 | 176234  | 2-scf00054 | 2 |
| AX-157945327 | 3 | 93.511 | KV452746.1 | 179145  | 2-scf00054 | 2 |
| AX-157945328 | 3 | 93.511 | KV452746.1 | 179658  | 2-scf00054 | 2 |
| AX-157945332 | 3 | 93.511 | KV452746.1 | 183950  | 2-scf00054 | 2 |
| AX-157945334 | 3 | 93.511 | KV452746.1 | 188866  | 2-scf00054 | 2 |
| AX-157945339 | 3 | 93.511 | KV452746.1 | 193242  | 2-scf00054 | 2 |

|              |   |        |            |        |            |   |
|--------------|---|--------|------------|--------|------------|---|
| AX-157945341 | 3 | 93.511 | KV452746.1 | 194768 | 2-scf00054 | 2 |
| AX-157945346 | 3 | 93.511 | KV452746.1 | 200007 | 2-scf00054 | 2 |
| AX-157945354 | 3 | 93.511 | KV452746.1 | 207239 | 2-scf00054 | 2 |
| AX-157945355 | 3 | 93.511 | KV452746.1 | 207762 | 2-scf00054 | 2 |
| AX-157945356 | 3 | 93.511 | KV452746.1 | 208126 | 2-scf00054 | 2 |
| AX-157945361 | 3 | 93.511 | KV452746.1 | 215066 | 2-scf00054 | 2 |
| AX-157815061 | 3 | 93.511 | KV452746.1 | 222554 | 2-scf00054 | 2 |
| AX-157945367 | 3 | 93.511 | KV452746.1 | 224509 | 2-scf00054 | 2 |
| AX-157945368 | 3 | 93.511 | KV452746.1 | 226578 | 2-scf00054 | 2 |
| AX-157945371 | 3 | 93.511 | KV452746.1 | 227531 | 2-scf00054 | 2 |
| AX-157945372 | 3 | 93.511 | KV452746.1 | 227871 | 2-scf00054 | 2 |
| AX-157945376 | 3 | 93.511 | KV452746.1 | 232926 | 2-scf00054 | 2 |
| AX-157945379 | 3 | 93.511 | KV452746.1 | 234922 | 2-scf00054 | 2 |
| AX-157945385 | 3 | 93.511 | KV452746.1 | 238418 | 2-scf00054 | 2 |
| AX-157945388 | 3 | 93.511 | KV452746.1 | 243008 | 2-scf00054 | 2 |
| AX-157945392 | 3 | 93.511 | KV452746.1 | 246350 | 2-scf00054 | 2 |
| AX-157945394 | 3 | 93.511 | KV452746.1 | 247642 | 2-scf00054 | 2 |
| AX-157945395 | 3 | 93.511 | KV452746.1 | 249296 | 2-scf00054 | 2 |
| AX-157945419 | 3 | 93.511 | KV452746.1 | 270374 | 2-scf00054 | 2 |
| AX-158390135 | 3 | 93.511 | KV452746.1 | 271510 | 2-scf00054 | 2 |
| AX-157945421 | 3 | 93.511 | KV452746.1 | 272133 | 2-scf00054 | 2 |
| AX-157945424 | 3 | 93.511 | KV452746.1 | 274020 | 2-scf00054 | 2 |
| AX-157945425 | 3 | 93.511 | KV452746.1 | 275554 | 2-scf00054 | 2 |
| AX-157945426 | 3 | 93.511 | KV452746.1 | 276027 | 2-scf00054 | 2 |
| AX-157945428 | 3 | 93.511 | KV452746.1 | 277516 | 2-scf00054 | 2 |
| AX-157945430 | 3 | 93.511 | KV452746.1 | 278882 | 2-scf00054 | 2 |
| AX-157945431 | 3 | 93.511 | KV452746.1 | 279336 | 2-scf00054 | 2 |
| AX-157945434 | 3 | 93.511 | KV452746.1 | 284923 | 2-scf00054 | 2 |
| AX-157945436 | 3 | 93.511 | KV452746.1 | 286650 | 2-scf00054 | 2 |
| AX-157815068 | 3 | 93.511 | KV452746.1 | 287396 | 2-scf00054 | 2 |
| AX-157945437 | 3 | 93.511 | KV452746.1 | 287629 | 2-scf00054 | 2 |
| AX-157945438 | 3 | 93.511 | KV452746.1 | 287912 | 2-scf00054 | 2 |
| AX-157945439 | 3 | 93.511 | KV452746.1 | 288208 | 2-scf00054 | 2 |
| AX-157945441 | 3 | 93.511 | KV452746.1 | 289092 | 2-scf00054 | 2 |
| AX-157869511 | 3 | 93.511 | KV452746.1 | 289891 | 2-scf00054 | 2 |
| AX-157945443 | 3 | 93.511 | KV452746.1 | 290903 | 2-scf00054 | 2 |
| AX-157869513 | 3 | 93.511 | KV452746.1 | 292174 | 2-scf00054 | 2 |
| AX-157945444 | 3 | 93.511 | KV452746.1 | 293893 | 2-scf00054 | 2 |
| AX-157945446 | 3 | 93.511 | KV452746.1 | 295852 | 2-scf00054 | 2 |
| AX-157869514 | 3 | 93.511 | KV452746.1 | 297252 | 2-scf00054 | 2 |
| AX-157945448 | 3 | 93.511 | KV452746.1 | 300827 | 2-scf00054 | 2 |
| AX-157815071 | 3 | 93.511 | KV452746.1 | 301498 | 2-scf00054 | 2 |
| AX-157815072 | 3 | 93.511 | KV452746.1 | 303065 | 2-scf00054 | 2 |
| AX-157815073 | 3 | 93.511 | KV452746.1 | 304654 | 2-scf00054 | 2 |
| AX-157945452 | 3 | 93.511 | KV452746.1 | 307005 | 2-scf00054 | 2 |
| AX-157815074 | 3 | 93.511 | KV452746.1 | 309085 | 2-scf00054 | 2 |
| AX-157945453 | 3 | 93.511 | KV452746.1 | 309271 | 2-scf00054 | 2 |
| AX-157815075 | 3 | 93.511 | KV452746.1 | 312445 | 2-scf00054 | 2 |
| AX-157945458 | 3 | 93.511 | KV452746.1 | 313081 | 2-scf00054 | 2 |
| AX-157756368 | 3 | 93.511 | KV452746.1 | 313787 | 2-scf00054 | 2 |
| AX-157945459 | 3 | 93.511 | KV452746.1 | 314226 | 2-scf00054 | 2 |

|              |   |        |            |        |            |   |
|--------------|---|--------|------------|--------|------------|---|
| AX-157945460 | 3 | 93.511 | KV452746.1 | 314813 | 2-scf00054 | 2 |
| AX-157945461 | 3 | 93.511 | KV452746.1 | 315539 | 2-scf00054 | 2 |
| AX-157945462 | 3 | 93.511 | KV452746.1 | 316399 | 2-scf00054 | 2 |
| AX-157945464 | 3 | 93.511 | KV452746.1 | 318940 | 2-scf00054 | 2 |
| AX-157945465 | 3 | 93.511 | KV452746.1 | 319770 | 2-scf00054 | 2 |
| AX-157815076 | 3 | 93.511 | KV452746.1 | 319882 | 2-scf00054 | 2 |
| AX-157945466 | 3 | 93.511 | KV452746.1 | 320156 | 2-scf00054 | 2 |
| AX-157945467 | 3 | 93.511 | KV452746.1 | 320735 | 2-scf00054 | 2 |
| AX-157815077 | 3 | 93.511 | KV452746.1 | 321390 | 2-scf00054 | 2 |
| AX-157945468 | 3 | 93.511 | KV452746.1 | 321715 | 2-scf00054 | 2 |
| AX-157945469 | 3 | 93.511 | KV452746.1 | 322097 | 2-scf00054 | 2 |
| AX-157815078 | 3 | 93.511 | KV452746.1 | 322590 | 2-scf00054 | 2 |
| AX-157815079 | 3 | 93.511 | KV452746.1 | 324183 | 2-scf00054 | 2 |
| AX-157945472 | 3 | 93.511 | KV452746.1 | 324463 | 2-scf00054 | 2 |
| AX-157883933 | 3 | 93.511 | KV452746.1 | 325228 | 2-scf00054 | 2 |
| AX-158390138 | 3 | 93.511 | KV452746.1 | 327057 | 2-scf00054 | 2 |
| AX-157945473 | 3 | 93.511 | KV452746.1 | 327620 | 2-scf00054 | 2 |
| AX-157945474 | 3 | 93.511 | KV452746.1 | 329135 | 2-scf00054 | 2 |
| AX-157945475 | 3 | 93.511 | KV452746.1 | 330659 | 2-scf00054 | 2 |
| AX-157945476 | 3 | 93.511 | KV452746.1 | 331615 | 2-scf00054 | 2 |
| AX-157945477 | 3 | 93.511 | KV452746.1 | 332569 | 2-scf00054 | 2 |
| AX-157945479 | 3 | 93.511 | KV452746.1 | 334653 | 2-scf00054 | 2 |
| AX-157711570 | 3 | 93.511 | KV452746.1 | 334936 | 2-scf00054 | 2 |
| AX-157945480 | 3 | 93.511 | KV452746.1 | 335381 | 2-scf00054 | 2 |
| AX-157945482 | 3 | 93.511 | KV452746.1 | 336053 | 2-scf00054 | 2 |
| AX-157815080 | 3 | 93.511 | KV452746.1 | 336270 | 2-scf00054 | 2 |
| AX-157945483 | 3 | 93.511 | KV452746.1 | 338097 | 2-scf00054 | 2 |
| AX-157815081 | 3 | 93.511 | KV452746.1 | 338310 | 2-scf00054 | 2 |
| AX-157815082 | 3 | 93.511 | KV452746.1 | 338905 | 2-scf00054 | 2 |
| AX-157815083 | 3 | 93.511 | KV452746.1 | 339147 | 2-scf00054 | 2 |
| AX-157945485 | 3 | 93.511 | KV452746.1 | 340196 | 2-scf00054 | 2 |
| AX-157945486 | 3 | 93.511 | KV452746.1 | 340253 | 2-scf00054 | 2 |
| AX-157945487 | 3 | 93.511 | KV452746.1 | 340584 | 2-scf00054 | 2 |
| AX-157945488 | 3 | 93.511 | KV452746.1 | 343947 | 2-scf00054 | 2 |
| AX-157945490 | 3 | 93.511 | KV452746.1 | 346174 | 2-scf00054 | 2 |
| AX-157945492 | 3 | 93.511 | KV452746.1 | 348672 | 2-scf00054 | 2 |
| AX-157723693 | 3 | 93.511 | KV452746.1 | 350677 | 2-scf00054 | 2 |
| AX-157945494 | 3 | 93.511 | KV452746.1 | 351602 | 2-scf00054 | 2 |
| AX-157945496 | 3 | 93.511 | KV452746.1 | 352972 | 2-scf00054 | 2 |
| AX-157945497 | 3 | 93.511 | KV452746.1 | 353247 | 2-scf00054 | 2 |
| AX-157945498 | 3 | 93.511 | KV452746.1 | 354081 | 2-scf00054 | 2 |
| AX-158390139 | 3 | 93.511 | KV452746.1 | 357430 | 2-scf00054 | 2 |
| AX-157945500 | 3 | 93.511 | KV452746.1 | 357782 | 2-scf00054 | 2 |
| AX-157945501 | 3 | 93.511 | KV452746.1 | 358592 | 2-scf00054 | 2 |
| AX-158405894 | 3 | 93.511 | KV452746.1 | 359179 | 2-scf00054 | 2 |
| AX-157945502 | 3 | 93.511 | KV452746.1 | 360503 | 2-scf00054 | 2 |
| AX-157869516 | 3 | 93.511 | KV452746.1 | 362076 | 2-scf00054 | 2 |
| AX-157945506 | 3 | 93.511 | KV452746.1 | 363700 | 2-scf00054 | 2 |
| AX-157945507 | 3 | 93.511 | KV452746.1 | 364273 | 2-scf00054 | 2 |
| AX-157945508 | 3 | 93.511 | KV452746.1 | 364577 | 2-scf00054 | 2 |
| AX-157945509 | 3 | 93.511 | KV452746.1 | 367140 | 2-scf00054 | 2 |

|              |   |        |            |         |            |   |
|--------------|---|--------|------------|---------|------------|---|
| AX-157945511 | 3 | 93.511 | KV452746.1 | 368321  | 2-scf00054 | 2 |
| AX-157945512 | 3 | 93.511 | KV452746.1 | 369039  | 2-scf00054 | 2 |
| AX-157945513 | 3 | 93.511 | KV452746.1 | 369445  | 2-scf00054 | 2 |
| AX-157945514 | 3 | 93.511 | KV452746.1 | 370521  | 2-scf00054 | 2 |
| AX-158405895 | 3 | 93.511 | KV452746.1 | 371435  | 2-scf00054 | 2 |
| AX-158405896 | 3 | 93.511 | KV452746.1 | 372030  | 2-scf00054 | 2 |
| AX-157945519 | 3 | 93.511 | KV452746.1 | 376662  | 2-scf00054 | 2 |
| AX-157945521 | 3 | 93.511 | KV452746.1 | 377405  | 2-scf00054 | 2 |
| AX-157945523 | 3 | 93.511 | KV452746.1 | 379657  | 2-scf00054 | 2 |
| AX-157815084 | 3 | 93.511 | KV452746.1 | 384554  | 2-scf00054 | 2 |
| AX-157945525 | 3 | 93.511 | KV452746.1 | 387464  | 2-scf00054 | 2 |
| AX-157815086 | 3 | 93.511 | KV452746.1 | 387568  | 2-scf00054 | 2 |
| AX-157815087 | 3 | 93.511 | KV452746.1 | 388444  | 2-scf00054 | 2 |
| AX-157945529 | 3 | 93.511 | KV452746.1 | 389783  | 2-scf00054 | 2 |
| AX-157945530 | 3 | 93.511 | KV452746.1 | 390167  | 2-scf00054 | 2 |
| AX-157815088 | 3 | 93.511 | KV452746.1 | 390386  | 2-scf00054 | 2 |
| AX-157945531 | 3 | 93.511 | KV452746.1 | 392245  | 2-scf00054 | 2 |
| AX-157945532 | 3 | 93.511 | KV452746.1 | 393761  | 2-scf00054 | 2 |
| AX-157945533 | 3 | 93.511 | KV452746.1 | 395405  | 2-scf00054 | 2 |
| AX-157945534 | 3 | 93.511 | KV452746.1 | 395858  | 2-scf00054 | 2 |
| AX-157945638 | 3 | 93.511 | KV452746.1 | 525074  | 2-scf00054 | 2 |
| AX-157945643 | 3 | 93.511 | KV452746.1 | 528432  | 2-scf00054 | 2 |
| AX-157945665 | 3 | 93.511 | KV452746.1 | 555704  | 2-scf00054 | 2 |
| AX-157945672 | 3 | 93.511 | KV452746.1 | 563137  | 2-scf00054 | 2 |
| AX-157945524 | 3 | 93.523 | KV452746.1 | 383561  | 2-scf00054 | 2 |
| AX-157815085 | 3 | 93.536 | KV452746.1 | 384962  | 2-scf00054 | 2 |
| AX-157945527 | 3 | 93.549 | KV452746.1 | 388924  | 2-scf00054 | 2 |
| AX-157869517 | 3 | 93.555 | KV452746.1 | 391322  | 2-scf00054 | 2 |
| AX-157710800 | 3 | 93.568 | KV452746.1 | 417368  | 2-scf00054 | 2 |
| AX-157945556 | 3 | 93.568 | KV452746.1 | 432856  | 2-scf00054 | 2 |
| AX-157945599 | 3 | 93.568 | KV452746.1 | 480421  | 2-scf00054 | 2 |
| AX-157708157 | 3 | 93.568 | KV452746.1 | 494745  | 2-scf00054 | 2 |
| AX-157945573 | 3 | 93.578 | KV452746.1 | 454030  | 2-scf00054 | 2 |
| AX-157945576 | 3 | 93.588 | KV452746.1 | 455076  | 2-scf00054 | 2 |
| AX-157945580 | 3 | 93.599 | KV452746.1 | 458054  | 2-scf00054 | 2 |
| AX-157945591 | 3 | 93.61  | KV452746.1 | 473096  | 2-scf00054 | 2 |
| AX-157930190 | 3 | 93.62  | KV452730.1 | 9417818 | 2-scf00040 | 2 |
| AX-157943107 | 3 | 93.62  | KV452747.1 | 45494   | 2-scf00053 | 2 |
| AX-157943144 | 3 | 93.62  | KV452747.1 | 89868   | 2-scf00053 | 2 |
| AX-157943147 | 3 | 93.62  | KV452747.1 | 95487   | 2-scf00053 | 2 |
| AX-157943153 | 3 | 93.62  | KV452747.1 | 102038  | 2-scf00053 | 2 |
| AX-158390111 | 3 | 93.62  | KV452747.1 | 175725  | 2-scf00053 | 2 |
| AX-157943242 | 3 | 93.62  | KV452747.1 | 208898  | 2-scf00053 | 2 |
| AX-157943248 | 3 | 93.62  | KV452747.1 | 212596  | 2-scf00053 | 2 |
| AX-157943250 | 3 | 93.62  | KV452747.1 | 213645  | 2-scf00053 | 2 |
| AX-157943304 | 3 | 93.62  | KV452747.1 | 270273  | 2-scf00053 | 2 |
| AX-158390120 | 3 | 93.62  | KV452747.1 | 285036  | 2-scf00053 | 2 |
| AX-157943327 | 3 | 93.62  | KV452747.1 | 287697  | 2-scf00053 | 2 |
| AX-157943333 | 3 | 93.62  | KV452747.1 | 292204  | 2-scf00053 | 2 |
| AX-157943336 | 3 | 93.62  | KV452747.1 | 293446  | 2-scf00053 | 2 |
| AX-157943341 | 3 | 93.62  | KV452747.1 | 303975  | 2-scf00053 | 2 |

|              |   |        |            |         |                |    |
|--------------|---|--------|------------|---------|----------------|----|
| AX-157943360 | 3 | 93.62  | KV452747.1 | 317924  | 2-scf00053     | 2  |
| AX-157943365 | 3 | 93.62  | KV452747.1 | 320479  | 2-scf00053     | 2  |
| AX-157943405 | 3 | 93.62  | KV452747.1 | 365394  | 2-scf00053     | 2  |
| AX-157943441 | 3 | 93.62  | KV452747.1 | 402427  | 2-scf00053     | 2  |
| AX-157943601 | 3 | 93.62  | KV452747.1 | 562919  | 2-scf00053     | 2  |
| AX-157944239 | 3 | 93.62  | KV452747.1 | 1223903 | 2-scf00053     | 2  |
| AX-157815095 | 3 | 93.62  | KV452746.1 | 479330  | 2-scf00054     | 2  |
| AX-157945605 | 3 | 93.62  | KV452746.1 | 486844  | 2-scf00054     | 2  |
| AX-157945607 | 3 | 93.62  | KV452746.1 | 488531  | 2-scf00054     | 2  |
| AX-157945608 | 3 | 93.62  | KV452746.1 | 489012  | 2-scf00054     | 2  |
| AX-157945624 | 3 | 93.62  | KV452746.1 | 509192  | 2-scf00054     | 2  |
| AX-157945662 | 3 | 93.62  | KV452746.1 | 549035  | 2-scf00054     | 2  |
| AX-157945669 | 3 | 93.62  | KV452746.1 | 558402  | 2-scf00054     | 2  |
| AX-157945670 | 3 | 93.62  | KV452746.1 | 558837  | 2-scf00054     | 2  |
| AX-157869527 | 3 | 93.62  | KV452746.1 | 563324  | 2-scf00054     | 2  |
| AX-157869530 | 3 | 93.62  | KV452746.1 | 566630  | 2-scf00054     | 2  |
| AX-157945698 | 3 | 93.62  | KV452746.1 | 591647  | 2-scf00054     | 2  |
| AX-157945699 | 3 | 93.62  | KV452746.1 | 593868  | 2-scf00054     | 2  |
| AX-157945701 | 3 | 93.62  | KV452746.1 | 595867  | 2-scf00054     | 2  |
| AX-157945711 | 3 | 93.62  | KV452746.1 | 612245  | 2-scf00054     | 2  |
| AX-157694364 | 3 | 93.62  | FI896849.1 | 755     | 10RI212 lctalt | UN |
| AX-158390122 | 3 | 93.729 | KV452747.1 | 321013  | 2-scf00053     | 2  |
| AX-157943394 | 3 | 93.729 | KV452747.1 | 344452  | 2-scf00053     | 2  |
| AX-157943124 | 3 | 93.839 | KV452747.1 | 72608   | 2-scf00053     | 2  |
| AX-157943398 | 3 | 93.839 | KV452747.1 | 357854  | 2-scf00053     | 2  |
| AX-157943433 | 3 | 93.839 | KV452747.1 | 389038  | 2-scf00053     | 2  |
| AX-157943435 | 3 | 93.839 | KV452747.1 | 396671  | 2-scf00053     | 2  |
| AX-157943438 | 3 | 93.839 | KV452747.1 | 399318  | 2-scf00053     | 2  |
| AX-157943452 | 3 | 93.839 | KV452747.1 | 422033  | 2-scf00053     | 2  |
| AX-157943472 | 3 | 93.839 | KV452747.1 | 446741  | 2-scf00053     | 2  |
| AX-157943473 | 3 | 93.839 | KV452747.1 | 447892  | 2-scf00053     | 2  |
| AX-157943476 | 3 | 93.839 | KV452747.1 | 450774  | 2-scf00053     | 2  |
| AX-157943478 | 3 | 93.839 | KV452747.1 | 451946  | 2-scf00053     | 2  |
| AX-157943479 | 3 | 93.839 | KV452747.1 | 457812  | 2-scf00053     | 2  |
| AX-157814940 | 3 | 93.839 | KV452747.1 | 459124  | 2-scf00053     | 2  |
| AX-157943482 | 3 | 93.839 | KV452747.1 | 459893  | 2-scf00053     | 2  |
| AX-157943483 | 3 | 93.839 | KV452747.1 | 460905  | 2-scf00053     | 2  |
| AX-157943484 | 3 | 93.839 | KV452747.1 | 461539  | 2-scf00053     | 2  |
| AX-157943486 | 3 | 93.839 | KV452747.1 | 462919  | 2-scf00053     | 2  |
| AX-157943487 | 3 | 93.839 | KV452747.1 | 463316  | 2-scf00053     | 2  |
| AX-157943488 | 3 | 93.839 | KV452747.1 | 464977  | 2-scf00053     | 2  |
| AX-157746237 | 3 | 93.839 | KV452747.1 | 469842  | 2-scf00053     | 2  |
| AX-157943492 | 3 | 93.839 | KV452747.1 | 470832  | 2-scf00053     | 2  |
| AX-157943499 | 3 | 93.839 | KV452747.1 | 477479  | 2-scf00053     | 2  |
| AX-157943501 | 3 | 93.839 | KV452747.1 | 478253  | 2-scf00053     | 2  |
| AX-157943502 | 3 | 93.839 | KV452747.1 | 478929  | 2-scf00053     | 2  |
| AX-157943504 | 3 | 93.839 | KV452747.1 | 479358  | 2-scf00053     | 2  |
| AX-157943506 | 3 | 93.839 | KV452747.1 | 484187  | 2-scf00053     | 2  |
| AX-157814941 | 3 | 93.839 | KV452747.1 | 484505  | 2-scf00053     | 2  |
| AX-157943508 | 3 | 93.839 | KV452747.1 | 484732  | 2-scf00053     | 2  |
| AX-157757064 | 3 | 93.839 | KV452747.1 | 485148  | 2-scf00053     | 2  |

|              |   |        |            |        |            |   |
|--------------|---|--------|------------|--------|------------|---|
| AX-158390126 | 3 | 93.839 | KV452747.1 | 489612 | 2-scf00053 | 2 |
| AX-157943518 | 3 | 93.839 | KV452747.1 | 489832 | 2-scf00053 | 2 |
| AX-157943523 | 3 | 93.839 | KV452747.1 | 491085 | 2-scf00053 | 2 |
| AX-157943524 | 3 | 93.839 | KV452747.1 | 492145 | 2-scf00053 | 2 |
| AX-157943525 | 3 | 93.839 | KV452747.1 | 492587 | 2-scf00053 | 2 |
| AX-157814942 | 3 | 93.839 | KV452747.1 | 492945 | 2-scf00053 | 2 |
| AX-157814943 | 3 | 93.839 | KV452747.1 | 493251 | 2-scf00053 | 2 |
| AX-157943527 | 3 | 93.839 | KV452747.1 | 493401 | 2-scf00053 | 2 |
| AX-157943528 | 3 | 93.839 | KV452747.1 | 493883 | 2-scf00053 | 2 |
| AX-157943529 | 3 | 93.839 | KV452747.1 | 494363 | 2-scf00053 | 2 |
| AX-157943531 | 3 | 93.839 | KV452747.1 | 496430 | 2-scf00053 | 2 |
| AX-157943532 | 3 | 93.839 | KV452747.1 | 496820 | 2-scf00053 | 2 |
| AX-157943534 | 3 | 93.839 | KV452747.1 | 497575 | 2-scf00053 | 2 |
| AX-158390127 | 3 | 93.839 | KV452747.1 | 498158 | 2-scf00053 | 2 |
| AX-157943535 | 3 | 93.839 | KV452747.1 | 498482 | 2-scf00053 | 2 |
| AX-157943536 | 3 | 93.839 | KV452747.1 | 498907 | 2-scf00053 | 2 |
| AX-157943537 | 3 | 93.839 | KV452747.1 | 499680 | 2-scf00053 | 2 |
| AX-157943540 | 3 | 93.839 | KV452747.1 | 501079 | 2-scf00053 | 2 |
| AX-157814944 | 3 | 93.839 | KV452747.1 | 502015 | 2-scf00053 | 2 |
| AX-157774707 | 3 | 93.839 | KV452747.1 | 502506 | 2-scf00053 | 2 |
| AX-157943541 | 3 | 93.839 | KV452747.1 | 503650 | 2-scf00053 | 2 |
| AX-157710908 | 3 | 93.839 | KV452747.1 | 504265 | 2-scf00053 | 2 |
| AX-157943542 | 3 | 93.839 | KV452747.1 | 504310 | 2-scf00053 | 2 |
| AX-157943544 | 3 | 93.839 | KV452747.1 | 507401 | 2-scf00053 | 2 |
| AX-157750102 | 3 | 93.839 | KV452747.1 | 509201 | 2-scf00053 | 2 |
| AX-157943545 | 3 | 93.839 | KV452747.1 | 509882 | 2-scf00053 | 2 |
| AX-157943548 | 3 | 93.839 | KV452747.1 | 514793 | 2-scf00053 | 2 |
| AX-157814946 | 3 | 93.839 | KV452747.1 | 515149 | 2-scf00053 | 2 |
| AX-157943551 | 3 | 93.839 | KV452747.1 | 516007 | 2-scf00053 | 2 |
| AX-157943554 | 3 | 93.839 | KV452747.1 | 521771 | 2-scf00053 | 2 |
| AX-157943556 | 3 | 93.839 | KV452747.1 | 522176 | 2-scf00053 | 2 |
| AX-157943557 | 3 | 93.839 | KV452747.1 | 522539 | 2-scf00053 | 2 |
| AX-157943558 | 3 | 93.839 | KV452747.1 | 522897 | 2-scf00053 | 2 |
| AX-157943559 | 3 | 93.839 | KV452747.1 | 523682 | 2-scf00053 | 2 |
| AX-157943560 | 3 | 93.839 | KV452747.1 | 524556 | 2-scf00053 | 2 |
| AX-157943567 | 3 | 93.839 | KV452747.1 | 535696 | 2-scf00053 | 2 |
| AX-157814948 | 3 | 93.839 | KV452747.1 | 539472 | 2-scf00053 | 2 |
| AX-157754248 | 3 | 93.839 | KV452747.1 | 547365 | 2-scf00053 | 2 |
| AX-157814950 | 3 | 93.839 | KV452747.1 | 550036 | 2-scf00053 | 2 |
| AX-157943584 | 3 | 93.839 | KV452747.1 | 550124 | 2-scf00053 | 2 |
| AX-157943586 | 3 | 93.839 | KV452747.1 | 550888 | 2-scf00053 | 2 |
| AX-158405842 | 3 | 93.839 | KV452747.1 | 553143 | 2-scf00053 | 2 |
| AX-157943591 | 3 | 93.839 | KV452747.1 | 555605 | 2-scf00053 | 2 |
| AX-157943592 | 3 | 93.839 | KV452747.1 | 557073 | 2-scf00053 | 2 |
| AX-157943595 | 3 | 93.839 | KV452747.1 | 558726 | 2-scf00053 | 2 |
| AX-157943596 | 3 | 93.839 | KV452747.1 | 559077 | 2-scf00053 | 2 |
| AX-157772811 | 3 | 93.839 | KV452747.1 | 559535 | 2-scf00053 | 2 |
| AX-157697083 | 3 | 93.839 | KV452747.1 | 560134 | 2-scf00053 | 2 |
| AX-157943600 | 3 | 93.839 | KV452747.1 | 561954 | 2-scf00053 | 2 |
| AX-157943606 | 3 | 93.839 | KV452747.1 | 564446 | 2-scf00053 | 2 |
| AX-157943607 | 3 | 93.839 | KV452747.1 | 564750 | 2-scf00053 | 2 |



|              |   |        |            |         |            |   |
|--------------|---|--------|------------|---------|------------|---|
| AX-157739786 | 3 | 93.839 | KV452747.1 | 565082  | 2-scf00053 | 2 |
| AX-157943608 | 3 | 93.839 | KV452747.1 | 566153  | 2-scf00053 | 2 |
| AX-157718638 | 3 | 93.839 | KV452747.1 | 570207  | 2-scf00053 | 2 |
| AX-157943616 | 3 | 93.839 | KV452747.1 | 579929  | 2-scf00053 | 2 |
| AX-157943618 | 3 | 93.839 | KV452747.1 | 581370  | 2-scf00053 | 2 |
| AX-157943619 | 3 | 93.839 | KV452747.1 | 581855  | 2-scf00053 | 2 |
| AX-157943620 | 3 | 93.839 | KV452747.1 | 584924  | 2-scf00053 | 2 |
| AX-157943624 | 3 | 93.839 | KV452747.1 | 585508  | 2-scf00053 | 2 |
| AX-157943626 | 3 | 93.839 | KV452747.1 | 586101  | 2-scf00053 | 2 |
| AX-157943634 | 3 | 93.839 | KV452747.1 | 590446  | 2-scf00053 | 2 |
| AX-157943640 | 3 | 93.839 | KV452747.1 | 592816  | 2-scf00053 | 2 |
| AX-157943641 | 3 | 93.839 | KV452747.1 | 593948  | 2-scf00053 | 2 |
| AX-157943645 | 3 | 93.839 | KV452747.1 | 595297  | 2-scf00053 | 2 |
| AX-157943646 | 3 | 93.839 | KV452747.1 | 595732  | 2-scf00053 | 2 |
| AX-157814953 | 3 | 93.839 | KV452747.1 | 597897  | 2-scf00053 | 2 |
| AX-157814954 | 3 | 93.839 | KV452747.1 | 598415  | 2-scf00053 | 2 |
| AX-157943648 | 3 | 93.839 | KV452747.1 | 599913  | 2-scf00053 | 2 |
| AX-157943651 | 3 | 93.839 | KV452747.1 | 601158  | 2-scf00053 | 2 |
| AX-157943652 | 3 | 93.839 | KV452747.1 | 601718  | 2-scf00053 | 2 |
| AX-157943654 | 3 | 93.839 | KV452747.1 | 604042  | 2-scf00053 | 2 |
| AX-157943657 | 3 | 93.839 | KV452747.1 | 606802  | 2-scf00053 | 2 |
| AX-157943659 | 3 | 93.839 | KV452747.1 | 608799  | 2-scf00053 | 2 |
| AX-157943660 | 3 | 93.839 | KV452747.1 | 610306  | 2-scf00053 | 2 |
| AX-157943664 | 3 | 93.839 | KV452747.1 | 620566  | 2-scf00053 | 2 |
| AX-157943667 | 3 | 93.839 | KV452747.1 | 627745  | 2-scf00053 | 2 |
| AX-157943670 | 3 | 93.839 | KV452747.1 | 632431  | 2-scf00053 | 2 |
| AX-157943676 | 3 | 93.839 | KV452747.1 | 637262  | 2-scf00053 | 2 |
| AX-157943680 | 3 | 93.839 | KV452747.1 | 639317  | 2-scf00053 | 2 |
| AX-157943684 | 3 | 93.839 | KV452747.1 | 642608  | 2-scf00053 | 2 |
| AX-157943693 | 3 | 93.839 | KV452747.1 | 650843  | 2-scf00053 | 2 |
| AX-157943695 | 3 | 93.839 | KV452747.1 | 651704  | 2-scf00053 | 2 |
| AX-157943696 | 3 | 93.839 | KV452747.1 | 651939  | 2-scf00053 | 2 |
| AX-157754145 | 3 | 93.839 | KV452747.1 | 652355  | 2-scf00053 | 2 |
| AX-157943891 | 3 | 93.839 | KV452747.1 | 882937  | 2-scf00053 | 2 |
| AX-157944057 | 3 | 93.839 | KV452747.1 | 1052823 | 2-scf00053 | 2 |
| AX-157814988 | 3 | 93.839 | KV452747.1 | 1094572 | 2-scf00053 | 2 |
| AX-157945290 | 3 | 93.839 | KV452746.1 | 125577  | 2-scf00054 | 2 |
| AX-157945297 | 3 | 93.839 | KV452746.1 | 132323  | 2-scf00054 | 2 |
| AX-157815053 | 3 | 93.839 | KV452746.1 | 179423  | 2-scf00054 | 2 |
| AX-157945333 | 3 | 93.839 | KV452746.1 | 186664  | 2-scf00054 | 2 |
| AX-157945423 | 3 | 93.839 | KV452746.1 | 272910  | 2-scf00054 | 2 |
| AX-158390136 | 3 | 93.839 | KV452746.1 | 279982  | 2-scf00054 | 2 |
| AX-157772810 | 3 | 93.839 | KV452746.1 | 450288  | 2-scf00054 | 2 |
| AX-157945582 | 3 | 93.839 | KV452746.1 | 459627  | 2-scf00054 | 2 |
| AX-157945592 | 3 | 93.839 | KV452746.1 | 474130  | 2-scf00054 | 2 |
| AX-157945596 | 3 | 93.839 | KV452746.1 | 476876  | 2-scf00054 | 2 |
| AX-157945645 | 3 | 93.839 | KV452746.1 | 529214  | 2-scf00054 | 2 |
| AX-157869524 | 3 | 93.839 | KV452746.1 | 533963  | 2-scf00054 | 2 |
| AX-157945658 | 3 | 93.839 | KV452746.1 | 545243  | 2-scf00054 | 2 |
| AX-157945664 | 3 | 93.839 | KV452746.1 | 550738  | 2-scf00054 | 2 |
| AX-157943694 | 3 | 93.842 | KV452747.1 | 651347  | 2-scf00053 | 2 |

|              |   |        |            |         |            |   |
|--------------|---|--------|------------|---------|------------|---|
| AX-157942660 | 3 | 93.846 | KV452745.1 | 1133588 | 2-scf00051 | 2 |
| AX-157943115 | 3 | 93.846 | KV452747.1 | 49402   | 2-scf00053 | 2 |
| AX-157814928 | 3 | 93.846 | KV452747.1 | 55588   | 2-scf00053 | 2 |
| AX-157814929 | 3 | 93.846 | KV452747.1 | 56622   | 2-scf00053 | 2 |
| AX-157814930 | 3 | 93.846 | KV452747.1 | 83517   | 2-scf00053 | 2 |
| AX-157943142 | 3 | 93.846 | KV452747.1 | 84596   | 2-scf00053 | 2 |
| AX-157814931 | 3 | 93.846 | KV452747.1 | 92063   | 2-scf00053 | 2 |
| AX-157943154 | 3 | 93.846 | KV452747.1 | 105595  | 2-scf00053 | 2 |
| AX-157943169 | 3 | 93.846 | KV452747.1 | 120873  | 2-scf00053 | 2 |
| AX-157943194 | 3 | 93.846 | KV452747.1 | 143536  | 2-scf00053 | 2 |
| AX-157943201 | 3 | 93.846 | KV452747.1 | 156438  | 2-scf00053 | 2 |
| AX-157943232 | 3 | 93.846 | KV452747.1 | 199718  | 2-scf00053 | 2 |
| AX-157943251 | 3 | 93.846 | KV452747.1 | 214307  | 2-scf00053 | 2 |
| AX-157943255 | 3 | 93.846 | KV452747.1 | 215703  | 2-scf00053 | 2 |
| AX-158390116 | 3 | 93.846 | KV452747.1 | 241388  | 2-scf00053 | 2 |
| AX-157943294 | 3 | 93.846 | KV452747.1 | 254183  | 2-scf00053 | 2 |
| AX-157943297 | 3 | 93.846 | KV452747.1 | 255131  | 2-scf00053 | 2 |
| AX-157943307 | 3 | 93.846 | KV452747.1 | 271715  | 2-scf00053 | 2 |
| AX-157943310 | 3 | 93.846 | KV452747.1 | 275248  | 2-scf00053 | 2 |
| AX-157943312 | 3 | 93.846 | KV452747.1 | 276537  | 2-scf00053 | 2 |
| AX-157943314 | 3 | 93.846 | KV452747.1 | 277031  | 2-scf00053 | 2 |
| AX-157943324 | 3 | 93.846 | KV452747.1 | 283674  | 2-scf00053 | 2 |
| AX-157943326 | 3 | 93.846 | KV452747.1 | 284688  | 2-scf00053 | 2 |
| AX-157943328 | 3 | 93.846 | KV452747.1 | 288146  | 2-scf00053 | 2 |
| AX-158390121 | 3 | 93.846 | KV452747.1 | 288549  | 2-scf00053 | 2 |
| AX-157943329 | 3 | 93.846 | KV452747.1 | 288820  | 2-scf00053 | 2 |
| AX-157707604 | 3 | 93.846 | KV452747.1 | 289951  | 2-scf00053 | 2 |
| AX-157943331 | 3 | 93.846 | KV452747.1 | 290408  | 2-scf00053 | 2 |
| AX-157943332 | 3 | 93.846 | KV452747.1 | 291591  | 2-scf00053 | 2 |
| AX-157943338 | 3 | 93.846 | KV452747.1 | 294470  | 2-scf00053 | 2 |
| AX-157814935 | 3 | 93.846 | KV452747.1 | 295688  | 2-scf00053 | 2 |
| AX-157943339 | 3 | 93.846 | KV452747.1 | 295910  | 2-scf00053 | 2 |
| AX-157943340 | 3 | 93.846 | KV452747.1 | 298034  | 2-scf00053 | 2 |
| AX-157943342 | 3 | 93.846 | KV452747.1 | 304721  | 2-scf00053 | 2 |
| AX-157943344 | 3 | 93.846 | KV452747.1 | 305402  | 2-scf00053 | 2 |
| AX-157943345 | 3 | 93.846 | KV452747.1 | 307322  | 2-scf00053 | 2 |
| AX-157943348 | 3 | 93.846 | KV452747.1 | 307726  | 2-scf00053 | 2 |
| AX-157943349 | 3 | 93.846 | KV452747.1 | 308105  | 2-scf00053 | 2 |
| AX-157943350 | 3 | 93.846 | KV452747.1 | 309977  | 2-scf00053 | 2 |
| AX-157943353 | 3 | 93.846 | KV452747.1 | 310383  | 2-scf00053 | 2 |
| AX-157943354 | 3 | 93.846 | KV452747.1 | 311077  | 2-scf00053 | 2 |
| AX-157814936 | 3 | 93.846 | KV452747.1 | 311211  | 2-scf00053 | 2 |
| AX-157943357 | 3 | 93.846 | KV452747.1 | 314492  | 2-scf00053 | 2 |
| AX-157943362 | 3 | 93.846 | KV452747.1 | 318984  | 2-scf00053 | 2 |
| AX-157943363 | 3 | 93.846 | KV452747.1 | 320046  | 2-scf00053 | 2 |
| AX-157943366 | 3 | 93.846 | KV452747.1 | 321748  | 2-scf00053 | 2 |
| AX-157943367 | 3 | 93.846 | KV452747.1 | 324326  | 2-scf00053 | 2 |
| AX-157943368 | 3 | 93.846 | KV452747.1 | 324830  | 2-scf00053 | 2 |
| AX-157943373 | 3 | 93.846 | KV452747.1 | 336464  | 2-scf00053 | 2 |
| AX-157943374 | 3 | 93.846 | KV452747.1 | 337147  | 2-scf00053 | 2 |
| AX-157943375 | 3 | 93.846 | KV452747.1 | 337357  | 2-scf00053 | 2 |

|              |   |        |            |        |            |   |
|--------------|---|--------|------------|--------|------------|---|
| AX-157943376 | 3 | 93.846 | KV452747.1 | 338461 | 2-scf00053 | 2 |
| AX-157943379 | 3 | 93.846 | KV452747.1 | 339585 | 2-scf00053 | 2 |
| AX-157943383 | 3 | 93.846 | KV452747.1 | 340938 | 2-scf00053 | 2 |
| AX-157943387 | 3 | 93.846 | KV452747.1 | 342109 | 2-scf00053 | 2 |
| AX-157943388 | 3 | 93.846 | KV452747.1 | 342616 | 2-scf00053 | 2 |
| AX-157943390 | 3 | 93.846 | KV452747.1 | 343033 | 2-scf00053 | 2 |
| AX-157943391 | 3 | 93.846 | KV452747.1 | 343667 | 2-scf00053 | 2 |
| AX-157943395 | 3 | 93.846 | KV452747.1 | 345390 | 2-scf00053 | 2 |
| AX-157943396 | 3 | 93.846 | KV452747.1 | 347086 | 2-scf00053 | 2 |
| AX-157943397 | 3 | 93.846 | KV452747.1 | 349489 | 2-scf00053 | 2 |
| AX-157943399 | 3 | 93.846 | KV452747.1 | 358718 | 2-scf00053 | 2 |
| AX-157943400 | 3 | 93.846 | KV452747.1 | 360754 | 2-scf00053 | 2 |
| AX-157943402 | 3 | 93.846 | KV452747.1 | 362072 | 2-scf00053 | 2 |
| AX-157943403 | 3 | 93.846 | KV452747.1 | 363529 | 2-scf00053 | 2 |
| AX-157943404 | 3 | 93.846 | KV452747.1 | 363904 | 2-scf00053 | 2 |
| AX-157943406 | 3 | 93.846 | KV452747.1 | 366129 | 2-scf00053 | 2 |
| AX-157943411 | 3 | 93.846 | KV452747.1 | 370678 | 2-scf00053 | 2 |
| AX-157943420 | 3 | 93.846 | KV452747.1 | 375394 | 2-scf00053 | 2 |
| AX-157943421 | 3 | 93.846 | KV452747.1 | 376135 | 2-scf00053 | 2 |
| AX-157943423 | 3 | 93.846 | KV452747.1 | 379171 | 2-scf00053 | 2 |
| AX-157943426 | 3 | 93.846 | KV452747.1 | 382737 | 2-scf00053 | 2 |
| AX-157943427 | 3 | 93.846 | KV452747.1 | 383543 | 2-scf00053 | 2 |
| AX-157943429 | 3 | 93.846 | KV452747.1 | 384163 | 2-scf00053 | 2 |
| AX-157943430 | 3 | 93.846 | KV452747.1 | 386798 | 2-scf00053 | 2 |
| AX-157943432 | 3 | 93.846 | KV452747.1 | 387984 | 2-scf00053 | 2 |
| AX-157943436 | 3 | 93.846 | KV452747.1 | 396935 | 2-scf00053 | 2 |
| AX-157943437 | 3 | 93.846 | KV452747.1 | 397424 | 2-scf00053 | 2 |
| AX-157943439 | 3 | 93.846 | KV452747.1 | 400666 | 2-scf00053 | 2 |
| AX-157943442 | 3 | 93.846 | KV452747.1 | 402845 | 2-scf00053 | 2 |
| AX-157943443 | 3 | 93.846 | KV452747.1 | 404683 | 2-scf00053 | 2 |
| AX-157943444 | 3 | 93.846 | KV452747.1 | 406384 | 2-scf00053 | 2 |
| AX-157943445 | 3 | 93.846 | KV452747.1 | 409306 | 2-scf00053 | 2 |
| AX-157943446 | 3 | 93.846 | KV452747.1 | 410093 | 2-scf00053 | 2 |
| AX-158390124 | 3 | 93.846 | KV452747.1 | 412844 | 2-scf00053 | 2 |
| AX-157943447 | 3 | 93.846 | KV452747.1 | 414857 | 2-scf00053 | 2 |
| AX-157943448 | 3 | 93.846 | KV452747.1 | 415439 | 2-scf00053 | 2 |
| AX-157943451 | 3 | 93.846 | KV452747.1 | 421238 | 2-scf00053 | 2 |
| AX-157943453 | 3 | 93.846 | KV452747.1 | 422879 | 2-scf00053 | 2 |
| AX-157943454 | 3 | 93.846 | KV452747.1 | 423578 | 2-scf00053 | 2 |
| AX-157943455 | 3 | 93.846 | KV452747.1 | 425194 | 2-scf00053 | 2 |
| AX-157943456 | 3 | 93.846 | KV452747.1 | 425625 | 2-scf00053 | 2 |
| AX-157943458 | 3 | 93.846 | KV452747.1 | 429176 | 2-scf00053 | 2 |
| AX-158390125 | 3 | 93.846 | KV452747.1 | 442025 | 2-scf00053 | 2 |
| AX-157854586 | 3 | 93.846 | KV452747.1 | 550982 | 2-scf00053 | 2 |
| AX-157943653 | 3 | 93.846 | KV452747.1 | 603514 | 2-scf00053 | 2 |
| AX-157943698 | 3 | 93.846 | KV452747.1 | 653376 | 2-scf00053 | 2 |
| AX-157943709 | 3 | 93.846 | KV452747.1 | 673735 | 2-scf00053 | 2 |
| AX-157943733 | 3 | 93.846 | KV452747.1 | 731576 | 2-scf00053 | 2 |
| AX-157943750 | 3 | 93.846 | KV452747.1 | 742158 | 2-scf00053 | 2 |
| AX-157943751 | 3 | 93.846 | KV452747.1 | 742538 | 2-scf00053 | 2 |
| AX-157758365 | 3 | 93.846 | KV452747.1 | 744580 | 2-scf00053 | 2 |

|              |   |        |            |        |            |   |
|--------------|---|--------|------------|--------|------------|---|
| AX-157943763 | 3 | 93.846 | KV452747.1 | 752234 | 2-scf00053 | 2 |
| AX-157943764 | 3 | 93.846 | KV452747.1 | 752960 | 2-scf00053 | 2 |
| AX-157943824 | 3 | 93.846 | KV452747.1 | 824071 | 2-scf00053 | 2 |
| AX-157943886 | 3 | 93.846 | KV452747.1 | 880284 | 2-scf00053 | 2 |
| AX-157943925 | 3 | 93.846 | KV452747.1 | 919055 | 2-scf00053 | 2 |
| AX-157945309 | 3 | 93.846 | KV452746.1 | 163374 | 2-scf00054 | 2 |
| AX-157945322 | 3 | 93.846 | KV452746.1 | 174264 | 2-scf00054 | 2 |
| AX-157945335 | 3 | 93.846 | KV452746.1 | 189713 | 2-scf00054 | 2 |
| AX-157945336 | 3 | 93.846 | KV452746.1 | 191541 | 2-scf00054 | 2 |
| AX-157945337 | 3 | 93.846 | KV452746.1 | 192056 | 2-scf00054 | 2 |
| AX-157815054 | 3 | 93.846 | KV452746.1 | 192195 | 2-scf00054 | 2 |
| AX-157945338 | 3 | 93.846 | KV452746.1 | 192832 | 2-scf00054 | 2 |
| AX-157945340 | 3 | 93.846 | KV452746.1 | 193602 | 2-scf00054 | 2 |
| AX-157945342 | 3 | 93.846 | KV452746.1 | 195142 | 2-scf00054 | 2 |
| AX-157945343 | 3 | 93.846 | KV452746.1 | 195591 | 2-scf00054 | 2 |
| AX-157815055 | 3 | 93.846 | KV452746.1 | 198310 | 2-scf00054 | 2 |
| AX-157945348 | 3 | 93.846 | KV452746.1 | 202028 | 2-scf00054 | 2 |
| AX-157945350 | 3 | 93.846 | KV452746.1 | 203120 | 2-scf00054 | 2 |
| AX-157945352 | 3 | 93.846 | KV452746.1 | 206051 | 2-scf00054 | 2 |
| AX-157815057 | 3 | 93.846 | KV452746.1 | 206160 | 2-scf00054 | 2 |
| AX-157945353 | 3 | 93.846 | KV452746.1 | 206720 | 2-scf00054 | 2 |
| AX-157815058 | 3 | 93.846 | KV452746.1 | 210006 | 2-scf00054 | 2 |
| AX-157945357 | 3 | 93.846 | KV452746.1 | 210189 | 2-scf00054 | 2 |
| AX-157945359 | 3 | 93.846 | KV452746.1 | 212964 | 2-scf00054 | 2 |
| AX-157945360 | 3 | 93.846 | KV452746.1 | 213281 | 2-scf00054 | 2 |
| AX-157945362 | 3 | 93.846 | KV452746.1 | 215827 | 2-scf00054 | 2 |
| AX-157945363 | 3 | 93.846 | KV452746.1 | 216520 | 2-scf00054 | 2 |
| AX-157945366 | 3 | 93.846 | KV452746.1 | 221034 | 2-scf00054 | 2 |
| AX-157815062 | 3 | 93.846 | KV452746.1 | 225644 | 2-scf00054 | 2 |
| AX-157945369 | 3 | 93.846 | KV452746.1 | 226794 | 2-scf00054 | 2 |
| AX-157815065 | 3 | 93.846 | KV452746.1 | 244450 | 2-scf00054 | 2 |
| AX-157945391 | 3 | 93.846 | KV452746.1 | 245393 | 2-scf00054 | 2 |
| AX-157945393 | 3 | 93.846 | KV452746.1 | 246903 | 2-scf00054 | 2 |
| AX-157945397 | 3 | 93.846 | KV452746.1 | 250529 | 2-scf00054 | 2 |
| AX-157815067 | 3 | 93.846 | KV452746.1 | 264725 | 2-scf00054 | 2 |
| AX-157945416 | 3 | 93.846 | KV452746.1 | 264917 | 2-scf00054 | 2 |
| AX-157945417 | 3 | 93.846 | KV452746.1 | 266484 | 2-scf00054 | 2 |
| AX-157945435 | 3 | 93.846 | KV452746.1 | 286421 | 2-scf00054 | 2 |
| AX-157869512 | 3 | 93.846 | KV452746.1 | 291227 | 2-scf00054 | 2 |
| AX-157815070 | 3 | 93.846 | KV452746.1 | 297493 | 2-scf00054 | 2 |
| AX-157945450 | 3 | 93.846 | KV452746.1 | 304163 | 2-scf00054 | 2 |
| AX-157945455 | 3 | 93.846 | KV452746.1 | 311756 | 2-scf00054 | 2 |
| AX-157945457 | 3 | 93.846 | KV452746.1 | 312697 | 2-scf00054 | 2 |
| AX-157869515 | 3 | 93.846 | KV452746.1 | 349304 | 2-scf00054 | 2 |
| AX-157945504 | 3 | 93.846 | KV452746.1 | 363068 | 2-scf00054 | 2 |
| AX-158405897 | 3 | 93.846 | KV452746.1 | 372222 | 2-scf00054 | 2 |
| AX-157945515 | 3 | 93.846 | KV452746.1 | 372514 | 2-scf00054 | 2 |
| AX-157815090 | 3 | 93.846 | KV452746.1 | 392994 | 2-scf00054 | 2 |
| AX-157945631 | 3 | 93.846 | KV452746.1 | 513080 | 2-scf00054 | 2 |
| AX-157945632 | 3 | 93.846 | KV452746.1 | 513541 | 2-scf00054 | 2 |
| AX-157945652 | 3 | 93.846 | KV452746.1 | 539368 | 2-scf00054 | 2 |

|              |   |        |            |         |                |    |
|--------------|---|--------|------------|---------|----------------|----|
| AX-157945675 | 3 | 93.846 | KV452746.1 | 567470  | 2-scf00054     | 2  |
| AX-157945681 | 3 | 93.846 | KV452746.1 | 572918  | 2-scf00054     | 2  |
| AX-157945684 | 3 | 93.846 | KV452746.1 | 577359  | 2-scf00054     | 2  |
| AX-158405901 | 3 | 93.846 | KV452746.1 | 581013  | 2-scf00054     | 2  |
| AX-157945696 | 3 | 93.846 | KV452746.1 | 590483  | 2-scf00054     | 2  |
| AX-157703582 | 3 | 93.846 | DX099245.1 | 576     | IORI212 lctalu | UN |
| AX-157753646 | 3 | 93.85  | KV452747.1 | 663356  | 2-scf00053     | 2  |
| AX-157814963 | 3 | 93.853 | KV452747.1 | 728329  | 2-scf00053     | 2  |
| AX-157943797 | 3 | 93.853 | KV452747.1 | 804748  | 2-scf00053     | 2  |
| AX-157943848 | 3 | 93.853 | KV452747.1 | 842485  | 2-scf00053     | 2  |
| AX-157943725 | 3 | 93.857 | KV452747.1 | 728107  | 2-scf00053     | 2  |
| AX-157943730 | 3 | 93.857 | KV452747.1 | 730228  | 2-scf00053     | 2  |
| AX-157943489 | 3 | 93.863 | KV452747.1 | 466181  | 2-scf00053     | 2  |
| AX-157943731 | 3 | 93.863 | KV452747.1 | 730699  | 2-scf00053     | 2  |
| AX-157943932 | 3 | 93.863 | KV452747.1 | 936153  | 2-scf00053     | 2  |
| AX-157944066 | 3 | 93.863 | KV452747.1 | 1064062 | 2-scf00053     | 2  |
| AX-157943734 | 3 | 93.867 | KV452747.1 | 731842  | 2-scf00053     | 2  |
| AX-157943704 | 3 | 93.87  | KV452747.1 | 662131  | 2-scf00053     | 2  |
| AX-157943737 | 3 | 93.87  | KV452747.1 | 732683  | 2-scf00053     | 2  |
| AX-157943741 | 3 | 93.87  | KV452747.1 | 734496  | 2-scf00053     | 2  |
| AX-157943742 | 3 | 93.87  | KV452747.1 | 734851  | 2-scf00053     | 2  |
| AX-157943802 | 3 | 93.87  | KV452747.1 | 808298  | 2-scf00053     | 2  |
| AX-157943805 | 3 | 93.87  | KV452747.1 | 809918  | 2-scf00053     | 2  |
| AX-157943809 | 3 | 93.87  | KV452747.1 | 813054  | 2-scf00053     | 2  |
| AX-157943810 | 3 | 93.87  | KV452747.1 | 814145  | 2-scf00053     | 2  |
| AX-157943740 | 3 | 93.872 | KV452747.1 | 734191  | 2-scf00053     | 2  |
| AX-157943745 | 3 | 93.875 | KV452747.1 | 736567  | 2-scf00053     | 2  |
| AX-157945567 | 3 | 93.875 | KV452746.1 | 448235  | 2-scf00054     | 2  |
| AX-157943749 | 3 | 93.88  | KV452747.1 | 740896  | 2-scf00053     | 2  |
| AX-157943758 | 3 | 93.884 | KV452747.1 | 748654  | 2-scf00053     | 2  |
| AX-157943798 | 3 | 93.889 | KV452747.1 | 805151  | 2-scf00053     | 2  |
| AX-157943872 | 3 | 93.889 | KV452747.1 | 872345  | 2-scf00053     | 2  |
| AX-157864780 | 3 | 93.892 | KV452747.1 | 816092  | 2-scf00053     | 2  |
| AX-157943840 | 3 | 93.892 | KV452747.1 | 831212  | 2-scf00053     | 2  |
| AX-157943815 | 3 | 93.921 | KV452747.1 | 818988  | 2-scf00053     | 2  |
| AX-157943623 | 3 | 93.928 | KV452747.1 | 585168  | 2-scf00053     | 2  |
| AX-157723857 | 3 | 93.928 | KV452747.1 | 751405  | 2-scf00053     | 2  |
| AX-157943768 | 3 | 93.928 | KV452747.1 | 756642  | 2-scf00053     | 2  |
| AX-157943816 | 3 | 93.928 | KV452747.1 | 819992  | 2-scf00053     | 2  |
| AX-157943830 | 3 | 93.928 | KV452747.1 | 825541  | 2-scf00053     | 2  |
| AX-157751205 | 3 | 93.928 | KV452747.1 | 825606  | 2-scf00053     | 2  |
| AX-157943844 | 3 | 93.928 | KV452747.1 | 834869  | 2-scf00053     | 2  |
| AX-157699066 | 3 | 93.928 | KV452747.1 | 851015  | 2-scf00053     | 2  |
| AX-157943883 | 3 | 93.928 | KV452747.1 | 877179  | 2-scf00053     | 2  |
| AX-157943890 | 3 | 93.928 | KV452747.1 | 882474  | 2-scf00053     | 2  |
| AX-157702241 | 3 | 93.928 | KV452747.1 | 887694  | 2-scf00053     | 2  |
| AX-157814967 | 3 | 93.928 | KV452747.1 | 904678  | 2-scf00053     | 2  |
| AX-157943919 | 3 | 93.928 | KV452747.1 | 913989  | 2-scf00053     | 2  |
| AX-157943928 | 3 | 93.928 | KV452747.1 | 931717  | 2-scf00053     | 2  |
| AX-157944162 | 3 | 93.928 | KV452747.1 | 1136518 | 2-scf00053     | 2  |
| AX-157944184 | 3 | 93.928 | KV452747.1 | 1167383 | 2-scf00053     | 2  |

|              |   |        |            |          |            |   |
|--------------|---|--------|------------|----------|------------|---|
| AX-157716928 | 3 | 93.928 | KV452747.1 | 1176726  | 2-scf00053 | 2 |
| AX-157945268 | 3 | 93.928 | KV452746.1 | 16521    | 2-scf00054 | 2 |
| AX-157933821 | 3 | 93.948 | KV452730.1 | 14560990 | 2-scf00040 | 2 |
| AX-157941247 | 3 | 93.948 | KV452742.1 | 1759818  | 2-scf00046 | 2 |
| AX-157752796 | 3 | 93.948 | KV452747.1 | 468731   | 2-scf00053 | 2 |
| AX-157943635 | 3 | 93.948 | KV452747.1 | 590680   | 2-scf00053 | 2 |
| AX-157943638 | 3 | 93.948 | KV452747.1 | 591382   | 2-scf00053 | 2 |
| AX-157943662 | 3 | 93.948 | KV452747.1 | 618256   | 2-scf00053 | 2 |
| AX-157943873 | 3 | 93.948 | KV452747.1 | 872548   | 2-scf00053 | 2 |
| AX-157943877 | 3 | 93.948 | KV452747.1 | 873417   | 2-scf00053 | 2 |
| AX-157772889 | 3 | 93.948 | KV452747.1 | 873587   | 2-scf00053 | 2 |
| AX-157943878 | 3 | 93.948 | KV452747.1 | 874710   | 2-scf00053 | 2 |
| AX-157943882 | 3 | 93.948 | KV452747.1 | 876396   | 2-scf00053 | 2 |
| AX-157943894 | 3 | 93.948 | KV452747.1 | 885739   | 2-scf00053 | 2 |
| AX-157943895 | 3 | 93.948 | KV452747.1 | 886903   | 2-scf00053 | 2 |
| AX-157757147 | 3 | 93.948 | KV452747.1 | 889330   | 2-scf00053 | 2 |
| AX-157814968 | 3 | 93.948 | KV452747.1 | 904811   | 2-scf00053 | 2 |
| AX-157943921 | 3 | 93.948 | KV452747.1 | 914079   | 2-scf00053 | 2 |
| AX-157943922 | 3 | 93.948 | KV452747.1 | 914746   | 2-scf00053 | 2 |
| AX-157743077 | 3 | 93.948 | KV452747.1 | 915191   | 2-scf00053 | 2 |
| AX-157943926 | 3 | 93.948 | KV452747.1 | 926737   | 2-scf00053 | 2 |
| AX-157943936 | 3 | 93.948 | KV452747.1 | 939372   | 2-scf00053 | 2 |
| AX-157943945 | 3 | 93.948 | KV452747.1 | 950231   | 2-scf00053 | 2 |
| AX-157943972 | 3 | 93.948 | KV452747.1 | 966972   | 2-scf00053 | 2 |
| AX-157943372 | 3 | 94.166 | KV452747.1 | 326397   | 2-scf00053 | 2 |
| AX-157943497 | 3 | 94.166 | KV452747.1 | 477167   | 2-scf00053 | 2 |
| AX-157943510 | 3 | 94.166 | KV452747.1 | 485740   | 2-scf00053 | 2 |
| AX-157943578 | 3 | 94.166 | KV452747.1 | 541656   | 2-scf00053 | 2 |
| AX-157943946 | 3 | 94.166 | KV452747.1 | 950793   | 2-scf00053 | 2 |
| AX-157814971 | 3 | 94.166 | KV452747.1 | 952507   | 2-scf00053 | 2 |
| AX-157943951 | 3 | 94.166 | KV452747.1 | 953742   | 2-scf00053 | 2 |
| AX-157943954 | 3 | 94.166 | KV452747.1 | 954897   | 2-scf00053 | 2 |
| AX-157943955 | 3 | 94.166 | KV452747.1 | 956188   | 2-scf00053 | 2 |
| AX-157943958 | 3 | 94.166 | KV452747.1 | 957483   | 2-scf00053 | 2 |
| AX-157943963 | 3 | 94.166 | KV452747.1 | 958627   | 2-scf00053 | 2 |
| AX-157943965 | 3 | 94.166 | KV452747.1 | 959819   | 2-scf00053 | 2 |
| AX-157943966 | 3 | 94.166 | KV452747.1 | 960407   | 2-scf00053 | 2 |
| AX-157814972 | 3 | 94.166 | KV452747.1 | 964258   | 2-scf00053 | 2 |
| AX-157814973 | 3 | 94.166 | KV452747.1 | 964474   | 2-scf00053 | 2 |
| AX-157943968 | 3 | 94.166 | KV452747.1 | 965127   | 2-scf00053 | 2 |
| AX-157943969 | 3 | 94.166 | KV452747.1 | 965905   | 2-scf00053 | 2 |
| AX-157943970 | 3 | 94.166 | KV452747.1 | 966147   | 2-scf00053 | 2 |
| AX-157943974 | 3 | 94.166 | KV452747.1 | 967337   | 2-scf00053 | 2 |
| AX-157943976 | 3 | 94.166 | KV452747.1 | 967962   | 2-scf00053 | 2 |
| AX-157814974 | 3 | 94.166 | KV452747.1 | 968402   | 2-scf00053 | 2 |
| AX-157943977 | 3 | 94.166 | KV452747.1 | 968618   | 2-scf00053 | 2 |
| AX-157943979 | 3 | 94.166 | KV452747.1 | 968985   | 2-scf00053 | 2 |
| AX-157814975 | 3 | 94.166 | KV452747.1 | 969999   | 2-scf00053 | 2 |
| AX-157943981 | 3 | 94.166 | KV452747.1 | 970844   | 2-scf00053 | 2 |
| AX-157753547 | 3 | 94.166 | KV452747.1 | 974035   | 2-scf00053 | 2 |
| AX-157943984 | 3 | 94.166 | KV452747.1 | 975001   | 2-scf00053 | 2 |

|              |   |        |            |         |            |   |
|--------------|---|--------|------------|---------|------------|---|
| AX-157814976 | 3 | 94.166 | KV452747.1 | 975607  | 2-scf00053 | 2 |
| AX-157943986 | 3 | 94.166 | KV452747.1 | 976210  | 2-scf00053 | 2 |
| AX-157814977 | 3 | 94.166 | KV452747.1 | 978802  | 2-scf00053 | 2 |
| AX-157943988 | 3 | 94.166 | KV452747.1 | 979198  | 2-scf00053 | 2 |
| AX-157943990 | 3 | 94.166 | KV452747.1 | 979417  | 2-scf00053 | 2 |
| AX-157943991 | 3 | 94.166 | KV452747.1 | 980233  | 2-scf00053 | 2 |
| AX-157943993 | 3 | 94.166 | KV452747.1 | 980942  | 2-scf00053 | 2 |
| AX-157943994 | 3 | 94.166 | KV452747.1 | 981669  | 2-scf00053 | 2 |
| AX-157943995 | 3 | 94.166 | KV452747.1 | 986602  | 2-scf00053 | 2 |
| AX-158421999 | 3 | 94.166 | KV452747.1 | 988655  | 2-scf00053 | 2 |
| AX-157814978 | 3 | 94.166 | KV452747.1 | 992880  | 2-scf00053 | 2 |
| AX-158404823 | 3 | 94.166 | KV452747.1 | 996472  | 2-scf00053 | 2 |
| AX-157943998 | 3 | 94.166 | KV452747.1 | 997843  | 2-scf00053 | 2 |
| AX-157944050 | 3 | 94.166 | KV452747.1 | 1047733 | 2-scf00053 | 2 |
| AX-157944060 | 3 | 94.166 | KV452747.1 | 1058524 | 2-scf00053 | 2 |
| AX-157944153 | 3 | 94.166 | KV452747.1 | 1132050 | 2-scf00053 | 2 |
| AX-157944293 | 3 | 94.166 | KV452747.1 | 1284862 | 2-scf00053 | 2 |
| AX-158405855 | 3 | 94.215 | KV452747.1 | 996584  | 2-scf00053 | 2 |
| AX-157943756 | 3 | 94.276 | KV452747.1 | 747173  | 2-scf00053 | 2 |
| AX-157944000 | 3 | 94.276 | KV452747.1 | 1002544 | 2-scf00053 | 2 |
| AX-157753449 | 3 | 94.276 | KV452747.1 | 1003194 | 2-scf00053 | 2 |
| AX-157944001 | 3 | 94.276 | KV452747.1 | 1006612 | 2-scf00053 | 2 |
| AX-157944002 | 3 | 94.276 | KV452747.1 | 1007035 | 2-scf00053 | 2 |
| AX-157944005 | 3 | 94.276 | KV452747.1 | 1020045 | 2-scf00053 | 2 |
| AX-157944006 | 3 | 94.276 | KV452747.1 | 1020796 | 2-scf00053 | 2 |
| AX-157944008 | 3 | 94.276 | KV452747.1 | 1022921 | 2-scf00053 | 2 |
| AX-157944011 | 3 | 94.276 | KV452747.1 | 1024216 | 2-scf00053 | 2 |
| AX-157944012 | 3 | 94.276 | KV452747.1 | 1025267 | 2-scf00053 | 2 |
| AX-157944013 | 3 | 94.276 | KV452747.1 | 1025785 | 2-scf00053 | 2 |
| AX-157814979 | 3 | 94.276 | KV452747.1 | 1026876 | 2-scf00053 | 2 |
| AX-157944017 | 3 | 94.276 | KV452747.1 | 1028387 | 2-scf00053 | 2 |
| AX-157944024 | 3 | 94.276 | KV452747.1 | 1034322 | 2-scf00053 | 2 |
| AX-157944025 | 3 | 94.276 | KV452747.1 | 1034596 | 2-scf00053 | 2 |
| AX-157944026 | 3 | 94.276 | KV452747.1 | 1035489 | 2-scf00053 | 2 |
| AX-157944027 | 3 | 94.276 | KV452747.1 | 1036171 | 2-scf00053 | 2 |
| AX-157944029 | 3 | 94.276 | KV452747.1 | 1036585 | 2-scf00053 | 2 |
| AX-157944031 | 3 | 94.276 | KV452747.1 | 1038247 | 2-scf00053 | 2 |
| AX-157944035 | 3 | 94.276 | KV452747.1 | 1041157 | 2-scf00053 | 2 |
| AX-157944038 | 3 | 94.276 | KV452747.1 | 1041466 | 2-scf00053 | 2 |
| AX-157944039 | 3 | 94.276 | KV452747.1 | 1041926 | 2-scf00053 | 2 |
| AX-157944041 | 3 | 94.276 | KV452747.1 | 1042331 | 2-scf00053 | 2 |
| AX-157944042 | 3 | 94.276 | KV452747.1 | 1042631 | 2-scf00053 | 2 |
| AX-157944045 | 3 | 94.276 | KV452747.1 | 1044670 | 2-scf00053 | 2 |
| AX-157944046 | 3 | 94.276 | KV452747.1 | 1045088 | 2-scf00053 | 2 |
| AX-157944048 | 3 | 94.276 | KV452747.1 | 1046270 | 2-scf00053 | 2 |
| AX-157944049 | 3 | 94.276 | KV452747.1 | 1047338 | 2-scf00053 | 2 |
| AX-157944051 | 3 | 94.276 | KV452747.1 | 1048299 | 2-scf00053 | 2 |
| AX-157944053 | 3 | 94.276 | KV452747.1 | 1049473 | 2-scf00053 | 2 |
| AX-157944055 | 3 | 94.276 | KV452747.1 | 1051479 | 2-scf00053 | 2 |
| AX-157944056 | 3 | 94.276 | KV452747.1 | 1052457 | 2-scf00053 | 2 |
| AX-157944058 | 3 | 94.276 | KV452747.1 | 1056370 | 2-scf00053 | 2 |

|              |   |        |            |         |            |   |
|--------------|---|--------|------------|---------|------------|---|
| AX-157944059 | 3 | 94.276 | KV452747.1 | 1056854 | 2-scf00053 | 2 |
| AX-157944062 | 3 | 94.276 | KV452747.1 | 1060865 | 2-scf00053 | 2 |
| AX-157944063 | 3 | 94.276 | KV452747.1 | 1062180 | 2-scf00053 | 2 |
| AX-157944065 | 3 | 94.276 | KV452747.1 | 1063778 | 2-scf00053 | 2 |
| AX-157944068 | 3 | 94.276 | KV452747.1 | 1064632 | 2-scf00053 | 2 |
| AX-157944072 | 3 | 94.276 | KV452747.1 | 1066987 | 2-scf00053 | 2 |
| AX-157944073 | 3 | 94.276 | KV452747.1 | 1067457 | 2-scf00053 | 2 |
| AX-157944078 | 3 | 94.276 | KV452747.1 | 1068468 | 2-scf00053 | 2 |
| AX-157739845 | 3 | 94.276 | KV452747.1 | 1068776 | 2-scf00053 | 2 |
| AX-157944079 | 3 | 94.276 | KV452747.1 | 1068924 | 2-scf00053 | 2 |
| AX-157814981 | 3 | 94.276 | KV452747.1 | 1069751 | 2-scf00053 | 2 |
| AX-157814983 | 3 | 94.276 | KV452747.1 | 1073829 | 2-scf00053 | 2 |
| AX-157942649 | 3 | 94.385 | KV452745.1 | 1115042 | 2-scf00051 | 2 |
| AX-157942692 | 3 | 94.385 | KV452745.1 | 1175732 | 2-scf00051 | 2 |
| AX-157942739 | 3 | 94.385 | KV452745.1 | 1236621 | 2-scf00051 | 2 |
| AX-157942798 | 3 | 94.385 | KV452745.1 | 1341603 | 2-scf00051 | 2 |
| AX-157943690 | 3 | 94.385 | KV452747.1 | 647540  | 2-scf00053 | 2 |
| AX-157943938 | 3 | 94.385 | KV452747.1 | 939975  | 2-scf00053 | 2 |
| AX-157944088 | 3 | 94.385 | KV452747.1 | 1075248 | 2-scf00053 | 2 |
| AX-157944089 | 3 | 94.385 | KV452747.1 | 1075793 | 2-scf00053 | 2 |
| AX-157814984 | 3 | 94.385 | KV452747.1 | 1076469 | 2-scf00053 | 2 |
| AX-157944091 | 3 | 94.385 | KV452747.1 | 1076510 | 2-scf00053 | 2 |
| AX-157944092 | 3 | 94.385 | KV452747.1 | 1077229 | 2-scf00053 | 2 |
| AX-157944093 | 3 | 94.385 | KV452747.1 | 1078044 | 2-scf00053 | 2 |
| AX-157944095 | 3 | 94.385 | KV452747.1 | 1080394 | 2-scf00053 | 2 |
| AX-157944096 | 3 | 94.385 | KV452747.1 | 1081141 | 2-scf00053 | 2 |
| AX-157814986 | 3 | 94.385 | KV452747.1 | 1083690 | 2-scf00053 | 2 |
| AX-157944099 | 3 | 94.385 | KV452747.1 | 1085365 | 2-scf00053 | 2 |
| AX-157944102 | 3 | 94.385 | KV452747.1 | 1095741 | 2-scf00053 | 2 |
| AX-157814989 | 3 | 94.385 | KV452747.1 | 1096317 | 2-scf00053 | 2 |
| AX-157944105 | 3 | 94.385 | KV452747.1 | 1100412 | 2-scf00053 | 2 |
| AX-157748688 | 3 | 94.385 | KV452747.1 | 1107418 | 2-scf00053 | 2 |
| AX-157883914 | 3 | 94.385 | KV452747.1 | 1108409 | 2-scf00053 | 2 |
| AX-157944111 | 3 | 94.385 | KV452747.1 | 1108652 | 2-scf00053 | 2 |
| AX-157944113 | 3 | 94.385 | KV452747.1 | 1109432 | 2-scf00053 | 2 |
| AX-157944116 | 3 | 94.385 | KV452747.1 | 1110692 | 2-scf00053 | 2 |
| AX-157944118 | 3 | 94.385 | KV452747.1 | 1111137 | 2-scf00053 | 2 |
| AX-157944120 | 3 | 94.385 | KV452747.1 | 1111797 | 2-scf00053 | 2 |
| AX-157944122 | 3 | 94.385 | KV452747.1 | 1112905 | 2-scf00053 | 2 |
| AX-157944124 | 3 | 94.385 | KV452747.1 | 1113388 | 2-scf00053 | 2 |
| AX-157944132 | 3 | 94.385 | KV452747.1 | 1119431 | 2-scf00053 | 2 |
| AX-157944135 | 3 | 94.385 | KV452747.1 | 1121434 | 2-scf00053 | 2 |
| AX-157944137 | 3 | 94.385 | KV452747.1 | 1122301 | 2-scf00053 | 2 |
| AX-157944140 | 3 | 94.385 | KV452747.1 | 1123943 | 2-scf00053 | 2 |
| AX-157944142 | 3 | 94.385 | KV452747.1 | 1124570 | 2-scf00053 | 2 |
| AX-157944165 | 3 | 94.385 | KV452747.1 | 1139136 | 2-scf00053 | 2 |
| AX-157814992 | 3 | 94.385 | KV452747.1 | 1140132 | 2-scf00053 | 2 |
| AX-157944167 | 3 | 94.385 | KV452747.1 | 1140278 | 2-scf00053 | 2 |
| AX-157944168 | 3 | 94.385 | KV452747.1 | 1144274 | 2-scf00053 | 2 |
| AX-157944169 | 3 | 94.385 | KV452747.1 | 1147779 | 2-scf00053 | 2 |
| AX-157814994 | 3 | 94.385 | KV452747.1 | 1167990 | 2-scf00053 | 2 |



|              |   |        |             |         |            |    |
|--------------|---|--------|-------------|---------|------------|----|
| AX-157814995 | 3 | 94.385 | KV452747.1  | 1168059 | 2-scf00053 | 2  |
| AX-157869505 | 3 | 94.385 | KV452747.1  | 1170871 | 2-scf00053 | 2  |
| AX-157944187 | 3 | 94.385 | KV452747.1  | 1171887 | 2-scf00053 | 2  |
| AX-157944193 | 3 | 94.385 | KV452747.1  | 1177674 | 2-scf00053 | 2  |
| AX-157944214 | 3 | 94.385 | KV452747.1  | 1202363 | 2-scf00053 | 2  |
| AX-157944216 | 3 | 94.385 | KV452747.1  | 1203183 | 2-scf00053 | 2  |
| AX-157707997 | 3 | 94.385 | KV452747.1  | 1210030 | 2-scf00053 | 2  |
| AX-157707998 | 3 | 94.385 | KV452747.1  | 1210066 | 2-scf00053 | 2  |
| AX-157854590 | 3 | 94.385 | KV452747.1  | 1211255 | 2-scf00053 | 2  |
| AX-157944232 | 3 | 94.385 | KV452747.1  | 1220439 | 2-scf00053 | 2  |
| AX-157815001 | 3 | 94.385 | KV452747.1  | 1253451 | 2-scf00053 | 2  |
| AX-157944286 | 3 | 94.385 | KV452747.1  | 1277248 | 2-scf00053 | 2  |
| AX-157945537 | 3 | 94.385 | KV452746.1  | 397956  | 2-scf00054 | 2  |
| AX-157945586 | 3 | 94.385 | KV452746.1  | 463525  | 2-scf00054 | 2  |
| AX-157945612 | 3 | 94.385 | KV452746.1  | 493551  | 2-scf00054 | 2  |
| AX-157869522 | 3 | 94.385 | KV452746.1  | 506122  | 2-scf00054 | 2  |
| AX-157945622 | 3 | 94.385 | KV452746.1  | 507393  | 2-scf00054 | 2  |
| AX-157814996 | 3 | 94.408 | KV452747.1  | 1174943 | 2-scf00053 | 2  |
| AX-157943933 | 3 | 94.421 | KV452747.1  | 936992  | 2-scf00053 | 2  |
| AX-157943942 | 3 | 94.421 | KV452747.1  | 946189  | 2-scf00053 | 2  |
| AX-157944015 | 3 | 94.421 | KV452747.1  | 1026120 | 2-scf00053 | 2  |
| AX-157814980 | 3 | 94.421 | KV452747.1  | 1031728 | 2-scf00053 | 2  |
| AX-157944034 | 3 | 94.421 | KV452747.1  | 1040842 | 2-scf00053 | 2  |
| AX-157944128 | 3 | 94.421 | KV452747.1  | 1116271 | 2-scf00053 | 2  |
| AX-157944146 | 3 | 94.421 | KV452747.1  | 1126156 | 2-scf00053 | 2  |
| AX-157944190 | 3 | 94.421 | KV452747.1  | 1175973 | 2-scf00053 | 2  |
| AX-157944311 | 3 | 94.421 | KV452747.1  | 1306429 | 2-scf00053 | 2  |
| AX-157944415 | 3 | 94.421 | KV452747.1  | 1389141 | 2-scf00053 | 2  |
| AX-157944192 | 3 | 94.432 | KV452747.1  | 1177362 | 2-scf00053 | 2  |
| AX-157944195 | 3 | 94.452 | KV452747.1  | 1179776 | 2-scf00053 | 2  |
| AX-157944196 | 3 | 94.452 | KV452747.1  | 1180386 | 2-scf00053 | 2  |
| AX-157944203 | 3 | 94.452 | KV452747.1  | 1188450 | 2-scf00053 | 2  |
| AX-157944248 | 3 | 94.452 | KV452747.1  | 1231650 | 2-scf00053 | 2  |
| AX-157815006 | 3 | 94.452 | KV452747.1  | 1273233 | 2-scf00053 | 2  |
| AX-157707012 | 3 | 94.452 | 3ML01033335 | 496     | scf08981_1 | UN |
| AX-157944204 | 3 | 94.461 | KV452747.1  | 1191039 | 2-scf00053 | 2  |
| AX-157944158 | 3 | 94.475 | KV452747.1  | 1134493 | 2-scf00053 | 2  |
| AX-157944189 | 3 | 94.475 | KV452747.1  | 1174183 | 2-scf00053 | 2  |
| AX-157752707 | 3 | 94.475 | KV452747.1  | 1206636 | 2-scf00053 | 2  |
| AX-157942555 | 3 | 94.494 | KV452745.1  | 950978  | 2-scf00051 | 2  |
| AX-157943477 | 3 | 94.494 | KV452747.1  | 451443  | 2-scf00053 | 2  |
| AX-157943493 | 3 | 94.494 | KV452747.1  | 471552  | 2-scf00053 | 2  |
| AX-157943546 | 3 | 94.494 | KV452747.1  | 510902  | 2-scf00053 | 2  |
| AX-157943550 | 3 | 94.494 | KV452747.1  | 515604  | 2-scf00053 | 2  |
| AX-157943553 | 3 | 94.494 | KV452747.1  | 520911  | 2-scf00053 | 2  |
| AX-157943613 | 3 | 94.494 | KV452747.1  | 567772  | 2-scf00053 | 2  |
| AX-157943663 | 3 | 94.494 | KV452747.1  | 619890  | 2-scf00053 | 2  |
| AX-157943683 | 3 | 94.494 | KV452747.1  | 640974  | 2-scf00053 | 2  |
| AX-157944225 | 3 | 94.494 | KV452747.1  | 1215088 | 2-scf00053 | 2  |
| AX-157944228 | 3 | 94.494 | KV452747.1  | 1216470 | 2-scf00053 | 2  |
| AX-157944231 | 3 | 94.494 | KV452747.1  | 1218966 | 2-scf00053 | 2  |

|              |   |        |            |         |            |   |
|--------------|---|--------|------------|---------|------------|---|
| AX-157944240 | 3 | 94.494 | KV452747.1 | 1225151 | 2-scf00053 | 2 |
| AX-157944243 | 3 | 94.494 | KV452747.1 | 1226441 | 2-scf00053 | 2 |
| AX-157773273 | 3 | 94.494 | KV452747.1 | 1231036 | 2-scf00053 | 2 |
| AX-157944253 | 3 | 94.494 | KV452747.1 | 1234599 | 2-scf00053 | 2 |
| AX-157944262 | 3 | 94.494 | KV452747.1 | 1237724 | 2-scf00053 | 2 |
| AX-157944266 | 3 | 94.494 | KV452747.1 | 1240658 | 2-scf00053 | 2 |
| AX-158405861 | 3 | 94.494 | KV452747.1 | 1254234 | 2-scf00053 | 2 |
| AX-157944280 | 3 | 94.494 | KV452747.1 | 1265845 | 2-scf00053 | 2 |
| AX-157944439 | 3 | 94.494 | KV452747.1 | 1408572 | 2-scf00053 | 2 |
| AX-157739322 | 3 | 94.712 | KV452747.1 | 1289466 | 2-scf00053 | 2 |
| AX-157944297 | 3 | 94.712 | KV452747.1 | 1290514 | 2-scf00053 | 2 |
| AX-157944317 | 3 | 94.735 | KV452747.1 | 1309187 | 2-scf00053 | 2 |
| AX-157815007 | 3 | 94.786 | KV452747.1 | 1309380 | 2-scf00053 | 2 |
| AX-157815014 | 3 | 94.786 | KV452747.1 | 1345891 | 2-scf00053 | 2 |
| AX-157944320 | 3 | 94.822 | KV452747.1 | 1311070 | 2-scf00053 | 2 |
| AX-157944322 | 3 | 94.822 | KV452747.1 | 1312207 | 2-scf00053 | 2 |
| AX-157944323 | 3 | 94.822 | KV452747.1 | 1313659 | 2-scf00053 | 2 |
| AX-157944339 | 3 | 94.835 | KV452747.1 | 1323401 | 2-scf00053 | 2 |
| AX-157944355 | 3 | 94.848 | KV452747.1 | 1336475 | 2-scf00053 | 2 |
| AX-157944336 | 3 | 95.039 | KV452747.1 | 1320980 | 2-scf00053 | 2 |
| AX-157815009 | 3 | 95.039 | KV452747.1 | 1322481 | 2-scf00053 | 2 |
| AX-157815012 | 3 | 95.039 | KV452747.1 | 1329593 | 2-scf00053 | 2 |
| AX-157944354 | 3 | 95.039 | KV452747.1 | 1335079 | 2-scf00053 | 2 |
| AX-157944358 | 3 | 95.039 | KV452747.1 | 1341400 | 2-scf00053 | 2 |
| AX-157944363 | 3 | 95.207 | KV452747.1 | 1343210 | 2-scf00053 | 2 |
| AX-157944084 | 3 | 95.208 | KV452747.1 | 1072803 | 2-scf00053 | 2 |
| AX-157944236 | 3 | 95.208 | KV452747.1 | 1222118 | 2-scf00053 | 2 |
| AX-157944278 | 3 | 95.208 | KV452747.1 | 1264142 | 2-scf00053 | 2 |
| AX-157944308 | 3 | 95.208 | KV452747.1 | 1304987 | 2-scf00053 | 2 |
| AX-157944360 | 3 | 95.208 | KV452747.1 | 1342603 | 2-scf00053 | 2 |
| AX-157944374 | 3 | 95.208 | KV452747.1 | 1347399 | 2-scf00053 | 2 |
| AX-157944380 | 3 | 95.209 | KV452747.1 | 1352328 | 2-scf00053 | 2 |
| AX-157944381 | 3 | 95.209 | KV452747.1 | 1353897 | 2-scf00053 | 2 |
| AX-157745341 | 3 | 95.209 | KV452747.1 | 1356443 | 2-scf00053 | 2 |
| AX-157944382 | 3 | 95.209 | KV452747.1 | 1357961 | 2-scf00053 | 2 |
| AX-157944385 | 3 | 95.472 | KV452747.1 | 1363584 | 2-scf00053 | 2 |
| AX-157944388 | 3 | 95.484 | KV452747.1 | 1364357 | 2-scf00053 | 2 |
| AX-157944421 | 3 | 95.484 | KV452747.1 | 1393850 | 2-scf00053 | 2 |
| AX-157944393 | 3 | 95.496 | KV452747.1 | 1366750 | 2-scf00053 | 2 |
| AX-157815020 | 3 | 95.496 | KV452747.1 | 1376275 | 2-scf00053 | 2 |
| AX-157944399 | 3 | 95.503 | KV452747.1 | 1371670 | 2-scf00053 | 2 |
| AX-157944401 | 3 | 95.509 | KV452747.1 | 1372373 | 2-scf00053 | 2 |
| AX-157944406 | 3 | 95.559 | KV452747.1 | 1381674 | 2-scf00053 | 2 |
| AX-157944413 | 3 | 95.559 | KV452747.1 | 1387176 | 2-scf00053 | 2 |
| AX-157944412 | 3 | 95.616 | KV452747.1 | 1386346 | 2-scf00053 | 2 |
| AX-157944414 | 3 | 95.616 | KV452747.1 | 1387707 | 2-scf00053 | 2 |
| AX-157944417 | 3 | 95.616 | KV452747.1 | 1389976 | 2-scf00053 | 2 |
| AX-157815023 | 3 | 95.675 | KV452747.1 | 1392861 | 2-scf00053 | 2 |
| AX-157747637 | 3 | 95.726 | KV452747.1 | 1395559 | 2-scf00053 | 2 |
| AX-157944425 | 3 | 95.826 | KV452747.1 | 1398881 | 2-scf00053 | 2 |
| AX-157944434 | 3 | 95.916 | KV452747.1 | 1403170 | 2-scf00053 | 2 |

|              |   |        |            |         |            |   |
|--------------|---|--------|------------|---------|------------|---|
| AX-157944435 | 3 | 95.916 | KV452747.1 | 1404116 | 2-scf00053 | 2 |
| AX-157944437 | 3 | 95.916 | KV452747.1 | 1406673 | 2-scf00053 | 2 |
| AX-157773002 | 3 | 95.916 | KV452747.1 | 1409098 | 2-scf00053 | 2 |
| AX-157944440 | 3 | 95.916 | KV452747.1 | 1410410 | 2-scf00053 | 2 |
| AX-157944445 | 3 | 95.916 | KV452747.1 | 1414548 | 2-scf00053 | 2 |
| AX-157883918 | 3 | 95.916 | KV452747.1 | 1416980 | 2-scf00053 | 2 |
| AX-157719465 | 3 | 96.35  | KV452747.1 | 1435788 | 2-scf00053 | 2 |
| AX-157944461 | 3 | 96.353 | KV452747.1 | 1436434 | 2-scf00053 | 2 |
| AX-157725308 | 3 | 96.353 | KV452747.1 | 1436988 | 2-scf00053 | 2 |
| AX-157751102 | 3 | 96.353 | KV452747.1 | 1438910 | 2-scf00053 | 2 |
| AX-157944463 | 3 | 96.353 | KV452747.1 | 1439261 | 2-scf00053 | 2 |
| AX-157815025 | 3 | 96.353 | KV452747.1 | 1444172 | 2-scf00053 | 2 |
| AX-158415141 | 3 | 96.353 | KV452747.1 | 1445121 | 2-scf00053 | 2 |
| AX-158379384 | 3 | 96.353 | KV452747.1 | 1457255 | 2-scf00053 | 2 |
| AX-157944480 | 3 | 96.353 | KV452747.1 | 1459676 | 2-scf00053 | 2 |
| AX-157815027 | 3 | 96.353 | KV452747.1 | 1460949 | 2-scf00053 | 2 |
| AX-157944482 | 3 | 96.353 | KV452747.1 | 1464972 | 2-scf00053 | 2 |
| AX-157815028 | 3 | 96.353 | KV452747.1 | 1468019 | 2-scf00053 | 2 |
| AX-157944486 | 3 | 96.353 | KV452747.1 | 1469275 | 2-scf00053 | 2 |
| AX-157944489 | 3 | 96.353 | KV452747.1 | 1475166 | 2-scf00053 | 2 |
| AX-157815029 | 3 | 96.353 | KV452747.1 | 1476463 | 2-scf00053 | 2 |
| AX-157944494 | 3 | 96.353 | KV452747.1 | 1483794 | 2-scf00053 | 2 |
| AX-157944497 | 3 | 96.353 | KV452747.1 | 1484729 | 2-scf00053 | 2 |
| AX-157942588 | 3 | 96.462 | KV452745.1 | 987709  | 2-scf00051 | 2 |
| AX-157943552 | 3 | 96.462 | KV452747.1 | 517623  | 2-scf00053 | 2 |
| AX-157943563 | 3 | 96.462 | KV452747.1 | 533889  | 2-scf00053 | 2 |
| AX-157943615 | 3 | 96.462 | KV452747.1 | 575362  | 2-scf00053 | 2 |
| AX-157943675 | 3 | 96.462 | KV452747.1 | 635247  | 2-scf00053 | 2 |
| AX-157740035 | 3 | 96.462 | KV452747.1 | 665817  | 2-scf00053 | 2 |
| AX-157944351 | 3 | 96.462 | KV452747.1 | 1332328 | 2-scf00053 | 2 |
| AX-157944498 | 3 | 96.462 | KV452747.1 | 1485467 | 2-scf00053 | 2 |
| AX-157944502 | 3 | 96.462 | KV452747.1 | 1487192 | 2-scf00053 | 2 |
| AX-157944507 | 3 | 96.462 | KV452747.1 | 1489789 | 2-scf00053 | 2 |
| AX-157815030 | 3 | 96.462 | KV452747.1 | 1494094 | 2-scf00053 | 2 |
| AX-157944521 | 3 | 96.462 | KV452747.1 | 1502065 | 2-scf00053 | 2 |
| AX-157944523 | 3 | 96.462 | KV452747.1 | 1504457 | 2-scf00053 | 2 |
| AX-157944536 | 3 | 96.462 | KV452747.1 | 1538823 | 2-scf00053 | 2 |
| AX-157944538 | 3 | 96.462 | KV452747.1 | 1539266 | 2-scf00053 | 2 |
| AX-157944568 | 3 | 96.462 | KV452747.1 | 1594806 | 2-scf00053 | 2 |
| AX-157944579 | 3 | 96.462 | KV452747.1 | 1600966 | 2-scf00053 | 2 |
| AX-157944580 | 3 | 96.462 | KV452747.1 | 1601923 | 2-scf00053 | 2 |
| AX-157944584 | 3 | 96.462 | KV452747.1 | 1606264 | 2-scf00053 | 2 |
| AX-157944590 | 3 | 96.462 | KV452747.1 | 1613818 | 2-scf00053 | 2 |
| AX-157944592 | 3 | 96.462 | KV452747.1 | 1615392 | 2-scf00053 | 2 |
| AX-157944595 | 3 | 96.462 | KV452747.1 | 1618208 | 2-scf00053 | 2 |
| AX-157944596 | 3 | 96.462 | KV452747.1 | 1618851 | 2-scf00053 | 2 |
| AX-157944616 | 3 | 96.462 | KV452747.1 | 1635503 | 2-scf00053 | 2 |
| AX-157944628 | 3 | 96.462 | KV452747.1 | 1648093 | 2-scf00053 | 2 |
| AX-157944648 | 3 | 96.462 | KV452747.1 | 1663885 | 2-scf00053 | 2 |
| AX-157944649 | 3 | 96.462 | KV452747.1 | 1664375 | 2-scf00053 | 2 |
| AX-157944679 | 3 | 96.462 | KV452747.1 | 1696759 | 2-scf00053 | 2 |

|              |   |        |            |         |            |   |
|--------------|---|--------|------------|---------|------------|---|
| AX-157944681 | 3 | 96.462 | KV452747.1 | 1697390 | 2-scf00053 | 2 |
| AX-157944692 | 3 | 96.462 | KV452747.1 | 1703882 | 2-scf00053 | 2 |
| AX-157944708 | 3 | 96.462 | KV452747.1 | 1709778 | 2-scf00053 | 2 |
| AX-157944718 | 3 | 96.462 | KV452747.1 | 1716647 | 2-scf00053 | 2 |
| AX-157944733 | 3 | 96.462 | KV452747.1 | 1731267 | 2-scf00053 | 2 |
| AX-157945601 | 3 | 96.462 | KV452746.1 | 482802  | 2-scf00054 | 2 |
| AX-157944546 | 3 | 96.517 | KV452747.1 | 1546432 | 2-scf00053 | 2 |
| AX-157944547 | 3 | 96.551 | KV452747.1 | 1548381 | 2-scf00053 | 2 |
| AX-157944200 | 3 | 96.571 | KV452747.1 | 1183400 | 2-scf00053 | 2 |
| AX-157718900 | 3 | 96.571 | KV452747.1 | 1568910 | 2-scf00053 | 2 |
| AX-157944549 | 3 | 96.571 | KV452747.1 | 1569923 | 2-scf00053 | 2 |
| AX-157944550 | 3 | 96.571 | KV452747.1 | 1570543 | 2-scf00053 | 2 |
| AX-157944551 | 3 | 96.571 | KV452747.1 | 1570954 | 2-scf00053 | 2 |
| AX-157944552 | 3 | 96.571 | KV452747.1 | 1571823 | 2-scf00053 | 2 |
| AX-157944556 | 3 | 96.571 | KV452747.1 | 1575363 | 2-scf00053 | 2 |
| AX-157944562 | 3 | 96.571 | KV452747.1 | 1587697 | 2-scf00053 | 2 |
| AX-157944569 | 3 | 96.571 | KV452747.1 | 1595537 | 2-scf00053 | 2 |
| AX-157944598 | 3 | 96.571 | KV452747.1 | 1623696 | 2-scf00053 | 2 |
| AX-157944669 | 3 | 96.571 | KV452747.1 | 1681045 | 2-scf00053 | 2 |
| AX-158422004 | 3 | 96.571 | KV452747.1 | 1685851 | 2-scf00053 | 2 |
| AX-157944707 | 3 | 96.571 | KV452747.1 | 1709485 | 2-scf00053 | 2 |
| AX-158415143 | 3 | 96.571 | KV452747.1 | 1710390 | 2-scf00053 | 2 |
| AX-157944710 | 3 | 96.571 | KV452747.1 | 1711681 | 2-scf00053 | 2 |
| AX-158405869 | 3 | 96.708 | KV452747.1 | 1614131 | 2-scf00053 | 2 |
| AX-157944597 | 3 | 96.708 | KV452747.1 | 1620807 | 2-scf00053 | 2 |
| AX-157944606 | 3 | 96.737 | KV452747.1 | 1628675 | 2-scf00053 | 2 |
| AX-157944612 | 3 | 96.794 | KV452747.1 | 1632488 | 2-scf00053 | 2 |
| AX-157944661 | 3 | 96.794 | KV452747.1 | 1671720 | 2-scf00053 | 2 |
| AX-157944663 | 3 | 96.794 | KV452747.1 | 1672285 | 2-scf00053 | 2 |
| AX-157944626 | 3 | 96.845 | KV452747.1 | 1645907 | 2-scf00053 | 2 |
| AX-157944719 | 3 | 96.845 | KV452747.1 | 1717229 | 2-scf00053 | 2 |
| AX-157944629 | 3 | 96.982 | KV452747.1 | 1648252 | 2-scf00053 | 2 |
| AX-157944631 | 3 | 97.119 | KV452747.1 | 1651592 | 2-scf00053 | 2 |
| AX-157944634 | 3 | 97.393 | KV452747.1 | 1655784 | 2-scf00053 | 2 |
| AX-157944666 | 3 | 97.393 | KV452747.1 | 1675883 | 2-scf00053 | 2 |
| AX-157944690 | 3 | 97.393 | KV452747.1 | 1702776 | 2-scf00053 | 2 |
| AX-157944637 | 3 | 97.417 | KV452747.1 | 1657997 | 2-scf00053 | 2 |
| AX-157944675 | 3 | 97.417 | KV452747.1 | 1690810 | 2-scf00053 | 2 |
| AX-157944694 | 3 | 97.417 | KV452747.1 | 1704474 | 2-scf00053 | 2 |
| AX-157944703 | 3 | 97.417 | KV452747.1 | 1708389 | 2-scf00053 | 2 |
| AX-157944759 | 3 | 97.417 | KV452747.1 | 1752670 | 2-scf00053 | 2 |
| AX-157944432 | 3 | 97.455 | KV452747.1 | 1402709 | 2-scf00053 | 2 |
| AX-157862803 | 3 | 97.455 | KV452747.1 | 1462569 | 2-scf00053 | 2 |
| AX-157944555 | 3 | 97.455 | KV452747.1 | 1574673 | 2-scf00053 | 2 |
| AX-157752998 | 3 | 97.455 | KV452747.1 | 1614720 | 2-scf00053 | 2 |
| AX-157944655 | 3 | 97.455 | KV452747.1 | 1669758 | 2-scf00053 | 2 |
| AX-157944701 | 3 | 97.455 | KV452747.1 | 1706992 | 2-scf00053 | 2 |
| AX-157944721 | 3 | 97.455 | KV452747.1 | 1718097 | 2-scf00053 | 2 |
| AX-157944764 | 3 | 97.455 | KV452747.1 | 1759403 | 2-scf00053 | 2 |
| AX-157944803 | 3 | 97.455 | KV452747.1 | 1801315 | 2-scf00053 | 2 |
| AX-157742051 | 3 | 97.455 | KV452747.1 | 1968270 | 2-scf00053 | 2 |

|              |   |        |            |         |            |   |
|--------------|---|--------|------------|---------|------------|---|
| AX-158405883 | 3 | 97.455 | KV452747.1 | 1968775 | 2-scf00053 | 2 |
| AX-157945076 | 3 | 97.455 | KV452747.1 | 2023171 | 2-scf00053 | 2 |
| AX-157944724 | 3 | 97.492 | KV452747.1 | 1723170 | 2-scf00053 | 2 |
| AX-157944726 | 3 | 97.531 | KV452747.1 | 1724705 | 2-scf00053 | 2 |
| AX-157944752 | 3 | 97.531 | KV452747.1 | 1746541 | 2-scf00053 | 2 |
| AX-157944755 | 3 | 97.531 | KV452747.1 | 1750536 | 2-scf00053 | 2 |
| AX-157944758 | 3 | 97.531 | KV452747.1 | 1751968 | 2-scf00053 | 2 |
| AX-157944765 | 3 | 97.662 | KV452747.1 | 1759975 | 2-scf00053 | 2 |
| AX-157716636 | 3 | 97.662 | KV452747.1 | 1767031 | 2-scf00053 | 2 |
| AX-157944809 | 3 | 97.662 | KV452747.1 | 1805777 | 2-scf00053 | 2 |
| AX-157883913 | 3 | 97.666 | KV452747.1 | 929537  | 2-scf00053 | 2 |
| AX-157943939 | 3 | 97.666 | KV452747.1 | 943390  | 2-scf00053 | 2 |
| AX-157944103 | 3 | 97.666 | KV452747.1 | 1096901 | 2-scf00053 | 2 |
| AX-157944130 | 3 | 97.666 | KV452747.1 | 1117839 | 2-scf00053 | 2 |
| AX-158404825 | 3 | 97.666 | KV452747.1 | 1254517 | 2-scf00053 | 2 |
| AX-157944299 | 3 | 97.666 | KV452747.1 | 1292941 | 2-scf00053 | 2 |
| AX-157944394 | 3 | 97.666 | KV452747.1 | 1367177 | 2-scf00053 | 2 |
| AX-157944766 | 3 | 97.666 | KV452747.1 | 1760587 | 2-scf00053 | 2 |
| AX-157944767 | 3 | 97.666 | KV452747.1 | 1761189 | 2-scf00053 | 2 |
| AX-157944772 | 3 | 97.666 | KV452747.1 | 1772433 | 2-scf00053 | 2 |
| AX-157944773 | 3 | 97.666 | KV452747.1 | 1773079 | 2-scf00053 | 2 |
| AX-157944776 | 3 | 97.666 | KV452747.1 | 1773910 | 2-scf00053 | 2 |
| AX-157944779 | 3 | 97.666 | KV452747.1 | 1775001 | 2-scf00053 | 2 |
| AX-157944787 | 3 | 97.666 | KV452747.1 | 1783587 | 2-scf00053 | 2 |
| AX-157944790 | 3 | 97.666 | KV452747.1 | 1786882 | 2-scf00053 | 2 |
| AX-157944794 | 3 | 97.666 | KV452747.1 | 1790270 | 2-scf00053 | 2 |
| AX-157944796 | 3 | 97.666 | KV452747.1 | 1791171 | 2-scf00053 | 2 |
| AX-157944799 | 3 | 97.666 | KV452747.1 | 1792899 | 2-scf00053 | 2 |
| AX-158405878 | 3 | 97.666 | KV452747.1 | 1797189 | 2-scf00053 | 2 |
| AX-157815032 | 3 | 97.666 | KV452747.1 | 1800135 | 2-scf00053 | 2 |
| AX-157944805 | 3 | 97.666 | KV452747.1 | 1801616 | 2-scf00053 | 2 |
| AX-157944806 | 3 | 97.666 | KV452747.1 | 1802340 | 2-scf00053 | 2 |
| AX-157747498 | 3 | 97.666 | KV452747.1 | 1803330 | 2-scf00053 | 2 |
| AX-157944818 | 3 | 97.666 | KV452747.1 | 1815646 | 2-scf00053 | 2 |
| AX-157944872 | 3 | 97.666 | KV452747.1 | 1859459 | 2-scf00053 | 2 |
| AX-157944815 | 3 | 97.776 | KV452747.1 | 1810354 | 2-scf00053 | 2 |
| AX-157944817 | 3 | 97.776 | KV452747.1 | 1813611 | 2-scf00053 | 2 |
| AX-157944819 | 3 | 97.885 | KV452747.1 | 1818604 | 2-scf00053 | 2 |
| AX-157944822 | 3 | 97.885 | KV452747.1 | 1822691 | 2-scf00053 | 2 |
| AX-157944823 | 3 | 97.885 | KV452747.1 | 1823537 | 2-scf00053 | 2 |
| AX-157944837 | 3 | 97.885 | KV452747.1 | 1836931 | 2-scf00053 | 2 |
| AX-157944854 | 3 | 97.885 | KV452747.1 | 1845251 | 2-scf00053 | 2 |
| AX-157944874 | 3 | 97.885 | KV452747.1 | 1860990 | 2-scf00053 | 2 |
| AX-157944946 | 3 | 97.885 | KV452747.1 | 1909095 | 2-scf00053 | 2 |
| AX-157944826 | 3 | 97.901 | KV452747.1 | 1825734 | 2-scf00053 | 2 |
| AX-157815034 | 3 | 97.93  | KV452747.1 | 1828287 | 2-scf00053 | 2 |
| AX-157944827 | 3 | 97.959 | KV452747.1 | 1826079 | 2-scf00053 | 2 |
| AX-157944833 | 3 | 97.959 | KV452747.1 | 1834296 | 2-scf00053 | 2 |
| AX-157944897 | 3 | 97.959 | KV452747.1 | 1874865 | 2-scf00053 | 2 |
| AX-157944843 | 3 | 97.994 | KV452747.1 | 1841147 | 2-scf00053 | 2 |
| AX-157944847 | 3 | 97.994 | KV452747.1 | 1842041 | 2-scf00053 | 2 |

|              |   |        |            |         |            |   |
|--------------|---|--------|------------|---------|------------|---|
| AX-157741827 | 3 | 97.994 | KV452747.1 | 1847729 | 2-scf00053 | 2 |
| AX-157944858 | 3 | 98.106 | KV452747.1 | 1847936 | 2-scf00053 | 2 |
| AX-157944860 | 3 | 98.213 | KV452747.1 | 1849750 | 2-scf00053 | 2 |
| AX-157944865 | 3 | 98.213 | KV452747.1 | 1857625 | 2-scf00053 | 2 |
| AX-157944866 | 3 | 98.213 | KV452747.1 | 1858225 | 2-scf00053 | 2 |
| AX-157944869 | 3 | 98.213 | KV452747.1 | 1858762 | 2-scf00053 | 2 |
| AX-157944877 | 3 | 98.213 | KV452747.1 | 1862281 | 2-scf00053 | 2 |
| AX-157944888 | 3 | 98.213 | KV452747.1 | 1869843 | 2-scf00053 | 2 |
| AX-157944891 | 3 | 98.213 | KV452747.1 | 1870873 | 2-scf00053 | 2 |
| AX-157944893 | 3 | 98.213 | KV452747.1 | 1873210 | 2-scf00053 | 2 |
| AX-157944898 | 3 | 98.213 | KV452747.1 | 1875582 | 2-scf00053 | 2 |
| AX-157815036 | 3 | 98.213 | KV452747.1 | 1879314 | 2-scf00053 | 2 |
| AX-157944904 | 3 | 98.273 | KV452747.1 | 1879901 | 2-scf00053 | 2 |
| AX-157815038 | 3 | 98.322 | KV452747.1 | 1883123 | 2-scf00053 | 2 |
| AX-157753981 | 3 | 98.322 | KV452747.1 | 1884323 | 2-scf00053 | 2 |
| AX-157944912 | 3 | 98.322 | KV452747.1 | 1887993 | 2-scf00053 | 2 |
| AX-157944428 | 3 | 98.541 | KV452747.1 | 1400769 | 2-scf00053 | 2 |
| AX-157944831 | 3 | 98.541 | KV452747.1 | 1832629 | 2-scf00053 | 2 |
| AX-157944834 | 3 | 98.541 | KV452747.1 | 1835694 | 2-scf00053 | 2 |
| AX-157944859 | 3 | 98.541 | KV452747.1 | 1849421 | 2-scf00053 | 2 |
| AX-157944879 | 3 | 98.541 | KV452747.1 | 1863755 | 2-scf00053 | 2 |
| AX-157944916 | 3 | 98.541 | KV452747.1 | 1890422 | 2-scf00053 | 2 |
| AX-158405879 | 3 | 98.541 | KV452747.1 | 1890695 | 2-scf00053 | 2 |
| AX-158415145 | 3 | 98.541 | KV452747.1 | 1890874 | 2-scf00053 | 2 |
| AX-157944918 | 3 | 98.541 | KV452747.1 | 1891145 | 2-scf00053 | 2 |
| AX-157944919 | 3 | 98.541 | KV452747.1 | 1891585 | 2-scf00053 | 2 |
| AX-157944926 | 3 | 98.541 | KV452747.1 | 1893797 | 2-scf00053 | 2 |
| AX-157944932 | 3 | 98.541 | KV452747.1 | 1897343 | 2-scf00053 | 2 |
| AX-157944942 | 3 | 98.541 | KV452747.1 | 1905068 | 2-scf00053 | 2 |
| AX-157944949 | 3 | 98.541 | KV452747.1 | 1912965 | 2-scf00053 | 2 |
| AX-157944958 | 3 | 98.541 | KV452747.1 | 1918195 | 2-scf00053 | 2 |
| AX-157944964 | 3 | 98.541 | KV452747.1 | 1925505 | 2-scf00053 | 2 |
| AX-157944965 | 3 | 98.541 | KV452747.1 | 1926023 | 2-scf00053 | 2 |
| AX-157944968 | 3 | 98.541 | KV452747.1 | 1930169 | 2-scf00053 | 2 |
| AX-157715673 | 3 | 98.541 | KV452747.1 | 1931554 | 2-scf00053 | 2 |
| AX-157716142 | 3 | 98.541 | KV452747.1 | 1932319 | 2-scf00053 | 2 |
| AX-157815041 | 3 | 98.541 | KV452747.1 | 1938912 | 2-scf00053 | 2 |
| AX-157944973 | 3 | 98.541 | KV452747.1 | 1939547 | 2-scf00053 | 2 |
| AX-157944975 | 3 | 98.541 | KV452747.1 | 1940699 | 2-scf00053 | 2 |
| AX-157944982 | 3 | 98.541 | KV452747.1 | 1943398 | 2-scf00053 | 2 |
| AX-157944987 | 3 | 98.541 | KV452747.1 | 1945905 | 2-scf00053 | 2 |
| AX-157772088 | 3 | 98.541 | KV452747.1 | 1947826 | 2-scf00053 | 2 |
| AX-157944990 | 3 | 98.541 | KV452747.1 | 1949413 | 2-scf00053 | 2 |
| AX-157945021 | 3 | 98.541 | KV452747.1 | 1986226 | 2-scf00053 | 2 |
| AX-157945743 | 3 | 98.541 | KV452750.1 | 77906   | 2-scf00055 | 2 |
| AX-157944941 | 3 | 98.651 | KV452747.1 | 1903221 | 2-scf00053 | 2 |
| AX-157944992 | 3 | 98.651 | KV452747.1 | 1962340 | 2-scf00053 | 2 |
| AX-157875233 | 3 | 98.651 | KV452747.1 | 1985167 | 2-scf00053 | 2 |
| AX-157945201 | 3 | 98.651 | KV452747.1 | 2141079 | 2-scf00053 | 2 |
| AX-157944993 | 3 | 98.759 | KV452747.1 | 1967102 | 2-scf00053 | 2 |
| AX-157944999 | 3 | 98.759 | KV452747.1 | 1970156 | 2-scf00053 | 2 |

|              |   |        |             |         |            |    |
|--------------|---|--------|-------------|---------|------------|----|
| AX-157945001 | 3 | 98.759 | KV452747.1  | 1972300 | 2-scf00053 | 2  |
| AX-157945009 | 3 | 98.759 | KV452747.1  | 1977475 | 2-scf00053 | 2  |
| AX-157945012 | 3 | 98.759 | KV452747.1  | 1980427 | 2-scf00053 | 2  |
| AX-157945030 | 3 | 98.759 | KV452747.1  | 1992561 | 2-scf00053 | 2  |
| AX-157945037 | 3 | 98.759 | KV452747.1  | 1998087 | 2-scf00053 | 2  |
| AX-157945041 | 3 | 98.759 | KV452747.1  | 1999270 | 2-scf00053 | 2  |
| AX-157945092 | 3 | 98.759 | KV452747.1  | 2035931 | 2-scf00053 | 2  |
| AX-157945185 | 3 | 98.759 | KV452747.1  | 2124958 | 2-scf00053 | 2  |
| AX-157756613 | 3 | 98.759 | KV452747.1  | 2143027 | 2-scf00053 | 2  |
| AX-157945242 | 3 | 98.759 | KV452747.1  | 2179684 | 2-scf00053 | 2  |
| AX-157945252 | 3 | 98.759 | KV452747.1  | 2193351 | 2-scf00053 | 2  |
| AX-157945740 | 3 | 98.759 | KV452750.1  | 64482   | 2-scf00055 | 2  |
| AX-157742190 | 3 | 98.759 | KV452750.1  | 261687  | 2-scf00055 | 2  |
| AX-157945861 | 3 | 98.759 | KV452750.1  | 306159  | 2-scf00055 | 2  |
| AX-157945890 | 3 | 98.759 | KV452750.1  | 338759  | 2-scf00055 | 2  |
| AX-157706806 | 3 | 98.759 | 3ML01032946 | 218     | scf08578_1 | UN |
| AX-157944835 | 3 | 98.789 | KV452747.1  | 1836150 | 2-scf00053 | 2  |
| AX-157944862 | 3 | 98.789 | KV452747.1  | 1852514 | 2-scf00053 | 2  |
| AX-157815042 | 3 | 98.789 | KV452747.1  | 1950953 | 2-scf00053 | 2  |
| AX-157945014 | 3 | 98.789 | KV452747.1  | 1980899 | 2-scf00053 | 2  |
| AX-157945032 | 3 | 98.789 | KV452747.1  | 1994812 | 2-scf00053 | 2  |
| AX-157945787 | 3 | 98.789 | KV452750.1  | 166334  | 2-scf00055 | 2  |
| AX-157945864 | 3 | 98.789 | KV452750.1  | 308936  | 2-scf00055 | 2  |
| AX-157773264 | 3 | 98.816 | KV452747.1  | 1985801 | 2-scf00053 | 2  |
| AX-157758037 | 3 | 98.816 | KV452747.1  | 1993285 | 2-scf00053 | 2  |
| AX-157945223 | 3 | 98.816 | KV452747.1  | 2160525 | 2-scf00053 | 2  |
| AX-157945238 | 3 | 98.816 | KV452747.1  | 2177230 | 2-scf00053 | 2  |
| AX-157945807 | 3 | 98.816 | KV452750.1  | 228040  | 2-scf00055 | 2  |
| AX-157945022 | 3 | 98.831 | KV452747.1  | 1986354 | 2-scf00053 | 2  |
| AX-157723188 | 3 | 98.831 | KV452747.1  | 2052456 | 2-scf00053 | 2  |
| AX-157945129 | 3 | 98.831 | KV452747.1  | 2062312 | 2-scf00053 | 2  |
| AX-157945207 | 3 | 98.831 | KV452747.1  | 2146442 | 2-scf00053 | 2  |
| AX-157945239 | 3 | 98.831 | KV452747.1  | 2177688 | 2-scf00053 | 2  |
| AX-157945243 | 3 | 98.831 | KV452747.1  | 2180891 | 2-scf00053 | 2  |
| AX-157945724 | 3 | 98.831 | KV452750.1  | 21807   | 2-scf00055 | 2  |
| AX-157945833 | 3 | 98.831 | KV452750.1  | 266148  | 2-scf00055 | 2  |
| AX-157945005 | 3 | 98.849 | KV452747.1  | 1974855 | 2-scf00053 | 2  |
| AX-157945024 | 3 | 98.849 | KV452747.1  | 1987119 | 2-scf00053 | 2  |
| AX-157725725 | 3 | 98.849 | KV452747.1  | 2005595 | 2-scf00053 | 2  |
| AX-157945053 | 3 | 98.849 | KV452747.1  | 2006798 | 2-scf00053 | 2  |
| AX-157945227 | 3 | 98.849 | KV452747.1  | 2164090 | 2-scf00053 | 2  |
| AX-157945244 | 3 | 98.849 | KV452747.1  | 2182069 | 2-scf00053 | 2  |
| AX-157945247 | 3 | 98.849 | KV452747.1  | 2186186 | 2-scf00053 | 2  |
| AX-157945733 | 3 | 98.849 | KV452750.1  | 37486   | 2-scf00055 | 2  |
| AX-157945776 | 3 | 98.849 | KV452750.1  | 138856  | 2-scf00055 | 2  |
| AX-158405913 | 3 | 98.849 | KV452750.1  | 246119  | 2-scf00055 | 2  |
| AX-157945027 | 3 | 98.868 | KV452747.1  | 1991486 | 2-scf00053 | 2  |
| AX-158379386 | 3 | 98.868 | KV452747.1  | 1993100 | 2-scf00053 | 2  |
| AX-157945034 | 3 | 98.868 | KV452747.1  | 1995341 | 2-scf00053 | 2  |
| AX-157945136 | 3 | 98.868 | KV452747.1  | 2066049 | 2-scf00053 | 2  |
| AX-157815045 | 3 | 98.868 | KV452747.1  | 2109746 | 2-scf00053 | 2  |

|              |   |        |            |         |            |   |
|--------------|---|--------|------------|---------|------------|---|
| AX-157945061 | 3 | 98.89  | KV452747.1 | 2014145 | 2-scf00053 | 2 |
| AX-157944940 | 3 | 98.977 | KV452747.1 | 1902596 | 2-scf00053 | 2 |
| AX-157944979 | 3 | 98.977 | KV452747.1 | 1941494 | 2-scf00053 | 2 |
| AX-157945038 | 3 | 98.977 | KV452747.1 | 1998600 | 2-scf00053 | 2 |
| AX-157945043 | 3 | 98.977 | KV452747.1 | 1999646 | 2-scf00053 | 2 |
| AX-157945049 | 3 | 98.977 | KV452747.1 | 2000905 | 2-scf00053 | 2 |
| AX-157945082 | 3 | 98.977 | KV452747.1 | 2026253 | 2-scf00053 | 2 |
| AX-157945083 | 3 | 98.977 | KV452747.1 | 2027045 | 2-scf00053 | 2 |
| AX-157945084 | 3 | 98.977 | KV452747.1 | 2028582 | 2-scf00053 | 2 |
| AX-157945085 | 3 | 98.977 | KV452747.1 | 2030275 | 2-scf00053 | 2 |
| AX-157945089 | 3 | 98.977 | KV452747.1 | 2034838 | 2-scf00053 | 2 |
| AX-157945095 | 3 | 98.977 | KV452747.1 | 2036863 | 2-scf00053 | 2 |
| AX-157945111 | 3 | 98.977 | KV452747.1 | 2045204 | 2-scf00053 | 2 |
| AX-157713938 | 3 | 98.977 | KV452747.1 | 2050331 | 2-scf00053 | 2 |
| AX-157945184 | 3 | 98.977 | KV452747.1 | 2124130 | 2-scf00053 | 2 |
| AX-157945101 | 3 | 99.032 | KV452747.1 | 2040675 | 2-scf00053 | 2 |
| AX-157945108 | 3 | 99.075 | KV452747.1 | 2043082 | 2-scf00053 | 2 |
| AX-157864789 | 3 | 99.172 | KV452747.1 | 2053268 | 2-scf00053 | 2 |
| AX-157945159 | 3 | 99.172 | KV452747.1 | 2098425 | 2-scf00053 | 2 |
| AX-157944471 | 3 | 99.305 | KV452747.1 | 1450157 | 2-scf00053 | 2 |
| AX-157945118 | 3 | 99.305 | KV452747.1 | 2056584 | 2-scf00053 | 2 |
| AX-157945119 | 3 | 99.305 | KV452747.1 | 2060128 | 2-scf00053 | 2 |
| AX-157945125 | 3 | 99.305 | KV452747.1 | 2061151 | 2-scf00053 | 2 |
| AX-157945143 | 3 | 99.305 | KV452747.1 | 2077188 | 2-scf00053 | 2 |
| AX-157945146 | 3 | 99.305 | KV452747.1 | 2082093 | 2-scf00053 | 2 |
| AX-157945154 | 3 | 99.39  | KV452747.1 | 2092069 | 2-scf00053 | 2 |
| AX-157945080 | 3 | 99.47  | KV452747.1 | 2024269 | 2-scf00053 | 2 |
| AX-157945155 | 3 | 99.47  | KV452747.1 | 2093008 | 2-scf00053 | 2 |
| AX-157945156 | 3 | 99.47  | KV452747.1 | 2093900 | 2-scf00053 | 2 |
| AX-157748050 | 3 | 99.47  | KV452747.1 | 2109387 | 2-scf00053 | 2 |
| AX-157945179 | 3 | 99.47  | KV452747.1 | 2115037 | 2-scf00053 | 2 |
| AX-157945183 | 3 | 99.47  | KV452747.1 | 2122056 | 2-scf00053 | 2 |
| AX-157945190 | 3 | 99.47  | KV452747.1 | 2127643 | 2-scf00053 | 2 |
| AX-157945186 | 3 | 99.632 | KV452747.1 | 2125703 | 2-scf00053 | 2 |
| AX-157723373 | 3 | 99.632 | KV452747.1 | 2129847 | 2-scf00053 | 2 |
| AX-157945199 | 3 | 99.632 | KV452747.1 | 2140629 | 2-scf00053 | 2 |
| AX-157945221 | 3 | 99.632 | KV452747.1 | 2159165 | 2-scf00053 | 2 |
| AX-157715053 | 3 | 99.632 | KV452747.1 | 2165984 | 2-scf00053 | 2 |
| AX-157815046 | 3 | 99.632 | KV452747.1 | 2174363 | 2-scf00053 | 2 |
| AX-157815109 | 3 | 99.632 | KV452750.1 | 165826  | 2-scf00055 | 2 |
| AX-157745420 | 3 | 99.632 | KV452750.1 | 185591  | 2-scf00055 | 2 |
| AX-157945823 | 3 | 99.632 | KV452750.1 | 245412  | 2-scf00055 | 2 |
| AX-157945113 | 3 | 99.633 | KV452747.1 | 2045558 | 2-scf00053 | 2 |
| AX-157945140 | 3 | 99.633 | KV452747.1 | 2069633 | 2-scf00053 | 2 |
| AX-157945149 | 3 | 99.633 | KV452747.1 | 2083483 | 2-scf00053 | 2 |
| AX-157945161 | 3 | 99.633 | KV452747.1 | 2099555 | 2-scf00053 | 2 |
| AX-157945169 | 3 | 99.633 | KV452747.1 | 2108021 | 2-scf00053 | 2 |
| AX-157945176 | 3 | 99.633 | KV452747.1 | 2110476 | 2-scf00053 | 2 |
| AX-157945194 | 3 | 99.633 | KV452747.1 | 2134438 | 2-scf00053 | 2 |
| AX-157945215 | 3 | 99.633 | KV452747.1 | 2153331 | 2-scf00053 | 2 |
| AX-157945220 | 3 | 99.633 | KV452747.1 | 2157891 | 2-scf00053 | 2 |



|              |   |         |            |         |            |   |
|--------------|---|---------|------------|---------|------------|---|
| AX-157945225 | 3 | 99.633  | KV452747.1 | 2161925 | 2-scf00053 | 2 |
| AX-157883932 | 3 | 99.633  | KV452747.1 | 2195163 | 2-scf00053 | 2 |
| AX-157945725 | 3 | 99.633  | KV452750.1 | 23314   | 2-scf00055 | 2 |
| AX-157751499 | 3 | 99.633  | KV452750.1 | 189068  | 2-scf00055 | 2 |
| AX-157945828 | 3 | 99.633  | KV452750.1 | 257584  | 2-scf00055 | 2 |
| AX-157945230 | 3 | 99.638  | KV452747.1 | 2164530 | 2-scf00053 | 2 |
| AX-157945232 | 3 | 99.638  | KV452747.1 | 2171502 | 2-scf00053 | 2 |
| AX-157945213 | 3 | 99.642  | KV452747.1 | 2152736 | 2-scf00053 | 2 |
| AX-157945245 | 3 | 99.642  | KV452747.1 | 2182387 | 2-scf00053 | 2 |
| AX-157945767 | 3 | 99.907  | KV452750.1 | 122550  | 2-scf00055 | 2 |
| AX-157714852 | 3 | 100.006 | KV452750.1 | 149556  | 2-scf00055 | 2 |
| AX-157945035 | 3 | 100.046 | KV452747.1 | 1997464 | 2-scf00053 | 2 |
| AX-157945098 | 3 | 100.046 | KV452747.1 | 2039303 | 2-scf00053 | 2 |
| AX-157945789 | 3 | 100.046 | KV452750.1 | 169114  | 2-scf00055 | 2 |
| AX-157772236 | 3 | 100.046 | KV452750.1 | 175195  | 2-scf00055 | 2 |
| AX-157945814 | 3 | 100.046 | KV452750.1 | 233939  | 2-scf00055 | 2 |
| AX-157945816 | 3 | 100.046 | KV452750.1 | 234931  | 2-scf00055 | 2 |
| AX-157945829 | 3 | 100.046 | KV452750.1 | 261965  | 2-scf00055 | 2 |
| AX-157869531 | 3 | 100.132 | KV452750.1 | 248252  | 2-scf00055 | 2 |
| AX-157815110 | 3 | 100.286 | KV452750.1 | 249655  | 2-scf00055 | 2 |
| AX-157744240 | 3 | 100.286 | KV452750.1 | 267421  | 2-scf00055 | 2 |
| AX-157945835 | 3 | 100.286 | KV452750.1 | 268868  | 2-scf00055 | 2 |
| AX-157945836 | 3 | 100.369 | KV452750.1 | 270824  | 2-scf00055 | 2 |
| AX-157945841 | 3 | 100.369 | KV452750.1 | 277647  | 2-scf00055 | 2 |
| AX-157945842 | 3 | 100.369 | KV452750.1 | 278484  | 2-scf00055 | 2 |
| AX-157945843 | 3 | 100.369 | KV452750.1 | 279086  | 2-scf00055 | 2 |
| AX-157741363 | 3 | 100.394 | KV452750.1 | 279017  | 2-scf00055 | 2 |
| AX-157945849 | 3 | 100.682 | KV452750.1 | 291846  | 2-scf00055 | 2 |
| AX-157722165 | 3 | 100.682 | KV452750.1 | 293102  | 2-scf00055 | 2 |
| AX-157945851 | 3 | 100.693 | KV452750.1 | 294112  | 2-scf00055 | 2 |
| AX-157945853 | 3 | 100.915 | KV452750.1 | 296338  | 2-scf00055 | 2 |
| AX-157945854 | 3 | 100.921 | KV452750.1 | 296682  | 2-scf00055 | 2 |
| AX-157869532 | 3 | 100.925 | KV452750.1 | 297466  | 2-scf00055 | 2 |
| AX-157945858 | 3 | 100.93  | KV452750.1 | 303040  | 2-scf00055 | 2 |
| AX-157945862 | 3 | 100.93  | KV452750.1 | 306963  | 2-scf00055 | 2 |
| AX-157945895 | 3 | 100.93  | KV452750.1 | 343737  | 2-scf00055 | 2 |
| AX-157747720 | 3 | 100.993 | KV452750.1 | 310277  | 2-scf00055 | 2 |
| AX-157945056 | 3 | 101.057 | KV452747.1 | 2008794 | 2-scf00053 | 2 |
| AX-157945210 | 3 | 101.057 | KV452747.1 | 2147840 | 2-scf00053 | 2 |
| AX-157945868 | 3 | 101.057 | KV452750.1 | 311304  | 2-scf00055 | 2 |
| AX-157875248 | 3 | 101.057 | KV452750.1 | 311699  | 2-scf00055 | 2 |
| AX-157945870 | 3 | 101.057 | KV452750.1 | 312613  | 2-scf00055 | 2 |
| AX-157721960 | 3 | 101.057 | KV452750.1 | 312953  | 2-scf00055 | 2 |
| AX-157945871 | 3 | 101.057 | KV452750.1 | 313046  | 2-scf00055 | 2 |
| AX-157945874 | 3 | 101.057 | KV452750.1 | 319801  | 2-scf00055 | 2 |
| AX-157945878 | 3 | 101.057 | KV452750.1 | 323243  | 2-scf00055 | 2 |
| AX-157945880 | 3 | 101.057 | KV452750.1 | 325274  | 2-scf00055 | 2 |
| AX-157945888 | 3 | 101.057 | KV452750.1 | 335833  | 2-scf00055 | 2 |
| AX-157945893 | 3 | 101.457 | KV452750.1 | 341342  | 2-scf00055 | 2 |
| AX-157945894 | 3 | 101.457 | KV452750.1 | 342132  | 2-scf00055 | 2 |
| AX-157945900 | 3 | 101.499 | KV452750.1 | 355102  | 2-scf00055 | 2 |

|              |   |         |            |        |            |   |
|--------------|---|---------|------------|--------|------------|---|
| AX-157815124 | 3 | 101.499 | KV452750.1 | 398347 | 2-scf00055 | 2 |
| AX-157945901 | 3 | 101.578 | KV452750.1 | 361169 | 2-scf00055 | 2 |
| AX-157716612 | 3 | 102.083 | KV452750.1 | 394939 | 2-scf00055 | 2 |
| AX-157945929 | 3 | 102.087 | KV452750.1 | 397042 | 2-scf00055 | 2 |
| AX-157701135 | 3 | 102.15  | KV452750.1 | 353866 | 2-scf00055 | 2 |
| AX-157717374 | 3 | 102.15  | KV452750.1 | 397754 | 2-scf00055 | 2 |
| AX-157945933 | 3 | 102.254 | KV452750.1 | 408176 | 2-scf00055 | 2 |
| AX-157945817 | 3 | 102.262 | KV452750.1 | 236063 | 2-scf00055 | 2 |
| AX-157945910 | 3 | 102.262 | KV452750.1 | 372176 | 2-scf00055 | 2 |
| AX-157945934 | 3 | 102.262 | KV452750.1 | 409410 | 2-scf00055 | 2 |
| AX-157945964 | 3 | 102.783 | KV452750.1 | 627455 | 2-scf00055 | 2 |
| AX-157945966 | 3 | 102.783 | KV452750.1 | 628326 | 2-scf00055 | 2 |
| AX-157945967 | 3 | 102.783 | KV452750.1 | 628705 | 2-scf00055 | 2 |
| AX-157945984 | 3 | 102.783 | KV452750.1 | 665063 | 2-scf00055 | 2 |
| AX-157945969 | 3 | 102.784 | KV452750.1 | 631142 | 2-scf00055 | 2 |
| AX-157815126 | 3 | 102.814 | KV452750.1 | 643684 | 2-scf00055 | 2 |
| AX-157742073 | 3 | 102.885 | KV452750.1 | 660846 | 2-scf00055 | 2 |
| AX-157945978 | 3 | 102.9   | KV452750.1 | 661420 | 2-scf00055 | 2 |
| AX-157945987 | 3 | 102.9   | KV452750.1 | 667803 | 2-scf00055 | 2 |
| AX-157945979 | 3 | 102.919 | KV452750.1 | 662271 | 2-scf00055 | 2 |
| AX-157945980 | 3 | 102.919 | KV452750.1 | 662745 | 2-scf00055 | 2 |
| AX-157815128 | 3 | 102.919 | KV452750.1 | 686267 | 2-scf00055 | 2 |
| AX-157945988 | 3 | 103.029 | KV452750.1 | 670793 | 2-scf00055 | 2 |
| AX-157749821 | 3 | 103.029 | KV452750.1 | 671718 | 2-scf00055 | 2 |
| AX-158379390 | 3 | 103.029 | KV452750.1 | 671776 | 2-scf00055 | 2 |
| AX-157945994 | 3 | 103.029 | KV452750.1 | 676063 | 2-scf00055 | 2 |
| AX-157720882 | 3 | 103.029 | KV452750.1 | 679458 | 2-scf00055 | 2 |
| AX-157864799 | 3 | 103.029 | KV452750.1 | 679702 | 2-scf00055 | 2 |
| AX-157945995 | 3 | 103.029 | KV452750.1 | 681488 | 2-scf00055 | 2 |
| AX-157946008 | 3 | 103.029 | KV452750.1 | 700664 | 2-scf00055 | 2 |
| AX-157815127 | 3 | 103.13  | KV452750.1 | 684260 | 2-scf00055 | 2 |
| AX-157945999 | 3 | 103.203 | KV452750.1 | 688407 | 2-scf00055 | 2 |
| AX-157946000 | 3 | 103.252 | KV452750.1 | 688893 | 2-scf00055 | 2 |
| AX-157945993 | 3 | 103.282 | KV452750.1 | 675236 | 2-scf00055 | 2 |
| AX-157946001 | 3 | 103.282 | KV452750.1 | 690966 | 2-scf00055 | 2 |
| AX-157946012 | 3 | 103.282 | KV452750.1 | 706093 | 2-scf00055 | 2 |
| AX-157946010 | 3 | 103.329 | KV452750.1 | 702907 | 2-scf00055 | 2 |
| AX-157946013 | 3 | 103.329 | KV452750.1 | 707383 | 2-scf00055 | 2 |
| AX-157946022 | 3 | 103.329 | KV452750.1 | 715828 | 2-scf00055 | 2 |
| AX-157945992 | 3 | 103.379 | KV452750.1 | 674516 | 2-scf00055 | 2 |
| AX-157747293 | 3 | 103.379 | KV452750.1 | 704470 | 2-scf00055 | 2 |
| AX-157815132 | 3 | 103.379 | KV452750.1 | 708773 | 2-scf00055 | 2 |
| AX-157774079 | 3 | 103.595 | KV452750.1 | 687004 | 2-scf00055 | 2 |
| AX-157946018 | 3 | 103.595 | KV452750.1 | 712678 | 2-scf00055 | 2 |
| AX-157946016 | 3 | 103.607 | KV452750.1 | 711367 | 2-scf00055 | 2 |
| AX-157716633 | 3 | 103.607 | KV452750.1 | 716765 | 2-scf00055 | 2 |
| AX-158390147 | 3 | 103.614 | KV452750.1 | 717108 | 2-scf00055 | 2 |
| AX-157775525 | 3 | 103.911 | KV452750.1 | 717536 | 2-scf00055 | 2 |
| AX-157946064 | 3 | 103.911 | KV452750.1 | 780701 | 2-scf00055 | 2 |
| AX-157724374 | 3 | 104.222 | KV452750.1 | 720505 | 2-scf00055 | 2 |
| AX-157815133 | 3 | 104.222 | KV452750.1 | 720620 | 2-scf00055 | 2 |

|              |   |         |             |         |            |    |
|--------------|---|---------|-------------|---------|------------|----|
| AX-157946026 | 3 | 104.222 | KV452750.1  | 726866  | 2-scf00055 | 2  |
| AX-157738436 | 3 | 104.222 | KV452750.1  | 727361  | 2-scf00055 | 2  |
| AX-157946027 | 3 | 104.312 | KV452750.1  | 729122  | 2-scf00055 | 2  |
| AX-157946029 | 3 | 104.323 | KV452750.1  | 730821  | 2-scf00055 | 2  |
| AX-157946030 | 3 | 104.333 | KV452750.1  | 731109  | 2-scf00055 | 2  |
| AX-157946066 | 3 | 104.333 | KV452750.1  | 784915  | 2-scf00055 | 2  |
| AX-157723647 | 3 | 104.341 | KV452750.1  | 735561  | 2-scf00055 | 2  |
| AX-157946034 | 3 | 104.341 | KV452750.1  | 735929  | 2-scf00055 | 2  |
| AX-157946035 | 3 | 104.341 | KV452750.1  | 736892  | 2-scf00055 | 2  |
| AX-157946038 | 3 | 104.341 | KV452750.1  | 739907  | 2-scf00055 | 2  |
| AX-157946039 | 3 | 104.341 | KV452750.1  | 744100  | 2-scf00055 | 2  |
| AX-157946040 | 3 | 104.341 | KV452750.1  | 744979  | 2-scf00055 | 2  |
| AX-157946044 | 3 | 104.341 | KV452750.1  | 749646  | 2-scf00055 | 2  |
| AX-157946047 | 3 | 104.341 | KV452750.1  | 751727  | 2-scf00055 | 2  |
| AX-157946052 | 3 | 104.341 | KV452750.1  | 763662  | 2-scf00055 | 2  |
| AX-157946054 | 3 | 104.341 | KV452750.1  | 767716  | 2-scf00055 | 2  |
| AX-157946057 | 3 | 104.341 | KV452750.1  | 772490  | 2-scf00055 | 2  |
| AX-157815140 | 3 | 104.341 | KV452750.1  | 772934  | 2-scf00055 | 2  |
| AX-157815141 | 3 | 104.341 | KV452750.1  | 775716  | 2-scf00055 | 2  |
| AX-157946059 | 3 | 104.341 | KV452750.1  | 775860  | 2-scf00055 | 2  |
| AX-157946060 | 3 | 104.341 | KV452750.1  | 777247  | 2-scf00055 | 2  |
| AX-157946062 | 3 | 104.341 | KV452750.1  | 779271  | 2-scf00055 | 2  |
| AX-157946083 | 3 | 104.341 | KV452750.1  | 803646  | 2-scf00055 | 2  |
| AX-157745328 | 3 | 104.341 | KV452750.1  | 808106  | 2-scf00055 | 2  |
| AX-157721492 | 3 | 104.341 | KV452750.1  | 809599  | 2-scf00055 | 2  |
| AX-157946096 | 3 | 104.341 | KV452750.1  | 823329  | 2-scf00055 | 2  |
| AX-157946097 | 3 | 104.341 | KV452750.1  | 827156  | 2-scf00055 | 2  |
| AX-157946107 | 3 | 104.341 | KV452750.1  | 838807  | 2-scf00055 | 2  |
| AX-157697515 | 3 | 104.341 | KV452750.1  | 863338  | 2-scf00055 | 2  |
| AX-157751813 | 3 | 104.341 | KV452750.1  | 868439  | 2-scf00055 | 2  |
| AX-157946136 | 3 | 104.341 | KV452750.1  | 877531  | 2-scf00055 | 2  |
| AX-157946145 | 3 | 104.341 | KV452750.1  | 885145  | 2-scf00055 | 2  |
| AX-157946146 | 3 | 104.341 | KV452750.1  | 885523  | 2-scf00055 | 2  |
| AX-157946149 | 3 | 104.341 | KV452750.1  | 887811  | 2-scf00055 | 2  |
| AX-157946184 | 3 | 104.341 | KV452750.1  | 946044  | 2-scf00055 | 2  |
| AX-157946203 | 3 | 104.341 | KV452750.1  | 1002366 | 2-scf00055 | 2  |
| AX-157946204 | 3 | 104.341 | KV452750.1  | 1003034 | 2-scf00055 | 2  |
| AX-157946205 | 3 | 104.341 | KV452750.1  | 1003904 | 2-scf00055 | 2  |
| AX-157705792 | 3 | 104.343 | 3ML01030888 | 449     | scf06492_1 | UN |
| AX-157946068 | 3 | 104.626 | KV452750.1  | 786587  | 2-scf00055 | 2  |
| AX-157946076 | 3 | 104.816 | KV452750.1  | 797158  | 2-scf00055 | 2  |
| AX-157946085 | 3 | 105.046 | KV452750.1  | 804670  | 2-scf00055 | 2  |
| AX-157719081 | 3 | 105.046 | KV452750.1  | 806213  | 2-scf00055 | 2  |
| AX-157726042 | 3 | 105.046 | KV452750.1  | 806647  | 2-scf00055 | 2  |
| AX-157946087 | 3 | 105.046 | KV452750.1  | 812336  | 2-scf00055 | 2  |
| AX-157946090 | 3 | 105.113 | KV452750.1  | 816031  | 2-scf00055 | 2  |
| AX-157946126 | 3 | 105.113 | KV452750.1  | 867940  | 2-scf00055 | 2  |
| AX-157946100 | 3 | 105.167 | KV452750.1  | 830730  | 2-scf00055 | 2  |
| AX-157946103 | 3 | 105.219 | KV452750.1  | 836690  | 2-scf00055 | 2  |
| AX-157946105 | 3 | 105.219 | KV452750.1  | 837821  | 2-scf00055 | 2  |
| AX-157815142 | 3 | 105.299 | KV452750.1  | 841430  | 2-scf00055 | 2  |

|              |   |         |            |         |            |   |
|--------------|---|---------|------------|---------|------------|---|
| AX-157946113 | 3 | 105.383 | KV452750.1 | 849628  | 2-scf00055 | 2 |
| AX-157946114 | 3 | 105.383 | KV452750.1 | 853312  | 2-scf00055 | 2 |
| AX-157946116 | 3 | 105.465 | KV452750.1 | 856749  | 2-scf00055 | 2 |
| AX-157946117 | 3 | 105.547 | KV452750.1 | 858164  | 2-scf00055 | 2 |
| AX-157946120 | 3 | 105.547 | KV452750.1 | 860044  | 2-scf00055 | 2 |
| AX-158405922 | 3 | 105.547 | KV452750.1 | 860240  | 2-scf00055 | 2 |
| AX-157772708 | 3 | 105.547 | KV452750.1 | 862419  | 2-scf00055 | 2 |
| AX-157946123 | 3 | 105.547 | KV452750.1 | 865994  | 2-scf00055 | 2 |
| AX-157946127 | 3 | 105.547 | KV452750.1 | 868815  | 2-scf00055 | 2 |
| AX-157755000 | 3 | 105.547 | KV452750.1 | 872121  | 2-scf00055 | 2 |
| AX-157946132 | 3 | 105.547 | KV452750.1 | 874360  | 2-scf00055 | 2 |
| AX-157946133 | 3 | 105.547 | KV452750.1 | 874909  | 2-scf00055 | 2 |
| AX-157946138 | 3 | 105.597 | KV452750.1 | 878957  | 2-scf00055 | 2 |
| AX-157946140 | 3 | 105.656 | KV452750.1 | 880307  | 2-scf00055 | 2 |
| AX-157946144 | 3 | 105.656 | KV452750.1 | 884770  | 2-scf00055 | 2 |
| AX-157946147 | 3 | 105.656 | KV452750.1 | 886634  | 2-scf00055 | 2 |
| AX-157946152 | 3 | 105.656 | KV452750.1 | 890932  | 2-scf00055 | 2 |
| AX-157946188 | 3 | 105.656 | KV452750.1 | 961324  | 2-scf00055 | 2 |
| AX-157946195 | 3 | 105.656 | KV452750.1 | 984651  | 2-scf00055 | 2 |
| AX-157946156 | 3 | 105.875 | KV452750.1 | 895752  | 2-scf00055 | 2 |
| AX-157864801 | 3 | 105.875 | KV452750.1 | 896723  | 2-scf00055 | 2 |
| AX-157946159 | 3 | 105.875 | KV452750.1 | 906158  | 2-scf00055 | 2 |
| AX-157946163 | 3 | 106.036 | KV452750.1 | 913065  | 2-scf00055 | 2 |
| AX-157946171 | 3 | 106.196 | KV452750.1 | 927398  | 2-scf00055 | 2 |
| AX-157946178 | 3 | 106.196 | KV452750.1 | 938408  | 2-scf00055 | 2 |
| AX-157946179 | 3 | 106.196 | KV452750.1 | 940102  | 2-scf00055 | 2 |
| AX-157946186 | 3 | 106.196 | KV452750.1 | 954084  | 2-scf00055 | 2 |
| AX-157815145 | 3 | 106.196 | KV452750.1 | 956699  | 2-scf00055 | 2 |
| AX-157744847 | 3 | 106.196 | KV452750.1 | 959857  | 2-scf00055 | 2 |
| AX-157946189 | 3 | 106.196 | KV452750.1 | 961927  | 2-scf00055 | 2 |
| AX-157946190 | 3 | 106.196 | KV452750.1 | 962452  | 2-scf00055 | 2 |
| AX-158405923 | 3 | 106.196 | KV452750.1 | 972813  | 2-scf00055 | 2 |
| AX-157946192 | 3 | 106.196 | KV452750.1 | 981789  | 2-scf00055 | 2 |
| AX-157946197 | 3 | 106.196 | KV452750.1 | 989872  | 2-scf00055 | 2 |
| AX-157946200 | 3 | 106.196 | KV452750.1 | 998982  | 2-scf00055 | 2 |
| AX-157694998 | 3 | 106.218 | KV452750.1 | 909211  | 2-scf00055 | 2 |
| AX-157946193 | 3 | 106.218 | KV452750.1 | 982374  | 2-scf00055 | 2 |
| AX-157946137 | 3 | 106.22  | KV452750.1 | 878377  | 2-scf00055 | 2 |
| AX-157773578 | 3 | 106.995 | KV452750.1 | 996767  | 2-scf00055 | 2 |
| AX-157946201 | 3 | 107.099 | KV452750.1 | 999547  | 2-scf00055 | 2 |
| AX-157946207 | 3 | 107.11  | KV452750.1 | 1007694 | 2-scf00055 | 2 |
| AX-157946209 | 3 | 107.258 | KV452750.1 | 1011116 | 2-scf00055 | 2 |
| AX-157758808 | 3 | 107.258 | KV452750.1 | 1011660 | 2-scf00055 | 2 |
| AX-157946210 | 3 | 107.302 | KV452750.1 | 1012230 | 2-scf00055 | 2 |
| AX-158405928 | 3 | 107.302 | KV452750.1 | 1034889 | 2-scf00055 | 2 |
| AX-157946211 | 3 | 107.404 | KV452750.1 | 1017677 | 2-scf00055 | 2 |
| AX-157946212 | 3 | 107.405 | KV452750.1 | 1018127 | 2-scf00055 | 2 |
| AX-157946215 | 3 | 107.406 | KV452750.1 | 1023562 | 2-scf00055 | 2 |
| AX-157946216 | 3 | 107.406 | KV452750.1 | 1025123 | 2-scf00055 | 2 |
| AX-157946217 | 3 | 107.406 | KV452750.1 | 1025512 | 2-scf00055 | 2 |
| AX-157715334 | 3 | 107.406 | KV452750.1 | 1029489 | 2-scf00055 | 2 |

|              |   |         |            |         |            |   |
|--------------|---|---------|------------|---------|------------|---|
| AX-157815156 | 3 | 107.406 | KV452750.1 | 1030786 | 2-scf00055 | 2 |
| AX-157946219 | 3 | 107.406 | KV452750.1 | 1031261 | 2-scf00055 | 2 |
| AX-157815157 | 3 | 107.406 | KV452750.1 | 1032174 | 2-scf00055 | 2 |
| AX-157946221 | 3 | 107.406 | KV452750.1 | 1033236 | 2-scf00055 | 2 |
| AX-158405927 | 3 | 107.406 | KV452750.1 | 1034661 | 2-scf00055 | 2 |
| AX-157946223 | 3 | 107.406 | KV452750.1 | 1036585 | 2-scf00055 | 2 |
| AX-157946225 | 3 | 107.695 | KV452750.1 | 1041005 | 2-scf00055 | 2 |
| AX-157748456 | 3 | 107.841 | KV452750.1 | 1042382 | 2-scf00055 | 2 |
| AX-157946226 | 3 | 107.844 | KV452750.1 | 1045983 | 2-scf00055 | 2 |
| AX-157946227 | 3 | 107.844 | KV452750.1 | 1047139 | 2-scf00055 | 2 |
| AX-157946229 | 3 | 107.953 | KV452750.1 | 1050720 | 2-scf00055 | 2 |
| AX-157946232 | 3 | 107.953 | KV452750.1 | 1053943 | 2-scf00055 | 2 |
| AX-157815158 | 3 | 107.953 | KV452750.1 | 1054528 | 2-scf00055 | 2 |
| AX-157946233 | 3 | 107.953 | KV452750.1 | 1054816 | 2-scf00055 | 2 |
| AX-157946234 | 3 | 107.953 | KV452750.1 | 1055235 | 2-scf00055 | 2 |
| AX-157946236 | 3 | 107.979 | KV452750.1 | 1057842 | 2-scf00055 | 2 |
| AX-157946242 | 3 | 108.201 | KV452750.1 | 1064683 | 2-scf00055 | 2 |
| AX-157946244 | 3 | 108.202 | KV452750.1 | 1067320 | 2-scf00055 | 2 |
| AX-157946248 | 3 | 108.792 | KV452750.1 | 1074527 | 2-scf00055 | 2 |
| AX-157946249 | 3 | 108.792 | KV452750.1 | 1075864 | 2-scf00055 | 2 |
| AX-157854602 | 3 | 108.792 | KV452750.1 | 1076727 | 2-scf00055 | 2 |
| AX-157746536 | 3 | 108.792 | KV452750.1 | 1078600 | 2-scf00055 | 2 |
| AX-157946254 | 3 | 108.792 | KV452750.1 | 1082448 | 2-scf00055 | 2 |
| AX-157738689 | 3 | 108.795 | KV452750.1 | 1080369 | 2-scf00055 | 2 |
| AX-157946257 | 3 | 109.267 | KV452750.1 | 1087197 | 2-scf00055 | 2 |
| AX-157946258 | 3 | 109.267 | KV452750.1 | 1088265 | 2-scf00055 | 2 |
| AX-157883939 | 3 | 109.267 | KV452750.1 | 1089798 | 2-scf00055 | 2 |
| AX-157946260 | 3 | 109.303 | KV452750.1 | 1092749 | 2-scf00055 | 2 |
| AX-157946261 | 3 | 109.376 | KV452750.1 | 1093108 | 2-scf00055 | 2 |
| AX-157946263 | 3 | 109.376 | KV452750.1 | 1094580 | 2-scf00055 | 2 |
| AX-157946265 | 3 | 109.376 | KV452750.1 | 1096276 | 2-scf00055 | 2 |
| AX-157727743 | 3 | 109.376 | KV452750.1 | 1097690 | 2-scf00055 | 2 |
| AX-157946266 | 3 | 109.384 | KV452750.1 | 1098112 | 2-scf00055 | 2 |
| AX-157946267 | 3 | 109.681 | KV452750.1 | 1103842 | 2-scf00055 | 2 |
| AX-158379393 | 3 | 109.681 | KV452750.1 | 1104870 | 2-scf00055 | 2 |
| AX-157946269 | 3 | 109.683 | KV452750.1 | 1105248 | 2-scf00055 | 2 |
| AX-157946270 | 3 | 110.141 | KV452750.1 | 1106073 | 2-scf00055 | 2 |
| AX-157946272 | 3 | 110.141 | KV452750.1 | 1108268 | 2-scf00055 | 2 |
| AX-157946273 | 3 | 110.141 | KV452750.1 | 1109634 | 2-scf00055 | 2 |
| AX-157946275 | 3 | 110.141 | KV452750.1 | 1110887 | 2-scf00055 | 2 |
| AX-157946276 | 3 | 110.25  | KV452750.1 | 1112046 | 2-scf00055 | 2 |
| AX-157946277 | 3 | 110.25  | KV452750.1 | 1113279 | 2-scf00055 | 2 |
| AX-157946278 | 3 | 110.304 | KV452750.1 | 1113959 | 2-scf00055 | 2 |
| AX-157815162 | 3 | 110.359 | KV452750.1 | 1118098 | 2-scf00055 | 2 |
| AX-157946282 | 3 | 110.528 | KV452750.1 | 1118416 | 2-scf00055 | 2 |
| AX-157946283 | 3 | 110.724 | KV452750.1 | 1120295 | 2-scf00055 | 2 |
| AX-157946284 | 3 | 110.906 | KV452750.1 | 1123437 | 2-scf00055 | 2 |
| AX-157946285 | 3 | 110.906 | KV452750.1 | 1124470 | 2-scf00055 | 2 |
| AX-157815164 | 3 | 110.906 | KV452750.1 | 1125807 | 2-scf00055 | 2 |
| AX-157875261 | 3 | 110.911 | KV452750.1 | 1128511 | 2-scf00055 | 2 |
| AX-157946286 | 3 | 110.916 | KV452750.1 | 1129326 | 2-scf00055 | 2 |

|              |   |         |            |         |            |   |
|--------------|---|---------|------------|---------|------------|---|
| AX-157946298 | 3 | 110.916 | KV452750.1 | 1153541 | 2-scf00055 | 2 |
| AX-157946289 | 3 | 111.638 | KV452750.1 | 1137195 | 2-scf00055 | 2 |
| AX-157710591 | 3 | 111.644 | KV452750.1 | 1138088 | 2-scf00055 | 2 |
| AX-157946296 | 3 | 111.644 | KV452750.1 | 1150444 | 2-scf00055 | 2 |
| AX-157946299 | 3 | 112.346 | KV452750.1 | 1156957 | 2-scf00055 | 2 |
| AX-157946300 | 3 | 112.548 | KV452750.1 | 1159313 | 2-scf00055 | 2 |
| AX-157721009 | 3 | 112.548 | KV452750.1 | 1160369 | 2-scf00055 | 2 |
| AX-158405930 | 3 | 112.548 | KV452750.1 | 1161401 | 2-scf00055 | 2 |
| AX-158405931 | 3 | 112.548 | KV452750.1 | 1162136 | 2-scf00055 | 2 |
| AX-157748735 | 3 | 112.548 | KV452750.1 | 1163293 | 2-scf00055 | 2 |
| AX-157815168 | 3 | 112.548 | KV452750.1 | 1164853 | 2-scf00055 | 2 |
| AX-158379394 | 3 | 112.548 | KV452750.1 | 1171216 | 2-scf00055 | 2 |
| AX-157815169 | 3 | 112.548 | KV452750.1 | 1172908 | 2-scf00055 | 2 |
| AX-157946309 | 3 | 112.716 | KV452750.1 | 1177419 | 2-scf00055 | 2 |
| AX-157946310 | 3 | 112.876 | KV452750.1 | 1178368 | 2-scf00055 | 2 |
| AX-157946312 | 3 | 112.876 | KV452750.1 | 1181228 | 2-scf00055 | 2 |
| AX-157946313 | 3 | 112.876 | KV452750.1 | 1181674 | 2-scf00055 | 2 |
| AX-157946317 | 3 | 112.876 | KV452750.1 | 1184177 | 2-scf00055 | 2 |
| AX-157854604 | 3 | 112.876 | KV452750.1 | 1185372 | 2-scf00055 | 2 |
| AX-157771702 | 3 | 112.876 | KV452750.1 | 1185456 | 2-scf00055 | 2 |
| AX-157946319 | 3 | 112.876 | KV452750.1 | 1189069 | 2-scf00055 | 2 |
| AX-157946318 | 3 | 112.985 | KV452750.1 | 1188420 | 2-scf00055 | 2 |
| AX-157946320 | 3 | 112.985 | KV452750.1 | 1189664 | 2-scf00055 | 2 |
| AX-157946322 | 3 | 112.985 | KV452750.1 | 1192878 | 2-scf00055 | 2 |
| AX-157946324 | 3 | 113.149 | KV452750.1 | 1195823 | 2-scf00055 | 2 |
| AX-157946325 | 3 | 113.149 | KV452750.1 | 1196430 | 2-scf00055 | 2 |
| AX-157946326 | 3 | 113.149 | KV452750.1 | 1198478 | 2-scf00055 | 2 |
| AX-157946327 | 3 | 113.149 | KV452750.1 | 1199316 | 2-scf00055 | 2 |
| AX-157946328 | 3 | 113.192 | KV452750.1 | 1202030 | 2-scf00055 | 2 |
| AX-157854605 | 3 | 113.214 | KV452750.1 | 1204418 | 2-scf00055 | 2 |
| AX-157946330 | 3 | 113.251 | KV452750.1 | 1204875 | 2-scf00055 | 2 |
| AX-157946331 | 3 | 113.311 | KV452750.1 | 1207715 | 2-scf00055 | 2 |
| AX-157946332 | 3 | 113.64  | KV452750.1 | 1210258 | 2-scf00055 | 2 |
| AX-157946333 | 3 | 113.641 | KV452750.1 | 1214726 | 2-scf00055 | 2 |
| AX-157946334 | 3 | 113.641 | KV452750.1 | 1215480 | 2-scf00055 | 2 |
| AX-157946339 | 3 | 113.641 | KV452750.1 | 1221486 | 2-scf00055 | 2 |
| AX-157946340 | 3 | 113.642 | KV452750.1 | 1222137 | 2-scf00055 | 2 |
| AX-157946344 | 3 | 113.87  | KV452750.1 | 1227064 | 2-scf00055 | 2 |
| AX-157946351 | 3 | 113.919 | KV452750.1 | 1234799 | 2-scf00055 | 2 |
| AX-157946352 | 3 | 114.43  | KV452750.1 | 1235365 | 2-scf00055 | 2 |
| AX-157946356 | 3 | 114.84  | KV452750.1 | 1240659 | 2-scf00055 | 2 |
| AX-157946357 | 3 | 114.845 | KV452750.1 | 1241621 | 2-scf00055 | 2 |
| AX-157946358 | 3 | 114.845 | KV452750.1 | 1242351 | 2-scf00055 | 2 |
| AX-158382698 | 3 | 114.845 | KV452750.1 | 1242436 | 2-scf00055 | 2 |
| AX-157946359 | 3 | 114.845 | KV452750.1 | 1243237 | 2-scf00055 | 2 |
| AX-157946361 | 3 | 115.277 | KV452750.1 | 1247275 | 2-scf00055 | 2 |
| AX-157946363 | 3 | 115.282 | KV452750.1 | 1248720 | 2-scf00055 | 2 |
| AX-157946368 | 3 | 115.282 | KV452750.1 | 1254207 | 2-scf00055 | 2 |
| AX-158382700 | 3 | 115.359 | KV452750.1 | 1255385 | 2-scf00055 | 2 |
| AX-157946373 | 3 | 115.359 | KV452750.1 | 1263338 | 2-scf00055 | 2 |
| AX-157946370 | 3 | 115.61  | KV452750.1 | 1257239 | 2-scf00055 | 2 |

|              |   |         |            |         |            |   |
|--------------|---|---------|------------|---------|------------|---|
| AX-157815170 | 3 | 115.61  | KV452750.1 | 1261659 | 2-scf00055 | 2 |
| AX-157946372 | 3 | 115.61  | KV452750.1 | 1262086 | 2-scf00055 | 2 |
| AX-157946374 | 3 | 115.61  | KV452750.1 | 1263788 | 2-scf00055 | 2 |
| AX-157946375 | 3 | 115.61  | KV452750.1 | 1264450 | 2-scf00055 | 2 |
| AX-157946376 | 3 | 115.61  | KV452750.1 | 1265270 | 2-scf00055 | 2 |
| AX-157946377 | 3 | 115.61  | KV452750.1 | 1266935 | 2-scf00055 | 2 |
| AX-157946378 | 3 | 115.61  | KV452750.1 | 1267294 | 2-scf00055 | 2 |
| AX-157946380 | 3 | 115.719 | KV452750.1 | 1270811 | 2-scf00055 | 2 |
| AX-157946382 | 3 | 115.719 | KV452750.1 | 1276338 | 2-scf00055 | 2 |
| AX-157946383 | 3 | 115.719 | KV452750.1 | 1277233 | 2-scf00055 | 2 |
| AX-157946386 | 3 | 115.719 | KV452750.1 | 1282074 | 2-scf00055 | 2 |
| AX-157946389 | 3 | 115.828 | KV452750.1 | 1286332 | 2-scf00055 | 2 |
| AX-157946393 | 3 | 115.828 | KV452750.1 | 1290500 | 2-scf00055 | 2 |
| AX-158390149 | 3 | 115.828 | KV452750.1 | 1291867 | 2-scf00055 | 2 |
| AX-158382701 | 3 | 115.828 | KV452750.1 | 1298056 | 2-scf00055 | 2 |
| AX-158405934 | 3 | 115.937 | KV452750.1 | 1295783 | 2-scf00055 | 2 |
| AX-157946395 | 3 | 115.937 | KV452750.1 | 1296128 | 2-scf00055 | 2 |
| AX-157946417 | 3 | 115.937 | KV452750.1 | 1337245 | 2-scf00055 | 2 |
| AX-157946396 | 3 | 115.986 | KV452750.1 | 1296480 | 2-scf00055 | 2 |
| AX-157946398 | 3 | 115.986 | KV452750.1 | 1300364 | 2-scf00055 | 2 |
| AX-157946397 | 3 | 116.046 | KV452750.1 | 1298548 | 2-scf00055 | 2 |
| AX-157946399 | 3 | 116.156 | KV452750.1 | 1300934 | 2-scf00055 | 2 |
| AX-157946400 | 3 | 116.156 | KV452750.1 | 1301766 | 2-scf00055 | 2 |
| AX-157946401 | 3 | 116.156 | KV452750.1 | 1302273 | 2-scf00055 | 2 |
| AX-157720124 | 3 | 116.156 | KV452750.1 | 1303501 | 2-scf00055 | 2 |
| AX-157946392 | 3 | 116.374 | KV452750.1 | 1289393 | 2-scf00055 | 2 |
| AX-157946402 | 3 | 116.374 | KV452750.1 | 1305408 | 2-scf00055 | 2 |
| AX-157946403 | 3 | 116.374 | KV452750.1 | 1308839 | 2-scf00055 | 2 |
| AX-157946404 | 3 | 116.374 | KV452750.1 | 1311006 | 2-scf00055 | 2 |
| AX-157771862 | 3 | 116.374 | KV452750.1 | 1311722 | 2-scf00055 | 2 |
| AX-157946405 | 3 | 116.374 | KV452750.1 | 1312163 | 2-scf00055 | 2 |
| AX-157727603 | 3 | 116.374 | KV452750.1 | 1321997 | 2-scf00055 | 2 |
| AX-157946413 | 3 | 116.374 | KV452750.1 | 1322543 | 2-scf00055 | 2 |
| AX-157946414 | 3 | 116.374 | KV452750.1 | 1324016 | 2-scf00055 | 2 |
| AX-157946415 | 3 | 116.374 | KV452750.1 | 1326682 | 2-scf00055 | 2 |
| AX-157946416 | 3 | 116.872 | KV452750.1 | 1333482 | 2-scf00055 | 2 |
| AX-157754346 | 3 | 116.877 | KV452750.1 | 1334991 | 2-scf00055 | 2 |
| AX-157946418 | 3 | 116.952 | KV452750.1 | 1338620 | 2-scf00055 | 2 |
| AX-157742248 | 3 | 116.952 | KV452750.1 | 1342437 | 2-scf00055 | 2 |
| AX-158382702 | 3 | 117.139 | KV452750.1 | 1345505 | 2-scf00055 | 2 |
| AX-157946423 | 3 | 117.139 | KV452750.1 | 1347443 | 2-scf00055 | 2 |
| AX-157946424 | 3 | 117.139 | KV452750.1 | 1347851 | 2-scf00055 | 2 |
| AX-157946425 | 3 | 117.139 | KV452750.1 | 1349382 | 2-scf00055 | 2 |
| AX-157946426 | 3 | 117.139 | KV452750.1 | 1351530 | 2-scf00055 | 2 |
| AX-157946428 | 3 | 117.139 | KV452750.1 | 1353677 | 2-scf00055 | 2 |
| AX-157946432 | 3 | 117.139 | KV452750.1 | 1357397 | 2-scf00055 | 2 |
| AX-157946433 | 3 | 117.139 | KV452750.1 | 1358346 | 2-scf00055 | 2 |
| AX-157719668 | 3 | 117.139 | KV452750.1 | 1361502 | 2-scf00055 | 2 |
| AX-157946437 | 3 | 117.465 | KV452750.1 | 1365955 | 2-scf00055 | 2 |
| AX-157946436 | 3 | 117.466 | KV452750.1 | 1364210 | 2-scf00055 | 2 |
| AX-157946438 | 3 | 117.466 | KV452750.1 | 1367306 | 2-scf00055 | 2 |

|              |   |         |            |         |            |   |
|--------------|---|---------|------------|---------|------------|---|
| AX-157946439 | 3 | 117.466 | KV452750.1 | 1367665 | 2-scf00055 | 2 |
| AX-157946440 | 3 | 117.466 | KV452750.1 | 1368539 | 2-scf00055 | 2 |
| AX-157746624 | 3 | 117.466 | KV452750.1 | 1369864 | 2-scf00055 | 2 |
| AX-157741247 | 3 | 117.466 | KV452750.1 | 1370657 | 2-scf00055 | 2 |
| AX-157946441 | 3 | 117.466 | KV452750.1 | 1371374 | 2-scf00055 | 2 |
| AX-157946442 | 3 | 117.466 | KV452750.1 | 1372738 | 2-scf00055 | 2 |
| AX-157946444 | 3 | 117.466 | KV452750.1 | 1374645 | 2-scf00055 | 2 |
| AX-157946445 | 3 | 117.466 | KV452750.1 | 1375298 | 2-scf00055 | 2 |
| AX-157946447 | 3 | 117.466 | KV452750.1 | 1378408 | 2-scf00055 | 2 |
| AX-157946465 | 3 | 117.466 | KV452750.1 | 1404337 | 2-scf00055 | 2 |
| AX-157946466 | 3 | 117.466 | KV452750.1 | 1405754 | 2-scf00055 | 2 |
| AX-157946499 | 3 | 117.466 | KV452750.1 | 1451700 | 2-scf00055 | 2 |
| AX-157946452 | 3 | 118.001 | KV452750.1 | 1388818 | 2-scf00055 | 2 |
| AX-157946456 | 3 | 118.001 | KV452750.1 | 1392830 | 2-scf00055 | 2 |
| AX-157946457 | 3 | 118.001 | KV452750.1 | 1394917 | 2-scf00055 | 2 |
| AX-157946459 | 3 | 118.001 | KV452750.1 | 1398046 | 2-scf00055 | 2 |
| AX-157946461 | 3 | 118.227 | KV452750.1 | 1400287 | 2-scf00055 | 2 |
| AX-157946463 | 3 | 118.338 | KV452750.1 | 1401941 | 2-scf00055 | 2 |
| AX-157946464 | 3 | 118.338 | KV452750.1 | 1402884 | 2-scf00055 | 2 |
| AX-157946467 | 3 | 118.446 | KV452750.1 | 1408601 | 2-scf00055 | 2 |
| AX-157946470 | 3 | 118.67  | KV452750.1 | 1410715 | 2-scf00055 | 2 |
| AX-157946472 | 3 | 118.67  | KV452750.1 | 1413668 | 2-scf00055 | 2 |
| AX-157946473 | 3 | 118.67  | KV452750.1 | 1416959 | 2-scf00055 | 2 |
| AX-157946474 | 3 | 118.67  | KV452750.1 | 1417401 | 2-scf00055 | 2 |
| AX-157946475 | 3 | 118.67  | KV452750.1 | 1418080 | 2-scf00055 | 2 |
| AX-158405936 | 3 | 118.67  | KV452750.1 | 1433705 | 2-scf00055 | 2 |
| AX-157946471 | 3 | 118.779 | KV452750.1 | 1412204 | 2-scf00055 | 2 |
| AX-157946477 | 3 | 118.779 | KV452750.1 | 1419439 | 2-scf00055 | 2 |
| AX-157946478 | 3 | 118.779 | KV452750.1 | 1420098 | 2-scf00055 | 2 |
| AX-157946479 | 3 | 118.779 | KV452750.1 | 1421105 | 2-scf00055 | 2 |
| AX-157946484 | 3 | 118.779 | KV452750.1 | 1426966 | 2-scf00055 | 2 |
| AX-157946482 | 3 | 118.829 | KV452750.1 | 1425376 | 2-scf00055 | 2 |
| AX-157946485 | 3 | 118.888 | KV452750.1 | 1427888 | 2-scf00055 | 2 |
| AX-157946486 | 3 | 118.888 | KV452750.1 | 1429606 | 2-scf00055 | 2 |
| AX-157946491 | 3 | 119.008 | KV452750.1 | 1442627 | 2-scf00055 | 2 |
| AX-157946492 | 3 | 119.107 | KV452750.1 | 1444188 | 2-scf00055 | 2 |
| AX-157946493 | 3 | 119.107 | KV452750.1 | 1444904 | 2-scf00055 | 2 |
| AX-157946494 | 3 | 119.107 | KV452750.1 | 1446127 | 2-scf00055 | 2 |
| AX-157946495 | 3 | 119.107 | KV452750.1 | 1447212 | 2-scf00055 | 2 |
| AX-157946498 | 3 | 119.107 | KV452750.1 | 1450981 | 2-scf00055 | 2 |
| AX-157946497 | 3 | 119.367 | KV452750.1 | 1449966 | 2-scf00055 | 2 |
| AX-157716403 | 3 | 119.367 | KV452750.1 | 1458873 | 2-scf00055 | 2 |
| AX-157946509 | 3 | 119.367 | KV452750.1 | 1466997 | 2-scf00055 | 2 |
| AX-157946501 | 3 | 119.368 | KV452750.1 | 1459452 | 2-scf00055 | 2 |
| AX-157946502 | 3 | 119.427 | KV452750.1 | 1460004 | 2-scf00055 | 2 |
| AX-158404872 | 3 | 119.487 | KV452750.1 | 1464377 | 2-scf00055 | 2 |
| AX-157946507 | 3 | 119.553 | KV452750.1 | 1464566 | 2-scf00055 | 2 |
| AX-157946513 | 3 | 119.937 | KV452750.1 | 1472493 | 2-scf00055 | 2 |
| AX-158382703 | 3 | 119.938 | KV452750.1 | 1461518 | 2-scf00055 | 2 |
| AX-158379395 | 3 | 119.938 | KV452750.1 | 1473653 | 2-scf00055 | 2 |
| AX-157946516 | 3 | 119.938 | KV452750.1 | 1480477 | 2-scf00055 | 2 |



|              |   |         |            |         |            |   |
|--------------|---|---------|------------|---------|------------|---|
| AX-157946517 | 3 | 119.938 | KV452750.1 | 1482328 | 2-scf00055 | 2 |
| AX-157946518 | 3 | 119.938 | KV452750.1 | 1482661 | 2-scf00055 | 2 |
| AX-157946519 | 3 | 119.938 | KV452750.1 | 1483947 | 2-scf00055 | 2 |
| AX-157946520 | 3 | 119.938 | KV452750.1 | 1485012 | 2-scf00055 | 2 |
| AX-157946521 | 3 | 119.938 | KV452750.1 | 1485754 | 2-scf00055 | 2 |
| AX-157946523 | 3 | 119.938 | KV452750.1 | 1488135 | 2-scf00055 | 2 |
| AX-157946524 | 3 | 119.938 | KV452750.1 | 1489137 | 2-scf00055 | 2 |
| AX-157854608 | 3 | 119.938 | KV452750.1 | 1505614 | 2-scf00055 | 2 |
| AX-157695796 | 3 | 119.943 | KV452750.1 | 1474555 | 2-scf00055 | 2 |
| AX-157946525 | 3 | 119.943 | KV452750.1 | 1489738 | 2-scf00055 | 2 |
| AX-157946514 | 3 | 120.004 | KV452750.1 | 1473759 | 2-scf00055 | 2 |
| AX-157946529 | 3 | 120.004 | KV452750.1 | 1495378 | 2-scf00055 | 2 |
| AX-157946531 | 3 | 120.071 | KV452750.1 | 1497098 | 2-scf00055 | 2 |
| AX-157946532 | 3 | 120.149 | KV452750.1 | 1497855 | 2-scf00055 | 2 |
| AX-157946533 | 3 | 120.149 | KV452750.1 | 1499654 | 2-scf00055 | 2 |
| AX-157946540 | 3 | 120.713 | KV452750.1 | 1508843 | 2-scf00055 | 2 |
| AX-157740153 | 3 | 120.716 | KV452750.1 | 1508980 | 2-scf00055 | 2 |
| AX-157719151 | 3 | 120.815 | KV452750.1 | 1510114 | 2-scf00055 | 2 |
| AX-157946553 | 3 | 120.815 | KV452750.1 | 1526176 | 2-scf00055 | 2 |
| AX-157946541 | 3 | 120.968 | KV452750.1 | 1511950 | 2-scf00055 | 2 |
| AX-157946542 | 3 | 120.968 | KV452750.1 | 1512445 | 2-scf00055 | 2 |
| AX-157946543 | 3 | 120.968 | KV452750.1 | 1513805 | 2-scf00055 | 2 |
| AX-157708828 | 3 | 120.968 | KV452750.1 | 1514301 | 2-scf00055 | 2 |
| AX-157946544 | 3 | 120.968 | KV452750.1 | 1515916 | 2-scf00055 | 2 |
| AX-157739844 | 3 | 120.968 | KV452750.1 | 1516488 | 2-scf00055 | 2 |
| AX-157946545 | 3 | 121.1   | KV452750.1 | 1517552 | 2-scf00055 | 2 |
| AX-157946547 | 3 | 121.1   | KV452750.1 | 1519628 | 2-scf00055 | 2 |
| AX-157946548 | 3 | 121.1   | KV452750.1 | 1520793 | 2-scf00055 | 2 |
| AX-157946549 | 3 | 121.1   | KV452750.1 | 1521725 | 2-scf00055 | 2 |
| AX-157883945 | 3 | 121.1   | KV452750.1 | 1535367 | 2-scf00055 | 2 |
| AX-157946550 | 3 | 121.231 | KV452750.1 | 1524422 | 2-scf00055 | 2 |
| AX-157946552 | 3 | 121.41  | KV452750.1 | 1525443 | 2-scf00055 | 2 |
| AX-157946556 | 3 | 121.583 | KV452750.1 | 1531602 | 2-scf00055 | 2 |
| AX-157946558 | 3 | 121.758 | KV452750.1 | 1535209 | 2-scf00055 | 2 |
| AX-157946559 | 3 | 121.758 | KV452750.1 | 1543088 | 2-scf00055 | 2 |
| AX-157946561 | 3 | 121.758 | KV452750.1 | 1545832 | 2-scf00055 | 2 |
| AX-157883944 | 3 | 121.89  | KV452750.1 | 1525012 | 2-scf00055 | 2 |
| AX-157946555 | 3 | 121.89  | KV452750.1 | 1527324 | 2-scf00055 | 2 |
| AX-157946564 | 3 | 121.89  | KV452750.1 | 1552766 | 2-scf00055 | 2 |
| AX-157946565 | 3 | 121.89  | KV452750.1 | 1553963 | 2-scf00055 | 2 |
| AX-157815175 | 3 | 121.89  | KV452750.1 | 1554786 | 2-scf00055 | 2 |
| AX-157946566 | 3 | 121.89  | KV452750.1 | 1557170 | 2-scf00055 | 2 |
| AX-157773070 | 3 | 121.89  | KV452750.1 | 1559777 | 2-scf00055 | 2 |
| AX-157815176 | 3 | 121.89  | KV452750.1 | 1560113 | 2-scf00055 | 2 |
| AX-157716704 | 3 | 121.89  | KV452750.1 | 1562103 | 2-scf00055 | 2 |
| AX-157946569 | 3 | 121.89  | KV452750.1 | 1564652 | 2-scf00055 | 2 |
| AX-158390153 | 3 | 121.89  | KV452750.1 | 1575707 | 2-scf00055 | 2 |
| AX-157946580 | 3 | 121.89  | KV452750.1 | 1583289 | 2-scf00055 | 2 |
| AX-157946579 | 3 | 122.224 | KV452750.1 | 1582447 | 2-scf00055 | 2 |
| AX-157946582 | 3 | 122.585 | KV452750.1 | 1586184 | 2-scf00055 | 2 |
| AX-157946583 | 3 | 122.901 | KV452750.1 | 1588448 | 2-scf00055 | 2 |

|              |   |         |            |         |            |   |
|--------------|---|---------|------------|---------|------------|---|
| AX-157771308 | 3 | 122.901 | KV452750.1 | 1589701 | 2-scf00055 | 2 |
| AX-157946585 | 3 | 122.921 | KV452750.1 | 1590459 | 2-scf00055 | 2 |
| AX-157883946 | 3 | 122.921 | KV452750.1 | 1591408 | 2-scf00055 | 2 |
| AX-157946602 | 3 | 122.921 | KV452750.1 | 1612124 | 2-scf00055 | 2 |
| AX-157946586 | 3 | 123.049 | KV452750.1 | 1591889 | 2-scf00055 | 2 |
| AX-157752683 | 3 | 123.212 | KV452750.1 | 1597530 | 2-scf00055 | 2 |
| AX-157946590 | 3 | 123.482 | KV452750.1 | 1599436 | 2-scf00055 | 2 |
| AX-157946595 | 3 | 123.69  | KV452750.1 | 1603400 | 2-scf00055 | 2 |
| AX-157946597 | 3 | 123.813 | KV452750.1 | 1604926 | 2-scf00055 | 2 |
| AX-157946598 | 3 | 123.976 | KV452750.1 | 1607425 | 2-scf00055 | 2 |
| AX-157946599 | 3 | 123.978 | KV452750.1 | 1608148 | 2-scf00055 | 2 |
| AX-157946600 | 3 | 123.978 | KV452750.1 | 1609007 | 2-scf00055 | 2 |
| AX-157946601 | 3 | 124.099 | KV452750.1 | 1611525 | 2-scf00055 | 2 |
| AX-157946604 | 3 | 124.16  | KV452750.1 | 1613985 | 2-scf00055 | 2 |
| AX-157946605 | 3 | 124.221 | KV452750.1 | 1614750 | 2-scf00055 | 2 |
| AX-157946606 | 3 | 124.403 | KV452750.1 | 1615125 | 2-scf00055 | 2 |
| AX-158405941 | 3 | 124.586 | KV452750.1 | 1616979 | 2-scf00055 | 2 |
| AX-157946607 | 3 | 124.586 | KV452750.1 | 1618868 | 2-scf00055 | 2 |
| AX-158379396 | 3 | 124.586 | KV452750.1 | 1620322 | 2-scf00055 | 2 |
| AX-157946608 | 3 | 124.586 | KV452750.1 | 1620368 | 2-scf00055 | 2 |
| AX-157946609 | 3 | 124.591 | KV452750.1 | 1624158 | 2-scf00055 | 2 |
| AX-157946612 | 3 | 125.02  | KV452750.1 | 1631148 | 2-scf00055 | 2 |
| AX-157716822 | 3 | 125.023 | KV452750.1 | 1632329 | 2-scf00055 | 2 |
| AX-157946614 | 3 | 125.023 | KV452750.1 | 1635739 | 2-scf00055 | 2 |
| AX-157946615 | 3 | 125.023 | KV452750.1 | 1636386 | 2-scf00055 | 2 |
| AX-157718272 | 3 | 125.023 | KV452750.1 | 1636867 | 2-scf00055 | 2 |
| AX-157750064 | 3 | 125.023 | KV452750.1 | 1638254 | 2-scf00055 | 2 |
| AX-158382706 | 3 | 125.023 | KV452750.1 | 1638332 | 2-scf00055 | 2 |
| AX-157946618 | 3 | 125.023 | KV452750.1 | 1641742 | 2-scf00055 | 2 |
| AX-157946619 | 3 | 125.023 | KV452750.1 | 1642445 | 2-scf00055 | 2 |
| AX-157946621 | 3 | 125.023 | KV452750.1 | 1643708 | 2-scf00055 | 2 |
| AX-157946622 | 3 | 125.023 | KV452750.1 | 1644506 | 2-scf00055 | 2 |
| AX-157946623 | 3 | 125.023 | KV452750.1 | 1645360 | 2-scf00055 | 2 |
| AX-157775344 | 3 | 125.023 | KV452750.1 | 1646127 | 2-scf00055 | 2 |
| AX-157946624 | 3 | 125.023 | KV452750.1 | 1647875 | 2-scf00055 | 2 |
| AX-157946628 | 3 | 125.023 | KV452750.1 | 1654504 | 2-scf00055 | 2 |
| AX-157946638 | 3 | 125.023 | KV452750.1 | 1667980 | 2-scf00055 | 2 |
| AX-157946682 | 3 | 125.023 | KV452750.1 | 1716834 | 2-scf00055 | 2 |
| AX-157723405 | 3 | 125.023 | KV452750.1 | 1829837 | 2-scf00055 | 2 |
| AX-157946613 | 3 | 125.319 | KV452750.1 | 1631792 | 2-scf00055 | 2 |
| AX-157740976 | 3 | 125.319 | KV452750.1 | 1655004 | 2-scf00055 | 2 |
| AX-157946643 | 3 | 125.319 | KV452750.1 | 1675154 | 2-scf00055 | 2 |
| AX-157946629 | 3 | 125.457 | KV452750.1 | 1656347 | 2-scf00055 | 2 |
| AX-157756555 | 3 | 125.46  | KV452750.1 | 1662780 | 2-scf00055 | 2 |
| AX-157946634 | 3 | 125.46  | KV452750.1 | 1663300 | 2-scf00055 | 2 |
| AX-157946636 | 3 | 125.46  | KV452750.1 | 1666730 | 2-scf00055 | 2 |
| AX-157946637 | 3 | 125.46  | KV452750.1 | 1666999 | 2-scf00055 | 2 |
| AX-157946639 | 3 | 125.46  | KV452750.1 | 1668917 | 2-scf00055 | 2 |
| AX-157946640 | 3 | 125.46  | KV452750.1 | 1669418 | 2-scf00055 | 2 |
| AX-157946644 | 3 | 125.46  | KV452750.1 | 1675860 | 2-scf00055 | 2 |
| AX-157875272 | 3 | 125.461 | KV452750.1 | 1655284 | 2-scf00055 | 2 |

|              |   |         |            |         |            |   |
|--------------|---|---------|------------|---------|------------|---|
| AX-157946630 | 3 | 125.461 | KV452750.1 | 1658333 | 2-scf00055 | 2 |
| AX-157738495 | 3 | 125.461 | KV452750.1 | 1661397 | 2-scf00055 | 2 |
| AX-157719690 | 3 | 125.461 | KV452750.1 | 1672306 | 2-scf00055 | 2 |
| AX-157946645 | 3 | 125.461 | KV452750.1 | 1677152 | 2-scf00055 | 2 |
| AX-157743276 | 3 | 125.461 | KV452750.1 | 1677848 | 2-scf00055 | 2 |
| AX-157946648 | 3 | 125.461 | KV452750.1 | 1680080 | 2-scf00055 | 2 |
| AX-157875273 | 3 | 125.461 | KV452750.1 | 1709295 | 2-scf00055 | 2 |
| AX-157946675 | 3 | 125.461 | KV452750.1 | 1712858 | 2-scf00055 | 2 |
| AX-157946684 | 3 | 125.461 | KV452750.1 | 1717920 | 2-scf00055 | 2 |
| AX-157946751 | 3 | 125.461 | KV452750.1 | 1832525 | 2-scf00055 | 2 |
| AX-157946775 | 3 | 125.461 | KV452750.1 | 1872501 | 2-scf00055 | 2 |
| AX-157946792 | 3 | 125.461 | KV452750.1 | 1892988 | 2-scf00055 | 2 |
| AX-157946793 | 3 | 125.461 | KV452750.1 | 1893785 | 2-scf00055 | 2 |
| AX-157946804 | 3 | 125.461 | KV452750.1 | 1900841 | 2-scf00055 | 2 |
| AX-157946650 | 3 | 125.679 | KV452750.1 | 1681706 | 2-scf00055 | 2 |
| AX-157946653 | 3 | 125.771 | KV452750.1 | 1683845 | 2-scf00055 | 2 |
| AX-157946641 | 3 | 125.806 | KV452750.1 | 1670056 | 2-scf00055 | 2 |
| AX-157946656 | 3 | 125.806 | KV452750.1 | 1689438 | 2-scf00055 | 2 |
| AX-157946660 | 3 | 125.806 | KV452750.1 | 1693670 | 2-scf00055 | 2 |
| AX-157946672 | 3 | 125.806 | KV452750.1 | 1707654 | 2-scf00055 | 2 |
| AX-157946673 | 3 | 125.806 | KV452750.1 | 1708154 | 2-scf00055 | 2 |
| AX-157721819 | 3 | 125.806 | KV452750.1 | 1720576 | 2-scf00055 | 2 |
| AX-157946611 | 3 | 125.898 | KV452750.1 | 1627553 | 2-scf00055 | 2 |
| AX-158382708 | 3 | 125.898 | KV452750.1 | 1660729 | 2-scf00055 | 2 |
| AX-157946642 | 3 | 125.898 | KV452750.1 | 1671835 | 2-scf00055 | 2 |
| AX-157946661 | 3 | 125.898 | KV452750.1 | 1694702 | 2-scf00055 | 2 |
| AX-157946665 | 3 | 125.898 | KV452750.1 | 1697321 | 2-scf00055 | 2 |
| AX-157946668 | 3 | 125.898 | KV452750.1 | 1703092 | 2-scf00055 | 2 |
| AX-157946677 | 3 | 125.898 | KV452750.1 | 1713958 | 2-scf00055 | 2 |
| AX-157946678 | 3 | 125.898 | KV452750.1 | 1714317 | 2-scf00055 | 2 |
| AX-157946680 | 3 | 125.898 | KV452750.1 | 1715690 | 2-scf00055 | 2 |
| AX-157946681 | 3 | 125.898 | KV452750.1 | 1716104 | 2-scf00055 | 2 |
| AX-157946685 | 3 | 125.898 | KV452750.1 | 1718287 | 2-scf00055 | 2 |
| AX-157946686 | 3 | 125.898 | KV452750.1 | 1722551 | 2-scf00055 | 2 |
| AX-157946688 | 3 | 125.898 | KV452750.1 | 1724262 | 2-scf00055 | 2 |
| AX-157946691 | 3 | 125.898 | KV452750.1 | 1728014 | 2-scf00055 | 2 |
| AX-157946692 | 3 | 125.898 | KV452750.1 | 1730330 | 2-scf00055 | 2 |
| AX-157946693 | 3 | 125.898 | KV452750.1 | 1732091 | 2-scf00055 | 2 |
| AX-157946696 | 3 | 125.898 | KV452750.1 | 1735582 | 2-scf00055 | 2 |
| AX-157946698 | 3 | 125.898 | KV452750.1 | 1738044 | 2-scf00055 | 2 |
| AX-157946701 | 3 | 125.898 | KV452750.1 | 1741521 | 2-scf00055 | 2 |
| AX-157946699 | 3 | 126.116 | KV452750.1 | 1738874 | 2-scf00055 | 2 |
| AX-157946702 | 3 | 126.116 | KV452750.1 | 1743335 | 2-scf00055 | 2 |
| AX-157946705 | 3 | 126.116 | KV452750.1 | 1745286 | 2-scf00055 | 2 |
| AX-157710721 | 3 | 126.116 | KV452750.1 | 1746385 | 2-scf00055 | 2 |
| AX-157946706 | 3 | 126.116 | KV452750.1 | 1746941 | 2-scf00055 | 2 |
| AX-157753959 | 3 | 126.116 | KV452750.1 | 1748548 | 2-scf00055 | 2 |
| AX-157946708 | 3 | 126.116 | KV452750.1 | 1749566 | 2-scf00055 | 2 |
| AX-157946711 | 3 | 126.116 | KV452750.1 | 1751532 | 2-scf00055 | 2 |
| AX-158405943 | 3 | 126.116 | KV452750.1 | 1754761 | 2-scf00055 | 2 |
| AX-157946715 | 3 | 126.116 | KV452750.1 | 1755973 | 2-scf00055 | 2 |

|              |   |         |            |         |            |    |
|--------------|---|---------|------------|---------|------------|----|
| AX-157946721 | 3 | 126.116 | KV452750.1 | 1763730 | 2-scf00055 | 2  |
| AX-157946725 | 3 | 126.116 | KV452750.1 | 1766064 | 2-scf00055 | 2  |
| AX-157946728 | 3 | 126.116 | KV452750.1 | 1769081 | 2-scf00055 | 2  |
| AX-157946730 | 3 | 126.116 | KV452750.1 | 1771758 | 2-scf00055 | 2  |
| AX-157946732 | 3 | 126.116 | KV452750.1 | 1773419 | 2-scf00055 | 2  |
| AX-157946733 | 3 | 126.116 | KV452750.1 | 1773983 | 2-scf00055 | 2  |
| AX-157754079 | 3 | 126.116 | KV452750.1 | 1775868 | 2-scf00055 | 2  |
| AX-157946735 | 3 | 126.116 | KV452750.1 | 1777191 | 2-scf00055 | 2  |
| AX-157946783 | 3 | 126.116 | KV452750.1 | 1881870 | 2-scf00055 | 2  |
| AX-157688010 | 3 | 126.116 | KV452749.1 | 1772    | 2-scf01161 | 2  |
| AX-157704341 | 3 | 126.116 | KV453441.1 | 28983   | scf00758   | UN |
| AX-157741891 | 3 | 126.252 | KV452750.1 | 1836600 | 2-scf00055 | 2  |
| AX-157946709 | 3 | 126.335 | KV452750.1 | 1750631 | 2-scf00055 | 2  |
| AX-157946712 | 3 | 126.335 | KV452750.1 | 1752483 | 2-scf00055 | 2  |
| AX-157946726 | 3 | 126.335 | KV452750.1 | 1766703 | 2-scf00055 | 2  |
| AX-157946750 | 3 | 126.335 | KV452750.1 | 1831670 | 2-scf00055 | 2  |
| AX-157946753 | 3 | 126.335 | KV452750.1 | 1837577 | 2-scf00055 | 2  |
| AX-157946754 | 3 | 126.335 | KV452750.1 | 1839374 | 2-scf00055 | 2  |
| AX-157815180 | 3 | 126.335 | KV452750.1 | 1840477 | 2-scf00055 | 2  |
| AX-157771224 | 3 | 126.335 | KV452750.1 | 1840665 | 2-scf00055 | 2  |
| AX-157748388 | 3 | 126.335 | KV452750.1 | 1841372 | 2-scf00055 | 2  |
| AX-157946757 | 3 | 126.335 | KV452750.1 | 1846904 | 2-scf00055 | 2  |
| AX-157815183 | 3 | 126.335 | KV452750.1 | 1847360 | 2-scf00055 | 2  |
| AX-157815185 | 3 | 126.335 | KV452750.1 | 1849260 | 2-scf00055 | 2  |
| AX-157699380 | 3 | 126.335 | KV452750.1 | 1850225 | 2-scf00055 | 2  |
| AX-157745127 | 3 | 126.335 | KV452750.1 | 1854253 | 2-scf00055 | 2  |
| AX-157946761 | 3 | 126.335 | KV452750.1 | 1857351 | 2-scf00055 | 2  |
| AX-157815187 | 3 | 126.335 | KV452750.1 | 1858249 | 2-scf00055 | 2  |
| AX-157946764 | 3 | 126.335 | KV452750.1 | 1860418 | 2-scf00055 | 2  |
| AX-157946765 | 3 | 126.335 | KV452750.1 | 1861061 | 2-scf00055 | 2  |
| AX-157946766 | 3 | 126.335 | KV452750.1 | 1861829 | 2-scf00055 | 2  |
| AX-157946769 | 3 | 126.335 | KV452750.1 | 1863717 | 2-scf00055 | 2  |
| AX-157946776 | 3 | 126.335 | KV452750.1 | 1873220 | 2-scf00055 | 2  |
| AX-157946773 | 3 | 126.525 | KV452750.1 | 1870610 | 2-scf00055 | 2  |
| AX-157946722 | 3 | 126.595 | KV452750.1 | 1764263 | 2-scf00055 | 2  |
| AX-157946768 | 3 | 126.595 | KV452750.1 | 1863391 | 2-scf00055 | 2  |
| AX-157946782 | 3 | 126.595 | KV452750.1 | 1880986 | 2-scf00055 | 2  |
| AX-157946784 | 3 | 126.595 | KV452750.1 | 1882178 | 2-scf00055 | 2  |
| AX-157854611 | 3 | 126.595 | KV452750.1 | 1885978 | 2-scf00055 | 2  |
| AX-157748262 | 3 | 126.595 | KV452750.1 | 1886661 | 2-scf00055 | 2  |
| AX-157946788 | 3 | 126.595 | KV452750.1 | 1889673 | 2-scf00055 | 2  |
| AX-157946800 | 3 | 126.595 | KV452750.1 | 1898225 | 2-scf00055 | 2  |
| AX-157946790 | 3 | 126.705 | KV452750.1 | 1891249 | 2-scf00055 | 2  |
| AX-157725566 | 3 | 126.705 | KV452750.1 | 1892246 | 2-scf00055 | 2  |
| AX-157946791 | 3 | 126.88  | KV452750.1 | 1892483 | 2-scf00055 | 2  |
| AX-157946797 | 3 | 126.881 | KV452750.1 | 1895901 | 2-scf00055 | 2  |
| AX-157946799 | 3 | 126.881 | KV452750.1 | 1897865 | 2-scf00055 | 2  |
| AX-157946801 | 3 | 126.881 | KV452750.1 | 1899378 | 2-scf00055 | 2  |
| AX-157946802 | 3 | 126.881 | KV452750.1 | 1900241 | 2-scf00055 | 2  |
| AX-157946803 | 3 | 126.881 | KV452750.1 | 1900337 | 2-scf00055 | 2  |
| AX-157946830 | 3 | 126.881 | KV452750.1 | 1949746 | 2-scf00055 | 2  |

|              |   |         |            |         |            |   |
|--------------|---|---------|------------|---------|------------|---|
| AX-158379399 | 3 | 127.099 | KV452750.1 | 1905382 | 2-scf00055 | 2 |
| AX-157946808 | 3 | 127.099 | KV452750.1 | 1909347 | 2-scf00055 | 2 |
| AX-157946809 | 3 | 127.099 | KV452750.1 | 1909735 | 2-scf00055 | 2 |
| AX-157946810 | 3 | 127.099 | KV452750.1 | 1909961 | 2-scf00055 | 2 |
| AX-157946811 | 3 | 127.099 | KV452750.1 | 1910445 | 2-scf00055 | 2 |
| AX-157745441 | 3 | 127.099 | KV452750.1 | 1937785 | 2-scf00055 | 2 |
| AX-157946828 | 3 | 127.099 | KV452750.1 | 1948047 | 2-scf00055 | 2 |
| AX-157946814 | 3 | 127.209 | KV452750.1 | 1914518 | 2-scf00055 | 2 |
| AX-157946806 | 3 | 127.318 | KV452750.1 | 1907802 | 2-scf00055 | 2 |
| AX-157946816 | 3 | 127.318 | KV452750.1 | 1920662 | 2-scf00055 | 2 |
| AX-157946823 | 3 | 127.318 | KV452750.1 | 1935468 | 2-scf00055 | 2 |
| AX-157815197 | 3 | 127.318 | KV452750.1 | 1938940 | 2-scf00055 | 2 |
| AX-158422011 | 3 | 127.318 | KV452750.1 | 1939727 | 2-scf00055 | 2 |
| AX-157946834 | 3 | 127.318 | KV452750.1 | 1954155 | 2-scf00055 | 2 |
| AX-157946835 | 3 | 127.318 | KV452750.1 | 1954653 | 2-scf00055 | 2 |
| AX-157946843 | 3 | 127.318 | KV452750.1 | 1967187 | 2-scf00055 | 2 |
| AX-157815196 | 3 | 127.349 | KV452750.1 | 1937466 | 2-scf00055 | 2 |
| AX-157946838 | 3 | 127.349 | KV452750.1 | 1958982 | 2-scf00055 | 2 |
| AX-157946839 | 3 | 127.388 | KV452750.1 | 1959380 | 2-scf00055 | 2 |
| AX-157740422 | 3 | 127.427 | KV452750.1 | 1963889 | 2-scf00055 | 2 |
| AX-157946841 | 3 | 127.427 | KV452750.1 | 1964554 | 2-scf00055 | 2 |
| AX-157946852 | 3 | 127.427 | KV452750.1 | 1979684 | 2-scf00055 | 2 |
| AX-157946845 | 3 | 127.536 | KV452750.1 | 1969390 | 2-scf00055 | 2 |
| AX-157946847 | 3 | 127.536 | KV452750.1 | 1970751 | 2-scf00055 | 2 |
| AX-157946848 | 3 | 127.536 | KV452750.1 | 1972735 | 2-scf00055 | 2 |
| AX-157714785 | 3 | 127.536 | KV452750.1 | 1975597 | 2-scf00055 | 2 |
| AX-157946850 | 3 | 127.536 | KV452750.1 | 1976497 | 2-scf00055 | 2 |
| AX-157946853 | 3 | 127.536 | KV452750.1 | 1980465 | 2-scf00055 | 2 |
| AX-157946854 | 3 | 127.536 | KV452750.1 | 1981403 | 2-scf00055 | 2 |
| AX-157815201 | 3 | 127.536 | KV452750.1 | 1983137 | 2-scf00055 | 2 |
| AX-157708112 | 3 | 127.536 | KV452750.1 | 1984206 | 2-scf00055 | 2 |
| AX-157946857 | 3 | 127.536 | KV452750.1 | 1986354 | 2-scf00055 | 2 |
| AX-157946829 | 3 | 127.645 | KV452750.1 | 1948638 | 2-scf00055 | 2 |
| AX-157946844 | 3 | 127.645 | KV452750.1 | 1967494 | 2-scf00055 | 2 |
| AX-157815200 | 3 | 127.645 | KV452750.1 | 1978192 | 2-scf00055 | 2 |
| AX-157946855 | 3 | 127.645 | KV452750.1 | 1982105 | 2-scf00055 | 2 |
| AX-157946860 | 3 | 127.645 | KV452750.1 | 1990270 | 2-scf00055 | 2 |
| AX-157946862 | 3 | 127.645 | KV452750.1 | 1993990 | 2-scf00055 | 2 |
| AX-157946863 | 3 | 127.645 | KV452750.1 | 1995060 | 2-scf00055 | 2 |
| AX-157946865 | 3 | 127.645 | KV452750.1 | 1998121 | 2-scf00055 | 2 |
| AX-157946866 | 3 | 127.645 | KV452750.1 | 1998650 | 2-scf00055 | 2 |
| AX-157743330 | 3 | 127.645 | KV452750.1 | 1999241 | 2-scf00055 | 2 |
| AX-157946918 | 3 | 127.645 | KV452750.1 | 2092954 | 2-scf00055 | 2 |
| AX-157946923 | 3 | 127.645 | KV452750.1 | 2096717 | 2-scf00055 | 2 |
| AX-157946963 | 3 | 127.645 | KV452750.1 | 2160064 | 2-scf00055 | 2 |
| AX-157946984 | 3 | 127.645 | KV452750.1 | 2203696 | 2-scf00055 | 2 |
| AX-157869538 | 3 | 127.645 | KV452750.1 | 2231944 | 2-scf00055 | 2 |
| AX-157947006 | 3 | 127.645 | KV452750.1 | 2246134 | 2-scf00055 | 2 |
| AX-157947065 | 3 | 127.645 | KV452750.1 | 2313310 | 2-scf00055 | 2 |
| AX-157947094 | 3 | 127.645 | KV452750.1 | 2353760 | 2-scf00055 | 2 |
| AX-157947095 | 3 | 127.645 | KV452750.1 | 2354208 | 2-scf00055 | 2 |

|              |   |         |             |         |            |    |
|--------------|---|---------|-------------|---------|------------|----|
| AX-157947203 | 3 | 127.645 | KV452750.1  | 2545691 | 2-scf00055 | 2  |
| AX-157946870 | 3 | 127.864 | KV452750.1  | 2004977 | 2-scf00055 | 2  |
| AX-157946868 | 3 | 128.083 | KV452750.1  | 2002156 | 2-scf00055 | 2  |
| AX-157946874 | 3 | 128.083 | KV452750.1  | 2013460 | 2-scf00055 | 2  |
| AX-157946875 | 3 | 128.083 | KV452750.1  | 2013992 | 2-scf00055 | 2  |
| AX-157946876 | 3 | 128.083 | KV452750.1  | 2014554 | 2-scf00055 | 2  |
| AX-157946883 | 3 | 128.083 | KV452750.1  | 2022797 | 2-scf00055 | 2  |
| AX-157883950 | 3 | 128.083 | KV452750.1  | 2027223 | 2-scf00055 | 2  |
| AX-157747180 | 3 | 128.083 | KV452750.1  | 2040766 | 2-scf00055 | 2  |
| AX-157946890 | 3 | 128.083 | KV452750.1  | 2042240 | 2-scf00055 | 2  |
| AX-157815203 | 3 | 128.296 | KV452750.1  | 2044067 | 2-scf00055 | 2  |
| AX-157947038 | 3 | 128.296 | KV452750.1  | 2283311 | 2-scf00055 | 2  |
| AX-157947232 | 3 | 128.296 | KV452750.1  | 2617868 | 2-scf00055 | 2  |
| AX-157946895 | 3 | 128.551 | KV452750.1  | 2051768 | 2-scf00055 | 2  |
| AX-157946877 | 3 | 128.705 | KV452750.1  | 2015982 | 2-scf00055 | 2  |
| AX-157946911 | 3 | 128.705 | KV452750.1  | 2080138 | 2-scf00055 | 2  |
| AX-157854615 | 3 | 128.705 | KV452750.1  | 2081534 | 2-scf00055 | 2  |
| AX-157946912 | 3 | 128.705 | KV452750.1  | 2081677 | 2-scf00055 | 2  |
| AX-157946914 | 3 | 128.773 | KV452750.1  | 2085504 | 2-scf00055 | 2  |
| AX-157946915 | 3 | 128.975 | KV452750.1  | 2087584 | 2-scf00055 | 2  |
| AX-157946919 | 3 | 129.178 | KV452750.1  | 2094093 | 2-scf00055 | 2  |
| AX-157946921 | 3 | 129.178 | KV452750.1  | 2095216 | 2-scf00055 | 2  |
| AX-157946926 | 3 | 129.178 | KV452750.1  | 2102814 | 2-scf00055 | 2  |
| AX-157723169 | 3 | 129.178 | KV452750.1  | 2285288 | 2-scf00055 | 2  |
| AX-157947146 | 3 | 129.178 | KV452750.1  | 2427342 | 2-scf00055 | 2  |
| AX-157707374 | 3 | 129.178 | 3ML01034139 | 262     | scf09810_1 | UN |
| AX-157700642 | 3 | 129.28  | KV452750.1  | 2103235 | 2-scf00055 | 2  |
| AX-157946924 | 3 | 129.396 | KV452750.1  | 2096967 | 2-scf00055 | 2  |
| AX-157946931 | 3 | 129.396 | KV452750.1  | 2109231 | 2-scf00055 | 2  |
| AX-157946933 | 3 | 129.396 | KV452750.1  | 2112352 | 2-scf00055 | 2  |
| AX-157946934 | 3 | 129.396 | KV452750.1  | 2114530 | 2-scf00055 | 2  |
| AX-157946935 | 3 | 129.396 | KV452750.1  | 2115550 | 2-scf00055 | 2  |
| AX-157946936 | 3 | 129.396 | KV452750.1  | 2117510 | 2-scf00055 | 2  |
| AX-157946937 | 3 | 129.396 | KV452750.1  | 2118144 | 2-scf00055 | 2  |
| AX-157740377 | 3 | 129.396 | KV452750.1  | 2118440 | 2-scf00055 | 2  |
| AX-157946939 | 3 | 129.396 | KV452750.1  | 2119585 | 2-scf00055 | 2  |
| AX-158379402 | 3 | 129.396 | KV452750.1  | 2121687 | 2-scf00055 | 2  |
| AX-158382712 | 3 | 129.396 | KV452750.1  | 2124029 | 2-scf00055 | 2  |
| AX-157722699 | 3 | 129.396 | KV452750.1  | 2124190 | 2-scf00055 | 2  |
| AX-157946967 | 3 | 129.396 | KV452750.1  | 2170513 | 2-scf00055 | 2  |
| AX-157815225 | 3 | 129.396 | KV452750.1  | 2214007 | 2-scf00055 | 2  |
| AX-157947049 | 3 | 129.396 | KV452750.1  | 2296354 | 2-scf00055 | 2  |
| AX-157947170 | 3 | 129.396 | KV452750.1  | 2506367 | 2-scf00055 | 2  |
| AX-157946930 | 3 | 129.615 | KV452750.1  | 2108522 | 2-scf00055 | 2  |
| AX-157946946 | 3 | 129.615 | KV452750.1  | 2133342 | 2-scf00055 | 2  |
| AX-157815211 | 3 | 129.615 | KV452750.1  | 2133837 | 2-scf00055 | 2  |
| AX-157946948 | 3 | 129.615 | KV452750.1  | 2136029 | 2-scf00055 | 2  |
| AX-157946949 | 3 | 129.615 | KV452750.1  | 2138979 | 2-scf00055 | 2  |
| AX-157746752 | 3 | 129.615 | KV452750.1  | 2140362 | 2-scf00055 | 2  |
| AX-157946950 | 3 | 129.615 | KV452750.1  | 2141199 | 2-scf00055 | 2  |
| AX-157946951 | 3 | 129.615 | KV452750.1  | 2144694 | 2-scf00055 | 2  |

|              |   |         |            |         |            |   |
|--------------|---|---------|------------|---------|------------|---|
| AX-157946952 | 3 | 129.615 | KV452750.1 | 2146650 | 2-scf00055 | 2 |
| AX-157946953 | 3 | 129.615 | KV452750.1 | 2147172 | 2-scf00055 | 2 |
| AX-157946954 | 3 | 129.615 | KV452750.1 | 2149481 | 2-scf00055 | 2 |
| AX-157946955 | 3 | 129.615 | KV452750.1 | 2149814 | 2-scf00055 | 2 |
| AX-157946956 | 3 | 129.615 | KV452750.1 | 2150355 | 2-scf00055 | 2 |
| AX-157743915 | 3 | 129.615 | KV452750.1 | 2150396 | 2-scf00055 | 2 |
| AX-157946958 | 3 | 129.615 | KV452750.1 | 2151198 | 2-scf00055 | 2 |
| AX-157946959 | 3 | 129.615 | KV452750.1 | 2151408 | 2-scf00055 | 2 |
| AX-157946960 | 3 | 129.615 | KV452750.1 | 2152339 | 2-scf00055 | 2 |
| AX-157946961 | 3 | 129.615 | KV452750.1 | 2157032 | 2-scf00055 | 2 |
| AX-157946965 | 3 | 129.615 | KV452750.1 | 2162303 | 2-scf00055 | 2 |
| AX-157815213 | 3 | 129.615 | KV452750.1 | 2163147 | 2-scf00055 | 2 |
| AX-157815223 | 3 | 129.615 | KV452750.1 | 2201257 | 2-scf00055 | 2 |
| AX-157774684 | 3 | 129.615 | KV452750.1 | 2208639 | 2-scf00055 | 2 |
| AX-157947419 | 3 | 129.615 | KV452750.1 | 3033027 | 2-scf00055 | 2 |
| AX-157815215 | 3 | 129.724 | KV452750.1 | 2167351 | 2-scf00055 | 2 |
| AX-157946825 | 3 | 129.833 | KV452750.1 | 1941044 | 2-scf00055 | 2 |
| AX-157946878 | 3 | 129.833 | KV452750.1 | 2017189 | 2-scf00055 | 2 |
| AX-157713529 | 3 | 129.833 | KV452750.1 | 2105718 | 2-scf00055 | 2 |
| AX-157946929 | 3 | 129.833 | KV452750.1 | 2107275 | 2-scf00055 | 2 |
| AX-157757644 | 3 | 129.833 | KV452750.1 | 2172493 | 2-scf00055 | 2 |
| AX-157721253 | 3 | 129.833 | KV452750.1 | 2174210 | 2-scf00055 | 2 |
| AX-157946970 | 3 | 129.833 | KV452750.1 | 2177818 | 2-scf00055 | 2 |
| AX-157946972 | 3 | 129.833 | KV452750.1 | 2181233 | 2-scf00055 | 2 |
| AX-157946973 | 3 | 129.833 | KV452750.1 | 2184005 | 2-scf00055 | 2 |
| AX-157738707 | 3 | 129.833 | KV452750.1 | 2185357 | 2-scf00055 | 2 |
| AX-157946974 | 3 | 129.833 | KV452750.1 | 2188688 | 2-scf00055 | 2 |
| AX-157748720 | 3 | 129.833 | KV452750.1 | 2189474 | 2-scf00055 | 2 |
| AX-157946977 | 3 | 129.833 | KV452750.1 | 2193397 | 2-scf00055 | 2 |
| AX-157745485 | 3 | 129.833 | KV452750.1 | 2195440 | 2-scf00055 | 2 |
| AX-157815221 | 3 | 129.833 | KV452750.1 | 2196417 | 2-scf00055 | 2 |
| AX-157946979 | 3 | 129.833 | KV452750.1 | 2197580 | 2-scf00055 | 2 |
| AX-157946980 | 3 | 129.833 | KV452750.1 | 2198067 | 2-scf00055 | 2 |
| AX-157815222 | 3 | 129.833 | KV452750.1 | 2199074 | 2-scf00055 | 2 |
| AX-157946982 | 3 | 129.833 | KV452750.1 | 2199352 | 2-scf00055 | 2 |
| AX-157946985 | 3 | 129.833 | KV452750.1 | 2205079 | 2-scf00055 | 2 |
| AX-157815224 | 3 | 129.833 | KV452750.1 | 2208745 | 2-scf00055 | 2 |
| AX-157771918 | 3 | 129.833 | KV452750.1 | 2209078 | 2-scf00055 | 2 |
| AX-157946987 | 3 | 129.833 | KV452750.1 | 2209504 | 2-scf00055 | 2 |
| AX-157946988 | 3 | 129.833 | KV452750.1 | 2210324 | 2-scf00055 | 2 |
| AX-157713053 | 3 | 129.833 | KV452750.1 | 2211421 | 2-scf00055 | 2 |
| AX-157815226 | 3 | 129.833 | KV452750.1 | 2220480 | 2-scf00055 | 2 |
| AX-157946994 | 3 | 129.833 | KV452750.1 | 2221412 | 2-scf00055 | 2 |
| AX-157815227 | 3 | 129.833 | KV452750.1 | 2221845 | 2-scf00055 | 2 |
| AX-157736942 | 3 | 129.833 | KV452750.1 | 2222088 | 2-scf00055 | 2 |
| AX-157946995 | 3 | 129.833 | KV452750.1 | 2222631 | 2-scf00055 | 2 |
| AX-157815228 | 3 | 129.833 | KV452750.1 | 2223579 | 2-scf00055 | 2 |
| AX-157946998 | 3 | 129.833 | KV452750.1 | 2234124 | 2-scf00055 | 2 |
| AX-157946999 | 3 | 129.833 | KV452750.1 | 2234864 | 2-scf00055 | 2 |
| AX-157947008 | 3 | 129.833 | KV452750.1 | 2249829 | 2-scf00055 | 2 |
| AX-157947043 | 3 | 129.833 | KV452750.1 | 2290345 | 2-scf00055 | 2 |

|              |   |         |            |         |            |   |
|--------------|---|---------|------------|---------|------------|---|
| AX-157947057 | 3 | 129.833 | KV452750.1 | 2305812 | 2-scf00055 | 2 |
| AX-157947058 | 3 | 129.833 | KV452750.1 | 2306815 | 2-scf00055 | 2 |
| AX-157739750 | 3 | 129.833 | KV452750.1 | 2309444 | 2-scf00055 | 2 |
| AX-157947068 | 3 | 129.833 | KV452750.1 | 2317348 | 2-scf00055 | 2 |
| AX-157947072 | 3 | 129.833 | KV452750.1 | 2320367 | 2-scf00055 | 2 |
| AX-157947108 | 3 | 129.833 | KV452750.1 | 2373746 | 2-scf00055 | 2 |
| AX-157947120 | 3 | 129.833 | KV452750.1 | 2390483 | 2-scf00055 | 2 |
| AX-157875284 | 3 | 129.833 | KV452750.1 | 2404348 | 2-scf00055 | 2 |
| AX-157720438 | 3 | 129.833 | KV452750.1 | 2422257 | 2-scf00055 | 2 |
| AX-157947184 | 3 | 129.833 | KV452750.1 | 2519399 | 2-scf00055 | 2 |
| AX-157742631 | 3 | 129.833 | KV452750.1 | 2538025 | 2-scf00055 | 2 |
| AX-157947207 | 3 | 129.833 | KV452750.1 | 2556091 | 2-scf00055 | 2 |
| AX-157946996 | 3 | 130.161 | KV452750.1 | 2229454 | 2-scf00055 | 2 |
| AX-157946997 | 3 | 130.161 | KV452750.1 | 2230795 | 2-scf00055 | 2 |
| AX-157815229 | 3 | 130.161 | KV452750.1 | 2236041 | 2-scf00055 | 2 |
| AX-157947000 | 3 | 130.161 | KV452750.1 | 2236542 | 2-scf00055 | 2 |
| AX-157770662 | 3 | 130.161 | KV452750.1 | 2238919 | 2-scf00055 | 2 |
| AX-157947010 | 3 | 130.161 | KV452750.1 | 2252773 | 2-scf00055 | 2 |
| AX-157947012 | 3 | 130.161 | KV452750.1 | 2254731 | 2-scf00055 | 2 |
| AX-157947013 | 3 | 130.161 | KV452750.1 | 2255439 | 2-scf00055 | 2 |
| AX-157947186 | 3 | 130.161 | KV452750.1 | 2521566 | 2-scf00055 | 2 |
| AX-157947019 | 3 | 130.188 | KV452750.1 | 2265715 | 2-scf00055 | 2 |
| AX-157947020 | 3 | 130.216 | KV452750.1 | 2267072 | 2-scf00055 | 2 |
| AX-157947021 | 3 | 130.242 | KV452750.1 | 2268194 | 2-scf00055 | 2 |
| AX-157946822 | 3 | 130.27  | KV452750.1 | 1933369 | 2-scf00055 | 2 |
| AX-157946832 | 3 | 130.27  | KV452750.1 | 1950867 | 2-scf00055 | 2 |
| AX-157946989 | 3 | 130.27  | KV452750.1 | 2211011 | 2-scf00055 | 2 |
| AX-157947004 | 3 | 130.27  | KV452750.1 | 2244275 | 2-scf00055 | 2 |
| AX-157947014 | 3 | 130.27  | KV452750.1 | 2258951 | 2-scf00055 | 2 |
| AX-157947015 | 3 | 130.27  | KV452750.1 | 2259801 | 2-scf00055 | 2 |
| AX-157947017 | 3 | 130.27  | KV452750.1 | 2261122 | 2-scf00055 | 2 |
| AX-157947018 | 3 | 130.27  | KV452750.1 | 2262270 | 2-scf00055 | 2 |
| AX-157753963 | 3 | 130.27  | KV452750.1 | 2266983 | 2-scf00055 | 2 |
| AX-157947022 | 3 | 130.27  | KV452750.1 | 2269955 | 2-scf00055 | 2 |
| AX-157947025 | 3 | 130.27  | KV452750.1 | 2271906 | 2-scf00055 | 2 |
| AX-158379403 | 3 | 130.27  | KV452750.1 | 2272055 | 2-scf00055 | 2 |
| AX-157947027 | 3 | 130.27  | KV452750.1 | 2273519 | 2-scf00055 | 2 |
| AX-157947028 | 3 | 130.27  | KV452750.1 | 2273913 | 2-scf00055 | 2 |
| AX-157947030 | 3 | 130.27  | KV452750.1 | 2276522 | 2-scf00055 | 2 |
| AX-157720721 | 3 | 130.27  | KV452750.1 | 2277976 | 2-scf00055 | 2 |
| AX-157947033 | 3 | 130.27  | KV452750.1 | 2279290 | 2-scf00055 | 2 |
| AX-157947036 | 3 | 130.27  | KV452750.1 | 2281943 | 2-scf00055 | 2 |
| AX-157947040 | 3 | 130.27  | KV452750.1 | 2284478 | 2-scf00055 | 2 |
| AX-157947042 | 3 | 130.27  | KV452750.1 | 2288507 | 2-scf00055 | 2 |
| AX-157742287 | 3 | 130.27  | KV452750.1 | 2289874 | 2-scf00055 | 2 |
| AX-157947046 | 3 | 130.27  | KV452750.1 | 2293596 | 2-scf00055 | 2 |
| AX-157947047 | 3 | 130.27  | KV452750.1 | 2294218 | 2-scf00055 | 2 |
| AX-157947048 | 3 | 130.27  | KV452750.1 | 2295444 | 2-scf00055 | 2 |
| AX-157947052 | 3 | 130.27  | KV452750.1 | 2298804 | 2-scf00055 | 2 |
| AX-157815231 | 3 | 130.27  | KV452750.1 | 2300557 | 2-scf00055 | 2 |
| AX-157947054 | 3 | 130.27  | KV452750.1 | 2301251 | 2-scf00055 | 2 |



|              |   |         |            |         |            |   |
|--------------|---|---------|------------|---------|------------|---|
| AX-157947060 | 3 | 130.27  | KV452750.1 | 2307566 | 2-scf00055 | 2 |
| AX-157947062 | 3 | 130.27  | KV452750.1 | 2311236 | 2-scf00055 | 2 |
| AX-157947066 | 3 | 130.27  | KV452750.1 | 2314080 | 2-scf00055 | 2 |
| AX-157947087 | 3 | 130.27  | KV452750.1 | 2341549 | 2-scf00055 | 2 |
| AX-157947099 | 3 | 130.27  | KV452750.1 | 2360890 | 2-scf00055 | 2 |
| AX-157815235 | 3 | 130.27  | KV452750.1 | 2382046 | 2-scf00055 | 2 |
| AX-157947128 | 3 | 130.27  | KV452750.1 | 2399011 | 2-scf00055 | 2 |
| AX-157947175 | 3 | 130.27  | KV452750.1 | 2510605 | 2-scf00055 | 2 |
| AX-157815244 | 3 | 130.27  | KV452750.1 | 2538923 | 2-scf00055 | 2 |
| AX-157815245 | 3 | 130.27  | KV452750.1 | 2539600 | 2-scf00055 | 2 |
| AX-157947208 | 3 | 130.27  | KV452750.1 | 2557539 | 2-scf00055 | 2 |
| AX-157947214 | 3 | 130.27  | KV452750.1 | 2570168 | 2-scf00055 | 2 |
| AX-157947220 | 3 | 130.27  | KV452750.1 | 2598120 | 2-scf00055 | 2 |
| AX-157947235 | 3 | 130.27  | KV452750.1 | 2623012 | 2-scf00055 | 2 |
| AX-158390162 | 3 | 130.311 | KV452750.1 | 2318503 | 2-scf00055 | 2 |
| AX-157883952 | 3 | 130.311 | KV452750.1 | 2318687 | 2-scf00055 | 2 |
| AX-157883954 | 3 | 130.351 | KV452750.1 | 2323703 | 2-scf00055 | 2 |
| AX-157947067 | 3 | 130.379 | KV452750.1 | 2316739 | 2-scf00055 | 2 |
| AX-157947071 | 3 | 130.379 | KV452750.1 | 2320104 | 2-scf00055 | 2 |
| AX-157947075 | 3 | 130.379 | KV452750.1 | 2325397 | 2-scf00055 | 2 |
| AX-157947077 | 3 | 130.379 | KV452750.1 | 2326535 | 2-scf00055 | 2 |
| AX-157947079 | 3 | 130.379 | KV452750.1 | 2327848 | 2-scf00055 | 2 |
| AX-157883951 | 3 | 130.706 | KV452750.1 | 2226457 | 2-scf00055 | 2 |
| AX-157947064 | 3 | 130.706 | KV452750.1 | 2312851 | 2-scf00055 | 2 |
| AX-157947084 | 3 | 130.706 | KV452750.1 | 2338473 | 2-scf00055 | 2 |
| AX-157739267 | 3 | 130.706 | KV452750.1 | 2526914 | 2-scf00055 | 2 |
| AX-157947200 | 3 | 130.706 | KV452750.1 | 2536376 | 2-scf00055 | 2 |
| AX-157947092 | 3 | 130.707 | KV452750.1 | 2352681 | 2-scf00055 | 2 |
| AX-157947098 | 3 | 130.766 | KV452750.1 | 2360027 | 2-scf00055 | 2 |
| AX-157947143 | 3 | 130.766 | KV452750.1 | 2423265 | 2-scf00055 | 2 |
| AX-157947145 | 3 | 130.766 | KV452750.1 | 2424683 | 2-scf00055 | 2 |
| AX-157749848 | 3 | 130.766 | KV452750.1 | 2588935 | 2-scf00055 | 2 |
| AX-157739418 | 3 | 130.816 | KV452750.1 | 2338850 | 2-scf00055 | 2 |
| AX-157947097 | 3 | 130.816 | KV452750.1 | 2358688 | 2-scf00055 | 2 |
| AX-157947100 | 3 | 130.816 | KV452750.1 | 2361427 | 2-scf00055 | 2 |
| AX-157947101 | 3 | 130.816 | KV452750.1 | 2361901 | 2-scf00055 | 2 |
| AX-157741915 | 3 | 130.816 | KV452750.1 | 2362425 | 2-scf00055 | 2 |
| AX-157947102 | 3 | 130.816 | KV452750.1 | 2363507 | 2-scf00055 | 2 |
| AX-157947105 | 3 | 130.816 | KV452750.1 | 2366543 | 2-scf00055 | 2 |
| AX-157774129 | 3 | 130.816 | KV452750.1 | 2369170 | 2-scf00055 | 2 |
| AX-157724570 | 3 | 130.816 | KV452750.1 | 2377211 | 2-scf00055 | 2 |
| AX-157947112 | 3 | 130.816 | KV452750.1 | 2379282 | 2-scf00055 | 2 |
| AX-157947117 | 3 | 130.816 | KV452750.1 | 2385694 | 2-scf00055 | 2 |
| AX-157947123 | 3 | 130.816 | KV452750.1 | 2395619 | 2-scf00055 | 2 |
| AX-157947124 | 3 | 130.816 | KV452750.1 | 2395941 | 2-scf00055 | 2 |
| AX-157947125 | 3 | 130.816 | KV452750.1 | 2396725 | 2-scf00055 | 2 |
| AX-157947129 | 3 | 130.816 | KV452750.1 | 2399851 | 2-scf00055 | 2 |
| AX-157947130 | 3 | 130.816 | KV452750.1 | 2400665 | 2-scf00055 | 2 |
| AX-157947131 | 3 | 130.816 | KV452750.1 | 2401420 | 2-scf00055 | 2 |
| AX-157947133 | 3 | 130.816 | KV452750.1 | 2403799 | 2-scf00055 | 2 |
| AX-157947136 | 3 | 130.816 | KV452750.1 | 2410290 | 2-scf00055 | 2 |

|              |   |         |            |         |            |   |
|--------------|---|---------|------------|---------|------------|---|
| AX-157754255 | 3 | 130.816 | KV452750.1 | 2411172 | 2-scf00055 | 2 |
| AX-157947137 | 3 | 130.816 | KV452750.1 | 2412129 | 2-scf00055 | 2 |
| AX-157947142 | 3 | 130.816 | KV452750.1 | 2422764 | 2-scf00055 | 2 |
| AX-158379405 | 3 | 130.816 | KV452750.1 | 2426892 | 2-scf00055 | 2 |
| AX-157947147 | 3 | 130.816 | KV452750.1 | 2428064 | 2-scf00055 | 2 |
| AX-157731522 | 3 | 130.816 | KV452750.1 | 2430120 | 2-scf00055 | 2 |
| AX-157947150 | 3 | 130.816 | KV452750.1 | 2430649 | 2-scf00055 | 2 |
| AX-157775411 | 3 | 130.816 | KV452750.1 | 2432304 | 2-scf00055 | 2 |
| AX-157947151 | 3 | 130.816 | KV452750.1 | 2432973 | 2-scf00055 | 2 |
| AX-157815241 | 3 | 130.816 | KV452750.1 | 2491342 | 2-scf00055 | 2 |
| AX-157947163 | 3 | 130.816 | KV452750.1 | 2492916 | 2-scf00055 | 2 |
| AX-157947165 | 3 | 130.816 | KV452750.1 | 2494781 | 2-scf00055 | 2 |
| AX-157947166 | 3 | 130.816 | KV452750.1 | 2495686 | 2-scf00055 | 2 |
| AX-157751968 | 3 | 130.816 | KV452750.1 | 2497623 | 2-scf00055 | 2 |
| AX-157947167 | 3 | 130.816 | KV452750.1 | 2503199 | 2-scf00055 | 2 |
| AX-157947168 | 3 | 130.816 | KV452750.1 | 2503802 | 2-scf00055 | 2 |
| AX-157947169 | 3 | 130.816 | KV452750.1 | 2504777 | 2-scf00055 | 2 |
| AX-158404884 | 3 | 130.816 | KV452750.1 | 2506597 | 2-scf00055 | 2 |
| AX-157947172 | 3 | 130.816 | KV452750.1 | 2507880 | 2-scf00055 | 2 |
| AX-157947174 | 3 | 130.816 | KV452750.1 | 2510189 | 2-scf00055 | 2 |
| AX-157947177 | 3 | 130.816 | KV452750.1 | 2512832 | 2-scf00055 | 2 |
| AX-157947178 | 3 | 130.816 | KV452750.1 | 2513243 | 2-scf00055 | 2 |
| AX-157947179 | 3 | 130.816 | KV452750.1 | 2514065 | 2-scf00055 | 2 |
| AX-157724157 | 3 | 130.816 | KV452750.1 | 2516381 | 2-scf00055 | 2 |
| AX-157947183 | 3 | 130.816 | KV452750.1 | 2519052 | 2-scf00055 | 2 |
| AX-157947187 | 3 | 130.816 | KV452750.1 | 2522411 | 2-scf00055 | 2 |
| AX-157947188 | 3 | 130.816 | KV452750.1 | 2523525 | 2-scf00055 | 2 |
| AX-157815242 | 3 | 130.816 | KV452750.1 | 2523812 | 2-scf00055 | 2 |
| AX-157815243 | 3 | 130.816 | KV452750.1 | 2524180 | 2-scf00055 | 2 |
| AX-157947189 | 3 | 130.816 | KV452750.1 | 2524573 | 2-scf00055 | 2 |
| AX-157947190 | 3 | 130.816 | KV452750.1 | 2525910 | 2-scf00055 | 2 |
| AX-157947191 | 3 | 130.816 | KV452750.1 | 2527180 | 2-scf00055 | 2 |
| AX-157947192 | 3 | 130.816 | KV452750.1 | 2527757 | 2-scf00055 | 2 |
| AX-157947193 | 3 | 130.816 | KV452750.1 | 2528837 | 2-scf00055 | 2 |
| AX-157947194 | 3 | 130.816 | KV452750.1 | 2529224 | 2-scf00055 | 2 |
| AX-157947196 | 3 | 130.816 | KV452750.1 | 2531304 | 2-scf00055 | 2 |
| AX-157947197 | 3 | 130.816 | KV452750.1 | 2532784 | 2-scf00055 | 2 |
| AX-157947201 | 3 | 130.816 | KV452750.1 | 2539742 | 2-scf00055 | 2 |
| AX-157751243 | 3 | 130.816 | KV452750.1 | 2543181 | 2-scf00055 | 2 |
| AX-157947202 | 3 | 130.816 | KV452750.1 | 2544347 | 2-scf00055 | 2 |
| AX-157725491 | 3 | 130.816 | KV452750.1 | 2549491 | 2-scf00055 | 2 |
| AX-157947204 | 3 | 130.816 | KV452750.1 | 2550259 | 2-scf00055 | 2 |
| AX-157756255 | 3 | 130.816 | KV452750.1 | 2550658 | 2-scf00055 | 2 |
| AX-157947206 | 3 | 130.816 | KV452750.1 | 2554033 | 2-scf00055 | 2 |
| AX-157745542 | 3 | 130.816 | KV452750.1 | 2561719 | 2-scf00055 | 2 |
| AX-157815246 | 3 | 130.816 | KV452750.1 | 2562312 | 2-scf00055 | 2 |
| AX-157815247 | 3 | 130.816 | KV452750.1 | 2562391 | 2-scf00055 | 2 |
| AX-157947210 | 3 | 130.816 | KV452750.1 | 2566184 | 2-scf00055 | 2 |
| AX-157947212 | 3 | 130.816 | KV452750.1 | 2568475 | 2-scf00055 | 2 |
| AX-157947213 | 3 | 130.816 | KV452750.1 | 2568995 | 2-scf00055 | 2 |
| AX-157815248 | 3 | 130.816 | KV452750.1 | 2572648 | 2-scf00055 | 2 |

|              |   |         |            |         |            |    |
|--------------|---|---------|------------|---------|------------|----|
| AX-157947215 | 3 | 130.816 | KV452750.1 | 2574940 | 2-scf00055 | 2  |
| AX-157947216 | 3 | 130.816 | KV452750.1 | 2577126 | 2-scf00055 | 2  |
| AX-157947217 | 3 | 130.816 | KV452750.1 | 2579503 | 2-scf00055 | 2  |
| AX-157739301 | 3 | 130.816 | KV452750.1 | 2581897 | 2-scf00055 | 2  |
| AX-157720729 | 3 | 130.816 | KV452750.1 | 2585229 | 2-scf00055 | 2  |
| AX-157716043 | 3 | 130.816 | KV452750.1 | 2587676 | 2-scf00055 | 2  |
| AX-157815249 | 3 | 130.816 | KV452750.1 | 2592351 | 2-scf00055 | 2  |
| AX-157947219 | 3 | 130.816 | KV452750.1 | 2594263 | 2-scf00055 | 2  |
| AX-157947221 | 3 | 130.816 | KV452750.1 | 2598799 | 2-scf00055 | 2  |
| AX-157947222 | 3 | 130.816 | KV452750.1 | 2599428 | 2-scf00055 | 2  |
| AX-157947223 | 3 | 130.816 | KV452750.1 | 2600677 | 2-scf00055 | 2  |
| AX-157947224 | 3 | 130.816 | KV452750.1 | 2601186 | 2-scf00055 | 2  |
| AX-157746832 | 3 | 130.816 | KV452750.1 | 2602837 | 2-scf00055 | 2  |
| AX-157715924 | 3 | 130.816 | KV452750.1 | 2604977 | 2-scf00055 | 2  |
| AX-157815252 | 3 | 130.816 | KV452750.1 | 2607164 | 2-scf00055 | 2  |
| AX-157815254 | 3 | 130.816 | KV452750.1 | 2609547 | 2-scf00055 | 2  |
| AX-157815255 | 3 | 130.816 | KV452750.1 | 2609696 | 2-scf00055 | 2  |
| AX-157947225 | 3 | 130.816 | KV452750.1 | 2610583 | 2-scf00055 | 2  |
| AX-157947226 | 3 | 130.816 | KV452750.1 | 2611912 | 2-scf00055 | 2  |
| AX-157741183 | 3 | 130.816 | KV452750.1 | 2617637 | 2-scf00055 | 2  |
| AX-157947236 | 3 | 130.816 | KV452750.1 | 2627801 | 2-scf00055 | 2  |
| AX-157947237 | 3 | 130.816 | KV452750.1 | 2628203 | 2-scf00055 | 2  |
| AX-157947238 | 3 | 130.816 | KV452750.1 | 2629367 | 2-scf00055 | 2  |
| AX-157947239 | 3 | 130.816 | KV452750.1 | 2629879 | 2-scf00055 | 2  |
| AX-157947240 | 3 | 130.816 | KV452750.1 | 2630962 | 2-scf00055 | 2  |
| AX-157947241 | 3 | 130.816 | KV452750.1 | 2632340 | 2-scf00055 | 2  |
| AX-157947242 | 3 | 130.816 | KV452750.1 | 2632691 | 2-scf00055 | 2  |
| AX-157815259 | 3 | 130.816 | KV452750.1 | 2634449 | 2-scf00055 | 2  |
| AX-157947244 | 3 | 130.816 | KV452750.1 | 2635508 | 2-scf00055 | 2  |
| AX-157947245 | 3 | 130.816 | KV452750.1 | 2636808 | 2-scf00055 | 2  |
| AX-157815260 | 3 | 130.816 | KV452750.1 | 2637481 | 2-scf00055 | 2  |
| AX-157947246 | 3 | 130.816 | KV452750.1 | 2637546 | 2-scf00055 | 2  |
| AX-157947247 | 3 | 130.816 | KV452750.1 | 2639092 | 2-scf00055 | 2  |
| AX-157947248 | 3 | 130.816 | KV452750.1 | 2641329 | 2-scf00055 | 2  |
| AX-157716412 | 3 | 130.816 | KV452750.1 | 2648390 | 2-scf00055 | 2  |
| AX-157947253 | 3 | 130.816 | KV452750.1 | 2648899 | 2-scf00055 | 2  |
| AX-157720288 | 3 | 130.816 | KV452750.1 | 2657970 | 2-scf00055 | 2  |
| AX-157947263 | 3 | 130.816 | KV452750.1 | 2695023 | 2-scf00055 | 2  |
| AX-158382718 | 3 | 130.816 | KV452750.1 | 2739966 | 2-scf00055 | 2  |
| AX-157854619 | 3 | 130.816 | KV452750.1 | 2771384 | 2-scf00055 | 2  |
| AX-157725855 | 3 | 130.816 | KV452750.1 | 2791433 | 2-scf00055 | 2  |
| AX-157947314 | 3 | 130.816 | KV452750.1 | 2808230 | 2-scf00055 | 2  |
| AX-157947322 | 3 | 130.816 | KV452750.1 | 2814946 | 2-scf00055 | 2  |
| AX-157947326 | 3 | 130.816 | KV452750.1 | 2822580 | 2-scf00055 | 2  |
| AX-157746100 | 3 | 130.816 | KV452750.1 | 2832456 | 2-scf00055 | 2  |
| AX-157947343 | 3 | 130.816 | KV452750.1 | 2850448 | 2-scf00055 | 2  |
| AX-157947344 | 3 | 130.816 | KV452750.1 | 2852800 | 2-scf00055 | 2  |
| AX-157815278 | 3 | 130.816 | KV452750.1 | 2863673 | 2-scf00055 | 2  |
| AX-157947350 | 3 | 130.816 | KV452750.1 | 2865662 | 2-scf00055 | 2  |
| AX-157686606 | 3 | 130.816 | KV453408.1 | 10678   | scf00708   | UN |
| AX-157686618 | 3 | 130.816 | KV453410.1 | 39681   | scf00710   | UN |

|              |   |         |            |         |            |   |
|--------------|---|---------|------------|---------|------------|---|
| AX-157947255 | 3 | 130.864 | KV452750.1 | 2650632 | 2-scf00055 | 2 |
| AX-157947085 | 3 | 130.925 | KV452750.1 | 2340474 | 2-scf00055 | 2 |
| AX-157947171 | 3 | 130.925 | KV452750.1 | 2507523 | 2-scf00055 | 2 |
| AX-157747941 | 3 | 130.925 | KV452750.1 | 2561138 | 2-scf00055 | 2 |
| AX-157747241 | 3 | 130.925 | KV452750.1 | 2654373 | 2-scf00055 | 2 |
| AX-157947257 | 3 | 130.925 | KV452750.1 | 2654416 | 2-scf00055 | 2 |
| AX-157947259 | 3 | 130.925 | KV452750.1 | 2656450 | 2-scf00055 | 2 |
| AX-157815263 | 3 | 130.925 | KV452750.1 | 2658447 | 2-scf00055 | 2 |
| AX-158405958 | 3 | 130.925 | KV452750.1 | 2700379 | 2-scf00055 | 2 |
| AX-157947271 | 3 | 130.925 | KV452750.1 | 2727414 | 2-scf00055 | 2 |
| AX-157947273 | 3 | 130.925 | KV452750.1 | 2731164 | 2-scf00055 | 2 |
| AX-157947274 | 3 | 130.925 | KV452750.1 | 2731631 | 2-scf00055 | 2 |
| AX-157947275 | 3 | 130.925 | KV452750.1 | 2733874 | 2-scf00055 | 2 |
| AX-157719171 | 3 | 130.925 | KV452750.1 | 2743267 | 2-scf00055 | 2 |
| AX-157947277 | 3 | 130.925 | KV452750.1 | 2745856 | 2-scf00055 | 2 |
| AX-157947287 | 3 | 130.925 | KV452750.1 | 2769000 | 2-scf00055 | 2 |
| AX-158379408 | 3 | 130.925 | KV452750.1 | 2769214 | 2-scf00055 | 2 |
| AX-157947288 | 3 | 130.925 | KV452750.1 | 2769408 | 2-scf00055 | 2 |
| AX-157947289 | 3 | 130.925 | KV452750.1 | 2770192 | 2-scf00055 | 2 |
| AX-157947291 | 3 | 130.925 | KV452750.1 | 2772832 | 2-scf00055 | 2 |
| AX-157854620 | 3 | 130.925 | KV452750.1 | 2774375 | 2-scf00055 | 2 |
| AX-157947292 | 3 | 130.925 | KV452750.1 | 2775026 | 2-scf00055 | 2 |
| AX-157947296 | 3 | 130.925 | KV452750.1 | 2776786 | 2-scf00055 | 2 |
| AX-157947299 | 3 | 130.925 | KV452750.1 | 2780883 | 2-scf00055 | 2 |
| AX-157947301 | 3 | 130.925 | KV452750.1 | 2782380 | 2-scf00055 | 2 |
| AX-157947303 | 3 | 130.925 | KV452750.1 | 2783283 | 2-scf00055 | 2 |
| AX-157947306 | 3 | 130.925 | KV452750.1 | 2786240 | 2-scf00055 | 2 |
| AX-157815266 | 3 | 130.925 | KV452750.1 | 2787711 | 2-scf00055 | 2 |
| AX-157947308 | 3 | 130.925 | KV452750.1 | 2790249 | 2-scf00055 | 2 |
| AX-157947309 | 3 | 130.925 | KV452750.1 | 2798571 | 2-scf00055 | 2 |
| AX-157947315 | 3 | 130.925 | KV452750.1 | 2809758 | 2-scf00055 | 2 |
| AX-157947316 | 3 | 130.925 | KV452750.1 | 2810065 | 2-scf00055 | 2 |
| AX-157947317 | 3 | 130.925 | KV452750.1 | 2810448 | 2-scf00055 | 2 |
| AX-157947321 | 3 | 130.925 | KV452750.1 | 2814604 | 2-scf00055 | 2 |
| AX-157815269 | 3 | 130.925 | KV452750.1 | 2815197 | 2-scf00055 | 2 |
| AX-157815271 | 3 | 130.925 | KV452750.1 | 2816573 | 2-scf00055 | 2 |
| AX-157815272 | 3 | 130.925 | KV452750.1 | 2817850 | 2-scf00055 | 2 |
| AX-157947324 | 3 | 130.925 | KV452750.1 | 2822006 | 2-scf00055 | 2 |
| AX-157869539 | 3 | 130.925 | KV452750.1 | 2824041 | 2-scf00055 | 2 |
| AX-157947329 | 3 | 130.925 | KV452750.1 | 2826788 | 2-scf00055 | 2 |
| AX-157815273 | 3 | 130.925 | KV452750.1 | 2827105 | 2-scf00055 | 2 |
| AX-157947330 | 3 | 130.925 | KV452750.1 | 2827898 | 2-scf00055 | 2 |
| AX-157947331 | 3 | 130.925 | KV452750.1 | 2828622 | 2-scf00055 | 2 |
| AX-157716170 | 3 | 130.925 | KV452750.1 | 2830842 | 2-scf00055 | 2 |
| AX-157716789 | 3 | 130.925 | KV452750.1 | 2834513 | 2-scf00055 | 2 |
| AX-157947334 | 3 | 130.925 | KV452750.1 | 2835087 | 2-scf00055 | 2 |
| AX-157947339 | 3 | 130.925 | KV452750.1 | 2843300 | 2-scf00055 | 2 |
| AX-157744272 | 3 | 130.925 | KV452750.1 | 2846919 | 2-scf00055 | 2 |
| AX-157947345 | 3 | 130.925 | KV452750.1 | 2854551 | 2-scf00055 | 2 |
| AX-157947346 | 3 | 130.925 | KV452750.1 | 2855228 | 2-scf00055 | 2 |
| AX-157947349 | 3 | 130.925 | KV452750.1 | 2864616 | 2-scf00055 | 2 |

|              |   |         |            |         |            |    |
|--------------|---|---------|------------|---------|------------|----|
| AX-157947359 | 3 | 130.925 | KV452750.1 | 2885946 | 2-scf00055 | 2  |
| AX-157947361 | 3 | 130.925 | KV452750.1 | 2888298 | 2-scf00055 | 2  |
| AX-157815283 | 3 | 130.925 | KV452750.1 | 2909826 | 2-scf00055 | 2  |
| AX-157947373 | 3 | 130.925 | KV452750.1 | 2910751 | 2-scf00055 | 2  |
| AX-157686607 | 3 | 130.925 | KV453408.1 | 16014   | scf00708   | UN |
| AX-157686619 | 3 | 130.925 | KV453410.1 | 40147   | scf00710   | UN |
| AX-157947338 | 3 | 130.947 | KV452750.1 | 2842387 | 2-scf00055 | 2  |
| AX-157947342 | 3 | 130.98  | KV452750.1 | 2850176 | 2-scf00055 | 2  |
| AX-157854622 | 3 | 131.035 | KV452750.1 | 2854831 | 2-scf00055 | 2  |
| AX-157815277 | 3 | 131.035 | KV452750.1 | 2863280 | 2-scf00055 | 2  |
| AX-157815280 | 3 | 131.201 | KV452750.1 | 2880470 | 2-scf00055 | 2  |
| AX-157738382 | 3 | 131.253 | KV452750.1 | 2586589 | 2-scf00055 | 2  |
| AX-157775316 | 3 | 131.253 | KV452750.1 | 2765069 | 2-scf00055 | 2  |
| AX-157947358 | 3 | 131.253 | KV452750.1 | 2884714 | 2-scf00055 | 2  |
| AX-157947363 | 3 | 131.253 | KV452750.1 | 2890067 | 2-scf00055 | 2  |
| AX-157947364 | 3 | 131.253 | KV452750.1 | 2890953 | 2-scf00055 | 2  |
| AX-157947365 | 3 | 131.253 | KV452750.1 | 2892387 | 2-scf00055 | 2  |
| AX-157947366 | 3 | 131.253 | KV452750.1 | 2893668 | 2-scf00055 | 2  |
| AX-157947367 | 3 | 131.253 | KV452750.1 | 2894397 | 2-scf00055 | 2  |
| AX-157947368 | 3 | 131.253 | KV452750.1 | 2897262 | 2-scf00055 | 2  |
| AX-157815281 | 3 | 131.253 | KV452750.1 | 2898175 | 2-scf00055 | 2  |
| AX-157721516 | 3 | 131.253 | KV452750.1 | 2908251 | 2-scf00055 | 2  |
| AX-157815285 | 3 | 131.253 | KV452750.1 | 2910297 | 2-scf00055 | 2  |
| AX-157947374 | 3 | 131.253 | KV452750.1 | 2911913 | 2-scf00055 | 2  |
| AX-157947375 | 3 | 131.253 | KV452750.1 | 2914173 | 2-scf00055 | 2  |
| AX-157717972 | 3 | 131.253 | KV452750.1 | 2966607 | 2-scf00055 | 2  |
| AX-157815291 | 3 | 131.253 | KV452750.1 | 3002294 | 2-scf00055 | 2  |
| AX-157947447 | 3 | 131.253 | KV452750.1 | 3067212 | 2-scf00055 | 2  |
| AX-157686616 | 3 | 131.253 | KV453410.1 | 37918   | scf00710   | UN |
| AX-157680237 | 3 | 131.253 | KV453410.1 | 41620   | scf00710   | UN |
| AX-157947341 | 3 | 131.471 | KV452750.1 | 2849322 | 2-scf00055 | 2  |
| AX-157947386 | 3 | 131.471 | KV452750.1 | 2965784 | 2-scf00055 | 2  |
| AX-157947388 | 3 | 131.471 | KV452750.1 | 2972469 | 2-scf00055 | 2  |
| AX-157862809 | 3 | 131.471 | KV452750.1 | 2974869 | 2-scf00055 | 2  |
| AX-157947390 | 3 | 131.471 | KV452750.1 | 2978935 | 2-scf00055 | 2  |
| AX-157815287 | 3 | 131.471 | KV452750.1 | 2979447 | 2-scf00055 | 2  |
| AX-157751452 | 3 | 131.471 | KV452750.1 | 2979660 | 2-scf00055 | 2  |
| AX-157815288 | 3 | 131.471 | KV452750.1 | 2981113 | 2-scf00055 | 2  |
| AX-157947391 | 3 | 131.471 | KV452750.1 | 2981652 | 2-scf00055 | 2  |
| AX-157947392 | 3 | 131.471 | KV452750.1 | 2984921 | 2-scf00055 | 2  |
| AX-157815293 | 3 | 131.471 | KV452750.1 | 3052092 | 2-scf00055 | 2  |
| AX-157815296 | 3 | 131.471 | KV452750.1 | 3073412 | 2-scf00055 | 2  |
| AX-157947387 | 3 | 131.69  | KV452750.1 | 2971189 | 2-scf00055 | 2  |
| AX-157947393 | 3 | 131.69  | KV452750.1 | 2985209 | 2-scf00055 | 2  |
| AX-157947394 | 3 | 131.69  | KV452750.1 | 2986387 | 2-scf00055 | 2  |
| AX-157947396 | 3 | 131.69  | KV452750.1 | 2989547 | 2-scf00055 | 2  |
| AX-157947397 | 3 | 131.69  | KV452750.1 | 2990857 | 2-scf00055 | 2  |
| AX-157875291 | 3 | 131.69  | KV452750.1 | 2992091 | 2-scf00055 | 2  |
| AX-157947398 | 3 | 131.69  | KV452750.1 | 2993666 | 2-scf00055 | 2  |
| AX-157743911 | 3 | 131.69  | KV452750.1 | 2995961 | 2-scf00055 | 2  |
| AX-157947399 | 3 | 131.69  | KV452750.1 | 2996332 | 2-scf00055 | 2  |

|              |   |         |            |         |            |   |
|--------------|---|---------|------------|---------|------------|---|
| AX-157815290 | 3 | 131.69  | KV452750.1 | 2996688 | 2-scf00055 | 2 |
| AX-157947400 | 3 | 131.69  | KV452750.1 | 2997828 | 2-scf00055 | 2 |
| AX-157947402 | 3 | 131.69  | KV452750.1 | 2998775 | 2-scf00055 | 2 |
| AX-157947403 | 3 | 131.69  | KV452750.1 | 3003841 | 2-scf00055 | 2 |
| AX-157947405 | 3 | 131.69  | KV452750.1 | 3005606 | 2-scf00055 | 2 |
| AX-157883961 | 3 | 131.69  | KV452750.1 | 3028934 | 2-scf00055 | 2 |
| AX-157947417 | 3 | 131.69  | KV452750.1 | 3030793 | 2-scf00055 | 2 |
| AX-157947423 | 3 | 131.69  | KV452750.1 | 3037092 | 2-scf00055 | 2 |
| AX-157751303 | 3 | 131.69  | KV452750.1 | 3041554 | 2-scf00055 | 2 |
| AX-157947424 | 3 | 131.69  | KV452750.1 | 3043533 | 2-scf00055 | 2 |
| AX-157947427 | 3 | 131.69  | KV452750.1 | 3044214 | 2-scf00055 | 2 |
| AX-157947428 | 3 | 131.69  | KV452750.1 | 3044709 | 2-scf00055 | 2 |
| AX-157947429 | 3 | 131.69  | KV452750.1 | 3045645 | 2-scf00055 | 2 |
| AX-157947430 | 3 | 131.69  | KV452750.1 | 3045778 | 2-scf00055 | 2 |
| AX-157947433 | 3 | 131.69  | KV452750.1 | 3052286 | 2-scf00055 | 2 |
| AX-157947434 | 3 | 131.69  | KV452750.1 | 3053150 | 2-scf00055 | 2 |
| AX-157854627 | 3 | 131.69  | KV452750.1 | 3085959 | 2-scf00055 | 2 |
| AX-157947476 | 3 | 131.69  | KV452750.1 | 3108728 | 2-scf00055 | 2 |
| AX-157947509 | 3 | 131.69  | KV452750.1 | 3147157 | 2-scf00055 | 2 |
| AX-158382720 | 3 | 131.721 | KV452750.1 | 3053862 | 2-scf00055 | 2 |
| AX-157947441 | 3 | 131.721 | KV452750.1 | 3060797 | 2-scf00055 | 2 |
| AX-157947436 | 3 | 131.739 | KV452750.1 | 3055514 | 2-scf00055 | 2 |
| AX-157947437 | 3 | 131.771 | KV452750.1 | 3059431 | 2-scf00055 | 2 |
| AX-157947442 | 3 | 131.799 | KV452750.1 | 3061734 | 2-scf00055 | 2 |
| AX-157947443 | 3 | 131.799 | KV452750.1 | 3062016 | 2-scf00055 | 2 |
| AX-157947444 | 3 | 131.799 | KV452750.1 | 3062598 | 2-scf00055 | 2 |
| AX-157815294 | 3 | 131.908 | KV452750.1 | 3065577 | 2-scf00055 | 2 |
| AX-157815295 | 3 | 131.908 | KV452750.1 | 3066156 | 2-scf00055 | 2 |
| AX-157774018 | 3 | 131.908 | KV452750.1 | 3068208 | 2-scf00055 | 2 |
| AX-157947448 | 3 | 131.908 | KV452750.1 | 3068851 | 2-scf00055 | 2 |
| AX-157947449 | 3 | 131.908 | KV452750.1 | 3069631 | 2-scf00055 | 2 |
| AX-157947450 | 3 | 131.908 | KV452750.1 | 3071354 | 2-scf00055 | 2 |
| AX-157947451 | 3 | 131.908 | KV452750.1 | 3073258 | 2-scf00055 | 2 |
| AX-157947455 | 3 | 131.908 | KV452750.1 | 3080212 | 2-scf00055 | 2 |
| AX-157815298 | 3 | 131.908 | KV452750.1 | 3080703 | 2-scf00055 | 2 |
| AX-157947456 | 3 | 131.945 | KV452750.1 | 3084530 | 2-scf00055 | 2 |
| AX-157947472 | 3 | 131.945 | KV452750.1 | 3102343 | 2-scf00055 | 2 |
| AX-157947459 | 3 | 131.994 | KV452750.1 | 3088017 | 2-scf00055 | 2 |
| AX-157726871 | 3 | 132.018 | KV452750.1 | 2997140 | 2-scf00055 | 2 |
| AX-157947461 | 3 | 132.018 | KV452750.1 | 3090710 | 2-scf00055 | 2 |
| AX-157947462 | 3 | 132.018 | KV452750.1 | 3091979 | 2-scf00055 | 2 |
| AX-157947463 | 3 | 132.018 | KV452750.1 | 3092296 | 2-scf00055 | 2 |
| AX-157947466 | 3 | 132.073 | KV452750.1 | 3096582 | 2-scf00055 | 2 |
| AX-157947467 | 3 | 132.112 | KV452750.1 | 3097231 | 2-scf00055 | 2 |
| AX-157947469 | 3 | 132.127 | KV452750.1 | 3100380 | 2-scf00055 | 2 |
| AX-157720486 | 3 | 132.127 | KV452750.1 | 3101995 | 2-scf00055 | 2 |
| AX-157947473 | 3 | 132.127 | KV452750.1 | 3103296 | 2-scf00055 | 2 |
| AX-157947474 | 3 | 132.127 | KV452750.1 | 3103641 | 2-scf00055 | 2 |
| AX-158415188 | 3 | 132.127 | KV452750.1 | 3106442 | 2-scf00055 | 2 |
| AX-157947475 | 3 | 132.127 | KV452750.1 | 3108460 | 2-scf00055 | 2 |
| AX-157947499 | 3 | 132.127 | KV452750.1 | 3134309 | 2-scf00055 | 2 |

|              |   |         |            |         |            |   |
|--------------|---|---------|------------|---------|------------|---|
| AX-157947508 | 3 | 132.127 | KV452750.1 | 3146287 | 2-scf00055 | 2 |
| AX-157947478 | 3 | 132.345 | KV452750.1 | 3110296 | 2-scf00055 | 2 |
| AX-157947480 | 3 | 132.431 | KV452750.1 | 3112801 | 2-scf00055 | 2 |
| AX-157815299 | 3 | 132.455 | KV452750.1 | 3086305 | 2-scf00055 | 2 |
| AX-157947465 | 3 | 132.455 | KV452750.1 | 3094609 | 2-scf00055 | 2 |
| AX-157947481 | 3 | 132.455 | KV452750.1 | 3113384 | 2-scf00055 | 2 |
| AX-157947482 | 3 | 132.455 | KV452750.1 | 3114338 | 2-scf00055 | 2 |
| AX-157947483 | 3 | 132.455 | KV452750.1 | 3115131 | 2-scf00055 | 2 |
| AX-157947487 | 3 | 132.564 | KV452750.1 | 3118058 | 2-scf00055 | 2 |
| AX-157947489 | 3 | 132.564 | KV452750.1 | 3120090 | 2-scf00055 | 2 |
| AX-157947493 | 3 | 132.564 | KV452750.1 | 3125093 | 2-scf00055 | 2 |
| AX-157775091 | 3 | 132.564 | KV452750.1 | 3126738 | 2-scf00055 | 2 |
| AX-158405964 | 3 | 132.564 | KV452750.1 | 3131888 | 2-scf00055 | 2 |
| AX-157947496 | 3 | 132.564 | KV452750.1 | 3132285 | 2-scf00055 | 2 |
| AX-157947497 | 3 | 132.564 | KV452750.1 | 3132911 | 2-scf00055 | 2 |
| AX-157947498 | 3 | 132.564 | KV452750.1 | 3134058 | 2-scf00055 | 2 |
| AX-157757614 | 3 | 132.564 | KV452750.1 | 3135451 | 2-scf00055 | 2 |
| AX-157947500 | 3 | 132.564 | KV452750.1 | 3135606 | 2-scf00055 | 2 |
| AX-157947501 | 3 | 132.564 | KV452750.1 | 3137504 | 2-scf00055 | 2 |
| AX-157947505 | 3 | 132.564 | KV452750.1 | 3141799 | 2-scf00055 | 2 |
| AX-157947517 | 3 | 132.564 | KV452750.1 | 3163470 | 2-scf00055 | 2 |
| AX-157751340 | 3 | 132.564 | KV452750.1 | 3195709 | 2-scf00055 | 2 |
| AX-157947534 | 3 | 132.564 | KV452750.1 | 3199648 | 2-scf00055 | 2 |
| AX-157947543 | 3 | 132.564 | KV452750.1 | 3211927 | 2-scf00055 | 2 |
| AX-157947563 | 3 | 132.564 | KV452750.1 | 3241264 | 2-scf00055 | 2 |
| AX-157947584 | 3 | 132.564 | KV452750.1 | 3270816 | 2-scf00055 | 2 |
| AX-157947381 | 3 | 132.782 | KV452750.1 | 2932423 | 2-scf00055 | 2 |
| AX-157947506 | 3 | 132.782 | KV452750.1 | 3142819 | 2-scf00055 | 2 |
| AX-157947510 | 3 | 132.782 | KV452750.1 | 3148339 | 2-scf00055 | 2 |
| AX-157947511 | 3 | 132.782 | KV452750.1 | 3150671 | 2-scf00055 | 2 |
| AX-158405965 | 3 | 132.782 | KV452750.1 | 3151264 | 2-scf00055 | 2 |
| AX-157742482 | 3 | 132.782 | KV452750.1 | 3151787 | 2-scf00055 | 2 |
| AX-157947512 | 3 | 132.782 | KV452750.1 | 3152211 | 2-scf00055 | 2 |
| AX-157947514 | 3 | 132.782 | KV452750.1 | 3158544 | 2-scf00055 | 2 |
| AX-157722429 | 3 | 132.782 | KV452750.1 | 3164597 | 2-scf00055 | 2 |
| AX-157947518 | 3 | 132.782 | KV452750.1 | 3167851 | 2-scf00055 | 2 |
| AX-158379412 | 3 | 132.782 | KV452750.1 | 3168226 | 2-scf00055 | 2 |
| AX-157947545 | 3 | 132.782 | KV452750.1 | 3219342 | 2-scf00055 | 2 |
| AX-157947557 | 3 | 132.782 | KV452750.1 | 3236578 | 2-scf00055 | 2 |
| AX-157947588 | 3 | 132.782 | KV452750.1 | 3280841 | 2-scf00055 | 2 |
| AX-157947590 | 3 | 132.782 | KV452750.1 | 3284233 | 2-scf00055 | 2 |
| AX-157682548 | 3 | 132.782 | KV452752.1 | 372     | 2-scf00057 | 2 |
| AX-157687899 | 3 | 132.782 | KV452754.1 | 2383    | 2-scf01086 | 2 |
| AX-157710409 | 3 | 132.963 | KV452750.1 | 3066491 | 2-scf00055 | 2 |
| AX-157947520 | 3 | 132.963 | KV452750.1 | 3172235 | 2-scf00055 | 2 |
| AX-157947522 | 3 | 132.963 | KV452750.1 | 3174473 | 2-scf00055 | 2 |
| AX-157947523 | 3 | 132.963 | KV452750.1 | 3176806 | 2-scf00055 | 2 |
| AX-157947524 | 3 | 132.963 | KV452750.1 | 3177969 | 2-scf00055 | 2 |
| AX-157947528 | 3 | 132.963 | KV452750.1 | 3184637 | 2-scf00055 | 2 |
| AX-157947530 | 3 | 132.963 | KV452750.1 | 3194328 | 2-scf00055 | 2 |
| AX-157947531 | 3 | 132.963 | KV452750.1 | 3195177 | 2-scf00055 | 2 |

|              |   |         |             |         |            |    |
|--------------|---|---------|-------------|---------|------------|----|
| AX-157947532 | 3 | 132.963 | KV452750.1  | 3196644 | 2-scf00055 | 2  |
| AX-157947535 | 3 | 132.963 | KV452750.1  | 3200623 | 2-scf00055 | 2  |
| AX-157947538 | 3 | 132.963 | KV452750.1  | 3205278 | 2-scf00055 | 2  |
| AX-157947540 | 3 | 132.963 | KV452750.1  | 3207887 | 2-scf00055 | 2  |
| AX-157947541 | 3 | 132.963 | KV452750.1  | 3209277 | 2-scf00055 | 2  |
| AX-157947542 | 3 | 132.963 | KV452750.1  | 3209775 | 2-scf00055 | 2  |
| AX-157815301 | 3 | 132.963 | KV452750.1  | 3209861 | 2-scf00055 | 2  |
| AX-157947544 | 3 | 132.963 | KV452750.1  | 3212399 | 2-scf00055 | 2  |
| AX-157947548 | 3 | 132.963 | KV452750.1  | 3224222 | 2-scf00055 | 2  |
| AX-157947549 | 3 | 133.058 | KV452750.1  | 3226358 | 2-scf00055 | 2  |
| AX-157947551 | 3 | 133.175 | KV452750.1  | 3229219 | 2-scf00055 | 2  |
| AX-157883965 | 3 | 133.328 | KV452750.1  | 3205687 | 2-scf00055 | 2  |
| AX-157947547 | 3 | 133.328 | KV452750.1  | 3223018 | 2-scf00055 | 2  |
| AX-157815302 | 3 | 133.328 | KV452750.1  | 3225311 | 2-scf00055 | 2  |
| AX-157947552 | 3 | 133.328 | KV452750.1  | 3231779 | 2-scf00055 | 2  |
| AX-157947553 | 3 | 133.328 | KV452750.1  | 3232848 | 2-scf00055 | 2  |
| AX-157947555 | 3 | 133.328 | KV452750.1  | 3234457 | 2-scf00055 | 2  |
| AX-157947558 | 3 | 133.328 | KV452750.1  | 3237317 | 2-scf00055 | 2  |
| AX-157947564 | 3 | 133.328 | KV452750.1  | 3241570 | 2-scf00055 | 2  |
| AX-157947565 | 3 | 133.328 | KV452750.1  | 3242150 | 2-scf00055 | 2  |
| AX-157947569 | 3 | 133.328 | KV452750.1  | 3247422 | 2-scf00055 | 2  |
| AX-157864812 | 3 | 133.328 | KV452750.1  | 3254714 | 2-scf00055 | 2  |
| AX-157947580 | 3 | 133.328 | KV452750.1  | 3261659 | 2-scf00055 | 2  |
| AX-157947629 | 3 | 133.328 | KV452750.1  | 3341744 | 2-scf00055 | 2  |
| AX-157947571 | 3 | 133.378 | KV452750.1  | 3249925 | 2-scf00055 | 2  |
| AX-157740102 | 3 | 133.378 | KV452750.1  | 3254899 | 2-scf00055 | 2  |
| AX-157854630 | 3 | 133.548 | KV452750.1  | 3237984 | 2-scf00055 | 2  |
| AX-158404891 | 3 | 133.548 | KV452750.1  | 3267033 | 2-scf00055 | 2  |
| AX-157771489 | 3 | 133.548 | KV452750.1  | 3270096 | 2-scf00055 | 2  |
| AX-157883968 | 3 | 133.548 | KV452750.1  | 3278654 | 2-scf00055 | 2  |
| AX-157709756 | 3 | 133.548 | KV452750.1  | 3289207 | 2-scf00055 | 2  |
| AX-157947598 | 3 | 133.548 | KV452750.1  | 3292454 | 2-scf00055 | 2  |
| AX-157947603 | 3 | 133.548 | KV452750.1  | 3303389 | 2-scf00055 | 2  |
| AX-157714710 | 3 | 133.548 | KV452750.1  | 3304329 | 2-scf00055 | 2  |
| AX-157947606 | 3 | 133.548 | KV452750.1  | 3309977 | 2-scf00055 | 2  |
| AX-157947608 | 3 | 133.548 | KV452750.1  | 3311008 | 2-scf00055 | 2  |
| AX-157815321 | 3 | 133.548 | KV452750.1  | 3584988 | 2-scf00055 | 2  |
| AX-157947757 | 3 | 133.548 | KV452750.1  | 3606525 | 2-scf00055 | 2  |
| AX-157680355 | 3 | 133.548 | 3ML01031400 | 328     | scf07013_1 | UN |
| AX-157714643 | 3 | 133.697 | KV452750.1  | 3318118 | 2-scf00055 | 2  |
| AX-157947623 | 3 | 133.884 | KV452750.1  | 3332655 | 2-scf00055 | 2  |
| AX-157947627 | 3 | 133.884 | KV452750.1  | 3336223 | 2-scf00055 | 2  |
| AX-157947634 | 3 | 133.884 | KV452750.1  | 3349103 | 2-scf00055 | 2  |
| AX-157743665 | 3 | 133.884 | KV452750.1  | 3354443 | 2-scf00055 | 2  |
| AX-157947640 | 3 | 133.884 | KV452750.1  | 3357303 | 2-scf00055 | 2  |
| AX-157947582 | 3 | 133.885 | KV452750.1  | 3266902 | 2-scf00055 | 2  |
| AX-157947592 | 3 | 133.885 | KV452750.1  | 3285995 | 2-scf00055 | 2  |
| AX-157947600 | 3 | 133.885 | KV452750.1  | 3297960 | 2-scf00055 | 2  |
| AX-157947605 | 3 | 133.885 | KV452750.1  | 3309309 | 2-scf00055 | 2  |
| AX-157947626 | 3 | 133.885 | KV452750.1  | 3335513 | 2-scf00055 | 2  |
| AX-157947628 | 3 | 133.885 | KV452750.1  | 3337768 | 2-scf00055 | 2  |



|              |   |         |             |         |            |    |
|--------------|---|---------|-------------|---------|------------|----|
| AX-157714941 | 3 | 133.885 | KV452750.1  | 3343660 | 2-scf00055 | 2  |
| AX-157740175 | 3 | 133.885 | KV452750.1  | 3344442 | 2-scf00055 | 2  |
| AX-157947635 | 3 | 133.885 | KV452750.1  | 3350842 | 2-scf00055 | 2  |
| AX-157815304 | 3 | 133.885 | KV452750.1  | 3357196 | 2-scf00055 | 2  |
| AX-157947641 | 3 | 133.885 | KV452750.1  | 3359488 | 2-scf00055 | 2  |
| AX-157725547 | 3 | 133.885 | KV452750.1  | 3563815 | 2-scf00055 | 2  |
| AX-157947647 | 3 | 133.924 | KV452750.1  | 3372412 | 2-scf00055 | 2  |
| AX-157947650 | 3 | 133.924 | KV452750.1  | 3375480 | 2-scf00055 | 2  |
| AX-157747269 | 3 | 133.924 | KV452750.1  | 3379863 | 2-scf00055 | 2  |
| AX-157947645 | 3 | 134.053 | KV452750.1  | 3367568 | 2-scf00055 | 2  |
| AX-157947649 | 3 | 134.053 | KV452750.1  | 3373664 | 2-scf00055 | 2  |
| AX-157947653 | 3 | 134.053 | KV452750.1  | 3381607 | 2-scf00055 | 2  |
| AX-157947655 | 3 | 134.053 | KV452750.1  | 3384352 | 2-scf00055 | 2  |
| AX-157854631 | 3 | 134.053 | KV452750.1  | 3385596 | 2-scf00055 | 2  |
| AX-157947657 | 3 | 134.053 | KV452750.1  | 3387240 | 2-scf00055 | 2  |
| AX-157947659 | 3 | 134.053 | KV452750.1  | 3388760 | 2-scf00055 | 2  |
| AX-157815305 | 3 | 134.053 | KV452750.1  | 3404866 | 2-scf00055 | 2  |
| AX-157947679 | 3 | 134.053 | KV452750.1  | 3411425 | 2-scf00055 | 2  |
| AX-157947723 | 3 | 134.053 | KV452750.1  | 3565851 | 2-scf00055 | 2  |
| AX-157815319 | 3 | 134.053 | KV452750.1  | 3566238 | 2-scf00055 | 2  |
| AX-157680166 | 3 | 134.053 | KV452751.1  | 2684    | 2-scf00056 | 2  |
| AX-157705959 | 3 | 134.053 | 3ML01031318 | 109     | scf06927_1 | UN |
| AX-157815312 | 3 | 134.1   | KV452750.1  | 3473894 | 2-scf00055 | 2  |
| AX-157947666 | 3 | 134.153 | KV452750.1  | 3397713 | 2-scf00055 | 2  |
| AX-157947675 | 3 | 134.213 | KV452750.1  | 3408113 | 2-scf00055 | 2  |
| AX-157947676 | 3 | 134.213 | KV452750.1  | 3408807 | 2-scf00055 | 2  |
| AX-157815306 | 3 | 134.213 | KV452750.1  | 3408958 | 2-scf00055 | 2  |
| AX-157947677 | 3 | 134.213 | KV452750.1  | 3409843 | 2-scf00055 | 2  |
| AX-157947680 | 3 | 134.213 | KV452750.1  | 3412362 | 2-scf00055 | 2  |
| AX-157947682 | 3 | 134.213 | KV452750.1  | 3413814 | 2-scf00055 | 2  |
| AX-157815314 | 3 | 134.213 | KV452750.1  | 3494905 | 2-scf00055 | 2  |
| AX-157724100 | 3 | 134.213 | KV452750.1  | 3500616 | 2-scf00055 | 2  |
| AX-157947701 | 3 | 134.213 | KV452750.1  | 3531042 | 2-scf00055 | 2  |
| AX-157947703 | 3 | 134.213 | KV452750.1  | 3531968 | 2-scf00055 | 2  |
| AX-157709594 | 3 | 134.213 | KV452750.1  | 3534477 | 2-scf00055 | 2  |
| AX-157947705 | 3 | 134.213 | KV452750.1  | 3535155 | 2-scf00055 | 2  |
| AX-157947706 | 3 | 134.213 | KV452750.1  | 3536524 | 2-scf00055 | 2  |
| AX-157947709 | 3 | 134.213 | KV452750.1  | 3546767 | 2-scf00055 | 2  |
| AX-157947716 | 3 | 134.213 | KV452750.1  | 3552067 | 2-scf00055 | 2  |
| AX-157947806 | 3 | 134.213 | KV452750.1  | 3707980 | 2-scf00055 | 2  |
| AX-157947807 | 3 | 134.213 | KV452750.1  | 3708274 | 2-scf00055 | 2  |
| AX-157947857 | 3 | 134.213 | KV452750.1  | 3757676 | 2-scf00055 | 2  |
| AX-157948169 | 3 | 134.213 | KV452759.1  | 238182  | 2-scf00060 | 2  |
| AX-157947615 | 3 | 134.222 | KV452750.1  | 3319287 | 2-scf00055 | 2  |
| AX-157947658 | 3 | 134.222 | KV452750.1  | 3388433 | 2-scf00055 | 2  |
| AX-157947669 | 3 | 134.222 | KV452750.1  | 3402493 | 2-scf00055 | 2  |
| AX-157947670 | 3 | 134.222 | KV452750.1  | 3404607 | 2-scf00055 | 2  |
| AX-157947692 | 3 | 134.222 | KV452750.1  | 3501192 | 2-scf00055 | 2  |
| AX-157947707 | 3 | 134.222 | KV452750.1  | 3539103 | 2-scf00055 | 2  |
| AX-157815315 | 3 | 134.222 | KV452750.1  | 3539370 | 2-scf00055 | 2  |
| AX-157947717 | 3 | 134.222 | KV452750.1  | 3554390 | 2-scf00055 | 2  |

|              |   |         |            |         |            |   |
|--------------|---|---------|------------|---------|------------|---|
| AX-157947751 | 3 | 134.222 | KV452750.1 | 3603029 | 2-scf00055 | 2 |
| AX-157947752 | 3 | 134.222 | KV452750.1 | 3603410 | 2-scf00055 | 2 |
| AX-157947836 | 3 | 134.222 | KV452750.1 | 3734749 | 2-scf00055 | 2 |
| AX-157947710 | 3 | 134.373 | KV452750.1 | 3548681 | 2-scf00055 | 2 |
| AX-157756986 | 3 | 134.373 | KV452750.1 | 3551841 | 2-scf00055 | 2 |
| AX-157947718 | 3 | 134.373 | KV452750.1 | 3559003 | 2-scf00055 | 2 |
| AX-157947720 | 3 | 134.373 | KV452750.1 | 3560762 | 2-scf00055 | 2 |
| AX-157749881 | 3 | 134.373 | KV452750.1 | 3562614 | 2-scf00055 | 2 |
| AX-157947724 | 3 | 134.373 | KV452750.1 | 3566994 | 2-scf00055 | 2 |
| AX-157815320 | 3 | 134.373 | KV452750.1 | 3569853 | 2-scf00055 | 2 |
| AX-157947785 | 3 | 134.373 | KV452750.1 | 3664743 | 2-scf00055 | 2 |
| AX-157947799 | 3 | 134.373 | KV452750.1 | 3683734 | 2-scf00055 | 2 |
| AX-157947678 | 3 | 134.533 | KV452750.1 | 3410991 | 2-scf00055 | 2 |
| AX-157713008 | 3 | 134.533 | KV452750.1 | 3575266 | 2-scf00055 | 2 |
| AX-157947736 | 3 | 134.533 | KV452750.1 | 3581553 | 2-scf00055 | 2 |
| AX-157947744 | 3 | 134.533 | KV452750.1 | 3598168 | 2-scf00055 | 2 |
| AX-157947746 | 3 | 134.533 | KV452750.1 | 3599480 | 2-scf00055 | 2 |
| AX-157947747 | 3 | 134.533 | KV452750.1 | 3600558 | 2-scf00055 | 2 |
| AX-157947749 | 3 | 134.533 | KV452750.1 | 3601371 | 2-scf00055 | 2 |
| AX-157947750 | 3 | 134.533 | KV452750.1 | 3602013 | 2-scf00055 | 2 |
| AX-157947765 | 3 | 134.533 | KV452750.1 | 3622666 | 2-scf00055 | 2 |
| AX-157947766 | 3 | 134.533 | KV452750.1 | 3623149 | 2-scf00055 | 2 |
| AX-157947768 | 3 | 134.533 | KV452750.1 | 3625586 | 2-scf00055 | 2 |
| AX-157756113 | 3 | 134.533 | KV452750.1 | 3627860 | 2-scf00055 | 2 |
| AX-157947769 | 3 | 134.533 | KV452750.1 | 3629457 | 2-scf00055 | 2 |
| AX-157947772 | 3 | 134.533 | KV452750.1 | 3635795 | 2-scf00055 | 2 |
| AX-157947775 | 3 | 134.533 | KV452750.1 | 3642911 | 2-scf00055 | 2 |
| AX-157947782 | 3 | 134.533 | KV452750.1 | 3661730 | 2-scf00055 | 2 |
| AX-157947791 | 3 | 134.533 | KV452750.1 | 3671186 | 2-scf00055 | 2 |
| AX-157742987 | 3 | 134.533 | KV452750.1 | 3677867 | 2-scf00055 | 2 |
| AX-157947800 | 3 | 134.533 | KV452750.1 | 3684425 | 2-scf00055 | 2 |
| AX-157947805 | 3 | 134.533 | KV452750.1 | 3707277 | 2-scf00055 | 2 |
| AX-157947850 | 3 | 134.533 | KV452750.1 | 3746855 | 2-scf00055 | 2 |
| AX-157815332 | 3 | 134.533 | KV452750.1 | 3765961 | 2-scf00055 | 2 |
| AX-157947864 | 3 | 134.533 | KV452750.1 | 3773544 | 2-scf00055 | 2 |
| AX-157947881 | 3 | 134.533 | KV452750.1 | 3801048 | 2-scf00055 | 2 |
| AX-157947941 | 3 | 134.533 | KV452756.1 | 22869   | 2-scf00058 | 2 |
| AX-157948005 | 3 | 134.533 | KV452756.1 | 137581  | 2-scf00058 | 2 |
| AX-157948007 | 3 | 134.533 | KV452756.1 | 139509  | 2-scf00058 | 2 |
| AX-157948031 | 3 | 134.533 | KV452756.1 | 164128  | 2-scf00058 | 2 |
| AX-157947781 | 3 | 134.77  | KV452750.1 | 3658905 | 2-scf00055 | 2 |
| AX-157947786 | 3 | 134.77  | KV452750.1 | 3665866 | 2-scf00055 | 2 |
| AX-157947787 | 3 | 134.77  | KV452750.1 | 3666513 | 2-scf00055 | 2 |
| AX-157947795 | 3 | 134.77  | KV452750.1 | 3678927 | 2-scf00055 | 2 |
| AX-157947796 | 3 | 134.77  | KV452750.1 | 3679956 | 2-scf00055 | 2 |
| AX-157947797 | 3 | 134.77  | KV452750.1 | 3680383 | 2-scf00055 | 2 |
| AX-157947798 | 3 | 134.77  | KV452750.1 | 3680864 | 2-scf00055 | 2 |
| AX-158405974 | 3 | 134.77  | KV452750.1 | 3682060 | 2-scf00055 | 2 |
| AX-157773665 | 3 | 134.77  | KV452750.1 | 3686759 | 2-scf00055 | 2 |
| AX-157749947 | 3 | 135.245 | KV452750.1 | 3693020 | 2-scf00055 | 2 |
| AX-157947812 | 3 | 135.245 | KV452750.1 | 3713810 | 2-scf00055 | 2 |

|              |   |         |             |         |            |    |
|--------------|---|---------|-------------|---------|------------|----|
| AX-157947813 | 3 | 135.539 | KV452750.1  | 3714643 | 2-scf00055 | 2  |
| AX-157947728 | 3 | 135.715 | KV452750.1  | 3571497 | 2-scf00055 | 2  |
| AX-157947732 | 3 | 135.715 | KV452750.1  | 3578093 | 2-scf00055 | 2  |
| AX-157745940 | 3 | 135.715 | KV452750.1  | 3722763 | 2-scf00055 | 2  |
| AX-157947837 | 3 | 135.715 | KV452750.1  | 3734932 | 2-scf00055 | 2  |
| AX-157947826 | 3 | 135.716 | KV452750.1  | 3723604 | 2-scf00055 | 2  |
| AX-157947828 | 3 | 135.721 | KV452750.1  | 3726891 | 2-scf00055 | 2  |
| AX-157947829 | 3 | 135.721 | KV452750.1  | 3729045 | 2-scf00055 | 2  |
| AX-157947831 | 3 | 135.721 | KV452750.1  | 3731823 | 2-scf00055 | 2  |
| AX-157947833 | 3 | 135.721 | KV452750.1  | 3733300 | 2-scf00055 | 2  |
| AX-157947835 | 3 | 135.721 | KV452750.1  | 3734390 | 2-scf00055 | 2  |
| AX-157947841 | 3 | 135.721 | KV452750.1  | 3737080 | 2-scf00055 | 2  |
| AX-157947846 | 3 | 135.721 | KV452750.1  | 3739801 | 2-scf00055 | 2  |
| AX-157947849 | 3 | 135.721 | KV452750.1  | 3744139 | 2-scf00055 | 2  |
| AX-157947852 | 3 | 135.721 | KV452750.1  | 3747893 | 2-scf00055 | 2  |
| AX-157947853 | 3 | 135.721 | KV452750.1  | 3749034 | 2-scf00055 | 2  |
| AX-157947866 | 3 | 135.721 | KV452750.1  | 3774816 | 2-scf00055 | 2  |
| AX-157757784 | 3 | 135.721 | KV452750.1  | 3776048 | 2-scf00055 | 2  |
| AX-157757517 | 3 | 135.721 | KV452750.1  | 3781336 | 2-scf00055 | 2  |
| AX-157947880 | 3 | 135.721 | KV452750.1  | 3800033 | 2-scf00055 | 2  |
| AX-157947905 | 3 | 135.721 | KV452750.1  | 3844992 | 2-scf00055 | 2  |
| AX-157947919 | 3 | 135.721 | KV452750.1  | 3863484 | 2-scf00055 | 2  |
| AX-157947924 | 3 | 135.721 | KV452750.1  | 3876684 | 2-scf00055 | 2  |
| AX-157947938 | 3 | 135.721 | KV452756.1  | 20670   | 2-scf00058 | 2  |
| AX-157948004 | 3 | 135.721 | KV452756.1  | 133068  | 2-scf00058 | 2  |
| AX-157948008 | 3 | 135.721 | KV452756.1  | 140545  | 2-scf00058 | 2  |
| AX-157948012 | 3 | 135.721 | KV452756.1  | 144465  | 2-scf00058 | 2  |
| AX-157948013 | 3 | 135.721 | KV452756.1  | 147380  | 2-scf00058 | 2  |
| AX-157948017 | 3 | 135.721 | KV452756.1  | 151160  | 2-scf00058 | 2  |
| AX-157948019 | 3 | 135.721 | KV452756.1  | 153602  | 2-scf00058 | 2  |
| AX-158382728 | 3 | 135.721 | KV452756.1  | 153986  | 2-scf00058 | 2  |
| AX-157948020 | 3 | 135.721 | KV452756.1  | 154884  | 2-scf00058 | 2  |
| AX-157948030 | 3 | 135.721 | KV452756.1  | 163414  | 2-scf00058 | 2  |
| AX-157948036 | 3 | 135.721 | KV452756.1  | 175228  | 2-scf00058 | 2  |
| AX-157948057 | 3 | 135.721 | KV452756.1  | 222197  | 2-scf00058 | 2  |
| AX-157948078 | 3 | 135.721 | KV452759.1  | 26609   | 2-scf00060 | 2  |
| AX-157948081 | 3 | 135.721 | KV452759.1  | 27937   | 2-scf00060 | 2  |
| AX-157948141 | 3 | 135.721 | KV452759.1  | 192585  | 2-scf00060 | 2  |
| AX-157682607 | 3 | 135.721 | KV452760.1  | 138044  | 2-scf00061 | 2  |
| AX-157948219 | 3 | 135.721 | KV452763.1  | 31932   | 2-scf00066 | 2  |
| AX-157681222 | 3 | 135.721 | KV452753.1  | 669     | 2-scf01126 | 2  |
| AX-157688251 | 3 | 135.721 | 3ML01025813 | 1231    | scf01424_1 | UN |
| AX-157947754 | 3 | 135.844 | KV452750.1  | 3604800 | 2-scf00055 | 2  |
| AX-157947783 | 3 | 135.844 | KV452750.1  | 3663242 | 2-scf00055 | 2  |
| AX-157947789 | 3 | 135.844 | KV452750.1  | 3669469 | 2-scf00055 | 2  |
| AX-157947863 | 3 | 135.844 | KV452750.1  | 3769767 | 2-scf00055 | 2  |
| AX-157854635 | 3 | 135.844 | KV452750.1  | 3851924 | 2-scf00055 | 2  |
| AX-157947930 | 3 | 135.844 | KV452756.1  | 10596   | 2-scf00058 | 2  |
| AX-157682596 | 3 | 135.844 | KV452760.1  | 109888  | 2-scf00061 | 2  |
| AX-157680272 | 3 | 135.844 | KV452758.1  | 56112   | 2-scf00063 | 2  |
| AX-157947851 | 3 | 135.958 | KV452750.1  | 3747316 | 2-scf00055 | 2  |

|              |   |         |            |         |            |   |
|--------------|---|---------|------------|---------|------------|---|
| AX-157947883 | 3 | 135.958 | KV452750.1 | 3805032 | 2-scf00055 | 2 |
| AX-157947886 | 3 | 135.958 | KV452750.1 | 3810970 | 2-scf00055 | 2 |
| AX-157947888 | 3 | 135.958 | KV452750.1 | 3812724 | 2-scf00055 | 2 |
| AX-157947893 | 3 | 135.958 | KV452750.1 | 3816285 | 2-scf00055 | 2 |
| AX-157862812 | 3 | 135.958 | KV452750.1 | 3834708 | 2-scf00055 | 2 |
| AX-157947906 | 3 | 135.958 | KV452750.1 | 3845666 | 2-scf00055 | 2 |
| AX-157947910 | 3 | 135.958 | KV452750.1 | 3851045 | 2-scf00055 | 2 |
| AX-157947911 | 3 | 135.958 | KV452750.1 | 3852870 | 2-scf00055 | 2 |
| AX-157947914 | 3 | 135.958 | KV452750.1 | 3857612 | 2-scf00055 | 2 |
| AX-157723461 | 3 | 135.958 | KV452750.1 | 3860771 | 2-scf00055 | 2 |
| AX-157947920 | 3 | 135.958 | KV452750.1 | 3866146 | 2-scf00055 | 2 |
| AX-157947922 | 3 | 135.958 | KV452750.1 | 3874584 | 2-scf00055 | 2 |
| AX-157947925 | 3 | 135.958 | KV452750.1 | 3878067 | 2-scf00055 | 2 |
| AX-157947929 | 3 | 135.958 | KV452756.1 | 10177   | 2-scf00058 | 2 |
| AX-157883976 | 3 | 135.958 | KV452756.1 | 10320   | 2-scf00058 | 2 |
| AX-157947933 | 3 | 135.958 | KV452756.1 | 14361   | 2-scf00058 | 2 |
| AX-157947934 | 3 | 135.958 | KV452756.1 | 16498   | 2-scf00058 | 2 |
| AX-157947935 | 3 | 135.958 | KV452756.1 | 18627   | 2-scf00058 | 2 |
| AX-157947936 | 3 | 135.958 | KV452756.1 | 19645   | 2-scf00058 | 2 |
| AX-157947940 | 3 | 135.958 | KV452756.1 | 22315   | 2-scf00058 | 2 |
| AX-157947942 | 3 | 135.958 | KV452756.1 | 23764   | 2-scf00058 | 2 |
| AX-157947945 | 3 | 135.958 | KV452756.1 | 28935   | 2-scf00058 | 2 |
| AX-157947947 | 3 | 135.958 | KV452756.1 | 32225   | 2-scf00058 | 2 |
| AX-157947948 | 3 | 135.958 | KV452756.1 | 34673   | 2-scf00058 | 2 |
| AX-157947951 | 3 | 135.958 | KV452756.1 | 39112   | 2-scf00058 | 2 |
| AX-157947952 | 3 | 135.958 | KV452756.1 | 39644   | 2-scf00058 | 2 |
| AX-157947954 | 3 | 135.958 | KV452756.1 | 46997   | 2-scf00058 | 2 |
| AX-157749954 | 3 | 135.958 | KV452756.1 | 61075   | 2-scf00058 | 2 |
| AX-157749206 | 3 | 135.958 | KV452756.1 | 70915   | 2-scf00058 | 2 |
| AX-157947970 | 3 | 135.958 | KV452756.1 | 76079   | 2-scf00058 | 2 |
| AX-157947973 | 3 | 135.958 | KV452756.1 | 78709   | 2-scf00058 | 2 |
| AX-157947974 | 3 | 135.958 | KV452756.1 | 78960   | 2-scf00058 | 2 |
| AX-157947975 | 3 | 135.958 | KV452756.1 | 82623   | 2-scf00058 | 2 |
| AX-157815338 | 3 | 135.958 | KV452756.1 | 83490   | 2-scf00058 | 2 |
| AX-157947980 | 3 | 135.958 | KV452756.1 | 92985   | 2-scf00058 | 2 |
| AX-157747593 | 3 | 135.958 | KV452756.1 | 97216   | 2-scf00058 | 2 |
| AX-157947983 | 3 | 135.958 | KV452756.1 | 100074  | 2-scf00058 | 2 |
| AX-157947984 | 3 | 135.958 | KV452756.1 | 102996  | 2-scf00058 | 2 |
| AX-157773230 | 3 | 135.958 | KV452756.1 | 103443  | 2-scf00058 | 2 |
| AX-157947985 | 3 | 135.958 | KV452756.1 | 103490  | 2-scf00058 | 2 |
| AX-157947986 | 3 | 135.958 | KV452756.1 | 103743  | 2-scf00058 | 2 |
| AX-157724389 | 3 | 135.958 | KV452756.1 | 107246  | 2-scf00058 | 2 |
| AX-157947989 | 3 | 135.958 | KV452756.1 | 112004  | 2-scf00058 | 2 |
| AX-157947990 | 3 | 135.958 | KV452756.1 | 112466  | 2-scf00058 | 2 |
| AX-157947996 | 3 | 135.958 | KV452756.1 | 116472  | 2-scf00058 | 2 |
| AX-157948003 | 3 | 135.958 | KV452756.1 | 128887  | 2-scf00058 | 2 |
| AX-158405976 | 3 | 135.958 | KV452756.1 | 135184  | 2-scf00058 | 2 |
| AX-158405977 | 3 | 135.958 | KV452756.1 | 135463  | 2-scf00058 | 2 |
| AX-158405978 | 3 | 135.958 | KV452756.1 | 135619  | 2-scf00058 | 2 |
| AX-158405981 | 3 | 135.958 | KV452756.1 | 144068  | 2-scf00058 | 2 |
| AX-158405982 | 3 | 135.958 | KV452756.1 | 144153  | 2-scf00058 | 2 |

|              |   |         |             |        |            |    |
|--------------|---|---------|-------------|--------|------------|----|
| AX-157948016 | 3 | 135.958 | KV452756.1  | 149392 | 2-scf00058 | 2  |
| AX-157948018 | 3 | 135.958 | KV452756.1  | 152720 | 2-scf00058 | 2  |
| AX-157948022 | 3 | 135.958 | KV452756.1  | 155691 | 2-scf00058 | 2  |
| AX-157948028 | 3 | 135.958 | KV452756.1  | 162573 | 2-scf00058 | 2  |
| AX-157948029 | 3 | 135.958 | KV452756.1  | 162951 | 2-scf00058 | 2  |
| AX-157948032 | 3 | 135.958 | KV452756.1  | 165376 | 2-scf00058 | 2  |
| AX-157948033 | 3 | 135.958 | KV452756.1  | 166937 | 2-scf00058 | 2  |
| AX-157948034 | 3 | 135.958 | KV452756.1  | 167391 | 2-scf00058 | 2  |
| AX-157773007 | 3 | 135.958 | KV452756.1  | 185602 | 2-scf00058 | 2  |
| AX-157948041 | 3 | 135.958 | KV452756.1  | 187866 | 2-scf00058 | 2  |
| AX-157948042 | 3 | 135.958 | KV452756.1  | 189392 | 2-scf00058 | 2  |
| AX-157948043 | 3 | 135.958 | KV452756.1  | 190364 | 2-scf00058 | 2  |
| AX-157948044 | 3 | 135.958 | KV452756.1  | 191217 | 2-scf00058 | 2  |
| AX-157725923 | 3 | 135.958 | KV452756.1  | 191812 | 2-scf00058 | 2  |
| AX-157948045 | 3 | 135.958 | KV452756.1  | 194312 | 2-scf00058 | 2  |
| AX-157948046 | 3 | 135.958 | KV452756.1  | 195158 | 2-scf00058 | 2  |
| AX-158390170 | 3 | 135.958 | KV452756.1  | 195840 | 2-scf00058 | 2  |
| AX-157716795 | 3 | 135.958 | KV452756.1  | 211207 | 2-scf00058 | 2  |
| AX-157948056 | 3 | 135.958 | KV452756.1  | 212886 | 2-scf00058 | 2  |
| AX-157948070 | 3 | 135.958 | KV452756.1  | 245314 | 2-scf00058 | 2  |
| AX-157682549 | 3 | 135.958 | KV452755.1  | 65     | 2-scf00059 | 2  |
| AX-157948087 | 3 | 135.958 | KV452759.1  | 33457  | 2-scf00060 | 2  |
| AX-157948094 | 3 | 135.958 | KV452759.1  | 74470  | 2-scf00060 | 2  |
| AX-157948107 | 3 | 135.958 | KV452759.1  | 109630 | 2-scf00060 | 2  |
| AX-157948112 | 3 | 135.958 | KV452759.1  | 113159 | 2-scf00060 | 2  |
| AX-157948114 | 3 | 135.958 | KV452759.1  | 118091 | 2-scf00060 | 2  |
| AX-157815352 | 3 | 135.958 | KV452759.1  | 166873 | 2-scf00060 | 2  |
| AX-157948139 | 3 | 135.958 | KV452759.1  | 176818 | 2-scf00060 | 2  |
| AX-157948140 | 3 | 135.958 | KV452759.1  | 184716 | 2-scf00060 | 2  |
| AX-157815361 | 3 | 135.958 | KV452759.1  | 196611 | 2-scf00060 | 2  |
| AX-157948154 | 3 | 135.958 | KV452759.1  | 215565 | 2-scf00060 | 2  |
| AX-157815364 | 3 | 135.958 | KV452759.1  | 218352 | 2-scf00060 | 2  |
| AX-157948185 | 3 | 135.958 | KV452760.1  | 52728  | 2-scf00061 | 2  |
| AX-157772960 | 3 | 135.958 | KV452760.1  | 74892  | 2-scf00061 | 2  |
| AX-157682554 | 3 | 135.958 | KV452758.1  | 8686   | 2-scf00063 | 2  |
| AX-157680610 | 3 | 135.958 | KV452758.1  | 10556  | 2-scf00063 | 2  |
| AX-157682567 | 3 | 135.958 | KV452758.1  | 40169  | 2-scf00063 | 2  |
| AX-157682570 | 3 | 135.958 | KV452758.1  | 43233  | 2-scf00063 | 2  |
| AX-157682575 | 3 | 135.958 | KV452758.1  | 54469  | 2-scf00063 | 2  |
| AX-157745010 | 3 | 135.958 | KV452763.1  | 26003  | 2-scf00066 | 2  |
| AX-157948220 | 3 | 135.958 | KV452763.1  | 33115  | 2-scf00066 | 2  |
| AX-157815389 | 3 | 135.958 | KV452763.1  | 40629  | 2-scf00066 | 2  |
| AX-157706299 | 3 | 135.958 | 3ML01032008 | 531    | scf07625_1 | UN |
| AX-157883983 | 3 | 136.067 | KV452759.1  | 146952 | 2-scf00060 | 2  |
| AX-157948153 | 3 | 136.067 | KV452759.1  | 214635 | 2-scf00060 | 2  |
| AX-158415207 | 3 | 136.067 | KV452760.1  | 30952  | 2-scf00061 | 2  |
| AX-157948180 | 3 | 136.067 | KV452760.1  | 35275  | 2-scf00061 | 2  |
| AX-157948193 | 3 | 136.067 | KV452760.1  | 65808  | 2-scf00061 | 2  |
| AX-157815374 | 3 | 136.067 | KV452760.1  | 68321  | 2-scf00061 | 2  |
| AX-157815380 | 3 | 136.067 | KV452760.1  | 83401  | 2-scf00061 | 2  |
| AX-157682588 | 3 | 136.067 | KV452760.1  | 98510  | 2-scf00061 | 2  |

|              |   |         |             |        |            |    |
|--------------|---|---------|-------------|--------|------------|----|
| AX-157682594 | 3 | 136.067 | KV452760.1  | 106485 | 2-scf00061 | 2  |
| AX-157680615 | 3 | 136.067 | KV452760.1  | 112137 | 2-scf00061 | 2  |
| AX-157682602 | 3 | 136.067 | KV452760.1  | 123380 | 2-scf00061 | 2  |
| AX-157682603 | 3 | 136.067 | KV452760.1  | 126365 | 2-scf00061 | 2  |
| AX-158405991 | 3 | 136.067 | KV452760.1  | 128904 | 2-scf00061 | 2  |
| AX-158405992 | 3 | 136.067 | KV452760.1  | 130554 | 2-scf00061 | 2  |
| AX-157682606 | 3 | 136.067 | KV452760.1  | 132593 | 2-scf00061 | 2  |
| AX-157679952 | 3 | 136.067 | KV452760.1  | 134693 | 2-scf00061 | 2  |
| AX-157680351 | 3 | 136.067 | KV452760.1  | 140908 | 2-scf00061 | 2  |
| AX-157680616 | 3 | 136.067 | KV452760.1  | 151594 | 2-scf00061 | 2  |
| AX-157682614 | 3 | 136.067 | KV452760.1  | 164211 | 2-scf00061 | 2  |
| AX-157682557 | 3 | 136.067 | KV452758.1  | 20400  | 2-scf00063 | 2  |
| AX-157948225 | 3 | 136.067 | KV452763.1  | 41831  | 2-scf00066 | 2  |
| AX-157681305 | 3 | 136.067 | 3ML01031747 | 69     | scf07367_1 | UN |
| AX-157948051 | 3 | 136.176 | KV452756.1  | 200944 | 2-scf00058 | 2  |
| AX-157815342 | 3 | 136.176 | KV452756.1  | 206937 | 2-scf00058 | 2  |
| AX-158405985 | 3 | 136.176 | KV452759.1  | 39802  | 2-scf00060 | 2  |
| AX-157948098 | 3 | 136.176 | KV452759.1  | 92651  | 2-scf00060 | 2  |
| AX-157948102 | 3 | 136.176 | KV452759.1  | 102120 | 2-scf00060 | 2  |
| AX-157948103 | 3 | 136.176 | KV452759.1  | 102481 | 2-scf00060 | 2  |
| AX-157948104 | 3 | 136.176 | KV452759.1  | 107365 | 2-scf00060 | 2  |
| AX-157948105 | 3 | 136.176 | KV452759.1  | 108952 | 2-scf00060 | 2  |
| AX-157948109 | 3 | 136.176 | KV452759.1  | 110453 | 2-scf00060 | 2  |
| AX-157948111 | 3 | 136.176 | KV452759.1  | 112353 | 2-scf00060 | 2  |
| AX-157948115 | 3 | 136.176 | KV452759.1  | 121226 | 2-scf00060 | 2  |
| AX-157815349 | 3 | 136.176 | KV452759.1  | 121675 | 2-scf00060 | 2  |
| AX-157948116 | 3 | 136.176 | KV452759.1  | 122448 | 2-scf00060 | 2  |
| AX-157815350 | 3 | 136.176 | KV452759.1  | 122584 | 2-scf00060 | 2  |
| AX-157948119 | 3 | 136.176 | KV452759.1  | 129350 | 2-scf00060 | 2  |
| AX-157747907 | 3 | 136.176 | KV452759.1  | 150227 | 2-scf00060 | 2  |
| AX-157682591 | 3 | 136.176 | KV452760.1  | 104669 | 2-scf00061 | 2  |
| AX-157682609 | 3 | 136.176 | KV452760.1  | 155802 | 2-scf00061 | 2  |
| AX-157948126 | 3 | 136.22  | KV452759.1  | 146317 | 2-scf00060 | 2  |
| AX-157815351 | 3 | 136.253 | KV452759.1  | 148606 | 2-scf00060 | 2  |
| AX-157948138 | 3 | 136.286 | KV452759.1  | 176155 | 2-scf00060 | 2  |
| AX-157815357 | 3 | 136.286 | KV452759.1  | 183677 | 2-scf00060 | 2  |
| AX-157815358 | 3 | 136.286 | KV452759.1  | 184190 | 2-scf00060 | 2  |
| AX-157815359 | 3 | 136.286 | KV452759.1  | 186824 | 2-scf00060 | 2  |
| AX-157948143 | 3 | 136.286 | KV452759.1  | 196690 | 2-scf00060 | 2  |
| AX-157815362 | 3 | 136.286 | KV452759.1  | 197469 | 2-scf00060 | 2  |
| AX-157716147 | 3 | 136.286 | KV452759.1  | 207459 | 2-scf00060 | 2  |
| AX-157948148 | 3 | 136.286 | KV452759.1  | 208321 | 2-scf00060 | 2  |
| AX-157948150 | 3 | 136.286 | KV452759.1  | 211335 | 2-scf00060 | 2  |
| AX-157948151 | 3 | 136.286 | KV452759.1  | 211746 | 2-scf00060 | 2  |
| AX-157948165 | 3 | 136.286 | KV452759.1  | 234924 | 2-scf00060 | 2  |
| AX-157948168 | 3 | 136.286 | KV452759.1  | 237490 | 2-scf00060 | 2  |
| AX-157815370 | 3 | 136.395 | KV452760.1  | 27067  | 2-scf00061 | 2  |
| AX-157948178 | 3 | 136.395 | KV452760.1  | 27534  | 2-scf00061 | 2  |
| AX-157948181 | 3 | 136.395 | KV452760.1  | 35492  | 2-scf00061 | 2  |
| AX-157713749 | 3 | 136.395 | KV452760.1  | 39780  | 2-scf00061 | 2  |
| AX-157948184 | 3 | 136.395 | KV452760.1  | 50627  | 2-scf00061 | 2  |

|              |   |         |            |         |            |   |
|--------------|---|---------|------------|---------|------------|---|
| AX-157755440 | 3 | 136.395 | KV452760.1 | 52045   | 2-scf00061 | 2 |
| AX-157682600 | 3 | 136.395 | KV452760.1 | 117841  | 2-scf00061 | 2 |
| AX-157680613 | 3 | 136.395 | KV452758.1 | 30939   | 2-scf00063 | 2 |
| AX-157947931 | 3 | 136.504 | KV452756.1 | 12362   | 2-scf00058 | 2 |
| AX-157948120 | 3 | 136.504 | KV452759.1 | 132127  | 2-scf00060 | 2 |
| AX-157948166 | 3 | 136.504 | KV452759.1 | 236133  | 2-scf00060 | 2 |
| AX-157948186 | 3 | 136.504 | KV452760.1 | 53298   | 2-scf00061 | 2 |
| AX-157948192 | 3 | 136.504 | KV452760.1 | 61492   | 2-scf00061 | 2 |
| AX-157815375 | 3 | 136.504 | KV452760.1 | 68649   | 2-scf00061 | 2 |
| AX-157815376 | 3 | 136.504 | KV452760.1 | 68908   | 2-scf00061 | 2 |
| AX-157707713 | 3 | 136.504 | KV452760.1 | 70118   | 2-scf00061 | 2 |
| AX-157707712 | 3 | 136.504 | KV452760.1 | 70192   | 2-scf00061 | 2 |
| AX-157948197 | 3 | 136.504 | KV452760.1 | 71423   | 2-scf00061 | 2 |
| AX-157948199 | 3 | 136.504 | KV452760.1 | 72891   | 2-scf00061 | 2 |
| AX-157948201 | 3 | 136.504 | KV452760.1 | 75173   | 2-scf00061 | 2 |
| AX-157948203 | 3 | 136.504 | KV452760.1 | 83061   | 2-scf00061 | 2 |
| AX-157815381 | 3 | 136.504 | KV452760.1 | 89955   | 2-scf00061 | 2 |
| AX-157682586 | 3 | 136.504 | KV452760.1 | 97575   | 2-scf00061 | 2 |
| AX-157682587 | 3 | 136.504 | KV452760.1 | 98114   | 2-scf00061 | 2 |
| AX-157680614 | 3 | 136.504 | KV452758.1 | 36483   | 2-scf00063 | 2 |
| AX-157682615 | 3 | 136.504 | KV452761.1 | 349     | 2-scf00065 | 2 |
| AX-157682619 | 3 | 136.504 | KV452762.1 | 12173   | 2-scf00067 | 2 |
| AX-157682552 | 3 | 136.558 | KV452758.1 | 334     | 2-scf00063 | 2 |
| AX-157947874 | 3 | 136.613 | KV452750.1 | 3787964 | 2-scf00055 | 2 |
| AX-157709959 | 3 | 136.613 | KV452756.1 | 23868   | 2-scf00058 | 2 |
| AX-157947943 | 3 | 136.613 | KV452756.1 | 24374   | 2-scf00058 | 2 |
| AX-157947958 | 3 | 136.613 | KV452756.1 | 56770   | 2-scf00058 | 2 |
| AX-157947971 | 3 | 136.613 | KV452756.1 | 76572   | 2-scf00058 | 2 |
| AX-157947991 | 3 | 136.613 | KV452756.1 | 113100  | 2-scf00058 | 2 |
| AX-157947999 | 3 | 136.613 | KV452756.1 | 122479  | 2-scf00058 | 2 |
| AX-157948006 | 3 | 136.613 | KV452756.1 | 139073  | 2-scf00058 | 2 |
| AX-157948060 | 3 | 136.613 | KV452756.1 | 226096  | 2-scf00058 | 2 |
| AX-157948089 | 3 | 136.613 | KV452759.1 | 35264   | 2-scf00060 | 2 |
| AX-157948132 | 3 | 136.613 | KV452759.1 | 165893  | 2-scf00060 | 2 |
| AX-157948135 | 3 | 136.613 | KV452759.1 | 171225  | 2-scf00060 | 2 |
| AX-157815354 | 3 | 136.613 | KV452759.1 | 174023  | 2-scf00060 | 2 |
| AX-157815355 | 3 | 136.613 | KV452759.1 | 176591  | 2-scf00060 | 2 |
| AX-157815356 | 3 | 136.613 | KV452759.1 | 177194  | 2-scf00060 | 2 |
| AX-157869549 | 3 | 136.613 | KV452759.1 | 180427  | 2-scf00060 | 2 |
| AX-157948152 | 3 | 136.613 | KV452759.1 | 213613  | 2-scf00060 | 2 |
| AX-157815363 | 3 | 136.613 | KV452759.1 | 217667  | 2-scf00060 | 2 |
| AX-157682590 | 3 | 136.613 | KV452760.1 | 102480  | 2-scf00061 | 2 |
| AX-157682597 | 3 | 136.613 | KV452760.1 | 110238  | 2-scf00061 | 2 |
| AX-157682598 | 3 | 136.613 | KV452760.1 | 111052  | 2-scf00061 | 2 |
| AX-157682551 | 3 | 136.613 | KV452757.1 | 10272   | 2-scf00062 | 2 |
| AX-157682553 | 3 | 136.613 | KV452758.1 | 588     | 2-scf00063 | 2 |
| AX-157680611 | 3 | 136.613 | KV452758.1 | 15653   | 2-scf00063 | 2 |
| AX-157682559 | 3 | 136.613 | KV452758.1 | 28799   | 2-scf00063 | 2 |
| AX-157682564 | 3 | 136.613 | KV452758.1 | 33905   | 2-scf00063 | 2 |
| AX-157682565 | 3 | 136.613 | KV452758.1 | 35106   | 2-scf00063 | 2 |
| AX-157682566 | 3 | 136.613 | KV452758.1 | 36799   | 2-scf00063 | 2 |

|              |   |         |             |       |            |    |
|--------------|---|---------|-------------|-------|------------|----|
| AX-157682569 | 3 | 136.613 | KV452758.1  | 42181 | 2-scf00063 | 2  |
| AX-157682571 | 3 | 136.613 | KV452758.1  | 45351 | 2-scf00063 | 2  |
| AX-157682576 | 3 | 136.613 | KV452758.1  | 54795 | 2-scf00063 | 2  |
| AX-157682577 | 3 | 136.613 | KV452758.1  | 57041 | 2-scf00063 | 2  |
| AX-157682578 | 3 | 136.613 | KV452758.1  | 60518 | 2-scf00063 | 2  |
| AX-157682579 | 3 | 136.613 | KV452758.1  | 63932 | 2-scf00063 | 2  |
| AX-157708171 | 3 | 136.613 | KV452758.1  | 64911 | 2-scf00063 | 2  |
| AX-157682581 | 3 | 136.613 | KV452758.1  | 70026 | 2-scf00063 | 2  |
| AX-157948205 | 3 | 136.613 | KV452763.1  | 1435  | 2-scf00066 | 2  |
| AX-157948207 | 3 | 136.613 | KV452763.1  | 3338  | 2-scf00066 | 2  |
| AX-157948208 | 3 | 136.613 | KV452763.1  | 5777  | 2-scf00066 | 2  |
| AX-157948210 | 3 | 136.613 | KV452763.1  | 9276  | 2-scf00066 | 2  |
| AX-157948211 | 3 | 136.613 | KV452763.1  | 9992  | 2-scf00066 | 2  |
| AX-157948212 | 3 | 136.613 | KV452763.1  | 11645 | 2-scf00066 | 2  |
| AX-158405994 | 3 | 136.613 | KV452763.1  | 12474 | 2-scf00066 | 2  |
| AX-157718073 | 3 | 136.613 | KV452763.1  | 16696 | 2-scf00066 | 2  |
| AX-157756637 | 3 | 136.613 | KV452763.1  | 19585 | 2-scf00066 | 2  |
| AX-157948214 | 3 | 136.613 | KV452763.1  | 19689 | 2-scf00066 | 2  |
| AX-157815383 | 3 | 136.613 | KV452763.1  | 26770 | 2-scf00066 | 2  |
| AX-157948216 | 3 | 136.613 | KV452763.1  | 28358 | 2-scf00066 | 2  |
| AX-157815384 | 3 | 136.613 | KV452763.1  | 29745 | 2-scf00066 | 2  |
| AX-157815385 | 3 | 136.613 | KV452763.1  | 30066 | 2-scf00066 | 2  |
| AX-157815386 | 3 | 136.613 | KV452763.1  | 31768 | 2-scf00066 | 2  |
| AX-157815387 | 3 | 136.613 | KV452763.1  | 35703 | 2-scf00066 | 2  |
| AX-157948222 | 3 | 136.613 | KV452763.1  | 35839 | 2-scf00066 | 2  |
| AX-157948223 | 3 | 136.613 | KV452763.1  | 36210 | 2-scf00066 | 2  |
| AX-157815388 | 3 | 136.613 | KV452763.1  | 36879 | 2-scf00066 | 2  |
| AX-157948224 | 3 | 136.613 | KV452763.1  | 41432 | 2-scf00066 | 2  |
| AX-157948226 | 3 | 136.613 | KV452763.1  | 44553 | 2-scf00066 | 2  |
| AX-157948227 | 3 | 136.613 | KV452763.1  | 44984 | 2-scf00066 | 2  |
| AX-157948229 | 3 | 136.613 | KV452763.1  | 49545 | 2-scf00066 | 2  |
| AX-157815391 | 3 | 136.613 | KV452763.1  | 53096 | 2-scf00066 | 2  |
| AX-157948232 | 3 | 136.613 | KV452763.1  | 55541 | 2-scf00066 | 2  |
| AX-157948233 | 3 | 136.613 | KV452763.1  | 56036 | 2-scf00066 | 2  |
| AX-157948234 | 3 | 136.613 | KV452763.1  | 57371 | 2-scf00066 | 2  |
| AX-157815392 | 3 | 136.613 | KV452763.1  | 58414 | 2-scf00066 | 2  |
| AX-157948235 | 3 | 136.613 | KV452763.1  | 64020 | 2-scf00066 | 2  |
| AX-157948236 | 3 | 136.613 | KV452763.1  | 69166 | 2-scf00066 | 2  |
| AX-157948238 | 3 | 136.613 | KV452763.1  | 71089 | 2-scf00066 | 2  |
| AX-157948239 | 3 | 136.613 | KV452763.1  | 73634 | 2-scf00066 | 2  |
| AX-158390174 | 3 | 136.613 | KV452763.1  | 73809 | 2-scf00066 | 2  |
| AX-157948240 | 3 | 136.613 | KV452763.1  | 74312 | 2-scf00066 | 2  |
| AX-157948241 | 3 | 136.613 | KV452763.1  | 74915 | 2-scf00066 | 2  |
| AX-157815393 | 3 | 136.613 | KV452763.1  | 76503 | 2-scf00066 | 2  |
| AX-157714554 | 3 | 136.613 | KV452763.1  | 77456 | 2-scf00066 | 2  |
| AX-157815394 | 3 | 136.613 | KV452763.1  | 78537 | 2-scf00066 | 2  |
| AX-157815395 | 3 | 136.613 | KV452763.1  | 83306 | 2-scf00066 | 2  |
| AX-157948242 | 3 | 136.613 | KV452763.1  | 84514 | 2-scf00066 | 2  |
| AX-157682616 | 3 | 136.613 | KV452762.1  | 4935  | 2-scf00067 | 2  |
| AX-157682618 | 3 | 136.613 | KV452762.1  | 9708  | 2-scf00067 | 2  |
| AX-157704810 | 3 | 136.613 | 3ML01027467 | 590   | scf03073_1 | UN |



|              |   |         |             |        |            |    |
|--------------|---|---------|-------------|--------|------------|----|
| AX-157697416 | 3 | 136.613 | 3ML01033628 | 106    | scf09287_1 | UN |
| AX-157948243 | 4 | 0       | KV452803.1  | 204538 | 4-scf00068 | 4  |
| AX-157948300 | 4 | 0.298   | KV452803.1  | 131384 | 4-scf00068 | 4  |
| AX-157948289 | 4 | 0.298   | KV452803.1  | 140338 | 4-scf00068 | 4  |
| AX-157948273 | 4 | 0.298   | KV452803.1  | 156886 | 4-scf00068 | 4  |
| AX-157948272 | 4 | 0.298   | KV452803.1  | 157113 | 4-scf00068 | 4  |
| AX-157948271 | 4 | 0.298   | KV452803.1  | 158166 | 4-scf00068 | 4  |
| AX-157721501 | 4 | 0.298   | KV452803.1  | 158442 | 4-scf00068 | 4  |
| AX-157948269 | 4 | 0.298   | KV452803.1  | 160750 | 4-scf00068 | 4  |
| AX-157948258 | 4 | 0.298   | KV452803.1  | 178786 | 4-scf00068 | 4  |
| AX-157738787 | 4 | 0.298   | KV452803.1  | 201842 | 4-scf00068 | 4  |
| AX-157948368 | 4 | 0.298   | KV452803.1  | 206801 | 4-scf00068 | 4  |
| AX-157854642 | 4 | 0.298   | KV452803.1  | 207812 | 4-scf00068 | 4  |
| AX-157948373 | 4 | 0.298   | KV452803.1  | 212102 | 4-scf00068 | 4  |
| AX-157738446 | 4 | 0.298   | KV452802.1  | 216313 | 4-scf00070 | 4  |
| AX-157951378 | 4 | 0.298   | KV452802.1  | 230594 | 4-scf00070 | 4  |
| AX-158406004 | 4 | 0.339   | KV452803.1  | 147146 | 4-scf00068 | 4  |
| AX-157948352 | 4 | 0.379   | KV452803.1  | 19717  | 4-scf00068 | 4  |
| AX-157948344 | 4 | 0.379   | KV452803.1  | 37190  | 4-scf00068 | 4  |
| AX-157948282 | 4 | 0.379   | KV452803.1  | 145584 | 4-scf00068 | 4  |
| AX-157948362 | 4 | 0.423   | KV452803.1  | 4803   | 4-scf00068 | 4  |
| AX-157948360 | 4 | 0.423   | KV452803.1  | 6837   | 4-scf00068 | 4  |
| AX-157754858 | 4 | 0.423   | KV452803.1  | 8788   | 4-scf00068 | 4  |
| AX-157724096 | 4 | 0.423   | KV452803.1  | 15533  | 4-scf00068 | 4  |
| AX-157948351 | 4 | 0.423   | KV452803.1  | 21615  | 4-scf00068 | 4  |
| AX-157948349 | 4 | 0.423   | KV452803.1  | 27295  | 4-scf00068 | 4  |
| AX-157948347 | 4 | 0.423   | KV452803.1  | 34748  | 4-scf00068 | 4  |
| AX-157948345 | 4 | 0.423   | KV452803.1  | 36228  | 4-scf00068 | 4  |
| AX-157948342 | 4 | 0.423   | KV452803.1  | 48162  | 4-scf00068 | 4  |
| AX-157948341 | 4 | 0.423   | KV452803.1  | 54992  | 4-scf00068 | 4  |
| AX-157749984 | 4 | 0.423   | KV452803.1  | 56868  | 4-scf00068 | 4  |
| AX-157948338 | 4 | 0.423   | KV452803.1  | 58574  | 4-scf00068 | 4  |
| AX-157757563 | 4 | 0.423   | KV452803.1  | 59373  | 4-scf00068 | 4  |
| AX-157948337 | 4 | 0.423   | KV452803.1  | 60392  | 4-scf00068 | 4  |
| AX-157757053 | 4 | 0.423   | KV452803.1  | 60902  | 4-scf00068 | 4  |
| AX-157948336 | 4 | 0.423   | KV452803.1  | 61594  | 4-scf00068 | 4  |
| AX-157948334 | 4 | 0.423   | KV452803.1  | 66033  | 4-scf00068 | 4  |
| AX-157948332 | 4 | 0.423   | KV452803.1  | 68771  | 4-scf00068 | 4  |
| AX-157948327 | 4 | 0.423   | KV452803.1  | 78376  | 4-scf00068 | 4  |
| AX-157948325 | 4 | 0.423   | KV452803.1  | 81555  | 4-scf00068 | 4  |
| AX-157948324 | 4 | 0.423   | KV452803.1  | 82858  | 4-scf00068 | 4  |
| AX-158404909 | 4 | 0.423   | KV452803.1  | 86947  | 4-scf00068 | 4  |
| AX-157815405 | 4 | 0.423   | KV452803.1  | 90272  | 4-scf00068 | 4  |
| AX-157948322 | 4 | 0.423   | KV452803.1  | 90882  | 4-scf00068 | 4  |
| AX-157948321 | 4 | 0.423   | KV452803.1  | 91231  | 4-scf00068 | 4  |
| AX-157948320 | 4 | 0.423   | KV452803.1  | 97971  | 4-scf00068 | 4  |
| AX-157948318 | 4 | 0.423   | KV452803.1  | 101670 | 4-scf00068 | 4  |
| AX-157948306 | 4 | 0.423   | KV452803.1  | 123815 | 4-scf00068 | 4  |
| AX-157948301 | 4 | 0.423   | KV452803.1  | 130864 | 4-scf00068 | 4  |
| AX-157948292 | 4 | 0.423   | KV452803.1  | 138292 | 4-scf00068 | 4  |
| AX-157948291 | 4 | 0.423   | KV452803.1  | 138609 | 4-scf00068 | 4  |

|              |   |       |            |        |            |   |
|--------------|---|-------|------------|--------|------------|---|
| AX-157948287 | 4 | 0.423 | KV452803.1 | 141463 | 4-scf00068 | 4 |
| AX-157948285 | 4 | 0.423 | KV452803.1 | 144575 | 4-scf00068 | 4 |
| AX-157948267 | 4 | 0.423 | KV452803.1 | 162694 | 4-scf00068 | 4 |
| AX-157948371 | 4 | 0.423 | KV452803.1 | 210746 | 4-scf00068 | 4 |
| AX-157948372 | 4 | 0.423 | KV452803.1 | 211661 | 4-scf00068 | 4 |
| AX-157948382 | 4 | 0.423 | KV452803.1 | 223229 | 4-scf00068 | 4 |
| AX-157948387 | 4 | 0.423 | KV452803.1 | 228592 | 4-scf00068 | 4 |
| AX-157948395 | 4 | 0.423 | KV452803.1 | 246236 | 4-scf00068 | 4 |
| AX-157948413 | 4 | 0.423 | KV452803.1 | 282619 | 4-scf00068 | 4 |
| AX-157948418 | 4 | 0.423 | KV452803.1 | 290764 | 4-scf00068 | 4 |
| AX-157948420 | 4 | 0.423 | KV452803.1 | 292792 | 4-scf00068 | 4 |
| AX-157948438 | 4 | 0.423 | KV452803.1 | 319412 | 4-scf00068 | 4 |
| AX-157815412 | 4 | 0.423 | KV452803.1 | 321380 | 4-scf00068 | 4 |
| AX-157948441 | 4 | 0.423 | KV452803.1 | 324665 | 4-scf00068 | 4 |
| AX-157948452 | 4 | 0.423 | KV452803.1 | 345796 | 4-scf00068 | 4 |
| AX-157948466 | 4 | 0.423 | KV452803.1 | 366023 | 4-scf00068 | 4 |
| AX-157948472 | 4 | 0.423 | KV452803.1 | 376661 | 4-scf00068 | 4 |
| AX-157948474 | 4 | 0.423 | KV452803.1 | 379386 | 4-scf00068 | 4 |
| AX-157948486 | 4 | 0.423 | KV452803.1 | 400191 | 4-scf00068 | 4 |
| AX-157948493 | 4 | 0.423 | KV452803.1 | 413789 | 4-scf00068 | 4 |
| AX-157948496 | 4 | 0.423 | KV452803.1 | 417332 | 4-scf00068 | 4 |
| AX-157948499 | 4 | 0.423 | KV452803.1 | 418837 | 4-scf00068 | 4 |
| AX-157815425 | 4 | 0.423 | KV452803.1 | 428072 | 4-scf00068 | 4 |
| AX-157815426 | 4 | 0.423 | KV452803.1 | 429946 | 4-scf00068 | 4 |
| AX-157948510 | 4 | 0.423 | KV452803.1 | 437068 | 4-scf00068 | 4 |
| AX-157948515 | 4 | 0.423 | KV452803.1 | 450748 | 4-scf00068 | 4 |
| AX-157815428 | 4 | 0.423 | KV452803.1 | 470698 | 4-scf00068 | 4 |
| AX-157948541 | 4 | 0.423 | KV452803.1 | 493036 | 4-scf00068 | 4 |
| AX-157948545 | 4 | 0.423 | KV452803.1 | 499427 | 4-scf00068 | 4 |
| AX-157739470 | 4 | 0.423 | KV452803.1 | 502913 | 4-scf00068 | 4 |
| AX-157948559 | 4 | 0.423 | KV452803.1 | 518596 | 4-scf00068 | 4 |
| AX-157948580 | 4 | 0.423 | KV452803.1 | 552831 | 4-scf00068 | 4 |
| AX-157951200 | 4 | 0.423 | KV452802.1 | 3024   | 4-scf00070 | 4 |
| AX-157951202 | 4 | 0.423 | KV452802.1 | 5116   | 4-scf00070 | 4 |
| AX-157951205 | 4 | 0.423 | KV452802.1 | 10296  | 4-scf00070 | 4 |
| AX-157951215 | 4 | 0.423 | KV452802.1 | 32601  | 4-scf00070 | 4 |
| AX-157951225 | 4 | 0.423 | KV452802.1 | 53976  | 4-scf00070 | 4 |
| AX-157951227 | 4 | 0.423 | KV452802.1 | 55665  | 4-scf00070 | 4 |
| AX-157951228 | 4 | 0.423 | KV452802.1 | 56197  | 4-scf00070 | 4 |
| AX-157951229 | 4 | 0.423 | KV452802.1 | 58402  | 4-scf00070 | 4 |
| AX-157951230 | 4 | 0.423 | KV452802.1 | 60156  | 4-scf00070 | 4 |
| AX-157951231 | 4 | 0.423 | KV452802.1 | 62009  | 4-scf00070 | 4 |
| AX-157951232 | 4 | 0.423 | KV452802.1 | 62405  | 4-scf00070 | 4 |
| AX-157773301 | 4 | 0.423 | KV452802.1 | 70108  | 4-scf00070 | 4 |
| AX-157951253 | 4 | 0.423 | KV452802.1 | 85195  | 4-scf00070 | 4 |
| AX-157951276 | 4 | 0.423 | KV452802.1 | 120091 | 4-scf00070 | 4 |
| AX-157951279 | 4 | 0.423 | KV452802.1 | 121114 | 4-scf00070 | 4 |
| AX-157951284 | 4 | 0.423 | KV452802.1 | 123498 | 4-scf00070 | 4 |
| AX-157951285 | 4 | 0.423 | KV452802.1 | 123988 | 4-scf00070 | 4 |
| AX-157951286 | 4 | 0.423 | KV452802.1 | 124174 | 4-scf00070 | 4 |
| AX-157753113 | 4 | 0.423 | KV452802.1 | 125453 | 4-scf00070 | 4 |

|              |   |       |             |        |            |    |
|--------------|---|-------|-------------|--------|------------|----|
| AX-157951287 | 4 | 0.423 | KV452802.1  | 125776 | 4-scf00070 | 4  |
| AX-157951296 | 4 | 0.423 | KV452802.1  | 141421 | 4-scf00070 | 4  |
| AX-157951299 | 4 | 0.423 | KV452802.1  | 145149 | 4-scf00070 | 4  |
| AX-157951302 | 4 | 0.423 | KV452802.1  | 148344 | 4-scf00070 | 4  |
| AX-157771390 | 4 | 0.423 | KV452802.1  | 151231 | 4-scf00070 | 4  |
| AX-157951307 | 4 | 0.423 | KV452802.1  | 154423 | 4-scf00070 | 4  |
| AX-157951308 | 4 | 0.423 | KV452802.1  | 155606 | 4-scf00070 | 4  |
| AX-157951309 | 4 | 0.423 | KV452802.1  | 156419 | 4-scf00070 | 4  |
| AX-157951311 | 4 | 0.423 | KV452802.1  | 158852 | 4-scf00070 | 4  |
| AX-157951313 | 4 | 0.423 | KV452802.1  | 161516 | 4-scf00070 | 4  |
| AX-157951317 | 4 | 0.423 | KV452802.1  | 165405 | 4-scf00070 | 4  |
| AX-157951320 | 4 | 0.423 | KV452802.1  | 167839 | 4-scf00070 | 4  |
| AX-157747690 | 4 | 0.423 | KV452802.1  | 170166 | 4-scf00070 | 4  |
| AX-157951324 | 4 | 0.423 | KV452802.1  | 175449 | 4-scf00070 | 4  |
| AX-157951339 | 4 | 0.423 | KV452802.1  | 184890 | 4-scf00070 | 4  |
| AX-157951353 | 4 | 0.423 | KV452802.1  | 203439 | 4-scf00070 | 4  |
| AX-157951360 | 4 | 0.423 | KV452802.1  | 210433 | 4-scf00070 | 4  |
| AX-157951361 | 4 | 0.423 | KV452802.1  | 210967 | 4-scf00070 | 4  |
| AX-158382796 | 4 | 0.423 | KV452802.1  | 214634 | 4-scf00070 | 4  |
| AX-157951368 | 4 | 0.423 | KV452802.1  | 217283 | 4-scf00070 | 4  |
| AX-157951370 | 4 | 0.423 | KV452802.1  | 218203 | 4-scf00070 | 4  |
| AX-157951380 | 4 | 0.423 | KV452802.1  | 231759 | 4-scf00070 | 4  |
| AX-157951381 | 4 | 0.423 | KV452802.1  | 232500 | 4-scf00070 | 4  |
| AX-157951382 | 4 | 0.423 | KV452802.1  | 235019 | 4-scf00070 | 4  |
| AX-157951384 | 4 | 0.423 | KV452802.1  | 237208 | 4-scf00070 | 4  |
| AX-157951385 | 4 | 0.423 | KV452802.1  | 237592 | 4-scf00070 | 4  |
| AX-157723396 | 4 | 0.423 | KV452802.1  | 240897 | 4-scf00070 | 4  |
| AX-157815589 | 4 | 0.423 | KV452802.1  | 244849 | 4-scf00070 | 4  |
| AX-157724907 | 4 | 0.423 | KV452802.1  | 256205 | 4-scf00070 | 4  |
| AX-157951403 | 4 | 0.423 | KV452802.1  | 275958 | 4-scf00070 | 4  |
| AX-157722301 | 4 | 0.423 | KV452802.1  | 278243 | 4-scf00070 | 4  |
| AX-157951405 | 4 | 0.423 | KV452802.1  | 280280 | 4-scf00070 | 4  |
| AX-157722603 | 4 | 0.423 | KV452802.1  | 282704 | 4-scf00070 | 4  |
| AX-157815592 | 4 | 0.423 | KV452802.1  | 285752 | 4-scf00070 | 4  |
| AX-157951410 | 4 | 0.423 | KV452802.1  | 286567 | 4-scf00070 | 4  |
| AX-157773575 | 4 | 0.423 | KV452802.1  | 292181 | 4-scf00070 | 4  |
| AX-157951412 | 4 | 0.423 | KV452802.1  | 294390 | 4-scf00070 | 4  |
| AX-157719067 | 4 | 0.423 | KV452802.1  | 295806 | 4-scf00070 | 4  |
| AX-157951415 | 4 | 0.423 | KV452802.1  | 296420 | 4-scf00070 | 4  |
| AX-157951418 | 4 | 0.423 | KV452802.1  | 298536 | 4-scf00070 | 4  |
| AX-157689743 | 4 | 0.423 | 3ML01031826 | 507    | scf07447_1 | UN |
| AX-157706637 | 4 | 0.423 | 3ML01023899 | 529    | scf08262_1 | UN |
| AX-157951416 | 4 | 0.434 | KV452802.1  | 297531 | 4-scf00070 | 4  |
| AX-157742729 | 4 | 0.532 | KV452803.1  | 211584 | 4-scf00068 | 4  |
| AX-157948374 | 4 | 0.532 | KV452803.1  | 213668 | 4-scf00068 | 4  |
| AX-157948380 | 4 | 0.532 | KV452803.1  | 221569 | 4-scf00068 | 4  |
| AX-157727421 | 4 | 0.641 | KV452803.1  | 223624 | 4-scf00068 | 4  |
| AX-157948384 | 4 | 0.641 | KV452803.1  | 225965 | 4-scf00068 | 4  |
| AX-157864815 | 4 | 0.641 | KV452803.1  | 227342 | 4-scf00068 | 4  |
| AX-157948280 | 4 | 0.751 | KV452803.1  | 149765 | 4-scf00068 | 4  |
| AX-157747848 | 4 | 0.751 | KV452803.1  | 157440 | 4-scf00068 | 4  |

|              |   |       |            |        |            |   |
|--------------|---|-------|------------|--------|------------|---|
| AX-157883991 | 4 | 0.751 | KV452803.1 | 239356 | 4-scf00068 | 4 |
| AX-157948391 | 4 | 0.751 | KV452803.1 | 239951 | 4-scf00068 | 4 |
| AX-157948394 | 4 | 0.751 | KV452803.1 | 245911 | 4-scf00068 | 4 |
| AX-157815409 | 4 | 0.751 | KV452803.1 | 248296 | 4-scf00068 | 4 |
| AX-157948397 | 4 | 0.751 | KV452803.1 | 249840 | 4-scf00068 | 4 |
| AX-157948398 | 4 | 0.751 | KV452803.1 | 250821 | 4-scf00068 | 4 |
| AX-157720137 | 4 | 0.751 | KV452803.1 | 253582 | 4-scf00068 | 4 |
| AX-157948401 | 4 | 0.751 | KV452803.1 | 256671 | 4-scf00068 | 4 |
| AX-157948402 | 4 | 0.751 | KV452803.1 | 258644 | 4-scf00068 | 4 |
| AX-157742937 | 4 | 0.751 | KV452803.1 | 263989 | 4-scf00068 | 4 |
| AX-157948406 | 4 | 0.751 | KV452803.1 | 268664 | 4-scf00068 | 4 |
| AX-157815410 | 4 | 0.751 | KV452803.1 | 271193 | 4-scf00068 | 4 |
| AX-157715073 | 4 | 0.751 | KV452803.1 | 271339 | 4-scf00068 | 4 |
| AX-157948409 | 4 | 0.751 | KV452803.1 | 272077 | 4-scf00068 | 4 |
| AX-157948410 | 4 | 0.751 | KV452803.1 | 279351 | 4-scf00068 | 4 |
| AX-157948414 | 4 | 0.751 | KV452803.1 | 283084 | 4-scf00068 | 4 |
| AX-157948415 | 4 | 0.751 | KV452803.1 | 284214 | 4-scf00068 | 4 |
| AX-157948416 | 4 | 0.751 | KV452803.1 | 286891 | 4-scf00068 | 4 |
| AX-157948419 | 4 | 0.751 | KV452803.1 | 291351 | 4-scf00068 | 4 |
| AX-158379419 | 4 | 0.751 | KV452803.1 | 464514 | 4-scf00068 | 4 |
| AX-157948554 | 4 | 0.751 | KV452803.1 | 513496 | 4-scf00068 | 4 |
| AX-157951258 | 4 | 0.751 | KV452802.1 | 99641  | 4-scf00070 | 4 |
| AX-157951266 | 4 | 0.751 | KV452802.1 | 112250 | 4-scf00070 | 4 |
| AX-157951268 | 4 | 0.751 | KV452802.1 | 114329 | 4-scf00070 | 4 |
| AX-157951270 | 4 | 0.751 | KV452802.1 | 115366 | 4-scf00070 | 4 |
| AX-157951271 | 4 | 0.751 | KV452802.1 | 116825 | 4-scf00070 | 4 |
| AX-157951273 | 4 | 0.751 | KV452802.1 | 118023 | 4-scf00070 | 4 |
| AX-157951281 | 4 | 0.751 | KV452802.1 | 121863 | 4-scf00070 | 4 |
| AX-157951300 | 4 | 0.751 | KV452802.1 | 146181 | 4-scf00070 | 4 |
| AX-157951301 | 4 | 0.751 | KV452802.1 | 148004 | 4-scf00070 | 4 |
| AX-157951306 | 4 | 0.751 | KV452802.1 | 151462 | 4-scf00070 | 4 |
| AX-157951319 | 4 | 0.751 | KV452802.1 | 167277 | 4-scf00070 | 4 |
| AX-157951322 | 4 | 0.751 | KV452802.1 | 169326 | 4-scf00070 | 4 |
| AX-157951323 | 4 | 0.751 | KV452802.1 | 173238 | 4-scf00070 | 4 |
| AX-157951329 | 4 | 0.751 | KV452802.1 | 178090 | 4-scf00070 | 4 |
| AX-157951330 | 4 | 0.751 | KV452802.1 | 178714 | 4-scf00070 | 4 |
| AX-157951331 | 4 | 0.751 | KV452802.1 | 179577 | 4-scf00070 | 4 |
| AX-157951334 | 4 | 0.751 | KV452802.1 | 180812 | 4-scf00070 | 4 |
| AX-157951342 | 4 | 0.751 | KV452802.1 | 188669 | 4-scf00070 | 4 |
| AX-157951347 | 4 | 0.751 | KV452802.1 | 195592 | 4-scf00070 | 4 |
| AX-157951350 | 4 | 0.751 | KV452802.1 | 198904 | 4-scf00070 | 4 |
| AX-157951351 | 4 | 0.751 | KV452802.1 | 200746 | 4-scf00070 | 4 |
| AX-157951352 | 4 | 0.751 | KV452802.1 | 201941 | 4-scf00070 | 4 |
| AX-157951358 | 4 | 0.751 | KV452802.1 | 208760 | 4-scf00070 | 4 |
| AX-157951362 | 4 | 0.751 | KV452802.1 | 212049 | 4-scf00070 | 4 |
| AX-158382797 | 4 | 0.751 | KV452802.1 | 217500 | 4-scf00070 | 4 |
| AX-157951376 | 4 | 0.751 | KV452802.1 | 229138 | 4-scf00070 | 4 |
| AX-157951394 | 4 | 0.751 | KV452802.1 | 256910 | 4-scf00070 | 4 |
| AX-157951395 | 4 | 0.751 | KV452802.1 | 257304 | 4-scf00070 | 4 |
| AX-157951401 | 4 | 0.751 | KV452802.1 | 268231 | 4-scf00070 | 4 |
| AX-157951408 | 4 | 0.751 | KV452802.1 | 282457 | 4-scf00070 | 4 |

|              |   |       |             |        |            |    |
|--------------|---|-------|-------------|--------|------------|----|
| AX-157951409 | 4 | 0.751 | KV452802.1  | 282776 | 4-scf00070 | 4  |
| AX-157815593 | 4 | 0.751 | KV452802.1  | 289436 | 4-scf00070 | 4  |
| AX-157951424 | 4 | 0.751 | KV452802.1  | 311993 | 4-scf00070 | 4  |
| AX-157951425 | 4 | 0.751 | KV452802.1  | 312655 | 4-scf00070 | 4  |
| AX-157706214 | 4 | 0.751 | 3ML01032476 | 253    | scf08097_1 | UN |
| AX-157948253 | 4 | 0.86  | KV452803.1  | 190523 | 4-scf00068 | 4  |
| AX-157948421 | 4 | 0.86  | KV452803.1  | 293538 | 4-scf00068 | 4  |
| AX-157948423 | 4 | 0.86  | KV452803.1  | 294542 | 4-scf00068 | 4  |
| AX-157948424 | 4 | 0.86  | KV452803.1  | 294982 | 4-scf00068 | 4  |
| AX-157948456 | 4 | 0.86  | KV452803.1  | 352300 | 4-scf00068 | 4  |
| AX-157948364 | 4 | 0.969 | KV452803.1  | 1759   | 4-scf00068 | 4  |
| AX-157815401 | 4 | 0.969 | KV452803.1  | 103071 | 4-scf00068 | 4  |
| AX-157948303 | 4 | 0.969 | KV452803.1  | 129639 | 4-scf00068 | 4  |
| AX-157948245 | 4 | 0.969 | KV452803.1  | 200734 | 4-scf00068 | 4  |
| AX-157948432 | 4 | 0.969 | KV452803.1  | 314951 | 4-scf00068 | 4  |
| AX-157948442 | 4 | 0.969 | KV452803.1  | 326788 | 4-scf00068 | 4  |
| AX-158379418 | 4 | 0.969 | KV452803.1  | 327940 | 4-scf00068 | 4  |
| AX-157738486 | 4 | 0.969 | KV452803.1  | 329951 | 4-scf00068 | 4  |
| AX-157948447 | 4 | 0.969 | KV452803.1  | 336087 | 4-scf00068 | 4  |
| AX-157948451 | 4 | 0.969 | KV452803.1  | 344683 | 4-scf00068 | 4  |
| AX-157721401 | 4 | 0.969 | KV452803.1  | 349220 | 4-scf00068 | 4  |
| AX-157948454 | 4 | 0.969 | KV452803.1  | 350406 | 4-scf00068 | 4  |
| AX-157948457 | 4 | 0.969 | KV452803.1  | 352975 | 4-scf00068 | 4  |
| AX-157948459 | 4 | 0.969 | KV452803.1  | 356792 | 4-scf00068 | 4  |
| AX-157948461 | 4 | 0.969 | KV452803.1  | 358701 | 4-scf00068 | 4  |
| AX-157948462 | 4 | 0.969 | KV452803.1  | 362808 | 4-scf00068 | 4  |
| AX-157739921 | 4 | 0.969 | KV452803.1  | 364592 | 4-scf00068 | 4  |
| AX-157948468 | 4 | 0.969 | KV452803.1  | 373504 | 4-scf00068 | 4  |
| AX-157948469 | 4 | 0.969 | KV452803.1  | 373904 | 4-scf00068 | 4  |
| AX-157815424 | 4 | 0.969 | KV452803.1  | 417677 | 4-scf00068 | 4  |
| AX-157948562 | 4 | 0.969 | KV452803.1  | 522684 | 4-scf00068 | 4  |
| AX-157951263 | 4 | 0.969 | KV452802.1  | 105173 | 4-scf00070 | 4  |
| AX-157951290 | 4 | 0.969 | KV452802.1  | 129517 | 4-scf00070 | 4  |
| AX-157951291 | 4 | 0.969 | KV452802.1  | 134492 | 4-scf00070 | 4  |
| AX-157951315 | 4 | 0.969 | KV452802.1  | 162924 | 4-scf00070 | 4  |
| AX-157951346 | 4 | 0.969 | KV452802.1  | 194788 | 4-scf00070 | 4  |
| AX-157951356 | 4 | 0.969 | KV452802.1  | 205098 | 4-scf00070 | 4  |
| AX-157951400 | 4 | 0.969 | KV452802.1  | 267631 | 4-scf00070 | 4  |
| AX-157948458 | 4 | 1.078 | KV452803.1  | 353951 | 4-scf00068 | 4  |
| AX-157815416 | 4 | 1.078 | KV452803.1  | 377216 | 4-scf00068 | 4  |
| AX-157815417 | 4 | 1.078 | KV452803.1  | 377484 | 4-scf00068 | 4  |
| AX-157948473 | 4 | 1.078 | KV452803.1  | 378804 | 4-scf00068 | 4  |
| AX-157948479 | 4 | 1.078 | KV452803.1  | 387835 | 4-scf00068 | 4  |
| AX-157948480 | 4 | 1.078 | KV452803.1  | 388052 | 4-scf00068 | 4  |
| AX-157948481 | 4 | 1.078 | KV452803.1  | 389467 | 4-scf00068 | 4  |
| AX-157948485 | 4 | 1.078 | KV452803.1  | 396046 | 4-scf00068 | 4  |
| AX-157727608 | 4 | 1.078 | KV452803.1  | 397097 | 4-scf00068 | 4  |
| AX-157815421 | 4 | 1.078 | KV452803.1  | 400777 | 4-scf00068 | 4  |
| AX-157747245 | 4 | 1.078 | KV452803.1  | 402595 | 4-scf00068 | 4  |
| AX-158382733 | 4 | 1.078 | KV452803.1  | 407028 | 4-scf00068 | 4  |
| AX-157948492 | 4 | 1.078 | KV452803.1  | 411814 | 4-scf00068 | 4  |

|              |   |       |            |        |            |   |
|--------------|---|-------|------------|--------|------------|---|
| AX-157948494 | 4 | 1.078 | KV452803.1 | 414982 | 4-scf00068 | 4 |
| AX-157948500 | 4 | 1.078 | KV452803.1 | 421607 | 4-scf00068 | 4 |
| AX-157948501 | 4 | 1.078 | KV452803.1 | 423186 | 4-scf00068 | 4 |
| AX-157948502 | 4 | 1.078 | KV452803.1 | 424754 | 4-scf00068 | 4 |
| AX-157948505 | 4 | 1.078 | KV452803.1 | 425920 | 4-scf00068 | 4 |
| AX-157948507 | 4 | 1.078 | KV452803.1 | 428851 | 4-scf00068 | 4 |
| AX-157948509 | 4 | 1.078 | KV452803.1 | 435261 | 4-scf00068 | 4 |
| AX-157714292 | 4 | 1.078 | KV452803.1 | 435310 | 4-scf00068 | 4 |
| AX-157745507 | 4 | 1.078 | KV452803.1 | 445719 | 4-scf00068 | 4 |
| AX-157948514 | 4 | 1.078 | KV452803.1 | 448396 | 4-scf00068 | 4 |
| AX-157951373 | 4 | 1.078 | KV452802.1 | 220770 | 4-scf00070 | 4 |
| AX-157951389 | 4 | 1.078 | KV452802.1 | 249699 | 4-scf00070 | 4 |
| AX-157948519 | 4 | 1.297 | KV452803.1 | 460382 | 4-scf00068 | 4 |
| AX-157948520 | 4 | 1.297 | KV452803.1 | 462082 | 4-scf00068 | 4 |
| AX-157948522 | 4 | 1.297 | KV452803.1 | 466439 | 4-scf00068 | 4 |
| AX-157948523 | 4 | 1.297 | KV452803.1 | 468798 | 4-scf00068 | 4 |
| AX-157948529 | 4 | 1.297 | KV452803.1 | 476236 | 4-scf00068 | 4 |
| AX-157948535 | 4 | 1.297 | KV452803.1 | 481001 | 4-scf00068 | 4 |
| AX-157951414 | 4 | 1.297 | KV452802.1 | 295975 | 4-scf00070 | 4 |
| AX-157948528 | 4 | 1.378 | KV452803.1 | 474146 | 4-scf00068 | 4 |
| AX-157854643 | 4 | 1.406 | KV452803.1 | 479579 | 4-scf00068 | 4 |
| AX-157815430 | 4 | 1.406 | KV452803.1 | 482401 | 4-scf00068 | 4 |
| AX-157768869 | 4 | 1.406 | KV452803.1 | 482707 | 4-scf00068 | 4 |
| AX-157720231 | 4 | 1.406 | KV452803.1 | 483141 | 4-scf00068 | 4 |
| AX-157714596 | 4 | 1.406 | KV452803.1 | 483753 | 4-scf00068 | 4 |
| AX-157864821 | 4 | 1.406 | KV452803.1 | 488203 | 4-scf00068 | 4 |
| AX-157780888 | 4 | 1.406 | KV452803.1 | 491551 | 4-scf00068 | 4 |
| AX-157948540 | 4 | 1.406 | KV452803.1 | 491967 | 4-scf00068 | 4 |
| AX-157951379 | 4 | 1.406 | KV452802.1 | 230809 | 4-scf00070 | 4 |
| AX-157815432 | 4 | 1.515 | KV452803.1 | 498807 | 4-scf00068 | 4 |
| AX-157815433 | 4 | 1.515 | KV452803.1 | 501925 | 4-scf00068 | 4 |
| AX-157948548 | 4 | 1.515 | KV452803.1 | 502828 | 4-scf00068 | 4 |
| AX-157948556 | 4 | 1.515 | KV452803.1 | 516185 | 4-scf00068 | 4 |
| AX-157948561 | 4 | 1.515 | KV452803.1 | 522170 | 4-scf00068 | 4 |
| AX-157948564 | 4 | 1.515 | KV452803.1 | 535491 | 4-scf00068 | 4 |
| AX-157948565 | 4 | 1.515 | KV452803.1 | 536014 | 4-scf00068 | 4 |
| AX-157746228 | 4 | 1.515 | KV452803.1 | 539739 | 4-scf00068 | 4 |
| AX-157815434 | 4 | 1.515 | KV452803.1 | 539849 | 4-scf00068 | 4 |
| AX-157948569 | 4 | 1.515 | KV452803.1 | 540417 | 4-scf00068 | 4 |
| AX-157948570 | 4 | 1.515 | KV452803.1 | 541195 | 4-scf00068 | 4 |
| AX-157948573 | 4 | 1.515 | KV452803.1 | 544494 | 4-scf00068 | 4 |
| AX-157948574 | 4 | 1.515 | KV452803.1 | 545038 | 4-scf00068 | 4 |
| AX-157948588 | 4 | 1.515 | KV452803.1 | 565403 | 4-scf00068 | 4 |
| AX-157948595 | 4 | 1.515 | KV452803.1 | 573571 | 4-scf00068 | 4 |
| AX-157948604 | 4 | 1.515 | KV452803.1 | 582572 | 4-scf00068 | 4 |
| AX-157815437 | 4 | 1.515 | KV452803.1 | 585551 | 4-scf00068 | 4 |
| AX-157749692 | 4 | 1.587 | KV452803.1 | 541266 | 4-scf00068 | 4 |
| AX-157715695 | 4 | 1.624 | KV452803.1 | 549292 | 4-scf00068 | 4 |
| AX-157948578 | 4 | 1.624 | KV452803.1 | 549902 | 4-scf00068 | 4 |
| AX-157948585 | 4 | 1.624 | KV452803.1 | 563585 | 4-scf00068 | 4 |
| AX-157948587 | 4 | 1.624 | KV452803.1 | 564843 | 4-scf00068 | 4 |

|              |   |       |            |        |            |   |
|--------------|---|-------|------------|--------|------------|---|
| AX-157948589 | 4 | 1.653 | KV452803.1 | 567547 | 4-scf00068 | 4 |
| AX-157948591 | 4 | 1.659 | KV452803.1 | 568756 | 4-scf00068 | 4 |
| AX-157948592 | 4 | 1.665 | KV452803.1 | 570249 | 4-scf00068 | 4 |
| AX-157948593 | 4 | 1.696 | KV452803.1 | 570878 | 4-scf00068 | 4 |
| AX-157948376 | 4 | 1.727 | KV452803.1 | 214732 | 4-scf00068 | 4 |
| AX-157948483 | 4 | 1.727 | KV452803.1 | 391960 | 4-scf00068 | 4 |
| AX-157948602 | 4 | 1.727 | KV452803.1 | 579486 | 4-scf00068 | 4 |
| AX-158382735 | 4 | 1.727 | KV452803.1 | 604608 | 4-scf00068 | 4 |
| AX-157948637 | 4 | 1.727 | KV452803.1 | 619999 | 4-scf00068 | 4 |
| AX-157948606 | 4 | 1.761 | KV452803.1 | 584635 | 4-scf00068 | 4 |
| AX-157948608 | 4 | 1.761 | KV452803.1 | 586261 | 4-scf00068 | 4 |
| AX-157726839 | 4 | 1.761 | KV452803.1 | 588239 | 4-scf00068 | 4 |
| AX-157948609 | 4 | 1.761 | KV452803.1 | 590532 | 4-scf00068 | 4 |
| AX-157854644 | 4 | 1.761 | KV452803.1 | 591367 | 4-scf00068 | 4 |
| AX-157948611 | 4 | 1.966 | KV452803.1 | 592429 | 4-scf00068 | 4 |
| AX-157948612 | 4 | 1.966 | KV452803.1 | 594507 | 4-scf00068 | 4 |
| AX-157948613 | 4 | 2.171 | KV452803.1 | 595852 | 4-scf00068 | 4 |
| AX-157948614 | 4 | 2.171 | KV452803.1 | 597121 | 4-scf00068 | 4 |
| AX-157743339 | 4 | 2.171 | KV452803.1 | 600137 | 4-scf00068 | 4 |
| AX-157948618 | 4 | 2.171 | KV452803.1 | 600940 | 4-scf00068 | 4 |
| AX-157948621 | 4 | 2.171 | KV452803.1 | 604324 | 4-scf00068 | 4 |
| AX-157948624 | 4 | 2.171 | KV452803.1 | 607454 | 4-scf00068 | 4 |
| AX-157948625 | 4 | 2.171 | KV452803.1 | 607810 | 4-scf00068 | 4 |
| AX-157883995 | 4 | 2.171 | KV452803.1 | 609801 | 4-scf00068 | 4 |
| AX-157948622 | 4 | 2.194 | KV452803.1 | 605291 | 4-scf00068 | 4 |
| AX-157948626 | 4 | 2.238 | KV452803.1 | 608475 | 4-scf00068 | 4 |
| AX-157948551 | 4 | 2.28  | KV452803.1 | 507888 | 4-scf00068 | 4 |
| AX-157758347 | 4 | 2.28  | KV452803.1 | 609240 | 4-scf00068 | 4 |
| AX-157697888 | 4 | 2.28  | KV452803.1 | 611041 | 4-scf00068 | 4 |
| AX-157948632 | 4 | 2.411 | KV452803.1 | 616750 | 4-scf00068 | 4 |
| AX-157948633 | 4 | 2.411 | KV452803.1 | 617269 | 4-scf00068 | 4 |
| AX-157948634 | 4 | 2.412 | KV452803.1 | 617717 | 4-scf00068 | 4 |
| AX-157948642 | 4 | 2.682 | KV452803.1 | 625542 | 4-scf00068 | 4 |
| AX-157948648 | 4 | 2.682 | KV452803.1 | 631111 | 4-scf00068 | 4 |
| AX-157948649 | 4 | 2.924 | KV452803.1 | 631883 | 4-scf00068 | 4 |
| AX-157724600 | 4 | 2.937 | KV452803.1 | 634766 | 4-scf00068 | 4 |
| AX-157948651 | 4 | 2.937 | KV452803.1 | 636695 | 4-scf00068 | 4 |
| AX-157948652 | 4 | 2.937 | KV452803.1 | 636919 | 4-scf00068 | 4 |
| AX-157948653 | 4 | 2.937 | KV452803.1 | 639120 | 4-scf00068 | 4 |
| AX-157723288 | 4 | 2.937 | KV452803.1 | 640614 | 4-scf00068 | 4 |
| AX-157749872 | 4 | 2.937 | KV452803.1 | 647013 | 4-scf00068 | 4 |
| AX-157948659 | 4 | 2.937 | KV452803.1 | 647157 | 4-scf00068 | 4 |
| AX-157948661 | 4 | 2.937 | KV452803.1 | 648446 | 4-scf00068 | 4 |
| AX-157948666 | 4 | 2.937 | KV452803.1 | 658831 | 4-scf00068 | 4 |
| AX-157750055 | 4 | 3.014 | KV452803.1 | 654080 | 4-scf00068 | 4 |
| AX-157948664 | 4 | 3.014 | KV452803.1 | 655668 | 4-scf00068 | 4 |
| AX-157948655 | 4 | 3.155 | KV452803.1 | 640672 | 4-scf00068 | 4 |
| AX-157948658 | 4 | 3.155 | KV452803.1 | 646830 | 4-scf00068 | 4 |
| AX-157714901 | 4 | 3.155 | KV452803.1 | 666708 | 4-scf00068 | 4 |
| AX-157721013 | 4 | 3.155 | KV452803.1 | 667611 | 4-scf00068 | 4 |
| AX-157815443 | 4 | 3.155 | KV452803.1 | 670357 | 4-scf00068 | 4 |

|              |   |       |            |        |            |   |
|--------------|---|-------|------------|--------|------------|---|
| AX-157948669 | 4 | 3.155 | KV452803.1 | 670815 | 4-scf00068 | 4 |
| AX-157815444 | 4 | 3.155 | KV452803.1 | 671489 | 4-scf00068 | 4 |
| AX-157948671 | 4 | 3.155 | KV452803.1 | 671786 | 4-scf00068 | 4 |
| AX-157815445 | 4 | 3.155 | KV452803.1 | 672730 | 4-scf00068 | 4 |
| AX-157775168 | 4 | 3.155 | KV452803.1 | 673040 | 4-scf00068 | 4 |
| AX-157948673 | 4 | 3.155 | KV452803.1 | 673756 | 4-scf00068 | 4 |
| AX-157948674 | 4 | 3.155 | KV452803.1 | 676401 | 4-scf00068 | 4 |
| AX-157948675 | 4 | 3.155 | KV452803.1 | 676866 | 4-scf00068 | 4 |
| AX-157948676 | 4 | 3.155 | KV452803.1 | 677413 | 4-scf00068 | 4 |
| AX-157948680 | 4 | 3.155 | KV452803.1 | 681491 | 4-scf00068 | 4 |
| AX-157948683 | 4 | 3.155 | KV452803.1 | 684090 | 4-scf00068 | 4 |
| AX-157948688 | 4 | 3.155 | KV452803.1 | 688280 | 4-scf00068 | 4 |
| AX-157948689 | 4 | 3.155 | KV452803.1 | 688761 | 4-scf00068 | 4 |
| AX-158379421 | 4 | 3.155 | KV452803.1 | 694679 | 4-scf00068 | 4 |
| AX-157948701 | 4 | 3.155 | KV452803.1 | 702014 | 4-scf00068 | 4 |
| AX-157948706 | 4 | 3.155 | KV452803.1 | 709155 | 4-scf00068 | 4 |
| AX-157948694 | 4 | 3.204 | KV452803.1 | 694961 | 4-scf00068 | 4 |
| AX-157948696 | 4 | 3.29  | KV452803.1 | 697027 | 4-scf00068 | 4 |
| AX-157948697 | 4 | 3.374 | KV452803.1 | 699210 | 4-scf00068 | 4 |
| AX-157948698 | 4 | 3.374 | KV452803.1 | 699658 | 4-scf00068 | 4 |
| AX-157948702 | 4 | 3.374 | KV452803.1 | 702409 | 4-scf00068 | 4 |
| AX-157948692 | 4 | 3.449 | KV452803.1 | 691901 | 4-scf00068 | 4 |
| AX-157875310 | 4 | 3.449 | KV452803.1 | 700171 | 4-scf00068 | 4 |
| AX-157948700 | 4 | 3.449 | KV452803.1 | 701077 | 4-scf00068 | 4 |
| AX-157948703 | 4 | 3.449 | KV452803.1 | 704506 | 4-scf00068 | 4 |
| AX-157948708 | 4 | 3.51  | KV452803.1 | 711159 | 4-scf00068 | 4 |
| AX-157948713 | 4 | 3.554 | KV452803.1 | 716585 | 4-scf00068 | 4 |
| AX-157948714 | 4 | 3.593 | KV452803.1 | 717693 | 4-scf00068 | 4 |
| AX-157948715 | 4 | 3.593 | KV452803.1 | 719068 | 4-scf00068 | 4 |
| AX-157948717 | 4 | 3.593 | KV452803.1 | 721191 | 4-scf00068 | 4 |
| AX-157948705 | 4 | 3.92  | KV452803.1 | 707215 | 4-scf00068 | 4 |
| AX-157948707 | 4 | 3.92  | KV452803.1 | 710152 | 4-scf00068 | 4 |
| AX-157948716 | 4 | 3.92  | KV452803.1 | 719727 | 4-scf00068 | 4 |
| AX-157948723 | 4 | 3.92  | KV452803.1 | 734915 | 4-scf00068 | 4 |
| AX-157948724 | 4 | 3.92  | KV452803.1 | 735894 | 4-scf00068 | 4 |
| AX-157948729 | 4 | 3.92  | KV452803.1 | 744649 | 4-scf00068 | 4 |
| AX-158406015 | 4 | 3.92  | KV452803.1 | 744813 | 4-scf00068 | 4 |
| AX-157948731 | 4 | 3.92  | KV452803.1 | 746293 | 4-scf00068 | 4 |
| AX-157948732 | 4 | 3.92  | KV452803.1 | 748057 | 4-scf00068 | 4 |
| AX-158382738 | 4 | 3.92  | KV452803.1 | 749493 | 4-scf00068 | 4 |
| AX-157948734 | 4 | 3.92  | KV452803.1 | 749673 | 4-scf00068 | 4 |
| AX-157948735 | 4 | 3.92  | KV452803.1 | 750466 | 4-scf00068 | 4 |
| AX-157948749 | 4 | 3.92  | KV452803.1 | 767622 | 4-scf00068 | 4 |
| AX-157948736 | 4 | 3.962 | KV452803.1 | 751340 | 4-scf00068 | 4 |
| AX-157948770 | 4 | 3.962 | KV452803.1 | 794569 | 4-scf00068 | 4 |
| AX-157948737 | 4 | 4.008 | KV452803.1 | 752510 | 4-scf00068 | 4 |
| AX-157883997 | 4 | 4.03  | KV452803.1 | 749333 | 4-scf00068 | 4 |
| AX-157948740 | 4 | 4.03  | KV452803.1 | 755092 | 4-scf00068 | 4 |
| AX-157948743 | 4 | 4.03  | KV452803.1 | 760947 | 4-scf00068 | 4 |
| AX-157948746 | 4 | 4.03  | KV452803.1 | 763495 | 4-scf00068 | 4 |
| AX-157948751 | 4 | 4.03  | KV452803.1 | 768716 | 4-scf00068 | 4 |



|              |   |       |            |        |            |   |
|--------------|---|-------|------------|--------|------------|---|
| AX-157815448 | 4 | 4.051 | KV452803.1 | 772214 | 4-scf00068 | 4 |
| AX-157948760 | 4 | 4.051 | KV452803.1 | 782335 | 4-scf00068 | 4 |
| AX-157948759 | 4 | 4.072 | KV452803.1 | 781112 | 4-scf00068 | 4 |
| AX-157948764 | 4 | 4.098 | KV452803.1 | 784939 | 4-scf00068 | 4 |
| AX-157948718 | 4 | 4.113 | KV452803.1 | 722118 | 4-scf00068 | 4 |
| AX-157948752 | 4 | 4.113 | KV452803.1 | 771112 | 4-scf00068 | 4 |
| AX-157948765 | 4 | 4.113 | KV452803.1 | 786475 | 4-scf00068 | 4 |
| AX-157948747 | 4 | 4.139 | KV452803.1 | 764073 | 4-scf00068 | 4 |
| AX-157948748 | 4 | 4.139 | KV452803.1 | 766930 | 4-scf00068 | 4 |
| AX-157757686 | 4 | 4.139 | KV452803.1 | 777490 | 4-scf00068 | 4 |
| AX-157948762 | 4 | 4.139 | KV452803.1 | 783871 | 4-scf00068 | 4 |
| AX-157948766 | 4 | 4.139 | KV452803.1 | 789510 | 4-scf00068 | 4 |
| AX-157815449 | 4 | 4.139 | KV452803.1 | 790226 | 4-scf00068 | 4 |
| AX-157869553 | 4 | 4.139 | KV452803.1 | 796146 | 4-scf00068 | 4 |
| AX-157948773 | 4 | 4.139 | KV452803.1 | 797850 | 4-scf00068 | 4 |
| AX-157948774 | 4 | 4.139 | KV452803.1 | 798301 | 4-scf00068 | 4 |
| AX-157756649 | 4 | 4.152 | KV452803.1 | 804188 | 4-scf00068 | 4 |
| AX-157948777 | 4 | 4.248 | KV452803.1 | 805365 | 4-scf00068 | 4 |
| AX-157743443 | 4 | 4.248 | KV452803.1 | 805633 | 4-scf00068 | 4 |
| AX-157948779 | 4 | 4.248 | KV452803.1 | 809441 | 4-scf00068 | 4 |
| AX-157948781 | 4 | 4.248 | KV452803.1 | 813437 | 4-scf00068 | 4 |
| AX-157948784 | 4 | 4.574 | KV452803.1 | 818497 | 4-scf00068 | 4 |
| AX-157948795 | 4 | 4.574 | KV452803.1 | 832302 | 4-scf00068 | 4 |
| AX-157772702 | 4 | 4.576 | KV452803.1 | 724195 | 4-scf00068 | 4 |
| AX-157948785 | 4 | 4.576 | KV452803.1 | 819459 | 4-scf00068 | 4 |
| AX-157757318 | 4 | 4.576 | KV452803.1 | 820567 | 4-scf00068 | 4 |
| AX-157948787 | 4 | 4.58  | KV452803.1 | 822950 | 4-scf00068 | 4 |
| AX-157948726 | 4 | 4.586 | KV452803.1 | 739402 | 4-scf00068 | 4 |
| AX-157724065 | 4 | 4.586 | KV452803.1 | 826365 | 4-scf00068 | 4 |
| AX-157948796 | 4 | 4.591 | KV452803.1 | 833664 | 4-scf00068 | 4 |
| AX-157948797 | 4 | 4.607 | KV452803.1 | 834070 | 4-scf00068 | 4 |
| AX-157757422 | 4 | 4.653 | KV452803.1 | 834911 | 4-scf00068 | 4 |
| AX-157948827 | 4 | 4.653 | KV452803.1 | 861899 | 4-scf00068 | 4 |
| AX-157948801 | 4 | 4.685 | KV452803.1 | 838011 | 4-scf00068 | 4 |
| AX-157815451 | 4 | 4.685 | KV452803.1 | 838896 | 4-scf00068 | 4 |
| AX-157948803 | 4 | 4.685 | KV452803.1 | 839642 | 4-scf00068 | 4 |
| AX-157948804 | 4 | 4.685 | KV452803.1 | 840730 | 4-scf00068 | 4 |
| AX-157948805 | 4 | 4.794 | KV452803.1 | 842118 | 4-scf00068 | 4 |
| AX-157948807 | 4 | 4.904 | KV452803.1 | 844580 | 4-scf00068 | 4 |
| AX-157948808 | 4 | 4.904 | KV452803.1 | 845270 | 4-scf00068 | 4 |
| AX-157815452 | 4 | 4.904 | KV452803.1 | 846454 | 4-scf00068 | 4 |
| AX-157948811 | 4 | 4.904 | KV452803.1 | 848246 | 4-scf00068 | 4 |
| AX-157948812 | 4 | 4.904 | KV452803.1 | 849435 | 4-scf00068 | 4 |
| AX-157948815 | 4 | 4.904 | KV452803.1 | 851563 | 4-scf00068 | 4 |
| AX-157948816 | 4 | 4.904 | KV452803.1 | 852448 | 4-scf00068 | 4 |
| AX-157948818 | 4 | 4.904 | KV452803.1 | 855114 | 4-scf00068 | 4 |
| AX-157948822 | 4 | 4.904 | KV452803.1 | 858224 | 4-scf00068 | 4 |
| AX-157948825 | 4 | 4.904 | KV452803.1 | 860008 | 4-scf00068 | 4 |
| AX-157948826 | 4 | 4.904 | KV452803.1 | 861044 | 4-scf00068 | 4 |
| AX-157948828 | 4 | 4.904 | KV452803.1 | 862803 | 4-scf00068 | 4 |
| AX-157948829 | 4 | 5.229 | KV452803.1 | 864720 | 4-scf00068 | 4 |

|              |   |       |            |         |            |   |
|--------------|---|-------|------------|---------|------------|---|
| AX-157948834 | 4 | 5.229 | KV452803.1 | 871582  | 4-scf00068 | 4 |
| AX-157948838 | 4 | 5.229 | KV452803.1 | 879216  | 4-scf00068 | 4 |
| AX-157948839 | 4 | 5.229 | KV452803.1 | 880045  | 4-scf00068 | 4 |
| AX-157948841 | 4 | 5.229 | KV452803.1 | 881067  | 4-scf00068 | 4 |
| AX-157948843 | 4 | 5.231 | KV452803.1 | 881939  | 4-scf00068 | 4 |
| AX-157948844 | 4 | 5.232 | KV452803.1 | 884147  | 4-scf00068 | 4 |
| AX-158379422 | 4 | 5.234 | KV452803.1 | 855172  | 4-scf00068 | 4 |
| AX-157948821 | 4 | 5.234 | KV452803.1 | 857717  | 4-scf00068 | 4 |
| AX-157948847 | 4 | 5.234 | KV452803.1 | 886288  | 4-scf00068 | 4 |
| AX-157948848 | 4 | 5.234 | KV452803.1 | 888119  | 4-scf00068 | 4 |
| AX-157948849 | 4 | 5.234 | KV452803.1 | 889280  | 4-scf00068 | 4 |
| AX-157883999 | 4 | 5.234 | KV452803.1 | 890803  | 4-scf00068 | 4 |
| AX-157948855 | 4 | 5.234 | KV452803.1 | 897762  | 4-scf00068 | 4 |
| AX-157948858 | 4 | 5.234 | KV452803.1 | 901976  | 4-scf00068 | 4 |
| AX-157948859 | 4 | 5.234 | KV452803.1 | 902716  | 4-scf00068 | 4 |
| AX-157948860 | 4 | 5.234 | KV452803.1 | 903756  | 4-scf00068 | 4 |
| AX-157948861 | 4 | 5.449 | KV452803.1 | 910880  | 4-scf00068 | 4 |
| AX-157948865 | 4 | 5.449 | KV452803.1 | 915872  | 4-scf00068 | 4 |
| AX-157948876 | 4 | 5.449 | KV452803.1 | 926559  | 4-scf00068 | 4 |
| AX-157948877 | 4 | 5.449 | KV452803.1 | 927757  | 4-scf00068 | 4 |
| AX-157948878 | 4 | 5.449 | KV452803.1 | 928412  | 4-scf00068 | 4 |
| AX-157710612 | 4 | 5.449 | KV452803.1 | 929427  | 4-scf00068 | 4 |
| AX-157948880 | 4 | 5.5   | KV452803.1 | 930904  | 4-scf00068 | 4 |
| AX-157948862 | 4 | 5.559 | KV452803.1 | 911350  | 4-scf00068 | 4 |
| AX-157948866 | 4 | 5.559 | KV452803.1 | 917109  | 4-scf00068 | 4 |
| AX-157948874 | 4 | 5.559 | KV452803.1 | 925553  | 4-scf00068 | 4 |
| AX-157948875 | 4 | 5.559 | KV452803.1 | 926106  | 4-scf00068 | 4 |
| AX-157948879 | 4 | 5.559 | KV452803.1 | 929161  | 4-scf00068 | 4 |
| AX-157948882 | 4 | 5.559 | KV452803.1 | 935024  | 4-scf00068 | 4 |
| AX-157948883 | 4 | 5.559 | KV452803.1 | 935657  | 4-scf00068 | 4 |
| AX-157751427 | 4 | 5.559 | KV452803.1 | 936255  | 4-scf00068 | 4 |
| AX-157948884 | 4 | 5.559 | KV452803.1 | 937263  | 4-scf00068 | 4 |
| AX-157948885 | 4 | 5.559 | KV452803.1 | 938255  | 4-scf00068 | 4 |
| AX-157948886 | 4 | 5.559 | KV452803.1 | 941266  | 4-scf00068 | 4 |
| AX-157948887 | 4 | 5.559 | KV452803.1 | 943228  | 4-scf00068 | 4 |
| AX-157948889 | 4 | 5.607 | KV452803.1 | 946973  | 4-scf00068 | 4 |
| AX-158406021 | 4 | 6.064 | KV452803.1 | 949842  | 4-scf00068 | 4 |
| AX-157948893 | 4 | 6.081 | KV452803.1 | 950572  | 4-scf00068 | 4 |
| AX-157948904 | 4 | 6.081 | KV452803.1 | 961975  | 4-scf00068 | 4 |
| AX-157948906 | 4 | 6.126 | KV452803.1 | 964743  | 4-scf00068 | 4 |
| AX-157948908 | 4 | 6.168 | KV452803.1 | 966222  | 4-scf00068 | 4 |
| AX-157815453 | 4 | 6.168 | KV452803.1 | 999784  | 4-scf00068 | 4 |
| AX-157948935 | 4 | 6.168 | KV452803.1 | 1005211 | 4-scf00068 | 4 |
| AX-157748747 | 4 | 6.168 | KV452803.1 | 1021717 | 4-scf00068 | 4 |
| AX-157948910 | 4 | 6.213 | KV452803.1 | 967839  | 4-scf00068 | 4 |
| AX-157948916 | 4 | 6.214 | KV452803.1 | 980018  | 4-scf00068 | 4 |
| AX-157948917 | 4 | 6.214 | KV452803.1 | 981393  | 4-scf00068 | 4 |
| AX-157948918 | 4 | 6.214 | KV452803.1 | 982722  | 4-scf00068 | 4 |
| AX-157948920 | 4 | 6.214 | KV452803.1 | 984761  | 4-scf00068 | 4 |
| AX-157948923 | 4 | 6.214 | KV452803.1 | 988831  | 4-scf00068 | 4 |
| AX-157948924 | 4 | 6.214 | KV452803.1 | 991017  | 4-scf00068 | 4 |

|              |   |       |            |         |            |   |
|--------------|---|-------|------------|---------|------------|---|
| AX-158406022 | 4 | 6.214 | KV452803.1 | 991824  | 4-scf00068 | 4 |
| AX-157948930 | 4 | 6.214 | KV452803.1 | 1000133 | 4-scf00068 | 4 |
| AX-157948926 | 4 | 6.245 | KV452803.1 | 992757  | 4-scf00068 | 4 |
| AX-157739444 | 4 | 6.289 | KV452803.1 | 1000756 | 4-scf00068 | 4 |
| AX-157948933 | 4 | 6.324 | KV452803.1 | 1003636 | 4-scf00068 | 4 |
| AX-157948936 | 4 | 6.334 | KV452803.1 | 1006058 | 4-scf00068 | 4 |
| AX-157948939 | 4 | 6.366 | KV452803.1 | 1010706 | 4-scf00068 | 4 |
| AX-157948941 | 4 | 6.395 | KV452803.1 | 1012861 | 4-scf00068 | 4 |
| AX-157948942 | 4 | 6.433 | KV452803.1 | 1013849 | 4-scf00068 | 4 |
| AX-157948943 | 4 | 6.433 | KV452803.1 | 1016700 | 4-scf00068 | 4 |
| AX-157948945 | 4 | 6.434 | KV452803.1 | 1024634 | 4-scf00068 | 4 |
| AX-157948946 | 4 | 6.597 | KV452803.1 | 1025008 | 4-scf00068 | 4 |
| AX-157740852 | 4 | 6.761 | KV452803.1 | 1019297 | 4-scf00068 | 4 |
| AX-157948950 | 4 | 6.761 | KV452803.1 | 1034314 | 4-scf00068 | 4 |
| AX-157948951 | 4 | 6.761 | KV452803.1 | 1036008 | 4-scf00068 | 4 |
| AX-157948952 | 4 | 6.761 | KV452803.1 | 1036722 | 4-scf00068 | 4 |
| AX-157948954 | 4 | 6.761 | KV452803.1 | 1038826 | 4-scf00068 | 4 |
| AX-157815456 | 4 | 6.762 | KV452803.1 | 1041369 | 4-scf00068 | 4 |
| AX-157745431 | 4 | 6.765 | KV452803.1 | 1043923 | 4-scf00068 | 4 |
| AX-158406023 | 4 | 7.064 | KV452803.1 | 1044814 | 4-scf00068 | 4 |
| AX-157948958 | 4 | 7.197 | KV452803.1 | 1050032 | 4-scf00068 | 4 |
| AX-157948937 | 4 | 7.198 | KV452803.1 | 1007873 | 4-scf00068 | 4 |
| AX-157948961 | 4 | 7.198 | KV452803.1 | 1056727 | 4-scf00068 | 4 |
| AX-157948963 | 4 | 7.198 | KV452803.1 | 1057994 | 4-scf00068 | 4 |
| AX-157948965 | 4 | 7.198 | KV452803.1 | 1060662 | 4-scf00068 | 4 |
| AX-157815457 | 4 | 7.198 | KV452803.1 | 1061068 | 4-scf00068 | 4 |
| AX-157948966 | 4 | 7.198 | KV452803.1 | 1061423 | 4-scf00068 | 4 |
| AX-157948968 | 4 | 7.198 | KV452803.1 | 1062973 | 4-scf00068 | 4 |
| AX-157948969 | 4 | 7.198 | KV452803.1 | 1065542 | 4-scf00068 | 4 |
| AX-157948971 | 4 | 7.198 | KV452803.1 | 1068253 | 4-scf00068 | 4 |
| AX-157751110 | 4 | 7.198 | KV452803.1 | 1070054 | 4-scf00068 | 4 |
| AX-157948972 | 4 | 7.198 | KV452803.1 | 1072014 | 4-scf00068 | 4 |
| AX-157948973 | 4 | 7.198 | KV452803.1 | 1072760 | 4-scf00068 | 4 |
| AX-157948974 | 4 | 7.344 | KV452803.1 | 1076304 | 4-scf00068 | 4 |
| AX-157750715 | 4 | 7.631 | KV452803.1 | 1077833 | 4-scf00068 | 4 |
| AX-157948976 | 4 | 7.635 | KV452803.1 | 1081380 | 4-scf00068 | 4 |
| AX-157948979 | 4 | 7.635 | KV452803.1 | 1084622 | 4-scf00068 | 4 |
| AX-157948982 | 4 | 7.635 | KV452803.1 | 1088204 | 4-scf00068 | 4 |
| AX-157948985 | 4 | 7.635 | KV452803.1 | 1092598 | 4-scf00068 | 4 |
| AX-157948988 | 4 | 7.635 | KV452803.1 | 1094703 | 4-scf00068 | 4 |
| AX-157948989 | 4 | 7.635 | KV452803.1 | 1095080 | 4-scf00068 | 4 |
| AX-157948991 | 4 | 7.635 | KV452803.1 | 1096983 | 4-scf00068 | 4 |
| AX-157948992 | 4 | 7.635 | KV452803.1 | 1098748 | 4-scf00068 | 4 |
| AX-157948993 | 4 | 7.635 | KV452803.1 | 1099528 | 4-scf00068 | 4 |
| AX-157815461 | 4 | 7.635 | KV452803.1 | 1102057 | 4-scf00068 | 4 |
| AX-157884004 | 4 | 7.636 | KV452803.1 | 1099830 | 4-scf00068 | 4 |
| AX-157948980 | 4 | 7.765 | KV452803.1 | 1086628 | 4-scf00068 | 4 |
| AX-157948995 | 4 | 7.765 | KV452803.1 | 1102431 | 4-scf00068 | 4 |
| AX-157948997 | 4 | 7.765 | KV452803.1 | 1104354 | 4-scf00068 | 4 |
| AX-157948998 | 4 | 7.963 | KV452803.1 | 1106899 | 4-scf00068 | 4 |
| AX-157949001 | 4 | 7.963 | KV452803.1 | 1109251 | 4-scf00068 | 4 |

|              |   |        |            |         |            |   |
|--------------|---|--------|------------|---------|------------|---|
| AX-157949003 | 4 | 7.963  | KV452803.1 | 1110883 | 4-scf00068 | 4 |
| AX-157949004 | 4 | 8.069  | KV452803.1 | 1111413 | 4-scf00068 | 4 |
| AX-157949005 | 4 | 8.127  | KV452803.1 | 1113605 | 4-scf00068 | 4 |
| AX-157949008 | 4 | 8.127  | KV452803.1 | 1116177 | 4-scf00068 | 4 |
| AX-157949053 | 4 | 8.127  | KV452803.1 | 1169159 | 4-scf00068 | 4 |
| AX-157949054 | 4 | 8.127  | KV452803.1 | 1170057 | 4-scf00068 | 4 |
| AX-157949011 | 4 | 8.203  | KV452803.1 | 1120733 | 4-scf00068 | 4 |
| AX-157949012 | 4 | 8.291  | KV452803.1 | 1121236 | 4-scf00068 | 4 |
| AX-157949013 | 4 | 8.291  | KV452803.1 | 1121691 | 4-scf00068 | 4 |
| AX-157949014 | 4 | 8.291  | KV452803.1 | 1122596 | 4-scf00068 | 4 |
| AX-157949031 | 4 | 8.291  | KV452803.1 | 1145775 | 4-scf00068 | 4 |
| AX-157949059 | 4 | 8.291  | KV452803.1 | 1176083 | 4-scf00068 | 4 |
| AX-157949015 | 4 | 8.325  | KV452803.1 | 1124853 | 4-scf00068 | 4 |
| AX-157949018 | 4 | 8.36   | KV452803.1 | 1129516 | 4-scf00068 | 4 |
| AX-157949023 | 4 | 8.4    | KV452803.1 | 1137917 | 4-scf00068 | 4 |
| AX-157949027 | 4 | 8.4    | KV452803.1 | 1140603 | 4-scf00068 | 4 |
| AX-157949028 | 4 | 8.401  | KV452803.1 | 1142081 | 4-scf00068 | 4 |
| AX-157949029 | 4 | 8.402  | KV452803.1 | 1143945 | 4-scf00068 | 4 |
| AX-157949035 | 4 | 8.403  | KV452803.1 | 1149424 | 4-scf00068 | 4 |
| AX-157949036 | 4 | 8.403  | KV452803.1 | 1150496 | 4-scf00068 | 4 |
| AX-157949037 | 4 | 8.403  | KV452803.1 | 1151549 | 4-scf00068 | 4 |
| AX-157949039 | 4 | 8.46   | KV452803.1 | 1153948 | 4-scf00068 | 4 |
| AX-157949030 | 4 | 8.555  | KV452803.1 | 1145036 | 4-scf00068 | 4 |
| AX-157949045 | 4 | 8.555  | KV452803.1 | 1158469 | 4-scf00068 | 4 |
| AX-157949047 | 4 | 8.555  | KV452803.1 | 1162067 | 4-scf00068 | 4 |
| AX-157741018 | 4 | 8.555  | KV452803.1 | 1171144 | 4-scf00068 | 4 |
| AX-157949048 | 4 | 8.677  | KV452803.1 | 1165656 | 4-scf00068 | 4 |
| AX-157949050 | 4 | 8.677  | KV452803.1 | 1167367 | 4-scf00068 | 4 |
| AX-157949051 | 4 | 8.766  | KV452803.1 | 1168140 | 4-scf00068 | 4 |
| AX-157949052 | 4 | 8.766  | KV452803.1 | 1168413 | 4-scf00068 | 4 |
| AX-157949056 | 4 | 8.766  | KV452803.1 | 1172115 | 4-scf00068 | 4 |
| AX-157949057 | 4 | 8.769  | KV452803.1 | 1172580 | 4-scf00068 | 4 |
| AX-157949062 | 4 | 8.965  | KV452803.1 | 1188652 | 4-scf00068 | 4 |
| AX-157949069 | 4 | 9.166  | KV452803.1 | 1194147 | 4-scf00068 | 4 |
| AX-157949070 | 4 | 9.166  | KV452803.1 | 1195911 | 4-scf00068 | 4 |
| AX-157949071 | 4 | 9.166  | KV452803.1 | 1197647 | 4-scf00068 | 4 |
| AX-157949072 | 4 | 9.166  | KV452803.1 | 1198024 | 4-scf00068 | 4 |
| AX-157949077 | 4 | 9.166  | KV452803.1 | 1205313 | 4-scf00068 | 4 |
| AX-157949078 | 4 | 9.174  | KV452803.1 | 1205798 | 4-scf00068 | 4 |
| AX-157949081 | 4 | 9.443  | KV452803.1 | 1209592 | 4-scf00068 | 4 |
| AX-157949082 | 4 | 9.713  | KV452803.1 | 1210563 | 4-scf00068 | 4 |
| AX-157949083 | 4 | 9.713  | KV452803.1 | 1211652 | 4-scf00068 | 4 |
| AX-157949086 | 4 | 9.713  | KV452803.1 | 1213672 | 4-scf00068 | 4 |
| AX-157949087 | 4 | 9.713  | KV452803.1 | 1214526 | 4-scf00068 | 4 |
| AX-157949088 | 4 | 9.713  | KV452803.1 | 1215299 | 4-scf00068 | 4 |
| AX-157949089 | 4 | 9.713  | KV452803.1 | 1217461 | 4-scf00068 | 4 |
| AX-158404921 | 4 | 9.719  | KV452803.1 | 1217620 | 4-scf00068 | 4 |
| AX-158406025 | 4 | 9.722  | KV452803.1 | 1217710 | 4-scf00068 | 4 |
| AX-157949091 | 4 | 9.898  | KV452803.1 | 1220030 | 4-scf00068 | 4 |
| AX-157949092 | 4 | 10.025 | KV452803.1 | 1220427 | 4-scf00068 | 4 |
| AX-157949093 | 4 | 10.086 | KV452803.1 | 1221379 | 4-scf00068 | 4 |

|              |   |        |            |         |            |    |
|--------------|---|--------|------------|---------|------------|----|
| AX-157949100 | 4 | 10.086 | KV452803.1 | 1230135 | 4-scf00068 | 4  |
| AX-157949101 | 4 | 10.086 | KV452803.1 | 1230913 | 4-scf00068 | 4  |
| AX-157949094 | 4 | 10.401 | KV452803.1 | 1223497 | 4-scf00068 | 4  |
| AX-157949096 | 4 | 10.401 | KV452803.1 | 1225330 | 4-scf00068 | 4  |
| AX-157949102 | 4 | 10.401 | KV452803.1 | 1231529 | 4-scf00068 | 4  |
| AX-157949104 | 4 | 10.576 | KV452803.1 | 1232893 | 4-scf00068 | 4  |
| AX-157949106 | 4 | 10.576 | KV452803.1 | 1235865 | 4-scf00068 | 4  |
| AX-157949109 | 4 | 10.58  | KV452803.1 | 1240317 | 4-scf00068 | 4  |
| AX-157949111 | 4 | 10.584 | KV452803.1 | 1245467 | 4-scf00068 | 4  |
| AX-157949105 | 4 | 10.585 | KV452803.1 | 1233834 | 4-scf00068 | 4  |
| AX-157949108 | 4 | 10.585 | KV452803.1 | 1238312 | 4-scf00068 | 4  |
| AX-157727689 | 4 | 10.585 | KV452803.1 | 1245922 | 4-scf00068 | 4  |
| AX-157949112 | 4 | 10.585 | KV452803.1 | 1246631 | 4-scf00068 | 4  |
| AX-157949114 | 4 | 10.585 | KV452803.1 | 1248324 | 4-scf00068 | 4  |
| AX-157949116 | 4 | 10.585 | KV452803.1 | 1249694 | 4-scf00068 | 4  |
| AX-157949117 | 4 | 10.585 | KV452803.1 | 1250537 | 4-scf00068 | 4  |
| AX-157949122 | 4 | 10.764 | KV452803.1 | 1254782 | 4-scf00068 | 4  |
| AX-157949123 | 4 | 10.953 | KV452803.1 | 1256319 | 4-scf00068 | 4  |
| AX-157754034 | 4 | 10.953 | KV452803.1 | 1257019 | 4-scf00068 | 4  |
| AX-157949127 | 4 | 10.953 | KV452803.1 | 1262584 | 4-scf00068 | 4  |
| AX-157815464 | 4 | 11.321 | KV452803.1 | 1269589 | 4-scf00068 | 4  |
| AX-157949132 | 4 | 11.35  | KV452803.1 | 1270166 | 4-scf00068 | 4  |
| AX-157949135 | 4 | 11.368 | KV452803.1 | 1272285 | 4-scf00068 | 4  |
| AX-157949137 | 4 | 11.402 | KV452803.1 | 1276005 | 4-scf00068 | 4  |
| AX-157949148 | 4 | 11.402 | KV452803.1 | 1292239 | 4-scf00068 | 4  |
| AX-157949138 | 4 | 11.434 | KV452803.1 | 1277603 | 4-scf00068 | 4  |
| AX-157750244 | 4 | 11.466 | KV452803.1 | 1274437 | 4-scf00068 | 4  |
| AX-157949139 | 4 | 11.466 | KV452803.1 | 1277817 | 4-scf00068 | 4  |
| AX-157949140 | 4 | 11.466 | KV452803.1 | 1278805 | 4-scf00068 | 4  |
| AX-157949142 | 4 | 11.466 | KV452803.1 | 1280934 | 4-scf00068 | 4  |
| AX-157949144 | 4 | 11.587 | KV452803.1 | 1286508 | 4-scf00068 | 4  |
| AX-157756972 | 4 | 11.701 | KV452803.1 | 1289095 | 4-scf00068 | 4  |
| AX-158379424 | 4 | 11.814 | KV452803.1 | 1290153 | 4-scf00068 | 4  |
| AX-157949125 | 4 | 11.86  | KV452803.1 | 1258683 | 4-scf00068 | 4  |
| AX-157949153 | 4 | 11.86  | KV452803.1 | 1300649 | 4-scf00068 | 4  |
| AX-157949155 | 4 | 11.988 | KV452803.1 | 1301634 | 4-scf00068 | 4  |
| AX-157949156 | 4 | 12.162 | KV452803.1 | 1302552 | 4-scf00068 | 4  |
| AX-157949159 | 4 | 12.162 | KV452803.1 | 1304054 | 4-scf00068 | 4  |
| AX-157949160 | 4 | 12.31  | KV452803.1 | 1306305 | 4-scf00068 | 4  |
| AX-157949161 | 4 | 12.331 | KV452803.1 | 1306545 | 4-scf00068 | 4  |
| AX-157754811 | 4 | 12.331 | KV452803.1 | 1311268 | 4-scf00068 | 4  |
| AX-157949170 | 4 | 12.331 | KV452803.1 | 1314817 | 4-scf00068 | 4  |
| AX-157949172 | 4 | 12.331 | KV452803.1 | 1317783 | 4-scf00068 | 4  |
| AX-158390180 | 4 | 12.331 | KV452803.1 | 1319069 | 4-scf00068 | 4  |
| AX-157747342 | 4 | 12.331 | KV452803.1 | 1319552 | 4-scf00068 | 4  |
| AX-157949173 | 4 | 12.331 | KV452803.1 | 1322057 | 4-scf00068 | 4  |
| AX-157949174 | 4 | 12.331 | KV452803.1 | 1322593 | 4-scf00068 | 4  |
| AX-157949176 | 4 | 12.331 | KV452803.1 | 1323862 | 4-scf00068 | 4  |
| AX-157949181 | 4 | 12.331 | KV452803.1 | 1330685 | 4-scf00068 | 4  |
| AX-157884006 | 4 | 12.331 | KV452803.1 | 1373170 | 4-scf00068 | 4  |
| AX-157701244 | 4 | 12.331 | DX084046.1 | 198     | 4-scf00068 | UN |

|              |   |        |             |         |            |    |
|--------------|---|--------|-------------|---------|------------|----|
| AX-157949186 | 4 | 12.58  | KV452803.1  | 1339329 | 4-scf00068 | 4  |
| AX-157949187 | 4 | 12.61  | KV452803.1  | 1341247 | 4-scf00068 | 4  |
| AX-157949183 | 4 | 12.626 | KV452803.1  | 1333900 | 4-scf00068 | 4  |
| AX-157949190 | 4 | 12.626 | KV452803.1  | 1344434 | 4-scf00068 | 4  |
| AX-157949195 | 4 | 12.626 | KV452803.1  | 1348907 | 4-scf00068 | 4  |
| AX-157949205 | 4 | 12.626 | KV452803.1  | 1359731 | 4-scf00068 | 4  |
| AX-157949208 | 4 | 12.626 | KV452803.1  | 1363506 | 4-scf00068 | 4  |
| AX-157949197 | 4 | 12.658 | KV452803.1  | 1350321 | 4-scf00068 | 4  |
| AX-157949209 | 4 | 12.658 | KV452803.1  | 1363712 | 4-scf00068 | 4  |
| AX-157949198 | 4 | 12.673 | KV452803.1  | 1350996 | 4-scf00068 | 4  |
| AX-157949199 | 4 | 12.704 | KV452803.1  | 1351918 | 4-scf00068 | 4  |
| AX-157949202 | 4 | 12.704 | KV452803.1  | 1356181 | 4-scf00068 | 4  |
| AX-157949204 | 4 | 12.704 | KV452803.1  | 1359130 | 4-scf00068 | 4  |
| AX-157949206 | 4 | 12.704 | KV452803.1  | 1360322 | 4-scf00068 | 4  |
| AX-157815465 | 4 | 12.704 | KV452803.1  | 1364148 | 4-scf00068 | 4  |
| AX-157949211 | 4 | 12.796 | KV452803.1  | 1367624 | 4-scf00068 | 4  |
| AX-157949213 | 4 | 12.829 | KV452803.1  | 1370964 | 4-scf00068 | 4  |
| AX-158379425 | 4 | 12.954 | KV452803.1  | 1373871 | 4-scf00068 | 4  |
| AX-157949219 | 4 | 12.954 | KV452803.1  | 1374560 | 4-scf00068 | 4  |
| AX-157949221 | 4 | 12.954 | KV452803.1  | 1376715 | 4-scf00068 | 4  |
| AX-157949223 | 4 | 12.954 | KV452803.1  | 1377563 | 4-scf00068 | 4  |
| AX-157949224 | 4 | 12.954 | KV452803.1  | 1378072 | 4-scf00068 | 4  |
| AX-157707338 | 4 | 12.954 | 3ML01034038 | 356     | scf09708_1 | UN |
| AX-157949225 | 4 | 13.327 | KV452803.1  | 1379267 | 4-scf00068 | 4  |
| AX-157949228 | 4 | 13.327 | KV452803.1  | 1380908 | 4-scf00068 | 4  |
| AX-157949233 | 4 | 13.327 | KV452803.1  | 1391720 | 4-scf00068 | 4  |
| AX-157949229 | 4 | 13.329 | KV452803.1  | 1385690 | 4-scf00068 | 4  |
| AX-157949232 | 4 | 13.378 | KV452803.1  | 1390394 | 4-scf00068 | 4  |
| AX-157949234 | 4 | 13.454 | KV452803.1  | 1392437 | 4-scf00068 | 4  |
| AX-157949235 | 4 | 13.454 | KV452803.1  | 1394121 | 4-scf00068 | 4  |
| AX-157949236 | 4 | 13.535 | KV452803.1  | 1394210 | 4-scf00068 | 4  |
| AX-157949239 | 4 | 13.585 | KV452803.1  | 1396097 | 4-scf00068 | 4  |
| AX-157718401 | 4 | 13.585 | KV452803.1  | 1401111 | 4-scf00068 | 4  |
| AX-157949242 | 4 | 13.663 | KV452803.1  | 1398560 | 4-scf00068 | 4  |
| AX-157949247 | 4 | 13.663 | KV452803.1  | 1401663 | 4-scf00068 | 4  |
| AX-157949241 | 4 | 13.774 | KV452803.1  | 1397557 | 4-scf00068 | 4  |
| AX-157949250 | 4 | 13.774 | KV452803.1  | 1403939 | 4-scf00068 | 4  |
| AX-157949251 | 4 | 13.89  | KV452803.1  | 1406639 | 4-scf00068 | 4  |
| AX-157949253 | 4 | 13.96  | KV452803.1  | 1407955 | 4-scf00068 | 4  |
| AX-157949246 | 4 | 14.08  | KV452803.1  | 1400936 | 4-scf00068 | 4  |
| AX-157949254 | 4 | 14.08  | KV452803.1  | 1408944 | 4-scf00068 | 4  |
| AX-157949261 | 4 | 14.08  | KV452803.1  | 1417625 | 4-scf00068 | 4  |
| AX-157949274 | 4 | 14.08  | KV452803.1  | 1440562 | 4-scf00068 | 4  |
| AX-157949255 | 4 | 14.081 | KV452803.1  | 1411819 | 4-scf00068 | 4  |
| AX-157949256 | 4 | 14.081 | KV452803.1  | 1412440 | 4-scf00068 | 4  |
| AX-157949259 | 4 | 14.081 | KV452803.1  | 1415657 | 4-scf00068 | 4  |
| AX-157739370 | 4 | 14.081 | KV452803.1  | 1425405 | 4-scf00068 | 4  |
| AX-157949263 | 4 | 14.381 | KV452803.1  | 1422549 | 4-scf00068 | 4  |
| AX-157949264 | 4 | 14.381 | KV452803.1  | 1423809 | 4-scf00068 | 4  |
| AX-157949268 | 4 | 14.386 | KV452803.1  | 1428707 | 4-scf00068 | 4  |
| AX-157949276 | 4 | 14.831 | KV452803.1  | 1444836 | 4-scf00068 | 4  |

|              |   |        |            |         |            |   |
|--------------|---|--------|------------|---------|------------|---|
| AX-157949278 | 4 | 14.831 | KV452803.1 | 1447491 | 4-scf00068 | 4 |
| AX-157949280 | 4 | 14.831 | KV452803.1 | 1449374 | 4-scf00068 | 4 |
| AX-157751420 | 4 | 14.831 | KV452803.1 | 1451997 | 4-scf00068 | 4 |
| AX-157949283 | 4 | 14.986 | KV452803.1 | 1453699 | 4-scf00068 | 4 |
| AX-157949286 | 4 | 15.141 | KV452803.1 | 1459008 | 4-scf00068 | 4 |
| AX-157949287 | 4 | 15.141 | KV452803.1 | 1459961 | 4-scf00068 | 4 |
| AX-157949289 | 4 | 15.178 | KV452803.1 | 1461764 | 4-scf00068 | 4 |
| AX-157949291 | 4 | 15.202 | KV452803.1 | 1467498 | 4-scf00068 | 4 |
| AX-157949293 | 4 | 15.202 | KV452803.1 | 1468343 | 4-scf00068 | 4 |
| AX-157949267 | 4 | 15.393 | KV452803.1 | 1427176 | 4-scf00068 | 4 |
| AX-157949284 | 4 | 15.393 | KV452803.1 | 1455318 | 4-scf00068 | 4 |
| AX-157949294 | 4 | 15.393 | KV452803.1 | 1468898 | 4-scf00068 | 4 |
| AX-157949296 | 4 | 15.485 | KV452803.1 | 1471297 | 4-scf00068 | 4 |
| AX-157949297 | 4 | 15.744 | KV452803.1 | 1473391 | 4-scf00068 | 4 |
| AX-157949299 | 4 | 15.959 | KV452803.1 | 1476858 | 4-scf00068 | 4 |
| AX-157770638 | 4 | 15.96  | KV452803.1 | 1477220 | 4-scf00068 | 4 |
| AX-157949300 | 4 | 15.96  | KV452803.1 | 1477818 | 4-scf00068 | 4 |
| AX-157949302 | 4 | 15.96  | KV452803.1 | 1481247 | 4-scf00068 | 4 |
| AX-157949304 | 4 | 15.96  | KV452803.1 | 1484214 | 4-scf00068 | 4 |
| AX-158379427 | 4 | 16.335 | KV452803.1 | 1485607 | 4-scf00068 | 4 |
| AX-157770611 | 4 | 16.335 | KV452803.1 | 1489823 | 4-scf00068 | 4 |
| AX-157949308 | 4 | 16.335 | KV452803.1 | 1491305 | 4-scf00068 | 4 |
| AX-157949309 | 4 | 16.335 | KV452803.1 | 1492024 | 4-scf00068 | 4 |
| AX-157949314 | 4 | 16.586 | KV452803.1 | 1497363 | 4-scf00068 | 4 |
| AX-157949317 | 4 | 16.836 | KV452803.1 | 1499987 | 4-scf00068 | 4 |
| AX-157727211 | 4 | 16.836 | KV452803.1 | 1509543 | 4-scf00068 | 4 |
| AX-157949321 | 4 | 16.836 | KV452803.1 | 1510076 | 4-scf00068 | 4 |
| AX-157949322 | 4 | 16.836 | KV452803.1 | 1511609 | 4-scf00068 | 4 |
| AX-157949325 | 4 | 16.836 | KV452803.1 | 1518028 | 4-scf00068 | 4 |
| AX-157949326 | 4 | 16.836 | KV452803.1 | 1518481 | 4-scf00068 | 4 |
| AX-157949327 | 4 | 16.836 | KV452803.1 | 1519909 | 4-scf00068 | 4 |
| AX-157949328 | 4 | 16.836 | KV452803.1 | 1522350 | 4-scf00068 | 4 |
| AX-157949375 | 4 | 16.836 | KV452803.1 | 1584942 | 4-scf00068 | 4 |
| AX-157884011 | 4 | 16.961 | KV452803.1 | 1527861 | 4-scf00068 | 4 |
| AX-157815472 | 4 | 16.961 | KV452803.1 | 1528753 | 4-scf00068 | 4 |
| AX-157949331 | 4 | 16.961 | KV452803.1 | 1529001 | 4-scf00068 | 4 |
| AX-157949336 | 4 | 16.961 | KV452803.1 | 1536199 | 4-scf00068 | 4 |
| AX-157949337 | 4 | 16.961 | KV452803.1 | 1538740 | 4-scf00068 | 4 |
| AX-157949338 | 4 | 16.961 | KV452803.1 | 1539760 | 4-scf00068 | 4 |
| AX-157949339 | 4 | 16.961 | KV452803.1 | 1540849 | 4-scf00068 | 4 |
| AX-157949360 | 4 | 16.961 | KV452803.1 | 1565612 | 4-scf00068 | 4 |
| AX-157949343 | 4 | 17.044 | KV452803.1 | 1544556 | 4-scf00068 | 4 |
| AX-157949344 | 4 | 17.076 | KV452803.1 | 1544934 | 4-scf00068 | 4 |
| AX-157949346 | 4 | 17.097 | KV452803.1 | 1547484 | 4-scf00068 | 4 |
| AX-157949347 | 4 | 17.149 | KV452803.1 | 1548389 | 4-scf00068 | 4 |
| AX-157949348 | 4 | 17.205 | KV452803.1 | 1548910 | 4-scf00068 | 4 |
| AX-157949349 | 4 | 17.337 | KV452803.1 | 1549746 | 4-scf00068 | 4 |
| AX-157949350 | 4 | 17.337 | KV452803.1 | 1551577 | 4-scf00068 | 4 |
| AX-157721387 | 4 | 17.337 | KV452803.1 | 1552489 | 4-scf00068 | 4 |
| AX-157949355 | 4 | 17.337 | KV452803.1 | 1558053 | 4-scf00068 | 4 |
| AX-157949357 | 4 | 17.337 | KV452803.1 | 1559881 | 4-scf00068 | 4 |

|              |   |        |            |         |            |   |
|--------------|---|--------|------------|---------|------------|---|
| AX-157949361 | 4 | 17.337 | KV452803.1 | 1567746 | 4-scf00068 | 4 |
| AX-157949362 | 4 | 17.337 | KV452803.1 | 1568722 | 4-scf00068 | 4 |
| AX-157949365 | 4 | 17.337 | KV452803.1 | 1570883 | 4-scf00068 | 4 |
| AX-157949366 | 4 | 17.337 | KV452803.1 | 1571350 | 4-scf00068 | 4 |
| AX-158379428 | 4 | 17.337 | KV452803.1 | 1571562 | 4-scf00068 | 4 |
| AX-157949373 | 4 | 17.337 | KV452803.1 | 1580437 | 4-scf00068 | 4 |
| AX-157949351 | 4 | 17.573 | KV452803.1 | 1553757 | 4-scf00068 | 4 |
| AX-157854653 | 4 | 17.573 | KV452803.1 | 1577257 | 4-scf00068 | 4 |
| AX-157949376 | 4 | 17.573 | KV452803.1 | 1588562 | 4-scf00068 | 4 |
| AX-157949319 | 4 | 17.873 | KV452803.1 | 1502535 | 4-scf00068 | 4 |
| AX-157949381 | 4 | 17.873 | KV452803.1 | 1598527 | 4-scf00068 | 4 |
| AX-157949387 | 4 | 18.144 | KV452803.1 | 1607668 | 4-scf00068 | 4 |
| AX-157949388 | 4 | 18.144 | KV452803.1 | 1608670 | 4-scf00068 | 4 |
| AX-157949389 | 4 | 18.183 | KV452803.1 | 1609062 | 4-scf00068 | 4 |
| AX-157949394 | 4 | 18.511 | KV452803.1 | 1616628 | 4-scf00068 | 4 |
| AX-157740324 | 4 | 18.511 | KV452803.1 | 1617288 | 4-scf00068 | 4 |
| AX-157949399 | 4 | 18.9   | KV452803.1 | 1622755 | 4-scf00068 | 4 |
| AX-157949401 | 4 | 19.094 | KV452803.1 | 1623874 | 4-scf00068 | 4 |
| AX-157949403 | 4 | 19.094 | KV452803.1 | 1625343 | 4-scf00068 | 4 |
| AX-157949407 | 4 | 19.098 | KV452803.1 | 1630408 | 4-scf00068 | 4 |
| AX-157884012 | 4 | 19.261 | KV452803.1 | 1632171 | 4-scf00068 | 4 |
| AX-157949413 | 4 | 19.261 | KV452803.1 | 1634524 | 4-scf00068 | 4 |
| AX-157949418 | 4 | 19.566 | KV452803.1 | 1643886 | 4-scf00068 | 4 |
| AX-157949422 | 4 | 19.726 | KV452803.1 | 1647515 | 4-scf00068 | 4 |
| AX-157699595 | 4 | 19.749 | KV452804.1 | 5712791 | 4-scf00071 | 4 |
| AX-157949423 | 4 | 19.85  | KV452803.1 | 1648404 | 4-scf00068 | 4 |
| AX-157875335 | 4 | 19.96  | KV452803.1 | 1656423 | 4-scf00068 | 4 |
| AX-157949426 | 4 | 20.024 | KV452803.1 | 1656681 | 4-scf00068 | 4 |
| AX-157949410 | 4 | 20.199 | KV452803.1 | 1632801 | 4-scf00068 | 4 |
| AX-157949428 | 4 | 20.199 | KV452803.1 | 1658001 | 4-scf00068 | 4 |
| AX-157949430 | 4 | 20.199 | KV452803.1 | 1660840 | 4-scf00068 | 4 |
| AX-157720858 | 4 | 20.336 | KV452803.1 | 1650438 | 4-scf00068 | 4 |
| AX-157752069 | 4 | 20.336 | KV452803.1 | 1662849 | 4-scf00068 | 4 |
| AX-157949434 | 4 | 20.339 | KV452803.1 | 1669122 | 4-scf00068 | 4 |
| AX-157884013 | 4 | 20.339 | KV452803.1 | 1672715 | 4-scf00068 | 4 |
| AX-157949436 | 4 | 20.339 | KV452803.1 | 1674354 | 4-scf00068 | 4 |
| AX-157949437 | 4 | 20.339 | KV452803.1 | 1674984 | 4-scf00068 | 4 |
| AX-157949439 | 4 | 20.339 | KV452803.1 | 1676498 | 4-scf00068 | 4 |
| AX-157949440 | 4 | 20.339 | KV452803.1 | 1677260 | 4-scf00068 | 4 |
| AX-157949441 | 4 | 20.339 | KV452803.1 | 1678102 | 4-scf00068 | 4 |
| AX-157949442 | 4 | 20.339 | KV452803.1 | 1679839 | 4-scf00068 | 4 |
| AX-157949454 | 4 | 20.339 | KV452803.1 | 1697761 | 4-scf00068 | 4 |
| AX-157949446 | 4 | 20.395 | KV452803.1 | 1683064 | 4-scf00068 | 4 |
| AX-157949447 | 4 | 20.455 | KV452803.1 | 1685004 | 4-scf00068 | 4 |
| AX-157748288 | 4 | 20.557 | KV452803.1 | 1685195 | 4-scf00068 | 4 |
| AX-157949449 | 4 | 20.557 | KV452803.1 | 1688055 | 4-scf00068 | 4 |
| AX-158415223 | 4 | 20.557 | KV452803.1 | 1688774 | 4-scf00068 | 4 |
| AX-158406033 | 4 | 20.557 | KV452803.1 | 1688870 | 4-scf00068 | 4 |
| AX-157727120 | 4 | 20.557 | KV452803.1 | 1690763 | 4-scf00068 | 4 |
| AX-157949451 | 4 | 20.615 | KV452803.1 | 1692962 | 4-scf00068 | 4 |
| AX-158406034 | 4 | 20.615 | KV452803.1 | 1715945 | 4-scf00068 | 4 |



|              |   |        |            |         |            |   |
|--------------|---|--------|------------|---------|------------|---|
| AX-158379429 | 4 | 20.736 | KV452803.1 | 1697697 | 4-scf00068 | 4 |
| AX-157949455 | 4 | 20.736 | KV452803.1 | 1698576 | 4-scf00068 | 4 |
| AX-157949457 | 4 | 20.837 | KV452803.1 | 1701199 | 4-scf00068 | 4 |
| AX-157949459 | 4 | 21.102 | KV452803.1 | 1703273 | 4-scf00068 | 4 |
| AX-157949461 | 4 | 21.104 | KV452803.1 | 1707080 | 4-scf00068 | 4 |
| AX-157949462 | 4 | 21.104 | KV452803.1 | 1710871 | 4-scf00068 | 4 |
| AX-157949465 | 4 | 21.104 | KV452803.1 | 1712729 | 4-scf00068 | 4 |
| AX-157702442 | 4 | 21.104 | KV452803.1 | 1715395 | 4-scf00068 | 4 |
| AX-157949471 | 4 | 21.163 | KV452803.1 | 1721376 | 4-scf00068 | 4 |
| AX-157949473 | 4 | 21.213 | KV452803.1 | 1722974 | 4-scf00068 | 4 |
| AX-157949475 | 4 | 21.214 | KV452803.1 | 1726338 | 4-scf00068 | 4 |
| AX-157949482 | 4 | 21.58  | KV452803.1 | 1735430 | 4-scf00068 | 4 |
| AX-157949483 | 4 | 21.67  | KV452803.1 | 1736685 | 4-scf00068 | 4 |
| AX-157949484 | 4 | 21.751 | KV452803.1 | 1738074 | 4-scf00068 | 4 |
| AX-157949485 | 4 | 21.754 | KV452803.1 | 1739320 | 4-scf00068 | 4 |
| AX-157949486 | 4 | 21.754 | KV452803.1 | 1739819 | 4-scf00068 | 4 |
| AX-157949488 | 4 | 21.757 | KV452803.1 | 1741925 | 4-scf00068 | 4 |
| AX-157742161 | 4 | 21.76  | KV452803.1 | 1743455 | 4-scf00068 | 4 |
| AX-157949489 | 4 | 21.76  | KV452803.1 | 1743986 | 4-scf00068 | 4 |
| AX-157949490 | 4 | 21.978 | KV452803.1 | 1747095 | 4-scf00068 | 4 |
| AX-157875339 | 4 | 21.978 | KV452803.1 | 1748117 | 4-scf00068 | 4 |
| AX-157949491 | 4 | 21.978 | KV452803.1 | 1748449 | 4-scf00068 | 4 |
| AX-157949492 | 4 | 21.978 | KV452803.1 | 1748876 | 4-scf00068 | 4 |
| AX-157949494 | 4 | 21.978 | KV452803.1 | 1750956 | 4-scf00068 | 4 |
| AX-157949495 | 4 | 22.012 | KV452803.1 | 1753600 | 4-scf00068 | 4 |
| AX-157949497 | 4 | 22.028 | KV452803.1 | 1755553 | 4-scf00068 | 4 |
| AX-157949480 | 4 | 22.057 | KV452803.1 | 1733084 | 4-scf00068 | 4 |
| AX-157875340 | 4 | 22.057 | KV452803.1 | 1753227 | 4-scf00068 | 4 |
| AX-157949500 | 4 | 22.057 | KV452803.1 | 1757555 | 4-scf00068 | 4 |
| AX-158379430 | 4 | 22.09  | KV452803.1 | 1758315 | 4-scf00068 | 4 |
| AX-157949504 | 4 | 22.131 | KV452803.1 | 1762655 | 4-scf00068 | 4 |
| AX-157739659 | 4 | 22.284 | KV452803.1 | 1764687 | 4-scf00068 | 4 |
| AX-157722364 | 4 | 22.284 | KV452803.1 | 1765331 | 4-scf00068 | 4 |
| AX-157949509 | 4 | 22.804 | KV452803.1 | 1772387 | 4-scf00068 | 4 |
| AX-157949511 | 4 | 22.926 | KV452803.1 | 1773479 | 4-scf00068 | 4 |
| AX-157949513 | 4 | 23.51  | KV452803.1 | 1777499 | 4-scf00068 | 4 |
| AX-157949515 | 4 | 23.511 | KV452803.1 | 1780168 | 4-scf00068 | 4 |
| AX-157949516 | 4 | 23.511 | KV452803.1 | 1781189 | 4-scf00068 | 4 |
| AX-157694548 | 4 | 23.511 | KV452803.1 | 1782315 | 4-scf00068 | 4 |
| AX-158404925 | 4 | 23.511 | KV452803.1 | 1783210 | 4-scf00068 | 4 |
| AX-157949518 | 4 | 23.511 | KV452803.1 | 1783741 | 4-scf00068 | 4 |
| AX-157716159 | 4 | 23.511 | KV452803.1 | 1784420 | 4-scf00068 | 4 |
| AX-157949520 | 4 | 23.834 | KV452803.1 | 1788092 | 4-scf00068 | 4 |
| AX-157815473 | 4 | 23.834 | KV452803.1 | 1791939 | 4-scf00068 | 4 |
| AX-157949524 | 4 | 23.834 | KV452803.1 | 1792788 | 4-scf00068 | 4 |
| AX-158382756 | 4 | 23.847 | KV452803.1 | 1798482 | 4-scf00068 | 4 |
| AX-157949528 | 4 | 23.848 | KV452803.1 | 1799057 | 4-scf00068 | 4 |
| AX-157949531 | 4 | 24.639 | KV452803.1 | 1807906 | 4-scf00068 | 4 |
| AX-157740728 | 4 | 24.639 | KV452803.1 | 1809074 | 4-scf00068 | 4 |
| AX-157949534 | 4 | 25.041 | KV452803.1 | 1811351 | 4-scf00068 | 4 |
| AX-157949535 | 4 | 25.041 | KV452803.1 | 1812114 | 4-scf00068 | 4 |

|              |   |        |            |         |            |   |
|--------------|---|--------|------------|---------|------------|---|
| AX-157949536 | 4 | 25.041 | KV452803.1 | 1812867 | 4-scf00068 | 4 |
| AX-157949537 | 4 | 25.041 | KV452803.1 | 1813548 | 4-scf00068 | 4 |
| AX-157949538 | 4 | 25.041 | KV452803.1 | 1814784 | 4-scf00068 | 4 |
| AX-157949539 | 4 | 25.041 | KV452803.1 | 1815341 | 4-scf00068 | 4 |
| AX-157949540 | 4 | 25.041 | KV452803.1 | 1815768 | 4-scf00068 | 4 |
| AX-157949541 | 4 | 25.432 | KV452803.1 | 1818872 | 4-scf00068 | 4 |
| AX-157949543 | 4 | 25.432 | KV452803.1 | 1820748 | 4-scf00068 | 4 |
| AX-157949544 | 4 | 25.562 | KV452803.1 | 1823121 | 4-scf00068 | 4 |
| AX-157949545 | 4 | 25.562 | KV452803.1 | 1824603 | 4-scf00068 | 4 |
| AX-157949546 | 4 | 25.562 | KV452803.1 | 1825582 | 4-scf00068 | 4 |
| AX-157949551 | 4 | 25.562 | KV452803.1 | 1829872 | 4-scf00068 | 4 |
| AX-157949554 | 4 | 25.716 | KV452803.1 | 1835773 | 4-scf00068 | 4 |
| AX-157949556 | 4 | 25.77  | KV452803.1 | 1837172 | 4-scf00068 | 4 |
| AX-157949557 | 4 | 25.77  | KV452803.1 | 1837758 | 4-scf00068 | 4 |
| AX-157949558 | 4 | 25.77  | KV452803.1 | 1840687 | 4-scf00068 | 4 |
| AX-157949547 | 4 | 25.811 | KV452803.1 | 1826074 | 4-scf00068 | 4 |
| AX-157875341 | 4 | 25.811 | KV452803.1 | 1831071 | 4-scf00068 | 4 |
| AX-157949560 | 4 | 25.811 | KV452803.1 | 1843666 | 4-scf00068 | 4 |
| AX-157949570 | 4 | 25.811 | KV452803.1 | 1852060 | 4-scf00068 | 4 |
| AX-157949561 | 4 | 25.89  | KV452803.1 | 1844333 | 4-scf00068 | 4 |
| AX-157949565 | 4 | 26.052 | KV452803.1 | 1848085 | 4-scf00068 | 4 |
| AX-157949568 | 4 | 26.052 | KV452803.1 | 1851054 | 4-scf00068 | 4 |
| AX-157949571 | 4 | 26.052 | KV452803.1 | 1852730 | 4-scf00068 | 4 |
| AX-157949572 | 4 | 26.598 | KV452803.1 | 1855666 | 4-scf00068 | 4 |
| AX-157949573 | 4 | 26.598 | KV452803.1 | 1856434 | 4-scf00068 | 4 |
| AX-157720393 | 4 | 26.598 | KV452803.1 | 1857074 | 4-scf00068 | 4 |
| AX-157949574 | 4 | 26.636 | KV452803.1 | 1857542 | 4-scf00068 | 4 |
| AX-157949576 | 4 | 26.752 | KV452803.1 | 1860160 | 4-scf00068 | 4 |
| AX-157949582 | 4 | 26.752 | KV452803.1 | 1864274 | 4-scf00068 | 4 |
| AX-157949583 | 4 | 26.758 | KV452803.1 | 1866704 | 4-scf00068 | 4 |
| AX-157949584 | 4 | 26.766 | KV452803.1 | 1867853 | 4-scf00068 | 4 |
| AX-157869557 | 4 | 26.77  | KV452803.1 | 1870153 | 4-scf00068 | 4 |
| AX-157949593 | 4 | 27.253 | KV452803.1 | 1880252 | 4-scf00068 | 4 |
| AX-157949595 | 4 | 27.253 | KV452803.1 | 1880839 | 4-scf00068 | 4 |
| AX-157949596 | 4 | 27.278 | KV452803.1 | 1881029 | 4-scf00068 | 4 |
| AX-157949597 | 4 | 27.29  | KV452803.1 | 1881733 | 4-scf00068 | 4 |
| AX-157949599 | 4 | 27.318 | KV452803.1 | 1885689 | 4-scf00068 | 4 |
| AX-157949600 | 4 | 27.338 | KV452803.1 | 1886803 | 4-scf00068 | 4 |
| AX-157949604 | 4 | 27.585 | KV452803.1 | 1890442 | 4-scf00068 | 4 |
| AX-157739284 | 4 | 27.585 | KV452803.1 | 1891126 | 4-scf00068 | 4 |
| AX-157949606 | 4 | 28.105 | KV452803.1 | 1898205 | 4-scf00068 | 4 |
| AX-157815475 | 4 | 28.105 | KV452803.1 | 1899939 | 4-scf00068 | 4 |
| AX-157815476 | 4 | 28.105 | KV452803.1 | 1900237 | 4-scf00068 | 4 |
| AX-157949608 | 4 | 28.105 | KV452803.1 | 1900673 | 4-scf00068 | 4 |
| AX-158406037 | 4 | 28.105 | KV452803.1 | 1901432 | 4-scf00068 | 4 |
| AX-157949609 | 4 | 28.105 | KV452803.1 | 1903718 | 4-scf00068 | 4 |
| AX-157949613 | 4 | 28.105 | KV452803.1 | 1907160 | 4-scf00068 | 4 |
| AX-157949616 | 4 | 28.105 | KV452803.1 | 1910219 | 4-scf00068 | 4 |
| AX-157949617 | 4 | 28.105 | KV452803.1 | 1911078 | 4-scf00068 | 4 |
| AX-157815478 | 4 | 28.105 | KV452803.1 | 1911325 | 4-scf00068 | 4 |
| AX-157949619 | 4 | 28.113 | KV452803.1 | 1913475 | 4-scf00068 | 4 |

|              |   |        |            |         |            |   |
|--------------|---|--------|------------|---------|------------|---|
| AX-157949623 | 4 | 28.64  | KV452803.1 | 1922388 | 4-scf00068 | 4 |
| AX-157949624 | 4 | 28.652 | KV452803.1 | 1923211 | 4-scf00068 | 4 |
| AX-157949625 | 4 | 28.652 | KV452803.1 | 1924038 | 4-scf00068 | 4 |
| AX-157949627 | 4 | 28.652 | KV452803.1 | 1925672 | 4-scf00068 | 4 |
| AX-157708928 | 4 | 28.652 | KV452803.1 | 1926752 | 4-scf00068 | 4 |
| AX-157949628 | 4 | 28.652 | KV452803.1 | 1929298 | 4-scf00068 | 4 |
| AX-157815483 | 4 | 28.871 | KV452803.1 | 1937611 | 4-scf00068 | 4 |
| AX-157739270 | 4 | 28.871 | KV452803.1 | 1940732 | 4-scf00068 | 4 |
| AX-157949634 | 4 | 29.064 | KV452803.1 | 1945421 | 4-scf00068 | 4 |
| AX-157949637 | 4 | 29.064 | KV452803.1 | 1948784 | 4-scf00068 | 4 |
| AX-157757985 | 4 | 29.064 | KV452803.1 | 1950632 | 4-scf00068 | 4 |
| AX-157949641 | 4 | 29.064 | KV452803.1 | 1951265 | 4-scf00068 | 4 |
| AX-157949644 | 4 | 29.072 | KV452803.1 | 1955307 | 4-scf00068 | 4 |
| AX-157949647 | 4 | 29.08  | KV452803.1 | 1961339 | 4-scf00068 | 4 |
| AX-157949662 | 4 | 29.643 | KV452803.1 | 1984580 | 4-scf00068 | 4 |
| AX-157949663 | 4 | 29.643 | KV452803.1 | 1984793 | 4-scf00068 | 4 |
| AX-157949664 | 4 | 29.643 | KV452803.1 | 1985758 | 4-scf00068 | 4 |
| AX-157949666 | 4 | 29.643 | KV452803.1 | 1986865 | 4-scf00068 | 4 |
| AX-157949668 | 4 | 29.875 | KV452803.1 | 1988924 | 4-scf00068 | 4 |
| AX-157949672 | 4 | 29.886 | KV452803.1 | 1993248 | 4-scf00068 | 4 |
| AX-157949673 | 4 | 30.327 | KV452803.1 | 1995862 | 4-scf00068 | 4 |
| AX-157949674 | 4 | 30.33  | KV452803.1 | 1996952 | 4-scf00068 | 4 |
| AX-157949678 | 4 | 30.528 | KV452803.1 | 2001506 | 4-scf00068 | 4 |
| AX-157949679 | 4 | 30.528 | KV452803.1 | 2001891 | 4-scf00068 | 4 |
| AX-157949681 | 4 | 30.528 | KV452803.1 | 2004602 | 4-scf00068 | 4 |
| AX-157949685 | 4 | 30.573 | KV452803.1 | 2008658 | 4-scf00068 | 4 |
| AX-157949686 | 4 | 30.76  | KV452803.1 | 2009789 | 4-scf00068 | 4 |
| AX-157949688 | 4 | 30.76  | KV452803.1 | 2011665 | 4-scf00068 | 4 |
| AX-157949689 | 4 | 30.76  | KV452803.1 | 2012005 | 4-scf00068 | 4 |
| AX-157949690 | 4 | 30.76  | KV452803.1 | 2015656 | 4-scf00068 | 4 |
| AX-157949692 | 4 | 30.76  | KV452803.1 | 2017561 | 4-scf00068 | 4 |
| AX-157949695 | 4 | 30.76  | KV452803.1 | 2021251 | 4-scf00068 | 4 |
| AX-157949680 | 4 | 30.895 | KV452803.1 | 2002425 | 4-scf00068 | 4 |
| AX-157949699 | 4 | 30.895 | KV452803.1 | 2027343 | 4-scf00068 | 4 |
| AX-157949701 | 4 | 31.019 | KV452803.1 | 2034208 | 4-scf00068 | 4 |
| AX-157949708 | 4 | 31.019 | KV452803.1 | 2048218 | 4-scf00068 | 4 |
| AX-157875343 | 4 | 31.019 | KV452803.1 | 2053275 | 4-scf00068 | 4 |
| AX-157949711 | 4 | 31.454 | KV452803.1 | 2051913 | 4-scf00068 | 4 |
| AX-157949713 | 4 | 31.455 | KV452803.1 | 2052952 | 4-scf00068 | 4 |
| AX-157949718 | 4 | 31.457 | KV452803.1 | 2057121 | 4-scf00068 | 4 |
| AX-157949719 | 4 | 31.792 | KV452803.1 | 2064270 | 4-scf00068 | 4 |
| AX-157949720 | 4 | 31.792 | KV452803.1 | 2066702 | 4-scf00068 | 4 |
| AX-157750882 | 4 | 31.792 | KV452803.1 | 2071893 | 4-scf00068 | 4 |
| AX-158379433 | 4 | 31.792 | KV452803.1 | 2072204 | 4-scf00068 | 4 |
| AX-157949723 | 4 | 31.792 | KV452803.1 | 2073815 | 4-scf00068 | 4 |
| AX-157949724 | 4 | 31.792 | KV452803.1 | 2074314 | 4-scf00068 | 4 |
| AX-157709804 | 4 | 31.896 | KV452803.1 | 2070734 | 4-scf00068 | 4 |
| AX-157949705 | 4 | 31.974 | KV452803.1 | 2041657 | 4-scf00068 | 4 |
| AX-157949725 | 4 | 31.974 | KV452803.1 | 2075045 | 4-scf00068 | 4 |
| AX-157949726 | 4 | 32.241 | KV452803.1 | 2079526 | 4-scf00068 | 4 |
| AX-157949727 | 4 | 32.302 | KV452803.1 | 2080267 | 4-scf00068 | 4 |

|              |   |        |            |         |            |   |
|--------------|---|--------|------------|---------|------------|---|
| AX-158382761 | 4 | 32.376 | KV452803.1 | 2082884 | 4-scf00068 | 4 |
| AX-157755268 | 4 | 32.376 | KV452803.1 | 2087271 | 4-scf00068 | 4 |
| AX-157724396 | 4 | 32.382 | KV452803.1 | 2084593 | 4-scf00068 | 4 |
| AX-157752953 | 4 | 32.382 | KV452803.1 | 2086441 | 4-scf00068 | 4 |
| AX-157875344 | 4 | 32.382 | KV452803.1 | 2087108 | 4-scf00068 | 4 |
| AX-157949729 | 4 | 32.624 | KV452803.1 | 2089285 | 4-scf00068 | 4 |
| AX-157949730 | 4 | 32.624 | KV452803.1 | 2089788 | 4-scf00068 | 4 |
| AX-157719735 | 4 | 32.624 | KV452803.1 | 2114029 | 4-scf00068 | 4 |
| AX-157949731 | 4 | 32.627 | KV452803.1 | 2091147 | 4-scf00068 | 4 |
| AX-157884015 | 4 | 33.037 | KV452803.1 | 2098574 | 4-scf00068 | 4 |
| AX-157949741 | 4 | 33.037 | KV452803.1 | 2110843 | 4-scf00068 | 4 |
| AX-157949736 | 4 | 33.04  | KV452803.1 | 2099572 | 4-scf00068 | 4 |
| AX-157949737 | 4 | 33.04  | KV452803.1 | 2101459 | 4-scf00068 | 4 |
| AX-157707704 | 4 | 33.041 | KV452803.1 | 2102591 | 4-scf00068 | 4 |
| AX-157949816 | 4 | 33.041 | KV452803.1 | 2267081 | 4-scf00068 | 4 |
| AX-157949745 | 4 | 33.372 | KV452803.1 | 2119490 | 4-scf00068 | 4 |
| AX-157949747 | 4 | 33.373 | KV452803.1 | 2121549 | 4-scf00068 | 4 |
| AX-157949749 | 4 | 33.373 | KV452803.1 | 2124786 | 4-scf00068 | 4 |
| AX-157949732 | 4 | 33.394 | KV452803.1 | 2094437 | 4-scf00068 | 4 |
| AX-157949751 | 4 | 33.394 | KV452803.1 | 2128235 | 4-scf00068 | 4 |
| AX-158406041 | 4 | 33.394 | KV452803.1 | 2130695 | 4-scf00068 | 4 |
| AX-157949755 | 4 | 33.613 | KV452803.1 | 2139071 | 4-scf00068 | 4 |
| AX-157949769 | 4 | 33.873 | KV452803.1 | 2161884 | 4-scf00068 | 4 |
| AX-157949770 | 4 | 33.873 | KV452803.1 | 2162252 | 4-scf00068 | 4 |
| AX-157949771 | 4 | 33.873 | KV452803.1 | 2163183 | 4-scf00068 | 4 |
| AX-157815488 | 4 | 33.873 | KV452803.1 | 2163709 | 4-scf00068 | 4 |
| AX-157949772 | 4 | 33.873 | KV452803.1 | 2164586 | 4-scf00068 | 4 |
| AX-157715854 | 4 | 33.873 | KV452803.1 | 2166985 | 4-scf00068 | 4 |
| AX-157748020 | 4 | 33.873 | KV452803.1 | 2168505 | 4-scf00068 | 4 |
| AX-157949773 | 4 | 33.873 | KV452803.1 | 2170382 | 4-scf00068 | 4 |
| AX-157721602 | 4 | 34.102 | KV452803.1 | 2189409 | 4-scf00068 | 4 |
| AX-157949780 | 4 | 34.245 | KV452803.1 | 2190413 | 4-scf00068 | 4 |
| AX-157949781 | 4 | 34.246 | KV452803.1 | 2191580 | 4-scf00068 | 4 |
| AX-157949784 | 4 | 34.436 | KV452803.1 | 2202302 | 4-scf00068 | 4 |
| AX-157738865 | 4 | 34.436 | KV452803.1 | 2218098 | 4-scf00068 | 4 |
| AX-157718026 | 4 | 34.498 | KV452803.1 | 2197400 | 4-scf00068 | 4 |
| AX-157949787 | 4 | 34.498 | KV452803.1 | 2208123 | 4-scf00068 | 4 |
| AX-157815491 | 4 | 34.498 | KV452803.1 | 2233958 | 4-scf00068 | 4 |
| AX-157949790 | 4 | 34.578 | KV452803.1 | 2214806 | 4-scf00068 | 4 |
| AX-157949792 | 4 | 34.578 | KV452803.1 | 2218214 | 4-scf00068 | 4 |
| AX-157949794 | 4 | 34.578 | KV452803.1 | 2219861 | 4-scf00068 | 4 |
| AX-157949795 | 4 | 34.578 | KV452803.1 | 2222653 | 4-scf00068 | 4 |
| AX-157949796 | 4 | 34.578 | KV452803.1 | 2224969 | 4-scf00068 | 4 |
| AX-157949798 | 4 | 34.578 | KV452803.1 | 2227233 | 4-scf00068 | 4 |
| AX-157949799 | 4 | 34.578 | KV452803.1 | 2227943 | 4-scf00068 | 4 |
| AX-157949800 | 4 | 34.578 | KV452803.1 | 2228836 | 4-scf00068 | 4 |
| AX-157949802 | 4 | 34.578 | KV452803.1 | 2232050 | 4-scf00068 | 4 |
| AX-157756159 | 4 | 34.578 | KV452803.1 | 2233559 | 4-scf00068 | 4 |
| AX-158379434 | 4 | 34.578 | KV452803.1 | 2234732 | 4-scf00068 | 4 |
| AX-157815493 | 4 | 34.578 | KV452803.1 | 2241616 | 4-scf00068 | 4 |
| AX-157949812 | 4 | 34.578 | KV452803.1 | 2263045 | 4-scf00068 | 4 |

|              |   |        |            |         |            |   |
|--------------|---|--------|------------|---------|------------|---|
| AX-157723105 | 4 | 34.635 | KV452803.1 | 2193424 | 4-scf00068 | 4 |
| AX-157715259 | 4 | 34.635 | KV452803.1 | 2246127 | 4-scf00068 | 4 |
| AX-157949829 | 4 | 34.635 | KV452803.1 | 2295814 | 4-scf00068 | 4 |
| AX-157949831 | 4 | 34.635 | KV452803.1 | 2298318 | 4-scf00068 | 4 |
| AX-157949847 | 4 | 34.635 | KV452803.1 | 2319939 | 4-scf00068 | 4 |
| AX-157949807 | 4 | 34.687 | KV452803.1 | 2254273 | 4-scf00068 | 4 |
| AX-157815495 | 4 | 34.687 | KV452803.1 | 2254474 | 4-scf00068 | 4 |
| AX-157949810 | 4 | 34.687 | KV452803.1 | 2261208 | 4-scf00068 | 4 |
| AX-157949814 | 4 | 34.687 | KV452803.1 | 2265480 | 4-scf00068 | 4 |
| AX-157949819 | 4 | 34.687 | KV452803.1 | 2273100 | 4-scf00068 | 4 |
| AX-157949823 | 4 | 34.743 | KV452803.1 | 2291240 | 4-scf00068 | 4 |
| AX-157949828 | 4 | 34.818 | KV452803.1 | 2295452 | 4-scf00068 | 4 |
| AX-157949835 | 4 | 34.818 | KV452803.1 | 2302755 | 4-scf00068 | 4 |
| AX-157749934 | 4 | 34.95  | KV452803.1 | 2303532 | 4-scf00068 | 4 |
| AX-157949836 | 4 | 34.95  | KV452803.1 | 2304206 | 4-scf00068 | 4 |
| AX-157949838 | 4 | 35.147 | KV452803.1 | 2308031 | 4-scf00068 | 4 |
| AX-157949840 | 4 | 35.343 | KV452803.1 | 2310922 | 4-scf00068 | 4 |
| AX-157949841 | 4 | 35.343 | KV452803.1 | 2312182 | 4-scf00068 | 4 |
| AX-157949842 | 4 | 35.343 | KV452803.1 | 2313712 | 4-scf00068 | 4 |
| AX-157949843 | 4 | 35.343 | KV452803.1 | 2314226 | 4-scf00068 | 4 |
| AX-157949844 | 4 | 35.343 | KV452803.1 | 2317149 | 4-scf00068 | 4 |
| AX-157949849 | 4 | 35.343 | KV452803.1 | 2322168 | 4-scf00068 | 4 |
| AX-157949854 | 4 | 35.78  | KV452803.1 | 2327685 | 4-scf00068 | 4 |
| AX-157949855 | 4 | 35.78  | KV452803.1 | 2330069 | 4-scf00068 | 4 |
| AX-157949861 | 4 | 35.782 | KV452803.1 | 2338653 | 4-scf00068 | 4 |
| AX-157702491 | 4 | 35.782 | KV452803.1 | 2464387 | 4-scf00068 | 4 |
| AX-158379435 | 4 | 36.028 | KV452803.1 | 2353291 | 4-scf00068 | 4 |
| AX-157949876 | 4 | 36.278 | KV452803.1 | 2361967 | 4-scf00068 | 4 |
| AX-157949882 | 4 | 36.278 | KV452803.1 | 2369664 | 4-scf00068 | 4 |
| AX-157949887 | 4 | 36.278 | KV452803.1 | 2377164 | 4-scf00068 | 4 |
| AX-157949886 | 4 | 36.364 | KV452803.1 | 2376489 | 4-scf00068 | 4 |
| AX-157949881 | 4 | 36.456 | KV452803.1 | 2368025 | 4-scf00068 | 4 |
| AX-157717771 | 4 | 36.456 | KV452803.1 | 2378769 | 4-scf00068 | 4 |
| AX-157949890 | 4 | 36.456 | KV452803.1 | 2380933 | 4-scf00068 | 4 |
| AX-157949891 | 4 | 36.456 | KV452803.1 | 2382085 | 4-scf00068 | 4 |
| AX-157949883 | 4 | 36.692 | KV452803.1 | 2373642 | 4-scf00068 | 4 |
| AX-157949892 | 4 | 36.692 | KV452803.1 | 2383993 | 4-scf00068 | 4 |
| AX-157949893 | 4 | 36.692 | KV452803.1 | 2385033 | 4-scf00068 | 4 |
| AX-157949897 | 4 | 36.693 | KV452803.1 | 2390935 | 4-scf00068 | 4 |
| AX-157949903 | 4 | 36.752 | KV452803.1 | 2396698 | 4-scf00068 | 4 |
| AX-157949904 | 4 | 36.854 | KV452803.1 | 2397982 | 4-scf00068 | 4 |
| AX-157949906 | 4 | 36.984 | KV452803.1 | 2400019 | 4-scf00068 | 4 |
| AX-157949908 | 4 | 36.984 | KV452803.1 | 2402598 | 4-scf00068 | 4 |
| AX-157949909 | 4 | 36.984 | KV452803.1 | 2403710 | 4-scf00068 | 4 |
| AX-157949910 | 4 | 36.984 | KV452803.1 | 2405246 | 4-scf00068 | 4 |
| AX-157949911 | 4 | 36.984 | KV452803.1 | 2405837 | 4-scf00068 | 4 |
| AX-157949912 | 4 | 36.984 | KV452803.1 | 2406437 | 4-scf00068 | 4 |
| AX-157815497 | 4 | 36.984 | KV452803.1 | 2406742 | 4-scf00068 | 4 |
| AX-157875349 | 4 | 36.984 | KV452803.1 | 2406888 | 4-scf00068 | 4 |
| AX-157949915 | 4 | 36.984 | KV452803.1 | 2410762 | 4-scf00068 | 4 |
| AX-157949917 | 4 | 36.984 | KV452803.1 | 2411639 | 4-scf00068 | 4 |

|              |   |        |            |         |            |   |
|--------------|---|--------|------------|---------|------------|---|
| AX-157949920 | 4 | 36.984 | KV452803.1 | 2414640 | 4-scf00068 | 4 |
| AX-157949921 | 4 | 36.984 | KV452803.1 | 2415329 | 4-scf00068 | 4 |
| AX-157949924 | 4 | 36.984 | KV452803.1 | 2419291 | 4-scf00068 | 4 |
| AX-157949925 | 4 | 36.984 | KV452803.1 | 2419948 | 4-scf00068 | 4 |
| AX-157949927 | 4 | 36.984 | KV452803.1 | 2421233 | 4-scf00068 | 4 |
| AX-157720663 | 4 | 36.984 | KV452803.1 | 2497313 | 4-scf00068 | 4 |
| AX-158406043 | 4 | 37.117 | KV452803.1 | 2425816 | 4-scf00068 | 4 |
| AX-157949928 | 4 | 37.117 | KV452803.1 | 2427347 | 4-scf00068 | 4 |
| AX-157949931 | 4 | 37.179 | KV452803.1 | 2431319 | 4-scf00068 | 4 |
| AX-157949932 | 4 | 37.184 | KV452803.1 | 2432268 | 4-scf00068 | 4 |
| AX-157949968 | 4 | 37.184 | KV452803.1 | 2488470 | 4-scf00068 | 4 |
| AX-157949933 | 4 | 37.25  | KV452803.1 | 2433234 | 4-scf00068 | 4 |
| AX-157696244 | 4 | 37.25  | KV452803.1 | 2434040 | 4-scf00068 | 4 |
| AX-157949894 | 4 | 37.395 | KV452803.1 | 2386696 | 4-scf00068 | 4 |
| AX-157949937 | 4 | 37.395 | KV452803.1 | 2437444 | 4-scf00068 | 4 |
| AX-157949943 | 4 | 37.395 | KV452803.1 | 2447474 | 4-scf00068 | 4 |
| AX-157949944 | 4 | 37.517 | KV452803.1 | 2449633 | 4-scf00068 | 4 |
| AX-157949945 | 4 | 37.517 | KV452803.1 | 2454275 | 4-scf00068 | 4 |
| AX-157949946 | 4 | 37.517 | KV452803.1 | 2454716 | 4-scf00068 | 4 |
| AX-157949948 | 4 | 37.517 | KV452803.1 | 2457138 | 4-scf00068 | 4 |
| AX-157949934 | 4 | 37.65  | KV452803.1 | 2433343 | 4-scf00068 | 4 |
| AX-157949938 | 4 | 37.65  | KV452803.1 | 2441845 | 4-scf00068 | 4 |
| AX-157949942 | 4 | 37.65  | KV452803.1 | 2445644 | 4-scf00068 | 4 |
| AX-157753743 | 4 | 37.65  | KV452803.1 | 2461566 | 4-scf00068 | 4 |
| AX-157815499 | 4 | 37.65  | KV452803.1 | 2462664 | 4-scf00068 | 4 |
| AX-157715799 | 4 | 37.65  | KV452803.1 | 2462909 | 4-scf00068 | 4 |
| AX-157949952 | 4 | 37.65  | KV452803.1 | 2463443 | 4-scf00068 | 4 |
| AX-157949954 | 4 | 37.65  | KV452803.1 | 2470194 | 4-scf00068 | 4 |
| AX-157949957 | 4 | 37.65  | KV452803.1 | 2475219 | 4-scf00068 | 4 |
| AX-157754622 | 4 | 37.65  | KV452803.1 | 2478467 | 4-scf00068 | 4 |
| AX-157949960 | 4 | 37.65  | KV452803.1 | 2482735 | 4-scf00068 | 4 |
| AX-157949961 | 4 | 37.65  | KV452803.1 | 2483138 | 4-scf00068 | 4 |
| AX-157949962 | 4 | 37.65  | KV452803.1 | 2483755 | 4-scf00068 | 4 |
| AX-157949965 | 4 | 37.65  | KV452803.1 | 2486682 | 4-scf00068 | 4 |
| AX-157949966 | 4 | 37.65  | KV452803.1 | 2486796 | 4-scf00068 | 4 |
| AX-157949969 | 4 | 37.65  | KV452803.1 | 2489240 | 4-scf00068 | 4 |
| AX-157949970 | 4 | 37.65  | KV452803.1 | 2490446 | 4-scf00068 | 4 |
| AX-157949975 | 4 | 37.65  | KV452803.1 | 2496298 | 4-scf00068 | 4 |
| AX-157949976 | 4 | 37.65  | KV452803.1 | 2497655 | 4-scf00068 | 4 |
| AX-157949978 | 4 | 37.65  | KV452803.1 | 2510559 | 4-scf00068 | 4 |
| AX-157949985 | 4 | 37.65  | KV452803.1 | 2520743 | 4-scf00068 | 4 |
| AX-157815502 | 4 | 37.65  | KV452803.1 | 2521688 | 4-scf00068 | 4 |
| AX-157815503 | 4 | 37.65  | KV452803.1 | 2522750 | 4-scf00068 | 4 |
| AX-157949988 | 4 | 37.65  | KV452803.1 | 2525694 | 4-scf00068 | 4 |
| AX-157949991 | 4 | 37.65  | KV452803.1 | 2529992 | 4-scf00068 | 4 |
| AX-157773804 | 4 | 37.65  | KV452803.1 | 2533073 | 4-scf00068 | 4 |
| AX-157815504 | 4 | 37.65  | KV452803.1 | 2533618 | 4-scf00068 | 4 |
| AX-157949994 | 4 | 37.65  | KV452803.1 | 2534717 | 4-scf00068 | 4 |
| AX-157949996 | 4 | 37.65  | KV452803.1 | 2536094 | 4-scf00068 | 4 |
| AX-157815505 | 4 | 37.65  | KV452803.1 | 2539131 | 4-scf00068 | 4 |
| AX-157949998 | 4 | 37.65  | KV452803.1 | 2541691 | 4-scf00068 | 4 |

|              |   |        |            |         |            |   |
|--------------|---|--------|------------|---------|------------|---|
| AX-157949999 | 4 | 37.65  | KV452803.1 | 2542899 | 4-scf00068 | 4 |
| AX-157744778 | 4 | 37.65  | KV452803.1 | 2544348 | 4-scf00068 | 4 |
| AX-157815507 | 4 | 37.65  | KV452803.1 | 2544724 | 4-scf00068 | 4 |
| AX-157950003 | 4 | 37.65  | KV452803.1 | 2548587 | 4-scf00068 | 4 |
| AX-157950007 | 4 | 37.65  | KV452803.1 | 2552827 | 4-scf00068 | 4 |
| AX-157950009 | 4 | 37.65  | KV452803.1 | 2554284 | 4-scf00068 | 4 |
| AX-157950012 | 4 | 37.65  | KV452803.1 | 2558167 | 4-scf00068 | 4 |
| AX-157950013 | 4 | 37.65  | KV452803.1 | 2558530 | 4-scf00068 | 4 |
| AX-157950014 | 4 | 37.65  | KV452803.1 | 2560689 | 4-scf00068 | 4 |
| AX-157950016 | 4 | 37.65  | KV452803.1 | 2562631 | 4-scf00068 | 4 |
| AX-157950018 | 4 | 37.65  | KV452803.1 | 2564822 | 4-scf00068 | 4 |
| AX-157815508 | 4 | 37.65  | KV452803.1 | 2567685 | 4-scf00068 | 4 |
| AX-157815509 | 4 | 37.65  | KV452803.1 | 2568936 | 4-scf00068 | 4 |
| AX-157950025 | 4 | 37.65  | KV452803.1 | 2574662 | 4-scf00068 | 4 |
| AX-157875352 | 4 | 37.65  | KV452803.1 | 2584157 | 4-scf00068 | 4 |
| AX-157815520 | 4 | 37.65  | KV452803.1 | 2615620 | 4-scf00068 | 4 |
| AX-157727920 | 4 | 37.957 | KV452803.1 | 2572353 | 4-scf00068 | 4 |
| AX-157949971 | 4 | 38.052 | KV452803.1 | 2490832 | 4-scf00068 | 4 |
| AX-157949984 | 4 | 38.052 | KV452803.1 | 2520062 | 4-scf00068 | 4 |
| AX-157950024 | 4 | 38.052 | KV452803.1 | 2573686 | 4-scf00068 | 4 |
| AX-157815510 | 4 | 38.052 | KV452803.1 | 2575201 | 4-scf00068 | 4 |
| AX-157950026 | 4 | 38.052 | KV452803.1 | 2575630 | 4-scf00068 | 4 |
| AX-158406046 | 4 | 38.052 | KV452803.1 | 2579102 | 4-scf00068 | 4 |
| AX-157875351 | 4 | 38.052 | KV452803.1 | 2580624 | 4-scf00068 | 4 |
| AX-157950027 | 4 | 38.052 | KV452803.1 | 2581567 | 4-scf00068 | 4 |
| AX-157950028 | 4 | 38.052 | KV452803.1 | 2583060 | 4-scf00068 | 4 |
| AX-157772141 | 4 | 38.052 | KV452803.1 | 2588732 | 4-scf00068 | 4 |
| AX-157950029 | 4 | 38.052 | KV452803.1 | 2591461 | 4-scf00068 | 4 |
| AX-157950030 | 4 | 38.052 | KV452803.1 | 2596015 | 4-scf00068 | 4 |
| AX-157815515 | 4 | 38.052 | KV452803.1 | 2598344 | 4-scf00068 | 4 |
| AX-157950040 | 4 | 38.052 | KV452803.1 | 2609827 | 4-scf00068 | 4 |
| AX-157950043 | 4 | 38.052 | KV452803.1 | 2614227 | 4-scf00068 | 4 |
| AX-157950047 | 4 | 38.052 | KV452803.1 | 2616888 | 4-scf00068 | 4 |
| AX-157746814 | 4 | 38.052 | KV452803.1 | 2621671 | 4-scf00068 | 4 |
| AX-157950052 | 4 | 38.052 | KV452803.1 | 2623368 | 4-scf00068 | 4 |
| AX-157950056 | 4 | 38.052 | KV452803.1 | 2625784 | 4-scf00068 | 4 |
| AX-157950057 | 4 | 38.052 | KV452803.1 | 2626175 | 4-scf00068 | 4 |
| AX-157950107 | 4 | 38.052 | KV452803.1 | 2710516 | 4-scf00068 | 4 |
| AX-158390194 | 4 | 38.052 | KV452803.1 | 2711869 | 4-scf00068 | 4 |
| AX-157950113 | 4 | 38.052 | KV452803.1 | 2717765 | 4-scf00068 | 4 |
| AX-157715361 | 4 | 38.052 | KV452803.1 | 2769102 | 4-scf00068 | 4 |
| AX-157815528 | 4 | 38.052 | KV452803.1 | 2802079 | 4-scf00068 | 4 |
| AX-157815531 | 4 | 38.052 | KV452803.1 | 2808299 | 4-scf00068 | 4 |
| AX-157751023 | 4 | 38.052 | KV452803.1 | 2851219 | 4-scf00068 | 4 |
| AX-157815536 | 4 | 38.052 | KV452803.1 | 2861800 | 4-scf00068 | 4 |
| AX-157950247 | 4 | 38.052 | KV452803.1 | 2896301 | 4-scf00068 | 4 |
| AX-157950262 | 4 | 38.052 | KV452803.1 | 2916281 | 4-scf00068 | 4 |
| AX-157950350 | 4 | 38.052 | KV452803.1 | 3027135 | 4-scf00068 | 4 |
| AX-157950368 | 4 | 38.052 | KV452803.1 | 3053872 | 4-scf00068 | 4 |
| AX-157950067 | 4 | 38.325 | KV452803.1 | 2644571 | 4-scf00068 | 4 |
| AX-157950070 | 4 | 38.325 | KV452803.1 | 2649290 | 4-scf00068 | 4 |

|              |   |        |             |         |            |    |
|--------------|---|--------|-------------|---------|------------|----|
| AX-157950071 | 4 | 38.325 | KV452803.1  | 2649883 | 4-scf00068 | 4  |
| AX-157950072 | 4 | 38.325 | KV452803.1  | 2651770 | 4-scf00068 | 4  |
| AX-157950074 | 4 | 38.325 | KV452803.1  | 2653261 | 4-scf00068 | 4  |
| AX-157950077 | 4 | 38.325 | KV452803.1  | 2656924 | 4-scf00068 | 4  |
| AX-157757902 | 4 | 38.325 | KV452803.1  | 2657636 | 4-scf00068 | 4  |
| AX-157950080 | 4 | 38.325 | KV452803.1  | 2659943 | 4-scf00068 | 4  |
| AX-157950081 | 4 | 38.325 | KV452803.1  | 2661444 | 4-scf00068 | 4  |
| AX-157950085 | 4 | 38.325 | KV452803.1  | 2671072 | 4-scf00068 | 4  |
| AX-157950082 | 4 | 38.326 | KV452803.1  | 2664259 | 4-scf00068 | 4  |
| AX-157949967 | 4 | 38.484 | KV452803.1  | 2487271 | 4-scf00068 | 4  |
| AX-157950079 | 4 | 38.484 | KV452803.1  | 2658649 | 4-scf00068 | 4  |
| AX-157950086 | 4 | 38.484 | KV452803.1  | 2672784 | 4-scf00068 | 4  |
| AX-157950098 | 4 | 38.484 | KV452803.1  | 2693590 | 4-scf00068 | 4  |
| AX-157950106 | 4 | 38.484 | KV452803.1  | 2709395 | 4-scf00068 | 4  |
| AX-157950186 | 4 | 38.484 | KV452803.1  | 2801966 | 4-scf00068 | 4  |
| AX-157950088 | 4 | 38.599 | KV452803.1  | 2676097 | 4-scf00068 | 4  |
| AX-157950091 | 4 | 38.599 | KV452803.1  | 2678060 | 4-scf00068 | 4  |
| AX-157719947 | 4 | 38.599 | KV452803.1  | 2718980 | 4-scf00068 | 4  |
| AX-157950092 | 4 | 38.663 | KV452803.1  | 2678657 | 4-scf00068 | 4  |
| AX-158406050 | 4 | 38.663 | KV452803.1  | 2715291 | 4-scf00068 | 4  |
| AX-157748033 | 4 | 38.736 | KV452803.1  | 2686542 | 4-scf00068 | 4  |
| AX-157727253 | 4 | 38.736 | KV452803.1  | 2692554 | 4-scf00068 | 4  |
| AX-157950104 | 4 | 38.736 | KV452803.1  | 2701185 | 4-scf00068 | 4  |
| AX-157773843 | 4 | 38.872 | KV452803.1  | 2717197 | 4-scf00068 | 4  |
| AX-157950118 | 4 | 38.872 | KV452803.1  | 2723111 | 4-scf00068 | 4  |
| AX-158421208 | 4 | 38.872 | 3ML01032939 | 337     | scf08571_1 | UN |
| AX-157706800 | 4 | 38.872 | 3ML01032939 | 514     | scf08571_1 | UN |
| AX-157950015 | 4 | 39.009 | KV452803.1  | 2561352 | 4-scf00068 | 4  |
| AX-157950064 | 4 | 39.009 | KV452803.1  | 2642194 | 4-scf00068 | 4  |
| AX-157755866 | 4 | 39.009 | KV452803.1  | 2654050 | 4-scf00068 | 4  |
| AX-157950075 | 4 | 39.009 | KV452803.1  | 2654455 | 4-scf00068 | 4  |
| AX-157950095 | 4 | 39.009 | KV452803.1  | 2683548 | 4-scf00068 | 4  |
| AX-157950097 | 4 | 39.009 | KV452803.1  | 2689613 | 4-scf00068 | 4  |
| AX-157950120 | 4 | 39.009 | KV452803.1  | 2725521 | 4-scf00068 | 4  |
| AX-157950126 | 4 | 39.009 | KV452803.1  | 2732413 | 4-scf00068 | 4  |
| AX-157950127 | 4 | 39.009 | KV452803.1  | 2732950 | 4-scf00068 | 4  |
| AX-157950139 | 4 | 39.009 | KV452803.1  | 2748120 | 4-scf00068 | 4  |
| AX-157950140 | 4 | 39.009 | KV452803.1  | 2748587 | 4-scf00068 | 4  |
| AX-157950143 | 4 | 39.009 | KV452803.1  | 2750478 | 4-scf00068 | 4  |
| AX-157950145 | 4 | 39.009 | KV452803.1  | 2751376 | 4-scf00068 | 4  |
| AX-157739089 | 4 | 39.009 | KV452803.1  | 2751704 | 4-scf00068 | 4  |
| AX-157950147 | 4 | 39.009 | KV452803.1  | 2752332 | 4-scf00068 | 4  |
| AX-157950149 | 4 | 39.009 | KV452803.1  | 2754699 | 4-scf00068 | 4  |
| AX-157815522 | 4 | 39.009 | KV452803.1  | 2761687 | 4-scf00068 | 4  |
| AX-157950153 | 4 | 39.009 | KV452803.1  | 2763425 | 4-scf00068 | 4  |
| AX-157950154 | 4 | 39.009 | KV452803.1  | 2765008 | 4-scf00068 | 4  |
| AX-157950155 | 4 | 39.009 | KV452803.1  | 2765370 | 4-scf00068 | 4  |
| AX-157950161 | 4 | 39.009 | KV452803.1  | 2776753 | 4-scf00068 | 4  |
| AX-157950174 | 4 | 39.009 | KV452803.1  | 2789839 | 4-scf00068 | 4  |
| AX-157950179 | 4 | 39.009 | KV452803.1  | 2792364 | 4-scf00068 | 4  |
| AX-157950182 | 4 | 39.009 | KV452803.1  | 2796693 | 4-scf00068 | 4  |



|              |   |        |            |         |                |    |
|--------------|---|--------|------------|---------|----------------|----|
| AX-157875356 | 4 | 39.009 | KV452803.1 | 2797249 | 4-scf00068     | 4  |
| AX-157950204 | 4 | 39.009 | KV452803.1 | 2826723 | 4-scf00068     | 4  |
| AX-157714719 | 4 | 39.009 | KV452803.1 | 2836150 | 4-scf00068     | 4  |
| AX-157950164 | 4 | 39.054 | KV452803.1 | 2778639 | 4-scf00068     | 4  |
| AX-157815523 | 4 | 39.146 | KV452803.1 | 2779436 | 4-scf00068     | 4  |
| AX-158406052 | 4 | 39.146 | KV452803.1 | 2782013 | 4-scf00068     | 4  |
| AX-157950173 | 4 | 39.146 | KV452803.1 | 2788682 | 4-scf00068     | 4  |
| AX-157950180 | 4 | 39.146 | KV452803.1 | 2793717 | 4-scf00068     | 4  |
| AX-157950183 | 4 | 39.284 | KV452803.1 | 2798469 | 4-scf00068     | 4  |
| AX-157815526 | 4 | 39.284 | KV452803.1 | 2799810 | 4-scf00068     | 4  |
| AX-157815527 | 4 | 39.284 | KV452803.1 | 2799964 | 4-scf00068     | 4  |
| AX-157950185 | 4 | 39.284 | KV452803.1 | 2800955 | 4-scf00068     | 4  |
| AX-157950188 | 4 | 39.284 | KV452803.1 | 2807403 | 4-scf00068     | 4  |
| AX-157815530 | 4 | 39.284 | KV452803.1 | 2807831 | 4-scf00068     | 4  |
| AX-157950206 | 4 | 39.284 | KV452803.1 | 2828289 | 4-scf00068     | 4  |
| AX-157694461 | 4 | 39.284 | FI864134.1 | 720     | IORI212 lctalu | UN |
| AX-157950208 | 4 | 39.394 | KV452803.1 | 2830776 | 4-scf00068     | 4  |
| AX-157815534 | 4 | 39.394 | KV452803.1 | 2831192 | 4-scf00068     | 4  |
| AX-157815535 | 4 | 39.394 | KV452803.1 | 2838932 | 4-scf00068     | 4  |
| AX-157950209 | 4 | 39.394 | KV452803.1 | 2839552 | 4-scf00068     | 4  |
| AX-157950210 | 4 | 39.394 | KV452803.1 | 2844892 | 4-scf00068     | 4  |
| AX-157950213 | 4 | 39.394 | KV452803.1 | 2846778 | 4-scf00068     | 4  |
| AX-157950215 | 4 | 39.394 | KV452803.1 | 2847890 | 4-scf00068     | 4  |
| AX-157950216 | 4 | 39.394 | KV452803.1 | 2848159 | 4-scf00068     | 4  |
| AX-157750332 | 4 | 39.394 | KV452803.1 | 2853519 | 4-scf00068     | 4  |
| AX-157775045 | 4 | 39.394 | KV452803.1 | 2854997 | 4-scf00068     | 4  |
| AX-157950222 | 4 | 39.394 | KV452803.1 | 2857886 | 4-scf00068     | 4  |
| AX-157950225 | 4 | 39.394 | KV452803.1 | 2861555 | 4-scf00068     | 4  |
| AX-157950229 | 4 | 39.394 | KV452803.1 | 2866994 | 4-scf00068     | 4  |
| AX-157747985 | 4 | 39.394 | KV452803.1 | 2867280 | 4-scf00068     | 4  |
| AX-157950230 | 4 | 39.394 | KV452803.1 | 2869479 | 4-scf00068     | 4  |
| AX-157745498 | 4 | 39.394 | KV452803.1 | 2870768 | 4-scf00068     | 4  |
| AX-157950236 | 4 | 39.394 | KV452803.1 | 2877126 | 4-scf00068     | 4  |
| AX-157950242 | 4 | 39.394 | KV452803.1 | 2890938 | 4-scf00068     | 4  |
| AX-157950300 | 4 | 39.394 | KV452803.1 | 2967572 | 4-scf00068     | 4  |
| AX-157950301 | 4 | 39.394 | KV452803.1 | 2968801 | 4-scf00068     | 4  |
| AX-157950116 | 4 | 39.503 | KV452803.1 | 2721717 | 4-scf00068     | 4  |
| AX-157950125 | 4 | 39.503 | KV452803.1 | 2731608 | 4-scf00068     | 4  |
| AX-157950142 | 4 | 39.503 | KV452803.1 | 2750256 | 4-scf00068     | 4  |
| AX-158404939 | 4 | 39.503 | KV452803.1 | 2782277 | 4-scf00068     | 4  |
| AX-157950176 | 4 | 39.503 | KV452803.1 | 2790746 | 4-scf00068     | 4  |
| AX-157950217 | 4 | 39.503 | KV452803.1 | 2848698 | 4-scf00068     | 4  |
| AX-157950218 | 4 | 39.503 | KV452803.1 | 2851738 | 4-scf00068     | 4  |
| AX-158379439 | 4 | 39.503 | KV452803.1 | 2859011 | 4-scf00068     | 4  |
| AX-157950224 | 4 | 39.503 | KV452803.1 | 2861160 | 4-scf00068     | 4  |
| AX-157756450 | 4 | 39.503 | KV452803.1 | 2880846 | 4-scf00068     | 4  |
| AX-157744365 | 4 | 39.503 | KV452803.1 | 2883899 | 4-scf00068     | 4  |
| AX-157854661 | 4 | 39.503 | KV452803.1 | 2885483 | 4-scf00068     | 4  |
| AX-157753135 | 4 | 39.503 | KV452803.1 | 2886827 | 4-scf00068     | 4  |
| AX-157950240 | 4 | 39.503 | KV452803.1 | 2889633 | 4-scf00068     | 4  |
| AX-157950241 | 4 | 39.503 | KV452803.1 | 2890363 | 4-scf00068     | 4  |

|              |   |        |            |         |            |   |
|--------------|---|--------|------------|---------|------------|---|
| AX-157950728 | 4 | 39.503 | KV452803.1 | 3494689 | 4-scf00068 | 4 |
| AX-157950744 | 4 | 39.503 | KV452803.1 | 3512488 | 4-scf00068 | 4 |
| AX-157951089 | 4 | 39.503 | KV452803.1 | 3973604 | 4-scf00068 | 4 |
| AX-157950243 | 4 | 39.56  | KV452803.1 | 2891584 | 4-scf00068 | 4 |
| AX-157950246 | 4 | 39.612 | KV452803.1 | 2895120 | 4-scf00068 | 4 |
| AX-157815538 | 4 | 39.612 | KV452803.1 | 2895338 | 4-scf00068 | 4 |
| AX-157950248 | 4 | 39.612 | KV452803.1 | 2897448 | 4-scf00068 | 4 |
| AX-157950256 | 4 | 39.612 | KV452803.1 | 2905587 | 4-scf00068 | 4 |
| AX-157950257 | 4 | 39.612 | KV452803.1 | 2905700 | 4-scf00068 | 4 |
| AX-157950252 | 4 | 39.668 | KV452803.1 | 2900375 | 4-scf00068 | 4 |
| AX-157950258 | 4 | 39.668 | KV452803.1 | 2909054 | 4-scf00068 | 4 |
| AX-157864834 | 4 | 39.721 | KV452803.1 | 2577146 | 4-scf00068 | 4 |
| AX-157950044 | 4 | 39.721 | KV452803.1 | 2614431 | 4-scf00068 | 4 |
| AX-157950112 | 4 | 39.721 | KV452803.1 | 2713900 | 4-scf00068 | 4 |
| AX-157741908 | 4 | 39.721 | KV452803.1 | 2800413 | 4-scf00068 | 4 |
| AX-157950255 | 4 | 39.721 | KV452803.1 | 2904699 | 4-scf00068 | 4 |
| AX-157950259 | 4 | 39.721 | KV452803.1 | 2910225 | 4-scf00068 | 4 |
| AX-157950260 | 4 | 39.721 | KV452803.1 | 2911597 | 4-scf00068 | 4 |
| AX-157815539 | 4 | 39.721 | KV452803.1 | 2912521 | 4-scf00068 | 4 |
| AX-157719410 | 4 | 39.721 | KV452803.1 | 2914818 | 4-scf00068 | 4 |
| AX-157950267 | 4 | 39.721 | KV452803.1 | 2928070 | 4-scf00068 | 4 |
| AX-157950270 | 4 | 39.721 | KV452803.1 | 2931790 | 4-scf00068 | 4 |
| AX-157950273 | 4 | 39.721 | KV452803.1 | 2933745 | 4-scf00068 | 4 |
| AX-157950276 | 4 | 39.721 | KV452803.1 | 2942301 | 4-scf00068 | 4 |
| AX-157710666 | 4 | 39.721 | KV452803.1 | 2943928 | 4-scf00068 | 4 |
| AX-157950277 | 4 | 39.721 | KV452803.1 | 2944491 | 4-scf00068 | 4 |
| AX-157950278 | 4 | 39.721 | KV452803.1 | 2944879 | 4-scf00068 | 4 |
| AX-157950279 | 4 | 39.721 | KV452803.1 | 2945676 | 4-scf00068 | 4 |
| AX-157950281 | 4 | 39.721 | KV452803.1 | 2950407 | 4-scf00068 | 4 |
| AX-157950282 | 4 | 39.721 | KV452803.1 | 2950929 | 4-scf00068 | 4 |
| AX-157950283 | 4 | 39.721 | KV452803.1 | 2951301 | 4-scf00068 | 4 |
| AX-157950284 | 4 | 39.721 | KV452803.1 | 2952242 | 4-scf00068 | 4 |
| AX-157725499 | 4 | 39.721 | KV452803.1 | 2953117 | 4-scf00068 | 4 |
| AX-157747463 | 4 | 39.721 | KV452803.1 | 2953581 | 4-scf00068 | 4 |
| AX-157757248 | 4 | 39.721 | KV452803.1 | 2954042 | 4-scf00068 | 4 |
| AX-157950287 | 4 | 39.721 | KV452803.1 | 2956674 | 4-scf00068 | 4 |
| AX-157950290 | 4 | 39.721 | KV452803.1 | 2960028 | 4-scf00068 | 4 |
| AX-157950291 | 4 | 39.721 | KV452803.1 | 2960511 | 4-scf00068 | 4 |
| AX-157950293 | 4 | 39.721 | KV452803.1 | 2963416 | 4-scf00068 | 4 |
| AX-157950295 | 4 | 39.721 | KV452803.1 | 2965392 | 4-scf00068 | 4 |
| AX-157950298 | 4 | 39.721 | KV452803.1 | 2966784 | 4-scf00068 | 4 |
| AX-157950299 | 4 | 39.721 | KV452803.1 | 2967192 | 4-scf00068 | 4 |
| AX-157950302 | 4 | 39.721 | KV452803.1 | 2969436 | 4-scf00068 | 4 |
| AX-157950304 | 4 | 39.721 | KV452803.1 | 2973549 | 4-scf00068 | 4 |
| AX-157950305 | 4 | 39.721 | KV452803.1 | 2973988 | 4-scf00068 | 4 |
| AX-157950306 | 4 | 39.721 | KV452803.1 | 2975355 | 4-scf00068 | 4 |
| AX-157722363 | 4 | 39.721 | KV452803.1 | 2994845 | 4-scf00068 | 4 |
| AX-157725096 | 4 | 39.721 | KV452803.1 | 3005678 | 4-scf00068 | 4 |
| AX-157950275 | 4 | 39.777 | KV452803.1 | 2941828 | 4-scf00068 | 4 |
| AX-157950297 | 4 | 39.777 | KV452803.1 | 2966190 | 4-scf00068 | 4 |
| AX-157950307 | 4 | 39.777 | KV452803.1 | 2976001 | 4-scf00068 | 4 |

|              |   |        |            |         |            |   |
|--------------|---|--------|------------|---------|------------|---|
| AX-157950023 | 4 | 39.94  | KV452803.1 | 2572115 | 4-scf00068 | 4 |
| AX-157775002 | 4 | 39.94  | KV452803.1 | 2574468 | 4-scf00068 | 4 |
| AX-157950036 | 4 | 39.94  | KV452803.1 | 2605852 | 4-scf00068 | 4 |
| AX-157869562 | 4 | 39.94  | KV452803.1 | 2838236 | 4-scf00068 | 4 |
| AX-157950309 | 4 | 39.94  | KV452803.1 | 2984191 | 4-scf00068 | 4 |
| AX-157709510 | 4 | 39.94  | KV452803.1 | 2988590 | 4-scf00068 | 4 |
| AX-157950312 | 4 | 39.94  | KV452803.1 | 2989092 | 4-scf00068 | 4 |
| AX-157950313 | 4 | 39.94  | KV452803.1 | 2990440 | 4-scf00068 | 4 |
| AX-157950314 | 4 | 39.94  | KV452803.1 | 2990653 | 4-scf00068 | 4 |
| AX-157950315 | 4 | 39.94  | KV452803.1 | 2991788 | 4-scf00068 | 4 |
| AX-157758162 | 4 | 39.94  | KV452803.1 | 2991828 | 4-scf00068 | 4 |
| AX-157950316 | 4 | 39.94  | KV452803.1 | 2992152 | 4-scf00068 | 4 |
| AX-157950319 | 4 | 39.94  | KV452803.1 | 2996611 | 4-scf00068 | 4 |
| AX-157950320 | 4 | 39.94  | KV452803.1 | 2997001 | 4-scf00068 | 4 |
| AX-157727664 | 4 | 39.94  | KV452803.1 | 3002193 | 4-scf00068 | 4 |
| AX-157950324 | 4 | 39.94  | KV452803.1 | 3002259 | 4-scf00068 | 4 |
| AX-157950325 | 4 | 39.94  | KV452803.1 | 3002982 | 4-scf00068 | 4 |
| AX-157744018 | 4 | 39.94  | KV452803.1 | 3072335 | 4-scf00068 | 4 |
| AX-157950333 | 4 | 40.001 | KV452803.1 | 3015039 | 4-scf00068 | 4 |
| AX-157950280 | 4 | 40.049 | KV452803.1 | 2949799 | 4-scf00068 | 4 |
| AX-157950330 | 4 | 40.049 | KV452803.1 | 3009726 | 4-scf00068 | 4 |
| AX-157950331 | 4 | 40.049 | KV452803.1 | 3011697 | 4-scf00068 | 4 |
| AX-157950336 | 4 | 40.049 | KV452803.1 | 3019358 | 4-scf00068 | 4 |
| AX-157950337 | 4 | 40.049 | KV452803.1 | 3020599 | 4-scf00068 | 4 |
| AX-157950339 | 4 | 40.049 | KV452803.1 | 3021246 | 4-scf00068 | 4 |
| AX-157950341 | 4 | 40.049 | KV452803.1 | 3022363 | 4-scf00068 | 4 |
| AX-157950342 | 4 | 40.049 | KV452803.1 | 3023911 | 4-scf00068 | 4 |
| AX-157950343 | 4 | 40.049 | KV452803.1 | 3024311 | 4-scf00068 | 4 |
| AX-157754195 | 4 | 40.049 | KV452803.1 | 3024653 | 4-scf00068 | 4 |
| AX-157950344 | 4 | 40.049 | KV452803.1 | 3025013 | 4-scf00068 | 4 |
| AX-157950345 | 4 | 40.049 | KV452803.1 | 3025418 | 4-scf00068 | 4 |
| AX-157950348 | 4 | 40.049 | KV452803.1 | 3026451 | 4-scf00068 | 4 |
| AX-157950349 | 4 | 40.049 | KV452803.1 | 3026807 | 4-scf00068 | 4 |
| AX-157950354 | 4 | 40.049 | KV452803.1 | 3030881 | 4-scf00068 | 4 |
| AX-157950355 | 4 | 40.049 | KV452803.1 | 3032159 | 4-scf00068 | 4 |
| AX-157950356 | 4 | 40.049 | KV452803.1 | 3033607 | 4-scf00068 | 4 |
| AX-157950357 | 4 | 40.049 | KV452803.1 | 3037197 | 4-scf00068 | 4 |
| AX-157950359 | 4 | 40.049 | KV452803.1 | 3040983 | 4-scf00068 | 4 |
| AX-157950361 | 4 | 40.049 | KV452803.1 | 3045367 | 4-scf00068 | 4 |
| AX-157950365 | 4 | 40.049 | KV452803.1 | 3050067 | 4-scf00068 | 4 |
| AX-157950366 | 4 | 40.049 | KV452803.1 | 3051245 | 4-scf00068 | 4 |
| AX-157950378 | 4 | 40.049 | KV452803.1 | 3062981 | 4-scf00068 | 4 |
| AX-157950087 | 4 | 40.195 | KV452803.1 | 2674683 | 4-scf00068 | 4 |
| AX-157950360 | 4 | 40.195 | KV452803.1 | 3045155 | 4-scf00068 | 4 |
| AX-157864840 | 4 | 40.195 | KV452803.1 | 3054366 | 4-scf00068 | 4 |
| AX-157950371 | 4 | 40.195 | KV452803.1 | 3056246 | 4-scf00068 | 4 |
| AX-157950372 | 4 | 40.337 | KV452803.1 | 3057256 | 4-scf00068 | 4 |
| AX-157950374 | 4 | 40.337 | KV452803.1 | 3059295 | 4-scf00068 | 4 |
| AX-157950375 | 4 | 40.337 | KV452803.1 | 3060437 | 4-scf00068 | 4 |
| AX-157753526 | 4 | 40.337 | KV452803.1 | 3062041 | 4-scf00068 | 4 |
| AX-157950381 | 4 | 40.337 | KV452803.1 | 3065585 | 4-scf00068 | 4 |

|              |   |        |            |         |            |   |
|--------------|---|--------|------------|---------|------------|---|
| AX-157950382 | 4 | 40.337 | KV452803.1 | 3066643 | 4-scf00068 | 4 |
| AX-157745347 | 4 | 40.431 | KV452803.1 | 3063923 | 4-scf00068 | 4 |
| AX-157950386 | 4 | 40.481 | KV452803.1 | 3072841 | 4-scf00068 | 4 |
| AX-157950402 | 4 | 40.481 | KV452803.1 | 3095238 | 4-scf00068 | 4 |
| AX-157709807 | 4 | 40.481 | KV452803.1 | 3612800 | 4-scf00068 | 4 |
| AX-157950840 | 4 | 40.481 | KV452803.1 | 3654274 | 4-scf00068 | 4 |
| AX-157950404 | 4 | 40.501 | KV452803.1 | 3100071 | 4-scf00068 | 4 |
| AX-157950405 | 4 | 40.501 | KV452803.1 | 3100969 | 4-scf00068 | 4 |
| AX-157950414 | 4 | 40.501 | KV452803.1 | 3110062 | 4-scf00068 | 4 |
| AX-157950416 | 4 | 40.501 | KV452803.1 | 3111117 | 4-scf00068 | 4 |
| AX-157950409 | 4 | 40.645 | KV452803.1 | 3104290 | 4-scf00068 | 4 |
| AX-157950412 | 4 | 40.814 | KV452803.1 | 3106993 | 4-scf00068 | 4 |
| AX-157950432 | 4 | 40.814 | KV452803.1 | 3128806 | 4-scf00068 | 4 |
| AX-157950532 | 4 | 40.814 | KV452803.1 | 3254619 | 4-scf00068 | 4 |
| AX-158406058 | 4 | 40.924 | KV452803.1 | 2902956 | 4-scf00068 | 4 |
| AX-157950406 | 4 | 40.924 | KV452803.1 | 3102103 | 4-scf00068 | 4 |
| AX-157752120 | 4 | 40.924 | KV452803.1 | 3118490 | 4-scf00068 | 4 |
| AX-157950423 | 4 | 40.924 | KV452803.1 | 3122059 | 4-scf00068 | 4 |
| AX-157950426 | 4 | 40.924 | KV452803.1 | 3125119 | 4-scf00068 | 4 |
| AX-158406060 | 4 | 40.924 | KV452803.1 | 3136262 | 4-scf00068 | 4 |
| AX-157950439 | 4 | 40.924 | KV452803.1 | 3143625 | 4-scf00068 | 4 |
| AX-157950440 | 4 | 40.924 | KV452803.1 | 3144632 | 4-scf00068 | 4 |
| AX-157950448 | 4 | 40.924 | KV452803.1 | 3152835 | 4-scf00068 | 4 |
| AX-157950451 | 4 | 40.924 | KV452803.1 | 3154617 | 4-scf00068 | 4 |
| AX-158382778 | 4 | 40.924 | KV452803.1 | 3165975 | 4-scf00068 | 4 |
| AX-157950461 | 4 | 40.924 | KV452803.1 | 3168994 | 4-scf00068 | 4 |
| AX-157950465 | 4 | 40.924 | KV452803.1 | 3181137 | 4-scf00068 | 4 |
| AX-157723328 | 4 | 40.924 | KV452803.1 | 3190425 | 4-scf00068 | 4 |
| AX-157950475 | 4 | 40.924 | KV452803.1 | 3195420 | 4-scf00068 | 4 |
| AX-157950476 | 4 | 40.924 | KV452803.1 | 3196301 | 4-scf00068 | 4 |
| AX-157950479 | 4 | 40.924 | KV452803.1 | 3198149 | 4-scf00068 | 4 |
| AX-157950483 | 4 | 40.924 | KV452803.1 | 3202790 | 4-scf00068 | 4 |
| AX-157950484 | 4 | 40.924 | KV452803.1 | 3202963 | 4-scf00068 | 4 |
| AX-157950490 | 4 | 40.924 | KV452803.1 | 3208982 | 4-scf00068 | 4 |
| AX-157950491 | 4 | 40.924 | KV452803.1 | 3209639 | 4-scf00068 | 4 |
| AX-157950492 | 4 | 40.924 | KV452803.1 | 3211859 | 4-scf00068 | 4 |
| AX-157725964 | 4 | 40.924 | KV452803.1 | 3212826 | 4-scf00068 | 4 |
| AX-157950493 | 4 | 40.924 | KV452803.1 | 3213311 | 4-scf00068 | 4 |
| AX-157950494 | 4 | 40.924 | KV452803.1 | 3214910 | 4-scf00068 | 4 |
| AX-157950495 | 4 | 40.924 | KV452803.1 | 3216365 | 4-scf00068 | 4 |
| AX-157950497 | 4 | 40.924 | KV452803.1 | 3218361 | 4-scf00068 | 4 |
| AX-157950498 | 4 | 40.924 | KV452803.1 | 3219064 | 4-scf00068 | 4 |
| AX-157950539 | 4 | 40.924 | KV452803.1 | 3258952 | 4-scf00068 | 4 |
| AX-157950547 | 4 | 40.924 | KV452803.1 | 3269817 | 4-scf00068 | 4 |
| AX-157950507 | 4 | 40.98  | KV452803.1 | 3227839 | 4-scf00068 | 4 |
| AX-157950418 | 4 | 41.033 | KV452803.1 | 3113379 | 4-scf00068 | 4 |
| AX-157950420 | 4 | 41.033 | KV452803.1 | 3119318 | 4-scf00068 | 4 |
| AX-158379441 | 4 | 41.033 | KV452803.1 | 3119878 | 4-scf00068 | 4 |
| AX-157950425 | 4 | 41.033 | KV452803.1 | 3124455 | 4-scf00068 | 4 |
| AX-157950478 | 4 | 41.033 | KV452803.1 | 3197339 | 4-scf00068 | 4 |
| AX-157950482 | 4 | 41.033 | KV452803.1 | 3201494 | 4-scf00068 | 4 |

|              |   |        |             |         |            |    |
|--------------|---|--------|-------------|---------|------------|----|
| AX-157950502 | 4 | 41.033 | KV452803.1  | 3222409 | 4-scf00068 | 4  |
| AX-157854662 | 4 | 41.033 | KV452803.1  | 3224050 | 4-scf00068 | 4  |
| AX-157815545 | 4 | 41.033 | KV452803.1  | 3226941 | 4-scf00068 | 4  |
| AX-157950509 | 4 | 41.033 | KV452803.1  | 3229300 | 4-scf00068 | 4  |
| AX-157950510 | 4 | 41.033 | KV452803.1  | 3229678 | 4-scf00068 | 4  |
| AX-157950512 | 4 | 41.033 | KV452803.1  | 3234294 | 4-scf00068 | 4  |
| AX-157950513 | 4 | 41.033 | KV452803.1  | 3234675 | 4-scf00068 | 4  |
| AX-157950515 | 4 | 41.033 | KV452803.1  | 3235718 | 4-scf00068 | 4  |
| AX-157950516 | 4 | 41.033 | KV452803.1  | 3236136 | 4-scf00068 | 4  |
| AX-157950517 | 4 | 41.033 | KV452803.1  | 3237859 | 4-scf00068 | 4  |
| AX-157771956 | 4 | 41.033 | KV452803.1  | 3238590 | 4-scf00068 | 4  |
| AX-157950523 | 4 | 41.033 | KV452803.1  | 3244488 | 4-scf00068 | 4  |
| AX-157950524 | 4 | 41.033 | KV452803.1  | 3244895 | 4-scf00068 | 4  |
| AX-157950526 | 4 | 41.033 | KV452803.1  | 3247559 | 4-scf00068 | 4  |
| AX-157950527 | 4 | 41.033 | KV452803.1  | 3248098 | 4-scf00068 | 4  |
| AX-157950529 | 4 | 41.033 | KV452803.1  | 3249747 | 4-scf00068 | 4  |
| AX-157950530 | 4 | 41.033 | KV452803.1  | 3251958 | 4-scf00068 | 4  |
| AX-157950534 | 4 | 41.033 | KV452803.1  | 3255410 | 4-scf00068 | 4  |
| AX-157950551 | 4 | 41.033 | KV452803.1  | 3275203 | 4-scf00068 | 4  |
| AX-157950567 | 4 | 41.033 | KV452803.1  | 3302014 | 4-scf00068 | 4  |
| AX-157950606 | 4 | 41.033 | KV452803.1  | 3344589 | 4-scf00068 | 4  |
| AX-157950686 | 4 | 41.033 | KV452803.1  | 3432643 | 4-scf00068 | 4  |
| AX-157950821 | 4 | 41.033 | KV452803.1  | 3620293 | 4-scf00068 | 4  |
| AX-157950858 | 4 | 41.033 | KV452803.1  | 3670211 | 4-scf00068 | 4  |
| AX-157950859 | 4 | 41.033 | KV452803.1  | 3670671 | 4-scf00068 | 4  |
| AX-157950865 | 4 | 41.033 | KV452803.1  | 3678203 | 4-scf00068 | 4  |
| AX-157707085 | 4 | 41.033 | 3ML01033639 | 140     | scf09298_1 | UN |
| AX-157950496 | 4 | 41.142 | KV452803.1  | 3217632 | 4-scf00068 | 4  |
| AX-157950518 | 4 | 41.142 | KV452803.1  | 3239548 | 4-scf00068 | 4  |
| AX-157756119 | 4 | 41.142 | KV452803.1  | 3270296 | 4-scf00068 | 4  |
| AX-157950550 | 4 | 41.142 | KV452803.1  | 3274975 | 4-scf00068 | 4  |
| AX-157950552 | 4 | 41.142 | KV452803.1  | 3277367 | 4-scf00068 | 4  |
| AX-157950556 | 4 | 41.142 | KV452803.1  | 3281612 | 4-scf00068 | 4  |
| AX-158406061 | 4 | 41.142 | KV452803.1  | 3292927 | 4-scf00068 | 4  |
| AX-157950561 | 4 | 41.142 | KV452803.1  | 3294529 | 4-scf00068 | 4  |
| AX-157950562 | 4 | 41.142 | KV452803.1  | 3296271 | 4-scf00068 | 4  |
| AX-157950569 | 4 | 41.142 | KV452803.1  | 3304963 | 4-scf00068 | 4  |
| AX-157950579 | 4 | 41.142 | KV452803.1  | 3315083 | 4-scf00068 | 4  |
| AX-157815547 | 4 | 41.142 | KV452803.1  | 3315148 | 4-scf00068 | 4  |
| AX-157815548 | 4 | 41.142 | KV452803.1  | 3315306 | 4-scf00068 | 4  |
| AX-157950581 | 4 | 41.142 | KV452803.1  | 3317382 | 4-scf00068 | 4  |
| AX-157950583 | 4 | 41.142 | KV452803.1  | 3319024 | 4-scf00068 | 4  |
| AX-157950586 | 4 | 41.142 | KV452803.1  | 3322044 | 4-scf00068 | 4  |
| AX-157950589 | 4 | 41.142 | KV452803.1  | 3323372 | 4-scf00068 | 4  |
| AX-157815549 | 4 | 41.142 | KV452803.1  | 3327776 | 4-scf00068 | 4  |
| AX-157950592 | 4 | 41.142 | KV452803.1  | 3327897 | 4-scf00068 | 4  |
| AX-157950595 | 4 | 41.142 | KV452803.1  | 3331370 | 4-scf00068 | 4  |
| AX-157950599 | 4 | 41.142 | KV452803.1  | 3336434 | 4-scf00068 | 4  |
| AX-157950611 | 4 | 41.142 | KV452803.1  | 3348970 | 4-scf00068 | 4  |
| AX-157950690 | 4 | 41.142 | KV452803.1  | 3438802 | 4-scf00068 | 4  |
| AX-157703931 | 4 | 41.142 | KV452803.1  | 3441769 | 4-scf00068 | 4  |

|              |   |        |            |         |            |   |
|--------------|---|--------|------------|---------|------------|---|
| AX-157950707 | 4 | 41.142 | KV452803.1 | 3456226 | 4-scf00068 | 4 |
| AX-157950734 | 4 | 41.142 | KV452803.1 | 3500394 | 4-scf00068 | 4 |
| AX-157950758 | 4 | 41.142 | KV452803.1 | 3533083 | 4-scf00068 | 4 |
| AX-157950765 | 4 | 41.142 | KV452803.1 | 3547132 | 4-scf00068 | 4 |
| AX-157722269 | 4 | 41.142 | KV452803.1 | 3632598 | 4-scf00068 | 4 |
| AX-157950834 | 4 | 41.142 | KV452803.1 | 3643148 | 4-scf00068 | 4 |
| AX-157950600 | 4 | 41.271 | KV452803.1 | 3336881 | 4-scf00068 | 4 |
| AX-157950614 | 4 | 41.271 | KV452803.1 | 3351072 | 4-scf00068 | 4 |
| AX-157950742 | 4 | 41.271 | KV452803.1 | 3511567 | 4-scf00068 | 4 |
| AX-157950854 | 4 | 41.271 | KV452803.1 | 3664700 | 4-scf00068 | 4 |
| AX-157950585 | 4 | 41.416 | KV452803.1 | 3321416 | 4-scf00068 | 4 |
| AX-157950602 | 4 | 41.416 | KV452803.1 | 3340475 | 4-scf00068 | 4 |
| AX-157950610 | 4 | 41.416 | KV452803.1 | 3348298 | 4-scf00068 | 4 |
| AX-157875363 | 4 | 41.416 | KV452803.1 | 3371449 | 4-scf00068 | 4 |
| AX-157950419 | 4 | 41.506 | KV452803.1 | 3116810 | 4-scf00068 | 4 |
| AX-157950489 | 4 | 41.506 | KV452803.1 | 3208301 | 4-scf00068 | 4 |
| AX-157950617 | 4 | 41.506 | KV452803.1 | 3354731 | 4-scf00068 | 4 |
| AX-157950570 | 4 | 41.571 | KV452803.1 | 3305818 | 4-scf00068 | 4 |
| AX-157950619 | 4 | 41.571 | KV452803.1 | 3357083 | 4-scf00068 | 4 |
| AX-157950757 | 4 | 41.571 | KV452803.1 | 3531216 | 4-scf00068 | 4 |
| AX-157950635 | 4 | 41.688 | KV452803.1 | 3374035 | 4-scf00068 | 4 |
| AX-157950640 | 4 | 41.688 | KV452803.1 | 3381160 | 4-scf00068 | 4 |
| AX-157950647 | 4 | 41.711 | KV452803.1 | 3391213 | 4-scf00068 | 4 |
| AX-157950651 | 4 | 41.724 | KV452803.1 | 3395003 | 4-scf00068 | 4 |
| AX-157950653 | 4 | 41.747 | KV452803.1 | 3398200 | 4-scf00068 | 4 |
| AX-157950655 | 4 | 41.747 | KV452803.1 | 3399531 | 4-scf00068 | 4 |
| AX-157950656 | 4 | 41.747 | KV452803.1 | 3400020 | 4-scf00068 | 4 |
| AX-157950696 | 4 | 41.747 | KV452803.1 | 3444479 | 4-scf00068 | 4 |
| AX-157774588 | 4 | 41.76  | KV452803.1 | 3399748 | 4-scf00068 | 4 |
| AX-157724338 | 4 | 41.775 | KV452803.1 | 3400497 | 4-scf00068 | 4 |
| AX-157950609 | 4 | 41.798 | KV452803.1 | 3347778 | 4-scf00068 | 4 |
| AX-157950636 | 4 | 41.798 | KV452803.1 | 3376472 | 4-scf00068 | 4 |
| AX-157750577 | 4 | 41.798 | KV452803.1 | 3388908 | 4-scf00068 | 4 |
| AX-157950658 | 4 | 41.798 | KV452803.1 | 3402376 | 4-scf00068 | 4 |
| AX-157693121 | 4 | 41.798 | KV452803.1 | 3403254 | 4-scf00068 | 4 |
| AX-157950660 | 4 | 41.798 | KV452803.1 | 3405125 | 4-scf00068 | 4 |
| AX-157722830 | 4 | 41.798 | KV452803.1 | 3410867 | 4-scf00068 | 4 |
| AX-157950665 | 4 | 41.798 | KV452803.1 | 3411665 | 4-scf00068 | 4 |
| AX-157950666 | 4 | 41.798 | KV452803.1 | 3412287 | 4-scf00068 | 4 |
| AX-157950667 | 4 | 41.798 | KV452803.1 | 3412696 | 4-scf00068 | 4 |
| AX-157950669 | 4 | 41.798 | KV452803.1 | 3415820 | 4-scf00068 | 4 |
| AX-157950674 | 4 | 41.798 | KV452803.1 | 3420866 | 4-scf00068 | 4 |
| AX-157950675 | 4 | 41.798 | KV452803.1 | 3421230 | 4-scf00068 | 4 |
| AX-157726865 | 4 | 41.798 | KV452803.1 | 3423941 | 4-scf00068 | 4 |
| AX-157950680 | 4 | 41.798 | KV452803.1 | 3426634 | 4-scf00068 | 4 |
| AX-157950681 | 4 | 41.798 | KV452803.1 | 3427247 | 4-scf00068 | 4 |
| AX-157950685 | 4 | 41.798 | KV452803.1 | 3432187 | 4-scf00068 | 4 |
| AX-157950687 | 4 | 41.798 | KV452803.1 | 3435105 | 4-scf00068 | 4 |
| AX-157950688 | 4 | 41.798 | KV452803.1 | 3435806 | 4-scf00068 | 4 |
| AX-157950693 | 4 | 41.798 | KV452803.1 | 3442304 | 4-scf00068 | 4 |
| AX-157875365 | 4 | 41.798 | KV452803.1 | 3443798 | 4-scf00068 | 4 |

|              |   |        |             |         |            |    |
|--------------|---|--------|-------------|---------|------------|----|
| AX-157950695 | 4 | 41.798 | KV452803.1  | 3444281 | 4-scf00068 | 4  |
| AX-157950698 | 4 | 41.798 | KV452803.1  | 3448803 | 4-scf00068 | 4  |
| AX-157950699 | 4 | 41.798 | KV452803.1  | 3449429 | 4-scf00068 | 4  |
| AX-157950700 | 4 | 41.798 | KV452803.1  | 3449789 | 4-scf00068 | 4  |
| AX-157950703 | 4 | 41.798 | KV452803.1  | 3453099 | 4-scf00068 | 4  |
| AX-157750759 | 4 | 41.798 | KV452803.1  | 3474620 | 4-scf00068 | 4  |
| AX-157950715 | 4 | 41.798 | KV452803.1  | 3475545 | 4-scf00068 | 4  |
| AX-157950717 | 4 | 41.798 | KV452803.1  | 3476809 | 4-scf00068 | 4  |
| AX-157950721 | 4 | 41.798 | KV452803.1  | 3484925 | 4-scf00068 | 4  |
| AX-157950725 | 4 | 41.798 | KV452803.1  | 3488400 | 4-scf00068 | 4  |
| AX-157950727 | 4 | 41.798 | KV452803.1  | 3489679 | 4-scf00068 | 4  |
| AX-157950736 | 4 | 41.798 | KV452803.1  | 3504770 | 4-scf00068 | 4  |
| AX-157815556 | 4 | 41.798 | KV452803.1  | 3505472 | 4-scf00068 | 4  |
| AX-157950743 | 4 | 41.798 | KV452803.1  | 3512010 | 4-scf00068 | 4  |
| AX-157950748 | 4 | 41.798 | KV452803.1  | 3522760 | 4-scf00068 | 4  |
| AX-157950781 | 4 | 41.798 | KV452803.1  | 3567793 | 4-scf00068 | 4  |
| AX-157950795 | 4 | 41.798 | KV452803.1  | 3583258 | 4-scf00068 | 4  |
| AX-157950830 | 4 | 41.798 | KV452803.1  | 3633651 | 4-scf00068 | 4  |
| AX-157950833 | 4 | 41.798 | KV452803.1  | 3641371 | 4-scf00068 | 4  |
| AX-157950838 | 4 | 41.798 | KV452803.1  | 3652870 | 4-scf00068 | 4  |
| AX-157950860 | 4 | 41.798 | KV452803.1  | 3671452 | 4-scf00068 | 4  |
| AX-157950918 | 4 | 41.798 | KV452803.1  | 3762110 | 4-scf00068 | 4  |
| AX-157724291 | 4 | 41.798 | KV452803.1  | 3767236 | 4-scf00068 | 4  |
| AX-157950944 | 4 | 41.798 | KV452803.1  | 3788096 | 4-scf00068 | 4  |
| AX-157707086 | 4 | 41.798 | 3ML01033639 | 214     | scf09298_1 | UN |
| AX-157950737 | 4 | 41.81  | KV452803.1  | 3507724 | 4-scf00068 | 4  |
| AX-157950607 | 4 | 41.828 | KV452803.1  | 3345143 | 4-scf00068 | 4  |
| AX-157950749 | 4 | 41.828 | KV452803.1  | 3524188 | 4-scf00068 | 4  |
| AX-157950751 | 4 | 41.849 | KV452803.1  | 3524823 | 4-scf00068 | 4  |
| AX-157714741 | 4 | 41.867 | KV452803.1  | 3525534 | 4-scf00068 | 4  |
| AX-157950755 | 4 | 41.886 | KV452803.1  | 3529896 | 4-scf00068 | 4  |
| AX-157950564 | 4 | 41.907 | KV452803.1  | 3299384 | 4-scf00068 | 4  |
| AX-157722341 | 4 | 41.907 | KV452803.1  | 3374573 | 4-scf00068 | 4  |
| AX-157875364 | 4 | 41.907 | KV452803.1  | 3400926 | 4-scf00068 | 4  |
| AX-157950663 | 4 | 41.907 | KV452803.1  | 3410351 | 4-scf00068 | 4  |
| AX-157815551 | 4 | 41.907 | KV452803.1  | 3416631 | 4-scf00068 | 4  |
| AX-157950760 | 4 | 41.907 | KV452803.1  | 3539486 | 4-scf00068 | 4  |
| AX-157950761 | 4 | 41.907 | KV452803.1  | 3540074 | 4-scf00068 | 4  |
| AX-157717599 | 4 | 41.907 | KV452803.1  | 3540426 | 4-scf00068 | 4  |
| AX-157950767 | 4 | 41.907 | KV452803.1  | 3553608 | 4-scf00068 | 4  |
| AX-157950768 | 4 | 41.907 | KV452803.1  | 3554345 | 4-scf00068 | 4  |
| AX-157950786 | 4 | 41.907 | KV452803.1  | 3574635 | 4-scf00068 | 4  |
| AX-157950787 | 4 | 41.907 | KV452803.1  | 3575014 | 4-scf00068 | 4  |
| AX-157950789 | 4 | 41.907 | KV452803.1  | 3576022 | 4-scf00068 | 4  |
| AX-157950790 | 4 | 41.907 | KV452803.1  | 3577331 | 4-scf00068 | 4  |
| AX-157950791 | 4 | 41.907 | KV452803.1  | 3578779 | 4-scf00068 | 4  |
| AX-157950792 | 4 | 41.907 | KV452803.1  | 3581821 | 4-scf00068 | 4  |
| AX-157950793 | 4 | 41.907 | KV452803.1  | 3582183 | 4-scf00068 | 4  |
| AX-157950794 | 4 | 41.907 | KV452803.1  | 3582623 | 4-scf00068 | 4  |
| AX-157950798 | 4 | 41.907 | KV452803.1  | 3586116 | 4-scf00068 | 4  |
| AX-157725450 | 4 | 41.907 | KV452803.1  | 3590976 | 4-scf00068 | 4  |

|              |   |        |            |         |            |   |
|--------------|---|--------|------------|---------|------------|---|
| AX-157950804 | 4 | 41.907 | KV452803.1 | 3597568 | 4-scf00068 | 4 |
| AX-157950806 | 4 | 41.907 | KV452803.1 | 3600224 | 4-scf00068 | 4 |
| AX-157950812 | 4 | 41.907 | KV452803.1 | 3606865 | 4-scf00068 | 4 |
| AX-158382788 | 4 | 41.907 | KV452803.1 | 3610004 | 4-scf00068 | 4 |
| AX-157815564 | 4 | 41.907 | KV452803.1 | 3612562 | 4-scf00068 | 4 |
| AX-157950839 | 4 | 41.907 | KV452803.1 | 3653166 | 4-scf00068 | 4 |
| AX-157950863 | 4 | 41.907 | KV452803.1 | 3675590 | 4-scf00068 | 4 |
| AX-157950876 | 4 | 41.907 | KV452803.1 | 3695416 | 4-scf00068 | 4 |
| AX-158379444 | 4 | 41.94  | KV452803.1 | 3630849 | 4-scf00068 | 4 |
| AX-157950849 | 4 | 41.951 | KV452803.1 | 3663108 | 4-scf00068 | 4 |
| AX-157746896 | 4 | 41.974 | KV452803.1 | 3615191 | 4-scf00068 | 4 |
| AX-157950822 | 4 | 41.974 | KV452803.1 | 3621439 | 4-scf00068 | 4 |
| AX-157950850 | 4 | 41.974 | KV452803.1 | 3663531 | 4-scf00068 | 4 |
| AX-157722356 | 4 | 41.997 | KV452803.1 | 3339050 | 4-scf00068 | 4 |
| AX-157771800 | 4 | 41.997 | KV452803.1 | 3339678 | 4-scf00068 | 4 |
| AX-157950677 | 4 | 41.997 | KV452803.1 | 3423163 | 4-scf00068 | 4 |
| AX-157950762 | 4 | 41.997 | KV452803.1 | 3540350 | 4-scf00068 | 4 |
| AX-158406062 | 4 | 41.997 | KV452803.1 | 3568971 | 4-scf00068 | 4 |
| AX-157950783 | 4 | 41.997 | KV452803.1 | 3569878 | 4-scf00068 | 4 |
| AX-157950813 | 4 | 41.997 | KV452803.1 | 3608065 | 4-scf00068 | 4 |
| AX-157950814 | 4 | 41.997 | KV452803.1 | 3608997 | 4-scf00068 | 4 |
| AX-157950818 | 4 | 41.997 | KV452803.1 | 3614716 | 4-scf00068 | 4 |
| AX-157950853 | 4 | 41.997 | KV452803.1 | 3664442 | 4-scf00068 | 4 |
| AX-157950720 | 4 | 42.016 | KV452803.1 | 3481442 | 4-scf00068 | 4 |
| AX-157815559 | 4 | 42.016 | KV452803.1 | 3523497 | 4-scf00068 | 4 |
| AX-157950774 | 4 | 42.016 | KV452803.1 | 3563420 | 4-scf00068 | 4 |
| AX-157950779 | 4 | 42.016 | KV452803.1 | 3566588 | 4-scf00068 | 4 |
| AX-157950785 | 4 | 42.016 | KV452803.1 | 3572477 | 4-scf00068 | 4 |
| AX-157950819 | 4 | 42.016 | KV452803.1 | 3619077 | 4-scf00068 | 4 |
| AX-157950837 | 4 | 42.016 | KV452803.1 | 3651094 | 4-scf00068 | 4 |
| AX-157950862 | 4 | 42.016 | KV452803.1 | 3674374 | 4-scf00068 | 4 |
| AX-157950864 | 4 | 42.016 | KV452803.1 | 3677329 | 4-scf00068 | 4 |
| AX-157950866 | 4 | 42.016 | KV452803.1 | 3681046 | 4-scf00068 | 4 |
| AX-157950867 | 4 | 42.016 | KV452803.1 | 3681972 | 4-scf00068 | 4 |
| AX-157950871 | 4 | 42.016 | KV452803.1 | 3690823 | 4-scf00068 | 4 |
| AX-157950940 | 4 | 42.016 | KV452803.1 | 3783345 | 4-scf00068 | 4 |
| AX-157950537 | 4 | 42.235 | KV452803.1 | 3258347 | 4-scf00068 | 4 |
| AX-157740296 | 4 | 42.235 | KV452803.1 | 3435493 | 4-scf00068 | 4 |
| AX-157950820 | 4 | 42.235 | KV452803.1 | 3620011 | 4-scf00068 | 4 |
| AX-158406065 | 4 | 42.235 | KV452803.1 | 3658737 | 4-scf00068 | 4 |
| AX-157950875 | 4 | 42.235 | KV452803.1 | 3695048 | 4-scf00068 | 4 |
| AX-157950877 | 4 | 42.235 | KV452803.1 | 3695930 | 4-scf00068 | 4 |
| AX-157950879 | 4 | 42.235 | KV452803.1 | 3698623 | 4-scf00068 | 4 |
| AX-157950882 | 4 | 42.235 | KV452803.1 | 3700949 | 4-scf00068 | 4 |
| AX-157950883 | 4 | 42.235 | KV452803.1 | 3701556 | 4-scf00068 | 4 |
| AX-157950884 | 4 | 42.235 | KV452803.1 | 3701918 | 4-scf00068 | 4 |
| AX-157815565 | 4 | 42.235 | KV452803.1 | 3708311 | 4-scf00068 | 4 |
| AX-158382791 | 4 | 42.235 | KV452803.1 | 3708921 | 4-scf00068 | 4 |
| AX-157950891 | 4 | 42.235 | KV452803.1 | 3709934 | 4-scf00068 | 4 |
| AX-157950892 | 4 | 42.235 | KV452803.1 | 3711021 | 4-scf00068 | 4 |
| AX-157884021 | 4 | 42.235 | KV452803.1 | 3711313 | 4-scf00068 | 4 |



|              |   |        |            |         |            |   |
|--------------|---|--------|------------|---------|------------|---|
| AX-157815566 | 4 | 42.235 | KV452803.1 | 3712242 | 4-scf00068 | 4 |
| AX-157950894 | 4 | 42.235 | KV452803.1 | 3712546 | 4-scf00068 | 4 |
| AX-157950895 | 4 | 42.235 | KV452803.1 | 3714408 | 4-scf00068 | 4 |
| AX-157854663 | 4 | 42.235 | KV452803.1 | 3715441 | 4-scf00068 | 4 |
| AX-157950897 | 4 | 42.235 | KV452803.1 | 3718634 | 4-scf00068 | 4 |
| AX-157950900 | 4 | 42.235 | KV452803.1 | 3725300 | 4-scf00068 | 4 |
| AX-157950902 | 4 | 42.235 | KV452803.1 | 3727656 | 4-scf00068 | 4 |
| AX-157950903 | 4 | 42.235 | KV452803.1 | 3728945 | 4-scf00068 | 4 |
| AX-157950904 | 4 | 42.235 | KV452803.1 | 3732828 | 4-scf00068 | 4 |
| AX-158404957 | 4 | 42.235 | KV452803.1 | 3733118 | 4-scf00068 | 4 |
| AX-157950907 | 4 | 42.235 | KV452803.1 | 3736779 | 4-scf00068 | 4 |
| AX-157950908 | 4 | 42.235 | KV452803.1 | 3737113 | 4-scf00068 | 4 |
| AX-157771845 | 4 | 42.235 | KV452803.1 | 3739078 | 4-scf00068 | 4 |
| AX-157950912 | 4 | 42.235 | KV452803.1 | 3747517 | 4-scf00068 | 4 |
| AX-157756916 | 4 | 42.235 | KV452803.1 | 3750526 | 4-scf00068 | 4 |
| AX-157950881 | 4 | 42.236 | KV452803.1 | 3700536 | 4-scf00068 | 4 |
| AX-157710940 | 4 | 42.236 | KV452803.1 | 3742161 | 4-scf00068 | 4 |
| AX-157950915 | 4 | 42.548 | KV452803.1 | 3757677 | 4-scf00068 | 4 |
| AX-158406067 | 4 | 42.548 | KV452803.1 | 3758282 | 4-scf00068 | 4 |
| AX-157950922 | 4 | 42.549 | KV452803.1 | 3766879 | 4-scf00068 | 4 |
| AX-157950924 | 4 | 42.59  | KV452803.1 | 3770231 | 4-scf00068 | 4 |
| AX-157950929 | 4 | 42.687 | KV452803.1 | 3776705 | 4-scf00068 | 4 |
| AX-157950935 | 4 | 42.783 | KV452803.1 | 3780498 | 4-scf00068 | 4 |
| AX-157950939 | 4 | 42.783 | KV452803.1 | 3783115 | 4-scf00068 | 4 |
| AX-157950538 | 4 | 42.89  | KV452803.1 | 3258520 | 4-scf00068 | 4 |
| AX-157950638 | 4 | 42.89  | KV452803.1 | 3379264 | 4-scf00068 | 4 |
| AX-157950913 | 4 | 42.89  | KV452803.1 | 3750152 | 4-scf00068 | 4 |
| AX-157950945 | 4 | 42.89  | KV452803.1 | 3788937 | 4-scf00068 | 4 |
| AX-157950946 | 4 | 42.89  | KV452803.1 | 3790118 | 4-scf00068 | 4 |
| AX-157950947 | 4 | 42.89  | KV452803.1 | 3793983 | 4-scf00068 | 4 |
| AX-157950948 | 4 | 42.89  | KV452803.1 | 3794346 | 4-scf00068 | 4 |
| AX-157950950 | 4 | 42.89  | KV452803.1 | 3796506 | 4-scf00068 | 4 |
| AX-157950951 | 4 | 42.89  | KV452803.1 | 3797287 | 4-scf00068 | 4 |
| AX-157753634 | 4 | 42.89  | KV452803.1 | 3798937 | 4-scf00068 | 4 |
| AX-157950960 | 4 | 42.89  | KV452803.1 | 3808630 | 4-scf00068 | 4 |
| AX-157950988 | 4 | 42.89  | KV452803.1 | 3847170 | 4-scf00068 | 4 |
| AX-157950718 | 4 | 42.998 | KV452803.1 | 3478341 | 4-scf00068 | 4 |
| AX-157950956 | 4 | 42.998 | KV452803.1 | 3804909 | 4-scf00068 | 4 |
| AX-157950540 | 4 | 43.109 | KV452803.1 | 3259269 | 4-scf00068 | 4 |
| AX-157950620 | 4 | 43.109 | KV452803.1 | 3358241 | 4-scf00068 | 4 |
| AX-157815563 | 4 | 43.109 | KV452803.1 | 3612000 | 4-scf00068 | 4 |
| AX-157950898 | 4 | 43.109 | KV452803.1 | 3719674 | 4-scf00068 | 4 |
| AX-157950926 | 4 | 43.109 | KV452803.1 | 3772266 | 4-scf00068 | 4 |
| AX-157950962 | 4 | 43.109 | KV452803.1 | 3810585 | 4-scf00068 | 4 |
| AX-158382792 | 4 | 43.109 | KV452803.1 | 3810988 | 4-scf00068 | 4 |
| AX-157950964 | 4 | 43.109 | KV452803.1 | 3811686 | 4-scf00068 | 4 |
| AX-157950965 | 4 | 43.109 | KV452803.1 | 3812087 | 4-scf00068 | 4 |
| AX-157950966 | 4 | 43.109 | KV452803.1 | 3812601 | 4-scf00068 | 4 |
| AX-157950967 | 4 | 43.109 | KV452803.1 | 3813224 | 4-scf00068 | 4 |
| AX-157950968 | 4 | 43.109 | KV452803.1 | 3813588 | 4-scf00068 | 4 |
| AX-157815567 | 4 | 43.109 | KV452803.1 | 3819784 | 4-scf00068 | 4 |

|              |   |        |            |         |            |   |
|--------------|---|--------|------------|---------|------------|---|
| AX-157950846 | 4 | 43.218 | KV452803.1 | 3660278 | 4-scf00068 | 4 |
| AX-157950852 | 4 | 43.218 | KV452803.1 | 3664014 | 4-scf00068 | 4 |
| AX-157752764 | 4 | 43.218 | KV452803.1 | 3821715 | 4-scf00068 | 4 |
| AX-157950972 | 4 | 43.218 | KV452803.1 | 3823800 | 4-scf00068 | 4 |
| AX-157950973 | 4 | 43.218 | KV452803.1 | 3824387 | 4-scf00068 | 4 |
| AX-157950975 | 4 | 43.218 | KV452803.1 | 3826156 | 4-scf00068 | 4 |
| AX-157815570 | 4 | 43.218 | KV452803.1 | 3829439 | 4-scf00068 | 4 |
| AX-157950979 | 4 | 43.218 | KV452803.1 | 3831519 | 4-scf00068 | 4 |
| AX-157950980 | 4 | 43.218 | KV452803.1 | 3835339 | 4-scf00068 | 4 |
| AX-157950985 | 4 | 43.218 | KV452803.1 | 3843076 | 4-scf00068 | 4 |
| AX-157950989 | 4 | 43.268 | KV452803.1 | 3847494 | 4-scf00068 | 4 |
| AX-157815571 | 4 | 43.327 | KV452803.1 | 3835546 | 4-scf00068 | 4 |
| AX-157950981 | 4 | 43.327 | KV452803.1 | 3836484 | 4-scf00068 | 4 |
| AX-157748520 | 4 | 43.327 | KV452803.1 | 3847765 | 4-scf00068 | 4 |
| AX-157815572 | 4 | 43.327 | KV452803.1 | 3850254 | 4-scf00068 | 4 |
| AX-157950991 | 4 | 43.327 | KV452803.1 | 3850773 | 4-scf00068 | 4 |
| AX-158382793 | 4 | 43.327 | KV452803.1 | 3850872 | 4-scf00068 | 4 |
| AX-157950995 | 4 | 43.345 | KV452803.1 | 3855753 | 4-scf00068 | 4 |
| AX-157951011 | 4 | 43.345 | KV452803.1 | 3878903 | 4-scf00068 | 4 |
| AX-157717956 | 4 | 43.362 | KV452803.1 | 3859987 | 4-scf00068 | 4 |
| AX-157950998 | 4 | 43.362 | KV452803.1 | 3860526 | 4-scf00068 | 4 |
| AX-157951015 | 4 | 43.362 | KV452803.1 | 3882979 | 4-scf00068 | 4 |
| AX-157951029 | 4 | 43.362 | KV452803.1 | 3892531 | 4-scf00068 | 4 |
| AX-157951000 | 4 | 43.374 | KV452803.1 | 3864280 | 4-scf00068 | 4 |
| AX-157951001 | 4 | 43.374 | KV452803.1 | 3864883 | 4-scf00068 | 4 |
| AX-157951003 | 4 | 43.387 | KV452803.1 | 3867912 | 4-scf00068 | 4 |
| AX-157951004 | 4 | 43.403 | KV452803.1 | 3868899 | 4-scf00068 | 4 |
| AX-157815575 | 4 | 43.415 | KV452803.1 | 3872579 | 4-scf00068 | 4 |
| AX-157950528 | 4 | 43.436 | KV452803.1 | 3249095 | 4-scf00068 | 4 |
| AX-157950580 | 4 | 43.436 | KV452803.1 | 3315833 | 4-scf00068 | 4 |
| AX-157950649 | 4 | 43.436 | KV452803.1 | 3392350 | 4-scf00068 | 4 |
| AX-157950671 | 4 | 43.436 | KV452803.1 | 3417935 | 4-scf00068 | 4 |
| AX-157950845 | 4 | 43.436 | KV452803.1 | 3659715 | 4-scf00068 | 4 |
| AX-157950861 | 4 | 43.436 | KV452803.1 | 3672027 | 4-scf00068 | 4 |
| AX-157950899 | 4 | 43.436 | KV452803.1 | 3721121 | 4-scf00068 | 4 |
| AX-157950905 | 4 | 43.436 | KV452803.1 | 3734432 | 4-scf00068 | 4 |
| AX-157950963 | 4 | 43.436 | KV452803.1 | 3811209 | 4-scf00068 | 4 |
| AX-157950971 | 4 | 43.436 | KV452803.1 | 3822647 | 4-scf00068 | 4 |
| AX-157745857 | 4 | 43.436 | KV452803.1 | 3873312 | 4-scf00068 | 4 |
| AX-157951006 | 4 | 43.436 | KV452803.1 | 3874802 | 4-scf00068 | 4 |
| AX-157951008 | 4 | 43.436 | KV452803.1 | 3876447 | 4-scf00068 | 4 |
| AX-157951010 | 4 | 43.436 | KV452803.1 | 3877695 | 4-scf00068 | 4 |
| AX-157864852 | 4 | 43.436 | KV452803.1 | 3880137 | 4-scf00068 | 4 |
| AX-157951012 | 4 | 43.436 | KV452803.1 | 3880971 | 4-scf00068 | 4 |
| AX-157951020 | 4 | 43.436 | KV452803.1 | 3886343 | 4-scf00068 | 4 |
| AX-157951021 | 4 | 43.436 | KV452803.1 | 3886716 | 4-scf00068 | 4 |
| AX-157951023 | 4 | 43.436 | KV452803.1 | 3887177 | 4-scf00068 | 4 |
| AX-157951024 | 4 | 43.436 | KV452803.1 | 3887421 | 4-scf00068 | 4 |
| AX-157951025 | 4 | 43.436 | KV452803.1 | 3887775 | 4-scf00068 | 4 |
| AX-157951031 | 4 | 43.436 | KV452803.1 | 3893438 | 4-scf00068 | 4 |
| AX-157951028 | 4 | 43.437 | KV452803.1 | 3891716 | 4-scf00068 | 4 |

|              |   |        |             |         |            |    |
|--------------|---|--------|-------------|---------|------------|----|
| AX-157951032 | 4 | 43.437 | KV452803.1  | 3893853 | 4-scf00068 | 4  |
| AX-157951033 | 4 | 43.7   | KV452803.1  | 3895167 | 4-scf00068 | 4  |
| AX-157951057 | 4 | 43.7   | KV452803.1  | 3929564 | 4-scf00068 | 4  |
| AX-158379446 | 4 | 43.7   | KV452803.1  | 3930002 | 4-scf00068 | 4  |
| AX-158382795 | 4 | 43.83  | KV452803.1  | 3935449 | 4-scf00068 | 4  |
| AX-157951062 | 4 | 43.83  | KV452803.1  | 3940392 | 4-scf00068 | 4  |
| AX-157951064 | 4 | 43.83  | KV452803.1  | 3941535 | 4-scf00068 | 4  |
| AX-157951065 | 4 | 43.83  | KV452803.1  | 3942234 | 4-scf00068 | 4  |
| AX-157951072 | 4 | 43.83  | KV452803.1  | 3950421 | 4-scf00068 | 4  |
| AX-157951067 | 4 | 44.015 | KV452803.1  | 3946175 | 4-scf00068 | 4  |
| AX-157951073 | 4 | 44.093 | KV452803.1  | 3955189 | 4-scf00068 | 4  |
| AX-157951074 | 4 | 44.093 | KV452803.1  | 3957555 | 4-scf00068 | 4  |
| AX-157951075 | 4 | 44.093 | KV452803.1  | 3960012 | 4-scf00068 | 4  |
| AX-157951080 | 4 | 44.093 | KV452803.1  | 3966510 | 4-scf00068 | 4  |
| AX-157951082 | 4 | 44.093 | KV452803.1  | 3969106 | 4-scf00068 | 4  |
| AX-157951083 | 4 | 44.093 | KV452803.1  | 3969680 | 4-scf00068 | 4  |
| AX-157951084 | 4 | 44.093 | KV452803.1  | 3970251 | 4-scf00068 | 4  |
| AX-157696551 | 4 | 44.093 | KV452803.1  | 3970440 | 4-scf00068 | 4  |
| AX-157951085 | 4 | 44.093 | KV452803.1  | 3970832 | 4-scf00068 | 4  |
| AX-157815578 | 4 | 44.093 | KV452803.1  | 3972040 | 4-scf00068 | 4  |
| AX-157951087 | 4 | 44.093 | KV452803.1  | 3972371 | 4-scf00068 | 4  |
| AX-157951088 | 4 | 44.093 | KV452803.1  | 3972852 | 4-scf00068 | 4  |
| AX-157951091 | 4 | 44.093 | KV452803.1  | 3977616 | 4-scf00068 | 4  |
| AX-157854665 | 4 | 44.093 | KV452803.1  | 3982172 | 4-scf00068 | 4  |
| AX-157951094 | 4 | 44.093 | KV452803.1  | 3984290 | 4-scf00068 | 4  |
| AX-157951095 | 4 | 44.093 | KV452803.1  | 3985068 | 4-scf00068 | 4  |
| AX-157951076 | 4 | 44.202 | KV452803.1  | 3961096 | 4-scf00068 | 4  |
| AX-157951096 | 4 | 44.202 | KV452803.1  | 3987043 | 4-scf00068 | 4  |
| AX-157854666 | 4 | 44.202 | KV452803.1  | 3988645 | 4-scf00068 | 4  |
| AX-157951100 | 4 | 44.202 | KV452803.1  | 3990369 | 4-scf00068 | 4  |
| AX-157951101 | 4 | 44.202 | KV452803.1  | 3992179 | 4-scf00068 | 4  |
| AX-157951102 | 4 | 44.202 | KV452803.1  | 3992865 | 4-scf00068 | 4  |
| AX-157951103 | 4 | 44.202 | KV452803.1  | 3993560 | 4-scf00068 | 4  |
| AX-157951106 | 4 | 44.202 | KV452803.1  | 3997045 | 4-scf00068 | 4  |
| AX-157864854 | 4 | 44.422 | KV452803.1  | 4018126 | 4-scf00068 | 4  |
| AX-157951119 | 4 | 44.422 | KV452803.1  | 4021207 | 4-scf00068 | 4  |
| AX-157687944 | 4 | 44.485 | 3ML01025363 | 1311    | scf01114_1 | UN |
| AX-157951125 | 4 | 44.637 | KV452803.1  | 4029026 | 4-scf00068 | 4  |
| AX-157951104 | 4 | 44.858 | KV452803.1  | 3995657 | 4-scf00068 | 4  |
| AX-157951109 | 4 | 44.858 | KV452803.1  | 4002407 | 4-scf00068 | 4  |
| AX-157951116 | 4 | 44.858 | KV452803.1  | 4013756 | 4-scf00068 | 4  |
| AX-157951117 | 4 | 44.858 | KV452803.1  | 4015995 | 4-scf00068 | 4  |
| AX-157757624 | 4 | 44.858 | KV452803.1  | 4020342 | 4-scf00068 | 4  |
| AX-157741187 | 4 | 44.858 | KV452803.1  | 4039651 | 4-scf00068 | 4  |
| AX-157750422 | 4 | 44.858 | KV452803.1  | 4041594 | 4-scf00068 | 4  |
| AX-157951133 | 4 | 44.858 | KV452803.1  | 4043479 | 4-scf00068 | 4  |
| AX-157951134 | 4 | 44.858 | KV452803.1  | 4043995 | 4-scf00068 | 4  |
| AX-157951135 | 4 | 44.858 | KV452803.1  | 4045799 | 4-scf00068 | 4  |
| AX-157951136 | 4 | 44.858 | KV452803.1  | 4047402 | 4-scf00068 | 4  |
| AX-157951138 | 4 | 44.858 | KV452803.1  | 4049393 | 4-scf00068 | 4  |
| AX-157951142 | 4 | 44.858 | KV452803.1  | 4057228 | 4-scf00068 | 4  |

|              |   |        |             |         |            |    |
|--------------|---|--------|-------------|---------|------------|----|
| AX-157951143 | 4 | 44.858 | KV452803.1  | 4057633 | 4-scf00068 | 4  |
| AX-157815582 | 4 | 44.858 | KV452803.1  | 4068678 | 4-scf00068 | 4  |
| AX-157815579 | 4 | 44.967 | KV452803.1  | 4044562 | 4-scf00068 | 4  |
| AX-157864857 | 4 | 44.967 | KV452803.1  | 4059570 | 4-scf00068 | 4  |
| AX-157951145 | 4 | 44.967 | KV452803.1  | 4062048 | 4-scf00068 | 4  |
| AX-157951146 | 4 | 44.967 | KV452803.1  | 4063384 | 4-scf00068 | 4  |
| AX-157716131 | 4 | 44.967 | KV452803.1  | 4064935 | 4-scf00068 | 4  |
| AX-157951147 | 4 | 44.967 | KV452803.1  | 4065491 | 4-scf00068 | 4  |
| AX-157951148 | 4 | 44.967 | KV452803.1  | 4065888 | 4-scf00068 | 4  |
| AX-157951155 | 4 | 44.967 | KV452803.1  | 4075069 | 4-scf00068 | 4  |
| AX-157951156 | 4 | 44.967 | KV452803.1  | 4075324 | 4-scf00068 | 4  |
| AX-157951157 | 4 | 44.967 | KV452803.1  | 4076769 | 4-scf00068 | 4  |
| AX-157951159 | 4 | 44.967 | KV452803.1  | 4078505 | 4-scf00068 | 4  |
| AX-157951160 | 4 | 44.967 | KV452803.1  | 4080603 | 4-scf00068 | 4  |
| AX-157951161 | 4 | 44.967 | KV452803.1  | 4081268 | 4-scf00068 | 4  |
| AX-157951163 | 4 | 44.967 | KV452803.1  | 4082986 | 4-scf00068 | 4  |
| AX-157951164 | 4 | 44.967 | KV452803.1  | 4083152 | 4-scf00068 | 4  |
| AX-157951167 | 4 | 44.967 | KV452803.1  | 4084937 | 4-scf00068 | 4  |
| AX-157951169 | 4 | 44.967 | KV452803.1  | 4086925 | 4-scf00068 | 4  |
| AX-157951171 | 4 | 44.967 | KV452803.1  | 4088201 | 4-scf00068 | 4  |
| AX-157951174 | 4 | 44.967 | KV452803.1  | 4091883 | 4-scf00068 | 4  |
| AX-158415259 | 4 | 44.967 | KV452803.1  | 4117769 | 4-scf00068 | 4  |
| AX-157815583 | 4 | 45.069 | KV452803.1  | 4093264 | 4-scf00068 | 4  |
| AX-157951180 | 4 | 45.185 | KV452803.1  | 4097410 | 4-scf00068 | 4  |
| AX-157951182 | 4 | 45.185 | KV452803.1  | 4098436 | 4-scf00068 | 4  |
| AX-158390203 | 4 | 45.185 | KV452803.1  | 4099425 | 4-scf00068 | 4  |
| AX-157951183 | 4 | 45.185 | KV452803.1  | 4099722 | 4-scf00068 | 4  |
| AX-157741570 | 4 | 45.185 | KV452803.1  | 4103616 | 4-scf00068 | 4  |
| AX-158415261 | 4 | 45.185 | KV452804.1  | 15573   | 4-scf00071 | 4  |
| AX-157951432 | 4 | 45.185 | KV452804.1  | 16925   | 4-scf00071 | 4  |
| AX-157687946 | 4 | 45.185 | 3ML01025363 | 1769    | scf01114_1 | UN |
| AX-157951434 | 4 | 45.203 | KV452804.1  | 17784   | 4-scf00071 | 4  |
| AX-157951439 | 4 | 45.245 | KV452804.1  | 22048   | 4-scf00071 | 4  |
| AX-157951184 | 4 | 45.295 | KV452803.1  | 4101367 | 4-scf00068 | 4  |
| AX-157951185 | 4 | 45.295 | KV452803.1  | 4101889 | 4-scf00068 | 4  |
| AX-157951442 | 4 | 45.295 | KV452804.1  | 24689   | 4-scf00071 | 4  |
| AX-157951443 | 4 | 45.295 | KV452804.1  | 26987   | 4-scf00071 | 4  |
| AX-157951444 | 4 | 45.295 | KV452804.1  | 28345   | 4-scf00071 | 4  |
| AX-157951448 | 4 | 45.295 | KV452804.1  | 32584   | 4-scf00071 | 4  |
| AX-157951450 | 4 | 45.295 | KV452804.1  | 33529   | 4-scf00071 | 4  |
| AX-157747033 | 4 | 45.295 | KV452804.1  | 34693   | 4-scf00071 | 4  |
| AX-157951452 | 4 | 45.295 | KV452804.1  | 38458   | 4-scf00071 | 4  |
| AX-157951453 | 4 | 45.295 | KV452804.1  | 39411   | 4-scf00071 | 4  |
| AX-157951454 | 4 | 45.295 | KV452804.1  | 40226   | 4-scf00071 | 4  |
| AX-157951455 | 4 | 45.295 | KV452804.1  | 42581   | 4-scf00071 | 4  |
| AX-157951456 | 4 | 45.295 | KV452804.1  | 43831   | 4-scf00071 | 4  |
| AX-157951458 | 4 | 45.295 | KV452804.1  | 44911   | 4-scf00071 | 4  |
| AX-157951460 | 4 | 45.295 | KV452804.1  | 45784   | 4-scf00071 | 4  |
| AX-157951461 | 4 | 45.295 | KV452804.1  | 46370   | 4-scf00071 | 4  |
| AX-157951462 | 4 | 45.295 | KV452804.1  | 47050   | 4-scf00071 | 4  |
| AX-157951464 | 4 | 45.513 | KV452804.1  | 49540   | 4-scf00071 | 4  |

|              |   |        |            |        |            |   |
|--------------|---|--------|------------|--------|------------|---|
| AX-157951466 | 4 | 45.513 | KV452804.1 | 52085  | 4-scf00071 | 4 |
| AX-157951470 | 4 | 45.513 | KV452804.1 | 58902  | 4-scf00071 | 4 |
| AX-157815596 | 4 | 45.513 | KV452804.1 | 61812  | 4-scf00071 | 4 |
| AX-157951472 | 4 | 45.513 | KV452804.1 | 62014  | 4-scf00071 | 4 |
| AX-157951473 | 4 | 45.513 | KV452804.1 | 63303  | 4-scf00071 | 4 |
| AX-157951475 | 4 | 45.513 | KV452804.1 | 65189  | 4-scf00071 | 4 |
| AX-157951477 | 4 | 45.513 | KV452804.1 | 66726  | 4-scf00071 | 4 |
| AX-157951479 | 4 | 45.513 | KV452804.1 | 67633  | 4-scf00071 | 4 |
| AX-157752186 | 4 | 45.513 | KV452804.1 | 67690  | 4-scf00071 | 4 |
| AX-157815597 | 4 | 45.622 | KV452804.1 | 68153  | 4-scf00071 | 4 |
| AX-157951483 | 4 | 45.622 | KV452804.1 | 80518  | 4-scf00071 | 4 |
| AX-157951484 | 4 | 45.622 | KV452804.1 | 83491  | 4-scf00071 | 4 |
| AX-157951485 | 4 | 45.622 | KV452804.1 | 84084  | 4-scf00071 | 4 |
| AX-157951486 | 4 | 45.622 | KV452804.1 | 84926  | 4-scf00071 | 4 |
| AX-157951445 | 4 | 45.841 | KV452804.1 | 29264  | 4-scf00071 | 4 |
| AX-157951467 | 4 | 45.841 | KV452804.1 | 52972  | 4-scf00071 | 4 |
| AX-157951500 | 4 | 45.841 | KV452804.1 | 105142 | 4-scf00071 | 4 |
| AX-157951501 | 4 | 45.841 | KV452804.1 | 106616 | 4-scf00071 | 4 |
| AX-157951523 | 4 | 45.841 | KV452804.1 | 135979 | 4-scf00071 | 4 |
| AX-157951524 | 4 | 45.841 | KV452804.1 | 137029 | 4-scf00071 | 4 |
| AX-157951525 | 4 | 45.841 | KV452804.1 | 138052 | 4-scf00071 | 4 |
| AX-157951527 | 4 | 45.841 | KV452804.1 | 139754 | 4-scf00071 | 4 |
| AX-157951528 | 4 | 45.841 | KV452804.1 | 141470 | 4-scf00071 | 4 |
| AX-157951529 | 4 | 45.841 | KV452804.1 | 142221 | 4-scf00071 | 4 |
| AX-157951530 | 4 | 45.841 | KV452804.1 | 143462 | 4-scf00071 | 4 |
| AX-157951533 | 4 | 45.841 | KV452804.1 | 147572 | 4-scf00071 | 4 |
| AX-157815599 | 4 | 45.841 | KV452804.1 | 148647 | 4-scf00071 | 4 |
| AX-157951534 | 4 | 45.841 | KV452804.1 | 150463 | 4-scf00071 | 4 |
| AX-157951537 | 4 | 45.841 | KV452804.1 | 155869 | 4-scf00071 | 4 |
| AX-158382803 | 4 | 45.841 | KV452804.1 | 209950 | 4-scf00071 | 4 |
| AX-157951691 | 4 | 45.841 | KV452804.1 | 352720 | 4-scf00071 | 4 |
| AX-157951517 | 4 | 45.871 | KV452804.1 | 128748 | 4-scf00071 | 4 |
| AX-157951521 | 4 | 45.871 | KV452804.1 | 134607 | 4-scf00071 | 4 |
| AX-157738529 | 4 | 45.871 | KV452804.1 | 152477 | 4-scf00071 | 4 |
| AX-157951535 | 4 | 45.894 | KV452804.1 | 152980 | 4-scf00071 | 4 |
| AX-157951437 | 4 | 45.95  | KV452804.1 | 20975  | 4-scf00071 | 4 |
| AX-157951440 | 4 | 45.95  | KV452804.1 | 22924  | 4-scf00071 | 4 |
| AX-157951536 | 4 | 45.95  | KV452804.1 | 153705 | 4-scf00071 | 4 |
| AX-157951538 | 4 | 45.95  | KV452804.1 | 158632 | 4-scf00071 | 4 |
| AX-157951541 | 4 | 45.95  | KV452804.1 | 161693 | 4-scf00071 | 4 |
| AX-157951542 | 4 | 45.95  | KV452804.1 | 162396 | 4-scf00071 | 4 |
| AX-158422030 | 4 | 45.95  | KV452804.1 | 162508 | 4-scf00071 | 4 |
| AX-157951546 | 4 | 45.95  | KV452804.1 | 172588 | 4-scf00071 | 4 |
| AX-157951547 | 4 | 45.95  | KV452804.1 | 173571 | 4-scf00071 | 4 |
| AX-157951574 | 4 | 45.95  | KV452804.1 | 201634 | 4-scf00071 | 4 |
| AX-157951656 | 4 | 45.95  | KV452804.1 | 293792 | 4-scf00071 | 4 |
| AX-157758589 | 4 | 46.063 | KV452804.1 | 181002 | 4-scf00071 | 4 |
| AX-157951555 | 4 | 46.168 | KV452804.1 | 181561 | 4-scf00071 | 4 |
| AX-157951556 | 4 | 46.168 | KV452804.1 | 182002 | 4-scf00071 | 4 |
| AX-157951557 | 4 | 46.168 | KV452804.1 | 183372 | 4-scf00071 | 4 |
| AX-157747542 | 4 | 46.168 | KV452804.1 | 185365 | 4-scf00071 | 4 |

|              |   |        |            |        |            |   |
|--------------|---|--------|------------|--------|------------|---|
| AX-157951561 | 4 | 46.168 | KV452804.1 | 190509 | 4-scf00071 | 4 |
| AX-158390206 | 4 | 46.168 | KV452804.1 | 191071 | 4-scf00071 | 4 |
| AX-157951563 | 4 | 46.168 | KV452804.1 | 191207 | 4-scf00071 | 4 |
| AX-157951568 | 4 | 46.168 | KV452804.1 | 196586 | 4-scf00071 | 4 |
| AX-157951570 | 4 | 46.168 | KV452804.1 | 197771 | 4-scf00071 | 4 |
| AX-157951571 | 4 | 46.168 | KV452804.1 | 198386 | 4-scf00071 | 4 |
| AX-157951573 | 4 | 46.168 | KV452804.1 | 201066 | 4-scf00071 | 4 |
| AX-157951575 | 4 | 46.213 | KV452804.1 | 202905 | 4-scf00071 | 4 |
| AX-158415263 | 4 | 46.238 | KV452804.1 | 204251 | 4-scf00071 | 4 |
| AX-157951518 | 4 | 46.277 | KV452804.1 | 130306 | 4-scf00071 | 4 |
| AX-157951550 | 4 | 46.277 | KV452804.1 | 176794 | 4-scf00071 | 4 |
| AX-157951578 | 4 | 46.277 | KV452804.1 | 207200 | 4-scf00071 | 4 |
| AX-157951579 | 4 | 46.277 | KV452804.1 | 207918 | 4-scf00071 | 4 |
| AX-157951580 | 4 | 46.277 | KV452804.1 | 208766 | 4-scf00071 | 4 |
| AX-157951583 | 4 | 46.277 | KV452804.1 | 211306 | 4-scf00071 | 4 |
| AX-157951586 | 4 | 46.313 | KV452804.1 | 216289 | 4-scf00071 | 4 |
| AX-157951567 | 4 | 46.344 | KV452804.1 | 195921 | 4-scf00071 | 4 |
| AX-157951572 | 4 | 46.344 | KV452804.1 | 199128 | 4-scf00071 | 4 |
| AX-157951587 | 4 | 46.344 | KV452804.1 | 216928 | 4-scf00071 | 4 |
| AX-157951593 | 4 | 46.344 | KV452804.1 | 225015 | 4-scf00071 | 4 |
| AX-157951599 | 4 | 46.366 | KV452804.1 | 229507 | 4-scf00071 | 4 |
| AX-157951590 | 4 | 46.387 | KV452804.1 | 221717 | 4-scf00071 | 4 |
| AX-158379448 | 4 | 46.387 | KV452804.1 | 230113 | 4-scf00071 | 4 |
| AX-157951600 | 4 | 46.387 | KV452804.1 | 230335 | 4-scf00071 | 4 |
| AX-157951603 | 4 | 46.387 | KV452804.1 | 233496 | 4-scf00071 | 4 |
| AX-157951604 | 4 | 46.387 | KV452804.1 | 235009 | 4-scf00071 | 4 |
| AX-157815604 | 4 | 46.387 | KV452804.1 | 242103 | 4-scf00071 | 4 |
| AX-157951611 | 4 | 46.387 | KV452804.1 | 245906 | 4-scf00071 | 4 |
| AX-157951636 | 4 | 46.387 | KV452804.1 | 275630 | 4-scf00071 | 4 |
| AX-157951648 | 4 | 46.387 | KV452804.1 | 288779 | 4-scf00071 | 4 |
| AX-157951675 | 4 | 46.387 | KV452804.1 | 331460 | 4-scf00071 | 4 |
| AX-157756227 | 4 | 46.387 | KV452804.1 | 337175 | 4-scf00071 | 4 |
| AX-157951715 | 4 | 46.387 | KV452804.1 | 388939 | 4-scf00071 | 4 |
| AX-157815608 | 4 | 46.387 | KV452804.1 | 392081 | 4-scf00071 | 4 |
| AX-157951602 | 4 | 46.406 | KV452804.1 | 233099 | 4-scf00071 | 4 |
| AX-157815603 | 4 | 46.406 | KV452804.1 | 241034 | 4-scf00071 | 4 |
| AX-157951637 | 4 | 46.423 | KV452804.1 | 276086 | 4-scf00071 | 4 |
| AX-157951988 | 4 | 46.423 | KV452804.1 | 748401 | 4-scf00071 | 4 |
| AX-157951641 | 4 | 46.453 | KV452804.1 | 280389 | 4-scf00071 | 4 |
| AX-157951560 | 4 | 46.496 | KV452804.1 | 188521 | 4-scf00071 | 4 |
| AX-157951581 | 4 | 46.496 | KV452804.1 | 210238 | 4-scf00071 | 4 |
| AX-157951633 | 4 | 46.496 | KV452804.1 | 272820 | 4-scf00071 | 4 |
| AX-157951634 | 4 | 46.496 | KV452804.1 | 273881 | 4-scf00071 | 4 |
| AX-157951642 | 4 | 46.496 | KV452804.1 | 282061 | 4-scf00071 | 4 |
| AX-157951644 | 4 | 46.496 | KV452804.1 | 284158 | 4-scf00071 | 4 |
| AX-157951645 | 4 | 46.496 | KV452804.1 | 285391 | 4-scf00071 | 4 |
| AX-157951649 | 4 | 46.496 | KV452804.1 | 289564 | 4-scf00071 | 4 |
| AX-157951650 | 4 | 46.496 | KV452804.1 | 290331 | 4-scf00071 | 4 |
| AX-157951652 | 4 | 46.496 | KV452804.1 | 291725 | 4-scf00071 | 4 |
| AX-157951653 | 4 | 46.496 | KV452804.1 | 292145 | 4-scf00071 | 4 |
| AX-157951658 | 4 | 46.496 | KV452804.1 | 295013 | 4-scf00071 | 4 |

|              |   |        |            |        |            |   |
|--------------|---|--------|------------|--------|------------|---|
| AX-157743974 | 4 | 46.496 | KV452804.1 | 300607 | 4-scf00071 | 4 |
| AX-157951664 | 4 | 46.496 | KV452804.1 | 302575 | 4-scf00071 | 4 |
| AX-157951665 | 4 | 46.496 | KV452804.1 | 303236 | 4-scf00071 | 4 |
| AX-157854671 | 4 | 46.496 | KV452804.1 | 306582 | 4-scf00071 | 4 |
| AX-157951666 | 4 | 46.496 | KV452804.1 | 307594 | 4-scf00071 | 4 |
| AX-157951737 | 4 | 46.496 | KV452804.1 | 420058 | 4-scf00071 | 4 |
| AX-158390209 | 4 | 46.496 | KV452804.1 | 423168 | 4-scf00071 | 4 |
| AX-157951756 | 4 | 46.496 | KV452804.1 | 450511 | 4-scf00071 | 4 |
| AX-157951776 | 4 | 46.496 | KV452804.1 | 472242 | 4-scf00071 | 4 |
| AX-157951791 | 4 | 46.496 | KV452804.1 | 493477 | 4-scf00071 | 4 |
| AX-157951799 | 4 | 46.496 | KV452804.1 | 499614 | 4-scf00071 | 4 |
| AX-157951800 | 4 | 46.496 | KV452804.1 | 500313 | 4-scf00071 | 4 |
| AX-157951811 | 4 | 46.496 | KV452804.1 | 513536 | 4-scf00071 | 4 |
| AX-157951823 | 4 | 46.496 | KV452804.1 | 526841 | 4-scf00071 | 4 |
| AX-157875414 | 4 | 46.496 | KV452804.1 | 565977 | 4-scf00071 | 4 |
| AX-157815617 | 4 | 46.496 | KV452804.1 | 746802 | 4-scf00071 | 4 |
| AX-157765191 | 4 | 46.605 | KV452804.1 | 321241 | 4-scf00071 | 4 |
| AX-157951680 | 4 | 46.605 | KV452804.1 | 341891 | 4-scf00071 | 4 |
| AX-157951705 | 4 | 46.605 | KV452804.1 | 377292 | 4-scf00071 | 4 |
| AX-157951671 | 4 | 46.633 | KV452804.1 | 322646 | 4-scf00071 | 4 |
| AX-157951673 | 4 | 46.649 | KV452804.1 | 325045 | 4-scf00071 | 4 |
| AX-157951674 | 4 | 46.682 | KV452804.1 | 330656 | 4-scf00071 | 4 |
| AX-157951670 | 4 | 46.714 | KV452804.1 | 318792 | 4-scf00071 | 4 |
| AX-157951676 | 4 | 46.714 | KV452804.1 | 334471 | 4-scf00071 | 4 |
| AX-157951679 | 4 | 46.714 | KV452804.1 | 340176 | 4-scf00071 | 4 |
| AX-157951682 | 4 | 46.714 | KV452804.1 | 343255 | 4-scf00071 | 4 |
| AX-157951684 | 4 | 46.714 | KV452804.1 | 344778 | 4-scf00071 | 4 |
| AX-157951686 | 4 | 46.714 | KV452804.1 | 347480 | 4-scf00071 | 4 |
| AX-157715042 | 4 | 46.714 | KV452804.1 | 349248 | 4-scf00071 | 4 |
| AX-157951690 | 4 | 46.714 | KV452804.1 | 351559 | 4-scf00071 | 4 |
| AX-157951695 | 4 | 46.714 | KV452804.1 | 357966 | 4-scf00071 | 4 |
| AX-157951699 | 4 | 46.714 | KV452804.1 | 365881 | 4-scf00071 | 4 |
| AX-157951701 | 4 | 46.714 | KV452804.1 | 367625 | 4-scf00071 | 4 |
| AX-157951702 | 4 | 46.714 | KV452804.1 | 369937 | 4-scf00071 | 4 |
| AX-157815607 | 4 | 46.714 | KV452804.1 | 372268 | 4-scf00071 | 4 |
| AX-157951708 | 4 | 46.714 | KV452804.1 | 380054 | 4-scf00071 | 4 |
| AX-157951709 | 4 | 46.714 | KV452804.1 | 382369 | 4-scf00071 | 4 |
| AX-157951710 | 4 | 46.714 | KV452804.1 | 383598 | 4-scf00071 | 4 |
| AX-157951712 | 4 | 46.714 | KV452804.1 | 386574 | 4-scf00071 | 4 |
| AX-157951713 | 4 | 46.714 | KV452804.1 | 387009 | 4-scf00071 | 4 |
| AX-157951716 | 4 | 46.714 | KV452804.1 | 389961 | 4-scf00071 | 4 |
| AX-157951717 | 4 | 46.823 | KV452804.1 | 392247 | 4-scf00071 | 4 |
| AX-157749114 | 4 | 46.823 | KV452804.1 | 394300 | 4-scf00071 | 4 |
| AX-158415264 | 4 | 46.823 | KV452804.1 | 396379 | 4-scf00071 | 4 |
| AX-157951722 | 4 | 46.823 | KV452804.1 | 397823 | 4-scf00071 | 4 |
| AX-157951723 | 4 | 46.823 | KV452804.1 | 398759 | 4-scf00071 | 4 |
| AX-157951724 | 4 | 46.823 | KV452804.1 | 399112 | 4-scf00071 | 4 |
| AX-157854673 | 4 | 46.823 | KV452804.1 | 454076 | 4-scf00071 | 4 |
| AX-157951788 | 4 | 46.823 | KV452804.1 | 486025 | 4-scf00071 | 4 |
| AX-157951729 | 4 | 46.859 | KV452804.1 | 405031 | 4-scf00071 | 4 |
| AX-157951672 | 4 | 46.933 | KV452804.1 | 324519 | 4-scf00071 | 4 |

|              |   |        |            |        |            |   |
|--------------|---|--------|------------|--------|------------|---|
| AX-157951731 | 4 | 46.933 | KV452804.1 | 412119 | 4-scf00071 | 4 |
| AX-157951732 | 4 | 46.933 | KV452804.1 | 413069 | 4-scf00071 | 4 |
| AX-157951734 | 4 | 46.933 | KV452804.1 | 415232 | 4-scf00071 | 4 |
| AX-157749032 | 4 | 46.933 | KV452804.1 | 426286 | 4-scf00071 | 4 |
| AX-157951743 | 4 | 46.933 | KV452804.1 | 428477 | 4-scf00071 | 4 |
| AX-157951745 | 4 | 46.933 | KV452804.1 | 431800 | 4-scf00071 | 4 |
| AX-157718923 | 4 | 46.933 | KV452804.1 | 438410 | 4-scf00071 | 4 |
| AX-157951749 | 4 | 46.933 | KV452804.1 | 439493 | 4-scf00071 | 4 |
| AX-157951751 | 4 | 46.933 | KV452804.1 | 443107 | 4-scf00071 | 4 |
| AX-157951759 | 4 | 46.933 | KV452804.1 | 455648 | 4-scf00071 | 4 |
| AX-157854674 | 4 | 46.933 | KV452804.1 | 455768 | 4-scf00071 | 4 |
| AX-157951760 | 4 | 46.933 | KV452804.1 | 457326 | 4-scf00071 | 4 |
| AX-157951765 | 4 | 46.933 | KV452804.1 | 461304 | 4-scf00071 | 4 |
| AX-157951767 | 4 | 46.933 | KV452804.1 | 463669 | 4-scf00071 | 4 |
| AX-157951771 | 4 | 46.933 | KV452804.1 | 467778 | 4-scf00071 | 4 |
| AX-157951773 | 4 | 46.933 | KV452804.1 | 468809 | 4-scf00071 | 4 |
| AX-157724271 | 4 | 46.933 | KV452804.1 | 473681 | 4-scf00071 | 4 |
| AX-157951783 | 4 | 46.933 | KV452804.1 | 480496 | 4-scf00071 | 4 |
| AX-157951784 | 4 | 46.933 | KV452804.1 | 481336 | 4-scf00071 | 4 |
| AX-157951787 | 4 | 46.933 | KV452804.1 | 485049 | 4-scf00071 | 4 |
| AX-158382816 | 4 | 46.933 | KV452804.1 | 534772 | 4-scf00071 | 4 |
| AX-157951880 | 4 | 46.933 | KV452804.1 | 612024 | 4-scf00071 | 4 |
| AX-157951927 | 4 | 46.933 | KV452804.1 | 675955 | 4-scf00071 | 4 |
| AX-157951785 | 4 | 46.987 | KV452804.1 | 483949 | 4-scf00071 | 4 |
| AX-157951789 | 4 | 47.005 | KV452804.1 | 487261 | 4-scf00071 | 4 |
| AX-157951790 | 4 | 47.025 | KV452804.1 | 492759 | 4-scf00071 | 4 |
| AX-157815609 | 4 | 47.042 | KV452804.1 | 402121 | 4-scf00071 | 4 |
| AX-157815610 | 4 | 47.042 | KV452804.1 | 402368 | 4-scf00071 | 4 |
| AX-157951792 | 4 | 47.042 | KV452804.1 | 494102 | 4-scf00071 | 4 |
| AX-157951794 | 4 | 47.042 | KV452804.1 | 495571 | 4-scf00071 | 4 |
| AX-157951797 | 4 | 47.042 | KV452804.1 | 497902 | 4-scf00071 | 4 |
| AX-157951804 | 4 | 47.053 | KV452804.1 | 505352 | 4-scf00071 | 4 |
| AX-157951766 | 4 | 47.061 | KV452804.1 | 461990 | 4-scf00071 | 4 |
| AX-157951806 | 4 | 47.061 | KV452804.1 | 508203 | 4-scf00071 | 4 |
| AX-157951810 | 4 | 47.069 | KV452804.1 | 512325 | 4-scf00071 | 4 |
| AX-157951851 | 4 | 47.069 | KV452804.1 | 565625 | 4-scf00071 | 4 |
| AX-157951854 | 4 | 47.069 | KV452804.1 | 569196 | 4-scf00071 | 4 |
| AX-158390211 | 4 | 47.271 | KV452804.1 | 466038 | 4-scf00071 | 4 |
| AX-157951817 | 4 | 47.271 | KV452804.1 | 520141 | 4-scf00071 | 4 |
| AX-157951820 | 4 | 47.568 | KV452804.1 | 523075 | 4-scf00071 | 4 |
| AX-157951830 | 4 | 47.598 | KV452804.1 | 535822 | 4-scf00071 | 4 |
| AX-158379450 | 4 | 47.661 | KV452804.1 | 537502 | 4-scf00071 | 4 |
| AX-157951728 | 4 | 47.698 | KV452804.1 | 404419 | 4-scf00071 | 4 |
| AX-157951832 | 4 | 47.698 | KV452804.1 | 539590 | 4-scf00071 | 4 |
| AX-158406089 | 4 | 47.698 | KV452804.1 | 542197 | 4-scf00071 | 4 |
| AX-157951833 | 4 | 47.698 | KV452804.1 | 543691 | 4-scf00071 | 4 |
| AX-157951835 | 4 | 47.698 | KV452804.1 | 545617 | 4-scf00071 | 4 |
| AX-157951837 | 4 | 47.698 | KV452804.1 | 549583 | 4-scf00071 | 4 |
| AX-157951841 | 4 | 47.698 | KV452804.1 | 554083 | 4-scf00071 | 4 |
| AX-158382818 | 4 | 47.698 | KV452804.1 | 561212 | 4-scf00071 | 4 |
| AX-157951848 | 4 | 47.698 | KV452804.1 | 563518 | 4-scf00071 | 4 |



|              |   |        |            |        |            |   |
|--------------|---|--------|------------|--------|------------|---|
| AX-157951850 | 4 | 47.698 | KV452804.1 | 564768 | 4-scf00071 | 4 |
| AX-157951852 | 4 | 47.698 | KV452804.1 | 567637 | 4-scf00071 | 4 |
| AX-157951856 | 4 | 47.698 | KV452804.1 | 572332 | 4-scf00071 | 4 |
| AX-157951738 | 4 | 47.807 | KV452804.1 | 421165 | 4-scf00071 | 4 |
| AX-157951764 | 4 | 47.807 | KV452804.1 | 460691 | 4-scf00071 | 4 |
| AX-157951772 | 4 | 47.807 | KV452804.1 | 468184 | 4-scf00071 | 4 |
| AX-157951802 | 4 | 47.807 | KV452804.1 | 502301 | 4-scf00071 | 4 |
| AX-157951808 | 4 | 47.807 | KV452804.1 | 510031 | 4-scf00071 | 4 |
| AX-157951813 | 4 | 47.807 | KV452804.1 | 516490 | 4-scf00071 | 4 |
| AX-157951815 | 4 | 47.807 | KV452804.1 | 517893 | 4-scf00071 | 4 |
| AX-157815613 | 4 | 47.807 | KV452804.1 | 577737 | 4-scf00071 | 4 |
| AX-157951858 | 4 | 47.807 | KV452804.1 | 578219 | 4-scf00071 | 4 |
| AX-157951859 | 4 | 47.807 | KV452804.1 | 580039 | 4-scf00071 | 4 |
| AX-157951861 | 4 | 47.807 | KV452804.1 | 586287 | 4-scf00071 | 4 |
| AX-158406090 | 4 | 47.807 | KV452804.1 | 590224 | 4-scf00071 | 4 |
| AX-157951867 | 4 | 47.807 | KV452804.1 | 595131 | 4-scf00071 | 4 |
| AX-157951868 | 4 | 47.807 | KV452804.1 | 598021 | 4-scf00071 | 4 |
| AX-157951873 | 4 | 47.807 | KV452804.1 | 601323 | 4-scf00071 | 4 |
| AX-157951875 | 4 | 47.807 | KV452804.1 | 603687 | 4-scf00071 | 4 |
| AX-157951876 | 4 | 47.807 | KV452804.1 | 604818 | 4-scf00071 | 4 |
| AX-157951878 | 4 | 47.807 | KV452804.1 | 609629 | 4-scf00071 | 4 |
| AX-157951883 | 4 | 47.807 | KV452804.1 | 614906 | 4-scf00071 | 4 |
| AX-157951884 | 4 | 47.807 | KV452804.1 | 616062 | 4-scf00071 | 4 |
| AX-157951885 | 4 | 47.807 | KV452804.1 | 616757 | 4-scf00071 | 4 |
| AX-157951886 | 4 | 47.807 | KV452804.1 | 617492 | 4-scf00071 | 4 |
| AX-157951887 | 4 | 47.807 | KV452804.1 | 618093 | 4-scf00071 | 4 |
| AX-157951889 | 4 | 47.807 | KV452804.1 | 618973 | 4-scf00071 | 4 |
| AX-157951890 | 4 | 47.807 | KV452804.1 | 622631 | 4-scf00071 | 4 |
| AX-157951891 | 4 | 47.807 | KV452804.1 | 624092 | 4-scf00071 | 4 |
| AX-157951892 | 4 | 47.807 | KV452804.1 | 624882 | 4-scf00071 | 4 |
| AX-157951894 | 4 | 47.807 | KV452804.1 | 625792 | 4-scf00071 | 4 |
| AX-157951896 | 4 | 47.807 | KV452804.1 | 630215 | 4-scf00071 | 4 |
| AX-157951900 | 4 | 47.807 | KV452804.1 | 636131 | 4-scf00071 | 4 |
| AX-157951901 | 4 | 47.807 | KV452804.1 | 638102 | 4-scf00071 | 4 |
| AX-157951902 | 4 | 47.807 | KV452804.1 | 641010 | 4-scf00071 | 4 |
| AX-157951903 | 4 | 47.807 | KV452804.1 | 641706 | 4-scf00071 | 4 |
| AX-157951904 | 4 | 47.807 | KV452804.1 | 645128 | 4-scf00071 | 4 |
| AX-157951905 | 4 | 47.807 | KV452804.1 | 648729 | 4-scf00071 | 4 |
| AX-157951911 | 4 | 47.807 | KV452804.1 | 654918 | 4-scf00071 | 4 |
| AX-157951913 | 4 | 47.807 | KV452804.1 | 656203 | 4-scf00071 | 4 |
| AX-157951917 | 4 | 47.807 | KV452804.1 | 667023 | 4-scf00071 | 4 |
| AX-157951919 | 4 | 47.807 | KV452804.1 | 667811 | 4-scf00071 | 4 |
| AX-157951921 | 4 | 47.807 | KV452804.1 | 669103 | 4-scf00071 | 4 |
| AX-157951922 | 4 | 47.807 | KV452804.1 | 670105 | 4-scf00071 | 4 |
| AX-158406093 | 4 | 47.807 | KV452804.1 | 673696 | 4-scf00071 | 4 |
| AX-157758449 | 4 | 47.807 | KV452804.1 | 674757 | 4-scf00071 | 4 |
| AX-157951928 | 4 | 47.807 | KV452804.1 | 677648 | 4-scf00071 | 4 |
| AX-157951931 | 4 | 47.807 | KV452804.1 | 680020 | 4-scf00071 | 4 |
| AX-157951939 | 4 | 47.807 | KV452804.1 | 689701 | 4-scf00071 | 4 |
| AX-157951980 | 4 | 47.807 | KV452804.1 | 738142 | 4-scf00071 | 4 |
| AX-157951989 | 4 | 47.807 | KV452804.1 | 751679 | 4-scf00071 | 4 |

|              |   |        |            |         |            |   |
|--------------|---|--------|------------|---------|------------|---|
| AX-157951999 | 4 | 47.807 | KV452804.1 | 765535  | 4-scf00071 | 4 |
| AX-157952010 | 4 | 47.807 | KV452804.1 | 778616  | 4-scf00071 | 4 |
| AX-157884030 | 4 | 47.841 | KV452804.1 | 638236  | 4-scf00071 | 4 |
| AX-157951934 | 4 | 47.841 | KV452804.1 | 681067  | 4-scf00071 | 4 |
| AX-157951990 | 4 | 47.841 | KV452804.1 | 751926  | 4-scf00071 | 4 |
| AX-157951937 | 4 | 47.867 | KV452804.1 | 684021  | 4-scf00071 | 4 |
| AX-157749893 | 4 | 47.896 | KV452804.1 | 691801  | 4-scf00071 | 4 |
| AX-157951726 | 4 | 47.917 | KV452804.1 | 401080  | 4-scf00071 | 4 |
| AX-157951739 | 4 | 47.917 | KV452804.1 | 423843  | 4-scf00071 | 4 |
| AX-157951777 | 4 | 47.917 | KV452804.1 | 473204  | 4-scf00071 | 4 |
| AX-157951829 | 4 | 47.917 | KV452804.1 | 534354  | 4-scf00071 | 4 |
| AX-157951869 | 4 | 47.917 | KV452804.1 | 598882  | 4-scf00071 | 4 |
| AX-157951870 | 4 | 47.917 | KV452804.1 | 599197  | 4-scf00071 | 4 |
| AX-157951877 | 4 | 47.917 | KV452804.1 | 608027  | 4-scf00071 | 4 |
| AX-157951888 | 4 | 47.917 | KV452804.1 | 618718  | 4-scf00071 | 4 |
| AX-157951906 | 4 | 47.917 | KV452804.1 | 649946  | 4-scf00071 | 4 |
| AX-157951942 | 4 | 47.917 | KV452804.1 | 693299  | 4-scf00071 | 4 |
| AX-157951946 | 4 | 47.917 | KV452804.1 | 697780  | 4-scf00071 | 4 |
| AX-157951952 | 4 | 47.917 | KV452804.1 | 706949  | 4-scf00071 | 4 |
| AX-157951953 | 4 | 47.917 | KV452804.1 | 707923  | 4-scf00071 | 4 |
| AX-157951954 | 4 | 47.917 | KV452804.1 | 708085  | 4-scf00071 | 4 |
| AX-157951957 | 4 | 47.917 | KV452804.1 | 711370  | 4-scf00071 | 4 |
| AX-157815614 | 4 | 47.917 | KV452804.1 | 711654  | 4-scf00071 | 4 |
| AX-157951958 | 4 | 47.917 | KV452804.1 | 712115  | 4-scf00071 | 4 |
| AX-157717109 | 4 | 47.917 | KV452804.1 | 716205  | 4-scf00071 | 4 |
| AX-157695638 | 4 | 47.917 | KV452804.1 | 719045  | 4-scf00071 | 4 |
| AX-158382823 | 4 | 47.917 | KV452804.1 | 721242  | 4-scf00071 | 4 |
| AX-157951966 | 4 | 47.917 | KV452804.1 | 722053  | 4-scf00071 | 4 |
| AX-157951969 | 4 | 47.917 | KV452804.1 | 725309  | 4-scf00071 | 4 |
| AX-157951972 | 4 | 47.917 | KV452804.1 | 728916  | 4-scf00071 | 4 |
| AX-157815616 | 4 | 47.917 | KV452804.1 | 730707  | 4-scf00071 | 4 |
| AX-157951975 | 4 | 47.917 | KV452804.1 | 731855  | 4-scf00071 | 4 |
| AX-157951978 | 4 | 47.917 | KV452804.1 | 735506  | 4-scf00071 | 4 |
| AX-157951981 | 4 | 47.917 | KV452804.1 | 738459  | 4-scf00071 | 4 |
| AX-157951983 | 4 | 47.917 | KV452804.1 | 739521  | 4-scf00071 | 4 |
| AX-157739728 | 4 | 47.917 | KV452804.1 | 745799  | 4-scf00071 | 4 |
| AX-157951994 | 4 | 47.917 | KV452804.1 | 755639  | 4-scf00071 | 4 |
| AX-157815619 | 4 | 47.917 | KV452804.1 | 779142  | 4-scf00071 | 4 |
| AX-157815631 | 4 | 47.917 | KV452804.1 | 1012825 | 4-scf00071 | 4 |
| AX-157951961 | 4 | 47.962 | KV452804.1 | 716966  | 4-scf00071 | 4 |
| AX-157951987 | 4 | 47.962 | KV452804.1 | 747770  | 4-scf00071 | 4 |
| AX-157951839 | 4 | 48.026 | KV452804.1 | 551151  | 4-scf00071 | 4 |
| AX-157951949 | 4 | 48.026 | KV452804.1 | 704784  | 4-scf00071 | 4 |
| AX-157951970 | 4 | 48.026 | KV452804.1 | 726509  | 4-scf00071 | 4 |
| AX-157951986 | 4 | 48.026 | KV452804.1 | 743192  | 4-scf00071 | 4 |
| AX-157951992 | 4 | 48.026 | KV452804.1 | 753567  | 4-scf00071 | 4 |
| AX-157951993 | 4 | 48.026 | KV452804.1 | 754549  | 4-scf00071 | 4 |
| AX-157951997 | 4 | 48.026 | KV452804.1 | 761557  | 4-scf00071 | 4 |
| AX-157951998 | 4 | 48.026 | KV452804.1 | 761727  | 4-scf00071 | 4 |
| AX-157695127 | 4 | 48.026 | KV452804.1 | 762841  | 4-scf00071 | 4 |
| AX-157952002 | 4 | 48.026 | KV452804.1 | 767583  | 4-scf00071 | 4 |

|              |   |        |            |         |            |   |
|--------------|---|--------|------------|---------|------------|---|
| AX-157952005 | 4 | 48.026 | KV452804.1 | 774512  | 4-scf00071 | 4 |
| AX-157952009 | 4 | 48.026 | KV452804.1 | 777542  | 4-scf00071 | 4 |
| AX-157775028 | 4 | 48.026 | KV452804.1 | 777705  | 4-scf00071 | 4 |
| AX-157952011 | 4 | 48.026 | KV452804.1 | 782729  | 4-scf00071 | 4 |
| AX-157952012 | 4 | 48.026 | KV452804.1 | 783538  | 4-scf00071 | 4 |
| AX-157952013 | 4 | 48.026 | KV452804.1 | 783918  | 4-scf00071 | 4 |
| AX-157815621 | 4 | 48.026 | KV452804.1 | 786212  | 4-scf00071 | 4 |
| AX-157773440 | 4 | 48.077 | KV452804.1 | 771808  | 4-scf00071 | 4 |
| AX-157815622 | 4 | 48.077 | KV452804.1 | 788604  | 4-scf00071 | 4 |
| AX-157951968 | 4 | 48.135 | KV452804.1 | 724733  | 4-scf00071 | 4 |
| AX-157952016 | 4 | 48.135 | KV452804.1 | 788170  | 4-scf00071 | 4 |
| AX-157952019 | 4 | 48.135 | KV452804.1 | 793602  | 4-scf00071 | 4 |
| AX-157952020 | 4 | 48.135 | KV452804.1 | 794450  | 4-scf00071 | 4 |
| AX-157952021 | 4 | 48.135 | KV452804.1 | 794918  | 4-scf00071 | 4 |
| AX-157815624 | 4 | 48.135 | KV452804.1 | 796911  | 4-scf00071 | 4 |
| AX-157952023 | 4 | 48.135 | KV452804.1 | 797322  | 4-scf00071 | 4 |
| AX-157952024 | 4 | 48.135 | KV452804.1 | 797894  | 4-scf00071 | 4 |
| AX-157952025 | 4 | 48.135 | KV452804.1 | 798529  | 4-scf00071 | 4 |
| AX-157952029 | 4 | 48.135 | KV452804.1 | 802567  | 4-scf00071 | 4 |
| AX-157772011 | 4 | 48.135 | KV452804.1 | 807068  | 4-scf00071 | 4 |
| AX-157815625 | 4 | 48.135 | KV452804.1 | 809180  | 4-scf00071 | 4 |
| AX-157815627 | 4 | 48.135 | KV452804.1 | 815529  | 4-scf00071 | 4 |
| AX-157952035 | 4 | 48.135 | KV452804.1 | 816893  | 4-scf00071 | 4 |
| AX-157952037 | 4 | 48.135 | KV452804.1 | 819963  | 4-scf00071 | 4 |
| AX-157952038 | 4 | 48.135 | KV452804.1 | 825444  | 4-scf00071 | 4 |
| AX-157952148 | 4 | 48.135 | KV452804.1 | 960054  | 4-scf00071 | 4 |
| AX-157952042 | 4 | 48.212 | KV452804.1 | 828856  | 4-scf00071 | 4 |
| AX-157715777 | 4 | 48.286 | KV452804.1 | 809653  | 4-scf00071 | 4 |
| AX-157952045 | 4 | 48.286 | KV452804.1 | 832975  | 4-scf00071 | 4 |
| AX-157952086 | 4 | 48.286 | KV452804.1 | 893951  | 4-scf00071 | 4 |
| AX-157951752 | 4 | 48.354 | KV452804.1 | 443463  | 4-scf00071 | 4 |
| AX-157951971 | 4 | 48.354 | KV452804.1 | 727080  | 4-scf00071 | 4 |
| AX-157951984 | 4 | 48.354 | KV452804.1 | 740820  | 4-scf00071 | 4 |
| AX-157952036 | 4 | 48.354 | KV452804.1 | 819218  | 4-scf00071 | 4 |
| AX-158382825 | 4 | 48.354 | KV452804.1 | 832686  | 4-scf00071 | 4 |
| AX-157952047 | 4 | 48.354 | KV452804.1 | 837001  | 4-scf00071 | 4 |
| AX-157952049 | 4 | 48.354 | KV452804.1 | 845414  | 4-scf00071 | 4 |
| AX-157952051 | 4 | 48.354 | KV452804.1 | 848864  | 4-scf00071 | 4 |
| AX-157952053 | 4 | 48.354 | KV452804.1 | 850268  | 4-scf00071 | 4 |
| AX-157952059 | 4 | 48.354 | KV452804.1 | 858633  | 4-scf00071 | 4 |
| AX-157952063 | 4 | 48.354 | KV452804.1 | 865231  | 4-scf00071 | 4 |
| AX-157952071 | 4 | 48.354 | KV452804.1 | 874521  | 4-scf00071 | 4 |
| AX-157952076 | 4 | 48.354 | KV452804.1 | 880815  | 4-scf00071 | 4 |
| AX-157952077 | 4 | 48.354 | KV452804.1 | 881271  | 4-scf00071 | 4 |
| AX-157884032 | 4 | 48.354 | KV452804.1 | 882447  | 4-scf00071 | 4 |
| AX-157952079 | 4 | 48.354 | KV452804.1 | 884279  | 4-scf00071 | 4 |
| AX-157952254 | 4 | 48.354 | KV452804.1 | 1087513 | 4-scf00071 | 4 |
| AX-157952280 | 4 | 48.354 | KV452804.1 | 1128392 | 4-scf00071 | 4 |
| AX-157952327 | 4 | 48.354 | KV452804.1 | 1201443 | 4-scf00071 | 4 |
| AX-157952342 | 4 | 48.354 | KV452804.1 | 1221361 | 4-scf00071 | 4 |
| AX-157952377 | 4 | 48.354 | KV452804.1 | 1275865 | 4-scf00071 | 4 |

|              |   |        |            |         |            |   |
|--------------|---|--------|------------|---------|------------|---|
| AX-157952454 | 4 | 48.354 | KV452804.1 | 1381825 | 4-scf00071 | 4 |
| AX-157952493 | 4 | 48.354 | KV452804.1 | 1433267 | 4-scf00071 | 4 |
| AX-157757768 | 4 | 48.412 | KV452804.1 | 901142  | 4-scf00071 | 4 |
| AX-157951780 | 4 | 48.463 | KV452804.1 | 477303  | 4-scf00071 | 4 |
| AX-157952026 | 4 | 48.463 | KV452804.1 | 799195  | 4-scf00071 | 4 |
| AX-157952031 | 4 | 48.463 | KV452804.1 | 805152  | 4-scf00071 | 4 |
| AX-157952052 | 4 | 48.463 | KV452804.1 | 849225  | 4-scf00071 | 4 |
| AX-157952087 | 4 | 48.463 | KV452804.1 | 895031  | 4-scf00071 | 4 |
| AX-157952095 | 4 | 48.463 | KV452804.1 | 905193  | 4-scf00071 | 4 |
| AX-157952097 | 4 | 48.463 | KV452804.1 | 907269  | 4-scf00071 | 4 |
| AX-157952098 | 4 | 48.463 | KV452804.1 | 908713  | 4-scf00071 | 4 |
| AX-157952099 | 4 | 48.463 | KV452804.1 | 909133  | 4-scf00071 | 4 |
| AX-157952100 | 4 | 48.463 | KV452804.1 | 909823  | 4-scf00071 | 4 |
| AX-157952102 | 4 | 48.463 | KV452804.1 | 911370  | 4-scf00071 | 4 |
| AX-157952104 | 4 | 48.463 | KV452804.1 | 914934  | 4-scf00071 | 4 |
| AX-157952109 | 4 | 48.463 | KV452804.1 | 918908  | 4-scf00071 | 4 |
| AX-157952111 | 4 | 48.463 | KV452804.1 | 921189  | 4-scf00071 | 4 |
| AX-157952112 | 4 | 48.463 | KV452804.1 | 923275  | 4-scf00071 | 4 |
| AX-157952113 | 4 | 48.463 | KV452804.1 | 923719  | 4-scf00071 | 4 |
| AX-157952114 | 4 | 48.463 | KV452804.1 | 926121  | 4-scf00071 | 4 |
| AX-157952115 | 4 | 48.463 | KV452804.1 | 926563  | 4-scf00071 | 4 |
| AX-157952119 | 4 | 48.463 | KV452804.1 | 929333  | 4-scf00071 | 4 |
| AX-157952120 | 4 | 48.463 | KV452804.1 | 929987  | 4-scf00071 | 4 |
| AX-157952121 | 4 | 48.463 | KV452804.1 | 930776  | 4-scf00071 | 4 |
| AX-157952122 | 4 | 48.463 | KV452804.1 | 931146  | 4-scf00071 | 4 |
| AX-157952124 | 4 | 48.463 | KV452804.1 | 933516  | 4-scf00071 | 4 |
| AX-157952125 | 4 | 48.463 | KV452804.1 | 934824  | 4-scf00071 | 4 |
| AX-157952126 | 4 | 48.463 | KV452804.1 | 935455  | 4-scf00071 | 4 |
| AX-157952127 | 4 | 48.463 | KV452804.1 | 936953  | 4-scf00071 | 4 |
| AX-157952130 | 4 | 48.463 | KV452804.1 | 941267  | 4-scf00071 | 4 |
| AX-157952134 | 4 | 48.463 | KV452804.1 | 945973  | 4-scf00071 | 4 |
| AX-157952137 | 4 | 48.463 | KV452804.1 | 948059  | 4-scf00071 | 4 |
| AX-157952139 | 4 | 48.463 | KV452804.1 | 949108  | 4-scf00071 | 4 |
| AX-157952141 | 4 | 48.463 | KV452804.1 | 950142  | 4-scf00071 | 4 |
| AX-157875421 | 4 | 48.463 | KV452804.1 | 951588  | 4-scf00071 | 4 |
| AX-157952142 | 4 | 48.463 | KV452804.1 | 951871  | 4-scf00071 | 4 |
| AX-157952143 | 4 | 48.463 | KV452804.1 | 954244  | 4-scf00071 | 4 |
| AX-157952150 | 4 | 48.463 | KV452804.1 | 960996  | 4-scf00071 | 4 |
| AX-157753002 | 4 | 48.463 | KV452804.1 | 961691  | 4-scf00071 | 4 |
| AX-157952151 | 4 | 48.463 | KV452804.1 | 962367  | 4-scf00071 | 4 |
| AX-157952153 | 4 | 48.463 | KV452804.1 | 964774  | 4-scf00071 | 4 |
| AX-158406095 | 4 | 48.463 | KV452804.1 | 966503  | 4-scf00071 | 4 |
| AX-157952156 | 4 | 48.463 | KV452804.1 | 967646  | 4-scf00071 | 4 |
| AX-157952158 | 4 | 48.463 | KV452804.1 | 969948  | 4-scf00071 | 4 |
| AX-157952160 | 4 | 48.463 | KV452804.1 | 971985  | 4-scf00071 | 4 |
| AX-157952164 | 4 | 48.463 | KV452804.1 | 978327  | 4-scf00071 | 4 |
| AX-157952165 | 4 | 48.463 | KV452804.1 | 979429  | 4-scf00071 | 4 |
| AX-157854676 | 4 | 48.463 | KV452804.1 | 980339  | 4-scf00071 | 4 |
| AX-157952166 | 4 | 48.463 | KV452804.1 | 980568  | 4-scf00071 | 4 |
| AX-157952168 | 4 | 48.463 | KV452804.1 | 981912  | 4-scf00071 | 4 |
| AX-157952170 | 4 | 48.463 | KV452804.1 | 984452  | 4-scf00071 | 4 |

|              |   |        |             |         |            |    |
|--------------|---|--------|-------------|---------|------------|----|
| AX-157755870 | 4 | 48.463 | KV452804.1  | 985672  | 4-scf00071 | 4  |
| AX-157952171 | 4 | 48.463 | KV452804.1  | 987296  | 4-scf00071 | 4  |
| AX-157952179 | 4 | 48.463 | KV452804.1  | 995593  | 4-scf00071 | 4  |
| AX-157952180 | 4 | 48.463 | KV452804.1  | 995997  | 4-scf00071 | 4  |
| AX-157952186 | 4 | 48.463 | KV452804.1  | 1008602 | 4-scf00071 | 4  |
| AX-157952188 | 4 | 48.463 | KV452804.1  | 1011636 | 4-scf00071 | 4  |
| AX-157952190 | 4 | 48.463 | KV452804.1  | 1012706 | 4-scf00071 | 4  |
| AX-157952191 | 4 | 48.463 | KV452804.1  | 1013768 | 4-scf00071 | 4  |
| AX-157952195 | 4 | 48.463 | KV452804.1  | 1017358 | 4-scf00071 | 4  |
| AX-157952196 | 4 | 48.463 | KV452804.1  | 1017905 | 4-scf00071 | 4  |
| AX-157952197 | 4 | 48.463 | KV452804.1  | 1019414 | 4-scf00071 | 4  |
| AX-157952200 | 4 | 48.463 | KV452804.1  | 1025061 | 4-scf00071 | 4  |
| AX-157952225 | 4 | 48.463 | KV452804.1  | 1046198 | 4-scf00071 | 4  |
| AX-157952226 | 4 | 48.463 | KV452804.1  | 1046726 | 4-scf00071 | 4  |
| AX-157952237 | 4 | 48.463 | KV452804.1  | 1063854 | 4-scf00071 | 4  |
| AX-157952251 | 4 | 48.463 | KV452804.1  | 1085593 | 4-scf00071 | 4  |
| AX-157815633 | 4 | 48.463 | KV452804.1  | 1111025 | 4-scf00071 | 4  |
| AX-157952282 | 4 | 48.463 | KV452804.1  | 1130545 | 4-scf00071 | 4  |
| AX-157724598 | 4 | 48.463 | KV452804.1  | 1136402 | 4-scf00071 | 4  |
| AX-157952289 | 4 | 48.463 | KV452804.1  | 1138012 | 4-scf00071 | 4  |
| AX-157952299 | 4 | 48.463 | KV452804.1  | 1155155 | 4-scf00071 | 4  |
| AX-157952311 | 4 | 48.463 | KV452804.1  | 1180638 | 4-scf00071 | 4  |
| AX-157952328 | 4 | 48.463 | KV452804.1  | 1203541 | 4-scf00071 | 4  |
| AX-157952338 | 4 | 48.463 | KV452804.1  | 1214360 | 4-scf00071 | 4  |
| AX-157952340 | 4 | 48.463 | KV452804.1  | 1218913 | 4-scf00071 | 4  |
| AX-157952341 | 4 | 48.463 | KV452804.1  | 1220233 | 4-scf00071 | 4  |
| AX-157952343 | 4 | 48.463 | KV452804.1  | 1221918 | 4-scf00071 | 4  |
| AX-157952351 | 4 | 48.463 | KV452804.1  | 1235694 | 4-scf00071 | 4  |
| AX-157747561 | 4 | 48.463 | KV452804.1  | 1384350 | 4-scf00071 | 4  |
| AX-157952512 | 4 | 48.463 | KV452804.1  | 1460547 | 4-scf00071 | 4  |
| AX-157952531 | 4 | 48.463 | KV452804.1  | 1498937 | 4-scf00071 | 4  |
| AX-157748561 | 4 | 48.463 | KV452804.1  | 1598796 | 4-scf00071 | 4  |
| AX-157952658 | 4 | 48.463 | KV452804.1  | 1660821 | 4-scf00071 | 4  |
| AX-157952669 | 4 | 48.463 | KV452804.1  | 1674134 | 4-scf00071 | 4  |
| AX-157707410 | 4 | 48.463 | 3ML01034223 | 478     | scf09893_1 | UN |
| AX-157951667 | 4 | 48.572 | KV452804.1  | 310724  | 4-scf00071 | 4  |
| AX-157951881 | 4 | 48.572 | KV452804.1  | 613374  | 4-scf00071 | 4  |
| AX-157952015 | 4 | 48.572 | KV452804.1  | 785542  | 4-scf00071 | 4  |
| AX-157952044 | 4 | 48.572 | KV452804.1  | 832458  | 4-scf00071 | 4  |
| AX-158382827 | 4 | 48.572 | KV452804.1  | 848970  | 4-scf00071 | 4  |
| AX-157952058 | 4 | 48.572 | KV452804.1  | 858036  | 4-scf00071 | 4  |
| AX-157952065 | 4 | 48.572 | KV452804.1  | 867619  | 4-scf00071 | 4  |
| AX-157952069 | 4 | 48.572 | KV452804.1  | 873346  | 4-scf00071 | 4  |
| AX-157952072 | 4 | 48.572 | KV452804.1  | 875509  | 4-scf00071 | 4  |
| AX-157952117 | 4 | 48.572 | KV452804.1  | 927657  | 4-scf00071 | 4  |
| AX-157952144 | 4 | 48.572 | KV452804.1  | 955055  | 4-scf00071 | 4  |
| AX-157952163 | 4 | 48.572 | KV452804.1  | 977752  | 4-scf00071 | 4  |
| AX-158382833 | 4 | 48.572 | KV452804.1  | 986951  | 4-scf00071 | 4  |
| AX-157952181 | 4 | 48.572 | KV452804.1  | 997450  | 4-scf00071 | 4  |
| AX-157952216 | 4 | 48.572 | KV452804.1  | 1038907 | 4-scf00071 | 4  |
| AX-157952217 | 4 | 48.572 | KV452804.1  | 1040243 | 4-scf00071 | 4  |

|              |   |        |            |         |            |   |
|--------------|---|--------|------------|---------|------------|---|
| AX-157952219 | 4 | 48.572 | KV452804.1 | 1041814 | 4-scf00071 | 4 |
| AX-157952221 | 4 | 48.572 | KV452804.1 | 1043075 | 4-scf00071 | 4 |
| AX-157952224 | 4 | 48.572 | KV452804.1 | 1045126 | 4-scf00071 | 4 |
| AX-157952231 | 4 | 48.572 | KV452804.1 | 1056392 | 4-scf00071 | 4 |
| AX-157952234 | 4 | 48.572 | KV452804.1 | 1059348 | 4-scf00071 | 4 |
| AX-157952235 | 4 | 48.572 | KV452804.1 | 1060386 | 4-scf00071 | 4 |
| AX-157952239 | 4 | 48.572 | KV452804.1 | 1066601 | 4-scf00071 | 4 |
| AX-157952241 | 4 | 48.572 | KV452804.1 | 1067826 | 4-scf00071 | 4 |
| AX-157952243 | 4 | 48.572 | KV452804.1 | 1070945 | 4-scf00071 | 4 |
| AX-158382837 | 4 | 48.572 | KV452804.1 | 1082958 | 4-scf00071 | 4 |
| AX-157952250 | 4 | 48.572 | KV452804.1 | 1084899 | 4-scf00071 | 4 |
| AX-157952252 | 4 | 48.572 | KV452804.1 | 1086036 | 4-scf00071 | 4 |
| AX-157952255 | 4 | 48.572 | KV452804.1 | 1088173 | 4-scf00071 | 4 |
| AX-157952256 | 4 | 48.572 | KV452804.1 | 1089287 | 4-scf00071 | 4 |
| AX-157952257 | 4 | 48.572 | KV452804.1 | 1089756 | 4-scf00071 | 4 |
| AX-158382838 | 4 | 48.572 | KV452804.1 | 1093317 | 4-scf00071 | 4 |
| AX-157952260 | 4 | 48.572 | KV452804.1 | 1099680 | 4-scf00071 | 4 |
| AX-157815632 | 4 | 48.572 | KV452804.1 | 1099734 | 4-scf00071 | 4 |
| AX-157952265 | 4 | 48.572 | KV452804.1 | 1106178 | 4-scf00071 | 4 |
| AX-157952267 | 4 | 48.572 | KV452804.1 | 1108522 | 4-scf00071 | 4 |
| AX-157952269 | 4 | 48.572 | KV452804.1 | 1109292 | 4-scf00071 | 4 |
| AX-157952272 | 4 | 48.572 | KV452804.1 | 1115281 | 4-scf00071 | 4 |
| AX-157952274 | 4 | 48.572 | KV452804.1 | 1118965 | 4-scf00071 | 4 |
| AX-157952275 | 4 | 48.572 | KV452804.1 | 1120131 | 4-scf00071 | 4 |
| AX-157884035 | 4 | 48.572 | KV452804.1 | 1128868 | 4-scf00071 | 4 |
| AX-157952295 | 4 | 48.572 | KV452804.1 | 1150757 | 4-scf00071 | 4 |
| AX-157952297 | 4 | 48.572 | KV452804.1 | 1152706 | 4-scf00071 | 4 |
| AX-157815636 | 4 | 48.572 | KV452804.1 | 1167777 | 4-scf00071 | 4 |
| AX-157952305 | 4 | 48.572 | KV452804.1 | 1168771 | 4-scf00071 | 4 |
| AX-157952309 | 4 | 48.572 | KV452804.1 | 1177343 | 4-scf00071 | 4 |
| AX-157952316 | 4 | 48.572 | KV452804.1 | 1186286 | 4-scf00071 | 4 |
| AX-157952320 | 4 | 48.572 | KV452804.1 | 1189743 | 4-scf00071 | 4 |
| AX-157952329 | 4 | 48.572 | KV452804.1 | 1204330 | 4-scf00071 | 4 |
| AX-157952330 | 4 | 48.572 | KV452804.1 | 1204969 | 4-scf00071 | 4 |
| AX-157952334 | 4 | 48.572 | KV452804.1 | 1208381 | 4-scf00071 | 4 |
| AX-157952336 | 4 | 48.572 | KV452804.1 | 1211555 | 4-scf00071 | 4 |
| AX-157952339 | 4 | 48.572 | KV452804.1 | 1215553 | 4-scf00071 | 4 |
| AX-157952344 | 4 | 48.572 | KV452804.1 | 1223829 | 4-scf00071 | 4 |
| AX-157952345 | 4 | 48.572 | KV452804.1 | 1224772 | 4-scf00071 | 4 |
| AX-157952413 | 4 | 48.572 | KV452804.1 | 1306633 | 4-scf00071 | 4 |
| AX-157756902 | 4 | 48.572 | KV452804.1 | 1383028 | 4-scf00071 | 4 |
| AX-157952473 | 4 | 48.572 | KV452804.1 | 1408969 | 4-scf00071 | 4 |
| AX-157815654 | 4 | 48.572 | KV452804.1 | 1410934 | 4-scf00071 | 4 |
| AX-157952484 | 4 | 48.572 | KV452804.1 | 1423441 | 4-scf00071 | 4 |
| AX-157952511 | 4 | 48.572 | KV452804.1 | 1460456 | 4-scf00071 | 4 |
| AX-157952514 | 4 | 48.572 | KV452804.1 | 1462726 | 4-scf00071 | 4 |
| AX-157952627 | 4 | 48.572 | KV452804.1 | 1619545 | 4-scf00071 | 4 |
| AX-157952894 | 4 | 48.572 | KV452804.1 | 2011781 | 4-scf00071 | 4 |
| AX-157742266 | 4 | 48.645 | KV452804.1 | 1078671 | 4-scf00071 | 4 |
| AX-157952350 | 4 | 48.645 | KV452804.1 | 1232675 | 4-scf00071 | 4 |
| AX-157952400 | 4 | 48.645 | KV452804.1 | 1297569 | 4-scf00071 | 4 |

|              |   |        |            |         |            |   |
|--------------|---|--------|------------|---------|------------|---|
| AX-157951720 | 4 | 48.735 | KV452804.1 | 396122  | 4-scf00071 | 4 |
| AX-157951727 | 4 | 48.735 | KV452804.1 | 403902  | 4-scf00071 | 4 |
| AX-157951814 | 4 | 48.735 | KV452804.1 | 517170  | 4-scf00071 | 4 |
| AX-157951836 | 4 | 48.735 | KV452804.1 | 546781  | 4-scf00071 | 4 |
| AX-157951838 | 4 | 48.735 | KV452804.1 | 550781  | 4-scf00071 | 4 |
| AX-157951865 | 4 | 48.735 | KV452804.1 | 591256  | 4-scf00071 | 4 |
| AX-157951907 | 4 | 48.735 | KV452804.1 | 650634  | 4-scf00071 | 4 |
| AX-157951912 | 4 | 48.735 | KV452804.1 | 655768  | 4-scf00071 | 4 |
| AX-157951916 | 4 | 48.735 | KV452804.1 | 664365  | 4-scf00071 | 4 |
| AX-157951932 | 4 | 48.735 | KV452804.1 | 680530  | 4-scf00071 | 4 |
| AX-157952006 | 4 | 48.735 | KV452804.1 | 774774  | 4-scf00071 | 4 |
| AX-157952039 | 4 | 48.735 | KV452804.1 | 826117  | 4-scf00071 | 4 |
| AX-157952054 | 4 | 48.735 | KV452804.1 | 854771  | 4-scf00071 | 4 |
| AX-157952064 | 4 | 48.735 | KV452804.1 | 865905  | 4-scf00071 | 4 |
| AX-157952066 | 4 | 48.735 | KV452804.1 | 868029  | 4-scf00071 | 4 |
| AX-157952067 | 4 | 48.735 | KV452804.1 | 869554  | 4-scf00071 | 4 |
| AX-157952085 | 4 | 48.735 | KV452804.1 | 891837  | 4-scf00071 | 4 |
| AX-157952094 | 4 | 48.735 | KV452804.1 | 903667  | 4-scf00071 | 4 |
| AX-157815629 | 4 | 48.735 | KV452804.1 | 934138  | 4-scf00071 | 4 |
| AX-157952131 | 4 | 48.735 | KV452804.1 | 942085  | 4-scf00071 | 4 |
| AX-157952145 | 4 | 48.735 | KV452804.1 | 955287  | 4-scf00071 | 4 |
| AX-157952176 | 4 | 48.735 | KV452804.1 | 992375  | 4-scf00071 | 4 |
| AX-157952178 | 4 | 48.735 | KV452804.1 | 994271  | 4-scf00071 | 4 |
| AX-157952222 | 4 | 48.735 | KV452804.1 | 1043332 | 4-scf00071 | 4 |
| AX-157771070 | 4 | 48.735 | KV452804.1 | 1044146 | 4-scf00071 | 4 |
| AX-157952228 | 4 | 48.735 | KV452804.1 | 1051861 | 4-scf00071 | 4 |
| AX-157952232 | 4 | 48.735 | KV452804.1 | 1056959 | 4-scf00071 | 4 |
| AX-157952248 | 4 | 48.735 | KV452804.1 | 1076899 | 4-scf00071 | 4 |
| AX-157721348 | 4 | 48.735 | KV452804.1 | 1079020 | 4-scf00071 | 4 |
| AX-157952300 | 4 | 48.735 | KV452804.1 | 1157229 | 4-scf00071 | 4 |
| AX-157875427 | 4 | 48.735 | KV452804.1 | 1157310 | 4-scf00071 | 4 |
| AX-157952301 | 4 | 48.735 | KV452804.1 | 1158666 | 4-scf00071 | 4 |
| AX-157952306 | 4 | 48.735 | KV452804.1 | 1169247 | 4-scf00071 | 4 |
| AX-157952308 | 4 | 48.735 | KV452804.1 | 1173936 | 4-scf00071 | 4 |
| AX-157952312 | 4 | 48.735 | KV452804.1 | 1181331 | 4-scf00071 | 4 |
| AX-157952313 | 4 | 48.735 | KV452804.1 | 1181776 | 4-scf00071 | 4 |
| AX-157952314 | 4 | 48.735 | KV452804.1 | 1182490 | 4-scf00071 | 4 |
| AX-157815637 | 4 | 48.735 | KV452804.1 | 1182905 | 4-scf00071 | 4 |
| AX-157952315 | 4 | 48.735 | KV452804.1 | 1183359 | 4-scf00071 | 4 |
| AX-157952325 | 4 | 48.735 | KV452804.1 | 1200372 | 4-scf00071 | 4 |
| AX-157952348 | 4 | 48.735 | KV452804.1 | 1227839 | 4-scf00071 | 4 |
| AX-157952349 | 4 | 48.735 | KV452804.1 | 1229235 | 4-scf00071 | 4 |
| AX-157952354 | 4 | 48.735 | KV452804.1 | 1239645 | 4-scf00071 | 4 |
| AX-157952355 | 4 | 48.735 | KV452804.1 | 1241176 | 4-scf00071 | 4 |
| AX-157952356 | 4 | 48.735 | KV452804.1 | 1244878 | 4-scf00071 | 4 |
| AX-157815639 | 4 | 48.735 | KV452804.1 | 1245098 | 4-scf00071 | 4 |
| AX-157952357 | 4 | 48.735 | KV452804.1 | 1245740 | 4-scf00071 | 4 |
| AX-157815640 | 4 | 48.735 | KV452804.1 | 1254924 | 4-scf00071 | 4 |
| AX-157952360 | 4 | 48.735 | KV452804.1 | 1256565 | 4-scf00071 | 4 |
| AX-157952363 | 4 | 48.735 | KV452804.1 | 1259494 | 4-scf00071 | 4 |
| AX-157952364 | 4 | 48.735 | KV452804.1 | 1260159 | 4-scf00071 | 4 |

|              |   |        |            |         |            |   |
|--------------|---|--------|------------|---------|------------|---|
| AX-157952366 | 4 | 48.735 | KV452804.1 | 1261832 | 4-scf00071 | 4 |
| AX-157952369 | 4 | 48.735 | KV452804.1 | 1266396 | 4-scf00071 | 4 |
| AX-157952373 | 4 | 48.735 | KV452804.1 | 1271527 | 4-scf00071 | 4 |
| AX-157952376 | 4 | 48.735 | KV452804.1 | 1273954 | 4-scf00071 | 4 |
| AX-157952383 | 4 | 48.735 | KV452804.1 | 1280554 | 4-scf00071 | 4 |
| AX-157952387 | 4 | 48.735 | KV452804.1 | 1283430 | 4-scf00071 | 4 |
| AX-157952389 | 4 | 48.735 | KV452804.1 | 1284593 | 4-scf00071 | 4 |
| AX-157952391 | 4 | 48.735 | KV452804.1 | 1285863 | 4-scf00071 | 4 |
| AX-157725901 | 4 | 48.735 | KV452804.1 | 1288104 | 4-scf00071 | 4 |
| AX-157952396 | 4 | 48.735 | KV452804.1 | 1294392 | 4-scf00071 | 4 |
| AX-157952397 | 4 | 48.735 | KV452804.1 | 1294770 | 4-scf00071 | 4 |
| AX-157952398 | 4 | 48.735 | KV452804.1 | 1295624 | 4-scf00071 | 4 |
| AX-157952399 | 4 | 48.735 | KV452804.1 | 1296522 | 4-scf00071 | 4 |
| AX-157815642 | 4 | 48.735 | KV452804.1 | 1297225 | 4-scf00071 | 4 |
| AX-157952401 | 4 | 48.735 | KV452804.1 | 1297939 | 4-scf00071 | 4 |
| AX-157952402 | 4 | 48.735 | KV452804.1 | 1299150 | 4-scf00071 | 4 |
| AX-157952403 | 4 | 48.735 | KV452804.1 | 1299593 | 4-scf00071 | 4 |
| AX-157952404 | 4 | 48.735 | KV452804.1 | 1299981 | 4-scf00071 | 4 |
| AX-157952405 | 4 | 48.735 | KV452804.1 | 1300349 | 4-scf00071 | 4 |
| AX-157815643 | 4 | 48.735 | KV452804.1 | 1300769 | 4-scf00071 | 4 |
| AX-157952406 | 4 | 48.735 | KV452804.1 | 1301002 | 4-scf00071 | 4 |
| AX-157952407 | 4 | 48.735 | KV452804.1 | 1302056 | 4-scf00071 | 4 |
| AX-157952408 | 4 | 48.735 | KV452804.1 | 1302935 | 4-scf00071 | 4 |
| AX-157952409 | 4 | 48.735 | KV452804.1 | 1303481 | 4-scf00071 | 4 |
| AX-157952411 | 4 | 48.735 | KV452804.1 | 1305486 | 4-scf00071 | 4 |
| AX-157952415 | 4 | 48.735 | KV452804.1 | 1314398 | 4-scf00071 | 4 |
| AX-157952416 | 4 | 48.735 | KV452804.1 | 1315323 | 4-scf00071 | 4 |
| AX-157715660 | 4 | 48.735 | KV452804.1 | 1315687 | 4-scf00071 | 4 |
| AX-157875430 | 4 | 48.735 | KV452804.1 | 1343920 | 4-scf00071 | 4 |
| AX-157952429 | 4 | 48.735 | KV452804.1 | 1346414 | 4-scf00071 | 4 |
| AX-157815646 | 4 | 48.735 | KV452804.1 | 1347934 | 4-scf00071 | 4 |
| AX-157952431 | 4 | 48.735 | KV452804.1 | 1352217 | 4-scf00071 | 4 |
| AX-157952433 | 4 | 48.735 | KV452804.1 | 1355305 | 4-scf00071 | 4 |
| AX-157952434 | 4 | 48.735 | KV452804.1 | 1355732 | 4-scf00071 | 4 |
| AX-157952435 | 4 | 48.735 | KV452804.1 | 1357657 | 4-scf00071 | 4 |
| AX-157952436 | 4 | 48.735 | KV452804.1 | 1359383 | 4-scf00071 | 4 |
| AX-157952438 | 4 | 48.735 | KV452804.1 | 1362290 | 4-scf00071 | 4 |
| AX-157952439 | 4 | 48.735 | KV452804.1 | 1364121 | 4-scf00071 | 4 |
| AX-157952441 | 4 | 48.735 | KV452804.1 | 1365481 | 4-scf00071 | 4 |
| AX-157952442 | 4 | 48.735 | KV452804.1 | 1367151 | 4-scf00071 | 4 |
| AX-157952444 | 4 | 48.735 | KV452804.1 | 1371157 | 4-scf00071 | 4 |
| AX-157952445 | 4 | 48.735 | KV452804.1 | 1372777 | 4-scf00071 | 4 |
| AX-157952446 | 4 | 48.735 | KV452804.1 | 1373353 | 4-scf00071 | 4 |
| AX-157815647 | 4 | 48.735 | KV452804.1 | 1376697 | 4-scf00071 | 4 |
| AX-157952448 | 4 | 48.735 | KV452804.1 | 1377393 | 4-scf00071 | 4 |
| AX-157952449 | 4 | 48.735 | KV452804.1 | 1377763 | 4-scf00071 | 4 |
| AX-157952452 | 4 | 48.735 | KV452804.1 | 1379207 | 4-scf00071 | 4 |
| AX-157815649 | 4 | 48.735 | KV452804.1 | 1380458 | 4-scf00071 | 4 |
| AX-157815650 | 4 | 48.735 | KV452804.1 | 1380494 | 4-scf00071 | 4 |
| AX-157952455 | 4 | 48.735 | KV452804.1 | 1382316 | 4-scf00071 | 4 |
| AX-157815651 | 4 | 48.735 | KV452804.1 | 1384537 | 4-scf00071 | 4 |



|              |   |        |            |         |            |   |
|--------------|---|--------|------------|---------|------------|---|
| AX-157952469 | 4 | 48.735 | KV452804.1 | 1402336 | 4-scf00071 | 4 |
| AX-157952470 | 4 | 48.735 | KV452804.1 | 1402793 | 4-scf00071 | 4 |
| AX-157952472 | 4 | 48.735 | KV452804.1 | 1406561 | 4-scf00071 | 4 |
| AX-157952474 | 4 | 48.735 | KV452804.1 | 1409710 | 4-scf00071 | 4 |
| AX-157952475 | 4 | 48.735 | KV452804.1 | 1413643 | 4-scf00071 | 4 |
| AX-157952477 | 4 | 48.735 | KV452804.1 | 1414753 | 4-scf00071 | 4 |
| AX-157952478 | 4 | 48.735 | KV452804.1 | 1416913 | 4-scf00071 | 4 |
| AX-157695824 | 4 | 48.735 | KV452804.1 | 1417717 | 4-scf00071 | 4 |
| AX-157754427 | 4 | 48.735 | KV452804.1 | 1417899 | 4-scf00071 | 4 |
| AX-157952479 | 4 | 48.735 | KV452804.1 | 1420229 | 4-scf00071 | 4 |
| AX-157952482 | 4 | 48.735 | KV452804.1 | 1422435 | 4-scf00071 | 4 |
| AX-157952483 | 4 | 48.735 | KV452804.1 | 1422903 | 4-scf00071 | 4 |
| AX-157723866 | 4 | 48.735 | KV452804.1 | 1425022 | 4-scf00071 | 4 |
| AX-157952486 | 4 | 48.735 | KV452804.1 | 1425441 | 4-scf00071 | 4 |
| AX-157952489 | 4 | 48.735 | KV452804.1 | 1428191 | 4-scf00071 | 4 |
| AX-157952490 | 4 | 48.735 | KV452804.1 | 1429215 | 4-scf00071 | 4 |
| AX-157952491 | 4 | 48.735 | KV452804.1 | 1430421 | 4-scf00071 | 4 |
| AX-157952494 | 4 | 48.735 | KV452804.1 | 1433835 | 4-scf00071 | 4 |
| AX-157952497 | 4 | 48.735 | KV452804.1 | 1437808 | 4-scf00071 | 4 |
| AX-157952498 | 4 | 48.735 | KV452804.1 | 1438116 | 4-scf00071 | 4 |
| AX-157952500 | 4 | 48.735 | KV452804.1 | 1441394 | 4-scf00071 | 4 |
| AX-157952501 | 4 | 48.735 | KV452804.1 | 1442999 | 4-scf00071 | 4 |
| AX-157952502 | 4 | 48.735 | KV452804.1 | 1443570 | 4-scf00071 | 4 |
| AX-157952503 | 4 | 48.735 | KV452804.1 | 1444257 | 4-scf00071 | 4 |
| AX-157952504 | 4 | 48.735 | KV452804.1 | 1448338 | 4-scf00071 | 4 |
| AX-157952509 | 4 | 48.735 | KV452804.1 | 1457334 | 4-scf00071 | 4 |
| AX-157952510 | 4 | 48.735 | KV452804.1 | 1458401 | 4-scf00071 | 4 |
| AX-157952513 | 4 | 48.735 | KV452804.1 | 1462646 | 4-scf00071 | 4 |
| AX-157952515 | 4 | 48.735 | KV452804.1 | 1463653 | 4-scf00071 | 4 |
| AX-157815659 | 4 | 48.735 | KV452804.1 | 1474664 | 4-scf00071 | 4 |
| AX-157952519 | 4 | 48.735 | KV452804.1 | 1474811 | 4-scf00071 | 4 |
| AX-157952521 | 4 | 48.735 | KV452804.1 | 1476706 | 4-scf00071 | 4 |
| AX-157815660 | 4 | 48.735 | KV452804.1 | 1476879 | 4-scf00071 | 4 |
| AX-157952523 | 4 | 48.735 | KV452804.1 | 1483521 | 4-scf00071 | 4 |
| AX-157952526 | 4 | 48.735 | KV452804.1 | 1487175 | 4-scf00071 | 4 |
| AX-157952537 | 4 | 48.735 | KV452804.1 | 1514150 | 4-scf00071 | 4 |
| AX-157952552 | 4 | 48.735 | KV452804.1 | 1536578 | 4-scf00071 | 4 |
| AX-157952565 | 4 | 48.735 | KV452804.1 | 1553791 | 4-scf00071 | 4 |
| AX-157952619 | 4 | 48.735 | KV452804.1 | 1605899 | 4-scf00071 | 4 |
| AX-157815663 | 4 | 48.764 | KV452804.1 | 1491310 | 4-scf00071 | 4 |
| AX-158390212 | 4 | 48.9   | KV452804.1 | 683915  | 4-scf00071 | 4 |
| AX-157815628 | 4 | 48.9   | KV452804.1 | 838045  | 4-scf00071 | 4 |
| AX-157952136 | 4 | 48.9   | KV452804.1 | 947287  | 4-scf00071 | 4 |
| AX-157952162 | 4 | 48.9   | KV452804.1 | 973608  | 4-scf00071 | 4 |
| AX-157952172 | 4 | 48.9   | KV452804.1 | 988295  | 4-scf00071 | 4 |
| AX-157952236 | 4 | 48.9   | KV452804.1 | 1062025 | 4-scf00071 | 4 |
| AX-157952284 | 4 | 48.9   | KV452804.1 | 1133035 | 4-scf00071 | 4 |
| AX-157952285 | 4 | 48.9   | KV452804.1 | 1133449 | 4-scf00071 | 4 |
| AX-157952292 | 4 | 48.9   | KV452804.1 | 1141819 | 4-scf00071 | 4 |
| AX-157952294 | 4 | 48.9   | KV452804.1 | 1149782 | 4-scf00071 | 4 |
| AX-157952378 | 4 | 48.9   | KV452804.1 | 1276327 | 4-scf00071 | 4 |

|              |   |        |            |         |            |   |
|--------------|---|--------|------------|---------|------------|---|
| AX-157952424 | 4 | 48.9   | KV452804.1 | 1340310 | 4-scf00071 | 4 |
| AX-157716075 | 4 | 48.9   | KV452804.1 | 1504945 | 4-scf00071 | 4 |
| AX-157952534 | 4 | 48.9   | KV452804.1 | 1508652 | 4-scf00071 | 4 |
| AX-157952539 | 4 | 48.9   | KV452804.1 | 1515292 | 4-scf00071 | 4 |
| AX-157952542 | 4 | 48.9   | KV452804.1 | 1516727 | 4-scf00071 | 4 |
| AX-157952553 | 4 | 48.9   | KV452804.1 | 1536969 | 4-scf00071 | 4 |
| AX-157952557 | 4 | 48.9   | KV452804.1 | 1545494 | 4-scf00071 | 4 |
| AX-157952559 | 4 | 48.9   | KV452804.1 | 1549053 | 4-scf00071 | 4 |
| AX-157854677 | 4 | 48.9   | KV452804.1 | 1550475 | 4-scf00071 | 4 |
| AX-157952564 | 4 | 48.9   | KV452804.1 | 1553086 | 4-scf00071 | 4 |
| AX-157952567 | 4 | 48.9   | KV452804.1 | 1555026 | 4-scf00071 | 4 |
| AX-157952572 | 4 | 48.9   | KV452804.1 | 1558751 | 4-scf00071 | 4 |
| AX-157952574 | 4 | 48.9   | KV452804.1 | 1563475 | 4-scf00071 | 4 |
| AX-157952602 | 4 | 48.9   | KV452804.1 | 1589769 | 4-scf00071 | 4 |
| AX-157952603 | 4 | 48.9   | KV452804.1 | 1590638 | 4-scf00071 | 4 |
| AX-157952606 | 4 | 48.9   | KV452804.1 | 1594454 | 4-scf00071 | 4 |
| AX-157952615 | 4 | 48.9   | KV452804.1 | 1600705 | 4-scf00071 | 4 |
| AX-157952621 | 4 | 48.9   | KV452804.1 | 1606841 | 4-scf00071 | 4 |
| AX-157875433 | 4 | 48.9   | KV452804.1 | 1632138 | 4-scf00071 | 4 |
| AX-157952648 | 4 | 48.9   | KV452804.1 | 1643352 | 4-scf00071 | 4 |
| AX-157952743 | 4 | 48.9   | KV452804.1 | 1786702 | 4-scf00071 | 4 |
| AX-157952748 | 4 | 48.9   | KV452804.1 | 1792140 | 4-scf00071 | 4 |
| AX-157952749 | 4 | 48.9   | KV452804.1 | 1793031 | 4-scf00071 | 4 |
| AX-157952762 | 4 | 48.9   | KV452804.1 | 1803251 | 4-scf00071 | 4 |
| AX-157952772 | 4 | 48.9   | KV452804.1 | 1814588 | 4-scf00071 | 4 |
| AX-157952773 | 4 | 48.9   | KV452804.1 | 1815622 | 4-scf00071 | 4 |
| AX-157952778 | 4 | 48.9   | KV452804.1 | 1825117 | 4-scf00071 | 4 |
| AX-157952786 | 4 | 48.9   | KV452804.1 | 1836436 | 4-scf00071 | 4 |
| AX-157738826 | 4 | 48.9   | KV452804.1 | 1843148 | 4-scf00071 | 4 |
| AX-157725537 | 4 | 48.9   | KV452804.1 | 1923735 | 4-scf00071 | 4 |
| AX-157952847 | 4 | 48.9   | KV452804.1 | 1939008 | 4-scf00071 | 4 |
| AX-157815692 | 4 | 48.9   | KV452804.1 | 2046969 | 4-scf00071 | 4 |
| AX-157719988 | 4 | 48.923 | KV452804.1 | 1562620 | 4-scf00071 | 4 |
| AX-157952107 | 4 | 48.943 | KV452804.1 | 917138  | 4-scf00071 | 4 |
| AX-157952146 | 4 | 48.943 | KV452804.1 | 956412  | 4-scf00071 | 4 |
| AX-157952359 | 4 | 48.943 | KV452804.1 | 1255044 | 4-scf00071 | 4 |
| AX-158379454 | 4 | 48.943 | KV452804.1 | 1482251 | 4-scf00071 | 4 |
| AX-157952581 | 4 | 48.943 | KV452804.1 | 1569214 | 4-scf00071 | 4 |
| AX-157952583 | 4 | 48.981 | KV452804.1 | 1570267 | 4-scf00071 | 4 |
| AX-157952014 | 4 | 49.009 | KV452804.1 | 784161  | 4-scf00071 | 4 |
| AX-157952281 | 4 | 49.009 | KV452804.1 | 1129116 | 4-scf00071 | 4 |
| AX-157815664 | 4 | 49.009 | KV452804.1 | 1506831 | 4-scf00071 | 4 |
| AX-157952538 | 4 | 49.009 | KV452804.1 | 1514642 | 4-scf00071 | 4 |
| AX-157952541 | 4 | 49.009 | KV452804.1 | 1515998 | 4-scf00071 | 4 |
| AX-157815666 | 4 | 49.009 | KV452804.1 | 1573028 | 4-scf00071 | 4 |
| AX-157742039 | 4 | 49.009 | KV452804.1 | 1576299 | 4-scf00071 | 4 |
| AX-157952588 | 4 | 49.009 | KV452804.1 | 1576751 | 4-scf00071 | 4 |
| AX-157952589 | 4 | 49.009 | KV452804.1 | 1577186 | 4-scf00071 | 4 |
| AX-157952590 | 4 | 49.009 | KV452804.1 | 1577997 | 4-scf00071 | 4 |
| AX-157952592 | 4 | 49.009 | KV452804.1 | 1579221 | 4-scf00071 | 4 |
| AX-157952594 | 4 | 49.009 | KV452804.1 | 1580351 | 4-scf00071 | 4 |

|              |   |        |            |         |            |   |
|--------------|---|--------|------------|---------|------------|---|
| AX-157952595 | 4 | 49.009 | KV452804.1 | 1580918 | 4-scf00071 | 4 |
| AX-157952596 | 4 | 49.009 | KV452804.1 | 1581497 | 4-scf00071 | 4 |
| AX-157952599 | 4 | 49.009 | KV452804.1 | 1585439 | 4-scf00071 | 4 |
| AX-157952601 | 4 | 49.009 | KV452804.1 | 1589215 | 4-scf00071 | 4 |
| AX-157952607 | 4 | 49.009 | KV452804.1 | 1596469 | 4-scf00071 | 4 |
| AX-157952608 | 4 | 49.009 | KV452804.1 | 1597109 | 4-scf00071 | 4 |
| AX-157952609 | 4 | 49.009 | KV452804.1 | 1597562 | 4-scf00071 | 4 |
| AX-157952610 | 4 | 49.009 | KV452804.1 | 1597657 | 4-scf00071 | 4 |
| AX-157952611 | 4 | 49.009 | KV452804.1 | 1598835 | 4-scf00071 | 4 |
| AX-157952614 | 4 | 49.009 | KV452804.1 | 1600292 | 4-scf00071 | 4 |
| AX-157772298 | 4 | 49.04  | KV452804.1 | 1603421 | 4-scf00071 | 4 |
| AX-157952496 | 4 | 49.071 | KV452804.1 | 1435242 | 4-scf00071 | 4 |
| AX-157952605 | 4 | 49.071 | KV452804.1 | 1593772 | 4-scf00071 | 4 |
| AX-157815667 | 4 | 49.071 | KV452804.1 | 1602163 | 4-scf00071 | 4 |
| AX-157815668 | 4 | 49.071 | KV452804.1 | 1603838 | 4-scf00071 | 4 |
| AX-157952017 | 4 | 49.118 | KV452804.1 | 789004  | 4-scf00071 | 4 |
| AX-157952277 | 4 | 49.118 | KV452804.1 | 1122189 | 4-scf00071 | 4 |
| AX-157952560 | 4 | 49.118 | KV452804.1 | 1549913 | 4-scf00071 | 4 |
| AX-157952620 | 4 | 49.118 | KV452804.1 | 1606267 | 4-scf00071 | 4 |
| AX-157952623 | 4 | 49.118 | KV452804.1 | 1610129 | 4-scf00071 | 4 |
| AX-157952270 | 4 | 49.336 | KV452804.1 | 1111132 | 4-scf00071 | 4 |
| AX-157952598 | 4 | 49.336 | KV452804.1 | 1583618 | 4-scf00071 | 4 |
| AX-158406107 | 4 | 49.336 | KV452804.1 | 1624695 | 4-scf00071 | 4 |
| AX-157952631 | 4 | 49.336 | KV452804.1 | 1626218 | 4-scf00071 | 4 |
| AX-157952637 | 4 | 49.336 | KV452804.1 | 1630830 | 4-scf00071 | 4 |
| AX-157952643 | 4 | 49.336 | KV452804.1 | 1637270 | 4-scf00071 | 4 |
| AX-157952644 | 4 | 49.336 | KV452804.1 | 1639512 | 4-scf00071 | 4 |
| AX-157952646 | 4 | 49.336 | KV452804.1 | 1640867 | 4-scf00071 | 4 |
| AX-157952647 | 4 | 49.336 | KV452804.1 | 1642688 | 4-scf00071 | 4 |
| AX-157952650 | 4 | 49.336 | KV452804.1 | 1646629 | 4-scf00071 | 4 |
| AX-157952651 | 4 | 49.336 | KV452804.1 | 1647193 | 4-scf00071 | 4 |
| AX-157952656 | 4 | 49.336 | KV452804.1 | 1656139 | 4-scf00071 | 4 |
| AX-157952657 | 4 | 49.336 | KV452804.1 | 1657872 | 4-scf00071 | 4 |
| AX-157952662 | 4 | 49.336 | KV452804.1 | 1667236 | 4-scf00071 | 4 |
| AX-157952663 | 4 | 49.336 | KV452804.1 | 1667642 | 4-scf00071 | 4 |
| AX-157952666 | 4 | 49.336 | KV452804.1 | 1669682 | 4-scf00071 | 4 |
| AX-157952673 | 4 | 49.336 | KV452804.1 | 1681655 | 4-scf00071 | 4 |
| AX-157952674 | 4 | 49.336 | KV452804.1 | 1682122 | 4-scf00071 | 4 |
| AX-157952675 | 4 | 49.336 | KV452804.1 | 1684931 | 4-scf00071 | 4 |
| AX-157952676 | 4 | 49.336 | KV452804.1 | 1685443 | 4-scf00071 | 4 |
| AX-157952677 | 4 | 49.336 | KV452804.1 | 1687376 | 4-scf00071 | 4 |
| AX-157718921 | 4 | 49.336 | KV452804.1 | 1690633 | 4-scf00071 | 4 |
| AX-157952679 | 4 | 49.336 | KV452804.1 | 1694367 | 4-scf00071 | 4 |
| AX-157952683 | 4 | 49.336 | KV452804.1 | 1697810 | 4-scf00071 | 4 |
| AX-157952685 | 4 | 49.336 | KV452804.1 | 1699610 | 4-scf00071 | 4 |
| AX-157952686 | 4 | 49.336 | KV452804.1 | 1701029 | 4-scf00071 | 4 |
| AX-157952687 | 4 | 49.336 | KV452804.1 | 1702692 | 4-scf00071 | 4 |
| AX-157740584 | 4 | 49.336 | KV452804.1 | 1703905 | 4-scf00071 | 4 |
| AX-157952689 | 4 | 49.336 | KV452804.1 | 1704382 | 4-scf00071 | 4 |
| AX-157952690 | 4 | 49.336 | KV452804.1 | 1705272 | 4-scf00071 | 4 |
| AX-157952692 | 4 | 49.336 | KV452804.1 | 1707719 | 4-scf00071 | 4 |

|              |   |        |            |         |            |   |
|--------------|---|--------|------------|---------|------------|---|
| AX-157952695 | 4 | 49.336 | KV452804.1 | 1714088 | 4-scf00071 | 4 |
| AX-157952697 | 4 | 49.336 | KV452804.1 | 1719250 | 4-scf00071 | 4 |
| AX-157952698 | 4 | 49.336 | KV452804.1 | 1721300 | 4-scf00071 | 4 |
| AX-157748748 | 4 | 49.336 | KV452804.1 | 1725567 | 4-scf00071 | 4 |
| AX-157952702 | 4 | 49.336 | KV452804.1 | 1727603 | 4-scf00071 | 4 |
| AX-157719294 | 4 | 49.336 | KV452804.1 | 1728081 | 4-scf00071 | 4 |
| AX-157727764 | 4 | 49.336 | KV452804.1 | 1728280 | 4-scf00071 | 4 |
| AX-157952703 | 4 | 49.336 | KV452804.1 | 1728786 | 4-scf00071 | 4 |
| AX-157952704 | 4 | 49.336 | KV452804.1 | 1730925 | 4-scf00071 | 4 |
| AX-157952706 | 4 | 49.336 | KV452804.1 | 1733907 | 4-scf00071 | 4 |
| AX-157952707 | 4 | 49.336 | KV452804.1 | 1734410 | 4-scf00071 | 4 |
| AX-157952708 | 4 | 49.336 | KV452804.1 | 1735355 | 4-scf00071 | 4 |
| AX-157952714 | 4 | 49.336 | KV452804.1 | 1745153 | 4-scf00071 | 4 |
| AX-157952716 | 4 | 49.336 | KV452804.1 | 1750332 | 4-scf00071 | 4 |
| AX-157952717 | 4 | 49.336 | KV452804.1 | 1752144 | 4-scf00071 | 4 |
| AX-157952719 | 4 | 49.336 | KV452804.1 | 1753834 | 4-scf00071 | 4 |
| AX-157952721 | 4 | 49.336 | KV452804.1 | 1756533 | 4-scf00071 | 4 |
| AX-157952722 | 4 | 49.336 | KV452804.1 | 1757063 | 4-scf00071 | 4 |
| AX-157952725 | 4 | 49.336 | KV452804.1 | 1761489 | 4-scf00071 | 4 |
| AX-157952726 | 4 | 49.336 | KV452804.1 | 1762120 | 4-scf00071 | 4 |
| AX-157952728 | 4 | 49.336 | KV452804.1 | 1764789 | 4-scf00071 | 4 |
| AX-157815669 | 4 | 49.336 | KV452804.1 | 1765454 | 4-scf00071 | 4 |
| AX-157815670 | 4 | 49.336 | KV452804.1 | 1765489 | 4-scf00071 | 4 |
| AX-157952732 | 4 | 49.336 | KV452804.1 | 1772469 | 4-scf00071 | 4 |
| AX-157952734 | 4 | 49.336 | KV452804.1 | 1773740 | 4-scf00071 | 4 |
| AX-157952735 | 4 | 49.336 | KV452804.1 | 1774968 | 4-scf00071 | 4 |
| AX-157952740 | 4 | 49.336 | KV452804.1 | 1782500 | 4-scf00071 | 4 |
| AX-157952742 | 4 | 49.336 | KV452804.1 | 1784085 | 4-scf00071 | 4 |
| AX-157952746 | 4 | 49.336 | KV452804.1 | 1788847 | 4-scf00071 | 4 |
| AX-157952747 | 4 | 49.336 | KV452804.1 | 1790588 | 4-scf00071 | 4 |
| AX-157952750 | 4 | 49.336 | KV452804.1 | 1794283 | 4-scf00071 | 4 |
| AX-158406111 | 4 | 49.336 | KV452804.1 | 1795063 | 4-scf00071 | 4 |
| AX-157952752 | 4 | 49.336 | KV452804.1 | 1796208 | 4-scf00071 | 4 |
| AX-157952753 | 4 | 49.336 | KV452804.1 | 1796875 | 4-scf00071 | 4 |
| AX-157952754 | 4 | 49.336 | KV452804.1 | 1797417 | 4-scf00071 | 4 |
| AX-157952756 | 4 | 49.336 | KV452804.1 | 1799239 | 4-scf00071 | 4 |
| AX-157952759 | 4 | 49.336 | KV452804.1 | 1800695 | 4-scf00071 | 4 |
| AX-157741102 | 4 | 49.336 | KV452804.1 | 1808794 | 4-scf00071 | 4 |
| AX-157952767 | 4 | 49.336 | KV452804.1 | 1809496 | 4-scf00071 | 4 |
| AX-157952770 | 4 | 49.336 | KV452804.1 | 1813847 | 4-scf00071 | 4 |
| AX-157952777 | 4 | 49.336 | KV452804.1 | 1823556 | 4-scf00071 | 4 |
| AX-157952779 | 4 | 49.336 | KV452804.1 | 1825758 | 4-scf00071 | 4 |
| AX-157696548 | 4 | 49.336 | KV452804.1 | 1826658 | 4-scf00071 | 4 |
| AX-157952784 | 4 | 49.336 | KV452804.1 | 1830519 | 4-scf00071 | 4 |
| AX-157952785 | 4 | 49.336 | KV452804.1 | 1831448 | 4-scf00071 | 4 |
| AX-157952788 | 4 | 49.336 | KV452804.1 | 1838062 | 4-scf00071 | 4 |
| AX-157952792 | 4 | 49.336 | KV452804.1 | 1841437 | 4-scf00071 | 4 |
| AX-157952794 | 4 | 49.336 | KV452804.1 | 1845800 | 4-scf00071 | 4 |
| AX-157952795 | 4 | 49.336 | KV452804.1 | 1846583 | 4-scf00071 | 4 |
| AX-157952798 | 4 | 49.336 | KV452804.1 | 1848828 | 4-scf00071 | 4 |
| AX-157875438 | 4 | 49.336 | KV452804.1 | 1849590 | 4-scf00071 | 4 |

|              |   |        |             |         |            |    |
|--------------|---|--------|-------------|---------|------------|----|
| AX-157952800 | 4 | 49.336 | KV452804.1  | 1851082 | 4-scf00071 | 4  |
| AX-157952815 | 4 | 49.336 | KV452804.1  | 1879581 | 4-scf00071 | 4  |
| AX-157775921 | 4 | 49.336 | KV452804.1  | 1880691 | 4-scf00071 | 4  |
| AX-157952822 | 4 | 49.336 | KV452804.1  | 1893508 | 4-scf00071 | 4  |
| AX-157952823 | 4 | 49.336 | KV452804.1  | 1893901 | 4-scf00071 | 4  |
| AX-157815674 | 4 | 49.336 | KV452804.1  | 1908883 | 4-scf00071 | 4  |
| AX-157815678 | 4 | 49.336 | KV452804.1  | 1928526 | 4-scf00071 | 4  |
| AX-157952849 | 4 | 49.336 | KV452804.1  | 1944916 | 4-scf00071 | 4  |
| AX-157952970 | 4 | 49.336 | KV452804.1  | 2107573 | 4-scf00071 | 4  |
| AX-157706415 | 4 | 49.336 | 3ML01032203 | 475     | scf07819_1 | UN |
| AX-157952668 | 4 | 49.446 | KV452804.1  | 1673613 | 4-scf00071 | 4  |
| AX-157952684 | 4 | 49.446 | KV452804.1  | 1699243 | 4-scf00071 | 4  |
| AX-157952701 | 4 | 49.446 | KV452804.1  | 1726089 | 4-scf00071 | 4  |
| AX-158382851 | 4 | 49.446 | KV452804.1  | 1829294 | 4-scf00071 | 4  |
| AX-157715275 | 4 | 49.446 | KV452804.1  | 1854275 | 4-scf00071 | 4  |
| AX-157952802 | 4 | 49.446 | KV452804.1  | 1856144 | 4-scf00071 | 4  |
| AX-157952804 | 4 | 49.446 | KV452804.1  | 1860067 | 4-scf00071 | 4  |
| AX-157952805 | 4 | 49.446 | KV452804.1  | 1861771 | 4-scf00071 | 4  |
| AX-157952807 | 4 | 49.446 | KV452804.1  | 1864272 | 4-scf00071 | 4  |
| AX-157952809 | 4 | 49.446 | KV452804.1  | 1866794 | 4-scf00071 | 4  |
| AX-157952812 | 4 | 49.446 | KV452804.1  | 1870741 | 4-scf00071 | 4  |
| AX-157952813 | 4 | 49.446 | KV452804.1  | 1871330 | 4-scf00071 | 4  |
| AX-157952814 | 4 | 49.446 | KV452804.1  | 1874053 | 4-scf00071 | 4  |
| AX-157952816 | 4 | 49.446 | KV452804.1  | 1881474 | 4-scf00071 | 4  |
| AX-157952817 | 4 | 49.446 | KV452804.1  | 1882000 | 4-scf00071 | 4  |
| AX-157717363 | 4 | 49.446 | KV452804.1  | 1885488 | 4-scf00071 | 4  |
| AX-157697276 | 4 | 49.446 | KV452804.1  | 1885892 | 4-scf00071 | 4  |
| AX-157952824 | 4 | 49.446 | KV452804.1  | 1894768 | 4-scf00071 | 4  |
| AX-157952825 | 4 | 49.446 | KV452804.1  | 1895063 | 4-scf00071 | 4  |
| AX-157815673 | 4 | 49.446 | KV452804.1  | 1902273 | 4-scf00071 | 4  |
| AX-157952829 | 4 | 49.446 | KV452804.1  | 1906573 | 4-scf00071 | 4  |
| AX-157952832 | 4 | 49.446 | KV452804.1  | 1913196 | 4-scf00071 | 4  |
| AX-157952833 | 4 | 49.446 | KV452804.1  | 1914428 | 4-scf00071 | 4  |
| AX-157952834 | 4 | 49.446 | KV452804.1  | 1916139 | 4-scf00071 | 4  |
| AX-157952836 | 4 | 49.446 | KV452804.1  | 1916665 | 4-scf00071 | 4  |
| AX-157854679 | 4 | 49.446 | KV452804.1  | 1930127 | 4-scf00071 | 4  |
| AX-157952843 | 4 | 49.446 | KV452804.1  | 1932771 | 4-scf00071 | 4  |
| AX-157952844 | 4 | 49.446 | KV452804.1  | 1935650 | 4-scf00071 | 4  |
| AX-157952852 | 4 | 49.446 | KV452804.1  | 1949502 | 4-scf00071 | 4  |
| AX-157952856 | 4 | 49.446 | KV452804.1  | 1953730 | 4-scf00071 | 4  |
| AX-157758118 | 4 | 49.446 | KV452804.1  | 1955056 | 4-scf00071 | 4  |
| AX-157952858 | 4 | 49.446 | KV452804.1  | 1956078 | 4-scf00071 | 4  |
| AX-157815679 | 4 | 49.446 | KV452804.1  | 1956500 | 4-scf00071 | 4  |
| AX-157952859 | 4 | 49.446 | KV452804.1  | 1957301 | 4-scf00071 | 4  |
| AX-157952860 | 4 | 49.446 | KV452804.1  | 1957993 | 4-scf00071 | 4  |
| AX-157952878 | 4 | 49.446 | KV452804.1  | 1988146 | 4-scf00071 | 4  |
| AX-157952881 | 4 | 49.446 | KV452804.1  | 1990512 | 4-scf00071 | 4  |
| AX-157952895 | 4 | 49.446 | KV452804.1  | 2013733 | 4-scf00071 | 4  |
| AX-157952914 | 4 | 49.446 | KV452804.1  | 2034626 | 4-scf00071 | 4  |
| AX-157952915 | 4 | 49.446 | KV452804.1  | 2035222 | 4-scf00071 | 4  |
| AX-157875442 | 4 | 49.446 | KV452804.1  | 2061351 | 4-scf00071 | 4  |

|              |   |        |            |         |            |   |
|--------------|---|--------|------------|---------|------------|---|
| AX-157952951 | 4 | 49.446 | KV452804.1 | 2081157 | 4-scf00071 | 4 |
| AX-157952968 | 4 | 49.446 | KV452804.1 | 2105530 | 4-scf00071 | 4 |
| AX-157953053 | 4 | 49.446 | KV452804.1 | 2247530 | 4-scf00071 | 4 |
| AX-157953095 | 4 | 49.446 | KV452804.1 | 2317413 | 4-scf00071 | 4 |
| AX-157953156 | 4 | 49.446 | KV452804.1 | 2413200 | 4-scf00071 | 4 |
| AX-158390225 | 4 | 49.446 | KV452804.1 | 2626511 | 4-scf00071 | 4 |
| AX-157952575 | 4 | 49.555 | KV452804.1 | 1564141 | 4-scf00071 | 4 |
| AX-157952579 | 4 | 49.555 | KV452804.1 | 1567959 | 4-scf00071 | 4 |
| AX-157708321 | 4 | 49.555 | KV452804.1 | 1638774 | 4-scf00071 | 4 |
| AX-157952681 | 4 | 49.555 | KV452804.1 | 1695467 | 4-scf00071 | 4 |
| AX-157952862 | 4 | 49.555 | KV452804.1 | 1960792 | 4-scf00071 | 4 |
| AX-157952866 | 4 | 49.555 | KV452804.1 | 1964444 | 4-scf00071 | 4 |
| AX-157952867 | 4 | 49.555 | KV452804.1 | 1965717 | 4-scf00071 | 4 |
| AX-157952868 | 4 | 49.555 | KV452804.1 | 1966812 | 4-scf00071 | 4 |
| AX-157952870 | 4 | 49.555 | KV452804.1 | 1970981 | 4-scf00071 | 4 |
| AX-157952873 | 4 | 49.555 | KV452804.1 | 1973716 | 4-scf00071 | 4 |
| AX-157952874 | 4 | 49.555 | KV452804.1 | 1974578 | 4-scf00071 | 4 |
| AX-157952875 | 4 | 49.555 | KV452804.1 | 1975716 | 4-scf00071 | 4 |
| AX-157815682 | 4 | 49.555 | KV452804.1 | 1980109 | 4-scf00071 | 4 |
| AX-157952877 | 4 | 49.555 | KV452804.1 | 1986638 | 4-scf00071 | 4 |
| AX-157815685 | 4 | 49.555 | KV452804.1 | 1986696 | 4-scf00071 | 4 |
| AX-157952879 | 4 | 49.555 | KV452804.1 | 1988647 | 4-scf00071 | 4 |
| AX-157952887 | 4 | 49.555 | KV452804.1 | 2003367 | 4-scf00071 | 4 |
| AX-157952888 | 4 | 49.555 | KV452804.1 | 2005697 | 4-scf00071 | 4 |
| AX-157952890 | 4 | 49.555 | KV452804.1 | 2008552 | 4-scf00071 | 4 |
| AX-157952902 | 4 | 49.555 | KV452804.1 | 2020689 | 4-scf00071 | 4 |
| AX-157952903 | 4 | 49.555 | KV452804.1 | 2022157 | 4-scf00071 | 4 |
| AX-157952904 | 4 | 49.555 | KV452804.1 | 2022810 | 4-scf00071 | 4 |
| AX-157952905 | 4 | 49.555 | KV452804.1 | 2024194 | 4-scf00071 | 4 |
| AX-157952906 | 4 | 49.555 | KV452804.1 | 2025232 | 4-scf00071 | 4 |
| AX-157751422 | 4 | 49.555 | KV452804.1 | 2025397 | 4-scf00071 | 4 |
| AX-157952912 | 4 | 49.555 | KV452804.1 | 2032242 | 4-scf00071 | 4 |
| AX-157952913 | 4 | 49.555 | KV452804.1 | 2033169 | 4-scf00071 | 4 |
| AX-157952916 | 4 | 49.555 | KV452804.1 | 2038141 | 4-scf00071 | 4 |
| AX-157815688 | 4 | 49.555 | KV452804.1 | 2040040 | 4-scf00071 | 4 |
| AX-157952917 | 4 | 49.555 | KV452804.1 | 2041410 | 4-scf00071 | 4 |
| AX-157815696 | 4 | 49.555 | KV452804.1 | 2067986 | 4-scf00071 | 4 |
| AX-157815690 | 4 | 49.598 | KV452804.1 | 2042067 | 4-scf00071 | 4 |
| AX-157952919 | 4 | 49.685 | KV452804.1 | 2045957 | 4-scf00071 | 4 |
| AX-157815675 | 4 | 49.773 | KV452804.1 | 1910798 | 4-scf00071 | 4 |
| AX-157952831 | 4 | 49.773 | KV452804.1 | 1911185 | 4-scf00071 | 4 |
| AX-157952838 | 4 | 49.773 | KV452804.1 | 1922417 | 4-scf00071 | 4 |
| AX-157952848 | 4 | 49.773 | KV452804.1 | 1939605 | 4-scf00071 | 4 |
| AX-157952854 | 4 | 49.773 | KV452804.1 | 1951463 | 4-scf00071 | 4 |
| AX-157952869 | 4 | 49.773 | KV452804.1 | 1968780 | 4-scf00071 | 4 |
| AX-157864870 | 4 | 49.773 | KV452804.1 | 1981879 | 4-scf00071 | 4 |
| AX-157952911 | 4 | 49.773 | KV452804.1 | 2031933 | 4-scf00071 | 4 |
| AX-157815693 | 4 | 49.773 | KV452804.1 | 2047007 | 4-scf00071 | 4 |
| AX-157815694 | 4 | 49.773 | KV452804.1 | 2047147 | 4-scf00071 | 4 |
| AX-157952921 | 4 | 49.773 | KV452804.1 | 2050500 | 4-scf00071 | 4 |
| AX-157952923 | 4 | 49.773 | KV452804.1 | 2052221 | 4-scf00071 | 4 |

|              |   |        |            |         |            |   |
|--------------|---|--------|------------|---------|------------|---|
| AX-157952928 | 4 | 49.773 | KV452804.1 | 2054977 | 4-scf00071 | 4 |
| AX-157952933 | 4 | 49.773 | KV452804.1 | 2059218 | 4-scf00071 | 4 |
| AX-158382852 | 4 | 49.773 | KV452804.1 | 2065543 | 4-scf00071 | 4 |
| AX-157952938 | 4 | 49.773 | KV452804.1 | 2066006 | 4-scf00071 | 4 |
| AX-157952940 | 4 | 49.773 | KV452804.1 | 2070502 | 4-scf00071 | 4 |
| AX-157775909 | 4 | 49.773 | KV452804.1 | 2071176 | 4-scf00071 | 4 |
| AX-157952941 | 4 | 49.773 | KV452804.1 | 2073261 | 4-scf00071 | 4 |
| AX-157952944 | 4 | 49.773 | KV452804.1 | 2074996 | 4-scf00071 | 4 |
| AX-157952945 | 4 | 49.773 | KV452804.1 | 2076116 | 4-scf00071 | 4 |
| AX-157815697 | 4 | 49.773 | KV452804.1 | 2076538 | 4-scf00071 | 4 |
| AX-157952946 | 4 | 49.773 | KV452804.1 | 2076804 | 4-scf00071 | 4 |
| AX-157952949 | 4 | 49.773 | KV452804.1 | 2080240 | 4-scf00071 | 4 |
| AX-157952950 | 4 | 49.773 | KV452804.1 | 2080737 | 4-scf00071 | 4 |
| AX-157815698 | 4 | 49.773 | KV452804.1 | 2085300 | 4-scf00071 | 4 |
| AX-157884038 | 4 | 49.773 | KV452804.1 | 2094738 | 4-scf00071 | 4 |
| AX-157952969 | 4 | 49.773 | KV452804.1 | 2106240 | 4-scf00071 | 4 |
| AX-157815683 | 4 | 49.828 | KV452804.1 | 1983870 | 4-scf00071 | 4 |
| AX-157952952 | 4 | 49.828 | KV452804.1 | 2087506 | 4-scf00071 | 4 |
| AX-157952955 | 4 | 49.883 | KV452804.1 | 2089173 | 4-scf00071 | 4 |
| AX-157952960 | 4 | 50.101 | KV452804.1 | 2096681 | 4-scf00071 | 4 |
| AX-157952964 | 4 | 50.101 | KV452804.1 | 2102165 | 4-scf00071 | 4 |
| AX-157952966 | 4 | 50.101 | KV452804.1 | 2104318 | 4-scf00071 | 4 |
| AX-157952967 | 4 | 50.101 | KV452804.1 | 2104878 | 4-scf00071 | 4 |
| AX-157952983 | 4 | 50.37  | KV452804.1 | 2124466 | 4-scf00071 | 4 |
| AX-157952985 | 4 | 50.37  | KV452804.1 | 2126913 | 4-scf00071 | 4 |
| AX-157952962 | 4 | 50.505 | KV452804.1 | 2098833 | 4-scf00071 | 4 |
| AX-157952987 | 4 | 50.505 | KV452804.1 | 2131591 | 4-scf00071 | 4 |
| AX-157952988 | 4 | 50.505 | KV452804.1 | 2132708 | 4-scf00071 | 4 |
| AX-157952990 | 4 | 50.505 | KV452804.1 | 2134387 | 4-scf00071 | 4 |
| AX-157952993 | 4 | 50.505 | KV452804.1 | 2136992 | 4-scf00071 | 4 |
| AX-157952992 | 4 | 50.685 | KV452804.1 | 2136394 | 4-scf00071 | 4 |
| AX-157952995 | 4 | 50.692 | KV452804.1 | 2139084 | 4-scf00071 | 4 |
| AX-157710822 | 4 | 50.835 | KV452804.1 | 2142870 | 4-scf00071 | 4 |
| AX-157815700 | 4 | 50.971 | KV452804.1 | 2143645 | 4-scf00071 | 4 |
| AX-157952999 | 4 | 50.976 | KV452804.1 | 2147580 | 4-scf00071 | 4 |
| AX-157953011 | 4 | 51.099 | KV452804.1 | 2173279 | 4-scf00071 | 4 |
| AX-157953025 | 4 | 51.099 | KV452804.1 | 2201584 | 4-scf00071 | 4 |
| AX-157953110 | 4 | 51.099 | KV452804.1 | 2341977 | 4-scf00071 | 4 |
| AX-157953175 | 4 | 51.099 | KV452804.1 | 2425825 | 4-scf00071 | 4 |
| AX-157854681 | 4 | 51.194 | KV452804.1 | 2137740 | 4-scf00071 | 4 |
| AX-157953013 | 4 | 51.194 | KV452804.1 | 2177182 | 4-scf00071 | 4 |
| AX-157953014 | 4 | 51.194 | KV452804.1 | 2177735 | 4-scf00071 | 4 |
| AX-157953016 | 4 | 51.194 | KV452804.1 | 2180964 | 4-scf00071 | 4 |
| AX-157815701 | 4 | 51.194 | KV452804.1 | 2185626 | 4-scf00071 | 4 |
| AX-157815702 | 4 | 51.194 | KV452804.1 | 2191532 | 4-scf00071 | 4 |
| AX-157815703 | 4 | 51.194 | KV452804.1 | 2192410 | 4-scf00071 | 4 |
| AX-157953022 | 4 | 51.194 | KV452804.1 | 2197038 | 4-scf00071 | 4 |
| AX-157953030 | 4 | 51.194 | KV452804.1 | 2206867 | 4-scf00071 | 4 |
| AX-157953032 | 4 | 51.194 | KV452804.1 | 2210011 | 4-scf00071 | 4 |
| AX-157953033 | 4 | 51.194 | KV452804.1 | 2210555 | 4-scf00071 | 4 |
| AX-157815706 | 4 | 51.194 | KV452804.1 | 2214996 | 4-scf00071 | 4 |

|              |   |        |             |         |            |    |
|--------------|---|--------|-------------|---------|------------|----|
| AX-157953038 | 4 | 51.194 | KV452804.1  | 2221609 | 4-scf00071 | 4  |
| AX-157953040 | 4 | 51.194 | KV452804.1  | 2226091 | 4-scf00071 | 4  |
| AX-157953043 | 4 | 51.194 | KV452804.1  | 2227590 | 4-scf00071 | 4  |
| AX-157953047 | 4 | 51.194 | KV452804.1  | 2238416 | 4-scf00071 | 4  |
| AX-157953048 | 4 | 51.194 | KV452804.1  | 2238839 | 4-scf00071 | 4  |
| AX-157749599 | 4 | 51.194 | KV452804.1  | 2242025 | 4-scf00071 | 4  |
| AX-157815707 | 4 | 51.194 | KV452804.1  | 2243055 | 4-scf00071 | 4  |
| AX-157815708 | 4 | 51.194 | KV452804.1  | 2243747 | 4-scf00071 | 4  |
| AX-157953050 | 4 | 51.194 | KV452804.1  | 2243786 | 4-scf00071 | 4  |
| AX-157754915 | 4 | 51.194 | KV452804.1  | 2360258 | 4-scf00071 | 4  |
| AX-157953215 | 4 | 51.194 | KV452804.1  | 2472847 | 4-scf00071 | 4  |
| AX-157706917 | 4 | 51.194 | 3ML01033151 | 118     | scf08791_1 | UN |
| AX-157815709 | 4 | 51.195 | KV452804.1  | 2248997 | 4-scf00071 | 4  |
| AX-157953003 | 4 | 51.522 | KV452804.1  | 2156755 | 4-scf00071 | 4  |
| AX-157953039 | 4 | 51.522 | KV452804.1  | 2225272 | 4-scf00071 | 4  |
| AX-157953058 | 4 | 51.522 | KV452804.1  | 2255045 | 4-scf00071 | 4  |
| AX-157953059 | 4 | 51.522 | KV452804.1  | 2255429 | 4-scf00071 | 4  |
| AX-157953062 | 4 | 51.522 | KV452804.1  | 2258113 | 4-scf00071 | 4  |
| AX-157953066 | 4 | 51.522 | KV452804.1  | 2261196 | 4-scf00071 | 4  |
| AX-157953068 | 4 | 51.522 | KV452804.1  | 2265709 | 4-scf00071 | 4  |
| AX-157953071 | 4 | 51.522 | KV452804.1  | 2270136 | 4-scf00071 | 4  |
| AX-157953073 | 4 | 51.522 | KV452804.1  | 2273106 | 4-scf00071 | 4  |
| AX-157717648 | 4 | 51.522 | KV452804.1  | 2273555 | 4-scf00071 | 4  |
| AX-157815710 | 4 | 51.522 | KV452804.1  | 2275343 | 4-scf00071 | 4  |
| AX-157953074 | 4 | 51.522 | KV452804.1  | 2276136 | 4-scf00071 | 4  |
| AX-157953076 | 4 | 51.522 | KV452804.1  | 2277749 | 4-scf00071 | 4  |
| AX-157953080 | 4 | 51.522 | KV452804.1  | 2283657 | 4-scf00071 | 4  |
| AX-158406120 | 4 | 51.522 | KV452804.1  | 2289664 | 4-scf00071 | 4  |
| AX-157953088 | 4 | 51.522 | KV452804.1  | 2298066 | 4-scf00071 | 4  |
| AX-157953089 | 4 | 51.522 | KV452804.1  | 2298641 | 4-scf00071 | 4  |
| AX-157953091 | 4 | 51.522 | KV452804.1  | 2302956 | 4-scf00071 | 4  |
| AX-157953093 | 4 | 51.522 | KV452804.1  | 2310190 | 4-scf00071 | 4  |
| AX-157772892 | 4 | 51.522 | KV452804.1  | 2315737 | 4-scf00071 | 4  |
| AX-157953097 | 4 | 51.522 | KV452804.1  | 2318156 | 4-scf00071 | 4  |
| AX-157953099 | 4 | 51.522 | KV452804.1  | 2320830 | 4-scf00071 | 4  |
| AX-157713968 | 4 | 51.522 | KV452804.1  | 2324046 | 4-scf00071 | 4  |
| AX-157953102 | 4 | 51.522 | KV452804.1  | 2326130 | 4-scf00071 | 4  |
| AX-157953105 | 4 | 51.522 | KV452804.1  | 2335975 | 4-scf00071 | 4  |
| AX-157953106 | 4 | 51.522 | KV452804.1  | 2336686 | 4-scf00071 | 4  |
| AX-157953107 | 4 | 51.522 | KV452804.1  | 2337625 | 4-scf00071 | 4  |
| AX-157746999 | 4 | 51.522 | KV452804.1  | 2338573 | 4-scf00071 | 4  |
| AX-157953109 | 4 | 51.522 | KV452804.1  | 2341001 | 4-scf00071 | 4  |
| AX-157953114 | 4 | 51.522 | KV452804.1  | 2353557 | 4-scf00071 | 4  |
| AX-157953115 | 4 | 51.522 | KV452804.1  | 2356114 | 4-scf00071 | 4  |
| AX-157953117 | 4 | 51.522 | KV452804.1  | 2359789 | 4-scf00071 | 4  |
| AX-157953118 | 4 | 51.522 | KV452804.1  | 2361565 | 4-scf00071 | 4  |
| AX-157953123 | 4 | 51.522 | KV452804.1  | 2366060 | 4-scf00071 | 4  |
| AX-157953124 | 4 | 51.522 | KV452804.1  | 2366703 | 4-scf00071 | 4  |
| AX-157953125 | 4 | 51.522 | KV452804.1  | 2367120 | 4-scf00071 | 4  |
| AX-157953126 | 4 | 51.522 | KV452804.1  | 2367614 | 4-scf00071 | 4  |
| AX-157722009 | 4 | 51.522 | KV452804.1  | 2369233 | 4-scf00071 | 4  |



|              |   |        |            |         |            |   |
|--------------|---|--------|------------|---------|------------|---|
| AX-157953127 | 4 | 51.522 | KV452804.1 | 2372229 | 4-scf00071 | 4 |
| AX-157953130 | 4 | 51.522 | KV452804.1 | 2374933 | 4-scf00071 | 4 |
| AX-157953131 | 4 | 51.522 | KV452804.1 | 2375828 | 4-scf00071 | 4 |
| AX-157953132 | 4 | 51.522 | KV452804.1 | 2377871 | 4-scf00071 | 4 |
| AX-157953134 | 4 | 51.522 | KV452804.1 | 2379305 | 4-scf00071 | 4 |
| AX-157953148 | 4 | 51.522 | KV452804.1 | 2402571 | 4-scf00071 | 4 |
| AX-158404990 | 4 | 51.522 | KV452804.1 | 2405485 | 4-scf00071 | 4 |
| AX-157953154 | 4 | 51.522 | KV452804.1 | 2410351 | 4-scf00071 | 4 |
| AX-157953155 | 4 | 51.522 | KV452804.1 | 2412552 | 4-scf00071 | 4 |
| AX-158406122 | 4 | 51.522 | KV452804.1 | 2412902 | 4-scf00071 | 4 |
| AX-157953158 | 4 | 51.522 | KV452804.1 | 2414209 | 4-scf00071 | 4 |
| AX-157953159 | 4 | 51.522 | KV452804.1 | 2414712 | 4-scf00071 | 4 |
| AX-157953160 | 4 | 51.522 | KV452804.1 | 2416079 | 4-scf00071 | 4 |
| AX-157953164 | 4 | 51.522 | KV452804.1 | 2418760 | 4-scf00071 | 4 |
| AX-157953165 | 4 | 51.522 | KV452804.1 | 2419307 | 4-scf00071 | 4 |
| AX-157953292 | 4 | 51.522 | KV452804.1 | 2573893 | 4-scf00071 | 4 |
| AX-157953298 | 4 | 51.522 | KV452804.1 | 2580546 | 4-scf00071 | 4 |
| AX-157953338 | 4 | 51.522 | KV452804.1 | 2643385 | 4-scf00071 | 4 |
| AX-157953375 | 4 | 51.522 | KV452804.1 | 2693161 | 4-scf00071 | 4 |
| AX-157953478 | 4 | 51.522 | KV452804.1 | 2813021 | 4-scf00071 | 4 |
| AX-157953168 | 4 | 51.608 | KV452804.1 | 2421488 | 4-scf00071 | 4 |
| AX-157952997 | 4 | 51.74  | KV452804.1 | 2144790 | 4-scf00071 | 4 |
| AX-157953060 | 4 | 51.74  | KV452804.1 | 2256033 | 4-scf00071 | 4 |
| AX-157953075 | 4 | 51.74  | KV452804.1 | 2277219 | 4-scf00071 | 4 |
| AX-157953081 | 4 | 51.74  | KV452804.1 | 2284361 | 4-scf00071 | 4 |
| AX-157953141 | 4 | 51.74  | KV452804.1 | 2390198 | 4-scf00071 | 4 |
| AX-157953171 | 4 | 51.74  | KV452804.1 | 2423042 | 4-scf00071 | 4 |
| AX-157953172 | 4 | 51.74  | KV452804.1 | 2423525 | 4-scf00071 | 4 |
| AX-157953178 | 4 | 51.74  | KV452804.1 | 2429786 | 4-scf00071 | 4 |
| AX-157953179 | 4 | 51.74  | KV452804.1 | 2430220 | 4-scf00071 | 4 |
| AX-157953184 | 4 | 51.74  | KV452804.1 | 2433177 | 4-scf00071 | 4 |
| AX-157953185 | 4 | 51.74  | KV452804.1 | 2434575 | 4-scf00071 | 4 |
| AX-157953188 | 4 | 51.74  | KV452804.1 | 2438112 | 4-scf00071 | 4 |
| AX-157953192 | 4 | 51.74  | KV452804.1 | 2443323 | 4-scf00071 | 4 |
| AX-157953193 | 4 | 51.74  | KV452804.1 | 2444695 | 4-scf00071 | 4 |
| AX-157953196 | 4 | 51.74  | KV452804.1 | 2452327 | 4-scf00071 | 4 |
| AX-157953197 | 4 | 51.74  | KV452804.1 | 2453141 | 4-scf00071 | 4 |
| AX-157953198 | 4 | 51.74  | KV452804.1 | 2453364 | 4-scf00071 | 4 |
| AX-157953199 | 4 | 51.74  | KV452804.1 | 2454544 | 4-scf00071 | 4 |
| AX-157953201 | 4 | 51.74  | KV452804.1 | 2456251 | 4-scf00071 | 4 |
| AX-157953202 | 4 | 51.74  | KV452804.1 | 2457127 | 4-scf00071 | 4 |
| AX-157953203 | 4 | 51.74  | KV452804.1 | 2458599 | 4-scf00071 | 4 |
| AX-157953205 | 4 | 51.74  | KV452804.1 | 2460938 | 4-scf00071 | 4 |
| AX-157953206 | 4 | 51.74  | KV452804.1 | 2462034 | 4-scf00071 | 4 |
| AX-157953208 | 4 | 51.74  | KV452804.1 | 2463190 | 4-scf00071 | 4 |
| AX-157953209 | 4 | 51.74  | KV452804.1 | 2467096 | 4-scf00071 | 4 |
| AX-157953210 | 4 | 51.74  | KV452804.1 | 2467932 | 4-scf00071 | 4 |
| AX-157953216 | 4 | 51.74  | KV452804.1 | 2473454 | 4-scf00071 | 4 |
| AX-157953222 | 4 | 51.74  | KV452804.1 | 2479327 | 4-scf00071 | 4 |
| AX-158406123 | 4 | 51.74  | KV452804.1 | 2487275 | 4-scf00071 | 4 |
| AX-157953228 | 4 | 51.74  | KV452804.1 | 2488486 | 4-scf00071 | 4 |

|              |   |       |            |         |            |   |
|--------------|---|-------|------------|---------|------------|---|
| AX-157953229 | 4 | 51.74 | KV452804.1 | 2488983 | 4-scf00071 | 4 |
| AX-157953232 | 4 | 51.74 | KV452804.1 | 2492144 | 4-scf00071 | 4 |
| AX-157953235 | 4 | 51.74 | KV452804.1 | 2494275 | 4-scf00071 | 4 |
| AX-157953237 | 4 | 51.74 | KV452804.1 | 2501272 | 4-scf00071 | 4 |
| AX-157953238 | 4 | 51.74 | KV452804.1 | 2501731 | 4-scf00071 | 4 |
| AX-157953240 | 4 | 51.74 | KV452804.1 | 2502575 | 4-scf00071 | 4 |
| AX-157714863 | 4 | 51.74 | KV452804.1 | 2504957 | 4-scf00071 | 4 |
| AX-157953244 | 4 | 51.74 | KV452804.1 | 2508931 | 4-scf00071 | 4 |
| AX-157953245 | 4 | 51.74 | KV452804.1 | 2509607 | 4-scf00071 | 4 |
| AX-157953248 | 4 | 51.74 | KV452804.1 | 2511835 | 4-scf00071 | 4 |
| AX-157815717 | 4 | 51.74 | KV452804.1 | 2517331 | 4-scf00071 | 4 |
| AX-157953251 | 4 | 51.74 | KV452804.1 | 2519266 | 4-scf00071 | 4 |
| AX-157953256 | 4 | 51.74 | KV452804.1 | 2524537 | 4-scf00071 | 4 |
| AX-157953261 | 4 | 51.74 | KV452804.1 | 2527597 | 4-scf00071 | 4 |
| AX-157953264 | 4 | 51.74 | KV452804.1 | 2536162 | 4-scf00071 | 4 |
| AX-157953265 | 4 | 51.74 | KV452804.1 | 2537702 | 4-scf00071 | 4 |
| AX-157953266 | 4 | 51.74 | KV452804.1 | 2539128 | 4-scf00071 | 4 |
| AX-157953268 | 4 | 51.74 | KV452804.1 | 2543242 | 4-scf00071 | 4 |
| AX-157953270 | 4 | 51.74 | KV452804.1 | 2548382 | 4-scf00071 | 4 |
| AX-157953271 | 4 | 51.74 | KV452804.1 | 2548737 | 4-scf00071 | 4 |
| AX-157953272 | 4 | 51.74 | KV452804.1 | 2549475 | 4-scf00071 | 4 |
| AX-157717257 | 4 | 51.74 | KV452804.1 | 2551478 | 4-scf00071 | 4 |
| AX-157953273 | 4 | 51.74 | KV452804.1 | 2552544 | 4-scf00071 | 4 |
| AX-157953274 | 4 | 51.74 | KV452804.1 | 2553279 | 4-scf00071 | 4 |
| AX-157953281 | 4 | 51.74 | KV452804.1 | 2562573 | 4-scf00071 | 4 |
| AX-157953283 | 4 | 51.74 | KV452804.1 | 2564400 | 4-scf00071 | 4 |
| AX-157953290 | 4 | 51.74 | KV452804.1 | 2571699 | 4-scf00071 | 4 |
| AX-157953297 | 4 | 51.74 | KV452804.1 | 2579811 | 4-scf00071 | 4 |
| AX-157773341 | 4 | 51.74 | KV452804.1 | 2581310 | 4-scf00071 | 4 |
| AX-157953302 | 4 | 51.74 | KV452804.1 | 2583939 | 4-scf00071 | 4 |
| AX-158390224 | 4 | 51.74 | KV452804.1 | 2586899 | 4-scf00071 | 4 |
| AX-157953306 | 4 | 51.74 | KV452804.1 | 2588602 | 4-scf00071 | 4 |
| AX-157953310 | 4 | 51.74 | KV452804.1 | 2593121 | 4-scf00071 | 4 |
| AX-157953314 | 4 | 51.74 | KV452804.1 | 2597486 | 4-scf00071 | 4 |
| AX-158406127 | 4 | 51.74 | KV452804.1 | 2611121 | 4-scf00071 | 4 |
| AX-157953328 | 4 | 51.74 | KV452804.1 | 2626556 | 4-scf00071 | 4 |
| AX-157953332 | 4 | 51.74 | KV452804.1 | 2633130 | 4-scf00071 | 4 |
| AX-158382858 | 4 | 51.74 | KV452804.1 | 2636502 | 4-scf00071 | 4 |
| AX-157775646 | 4 | 51.74 | KV452804.1 | 2637458 | 4-scf00071 | 4 |
| AX-157953335 | 4 | 51.74 | KV452804.1 | 2641019 | 4-scf00071 | 4 |
| AX-157953336 | 4 | 51.74 | KV452804.1 | 2641505 | 4-scf00071 | 4 |
| AX-157953337 | 4 | 51.74 | KV452804.1 | 2642886 | 4-scf00071 | 4 |
| AX-157953339 | 4 | 51.74 | KV452804.1 | 2647643 | 4-scf00071 | 4 |
| AX-157953340 | 4 | 51.74 | KV452804.1 | 2648296 | 4-scf00071 | 4 |
| AX-157953341 | 4 | 51.74 | KV452804.1 | 2648736 | 4-scf00071 | 4 |
| AX-158406129 | 4 | 51.74 | KV452804.1 | 2655678 | 4-scf00071 | 4 |
| AX-157815722 | 4 | 51.74 | KV452804.1 | 2656527 | 4-scf00071 | 4 |
| AX-157953348 | 4 | 51.74 | KV452804.1 | 2657299 | 4-scf00071 | 4 |
| AX-157953373 | 4 | 51.74 | KV452804.1 | 2692271 | 4-scf00071 | 4 |
| AX-157953392 | 4 | 51.74 | KV452804.1 | 2714753 | 4-scf00071 | 4 |
| AX-157953448 | 4 | 51.74 | KV452804.1 | 2786438 | 4-scf00071 | 4 |

|              |   |        |             |         |            |    |
|--------------|---|--------|-------------|---------|------------|----|
| AX-157953451 | 4 | 51.74  | KV452804.1  | 2788825 | 4-scf00071 | 4  |
| AX-157953456 | 4 | 51.74  | KV452804.1  | 2792384 | 4-scf00071 | 4  |
| AX-157953516 | 4 | 51.74  | KV452804.1  | 2865970 | 4-scf00071 | 4  |
| AX-157953540 | 4 | 51.74  | KV452804.1  | 2894514 | 4-scf00071 | 4  |
| AX-157953544 | 4 | 51.74  | KV452804.1  | 2900734 | 4-scf00071 | 4  |
| AX-157705593 | 4 | 51.74  | 3ML01030326 | 112     | scf05922_1 | UN |
| AX-157705594 | 4 | 51.74  | 3ML01030326 | 374     | scf05922_1 | UN |
| AX-157953350 | 4 | 51.759 | KV452804.1  | 2661587 | 4-scf00071 | 4  |
| AX-157953351 | 4 | 51.77  | KV452804.1  | 2663047 | 4-scf00071 | 4  |
| AX-157953352 | 4 | 51.777 | KV452804.1  | 2666004 | 4-scf00071 | 4  |
| AX-157953150 | 4 | 51.793 | KV452804.1  | 2404002 | 4-scf00071 | 4  |
| AX-157953220 | 4 | 51.793 | KV452804.1  | 2476800 | 4-scf00071 | 4  |
| AX-157953236 | 4 | 51.793 | KV452804.1  | 2497390 | 4-scf00071 | 4  |
| AX-157953250 | 4 | 51.793 | KV452804.1  | 2516015 | 4-scf00071 | 4  |
| AX-157815720 | 4 | 51.793 | KV452804.1  | 2537266 | 4-scf00071 | 4  |
| AX-157953357 | 4 | 51.793 | KV452804.1  | 2671869 | 4-scf00071 | 4  |
| AX-157953397 | 4 | 51.793 | KV452804.1  | 2720053 | 4-scf00071 | 4  |
| AX-157953457 | 4 | 51.793 | KV452804.1  | 2792786 | 4-scf00071 | 4  |
| AX-157953359 | 4 | 51.815 | KV452804.1  | 2673199 | 4-scf00071 | 4  |
| AX-157953167 | 4 | 51.849 | KV452804.1  | 2421240 | 4-scf00071 | 4  |
| AX-157953169 | 4 | 51.849 | KV452804.1  | 2421981 | 4-scf00071 | 4  |
| AX-157953194 | 4 | 51.849 | KV452804.1  | 2445596 | 4-scf00071 | 4  |
| AX-157953211 | 4 | 51.849 | KV452804.1  | 2468297 | 4-scf00071 | 4  |
| AX-157953258 | 4 | 51.849 | KV452804.1  | 2526384 | 4-scf00071 | 4  |
| AX-157710645 | 4 | 51.849 | KV452804.1  | 2543002 | 4-scf00071 | 4  |
| AX-157953346 | 4 | 51.849 | KV452804.1  | 2656303 | 4-scf00071 | 4  |
| AX-157953361 | 4 | 51.849 | KV452804.1  | 2674448 | 4-scf00071 | 4  |
| AX-157953363 | 4 | 51.849 | KV452804.1  | 2677193 | 4-scf00071 | 4  |
| AX-157953365 | 4 | 51.849 | KV452804.1  | 2681145 | 4-scf00071 | 4  |
| AX-157953366 | 4 | 51.849 | KV452804.1  | 2682896 | 4-scf00071 | 4  |
| AX-157953368 | 4 | 51.849 | KV452804.1  | 2685900 | 4-scf00071 | 4  |
| AX-157875457 | 4 | 51.849 | KV452804.1  | 2687552 | 4-scf00071 | 4  |
| AX-157953371 | 4 | 51.849 | KV452804.1  | 2689673 | 4-scf00071 | 4  |
| AX-157953376 | 4 | 51.849 | KV452804.1  | 2693425 | 4-scf00071 | 4  |
| AX-157953379 | 4 | 51.849 | KV452804.1  | 2697864 | 4-scf00071 | 4  |
| AX-157953380 | 4 | 51.849 | KV452804.1  | 2698364 | 4-scf00071 | 4  |
| AX-157953381 | 4 | 51.849 | KV452804.1  | 2699059 | 4-scf00071 | 4  |
| AX-157953383 | 4 | 51.849 | KV452804.1  | 2703723 | 4-scf00071 | 4  |
| AX-157953384 | 4 | 51.849 | KV452804.1  | 2706536 | 4-scf00071 | 4  |
| AX-157875458 | 4 | 51.849 | KV452804.1  | 2707680 | 4-scf00071 | 4  |
| AX-157953389 | 4 | 51.849 | KV452804.1  | 2712351 | 4-scf00071 | 4  |
| AX-157739689 | 4 | 51.849 | KV452804.1  | 2713088 | 4-scf00071 | 4  |
| AX-157953391 | 4 | 51.849 | KV452804.1  | 2714164 | 4-scf00071 | 4  |
| AX-157953409 | 4 | 51.849 | KV452804.1  | 2740816 | 4-scf00071 | 4  |
| AX-157953427 | 4 | 51.849 | KV452804.1  | 2762725 | 4-scf00071 | 4  |
| AX-157953432 | 4 | 51.849 | KV452804.1  | 2768434 | 4-scf00071 | 4  |
| AX-157953436 | 4 | 51.849 | KV452804.1  | 2773128 | 4-scf00071 | 4  |
| AX-157953450 | 4 | 51.849 | KV452804.1  | 2787613 | 4-scf00071 | 4  |
| AX-157869569 | 4 | 51.849 | KV452804.1  | 2845606 | 4-scf00071 | 4  |
| AX-157815735 | 4 | 51.849 | KV452804.1  | 2871888 | 4-scf00071 | 4  |
| AX-157815721 | 4 | 51.92  | KV452804.1  | 2541107 | 4-scf00071 | 4  |

|              |   |        |            |         |            |   |
|--------------|---|--------|------------|---------|------------|---|
| AX-157953393 | 4 | 51.92  | KV452804.1 | 2715859 | 4-scf00071 | 4 |
| AX-157953458 | 4 | 51.92  | KV452804.1 | 2793718 | 4-scf00071 | 4 |
| AX-157953410 | 4 | 51.959 | KV452804.1 | 2742541 | 4-scf00071 | 4 |
| AX-157953412 | 4 | 51.959 | KV452804.1 | 2743951 | 4-scf00071 | 4 |
| AX-157953415 | 4 | 51.959 | KV452804.1 | 2746367 | 4-scf00071 | 4 |
| AX-157953419 | 4 | 51.959 | KV452804.1 | 2755871 | 4-scf00071 | 4 |
| AX-157953423 | 4 | 51.959 | KV452804.1 | 2758369 | 4-scf00071 | 4 |
| AX-157953493 | 4 | 51.959 | KV452804.1 | 2839004 | 4-scf00071 | 4 |
| AX-157953532 | 4 | 51.959 | KV452804.1 | 2884822 | 4-scf00071 | 4 |
| AX-157753945 | 4 | 52.068 | KV452804.1 | 2187044 | 4-scf00071 | 4 |
| AX-157953035 | 4 | 52.068 | KV452804.1 | 2218063 | 4-scf00071 | 4 |
| AX-157953364 | 4 | 52.068 | KV452804.1 | 2678997 | 4-scf00071 | 4 |
| AX-157953382 | 4 | 52.068 | KV452804.1 | 2701638 | 4-scf00071 | 4 |
| AX-157717784 | 4 | 52.068 | KV452804.1 | 2748751 | 4-scf00071 | 4 |
| AX-157751231 | 4 | 52.068 | KV452804.1 | 2771227 | 4-scf00071 | 4 |
| AX-157953435 | 4 | 52.068 | KV452804.1 | 2772302 | 4-scf00071 | 4 |
| AX-157953437 | 4 | 52.068 | KV452804.1 | 2773857 | 4-scf00071 | 4 |
| AX-157953442 | 4 | 52.068 | KV452804.1 | 2776596 | 4-scf00071 | 4 |
| AX-157953443 | 4 | 52.068 | KV452804.1 | 2777975 | 4-scf00071 | 4 |
| AX-157953444 | 4 | 52.068 | KV452804.1 | 2780682 | 4-scf00071 | 4 |
| AX-157953454 | 4 | 52.068 | KV452804.1 | 2790221 | 4-scf00071 | 4 |
| AX-157699203 | 4 | 52.068 | KV452804.1 | 2791356 | 4-scf00071 | 4 |
| AX-157953461 | 4 | 52.068 | KV452804.1 | 2795137 | 4-scf00071 | 4 |
| AX-157953464 | 4 | 52.068 | KV452804.1 | 2798186 | 4-scf00071 | 4 |
| AX-158406132 | 4 | 52.068 | KV452804.1 | 2798255 | 4-scf00071 | 4 |
| AX-157953465 | 4 | 52.068 | KV452804.1 | 2798880 | 4-scf00071 | 4 |
| AX-157953466 | 4 | 52.068 | KV452804.1 | 2799281 | 4-scf00071 | 4 |
| AX-157953468 | 4 | 52.068 | KV452804.1 | 2799837 | 4-scf00071 | 4 |
| AX-157953469 | 4 | 52.068 | KV452804.1 | 2800855 | 4-scf00071 | 4 |
| AX-157953476 | 4 | 52.068 | KV452804.1 | 2807145 | 4-scf00071 | 4 |
| AX-157953497 | 4 | 52.068 | KV452804.1 | 2845080 | 4-scf00071 | 4 |
| AX-157953507 | 4 | 52.068 | KV452804.1 | 2859016 | 4-scf00071 | 4 |
| AX-157952665 | 4 | 52.286 | KV452804.1 | 1668781 | 4-scf00071 | 4 |
| AX-157952775 | 4 | 52.286 | KV452804.1 | 1818286 | 4-scf00071 | 4 |
| AX-157952934 | 4 | 52.286 | KV452804.1 | 2062806 | 4-scf00071 | 4 |
| AX-157953026 | 4 | 52.286 | KV452804.1 | 2203282 | 4-scf00071 | 4 |
| AX-157953119 | 4 | 52.286 | KV452804.1 | 2362345 | 4-scf00071 | 4 |
| AX-157953139 | 4 | 52.286 | KV452804.1 | 2386342 | 4-scf00071 | 4 |
| AX-157953195 | 4 | 52.286 | KV452804.1 | 2449502 | 4-scf00071 | 4 |
| AX-157815714 | 4 | 52.286 | KV452804.1 | 2459368 | 4-scf00071 | 4 |
| AX-157884040 | 4 | 52.286 | KV452804.1 | 2515575 | 4-scf00071 | 4 |
| AX-157953259 | 4 | 52.286 | KV452804.1 | 2526659 | 4-scf00071 | 4 |
| AX-157953262 | 4 | 52.286 | KV452804.1 | 2529640 | 4-scf00071 | 4 |
| AX-157953299 | 4 | 52.286 | KV452804.1 | 2582033 | 4-scf00071 | 4 |
| AX-157953301 | 4 | 52.286 | KV452804.1 | 2583326 | 4-scf00071 | 4 |
| AX-157953303 | 4 | 52.286 | KV452804.1 | 2585090 | 4-scf00071 | 4 |
| AX-157953313 | 4 | 52.286 | KV452804.1 | 2595565 | 4-scf00071 | 4 |
| AX-157953349 | 4 | 52.286 | KV452804.1 | 2660627 | 4-scf00071 | 4 |
| AX-157953439 | 4 | 52.286 | KV452804.1 | 2774825 | 4-scf00071 | 4 |
| AX-157953447 | 4 | 52.286 | KV452804.1 | 2785290 | 4-scf00071 | 4 |
| AX-157953481 | 4 | 52.286 | KV452804.1 | 2821142 | 4-scf00071 | 4 |

|              |   |        |             |         |            |    |
|--------------|---|--------|-------------|---------|------------|----|
| AX-157953482 | 4 | 52.286 | KV452804.1  | 2825114 | 4-scf00071 | 4  |
| AX-157953484 | 4 | 52.286 | KV452804.1  | 2829313 | 4-scf00071 | 4  |
| AX-157953487 | 4 | 52.286 | KV452804.1  | 2832544 | 4-scf00071 | 4  |
| AX-157953488 | 4 | 52.286 | KV452804.1  | 2833624 | 4-scf00071 | 4  |
| AX-157953491 | 4 | 52.286 | KV452804.1  | 2836433 | 4-scf00071 | 4  |
| AX-157953492 | 4 | 52.286 | KV452804.1  | 2838580 | 4-scf00071 | 4  |
| AX-157815726 | 4 | 52.286 | KV452804.1  | 2843391 | 4-scf00071 | 4  |
| AX-157953500 | 4 | 52.286 | KV452804.1  | 2850931 | 4-scf00071 | 4  |
| AX-158406135 | 4 | 52.286 | KV452804.1  | 2852002 | 4-scf00071 | 4  |
| AX-157953503 | 4 | 52.286 | KV452804.1  | 2853017 | 4-scf00071 | 4  |
| AX-157771920 | 4 | 52.286 | KV452804.1  | 2853126 | 4-scf00071 | 4  |
| AX-157953505 | 4 | 52.286 | KV452804.1  | 2856376 | 4-scf00071 | 4  |
| AX-157815728 | 4 | 52.286 | KV452804.1  | 2856748 | 4-scf00071 | 4  |
| AX-157815729 | 4 | 52.286 | KV452804.1  | 2857393 | 4-scf00071 | 4  |
| AX-157815730 | 4 | 52.286 | KV452804.1  | 2858183 | 4-scf00071 | 4  |
| AX-157953506 | 4 | 52.286 | KV452804.1  | 2858752 | 4-scf00071 | 4  |
| AX-157953508 | 4 | 52.286 | KV452804.1  | 2859751 | 4-scf00071 | 4  |
| AX-157953509 | 4 | 52.286 | KV452804.1  | 2860207 | 4-scf00071 | 4  |
| AX-157953510 | 4 | 52.286 | KV452804.1  | 2861397 | 4-scf00071 | 4  |
| AX-157953512 | 4 | 52.286 | KV452804.1  | 2863848 | 4-scf00071 | 4  |
| AX-157815733 | 4 | 52.286 | KV452804.1  | 2864478 | 4-scf00071 | 4  |
| AX-157953513 | 4 | 52.286 | KV452804.1  | 2864852 | 4-scf00071 | 4  |
| AX-157953518 | 4 | 52.286 | KV452804.1  | 2866703 | 4-scf00071 | 4  |
| AX-157953521 | 4 | 52.286 | KV452804.1  | 2873473 | 4-scf00071 | 4  |
| AX-157953523 | 4 | 52.286 | KV452804.1  | 2875080 | 4-scf00071 | 4  |
| AX-157953528 | 4 | 52.286 | KV452804.1  | 2878653 | 4-scf00071 | 4  |
| AX-157756677 | 4 | 52.286 | KV452804.1  | 2879575 | 4-scf00071 | 4  |
| AX-157953529 | 4 | 52.286 | KV452804.1  | 2880107 | 4-scf00071 | 4  |
| AX-157953531 | 4 | 52.286 | KV452804.1  | 2882026 | 4-scf00071 | 4  |
| AX-157953534 | 4 | 52.286 | KV452804.1  | 2890144 | 4-scf00071 | 4  |
| AX-157953535 | 4 | 52.286 | KV452804.1  | 2890721 | 4-scf00071 | 4  |
| AX-157953536 | 4 | 52.286 | KV452804.1  | 2891193 | 4-scf00071 | 4  |
| AX-157953537 | 4 | 52.286 | KV452804.1  | 2892102 | 4-scf00071 | 4  |
| AX-157953538 | 4 | 52.286 | KV452804.1  | 2892509 | 4-scf00071 | 4  |
| AX-157953542 | 4 | 52.286 | KV452804.1  | 2898562 | 4-scf00071 | 4  |
| AX-157953551 | 4 | 52.286 | KV452804.1  | 2908574 | 4-scf00071 | 4  |
| AX-157710894 | 4 | 52.286 | KV452804.1  | 2912834 | 4-scf00071 | 4  |
| AX-157815741 | 4 | 52.286 | KV452804.1  | 2925263 | 4-scf00071 | 4  |
| AX-157953567 | 4 | 52.286 | KV452804.1  | 2929386 | 4-scf00071 | 4  |
| AX-157706704 | 4 | 52.286 | 3ML01032764 | 254     | scf08393_1 | UN |
| AX-157953543 | 4 | 52.505 | KV452804.1  | 2899595 | 4-scf00071 | 4  |
| AX-157953547 | 4 | 52.505 | KV452804.1  | 2902335 | 4-scf00071 | 4  |
| AX-157953550 | 4 | 52.505 | KV452804.1  | 2905429 | 4-scf00071 | 4  |
| AX-157953553 | 4 | 52.505 | KV452804.1  | 2909619 | 4-scf00071 | 4  |
| AX-157775704 | 4 | 52.505 | KV452804.1  | 2947112 | 4-scf00071 | 4  |
| AX-157953554 | 4 | 52.585 | KV452804.1  | 2910066 | 4-scf00071 | 4  |
| AX-157953555 | 4 | 52.585 | KV452804.1  | 2910616 | 4-scf00071 | 4  |
| AX-157953556 | 4 | 52.654 | KV452804.1  | 2910909 | 4-scf00071 | 4  |
| AX-157953524 | 4 | 52.723 | KV452804.1  | 2876133 | 4-scf00071 | 4  |
| AX-157815737 | 4 | 52.723 | KV452804.1  | 2907393 | 4-scf00071 | 4  |
| AX-157953557 | 4 | 52.723 | KV452804.1  | 2913346 | 4-scf00071 | 4  |

|              |   |        |             |         |            |    |
|--------------|---|--------|-------------|---------|------------|----|
| AX-157953565 | 4 | 52.723 | KV452804.1  | 2918606 | 4-scf00071 | 4  |
| AX-157815739 | 4 | 52.723 | KV452804.1  | 2918813 | 4-scf00071 | 4  |
| AX-157774104 | 4 | 52.723 | KV452804.1  | 2920443 | 4-scf00071 | 4  |
| AX-157953566 | 4 | 52.723 | KV452804.1  | 2927672 | 4-scf00071 | 4  |
| AX-157815742 | 4 | 52.723 | KV452804.1  | 2928593 | 4-scf00071 | 4  |
| AX-157741129 | 4 | 52.723 | KV452804.1  | 2929227 | 4-scf00071 | 4  |
| AX-157720581 | 4 | 52.723 | KV452804.1  | 2930871 | 4-scf00071 | 4  |
| AX-157953569 | 4 | 52.723 | KV452804.1  | 2931918 | 4-scf00071 | 4  |
| AX-157815744 | 4 | 52.723 | KV452804.1  | 2936697 | 4-scf00071 | 4  |
| AX-157953572 | 4 | 52.723 | KV452804.1  | 2937067 | 4-scf00071 | 4  |
| AX-157815745 | 4 | 52.723 | KV452804.1  | 2938402 | 4-scf00071 | 4  |
| AX-157953574 | 4 | 52.723 | KV452804.1  | 2939283 | 4-scf00071 | 4  |
| AX-157953575 | 4 | 52.723 | KV452804.1  | 2941409 | 4-scf00071 | 4  |
| AX-157953577 | 4 | 52.723 | KV452804.1  | 2942400 | 4-scf00071 | 4  |
| AX-157748064 | 4 | 52.723 | KV452804.1  | 2943518 | 4-scf00071 | 4  |
| AX-157953580 | 4 | 52.723 | KV452804.1  | 2945798 | 4-scf00071 | 4  |
| AX-157953581 | 4 | 52.723 | KV452804.1  | 2946279 | 4-scf00071 | 4  |
| AX-157953582 | 4 | 52.723 | KV452804.1  | 2948497 | 4-scf00071 | 4  |
| AX-157953602 | 4 | 52.723 | KV452804.1  | 2986331 | 4-scf00071 | 4  |
| AX-157953612 | 4 | 52.723 | KV452804.1  | 3008769 | 4-scf00071 | 4  |
| AX-157815746 | 4 | 52.832 | KV452804.1  | 2951087 | 4-scf00071 | 4  |
| AX-157815743 | 4 | 52.941 | KV452804.1  | 2935500 | 4-scf00071 | 4  |
| AX-157953585 | 4 | 52.941 | KV452804.1  | 2957526 | 4-scf00071 | 4  |
| AX-157953586 | 4 | 52.941 | KV452804.1  | 2959448 | 4-scf00071 | 4  |
| AX-157953587 | 4 | 52.941 | KV452804.1  | 2960320 | 4-scf00071 | 4  |
| AX-157953588 | 4 | 52.941 | KV452804.1  | 2961631 | 4-scf00071 | 4  |
| AX-157815719 | 4 | 53.051 | KV452804.1  | 2529004 | 4-scf00071 | 4  |
| AX-157815738 | 4 | 53.051 | KV452804.1  | 2911838 | 4-scf00071 | 4  |
| AX-157717928 | 4 | 53.051 | KV452804.1  | 2962806 | 4-scf00071 | 4  |
| AX-157953844 | 4 | 53.051 | KV452804.1  | 3303227 | 4-scf00071 | 4  |
| AX-157953486 | 4 | 53.27  | KV452804.1  | 2832177 | 4-scf00071 | 4  |
| AX-157953549 | 4 | 53.27  | KV452804.1  | 2903961 | 4-scf00071 | 4  |
| AX-157953593 | 4 | 53.27  | KV452804.1  | 2975134 | 4-scf00071 | 4  |
| AX-157953595 | 4 | 53.27  | KV452804.1  | 2978538 | 4-scf00071 | 4  |
| AX-157953596 | 4 | 53.27  | KV452804.1  | 2979240 | 4-scf00071 | 4  |
| AX-157953597 | 4 | 53.27  | KV452804.1  | 2980562 | 4-scf00071 | 4  |
| AX-157953598 | 4 | 53.27  | KV452804.1  | 2981092 | 4-scf00071 | 4  |
| AX-157953600 | 4 | 53.27  | KV452804.1  | 2985676 | 4-scf00071 | 4  |
| AX-157953605 | 4 | 53.27  | KV452804.1  | 2989828 | 4-scf00071 | 4  |
| AX-157953489 | 4 | 53.379 | KV452804.1  | 2834112 | 4-scf00071 | 4  |
| AX-157953495 | 4 | 53.379 | KV452804.1  | 2843997 | 4-scf00071 | 4  |
| AX-157721147 | 4 | 53.379 | KV452804.1  | 2991526 | 4-scf00071 | 4  |
| AX-157717044 | 4 | 53.379 | KV452804.1  | 2994197 | 4-scf00071 | 4  |
| AX-157815750 | 4 | 53.379 | KV452804.1  | 2995675 | 4-scf00071 | 4  |
| AX-157746134 | 4 | 53.379 | KV452804.1  | 2997009 | 4-scf00071 | 4  |
| AX-157953608 | 4 | 53.379 | KV452804.1  | 2997666 | 4-scf00071 | 4  |
| AX-157815751 | 4 | 53.379 | KV452804.1  | 2998251 | 4-scf00071 | 4  |
| AX-157953619 | 4 | 53.479 | KV452804.1  | 3014097 | 4-scf00071 | 4  |
| AX-157706749 | 4 | 53.479 | 3ML01032843 | 518     | scf08474_1 | UN |
| AX-157815752 | 4 | 53.598 | KV452804.1  | 3008119 | 4-scf00071 | 4  |
| AX-157953613 | 4 | 53.598 | KV452804.1  | 3010010 | 4-scf00071 | 4  |

|              |   |        |            |         |            |   |
|--------------|---|--------|------------|---------|------------|---|
| AX-157953614 | 4 | 53.598 | KV452804.1 | 3010249 | 4-scf00071 | 4 |
| AX-157953615 | 4 | 53.598 | KV452804.1 | 3010925 | 4-scf00071 | 4 |
| AX-157953618 | 4 | 53.598 | KV452804.1 | 3013436 | 4-scf00071 | 4 |
| AX-157953620 | 4 | 53.598 | KV452804.1 | 3014724 | 4-scf00071 | 4 |
| AX-157854684 | 4 | 53.598 | KV452804.1 | 3015019 | 4-scf00071 | 4 |
| AX-157815753 | 4 | 53.598 | KV452804.1 | 3016388 | 4-scf00071 | 4 |
| AX-157815755 | 4 | 53.598 | KV452804.1 | 3023804 | 4-scf00071 | 4 |
| AX-157953626 | 4 | 53.598 | KV452804.1 | 3026803 | 4-scf00071 | 4 |
| AX-157953630 | 4 | 53.598 | KV452804.1 | 3028879 | 4-scf00071 | 4 |
| AX-157953632 | 4 | 53.598 | KV452804.1 | 3030505 | 4-scf00071 | 4 |
| AX-157953633 | 4 | 53.598 | KV452804.1 | 3032829 | 4-scf00071 | 4 |
| AX-157758609 | 4 | 53.598 | KV452804.1 | 3033185 | 4-scf00071 | 4 |
| AX-157953634 | 4 | 53.598 | KV452804.1 | 3033858 | 4-scf00071 | 4 |
| AX-157953646 | 4 | 53.598 | KV452804.1 | 3064338 | 4-scf00071 | 4 |
| AX-157953647 | 4 | 53.598 | KV452804.1 | 3066242 | 4-scf00071 | 4 |
| AX-157815756 | 4 | 53.816 | KV452804.1 | 3039471 | 4-scf00071 | 4 |
| AX-157815758 | 4 | 53.816 | KV452804.1 | 3039916 | 4-scf00071 | 4 |
| AX-157953638 | 4 | 53.816 | KV452804.1 | 3044930 | 4-scf00071 | 4 |
| AX-157953640 | 4 | 53.816 | KV452804.1 | 3051410 | 4-scf00071 | 4 |
| AX-157752471 | 4 | 53.816 | KV452804.1 | 3055685 | 4-scf00071 | 4 |
| AX-158378704 | 4 | 53.816 | KV452804.1 | 3058332 | 4-scf00071 | 4 |
| AX-157953644 | 4 | 53.816 | KV452804.1 | 3059382 | 4-scf00071 | 4 |
| AX-157875463 | 4 | 53.816 | KV452804.1 | 3068148 | 4-scf00071 | 4 |
| AX-157953691 | 4 | 53.816 | KV452804.1 | 3109325 | 4-scf00071 | 4 |
| AX-157815785 | 4 | 53.816 | KV452804.1 | 3301552 | 4-scf00071 | 4 |
| AX-157815786 | 4 | 53.816 | KV452804.1 | 3302348 | 4-scf00071 | 4 |
| AX-157815787 | 4 | 53.816 | KV452804.1 | 3302981 | 4-scf00071 | 4 |
| AX-157953923 | 4 | 53.816 | KV452804.1 | 3395774 | 4-scf00071 | 4 |
| AX-157954060 | 4 | 53.816 | KV452804.1 | 3614172 | 4-scf00071 | 4 |
| AX-157953657 | 4 | 53.886 | KV452804.1 | 3077907 | 4-scf00071 | 4 |
| AX-157953686 | 4 | 53.886 | KV452804.1 | 3103887 | 4-scf00071 | 4 |
| AX-158406141 | 4 | 53.886 | KV452804.1 | 3105694 | 4-scf00071 | 4 |
| AX-157953843 | 4 | 53.886 | KV452804.1 | 3300907 | 4-scf00071 | 4 |
| AX-157953858 | 4 | 53.886 | KV452804.1 | 3323581 | 4-scf00071 | 4 |
| AX-157952828 | 4 | 53.925 | KV452804.1 | 1905003 | 4-scf00071 | 4 |
| AX-157952850 | 4 | 53.925 | KV452804.1 | 1945751 | 4-scf00071 | 4 |
| AX-157952932 | 4 | 53.925 | KV452804.1 | 2058221 | 4-scf00071 | 4 |
| AX-157953087 | 4 | 53.925 | KV452804.1 | 2291869 | 4-scf00071 | 4 |
| AX-157742912 | 4 | 53.925 | KV452804.1 | 2335334 | 4-scf00071 | 4 |
| AX-157953129 | 4 | 53.925 | KV452804.1 | 2374250 | 4-scf00071 | 4 |
| AX-157953317 | 4 | 53.925 | KV452804.1 | 2602845 | 4-scf00071 | 4 |
| AX-157953394 | 4 | 53.925 | KV452804.1 | 2717288 | 4-scf00071 | 4 |
| AX-157953417 | 4 | 53.925 | KV452804.1 | 2750981 | 4-scf00071 | 4 |
| AX-157953453 | 4 | 53.925 | KV452804.1 | 2789559 | 4-scf00071 | 4 |
| AX-157953459 | 4 | 53.925 | KV452804.1 | 2794263 | 4-scf00071 | 4 |
| AX-157953485 | 4 | 53.925 | KV452804.1 | 2829936 | 4-scf00071 | 4 |
| AX-157953502 | 4 | 53.925 | KV452804.1 | 2852646 | 4-scf00071 | 4 |
| AX-158390227 | 4 | 53.925 | KV452804.1 | 2869453 | 4-scf00071 | 4 |
| AX-157953533 | 4 | 53.925 | KV452804.1 | 2887875 | 4-scf00071 | 4 |
| AX-157765503 | 4 | 53.925 | KV452804.1 | 2954123 | 4-scf00071 | 4 |
| AX-157953592 | 4 | 53.925 | KV452804.1 | 2972485 | 4-scf00071 | 4 |

|              |   |        |            |         |            |   |
|--------------|---|--------|------------|---------|------------|---|
| AX-157953594 | 4 | 53.925 | KV452804.1 | 2976023 | 4-scf00071 | 4 |
| AX-157953609 | 4 | 53.925 | KV452804.1 | 3003444 | 4-scf00071 | 4 |
| AX-157953623 | 4 | 53.925 | KV452804.1 | 3017521 | 4-scf00071 | 4 |
| AX-157953628 | 4 | 53.925 | KV452804.1 | 3027964 | 4-scf00071 | 4 |
| AX-157953652 | 4 | 53.925 | KV452804.1 | 3071391 | 4-scf00071 | 4 |
| AX-157953653 | 4 | 53.925 | KV452804.1 | 3072088 | 4-scf00071 | 4 |
| AX-157953656 | 4 | 53.925 | KV452804.1 | 3075147 | 4-scf00071 | 4 |
| AX-157953658 | 4 | 53.925 | KV452804.1 | 3078763 | 4-scf00071 | 4 |
| AX-157815761 | 4 | 53.925 | KV452804.1 | 3079349 | 4-scf00071 | 4 |
| AX-157953665 | 4 | 53.925 | KV452804.1 | 3083956 | 4-scf00071 | 4 |
| AX-157953666 | 4 | 53.925 | KV452804.1 | 3084517 | 4-scf00071 | 4 |
| AX-157953667 | 4 | 53.925 | KV452804.1 | 3084745 | 4-scf00071 | 4 |
| AX-157953671 | 4 | 53.925 | KV452804.1 | 3086444 | 4-scf00071 | 4 |
| AX-157953678 | 4 | 53.925 | KV452804.1 | 3094244 | 4-scf00071 | 4 |
| AX-157953679 | 4 | 53.925 | KV452804.1 | 3094562 | 4-scf00071 | 4 |
| AX-157953680 | 4 | 53.925 | KV452804.1 | 3095609 | 4-scf00071 | 4 |
| AX-157815765 | 4 | 53.925 | KV452804.1 | 3096065 | 4-scf00071 | 4 |
| AX-157953683 | 4 | 53.925 | KV452804.1 | 3098449 | 4-scf00071 | 4 |
| AX-157953685 | 4 | 53.925 | KV452804.1 | 3102991 | 4-scf00071 | 4 |
| AX-158406140 | 4 | 53.925 | KV452804.1 | 3105543 | 4-scf00071 | 4 |
| AX-157953689 | 4 | 53.925 | KV452804.1 | 3107634 | 4-scf00071 | 4 |
| AX-157869573 | 4 | 53.925 | KV452804.1 | 3120949 | 4-scf00071 | 4 |
| AX-157953692 | 4 | 53.925 | KV452804.1 | 3127576 | 4-scf00071 | 4 |
| AX-157953693 | 4 | 53.925 | KV452804.1 | 3128233 | 4-scf00071 | 4 |
| AX-157709534 | 4 | 53.925 | KV452804.1 | 3129583 | 4-scf00071 | 4 |
| AX-157953694 | 4 | 53.925 | KV452804.1 | 3129731 | 4-scf00071 | 4 |
| AX-157953695 | 4 | 53.925 | KV452804.1 | 3130092 | 4-scf00071 | 4 |
| AX-157953698 | 4 | 53.925 | KV452804.1 | 3133662 | 4-scf00071 | 4 |
| AX-157953700 | 4 | 53.925 | KV452804.1 | 3135791 | 4-scf00071 | 4 |
| AX-157815771 | 4 | 53.925 | KV452804.1 | 3137248 | 4-scf00071 | 4 |
| AX-157953702 | 4 | 53.925 | KV452804.1 | 3138088 | 4-scf00071 | 4 |
| AX-157953704 | 4 | 53.925 | KV452804.1 | 3141611 | 4-scf00071 | 4 |
| AX-157815772 | 4 | 53.925 | KV452804.1 | 3144191 | 4-scf00071 | 4 |
| AX-157953706 | 4 | 53.925 | KV452804.1 | 3144321 | 4-scf00071 | 4 |
| AX-157815773 | 4 | 53.925 | KV452804.1 | 3149844 | 4-scf00071 | 4 |
| AX-157953710 | 4 | 53.925 | KV452804.1 | 3150114 | 4-scf00071 | 4 |
| AX-157953711 | 4 | 53.925 | KV452804.1 | 3151831 | 4-scf00071 | 4 |
| AX-157953712 | 4 | 53.925 | KV452804.1 | 3153188 | 4-scf00071 | 4 |
| AX-157953713 | 4 | 53.925 | KV452804.1 | 3153432 | 4-scf00071 | 4 |
| AX-157953715 | 4 | 53.925 | KV452804.1 | 3158257 | 4-scf00071 | 4 |
| AX-157953717 | 4 | 53.925 | KV452804.1 | 3159369 | 4-scf00071 | 4 |
| AX-157953718 | 4 | 53.925 | KV452804.1 | 3160052 | 4-scf00071 | 4 |
| AX-158422038 | 4 | 53.925 | KV452804.1 | 3162717 | 4-scf00071 | 4 |
| AX-157815775 | 4 | 53.925 | KV452804.1 | 3166488 | 4-scf00071 | 4 |
| AX-157953722 | 4 | 53.925 | KV452804.1 | 3167197 | 4-scf00071 | 4 |
| AX-157953723 | 4 | 53.925 | KV452804.1 | 3168178 | 4-scf00071 | 4 |
| AX-157815777 | 4 | 53.925 | KV452804.1 | 3168858 | 4-scf00071 | 4 |
| AX-157953724 | 4 | 53.925 | KV452804.1 | 3170686 | 4-scf00071 | 4 |
| AX-157953726 | 4 | 53.925 | KV452804.1 | 3172724 | 4-scf00071 | 4 |
| AX-157953728 | 4 | 53.925 | KV452804.1 | 3173565 | 4-scf00071 | 4 |
| AX-157953729 | 4 | 53.925 | KV452804.1 | 3173757 | 4-scf00071 | 4 |



|              |   |        |            |         |            |   |
|--------------|---|--------|------------|---------|------------|---|
| AX-157953730 | 4 | 53.925 | KV452804.1 | 3174780 | 4-scf00071 | 4 |
| AX-157953732 | 4 | 53.925 | KV452804.1 | 3175968 | 4-scf00071 | 4 |
| AX-157953733 | 4 | 53.925 | KV452804.1 | 3177094 | 4-scf00071 | 4 |
| AX-157953737 | 4 | 53.925 | KV452804.1 | 3179426 | 4-scf00071 | 4 |
| AX-157953738 | 4 | 53.925 | KV452804.1 | 3180379 | 4-scf00071 | 4 |
| AX-157953744 | 4 | 53.925 | KV452804.1 | 3189537 | 4-scf00071 | 4 |
| AX-157953748 | 4 | 53.925 | KV452804.1 | 3192851 | 4-scf00071 | 4 |
| AX-157953749 | 4 | 53.925 | KV452804.1 | 3193447 | 4-scf00071 | 4 |
| AX-157953759 | 4 | 53.925 | KV452804.1 | 3201442 | 4-scf00071 | 4 |
| AX-157697046 | 4 | 53.925 | KV452804.1 | 3203551 | 4-scf00071 | 4 |
| AX-157953761 | 4 | 53.925 | KV452804.1 | 3204266 | 4-scf00071 | 4 |
| AX-157953762 | 4 | 53.925 | KV452804.1 | 3204766 | 4-scf00071 | 4 |
| AX-157695104 | 4 | 53.925 | KV452804.1 | 3206208 | 4-scf00071 | 4 |
| AX-157953766 | 4 | 53.925 | KV452804.1 | 3210107 | 4-scf00071 | 4 |
| AX-157953767 | 4 | 53.925 | KV452804.1 | 3210740 | 4-scf00071 | 4 |
| AX-157953768 | 4 | 53.925 | KV452804.1 | 3210950 | 4-scf00071 | 4 |
| AX-157815778 | 4 | 53.925 | KV452804.1 | 3213349 | 4-scf00071 | 4 |
| AX-157953770 | 4 | 53.925 | KV452804.1 | 3214964 | 4-scf00071 | 4 |
| AX-157953771 | 4 | 53.925 | KV452804.1 | 3215834 | 4-scf00071 | 4 |
| AX-157953774 | 4 | 53.925 | KV452804.1 | 3218300 | 4-scf00071 | 4 |
| AX-157953777 | 4 | 53.925 | KV452804.1 | 3221385 | 4-scf00071 | 4 |
| AX-157953778 | 4 | 53.925 | KV452804.1 | 3221730 | 4-scf00071 | 4 |
| AX-157953779 | 4 | 53.925 | KV452804.1 | 3222045 | 4-scf00071 | 4 |
| AX-157953780 | 4 | 53.925 | KV452804.1 | 3223180 | 4-scf00071 | 4 |
| AX-157953781 | 4 | 53.925 | KV452804.1 | 3223770 | 4-scf00071 | 4 |
| AX-157953782 | 4 | 53.925 | KV452804.1 | 3224467 | 4-scf00071 | 4 |
| AX-157953783 | 4 | 53.925 | KV452804.1 | 3224684 | 4-scf00071 | 4 |
| AX-157953784 | 4 | 53.925 | KV452804.1 | 3225318 | 4-scf00071 | 4 |
| AX-157953786 | 4 | 53.925 | KV452804.1 | 3227116 | 4-scf00071 | 4 |
| AX-157953787 | 4 | 53.925 | KV452804.1 | 3227689 | 4-scf00071 | 4 |
| AX-157953788 | 4 | 53.925 | KV452804.1 | 3233549 | 4-scf00071 | 4 |
| AX-157953790 | 4 | 53.925 | KV452804.1 | 3235996 | 4-scf00071 | 4 |
| AX-157953791 | 4 | 53.925 | KV452804.1 | 3236603 | 4-scf00071 | 4 |
| AX-157815780 | 4 | 53.925 | KV452804.1 | 3238906 | 4-scf00071 | 4 |
| AX-157953792 | 4 | 53.925 | KV452804.1 | 3238984 | 4-scf00071 | 4 |
| AX-157953795 | 4 | 53.925 | KV452804.1 | 3241941 | 4-scf00071 | 4 |
| AX-157953797 | 4 | 53.925 | KV452804.1 | 3244600 | 4-scf00071 | 4 |
| AX-157953798 | 4 | 53.925 | KV452804.1 | 3245601 | 4-scf00071 | 4 |
| AX-157953799 | 4 | 53.925 | KV452804.1 | 3246574 | 4-scf00071 | 4 |
| AX-157953804 | 4 | 53.925 | KV452804.1 | 3253809 | 4-scf00071 | 4 |
| AX-157953805 | 4 | 53.925 | KV452804.1 | 3255000 | 4-scf00071 | 4 |
| AX-157815784 | 4 | 53.925 | KV452804.1 | 3255200 | 4-scf00071 | 4 |
| AX-157953806 | 4 | 53.925 | KV452804.1 | 3255451 | 4-scf00071 | 4 |
| AX-157953808 | 4 | 53.925 | KV452804.1 | 3256592 | 4-scf00071 | 4 |
| AX-157953809 | 4 | 53.925 | KV452804.1 | 3259691 | 4-scf00071 | 4 |
| AX-157953810 | 4 | 53.925 | KV452804.1 | 3261034 | 4-scf00071 | 4 |
| AX-157953811 | 4 | 53.925 | KV452804.1 | 3265127 | 4-scf00071 | 4 |
| AX-157953813 | 4 | 53.925 | KV452804.1 | 3267262 | 4-scf00071 | 4 |
| AX-157741003 | 4 | 53.925 | KV452804.1 | 3269075 | 4-scf00071 | 4 |
| AX-157953814 | 4 | 53.925 | KV452804.1 | 3269494 | 4-scf00071 | 4 |
| AX-157953816 | 4 | 53.925 | KV452804.1 | 3271076 | 4-scf00071 | 4 |

|              |   |        |            |         |            |   |
|--------------|---|--------|------------|---------|------------|---|
| AX-157953819 | 4 | 53.925 | KV452804.1 | 3274678 | 4-scf00071 | 4 |
| AX-158406152 | 4 | 53.925 | KV452804.1 | 3280772 | 4-scf00071 | 4 |
| AX-157953826 | 4 | 53.925 | KV452804.1 | 3282192 | 4-scf00071 | 4 |
| AX-157953828 | 4 | 53.925 | KV452804.1 | 3283621 | 4-scf00071 | 4 |
| AX-157953829 | 4 | 53.925 | KV452804.1 | 3284481 | 4-scf00071 | 4 |
| AX-157953830 | 4 | 53.925 | KV452804.1 | 3285866 | 4-scf00071 | 4 |
| AX-157953834 | 4 | 53.925 | KV452804.1 | 3292590 | 4-scf00071 | 4 |
| AX-157953837 | 4 | 53.925 | KV452804.1 | 3295924 | 4-scf00071 | 4 |
| AX-157953838 | 4 | 53.925 | KV452804.1 | 3296542 | 4-scf00071 | 4 |
| AX-157953839 | 4 | 53.925 | KV452804.1 | 3297065 | 4-scf00071 | 4 |
| AX-157953840 | 4 | 53.925 | KV452804.1 | 3298157 | 4-scf00071 | 4 |
| AX-157953846 | 4 | 53.925 | KV452804.1 | 3308167 | 4-scf00071 | 4 |
| AX-157953847 | 4 | 53.925 | KV452804.1 | 3309794 | 4-scf00071 | 4 |
| AX-157953849 | 4 | 53.925 | KV452804.1 | 3312035 | 4-scf00071 | 4 |
| AX-157953850 | 4 | 53.925 | KV452804.1 | 3312587 | 4-scf00071 | 4 |
| AX-157953852 | 4 | 53.925 | KV452804.1 | 3315602 | 4-scf00071 | 4 |
| AX-157953854 | 4 | 53.925 | KV452804.1 | 3317100 | 4-scf00071 | 4 |
| AX-157953855 | 4 | 53.925 | KV452804.1 | 3318684 | 4-scf00071 | 4 |
| AX-157720604 | 4 | 53.925 | KV452804.1 | 3320975 | 4-scf00071 | 4 |
| AX-157953856 | 4 | 53.925 | KV452804.1 | 3321787 | 4-scf00071 | 4 |
| AX-157953860 | 4 | 53.925 | KV452804.1 | 3325317 | 4-scf00071 | 4 |
| AX-157953861 | 4 | 53.925 | KV452804.1 | 3326147 | 4-scf00071 | 4 |
| AX-157953863 | 4 | 53.925 | KV452804.1 | 3328435 | 4-scf00071 | 4 |
| AX-157953864 | 4 | 53.925 | KV452804.1 | 3328675 | 4-scf00071 | 4 |
| AX-157953865 | 4 | 53.925 | KV452804.1 | 3329186 | 4-scf00071 | 4 |
| AX-157953866 | 4 | 53.925 | KV452804.1 | 3330802 | 4-scf00071 | 4 |
| AX-157953871 | 4 | 53.925 | KV452804.1 | 3334242 | 4-scf00071 | 4 |
| AX-157953872 | 4 | 53.925 | KV452804.1 | 3335003 | 4-scf00071 | 4 |
| AX-157953873 | 4 | 53.925 | KV452804.1 | 3335278 | 4-scf00071 | 4 |
| AX-157953874 | 4 | 53.925 | KV452804.1 | 3336808 | 4-scf00071 | 4 |
| AX-157953875 | 4 | 53.925 | KV452804.1 | 3337482 | 4-scf00071 | 4 |
| AX-157953876 | 4 | 53.925 | KV452804.1 | 3338396 | 4-scf00071 | 4 |
| AX-157953878 | 4 | 53.925 | KV452804.1 | 3339461 | 4-scf00071 | 4 |
| AX-157953881 | 4 | 53.925 | KV452804.1 | 3340876 | 4-scf00071 | 4 |
| AX-157953882 | 4 | 53.925 | KV452804.1 | 3341005 | 4-scf00071 | 4 |
| AX-157953883 | 4 | 53.925 | KV452804.1 | 3341803 | 4-scf00071 | 4 |
| AX-157708127 | 4 | 53.925 | KV452804.1 | 3342816 | 4-scf00071 | 4 |
| AX-157953884 | 4 | 53.925 | KV452804.1 | 3343046 | 4-scf00071 | 4 |
| AX-157953885 | 4 | 53.925 | KV452804.1 | 3343787 | 4-scf00071 | 4 |
| AX-157953886 | 4 | 53.925 | KV452804.1 | 3344766 | 4-scf00071 | 4 |
| AX-157953890 | 4 | 53.925 | KV452804.1 | 3351001 | 4-scf00071 | 4 |
| AX-157815788 | 4 | 53.925 | KV452804.1 | 3354233 | 4-scf00071 | 4 |
| AX-157953897 | 4 | 53.925 | KV452804.1 | 3364699 | 4-scf00071 | 4 |
| AX-157953900 | 4 | 53.925 | KV452804.1 | 3368926 | 4-scf00071 | 4 |
| AX-157953901 | 4 | 53.925 | KV452804.1 | 3369172 | 4-scf00071 | 4 |
| AX-157754405 | 4 | 53.925 | KV452804.1 | 3369516 | 4-scf00071 | 4 |
| AX-157953902 | 4 | 53.925 | KV452804.1 | 3370712 | 4-scf00071 | 4 |
| AX-157953903 | 4 | 53.925 | KV452804.1 | 3374428 | 4-scf00071 | 4 |
| AX-157953905 | 4 | 53.925 | KV452804.1 | 3377118 | 4-scf00071 | 4 |
| AX-157953906 | 4 | 53.925 | KV452804.1 | 3377859 | 4-scf00071 | 4 |
| AX-157953909 | 4 | 53.925 | KV452804.1 | 3381143 | 4-scf00071 | 4 |

|              |   |        |            |         |            |   |
|--------------|---|--------|------------|---------|------------|---|
| AX-157815793 | 4 | 53.925 | KV452804.1 | 3382268 | 4-scf00071 | 4 |
| AX-157953911 | 4 | 53.925 | KV452804.1 | 3382456 | 4-scf00071 | 4 |
| AX-157953912 | 4 | 53.925 | KV452804.1 | 3382696 | 4-scf00071 | 4 |
| AX-157953913 | 4 | 53.925 | KV452804.1 | 3383785 | 4-scf00071 | 4 |
| AX-157953914 | 4 | 53.925 | KV452804.1 | 3384938 | 4-scf00071 | 4 |
| AX-157953915 | 4 | 53.925 | KV452804.1 | 3385489 | 4-scf00071 | 4 |
| AX-157953917 | 4 | 53.925 | KV452804.1 | 3386979 | 4-scf00071 | 4 |
| AX-157953920 | 4 | 53.925 | KV452804.1 | 3391003 | 4-scf00071 | 4 |
| AX-157953929 | 4 | 53.925 | KV452804.1 | 3404217 | 4-scf00071 | 4 |
| AX-157954048 | 4 | 53.925 | KV452804.1 | 3602394 | 4-scf00071 | 4 |
| AX-157954052 | 4 | 53.925 | KV452804.1 | 3605898 | 4-scf00071 | 4 |
| AX-157815824 | 4 | 53.925 | KV452804.1 | 3687915 | 4-scf00071 | 4 |
| AX-157954125 | 4 | 53.925 | KV452804.1 | 3695853 | 4-scf00071 | 4 |
| AX-157954368 | 4 | 53.925 | KV452804.1 | 3984283 | 4-scf00071 | 4 |
| AX-157954496 | 4 | 53.925 | KV452804.1 | 4116688 | 4-scf00071 | 4 |
| AX-157815907 | 4 | 53.925 | KV452804.1 | 5304045 | 4-scf00071 | 4 |
| AX-157955735 | 4 | 53.925 | KV452804.1 | 5515254 | 4-scf00071 | 4 |
| AX-157955977 | 4 | 53.925 | KV452804.1 | 5831184 | 4-scf00071 | 4 |
| AX-157815977 | 4 | 53.925 | KV452804.1 | 6099563 | 4-scf00071 | 4 |
| AX-157956193 | 4 | 53.925 | KV452804.1 | 6158537 | 4-scf00071 | 4 |
| AX-157816156 | 4 | 53.925 | KV452806.1 | 2359122 | 4-scf00073 | 4 |
| AX-157958141 | 4 | 53.925 | KV452806.1 | 2367613 | 4-scf00073 | 4 |
| AX-157958243 | 4 | 53.925 | KV452814.1 | 143797  | 4-scf00074 | 4 |
| AX-157748421 | 4 | 53.925 | KV452814.1 | 296299  | 4-scf00074 | 4 |
| AX-157958347 | 4 | 53.925 | KV452814.1 | 377726  | 4-scf00074 | 4 |
| AX-157958351 | 4 | 53.925 | KV452814.1 | 385079  | 4-scf00074 | 4 |
| AX-157816176 | 4 | 53.925 | KV452814.1 | 390223  | 4-scf00074 | 4 |
| AX-157958375 | 4 | 53.925 | KV452814.1 | 430270  | 4-scf00074 | 4 |
| AX-157747483 | 4 | 53.925 | KV452814.1 | 459477  | 4-scf00074 | 4 |
| AX-157958425 | 4 | 53.925 | KV452814.1 | 494294  | 4-scf00074 | 4 |
| AX-157958434 | 4 | 53.925 | KV452814.1 | 510951  | 4-scf00074 | 4 |
| AX-157958517 | 4 | 53.925 | KV452814.1 | 669283  | 4-scf00074 | 4 |
| AX-157958615 | 4 | 53.925 | KV452814.1 | 850514  | 4-scf00074 | 4 |
| AX-157958655 | 4 | 53.925 | KV452814.1 | 894960  | 4-scf00074 | 4 |
| AX-157958714 | 4 | 53.925 | KV452814.1 | 1071593 | 4-scf00074 | 4 |
| AX-158415342 | 4 | 53.925 | KV452815.1 | 181969  | 4-scf00076 | 4 |
| AX-157959114 | 4 | 53.925 | KV452815.1 | 302533  | 4-scf00076 | 4 |
| AX-157959519 | 4 | 53.925 | KV452816.1 | 217644  | 4-scf00077 | 4 |
| AX-157959421 | 4 | 53.925 | KV452816.1 | 423594  | 4-scf00077 | 4 |
| AX-157816261 | 4 | 53.925 | KV452816.1 | 530640  | 4-scf00077 | 4 |
| AX-157959364 | 4 | 53.925 | KV452816.1 | 539120  | 4-scf00077 | 4 |
| AX-157959349 | 4 | 53.925 | KV452816.1 | 573762  | 4-scf00077 | 4 |
| AX-157959281 | 4 | 53.925 | KV452816.1 | 705299  | 4-scf00077 | 4 |
| AX-157959219 | 4 | 53.925 | KV452816.1 | 802338  | 4-scf00077 | 4 |
| AX-157959201 | 4 | 53.925 | KV452816.1 | 830088  | 4-scf00077 | 4 |
| AX-157959197 | 4 | 53.925 | KV452816.1 | 841654  | 4-scf00077 | 4 |
| AX-157959632 | 4 | 53.925 | KV452816.1 | 873618  | 4-scf00077 | 4 |
| AX-157959670 | 4 | 53.925 | KV452816.1 | 948876  | 4-scf00077 | 4 |
| AX-157959693 | 4 | 53.925 | KV452816.1 | 982209  | 4-scf00077 | 4 |
| AX-157959699 | 4 | 53.925 | KV452816.1 | 988477  | 4-scf00077 | 4 |
| AX-157959749 | 4 | 53.925 | KV452816.1 | 1093295 | 4-scf00077 | 4 |

|              |   |        |            |         |            |   |
|--------------|---|--------|------------|---------|------------|---|
| AX-157959817 | 4 | 53.925 | KV452816.1 | 1210753 | 4-scf00077 | 4 |
| AX-157959870 | 4 | 53.925 | KV452816.1 | 1304421 | 4-scf00077 | 4 |
| AX-157959876 | 4 | 53.925 | KV452816.1 | 1318587 | 4-scf00077 | 4 |
| AX-157959897 | 4 | 53.925 | KV452816.1 | 1341903 | 4-scf00077 | 4 |
| AX-157959910 | 4 | 53.925 | KV452816.1 | 1360836 | 4-scf00077 | 4 |
| AX-157959926 | 4 | 53.925 | KV452816.1 | 1394878 | 4-scf00077 | 4 |
| AX-157959939 | 4 | 53.925 | KV452816.1 | 1415228 | 4-scf00077 | 4 |
| AX-157959966 | 4 | 53.925 | KV452818.1 | 19464   | 4-scf00079 | 4 |
| AX-157959971 | 4 | 53.925 | KV452818.1 | 31572   | 4-scf00079 | 4 |
| AX-157875516 | 4 | 53.925 | KV452818.1 | 138980  | 4-scf00079 | 4 |
| AX-157960028 | 4 | 53.925 | KV452818.1 | 165380  | 4-scf00079 | 4 |
| AX-157960048 | 4 | 53.925 | KV452818.1 | 201839  | 4-scf00079 | 4 |
| AX-157725515 | 4 | 53.925 | KV452818.1 | 318287  | 4-scf00079 | 4 |
| AX-157960469 | 4 | 53.925 | KV452819.1 | 3020    | 4-scf00080 | 4 |
| AX-157960440 | 4 | 53.925 | KV452819.1 | 42978   | 4-scf00080 | 4 |
| AX-157816359 | 4 | 53.925 | KV452819.1 | 54446   | 4-scf00080 | 4 |
| AX-157960410 | 4 | 53.925 | KV452819.1 | 91210   | 4-scf00080 | 4 |
| AX-157960361 | 4 | 53.925 | KV452819.1 | 155443  | 4-scf00080 | 4 |
| AX-157960336 | 4 | 53.925 | KV452819.1 | 189342  | 4-scf00080 | 4 |
| AX-157816346 | 4 | 53.925 | KV452819.1 | 195530  | 4-scf00080 | 4 |
| AX-157739300 | 4 | 53.925 | KV452819.1 | 209717  | 4-scf00080 | 4 |
| AX-157960271 | 4 | 53.925 | KV452819.1 | 264292  | 4-scf00080 | 4 |
| AX-157960239 | 4 | 53.925 | KV452819.1 | 286132  | 4-scf00080 | 4 |
| AX-157960237 | 4 | 53.925 | KV452819.1 | 289655  | 4-scf00080 | 4 |
| AX-157744366 | 4 | 53.925 | KV452819.1 | 300429  | 4-scf00080 | 4 |
| AX-157958987 | 4 | 53.925 | KV452819.1 | 426526  | 4-scf00080 | 4 |
| AX-157958969 | 4 | 53.925 | KV452819.1 | 452104  | 4-scf00080 | 4 |
| AX-157958892 | 4 | 53.925 | KV452819.1 | 565597  | 4-scf00080 | 4 |
| AX-157717607 | 4 | 53.925 | KV452819.1 | 571410  | 4-scf00080 | 4 |
| AX-157723150 | 4 | 53.925 | KV452819.1 | 614689  | 4-scf00080 | 4 |
| AX-157958814 | 4 | 53.925 | KV452819.1 | 669950  | 4-scf00080 | 4 |
| AX-157962491 | 4 | 53.925 | KV452819.1 | 865609  | 4-scf00080 | 4 |
| AX-157962502 | 4 | 53.925 | KV452819.1 | 888805  | 4-scf00080 | 4 |
| AX-157962503 | 4 | 53.925 | KV452819.1 | 898525  | 4-scf00080 | 4 |
| AX-157962556 | 4 | 53.925 | KV452819.1 | 970000  | 4-scf00080 | 4 |
| AX-157961963 | 4 | 53.925 | KV452819.1 | 1345222 | 4-scf00080 | 4 |
| AX-157961970 | 4 | 53.925 | KV452819.1 | 1351474 | 4-scf00080 | 4 |
| AX-157962018 | 4 | 53.925 | KV452819.1 | 1455189 | 4-scf00080 | 4 |
| AX-157962019 | 4 | 53.925 | KV452819.1 | 1459352 | 4-scf00080 | 4 |
| AX-157960547 | 4 | 53.925 | KV452807.1 | 132127  | 4-scf00081 | 4 |
| AX-157816379 | 4 | 53.925 | KV452811.1 | 133214  | 4-scf00082 | 4 |
| AX-157960668 | 4 | 53.925 | KV452811.1 | 151085  | 4-scf00082 | 4 |
| AX-157682644 | 4 | 53.925 | KV452810.1 | 6454    | 4-scf00085 | 4 |
| AX-157961265 | 4 | 53.925 | KV452824.1 | 774833  | 4-scf00086 | 4 |
| AX-157961376 | 4 | 53.925 | KV452824.1 | 901572  | 4-scf00086 | 4 |
| AX-157961660 | 4 | 53.925 | KV452812.1 | 87975   | 4-scf00087 | 4 |
| AX-157961714 | 4 | 53.925 | KV452813.1 | 77409   | 4-scf00088 | 4 |
| AX-157961777 | 4 | 53.925 | KV452813.1 | 255639  | 4-scf00088 | 4 |
| AX-157961870 | 4 | 53.925 | KV452813.1 | 504689  | 4-scf00088 | 4 |
| AX-157816436 | 4 | 53.925 | KV452813.1 | 579329  | 4-scf00088 | 4 |
| AX-157962619 | 4 | 53.925 | KV452820.1 | 16323   | 4-scf00091 | 4 |

|              |   |        |            |         |                |    |
|--------------|---|--------|------------|---------|----------------|----|
| AX-157962650 | 4 | 53.925 | KV452820.1 | 44473   | 4-scf00091     | 4  |
| AX-157962673 | 4 | 53.925 | KV452820.1 | 75709   | 4-scf00091     | 4  |
| AX-157963013 | 4 | 53.925 | KV452829.1 | 442941  | 4-scf00092     | 4  |
| AX-157682694 | 4 | 53.925 | KV452826.1 | 39334   | 4-scf00095     | 4  |
| AX-157969522 | 4 | 53.925 | KV452827.1 | 536385  | 4-scf00096     | 4  |
| AX-157700351 | 4 | 53.925 | FI871911.1 | 84      | IORI212 lctalu | UN |
| AX-157708002 | 4 | 53.925 | KV453395.1 | 10894   | scf00689       | UN |
| AX-157686389 | 4 | 53.925 | KV453395.1 | 41943   | scf00689       | UN |
| AX-157953895 | 4 | 53.93  | KV452804.1 | 3359828 | 4-scf00071     | 4  |
| AX-157953927 | 4 | 53.93  | KV452804.1 | 3402123 | 4-scf00071     | 4  |
| AX-157954053 | 4 | 53.93  | KV452804.1 | 3607441 | 4-scf00071     | 4  |
| AX-157953930 | 4 | 53.949 | KV452804.1 | 3404547 | 4-scf00071     | 4  |
| AX-157953931 | 4 | 54.034 | KV452804.1 | 3405692 | 4-scf00071     | 4  |
| AX-157953933 | 4 | 54.034 | KV452804.1 | 3407788 | 4-scf00071     | 4  |
| AX-157953934 | 4 | 54.034 | KV452804.1 | 3411042 | 4-scf00071     | 4  |
| AX-157953935 | 4 | 54.034 | KV452804.1 | 3413842 | 4-scf00071     | 4  |
| AX-157815801 | 4 | 54.034 | KV452804.1 | 3415706 | 4-scf00071     | 4  |
| AX-157815802 | 4 | 54.144 | KV452804.1 | 3421646 | 4-scf00071     | 4  |
| AX-157815804 | 4 | 54.144 | KV452804.1 | 3430131 | 4-scf00071     | 4  |
| AX-157953942 | 4 | 54.144 | KV452804.1 | 3431691 | 4-scf00071     | 4  |
| AX-157753283 | 4 | 54.144 | KV452804.1 | 3433003 | 4-scf00071     | 4  |
| AX-157953621 | 4 | 54.253 | KV452804.1 | 3015726 | 4-scf00071     | 4  |
| AX-158406139 | 4 | 54.253 | KV452804.1 | 3103256 | 4-scf00071     | 4  |
| AX-157815792 | 4 | 54.253 | KV452804.1 | 3378695 | 4-scf00071     | 4  |
| AX-157953944 | 4 | 54.253 | KV452804.1 | 3434715 | 4-scf00071     | 4  |
| AX-157953946 | 4 | 54.253 | KV452804.1 | 3437800 | 4-scf00071     | 4  |
| AX-157953947 | 4 | 54.253 | KV452804.1 | 3438661 | 4-scf00071     | 4  |
| AX-157953948 | 4 | 54.253 | KV452804.1 | 3439405 | 4-scf00071     | 4  |
| AX-157815805 | 4 | 54.253 | KV452804.1 | 3439710 | 4-scf00071     | 4  |
| AX-157953949 | 4 | 54.253 | KV452804.1 | 3442099 | 4-scf00071     | 4  |
| AX-157953950 | 4 | 54.253 | KV452804.1 | 3445087 | 4-scf00071     | 4  |
| AX-157953951 | 4 | 54.253 | KV452804.1 | 3445962 | 4-scf00071     | 4  |
| AX-157953952 | 4 | 54.253 | KV452804.1 | 3448057 | 4-scf00071     | 4  |
| AX-157953956 | 4 | 54.253 | KV452804.1 | 3454508 | 4-scf00071     | 4  |
| AX-157953959 | 4 | 54.253 | KV452804.1 | 3457152 | 4-scf00071     | 4  |
| AX-157953960 | 4 | 54.253 | KV452804.1 | 3458567 | 4-scf00071     | 4  |
| AX-157953969 | 4 | 54.253 | KV452804.1 | 3468085 | 4-scf00071     | 4  |
| AX-157953970 | 4 | 54.253 | KV452804.1 | 3468833 | 4-scf00071     | 4  |
| AX-157953972 | 4 | 54.253 | KV452804.1 | 3474629 | 4-scf00071     | 4  |
| AX-157953976 | 4 | 54.253 | KV452804.1 | 3481230 | 4-scf00071     | 4  |
| AX-157854687 | 4 | 54.253 | KV452804.1 | 3482303 | 4-scf00071     | 4  |
| AX-157953979 | 4 | 54.289 | KV452804.1 | 3483683 | 4-scf00071     | 4  |
| AX-157815782 | 4 | 54.362 | KV452804.1 | 3245216 | 4-scf00071     | 4  |
| AX-157953977 | 4 | 54.362 | KV452804.1 | 3481847 | 4-scf00071     | 4  |
| AX-157953983 | 4 | 54.362 | KV452804.1 | 3490277 | 4-scf00071     | 4  |
| AX-157953984 | 4 | 54.362 | KV452804.1 | 3491462 | 4-scf00071     | 4  |
| AX-157953986 | 4 | 54.362 | KV452804.1 | 3492507 | 4-scf00071     | 4  |
| AX-157953987 | 4 | 54.362 | KV452804.1 | 3493011 | 4-scf00071     | 4  |
| AX-157953988 | 4 | 54.362 | KV452804.1 | 3493492 | 4-scf00071     | 4  |
| AX-157954014 | 4 | 54.362 | KV452804.1 | 3537953 | 4-scf00071     | 4  |
| AX-157954033 | 4 | 54.362 | KV452804.1 | 3565685 | 4-scf00071     | 4  |

|              |   |        |            |         |            |   |
|--------------|---|--------|------------|---------|------------|---|
| AX-157954153 | 4 | 54.362 | KV452804.1 | 3737571 | 4-scf00071 | 4 |
| AX-157815806 | 4 | 54.418 | KV452804.1 | 3503522 | 4-scf00071 | 4 |
| AX-157953922 | 4 | 54.471 | KV452804.1 | 3395080 | 4-scf00071 | 4 |
| AX-157953971 | 4 | 54.471 | KV452804.1 | 3470164 | 4-scf00071 | 4 |
| AX-157953981 | 4 | 54.471 | KV452804.1 | 3486239 | 4-scf00071 | 4 |
| AX-157954003 | 4 | 54.471 | KV452804.1 | 3517512 | 4-scf00071 | 4 |
| AX-157954007 | 4 | 54.471 | KV452804.1 | 3525176 | 4-scf00071 | 4 |
| AX-157954009 | 4 | 54.471 | KV452804.1 | 3529977 | 4-scf00071 | 4 |
| AX-157954010 | 4 | 54.471 | KV452804.1 | 3533183 | 4-scf00071 | 4 |
| AX-157954011 | 4 | 54.471 | KV452804.1 | 3534239 | 4-scf00071 | 4 |
| AX-157954008 | 4 | 54.576 | KV452804.1 | 3529399 | 4-scf00071 | 4 |
| AX-157954015 | 4 | 54.576 | KV452804.1 | 3539383 | 4-scf00071 | 4 |
| AX-157954044 | 4 | 54.576 | KV452804.1 | 3598305 | 4-scf00071 | 4 |
| AX-157954046 | 4 | 54.576 | KV452804.1 | 3600752 | 4-scf00071 | 4 |
| AX-157954061 | 4 | 54.576 | KV452804.1 | 3615155 | 4-scf00071 | 4 |
| AX-158406162 | 4 | 54.576 | KV452804.1 | 3644862 | 4-scf00071 | 4 |
| AX-157953924 | 4 | 54.69  | KV452804.1 | 3396688 | 4-scf00071 | 4 |
| AX-157953994 | 4 | 54.69  | KV452804.1 | 3508127 | 4-scf00071 | 4 |
| AX-157954004 | 4 | 54.69  | KV452804.1 | 3518535 | 4-scf00071 | 4 |
| AX-157954012 | 4 | 54.69  | KV452804.1 | 3536806 | 4-scf00071 | 4 |
| AX-157954025 | 4 | 54.69  | KV452804.1 | 3553835 | 4-scf00071 | 4 |
| AX-157954027 | 4 | 54.69  | KV452804.1 | 3559991 | 4-scf00071 | 4 |
| AX-157755097 | 4 | 54.69  | KV452804.1 | 3571545 | 4-scf00071 | 4 |
| AX-157765600 | 4 | 54.69  | KV452804.1 | 3571669 | 4-scf00071 | 4 |
| AX-157954036 | 4 | 54.69  | KV452804.1 | 3572004 | 4-scf00071 | 4 |
| AX-157715598 | 4 | 54.69  | KV452804.1 | 3573776 | 4-scf00071 | 4 |
| AX-157954039 | 4 | 54.69  | KV452804.1 | 3590710 | 4-scf00071 | 4 |
| AX-157815812 | 4 | 54.69  | KV452804.1 | 3601809 | 4-scf00071 | 4 |
| AX-157954049 | 4 | 54.69  | KV452804.1 | 3603617 | 4-scf00071 | 4 |
| AX-157954050 | 4 | 54.69  | KV452804.1 | 3604355 | 4-scf00071 | 4 |
| AX-157954054 | 4 | 54.69  | KV452804.1 | 3607926 | 4-scf00071 | 4 |
| AX-157954056 | 4 | 54.69  | KV452804.1 | 3611022 | 4-scf00071 | 4 |
| AX-157954057 | 4 | 54.69  | KV452804.1 | 3611452 | 4-scf00071 | 4 |
| AX-157954058 | 4 | 54.69  | KV452804.1 | 3612440 | 4-scf00071 | 4 |
| AX-157954059 | 4 | 54.69  | KV452804.1 | 3613002 | 4-scf00071 | 4 |
| AX-157714159 | 4 | 54.69  | KV452804.1 | 3623182 | 4-scf00071 | 4 |
| AX-157954068 | 4 | 54.69  | KV452804.1 | 3625827 | 4-scf00071 | 4 |
| AX-157954074 | 4 | 54.69  | KV452804.1 | 3632218 | 4-scf00071 | 4 |
| AX-157954075 | 4 | 54.69  | KV452804.1 | 3632433 | 4-scf00071 | 4 |
| AX-157954108 | 4 | 54.69  | KV452804.1 | 3668664 | 4-scf00071 | 4 |
| AX-157954442 | 4 | 54.69  | KV452804.1 | 4061204 | 4-scf00071 | 4 |
| AX-157956401 | 4 | 54.69  | KV452805.1 | 3207    | 4-scf00072 | 4 |
| AX-157957680 | 4 | 54.69  | KV452806.1 | 1502178 | 4-scf00073 | 4 |
| AX-157963712 | 4 | 54.69  | KV452829.1 | 1895041 | 4-scf00092 | 4 |
| AX-157954081 | 4 | 54.749 | KV452804.1 | 3638250 | 4-scf00071 | 4 |
| AX-157953677 | 4 | 54.799 | KV452804.1 | 3090895 | 4-scf00071 | 4 |
| AX-157953755 | 4 | 54.799 | KV452804.1 | 3198986 | 4-scf00071 | 4 |
| AX-157953756 | 4 | 54.799 | KV452804.1 | 3200036 | 4-scf00071 | 4 |
| AX-157953867 | 4 | 54.799 | KV452804.1 | 3331982 | 4-scf00071 | 4 |
| AX-157953992 | 4 | 54.799 | KV452804.1 | 3505709 | 4-scf00071 | 4 |
| AX-157954002 | 4 | 54.799 | KV452804.1 | 3516560 | 4-scf00071 | 4 |

|              |   |        |            |         |            |   |
|--------------|---|--------|------------|---------|------------|---|
| AX-157954024 | 4 | 54.799 | KV452804.1 | 3550048 | 4-scf00071 | 4 |
| AX-157954034 | 4 | 54.799 | KV452804.1 | 3567381 | 4-scf00071 | 4 |
| AX-157815814 | 4 | 54.799 | KV452804.1 | 3627818 | 4-scf00071 | 4 |
| AX-157815815 | 4 | 54.799 | KV452804.1 | 3639007 | 4-scf00071 | 4 |
| AX-157954082 | 4 | 54.799 | KV452804.1 | 3639559 | 4-scf00071 | 4 |
| AX-157954083 | 4 | 54.799 | KV452804.1 | 3639940 | 4-scf00071 | 4 |
| AX-157954084 | 4 | 54.799 | KV452804.1 | 3642974 | 4-scf00071 | 4 |
| AX-157954086 | 4 | 54.799 | KV452804.1 | 3644262 | 4-scf00071 | 4 |
| AX-158406161 | 4 | 54.799 | KV452804.1 | 3644792 | 4-scf00071 | 4 |
| AX-157954088 | 4 | 54.799 | KV452804.1 | 3649229 | 4-scf00071 | 4 |
| AX-157954090 | 4 | 54.799 | KV452804.1 | 3650280 | 4-scf00071 | 4 |
| AX-157815817 | 4 | 54.799 | KV452804.1 | 3672847 | 4-scf00071 | 4 |
| AX-157954150 | 4 | 54.799 | KV452804.1 | 3735221 | 4-scf00071 | 4 |
| AX-157954155 | 4 | 54.799 | KV452804.1 | 3743294 | 4-scf00071 | 4 |
| AX-157953842 | 4 | 54.821 | KV452804.1 | 3300027 | 4-scf00071 | 4 |
| AX-157953845 | 4 | 54.821 | KV452804.1 | 3304596 | 4-scf00071 | 4 |
| AX-157954085 | 4 | 54.821 | KV452804.1 | 3644092 | 4-scf00071 | 4 |
| AX-157954087 | 4 | 54.821 | KV452804.1 | 3644994 | 4-scf00071 | 4 |
| AX-157954089 | 4 | 54.867 | KV452804.1 | 3649631 | 4-scf00071 | 4 |
| AX-157815762 | 4 | 54.908 | KV452804.1 | 3080339 | 4-scf00071 | 4 |
| AX-157953670 | 4 | 54.908 | KV452804.1 | 3086214 | 4-scf00071 | 4 |
| AX-157953904 | 4 | 54.908 | KV452804.1 | 3374912 | 4-scf00071 | 4 |
| AX-157815800 | 4 | 54.908 | KV452804.1 | 3414136 | 4-scf00071 | 4 |
| AX-157953937 | 4 | 54.908 | KV452804.1 | 3419245 | 4-scf00071 | 4 |
| AX-157954035 | 4 | 54.908 | KV452804.1 | 3568478 | 4-scf00071 | 4 |
| AX-157954055 | 4 | 54.908 | KV452804.1 | 3610961 | 4-scf00071 | 4 |
| AX-157954080 | 4 | 54.908 | KV452804.1 | 3635917 | 4-scf00071 | 4 |
| AX-157954091 | 4 | 54.908 | KV452804.1 | 3651229 | 4-scf00071 | 4 |
| AX-157954093 | 4 | 54.908 | KV452804.1 | 3652293 | 4-scf00071 | 4 |
| AX-157954095 | 4 | 54.908 | KV452804.1 | 3654926 | 4-scf00071 | 4 |
| AX-157954097 | 4 | 54.908 | KV452804.1 | 3656671 | 4-scf00071 | 4 |
| AX-157954099 | 4 | 54.908 | KV452804.1 | 3658160 | 4-scf00071 | 4 |
| AX-157954100 | 4 | 54.908 | KV452804.1 | 3658830 | 4-scf00071 | 4 |
| AX-157954102 | 4 | 54.908 | KV452804.1 | 3661605 | 4-scf00071 | 4 |
| AX-157954103 | 4 | 54.908 | KV452804.1 | 3663012 | 4-scf00071 | 4 |
| AX-157954104 | 4 | 54.908 | KV452804.1 | 3663232 | 4-scf00071 | 4 |
| AX-157954105 | 4 | 54.908 | KV452804.1 | 3664524 | 4-scf00071 | 4 |
| AX-157739627 | 4 | 54.908 | KV452804.1 | 3672642 | 4-scf00071 | 4 |
| AX-157815818 | 4 | 54.908 | KV452804.1 | 3672911 | 4-scf00071 | 4 |
| AX-157954110 | 4 | 54.908 | KV452804.1 | 3673474 | 4-scf00071 | 4 |
| AX-157738668 | 4 | 54.908 | KV452804.1 | 3674752 | 4-scf00071 | 4 |
| AX-157954112 | 4 | 54.908 | KV452804.1 | 3676038 | 4-scf00071 | 4 |
| AX-157954113 | 4 | 54.908 | KV452804.1 | 3677260 | 4-scf00071 | 4 |
| AX-157954114 | 4 | 54.908 | KV452804.1 | 3678340 | 4-scf00071 | 4 |
| AX-157754736 | 4 | 54.908 | KV452804.1 | 3680150 | 4-scf00071 | 4 |
| AX-157954116 | 4 | 54.908 | KV452804.1 | 3682119 | 4-scf00071 | 4 |
| AX-157954117 | 4 | 54.908 | KV452804.1 | 3682366 | 4-scf00071 | 4 |
| AX-157954119 | 4 | 54.908 | KV452804.1 | 3685227 | 4-scf00071 | 4 |
| AX-157815822 | 4 | 54.908 | KV452804.1 | 3685594 | 4-scf00071 | 4 |
| AX-157725552 | 4 | 54.908 | KV452804.1 | 3698603 | 4-scf00071 | 4 |
| AX-157954134 | 4 | 54.908 | KV452804.1 | 3706046 | 4-scf00071 | 4 |

|              |   |        |            |         |            |   |
|--------------|---|--------|------------|---------|------------|---|
| AX-157954141 | 4 | 54.908 | KV452804.1 | 3716820 | 4-scf00071 | 4 |
| AX-157815828 | 4 | 54.908 | KV452804.1 | 3726814 | 4-scf00071 | 4 |
| AX-157954142 | 4 | 54.908 | KV452804.1 | 3726947 | 4-scf00071 | 4 |
| AX-157954143 | 4 | 54.908 | KV452804.1 | 3727789 | 4-scf00071 | 4 |
| AX-157954152 | 4 | 54.908 | KV452804.1 | 3736184 | 4-scf00071 | 4 |
| AX-157954154 | 4 | 54.908 | KV452804.1 | 3742119 | 4-scf00071 | 4 |
| AX-157815830 | 4 | 54.908 | KV452804.1 | 3748281 | 4-scf00071 | 4 |
| AX-157954194 | 4 | 54.908 | KV452804.1 | 3799329 | 4-scf00071 | 4 |
| AX-157954200 | 4 | 54.908 | KV452804.1 | 3803798 | 4-scf00071 | 4 |
| AX-157954236 | 4 | 54.908 | KV452804.1 | 3846026 | 4-scf00071 | 4 |
| AX-157954240 | 4 | 54.908 | KV452804.1 | 3850025 | 4-scf00071 | 4 |
| AX-157716430 | 4 | 54.908 | KV452804.1 | 4015941 | 4-scf00071 | 4 |
| AX-157954532 | 4 | 54.908 | KV452804.1 | 4152594 | 4-scf00071 | 4 |
| AX-157954533 | 4 | 54.908 | KV452804.1 | 4152856 | 4-scf00071 | 4 |
| AX-157954689 | 4 | 54.908 | KV452804.1 | 4349105 | 4-scf00071 | 4 |
| AX-157854714 | 4 | 54.908 | KV452804.1 | 4538101 | 4-scf00071 | 4 |
| AX-157854715 | 4 | 54.908 | KV452804.1 | 4555582 | 4-scf00071 | 4 |
| AX-157954907 | 4 | 54.908 | KV452804.1 | 4648532 | 4-scf00071 | 4 |
| AX-157682659 | 4 | 54.908 | KV452821.1 | 15542   | 4-scf00093 | 4 |
| AX-157682686 | 4 | 54.908 | KV452826.1 | 31358   | 4-scf00095 | 4 |
| AX-157954071 | 4 | 54.909 | KV452804.1 | 3629111 | 4-scf00071 | 4 |
| AX-157721119 | 4 | 54.909 | KV452804.1 | 3744700 | 4-scf00071 | 4 |
| AX-157954124 | 4 | 55.127 | KV452804.1 | 3693339 | 4-scf00071 | 4 |
| AX-157954157 | 4 | 55.127 | KV452804.1 | 3746030 | 4-scf00071 | 4 |
| AX-157954160 | 4 | 55.127 | KV452804.1 | 3749561 | 4-scf00071 | 4 |
| AX-157954165 | 4 | 55.127 | KV452804.1 | 3754008 | 4-scf00071 | 4 |
| AX-157815832 | 4 | 55.127 | KV452804.1 | 3755149 | 4-scf00071 | 4 |
| AX-157954167 | 4 | 55.127 | KV452804.1 | 3759366 | 4-scf00071 | 4 |
| AX-157954170 | 4 | 55.127 | KV452804.1 | 3762278 | 4-scf00071 | 4 |
| AX-157954171 | 4 | 55.127 | KV452804.1 | 3764064 | 4-scf00071 | 4 |
| AX-157954173 | 4 | 55.127 | KV452804.1 | 3767783 | 4-scf00071 | 4 |
| AX-157954179 | 4 | 55.127 | KV452804.1 | 3777526 | 4-scf00071 | 4 |
| AX-157954181 | 4 | 55.127 | KV452804.1 | 3779569 | 4-scf00071 | 4 |
| AX-157750185 | 4 | 55.127 | KV452804.1 | 3780324 | 4-scf00071 | 4 |
| AX-157954183 | 4 | 55.127 | KV452804.1 | 3781727 | 4-scf00071 | 4 |
| AX-157954192 | 4 | 55.127 | KV452804.1 | 3797914 | 4-scf00071 | 4 |
| AX-157815839 | 4 | 55.127 | KV452804.1 | 3928739 | 4-scf00071 | 4 |
| AX-157954320 | 4 | 55.127 | KV452804.1 | 3929213 | 4-scf00071 | 4 |
| AX-157954373 | 4 | 55.127 | KV452804.1 | 3990578 | 4-scf00071 | 4 |
| AX-157954393 | 4 | 55.127 | KV452804.1 | 4012585 | 4-scf00071 | 4 |
| AX-157954836 | 4 | 55.127 | KV452804.1 | 4536299 | 4-scf00071 | 4 |
| AX-157815887 | 4 | 55.127 | KV452804.1 | 4555271 | 4-scf00071 | 4 |
| AX-157955895 | 4 | 55.127 | KV452804.1 | 5708414 | 4-scf00071 | 4 |
| AX-157954178 | 4 | 55.14  | KV452804.1 | 3776045 | 4-scf00071 | 4 |
| AX-157954180 | 4 | 55.159 | KV452804.1 | 3778713 | 4-scf00071 | 4 |
| AX-157954182 | 4 | 55.186 | KV452804.1 | 3780983 | 4-scf00071 | 4 |
| AX-157954197 | 4 | 55.186 | KV452804.1 | 3800997 | 4-scf00071 | 4 |
| AX-157954199 | 4 | 55.186 | KV452804.1 | 3803395 | 4-scf00071 | 4 |
| AX-157815834 | 4 | 55.209 | KV452804.1 | 3790526 | 4-scf00071 | 4 |
| AX-157954098 | 4 | 55.236 | KV452804.1 | 3657431 | 4-scf00071 | 4 |
| AX-157815816 | 4 | 55.236 | KV452804.1 | 3664264 | 4-scf00071 | 4 |



|              |   |        |            |         |            |   |
|--------------|---|--------|------------|---------|------------|---|
| AX-157954211 | 4 | 55.236 | KV452804.1 | 3815451 | 4-scf00071 | 4 |
| AX-157713099 | 4 | 55.236 | KV452804.1 | 3825423 | 4-scf00071 | 4 |
| AX-158406167 | 4 | 55.236 | KV452804.1 | 3828067 | 4-scf00071 | 4 |
| AX-157815835 | 4 | 55.236 | KV452804.1 | 3833771 | 4-scf00071 | 4 |
| AX-157954227 | 4 | 55.236 | KV452804.1 | 3835124 | 4-scf00071 | 4 |
| AX-157954229 | 4 | 55.236 | KV452804.1 | 3836937 | 4-scf00071 | 4 |
| AX-157954231 | 4 | 55.236 | KV452804.1 | 3838988 | 4-scf00071 | 4 |
| AX-157884053 | 4 | 55.236 | KV452804.1 | 3840198 | 4-scf00071 | 4 |
| AX-157954233 | 4 | 55.236 | KV452804.1 | 3840446 | 4-scf00071 | 4 |
| AX-157954234 | 4 | 55.236 | KV452804.1 | 3844863 | 4-scf00071 | 4 |
| AX-157954246 | 4 | 55.236 | KV452804.1 | 3856468 | 4-scf00071 | 4 |
| AX-157954260 | 4 | 55.236 | KV452804.1 | 3870551 | 4-scf00071 | 4 |
| AX-157954270 | 4 | 55.236 | KV452804.1 | 3881606 | 4-scf00071 | 4 |
| AX-157954277 | 4 | 55.236 | KV452804.1 | 3887008 | 4-scf00071 | 4 |
| AX-157954283 | 4 | 55.236 | KV452804.1 | 3892577 | 4-scf00071 | 4 |
| AX-157954285 | 4 | 55.236 | KV452804.1 | 3893568 | 4-scf00071 | 4 |
| AX-157954296 | 4 | 55.236 | KV452804.1 | 3906050 | 4-scf00071 | 4 |
| AX-157954297 | 4 | 55.236 | KV452804.1 | 3906405 | 4-scf00071 | 4 |
| AX-157954312 | 4 | 55.236 | KV452804.1 | 3922495 | 4-scf00071 | 4 |
| AX-157954315 | 4 | 55.236 | KV452804.1 | 3925746 | 4-scf00071 | 4 |
| AX-157954316 | 4 | 55.236 | KV452804.1 | 3926137 | 4-scf00071 | 4 |
| AX-157954317 | 4 | 55.236 | KV452804.1 | 3926791 | 4-scf00071 | 4 |
| AX-157954340 | 4 | 55.236 | KV452804.1 | 3952862 | 4-scf00071 | 4 |
| AX-157954346 | 4 | 55.236 | KV452804.1 | 3956371 | 4-scf00071 | 4 |
| AX-157954350 | 4 | 55.236 | KV452804.1 | 3959166 | 4-scf00071 | 4 |
| AX-157954351 | 4 | 55.236 | KV452804.1 | 3959627 | 4-scf00071 | 4 |
| AX-157954353 | 4 | 55.236 | KV452804.1 | 3961396 | 4-scf00071 | 4 |
| AX-157709822 | 4 | 55.236 | KV452804.1 | 3972399 | 4-scf00071 | 4 |
| AX-157954374 | 4 | 55.236 | KV452804.1 | 3991033 | 4-scf00071 | 4 |
| AX-157954497 | 4 | 55.236 | KV452804.1 | 4118409 | 4-scf00071 | 4 |
| AX-157954291 | 4 | 55.267 | KV452804.1 | 3901310 | 4-scf00071 | 4 |
| AX-157884054 | 4 | 55.291 | KV452804.1 | 3902332 | 4-scf00071 | 4 |
| AX-157954339 | 4 | 55.291 | KV452804.1 | 3951064 | 4-scf00071 | 4 |
| AX-157954299 | 4 | 55.316 | KV452804.1 | 3907681 | 4-scf00071 | 4 |
| AX-157953998 | 4 | 55.345 | KV452804.1 | 3511784 | 4-scf00071 | 4 |
| AX-157954126 | 4 | 55.345 | KV452804.1 | 3696359 | 4-scf00071 | 4 |
| AX-157954135 | 4 | 55.345 | KV452804.1 | 3707519 | 4-scf00071 | 4 |
| AX-157954140 | 4 | 55.345 | KV452804.1 | 3715542 | 4-scf00071 | 4 |
| AX-157815826 | 4 | 55.345 | KV452804.1 | 3721190 | 4-scf00071 | 4 |
| AX-157815827 | 4 | 55.345 | KV452804.1 | 3725001 | 4-scf00071 | 4 |
| AX-157954161 | 4 | 55.345 | KV452804.1 | 3749927 | 4-scf00071 | 4 |
| AX-157954164 | 4 | 55.345 | KV452804.1 | 3752807 | 4-scf00071 | 4 |
| AX-157756466 | 4 | 55.345 | KV452804.1 | 3814954 | 4-scf00071 | 4 |
| AX-157875472 | 4 | 55.345 | KV452804.1 | 3849383 | 4-scf00071 | 4 |
| AX-157954242 | 4 | 55.345 | KV452804.1 | 3851530 | 4-scf00071 | 4 |
| AX-157954243 | 4 | 55.345 | KV452804.1 | 3852503 | 4-scf00071 | 4 |
| AX-157954248 | 4 | 55.345 | KV452804.1 | 3858794 | 4-scf00071 | 4 |
| AX-157954251 | 4 | 55.345 | KV452804.1 | 3861966 | 4-scf00071 | 4 |
| AX-157954252 | 4 | 55.345 | KV452804.1 | 3862439 | 4-scf00071 | 4 |
| AX-157954261 | 4 | 55.345 | KV452804.1 | 3871248 | 4-scf00071 | 4 |
| AX-157954271 | 4 | 55.345 | KV452804.1 | 3882137 | 4-scf00071 | 4 |

|              |   |        |            |         |            |   |
|--------------|---|--------|------------|---------|------------|---|
| AX-157954286 | 4 | 55.345 | KV452804.1 | 3895568 | 4-scf00071 | 4 |
| AX-157954287 | 4 | 55.345 | KV452804.1 | 3896223 | 4-scf00071 | 4 |
| AX-157954294 | 4 | 55.345 | KV452804.1 | 3904060 | 4-scf00071 | 4 |
| AX-157954295 | 4 | 55.345 | KV452804.1 | 3905179 | 4-scf00071 | 4 |
| AX-157713229 | 4 | 55.345 | KV452804.1 | 3916066 | 4-scf00071 | 4 |
| AX-157954313 | 4 | 55.345 | KV452804.1 | 3923285 | 4-scf00071 | 4 |
| AX-157954318 | 4 | 55.345 | KV452804.1 | 3927303 | 4-scf00071 | 4 |
| AX-157954323 | 4 | 55.345 | KV452804.1 | 3935393 | 4-scf00071 | 4 |
| AX-157954333 | 4 | 55.345 | KV452804.1 | 3942888 | 4-scf00071 | 4 |
| AX-157954336 | 4 | 55.345 | KV452804.1 | 3947031 | 4-scf00071 | 4 |
| AX-157954338 | 4 | 55.345 | KV452804.1 | 3949452 | 4-scf00071 | 4 |
| AX-157954345 | 4 | 55.345 | KV452804.1 | 3955971 | 4-scf00071 | 4 |
| AX-157954347 | 4 | 55.345 | KV452804.1 | 3957147 | 4-scf00071 | 4 |
| AX-157815840 | 4 | 55.345 | KV452804.1 | 3958413 | 4-scf00071 | 4 |
| AX-157954354 | 4 | 55.345 | KV452804.1 | 3963215 | 4-scf00071 | 4 |
| AX-157815841 | 4 | 55.345 | KV452804.1 | 3972086 | 4-scf00071 | 4 |
| AX-157954364 | 4 | 55.345 | KV452804.1 | 3980042 | 4-scf00071 | 4 |
| AX-157954365 | 4 | 55.345 | KV452804.1 | 3981570 | 4-scf00071 | 4 |
| AX-157954366 | 4 | 55.345 | KV452804.1 | 3981890 | 4-scf00071 | 4 |
| AX-157954372 | 4 | 55.345 | KV452804.1 | 3989828 | 4-scf00071 | 4 |
| AX-157954375 | 4 | 55.345 | KV452804.1 | 3992575 | 4-scf00071 | 4 |
| AX-157954378 | 4 | 55.345 | KV452804.1 | 3998373 | 4-scf00071 | 4 |
| AX-157954380 | 4 | 55.345 | KV452804.1 | 4000102 | 4-scf00071 | 4 |
| AX-157954383 | 4 | 55.345 | KV452804.1 | 4003571 | 4-scf00071 | 4 |
| AX-157954390 | 4 | 55.345 | KV452804.1 | 4009099 | 4-scf00071 | 4 |
| AX-157954392 | 4 | 55.345 | KV452804.1 | 4012192 | 4-scf00071 | 4 |
| AX-157884057 | 4 | 55.345 | KV452804.1 | 4016252 | 4-scf00071 | 4 |
| AX-157954396 | 4 | 55.345 | KV452804.1 | 4016664 | 4-scf00071 | 4 |
| AX-157954397 | 4 | 55.345 | KV452804.1 | 4017113 | 4-scf00071 | 4 |
| AX-157954493 | 4 | 55.345 | KV452804.1 | 4114619 | 4-scf00071 | 4 |
| AX-157954495 | 4 | 55.345 | KV452804.1 | 4115965 | 4-scf00071 | 4 |
| AX-157954508 | 4 | 55.345 | KV452804.1 | 4128714 | 4-scf00071 | 4 |
| AX-157954622 | 4 | 55.345 | KV452804.1 | 4249486 | 4-scf00071 | 4 |
| AX-157758190 | 4 | 55.345 | KV452804.1 | 4291392 | 4-scf00071 | 4 |
| AX-157954924 | 4 | 55.345 | KV452804.1 | 4669758 | 4-scf00071 | 4 |
| AX-157815976 | 4 | 55.345 | KV452804.1 | 6083904 | 4-scf00071 | 4 |
| AX-157954402 | 4 | 55.399 | KV452804.1 | 4020274 | 4-scf00071 | 4 |
| AX-157953938 | 4 | 55.454 | KV452804.1 | 3423216 | 4-scf00071 | 4 |
| AX-157953964 | 4 | 55.454 | KV452804.1 | 3462749 | 4-scf00071 | 4 |
| AX-157954207 | 4 | 55.454 | KV452804.1 | 3812179 | 4-scf00071 | 4 |
| AX-157954214 | 4 | 55.454 | KV452804.1 | 3817389 | 4-scf00071 | 4 |
| AX-157954215 | 4 | 55.454 | KV452804.1 | 3817804 | 4-scf00071 | 4 |
| AX-157954216 | 4 | 55.454 | KV452804.1 | 3818044 | 4-scf00071 | 4 |
| AX-157954282 | 4 | 55.454 | KV452804.1 | 3891748 | 4-scf00071 | 4 |
| AX-157954290 | 4 | 55.454 | KV452804.1 | 3898688 | 4-scf00071 | 4 |
| AX-157954367 | 4 | 55.454 | KV452804.1 | 3983156 | 4-scf00071 | 4 |
| AX-157954386 | 4 | 55.454 | KV452804.1 | 4005788 | 4-scf00071 | 4 |
| AX-157954387 | 4 | 55.454 | KV452804.1 | 4006611 | 4-scf00071 | 4 |
| AX-157954388 | 4 | 55.454 | KV452804.1 | 4007449 | 4-scf00071 | 4 |
| AX-157954394 | 4 | 55.454 | KV452804.1 | 4013552 | 4-scf00071 | 4 |
| AX-157954398 | 4 | 55.454 | KV452804.1 | 4017727 | 4-scf00071 | 4 |

|              |   |        |            |         |            |   |
|--------------|---|--------|------------|---------|------------|---|
| AX-157954399 | 4 | 55.454 | KV452804.1 | 4018637 | 4-scf00071 | 4 |
| AX-157954400 | 4 | 55.454 | KV452804.1 | 4018989 | 4-scf00071 | 4 |
| AX-157954401 | 4 | 55.454 | KV452804.1 | 4019523 | 4-scf00071 | 4 |
| AX-157954403 | 4 | 55.454 | KV452804.1 | 4021085 | 4-scf00071 | 4 |
| AX-157954404 | 4 | 55.454 | KV452804.1 | 4021712 | 4-scf00071 | 4 |
| AX-157954406 | 4 | 55.454 | KV452804.1 | 4024908 | 4-scf00071 | 4 |
| AX-157954407 | 4 | 55.454 | KV452804.1 | 4025788 | 4-scf00071 | 4 |
| AX-157954408 | 4 | 55.454 | KV452804.1 | 4025961 | 4-scf00071 | 4 |
| AX-157954409 | 4 | 55.454 | KV452804.1 | 4026472 | 4-scf00071 | 4 |
| AX-157954410 | 4 | 55.454 | KV452804.1 | 4027987 | 4-scf00071 | 4 |
| AX-157954411 | 4 | 55.454 | KV452804.1 | 4028816 | 4-scf00071 | 4 |
| AX-157954418 | 4 | 55.454 | KV452804.1 | 4036822 | 4-scf00071 | 4 |
| AX-157954425 | 4 | 55.454 | KV452804.1 | 4043875 | 4-scf00071 | 4 |
| AX-157954426 | 4 | 55.454 | KV452804.1 | 4045202 | 4-scf00071 | 4 |
| AX-157954427 | 4 | 55.454 | KV452804.1 | 4046309 | 4-scf00071 | 4 |
| AX-157954428 | 4 | 55.454 | KV452804.1 | 4046723 | 4-scf00071 | 4 |
| AX-157954429 | 4 | 55.454 | KV452804.1 | 4047234 | 4-scf00071 | 4 |
| AX-157954430 | 4 | 55.454 | KV452804.1 | 4048029 | 4-scf00071 | 4 |
| AX-157954431 | 4 | 55.454 | KV452804.1 | 4049232 | 4-scf00071 | 4 |
| AX-157954433 | 4 | 55.454 | KV452804.1 | 4052718 | 4-scf00071 | 4 |
| AX-157954434 | 4 | 55.454 | KV452804.1 | 4053355 | 4-scf00071 | 4 |
| AX-157954435 | 4 | 55.454 | KV452804.1 | 4053836 | 4-scf00071 | 4 |
| AX-157954436 | 4 | 55.454 | KV452804.1 | 4054611 | 4-scf00071 | 4 |
| AX-157954437 | 4 | 55.454 | KV452804.1 | 4055580 | 4-scf00071 | 4 |
| AX-157954440 | 4 | 55.454 | KV452804.1 | 4059274 | 4-scf00071 | 4 |
| AX-157954441 | 4 | 55.454 | KV452804.1 | 4060007 | 4-scf00071 | 4 |
| AX-157875476 | 4 | 55.454 | KV452804.1 | 4061146 | 4-scf00071 | 4 |
| AX-157954444 | 4 | 55.454 | KV452804.1 | 4067850 | 4-scf00071 | 4 |
| AX-157954445 | 4 | 55.454 | KV452804.1 | 4068245 | 4-scf00071 | 4 |
| AX-157954448 | 4 | 55.454 | KV452804.1 | 4070805 | 4-scf00071 | 4 |
| AX-157954449 | 4 | 55.454 | KV452804.1 | 4071536 | 4-scf00071 | 4 |
| AX-157954450 | 4 | 55.454 | KV452804.1 | 4074016 | 4-scf00071 | 4 |
| AX-157954453 | 4 | 55.454 | KV452804.1 | 4076041 | 4-scf00071 | 4 |
| AX-157954454 | 4 | 55.454 | KV452804.1 | 4076502 | 4-scf00071 | 4 |
| AX-157721889 | 4 | 55.454 | KV452804.1 | 4077024 | 4-scf00071 | 4 |
| AX-157954455 | 4 | 55.454 | KV452804.1 | 4077298 | 4-scf00071 | 4 |
| AX-157954456 | 4 | 55.454 | KV452804.1 | 4077969 | 4-scf00071 | 4 |
| AX-157954458 | 4 | 55.454 | KV452804.1 | 4079089 | 4-scf00071 | 4 |
| AX-157954460 | 4 | 55.454 | KV452804.1 | 4080209 | 4-scf00071 | 4 |
| AX-157954463 | 4 | 55.454 | KV452804.1 | 4083754 | 4-scf00071 | 4 |
| AX-157954464 | 4 | 55.454 | KV452804.1 | 4084810 | 4-scf00071 | 4 |
| AX-157954465 | 4 | 55.454 | KV452804.1 | 4085274 | 4-scf00071 | 4 |
| AX-157954466 | 4 | 55.454 | KV452804.1 | 4085558 | 4-scf00071 | 4 |
| AX-157954467 | 4 | 55.454 | KV452804.1 | 4087591 | 4-scf00071 | 4 |
| AX-157954468 | 4 | 55.454 | KV452804.1 | 4088347 | 4-scf00071 | 4 |
| AX-157954473 | 4 | 55.454 | KV452804.1 | 4091985 | 4-scf00071 | 4 |
| AX-157954475 | 4 | 55.454 | KV452804.1 | 4092497 | 4-scf00071 | 4 |
| AX-157954476 | 4 | 55.454 | KV452804.1 | 4095770 | 4-scf00071 | 4 |
| AX-157815843 | 4 | 55.454 | KV452804.1 | 4096989 | 4-scf00071 | 4 |
| AX-157954478 | 4 | 55.454 | KV452804.1 | 4098347 | 4-scf00071 | 4 |
| AX-157954479 | 4 | 55.454 | KV452804.1 | 4098951 | 4-scf00071 | 4 |

|              |   |        |            |         |            |   |
|--------------|---|--------|------------|---------|------------|---|
| AX-157954480 | 4 | 55.454 | KV452804.1 | 4099221 | 4-scf00071 | 4 |
| AX-157954481 | 4 | 55.454 | KV452804.1 | 4099488 | 4-scf00071 | 4 |
| AX-157954483 | 4 | 55.454 | KV452804.1 | 4101000 | 4-scf00071 | 4 |
| AX-157710883 | 4 | 55.454 | KV452804.1 | 4101895 | 4-scf00071 | 4 |
| AX-157954485 | 4 | 55.454 | KV452804.1 | 4102262 | 4-scf00071 | 4 |
| AX-157815844 | 4 | 55.454 | KV452804.1 | 4103972 | 4-scf00071 | 4 |
| AX-157954486 | 4 | 55.454 | KV452804.1 | 4104551 | 4-scf00071 | 4 |
| AX-157954488 | 4 | 55.454 | KV452804.1 | 4106248 | 4-scf00071 | 4 |
| AX-157815845 | 4 | 55.454 | KV452804.1 | 4107144 | 4-scf00071 | 4 |
| AX-157954489 | 4 | 55.454 | KV452804.1 | 4112304 | 4-scf00071 | 4 |
| AX-157954490 | 4 | 55.454 | KV452804.1 | 4112697 | 4-scf00071 | 4 |
| AX-157954498 | 4 | 55.454 | KV452804.1 | 4118610 | 4-scf00071 | 4 |
| AX-157954499 | 4 | 55.454 | KV452804.1 | 4121564 | 4-scf00071 | 4 |
| AX-157954502 | 4 | 55.454 | KV452804.1 | 4124399 | 4-scf00071 | 4 |
| AX-157954503 | 4 | 55.454 | KV452804.1 | 4127006 | 4-scf00071 | 4 |
| AX-157719579 | 4 | 55.454 | KV452804.1 | 4127400 | 4-scf00071 | 4 |
| AX-157954505 | 4 | 55.454 | KV452804.1 | 4127659 | 4-scf00071 | 4 |
| AX-157954506 | 4 | 55.454 | KV452804.1 | 4127957 | 4-scf00071 | 4 |
| AX-157954507 | 4 | 55.454 | KV452804.1 | 4128306 | 4-scf00071 | 4 |
| AX-157954509 | 4 | 55.454 | KV452804.1 | 4129515 | 4-scf00071 | 4 |
| AX-157954522 | 4 | 55.454 | KV452804.1 | 4140705 | 4-scf00071 | 4 |
| AX-157954527 | 4 | 55.454 | KV452804.1 | 4147715 | 4-scf00071 | 4 |
| AX-157954540 | 4 | 55.454 | KV452804.1 | 4160495 | 4-scf00071 | 4 |
| AX-157954543 | 4 | 55.454 | KV452804.1 | 4163749 | 4-scf00071 | 4 |
| AX-158422042 | 4 | 55.454 | KV452804.1 | 4165645 | 4-scf00071 | 4 |
| AX-157954548 | 4 | 55.454 | KV452804.1 | 4170331 | 4-scf00071 | 4 |
| AX-157954549 | 4 | 55.454 | KV452804.1 | 4171198 | 4-scf00071 | 4 |
| AX-157954555 | 4 | 55.454 | KV452804.1 | 4177170 | 4-scf00071 | 4 |
| AX-157775034 | 4 | 55.454 | KV452804.1 | 4180477 | 4-scf00071 | 4 |
| AX-157954565 | 4 | 55.454 | KV452804.1 | 4187663 | 4-scf00071 | 4 |
| AX-157954576 | 4 | 55.454 | KV452804.1 | 4196703 | 4-scf00071 | 4 |
| AX-157954577 | 4 | 55.454 | KV452804.1 | 4199732 | 4-scf00071 | 4 |
| AX-157815848 | 4 | 55.454 | KV452804.1 | 4200916 | 4-scf00071 | 4 |
| AX-157954579 | 4 | 55.454 | KV452804.1 | 4201334 | 4-scf00071 | 4 |
| AX-157954580 | 4 | 55.454 | KV452804.1 | 4201790 | 4-scf00071 | 4 |
| AX-157954581 | 4 | 55.454 | KV452804.1 | 4203390 | 4-scf00071 | 4 |
| AX-157954582 | 4 | 55.454 | KV452804.1 | 4203917 | 4-scf00071 | 4 |
| AX-157815849 | 4 | 55.454 | KV452804.1 | 4204028 | 4-scf00071 | 4 |
| AX-157954585 | 4 | 55.454 | KV452804.1 | 4206595 | 4-scf00071 | 4 |
| AX-157954590 | 4 | 55.454 | KV452804.1 | 4211694 | 4-scf00071 | 4 |
| AX-157954597 | 4 | 55.454 | KV452804.1 | 4217928 | 4-scf00071 | 4 |
| AX-157954599 | 4 | 55.454 | KV452804.1 | 4221275 | 4-scf00071 | 4 |
| AX-157815852 | 4 | 55.454 | KV452804.1 | 4225423 | 4-scf00071 | 4 |
| AX-157954614 | 4 | 55.454 | KV452804.1 | 4240364 | 4-scf00071 | 4 |
| AX-157954619 | 4 | 55.454 | KV452804.1 | 4246874 | 4-scf00071 | 4 |
| AX-157954633 | 4 | 55.454 | KV452804.1 | 4260046 | 4-scf00071 | 4 |
| AX-157954634 | 4 | 55.454 | KV452804.1 | 4260675 | 4-scf00071 | 4 |
| AX-157954636 | 4 | 55.454 | KV452804.1 | 4261692 | 4-scf00071 | 4 |
| AX-157954637 | 4 | 55.454 | KV452804.1 | 4264160 | 4-scf00071 | 4 |
| AX-157954638 | 4 | 55.454 | KV452804.1 | 4264908 | 4-scf00071 | 4 |
| AX-157815857 | 4 | 55.454 | KV452804.1 | 4272043 | 4-scf00071 | 4 |

|              |   |        |            |         |            |   |
|--------------|---|--------|------------|---------|------------|---|
| AX-157954643 | 4 | 55.454 | KV452804.1 | 4273427 | 4-scf00071 | 4 |
| AX-157954644 | 4 | 55.454 | KV452804.1 | 4274670 | 4-scf00071 | 4 |
| AX-157954647 | 4 | 55.454 | KV452804.1 | 4283522 | 4-scf00071 | 4 |
| AX-157954659 | 4 | 55.454 | KV452804.1 | 4299299 | 4-scf00071 | 4 |
| AX-157954663 | 4 | 55.454 | KV452804.1 | 4305527 | 4-scf00071 | 4 |
| AX-157954667 | 4 | 55.454 | KV452804.1 | 4308702 | 4-scf00071 | 4 |
| AX-157954672 | 4 | 55.454 | KV452804.1 | 4318371 | 4-scf00071 | 4 |
| AX-158379467 | 4 | 55.454 | KV452804.1 | 4324394 | 4-scf00071 | 4 |
| AX-157954679 | 4 | 55.454 | KV452804.1 | 4329452 | 4-scf00071 | 4 |
| AX-157954682 | 4 | 55.454 | KV452804.1 | 4337391 | 4-scf00071 | 4 |
| AX-157954685 | 4 | 55.454 | KV452804.1 | 4342824 | 4-scf00071 | 4 |
| AX-157954691 | 4 | 55.454 | KV452804.1 | 4355307 | 4-scf00071 | 4 |
| AX-157954694 | 4 | 55.454 | KV452804.1 | 4359312 | 4-scf00071 | 4 |
| AX-157954703 | 4 | 55.454 | KV452804.1 | 4371590 | 4-scf00071 | 4 |
| AX-157954705 | 4 | 55.454 | KV452804.1 | 4375061 | 4-scf00071 | 4 |
| AX-157954706 | 4 | 55.454 | KV452804.1 | 4376306 | 4-scf00071 | 4 |
| AX-157954712 | 4 | 55.454 | KV452804.1 | 4382217 | 4-scf00071 | 4 |
| AX-157954721 | 4 | 55.454 | KV452804.1 | 4391021 | 4-scf00071 | 4 |
| AX-157954723 | 4 | 55.454 | KV452804.1 | 4394375 | 4-scf00071 | 4 |
| AX-157954725 | 4 | 55.454 | KV452804.1 | 4396127 | 4-scf00071 | 4 |
| AX-157815861 | 4 | 55.454 | KV452804.1 | 4399173 | 4-scf00071 | 4 |
| AX-157954733 | 4 | 55.454 | KV452804.1 | 4402143 | 4-scf00071 | 4 |
| AX-157815864 | 4 | 55.454 | KV452804.1 | 4404685 | 4-scf00071 | 4 |
| AX-157954755 | 4 | 55.454 | KV452804.1 | 4431719 | 4-scf00071 | 4 |
| AX-157954756 | 4 | 55.454 | KV452804.1 | 4432102 | 4-scf00071 | 4 |
| AX-157815866 | 4 | 55.454 | KV452804.1 | 4433918 | 4-scf00071 | 4 |
| AX-157954758 | 4 | 55.454 | KV452804.1 | 4434954 | 4-scf00071 | 4 |
| AX-157954760 | 4 | 55.454 | KV452804.1 | 4436697 | 4-scf00071 | 4 |
| AX-157954761 | 4 | 55.454 | KV452804.1 | 4437891 | 4-scf00071 | 4 |
| AX-157954763 | 4 | 55.454 | KV452804.1 | 4441223 | 4-scf00071 | 4 |
| AX-157815869 | 4 | 55.454 | KV452804.1 | 4441669 | 4-scf00071 | 4 |
| AX-157954765 | 4 | 55.454 | KV452804.1 | 4442504 | 4-scf00071 | 4 |
| AX-157954771 | 4 | 55.454 | KV452804.1 | 4448689 | 4-scf00071 | 4 |
| AX-157815871 | 4 | 55.454 | KV452804.1 | 4449938 | 4-scf00071 | 4 |
| AX-157954773 | 4 | 55.454 | KV452804.1 | 4450413 | 4-scf00071 | 4 |
| AX-157714955 | 4 | 55.454 | KV452804.1 | 4451385 | 4-scf00071 | 4 |
| AX-157954774 | 4 | 55.454 | KV452804.1 | 4452957 | 4-scf00071 | 4 |
| AX-157815872 | 4 | 55.454 | KV452804.1 | 4453532 | 4-scf00071 | 4 |
| AX-157954777 | 4 | 55.454 | KV452804.1 | 4455934 | 4-scf00071 | 4 |
| AX-157815873 | 4 | 55.454 | KV452804.1 | 4456448 | 4-scf00071 | 4 |
| AX-157954778 | 4 | 55.454 | KV452804.1 | 4456697 | 4-scf00071 | 4 |
| AX-157749780 | 4 | 55.454 | KV452804.1 | 4457482 | 4-scf00071 | 4 |
| AX-157954779 | 4 | 55.454 | KV452804.1 | 4458426 | 4-scf00071 | 4 |
| AX-157954780 | 4 | 55.454 | KV452804.1 | 4458712 | 4-scf00071 | 4 |
| AX-157954781 | 4 | 55.454 | KV452804.1 | 4459042 | 4-scf00071 | 4 |
| AX-157815874 | 4 | 55.454 | KV452804.1 | 4460542 | 4-scf00071 | 4 |
| AX-157815875 | 4 | 55.454 | KV452804.1 | 4464470 | 4-scf00071 | 4 |
| AX-157815877 | 4 | 55.454 | KV452804.1 | 4469637 | 4-scf00071 | 4 |
| AX-157815878 | 4 | 55.454 | KV452804.1 | 4471183 | 4-scf00071 | 4 |
| AX-157954798 | 4 | 55.454 | KV452804.1 | 4482305 | 4-scf00071 | 4 |
| AX-158390235 | 4 | 55.454 | KV452804.1 | 4485207 | 4-scf00071 | 4 |

|              |   |        |            |         |            |   |
|--------------|---|--------|------------|---------|------------|---|
| AX-157954805 | 4 | 55.454 | KV452804.1 | 4502712 | 4-scf00071 | 4 |
| AX-157815883 | 4 | 55.454 | KV452804.1 | 4503122 | 4-scf00071 | 4 |
| AX-157954806 | 4 | 55.454 | KV452804.1 | 4503359 | 4-scf00071 | 4 |
| AX-157954808 | 4 | 55.454 | KV452804.1 | 4504885 | 4-scf00071 | 4 |
| AX-157954810 | 4 | 55.454 | KV452804.1 | 4506667 | 4-scf00071 | 4 |
| AX-157854711 | 4 | 55.454 | KV452804.1 | 4515034 | 4-scf00071 | 4 |
| AX-157854712 | 4 | 55.454 | KV452804.1 | 4515115 | 4-scf00071 | 4 |
| AX-157954817 | 4 | 55.454 | KV452804.1 | 4517381 | 4-scf00071 | 4 |
| AX-157815886 | 4 | 55.454 | KV452804.1 | 4520900 | 4-scf00071 | 4 |
| AX-158382872 | 4 | 55.454 | KV452804.1 | 4524401 | 4-scf00071 | 4 |
| AX-157954825 | 4 | 55.454 | KV452804.1 | 4528246 | 4-scf00071 | 4 |
| AX-157954827 | 4 | 55.454 | KV452804.1 | 4529163 | 4-scf00071 | 4 |
| AX-157954828 | 4 | 55.454 | KV452804.1 | 4529950 | 4-scf00071 | 4 |
| AX-157954831 | 4 | 55.454 | KV452804.1 | 4531297 | 4-scf00071 | 4 |
| AX-157954832 | 4 | 55.454 | KV452804.1 | 4532185 | 4-scf00071 | 4 |
| AX-157954833 | 4 | 55.454 | KV452804.1 | 4532448 | 4-scf00071 | 4 |
| AX-157954835 | 4 | 55.454 | KV452804.1 | 4535872 | 4-scf00071 | 4 |
| AX-157954837 | 4 | 55.454 | KV452804.1 | 4536821 | 4-scf00071 | 4 |
| AX-157954838 | 4 | 55.454 | KV452804.1 | 4537341 | 4-scf00071 | 4 |
| AX-157954839 | 4 | 55.454 | KV452804.1 | 4538066 | 4-scf00071 | 4 |
| AX-157954844 | 4 | 55.454 | KV452804.1 | 4543104 | 4-scf00071 | 4 |
| AX-157954845 | 4 | 55.454 | KV452804.1 | 4544672 | 4-scf00071 | 4 |
| AX-157954846 | 4 | 55.454 | KV452804.1 | 4547638 | 4-scf00071 | 4 |
| AX-157954847 | 4 | 55.454 | KV452804.1 | 4549265 | 4-scf00071 | 4 |
| AX-157954848 | 4 | 55.454 | KV452804.1 | 4549848 | 4-scf00071 | 4 |
| AX-157954849 | 4 | 55.454 | KV452804.1 | 4551631 | 4-scf00071 | 4 |
| AX-157954850 | 4 | 55.454 | KV452804.1 | 4552746 | 4-scf00071 | 4 |
| AX-157954851 | 4 | 55.454 | KV452804.1 | 4553654 | 4-scf00071 | 4 |
| AX-157954852 | 4 | 55.454 | KV452804.1 | 4554083 | 4-scf00071 | 4 |
| AX-157954853 | 4 | 55.454 | KV452804.1 | 4558828 | 4-scf00071 | 4 |
| AX-157773962 | 4 | 55.454 | KV452804.1 | 4562616 | 4-scf00071 | 4 |
| AX-157954854 | 4 | 55.454 | KV452804.1 | 4564753 | 4-scf00071 | 4 |
| AX-157954857 | 4 | 55.454 | KV452804.1 | 4566136 | 4-scf00071 | 4 |
| AX-157954859 | 4 | 55.454 | KV452804.1 | 4567531 | 4-scf00071 | 4 |
| AX-157815888 | 4 | 55.454 | KV452804.1 | 4567839 | 4-scf00071 | 4 |
| AX-157954861 | 4 | 55.454 | KV452804.1 | 4571772 | 4-scf00071 | 4 |
| AX-157815889 | 4 | 55.454 | KV452804.1 | 4573148 | 4-scf00071 | 4 |
| AX-157954865 | 4 | 55.454 | KV452804.1 | 4575959 | 4-scf00071 | 4 |
| AX-157954866 | 4 | 55.454 | KV452804.1 | 4576579 | 4-scf00071 | 4 |
| AX-157954869 | 4 | 55.454 | KV452804.1 | 4579709 | 4-scf00071 | 4 |
| AX-157954870 | 4 | 55.454 | KV452804.1 | 4580522 | 4-scf00071 | 4 |
| AX-157954871 | 4 | 55.454 | KV452804.1 | 4582751 | 4-scf00071 | 4 |
| AX-157954874 | 4 | 55.454 | KV452804.1 | 4590725 | 4-scf00071 | 4 |
| AX-157954876 | 4 | 55.454 | KV452804.1 | 4594794 | 4-scf00071 | 4 |
| AX-157954877 | 4 | 55.454 | KV452804.1 | 4595558 | 4-scf00071 | 4 |
| AX-157884064 | 4 | 55.454 | KV452804.1 | 4601233 | 4-scf00071 | 4 |
| AX-157815890 | 4 | 55.454 | KV452804.1 | 4614749 | 4-scf00071 | 4 |
| AX-157954890 | 4 | 55.454 | KV452804.1 | 4616223 | 4-scf00071 | 4 |
| AX-157954893 | 4 | 55.454 | KV452804.1 | 4625023 | 4-scf00071 | 4 |
| AX-157954896 | 4 | 55.454 | KV452804.1 | 4630624 | 4-scf00071 | 4 |
| AX-157954899 | 4 | 55.454 | KV452804.1 | 4639295 | 4-scf00071 | 4 |

|              |   |        |            |         |            |   |
|--------------|---|--------|------------|---------|------------|---|
| AX-157954902 | 4 | 55.454 | KV452804.1 | 4644161 | 4-scf00071 | 4 |
| AX-157954904 | 4 | 55.454 | KV452804.1 | 4645999 | 4-scf00071 | 4 |
| AX-157954905 | 4 | 55.454 | KV452804.1 | 4646746 | 4-scf00071 | 4 |
| AX-157954913 | 4 | 55.454 | KV452804.1 | 4655551 | 4-scf00071 | 4 |
| AX-157954916 | 4 | 55.454 | KV452804.1 | 4658271 | 4-scf00071 | 4 |
| AX-157954925 | 4 | 55.454 | KV452804.1 | 4673257 | 4-scf00071 | 4 |
| AX-157954928 | 4 | 55.454 | KV452804.1 | 4678128 | 4-scf00071 | 4 |
| AX-157954933 | 4 | 55.454 | KV452804.1 | 4689268 | 4-scf00071 | 4 |
| AX-157955001 | 4 | 55.454 | KV452804.1 | 4764227 | 4-scf00071 | 4 |
| AX-157955006 | 4 | 55.454 | KV452804.1 | 4768150 | 4-scf00071 | 4 |
| AX-157955017 | 4 | 55.454 | KV452804.1 | 4777061 | 4-scf00071 | 4 |
| AX-157955047 | 4 | 55.454 | KV452804.1 | 4806590 | 4-scf00071 | 4 |
| AX-157955060 | 4 | 55.454 | KV452804.1 | 4816340 | 4-scf00071 | 4 |
| AX-157955106 | 4 | 55.454 | KV452804.1 | 4865871 | 4-scf00071 | 4 |
| AX-157955164 | 4 | 55.454 | KV452804.1 | 4934359 | 4-scf00071 | 4 |
| AX-157955169 | 4 | 55.454 | KV452804.1 | 4938749 | 4-scf00071 | 4 |
| AX-157955189 | 4 | 55.454 | KV452804.1 | 4959823 | 4-scf00071 | 4 |
| AX-157955216 | 4 | 55.454 | KV452804.1 | 4986499 | 4-scf00071 | 4 |
| AX-157955266 | 4 | 55.454 | KV452804.1 | 5039600 | 4-scf00071 | 4 |
| AX-157955273 | 4 | 55.454 | KV452804.1 | 5043433 | 4-scf00071 | 4 |
| AX-157815906 | 4 | 55.454 | KV452804.1 | 5043847 | 4-scf00071 | 4 |
| AX-157955277 | 4 | 55.454 | KV452804.1 | 5048311 | 4-scf00071 | 4 |
| AX-157955280 | 4 | 55.454 | KV452804.1 | 5050544 | 4-scf00071 | 4 |
| AX-157955281 | 4 | 55.454 | KV452804.1 | 5051052 | 4-scf00071 | 4 |
| AX-157955283 | 4 | 55.454 | KV452804.1 | 5052547 | 4-scf00071 | 4 |
| AX-157955284 | 4 | 55.454 | KV452804.1 | 5053279 | 4-scf00071 | 4 |
| AX-157955285 | 4 | 55.454 | KV452804.1 | 5054372 | 4-scf00071 | 4 |
| AX-157955286 | 4 | 55.454 | KV452804.1 | 5054736 | 4-scf00071 | 4 |
| AX-157955289 | 4 | 55.454 | KV452804.1 | 5057131 | 4-scf00071 | 4 |
| AX-157955290 | 4 | 55.454 | KV452804.1 | 5057731 | 4-scf00071 | 4 |
| AX-158406192 | 4 | 55.454 | KV452804.1 | 5059291 | 4-scf00071 | 4 |
| AX-158406194 | 4 | 55.454 | KV452804.1 | 5059786 | 4-scf00071 | 4 |
| AX-157955294 | 4 | 55.454 | KV452804.1 | 5061771 | 4-scf00071 | 4 |
| AX-157955295 | 4 | 55.454 | KV452804.1 | 5063043 | 4-scf00071 | 4 |
| AX-157955296 | 4 | 55.454 | KV452804.1 | 5064368 | 4-scf00071 | 4 |
| AX-157955297 | 4 | 55.454 | KV452804.1 | 5064814 | 4-scf00071 | 4 |
| AX-157955301 | 4 | 55.454 | KV452804.1 | 5070473 | 4-scf00071 | 4 |
| AX-158379471 | 4 | 55.454 | KV452804.1 | 5072709 | 4-scf00071 | 4 |
| AX-157955306 | 4 | 55.454 | KV452804.1 | 5077411 | 4-scf00071 | 4 |
| AX-157955307 | 4 | 55.454 | KV452804.1 | 5078197 | 4-scf00071 | 4 |
| AX-157955308 | 4 | 55.454 | KV452804.1 | 5078631 | 4-scf00071 | 4 |
| AX-157955310 | 4 | 55.454 | KV452804.1 | 5079897 | 4-scf00071 | 4 |
| AX-157955311 | 4 | 55.454 | KV452804.1 | 5080252 | 4-scf00071 | 4 |
| AX-157955312 | 4 | 55.454 | KV452804.1 | 5080881 | 4-scf00071 | 4 |
| AX-157955313 | 4 | 55.454 | KV452804.1 | 5081708 | 4-scf00071 | 4 |
| AX-157738295 | 4 | 55.454 | KV452804.1 | 5083768 | 4-scf00071 | 4 |
| AX-157955324 | 4 | 55.454 | KV452804.1 | 5096929 | 4-scf00071 | 4 |
| AX-157955382 | 4 | 55.454 | KV452804.1 | 5157451 | 4-scf00071 | 4 |
| AX-157955387 | 4 | 55.454 | KV452804.1 | 5161106 | 4-scf00071 | 4 |
| AX-157955397 | 4 | 55.454 | KV452804.1 | 5170327 | 4-scf00071 | 4 |
| AX-157955411 | 4 | 55.454 | KV452804.1 | 5182126 | 4-scf00071 | 4 |

|              |   |        |            |         |            |   |
|--------------|---|--------|------------|---------|------------|---|
| AX-157955420 | 4 | 55.454 | KV452804.1 | 5188706 | 4-scf00071 | 4 |
| AX-157955428 | 4 | 55.454 | KV452804.1 | 5195057 | 4-scf00071 | 4 |
| AX-158379472 | 4 | 55.454 | KV452804.1 | 5238303 | 4-scf00071 | 4 |
| AX-157738835 | 4 | 55.454 | KV452804.1 | 5276719 | 4-scf00071 | 4 |
| AX-157955520 | 4 | 55.454 | KV452804.1 | 5293872 | 4-scf00071 | 4 |
| AX-157955591 | 4 | 55.454 | KV452804.1 | 5352569 | 4-scf00071 | 4 |
| AX-157955626 | 4 | 55.454 | KV452804.1 | 5387404 | 4-scf00071 | 4 |
| AX-157955673 | 4 | 55.454 | KV452804.1 | 5428499 | 4-scf00071 | 4 |
| AX-157955690 | 4 | 55.454 | KV452804.1 | 5453583 | 4-scf00071 | 4 |
| AX-157955761 | 4 | 55.454 | KV452804.1 | 5543529 | 4-scf00071 | 4 |
| AX-157955763 | 4 | 55.454 | KV452804.1 | 5545162 | 4-scf00071 | 4 |
| AX-157955764 | 4 | 55.454 | KV452804.1 | 5545906 | 4-scf00071 | 4 |
| AX-157955838 | 4 | 55.454 | KV452804.1 | 5633723 | 4-scf00071 | 4 |
| AX-157955851 | 4 | 55.454 | KV452804.1 | 5650450 | 4-scf00071 | 4 |
| AX-157955876 | 4 | 55.454 | KV452804.1 | 5679737 | 4-scf00071 | 4 |
| AX-157815938 | 4 | 55.454 | KV452804.1 | 5686681 | 4-scf00071 | 4 |
| AX-157815942 | 4 | 55.454 | KV452804.1 | 5693455 | 4-scf00071 | 4 |
| AX-157745630 | 4 | 55.454 | KV452804.1 | 5703210 | 4-scf00071 | 4 |
| AX-157955891 | 4 | 55.454 | KV452804.1 | 5703288 | 4-scf00071 | 4 |
| AX-157955923 | 4 | 55.454 | KV452804.1 | 5745883 | 4-scf00071 | 4 |
| AX-157955940 | 4 | 55.454 | KV452804.1 | 5772074 | 4-scf00071 | 4 |
| AX-157955943 | 4 | 55.454 | KV452804.1 | 5773028 | 4-scf00071 | 4 |
| AX-157955944 | 4 | 55.454 | KV452804.1 | 5773303 | 4-scf00071 | 4 |
| AX-157955945 | 4 | 55.454 | KV452804.1 | 5774898 | 4-scf00071 | 4 |
| AX-157955946 | 4 | 55.454 | KV452804.1 | 5777621 | 4-scf00071 | 4 |
| AX-157748901 | 4 | 55.454 | KV452804.1 | 5785291 | 4-scf00071 | 4 |
| AX-157955955 | 4 | 55.454 | KV452804.1 | 5789639 | 4-scf00071 | 4 |
| AX-157955957 | 4 | 55.454 | KV452804.1 | 5792256 | 4-scf00071 | 4 |
| AX-157955961 | 4 | 55.454 | KV452804.1 | 5803280 | 4-scf00071 | 4 |
| AX-157955962 | 4 | 55.454 | KV452804.1 | 5804177 | 4-scf00071 | 4 |
| AX-157956001 | 4 | 55.454 | KV452804.1 | 5861346 | 4-scf00071 | 4 |
| AX-157956008 | 4 | 55.454 | KV452804.1 | 5875232 | 4-scf00071 | 4 |
| AX-157956011 | 4 | 55.454 | KV452804.1 | 5879398 | 4-scf00071 | 4 |
| AX-157956016 | 4 | 55.454 | KV452804.1 | 5883176 | 4-scf00071 | 4 |
| AX-157956017 | 4 | 55.454 | KV452804.1 | 5883885 | 4-scf00071 | 4 |
| AX-157956019 | 4 | 55.454 | KV452804.1 | 5886605 | 4-scf00071 | 4 |
| AX-157956040 | 4 | 55.454 | KV452804.1 | 5911628 | 4-scf00071 | 4 |
| AX-157703996 | 4 | 55.454 | KV452804.1 | 5915836 | 4-scf00071 | 4 |
| AX-157956044 | 4 | 55.454 | KV452804.1 | 5916839 | 4-scf00071 | 4 |
| AX-157956045 | 4 | 55.454 | KV452804.1 | 5917306 | 4-scf00071 | 4 |
| AX-157815964 | 4 | 55.454 | KV452804.1 | 5951850 | 4-scf00071 | 4 |
| AX-157956067 | 4 | 55.454 | KV452804.1 | 5954772 | 4-scf00071 | 4 |
| AX-157956156 | 4 | 55.454 | KV452804.1 | 6107913 | 4-scf00071 | 4 |
| AX-157956162 | 4 | 55.454 | KV452804.1 | 6115328 | 4-scf00071 | 4 |
| AX-157956168 | 4 | 55.454 | KV452804.1 | 6121654 | 4-scf00071 | 4 |
| AX-157956188 | 4 | 55.454 | KV452804.1 | 6155254 | 4-scf00071 | 4 |
| AX-157956192 | 4 | 55.454 | KV452804.1 | 6157626 | 4-scf00071 | 4 |
| AX-157956677 | 4 | 55.454 | KV452806.1 | 212250  | 4-scf00073 | 4 |
| AX-157956824 | 4 | 55.454 | KV452806.1 | 413809  | 4-scf00073 | 4 |
| AX-157956936 | 4 | 55.454 | KV452806.1 | 602414  | 4-scf00073 | 4 |
| AX-157957429 | 4 | 55.454 | KV452806.1 | 1202092 | 4-scf00073 | 4 |



|              |   |        |            |         |            |   |
|--------------|---|--------|------------|---------|------------|---|
| AX-157957438 | 4 | 55.454 | KV452806.1 | 1222112 | 4-scf00073 | 4 |
| AX-157957473 | 4 | 55.454 | KV452806.1 | 1271432 | 4-scf00073 | 4 |
| AX-157957474 | 4 | 55.454 | KV452806.1 | 1272428 | 4-scf00073 | 4 |
| AX-157957475 | 4 | 55.454 | KV452806.1 | 1272948 | 4-scf00073 | 4 |
| AX-157957477 | 4 | 55.454 | KV452806.1 | 1276100 | 4-scf00073 | 4 |
| AX-157957479 | 4 | 55.454 | KV452806.1 | 1278310 | 4-scf00073 | 4 |
| AX-157816103 | 4 | 55.454 | KV452806.1 | 1279441 | 4-scf00073 | 4 |
| AX-157957481 | 4 | 55.454 | KV452806.1 | 1279522 | 4-scf00073 | 4 |
| AX-157957482 | 4 | 55.454 | KV452806.1 | 1280288 | 4-scf00073 | 4 |
| AX-157816104 | 4 | 55.454 | KV452806.1 | 1281483 | 4-scf00073 | 4 |
| AX-157957485 | 4 | 55.454 | KV452806.1 | 1281966 | 4-scf00073 | 4 |
| AX-157957486 | 4 | 55.454 | KV452806.1 | 1282731 | 4-scf00073 | 4 |
| AX-157957488 | 4 | 55.454 | KV452806.1 | 1283728 | 4-scf00073 | 4 |
| AX-157957489 | 4 | 55.454 | KV452806.1 | 1284136 | 4-scf00073 | 4 |
| AX-157957490 | 4 | 55.454 | KV452806.1 | 1284574 | 4-scf00073 | 4 |
| AX-157957492 | 4 | 55.454 | KV452806.1 | 1286132 | 4-scf00073 | 4 |
| AX-157957496 | 4 | 55.454 | KV452806.1 | 1289627 | 4-scf00073 | 4 |
| AX-157957499 | 4 | 55.454 | KV452806.1 | 1292349 | 4-scf00073 | 4 |
| AX-157957500 | 4 | 55.454 | KV452806.1 | 1292931 | 4-scf00073 | 4 |
| AX-157957506 | 4 | 55.454 | KV452806.1 | 1297861 | 4-scf00073 | 4 |
| AX-157957508 | 4 | 55.454 | KV452806.1 | 1300046 | 4-scf00073 | 4 |
| AX-157957513 | 4 | 55.454 | KV452806.1 | 1306006 | 4-scf00073 | 4 |
| AX-157957514 | 4 | 55.454 | KV452806.1 | 1307577 | 4-scf00073 | 4 |
| AX-157957515 | 4 | 55.454 | KV452806.1 | 1308456 | 4-scf00073 | 4 |
| AX-157957516 | 4 | 55.454 | KV452806.1 | 1310542 | 4-scf00073 | 4 |
| AX-157957517 | 4 | 55.454 | KV452806.1 | 1315626 | 4-scf00073 | 4 |
| AX-157957518 | 4 | 55.454 | KV452806.1 | 1316607 | 4-scf00073 | 4 |
| AX-157957519 | 4 | 55.454 | KV452806.1 | 1317540 | 4-scf00073 | 4 |
| AX-157957523 | 4 | 55.454 | KV452806.1 | 1321185 | 4-scf00073 | 4 |
| AX-157816105 | 4 | 55.454 | KV452806.1 | 1324256 | 4-scf00073 | 4 |
| AX-157957528 | 4 | 55.454 | KV452806.1 | 1327362 | 4-scf00073 | 4 |
| AX-157957535 | 4 | 55.454 | KV452806.1 | 1333691 | 4-scf00073 | 4 |
| AX-157816107 | 4 | 55.454 | KV452806.1 | 1336044 | 4-scf00073 | 4 |
| AX-157957537 | 4 | 55.454 | KV452806.1 | 1339771 | 4-scf00073 | 4 |
| AX-157957540 | 4 | 55.454 | KV452806.1 | 1343811 | 4-scf00073 | 4 |
| AX-157957542 | 4 | 55.454 | KV452806.1 | 1345435 | 4-scf00073 | 4 |
| AX-157816108 | 4 | 55.454 | KV452806.1 | 1346717 | 4-scf00073 | 4 |
| AX-157816109 | 4 | 55.454 | KV452806.1 | 1351635 | 4-scf00073 | 4 |
| AX-157957550 | 4 | 55.454 | KV452806.1 | 1354778 | 4-scf00073 | 4 |
| AX-157957552 | 4 | 55.454 | KV452806.1 | 1355532 | 4-scf00073 | 4 |
| AX-157869597 | 4 | 55.454 | KV452806.1 | 1361403 | 4-scf00073 | 4 |
| AX-157816111 | 4 | 55.454 | KV452806.1 | 1362380 | 4-scf00073 | 4 |
| AX-157764613 | 4 | 55.454 | KV452806.1 | 1362944 | 4-scf00073 | 4 |
| AX-157957599 | 4 | 55.454 | KV452806.1 | 1407204 | 4-scf00073 | 4 |
| AX-157957681 | 4 | 55.454 | KV452806.1 | 1510194 | 4-scf00073 | 4 |
| AX-157958274 | 4 | 55.454 | KV452814.1 | 236406  | 4-scf00074 | 4 |
| AX-157816178 | 4 | 55.454 | KV452814.1 | 397605  | 4-scf00074 | 4 |
| AX-157816179 | 4 | 55.454 | KV452814.1 | 400709  | 4-scf00074 | 4 |
| AX-157958512 | 4 | 55.454 | KV452814.1 | 660905  | 4-scf00074 | 4 |
| AX-157958552 | 4 | 55.454 | KV452814.1 | 741841  | 4-scf00074 | 4 |
| AX-157958563 | 4 | 55.454 | KV452814.1 | 762511  | 4-scf00074 | 4 |

|              |   |        |            |         |            |   |
|--------------|---|--------|------------|---------|------------|---|
| AX-157958649 | 4 | 55.454 | KV452814.1 | 888079  | 4-scf00074 | 4 |
| AX-157958780 | 4 | 55.454 | KV452814.1 | 1274269 | 4-scf00074 | 4 |
| AX-157959130 | 4 | 55.454 | KV452815.1 | 411763  | 4-scf00076 | 4 |
| AX-157959623 | 4 | 55.454 | KV452816.1 | 10669   | 4-scf00077 | 4 |
| AX-157959609 | 4 | 55.454 | KV452816.1 | 49204   | 4-scf00077 | 4 |
| AX-157959600 | 4 | 55.454 | KV452816.1 | 60333   | 4-scf00077 | 4 |
| AX-157816281 | 4 | 55.454 | KV452816.1 | 71440   | 4-scf00077 | 4 |
| AX-157959478 | 4 | 55.454 | KV452816.1 | 289208  | 4-scf00077 | 4 |
| AX-157816265 | 4 | 55.454 | KV452816.1 | 518216  | 4-scf00077 | 4 |
| AX-157959343 | 4 | 55.454 | KV452816.1 | 581305  | 4-scf00077 | 4 |
| AX-157959339 | 4 | 55.454 | KV452816.1 | 584990  | 4-scf00077 | 4 |
| AX-157959296 | 4 | 55.454 | KV452816.1 | 677651  | 4-scf00077 | 4 |
| AX-157959196 | 4 | 55.454 | KV452816.1 | 842075  | 4-scf00077 | 4 |
| AX-157959651 | 4 | 55.454 | KV452816.1 | 909748  | 4-scf00077 | 4 |
| AX-157816303 | 4 | 55.454 | KV452816.1 | 1005188 | 4-scf00077 | 4 |
| AX-157816305 | 4 | 55.454 | KV452816.1 | 1041091 | 4-scf00077 | 4 |
| AX-157959829 | 4 | 55.454 | KV452816.1 | 1228600 | 4-scf00077 | 4 |
| AX-157959899 | 4 | 55.454 | KV452816.1 | 1342832 | 4-scf00077 | 4 |
| AX-157960099 | 4 | 55.454 | KV452818.1 | 389569  | 4-scf00079 | 4 |
| AX-157960146 | 4 | 55.454 | KV452818.1 | 477459  | 4-scf00079 | 4 |
| AX-157960433 | 4 | 55.454 | KV452819.1 | 54996   | 4-scf00080 | 4 |
| AX-157960422 | 4 | 55.454 | KV452819.1 | 74278   | 4-scf00080 | 4 |
| AX-157960390 | 4 | 55.454 | KV452819.1 | 117109  | 4-scf00080 | 4 |
| AX-157960324 | 4 | 55.454 | KV452819.1 | 200348  | 4-scf00080 | 4 |
| AX-157960320 | 4 | 55.454 | KV452819.1 | 205457  | 4-scf00080 | 4 |
| AX-157960213 | 4 | 55.454 | KV452819.1 | 312579  | 4-scf00080 | 4 |
| AX-157960178 | 4 | 55.454 | KV452819.1 | 341836  | 4-scf00080 | 4 |
| AX-157958810 | 4 | 55.454 | KV452819.1 | 672730  | 4-scf00080 | 4 |
| AX-157961951 | 4 | 55.454 | KV452819.1 | 1319321 | 4-scf00080 | 4 |
| AX-157961959 | 4 | 55.454 | KV452819.1 | 1334060 | 4-scf00080 | 4 |
| AX-157961965 | 4 | 55.454 | KV452819.1 | 1347737 | 4-scf00080 | 4 |
| AX-157816441 | 4 | 55.454 | KV452819.1 | 1372513 | 4-scf00080 | 4 |
| AX-157961987 | 4 | 55.454 | KV452819.1 | 1380918 | 4-scf00080 | 4 |
| AX-157961989 | 4 | 55.454 | KV452819.1 | 1398856 | 4-scf00080 | 4 |
| AX-157816443 | 4 | 55.454 | KV452819.1 | 1444127 | 4-scf00080 | 4 |
| AX-157962014 | 4 | 55.454 | KV452819.1 | 1450026 | 4-scf00080 | 4 |
| AX-157962022 | 4 | 55.454 | KV452819.1 | 1469820 | 4-scf00080 | 4 |
| AX-157962024 | 4 | 55.454 | KV452819.1 | 1470287 | 4-scf00080 | 4 |
| AX-157962029 | 4 | 55.454 | KV452819.1 | 1482429 | 4-scf00080 | 4 |
| AX-157960524 | 4 | 55.454 | KV452807.1 | 95508   | 4-scf00081 | 4 |
| AX-157960536 | 4 | 55.454 | KV452807.1 | 120443  | 4-scf00081 | 4 |
| AX-157961109 | 4 | 55.454 | KV452824.1 | 572301  | 4-scf00086 | 4 |
| AX-157961124 | 4 | 55.454 | KV452824.1 | 590017  | 4-scf00086 | 4 |
| AX-157961146 | 4 | 55.454 | KV452824.1 | 637069  | 4-scf00086 | 4 |
| AX-157961151 | 4 | 55.454 | KV452824.1 | 639069  | 4-scf00086 | 4 |
| AX-157961161 | 4 | 55.454 | KV452824.1 | 647912  | 4-scf00086 | 4 |
| AX-157961234 | 4 | 55.454 | KV452824.1 | 718771  | 4-scf00086 | 4 |
| AX-157961323 | 4 | 55.454 | KV452824.1 | 827980  | 4-scf00086 | 4 |
| AX-157961598 | 4 | 55.454 | KV452812.1 | 20186   | 4-scf00087 | 4 |
| AX-157961657 | 4 | 55.454 | KV452812.1 | 86324   | 4-scf00087 | 4 |
| AX-157961733 | 4 | 55.454 | KV452813.1 | 120027  | 4-scf00088 | 4 |

|              |   |        |             |         |            |    |
|--------------|---|--------|-------------|---------|------------|----|
| AX-157961783 | 4 | 55.454 | KV452813.1  | 273951  | 4-scf00088 | 4  |
| AX-157682648 | 4 | 55.454 | KV452821.1  | 2036    | 4-scf00093 | 4  |
| AX-157682692 | 4 | 55.454 | KV452826.1  | 38513   | 4-scf00095 | 4  |
| AX-157705936 | 4 | 55.454 | 3ML01031276 | 150     | scf06884_1 | UN |
| AX-157707154 | 4 | 55.454 | 3ML01034284 | 227     | scf09954_1 | UN |
| AX-157954799 | 4 | 55.455 | KV452804.1  | 4483811 | 4-scf00071 | 4  |
| AX-157869583 | 4 | 55.455 | KV452804.1  | 4565524 | 4-scf00071 | 4  |
| AX-157954969 | 4 | 55.455 | KV452804.1  | 4730474 | 4-scf00071 | 4  |
| AX-157955044 | 4 | 55.455 | KV452804.1  | 4802455 | 4-scf00071 | 4  |
| AX-157727534 | 4 | 55.455 | KV452804.1  | 4805723 | 4-scf00071 | 4  |
| AX-157955080 | 4 | 55.455 | KV452804.1  | 4838639 | 4-scf00071 | 4  |
| AX-157955088 | 4 | 55.455 | KV452804.1  | 4847048 | 4-scf00071 | 4  |
| AX-157815901 | 4 | 55.455 | KV452804.1  | 4865762 | 4-scf00071 | 4  |
| AX-157955121 | 4 | 55.455 | KV452804.1  | 4885482 | 4-scf00071 | 4  |
| AX-157755163 | 4 | 55.455 | KV452804.1  | 4908195 | 4-scf00071 | 4  |
| AX-157705946 | 4 | 55.455 | 3ML01032163 | 530     | scf07777_1 | UN |
| AX-157737469 | 4 | 55.475 | KV452804.1  | 5093637 | 4-scf00071 | 4  |
| AX-158379464 | 4 | 55.485 | KV452804.1  | 3708559 | 4-scf00071 | 4  |
| AX-157815825 | 4 | 55.485 | KV452804.1  | 3712715 | 4-scf00071 | 4  |
| AX-157756484 | 4 | 55.485 | KV452804.1  | 3769076 | 4-scf00071 | 4  |
| AX-157954321 | 4 | 55.485 | KV452804.1  | 3931983 | 4-scf00071 | 4  |
| AX-157954944 | 4 | 55.485 | KV452804.1  | 4703808 | 4-scf00071 | 4  |
| AX-157955383 | 4 | 55.485 | KV452804.1  | 5158079 | 4-scf00071 | 4  |
| AX-157955409 | 4 | 55.485 | KV452804.1  | 5180274 | 4-scf00071 | 4  |
| AX-157955425 | 4 | 55.485 | KV452804.1  | 5193586 | 4-scf00071 | 4  |
| AX-157956002 | 4 | 55.485 | KV452804.1  | 5866641 | 4-scf00071 | 4  |
| AX-157815851 | 4 | 55.515 | KV452804.1  | 4218870 | 4-scf00071 | 4  |
| AX-157954997 | 4 | 55.515 | KV452804.1  | 4761008 | 4-scf00071 | 4  |
| AX-157955125 | 4 | 55.515 | KV452804.1  | 4889511 | 4-scf00071 | 4  |
| AX-157955320 | 4 | 55.515 | KV452804.1  | 5093104 | 4-scf00071 | 4  |
| AX-157955339 | 4 | 55.515 | KV452804.1  | 5108751 | 4-scf00071 | 4  |
| AX-157955349 | 4 | 55.515 | KV452804.1  | 5118739 | 4-scf00071 | 4  |
| AX-157955479 | 4 | 55.515 | KV452804.1  | 5247476 | 4-scf00071 | 4  |
| AX-157955597 | 4 | 55.515 | KV452804.1  | 5358647 | 4-scf00071 | 4  |
| AX-157955765 | 4 | 55.515 | KV452804.1  | 5546956 | 4-scf00071 | 4  |
| AX-157956182 | 4 | 55.515 | KV452804.1  | 6142283 | 4-scf00071 | 4  |
| AX-157816026 | 4 | 55.515 | KV452806.1  | 152386  | 4-scf00073 | 4  |
| AX-157706724 | 4 | 55.515 | 3ML01032800 | 347     | scf08430_1 | UN |
| AX-157955755 | 4 | 55.528 | KV452804.1  | 5539546 | 4-scf00071 | 4  |
| AX-157815924 | 4 | 55.556 | KV452804.1  | 5545231 | 4-scf00071 | 4  |
| AX-157713807 | 4 | 55.585 | KV452804.1  | 5568022 | 4-scf00071 | 4  |
| AX-157955794 | 4 | 55.585 | KV452804.1  | 5588610 | 4-scf00071 | 4  |
| AX-157957005 | 4 | 55.585 | KV452806.1  | 675623  | 4-scf00073 | 4  |
| AX-157955786 | 4 | 55.602 | KV452804.1  | 5579516 | 4-scf00071 | 4  |
| AX-158390252 | 4 | 55.634 | KV452804.1  | 5655891 | 4-scf00071 | 4  |
| AX-157955860 | 4 | 55.634 | KV452804.1  | 5659024 | 4-scf00071 | 4  |
| AX-157955864 | 4 | 55.794 | KV452804.1  | 5666754 | 4-scf00071 | 4  |
| AX-157954385 | 4 | 55.795 | KV452804.1  | 4004352 | 4-scf00071 | 4  |
| AX-157954412 | 4 | 55.795 | KV452804.1  | 4029728 | 4-scf00071 | 4  |
| AX-157754424 | 4 | 55.795 | KV452804.1  | 4069370 | 4-scf00071 | 4  |
| AX-157954649 | 4 | 55.795 | KV452804.1  | 4285227 | 4-scf00071 | 4  |

|              |   |        |            |         |            |   |
|--------------|---|--------|------------|---------|------------|---|
| AX-157954724 | 4 | 55.795 | KV452804.1 | 4395551 | 4-scf00071 | 4 |
| AX-157954762 | 4 | 55.795 | KV452804.1 | 4440999 | 4-scf00071 | 4 |
| AX-157754455 | 4 | 55.795 | KV452804.1 | 4483620 | 4-scf00071 | 4 |
| AX-157815885 | 4 | 55.795 | KV452804.1 | 4510130 | 4-scf00071 | 4 |
| AX-157954824 | 4 | 55.795 | KV452804.1 | 4526895 | 4-scf00071 | 4 |
| AX-157954834 | 4 | 55.795 | KV452804.1 | 4533304 | 4-scf00071 | 4 |
| AX-157954976 | 4 | 55.795 | KV452804.1 | 4740119 | 4-scf00071 | 4 |
| AX-157954985 | 4 | 55.795 | KV452804.1 | 4749041 | 4-scf00071 | 4 |
| AX-157955051 | 4 | 55.795 | KV452804.1 | 4808715 | 4-scf00071 | 4 |
| AX-157955066 | 4 | 55.795 | KV452804.1 | 4819759 | 4-scf00071 | 4 |
| AX-157955067 | 4 | 55.795 | KV452804.1 | 4820702 | 4-scf00071 | 4 |
| AX-158379469 | 4 | 55.795 | KV452804.1 | 4822554 | 4-scf00071 | 4 |
| AX-157955083 | 4 | 55.795 | KV452804.1 | 4843063 | 4-scf00071 | 4 |
| AX-157955124 | 4 | 55.795 | KV452804.1 | 4888133 | 4-scf00071 | 4 |
| AX-157955144 | 4 | 55.795 | KV452804.1 | 4918624 | 4-scf00071 | 4 |
| AX-157755853 | 4 | 55.795 | KV452804.1 | 4924301 | 4-scf00071 | 4 |
| AX-157955153 | 4 | 55.795 | KV452804.1 | 4926094 | 4-scf00071 | 4 |
| AX-157955186 | 4 | 55.795 | KV452804.1 | 4957802 | 4-scf00071 | 4 |
| AX-158379470 | 4 | 55.795 | KV452804.1 | 4984164 | 4-scf00071 | 4 |
| AX-157772260 | 4 | 55.795 | KV452804.1 | 5055893 | 4-scf00071 | 4 |
| AX-157955422 | 4 | 55.795 | KV452804.1 | 5190075 | 4-scf00071 | 4 |
| AX-157955565 | 4 | 55.795 | KV452804.1 | 5328907 | 4-scf00071 | 4 |
| AX-157955589 | 4 | 55.795 | KV452804.1 | 5351275 | 4-scf00071 | 4 |
| AX-157955762 | 4 | 55.795 | KV452804.1 | 5543978 | 4-scf00071 | 4 |
| AX-157955787 | 4 | 55.795 | KV452804.1 | 5581068 | 4-scf00071 | 4 |
| AX-157955789 | 4 | 55.795 | KV452804.1 | 5583792 | 4-scf00071 | 4 |
| AX-157955790 | 4 | 55.795 | KV452804.1 | 5584064 | 4-scf00071 | 4 |
| AX-157815929 | 4 | 55.795 | KV452804.1 | 5584331 | 4-scf00071 | 4 |
| AX-157955819 | 4 | 55.795 | KV452804.1 | 5613483 | 4-scf00071 | 4 |
| AX-158378706 | 4 | 55.795 | KV452804.1 | 5615734 | 4-scf00071 | 4 |
| AX-157955832 | 4 | 55.795 | KV452804.1 | 5626952 | 4-scf00071 | 4 |
| AX-157739265 | 4 | 55.795 | KV452804.1 | 5679084 | 4-scf00071 | 4 |
| AX-157955877 | 4 | 55.795 | KV452804.1 | 5680479 | 4-scf00071 | 4 |
| AX-157955879 | 4 | 55.795 | KV452804.1 | 5685182 | 4-scf00071 | 4 |
| AX-157750596 | 4 | 55.795 | KV452804.1 | 5695511 | 4-scf00071 | 4 |
| AX-157955889 | 4 | 55.795 | KV452804.1 | 5696593 | 4-scf00071 | 4 |
| AX-157955890 | 4 | 55.795 | KV452804.1 | 5698527 | 4-scf00071 | 4 |
| AX-157815943 | 4 | 55.795 | KV452804.1 | 5698982 | 4-scf00071 | 4 |
| AX-157718127 | 4 | 55.795 | KV452804.1 | 5699368 | 4-scf00071 | 4 |
| AX-157815944 | 4 | 55.795 | KV452804.1 | 5699860 | 4-scf00071 | 4 |
| AX-157955924 | 4 | 55.795 | KV452804.1 | 5748299 | 4-scf00071 | 4 |
| AX-157955925 | 4 | 55.795 | KV452804.1 | 5749963 | 4-scf00071 | 4 |
| AX-157955928 | 4 | 55.795 | KV452804.1 | 5751123 | 4-scf00071 | 4 |
| AX-157955931 | 4 | 55.795 | KV452804.1 | 5754650 | 4-scf00071 | 4 |
| AX-157955934 | 4 | 55.795 | KV452804.1 | 5761914 | 4-scf00071 | 4 |
| AX-157955937 | 4 | 55.795 | KV452804.1 | 5763446 | 4-scf00071 | 4 |
| AX-157746167 | 4 | 55.795 | KV452804.1 | 5765609 | 4-scf00071 | 4 |
| AX-157955939 | 4 | 55.795 | KV452804.1 | 5769804 | 4-scf00071 | 4 |
| AX-157955942 | 4 | 55.795 | KV452804.1 | 5772756 | 4-scf00071 | 4 |
| AX-157955956 | 4 | 55.795 | KV452804.1 | 5791516 | 4-scf00071 | 4 |
| AX-157955964 | 4 | 55.795 | KV452804.1 | 5805827 | 4-scf00071 | 4 |

|              |   |        |            |         |            |   |
|--------------|---|--------|------------|---------|------------|---|
| AX-157955981 | 4 | 55.795 | KV452804.1 | 5836078 | 4-scf00071 | 4 |
| AX-157955989 | 4 | 55.795 | KV452804.1 | 5845124 | 4-scf00071 | 4 |
| AX-157955990 | 4 | 55.795 | KV452804.1 | 5845467 | 4-scf00071 | 4 |
| AX-157955991 | 4 | 55.795 | KV452804.1 | 5847440 | 4-scf00071 | 4 |
| AX-157955992 | 4 | 55.795 | KV452804.1 | 5847698 | 4-scf00071 | 4 |
| AX-157955993 | 4 | 55.795 | KV452804.1 | 5848466 | 4-scf00071 | 4 |
| AX-157955998 | 4 | 55.795 | KV452804.1 | 5857454 | 4-scf00071 | 4 |
| AX-158405051 | 4 | 55.795 | KV452804.1 | 5860940 | 4-scf00071 | 4 |
| AX-157956005 | 4 | 55.795 | KV452804.1 | 5872783 | 4-scf00071 | 4 |
| AX-157956006 | 4 | 55.795 | KV452804.1 | 5873782 | 4-scf00071 | 4 |
| AX-157956009 | 4 | 55.795 | KV452804.1 | 5876370 | 4-scf00071 | 4 |
| AX-157956013 | 4 | 55.795 | KV452804.1 | 5881105 | 4-scf00071 | 4 |
| AX-157756210 | 4 | 55.795 | KV452804.1 | 5898056 | 4-scf00071 | 4 |
| AX-157956028 | 4 | 55.795 | KV452804.1 | 5899789 | 4-scf00071 | 4 |
| AX-157956030 | 4 | 55.795 | KV452804.1 | 5903268 | 4-scf00071 | 4 |
| AX-157956042 | 4 | 55.795 | KV452804.1 | 5914653 | 4-scf00071 | 4 |
| AX-157956046 | 4 | 55.795 | KV452804.1 | 5917606 | 4-scf00071 | 4 |
| AX-157956049 | 4 | 55.795 | KV452804.1 | 5919961 | 4-scf00071 | 4 |
| AX-157956256 | 4 | 55.795 | KV452804.1 | 6297269 | 4-scf00071 | 4 |
| AX-158422051 | 4 | 55.795 | KV452805.1 | 56833   | 4-scf00072 | 4 |
| AX-157956985 | 4 | 55.795 | KV452806.1 | 653494  | 4-scf00073 | 4 |
| AX-157957019 | 4 | 55.795 | KV452806.1 | 691257  | 4-scf00073 | 4 |
| AX-157957061 | 4 | 55.795 | KV452806.1 | 739895  | 4-scf00073 | 4 |
| AX-157958042 | 4 | 55.795 | KV452806.1 | 2087374 | 4-scf00073 | 4 |
| AX-157958513 | 4 | 55.795 | KV452814.1 | 661865  | 4-scf00074 | 4 |
| AX-157958706 | 4 | 55.795 | KV452814.1 | 1035085 | 4-scf00074 | 4 |
| AX-157959790 | 4 | 55.795 | KV452816.1 | 1180255 | 4-scf00077 | 4 |
| AX-157717548 | 4 | 55.795 | KV452816.1 | 1286185 | 4-scf00077 | 4 |
| AX-157959937 | 4 | 55.795 | KV452816.1 | 1413687 | 4-scf00077 | 4 |
| AX-157959949 | 4 | 55.795 | KV452816.1 | 1434225 | 4-scf00077 | 4 |
| AX-157961929 | 4 | 55.795 | KV452819.1 | 1219101 | 4-scf00080 | 4 |
| AX-157961977 | 4 | 55.795 | KV452819.1 | 1360680 | 4-scf00080 | 4 |
| AX-157962009 | 4 | 55.795 | KV452819.1 | 1436802 | 4-scf00080 | 4 |
| AX-157962011 | 4 | 55.795 | KV452819.1 | 1445629 | 4-scf00080 | 4 |
| AX-157961108 | 4 | 55.795 | KV452824.1 | 571531  | 4-scf00086 | 4 |
| AX-158406421 | 4 | 55.795 | KV452824.1 | 959012  | 4-scf00086 | 4 |
| AX-157816427 | 4 | 55.795 | KV452812.1 | 9902    | 4-scf00087 | 4 |
| AX-157954018 | 4 | 55.923 | KV452804.1 | 3541839 | 4-scf00071 | 4 |
| AX-157954660 | 4 | 55.923 | KV452804.1 | 4300282 | 4-scf00071 | 4 |
| AX-157954662 | 4 | 55.923 | KV452804.1 | 4302976 | 4-scf00071 | 4 |
| AX-157954776 | 4 | 55.923 | KV452804.1 | 4454237 | 4-scf00071 | 4 |
| AX-157715051 | 4 | 55.923 | KV452804.1 | 4500679 | 4-scf00071 | 4 |
| AX-157954860 | 4 | 55.923 | KV452804.1 | 4568043 | 4-scf00071 | 4 |
| AX-157954872 | 4 | 55.923 | KV452804.1 | 4585699 | 4-scf00071 | 4 |
| AX-157954875 | 4 | 55.923 | KV452804.1 | 4591667 | 4-scf00071 | 4 |
| AX-157954937 | 4 | 55.923 | KV452804.1 | 4693959 | 4-scf00071 | 4 |
| AX-157750328 | 4 | 55.923 | KV452804.1 | 4704938 | 4-scf00071 | 4 |
| AX-157954984 | 4 | 55.923 | KV452804.1 | 4748054 | 4-scf00071 | 4 |
| AX-157739212 | 4 | 55.923 | KV452804.1 | 4795395 | 4-scf00071 | 4 |
| AX-157955046 | 4 | 55.923 | KV452804.1 | 4804535 | 4-scf00071 | 4 |
| AX-157955052 | 4 | 55.923 | KV452804.1 | 4809023 | 4-scf00071 | 4 |

|              |   |        |            |         |            |   |
|--------------|---|--------|------------|---------|------------|---|
| AX-157815897 | 4 | 55.923 | KV452804.1 | 4823886 | 4-scf00071 | 4 |
| AX-157955136 | 4 | 55.923 | KV452804.1 | 4908548 | 4-scf00071 | 4 |
| AX-157955386 | 4 | 55.923 | KV452804.1 | 5160474 | 4-scf00071 | 4 |
| AX-157955429 | 4 | 55.923 | KV452804.1 | 5196245 | 4-scf00071 | 4 |
| AX-157758240 | 4 | 55.923 | KV452804.1 | 5196971 | 4-scf00071 | 4 |
| AX-157955458 | 4 | 55.923 | KV452804.1 | 5228832 | 4-scf00071 | 4 |
| AX-157955459 | 4 | 55.923 | KV452804.1 | 5229599 | 4-scf00071 | 4 |
| AX-157955500 | 4 | 55.923 | KV452804.1 | 5265153 | 4-scf00071 | 4 |
| AX-157955503 | 4 | 55.923 | KV452804.1 | 5268726 | 4-scf00071 | 4 |
| AX-157955512 | 4 | 55.923 | KV452804.1 | 5284288 | 4-scf00071 | 4 |
| AX-157955574 | 4 | 55.923 | KV452804.1 | 5337529 | 4-scf00071 | 4 |
| AX-157955644 | 4 | 55.923 | KV452804.1 | 5406105 | 4-scf00071 | 4 |
| AX-157955760 | 4 | 55.923 | KV452804.1 | 5542959 | 4-scf00071 | 4 |
| AX-157815925 | 4 | 55.923 | KV452804.1 | 5546801 | 4-scf00071 | 4 |
| AX-157955766 | 4 | 55.923 | KV452804.1 | 5548420 | 4-scf00071 | 4 |
| AX-157875483 | 4 | 55.923 | KV452804.1 | 5679297 | 4-scf00071 | 4 |
| AX-157815936 | 4 | 55.923 | KV452804.1 | 5680675 | 4-scf00071 | 4 |
| AX-157955878 | 4 | 55.923 | KV452804.1 | 5682216 | 4-scf00071 | 4 |
| AX-157955884 | 4 | 55.923 | KV452804.1 | 5688747 | 4-scf00071 | 4 |
| AX-157955953 | 4 | 55.923 | KV452804.1 | 5785782 | 4-scf00071 | 4 |
| AX-157956003 | 4 | 55.923 | KV452804.1 | 5870300 | 4-scf00071 | 4 |
| AX-157956018 | 4 | 55.923 | KV452804.1 | 5884697 | 4-scf00071 | 4 |
| AX-157862827 | 4 | 55.923 | KV452804.1 | 5887786 | 4-scf00071 | 4 |
| AX-157815960 | 4 | 55.923 | KV452804.1 | 5904396 | 4-scf00071 | 4 |
| AX-157956043 | 4 | 55.923 | KV452804.1 | 5915174 | 4-scf00071 | 4 |
| AX-157956057 | 4 | 55.923 | KV452804.1 | 5931469 | 4-scf00071 | 4 |
| AX-157956058 | 4 | 55.923 | KV452804.1 | 5932740 | 4-scf00071 | 4 |
| AX-157815961 | 4 | 55.923 | KV452804.1 | 5936535 | 4-scf00071 | 4 |
| AX-157956063 | 4 | 55.923 | KV452804.1 | 5951094 | 4-scf00071 | 4 |
| AX-157815965 | 4 | 55.923 | KV452804.1 | 5954395 | 4-scf00071 | 4 |
| AX-158406227 | 4 | 55.923 | KV452804.1 | 5981241 | 4-scf00071 | 4 |
| AX-157956079 | 4 | 55.923 | KV452804.1 | 5982938 | 4-scf00071 | 4 |
| AX-157723330 | 4 | 55.923 | KV452804.1 | 5986447 | 4-scf00071 | 4 |
| AX-157724583 | 4 | 55.923 | KV452804.1 | 6010379 | 4-scf00071 | 4 |
| AX-157956089 | 4 | 55.923 | KV452804.1 | 6010646 | 4-scf00071 | 4 |
| AX-157956095 | 4 | 55.923 | KV452804.1 | 6016559 | 4-scf00071 | 4 |
| AX-157956098 | 4 | 55.923 | KV452804.1 | 6021644 | 4-scf00071 | 4 |
| AX-157956100 | 4 | 55.923 | KV452804.1 | 6022163 | 4-scf00071 | 4 |
| AX-157956101 | 4 | 55.923 | KV452804.1 | 6022980 | 4-scf00071 | 4 |
| AX-157815968 | 4 | 55.923 | KV452804.1 | 6024331 | 4-scf00071 | 4 |
| AX-157956102 | 4 | 55.923 | KV452804.1 | 6024839 | 4-scf00071 | 4 |
| AX-157956103 | 4 | 55.923 | KV452804.1 | 6025389 | 4-scf00071 | 4 |
| AX-157956104 | 4 | 55.923 | KV452804.1 | 6026056 | 4-scf00071 | 4 |
| AX-157956108 | 4 | 55.923 | KV452804.1 | 6030090 | 4-scf00071 | 4 |
| AX-157815970 | 4 | 55.923 | KV452804.1 | 6048078 | 4-scf00071 | 4 |
| AX-157815971 | 4 | 55.923 | KV452804.1 | 6049294 | 4-scf00071 | 4 |
| AX-157956118 | 4 | 55.923 | KV452804.1 | 6050439 | 4-scf00071 | 4 |
| AX-157956120 | 4 | 55.923 | KV452804.1 | 6052039 | 4-scf00071 | 4 |
| AX-157956136 | 4 | 55.923 | KV452804.1 | 6077071 | 4-scf00071 | 4 |
| AX-157956137 | 4 | 55.923 | KV452804.1 | 6077466 | 4-scf00071 | 4 |
| AX-157956138 | 4 | 55.923 | KV452804.1 | 6078306 | 4-scf00071 | 4 |

|              |   |        |            |         |            |   |
|--------------|---|--------|------------|---------|------------|---|
| AX-158415309 | 4 | 55.923 | KV452804.1 | 6104134 | 4-scf00071 | 4 |
| AX-157956159 | 4 | 55.923 | KV452804.1 | 6110680 | 4-scf00071 | 4 |
| AX-157956169 | 4 | 55.923 | KV452804.1 | 6124512 | 4-scf00071 | 4 |
| AX-157773472 | 4 | 55.923 | KV452804.1 | 6138694 | 4-scf00071 | 4 |
| AX-157956191 | 4 | 55.923 | KV452804.1 | 6157362 | 4-scf00071 | 4 |
| AX-158415314 | 4 | 55.923 | KV452804.1 | 6205216 | 4-scf00071 | 4 |
| AX-157956230 | 4 | 55.923 | KV452804.1 | 6233163 | 4-scf00071 | 4 |
| AX-157956246 | 4 | 55.923 | KV452804.1 | 6285867 | 4-scf00071 | 4 |
| AX-157956247 | 4 | 55.923 | KV452804.1 | 6286911 | 4-scf00071 | 4 |
| AX-157956248 | 4 | 55.923 | KV452804.1 | 6287766 | 4-scf00071 | 4 |
| AX-157956249 | 4 | 55.923 | KV452804.1 | 6289128 | 4-scf00071 | 4 |
| AX-157956261 | 4 | 55.923 | KV452804.1 | 6330117 | 4-scf00071 | 4 |
| AX-157956263 | 4 | 55.923 | KV452804.1 | 6335052 | 4-scf00071 | 4 |
| AX-157956265 | 4 | 55.923 | KV452804.1 | 6335923 | 4-scf00071 | 4 |
| AX-157956266 | 4 | 55.923 | KV452804.1 | 6336399 | 4-scf00071 | 4 |
| AX-157956320 | 4 | 55.923 | KV452804.1 | 6601973 | 4-scf00071 | 4 |
| AX-157956370 | 4 | 55.923 | KV452804.1 | 6796870 | 4-scf00071 | 4 |
| AX-158382887 | 4 | 55.923 | KV452805.1 | 37143   | 4-scf00072 | 4 |
| AX-157956483 | 4 | 55.923 | KV452805.1 | 107916  | 4-scf00072 | 4 |
| AX-157956525 | 4 | 55.923 | KV452806.1 | 3687    | 4-scf00073 | 4 |
| AX-157816020 | 4 | 55.923 | KV452806.1 | 70698   | 4-scf00073 | 4 |
| AX-157816024 | 4 | 55.923 | KV452806.1 | 121171  | 4-scf00073 | 4 |
| AX-157956615 | 4 | 55.923 | KV452806.1 | 121326  | 4-scf00073 | 4 |
| AX-157956623 | 4 | 55.923 | KV452806.1 | 137003  | 4-scf00073 | 4 |
| AX-157956682 | 4 | 55.923 | KV452806.1 | 219434  | 4-scf00073 | 4 |
| AX-157956685 | 4 | 55.923 | KV452806.1 | 225233  | 4-scf00073 | 4 |
| AX-157956686 | 4 | 55.923 | KV452806.1 | 225755  | 4-scf00073 | 4 |
| AX-157775486 | 4 | 55.923 | KV452806.1 | 225922  | 4-scf00073 | 4 |
| AX-157956688 | 4 | 55.923 | KV452806.1 | 230568  | 4-scf00073 | 4 |
| AX-157956689 | 4 | 55.923 | KV452806.1 | 230878  | 4-scf00073 | 4 |
| AX-157956690 | 4 | 55.923 | KV452806.1 | 231810  | 4-scf00073 | 4 |
| AX-157956691 | 4 | 55.923 | KV452806.1 | 232498  | 4-scf00073 | 4 |
| AX-157816036 | 4 | 55.923 | KV452806.1 | 235706  | 4-scf00073 | 4 |
| AX-157956695 | 4 | 55.923 | KV452806.1 | 236097  | 4-scf00073 | 4 |
| AX-157956696 | 4 | 55.923 | KV452806.1 | 236570  | 4-scf00073 | 4 |
| AX-157718185 | 4 | 55.923 | KV452806.1 | 262338  | 4-scf00073 | 4 |
| AX-157956722 | 4 | 55.923 | KV452806.1 | 283520  | 4-scf00073 | 4 |
| AX-157766498 | 4 | 55.923 | KV452806.1 | 344850  | 4-scf00073 | 4 |
| AX-157816053 | 4 | 55.923 | KV452806.1 | 358049  | 4-scf00073 | 4 |
| AX-157956784 | 4 | 55.923 | KV452806.1 | 358400  | 4-scf00073 | 4 |
| AX-157745921 | 4 | 55.923 | KV452806.1 | 359107  | 4-scf00073 | 4 |
| AX-157956786 | 4 | 55.923 | KV452806.1 | 362877  | 4-scf00073 | 4 |
| AX-157956862 | 4 | 55.923 | KV452806.1 | 471003  | 4-scf00073 | 4 |
| AX-157956870 | 4 | 55.923 | KV452806.1 | 486821  | 4-scf00073 | 4 |
| AX-157956873 | 4 | 55.923 | KV452806.1 | 489867  | 4-scf00073 | 4 |
| AX-157956875 | 4 | 55.923 | KV452806.1 | 494884  | 4-scf00073 | 4 |
| AX-157956876 | 4 | 55.923 | KV452806.1 | 495619  | 4-scf00073 | 4 |
| AX-157956880 | 4 | 55.923 | KV452806.1 | 503862  | 4-scf00073 | 4 |
| AX-157956882 | 4 | 55.923 | KV452806.1 | 505681  | 4-scf00073 | 4 |
| AX-157816077 | 4 | 55.923 | KV452806.1 | 869940  | 4-scf00073 | 4 |
| AX-157742950 | 4 | 55.923 | KV452806.1 | 2416690 | 4-scf00073 | 4 |

|              |   |        |            |         |            |    |
|--------------|---|--------|------------|---------|------------|----|
| AX-157962434 | 4 | 55.923 | KV452819.1 | 2595825 | 4-scf00080 | 4  |
| AX-157961572 | 4 | 55.923 | KV452824.1 | 1426764 | 4-scf00086 | 4  |
| AX-157816525 | 4 | 55.923 | KV452829.1 | 451783  | 4-scf00092 | 4  |
| AX-157963488 | 4 | 55.923 | KV452829.1 | 1248800 | 4-scf00092 | 4  |
| AX-157956121 | 4 | 55.943 | KV452804.1 | 6052275 | 4-scf00071 | 4  |
| AX-157743661 | 4 | 55.965 | KV452804.1 | 6079111 | 4-scf00071 | 4  |
| AX-157956167 | 4 | 55.974 | KV452804.1 | 6120556 | 4-scf00071 | 4  |
| AX-157956175 | 4 | 55.994 | KV452804.1 | 6130937 | 4-scf00071 | 4  |
| AX-157956470 | 4 | 55.994 | KV452805.1 | 83869   | 4-scf00072 | 4  |
| AX-157956190 | 4 | 56.014 | KV452804.1 | 6156564 | 4-scf00071 | 4  |
| AX-157954855 | 4 | 56.035 | KV452804.1 | 4565033 | 4-scf00071 | 4  |
| AX-157724747 | 4 | 56.035 | KV452804.1 | 5746807 | 4-scf00071 | 4  |
| AX-157956203 | 4 | 56.035 | KV452804.1 | 6168107 | 4-scf00071 | 4  |
| AX-157958041 | 4 | 56.035 | KV452806.1 | 2086090 | 4-scf00073 | 4  |
| AX-157958192 | 4 | 56.035 | KV452814.1 | 38640   | 4-scf00074 | 4  |
| AX-157959347 | 4 | 56.035 | KV452816.1 | 575285  | 4-scf00077 | 4  |
| AX-158406360 | 4 | 56.035 | KV452816.1 | 907031  | 4-scf00077 | 4  |
| AX-157816293 | 4 | 56.035 | KV452816.1 | 939542  | 4-scf00077 | 4  |
| AX-157816364 | 4 | 56.035 | KV452819.1 | 26647   | 4-scf00080 | 4  |
| AX-157960393 | 4 | 56.035 | KV452819.1 | 112956  | 4-scf00080 | 4  |
| AX-157962516 | 4 | 56.035 | KV452819.1 | 922909  | 4-scf00080 | 4  |
| AX-157961994 | 4 | 56.035 | KV452819.1 | 1412291 | 4-scf00080 | 4  |
| AX-157816444 | 4 | 56.035 | KV452819.1 | 1506241 | 4-scf00080 | 4  |
| AX-157962663 | 4 | 56.035 | KV452820.1 | 55189   | 4-scf00091 | 4  |
| AX-157686381 | 4 | 56.035 | KV453395.1 | 19001   | scf00689   | UN |
| AX-157953896 | 4 | 56.051 | KV452804.1 | 3360588 | 4-scf00071 | 4  |
| AX-157954129 | 4 | 56.051 | KV452804.1 | 3701757 | 4-scf00071 | 4  |
| AX-157954137 | 4 | 56.051 | KV452804.1 | 3709460 | 4-scf00071 | 4  |
| AX-157723241 | 4 | 56.051 | KV452804.1 | 3716183 | 4-scf00071 | 4  |
| AX-158406164 | 4 | 56.051 | KV452804.1 | 3718259 | 4-scf00071 | 4  |
| AX-157954504 | 4 | 56.051 | KV452804.1 | 4127138 | 4-scf00071 | 4  |
| AX-157954740 | 4 | 56.051 | KV452804.1 | 4415407 | 4-scf00071 | 4  |
| AX-157954826 | 4 | 56.051 | KV452804.1 | 4528550 | 4-scf00071 | 4  |
| AX-157725647 | 4 | 56.051 | KV452804.1 | 4655065 | 4-scf00071 | 4  |
| AX-157955108 | 4 | 56.051 | KV452804.1 | 4868136 | 4-scf00071 | 4  |
| AX-157955116 | 4 | 56.051 | KV452804.1 | 4877669 | 4-scf00071 | 4  |
| AX-157955126 | 4 | 56.051 | KV452804.1 | 4890163 | 4-scf00071 | 4  |
| AX-158406196 | 4 | 56.051 | KV452804.1 | 5159339 | 4-scf00071 | 4  |
| AX-157955391 | 4 | 56.051 | KV452804.1 | 5165634 | 4-scf00071 | 4  |
| AX-157955395 | 4 | 56.051 | KV452804.1 | 5168064 | 4-scf00071 | 4  |
| AX-157955399 | 4 | 56.051 | KV452804.1 | 5171657 | 4-scf00071 | 4  |
| AX-157955733 | 4 | 56.051 | KV452804.1 | 5511578 | 4-scf00071 | 4  |
| AX-157815950 | 4 | 56.051 | KV452804.1 | 5739852 | 4-scf00071 | 4  |
| AX-157956068 | 4 | 56.051 | KV452804.1 | 5958684 | 4-scf00071 | 4  |
| AX-157956070 | 4 | 56.051 | KV452804.1 | 5963277 | 4-scf00071 | 4  |
| AX-157956072 | 4 | 56.051 | KV452804.1 | 5968752 | 4-scf00071 | 4  |
| AX-157956081 | 4 | 56.051 | KV452804.1 | 5988096 | 4-scf00071 | 4  |
| AX-157864886 | 4 | 56.051 | KV452804.1 | 6002299 | 4-scf00071 | 4  |
| AX-157956086 | 4 | 56.051 | KV452804.1 | 6007922 | 4-scf00071 | 4  |
| AX-157815969 | 4 | 56.051 | KV452804.1 | 6029196 | 4-scf00071 | 4  |
| AX-157715738 | 4 | 56.051 | KV452804.1 | 6155853 | 4-scf00071 | 4  |



|              |   |        |            |         |            |   |
|--------------|---|--------|------------|---------|------------|---|
| AX-157956189 | 4 | 56.051 | KV452804.1 | 6156056 | 4-scf00071 | 4 |
| AX-157744696 | 4 | 56.051 | KV452804.1 | 6168400 | 4-scf00071 | 4 |
| AX-157956209 | 4 | 56.051 | KV452804.1 | 6178490 | 4-scf00071 | 4 |
| AX-157956210 | 4 | 56.051 | KV452804.1 | 6178882 | 4-scf00071 | 4 |
| AX-158406238 | 4 | 56.051 | KV452804.1 | 6203304 | 4-scf00071 | 4 |
| AX-158415313 | 4 | 56.051 | KV452804.1 | 6204074 | 4-scf00071 | 4 |
| AX-157815988 | 4 | 56.051 | KV452804.1 | 6211431 | 4-scf00071 | 4 |
| AX-157956238 | 4 | 56.051 | KV452804.1 | 6258909 | 4-scf00071 | 4 |
| AX-158406240 | 4 | 56.051 | KV452804.1 | 6268606 | 4-scf00071 | 4 |
| AX-157956244 | 4 | 56.051 | KV452804.1 | 6282182 | 4-scf00071 | 4 |
| AX-158406242 | 4 | 56.051 | KV452804.1 | 6283266 | 4-scf00071 | 4 |
| AX-157956245 | 4 | 56.051 | KV452804.1 | 6285320 | 4-scf00071 | 4 |
| AX-157956250 | 4 | 56.051 | KV452804.1 | 6289579 | 4-scf00071 | 4 |
| AX-157956251 | 4 | 56.051 | KV452804.1 | 6290184 | 4-scf00071 | 4 |
| AX-157956252 | 4 | 56.051 | KV452804.1 | 6290519 | 4-scf00071 | 4 |
| AX-157956253 | 4 | 56.051 | KV452804.1 | 6292307 | 4-scf00071 | 4 |
| AX-157956255 | 4 | 56.051 | KV452804.1 | 6296154 | 4-scf00071 | 4 |
| AX-157753985 | 4 | 56.051 | KV452804.1 | 6317502 | 4-scf00071 | 4 |
| AX-157956268 | 4 | 56.051 | KV452804.1 | 6342887 | 4-scf00071 | 4 |
| AX-157956271 | 4 | 56.051 | KV452804.1 | 6347751 | 4-scf00071 | 4 |
| AX-157956272 | 4 | 56.051 | KV452804.1 | 6348589 | 4-scf00071 | 4 |
| AX-157956273 | 4 | 56.051 | KV452804.1 | 6356270 | 4-scf00071 | 4 |
| AX-157956340 | 4 | 56.051 | KV452804.1 | 6706131 | 4-scf00071 | 4 |
| AX-157956341 | 4 | 56.051 | KV452804.1 | 6709684 | 4-scf00071 | 4 |
| AX-157956342 | 4 | 56.051 | KV452804.1 | 6711449 | 4-scf00071 | 4 |
| AX-157718128 | 4 | 56.051 | KV452804.1 | 6719011 | 4-scf00071 | 4 |
| AX-157956343 | 4 | 56.051 | KV452804.1 | 6731654 | 4-scf00071 | 4 |
| AX-157956344 | 4 | 56.051 | KV452804.1 | 6732523 | 4-scf00071 | 4 |
| AX-157956350 | 4 | 56.051 | KV452804.1 | 6747021 | 4-scf00071 | 4 |
| AX-157956352 | 4 | 56.051 | KV452804.1 | 6752138 | 4-scf00071 | 4 |
| AX-157956353 | 4 | 56.051 | KV452804.1 | 6752752 | 4-scf00071 | 4 |
| AX-157956358 | 4 | 56.051 | KV452804.1 | 6760188 | 4-scf00071 | 4 |
| AX-157956359 | 4 | 56.051 | KV452804.1 | 6761915 | 4-scf00071 | 4 |
| AX-157956361 | 4 | 56.051 | KV452804.1 | 6766705 | 4-scf00071 | 4 |
| AX-157724801 | 4 | 56.051 | KV452804.1 | 6771126 | 4-scf00071 | 4 |
| AX-157956363 | 4 | 56.051 | KV452804.1 | 6780341 | 4-scf00071 | 4 |
| AX-157956364 | 4 | 56.051 | KV452804.1 | 6781210 | 4-scf00071 | 4 |
| AX-157956366 | 4 | 56.051 | KV452804.1 | 6787747 | 4-scf00071 | 4 |
| AX-157742460 | 4 | 56.051 | KV452804.1 | 6790610 | 4-scf00071 | 4 |
| AX-157956368 | 4 | 56.051 | KV452804.1 | 6793556 | 4-scf00071 | 4 |
| AX-157956369 | 4 | 56.051 | KV452804.1 | 6794786 | 4-scf00071 | 4 |
| AX-157956371 | 4 | 56.051 | KV452804.1 | 6798184 | 4-scf00071 | 4 |
| AX-158406253 | 4 | 56.051 | KV452804.1 | 6805414 | 4-scf00071 | 4 |
| AX-157956380 | 4 | 56.051 | KV452804.1 | 6825045 | 4-scf00071 | 4 |
| AX-157956400 | 4 | 56.051 | KV452805.1 | 2291    | 4-scf00072 | 4 |
| AX-157956425 | 4 | 56.051 | KV452805.1 | 28057   | 4-scf00072 | 4 |
| AX-157956431 | 4 | 56.051 | KV452805.1 | 33185   | 4-scf00072 | 4 |
| AX-157956433 | 4 | 56.051 | KV452805.1 | 34141   | 4-scf00072 | 4 |
| AX-158406260 | 4 | 56.051 | KV452805.1 | 42280   | 4-scf00072 | 4 |
| AX-157956477 | 4 | 56.051 | KV452805.1 | 98116   | 4-scf00072 | 4 |
| AX-157956482 | 4 | 56.051 | KV452805.1 | 106966  | 4-scf00072 | 4 |

|              |   |        |            |        |            |   |
|--------------|---|--------|------------|--------|------------|---|
| AX-157956486 | 4 | 56.051 | KV452805.1 | 114293 | 4-scf00072 | 4 |
| AX-157956489 | 4 | 56.051 | KV452805.1 | 121358 | 4-scf00072 | 4 |
| AX-157956513 | 4 | 56.051 | KV452805.1 | 185345 | 4-scf00072 | 4 |
| AX-157956514 | 4 | 56.051 | KV452805.1 | 187659 | 4-scf00072 | 4 |
| AX-158415324 | 4 | 56.051 | KV452805.1 | 189769 | 4-scf00072 | 4 |
| AX-157956518 | 4 | 56.051 | KV452805.1 | 195023 | 4-scf00072 | 4 |
| AX-157816013 | 4 | 56.051 | KV452806.1 | 8189   | 4-scf00073 | 4 |
| AX-157956529 | 4 | 56.051 | KV452806.1 | 10531  | 4-scf00073 | 4 |
| AX-157956535 | 4 | 56.051 | KV452806.1 | 15979  | 4-scf00073 | 4 |
| AX-157746316 | 4 | 56.051 | KV452806.1 | 26353  | 4-scf00073 | 4 |
| AX-157956545 | 4 | 56.051 | KV452806.1 | 28288  | 4-scf00073 | 4 |
| AX-157956547 | 4 | 56.051 | KV452806.1 | 30155  | 4-scf00073 | 4 |
| AX-157956552 | 4 | 56.051 | KV452806.1 | 37709  | 4-scf00073 | 4 |
| AX-157956557 | 4 | 56.051 | KV452806.1 | 42164  | 4-scf00073 | 4 |
| AX-157724330 | 4 | 56.051 | KV452806.1 | 57372  | 4-scf00073 | 4 |
| AX-157956565 | 4 | 56.051 | KV452806.1 | 58188  | 4-scf00073 | 4 |
| AX-157956566 | 4 | 56.051 | KV452806.1 | 59306  | 4-scf00073 | 4 |
| AX-157956567 | 4 | 56.051 | KV452806.1 | 61426  | 4-scf00073 | 4 |
| AX-157956573 | 4 | 56.051 | KV452806.1 | 67121  | 4-scf00073 | 4 |
| AX-157956582 | 4 | 56.051 | KV452806.1 | 77454  | 4-scf00073 | 4 |
| AX-157956583 | 4 | 56.051 | KV452806.1 | 78488  | 4-scf00073 | 4 |
| AX-157716875 | 4 | 56.051 | KV452806.1 | 84281  | 4-scf00073 | 4 |
| AX-157956595 | 4 | 56.051 | KV452806.1 | 92332  | 4-scf00073 | 4 |
| AX-157956599 | 4 | 56.051 | KV452806.1 | 95394  | 4-scf00073 | 4 |
| AX-158406265 | 4 | 56.051 | KV452806.1 | 101205 | 4-scf00073 | 4 |
| AX-157956618 | 4 | 56.051 | KV452806.1 | 125325 | 4-scf00073 | 4 |
| AX-157816025 | 4 | 56.051 | KV452806.1 | 144486 | 4-scf00073 | 4 |
| AX-157956628 | 4 | 56.051 | KV452806.1 | 147156 | 4-scf00073 | 4 |
| AX-157956630 | 4 | 56.051 | KV452806.1 | 152100 | 4-scf00073 | 4 |
| AX-157956632 | 4 | 56.051 | KV452806.1 | 160887 | 4-scf00073 | 4 |
| AX-157956633 | 4 | 56.051 | KV452806.1 | 161451 | 4-scf00073 | 4 |
| AX-157956640 | 4 | 56.051 | KV452806.1 | 172787 | 4-scf00073 | 4 |
| AX-157956641 | 4 | 56.051 | KV452806.1 | 173365 | 4-scf00073 | 4 |
| AX-157763464 | 4 | 56.051 | KV452806.1 | 202869 | 4-scf00073 | 4 |
| AX-157816032 | 4 | 56.051 | KV452806.1 | 207329 | 4-scf00073 | 4 |
| AX-157956672 | 4 | 56.051 | KV452806.1 | 207879 | 4-scf00073 | 4 |
| AX-157956674 | 4 | 56.051 | KV452806.1 | 209974 | 4-scf00073 | 4 |
| AX-157875494 | 4 | 56.051 | KV452806.1 | 218049 | 4-scf00073 | 4 |
| AX-157956711 | 4 | 56.051 | KV452806.1 | 255539 | 4-scf00073 | 4 |
| AX-157956712 | 4 | 56.051 | KV452806.1 | 256169 | 4-scf00073 | 4 |
| AX-157713934 | 4 | 56.051 | KV452806.1 | 259541 | 4-scf00073 | 4 |
| AX-157956715 | 4 | 56.051 | KV452806.1 | 260423 | 4-scf00073 | 4 |
| AX-157816042 | 4 | 56.051 | KV452806.1 | 261668 | 4-scf00073 | 4 |
| AX-157772054 | 4 | 56.051 | KV452806.1 | 263535 | 4-scf00073 | 4 |
| AX-157956719 | 4 | 56.051 | KV452806.1 | 274994 | 4-scf00073 | 4 |
| AX-157956723 | 4 | 56.051 | KV452806.1 | 283977 | 4-scf00073 | 4 |
| AX-157816048 | 4 | 56.051 | KV452806.1 | 324931 | 4-scf00073 | 4 |
| AX-157956758 | 4 | 56.051 | KV452806.1 | 326733 | 4-scf00073 | 4 |
| AX-157956763 | 4 | 56.051 | KV452806.1 | 332544 | 4-scf00073 | 4 |
| AX-157748511 | 4 | 56.051 | KV452806.1 | 350340 | 4-scf00073 | 4 |
| AX-157956795 | 4 | 56.051 | KV452806.1 | 370692 | 4-scf00073 | 4 |

|              |   |        |            |         |                |    |
|--------------|---|--------|------------|---------|----------------|----|
| AX-157816056 | 4 | 56.051 | KV452806.1 | 381735  | 4-scf00073     | 4  |
| AX-157816059 | 4 | 56.051 | KV452806.1 | 387809  | 4-scf00073     | 4  |
| AX-157956820 | 4 | 56.051 | KV452806.1 | 407158  | 4-scf00073     | 4  |
| AX-157956826 | 4 | 56.051 | KV452806.1 | 415138  | 4-scf00073     | 4  |
| AX-157956829 | 4 | 56.051 | KV452806.1 | 419618  | 4-scf00073     | 4  |
| AX-157956871 | 4 | 56.051 | KV452806.1 | 488926  | 4-scf00073     | 4  |
| AX-157956899 | 4 | 56.051 | KV452806.1 | 537777  | 4-scf00073     | 4  |
| AX-157957750 | 4 | 56.051 | KV452806.1 | 1612595 | 4-scf00073     | 4  |
| AX-157962200 | 4 | 56.051 | KV452819.1 | 1819334 | 4-scf00080     | 4  |
| AX-157695897 | 4 | 56.051 | FI868492.1 | 47      | IORI212 Ictalu | UN |
| AX-157956620 | 4 | 56.056 | KV452806.1 | 134305  | 4-scf00073     | 4  |
| AX-157815978 | 4 | 56.061 | KV452804.1 | 6116041 | 4-scf00071     | 4  |
| AX-157956163 | 4 | 56.061 | KV452804.1 | 6116315 | 4-scf00071     | 4  |
| AX-157956228 | 4 | 56.061 | KV452804.1 | 6225014 | 4-scf00071     | 4  |
| AX-157956478 | 4 | 56.061 | KV452805.1 | 99761   | 4-scf00072     | 4  |
| AX-157956625 | 4 | 56.061 | KV452806.1 | 137716  | 4-scf00073     | 4  |
| AX-157957168 | 4 | 56.061 | KV452806.1 | 889732  | 4-scf00073     | 4  |
| AX-157961597 | 4 | 56.061 | KV452812.1 | 19318   | 4-scf00087     | 4  |
| AX-157816557 | 4 | 56.061 | KV452829.1 | 1189452 | 4-scf00092     | 4  |
| AX-157956666 | 4 | 56.066 | KV452806.1 | 201232  | 4-scf00073     | 4  |
| AX-157815954 | 4 | 56.071 | KV452804.1 | 5777739 | 4-scf00071     | 4  |
| AX-157956416 | 4 | 56.071 | KV452805.1 | 16674   | 4-scf00072     | 4  |
| AX-157816033 | 4 | 56.071 | KV452806.1 | 213102  | 4-scf00073     | 4  |
| AX-157959948 | 4 | 56.071 | KV452816.1 | 1428581 | 4-scf00077     | 4  |
| AX-157773937 | 4 | 56.071 | KV452819.1 | 310978  | 4-scf00080     | 4  |
| AX-157816467 | 4 | 56.071 | KV452819.1 | 904421  | 4-scf00080     | 4  |
| AX-157961719 | 4 | 56.071 | KV452813.1 | 90315   | 4-scf00088     | 4  |
| AX-157687378 | 4 | 56.071 | KV453509.1 | 12885   | scf00865       | UN |
| AX-157956679 | 4 | 56.077 | KV452806.1 | 216400  | 4-scf00073     | 4  |
| AX-157956681 | 4 | 56.077 | KV452806.1 | 218600  | 4-scf00073     | 4  |
| AX-157816035 | 4 | 56.077 | KV452806.1 | 219181  | 4-scf00073     | 4  |
| AX-157956693 | 4 | 56.077 | KV452806.1 | 234984  | 4-scf00073     | 4  |
| AX-157956692 | 4 | 56.113 | KV452806.1 | 233354  | 4-scf00073     | 4  |
| AX-157956694 | 4 | 56.119 | KV452806.1 | 235333  | 4-scf00073     | 4  |
| AX-157956704 | 4 | 56.155 | KV452806.1 | 245202  | 4-scf00073     | 4  |
| AX-157956710 | 4 | 56.16  | KV452806.1 | 255300  | 4-scf00073     | 4  |
| AX-157956714 | 4 | 56.164 | KV452806.1 | 258643  | 4-scf00073     | 4  |
| AX-157816043 | 4 | 56.17  | KV452806.1 | 262282  | 4-scf00073     | 4  |
| AX-157954501 | 4 | 56.18  | KV452804.1 | 4123989 | 4-scf00071     | 4  |
| AX-157954814 | 4 | 56.18  | KV452804.1 | 4511013 | 4-scf00071     | 4  |
| AX-157954878 | 4 | 56.18  | KV452804.1 | 4599664 | 4-scf00071     | 4  |
| AX-157954931 | 4 | 56.18  | KV452804.1 | 4686603 | 4-scf00071     | 4  |
| AX-157955059 | 4 | 56.18  | KV452804.1 | 4815951 | 4-scf00071     | 4  |
| AX-157955063 | 4 | 56.18  | KV452804.1 | 4818126 | 4-scf00071     | 4  |
| AX-157725063 | 4 | 56.18  | KV452804.1 | 5021249 | 4-scf00071     | 4  |
| AX-157955369 | 4 | 56.18  | KV452804.1 | 5139859 | 4-scf00071     | 4  |
| AX-157955533 | 4 | 56.18  | KV452804.1 | 5305032 | 4-scf00071     | 4  |
| AX-157955536 | 4 | 56.18  | KV452804.1 | 5307300 | 4-scf00071     | 4  |
| AX-157955541 | 4 | 56.18  | KV452804.1 | 5311655 | 4-scf00071     | 4  |
| AX-157884103 | 4 | 56.18  | KV452804.1 | 5653010 | 4-scf00071     | 4  |
| AX-157955871 | 4 | 56.18  | KV452804.1 | 5674580 | 4-scf00071     | 4  |

|              |   |       |            |         |            |   |
|--------------|---|-------|------------|---------|------------|---|
| AX-157955983 | 4 | 56.18 | KV452804.1 | 5837409 | 4-scf00071 | 4 |
| AX-157955987 | 4 | 56.18 | KV452804.1 | 5843002 | 4-scf00071 | 4 |
| AX-157955988 | 4 | 56.18 | KV452804.1 | 5844420 | 4-scf00071 | 4 |
| AX-157770901 | 4 | 56.18 | KV452804.1 | 6083461 | 4-scf00071 | 4 |
| AX-157956142 | 4 | 56.18 | KV452804.1 | 6085071 | 4-scf00071 | 4 |
| AX-157956164 | 4 | 56.18 | KV452804.1 | 6117164 | 4-scf00071 | 4 |
| AX-157956173 | 4 | 56.18 | KV452804.1 | 6129066 | 4-scf00071 | 4 |
| AX-157956179 | 4 | 56.18 | KV452804.1 | 6138567 | 4-scf00071 | 4 |
| AX-157956227 | 4 | 56.18 | KV452804.1 | 6223386 | 4-scf00071 | 4 |
| AX-157956426 | 4 | 56.18 | KV452805.1 | 29444   | 4-scf00072 | 4 |
| AX-157956555 | 4 | 56.18 | KV452806.1 | 40476   | 4-scf00073 | 4 |
| AX-157956581 | 4 | 56.18 | KV452806.1 | 77216   | 4-scf00073 | 4 |
| AX-157956621 | 4 | 56.18 | KV452806.1 | 135036  | 4-scf00073 | 4 |
| AX-157956622 | 4 | 56.18 | KV452806.1 | 135771  | 4-scf00073 | 4 |
| AX-157875493 | 4 | 56.18 | KV452806.1 | 204515  | 4-scf00073 | 4 |
| AX-157816034 | 4 | 56.18 | KV452806.1 | 214061  | 4-scf00073 | 4 |
| AX-157854734 | 4 | 56.18 | KV452806.1 | 245075  | 4-scf00073 | 4 |
| AX-157956707 | 4 | 56.18 | KV452806.1 | 252233  | 4-scf00073 | 4 |
| AX-157956720 | 4 | 56.18 | KV452806.1 | 279841  | 4-scf00073 | 4 |
| AX-157772394 | 4 | 56.18 | KV452806.1 | 300761  | 4-scf00073 | 4 |
| AX-157758916 | 4 | 56.18 | KV452806.1 | 301347  | 4-scf00073 | 4 |
| AX-157816047 | 4 | 56.18 | KV452806.1 | 303347  | 4-scf00073 | 4 |
| AX-157956746 | 4 | 56.18 | KV452806.1 | 311878  | 4-scf00073 | 4 |
| AX-157956747 | 4 | 56.18 | KV452806.1 | 312256  | 4-scf00073 | 4 |
| AX-157956751 | 4 | 56.18 | KV452806.1 | 315139  | 4-scf00073 | 4 |
| AX-157816049 | 4 | 56.18 | KV452806.1 | 330461  | 4-scf00073 | 4 |
| AX-157956765 | 4 | 56.18 | KV452806.1 | 334240  | 4-scf00073 | 4 |
| AX-157956769 | 4 | 56.18 | KV452806.1 | 340411  | 4-scf00073 | 4 |
| AX-157816054 | 4 | 56.18 | KV452806.1 | 366020  | 4-scf00073 | 4 |
| AX-157956792 | 4 | 56.18 | KV452806.1 | 368703  | 4-scf00073 | 4 |
| AX-157956802 | 4 | 56.18 | KV452806.1 | 380449  | 4-scf00073 | 4 |
| AX-157956812 | 4 | 56.18 | KV452806.1 | 396002  | 4-scf00073 | 4 |
| AX-157715863 | 4 | 56.18 | KV452806.1 | 411525  | 4-scf00073 | 4 |
| AX-157956832 | 4 | 56.18 | KV452806.1 | 427074  | 4-scf00073 | 4 |
| AX-157956865 | 4 | 56.18 | KV452806.1 | 477997  | 4-scf00073 | 4 |
| AX-157956883 | 4 | 56.18 | KV452806.1 | 506400  | 4-scf00073 | 4 |
| AX-157956942 | 4 | 56.18 | KV452806.1 | 611531  | 4-scf00073 | 4 |
| AX-157956947 | 4 | 56.18 | KV452806.1 | 616013  | 4-scf00073 | 4 |
| AX-157956953 | 4 | 56.18 | KV452806.1 | 623240  | 4-scf00073 | 4 |
| AX-157956954 | 4 | 56.18 | KV452806.1 | 623912  | 4-scf00073 | 4 |
| AX-157956965 | 4 | 56.18 | KV452806.1 | 636693  | 4-scf00073 | 4 |
| AX-157956966 | 4 | 56.18 | KV452806.1 | 637468  | 4-scf00073 | 4 |
| AX-157956969 | 4 | 56.18 | KV452806.1 | 638297  | 4-scf00073 | 4 |
| AX-157957003 | 4 | 56.18 | KV452806.1 | 673901  | 4-scf00073 | 4 |
| AX-157957007 | 4 | 56.18 | KV452806.1 | 678483  | 4-scf00073 | 4 |
| AX-157957009 | 4 | 56.18 | KV452806.1 | 680310  | 4-scf00073 | 4 |
| AX-157957031 | 4 | 56.18 | KV452806.1 | 706168  | 4-scf00073 | 4 |
| AX-157957048 | 4 | 56.18 | KV452806.1 | 726409  | 4-scf00073 | 4 |
| AX-157754417 | 4 | 56.18 | KV452806.1 | 747336  | 4-scf00073 | 4 |
| AX-157957069 | 4 | 56.18 | KV452806.1 | 755451  | 4-scf00073 | 4 |
| AX-157755578 | 4 | 56.18 | KV452806.1 | 834534  | 4-scf00073 | 4 |

|              |   |       |            |         |            |   |
|--------------|---|-------|------------|---------|------------|---|
| AX-157957122 | 4 | 56.18 | KV452806.1 | 836436  | 4-scf00073 | 4 |
| AX-157957236 | 4 | 56.18 | KV452806.1 | 964586  | 4-scf00073 | 4 |
| AX-157957311 | 4 | 56.18 | KV452806.1 | 1052776 | 4-scf00073 | 4 |
| AX-157816096 | 4 | 56.18 | KV452806.1 | 1111688 | 4-scf00073 | 4 |
| AX-157719481 | 4 | 56.18 | KV452806.1 | 1174261 | 4-scf00073 | 4 |
| AX-157869596 | 4 | 56.18 | KV452806.1 | 1195103 | 4-scf00073 | 4 |
| AX-157957430 | 4 | 56.18 | KV452806.1 | 1203709 | 4-scf00073 | 4 |
| AX-157957600 | 4 | 56.18 | KV452806.1 | 1408022 | 4-scf00073 | 4 |
| AX-157957722 | 4 | 56.18 | KV452806.1 | 1568800 | 4-scf00073 | 4 |
| AX-157957740 | 4 | 56.18 | KV452806.1 | 1595504 | 4-scf00073 | 4 |
| AX-157957800 | 4 | 56.18 | KV452806.1 | 1699952 | 4-scf00073 | 4 |
| AX-157864899 | 4 | 56.18 | KV452806.1 | 1700590 | 4-scf00073 | 4 |
| AX-157957937 | 4 | 56.18 | KV452806.1 | 1920110 | 4-scf00073 | 4 |
| AX-157957940 | 4 | 56.18 | KV452806.1 | 1925990 | 4-scf00073 | 4 |
| AX-157864901 | 4 | 56.18 | KV452806.1 | 2148095 | 4-scf00073 | 4 |
| AX-157958506 | 4 | 56.18 | KV452814.1 | 636659  | 4-scf00074 | 4 |
| AX-157958564 | 4 | 56.18 | KV452814.1 | 768954  | 4-scf00074 | 4 |
| AX-157959419 | 4 | 56.18 | KV452816.1 | 429976  | 4-scf00077 | 4 |
| AX-157816263 | 4 | 56.18 | KV452816.1 | 529183  | 4-scf00077 | 4 |
| AX-157959803 | 4 | 56.18 | KV452816.1 | 1195322 | 4-scf00077 | 4 |
| AX-157960434 | 4 | 56.18 | KV452819.1 | 53708   | 4-scf00080 | 4 |
| AX-157709916 | 4 | 56.18 | KV452819.1 | 201049  | 4-scf00080 | 4 |
| AX-157816461 | 4 | 56.18 | KV452819.1 | 691379  | 4-scf00080 | 4 |
| AX-157960863 | 4 | 56.18 | KV452824.1 | 263146  | 4-scf00086 | 4 |
| AX-157723668 | 4 | 56.18 | KV452824.1 | 263548  | 4-scf00086 | 4 |
| AX-157960985 | 4 | 56.18 | KV452824.1 | 427452  | 4-scf00086 | 4 |
| AX-158406416 | 4 | 56.18 | KV452824.1 | 495624  | 4-scf00086 | 4 |
| AX-157869604 | 4 | 56.18 | KV452824.1 | 553288  | 4-scf00086 | 4 |
| AX-157961189 | 4 | 56.18 | KV452824.1 | 676070  | 4-scf00086 | 4 |
| AX-157961225 | 4 | 56.18 | KV452824.1 | 713266  | 4-scf00086 | 4 |
| AX-158382920 | 4 | 56.18 | KV452824.1 | 715728  | 4-scf00086 | 4 |
| AX-157961269 | 4 | 56.18 | KV452824.1 | 779820  | 4-scf00086 | 4 |
| AX-157961275 | 4 | 56.18 | KV452824.1 | 782531  | 4-scf00086 | 4 |
| AX-157961318 | 4 | 56.18 | KV452824.1 | 823093  | 4-scf00086 | 4 |
| AX-157961320 | 4 | 56.18 | KV452824.1 | 823930  | 4-scf00086 | 4 |
| AX-157961330 | 4 | 56.18 | KV452824.1 | 843046  | 4-scf00086 | 4 |
| AX-157961367 | 4 | 56.18 | KV452824.1 | 890713  | 4-scf00086 | 4 |
| AX-157758504 | 4 | 56.18 | KV452824.1 | 903320  | 4-scf00086 | 4 |
| AX-157961438 | 4 | 56.18 | KV452824.1 | 1040877 | 4-scf00086 | 4 |
| AX-157961443 | 4 | 56.18 | KV452824.1 | 1082045 | 4-scf00086 | 4 |
| AX-157961449 | 4 | 56.18 | KV452824.1 | 1115219 | 4-scf00086 | 4 |
| AX-157961464 | 4 | 56.18 | KV452824.1 | 1197613 | 4-scf00086 | 4 |
| AX-157961469 | 4 | 56.18 | KV452824.1 | 1215714 | 4-scf00086 | 4 |
| AX-157961471 | 4 | 56.18 | KV452824.1 | 1217620 | 4-scf00086 | 4 |
| AX-157961476 | 4 | 56.18 | KV452824.1 | 1237346 | 4-scf00086 | 4 |
| AX-157961477 | 4 | 56.18 | KV452824.1 | 1240654 | 4-scf00086 | 4 |
| AX-157961491 | 4 | 56.18 | KV452824.1 | 1265936 | 4-scf00086 | 4 |
| AX-157961494 | 4 | 56.18 | KV452824.1 | 1268779 | 4-scf00086 | 4 |
| AX-157961496 | 4 | 56.18 | KV452824.1 | 1270499 | 4-scf00086 | 4 |
| AX-157961499 | 4 | 56.18 | KV452824.1 | 1274247 | 4-scf00086 | 4 |
| AX-157961505 | 4 | 56.18 | KV452824.1 | 1287649 | 4-scf00086 | 4 |

|              |   |        |            |         |            |   |
|--------------|---|--------|------------|---------|------------|---|
| AX-157961510 | 4 | 56.18  | KV452824.1 | 1304952 | 4-scf00086 | 4 |
| AX-157961513 | 4 | 56.18  | KV452824.1 | 1307796 | 4-scf00086 | 4 |
| AX-157961519 | 4 | 56.18  | KV452824.1 | 1316325 | 4-scf00086 | 4 |
| AX-157961523 | 4 | 56.18  | KV452824.1 | 1320009 | 4-scf00086 | 4 |
| AX-157961532 | 4 | 56.18  | KV452824.1 | 1334225 | 4-scf00086 | 4 |
| AX-157961533 | 4 | 56.18  | KV452824.1 | 1335105 | 4-scf00086 | 4 |
| AX-157961536 | 4 | 56.18  | KV452824.1 | 1338147 | 4-scf00086 | 4 |
| AX-157961540 | 4 | 56.18  | KV452824.1 | 1345527 | 4-scf00086 | 4 |
| AX-157961543 | 4 | 56.18  | KV452824.1 | 1349572 | 4-scf00086 | 4 |
| AX-157961545 | 4 | 56.18  | KV452824.1 | 1366313 | 4-scf00086 | 4 |
| AX-157961548 | 4 | 56.18  | KV452824.1 | 1372118 | 4-scf00086 | 4 |
| AX-157961556 | 4 | 56.18  | KV452824.1 | 1391380 | 4-scf00086 | 4 |
| AX-157961558 | 4 | 56.18  | KV452824.1 | 1395828 | 4-scf00086 | 4 |
| AX-157961562 | 4 | 56.18  | KV452824.1 | 1401250 | 4-scf00086 | 4 |
| AX-157961565 | 4 | 56.18  | KV452824.1 | 1406969 | 4-scf00086 | 4 |
| AX-157961571 | 4 | 56.18  | KV452824.1 | 1420601 | 4-scf00086 | 4 |
| AX-157961576 | 4 | 56.18  | KV452824.1 | 1444755 | 4-scf00086 | 4 |
| AX-157961580 | 4 | 56.18  | KV452824.1 | 1448328 | 4-scf00086 | 4 |
| AX-157961581 | 4 | 56.18  | KV452824.1 | 1451282 | 4-scf00086 | 4 |
| AX-157961582 | 4 | 56.18  | KV452824.1 | 1457938 | 4-scf00086 | 4 |
| AX-157961583 | 4 | 56.18  | KV452824.1 | 1476076 | 4-scf00086 | 4 |
| AX-157961584 | 4 | 56.18  | KV452824.1 | 1477379 | 4-scf00086 | 4 |
| AX-157961585 | 4 | 56.18  | KV452824.1 | 1478083 | 4-scf00086 | 4 |
| AX-157961586 | 4 | 56.18  | KV452824.1 | 1478673 | 4-scf00086 | 4 |
| AX-157961666 | 4 | 56.18  | KV452812.1 | 94653   | 4-scf00087 | 4 |
| AX-157961682 | 4 | 56.18  | KV452813.1 | 7883    | 4-scf00088 | 4 |
| AX-157961684 | 4 | 56.18  | KV452813.1 | 8162    | 4-scf00088 | 4 |
| AX-157961688 | 4 | 56.18  | KV452813.1 | 22238   | 4-scf00088 | 4 |
| AX-157961697 | 4 | 56.18  | KV452813.1 | 53997   | 4-scf00088 | 4 |
| AX-157961704 | 4 | 56.18  | KV452813.1 | 60626   | 4-scf00088 | 4 |
| AX-157961709 | 4 | 56.18  | KV452813.1 | 68658   | 4-scf00088 | 4 |
| AX-157961710 | 4 | 56.18  | KV452813.1 | 71577   | 4-scf00088 | 4 |
| AX-157961715 | 4 | 56.18  | KV452813.1 | 83944   | 4-scf00088 | 4 |
| AX-157961724 | 4 | 56.18  | KV452813.1 | 97477   | 4-scf00088 | 4 |
| AX-157961725 | 4 | 56.18  | KV452813.1 | 101692  | 4-scf00088 | 4 |
| AX-157961726 | 4 | 56.18  | KV452813.1 | 104203  | 4-scf00088 | 4 |
| AX-157961728 | 4 | 56.18  | KV452813.1 | 105478  | 4-scf00088 | 4 |
| AX-157961732 | 4 | 56.18  | KV452813.1 | 110676  | 4-scf00088 | 4 |
| AX-157961750 | 4 | 56.18  | KV452813.1 | 163190  | 4-scf00088 | 4 |
| AX-157961821 | 4 | 56.18  | KV452813.1 | 373774  | 4-scf00088 | 4 |
| AX-157962737 | 4 | 56.18  | KV452829.1 | 85475   | 4-scf00092 | 4 |
| AX-157816526 | 4 | 56.18  | KV452829.1 | 452717  | 4-scf00092 | 4 |
| AX-157963028 | 4 | 56.18  | KV452829.1 | 459983  | 4-scf00092 | 4 |
| AX-157963066 | 4 | 56.18  | KV452829.1 | 527945  | 4-scf00092 | 4 |
| AX-157816536 | 4 | 56.18  | KV452829.1 | 533321  | 4-scf00092 | 4 |
| AX-157875536 | 4 | 56.18  | KV452829.1 | 879729  | 4-scf00092 | 4 |
| AX-157963412 | 4 | 56.18  | KV452829.1 | 1093735 | 4-scf00092 | 4 |
| AX-157963415 | 4 | 56.18  | KV452829.1 | 1097913 | 4-scf00092 | 4 |
| AX-157963765 | 4 | 56.18  | KV452829.1 | 1961608 | 4-scf00092 | 4 |
| AX-157816023 | 4 | 56.244 | KV452806.1 | 105683  | 4-scf00073 | 4 |
| AX-157956760 | 4 | 56.244 | KV452806.1 | 327581  | 4-scf00073 | 4 |

|              |   |        |            |         |            |   |
|--------------|---|--------|------------|---------|------------|---|
| AX-157956796 | 4 | 56.244 | KV452806.1 | 370897  | 4-scf00073 | 4 |
| AX-157956184 | 4 | 56.308 | KV452804.1 | 6153007 | 4-scf00071 | 4 |
| AX-157956668 | 4 | 56.308 | KV452806.1 | 203850  | 4-scf00073 | 4 |
| AX-157956675 | 4 | 56.308 | KV452806.1 | 210758  | 4-scf00073 | 4 |
| AX-157816055 | 4 | 56.308 | KV452806.1 | 368090  | 4-scf00073 | 4 |
| AX-157816058 | 4 | 56.308 | KV452806.1 | 382580  | 4-scf00073 | 4 |
| AX-157956830 | 4 | 56.308 | KV452806.1 | 422045  | 4-scf00073 | 4 |
| AX-157956834 | 4 | 56.308 | KV452806.1 | 430513  | 4-scf00073 | 4 |
| AX-157956835 | 4 | 56.308 | KV452806.1 | 431643  | 4-scf00073 | 4 |
| AX-157956838 | 4 | 56.308 | KV452806.1 | 436939  | 4-scf00073 | 4 |
| AX-157956839 | 4 | 56.308 | KV452806.1 | 437555  | 4-scf00073 | 4 |
| AX-157956842 | 4 | 56.308 | KV452806.1 | 440387  | 4-scf00073 | 4 |
| AX-157956843 | 4 | 56.308 | KV452806.1 | 441367  | 4-scf00073 | 4 |
| AX-157956844 | 4 | 56.308 | KV452806.1 | 441873  | 4-scf00073 | 4 |
| AX-157956847 | 4 | 56.308 | KV452806.1 | 446009  | 4-scf00073 | 4 |
| AX-157956848 | 4 | 56.308 | KV452806.1 | 453703  | 4-scf00073 | 4 |
| AX-157956851 | 4 | 56.308 | KV452806.1 | 458151  | 4-scf00073 | 4 |
| AX-157956863 | 4 | 56.308 | KV452806.1 | 473942  | 4-scf00073 | 4 |
| AX-157956864 | 4 | 56.308 | KV452806.1 | 475213  | 4-scf00073 | 4 |
| AX-157956869 | 4 | 56.308 | KV452806.1 | 485652  | 4-scf00073 | 4 |
| AX-157956872 | 4 | 56.308 | KV452806.1 | 489493  | 4-scf00073 | 4 |
| AX-157956881 | 4 | 56.308 | KV452806.1 | 504825  | 4-scf00073 | 4 |
| AX-157956889 | 4 | 56.308 | KV452806.1 | 518346  | 4-scf00073 | 4 |
| AX-157956890 | 4 | 56.308 | KV452806.1 | 518976  | 4-scf00073 | 4 |
| AX-157956893 | 4 | 56.308 | KV452806.1 | 524026  | 4-scf00073 | 4 |
| AX-157956900 | 4 | 56.308 | KV452806.1 | 539530  | 4-scf00073 | 4 |
| AX-157956901 | 4 | 56.308 | KV452806.1 | 541522  | 4-scf00073 | 4 |
| AX-157957709 | 4 | 56.308 | KV452806.1 | 1552670 | 4-scf00073 | 4 |
| AX-157958104 | 4 | 56.308 | KV452806.1 | 2237010 | 4-scf00073 | 4 |
| AX-157956910 | 4 | 56.436 | KV452806.1 | 559976  | 4-scf00073 | 4 |
| AX-157956912 | 4 | 56.565 | KV452806.1 | 563328  | 4-scf00073 | 4 |
| AX-157956924 | 4 | 56.566 | KV452806.1 | 585605  | 4-scf00073 | 4 |
| AX-157956831 | 4 | 56.567 | KV452806.1 | 423984  | 4-scf00073 | 4 |
| AX-157956857 | 4 | 56.567 | KV452806.1 | 464441  | 4-scf00073 | 4 |
| AX-157956891 | 4 | 56.567 | KV452806.1 | 519948  | 4-scf00073 | 4 |
| AX-157722899 | 4 | 56.567 | KV452806.1 | 529315  | 4-scf00073 | 4 |
| AX-157723071 | 4 | 56.567 | KV452806.1 | 550257  | 4-scf00073 | 4 |
| AX-157956917 | 4 | 56.567 | KV452806.1 | 571580  | 4-scf00073 | 4 |
| AX-157875498 | 4 | 56.567 | KV452806.1 | 592203  | 4-scf00073 | 4 |
| AX-157713801 | 4 | 56.567 | KV452806.1 | 801978  | 4-scf00073 | 4 |
| AX-157957125 | 4 | 56.567 | KV452806.1 | 839896  | 4-scf00073 | 4 |
| AX-157956940 | 4 | 56.669 | KV452806.1 | 610032  | 4-scf00073 | 4 |
| AX-157956943 | 4 | 56.992 | KV452806.1 | 614023  | 4-scf00073 | 4 |
| AX-157956944 | 4 | 56.992 | KV452806.1 | 614401  | 4-scf00073 | 4 |
| AX-157956949 | 4 | 56.992 | KV452806.1 | 620339  | 4-scf00073 | 4 |
| AX-157956951 | 4 | 56.992 | KV452806.1 | 622343  | 4-scf00073 | 4 |
| AX-157956974 | 4 | 56.992 | KV452806.1 | 645505  | 4-scf00073 | 4 |
| AX-157956975 | 4 | 56.992 | KV452806.1 | 645952  | 4-scf00073 | 4 |
| AX-157816066 | 4 | 56.992 | KV452806.1 | 646673  | 4-scf00073 | 4 |
| AX-157956976 | 4 | 56.992 | KV452806.1 | 646947  | 4-scf00073 | 4 |
| AX-157956977 | 4 | 56.992 | KV452806.1 | 647566  | 4-scf00073 | 4 |

|              |   |        |            |        |            |   |
|--------------|---|--------|------------|--------|------------|---|
| AX-157956979 | 4 | 56.992 | KV452806.1 | 649531 | 4-scf00073 | 4 |
| AX-157956980 | 4 | 56.992 | KV452806.1 | 650238 | 4-scf00073 | 4 |
| AX-157956982 | 4 | 56.992 | KV452806.1 | 651361 | 4-scf00073 | 4 |
| AX-157956983 | 4 | 56.992 | KV452806.1 | 652272 | 4-scf00073 | 4 |
| AX-157956984 | 4 | 56.992 | KV452806.1 | 653187 | 4-scf00073 | 4 |
| AX-157956986 | 4 | 56.992 | KV452806.1 | 656337 | 4-scf00073 | 4 |
| AX-157956988 | 4 | 56.992 | KV452806.1 | 658658 | 4-scf00073 | 4 |
| AX-157956989 | 4 | 56.992 | KV452806.1 | 658866 | 4-scf00073 | 4 |
| AX-157956990 | 4 | 56.992 | KV452806.1 | 659683 | 4-scf00073 | 4 |
| AX-157956991 | 4 | 56.992 | KV452806.1 | 660208 | 4-scf00073 | 4 |
| AX-157956992 | 4 | 56.992 | KV452806.1 | 660895 | 4-scf00073 | 4 |
| AX-157956994 | 4 | 56.992 | KV452806.1 | 665315 | 4-scf00073 | 4 |
| AX-157956995 | 4 | 56.992 | KV452806.1 | 666168 | 4-scf00073 | 4 |
| AX-157956996 | 4 | 56.992 | KV452806.1 | 666639 | 4-scf00073 | 4 |
| AX-157956997 | 4 | 56.992 | KV452806.1 | 667010 | 4-scf00073 | 4 |
| AX-157758266 | 4 | 56.992 | KV452806.1 | 668727 | 4-scf00073 | 4 |
| AX-157957000 | 4 | 56.992 | KV452806.1 | 671306 | 4-scf00073 | 4 |
| AX-157957001 | 4 | 56.992 | KV452806.1 | 672845 | 4-scf00073 | 4 |
| AX-157957002 | 4 | 56.992 | KV452806.1 | 673197 | 4-scf00073 | 4 |
| AX-157957004 | 4 | 56.992 | KV452806.1 | 675004 | 4-scf00073 | 4 |
| AX-157816067 | 4 | 56.992 | KV452806.1 | 678566 | 4-scf00073 | 4 |
| AX-157957008 | 4 | 56.992 | KV452806.1 | 679453 | 4-scf00073 | 4 |
| AX-157957010 | 4 | 56.992 | KV452806.1 | 682079 | 4-scf00073 | 4 |
| AX-157723454 | 4 | 56.992 | KV452806.1 | 683459 | 4-scf00073 | 4 |
| AX-157957013 | 4 | 56.992 | KV452806.1 | 685183 | 4-scf00073 | 4 |
| AX-157957014 | 4 | 56.992 | KV452806.1 | 686973 | 4-scf00073 | 4 |
| AX-157957015 | 4 | 56.992 | KV452806.1 | 687189 | 4-scf00073 | 4 |
| AX-157957017 | 4 | 56.992 | KV452806.1 | 689245 | 4-scf00073 | 4 |
| AX-157957022 | 4 | 56.992 | KV452806.1 | 692884 | 4-scf00073 | 4 |
| AX-157957023 | 4 | 56.992 | KV452806.1 | 694790 | 4-scf00073 | 4 |
| AX-157957024 | 4 | 56.992 | KV452806.1 | 696782 | 4-scf00073 | 4 |
| AX-157957025 | 4 | 56.992 | KV452806.1 | 697445 | 4-scf00073 | 4 |
| AX-157957026 | 4 | 56.992 | KV452806.1 | 698168 | 4-scf00073 | 4 |
| AX-157957028 | 4 | 56.992 | KV452806.1 | 701654 | 4-scf00073 | 4 |
| AX-157957034 | 4 | 56.992 | KV452806.1 | 709468 | 4-scf00073 | 4 |
| AX-158382897 | 4 | 56.992 | KV452806.1 | 711679 | 4-scf00073 | 4 |
| AX-157957047 | 4 | 56.992 | KV452806.1 | 725966 | 4-scf00073 | 4 |
| AX-157957049 | 4 | 56.992 | KV452806.1 | 728286 | 4-scf00073 | 4 |
| AX-157957050 | 4 | 56.992 | KV452806.1 | 728604 | 4-scf00073 | 4 |
| AX-157957051 | 4 | 56.992 | KV452806.1 | 729011 | 4-scf00073 | 4 |
| AX-157957052 | 4 | 56.992 | KV452806.1 | 730904 | 4-scf00073 | 4 |
| AX-157957053 | 4 | 56.992 | KV452806.1 | 732083 | 4-scf00073 | 4 |
| AX-157957055 | 4 | 56.992 | KV452806.1 | 733337 | 4-scf00073 | 4 |
| AX-157957056 | 4 | 56.992 | KV452806.1 | 734042 | 4-scf00073 | 4 |
| AX-157957057 | 4 | 56.992 | KV452806.1 | 736797 | 4-scf00073 | 4 |
| AX-157816068 | 4 | 56.992 | KV452806.1 | 737899 | 4-scf00073 | 4 |
| AX-157957059 | 4 | 56.992 | KV452806.1 | 739037 | 4-scf00073 | 4 |
| AX-157957060 | 4 | 56.992 | KV452806.1 | 739782 | 4-scf00073 | 4 |
| AX-157957062 | 4 | 56.992 | KV452806.1 | 744474 | 4-scf00073 | 4 |
| AX-157957063 | 4 | 56.992 | KV452806.1 | 747989 | 4-scf00073 | 4 |
| AX-157957064 | 4 | 56.992 | KV452806.1 | 752082 | 4-scf00073 | 4 |



|              |   |        |            |         |            |   |
|--------------|---|--------|------------|---------|------------|---|
| AX-157957065 | 4 | 56.992 | KV452806.1 | 752752  | 4-scf00073 | 4 |
| AX-157957066 | 4 | 56.992 | KV452806.1 | 753627  | 4-scf00073 | 4 |
| AX-157957067 | 4 | 56.992 | KV452806.1 | 754459  | 4-scf00073 | 4 |
| AX-157957068 | 4 | 56.992 | KV452806.1 | 755088  | 4-scf00073 | 4 |
| AX-157816378 | 4 | 56.992 | KV452811.1 | 130396  | 4-scf00082 | 4 |
| AX-157954809 | 4 | 57.207 | KV452804.1 | 4506089 | 4-scf00071 | 4 |
| AX-157854724 | 4 | 57.207 | KV452804.1 | 6033292 | 4-scf00071 | 4 |
| AX-157956399 | 4 | 57.207 | KV452805.1 | 1300    | 4-scf00072 | 4 |
| AX-157956402 | 4 | 57.207 | KV452805.1 | 3576    | 4-scf00072 | 4 |
| AX-157956493 | 4 | 57.207 | KV452805.1 | 136023  | 4-scf00072 | 4 |
| AX-157956512 | 4 | 57.207 | KV452805.1 | 182684  | 4-scf00072 | 4 |
| AX-157956515 | 4 | 57.207 | KV452805.1 | 187813  | 4-scf00072 | 4 |
| AX-157956517 | 4 | 57.207 | KV452805.1 | 194179  | 4-scf00072 | 4 |
| AX-157956519 | 4 | 57.207 | KV452805.1 | 196810  | 4-scf00072 | 4 |
| AX-157956523 | 4 | 57.207 | KV452806.1 | 438     | 4-scf00073 | 4 |
| AX-157816012 | 4 | 57.207 | KV452806.1 | 5885    | 4-scf00073 | 4 |
| AX-157956527 | 4 | 57.207 | KV452806.1 | 9251    | 4-scf00073 | 4 |
| AX-157956530 | 4 | 57.207 | KV452806.1 | 10850   | 4-scf00073 | 4 |
| AX-157956537 | 4 | 57.207 | KV452806.1 | 17671   | 4-scf00073 | 4 |
| AX-157956603 | 4 | 57.207 | KV452806.1 | 100752  | 4-scf00073 | 4 |
| AX-157854730 | 4 | 57.207 | KV452806.1 | 103508  | 4-scf00073 | 4 |
| AX-157956619 | 4 | 57.207 | KV452806.1 | 132713  | 4-scf00073 | 4 |
| AX-157956624 | 4 | 57.207 | KV452806.1 | 137413  | 4-scf00073 | 4 |
| AX-157956777 | 4 | 57.207 | KV452806.1 | 351072  | 4-scf00073 | 4 |
| AX-157956907 | 4 | 57.207 | KV452806.1 | 555928  | 4-scf00073 | 4 |
| AX-157956915 | 4 | 57.207 | KV452806.1 | 567177  | 4-scf00073 | 4 |
| AX-157751334 | 4 | 57.207 | KV452806.1 | 756989  | 4-scf00073 | 4 |
| AX-157957072 | 4 | 57.207 | KV452806.1 | 758515  | 4-scf00073 | 4 |
| AX-157957078 | 4 | 57.207 | KV452806.1 | 767047  | 4-scf00073 | 4 |
| AX-157957080 | 4 | 57.207 | KV452806.1 | 769966  | 4-scf00073 | 4 |
| AX-157957087 | 4 | 57.207 | KV452806.1 | 777262  | 4-scf00073 | 4 |
| AX-157957089 | 4 | 57.207 | KV452806.1 | 779605  | 4-scf00073 | 4 |
| AX-157957090 | 4 | 57.207 | KV452806.1 | 779991  | 4-scf00073 | 4 |
| AX-157957091 | 4 | 57.207 | KV452806.1 | 782445  | 4-scf00073 | 4 |
| AX-157957092 | 4 | 57.207 | KV452806.1 | 784086  | 4-scf00073 | 4 |
| AX-157957093 | 4 | 57.207 | KV452806.1 | 785096  | 4-scf00073 | 4 |
| AX-157957094 | 4 | 57.207 | KV452806.1 | 786155  | 4-scf00073 | 4 |
| AX-157957095 | 4 | 57.207 | KV452806.1 | 786633  | 4-scf00073 | 4 |
| AX-157816069 | 4 | 57.207 | KV452806.1 | 799750  | 4-scf00073 | 4 |
| AX-157957097 | 4 | 57.207 | KV452806.1 | 806779  | 4-scf00073 | 4 |
| AX-157816070 | 4 | 57.207 | KV452806.1 | 807529  | 4-scf00073 | 4 |
| AX-157957098 | 4 | 57.207 | KV452806.1 | 808221  | 4-scf00073 | 4 |
| AX-157957099 | 4 | 57.207 | KV452806.1 | 809319  | 4-scf00073 | 4 |
| AX-157957101 | 4 | 57.207 | KV452806.1 | 810942  | 4-scf00073 | 4 |
| AX-157957104 | 4 | 57.207 | KV452806.1 | 815022  | 4-scf00073 | 4 |
| AX-157957105 | 4 | 57.207 | KV452806.1 | 815623  | 4-scf00073 | 4 |
| AX-157957108 | 4 | 57.207 | KV452806.1 | 817906  | 4-scf00073 | 4 |
| AX-157957109 | 4 | 57.207 | KV452806.1 | 819099  | 4-scf00073 | 4 |
| AX-157957110 | 4 | 57.207 | KV452806.1 | 821467  | 4-scf00073 | 4 |
| AX-157957111 | 4 | 57.207 | KV452806.1 | 821558  | 4-scf00073 | 4 |
| AX-157957112 | 4 | 57.207 | KV452806.1 | 821995  | 4-scf00073 | 4 |

|              |   |        |            |         |            |   |
|--------------|---|--------|------------|---------|------------|---|
| AX-158406277 | 4 | 57.207 | KV452806.1 | 822870  | 4-scf00073 | 4 |
| AX-157957114 | 4 | 57.207 | KV452806.1 | 825254  | 4-scf00073 | 4 |
| AX-157957115 | 4 | 57.207 | KV452806.1 | 825728  | 4-scf00073 | 4 |
| AX-157854736 | 4 | 57.207 | KV452806.1 | 826980  | 4-scf00073 | 4 |
| AX-157957116 | 4 | 57.207 | KV452806.1 | 827139  | 4-scf00073 | 4 |
| AX-157957117 | 4 | 57.207 | KV452806.1 | 828323  | 4-scf00073 | 4 |
| AX-157770966 | 4 | 57.207 | KV452806.1 | 829893  | 4-scf00073 | 4 |
| AX-157957118 | 4 | 57.207 | KV452806.1 | 830546  | 4-scf00073 | 4 |
| AX-157957119 | 4 | 57.207 | KV452806.1 | 830780  | 4-scf00073 | 4 |
| AX-157957120 | 4 | 57.207 | KV452806.1 | 832412  | 4-scf00073 | 4 |
| AX-158390262 | 4 | 57.207 | KV452806.1 | 833608  | 4-scf00073 | 4 |
| AX-157816072 | 4 | 57.207 | KV452806.1 | 834447  | 4-scf00073 | 4 |
| AX-157957121 | 4 | 57.207 | KV452806.1 | 835726  | 4-scf00073 | 4 |
| AX-157816073 | 4 | 57.207 | KV452806.1 | 838204  | 4-scf00073 | 4 |
| AX-157957124 | 4 | 57.207 | KV452806.1 | 838825  | 4-scf00073 | 4 |
| AX-157957126 | 4 | 57.207 | KV452806.1 | 841190  | 4-scf00073 | 4 |
| AX-157957128 | 4 | 57.207 | KV452806.1 | 841575  | 4-scf00073 | 4 |
| AX-157957131 | 4 | 57.207 | KV452806.1 | 849554  | 4-scf00073 | 4 |
| AX-157957132 | 4 | 57.207 | KV452806.1 | 850076  | 4-scf00073 | 4 |
| AX-157816075 | 4 | 57.207 | KV452806.1 | 856620  | 4-scf00073 | 4 |
| AX-157957136 | 4 | 57.207 | KV452806.1 | 857743  | 4-scf00073 | 4 |
| AX-157957137 | 4 | 57.207 | KV452806.1 | 858206  | 4-scf00073 | 4 |
| AX-157957147 | 4 | 57.207 | KV452806.1 | 863616  | 4-scf00073 | 4 |
| AX-157957161 | 4 | 57.207 | KV452806.1 | 884082  | 4-scf00073 | 4 |
| AX-157957163 | 4 | 57.207 | KV452806.1 | 884886  | 4-scf00073 | 4 |
| AX-157957172 | 4 | 57.207 | KV452806.1 | 892207  | 4-scf00073 | 4 |
| AX-157957356 | 4 | 57.207 | KV452806.1 | 1125751 | 4-scf00073 | 4 |
| AX-157957469 | 4 | 57.207 | KV452806.1 | 1266078 | 4-scf00073 | 4 |
| AX-157957574 | 4 | 57.207 | KV452806.1 | 1383698 | 4-scf00073 | 4 |
| AX-157957861 | 4 | 57.207 | KV452806.1 | 1809703 | 4-scf00073 | 4 |
| AX-157957862 | 4 | 57.207 | KV452806.1 | 1810599 | 4-scf00073 | 4 |
| AX-157957870 | 4 | 57.207 | KV452806.1 | 1819661 | 4-scf00073 | 4 |
| AX-157958601 | 4 | 57.207 | KV452814.1 | 827768  | 4-scf00074 | 4 |
| AX-157816191 | 4 | 57.207 | KV452814.1 | 859831  | 4-scf00074 | 4 |
| AX-157960351 | 4 | 57.207 | KV452819.1 | 170853  | 4-scf00080 | 4 |
| AX-157960186 | 4 | 57.207 | KV452819.1 | 339119  | 4-scf00080 | 4 |
| AX-158406432 | 4 | 57.207 | KV452819.1 | 1526771 | 4-scf00080 | 4 |
| AX-157961034 | 4 | 57.207 | KV452824.1 | 485711  | 4-scf00086 | 4 |
| AX-157961120 | 4 | 57.207 | KV452824.1 | 586623  | 4-scf00086 | 4 |
| AX-157957134 | 4 | 57.248 | KV452806.1 | 853496  | 4-scf00073 | 4 |
| AX-157816074 | 4 | 57.277 | KV452806.1 | 853907  | 4-scf00073 | 4 |
| AX-157957140 | 4 | 57.335 | KV452806.1 | 859984  | 4-scf00073 | 4 |
| AX-157956993 | 4 | 57.464 | KV452806.1 | 661662  | 4-scf00073 | 4 |
| AX-157957141 | 4 | 57.464 | KV452806.1 | 860449  | 4-scf00073 | 4 |
| AX-157957143 | 4 | 57.464 | KV452806.1 | 860996  | 4-scf00073 | 4 |
| AX-157957145 | 4 | 57.464 | KV452806.1 | 861680  | 4-scf00073 | 4 |
| AX-157957148 | 4 | 57.464 | KV452806.1 | 864129  | 4-scf00073 | 4 |
| AX-157816076 | 4 | 57.464 | KV452806.1 | 865236  | 4-scf00073 | 4 |
| AX-157766515 | 4 | 57.464 | KV452806.1 | 866435  | 4-scf00073 | 4 |
| AX-157957150 | 4 | 57.464 | KV452806.1 | 868625  | 4-scf00073 | 4 |
| AX-157957154 | 4 | 57.464 | KV452806.1 | 871525  | 4-scf00073 | 4 |

|              |   |        |            |        |            |   |
|--------------|---|--------|------------|--------|------------|---|
| AX-157957155 | 4 | 57.464 | KV452806.1 | 874504 | 4-scf00073 | 4 |
| AX-157957157 | 4 | 57.464 | KV452806.1 | 877595 | 4-scf00073 | 4 |
| AX-157957158 | 4 | 57.464 | KV452806.1 | 880427 | 4-scf00073 | 4 |
| AX-157816078 | 4 | 57.464 | KV452806.1 | 881430 | 4-scf00073 | 4 |
| AX-157957159 | 4 | 57.464 | KV452806.1 | 881563 | 4-scf00073 | 4 |
| AX-157957166 | 4 | 57.464 | KV452806.1 | 887221 | 4-scf00073 | 4 |
| AX-157816079 | 4 | 57.464 | KV452806.1 | 887763 | 4-scf00073 | 4 |
| AX-157957167 | 4 | 57.464 | KV452806.1 | 888232 | 4-scf00073 | 4 |
| AX-157816080 | 4 | 57.464 | KV452806.1 | 888526 | 4-scf00073 | 4 |
| AX-157957176 | 4 | 57.464 | KV452806.1 | 902584 | 4-scf00073 | 4 |
| AX-157957177 | 4 | 57.464 | KV452806.1 | 903237 | 4-scf00073 | 4 |
| AX-157816081 | 4 | 57.464 | KV452806.1 | 904518 | 4-scf00073 | 4 |
| AX-157854737 | 4 | 57.464 | KV452806.1 | 906730 | 4-scf00073 | 4 |
| AX-157957178 | 4 | 57.464 | KV452806.1 | 907232 | 4-scf00073 | 4 |
| AX-157957180 | 4 | 57.464 | KV452806.1 | 908665 | 4-scf00073 | 4 |
| AX-157957181 | 4 | 57.464 | KV452806.1 | 908989 | 4-scf00073 | 4 |
| AX-157957183 | 4 | 57.464 | KV452806.1 | 909992 | 4-scf00073 | 4 |
| AX-157957184 | 4 | 57.464 | KV452806.1 | 910315 | 4-scf00073 | 4 |
| AX-157816082 | 4 | 57.464 | KV452806.1 | 910562 | 4-scf00073 | 4 |
| AX-157957185 | 4 | 57.464 | KV452806.1 | 910871 | 4-scf00073 | 4 |
| AX-157957186 | 4 | 57.464 | KV452806.1 | 911306 | 4-scf00073 | 4 |
| AX-157957187 | 4 | 57.464 | KV452806.1 | 911831 | 4-scf00073 | 4 |
| AX-157957188 | 4 | 57.464 | KV452806.1 | 912241 | 4-scf00073 | 4 |
| AX-157957190 | 4 | 57.464 | KV452806.1 | 912992 | 4-scf00073 | 4 |
| AX-157957191 | 4 | 57.464 | KV452806.1 | 915147 | 4-scf00073 | 4 |
| AX-157957192 | 4 | 57.464 | KV452806.1 | 916049 | 4-scf00073 | 4 |
| AX-157957193 | 4 | 57.464 | KV452806.1 | 916463 | 4-scf00073 | 4 |
| AX-157957194 | 4 | 57.464 | KV452806.1 | 917884 | 4-scf00073 | 4 |
| AX-157957195 | 4 | 57.464 | KV452806.1 | 918330 | 4-scf00073 | 4 |
| AX-157957196 | 4 | 57.464 | KV452806.1 | 918480 | 4-scf00073 | 4 |
| AX-157957197 | 4 | 57.464 | KV452806.1 | 919636 | 4-scf00073 | 4 |
| AX-157957198 | 4 | 57.464 | KV452806.1 | 920121 | 4-scf00073 | 4 |
| AX-157957199 | 4 | 57.464 | KV452806.1 | 920705 | 4-scf00073 | 4 |
| AX-157957200 | 4 | 57.464 | KV452806.1 | 921031 | 4-scf00073 | 4 |
| AX-157957202 | 4 | 57.464 | KV452806.1 | 922904 | 4-scf00073 | 4 |
| AX-157957204 | 4 | 57.464 | KV452806.1 | 923872 | 4-scf00073 | 4 |
| AX-157957205 | 4 | 57.464 | KV452806.1 | 924628 | 4-scf00073 | 4 |
| AX-157957206 | 4 | 57.464 | KV452806.1 | 925586 | 4-scf00073 | 4 |
| AX-157957207 | 4 | 57.464 | KV452806.1 | 926320 | 4-scf00073 | 4 |
| AX-157957208 | 4 | 57.464 | KV452806.1 | 928257 | 4-scf00073 | 4 |
| AX-157957209 | 4 | 57.464 | KV452806.1 | 928977 | 4-scf00073 | 4 |
| AX-157957211 | 4 | 57.464 | KV452806.1 | 930615 | 4-scf00073 | 4 |
| AX-157957212 | 4 | 57.464 | KV452806.1 | 933343 | 4-scf00073 | 4 |
| AX-158415330 | 4 | 57.464 | KV452806.1 | 934220 | 4-scf00073 | 4 |
| AX-157957213 | 4 | 57.464 | KV452806.1 | 937712 | 4-scf00073 | 4 |
| AX-157957214 | 4 | 57.464 | KV452806.1 | 938814 | 4-scf00073 | 4 |
| AX-157957215 | 4 | 57.464 | KV452806.1 | 939877 | 4-scf00073 | 4 |
| AX-157957216 | 4 | 57.464 | KV452806.1 | 940561 | 4-scf00073 | 4 |
| AX-157816086 | 4 | 57.464 | KV452806.1 | 941388 | 4-scf00073 | 4 |
| AX-157957217 | 4 | 57.464 | KV452806.1 | 942025 | 4-scf00073 | 4 |
| AX-157957218 | 4 | 57.464 | KV452806.1 | 942408 | 4-scf00073 | 4 |

|              |   |        |            |         |            |   |
|--------------|---|--------|------------|---------|------------|---|
| AX-157957221 | 4 | 57.464 | KV452806.1 | 948906  | 4-scf00073 | 4 |
| AX-157957222 | 4 | 57.464 | KV452806.1 | 949513  | 4-scf00073 | 4 |
| AX-157957228 | 4 | 57.464 | KV452806.1 | 956462  | 4-scf00073 | 4 |
| AX-157749992 | 4 | 57.464 | KV452806.1 | 959595  | 4-scf00073 | 4 |
| AX-157724458 | 4 | 57.464 | KV452806.1 | 968200  | 4-scf00073 | 4 |
| AX-157957279 | 4 | 57.464 | KV452806.1 | 1006985 | 4-scf00073 | 4 |
| AX-157957293 | 4 | 57.464 | KV452806.1 | 1033610 | 4-scf00073 | 4 |
| AX-157816087 | 4 | 57.464 | KV452806.1 | 1033688 | 4-scf00073 | 4 |
| AX-157957317 | 4 | 57.464 | KV452806.1 | 1061539 | 4-scf00073 | 4 |
| AX-157957331 | 4 | 57.464 | KV452806.1 | 1084264 | 4-scf00073 | 4 |
| AX-157957332 | 4 | 57.464 | KV452806.1 | 1089063 | 4-scf00073 | 4 |
| AX-157816094 | 4 | 57.464 | KV452806.1 | 1110382 | 4-scf00073 | 4 |
| AX-157957367 | 4 | 57.464 | KV452806.1 | 1135793 | 4-scf00073 | 4 |
| AX-157816112 | 4 | 57.464 | KV452806.1 | 1368980 | 4-scf00073 | 4 |
| AX-157816113 | 4 | 57.464 | KV452806.1 | 1369596 | 4-scf00073 | 4 |
| AX-157957562 | 4 | 57.464 | KV452806.1 | 1373733 | 4-scf00073 | 4 |
| AX-157957582 | 4 | 57.464 | KV452806.1 | 1390992 | 4-scf00073 | 4 |
| AX-157957607 | 4 | 57.464 | KV452806.1 | 1421335 | 4-scf00073 | 4 |
| AX-157957229 | 4 | 57.498 | KV452806.1 | 957402  | 4-scf00073 | 4 |
| AX-157744428 | 4 | 57.532 | KV452804.1 | 4509256 | 4-scf00071 | 4 |
| AX-157957138 | 4 | 57.532 | KV452806.1 | 859363  | 4-scf00073 | 4 |
| AX-157862833 | 4 | 57.532 | KV452806.1 | 897645  | 4-scf00073 | 4 |
| AX-157875503 | 4 | 57.532 | KV452806.1 | 938921  | 4-scf00073 | 4 |
| AX-157957227 | 4 | 57.532 | KV452806.1 | 955825  | 4-scf00073 | 4 |
| AX-157957231 | 4 | 57.532 | KV452806.1 | 961054  | 4-scf00073 | 4 |
| AX-157722682 | 4 | 57.532 | KV452806.1 | 992499  | 4-scf00073 | 4 |
| AX-157957271 | 4 | 57.532 | KV452806.1 | 997980  | 4-scf00073 | 4 |
| AX-157957272 | 4 | 57.532 | KV452806.1 | 998603  | 4-scf00073 | 4 |
| AX-157957277 | 4 | 57.532 | KV452806.1 | 1003265 | 4-scf00073 | 4 |
| AX-157957278 | 4 | 57.532 | KV452806.1 | 1004458 | 4-scf00073 | 4 |
| AX-157957283 | 4 | 57.532 | KV452806.1 | 1011027 | 4-scf00073 | 4 |
| AX-157957290 | 4 | 57.532 | KV452806.1 | 1022183 | 4-scf00073 | 4 |
| AX-157816090 | 4 | 57.532 | KV452806.1 | 1045940 | 4-scf00073 | 4 |
| AX-157869594 | 4 | 57.532 | KV452806.1 | 1070056 | 4-scf00073 | 4 |
| AX-157772478 | 4 | 57.532 | KV452806.1 | 1074466 | 4-scf00073 | 4 |
| AX-157957335 | 4 | 57.532 | KV452806.1 | 1093705 | 4-scf00073 | 4 |
| AX-157957336 | 4 | 57.532 | KV452806.1 | 1094831 | 4-scf00073 | 4 |
| AX-157957337 | 4 | 57.532 | KV452806.1 | 1098103 | 4-scf00073 | 4 |
| AX-157816095 | 4 | 57.532 | KV452806.1 | 1111108 | 4-scf00073 | 4 |
| AX-157954936 | 4 | 57.563 | KV452804.1 | 4692104 | 4-scf00071 | 4 |
| AX-157954956 | 4 | 57.563 | KV452804.1 | 4718049 | 4-scf00071 | 4 |
| AX-157954980 | 4 | 57.563 | KV452804.1 | 4745074 | 4-scf00071 | 4 |
| AX-157955753 | 4 | 57.563 | KV452804.1 | 5538444 | 4-scf00071 | 4 |
| AX-157955756 | 4 | 57.563 | KV452804.1 | 5540068 | 4-scf00071 | 4 |
| AX-157955968 | 4 | 57.563 | KV452804.1 | 5812495 | 4-scf00071 | 4 |
| AX-157955969 | 4 | 57.563 | KV452804.1 | 5812865 | 4-scf00071 | 4 |
| AX-157955970 | 4 | 57.563 | KV452804.1 | 5814431 | 4-scf00071 | 4 |
| AX-157956654 | 4 | 57.563 | KV452806.1 | 190132  | 4-scf00073 | 4 |
| AX-157956738 | 4 | 57.563 | KV452806.1 | 304299  | 4-scf00073 | 4 |
| AX-157956794 | 4 | 57.563 | KV452806.1 | 370283  | 4-scf00073 | 4 |
| AX-158406274 | 4 | 57.563 | KV452806.1 | 574586  | 4-scf00073 | 4 |

|              |   |        |            |         |            |   |
|--------------|---|--------|------------|---------|------------|---|
| AX-157957233 | 4 | 57.563 | KV452806.1 | 962871  | 4-scf00073 | 4 |
| AX-157957237 | 4 | 57.563 | KV452806.1 | 966271  | 4-scf00073 | 4 |
| AX-157869592 | 4 | 57.563 | KV452806.1 | 967178  | 4-scf00073 | 4 |
| AX-157957239 | 4 | 57.563 | KV452806.1 | 967699  | 4-scf00073 | 4 |
| AX-157957261 | 4 | 57.563 | KV452806.1 | 989930  | 4-scf00073 | 4 |
| AX-157869593 | 4 | 57.563 | KV452806.1 | 996437  | 4-scf00073 | 4 |
| AX-157957275 | 4 | 57.563 | KV452806.1 | 1002444 | 4-scf00073 | 4 |
| AX-157957334 | 4 | 57.563 | KV452806.1 | 1092972 | 4-scf00073 | 4 |
| AX-157957524 | 4 | 57.563 | KV452806.1 | 1322523 | 4-scf00073 | 4 |
| AX-157957529 | 4 | 57.563 | KV452806.1 | 1328951 | 4-scf00073 | 4 |
| AX-157957530 | 4 | 57.563 | KV452806.1 | 1329390 | 4-scf00073 | 4 |
| AX-157957531 | 4 | 57.563 | KV452806.1 | 1330661 | 4-scf00073 | 4 |
| AX-157957532 | 4 | 57.563 | KV452806.1 | 1330893 | 4-scf00073 | 4 |
| AX-157957548 | 4 | 57.563 | KV452806.1 | 1353333 | 4-scf00073 | 4 |
| AX-157816137 | 4 | 57.563 | KV452806.1 | 1925682 | 4-scf00073 | 4 |
| AX-157960780 | 4 | 57.563 | KV452824.1 | 171054  | 4-scf00086 | 4 |
| AX-157962741 | 4 | 57.563 | KV452829.1 | 112778  | 4-scf00092 | 4 |
| AX-157962986 | 4 | 57.563 | KV452829.1 | 424119  | 4-scf00092 | 4 |
| AX-157725123 | 4 | 57.592 | KV452804.1 | 4280680 | 4-scf00071 | 4 |
| AX-157956124 | 4 | 57.592 | KV452804.1 | 6053668 | 4-scf00071 | 4 |
| AX-157957174 | 4 | 57.592 | KV452806.1 | 895702  | 4-scf00073 | 4 |
| AX-157957175 | 4 | 57.592 | KV452806.1 | 901005  | 4-scf00073 | 4 |
| AX-157957254 | 4 | 57.592 | KV452806.1 | 984425  | 4-scf00073 | 4 |
| AX-157957255 | 4 | 57.592 | KV452806.1 | 984960  | 4-scf00073 | 4 |
| AX-157749285 | 4 | 57.592 | KV452806.1 | 986202  | 4-scf00073 | 4 |
| AX-157957263 | 4 | 57.592 | KV452806.1 | 992457  | 4-scf00073 | 4 |
| AX-157957266 | 4 | 57.592 | KV452806.1 | 994569  | 4-scf00073 | 4 |
| AX-157957267 | 4 | 57.592 | KV452806.1 | 994889  | 4-scf00073 | 4 |
| AX-157957268 | 4 | 57.592 | KV452806.1 | 995179  | 4-scf00073 | 4 |
| AX-157957269 | 4 | 57.592 | KV452806.1 | 995430  | 4-scf00073 | 4 |
| AX-157957273 | 4 | 57.592 | KV452806.1 | 999544  | 4-scf00073 | 4 |
| AX-157957274 | 4 | 57.592 | KV452806.1 | 1001028 | 4-scf00073 | 4 |
| AX-157957276 | 4 | 57.592 | KV452806.1 | 1002654 | 4-scf00073 | 4 |
| AX-157773764 | 4 | 57.592 | KV452806.1 | 1011439 | 4-scf00073 | 4 |
| AX-157957287 | 4 | 57.592 | KV452806.1 | 1018712 | 4-scf00073 | 4 |
| AX-157957294 | 4 | 57.592 | KV452806.1 | 1033930 | 4-scf00073 | 4 |
| AX-157957296 | 4 | 57.592 | KV452806.1 | 1038307 | 4-scf00073 | 4 |
| AX-157816088 | 4 | 57.592 | KV452806.1 | 1038814 | 4-scf00073 | 4 |
| AX-157957299 | 4 | 57.592 | KV452806.1 | 1041084 | 4-scf00073 | 4 |
| AX-158415331 | 4 | 57.592 | KV452806.1 | 1042018 | 4-scf00073 | 4 |
| AX-157957303 | 4 | 57.592 | KV452806.1 | 1043478 | 4-scf00073 | 4 |
| AX-157957304 | 4 | 57.592 | KV452806.1 | 1043554 | 4-scf00073 | 4 |
| AX-157957307 | 4 | 57.592 | KV452806.1 | 1048274 | 4-scf00073 | 4 |
| AX-157957309 | 4 | 57.592 | KV452806.1 | 1051147 | 4-scf00073 | 4 |
| AX-157957322 | 4 | 57.592 | KV452806.1 | 1073689 | 4-scf00073 | 4 |
| AX-157957324 | 4 | 57.592 | KV452806.1 | 1077568 | 4-scf00073 | 4 |
| AX-157957325 | 4 | 57.592 | KV452806.1 | 1078746 | 4-scf00073 | 4 |
| AX-157957326 | 4 | 57.592 | KV452806.1 | 1080895 | 4-scf00073 | 4 |
| AX-157957327 | 4 | 57.592 | KV452806.1 | 1081521 | 4-scf00073 | 4 |
| AX-157957328 | 4 | 57.592 | KV452806.1 | 1082206 | 4-scf00073 | 4 |
| AX-157957329 | 4 | 57.592 | KV452806.1 | 1083076 | 4-scf00073 | 4 |

|              |   |        |            |         |            |   |
|--------------|---|--------|------------|---------|------------|---|
| AX-157957343 | 4 | 57.592 | KV452806.1 | 1109867 | 4-scf00073 | 4 |
| AX-157957346 | 4 | 57.592 | KV452806.1 | 1115192 | 4-scf00073 | 4 |
| AX-157957348 | 4 | 57.592 | KV452806.1 | 1117912 | 4-scf00073 | 4 |
| AX-157957349 | 4 | 57.592 | KV452806.1 | 1120885 | 4-scf00073 | 4 |
| AX-157954888 | 4 | 57.72  | KV452804.1 | 4614301 | 4-scf00071 | 4 |
| AX-157956123 | 4 | 57.72  | KV452804.1 | 6053275 | 4-scf00071 | 4 |
| AX-157781191 | 4 | 57.72  | KV452804.1 | 6056889 | 4-scf00071 | 4 |
| AX-157956127 | 4 | 57.72  | KV452804.1 | 6057498 | 4-scf00071 | 4 |
| AX-157725643 | 4 | 57.72  | KV452804.1 | 6075144 | 4-scf00071 | 4 |
| AX-157956793 | 4 | 57.72  | KV452806.1 | 369634  | 4-scf00073 | 4 |
| AX-157956846 | 4 | 57.72  | KV452806.1 | 444426  | 4-scf00073 | 4 |
| AX-157956946 | 4 | 57.72  | KV452806.1 | 615428  | 4-scf00073 | 4 |
| AX-157957350 | 4 | 57.72  | KV452806.1 | 1122792 | 4-scf00073 | 4 |
| AX-157957352 | 4 | 57.72  | KV452806.1 | 1123538 | 4-scf00073 | 4 |
| AX-157957358 | 4 | 57.72  | KV452806.1 | 1126631 | 4-scf00073 | 4 |
| AX-157957359 | 4 | 57.72  | KV452806.1 | 1127036 | 4-scf00073 | 4 |
| AX-157957360 | 4 | 57.72  | KV452806.1 | 1127281 | 4-scf00073 | 4 |
| AX-157957361 | 4 | 57.72  | KV452806.1 | 1129158 | 4-scf00073 | 4 |
| AX-157957363 | 4 | 57.72  | KV452806.1 | 1130271 | 4-scf00073 | 4 |
| AX-157957369 | 4 | 57.72  | KV452806.1 | 1137338 | 4-scf00073 | 4 |
| AX-157957371 | 4 | 57.72  | KV452806.1 | 1141572 | 4-scf00073 | 4 |
| AX-157957372 | 4 | 57.72  | KV452806.1 | 1141738 | 4-scf00073 | 4 |
| AX-157957373 | 4 | 57.72  | KV452806.1 | 1142665 | 4-scf00073 | 4 |
| AX-157712940 | 4 | 57.72  | KV452806.1 | 1143773 | 4-scf00073 | 4 |
| AX-157816097 | 4 | 57.72  | KV452806.1 | 1144055 | 4-scf00073 | 4 |
| AX-157957374 | 4 | 57.72  | KV452806.1 | 1146193 | 4-scf00073 | 4 |
| AX-157957375 | 4 | 57.72  | KV452806.1 | 1146927 | 4-scf00073 | 4 |
| AX-157957376 | 4 | 57.72  | KV452806.1 | 1147538 | 4-scf00073 | 4 |
| AX-157957377 | 4 | 57.72  | KV452806.1 | 1148555 | 4-scf00073 | 4 |
| AX-157957379 | 4 | 57.72  | KV452806.1 | 1150790 | 4-scf00073 | 4 |
| AX-157957381 | 4 | 57.72  | KV452806.1 | 1151925 | 4-scf00073 | 4 |
| AX-157957382 | 4 | 57.72  | KV452806.1 | 1152291 | 4-scf00073 | 4 |
| AX-157816098 | 4 | 57.72  | KV452806.1 | 1153287 | 4-scf00073 | 4 |
| AX-157957384 | 4 | 57.72  | KV452806.1 | 1154415 | 4-scf00073 | 4 |
| AX-157957385 | 4 | 57.72  | KV452806.1 | 1155130 | 4-scf00073 | 4 |
| AX-157957386 | 4 | 57.72  | KV452806.1 | 1156317 | 4-scf00073 | 4 |
| AX-157957387 | 4 | 57.72  | KV452806.1 | 1156863 | 4-scf00073 | 4 |
| AX-157816099 | 4 | 57.72  | KV452806.1 | 1157711 | 4-scf00073 | 4 |
| AX-157957388 | 4 | 57.72  | KV452806.1 | 1161438 | 4-scf00073 | 4 |
| AX-157957389 | 4 | 57.72  | KV452806.1 | 1162520 | 4-scf00073 | 4 |
| AX-157957390 | 4 | 57.72  | KV452806.1 | 1162892 | 4-scf00073 | 4 |
| AX-157957391 | 4 | 57.72  | KV452806.1 | 1165127 | 4-scf00073 | 4 |
| AX-157957392 | 4 | 57.72  | KV452806.1 | 1165899 | 4-scf00073 | 4 |
| AX-157957393 | 4 | 57.72  | KV452806.1 | 1166495 | 4-scf00073 | 4 |
| AX-157957394 | 4 | 57.72  | KV452806.1 | 1167623 | 4-scf00073 | 4 |
| AX-157957395 | 4 | 57.72  | KV452806.1 | 1168396 | 4-scf00073 | 4 |
| AX-157957396 | 4 | 57.72  | KV452806.1 | 1168828 | 4-scf00073 | 4 |
| AX-157957397 | 4 | 57.72  | KV452806.1 | 1169580 | 4-scf00073 | 4 |
| AX-157957398 | 4 | 57.72  | KV452806.1 | 1169992 | 4-scf00073 | 4 |
| AX-157957399 | 4 | 57.72  | KV452806.1 | 1170498 | 4-scf00073 | 4 |
| AX-157957400 | 4 | 57.72  | KV452806.1 | 1171002 | 4-scf00073 | 4 |

|              |   |        |            |         |            |   |
|--------------|---|--------|------------|---------|------------|---|
| AX-157957401 | 4 | 57.72  | KV452806.1 | 1171710 | 4-scf00073 | 4 |
| AX-157957402 | 4 | 57.72  | KV452806.1 | 1172399 | 4-scf00073 | 4 |
| AX-157957404 | 4 | 57.72  | KV452806.1 | 1176555 | 4-scf00073 | 4 |
| AX-157745334 | 4 | 57.72  | KV452806.1 | 1181503 | 4-scf00073 | 4 |
| AX-157957427 | 4 | 57.72  | KV452806.1 | 1200713 | 4-scf00073 | 4 |
| AX-157957436 | 4 | 57.72  | KV452806.1 | 1220922 | 4-scf00073 | 4 |
| AX-157957440 | 4 | 57.72  | KV452806.1 | 1226226 | 4-scf00073 | 4 |
| AX-157957443 | 4 | 57.72  | KV452806.1 | 1230710 | 4-scf00073 | 4 |
| AX-157957445 | 4 | 57.72  | KV452806.1 | 1233879 | 4-scf00073 | 4 |
| AX-157957446 | 4 | 57.72  | KV452806.1 | 1235328 | 4-scf00073 | 4 |
| AX-157957448 | 4 | 57.72  | KV452806.1 | 1237873 | 4-scf00073 | 4 |
| AX-157957449 | 4 | 57.72  | KV452806.1 | 1239256 | 4-scf00073 | 4 |
| AX-157957452 | 4 | 57.72  | KV452806.1 | 1242285 | 4-scf00073 | 4 |
| AX-157957453 | 4 | 57.72  | KV452806.1 | 1242748 | 4-scf00073 | 4 |
| AX-157816100 | 4 | 57.72  | KV452806.1 | 1243282 | 4-scf00073 | 4 |
| AX-157957454 | 4 | 57.72  | KV452806.1 | 1243880 | 4-scf00073 | 4 |
| AX-157957457 | 4 | 57.72  | KV452806.1 | 1246581 | 4-scf00073 | 4 |
| AX-157957458 | 4 | 57.72  | KV452806.1 | 1247153 | 4-scf00073 | 4 |
| AX-157957459 | 4 | 57.72  | KV452806.1 | 1249280 | 4-scf00073 | 4 |
| AX-157957461 | 4 | 57.72  | KV452806.1 | 1250680 | 4-scf00073 | 4 |
| AX-157957462 | 4 | 57.72  | KV452806.1 | 1251542 | 4-scf00073 | 4 |
| AX-157957463 | 4 | 57.72  | KV452806.1 | 1252348 | 4-scf00073 | 4 |
| AX-157957466 | 4 | 57.72  | KV452806.1 | 1256332 | 4-scf00073 | 4 |
| AX-157957471 | 4 | 57.72  | KV452806.1 | 1268955 | 4-scf00073 | 4 |
| AX-157957561 | 4 | 57.72  | KV452806.1 | 1369803 | 4-scf00073 | 4 |
| AX-157957566 | 4 | 57.72  | KV452806.1 | 1377249 | 4-scf00073 | 4 |
| AX-157957567 | 4 | 57.72  | KV452806.1 | 1378190 | 4-scf00073 | 4 |
| AX-157957568 | 4 | 57.72  | KV452806.1 | 1379836 | 4-scf00073 | 4 |
| AX-157957570 | 4 | 57.72  | KV452806.1 | 1381810 | 4-scf00073 | 4 |
| AX-157957571 | 4 | 57.72  | KV452806.1 | 1381963 | 4-scf00073 | 4 |
| AX-157957630 | 4 | 57.72  | KV452806.1 | 1445797 | 4-scf00073 | 4 |
| AX-157957634 | 4 | 57.72  | KV452806.1 | 1451062 | 4-scf00073 | 4 |
| AX-157957635 | 4 | 57.72  | KV452806.1 | 1451652 | 4-scf00073 | 4 |
| AX-157957637 | 4 | 57.72  | KV452806.1 | 1453518 | 4-scf00073 | 4 |
| AX-157957639 | 4 | 57.72  | KV452806.1 | 1455879 | 4-scf00073 | 4 |
| AX-157957641 | 4 | 57.72  | KV452806.1 | 1457705 | 4-scf00073 | 4 |
| AX-157957644 | 4 | 57.72  | KV452806.1 | 1458856 | 4-scf00073 | 4 |
| AX-157957656 | 4 | 57.72  | KV452806.1 | 1475613 | 4-scf00073 | 4 |
| AX-157957657 | 4 | 57.72  | KV452806.1 | 1476930 | 4-scf00073 | 4 |
| AX-157957658 | 4 | 57.72  | KV452806.1 | 1477645 | 4-scf00073 | 4 |
| AX-157957659 | 4 | 57.72  | KV452806.1 | 1478197 | 4-scf00073 | 4 |
| AX-157957660 | 4 | 57.72  | KV452806.1 | 1478813 | 4-scf00073 | 4 |
| AX-157957662 | 4 | 57.72  | KV452806.1 | 1480278 | 4-scf00073 | 4 |
| AX-157957666 | 4 | 57.72  | KV452806.1 | 1484161 | 4-scf00073 | 4 |
| AX-157957874 | 4 | 57.72  | KV452806.1 | 1828142 | 4-scf00073 | 4 |
| AX-157958193 | 4 | 57.72  | KV452814.1 | 40858   | 4-scf00074 | 4 |
| AX-157958804 | 4 | 57.72  | KV452819.1 | 683904  | 4-scf00080 | 4 |
| AX-157745320 | 4 | 57.72  | KV452811.1 | 24720   | 4-scf00082 | 4 |
| AX-157960627 | 4 | 57.72  | KV452811.1 | 93114   | 4-scf00082 | 4 |
| AX-157746217 | 4 | 57.72  | KV452829.1 | 622494  | 4-scf00092 | 4 |
| AX-157956126 | 4 | 57.848 | KV452804.1 | 6057167 | 4-scf00071 | 4 |

|              |   |        |            |         |            |   |
|--------------|---|--------|------------|---------|------------|---|
| AX-157957435 | 4 | 57.848 | KV452806.1 | 1212558 | 4-scf00073 | 4 |
| AX-157957444 | 4 | 57.848 | KV452806.1 | 1232841 | 4-scf00073 | 4 |
| AX-157957450 | 4 | 57.848 | KV452806.1 | 1240188 | 4-scf00073 | 4 |
| AX-157957451 | 4 | 57.848 | KV452806.1 | 1241391 | 4-scf00073 | 4 |
| AX-157957565 | 4 | 57.848 | KV452806.1 | 1376866 | 4-scf00073 | 4 |
| AX-157957647 | 4 | 57.848 | KV452806.1 | 1459894 | 4-scf00073 | 4 |
| AX-157962199 | 4 | 57.848 | KV452819.1 | 1812865 | 4-scf00080 | 4 |
| AX-157961264 | 4 | 57.848 | KV452824.1 | 765923  | 4-scf00086 | 4 |
| AX-157961280 | 4 | 57.848 | KV452824.1 | 784217  | 4-scf00086 | 4 |
| AX-157961411 | 4 | 57.848 | KV452824.1 | 967362  | 4-scf00086 | 4 |
| AX-157961661 | 4 | 57.848 | KV452812.1 | 92507   | 4-scf00087 | 4 |
| AX-157963187 | 4 | 57.848 | KV452829.1 | 725063  | 4-scf00092 | 4 |
| AX-157963278 | 4 | 57.848 | KV452829.1 | 853075  | 4-scf00092 | 4 |
| AX-158376698 | 4 | 57.848 | KV452825.1 | 165313  | 4-scf00593 | 4 |
| AX-157954813 | 4 | 57.976 | KV452804.1 | 4509691 | 4-scf00071 | 4 |
| AX-157955086 | 4 | 57.976 | KV452804.1 | 4845452 | 4-scf00071 | 4 |
| AX-157955850 | 4 | 57.976 | KV452804.1 | 5648348 | 4-scf00071 | 4 |
| AX-157955853 | 4 | 57.976 | KV452804.1 | 5653194 | 4-scf00071 | 4 |
| AX-157955854 | 4 | 57.976 | KV452804.1 | 5654734 | 4-scf00071 | 4 |
| AX-157815934 | 4 | 57.976 | KV452804.1 | 5660744 | 4-scf00071 | 4 |
| AX-157815952 | 4 | 57.976 | KV452804.1 | 5766131 | 4-scf00071 | 4 |
| AX-157955985 | 4 | 57.976 | KV452804.1 | 5841809 | 4-scf00071 | 4 |
| AX-158415308 | 4 | 57.976 | KV452804.1 | 6041634 | 4-scf00071 | 4 |
| AX-157956116 | 4 | 57.976 | KV452804.1 | 6043091 | 4-scf00071 | 4 |
| AX-158405053 | 4 | 57.976 | KV452804.1 | 6083242 | 4-scf00071 | 4 |
| AX-157956195 | 4 | 57.976 | KV452804.1 | 6160605 | 4-scf00071 | 4 |
| AX-157956257 | 4 | 57.976 | KV452804.1 | 6302442 | 4-scf00071 | 4 |
| AX-157956528 | 4 | 57.976 | KV452806.1 | 10239   | 4-scf00073 | 4 |
| AX-157884114 | 4 | 57.976 | KV452806.1 | 69652   | 4-scf00073 | 4 |
| AX-157956737 | 4 | 57.976 | KV452806.1 | 304017  | 4-scf00073 | 4 |
| AX-157956750 | 4 | 57.976 | KV452806.1 | 314859  | 4-scf00073 | 4 |
| AX-157956752 | 4 | 57.976 | KV452806.1 | 315323  | 4-scf00073 | 4 |
| AX-157956753 | 4 | 57.976 | KV452806.1 | 316574  | 4-scf00073 | 4 |
| AX-157816061 | 4 | 57.976 | KV452806.1 | 422743  | 4-scf00073 | 4 |
| AX-157956849 | 4 | 57.976 | KV452806.1 | 457376  | 4-scf00073 | 4 |
| AX-157957035 | 4 | 57.976 | KV452806.1 | 713300  | 4-scf00073 | 4 |
| AX-157957041 | 4 | 57.976 | KV452806.1 | 718972  | 4-scf00073 | 4 |
| AX-157957071 | 4 | 57.976 | KV452806.1 | 757756  | 4-scf00073 | 4 |
| AX-157957073 | 4 | 57.976 | KV452806.1 | 761999  | 4-scf00073 | 4 |
| AX-157957074 | 4 | 57.976 | KV452806.1 | 762502  | 4-scf00073 | 4 |
| AX-157957075 | 4 | 57.976 | KV452806.1 | 764605  | 4-scf00073 | 4 |
| AX-157957077 | 4 | 57.976 | KV452806.1 | 766416  | 4-scf00073 | 4 |
| AX-157957083 | 4 | 57.976 | KV452806.1 | 772390  | 4-scf00073 | 4 |
| AX-157957086 | 4 | 57.976 | KV452806.1 | 776754  | 4-scf00073 | 4 |
| AX-157957100 | 4 | 57.976 | KV452806.1 | 810022  | 4-scf00073 | 4 |
| AX-157957232 | 4 | 57.976 | KV452806.1 | 961827  | 4-scf00073 | 4 |
| AX-157957247 | 4 | 57.976 | KV452806.1 | 976874  | 4-scf00073 | 4 |
| AX-157957264 | 4 | 57.976 | KV452806.1 | 992759  | 4-scf00073 | 4 |
| AX-157957291 | 4 | 57.976 | KV452806.1 | 1025350 | 4-scf00073 | 4 |
| AX-157957292 | 4 | 57.976 | KV452806.1 | 1031111 | 4-scf00073 | 4 |
| AX-157957297 | 4 | 57.976 | KV452806.1 | 1038608 | 4-scf00073 | 4 |



|              |   |        |            |         |            |   |
|--------------|---|--------|------------|---------|------------|---|
| AX-157816089 | 4 | 57.976 | KV452806.1 | 1039151 | 4-scf00073 | 4 |
| AX-157957298 | 4 | 57.976 | KV452806.1 | 1040625 | 4-scf00073 | 4 |
| AX-157957300 | 4 | 57.976 | KV452806.1 | 1042730 | 4-scf00073 | 4 |
| AX-157957305 | 4 | 57.976 | KV452806.1 | 1044646 | 4-scf00073 | 4 |
| AX-157957306 | 4 | 57.976 | KV452806.1 | 1045630 | 4-scf00073 | 4 |
| AX-157957308 | 4 | 57.976 | KV452806.1 | 1050822 | 4-scf00073 | 4 |
| AX-157957310 | 4 | 57.976 | KV452806.1 | 1051657 | 4-scf00073 | 4 |
| AX-157957314 | 4 | 57.976 | KV452806.1 | 1057977 | 4-scf00073 | 4 |
| AX-157957318 | 4 | 57.976 | KV452806.1 | 1061761 | 4-scf00073 | 4 |
| AX-157957338 | 4 | 57.976 | KV452806.1 | 1100444 | 4-scf00073 | 4 |
| AX-157957351 | 4 | 57.976 | KV452806.1 | 1123103 | 4-scf00073 | 4 |
| AX-157957412 | 4 | 57.976 | KV452806.1 | 1185051 | 4-scf00073 | 4 |
| AX-157957428 | 4 | 57.976 | KV452806.1 | 1201210 | 4-scf00073 | 4 |
| AX-157957437 | 4 | 57.976 | KV452806.1 | 1221155 | 4-scf00073 | 4 |
| AX-157957439 | 4 | 57.976 | KV452806.1 | 1225633 | 4-scf00073 | 4 |
| AX-157957455 | 4 | 57.976 | KV452806.1 | 1244846 | 4-scf00073 | 4 |
| AX-157957456 | 4 | 57.976 | KV452806.1 | 1245721 | 4-scf00073 | 4 |
| AX-157957460 | 4 | 57.976 | KV452806.1 | 1249792 | 4-scf00073 | 4 |
| AX-157957467 | 4 | 57.976 | KV452806.1 | 1257560 | 4-scf00073 | 4 |
| AX-158390263 | 4 | 57.976 | KV452806.1 | 1260020 | 4-scf00073 | 4 |
| AX-158390264 | 4 | 57.976 | KV452806.1 | 1262623 | 4-scf00073 | 4 |
| AX-157957468 | 4 | 57.976 | KV452806.1 | 1265044 | 4-scf00073 | 4 |
| AX-158390265 | 4 | 57.976 | KV452806.1 | 1274050 | 4-scf00073 | 4 |
| AX-157957476 | 4 | 57.976 | KV452806.1 | 1274572 | 4-scf00073 | 4 |
| AX-157816102 | 4 | 57.976 | KV452806.1 | 1275143 | 4-scf00073 | 4 |
| AX-157957478 | 4 | 57.976 | KV452806.1 | 1277208 | 4-scf00073 | 4 |
| AX-157957480 | 4 | 57.976 | KV452806.1 | 1279218 | 4-scf00073 | 4 |
| AX-157854738 | 4 | 57.976 | KV452806.1 | 1327523 | 4-scf00073 | 4 |
| AX-157957541 | 4 | 57.976 | KV452806.1 | 1345096 | 4-scf00073 | 4 |
| AX-157957558 | 4 | 57.976 | KV452806.1 | 1364302 | 4-scf00073 | 4 |
| AX-157957559 | 4 | 57.976 | KV452806.1 | 1366364 | 4-scf00073 | 4 |
| AX-157957564 | 4 | 57.976 | KV452806.1 | 1376199 | 4-scf00073 | 4 |
| AX-157957572 | 4 | 57.976 | KV452806.1 | 1382683 | 4-scf00073 | 4 |
| AX-157957575 | 4 | 57.976 | KV452806.1 | 1384380 | 4-scf00073 | 4 |
| AX-157957577 | 4 | 57.976 | KV452806.1 | 1387128 | 4-scf00073 | 4 |
| AX-157957578 | 4 | 57.976 | KV452806.1 | 1388091 | 4-scf00073 | 4 |
| AX-157957580 | 4 | 57.976 | KV452806.1 | 1389732 | 4-scf00073 | 4 |
| AX-157957581 | 4 | 57.976 | KV452806.1 | 1390260 | 4-scf00073 | 4 |
| AX-157957583 | 4 | 57.976 | KV452806.1 | 1391791 | 4-scf00073 | 4 |
| AX-157957586 | 4 | 57.976 | KV452806.1 | 1396128 | 4-scf00073 | 4 |
| AX-157957587 | 4 | 57.976 | KV452806.1 | 1396625 | 4-scf00073 | 4 |
| AX-157957589 | 4 | 57.976 | KV452806.1 | 1397891 | 4-scf00073 | 4 |
| AX-157957590 | 4 | 57.976 | KV452806.1 | 1398476 | 4-scf00073 | 4 |
| AX-157957591 | 4 | 57.976 | KV452806.1 | 1399902 | 4-scf00073 | 4 |
| AX-158390266 | 4 | 57.976 | KV452806.1 | 1401544 | 4-scf00073 | 4 |
| AX-157957596 | 4 | 57.976 | KV452806.1 | 1404949 | 4-scf00073 | 4 |
| AX-157957597 | 4 | 57.976 | KV452806.1 | 1406169 | 4-scf00073 | 4 |
| AX-157957601 | 4 | 57.976 | KV452806.1 | 1409045 | 4-scf00073 | 4 |
| AX-157720777 | 4 | 57.976 | KV452806.1 | 1411157 | 4-scf00073 | 4 |
| AX-157957602 | 4 | 57.976 | KV452806.1 | 1413153 | 4-scf00073 | 4 |
| AX-157957603 | 4 | 57.976 | KV452806.1 | 1413787 | 4-scf00073 | 4 |

|              |   |        |            |         |            |   |
|--------------|---|--------|------------|---------|------------|---|
| AX-157957604 | 4 | 57.976 | KV452806.1 | 1419134 | 4-scf00073 | 4 |
| AX-157957605 | 4 | 57.976 | KV452806.1 | 1419876 | 4-scf00073 | 4 |
| AX-157957606 | 4 | 57.976 | KV452806.1 | 1420480 | 4-scf00073 | 4 |
| AX-157957615 | 4 | 57.976 | KV452806.1 | 1428168 | 4-scf00073 | 4 |
| AX-157957616 | 4 | 57.976 | KV452806.1 | 1428670 | 4-scf00073 | 4 |
| AX-157957617 | 4 | 57.976 | KV452806.1 | 1429784 | 4-scf00073 | 4 |
| AX-157957618 | 4 | 57.976 | KV452806.1 | 1430643 | 4-scf00073 | 4 |
| AX-157957622 | 4 | 57.976 | KV452806.1 | 1435757 | 4-scf00073 | 4 |
| AX-157957624 | 4 | 57.976 | KV452806.1 | 1436558 | 4-scf00073 | 4 |
| AX-157957625 | 4 | 57.976 | KV452806.1 | 1437413 | 4-scf00073 | 4 |
| AX-157957626 | 4 | 57.976 | KV452806.1 | 1438638 | 4-scf00073 | 4 |
| AX-157957627 | 4 | 57.976 | KV452806.1 | 1439319 | 4-scf00073 | 4 |
| AX-157957631 | 4 | 57.976 | KV452806.1 | 1448141 | 4-scf00073 | 4 |
| AX-157957632 | 4 | 57.976 | KV452806.1 | 1448555 | 4-scf00073 | 4 |
| AX-157957645 | 4 | 57.976 | KV452806.1 | 1459105 | 4-scf00073 | 4 |
| AX-157957646 | 4 | 57.976 | KV452806.1 | 1459322 | 4-scf00073 | 4 |
| AX-157957650 | 4 | 57.976 | KV452806.1 | 1465260 | 4-scf00073 | 4 |
| AX-157957664 | 4 | 57.976 | KV452806.1 | 1481878 | 4-scf00073 | 4 |
| AX-157957670 | 4 | 57.976 | KV452806.1 | 1488780 | 4-scf00073 | 4 |
| AX-157957671 | 4 | 57.976 | KV452806.1 | 1489955 | 4-scf00073 | 4 |
| AX-157957672 | 4 | 57.976 | KV452806.1 | 1490438 | 4-scf00073 | 4 |
| AX-157957678 | 4 | 57.976 | KV452806.1 | 1498779 | 4-scf00073 | 4 |
| AX-157957679 | 4 | 57.976 | KV452806.1 | 1501382 | 4-scf00073 | 4 |
| AX-157816115 | 4 | 57.976 | KV452806.1 | 1507178 | 4-scf00073 | 4 |
| AX-157957682 | 4 | 57.976 | KV452806.1 | 1511362 | 4-scf00073 | 4 |
| AX-157744632 | 4 | 57.976 | KV452806.1 | 1512436 | 4-scf00073 | 4 |
| AX-157816116 | 4 | 57.976 | KV452806.1 | 1515080 | 4-scf00073 | 4 |
| AX-157957687 | 4 | 57.976 | KV452806.1 | 1518001 | 4-scf00073 | 4 |
| AX-157957688 | 4 | 57.976 | KV452806.1 | 1518755 | 4-scf00073 | 4 |
| AX-157957689 | 4 | 57.976 | KV452806.1 | 1519575 | 4-scf00073 | 4 |
| AX-157957691 | 4 | 57.976 | KV452806.1 | 1523456 | 4-scf00073 | 4 |
| AX-157884120 | 4 | 57.976 | KV452806.1 | 1524476 | 4-scf00073 | 4 |
| AX-157957693 | 4 | 57.976 | KV452806.1 | 1525061 | 4-scf00073 | 4 |
| AX-157957695 | 4 | 57.976 | KV452806.1 | 1527071 | 4-scf00073 | 4 |
| AX-158406287 | 4 | 57.976 | KV452806.1 | 1527488 | 4-scf00073 | 4 |
| AX-157957696 | 4 | 57.976 | KV452806.1 | 1527565 | 4-scf00073 | 4 |
| AX-157767811 | 4 | 57.976 | KV452806.1 | 1528347 | 4-scf00073 | 4 |
| AX-157957697 | 4 | 57.976 | KV452806.1 | 1529098 | 4-scf00073 | 4 |
| AX-157957698 | 4 | 57.976 | KV452806.1 | 1529474 | 4-scf00073 | 4 |
| AX-157717627 | 4 | 57.976 | KV452806.1 | 1535364 | 4-scf00073 | 4 |
| AX-157816121 | 4 | 57.976 | KV452806.1 | 1535742 | 4-scf00073 | 4 |
| AX-157957701 | 4 | 57.976 | KV452806.1 | 1535957 | 4-scf00073 | 4 |
| AX-157816122 | 4 | 57.976 | KV452806.1 | 1536466 | 4-scf00073 | 4 |
| AX-157875504 | 4 | 57.976 | KV452806.1 | 1538349 | 4-scf00073 | 4 |
| AX-157957704 | 4 | 57.976 | KV452806.1 | 1544381 | 4-scf00073 | 4 |
| AX-157957708 | 4 | 57.976 | KV452806.1 | 1552262 | 4-scf00073 | 4 |
| AX-157957719 | 4 | 57.976 | KV452806.1 | 1567378 | 4-scf00073 | 4 |
| AX-157957720 | 4 | 57.976 | KV452806.1 | 1567673 | 4-scf00073 | 4 |
| AX-157957721 | 4 | 57.976 | KV452806.1 | 1567813 | 4-scf00073 | 4 |
| AX-157957726 | 4 | 57.976 | KV452806.1 | 1576289 | 4-scf00073 | 4 |
| AX-157957727 | 4 | 57.976 | KV452806.1 | 1578079 | 4-scf00073 | 4 |

|              |   |        |            |         |            |   |
|--------------|---|--------|------------|---------|------------|---|
| AX-157957728 | 4 | 57.976 | KV452806.1 | 1581000 | 4-scf00073 | 4 |
| AX-157957730 | 4 | 57.976 | KV452806.1 | 1582216 | 4-scf00073 | 4 |
| AX-157957732 | 4 | 57.976 | KV452806.1 | 1584841 | 4-scf00073 | 4 |
| AX-157957734 | 4 | 57.976 | KV452806.1 | 1587868 | 4-scf00073 | 4 |
| AX-157957736 | 4 | 57.976 | KV452806.1 | 1592054 | 4-scf00073 | 4 |
| AX-157957737 | 4 | 57.976 | KV452806.1 | 1593275 | 4-scf00073 | 4 |
| AX-157957756 | 4 | 57.976 | KV452806.1 | 1620255 | 4-scf00073 | 4 |
| AX-157957767 | 4 | 57.976 | KV452806.1 | 1640051 | 4-scf00073 | 4 |
| AX-157816125 | 4 | 57.976 | KV452806.1 | 1649008 | 4-scf00073 | 4 |
| AX-157957776 | 4 | 57.976 | KV452806.1 | 1654963 | 4-scf00073 | 4 |
| AX-157957810 | 4 | 57.976 | KV452806.1 | 1712116 | 4-scf00073 | 4 |
| AX-157957955 | 4 | 57.976 | KV452806.1 | 1942346 | 4-scf00073 | 4 |
| AX-157957966 | 4 | 57.976 | KV452806.1 | 1969089 | 4-scf00073 | 4 |
| AX-157958007 | 4 | 57.976 | KV452806.1 | 2047894 | 4-scf00073 | 4 |
| AX-157958039 | 4 | 57.976 | KV452806.1 | 2084237 | 4-scf00073 | 4 |
| AX-157958118 | 4 | 57.976 | KV452806.1 | 2277559 | 4-scf00073 | 4 |
| AX-157958127 | 4 | 57.976 | KV452806.1 | 2301433 | 4-scf00073 | 4 |
| AX-157958144 | 4 | 57.976 | KV452806.1 | 2372375 | 4-scf00073 | 4 |
| AX-157958194 | 4 | 57.976 | KV452814.1 | 41151   | 4-scf00074 | 4 |
| AX-157958258 | 4 | 57.976 | KV452814.1 | 199387  | 4-scf00074 | 4 |
| AX-157958392 | 4 | 57.976 | KV452814.1 | 456325  | 4-scf00074 | 4 |
| AX-157958433 | 4 | 57.976 | KV452814.1 | 510435  | 4-scf00074 | 4 |
| AX-157958447 | 4 | 57.976 | KV452814.1 | 539029  | 4-scf00074 | 4 |
| AX-157958449 | 4 | 57.976 | KV452814.1 | 543538  | 4-scf00074 | 4 |
| AX-157958477 | 4 | 57.976 | KV452814.1 | 596522  | 4-scf00074 | 4 |
| AX-157816185 | 4 | 57.976 | KV452814.1 | 604133  | 4-scf00074 | 4 |
| AX-157958548 | 4 | 57.976 | KV452814.1 | 738698  | 4-scf00074 | 4 |
| AX-157958568 | 4 | 57.976 | KV452814.1 | 774586  | 4-scf00074 | 4 |
| AX-157958605 | 4 | 57.976 | KV452814.1 | 836099  | 4-scf00074 | 4 |
| AX-157958645 | 4 | 57.976 | KV452814.1 | 883656  | 4-scf00074 | 4 |
| AX-157958647 | 4 | 57.976 | KV452814.1 | 884985  | 4-scf00074 | 4 |
| AX-157958651 | 4 | 57.976 | KV452814.1 | 890340  | 4-scf00074 | 4 |
| AX-157958691 | 4 | 57.976 | KV452814.1 | 974833  | 4-scf00074 | 4 |
| AX-157958740 | 4 | 57.976 | KV452814.1 | 1159452 | 4-scf00074 | 4 |
| AX-157958753 | 4 | 57.976 | KV452814.1 | 1191732 | 4-scf00074 | 4 |
| AX-157958755 | 4 | 57.976 | KV452814.1 | 1193022 | 4-scf00074 | 4 |
| AX-157958796 | 4 | 57.976 | KV452814.1 | 1315671 | 4-scf00074 | 4 |
| AX-157959058 | 4 | 57.976 | KV452815.1 | 90376   | 4-scf00076 | 4 |
| AX-157816223 | 4 | 57.976 | KV452815.1 | 410956  | 4-scf00076 | 4 |
| AX-157743571 | 4 | 57.976 | KV452815.1 | 428444  | 4-scf00076 | 4 |
| AX-157959155 | 4 | 57.976 | KV452815.1 | 563199  | 4-scf00076 | 4 |
| AX-157816236 | 4 | 57.976 | KV452815.1 | 577270  | 4-scf00076 | 4 |
| AX-157816283 | 4 | 57.976 | KV452816.1 | 19420   | 4-scf00077 | 4 |
| AX-158406357 | 4 | 57.976 | KV452816.1 | 156222  | 4-scf00077 | 4 |
| AX-157959533 | 4 | 57.976 | KV452816.1 | 194555  | 4-scf00077 | 4 |
| AX-157959245 | 4 | 57.976 | KV452816.1 | 763307  | 4-scf00077 | 4 |
| AX-157959628 | 4 | 57.976 | KV452816.1 | 865733  | 4-scf00077 | 4 |
| AX-157816312 | 4 | 57.976 | KV452816.1 | 1091481 | 4-scf00077 | 4 |
| AX-157959820 | 4 | 57.976 | KV452816.1 | 1214562 | 4-scf00077 | 4 |
| AX-157959840 | 4 | 57.976 | KV452816.1 | 1245428 | 4-scf00077 | 4 |
| AX-157959914 | 4 | 57.976 | KV452816.1 | 1373019 | 4-scf00077 | 4 |

|              |   |        |            |         |            |   |
|--------------|---|--------|------------|---------|------------|---|
| AX-157959923 | 4 | 57.976 | KV452816.1 | 1390182 | 4-scf00077 | 4 |
| AX-157960098 | 4 | 57.976 | KV452818.1 | 387639  | 4-scf00079 | 4 |
| AX-157960115 | 4 | 57.976 | KV452818.1 | 422636  | 4-scf00079 | 4 |
| AX-157960343 | 4 | 57.976 | KV452819.1 | 177378  | 4-scf00080 | 4 |
| AX-157816325 | 4 | 57.976 | KV452819.1 | 336887  | 4-scf00080 | 4 |
| AX-157960189 | 4 | 57.976 | KV452819.1 | 338428  | 4-scf00080 | 4 |
| AX-157816209 | 4 | 57.976 | KV452819.1 | 368678  | 4-scf00080 | 4 |
| AX-157958974 | 4 | 57.976 | KV452819.1 | 444512  | 4-scf00080 | 4 |
| AX-157958885 | 4 | 57.976 | KV452819.1 | 586021  | 4-scf00080 | 4 |
| AX-157764408 | 4 | 57.976 | KV452819.1 | 636293  | 4-scf00080 | 4 |
| AX-157816193 | 4 | 57.976 | KV452819.1 | 636583  | 4-scf00080 | 4 |
| AX-157742422 | 4 | 57.976 | KV452819.1 | 673328  | 4-scf00080 | 4 |
| AX-157962442 | 4 | 57.976 | KV452819.1 | 711378  | 4-scf00080 | 4 |
| AX-157961912 | 4 | 57.976 | KV452819.1 | 1138016 | 4-scf00080 | 4 |
| AX-157961938 | 4 | 57.976 | KV452819.1 | 1279196 | 4-scf00080 | 4 |
| AX-157962033 | 4 | 57.976 | KV452819.1 | 1496853 | 4-scf00080 | 4 |
| AX-157962191 | 4 | 57.976 | KV452819.1 | 1802932 | 4-scf00080 | 4 |
| AX-157962206 | 4 | 57.976 | KV452819.1 | 1830759 | 4-scf00080 | 4 |
| AX-157962207 | 4 | 57.976 | KV452819.1 | 1846463 | 4-scf00080 | 4 |
| AX-157962211 | 4 | 57.976 | KV452819.1 | 1852881 | 4-scf00080 | 4 |
| AX-157962214 | 4 | 57.976 | KV452819.1 | 1865169 | 4-scf00080 | 4 |
| AX-157962232 | 4 | 57.976 | KV452819.1 | 1939049 | 4-scf00080 | 4 |
| AX-157962245 | 4 | 57.976 | KV452819.1 | 1969158 | 4-scf00080 | 4 |
| AX-157962262 | 4 | 57.976 | KV452819.1 | 2003295 | 4-scf00080 | 4 |
| AX-157962270 | 4 | 57.976 | KV452819.1 | 2037106 | 4-scf00080 | 4 |
| AX-157962278 | 4 | 57.976 | KV452819.1 | 2060889 | 4-scf00080 | 4 |
| AX-157962292 | 4 | 57.976 | KV452819.1 | 2114815 | 4-scf00080 | 4 |
| AX-157962302 | 4 | 57.976 | KV452819.1 | 2142831 | 4-scf00080 | 4 |
| AX-157962314 | 4 | 57.976 | KV452819.1 | 2192122 | 4-scf00080 | 4 |
| AX-157962327 | 4 | 57.976 | KV452819.1 | 2254731 | 4-scf00080 | 4 |
| AX-157962328 | 4 | 57.976 | KV452819.1 | 2255739 | 4-scf00080 | 4 |
| AX-157962329 | 4 | 57.976 | KV452819.1 | 2260589 | 4-scf00080 | 4 |
| AX-157962350 | 4 | 57.976 | KV452819.1 | 2310179 | 4-scf00080 | 4 |
| AX-157962357 | 4 | 57.976 | KV452819.1 | 2331520 | 4-scf00080 | 4 |
| AX-157962358 | 4 | 57.976 | KV452819.1 | 2338889 | 4-scf00080 | 4 |
| AX-157962398 | 4 | 57.976 | KV452819.1 | 2443245 | 4-scf00080 | 4 |
| AX-157962410 | 4 | 57.976 | KV452819.1 | 2501748 | 4-scf00080 | 4 |
| AX-157962416 | 4 | 57.976 | KV452819.1 | 2517466 | 4-scf00080 | 4 |
| AX-158406392 | 4 | 57.976 | KV452807.1 | 113252  | 4-scf00081 | 4 |
| AX-157960542 | 4 | 57.976 | KV452807.1 | 127023  | 4-scf00081 | 4 |
| AX-157960585 | 4 | 57.976 | KV452811.1 | 50800   | 4-scf00082 | 4 |
| AX-157960609 | 4 | 57.976 | KV452811.1 | 74319   | 4-scf00082 | 4 |
| AX-157875520 | 4 | 57.976 | KV452811.1 | 118672  | 4-scf00082 | 4 |
| AX-157960779 | 4 | 57.976 | KV452824.1 | 169632  | 4-scf00086 | 4 |
| AX-157960783 | 4 | 57.976 | KV452824.1 | 187409  | 4-scf00086 | 4 |
| AX-157960813 | 4 | 57.976 | KV452824.1 | 213568  | 4-scf00086 | 4 |
| AX-157960857 | 4 | 57.976 | KV452824.1 | 252121  | 4-scf00086 | 4 |
| AX-157960882 | 4 | 57.976 | KV452824.1 | 285830  | 4-scf00086 | 4 |
| AX-157960884 | 4 | 57.976 | KV452824.1 | 286751  | 4-scf00086 | 4 |
| AX-157960919 | 4 | 57.976 | KV452824.1 | 327875  | 4-scf00086 | 4 |
| AX-157816404 | 4 | 57.976 | KV452824.1 | 330825  | 4-scf00086 | 4 |

|              |   |        |            |         |            |   |
|--------------|---|--------|------------|---------|------------|---|
| AX-157960949 | 4 | 57.976 | KV452824.1 | 395558  | 4-scf00086 | 4 |
| AX-157960960 | 4 | 57.976 | KV452824.1 | 402921  | 4-scf00086 | 4 |
| AX-157960969 | 4 | 57.976 | KV452824.1 | 412833  | 4-scf00086 | 4 |
| AX-157961018 | 4 | 57.976 | KV452824.1 | 470775  | 4-scf00086 | 4 |
| AX-157961030 | 4 | 57.976 | KV452824.1 | 483245  | 4-scf00086 | 4 |
| AX-157961067 | 4 | 57.976 | KV452824.1 | 518231  | 4-scf00086 | 4 |
| AX-157961069 | 4 | 57.976 | KV452824.1 | 523340  | 4-scf00086 | 4 |
| AX-157961099 | 4 | 57.976 | KV452824.1 | 559216  | 4-scf00086 | 4 |
| AX-157961164 | 4 | 57.976 | KV452824.1 | 650814  | 4-scf00086 | 4 |
| AX-157961230 | 4 | 57.976 | KV452824.1 | 714716  | 4-scf00086 | 4 |
| AX-157961595 | 4 | 57.976 | KV452812.1 | 14702   | 4-scf00087 | 4 |
| AX-157961611 | 4 | 57.976 | KV452812.1 | 39753   | 4-scf00087 | 4 |
| AX-157816435 | 4 | 57.976 | KV452812.1 | 62933   | 4-scf00087 | 4 |
| AX-157961652 | 4 | 57.976 | KV452812.1 | 84275   | 4-scf00087 | 4 |
| AX-157961658 | 4 | 57.976 | KV452812.1 | 87418   | 4-scf00087 | 4 |
| AX-157961705 | 4 | 57.976 | KV452813.1 | 61446   | 4-scf00088 | 4 |
| AX-157961769 | 4 | 57.976 | KV452813.1 | 224364  | 4-scf00088 | 4 |
| AX-157961817 | 4 | 57.976 | KV452813.1 | 364496  | 4-scf00088 | 4 |
| AX-157962640 | 4 | 57.976 | KV452820.1 | 37113   | 4-scf00091 | 4 |
| AX-157743785 | 4 | 57.976 | KV452820.1 | 102171  | 4-scf00091 | 4 |
| AX-157962724 | 4 | 57.976 | KV452829.1 | 56186   | 4-scf00092 | 4 |
| AX-157963522 | 4 | 57.976 | KV452829.1 | 1348824 | 4-scf00092 | 4 |
| AX-157963619 | 4 | 57.976 | KV452829.1 | 1706897 | 4-scf00092 | 4 |
| AX-157963625 | 4 | 57.976 | KV452829.1 | 1735022 | 4-scf00092 | 4 |
| AX-157963751 | 4 | 57.976 | KV452829.1 | 1946875 | 4-scf00092 | 4 |
| AX-157682647 | 4 | 57.976 | KV452821.1 | 1814    | 4-scf00093 | 4 |
| AX-157680622 | 4 | 57.976 | KV452826.1 | 30728   | 4-scf00095 | 4 |
| AX-157969326 | 4 | 57.976 | KV452827.1 | 10824   | 4-scf00096 | 4 |
| AX-157969333 | 4 | 57.976 | KV452827.1 | 44612   | 4-scf00096 | 4 |
| AX-157969343 | 4 | 57.976 | KV452827.1 | 75717   | 4-scf00096 | 4 |
| AX-157969346 | 4 | 57.976 | KV452827.1 | 78396   | 4-scf00096 | 4 |
| AX-157969351 | 4 | 57.976 | KV452827.1 | 90203   | 4-scf00096 | 4 |
| AX-157969354 | 4 | 57.976 | KV452827.1 | 96695   | 4-scf00096 | 4 |
| AX-157969377 | 4 | 57.976 | KV452827.1 | 141041  | 4-scf00096 | 4 |
| AX-157969389 | 4 | 57.976 | KV452827.1 | 175980  | 4-scf00096 | 4 |
| AX-157969418 | 4 | 57.976 | KV452827.1 | 268224  | 4-scf00096 | 4 |
| AX-157969440 | 4 | 57.976 | KV452827.1 | 324203  | 4-scf00096 | 4 |
| AX-157969456 | 4 | 57.976 | KV452827.1 | 359494  | 4-scf00096 | 4 |
| AX-157969477 | 4 | 57.976 | KV452827.1 | 413889  | 4-scf00096 | 4 |
| AX-157969480 | 4 | 57.976 | KV452827.1 | 418152  | 4-scf00096 | 4 |
| AX-157969503 | 4 | 57.976 | KV452827.1 | 494464  | 4-scf00096 | 4 |
| AX-157969515 | 4 | 57.976 | KV452827.1 | 520358  | 4-scf00096 | 4 |
| AX-158405272 | 4 | 57.976 | KV452827.1 | 531523  | 4-scf00096 | 4 |
| AX-157969517 | 4 | 57.976 | KV452827.1 | 533173  | 4-scf00096 | 4 |
| AX-157969527 | 4 | 57.976 | KV452827.1 | 543098  | 4-scf00096 | 4 |
| AX-157969533 | 4 | 57.976 | KV452827.1 | 578333  | 4-scf00096 | 4 |
| AX-157969544 | 4 | 57.976 | KV452827.1 | 641155  | 4-scf00096 | 4 |
| AX-157969549 | 4 | 57.976 | KV452827.1 | 675134  | 4-scf00096 | 4 |
| AX-157969553 | 4 | 57.976 | KV452827.1 | 680969  | 4-scf00096 | 4 |
| AX-157969555 | 4 | 57.976 | KV452827.1 | 686233  | 4-scf00096 | 4 |
| AX-157969571 | 4 | 57.976 | KV452827.1 | 741947  | 4-scf00096 | 4 |

|              |   |        |            |         |            |    |
|--------------|---|--------|------------|---------|------------|----|
| AX-157969572 | 4 | 57.976 | KV452827.1 | 745210  | 4-scf00096 | 4  |
| AX-157969574 | 4 | 57.976 | KV452827.1 | 748069  | 4-scf00096 | 4  |
| AX-157969577 | 4 | 57.976 | KV452827.1 | 760787  | 4-scf00096 | 4  |
| AX-157969578 | 4 | 57.976 | KV452827.1 | 761657  | 4-scf00096 | 4  |
| AX-157969585 | 4 | 57.976 | KV452827.1 | 795996  | 4-scf00096 | 4  |
| AX-157969588 | 4 | 57.976 | KV452827.1 | 817833  | 4-scf00096 | 4  |
| AX-157969601 | 4 | 57.976 | KV452827.1 | 860025  | 4-scf00096 | 4  |
| AX-157969610 | 4 | 57.976 | KV452827.1 | 910333  | 4-scf00096 | 4  |
| AX-157969613 | 4 | 57.976 | KV452827.1 | 916746  | 4-scf00096 | 4  |
| AX-157969617 | 4 | 57.976 | KV452827.1 | 928375  | 4-scf00096 | 4  |
| AX-157969620 | 4 | 57.976 | KV452827.1 | 931422  | 4-scf00096 | 4  |
| AX-157969633 | 4 | 57.976 | KV452827.1 | 1033819 | 4-scf00096 | 4  |
| AX-157969638 | 4 | 57.976 | KV452827.1 | 1039650 | 4-scf00096 | 4  |
| AX-157969641 | 4 | 57.976 | KV452827.1 | 1076446 | 4-scf00096 | 4  |
| AX-157969646 | 4 | 57.976 | KV452827.1 | 1093545 | 4-scf00096 | 4  |
| AX-157969649 | 4 | 57.976 | KV452827.1 | 1105328 | 4-scf00096 | 4  |
| AX-157969673 | 4 | 57.976 | KV452827.1 | 1220126 | 4-scf00096 | 4  |
| AX-157969678 | 4 | 57.976 | KV452827.1 | 1233784 | 4-scf00096 | 4  |
| AX-157816863 | 4 | 57.976 | KV452827.1 | 1236083 | 4-scf00096 | 4  |
| AX-157969679 | 4 | 57.976 | KV452827.1 | 1240147 | 4-scf00096 | 4  |
| AX-157969683 | 4 | 57.976 | KV452827.1 | 1261650 | 4-scf00096 | 4  |
| AX-157969686 | 4 | 57.976 | KV452827.1 | 1276039 | 4-scf00096 | 4  |
| AX-157969690 | 4 | 57.976 | KV452827.1 | 1284968 | 4-scf00096 | 4  |
| AX-158406627 | 4 | 57.976 | KV452827.1 | 1300652 | 4-scf00096 | 4  |
| AX-157969694 | 4 | 57.976 | KV452827.1 | 1303904 | 4-scf00096 | 4  |
| AX-157682715 | 4 | 57.976 | KV452828.1 | 37049   | 4-scf00097 | 4  |
| AX-157682733 | 4 | 57.976 | KV452828.1 | 153070  | 4-scf00097 | 4  |
| AX-157686385 | 4 | 57.976 | KV453395.1 | 23415   | scf00689   | UN |
| AX-157957747 | 4 | 57.992 | KV452806.1 | 1607787 | 4-scf00073 | 4  |
| AX-157957759 | 4 | 58.037 | KV452806.1 | 1624041 | 4-scf00073 | 4  |
| AX-157960837 | 4 | 58.037 | KV452824.1 | 238309  | 4-scf00086 | 4  |
| AX-157854764 | 4 | 58.037 | KV452824.1 | 510236  | 4-scf00086 | 4  |
| AX-157854765 | 4 | 58.037 | KV452824.1 | 515365  | 4-scf00086 | 4  |
| AX-157961458 | 4 | 58.037 | KV452824.1 | 1178635 | 4-scf00086 | 4  |
| AX-157962908 | 4 | 58.037 | KV452829.1 | 354411  | 4-scf00092 | 4  |
| AX-157957748 | 4 | 58.104 | KV452806.1 | 1608234 | 4-scf00073 | 4  |
| AX-157957764 | 4 | 58.104 | KV452806.1 | 1630799 | 4-scf00073 | 4  |
| AX-157771838 | 4 | 58.104 | KV452806.1 | 1637066 | 4-scf00073 | 4  |
| AX-157961015 | 4 | 58.104 | KV452824.1 | 459010  | 4-scf00086 | 4  |
| AX-157969699 | 4 | 58.104 | KV452827.1 | 1312174 | 4-scf00096 | 4  |
| AX-157680624 | 4 | 58.104 | KV452828.1 | 52467   | 4-scf00097 | 4  |
| AX-157957774 | 4 | 58.232 | KV452806.1 | 1651947 | 4-scf00073 | 4  |
| AX-157816126 | 4 | 58.232 | KV452806.1 | 1653776 | 4-scf00073 | 4  |
| AX-157957779 | 4 | 58.36  | KV452806.1 | 1660491 | 4-scf00073 | 4  |
| AX-157816127 | 4 | 58.36  | KV452806.1 | 1660933 | 4-scf00073 | 4  |
| AX-157957790 | 4 | 58.425 | KV452806.1 | 1675068 | 4-scf00073 | 4  |
| AX-157957802 | 4 | 58.45  | KV452806.1 | 1701789 | 4-scf00073 | 4  |
| AX-157957785 | 4 | 58.488 | KV452806.1 | 1669359 | 4-scf00073 | 4  |
| AX-157957803 | 4 | 58.488 | KV452806.1 | 1702600 | 4-scf00073 | 4  |
| AX-157957805 | 4 | 58.488 | KV452806.1 | 1704885 | 4-scf00073 | 4  |
| AX-158382906 | 4 | 58.488 | KV452806.1 | 1717779 | 4-scf00073 | 4  |

|              |   |        |            |         |            |   |
|--------------|---|--------|------------|---------|------------|---|
| AX-157957823 | 4 | 58.488 | KV452806.1 | 1730799 | 4-scf00073 | 4 |
| AX-157957853 | 4 | 58.488 | KV452806.1 | 1800380 | 4-scf00073 | 4 |
| AX-157957901 | 4 | 58.488 | KV452806.1 | 1869221 | 4-scf00073 | 4 |
| AX-157957285 | 4 | 58.497 | KV452806.1 | 1013363 | 4-scf00073 | 4 |
| AX-157957817 | 4 | 58.497 | KV452806.1 | 1725247 | 4-scf00073 | 4 |
| AX-157957851 | 4 | 58.497 | KV452806.1 | 1797639 | 4-scf00073 | 4 |
| AX-157816147 | 4 | 58.497 | KV452806.1 | 1965088 | 4-scf00073 | 4 |
| AX-157816398 | 4 | 58.497 | KV452824.1 | 278353  | 4-scf00086 | 4 |
| AX-157957857 | 4 | 58.526 | KV452806.1 | 1805591 | 4-scf00073 | 4 |
| AX-157957864 | 4 | 58.566 | KV452806.1 | 1811645 | 4-scf00073 | 4 |
| AX-157957798 | 4 | 58.616 | KV452806.1 | 1696464 | 4-scf00073 | 4 |
| AX-157957809 | 4 | 58.616 | KV452806.1 | 1711373 | 4-scf00073 | 4 |
| AX-157957824 | 4 | 58.616 | KV452806.1 | 1734640 | 4-scf00073 | 4 |
| AX-157957843 | 4 | 58.616 | KV452806.1 | 1762863 | 4-scf00073 | 4 |
| AX-157957849 | 4 | 58.616 | KV452806.1 | 1787467 | 4-scf00073 | 4 |
| AX-157957863 | 4 | 58.616 | KV452806.1 | 1810776 | 4-scf00073 | 4 |
| AX-157957867 | 4 | 58.616 | KV452806.1 | 1815641 | 4-scf00073 | 4 |
| AX-157957920 | 4 | 58.616 | KV452806.1 | 1896064 | 4-scf00073 | 4 |
| AX-157957950 | 4 | 58.616 | KV452806.1 | 1932751 | 4-scf00073 | 4 |
| AX-157960591 | 4 | 58.616 | KV452811.1 | 63299   | 4-scf00082 | 4 |
| AX-157961484 | 4 | 58.616 | KV452824.1 | 1252541 | 4-scf00086 | 4 |
| AX-157958003 | 4 | 58.744 | KV452806.1 | 2042736 | 4-scf00073 | 4 |
| AX-157958038 | 4 | 58.775 | KV452806.1 | 2083404 | 4-scf00073 | 4 |
| AX-157957366 | 4 | 58.872 | KV452806.1 | 1132007 | 4-scf00073 | 4 |
| AX-157727201 | 4 | 58.872 | KV452806.1 | 2105474 | 4-scf00073 | 4 |
| AX-157958083 | 4 | 58.872 | KV452806.1 | 2163360 | 4-scf00073 | 4 |
| AX-157969520 | 4 | 58.872 | KV452827.1 | 535865  | 4-scf00096 | 4 |
| AX-157969697 | 4 | 58.872 | KV452827.1 | 1311678 | 4-scf00096 | 4 |
| AX-157957555 | 4 | 59     | KV452806.1 | 1360792 | 4-scf00073 | 4 |
| AX-157958131 | 4 | 59     | KV452806.1 | 2318932 | 4-scf00073 | 4 |
| AX-157816155 | 4 | 59     | KV452806.1 | 2357994 | 4-scf00073 | 4 |
| AX-157958151 | 4 | 59     | KV452806.1 | 2413203 | 4-scf00073 | 4 |
| AX-157959057 | 4 | 59     | KV452815.1 | 83668   | 4-scf00076 | 4 |
| AX-157959516 | 4 | 59     | KV452816.1 | 222295  | 4-scf00077 | 4 |
| AX-158406353 | 4 | 59     | KV452816.1 | 254453  | 4-scf00077 | 4 |
| AX-157960131 | 4 | 59     | KV452818.1 | 442923  | 4-scf00079 | 4 |
| AX-157960456 | 4 | 59     | KV452819.1 | 11161   | 4-scf00080 | 4 |
| AX-157959007 | 4 | 59     | KV452819.1 | 400801  | 4-scf00080 | 4 |
| AX-157959006 | 4 | 59     | KV452819.1 | 402349  | 4-scf00080 | 4 |
| AX-157959005 | 4 | 59     | KV452819.1 | 402724  | 4-scf00080 | 4 |
| AX-157959003 | 4 | 59     | KV452819.1 | 403639  | 4-scf00080 | 4 |
| AX-157959000 | 4 | 59     | KV452819.1 | 409493  | 4-scf00080 | 4 |
| AX-157958957 | 4 | 59     | KV452819.1 | 465622  | 4-scf00080 | 4 |
| AX-157958938 | 4 | 59     | KV452819.1 | 499015  | 4-scf00080 | 4 |
| AX-157958936 | 4 | 59     | KV452819.1 | 500214  | 4-scf00080 | 4 |
| AX-157958874 | 4 | 59     | KV452819.1 | 598808  | 4-scf00080 | 4 |
| AX-157958872 | 4 | 59     | KV452819.1 | 602274  | 4-scf00080 | 4 |
| AX-157816197 | 4 | 59     | KV452819.1 | 616134  | 4-scf00080 | 4 |
| AX-157958861 | 4 | 59     | KV452819.1 | 617489  | 4-scf00080 | 4 |
| AX-157958843 | 4 | 59     | KV452819.1 | 641998  | 4-scf00080 | 4 |
| AX-157958811 | 4 | 59     | KV452819.1 | 672572  | 4-scf00080 | 4 |

|              |   |        |            |         |            |   |
|--------------|---|--------|------------|---------|------------|---|
| AX-157682626 | 4 | 59     | KV452808.1 | 10891   | 4-scf00083 | 4 |
| AX-157682627 | 4 | 59     | KV452808.1 | 17046   | 4-scf00083 | 4 |
| AX-157682628 | 4 | 59     | KV452808.1 | 17597   | 4-scf00083 | 4 |
| AX-157680617 | 4 | 59     | KV452809.1 | 1427    | 4-scf00084 | 4 |
| AX-157682637 | 4 | 59     | KV452809.1 | 2519    | 4-scf00084 | 4 |
| AX-157727205 | 4 | 59     | KV452824.1 | 104637  | 4-scf00086 | 4 |
| AX-157960739 | 4 | 59     | KV452824.1 | 106489  | 4-scf00086 | 4 |
| AX-157960741 | 4 | 59     | KV452824.1 | 107318  | 4-scf00086 | 4 |
| AX-157864904 | 4 | 59     | KV452824.1 | 112835  | 4-scf00086 | 4 |
| AX-157721668 | 4 | 59     | KV452824.1 | 224682  | 4-scf00086 | 4 |
| AX-157960826 | 4 | 59     | KV452824.1 | 229969  | 4-scf00086 | 4 |
| AX-157884139 | 4 | 59     | KV452824.1 | 244899  | 4-scf00086 | 4 |
| AX-157960856 | 4 | 59     | KV452824.1 | 251289  | 4-scf00086 | 4 |
| AX-157816407 | 4 | 59     | KV452824.1 | 378207  | 4-scf00086 | 4 |
| AX-157961393 | 4 | 59     | KV452824.1 | 944095  | 4-scf00086 | 4 |
| AX-158420647 | 4 | 59     | KV452825.1 | 32807   | 4-scf00593 | 4 |
| AX-157685956 | 4 | 59     | KV452817.1 | 56191   | 4-scf00821 | 4 |
| AX-157685955 | 4 | 59     | KV452817.1 | 58618   | 4-scf00821 | 4 |
| AX-157685954 | 4 | 59     | KV452817.1 | 60831   | 4-scf00821 | 4 |
| AX-157685953 | 4 | 59     | KV452817.1 | 64071   | 4-scf00821 | 4 |
| AX-157747763 | 4 | 59.128 | KV452806.1 | 983252  | 4-scf00073 | 4 |
| AX-157961002 | 4 | 59.128 | KV452824.1 | 444312  | 4-scf00086 | 4 |
| AX-157961035 | 4 | 59.202 | KV452824.1 | 485966  | 4-scf00086 | 4 |
| AX-157961062 | 4 | 59.256 | KV452824.1 | 508185  | 4-scf00086 | 4 |
| AX-157961105 | 4 | 59.259 | KV452824.1 | 570782  | 4-scf00086 | 4 |
| AX-157961454 | 4 | 59.259 | KV452824.1 | 1164164 | 4-scf00086 | 4 |
| AX-157961530 | 4 | 59.259 | KV452824.1 | 1330333 | 4-scf00086 | 4 |
| AX-157956926 | 4 | 59.428 | KV452806.1 | 588559  | 4-scf00073 | 4 |
| AX-157720008 | 4 | 59.428 | KV452824.1 | 165158  | 4-scf00086 | 4 |
| AX-157960829 | 4 | 59.428 | KV452824.1 | 232782  | 4-scf00086 | 4 |
| AX-157960832 | 4 | 59.428 | KV452824.1 | 234655  | 4-scf00086 | 4 |
| AX-158406414 | 4 | 59.428 | KV452824.1 | 279157  | 4-scf00086 | 4 |
| AX-157745495 | 4 | 59.428 | KV452824.1 | 661062  | 4-scf00086 | 4 |
| AX-157961191 | 4 | 59.428 | KV452824.1 | 682216  | 4-scf00086 | 4 |
| AX-157816419 | 4 | 59.428 | KV452824.1 | 736765  | 4-scf00086 | 4 |
| AX-157961577 | 4 | 59.428 | KV452824.1 | 1447704 | 4-scf00086 | 4 |
| AX-157721813 | 4 | 59.428 | KV452829.1 | 490570  | 4-scf00092 | 4 |
| AX-157816530 | 4 | 59.428 | KV452829.1 | 507484  | 4-scf00092 | 4 |
| AX-157816531 | 4 | 59.428 | KV452829.1 | 507917  | 4-scf00092 | 4 |
| AX-157960071 | 4 | 59.602 | KV452818.1 | 279505  | 4-scf00079 | 4 |
| AX-157962066 | 4 | 59.602 | KV452819.1 | 1591767 | 4-scf00080 | 4 |
| AX-157962072 | 4 | 59.602 | KV452819.1 | 1601048 | 4-scf00080 | 4 |
| AX-157962074 | 4 | 59.602 | KV452819.1 | 1605378 | 4-scf00080 | 4 |
| AX-157962077 | 4 | 59.602 | KV452819.1 | 1615078 | 4-scf00080 | 4 |
| AX-157962080 | 4 | 59.602 | KV452819.1 | 1616910 | 4-scf00080 | 4 |
| AX-157962084 | 4 | 59.602 | KV452819.1 | 1625804 | 4-scf00080 | 4 |
| AX-157962092 | 4 | 59.602 | KV452819.1 | 1636973 | 4-scf00080 | 4 |
| AX-157962156 | 4 | 59.602 | KV452819.1 | 1720398 | 4-scf00080 | 4 |
| AX-157961314 | 4 | 59.602 | KV452824.1 | 817820  | 4-scf00086 | 4 |
| AX-157961379 | 4 | 59.602 | KV452824.1 | 917552  | 4-scf00086 | 4 |
| AX-157961455 | 4 | 59.602 | KV452824.1 | 1167060 | 4-scf00086 | 4 |



|              |   |        |            |         |            |   |
|--------------|---|--------|------------|---------|------------|---|
| AX-157962757 | 4 | 59.602 | KV452829.1 | 143936  | 4-scf00092 | 4 |
| AX-157962758 | 4 | 59.602 | KV452829.1 | 146323  | 4-scf00092 | 4 |
| AX-157816495 | 4 | 59.602 | KV452829.1 | 147173  | 4-scf00092 | 4 |
| AX-157962759 | 4 | 59.602 | KV452829.1 | 147248  | 4-scf00092 | 4 |
| AX-157962826 | 4 | 59.602 | KV452829.1 | 233308  | 4-scf00092 | 4 |
| AX-157962827 | 4 | 59.602 | KV452829.1 | 233464  | 4-scf00092 | 4 |
| AX-157816505 | 4 | 59.602 | KV452829.1 | 233895  | 4-scf00092 | 4 |
| AX-157962829 | 4 | 59.602 | KV452829.1 | 234176  | 4-scf00092 | 4 |
| AX-157962849 | 4 | 59.602 | KV452829.1 | 267963  | 4-scf00092 | 4 |
| AX-157962887 | 4 | 59.602 | KV452829.1 | 331079  | 4-scf00092 | 4 |
| AX-157962888 | 4 | 59.602 | KV452829.1 | 331827  | 4-scf00092 | 4 |
| AX-157962918 | 4 | 59.602 | KV452829.1 | 363770  | 4-scf00092 | 4 |
| AX-157963000 | 4 | 59.602 | KV452829.1 | 434145  | 4-scf00092 | 4 |
| AX-157963005 | 4 | 59.602 | KV452829.1 | 438842  | 4-scf00092 | 4 |
| AX-157957533 | 4 | 59.753 | KV452806.1 | 1332210 | 4-scf00073 | 4 |
| AX-157751808 | 4 | 59.753 | KV452829.1 | 403010  | 4-scf00092 | 4 |
| AX-157962963 | 4 | 59.753 | KV452829.1 | 403909  | 4-scf00092 | 4 |
| AX-158382943 | 4 | 59.753 | KV452829.1 | 898331  | 4-scf00092 | 4 |
| AX-157963302 | 4 | 59.753 | KV452829.1 | 899399  | 4-scf00092 | 4 |
| AX-157963543 | 4 | 59.753 | KV452829.1 | 1418811 | 4-scf00092 | 4 |
| AX-157963566 | 4 | 59.753 | KV452829.1 | 1541738 | 4-scf00092 | 4 |
| AX-157963641 | 4 | 59.753 | KV452829.1 | 1824598 | 4-scf00092 | 4 |
| AX-157963018 | 4 | 59.768 | KV452829.1 | 447861  | 4-scf00092 | 4 |
| AX-157957431 | 4 | 59.834 | KV452806.1 | 1204089 | 4-scf00073 | 4 |
| AX-157957593 | 4 | 59.834 | KV452806.1 | 1402097 | 4-scf00073 | 4 |
| AX-157957807 | 4 | 59.834 | KV452806.1 | 1705780 | 4-scf00073 | 4 |
| AX-157957972 | 4 | 59.834 | KV452806.1 | 1983483 | 4-scf00073 | 4 |
| AX-157958094 | 4 | 59.834 | KV452806.1 | 2203497 | 4-scf00073 | 4 |
| AX-157958096 | 4 | 59.834 | KV452806.1 | 2204975 | 4-scf00073 | 4 |
| AX-157854754 | 4 | 59.834 | KV452815.1 | 618981  | 4-scf00076 | 4 |
| AX-157698761 | 4 | 59.834 | KV452819.1 | 303761  | 4-scf00080 | 4 |
| AX-157746204 | 4 | 59.834 | KV452819.1 | 781325  | 4-scf00080 | 4 |
| AX-157962572 | 4 | 59.834 | KV452819.1 | 1017244 | 4-scf00080 | 4 |
| AX-157962590 | 4 | 59.834 | KV452819.1 | 1054743 | 4-scf00080 | 4 |
| AX-157961941 | 4 | 59.834 | KV452819.1 | 1286673 | 4-scf00080 | 4 |
| AX-157961942 | 4 | 59.834 | KV452819.1 | 1287068 | 4-scf00080 | 4 |
| AX-157702906 | 4 | 59.834 | KV452819.1 | 1289304 | 4-scf00080 | 4 |
| AX-158390272 | 4 | 59.834 | KV452819.1 | 1362754 | 4-scf00080 | 4 |
| AX-157816446 | 4 | 59.834 | KV452819.1 | 1530107 | 4-scf00080 | 4 |
| AX-157960504 | 4 | 59.834 | KV452807.1 | 34483   | 4-scf00081 | 4 |
| AX-157960898 | 4 | 59.834 | KV452824.1 | 306883  | 4-scf00086 | 4 |
| AX-157960903 | 4 | 59.834 | KV452824.1 | 308175  | 4-scf00086 | 4 |
| AX-157960909 | 4 | 59.834 | KV452824.1 | 312784  | 4-scf00086 | 4 |
| AX-157960910 | 4 | 59.834 | KV452824.1 | 314856  | 4-scf00086 | 4 |
| AX-157960911 | 4 | 59.834 | KV452824.1 | 315413  | 4-scf00086 | 4 |
| AX-157816403 | 4 | 59.834 | KV452824.1 | 316157  | 4-scf00086 | 4 |
| AX-157960913 | 4 | 59.834 | KV452824.1 | 316777  | 4-scf00086 | 4 |
| AX-157773466 | 4 | 59.834 | KV452824.1 | 353564  | 4-scf00086 | 4 |
| AX-157961020 | 4 | 59.834 | KV452824.1 | 471818  | 4-scf00086 | 4 |
| AX-157962819 | 4 | 59.834 | KV452829.1 | 225216  | 4-scf00092 | 4 |
| AX-157962825 | 4 | 59.834 | KV452829.1 | 231548  | 4-scf00092 | 4 |

|              |   |        |            |         |            |   |
|--------------|---|--------|------------|---------|------------|---|
| AX-157962838 | 4 | 59.834 | KV452829.1 | 249464  | 4-scf00092 | 4 |
| AX-157963001 | 4 | 59.834 | KV452829.1 | 436080  | 4-scf00092 | 4 |
| AX-157747480 | 4 | 59.834 | KV452829.1 | 473218  | 4-scf00092 | 4 |
| AX-157816532 | 4 | 59.834 | KV452829.1 | 509429  | 4-scf00092 | 4 |
| AX-157963057 | 4 | 59.834 | KV452829.1 | 520884  | 4-scf00092 | 4 |
| AX-157854774 | 4 | 59.834 | KV452829.1 | 554605  | 4-scf00092 | 4 |
| AX-157854775 | 4 | 59.834 | KV452829.1 | 559398  | 4-scf00092 | 4 |
| AX-157816542 | 4 | 59.834 | KV452829.1 | 561077  | 4-scf00092 | 4 |
| AX-157963094 | 4 | 59.834 | KV452829.1 | 565642  | 4-scf00092 | 4 |
| AX-157816543 | 4 | 59.834 | KV452829.1 | 567781  | 4-scf00092 | 4 |
| AX-157816544 | 4 | 59.834 | KV452829.1 | 567939  | 4-scf00092 | 4 |
| AX-157963097 | 4 | 59.834 | KV452829.1 | 581895  | 4-scf00092 | 4 |
| AX-157854777 | 4 | 59.834 | KV452829.1 | 582471  | 4-scf00092 | 4 |
| AX-157963099 | 4 | 59.834 | KV452829.1 | 585762  | 4-scf00092 | 4 |
| AX-157963102 | 4 | 59.834 | KV452829.1 | 588233  | 4-scf00092 | 4 |
| AX-157963165 | 4 | 59.834 | KV452829.1 | 701688  | 4-scf00092 | 4 |
| AX-157963191 | 4 | 59.834 | KV452829.1 | 734665  | 4-scf00092 | 4 |
| AX-157963232 | 4 | 59.834 | KV452829.1 | 778725  | 4-scf00092 | 4 |
| AX-157963282 | 4 | 59.834 | KV452829.1 | 858270  | 4-scf00092 | 4 |
| AX-157854788 | 4 | 59.834 | KV452829.1 | 1533008 | 4-scf00092 | 4 |
| AX-157963563 | 4 | 59.834 | KV452829.1 | 1538924 | 4-scf00092 | 4 |
| AX-157854790 | 4 | 59.834 | KV452829.1 | 1541124 | 4-scf00092 | 4 |
| AX-157854794 | 4 | 59.834 | KV452829.1 | 1556459 | 4-scf00092 | 4 |
| AX-157854796 | 4 | 59.834 | KV452829.1 | 1559453 | 4-scf00092 | 4 |
| AX-157854797 | 4 | 59.834 | KV452829.1 | 1580767 | 4-scf00092 | 4 |
| AX-157963580 | 4 | 59.834 | KV452829.1 | 1583853 | 4-scf00092 | 4 |
| AX-157854798 | 4 | 59.834 | KV452829.1 | 1597814 | 4-scf00092 | 4 |
| AX-157854800 | 4 | 59.834 | KV452829.1 | 1622541 | 4-scf00092 | 4 |
| AX-157854802 | 4 | 59.834 | KV452829.1 | 1623903 | 4-scf00092 | 4 |
| AX-157816561 | 4 | 59.834 | KV452829.1 | 1627068 | 4-scf00092 | 4 |
| AX-158406467 | 4 | 59.834 | KV452829.1 | 1628654 | 4-scf00092 | 4 |
| AX-158406470 | 4 | 59.834 | KV452829.1 | 1629380 | 4-scf00092 | 4 |
| AX-157816562 | 4 | 59.834 | KV452829.1 | 1630665 | 4-scf00092 | 4 |
| AX-157816563 | 4 | 59.834 | KV452829.1 | 1657805 | 4-scf00092 | 4 |
| AX-157854805 | 4 | 59.834 | KV452829.1 | 1702752 | 4-scf00092 | 4 |
| AX-157703202 | 4 | 59.834 | KV452829.1 | 1711822 | 4-scf00092 | 4 |
| AX-157854807 | 4 | 59.834 | KV452829.1 | 1744810 | 4-scf00092 | 4 |
| AX-158406472 | 4 | 59.834 | KV452829.1 | 1757012 | 4-scf00092 | 4 |
| AX-157854810 | 4 | 59.834 | KV452829.1 | 1758722 | 4-scf00092 | 4 |
| AX-157854812 | 4 | 59.834 | KV452829.1 | 1770996 | 4-scf00092 | 4 |
| AX-158406473 | 4 | 59.834 | KV452829.1 | 1778322 | 4-scf00092 | 4 |
| AX-157854813 | 4 | 59.834 | KV452829.1 | 1781149 | 4-scf00092 | 4 |
| AX-157854814 | 4 | 59.834 | KV452829.1 | 1815850 | 4-scf00092 | 4 |
| AX-157854816 | 4 | 59.834 | KV452829.1 | 1826516 | 4-scf00092 | 4 |
| AX-157854817 | 4 | 59.834 | KV452829.1 | 1830610 | 4-scf00092 | 4 |
| AX-157854818 | 4 | 59.834 | KV452829.1 | 1831798 | 4-scf00092 | 4 |
| AX-157854819 | 4 | 59.834 | KV452829.1 | 1841841 | 4-scf00092 | 4 |
| AX-157963653 | 4 | 59.834 | KV452829.1 | 1844934 | 4-scf00092 | 4 |
| AX-157854822 | 4 | 59.834 | KV452829.1 | 1846618 | 4-scf00092 | 4 |
| AX-157963659 | 4 | 59.834 | KV452829.1 | 1849057 | 4-scf00092 | 4 |
| AX-157963661 | 4 | 59.834 | KV452829.1 | 1850734 | 4-scf00092 | 4 |

|              |   |        |            |         |            |   |
|--------------|---|--------|------------|---------|------------|---|
| AX-157816565 | 4 | 59.834 | KV452829.1 | 1855001 | 4-scf00092 | 4 |
| AX-157963668 | 4 | 59.834 | KV452829.1 | 1858329 | 4-scf00092 | 4 |
| AX-157854823 | 4 | 59.834 | KV452829.1 | 1859019 | 4-scf00092 | 4 |
| AX-157963669 | 4 | 59.834 | KV452829.1 | 1859555 | 4-scf00092 | 4 |
| AX-157854824 | 4 | 59.834 | KV452829.1 | 1862604 | 4-scf00092 | 4 |
| AX-157963675 | 4 | 59.834 | KV452829.1 | 1866127 | 4-scf00092 | 4 |
| AX-157963679 | 4 | 59.834 | KV452829.1 | 1868947 | 4-scf00092 | 4 |
| AX-157854827 | 4 | 59.834 | KV452829.1 | 1874883 | 4-scf00092 | 4 |
| AX-157963691 | 4 | 59.834 | KV452829.1 | 1878854 | 4-scf00092 | 4 |
| AX-157963704 | 4 | 59.834 | KV452829.1 | 1887217 | 4-scf00092 | 4 |
| AX-157963705 | 4 | 59.834 | KV452829.1 | 1887652 | 4-scf00092 | 4 |
| AX-157963706 | 4 | 59.834 | KV452829.1 | 1888193 | 4-scf00092 | 4 |
| AX-157963707 | 4 | 59.834 | KV452829.1 | 1889266 | 4-scf00092 | 4 |
| AX-157854828 | 4 | 59.834 | KV452829.1 | 1889685 | 4-scf00092 | 4 |
| AX-157963708 | 4 | 59.834 | KV452829.1 | 1889910 | 4-scf00092 | 4 |
| AX-157963709 | 4 | 59.834 | KV452829.1 | 1890608 | 4-scf00092 | 4 |
| AX-157816567 | 4 | 59.834 | KV452829.1 | 1893429 | 4-scf00092 | 4 |
| AX-157963710 | 4 | 59.834 | KV452829.1 | 1893626 | 4-scf00092 | 4 |
| AX-157963711 | 4 | 59.834 | KV452829.1 | 1894477 | 4-scf00092 | 4 |
| AX-157854829 | 4 | 59.834 | KV452829.1 | 1894599 | 4-scf00092 | 4 |
| AX-157963715 | 4 | 59.834 | KV452829.1 | 1900276 | 4-scf00092 | 4 |
| AX-157963719 | 4 | 59.834 | KV452829.1 | 1911092 | 4-scf00092 | 4 |
| AX-157816570 | 4 | 59.834 | KV452829.1 | 1916322 | 4-scf00092 | 4 |
| AX-157963723 | 4 | 59.834 | KV452829.1 | 1918262 | 4-scf00092 | 4 |
| AX-157963728 | 4 | 59.834 | KV452829.1 | 1919576 | 4-scf00092 | 4 |
| AX-157963734 | 4 | 59.834 | KV452829.1 | 1922498 | 4-scf00092 | 4 |
| AX-157963754 | 4 | 59.834 | KV452829.1 | 1952479 | 4-scf00092 | 4 |
| AX-157963761 | 4 | 59.834 | KV452829.1 | 1957304 | 4-scf00092 | 4 |
| AX-157963762 | 4 | 59.834 | KV452829.1 | 1959004 | 4-scf00092 | 4 |
| AX-157963763 | 4 | 59.834 | KV452829.1 | 1960963 | 4-scf00092 | 4 |
| AX-157816575 | 4 | 59.834 | KV452829.1 | 1963645 | 4-scf00092 | 4 |
| AX-157963768 | 4 | 59.834 | KV452829.1 | 1964370 | 4-scf00092 | 4 |
| AX-157963770 | 4 | 59.834 | KV452829.1 | 1964683 | 4-scf00092 | 4 |
| AX-157816576 | 4 | 59.834 | KV452829.1 | 1965601 | 4-scf00092 | 4 |
| AX-157816577 | 4 | 59.834 | KV452829.1 | 1966705 | 4-scf00092 | 4 |
| AX-157963772 | 4 | 59.834 | KV452829.1 | 1967491 | 4-scf00092 | 4 |
| AX-157854834 | 4 | 59.834 | KV452829.1 | 1969266 | 4-scf00092 | 4 |
| AX-157816578 | 4 | 59.834 | KV452829.1 | 1970178 | 4-scf00092 | 4 |
| AX-157963775 | 4 | 59.834 | KV452829.1 | 1970546 | 4-scf00092 | 4 |
| AX-157854835 | 4 | 59.834 | KV452829.1 | 1974316 | 4-scf00092 | 4 |
| AX-157963777 | 4 | 59.834 | KV452829.1 | 1974749 | 4-scf00092 | 4 |
| AX-157854836 | 4 | 59.834 | KV452829.1 | 1977199 | 4-scf00092 | 4 |
| AX-157963779 | 4 | 59.834 | KV452829.1 | 1979574 | 4-scf00092 | 4 |
| AX-157963781 | 4 | 59.834 | KV452829.1 | 1981773 | 4-scf00092 | 4 |
| AX-157963789 | 4 | 59.834 | KV452829.1 | 1988779 | 4-scf00092 | 4 |
| AX-158406474 | 4 | 59.834 | KV452829.1 | 1989528 | 4-scf00092 | 4 |
| AX-157963790 | 4 | 59.834 | KV452829.1 | 1989949 | 4-scf00092 | 4 |
| AX-157854837 | 4 | 59.834 | KV452829.1 | 1990313 | 4-scf00092 | 4 |
| AX-157854838 | 4 | 59.834 | KV452829.1 | 1990422 | 4-scf00092 | 4 |
| AX-157963791 | 4 | 59.834 | KV452829.1 | 1991579 | 4-scf00092 | 4 |
| AX-157854839 | 4 | 59.834 | KV452829.1 | 1993963 | 4-scf00092 | 4 |

|              |   |        |             |         |                |    |
|--------------|---|--------|-------------|---------|----------------|----|
| AX-157963793 | 4 | 59.834 | KV452829.1  | 1994064 | 4-scf00092     | 4  |
| AX-157963795 | 4 | 59.834 | KV452829.1  | 1995329 | 4-scf00092     | 4  |
| AX-157963796 | 4 | 59.834 | KV452829.1  | 1996970 | 4-scf00092     | 4  |
| AX-157963797 | 4 | 59.834 | KV452829.1  | 1997087 | 4-scf00092     | 4  |
| AX-157963808 | 4 | 59.834 | KV452829.1  | 2007473 | 4-scf00092     | 4  |
| AX-157963809 | 4 | 59.834 | KV452829.1  | 2009892 | 4-scf00092     | 4  |
| AX-157963837 | 4 | 59.834 | KV452829.1  | 2037122 | 4-scf00092     | 4  |
| AX-157963853 | 4 | 59.834 | KV452829.1  | 2056238 | 4-scf00092     | 4  |
| AX-158406610 | 4 | 59.834 | KV452827.1  | 139242  | 4-scf00096     | 4  |
| AX-157969434 | 4 | 59.834 | KV452827.1  | 313836  | 4-scf00096     | 4  |
| AX-157969437 | 4 | 59.834 | KV452827.1  | 321987  | 4-scf00096     | 4  |
| AX-157969455 | 4 | 59.834 | KV452827.1  | 357483  | 4-scf00096     | 4  |
| AX-157969468 | 4 | 59.834 | KV452827.1  | 383845  | 4-scf00096     | 4  |
| AX-157969550 | 4 | 59.834 | KV452827.1  | 676446  | 4-scf00096     | 4  |
| AX-157969562 | 4 | 59.834 | KV452827.1  | 705004  | 4-scf00096     | 4  |
| AX-157969643 | 4 | 59.834 | KV452827.1  | 1083628 | 4-scf00096     | 4  |
| AX-157681226 | 4 | 59.834 | 3ML01025951 | 1954    | scf01560_1     | UN |
| AX-157706653 | 4 | 59.834 | 3ML01032676 | 168     | scf08303_1     | UN |
| AX-157681284 | 4 | 59.834 |             | 150     | scf18734       | UN |
| AX-157963105 | 4 | 59.896 | KV452829.1  | 593452  | 4-scf00092     | 4  |
| AX-157963121 | 4 | 59.915 | KV452829.1  | 627716  | 4-scf00092     | 4  |
| AX-157963308 | 4 | 59.915 | KV452829.1  | 903373  | 4-scf00092     | 4  |
| AX-157963788 | 4 | 59.915 | KV452829.1  | 1985796 | 4-scf00092     | 4  |
| AX-157963894 | 4 | 59.915 | KV452829.1  | 2105254 | 4-scf00092     | 4  |
| AX-157963221 | 4 | 60.076 | KV452829.1  | 757874  | 4-scf00092     | 4  |
| AX-157963235 | 4 | 60.076 | KV452829.1  | 789342  | 4-scf00092     | 4  |
| AX-157963358 | 4 | 60.076 | KV452829.1  | 958588  | 4-scf00092     | 4  |
| AX-157963363 | 4 | 60.076 | KV452829.1  | 979389  | 4-scf00092     | 4  |
| AX-157963367 | 4 | 60.076 | KV452829.1  | 988371  | 4-scf00092     | 4  |
| AX-157963371 | 4 | 60.076 | KV452829.1  | 994384  | 4-scf00092     | 4  |
| AX-157963372 | 4 | 60.076 | KV452829.1  | 1001419 | 4-scf00092     | 4  |
| AX-157963397 | 4 | 60.076 | KV452829.1  | 1046659 | 4-scf00092     | 4  |
| AX-157963400 | 4 | 60.076 | KV452829.1  | 1053251 | 4-scf00092     | 4  |
| AX-157963684 | 4 | 60.076 | KV452829.1  | 1872426 | 4-scf00092     | 4  |
| AX-157963736 | 4 | 60.076 | KV452829.1  | 1931728 | 4-scf00092     | 4  |
| AX-157963812 | 4 | 60.076 | KV452829.1  | 2011792 | 4-scf00092     | 4  |
| AX-157963816 | 4 | 60.076 | KV452829.1  | 2016783 | 4-scf00092     | 4  |
| AX-157963852 | 4 | 60.076 | KV452829.1  | 2049250 | 4-scf00092     | 4  |
| AX-157963876 | 4 | 60.076 | KV452829.1  | 2083649 | 4-scf00092     | 4  |
| AX-157963878 | 4 | 60.076 | KV452829.1  | 2084255 | 4-scf00092     | 4  |
| AX-157963902 | 4 | 60.076 | KV452829.1  | 2110163 | 4-scf00092     | 4  |
| AX-157963913 | 4 | 60.076 | KV452829.1  | 2124346 | 4-scf00092     | 4  |
| AX-157694412 | 4 | 60.076 | FI858557.1  | 268     | IORI212 lctalu | UN |
| AX-157698597 | 4 | 60.076 | FI888117.1  | 481     | IORI212 lctalt | UN |
| AX-157963921 | 4 | 60.704 | KV452829.1  | 2133012 | 4-scf00092     | 4  |
| AX-157963933 | 4 | 60.751 | KV452829.1  | 2148367 | 4-scf00092     | 4  |
| AX-157963943 | 4 | 60.939 | KV452829.1  | 2171124 | 4-scf00092     | 4  |
| AX-157744886 | 4 | 60.962 | KV452829.1  | 2174612 | 4-scf00092     | 4  |
| AX-157963947 | 4 | 61.222 | KV452829.1  | 2176794 | 4-scf00092     | 4  |
| AX-157963949 | 4 | 61.357 | KV452829.1  | 2181607 | 4-scf00092     | 4  |
| AX-157963955 | 4 | 61.713 | KV452829.1  | 2190366 | 4-scf00092     | 4  |

|              |   |        |            |         |            |   |
|--------------|---|--------|------------|---------|------------|---|
| AX-157816594 | 4 | 62.074 | KV452829.1 | 2202387 | 4-scf00092 | 4 |
| AX-157963962 | 4 | 62.074 | KV452829.1 | 2202544 | 4-scf00092 | 4 |
| AX-157964370 | 4 | 62.074 | KV452829.1 | 2615231 | 4-scf00092 | 4 |
| AX-157738299 | 4 | 62.074 | KV452829.1 | 2618169 | 4-scf00092 | 4 |
| AX-157964641 | 4 | 62.074 | KV452829.1 | 2872867 | 4-scf00092 | 4 |
| AX-157963971 | 4 | 62.078 | KV452829.1 | 2208655 | 4-scf00092 | 4 |
| AX-157964025 | 4 | 62.243 | KV452829.1 | 2276757 | 4-scf00092 | 4 |
| AX-157964135 | 4 | 62.243 | KV452829.1 | 2412025 | 4-scf00092 | 4 |
| AX-157708509 | 4 | 62.243 | KV452829.1 | 2644753 | 4-scf00092 | 4 |
| AX-158382957 | 4 | 62.243 | KV452829.1 | 2838858 | 4-scf00092 | 4 |
| AX-157964693 | 4 | 62.243 | KV452829.1 | 2920973 | 4-scf00092 | 4 |
| AX-157816635 | 4 | 62.243 | KV452829.1 | 2935545 | 4-scf00092 | 4 |
| AX-157964714 | 4 | 62.243 | KV452829.1 | 2935606 | 4-scf00092 | 4 |
| AX-157726250 | 4 | 62.405 | KV452829.1 | 2357686 | 4-scf00092 | 4 |
| AX-157964694 | 4 | 62.405 | KV452829.1 | 2921787 | 4-scf00092 | 4 |
| AX-157964710 | 4 | 62.405 | KV452829.1 | 2934192 | 4-scf00092 | 4 |
| AX-157964713 | 4 | 62.405 | KV452829.1 | 2935247 | 4-scf00092 | 4 |
| AX-157964711 | 4 | 62.406 | KV452829.1 | 2935044 | 4-scf00092 | 4 |
| AX-157964718 | 4 | 62.406 | KV452829.1 | 2936943 | 4-scf00092 | 4 |
| AX-158382959 | 4 | 62.406 | KV452829.1 | 2937915 | 4-scf00092 | 4 |
| AX-157964721 | 4 | 62.406 | KV452829.1 | 2942741 | 4-scf00092 | 4 |
| AX-157964727 | 4 | 62.406 | KV452829.1 | 2950086 | 4-scf00092 | 4 |
| AX-157816638 | 4 | 62.406 | KV452829.1 | 2961618 | 4-scf00092 | 4 |
| AX-157964738 | 4 | 62.406 | KV452829.1 | 2963818 | 4-scf00092 | 4 |
| AX-157875550 | 4 | 62.515 | KV452829.1 | 2974717 | 4-scf00092 | 4 |
| AX-157964160 | 4 | 62.556 | KV452829.1 | 2434981 | 4-scf00092 | 4 |
| AX-157964189 | 4 | 62.556 | KV452829.1 | 2462993 | 4-scf00092 | 4 |
| AX-157964216 | 4 | 62.556 | KV452829.1 | 2481974 | 4-scf00092 | 4 |
| AX-157964251 | 4 | 62.556 | KV452829.1 | 2516371 | 4-scf00092 | 4 |
| AX-157964258 | 4 | 62.556 | KV452829.1 | 2523219 | 4-scf00092 | 4 |
| AX-157964291 | 4 | 62.556 | KV452829.1 | 2549745 | 4-scf00092 | 4 |
| AX-157964295 | 4 | 62.556 | KV452829.1 | 2550526 | 4-scf00092 | 4 |
| AX-157964305 | 4 | 62.556 | KV452829.1 | 2556864 | 4-scf00092 | 4 |
| AX-157964316 | 4 | 62.556 | KV452829.1 | 2570135 | 4-scf00092 | 4 |
| AX-157964322 | 4 | 62.556 | KV452829.1 | 2582258 | 4-scf00092 | 4 |
| AX-158406490 | 4 | 62.556 | KV452829.1 | 2586948 | 4-scf00092 | 4 |
| AX-157964342 | 4 | 62.556 | KV452829.1 | 2595365 | 4-scf00092 | 4 |
| AX-157964345 | 4 | 62.556 | KV452829.1 | 2598615 | 4-scf00092 | 4 |
| AX-157712947 | 4 | 62.556 | KV452829.1 | 2775756 | 4-scf00092 | 4 |
| AX-157816622 | 4 | 62.556 | KV452829.1 | 2784471 | 4-scf00092 | 4 |
| AX-157964619 | 4 | 62.556 | KV452829.1 | 2850007 | 4-scf00092 | 4 |
| AX-157964672 | 4 | 62.556 | KV452829.1 | 2897417 | 4-scf00092 | 4 |
| AX-157964758 | 4 | 62.556 | KV452829.1 | 2981101 | 4-scf00092 | 4 |
| AX-157964795 | 4 | 62.556 | KV452829.1 | 3025864 | 4-scf00092 | 4 |
| AX-157964796 | 4 | 62.556 | KV452829.1 | 3027123 | 4-scf00092 | 4 |
| AX-157816647 | 4 | 62.556 | KV452829.1 | 3028532 | 4-scf00092 | 4 |
| AX-157964798 | 4 | 62.556 | KV452829.1 | 3030570 | 4-scf00092 | 4 |
| AX-157964829 | 4 | 62.556 | KV452829.1 | 3047338 | 4-scf00092 | 4 |
| AX-157964833 | 4 | 62.556 | KV452829.1 | 3053014 | 4-scf00092 | 4 |
| AX-157964834 | 4 | 62.556 | KV452829.1 | 3055075 | 4-scf00092 | 4 |
| AX-157964836 | 4 | 62.556 | KV452829.1 | 3055643 | 4-scf00092 | 4 |

|              |   |        |            |         |            |   |
|--------------|---|--------|------------|---------|------------|---|
| AX-157964837 | 4 | 62.556 | KV452829.1 | 3056204 | 4-scf00092 | 4 |
| AX-157816650 | 4 | 62.556 | KV452829.1 | 3057948 | 4-scf00092 | 4 |
| AX-157964975 | 4 | 62.556 | KV452829.1 | 3156114 | 4-scf00092 | 4 |
| AX-157965182 | 4 | 62.556 | KV452829.1 | 3387302 | 4-scf00092 | 4 |
| AX-157965517 | 4 | 62.556 | KV452829.1 | 3668512 | 4-scf00092 | 4 |
| AX-157965525 | 4 | 62.624 | KV452829.1 | 3675882 | 4-scf00092 | 4 |
| AX-157965529 | 4 | 62.624 | KV452829.1 | 3678158 | 4-scf00092 | 4 |
| AX-157965533 | 4 | 62.736 | KV452829.1 | 3682025 | 4-scf00092 | 4 |
| AX-157965535 | 4 | 62.841 | KV452829.1 | 3683205 | 4-scf00092 | 4 |
| AX-157965728 | 4 | 62.846 | KV452829.1 | 3860757 | 4-scf00092 | 4 |
| AX-157965844 | 4 | 63.17  | KV452829.1 | 3955849 | 4-scf00092 | 4 |
| AX-157965870 | 4 | 63.171 | KV452829.1 | 3983266 | 4-scf00092 | 4 |
| AX-157965887 | 4 | 63.171 | KV452829.1 | 3999651 | 4-scf00092 | 4 |
| AX-157965888 | 4 | 63.171 | KV452829.1 | 4000253 | 4-scf00092 | 4 |
| AX-157965892 | 4 | 63.171 | KV452829.1 | 4002113 | 4-scf00092 | 4 |
| AX-157965897 | 4 | 63.171 | KV452829.1 | 4004463 | 4-scf00092 | 4 |
| AX-157965904 | 4 | 63.171 | KV452829.1 | 4014243 | 4-scf00092 | 4 |
| AX-157816679 | 4 | 63.171 | KV452829.1 | 4014700 | 4-scf00092 | 4 |
| AX-157965907 | 4 | 63.171 | KV452829.1 | 4016275 | 4-scf00092 | 4 |
| AX-157965910 | 4 | 63.233 | KV452829.1 | 4017105 | 4-scf00092 | 4 |
| AX-157966074 | 4 | 63.233 | KV452829.1 | 4166806 | 4-scf00092 | 4 |
| AX-157697273 | 4 | 63.263 | KV452829.1 | 4021253 | 4-scf00092 | 4 |
| AX-157965514 | 4 | 63.281 | KV452829.1 | 3666214 | 4-scf00092 | 4 |
| AX-157965917 | 4 | 63.281 | KV452829.1 | 4022270 | 4-scf00092 | 4 |
| AX-157965920 | 4 | 63.281 | KV452829.1 | 4025520 | 4-scf00092 | 4 |
| AX-157965924 | 4 | 63.335 | KV452829.1 | 4028030 | 4-scf00092 | 4 |
| AX-158406520 | 4 | 63.39  | KV452829.1 | 3901502 | 4-scf00092 | 4 |
| AX-157965784 | 4 | 63.39  | KV452829.1 | 3908710 | 4-scf00092 | 4 |
| AX-157965789 | 4 | 63.39  | KV452829.1 | 3912120 | 4-scf00092 | 4 |
| AX-157965811 | 4 | 63.39  | KV452829.1 | 3926791 | 4-scf00092 | 4 |
| AX-157965846 | 4 | 63.39  | KV452829.1 | 3957342 | 4-scf00092 | 4 |
| AX-157965906 | 4 | 63.39  | KV452829.1 | 4015710 | 4-scf00092 | 4 |
| AX-158405216 | 4 | 63.39  | KV452829.1 | 4025794 | 4-scf00092 | 4 |
| AX-157965926 | 4 | 63.39  | KV452829.1 | 4029242 | 4-scf00092 | 4 |
| AX-157965927 | 4 | 63.39  | KV452829.1 | 4030514 | 4-scf00092 | 4 |
| AX-157965929 | 4 | 63.39  | KV452829.1 | 4031398 | 4-scf00092 | 4 |
| AX-157965933 | 4 | 63.39  | KV452829.1 | 4035006 | 4-scf00092 | 4 |
| AX-157965939 | 4 | 63.39  | KV452829.1 | 4040247 | 4-scf00092 | 4 |
| AX-157965941 | 4 | 63.39  | KV452829.1 | 4043774 | 4-scf00092 | 4 |
| AX-157965943 | 4 | 63.39  | KV452829.1 | 4044032 | 4-scf00092 | 4 |
| AX-157965945 | 4 | 63.39  | KV452829.1 | 4045584 | 4-scf00092 | 4 |
| AX-157965969 | 4 | 63.39  | KV452829.1 | 4072083 | 4-scf00092 | 4 |
| AX-157816681 | 4 | 63.39  | KV452829.1 | 4076767 | 4-scf00092 | 4 |
| AX-157965981 | 4 | 63.39  | KV452829.1 | 4089347 | 4-scf00092 | 4 |
| AX-157965951 | 4 | 63.554 | KV452829.1 | 4052310 | 4-scf00092 | 4 |
| AX-157964962 | 4 | 63.718 | KV452829.1 | 3148414 | 4-scf00092 | 4 |
| AX-157750226 | 4 | 63.718 | KV452829.1 | 4058190 | 4-scf00092 | 4 |
| AX-157965959 | 4 | 63.718 | KV452829.1 | 4058648 | 4-scf00092 | 4 |
| AX-157965960 | 4 | 63.718 | KV452829.1 | 4060045 | 4-scf00092 | 4 |
| AX-157965963 | 4 | 63.718 | KV452829.1 | 4062645 | 4-scf00092 | 4 |
| AX-157721991 | 4 | 63.718 | KV452829.1 | 4064098 | 4-scf00092 | 4 |

|              |   |        |            |         |            |   |
|--------------|---|--------|------------|---------|------------|---|
| AX-157965965 | 4 | 63.718 | KV452829.1 | 4068554 | 4-scf00092 | 4 |
| AX-157965967 | 4 | 63.718 | KV452829.1 | 4070132 | 4-scf00092 | 4 |
| AX-157965972 | 4 | 63.718 | KV452829.1 | 4073648 | 4-scf00092 | 4 |
| AX-157965977 | 4 | 63.718 | KV452829.1 | 4084390 | 4-scf00092 | 4 |
| AX-157816682 | 4 | 63.718 | KV452829.1 | 4092497 | 4-scf00092 | 4 |
| AX-157965984 | 4 | 63.718 | KV452829.1 | 4092881 | 4-scf00092 | 4 |
| AX-157966032 | 4 | 63.718 | KV452829.1 | 4127364 | 4-scf00092 | 4 |
| AX-157966055 | 4 | 63.718 | KV452829.1 | 4150030 | 4-scf00092 | 4 |
| AX-157966056 | 4 | 63.718 | KV452829.1 | 4151687 | 4-scf00092 | 4 |
| AX-157966062 | 4 | 63.718 | KV452829.1 | 4157219 | 4-scf00092 | 4 |
| AX-157965974 | 4 | 63.827 | KV452829.1 | 4077070 | 4-scf00092 | 4 |
| AX-157965987 | 4 | 63.827 | KV452829.1 | 4095077 | 4-scf00092 | 4 |
| AX-157965994 | 4 | 63.827 | KV452829.1 | 4099024 | 4-scf00092 | 4 |
| AX-157965995 | 4 | 63.827 | KV452829.1 | 4100411 | 4-scf00092 | 4 |
| AX-157965996 | 4 | 63.827 | KV452829.1 | 4101428 | 4-scf00092 | 4 |
| AX-157966004 | 4 | 63.827 | KV452829.1 | 4105177 | 4-scf00092 | 4 |
| AX-157719616 | 4 | 63.827 | KV452829.1 | 4106915 | 4-scf00092 | 4 |
| AX-157966015 | 4 | 63.827 | KV452829.1 | 4115187 | 4-scf00092 | 4 |
| AX-157966024 | 4 | 63.827 | KV452829.1 | 4122744 | 4-scf00092 | 4 |
| AX-157966027 | 4 | 63.827 | KV452829.1 | 4124752 | 4-scf00092 | 4 |
| AX-157966021 | 4 | 64.045 | KV452829.1 | 4119724 | 4-scf00092 | 4 |
| AX-158406524 | 4 | 64.045 | KV452829.1 | 4121074 | 4-scf00092 | 4 |
| AX-157966029 | 4 | 64.155 | KV452829.1 | 4127047 | 4-scf00092 | 4 |
| AX-157966035 | 4 | 64.155 | KV452829.1 | 4129175 | 4-scf00092 | 4 |
| AX-157966005 | 4 | 64.264 | KV452829.1 | 4108375 | 4-scf00092 | 4 |
| AX-157966036 | 4 | 64.264 | KV452829.1 | 4132034 | 4-scf00092 | 4 |
| AX-157966037 | 4 | 64.264 | KV452829.1 | 4132462 | 4-scf00092 | 4 |
| AX-157966042 | 4 | 64.264 | KV452829.1 | 4135589 | 4-scf00092 | 4 |
| AX-157966069 | 4 | 64.264 | KV452829.1 | 4163890 | 4-scf00092 | 4 |
| AX-157966086 | 4 | 64.264 | KV452829.1 | 4180843 | 4-scf00092 | 4 |
| AX-157966087 | 4 | 64.264 | KV452829.1 | 4182905 | 4-scf00092 | 4 |
| AX-157966092 | 4 | 64.264 | KV452829.1 | 4186940 | 4-scf00092 | 4 |
| AX-157966105 | 4 | 64.264 | KV452829.1 | 4194773 | 4-scf00092 | 4 |
| AX-157966131 | 4 | 64.264 | KV452829.1 | 4216887 | 4-scf00092 | 4 |
| AX-157966149 | 4 | 64.264 | KV452829.1 | 4230393 | 4-scf00092 | 4 |
| AX-157966164 | 4 | 64.264 | KV452829.1 | 4249264 | 4-scf00092 | 4 |
| AX-157816683 | 4 | 64.348 | KV452829.1 | 4140474 | 4-scf00092 | 4 |
| AX-157966123 | 4 | 64.348 | KV452829.1 | 4211613 | 4-scf00092 | 4 |
| AX-157966124 | 4 | 64.348 | KV452829.1 | 4213878 | 4-scf00092 | 4 |
| AX-157965815 | 4 | 64.428 | KV452829.1 | 3931680 | 4-scf00092 | 4 |
| AX-157965962 | 4 | 64.428 | KV452829.1 | 4061045 | 4-scf00092 | 4 |
| AX-157966044 | 4 | 64.428 | KV452829.1 | 4137380 | 4-scf00092 | 4 |
| AX-157966047 | 4 | 64.428 | KV452829.1 | 4142982 | 4-scf00092 | 4 |
| AX-157966048 | 4 | 64.428 | KV452829.1 | 4143594 | 4-scf00092 | 4 |
| AX-157966050 | 4 | 64.428 | KV452829.1 | 4144910 | 4-scf00092 | 4 |
| AX-157966052 | 4 | 64.428 | KV452829.1 | 4146268 | 4-scf00092 | 4 |
| AX-157720398 | 4 | 64.428 | KV452829.1 | 4146759 | 4-scf00092 | 4 |
| AX-157966054 | 4 | 64.428 | KV452829.1 | 4149630 | 4-scf00092 | 4 |
| AX-157966059 | 4 | 64.428 | KV452829.1 | 4153567 | 4-scf00092 | 4 |
| AX-157966060 | 4 | 64.428 | KV452829.1 | 4154828 | 4-scf00092 | 4 |
| AX-157966083 | 4 | 64.428 | KV452829.1 | 4177490 | 4-scf00092 | 4 |

|              |   |        |            |         |            |   |
|--------------|---|--------|------------|---------|------------|---|
| AX-157966104 | 4 | 64.428 | KV452829.1 | 4194252 | 4-scf00092 | 4 |
| AX-157966130 | 4 | 64.428 | KV452829.1 | 4215642 | 4-scf00092 | 4 |
| AX-157966184 | 4 | 64.428 | KV452829.1 | 4271759 | 4-scf00092 | 4 |
| AX-157966065 | 4 | 64.59  | KV452829.1 | 4161874 | 4-scf00092 | 4 |
| AX-157966068 | 4 | 64.59  | KV452829.1 | 4163149 | 4-scf00092 | 4 |
| AX-157966071 | 4 | 64.591 | KV452829.1 | 4164328 | 4-scf00092 | 4 |
| AX-157966072 | 4 | 64.591 | KV452829.1 | 4164705 | 4-scf00092 | 4 |
| AX-157966077 | 4 | 64.591 | KV452829.1 | 4171373 | 4-scf00092 | 4 |
| AX-157966081 | 4 | 64.591 | KV452829.1 | 4173630 | 4-scf00092 | 4 |
| AX-157966085 | 4 | 64.591 | KV452829.1 | 4180061 | 4-scf00092 | 4 |
| AX-157966088 | 4 | 64.701 | KV452829.1 | 4184462 | 4-scf00092 | 4 |
| AX-157966089 | 4 | 64.701 | KV452829.1 | 4185125 | 4-scf00092 | 4 |
| AX-157966091 | 4 | 64.701 | KV452829.1 | 4186407 | 4-scf00092 | 4 |
| AX-157966094 | 4 | 64.701 | KV452829.1 | 4189215 | 4-scf00092 | 4 |
| AX-157966098 | 4 | 64.729 | KV452829.1 | 4190254 | 4-scf00092 | 4 |
| AX-157966102 | 4 | 64.729 | KV452829.1 | 4193824 | 4-scf00092 | 4 |
| AX-157966110 | 4 | 64.759 | KV452829.1 | 4196309 | 4-scf00092 | 4 |
| AX-157727309 | 4 | 64.802 | KV452829.1 | 4199223 | 4-scf00092 | 4 |
| AX-157965289 | 4 | 64.827 | KV452829.1 | 3486198 | 4-scf00092 | 4 |
| AX-157966118 | 4 | 64.919 | KV452829.1 | 4207195 | 4-scf00092 | 4 |
| AX-157714240 | 4 | 64.919 | KV452829.1 | 4210643 | 4-scf00092 | 4 |
| AX-157816685 | 4 | 64.919 | KV452829.1 | 4212956 | 4-scf00092 | 4 |
| AX-157966127 | 4 | 64.919 | KV452829.1 | 4214603 | 4-scf00092 | 4 |
| AX-157966132 | 4 | 64.919 | KV452829.1 | 4217660 | 4-scf00092 | 4 |
| AX-157966135 | 4 | 64.919 | KV452829.1 | 4218764 | 4-scf00092 | 4 |
| AX-157966137 | 4 | 64.919 | KV452829.1 | 4220616 | 4-scf00092 | 4 |
| AX-157966143 | 4 | 64.919 | KV452829.1 | 4225222 | 4-scf00092 | 4 |
| AX-157966175 | 4 | 64.919 | KV452829.1 | 4264374 | 4-scf00092 | 4 |
| AX-157966120 | 4 | 64.92  | KV452829.1 | 4207566 | 4-scf00092 | 4 |
| AX-157966139 | 4 | 64.92  | KV452829.1 | 4222153 | 4-scf00092 | 4 |
| AX-157966145 | 4 | 65.083 | KV452829.1 | 4228782 | 4-scf00092 | 4 |
| AX-157966148 | 4 | 65.083 | KV452829.1 | 4230039 | 4-scf00092 | 4 |
| AX-157748339 | 4 | 65.247 | KV452829.1 | 4234812 | 4-scf00092 | 4 |
| AX-157966152 | 4 | 65.247 | KV452829.1 | 4235366 | 4-scf00092 | 4 |
| AX-157966134 | 4 | 65.325 | KV452829.1 | 4218349 | 4-scf00092 | 4 |
| AX-157966155 | 4 | 65.325 | KV452829.1 | 4238658 | 4-scf00092 | 4 |
| AX-157966181 | 4 | 65.325 | KV452829.1 | 4269903 | 4-scf00092 | 4 |
| AX-157966159 | 4 | 65.41  | KV452829.1 | 4245256 | 4-scf00092 | 4 |
| AX-157966167 | 4 | 65.574 | KV452829.1 | 4257324 | 4-scf00092 | 4 |
| AX-157966170 | 4 | 65.902 | KV452829.1 | 4261728 | 4-scf00092 | 4 |
| AX-157816687 | 4 | 65.902 | KV452829.1 | 4262367 | 4-scf00092 | 4 |
| AX-157757223 | 4 | 65.906 | KV452829.1 | 4265414 | 4-scf00092 | 4 |
| AX-157715925 | 4 | 65.907 | KV452829.1 | 4270671 | 4-scf00092 | 4 |
| AX-157966185 | 4 | 65.987 | KV452829.1 | 4274856 | 4-scf00092 | 4 |
| AX-157966182 | 4 | 66.061 | KV452829.1 | 4270902 | 4-scf00092 | 4 |
| AX-158382970 | 4 | 66.061 | KV452829.1 | 4276434 | 4-scf00092 | 4 |
| AX-157725240 | 4 | 66.122 | KV452829.1 | 4132966 | 4-scf00092 | 4 |
| AX-157966192 | 4 | 66.122 | KV452829.1 | 4278911 | 4-scf00092 | 4 |
| AX-157966196 | 4 | 66.122 | KV452829.1 | 4280180 | 4-scf00092 | 4 |
| AX-157966198 | 4 | 66.122 | KV452829.1 | 4281685 | 4-scf00092 | 4 |
| AX-157816688 | 4 | 66.213 | KV452829.1 | 4282752 | 4-scf00092 | 4 |



|              |   |        |            |         |            |   |
|--------------|---|--------|------------|---------|------------|---|
| AX-157966205 | 4 | 66.331 | KV452829.1 | 4286798 | 4-scf00092 | 4 |
| AX-157716348 | 4 | 66.331 | KV452829.1 | 4287365 | 4-scf00092 | 4 |
| AX-157816689 | 4 | 66.435 | KV452829.1 | 4287635 | 4-scf00092 | 4 |
| AX-157740644 | 4 | 66.541 | KV452829.1 | 4293439 | 4-scf00092 | 4 |
| AX-157966208 | 4 | 66.56  | KV452829.1 | 4300073 | 4-scf00092 | 4 |
| AX-157966212 | 4 | 66.577 | KV452829.1 | 4303387 | 4-scf00092 | 4 |
| AX-157966214 | 4 | 66.616 | KV452829.1 | 4303777 | 4-scf00092 | 4 |
| AX-157966215 | 4 | 66.697 | KV452829.1 | 4305010 | 4-scf00092 | 4 |
| AX-157966217 | 4 | 66.778 | KV452829.1 | 4306597 | 4-scf00092 | 4 |
| AX-157816696 | 4 | 66.778 | KV452829.1 | 4312466 | 4-scf00092 | 4 |
| AX-157966225 | 4 | 66.778 | KV452829.1 | 4320587 | 4-scf00092 | 4 |
| AX-157966228 | 4 | 66.778 | KV452829.1 | 4321529 | 4-scf00092 | 4 |
| AX-157966231 | 4 | 66.778 | KV452829.1 | 4322741 | 4-scf00092 | 4 |
| AX-157966232 | 4 | 66.778 | KV452829.1 | 4323151 | 4-scf00092 | 4 |
| AX-157966235 | 4 | 66.778 | KV452829.1 | 4324010 | 4-scf00092 | 4 |
| AX-157966236 | 4 | 66.778 | KV452829.1 | 4324338 | 4-scf00092 | 4 |
| AX-157966237 | 4 | 66.778 | KV452829.1 | 4325165 | 4-scf00092 | 4 |
| AX-157966239 | 4 | 66.778 | KV452829.1 | 4325783 | 4-scf00092 | 4 |
| AX-157966243 | 4 | 66.778 | KV452829.1 | 4328818 | 4-scf00092 | 4 |
| AX-157966245 | 4 | 66.778 | KV452829.1 | 4330081 | 4-scf00092 | 4 |
| AX-157739775 | 4 | 66.778 | KV452829.1 | 4359222 | 4-scf00092 | 4 |
| AX-157816695 | 4 | 66.887 | KV452829.1 | 4312125 | 4-scf00092 | 4 |
| AX-157966241 | 4 | 66.887 | KV452829.1 | 4326645 | 4-scf00092 | 4 |
| AX-157727354 | 4 | 66.887 | KV452829.1 | 4334898 | 4-scf00092 | 4 |
| AX-157966248 | 4 | 66.887 | KV452829.1 | 4337144 | 4-scf00092 | 4 |
| AX-157966249 | 4 | 66.887 | KV452829.1 | 4337695 | 4-scf00092 | 4 |
| AX-157966251 | 4 | 66.887 | KV452829.1 | 4340183 | 4-scf00092 | 4 |
| AX-157966257 | 4 | 66.887 | KV452829.1 | 4342476 | 4-scf00092 | 4 |
| AX-157966260 | 4 | 66.887 | KV452829.1 | 4343056 | 4-scf00092 | 4 |
| AX-157966264 | 4 | 66.887 | KV452829.1 | 4343952 | 4-scf00092 | 4 |
| AX-157966273 | 4 | 66.887 | KV452829.1 | 4353035 | 4-scf00092 | 4 |
| AX-157966275 | 4 | 66.887 | KV452829.1 | 4356078 | 4-scf00092 | 4 |
| AX-157966277 | 4 | 66.887 | KV452829.1 | 4356981 | 4-scf00092 | 4 |
| AX-157966278 | 4 | 66.887 | KV452829.1 | 4357416 | 4-scf00092 | 4 |
| AX-157966284 | 4 | 66.887 | KV452829.1 | 4360252 | 4-scf00092 | 4 |
| AX-157966285 | 4 | 66.888 | KV452829.1 | 4362492 | 4-scf00092 | 4 |
| AX-157854955 | 4 | 67.214 | KV452829.1 | 4295766 | 4-scf00092 | 4 |
| AX-157966295 | 4 | 67.214 | KV452829.1 | 4367541 | 4-scf00092 | 4 |
| AX-157966298 | 4 | 67.214 | KV452829.1 | 4368635 | 4-scf00092 | 4 |
| AX-157966305 | 4 | 67.214 | KV452829.1 | 4375037 | 4-scf00092 | 4 |
| AX-157966307 | 4 | 67.214 | KV452829.1 | 4376486 | 4-scf00092 | 4 |
| AX-157966309 | 4 | 67.216 | KV452829.1 | 4376988 | 4-scf00092 | 4 |
| AX-157966293 | 4 | 67.217 | KV452829.1 | 4366178 | 4-scf00092 | 4 |
| AX-157966313 | 4 | 67.217 | KV452829.1 | 4379972 | 4-scf00092 | 4 |
| AX-157966317 | 4 | 67.219 | KV452829.1 | 4382489 | 4-scf00092 | 4 |
| AX-157966320 | 4 | 67.43  | KV452829.1 | 4386202 | 4-scf00092 | 4 |
| AX-157966326 | 4 | 67.652 | KV452829.1 | 4388842 | 4-scf00092 | 4 |
| AX-157966327 | 4 | 67.652 | KV452829.1 | 4389911 | 4-scf00092 | 4 |
| AX-157966329 | 4 | 67.709 | KV452829.1 | 4391484 | 4-scf00092 | 4 |
| AX-157739650 | 4 | 67.761 | KV452829.1 | 4394169 | 4-scf00092 | 4 |
| AX-157966339 | 4 | 67.761 | KV452829.1 | 4396033 | 4-scf00092 | 4 |

|              |   |        |             |         |            |    |
|--------------|---|--------|-------------|---------|------------|----|
| AX-157754201 | 4 | 67.761 | KV452829.1  | 4396734 | 4-scf00092 | 4  |
| AX-157966341 | 4 | 67.761 | KV452829.1  | 4397470 | 4-scf00092 | 4  |
| AX-157966342 | 4 | 67.778 | KV452829.1  | 4398921 | 4-scf00092 | 4  |
| AX-157726952 | 4 | 67.798 | KV452829.1  | 4402032 | 4-scf00092 | 4  |
| AX-157966347 | 4 | 67.798 | KV452829.1  | 4404474 | 4-scf00092 | 4  |
| AX-157966378 | 4 | 67.798 | KV452829.1  | 4426028 | 4-scf00092 | 4  |
| AX-157966333 | 4 | 67.821 | KV452829.1  | 4393485 | 4-scf00092 | 4  |
| AX-157966349 | 4 | 67.821 | KV452829.1  | 4404868 | 4-scf00092 | 4  |
| AX-157966355 | 4 | 67.821 | KV452829.1  | 4407502 | 4-scf00092 | 4  |
| AX-157966352 | 4 | 67.846 | KV452829.1  | 4406040 | 4-scf00092 | 4  |
| AX-157966356 | 4 | 67.87  | KV452829.1  | 4408870 | 4-scf00092 | 4  |
| AX-157966359 | 4 | 67.87  | KV452829.1  | 4409824 | 4-scf00092 | 4  |
| AX-157966360 | 4 | 67.87  | KV452829.1  | 4411227 | 4-scf00092 | 4  |
| AX-157966364 | 4 | 67.87  | KV452829.1  | 4414098 | 4-scf00092 | 4  |
| AX-157966386 | 4 | 67.87  | KV452829.1  | 4432211 | 4-scf00092 | 4  |
| AX-157966344 | 4 | 67.886 | KV452829.1  | 4399791 | 4-scf00092 | 4  |
| AX-157966368 | 4 | 67.886 | KV452829.1  | 4419178 | 4-scf00092 | 4  |
| AX-157966374 | 4 | 67.936 | KV452829.1  | 4422519 | 4-scf00092 | 4  |
| AX-157966312 | 4 | 67.979 | KV452829.1  | 4378560 | 4-scf00092 | 4  |
| AX-157816697 | 4 | 67.979 | KV452829.1  | 4423228 | 4-scf00092 | 4  |
| AX-157966376 | 4 | 67.979 | KV452829.1  | 4424905 | 4-scf00092 | 4  |
| AX-157966253 | 4 | 68.134 | KV452829.1  | 4341063 | 4-scf00092 | 4  |
| AX-157966287 | 4 | 68.134 | KV452829.1  | 4363068 | 4-scf00092 | 4  |
| AX-157816699 | 4 | 68.134 | KV452829.1  | 4428869 | 4-scf00092 | 4  |
| AX-157966389 | 4 | 68.134 | KV452829.1  | 4432521 | 4-scf00092 | 4  |
| AX-157966390 | 4 | 68.134 | KV452829.1  | 4433219 | 4-scf00092 | 4  |
| AX-157966397 | 4 | 68.134 | KV452829.1  | 4437234 | 4-scf00092 | 4  |
| AX-157816700 | 4 | 68.134 | KV452829.1  | 4439561 | 4-scf00092 | 4  |
| AX-157966399 | 4 | 68.134 | KV452829.1  | 4440027 | 4-scf00092 | 4  |
| AX-157966400 | 4 | 68.134 | KV452829.1  | 4440177 | 4-scf00092 | 4  |
| AX-157966403 | 4 | 68.14  | KV452829.1  | 4442698 | 4-scf00092 | 4  |
| AX-157966393 | 4 | 68.146 | KV452829.1  | 4435030 | 4-scf00092 | 4  |
| AX-157966404 | 4 | 68.146 | KV452829.1  | 4442905 | 4-scf00092 | 4  |
| AX-157966406 | 4 | 68.351 | KV452829.1  | 4444448 | 4-scf00092 | 4  |
| AX-157966408 | 4 | 68.745 | KV452829.1  | 4447968 | 4-scf00092 | 4  |
| AX-157725461 | 4 | 68.745 | KV452829.1  | 4451145 | 4-scf00092 | 4  |
| AX-157966414 | 4 | 68.745 | KV452829.1  | 4452215 | 4-scf00092 | 4  |
| AX-157966418 | 4 | 68.745 | KV452829.1  | 4453291 | 4-scf00092 | 4  |
| AX-157966420 | 4 | 68.745 | KV452829.1  | 4455195 | 4-scf00092 | 4  |
| AX-157966422 | 4 | 68.745 | KV452829.1  | 4456809 | 4-scf00092 | 4  |
| AX-157966423 | 4 | 68.745 | KV452829.1  | 4458032 | 4-scf00092 | 4  |
| AX-157966426 | 4 | 68.749 | KV452829.1  | 4459417 | 4-scf00092 | 4  |
| AX-157966431 | 4 | 68.749 | KV452829.1  | 4464533 | 4-scf00092 | 4  |
| AX-157966427 | 4 | 69.178 | KV452829.1  | 4460058 | 4-scf00092 | 4  |
| AX-157966428 | 4 | 69.178 | KV452829.1  | 4463198 | 4-scf00092 | 4  |
| AX-157705829 | 4 | 69.178 | 3ML01030988 | 746     | scf06592_1 | UN |
| AX-157966429 | 4 | 69.181 | KV452829.1  | 4463449 | 4-scf00092 | 4  |
| AX-157966432 | 4 | 69.181 | KV452829.1  | 4467223 | 4-scf00092 | 4  |
| AX-157747586 | 4 | 69.181 | KV452829.1  | 4467727 | 4-scf00092 | 4  |
| AX-157720754 | 4 | 69.181 | KV452829.1  | 4468330 | 4-scf00092 | 4  |
| AX-157966433 | 4 | 69.183 | KV452829.1  | 4469420 | 4-scf00092 | 4  |

|              |   |        |            |         |            |   |
|--------------|---|--------|------------|---------|------------|---|
| AX-158379491 | 4 | 69.183 | KV452829.1 | 4469557 | 4-scf00092 | 4 |
| AX-157966435 | 4 | 69.183 | KV452829.1 | 4469827 | 4-scf00092 | 4 |
| AX-157966436 | 4 | 69.4   | KV452829.1 | 4471833 | 4-scf00092 | 4 |
| AX-157966443 | 4 | 69.4   | KV452829.1 | 4475239 | 4-scf00092 | 4 |
| AX-157966444 | 4 | 69.4   | KV452829.1 | 4477350 | 4-scf00092 | 4 |
| AX-157744390 | 4 | 69.4   | KV452829.1 | 4484659 | 4-scf00092 | 4 |
| AX-157966454 | 4 | 69.957 | KV452829.1 | 4488646 | 4-scf00092 | 4 |
| AX-157966458 | 4 | 70.027 | KV452829.1 | 4492082 | 4-scf00092 | 4 |
| AX-157966462 | 4 | 70.097 | KV452829.1 | 4493545 | 4-scf00092 | 4 |
| AX-157723014 | 4 | 70.097 | KV452829.1 | 4495091 | 4-scf00092 | 4 |
| AX-157966464 | 4 | 70.097 | KV452829.1 | 4495997 | 4-scf00092 | 4 |
| AX-157751009 | 4 | 70.097 | KV452829.1 | 4497972 | 4-scf00092 | 4 |
| AX-157747751 | 4 | 70.791 | KV452829.1 | 4499572 | 4-scf00092 | 4 |
| AX-157816703 | 4 | 70.793 | KV452829.1 | 4505264 | 4-scf00092 | 4 |
| AX-157966467 | 4 | 70.793 | KV452829.1 | 4507463 | 4-scf00092 | 4 |
| AX-157966469 | 4 | 70.834 | KV452829.1 | 4508271 | 4-scf00092 | 4 |
| AX-157966474 | 4 | 70.884 | KV452829.1 | 4514476 | 4-scf00092 | 4 |
| AX-157966475 | 4 | 70.932 | KV452829.1 | 4516421 | 4-scf00092 | 4 |
| AX-157966479 | 4 | 70.932 | KV452829.1 | 4519598 | 4-scf00092 | 4 |
| AX-157816704 | 4 | 70.932 | KV452829.1 | 4520034 | 4-scf00092 | 4 |
| AX-157966481 | 4 | 70.932 | KV452829.1 | 4520550 | 4-scf00092 | 4 |
| AX-157966482 | 4 | 70.932 | KV452829.1 | 4522457 | 4-scf00092 | 4 |
| AX-157966521 | 4 | 70.932 | KV452829.1 | 4575228 | 4-scf00092 | 4 |
| AX-157966527 | 4 | 70.932 | KV452829.1 | 4578747 | 4-scf00092 | 4 |
| AX-157966549 | 4 | 70.932 | KV452829.1 | 4604131 | 4-scf00092 | 4 |
| AX-157966487 | 4 | 70.933 | KV452829.1 | 4527305 | 4-scf00092 | 4 |
| AX-157966489 | 4 | 70.933 | KV452829.1 | 4528156 | 4-scf00092 | 4 |
| AX-157966471 | 4 | 71.26  | KV452829.1 | 4511149 | 4-scf00092 | 4 |
| AX-157966491 | 4 | 71.26  | KV452829.1 | 4538557 | 4-scf00092 | 4 |
| AX-157966492 | 4 | 71.26  | KV452829.1 | 4542853 | 4-scf00092 | 4 |
| AX-157816705 | 4 | 71.26  | KV452829.1 | 4545878 | 4-scf00092 | 4 |
| AX-157966495 | 4 | 71.26  | KV452829.1 | 4549603 | 4-scf00092 | 4 |
| AX-157966498 | 4 | 71.26  | KV452829.1 | 4551918 | 4-scf00092 | 4 |
| AX-157966501 | 4 | 71.277 | KV452829.1 | 4553901 | 4-scf00092 | 4 |
| AX-157966506 | 4 | 71.295 | KV452829.1 | 4558222 | 4-scf00092 | 4 |
| AX-157966510 | 4 | 71.318 | KV452829.1 | 4561156 | 4-scf00092 | 4 |
| AX-157966511 | 4 | 71.344 | KV452829.1 | 4564461 | 4-scf00092 | 4 |
| AX-157966517 | 4 | 71.349 | KV452829.1 | 4570216 | 4-scf00092 | 4 |
| AX-157966532 | 4 | 71.349 | KV452829.1 | 4583010 | 4-scf00092 | 4 |
| AX-157816706 | 4 | 71.357 | KV452829.1 | 4571787 | 4-scf00092 | 4 |
| AX-157966516 | 4 | 71.358 | KV452829.1 | 4568444 | 4-scf00092 | 4 |
| AX-157966519 | 4 | 71.358 | KV452829.1 | 4573159 | 4-scf00092 | 4 |
| AX-157966524 | 4 | 71.358 | KV452829.1 | 4577340 | 4-scf00092 | 4 |
| AX-157816709 | 4 | 71.358 | KV452829.1 | 4580815 | 4-scf00092 | 4 |
| AX-157966528 | 4 | 71.358 | KV452829.1 | 4581159 | 4-scf00092 | 4 |
| AX-157966522 | 4 | 71.364 | KV452829.1 | 4576667 | 4-scf00092 | 4 |
| AX-157816708 | 4 | 71.369 | KV452829.1 | 4578197 | 4-scf00092 | 4 |
| AX-157966529 | 4 | 71.369 | KV452829.1 | 4581848 | 4-scf00092 | 4 |
| AX-157816711 | 4 | 71.369 | KV452829.1 | 4583817 | 4-scf00092 | 4 |
| AX-157816712 | 4 | 71.369 | KV452829.1 | 4585301 | 4-scf00092 | 4 |
| AX-157816713 | 4 | 71.369 | KV452829.1 | 4586571 | 4-scf00092 | 4 |

|              |   |        |            |         |            |   |
|--------------|---|--------|------------|---------|------------|---|
| AX-157747121 | 4 | 71.369 | KV452829.1 | 4590535 | 4-scf00092 | 4 |
| AX-157966535 | 4 | 71.369 | KV452829.1 | 4594491 | 4-scf00092 | 4 |
| AX-157748406 | 4 | 71.369 | KV452829.1 | 4595116 | 4-scf00092 | 4 |
| AX-157966547 | 4 | 71.369 | KV452829.1 | 4603034 | 4-scf00092 | 4 |
| AX-157966572 | 4 | 71.369 | KV452829.1 | 4629214 | 4-scf00092 | 4 |
| AX-157816717 | 4 | 71.369 | KV452829.1 | 4648547 | 4-scf00092 | 4 |
| AX-157966552 | 4 | 71.429 | KV452829.1 | 4605488 | 4-scf00092 | 4 |
| AX-157726789 | 4 | 71.479 | KV452829.1 | 4607567 | 4-scf00092 | 4 |
| AX-157966553 | 4 | 71.479 | KV452829.1 | 4610877 | 4-scf00092 | 4 |
| AX-157966555 | 4 | 71.588 | KV452829.1 | 4612121 | 4-scf00092 | 4 |
| AX-157966557 | 4 | 71.6   | KV452829.1 | 4612562 | 4-scf00092 | 4 |
| AX-157816715 | 4 | 71.616 | KV452829.1 | 4606559 | 4-scf00092 | 4 |
| AX-157966558 | 4 | 71.616 | KV452829.1 | 4613101 | 4-scf00092 | 4 |
| AX-157966564 | 4 | 71.616 | KV452829.1 | 4616535 | 4-scf00092 | 4 |
| AX-157966560 | 4 | 71.716 | KV452829.1 | 4614265 | 4-scf00092 | 4 |
| AX-157966565 | 4 | 71.807 | KV452829.1 | 4617387 | 4-scf00092 | 4 |
| AX-157966551 | 4 | 71.915 | KV452829.1 | 4604615 | 4-scf00092 | 4 |
| AX-157710499 | 4 | 71.915 | KV452829.1 | 4620505 | 4-scf00092 | 4 |
| AX-157966570 | 4 | 71.915 | KV452829.1 | 4626603 | 4-scf00092 | 4 |
| AX-157875566 | 4 | 71.956 | KV452829.1 | 4627559 | 4-scf00092 | 4 |
| AX-157723888 | 4 | 71.981 | KV452829.1 | 4627175 | 4-scf00092 | 4 |
| AX-157966577 | 4 | 71.981 | KV452829.1 | 4638617 | 4-scf00092 | 4 |
| AX-157966578 | 4 | 71.992 | KV452829.1 | 4639100 | 4-scf00092 | 4 |
| AX-157854956 | 4 | 72.003 | KV452829.1 | 4619296 | 4-scf00092 | 4 |
| AX-157966581 | 4 | 72.003 | KV452829.1 | 4640108 | 4-scf00092 | 4 |
| AX-157966593 | 4 | 72.003 | KV452829.1 | 4652005 | 4-scf00092 | 4 |
| AX-157966585 | 4 | 72.01  | KV452829.1 | 4642637 | 4-scf00092 | 4 |
| AX-157875564 | 4 | 72.018 | KV452829.1 | 4603593 | 4-scf00092 | 4 |
| AX-157816716 | 4 | 72.018 | KV452829.1 | 4643824 | 4-scf00092 | 4 |
| AX-157966569 | 4 | 72.025 | KV452829.1 | 4623800 | 4-scf00092 | 4 |
| AX-157966584 | 4 | 72.025 | KV452829.1 | 4640899 | 4-scf00092 | 4 |
| AX-157966589 | 4 | 72.025 | KV452829.1 | 4646386 | 4-scf00092 | 4 |
| AX-157966590 | 4 | 72.025 | KV452829.1 | 4647153 | 4-scf00092 | 4 |
| AX-157752038 | 4 | 72.025 | KV452829.1 | 4647853 | 4-scf00092 | 4 |
| AX-157966598 | 4 | 72.025 | KV452829.1 | 4652879 | 4-scf00092 | 4 |
| AX-157966599 | 4 | 72.025 | KV452829.1 | 4653360 | 4-scf00092 | 4 |
| AX-157816719 | 4 | 72.025 | KV452829.1 | 4657088 | 4-scf00092 | 4 |
| AX-157966592 | 4 | 72.243 | KV452829.1 | 4647472 | 4-scf00092 | 4 |
| AX-157966604 | 4 | 72.243 | KV452829.1 | 4661976 | 4-scf00092 | 4 |
| AX-157966605 | 4 | 72.243 | KV452829.1 | 4662799 | 4-scf00092 | 4 |
| AX-157966608 | 4 | 72.243 | KV452829.1 | 4664145 | 4-scf00092 | 4 |
| AX-157966609 | 4 | 72.243 | KV452829.1 | 4665719 | 4-scf00092 | 4 |
| AX-157966613 | 4 | 72.318 | KV452829.1 | 4669129 | 4-scf00092 | 4 |
| AX-157966615 | 4 | 72.352 | KV452829.1 | 4670056 | 4-scf00092 | 4 |
| AX-157966617 | 4 | 72.396 | KV452829.1 | 4673960 | 4-scf00092 | 4 |
| AX-157816724 | 4 | 72.396 | KV452829.1 | 4715649 | 4-scf00092 | 4 |
| AX-157966619 | 4 | 72.462 | KV452829.1 | 4675313 | 4-scf00092 | 4 |
| AX-157966620 | 4 | 72.516 | KV452829.1 | 4676728 | 4-scf00092 | 4 |
| AX-157966611 | 4 | 72.571 | KV452829.1 | 4666643 | 4-scf00092 | 4 |
| AX-157966622 | 4 | 72.571 | KV452829.1 | 4679397 | 4-scf00092 | 4 |
| AX-157966623 | 4 | 72.571 | KV452829.1 | 4679820 | 4-scf00092 | 4 |

|              |   |        |            |         |            |   |
|--------------|---|--------|------------|---------|------------|---|
| AX-157966624 | 4 | 72.571 | KV452829.1 | 4680880 | 4-scf00092 | 4 |
| AX-157966628 | 4 | 72.572 | KV452829.1 | 4684032 | 4-scf00092 | 4 |
| AX-157966614 | 4 | 72.735 | KV452829.1 | 4669483 | 4-scf00092 | 4 |
| AX-157966630 | 4 | 72.735 | KV452829.1 | 4685140 | 4-scf00092 | 4 |
| AX-157966631 | 4 | 72.735 | KV452829.1 | 4685950 | 4-scf00092 | 4 |
| AX-157751934 | 4 | 72.735 | KV452829.1 | 4687543 | 4-scf00092 | 4 |
| AX-157966632 | 4 | 72.735 | KV452829.1 | 4687985 | 4-scf00092 | 4 |
| AX-157740213 | 4 | 72.735 | KV452829.1 | 4714339 | 4-scf00092 | 4 |
| AX-157966633 | 4 | 72.899 | KV452829.1 | 4690524 | 4-scf00092 | 4 |
| AX-157966634 | 4 | 72.899 | KV452829.1 | 4691039 | 4-scf00092 | 4 |
| AX-157966638 | 4 | 72.899 | KV452829.1 | 4697241 | 4-scf00092 | 4 |
| AX-157966639 | 4 | 72.899 | KV452829.1 | 4699640 | 4-scf00092 | 4 |
| AX-157966641 | 4 | 72.899 | KV452829.1 | 4701261 | 4-scf00092 | 4 |
| AX-158405231 | 4 | 72.899 | KV452829.1 | 4704296 | 4-scf00092 | 4 |
| AX-157966643 | 4 | 72.899 | KV452829.1 | 4704973 | 4-scf00092 | 4 |
| AX-157966646 | 4 | 72.899 | KV452829.1 | 4710716 | 4-scf00092 | 4 |
| AX-157966649 | 4 | 72.899 | KV452829.1 | 4712681 | 4-scf00092 | 4 |
| AX-157966651 | 4 | 72.899 | KV452829.1 | 4714905 | 4-scf00092 | 4 |
| AX-157864925 | 4 | 72.899 | KV452829.1 | 4716544 | 4-scf00092 | 4 |
| AX-157875569 | 4 | 72.899 | KV452829.1 | 4717290 | 4-scf00092 | 4 |
| AX-157966654 | 4 | 72.899 | KV452829.1 | 4719031 | 4-scf00092 | 4 |
| AX-157966656 | 4 | 72.899 | KV452829.1 | 4721196 | 4-scf00092 | 4 |
| AX-157966657 | 4 | 72.899 | KV452829.1 | 4722815 | 4-scf00092 | 4 |
| AX-157723899 | 4 | 72.899 | KV452829.1 | 4725626 | 4-scf00092 | 4 |
| AX-157966658 | 4 | 72.899 | KV452829.1 | 4726374 | 4-scf00092 | 4 |
| AX-157966660 | 4 | 72.899 | KV452829.1 | 4728182 | 4-scf00092 | 4 |
| AX-157966661 | 4 | 72.899 | KV452829.1 | 4729721 | 4-scf00092 | 4 |
| AX-157966662 | 4 | 73.001 | KV452829.1 | 4731019 | 4-scf00092 | 4 |
| AX-157966663 | 4 | 73.117 | KV452829.1 | 4731234 | 4-scf00092 | 4 |
| AX-157966665 | 4 | 73.117 | KV452829.1 | 4733835 | 4-scf00092 | 4 |
| AX-157966666 | 4 | 73.117 | KV452829.1 | 4734796 | 4-scf00092 | 4 |
| AX-157966667 | 4 | 73.117 | KV452829.1 | 4735922 | 4-scf00092 | 4 |
| AX-157966668 | 4 | 73.41  | KV452829.1 | 4741850 | 4-scf00092 | 4 |
| AX-157966671 | 4 | 73.41  | KV452829.1 | 4743236 | 4-scf00092 | 4 |
| AX-157966673 | 4 | 73.552 | KV452829.1 | 4745710 | 4-scf00092 | 4 |
| AX-157966682 | 4 | 73.552 | KV452829.1 | 4760783 | 4-scf00092 | 4 |
| AX-157966713 | 4 | 73.552 | KV452829.1 | 4788085 | 4-scf00092 | 4 |
| AX-157966674 | 4 | 73.554 | KV452829.1 | 4747562 | 4-scf00092 | 4 |
| AX-157966675 | 4 | 73.555 | KV452829.1 | 4748882 | 4-scf00092 | 4 |
| AX-157966676 | 4 | 73.555 | KV452829.1 | 4750701 | 4-scf00092 | 4 |
| AX-157966679 | 4 | 73.555 | KV452829.1 | 4754094 | 4-scf00092 | 4 |
| AX-157966681 | 4 | 73.555 | KV452829.1 | 4757237 | 4-scf00092 | 4 |
| AX-157966683 | 4 | 73.555 | KV452829.1 | 4761621 | 4-scf00092 | 4 |
| AX-157966684 | 4 | 73.555 | KV452829.1 | 4762244 | 4-scf00092 | 4 |
| AX-157966685 | 4 | 73.555 | KV452829.1 | 4763483 | 4-scf00092 | 4 |
| AX-157775169 | 4 | 73.555 | KV452829.1 | 4766008 | 4-scf00092 | 4 |
| AX-157966690 | 4 | 73.555 | KV452829.1 | 4769103 | 4-scf00092 | 4 |
| AX-157966691 | 4 | 73.555 | KV452829.1 | 4769795 | 4-scf00092 | 4 |
| AX-157966703 | 4 | 73.555 | KV452829.1 | 4779014 | 4-scf00092 | 4 |
| AX-157966704 | 4 | 73.555 | KV452829.1 | 4780125 | 4-scf00092 | 4 |
| AX-157966708 | 4 | 73.555 | KV452829.1 | 4782916 | 4-scf00092 | 4 |

|              |   |        |            |         |            |   |
|--------------|---|--------|------------|---------|------------|---|
| AX-157966712 | 4 | 73.555 | KV452829.1 | 4786134 | 4-scf00092 | 4 |
| AX-157966717 | 4 | 73.555 | KV452829.1 | 4792010 | 4-scf00092 | 4 |
| AX-157966794 | 4 | 73.555 | KV452829.1 | 4862376 | 4-scf00092 | 4 |
| AX-157966808 | 4 | 73.555 | KV452829.1 | 4879050 | 4-scf00092 | 4 |
| AX-157966719 | 4 | 73.575 | KV452829.1 | 4796464 | 4-scf00092 | 4 |
| AX-157966722 | 4 | 73.664 | KV452829.1 | 4797824 | 4-scf00092 | 4 |
| AX-157966797 | 4 | 73.664 | KV452829.1 | 4865097 | 4-scf00092 | 4 |
| AX-157724329 | 4 | 73.664 | KV452829.1 | 4886227 | 4-scf00092 | 4 |
| AX-157966729 | 4 | 73.69  | KV452829.1 | 4805432 | 4-scf00092 | 4 |
| AX-157966734 | 4 | 73.69  | KV452829.1 | 4809166 | 4-scf00092 | 4 |
| AX-157966723 | 4 | 73.71  | KV452829.1 | 4798650 | 4-scf00092 | 4 |
| AX-157966733 | 4 | 73.71  | KV452829.1 | 4808622 | 4-scf00092 | 4 |
| AX-157966735 | 4 | 73.71  | KV452829.1 | 4811030 | 4-scf00092 | 4 |
| AX-157966805 | 4 | 73.71  | KV452829.1 | 4876372 | 4-scf00092 | 4 |
| AX-157966738 | 4 | 73.742 | KV452829.1 | 4814320 | 4-scf00092 | 4 |
| AX-157966747 | 4 | 73.742 | KV452829.1 | 4820756 | 4-scf00092 | 4 |
| AX-157966742 | 4 | 73.773 | KV452829.1 | 4815714 | 4-scf00092 | 4 |
| AX-157773262 | 4 | 73.773 | KV452829.1 | 4817145 | 4-scf00092 | 4 |
| AX-157966748 | 4 | 73.773 | KV452829.1 | 4821403 | 4-scf00092 | 4 |
| AX-157745986 | 4 | 73.773 | KV452829.1 | 4823612 | 4-scf00092 | 4 |
| AX-157816727 | 4 | 73.773 | KV452829.1 | 4824961 | 4-scf00092 | 4 |
| AX-157715876 | 4 | 73.773 | KV452829.1 | 4828884 | 4-scf00092 | 4 |
| AX-157966753 | 4 | 73.826 | KV452829.1 | 4832799 | 4-scf00092 | 4 |
| AX-157966789 | 4 | 73.826 | KV452829.1 | 4858842 | 4-scf00092 | 4 |
| AX-157816730 | 4 | 73.826 | KV452829.1 | 4885391 | 4-scf00092 | 4 |
| AX-157966755 | 4 | 73.841 | KV452829.1 | 4833779 | 4-scf00092 | 4 |
| AX-157966724 | 4 | 73.882 | KV452829.1 | 4798698 | 4-scf00092 | 4 |
| AX-157966757 | 4 | 73.882 | KV452829.1 | 4833960 | 4-scf00092 | 4 |
| AX-157966759 | 4 | 73.882 | KV452829.1 | 4835107 | 4-scf00092 | 4 |
| AX-157816728 | 4 | 73.882 | KV452829.1 | 4835149 | 4-scf00092 | 4 |
| AX-157966761 | 4 | 73.882 | KV452829.1 | 4837053 | 4-scf00092 | 4 |
| AX-157966763 | 4 | 73.882 | KV452829.1 | 4842740 | 4-scf00092 | 4 |
| AX-157966765 | 4 | 73.882 | KV452829.1 | 4843163 | 4-scf00092 | 4 |
| AX-157966774 | 4 | 73.882 | KV452829.1 | 4852102 | 4-scf00092 | 4 |
| AX-157966777 | 4 | 73.882 | KV452829.1 | 4854198 | 4-scf00092 | 4 |
| AX-157966780 | 4 | 73.882 | KV452829.1 | 4855394 | 4-scf00092 | 4 |
| AX-157966784 | 4 | 73.882 | KV452829.1 | 4856726 | 4-scf00092 | 4 |
| AX-157740087 | 4 | 73.882 | KV452829.1 | 4862985 | 4-scf00092 | 4 |
| AX-157966837 | 4 | 73.882 | KV452829.1 | 4909621 | 4-scf00092 | 4 |
| AX-157966796 | 4 | 74.046 | KV452829.1 | 4862636 | 4-scf00092 | 4 |
| AX-157816729 | 4 | 74.046 | KV452829.1 | 4870538 | 4-scf00092 | 4 |
| AX-157966801 | 4 | 74.21  | KV452829.1 | 4874362 | 4-scf00092 | 4 |
| AX-157966804 | 4 | 74.21  | KV452829.1 | 4875073 | 4-scf00092 | 4 |
| AX-157966806 | 4 | 74.21  | KV452829.1 | 4876802 | 4-scf00092 | 4 |
| AX-158406539 | 4 | 74.21  | KV452829.1 | 4879985 | 4-scf00092 | 4 |
| AX-157966810 | 4 | 74.21  | KV452829.1 | 4882022 | 4-scf00092 | 4 |
| AX-157966819 | 4 | 74.21  | KV452829.1 | 4890574 | 4-scf00092 | 4 |
| AX-157966820 | 4 | 74.462 | KV452829.1 | 4892352 | 4-scf00092 | 4 |
| AX-157966822 | 4 | 74.465 | KV452829.1 | 4893291 | 4-scf00092 | 4 |
| AX-157966814 | 4 | 74.467 | KV452829.1 | 4888035 | 4-scf00092 | 4 |
| AX-157742005 | 4 | 74.467 | KV452829.1 | 4893421 | 4-scf00092 | 4 |

|              |   |        |            |         |            |   |
|--------------|---|--------|------------|---------|------------|---|
| AX-157755241 | 4 | 74.467 | KV452829.1 | 4896354 | 4-scf00092 | 4 |
| AX-157966831 | 4 | 74.805 | KV452829.1 | 4902602 | 4-scf00092 | 4 |
| AX-157966835 | 4 | 74.806 | KV452829.1 | 4907894 | 4-scf00092 | 4 |
| AX-157966846 | 4 | 74.975 | KV452829.1 | 4915121 | 4-scf00092 | 4 |
| AX-157966847 | 4 | 74.975 | KV452829.1 | 4915777 | 4-scf00092 | 4 |
| AX-157966851 | 4 | 75.084 | KV452829.1 | 4917651 | 4-scf00092 | 4 |
| AX-157966859 | 4 | 75.084 | KV452829.1 | 4921464 | 4-scf00092 | 4 |
| AX-157764540 | 4 | 75.091 | KV452829.1 | 4921748 | 4-scf00092 | 4 |
| AX-157816733 | 4 | 75.096 | KV452829.1 | 4929102 | 4-scf00092 | 4 |
| AX-157966862 | 4 | 75.153 | KV452829.1 | 4930613 | 4-scf00092 | 4 |
| AX-157966864 | 4 | 75.206 | KV452829.1 | 4932162 | 4-scf00092 | 4 |
| AX-157966865 | 4 | 75.206 | KV452829.1 | 4934603 | 4-scf00092 | 4 |
| AX-157966866 | 4 | 75.206 | KV452829.1 | 4934964 | 4-scf00092 | 4 |
| AX-157966869 | 4 | 75.207 | KV452829.1 | 4939936 | 4-scf00092 | 4 |
| AX-157966868 | 4 | 75.225 | KV452829.1 | 4937265 | 4-scf00092 | 4 |
| AX-157739595 | 4 | 75.225 | KV452829.1 | 4940972 | 4-scf00092 | 4 |
| AX-157966881 | 4 | 75.777 | KV452829.1 | 4962037 | 4-scf00092 | 4 |
| AX-157966883 | 4 | 75.797 | KV452829.1 | 4963284 | 4-scf00092 | 4 |
| AX-157966885 | 4 | 75.869 | KV452829.1 | 4964782 | 4-scf00092 | 4 |
| AX-157966886 | 4 | 75.945 | KV452829.1 | 4965262 | 4-scf00092 | 4 |
| AX-157966888 | 4 | 75.945 | KV452829.1 | 4965769 | 4-scf00092 | 4 |
| AX-157966890 | 4 | 75.945 | KV452829.1 | 4966004 | 4-scf00092 | 4 |
| AX-157966897 | 4 | 76.068 | KV452829.1 | 4969429 | 4-scf00092 | 4 |
| AX-157966899 | 4 | 76.068 | KV452829.1 | 4970901 | 4-scf00092 | 4 |
| AX-157726749 | 4 | 76.068 | KV452829.1 | 4971393 | 4-scf00092 | 4 |
| AX-157966901 | 4 | 76.068 | KV452829.1 | 4973127 | 4-scf00092 | 4 |
| AX-157966908 | 4 | 76.068 | KV452829.1 | 4978000 | 4-scf00092 | 4 |
| AX-157966911 | 4 | 76.068 | KV452829.1 | 4979508 | 4-scf00092 | 4 |
| AX-157966906 | 4 | 76.069 | KV452829.1 | 4977076 | 4-scf00092 | 4 |
| AX-157966912 | 4 | 76.069 | KV452829.1 | 4985279 | 4-scf00092 | 4 |
| AX-157966914 | 4 | 76.069 | KV452829.1 | 4988029 | 4-scf00092 | 4 |
| AX-157966924 | 4 | 76.069 | KV452829.1 | 4999793 | 4-scf00092 | 4 |
| AX-157967001 | 4 | 76.069 | KV452829.1 | 5071597 | 4-scf00092 | 4 |
| AX-157967044 | 4 | 76.069 | KV452829.1 | 5113649 | 4-scf00092 | 4 |
| AX-157966916 | 4 | 76.396 | KV452829.1 | 4993642 | 4-scf00092 | 4 |
| AX-157966928 | 4 | 76.396 | KV452829.1 | 5002122 | 4-scf00092 | 4 |
| AX-157966929 | 4 | 76.396 | KV452829.1 | 5004052 | 4-scf00092 | 4 |
| AX-157966934 | 4 | 76.396 | KV452829.1 | 5007419 | 4-scf00092 | 4 |
| AX-157966937 | 4 | 76.396 | KV452829.1 | 5010578 | 4-scf00092 | 4 |
| AX-157966941 | 4 | 76.396 | KV452829.1 | 5017844 | 4-scf00092 | 4 |
| AX-157966944 | 4 | 76.396 | KV452829.1 | 5019685 | 4-scf00092 | 4 |
| AX-157773276 | 4 | 76.396 | KV452829.1 | 5020584 | 4-scf00092 | 4 |
| AX-157966945 | 4 | 76.396 | KV452829.1 | 5024230 | 4-scf00092 | 4 |
| AX-157966951 | 4 | 76.396 | KV452829.1 | 5026059 | 4-scf00092 | 4 |
| AX-157966946 | 4 | 76.599 | KV452829.1 | 5025388 | 4-scf00092 | 4 |
| AX-157966953 | 4 | 76.629 | KV452829.1 | 5028159 | 4-scf00092 | 4 |
| AX-157966960 | 4 | 76.725 | KV452829.1 | 5033884 | 4-scf00092 | 4 |
| AX-157966967 | 4 | 76.833 | KV452829.1 | 5042088 | 4-scf00092 | 4 |
| AX-157966969 | 4 | 76.833 | KV452829.1 | 5044629 | 4-scf00092 | 4 |
| AX-157966970 | 4 | 76.833 | KV452829.1 | 5044956 | 4-scf00092 | 4 |
| AX-157966971 | 4 | 76.833 | KV452829.1 | 5046291 | 4-scf00092 | 4 |

|              |   |        |            |         |            |   |
|--------------|---|--------|------------|---------|------------|---|
| AX-157966909 | 4 | 76.942 | KV452829.1 | 4979151 | 4-scf00092 | 4 |
| AX-157966964 | 4 | 76.942 | KV452829.1 | 5038557 | 4-scf00092 | 4 |
| AX-157966968 | 4 | 76.942 | KV452829.1 | 5043295 | 4-scf00092 | 4 |
| AX-157966976 | 4 | 76.942 | KV452829.1 | 5048618 | 4-scf00092 | 4 |
| AX-157966979 | 4 | 76.942 | KV452829.1 | 5050741 | 4-scf00092 | 4 |
| AX-157967028 | 4 | 76.942 | KV452829.1 | 5095388 | 4-scf00092 | 4 |
| AX-157966977 | 4 | 77.051 | KV452829.1 | 5049794 | 4-scf00092 | 4 |
| AX-158422095 | 4 | 77.051 | KV452829.1 | 5053357 | 4-scf00092 | 4 |
| AX-158405232 | 4 | 77.051 | KV452829.1 | 5053466 | 4-scf00092 | 4 |
| AX-157966980 | 4 | 77.051 | KV452829.1 | 5055383 | 4-scf00092 | 4 |
| AX-157772143 | 4 | 77.051 | KV452829.1 | 5058324 | 4-scf00092 | 4 |
| AX-157966992 | 4 | 77.051 | KV452829.1 | 5063809 | 4-scf00092 | 4 |
| AX-157966998 | 4 | 77.051 | KV452829.1 | 5067662 | 4-scf00092 | 4 |
| AX-157722086 | 4 | 77.051 | KV452829.1 | 5068921 | 4-scf00092 | 4 |
| AX-157967010 | 4 | 77.051 | KV452829.1 | 5076612 | 4-scf00092 | 4 |
| AX-157754271 | 4 | 77.051 | KV452829.1 | 5079905 | 4-scf00092 | 4 |
| AX-157708008 | 4 | 77.051 | KV452829.1 | 5086969 | 4-scf00092 | 4 |
| AX-157967012 | 4 | 77.189 | KV452829.1 | 5080549 | 4-scf00092 | 4 |
| AX-157967013 | 4 | 77.189 | KV452829.1 | 5082111 | 4-scf00092 | 4 |
| AX-157967016 | 4 | 77.189 | KV452829.1 | 5083296 | 4-scf00092 | 4 |
| AX-157967020 | 4 | 77.189 | KV452829.1 | 5085385 | 4-scf00092 | 4 |
| AX-157967022 | 4 | 77.189 | KV452829.1 | 5086440 | 4-scf00092 | 4 |
| AX-157967015 | 4 | 77.191 | KV452829.1 | 5082888 | 4-scf00092 | 4 |
| AX-157967023 | 4 | 77.191 | KV452829.1 | 5087345 | 4-scf00092 | 4 |
| AX-157701395 | 4 | 77.191 | KV452829.1 | 5092355 | 4-scf00092 | 4 |
| AX-157967029 | 4 | 77.191 | KV452829.1 | 5096162 | 4-scf00092 | 4 |
| AX-157816739 | 4 | 77.531 | KV452829.1 | 5091111 | 4-scf00092 | 4 |
| AX-157967027 | 4 | 77.698 | KV452829.1 | 5093970 | 4-scf00092 | 4 |
| AX-157816740 | 4 | 77.875 | KV452829.1 | 5098419 | 4-scf00092 | 4 |
| AX-157816741 | 4 | 77.876 | KV452829.1 | 5098470 | 4-scf00092 | 4 |
| AX-157967037 | 4 | 77.876 | KV452829.1 | 5106232 | 4-scf00092 | 4 |
| AX-157752094 | 4 | 77.876 | KV452829.1 | 5107399 | 4-scf00092 | 4 |
| AX-157816742 | 4 | 77.876 | KV452829.1 | 5110826 | 4-scf00092 | 4 |
| AX-157967043 | 4 | 77.876 | KV452829.1 | 5111718 | 4-scf00092 | 4 |
| AX-157967078 | 4 | 77.876 | KV452829.1 | 5164881 | 4-scf00092 | 4 |
| AX-157967080 | 4 | 77.876 | KV452829.1 | 5169054 | 4-scf00092 | 4 |
| AX-157781920 | 4 | 78.057 | KV452829.1 | 5119466 | 4-scf00092 | 4 |
| AX-157816754 | 4 | 78.057 | KV452829.1 | 5206712 | 4-scf00092 | 4 |
| AX-157816745 | 4 | 78.288 | KV452829.1 | 5122227 | 4-scf00092 | 4 |
| AX-157967053 | 4 | 78.288 | KV452829.1 | 5133500 | 4-scf00092 | 4 |
| AX-157967056 | 4 | 78.288 | KV452829.1 | 5136025 | 4-scf00092 | 4 |
| AX-157816749 | 4 | 78.288 | KV452829.1 | 5136910 | 4-scf00092 | 4 |
| AX-157967061 | 4 | 78.288 | KV452829.1 | 5142847 | 4-scf00092 | 4 |
| AX-157967070 | 4 | 78.288 | KV452829.1 | 5156531 | 4-scf00092 | 4 |
| AX-157772505 | 4 | 78.378 | KV452829.1 | 5176022 | 4-scf00092 | 4 |
| AX-157816743 | 4 | 78.426 | KV452829.1 | 5119318 | 4-scf00092 | 4 |
| AX-157967060 | 4 | 78.426 | KV452829.1 | 5142508 | 4-scf00092 | 4 |
| AX-157967086 | 4 | 78.426 | KV452829.1 | 5178403 | 4-scf00092 | 4 |
| AX-157864931 | 4 | 78.426 | KV452829.1 | 5178776 | 4-scf00092 | 4 |
| AX-157967089 | 4 | 78.426 | KV452829.1 | 5180456 | 4-scf00092 | 4 |
| AX-157967092 | 4 | 78.426 | KV452829.1 | 5182113 | 4-scf00092 | 4 |



|              |   |        |             |         |            |    |
|--------------|---|--------|-------------|---------|------------|----|
| AX-157967095 | 4 | 78.426 | KV452829.1  | 5182629 | 4-scf00092 | 4  |
| AX-157967098 | 4 | 78.426 | KV452829.1  | 5183153 | 4-scf00092 | 4  |
| AX-157967100 | 4 | 78.426 | KV452829.1  | 5183626 | 4-scf00092 | 4  |
| AX-157967105 | 4 | 78.426 | KV452829.1  | 5188807 | 4-scf00092 | 4  |
| AX-157967108 | 4 | 78.426 | KV452829.1  | 5195296 | 4-scf00092 | 4  |
| AX-157967109 | 4 | 78.426 | KV452829.1  | 5196478 | 4-scf00092 | 4  |
| AX-157739684 | 4 | 78.426 | KV452829.1  | 5196943 | 4-scf00092 | 4  |
| AX-157706643 | 4 | 78.426 | 3ML01032652 | 100     | scf08278_1 | UN |
| AX-157967050 | 4 | 79.25  | KV452829.1  | 5128048 | 4-scf00092 | 4  |
| AX-157816746 | 4 | 79.25  | KV452829.1  | 5132296 | 4-scf00092 | 4  |
| AX-157967118 | 4 | 79.25  | KV452829.1  | 5210909 | 4-scf00092 | 4  |
| AX-157967125 | 4 | 79.25  | KV452829.1  | 5217805 | 4-scf00092 | 4  |
| AX-157967127 | 4 | 79.25  | KV452829.1  | 5219058 | 4-scf00092 | 4  |
| AX-157967133 | 4 | 79.25  | KV452829.1  | 5222514 | 4-scf00092 | 4  |
| AX-157967138 | 4 | 79.25  | KV452829.1  | 5225814 | 4-scf00092 | 4  |
| AX-157967142 | 4 | 79.25  | KV452829.1  | 5233984 | 4-scf00092 | 4  |
| AX-157967139 | 4 | 79.3   | KV452829.1  | 5228439 | 4-scf00092 | 4  |
| AX-157967141 | 4 | 79.346 | KV452829.1  | 5233265 | 4-scf00092 | 4  |
| AX-157967115 | 4 | 79.387 | KV452829.1  | 5210285 | 4-scf00092 | 4  |
| AX-157816756 | 4 | 79.387 | KV452829.1  | 5234881 | 4-scf00092 | 4  |
| AX-157967145 | 4 | 79.387 | KV452829.1  | 5235942 | 4-scf00092 | 4  |
| AX-157967148 | 4 | 79.387 | KV452829.1  | 5242396 | 4-scf00092 | 4  |
| AX-157967152 | 4 | 79.387 | KV452829.1  | 5247799 | 4-scf00092 | 4  |
| AX-157967154 | 4 | 79.387 | KV452829.1  | 5249813 | 4-scf00092 | 4  |
| AX-157967156 | 4 | 79.387 | KV452829.1  | 5253279 | 4-scf00092 | 4  |
| AX-157967158 | 4 | 79.387 | KV452829.1  | 5258433 | 4-scf00092 | 4  |
| AX-157967163 | 4 | 79.758 | KV452829.1  | 5267843 | 4-scf00092 | 4  |
| AX-157816757 | 4 | 79.926 | KV452829.1  | 5274147 | 4-scf00092 | 4  |
| AX-157967167 | 4 | 79.93  | KV452829.1  | 5276556 | 4-scf00092 | 4  |
| AX-157967169 | 4 | 79.934 | KV452829.1  | 5280894 | 4-scf00092 | 4  |
| AX-157967171 | 4 | 79.934 | KV452829.1  | 5284107 | 4-scf00092 | 4  |
| AX-157967084 | 4 | 79.937 | KV452829.1  | 5176462 | 4-scf00092 | 4  |
| AX-157967175 | 4 | 79.937 | KV452829.1  | 5287128 | 4-scf00092 | 4  |
| AX-157967176 | 4 | 79.937 | KV452829.1  | 5288119 | 4-scf00092 | 4  |
| AX-157967181 | 4 | 79.937 | KV452829.1  | 5290648 | 4-scf00092 | 4  |
| AX-158379496 | 4 | 80.212 | KV452829.1  | 5227973 | 4-scf00092 | 4  |
| AX-157967187 | 4 | 80.212 | KV452829.1  | 5294098 | 4-scf00092 | 4  |
| AX-157967190 | 4 | 80.212 | KV452829.1  | 5296637 | 4-scf00092 | 4  |
| AX-157715999 | 4 | 80.212 | KV452829.1  | 5297374 | 4-scf00092 | 4  |
| AX-157967192 | 4 | 80.212 | KV452829.1  | 5297925 | 4-scf00092 | 4  |
| AX-157967195 | 4 | 80.212 | KV452829.1  | 5299753 | 4-scf00092 | 4  |
| AX-158406549 | 4 | 80.212 | KV452829.1  | 5303865 | 4-scf00092 | 4  |
| AX-158406552 | 4 | 80.212 | KV452829.1  | 5304420 | 4-scf00092 | 4  |
| AX-157967196 | 4 | 80.214 | KV452829.1  | 5302523 | 4-scf00092 | 4  |
| AX-158406550 | 4 | 80.417 | KV452829.1  | 5304123 | 4-scf00092 | 4  |
| AX-157816758 | 4 | 80.417 | KV452829.1  | 5304699 | 4-scf00092 | 4  |
| AX-157816760 | 4 | 80.624 | KV452829.1  | 5307324 | 4-scf00092 | 4  |
| AX-157967211 | 4 | 80.665 | KV452829.1  | 5319915 | 4-scf00092 | 4  |
| AX-157967204 | 4 | 80.711 | KV452829.1  | 5312358 | 4-scf00092 | 4  |
| AX-157967220 | 4 | 80.711 | KV452829.1  | 5326822 | 4-scf00092 | 4  |
| AX-157967252 | 4 | 80.711 | KV452829.1  | 5373523 | 4-scf00092 | 4  |

|              |   |        |            |         |            |   |
|--------------|---|--------|------------|---------|------------|---|
| AX-157967221 | 4 | 80.761 | KV452829.1 | 5327224 | 4-scf00092 | 4 |
| AX-157967222 | 4 | 80.761 | KV452829.1 | 5329370 | 4-scf00092 | 4 |
| AX-157967223 | 4 | 80.761 | KV452829.1 | 5330753 | 4-scf00092 | 4 |
| AX-157816761 | 4 | 80.761 | KV452829.1 | 5333970 | 4-scf00092 | 4 |
| AX-157749664 | 4 | 80.761 | KV452829.1 | 5335516 | 4-scf00092 | 4 |
| AX-157967231 | 4 | 80.761 | KV452829.1 | 5339773 | 4-scf00092 | 4 |
| AX-157816764 | 4 | 80.761 | KV452829.1 | 5339842 | 4-scf00092 | 4 |
| AX-157724344 | 4 | 80.761 | KV452829.1 | 5358292 | 4-scf00092 | 4 |
| AX-157967249 | 4 | 80.761 | KV452829.1 | 5371104 | 4-scf00092 | 4 |
| AX-157967251 | 4 | 80.761 | KV452829.1 | 5372925 | 4-scf00092 | 4 |
| AX-157967259 | 4 | 80.761 | KV452829.1 | 5376296 | 4-scf00092 | 4 |
| AX-157967260 | 4 | 80.761 | KV452829.1 | 5377185 | 4-scf00092 | 4 |
| AX-157967264 | 4 | 80.761 | KV452829.1 | 5378469 | 4-scf00092 | 4 |
| AX-157967265 | 4 | 80.761 | KV452829.1 | 5379221 | 4-scf00092 | 4 |
| AX-157967275 | 4 | 80.761 | KV452829.1 | 5392106 | 4-scf00092 | 4 |
| AX-157967276 | 4 | 80.761 | KV452829.1 | 5393278 | 4-scf00092 | 4 |
| AX-157967395 | 4 | 80.761 | KV452829.1 | 5516623 | 4-scf00092 | 4 |
| AX-157967213 | 4 | 81.036 | KV452829.1 | 5321463 | 4-scf00092 | 4 |
| AX-157816766 | 4 | 81.036 | KV452829.1 | 5369479 | 4-scf00092 | 4 |
| AX-157967268 | 4 | 81.036 | KV452829.1 | 5384430 | 4-scf00092 | 4 |
| AX-157967269 | 4 | 81.036 | KV452829.1 | 5385020 | 4-scf00092 | 4 |
| AX-157967279 | 4 | 81.036 | KV452829.1 | 5398023 | 4-scf00092 | 4 |
| AX-158406553 | 4 | 81.036 | KV452829.1 | 5399746 | 4-scf00092 | 4 |
| AX-157967291 | 4 | 81.036 | KV452829.1 | 5407294 | 4-scf00092 | 4 |
| AX-157967298 | 4 | 81.036 | KV452829.1 | 5413016 | 4-scf00092 | 4 |
| AX-157967301 | 4 | 81.036 | KV452829.1 | 5414284 | 4-scf00092 | 4 |
| AX-157746047 | 4 | 81.443 | KV452829.1 | 5423198 | 4-scf00092 | 4 |
| AX-157816769 | 4 | 81.454 | KV452829.1 | 5425295 | 4-scf00092 | 4 |
| AX-157869622 | 4 | 81.454 | KV452829.1 | 5426452 | 4-scf00092 | 4 |
| AX-157967316 | 4 | 81.454 | KV452829.1 | 5434345 | 4-scf00092 | 4 |
| AX-157967319 | 4 | 81.454 | KV452829.1 | 5435240 | 4-scf00092 | 4 |
| AX-157967336 | 4 | 81.454 | KV452829.1 | 5442807 | 4-scf00092 | 4 |
| AX-157967322 | 4 | 81.72  | KV452829.1 | 5436690 | 4-scf00092 | 4 |
| AX-157967200 | 4 | 81.725 | KV452829.1 | 5307650 | 4-scf00092 | 4 |
| AX-157967202 | 4 | 81.725 | KV452829.1 | 5311062 | 4-scf00092 | 4 |
| AX-157967227 | 4 | 81.725 | KV452829.1 | 5333701 | 4-scf00092 | 4 |
| AX-157767006 | 4 | 81.725 | KV452829.1 | 5334147 | 4-scf00092 | 4 |
| AX-158405235 | 4 | 81.725 | KV452829.1 | 5389477 | 4-scf00092 | 4 |
| AX-157967292 | 4 | 81.725 | KV452829.1 | 5408192 | 4-scf00092 | 4 |
| AX-157816768 | 4 | 81.725 | KV452829.1 | 5422921 | 4-scf00092 | 4 |
| AX-157967323 | 4 | 81.725 | KV452829.1 | 5436968 | 4-scf00092 | 4 |
| AX-157967324 | 4 | 81.725 | KV452829.1 | 5437246 | 4-scf00092 | 4 |
| AX-157967326 | 4 | 81.725 | KV452829.1 | 5437887 | 4-scf00092 | 4 |
| AX-157967327 | 4 | 81.725 | KV452829.1 | 5438147 | 4-scf00092 | 4 |
| AX-157967328 | 4 | 81.725 | KV452829.1 | 5439483 | 4-scf00092 | 4 |
| AX-157967332 | 4 | 81.725 | KV452829.1 | 5441208 | 4-scf00092 | 4 |
| AX-157967335 | 4 | 81.725 | KV452829.1 | 5442536 | 4-scf00092 | 4 |
| AX-157967339 | 4 | 81.725 | KV452829.1 | 5444943 | 4-scf00092 | 4 |
| AX-157967342 | 4 | 81.725 | KV452829.1 | 5447605 | 4-scf00092 | 4 |
| AX-157967351 | 4 | 81.725 | KV452829.1 | 5457164 | 4-scf00092 | 4 |
| AX-157967352 | 4 | 81.725 | KV452829.1 | 5457780 | 4-scf00092 | 4 |

|              |   |        |             |         |            |    |
|--------------|---|--------|-------------|---------|------------|----|
| AX-157967360 | 4 | 81.725 | KV452829.1  | 5472159 | 4-scf00092 | 4  |
| AX-157967362 | 4 | 81.725 | KV452829.1  | 5473108 | 4-scf00092 | 4  |
| AX-157967363 | 4 | 81.725 | KV452829.1  | 5474938 | 4-scf00092 | 4  |
| AX-157967343 | 4 | 81.859 | KV452829.1  | 5448297 | 4-scf00092 | 4  |
| AX-157967347 | 4 | 81.859 | KV452829.1  | 5450401 | 4-scf00092 | 4  |
| AX-157967348 | 4 | 81.859 | KV452829.1  | 5454050 | 4-scf00092 | 4  |
| AX-157967349 | 4 | 81.859 | KV452829.1  | 5455996 | 4-scf00092 | 4  |
| AX-157749753 | 4 | 81.859 | KV452829.1  | 5458801 | 4-scf00092 | 4  |
| AX-157967354 | 4 | 81.924 | KV452829.1  | 5457854 | 4-scf00092 | 4  |
| AX-157967355 | 4 | 82.157 | KV452829.1  | 5460845 | 4-scf00092 | 4  |
| AX-157967356 | 4 | 82.157 | KV452829.1  | 5463578 | 4-scf00092 | 4  |
| AX-157816771 | 4 | 82.157 | KV452829.1  | 5463804 | 4-scf00092 | 4  |
| AX-157967272 | 4 | 82.31  | KV452829.1  | 5387217 | 4-scf00092 | 4  |
| AX-157967359 | 4 | 82.31  | KV452829.1  | 5466609 | 4-scf00092 | 4  |
| AX-157967369 | 4 | 82.31  | KV452829.1  | 5480983 | 4-scf00092 | 4  |
| AX-157740767 | 4 | 82.31  | KV452829.1  | 5482089 | 4-scf00092 | 4  |
| AX-157706988 | 4 | 82.31  | 3ML01033290 | 223     | scf08933_1 | UN |
| AX-157688819 | 4 | 82.615 | 3ML01027135 | 1187    | scf02738_1 | UN |
| AX-157816763 | 4 | 82.616 | KV452829.1  | 5336805 | 4-scf00092 | 4  |
| AX-157967270 | 4 | 82.616 | KV452829.1  | 5386534 | 4-scf00092 | 4  |
| AX-157967295 | 4 | 82.616 | KV452829.1  | 5410269 | 4-scf00092 | 4  |
| AX-157967302 | 4 | 82.616 | KV452829.1  | 5417635 | 4-scf00092 | 4  |
| AX-157967419 | 4 | 82.616 | KV452829.1  | 5542172 | 4-scf00092 | 4  |
| AX-157688818 | 4 | 82.616 | 3ML01027135 | 602     | scf02738_1 | UN |
| AX-157967375 | 4 | 82.628 | KV452829.1  | 5497666 | 4-scf00092 | 4  |
| AX-157967377 | 4 | 82.647 | KV452829.1  | 5499855 | 4-scf00092 | 4  |
| AX-157967380 | 4 | 83.221 | KV452829.1  | 5502108 | 4-scf00092 | 4  |
| AX-157967381 | 4 | 83.228 | KV452829.1  | 5503072 | 4-scf00092 | 4  |
| AX-157967383 | 4 | 83.228 | KV452829.1  | 5505202 | 4-scf00092 | 4  |
| AX-157707875 | 4 | 83.228 | KV452829.1  | 5506710 | 4-scf00092 | 4  |
| AX-157967390 | 4 | 83.501 | KV452829.1  | 5509424 | 4-scf00092 | 4  |
| AX-157771085 | 4 | 83.501 | KV452829.1  | 5510457 | 4-scf00092 | 4  |
| AX-157967393 | 4 | 83.501 | KV452829.1  | 5512739 | 4-scf00092 | 4  |
| AX-157816775 | 4 | 83.501 | KV452829.1  | 5513656 | 4-scf00092 | 4  |
| AX-157967415 | 4 | 83.501 | KV452829.1  | 5539811 | 4-scf00092 | 4  |
| AX-158379498 | 4 | 83.775 | KV452829.1  | 5521208 | 4-scf00092 | 4  |
| AX-157739158 | 4 | 83.775 | KV452829.1  | 5521958 | 4-scf00092 | 4  |
| AX-157967404 | 4 | 83.775 | KV452829.1  | 5526681 | 4-scf00092 | 4  |
| AX-157967406 | 4 | 83.775 | KV452829.1  | 5527077 | 4-scf00092 | 4  |
| AX-157967421 | 4 | 83.775 | KV452829.1  | 5543222 | 4-scf00092 | 4  |
| AX-157967313 | 4 | 83.849 | KV452829.1  | 5432432 | 4-scf00092 | 4  |
| AX-157967407 | 4 | 83.849 | KV452829.1  | 5528423 | 4-scf00092 | 4  |
| AX-157967420 | 4 | 83.849 | KV452829.1  | 5542798 | 4-scf00092 | 4  |
| AX-157967458 | 4 | 83.849 | KV452829.1  | 5573617 | 4-scf00092 | 4  |
| AX-157967423 | 4 | 83.924 | KV452829.1  | 5544753 | 4-scf00092 | 4  |
| AX-157967426 | 4 | 84.002 | KV452829.1  | 5547473 | 4-scf00092 | 4  |
| AX-157967429 | 4 | 84.454 | KV452829.1  | 5551452 | 4-scf00092 | 4  |
| AX-157967453 | 4 | 84.454 | KV452829.1  | 5568784 | 4-scf00092 | 4  |
| AX-157967455 | 4 | 84.454 | KV452829.1  | 5569594 | 4-scf00092 | 4  |
| AX-157967432 | 4 | 84.459 | KV452829.1  | 5553863 | 4-scf00092 | 4  |
| AX-157967434 | 4 | 84.459 | KV452829.1  | 5554682 | 4-scf00092 | 4  |

|              |   |        |            |         |            |   |
|--------------|---|--------|------------|---------|------------|---|
| AX-157854961 | 4 | 84.459 | KV452829.1 | 5555344 | 4-scf00092 | 4 |
| AX-157967439 | 4 | 84.508 | KV452829.1 | 5558876 | 4-scf00092 | 4 |
| AX-157967487 | 4 | 84.508 | KV452829.1 | 5594077 | 4-scf00092 | 4 |
| AX-157967450 | 4 | 84.553 | KV452829.1 | 5566942 | 4-scf00092 | 4 |
| AX-157967452 | 4 | 84.596 | KV452829.1 | 5567749 | 4-scf00092 | 4 |
| AX-157816776 | 4 | 84.596 | KV452829.1 | 5570155 | 4-scf00092 | 4 |
| AX-157967441 | 4 | 84.597 | KV452829.1 | 5563021 | 4-scf00092 | 4 |
| AX-157967456 | 4 | 84.597 | KV452829.1 | 5570960 | 4-scf00092 | 4 |
| AX-157967431 | 4 | 84.934 | KV452829.1 | 5552454 | 4-scf00092 | 4 |
| AX-157967464 | 4 | 84.934 | KV452829.1 | 5576830 | 4-scf00092 | 4 |
| AX-157967610 | 4 | 84.934 | KV452829.1 | 5770789 | 4-scf00092 | 4 |
| AX-157816777 | 4 | 85.28  | KV452829.1 | 5585601 | 4-scf00092 | 4 |
| AX-157967478 | 4 | 85.28  | KV452829.1 | 5586984 | 4-scf00092 | 4 |
| AX-157967479 | 4 | 85.28  | KV452829.1 | 5587896 | 4-scf00092 | 4 |
| AX-157967485 | 4 | 85.28  | KV452829.1 | 5593679 | 4-scf00092 | 4 |
| AX-157967490 | 4 | 85.28  | KV452829.1 | 5598187 | 4-scf00092 | 4 |
| AX-157967491 | 4 | 85.28  | KV452829.1 | 5599351 | 4-scf00092 | 4 |
| AX-157967492 | 4 | 85.28  | KV452829.1 | 5602006 | 4-scf00092 | 4 |
| AX-158405238 | 4 | 85.28  | KV452829.1 | 5603831 | 4-scf00092 | 4 |
| AX-157967494 | 4 | 85.28  | KV452829.1 | 5604786 | 4-scf00092 | 4 |
| AX-157967496 | 4 | 85.28  | KV452829.1 | 5606006 | 4-scf00092 | 4 |
| AX-157967497 | 4 | 85.28  | KV452829.1 | 5606635 | 4-scf00092 | 4 |
| AX-157755713 | 4 | 85.28  | KV452829.1 | 5611095 | 4-scf00092 | 4 |
| AX-157967501 | 4 | 85.28  | KV452829.1 | 5612268 | 4-scf00092 | 4 |
| AX-157709540 | 4 | 85.28  | KV452829.1 | 5613640 | 4-scf00092 | 4 |
| AX-157967508 | 4 | 85.28  | KV452829.1 | 5618416 | 4-scf00092 | 4 |
| AX-157967509 | 4 | 85.28  | KV452829.1 | 5620543 | 4-scf00092 | 4 |
| AX-157967514 | 4 | 85.28  | KV452829.1 | 5624558 | 4-scf00092 | 4 |
| AX-157967515 | 4 | 85.28  | KV452829.1 | 5627825 | 4-scf00092 | 4 |
| AX-157967517 | 4 | 85.28  | KV452829.1 | 5629349 | 4-scf00092 | 4 |
| AX-157967523 | 4 | 85.28  | KV452829.1 | 5631763 | 4-scf00092 | 4 |
| AX-157967524 | 4 | 85.28  | KV452829.1 | 5632157 | 4-scf00092 | 4 |
| AX-157967526 | 4 | 85.28  | KV452829.1 | 5633280 | 4-scf00092 | 4 |
| AX-157967530 | 4 | 85.28  | KV452829.1 | 5636445 | 4-scf00092 | 4 |
| AX-157967536 | 4 | 85.28  | KV452829.1 | 5646343 | 4-scf00092 | 4 |
| AX-157967538 | 4 | 85.28  | KV452829.1 | 5648281 | 4-scf00092 | 4 |
| AX-157967540 | 4 | 85.28  | KV452829.1 | 5648732 | 4-scf00092 | 4 |
| AX-157967545 | 4 | 85.28  | KV452829.1 | 5660219 | 4-scf00092 | 4 |
| AX-157967547 | 4 | 85.28  | KV452829.1 | 5663325 | 4-scf00092 | 4 |
| AX-157967559 | 4 | 85.28  | KV452829.1 | 5684938 | 4-scf00092 | 4 |
| AX-157967564 | 4 | 85.28  | KV452829.1 | 5701614 | 4-scf00092 | 4 |
| AX-157967567 | 4 | 85.28  | KV452829.1 | 5707604 | 4-scf00092 | 4 |
| AX-157967575 | 4 | 85.28  | KV452829.1 | 5727183 | 4-scf00092 | 4 |
| AX-157967576 | 4 | 85.28  | KV452829.1 | 5729215 | 4-scf00092 | 4 |
| AX-157967588 | 4 | 85.28  | KV452829.1 | 5748367 | 4-scf00092 | 4 |
| AX-157967598 | 4 | 85.28  | KV452829.1 | 5762000 | 4-scf00092 | 4 |
| AX-157967600 | 4 | 85.28  | KV452829.1 | 5763086 | 4-scf00092 | 4 |
| AX-157967601 | 4 | 85.28  | KV452829.1 | 5763834 | 4-scf00092 | 4 |
| AX-157967607 | 4 | 85.28  | KV452829.1 | 5768985 | 4-scf00092 | 4 |
| AX-157967630 | 4 | 85.28  | KV452829.1 | 5801299 | 4-scf00092 | 4 |
| AX-157967631 | 4 | 85.28  | KV452829.1 | 5802022 | 4-scf00092 | 4 |

|              |   |       |            |         |            |   |
|--------------|---|-------|------------|---------|------------|---|
| AX-157967632 | 4 | 85.28 | KV452829.1 | 5804293 | 4-scf00092 | 4 |
| AX-157967633 | 4 | 85.28 | KV452829.1 | 5806413 | 4-scf00092 | 4 |
| AX-157967637 | 4 | 85.28 | KV452829.1 | 5807650 | 4-scf00092 | 4 |
| AX-157967648 | 4 | 85.28 | KV452829.1 | 5829999 | 4-scf00092 | 4 |
| AX-157967654 | 4 | 85.28 | KV452829.1 | 5842800 | 4-scf00092 | 4 |
| AX-157967655 | 4 | 85.28 | KV452829.1 | 5845245 | 4-scf00092 | 4 |
| AX-157967657 | 4 | 85.28 | KV452829.1 | 5845769 | 4-scf00092 | 4 |
| AX-157967659 | 4 | 85.28 | KV452829.1 | 5850358 | 4-scf00092 | 4 |
| AX-157967662 | 4 | 85.28 | KV452829.1 | 5863079 | 4-scf00092 | 4 |
| AX-157967665 | 4 | 85.28 | KV452829.1 | 5879112 | 4-scf00092 | 4 |
| AX-157774994 | 4 | 85.28 | KV452829.1 | 5884115 | 4-scf00092 | 4 |
| AX-157967668 | 4 | 85.28 | KV452829.1 | 5887185 | 4-scf00092 | 4 |
| AX-157967670 | 4 | 85.28 | KV452829.1 | 5890090 | 4-scf00092 | 4 |
| AX-157967672 | 4 | 85.28 | KV452829.1 | 5903025 | 4-scf00092 | 4 |
| AX-158422102 | 4 | 85.28 | KV452829.1 | 5911018 | 4-scf00092 | 4 |
| AX-157967678 | 4 | 85.28 | KV452829.1 | 5914969 | 4-scf00092 | 4 |
| AX-157967679 | 4 | 85.28 | KV452829.1 | 5915712 | 4-scf00092 | 4 |
| AX-157967686 | 4 | 85.28 | KV452829.1 | 5929385 | 4-scf00092 | 4 |
| AX-157967690 | 4 | 85.28 | KV452829.1 | 5940419 | 4-scf00092 | 4 |
| AX-157967693 | 4 | 85.28 | KV452829.1 | 5946841 | 4-scf00092 | 4 |
| AX-158405241 | 4 | 85.28 | KV452829.1 | 5980984 | 4-scf00092 | 4 |
| AX-157967710 | 4 | 85.28 | KV452829.1 | 5994999 | 4-scf00092 | 4 |
| AX-157770764 | 4 | 85.28 | KV452829.1 | 6003093 | 4-scf00092 | 4 |
| AX-157967717 | 4 | 85.28 | KV452829.1 | 6004898 | 4-scf00092 | 4 |
| AX-157967721 | 4 | 85.28 | KV452829.1 | 6015416 | 4-scf00092 | 4 |
| AX-157967722 | 4 | 85.28 | KV452829.1 | 6016351 | 4-scf00092 | 4 |
| AX-157967726 | 4 | 85.28 | KV452829.1 | 6022510 | 4-scf00092 | 4 |
| AX-157967728 | 4 | 85.28 | KV452829.1 | 6028908 | 4-scf00092 | 4 |
| AX-157967730 | 4 | 85.28 | KV452829.1 | 6029937 | 4-scf00092 | 4 |
| AX-157967731 | 4 | 85.28 | KV452829.1 | 6030330 | 4-scf00092 | 4 |
| AX-157967733 | 4 | 85.28 | KV452829.1 | 6033259 | 4-scf00092 | 4 |
| AX-157816778 | 4 | 85.28 | KV452829.1 | 6033339 | 4-scf00092 | 4 |
| AX-157967736 | 4 | 85.28 | KV452829.1 | 6034507 | 4-scf00092 | 4 |
| AX-157967741 | 4 | 85.28 | KV452829.1 | 6039755 | 4-scf00092 | 4 |
| AX-157967742 | 4 | 85.28 | KV452829.1 | 6041350 | 4-scf00092 | 4 |
| AX-157967743 | 4 | 85.28 | KV452829.1 | 6043893 | 4-scf00092 | 4 |
| AX-157967744 | 4 | 85.28 | KV452829.1 | 6046905 | 4-scf00092 | 4 |
| AX-157967746 | 4 | 85.28 | KV452829.1 | 6048148 | 4-scf00092 | 4 |
| AX-157967748 | 4 | 85.28 | KV452829.1 | 6049832 | 4-scf00092 | 4 |
| AX-157967751 | 4 | 85.28 | KV452829.1 | 6052886 | 4-scf00092 | 4 |
| AX-157967752 | 4 | 85.28 | KV452829.1 | 6057109 | 4-scf00092 | 4 |
| AX-157854964 | 4 | 85.28 | KV452829.1 | 6057540 | 4-scf00092 | 4 |
| AX-157967755 | 4 | 85.28 | KV452829.1 | 6060460 | 4-scf00092 | 4 |
| AX-157967792 | 4 | 85.28 | KV452829.1 | 6132808 | 4-scf00092 | 4 |
| AX-157967793 | 4 | 85.28 | KV452829.1 | 6141933 | 4-scf00092 | 4 |
| AX-157967795 | 4 | 85.28 | KV452829.1 | 6146473 | 4-scf00092 | 4 |
| AX-157967804 | 4 | 85.28 | KV452829.1 | 6160029 | 4-scf00092 | 4 |
| AX-157967814 | 4 | 85.28 | KV452829.1 | 6178174 | 4-scf00092 | 4 |
| AX-157967822 | 4 | 85.28 | KV452829.1 | 6192392 | 4-scf00092 | 4 |
| AX-157967834 | 4 | 85.28 | KV452829.1 | 6202584 | 4-scf00092 | 4 |
| AX-157967837 | 4 | 85.28 | KV452829.1 | 6211910 | 4-scf00092 | 4 |

|              |   |        |             |         |            |    |
|--------------|---|--------|-------------|---------|------------|----|
| AX-157967850 | 4 | 85.28  | KV452829.1  | 6222790 | 4-scf00092 | 4  |
| AX-157967856 | 4 | 85.28  | KV452829.1  | 6230771 | 4-scf00092 | 4  |
| AX-157967857 | 4 | 85.28  | KV452829.1  | 6232318 | 4-scf00092 | 4  |
| AX-157967858 | 4 | 85.28  | KV452829.1  | 6232976 | 4-scf00092 | 4  |
| AX-157967883 | 4 | 85.28  | KV452829.1  | 6257712 | 4-scf00092 | 4  |
| AX-157875577 | 4 | 85.28  | KV452829.1  | 6267149 | 4-scf00092 | 4  |
| AX-157967902 | 4 | 85.28  | KV452829.1  | 6271894 | 4-scf00092 | 4  |
| AX-157967958 | 4 | 85.28  | KV452829.1  | 6307135 | 4-scf00092 | 4  |
| AX-157816782 | 4 | 85.28  | KV452829.1  | 6332438 | 4-scf00092 | 4  |
| AX-157688081 | 4 | 85.28  | 3ML01025511 | 3306    | scf01214_1 | UN |
| AX-157706841 | 4 | 85.28  | 3ML01033022 | 52      | scf08659_1 | UN |
| AX-157967797 | 4 | 85.308 | KV452829.1  | 6147191 | 4-scf00092 | 4  |
| AX-157967502 | 4 | 85.337 | KV452829.1  | 5613037 | 4-scf00092 | 4  |
| AX-157967541 | 4 | 85.337 | KV452829.1  | 5650452 | 4-scf00092 | 4  |
| AX-157967641 | 4 | 85.337 | KV452829.1  | 5812743 | 4-scf00092 | 4  |
| AX-157967643 | 4 | 85.337 | KV452829.1  | 5814939 | 4-scf00092 | 4  |
| AX-157967677 | 4 | 85.337 | KV452829.1  | 5911882 | 4-scf00092 | 4  |
| AX-157967692 | 4 | 85.337 | KV452829.1  | 5945156 | 4-scf00092 | 4  |
| AX-157967694 | 4 | 85.337 | KV452829.1  | 5946914 | 4-scf00092 | 4  |
| AX-157967695 | 4 | 85.337 | KV452829.1  | 5947429 | 4-scf00092 | 4  |
| AX-157967696 | 4 | 85.337 | KV452829.1  | 5947975 | 4-scf00092 | 4  |
| AX-157967799 | 4 | 85.337 | KV452829.1  | 6148542 | 4-scf00092 | 4  |
| AX-157967806 | 4 | 85.337 | KV452829.1  | 6161530 | 4-scf00092 | 4  |
| AX-157967816 | 4 | 85.337 | KV452829.1  | 6179905 | 4-scf00092 | 4  |
| AX-157967911 | 4 | 85.337 | KV452829.1  | 6275697 | 4-scf00092 | 4  |
| AX-157967948 | 4 | 85.337 | KV452829.1  | 6299709 | 4-scf00092 | 4  |
| AX-157967960 | 4 | 85.337 | KV452829.1  | 6309443 | 4-scf00092 | 4  |
| AX-157967962 | 4 | 85.337 | KV452829.1  | 6312023 | 4-scf00092 | 4  |
| AX-157967811 | 4 | 85.365 | KV452829.1  | 6165831 | 4-scf00092 | 4  |
| AX-157967764 | 4 | 85.372 | KV452829.1  | 6081279 | 4-scf00092 | 4  |
| AX-157967638 | 4 | 85.399 | KV452829.1  | 5808540 | 4-scf00092 | 4  |
| AX-157967669 | 4 | 85.399 | KV452829.1  | 5887838 | 4-scf00092 | 4  |
| AX-157967675 | 4 | 85.399 | KV452829.1  | 5909097 | 4-scf00092 | 4  |
| AX-157967835 | 4 | 85.399 | KV452829.1  | 6203956 | 4-scf00092 | 4  |
| AX-157967862 | 4 | 85.399 | KV452829.1  | 6237768 | 4-scf00092 | 4  |
| AX-157967876 | 4 | 85.399 | KV452829.1  | 6252997 | 4-scf00092 | 4  |
| AX-157967737 | 4 | 85.417 | KV452829.1  | 6035085 | 4-scf00092 | 4  |
| AX-157967762 | 4 | 85.417 | KV452829.1  | 6079226 | 4-scf00092 | 4  |
| AX-157967839 | 4 | 85.417 | KV452829.1  | 6212247 | 4-scf00092 | 4  |
| AX-157967848 | 4 | 85.417 | KV452829.1  | 6219455 | 4-scf00092 | 4  |
| AX-157708611 | 4 | 85.417 | KV452829.1  | 6220080 | 4-scf00092 | 4  |
| AX-157967864 | 4 | 85.417 | KV452829.1  | 6240980 | 4-scf00092 | 4  |
| AX-157967825 | 4 | 85.487 | KV452829.1  | 6194690 | 4-scf00092 | 4  |
| AX-157967855 | 4 | 85.487 | KV452829.1  | 6228671 | 4-scf00092 | 4  |
| AX-157967604 | 4 | 85.554 | KV452829.1  | 5766854 | 4-scf00092 | 4  |
| AX-157967608 | 4 | 85.554 | KV452829.1  | 5769338 | 4-scf00092 | 4  |
| AX-157967644 | 4 | 85.554 | KV452829.1  | 5827250 | 4-scf00092 | 4  |
| AX-157967646 | 4 | 85.554 | KV452829.1  | 5829375 | 4-scf00092 | 4  |
| AX-157967681 | 4 | 85.554 | KV452829.1  | 5916777 | 4-scf00092 | 4  |
| AX-157967687 | 4 | 85.554 | KV452829.1  | 5929884 | 4-scf00092 | 4  |
| AX-157967707 | 4 | 85.554 | KV452829.1  | 5978261 | 4-scf00092 | 4  |

|              |   |        |            |         |            |   |
|--------------|---|--------|------------|---------|------------|---|
| AX-157967709 | 4 | 85.554 | KV452829.1 | 5980038 | 4-scf00092 | 4 |
| AX-158405240 | 4 | 85.554 | KV452829.1 | 5980723 | 4-scf00092 | 4 |
| AX-158422103 | 4 | 85.554 | KV452829.1 | 5980858 | 4-scf00092 | 4 |
| AX-158422104 | 4 | 85.554 | KV452829.1 | 5998900 | 4-scf00092 | 4 |
| AX-157967712 | 4 | 85.554 | KV452829.1 | 5999613 | 4-scf00092 | 4 |
| AX-157967740 | 4 | 85.554 | KV452829.1 | 6039457 | 4-scf00092 | 4 |
| AX-157967749 | 4 | 85.554 | KV452829.1 | 6050119 | 4-scf00092 | 4 |
| AX-157967765 | 4 | 85.554 | KV452829.1 | 6081996 | 4-scf00092 | 4 |
| AX-157967830 | 4 | 85.554 | KV452829.1 | 6200536 | 4-scf00092 | 4 |
| AX-157967853 | 4 | 85.554 | KV452829.1 | 6226094 | 4-scf00092 | 4 |
| AX-157967854 | 4 | 85.554 | KV452829.1 | 6226577 | 4-scf00092 | 4 |
| AX-157967866 | 4 | 85.554 | KV452829.1 | 6243028 | 4-scf00092 | 4 |
| AX-157967868 | 4 | 85.554 | KV452829.1 | 6245768 | 4-scf00092 | 4 |
| AX-157967869 | 4 | 85.554 | KV452829.1 | 6246043 | 4-scf00092 | 4 |
| AX-157967870 | 4 | 85.554 | KV452829.1 | 6247969 | 4-scf00092 | 4 |
| AX-157967879 | 4 | 85.554 | KV452829.1 | 6254942 | 4-scf00092 | 4 |
| AX-157967881 | 4 | 85.554 | KV452829.1 | 6255349 | 4-scf00092 | 4 |
| AX-157967884 | 4 | 85.554 | KV452829.1 | 6258510 | 4-scf00092 | 4 |
| AX-157724565 | 4 | 85.554 | KV452829.1 | 6260841 | 4-scf00092 | 4 |
| AX-157816779 | 4 | 85.554 | KV452829.1 | 6264588 | 4-scf00092 | 4 |
| AX-157707972 | 4 | 85.554 | KV452829.1 | 6321236 | 4-scf00092 | 4 |
| AX-157967908 | 4 | 85.69  | KV452829.1 | 6274152 | 4-scf00092 | 4 |
| AX-157967910 | 4 | 85.69  | KV452829.1 | 6275335 | 4-scf00092 | 4 |
| AX-157967913 | 4 | 85.69  | KV452829.1 | 6276848 | 4-scf00092 | 4 |
| AX-157967916 | 4 | 85.69  | KV452829.1 | 6277278 | 4-scf00092 | 4 |
| AX-157967922 | 4 | 85.69  | KV452829.1 | 6279696 | 4-scf00092 | 4 |
| AX-157967676 | 4 | 85.963 | KV452829.1 | 5910416 | 4-scf00092 | 4 |
| AX-157967697 | 4 | 85.963 | KV452829.1 | 5948558 | 4-scf00092 | 4 |
| AX-157967701 | 4 | 85.963 | KV452829.1 | 5961019 | 4-scf00092 | 4 |
| AX-157869628 | 4 | 85.963 | KV452829.1 | 6250303 | 4-scf00092 | 4 |
| AX-157967893 | 4 | 85.963 | KV452829.1 | 6267459 | 4-scf00092 | 4 |
| AX-157816780 | 4 | 85.963 | KV452829.1 | 6293617 | 4-scf00092 | 4 |
| AX-157781932 | 4 | 85.963 | KV452829.1 | 6294087 | 4-scf00092 | 4 |
| AX-158379500 | 4 | 85.963 | KV452829.1 | 6303864 | 4-scf00092 | 4 |
| AX-158390295 | 4 | 85.964 | KV452829.1 | 5605681 | 4-scf00092 | 4 |
| AX-158406575 | 4 | 85.964 | KV452829.1 | 5925220 | 4-scf00092 | 4 |
| AX-157967940 | 4 | 85.964 | KV452829.1 | 6295142 | 4-scf00092 | 4 |
| AX-157967957 | 4 | 85.964 | KV452829.1 | 6304901 | 4-scf00092 | 4 |
| AX-157967959 | 4 | 85.964 | KV452829.1 | 6307970 | 4-scf00092 | 4 |
| AX-157967961 | 4 | 85.964 | KV452829.1 | 6311231 | 4-scf00092 | 4 |
| AX-157967964 | 4 | 85.964 | KV452829.1 | 6312458 | 4-scf00092 | 4 |
| AX-157967965 | 4 | 85.964 | KV452829.1 | 6313019 | 4-scf00092 | 4 |
| AX-157967469 | 4 | 86.1   | KV452829.1 | 5581503 | 4-scf00092 | 4 |
| AX-157967506 | 4 | 86.1   | KV452829.1 | 5617501 | 4-scf00092 | 4 |
| AX-157967673 | 4 | 86.1   | KV452829.1 | 5908726 | 4-scf00092 | 4 |
| AX-157967685 | 4 | 86.1   | KV452829.1 | 5928730 | 4-scf00092 | 4 |
| AX-157967708 | 4 | 86.1   | KV452829.1 | 5979425 | 4-scf00092 | 4 |
| AX-157967903 | 4 | 86.1   | KV452829.1 | 6272632 | 4-scf00092 | 4 |
| AX-157727208 | 4 | 86.1   | KV452829.1 | 6283565 | 4-scf00092 | 4 |
| AX-157967945 | 4 | 86.1   | KV452829.1 | 6298096 | 4-scf00092 | 4 |
| AX-157967971 | 4 | 86.1   | KV452829.1 | 6315770 | 4-scf00092 | 4 |

|              |   |        |             |         |            |    |
|--------------|---|--------|-------------|---------|------------|----|
| AX-157967973 | 4 | 86.1   | KV452829.1  | 6316839 | 4-scf00092 | 4  |
| AX-157967979 | 4 | 86.1   | KV452829.1  | 6321933 | 4-scf00092 | 4  |
| AX-157967980 | 4 | 86.1   | KV452829.1  | 6322986 | 4-scf00092 | 4  |
| AX-157967981 | 4 | 86.1   | KV452829.1  | 6323560 | 4-scf00092 | 4  |
| AX-157967985 | 4 | 86.1   | KV452829.1  | 6331400 | 4-scf00092 | 4  |
| AX-157967986 | 4 | 86.1   | KV452829.1  | 6332832 | 4-scf00092 | 4  |
| AX-157967987 | 4 | 86.1   | KV452829.1  | 6333497 | 4-scf00092 | 4  |
| AX-157967988 | 4 | 86.1   | KV452829.1  | 6334055 | 4-scf00092 | 4  |
| AX-157967992 | 4 | 86.1   | KV452829.1  | 6336840 | 4-scf00092 | 4  |
| AX-157738975 | 4 | 86.1   | KV452829.1  | 6337037 | 4-scf00092 | 4  |
| AX-157816783 | 4 | 86.1   | KV452829.1  | 6340940 | 4-scf00092 | 4  |
| AX-157967999 | 4 | 86.1   | KV452829.1  | 6348616 | 4-scf00092 | 4  |
| AX-158379501 | 4 | 86.1   | KV452829.1  | 6350680 | 4-scf00092 | 4  |
| AX-157968002 | 4 | 86.1   | KV452829.1  | 6352595 | 4-scf00092 | 4  |
| AX-157968006 | 4 | 86.1   | KV452829.1  | 6354193 | 4-scf00092 | 4  |
| AX-157968009 | 4 | 86.1   | KV452829.1  | 6359372 | 4-scf00092 | 4  |
| AX-157968010 | 4 | 86.1   | KV452829.1  | 6360068 | 4-scf00092 | 4  |
| AX-157884164 | 4 | 86.1   | KV452829.1  | 6360156 | 4-scf00092 | 4  |
| AX-157968012 | 4 | 86.101 | KV452829.1  | 6361956 | 4-scf00092 | 4  |
| AX-157869630 | 4 | 86.219 | KV452829.1  | 6364193 | 4-scf00092 | 4  |
| AX-157968015 | 4 | 86.384 | KV452829.1  | 6366946 | 4-scf00092 | 4  |
| AX-157968019 | 4 | 86.628 | KV452829.1  | 6368451 | 4-scf00092 | 4  |
| AX-157968068 | 4 | 86.628 | KV452829.1  | 6409738 | 4-scf00092 | 4  |
| AX-157968020 | 4 | 86.637 | KV452829.1  | 6370012 | 4-scf00092 | 4  |
| AX-157968023 | 4 | 86.639 | KV452829.1  | 6370963 | 4-scf00092 | 4  |
| AX-157968049 | 4 | 86.639 | KV452829.1  | 6387947 | 4-scf00092 | 4  |
| AX-157967982 | 4 | 86.648 | KV452829.1  | 6323992 | 4-scf00092 | 4  |
| AX-157968007 | 4 | 86.648 | KV452829.1  | 6357053 | 4-scf00092 | 4  |
| AX-157968017 | 4 | 86.648 | KV452829.1  | 6368135 | 4-scf00092 | 4  |
| AX-157968028 | 4 | 86.648 | KV452829.1  | 6374743 | 4-scf00092 | 4  |
| AX-157968034 | 4 | 86.648 | KV452829.1  | 6377110 | 4-scf00092 | 4  |
| AX-157968035 | 4 | 86.648 | KV452829.1  | 6378149 | 4-scf00092 | 4  |
| AX-157968036 | 4 | 86.648 | KV452829.1  | 6379560 | 4-scf00092 | 4  |
| AX-157968037 | 4 | 86.648 | KV452829.1  | 6380104 | 4-scf00092 | 4  |
| AX-157968042 | 4 | 86.648 | KV452829.1  | 6382658 | 4-scf00092 | 4  |
| AX-157968043 | 4 | 86.648 | KV452829.1  | 6383224 | 4-scf00092 | 4  |
| AX-157816788 | 4 | 86.648 | KV452829.1  | 6388456 | 4-scf00092 | 4  |
| AX-157968052 | 4 | 86.648 | KV452829.1  | 6389802 | 4-scf00092 | 4  |
| AX-157816789 | 4 | 86.648 | KV452829.1  | 6390749 | 4-scf00092 | 4  |
| AX-157968055 | 4 | 86.648 | KV452829.1  | 6392769 | 4-scf00092 | 4  |
| AX-157968056 | 4 | 86.648 | KV452829.1  | 6393767 | 4-scf00092 | 4  |
| AX-157968057 | 4 | 86.648 | KV452829.1  | 6394625 | 4-scf00092 | 4  |
| AX-157689478 | 4 | 86.648 | 3ML01029944 | 587     | scf05566_1 | UN |
| AX-157968030 | 4 | 86.72  | KV452829.1  | 6375511 | 4-scf00092 | 4  |
| AX-157968040 | 4 | 86.72  | KV452829.1  | 6382526 | 4-scf00092 | 4  |
| AX-157968046 | 4 | 86.72  | KV452829.1  | 6385788 | 4-scf00092 | 4  |
| AX-157738702 | 4 | 86.72  | KV452829.1  | 6403087 | 4-scf00092 | 4  |
| AX-157968061 | 4 | 86.72  | KV452829.1  | 6404616 | 4-scf00092 | 4  |
| AX-157968072 | 4 | 86.72  | KV452829.1  | 6416619 | 4-scf00092 | 4  |
| AX-157968064 | 4 | 86.785 | KV452829.1  | 6406479 | 4-scf00092 | 4  |
| AX-157968069 | 4 | 86.853 | KV452829.1  | 6410944 | 4-scf00092 | 4  |



|              |   |        |            |         |            |   |
|--------------|---|--------|------------|---------|------------|---|
| AX-157968071 | 4 | 86.914 | KV452829.1 | 6414892 | 4-scf00092 | 4 |
| AX-157968074 | 4 | 86.96  | KV452829.1 | 6417680 | 4-scf00092 | 4 |
| AX-157719996 | 4 | 87.024 | KV452829.1 | 6419108 | 4-scf00092 | 4 |
| AX-157968076 | 4 | 87.059 | KV452829.1 | 6419584 | 4-scf00092 | 4 |
| AX-157968079 | 4 | 87.093 | KV452829.1 | 6422781 | 4-scf00092 | 4 |
| AX-157968080 | 4 | 87.604 | KV452829.1 | 6423756 | 4-scf00092 | 4 |
| AX-157968082 | 4 | 87.605 | KV452829.1 | 6424647 | 4-scf00092 | 4 |
| AX-157968084 | 4 | 87.605 | KV452829.1 | 6426004 | 4-scf00092 | 4 |
| AX-157968086 | 4 | 87.608 | KV452829.1 | 6430062 | 4-scf00092 | 4 |
| AX-157775030 | 4 | 87.608 | KV452829.1 | 6434399 | 4-scf00092 | 4 |
| AX-157968090 | 4 | 87.608 | KV452829.1 | 6434934 | 4-scf00092 | 4 |
| AX-157968094 | 4 | 87.809 | KV452829.1 | 6441375 | 4-scf00092 | 4 |
| AX-157968122 | 4 | 88.016 | KV452829.1 | 6463216 | 4-scf00092 | 4 |
| AX-157742019 | 4 | 88.016 | KV452829.1 | 6464331 | 4-scf00092 | 4 |
| AX-157968126 | 4 | 88.016 | KV452829.1 | 6467102 | 4-scf00092 | 4 |
| AX-157968137 | 4 | 88.016 | KV452829.1 | 6477255 | 4-scf00092 | 4 |
| AX-157968141 | 4 | 88.016 | KV452829.1 | 6480060 | 4-scf00092 | 4 |
| AX-157968143 | 4 | 88.016 | KV452829.1 | 6480599 | 4-scf00092 | 4 |
| AX-157968144 | 4 | 88.028 | KV452829.1 | 6483842 | 4-scf00092 | 4 |
| AX-157968146 | 4 | 88.037 | KV452829.1 | 6484507 | 4-scf00092 | 4 |
| AX-157968156 | 4 | 88.045 | KV452829.1 | 6494644 | 4-scf00092 | 4 |
| AX-157968093 | 4 | 88.048 | KV452829.1 | 6438907 | 4-scf00092 | 4 |
| AX-157968098 | 4 | 88.048 | KV452829.1 | 6442260 | 4-scf00092 | 4 |
| AX-157968102 | 4 | 88.048 | KV452829.1 | 6445259 | 4-scf00092 | 4 |
| AX-157968106 | 4 | 88.048 | KV452829.1 | 6447181 | 4-scf00092 | 4 |
| AX-157968118 | 4 | 88.048 | KV452829.1 | 6460713 | 4-scf00092 | 4 |
| AX-157968119 | 4 | 88.048 | KV452829.1 | 6461271 | 4-scf00092 | 4 |
| AX-157968135 | 4 | 88.048 | KV452829.1 | 6476364 | 4-scf00092 | 4 |
| AX-157968158 | 4 | 88.048 | KV452829.1 | 6495569 | 4-scf00092 | 4 |
| AX-157968174 | 4 | 88.048 | KV452829.1 | 6525865 | 4-scf00092 | 4 |
| AX-157758588 | 4 | 88.059 | KV452829.1 | 6452619 | 4-scf00092 | 4 |
| AX-157968164 | 4 | 88.059 | KV452829.1 | 6498805 | 4-scf00092 | 4 |
| AX-157968166 | 4 | 88.071 | KV452829.1 | 6504965 | 4-scf00092 | 4 |
| AX-157968168 | 4 | 88.085 | KV452829.1 | 6505828 | 4-scf00092 | 4 |
| AX-157968107 | 4 | 88.097 | KV452829.1 | 6447617 | 4-scf00092 | 4 |
| AX-157968110 | 4 | 88.097 | KV452829.1 | 6450896 | 4-scf00092 | 4 |
| AX-157968121 | 4 | 88.097 | KV452829.1 | 6462554 | 4-scf00092 | 4 |
| AX-157738599 | 4 | 88.097 | KV452829.1 | 6465895 | 4-scf00092 | 4 |
| AX-157816793 | 4 | 88.097 | KV452829.1 | 6502727 | 4-scf00092 | 4 |
| AX-157968171 | 4 | 88.097 | KV452829.1 | 6514366 | 4-scf00092 | 4 |
| AX-157968172 | 4 | 88.097 | KV452829.1 | 6515889 | 4-scf00092 | 4 |
| AX-157968178 | 4 | 88.097 | KV452829.1 | 6537041 | 4-scf00092 | 4 |
| AX-157968173 | 4 | 88.11  | KV452829.1 | 6519918 | 4-scf00092 | 4 |
| AX-157744420 | 4 | 88.124 | KV452829.1 | 6524891 | 4-scf00092 | 4 |
| AX-157968175 | 4 | 88.139 | KV452829.1 | 6532836 | 4-scf00092 | 4 |
| AX-157968124 | 4 | 88.152 | KV452829.1 | 6464970 | 4-scf00092 | 4 |
| AX-157968134 | 4 | 88.152 | KV452829.1 | 6473751 | 4-scf00092 | 4 |
| AX-157968152 | 4 | 88.152 | KV452829.1 | 6491354 | 4-scf00092 | 4 |
| AX-157968176 | 4 | 88.152 | KV452829.1 | 6533478 | 4-scf00092 | 4 |
| AX-157771076 | 4 | 88.152 | KV452829.1 | 6536274 | 4-scf00092 | 4 |
| AX-157968179 | 4 | 88.152 | KV452829.1 | 6537921 | 4-scf00092 | 4 |

|              |   |        |            |         |            |   |
|--------------|---|--------|------------|---------|------------|---|
| AX-157750663 | 4 | 89.02  | KV452829.1 | 6574173 | 4-scf00092 | 4 |
| AX-157968154 | 4 | 89.052 | KV452829.1 | 6493177 | 4-scf00092 | 4 |
| AX-157968162 | 4 | 89.052 | KV452829.1 | 6497965 | 4-scf00092 | 4 |
| AX-157968195 | 4 | 89.052 | KV452829.1 | 6580418 | 4-scf00092 | 4 |
| AX-157968199 | 4 | 89.052 | KV452829.1 | 6585517 | 4-scf00092 | 4 |
| AX-157968222 | 4 | 89.052 | KV452829.1 | 6631288 | 4-scf00092 | 4 |
| AX-157968196 | 4 | 89.209 | KV452829.1 | 6584305 | 4-scf00092 | 4 |
| AX-157968197 | 4 | 89.209 | KV452829.1 | 6584511 | 4-scf00092 | 4 |
| AX-157816796 | 4 | 89.21  | KV452829.1 | 6590588 | 4-scf00092 | 4 |
| AX-157968207 | 4 | 89.21  | KV452829.1 | 6605502 | 4-scf00092 | 4 |
| AX-157968213 | 4 | 89.619 | KV452829.1 | 6612631 | 4-scf00092 | 4 |
| AX-157968228 | 4 | 89.824 | KV452829.1 | 6633777 | 4-scf00092 | 4 |
| AX-157968229 | 4 | 89.824 | KV452829.1 | 6634127 | 4-scf00092 | 4 |
| AX-157968231 | 4 | 89.824 | KV452829.1 | 6635388 | 4-scf00092 | 4 |
| AX-157968233 | 4 | 89.895 | KV452829.1 | 6636669 | 4-scf00092 | 4 |
| AX-157968203 | 4 | 89.963 | KV452829.1 | 6601312 | 4-scf00092 | 4 |
| AX-157968236 | 4 | 89.963 | KV452829.1 | 6638470 | 4-scf00092 | 4 |
| AX-157968211 | 4 | 90.03  | KV452829.1 | 6609802 | 4-scf00092 | 4 |
| AX-157968225 | 4 | 90.03  | KV452829.1 | 6632517 | 4-scf00092 | 4 |
| AX-157968242 | 4 | 90.03  | KV452829.1 | 6646155 | 4-scf00092 | 4 |
| AX-157740635 | 4 | 90.03  | KV452829.1 | 6648330 | 4-scf00092 | 4 |
| AX-157968258 | 4 | 90.03  | KV452829.1 | 6658738 | 4-scf00092 | 4 |
| AX-157968260 | 4 | 90.117 | KV452829.1 | 6660262 | 4-scf00092 | 4 |
| AX-157968263 | 4 | 90.148 | KV452829.1 | 6663623 | 4-scf00092 | 4 |
| AX-157968265 | 4 | 90.178 | KV452829.1 | 6665960 | 4-scf00092 | 4 |
| AX-157968268 | 4 | 90.214 | KV452829.1 | 6668131 | 4-scf00092 | 4 |
| AX-157968264 | 4 | 90.215 | KV452829.1 | 6665604 | 4-scf00092 | 4 |
| AX-157968271 | 4 | 90.215 | KV452829.1 | 6670039 | 4-scf00092 | 4 |
| AX-157968278 | 4 | 90.557 | KV452829.1 | 6673792 | 4-scf00092 | 4 |
| AX-157968282 | 4 | 90.557 | KV452829.1 | 6676427 | 4-scf00092 | 4 |
| AX-157968288 | 4 | 90.557 | KV452829.1 | 6681725 | 4-scf00092 | 4 |
| AX-157968306 | 4 | 90.557 | KV452829.1 | 6698782 | 4-scf00092 | 4 |
| AX-157968294 | 4 | 90.729 | KV452829.1 | 6686903 | 4-scf00092 | 4 |
| AX-157968285 | 4 | 90.789 | KV452829.1 | 6679013 | 4-scf00092 | 4 |
| AX-157968300 | 4 | 90.789 | KV452829.1 | 6693311 | 4-scf00092 | 4 |
| AX-157968302 | 4 | 90.845 | KV452829.1 | 6696582 | 4-scf00092 | 4 |
| AX-157854969 | 4 | 90.9   | KV452829.1 | 6676971 | 4-scf00092 | 4 |
| AX-157968295 | 4 | 90.9   | KV452829.1 | 6687759 | 4-scf00092 | 4 |
| AX-157750365 | 4 | 90.9   | KV452829.1 | 6695860 | 4-scf00092 | 4 |
| AX-157968309 | 4 | 90.9   | KV452829.1 | 6702776 | 4-scf00092 | 4 |
| AX-157968311 | 4 | 90.9   | KV452829.1 | 6703518 | 4-scf00092 | 4 |
| AX-157968316 | 4 | 90.9   | KV452829.1 | 6704913 | 4-scf00092 | 4 |
| AX-157968330 | 4 | 90.9   | KV452829.1 | 6709490 | 4-scf00092 | 4 |
| AX-157968332 | 4 | 90.9   | KV452829.1 | 6709727 | 4-scf00092 | 4 |
| AX-157968335 | 4 | 90.9   | KV452829.1 | 6710012 | 4-scf00092 | 4 |
| AX-157968337 | 4 | 90.9   | KV452829.1 | 6710660 | 4-scf00092 | 4 |
| AX-157968339 | 4 | 90.9   | KV452829.1 | 6712252 | 4-scf00092 | 4 |
| AX-157968340 | 4 | 90.9   | KV452829.1 | 6715310 | 4-scf00092 | 4 |
| AX-157968366 | 4 | 90.9   | KV452829.1 | 6739715 | 4-scf00092 | 4 |
| AX-157968368 | 4 | 90.9   | KV452829.1 | 6741464 | 4-scf00092 | 4 |
| AX-157968348 | 4 | 91.011 | KV452829.1 | 6725306 | 4-scf00092 | 4 |

|              |   |        |            |         |            |   |
|--------------|---|--------|------------|---------|------------|---|
| AX-157968350 | 4 | 91.306 | KV452829.1 | 6726505 | 4-scf00092 | 4 |
| AX-157968357 | 4 | 91.308 | KV452829.1 | 6730711 | 4-scf00092 | 4 |
| AX-157741566 | 4 | 91.308 | KV452829.1 | 6756345 | 4-scf00092 | 4 |
| AX-157968358 | 4 | 91.309 | KV452829.1 | 6732114 | 4-scf00092 | 4 |
| AX-157968370 | 4 | 91.31  | KV452829.1 | 6743958 | 4-scf00092 | 4 |
| AX-157968371 | 4 | 91.311 | KV452829.1 | 6746735 | 4-scf00092 | 4 |
| AX-157743318 | 4 | 91.311 | KV452829.1 | 6748565 | 4-scf00092 | 4 |
| AX-157968376 | 4 | 91.311 | KV452829.1 | 6752954 | 4-scf00092 | 4 |
| AX-157968377 | 4 | 91.369 | KV452829.1 | 6753535 | 4-scf00092 | 4 |
| AX-157968380 | 4 | 91.448 | KV452829.1 | 6755176 | 4-scf00092 | 4 |
| AX-157968381 | 4 | 91.448 | KV452829.1 | 6757495 | 4-scf00092 | 4 |
| AX-157968384 | 4 | 91.448 | KV452829.1 | 6762127 | 4-scf00092 | 4 |
| AX-157968343 | 4 | 91.45  | KV452829.1 | 6718709 | 4-scf00092 | 4 |
| AX-157968345 | 4 | 91.45  | KV452829.1 | 6721576 | 4-scf00092 | 4 |
| AX-157968352 | 4 | 91.45  | KV452829.1 | 6726911 | 4-scf00092 | 4 |
| AX-157968385 | 4 | 91.45  | KV452829.1 | 6763559 | 4-scf00092 | 4 |
| AX-157756803 | 4 | 91.639 | KV452829.1 | 6727926 | 4-scf00092 | 4 |
| AX-157968356 | 4 | 91.639 | KV452829.1 | 6730513 | 4-scf00092 | 4 |
| AX-157968374 | 4 | 91.639 | KV452829.1 | 6750617 | 4-scf00092 | 4 |
| AX-157968386 | 4 | 91.639 | KV452829.1 | 6765526 | 4-scf00092 | 4 |
| AX-157968408 | 4 | 91.639 | KV452829.1 | 6790065 | 4-scf00092 | 4 |
| AX-157968286 | 4 | 91.664 | KV452829.1 | 6681388 | 4-scf00092 | 4 |
| AX-157968338 | 4 | 91.664 | KV452829.1 | 6711936 | 4-scf00092 | 4 |
| AX-158379504 | 4 | 91.664 | KV452829.1 | 6752828 | 4-scf00092 | 4 |
| AX-157968395 | 4 | 91.664 | KV452829.1 | 6774089 | 4-scf00092 | 4 |
| AX-157968404 | 4 | 91.664 | KV452829.1 | 6785764 | 4-scf00092 | 4 |
| AX-157968405 | 4 | 91.738 | KV452829.1 | 6786132 | 4-scf00092 | 4 |
| AX-157968406 | 4 | 91.81  | KV452829.1 | 6787593 | 4-scf00092 | 4 |
| AX-157968410 | 4 | 91.81  | KV452829.1 | 6795441 | 4-scf00092 | 4 |
| AX-157968411 | 4 | 91.81  | KV452829.1 | 6796709 | 4-scf00092 | 4 |
| AX-157968310 | 4 | 92.649 | KV452829.1 | 6703130 | 4-scf00092 | 4 |
| AX-157724870 | 4 | 92.649 | KV452829.1 | 6747661 | 4-scf00092 | 4 |
| AX-157968393 | 4 | 92.649 | KV452829.1 | 6771785 | 4-scf00092 | 4 |
| AX-157720580 | 4 | 92.649 | KV452829.1 | 6798138 | 4-scf00092 | 4 |
| AX-157816799 | 4 | 92.649 | KV452829.1 | 6798830 | 4-scf00092 | 4 |
| AX-157715229 | 4 | 92.649 | KV452829.1 | 6812888 | 4-scf00092 | 4 |
| AX-158383000 | 4 | 92.653 | KV452829.1 | 6799440 | 4-scf00092 | 4 |
| AX-157968412 | 4 | 92.872 | KV452829.1 | 6800500 | 4-scf00092 | 4 |
| AX-157968419 | 4 | 93.083 | KV452829.1 | 6806671 | 4-scf00092 | 4 |
| AX-157714056 | 4 | 93.088 | KV452829.1 | 6815502 | 4-scf00092 | 4 |
| AX-157968423 | 4 | 93.093 | KV452829.1 | 6817613 | 4-scf00092 | 4 |
| AX-157968430 | 4 | 93.094 | KV452829.1 | 6830831 | 4-scf00092 | 4 |
| AX-157968431 | 4 | 93.094 | KV452829.1 | 6831044 | 4-scf00092 | 4 |
| AX-157968418 | 4 | 93.18  | KV452829.1 | 6805859 | 4-scf00092 | 4 |
| AX-157875586 | 4 | 93.18  | KV452829.1 | 6812542 | 4-scf00092 | 4 |
| AX-157968434 | 4 | 93.18  | KV452829.1 | 6832888 | 4-scf00092 | 4 |
| AX-157968437 | 4 | 93.231 | KV452829.1 | 6834479 | 4-scf00092 | 4 |
| AX-157968438 | 4 | 93.231 | KV452829.1 | 6835492 | 4-scf00092 | 4 |
| AX-157968439 | 4 | 93.368 | KV452829.1 | 6835787 | 4-scf00092 | 4 |
| AX-157968440 | 4 | 93.368 | KV452829.1 | 6837073 | 4-scf00092 | 4 |
| AX-157968444 | 4 | 93.368 | KV452829.1 | 6840095 | 4-scf00092 | 4 |

|              |   |        |             |         |            |    |
|--------------|---|--------|-------------|---------|------------|----|
| AX-157968448 | 4 | 93.368 | KV452829.1  | 6844821 | 4-scf00092 | 4  |
| AX-157968454 | 4 | 93.368 | KV452829.1  | 6849498 | 4-scf00092 | 4  |
| AX-157968450 | 4 | 93.773 | KV452829.1  | 6846131 | 4-scf00092 | 4  |
| AX-157968453 | 4 | 93.776 | KV452829.1  | 6849087 | 4-scf00092 | 4  |
| AX-157968396 | 4 | 93.778 | KV452829.1  | 6774522 | 4-scf00092 | 4  |
| AX-157968457 | 4 | 93.778 | KV452829.1  | 6851314 | 4-scf00092 | 4  |
| AX-157739111 | 4 | 93.778 | KV452829.1  | 6853814 | 4-scf00092 | 4  |
| AX-157968463 | 4 | 93.778 | KV452829.1  | 6854949 | 4-scf00092 | 4  |
| AX-157968466 | 4 | 93.778 | KV452829.1  | 6858480 | 4-scf00092 | 4  |
| AX-157968469 | 4 | 93.778 | KV452829.1  | 6860493 | 4-scf00092 | 4  |
| AX-157968502 | 4 | 93.778 | KV452829.1  | 6907384 | 4-scf00092 | 4  |
| AX-157706321 | 4 | 93.778 | 3ML01032052 | 379     | scf07664_1 | UN |
| AX-157681283 | 4 | 93.778 |             | 179     | scf18675   | UN |
| AX-157968478 | 4 | 94.06  | KV452829.1  | 6872755 | 4-scf00092 | 4  |
| AX-157968479 | 4 | 94.067 | KV452829.1  | 6873216 | 4-scf00092 | 4  |
| AX-157753083 | 4 | 94.067 | KV452829.1  | 6894789 | 4-scf00092 | 4  |
| AX-157968489 | 4 | 94.067 | KV452829.1  | 6895172 | 4-scf00092 | 4  |
| AX-157968491 | 4 | 94.067 | KV452829.1  | 6895724 | 4-scf00092 | 4  |
| AX-157816802 | 4 | 94.067 | KV452829.1  | 6895888 | 4-scf00092 | 4  |
| AX-157968494 | 4 | 94.333 | KV452829.1  | 6900765 | 4-scf00092 | 4  |
| AX-157968497 | 4 | 94.381 | KV452829.1  | 6903156 | 4-scf00092 | 4  |
| AX-157968499 | 4 | 94.381 | KV452829.1  | 6904091 | 4-scf00092 | 4  |
| AX-157968521 | 4 | 94.649 | KV452829.1  | 6918468 | 4-scf00092 | 4  |
| AX-157816804 | 4 | 94.649 | KV452829.1  | 6919077 | 4-scf00092 | 4  |
| AX-157749966 | 4 | 94.917 | KV452829.1  | 6920922 | 4-scf00092 | 4  |
| AX-157968526 | 4 | 94.917 | KV452829.1  | 6921771 | 4-scf00092 | 4  |
| AX-157968530 | 4 | 94.917 | KV452829.1  | 6924668 | 4-scf00092 | 4  |
| AX-157968532 | 4 | 94.917 | KV452829.1  | 6926627 | 4-scf00092 | 4  |
| AX-157968534 | 4 | 94.917 | KV452829.1  | 6927953 | 4-scf00092 | 4  |
| AX-157968495 | 4 | 94.918 | KV452829.1  | 6902400 | 4-scf00092 | 4  |
| AX-157968536 | 4 | 94.918 | KV452829.1  | 6928388 | 4-scf00092 | 4  |
| AX-157968541 | 4 | 95.29  | KV452829.1  | 6933216 | 4-scf00092 | 4  |
| AX-157968546 | 4 | 95.366 | KV452829.1  | 6938673 | 4-scf00092 | 4  |
| AX-157968547 | 4 | 95.503 | KV452829.1  | 6939739 | 4-scf00092 | 4  |
| AX-157968555 | 4 | 95.621 | KV452829.1  | 6946812 | 4-scf00092 | 4  |
| AX-157968564 | 4 | 95.621 | KV452829.1  | 6951233 | 4-scf00092 | 4  |
| AX-157968559 | 4 | 95.726 | KV452829.1  | 6948784 | 4-scf00092 | 4  |
| AX-157968567 | 4 | 96     | KV452829.1  | 6958554 | 4-scf00092 | 4  |
| AX-157968569 | 4 | 96     | KV452829.1  | 6960030 | 4-scf00092 | 4  |
| AX-157968481 | 4 | 96.059 | KV452829.1  | 6888068 | 4-scf00092 | 4  |
| AX-157968558 | 4 | 96.059 | KV452829.1  | 6948196 | 4-scf00092 | 4  |
| AX-157968565 | 4 | 96.059 | KV452829.1  | 6952459 | 4-scf00092 | 4  |
| AX-157968573 | 4 | 96.059 | KV452829.1  | 6966974 | 4-scf00092 | 4  |
| AX-157968578 | 4 | 96.059 | KV452829.1  | 6969893 | 4-scf00092 | 4  |
| AX-157968585 | 4 | 96.059 | KV452829.1  | 6975396 | 4-scf00092 | 4  |
| AX-157968579 | 4 | 96.103 | KV452829.1  | 6970504 | 4-scf00092 | 4  |
| AX-157968581 | 4 | 96.137 | KV452829.1  | 6971588 | 4-scf00092 | 4  |
| AX-157968513 | 4 | 96.139 | KV452829.1  | 6914341 | 4-scf00092 | 4  |
| AX-157968588 | 4 | 96.139 | KV452829.1  | 6976530 | 4-scf00092 | 4  |
| AX-157968594 | 4 | 96.139 | KV452829.1  | 6983561 | 4-scf00092 | 4  |
| AX-157968596 | 4 | 96.14  | KV452829.1  | 6985123 | 4-scf00092 | 4  |

|              |   |        |            |         |            |   |
|--------------|---|--------|------------|---------|------------|---|
| AX-157875587 | 4 | 96.679 | KV452829.1 | 6940816 | 4-scf00092 | 4 |
| AX-157968571 | 4 | 96.679 | KV452829.1 | 6961508 | 4-scf00092 | 4 |
| AX-157968587 | 4 | 96.679 | KV452829.1 | 6975812 | 4-scf00092 | 4 |
| AX-157968598 | 4 | 96.679 | KV452829.1 | 6985559 | 4-scf00092 | 4 |
| AX-157968603 | 4 | 96.679 | KV452829.1 | 6990830 | 4-scf00092 | 4 |
| AX-157968608 | 4 | 96.679 | KV452829.1 | 6992984 | 4-scf00092 | 4 |
| AX-157968609 | 4 | 96.679 | KV452829.1 | 6994468 | 4-scf00092 | 4 |
| AX-157758388 | 4 | 96.679 | KV452829.1 | 6998770 | 4-scf00092 | 4 |
| AX-157968633 | 4 | 96.679 | KV452829.1 | 7021560 | 4-scf00092 | 4 |
| AX-157968561 | 4 | 96.966 | KV452829.1 | 6949139 | 4-scf00092 | 4 |
| AX-157968610 | 4 | 96.966 | KV452829.1 | 6999304 | 4-scf00092 | 4 |
| AX-157968611 | 4 | 96.966 | KV452829.1 | 7000824 | 4-scf00092 | 4 |
| AX-157968612 | 4 | 96.967 | KV452829.1 | 7002356 | 4-scf00092 | 4 |
| AX-157775025 | 4 | 97.145 | KV452829.1 | 7003860 | 4-scf00092 | 4 |
| AX-158383003 | 4 | 97.211 | KV452829.1 | 7004564 | 4-scf00092 | 4 |
| AX-157968615 | 4 | 97.262 | KV452829.1 | 7007334 | 4-scf00092 | 4 |
| AX-157968619 | 4 | 97.263 | KV452829.1 | 7009531 | 4-scf00092 | 4 |
| AX-157968624 | 4 | 97.263 | KV452829.1 | 7012993 | 4-scf00092 | 4 |
| AX-157968621 | 4 | 97.268 | KV452829.1 | 7010366 | 4-scf00092 | 4 |
| AX-157968622 | 4 | 97.273 | KV452829.1 | 7011670 | 4-scf00092 | 4 |
| AX-158405257 | 4 | 97.273 | KV452829.1 | 7013493 | 4-scf00092 | 4 |
| AX-157968625 | 4 | 97.795 | KV452829.1 | 7015284 | 4-scf00092 | 4 |
| AX-157968631 | 4 | 97.797 | KV452829.1 | 7018792 | 4-scf00092 | 4 |
| AX-157968636 | 4 | 97.801 | KV452829.1 | 7031798 | 4-scf00092 | 4 |
| AX-157968638 | 4 | 97.801 | KV452829.1 | 7032193 | 4-scf00092 | 4 |
| AX-157723356 | 4 | 97.801 | KV452829.1 | 7120281 | 4-scf00092 | 4 |
| AX-157721448 | 4 | 97.801 | KV452829.1 | 7125408 | 4-scf00092 | 4 |
| AX-157968640 | 4 | 97.803 | KV452829.1 | 7038126 | 4-scf00092 | 4 |
| AX-157968647 | 4 | 98.185 | KV452829.1 | 7058280 | 4-scf00092 | 4 |
| AX-157968650 | 4 | 98.188 | KV452829.1 | 7062589 | 4-scf00092 | 4 |
| AX-157968652 | 4 | 98.188 | KV452829.1 | 7063295 | 4-scf00092 | 4 |
| AX-157694752 | 4 | 98.195 | KV452829.1 | 7064032 | 4-scf00092 | 4 |
| AX-157968653 | 4 | 98.462 | KV452829.1 | 7065517 | 4-scf00092 | 4 |
| AX-157968655 | 4 | 98.465 | KV452829.1 | 7066241 | 4-scf00092 | 4 |
| AX-157754876 | 4 | 98.465 | KV452829.1 | 7068326 | 4-scf00092 | 4 |
| AX-157968657 | 4 | 98.466 | KV452829.1 | 7070473 | 4-scf00092 | 4 |
| AX-157715942 | 4 | 98.829 | KV452829.1 | 7083832 | 4-scf00092 | 4 |
| AX-157968668 | 4 | 98.829 | KV452829.1 | 7084489 | 4-scf00092 | 4 |
| AX-157747711 | 4 | 99.011 | KV452829.1 | 7086913 | 4-scf00092 | 4 |
| AX-157748625 | 4 | 99.011 | KV452829.1 | 7090605 | 4-scf00092 | 4 |
| AX-157968671 | 4 | 99.079 | KV452829.1 | 7094401 | 4-scf00092 | 4 |
| AX-157732322 | 4 | 99.148 | KV452829.1 | 7080494 | 4-scf00092 | 4 |
| AX-157968663 | 4 | 99.148 | KV452829.1 | 7081713 | 4-scf00092 | 4 |
| AX-157968664 | 4 | 99.148 | KV452829.1 | 7082448 | 4-scf00092 | 4 |
| AX-157968670 | 4 | 99.148 | KV452829.1 | 7092396 | 4-scf00092 | 4 |
| AX-157816807 | 4 | 99.148 | KV452829.1 | 7098866 | 4-scf00092 | 4 |
| AX-157968674 | 4 | 99.148 | KV452829.1 | 7101945 | 4-scf00092 | 4 |
| AX-157864943 | 4 | 99.148 | KV452829.1 | 7105435 | 4-scf00092 | 4 |
| AX-157968677 | 4 | 99.148 | KV452829.1 | 7107038 | 4-scf00092 | 4 |
| AX-157968679 | 4 | 99.148 | KV452829.1 | 7114576 | 4-scf00092 | 4 |
| AX-157968681 | 4 | 99.148 | KV452829.1 | 7116297 | 4-scf00092 | 4 |

|              |   |         |            |         |            |   |
|--------------|---|---------|------------|---------|------------|---|
| AX-157968682 | 4 | 99.148  | KV452829.1 | 7116808 | 4-scf00092 | 4 |
| AX-157758747 | 4 | 99.148  | KV452829.1 | 7119387 | 4-scf00092 | 4 |
| AX-157774008 | 4 | 99.148  | KV452829.1 | 7121018 | 4-scf00092 | 4 |
| AX-157968686 | 4 | 99.148  | KV452829.1 | 7122479 | 4-scf00092 | 4 |
| AX-157968687 | 4 | 99.148  | KV452829.1 | 7123194 | 4-scf00092 | 4 |
| AX-157968692 | 4 | 99.148  | KV452829.1 | 7129056 | 4-scf00092 | 4 |
| AX-158379507 | 4 | 99.148  | KV452829.1 | 7129400 | 4-scf00092 | 4 |
| AX-157968695 | 4 | 99.148  | KV452829.1 | 7130501 | 4-scf00092 | 4 |
| AX-157968694 | 4 | 99.151  | KV452829.1 | 7130019 | 4-scf00092 | 4 |
| AX-157968690 | 4 | 99.153  | KV452829.1 | 7128108 | 4-scf00092 | 4 |
| AX-157770625 | 4 | 99.153  | KV452829.1 | 7131428 | 4-scf00092 | 4 |
| AX-157968696 | 4 | 99.153  | KV452829.1 | 7133506 | 4-scf00092 | 4 |
| AX-157968700 | 4 | 99.153  | KV452829.1 | 7139132 | 4-scf00092 | 4 |
| AX-157968697 | 4 | 99.352  | KV452829.1 | 7135661 | 4-scf00092 | 4 |
| AX-157968702 | 4 | 99.352  | KV452829.1 | 7139823 | 4-scf00092 | 4 |
| AX-157968705 | 4 | 99.352  | KV452829.1 | 7143572 | 4-scf00092 | 4 |
| AX-157968708 | 4 | 99.557  | KV452829.1 | 7144093 | 4-scf00092 | 4 |
| AX-157750476 | 4 | 99.558  | KV452829.1 | 7145531 | 4-scf00092 | 4 |
| AX-157968715 | 4 | 99.558  | KV452829.1 | 7145943 | 4-scf00092 | 4 |
| AX-157816808 | 4 | 99.558  | KV452829.1 | 7151195 | 4-scf00092 | 4 |
| AX-157757516 | 4 | 99.558  | KV452829.1 | 7153343 | 4-scf00092 | 4 |
| AX-157968719 | 4 | 99.558  | KV452829.1 | 7155829 | 4-scf00092 | 4 |
| AX-157968720 | 4 | 99.558  | KV452829.1 | 7157295 | 4-scf00092 | 4 |
| AX-157816809 | 4 | 99.558  | KV452829.1 | 7160028 | 4-scf00092 | 4 |
| AX-157758750 | 4 | 99.558  | KV452829.1 | 7160715 | 4-scf00092 | 4 |
| AX-157717669 | 4 | 99.602  | KV452829.1 | 7164005 | 4-scf00092 | 4 |
| AX-157968685 | 4 | 99.65   | KV452829.1 | 7121732 | 4-scf00092 | 4 |
| AX-157968727 | 4 | 99.65   | KV452829.1 | 7171791 | 4-scf00092 | 4 |
| AX-157816810 | 4 | 99.695  | KV452829.1 | 7172160 | 4-scf00092 | 4 |
| AX-157816812 | 4 | 99.705  | KV452829.1 | 7175800 | 4-scf00092 | 4 |
| AX-157968728 | 4 | 99.862  | KV452829.1 | 7177401 | 4-scf00092 | 4 |
| AX-157968729 | 4 | 100.017 | KV452829.1 | 7177838 | 4-scf00092 | 4 |
| AX-157968731 | 4 | 100.023 | KV452829.1 | 7180424 | 4-scf00092 | 4 |
| AX-157740916 | 4 | 100.028 | KV452829.1 | 7178976 | 4-scf00092 | 4 |
| AX-157744350 | 4 | 100.028 | KV452829.1 | 7181970 | 4-scf00092 | 4 |
| AX-157816815 | 4 | 100.028 | KV452829.1 | 7182527 | 4-scf00092 | 4 |
| AX-157968733 | 4 | 100.028 | KV452829.1 | 7183157 | 4-scf00092 | 4 |
| AX-157756607 | 4 | 100.394 | KV452829.1 | 7189387 | 4-scf00092 | 4 |
| AX-157968737 | 4 | 100.396 | KV452829.1 | 7196542 | 4-scf00092 | 4 |
| AX-157816820 | 4 | 100.555 | KV452829.1 | 7204062 | 4-scf00092 | 4 |
| AX-157968746 | 4 | 100.56  | KV452829.1 | 7204624 | 4-scf00092 | 4 |
| AX-157774921 | 4 | 100.562 | KV452829.1 | 7205252 | 4-scf00092 | 4 |
| AX-157816821 | 4 | 100.567 | KV452829.1 | 7205427 | 4-scf00092 | 4 |
| AX-157968726 | 4 | 100.572 | KV452829.1 | 7170881 | 4-scf00092 | 4 |
| AX-157772643 | 4 | 100.572 | KV452829.1 | 7191831 | 4-scf00092 | 4 |
| AX-157816819 | 4 | 100.572 | KV452829.1 | 7199914 | 4-scf00092 | 4 |
| AX-157758974 | 4 | 100.572 | KV452829.1 | 7201665 | 4-scf00092 | 4 |
| AX-157968743 | 4 | 100.572 | KV452829.1 | 7202354 | 4-scf00092 | 4 |
| AX-157741447 | 4 | 100.572 | KV452829.1 | 7208260 | 4-scf00092 | 4 |
| AX-157816822 | 4 | 100.572 | KV452829.1 | 7208704 | 4-scf00092 | 4 |
| AX-157968747 | 4 | 100.572 | KV452829.1 | 7209964 | 4-scf00092 | 4 |

|              |   |         |            |         |            |   |
|--------------|---|---------|------------|---------|------------|---|
| AX-157816823 | 4 | 100.572 | KV452829.1 | 7211548 | 4-scf00092 | 4 |
| AX-157741318 | 4 | 100.572 | KV452829.1 | 7216254 | 4-scf00092 | 4 |
| AX-157816827 | 4 | 100.572 | KV452829.1 | 7218045 | 4-scf00092 | 4 |
| AX-157968753 | 4 | 100.572 | KV452829.1 | 7220322 | 4-scf00092 | 4 |
| AX-157968756 | 4 | 100.572 | KV452829.1 | 7224800 | 4-scf00092 | 4 |
| AX-157968750 | 4 | 100.574 | KV452829.1 | 7218261 | 4-scf00092 | 4 |
| AX-157816828 | 4 | 100.576 | KV452829.1 | 7219474 | 4-scf00092 | 4 |
| AX-157968754 | 4 | 100.577 | KV452829.1 | 7222755 | 4-scf00092 | 4 |
| AX-157968755 | 4 | 100.579 | KV452829.1 | 7224515 | 4-scf00092 | 4 |
| AX-157968765 | 4 | 100.579 | KV452829.1 | 7231408 | 4-scf00092 | 4 |
| AX-157968758 | 4 | 100.715 | KV452829.1 | 7225852 | 4-scf00092 | 4 |
| AX-157968762 | 4 | 100.715 | KV452829.1 | 7228121 | 4-scf00092 | 4 |
| AX-157771201 | 4 | 100.715 | KV452829.1 | 7228992 | 4-scf00092 | 4 |
| AX-157968763 | 4 | 100.715 | KV452829.1 | 7230040 | 4-scf00092 | 4 |
| AX-157968772 | 4 | 100.715 | KV452829.1 | 7234715 | 4-scf00092 | 4 |
| AX-157968776 | 4 | 100.716 | KV452829.1 | 7238220 | 4-scf00092 | 4 |
| AX-157968783 | 4 | 101.008 | KV452829.1 | 7249297 | 4-scf00092 | 4 |
| AX-157968786 | 4 | 101.008 | KV452829.1 | 7252543 | 4-scf00092 | 4 |
| AX-157968788 | 4 | 101.008 | KV452829.1 | 7256418 | 4-scf00092 | 4 |
| AX-157816829 | 4 | 101.008 | KV452829.1 | 7265626 | 4-scf00092 | 4 |
| AX-157968793 | 4 | 101.008 | KV452829.1 | 7267329 | 4-scf00092 | 4 |
| AX-157968795 | 4 | 101.008 | KV452829.1 | 7270805 | 4-scf00092 | 4 |
| AX-157968797 | 4 | 101.008 | KV452829.1 | 7273458 | 4-scf00092 | 4 |
| AX-157968798 | 4 | 101.008 | KV452829.1 | 7273811 | 4-scf00092 | 4 |
| AX-158390300 | 4 | 101.538 | KV452829.1 | 7285789 | 4-scf00092 | 4 |
| AX-157968779 | 4 | 101.542 | KV452829.1 | 7243841 | 4-scf00092 | 4 |
| AX-157968808 | 4 | 101.542 | KV452829.1 | 7287202 | 4-scf00092 | 4 |
| AX-157968811 | 4 | 101.554 | KV452829.1 | 7291246 | 4-scf00092 | 4 |
| AX-157968812 | 4 | 101.554 | KV452829.1 | 7292182 | 4-scf00092 | 4 |
| AX-157968814 | 4 | 101.554 | KV452829.1 | 7293063 | 4-scf00092 | 4 |
| AX-157968815 | 4 | 101.554 | KV452829.1 | 7293900 | 4-scf00092 | 4 |
| AX-157968817 | 4 | 101.554 | KV452829.1 | 7294612 | 4-scf00092 | 4 |
| AX-157968819 | 4 | 101.664 | KV452829.1 | 7295538 | 4-scf00092 | 4 |
| AX-157968820 | 4 | 101.664 | KV452829.1 | 7296602 | 4-scf00092 | 4 |
| AX-157968824 | 4 | 101.682 | KV452829.1 | 7299736 | 4-scf00092 | 4 |
| AX-157968825 | 4 | 101.695 | KV452829.1 | 7300287 | 4-scf00092 | 4 |
| AX-157968829 | 4 | 101.695 | KV452829.1 | 7302776 | 4-scf00092 | 4 |
| AX-157968827 | 4 | 101.711 | KV452829.1 | 7301468 | 4-scf00092 | 4 |
| AX-157968828 | 4 | 101.738 | KV452829.1 | 7302398 | 4-scf00092 | 4 |
| AX-157968831 | 4 | 101.773 | KV452829.1 | 7303233 | 4-scf00092 | 4 |
| AX-157751355 | 4 | 101.773 | KV452829.1 | 7304182 | 4-scf00092 | 4 |
| AX-157968836 | 4 | 101.773 | KV452829.1 | 7305059 | 4-scf00092 | 4 |
| AX-157968838 | 4 | 101.773 | KV452829.1 | 7307183 | 4-scf00092 | 4 |
| AX-157968840 | 4 | 101.819 | KV452829.1 | 7308542 | 4-scf00092 | 4 |
| AX-157968832 | 4 | 101.923 | KV452829.1 | 7303708 | 4-scf00092 | 4 |
| AX-157968842 | 4 | 101.923 | KV452829.1 | 7310370 | 4-scf00092 | 4 |
| AX-157968850 | 4 | 101.923 | KV452829.1 | 7316651 | 4-scf00092 | 4 |
| AX-157968864 | 4 | 101.923 | KV452829.1 | 7330918 | 4-scf00092 | 4 |
| AX-157968853 | 4 | 101.991 | KV452829.1 | 7317439 | 4-scf00092 | 4 |
| AX-157968854 | 4 | 101.991 | KV452829.1 | 7319030 | 4-scf00092 | 4 |
| AX-157968861 | 4 | 101.991 | KV452829.1 | 7327927 | 4-scf00092 | 4 |

|              |   |         |            |         |            |   |
|--------------|---|---------|------------|---------|------------|---|
| AX-157968863 | 4 | 101.991 | KV452829.1 | 7330091 | 4-scf00092 | 4 |
| AX-157968867 | 4 | 101.991 | KV452829.1 | 7331144 | 4-scf00092 | 4 |
| AX-157968870 | 4 | 102.429 | KV452829.1 | 7333975 | 4-scf00092 | 4 |
| AX-157968872 | 4 | 102.429 | KV452829.1 | 7336370 | 4-scf00092 | 4 |
| AX-157968877 | 4 | 102.429 | KV452829.1 | 7339700 | 4-scf00092 | 4 |
| AX-157968881 | 4 | 102.429 | KV452829.1 | 7341281 | 4-scf00092 | 4 |
| AX-157968882 | 4 | 102.429 | KV452829.1 | 7342073 | 4-scf00092 | 4 |
| AX-157968886 | 4 | 102.538 | KV452829.1 | 7343869 | 4-scf00092 | 4 |
| AX-157816831 | 4 | 102.538 | KV452829.1 | 7345341 | 4-scf00092 | 4 |
| AX-157968889 | 4 | 102.538 | KV452829.1 | 7347893 | 4-scf00092 | 4 |
| AX-157816832 | 4 | 102.538 | KV452829.1 | 7351165 | 4-scf00092 | 4 |
| AX-157968902 | 4 | 102.745 | KV452829.1 | 7357685 | 4-scf00092 | 4 |
| AX-157968905 | 4 | 102.745 | KV452829.1 | 7360904 | 4-scf00092 | 4 |
| AX-157968911 | 4 | 102.745 | KV452829.1 | 7363355 | 4-scf00092 | 4 |
| AX-157968917 | 4 | 102.953 | KV452829.1 | 7366835 | 4-scf00092 | 4 |
| AX-157968922 | 4 | 102.953 | KV452829.1 | 7368927 | 4-scf00092 | 4 |
| AX-157968927 | 4 | 102.996 | KV452829.1 | 7373242 | 4-scf00092 | 4 |
| AX-157968931 | 4 | 102.996 | KV452829.1 | 7375620 | 4-scf00092 | 4 |
| AX-157752291 | 4 | 102.996 | KV452829.1 | 7378046 | 4-scf00092 | 4 |
| AX-157968888 | 4 | 103.193 | KV452829.1 | 7344914 | 4-scf00092 | 4 |
| AX-157968929 | 4 | 103.193 | KV452829.1 | 7374478 | 4-scf00092 | 4 |
| AX-157968935 | 4 | 103.193 | KV452829.1 | 7379989 | 4-scf00092 | 4 |
| AX-157968938 | 4 | 103.193 | KV452829.1 | 7380604 | 4-scf00092 | 4 |
| AX-157816833 | 4 | 103.193 | KV452829.1 | 7382012 | 4-scf00092 | 4 |
| AX-157968943 | 4 | 103.193 | KV452829.1 | 7383072 | 4-scf00092 | 4 |
| AX-157968944 | 4 | 103.193 | KV452829.1 | 7384405 | 4-scf00092 | 4 |
| AX-157968946 | 4 | 103.193 | KV452829.1 | 7385871 | 4-scf00092 | 4 |
| AX-157968948 | 4 | 103.193 | KV452829.1 | 7388429 | 4-scf00092 | 4 |
| AX-157968952 | 4 | 103.193 | KV452829.1 | 7390738 | 4-scf00092 | 4 |
| AX-157968956 | 4 | 103.193 | KV452829.1 | 7391489 | 4-scf00092 | 4 |
| AX-157816835 | 4 | 103.193 | KV452829.1 | 7392101 | 4-scf00092 | 4 |
| AX-157746002 | 4 | 103.193 | KV452829.1 | 7392875 | 4-scf00092 | 4 |
| AX-157968959 | 4 | 103.193 | KV452829.1 | 7395020 | 4-scf00092 | 4 |
| AX-157968963 | 4 | 103.193 | KV452829.1 | 7398169 | 4-scf00092 | 4 |
| AX-157968964 | 4 | 103.193 | KV452829.1 | 7398700 | 4-scf00092 | 4 |
| AX-157968967 | 4 | 103.193 | KV452829.1 | 7399814 | 4-scf00092 | 4 |
| AX-157968968 | 4 | 103.193 | KV452829.1 | 7399993 | 4-scf00092 | 4 |
| AX-157968970 | 4 | 103.193 | KV452829.1 | 7402717 | 4-scf00092 | 4 |
| AX-158383006 | 4 | 103.193 | KV452829.1 | 7408338 | 4-scf00092 | 4 |
| AX-157968978 | 4 | 103.193 | KV452829.1 | 7411120 | 4-scf00092 | 4 |
| AX-157884168 | 4 | 103.193 | KV452829.1 | 7412670 | 4-scf00092 | 4 |
| AX-158379510 | 4 | 103.412 | KV452829.1 | 7410668 | 4-scf00092 | 4 |
| AX-157968985 | 4 | 103.412 | KV452829.1 | 7415927 | 4-scf00092 | 4 |
| AX-157968992 | 4 | 103.412 | KV452829.1 | 7424194 | 4-scf00092 | 4 |
| AX-157968993 | 4 | 103.412 | KV452829.1 | 7426714 | 4-scf00092 | 4 |
| AX-157968994 | 4 | 103.412 | KV452829.1 | 7427873 | 4-scf00092 | 4 |
| AX-157816836 | 4 | 103.412 | KV452829.1 | 7429198 | 4-scf00092 | 4 |
| AX-157969026 | 4 | 103.412 | KV452829.1 | 7454069 | 4-scf00092 | 4 |
| AX-157969001 | 4 | 103.521 | KV452829.1 | 7431204 | 4-scf00092 | 4 |
| AX-157969005 | 4 | 103.521 | KV452829.1 | 7432775 | 4-scf00092 | 4 |
| AX-157969007 | 4 | 103.521 | KV452829.1 | 7436310 | 4-scf00092 | 4 |



|              |   |         |             |         |            |    |
|--------------|---|---------|-------------|---------|------------|----|
| AX-157969008 | 4 | 103.521 | KV452829.1  | 7438691 | 4-scf00092 | 4  |
| AX-157969009 | 4 | 103.521 | KV452829.1  | 7438868 | 4-scf00092 | 4  |
| AX-157969014 | 4 | 103.521 | KV452829.1  | 7442033 | 4-scf00092 | 4  |
| AX-157969015 | 4 | 103.521 | KV452829.1  | 7442567 | 4-scf00092 | 4  |
| AX-157969018 | 4 | 103.521 | KV452829.1  | 7445131 | 4-scf00092 | 4  |
| AX-157969019 | 4 | 103.578 | KV452829.1  | 7445867 | 4-scf00092 | 4  |
| AX-157968997 | 4 | 103.635 | KV452829.1  | 7430089 | 4-scf00092 | 4  |
| AX-157969020 | 4 | 103.635 | KV452829.1  | 7446346 | 4-scf00092 | 4  |
| AX-157816837 | 4 | 103.685 | KV452829.1  | 7448073 | 4-scf00092 | 4  |
| AX-157969023 | 4 | 103.849 | KV452829.1  | 7452297 | 4-scf00092 | 4  |
| AX-157969025 | 4 | 103.849 | KV452829.1  | 7453015 | 4-scf00092 | 4  |
| AX-158383007 | 4 | 103.849 | KV452829.1  | 7455174 | 4-scf00092 | 4  |
| AX-157969028 | 4 | 103.849 | KV452829.1  | 7456777 | 4-scf00092 | 4  |
| AX-157751029 | 4 | 103.849 | KV452829.1  | 7457737 | 4-scf00092 | 4  |
| AX-157969029 | 4 | 103.849 | KV452829.1  | 7458036 | 4-scf00092 | 4  |
| AX-157772057 | 4 | 103.849 | KV452829.1  | 7458640 | 4-scf00092 | 4  |
| AX-157969038 | 4 | 103.849 | KV452829.1  | 7466127 | 4-scf00092 | 4  |
| AX-157969035 | 4 | 103.9   | KV452829.1  | 7461784 | 4-scf00092 | 4  |
| AX-157717510 | 4 | 103.958 | KV452829.1  | 7468485 | 4-scf00092 | 4  |
| AX-157969048 | 4 | 103.958 | KV452829.1  | 7469712 | 4-scf00092 | 4  |
| AX-157968996 | 4 | 103.959 | KV452829.1  | 7429387 | 4-scf00092 | 4  |
| AX-157969054 | 4 | 103.959 | KV452829.1  | 7474505 | 4-scf00092 | 4  |
| AX-157969056 | 4 | 103.959 | KV452829.1  | 7477006 | 4-scf00092 | 4  |
| AX-157726362 | 4 | 103.959 | KV452829.1  | 7487031 | 4-scf00092 | 4  |
| AX-157969066 | 4 | 103.959 | KV452829.1  | 7489020 | 4-scf00092 | 4  |
| AX-157707421 | 4 | 103.959 | 3ML01034255 | 192     | scf09925_1 | UN |
| AX-158379511 | 4 | 104.286 | KV452829.1  | 7477749 | 4-scf00092 | 4  |
| AX-157969061 | 4 | 104.286 | KV452829.1  | 7483105 | 4-scf00092 | 4  |
| AX-158383008 | 4 | 104.504 | KV452829.1  | 7495494 | 4-scf00092 | 4  |
| AX-157969077 | 4 | 104.504 | KV452829.1  | 7497285 | 4-scf00092 | 4  |
| AX-157969079 | 4 | 104.504 | KV452829.1  | 7497913 | 4-scf00092 | 4  |
| AX-157969081 | 4 | 104.504 | KV452829.1  | 7499069 | 4-scf00092 | 4  |
| AX-157969082 | 4 | 104.504 | KV452829.1  | 7499618 | 4-scf00092 | 4  |
| AX-157969084 | 4 | 104.778 | KV452829.1  | 7501317 | 4-scf00092 | 4  |
| AX-157719232 | 4 | 104.845 | KV452829.1  | 7501712 | 4-scf00092 | 4  |
| AX-157969090 | 4 | 104.861 | KV452829.1  | 7508775 | 4-scf00092 | 4  |
| AX-157969104 | 4 | 104.861 | KV452829.1  | 7527679 | 4-scf00092 | 4  |
| AX-157772768 | 4 | 104.861 | KV452829.1  | 7565381 | 4-scf00092 | 4  |
| AX-157969093 | 4 | 104.952 | KV452829.1  | 7515571 | 4-scf00092 | 4  |
| AX-157969103 | 4 | 105.047 | KV452829.1  | 7525439 | 4-scf00092 | 4  |
| AX-157775710 | 4 | 105.05  | KV452829.1  | 7489839 | 4-scf00092 | 4  |
| AX-157969071 | 4 | 105.05  | KV452829.1  | 7493849 | 4-scf00092 | 4  |
| AX-157969086 | 4 | 105.05  | KV452829.1  | 7503328 | 4-scf00092 | 4  |
| AX-158383009 | 4 | 105.05  | KV452829.1  | 7504189 | 4-scf00092 | 4  |
| AX-157969094 | 4 | 105.05  | KV452829.1  | 7516396 | 4-scf00092 | 4  |
| AX-157969095 | 4 | 105.05  | KV452829.1  | 7516530 | 4-scf00092 | 4  |
| AX-157969098 | 4 | 105.05  | KV452829.1  | 7517914 | 4-scf00092 | 4  |
| AX-157969102 | 4 | 105.05  | KV452829.1  | 7522599 | 4-scf00092 | 4  |
| AX-157969110 | 4 | 105.05  | KV452829.1  | 7533125 | 4-scf00092 | 4  |
| AX-157969115 | 4 | 105.05  | KV452829.1  | 7538563 | 4-scf00092 | 4  |
| AX-157969117 | 4 | 105.05  | KV452829.1  | 7540982 | 4-scf00092 | 4  |

|              |   |         |            |         |            |    |
|--------------|---|---------|------------|---------|------------|----|
| AX-157969122 | 4 | 105.05  | KV452829.1 | 7545905 | 4-scf00092 | 4  |
| AX-157969125 | 4 | 105.05  | KV452829.1 | 7548345 | 4-scf00092 | 4  |
| AX-157774300 | 4 | 105.05  | KV452829.1 | 7548593 | 4-scf00092 | 4  |
| AX-157724122 | 4 | 105.05  | KV452829.1 | 7549472 | 4-scf00092 | 4  |
| AX-157969126 | 4 | 105.05  | KV452829.1 | 7550048 | 4-scf00092 | 4  |
| AX-157775803 | 4 | 105.05  | KV452829.1 | 7550237 | 4-scf00092 | 4  |
| AX-157969128 | 4 | 105.05  | KV452829.1 | 7551667 | 4-scf00092 | 4  |
| AX-157969137 | 4 | 105.155 | KV452829.1 | 7562125 | 4-scf00092 | 4  |
| AX-157969140 | 4 | 105.269 | KV452829.1 | 7565982 | 4-scf00092 | 4  |
| AX-157969142 | 4 | 105.269 | KV452829.1 | 7566873 | 4-scf00092 | 4  |
| AX-157743263 | 4 | 105.269 | KV452829.1 | 7567388 | 4-scf00092 | 4  |
| AX-157721578 | 4 | 105.269 | KV452829.1 | 7569679 | 4-scf00092 | 4  |
| AX-157969147 | 4 | 105.269 | KV452829.1 | 7571567 | 4-scf00092 | 4  |
| AX-157884169 | 4 | 105.269 | KV452829.1 | 7573112 | 4-scf00092 | 4  |
| AX-157754235 | 4 | 105.269 | KV452829.1 | 7573283 | 4-scf00092 | 4  |
| AX-157969152 | 4 | 105.269 | KV452829.1 | 7576696 | 4-scf00092 | 4  |
| AX-157724750 | 4 | 105.269 | KV452829.1 | 7577967 | 4-scf00092 | 4  |
| AX-157969154 | 4 | 105.433 | KV452829.1 | 7579804 | 4-scf00092 | 4  |
| AX-157969158 | 4 | 105.478 | KV452829.1 | 7583439 | 4-scf00092 | 4  |
| AX-157969139 | 4 | 105.597 | KV452829.1 | 7563842 | 4-scf00092 | 4  |
| AX-157969155 | 4 | 105.597 | KV452829.1 | 7581667 | 4-scf00092 | 4  |
| AX-157969157 | 4 | 105.597 | KV452829.1 | 7582224 | 4-scf00092 | 4  |
| AX-157969164 | 4 | 105.597 | KV452829.1 | 7586585 | 4-scf00092 | 4  |
| AX-157969165 | 4 | 105.597 | KV452829.1 | 7587416 | 4-scf00092 | 4  |
| AX-157969166 | 4 | 105.597 | KV452829.1 | 7588069 | 4-scf00092 | 4  |
| AX-157969169 | 4 | 105.597 | KV452829.1 | 7591400 | 4-scf00092 | 4  |
| AX-157969170 | 4 | 105.597 | KV452829.1 | 7592335 | 4-scf00092 | 4  |
| AX-157758713 | 4 | 105.597 | KV452829.1 | 7597469 | 4-scf00092 | 4  |
| AX-157969173 | 4 | 105.597 | KV452829.1 | 7601403 | 4-scf00092 | 4  |
| AX-157969174 | 4 | 105.597 | KV452829.1 | 7601895 | 4-scf00092 | 4  |
| AX-157751547 | 4 | 105.597 | KV452829.1 | 7603095 | 4-scf00092 | 4  |
| AX-157721034 | 4 | 105.597 | KV452829.1 | 7606177 | 4-scf00092 | 4  |
| AX-157969196 | 4 | 105.597 | KV452829.1 | 7620771 | 4-scf00092 | 4  |
| AX-157969202 | 4 | 105.597 | KV452829.1 | 7626494 | 4-scf00092 | 4  |
| AX-157689944 | 4 | 105.597 |            | 267     | scf14746   | UN |
| AX-157969274 | 4 | 106.259 | KV452829.1 | 7692682 | 4-scf00092 | 4  |
| AX-157969278 | 4 | 106.398 | KV452829.1 | 7694531 | 4-scf00092 | 4  |
| AX-157969271 | 4 | 106.399 | KV452829.1 | 7689601 | 4-scf00092 | 4  |
| AX-157969280 | 4 | 106.399 | KV452829.1 | 7696150 | 4-scf00092 | 4  |
| AX-157816841 | 4 | 106.399 | KV452829.1 | 7705429 | 4-scf00092 | 4  |
| AX-157969285 | 4 | 106.4   | KV452829.1 | 7707247 | 4-scf00092 | 4  |
| AX-157969276 | 4 | 106.401 | KV452829.1 | 7693480 | 4-scf00092 | 4  |
| AX-157969287 | 4 | 106.401 | KV452829.1 | 7710573 | 4-scf00092 | 4  |
| AX-157687262 | 4 | 106.401 | KV453492.1 | 10976   | scf00835   | UN |
| AX-157969291 | 4 | 106.414 | KV452829.1 | 7721753 | 4-scf00092 | 4  |
| AX-157969324 | 4 | 106.414 | KV452829.1 | 7800921 | 4-scf00092 | 4  |
| AX-157969792 | 4 | 107.348 | KV452836.1 | 153553  | 4-scf00099 | 4  |
| AX-157969794 | 4 | 107.348 | KV452836.1 | 154163  | 4-scf00099 | 4  |
| AX-157969801 | 4 | 107.348 | KV452836.1 | 156952  | 4-scf00099 | 4  |
| AX-157969813 | 4 | 107.348 | KV452836.1 | 174272  | 4-scf00099 | 4  |
| AX-157969815 | 4 | 107.348 | KV452836.1 | 179207  | 4-scf00099 | 4  |

|              |   |         |             |        |            |    |
|--------------|---|---------|-------------|--------|------------|----|
| AX-157969818 | 4 | 107.348 | KV452836.1  | 179382 | 4-scf00099 | 4  |
| AX-157710401 | 4 | 107.348 | KV452836.1  | 182213 | 4-scf00099 | 4  |
| AX-157969824 | 4 | 107.348 | KV452836.1  | 186868 | 4-scf00099 | 4  |
| AX-157969829 | 4 | 107.458 | KV452836.1  | 189598 | 4-scf00099 | 4  |
| AX-157969831 | 4 | 107.458 | KV452836.1  | 192506 | 4-scf00099 | 4  |
| AX-157969832 | 4 | 107.458 | KV452836.1  | 193353 | 4-scf00099 | 4  |
| AX-157969834 | 4 | 107.458 | KV452836.1  | 194051 | 4-scf00099 | 4  |
| AX-157969836 | 4 | 107.458 | KV452836.1  | 194485 | 4-scf00099 | 4  |
| AX-157734739 | 4 | 107.458 | KV452836.1  | 204437 | 4-scf00099 | 4  |
| AX-157969844 | 4 | 107.458 | KV452836.1  | 205071 | 4-scf00099 | 4  |
| AX-157969847 | 4 | 107.458 | KV452836.1  | 205705 | 4-scf00099 | 4  |
| AX-157969849 | 4 | 107.458 | KV452836.1  | 205980 | 4-scf00099 | 4  |
| AX-157969855 | 4 | 107.458 | KV452836.1  | 212019 | 4-scf00099 | 4  |
| AX-157686854 | 4 | 107.458 | KV452832.1  | 18697  | 4-scf00749 | 4  |
| AX-157687263 | 4 | 107.458 | KV453492.1  | 13063  | scf00835   | UN |
| AX-157969714 | 4 | 107.568 | KV452836.1  | 16495  | 4-scf00099 | 4  |
| AX-157969852 | 4 | 107.568 | KV452836.1  | 206873 | 4-scf00099 | 4  |
| AX-157816879 | 4 | 107.568 | KV452836.1  | 210153 | 4-scf00099 | 4  |
| AX-157816880 | 4 | 107.568 | KV452836.1  | 212520 | 4-scf00099 | 4  |
| AX-157969859 | 4 | 107.568 | KV452836.1  | 217895 | 4-scf00099 | 4  |
| AX-157816881 | 4 | 107.568 | KV452836.1  | 219853 | 4-scf00099 | 4  |
| AX-157969867 | 4 | 107.568 | KV452836.1  | 226546 | 4-scf00099 | 4  |
| AX-157969868 | 4 | 107.568 | KV452836.1  | 227872 | 4-scf00099 | 4  |
| AX-157816883 | 4 | 107.568 | KV452836.1  | 228280 | 4-scf00099 | 4  |
| AX-157969871 | 4 | 107.568 | KV452836.1  | 235691 | 4-scf00099 | 4  |
| AX-157969872 | 4 | 107.568 | KV452836.1  | 236420 | 4-scf00099 | 4  |
| AX-157969874 | 4 | 107.568 | KV452836.1  | 239510 | 4-scf00099 | 4  |
| AX-157969875 | 4 | 107.568 | KV452836.1  | 240273 | 4-scf00099 | 4  |
| AX-157969879 | 4 | 107.568 | KV452836.1  | 244291 | 4-scf00099 | 4  |
| AX-157969881 | 4 | 107.568 | KV452836.1  | 244883 | 4-scf00099 | 4  |
| AX-157720284 | 4 | 107.568 | KV452836.1  | 248631 | 4-scf00099 | 4  |
| AX-157682781 | 4 | 107.568 | KV452840.1  | 49965  | 4-scf00101 | 4  |
| AX-157682799 | 4 | 107.568 | KV452831.1  | 6326   | 4-scf00102 | 4  |
| AX-157969981 | 4 | 107.568 | KV452834.1  | 7527   | 4-scf00104 | 4  |
| AX-157970061 | 4 | 107.568 | KV452834.1  | 110766 | 4-scf00104 | 4  |
| AX-157970183 | 4 | 107.568 | KV452838.1  | 146553 | 4-scf00105 | 4  |
| AX-157970222 | 4 | 107.568 | KV452837.1  | 30110  | 4-scf00106 | 4  |
| AX-157686855 | 4 | 107.568 | KV452832.1  | 19683  | 4-scf00749 | 4  |
| AX-157687336 | 4 | 107.568 | KV452839.1  | 5637   | 4-scf00853 | 4  |
| AX-157687339 | 4 | 107.568 | KV452839.1  | 14934  | 4-scf00853 | 4  |
| AX-157687842 | 4 | 107.568 | KV453628.1  | 6995   | scf01056   | UN |
| AX-157689587 | 4 | 107.568 | 3ML01030661 | 163    | scf06261_1 | UN |
| AX-157681844 | 4 | 107.568 | 3ML01031181 | 338    | scf06787_1 | UN |
| AX-157969713 | 4 | 107.768 | KV452836.1  | 13774  | 4-scf00099 | 4  |
| AX-157969727 | 4 | 107.768 | KV452836.1  | 34100  | 4-scf00099 | 4  |
| AX-157816864 | 4 | 107.768 | KV452836.1  | 34157  | 4-scf00099 | 4  |
| AX-157969790 | 4 | 107.768 | KV452836.1  | 151800 | 4-scf00099 | 4  |
| AX-157745390 | 4 | 107.768 | KV452836.1  | 258058 | 4-scf00099 | 4  |
| AX-157969937 | 4 | 107.768 | KV452836.1  | 330655 | 4-scf00099 | 4  |
| AX-157682768 | 4 | 107.768 | KV452840.1  | 123904 | 4-scf00101 | 4  |
| AX-157682758 | 4 | 107.768 | KV452840.1  | 192047 | 4-scf00101 | 4  |

|              |   |         |            |         |            |   |
|--------------|---|---------|------------|---------|------------|---|
| AX-157682753 | 4 | 107.768 | KV452840.1 | 216954  | 4-scf00101 | 4 |
| AX-157682749 | 4 | 107.768 | KV452840.1 | 224280  | 4-scf00101 | 4 |
| AX-157682747 | 4 | 107.768 | KV452840.1 | 228021  | 4-scf00101 | 4 |
| AX-157682848 | 4 | 107.768 | KV452840.1 | 269798  | 4-scf00101 | 4 |
| AX-157869642 | 4 | 107.768 | KV452838.1 | 153533  | 4-scf00105 | 4 |
| AX-157970219 | 4 | 107.768 | KV452837.1 | 28446   | 4-scf00106 | 4 |
| AX-157816853 | 4 | 107.896 | KV452829.1 | 7743307 | 4-scf00092 | 4 |
| AX-157969892 | 4 | 107.896 | KV452836.1 | 266533  | 4-scf00099 | 4 |
| AX-157969895 | 4 | 107.896 | KV452836.1 | 270416  | 4-scf00099 | 4 |
| AX-157969896 | 4 | 107.896 | KV452836.1 | 274225  | 4-scf00099 | 4 |
| AX-157751671 | 4 | 107.896 | KV452836.1 | 274930  | 4-scf00099 | 4 |
| AX-157758192 | 4 | 107.896 | KV452836.1 | 276053  | 4-scf00099 | 4 |
| AX-157969897 | 4 | 107.896 | KV452836.1 | 277051  | 4-scf00099 | 4 |
| AX-157816890 | 4 | 107.896 | KV452836.1 | 287285  | 4-scf00099 | 4 |
| AX-157715604 | 4 | 107.896 | KV452836.1 | 292729  | 4-scf00099 | 4 |
| AX-157969918 | 4 | 107.896 | KV452836.1 | 300359  | 4-scf00099 | 4 |
| AX-157969922 | 4 | 107.896 | KV452836.1 | 311839  | 4-scf00099 | 4 |
| AX-157969933 | 4 | 107.896 | KV452836.1 | 323611  | 4-scf00099 | 4 |
| AX-157772146 | 4 | 107.896 | KV452836.1 | 325281  | 4-scf00099 | 4 |
| AX-157969935 | 4 | 107.896 | KV452836.1 | 327080  | 4-scf00099 | 4 |
| AX-157714095 | 4 | 107.896 | KV452836.1 | 328128  | 4-scf00099 | 4 |
| AX-157969944 | 4 | 107.896 | KV452836.1 | 340765  | 4-scf00099 | 4 |
| AX-157970166 | 4 | 107.896 | KV452838.1 | 113377  | 4-scf00105 | 4 |
| AX-157969963 | 4 | 107.999 | KV452836.1 | 398179  | 4-scf00099 | 4 |
| AX-157969293 | 4 | 108.661 | KV452829.1 | 7725109 | 4-scf00092 | 4 |
| AX-157969822 | 4 | 108.661 | KV452836.1 | 186531  | 4-scf00099 | 4 |
| AX-157682788 | 4 | 108.661 | KV452840.1 | 19717   | 4-scf00101 | 4 |
| AX-157682784 | 4 | 108.661 | KV452840.1 | 36434   | 4-scf00101 | 4 |
| AX-157682780 | 4 | 108.661 | KV452840.1 | 55505   | 4-scf00101 | 4 |
| AX-157682776 | 4 | 108.661 | KV452840.1 | 62710   | 4-scf00101 | 4 |
| AX-157682771 | 4 | 108.661 | KV452840.1 | 106512  | 4-scf00101 | 4 |
| AX-157682765 | 4 | 108.661 | KV452840.1 | 136044  | 4-scf00101 | 4 |
| AX-157682764 | 4 | 108.661 | KV452840.1 | 149928  | 4-scf00101 | 4 |
| AX-157682762 | 4 | 108.661 | KV452840.1 | 168349  | 4-scf00101 | 4 |
| AX-157682761 | 4 | 108.661 | KV452840.1 | 178144  | 4-scf00101 | 4 |
| AX-157682756 | 4 | 108.661 | KV452840.1 | 208441  | 4-scf00101 | 4 |
| AX-157682755 | 4 | 108.661 | KV452840.1 | 213755  | 4-scf00101 | 4 |
| AX-157682751 | 4 | 108.661 | KV452840.1 | 219531  | 4-scf00101 | 4 |
| AX-157682750 | 4 | 108.661 | KV452840.1 | 221501  | 4-scf00101 | 4 |
| AX-157681866 | 4 | 108.661 | KV452840.1 | 226905  | 4-scf00101 | 4 |
| AX-157682796 | 4 | 108.661 | KV452831.1 | 3084    | 4-scf00102 | 4 |
| AX-157682798 | 4 | 108.661 | KV452831.1 | 5676    | 4-scf00102 | 4 |
| AX-157680626 | 4 | 108.661 | KV452831.1 | 24678   | 4-scf00102 | 4 |
| AX-157682813 | 4 | 108.661 | KV452831.1 | 49263   | 4-scf00102 | 4 |
| AX-157680050 | 4 | 108.661 | KV452831.1 | 55857   | 4-scf00102 | 4 |
| AX-157680442 | 4 | 108.661 | KV452831.1 | 58143   | 4-scf00102 | 4 |
| AX-157682820 | 4 | 108.661 | KV452831.1 | 62730   | 4-scf00102 | 4 |
| AX-157682823 | 4 | 108.661 | KV452831.1 | 68328   | 4-scf00102 | 4 |
| AX-157970023 | 4 | 108.661 | KV452834.1 | 54736   | 4-scf00104 | 4 |
| AX-157970167 | 4 | 108.661 | KV452838.1 | 115888  | 4-scf00105 | 4 |
| AX-157686851 | 4 | 108.661 | KV452832.1 | 10816   | 4-scf00749 | 4 |

|              |   |         |             |        |            |    |
|--------------|---|---------|-------------|--------|------------|----|
| AX-157686852 | 4 | 108.661 | KV452832.1  | 12883  | 4-scf00749 | 4  |
| AX-157686853 | 4 | 108.661 | KV452832.1  | 16363  | 4-scf00749 | 4  |
| AX-157686856 | 4 | 108.661 | KV452832.1  | 21480  | 4-scf00749 | 4  |
| AX-157680955 | 4 | 108.661 | KV452832.1  | 23305  | 4-scf00749 | 4  |
| AX-157686860 | 4 | 108.661 | KV452832.1  | 29273  | 4-scf00749 | 4  |
| AX-157687337 | 4 | 108.661 | KV452839.1  | 12306  | 4-scf00853 | 4  |
| AX-157687841 | 4 | 108.661 | KV453628.1  | 2512   | scf01056   | UN |
| AX-157680391 | 4 | 108.661 | 3ML01030661 | 664    | scf06261_1 | UN |
| AX-157681845 | 4 | 108.661 | 3ML01031381 | 157    | scf06993_1 | UN |
| AX-157682794 | 4 | 108.668 | KV452840.1  | 6309   | 4-scf00101 | 4  |
| AX-157969920 | 4 | 109.644 | KV452836.1  | 305080 | 4-scf00099 | 4  |
| AX-157969921 | 4 | 109.644 | KV452836.1  | 305792 | 4-scf00099 | 4  |
| AX-157969973 | 4 | 109.644 | KV452834.1  | 671    | 4-scf00104 | 4  |
| AX-157969983 | 4 | 109.644 | KV452834.1  | 12341  | 4-scf00104 | 4  |
| AX-157969987 | 4 | 109.644 | KV452834.1  | 14803  | 4-scf00104 | 4  |
| AX-157969988 | 4 | 109.644 | KV452834.1  | 15200  | 4-scf00104 | 4  |
| AX-157753770 | 4 | 109.644 | KV452834.1  | 15612  | 4-scf00104 | 4  |
| AX-157969991 | 4 | 109.644 | KV452834.1  | 22960  | 4-scf00104 | 4  |
| AX-157969998 | 4 | 109.644 | KV452834.1  | 32101  | 4-scf00104 | 4  |
| AX-157753099 | 4 | 109.644 | KV452834.1  | 33834  | 4-scf00104 | 4  |
| AX-157970003 | 4 | 109.644 | KV452834.1  | 34002  | 4-scf00104 | 4  |
| AX-157970004 | 4 | 109.644 | KV452834.1  | 34568  | 4-scf00104 | 4  |
| AX-157869639 | 4 | 109.644 | KV452834.1  | 44266  | 4-scf00104 | 4  |
| AX-157970011 | 4 | 109.644 | KV452834.1  | 45034  | 4-scf00104 | 4  |
| AX-157970012 | 4 | 109.644 | KV452834.1  | 49495  | 4-scf00104 | 4  |
| AX-157970019 | 4 | 109.644 | KV452834.1  | 52994  | 4-scf00104 | 4  |
| AX-157970028 | 4 | 109.644 | KV452834.1  | 63891  | 4-scf00104 | 4  |
| AX-157970029 | 4 | 109.644 | KV452834.1  | 64174  | 4-scf00104 | 4  |
| AX-157970031 | 4 | 109.644 | KV452834.1  | 66975  | 4-scf00104 | 4  |
| AX-157749823 | 4 | 109.644 | KV452834.1  | 67751  | 4-scf00104 | 4  |
| AX-157970032 | 4 | 109.644 | KV452834.1  | 69087  | 4-scf00104 | 4  |
| AX-157970033 | 4 | 109.644 | KV452834.1  | 70090  | 4-scf00104 | 4  |
| AX-157722459 | 4 | 109.644 | KV452834.1  | 73430  | 4-scf00104 | 4  |
| AX-157753456 | 4 | 109.644 | KV452834.1  | 90322  | 4-scf00104 | 4  |
| AX-157970042 | 4 | 109.644 | KV452834.1  | 91522  | 4-scf00104 | 4  |
| AX-157816902 | 4 | 109.644 | KV452834.1  | 94621  | 4-scf00104 | 4  |
| AX-157970045 | 4 | 109.644 | KV452834.1  | 95405  | 4-scf00104 | 4  |
| AX-157970046 | 4 | 109.644 | KV452834.1  | 96355  | 4-scf00104 | 4  |
| AX-157757385 | 4 | 109.644 | KV452834.1  | 97423  | 4-scf00104 | 4  |
| AX-157970055 | 4 | 109.644 | KV452834.1  | 105444 | 4-scf00104 | 4  |
| AX-157970062 | 4 | 109.644 | KV452834.1  | 112399 | 4-scf00104 | 4  |
| AX-157970068 | 4 | 109.644 | KV452834.1  | 115534 | 4-scf00104 | 4  |
| AX-157970071 | 4 | 109.644 | KV452834.1  | 119864 | 4-scf00104 | 4  |
| AX-157970078 | 4 | 109.644 | KV452834.1  | 123813 | 4-scf00104 | 4  |
| AX-157970079 | 4 | 109.644 | KV452834.1  | 123945 | 4-scf00104 | 4  |
| AX-157970088 | 4 | 109.644 | KV452834.1  | 133329 | 4-scf00104 | 4  |
| AX-157970093 | 4 | 109.644 | KV452834.1  | 135560 | 4-scf00104 | 4  |
| AX-157864948 | 4 | 109.644 | KV452838.1  | 33145  | 4-scf00105 | 4  |
| AX-157970119 | 4 | 109.644 | KV452838.1  | 48525  | 4-scf00105 | 4  |
| AX-157970127 | 4 | 109.644 | KV452838.1  | 53306  | 4-scf00105 | 4  |
| AX-157970131 | 4 | 109.644 | KV452838.1  | 53862  | 4-scf00105 | 4  |

|              |   |         |             |         |            |    |
|--------------|---|---------|-------------|---------|------------|----|
| AX-157970135 | 4 | 109.644 | KV452838.1  | 55785   | 4-scf00105 | 4  |
| AX-157751635 | 4 | 109.644 | KV452838.1  | 58703   | 4-scf00105 | 4  |
| AX-157722062 | 4 | 109.644 | KV452838.1  | 124729  | 4-scf00105 | 4  |
| AX-157970181 | 4 | 109.644 | KV452838.1  | 140543  | 4-scf00105 | 4  |
| AX-157970192 | 4 | 109.644 | KV452837.1  | 3317    | 4-scf00106 | 4  |
| AX-157970230 | 4 | 109.644 | KV452837.1  | 44347   | 4-scf00106 | 4  |
| AX-157970232 | 4 | 109.644 | KV452837.1  | 45985   | 4-scf00106 | 4  |
| AX-157970259 | 4 | 109.644 | KV452837.1  | 105993  | 4-scf00106 | 4  |
| AX-157816917 | 4 | 109.644 | KV452837.1  | 106049  | 4-scf00106 | 4  |
| AX-157680008 | 4 | 109.644 | 3ML01034492 | 312     | scf10168_1 | UN |
| AX-157969299 | 4 | 110.517 | KV452829.1  | 7730050 | 4-scf00092 | 4  |
| AX-157969701 | 4 | 110.517 | KV452836.1  | 3217    | 4-scf00099 | 4  |
| AX-157969708 | 4 | 110.517 | KV452836.1  | 7604    | 4-scf00099 | 4  |
| AX-157969711 | 4 | 110.517 | KV452836.1  | 12444   | 4-scf00099 | 4  |
| AX-157854975 | 4 | 110.517 | KV452836.1  | 19212   | 4-scf00099 | 4  |
| AX-157969723 | 4 | 110.517 | KV452836.1  | 20005   | 4-scf00099 | 4  |
| AX-157854976 | 4 | 110.517 | KV452836.1  | 21264   | 4-scf00099 | 4  |
| AX-157716799 | 4 | 110.517 | KV452836.1  | 26528   | 4-scf00099 | 4  |
| AX-157969725 | 4 | 110.517 | KV452836.1  | 27937   | 4-scf00099 | 4  |
| AX-157969728 | 4 | 110.517 | KV452836.1  | 35081   | 4-scf00099 | 4  |
| AX-157969732 | 4 | 110.517 | KV452836.1  | 41717   | 4-scf00099 | 4  |
| AX-157816867 | 4 | 110.517 | KV452836.1  | 47337   | 4-scf00099 | 4  |
| AX-157969738 | 4 | 110.517 | KV452836.1  | 53676   | 4-scf00099 | 4  |
| AX-157816868 | 4 | 110.517 | KV452836.1  | 55157   | 4-scf00099 | 4  |
| AX-157816870 | 4 | 110.517 | KV452836.1  | 61347   | 4-scf00099 | 4  |
| AX-157969739 | 4 | 110.517 | KV452836.1  | 62961   | 4-scf00099 | 4  |
| AX-157753350 | 4 | 110.517 | KV452836.1  | 67647   | 4-scf00099 | 4  |
| AX-157969742 | 4 | 110.517 | KV452836.1  | 68407   | 4-scf00099 | 4  |
| AX-157969745 | 4 | 110.517 | KV452836.1  | 73331   | 4-scf00099 | 4  |
| AX-157969747 | 4 | 110.517 | KV452836.1  | 74179   | 4-scf00099 | 4  |
| AX-157969748 | 4 | 110.517 | KV452836.1  | 77615   | 4-scf00099 | 4  |
| AX-157816871 | 4 | 110.517 | KV452836.1  | 100472  | 4-scf00099 | 4  |
| AX-157748069 | 4 | 110.517 | KV452836.1  | 103200  | 4-scf00099 | 4  |
| AX-157969760 | 4 | 110.517 | KV452836.1  | 105677  | 4-scf00099 | 4  |
| AX-157969761 | 4 | 110.517 | KV452836.1  | 110090  | 4-scf00099 | 4  |
| AX-157969764 | 4 | 110.517 | KV452836.1  | 112100  | 4-scf00099 | 4  |
| AX-157816872 | 4 | 110.517 | KV452836.1  | 134424  | 4-scf00099 | 4  |
| AX-157969811 | 4 | 110.517 | KV452836.1  | 168671  | 4-scf00099 | 4  |
| AX-157969845 | 4 | 110.517 | KV452836.1  | 205175  | 4-scf00099 | 4  |
| AX-157969857 | 4 | 110.517 | KV452836.1  | 213603  | 4-scf00099 | 4  |
| AX-157969907 | 4 | 110.517 | KV452836.1  | 288277  | 4-scf00099 | 4  |
| AX-157969911 | 4 | 110.517 | KV452836.1  | 293461  | 4-scf00099 | 4  |
| AX-157969913 | 4 | 110.517 | KV452836.1  | 294158  | 4-scf00099 | 4  |
| AX-157969942 | 4 | 110.517 | KV452836.1  | 336174  | 4-scf00099 | 4  |
| AX-157681867 | 4 | 110.517 | KV452840.1  | 140291  | 4-scf00101 | 4  |
| AX-157682827 | 4 | 110.517 | KV452840.1  | 325850  | 4-scf00101 | 4  |
| AX-157682802 | 4 | 110.517 | KV452831.1  | 16328   | 4-scf00102 | 4  |
| AX-157682818 | 4 | 110.517 | KV452831.1  | 60059   | 4-scf00102 | 4  |
| AX-157682825 | 4 | 110.517 | KV452831.1  | 76997   | 4-scf00102 | 4  |
| AX-157747087 | 4 | 110.517 | KV452834.1  | 45222   | 4-scf00104 | 4  |
| AX-157970096 | 4 | 110.517 | KV452834.1  | 147537  | 4-scf00104 | 4  |

|              |   |                     |        |            |    |
|--------------|---|---------------------|--------|------------|----|
| AX-157688433 | 4 | 110.517 3ML01026141 | 1636   | scf01738_1 | UN |
| AX-157688434 | 4 | 110.517 3ML01026141 | 1882   | scf01738_1 | UN |
| AX-157689664 | 4 | 110.517 3ML01031181 | 297    | scf06787_1 | UN |
| AX-157707112 | 4 | 110.517 3ML01033523 | 484    | scf09178_1 | UN |
| AX-157719561 | 4 | 110.627 KV452836.1  | 141670 | 4-scf00099 | 4  |
| AX-157969782 | 4 | 110.627 KV452836.1  | 143429 | 4-scf00099 | 4  |
| AX-157969785 | 4 | 110.627 KV452836.1  | 144059 | 4-scf00099 | 4  |
| AX-157969786 | 4 | 110.627 KV452836.1  | 145980 | 4-scf00099 | 4  |
| AX-157969787 | 4 | 110.627 KV452836.1  | 146271 | 4-scf00099 | 4  |
| AX-157969791 | 4 | 110.627 KV452836.1  | 152308 | 4-scf00099 | 4  |
| AX-157969797 | 4 | 110.627 KV452836.1  | 155228 | 4-scf00099 | 4  |
| AX-157969798 | 4 | 110.627 KV452836.1  | 155605 | 4-scf00099 | 4  |
| AX-157969804 | 4 | 110.627 KV452836.1  | 158319 | 4-scf00099 | 4  |
| AX-157969807 | 4 | 110.627 KV452836.1  | 158769 | 4-scf00099 | 4  |
| AX-157969810 | 4 | 110.627 KV452836.1  | 160430 | 4-scf00099 | 4  |
| AX-157969819 | 4 | 110.627 KV452836.1  | 180400 | 4-scf00099 | 4  |
| AX-157969821 | 4 | 110.627 KV452836.1  | 180908 | 4-scf00099 | 4  |
| AX-157969826 | 4 | 110.627 KV452836.1  | 188866 | 4-scf00099 | 4  |
| AX-157969827 | 4 | 110.627 KV452836.1  | 189248 | 4-scf00099 | 4  |
| AX-157970197 | 4 | 110.627 KV452837.1  | 8250   | 4-scf00106 | 4  |
| AX-157969721 | 4 | 111.282 KV452836.1  | 19456  | 4-scf00099 | 4  |
| AX-157969733 | 4 | 111.282 KV452836.1  | 43728  | 4-scf00099 | 4  |
| AX-157746833 | 4 | 111.282 KV452836.1  | 48397  | 4-scf00099 | 4  |
| AX-157723628 | 4 | 111.282 KV452836.1  | 63229  | 4-scf00099 | 4  |
| AX-157969755 | 4 | 111.282 KV452836.1  | 96081  | 4-scf00099 | 4  |
| AX-157816874 | 4 | 111.282 KV452836.1  | 146646 | 4-scf00099 | 4  |
| AX-157969799 | 4 | 111.282 KV452836.1  | 156189 | 4-scf00099 | 4  |
| AX-157875607 | 4 | 111.282 KV452836.1  | 195301 | 4-scf00099 | 4  |
| AX-157816885 | 4 | 111.282 KV452836.1  | 243367 | 4-scf00099 | 4  |
| AX-157969878 | 4 | 111.282 KV452836.1  | 243576 | 4-scf00099 | 4  |
| AX-157969893 | 4 | 111.282 KV452836.1  | 268285 | 4-scf00099 | 4  |
| AX-157969898 | 4 | 111.282 KV452836.1  | 278064 | 4-scf00099 | 4  |
| AX-157969927 | 4 | 111.282 KV452836.1  | 316015 | 4-scf00099 | 4  |
| AX-157969929 | 4 | 111.282 KV452836.1  | 318257 | 4-scf00099 | 4  |
| AX-157969930 | 4 | 111.282 KV452836.1  | 318783 | 4-scf00099 | 4  |
| AX-157884176 | 4 | 111.282 KV452836.1  | 446828 | 4-scf00099 | 4  |
| AX-157682785 | 4 | 111.282 KV452840.1  | 26952  | 4-scf00101 | 4  |
| AX-157682824 | 4 | 111.282 KV452831.1  | 71380  | 4-scf00102 | 4  |
| AX-157969992 | 4 | 111.282 KV452834.1  | 24953  | 4-scf00104 | 4  |
| AX-157970022 | 4 | 111.282 KV452834.1  | 54532  | 4-scf00104 | 4  |
| AX-157816899 | 4 | 111.282 KV452834.1  | 71541  | 4-scf00104 | 4  |
| AX-157970056 | 4 | 111.282 KV452834.1  | 106743 | 4-scf00104 | 4  |
| AX-157970074 | 4 | 111.282 KV452834.1  | 121400 | 4-scf00104 | 4  |
| AX-157816904 | 4 | 111.282 KV452838.1  | 32571  | 4-scf00105 | 4  |
| AX-157970152 | 4 | 111.282 KV452838.1  | 80957  | 4-scf00105 | 4  |
| AX-157970168 | 4 | 111.282 KV452838.1  | 118404 | 4-scf00105 | 4  |
| AX-157816909 | 4 | 111.282 KV452838.1  | 147694 | 4-scf00105 | 4  |
| AX-157970188 | 4 | 111.282 KV452837.1  | 1235   | 4-scf00106 | 4  |
| AX-157970193 | 4 | 111.282 KV452837.1  | 3993   | 4-scf00106 | 4  |
| AX-157724401 | 4 | 111.282 KV452837.1  | 8005   | 4-scf00106 | 4  |
| AX-157816910 | 4 | 111.282 KV452837.1  | 8587   | 4-scf00106 | 4  |

|              |   |         |            |         |            |    |
|--------------|---|---------|------------|---------|------------|----|
| AX-157772994 | 4 | 111.282 | KV452837.1 | 11300   | 4-scf00106 | 4  |
| AX-157970203 | 4 | 111.282 | KV452837.1 | 12852   | 4-scf00106 | 4  |
| AX-157970209 | 4 | 111.282 | KV452837.1 | 16905   | 4-scf00106 | 4  |
| AX-157970210 | 4 | 111.282 | KV452837.1 | 17365   | 4-scf00106 | 4  |
| AX-157742814 | 4 | 111.282 | KV452837.1 | 22743   | 4-scf00106 | 4  |
| AX-157816912 | 4 | 111.282 | KV452837.1 | 23387   | 4-scf00106 | 4  |
| AX-157816913 | 4 | 111.282 | KV452837.1 | 23546   | 4-scf00106 | 4  |
| AX-157970216 | 4 | 111.282 | KV452837.1 | 23988   | 4-scf00106 | 4  |
| AX-157718612 | 4 | 111.282 | KV452837.1 | 26152   | 4-scf00106 | 4  |
| AX-157970218 | 4 | 111.282 | KV452837.1 | 27583   | 4-scf00106 | 4  |
| AX-157970223 | 4 | 111.282 | KV452837.1 | 33883   | 4-scf00106 | 4  |
| AX-157970224 | 4 | 111.282 | KV452837.1 | 35545   | 4-scf00106 | 4  |
| AX-157816916 | 4 | 111.282 | KV452837.1 | 37556   | 4-scf00106 | 4  |
| AX-157970239 | 4 | 111.282 | KV452837.1 | 51255   | 4-scf00106 | 4  |
| AX-157970253 | 4 | 111.282 | KV452837.1 | 56864   | 4-scf00106 | 4  |
| AX-158421213 | 4 | 111.282 | KV452832.1 | 30989   | 4-scf00749 | 4  |
| AX-157689887 | 4 | 111.282 |            | 300     | scf10629   | UN |
| AX-157970100 | 4 | 111.321 | KV452838.1 | 4927    | 4-scf00105 | 4  |
| AX-157750329 | 4 | 111.351 | KV452838.1 | 5286    | 4-scf00105 | 4  |
| AX-157969273 | 4 | 111.391 | KV452829.1 | 7690103 | 4-scf00092 | 4  |
| AX-157757434 | 4 | 111.391 | KV452829.1 | 7698276 | 4-scf00092 | 4  |
| AX-157741212 | 4 | 111.391 | KV452836.1 | 296228  | 4-scf00099 | 4  |
| AX-157969978 | 4 | 111.391 | KV452834.1 | 6397    | 4-scf00104 | 4  |
| AX-157970005 | 4 | 111.391 | KV452834.1 | 35162   | 4-scf00104 | 4  |
| AX-157970066 | 4 | 111.391 | KV452834.1 | 114383  | 4-scf00104 | 4  |
| AX-157816905 | 4 | 111.391 | KV452838.1 | 34063   | 4-scf00105 | 4  |
| AX-157970109 | 4 | 111.391 | KV452838.1 | 36100   | 4-scf00105 | 4  |
| AX-157970110 | 4 | 111.391 | KV452838.1 | 36670   | 4-scf00105 | 4  |
| AX-157816906 | 4 | 111.391 | KV452838.1 | 38216   | 4-scf00105 | 4  |
| AX-157970112 | 4 | 111.391 | KV452838.1 | 42151   | 4-scf00105 | 4  |
| AX-157970120 | 4 | 111.391 | KV452838.1 | 51931   | 4-scf00105 | 4  |
| AX-157970125 | 4 | 111.391 | KV452838.1 | 52844   | 4-scf00105 | 4  |
| AX-157970133 | 4 | 111.391 | KV452838.1 | 54697   | 4-scf00105 | 4  |
| AX-157970206 | 4 | 111.391 | KV452837.1 | 14831   | 4-scf00106 | 4  |
| AX-157970233 | 4 | 111.391 | KV452837.1 | 46451   | 4-scf00106 | 4  |
| AX-157884180 | 4 | 111.441 | KV452834.1 | 95883   | 4-scf00104 | 4  |
| AX-157970139 | 4 | 111.441 | KV452838.1 | 63199   | 4-scf00105 | 4  |
| AX-158415453 | 4 | 111.441 | KV452838.1 | 78280   | 4-scf00105 | 4  |
| AX-157970142 | 4 | 111.501 | KV452838.1 | 65083   | 4-scf00105 | 4  |
| AX-157816907 | 4 | 111.501 | KV452838.1 | 66064   | 4-scf00105 | 4  |
| AX-157875616 | 4 | 111.501 | KV452838.1 | 74550   | 4-scf00105 | 4  |
| AX-157970144 | 4 | 111.501 | KV452838.1 | 75038   | 4-scf00105 | 4  |
| AX-157970146 | 4 | 111.501 | KV452838.1 | 75752   | 4-scf00105 | 4  |
| AX-157970149 | 4 | 111.501 | KV452838.1 | 78665   | 4-scf00105 | 4  |
| AX-157970150 | 4 | 111.501 | KV452838.1 | 79965   | 4-scf00105 | 4  |
| AX-157970153 | 4 | 111.501 | KV452838.1 | 83304   | 4-scf00105 | 4  |
| AX-157970154 | 4 | 111.501 | KV452838.1 | 84695   | 4-scf00105 | 4  |
| AX-157970159 | 4 | 111.501 | KV452838.1 | 102540  | 4-scf00105 | 4  |
| AX-157970165 | 4 | 111.501 | KV452838.1 | 109740  | 4-scf00105 | 4  |
| AX-157745131 | 4 | 111.501 | KV452838.1 | 109924  | 4-scf00105 | 4  |
| AX-157970175 | 4 | 111.501 | KV452838.1 | 127513  | 4-scf00105 | 4  |



|              |   |         |            |        |             |    |
|--------------|---|---------|------------|--------|-------------|----|
| AX-157969923 | 4 | 111.502 | KV452836.1 | 312610 | 4-scf00099  | 4  |
| AX-157970182 | 4 | 111.502 | KV452838.1 | 143924 | 4-scf00105  | 4  |
| AX-157970185 | 4 | 111.502 | KV452838.1 | 147548 | 4-scf00105  | 4  |
| AX-157970503 | 5 | 0       | KV453024.1 | 18356  | 13-scf00108 | 13 |
| AX-157970444 | 5 | 0       | KV453024.1 | 96280  | 13-scf00108 | 13 |
| AX-157970440 | 5 | 0       | KV453024.1 | 99979  | 13-scf00108 | 13 |
| AX-157854982 | 5 | 0       | KV453024.1 | 219557 | 13-scf00108 | 13 |
| AX-157970328 | 5 | 0       | KV453024.1 | 252928 | 13-scf00108 | 13 |
| AX-158379515 | 5 | 0       | KV453024.1 | 267887 | 13-scf00108 | 13 |
| AX-157970310 | 5 | 0       | KV453024.1 | 283127 | 13-scf00108 | 13 |
| AX-157816922 | 5 | 0       | KV453024.1 | 283666 | 13-scf00108 | 13 |
| AX-157970309 | 5 | 0       | KV453024.1 | 292621 | 13-scf00108 | 13 |
| AX-157970307 | 5 | 0       | KV453024.1 | 293059 | 13-scf00108 | 13 |
| AX-157750449 | 5 | 0       | KV453024.1 | 300374 | 13-scf00108 | 13 |
| AX-157816919 | 5 | 0       | KV453024.1 | 302952 | 13-scf00108 | 13 |
| AX-157970300 | 5 | 0       | KV453024.1 | 304398 | 13-scf00108 | 13 |
| AX-157970297 | 5 | 0       | KV453024.1 | 309831 | 13-scf00108 | 13 |
| AX-157970296 | 5 | 0       | KV453024.1 | 310642 | 13-scf00108 | 13 |
| AX-157970294 | 5 | 0       | KV453024.1 | 311985 | 13-scf00108 | 13 |
| AX-157970293 | 5 | 0       | KV453024.1 | 316311 | 13-scf00108 | 13 |
| AX-157970291 | 5 | 0       | KV453024.1 | 318845 | 13-scf00108 | 13 |
| AX-157970289 | 5 | 0       | KV453024.1 | 322240 | 13-scf00108 | 13 |
| AX-157970286 | 5 | 0       | KV453024.1 | 324803 | 13-scf00108 | 13 |
| AX-157714752 | 5 | 0       | KV453024.1 | 325507 | 13-scf00108 | 13 |
| AX-157970285 | 5 | 0       | KV453024.1 | 326040 | 13-scf00108 | 13 |
| AX-157970282 | 5 | 0       | KV453024.1 | 328104 | 13-scf00108 | 13 |
| AX-157970273 | 5 | 0       | KV453024.1 | 334734 | 13-scf00108 | 13 |
| AX-157970267 | 5 | 0       | KV453024.1 | 339645 | 13-scf00108 | 13 |
| AX-157970262 | 5 | 0       | KV453024.1 | 341026 | 13-scf00108 | 13 |
| AX-157687704 | 5 | 0       | KV453024.1 | 344297 | 13-scf00108 | 13 |
| AX-157970521 | 5 | 0       | KV453021.1 | 6442   | 13-scf00109 | 13 |
| AX-157716539 | 5 | 0       | KV453021.1 | 6857   | 13-scf00109 | 13 |
| AX-157854984 | 5 | 0       | KV453021.1 | 8845   | 13-scf00109 | 13 |
| AX-158390316 | 5 | 0       | KV453021.1 | 9219   | 13-scf00109 | 13 |
| AX-157970527 | 5 | 0       | KV453021.1 | 11925  | 13-scf00109 | 13 |
| AX-157970529 | 5 | 0       | KV453021.1 | 12684  | 13-scf00109 | 13 |
| AX-157816949 | 5 | 0       | KV453021.1 | 14567  | 13-scf00109 | 13 |
| AX-157816950 | 5 | 0       | KV453021.1 | 17838  | 13-scf00109 | 13 |
| AX-157970530 | 5 | 0       | KV453021.1 | 17878  | 13-scf00109 | 13 |
| AX-157970531 | 5 | 0       | KV453021.1 | 18953  | 13-scf00109 | 13 |
| AX-157970533 | 5 | 0       | KV453021.1 | 19895  | 13-scf00109 | 13 |
| AX-157970534 | 5 | 0       | KV453021.1 | 19962  | 13-scf00109 | 13 |
| AX-157970537 | 5 | 0       | KV453021.1 | 23306  | 13-scf00109 | 13 |
| AX-157970538 | 5 | 0       | KV453021.1 | 24333  | 13-scf00109 | 13 |
| AX-157757901 | 5 | 0       | KV453021.1 | 25348  | 13-scf00109 | 13 |
| AX-157970541 | 5 | 0       | KV453021.1 | 26023  | 13-scf00109 | 13 |
| AX-157884188 | 5 | 0       | KV453021.1 | 26192  | 13-scf00109 | 13 |
| AX-157816952 | 5 | 0       | KV453021.1 | 29592  | 13-scf00109 | 13 |
| AX-157970552 | 5 | 0       | KV453021.1 | 45151  | 13-scf00109 | 13 |
| AX-157719697 | 5 | 0       | KV453021.1 | 46364  | 13-scf00109 | 13 |
| AX-157970553 | 5 | 0       | KV453021.1 | 49410  | 13-scf00109 | 13 |

|              |   |   |            |        |             |    |
|--------------|---|---|------------|--------|-------------|----|
| AX-158406653 | 5 | 0 | KV453021.1 | 68400  | 13-scf00109 | 13 |
| AX-157854985 | 5 | 0 | KV453021.1 | 69580  | 13-scf00109 | 13 |
| AX-157970554 | 5 | 0 | KV453021.1 | 70114  | 13-scf00109 | 13 |
| AX-157854986 | 5 | 0 | KV453021.1 | 70754  | 13-scf00109 | 13 |
| AX-157970555 | 5 | 0 | KV453021.1 | 71826  | 13-scf00109 | 13 |
| AX-157816953 | 5 | 0 | KV453021.1 | 71864  | 13-scf00109 | 13 |
| AX-157854987 | 5 | 0 | KV453021.1 | 71948  | 13-scf00109 | 13 |
| AX-157854988 | 5 | 0 | KV453021.1 | 72073  | 13-scf00109 | 13 |
| AX-157970556 | 5 | 0 | KV453021.1 | 72190  | 13-scf00109 | 13 |
| AX-157816954 | 5 | 0 | KV453021.1 | 72251  | 13-scf00109 | 13 |
| AX-157854989 | 5 | 0 | KV453021.1 | 77489  | 13-scf00109 | 13 |
| AX-157816956 | 5 | 0 | KV453021.1 | 78233  | 13-scf00109 | 13 |
| AX-157970560 | 5 | 0 | KV453021.1 | 82176  | 13-scf00109 | 13 |
| AX-157854990 | 5 | 0 | KV453021.1 | 82730  | 13-scf00109 | 13 |
| AX-157970561 | 5 | 0 | KV453021.1 | 86245  | 13-scf00109 | 13 |
| AX-157970562 | 5 | 0 | KV453021.1 | 87013  | 13-scf00109 | 13 |
| AX-157970563 | 5 | 0 | KV453021.1 | 88021  | 13-scf00109 | 13 |
| AX-157854991 | 5 | 0 | KV453021.1 | 88462  | 13-scf00109 | 13 |
| AX-157970564 | 5 | 0 | KV453021.1 | 92026  | 13-scf00109 | 13 |
| AX-157970566 | 5 | 0 | KV453021.1 | 95256  | 13-scf00109 | 13 |
| AX-157970576 | 5 | 0 | KV453022.1 | 1831   | 13-scf00110 | 13 |
| AX-157970578 | 5 | 0 | KV453022.1 | 2112   | 13-scf00110 | 13 |
| AX-157970579 | 5 | 0 | KV453022.1 | 2696   | 13-scf00110 | 13 |
| AX-157970580 | 5 | 0 | KV453022.1 | 3237   | 13-scf00110 | 13 |
| AX-157970581 | 5 | 0 | KV453022.1 | 4743   | 13-scf00110 | 13 |
| AX-157970582 | 5 | 0 | KV453022.1 | 5166   | 13-scf00110 | 13 |
| AX-157970585 | 5 | 0 | KV453022.1 | 6921   | 13-scf00110 | 13 |
| AX-157970586 | 5 | 0 | KV453022.1 | 14583  | 13-scf00110 | 13 |
| AX-157970589 | 5 | 0 | KV453022.1 | 18016  | 13-scf00110 | 13 |
| AX-157970593 | 5 | 0 | KV453022.1 | 25675  | 13-scf00110 | 13 |
| AX-157970595 | 5 | 0 | KV453022.1 | 30571  | 13-scf00110 | 13 |
| AX-157970598 | 5 | 0 | KV453022.1 | 33303  | 13-scf00110 | 13 |
| AX-157970604 | 5 | 0 | KV453022.1 | 41227  | 13-scf00110 | 13 |
| AX-157970605 | 5 | 0 | KV453022.1 | 46400  | 13-scf00110 | 13 |
| AX-157970609 | 5 | 0 | KV453022.1 | 49276  | 13-scf00110 | 13 |
| AX-157970611 | 5 | 0 | KV453022.1 | 53823  | 13-scf00110 | 13 |
| AX-157970612 | 5 | 0 | KV453022.1 | 56352  | 13-scf00110 | 13 |
| AX-157970614 | 5 | 0 | KV453022.1 | 59114  | 13-scf00110 | 13 |
| AX-157816961 | 5 | 0 | KV453022.1 | 65593  | 13-scf00110 | 13 |
| AX-157970621 | 5 | 0 | KV453022.1 | 74702  | 13-scf00110 | 13 |
| AX-157816962 | 5 | 0 | KV453022.1 | 76244  | 13-scf00110 | 13 |
| AX-157970627 | 5 | 0 | KV453022.1 | 86915  | 13-scf00110 | 13 |
| AX-157970628 | 5 | 0 | KV453022.1 | 89141  | 13-scf00110 | 13 |
| AX-157970630 | 5 | 0 | KV453022.1 | 90717  | 13-scf00110 | 13 |
| AX-157970631 | 5 | 0 | KV453022.1 | 91070  | 13-scf00110 | 13 |
| AX-157970633 | 5 | 0 | KV453022.1 | 91558  | 13-scf00110 | 13 |
| AX-157970634 | 5 | 0 | KV453022.1 | 94688  | 13-scf00110 | 13 |
| AX-157970637 | 5 | 0 | KV453022.1 | 95448  | 13-scf00110 | 13 |
| AX-157970641 | 5 | 0 | KV453022.1 | 100526 | 13-scf00110 | 13 |
| AX-157970643 | 5 | 0 | KV453022.1 | 104141 | 13-scf00110 | 13 |
| AX-157970644 | 5 | 0 | KV453022.1 | 105255 | 13-scf00110 | 13 |

|              |   |   |            |        |             |    |
|--------------|---|---|------------|--------|-------------|----|
| AX-157970645 | 5 | 0 | KV453022.1 | 107070 | 13-scf00110 | 13 |
| AX-157970646 | 5 | 0 | KV453022.1 | 107574 | 13-scf00110 | 13 |
| AX-157970649 | 5 | 0 | KV453022.1 | 110432 | 13-scf00110 | 13 |
| AX-157970650 | 5 | 0 | KV453022.1 | 111032 | 13-scf00110 | 13 |
| AX-157869646 | 5 | 0 | KV453022.1 | 112239 | 13-scf00110 | 13 |
| AX-157970653 | 5 | 0 | KV453022.1 | 112568 | 13-scf00110 | 13 |
| AX-157773036 | 5 | 0 | KV453022.1 | 114940 | 13-scf00110 | 13 |
| AX-157970657 | 5 | 0 | KV453022.1 | 117864 | 13-scf00110 | 13 |
| AX-157816968 | 5 | 0 | KV453022.1 | 122437 | 13-scf00110 | 13 |
| AX-157970667 | 5 | 0 | KV453022.1 | 131417 | 13-scf00110 | 13 |
| AX-157970681 | 5 | 0 | KV453022.1 | 140127 | 13-scf00110 | 13 |
| AX-157970685 | 5 | 0 | KV453022.1 | 143141 | 13-scf00110 | 13 |
| AX-157970687 | 5 | 0 | KV453022.1 | 144056 | 13-scf00110 | 13 |
| AX-157854993 | 5 | 0 | KV453022.1 | 144272 | 13-scf00110 | 13 |
| AX-157719993 | 5 | 0 | KV453022.1 | 144773 | 13-scf00110 | 13 |
| AX-157970689 | 5 | 0 | KV453022.1 | 145786 | 13-scf00110 | 13 |
| AX-157756314 | 5 | 0 | KV453022.1 | 147429 | 13-scf00110 | 13 |
| AX-157970698 | 5 | 0 | KV453022.1 | 152084 | 13-scf00110 | 13 |
| AX-157970700 | 5 | 0 | KV453022.1 | 154289 | 13-scf00110 | 13 |
| AX-157970703 | 5 | 0 | KV453022.1 | 155468 | 13-scf00110 | 13 |
| AX-157970704 | 5 | 0 | KV453022.1 | 155634 | 13-scf00110 | 13 |
| AX-157970848 | 5 | 0 | KV453025.1 | 181387 | 13-scf00111 | 13 |
| AX-157971563 | 5 | 0 | KV453023.1 | 1101   | 13-scf00112 | 13 |
| AX-157971564 | 5 | 0 | KV453023.1 | 2180   | 13-scf00112 | 13 |
| AX-157971571 | 5 | 0 | KV453023.1 | 19035  | 13-scf00112 | 13 |
| AX-157971573 | 5 | 0 | KV453023.1 | 19571  | 13-scf00112 | 13 |
| AX-157971575 | 5 | 0 | KV453023.1 | 19687  | 13-scf00112 | 13 |
| AX-157971577 | 5 | 0 | KV453023.1 | 20605  | 13-scf00112 | 13 |
| AX-157971578 | 5 | 0 | KV453023.1 | 21194  | 13-scf00112 | 13 |
| AX-157971579 | 5 | 0 | KV453023.1 | 21840  | 13-scf00112 | 13 |
| AX-157971581 | 5 | 0 | KV453023.1 | 22863  | 13-scf00112 | 13 |
| AX-157971583 | 5 | 0 | KV453023.1 | 29332  | 13-scf00112 | 13 |
| AX-157971585 | 5 | 0 | KV453023.1 | 29795  | 13-scf00112 | 13 |
| AX-157971586 | 5 | 0 | KV453023.1 | 30757  | 13-scf00112 | 13 |
| AX-157971589 | 5 | 0 | KV453023.1 | 33736  | 13-scf00112 | 13 |
| AX-157971590 | 5 | 0 | KV453023.1 | 36758  | 13-scf00112 | 13 |
| AX-157971593 | 5 | 0 | KV453023.1 | 39767  | 13-scf00112 | 13 |
| AX-157971596 | 5 | 0 | KV453023.1 | 41790  | 13-scf00112 | 13 |
| AX-157971598 | 5 | 0 | KV453023.1 | 42181  | 13-scf00112 | 13 |
| AX-157971600 | 5 | 0 | KV453023.1 | 42929  | 13-scf00112 | 13 |
| AX-157971601 | 5 | 0 | KV453023.1 | 45554  | 13-scf00112 | 13 |
| AX-157971604 | 5 | 0 | KV453023.1 | 48102  | 13-scf00112 | 13 |
| AX-157971605 | 5 | 0 | KV453023.1 | 49688  | 13-scf00112 | 13 |
| AX-157971606 | 5 | 0 | KV453023.1 | 50993  | 13-scf00112 | 13 |
| AX-157971610 | 5 | 0 | KV453023.1 | 53020  | 13-scf00112 | 13 |
| AX-157971611 | 5 | 0 | KV453023.1 | 53542  | 13-scf00112 | 13 |
| AX-157971612 | 5 | 0 | KV453023.1 | 55567  | 13-scf00112 | 13 |
| AX-157971614 | 5 | 0 | KV453023.1 | 62807  | 13-scf00112 | 13 |
| AX-157971615 | 5 | 0 | KV453023.1 | 63156  | 13-scf00112 | 13 |
| AX-157971616 | 5 | 0 | KV453023.1 | 64108  | 13-scf00112 | 13 |
| AX-157971618 | 5 | 0 | KV453023.1 | 66466  | 13-scf00112 | 13 |

|              |   |   |            |        |             |    |
|--------------|---|---|------------|--------|-------------|----|
| AX-157971619 | 5 | 0 | KV453023.1 | 68294  | 13-scf00112 | 13 |
| AX-157757411 | 5 | 0 | KV453023.1 | 70124  | 13-scf00112 | 13 |
| AX-157971621 | 5 | 0 | KV453023.1 | 71607  | 13-scf00112 | 13 |
| AX-157971622 | 5 | 0 | KV453023.1 | 72312  | 13-scf00112 | 13 |
| AX-157971625 | 5 | 0 | KV453023.1 | 73725  | 13-scf00112 | 13 |
| AX-157971628 | 5 | 0 | KV453023.1 | 74633  | 13-scf00112 | 13 |
| AX-157971629 | 5 | 0 | KV453023.1 | 81312  | 13-scf00112 | 13 |
| AX-157971630 | 5 | 0 | KV453023.1 | 82019  | 13-scf00112 | 13 |
| AX-157971631 | 5 | 0 | KV453023.1 | 83342  | 13-scf00112 | 13 |
| AX-157971635 | 5 | 0 | KV453023.1 | 86068  | 13-scf00112 | 13 |
| AX-157971637 | 5 | 0 | KV453023.1 | 86629  | 13-scf00112 | 13 |
| AX-157971638 | 5 | 0 | KV453023.1 | 86818  | 13-scf00112 | 13 |
| AX-157971641 | 5 | 0 | KV453023.1 | 92229  | 13-scf00112 | 13 |
| AX-157971643 | 5 | 0 | KV453023.1 | 93651  | 13-scf00112 | 13 |
| AX-157971645 | 5 | 0 | KV453023.1 | 95407  | 13-scf00112 | 13 |
| AX-157971646 | 5 | 0 | KV453023.1 | 96078  | 13-scf00112 | 13 |
| AX-157971647 | 5 | 0 | KV453023.1 | 96834  | 13-scf00112 | 13 |
| AX-157971649 | 5 | 0 | KV453023.1 | 97507  | 13-scf00112 | 13 |
| AX-157971654 | 5 | 0 | KV453023.1 | 101458 | 13-scf00112 | 13 |
| AX-157971658 | 5 | 0 | KV453023.1 | 106192 | 13-scf00112 | 13 |
| AX-157971659 | 5 | 0 | KV453023.1 | 108106 | 13-scf00112 | 13 |
| AX-157971664 | 5 | 0 | KV453023.1 | 113625 | 13-scf00112 | 13 |
| AX-157971665 | 5 | 0 | KV453023.1 | 114196 | 13-scf00112 | 13 |
| AX-157971666 | 5 | 0 | KV453023.1 | 115614 | 13-scf00112 | 13 |
| AX-157971668 | 5 | 0 | KV453023.1 | 116902 | 13-scf00112 | 13 |
| AX-157971672 | 5 | 0 | KV453023.1 | 117923 | 13-scf00112 | 13 |
| AX-157971673 | 5 | 0 | KV453023.1 | 118523 | 13-scf00112 | 13 |
| AX-157971677 | 5 | 0 | KV453023.1 | 120539 | 13-scf00112 | 13 |
| AX-157971679 | 5 | 0 | KV453023.1 | 121236 | 13-scf00112 | 13 |
| AX-157971681 | 5 | 0 | KV453023.1 | 123800 | 13-scf00112 | 13 |
| AX-157971684 | 5 | 0 | KV453023.1 | 131288 | 13-scf00112 | 13 |
| AX-157971686 | 5 | 0 | KV453023.1 | 135597 | 13-scf00112 | 13 |
| AX-157971689 | 5 | 0 | KV453023.1 | 138285 | 13-scf00112 | 13 |
| AX-157971691 | 5 | 0 | KV453023.1 | 138520 | 13-scf00112 | 13 |
| AX-157971697 | 5 | 0 | KV453023.1 | 147521 | 13-scf00112 | 13 |
| AX-157971698 | 5 | 0 | KV453023.1 | 149270 | 13-scf00112 | 13 |
| AX-157971699 | 5 | 0 | KV453023.1 | 152784 | 13-scf00112 | 13 |
| AX-157971700 | 5 | 0 | KV453023.1 | 153205 | 13-scf00112 | 13 |
| AX-157971701 | 5 | 0 | KV453023.1 | 153862 | 13-scf00112 | 13 |
| AX-157971702 | 5 | 0 | KV453023.1 | 154644 | 13-scf00112 | 13 |
| AX-157971704 | 5 | 0 | KV453023.1 | 155689 | 13-scf00112 | 13 |
| AX-157971706 | 5 | 0 | KV453023.1 | 157163 | 13-scf00112 | 13 |
| AX-157971707 | 5 | 0 | KV453023.1 | 157870 | 13-scf00112 | 13 |
| AX-157971708 | 5 | 0 | KV453023.1 | 159581 | 13-scf00112 | 13 |
| AX-157971710 | 5 | 0 | KV453023.1 | 160374 | 13-scf00112 | 13 |
| AX-157971713 | 5 | 0 | KV453023.1 | 161174 | 13-scf00112 | 13 |
| AX-157971714 | 5 | 0 | KV453023.1 | 161321 | 13-scf00112 | 13 |
| AX-157817016 | 5 | 0 | KV453023.1 | 161947 | 13-scf00112 | 13 |
| AX-157971716 | 5 | 0 | KV453023.1 | 162512 | 13-scf00112 | 13 |
| AX-157971717 | 5 | 0 | KV453023.1 | 162972 | 13-scf00112 | 13 |
| AX-157756441 | 5 | 0 | KV453023.1 | 163244 | 13-scf00112 | 13 |

|              |   |       |             |        |             |    |
|--------------|---|-------|-------------|--------|-------------|----|
| AX-157971718 | 5 | 0     | KV453023.1  | 166674 | 13-scf00112 | 13 |
| AX-157971719 | 5 | 0     | KV453023.1  | 168098 | 13-scf00112 | 13 |
| AX-157855004 | 5 | 0     | KV453023.1  | 172344 | 13-scf00112 | 13 |
| AX-157971722 | 5 | 0     | KV453023.1  | 174099 | 13-scf00112 | 13 |
| AX-157971723 | 5 | 0     | KV453023.1  | 175371 | 13-scf00112 | 13 |
| AX-157971724 | 5 | 0     | KV453023.1  | 175508 | 13-scf00112 | 13 |
| AX-157971726 | 5 | 0     | KV453023.1  | 178090 | 13-scf00112 | 13 |
| AX-157971729 | 5 | 0     | KV453023.1  | 178864 | 13-scf00112 | 13 |
| AX-157971734 | 5 | 0     | KV453023.1  | 186928 | 13-scf00112 | 13 |
| AX-157971736 | 5 | 0     | KV453023.1  | 187746 | 13-scf00112 | 13 |
| AX-157971737 | 5 | 0     | KV453023.1  | 189162 | 13-scf00112 | 13 |
| AX-157971739 | 5 | 0     | KV453023.1  | 194362 | 13-scf00112 | 13 |
| AX-157971741 | 5 | 0     | KV453023.1  | 196283 | 13-scf00112 | 13 |
| AX-157971742 | 5 | 0     | KV453023.1  | 198054 | 13-scf00112 | 13 |
| AX-157971744 | 5 | 0     | KV453023.1  | 199940 | 13-scf00112 | 13 |
| AX-157817017 | 5 | 0     | KV453023.1  | 200583 | 13-scf00112 | 13 |
| AX-157971746 | 5 | 0     | KV453023.1  | 202082 | 13-scf00112 | 13 |
| AX-157971747 | 5 | 0     | KV453023.1  | 202426 | 13-scf00112 | 13 |
| AX-157817018 | 5 | 0     | KV453023.1  | 203626 | 13-scf00112 | 13 |
| AX-157971749 | 5 | 0     | KV453023.1  | 204981 | 13-scf00112 | 13 |
| AX-157971750 | 5 | 0     | KV453023.1  | 205944 | 13-scf00112 | 13 |
| AX-157971751 | 5 | 0     | KV453023.1  | 207635 | 13-scf00112 | 13 |
| AX-157744279 | 5 | 0     | KV453023.1  | 208548 | 13-scf00112 | 13 |
| AX-157726785 | 5 | 0     | KV453023.1  | 211292 | 13-scf00112 | 13 |
| AX-157971752 | 5 | 0     | KV453023.1  | 212971 | 13-scf00112 | 13 |
| AX-157971755 | 5 | 0     | KV453023.1  | 215267 | 13-scf00112 | 13 |
| AX-157971756 | 5 | 0     | KV453023.1  | 217053 | 13-scf00112 | 13 |
| AX-157738368 | 5 | 0     | KV453023.1  | 219012 | 13-scf00112 | 13 |
| AX-157971758 | 5 | 0     | KV453023.1  | 221301 | 13-scf00112 | 13 |
| AX-157971760 | 5 | 0     | KV453023.1  | 221961 | 13-scf00112 | 13 |
| AX-157971761 | 5 | 0     | KV453023.1  | 222569 | 13-scf00112 | 13 |
| AX-157713651 | 5 | 0     | KV453023.1  | 226003 | 13-scf00112 | 13 |
| AX-157719603 | 5 | 0     | KV453023.1  | 229412 | 13-scf00112 | 13 |
| AX-157971765 | 5 | 0     | KV453023.1  | 240407 | 13-scf00112 | 13 |
| AX-157971767 | 5 | 0     | KV453023.1  | 242331 | 13-scf00112 | 13 |
| AX-157817019 | 5 | 0     | KV453023.1  | 242857 | 13-scf00112 | 13 |
| AX-157745241 | 5 | 0     | KV453023.1  | 249859 | 13-scf00112 | 13 |
| AX-157971768 | 5 | 0     | KV453023.1  | 252257 | 13-scf00112 | 13 |
| AX-157971770 | 5 | 0     | KV453023.1  | 253078 | 13-scf00112 | 13 |
| AX-157971772 | 5 | 0     | KV453023.1  | 256608 | 13-scf00112 | 13 |
| AX-157971775 | 5 | 0     | KV453023.1  | 264774 | 13-scf00112 | 13 |
| AX-157971777 | 5 | 0     | KV453023.1  | 269215 | 13-scf00112 | 13 |
| AX-157717395 | 5 | 0     | KV453023.1  | 270742 | 13-scf00112 | 13 |
| AX-157705098 | 5 | 0     | 3ML01028596 | 986    | scf04207_1  | UN |
| AX-157706820 | 5 | 0     | 3ML01032976 | 397    | scf08609_1  | UN |
| AX-157707331 | 5 | 0     | 3ML01034025 | 242    | scf09695_1  | UN |
| AX-157970321 | 5 | 0.108 | KV453024.1  | 273185 | 13-scf00108 | 13 |
| AX-157970325 | 5 | 0.111 | KV453024.1  | 258590 | 13-scf00108 | 13 |
| AX-157970352 | 5 | 0.253 | KV453024.1  | 213420 | 13-scf00108 | 13 |
| AX-158406646 | 5 | 0.253 | KV453024.1  | 214961 | 13-scf00108 | 13 |
| AX-157970349 | 5 | 0.253 | KV453024.1  | 215759 | 13-scf00108 | 13 |

|              |   |       |            |        |             |    |
|--------------|---|-------|------------|--------|-------------|----|
| AX-157970340 | 5 | 0.253 | KV453024.1 | 227277 | 13-scf00108 | 13 |
| AX-157970339 | 5 | 0.253 | KV453024.1 | 227907 | 13-scf00108 | 13 |
| AX-157970615 | 5 | 0.253 | KV453022.1 | 59863  | 13-scf00110 | 13 |
| AX-157970356 | 5 | 0.4   | KV453024.1 | 204578 | 13-scf00108 | 13 |
| AX-157970358 | 5 | 0.45  | KV453024.1 | 202465 | 13-scf00108 | 13 |
| AX-157970475 | 5 | 0.509 | KV453024.1 | 58055  | 13-scf00108 | 13 |
| AX-157970435 | 5 | 0.509 | KV453024.1 | 115407 | 13-scf00108 | 13 |
| AX-157970392 | 5 | 0.509 | KV453024.1 | 166964 | 13-scf00108 | 13 |
| AX-157816933 | 5 | 0.509 | KV453024.1 | 181399 | 13-scf00108 | 13 |
| AX-157970360 | 5 | 0.509 | KV453024.1 | 201892 | 13-scf00108 | 13 |
| AX-157816926 | 5 | 0.509 | KV453024.1 | 210402 | 13-scf00108 | 13 |
| AX-157970318 | 5 | 0.509 | KV453024.1 | 279011 | 13-scf00108 | 13 |
| AX-157970295 | 5 | 0.509 | KV453024.1 | 311402 | 13-scf00108 | 13 |
| AX-157687706 | 5 | 0.509 | KV453024.1 | 345649 | 13-scf00108 | 13 |
| AX-157687708 | 5 | 0.509 | KV453024.1 | 348216 | 13-scf00108 | 13 |
| AX-157970693 | 5 | 0.509 | KV453022.1 | 146881 | 13-scf00110 | 13 |
| AX-157970737 | 5 | 0.509 | KV453025.1 | 60292  | 13-scf00111 | 13 |
| AX-157970740 | 5 | 0.509 | KV453025.1 | 62270  | 13-scf00111 | 13 |
| AX-157970866 | 5 | 0.509 | KV453025.1 | 194192 | 13-scf00111 | 13 |
| AX-157970439 | 5 | 0.547 | KV453024.1 | 112292 | 13-scf00108 | 13 |
| AX-157816940 | 5 | 0.547 | KV453024.1 | 117919 | 13-scf00108 | 13 |
| AX-157970427 | 5 | 0.547 | KV453024.1 | 120026 | 13-scf00108 | 13 |
| AX-157970426 | 5 | 0.547 | KV453024.1 | 120933 | 13-scf00108 | 13 |
| AX-157970425 | 5 | 0.547 | KV453024.1 | 122020 | 13-scf00108 | 13 |
| AX-157816938 | 5 | 0.547 | KV453024.1 | 125658 | 13-scf00108 | 13 |
| AX-157970419 | 5 | 0.547 | KV453024.1 | 143300 | 13-scf00108 | 13 |
| AX-157970418 | 5 | 0.547 | KV453024.1 | 143660 | 13-scf00108 | 13 |
| AX-157970411 | 5 | 0.547 | KV453024.1 | 148014 | 13-scf00108 | 13 |
| AX-157970388 | 5 | 0.547 | KV453024.1 | 171361 | 13-scf00108 | 13 |
| AX-157970383 | 5 | 0.547 | KV453024.1 | 174265 | 13-scf00108 | 13 |
| AX-157816935 | 5 | 0.547 | KV453024.1 | 175115 | 13-scf00108 | 13 |
| AX-158383026 | 5 | 0.547 | KV453024.1 | 177345 | 13-scf00108 | 13 |
| AX-157771945 | 5 | 0.547 | KV453024.1 | 179675 | 13-scf00108 | 13 |
| AX-157816931 | 5 | 0.547 | KV453024.1 | 182731 | 13-scf00108 | 13 |
| AX-157744657 | 5 | 0.547 | KV453024.1 | 184230 | 13-scf00108 | 13 |
| AX-157970372 | 5 | 0.547 | KV453024.1 | 184355 | 13-scf00108 | 13 |
| AX-157970370 | 5 | 0.547 | KV453024.1 | 184756 | 13-scf00108 | 13 |
| AX-157713786 | 5 | 0.547 | KV453024.1 | 196165 | 13-scf00108 | 13 |
| AX-157774878 | 5 | 0.547 | KV453024.1 | 199596 | 13-scf00108 | 13 |
| AX-157816972 | 5 | 0.547 | KV453025.1 | 32323  | 13-scf00111 | 13 |
| AX-157970815 | 5 | 0.547 | KV453025.1 | 148086 | 13-scf00111 | 13 |
| AX-157970488 | 5 | 0.656 | KV453024.1 | 51528  | 13-scf00108 | 13 |
| AX-157970485 | 5 | 0.656 | KV453024.1 | 53131  | 13-scf00108 | 13 |
| AX-157970473 | 5 | 0.656 | KV453024.1 | 58762  | 13-scf00108 | 13 |
| AX-157970471 | 5 | 0.656 | KV453024.1 | 59761  | 13-scf00108 | 13 |
| AX-157970470 | 5 | 0.656 | KV453024.1 | 60206  | 13-scf00108 | 13 |
| AX-157970468 | 5 | 0.656 | KV453024.1 | 61672  | 13-scf00108 | 13 |
| AX-157970467 | 5 | 0.656 | KV453024.1 | 62371  | 13-scf00108 | 13 |
| AX-157970463 | 5 | 0.656 | KV453024.1 | 66783  | 13-scf00108 | 13 |
| AX-157970416 | 5 | 0.656 | KV453024.1 | 145581 | 13-scf00108 | 13 |
| AX-157970414 | 5 | 0.656 | KV453024.1 | 146997 | 13-scf00108 | 13 |

|              |   |       |            |        |             |    |
|--------------|---|-------|------------|--------|-------------|----|
| AX-157970399 | 5 | 0.656 | KV453024.1 | 156302 | 13-scf00108 | 13 |
| AX-157718089 | 5 | 0.656 | KV453024.1 | 225526 | 13-scf00108 | 13 |
| AX-157724169 | 5 | 0.656 | KV453024.1 | 245964 | 13-scf00108 | 13 |
| AX-157758797 | 5 | 0.656 | KV453024.1 | 273459 | 13-scf00108 | 13 |
| AX-157864954 | 5 | 0.656 | KV453025.1 | 23042  | 13-scf00111 | 13 |
| AX-157970719 | 5 | 0.656 | KV453025.1 | 35209  | 13-scf00111 | 13 |
| AX-157970518 | 5 | 0.765 | KV453024.1 | 1030   | 13-scf00108 | 13 |
| AX-157970517 | 5 | 0.765 | KV453024.1 | 4888   | 13-scf00108 | 13 |
| AX-157970513 | 5 | 0.765 | KV453024.1 | 6577   | 13-scf00108 | 13 |
| AX-157970510 | 5 | 0.765 | KV453024.1 | 13783  | 13-scf00108 | 13 |
| AX-157970501 | 5 | 0.765 | KV453024.1 | 20004  | 13-scf00108 | 13 |
| AX-157970500 | 5 | 0.765 | KV453024.1 | 22260  | 13-scf00108 | 13 |
| AX-157718739 | 5 | 0.765 | KV453024.1 | 25931  | 13-scf00108 | 13 |
| AX-157970497 | 5 | 0.765 | KV453024.1 | 29731  | 13-scf00108 | 13 |
| AX-157970494 | 5 | 0.765 | KV453024.1 | 45729  | 13-scf00108 | 13 |
| AX-157970491 | 5 | 0.765 | KV453024.1 | 49411  | 13-scf00108 | 13 |
| AX-157970490 | 5 | 0.765 | KV453024.1 | 49988  | 13-scf00108 | 13 |
| AX-157701565 | 5 | 0.765 | KV453024.1 | 50567  | 13-scf00108 | 13 |
| AX-157970484 | 5 | 0.765 | KV453024.1 | 54570  | 13-scf00108 | 13 |
| AX-157970479 | 5 | 0.765 | KV453024.1 | 56405  | 13-scf00108 | 13 |
| AX-157970464 | 5 | 0.765 | KV453024.1 | 65498  | 13-scf00108 | 13 |
| AX-157970453 | 5 | 0.765 | KV453024.1 | 76830  | 13-scf00108 | 13 |
| AX-157970451 | 5 | 0.765 | KV453024.1 | 81443  | 13-scf00108 | 13 |
| AX-157970445 | 5 | 0.765 | KV453024.1 | 94294  | 13-scf00108 | 13 |
| AX-158406649 | 5 | 0.765 | KV453024.1 | 108482 | 13-scf00108 | 13 |
| AX-157970437 | 5 | 0.765 | KV453024.1 | 115314 | 13-scf00108 | 13 |
| AX-157726890 | 5 | 0.765 | KV453024.1 | 115979 | 13-scf00108 | 13 |
| AX-157970424 | 5 | 0.765 | KV453024.1 | 123055 | 13-scf00108 | 13 |
| AX-157970423 | 5 | 0.765 | KV453024.1 | 126311 | 13-scf00108 | 13 |
| AX-157970421 | 5 | 0.765 | KV453024.1 | 129089 | 13-scf00108 | 13 |
| AX-157970420 | 5 | 0.765 | KV453024.1 | 136702 | 13-scf00108 | 13 |
| AX-157723908 | 5 | 0.765 | KV453024.1 | 141134 | 13-scf00108 | 13 |
| AX-157720156 | 5 | 0.765 | KV453024.1 | 154201 | 13-scf00108 | 13 |
| AX-157970396 | 5 | 0.765 | KV453024.1 | 158776 | 13-scf00108 | 13 |
| AX-157970382 | 5 | 0.765 | KV453024.1 | 175331 | 13-scf00108 | 13 |
| AX-158406647 | 5 | 0.765 | KV453024.1 | 207162 | 13-scf00108 | 13 |
| AX-157970345 | 5 | 0.765 | KV453024.1 | 221806 | 13-scf00108 | 13 |
| AX-157970326 | 5 | 0.765 | KV453024.1 | 257519 | 13-scf00108 | 13 |
| AX-157970661 | 5 | 0.765 | KV453022.1 | 122247 | 13-scf00110 | 13 |
| AX-157970679 | 5 | 0.765 | KV453022.1 | 138341 | 13-scf00110 | 13 |
| AX-157715646 | 5 | 0.765 | KV453025.1 | 26640  | 13-scf00111 | 13 |
| AX-157743961 | 5 | 0.765 | KV453025.1 | 27612  | 13-scf00111 | 13 |
| AX-157970720 | 5 | 0.765 | KV453025.1 | 35998  | 13-scf00111 | 13 |
| AX-157970723 | 5 | 0.765 | KV453025.1 | 37011  | 13-scf00111 | 13 |
| AX-157970725 | 5 | 0.765 | KV453025.1 | 37575  | 13-scf00111 | 13 |
| AX-157816973 | 5 | 0.765 | KV453025.1 | 39006  | 13-scf00111 | 13 |
| AX-157756410 | 5 | 0.765 | KV453025.1 | 43682  | 13-scf00111 | 13 |
| AX-157720539 | 5 | 0.765 | KV453025.1 | 44480  | 13-scf00111 | 13 |
| AX-157970727 | 5 | 0.765 | KV453025.1 | 47125  | 13-scf00111 | 13 |
| AX-157970733 | 5 | 0.765 | KV453025.1 | 55017  | 13-scf00111 | 13 |
| AX-157970735 | 5 | 0.765 | KV453025.1 | 56764  | 13-scf00111 | 13 |

|              |   |       |             |        |             |    |
|--------------|---|-------|-------------|--------|-------------|----|
| AX-157727032 | 5 | 0.765 | KV453025.1  | 65107  | 13-scf00111 | 13 |
| AX-157970745 | 5 | 0.765 | KV453025.1  | 65575  | 13-scf00111 | 13 |
| AX-157970749 | 5 | 0.765 | KV453025.1  | 66425  | 13-scf00111 | 13 |
| AX-157970751 | 5 | 0.765 | KV453025.1  | 68324  | 13-scf00111 | 13 |
| AX-157970793 | 5 | 0.765 | KV453025.1  | 131544 | 13-scf00111 | 13 |
| AX-157816984 | 5 | 0.765 | KV453025.1  | 145696 | 13-scf00111 | 13 |
| AX-157970889 | 5 | 0.765 | KV453025.1  | 210923 | 13-scf00111 | 13 |
| AX-157971071 | 5 | 0.765 | KV453025.1  | 366620 | 13-scf00111 | 13 |
| AX-157704657 | 5 | 0.765 | 3ML01026928 | 1297   | scf02530_1  | UN |
| AX-157816979 | 5 | 0.769 | KV453025.1  | 76363  | 13-scf00111 | 13 |
| AX-157970769 | 5 | 0.769 | KV453025.1  | 108117 | 13-scf00111 | 13 |
| AX-157816983 | 5 | 0.769 | KV453025.1  | 137979 | 13-scf00111 | 13 |
| AX-157970812 | 5 | 0.769 | KV453025.1  | 147204 | 13-scf00111 | 13 |
| AX-157970867 | 5 | 0.769 | KV453025.1  | 194428 | 13-scf00111 | 13 |
| AX-157724019 | 5 | 0.769 | KV453025.1  | 200171 | 13-scf00111 | 13 |
| AX-157970894 | 5 | 0.769 | KV453025.1  | 213855 | 13-scf00111 | 13 |
| AX-157970904 | 5 | 0.769 | KV453025.1  | 217939 | 13-scf00111 | 13 |
| AX-157816991 | 5 | 0.769 | KV453025.1  | 335723 | 13-scf00111 | 13 |
| AX-157704392 | 5 | 0.769 | 3ML01025873 | 2296   | scf01482_1  | UN |
| AX-157970713 | 5 | 0.781 | KV453025.1  | 27770  | 13-scf00111 | 13 |
| AX-157970801 | 5 | 0.781 | KV453025.1  | 139263 | 13-scf00111 | 13 |
| AX-157970880 | 5 | 0.781 | KV453025.1  | 204125 | 13-scf00111 | 13 |
| AX-157970829 | 5 | 0.792 | KV453025.1  | 166539 | 13-scf00111 | 13 |
| AX-157816945 | 5 | 0.902 | KV453024.1  | 41894  | 13-scf00108 | 13 |
| AX-157970730 | 5 | 0.902 | KV453025.1  | 50824  | 13-scf00111 | 13 |
| AX-157970731 | 5 | 0.902 | KV453025.1  | 52418  | 13-scf00111 | 13 |
| AX-157970732 | 5 | 0.902 | KV453025.1  | 53109  | 13-scf00111 | 13 |
| AX-157970744 | 5 | 0.902 | KV453025.1  | 64058  | 13-scf00111 | 13 |
| AX-157970800 | 5 | 0.902 | KV453025.1  | 138894 | 13-scf00111 | 13 |
| AX-157773363 | 5 | 0.902 | KV453025.1  | 170192 | 13-scf00111 | 13 |
| AX-157970834 | 5 | 0.902 | KV453025.1  | 170316 | 13-scf00111 | 13 |
| AX-157970856 | 5 | 0.902 | KV453025.1  | 186128 | 13-scf00111 | 13 |
| AX-157750153 | 5 | 0.902 | KV453025.1  | 189970 | 13-scf00111 | 13 |
| AX-157970863 | 5 | 0.902 | KV453025.1  | 190447 | 13-scf00111 | 13 |
| AX-157970865 | 5 | 0.902 | KV453025.1  | 193844 | 13-scf00111 | 13 |
| AX-157970921 | 5 | 1.745 | KV453025.1  | 230802 | 13-scf00111 | 13 |
| AX-157970931 | 5 | 1.886 | KV453025.1  | 238728 | 13-scf00111 | 13 |
| AX-157970996 | 5 | 1.964 | KV453025.1  | 297785 | 13-scf00111 | 13 |
| AX-157970997 | 5 | 2.169 | KV453025.1  | 299061 | 13-scf00111 | 13 |
| AX-157970976 | 5 | 2.308 | KV453025.1  | 284409 | 13-scf00111 | 13 |
| AX-157971003 | 5 | 2.308 | KV453025.1  | 301705 | 13-scf00111 | 13 |
| AX-157971043 | 5 | 2.308 | KV453025.1  | 326999 | 13-scf00111 | 13 |
| AX-157971047 | 5 | 2.308 | KV453025.1  | 329752 | 13-scf00111 | 13 |
| AX-157971052 | 5 | 2.308 | KV453025.1  | 332145 | 13-scf00111 | 13 |
| AX-157816993 | 5 | 2.308 | KV453025.1  | 342988 | 13-scf00111 | 13 |
| AX-157971063 | 5 | 2.308 | KV453025.1  | 354297 | 13-scf00111 | 13 |
| AX-157971065 | 5 | 2.308 | KV453025.1  | 359996 | 13-scf00111 | 13 |
| AX-157971072 | 5 | 2.308 | KV453025.1  | 367355 | 13-scf00111 | 13 |
| AX-157971074 | 5 | 2.308 | KV453025.1  | 367647 | 13-scf00111 | 13 |
| AX-157704393 | 5 | 2.308 | 3ML01025873 | 807    | scf01482_1  | UN |
| AX-157704394 | 5 | 2.308 | 3ML01025873 | 845    | scf01482_1  | UN |



|              |   |       |             |        |             |    |
|--------------|---|-------|-------------|--------|-------------|----|
| AX-157971075 | 5 | 2.589 | KV453025.1  | 368386 | 13-scf00111 | 13 |
| AX-157775699 | 5 | 2.589 | KV453025.1  | 372883 | 13-scf00111 | 13 |
| AX-157971087 | 5 | 2.589 | KV453025.1  | 374784 | 13-scf00111 | 13 |
| AX-157971094 | 5 | 2.657 | KV453025.1  | 384411 | 13-scf00111 | 13 |
| AX-157971079 | 5 | 2.721 | KV453025.1  | 370704 | 13-scf00111 | 13 |
| AX-157971088 | 5 | 2.721 | KV453025.1  | 375965 | 13-scf00111 | 13 |
| AX-157971098 | 5 | 2.721 | KV453025.1  | 387643 | 13-scf00111 | 13 |
| AX-157971172 | 5 | 2.721 | KV453025.1  | 453205 | 13-scf00111 | 13 |
| AX-157971106 | 5 | 2.729 | KV453025.1  | 395223 | 13-scf00111 | 13 |
| AX-157741185 | 5 | 2.729 | KV453025.1  | 485833 | 13-scf00111 | 13 |
| AX-157971112 | 5 | 2.838 | KV453025.1  | 403007 | 13-scf00111 | 13 |
| AX-157970970 | 5 | 2.85  | KV453025.1  | 278965 | 13-scf00111 | 13 |
| AX-157971118 | 5 | 2.85  | KV453025.1  | 406725 | 13-scf00111 | 13 |
| AX-157971119 | 5 | 2.85  | KV453025.1  | 407571 | 13-scf00111 | 13 |
| AX-157971121 | 5 | 2.85  | KV453025.1  | 410555 | 13-scf00111 | 13 |
| AX-157971122 | 5 | 2.85  | KV453025.1  | 410768 | 13-scf00111 | 13 |
| AX-157971123 | 5 | 2.85  | KV453025.1  | 412340 | 13-scf00111 | 13 |
| AX-157971125 | 5 | 2.85  | KV453025.1  | 413013 | 13-scf00111 | 13 |
| AX-157971143 | 5 | 2.85  | KV453025.1  | 427110 | 13-scf00111 | 13 |
| AX-157971200 | 5 | 2.85  | KV453025.1  | 472933 | 13-scf00111 | 13 |
| AX-157971202 | 5 | 2.85  | KV453025.1  | 475064 | 13-scf00111 | 13 |
| AX-157971213 | 5 | 2.85  | KV453025.1  | 483370 | 13-scf00111 | 13 |
| AX-157971126 | 5 | 2.853 | KV453025.1  | 413724 | 13-scf00111 | 13 |
| AX-157971129 | 5 | 2.856 | KV453025.1  | 416747 | 13-scf00111 | 13 |
| AX-157971130 | 5 | 3.005 | KV453025.1  | 417596 | 13-scf00111 | 13 |
| AX-157746667 | 5 | 3.14  | KV453025.1  | 413871 | 13-scf00111 | 13 |
| AX-157971141 | 5 | 3.14  | KV453025.1  | 426496 | 13-scf00111 | 13 |
| AX-157971144 | 5 | 3.14  | KV453025.1  | 429073 | 13-scf00111 | 13 |
| AX-157971146 | 5 | 3.14  | KV453025.1  | 429579 | 13-scf00111 | 13 |
| AX-157706789 | 5 | 3.14  | 3ML01032929 | 490    | scf08560_1  | UN |
| AX-157971147 | 5 | 3.141 | KV453025.1  | 430398 | 13-scf00111 | 13 |
| AX-157971149 | 5 | 3.141 | KV453025.1  | 431646 | 13-scf00111 | 13 |
| AX-157971151 | 5 | 3.141 | KV453025.1  | 434958 | 13-scf00111 | 13 |
| AX-157971155 | 5 | 3.141 | KV453025.1  | 436853 | 13-scf00111 | 13 |
| AX-157971158 | 5 | 3.141 | KV453025.1  | 439648 | 13-scf00111 | 13 |
| AX-157971159 | 5 | 3.287 | KV453025.1  | 442188 | 13-scf00111 | 13 |
| AX-157971167 | 5 | 3.287 | KV453025.1  | 451020 | 13-scf00111 | 13 |
| AX-157971168 | 5 | 3.287 | KV453025.1  | 451431 | 13-scf00111 | 13 |
| AX-157971171 | 5 | 3.287 | KV453025.1  | 452814 | 13-scf00111 | 13 |
| AX-158390322 | 5 | 3.287 | KV453025.1  | 452890 | 13-scf00111 | 13 |
| AX-157971180 | 5 | 3.287 | KV453025.1  | 459768 | 13-scf00111 | 13 |
| AX-157971184 | 5 | 3.287 | KV453025.1  | 462040 | 13-scf00111 | 13 |
| AX-157971187 | 5 | 3.287 | KV453025.1  | 463041 | 13-scf00111 | 13 |
| AX-157971188 | 5 | 3.287 | KV453025.1  | 463429 | 13-scf00111 | 13 |
| AX-157971192 | 5 | 3.287 | KV453025.1  | 464893 | 13-scf00111 | 13 |
| AX-157971196 | 5 | 3.287 | KV453025.1  | 467664 | 13-scf00111 | 13 |
| AX-157971199 | 5 | 3.287 | KV453025.1  | 469219 | 13-scf00111 | 13 |
| AX-157971193 | 5 | 3.312 | KV453025.1  | 465252 | 13-scf00111 | 13 |
| AX-157971203 | 5 | 3.312 | KV453025.1  | 476121 | 13-scf00111 | 13 |
| AX-157816998 | 5 | 3.396 | KV453025.1  | 496575 | 13-scf00111 | 13 |
| AX-157971234 | 5 | 3.396 | KV453025.1  | 509165 | 13-scf00111 | 13 |

|              |   |       |            |        |             |    |
|--------------|---|-------|------------|--------|-------------|----|
| AX-158383036 | 5 | 3.529 | KV453025.1 | 480475 | 13-scf00111 | 13 |
| AX-157971241 | 5 | 3.529 | KV453025.1 | 516218 | 13-scf00111 | 13 |
| AX-158406662 | 5 | 3.529 | KV453025.1 | 517456 | 13-scf00111 | 13 |
| AX-157971244 | 5 | 3.529 | KV453025.1 | 520684 | 13-scf00111 | 13 |
| AX-157971245 | 5 | 3.529 | KV453025.1 | 521666 | 13-scf00111 | 13 |
| AX-157971198 | 5 | 3.663 | KV453025.1 | 468529 | 13-scf00111 | 13 |
| AX-157971251 | 5 | 3.663 | KV453025.1 | 524957 | 13-scf00111 | 13 |
| AX-157816999 | 5 | 3.663 | KV453025.1 | 525950 | 13-scf00111 | 13 |
| AX-157971257 | 5 | 3.663 | KV453025.1 | 531237 | 13-scf00111 | 13 |
| AX-157971260 | 5 | 3.663 | KV453025.1 | 533725 | 13-scf00111 | 13 |
| AX-157884202 | 5 | 3.858 | KV453025.1 | 499522 | 13-scf00111 | 13 |
| AX-157971266 | 5 | 3.858 | KV453025.1 | 542179 | 13-scf00111 | 13 |
| AX-157971269 | 5 | 3.858 | KV453025.1 | 546249 | 13-scf00111 | 13 |
| AX-157971275 | 5 | 3.858 | KV453025.1 | 553315 | 13-scf00111 | 13 |
| AX-157757012 | 5 | 4.014 | KV453025.1 | 553893 | 13-scf00111 | 13 |
| AX-157971288 | 5 | 4.088 | KV453025.1 | 567229 | 13-scf00111 | 13 |
| AX-157971290 | 5 | 4.091 | KV453025.1 | 568284 | 13-scf00111 | 13 |
| AX-158383037 | 5 | 4.113 | KV453025.1 | 560575 | 13-scf00111 | 13 |
| AX-157971299 | 5 | 4.113 | KV453025.1 | 571958 | 13-scf00111 | 13 |
| AX-157971304 | 5 | 4.907 | KV453025.1 | 577056 | 13-scf00111 | 13 |
| AX-157971306 | 5 | 4.907 | KV453025.1 | 580798 | 13-scf00111 | 13 |
| AX-157971309 | 5 | 4.908 | KV453025.1 | 582602 | 13-scf00111 | 13 |
| AX-157971315 | 5 | 4.908 | KV453025.1 | 587144 | 13-scf00111 | 13 |
| AX-157971310 | 5 | 5.053 | KV453025.1 | 583757 | 13-scf00111 | 13 |
| AX-157971314 | 5 | 5.185 | KV453025.1 | 585985 | 13-scf00111 | 13 |
| AX-157773069 | 5 | 5.185 | KV453025.1 | 587773 | 13-scf00111 | 13 |
| AX-157971318 | 5 | 5.185 | KV453025.1 | 588648 | 13-scf00111 | 13 |
| AX-157724558 | 5 | 5.185 | KV453025.1 | 590940 | 13-scf00111 | 13 |
| AX-157971328 | 5 | 5.185 | KV453025.1 | 596227 | 13-scf00111 | 13 |
| AX-157971329 | 5 | 5.185 | KV453025.1 | 596955 | 13-scf00111 | 13 |
| AX-157971331 | 5 | 5.185 | KV453025.1 | 600993 | 13-scf00111 | 13 |
| AX-157971407 | 5 | 5.185 | KV453025.1 | 687422 | 13-scf00111 | 13 |
| AX-157774704 | 5 | 5.43  | KV453025.1 | 603572 | 13-scf00111 | 13 |
| AX-157971336 | 5 | 5.43  | KV453025.1 | 607347 | 13-scf00111 | 13 |
| AX-157971337 | 5 | 5.43  | KV453025.1 | 608150 | 13-scf00111 | 13 |
| AX-157752215 | 5 | 5.553 | KV453025.1 | 611387 | 13-scf00111 | 13 |
| AX-157971340 | 5 | 5.553 | KV453025.1 | 614518 | 13-scf00111 | 13 |
| AX-157971341 | 5 | 5.553 | KV453025.1 | 616574 | 13-scf00111 | 13 |
| AX-157971342 | 5 | 5.553 | KV453025.1 | 617669 | 13-scf00111 | 13 |
| AX-157971345 | 5 | 5.553 | KV453025.1 | 620970 | 13-scf00111 | 13 |
| AX-157771747 | 5 | 5.553 | KV453025.1 | 621812 | 13-scf00111 | 13 |
| AX-157971356 | 5 | 5.553 | KV453025.1 | 626172 | 13-scf00111 | 13 |
| AX-157971371 | 5 | 5.553 | KV453025.1 | 647536 | 13-scf00111 | 13 |
| AX-157971359 | 5 | 5.885 | KV453025.1 | 631672 | 13-scf00111 | 13 |
| AX-157971362 | 5 | 5.886 | KV453025.1 | 634409 | 13-scf00111 | 13 |
| AX-157773994 | 5 | 5.886 | KV453025.1 | 643779 | 13-scf00111 | 13 |
| AX-157971369 | 5 | 5.962 | KV453025.1 | 644218 | 13-scf00111 | 13 |
| AX-157971364 | 5 | 6.137 | KV453025.1 | 636177 | 13-scf00111 | 13 |
| AX-157971373 | 5 | 6.137 | KV453025.1 | 651826 | 13-scf00111 | 13 |
| AX-157971374 | 5 | 6.137 | KV453025.1 | 653733 | 13-scf00111 | 13 |
| AX-157710319 | 5 | 6.137 | KV453025.1 | 656797 | 13-scf00111 | 13 |

|              |   |       |            |        |             |    |
|--------------|---|-------|------------|--------|-------------|----|
| AX-157971379 | 5 | 6.137 | KV453025.1 | 658272 | 13-scf00111 | 13 |
| AX-157971382 | 5 | 6.137 | KV453025.1 | 660203 | 13-scf00111 | 13 |
| AX-157971384 | 5 | 6.137 | KV453025.1 | 661385 | 13-scf00111 | 13 |
| AX-157971389 | 5 | 6.137 | KV453025.1 | 663326 | 13-scf00111 | 13 |
| AX-157971390 | 5 | 6.137 | KV453025.1 | 664084 | 13-scf00111 | 13 |
| AX-157971396 | 5 | 6.137 | KV453025.1 | 670907 | 13-scf00111 | 13 |
| AX-157971397 | 5 | 6.137 | KV453025.1 | 671468 | 13-scf00111 | 13 |
| AX-157755595 | 5 | 6.137 | KV453025.1 | 672356 | 13-scf00111 | 13 |
| AX-157738370 | 5 | 6.137 | KV453025.1 | 673244 | 13-scf00111 | 13 |
| AX-157971398 | 5 | 6.137 | KV453025.1 | 673814 | 13-scf00111 | 13 |
| AX-157971403 | 5 | 6.137 | KV453025.1 | 677259 | 13-scf00111 | 13 |
| AX-157971376 | 5 | 6.239 | KV453025.1 | 655828 | 13-scf00111 | 13 |
| AX-157971405 | 5 | 6.239 | KV453025.1 | 684016 | 13-scf00111 | 13 |
| AX-157971421 | 5 | 6.239 | KV453025.1 | 704545 | 13-scf00111 | 13 |
| AX-157971424 | 5 | 6.239 | KV453025.1 | 709309 | 13-scf00111 | 13 |
| AX-157817001 | 5 | 6.304 | KV453025.1 | 692655 | 13-scf00111 | 13 |
| AX-157971414 | 5 | 6.355 | KV453025.1 | 700397 | 13-scf00111 | 13 |
| AX-157971416 | 5 | 6.355 | KV453025.1 | 701918 | 13-scf00111 | 13 |
| AX-157971417 | 5 | 6.355 | KV453025.1 | 702760 | 13-scf00111 | 13 |
| AX-157971422 | 5 | 6.355 | KV453025.1 | 706787 | 13-scf00111 | 13 |
| AX-157971430 | 5 | 6.355 | KV453025.1 | 716247 | 13-scf00111 | 13 |
| AX-157971432 | 5 | 6.355 | KV453025.1 | 718481 | 13-scf00111 | 13 |
| AX-157971434 | 5 | 6.355 | KV453025.1 | 719553 | 13-scf00111 | 13 |
| AX-157971437 | 5 | 6.355 | KV453025.1 | 722339 | 13-scf00111 | 13 |
| AX-157971438 | 5 | 6.422 | KV453025.1 | 722753 | 13-scf00111 | 13 |
| AX-157971443 | 5 | 6.501 | KV453025.1 | 726487 | 13-scf00111 | 13 |
| AX-157971445 | 5 | 6.501 | KV453025.1 | 726867 | 13-scf00111 | 13 |
| AX-157971446 | 5 | 6.501 | KV453025.1 | 727533 | 13-scf00111 | 13 |
| AX-157971448 | 5 | 6.501 | KV453025.1 | 728249 | 13-scf00111 | 13 |
| AX-157971451 | 5 | 6.654 | KV453025.1 | 730561 | 13-scf00111 | 13 |
| AX-157741885 | 5 | 6.654 | KV453025.1 | 825331 | 13-scf00111 | 13 |
| AX-157971458 | 5 | 6.792 | KV453025.1 | 734816 | 13-scf00111 | 13 |
| AX-157971461 | 5 | 6.792 | KV453025.1 | 738682 | 13-scf00111 | 13 |
| AX-157971464 | 5 | 6.792 | KV453025.1 | 743286 | 13-scf00111 | 13 |
| AX-157971466 | 5 | 6.792 | KV453025.1 | 748136 | 13-scf00111 | 13 |
| AX-157971470 | 5 | 6.812 | KV453025.1 | 752735 | 13-scf00111 | 13 |
| AX-157971471 | 5 | 6.854 | KV453025.1 | 753386 | 13-scf00111 | 13 |
| AX-157971463 | 5 | 6.902 | KV453025.1 | 740170 | 13-scf00111 | 13 |
| AX-158383040 | 5 | 6.902 | KV453025.1 | 751656 | 13-scf00111 | 13 |
| AX-157971472 | 5 | 6.902 | KV453025.1 | 754920 | 13-scf00111 | 13 |
| AX-157740924 | 5 | 6.902 | KV453025.1 | 755679 | 13-scf00111 | 13 |
| AX-157971474 | 5 | 6.902 | KV453025.1 | 756233 | 13-scf00111 | 13 |
| AX-157971477 | 5 | 6.902 | KV453025.1 | 759981 | 13-scf00111 | 13 |
| AX-157708400 | 5 | 6.902 | KV453025.1 | 760499 | 13-scf00111 | 13 |
| AX-157971478 | 5 | 6.902 | KV453025.1 | 761118 | 13-scf00111 | 13 |
| AX-157971480 | 5 | 6.902 | KV453025.1 | 761703 | 13-scf00111 | 13 |
| AX-157971481 | 5 | 6.902 | KV453025.1 | 764359 | 13-scf00111 | 13 |
| AX-157971486 | 5 | 6.902 | KV453025.1 | 774943 | 13-scf00111 | 13 |
| AX-157971492 | 5 | 7.339 | KV453025.1 | 783400 | 13-scf00111 | 13 |
| AX-157971497 | 5 | 7.339 | KV453025.1 | 788098 | 13-scf00111 | 13 |
| AX-157971504 | 5 | 7.503 | KV453025.1 | 804037 | 13-scf00111 | 13 |

|              |   |       |            |        |             |    |
|--------------|---|-------|------------|--------|-------------|----|
| AX-157971521 | 5 | 7.503 | KV453025.1 | 829758 | 13-scf00111 | 13 |
| AX-157864959 | 5 | 7.666 | KV453025.1 | 812326 | 13-scf00111 | 13 |
| AX-157754761 | 5 | 7.666 | KV453025.1 | 812918 | 13-scf00111 | 13 |
| AX-157971498 | 5 | 7.667 | KV453025.1 | 788926 | 13-scf00111 | 13 |
| AX-157971507 | 5 | 7.667 | KV453025.1 | 814080 | 13-scf00111 | 13 |
| AX-157971508 | 5 | 7.667 | KV453025.1 | 814762 | 13-scf00111 | 13 |
| AX-157971512 | 5 | 7.667 | KV453025.1 | 818007 | 13-scf00111 | 13 |
| AX-157738512 | 5 | 7.667 | KV453025.1 | 821501 | 13-scf00111 | 13 |
| AX-157817007 | 5 | 7.667 | KV453025.1 | 821806 | 13-scf00111 | 13 |
| AX-157971519 | 5 | 7.667 | KV453025.1 | 828419 | 13-scf00111 | 13 |
| AX-157971525 | 5 | 7.667 | KV453025.1 | 835327 | 13-scf00111 | 13 |
| AX-157971539 | 5 | 7.667 | KV453025.1 | 855243 | 13-scf00111 | 13 |
| AX-157971537 | 5 | 7.784 | KV453025.1 | 852068 | 13-scf00111 | 13 |
| AX-157772588 | 5 | 7.885 | KV453025.1 | 852904 | 13-scf00111 | 13 |
| AX-158383043 | 5 | 7.885 | KV453025.1 | 854828 | 13-scf00111 | 13 |
| AX-157971541 | 5 | 7.885 | KV453025.1 | 859189 | 13-scf00111 | 13 |
| AX-157971548 | 5 | 7.885 | KV453025.1 | 870288 | 13-scf00111 | 13 |
| AX-157971549 | 5 | 7.885 | KV453025.1 | 871211 | 13-scf00111 | 13 |
| AX-157971550 | 5 | 7.885 | KV453025.1 | 871487 | 13-scf00111 | 13 |
| AX-157742381 | 5 | 7.885 | KV453025.1 | 888393 | 13-scf00111 | 13 |
| AX-157971782 | 5 | 7.885 | KV453025.1 | 901802 | 13-scf00111 | 13 |
| AX-157971800 | 5 | 7.885 | KV453025.1 | 926312 | 13-scf00111 | 13 |
| AX-157971559 | 5 | 8.103 | KV453025.1 | 894231 | 13-scf00111 | 13 |
| AX-157971781 | 5 | 8.103 | KV453025.1 | 901152 | 13-scf00111 | 13 |
| AX-157855005 | 5 | 8.117 | KV453025.1 | 902585 | 13-scf00111 | 13 |
| AX-157971789 | 5 | 8.137 | KV453025.1 | 911786 | 13-scf00111 | 13 |
| AX-157772558 | 5 | 8.166 | KV453025.1 | 838571 | 13-scf00111 | 13 |
| AX-157971791 | 5 | 8.166 | KV453025.1 | 915699 | 13-scf00111 | 13 |
| AX-157971797 | 5 | 8.185 | KV453025.1 | 923336 | 13-scf00111 | 13 |
| AX-157719615 | 5 | 8.213 | KV453025.1 | 880911 | 13-scf00111 | 13 |
| AX-157971798 | 5 | 8.213 | KV453025.1 | 924723 | 13-scf00111 | 13 |
| AX-157971801 | 5 | 8.213 | KV453025.1 | 928938 | 13-scf00111 | 13 |
| AX-157971804 | 5 | 8.213 | KV453025.1 | 930210 | 13-scf00111 | 13 |
| AX-157971810 | 5 | 8.213 | KV453025.1 | 934753 | 13-scf00111 | 13 |
| AX-157971817 | 5 | 8.216 | KV453025.1 | 943741 | 13-scf00111 | 13 |
| AX-157971821 | 5 | 8.602 | KV453025.1 | 950525 | 13-scf00111 | 13 |
| AX-157971825 | 5 | 8.606 | KV453025.1 | 955363 | 13-scf00111 | 13 |
| AX-157971830 | 5 | 8.606 | KV453025.1 | 957017 | 13-scf00111 | 13 |
| AX-157971834 | 5 | 8.868 | KV453025.1 | 962090 | 13-scf00111 | 13 |
| AX-157971838 | 5 | 8.868 | KV453025.1 | 964601 | 13-scf00111 | 13 |
| AX-157971841 | 5 | 8.868 | KV453025.1 | 966267 | 13-scf00111 | 13 |
| AX-157971843 | 5 | 8.868 | KV453025.1 | 967074 | 13-scf00111 | 13 |
| AX-157971847 | 5 | 8.868 | KV453025.1 | 968226 | 13-scf00111 | 13 |
| AX-157971853 | 5 | 8.868 | KV453025.1 | 972870 | 13-scf00111 | 13 |
| AX-157971856 | 5 | 8.868 | KV453025.1 | 975637 | 13-scf00111 | 13 |
| AX-157971858 | 5 | 8.868 | KV453025.1 | 978280 | 13-scf00111 | 13 |
| AX-157971862 | 5 | 8.868 | KV453025.1 | 983981 | 13-scf00111 | 13 |
| AX-157971851 | 5 | 8.922 | KV453025.1 | 972135 | 13-scf00111 | 13 |
| AX-157971863 | 5 | 8.922 | KV453025.1 | 984792 | 13-scf00111 | 13 |
| AX-157971869 | 5 | 8.977 | KV453025.1 | 990175 | 13-scf00111 | 13 |
| AX-157971870 | 5 | 8.977 | KV453025.1 | 991127 | 13-scf00111 | 13 |

|              |   |        |            |         |             |    |
|--------------|---|--------|------------|---------|-------------|----|
| AX-157971873 | 5 | 9.035  | KV453025.1 | 996097  | 13-scf00111 | 13 |
| AX-157971972 | 5 | 9.035  | KV453025.1 | 1089548 | 13-scf00111 | 13 |
| AX-157971874 | 5 | 9.087  | KV453025.1 | 998082  | 13-scf00111 | 13 |
| AX-157971876 | 5 | 9.087  | KV453025.1 | 999919  | 13-scf00111 | 13 |
| AX-157971877 | 5 | 9.087  | KV453025.1 | 1002307 | 13-scf00111 | 13 |
| AX-157855008 | 5 | 9.087  | KV453025.1 | 1002657 | 13-scf00111 | 13 |
| AX-157971887 | 5 | 9.305  | KV453025.1 | 1012826 | 13-scf00111 | 13 |
| AX-157971890 | 5 | 9.305  | KV453025.1 | 1017211 | 13-scf00111 | 13 |
| AX-157971893 | 5 | 9.305  | KV453025.1 | 1019017 | 13-scf00111 | 13 |
| AX-157971896 | 5 | 9.305  | KV453025.1 | 1019984 | 13-scf00111 | 13 |
| AX-157971900 | 5 | 9.305  | KV453025.1 | 1021630 | 13-scf00111 | 13 |
| AX-157971901 | 5 | 9.305  | KV453025.1 | 1022838 | 13-scf00111 | 13 |
| AX-157971902 | 5 | 9.305  | KV453025.1 | 1023642 | 13-scf00111 | 13 |
| AX-157971906 | 5 | 9.305  | KV453025.1 | 1027008 | 13-scf00111 | 13 |
| AX-157817022 | 5 | 9.305  | KV453025.1 | 1056055 | 13-scf00111 | 13 |
| AX-158406668 | 5 | 9.305  | KV453025.1 | 1077510 | 13-scf00111 | 13 |
| AX-157971963 | 5 | 9.305  | KV453025.1 | 1085949 | 13-scf00111 | 13 |
| AX-157972003 | 5 | 9.305  | KV453025.1 | 1136783 | 13-scf00111 | 13 |
| AX-157971926 | 5 | 10.288 | KV453025.1 | 1051163 | 13-scf00111 | 13 |
| AX-157971928 | 5 | 10.288 | KV453025.1 | 1054637 | 13-scf00111 | 13 |
| AX-158379517 | 5 | 10.288 | KV453025.1 | 1056116 | 13-scf00111 | 13 |
| AX-157817023 | 5 | 10.288 | KV453025.1 | 1056526 | 13-scf00111 | 13 |
| AX-157971930 | 5 | 10.288 | KV453025.1 | 1057540 | 13-scf00111 | 13 |
| AX-157971932 | 5 | 10.288 | KV453025.1 | 1059407 | 13-scf00111 | 13 |
| AX-157817024 | 5 | 10.288 | KV453025.1 | 1061378 | 13-scf00111 | 13 |
| AX-157971936 | 5 | 10.288 | KV453025.1 | 1063342 | 13-scf00111 | 13 |
| AX-157971938 | 5 | 10.288 | KV453025.1 | 1064021 | 13-scf00111 | 13 |
| AX-157971939 | 5 | 10.288 | KV453025.1 | 1064938 | 13-scf00111 | 13 |
| AX-157725857 | 5 | 10.288 | KV453025.1 | 1069431 | 13-scf00111 | 13 |
| AX-157971948 | 5 | 10.288 | KV453025.1 | 1069517 | 13-scf00111 | 13 |
| AX-157971953 | 5 | 10.288 | KV453025.1 | 1076808 | 13-scf00111 | 13 |
| AX-157709024 | 5 | 10.288 | KV453025.1 | 1084452 | 13-scf00111 | 13 |
| AX-157971965 | 5 | 10.452 | KV453025.1 | 1087161 | 13-scf00111 | 13 |
| AX-157971976 | 5 | 10.452 | KV453025.1 | 1091308 | 13-scf00111 | 13 |
| AX-157971984 | 5 | 10.452 | KV453025.1 | 1095542 | 13-scf00111 | 13 |
| AX-157971986 | 5 | 10.452 | KV453025.1 | 1097425 | 13-scf00111 | 13 |
| AX-157740496 | 5 | 10.452 | KV453025.1 | 1099622 | 13-scf00111 | 13 |
| AX-157971989 | 5 | 10.452 | KV453025.1 | 1104697 | 13-scf00111 | 13 |
| AX-157772496 | 5 | 10.452 | KV453025.1 | 1126642 | 13-scf00111 | 13 |
| AX-157817034 | 5 | 10.452 | KV453025.1 | 1128386 | 13-scf00111 | 13 |
| AX-157972001 | 5 | 10.452 | KV453025.1 | 1128757 | 13-scf00111 | 13 |
| AX-157727635 | 5 | 10.452 | KV453025.1 | 1165985 | 13-scf00111 | 13 |
| AX-157972037 | 5 | 10.452 | KV453025.1 | 1181079 | 13-scf00111 | 13 |
| AX-157713881 | 5 | 10.452 | KV453025.1 | 1194727 | 13-scf00111 | 13 |
| AX-157972101 | 5 | 10.452 | KV453025.1 | 1263563 | 13-scf00111 | 13 |
| AX-157817028 | 5 | 10.534 | KV453025.1 | 1105927 | 13-scf00111 | 13 |
| AX-157817029 | 5 | 10.534 | KV453025.1 | 1106055 | 13-scf00111 | 13 |
| AX-157971994 | 5 | 10.616 | KV453025.1 | 1118179 | 13-scf00111 | 13 |
| AX-157746007 | 5 | 10.616 | KV453025.1 | 1124510 | 13-scf00111 | 13 |
| AX-157971998 | 5 | 10.616 | KV453025.1 | 1127581 | 13-scf00111 | 13 |
| AX-157971999 | 5 | 10.616 | KV453025.1 | 1128100 | 13-scf00111 | 13 |

|              |   |        |            |         |             |    |
|--------------|---|--------|------------|---------|-------------|----|
| AX-157972008 | 5 | 10.616 | KV453025.1 | 1145673 | 13-scf00111 | 13 |
| AX-157972010 | 5 | 10.616 | KV453025.1 | 1149875 | 13-scf00111 | 13 |
| AX-157971971 | 5 | 10.889 | KV453025.1 | 1088975 | 13-scf00111 | 13 |
| AX-157719828 | 5 | 10.889 | KV453025.1 | 1101767 | 13-scf00111 | 13 |
| AX-157972011 | 5 | 10.889 | KV453025.1 | 1150235 | 13-scf00111 | 13 |
| AX-157972013 | 5 | 10.889 | KV453025.1 | 1151774 | 13-scf00111 | 13 |
| AX-157817035 | 5 | 10.889 | KV453025.1 | 1153127 | 13-scf00111 | 13 |
| AX-157869653 | 5 | 11.026 | KV453025.1 | 1156834 | 13-scf00111 | 13 |
| AX-157972017 | 5 | 11.026 | KV453025.1 | 1157246 | 13-scf00111 | 13 |
| AX-157817036 | 5 | 11.062 | KV453025.1 | 1157907 | 13-scf00111 | 13 |
| AX-157972018 | 5 | 11.075 | KV453025.1 | 1158992 | 13-scf00111 | 13 |
| AX-157972033 | 5 | 11.075 | KV453025.1 | 1178291 | 13-scf00111 | 13 |
| AX-157817037 | 5 | 11.109 | KV453025.1 | 1159806 | 13-scf00111 | 13 |
| AX-157972022 | 5 | 11.162 | KV453025.1 | 1167554 | 13-scf00111 | 13 |
| AX-157972024 | 5 | 11.162 | KV453025.1 | 1168293 | 13-scf00111 | 13 |
| AX-157817038 | 5 | 11.162 | KV453025.1 | 1170112 | 13-scf00111 | 13 |
| AX-157817039 | 5 | 11.162 | KV453025.1 | 1170411 | 13-scf00111 | 13 |
| AX-157972026 | 5 | 11.165 | KV453025.1 | 1172432 | 13-scf00111 | 13 |
| AX-157972027 | 5 | 11.348 | KV453025.1 | 1173718 | 13-scf00111 | 13 |
| AX-157972032 | 5 | 11.695 | KV453025.1 | 1177270 | 13-scf00111 | 13 |
| AX-157744437 | 5 | 11.695 | KV453025.1 | 1188612 | 13-scf00111 | 13 |
| AX-157817041 | 5 | 11.695 | KV453025.1 | 1191036 | 13-scf00111 | 13 |
| AX-157817043 | 5 | 11.841 | KV453025.1 | 1197967 | 13-scf00111 | 13 |
| AX-158405303 | 5 | 11.961 | KV453025.1 | 1183612 | 13-scf00111 | 13 |
| AX-157774796 | 5 | 11.961 | KV453025.1 | 1199733 | 13-scf00111 | 13 |
| AX-157972045 | 5 | 11.961 | KV453025.1 | 1209253 | 13-scf00111 | 13 |
| AX-157817044 | 5 | 12.077 | KV453025.1 | 1200031 | 13-scf00111 | 13 |
| AX-157743845 | 5 | 12.077 | KV453025.1 | 1200564 | 13-scf00111 | 13 |
| AX-157972046 | 5 | 12.077 | KV453025.1 | 1209736 | 13-scf00111 | 13 |
| AX-157972051 | 5 | 12.077 | KV453025.1 | 1217794 | 13-scf00111 | 13 |
| AX-157972052 | 5 | 12.077 | KV453025.1 | 1219271 | 13-scf00111 | 13 |
| AX-158379518 | 5 | 12.077 | KV453025.1 | 1220730 | 13-scf00111 | 13 |
| AX-157972053 | 5 | 12.207 | KV453025.1 | 1219834 | 13-scf00111 | 13 |
| AX-157753048 | 5 | 12.207 | KV453025.1 | 1227539 | 13-scf00111 | 13 |
| AX-157972062 | 5 | 12.313 | KV453025.1 | 1228557 | 13-scf00111 | 13 |
| AX-157972068 | 5 | 12.827 | KV453025.1 | 1232451 | 13-scf00111 | 13 |
| AX-157972070 | 5 | 12.831 | KV453025.1 | 1234884 | 13-scf00111 | 13 |
| AX-157972075 | 5 | 12.832 | KV453025.1 | 1237053 | 13-scf00111 | 13 |
| AX-157972076 | 5 | 12.833 | KV453025.1 | 1240534 | 13-scf00111 | 13 |
| AX-157972077 | 5 | 12.833 | KV453025.1 | 1244392 | 13-scf00111 | 13 |
| AX-157972080 | 5 | 12.833 | KV453025.1 | 1245696 | 13-scf00111 | 13 |
| AX-158383051 | 5 | 12.833 | KV453025.1 | 1248385 | 13-scf00111 | 13 |
| AX-157972088 | 5 | 12.833 | KV453025.1 | 1252071 | 13-scf00111 | 13 |
| AX-157972093 | 5 | 12.833 | KV453025.1 | 1258848 | 13-scf00111 | 13 |
| AX-157972087 | 5 | 13.131 | KV453025.1 | 1251463 | 13-scf00111 | 13 |
| AX-157972095 | 5 | 13.131 | KV453025.1 | 1259840 | 13-scf00111 | 13 |
| AX-157972099 | 5 | 13.131 | KV453025.1 | 1262829 | 13-scf00111 | 13 |
| AX-157884241 | 5 | 13.131 | KV453025.1 | 1263513 | 13-scf00111 | 13 |
| AX-157972105 | 5 | 13.131 | KV453025.1 | 1269195 | 13-scf00111 | 13 |
| AX-157972108 | 5 | 13.131 | KV453025.1 | 1273135 | 13-scf00111 | 13 |
| AX-157739518 | 5 | 13.241 | KV453025.1 | 1286958 | 13-scf00111 | 13 |

|              |   |        |            |         |             |    |
|--------------|---|--------|------------|---------|-------------|----|
| AX-157972117 | 5 | 13.241 | KV453025.1 | 1288093 | 13-scf00111 | 13 |
| AX-157817047 | 5 | 13.241 | KV453025.1 | 1289334 | 13-scf00111 | 13 |
| AX-157972172 | 5 | 13.241 | KV453025.1 | 1342882 | 13-scf00111 | 13 |
| AX-157722501 | 5 | 13.35  | KV453025.1 | 1290957 | 13-scf00111 | 13 |
| AX-157972119 | 5 | 13.35  | KV453025.1 | 1292638 | 13-scf00111 | 13 |
| AX-157972121 | 5 | 13.459 | KV453025.1 | 1293987 | 13-scf00111 | 13 |
| AX-157972124 | 5 | 13.501 | KV453025.1 | 1295418 | 13-scf00111 | 13 |
| AX-157972126 | 5 | 13.501 | KV453025.1 | 1296033 | 13-scf00111 | 13 |
| AX-157972168 | 5 | 13.501 | KV453025.1 | 1339582 | 13-scf00111 | 13 |
| AX-157817049 | 5 | 13.541 | KV453025.1 | 1299001 | 13-scf00111 | 13 |
| AX-157972129 | 5 | 13.581 | KV453025.1 | 1300278 | 13-scf00111 | 13 |
| AX-157972130 | 5 | 13.623 | KV453025.1 | 1306176 | 13-scf00111 | 13 |
| AX-157972135 | 5 | 13.623 | KV453025.1 | 1308461 | 13-scf00111 | 13 |
| AX-157972136 | 5 | 13.787 | KV453025.1 | 1310796 | 13-scf00111 | 13 |
| AX-157972137 | 5 | 13.787 | KV453025.1 | 1311170 | 13-scf00111 | 13 |
| AX-157972145 | 5 | 13.835 | KV453025.1 | 1322118 | 13-scf00111 | 13 |
| AX-157972146 | 5 | 13.856 | KV453025.1 | 1322500 | 13-scf00111 | 13 |
| AX-157972150 | 5 | 13.896 | KV453025.1 | 1323739 | 13-scf00111 | 13 |
| AX-157972151 | 5 | 13.896 | KV453025.1 | 1324622 | 13-scf00111 | 13 |
| AX-157972154 | 5 | 13.896 | KV453025.1 | 1324760 | 13-scf00111 | 13 |
| AX-157972158 | 5 | 13.896 | KV453025.1 | 1328702 | 13-scf00111 | 13 |
| AX-157972160 | 5 | 13.896 | KV453025.1 | 1330179 | 13-scf00111 | 13 |
| AX-157972162 | 5 | 13.896 | KV453025.1 | 1330715 | 13-scf00111 | 13 |
| AX-157972163 | 5 | 13.896 | KV453025.1 | 1334713 | 13-scf00111 | 13 |
| AX-157972164 | 5 | 13.899 | KV453025.1 | 1336965 | 13-scf00111 | 13 |
| AX-157972166 | 5 | 14.333 | KV453025.1 | 1338617 | 13-scf00111 | 13 |
| AX-157972170 | 5 | 14.333 | KV453025.1 | 1342015 | 13-scf00111 | 13 |
| AX-157972171 | 5 | 14.333 | KV453025.1 | 1342397 | 13-scf00111 | 13 |
| AX-158379519 | 5 | 14.334 | KV453025.1 | 1342828 | 13-scf00111 | 13 |
| AX-157722167 | 5 | 14.335 | KV453025.1 | 1346827 | 13-scf00111 | 13 |
| AX-157972174 | 5 | 14.336 | KV453025.1 | 1347235 | 13-scf00111 | 13 |
| AX-157722642 | 5 | 14.338 | KV453025.1 | 1341567 | 13-scf00111 | 13 |
| AX-157817050 | 5 | 14.338 | KV453025.1 | 1351059 | 13-scf00111 | 13 |
| AX-157972181 | 5 | 14.338 | KV453025.1 | 1355975 | 13-scf00111 | 13 |
| AX-157972182 | 5 | 14.34  | KV453025.1 | 1357508 | 13-scf00111 | 13 |
| AX-157757480 | 5 | 14.442 | KV453025.1 | 1364451 | 13-scf00111 | 13 |
| AX-157748513 | 5 | 14.442 | KV453025.1 | 1370220 | 13-scf00111 | 13 |
| AX-157972191 | 5 | 14.442 | KV453025.1 | 1370412 | 13-scf00111 | 13 |
| AX-157972184 | 5 | 14.551 | KV453025.1 | 1359501 | 13-scf00111 | 13 |
| AX-157972192 | 5 | 14.551 | KV453025.1 | 1372705 | 13-scf00111 | 13 |
| AX-157972197 | 5 | 14.551 | KV453025.1 | 1377912 | 13-scf00111 | 13 |
| AX-157727227 | 5 | 14.551 | KV453025.1 | 1380033 | 13-scf00111 | 13 |
| AX-157972198 | 5 | 14.551 | KV453025.1 | 1380116 | 13-scf00111 | 13 |
| AX-157864964 | 5 | 14.551 | KV453025.1 | 1380574 | 13-scf00111 | 13 |
| AX-157972202 | 5 | 14.551 | KV453025.1 | 1383068 | 13-scf00111 | 13 |
| AX-157972203 | 5 | 14.551 | KV453025.1 | 1383920 | 13-scf00111 | 13 |
| AX-158390326 | 5 | 14.551 | KV453025.1 | 1384467 | 13-scf00111 | 13 |
| AX-157972209 | 5 | 14.551 | KV453025.1 | 1391891 | 13-scf00111 | 13 |
| AX-157972210 | 5 | 14.661 | KV453025.1 | 1393870 | 13-scf00111 | 13 |
| AX-157972212 | 5 | 14.661 | KV453025.1 | 1395260 | 13-scf00111 | 13 |
| AX-157972215 | 5 | 14.661 | KV453025.1 | 1396997 | 13-scf00111 | 13 |

|              |   |        |            |         |             |    |
|--------------|---|--------|------------|---------|-------------|----|
| AX-157972218 | 5 | 14.77  | KV453025.1 | 1401861 | 13-scf00111 | 13 |
| AX-157855020 | 5 | 14.77  | KV453025.1 | 1402273 | 13-scf00111 | 13 |
| AX-157972220 | 5 | 14.77  | KV453025.1 | 1404123 | 13-scf00111 | 13 |
| AX-157972221 | 5 | 14.77  | KV453025.1 | 1406144 | 13-scf00111 | 13 |
| AX-157972222 | 5 | 14.77  | KV453025.1 | 1409626 | 13-scf00111 | 13 |
| AX-157972223 | 5 | 14.77  | KV453025.1 | 1410133 | 13-scf00111 | 13 |
| AX-157710598 | 5 | 14.879 | KV453025.1 | 1390106 | 13-scf00111 | 13 |
| AX-157972224 | 5 | 14.879 | KV453025.1 | 1412701 | 13-scf00111 | 13 |
| AX-157972225 | 5 | 14.879 | KV453025.1 | 1416707 | 13-scf00111 | 13 |
| AX-157972226 | 5 | 14.988 | KV453025.1 | 1418012 | 13-scf00111 | 13 |
| AX-157757620 | 5 | 14.988 | KV453025.1 | 1420284 | 13-scf00111 | 13 |
| AX-157972229 | 5 | 15.054 | KV453025.1 | 1421829 | 13-scf00111 | 13 |
| AX-157972230 | 5 | 15.097 | KV453025.1 | 1422380 | 13-scf00111 | 13 |
| AX-157972231 | 5 | 15.097 | KV453025.1 | 1423178 | 13-scf00111 | 13 |
| AX-157972233 | 5 | 15.152 | KV453025.1 | 1426599 | 13-scf00111 | 13 |
| AX-157972235 | 5 | 15.207 | KV453025.1 | 1428230 | 13-scf00111 | 13 |
| AX-157972236 | 5 | 15.343 | KV453025.1 | 1430397 | 13-scf00111 | 13 |
| AX-157709459 | 5 | 15.343 | KV453025.1 | 1432673 | 13-scf00111 | 13 |
| AX-157972241 | 5 | 15.753 | KV453025.1 | 1434424 | 13-scf00111 | 13 |
| AX-157972243 | 5 | 15.753 | KV453025.1 | 1435939 | 13-scf00111 | 13 |
| AX-157771077 | 5 | 15.753 | KV453025.1 | 1436430 | 13-scf00111 | 13 |
| AX-157972251 | 5 | 15.753 | KV453025.1 | 1437879 | 13-scf00111 | 13 |
| AX-157972252 | 5 | 15.753 | KV453025.1 | 1438499 | 13-scf00111 | 13 |
| AX-157972254 | 5 | 15.753 | KV453025.1 | 1439173 | 13-scf00111 | 13 |
| AX-157972255 | 5 | 15.753 | KV453025.1 | 1440079 | 13-scf00111 | 13 |
| AX-157972258 | 5 | 15.753 | KV453025.1 | 1441131 | 13-scf00111 | 13 |
| AX-157972259 | 5 | 15.753 | KV453025.1 | 1441858 | 13-scf00111 | 13 |
| AX-157972260 | 5 | 15.753 | KV453025.1 | 1442147 | 13-scf00111 | 13 |
| AX-157709975 | 5 | 15.753 | KV453025.1 | 1442383 | 13-scf00111 | 13 |
| AX-157972282 | 5 | 15.753 | KV453025.1 | 1482977 | 13-scf00111 | 13 |
| AX-157723365 | 5 | 15.899 | KV453025.1 | 1443387 | 13-scf00111 | 13 |
| AX-157972263 | 5 | 15.899 | KV453025.1 | 1444196 | 13-scf00111 | 13 |
| AX-157972264 | 5 | 15.899 | KV453025.1 | 1445556 | 13-scf00111 | 13 |
| AX-157741191 | 5 | 16.045 | KV453025.1 | 1450449 | 13-scf00111 | 13 |
| AX-157972268 | 5 | 16.045 | KV453025.1 | 1454718 | 13-scf00111 | 13 |
| AX-157972269 | 5 | 16.045 | KV453025.1 | 1455288 | 13-scf00111 | 13 |
| AX-158378709 | 5 | 16.045 | KV453025.1 | 1458735 | 13-scf00111 | 13 |
| AX-157972270 | 5 | 16.189 | KV453025.1 | 1462883 | 13-scf00111 | 13 |
| AX-157855022 | 5 | 16.19  | KV453025.1 | 1464771 | 13-scf00111 | 13 |
| AX-157972272 | 5 | 16.299 | KV453025.1 | 1467584 | 13-scf00111 | 13 |
| AX-157727559 | 5 | 16.299 | KV453025.1 | 1469605 | 13-scf00111 | 13 |
| AX-157972276 | 5 | 16.299 | KV453025.1 | 1477882 | 13-scf00111 | 13 |
| AX-157972278 | 5 | 16.299 | KV453025.1 | 1479411 | 13-scf00111 | 13 |
| AX-157972283 | 5 | 16.299 | KV453025.1 | 1483581 | 13-scf00111 | 13 |
| AX-157972286 | 5 | 16.299 | KV453025.1 | 1486409 | 13-scf00111 | 13 |
| AX-157972288 | 5 | 16.299 | KV453025.1 | 1487243 | 13-scf00111 | 13 |
| AX-157972289 | 5 | 16.299 | KV453025.1 | 1487802 | 13-scf00111 | 13 |
| AX-157972290 | 5 | 16.299 | KV453025.1 | 1489483 | 13-scf00111 | 13 |
| AX-157972291 | 5 | 16.505 | KV453025.1 | 1490330 | 13-scf00111 | 13 |
| AX-157741649 | 5 | 16.505 | KV453025.1 | 1494820 | 13-scf00111 | 13 |
| AX-157972296 | 5 | 16.738 | KV453025.1 | 1496505 | 13-scf00111 | 13 |



|              |   |        |            |         |             |    |
|--------------|---|--------|------------|---------|-------------|----|
| AX-157972297 | 5 | 16.787 | KV453025.1 | 1496951 | 13-scf00111 | 13 |
| AX-157855023 | 5 | 16.847 | KV453025.1 | 1497536 | 13-scf00111 | 13 |
| AX-157972298 | 5 | 16.847 | KV453025.1 | 1498444 | 13-scf00111 | 13 |
| AX-157972299 | 5 | 16.847 | KV453025.1 | 1500142 | 13-scf00111 | 13 |
| AX-157972303 | 5 | 16.892 | KV453025.1 | 1506099 | 13-scf00111 | 13 |
| AX-157972304 | 5 | 16.956 | KV453025.1 | 1507154 | 13-scf00111 | 13 |
| AX-157972307 | 5 | 16.968 | KV453025.1 | 1509534 | 13-scf00111 | 13 |
| AX-157972312 | 5 | 16.98  | KV453025.1 | 1515323 | 13-scf00111 | 13 |
| AX-157972319 | 5 | 17.349 | KV453025.1 | 1526482 | 13-scf00111 | 13 |
| AX-157972323 | 5 | 17.412 | KV453025.1 | 1529988 | 13-scf00111 | 13 |
| AX-157972327 | 5 | 17.412 | KV453025.1 | 1531075 | 13-scf00111 | 13 |
| AX-157754752 | 5 | 17.482 | KV453025.1 | 1531823 | 13-scf00111 | 13 |
| AX-157972329 | 5 | 17.602 | KV453025.1 | 1533495 | 13-scf00111 | 13 |
| AX-157972342 | 5 | 17.602 | KV453025.1 | 1545820 | 13-scf00111 | 13 |
| AX-157972316 | 5 | 17.612 | KV453025.1 | 1521270 | 13-scf00111 | 13 |
| AX-157864965 | 5 | 17.612 | KV453025.1 | 1533126 | 13-scf00111 | 13 |
| AX-157747966 | 5 | 17.612 | KV453025.1 | 1534085 | 13-scf00111 | 13 |
| AX-157972333 | 5 | 17.612 | KV453025.1 | 1534814 | 13-scf00111 | 13 |
| AX-157972334 | 5 | 17.612 | KV453025.1 | 1536309 | 13-scf00111 | 13 |
| AX-157972335 | 5 | 17.612 | KV453025.1 | 1536631 | 13-scf00111 | 13 |
| AX-157972336 | 5 | 17.612 | KV453025.1 | 1537625 | 13-scf00111 | 13 |
| AX-157715623 | 5 | 17.612 | KV453025.1 | 1538890 | 13-scf00111 | 13 |
| AX-157972337 | 5 | 17.612 | KV453025.1 | 1541157 | 13-scf00111 | 13 |
| AX-157972339 | 5 | 17.612 | KV453025.1 | 1542279 | 13-scf00111 | 13 |
| AX-157972340 | 5 | 17.612 | KV453025.1 | 1543621 | 13-scf00111 | 13 |
| AX-157972341 | 5 | 17.612 | KV453025.1 | 1544822 | 13-scf00111 | 13 |
| AX-157972343 | 5 | 17.612 | KV453025.1 | 1547280 | 13-scf00111 | 13 |
| AX-157972346 | 5 | 17.612 | KV453025.1 | 1548315 | 13-scf00111 | 13 |
| AX-157972322 | 5 | 17.687 | KV453025.1 | 1528986 | 13-scf00111 | 13 |
| AX-158378711 | 5 | 17.687 | KV453025.1 | 1554173 | 13-scf00111 | 13 |
| AX-157972354 | 5 | 17.751 | KV453025.1 | 1557647 | 13-scf00111 | 13 |
| AX-157972355 | 5 | 17.83  | KV453025.1 | 1559256 | 13-scf00111 | 13 |
| AX-157708886 | 5 | 17.83  | KV453025.1 | 1559788 | 13-scf00111 | 13 |
| AX-157972357 | 5 | 17.94  | KV453025.1 | 1565055 | 13-scf00111 | 13 |
| AX-157972358 | 5 | 17.999 | KV453025.1 | 1566252 | 13-scf00111 | 13 |
| AX-157972360 | 5 | 18.049 | KV453025.1 | 1567735 | 13-scf00111 | 13 |
| AX-157972361 | 5 | 18.049 | KV453025.1 | 1571329 | 13-scf00111 | 13 |
| AX-158379520 | 5 | 18.049 | KV453025.1 | 1571866 | 13-scf00111 | 13 |
| AX-157725124 | 5 | 18.049 | KV453025.1 | 1578066 | 13-scf00111 | 13 |
| AX-157758257 | 5 | 18.049 | KV453025.1 | 1613984 | 13-scf00111 | 13 |
| AX-157972331 | 5 | 18.158 | KV453025.1 | 1533928 | 13-scf00111 | 13 |
| AX-157972351 | 5 | 18.158 | KV453025.1 | 1552487 | 13-scf00111 | 13 |
| AX-157713737 | 5 | 18.158 | KV453025.1 | 1556754 | 13-scf00111 | 13 |
| AX-157972367 | 5 | 18.158 | KV453025.1 | 1582888 | 13-scf00111 | 13 |
| AX-157972369 | 5 | 18.158 | KV453025.1 | 1586824 | 13-scf00111 | 13 |
| AX-157972375 | 5 | 18.213 | KV453025.1 | 1590124 | 13-scf00111 | 13 |
| AX-157972376 | 5 | 18.267 | KV453025.1 | 1591520 | 13-scf00111 | 13 |
| AX-157752889 | 5 | 18.267 | KV453025.1 | 1592179 | 13-scf00111 | 13 |
| AX-157972379 | 5 | 18.267 | KV453025.1 | 1595433 | 13-scf00111 | 13 |
| AX-157972380 | 5 | 18.267 | KV453025.1 | 1598231 | 13-scf00111 | 13 |
| AX-158390328 | 5 | 18.267 | KV453025.1 | 1604272 | 13-scf00111 | 13 |

|              |   |        |            |         |             |    |
|--------------|---|--------|------------|---------|-------------|----|
| AX-158383061 | 5 | 18.267 | KV453025.1 | 1638675 | 13-scf00111 | 13 |
| AX-157724112 | 5 | 18.377 | KV453025.1 | 1507503 | 13-scf00111 | 13 |
| AX-157972362 | 5 | 18.377 | KV453025.1 | 1574790 | 13-scf00111 | 13 |
| AX-157972382 | 5 | 18.377 | KV453025.1 | 1600392 | 13-scf00111 | 13 |
| AX-157972383 | 5 | 18.377 | KV453025.1 | 1602619 | 13-scf00111 | 13 |
| AX-157972386 | 5 | 18.377 | KV453025.1 | 1604148 | 13-scf00111 | 13 |
| AX-157972388 | 5 | 18.377 | KV453025.1 | 1604641 | 13-scf00111 | 13 |
| AX-157730335 | 5 | 18.377 | KV453025.1 | 1605425 | 13-scf00111 | 13 |
| AX-157884248 | 5 | 18.377 | KV453025.1 | 1606338 | 13-scf00111 | 13 |
| AX-157972392 | 5 | 18.377 | KV453025.1 | 1606551 | 13-scf00111 | 13 |
| AX-157972396 | 5 | 18.377 | KV453025.1 | 1608473 | 13-scf00111 | 13 |
| AX-157972399 | 5 | 18.377 | KV453025.1 | 1609723 | 13-scf00111 | 13 |
| AX-157972400 | 5 | 18.377 | KV453025.1 | 1610743 | 13-scf00111 | 13 |
| AX-157741454 | 5 | 18.522 | KV453025.1 | 1621074 | 13-scf00111 | 13 |
| AX-157972420 | 5 | 18.522 | KV453025.1 | 1637791 | 13-scf00111 | 13 |
| AX-157972424 | 5 | 18.814 | KV453025.1 | 1644979 | 13-scf00111 | 13 |
| AX-157884249 | 5 | 18.814 | KV453025.1 | 1646180 | 13-scf00111 | 13 |
| AX-157972427 | 5 | 18.814 | KV453025.1 | 1646704 | 13-scf00111 | 13 |
| AX-157817056 | 5 | 18.814 | KV453025.1 | 1647015 | 13-scf00111 | 13 |
| AX-157817057 | 5 | 18.814 | KV453025.1 | 1647161 | 13-scf00111 | 13 |
| AX-157972431 | 5 | 18.814 | KV453025.1 | 1648774 | 13-scf00111 | 13 |
| AX-157972446 | 5 | 18.814 | KV453025.1 | 1657674 | 13-scf00111 | 13 |
| AX-157972450 | 5 | 18.814 | KV453025.1 | 1660422 | 13-scf00111 | 13 |
| AX-157972454 | 5 | 18.814 | KV453025.1 | 1663704 | 13-scf00111 | 13 |
| AX-157739232 | 5 | 18.832 | KV453025.1 | 1650929 | 13-scf00111 | 13 |
| AX-157972437 | 5 | 18.923 | KV453025.1 | 1652390 | 13-scf00111 | 13 |
| AX-158379521 | 5 | 18.923 | KV453025.1 | 1652718 | 13-scf00111 | 13 |
| AX-157972438 | 5 | 18.923 | KV453025.1 | 1653294 | 13-scf00111 | 13 |
| AX-157972441 | 5 | 18.923 | KV453025.1 | 1655179 | 13-scf00111 | 13 |
| AX-157972443 | 5 | 18.923 | KV453025.1 | 1655548 | 13-scf00111 | 13 |
| AX-157972444 | 5 | 18.923 | KV453025.1 | 1657243 | 13-scf00111 | 13 |
| AX-157972449 | 5 | 18.923 | KV453025.1 | 1659926 | 13-scf00111 | 13 |
| AX-157972456 | 5 | 18.923 | KV453025.1 | 1667733 | 13-scf00111 | 13 |
| AX-157972459 | 5 | 18.975 | KV453025.1 | 1671986 | 13-scf00111 | 13 |
| AX-157710952 | 5 | 19.033 | KV453025.1 | 1679081 | 13-scf00111 | 13 |
| AX-157972465 | 5 | 19.072 | KV453025.1 | 1680070 | 13-scf00111 | 13 |
| AX-157875634 | 5 | 19.108 | KV453025.1 | 1684287 | 13-scf00111 | 13 |
| AX-157972468 | 5 | 19.119 | KV453025.1 | 1685241 | 13-scf00111 | 13 |
| AX-157972469 | 5 | 19.129 | KV453025.1 | 1685765 | 13-scf00111 | 13 |
| AX-157817058 | 5 | 19.129 | KV453025.1 | 1687032 | 13-scf00111 | 13 |
| AX-157972471 | 5 | 19.142 | KV453025.1 | 1686409 | 13-scf00111 | 13 |
| AX-157817060 | 5 | 19.202 | KV453025.1 | 1691276 | 13-scf00111 | 13 |
| AX-157972517 | 5 | 19.202 | KV453028.1 | 39751   | 13-scf00114 | 13 |
| AX-157688165 | 5 | 19.251 | KV453025.1 | 898106  | 13-scf00111 | 13 |
| AX-157971786 | 5 | 19.251 | KV453025.1 | 904033  | 13-scf00111 | 13 |
| AX-157972430 | 5 | 19.251 | KV453025.1 | 1648218 | 13-scf00111 | 13 |
| AX-157972432 | 5 | 19.251 | KV453025.1 | 1650346 | 13-scf00111 | 13 |
| AX-157884252 | 5 | 19.251 | KV453025.1 | 1673590 | 13-scf00111 | 13 |
| AX-157817061 | 5 | 19.251 | KV453025.1 | 1693813 | 13-scf00111 | 13 |
| AX-157972480 | 5 | 19.251 | KV453025.1 | 1694807 | 13-scf00111 | 13 |
| AX-157972483 | 5 | 19.251 | KV453025.1 | 1695811 | 13-scf00111 | 13 |

|              |   |        |             |         |             |    |
|--------------|---|--------|-------------|---------|-------------|----|
| AX-157706913 | 5 | 19.251 | KV453025.1  | 1697512 | 13-scf00111 | 13 |
| AX-157706914 | 5 | 19.251 | KV453025.1  | 1697562 | 13-scf00111 | 13 |
| AX-157972488 | 5 | 19.251 | KV453025.1  | 1699897 | 13-scf00111 | 13 |
| AX-157869659 | 5 | 19.251 | KV453025.1  | 1700179 | 13-scf00111 | 13 |
| AX-157972489 | 5 | 19.251 | KV453025.1  | 1701335 | 13-scf00111 | 13 |
| AX-157972493 | 5 | 19.251 | KV453025.1  | 1702342 | 13-scf00111 | 13 |
| AX-157972495 | 5 | 19.251 | KV453028.1  | 3945    | 13-scf00114 | 13 |
| AX-157972496 | 5 | 19.251 | KV453028.1  | 4032    | 13-scf00114 | 13 |
| AX-157869660 | 5 | 19.251 | KV453028.1  | 9866    | 13-scf00114 | 13 |
| AX-157864967 | 5 | 19.251 | KV453028.1  | 10089   | 13-scf00114 | 13 |
| AX-158415484 | 5 | 19.251 | KV453028.1  | 11797   | 13-scf00114 | 13 |
| AX-157972502 | 5 | 19.251 | KV453028.1  | 13392   | 13-scf00114 | 13 |
| AX-157972523 | 5 | 19.251 | KV453028.1  | 44850   | 13-scf00114 | 13 |
| AX-157972556 | 5 | 19.251 | KV453028.1  | 76657   | 13-scf00114 | 13 |
| AX-157694360 | 5 | 19.251 | FI888995.1  | 724     | 13-scf00114 | UN |
| AX-157855025 | 5 | 19.365 | KV453025.1  | 1682639 | 13-scf00111 | 13 |
| AX-157972470 | 5 | 19.365 | KV453025.1  | 1685903 | 13-scf00111 | 13 |
| AX-157972506 | 5 | 19.365 | KV453028.1  | 27760   | 13-scf00114 | 13 |
| AX-157972508 | 5 | 19.415 | KV453028.1  | 28542   | 13-scf00114 | 13 |
| AX-157972515 | 5 | 19.578 | KV453028.1  | 37591   | 13-scf00114 | 13 |
| AX-157972519 | 5 | 19.578 | KV453028.1  | 42173   | 13-scf00114 | 13 |
| AX-157972522 | 5 | 19.579 | KV453028.1  | 43948   | 13-scf00114 | 13 |
| AX-157972524 | 5 | 19.579 | KV453028.1  | 45004   | 13-scf00114 | 13 |
| AX-157972529 | 5 | 19.579 | KV453028.1  | 47583   | 13-scf00114 | 13 |
| AX-157747809 | 5 | 19.579 | KV453028.1  | 49068   | 13-scf00114 | 13 |
| AX-157972531 | 5 | 19.579 | KV453028.1  | 51349   | 13-scf00114 | 13 |
| AX-157817065 | 5 | 19.579 | KV453028.1  | 52010   | 13-scf00114 | 13 |
| AX-157817066 | 5 | 19.579 | KV453028.1  | 54347   | 13-scf00114 | 13 |
| AX-157972536 | 5 | 19.579 | KV453028.1  | 55556   | 13-scf00114 | 13 |
| AX-157972537 | 5 | 19.579 | KV453028.1  | 55660   | 13-scf00114 | 13 |
| AX-157972538 | 5 | 19.797 | KV453028.1  | 57152   | 13-scf00114 | 13 |
| AX-157972539 | 5 | 19.797 | KV453028.1  | 57666   | 13-scf00114 | 13 |
| AX-157972540 | 5 | 19.797 | KV453028.1  | 59840   | 13-scf00114 | 13 |
| AX-157972541 | 5 | 19.797 | KV453028.1  | 60789   | 13-scf00114 | 13 |
| AX-157817068 | 5 | 20.016 | KV453028.1  | 63340   | 13-scf00114 | 13 |
| AX-157972543 | 5 | 20.016 | KV453028.1  | 63768   | 13-scf00114 | 13 |
| AX-157972544 | 5 | 20.016 | KV453028.1  | 64083   | 13-scf00114 | 13 |
| AX-157972545 | 5 | 20.234 | KV453028.1  | 65227   | 13-scf00114 | 13 |
| AX-157773322 | 5 | 20.234 | KV453028.1  | 65491   | 13-scf00114 | 13 |
| AX-157972547 | 5 | 20.234 | KV453028.1  | 66309   | 13-scf00114 | 13 |
| AX-157972550 | 5 | 20.234 | KV453028.1  | 69022   | 13-scf00114 | 13 |
| AX-157972552 | 5 | 20.234 | KV453028.1  | 69559   | 13-scf00114 | 13 |
| AX-157972555 | 5 | 20.234 | KV453028.1  | 76301   | 13-scf00114 | 13 |
| AX-157972561 | 5 | 20.234 | KV453028.1  | 84370   | 13-scf00114 | 13 |
| AX-157972605 | 5 | 20.234 | KV453028.1  | 136770  | 13-scf00114 | 13 |
| AX-157744763 | 5 | 20.283 | KV453028.1  | 70879   | 13-scf00114 | 13 |
| AX-157855026 | 5 | 20.283 | KV453028.1  | 76095   | 13-scf00114 | 13 |
| AX-157972576 | 5 | 20.283 | KV453028.1  | 98564   | 13-scf00114 | 13 |
| AX-157711986 | 5 | 20.283 | 3ML01030775 | 365     | scf06377_1  | UN |
| AX-157972560 | 5 | 20.343 | KV453028.1  | 83114   | 13-scf00114 | 13 |
| AX-157972562 | 5 | 20.343 | KV453028.1  | 85768   | 13-scf00114 | 13 |

|              |   |        |            |        |             |    |
|--------------|---|--------|------------|--------|-------------|----|
| AX-157972565 | 5 | 20.485 | KV453028.1 | 89822  | 13-scf00114 | 13 |
| AX-157972588 | 5 | 20.804 | KV453028.1 | 119683 | 13-scf00114 | 13 |
| AX-157754156 | 5 | 21.106 | KV453028.1 | 126031 | 13-scf00114 | 13 |
| AX-157972574 | 5 | 21.108 | KV453028.1 | 97762  | 13-scf00114 | 13 |
| AX-157972595 | 5 | 21.108 | KV453028.1 | 129346 | 13-scf00114 | 13 |
| AX-157972584 | 5 | 21.109 | KV453028.1 | 115590 | 13-scf00114 | 13 |
| AX-157855027 | 5 | 21.109 | KV453028.1 | 128460 | 13-scf00114 | 13 |
| AX-157972597 | 5 | 21.109 | KV453028.1 | 132478 | 13-scf00114 | 13 |
| AX-157972598 | 5 | 21.109 | KV453028.1 | 133122 | 13-scf00114 | 13 |
| AX-157972602 | 5 | 21.109 | KV453028.1 | 134189 | 13-scf00114 | 13 |
| AX-157738628 | 5 | 21.109 | KV453028.1 | 135259 | 13-scf00114 | 13 |
| AX-157972603 | 5 | 21.109 | KV453028.1 | 136293 | 13-scf00114 | 13 |
| AX-157723107 | 5 | 21.109 | KV453028.1 | 140360 | 13-scf00114 | 13 |
| AX-157708884 | 5 | 21.109 | KV453028.1 | 140756 | 13-scf00114 | 13 |
| AX-157710862 | 5 | 21.109 | KV453028.1 | 141230 | 13-scf00114 | 13 |
| AX-157972611 | 5 | 21.109 | KV453028.1 | 142191 | 13-scf00114 | 13 |
| AX-157972613 | 5 | 21.109 | KV453028.1 | 143221 | 13-scf00114 | 13 |
| AX-157817071 | 5 | 21.109 | KV453028.1 | 144400 | 13-scf00114 | 13 |
| AX-157972616 | 5 | 21.409 | KV453028.1 | 145528 | 13-scf00114 | 13 |
| AX-157972621 | 5 | 21.41  | KV453028.1 | 147945 | 13-scf00114 | 13 |
| AX-157972622 | 5 | 21.466 | KV453028.1 | 148584 | 13-scf00114 | 13 |
| AX-157972625 | 5 | 21.748 | KV453028.1 | 150775 | 13-scf00114 | 13 |
| AX-157972626 | 5 | 22.094 | KV453028.1 | 152012 | 13-scf00114 | 13 |
| AX-157710137 | 5 | 22.094 | KV453028.1 | 156724 | 13-scf00114 | 13 |
| AX-157972629 | 5 | 22.094 | KV453028.1 | 159602 | 13-scf00114 | 13 |
| AX-157972633 | 5 | 22.203 | KV453028.1 | 162842 | 13-scf00114 | 13 |
| AX-157713643 | 5 | 22.203 | KV453028.1 | 168987 | 13-scf00114 | 13 |
| AX-158379522 | 5 | 22.203 | KV453028.1 | 169496 | 13-scf00114 | 13 |
| AX-157972643 | 5 | 22.203 | KV453028.1 | 170322 | 13-scf00114 | 13 |
| AX-158390333 | 5 | 22.203 | KV453028.1 | 170446 | 13-scf00114 | 13 |
| AX-157748761 | 5 | 22.203 | KV453028.1 | 171881 | 13-scf00114 | 13 |
| AX-157972645 | 5 | 22.203 | KV453028.1 | 172473 | 13-scf00114 | 13 |
| AX-157972650 | 5 | 22.203 | KV453028.1 | 177766 | 13-scf00114 | 13 |
| AX-157972653 | 5 | 22.203 | KV453028.1 | 179395 | 13-scf00114 | 13 |
| AX-157972661 | 5 | 22.203 | KV453028.1 | 182660 | 13-scf00114 | 13 |
| AX-157972662 | 5 | 22.203 | KV453028.1 | 183417 | 13-scf00114 | 13 |
| AX-157751744 | 5 | 22.421 | KV453028.1 | 160292 | 13-scf00114 | 13 |
| AX-157972637 | 5 | 22.421 | KV453028.1 | 166235 | 13-scf00114 | 13 |
| AX-157972671 | 5 | 22.421 | KV453028.1 | 187326 | 13-scf00114 | 13 |
| AX-157738635 | 5 | 22.421 | KV453028.1 | 187849 | 13-scf00114 | 13 |
| AX-157972672 | 5 | 22.421 | KV453028.1 | 188461 | 13-scf00114 | 13 |
| AX-157749913 | 5 | 22.421 | KV453028.1 | 189123 | 13-scf00114 | 13 |
| AX-157972673 | 5 | 22.421 | KV453028.1 | 190259 | 13-scf00114 | 13 |
| AX-157972675 | 5 | 22.421 | KV453028.1 | 191501 | 13-scf00114 | 13 |
| AX-157972679 | 5 | 22.421 | KV453028.1 | 196324 | 13-scf00114 | 13 |
| AX-157972684 | 5 | 22.421 | KV453028.1 | 198847 | 13-scf00114 | 13 |
| AX-157972685 | 5 | 22.421 | KV453028.1 | 199729 | 13-scf00114 | 13 |
| AX-157972687 | 5 | 22.421 | KV453028.1 | 200689 | 13-scf00114 | 13 |
| AX-158379523 | 5 | 22.421 | KV453028.1 | 200821 | 13-scf00114 | 13 |
| AX-157972689 | 5 | 22.421 | KV453028.1 | 201410 | 13-scf00114 | 13 |
| AX-157972692 | 5 | 22.421 | KV453028.1 | 202715 | 13-scf00114 | 13 |

|              |   |        |            |        |             |    |
|--------------|---|--------|------------|--------|-------------|----|
| AX-157972695 | 5 | 22.933 | KV453028.1 | 208751 | 13-scf00114 | 13 |
| AX-157972696 | 5 | 22.933 | KV453028.1 | 209126 | 13-scf00114 | 13 |
| AX-157972698 | 5 | 22.933 | KV453028.1 | 211398 | 13-scf00114 | 13 |
| AX-157972702 | 5 | 22.933 | KV453028.1 | 215208 | 13-scf00114 | 13 |
| AX-157972709 | 5 | 23.093 | KV453028.1 | 220419 | 13-scf00114 | 13 |
| AX-157726017 | 5 | 23.093 | KV453028.1 | 229545 | 13-scf00114 | 13 |
| AX-157972715 | 5 | 23.166 | KV453028.1 | 222641 | 13-scf00114 | 13 |
| AX-157972724 | 5 | 23.166 | KV453028.1 | 228164 | 13-scf00114 | 13 |
| AX-157972726 | 5 | 23.258 | KV453028.1 | 230950 | 13-scf00114 | 13 |
| AX-157972732 | 5 | 23.259 | KV453028.1 | 237472 | 13-scf00114 | 13 |
| AX-157972741 | 5 | 23.259 | KV453028.1 | 244706 | 13-scf00114 | 13 |
| AX-157972734 | 5 | 23.429 | KV453028.1 | 239746 | 13-scf00114 | 13 |
| AX-157972738 | 5 | 23.586 | KV453028.1 | 242003 | 13-scf00114 | 13 |
| AX-157972743 | 5 | 23.597 | KV453028.1 | 245982 | 13-scf00114 | 13 |
| AX-157972744 | 5 | 23.597 | KV453028.1 | 249636 | 13-scf00114 | 13 |
| AX-157972748 | 5 | 23.597 | KV453028.1 | 253442 | 13-scf00114 | 13 |
| AX-157972750 | 5 | 23.597 | KV453028.1 | 254107 | 13-scf00114 | 13 |
| AX-157972753 | 5 | 23.597 | KV453028.1 | 256529 | 13-scf00114 | 13 |
| AX-157972756 | 5 | 23.597 | KV453028.1 | 256936 | 13-scf00114 | 13 |
| AX-157972757 | 5 | 23.658 | KV453028.1 | 257329 | 13-scf00114 | 13 |
| AX-157972763 | 5 | 23.733 | KV453028.1 | 265243 | 13-scf00114 | 13 |
| AX-157972764 | 5 | 23.733 | KV453028.1 | 265681 | 13-scf00114 | 13 |
| AX-157972768 | 5 | 23.733 | KV453028.1 | 271598 | 13-scf00114 | 13 |
| AX-157972735 | 5 | 23.734 | KV453028.1 | 240642 | 13-scf00114 | 13 |
| AX-157817075 | 5 | 23.734 | KV453028.1 | 274674 | 13-scf00114 | 13 |
| AX-157750496 | 5 | 23.734 | KV453028.1 | 274864 | 13-scf00114 | 13 |
| AX-157972729 | 5 | 23.794 | KV453028.1 | 232924 | 13-scf00114 | 13 |
| AX-157972730 | 5 | 23.794 | KV453028.1 | 236388 | 13-scf00114 | 13 |
| AX-157972770 | 5 | 23.794 | KV453028.1 | 275830 | 13-scf00114 | 13 |
| AX-157972771 | 5 | 24.486 | KV453028.1 | 280376 | 13-scf00114 | 13 |
| AX-157709183 | 5 | 24.797 | KV453028.1 | 284493 | 13-scf00114 | 13 |
| AX-157972774 | 5 | 24.961 | KV453028.1 | 286972 | 13-scf00114 | 13 |
| AX-157972775 | 5 | 25.108 | KV453028.1 | 287897 | 13-scf00114 | 13 |
| AX-157972776 | 5 | 25.108 | KV453028.1 | 290542 | 13-scf00114 | 13 |
| AX-157972777 | 5 | 25.134 | KV453028.1 | 291222 | 13-scf00114 | 13 |
| AX-157817076 | 5 | 25.401 | KV453028.1 | 294071 | 13-scf00114 | 13 |
| AX-157817077 | 5 | 25.401 | KV453028.1 | 298689 | 13-scf00114 | 13 |
| AX-157972783 | 5 | 25.425 | KV453028.1 | 297401 | 13-scf00114 | 13 |
| AX-157722732 | 5 | 25.439 | KV453028.1 | 298326 | 13-scf00114 | 13 |
| AX-157972786 | 5 | 25.439 | KV453028.1 | 299870 | 13-scf00114 | 13 |
| AX-157972788 | 5 | 25.697 | KV453028.1 | 302393 | 13-scf00114 | 13 |
| AX-157884255 | 5 | 25.697 | KV453028.1 | 304277 | 13-scf00114 | 13 |
| AX-157972789 | 5 | 25.697 | KV453028.1 | 306645 | 13-scf00114 | 13 |
| AX-157972791 | 5 | 25.705 | KV453028.1 | 308134 | 13-scf00114 | 13 |
| AX-157744044 | 5 | 26.021 | KV453028.1 | 310095 | 13-scf00114 | 13 |
| AX-157817079 | 5 | 26.048 | KV453028.1 | 307516 | 13-scf00114 | 13 |
| AX-157972794 | 5 | 26.048 | KV453028.1 | 310759 | 13-scf00114 | 13 |
| AX-157752988 | 5 | 26.442 | KV453028.1 | 321319 | 13-scf00114 | 13 |
| AX-157972805 | 5 | 26.442 | KV453028.1 | 326227 | 13-scf00114 | 13 |
| AX-157972806 | 5 | 26.442 | KV453028.1 | 327499 | 13-scf00114 | 13 |
| AX-158390336 | 5 | 26.708 | KV453028.1 | 332624 | 13-scf00114 | 13 |

|              |   |        |            |        |             |    |
|--------------|---|--------|------------|--------|-------------|----|
| AX-157972812 | 5 | 26.708 | KV453028.1 | 339064 | 13-scf00114 | 13 |
| AX-157972799 | 5 | 26.896 | KV453028.1 | 316655 | 13-scf00114 | 13 |
| AX-157972814 | 5 | 26.896 | KV453028.1 | 358621 | 13-scf00114 | 13 |
| AX-157972818 | 5 | 26.896 | KV453028.1 | 362569 | 13-scf00114 | 13 |
| AX-157972822 | 5 | 26.896 | KV453028.1 | 368746 | 13-scf00114 | 13 |
| AX-157972825 | 5 | 26.896 | KV453028.1 | 377665 | 13-scf00114 | 13 |
| AX-157972842 | 5 | 26.896 | KV453028.1 | 411123 | 13-scf00114 | 13 |
| AX-157972810 | 5 | 27.03  | KV453028.1 | 329980 | 13-scf00114 | 13 |
| AX-157817081 | 5 | 27.03  | KV453028.1 | 354216 | 13-scf00114 | 13 |
| AX-157972815 | 5 | 27.03  | KV453028.1 | 359599 | 13-scf00114 | 13 |
| AX-157972817 | 5 | 27.03  | KV453028.1 | 361624 | 13-scf00114 | 13 |
| AX-157972829 | 5 | 27.03  | KV453028.1 | 380012 | 13-scf00114 | 13 |
| AX-157752359 | 5 | 27.03  | KV453028.1 | 387903 | 13-scf00114 | 13 |
| AX-157972834 | 5 | 27.031 | KV453028.1 | 389824 | 13-scf00114 | 13 |
| AX-157972836 | 5 | 27.295 | KV453028.1 | 394323 | 13-scf00114 | 13 |
| AX-157972838 | 5 | 27.295 | KV453028.1 | 397821 | 13-scf00114 | 13 |
| AX-157972839 | 5 | 27.295 | KV453028.1 | 398738 | 13-scf00114 | 13 |
| AX-157972841 | 5 | 27.295 | KV453028.1 | 407304 | 13-scf00114 | 13 |
| AX-157715267 | 5 | 27.295 | KV453028.1 | 408822 | 13-scf00114 | 13 |
| AX-157972878 | 5 | 27.295 | KV453028.1 | 453205 | 13-scf00114 | 13 |
| AX-157972890 | 5 | 27.295 | KV453028.1 | 462238 | 13-scf00114 | 13 |
| AX-157972844 | 5 | 27.487 | KV453028.1 | 415484 | 13-scf00114 | 13 |
| AX-157741006 | 5 | 27.487 | KV453028.1 | 417079 | 13-scf00114 | 13 |
| AX-157972845 | 5 | 27.678 | KV453028.1 | 418081 | 13-scf00114 | 13 |
| AX-157972852 | 5 | 27.678 | KV453028.1 | 424778 | 13-scf00114 | 13 |
| AX-158406681 | 5 | 27.678 | KV453028.1 | 432853 | 13-scf00114 | 13 |
| AX-157972856 | 5 | 27.678 | KV453028.1 | 435439 | 13-scf00114 | 13 |
| AX-157720298 | 5 | 27.678 | KV453028.1 | 507360 | 13-scf00114 | 13 |
| AX-157875638 | 5 | 27.745 | KV453028.1 | 438499 | 13-scf00114 | 13 |
| AX-157972861 | 5 | 27.787 | KV453028.1 | 439544 | 13-scf00114 | 13 |
| AX-157972862 | 5 | 27.788 | KV453028.1 | 440166 | 13-scf00114 | 13 |
| AX-157972866 | 5 | 27.829 | KV453028.1 | 442620 | 13-scf00114 | 13 |
| AX-157972867 | 5 | 27.829 | KV453028.1 | 443273 | 13-scf00114 | 13 |
| AX-157972872 | 5 | 27.829 | KV453028.1 | 447400 | 13-scf00114 | 13 |
| AX-157972873 | 5 | 27.829 | KV453028.1 | 448784 | 13-scf00114 | 13 |
| AX-157972874 | 5 | 27.829 | KV453028.1 | 449303 | 13-scf00114 | 13 |
| AX-157972876 | 5 | 27.829 | KV453028.1 | 449862 | 13-scf00114 | 13 |
| AX-157972877 | 5 | 27.829 | KV453028.1 | 452214 | 13-scf00114 | 13 |
| AX-157972879 | 5 | 27.829 | KV453028.1 | 453950 | 13-scf00114 | 13 |
| AX-157972883 | 5 | 27.829 | KV453028.1 | 456193 | 13-scf00114 | 13 |
| AX-157750922 | 5 | 27.829 | KV453028.1 | 456692 | 13-scf00114 | 13 |
| AX-157972885 | 5 | 27.829 | KV453028.1 | 457072 | 13-scf00114 | 13 |
| AX-157972887 | 5 | 27.829 | KV453028.1 | 460440 | 13-scf00114 | 13 |
| AX-157972889 | 5 | 27.829 | KV453028.1 | 461045 | 13-scf00114 | 13 |
| AX-157708227 | 5 | 27.829 | KV453028.1 | 462994 | 13-scf00114 | 13 |
| AX-157972891 | 5 | 27.829 | KV453028.1 | 463652 | 13-scf00114 | 13 |
| AX-157972892 | 5 | 27.829 | KV453028.1 | 468079 | 13-scf00114 | 13 |
| AX-157972894 | 5 | 27.829 | KV453028.1 | 468787 | 13-scf00114 | 13 |
| AX-157972902 | 5 | 27.829 | KV453028.1 | 489941 | 13-scf00114 | 13 |
| AX-157771577 | 5 | 27.829 | KV453028.1 | 491780 | 13-scf00114 | 13 |
| AX-157972908 | 5 | 27.829 | KV453028.1 | 504873 | 13-scf00114 | 13 |

|              |   |        |             |        |             |    |
|--------------|---|--------|-------------|--------|-------------|----|
| AX-157707313 | 5 | 27.829 | 3ML01033981 | 350    | scf09650_1  | UN |
| AX-157725799 | 5 | 27.832 | KV453028.1  | 493025 | 13-scf00114 | 13 |
| AX-157972905 | 5 | 27.832 | KV453028.1  | 497656 | 13-scf00114 | 13 |
| AX-157972907 | 5 | 27.835 | KV453028.1  | 501132 | 13-scf00114 | 13 |
| AX-157972850 | 5 | 28.003 | KV453028.1  | 424031 | 13-scf00114 | 13 |
| AX-157972871 | 5 | 28.003 | KV453028.1  | 445684 | 13-scf00114 | 13 |
| AX-157972899 | 5 | 28.003 | KV453028.1  | 487659 | 13-scf00114 | 13 |
| AX-157972900 | 5 | 28.003 | KV453028.1  | 488677 | 13-scf00114 | 13 |
| AX-157972909 | 5 | 28.003 | KV453028.1  | 508809 | 13-scf00114 | 13 |
| AX-157972911 | 5 | 28.006 | KV453028.1  | 511631 | 13-scf00114 | 13 |
| AX-157972914 | 5 | 28.391 | KV453028.1  | 513599 | 13-scf00114 | 13 |
| AX-157751287 | 5 | 28.391 | KV453028.1  | 540848 | 13-scf00114 | 13 |
| AX-157742800 | 5 | 28.406 | KV453028.1  | 514099 | 13-scf00114 | 13 |
| AX-157739511 | 5 | 28.413 | KV453028.1  | 517239 | 13-scf00114 | 13 |
| AX-157972916 | 5 | 28.413 | KV453028.1  | 518219 | 13-scf00114 | 13 |
| AX-157972919 | 5 | 28.413 | KV453028.1  | 520520 | 13-scf00114 | 13 |
| AX-157972920 | 5 | 28.413 | KV453028.1  | 521519 | 13-scf00114 | 13 |
| AX-157972921 | 5 | 28.413 | KV453028.1  | 522730 | 13-scf00114 | 13 |
| AX-157755909 | 5 | 28.413 | KV453028.1  | 523210 | 13-scf00114 | 13 |
| AX-157972924 | 5 | 28.896 | KV453028.1  | 525283 | 13-scf00114 | 13 |
| AX-157972925 | 5 | 28.896 | KV453028.1  | 526424 | 13-scf00114 | 13 |
| AX-157972927 | 5 | 28.896 | KV453028.1  | 527690 | 13-scf00114 | 13 |
| AX-157972928 | 5 | 28.896 | KV453028.1  | 528184 | 13-scf00114 | 13 |
| AX-157972931 | 5 | 28.896 | KV453028.1  | 530436 | 13-scf00114 | 13 |
| AX-157972933 | 5 | 28.896 | KV453028.1  | 530730 | 13-scf00114 | 13 |
| AX-157972935 | 5 | 28.896 | KV453028.1  | 534639 | 13-scf00114 | 13 |
| AX-157972936 | 5 | 28.896 | KV453028.1  | 538018 | 13-scf00114 | 13 |
| AX-157972937 | 5 | 28.897 | KV453028.1  | 538871 | 13-scf00114 | 13 |
| AX-157972941 | 5 | 29.511 | KV453028.1  | 544186 | 13-scf00114 | 13 |
| AX-157972951 | 5 | 29.511 | KV453028.1  | 549105 | 13-scf00114 | 13 |
| AX-157972949 | 5 | 29.546 | KV453028.1  | 547650 | 13-scf00114 | 13 |
| AX-157972954 | 5 | 29.601 | KV453028.1  | 549640 | 13-scf00114 | 13 |
| AX-157973042 | 5 | 29.601 | KV453028.1  | 627358 | 13-scf00114 | 13 |
| AX-157817089 | 5 | 29.664 | KV453028.1  | 555514 | 13-scf00114 | 13 |
| AX-157972958 | 5 | 29.681 | KV453028.1  | 557416 | 13-scf00114 | 13 |
| AX-157972967 | 5 | 30.041 | KV453028.1  | 564312 | 13-scf00114 | 13 |
| AX-157972984 | 5 | 30.041 | KV453028.1  | 582030 | 13-scf00114 | 13 |
| AX-157716051 | 5 | 30.432 | KV453028.1  | 579666 | 13-scf00114 | 13 |
| AX-157972981 | 5 | 30.432 | KV453028.1  | 580759 | 13-scf00114 | 13 |
| AX-157972990 | 5 | 30.432 | KV453028.1  | 587060 | 13-scf00114 | 13 |
| AX-157972995 | 5 | 30.432 | KV453028.1  | 588417 | 13-scf00114 | 13 |
| AX-157972998 | 5 | 30.435 | KV453028.1  | 589222 | 13-scf00114 | 13 |
| AX-157972992 | 5 | 30.436 | KV453028.1  | 587570 | 13-scf00114 | 13 |
| AX-157973005 | 5 | 30.436 | KV453028.1  | 593816 | 13-scf00114 | 13 |
| AX-157973013 | 5 | 30.869 | KV453028.1  | 599552 | 13-scf00114 | 13 |
| AX-157972989 | 5 | 30.978 | KV453028.1  | 586581 | 13-scf00114 | 13 |
| AX-157973015 | 5 | 30.978 | KV453028.1  | 607244 | 13-scf00114 | 13 |
| AX-157973016 | 5 | 30.978 | KV453028.1  | 608093 | 13-scf00114 | 13 |
| AX-157973017 | 5 | 30.978 | KV453028.1  | 608861 | 13-scf00114 | 13 |
| AX-157973019 | 5 | 30.978 | KV453028.1  | 610283 | 13-scf00114 | 13 |
| AX-157973021 | 5 | 30.978 | KV453028.1  | 611123 | 13-scf00114 | 13 |

|              |   |        |            |        |             |    |
|--------------|---|--------|------------|--------|-------------|----|
| AX-157973023 | 5 | 30.978 | KV453028.1 | 615979 | 13-scf00114 | 13 |
| AX-157973027 | 5 | 30.978 | KV453028.1 | 617535 | 13-scf00114 | 13 |
| AX-157817091 | 5 | 31.012 | KV453028.1 | 618381 | 13-scf00114 | 13 |
| AX-157973030 | 5 | 31.048 | KV453028.1 | 619721 | 13-scf00114 | 13 |
| AX-157973033 | 5 | 31.087 | KV453028.1 | 622742 | 13-scf00114 | 13 |
| AX-157973034 | 5 | 31.087 | KV453028.1 | 623251 | 13-scf00114 | 13 |
| AX-157973036 | 5 | 31.087 | KV453028.1 | 624808 | 13-scf00114 | 13 |
| AX-157973038 | 5 | 31.087 | KV453028.1 | 625524 | 13-scf00114 | 13 |
| AX-157973040 | 5 | 31.087 | KV453028.1 | 626287 | 13-scf00114 | 13 |
| AX-157973012 | 5 | 31.179 | KV453028.1 | 599132 | 13-scf00114 | 13 |
| AX-157973029 | 5 | 31.179 | KV453028.1 | 618793 | 13-scf00114 | 13 |
| AX-157973046 | 5 | 31.179 | KV453028.1 | 631812 | 13-scf00114 | 13 |
| AX-157973048 | 5 | 31.269 | KV453028.1 | 632327 | 13-scf00114 | 13 |
| AX-157973057 | 5 | 31.269 | KV453028.1 | 637547 | 13-scf00114 | 13 |
| AX-157973060 | 5 | 31.634 | KV453028.1 | 642241 | 13-scf00114 | 13 |
| AX-157973061 | 5 | 31.634 | KV453028.1 | 642856 | 13-scf00114 | 13 |
| AX-157973070 | 5 | 31.662 | KV453028.1 | 645929 | 13-scf00114 | 13 |
| AX-157973074 | 5 | 31.694 | KV453028.1 | 648391 | 13-scf00114 | 13 |
| AX-157973080 | 5 | 31.694 | KV453028.1 | 654909 | 13-scf00114 | 13 |
| AX-157722794 | 5 | 31.743 | KV453028.1 | 657034 | 13-scf00114 | 13 |
| AX-157817092 | 5 | 31.743 | KV453028.1 | 657308 | 13-scf00114 | 13 |
| AX-157973082 | 5 | 31.743 | KV453028.1 | 659326 | 13-scf00114 | 13 |
| AX-157973084 | 5 | 31.743 | KV453028.1 | 661657 | 13-scf00114 | 13 |
| AX-157973086 | 5 | 31.743 | KV453028.1 | 662796 | 13-scf00114 | 13 |
| AX-157973087 | 5 | 31.743 | KV453028.1 | 663793 | 13-scf00114 | 13 |
| AX-157817093 | 5 | 31.743 | KV453028.1 | 664559 | 13-scf00114 | 13 |
| AX-157973089 | 5 | 32.034 | KV453028.1 | 667126 | 13-scf00114 | 13 |
| AX-158415493 | 5 | 32.063 | KV453028.1 | 670537 | 13-scf00114 | 13 |
| AX-157875644 | 5 | 32.199 | KV453028.1 | 672921 | 13-scf00114 | 13 |
| AX-157973094 | 5 | 32.354 | KV453028.1 | 681516 | 13-scf00114 | 13 |
| AX-157973096 | 5 | 32.354 | KV453028.1 | 684594 | 13-scf00114 | 13 |
| AX-157973097 | 5 | 32.354 | KV453028.1 | 685689 | 13-scf00114 | 13 |
| AX-157973103 | 5 | 32.506 | KV453028.1 | 692688 | 13-scf00114 | 13 |
| AX-157817095 | 5 | 32.506 | KV453028.1 | 693851 | 13-scf00114 | 13 |
| AX-157973106 | 5 | 32.506 | KV453028.1 | 695783 | 13-scf00114 | 13 |
| AX-157973107 | 5 | 32.506 | KV453028.1 | 696695 | 13-scf00114 | 13 |
| AX-157973108 | 5 | 32.539 | KV453028.1 | 698673 | 13-scf00114 | 13 |
| AX-157973105 | 5 | 32.837 | KV453028.1 | 694615 | 13-scf00114 | 13 |
| AX-157973109 | 5 | 32.837 | KV453028.1 | 699424 | 13-scf00114 | 13 |
| AX-157973110 | 5 | 32.837 | KV453028.1 | 701886 | 13-scf00114 | 13 |
| AX-157724423 | 5 | 32.837 | KV453028.1 | 703505 | 13-scf00114 | 13 |
| AX-157973119 | 5 | 32.837 | KV453028.1 | 707159 | 13-scf00114 | 13 |
| AX-157855033 | 5 | 32.837 | KV453028.1 | 711687 | 13-scf00114 | 13 |
| AX-157973124 | 5 | 32.837 | KV453028.1 | 712932 | 13-scf00114 | 13 |
| AX-157973132 | 5 | 32.946 | KV453028.1 | 720991 | 13-scf00114 | 13 |
| AX-157973135 | 5 | 32.946 | KV453028.1 | 722845 | 13-scf00114 | 13 |
| AX-157720979 | 5 | 32.946 | KV453028.1 | 723837 | 13-scf00114 | 13 |
| AX-157973142 | 5 | 32.946 | KV453028.1 | 726497 | 13-scf00114 | 13 |
| AX-157973156 | 5 | 32.946 | KV453028.1 | 743648 | 13-scf00114 | 13 |
| AX-157973191 | 5 | 32.946 | KV453028.1 | 770904 | 13-scf00114 | 13 |
| AX-157973144 | 5 | 33.056 | KV453028.1 | 728492 | 13-scf00114 | 13 |



|              |   |        |            |        |             |    |
|--------------|---|--------|------------|--------|-------------|----|
| AX-157973145 | 5 | 33.056 | KV453028.1 | 729045 | 13-scf00114 | 13 |
| AX-157973148 | 5 | 33.056 | KV453028.1 | 731881 | 13-scf00114 | 13 |
| AX-157755272 | 5 | 33.056 | KV453028.1 | 738855 | 13-scf00114 | 13 |
| AX-157973155 | 5 | 33.056 | KV453028.1 | 741544 | 13-scf00114 | 13 |
| AX-157973158 | 5 | 33.056 | KV453028.1 | 744429 | 13-scf00114 | 13 |
| AX-157973161 | 5 | 33.056 | KV453028.1 | 747177 | 13-scf00114 | 13 |
| AX-157973167 | 5 | 33.056 | KV453028.1 | 750732 | 13-scf00114 | 13 |
| AX-157973170 | 5 | 33.148 | KV453028.1 | 755657 | 13-scf00114 | 13 |
| AX-157973179 | 5 | 33.23  | KV453028.1 | 763991 | 13-scf00114 | 13 |
| AX-157973153 | 5 | 33.329 | KV453028.1 | 737603 | 13-scf00114 | 13 |
| AX-158383079 | 5 | 33.329 | KV453028.1 | 760206 | 13-scf00114 | 13 |
| AX-157973181 | 5 | 33.329 | KV453028.1 | 765334 | 13-scf00114 | 13 |
| AX-157973188 | 5 | 33.329 | KV453028.1 | 769260 | 13-scf00114 | 13 |
| AX-157973199 | 5 | 33.329 | KV453028.1 | 775402 | 13-scf00114 | 13 |
| AX-157973209 | 5 | 33.329 | KV453028.1 | 786225 | 13-scf00114 | 13 |
| AX-157973213 | 5 | 33.329 | KV453028.1 | 789902 | 13-scf00114 | 13 |
| AX-157973266 | 5 | 33.329 | KV453028.1 | 840490 | 13-scf00114 | 13 |
| AX-158383080 | 5 | 33.602 | KV453028.1 | 775457 | 13-scf00114 | 13 |
| AX-157973203 | 5 | 33.603 | KV453028.1 | 777209 | 13-scf00114 | 13 |
| AX-157973208 | 5 | 33.603 | KV453028.1 | 782322 | 13-scf00114 | 13 |
| AX-157973212 | 5 | 33.603 | KV453028.1 | 787826 | 13-scf00114 | 13 |
| AX-157757137 | 5 | 33.603 | KV453028.1 | 792996 | 13-scf00114 | 13 |
| AX-157973219 | 5 | 33.603 | KV453028.1 | 793409 | 13-scf00114 | 13 |
| AX-157973221 | 5 | 33.603 | KV453028.1 | 800132 | 13-scf00114 | 13 |
| AX-157973227 | 5 | 33.603 | KV453028.1 | 804173 | 13-scf00114 | 13 |
| AX-157973239 | 5 | 33.603 | KV453028.1 | 815713 | 13-scf00114 | 13 |
| AX-157973243 | 5 | 33.603 | KV453028.1 | 819192 | 13-scf00114 | 13 |
| AX-157973246 | 5 | 33.603 | KV453028.1 | 821135 | 13-scf00114 | 13 |
| AX-157973247 | 5 | 33.603 | KV453028.1 | 821612 | 13-scf00114 | 13 |
| AX-157973251 | 5 | 33.821 | KV453028.1 | 825499 | 13-scf00114 | 13 |
| AX-157973253 | 5 | 33.821 | KV453028.1 | 827995 | 13-scf00114 | 13 |
| AX-158390343 | 5 | 33.821 | KV453028.1 | 828738 | 13-scf00114 | 13 |
| AX-157973260 | 5 | 33.821 | KV453028.1 | 835245 | 13-scf00114 | 13 |
| AX-157973263 | 5 | 33.821 | KV453028.1 | 836909 | 13-scf00114 | 13 |
| AX-157973271 | 5 | 33.821 | KV453028.1 | 843873 | 13-scf00114 | 13 |
| AX-157973272 | 5 | 33.821 | KV453028.1 | 846735 | 13-scf00114 | 13 |
| AX-157724938 | 5 | 33.821 | KV453028.1 | 847239 | 13-scf00114 | 13 |
| AX-157973273 | 5 | 33.821 | KV453028.1 | 847689 | 13-scf00114 | 13 |
| AX-157973274 | 5 | 33.821 | KV453028.1 | 849307 | 13-scf00114 | 13 |
| AX-157973277 | 5 | 33.821 | KV453028.1 | 851521 | 13-scf00114 | 13 |
| AX-157973283 | 5 | 33.821 | KV453028.1 | 856093 | 13-scf00114 | 13 |
| AX-157973303 | 5 | 33.821 | KV453028.1 | 875177 | 13-scf00114 | 13 |
| AX-157973349 | 5 | 33.821 | KV453028.1 | 922483 | 13-scf00114 | 13 |
| AX-157973286 | 5 | 33.886 | KV453028.1 | 860778 | 13-scf00114 | 13 |
| AX-157973288 | 5 | 33.973 | KV453028.1 | 861510 | 13-scf00114 | 13 |
| AX-157695522 | 5 | 33.973 | KV453028.1 | 900932 | 13-scf00114 | 13 |
| AX-157973291 | 5 | 34.006 | KV453028.1 | 866981 | 13-scf00114 | 13 |
| AX-157973190 | 5 | 34.04  | KV453028.1 | 770539 | 13-scf00114 | 13 |
| AX-157740632 | 5 | 34.04  | KV453028.1 | 773552 | 13-scf00114 | 13 |
| AX-157973196 | 5 | 34.04  | KV453028.1 | 774789 | 13-scf00114 | 13 |
| AX-157710641 | 5 | 34.04  | KV453028.1 | 783990 | 13-scf00114 | 13 |

|              |   |        |             |         |             |    |
|--------------|---|--------|-------------|---------|-------------|----|
| AX-158383083 | 5 | 34.04  | KV453028.1  | 815497  | 13-scf00114 | 13 |
| AX-157973278 | 5 | 34.04  | KV453028.1  | 852663  | 13-scf00114 | 13 |
| AX-157973294 | 5 | 34.04  | KV453028.1  | 868295  | 13-scf00114 | 13 |
| AX-158379528 | 5 | 34.04  | KV453028.1  | 869346  | 13-scf00114 | 13 |
| AX-157973299 | 5 | 34.04  | KV453028.1  | 870243  | 13-scf00114 | 13 |
| AX-157725286 | 5 | 34.04  | KV453028.1  | 870766  | 13-scf00114 | 13 |
| AX-157973307 | 5 | 34.04  | KV453028.1  | 880061  | 13-scf00114 | 13 |
| AX-157973312 | 5 | 34.04  | KV453028.1  | 885287  | 13-scf00114 | 13 |
| AX-157973314 | 5 | 34.04  | KV453028.1  | 889942  | 13-scf00114 | 13 |
| AX-157973315 | 5 | 34.04  | KV453028.1  | 890387  | 13-scf00114 | 13 |
| AX-157973322 | 5 | 34.04  | KV453028.1  | 895150  | 13-scf00114 | 13 |
| AX-157973323 | 5 | 34.04  | KV453028.1  | 896298  | 13-scf00114 | 13 |
| AX-158383085 | 5 | 34.04  | KV453028.1  | 899289  | 13-scf00114 | 13 |
| AX-157973328 | 5 | 34.04  | KV453028.1  | 899615  | 13-scf00114 | 13 |
| AX-157973335 | 5 | 34.04  | KV453028.1  | 910488  | 13-scf00114 | 13 |
| AX-157973338 | 5 | 34.04  | KV453028.1  | 911608  | 13-scf00114 | 13 |
| AX-158383087 | 5 | 34.04  | KV453028.1  | 912909  | 13-scf00114 | 13 |
| AX-157973341 | 5 | 34.04  | KV453028.1  | 913411  | 13-scf00114 | 13 |
| AX-157973345 | 5 | 34.04  | KV453028.1  | 914932  | 13-scf00114 | 13 |
| AX-157973348 | 5 | 34.04  | KV453028.1  | 916827  | 13-scf00114 | 13 |
| AX-157752729 | 5 | 34.04  | KV453028.1  | 919782  | 13-scf00114 | 13 |
| AX-157973390 | 5 | 34.04  | KV453028.1  | 960904  | 13-scf00114 | 13 |
| AX-157973397 | 5 | 34.04  | KV453028.1  | 964879  | 13-scf00114 | 13 |
| AX-157973363 | 5 | 34.144 | KV453028.1  | 929341  | 13-scf00114 | 13 |
| AX-157973357 | 5 | 34.259 | KV453028.1  | 925232  | 13-scf00114 | 13 |
| AX-157718941 | 5 | 34.259 | KV453028.1  | 936718  | 13-scf00114 | 13 |
| AX-157973370 | 5 | 34.259 | KV453028.1  | 941528  | 13-scf00114 | 13 |
| AX-157973373 | 5 | 34.259 | KV453028.1  | 944514  | 13-scf00114 | 13 |
| AX-157973385 | 5 | 34.259 | KV453028.1  | 959307  | 13-scf00114 | 13 |
| AX-157973378 | 5 | 34.279 | KV453028.1  | 949448  | 13-scf00114 | 13 |
| AX-157740476 | 5 | 34.31  | KV453028.1  | 951493  | 13-scf00114 | 13 |
| AX-157973404 | 5 | 34.341 | KV453028.1  | 971363  | 13-scf00114 | 13 |
| AX-157973405 | 5 | 34.341 | KV453028.1  | 972436  | 13-scf00114 | 13 |
| AX-157973433 | 5 | 34.341 | KV453028.1  | 1001461 | 13-scf00114 | 13 |
| AX-157973620 | 5 | 34.341 | KV453028.1  | 1234169 | 13-scf00114 | 13 |
| AX-157705932 | 5 | 34.341 | 3ML01031263 | 536     | scf06871_1  | UN |
| AX-157973354 | 5 | 34.368 | KV453028.1  | 923702  | 13-scf00114 | 13 |
| AX-157724554 | 5 | 34.368 | KV453028.1  | 956143  | 13-scf00114 | 13 |
| AX-157973383 | 5 | 34.368 | KV453028.1  | 957400  | 13-scf00114 | 13 |
| AX-157973384 | 5 | 34.368 | KV453028.1  | 957984  | 13-scf00114 | 13 |
| AX-157973386 | 5 | 34.368 | KV453028.1  | 960146  | 13-scf00114 | 13 |
| AX-157973388 | 5 | 34.368 | KV453028.1  | 960511  | 13-scf00114 | 13 |
| AX-157973393 | 5 | 34.368 | KV453028.1  | 962300  | 13-scf00114 | 13 |
| AX-157973395 | 5 | 34.368 | KV453028.1  | 963731  | 13-scf00114 | 13 |
| AX-157973416 | 5 | 34.368 | KV453028.1  | 987514  | 13-scf00114 | 13 |
| AX-157973430 | 5 | 34.368 | KV453028.1  | 998501  | 13-scf00114 | 13 |
| AX-157755709 | 5 | 34.368 | KV453028.1  | 1000259 | 13-scf00114 | 13 |
| AX-157884265 | 5 | 34.368 | KV453028.1  | 1053334 | 13-scf00114 | 13 |
| AX-157817099 | 5 | 34.368 | KV453028.1  | 1107269 | 13-scf00114 | 13 |
| AX-157973530 | 5 | 34.368 | KV453028.1  | 1114675 | 13-scf00114 | 13 |
| AX-157855036 | 5 | 34.368 | KV453028.1  | 1170406 | 13-scf00114 | 13 |

|              |   |        |            |         |             |    |
|--------------|---|--------|------------|---------|-------------|----|
| AX-157817129 | 5 | 34.368 | KV453028.1 | 1454929 | 13-scf00114 | 13 |
| AX-157973399 | 5 | 34.583 | KV453028.1 | 967247  | 13-scf00114 | 13 |
| AX-157973400 | 5 | 34.583 | KV453028.1 | 969158  | 13-scf00114 | 13 |
| AX-157817096 | 5 | 34.583 | KV453028.1 | 970658  | 13-scf00114 | 13 |
| AX-157973418 | 5 | 34.583 | KV453028.1 | 989222  | 13-scf00114 | 13 |
| AX-157973445 | 5 | 34.583 | KV453028.1 | 1022401 | 13-scf00114 | 13 |
| AX-157694025 | 5 | 34.589 | KV453028.1 | 958938  | 13-scf00114 | 13 |
| AX-157973394 | 5 | 34.589 | KV453028.1 | 963374  | 13-scf00114 | 13 |
| AX-157973408 | 5 | 34.589 | KV453028.1 | 979834  | 13-scf00114 | 13 |
| AX-157973409 | 5 | 34.589 | KV453028.1 | 980696  | 13-scf00114 | 13 |
| AX-157973412 | 5 | 34.589 | KV453028.1 | 984429  | 13-scf00114 | 13 |
| AX-157973421 | 5 | 34.589 | KV453028.1 | 992563  | 13-scf00114 | 13 |
| AX-157973449 | 5 | 34.589 | KV453028.1 | 1024787 | 13-scf00114 | 13 |
| AX-157973467 | 5 | 34.589 | KV453028.1 | 1040237 | 13-scf00114 | 13 |
| AX-157753102 | 5 | 34.589 | KV453028.1 | 1043356 | 13-scf00114 | 13 |
| AX-157973533 | 5 | 34.589 | KV453028.1 | 1116516 | 13-scf00114 | 13 |
| AX-157973559 | 5 | 34.589 | KV453028.1 | 1142636 | 13-scf00114 | 13 |
| AX-157973923 | 5 | 34.589 | KV453028.1 | 1579266 | 13-scf00114 | 13 |
| AX-157973414 | 5 | 34.592 | KV453028.1 | 985619  | 13-scf00114 | 13 |
| AX-157973423 | 5 | 34.594 | KV453028.1 | 993740  | 13-scf00114 | 13 |
| AX-157973426 | 5 | 34.597 | KV453028.1 | 994918  | 13-scf00114 | 13 |
| AX-157723815 | 5 | 34.6   | KV453028.1 | 974157  | 13-scf00114 | 13 |
| AX-157973417 | 5 | 34.6   | KV453028.1 | 988663  | 13-scf00114 | 13 |
| AX-157973438 | 5 | 34.6   | KV453028.1 | 1005965 | 13-scf00114 | 13 |
| AX-157973472 | 5 | 34.6   | KV453028.1 | 1048854 | 13-scf00114 | 13 |
| AX-157973500 | 5 | 34.6   | KV453028.1 | 1074977 | 13-scf00114 | 13 |
| AX-157973548 | 5 | 34.6   | KV453028.1 | 1131339 | 13-scf00114 | 13 |
| AX-157973554 | 5 | 34.6   | KV453028.1 | 1139092 | 13-scf00114 | 13 |
| AX-157973304 | 5 | 34.604 | KV453028.1 | 876532  | 13-scf00114 | 13 |
| AX-157973440 | 5 | 34.604 | KV453028.1 | 1012426 | 13-scf00114 | 13 |
| AX-157973444 | 5 | 34.604 | KV453028.1 | 1018014 | 13-scf00114 | 13 |
| AX-157973455 | 5 | 34.608 | KV453028.1 | 1032196 | 13-scf00114 | 13 |
| AX-157973461 | 5 | 34.612 | KV453028.1 | 1036007 | 13-scf00114 | 13 |
| AX-157973473 | 5 | 34.846 | KV453028.1 | 1050408 | 13-scf00114 | 13 |
| AX-157973415 | 5 | 35.042 | KV453028.1 | 986333  | 13-scf00114 | 13 |
| AX-157973456 | 5 | 35.042 | KV453028.1 | 1032915 | 13-scf00114 | 13 |
| AX-157973478 | 5 | 35.042 | KV453028.1 | 1055370 | 13-scf00114 | 13 |
| AX-157973531 | 5 | 35.042 | KV453028.1 | 1115112 | 13-scf00114 | 13 |
| AX-157973422 | 5 | 35.133 | KV453028.1 | 992946  | 13-scf00114 | 13 |
| AX-157973490 | 5 | 35.133 | KV453028.1 | 1069040 | 13-scf00114 | 13 |
| AX-157973494 | 5 | 35.133 | KV453028.1 | 1070534 | 13-scf00114 | 13 |
| AX-157973496 | 5 | 35.133 | KV453028.1 | 1071064 | 13-scf00114 | 13 |
| AX-157723008 | 5 | 35.133 | KV453028.1 | 1079029 | 13-scf00114 | 13 |
| AX-157973504 | 5 | 35.133 | KV453028.1 | 1080391 | 13-scf00114 | 13 |
| AX-157973514 | 5 | 35.133 | KV453028.1 | 1088007 | 13-scf00114 | 13 |
| AX-157973515 | 5 | 35.133 | KV453028.1 | 1088467 | 13-scf00114 | 13 |
| AX-158406691 | 5 | 35.133 | KV453028.1 | 1088906 | 13-scf00114 | 13 |
| AX-157973516 | 5 | 35.133 | KV453028.1 | 1093736 | 13-scf00114 | 13 |
| AX-157973518 | 5 | 35.133 | KV453028.1 | 1094225 | 13-scf00114 | 13 |
| AX-157973522 | 5 | 35.213 | KV453028.1 | 1095842 | 13-scf00114 | 13 |
| AX-157973546 | 5 | 35.213 | KV453028.1 | 1129056 | 13-scf00114 | 13 |

|              |   |        |            |         |             |    |
|--------------|---|--------|------------|---------|-------------|----|
| AX-157973521 | 5 | 35.242 | KV453028.1 | 1095311 | 13-scf00114 | 13 |
| AX-157973527 | 5 | 35.242 | KV453028.1 | 1101571 | 13-scf00114 | 13 |
| AX-157817097 | 5 | 35.242 | KV453028.1 | 1102867 | 13-scf00114 | 13 |
| AX-157973528 | 5 | 35.242 | KV453028.1 | 1102941 | 13-scf00114 | 13 |
| AX-157817098 | 5 | 35.242 | KV453028.1 | 1105405 | 13-scf00114 | 13 |
| AX-157743758 | 5 | 35.242 | KV453028.1 | 1105620 | 13-scf00114 | 13 |
| AX-157973538 | 5 | 35.242 | KV453028.1 | 1118894 | 13-scf00114 | 13 |
| AX-158403877 | 5 | 35.266 | KV453028.1 | 1109355 | 13-scf00114 | 13 |
| AX-157742893 | 5 | 35.295 | KV453028.1 | 1113926 | 13-scf00114 | 13 |
| AX-157973532 | 5 | 35.335 | KV453028.1 | 1116067 | 13-scf00114 | 13 |
| AX-157973431 | 5 | 35.351 | KV453028.1 | 999908  | 13-scf00114 | 13 |
| AX-157973450 | 5 | 35.351 | KV453028.1 | 1027379 | 13-scf00114 | 13 |
| AX-157973451 | 5 | 35.351 | KV453028.1 | 1031174 | 13-scf00114 | 13 |
| AX-157973470 | 5 | 35.351 | KV453028.1 | 1042188 | 13-scf00114 | 13 |
| AX-157817100 | 5 | 35.351 | KV453028.1 | 1118531 | 13-scf00114 | 13 |
| AX-157817101 | 5 | 35.351 | KV453028.1 | 1121585 | 13-scf00114 | 13 |
| AX-157973545 | 5 | 35.351 | KV453028.1 | 1127626 | 13-scf00114 | 13 |
| AX-157973551 | 5 | 35.351 | KV453028.1 | 1133838 | 13-scf00114 | 13 |
| AX-157973552 | 5 | 35.351 | KV453028.1 | 1134073 | 13-scf00114 | 13 |
| AX-157973558 | 5 | 35.354 | KV453028.1 | 1142137 | 13-scf00114 | 13 |
| AX-157973563 | 5 | 35.569 | KV453028.1 | 1147615 | 13-scf00114 | 13 |
| AX-157973358 | 5 | 35.788 | KV453028.1 | 925887  | 13-scf00114 | 13 |
| AX-157855035 | 5 | 35.788 | KV453028.1 | 926568  | 13-scf00114 | 13 |
| AX-157973380 | 5 | 35.788 | KV453028.1 | 950962  | 13-scf00114 | 13 |
| AX-157973428 | 5 | 35.788 | KV453028.1 | 995942  | 13-scf00114 | 13 |
| AX-157973452 | 5 | 35.788 | KV453028.1 | 1031778 | 13-scf00114 | 13 |
| AX-157973525 | 5 | 35.788 | KV453028.1 | 1099471 | 13-scf00114 | 13 |
| AX-158383093 | 5 | 35.788 | KV453028.1 | 1114325 | 13-scf00114 | 13 |
| AX-157973555 | 5 | 35.788 | KV453028.1 | 1140006 | 13-scf00114 | 13 |
| AX-157973556 | 5 | 35.788 | KV453028.1 | 1140528 | 13-scf00114 | 13 |
| AX-157973568 | 5 | 35.788 | KV453028.1 | 1156786 | 13-scf00114 | 13 |
| AX-157973578 | 5 | 35.788 | KV453028.1 | 1166725 | 13-scf00114 | 13 |
| AX-158379529 | 5 | 35.788 | KV453028.1 | 1168789 | 13-scf00114 | 13 |
| AX-157973582 | 5 | 35.788 | KV453028.1 | 1171204 | 13-scf00114 | 13 |
| AX-157973587 | 5 | 35.788 | KV453028.1 | 1177640 | 13-scf00114 | 13 |
| AX-157973598 | 5 | 35.788 | KV453028.1 | 1205717 | 13-scf00114 | 13 |
| AX-157973599 | 5 | 35.788 | KV453028.1 | 1206467 | 13-scf00114 | 13 |
| AX-157817107 | 5 | 35.788 | KV453028.1 | 1206705 | 13-scf00114 | 13 |
| AX-157694833 | 5 | 35.788 | KV453028.1 | 1207506 | 13-scf00114 | 13 |
| AX-157973605 | 5 | 35.788 | KV453028.1 | 1218327 | 13-scf00114 | 13 |
| AX-157973608 | 5 | 35.788 | KV453028.1 | 1221435 | 13-scf00114 | 13 |
| AX-157973613 | 5 | 35.788 | KV453028.1 | 1229939 | 13-scf00114 | 13 |
| AX-157817108 | 5 | 35.788 | KV453028.1 | 1231010 | 13-scf00114 | 13 |
| AX-157973619 | 5 | 35.788 | KV453028.1 | 1231985 | 13-scf00114 | 13 |
| AX-157864976 | 5 | 35.788 | KV453028.1 | 1239157 | 13-scf00114 | 13 |
| AX-157864977 | 5 | 35.788 | KV453028.1 | 1241952 | 13-scf00114 | 13 |
| AX-157817109 | 5 | 35.788 | KV453028.1 | 1242837 | 13-scf00114 | 13 |
| AX-157817110 | 5 | 35.788 | KV453028.1 | 1245766 | 13-scf00114 | 13 |
| AX-157973632 | 5 | 35.788 | KV453028.1 | 1245977 | 13-scf00114 | 13 |
| AX-157973639 | 5 | 35.788 | KV453028.1 | 1258769 | 13-scf00114 | 13 |
| AX-157973640 | 5 | 35.788 | KV453028.1 | 1258984 | 13-scf00114 | 13 |

|              |   |        |            |         |             |    |
|--------------|---|--------|------------|---------|-------------|----|
| AX-157973641 | 5 | 35.788 | KV453028.1 | 1259410 | 13-scf00114 | 13 |
| AX-158379530 | 5 | 35.788 | KV453028.1 | 1263275 | 13-scf00114 | 13 |
| AX-157747701 | 5 | 35.788 | KV453028.1 | 1265121 | 13-scf00114 | 13 |
| AX-157817115 | 5 | 35.788 | KV453028.1 | 1271271 | 13-scf00114 | 13 |
| AX-157973652 | 5 | 35.788 | KV453028.1 | 1271617 | 13-scf00114 | 13 |
| AX-157973655 | 5 | 35.788 | KV453028.1 | 1275295 | 13-scf00114 | 13 |
| AX-157817117 | 5 | 35.788 | KV453028.1 | 1278220 | 13-scf00114 | 13 |
| AX-157771175 | 5 | 35.788 | KV453028.1 | 1279464 | 13-scf00114 | 13 |
| AX-157973656 | 5 | 35.788 | KV453028.1 | 1279868 | 13-scf00114 | 13 |
| AX-157864978 | 5 | 35.788 | KV453028.1 | 1280295 | 13-scf00114 | 13 |
| AX-157973657 | 5 | 35.788 | KV453028.1 | 1281094 | 13-scf00114 | 13 |
| AX-157973660 | 5 | 35.788 | KV453028.1 | 1283503 | 13-scf00114 | 13 |
| AX-157973663 | 5 | 35.788 | KV453028.1 | 1287933 | 13-scf00114 | 13 |
| AX-157973664 | 5 | 35.788 | KV453028.1 | 1288410 | 13-scf00114 | 13 |
| AX-157855037 | 5 | 35.788 | KV453028.1 | 1290962 | 13-scf00114 | 13 |
| AX-157973674 | 5 | 35.788 | KV453028.1 | 1298741 | 13-scf00114 | 13 |
| AX-157973682 | 5 | 35.788 | KV453028.1 | 1308591 | 13-scf00114 | 13 |
| AX-157973683 | 5 | 35.788 | KV453028.1 | 1310184 | 13-scf00114 | 13 |
| AX-157973719 | 5 | 35.788 | KV453028.1 | 1350058 | 13-scf00114 | 13 |
| AX-157973729 | 5 | 35.788 | KV453028.1 | 1358034 | 13-scf00114 | 13 |
| AX-157973748 | 5 | 35.788 | KV453028.1 | 1384490 | 13-scf00114 | 13 |
| AX-157973773 | 5 | 35.788 | KV453028.1 | 1400943 | 13-scf00114 | 13 |
| AX-157726006 | 5 | 35.788 | KV453028.1 | 1404662 | 13-scf00114 | 13 |
| AX-157884268 | 5 | 35.788 | KV453028.1 | 1418351 | 13-scf00114 | 13 |
| AX-157973788 | 5 | 35.788 | KV453028.1 | 1419943 | 13-scf00114 | 13 |
| AX-157697175 | 5 | 35.788 | KV453028.1 | 1420181 | 13-scf00114 | 13 |
| AX-157973792 | 5 | 35.788 | KV453028.1 | 1424303 | 13-scf00114 | 13 |
| AX-157973800 | 5 | 35.788 | KV453028.1 | 1434976 | 13-scf00114 | 13 |
| AX-157973806 | 5 | 35.788 | KV453028.1 | 1441641 | 13-scf00114 | 13 |
| AX-157973811 | 5 | 35.788 | KV453028.1 | 1455304 | 13-scf00114 | 13 |
| AX-157973843 | 5 | 35.788 | KV453028.1 | 1485083 | 13-scf00114 | 13 |
| AX-157973852 | 5 | 35.788 | KV453028.1 | 1502767 | 13-scf00114 | 13 |
| AX-157973858 | 5 | 35.788 | KV453028.1 | 1519052 | 13-scf00114 | 13 |
| AX-157973865 | 5 | 35.788 | KV453028.1 | 1533307 | 13-scf00114 | 13 |
| AX-157973867 | 5 | 35.788 | KV453028.1 | 1534411 | 13-scf00114 | 13 |
| AX-157973876 | 5 | 35.788 | KV453028.1 | 1544851 | 13-scf00114 | 13 |
| AX-157973898 | 5 | 35.788 | KV453028.1 | 1559865 | 13-scf00114 | 13 |
| AX-157973917 | 5 | 35.788 | KV453028.1 | 1573235 | 13-scf00114 | 13 |
| AX-157973921 | 5 | 35.788 | KV453028.1 | 1576994 | 13-scf00114 | 13 |
| AX-157973928 | 5 | 35.788 | KV453028.1 | 1590468 | 13-scf00114 | 13 |
| AX-157973935 | 5 | 35.788 | KV453028.1 | 1604041 | 13-scf00114 | 13 |
| AX-157973957 | 5 | 35.788 | KV453028.1 | 1631304 | 13-scf00114 | 13 |
| AX-157973684 | 5 | 35.835 | KV453028.1 | 1311317 | 13-scf00114 | 13 |
| AX-157973752 | 5 | 35.835 | KV453028.1 | 1387367 | 13-scf00114 | 13 |
| AX-157973753 | 5 | 35.835 | KV453028.1 | 1388309 | 13-scf00114 | 13 |
| AX-157973690 | 5 | 35.889 | KV453028.1 | 1315151 | 13-scf00114 | 13 |
| AX-157973711 | 5 | 35.909 | KV453028.1 | 1338758 | 13-scf00114 | 13 |
| AX-157817123 | 5 | 35.933 | KV453028.1 | 1341020 | 13-scf00114 | 13 |
| AX-157973716 | 5 | 35.933 | KV453028.1 | 1346786 | 13-scf00114 | 13 |
| AX-157973722 | 5 | 35.957 | KV453028.1 | 1351297 | 13-scf00114 | 13 |
| AX-157973785 | 5 | 35.957 | KV453028.1 | 1416963 | 13-scf00114 | 13 |

|              |   |        |            |         |             |    |
|--------------|---|--------|------------|---------|-------------|----|
| AX-157782117 | 5 | 35.979 | KV453028.1 | 1132419 | 13-scf00114 | 13 |
| AX-157817119 | 5 | 35.979 | KV453028.1 | 1279309 | 13-scf00114 | 13 |
| AX-157973728 | 5 | 35.979 | KV453028.1 | 1356974 | 13-scf00114 | 13 |
| AX-157973570 | 5 | 36.007 | KV453028.1 | 1158584 | 13-scf00114 | 13 |
| AX-157973571 | 5 | 36.007 | KV453028.1 | 1159276 | 13-scf00114 | 13 |
| AX-157973576 | 5 | 36.007 | KV453028.1 | 1163592 | 13-scf00114 | 13 |
| AX-157973583 | 5 | 36.007 | KV453028.1 | 1172640 | 13-scf00114 | 13 |
| AX-157973585 | 5 | 36.007 | KV453028.1 | 1173845 | 13-scf00114 | 13 |
| AX-157973615 | 5 | 36.007 | KV453028.1 | 1230241 | 13-scf00114 | 13 |
| AX-157973616 | 5 | 36.007 | KV453028.1 | 1231249 | 13-scf00114 | 13 |
| AX-157973630 | 5 | 36.007 | KV453028.1 | 1243426 | 13-scf00114 | 13 |
| AX-157973636 | 5 | 36.007 | KV453028.1 | 1254464 | 13-scf00114 | 13 |
| AX-157973659 | 5 | 36.007 | KV453028.1 | 1282739 | 13-scf00114 | 13 |
| AX-157973671 | 5 | 36.007 | KV453028.1 | 1298195 | 13-scf00114 | 13 |
| AX-157973687 | 5 | 36.007 | KV453028.1 | 1312555 | 13-scf00114 | 13 |
| AX-157973707 | 5 | 36.007 | KV453028.1 | 1328820 | 13-scf00114 | 13 |
| AX-157973715 | 5 | 36.007 | KV453028.1 | 1346226 | 13-scf00114 | 13 |
| AX-157973732 | 5 | 36.007 | KV453028.1 | 1362269 | 13-scf00114 | 13 |
| AX-157973734 | 5 | 36.007 | KV453028.1 | 1370553 | 13-scf00114 | 13 |
| AX-157973735 | 5 | 36.007 | KV453028.1 | 1372260 | 13-scf00114 | 13 |
| AX-157744951 | 5 | 36.007 | KV453028.1 | 1373218 | 13-scf00114 | 13 |
| AX-157973736 | 5 | 36.007 | KV453028.1 | 1374813 | 13-scf00114 | 13 |
| AX-158383096 | 5 | 36.007 | KV453028.1 | 1387601 | 13-scf00114 | 13 |
| AX-157756079 | 5 | 36.007 | KV453028.1 | 1390931 | 13-scf00114 | 13 |
| AX-157973759 | 5 | 36.007 | KV453028.1 | 1391331 | 13-scf00114 | 13 |
| AX-157973760 | 5 | 36.007 | KV453028.1 | 1393218 | 13-scf00114 | 13 |
| AX-157973765 | 5 | 36.007 | KV453028.1 | 1395880 | 13-scf00114 | 13 |
| AX-157973766 | 5 | 36.007 | KV453028.1 | 1397342 | 13-scf00114 | 13 |
| AX-157973767 | 5 | 36.007 | KV453028.1 | 1398088 | 13-scf00114 | 13 |
| AX-157973769 | 5 | 36.007 | KV453028.1 | 1398591 | 13-scf00114 | 13 |
| AX-157973772 | 5 | 36.007 | KV453028.1 | 1400553 | 13-scf00114 | 13 |
| AX-157973775 | 5 | 36.007 | KV453028.1 | 1401679 | 13-scf00114 | 13 |
| AX-157973777 | 5 | 36.007 | KV453028.1 | 1404174 | 13-scf00114 | 13 |
| AX-157973778 | 5 | 36.007 | KV453028.1 | 1405713 | 13-scf00114 | 13 |
| AX-157973782 | 5 | 36.007 | KV453028.1 | 1413525 | 13-scf00114 | 13 |
| AX-157973784 | 5 | 36.007 | KV453028.1 | 1416397 | 13-scf00114 | 13 |
| AX-157973787 | 5 | 36.007 | KV453028.1 | 1418453 | 13-scf00114 | 13 |
| AX-158406693 | 5 | 36.007 | KV453028.1 | 1419440 | 13-scf00114 | 13 |
| AX-157973793 | 5 | 36.007 | KV453028.1 | 1424671 | 13-scf00114 | 13 |
| AX-157973794 | 5 | 36.007 | KV453028.1 | 1428058 | 13-scf00114 | 13 |
| AX-157973796 | 5 | 36.007 | KV453028.1 | 1431083 | 13-scf00114 | 13 |
| AX-157973799 | 5 | 36.007 | KV453028.1 | 1434411 | 13-scf00114 | 13 |
| AX-157817128 | 5 | 36.007 | KV453028.1 | 1453206 | 13-scf00114 | 13 |
| AX-157973827 | 5 | 36.007 | KV453028.1 | 1470743 | 13-scf00114 | 13 |
| AX-157973829 | 5 | 36.007 | KV453028.1 | 1472437 | 13-scf00114 | 13 |
| AX-157973854 | 5 | 36.007 | KV453028.1 | 1504003 | 13-scf00114 | 13 |
| AX-157973878 | 5 | 36.007 | KV453028.1 | 1545921 | 13-scf00114 | 13 |
| AX-157973883 | 5 | 36.007 | KV453028.1 | 1548804 | 13-scf00114 | 13 |
| AX-157973887 | 5 | 36.007 | KV453028.1 | 1551090 | 13-scf00114 | 13 |
| AX-157973797 | 5 | 36.04  | KV453028.1 | 1433788 | 13-scf00114 | 13 |
| AX-157973810 | 5 | 36.079 | KV453028.1 | 1453383 | 13-scf00114 | 13 |

|              |   |        |            |         |             |    |
|--------------|---|--------|------------|---------|-------------|----|
| AX-157973737 | 5 | 36.116 | KV453028.1 | 1375742 | 13-scf00114 | 13 |
| AX-157973746 | 5 | 36.116 | KV453028.1 | 1382896 | 13-scf00114 | 13 |
| AX-157973812 | 5 | 36.116 | KV453028.1 | 1460000 | 13-scf00114 | 13 |
| AX-157973815 | 5 | 36.116 | KV453028.1 | 1462422 | 13-scf00114 | 13 |
| AX-157973816 | 5 | 36.116 | KV453028.1 | 1463507 | 13-scf00114 | 13 |
| AX-157973820 | 5 | 36.116 | KV453028.1 | 1465893 | 13-scf00114 | 13 |
| AX-157973821 | 5 | 36.116 | KV453028.1 | 1466852 | 13-scf00114 | 13 |
| AX-157973825 | 5 | 36.116 | KV453028.1 | 1469035 | 13-scf00114 | 13 |
| AX-157973826 | 5 | 36.116 | KV453028.1 | 1470213 | 13-scf00114 | 13 |
| AX-157973939 | 5 | 36.116 | KV453028.1 | 1607114 | 13-scf00114 | 13 |
| AX-157817103 | 5 | 36.334 | KV453028.1 | 1176266 | 13-scf00114 | 13 |
| AX-157973603 | 5 | 36.334 | KV453028.1 | 1216670 | 13-scf00114 | 13 |
| AX-157817114 | 5 | 36.334 | KV453028.1 | 1267320 | 13-scf00114 | 13 |
| AX-157973701 | 5 | 36.334 | KV453028.1 | 1321759 | 13-scf00114 | 13 |
| AX-157726432 | 5 | 36.334 | KV453028.1 | 1467501 | 13-scf00114 | 13 |
| AX-157973832 | 5 | 36.334 | KV453028.1 | 1479645 | 13-scf00114 | 13 |
| AX-157973844 | 5 | 36.334 | KV453028.1 | 1491441 | 13-scf00114 | 13 |
| AX-157973855 | 5 | 36.334 | KV453028.1 | 1510523 | 13-scf00114 | 13 |
| AX-157973861 | 5 | 36.334 | KV453028.1 | 1528683 | 13-scf00114 | 13 |
| AX-157973866 | 5 | 36.334 | KV453028.1 | 1533664 | 13-scf00114 | 13 |
| AX-157973871 | 5 | 36.334 | KV453028.1 | 1538666 | 13-scf00114 | 13 |
| AX-157973903 | 5 | 36.334 | KV453028.1 | 1566202 | 13-scf00114 | 13 |
| AX-157973949 | 5 | 36.334 | KV453028.1 | 1615364 | 13-scf00114 | 13 |
| AX-157724328 | 5 | 36.334 | KV453028.1 | 1647347 | 13-scf00114 | 13 |
| AX-157973990 | 5 | 36.334 | KV453028.1 | 1670296 | 13-scf00114 | 13 |
| AX-158390349 | 5 | 36.334 | KV453028.1 | 1703448 | 13-scf00114 | 13 |
| AX-157974054 | 5 | 36.334 | KV453028.1 | 1716478 | 13-scf00114 | 13 |
| AX-157716788 | 5 | 36.444 | KV453028.1 | 1121753 | 13-scf00114 | 13 |
| AX-157973574 | 5 | 36.444 | KV453028.1 | 1161392 | 13-scf00114 | 13 |
| AX-157973577 | 5 | 36.444 | KV453028.1 | 1164501 | 13-scf00114 | 13 |
| AX-157973579 | 5 | 36.444 | KV453028.1 | 1167280 | 13-scf00114 | 13 |
| AX-157973612 | 5 | 36.444 | KV453028.1 | 1226476 | 13-scf00114 | 13 |
| AX-157973703 | 5 | 36.444 | KV453028.1 | 1323423 | 13-scf00114 | 13 |
| AX-157772008 | 5 | 36.444 | KV453028.1 | 1333078 | 13-scf00114 | 13 |
| AX-157973713 | 5 | 36.444 | KV453028.1 | 1342269 | 13-scf00114 | 13 |
| AX-157973724 | 5 | 36.444 | KV453028.1 | 1352705 | 13-scf00114 | 13 |
| AX-157973741 | 5 | 36.444 | KV453028.1 | 1378576 | 13-scf00114 | 13 |
| AX-157973743 | 5 | 36.444 | KV453028.1 | 1378937 | 13-scf00114 | 13 |
| AX-157973776 | 5 | 36.444 | KV453028.1 | 1403475 | 13-scf00114 | 13 |
| AX-157973804 | 5 | 36.444 | KV453028.1 | 1438661 | 13-scf00114 | 13 |
| AX-157973822 | 5 | 36.444 | KV453028.1 | 1468070 | 13-scf00114 | 13 |
| AX-157973831 | 5 | 36.444 | KV453028.1 | 1473407 | 13-scf00114 | 13 |
| AX-157973856 | 5 | 36.444 | KV453028.1 | 1511123 | 13-scf00114 | 13 |
| AX-157817131 | 5 | 36.444 | KV453028.1 | 1532344 | 13-scf00114 | 13 |
| AX-157726820 | 5 | 36.444 | KV453028.1 | 1551504 | 13-scf00114 | 13 |
| AX-157973888 | 5 | 36.444 | KV453028.1 | 1551585 | 13-scf00114 | 13 |
| AX-157973891 | 5 | 36.444 | KV453028.1 | 1555826 | 13-scf00114 | 13 |
| AX-157732564 | 5 | 36.444 | KV453028.1 | 1562672 | 13-scf00114 | 13 |
| AX-157973902 | 5 | 36.444 | KV453028.1 | 1563541 | 13-scf00114 | 13 |
| AX-157973907 | 5 | 36.444 | KV453028.1 | 1567054 | 13-scf00114 | 13 |
| AX-157973909 | 5 | 36.444 | KV453028.1 | 1568100 | 13-scf00114 | 13 |

|              |   |        |             |         |             |    |
|--------------|---|--------|-------------|---------|-------------|----|
| AX-157973915 | 5 | 36.444 | KV453028.1  | 1572472 | 13-scf00114 | 13 |
| AX-157717782 | 5 | 36.444 | KV453028.1  | 1572718 | 13-scf00114 | 13 |
| AX-157973916 | 5 | 36.444 | KV453028.1  | 1572948 | 13-scf00114 | 13 |
| AX-157973926 | 5 | 36.444 | KV453028.1  | 1586628 | 13-scf00114 | 13 |
| AX-157771766 | 5 | 36.444 | KV453028.1  | 1595447 | 13-scf00114 | 13 |
| AX-157973932 | 5 | 36.444 | KV453028.1  | 1599477 | 13-scf00114 | 13 |
| AX-157973937 | 5 | 36.444 | KV453028.1  | 1605636 | 13-scf00114 | 13 |
| AX-157817139 | 5 | 36.444 | KV453028.1  | 1606052 | 13-scf00114 | 13 |
| AX-157973938 | 5 | 36.444 | KV453028.1  | 1606462 | 13-scf00114 | 13 |
| AX-157973940 | 5 | 36.444 | KV453028.1  | 1607559 | 13-scf00114 | 13 |
| AX-157973942 | 5 | 36.444 | KV453028.1  | 1608278 | 13-scf00114 | 13 |
| AX-157973946 | 5 | 36.444 | KV453028.1  | 1610511 | 13-scf00114 | 13 |
| AX-157973947 | 5 | 36.444 | KV453028.1  | 1613861 | 13-scf00114 | 13 |
| AX-157973948 | 5 | 36.444 | KV453028.1  | 1615118 | 13-scf00114 | 13 |
| AX-157744659 | 5 | 36.444 | KV453028.1  | 1623319 | 13-scf00114 | 13 |
| AX-157973998 | 5 | 36.444 | KV453028.1  | 1677257 | 13-scf00114 | 13 |
| AX-157706921 | 5 | 36.444 | 3ML01033163 | 36      | scf08803_1  | UN |
| AX-157712065 | 5 | 36.444 | 3ML01033163 | 299     | scf08803_1  | UN |
| AX-157973508 | 5 | 36.5   | KV453028.1  | 1082827 | 13-scf00114 | 13 |
| AX-157817143 | 5 | 36.5   | KV453028.1  | 1623564 | 13-scf00114 | 13 |
| AX-157973959 | 5 | 36.553 | KV453028.1  | 1637933 | 13-scf00114 | 13 |
| AX-157973965 | 5 | 36.553 | KV453028.1  | 1641457 | 13-scf00114 | 13 |
| AX-157716248 | 5 | 36.553 | KV453028.1  | 1641706 | 13-scf00114 | 13 |
| AX-157973967 | 5 | 36.553 | KV453028.1  | 1644883 | 13-scf00114 | 13 |
| AX-157973972 | 5 | 36.609 | KV453028.1  | 1649803 | 13-scf00114 | 13 |
| AX-157973973 | 5 | 36.662 | KV453028.1  | 1653581 | 13-scf00114 | 13 |
| AX-157755013 | 5 | 36.662 | KV453028.1  | 1654432 | 13-scf00114 | 13 |
| AX-157973975 | 5 | 36.708 | KV453028.1  | 1655506 | 13-scf00114 | 13 |
| AX-157973983 | 5 | 36.725 | KV453028.1  | 1663632 | 13-scf00114 | 13 |
| AX-157974017 | 5 | 36.725 | KV453028.1  | 1688787 | 13-scf00114 | 13 |
| AX-157973993 | 5 | 36.771 | KV453028.1  | 1672868 | 13-scf00114 | 13 |
| AX-158406696 | 5 | 36.785 | KV453028.1  | 1671469 | 13-scf00114 | 13 |
| AX-157974005 | 5 | 36.808 | KV453028.1  | 1682829 | 13-scf00114 | 13 |
| AX-157974006 | 5 | 36.839 | KV453028.1  | 1685002 | 13-scf00114 | 13 |
| AX-157974039 | 5 | 36.839 | KV453028.1  | 1704521 | 13-scf00114 | 13 |
| AX-158405327 | 5 | 36.861 | KV453028.1  | 1686587 | 13-scf00114 | 13 |
| AX-157973637 | 5 | 36.881 | KV453028.1  | 1256910 | 13-scf00114 | 13 |
| AX-157974014 | 5 | 36.881 | KV453028.1  | 1688310 | 13-scf00114 | 13 |
| AX-157974024 | 5 | 36.881 | KV453028.1  | 1694506 | 13-scf00114 | 13 |
| AX-157974026 | 5 | 36.881 | KV453028.1  | 1695030 | 13-scf00114 | 13 |
| AX-157974027 | 5 | 36.881 | KV453028.1  | 1695508 | 13-scf00114 | 13 |
| AX-157974033 | 5 | 36.881 | KV453028.1  | 1702111 | 13-scf00114 | 13 |
| AX-157974036 | 5 | 36.881 | KV453028.1  | 1703203 | 13-scf00114 | 13 |
| AX-157974042 | 5 | 36.881 | KV453028.1  | 1706397 | 13-scf00114 | 13 |
| AX-157974045 | 5 | 36.881 | KV453028.1  | 1708927 | 13-scf00114 | 13 |
| AX-157974048 | 5 | 36.881 | KV453028.1  | 1709628 | 13-scf00114 | 13 |
| AX-157974056 | 5 | 36.881 | KV453028.1  | 1717096 | 13-scf00114 | 13 |
| AX-158383106 | 5 | 36.881 | KV453028.1  | 1724471 | 13-scf00114 | 13 |
| AX-157974068 | 5 | 36.881 | KV453028.1  | 1726725 | 13-scf00114 | 13 |
| AX-157974111 | 5 | 36.881 | KV453028.1  | 1773342 | 13-scf00114 | 13 |
| AX-157817144 | 5 | 36.99  | KV453028.1  | 1656156 | 13-scf00114 | 13 |



|              |   |        |            |         |             |    |
|--------------|---|--------|------------|---------|-------------|----|
| AX-157973984 | 5 | 36.99  | KV453028.1 | 1664393 | 13-scf00114 | 13 |
| AX-158406700 | 5 | 36.99  | KV453028.1 | 1678413 | 13-scf00114 | 13 |
| AX-157973999 | 5 | 36.99  | KV453028.1 | 1679591 | 13-scf00114 | 13 |
| AX-157974007 | 5 | 36.99  | KV453028.1 | 1685731 | 13-scf00114 | 13 |
| AX-157974008 | 5 | 36.99  | KV453028.1 | 1686139 | 13-scf00114 | 13 |
| AX-157974012 | 5 | 36.99  | KV453028.1 | 1687920 | 13-scf00114 | 13 |
| AX-157974023 | 5 | 36.99  | KV453028.1 | 1693939 | 13-scf00114 | 13 |
| AX-157974043 | 5 | 36.99  | KV453028.1 | 1707904 | 13-scf00114 | 13 |
| AX-157974066 | 5 | 36.99  | KV453028.1 | 1724941 | 13-scf00114 | 13 |
| AX-157974070 | 5 | 36.99  | KV453028.1 | 1729686 | 13-scf00114 | 13 |
| AX-157974072 | 5 | 36.99  | KV453028.1 | 1732157 | 13-scf00114 | 13 |
| AX-157974075 | 5 | 36.99  | KV453028.1 | 1733409 | 13-scf00114 | 13 |
| AX-157974076 | 5 | 36.99  | KV453028.1 | 1733489 | 13-scf00114 | 13 |
| AX-157974079 | 5 | 36.99  | KV453028.1 | 1736402 | 13-scf00114 | 13 |
| AX-157974082 | 5 | 36.99  | KV453028.1 | 1738687 | 13-scf00114 | 13 |
| AX-157974087 | 5 | 36.99  | KV453028.1 | 1741886 | 13-scf00114 | 13 |
| AX-157974089 | 5 | 36.99  | KV453028.1 | 1748215 | 13-scf00114 | 13 |
| AX-157750628 | 5 | 36.99  | KV453028.1 | 1763901 | 13-scf00114 | 13 |
| AX-157855040 | 5 | 36.99  | KV453028.1 | 1783610 | 13-scf00114 | 13 |
| AX-157974161 | 5 | 36.99  | KV453028.1 | 1821155 | 13-scf00114 | 13 |
| AX-157974088 | 5 | 37.099 | KV453028.1 | 1746628 | 13-scf00114 | 13 |
| AX-157974094 | 5 | 37.099 | KV453028.1 | 1754232 | 13-scf00114 | 13 |
| AX-157974097 | 5 | 37.099 | KV453028.1 | 1756724 | 13-scf00114 | 13 |
| AX-157722743 | 5 | 37.099 | KV453028.1 | 1757570 | 13-scf00114 | 13 |
| AX-158379532 | 5 | 37.099 | KV453028.1 | 1760026 | 13-scf00114 | 13 |
| AX-157974100 | 5 | 37.1   | KV453028.1 | 1760074 | 13-scf00114 | 13 |
| AX-157974104 | 5 | 37.263 | KV453028.1 | 1769593 | 13-scf00114 | 13 |
| AX-157974107 | 5 | 37.263 | KV453028.1 | 1771636 | 13-scf00114 | 13 |
| AX-157974095 | 5 | 37.427 | KV453028.1 | 1755456 | 13-scf00114 | 13 |
| AX-157974112 | 5 | 37.427 | KV453028.1 | 1774055 | 13-scf00114 | 13 |
| AX-157974113 | 5 | 37.427 | KV453028.1 | 1774704 | 13-scf00114 | 13 |
| AX-157974115 | 5 | 37.427 | KV453028.1 | 1776156 | 13-scf00114 | 13 |
| AX-157974117 | 5 | 37.427 | KV453028.1 | 1777910 | 13-scf00114 | 13 |
| AX-157974125 | 5 | 37.427 | KV453028.1 | 1784267 | 13-scf00114 | 13 |
| AX-157974127 | 5 | 37.427 | KV453028.1 | 1787541 | 13-scf00114 | 13 |
| AX-157974129 | 5 | 37.427 | KV453028.1 | 1788969 | 13-scf00114 | 13 |
| AX-157973565 | 5 | 37.645 | KV453028.1 | 1151030 | 13-scf00114 | 13 |
| AX-157974131 | 5 | 37.645 | KV453028.1 | 1791826 | 13-scf00114 | 13 |
| AX-157974134 | 5 | 37.645 | KV453028.1 | 1796103 | 13-scf00114 | 13 |
| AX-157974138 | 5 | 37.645 | KV453028.1 | 1803185 | 13-scf00114 | 13 |
| AX-157974141 | 5 | 37.645 | KV453028.1 | 1804533 | 13-scf00114 | 13 |
| AX-158406702 | 5 | 37.646 | KV453028.1 | 1816171 | 13-scf00114 | 13 |
| AX-157974159 | 5 | 37.649 | KV453028.1 | 1817309 | 13-scf00114 | 13 |
| AX-157974165 | 5 | 37.863 | KV453028.1 | 1823822 | 13-scf00114 | 13 |
| AX-157718996 | 5 | 38.081 | KV453028.1 | 1826173 | 13-scf00114 | 13 |
| AX-157974172 | 5 | 38.083 | KV453028.1 | 1832974 | 13-scf00114 | 13 |
| AX-158383109 | 5 | 38.083 | KV453028.1 | 1833188 | 13-scf00114 | 13 |
| AX-157974173 | 5 | 38.083 | KV453028.1 | 1833466 | 13-scf00114 | 13 |
| AX-157974176 | 5 | 38.083 | KV453028.1 | 1835464 | 13-scf00114 | 13 |
| AX-157974181 | 5 | 38.083 | KV453028.1 | 1839340 | 13-scf00114 | 13 |
| AX-157974183 | 5 | 38.301 | KV453028.1 | 1839756 | 13-scf00114 | 13 |

|              |   |        |            |         |             |    |
|--------------|---|--------|------------|---------|-------------|----|
| AX-157974188 | 5 | 38.301 | KV453028.1 | 1842445 | 13-scf00114 | 13 |
| AX-158415507 | 5 | 38.466 | KV453028.1 | 1848339 | 13-scf00114 | 13 |
| AX-158390352 | 5 | 38.629 | KV453028.1 | 1849443 | 13-scf00114 | 13 |
| AX-157974194 | 5 | 38.63  | KV453028.1 | 1848674 | 13-scf00114 | 13 |
| AX-158406705 | 5 | 38.63  | KV453028.1 | 1851514 | 13-scf00114 | 13 |
| AX-157974200 | 5 | 38.63  | KV453028.1 | 1854562 | 13-scf00114 | 13 |
| AX-157694675 | 5 | 38.63  | KV453028.1 | 1855288 | 13-scf00114 | 13 |
| AX-157974201 | 5 | 38.651 | KV453028.1 | 1856495 | 13-scf00114 | 13 |
| AX-157974202 | 5 | 38.678 | KV453028.1 | 1857699 | 13-scf00114 | 13 |
| AX-157974203 | 5 | 38.711 | KV453028.1 | 1859593 | 13-scf00114 | 13 |
| AX-157974255 | 5 | 38.711 | KV453028.1 | 1916183 | 13-scf00114 | 13 |
| AX-157974294 | 5 | 38.711 | KV453028.1 | 1947656 | 13-scf00114 | 13 |
| AX-157974157 | 5 | 38.739 | KV453028.1 | 1816902 | 13-scf00114 | 13 |
| AX-157855041 | 5 | 38.739 | KV453028.1 | 1860777 | 13-scf00114 | 13 |
| AX-157974207 | 5 | 38.739 | KV453028.1 | 1862494 | 13-scf00114 | 13 |
| AX-157974210 | 5 | 38.739 | KV453028.1 | 1864269 | 13-scf00114 | 13 |
| AX-157974211 | 5 | 38.739 | KV453028.1 | 1864656 | 13-scf00114 | 13 |
| AX-157974216 | 5 | 38.739 | KV453028.1 | 1871252 | 13-scf00114 | 13 |
| AX-157974217 | 5 | 38.739 | KV453028.1 | 1873390 | 13-scf00114 | 13 |
| AX-157974219 | 5 | 38.739 | KV453028.1 | 1875551 | 13-scf00114 | 13 |
| AX-157974222 | 5 | 38.739 | KV453028.1 | 1879084 | 13-scf00114 | 13 |
| AX-157974224 | 5 | 38.739 | KV453028.1 | 1879894 | 13-scf00114 | 13 |
| AX-158379533 | 5 | 38.739 | KV453028.1 | 1880483 | 13-scf00114 | 13 |
| AX-157974242 | 5 | 38.739 | KV453028.1 | 1902007 | 13-scf00114 | 13 |
| AX-157974244 | 5 | 38.739 | KV453028.1 | 1905299 | 13-scf00114 | 13 |
| AX-157714456 | 5 | 38.739 | KV453028.1 | 1912450 | 13-scf00114 | 13 |
| AX-157974263 | 5 | 38.739 | KV453028.1 | 1920463 | 13-scf00114 | 13 |
| AX-157974270 | 5 | 38.739 | KV453028.1 | 1927741 | 13-scf00114 | 13 |
| AX-157974283 | 5 | 38.739 | KV453028.1 | 1937412 | 13-scf00114 | 13 |
| AX-157974321 | 5 | 38.739 | KV453028.1 | 1975444 | 13-scf00114 | 13 |
| AX-158415508 | 5 | 38.78  | KV453028.1 | 1885221 | 13-scf00114 | 13 |
| AX-158403993 | 5 | 38.807 | KV453028.1 | 1885626 | 13-scf00114 | 13 |
| AX-157747066 | 5 | 38.828 | KV453028.1 | 1891810 | 13-scf00114 | 13 |
| AX-157720072 | 5 | 38.828 | KV453028.1 | 1915029 | 13-scf00114 | 13 |
| AX-157974418 | 5 | 38.828 | KV453028.1 | 2080079 | 13-scf00114 | 13 |
| AX-157974778 | 5 | 38.828 | KV453028.1 | 2450235 | 13-scf00114 | 13 |
| AX-157974795 | 5 | 38.828 | KV453028.1 | 2472989 | 13-scf00114 | 13 |
| AX-157817149 | 5 | 38.848 | KV453028.1 | 1899223 | 13-scf00114 | 13 |
| AX-157974240 | 5 | 38.848 | KV453028.1 | 1901638 | 13-scf00114 | 13 |
| AX-157974243 | 5 | 38.848 | KV453028.1 | 1902834 | 13-scf00114 | 13 |
| AX-157974245 | 5 | 38.848 | KV453028.1 | 1905512 | 13-scf00114 | 13 |
| AX-157974247 | 5 | 38.848 | KV453028.1 | 1906025 | 13-scf00114 | 13 |
| AX-157974253 | 5 | 38.848 | KV453028.1 | 1911834 | 13-scf00114 | 13 |
| AX-157974254 | 5 | 38.848 | KV453028.1 | 1913949 | 13-scf00114 | 13 |
| AX-157974257 | 5 | 38.848 | KV453028.1 | 1917418 | 13-scf00114 | 13 |
| AX-157817150 | 5 | 38.848 | KV453028.1 | 1918725 | 13-scf00114 | 13 |
| AX-157817151 | 5 | 38.848 | KV453028.1 | 1919009 | 13-scf00114 | 13 |
| AX-157974264 | 5 | 39.066 | KV453028.1 | 1921446 | 13-scf00114 | 13 |
| AX-157974266 | 5 | 39.066 | KV453028.1 | 1921675 | 13-scf00114 | 13 |
| AX-157775098 | 5 | 39.066 | KV453028.1 | 1925454 | 13-scf00114 | 13 |
| AX-157974269 | 5 | 39.066 | KV453028.1 | 1925694 | 13-scf00114 | 13 |

|              |   |        |            |         |             |    |
|--------------|---|--------|------------|---------|-------------|----|
| AX-157974273 | 5 | 39.066 | KV453028.1 | 1929968 | 13-scf00114 | 13 |
| AX-157974276 | 5 | 39.066 | KV453028.1 | 1931881 | 13-scf00114 | 13 |
| AX-158406709 | 5 | 39.066 | KV453028.1 | 2020866 | 13-scf00114 | 13 |
| AX-157974881 | 5 | 39.066 | KV453028.1 | 2559262 | 13-scf00114 | 13 |
| AX-157974972 | 5 | 39.066 | KV453028.1 | 2643932 | 13-scf00114 | 13 |
| AX-157974272 | 5 | 39.108 | KV453028.1 | 1929494 | 13-scf00114 | 13 |
| AX-157742762 | 5 | 39.176 | KV453028.1 | 1938283 | 13-scf00114 | 13 |
| AX-157817153 | 5 | 39.176 | KV453028.1 | 1941747 | 13-scf00114 | 13 |
| AX-157974287 | 5 | 39.176 | KV453028.1 | 1944482 | 13-scf00114 | 13 |
| AX-157974288 | 5 | 39.176 | KV453028.1 | 1945936 | 13-scf00114 | 13 |
| AX-157974295 | 5 | 39.245 | KV453028.1 | 1948000 | 13-scf00114 | 13 |
| AX-157974296 | 5 | 39.34  | KV453028.1 | 1950881 | 13-scf00114 | 13 |
| AX-157974300 | 5 | 39.34  | KV453028.1 | 1955609 | 13-scf00114 | 13 |
| AX-157974302 | 5 | 39.34  | KV453028.1 | 1960425 | 13-scf00114 | 13 |
| AX-157974310 | 5 | 39.504 | KV453028.1 | 1969708 | 13-scf00114 | 13 |
| AX-157974314 | 5 | 39.504 | KV453028.1 | 1972575 | 13-scf00114 | 13 |
| AX-157974316 | 5 | 39.504 | KV453028.1 | 1973436 | 13-scf00114 | 13 |
| AX-157974318 | 5 | 39.504 | KV453028.1 | 1974070 | 13-scf00114 | 13 |
| AX-157974320 | 5 | 39.504 | KV453028.1 | 1974468 | 13-scf00114 | 13 |
| AX-157884272 | 5 | 39.504 | KV453028.1 | 1975884 | 13-scf00114 | 13 |
| AX-157974322 | 5 | 39.504 | KV453028.1 | 1978301 | 13-scf00114 | 13 |
| AX-157974329 | 5 | 39.504 | KV453028.1 | 1987258 | 13-scf00114 | 13 |
| AX-157974331 | 5 | 39.504 | KV453028.1 | 1988596 | 13-scf00114 | 13 |
| AX-157974332 | 5 | 39.504 | KV453028.1 | 1988960 | 13-scf00114 | 13 |
| AX-157974336 | 5 | 39.504 | KV453028.1 | 1994295 | 13-scf00114 | 13 |
| AX-157974345 | 5 | 39.504 | KV453028.1 | 2001367 | 13-scf00114 | 13 |
| AX-157974337 | 5 | 39.505 | KV453028.1 | 1994965 | 13-scf00114 | 13 |
| AX-157974344 | 5 | 39.551 | KV453028.1 | 1999559 | 13-scf00114 | 13 |
| AX-157974346 | 5 | 39.642 | KV453028.1 | 2001779 | 13-scf00114 | 13 |
| AX-157974348 | 5 | 39.916 | KV453028.1 | 2003536 | 13-scf00114 | 13 |
| AX-157974358 | 5 | 39.916 | KV453028.1 | 2014011 | 13-scf00114 | 13 |
| AX-157974360 | 5 | 39.946 | KV453028.1 | 2017043 | 13-scf00114 | 13 |
| AX-157974362 | 5 | 40.27  | KV453028.1 | 2018785 | 13-scf00114 | 13 |
| AX-157754350 | 5 | 40.27  | KV453028.1 | 2019441 | 13-scf00114 | 13 |
| AX-158406708 | 5 | 40.27  | KV453028.1 | 2020599 | 13-scf00114 | 13 |
| AX-157974369 | 5 | 40.27  | KV453028.1 | 2030270 | 13-scf00114 | 13 |
| AX-157974378 | 5 | 40.27  | KV453028.1 | 2040606 | 13-scf00114 | 13 |
| AX-157974651 | 5 | 40.27  | KV453028.1 | 2339622 | 13-scf00114 | 13 |
| AX-157974664 | 5 | 40.27  | KV453028.1 | 2350349 | 13-scf00114 | 13 |
| AX-157974685 | 5 | 40.27  | KV453028.1 | 2368333 | 13-scf00114 | 13 |
| AX-157974726 | 5 | 40.27  | KV453028.1 | 2399633 | 13-scf00114 | 13 |
| AX-157752024 | 5 | 40.321 | KV453028.1 | 2045139 | 13-scf00114 | 13 |
| AX-157974372 | 5 | 40.407 | KV453028.1 | 2034426 | 13-scf00114 | 13 |
| AX-157974384 | 5 | 40.407 | KV453028.1 | 2048246 | 13-scf00114 | 13 |
| AX-157974428 | 5 | 40.407 | KV453028.1 | 2088544 | 13-scf00114 | 13 |
| AX-157974445 | 5 | 40.407 | KV453028.1 | 2105619 | 13-scf00114 | 13 |
| AX-157974406 | 5 | 40.489 | KV453028.1 | 2066427 | 13-scf00114 | 13 |
| AX-157974407 | 5 | 40.489 | KV453028.1 | 2067204 | 13-scf00114 | 13 |
| AX-158379534 | 5 | 40.489 | KV453028.1 | 2067559 | 13-scf00114 | 13 |
| AX-157974408 | 5 | 40.489 | KV453028.1 | 2067731 | 13-scf00114 | 13 |
| AX-157974409 | 5 | 40.489 | KV453028.1 | 2068122 | 13-scf00114 | 13 |

|              |   |        |            |         |             |    |
|--------------|---|--------|------------|---------|-------------|----|
| AX-157974417 | 5 | 40.489 | KV453028.1 | 2079434 | 13-scf00114 | 13 |
| AX-157974424 | 5 | 40.489 | KV453028.1 | 2086654 | 13-scf00114 | 13 |
| AX-157974430 | 5 | 40.489 | KV453028.1 | 2090606 | 13-scf00114 | 13 |
| AX-157974432 | 5 | 40.489 | KV453028.1 | 2093237 | 13-scf00114 | 13 |
| AX-157721810 | 5 | 40.489 | KV453028.1 | 2101317 | 13-scf00114 | 13 |
| AX-157974448 | 5 | 40.489 | KV453028.1 | 2107286 | 13-scf00114 | 13 |
| AX-157974476 | 5 | 40.489 | KV453028.1 | 2141323 | 13-scf00114 | 13 |
| AX-157884279 | 5 | 40.534 | KV453028.1 | 2097731 | 13-scf00114 | 13 |
| AX-157708533 | 5 | 40.565 | KV453028.1 | 2075572 | 13-scf00114 | 13 |
| AX-157974437 | 5 | 40.565 | KV453028.1 | 2098950 | 13-scf00114 | 13 |
| AX-157974444 | 5 | 40.598 | KV453028.1 | 2105185 | 13-scf00114 | 13 |
| AX-158406713 | 5 | 40.598 | KV453028.1 | 2109802 | 13-scf00114 | 13 |
| AX-157974453 | 5 | 40.598 | KV453028.1 | 2115703 | 13-scf00114 | 13 |
| AX-157974455 | 5 | 40.707 | KV453028.1 | 2117697 | 13-scf00114 | 13 |
| AX-157974461 | 5 | 40.707 | KV453028.1 | 2122326 | 13-scf00114 | 13 |
| AX-158406715 | 5 | 40.707 | KV453028.1 | 2125750 | 13-scf00114 | 13 |
| AX-157974468 | 5 | 40.707 | KV453028.1 | 2133173 | 13-scf00114 | 13 |
| AX-157974472 | 5 | 40.707 | KV453028.1 | 2135667 | 13-scf00114 | 13 |
| AX-157817154 | 5 | 40.707 | KV453028.1 | 2136181 | 13-scf00114 | 13 |
| AX-157974473 | 5 | 40.707 | KV453028.1 | 2136367 | 13-scf00114 | 13 |
| AX-157974478 | 5 | 40.707 | KV453028.1 | 2141863 | 13-scf00114 | 13 |
| AX-157817155 | 5 | 40.707 | KV453028.1 | 2143779 | 13-scf00114 | 13 |
| AX-157974479 | 5 | 40.707 | KV453028.1 | 2145573 | 13-scf00114 | 13 |
| AX-157974516 | 5 | 40.707 | KV453028.1 | 2184514 | 13-scf00114 | 13 |
| AX-157974526 | 5 | 40.707 | KV453028.1 | 2191672 | 13-scf00114 | 13 |
| AX-157974534 | 5 | 40.707 | KV453028.1 | 2200445 | 13-scf00114 | 13 |
| AX-157974564 | 5 | 40.707 | KV453028.1 | 2238589 | 13-scf00114 | 13 |
| AX-157974596 | 5 | 40.707 | KV453028.1 | 2266849 | 13-scf00114 | 13 |
| AX-157974761 | 5 | 40.707 | KV453028.1 | 2431601 | 13-scf00114 | 13 |
| AX-157974474 | 5 | 40.744 | KV453028.1 | 2138230 | 13-scf00114 | 13 |
| AX-157974482 | 5 | 40.747 | KV453028.1 | 2150796 | 13-scf00114 | 13 |
| AX-157974501 | 5 | 40.747 | KV453028.1 | 2168065 | 13-scf00114 | 13 |
| AX-157974623 | 5 | 40.747 | KV453028.1 | 2309931 | 13-scf00114 | 13 |
| AX-157974649 | 5 | 40.747 | KV453028.1 | 2337703 | 13-scf00114 | 13 |
| AX-157974308 | 5 | 40.817 | KV453028.1 | 1967469 | 13-scf00114 | 13 |
| AX-157855043 | 5 | 40.817 | KV453028.1 | 2022233 | 13-scf00114 | 13 |
| AX-157709240 | 5 | 40.817 | KV453028.1 | 2032067 | 13-scf00114 | 13 |
| AX-157875666 | 5 | 40.817 | KV453028.1 | 2032727 | 13-scf00114 | 13 |
| AX-157974403 | 5 | 40.817 | KV453028.1 | 2064859 | 13-scf00114 | 13 |
| AX-157974435 | 5 | 40.817 | KV453028.1 | 2094185 | 13-scf00114 | 13 |
| AX-157974481 | 5 | 40.817 | KV453028.1 | 2146704 | 13-scf00114 | 13 |
| AX-157974484 | 5 | 40.817 | KV453028.1 | 2152156 | 13-scf00114 | 13 |
| AX-157974485 | 5 | 40.817 | KV453028.1 | 2153050 | 13-scf00114 | 13 |
| AX-157974486 | 5 | 40.817 | KV453028.1 | 2153641 | 13-scf00114 | 13 |
| AX-157974488 | 5 | 40.817 | KV453028.1 | 2155851 | 13-scf00114 | 13 |
| AX-157974492 | 5 | 40.817 | KV453028.1 | 2158762 | 13-scf00114 | 13 |
| AX-157740212 | 5 | 40.817 | KV453028.1 | 2160628 | 13-scf00114 | 13 |
| AX-157974495 | 5 | 40.817 | KV453028.1 | 2161972 | 13-scf00114 | 13 |
| AX-157974497 | 5 | 40.817 | KV453028.1 | 2164220 | 13-scf00114 | 13 |
| AX-157974498 | 5 | 40.817 | KV453028.1 | 2164669 | 13-scf00114 | 13 |
| AX-157974499 | 5 | 40.817 | KV453028.1 | 2165535 | 13-scf00114 | 13 |

|              |   |        |             |         |             |    |
|--------------|---|--------|-------------|---------|-------------|----|
| AX-157974502 | 5 | 40.817 | KV453028.1  | 2168878 | 13-scf00114 | 13 |
| AX-157974509 | 5 | 40.817 | KV453028.1  | 2179137 | 13-scf00114 | 13 |
| AX-157974530 | 5 | 40.817 | KV453028.1  | 2196541 | 13-scf00114 | 13 |
| AX-158390360 | 5 | 40.817 | KV453028.1  | 2212607 | 13-scf00114 | 13 |
| AX-157974545 | 5 | 40.817 | KV453028.1  | 2214177 | 13-scf00114 | 13 |
| AX-157974559 | 5 | 40.817 | KV453028.1  | 2229889 | 13-scf00114 | 13 |
| AX-157974570 | 5 | 40.817 | KV453028.1  | 2243179 | 13-scf00114 | 13 |
| AX-158383119 | 5 | 40.817 | KV453028.1  | 2245345 | 13-scf00114 | 13 |
| AX-157715151 | 5 | 40.817 | KV453028.1  | 2246077 | 13-scf00114 | 13 |
| AX-157974585 | 5 | 40.817 | KV453028.1  | 2255640 | 13-scf00114 | 13 |
| AX-157974587 | 5 | 40.817 | KV453028.1  | 2256620 | 13-scf00114 | 13 |
| AX-157974588 | 5 | 40.817 | KV453028.1  | 2258705 | 13-scf00114 | 13 |
| AX-157974617 | 5 | 40.817 | KV453028.1  | 2302941 | 13-scf00114 | 13 |
| AX-157974619 | 5 | 40.817 | KV453028.1  | 2304347 | 13-scf00114 | 13 |
| AX-157855048 | 5 | 40.817 | KV453028.1  | 2305132 | 13-scf00114 | 13 |
| AX-157974641 | 5 | 40.817 | KV453028.1  | 2329294 | 13-scf00114 | 13 |
| AX-158406721 | 5 | 40.817 | KV453028.1  | 2355973 | 13-scf00114 | 13 |
| AX-157974715 | 5 | 40.817 | KV453028.1  | 2394443 | 13-scf00114 | 13 |
| AX-157705943 | 5 | 40.817 | 3ML01031286 | 459     | scf06894_1  | UN |
| AX-157974506 | 5 | 40.841 | KV453028.1  | 2174682 | 13-scf00114 | 13 |
| AX-157974507 | 5 | 40.873 | KV453028.1  | 2174989 | 13-scf00114 | 13 |
| AX-157974512 | 5 | 40.904 | KV453028.1  | 2181349 | 13-scf00114 | 13 |
| AX-157974513 | 5 | 40.926 | KV453028.1  | 2183316 | 13-scf00114 | 13 |
| AX-157974519 | 5 | 40.926 | KV453028.1  | 2187496 | 13-scf00114 | 13 |
| AX-157974535 | 5 | 40.926 | KV453028.1  | 2202120 | 13-scf00114 | 13 |
| AX-157974537 | 5 | 40.926 | KV453028.1  | 2202860 | 13-scf00114 | 13 |
| AX-157974538 | 5 | 40.926 | KV453028.1  | 2203665 | 13-scf00114 | 13 |
| AX-157974539 | 5 | 40.926 | KV453028.1  | 2204948 | 13-scf00114 | 13 |
| AX-157974540 | 5 | 40.926 | KV453028.1  | 2206760 | 13-scf00114 | 13 |
| AX-157774495 | 5 | 40.926 | KV453028.1  | 2213570 | 13-scf00114 | 13 |
| AX-157974546 | 5 | 40.926 | KV453028.1  | 2214806 | 13-scf00114 | 13 |
| AX-157696783 | 5 | 40.926 | KV453028.1  | 2215821 | 13-scf00114 | 13 |
| AX-157974548 | 5 | 40.926 | KV453028.1  | 2216573 | 13-scf00114 | 13 |
| AX-157974552 | 5 | 40.926 | KV453028.1  | 2226532 | 13-scf00114 | 13 |
| AX-157974556 | 5 | 40.926 | KV453028.1  | 2227222 | 13-scf00114 | 13 |
| AX-157974557 | 5 | 40.926 | KV453028.1  | 2227465 | 13-scf00114 | 13 |
| AX-157817172 | 5 | 40.926 | KV453028.1  | 2284574 | 13-scf00114 | 13 |
| AX-157974634 | 5 | 40.926 | KV453028.1  | 2322377 | 13-scf00114 | 13 |
| AX-157974644 | 5 | 40.926 | KV453028.1  | 2331744 | 13-scf00114 | 13 |
| AX-157974673 | 5 | 40.926 | KV453028.1  | 2361692 | 13-scf00114 | 13 |
| AX-157974688 | 5 | 40.926 | KV453028.1  | 2369067 | 13-scf00114 | 13 |
| AX-157817166 | 5 | 41.09  | KV453028.1  | 2242852 | 13-scf00114 | 13 |
| AX-157696456 | 5 | 41.09  | KV453028.1  | 2266405 | 13-scf00114 | 13 |
| AX-157974597 | 5 | 41.09  | KV453028.1  | 2267716 | 13-scf00114 | 13 |
| AX-157974599 | 5 | 41.09  | KV453028.1  | 2270896 | 13-scf00114 | 13 |
| AX-157974353 | 5 | 41.254 | KV453028.1  | 2007971 | 13-scf00114 | 13 |
| AX-157974494 | 5 | 41.254 | KV453028.1  | 2159980 | 13-scf00114 | 13 |
| AX-157974523 | 5 | 41.254 | KV453028.1  | 2189245 | 13-scf00114 | 13 |
| AX-157974527 | 5 | 41.254 | KV453028.1  | 2193318 | 13-scf00114 | 13 |
| AX-158406718 | 5 | 41.254 | KV453028.1  | 2215280 | 13-scf00114 | 13 |
| AX-157974561 | 5 | 41.254 | KV453028.1  | 2233927 | 13-scf00114 | 13 |

|              |   |        |            |         |             |    |
|--------------|---|--------|------------|---------|-------------|----|
| AX-157974563 | 5 | 41.254 | KV453028.1 | 2235745 | 13-scf00114 | 13 |
| AX-157974576 | 5 | 41.254 | KV453028.1 | 2245227 | 13-scf00114 | 13 |
| AX-157817167 | 5 | 41.254 | KV453028.1 | 2245931 | 13-scf00114 | 13 |
| AX-157974577 | 5 | 41.254 | KV453028.1 | 2247608 | 13-scf00114 | 13 |
| AX-157974594 | 5 | 41.254 | KV453028.1 | 2265355 | 13-scf00114 | 13 |
| AX-157974595 | 5 | 41.254 | KV453028.1 | 2265976 | 13-scf00114 | 13 |
| AX-157974601 | 5 | 41.254 | KV453028.1 | 2271884 | 13-scf00114 | 13 |
| AX-157974604 | 5 | 41.254 | KV453028.1 | 2280732 | 13-scf00114 | 13 |
| AX-157855046 | 5 | 41.254 | KV453028.1 | 2281551 | 13-scf00114 | 13 |
| AX-157974605 | 5 | 41.254 | KV453028.1 | 2283224 | 13-scf00114 | 13 |
| AX-157747827 | 5 | 41.254 | KV453028.1 | 2285823 | 13-scf00114 | 13 |
| AX-158390362 | 5 | 41.254 | KV453028.1 | 2287318 | 13-scf00114 | 13 |
| AX-157714068 | 5 | 41.254 | KV453028.1 | 2295667 | 13-scf00114 | 13 |
| AX-157817175 | 5 | 41.254 | KV453028.1 | 2301627 | 13-scf00114 | 13 |
| AX-157974620 | 5 | 41.254 | KV453028.1 | 2304885 | 13-scf00114 | 13 |
| AX-157974622 | 5 | 41.254 | KV453028.1 | 2307235 | 13-scf00114 | 13 |
| AX-157817179 | 5 | 41.254 | KV453028.1 | 2308667 | 13-scf00114 | 13 |
| AX-157974629 | 5 | 41.254 | KV453028.1 | 2316617 | 13-scf00114 | 13 |
| AX-157974635 | 5 | 41.254 | KV453028.1 | 2323048 | 13-scf00114 | 13 |
| AX-157708894 | 5 | 41.254 | KV453028.1 | 2324492 | 13-scf00114 | 13 |
| AX-157817182 | 5 | 41.254 | KV453028.1 | 2332801 | 13-scf00114 | 13 |
| AX-157974646 | 5 | 41.254 | KV453028.1 | 2335079 | 13-scf00114 | 13 |
| AX-157974655 | 5 | 41.254 | KV453028.1 | 2341819 | 13-scf00114 | 13 |
| AX-157974657 | 5 | 41.254 | KV453028.1 | 2342264 | 13-scf00114 | 13 |
| AX-157974658 | 5 | 41.254 | KV453028.1 | 2343149 | 13-scf00114 | 13 |
| AX-157974660 | 5 | 41.254 | KV453028.1 | 2344101 | 13-scf00114 | 13 |
| AX-157974670 | 5 | 41.254 | KV453028.1 | 2357859 | 13-scf00114 | 13 |
| AX-157974671 | 5 | 41.254 | KV453028.1 | 2359129 | 13-scf00114 | 13 |
| AX-157974672 | 5 | 41.254 | KV453028.1 | 2359899 | 13-scf00114 | 13 |
| AX-157974690 | 5 | 41.254 | KV453028.1 | 2369704 | 13-scf00114 | 13 |
| AX-157974704 | 5 | 41.254 | KV453028.1 | 2383075 | 13-scf00114 | 13 |
| AX-157772513 | 5 | 41.254 | KV453028.1 | 2397929 | 13-scf00114 | 13 |
| AX-157974741 | 5 | 41.254 | KV453028.1 | 2413791 | 13-scf00114 | 13 |
| AX-157875669 | 5 | 41.254 | KV453028.1 | 2424249 | 13-scf00114 | 13 |
| AX-157974764 | 5 | 41.254 | KV453028.1 | 2434246 | 13-scf00114 | 13 |
| AX-158383123 | 5 | 41.254 | KV453028.1 | 2441886 | 13-scf00114 | 13 |
| AX-157753088 | 5 | 41.254 | KV453028.1 | 2448331 | 13-scf00114 | 13 |
| AX-157974779 | 5 | 41.254 | KV453028.1 | 2451014 | 13-scf00114 | 13 |
| AX-157855051 | 5 | 41.254 | KV453028.1 | 2454809 | 13-scf00114 | 13 |
| AX-157974789 | 5 | 41.254 | KV453028.1 | 2463538 | 13-scf00114 | 13 |
| AX-157974790 | 5 | 41.254 | KV453028.1 | 2464431 | 13-scf00114 | 13 |
| AX-157974812 | 5 | 41.254 | KV453028.1 | 2490052 | 13-scf00114 | 13 |
| AX-157974813 | 5 | 41.254 | KV453028.1 | 2493801 | 13-scf00114 | 13 |
| AX-157974856 | 5 | 41.254 | KV453028.1 | 2532636 | 13-scf00114 | 13 |
| AX-157974504 | 5 | 41.292 | KV453028.1 | 2173534 | 13-scf00114 | 13 |
| AX-157974665 | 5 | 41.292 | KV453028.1 | 2350960 | 13-scf00114 | 13 |
| AX-157974669 | 5 | 41.313 | KV453028.1 | 2357249 | 13-scf00114 | 13 |
| AX-157974675 | 5 | 41.347 | KV453028.1 | 2363703 | 13-scf00114 | 13 |
| AX-157974677 | 5 | 41.347 | KV453028.1 | 2364334 | 13-scf00114 | 13 |
| AX-157974773 | 5 | 41.347 | KV453028.1 | 2443492 | 13-scf00114 | 13 |
| AX-157974491 | 5 | 41.363 | KV453028.1 | 2158327 | 13-scf00114 | 13 |

|              |   |        |            |         |             |    |
|--------------|---|--------|------------|---------|-------------|----|
| AX-157817170 | 5 | 41.363 | KV453028.1 | 2263824 | 13-scf00114 | 13 |
| AX-157974643 | 5 | 41.363 | KV453028.1 | 2331443 | 13-scf00114 | 13 |
| AX-157974681 | 5 | 41.363 | KV453028.1 | 2366002 | 13-scf00114 | 13 |
| AX-157974682 | 5 | 41.363 | KV453028.1 | 2366585 | 13-scf00114 | 13 |
| AX-157974697 | 5 | 41.363 | KV453028.1 | 2376565 | 13-scf00114 | 13 |
| AX-157974698 | 5 | 41.363 | KV453028.1 | 2376894 | 13-scf00114 | 13 |
| AX-157974699 | 5 | 41.363 | KV453028.1 | 2378063 | 13-scf00114 | 13 |
| AX-157974703 | 5 | 41.363 | KV453028.1 | 2382127 | 13-scf00114 | 13 |
| AX-158390364 | 5 | 41.363 | KV453028.1 | 2383012 | 13-scf00114 | 13 |
| AX-157974708 | 5 | 41.363 | KV453028.1 | 2389214 | 13-scf00114 | 13 |
| AX-157974709 | 5 | 41.363 | KV453028.1 | 2391423 | 13-scf00114 | 13 |
| AX-157974717 | 5 | 41.363 | KV453028.1 | 2395277 | 13-scf00114 | 13 |
| AX-157974718 | 5 | 41.363 | KV453028.1 | 2395928 | 13-scf00114 | 13 |
| AX-157974720 | 5 | 41.363 | KV453028.1 | 2396321 | 13-scf00114 | 13 |
| AX-157974727 | 5 | 41.363 | KV453028.1 | 2401256 | 13-scf00114 | 13 |
| AX-157974693 | 5 | 41.472 | KV453028.1 | 2371373 | 13-scf00114 | 13 |
| AX-157974730 | 5 | 41.472 | KV453028.1 | 2402477 | 13-scf00114 | 13 |
| AX-157817186 | 5 | 41.472 | KV453028.1 | 2405571 | 13-scf00114 | 13 |
| AX-157974735 | 5 | 41.472 | KV453028.1 | 2407615 | 13-scf00114 | 13 |
| AX-157716658 | 5 | 41.472 | KV453028.1 | 2410605 | 13-scf00114 | 13 |
| AX-157974743 | 5 | 41.472 | KV453028.1 | 2417027 | 13-scf00114 | 13 |
| AX-157974745 | 5 | 41.472 | KV453028.1 | 2420599 | 13-scf00114 | 13 |
| AX-157719950 | 5 | 41.472 | KV453028.1 | 2428896 | 13-scf00114 | 13 |
| AX-157974755 | 5 | 41.472 | KV453028.1 | 2429564 | 13-scf00114 | 13 |
| AX-157974757 | 5 | 41.472 | KV453028.1 | 2430661 | 13-scf00114 | 13 |
| AX-157817187 | 5 | 41.472 | KV453028.1 | 2433295 | 13-scf00114 | 13 |
| AX-157974767 | 5 | 41.472 | KV453028.1 | 2436740 | 13-scf00114 | 13 |
| AX-157974771 | 5 | 41.472 | KV453028.1 | 2440728 | 13-scf00114 | 13 |
| AX-157770817 | 5 | 41.472 | KV453028.1 | 2441322 | 13-scf00114 | 13 |
| AX-157974772 | 5 | 41.472 | KV453028.1 | 2441766 | 13-scf00114 | 13 |
| AX-157974784 | 5 | 41.472 | KV453028.1 | 2457998 | 13-scf00114 | 13 |
| AX-157817190 | 5 | 41.472 | KV453028.1 | 2469042 | 13-scf00114 | 13 |
| AX-158406723 | 5 | 41.472 | KV453028.1 | 2484057 | 13-scf00114 | 13 |
| AX-157974817 | 5 | 41.472 | KV453028.1 | 2496235 | 13-scf00114 | 13 |
| AX-157974794 | 5 | 41.559 | KV453028.1 | 2472097 | 13-scf00114 | 13 |
| AX-157817191 | 5 | 41.581 | KV453028.1 | 2479222 | 13-scf00114 | 13 |
| AX-157974802 | 5 | 41.581 | KV453028.1 | 2480575 | 13-scf00114 | 13 |
| AX-157974803 | 5 | 41.581 | KV453028.1 | 2481983 | 13-scf00114 | 13 |
| AX-157974805 | 5 | 41.581 | KV453028.1 | 2483908 | 13-scf00114 | 13 |
| AX-157974815 | 5 | 41.581 | KV453028.1 | 2494801 | 13-scf00114 | 13 |
| AX-157974822 | 5 | 41.8   | KV453028.1 | 2502706 | 13-scf00114 | 13 |
| AX-157974824 | 5 | 41.8   | KV453028.1 | 2504481 | 13-scf00114 | 13 |
| AX-157974833 | 5 | 41.8   | KV453028.1 | 2510757 | 13-scf00114 | 13 |
| AX-157974835 | 5 | 41.8   | KV453028.1 | 2515361 | 13-scf00114 | 13 |
| AX-157974836 | 5 | 41.8   | KV453028.1 | 2515937 | 13-scf00114 | 13 |
| AX-157974842 | 5 | 41.8   | KV453028.1 | 2520999 | 13-scf00114 | 13 |
| AX-157719426 | 5 | 41.8   | KV453028.1 | 2521901 | 13-scf00114 | 13 |
| AX-157974845 | 5 | 41.8   | KV453028.1 | 2526267 | 13-scf00114 | 13 |
| AX-157974847 | 5 | 41.8   | KV453028.1 | 2527066 | 13-scf00114 | 13 |
| AX-157974849 | 5 | 41.8   | KV453028.1 | 2528685 | 13-scf00114 | 13 |
| AX-157974853 | 5 | 41.8   | KV453028.1 | 2530596 | 13-scf00114 | 13 |

|              |   |        |            |         |             |    |
|--------------|---|--------|------------|---------|-------------|----|
| AX-157855052 | 5 | 41.8   | KV453028.1 | 2531947 | 13-scf00114 | 13 |
| AX-157974859 | 5 | 41.8   | KV453028.1 | 2533606 | 13-scf00114 | 13 |
| AX-157974860 | 5 | 41.8   | KV453028.1 | 2536515 | 13-scf00114 | 13 |
| AX-157974819 | 5 | 41.909 | KV453028.1 | 2499502 | 13-scf00114 | 13 |
| AX-157974855 | 5 | 41.909 | KV453028.1 | 2531141 | 13-scf00114 | 13 |
| AX-157724131 | 5 | 41.909 | KV453028.1 | 2545352 | 13-scf00114 | 13 |
| AX-157974873 | 5 | 41.909 | KV453028.1 | 2551341 | 13-scf00114 | 13 |
| AX-157974876 | 5 | 41.909 | KV453028.1 | 2554074 | 13-scf00114 | 13 |
| AX-157974889 | 5 | 41.909 | KV453028.1 | 2566023 | 13-scf00114 | 13 |
| AX-157974912 | 5 | 41.909 | KV453028.1 | 2589148 | 13-scf00114 | 13 |
| AX-157974921 | 5 | 41.909 | KV453028.1 | 2600923 | 13-scf00114 | 13 |
| AX-157974879 | 5 | 41.942 | KV453028.1 | 2556426 | 13-scf00114 | 13 |
| AX-157974898 | 5 | 41.942 | KV453028.1 | 2575456 | 13-scf00114 | 13 |
| AX-158390367 | 5 | 41.942 | KV453028.1 | 2588390 | 13-scf00114 | 13 |
| AX-157817195 | 5 | 41.971 | KV453028.1 | 2558612 | 13-scf00114 | 13 |
| AX-157974891 | 5 | 41.987 | KV453028.1 | 2568224 | 13-scf00114 | 13 |
| AX-158379538 | 5 | 42.018 | KV453028.1 | 2569197 | 13-scf00114 | 13 |
| AX-157974893 | 5 | 42.018 | KV453028.1 | 2570923 | 13-scf00114 | 13 |
| AX-157974827 | 5 | 42.019 | KV453028.1 | 2506569 | 13-scf00114 | 13 |
| AX-157974829 | 5 | 42.019 | KV453028.1 | 2509339 | 13-scf00114 | 13 |
| AX-157974844 | 5 | 42.019 | KV453028.1 | 2522884 | 13-scf00114 | 13 |
| AX-157974851 | 5 | 42.019 | KV453028.1 | 2529360 | 13-scf00114 | 13 |
| AX-157974868 | 5 | 42.019 | KV453028.1 | 2545462 | 13-scf00114 | 13 |
| AX-157974897 | 5 | 42.019 | KV453028.1 | 2573782 | 13-scf00114 | 13 |
| AX-157974907 | 5 | 42.019 | KV453028.1 | 2585339 | 13-scf00114 | 13 |
| AX-157974927 | 5 | 42.019 | KV453028.1 | 2605429 | 13-scf00114 | 13 |
| AX-157974928 | 5 | 42.019 | KV453028.1 | 2606140 | 13-scf00114 | 13 |
| AX-157974929 | 5 | 42.019 | KV453028.1 | 2608380 | 13-scf00114 | 13 |
| AX-157974953 | 5 | 42.019 | KV453028.1 | 2628455 | 13-scf00114 | 13 |
| AX-157974963 | 5 | 42.019 | KV453028.1 | 2634792 | 13-scf00114 | 13 |
| AX-157773109 | 5 | 42.019 | KV453028.1 | 2646035 | 13-scf00114 | 13 |
| AX-157753754 | 5 | 42.019 | KV453028.1 | 2651118 | 13-scf00114 | 13 |
| AX-157974872 | 5 | 42.096 | KV453028.1 | 2550687 | 13-scf00114 | 13 |
| AX-157974887 | 5 | 42.096 | KV453028.1 | 2565105 | 13-scf00114 | 13 |
| AX-157974901 | 5 | 42.096 | KV453028.1 | 2580552 | 13-scf00114 | 13 |
| AX-157974904 | 5 | 42.163 | KV453028.1 | 2583423 | 13-scf00114 | 13 |
| AX-157974910 | 5 | 42.163 | KV453028.1 | 2587051 | 13-scf00114 | 13 |
| AX-157738959 | 5 | 42.163 | KV453028.1 | 2590074 | 13-scf00114 | 13 |
| AX-157974863 | 5 | 42.455 | KV453028.1 | 2538824 | 13-scf00114 | 13 |
| AX-157974916 | 5 | 42.455 | KV453028.1 | 2591016 | 13-scf00114 | 13 |
| AX-157974917 | 5 | 42.455 | KV453028.1 | 2591424 | 13-scf00114 | 13 |
| AX-157974922 | 5 | 42.455 | KV453028.1 | 2601205 | 13-scf00114 | 13 |
| AX-157974923 | 5 | 42.455 | KV453028.1 | 2601831 | 13-scf00114 | 13 |
| AX-157974926 | 5 | 42.455 | KV453028.1 | 2604738 | 13-scf00114 | 13 |
| AX-157974932 | 5 | 42.455 | KV453028.1 | 2609936 | 13-scf00114 | 13 |
| AX-158379539 | 5 | 42.455 | KV453028.1 | 2649754 | 13-scf00114 | 13 |
| AX-157974978 | 5 | 42.455 | KV453028.1 | 2650431 | 13-scf00114 | 13 |
| AX-157974992 | 5 | 42.455 | KV453028.1 | 2660509 | 13-scf00114 | 13 |
| AX-157974930 | 5 | 42.526 | KV453028.1 | 2609502 | 13-scf00114 | 13 |
| AX-157974933 | 5 | 42.611 | KV453028.1 | 2614963 | 13-scf00114 | 13 |
| AX-157975001 | 5 | 42.611 | KV453028.1 | 2675463 | 13-scf00114 | 13 |



|              |   |        |            |         |             |    |
|--------------|---|--------|------------|---------|-------------|----|
| AX-157974936 | 5 | 42.674 | KV453028.1 | 2616328 | 13-scf00114 | 13 |
| AX-157974938 | 5 | 42.674 | KV453028.1 | 2617092 | 13-scf00114 | 13 |
| AX-157974941 | 5 | 42.674 | KV453028.1 | 2618414 | 13-scf00114 | 13 |
| AX-157974942 | 5 | 42.674 | KV453028.1 | 2619522 | 13-scf00114 | 13 |
| AX-157974943 | 5 | 42.674 | KV453028.1 | 2620377 | 13-scf00114 | 13 |
| AX-157974945 | 5 | 42.674 | KV453028.1 | 2622941 | 13-scf00114 | 13 |
| AX-157974949 | 5 | 42.674 | KV453028.1 | 2625133 | 13-scf00114 | 13 |
| AX-157974950 | 5 | 42.674 | KV453028.1 | 2626790 | 13-scf00114 | 13 |
| AX-157974951 | 5 | 42.674 | KV453028.1 | 2627698 | 13-scf00114 | 13 |
| AX-157974957 | 5 | 42.674 | KV453028.1 | 2629322 | 13-scf00114 | 13 |
| AX-157754828 | 5 | 42.674 | KV453028.1 | 2636628 | 13-scf00114 | 13 |
| AX-157974964 | 5 | 42.674 | KV453028.1 | 2638414 | 13-scf00114 | 13 |
| AX-157974969 | 5 | 42.674 | KV453028.1 | 2642115 | 13-scf00114 | 13 |
| AX-157974970 | 5 | 42.674 | KV453028.1 | 2642851 | 13-scf00114 | 13 |
| AX-157974979 | 5 | 42.674 | KV453028.1 | 2651802 | 13-scf00114 | 13 |
| AX-157974985 | 5 | 42.674 | KV453028.1 | 2654861 | 13-scf00114 | 13 |
| AX-157974983 | 5 | 42.738 | KV453028.1 | 2654119 | 13-scf00114 | 13 |
| AX-157974961 | 5 | 42.783 | KV453028.1 | 2632572 | 13-scf00114 | 13 |
| AX-157974989 | 5 | 42.783 | KV453028.1 | 2659245 | 13-scf00114 | 13 |
| AX-157974991 | 5 | 42.783 | KV453028.1 | 2660029 | 13-scf00114 | 13 |
| AX-157747887 | 5 | 42.783 | KV453028.1 | 2665864 | 13-scf00114 | 13 |
| AX-157817198 | 5 | 42.783 | KV453028.1 | 2670307 | 13-scf00114 | 13 |
| AX-157817199 | 5 | 42.783 | KV453028.1 | 2670457 | 13-scf00114 | 13 |
| AX-157974994 | 5 | 42.783 | KV453028.1 | 2672202 | 13-scf00114 | 13 |
| AX-157974995 | 5 | 42.783 | KV453028.1 | 2672410 | 13-scf00114 | 13 |
| AX-157974997 | 5 | 42.783 | KV453028.1 | 2673142 | 13-scf00114 | 13 |
| AX-157975000 | 5 | 42.783 | KV453028.1 | 2674112 | 13-scf00114 | 13 |
| AX-157742764 | 5 | 42.783 | KV453028.1 | 2674676 | 13-scf00114 | 13 |
| AX-157975005 | 5 | 42.783 | KV453028.1 | 2682271 | 13-scf00114 | 13 |
| AX-157975033 | 5 | 42.783 | KV453028.1 | 2701547 | 13-scf00114 | 13 |
| AX-157975050 | 5 | 42.783 | KV453028.1 | 2721666 | 13-scf00114 | 13 |
| AX-157758980 | 5 | 42.783 | KV453028.1 | 2725983 | 13-scf00114 | 13 |
| AX-157975064 | 5 | 42.783 | KV453028.1 | 2735703 | 13-scf00114 | 13 |
| AX-157975120 | 5 | 42.783 | KV453028.1 | 2782380 | 13-scf00114 | 13 |
| AX-157975008 | 5 | 43.001 | KV453028.1 | 2683693 | 13-scf00114 | 13 |
| AX-157975009 | 5 | 43.001 | KV453028.1 | 2684859 | 13-scf00114 | 13 |
| AX-157975010 | 5 | 43.001 | KV453028.1 | 2685629 | 13-scf00114 | 13 |
| AX-157975012 | 5 | 43.001 | KV453028.1 | 2686116 | 13-scf00114 | 13 |
| AX-157975013 | 5 | 43.001 | KV453028.1 | 2686657 | 13-scf00114 | 13 |
| AX-157975014 | 5 | 43.001 | KV453028.1 | 2687943 | 13-scf00114 | 13 |
| AX-157975016 | 5 | 43.001 | KV453028.1 | 2689096 | 13-scf00114 | 13 |
| AX-157975026 | 5 | 43.001 | KV453028.1 | 2694139 | 13-scf00114 | 13 |
| AX-157975042 | 5 | 43.001 | KV453028.1 | 2714398 | 13-scf00114 | 13 |
| AX-157817203 | 5 | 43.001 | KV453028.1 | 2798224 | 13-scf00114 | 13 |
| AX-157771166 | 5 | 43.034 | KV453028.1 | 2700344 | 13-scf00114 | 13 |
| AX-157975035 | 5 | 43.067 | KV453028.1 | 2702519 | 13-scf00114 | 13 |
| AX-158379540 | 5 | 43.111 | KV453028.1 | 2704043 | 13-scf00114 | 13 |
| AX-157975036 | 5 | 43.111 | KV453028.1 | 2704793 | 13-scf00114 | 13 |
| AX-157975038 | 5 | 43.111 | KV453028.1 | 2705859 | 13-scf00114 | 13 |
| AX-157757898 | 5 | 43.111 | KV453028.1 | 2708858 | 13-scf00114 | 13 |
| AX-157975040 | 5 | 43.111 | KV453028.1 | 2709913 | 13-scf00114 | 13 |

|              |   |        |            |         |                  |    |
|--------------|---|--------|------------|---------|------------------|----|
| AX-157975041 | 5 | 43.111 | KV453028.1 | 2710508 | 13-scf00114      | 13 |
| AX-157975043 | 5 | 43.111 | KV453028.1 | 2716960 | 13-scf00114      | 13 |
| AX-158390368 | 5 | 43.111 | KV453028.1 | 2717974 | 13-scf00114      | 13 |
| AX-157975046 | 5 | 43.111 | KV453028.1 | 2718898 | 13-scf00114      | 13 |
| AX-157975048 | 5 | 43.111 | KV453028.1 | 2720093 | 13-scf00114      | 13 |
| AX-157975049 | 5 | 43.111 | KV453028.1 | 2720883 | 13-scf00114      | 13 |
| AX-157975052 | 5 | 43.111 | KV453028.1 | 2723346 | 13-scf00114      | 13 |
| AX-157975055 | 5 | 43.274 | KV453028.1 | 2728289 | 13-scf00114      | 13 |
| AX-157975058 | 5 | 43.438 | KV453028.1 | 2729444 | 13-scf00114      | 13 |
| AX-157975072 | 5 | 43.438 | KV453028.1 | 2743982 | 13-scf00114      | 13 |
| AX-157975073 | 5 | 43.438 | KV453028.1 | 2745020 | 13-scf00114      | 13 |
| AX-157975077 | 5 | 43.438 | KV453028.1 | 2747416 | 13-scf00114      | 13 |
| AX-157975075 | 5 | 43.44  | KV453028.1 | 2746868 | 13-scf00114      | 13 |
| AX-157975078 | 5 | 43.441 | KV453028.1 | 2749648 | 13-scf00114      | 13 |
| AX-157975080 | 5 | 43.601 | KV453028.1 | 2751737 | 13-scf00114      | 13 |
| AX-157975081 | 5 | 43.601 | KV453028.1 | 2751819 | 13-scf00114      | 13 |
| AX-157975084 | 5 | 43.601 | KV453028.1 | 2753953 | 13-scf00114      | 13 |
| AX-157696355 | 5 | 43.601 | FI884568.1 | 120     | 13-ORI212 lctalt | UN |
| AX-157975088 | 5 | 43.766 | KV453028.1 | 2759155 | 13-scf00114      | 13 |
| AX-157975094 | 5 | 43.766 | KV453028.1 | 2762099 | 13-scf00114      | 13 |
| AX-157975103 | 5 | 43.766 | KV453028.1 | 2769003 | 13-scf00114      | 13 |
| AX-157975111 | 5 | 43.766 | KV453028.1 | 2775445 | 13-scf00114      | 13 |
| AX-157975113 | 5 | 43.766 | KV453028.1 | 2778554 | 13-scf00114      | 13 |
| AX-157975027 | 5 | 43.875 | KV453028.1 | 2696655 | 13-scf00114      | 13 |
| AX-157975118 | 5 | 43.875 | KV453028.1 | 2780746 | 13-scf00114      | 13 |
| AX-157975119 | 5 | 43.875 | KV453028.1 | 2781902 | 13-scf00114      | 13 |
| AX-157975122 | 5 | 43.876 | KV453028.1 | 2784277 | 13-scf00114      | 13 |
| AX-157975131 | 5 | 44.087 | KV453028.1 | 2794182 | 13-scf00114      | 13 |
| AX-157975132 | 5 | 44.216 | KV453028.1 | 2794684 | 13-scf00114      | 13 |
| AX-157975141 | 5 | 44.216 | KV453028.1 | 2801195 | 13-scf00114      | 13 |
| AX-157716572 | 5 | 44.217 | KV453028.1 | 2796110 | 13-scf00114      | 13 |
| AX-157975158 | 5 | 44.217 | KV453028.1 | 2815462 | 13-scf00114      | 13 |
| AX-157975138 | 5 | 44.444 | KV453028.1 | 2798385 | 13-scf00114      | 13 |
| AX-157975135 | 5 | 44.532 | KV453028.1 | 2795537 | 13-scf00114      | 13 |
| AX-157975142 | 5 | 44.532 | KV453028.1 | 2802918 | 13-scf00114      | 13 |
| AX-157975145 | 5 | 44.532 | KV453028.1 | 2804269 | 13-scf00114      | 13 |
| AX-157721235 | 5 | 44.532 | KV453028.1 | 2805417 | 13-scf00114      | 13 |
| AX-157975147 | 5 | 44.532 | KV453028.1 | 2806073 | 13-scf00114      | 13 |
| AX-157975148 | 5 | 44.532 | KV453028.1 | 2806794 | 13-scf00114      | 13 |
| AX-157975154 | 5 | 44.532 | KV453028.1 | 2812881 | 13-scf00114      | 13 |
| AX-157975155 | 5 | 44.532 | KV453028.1 | 2813464 | 13-scf00114      | 13 |
| AX-157975160 | 5 | 44.532 | KV453028.1 | 2816021 | 13-scf00114      | 13 |
| AX-157975161 | 5 | 44.532 | KV453028.1 | 2816459 | 13-scf00114      | 13 |
| AX-157975165 | 5 | 44.532 | KV453028.1 | 2820355 | 13-scf00114      | 13 |
| AX-157975166 | 5 | 44.532 | KV453028.1 | 2820989 | 13-scf00114      | 13 |
| AX-157884283 | 5 | 44.532 | KV453028.1 | 2823190 | 13-scf00114      | 13 |
| AX-157975168 | 5 | 44.532 | KV453028.1 | 2823797 | 13-scf00114      | 13 |
| AX-157975175 | 5 | 44.532 | KV453028.1 | 2828271 | 13-scf00114      | 13 |
| AX-157975179 | 5 | 44.532 | KV453028.1 | 2830000 | 13-scf00114      | 13 |
| AX-157975180 | 5 | 44.532 | KV453028.1 | 2830389 | 13-scf00114      | 13 |
| AX-157975181 | 5 | 44.532 | KV453028.1 | 2831400 | 13-scf00114      | 13 |

|              |   |        |             |         |             |    |
|--------------|---|--------|-------------|---------|-------------|----|
| AX-157975183 | 5 | 44.532 | KV453028.1  | 2832185 | 13-scf00114 | 13 |
| AX-157975184 | 5 | 44.532 | KV453028.1  | 2832647 | 13-scf00114 | 13 |
| AX-157748718 | 5 | 44.532 | KV453028.1  | 2833836 | 13-scf00114 | 13 |
| AX-157975186 | 5 | 44.641 | KV453028.1  | 2834589 | 13-scf00114 | 13 |
| AX-157975187 | 5 | 44.641 | KV453028.1  | 2835132 | 13-scf00114 | 13 |
| AX-157743839 | 5 | 44.779 | KV453028.1  | 2836609 | 13-scf00114 | 13 |
| AX-157975189 | 5 | 44.779 | KV453028.1  | 2837229 | 13-scf00114 | 13 |
| AX-157714070 | 5 | 44.779 | KV453028.1  | 2837673 | 13-scf00114 | 13 |
| AX-157975195 | 5 | 44.779 | KV453028.1  | 2849040 | 13-scf00114 | 13 |
| AX-157817207 | 5 | 45.055 | KV453028.1  | 2850402 | 13-scf00114 | 13 |
| AX-157975197 | 5 | 45.174 | KV453028.1  | 2851069 | 13-scf00114 | 13 |
| AX-157975198 | 5 | 45.177 | KV453028.1  | 2852239 | 13-scf00114 | 13 |
| AX-157975199 | 5 | 45.18  | KV453028.1  | 2852646 | 13-scf00114 | 13 |
| AX-157774748 | 5 | 45.183 | KV453028.1  | 2847323 | 13-scf00114 | 13 |
| AX-157975204 | 5 | 45.183 | KV453028.1  | 2856647 | 13-scf00114 | 13 |
| AX-157975249 | 5 | 45.183 | KV453028.1  | 2907212 | 13-scf00114 | 13 |
| AX-157975253 | 5 | 45.183 | KV453028.1  | 2909266 | 13-scf00114 | 13 |
| AX-157975328 | 5 | 45.183 | KV453028.1  | 2968630 | 13-scf00114 | 13 |
| AX-158390370 | 5 | 45.183 | KV453028.1  | 2984459 | 13-scf00114 | 13 |
| AX-157975354 | 5 | 45.183 | KV453028.1  | 2999892 | 13-scf00114 | 13 |
| AX-157975446 | 5 | 45.183 | KV453028.1  | 3098634 | 13-scf00114 | 13 |
| AX-157975457 | 5 | 45.183 | KV453028.1  | 3105843 | 13-scf00114 | 13 |
| AX-157975555 | 5 | 45.183 | KV453028.1  | 3295025 | 13-scf00114 | 13 |
| AX-157817227 | 5 | 45.183 | KV453028.1  | 3372500 | 13-scf00114 | 13 |
| AX-157975632 | 5 | 45.183 | KV453028.1  | 3372752 | 13-scf00114 | 13 |
| AX-157975633 | 5 | 45.183 | KV453028.1  | 3374354 | 13-scf00114 | 13 |
| AX-158390372 | 5 | 45.183 | KV453028.1  | 3374754 | 13-scf00114 | 13 |
| AX-157975634 | 5 | 45.183 | KV453028.1  | 3375578 | 13-scf00114 | 13 |
| AX-157975637 | 5 | 45.183 | KV453028.1  | 3377749 | 13-scf00114 | 13 |
| AX-158390375 | 5 | 45.183 | KV453028.1  | 3382975 | 13-scf00114 | 13 |
| AX-157975665 | 5 | 45.183 | KV453028.1  | 3415515 | 13-scf00114 | 13 |
| AX-157976483 | 5 | 45.183 | KV453028.1  | 4238757 | 13-scf00114 | 13 |
| AX-157682874 | 5 | 45.183 | KV453027.1  | 23673   | 13-scf00116 | 13 |
| AX-157975205 | 5 | 45.185 | KV453028.1  | 2858181 | 13-scf00114 | 13 |
| AX-157975272 | 5 | 45.185 | KV453028.1  | 2924368 | 13-scf00114 | 13 |
| AX-157975278 | 5 | 45.185 | KV453028.1  | 2928563 | 13-scf00114 | 13 |
| AX-157689523 | 5 | 45.185 | 3ML01030330 | 607     | scf05926_1  | UN |
| AX-157975209 | 5 | 45.187 | KV453028.1  | 2859281 | 13-scf00114 | 13 |
| AX-157817210 | 5 | 45.187 | KV453028.1  | 2882285 | 13-scf00114 | 13 |
| AX-157975210 | 5 | 45.188 | KV453028.1  | 2861340 | 13-scf00114 | 13 |
| AX-157975211 | 5 | 45.188 | KV453028.1  | 2862491 | 13-scf00114 | 13 |
| AX-157774016 | 5 | 45.407 | KV453028.1  | 2865268 | 13-scf00114 | 13 |
| AX-157975213 | 5 | 45.407 | KV453028.1  | 2866569 | 13-scf00114 | 13 |
| AX-157721947 | 5 | 45.698 | KV453028.1  | 2873059 | 13-scf00114 | 13 |
| AX-157975217 | 5 | 45.698 | KV453028.1  | 2876847 | 13-scf00114 | 13 |
| AX-157817209 | 5 | 45.698 | KV453028.1  | 2877014 | 13-scf00114 | 13 |
| AX-157975218 | 5 | 45.698 | KV453028.1  | 2877506 | 13-scf00114 | 13 |
| AX-157975220 | 5 | 45.844 | KV453028.1  | 2878797 | 13-scf00114 | 13 |
| AX-157975222 | 5 | 45.844 | KV453028.1  | 2880521 | 13-scf00114 | 13 |
| AX-157975223 | 5 | 45.844 | KV453028.1  | 2881188 | 13-scf00114 | 13 |
| AX-157975224 | 5 | 45.844 | KV453028.1  | 2882134 | 13-scf00114 | 13 |

|              |   |        |            |         |             |    |
|--------------|---|--------|------------|---------|-------------|----|
| AX-157975229 | 5 | 45.844 | KV453028.1 | 2885541 | 13-scf00114 | 13 |
| AX-157740830 | 5 | 45.844 | KV453028.1 | 2885837 | 13-scf00114 | 13 |
| AX-157975230 | 5 | 45.844 | KV453028.1 | 2888076 | 13-scf00114 | 13 |
| AX-157975238 | 5 | 45.844 | KV453028.1 | 2896820 | 13-scf00114 | 13 |
| AX-157975242 | 5 | 46.205 | KV453028.1 | 2899622 | 13-scf00114 | 13 |
| AX-157975243 | 5 | 46.206 | KV453028.1 | 2900819 | 13-scf00114 | 13 |
| AX-157975246 | 5 | 46.207 | KV453028.1 | 2904640 | 13-scf00114 | 13 |
| AX-157855054 | 5 | 46.207 | KV453028.1 | 2904764 | 13-scf00114 | 13 |
| AX-157755071 | 5 | 46.208 | KV453028.1 | 2905284 | 13-scf00114 | 13 |
| AX-157975235 | 5 | 46.21  | KV453028.1 | 2894019 | 13-scf00114 | 13 |
| AX-157975247 | 5 | 46.21  | KV453028.1 | 2906777 | 13-scf00114 | 13 |
| AX-157975250 | 5 | 46.387 | KV453028.1 | 2907598 | 13-scf00114 | 13 |
| AX-157817212 | 5 | 46.387 | KV453028.1 | 2913763 | 13-scf00114 | 13 |
| AX-157975258 | 5 | 46.387 | KV453028.1 | 2914621 | 13-scf00114 | 13 |
| AX-157975480 | 5 | 46.387 | KV453028.1 | 3143621 | 13-scf00114 | 13 |
| AX-157975259 | 5 | 46.391 | KV453028.1 | 2915115 | 13-scf00114 | 13 |
| AX-157975261 | 5 | 46.391 | KV453028.1 | 2915511 | 13-scf00114 | 13 |
| AX-157975330 | 5 | 46.391 | KV453028.1 | 2972178 | 13-scf00114 | 13 |
| AX-157975445 | 5 | 46.391 | KV453028.1 | 3096346 | 13-scf00114 | 13 |
| AX-157682870 | 5 | 46.391 | KV453027.1 | 18567   | 13-scf00116 | 13 |
| AX-157682873 | 5 | 46.391 | KV453027.1 | 21426   | 13-scf00116 | 13 |
| AX-157975268 | 5 | 46.933 | KV453028.1 | 2920632 | 13-scf00114 | 13 |
| AX-157975269 | 5 | 46.933 | KV453028.1 | 2921327 | 13-scf00114 | 13 |
| AX-157975273 | 5 | 46.934 | KV453028.1 | 2925395 | 13-scf00114 | 13 |
| AX-157975274 | 5 | 46.936 | KV453028.1 | 2925649 | 13-scf00114 | 13 |
| AX-157975276 | 5 | 46.939 | KV453028.1 | 2927535 | 13-scf00114 | 13 |
| AX-157975281 | 5 | 46.939 | KV453028.1 | 2931427 | 13-scf00114 | 13 |
| AX-157975283 | 5 | 46.939 | KV453028.1 | 2932595 | 13-scf00114 | 13 |
| AX-158406730 | 5 | 47.225 | KV453028.1 | 2934490 | 13-scf00114 | 13 |
| AX-157975270 | 5 | 47.226 | KV453028.1 | 2921800 | 13-scf00114 | 13 |
| AX-157696069 | 5 | 47.226 | KV453028.1 | 2937975 | 13-scf00114 | 13 |
| AX-157975287 | 5 | 47.226 | KV453028.1 | 2938463 | 13-scf00114 | 13 |
| AX-157975296 | 5 | 47.271 | KV453028.1 | 2942915 | 13-scf00114 | 13 |
| AX-157975298 | 5 | 47.288 | KV453028.1 | 2943435 | 13-scf00114 | 13 |
| AX-157975299 | 5 | 47.288 | KV453028.1 | 2945316 | 13-scf00114 | 13 |
| AX-157975300 | 5 | 47.33  | KV453028.1 | 2945633 | 13-scf00114 | 13 |
| AX-157975303 | 5 | 47.371 | KV453028.1 | 2948445 | 13-scf00114 | 13 |
| AX-157975356 | 5 | 47.371 | KV453028.1 | 3000984 | 13-scf00114 | 13 |
| AX-157975306 | 5 | 47.373 | KV453028.1 | 2951107 | 13-scf00114 | 13 |
| AX-157975308 | 5 | 47.373 | KV453028.1 | 2951313 | 13-scf00114 | 13 |
| AX-157719743 | 5 | 47.373 | KV453028.1 | 2977186 | 13-scf00114 | 13 |
| AX-157975309 | 5 | 47.375 | KV453028.1 | 2953051 | 13-scf00114 | 13 |
| AX-157682862 | 5 | 47.375 | KV453027.1 | 1376    | 13-scf00116 | 13 |
| AX-157975311 | 5 | 47.809 | KV453028.1 | 2955530 | 13-scf00114 | 13 |
| AX-157975315 | 5 | 47.809 | KV453028.1 | 2957314 | 13-scf00114 | 13 |
| AX-157975316 | 5 | 47.809 | KV453028.1 | 2958417 | 13-scf00114 | 13 |
| AX-157975318 | 5 | 47.809 | KV453028.1 | 2960847 | 13-scf00114 | 13 |
| AX-157975319 | 5 | 47.809 | KV453028.1 | 2961509 | 13-scf00114 | 13 |
| AX-157975326 | 5 | 47.809 | KV453028.1 | 2967072 | 13-scf00114 | 13 |
| AX-157975334 | 5 | 47.809 | KV453028.1 | 2978102 | 13-scf00114 | 13 |
| AX-157975336 | 5 | 47.809 | KV453028.1 | 2978979 | 13-scf00114 | 13 |

|              |   |        |             |         |             |    |
|--------------|---|--------|-------------|---------|-------------|----|
| AX-157975400 | 5 | 47.809 | KV453028.1  | 3028531 | 13-scf00114 | 13 |
| AX-157975415 | 5 | 47.809 | KV453028.1  | 3052998 | 13-scf00114 | 13 |
| AX-158379542 | 5 | 47.809 | KV453028.1  | 3082381 | 13-scf00114 | 13 |
| AX-157720024 | 5 | 47.809 | KV453028.1  | 3082498 | 13-scf00114 | 13 |
| AX-157975517 | 5 | 47.809 | KV453028.1  | 3222062 | 13-scf00114 | 13 |
| AX-157975595 | 5 | 47.809 | KV453028.1  | 3335623 | 13-scf00114 | 13 |
| AX-157975599 | 5 | 47.809 | KV453028.1  | 3338910 | 13-scf00114 | 13 |
| AX-157975621 | 5 | 47.809 | KV453028.1  | 3359508 | 13-scf00114 | 13 |
| AX-157773351 | 5 | 47.809 | KV453028.1  | 3362627 | 13-scf00114 | 13 |
| AX-157975624 | 5 | 47.809 | KV453028.1  | 3363554 | 13-scf00114 | 13 |
| AX-157975890 | 5 | 47.809 | KV453028.1  | 3662304 | 13-scf00114 | 13 |
| AX-157705783 | 5 | 47.809 | 3ML01030873 | 570     | scf06477_1  | UN |
| AX-157975327 | 5 | 47.831 | KV453028.1  | 2968164 | 13-scf00114 | 13 |
| AX-157975329 | 5 | 47.86  | KV453028.1  | 2971815 | 13-scf00114 | 13 |
| AX-157975340 | 5 | 47.86  | KV453028.1  | 2983582 | 13-scf00114 | 13 |
| AX-157975341 | 5 | 47.891 | KV453028.1  | 2985674 | 13-scf00114 | 13 |
| AX-157975345 | 5 | 47.891 | KV453028.1  | 2989828 | 13-scf00114 | 13 |
| AX-157975360 | 5 | 47.891 | KV453028.1  | 3005458 | 13-scf00114 | 13 |
| AX-157975362 | 5 | 47.891 | KV453028.1  | 3006011 | 13-scf00114 | 13 |
| AX-157975320 | 5 | 47.919 | KV453028.1  | 2963720 | 13-scf00114 | 13 |
| AX-157975337 | 5 | 47.919 | KV453028.1  | 2980265 | 13-scf00114 | 13 |
| AX-157975342 | 5 | 47.919 | KV453028.1  | 2986303 | 13-scf00114 | 13 |
| AX-157975343 | 5 | 47.919 | KV453028.1  | 2988978 | 13-scf00114 | 13 |
| AX-157975347 | 5 | 47.919 | KV453028.1  | 2992402 | 13-scf00114 | 13 |
| AX-157975351 | 5 | 47.919 | KV453028.1  | 2995590 | 13-scf00114 | 13 |
| AX-157975353 | 5 | 47.919 | KV453028.1  | 2998219 | 13-scf00114 | 13 |
| AX-157975357 | 5 | 47.919 | KV453028.1  | 3003031 | 13-scf00114 | 13 |
| AX-157975366 | 5 | 47.919 | KV453028.1  | 3009862 | 13-scf00114 | 13 |
| AX-157975369 | 5 | 47.919 | KV453028.1  | 3011704 | 13-scf00114 | 13 |
| AX-157975372 | 5 | 47.919 | KV453028.1  | 3013740 | 13-scf00114 | 13 |
| AX-157975377 | 5 | 47.919 | KV453028.1  | 3016328 | 13-scf00114 | 13 |
| AX-157975378 | 5 | 47.919 | KV453028.1  | 3016971 | 13-scf00114 | 13 |
| AX-157975380 | 5 | 47.919 | KV453028.1  | 3018732 | 13-scf00114 | 13 |
| AX-157975484 | 5 | 47.919 | KV453028.1  | 3145097 | 13-scf00114 | 13 |
| AX-157975494 | 5 | 47.919 | KV453028.1  | 3165583 | 13-scf00114 | 13 |
| AX-157975507 | 5 | 47.919 | KV453028.1  | 3197498 | 13-scf00114 | 13 |
| AX-157724350 | 5 | 47.919 | KV453028.1  | 3326037 | 13-scf00114 | 13 |
| AX-157975614 | 5 | 47.919 | KV453028.1  | 3356070 | 13-scf00114 | 13 |
| AX-157682863 | 5 | 47.919 | KV453027.1  | 1678    | 13-scf00116 | 13 |
| AX-157705342 | 5 | 47.919 | 3ML01029445 | 956     | scf05068_1  | UN |
| AX-157975379 | 5 | 47.96  | KV453028.1  | 3017444 | 13-scf00114 | 13 |
| AX-157975293 | 5 | 48.028 | KV453028.1  | 2940817 | 13-scf00114 | 13 |
| AX-157975386 | 5 | 48.028 | KV453028.1  | 3022299 | 13-scf00114 | 13 |
| AX-157817214 | 5 | 48.028 | KV453028.1  | 3022664 | 13-scf00114 | 13 |
| AX-157817215 | 5 | 48.028 | KV453028.1  | 3022848 | 13-scf00114 | 13 |
| AX-157975390 | 5 | 48.028 | KV453028.1  | 3024147 | 13-scf00114 | 13 |
| AX-157975413 | 5 | 48.028 | KV453028.1  | 3048550 | 13-scf00114 | 13 |
| AX-157714107 | 5 | 48.028 | KV453028.1  | 3052183 | 13-scf00114 | 13 |
| AX-157975451 | 5 | 48.028 | KV453028.1  | 3101417 | 13-scf00114 | 13 |
| AX-157975497 | 5 | 48.028 | KV453028.1  | 3178448 | 13-scf00114 | 13 |
| AX-157975426 | 5 | 48.122 | KV453028.1  | 3064653 | 13-scf00114 | 13 |

|              |   |        |            |         |             |    |
|--------------|---|--------|------------|---------|-------------|----|
| AX-157975427 | 5 | 48.137 | KV453028.1 | 3067419 | 13-scf00114 | 13 |
| AX-157875684 | 5 | 48.137 | KV453028.1 | 3067759 | 13-scf00114 | 13 |
| AX-157975430 | 5 | 48.137 | KV453028.1 | 3071673 | 13-scf00114 | 13 |
| AX-157864991 | 5 | 48.137 | KV453028.1 | 3073136 | 13-scf00114 | 13 |
| AX-157817226 | 5 | 48.137 | KV453028.1 | 3369112 | 13-scf00114 | 13 |
| AX-157975689 | 5 | 48.137 | KV453028.1 | 3434723 | 13-scf00114 | 13 |
| AX-157975381 | 5 | 48.246 | KV453028.1 | 3019612 | 13-scf00114 | 13 |
| AX-157817217 | 5 | 48.246 | KV453028.1 | 3050734 | 13-scf00114 | 13 |
| AX-157975418 | 5 | 48.246 | KV453028.1 | 3056152 | 13-scf00114 | 13 |
| AX-157975432 | 5 | 48.246 | KV453028.1 | 3077494 | 13-scf00114 | 13 |
| AX-157975435 | 5 | 48.246 | KV453028.1 | 3080415 | 13-scf00114 | 13 |
| AX-157975437 | 5 | 48.246 | KV453028.1 | 3084674 | 13-scf00114 | 13 |
| AX-157975444 | 5 | 48.246 | KV453028.1 | 3094746 | 13-scf00114 | 13 |
| AX-157875686 | 5 | 48.246 | KV453028.1 | 3095490 | 13-scf00114 | 13 |
| AX-157750227 | 5 | 48.246 | KV453028.1 | 3103876 | 13-scf00114 | 13 |
| AX-157975460 | 5 | 48.246 | KV453028.1 | 3110460 | 13-scf00114 | 13 |
| AX-157975461 | 5 | 48.246 | KV453028.1 | 3113496 | 13-scf00114 | 13 |
| AX-157975464 | 5 | 48.246 | KV453028.1 | 3115588 | 13-scf00114 | 13 |
| AX-157975466 | 5 | 48.246 | KV453028.1 | 3118049 | 13-scf00114 | 13 |
| AX-157975488 | 5 | 48.246 | KV453028.1 | 3153522 | 13-scf00114 | 13 |
| AX-157975489 | 5 | 48.246 | KV453028.1 | 3160685 | 13-scf00114 | 13 |
| AX-157975499 | 5 | 48.246 | KV453028.1 | 3181008 | 13-scf00114 | 13 |
| AX-157975508 | 5 | 48.246 | KV453028.1 | 3199105 | 13-scf00114 | 13 |
| AX-157693346 | 5 | 48.246 | KV453028.1 | 3202234 | 13-scf00114 | 13 |
| AX-157975513 | 5 | 48.246 | KV453028.1 | 3207677 | 13-scf00114 | 13 |
| AX-157975514 | 5 | 48.246 | KV453028.1 | 3212836 | 13-scf00114 | 13 |
| AX-157975521 | 5 | 48.246 | KV453028.1 | 3224968 | 13-scf00114 | 13 |
| AX-157975522 | 5 | 48.246 | KV453028.1 | 3225769 | 13-scf00114 | 13 |
| AX-157975523 | 5 | 48.246 | KV453028.1 | 3234305 | 13-scf00114 | 13 |
| AX-158390371 | 5 | 48.246 | KV453028.1 | 3250936 | 13-scf00114 | 13 |
| AX-157975538 | 5 | 48.246 | KV453028.1 | 3262618 | 13-scf00114 | 13 |
| AX-157975556 | 5 | 48.246 | KV453028.1 | 3295516 | 13-scf00114 | 13 |
| AX-157975561 | 5 | 48.246 | KV453028.1 | 3300863 | 13-scf00114 | 13 |
| AX-157975562 | 5 | 48.246 | KV453028.1 | 3301488 | 13-scf00114 | 13 |
| AX-157975564 | 5 | 48.246 | KV453028.1 | 3302062 | 13-scf00114 | 13 |
| AX-157975574 | 5 | 48.246 | KV453028.1 | 3309389 | 13-scf00114 | 13 |
| AX-157775442 | 5 | 48.246 | KV453028.1 | 3321351 | 13-scf00114 | 13 |
| AX-157975584 | 5 | 48.246 | KV453028.1 | 3324310 | 13-scf00114 | 13 |
| AX-157771009 | 5 | 48.246 | KV453028.1 | 3324954 | 13-scf00114 | 13 |
| AX-157975587 | 5 | 48.246 | KV453028.1 | 3327088 | 13-scf00114 | 13 |
| AX-157975589 | 5 | 48.246 | KV453028.1 | 3328199 | 13-scf00114 | 13 |
| AX-157975593 | 5 | 48.246 | KV453028.1 | 3332503 | 13-scf00114 | 13 |
| AX-157975596 | 5 | 48.246 | KV453028.1 | 3336242 | 13-scf00114 | 13 |
| AX-157975601 | 5 | 48.246 | KV453028.1 | 3339735 | 13-scf00114 | 13 |
| AX-157975602 | 5 | 48.246 | KV453028.1 | 3341572 | 13-scf00114 | 13 |
| AX-157975610 | 5 | 48.246 | KV453028.1 | 3348388 | 13-scf00114 | 13 |
| AX-157975611 | 5 | 48.246 | KV453028.1 | 3348859 | 13-scf00114 | 13 |
| AX-157975615 | 5 | 48.246 | KV453028.1 | 3357388 | 13-scf00114 | 13 |
| AX-158406735 | 5 | 48.246 | KV453028.1 | 3369480 | 13-scf00114 | 13 |
| AX-157975631 | 5 | 48.246 | KV453028.1 | 3370515 | 13-scf00114 | 13 |
| AX-157975652 | 5 | 48.246 | KV453028.1 | 3397232 | 13-scf00114 | 13 |

|              |   |        |             |          |              |    |
|--------------|---|--------|-------------|----------|--------------|----|
| AX-157975721 | 5 | 48.246 | KV453028.1  | 3477409  | 13-scf00114  | 13 |
| AX-157817246 | 5 | 48.246 | KV453028.1  | 3538695  | 13-scf00114  | 13 |
| AX-157975756 | 5 | 48.246 | KV453028.1  | 3540497  | 13-scf00114  | 13 |
| AX-157975757 | 5 | 48.246 | KV453028.1  | 3541861  | 13-scf00114  | 13 |
| AX-157875693 | 5 | 48.246 | KV453028.1  | 3563014  | 13-scf00114  | 13 |
| AX-157975771 | 5 | 48.246 | KV453028.1  | 3563782  | 13-scf00114  | 13 |
| AX-157975774 | 5 | 48.246 | KV453028.1  | 3566408  | 13-scf00114  | 13 |
| AX-157975794 | 5 | 48.246 | KV453028.1  | 3584132  | 13-scf00114  | 13 |
| AX-157875700 | 5 | 48.246 | KV453028.1  | 3610608  | 13-scf00114  | 13 |
| AX-157975878 | 5 | 48.246 | KV453028.1  | 3652639  | 13-scf00114  | 13 |
| AX-157975930 | 5 | 48.246 | KV453028.1  | 3705945  | 13-scf00114  | 13 |
| AX-157865000 | 5 | 48.246 | KV453028.1  | 3779864  | 13-scf00114  | 13 |
| AX-157976022 | 5 | 48.246 | KV453028.1  | 3789070  | 13-scf00114  | 13 |
| AX-157978849 | 5 | 48.246 | KV453028.1  | 6799852  | 13-scf00114  | 13 |
| AX-157979358 | 5 | 48.246 | KV453028.1  | 8500541  | 13-scf00114  | 13 |
| AX-157980428 | 5 | 48.246 | KV453028.1  | 10131038 | 13-scf00114  | 13 |
| AX-157682864 | 5 | 48.246 | KV453027.1  | 1983     | 13-scf00116  | 13 |
| AX-157694611 | 5 | 48.246 | KV453027.1  | 5802     | 13-scf00116  | 13 |
| AX-157682871 | 5 | 48.246 | KV453027.1  | 20086    | 13-scf00116  | 13 |
| AX-157682876 | 5 | 48.246 | KV453027.1  | 25928    | 13-scf00116  | 13 |
| AX-157682877 | 5 | 48.246 | KV453027.1  | 26165    | 13-scf00116  | 13 |
| AX-157693073 | 5 | 48.246 |             | 1826     | :229603_g7_i | UN |
| AX-157681112 | 5 | 48.246 | 3ML01029032 | 339      | scf04649_1   | UN |
| AX-157695187 | 5 | 48.246 | 3ML01029875 | 221      | scf05497_1   | UN |
| AX-157705782 | 5 | 48.246 | 3ML01030873 | 213      | scf06477_1   | UN |
| AX-157975539 | 5 | 48.355 | KV453028.1  | 3264382  | 13-scf00114  | 13 |
| AX-157975648 | 5 | 48.355 | KV453028.1  | 3395236  | 13-scf00114  | 13 |
| AX-157975653 | 5 | 48.355 | KV453028.1  | 3397689  | 13-scf00114  | 13 |
| AX-157975654 | 5 | 48.355 | KV453028.1  | 3398506  | 13-scf00114  | 13 |
| AX-157975661 | 5 | 48.355 | KV453028.1  | 3412451  | 13-scf00114  | 13 |
| AX-157975662 | 5 | 48.355 | KV453028.1  | 3412778  | 13-scf00114  | 13 |
| AX-157817234 | 5 | 48.355 | KV453028.1  | 3414721  | 13-scf00114  | 13 |
| AX-157817236 | 5 | 48.396 | KV453028.1  | 3429208  | 13-scf00114  | 13 |
| AX-157975394 | 5 | 48.465 | KV453028.1  | 3025823  | 13-scf00114  | 13 |
| AX-157975510 | 5 | 48.465 | KV453028.1  | 3200372  | 13-scf00114  | 13 |
| AX-157884289 | 5 | 48.465 | KV453028.1  | 3222641  | 13-scf00114  | 13 |
| AX-157975519 | 5 | 48.465 | KV453028.1  | 3223615  | 13-scf00114  | 13 |
| AX-157884290 | 5 | 48.465 | KV453028.1  | 3229943  | 13-scf00114  | 13 |
| AX-157975534 | 5 | 48.465 | KV453028.1  | 3251747  | 13-scf00114  | 13 |
| AX-157975535 | 5 | 48.465 | KV453028.1  | 3252410  | 13-scf00114  | 13 |
| AX-157975536 | 5 | 48.465 | KV453028.1  | 3252654  | 13-scf00114  | 13 |
| AX-157975537 | 5 | 48.465 | KV453028.1  | 3260957  | 13-scf00114  | 13 |
| AX-157975619 | 5 | 48.465 | KV453028.1  | 3358621  | 13-scf00114  | 13 |
| AX-157772105 | 5 | 48.465 | KV453028.1  | 3463529  | 13-scf00114  | 13 |
| AX-157975712 | 5 | 48.465 | KV453028.1  | 3467225  | 13-scf00114  | 13 |
| AX-157975713 | 5 | 48.465 | KV453028.1  | 3468610  | 13-scf00114  | 13 |
| AX-157975723 | 5 | 48.465 | KV453028.1  | 3478694  | 13-scf00114  | 13 |
| AX-157975724 | 5 | 48.465 | KV453028.1  | 3479748  | 13-scf00114  | 13 |
| AX-157975725 | 5 | 48.465 | KV453028.1  | 3480362  | 13-scf00114  | 13 |
| AX-157975742 | 5 | 48.465 | KV453028.1  | 3497363  | 13-scf00114  | 13 |
| AX-157817240 | 5 | 48.465 | KV453028.1  | 3513055  | 13-scf00114  | 13 |

|              |   |        |            |         |             |    |
|--------------|---|--------|------------|---------|-------------|----|
| AX-157975744 | 5 | 48.465 | KV453028.1 | 3513344 | 13-scf00114 | 13 |
| AX-158383147 | 5 | 48.465 | KV453028.1 | 3514921 | 13-scf00114 | 13 |
| AX-157975747 | 5 | 48.465 | KV453028.1 | 3515498 | 13-scf00114 | 13 |
| AX-157855056 | 5 | 48.465 | KV453028.1 | 3524767 | 13-scf00114 | 13 |
| AX-157975750 | 5 | 48.465 | KV453028.1 | 3527294 | 13-scf00114 | 13 |
| AX-157817245 | 5 | 48.465 | KV453028.1 | 3534336 | 13-scf00114 | 13 |
| AX-157975753 | 5 | 48.465 | KV453028.1 | 3536391 | 13-scf00114 | 13 |
| AX-157975779 | 5 | 48.465 | KV453028.1 | 3570373 | 13-scf00114 | 13 |
| AX-157975787 | 5 | 48.465 | KV453028.1 | 3574975 | 13-scf00114 | 13 |
| AX-157975813 | 5 | 48.465 | KV453028.1 | 3601205 | 13-scf00114 | 13 |
| AX-157975826 | 5 | 48.465 | KV453028.1 | 3613750 | 13-scf00114 | 13 |
| AX-157975828 | 5 | 48.465 | KV453028.1 | 3614927 | 13-scf00114 | 13 |
| AX-157975830 | 5 | 48.465 | KV453028.1 | 3615949 | 13-scf00114 | 13 |
| AX-157975847 | 5 | 48.465 | KV453028.1 | 3630625 | 13-scf00114 | 13 |
| AX-157975855 | 5 | 48.465 | KV453028.1 | 3635710 | 13-scf00114 | 13 |
| AX-157975863 | 5 | 48.465 | KV453028.1 | 3641616 | 13-scf00114 | 13 |
| AX-157975866 | 5 | 48.465 | KV453028.1 | 3644601 | 13-scf00114 | 13 |
| AX-157975873 | 5 | 48.465 | KV453028.1 | 3650276 | 13-scf00114 | 13 |
| AX-157855059 | 5 | 48.465 | KV453028.1 | 3651576 | 13-scf00114 | 13 |
| AX-157975876 | 5 | 48.465 | KV453028.1 | 3651691 | 13-scf00114 | 13 |
| AX-157697627 | 5 | 48.465 | KV453028.1 | 3655675 | 13-scf00114 | 13 |
| AX-157975884 | 5 | 48.465 | KV453028.1 | 3656263 | 13-scf00114 | 13 |
| AX-157855060 | 5 | 48.465 | KV453028.1 | 3658223 | 13-scf00114 | 13 |
| AX-157975888 | 5 | 48.465 | KV453028.1 | 3661742 | 13-scf00114 | 13 |
| AX-157975891 | 5 | 48.465 | KV453028.1 | 3663471 | 13-scf00114 | 13 |
| AX-157975897 | 5 | 48.465 | KV453028.1 | 3667305 | 13-scf00114 | 13 |
| AX-157976531 | 5 | 48.465 | KV453028.1 | 4295825 | 13-scf00114 | 13 |
| AX-157978623 | 5 | 48.465 | KV453028.1 | 6550055 | 13-scf00114 | 13 |
| AX-157975760 | 5 | 48.486 | KV453028.1 | 3544094 | 13-scf00114 | 13 |
| AX-157975765 | 5 | 48.506 | KV453028.1 | 3558552 | 13-scf00114 | 13 |
| AX-157975764 | 5 | 48.52  | KV453028.1 | 3556898 | 13-scf00114 | 13 |
| AX-157817247 | 5 | 48.52  | KV453028.1 | 3558732 | 13-scf00114 | 13 |
| AX-157975767 | 5 | 48.537 | KV453028.1 | 3558886 | 13-scf00114 | 13 |
| AX-157975768 | 5 | 48.545 | KV453028.1 | 3562159 | 13-scf00114 | 13 |
| AX-157817242 | 5 | 48.552 | KV453028.1 | 3530791 | 13-scf00114 | 13 |
| AX-157817243 | 5 | 48.552 | KV453028.1 | 3530950 | 13-scf00114 | 13 |
| AX-157817244 | 5 | 48.552 | KV453028.1 | 3531359 | 13-scf00114 | 13 |
| AX-157875695 | 5 | 48.552 | KV453028.1 | 3571744 | 13-scf00114 | 13 |
| AX-157875699 | 5 | 48.552 | KV453028.1 | 3603526 | 13-scf00114 | 13 |
| AX-157975807 | 5 | 48.562 | KV453028.1 | 3592795 | 13-scf00114 | 13 |
| AX-157975690 | 5 | 48.574 | KV453028.1 | 3435189 | 13-scf00114 | 13 |
| AX-157975748 | 5 | 48.574 | KV453028.1 | 3524039 | 13-scf00114 | 13 |
| AX-157975763 | 5 | 48.574 | KV453028.1 | 3555132 | 13-scf00114 | 13 |
| AX-157975770 | 5 | 48.574 | KV453028.1 | 3563205 | 13-scf00114 | 13 |
| AX-157975808 | 5 | 48.574 | KV453028.1 | 3596658 | 13-scf00114 | 13 |
| AX-157748559 | 5 | 48.574 | KV453028.1 | 3597514 | 13-scf00114 | 13 |
| AX-157975809 | 5 | 48.574 | KV453028.1 | 3597745 | 13-scf00114 | 13 |
| AX-157975810 | 5 | 48.574 | KV453028.1 | 3598014 | 13-scf00114 | 13 |
| AX-157975812 | 5 | 48.574 | KV453028.1 | 3598459 | 13-scf00114 | 13 |
| AX-157975832 | 5 | 48.574 | KV453028.1 | 3616344 | 13-scf00114 | 13 |
| AX-157975836 | 5 | 48.574 | KV453028.1 | 3619954 | 13-scf00114 | 13 |



|              |   |        |            |         |             |    |
|--------------|---|--------|------------|---------|-------------|----|
| AX-157975837 | 5 | 48.574 | KV453028.1 | 3621692 | 13-scf00114 | 13 |
| AX-157975845 | 5 | 48.574 | KV453028.1 | 3629002 | 13-scf00114 | 13 |
| AX-157744188 | 5 | 48.574 | KV453028.1 | 3639129 | 13-scf00114 | 13 |
| AX-157975859 | 5 | 48.574 | KV453028.1 | 3639999 | 13-scf00114 | 13 |
| AX-157975868 | 5 | 48.574 | KV453028.1 | 3646842 | 13-scf00114 | 13 |
| AX-157975870 | 5 | 48.574 | KV453028.1 | 3649708 | 13-scf00114 | 13 |
| AX-157975880 | 5 | 48.574 | KV453028.1 | 3653959 | 13-scf00114 | 13 |
| AX-157975886 | 5 | 48.574 | KV453028.1 | 3659873 | 13-scf00114 | 13 |
| AX-157817248 | 5 | 48.574 | KV453028.1 | 3662760 | 13-scf00114 | 13 |
| AX-157975913 | 5 | 48.574 | KV453028.1 | 3683764 | 13-scf00114 | 13 |
| AX-157975923 | 5 | 48.574 | KV453028.1 | 3700186 | 13-scf00114 | 13 |
| AX-157975964 | 5 | 48.574 | KV453028.1 | 3744130 | 13-scf00114 | 13 |
| AX-157976083 | 5 | 48.574 | KV453028.1 | 3844003 | 13-scf00114 | 13 |
| AX-157976126 | 5 | 48.574 | KV453028.1 | 3889599 | 13-scf00114 | 13 |
| AX-157869680 | 5 | 48.574 | KV453028.1 | 3943529 | 13-scf00114 | 13 |
| AX-157869681 | 5 | 48.574 | KV453028.1 | 3950442 | 13-scf00114 | 13 |
| AX-157976179 | 5 | 48.574 | KV453028.1 | 3957829 | 13-scf00114 | 13 |
| AX-157976304 | 5 | 48.574 | KV453028.1 | 4056159 | 13-scf00114 | 13 |
| AX-157976385 | 5 | 48.574 | KV453028.1 | 4134564 | 13-scf00114 | 13 |
| AX-157976393 | 5 | 48.574 | KV453028.1 | 4139026 | 13-scf00114 | 13 |
| AX-157976413 | 5 | 48.574 | KV453028.1 | 4161434 | 13-scf00114 | 13 |
| AX-157976552 | 5 | 48.574 | KV453028.1 | 4323504 | 13-scf00114 | 13 |
| AX-157976577 | 5 | 48.574 | KV453028.1 | 4353825 | 13-scf00114 | 13 |
| AX-157976580 | 5 | 48.574 | KV453028.1 | 4355157 | 13-scf00114 | 13 |
| AX-157976586 | 5 | 48.574 | KV453028.1 | 4359067 | 13-scf00114 | 13 |
| AX-157976615 | 5 | 48.574 | KV453028.1 | 4411864 | 13-scf00114 | 13 |
| AX-157719466 | 5 | 48.574 | KV453028.1 | 5003553 | 13-scf00114 | 13 |
| AX-157976897 | 5 | 48.574 | KV453028.1 | 5037958 | 13-scf00114 | 13 |
| AX-157713534 | 5 | 48.574 | KV453028.1 | 5050279 | 13-scf00114 | 13 |
| AX-157976950 | 5 | 48.574 | KV453028.1 | 5108561 | 13-scf00114 | 13 |
| AX-157869689 | 5 | 48.574 | KV453028.1 | 5152706 | 13-scf00114 | 13 |
| AX-157977156 | 5 | 48.574 | KV453028.1 | 5352868 | 13-scf00114 | 13 |
| AX-158390395 | 5 | 48.574 | KV453028.1 | 5487836 | 13-scf00114 | 13 |
| AX-157977417 | 5 | 48.574 | KV453028.1 | 5576497 | 13-scf00114 | 13 |
| AX-157977925 | 5 | 48.574 | KV453028.1 | 5969145 | 13-scf00114 | 13 |
| AX-158390402 | 5 | 48.574 | KV453028.1 | 6045320 | 13-scf00114 | 13 |
| AX-158390404 | 5 | 48.574 | KV453028.1 | 6156852 | 13-scf00114 | 13 |
| AX-158390406 | 5 | 48.574 | KV453028.1 | 6311848 | 13-scf00114 | 13 |
| AX-157817419 | 5 | 48.574 | KV453028.1 | 6549143 | 13-scf00114 | 13 |
| AX-157978622 | 5 | 48.574 | KV453028.1 | 6549391 | 13-scf00114 | 13 |
| AX-157978630 | 5 | 48.574 | KV453028.1 | 6552284 | 13-scf00114 | 13 |
| AX-157978636 | 5 | 48.574 | KV453028.1 | 6559004 | 13-scf00114 | 13 |
| AX-158390408 | 5 | 48.574 | KV453028.1 | 6566817 | 13-scf00114 | 13 |
| AX-157978659 | 5 | 48.574 | KV453028.1 | 6581769 | 13-scf00114 | 13 |
| AX-157978733 | 5 | 48.574 | KV453028.1 | 6662357 | 13-scf00114 | 13 |
| AX-157978737 | 5 | 48.574 | KV453028.1 | 6665222 | 13-scf00114 | 13 |
| AX-157979448 | 5 | 48.574 | KV453028.1 | 8633602 | 13-scf00114 | 13 |
| AX-157979610 | 5 | 48.574 | KV453028.1 | 8859637 | 13-scf00114 | 13 |
| AX-157979727 | 5 | 48.574 | KV453028.1 | 9092425 | 13-scf00114 | 13 |
| AX-157979832 | 5 | 48.574 | KV453028.1 | 9303690 | 13-scf00114 | 13 |
| AX-157979833 | 5 | 48.574 | KV453028.1 | 9308248 | 13-scf00114 | 13 |

|              |   |        |             |          |             |    |
|--------------|---|--------|-------------|----------|-------------|----|
| AX-157979834 | 5 | 48.574 | KV453028.1  | 9309489  | 13-scf00114 | 13 |
| AX-157979903 | 5 | 48.574 | KV453028.1  | 9426305  | 13-scf00114 | 13 |
| AX-158390434 | 5 | 48.574 | KV453028.1  | 9452594  | 13-scf00114 | 13 |
| AX-158390435 | 5 | 48.574 | KV453028.1  | 9457198  | 13-scf00114 | 13 |
| AX-158390436 | 5 | 48.574 | KV453028.1  | 9505799  | 13-scf00114 | 13 |
| AX-157869731 | 5 | 48.574 | KV453028.1  | 9812980  | 13-scf00114 | 13 |
| AX-158390439 | 5 | 48.574 | KV453028.1  | 9891209  | 13-scf00114 | 13 |
| AX-157869732 | 5 | 48.574 | KV453028.1  | 9959721  | 13-scf00114 | 13 |
| AX-157980613 | 5 | 48.574 | KV453028.1  | 10397383 | 13-scf00114 | 13 |
| AX-157980678 | 5 | 48.574 | KV453028.1  | 10517090 | 13-scf00114 | 13 |
| AX-157869735 | 5 | 48.574 | KV453028.1  | 10622306 | 13-scf00114 | 13 |
| AX-158390442 | 5 | 48.574 | KV453028.1  | 10753132 | 13-scf00114 | 13 |
| AX-157980920 | 5 | 48.574 | KV453028.1  | 10922368 | 13-scf00114 | 13 |
| AX-157980977 | 5 | 48.574 | KV453028.1  | 10994244 | 13-scf00114 | 13 |
| AX-157980978 | 5 | 48.574 | KV453028.1  | 10994804 | 13-scf00114 | 13 |
| AX-158390444 | 5 | 48.574 | KV453028.1  | 11019707 | 13-scf00114 | 13 |
| AX-157705575 | 5 | 48.574 | 3ML01030276 | 905      | scf05870_1  | UN |
| AX-157975894 | 5 | 48.575 | KV453028.1  | 3665453  | 13-scf00114 | 13 |
| AX-157975898 | 5 | 48.579 | KV453028.1  | 3667641  | 13-scf00114 | 13 |
| AX-157706796 | 5 | 48.579 | KV453028.1  | 3679415  | 13-scf00114 | 13 |
| AX-157706795 | 5 | 48.579 | KV453028.1  | 3679501  | 13-scf00114 | 13 |
| AX-157975949 | 5 | 48.579 | KV453028.1  | 3730137  | 13-scf00114 | 13 |
| AX-157975973 | 5 | 48.579 | KV453028.1  | 3751712  | 13-scf00114 | 13 |
| AX-157976017 | 5 | 48.579 | KV453028.1  | 3786416  | 13-scf00114 | 13 |
| AX-157976714 | 5 | 48.579 | KV453028.1  | 4598543  | 13-scf00114 | 13 |
| AX-157855094 | 5 | 48.579 | KV453028.1  | 4605031  | 13-scf00114 | 13 |
| AX-157976717 | 5 | 48.579 | KV453028.1  | 4606308  | 13-scf00114 | 13 |
| AX-158383163 | 5 | 48.579 | KV453028.1  | 4606407  | 13-scf00114 | 13 |
| AX-157976725 | 5 | 48.579 | KV453028.1  | 4614366  | 13-scf00114 | 13 |
| AX-157976732 | 5 | 48.579 | KV453028.1  | 4644070  | 13-scf00114 | 13 |
| AX-157976733 | 5 | 48.579 | KV453028.1  | 4646554  | 13-scf00114 | 13 |
| AX-157855095 | 5 | 48.579 | KV453028.1  | 4655760  | 13-scf00114 | 13 |
| AX-157855096 | 5 | 48.579 | KV453028.1  | 4659307  | 13-scf00114 | 13 |
| AX-157817288 | 5 | 48.579 | KV453028.1  | 4663989  | 13-scf00114 | 13 |
| AX-157711325 | 5 | 48.579 | KV453028.1  | 4678343  | 13-scf00114 | 13 |
| AX-157725712 | 5 | 48.579 | KV453028.1  | 4686088  | 13-scf00114 | 13 |
| AX-157976750 | 5 | 48.579 | KV453028.1  | 4689704  | 13-scf00114 | 13 |
| AX-158415538 | 5 | 48.579 | KV453028.1  | 4700117  | 13-scf00114 | 13 |
| AX-158406772 | 5 | 48.579 | KV453028.1  | 4700431  | 13-scf00114 | 13 |
| AX-157855100 | 5 | 48.579 | KV453028.1  | 4703079  | 13-scf00114 | 13 |
| AX-157976756 | 5 | 48.579 | KV453028.1  | 4703721  | 13-scf00114 | 13 |
| AX-158405339 | 5 | 48.579 | KV453028.1  | 4713608  | 13-scf00114 | 13 |
| AX-157976760 | 5 | 48.579 | KV453028.1  | 4715018  | 13-scf00114 | 13 |
| AX-157976762 | 5 | 48.579 | KV453028.1  | 4715616  | 13-scf00114 | 13 |
| AX-157699127 | 5 | 48.579 | KV453028.1  | 4719360  | 13-scf00114 | 13 |
| AX-158405340 | 5 | 48.579 | KV453028.1  | 4722966  | 13-scf00114 | 13 |
| AX-157976764 | 5 | 48.579 | KV453028.1  | 4725752  | 13-scf00114 | 13 |
| AX-157976768 | 5 | 48.579 | KV453028.1  | 4735211  | 13-scf00114 | 13 |
| AX-157976774 | 5 | 48.579 | KV453028.1  | 4755972  | 13-scf00114 | 13 |
| AX-157884307 | 5 | 48.579 | KV453028.1  | 4760639  | 13-scf00114 | 13 |
| AX-157976777 | 5 | 48.579 | KV453028.1  | 4763485  | 13-scf00114 | 13 |

|              |   |        |            |         |             |    |
|--------------|---|--------|------------|---------|-------------|----|
| AX-157976778 | 5 | 48.579 | KV453028.1 | 4764236 | 13-scf00114 | 13 |
| AX-158390383 | 5 | 48.579 | KV453028.1 | 4764498 | 13-scf00114 | 13 |
| AX-158390384 | 5 | 48.579 | KV453028.1 | 4765000 | 13-scf00114 | 13 |
| AX-157976786 | 5 | 48.579 | KV453028.1 | 4780806 | 13-scf00114 | 13 |
| AX-157976789 | 5 | 48.579 | KV453028.1 | 4783690 | 13-scf00114 | 13 |
| AX-157976793 | 5 | 48.579 | KV453028.1 | 4786238 | 13-scf00114 | 13 |
| AX-157703907 | 5 | 48.579 | KV453028.1 | 4795967 | 13-scf00114 | 13 |
| AX-158390386 | 5 | 48.579 | KV453028.1 | 4799014 | 13-scf00114 | 13 |
| AX-157768816 | 5 | 48.579 | KV453028.1 | 4802679 | 13-scf00114 | 13 |
| AX-158415539 | 5 | 48.579 | KV453028.1 | 4828857 | 13-scf00114 | 13 |
| AX-158390389 | 5 | 48.579 | KV453028.1 | 4844125 | 13-scf00114 | 13 |
| AX-157976815 | 5 | 48.579 | KV453028.1 | 4845509 | 13-scf00114 | 13 |
| AX-157976837 | 5 | 48.579 | KV453028.1 | 4887165 | 13-scf00114 | 13 |
| AX-157976839 | 5 | 48.579 | KV453028.1 | 4898900 | 13-scf00114 | 13 |
| AX-157976840 | 5 | 48.579 | KV453028.1 | 4899619 | 13-scf00114 | 13 |
| AX-157708075 | 5 | 48.579 | KV453028.1 | 4901561 | 13-scf00114 | 13 |
| AX-157855105 | 5 | 48.579 | KV453028.1 | 4902542 | 13-scf00114 | 13 |
| AX-157855106 | 5 | 48.579 | KV453028.1 | 4906113 | 13-scf00114 | 13 |
| AX-157855107 | 5 | 48.579 | KV453028.1 | 4910726 | 13-scf00114 | 13 |
| AX-157976848 | 5 | 48.579 | KV453028.1 | 4928424 | 13-scf00114 | 13 |
| AX-157976850 | 5 | 48.579 | KV453028.1 | 4931362 | 13-scf00114 | 13 |
| AX-157976851 | 5 | 48.579 | KV453028.1 | 4935201 | 13-scf00114 | 13 |
| AX-157976854 | 5 | 48.579 | KV453028.1 | 4946425 | 13-scf00114 | 13 |
| AX-157976857 | 5 | 48.579 | KV453028.1 | 4952452 | 13-scf00114 | 13 |
| AX-157976858 | 5 | 48.579 | KV453028.1 | 4955874 | 13-scf00114 | 13 |
| AX-157976860 | 5 | 48.579 | KV453028.1 | 4962942 | 13-scf00114 | 13 |
| AX-158406779 | 5 | 48.579 | KV453028.1 | 4964153 | 13-scf00114 | 13 |
| AX-158422126 | 5 | 48.579 | KV453028.1 | 4965903 | 13-scf00114 | 13 |
| AX-157855109 | 5 | 48.579 | KV453028.1 | 4973251 | 13-scf00114 | 13 |
| AX-157976869 | 5 | 48.579 | KV453028.1 | 4976564 | 13-scf00114 | 13 |
| AX-157976871 | 5 | 48.579 | KV453028.1 | 4978768 | 13-scf00114 | 13 |
| AX-157855111 | 5 | 48.579 | KV453028.1 | 4979727 | 13-scf00114 | 13 |
| AX-158422127 | 5 | 48.579 | KV453028.1 | 4981394 | 13-scf00114 | 13 |
| AX-157976875 | 5 | 48.579 | KV453028.1 | 4983728 | 13-scf00114 | 13 |
| AX-157976878 | 5 | 48.579 | KV453028.1 | 4992297 | 13-scf00114 | 13 |
| AX-158415541 | 5 | 48.579 | KV453028.1 | 5015745 | 13-scf00114 | 13 |
| AX-157976892 | 5 | 48.579 | KV453028.1 | 5017620 | 13-scf00114 | 13 |
| AX-157697587 | 5 | 48.579 | KV453028.1 | 5018920 | 13-scf00114 | 13 |
| AX-157976898 | 5 | 48.579 | KV453028.1 | 5039013 | 13-scf00114 | 13 |
| AX-157855113 | 5 | 48.579 | KV453028.1 | 5041419 | 13-scf00114 | 13 |
| AX-157855114 | 5 | 48.579 | KV453028.1 | 5042496 | 13-scf00114 | 13 |
| AX-157976903 | 5 | 48.579 | KV453028.1 | 5045172 | 13-scf00114 | 13 |
| AX-157855115 | 5 | 48.579 | KV453028.1 | 5045816 | 13-scf00114 | 13 |
| AX-157976905 | 5 | 48.579 | KV453028.1 | 5046333 | 13-scf00114 | 13 |
| AX-157817294 | 5 | 48.579 | KV453028.1 | 5046500 | 13-scf00114 | 13 |
| AX-157976907 | 5 | 48.579 | KV453028.1 | 5047135 | 13-scf00114 | 13 |
| AX-157817297 | 5 | 48.579 | KV453028.1 | 5049241 | 13-scf00114 | 13 |
| AX-157869685 | 5 | 48.579 | KV453028.1 | 5050856 | 13-scf00114 | 13 |
| AX-157869686 | 5 | 48.579 | KV453028.1 | 5053276 | 13-scf00114 | 13 |
| AX-157817299 | 5 | 48.579 | KV453028.1 | 5055780 | 13-scf00114 | 13 |
| AX-157817300 | 5 | 48.579 | KV453028.1 | 5056564 | 13-scf00114 | 13 |

|              |   |        |            |         |             |    |
|--------------|---|--------|------------|---------|-------------|----|
| AX-157976917 | 5 | 48.579 | KV453028.1 | 5063526 | 13-scf00114 | 13 |
| AX-157976922 | 5 | 48.579 | KV453028.1 | 5073861 | 13-scf00114 | 13 |
| AX-157976923 | 5 | 48.579 | KV453028.1 | 5075443 | 13-scf00114 | 13 |
| AX-157976932 | 5 | 48.579 | KV453028.1 | 5086770 | 13-scf00114 | 13 |
| AX-157817302 | 5 | 48.579 | KV453028.1 | 5098213 | 13-scf00114 | 13 |
| AX-157708239 | 5 | 48.579 | KV453028.1 | 5177508 | 13-scf00114 | 13 |
| AX-157977073 | 5 | 48.579 | KV453028.1 | 5255642 | 13-scf00114 | 13 |
| AX-157977074 | 5 | 48.579 | KV453028.1 | 5258442 | 13-scf00114 | 13 |
| AX-157977086 | 5 | 48.579 | KV453028.1 | 5278399 | 13-scf00114 | 13 |
| AX-157977088 | 5 | 48.579 | KV453028.1 | 5280136 | 13-scf00114 | 13 |
| AX-157977093 | 5 | 48.579 | KV453028.1 | 5281626 | 13-scf00114 | 13 |
| AX-157977096 | 5 | 48.579 | KV453028.1 | 5284384 | 13-scf00114 | 13 |
| AX-157977099 | 5 | 48.579 | KV453028.1 | 5286001 | 13-scf00114 | 13 |
| AX-157977100 | 5 | 48.579 | KV453028.1 | 5287460 | 13-scf00114 | 13 |
| AX-157977103 | 5 | 48.579 | KV453028.1 | 5290786 | 13-scf00114 | 13 |
| AX-157855120 | 5 | 48.579 | KV453028.1 | 5296599 | 13-scf00114 | 13 |
| AX-157865011 | 5 | 48.579 | KV453028.1 | 5303046 | 13-scf00114 | 13 |
| AX-157760537 | 5 | 48.579 | KV453028.1 | 5304445 | 13-scf00114 | 13 |
| AX-157743809 | 5 | 48.579 | KV453028.1 | 5304596 | 13-scf00114 | 13 |
| AX-157855121 | 5 | 48.579 | KV453028.1 | 5306183 | 13-scf00114 | 13 |
| AX-157865012 | 5 | 48.579 | KV453028.1 | 5315845 | 13-scf00114 | 13 |
| AX-157977189 | 5 | 48.579 | KV453028.1 | 5371087 | 13-scf00114 | 13 |
| AX-157978743 | 5 | 48.579 | KV453028.1 | 6669543 | 13-scf00114 | 13 |
| AX-157979274 | 5 | 48.579 | KV453028.1 | 8302865 | 13-scf00114 | 13 |
| AX-157979487 | 5 | 48.579 | KV453028.1 | 8684261 | 13-scf00114 | 13 |
| AX-157975667 | 5 | 48.582 | KV453028.1 | 3416092 | 13-scf00114 | 13 |
| AX-157975877 | 5 | 48.582 | KV453028.1 | 3652180 | 13-scf00114 | 13 |
| AX-157975906 | 5 | 48.582 | KV453028.1 | 3677002 | 13-scf00114 | 13 |
| AX-157975917 | 5 | 48.582 | KV453028.1 | 3694080 | 13-scf00114 | 13 |
| AX-157975935 | 5 | 48.582 | KV453028.1 | 3716319 | 13-scf00114 | 13 |
| AX-157855063 | 5 | 48.582 | KV453028.1 | 3717119 | 13-scf00114 | 13 |
| AX-157855064 | 5 | 48.582 | KV453028.1 | 3717259 | 13-scf00114 | 13 |
| AX-157855065 | 5 | 48.582 | KV453028.1 | 3719237 | 13-scf00114 | 13 |
| AX-157975937 | 5 | 48.582 | KV453028.1 | 3721352 | 13-scf00114 | 13 |
| AX-157975947 | 5 | 48.582 | KV453028.1 | 3729324 | 13-scf00114 | 13 |
| AX-157817252 | 5 | 48.582 | KV453028.1 | 3730315 | 13-scf00114 | 13 |
| AX-157743629 | 5 | 48.582 | KV453028.1 | 3733062 | 13-scf00114 | 13 |
| AX-158379544 | 5 | 48.582 | KV453028.1 | 3735474 | 13-scf00114 | 13 |
| AX-157975954 | 5 | 48.582 | KV453028.1 | 3735518 | 13-scf00114 | 13 |
| AX-157975965 | 5 | 48.582 | KV453028.1 | 3745111 | 13-scf00114 | 13 |
| AX-157975967 | 5 | 48.582 | KV453028.1 | 3746327 | 13-scf00114 | 13 |
| AX-157975969 | 5 | 48.582 | KV453028.1 | 3748071 | 13-scf00114 | 13 |
| AX-157817255 | 5 | 48.582 | KV453028.1 | 3763345 | 13-scf00114 | 13 |
| AX-157817256 | 5 | 48.582 | KV453028.1 | 3764713 | 13-scf00114 | 13 |
| AX-157975993 | 5 | 48.582 | KV453028.1 | 3766608 | 13-scf00114 | 13 |
| AX-157976082 | 5 | 48.582 | KV453028.1 | 3833790 | 13-scf00114 | 13 |
| AX-157976086 | 5 | 48.582 | KV453028.1 | 3849251 | 13-scf00114 | 13 |
| AX-157975909 | 5 | 48.587 | KV453028.1 | 3680505 | 13-scf00114 | 13 |
| AX-157975918 | 5 | 48.592 | KV453028.1 | 3695112 | 13-scf00114 | 13 |
| AX-158405337 | 5 | 48.593 | KV453028.1 | 3699380 | 13-scf00114 | 13 |
| AX-158415522 | 5 | 48.597 | KV453028.1 | 3697177 | 13-scf00114 | 13 |

|              |   |        |            |         |             |    |
|--------------|---|--------|------------|---------|-------------|----|
| AX-157975920 | 5 | 48.597 | KV453028.1 | 3697267 | 13-scf00114 | 13 |
| AX-157975925 | 5 | 48.597 | KV453028.1 | 3700577 | 13-scf00114 | 13 |
| AX-157975929 | 5 | 48.597 | KV453028.1 | 3704710 | 13-scf00114 | 13 |
| AX-157855062 | 5 | 48.597 | KV453028.1 | 3705551 | 13-scf00114 | 13 |
| AX-157975931 | 5 | 48.597 | KV453028.1 | 3709341 | 13-scf00114 | 13 |
| AX-157975951 | 5 | 48.597 | KV453028.1 | 3732683 | 13-scf00114 | 13 |
| AX-157975980 | 5 | 48.597 | KV453028.1 | 3754749 | 13-scf00114 | 13 |
| AX-157975984 | 5 | 48.597 | KV453028.1 | 3757730 | 13-scf00114 | 13 |
| AX-157975986 | 5 | 48.597 | KV453028.1 | 3759131 | 13-scf00114 | 13 |
| AX-157817254 | 5 | 48.597 | KV453028.1 | 3761684 | 13-scf00114 | 13 |
| AX-157976015 | 5 | 48.597 | KV453028.1 | 3784814 | 13-scf00114 | 13 |
| AX-157976018 | 5 | 48.597 | KV453028.1 | 3786626 | 13-scf00114 | 13 |
| AX-157976020 | 5 | 48.597 | KV453028.1 | 3787456 | 13-scf00114 | 13 |
| AX-157976258 | 5 | 48.597 | KV453028.1 | 4029899 | 13-scf00114 | 13 |
| AX-157975932 | 5 | 48.598 | KV453028.1 | 3713756 | 13-scf00114 | 13 |
| AX-157975961 | 5 | 48.598 | KV453028.1 | 3740545 | 13-scf00114 | 13 |
| AX-157975921 | 5 | 48.601 | KV453028.1 | 3698087 | 13-scf00114 | 13 |
| AX-157738738 | 5 | 48.601 | KV453028.1 | 3722265 | 13-scf00114 | 13 |
| AX-157855066 | 5 | 48.601 | KV453028.1 | 3762408 | 13-scf00114 | 13 |
| AX-157976002 | 5 | 48.601 | KV453028.1 | 3774807 | 13-scf00114 | 13 |
| AX-157976004 | 5 | 48.601 | KV453028.1 | 3776519 | 13-scf00114 | 13 |
| AX-157976005 | 5 | 48.601 | KV453028.1 | 3776880 | 13-scf00114 | 13 |
| AX-157976007 | 5 | 48.601 | KV453028.1 | 3777630 | 13-scf00114 | 13 |
| AX-157976009 | 5 | 48.601 | KV453028.1 | 3778772 | 13-scf00114 | 13 |
| AX-157976010 | 5 | 48.601 | KV453028.1 | 3780054 | 13-scf00114 | 13 |
| AX-157976019 | 5 | 48.601 | KV453028.1 | 3787254 | 13-scf00114 | 13 |
| AX-157975943 | 5 | 48.604 | KV453028.1 | 3723937 | 13-scf00114 | 13 |
| AX-157976014 | 5 | 48.604 | KV453028.1 | 3784185 | 13-scf00114 | 13 |
| AX-157817257 | 5 | 48.604 | KV453028.1 | 3788104 | 13-scf00114 | 13 |
| AX-157975840 | 5 | 48.606 | KV453028.1 | 3623995 | 13-scf00114 | 13 |
| AX-157975841 | 5 | 48.606 | KV453028.1 | 3624353 | 13-scf00114 | 13 |
| AX-157975944 | 5 | 48.606 | KV453028.1 | 3724775 | 13-scf00114 | 13 |
| AX-157975958 | 5 | 48.606 | KV453028.1 | 3737780 | 13-scf00114 | 13 |
| AX-158383148 | 5 | 48.608 | KV453028.1 | 3714055 | 13-scf00114 | 13 |
| AX-157975963 | 5 | 48.608 | KV453028.1 | 3742002 | 13-scf00114 | 13 |
| AX-157975966 | 5 | 48.618 | KV453028.1 | 3745960 | 13-scf00114 | 13 |
| AX-157975970 | 5 | 48.629 | KV453028.1 | 3748433 | 13-scf00114 | 13 |
| AX-157975972 | 5 | 48.637 | KV453028.1 | 3751248 | 13-scf00114 | 13 |
| AX-157975974 | 5 | 48.645 | KV453028.1 | 3753069 | 13-scf00114 | 13 |
| AX-157975977 | 5 | 48.655 | KV453028.1 | 3754142 | 13-scf00114 | 13 |
| AX-157855061 | 5 | 48.663 | KV453028.1 | 3674958 | 13-scf00114 | 13 |
| AX-157975903 | 5 | 48.663 | KV453028.1 | 3675324 | 13-scf00114 | 13 |
| AX-157975911 | 5 | 48.663 | KV453028.1 | 3681629 | 13-scf00114 | 13 |
| AX-157975916 | 5 | 48.663 | KV453028.1 | 3693052 | 13-scf00114 | 13 |
| AX-157975982 | 5 | 48.663 | KV453028.1 | 3755117 | 13-scf00114 | 13 |
| AX-157975783 | 5 | 48.666 | KV453028.1 | 3572365 | 13-scf00114 | 13 |
| AX-157975784 | 5 | 48.666 | KV453028.1 | 3572660 | 13-scf00114 | 13 |
| AX-157975834 | 5 | 48.666 | KV453028.1 | 3616723 | 13-scf00114 | 13 |
| AX-157817253 | 5 | 48.666 | KV453028.1 | 3755622 | 13-scf00114 | 13 |
| AX-157978024 | 5 | 48.666 | KV453028.1 | 6045155 | 13-scf00114 | 13 |
| AX-157975382 | 5 | 48.67  | KV453028.1 | 3020863 | 13-scf00114 | 13 |

|              |   |        |            |          |             |    |
|--------------|---|--------|------------|----------|-------------|----|
| AX-157817250 | 5 | 48.67  | KV453028.1 | 3721585  | 13-scf00114 | 13 |
| AX-157975985 | 5 | 48.67  | KV453028.1 | 3758395  | 13-scf00114 | 13 |
| AX-157975996 | 5 | 48.673 | KV453028.1 | 3768830  | 13-scf00114 | 13 |
| AX-157975997 | 5 | 48.673 | KV453028.1 | 3769252  | 13-scf00114 | 13 |
| AX-157875706 | 5 | 48.673 | KV453028.1 | 3773626  | 13-scf00114 | 13 |
| AX-157976000 | 5 | 48.673 | KV453028.1 | 3774070  | 13-scf00114 | 13 |
| AX-157740407 | 5 | 48.673 | KV453028.1 | 3777724  | 13-scf00114 | 13 |
| AX-157978676 | 5 | 48.673 | KV453028.1 | 6598330  | 13-scf00114 | 13 |
| AX-157980810 | 5 | 48.673 | KV453028.1 | 10752329 | 13-scf00114 | 13 |
| AX-157975691 | 5 | 48.675 | KV453028.1 | 3435561  | 13-scf00114 | 13 |
| AX-157975697 | 5 | 48.675 | KV453028.1 | 3441724  | 13-scf00114 | 13 |
| AX-157975864 | 5 | 48.675 | KV453028.1 | 3643082  | 13-scf00114 | 13 |
| AX-157975946 | 5 | 48.675 | KV453028.1 | 3727189  | 13-scf00114 | 13 |
| AX-157975994 | 5 | 48.675 | KV453028.1 | 3766786  | 13-scf00114 | 13 |
| AX-157975995 | 5 | 48.675 | KV453028.1 | 3767584  | 13-scf00114 | 13 |
| AX-157976006 | 5 | 48.675 | KV453028.1 | 3777396  | 13-scf00114 | 13 |
| AX-157976008 | 5 | 48.675 | KV453028.1 | 3778001  | 13-scf00114 | 13 |
| AX-157976216 | 5 | 48.675 | KV453028.1 | 3993566  | 13-scf00114 | 13 |
| AX-157976638 | 5 | 48.675 | KV453028.1 | 4433606  | 13-scf00114 | 13 |
| AX-157751780 | 5 | 48.675 | KV453028.1 | 8626801  | 13-scf00114 | 13 |
| AX-157855067 | 5 | 48.679 | KV453028.1 | 3782697  | 13-scf00114 | 13 |
| AX-157976023 | 5 | 48.683 | KV453028.1 | 3789420  | 13-scf00114 | 13 |
| AX-157976024 | 5 | 48.683 | KV453028.1 | 3790236  | 13-scf00114 | 13 |
| AX-157976245 | 5 | 48.683 | KV453028.1 | 4020492  | 13-scf00114 | 13 |
| AX-157976351 | 5 | 48.683 | KV453028.1 | 4113520  | 13-scf00114 | 13 |
| AX-157976458 | 5 | 48.683 | KV453028.1 | 4204905  | 13-scf00114 | 13 |
| AX-157976916 | 5 | 48.683 | KV453028.1 | 5060596  | 13-scf00114 | 13 |
| AX-157977301 | 5 | 48.683 | KV453028.1 | 5489808  | 13-scf00114 | 13 |
| AX-157978981 | 5 | 48.683 | KV453028.1 | 6966742  | 13-scf00114 | 13 |
| AX-157865023 | 5 | 48.683 | KV453028.1 | 7055998  | 13-scf00114 | 13 |
| AX-157979059 | 5 | 48.683 | KV453028.1 | 7198656  | 13-scf00114 | 13 |
| AX-157979098 | 5 | 48.683 | KV453028.1 | 7413442  | 13-scf00114 | 13 |
| AX-157979124 | 5 | 48.683 | KV453028.1 | 7550608  | 13-scf00114 | 13 |
| AX-157979192 | 5 | 48.683 | KV453028.1 | 7898334  | 13-scf00114 | 13 |
| AX-157979208 | 5 | 48.683 | KV453028.1 | 8004944  | 13-scf00114 | 13 |
| AX-157979399 | 5 | 48.683 | KV453028.1 | 8563310  | 13-scf00114 | 13 |
| AX-157855254 | 5 | 48.683 | KV453028.1 | 8563398  | 13-scf00114 | 13 |
| AX-157817507 | 5 | 48.683 | KV453028.1 | 8662400  | 13-scf00114 | 13 |
| AX-157979534 | 5 | 48.683 | KV453028.1 | 8748382  | 13-scf00114 | 13 |
| AX-157855278 | 5 | 48.683 | KV453028.1 | 8767769  | 13-scf00114 | 13 |
| AX-157817521 | 5 | 48.683 | KV453028.1 | 8781198  | 13-scf00114 | 13 |
| AX-157979589 | 5 | 48.683 | KV453028.1 | 8842604  | 13-scf00114 | 13 |
| AX-157979625 | 5 | 48.683 | KV453028.1 | 8877922  | 13-scf00114 | 13 |
| AX-157717408 | 5 | 48.683 | KV453028.1 | 8960272  | 13-scf00114 | 13 |
| AX-157979682 | 5 | 48.683 | KV453028.1 | 8974938  | 13-scf00114 | 13 |
| AX-157817542 | 5 | 48.683 | KV453028.1 | 8987345  | 13-scf00114 | 13 |
| AX-157979703 | 5 | 48.683 | KV453028.1 | 9003098  | 13-scf00114 | 13 |
| AX-157979710 | 5 | 48.683 | KV453028.1 | 9027541  | 13-scf00114 | 13 |
| AX-157711158 | 5 | 48.683 | KV453028.1 | 9044898  | 13-scf00114 | 13 |
| AX-157979754 | 5 | 48.683 | KV453028.1 | 9153240  | 13-scf00114 | 13 |
| AX-157855324 | 5 | 48.683 | KV453028.1 | 9214400  | 13-scf00114 | 13 |

|              |   |        |            |          |             |    |
|--------------|---|--------|------------|----------|-------------|----|
| AX-157979812 | 5 | 48.683 | KV453028.1 | 9250722  | 13-scf00114 | 13 |
| AX-157774230 | 5 | 48.683 | KV453028.1 | 9629135  | 13-scf00114 | 13 |
| AX-157980048 | 5 | 48.683 | KV453028.1 | 9682982  | 13-scf00114 | 13 |
| AX-157980063 | 5 | 48.683 | KV453028.1 | 9702273  | 13-scf00114 | 13 |
| AX-157980079 | 5 | 48.683 | KV453028.1 | 9718700  | 13-scf00114 | 13 |
| AX-157980081 | 5 | 48.683 | KV453028.1 | 9719883  | 13-scf00114 | 13 |
| AX-157765146 | 5 | 48.683 | KV453028.1 | 9803743  | 13-scf00114 | 13 |
| AX-157855380 | 5 | 48.683 | KV453028.1 | 9852698  | 13-scf00114 | 13 |
| AX-157980202 | 5 | 48.683 | KV453028.1 | 9864520  | 13-scf00114 | 13 |
| AX-157855383 | 5 | 48.683 | KV453028.1 | 9882192  | 13-scf00114 | 13 |
| AX-157980518 | 5 | 48.683 | KV453028.1 | 10257606 | 13-scf00114 | 13 |
| AX-157980526 | 5 | 48.683 | KV453028.1 | 10264247 | 13-scf00114 | 13 |
| AX-157980694 | 5 | 48.683 | KV453028.1 | 10535385 | 13-scf00114 | 13 |
| AX-157976026 | 5 | 48.725 | KV453028.1 | 3797702  | 13-scf00114 | 13 |
| AX-157976027 | 5 | 48.76  | KV453028.1 | 3798397  | 13-scf00114 | 13 |
| AX-157976028 | 5 | 48.76  | KV453028.1 | 3799329  | 13-scf00114 | 13 |
| AX-157976044 | 5 | 48.76  | KV453028.1 | 3807519  | 13-scf00114 | 13 |
| AX-157975677 | 5 | 48.792 | KV453028.1 | 3423490  | 13-scf00114 | 13 |
| AX-157975679 | 5 | 48.792 | KV453028.1 | 3424599  | 13-scf00114 | 13 |
| AX-157975716 | 5 | 48.792 | KV453028.1 | 3472429  | 13-scf00114 | 13 |
| AX-157755747 | 5 | 48.792 | KV453028.1 | 3569894  | 13-scf00114 | 13 |
| AX-157975882 | 5 | 48.792 | KV453028.1 | 3654491  | 13-scf00114 | 13 |
| AX-157757967 | 5 | 48.792 | KV453028.1 | 3685001  | 13-scf00114 | 13 |
| AX-157975950 | 5 | 48.792 | KV453028.1 | 3731765  | 13-scf00114 | 13 |
| AX-157975979 | 5 | 48.792 | KV453028.1 | 3754451  | 13-scf00114 | 13 |
| AX-157976025 | 5 | 48.792 | KV453028.1 | 3792731  | 13-scf00114 | 13 |
| AX-157976029 | 5 | 48.792 | KV453028.1 | 3800233  | 13-scf00114 | 13 |
| AX-157976032 | 5 | 48.792 | KV453028.1 | 3802717  | 13-scf00114 | 13 |
| AX-157976033 | 5 | 48.792 | KV453028.1 | 3803685  | 13-scf00114 | 13 |
| AX-157976046 | 5 | 48.792 | KV453028.1 | 3808433  | 13-scf00114 | 13 |
| AX-157976047 | 5 | 48.792 | KV453028.1 | 3808731  | 13-scf00114 | 13 |
| AX-157976048 | 5 | 48.792 | KV453028.1 | 3808947  | 13-scf00114 | 13 |
| AX-157976051 | 5 | 48.792 | KV453028.1 | 3810712  | 13-scf00114 | 13 |
| AX-157714239 | 5 | 48.792 | KV453028.1 | 3810873  | 13-scf00114 | 13 |
| AX-157976052 | 5 | 48.792 | KV453028.1 | 3811409  | 13-scf00114 | 13 |
| AX-157976053 | 5 | 48.792 | KV453028.1 | 3813150  | 13-scf00114 | 13 |
| AX-157976056 | 5 | 48.792 | KV453028.1 | 3814756  | 13-scf00114 | 13 |
| AX-157976058 | 5 | 48.792 | KV453028.1 | 3815583  | 13-scf00114 | 13 |
| AX-157976060 | 5 | 48.792 | KV453028.1 | 3816590  | 13-scf00114 | 13 |
| AX-157976063 | 5 | 48.792 | KV453028.1 | 3818001  | 13-scf00114 | 13 |
| AX-157976065 | 5 | 48.792 | KV453028.1 | 3819324  | 13-scf00114 | 13 |
| AX-157976072 | 5 | 48.792 | KV453028.1 | 3827162  | 13-scf00114 | 13 |
| AX-157855068 | 5 | 48.792 | KV453028.1 | 3829795  | 13-scf00114 | 13 |
| AX-157976076 | 5 | 48.792 | KV453028.1 | 3829849  | 13-scf00114 | 13 |
| AX-157976078 | 5 | 48.792 | KV453028.1 | 3830517  | 13-scf00114 | 13 |
| AX-157976079 | 5 | 48.792 | KV453028.1 | 3831121  | 13-scf00114 | 13 |
| AX-157976080 | 5 | 48.792 | KV453028.1 | 3832326  | 13-scf00114 | 13 |
| AX-157976088 | 5 | 48.792 | KV453028.1 | 3852658  | 13-scf00114 | 13 |
| AX-157817259 | 5 | 48.792 | KV453028.1 | 3854533  | 13-scf00114 | 13 |
| AX-157976089 | 5 | 48.792 | KV453028.1 | 3855985  | 13-scf00114 | 13 |
| AX-157976090 | 5 | 48.792 | KV453028.1 | 3857235  | 13-scf00114 | 13 |

|              |   |        |            |          |             |    |
|--------------|---|--------|------------|----------|-------------|----|
| AX-157976098 | 5 | 48.792 | KV453028.1 | 3864468  | 13-scf00114 | 13 |
| AX-157976170 | 5 | 48.792 | KV453028.1 | 3939697  | 13-scf00114 | 13 |
| AX-157976172 | 5 | 48.792 | KV453028.1 | 3940812  | 13-scf00114 | 13 |
| AX-157976173 | 5 | 48.792 | KV453028.1 | 3941533  | 13-scf00114 | 13 |
| AX-157855070 | 5 | 48.792 | KV453028.1 | 3963494  | 13-scf00114 | 13 |
| AX-158406747 | 5 | 48.792 | KV453028.1 | 4010760  | 13-scf00114 | 13 |
| AX-157976234 | 5 | 48.792 | KV453028.1 | 4011619  | 13-scf00114 | 13 |
| AX-157976241 | 5 | 48.792 | KV453028.1 | 4016610  | 13-scf00114 | 13 |
| AX-157976244 | 5 | 48.792 | KV453028.1 | 4019403  | 13-scf00114 | 13 |
| AX-157757733 | 5 | 48.792 | KV453028.1 | 4038060  | 13-scf00114 | 13 |
| AX-157976299 | 5 | 48.792 | KV453028.1 | 4052369  | 13-scf00114 | 13 |
| AX-157976317 | 5 | 48.792 | KV453028.1 | 4071650  | 13-scf00114 | 13 |
| AX-157976348 | 5 | 48.792 | KV453028.1 | 4110516  | 13-scf00114 | 13 |
| AX-157976417 | 5 | 48.792 | KV453028.1 | 4164469  | 13-scf00114 | 13 |
| AX-157976515 | 5 | 48.792 | KV453028.1 | 4281081  | 13-scf00114 | 13 |
| AX-157976600 | 5 | 48.792 | KV453028.1 | 4399934  | 13-scf00114 | 13 |
| AX-157976635 | 5 | 48.792 | KV453028.1 | 4431747  | 13-scf00114 | 13 |
| AX-157976641 | 5 | 48.792 | KV453028.1 | 4434825  | 13-scf00114 | 13 |
| AX-157976658 | 5 | 48.792 | KV453028.1 | 4482001  | 13-scf00114 | 13 |
| AX-157976720 | 5 | 48.792 | KV453028.1 | 4611614  | 13-scf00114 | 13 |
| AX-157976752 | 5 | 48.792 | KV453028.1 | 4690840  | 13-scf00114 | 13 |
| AX-157976817 | 5 | 48.792 | KV453028.1 | 4845642  | 13-scf00114 | 13 |
| AX-157976900 | 5 | 48.792 | KV453028.1 | 5041117  | 13-scf00114 | 13 |
| AX-157977279 | 5 | 48.792 | KV453028.1 | 5466035  | 13-scf00114 | 13 |
| AX-157977330 | 5 | 48.792 | KV453028.1 | 5513660  | 13-scf00114 | 13 |
| AX-157709361 | 5 | 48.792 | KV453028.1 | 5565876  | 13-scf00114 | 13 |
| AX-157977471 | 5 | 48.792 | KV453028.1 | 5619067  | 13-scf00114 | 13 |
| AX-157723550 | 5 | 48.792 | KV453028.1 | 5925874  | 13-scf00114 | 13 |
| AX-157978040 | 5 | 48.792 | KV453028.1 | 6057148  | 13-scf00114 | 13 |
| AX-157978191 | 5 | 48.792 | KV453028.1 | 6183756  | 13-scf00114 | 13 |
| AX-157978310 | 5 | 48.792 | KV453028.1 | 6285128  | 13-scf00114 | 13 |
| AX-157978388 | 5 | 48.792 | KV453028.1 | 6340630  | 13-scf00114 | 13 |
| AX-158390409 | 5 | 48.792 | KV453028.1 | 6596545  | 13-scf00114 | 13 |
| AX-157978689 | 5 | 48.792 | KV453028.1 | 6611775  | 13-scf00114 | 13 |
| AX-157978693 | 5 | 48.792 | KV453028.1 | 6616836  | 13-scf00114 | 13 |
| AX-157978695 | 5 | 48.792 | KV453028.1 | 6620685  | 13-scf00114 | 13 |
| AX-157978774 | 5 | 48.792 | KV453028.1 | 6710911  | 13-scf00114 | 13 |
| AX-157978775 | 5 | 48.792 | KV453028.1 | 6711277  | 13-scf00114 | 13 |
| AX-157979217 | 5 | 48.792 | KV453028.1 | 8072427  | 13-scf00114 | 13 |
| AX-157979232 | 5 | 48.792 | KV453028.1 | 8131004  | 13-scf00114 | 13 |
| AX-157979235 | 5 | 48.792 | KV453028.1 | 8136319  | 13-scf00114 | 13 |
| AX-157979535 | 5 | 48.792 | KV453028.1 | 8749782  | 13-scf00114 | 13 |
| AX-157817654 | 5 | 48.792 | KV453028.1 | 10322508 | 13-scf00114 | 13 |
| AX-157981921 | 5 | 48.792 | KV453028.1 | 11918924 | 13-scf00114 | 13 |
| AX-157982593 | 5 | 48.792 | KV453028.1 | 13062429 | 13-scf00114 | 13 |
| AX-157982619 | 5 | 48.792 | KV453028.1 | 13150126 | 13-scf00114 | 13 |
| AX-157774248 | 5 | 48.846 | KV453028.1 | 3904741  | 13-scf00114 | 13 |
| AX-157817265 | 5 | 48.901 | KV453028.1 | 3932573  | 13-scf00114 | 13 |
| AX-157976159 | 5 | 48.901 | KV453028.1 | 3932920  | 13-scf00114 | 13 |
| AX-157976161 | 5 | 48.901 | KV453028.1 | 3934019  | 13-scf00114 | 13 |
| AX-157976164 | 5 | 48.901 | KV453028.1 | 3935307  | 13-scf00114 | 13 |



|              |   |        |            |         |             |    |
|--------------|---|--------|------------|---------|-------------|----|
| AX-157976171 | 5 | 48.901 | KV453028.1 | 3940357 | 13-scf00114 | 13 |
| AX-157976174 | 5 | 48.901 | KV453028.1 | 3948293 | 13-scf00114 | 13 |
| AX-157976176 | 5 | 48.901 | KV453028.1 | 3953126 | 13-scf00114 | 13 |
| AX-157976183 | 5 | 48.901 | KV453028.1 | 3960586 | 13-scf00114 | 13 |
| AX-157976184 | 5 | 48.901 | KV453028.1 | 3961202 | 13-scf00114 | 13 |
| AX-157976208 | 5 | 48.901 | KV453028.1 | 3984640 | 13-scf00114 | 13 |
| AX-157976221 | 5 | 48.901 | KV453028.1 | 3998156 | 13-scf00114 | 13 |
| AX-157976318 | 5 | 48.901 | KV453028.1 | 4072583 | 13-scf00114 | 13 |
| AX-157976319 | 5 | 48.901 | KV453028.1 | 4074206 | 13-scf00114 | 13 |
| AX-157976829 | 5 | 48.901 | KV453028.1 | 4867377 | 13-scf00114 | 13 |
| AX-157976971 | 5 | 48.901 | KV453028.1 | 5137686 | 13-scf00114 | 13 |
| AX-157976976 | 5 | 48.901 | KV453028.1 | 5150870 | 13-scf00114 | 13 |
| AX-157977138 | 5 | 48.901 | KV453028.1 | 5339664 | 13-scf00114 | 13 |
| AX-157977139 | 5 | 48.901 | KV453028.1 | 5340280 | 13-scf00114 | 13 |
| AX-157817322 | 5 | 48.901 | KV453028.1 | 5345315 | 13-scf00114 | 13 |
| AX-157977144 | 5 | 48.901 | KV453028.1 | 5345590 | 13-scf00114 | 13 |
| AX-157977206 | 5 | 48.901 | KV453028.1 | 5380137 | 13-scf00114 | 13 |
| AX-157977283 | 5 | 48.901 | KV453028.1 | 5469007 | 13-scf00114 | 13 |
| AX-157978335 | 5 | 48.901 | KV453028.1 | 6302127 | 13-scf00114 | 13 |
| AX-157975542 | 5 | 48.921 | KV453028.1 | 3269549 | 13-scf00114 | 13 |
| AX-157975626 | 5 | 48.921 | KV453028.1 | 3364712 | 13-scf00114 | 13 |
| AX-157976167 | 5 | 48.921 | KV453028.1 | 3936919 | 13-scf00114 | 13 |
| AX-157976175 | 5 | 48.921 | KV453028.1 | 3952398 | 13-scf00114 | 13 |
| AX-157976177 | 5 | 48.921 | KV453028.1 | 3956002 | 13-scf00114 | 13 |
| AX-157976180 | 5 | 48.921 | KV453028.1 | 3958383 | 13-scf00114 | 13 |
| AX-157976182 | 5 | 48.921 | KV453028.1 | 3960055 | 13-scf00114 | 13 |
| AX-157736543 | 5 | 48.921 | KV453028.1 | 3966686 | 13-scf00114 | 13 |
| AX-157976186 | 5 | 48.921 | KV453028.1 | 3966790 | 13-scf00114 | 13 |
| AX-157976188 | 5 | 48.921 | KV453028.1 | 3967366 | 13-scf00114 | 13 |
| AX-157976223 | 5 | 48.921 | KV453028.1 | 4001068 | 13-scf00114 | 13 |
| AX-157976225 | 5 | 48.921 | KV453028.1 | 4003559 | 13-scf00114 | 13 |
| AX-157976262 | 5 | 48.921 | KV453028.1 | 4030635 | 13-scf00114 | 13 |
| AX-157754095 | 5 | 48.921 | KV453028.1 | 4169264 | 13-scf00114 | 13 |
| AX-157976556 | 5 | 48.921 | KV453028.1 | 4330338 | 13-scf00114 | 13 |
| AX-157976574 | 5 | 48.921 | KV453028.1 | 4350070 | 13-scf00114 | 13 |
| AX-157976674 | 5 | 48.921 | KV453028.1 | 4510543 | 13-scf00114 | 13 |
| AX-157976700 | 5 | 48.921 | KV453028.1 | 4558167 | 13-scf00114 | 13 |
| AX-157976769 | 5 | 48.921 | KV453028.1 | 4747483 | 13-scf00114 | 13 |
| AX-157976806 | 5 | 48.921 | KV453028.1 | 4811164 | 13-scf00114 | 13 |
| AX-157977000 | 5 | 48.921 | KV453028.1 | 5187953 | 13-scf00114 | 13 |
| AX-157977002 | 5 | 48.921 | KV453028.1 | 5188279 | 13-scf00114 | 13 |
| AX-157757042 | 5 | 48.921 | KV453028.1 | 5188799 | 13-scf00114 | 13 |
| AX-157977056 | 5 | 48.921 | KV453028.1 | 5232525 | 13-scf00114 | 13 |
| AX-157817319 | 5 | 48.921 | KV453028.1 | 5315560 | 13-scf00114 | 13 |
| AX-157977297 | 5 | 48.921 | KV453028.1 | 5483900 | 13-scf00114 | 13 |
| AX-157977317 | 5 | 48.921 | KV453028.1 | 5506121 | 13-scf00114 | 13 |
| AX-157724811 | 5 | 48.921 | KV453028.1 | 5529003 | 13-scf00114 | 13 |
| AX-157977512 | 5 | 48.921 | KV453028.1 | 5649999 | 13-scf00114 | 13 |
| AX-157977969 | 5 | 48.921 | KV453028.1 | 6009751 | 13-scf00114 | 13 |
| AX-157977970 | 5 | 48.921 | KV453028.1 | 6010964 | 13-scf00114 | 13 |
| AX-157739205 | 5 | 48.921 | KV453028.1 | 6014195 | 13-scf00114 | 13 |

|              |   |        |            |          |             |    |
|--------------|---|--------|------------|----------|-------------|----|
| AX-157977980 | 5 | 48.921 | KV453028.1 | 6018776  | 13-scf00114 | 13 |
| AX-157758762 | 5 | 48.921 | KV453028.1 | 6785108  | 13-scf00114 | 13 |
| AX-157978917 | 5 | 48.921 | KV453028.1 | 6888558  | 13-scf00114 | 13 |
| AX-157979317 | 5 | 48.921 | KV453028.1 | 8442852  | 13-scf00114 | 13 |
| AX-157976237 | 5 | 48.927 | KV453028.1 | 4012584  | 13-scf00114 | 13 |
| AX-157976070 | 5 | 48.936 | KV453028.1 | 3824944  | 13-scf00114 | 13 |
| AX-157976071 | 5 | 48.936 | KV453028.1 | 3825713  | 13-scf00114 | 13 |
| AX-157817263 | 5 | 48.936 | KV453028.1 | 3927475  | 13-scf00114 | 13 |
| AX-157976240 | 5 | 48.936 | KV453028.1 | 4015762  | 13-scf00114 | 13 |
| AX-157976280 | 5 | 48.936 | KV453028.1 | 4039086  | 13-scf00114 | 13 |
| AX-157976288 | 5 | 48.936 | KV453028.1 | 4042439  | 13-scf00114 | 13 |
| AX-157976400 | 5 | 48.936 | KV453028.1 | 4146916  | 13-scf00114 | 13 |
| AX-157976496 | 5 | 48.936 | KV453028.1 | 4249808  | 13-scf00114 | 13 |
| AX-157976533 | 5 | 48.936 | KV453028.1 | 4303243  | 13-scf00114 | 13 |
| AX-157977245 | 5 | 48.936 | KV453028.1 | 5428507  | 13-scf00114 | 13 |
| AX-157977269 | 5 | 48.936 | KV453028.1 | 5455398  | 13-scf00114 | 13 |
| AX-157977275 | 5 | 48.936 | KV453028.1 | 5457297  | 13-scf00114 | 13 |
| AX-157976281 | 5 | 48.946 | KV453028.1 | 4040117  | 13-scf00114 | 13 |
| AX-157976285 | 5 | 48.957 | KV453028.1 | 4042137  | 13-scf00114 | 13 |
| AX-157976290 | 5 | 48.966 | KV453028.1 | 4043393  | 13-scf00114 | 13 |
| AX-157976307 | 5 | 48.968 | KV453028.1 | 4059574  | 13-scf00114 | 13 |
| AX-157975745 | 5 | 48.973 | KV453028.1 | 3513641  | 13-scf00114 | 13 |
| AX-157976242 | 5 | 48.973 | KV453028.1 | 4018642  | 13-scf00114 | 13 |
| AX-157976326 | 5 | 48.973 | KV453028.1 | 4081272  | 13-scf00114 | 13 |
| AX-157976328 | 5 | 48.973 | KV453028.1 | 4088955  | 13-scf00114 | 13 |
| AX-157976368 | 5 | 48.973 | KV453028.1 | 4126098  | 13-scf00114 | 13 |
| AX-157755054 | 5 | 48.973 | KV453028.1 | 5220742  | 13-scf00114 | 13 |
| AX-157977299 | 5 | 48.973 | KV453028.1 | 5488992  | 13-scf00114 | 13 |
| AX-157977305 | 5 | 48.973 | KV453028.1 | 5497870  | 13-scf00114 | 13 |
| AX-157978145 | 5 | 48.973 | KV453028.1 | 6150517  | 13-scf00114 | 13 |
| AX-157978146 | 5 | 48.973 | KV453028.1 | 6151811  | 13-scf00114 | 13 |
| AX-157978264 | 5 | 48.973 | KV453028.1 | 6242686  | 13-scf00114 | 13 |
| AX-157740757 | 5 | 48.973 | KV453028.1 | 6461395  | 13-scf00114 | 13 |
| AX-157979348 | 5 | 48.973 | KV453028.1 | 8484203  | 13-scf00114 | 13 |
| AX-157979485 | 5 | 48.973 | KV453028.1 | 8679954  | 13-scf00114 | 13 |
| AX-157980120 | 5 | 48.973 | KV453028.1 | 9765049  | 13-scf00114 | 13 |
| AX-157980265 | 5 | 48.973 | KV453028.1 | 9951543  | 13-scf00114 | 13 |
| AX-157980266 | 5 | 48.973 | KV453028.1 | 9953306  | 13-scf00114 | 13 |
| AX-157817681 | 5 | 48.973 | KV453028.1 | 10632945 | 13-scf00114 | 13 |
| AX-157980732 | 5 | 48.973 | KV453028.1 | 10634905 | 13-scf00114 | 13 |
| AX-157884430 | 5 | 48.973 | KV453028.1 | 10847668 | 13-scf00114 | 13 |
| AX-157976343 | 5 | 48.978 | KV453028.1 | 4107723  | 13-scf00114 | 13 |
| AX-157976601 | 5 | 48.978 | KV453028.1 | 4400506  | 13-scf00114 | 13 |
| AX-157976359 | 5 | 48.981 | KV453028.1 | 4119954  | 13-scf00114 | 13 |
| AX-157976361 | 5 | 48.981 | KV453028.1 | 4121183  | 13-scf00114 | 13 |
| AX-157976366 | 5 | 48.981 | KV453028.1 | 4124583  | 13-scf00114 | 13 |
| AX-157719746 | 5 | 48.981 | KV453028.1 | 4185097  | 13-scf00114 | 13 |
| AX-157976464 | 5 | 48.981 | KV453028.1 | 4214176  | 13-scf00114 | 13 |
| AX-157976530 | 5 | 48.981 | KV453028.1 | 4295456  | 13-scf00114 | 13 |
| AX-157976575 | 5 | 48.981 | KV453028.1 | 4351764  | 13-scf00114 | 13 |
| AX-157976880 | 5 | 48.981 | KV453028.1 | 4999666  | 13-scf00114 | 13 |

|              |   |        |            |          |             |    |
|--------------|---|--------|------------|----------|-------------|----|
| AX-157727144 | 5 | 48.981 | KV453028.1 | 5002208  | 13-scf00114 | 13 |
| AX-157976999 | 5 | 48.981 | KV453028.1 | 5185483  | 13-scf00114 | 13 |
| AX-157977062 | 5 | 48.981 | KV453028.1 | 5243853  | 13-scf00114 | 13 |
| AX-157977126 | 5 | 48.981 | KV453028.1 | 5329744  | 13-scf00114 | 13 |
| AX-157977458 | 5 | 48.981 | KV453028.1 | 5609724  | 13-scf00114 | 13 |
| AX-157977539 | 5 | 48.981 | KV453028.1 | 5659259  | 13-scf00114 | 13 |
| AX-157977552 | 5 | 48.981 | KV453028.1 | 5665333  | 13-scf00114 | 13 |
| AX-157977561 | 5 | 48.981 | KV453028.1 | 5668676  | 13-scf00114 | 13 |
| AX-157977562 | 5 | 48.981 | KV453028.1 | 5669733  | 13-scf00114 | 13 |
| AX-157976293 | 5 | 48.984 | KV453028.1 | 4048135  | 13-scf00114 | 13 |
| AX-157976364 | 5 | 48.984 | KV453028.1 | 4122385  | 13-scf00114 | 13 |
| AX-157740665 | 5 | 48.984 | KV453028.1 | 4134191  | 13-scf00114 | 13 |
| AX-157976370 | 5 | 48.987 | KV453028.1 | 4126811  | 13-scf00114 | 13 |
| AX-157977205 | 5 | 48.987 | KV453028.1 | 5379765  | 13-scf00114 | 13 |
| AX-157978116 | 5 | 48.987 | KV453028.1 | 6117986  | 13-scf00114 | 13 |
| AX-157746431 | 5 | 48.987 | KV453028.1 | 6128195  | 13-scf00114 | 13 |
| AX-157745270 | 5 | 48.987 | KV453028.1 | 6130181  | 13-scf00114 | 13 |
| AX-157978182 | 5 | 48.987 | KV453028.1 | 6175682  | 13-scf00114 | 13 |
| AX-157978791 | 5 | 48.987 | KV453028.1 | 6732797  | 13-scf00114 | 13 |
| AX-157979367 | 5 | 48.987 | KV453028.1 | 8520987  | 13-scf00114 | 13 |
| AX-157716832 | 5 | 48.987 | KV453028.1 | 8631111  | 13-scf00114 | 13 |
| AX-157979446 | 5 | 48.987 | KV453028.1 | 8633167  | 13-scf00114 | 13 |
| AX-157979453 | 5 | 48.987 | KV453028.1 | 8639075  | 13-scf00114 | 13 |
| AX-157727380 | 5 | 48.987 | KV453028.1 | 9277192  | 13-scf00114 | 13 |
| AX-157980257 | 5 | 48.987 | KV453028.1 | 9942463  | 13-scf00114 | 13 |
| AX-158379566 | 5 | 48.987 | KV453028.1 | 10310315 | 13-scf00114 | 13 |
| AX-157716596 | 5 | 48.987 | KV453028.1 | 10639474 | 13-scf00114 | 13 |
| AX-158406752 | 5 | 48.988 | KV453028.1 | 4137996  | 13-scf00114 | 13 |
| AX-157976232 | 5 | 48.992 | KV453028.1 | 4011342  | 13-scf00114 | 13 |
| AX-157976418 | 5 | 48.992 | KV453028.1 | 4167855  | 13-scf00114 | 13 |
| AX-157976429 | 5 | 48.995 | KV453028.1 | 4184309  | 13-scf00114 | 13 |
| AX-157976482 | 5 | 48.995 | KV453028.1 | 4238117  | 13-scf00114 | 13 |
| AX-157976488 | 5 | 48.995 | KV453028.1 | 4245447  | 13-scf00114 | 13 |
| AX-158383154 | 5 | 48.995 | KV453028.1 | 4248919  | 13-scf00114 | 13 |
| AX-157746451 | 5 | 48.998 | KV453028.1 | 4063224  | 13-scf00114 | 13 |
| AX-157855081 | 5 | 48.998 | KV453028.1 | 4247437  | 13-scf00114 | 13 |
| AX-157976497 | 5 | 48.998 | KV453028.1 | 4251646  | 13-scf00114 | 13 |
| AX-157855083 | 5 | 48.998 | KV453028.1 | 4269372  | 13-scf00114 | 13 |
| AX-157976532 | 5 | 48.998 | KV453028.1 | 4300632  | 13-scf00114 | 13 |
| AX-157884301 | 5 | 48.998 | KV453028.1 | 4337160  | 13-scf00114 | 13 |
| AX-157976866 | 5 | 48.998 | KV453028.1 | 4974182  | 13-scf00114 | 13 |
| AX-157976966 | 5 | 48.998 | KV453028.1 | 5130430  | 13-scf00114 | 13 |
| AX-157976968 | 5 | 48.998 | KV453028.1 | 5134571  | 13-scf00114 | 13 |
| AX-157725921 | 5 | 48.998 | KV453028.1 | 5135201  | 13-scf00114 | 13 |
| AX-157976972 | 5 | 48.998 | KV453028.1 | 5141153  | 13-scf00114 | 13 |
| AX-157975495 | 5 | 49.001 | KV453028.1 | 3172537  | 13-scf00114 | 13 |
| AX-157975500 | 5 | 49.001 | KV453028.1 | 3181928  | 13-scf00114 | 13 |
| AX-157817280 | 5 | 49.001 | KV453028.1 | 4147362  | 13-scf00114 | 13 |
| AX-157976401 | 5 | 49.001 | KV453028.1 | 4147965  | 13-scf00114 | 13 |
| AX-158406755 | 5 | 49.001 | KV453028.1 | 4258581  | 13-scf00114 | 13 |
| AX-157976566 | 5 | 49.001 | KV453028.1 | 4338334  | 13-scf00114 | 13 |

|              |   |        |            |         |             |    |
|--------------|---|--------|------------|---------|-------------|----|
| AX-157884302 | 5 | 49.001 | KV453028.1 | 4338685 | 13-scf00114 | 13 |
| AX-158383157 | 5 | 49.001 | KV453028.1 | 4352569 | 13-scf00114 | 13 |
| AX-157976606 | 5 | 49.001 | KV453028.1 | 4405009 | 13-scf00114 | 13 |
| AX-157976612 | 5 | 49.001 | KV453028.1 | 4409832 | 13-scf00114 | 13 |
| AX-157976625 | 5 | 49.001 | KV453028.1 | 4421096 | 13-scf00114 | 13 |
| AX-157726355 | 5 | 49.001 | KV453028.1 | 4444426 | 13-scf00114 | 13 |
| AX-157977368 | 5 | 49.001 | KV453028.1 | 5541758 | 13-scf00114 | 13 |
| AX-157977433 | 5 | 49.001 | KV453028.1 | 5588211 | 13-scf00114 | 13 |
| AX-157977983 | 5 | 49.001 | KV453028.1 | 6020642 | 13-scf00114 | 13 |
| AX-157682878 | 5 | 49.001 | KV453027.1 | 27477   | 13-scf00116 | 13 |
| AX-157976316 | 5 | 49.003 | KV453028.1 | 4071413 | 13-scf00114 | 13 |
| AX-157976504 | 5 | 49.003 | KV453028.1 | 4267062 | 13-scf00114 | 13 |
| AX-157976513 | 5 | 49.007 | KV453028.1 | 4279001 | 13-scf00114 | 13 |
| AX-157975252 | 5 | 49.011 | KV453028.1 | 2908750 | 13-scf00114 | 13 |
| AX-157975441 | 5 | 49.011 | KV453028.1 | 3088258 | 13-scf00114 | 13 |
| AX-157976151 | 5 | 49.011 | KV453028.1 | 3926188 | 13-scf00114 | 13 |
| AX-157976153 | 5 | 49.011 | KV453028.1 | 3926527 | 13-scf00114 | 13 |
| AX-157976155 | 5 | 49.011 | KV453028.1 | 3927260 | 13-scf00114 | 13 |
| AX-157976209 | 5 | 49.011 | KV453028.1 | 3985494 | 13-scf00114 | 13 |
| AX-157976215 | 5 | 49.011 | KV453028.1 | 3987725 | 13-scf00114 | 13 |
| AX-157817269 | 5 | 49.011 | KV453028.1 | 3988166 | 13-scf00114 | 13 |
| AX-157817270 | 5 | 49.011 | KV453028.1 | 3988840 | 13-scf00114 | 13 |
| AX-157976246 | 5 | 49.011 | KV453028.1 | 4020724 | 13-scf00114 | 13 |
| AX-157976260 | 5 | 49.011 | KV453028.1 | 4030100 | 13-scf00114 | 13 |
| AX-157976265 | 5 | 49.011 | KV453028.1 | 4032065 | 13-scf00114 | 13 |
| AX-157976337 | 5 | 49.011 | KV453028.1 | 4100667 | 13-scf00114 | 13 |
| AX-157976363 | 5 | 49.011 | KV453028.1 | 4121980 | 13-scf00114 | 13 |
| AX-157976412 | 5 | 49.011 | KV453028.1 | 4159662 | 13-scf00114 | 13 |
| AX-157976461 | 5 | 49.011 | KV453028.1 | 4211787 | 13-scf00114 | 13 |
| AX-157976478 | 5 | 49.011 | KV453028.1 | 4232571 | 13-scf00114 | 13 |
| AX-158415529 | 5 | 49.011 | KV453028.1 | 4258514 | 13-scf00114 | 13 |
| AX-157700260 | 5 | 49.011 | KV453028.1 | 4289192 | 13-scf00114 | 13 |
| AX-157976521 | 5 | 49.011 | KV453028.1 | 4289850 | 13-scf00114 | 13 |
| AX-157976522 | 5 | 49.011 | KV453028.1 | 4290638 | 13-scf00114 | 13 |
| AX-158406756 | 5 | 49.011 | KV453028.1 | 4290888 | 13-scf00114 | 13 |
| AX-158406757 | 5 | 49.011 | KV453028.1 | 4291309 | 13-scf00114 | 13 |
| AX-157976524 | 5 | 49.011 | KV453028.1 | 4291647 | 13-scf00114 | 13 |
| AX-157976525 | 5 | 49.011 | KV453028.1 | 4292096 | 13-scf00114 | 13 |
| AX-157976527 | 5 | 49.011 | KV453028.1 | 4294024 | 13-scf00114 | 13 |
| AX-157976529 | 5 | 49.011 | KV453028.1 | 4294692 | 13-scf00114 | 13 |
| AX-157757412 | 5 | 49.011 | KV453028.1 | 4297725 | 13-scf00114 | 13 |
| AX-157976535 | 5 | 49.011 | KV453028.1 | 4305534 | 13-scf00114 | 13 |
| AX-157976538 | 5 | 49.011 | KV453028.1 | 4308563 | 13-scf00114 | 13 |
| AX-157976543 | 5 | 49.011 | KV453028.1 | 4310597 | 13-scf00114 | 13 |
| AX-157976547 | 5 | 49.011 | KV453028.1 | 4320538 | 13-scf00114 | 13 |
| AX-157976553 | 5 | 49.011 | KV453028.1 | 4325909 | 13-scf00114 | 13 |
| AX-157855084 | 5 | 49.011 | KV453028.1 | 4326039 | 13-scf00114 | 13 |
| AX-157976554 | 5 | 49.011 | KV453028.1 | 4326381 | 13-scf00114 | 13 |
| AX-157976557 | 5 | 49.011 | KV453028.1 | 4333697 | 13-scf00114 | 13 |
| AX-157976564 | 5 | 49.011 | KV453028.1 | 4337279 | 13-scf00114 | 13 |
| AX-157976569 | 5 | 49.011 | KV453028.1 | 4339678 | 13-scf00114 | 13 |

|              |   |        |             |         |             |    |
|--------------|---|--------|-------------|---------|-------------|----|
| AX-157782202 | 5 | 49.011 | KV453028.1  | 4340346 | 13-scf00114 | 13 |
| AX-157855085 | 5 | 49.011 | KV453028.1  | 4342163 | 13-scf00114 | 13 |
| AX-157855086 | 5 | 49.011 | KV453028.1  | 4342455 | 13-scf00114 | 13 |
| AX-157976583 | 5 | 49.011 | KV453028.1  | 4356357 | 13-scf00114 | 13 |
| AX-157976588 | 5 | 49.011 | KV453028.1  | 4367281 | 13-scf00114 | 13 |
| AX-157976589 | 5 | 49.011 | KV453028.1  | 4372934 | 13-scf00114 | 13 |
| AX-157976590 | 5 | 49.011 | KV453028.1  | 4374130 | 13-scf00114 | 13 |
| AX-157707855 | 5 | 49.011 | KV453028.1  | 4374622 | 13-scf00114 | 13 |
| AX-157976591 | 5 | 49.011 | KV453028.1  | 4384851 | 13-scf00114 | 13 |
| AX-157855088 | 5 | 49.011 | KV453028.1  | 4388407 | 13-scf00114 | 13 |
| AX-157817285 | 5 | 49.011 | KV453028.1  | 4388832 | 13-scf00114 | 13 |
| AX-157976593 | 5 | 49.011 | KV453028.1  | 4392645 | 13-scf00114 | 13 |
| AX-157976595 | 5 | 49.011 | KV453028.1  | 4393594 | 13-scf00114 | 13 |
| AX-157976608 | 5 | 49.011 | KV453028.1  | 4406322 | 13-scf00114 | 13 |
| AX-157976620 | 5 | 49.011 | KV453028.1  | 4415349 | 13-scf00114 | 13 |
| AX-157976623 | 5 | 49.011 | KV453028.1  | 4416408 | 13-scf00114 | 13 |
| AX-157976626 | 5 | 49.011 | KV453028.1  | 4424524 | 13-scf00114 | 13 |
| AX-157976637 | 5 | 49.011 | KV453028.1  | 4432549 | 13-scf00114 | 13 |
| AX-157976640 | 5 | 49.011 | KV453028.1  | 4434062 | 13-scf00114 | 13 |
| AX-157976642 | 5 | 49.011 | KV453028.1  | 4435325 | 13-scf00114 | 13 |
| AX-157855089 | 5 | 49.011 | KV453028.1  | 4438722 | 13-scf00114 | 13 |
| AX-157976643 | 5 | 49.011 | KV453028.1  | 4444841 | 13-scf00114 | 13 |
| AX-157976645 | 5 | 49.011 | KV453028.1  | 4448155 | 13-scf00114 | 13 |
| AX-157976646 | 5 | 49.011 | KV453028.1  | 4449339 | 13-scf00114 | 13 |
| AX-157976648 | 5 | 49.011 | KV453028.1  | 4450198 | 13-scf00114 | 13 |
| AX-157755704 | 5 | 49.011 | KV453028.1  | 4454847 | 13-scf00114 | 13 |
| AX-157855090 | 5 | 49.011 | KV453028.1  | 4454886 | 13-scf00114 | 13 |
| AX-157976652 | 5 | 49.011 | KV453028.1  | 4455914 | 13-scf00114 | 13 |
| AX-157976659 | 5 | 49.011 | KV453028.1  | 4482475 | 13-scf00114 | 13 |
| AX-157884306 | 5 | 49.011 | KV453028.1  | 4536202 | 13-scf00114 | 13 |
| AX-157977211 | 5 | 49.011 | KV453028.1  | 5384986 | 13-scf00114 | 13 |
| AX-157977307 | 5 | 49.011 | KV453028.1  | 5498611 | 13-scf00114 | 13 |
| AX-157977396 | 5 | 49.011 | KV453028.1  | 5563031 | 13-scf00114 | 13 |
| AX-157855252 | 5 | 49.011 | KV453028.1  | 8548992 | 13-scf00114 | 13 |
| AX-157979542 | 5 | 49.011 | KV453028.1  | 8762085 | 13-scf00114 | 13 |
| AX-157817531 | 5 | 49.011 | KV453028.1  | 8930227 | 13-scf00114 | 13 |
| AX-157979795 | 5 | 49.011 | KV453028.1  | 9225930 | 13-scf00114 | 13 |
| AX-157979920 | 5 | 49.011 | KV453028.1  | 9458233 | 13-scf00114 | 13 |
| AX-157980231 | 5 | 49.011 | KV453028.1  | 9901153 | 13-scf00114 | 13 |
| AX-157707517 | 5 | 49.011 | 3ML01034462 | 77      | scf10137_1  | UN |
| AX-157738405 | 5 | 49.063 | KV453028.1  | 4605487 | 13-scf00114 | 13 |
| AX-157975788 | 5 | 49.12  | KV453028.1  | 3575919 | 13-scf00114 | 13 |
| AX-157975789 | 5 | 49.12  | KV453028.1  | 3577184 | 13-scf00114 | 13 |
| AX-157975790 | 5 | 49.12  | KV453028.1  | 3578535 | 13-scf00114 | 13 |
| AX-157740847 | 5 | 49.12  | KV453028.1  | 3579832 | 13-scf00114 | 13 |
| AX-157975887 | 5 | 49.12  | KV453028.1  | 3660867 | 13-scf00114 | 13 |
| AX-158415525 | 5 | 49.12  | KV453028.1  | 3905665 | 13-scf00114 | 13 |
| AX-157976150 | 5 | 49.12  | KV453028.1  | 3924711 | 13-scf00114 | 13 |
| AX-157976168 | 5 | 49.12  | KV453028.1  | 3937510 | 13-scf00114 | 13 |
| AX-157976191 | 5 | 49.12  | KV453028.1  | 3972790 | 13-scf00114 | 13 |
| AX-157976201 | 5 | 49.12  | KV453028.1  | 3979662 | 13-scf00114 | 13 |

|              |   |       |            |         |             |    |
|--------------|---|-------|------------|---------|-------------|----|
| AX-157976284 | 5 | 49.12 | KV453028.1 | 4041634 | 13-scf00114 | 13 |
| AX-157976292 | 5 | 49.12 | KV453028.1 | 4047197 | 13-scf00114 | 13 |
| AX-157750491 | 5 | 49.12 | KV453028.1 | 4049004 | 13-scf00114 | 13 |
| AX-157976484 | 5 | 49.12 | KV453028.1 | 4239649 | 13-scf00114 | 13 |
| AX-157708544 | 5 | 49.12 | KV453028.1 | 4277509 | 13-scf00114 | 13 |
| AX-157976540 | 5 | 49.12 | KV453028.1 | 4309121 | 13-scf00114 | 13 |
| AX-157723151 | 5 | 49.12 | KV453028.1 | 4384328 | 13-scf00114 | 13 |
| AX-158383159 | 5 | 49.12 | KV453028.1 | 4417113 | 13-scf00114 | 13 |
| AX-157976629 | 5 | 49.12 | KV453028.1 | 4426170 | 13-scf00114 | 13 |
| AX-157976665 | 5 | 49.12 | KV453028.1 | 4497626 | 13-scf00114 | 13 |
| AX-157976670 | 5 | 49.12 | KV453028.1 | 4499605 | 13-scf00114 | 13 |
| AX-157976675 | 5 | 49.12 | KV453028.1 | 4512141 | 13-scf00114 | 13 |
| AX-157976697 | 5 | 49.12 | KV453028.1 | 4554942 | 13-scf00114 | 13 |
| AX-157976704 | 5 | 49.12 | KV453028.1 | 4577624 | 13-scf00114 | 13 |
| AX-157855093 | 5 | 49.12 | KV453028.1 | 4597184 | 13-scf00114 | 13 |
| AX-157976724 | 5 | 49.12 | KV453028.1 | 4613980 | 13-scf00114 | 13 |
| AX-157817287 | 5 | 49.12 | KV453028.1 | 4646766 | 13-scf00114 | 13 |
| AX-157976735 | 5 | 49.12 | KV453028.1 | 4653508 | 13-scf00114 | 13 |
| AX-157976736 | 5 | 49.12 | KV453028.1 | 4659386 | 13-scf00114 | 13 |
| AX-157976739 | 5 | 49.12 | KV453028.1 | 4664629 | 13-scf00114 | 13 |
| AX-157976747 | 5 | 49.12 | KV453028.1 | 4675416 | 13-scf00114 | 13 |
| AX-157855097 | 5 | 49.12 | KV453028.1 | 4685033 | 13-scf00114 | 13 |
| AX-157724909 | 5 | 49.12 | KV453028.1 | 4691380 | 13-scf00114 | 13 |
| AX-157855098 | 5 | 49.12 | KV453028.1 | 4692885 | 13-scf00114 | 13 |
| AX-157976753 | 5 | 49.12 | KV453028.1 | 4696485 | 13-scf00114 | 13 |
| AX-157976755 | 5 | 49.12 | KV453028.1 | 4701254 | 13-scf00114 | 13 |
| AX-157869683 | 5 | 49.12 | KV453028.1 | 4701836 | 13-scf00114 | 13 |
| AX-158406773 | 5 | 49.12 | KV453028.1 | 4713148 | 13-scf00114 | 13 |
| AX-157976765 | 5 | 49.12 | KV453028.1 | 4732209 | 13-scf00114 | 13 |
| AX-157976767 | 5 | 49.12 | KV453028.1 | 4734827 | 13-scf00114 | 13 |
| AX-157976771 | 5 | 49.12 | KV453028.1 | 4752377 | 13-scf00114 | 13 |
| AX-157855102 | 5 | 49.12 | KV453028.1 | 4754038 | 13-scf00114 | 13 |
| AX-158390381 | 5 | 49.12 | KV453028.1 | 4756635 | 13-scf00114 | 13 |
| AX-157722519 | 5 | 49.12 | KV453028.1 | 4756691 | 13-scf00114 | 13 |
| AX-157976776 | 5 | 49.12 | KV453028.1 | 4759748 | 13-scf00114 | 13 |
| AX-158390382 | 5 | 49.12 | KV453028.1 | 4760721 | 13-scf00114 | 13 |
| AX-157976781 | 5 | 49.12 | KV453028.1 | 4767644 | 13-scf00114 | 13 |
| AX-157976788 | 5 | 49.12 | KV453028.1 | 4781465 | 13-scf00114 | 13 |
| AX-157855103 | 5 | 49.12 | KV453028.1 | 4784332 | 13-scf00114 | 13 |
| AX-157976790 | 5 | 49.12 | KV453028.1 | 4784881 | 13-scf00114 | 13 |
| AX-157976797 | 5 | 49.12 | KV453028.1 | 4789942 | 13-scf00114 | 13 |
| AX-157976801 | 5 | 49.12 | KV453028.1 | 4801177 | 13-scf00114 | 13 |
| AX-157976802 | 5 | 49.12 | KV453028.1 | 4806147 | 13-scf00114 | 13 |
| AX-157976803 | 5 | 49.12 | KV453028.1 | 4807307 | 13-scf00114 | 13 |
| AX-157976807 | 5 | 49.12 | KV453028.1 | 4812038 | 13-scf00114 | 13 |
| AX-157757313 | 5 | 49.12 | KV453028.1 | 4813277 | 13-scf00114 | 13 |
| AX-157976811 | 5 | 49.12 | KV453028.1 | 4825410 | 13-scf00114 | 13 |
| AX-157976812 | 5 | 49.12 | KV453028.1 | 4834553 | 13-scf00114 | 13 |
| AX-157976818 | 5 | 49.12 | KV453028.1 | 4846906 | 13-scf00114 | 13 |
| AX-158406775 | 5 | 49.12 | KV453028.1 | 4857298 | 13-scf00114 | 13 |
| AX-157976825 | 5 | 49.12 | KV453028.1 | 4859515 | 13-scf00114 | 13 |

|              |   |       |            |         |             |    |
|--------------|---|-------|------------|---------|-------------|----|
| AX-157758433 | 5 | 49.12 | KV453028.1 | 4881103 | 13-scf00114 | 13 |
| AX-157976832 | 5 | 49.12 | KV453028.1 | 4882809 | 13-scf00114 | 13 |
| AX-157976833 | 5 | 49.12 | KV453028.1 | 4883169 | 13-scf00114 | 13 |
| AX-157717225 | 5 | 49.12 | KV453028.1 | 4886774 | 13-scf00114 | 13 |
| AX-157976838 | 5 | 49.12 | KV453028.1 | 4895131 | 13-scf00114 | 13 |
| AX-157976841 | 5 | 49.12 | KV453028.1 | 4906537 | 13-scf00114 | 13 |
| AX-157976842 | 5 | 49.12 | KV453028.1 | 4908147 | 13-scf00114 | 13 |
| AX-157976843 | 5 | 49.12 | KV453028.1 | 4909491 | 13-scf00114 | 13 |
| AX-158379548 | 5 | 49.12 | KV453028.1 | 4912201 | 13-scf00114 | 13 |
| AX-157976847 | 5 | 49.12 | KV453028.1 | 4923642 | 13-scf00114 | 13 |
| AX-157817291 | 5 | 49.12 | KV453028.1 | 4946389 | 13-scf00114 | 13 |
| AX-157976855 | 5 | 49.12 | KV453028.1 | 4949628 | 13-scf00114 | 13 |
| AX-157976856 | 5 | 49.12 | KV453028.1 | 4952142 | 13-scf00114 | 13 |
| AX-157817292 | 5 | 49.12 | KV453028.1 | 4955393 | 13-scf00114 | 13 |
| AX-157699150 | 5 | 49.12 | KV453028.1 | 4957807 | 13-scf00114 | 13 |
| AX-157756414 | 5 | 49.12 | KV453028.1 | 4960074 | 13-scf00114 | 13 |
| AX-157976859 | 5 | 49.12 | KV453028.1 | 4961903 | 13-scf00114 | 13 |
| AX-158406777 | 5 | 49.12 | KV453028.1 | 4963950 | 13-scf00114 | 13 |
| AX-158406778 | 5 | 49.12 | KV453028.1 | 4964008 | 13-scf00114 | 13 |
| AX-158406780 | 5 | 49.12 | KV453028.1 | 4964236 | 13-scf00114 | 13 |
| AX-157976868 | 5 | 49.12 | KV453028.1 | 4974685 | 13-scf00114 | 13 |
| AX-157855110 | 5 | 49.12 | KV453028.1 | 4977570 | 13-scf00114 | 13 |
| AX-158415540 | 5 | 49.12 | KV453028.1 | 4979217 | 13-scf00114 | 13 |
| AX-157976872 | 5 | 49.12 | KV453028.1 | 4979946 | 13-scf00114 | 13 |
| AX-157976874 | 5 | 49.12 | KV453028.1 | 4980593 | 13-scf00114 | 13 |
| AX-157976877 | 5 | 49.12 | KV453028.1 | 4988366 | 13-scf00114 | 13 |
| AX-158405342 | 5 | 49.12 | KV453028.1 | 5001380 | 13-scf00114 | 13 |
| AX-157855112 | 5 | 49.12 | KV453028.1 | 5004540 | 13-scf00114 | 13 |
| AX-157976883 | 5 | 49.12 | KV453028.1 | 5005419 | 13-scf00114 | 13 |
| AX-157976885 | 5 | 49.12 | KV453028.1 | 5005821 | 13-scf00114 | 13 |
| AX-157976887 | 5 | 49.12 | KV453028.1 | 5008794 | 13-scf00114 | 13 |
| AX-157976888 | 5 | 49.12 | KV453028.1 | 5009192 | 13-scf00114 | 13 |
| AX-157976889 | 5 | 49.12 | KV453028.1 | 5010007 | 13-scf00114 | 13 |
| AX-157976890 | 5 | 49.12 | KV453028.1 | 5011781 | 13-scf00114 | 13 |
| AX-157976891 | 5 | 49.12 | KV453028.1 | 5013652 | 13-scf00114 | 13 |
| AX-157976893 | 5 | 49.12 | KV453028.1 | 5019637 | 13-scf00114 | 13 |
| AX-157713392 | 5 | 49.12 | KV453028.1 | 5021234 | 13-scf00114 | 13 |
| AX-157976894 | 5 | 49.12 | KV453028.1 | 5022881 | 13-scf00114 | 13 |
| AX-157976895 | 5 | 49.12 | KV453028.1 | 5030741 | 13-scf00114 | 13 |
| AX-157693578 | 5 | 49.12 | KV453028.1 | 5035136 | 13-scf00114 | 13 |
| AX-157869684 | 5 | 49.12 | KV453028.1 | 5038182 | 13-scf00114 | 13 |
| AX-157976901 | 5 | 49.12 | KV453028.1 | 5042245 | 13-scf00114 | 13 |
| AX-157976902 | 5 | 49.12 | KV453028.1 | 5043675 | 13-scf00114 | 13 |
| AX-157817293 | 5 | 49.12 | KV453028.1 | 5044968 | 13-scf00114 | 13 |
| AX-157817295 | 5 | 49.12 | KV453028.1 | 5046759 | 13-scf00114 | 13 |
| AX-158390392 | 5 | 49.12 | KV453028.1 | 5048328 | 13-scf00114 | 13 |
| AX-157855116 | 5 | 49.12 | KV453028.1 | 5049401 | 13-scf00114 | 13 |
| AX-157771460 | 5 | 49.12 | KV453028.1 | 5049844 | 13-scf00114 | 13 |
| AX-157869687 | 5 | 49.12 | KV453028.1 | 5053747 | 13-scf00114 | 13 |
| AX-157976913 | 5 | 49.12 | KV453028.1 | 5056975 | 13-scf00114 | 13 |
| AX-157976918 | 5 | 49.12 | KV453028.1 | 5065586 | 13-scf00114 | 13 |

|              |   |       |            |         |             |    |
|--------------|---|-------|------------|---------|-------------|----|
| AX-157976919 | 5 | 49.12 | KV453028.1 | 5066474 | 13-scf00114 | 13 |
| AX-157725992 | 5 | 49.12 | KV453028.1 | 5074620 | 13-scf00114 | 13 |
| AX-157976924 | 5 | 49.12 | KV453028.1 | 5077506 | 13-scf00114 | 13 |
| AX-157976925 | 5 | 49.12 | KV453028.1 | 5078449 | 13-scf00114 | 13 |
| AX-158390393 | 5 | 49.12 | KV453028.1 | 5078952 | 13-scf00114 | 13 |
| AX-157738438 | 5 | 49.12 | KV453028.1 | 5086184 | 13-scf00114 | 13 |
| AX-157976930 | 5 | 49.12 | KV453028.1 | 5086307 | 13-scf00114 | 13 |
| AX-157726915 | 5 | 49.12 | KV453028.1 | 5087574 | 13-scf00114 | 13 |
| AX-157976935 | 5 | 49.12 | KV453028.1 | 5090897 | 13-scf00114 | 13 |
| AX-157976936 | 5 | 49.12 | KV453028.1 | 5091262 | 13-scf00114 | 13 |
| AX-157738550 | 5 | 49.12 | KV453028.1 | 5093890 | 13-scf00114 | 13 |
| AX-157976938 | 5 | 49.12 | KV453028.1 | 5095059 | 13-scf00114 | 13 |
| AX-157976944 | 5 | 49.12 | KV453028.1 | 5101890 | 13-scf00114 | 13 |
| AX-157724012 | 5 | 49.12 | KV453028.1 | 5103617 | 13-scf00114 | 13 |
| AX-157976946 | 5 | 49.12 | KV453028.1 | 5103894 | 13-scf00114 | 13 |
| AX-157976949 | 5 | 49.12 | KV453028.1 | 5107776 | 13-scf00114 | 13 |
| AX-157976952 | 5 | 49.12 | KV453028.1 | 5109245 | 13-scf00114 | 13 |
| AX-157976955 | 5 | 49.12 | KV453028.1 | 5109806 | 13-scf00114 | 13 |
| AX-157976956 | 5 | 49.12 | KV453028.1 | 5112543 | 13-scf00114 | 13 |
| AX-157976969 | 5 | 49.12 | KV453028.1 | 5135791 | 13-scf00114 | 13 |
| AX-157717993 | 5 | 49.12 | KV453028.1 | 5155965 | 13-scf00114 | 13 |
| AX-157976978 | 5 | 49.12 | KV453028.1 | 5157816 | 13-scf00114 | 13 |
| AX-157976990 | 5 | 49.12 | KV453028.1 | 5178611 | 13-scf00114 | 13 |
| AX-157976991 | 5 | 49.12 | KV453028.1 | 5178978 | 13-scf00114 | 13 |
| AX-157976993 | 5 | 49.12 | KV453028.1 | 5182127 | 13-scf00114 | 13 |
| AX-157976994 | 5 | 49.12 | KV453028.1 | 5182867 | 13-scf00114 | 13 |
| AX-157976996 | 5 | 49.12 | KV453028.1 | 5184367 | 13-scf00114 | 13 |
| AX-158406788 | 5 | 49.12 | KV453028.1 | 5184546 | 13-scf00114 | 13 |
| AX-157817305 | 5 | 49.12 | KV453028.1 | 5186482 | 13-scf00114 | 13 |
| AX-157694927 | 5 | 49.12 | KV453028.1 | 5186965 | 13-scf00114 | 13 |
| AX-157977003 | 5 | 49.12 | KV453028.1 | 5188557 | 13-scf00114 | 13 |
| AX-157977007 | 5 | 49.12 | KV453028.1 | 5193855 | 13-scf00114 | 13 |
| AX-157977009 | 5 | 49.12 | KV453028.1 | 5194114 | 13-scf00114 | 13 |
| AX-157977012 | 5 | 49.12 | KV453028.1 | 5196112 | 13-scf00114 | 13 |
| AX-157977014 | 5 | 49.12 | KV453028.1 | 5196343 | 13-scf00114 | 13 |
| AX-157977017 | 5 | 49.12 | KV453028.1 | 5197316 | 13-scf00114 | 13 |
| AX-157977018 | 5 | 49.12 | KV453028.1 | 5198301 | 13-scf00114 | 13 |
| AX-157977019 | 5 | 49.12 | KV453028.1 | 5199713 | 13-scf00114 | 13 |
| AX-157817307 | 5 | 49.12 | KV453028.1 | 5203150 | 13-scf00114 | 13 |
| AX-157977027 | 5 | 49.12 | KV453028.1 | 5207908 | 13-scf00114 | 13 |
| AX-157817309 | 5 | 49.12 | KV453028.1 | 5209946 | 13-scf00114 | 13 |
| AX-157977032 | 5 | 49.12 | KV453028.1 | 5211092 | 13-scf00114 | 13 |
| AX-157855118 | 5 | 49.12 | KV453028.1 | 5225705 | 13-scf00114 | 13 |
| AX-157977050 | 5 | 49.12 | KV453028.1 | 5227758 | 13-scf00114 | 13 |
| AX-157977057 | 5 | 49.12 | KV453028.1 | 5240932 | 13-scf00114 | 13 |
| AX-157977060 | 5 | 49.12 | KV453028.1 | 5243049 | 13-scf00114 | 13 |
| AX-157725253 | 5 | 49.12 | KV453028.1 | 5247681 | 13-scf00114 | 13 |
| AX-157977072 | 5 | 49.12 | KV453028.1 | 5254914 | 13-scf00114 | 13 |
| AX-157977078 | 5 | 49.12 | KV453028.1 | 5264194 | 13-scf00114 | 13 |
| AX-157977082 | 5 | 49.12 | KV453028.1 | 5271309 | 13-scf00114 | 13 |
| AX-157977084 | 5 | 49.12 | KV453028.1 | 5276680 | 13-scf00114 | 13 |



|              |   |       |            |         |             |    |
|--------------|---|-------|------------|---------|-------------|----|
| AX-157977085 | 5 | 49.12 | KV453028.1 | 5277616 | 13-scf00114 | 13 |
| AX-157977092 | 5 | 49.12 | KV453028.1 | 5281151 | 13-scf00114 | 13 |
| AX-157977098 | 5 | 49.12 | KV453028.1 | 5284627 | 13-scf00114 | 13 |
| AX-158383170 | 5 | 49.12 | KV453028.1 | 5286792 | 13-scf00114 | 13 |
| AX-157817314 | 5 | 49.12 | KV453028.1 | 5287664 | 13-scf00114 | 13 |
| AX-157977102 | 5 | 49.12 | KV453028.1 | 5290197 | 13-scf00114 | 13 |
| AX-157977104 | 5 | 49.12 | KV453028.1 | 5291793 | 13-scf00114 | 13 |
| AX-157977105 | 5 | 49.12 | KV453028.1 | 5300519 | 13-scf00114 | 13 |
| AX-157817317 | 5 | 49.12 | KV453028.1 | 5304160 | 13-scf00114 | 13 |
| AX-157741458 | 5 | 49.12 | KV453028.1 | 5305345 | 13-scf00114 | 13 |
| AX-158390394 | 5 | 49.12 | KV453028.1 | 5306505 | 13-scf00114 | 13 |
| AX-157977108 | 5 | 49.12 | KV453028.1 | 5308649 | 13-scf00114 | 13 |
| AX-157977109 | 5 | 49.12 | KV453028.1 | 5309959 | 13-scf00114 | 13 |
| AX-157749393 | 5 | 49.12 | KV453028.1 | 5317856 | 13-scf00114 | 13 |
| AX-157977111 | 5 | 49.12 | KV453028.1 | 5320584 | 13-scf00114 | 13 |
| AX-157977112 | 5 | 49.12 | KV453028.1 | 5321706 | 13-scf00114 | 13 |
| AX-157977113 | 5 | 49.12 | KV453028.1 | 5322115 | 13-scf00114 | 13 |
| AX-157977115 | 5 | 49.12 | KV453028.1 | 5322444 | 13-scf00114 | 13 |
| AX-157723970 | 5 | 49.12 | KV453028.1 | 5322658 | 13-scf00114 | 13 |
| AX-157817320 | 5 | 49.12 | KV453028.1 | 5323283 | 13-scf00114 | 13 |
| AX-157977116 | 5 | 49.12 | KV453028.1 | 5324606 | 13-scf00114 | 13 |
| AX-157977124 | 5 | 49.12 | KV453028.1 | 5329287 | 13-scf00114 | 13 |
| AX-157977127 | 5 | 49.12 | KV453028.1 | 5332085 | 13-scf00114 | 13 |
| AX-157977129 | 5 | 49.12 | KV453028.1 | 5333009 | 13-scf00114 | 13 |
| AX-157977130 | 5 | 49.12 | KV453028.1 | 5334372 | 13-scf00114 | 13 |
| AX-157977131 | 5 | 49.12 | KV453028.1 | 5334947 | 13-scf00114 | 13 |
| AX-157977135 | 5 | 49.12 | KV453028.1 | 5337698 | 13-scf00114 | 13 |
| AX-157977136 | 5 | 49.12 | KV453028.1 | 5337992 | 13-scf00114 | 13 |
| AX-158406792 | 5 | 49.12 | KV453028.1 | 5340950 | 13-scf00114 | 13 |
| AX-157977140 | 5 | 49.12 | KV453028.1 | 5342781 | 13-scf00114 | 13 |
| AX-157977141 | 5 | 49.12 | KV453028.1 | 5343216 | 13-scf00114 | 13 |
| AX-157977145 | 5 | 49.12 | KV453028.1 | 5346137 | 13-scf00114 | 13 |
| AX-157977147 | 5 | 49.12 | KV453028.1 | 5346996 | 13-scf00114 | 13 |
| AX-157817323 | 5 | 49.12 | KV453028.1 | 5348797 | 13-scf00114 | 13 |
| AX-157817324 | 5 | 49.12 | KV453028.1 | 5350986 | 13-scf00114 | 13 |
| AX-157977153 | 5 | 49.12 | KV453028.1 | 5352095 | 13-scf00114 | 13 |
| AX-157977154 | 5 | 49.12 | KV453028.1 | 5352410 | 13-scf00114 | 13 |
| AX-157977157 | 5 | 49.12 | KV453028.1 | 5352976 | 13-scf00114 | 13 |
| AX-157977161 | 5 | 49.12 | KV453028.1 | 5355034 | 13-scf00114 | 13 |
| AX-157977163 | 5 | 49.12 | KV453028.1 | 5356712 | 13-scf00114 | 13 |
| AX-157977164 | 5 | 49.12 | KV453028.1 | 5357321 | 13-scf00114 | 13 |
| AX-157977165 | 5 | 49.12 | KV453028.1 | 5357954 | 13-scf00114 | 13 |
| AX-157977166 | 5 | 49.12 | KV453028.1 | 5358383 | 13-scf00114 | 13 |
| AX-157977167 | 5 | 49.12 | KV453028.1 | 5358838 | 13-scf00114 | 13 |
| AX-157817325 | 5 | 49.12 | KV453028.1 | 5359702 | 13-scf00114 | 13 |
| AX-157977170 | 5 | 49.12 | KV453028.1 | 5360819 | 13-scf00114 | 13 |
| AX-157977173 | 5 | 49.12 | KV453028.1 | 5362289 | 13-scf00114 | 13 |
| AX-157977177 | 5 | 49.12 | KV453028.1 | 5363621 | 13-scf00114 | 13 |
| AX-157977179 | 5 | 49.12 | KV453028.1 | 5363952 | 13-scf00114 | 13 |
| AX-157817326 | 5 | 49.12 | KV453028.1 | 5364527 | 13-scf00114 | 13 |
| AX-157977180 | 5 | 49.12 | KV453028.1 | 5364764 | 13-scf00114 | 13 |

|              |   |       |            |         |             |    |
|--------------|---|-------|------------|---------|-------------|----|
| AX-157977183 | 5 | 49.12 | KV453028.1 | 5365413 | 13-scf00114 | 13 |
| AX-157977184 | 5 | 49.12 | KV453028.1 | 5365809 | 13-scf00114 | 13 |
| AX-157977185 | 5 | 49.12 | KV453028.1 | 5366640 | 13-scf00114 | 13 |
| AX-157977186 | 5 | 49.12 | KV453028.1 | 5368100 | 13-scf00114 | 13 |
| AX-157977188 | 5 | 49.12 | KV453028.1 | 5370059 | 13-scf00114 | 13 |
| AX-157817328 | 5 | 49.12 | KV453028.1 | 5371684 | 13-scf00114 | 13 |
| AX-157884309 | 5 | 49.12 | KV453028.1 | 5376302 | 13-scf00114 | 13 |
| AX-157977203 | 5 | 49.12 | KV453028.1 | 5378521 | 13-scf00114 | 13 |
| AX-157817331 | 5 | 49.12 | KV453028.1 | 5382994 | 13-scf00114 | 13 |
| AX-157977209 | 5 | 49.12 | KV453028.1 | 5383544 | 13-scf00114 | 13 |
| AX-157977212 | 5 | 49.12 | KV453028.1 | 5385852 | 13-scf00114 | 13 |
| AX-158379550 | 5 | 49.12 | KV453028.1 | 5386334 | 13-scf00114 | 13 |
| AX-157977214 | 5 | 49.12 | KV453028.1 | 5388689 | 13-scf00114 | 13 |
| AX-157884310 | 5 | 49.12 | KV453028.1 | 5390368 | 13-scf00114 | 13 |
| AX-157740565 | 5 | 49.12 | KV453028.1 | 5390994 | 13-scf00114 | 13 |
| AX-157977218 | 5 | 49.12 | KV453028.1 | 5391516 | 13-scf00114 | 13 |
| AX-157977221 | 5 | 49.12 | KV453028.1 | 5401225 | 13-scf00114 | 13 |
| AX-157977225 | 5 | 49.12 | KV453028.1 | 5407104 | 13-scf00114 | 13 |
| AX-157756084 | 5 | 49.12 | KV453028.1 | 5423483 | 13-scf00114 | 13 |
| AX-157977240 | 5 | 49.12 | KV453028.1 | 5424251 | 13-scf00114 | 13 |
| AX-157977241 | 5 | 49.12 | KV453028.1 | 5425338 | 13-scf00114 | 13 |
| AX-157977244 | 5 | 49.12 | KV453028.1 | 5426138 | 13-scf00114 | 13 |
| AX-157770810 | 5 | 49.12 | KV453028.1 | 5426993 | 13-scf00114 | 13 |
| AX-157977247 | 5 | 49.12 | KV453028.1 | 5430788 | 13-scf00114 | 13 |
| AX-157977251 | 5 | 49.12 | KV453028.1 | 5436711 | 13-scf00114 | 13 |
| AX-157977253 | 5 | 49.12 | KV453028.1 | 5437170 | 13-scf00114 | 13 |
| AX-157977259 | 5 | 49.12 | KV453028.1 | 5449060 | 13-scf00114 | 13 |
| AX-157977261 | 5 | 49.12 | KV453028.1 | 5450877 | 13-scf00114 | 13 |
| AX-157977263 | 5 | 49.12 | KV453028.1 | 5451203 | 13-scf00114 | 13 |
| AX-157977265 | 5 | 49.12 | KV453028.1 | 5453517 | 13-scf00114 | 13 |
| AX-157977267 | 5 | 49.12 | KV453028.1 | 5454765 | 13-scf00114 | 13 |
| AX-158383174 | 5 | 49.12 | KV453028.1 | 5458193 | 13-scf00114 | 13 |
| AX-157977276 | 5 | 49.12 | KV453028.1 | 5459878 | 13-scf00114 | 13 |
| AX-158406794 | 5 | 49.12 | KV453028.1 | 5466088 | 13-scf00114 | 13 |
| AX-157977284 | 5 | 49.12 | KV453028.1 | 5469498 | 13-scf00114 | 13 |
| AX-157977321 | 5 | 49.12 | KV453028.1 | 5508035 | 13-scf00114 | 13 |
| AX-157977322 | 5 | 49.12 | KV453028.1 | 5509354 | 13-scf00114 | 13 |
| AX-157740506 | 5 | 49.12 | KV453028.1 | 5519792 | 13-scf00114 | 13 |
| AX-157977340 | 5 | 49.12 | KV453028.1 | 5521365 | 13-scf00114 | 13 |
| AX-157977351 | 5 | 49.12 | KV453028.1 | 5526340 | 13-scf00114 | 13 |
| AX-157977377 | 5 | 49.12 | KV453028.1 | 5549099 | 13-scf00114 | 13 |
| AX-157977398 | 5 | 49.12 | KV453028.1 | 5563833 | 13-scf00114 | 13 |
| AX-157977404 | 5 | 49.12 | KV453028.1 | 5567948 | 13-scf00114 | 13 |
| AX-157977647 | 5 | 49.12 | KV453028.1 | 5749564 | 13-scf00114 | 13 |
| AX-157977712 | 5 | 49.12 | KV453028.1 | 5795967 | 13-scf00114 | 13 |
| AX-157978434 | 5 | 49.12 | KV453028.1 | 6388421 | 13-scf00114 | 13 |
| AX-157978650 | 5 | 49.12 | KV453028.1 | 6575290 | 13-scf00114 | 13 |
| AX-157978712 | 5 | 49.12 | KV453028.1 | 6635345 | 13-scf00114 | 13 |
| AX-157978730 | 5 | 49.12 | KV453028.1 | 6658184 | 13-scf00114 | 13 |
| AX-157978732 | 5 | 49.12 | KV453028.1 | 6658952 | 13-scf00114 | 13 |
| AX-157817449 | 5 | 49.12 | KV453028.1 | 6867887 | 13-scf00114 | 13 |

|              |   |       |            |          |             |    |
|--------------|---|-------|------------|----------|-------------|----|
| AX-157715933 | 5 | 49.12 | KV453028.1 | 6898434  | 13-scf00114 | 13 |
| AX-157979040 | 5 | 49.12 | KV453028.1 | 7087479  | 13-scf00114 | 13 |
| AX-157713088 | 5 | 49.12 | KV453028.1 | 7106999  | 13-scf00114 | 13 |
| AX-157817468 | 5 | 49.12 | KV453028.1 | 7122093  | 13-scf00114 | 13 |
| AX-157979064 | 5 | 49.12 | KV453028.1 | 7221697  | 13-scf00114 | 13 |
| AX-157979070 | 5 | 49.12 | KV453028.1 | 7254751  | 13-scf00114 | 13 |
| AX-157979075 | 5 | 49.12 | KV453028.1 | 7269961  | 13-scf00114 | 13 |
| AX-157979080 | 5 | 49.12 | KV453028.1 | 7313864  | 13-scf00114 | 13 |
| AX-157979102 | 5 | 49.12 | KV453028.1 | 7448202  | 13-scf00114 | 13 |
| AX-157979110 | 5 | 49.12 | KV453028.1 | 7481106  | 13-scf00114 | 13 |
| AX-157979118 | 5 | 49.12 | KV453028.1 | 7526895  | 13-scf00114 | 13 |
| AX-157979141 | 5 | 49.12 | KV453028.1 | 7630867  | 13-scf00114 | 13 |
| AX-157979170 | 5 | 49.12 | KV453028.1 | 7788132  | 13-scf00114 | 13 |
| AX-157979179 | 5 | 49.12 | KV453028.1 | 7825719  | 13-scf00114 | 13 |
| AX-157979187 | 5 | 49.12 | KV453028.1 | 7859139  | 13-scf00114 | 13 |
| AX-157979188 | 5 | 49.12 | KV453028.1 | 7872193  | 13-scf00114 | 13 |
| AX-157979198 | 5 | 49.12 | KV453028.1 | 7954114  | 13-scf00114 | 13 |
| AX-157979203 | 5 | 49.12 | KV453028.1 | 7971769  | 13-scf00114 | 13 |
| AX-157979206 | 5 | 49.12 | KV453028.1 | 7993769  | 13-scf00114 | 13 |
| AX-158422143 | 5 | 49.12 | KV453028.1 | 8043076  | 13-scf00114 | 13 |
| AX-157979219 | 5 | 49.12 | KV453028.1 | 8081986  | 13-scf00114 | 13 |
| AX-157979223 | 5 | 49.12 | KV453028.1 | 8101315  | 13-scf00114 | 13 |
| AX-157979224 | 5 | 49.12 | KV453028.1 | 8102028  | 13-scf00114 | 13 |
| AX-157979239 | 5 | 49.12 | KV453028.1 | 8150094  | 13-scf00114 | 13 |
| AX-157979267 | 5 | 49.12 | KV453028.1 | 8278982  | 13-scf00114 | 13 |
| AX-157979278 | 5 | 49.12 | KV453028.1 | 8341287  | 13-scf00114 | 13 |
| AX-157817482 | 5 | 49.12 | KV453028.1 | 8528727  | 13-scf00114 | 13 |
| AX-157743618 | 5 | 49.12 | KV453028.1 | 8614910  | 13-scf00114 | 13 |
| AX-157817498 | 5 | 49.12 | KV453028.1 | 8617570  | 13-scf00114 | 13 |
| AX-157817501 | 5 | 49.12 | KV453028.1 | 8622736  | 13-scf00114 | 13 |
| AX-157817502 | 5 | 49.12 | KV453028.1 | 8627305  | 13-scf00114 | 13 |
| AX-157979541 | 5 | 49.12 | KV453028.1 | 8756457  | 13-scf00114 | 13 |
| AX-157979627 | 5 | 49.12 | KV453028.1 | 8883063  | 13-scf00114 | 13 |
| AX-157979635 | 5 | 49.12 | KV453028.1 | 8898206  | 13-scf00114 | 13 |
| AX-157979652 | 5 | 49.12 | KV453028.1 | 8922976  | 13-scf00114 | 13 |
| AX-157979655 | 5 | 49.12 | KV453028.1 | 8925397  | 13-scf00114 | 13 |
| AX-157979665 | 5 | 49.12 | KV453028.1 | 8945845  | 13-scf00114 | 13 |
| AX-157979672 | 5 | 49.12 | KV453028.1 | 8954539  | 13-scf00114 | 13 |
| AX-157979678 | 5 | 49.12 | KV453028.1 | 8965306  | 13-scf00114 | 13 |
| AX-157724950 | 5 | 49.12 | KV453028.1 | 8993690  | 13-scf00114 | 13 |
| AX-157817545 | 5 | 49.12 | KV453028.1 | 9004717  | 13-scf00114 | 13 |
| AX-157754793 | 5 | 49.12 | KV453028.1 | 9030731  | 13-scf00114 | 13 |
| AX-157979771 | 5 | 49.12 | KV453028.1 | 9185830  | 13-scf00114 | 13 |
| AX-157979792 | 5 | 49.12 | KV453028.1 | 9221841  | 13-scf00114 | 13 |
| AX-157979815 | 5 | 49.12 | KV453028.1 | 9252128  | 13-scf00114 | 13 |
| AX-157979893 | 5 | 49.12 | KV453028.1 | 9416477  | 13-scf00114 | 13 |
| AX-157855358 | 5 | 49.12 | KV453028.1 | 9478148  | 13-scf00114 | 13 |
| AX-157980141 | 5 | 49.12 | KV453028.1 | 9782607  | 13-scf00114 | 13 |
| AX-157755317 | 5 | 49.12 | KV453028.1 | 9876690  | 13-scf00114 | 13 |
| AX-157980554 | 5 | 49.12 | KV453028.1 | 10302694 | 13-scf00114 | 13 |
| AX-157981420 | 5 | 49.12 | KV453028.1 | 11410908 | 13-scf00114 | 13 |

|              |   |        |             |          |             |    |
|--------------|---|--------|-------------|----------|-------------|----|
| AX-157981725 | 5 | 49.12  | KV453028.1  | 11689025 | 13-scf00114 | 13 |
| AX-157981749 | 5 | 49.12  | KV453028.1  | 11709862 | 13-scf00114 | 13 |
| AX-157982173 | 5 | 49.12  | KV453028.1  | 12270667 | 13-scf00114 | 13 |
| AX-157713920 | 5 | 49.12  | KV453028.1  | 12448862 | 13-scf00114 | 13 |
| AX-157982433 | 5 | 49.12  | KV453028.1  | 12637896 | 13-scf00114 | 13 |
| AX-157982506 | 5 | 49.12  | KV453028.1  | 12785215 | 13-scf00114 | 13 |
| AX-157982522 | 5 | 49.12  | KV453028.1  | 12821269 | 13-scf00114 | 13 |
| AX-157817918 | 5 | 49.12  | KV453028.1  | 13549639 | 13-scf00114 | 13 |
| AX-157707141 | 5 | 49.12  | 3ML01033584 | 275      | scf09241_1  | UN |
| AX-157977286 | 5 | 49.165 | KV453028.1  | 5470218  | 13-scf00114 | 13 |
| AX-157976059 | 5 | 49.229 | KV453028.1  | 3816324  | 13-scf00114 | 13 |
| AX-157976609 | 5 | 49.229 | KV453028.1  | 4408205  | 13-scf00114 | 13 |
| AX-157718848 | 5 | 49.229 | KV453028.1  | 4856861  | 13-scf00114 | 13 |
| AX-157977005 | 5 | 49.229 | KV453028.1  | 5192088  | 13-scf00114 | 13 |
| AX-157977117 | 5 | 49.229 | KV453028.1  | 5324909  | 13-scf00114 | 13 |
| AX-157977132 | 5 | 49.229 | KV453028.1  | 5335749  | 13-scf00114 | 13 |
| AX-157977216 | 5 | 49.229 | KV453028.1  | 5388923  | 13-scf00114 | 13 |
| AX-157817338 | 5 | 49.229 | KV453028.1  | 5495469  | 13-scf00114 | 13 |
| AX-157977310 | 5 | 49.229 | KV453028.1  | 5502160  | 13-scf00114 | 13 |
| AX-157977313 | 5 | 49.229 | KV453028.1  | 5504466  | 13-scf00114 | 13 |
| AX-157977323 | 5 | 49.229 | KV453028.1  | 5509703  | 13-scf00114 | 13 |
| AX-157977325 | 5 | 49.229 | KV453028.1  | 5510808  | 13-scf00114 | 13 |
| AX-157977327 | 5 | 49.229 | KV453028.1  | 5511835  | 13-scf00114 | 13 |
| AX-157817339 | 5 | 49.229 | KV453028.1  | 5512562  | 13-scf00114 | 13 |
| AX-157977331 | 5 | 49.229 | KV453028.1  | 5514404  | 13-scf00114 | 13 |
| AX-157977332 | 5 | 49.229 | KV453028.1  | 5515365  | 13-scf00114 | 13 |
| AX-157977342 | 5 | 49.229 | KV453028.1  | 5521920  | 13-scf00114 | 13 |
| AX-157977343 | 5 | 49.229 | KV453028.1  | 5522115  | 13-scf00114 | 13 |
| AX-157977346 | 5 | 49.229 | KV453028.1  | 5523653  | 13-scf00114 | 13 |
| AX-157977348 | 5 | 49.229 | KV453028.1  | 5524561  | 13-scf00114 | 13 |
| AX-157977357 | 5 | 49.229 | KV453028.1  | 5531517  | 13-scf00114 | 13 |
| AX-157977372 | 5 | 49.229 | KV453028.1  | 5545690  | 13-scf00114 | 13 |
| AX-157977374 | 5 | 49.229 | KV453028.1  | 5546753  | 13-scf00114 | 13 |
| AX-157977379 | 5 | 49.229 | KV453028.1  | 5549768  | 13-scf00114 | 13 |
| AX-157977380 | 5 | 49.229 | KV453028.1  | 5551919  | 13-scf00114 | 13 |
| AX-157977382 | 5 | 49.229 | KV453028.1  | 5552645  | 13-scf00114 | 13 |
| AX-157977390 | 5 | 49.229 | KV453028.1  | 5560316  | 13-scf00114 | 13 |
| AX-157977392 | 5 | 49.229 | KV453028.1  | 5561115  | 13-scf00114 | 13 |
| AX-157977400 | 5 | 49.229 | KV453028.1  | 5566010  | 13-scf00114 | 13 |
| AX-157977402 | 5 | 49.229 | KV453028.1  | 5566106  | 13-scf00114 | 13 |
| AX-157977403 | 5 | 49.229 | KV453028.1  | 5567271  | 13-scf00114 | 13 |
| AX-157869698 | 5 | 49.229 | KV453028.1  | 5568280  | 13-scf00114 | 13 |
| AX-157977406 | 5 | 49.229 | KV453028.1  | 5568851  | 13-scf00114 | 13 |
| AX-157977408 | 5 | 49.229 | KV453028.1  | 5569879  | 13-scf00114 | 13 |
| AX-157977410 | 5 | 49.229 | KV453028.1  | 5572339  | 13-scf00114 | 13 |
| AX-157977411 | 5 | 49.229 | KV453028.1  | 5573478  | 13-scf00114 | 13 |
| AX-157977413 | 5 | 49.229 | KV453028.1  | 5573719  | 13-scf00114 | 13 |
| AX-157977414 | 5 | 49.229 | KV453028.1  | 5574132  | 13-scf00114 | 13 |
| AX-157977423 | 5 | 49.229 | KV453028.1  | 5581560  | 13-scf00114 | 13 |
| AX-157977564 | 5 | 49.229 | KV453028.1  | 5671945  | 13-scf00114 | 13 |
| AX-157817356 | 5 | 49.229 | KV453028.1  | 5765437  | 13-scf00114 | 13 |

|              |   |        |            |         |             |    |
|--------------|---|--------|------------|---------|-------------|----|
| AX-157978524 | 5 | 49.229 | KV453028.1 | 6447611 | 13-scf00114 | 13 |
| AX-157978590 | 5 | 49.229 | KV453028.1 | 6512423 | 13-scf00114 | 13 |
| AX-157817428 | 5 | 49.229 | KV453028.1 | 6712106 | 13-scf00114 | 13 |
| AX-157976582 | 5 | 49.231 | KV453028.1 | 4355843 | 13-scf00114 | 13 |
| AX-158406774 | 5 | 49.231 | KV453028.1 | 4733826 | 13-scf00114 | 13 |
| AX-157976908 | 5 | 49.231 | KV453028.1 | 5049171 | 13-scf00114 | 13 |
| AX-157977369 | 5 | 49.231 | KV453028.1 | 5542625 | 13-scf00114 | 13 |
| AX-157977386 | 5 | 49.231 | KV453028.1 | 5555904 | 13-scf00114 | 13 |
| AX-157977388 | 5 | 49.231 | KV453028.1 | 5559805 | 13-scf00114 | 13 |
| AX-157977421 | 5 | 49.231 | KV453028.1 | 5580750 | 13-scf00114 | 13 |
| AX-157977429 | 5 | 49.231 | KV453028.1 | 5585617 | 13-scf00114 | 13 |
| AX-157817342 | 5 | 49.231 | KV453028.1 | 5586048 | 13-scf00114 | 13 |
| AX-157977431 | 5 | 49.231 | KV453028.1 | 5586792 | 13-scf00114 | 13 |
| AX-157977432 | 5 | 49.231 | KV453028.1 | 5587249 | 13-scf00114 | 13 |
| AX-157977435 | 5 | 49.231 | KV453028.1 | 5591045 | 13-scf00114 | 13 |
| AX-157977436 | 5 | 49.231 | KV453028.1 | 5591407 | 13-scf00114 | 13 |
| AX-157977439 | 5 | 49.231 | KV453028.1 | 5593875 | 13-scf00114 | 13 |
| AX-157757364 | 5 | 49.231 | KV453028.1 | 5594240 | 13-scf00114 | 13 |
| AX-157977440 | 5 | 49.231 | KV453028.1 | 5595762 | 13-scf00114 | 13 |
| AX-157977441 | 5 | 49.231 | KV453028.1 | 5596232 | 13-scf00114 | 13 |
| AX-157977444 | 5 | 49.231 | KV453028.1 | 5598871 | 13-scf00114 | 13 |
| AX-157977445 | 5 | 49.231 | KV453028.1 | 5599302 | 13-scf00114 | 13 |
| AX-157977447 | 5 | 49.231 | KV453028.1 | 5600078 | 13-scf00114 | 13 |
| AX-157977450 | 5 | 49.231 | KV453028.1 | 5602308 | 13-scf00114 | 13 |
| AX-157977451 | 5 | 49.231 | KV453028.1 | 5603136 | 13-scf00114 | 13 |
| AX-157977452 | 5 | 49.231 | KV453028.1 | 5604032 | 13-scf00114 | 13 |
| AX-157817344 | 5 | 49.231 | KV453028.1 | 5604368 | 13-scf00114 | 13 |
| AX-157977453 | 5 | 49.231 | KV453028.1 | 5604586 | 13-scf00114 | 13 |
| AX-157977455 | 5 | 49.231 | KV453028.1 | 5606799 | 13-scf00114 | 13 |
| AX-157977456 | 5 | 49.231 | KV453028.1 | 5608520 | 13-scf00114 | 13 |
| AX-157977462 | 5 | 49.231 | KV453028.1 | 5614148 | 13-scf00114 | 13 |
| AX-157977464 | 5 | 49.231 | KV453028.1 | 5614805 | 13-scf00114 | 13 |
| AX-157977468 | 5 | 49.231 | KV453028.1 | 5616432 | 13-scf00114 | 13 |
| AX-157977469 | 5 | 49.231 | KV453028.1 | 5617184 | 13-scf00114 | 13 |
| AX-157977470 | 5 | 49.231 | KV453028.1 | 5618446 | 13-scf00114 | 13 |
| AX-157978038 | 5 | 49.231 | KV453028.1 | 6055980 | 13-scf00114 | 13 |
| AX-157978672 | 5 | 49.231 | KV453028.1 | 6593499 | 13-scf00114 | 13 |
| AX-157978688 | 5 | 49.231 | KV453028.1 | 6611352 | 13-scf00114 | 13 |
| AX-157978734 | 5 | 49.231 | KV453028.1 | 6663639 | 13-scf00114 | 13 |
| AX-157978735 | 5 | 49.231 | KV453028.1 | 6663994 | 13-scf00114 | 13 |
| AX-157979231 | 5 | 49.231 | KV453028.1 | 8130329 | 13-scf00114 | 13 |
| AX-157977430 | 5 | 49.274 | KV453028.1 | 5586612 | 13-scf00114 | 13 |
| AX-157977434 | 5 | 49.283 | KV453028.1 | 5589579 | 13-scf00114 | 13 |
| AX-157977709 | 5 | 49.283 | KV453028.1 | 5795556 | 13-scf00114 | 13 |
| AX-157978052 | 5 | 49.283 | KV453028.1 | 6067651 | 13-scf00114 | 13 |
| AX-157977438 | 5 | 49.292 | KV453028.1 | 5593540 | 13-scf00114 | 13 |
| AX-157977446 | 5 | 49.303 | KV453028.1 | 5599482 | 13-scf00114 | 13 |
| AX-157975940 | 5 | 49.312 | KV453028.1 | 3723195 | 13-scf00114 | 13 |
| AX-157817345 | 5 | 49.312 | KV453028.1 | 5605996 | 13-scf00114 | 13 |
| AX-157977460 | 5 | 49.314 | KV453028.1 | 5611820 | 13-scf00114 | 13 |
| AX-157977461 | 5 | 49.318 | KV453028.1 | 5612941 | 13-scf00114 | 13 |

|              |   |        |            |         |             |    |
|--------------|---|--------|------------|---------|-------------|----|
| AX-157977465 | 5 | 49.329 | KV453028.1 | 5615881 | 13-scf00114 | 13 |
| AX-157975402 | 5 | 49.338 | KV453028.1 | 3029776 | 13-scf00114 | 13 |
| AX-157975791 | 5 | 49.338 | KV453028.1 | 3581457 | 13-scf00114 | 13 |
| AX-157976545 | 5 | 49.338 | KV453028.1 | 4315470 | 13-scf00114 | 13 |
| AX-157977011 | 5 | 49.338 | KV453028.1 | 5195728 | 13-scf00114 | 13 |
| AX-157977024 | 5 | 49.338 | KV453028.1 | 5206462 | 13-scf00114 | 13 |
| AX-157977028 | 5 | 49.338 | KV453028.1 | 5208355 | 13-scf00114 | 13 |
| AX-157977076 | 5 | 49.338 | KV453028.1 | 5262122 | 13-scf00114 | 13 |
| AX-157977121 | 5 | 49.338 | KV453028.1 | 5327521 | 13-scf00114 | 13 |
| AX-157977143 | 5 | 49.338 | KV453028.1 | 5344951 | 13-scf00114 | 13 |
| AX-157977420 | 5 | 49.338 | KV453028.1 | 5579713 | 13-scf00114 | 13 |
| AX-157977449 | 5 | 49.338 | KV453028.1 | 5601824 | 13-scf00114 | 13 |
| AX-157977514 | 5 | 49.338 | KV453028.1 | 5650682 | 13-scf00114 | 13 |
| AX-157724255 | 5 | 49.338 | KV453028.1 | 5651096 | 13-scf00114 | 13 |
| AX-157977517 | 5 | 49.338 | KV453028.1 | 5651670 | 13-scf00114 | 13 |
| AX-157977520 | 5 | 49.338 | KV453028.1 | 5652435 | 13-scf00114 | 13 |
| AX-157977525 | 5 | 49.338 | KV453028.1 | 5654492 | 13-scf00114 | 13 |
| AX-157741228 | 5 | 49.338 | KV453028.1 | 5655913 | 13-scf00114 | 13 |
| AX-157977534 | 5 | 49.338 | KV453028.1 | 5657493 | 13-scf00114 | 13 |
| AX-157977535 | 5 | 49.338 | KV453028.1 | 5658280 | 13-scf00114 | 13 |
| AX-157977538 | 5 | 49.338 | KV453028.1 | 5658994 | 13-scf00114 | 13 |
| AX-157977569 | 5 | 49.338 | KV453028.1 | 5673434 | 13-scf00114 | 13 |
| AX-157743010 | 5 | 49.338 | KV453028.1 | 5679285 | 13-scf00114 | 13 |
| AX-157977592 | 5 | 49.338 | KV453028.1 | 5693917 | 13-scf00114 | 13 |
| AX-157977604 | 5 | 49.338 | KV453028.1 | 5704977 | 13-scf00114 | 13 |
| AX-157977633 | 5 | 49.338 | KV453028.1 | 5737269 | 13-scf00114 | 13 |
| AX-157738670 | 5 | 49.338 | KV453028.1 | 5737594 | 13-scf00114 | 13 |
| AX-157977645 | 5 | 49.338 | KV453028.1 | 5745664 | 13-scf00114 | 13 |
| AX-157755311 | 5 | 49.338 | KV453028.1 | 5748133 | 13-scf00114 | 13 |
| AX-157977650 | 5 | 49.338 | KV453028.1 | 5751478 | 13-scf00114 | 13 |
| AX-157977652 | 5 | 49.338 | KV453028.1 | 5752106 | 13-scf00114 | 13 |
| AX-157977654 | 5 | 49.338 | KV453028.1 | 5752577 | 13-scf00114 | 13 |
| AX-157977659 | 5 | 49.338 | KV453028.1 | 5756188 | 13-scf00114 | 13 |
| AX-157977663 | 5 | 49.338 | KV453028.1 | 5757887 | 13-scf00114 | 13 |
| AX-157817354 | 5 | 49.338 | KV453028.1 | 5758378 | 13-scf00114 | 13 |
| AX-157977669 | 5 | 49.338 | KV453028.1 | 5763568 | 13-scf00114 | 13 |
| AX-157977684 | 5 | 49.338 | KV453028.1 | 5773195 | 13-scf00114 | 13 |
| AX-157977686 | 5 | 49.338 | KV453028.1 | 5775799 | 13-scf00114 | 13 |
| AX-157740960 | 5 | 49.338 | KV453028.1 | 5779387 | 13-scf00114 | 13 |
| AX-157977708 | 5 | 49.338 | KV453028.1 | 5795127 | 13-scf00114 | 13 |
| AX-157869706 | 5 | 49.338 | KV453028.1 | 5816757 | 13-scf00114 | 13 |
| AX-157721853 | 5 | 49.338 | KV453028.1 | 5823778 | 13-scf00114 | 13 |
| AX-157977750 | 5 | 49.338 | KV453028.1 | 5824441 | 13-scf00114 | 13 |
| AX-157817359 | 5 | 49.338 | KV453028.1 | 5825170 | 13-scf00114 | 13 |
| AX-157977751 | 5 | 49.338 | KV453028.1 | 5826173 | 13-scf00114 | 13 |
| AX-157718048 | 5 | 49.338 | KV453028.1 | 5831637 | 13-scf00114 | 13 |
| AX-157977758 | 5 | 49.338 | KV453028.1 | 5835028 | 13-scf00114 | 13 |
| AX-157817360 | 5 | 49.338 | KV453028.1 | 5835785 | 13-scf00114 | 13 |
| AX-157977762 | 5 | 49.338 | KV453028.1 | 5839661 | 13-scf00114 | 13 |
| AX-157977765 | 5 | 49.338 | KV453028.1 | 5841865 | 13-scf00114 | 13 |
| AX-157977800 | 5 | 49.338 | KV453028.1 | 5868154 | 13-scf00114 | 13 |

|              |   |        |            |         |             |    |
|--------------|---|--------|------------|---------|-------------|----|
| AX-157977927 | 5 | 49.338 | KV453028.1 | 5973413 | 13-scf00114 | 13 |
| AX-157977931 | 5 | 49.338 | KV453028.1 | 5977122 | 13-scf00114 | 13 |
| AX-157977949 | 5 | 49.338 | KV453028.1 | 5994908 | 13-scf00114 | 13 |
| AX-157977952 | 5 | 49.338 | KV453028.1 | 5996368 | 13-scf00114 | 13 |
| AX-157744715 | 5 | 49.338 | KV453028.1 | 6008916 | 13-scf00114 | 13 |
| AX-157817376 | 5 | 49.338 | KV453028.1 | 6028119 | 13-scf00114 | 13 |
| AX-157978013 | 5 | 49.338 | KV453028.1 | 6041246 | 13-scf00114 | 13 |
| AX-157978021 | 5 | 49.338 | KV453028.1 | 6043839 | 13-scf00114 | 13 |
| AX-157978022 | 5 | 49.338 | KV453028.1 | 6044754 | 13-scf00114 | 13 |
| AX-157978026 | 5 | 49.338 | KV453028.1 | 6046329 | 13-scf00114 | 13 |
| AX-157978039 | 5 | 49.338 | KV453028.1 | 6056807 | 13-scf00114 | 13 |
| AX-157978051 | 5 | 49.338 | KV453028.1 | 6066825 | 13-scf00114 | 13 |
| AX-157978062 | 5 | 49.338 | KV453028.1 | 6074818 | 13-scf00114 | 13 |
| AX-158390403 | 5 | 49.338 | KV453028.1 | 6079998 | 13-scf00114 | 13 |
| AX-157978073 | 5 | 49.338 | KV453028.1 | 6082884 | 13-scf00114 | 13 |
| AX-157978081 | 5 | 49.338 | KV453028.1 | 6091562 | 13-scf00114 | 13 |
| AX-157817380 | 5 | 49.338 | KV453028.1 | 6103058 | 13-scf00114 | 13 |
| AX-157817386 | 5 | 49.338 | KV453028.1 | 6126222 | 13-scf00114 | 13 |
| AX-157978128 | 5 | 49.338 | KV453028.1 | 6126514 | 13-scf00114 | 13 |
| AX-157978129 | 5 | 49.338 | KV453028.1 | 6126869 | 13-scf00114 | 13 |
| AX-157978184 | 5 | 49.338 | KV453028.1 | 6178679 | 13-scf00114 | 13 |
| AX-157855170 | 5 | 49.338 | KV453028.1 | 6182683 | 13-scf00114 | 13 |
| AX-157978204 | 5 | 49.338 | KV453028.1 | 6194027 | 13-scf00114 | 13 |
| AX-157978227 | 5 | 49.338 | KV453028.1 | 6211846 | 13-scf00114 | 13 |
| AX-158406807 | 5 | 49.338 | KV453028.1 | 6241653 | 13-scf00114 | 13 |
| AX-157978285 | 5 | 49.338 | KV453028.1 | 6264123 | 13-scf00114 | 13 |
| AX-157978295 | 5 | 49.338 | KV453028.1 | 6269824 | 13-scf00114 | 13 |
| AX-157978299 | 5 | 49.338 | KV453028.1 | 6271786 | 13-scf00114 | 13 |
| AX-157978301 | 5 | 49.338 | KV453028.1 | 6273051 | 13-scf00114 | 13 |
| AX-157817400 | 5 | 49.338 | KV453028.1 | 6276502 | 13-scf00114 | 13 |
| AX-157754205 | 5 | 49.338 | KV453028.1 | 6278960 | 13-scf00114 | 13 |
| AX-157978306 | 5 | 49.338 | KV453028.1 | 6279783 | 13-scf00114 | 13 |
| AX-157752112 | 5 | 49.338 | KV453028.1 | 6290089 | 13-scf00114 | 13 |
| AX-157978324 | 5 | 49.338 | KV453028.1 | 6296104 | 13-scf00114 | 13 |
| AX-157978332 | 5 | 49.338 | KV453028.1 | 6300236 | 13-scf00114 | 13 |
| AX-158390405 | 5 | 49.338 | KV453028.1 | 6308264 | 13-scf00114 | 13 |
| AX-157978361 | 5 | 49.338 | KV453028.1 | 6323429 | 13-scf00114 | 13 |
| AX-157978368 | 5 | 49.338 | KV453028.1 | 6326016 | 13-scf00114 | 13 |
| AX-157978374 | 5 | 49.338 | KV453028.1 | 6329620 | 13-scf00114 | 13 |
| AX-157817405 | 5 | 49.338 | KV453028.1 | 6330643 | 13-scf00114 | 13 |
| AX-157978419 | 5 | 49.338 | KV453028.1 | 6377487 | 13-scf00114 | 13 |
| AX-157978426 | 5 | 49.338 | KV453028.1 | 6383849 | 13-scf00114 | 13 |
| AX-157978433 | 5 | 49.338 | KV453028.1 | 6387642 | 13-scf00114 | 13 |
| AX-157978436 | 5 | 49.338 | KV453028.1 | 6389113 | 13-scf00114 | 13 |
| AX-157978438 | 5 | 49.338 | KV453028.1 | 6391685 | 13-scf00114 | 13 |
| AX-157978451 | 5 | 49.338 | KV453028.1 | 6400883 | 13-scf00114 | 13 |
| AX-157978452 | 5 | 49.338 | KV453028.1 | 6401631 | 13-scf00114 | 13 |
| AX-157978497 | 5 | 49.338 | KV453028.1 | 6422384 | 13-scf00114 | 13 |
| AX-157978594 | 5 | 49.338 | KV453028.1 | 6516815 | 13-scf00114 | 13 |
| AX-157978596 | 5 | 49.338 | KV453028.1 | 6517267 | 13-scf00114 | 13 |
| AX-157978597 | 5 | 49.338 | KV453028.1 | 6517540 | 13-scf00114 | 13 |

|              |   |        |            |          |             |    |
|--------------|---|--------|------------|----------|-------------|----|
| AX-157978687 | 5 | 49.338 | KV453028.1 | 6608924  | 13-scf00114 | 13 |
| AX-157978700 | 5 | 49.338 | KV453028.1 | 6623738  | 13-scf00114 | 13 |
| AX-157978721 | 5 | 49.338 | KV453028.1 | 6645536  | 13-scf00114 | 13 |
| AX-157978785 | 5 | 49.338 | KV453028.1 | 6726173  | 13-scf00114 | 13 |
| AX-157817430 | 5 | 49.338 | KV453028.1 | 6733290  | 13-scf00114 | 13 |
| AX-157978796 | 5 | 49.338 | KV453028.1 | 6739181  | 13-scf00114 | 13 |
| AX-157978840 | 5 | 49.338 | KV453028.1 | 6789639  | 13-scf00114 | 13 |
| AX-157978877 | 5 | 49.338 | KV453028.1 | 6846150  | 13-scf00114 | 13 |
| AX-157979023 | 5 | 49.338 | KV453028.1 | 7039743  | 13-scf00114 | 13 |
| AX-157979067 | 5 | 49.338 | KV453028.1 | 7244215  | 13-scf00114 | 13 |
| AX-157979291 | 5 | 49.338 | KV453028.1 | 8390669  | 13-scf00114 | 13 |
| AX-157979306 | 5 | 49.338 | KV453028.1 | 8432975  | 13-scf00114 | 13 |
| AX-157979314 | 5 | 49.338 | KV453028.1 | 8439740  | 13-scf00114 | 13 |
| AX-157979316 | 5 | 49.338 | KV453028.1 | 8441306  | 13-scf00114 | 13 |
| AX-157979319 | 5 | 49.338 | KV453028.1 | 8444923  | 13-scf00114 | 13 |
| AX-157979324 | 5 | 49.338 | KV453028.1 | 8459877  | 13-scf00114 | 13 |
| AX-158405390 | 5 | 49.338 | KV453028.1 | 8643101  | 13-scf00114 | 13 |
| AX-157979550 | 5 | 49.338 | KV453028.1 | 8781619  | 13-scf00114 | 13 |
| AX-157979551 | 5 | 49.338 | KV453028.1 | 8785334  | 13-scf00114 | 13 |
| AX-157979553 | 5 | 49.338 | KV453028.1 | 8786394  | 13-scf00114 | 13 |
| AX-157754399 | 5 | 49.338 | KV453028.1 | 9108929  | 13-scf00114 | 13 |
| AX-157979735 | 5 | 49.338 | KV453028.1 | 9113604  | 13-scf00114 | 13 |
| AX-157979751 | 5 | 49.338 | KV453028.1 | 9147444  | 13-scf00114 | 13 |
| AX-157980193 | 5 | 49.338 | KV453028.1 | 9850361  | 13-scf00114 | 13 |
| AX-157741213 | 5 | 49.338 | KV453028.1 | 9860813  | 13-scf00114 | 13 |
| AX-157980243 | 5 | 49.338 | KV453028.1 | 9925539  | 13-scf00114 | 13 |
| AX-157980248 | 5 | 49.338 | KV453028.1 | 9927821  | 13-scf00114 | 13 |
| AX-157817607 | 5 | 49.338 | KV453028.1 | 9929135  | 13-scf00114 | 13 |
| AX-157980249 | 5 | 49.338 | KV453028.1 | 9931631  | 13-scf00114 | 13 |
| AX-157980256 | 5 | 49.338 | KV453028.1 | 9938693  | 13-scf00114 | 13 |
| AX-157716834 | 5 | 49.338 | KV453028.1 | 9939855  | 13-scf00114 | 13 |
| AX-157980258 | 5 | 49.338 | KV453028.1 | 9943236  | 13-scf00114 | 13 |
| AX-157980284 | 5 | 49.338 | KV453028.1 | 9984787  | 13-scf00114 | 13 |
| AX-157749974 | 5 | 49.338 | KV453028.1 | 10066955 | 13-scf00114 | 13 |
| AX-157980372 | 5 | 49.338 | KV453028.1 | 10073631 | 13-scf00114 | 13 |
| AX-157980405 | 5 | 49.338 | KV453028.1 | 10109671 | 13-scf00114 | 13 |
| AX-157980408 | 5 | 49.338 | KV453028.1 | 10111601 | 13-scf00114 | 13 |
| AX-157980466 | 5 | 49.338 | KV453028.1 | 10169337 | 13-scf00114 | 13 |
| AX-157980618 | 5 | 49.338 | KV453028.1 | 10409826 | 13-scf00114 | 13 |
| AX-157980692 | 5 | 49.338 | KV453028.1 | 10531710 | 13-scf00114 | 13 |
| AX-157817682 | 5 | 49.338 | KV453028.1 | 10635151 | 13-scf00114 | 13 |
| AX-157817683 | 5 | 49.338 | KV453028.1 | 10638036 | 13-scf00114 | 13 |
| AX-157980734 | 5 | 49.338 | KV453028.1 | 10641771 | 13-scf00114 | 13 |
| AX-157980735 | 5 | 49.338 | KV453028.1 | 10643187 | 13-scf00114 | 13 |
| AX-157980736 | 5 | 49.338 | KV453028.1 | 10644129 | 13-scf00114 | 13 |
| AX-157980738 | 5 | 49.338 | KV453028.1 | 10648539 | 13-scf00114 | 13 |
| AX-157980740 | 5 | 49.338 | KV453028.1 | 10650447 | 13-scf00114 | 13 |
| AX-157980741 | 5 | 49.338 | KV453028.1 | 10650645 | 13-scf00114 | 13 |
| AX-157855504 | 5 | 49.338 | KV453028.1 | 10655500 | 13-scf00114 | 13 |
| AX-157980804 | 5 | 49.338 | KV453028.1 | 10748025 | 13-scf00114 | 13 |
| AX-157980832 | 5 | 49.338 | KV453028.1 | 10781339 | 13-scf00114 | 13 |



|              |   |        |             |          |                |    |
|--------------|---|--------|-------------|----------|----------------|----|
| AX-157980854 | 5 | 49.338 | KV453028.1  | 10818788 | 13-scf00114    | 13 |
| AX-157980855 | 5 | 49.338 | KV453028.1  | 10820081 | 13-scf00114    | 13 |
| AX-157700700 | 5 | 49.338 | FI861273.1  | 198      | IORI212 lctalu | UN |
| AX-157705332 | 5 | 49.338 | 3ML01029419 | 687      | scf05040_1     | UN |
| AX-157976492 | 5 | 49.413 | KV453028.1  | 4247528  | 13-scf00114    | 13 |
| AX-157756744 | 5 | 49.413 | KV453028.1  | 6291813  | 13-scf00114    | 13 |
| AX-157977021 | 5 | 49.483 | KV453028.1  | 5201610  | 13-scf00114    | 13 |
| AX-157977123 | 5 | 49.483 | KV453028.1  | 5329115  | 13-scf00114    | 13 |
| AX-157977223 | 5 | 49.483 | KV453028.1  | 5405934  | 13-scf00114    | 13 |
| AX-157979106 | 5 | 49.483 | KV453028.1  | 7460062  | 13-scf00114    | 13 |
| AX-157979107 | 5 | 49.483 | KV453028.1  | 7467916  | 13-scf00114    | 13 |
| AX-157979123 | 5 | 49.483 | KV453028.1  | 7548207  | 13-scf00114    | 13 |
| AX-157980602 | 5 | 49.483 | KV453028.1  | 10371708 | 13-scf00114    | 13 |
| AX-157982483 | 5 | 49.483 | KV453028.1  | 12727956 | 13-scf00114    | 13 |
| AX-157773632 | 5 | 49.483 | KV453028.1  | 12736945 | 13-scf00114    | 13 |
| AX-157982824 | 5 | 49.483 | KV453028.1  | 13570967 | 13-scf00114    | 13 |
| AX-157701672 | 5 | 49.483 | DX087052.1  | 323      | IORI212 lctalu | UN |
| AX-157978322 | 5 | 49.763 | KV453028.1  | 6295104  | 13-scf00114    | 13 |
| AX-157976066 | 5 | 49.772 | KV453028.1  | 3821642  | 13-scf00114    | 13 |
| AX-157817284 | 5 | 49.772 | KV453028.1  | 4252512  | 13-scf00114    | 13 |
| AX-157977304 | 5 | 49.772 | KV453028.1  | 5497503  | 13-scf00114    | 13 |
| AX-157977320 | 5 | 49.772 | KV453028.1  | 5506979  | 13-scf00114    | 13 |
| AX-157977326 | 5 | 49.772 | KV453028.1  | 5511156  | 13-scf00114    | 13 |
| AX-157977337 | 5 | 49.772 | KV453028.1  | 5518758  | 13-scf00114    | 13 |
| AX-157977345 | 5 | 49.772 | KV453028.1  | 5522857  | 13-scf00114    | 13 |
| AX-157977349 | 5 | 49.772 | KV453028.1  | 5525363  | 13-scf00114    | 13 |
| AX-157977350 | 5 | 49.772 | KV453028.1  | 5525853  | 13-scf00114    | 13 |
| AX-157977353 | 5 | 49.772 | KV453028.1  | 5527615  | 13-scf00114    | 13 |
| AX-157977355 | 5 | 49.772 | KV453028.1  | 5529395  | 13-scf00114    | 13 |
| AX-157977358 | 5 | 49.772 | KV453028.1  | 5532135  | 13-scf00114    | 13 |
| AX-157977359 | 5 | 49.772 | KV453028.1  | 5535040  | 13-scf00114    | 13 |
| AX-157977363 | 5 | 49.772 | KV453028.1  | 5536792  | 13-scf00114    | 13 |
| AX-157977365 | 5 | 49.772 | KV453028.1  | 5540568  | 13-scf00114    | 13 |
| AX-157977373 | 5 | 49.772 | KV453028.1  | 5546322  | 13-scf00114    | 13 |
| AX-157977383 | 5 | 49.772 | KV453028.1  | 5553047  | 13-scf00114    | 13 |
| AX-157977442 | 5 | 49.772 | KV453028.1  | 5598268  | 13-scf00114    | 13 |
| AX-157977481 | 5 | 49.772 | KV453028.1  | 5623820  | 13-scf00114    | 13 |
| AX-157977485 | 5 | 49.772 | KV453028.1  | 5632363  | 13-scf00114    | 13 |
| AX-157977487 | 5 | 49.772 | KV453028.1  | 5633187  | 13-scf00114    | 13 |
| AX-157758460 | 5 | 49.772 | KV453028.1  | 5643298  | 13-scf00114    | 13 |
| AX-157977500 | 5 | 49.772 | KV453028.1  | 5644727  | 13-scf00114    | 13 |
| AX-157748321 | 5 | 49.772 | KV453028.1  | 5728748  | 13-scf00114    | 13 |
| AX-157977632 | 5 | 49.772 | KV453028.1  | 5736831  | 13-scf00114    | 13 |
| AX-157977635 | 5 | 49.772 | KV453028.1  | 5738798  | 13-scf00114    | 13 |
| AX-157977753 | 5 | 49.772 | KV453028.1  | 5828289  | 13-scf00114    | 13 |
| AX-157977767 | 5 | 49.772 | KV453028.1  | 5842746  | 13-scf00114    | 13 |
| AX-157977788 | 5 | 49.772 | KV453028.1  | 5855259  | 13-scf00114    | 13 |
| AX-157977875 | 5 | 49.772 | KV453028.1  | 5919934  | 13-scf00114    | 13 |
| AX-158406801 | 5 | 49.772 | KV453028.1  | 5924242  | 13-scf00114    | 13 |
| AX-157977921 | 5 | 49.772 | KV453028.1  | 5967095  | 13-scf00114    | 13 |
| AX-157716985 | 5 | 49.772 | KV453028.1  | 5978191  | 13-scf00114    | 13 |

|              |   |        |            |         |             |    |
|--------------|---|--------|------------|---------|-------------|----|
| AX-157817371 | 5 | 49.772 | KV453028.1 | 5980560 | 13-scf00114 | 13 |
| AX-157977942 | 5 | 49.772 | KV453028.1 | 5986484 | 13-scf00114 | 13 |
| AX-157978008 | 5 | 49.772 | KV453028.1 | 6033495 | 13-scf00114 | 13 |
| AX-157978064 | 5 | 49.772 | KV453028.1 | 6075307 | 13-scf00114 | 13 |
| AX-157978095 | 5 | 49.772 | KV453028.1 | 6100821 | 13-scf00114 | 13 |
| AX-157978096 | 5 | 49.772 | KV453028.1 | 6101306 | 13-scf00114 | 13 |
| AX-157978098 | 5 | 49.772 | KV453028.1 | 6101492 | 13-scf00114 | 13 |
| AX-157817404 | 5 | 49.772 | KV453028.1 | 6316447 | 13-scf00114 | 13 |
| AX-157978356 | 5 | 49.772 | KV453028.1 | 6316767 | 13-scf00114 | 13 |
| AX-157978400 | 5 | 49.772 | KV453028.1 | 6356858 | 13-scf00114 | 13 |
| AX-157817409 | 5 | 49.772 | KV453028.1 | 6361109 | 13-scf00114 | 13 |
| AX-157978409 | 5 | 49.772 | KV453028.1 | 6369747 | 13-scf00114 | 13 |
| AX-157978425 | 5 | 49.772 | KV453028.1 | 6383501 | 13-scf00114 | 13 |
| AX-157817413 | 5 | 49.772 | KV453028.1 | 6385879 | 13-scf00114 | 13 |
| AX-157978437 | 5 | 49.772 | KV453028.1 | 6391201 | 13-scf00114 | 13 |
| AX-157978440 | 5 | 49.772 | KV453028.1 | 6392456 | 13-scf00114 | 13 |
| AX-157978441 | 5 | 49.772 | KV453028.1 | 6393254 | 13-scf00114 | 13 |
| AX-157978445 | 5 | 49.772 | KV453028.1 | 6395894 | 13-scf00114 | 13 |
| AX-157978448 | 5 | 49.772 | KV453028.1 | 6399745 | 13-scf00114 | 13 |
| AX-157855177 | 5 | 49.772 | KV453028.1 | 6400071 | 13-scf00114 | 13 |
| AX-157978449 | 5 | 49.772 | KV453028.1 | 6400111 | 13-scf00114 | 13 |
| AX-157978457 | 5 | 49.772 | KV453028.1 | 6402892 | 13-scf00114 | 13 |
| AX-157978462 | 5 | 49.772 | KV453028.1 | 6404300 | 13-scf00114 | 13 |
| AX-157978465 | 5 | 49.772 | KV453028.1 | 6404987 | 13-scf00114 | 13 |
| AX-157978467 | 5 | 49.772 | KV453028.1 | 6405559 | 13-scf00114 | 13 |
| AX-157978468 | 5 | 49.772 | KV453028.1 | 6406185 | 13-scf00114 | 13 |
| AX-157978470 | 5 | 49.772 | KV453028.1 | 6408938 | 13-scf00114 | 13 |
| AX-157978471 | 5 | 49.772 | KV453028.1 | 6409443 | 13-scf00114 | 13 |
| AX-157978475 | 5 | 49.772 | KV453028.1 | 6411437 | 13-scf00114 | 13 |
| AX-157978476 | 5 | 49.772 | KV453028.1 | 6412159 | 13-scf00114 | 13 |
| AX-157978477 | 5 | 49.772 | KV453028.1 | 6412624 | 13-scf00114 | 13 |
| AX-157978480 | 5 | 49.772 | KV453028.1 | 6413092 | 13-scf00114 | 13 |
| AX-157978482 | 5 | 49.772 | KV453028.1 | 6414241 | 13-scf00114 | 13 |
| AX-157978483 | 5 | 49.772 | KV453028.1 | 6415057 | 13-scf00114 | 13 |
| AX-157978488 | 5 | 49.772 | KV453028.1 | 6418469 | 13-scf00114 | 13 |
| AX-157978494 | 5 | 49.772 | KV453028.1 | 6420297 | 13-scf00114 | 13 |
| AX-157855178 | 5 | 49.772 | KV453028.1 | 6421639 | 13-scf00114 | 13 |
| AX-157978501 | 5 | 49.772 | KV453028.1 | 6423271 | 13-scf00114 | 13 |
| AX-157817415 | 5 | 49.772 | KV453028.1 | 6429903 | 13-scf00114 | 13 |
| AX-157978506 | 5 | 49.772 | KV453028.1 | 6430280 | 13-scf00114 | 13 |
| AX-157978509 | 5 | 49.772 | KV453028.1 | 6431428 | 13-scf00114 | 13 |
| AX-157716489 | 5 | 49.772 | KV453028.1 | 6432608 | 13-scf00114 | 13 |
| AX-157978512 | 5 | 49.772 | KV453028.1 | 6433603 | 13-scf00114 | 13 |
| AX-157978513 | 5 | 49.772 | KV453028.1 | 6435752 | 13-scf00114 | 13 |
| AX-157855180 | 5 | 49.772 | KV453028.1 | 6439095 | 13-scf00114 | 13 |
| AX-157978515 | 5 | 49.772 | KV453028.1 | 6439525 | 13-scf00114 | 13 |
| AX-158406813 | 5 | 49.772 | KV453028.1 | 6439751 | 13-scf00114 | 13 |
| AX-157978519 | 5 | 49.772 | KV453028.1 | 6445832 | 13-scf00114 | 13 |
| AX-157978521 | 5 | 49.772 | KV453028.1 | 6446531 | 13-scf00114 | 13 |
| AX-157978522 | 5 | 49.772 | KV453028.1 | 6446732 | 13-scf00114 | 13 |
| AX-157978527 | 5 | 49.772 | KV453028.1 | 6450264 | 13-scf00114 | 13 |

|              |   |        |            |         |             |    |
|--------------|---|--------|------------|---------|-------------|----|
| AX-157978528 | 5 | 49.772 | KV453028.1 | 6452839 | 13-scf00114 | 13 |
| AX-157978532 | 5 | 49.772 | KV453028.1 | 6456943 | 13-scf00114 | 13 |
| AX-158383184 | 5 | 49.772 | KV453028.1 | 6465933 | 13-scf00114 | 13 |
| AX-157978545 | 5 | 49.772 | KV453028.1 | 6466915 | 13-scf00114 | 13 |
| AX-157978548 | 5 | 49.772 | KV453028.1 | 6468497 | 13-scf00114 | 13 |
| AX-157978551 | 5 | 49.772 | KV453028.1 | 6474531 | 13-scf00114 | 13 |
| AX-157978556 | 5 | 49.772 | KV453028.1 | 6477064 | 13-scf00114 | 13 |
| AX-157978558 | 5 | 49.772 | KV453028.1 | 6477794 | 13-scf00114 | 13 |
| AX-157978559 | 5 | 49.772 | KV453028.1 | 6479884 | 13-scf00114 | 13 |
| AX-157978562 | 5 | 49.772 | KV453028.1 | 6482673 | 13-scf00114 | 13 |
| AX-157978567 | 5 | 49.772 | KV453028.1 | 6489226 | 13-scf00114 | 13 |
| AX-157978570 | 5 | 49.772 | KV453028.1 | 6497354 | 13-scf00114 | 13 |
| AX-157978575 | 5 | 49.772 | KV453028.1 | 6501244 | 13-scf00114 | 13 |
| AX-157978577 | 5 | 49.772 | KV453028.1 | 6502473 | 13-scf00114 | 13 |
| AX-157978579 | 5 | 49.772 | KV453028.1 | 6502757 | 13-scf00114 | 13 |
| AX-157978580 | 5 | 49.772 | KV453028.1 | 6505047 | 13-scf00114 | 13 |
| AX-157716137 | 5 | 49.772 | KV453028.1 | 6505611 | 13-scf00114 | 13 |
| AX-157978582 | 5 | 49.772 | KV453028.1 | 6505807 | 13-scf00114 | 13 |
| AX-157978585 | 5 | 49.772 | KV453028.1 | 6508757 | 13-scf00114 | 13 |
| AX-157978589 | 5 | 49.772 | KV453028.1 | 6512147 | 13-scf00114 | 13 |
| AX-157978593 | 5 | 49.772 | KV453028.1 | 6516319 | 13-scf00114 | 13 |
| AX-157817418 | 5 | 49.772 | KV453028.1 | 6519924 | 13-scf00114 | 13 |
| AX-157978601 | 5 | 49.772 | KV453028.1 | 6521424 | 13-scf00114 | 13 |
| AX-157978606 | 5 | 49.772 | KV453028.1 | 6526383 | 13-scf00114 | 13 |
| AX-157978608 | 5 | 49.772 | KV453028.1 | 6528861 | 13-scf00114 | 13 |
| AX-157978612 | 5 | 49.772 | KV453028.1 | 6531349 | 13-scf00114 | 13 |
| AX-157978613 | 5 | 49.772 | KV453028.1 | 6532808 | 13-scf00114 | 13 |
| AX-157978616 | 5 | 49.772 | KV453028.1 | 6543862 | 13-scf00114 | 13 |
| AX-157716127 | 5 | 49.772 | KV453028.1 | 6545605 | 13-scf00114 | 13 |
| AX-157978626 | 5 | 49.772 | KV453028.1 | 6551037 | 13-scf00114 | 13 |
| AX-157978628 | 5 | 49.772 | KV453028.1 | 6551406 | 13-scf00114 | 13 |
| AX-157817420 | 5 | 49.772 | KV453028.1 | 6554907 | 13-scf00114 | 13 |
| AX-157978633 | 5 | 49.772 | KV453028.1 | 6556169 | 13-scf00114 | 13 |
| AX-157978637 | 5 | 49.772 | KV453028.1 | 6559792 | 13-scf00114 | 13 |
| AX-157978638 | 5 | 49.772 | KV453028.1 | 6560318 | 13-scf00114 | 13 |
| AX-157978647 | 5 | 49.772 | KV453028.1 | 6571519 | 13-scf00114 | 13 |
| AX-157978648 | 5 | 49.772 | KV453028.1 | 6572642 | 13-scf00114 | 13 |
| AX-158383185 | 5 | 49.772 | KV453028.1 | 6572785 | 13-scf00114 | 13 |
| AX-157978660 | 5 | 49.772 | KV453028.1 | 6583417 | 13-scf00114 | 13 |
| AX-157978662 | 5 | 49.772 | KV453028.1 | 6583808 | 13-scf00114 | 13 |
| AX-157978665 | 5 | 49.772 | KV453028.1 | 6586992 | 13-scf00114 | 13 |
| AX-157978674 | 5 | 49.772 | KV453028.1 | 6597215 | 13-scf00114 | 13 |
| AX-157978679 | 5 | 49.772 | KV453028.1 | 6601511 | 13-scf00114 | 13 |
| AX-157978682 | 5 | 49.772 | KV453028.1 | 6605266 | 13-scf00114 | 13 |
| AX-157978686 | 5 | 49.772 | KV453028.1 | 6608075 | 13-scf00114 | 13 |
| AX-157978694 | 5 | 49.772 | KV453028.1 | 6617937 | 13-scf00114 | 13 |
| AX-157978697 | 5 | 49.772 | KV453028.1 | 6621110 | 13-scf00114 | 13 |
| AX-157978698 | 5 | 49.772 | KV453028.1 | 6623384 | 13-scf00114 | 13 |
| AX-157978704 | 5 | 49.772 | KV453028.1 | 6629373 | 13-scf00114 | 13 |
| AX-157978707 | 5 | 49.772 | KV453028.1 | 6631768 | 13-scf00114 | 13 |
| AX-157978709 | 5 | 49.772 | KV453028.1 | 6633249 | 13-scf00114 | 13 |

|              |   |        |             |          |             |    |
|--------------|---|--------|-------------|----------|-------------|----|
| AX-157978710 | 5 | 49.772 | KV453028.1  | 6634688  | 13-scf00114 | 13 |
| AX-157978716 | 5 | 49.772 | KV453028.1  | 6639111  | 13-scf00114 | 13 |
| AX-157978739 | 5 | 49.772 | KV453028.1  | 6665614  | 13-scf00114 | 13 |
| AX-157978740 | 5 | 49.772 | KV453028.1  | 6666905  | 13-scf00114 | 13 |
| AX-157978742 | 5 | 49.772 | KV453028.1  | 6667788  | 13-scf00114 | 13 |
| AX-157978760 | 5 | 49.772 | KV453028.1  | 6690976  | 13-scf00114 | 13 |
| AX-157978763 | 5 | 49.772 | KV453028.1  | 6698567  | 13-scf00114 | 13 |
| AX-157817427 | 5 | 49.772 | KV453028.1  | 6711893  | 13-scf00114 | 13 |
| AX-157978777 | 5 | 49.772 | KV453028.1  | 6712637  | 13-scf00114 | 13 |
| AX-157978802 | 5 | 49.772 | KV453028.1  | 6746979  | 13-scf00114 | 13 |
| AX-157978803 | 5 | 49.772 | KV453028.1  | 6750295  | 13-scf00114 | 13 |
| AX-157978805 | 5 | 49.772 | KV453028.1  | 6750813  | 13-scf00114 | 13 |
| AX-157978809 | 5 | 49.772 | KV453028.1  | 6753018  | 13-scf00114 | 13 |
| AX-157979001 | 5 | 49.772 | KV453028.1  | 6989674  | 13-scf00114 | 13 |
| AX-157979013 | 5 | 49.772 | KV453028.1  | 7005472  | 13-scf00114 | 13 |
| AX-157758851 | 5 | 49.772 | KV453028.1  | 8606759  | 13-scf00114 | 13 |
| AX-157979484 | 5 | 49.772 | KV453028.1  | 8675637  | 13-scf00114 | 13 |
| AX-157753186 | 5 | 49.772 | KV453028.1  | 8713732  | 13-scf00114 | 13 |
| AX-157979539 | 5 | 49.772 | KV453028.1  | 8754532  | 13-scf00114 | 13 |
| AX-157979567 | 5 | 49.772 | KV453028.1  | 8808075  | 13-scf00114 | 13 |
| AX-157817533 | 5 | 49.772 | KV453028.1  | 8943695  | 13-scf00114 | 13 |
| AX-157979746 | 5 | 49.772 | KV453028.1  | 9132418  | 13-scf00114 | 13 |
| AX-157979964 | 5 | 49.772 | KV453028.1  | 9542172  | 13-scf00114 | 13 |
| AX-157980011 | 5 | 49.772 | KV453028.1  | 9620842  | 13-scf00114 | 13 |
| AX-157980083 | 5 | 49.772 | KV453028.1  | 9720871  | 13-scf00114 | 13 |
| AX-157980090 | 5 | 49.772 | KV453028.1  | 9731931  | 13-scf00114 | 13 |
| AX-157980093 | 5 | 49.772 | KV453028.1  | 9735129  | 13-scf00114 | 13 |
| AX-157980111 | 5 | 49.772 | KV453028.1  | 9752109  | 13-scf00114 | 13 |
| AX-157980173 | 5 | 49.772 | KV453028.1  | 9826756  | 13-scf00114 | 13 |
| AX-157980178 | 5 | 49.772 | KV453028.1  | 9828705  | 13-scf00114 | 13 |
| AX-157980187 | 5 | 49.772 | KV453028.1  | 9836915  | 13-scf00114 | 13 |
| AX-157745823 | 5 | 49.772 | KV453028.1  | 9838889  | 13-scf00114 | 13 |
| AX-157980188 | 5 | 49.772 | KV453028.1  | 9841992  | 13-scf00114 | 13 |
| AX-157817633 | 5 | 49.772 | KV453028.1  | 10146997 | 13-scf00114 | 13 |
| AX-157817666 | 5 | 49.772 | KV453028.1  | 10509418 | 13-scf00114 | 13 |
| AX-157980668 | 5 | 49.772 | KV453028.1  | 10509704 | 13-scf00114 | 13 |
| AX-157817667 | 5 | 49.772 | KV453028.1  | 10514694 | 13-scf00114 | 13 |
| AX-157718882 | 5 | 49.772 | KV453028.1  | 10705044 | 13-scf00114 | 13 |
| AX-157980788 | 5 | 49.772 | KV453028.1  | 10719898 | 13-scf00114 | 13 |
| AX-157980793 | 5 | 49.772 | KV453028.1  | 10735422 | 13-scf00114 | 13 |
| AX-157714524 | 5 | 49.772 | KV453028.1  | 10738394 | 13-scf00114 | 13 |
| AX-157748930 | 5 | 49.772 | KV453028.1  | 10759571 | 13-scf00114 | 13 |
| AX-157705333 | 5 | 49.772 | 3ML01029419 | 71       | scf05040_1  | UN |
| AX-157978767 | 5 | 49.881 | KV453028.1  | 6701431  | 13-scf00114 | 13 |
| AX-157978782 | 5 | 49.881 | KV453028.1  | 6718849  | 13-scf00114 | 13 |
| AX-157978787 | 5 | 49.881 | KV453028.1  | 6729814  | 13-scf00114 | 13 |
| AX-157978788 | 5 | 49.881 | KV453028.1  | 6730795  | 13-scf00114 | 13 |
| AX-157978790 | 5 | 49.881 | KV453028.1  | 6731236  | 13-scf00114 | 13 |
| AX-157978793 | 5 | 49.881 | KV453028.1  | 6736954  | 13-scf00114 | 13 |
| AX-157978794 | 5 | 49.881 | KV453028.1  | 6737534  | 13-scf00114 | 13 |
| AX-157978795 | 5 | 49.881 | KV453028.1  | 6737858  | 13-scf00114 | 13 |

|              |   |        |            |         |             |    |
|--------------|---|--------|------------|---------|-------------|----|
| AX-157978800 | 5 | 49.881 | KV453028.1 | 6745733 | 13-scf00114 | 13 |
| AX-157978801 | 5 | 49.881 | KV453028.1 | 6746084 | 13-scf00114 | 13 |
| AX-157976558 | 5 | 49.99  | KV453028.1 | 4334863 | 13-scf00114 | 13 |
| AX-157977530 | 5 | 49.99  | KV453028.1 | 5655432 | 13-scf00114 | 13 |
| AX-157977574 | 5 | 49.99  | KV453028.1 | 5679840 | 13-scf00114 | 13 |
| AX-157977575 | 5 | 49.99  | KV453028.1 | 5680213 | 13-scf00114 | 13 |
| AX-157977657 | 5 | 49.99  | KV453028.1 | 5755413 | 13-scf00114 | 13 |
| AX-157869704 | 5 | 49.99  | KV453028.1 | 5773581 | 13-scf00114 | 13 |
| AX-157977685 | 5 | 49.99  | KV453028.1 | 5774354 | 13-scf00114 | 13 |
| AX-157977716 | 5 | 49.99  | KV453028.1 | 5798523 | 13-scf00114 | 13 |
| AX-157977726 | 5 | 49.99  | KV453028.1 | 5814124 | 13-scf00114 | 13 |
| AX-157978329 | 5 | 49.99  | KV453028.1 | 6298988 | 13-scf00114 | 13 |
| AX-157978362 | 5 | 49.99  | KV453028.1 | 6323850 | 13-scf00114 | 13 |
| AX-157978429 | 5 | 49.99  | KV453028.1 | 6387014 | 13-scf00114 | 13 |
| AX-157978432 | 5 | 49.99  | KV453028.1 | 6387213 | 13-scf00114 | 13 |
| AX-157978564 | 5 | 49.99  | KV453028.1 | 6482931 | 13-scf00114 | 13 |
| AX-157978701 | 5 | 49.99  | KV453028.1 | 6625889 | 13-scf00114 | 13 |
| AX-157978766 | 5 | 49.99  | KV453028.1 | 6700317 | 13-scf00114 | 13 |
| AX-157770884 | 5 | 49.99  | KV453028.1 | 6752209 | 13-scf00114 | 13 |
| AX-157726376 | 5 | 49.99  | KV453028.1 | 6752687 | 13-scf00114 | 13 |
| AX-157978812 | 5 | 49.99  | KV453028.1 | 6755476 | 13-scf00114 | 13 |
| AX-157746607 | 5 | 49.99  | KV453028.1 | 6756562 | 13-scf00114 | 13 |
| AX-157978815 | 5 | 49.99  | KV453028.1 | 6757108 | 13-scf00114 | 13 |
| AX-157978820 | 5 | 49.99  | KV453028.1 | 6765783 | 13-scf00114 | 13 |
| AX-157817436 | 5 | 49.99  | KV453028.1 | 6766849 | 13-scf00114 | 13 |
| AX-157978829 | 5 | 49.99  | KV453028.1 | 6775538 | 13-scf00114 | 13 |
| AX-157978835 | 5 | 49.99  | KV453028.1 | 6782411 | 13-scf00114 | 13 |
| AX-157978836 | 5 | 49.99  | KV453028.1 | 6782807 | 13-scf00114 | 13 |
| AX-157817438 | 5 | 49.99  | KV453028.1 | 6791567 | 13-scf00114 | 13 |
| AX-157978859 | 5 | 49.99  | KV453028.1 | 6824602 | 13-scf00114 | 13 |
| AX-157978860 | 5 | 49.99  | KV453028.1 | 6824997 | 13-scf00114 | 13 |
| AX-157978865 | 5 | 49.99  | KV453028.1 | 6831511 | 13-scf00114 | 13 |
| AX-157978866 | 5 | 49.99  | KV453028.1 | 6833032 | 13-scf00114 | 13 |
| AX-157855200 | 5 | 49.99  | KV453028.1 | 6835204 | 13-scf00114 | 13 |
| AX-157817443 | 5 | 49.99  | KV453028.1 | 6836704 | 13-scf00114 | 13 |
| AX-157855201 | 5 | 49.99  | KV453028.1 | 6837862 | 13-scf00114 | 13 |
| AX-157978868 | 5 | 49.99  | KV453028.1 | 6838959 | 13-scf00114 | 13 |
| AX-157978875 | 5 | 49.99  | KV453028.1 | 6845754 | 13-scf00114 | 13 |
| AX-157978879 | 5 | 49.99  | KV453028.1 | 6847293 | 13-scf00114 | 13 |
| AX-157817445 | 5 | 49.99  | KV453028.1 | 6851172 | 13-scf00114 | 13 |
| AX-157978883 | 5 | 49.99  | KV453028.1 | 6851685 | 13-scf00114 | 13 |
| AX-157714574 | 5 | 49.99  | KV453028.1 | 6854969 | 13-scf00114 | 13 |
| AX-157817446 | 5 | 49.99  | KV453028.1 | 6855625 | 13-scf00114 | 13 |
| AX-157817447 | 5 | 49.99  | KV453028.1 | 6858759 | 13-scf00114 | 13 |
| AX-157978891 | 5 | 49.99  | KV453028.1 | 6858953 | 13-scf00114 | 13 |
| AX-157817448 | 5 | 49.99  | KV453028.1 | 6862028 | 13-scf00114 | 13 |
| AX-157978905 | 5 | 49.99  | KV453028.1 | 6870351 | 13-scf00114 | 13 |
| AX-157774721 | 5 | 49.99  | KV453028.1 | 6870931 | 13-scf00114 | 13 |
| AX-157978906 | 5 | 49.99  | KV453028.1 | 6871636 | 13-scf00114 | 13 |
| AX-157978910 | 5 | 49.99  | KV453028.1 | 6879416 | 13-scf00114 | 13 |
| AX-157817450 | 5 | 49.99  | KV453028.1 | 6884495 | 13-scf00114 | 13 |

|              |   |       |            |         |             |    |
|--------------|---|-------|------------|---------|-------------|----|
| AX-157717695 | 5 | 49.99 | KV453028.1 | 6888285 | 13-scf00114 | 13 |
| AX-157817451 | 5 | 49.99 | KV453028.1 | 6894115 | 13-scf00114 | 13 |
| AX-157978933 | 5 | 49.99 | KV453028.1 | 6902375 | 13-scf00114 | 13 |
| AX-157978934 | 5 | 49.99 | KV453028.1 | 6903865 | 13-scf00114 | 13 |
| AX-157978936 | 5 | 49.99 | KV453028.1 | 6908246 | 13-scf00114 | 13 |
| AX-157978942 | 5 | 49.99 | KV453028.1 | 6920215 | 13-scf00114 | 13 |
| AX-157978944 | 5 | 49.99 | KV453028.1 | 6923780 | 13-scf00114 | 13 |
| AX-157978945 | 5 | 49.99 | KV453028.1 | 6925373 | 13-scf00114 | 13 |
| AX-157978946 | 5 | 49.99 | KV453028.1 | 6929452 | 13-scf00114 | 13 |
| AX-158406830 | 5 | 49.99 | KV453028.1 | 6930221 | 13-scf00114 | 13 |
| AX-157978951 | 5 | 49.99 | KV453028.1 | 6933368 | 13-scf00114 | 13 |
| AX-157855225 | 5 | 49.99 | KV453028.1 | 6935121 | 13-scf00114 | 13 |
| AX-157978956 | 5 | 49.99 | KV453028.1 | 6940730 | 13-scf00114 | 13 |
| AX-157699058 | 5 | 49.99 | KV453028.1 | 6940793 | 13-scf00114 | 13 |
| AX-157855226 | 5 | 49.99 | KV453028.1 | 6942727 | 13-scf00114 | 13 |
| AX-157855227 | 5 | 49.99 | KV453028.1 | 6943155 | 13-scf00114 | 13 |
| AX-157978986 | 5 | 49.99 | KV453028.1 | 6970997 | 13-scf00114 | 13 |
| AX-157978989 | 5 | 49.99 | KV453028.1 | 6974513 | 13-scf00114 | 13 |
| AX-157855231 | 5 | 49.99 | KV453028.1 | 6974732 | 13-scf00114 | 13 |
| AX-157978991 | 5 | 49.99 | KV453028.1 | 6976466 | 13-scf00114 | 13 |
| AX-157817459 | 5 | 49.99 | KV453028.1 | 6988590 | 13-scf00114 | 13 |
| AX-157817460 | 5 | 49.99 | KV453028.1 | 6992516 | 13-scf00114 | 13 |
| AX-157817461 | 5 | 49.99 | KV453028.1 | 6993153 | 13-scf00114 | 13 |
| AX-157979004 | 5 | 49.99 | KV453028.1 | 6993202 | 13-scf00114 | 13 |
| AX-157817462 | 5 | 49.99 | KV453028.1 | 6993960 | 13-scf00114 | 13 |
| AX-157817463 | 5 | 49.99 | KV453028.1 | 6994178 | 13-scf00114 | 13 |
| AX-157979005 | 5 | 49.99 | KV453028.1 | 6994404 | 13-scf00114 | 13 |
| AX-157979014 | 5 | 49.99 | KV453028.1 | 7009655 | 13-scf00114 | 13 |
| AX-157979019 | 5 | 49.99 | KV453028.1 | 7014702 | 13-scf00114 | 13 |
| AX-158406835 | 5 | 49.99 | KV453028.1 | 7019518 | 13-scf00114 | 13 |
| AX-158406836 | 5 | 49.99 | KV453028.1 | 7019971 | 13-scf00114 | 13 |
| AX-158406837 | 5 | 49.99 | KV453028.1 | 7020261 | 13-scf00114 | 13 |
| AX-158406839 | 5 | 49.99 | KV453028.1 | 7021327 | 13-scf00114 | 13 |
| AX-157724925 | 5 | 49.99 | KV453028.1 | 7043280 | 13-scf00114 | 13 |
| AX-157979028 | 5 | 49.99 | KV453028.1 | 7044138 | 13-scf00114 | 13 |
| AX-157979030 | 5 | 49.99 | KV453028.1 | 7045606 | 13-scf00114 | 13 |
| AX-157979032 | 5 | 49.99 | KV453028.1 | 7048978 | 13-scf00114 | 13 |
| AX-157869718 | 5 | 49.99 | KV453028.1 | 7068731 | 13-scf00114 | 13 |
| AX-157869719 | 5 | 49.99 | KV453028.1 | 7069167 | 13-scf00114 | 13 |
| AX-157979034 | 5 | 49.99 | KV453028.1 | 7073784 | 13-scf00114 | 13 |
| AX-157979036 | 5 | 49.99 | KV453028.1 | 7078715 | 13-scf00114 | 13 |
| AX-157817466 | 5 | 49.99 | KV453028.1 | 7081992 | 13-scf00114 | 13 |
| AX-158406842 | 5 | 49.99 | KV453028.1 | 7093176 | 13-scf00114 | 13 |
| AX-157979055 | 5 | 49.99 | KV453028.1 | 7173130 | 13-scf00114 | 13 |
| AX-157979061 | 5 | 49.99 | KV453028.1 | 7201306 | 13-scf00114 | 13 |
| AX-157979065 | 5 | 49.99 | KV453028.1 | 7229920 | 13-scf00114 | 13 |
| AX-157979073 | 5 | 49.99 | KV453028.1 | 7268804 | 13-scf00114 | 13 |
| AX-157979082 | 5 | 49.99 | KV453028.1 | 7322786 | 13-scf00114 | 13 |
| AX-157979087 | 5 | 49.99 | KV453028.1 | 7338313 | 13-scf00114 | 13 |
| AX-157757109 | 5 | 49.99 | KV453028.1 | 7345773 | 13-scf00114 | 13 |
| AX-157979097 | 5 | 49.99 | KV453028.1 | 7410486 | 13-scf00114 | 13 |

|              |   |       |            |         |             |    |
|--------------|---|-------|------------|---------|-------------|----|
| AX-157979101 | 5 | 49.99 | KV453028.1 | 7447459 | 13-scf00114 | 13 |
| AX-157979109 | 5 | 49.99 | KV453028.1 | 7475065 | 13-scf00114 | 13 |
| AX-157979120 | 5 | 49.99 | KV453028.1 | 7534769 | 13-scf00114 | 13 |
| AX-157979131 | 5 | 49.99 | KV453028.1 | 7572726 | 13-scf00114 | 13 |
| AX-157979134 | 5 | 49.99 | KV453028.1 | 7574923 | 13-scf00114 | 13 |
| AX-157855236 | 5 | 49.99 | KV453028.1 | 7638732 | 13-scf00114 | 13 |
| AX-157979148 | 5 | 49.99 | KV453028.1 | 7680634 | 13-scf00114 | 13 |
| AX-157979150 | 5 | 49.99 | KV453028.1 | 7695535 | 13-scf00114 | 13 |
| AX-157979155 | 5 | 49.99 | KV453028.1 | 7713328 | 13-scf00114 | 13 |
| AX-157884357 | 5 | 49.99 | KV453028.1 | 7763544 | 13-scf00114 | 13 |
| AX-157979161 | 5 | 49.99 | KV453028.1 | 7779293 | 13-scf00114 | 13 |
| AX-157979167 | 5 | 49.99 | KV453028.1 | 7783140 | 13-scf00114 | 13 |
| AX-157979172 | 5 | 49.99 | KV453028.1 | 7795825 | 13-scf00114 | 13 |
| AX-157979176 | 5 | 49.99 | KV453028.1 | 7804612 | 13-scf00114 | 13 |
| AX-157979181 | 5 | 49.99 | KV453028.1 | 7829079 | 13-scf00114 | 13 |
| AX-157979193 | 5 | 49.99 | KV453028.1 | 7900169 | 13-scf00114 | 13 |
| AX-157979194 | 5 | 49.99 | KV453028.1 | 7933860 | 13-scf00114 | 13 |
| AX-158406848 | 5 | 49.99 | KV453028.1 | 7940962 | 13-scf00114 | 13 |
| AX-157979199 | 5 | 49.99 | KV453028.1 | 7955250 | 13-scf00114 | 13 |
| AX-157979200 | 5 | 49.99 | KV453028.1 | 7960655 | 13-scf00114 | 13 |
| AX-157979212 | 5 | 49.99 | KV453028.1 | 8052043 | 13-scf00114 | 13 |
| AX-157979214 | 5 | 49.99 | KV453028.1 | 8067344 | 13-scf00114 | 13 |
| AX-157855240 | 5 | 49.99 | KV453028.1 | 8345639 | 13-scf00114 | 13 |
| AX-157979280 | 5 | 49.99 | KV453028.1 | 8348188 | 13-scf00114 | 13 |
| AX-157979323 | 5 | 49.99 | KV453028.1 | 8459566 | 13-scf00114 | 13 |
| AX-157979329 | 5 | 49.99 | KV453028.1 | 8469854 | 13-scf00114 | 13 |
| AX-157979330 | 5 | 49.99 | KV453028.1 | 8471556 | 13-scf00114 | 13 |
| AX-157979332 | 5 | 49.99 | KV453028.1 | 8472052 | 13-scf00114 | 13 |
| AX-157979334 | 5 | 49.99 | KV453028.1 | 8472553 | 13-scf00114 | 13 |
| AX-157979335 | 5 | 49.99 | KV453028.1 | 8473957 | 13-scf00114 | 13 |
| AX-157979346 | 5 | 49.99 | KV453028.1 | 8483015 | 13-scf00114 | 13 |
| AX-158390426 | 5 | 49.99 | KV453028.1 | 8483467 | 13-scf00114 | 13 |
| AX-157817480 | 5 | 49.99 | KV453028.1 | 8487251 | 13-scf00114 | 13 |
| AX-157855242 | 5 | 49.99 | KV453028.1 | 8496605 | 13-scf00114 | 13 |
| AX-157855243 | 5 | 49.99 | KV453028.1 | 8496952 | 13-scf00114 | 13 |
| AX-157979359 | 5 | 49.99 | KV453028.1 | 8505415 | 13-scf00114 | 13 |
| AX-157855245 | 5 | 49.99 | KV453028.1 | 8516041 | 13-scf00114 | 13 |
| AX-157979363 | 5 | 49.99 | KV453028.1 | 8518770 | 13-scf00114 | 13 |
| AX-157979368 | 5 | 49.99 | KV453028.1 | 8522327 | 13-scf00114 | 13 |
| AX-157979381 | 5 | 49.99 | KV453028.1 | 8530062 | 13-scf00114 | 13 |
| AX-157979384 | 5 | 49.99 | KV453028.1 | 8534521 | 13-scf00114 | 13 |
| AX-157817484 | 5 | 49.99 | KV453028.1 | 8534631 | 13-scf00114 | 13 |
| AX-157817486 | 5 | 49.99 | KV453028.1 | 8535322 | 13-scf00114 | 13 |
| AX-157817487 | 5 | 49.99 | KV453028.1 | 8535417 | 13-scf00114 | 13 |
| AX-157979385 | 5 | 49.99 | KV453028.1 | 8535538 | 13-scf00114 | 13 |
| AX-157817488 | 5 | 49.99 | KV453028.1 | 8538068 | 13-scf00114 | 13 |
| AX-157979387 | 5 | 49.99 | KV453028.1 | 8539175 | 13-scf00114 | 13 |
| AX-157855249 | 5 | 49.99 | KV453028.1 | 8540019 | 13-scf00114 | 13 |
| AX-157979392 | 5 | 49.99 | KV453028.1 | 8547211 | 13-scf00114 | 13 |
| AX-157817491 | 5 | 49.99 | KV453028.1 | 8547625 | 13-scf00114 | 13 |
| AX-157979393 | 5 | 49.99 | KV453028.1 | 8548045 | 13-scf00114 | 13 |

|              |   |       |            |         |             |    |
|--------------|---|-------|------------|---------|-------------|----|
| AX-157979396 | 5 | 49.99 | KV453028.1 | 8556458 | 13-scf00114 | 13 |
| AX-157979397 | 5 | 49.99 | KV453028.1 | 8560606 | 13-scf00114 | 13 |
| AX-157757185 | 5 | 49.99 | KV453028.1 | 8568275 | 13-scf00114 | 13 |
| AX-157817493 | 5 | 49.99 | KV453028.1 | 8577835 | 13-scf00114 | 13 |
| AX-157979407 | 5 | 49.99 | KV453028.1 | 8577995 | 13-scf00114 | 13 |
| AX-157884387 | 5 | 49.99 | KV453028.1 | 8581543 | 13-scf00114 | 13 |
| AX-157979414 | 5 | 49.99 | KV453028.1 | 8583392 | 13-scf00114 | 13 |
| AX-157855255 | 5 | 49.99 | KV453028.1 | 8585567 | 13-scf00114 | 13 |
| AX-157817494 | 5 | 49.99 | KV453028.1 | 8593851 | 13-scf00114 | 13 |
| AX-157855256 | 5 | 49.99 | KV453028.1 | 8605404 | 13-scf00114 | 13 |
| AX-157979427 | 5 | 49.99 | KV453028.1 | 8607127 | 13-scf00114 | 13 |
| AX-157855259 | 5 | 49.99 | KV453028.1 | 8609387 | 13-scf00114 | 13 |
| AX-157979430 | 5 | 49.99 | KV453028.1 | 8609809 | 13-scf00114 | 13 |
| AX-157979431 | 5 | 49.99 | KV453028.1 | 8614279 | 13-scf00114 | 13 |
| AX-157817503 | 5 | 49.99 | KV453028.1 | 8627344 | 13-scf00114 | 13 |
| AX-157979443 | 5 | 49.99 | KV453028.1 | 8631771 | 13-scf00114 | 13 |
| AX-157979473 | 5 | 49.99 | KV453028.1 | 8655968 | 13-scf00114 | 13 |
| AX-157717074 | 5 | 49.99 | KV453028.1 | 8658514 | 13-scf00114 | 13 |
| AX-157817506 | 5 | 49.99 | KV453028.1 | 8662176 | 13-scf00114 | 13 |
| AX-157979480 | 5 | 49.99 | KV453028.1 | 8664880 | 13-scf00114 | 13 |
| AX-157979481 | 5 | 49.99 | KV453028.1 | 8667015 | 13-scf00114 | 13 |
| AX-157855264 | 5 | 49.99 | KV453028.1 | 8667942 | 13-scf00114 | 13 |
| AX-157817509 | 5 | 49.99 | KV453028.1 | 8669485 | 13-scf00114 | 13 |
| AX-157855265 | 5 | 49.99 | KV453028.1 | 8671829 | 13-scf00114 | 13 |
| AX-157817511 | 5 | 49.99 | KV453028.1 | 8674136 | 13-scf00114 | 13 |
| AX-157817512 | 5 | 49.99 | KV453028.1 | 8676569 | 13-scf00114 | 13 |
| AX-157855267 | 5 | 49.99 | KV453028.1 | 8682654 | 13-scf00114 | 13 |
| AX-157855268 | 5 | 49.99 | KV453028.1 | 8683673 | 13-scf00114 | 13 |
| AX-157817514 | 5 | 49.99 | KV453028.1 | 8688739 | 13-scf00114 | 13 |
| AX-157817515 | 5 | 49.99 | KV453028.1 | 8694852 | 13-scf00114 | 13 |
| AX-157979493 | 5 | 49.99 | KV453028.1 | 8697236 | 13-scf00114 | 13 |
| AX-157884388 | 5 | 49.99 | KV453028.1 | 8697498 | 13-scf00114 | 13 |
| AX-157855270 | 5 | 49.99 | KV453028.1 | 8698215 | 13-scf00114 | 13 |
| AX-157855272 | 5 | 49.99 | KV453028.1 | 8713654 | 13-scf00114 | 13 |
| AX-157979509 | 5 | 49.99 | KV453028.1 | 8716177 | 13-scf00114 | 13 |
| AX-157979515 | 5 | 49.99 | KV453028.1 | 8722536 | 13-scf00114 | 13 |
| AX-157855273 | 5 | 49.99 | KV453028.1 | 8723583 | 13-scf00114 | 13 |
| AX-157979520 | 5 | 49.99 | KV453028.1 | 8727791 | 13-scf00114 | 13 |
| AX-157979527 | 5 | 49.99 | KV453028.1 | 8737101 | 13-scf00114 | 13 |
| AX-157979528 | 5 | 49.99 | KV453028.1 | 8738346 | 13-scf00114 | 13 |
| AX-157884389 | 5 | 49.99 | KV453028.1 | 8740667 | 13-scf00114 | 13 |
| AX-157855274 | 5 | 49.99 | KV453028.1 | 8747716 | 13-scf00114 | 13 |
| AX-157855275 | 5 | 49.99 | KV453028.1 | 8759963 | 13-scf00114 | 13 |
| AX-157855276 | 5 | 49.99 | KV453028.1 | 8760395 | 13-scf00114 | 13 |
| AX-157979544 | 5 | 49.99 | KV453028.1 | 8763809 | 13-scf00114 | 13 |
| AX-157979545 | 5 | 49.99 | KV453028.1 | 8766534 | 13-scf00114 | 13 |
| AX-157855280 | 5 | 49.99 | KV453028.1 | 8771559 | 13-scf00114 | 13 |
| AX-157979546 | 5 | 49.99 | KV453028.1 | 8774436 | 13-scf00114 | 13 |
| AX-157979548 | 5 | 49.99 | KV453028.1 | 8777832 | 13-scf00114 | 13 |
| AX-157817522 | 5 | 49.99 | KV453028.1 | 8783634 | 13-scf00114 | 13 |
| AX-158406858 | 5 | 49.99 | KV453028.1 | 8791366 | 13-scf00114 | 13 |



|              |   |       |            |         |             |    |
|--------------|---|-------|------------|---------|-------------|----|
| AX-157979562 | 5 | 49.99 | KV453028.1 | 8800255 | 13-scf00114 | 13 |
| AX-157979563 | 5 | 49.99 | KV453028.1 | 8801157 | 13-scf00114 | 13 |
| AX-157817523 | 5 | 49.99 | KV453028.1 | 8802834 | 13-scf00114 | 13 |
| AX-157855284 | 5 | 49.99 | KV453028.1 | 8803277 | 13-scf00114 | 13 |
| AX-157855285 | 5 | 49.99 | KV453028.1 | 8805283 | 13-scf00114 | 13 |
| AX-158390428 | 5 | 49.99 | KV453028.1 | 8808520 | 13-scf00114 | 13 |
| AX-157855286 | 5 | 49.99 | KV453028.1 | 8808760 | 13-scf00114 | 13 |
| AX-157979571 | 5 | 49.99 | KV453028.1 | 8810577 | 13-scf00114 | 13 |
| AX-157979581 | 5 | 49.99 | KV453028.1 | 8820373 | 13-scf00114 | 13 |
| AX-157817526 | 5 | 49.99 | KV453028.1 | 8822259 | 13-scf00114 | 13 |
| AX-157817527 | 5 | 49.99 | KV453028.1 | 8823100 | 13-scf00114 | 13 |
| AX-157817528 | 5 | 49.99 | KV453028.1 | 8823478 | 13-scf00114 | 13 |
| AX-157855287 | 5 | 49.99 | KV453028.1 | 8825575 | 13-scf00114 | 13 |
| AX-157979584 | 5 | 49.99 | KV453028.1 | 8826948 | 13-scf00114 | 13 |
| AX-157693646 | 5 | 49.99 | KV453028.1 | 8837182 | 13-scf00114 | 13 |
| AX-157979596 | 5 | 49.99 | KV453028.1 | 8848183 | 13-scf00114 | 13 |
| AX-157979597 | 5 | 49.99 | KV453028.1 | 8848952 | 13-scf00114 | 13 |
| AX-157979599 | 5 | 49.99 | KV453028.1 | 8851727 | 13-scf00114 | 13 |
| AX-157979603 | 5 | 49.99 | KV453028.1 | 8854642 | 13-scf00114 | 13 |
| AX-157979613 | 5 | 49.99 | KV453028.1 | 8861566 | 13-scf00114 | 13 |
| AX-157855290 | 5 | 49.99 | KV453028.1 | 8863011 | 13-scf00114 | 13 |
| AX-157979621 | 5 | 49.99 | KV453028.1 | 8872272 | 13-scf00114 | 13 |
| AX-157855292 | 5 | 49.99 | KV453028.1 | 8872622 | 13-scf00114 | 13 |
| AX-157979624 | 5 | 49.99 | KV453028.1 | 8873342 | 13-scf00114 | 13 |
| AX-157855294 | 5 | 49.99 | KV453028.1 | 8877979 | 13-scf00114 | 13 |
| AX-157884391 | 5 | 49.99 | KV453028.1 | 8878781 | 13-scf00114 | 13 |
| AX-157979626 | 5 | 49.99 | KV453028.1 | 8879137 | 13-scf00114 | 13 |
| AX-157979631 | 5 | 49.99 | KV453028.1 | 8892926 | 13-scf00114 | 13 |
| AX-157979634 | 5 | 49.99 | KV453028.1 | 8895736 | 13-scf00114 | 13 |
| AX-157979642 | 5 | 49.99 | KV453028.1 | 8907517 | 13-scf00114 | 13 |
| AX-157855297 | 5 | 49.99 | KV453028.1 | 8907640 | 13-scf00114 | 13 |
| AX-157979649 | 5 | 49.99 | KV453028.1 | 8916943 | 13-scf00114 | 13 |
| AX-157979650 | 5 | 49.99 | KV453028.1 | 8917942 | 13-scf00114 | 13 |
| AX-157817529 | 5 | 49.99 | KV453028.1 | 8924915 | 13-scf00114 | 13 |
| AX-157817530 | 5 | 49.99 | KV453028.1 | 8925883 | 13-scf00114 | 13 |
| AX-157855298 | 5 | 49.99 | KV453028.1 | 8926135 | 13-scf00114 | 13 |
| AX-157862881 | 5 | 49.99 | KV453028.1 | 8929065 | 13-scf00114 | 13 |
| AX-157979658 | 5 | 49.99 | KV453028.1 | 8931762 | 13-scf00114 | 13 |
| AX-157855299 | 5 | 49.99 | KV453028.1 | 8932156 | 13-scf00114 | 13 |
| AX-157855300 | 5 | 49.99 | KV453028.1 | 8937833 | 13-scf00114 | 13 |
| AX-157855301 | 5 | 49.99 | KV453028.1 | 8938313 | 13-scf00114 | 13 |
| AX-157710278 | 5 | 49.99 | KV453028.1 | 8950293 | 13-scf00114 | 13 |
| AX-157979668 | 5 | 49.99 | KV453028.1 | 8951512 | 13-scf00114 | 13 |
| AX-157855302 | 5 | 49.99 | KV453028.1 | 8952269 | 13-scf00114 | 13 |
| AX-157855303 | 5 | 49.99 | KV453028.1 | 8960190 | 13-scf00114 | 13 |
| AX-157979677 | 5 | 49.99 | KV453028.1 | 8961190 | 13-scf00114 | 13 |
| AX-157817537 | 5 | 49.99 | KV453028.1 | 8968102 | 13-scf00114 | 13 |
| AX-157817539 | 5 | 49.99 | KV453028.1 | 8970060 | 13-scf00114 | 13 |
| AX-157979688 | 5 | 49.99 | KV453028.1 | 8980469 | 13-scf00114 | 13 |
| AX-157979694 | 5 | 49.99 | KV453028.1 | 8982206 | 13-scf00114 | 13 |
| AX-157817540 | 5 | 49.99 | KV453028.1 | 8985341 | 13-scf00114 | 13 |

|              |   |       |            |         |             |    |
|--------------|---|-------|------------|---------|-------------|----|
| AX-157855306 | 5 | 49.99 | KV453028.1 | 8985746 | 13-scf00114 | 13 |
| AX-157979697 | 5 | 49.99 | KV453028.1 | 8990360 | 13-scf00114 | 13 |
| AX-157979698 | 5 | 49.99 | KV453028.1 | 8990872 | 13-scf00114 | 13 |
| AX-157855307 | 5 | 49.99 | KV453028.1 | 9017388 | 13-scf00114 | 13 |
| AX-157979708 | 5 | 49.99 | KV453028.1 | 9019568 | 13-scf00114 | 13 |
| AX-157817547 | 5 | 49.99 | KV453028.1 | 9027022 | 13-scf00114 | 13 |
| AX-157817549 | 5 | 49.99 | KV453028.1 | 9028073 | 13-scf00114 | 13 |
| AX-157979711 | 5 | 49.99 | KV453028.1 | 9028998 | 13-scf00114 | 13 |
| AX-157817550 | 5 | 49.99 | KV453028.1 | 9030566 | 13-scf00114 | 13 |
| AX-157855309 | 5 | 49.99 | KV453028.1 | 9032412 | 13-scf00114 | 13 |
| AX-157884394 | 5 | 49.99 | KV453028.1 | 9047992 | 13-scf00114 | 13 |
| AX-157817553 | 5 | 49.99 | KV453028.1 | 9049976 | 13-scf00114 | 13 |
| AX-157855312 | 5 | 49.99 | KV453028.1 | 9054894 | 13-scf00114 | 13 |
| AX-157855313 | 5 | 49.99 | KV453028.1 | 9055197 | 13-scf00114 | 13 |
| AX-158405392 | 5 | 49.99 | KV453028.1 | 9059642 | 13-scf00114 | 13 |
| AX-157979717 | 5 | 49.99 | KV453028.1 | 9062075 | 13-scf00114 | 13 |
| AX-157708446 | 5 | 49.99 | KV453028.1 | 9101191 | 13-scf00114 | 13 |
| AX-157979733 | 5 | 49.99 | KV453028.1 | 9112699 | 13-scf00114 | 13 |
| AX-157855314 | 5 | 49.99 | KV453028.1 | 9121544 | 13-scf00114 | 13 |
| AX-157979744 | 5 | 49.99 | KV453028.1 | 9127622 | 13-scf00114 | 13 |
| AX-157979753 | 5 | 49.99 | KV453028.1 | 9149642 | 13-scf00114 | 13 |
| AX-157855317 | 5 | 49.99 | KV453028.1 | 9153918 | 13-scf00114 | 13 |
| AX-157979755 | 5 | 49.99 | KV453028.1 | 9154395 | 13-scf00114 | 13 |
| AX-157979762 | 5 | 49.99 | KV453028.1 | 9167958 | 13-scf00114 | 13 |
| AX-157817558 | 5 | 49.99 | KV453028.1 | 9171926 | 13-scf00114 | 13 |
| AX-157979765 | 5 | 49.99 | KV453028.1 | 9176004 | 13-scf00114 | 13 |
| AX-157979769 | 5 | 49.99 | KV453028.1 | 9183549 | 13-scf00114 | 13 |
| AX-157817559 | 5 | 49.99 | KV453028.1 | 9188370 | 13-scf00114 | 13 |
| AX-158406868 | 5 | 49.99 | KV453028.1 | 9209122 | 13-scf00114 | 13 |
| AX-157979780 | 5 | 49.99 | KV453028.1 | 9210296 | 13-scf00114 | 13 |
| AX-157979783 | 5 | 49.99 | KV453028.1 | 9211444 | 13-scf00114 | 13 |
| AX-157855329 | 5 | 49.99 | KV453028.1 | 9216229 | 13-scf00114 | 13 |
| AX-157855330 | 5 | 49.99 | KV453028.1 | 9216326 | 13-scf00114 | 13 |
| AX-157979789 | 5 | 49.99 | KV453028.1 | 9216546 | 13-scf00114 | 13 |
| AX-157855331 | 5 | 49.99 | KV453028.1 | 9217185 | 13-scf00114 | 13 |
| AX-157979790 | 5 | 49.99 | KV453028.1 | 9217994 | 13-scf00114 | 13 |
| AX-157979794 | 5 | 49.99 | KV453028.1 | 9222536 | 13-scf00114 | 13 |
| AX-157979799 | 5 | 49.99 | KV453028.1 | 9233075 | 13-scf00114 | 13 |
| AX-157855332 | 5 | 49.99 | KV453028.1 | 9233808 | 13-scf00114 | 13 |
| AX-157979802 | 5 | 49.99 | KV453028.1 | 9240196 | 13-scf00114 | 13 |
| AX-157855340 | 5 | 49.99 | KV453028.1 | 9248916 | 13-scf00114 | 13 |
| AX-157979811 | 5 | 49.99 | KV453028.1 | 9249828 | 13-scf00114 | 13 |
| AX-157979814 | 5 | 49.99 | KV453028.1 | 9251388 | 13-scf00114 | 13 |
| AX-157855342 | 5 | 49.99 | KV453028.1 | 9251638 | 13-scf00114 | 13 |
| AX-157855343 | 5 | 49.99 | KV453028.1 | 9252533 | 13-scf00114 | 13 |
| AX-157709054 | 5 | 49.99 | KV453028.1 | 9252748 | 13-scf00114 | 13 |
| AX-157979820 | 5 | 49.99 | KV453028.1 | 9254589 | 13-scf00114 | 13 |
| AX-157884401 | 5 | 49.99 | KV453028.1 | 9255257 | 13-scf00114 | 13 |
| AX-157855345 | 5 | 49.99 | KV453028.1 | 9258199 | 13-scf00114 | 13 |
| AX-157979823 | 5 | 49.99 | KV453028.1 | 9258397 | 13-scf00114 | 13 |
| AX-157979824 | 5 | 49.99 | KV453028.1 | 9259570 | 13-scf00114 | 13 |

|              |   |       |            |         |             |    |
|--------------|---|-------|------------|---------|-------------|----|
| AX-157855347 | 5 | 49.99 | KV453028.1 | 9265910 | 13-scf00114 | 13 |
| AX-157817562 | 5 | 49.99 | KV453028.1 | 9269457 | 13-scf00114 | 13 |
| AX-157979830 | 5 | 49.99 | KV453028.1 | 9298440 | 13-scf00114 | 13 |
| AX-157817563 | 5 | 49.99 | KV453028.1 | 9305200 | 13-scf00114 | 13 |
| AX-157979841 | 5 | 49.99 | KV453028.1 | 9316244 | 13-scf00114 | 13 |
| AX-157979843 | 5 | 49.99 | KV453028.1 | 9317468 | 13-scf00114 | 13 |
| AX-157708150 | 5 | 49.99 | KV453028.1 | 9318077 | 13-scf00114 | 13 |
| AX-157979851 | 5 | 49.99 | KV453028.1 | 9330543 | 13-scf00114 | 13 |
| AX-157855349 | 5 | 49.99 | KV453028.1 | 9333925 | 13-scf00114 | 13 |
| AX-157855350 | 5 | 49.99 | KV453028.1 | 9337693 | 13-scf00114 | 13 |
| AX-157979853 | 5 | 49.99 | KV453028.1 | 9338277 | 13-scf00114 | 13 |
| AX-157979855 | 5 | 49.99 | KV453028.1 | 9345508 | 13-scf00114 | 13 |
| AX-158383202 | 5 | 49.99 | KV453028.1 | 9350238 | 13-scf00114 | 13 |
| AX-157707226 | 5 | 49.99 | KV453028.1 | 9350970 | 13-scf00114 | 13 |
| AX-157979862 | 5 | 49.99 | KV453028.1 | 9354929 | 13-scf00114 | 13 |
| AX-157979866 | 5 | 49.99 | KV453028.1 | 9360038 | 13-scf00114 | 13 |
| AX-157979869 | 5 | 49.99 | KV453028.1 | 9367607 | 13-scf00114 | 13 |
| AX-157979872 | 5 | 49.99 | KV453028.1 | 9370620 | 13-scf00114 | 13 |
| AX-158390431 | 5 | 49.99 | KV453028.1 | 9373237 | 13-scf00114 | 13 |
| AX-157855351 | 5 | 49.99 | KV453028.1 | 9381803 | 13-scf00114 | 13 |
| AX-157979879 | 5 | 49.99 | KV453028.1 | 9382421 | 13-scf00114 | 13 |
| AX-157817565 | 5 | 49.99 | KV453028.1 | 9388545 | 13-scf00114 | 13 |
| AX-157979885 | 5 | 49.99 | KV453028.1 | 9398073 | 13-scf00114 | 13 |
| AX-157855353 | 5 | 49.99 | KV453028.1 | 9421808 | 13-scf00114 | 13 |
| AX-157855354 | 5 | 49.99 | KV453028.1 | 9422018 | 13-scf00114 | 13 |
| AX-157979897 | 5 | 49.99 | KV453028.1 | 9422203 | 13-scf00114 | 13 |
| AX-157979904 | 5 | 49.99 | KV453028.1 | 9427551 | 13-scf00114 | 13 |
| AX-157855356 | 5 | 49.99 | KV453028.1 | 9428132 | 13-scf00114 | 13 |
| AX-157855357 | 5 | 49.99 | KV453028.1 | 9429400 | 13-scf00114 | 13 |
| AX-157979908 | 5 | 49.99 | KV453028.1 | 9429830 | 13-scf00114 | 13 |
| AX-157979915 | 5 | 49.99 | KV453028.1 | 9448366 | 13-scf00114 | 13 |
| AX-157979933 | 5 | 49.99 | KV453028.1 | 9490554 | 13-scf00114 | 13 |
| AX-157979939 | 5 | 49.99 | KV453028.1 | 9501747 | 13-scf00114 | 13 |
| AX-157693253 | 5 | 49.99 | KV453028.1 | 9502568 | 13-scf00114 | 13 |
| AX-157979940 | 5 | 49.99 | KV453028.1 | 9507035 | 13-scf00114 | 13 |
| AX-157979942 | 5 | 49.99 | KV453028.1 | 9511037 | 13-scf00114 | 13 |
| AX-157979948 | 5 | 49.99 | KV453028.1 | 9515609 | 13-scf00114 | 13 |
| AX-157817569 | 5 | 49.99 | KV453028.1 | 9519036 | 13-scf00114 | 13 |
| AX-157817570 | 5 | 49.99 | KV453028.1 | 9526137 | 13-scf00114 | 13 |
| AX-158390437 | 5 | 49.99 | KV453028.1 | 9526193 | 13-scf00114 | 13 |
| AX-157855360 | 5 | 49.99 | KV453028.1 | 9526453 | 13-scf00114 | 13 |
| AX-157979956 | 5 | 49.99 | KV453028.1 | 9531054 | 13-scf00114 | 13 |
| AX-157979959 | 5 | 49.99 | KV453028.1 | 9533806 | 13-scf00114 | 13 |
| AX-157979963 | 5 | 49.99 | KV453028.1 | 9541412 | 13-scf00114 | 13 |
| AX-157749011 | 5 | 49.99 | KV453028.1 | 9546555 | 13-scf00114 | 13 |
| AX-157979968 | 5 | 49.99 | KV453028.1 | 9550337 | 13-scf00114 | 13 |
| AX-157884406 | 5 | 49.99 | KV453028.1 | 9555163 | 13-scf00114 | 13 |
| AX-157979974 | 5 | 49.99 | KV453028.1 | 9564666 | 13-scf00114 | 13 |
| AX-157855364 | 5 | 49.99 | KV453028.1 | 9564986 | 13-scf00114 | 13 |
| AX-157979977 | 5 | 49.99 | KV453028.1 | 9565849 | 13-scf00114 | 13 |
| AX-157855365 | 5 | 49.99 | KV453028.1 | 9566538 | 13-scf00114 | 13 |

|              |   |       |            |         |             |    |
|--------------|---|-------|------------|---------|-------------|----|
| AX-157979985 | 5 | 49.99 | KV453028.1 | 9569370 | 13-scf00114 | 13 |
| AX-157979989 | 5 | 49.99 | KV453028.1 | 9571801 | 13-scf00114 | 13 |
| AX-157979990 | 5 | 49.99 | KV453028.1 | 9573650 | 13-scf00114 | 13 |
| AX-157979993 | 5 | 49.99 | KV453028.1 | 9584337 | 13-scf00114 | 13 |
| AX-157707796 | 5 | 49.99 | KV453028.1 | 9593265 | 13-scf00114 | 13 |
| AX-157980001 | 5 | 49.99 | KV453028.1 | 9597413 | 13-scf00114 | 13 |
| AX-157980003 | 5 | 49.99 | KV453028.1 | 9598389 | 13-scf00114 | 13 |
| AX-157980006 | 5 | 49.99 | KV453028.1 | 9601728 | 13-scf00114 | 13 |
| AX-157980007 | 5 | 49.99 | KV453028.1 | 9604834 | 13-scf00114 | 13 |
| AX-157980008 | 5 | 49.99 | KV453028.1 | 9606186 | 13-scf00114 | 13 |
| AX-157696808 | 5 | 49.99 | KV453028.1 | 9613221 | 13-scf00114 | 13 |
| AX-157817575 | 5 | 49.99 | KV453028.1 | 9621214 | 13-scf00114 | 13 |
| AX-157855367 | 5 | 49.99 | KV453028.1 | 9621799 | 13-scf00114 | 13 |
| AX-157817577 | 5 | 49.99 | KV453028.1 | 9623487 | 13-scf00114 | 13 |
| AX-157980013 | 5 | 49.99 | KV453028.1 | 9625142 | 13-scf00114 | 13 |
| AX-157817578 | 5 | 49.99 | KV453028.1 | 9625481 | 13-scf00114 | 13 |
| AX-157980015 | 5 | 49.99 | KV453028.1 | 9625990 | 13-scf00114 | 13 |
| AX-157980019 | 5 | 49.99 | KV453028.1 | 9635032 | 13-scf00114 | 13 |
| AX-157980024 | 5 | 49.99 | KV453028.1 | 9639847 | 13-scf00114 | 13 |
| AX-157980028 | 5 | 49.99 | KV453028.1 | 9644589 | 13-scf00114 | 13 |
| AX-158406879 | 5 | 49.99 | KV453028.1 | 9645419 | 13-scf00114 | 13 |
| AX-157980034 | 5 | 49.99 | KV453028.1 | 9649763 | 13-scf00114 | 13 |
| AX-157980036 | 5 | 49.99 | KV453028.1 | 9653808 | 13-scf00114 | 13 |
| AX-157817579 | 5 | 49.99 | KV453028.1 | 9661130 | 13-scf00114 | 13 |
| AX-157980041 | 5 | 49.99 | KV453028.1 | 9662064 | 13-scf00114 | 13 |
| AX-157744355 | 5 | 49.99 | KV453028.1 | 9663006 | 13-scf00114 | 13 |
| AX-157817581 | 5 | 49.99 | KV453028.1 | 9663332 | 13-scf00114 | 13 |
| AX-157884408 | 5 | 49.99 | KV453028.1 | 9670722 | 13-scf00114 | 13 |
| AX-157980044 | 5 | 49.99 | KV453028.1 | 9671167 | 13-scf00114 | 13 |
| AX-157713153 | 5 | 49.99 | KV453028.1 | 9672355 | 13-scf00114 | 13 |
| AX-157980046 | 5 | 49.99 | KV453028.1 | 9675551 | 13-scf00114 | 13 |
| AX-157855370 | 5 | 49.99 | KV453028.1 | 9681309 | 13-scf00114 | 13 |
| AX-157980052 | 5 | 49.99 | KV453028.1 | 9684541 | 13-scf00114 | 13 |
| AX-157980054 | 5 | 49.99 | KV453028.1 | 9689861 | 13-scf00114 | 13 |
| AX-157980058 | 5 | 49.99 | KV453028.1 | 9694474 | 13-scf00114 | 13 |
| AX-157980066 | 5 | 49.99 | KV453028.1 | 9707775 | 13-scf00114 | 13 |
| AX-157980067 | 5 | 49.99 | KV453028.1 | 9708515 | 13-scf00114 | 13 |
| AX-157980068 | 5 | 49.99 | KV453028.1 | 9709487 | 13-scf00114 | 13 |
| AX-157709021 | 5 | 49.99 | KV453028.1 | 9709949 | 13-scf00114 | 13 |
| AX-157884409 | 5 | 49.99 | KV453028.1 | 9710128 | 13-scf00114 | 13 |
| AX-157980073 | 5 | 49.99 | KV453028.1 | 9713650 | 13-scf00114 | 13 |
| AX-157980074 | 5 | 49.99 | KV453028.1 | 9715214 | 13-scf00114 | 13 |
| AX-157980075 | 5 | 49.99 | KV453028.1 | 9716181 | 13-scf00114 | 13 |
| AX-157980084 | 5 | 49.99 | KV453028.1 | 9723388 | 13-scf00114 | 13 |
| AX-157722244 | 5 | 49.99 | KV453028.1 | 9729698 | 13-scf00114 | 13 |
| AX-157980110 | 5 | 49.99 | KV453028.1 | 9751458 | 13-scf00114 | 13 |
| AX-157980116 | 5 | 49.99 | KV453028.1 | 9759950 | 13-scf00114 | 13 |
| AX-157980124 | 5 | 49.99 | KV453028.1 | 9769069 | 13-scf00114 | 13 |
| AX-157980126 | 5 | 49.99 | KV453028.1 | 9770341 | 13-scf00114 | 13 |
| AX-157980129 | 5 | 49.99 | KV453028.1 | 9771775 | 13-scf00114 | 13 |
| AX-157980135 | 5 | 49.99 | KV453028.1 | 9775453 | 13-scf00114 | 13 |

|              |   |       |             |          |                |    |
|--------------|---|-------|-------------|----------|----------------|----|
| AX-157855374 | 5 | 49.99 | KV453028.1  | 9776279  | 13-scf00114    | 13 |
| AX-157980138 | 5 | 49.99 | KV453028.1  | 9779301  | 13-scf00114    | 13 |
| AX-157980140 | 5 | 49.99 | KV453028.1  | 9780353  | 13-scf00114    | 13 |
| AX-157817589 | 5 | 49.99 | KV453028.1  | 9784204  | 13-scf00114    | 13 |
| AX-157980147 | 5 | 49.99 | KV453028.1  | 9788115  | 13-scf00114    | 13 |
| AX-157817590 | 5 | 49.99 | KV453028.1  | 9789902  | 13-scf00114    | 13 |
| AX-157980149 | 5 | 49.99 | KV453028.1  | 9796200  | 13-scf00114    | 13 |
| AX-157817592 | 5 | 49.99 | KV453028.1  | 9798390  | 13-scf00114    | 13 |
| AX-157980150 | 5 | 49.99 | KV453028.1  | 9799173  | 13-scf00114    | 13 |
| AX-157980153 | 5 | 49.99 | KV453028.1  | 9803001  | 13-scf00114    | 13 |
| AX-157980155 | 5 | 49.99 | KV453028.1  | 9803528  | 13-scf00114    | 13 |
| AX-157980157 | 5 | 49.99 | KV453028.1  | 9803978  | 13-scf00114    | 13 |
| AX-157980158 | 5 | 49.99 | KV453028.1  | 9805053  | 13-scf00114    | 13 |
| AX-157855377 | 5 | 49.99 | KV453028.1  | 9805697  | 13-scf00114    | 13 |
| AX-157980161 | 5 | 49.99 | KV453028.1  | 9809714  | 13-scf00114    | 13 |
| AX-157980163 | 5 | 49.99 | KV453028.1  | 9810466  | 13-scf00114    | 13 |
| AX-157869730 | 5 | 49.99 | KV453028.1  | 9811469  | 13-scf00114    | 13 |
| AX-157980164 | 5 | 49.99 | KV453028.1  | 9812363  | 13-scf00114    | 13 |
| AX-157855378 | 5 | 49.99 | KV453028.1  | 9816345  | 13-scf00114    | 13 |
| AX-157817593 | 5 | 49.99 | KV453028.1  | 9817993  | 13-scf00114    | 13 |
| AX-157855379 | 5 | 49.99 | KV453028.1  | 9826705  | 13-scf00114    | 13 |
| AX-157980175 | 5 | 49.99 | KV453028.1  | 9827682  | 13-scf00114    | 13 |
| AX-157980176 | 5 | 49.99 | KV453028.1  | 9828385  | 13-scf00114    | 13 |
| AX-157884414 | 5 | 49.99 | KV453028.1  | 9833698  | 13-scf00114    | 13 |
| AX-157884415 | 5 | 49.99 | KV453028.1  | 9834788  | 13-scf00114    | 13 |
| AX-157980190 | 5 | 49.99 | KV453028.1  | 9847112  | 13-scf00114    | 13 |
| AX-157817599 | 5 | 49.99 | KV453028.1  | 9848098  | 13-scf00114    | 13 |
| AX-157980195 | 5 | 49.99 | KV453028.1  | 9858062  | 13-scf00114    | 13 |
| AX-157855381 | 5 | 49.99 | KV453028.1  | 9861543  | 13-scf00114    | 13 |
| AX-157980200 | 5 | 49.99 | KV453028.1  | 9864064  | 13-scf00114    | 13 |
| AX-157716811 | 5 | 49.99 | KV453028.1  | 9866308  | 13-scf00114    | 13 |
| AX-157855382 | 5 | 49.99 | KV453028.1  | 9868187  | 13-scf00114    | 13 |
| AX-157980205 | 5 | 49.99 | KV453028.1  | 9868734  | 13-scf00114    | 13 |
| AX-157817601 | 5 | 49.99 | KV453028.1  | 9873357  | 13-scf00114    | 13 |
| AX-157980217 | 5 | 49.99 | KV453028.1  | 9881890  | 13-scf00114    | 13 |
| AX-157855385 | 5 | 49.99 | KV453028.1  | 9898431  | 13-scf00114    | 13 |
| AX-157980225 | 5 | 49.99 | KV453028.1  | 9898544  | 13-scf00114    | 13 |
| AX-157855386 | 5 | 49.99 | KV453028.1  | 9898721  | 13-scf00114    | 13 |
| AX-157855390 | 5 | 49.99 | KV453028.1  | 9902432  | 13-scf00114    | 13 |
| AX-157980234 | 5 | 49.99 | KV453028.1  | 9902916  | 13-scf00114    | 13 |
| AX-157817603 | 5 | 49.99 | KV453028.1  | 9905697  | 13-scf00114    | 13 |
| AX-157980261 | 5 | 49.99 | KV453028.1  | 9945934  | 13-scf00114    | 13 |
| AX-157980293 | 5 | 49.99 | KV453028.1  | 9994811  | 13-scf00114    | 13 |
| AX-157980353 | 5 | 49.99 | KV453028.1  | 10056684 | 13-scf00114    | 13 |
| AX-157980681 | 5 | 49.99 | KV453028.1  | 10518238 | 13-scf00114    | 13 |
| AX-157817673 | 5 | 49.99 | KV453028.1  | 10551941 | 13-scf00114    | 13 |
| AX-157980923 | 5 | 49.99 | KV453028.1  | 10925439 | 13-scf00114    | 13 |
| AX-157773776 | 5 | 49.99 | KV453028.1  | 12447038 | 13-scf00114    | 13 |
| AX-158421324 | 5 | 49.99 | FI864126.1  | 96       | IORI212 Ictalu | UN |
| AX-157711932 | 5 | 49.99 | 3ML01028396 | 185      | scf04003_1     | UN |
| AX-157705330 | 5 | 49.99 | 3ML01029419 | 255      | scf05040_1     | UN |

|              |   |        |            |          |             |    |
|--------------|---|--------|------------|----------|-------------|----|
| AX-157975815 | 5 | 50.1   | KV453028.1 | 3604199  | 13-scf00114 | 13 |
| AX-157977425 | 5 | 50.1   | KV453028.1 | 5582013  | 13-scf00114 | 13 |
| AX-157817393 | 5 | 50.1   | KV453028.1 | 6230412  | 13-scf00114 | 13 |
| AX-157817394 | 5 | 50.1   | KV453028.1 | 6233462  | 13-scf00114 | 13 |
| AX-157978667 | 5 | 50.1   | KV453028.1 | 6589004  | 13-scf00114 | 13 |
| AX-157817424 | 5 | 50.1   | KV453028.1 | 6594060  | 13-scf00114 | 13 |
| AX-157978992 | 5 | 50.1   | KV453028.1 | 6977276  | 13-scf00114 | 13 |
| AX-157978998 | 5 | 50.1   | KV453028.1 | 6986005  | 13-scf00114 | 13 |
| AX-157979045 | 5 | 50.1   | KV453028.1 | 7124667  | 13-scf00114 | 13 |
| AX-157979277 | 5 | 50.1   | KV453028.1 | 8317702  | 13-scf00114 | 13 |
| AX-157979352 | 5 | 50.1   | KV453028.1 | 8491268  | 13-scf00114 | 13 |
| AX-157979412 | 5 | 50.1   | KV453028.1 | 8582273  | 13-scf00114 | 13 |
| AX-157979424 | 5 | 50.1   | KV453028.1 | 8603032  | 13-scf00114 | 13 |
| AX-157750039 | 5 | 50.1   | KV453028.1 | 8620664  | 13-scf00114 | 13 |
| AX-157979433 | 5 | 50.1   | KV453028.1 | 8621383  | 13-scf00114 | 13 |
| AX-157979502 | 5 | 50.1   | KV453028.1 | 8703611  | 13-scf00114 | 13 |
| AX-157980287 | 5 | 50.1   | KV453028.1 | 9990050  | 13-scf00114 | 13 |
| AX-157980500 | 5 | 50.1   | KV453028.1 | 10216142 | 13-scf00114 | 13 |
| AX-157980608 | 5 | 50.1   | KV453028.1 | 10385537 | 13-scf00114 | 13 |
| AX-157817661 | 5 | 50.1   | KV453028.1 | 10456161 | 13-scf00114 | 13 |
| AX-157723030 | 5 | 50.1   | KV453028.1 | 10519615 | 13-scf00114 | 13 |
| AX-157980943 | 5 | 50.1   | KV453028.1 | 10961353 | 13-scf00114 | 13 |
| AX-157975407 | 5 | 50.209 | KV453028.1 | 3031620  | 13-scf00114 | 13 |
| AX-157975447 | 5 | 50.209 | KV453028.1 | 3099013  | 13-scf00114 | 13 |
| AX-157975604 | 5 | 50.209 | KV453028.1 | 3341940  | 13-scf00114 | 13 |
| AX-157975655 | 5 | 50.209 | KV453028.1 | 3399813  | 13-scf00114 | 13 |
| AX-157753053 | 5 | 50.209 | KV453028.1 | 3402406  | 13-scf00114 | 13 |
| AX-157975715 | 5 | 50.209 | KV453028.1 | 3469992  | 13-scf00114 | 13 |
| AX-157975718 | 5 | 50.209 | KV453028.1 | 3474639  | 13-scf00114 | 13 |
| AX-157975719 | 5 | 50.209 | KV453028.1 | 3475155  | 13-scf00114 | 13 |
| AX-157975773 | 5 | 50.209 | KV453028.1 | 3565636  | 13-scf00114 | 13 |
| AX-157975785 | 5 | 50.209 | KV453028.1 | 3574049  | 13-scf00114 | 13 |
| AX-157975852 | 5 | 50.209 | KV453028.1 | 3634301  | 13-scf00114 | 13 |
| AX-157975856 | 5 | 50.209 | KV453028.1 | 3636777  | 13-scf00114 | 13 |
| AX-157975858 | 5 | 50.209 | KV453028.1 | 3638054  | 13-scf00114 | 13 |
| AX-157975879 | 5 | 50.209 | KV453028.1 | 3653582  | 13-scf00114 | 13 |
| AX-157817251 | 5 | 50.209 | KV453028.1 | 3725273  | 13-scf00114 | 13 |
| AX-157707739 | 5 | 50.209 | KV453028.1 | 3797240  | 13-scf00114 | 13 |
| AX-157721473 | 5 | 50.209 | KV453028.1 | 3847467  | 13-scf00114 | 13 |
| AX-157976085 | 5 | 50.209 | KV453028.1 | 3848773  | 13-scf00114 | 13 |
| AX-157746375 | 5 | 50.209 | KV453028.1 | 3942258  | 13-scf00114 | 13 |
| AX-157743473 | 5 | 50.209 | KV453028.1 | 3970040  | 13-scf00114 | 13 |
| AX-157976213 | 5 | 50.209 | KV453028.1 | 3987124  | 13-scf00114 | 13 |
| AX-157976269 | 5 | 50.209 | KV453028.1 | 4034513  | 13-scf00114 | 13 |
| AX-157976289 | 5 | 50.209 | KV453028.1 | 4042958  | 13-scf00114 | 13 |
| AX-157976331 | 5 | 50.209 | KV453028.1 | 4096816  | 13-scf00114 | 13 |
| AX-157976408 | 5 | 50.209 | KV453028.1 | 4151650  | 13-scf00114 | 13 |
| AX-157817282 | 5 | 50.209 | KV453028.1 | 4152811  | 13-scf00114 | 13 |
| AX-157976411 | 5 | 50.209 | KV453028.1 | 4157740  | 13-scf00114 | 13 |
| AX-157817283 | 5 | 50.209 | KV453028.1 | 4158458  | 13-scf00114 | 13 |
| AX-157976415 | 5 | 50.209 | KV453028.1 | 4162841  | 13-scf00114 | 13 |

|              |   |        |            |         |             |    |
|--------------|---|--------|------------|---------|-------------|----|
| AX-158406753 | 5 | 50.209 | KV453028.1 | 4185741 | 13-scf00114 | 13 |
| AX-157976441 | 5 | 50.209 | KV453028.1 | 4192934 | 13-scf00114 | 13 |
| AX-157976450 | 5 | 50.209 | KV453028.1 | 4197110 | 13-scf00114 | 13 |
| AX-157976463 | 5 | 50.209 | KV453028.1 | 4213777 | 13-scf00114 | 13 |
| AX-157976470 | 5 | 50.209 | KV453028.1 | 4217469 | 13-scf00114 | 13 |
| AX-157976473 | 5 | 50.209 | KV453028.1 | 4221825 | 13-scf00114 | 13 |
| AX-157976474 | 5 | 50.209 | KV453028.1 | 4223014 | 13-scf00114 | 13 |
| AX-157976475 | 5 | 50.209 | KV453028.1 | 4223547 | 13-scf00114 | 13 |
| AX-157753027 | 5 | 50.209 | KV453028.1 | 4224569 | 13-scf00114 | 13 |
| AX-157976476 | 5 | 50.209 | KV453028.1 | 4229124 | 13-scf00114 | 13 |
| AX-157753988 | 5 | 50.209 | KV453028.1 | 5112976 | 13-scf00114 | 13 |
| AX-157977049 | 5 | 50.209 | KV453028.1 | 5225433 | 13-scf00114 | 13 |
| AX-157977334 | 5 | 50.209 | KV453028.1 | 5517754 | 13-scf00114 | 13 |
| AX-157977356 | 5 | 50.209 | KV453028.1 | 5530858 | 13-scf00114 | 13 |
| AX-158379551 | 5 | 50.209 | KV453028.1 | 5594005 | 13-scf00114 | 13 |
| AX-157977565 | 5 | 50.209 | KV453028.1 | 5672609 | 13-scf00114 | 13 |
| AX-157855127 | 5 | 50.209 | KV453028.1 | 5678389 | 13-scf00114 | 13 |
| AX-157977580 | 5 | 50.209 | KV453028.1 | 5681091 | 13-scf00114 | 13 |
| AX-157977593 | 5 | 50.209 | KV453028.1 | 5694383 | 13-scf00114 | 13 |
| AX-157755033 | 5 | 50.209 | KV453028.1 | 5715656 | 13-scf00114 | 13 |
| AX-157977621 | 5 | 50.209 | KV453028.1 | 5716572 | 13-scf00114 | 13 |
| AX-157869701 | 5 | 50.209 | KV453028.1 | 5751830 | 13-scf00114 | 13 |
| AX-157977666 | 5 | 50.209 | KV453028.1 | 5761324 | 13-scf00114 | 13 |
| AX-157977672 | 5 | 50.209 | KV453028.1 | 5766029 | 13-scf00114 | 13 |
| AX-157977681 | 5 | 50.209 | KV453028.1 | 5772078 | 13-scf00114 | 13 |
| AX-157977692 | 5 | 50.209 | KV453028.1 | 5781781 | 13-scf00114 | 13 |
| AX-157977718 | 5 | 50.209 | KV453028.1 | 5806626 | 13-scf00114 | 13 |
| AX-157977734 | 5 | 50.209 | KV453028.1 | 5816978 | 13-scf00114 | 13 |
| AX-157977737 | 5 | 50.209 | KV453028.1 | 5818872 | 13-scf00114 | 13 |
| AX-157977747 | 5 | 50.209 | KV453028.1 | 5823528 | 13-scf00114 | 13 |
| AX-157717124 | 5 | 50.209 | KV453028.1 | 5839869 | 13-scf00114 | 13 |
| AX-157977787 | 5 | 50.209 | KV453028.1 | 5855053 | 13-scf00114 | 13 |
| AX-157817366 | 5 | 50.209 | KV453028.1 | 5925116 | 13-scf00114 | 13 |
| AX-157977973 | 5 | 50.209 | KV453028.1 | 6013107 | 13-scf00114 | 13 |
| AX-157978009 | 5 | 50.209 | KV453028.1 | 6036249 | 13-scf00114 | 13 |
| AX-157978010 | 5 | 50.209 | KV453028.1 | 6037163 | 13-scf00114 | 13 |
| AX-157978011 | 5 | 50.209 | KV453028.1 | 6038710 | 13-scf00114 | 13 |
| AX-157978030 | 5 | 50.209 | KV453028.1 | 6048154 | 13-scf00114 | 13 |
| AX-157978056 | 5 | 50.209 | KV453028.1 | 6071357 | 13-scf00114 | 13 |
| AX-157978059 | 5 | 50.209 | KV453028.1 | 6072226 | 13-scf00114 | 13 |
| AX-157817378 | 5 | 50.209 | KV453028.1 | 6083196 | 13-scf00114 | 13 |
| AX-157978257 | 5 | 50.209 | KV453028.1 | 6233752 | 13-scf00114 | 13 |
| AX-157978258 | 5 | 50.209 | KV453028.1 | 6234756 | 13-scf00114 | 13 |
| AX-157817397 | 5 | 50.209 | KV453028.1 | 6267479 | 13-scf00114 | 13 |
| AX-157817398 | 5 | 50.209 | KV453028.1 | 6268759 | 13-scf00114 | 13 |
| AX-157708636 | 5 | 50.209 | KV453028.1 | 6271944 | 13-scf00114 | 13 |
| AX-157817399 | 5 | 50.209 | KV453028.1 | 6272657 | 13-scf00114 | 13 |
| AX-157978327 | 5 | 50.209 | KV453028.1 | 6297488 | 13-scf00114 | 13 |
| AX-157978328 | 5 | 50.209 | KV453028.1 | 6297898 | 13-scf00114 | 13 |
| AX-157723457 | 5 | 50.209 | KV453028.1 | 6314572 | 13-scf00114 | 13 |
| AX-157978370 | 5 | 50.209 | KV453028.1 | 6326919 | 13-scf00114 | 13 |

|              |   |        |            |         |             |    |
|--------------|---|--------|------------|---------|-------------|----|
| AX-157978420 | 5 | 50.209 | KV453028.1 | 6378082 | 13-scf00114 | 13 |
| AX-157978442 | 5 | 50.209 | KV453028.1 | 6393827 | 13-scf00114 | 13 |
| AX-157978443 | 5 | 50.209 | KV453028.1 | 6394667 | 13-scf00114 | 13 |
| AX-157752828 | 5 | 50.209 | KV453028.1 | 6416148 | 13-scf00114 | 13 |
| AX-157978487 | 5 | 50.209 | KV453028.1 | 6417888 | 13-scf00114 | 13 |
| AX-157978502 | 5 | 50.209 | KV453028.1 | 6423727 | 13-scf00114 | 13 |
| AX-157817414 | 5 | 50.209 | KV453028.1 | 6429088 | 13-scf00114 | 13 |
| AX-157978507 | 5 | 50.209 | KV453028.1 | 6431123 | 13-scf00114 | 13 |
| AX-157855179 | 5 | 50.209 | KV453028.1 | 6431713 | 13-scf00114 | 13 |
| AX-157978514 | 5 | 50.209 | KV453028.1 | 6436772 | 13-scf00114 | 13 |
| AX-157978543 | 5 | 50.209 | KV453028.1 | 6466081 | 13-scf00114 | 13 |
| AX-157978546 | 5 | 50.209 | KV453028.1 | 6467341 | 13-scf00114 | 13 |
| AX-157978552 | 5 | 50.209 | KV453028.1 | 6474797 | 13-scf00114 | 13 |
| AX-157978553 | 5 | 50.209 | KV453028.1 | 6475427 | 13-scf00114 | 13 |
| AX-157978555 | 5 | 50.209 | KV453028.1 | 6475780 | 13-scf00114 | 13 |
| AX-157978583 | 5 | 50.209 | KV453028.1 | 6507817 | 13-scf00114 | 13 |
| AX-157978619 | 5 | 50.209 | KV453028.1 | 6544711 | 13-scf00114 | 13 |
| AX-157978620 | 5 | 50.209 | KV453028.1 | 6546638 | 13-scf00114 | 13 |
| AX-157720215 | 5 | 50.209 | KV453028.1 | 6548490 | 13-scf00114 | 13 |
| AX-157978649 | 5 | 50.209 | KV453028.1 | 6574603 | 13-scf00114 | 13 |
| AX-157978652 | 5 | 50.209 | KV453028.1 | 6576425 | 13-scf00114 | 13 |
| AX-157978664 | 5 | 50.209 | KV453028.1 | 6585749 | 13-scf00114 | 13 |
| AX-157978669 | 5 | 50.209 | KV453028.1 | 6589831 | 13-scf00114 | 13 |
| AX-157978675 | 5 | 50.209 | KV453028.1 | 6597584 | 13-scf00114 | 13 |
| AX-157978681 | 5 | 50.209 | KV453028.1 | 6603629 | 13-scf00114 | 13 |
| AX-157742892 | 5 | 50.209 | KV453028.1 | 6604507 | 13-scf00114 | 13 |
| AX-157725739 | 5 | 50.209 | KV453028.1 | 6615161 | 13-scf00114 | 13 |
| AX-157978718 | 5 | 50.209 | KV453028.1 | 6639971 | 13-scf00114 | 13 |
| AX-157978719 | 5 | 50.209 | KV453028.1 | 6641119 | 13-scf00114 | 13 |
| AX-157978720 | 5 | 50.209 | KV453028.1 | 6643211 | 13-scf00114 | 13 |
| AX-157978754 | 5 | 50.209 | KV453028.1 | 6683353 | 13-scf00114 | 13 |
| AX-157978755 | 5 | 50.209 | KV453028.1 | 6689027 | 13-scf00114 | 13 |
| AX-157817431 | 5 | 50.209 | KV453028.1 | 6738567 | 13-scf00114 | 13 |
| AX-157978807 | 5 | 50.209 | KV453028.1 | 6751763 | 13-scf00114 | 13 |
| AX-157978811 | 5 | 50.209 | KV453028.1 | 6755248 | 13-scf00114 | 13 |
| AX-157978823 | 5 | 50.209 | KV453028.1 | 6768127 | 13-scf00114 | 13 |
| AX-157978826 | 5 | 50.209 | KV453028.1 | 6769652 | 13-scf00114 | 13 |
| AX-157978834 | 5 | 50.209 | KV453028.1 | 6778909 | 13-scf00114 | 13 |
| AX-157978839 | 5 | 50.209 | KV453028.1 | 6783655 | 13-scf00114 | 13 |
| AX-158383189 | 5 | 50.209 | KV453028.1 | 6791628 | 13-scf00114 | 13 |
| AX-157978844 | 5 | 50.209 | KV453028.1 | 6795856 | 13-scf00114 | 13 |
| AX-157978853 | 5 | 50.209 | KV453028.1 | 6805329 | 13-scf00114 | 13 |
| AX-157978856 | 5 | 50.209 | KV453028.1 | 6814674 | 13-scf00114 | 13 |
| AX-157978858 | 5 | 50.209 | KV453028.1 | 6815084 | 13-scf00114 | 13 |
| AX-157978862 | 5 | 50.209 | KV453028.1 | 6825295 | 13-scf00114 | 13 |
| AX-157817441 | 5 | 50.209 | KV453028.1 | 6826422 | 13-scf00114 | 13 |
| AX-157855195 | 5 | 50.209 | KV453028.1 | 6827441 | 13-scf00114 | 13 |
| AX-157855196 | 5 | 50.209 | KV453028.1 | 6828151 | 13-scf00114 | 13 |
| AX-157855197 | 5 | 50.209 | KV453028.1 | 6828472 | 13-scf00114 | 13 |
| AX-158390410 | 5 | 50.209 | KV453028.1 | 6828596 | 13-scf00114 | 13 |
| AX-157978863 | 5 | 50.209 | KV453028.1 | 6829767 | 13-scf00114 | 13 |



|              |   |        |            |         |             |    |
|--------------|---|--------|------------|---------|-------------|----|
| AX-157855198 | 5 | 50.209 | KV453028.1 | 6831239 | 13-scf00114 | 13 |
| AX-157855199 | 5 | 50.209 | KV453028.1 | 6834714 | 13-scf00114 | 13 |
| AX-157817442 | 5 | 50.209 | KV453028.1 | 6835808 | 13-scf00114 | 13 |
| AX-157855202 | 5 | 50.209 | KV453028.1 | 6840759 | 13-scf00114 | 13 |
| AX-157855203 | 5 | 50.209 | KV453028.1 | 6842104 | 13-scf00114 | 13 |
| AX-157978874 | 5 | 50.209 | KV453028.1 | 6845498 | 13-scf00114 | 13 |
| AX-157978878 | 5 | 50.209 | KV453028.1 | 6846902 | 13-scf00114 | 13 |
| AX-158379558 | 5 | 50.209 | KV453028.1 | 6847477 | 13-scf00114 | 13 |
| AX-157817444 | 5 | 50.209 | KV453028.1 | 6847535 | 13-scf00114 | 13 |
| AX-157855204 | 5 | 50.209 | KV453028.1 | 6848551 | 13-scf00114 | 13 |
| AX-157978882 | 5 | 50.209 | KV453028.1 | 6850560 | 13-scf00114 | 13 |
| AX-157724758 | 5 | 50.209 | KV453028.1 | 6851884 | 13-scf00114 | 13 |
| AX-157978884 | 5 | 50.209 | KV453028.1 | 6852323 | 13-scf00114 | 13 |
| AX-157869711 | 5 | 50.209 | KV453028.1 | 6852811 | 13-scf00114 | 13 |
| AX-157855206 | 5 | 50.209 | KV453028.1 | 6856741 | 13-scf00114 | 13 |
| AX-157855207 | 5 | 50.209 | KV453028.1 | 6858845 | 13-scf00114 | 13 |
| AX-157978892 | 5 | 50.209 | KV453028.1 | 6862435 | 13-scf00114 | 13 |
| AX-157978893 | 5 | 50.209 | KV453028.1 | 6865733 | 13-scf00114 | 13 |
| AX-157978895 | 5 | 50.209 | KV453028.1 | 6866110 | 13-scf00114 | 13 |
| AX-157869712 | 5 | 50.209 | KV453028.1 | 6866684 | 13-scf00114 | 13 |
| AX-157978896 | 5 | 50.209 | KV453028.1 | 6866987 | 13-scf00114 | 13 |
| AX-157978897 | 5 | 50.209 | KV453028.1 | 6867434 | 13-scf00114 | 13 |
| AX-157978900 | 5 | 50.209 | KV453028.1 | 6868277 | 13-scf00114 | 13 |
| AX-157978902 | 5 | 50.209 | KV453028.1 | 6868635 | 13-scf00114 | 13 |
| AX-157978903 | 5 | 50.209 | KV453028.1 | 6869309 | 13-scf00114 | 13 |
| AX-157978908 | 5 | 50.209 | KV453028.1 | 6871762 | 13-scf00114 | 13 |
| AX-157869713 | 5 | 50.209 | KV453028.1 | 6872701 | 13-scf00114 | 13 |
| AX-157978913 | 5 | 50.209 | KV453028.1 | 6883113 | 13-scf00114 | 13 |
| AX-157978914 | 5 | 50.209 | KV453028.1 | 6883776 | 13-scf00114 | 13 |
| AX-157744757 | 5 | 50.209 | KV453028.1 | 6884344 | 13-scf00114 | 13 |
| AX-157978919 | 5 | 50.209 | KV453028.1 | 6890677 | 13-scf00114 | 13 |
| AX-157855210 | 5 | 50.209 | KV453028.1 | 6892273 | 13-scf00114 | 13 |
| AX-157978922 | 5 | 50.209 | KV453028.1 | 6892646 | 13-scf00114 | 13 |
| AX-157855211 | 5 | 50.209 | KV453028.1 | 6893922 | 13-scf00114 | 13 |
| AX-157855212 | 5 | 50.209 | KV453028.1 | 6894021 | 13-scf00114 | 13 |
| AX-157855213 | 5 | 50.209 | KV453028.1 | 6895146 | 13-scf00114 | 13 |
| AX-157978925 | 5 | 50.209 | KV453028.1 | 6896279 | 13-scf00114 | 13 |
| AX-157855214 | 5 | 50.209 | KV453028.1 | 6896533 | 13-scf00114 | 13 |
| AX-157978926 | 5 | 50.209 | KV453028.1 | 6897487 | 13-scf00114 | 13 |
| AX-157724692 | 5 | 50.209 | KV453028.1 | 6900725 | 13-scf00114 | 13 |
| AX-157855216 | 5 | 50.209 | KV453028.1 | 6900863 | 13-scf00114 | 13 |
| AX-157817454 | 5 | 50.209 | KV453028.1 | 6903983 | 13-scf00114 | 13 |
| AX-157855217 | 5 | 50.209 | KV453028.1 | 6905366 | 13-scf00114 | 13 |
| AX-157855218 | 5 | 50.209 | KV453028.1 | 6905891 | 13-scf00114 | 13 |
| AX-157855219 | 5 | 50.209 | KV453028.1 | 6907949 | 13-scf00114 | 13 |
| AX-157978939 | 5 | 50.209 | KV453028.1 | 6910443 | 13-scf00114 | 13 |
| AX-157855220 | 5 | 50.209 | KV453028.1 | 6913739 | 13-scf00114 | 13 |
| AX-157817456 | 5 | 50.209 | KV453028.1 | 6917188 | 13-scf00114 | 13 |
| AX-157855221 | 5 | 50.209 | KV453028.1 | 6919770 | 13-scf00114 | 13 |
| AX-157978943 | 5 | 50.209 | KV453028.1 | 6921323 | 13-scf00114 | 13 |
| AX-157855222 | 5 | 50.209 | KV453028.1 | 6924541 | 13-scf00114 | 13 |

|              |   |        |            |         |             |    |
|--------------|---|--------|------------|---------|-------------|----|
| AX-157817458 | 5 | 50.209 | KV453028.1 | 6926983 | 13-scf00114 | 13 |
| AX-157855223 | 5 | 50.209 | KV453028.1 | 6927648 | 13-scf00114 | 13 |
| AX-157855224 | 5 | 50.209 | KV453028.1 | 6928221 | 13-scf00114 | 13 |
| AX-157978947 | 5 | 50.209 | KV453028.1 | 6930346 | 13-scf00114 | 13 |
| AX-157978949 | 5 | 50.209 | KV453028.1 | 6931741 | 13-scf00114 | 13 |
| AX-157884326 | 5 | 50.209 | KV453028.1 | 6934907 | 13-scf00114 | 13 |
| AX-158390411 | 5 | 50.209 | KV453028.1 | 6935848 | 13-scf00114 | 13 |
| AX-157978954 | 5 | 50.209 | KV453028.1 | 6939325 | 13-scf00114 | 13 |
| AX-157978957 | 5 | 50.209 | KV453028.1 | 6943239 | 13-scf00114 | 13 |
| AX-158422139 | 5 | 50.209 | KV453028.1 | 6944691 | 13-scf00114 | 13 |
| AX-157855228 | 5 | 50.209 | KV453028.1 | 6944946 | 13-scf00114 | 13 |
| AX-157978960 | 5 | 50.209 | KV453028.1 | 6945823 | 13-scf00114 | 13 |
| AX-157978962 | 5 | 50.209 | KV453028.1 | 6946516 | 13-scf00114 | 13 |
| AX-157978964 | 5 | 50.209 | KV453028.1 | 6949261 | 13-scf00114 | 13 |
| AX-157978966 | 5 | 50.209 | KV453028.1 | 6949989 | 13-scf00114 | 13 |
| AX-157752079 | 5 | 50.209 | KV453028.1 | 6950629 | 13-scf00114 | 13 |
| AX-157978967 | 5 | 50.209 | KV453028.1 | 6952937 | 13-scf00114 | 13 |
| AX-157978968 | 5 | 50.209 | KV453028.1 | 6953953 | 13-scf00114 | 13 |
| AX-157855229 | 5 | 50.209 | KV453028.1 | 6954264 | 13-scf00114 | 13 |
| AX-157978970 | 5 | 50.209 | KV453028.1 | 6955572 | 13-scf00114 | 13 |
| AX-157978974 | 5 | 50.209 | KV453028.1 | 6958399 | 13-scf00114 | 13 |
| AX-157855230 | 5 | 50.209 | KV453028.1 | 6961267 | 13-scf00114 | 13 |
| AX-157978976 | 5 | 50.209 | KV453028.1 | 6962105 | 13-scf00114 | 13 |
| AX-157978977 | 5 | 50.209 | KV453028.1 | 6962165 | 13-scf00114 | 13 |
| AX-157978988 | 5 | 50.209 | KV453028.1 | 6971513 | 13-scf00114 | 13 |
| AX-157978995 | 5 | 50.209 | KV453028.1 | 6980380 | 13-scf00114 | 13 |
| AX-157978997 | 5 | 50.209 | KV453028.1 | 6982069 | 13-scf00114 | 13 |
| AX-157979002 | 5 | 50.209 | KV453028.1 | 6989865 | 13-scf00114 | 13 |
| AX-157855234 | 5 | 50.209 | KV453028.1 | 6993595 | 13-scf00114 | 13 |
| AX-157869714 | 5 | 50.209 | KV453028.1 | 6997339 | 13-scf00114 | 13 |
| AX-158390412 | 5 | 50.209 | KV453028.1 | 6998505 | 13-scf00114 | 13 |
| AX-157869715 | 5 | 50.209 | KV453028.1 | 7001681 | 13-scf00114 | 13 |
| AX-157979010 | 5 | 50.209 | KV453028.1 | 7003216 | 13-scf00114 | 13 |
| AX-157869716 | 5 | 50.209 | KV453028.1 | 7008823 | 13-scf00114 | 13 |
| AX-158405381 | 5 | 50.209 | KV453028.1 | 7021166 | 13-scf00114 | 13 |
| AX-158390413 | 5 | 50.209 | KV453028.1 | 7037027 | 13-scf00114 | 13 |
| AX-157855235 | 5 | 50.209 | KV453028.1 | 7045555 | 13-scf00114 | 13 |
| AX-157817464 | 5 | 50.209 | KV453028.1 | 7050910 | 13-scf00114 | 13 |
| AX-157979037 | 5 | 50.209 | KV453028.1 | 7081750 | 13-scf00114 | 13 |
| AX-157979039 | 5 | 50.209 | KV453028.1 | 7084396 | 13-scf00114 | 13 |
| AX-158406841 | 5 | 50.209 | KV453028.1 | 7093086 | 13-scf00114 | 13 |
| AX-157979046 | 5 | 50.209 | KV453028.1 | 7131616 | 13-scf00114 | 13 |
| AX-157979048 | 5 | 50.209 | KV453028.1 | 7142153 | 13-scf00114 | 13 |
| AX-157979053 | 5 | 50.209 | KV453028.1 | 7166374 | 13-scf00114 | 13 |
| AX-158390414 | 5 | 50.209 | KV453028.1 | 7174798 | 13-scf00114 | 13 |
| AX-157979058 | 5 | 50.209 | KV453028.1 | 7197538 | 13-scf00114 | 13 |
| AX-157979063 | 5 | 50.209 | KV453028.1 | 7218199 | 13-scf00114 | 13 |
| AX-157979066 | 5 | 50.209 | KV453028.1 | 7237495 | 13-scf00114 | 13 |
| AX-157979072 | 5 | 50.209 | KV453028.1 | 7257979 | 13-scf00114 | 13 |
| AX-157979084 | 5 | 50.209 | KV453028.1 | 7323980 | 13-scf00114 | 13 |
| AX-157979093 | 5 | 50.209 | KV453028.1 | 7399328 | 13-scf00114 | 13 |

|              |   |        |            |         |             |    |
|--------------|---|--------|------------|---------|-------------|----|
| AX-157979094 | 5 | 50.209 | KV453028.1 | 7403005 | 13-scf00114 | 13 |
| AX-157979112 | 5 | 50.209 | KV453028.1 | 7514896 | 13-scf00114 | 13 |
| AX-157979115 | 5 | 50.209 | KV453028.1 | 7526087 | 13-scf00114 | 13 |
| AX-157979126 | 5 | 50.209 | KV453028.1 | 7552532 | 13-scf00114 | 13 |
| AX-158390417 | 5 | 50.209 | KV453028.1 | 7672245 | 13-scf00114 | 13 |
| AX-158390418 | 5 | 50.209 | KV453028.1 | 7673926 | 13-scf00114 | 13 |
| AX-157979147 | 5 | 50.209 | KV453028.1 | 7674457 | 13-scf00114 | 13 |
| AX-157979149 | 5 | 50.209 | KV453028.1 | 7681034 | 13-scf00114 | 13 |
| AX-158390420 | 5 | 50.209 | KV453028.1 | 7698069 | 13-scf00114 | 13 |
| AX-157884354 | 5 | 50.209 | KV453028.1 | 7719199 | 13-scf00114 | 13 |
| AX-157723113 | 5 | 50.209 | KV453028.1 | 7739309 | 13-scf00114 | 13 |
| AX-158403781 | 5 | 50.209 | KV453028.1 | 7742936 | 13-scf00114 | 13 |
| AX-157979158 | 5 | 50.209 | KV453028.1 | 7747384 | 13-scf00114 | 13 |
| AX-157756552 | 5 | 50.209 | KV453028.1 | 7752295 | 13-scf00114 | 13 |
| AX-157979160 | 5 | 50.209 | KV453028.1 | 7762604 | 13-scf00114 | 13 |
| AX-157979165 | 5 | 50.209 | KV453028.1 | 7780717 | 13-scf00114 | 13 |
| AX-157979171 | 5 | 50.209 | KV453028.1 | 7789096 | 13-scf00114 | 13 |
| AX-157979178 | 5 | 50.209 | KV453028.1 | 7806048 | 13-scf00114 | 13 |
| AX-157869721 | 5 | 50.209 | KV453028.1 | 7818165 | 13-scf00114 | 13 |
| AX-157979180 | 5 | 50.209 | KV453028.1 | 7826804 | 13-scf00114 | 13 |
| AX-157979183 | 5 | 50.209 | KV453028.1 | 7847029 | 13-scf00114 | 13 |
| AX-157979197 | 5 | 50.209 | KV453028.1 | 7950807 | 13-scf00114 | 13 |
| AX-157979201 | 5 | 50.209 | KV453028.1 | 7965381 | 13-scf00114 | 13 |
| AX-158406850 | 5 | 50.209 | KV453028.1 | 7985947 | 13-scf00114 | 13 |
| AX-158390422 | 5 | 50.209 | KV453028.1 | 7996862 | 13-scf00114 | 13 |
| AX-157979207 | 5 | 50.209 | KV453028.1 | 8000033 | 13-scf00114 | 13 |
| AX-157979213 | 5 | 50.209 | KV453028.1 | 8066948 | 13-scf00114 | 13 |
| AX-157979215 | 5 | 50.209 | KV453028.1 | 8069437 | 13-scf00114 | 13 |
| AX-157869724 | 5 | 50.209 | KV453028.1 | 8072817 | 13-scf00114 | 13 |
| AX-157855237 | 5 | 50.209 | KV453028.1 | 8074109 | 13-scf00114 | 13 |
| AX-157855238 | 5 | 50.209 | KV453028.1 | 8077401 | 13-scf00114 | 13 |
| AX-157979220 | 5 | 50.209 | KV453028.1 | 8092961 | 13-scf00114 | 13 |
| AX-157979221 | 5 | 50.209 | KV453028.1 | 8096442 | 13-scf00114 | 13 |
| AX-157979225 | 5 | 50.209 | KV453028.1 | 8103915 | 13-scf00114 | 13 |
| AX-157979226 | 5 | 50.209 | KV453028.1 | 8123922 | 13-scf00114 | 13 |
| AX-157979234 | 5 | 50.209 | KV453028.1 | 8132800 | 13-scf00114 | 13 |
| AX-157869725 | 5 | 50.209 | KV453028.1 | 8135791 | 13-scf00114 | 13 |
| AX-157979238 | 5 | 50.209 | KV453028.1 | 8149400 | 13-scf00114 | 13 |
| AX-157979243 | 5 | 50.209 | KV453028.1 | 8155562 | 13-scf00114 | 13 |
| AX-157979244 | 5 | 50.209 | KV453028.1 | 8157964 | 13-scf00114 | 13 |
| AX-157979245 | 5 | 50.209 | KV453028.1 | 8175712 | 13-scf00114 | 13 |
| AX-157979250 | 5 | 50.209 | KV453028.1 | 8186989 | 13-scf00114 | 13 |
| AX-158422144 | 5 | 50.209 | KV453028.1 | 8188474 | 13-scf00114 | 13 |
| AX-157979252 | 5 | 50.209 | KV453028.1 | 8195275 | 13-scf00114 | 13 |
| AX-157979253 | 5 | 50.209 | KV453028.1 | 8196493 | 13-scf00114 | 13 |
| AX-157979258 | 5 | 50.209 | KV453028.1 | 8232023 | 13-scf00114 | 13 |
| AX-157869726 | 5 | 50.209 | KV453028.1 | 8241156 | 13-scf00114 | 13 |
| AX-157979260 | 5 | 50.209 | KV453028.1 | 8251098 | 13-scf00114 | 13 |
| AX-157979261 | 5 | 50.209 | KV453028.1 | 8261271 | 13-scf00114 | 13 |
| AX-157979262 | 5 | 50.209 | KV453028.1 | 8269406 | 13-scf00114 | 13 |
| AX-158390424 | 5 | 50.209 | KV453028.1 | 8269792 | 13-scf00114 | 13 |

|              |   |        |            |         |             |    |
|--------------|---|--------|------------|---------|-------------|----|
| AX-157979266 | 5 | 50.209 | KV453028.1 | 8273379 | 13-scf00114 | 13 |
| AX-157979281 | 5 | 50.209 | KV453028.1 | 8349992 | 13-scf00114 | 13 |
| AX-157979283 | 5 | 50.209 | KV453028.1 | 8350937 | 13-scf00114 | 13 |
| AX-157713073 | 5 | 50.209 | KV453028.1 | 8355540 | 13-scf00114 | 13 |
| AX-157817473 | 5 | 50.209 | KV453028.1 | 8357947 | 13-scf00114 | 13 |
| AX-157817474 | 5 | 50.209 | KV453028.1 | 8360464 | 13-scf00114 | 13 |
| AX-157979286 | 5 | 50.209 | KV453028.1 | 8372846 | 13-scf00114 | 13 |
| AX-157979290 | 5 | 50.209 | KV453028.1 | 8383726 | 13-scf00114 | 13 |
| AX-157884383 | 5 | 50.209 | KV453028.1 | 8388273 | 13-scf00114 | 13 |
| AX-157979292 | 5 | 50.209 | KV453028.1 | 8401322 | 13-scf00114 | 13 |
| AX-157817475 | 5 | 50.209 | KV453028.1 | 8401679 | 13-scf00114 | 13 |
| AX-157979301 | 5 | 50.209 | KV453028.1 | 8427912 | 13-scf00114 | 13 |
| AX-157979304 | 5 | 50.209 | KV453028.1 | 8428316 | 13-scf00114 | 13 |
| AX-157979305 | 5 | 50.209 | KV453028.1 | 8430468 | 13-scf00114 | 13 |
| AX-157979311 | 5 | 50.209 | KV453028.1 | 8437550 | 13-scf00114 | 13 |
| AX-157979313 | 5 | 50.209 | KV453028.1 | 8438460 | 13-scf00114 | 13 |
| AX-157884384 | 5 | 50.209 | KV453028.1 | 8441904 | 13-scf00114 | 13 |
| AX-157817478 | 5 | 50.209 | KV453028.1 | 8450134 | 13-scf00114 | 13 |
| AX-157979326 | 5 | 50.209 | KV453028.1 | 8463286 | 13-scf00114 | 13 |
| AX-157979327 | 5 | 50.209 | KV453028.1 | 8463988 | 13-scf00114 | 13 |
| AX-157855241 | 5 | 50.209 | KV453028.1 | 8467468 | 13-scf00114 | 13 |
| AX-157817479 | 5 | 50.209 | KV453028.1 | 8473694 | 13-scf00114 | 13 |
| AX-157979339 | 5 | 50.209 | KV453028.1 | 8477552 | 13-scf00114 | 13 |
| AX-157979344 | 5 | 50.209 | KV453028.1 | 8482567 | 13-scf00114 | 13 |
| AX-157979355 | 5 | 50.209 | KV453028.1 | 8496252 | 13-scf00114 | 13 |
| AX-157709352 | 5 | 50.209 | KV453028.1 | 8509206 | 13-scf00114 | 13 |
| AX-157979372 | 5 | 50.209 | KV453028.1 | 8525077 | 13-scf00114 | 13 |
| AX-157979374 | 5 | 50.209 | KV453028.1 | 8525652 | 13-scf00114 | 13 |
| AX-157979375 | 5 | 50.209 | KV453028.1 | 8526049 | 13-scf00114 | 13 |
| AX-157817481 | 5 | 50.209 | KV453028.1 | 8527607 | 13-scf00114 | 13 |
| AX-157979379 | 5 | 50.209 | KV453028.1 | 8528562 | 13-scf00114 | 13 |
| AX-157855246 | 5 | 50.209 | KV453028.1 | 8532282 | 13-scf00114 | 13 |
| AX-157979382 | 5 | 50.209 | KV453028.1 | 8532483 | 13-scf00114 | 13 |
| AX-157817483 | 5 | 50.209 | KV453028.1 | 8532748 | 13-scf00114 | 13 |
| AX-157817485 | 5 | 50.209 | KV453028.1 | 8534843 | 13-scf00114 | 13 |
| AX-157979389 | 5 | 50.209 | KV453028.1 | 8541681 | 13-scf00114 | 13 |
| AX-157817489 | 5 | 50.209 | KV453028.1 | 8542606 | 13-scf00114 | 13 |
| AX-157817490 | 5 | 50.209 | KV453028.1 | 8542738 | 13-scf00114 | 13 |
| AX-157715219 | 5 | 50.209 | KV453028.1 | 8542789 | 13-scf00114 | 13 |
| AX-157855250 | 5 | 50.209 | KV453028.1 | 8543715 | 13-scf00114 | 13 |
| AX-157855251 | 5 | 50.209 | KV453028.1 | 8545110 | 13-scf00114 | 13 |
| AX-157979390 | 5 | 50.209 | KV453028.1 | 8546421 | 13-scf00114 | 13 |
| AX-157855253 | 5 | 50.209 | KV453028.1 | 8561119 | 13-scf00114 | 13 |
| AX-157979406 | 5 | 50.209 | KV453028.1 | 8575205 | 13-scf00114 | 13 |
| AX-158390427 | 5 | 50.209 | KV453028.1 | 8578803 | 13-scf00114 | 13 |
| AX-157979415 | 5 | 50.209 | KV453028.1 | 8586555 | 13-scf00114 | 13 |
| AX-157979419 | 5 | 50.209 | KV453028.1 | 8587643 | 13-scf00114 | 13 |
| AX-157979421 | 5 | 50.209 | KV453028.1 | 8588666 | 13-scf00114 | 13 |
| AX-157979422 | 5 | 50.209 | KV453028.1 | 8601135 | 13-scf00114 | 13 |
| AX-157716555 | 5 | 50.209 | KV453028.1 | 8602216 | 13-scf00114 | 13 |
| AX-157817496 | 5 | 50.209 | KV453028.1 | 8604137 | 13-scf00114 | 13 |

|              |   |        |            |         |             |    |
|--------------|---|--------|------------|---------|-------------|----|
| AX-157979426 | 5 | 50.209 | KV453028.1 | 8606191 | 13-scf00114 | 13 |
| AX-157855257 | 5 | 50.209 | KV453028.1 | 8606602 | 13-scf00114 | 13 |
| AX-157979429 | 5 | 50.209 | KV453028.1 | 8608870 | 13-scf00114 | 13 |
| AX-157855258 | 5 | 50.209 | KV453028.1 | 8608989 | 13-scf00114 | 13 |
| AX-157817497 | 5 | 50.209 | KV453028.1 | 8609326 | 13-scf00114 | 13 |
| AX-157855260 | 5 | 50.209 | KV453028.1 | 8616718 | 13-scf00114 | 13 |
| AX-157979432 | 5 | 50.209 | KV453028.1 | 8619742 | 13-scf00114 | 13 |
| AX-157817499 | 5 | 50.209 | KV453028.1 | 8622290 | 13-scf00114 | 13 |
| AX-157817500 | 5 | 50.209 | KV453028.1 | 8622381 | 13-scf00114 | 13 |
| AX-157979437 | 5 | 50.209 | KV453028.1 | 8627384 | 13-scf00114 | 13 |
| AX-157979439 | 5 | 50.209 | KV453028.1 | 8627881 | 13-scf00114 | 13 |
| AX-157855261 | 5 | 50.209 | KV453028.1 | 8628009 | 13-scf00114 | 13 |
| AX-157817504 | 5 | 50.209 | KV453028.1 | 8628084 | 13-scf00114 | 13 |
| AX-157979440 | 5 | 50.209 | KV453028.1 | 8628143 | 13-scf00114 | 13 |
| AX-157979441 | 5 | 50.209 | KV453028.1 | 8630687 | 13-scf00114 | 13 |
| AX-157979450 | 5 | 50.209 | KV453028.1 | 8635635 | 13-scf00114 | 13 |
| AX-157979452 | 5 | 50.209 | KV453028.1 | 8636574 | 13-scf00114 | 13 |
| AX-157979455 | 5 | 50.209 | KV453028.1 | 8643903 | 13-scf00114 | 13 |
| AX-157979458 | 5 | 50.209 | KV453028.1 | 8644579 | 13-scf00114 | 13 |
| AX-157979460 | 5 | 50.209 | KV453028.1 | 8645253 | 13-scf00114 | 13 |
| AX-157817505 | 5 | 50.209 | KV453028.1 | 8651968 | 13-scf00114 | 13 |
| AX-157979467 | 5 | 50.209 | KV453028.1 | 8653353 | 13-scf00114 | 13 |
| AX-157979469 | 5 | 50.209 | KV453028.1 | 8654077 | 13-scf00114 | 13 |
| AX-157979470 | 5 | 50.209 | KV453028.1 | 8654952 | 13-scf00114 | 13 |
| AX-157979474 | 5 | 50.209 | KV453028.1 | 8656379 | 13-scf00114 | 13 |
| AX-157979476 | 5 | 50.209 | KV453028.1 | 8659198 | 13-scf00114 | 13 |
| AX-157979477 | 5 | 50.209 | KV453028.1 | 8660613 | 13-scf00114 | 13 |
| AX-157855263 | 5 | 50.209 | KV453028.1 | 8661174 | 13-scf00114 | 13 |
| AX-157979478 | 5 | 50.209 | KV453028.1 | 8662666 | 13-scf00114 | 13 |
| AX-157979479 | 5 | 50.209 | KV453028.1 | 8663200 | 13-scf00114 | 13 |
| AX-157817508 | 5 | 50.209 | KV453028.1 | 8669168 | 13-scf00114 | 13 |
| AX-157817510 | 5 | 50.209 | KV453028.1 | 8670184 | 13-scf00114 | 13 |
| AX-157855266 | 5 | 50.209 | KV453028.1 | 8678762 | 13-scf00114 | 13 |
| AX-157817513 | 5 | 50.209 | KV453028.1 | 8679339 | 13-scf00114 | 13 |
| AX-157979486 | 5 | 50.209 | KV453028.1 | 8682180 | 13-scf00114 | 13 |
| AX-157979489 | 5 | 50.209 | KV453028.1 | 8693272 | 13-scf00114 | 13 |
| AX-157855269 | 5 | 50.209 | KV453028.1 | 8697016 | 13-scf00114 | 13 |
| AX-157979495 | 5 | 50.209 | KV453028.1 | 8697793 | 13-scf00114 | 13 |
| AX-157979497 | 5 | 50.209 | KV453028.1 | 8701060 | 13-scf00114 | 13 |
| AX-157722653 | 5 | 50.209 | KV453028.1 | 8703835 | 13-scf00114 | 13 |
| AX-157979505 | 5 | 50.209 | KV453028.1 | 8706817 | 13-scf00114 | 13 |
| AX-157855271 | 5 | 50.209 | KV453028.1 | 8711160 | 13-scf00114 | 13 |
| AX-157742598 | 5 | 50.209 | KV453028.1 | 8714555 | 13-scf00114 | 13 |
| AX-157817516 | 5 | 50.209 | KV453028.1 | 8714938 | 13-scf00114 | 13 |
| AX-157979508 | 5 | 50.209 | KV453028.1 | 8715332 | 13-scf00114 | 13 |
| AX-157979510 | 5 | 50.209 | KV453028.1 | 8717564 | 13-scf00114 | 13 |
| AX-157979511 | 5 | 50.209 | KV453028.1 | 8718031 | 13-scf00114 | 13 |
| AX-157979512 | 5 | 50.209 | KV453028.1 | 8720467 | 13-scf00114 | 13 |
| AX-157979513 | 5 | 50.209 | KV453028.1 | 8722106 | 13-scf00114 | 13 |
| AX-157979516 | 5 | 50.209 | KV453028.1 | 8723345 | 13-scf00114 | 13 |
| AX-157979519 | 5 | 50.209 | KV453028.1 | 8726619 | 13-scf00114 | 13 |

|              |   |        |            |         |             |    |
|--------------|---|--------|------------|---------|-------------|----|
| AX-157979523 | 5 | 50.209 | KV453028.1 | 8730875 | 13-scf00114 | 13 |
| AX-157979526 | 5 | 50.209 | KV453028.1 | 8735863 | 13-scf00114 | 13 |
| AX-157979529 | 5 | 50.209 | KV453028.1 | 8740496 | 13-scf00114 | 13 |
| AX-157817517 | 5 | 50.209 | KV453028.1 | 8740740 | 13-scf00114 | 13 |
| AX-157979531 | 5 | 50.209 | KV453028.1 | 8746775 | 13-scf00114 | 13 |
| AX-157979532 | 5 | 50.209 | KV453028.1 | 8747924 | 13-scf00114 | 13 |
| AX-157979536 | 5 | 50.209 | KV453028.1 | 8753269 | 13-scf00114 | 13 |
| AX-157979538 | 5 | 50.209 | KV453028.1 | 8753914 | 13-scf00114 | 13 |
| AX-157817518 | 5 | 50.209 | KV453028.1 | 8759839 | 13-scf00114 | 13 |
| AX-157855277 | 5 | 50.209 | KV453028.1 | 8761251 | 13-scf00114 | 13 |
| AX-157817520 | 5 | 50.209 | KV453028.1 | 8774133 | 13-scf00114 | 13 |
| AX-157979557 | 5 | 50.209 | KV453028.1 | 8796159 | 13-scf00114 | 13 |
| AX-157979560 | 5 | 50.209 | KV453028.1 | 8799003 | 13-scf00114 | 13 |
| AX-157855282 | 5 | 50.209 | KV453028.1 | 8801009 | 13-scf00114 | 13 |
| AX-157979573 | 5 | 50.209 | KV453028.1 | 8812477 | 13-scf00114 | 13 |
| AX-157979579 | 5 | 50.209 | KV453028.1 | 8819491 | 13-scf00114 | 13 |
| AX-157979600 | 5 | 50.209 | KV453028.1 | 8852389 | 13-scf00114 | 13 |
| AX-157855291 | 5 | 50.209 | KV453028.1 | 8870752 | 13-scf00114 | 13 |
| AX-157884390 | 5 | 50.209 | KV453028.1 | 8871414 | 13-scf00114 | 13 |
| AX-157855296 | 5 | 50.209 | KV453028.1 | 8892690 | 13-scf00114 | 13 |
| AX-158390430 | 5 | 50.209 | KV453028.1 | 8892988 | 13-scf00114 | 13 |
| AX-157979632 | 5 | 50.209 | KV453028.1 | 8893568 | 13-scf00114 | 13 |
| AX-157979637 | 5 | 50.209 | KV453028.1 | 8899466 | 13-scf00114 | 13 |
| AX-157979645 | 5 | 50.209 | KV453028.1 | 8909102 | 13-scf00114 | 13 |
| AX-157979646 | 5 | 50.209 | KV453028.1 | 8915097 | 13-scf00114 | 13 |
| AX-157756379 | 5 | 50.209 | KV453028.1 | 8920389 | 13-scf00114 | 13 |
| AX-157979654 | 5 | 50.209 | KV453028.1 | 8924606 | 13-scf00114 | 13 |
| AX-157979656 | 5 | 50.209 | KV453028.1 | 8930478 | 13-scf00114 | 13 |
| AX-157979659 | 5 | 50.209 | KV453028.1 | 8936080 | 13-scf00114 | 13 |
| AX-157979660 | 5 | 50.209 | KV453028.1 | 8936467 | 13-scf00114 | 13 |
| AX-157817532 | 5 | 50.209 | KV453028.1 | 8939255 | 13-scf00114 | 13 |
| AX-157979661 | 5 | 50.209 | KV453028.1 | 8939887 | 13-scf00114 | 13 |
| AX-157979667 | 5 | 50.209 | KV453028.1 | 8946431 | 13-scf00114 | 13 |
| AX-157714355 | 5 | 50.209 | KV453028.1 | 8948729 | 13-scf00114 | 13 |
| AX-158406861 | 5 | 50.209 | KV453028.1 | 8948796 | 13-scf00114 | 13 |
| AX-157743570 | 5 | 50.209 | KV453028.1 | 8949996 | 13-scf00114 | 13 |
| AX-157715768 | 5 | 50.209 | KV453028.1 | 8951128 | 13-scf00114 | 13 |
| AX-157817534 | 5 | 50.209 | KV453028.1 | 8951214 | 13-scf00114 | 13 |
| AX-157979669 | 5 | 50.209 | KV453028.1 | 8951923 | 13-scf00114 | 13 |
| AX-157979670 | 5 | 50.209 | KV453028.1 | 8953377 | 13-scf00114 | 13 |
| AX-157979673 | 5 | 50.209 | KV453028.1 | 8955119 | 13-scf00114 | 13 |
| AX-157979675 | 5 | 50.209 | KV453028.1 | 8955722 | 13-scf00114 | 13 |
| AX-157817536 | 5 | 50.209 | KV453028.1 | 8959450 | 13-scf00114 | 13 |
| AX-157884392 | 5 | 50.209 | KV453028.1 | 8965787 | 13-scf00114 | 13 |
| AX-157979679 | 5 | 50.209 | KV453028.1 | 8965996 | 13-scf00114 | 13 |
| AX-157979680 | 5 | 50.209 | KV453028.1 | 8971832 | 13-scf00114 | 13 |
| AX-157855304 | 5 | 50.209 | KV453028.1 | 8974264 | 13-scf00114 | 13 |
| AX-157979685 | 5 | 50.209 | KV453028.1 | 8979175 | 13-scf00114 | 13 |
| AX-157979689 | 5 | 50.209 | KV453028.1 | 8980793 | 13-scf00114 | 13 |
| AX-157979695 | 5 | 50.209 | KV453028.1 | 8984207 | 13-scf00114 | 13 |
| AX-157855305 | 5 | 50.209 | KV453028.1 | 8985125 | 13-scf00114 | 13 |

|              |   |        |            |         |             |    |
|--------------|---|--------|------------|---------|-------------|----|
| AX-157979700 | 5 | 50.209 | KV453028.1 | 8996911 | 13-scf00114 | 13 |
| AX-157817543 | 5 | 50.209 | KV453028.1 | 8998623 | 13-scf00114 | 13 |
| AX-157979701 | 5 | 50.209 | KV453028.1 | 8999748 | 13-scf00114 | 13 |
| AX-157979702 | 5 | 50.209 | KV453028.1 | 9001517 | 13-scf00114 | 13 |
| AX-157884393 | 5 | 50.209 | KV453028.1 | 9006722 | 13-scf00114 | 13 |
| AX-158406862 | 5 | 50.209 | KV453028.1 | 9012383 | 13-scf00114 | 13 |
| AX-157817546 | 5 | 50.209 | KV453028.1 | 9020095 | 13-scf00114 | 13 |
| AX-157855308 | 5 | 50.209 | KV453028.1 | 9020675 | 13-scf00114 | 13 |
| AX-157979709 | 5 | 50.209 | KV453028.1 | 9023314 | 13-scf00114 | 13 |
| AX-158406863 | 5 | 50.209 | KV453028.1 | 9026147 | 13-scf00114 | 13 |
| AX-157817548 | 5 | 50.209 | KV453028.1 | 9027297 | 13-scf00114 | 13 |
| AX-157817551 | 5 | 50.209 | KV453028.1 | 9035053 | 13-scf00114 | 13 |
| AX-157817552 | 5 | 50.209 | KV453028.1 | 9035576 | 13-scf00114 | 13 |
| AX-157862882 | 5 | 50.209 | KV453028.1 | 9036576 | 13-scf00114 | 13 |
| AX-157722762 | 5 | 50.209 | KV453028.1 | 9039385 | 13-scf00114 | 13 |
| AX-157979713 | 5 | 50.209 | KV453028.1 | 9040252 | 13-scf00114 | 13 |
| AX-157753140 | 5 | 50.209 | KV453028.1 | 9046625 | 13-scf00114 | 13 |
| AX-157855311 | 5 | 50.209 | KV453028.1 | 9049430 | 13-scf00114 | 13 |
| AX-157817554 | 5 | 50.209 | KV453028.1 | 9052968 | 13-scf00114 | 13 |
| AX-157979723 | 5 | 50.209 | KV453028.1 | 9088201 | 13-scf00114 | 13 |
| AX-157979725 | 5 | 50.209 | KV453028.1 | 9090950 | 13-scf00114 | 13 |
| AX-157979728 | 5 | 50.209 | KV453028.1 | 9102944 | 13-scf00114 | 13 |
| AX-157979730 | 5 | 50.209 | KV453028.1 | 9108445 | 13-scf00114 | 13 |
| AX-157979732 | 5 | 50.209 | KV453028.1 | 9111022 | 13-scf00114 | 13 |
| AX-157979737 | 5 | 50.209 | KV453028.1 | 9115482 | 13-scf00114 | 13 |
| AX-157979738 | 5 | 50.209 | KV453028.1 | 9117417 | 13-scf00114 | 13 |
| AX-157817556 | 5 | 50.209 | KV453028.1 | 9122876 | 13-scf00114 | 13 |
| AX-157979741 | 5 | 50.209 | KV453028.1 | 9125543 | 13-scf00114 | 13 |
| AX-157979742 | 5 | 50.209 | KV453028.1 | 9127005 | 13-scf00114 | 13 |
| AX-157979745 | 5 | 50.209 | KV453028.1 | 9128028 | 13-scf00114 | 13 |
| AX-157754275 | 5 | 50.209 | KV453028.1 | 9131276 | 13-scf00114 | 13 |
| AX-157979748 | 5 | 50.209 | KV453028.1 | 9145521 | 13-scf00114 | 13 |
| AX-157755427 | 5 | 50.209 | KV453028.1 | 9146124 | 13-scf00114 | 13 |
| AX-157979750 | 5 | 50.209 | KV453028.1 | 9146496 | 13-scf00114 | 13 |
| AX-157855315 | 5 | 50.209 | KV453028.1 | 9147089 | 13-scf00114 | 13 |
| AX-157979752 | 5 | 50.209 | KV453028.1 | 9148785 | 13-scf00114 | 13 |
| AX-157855316 | 5 | 50.209 | KV453028.1 | 9153535 | 13-scf00114 | 13 |
| AX-157884396 | 5 | 50.209 | KV453028.1 | 9153680 | 13-scf00114 | 13 |
| AX-157855318 | 5 | 50.209 | KV453028.1 | 9157621 | 13-scf00114 | 13 |
| AX-157817557 | 5 | 50.209 | KV453028.1 | 9158945 | 13-scf00114 | 13 |
| AX-157979756 | 5 | 50.209 | KV453028.1 | 9160000 | 13-scf00114 | 13 |
| AX-157979758 | 5 | 50.209 | KV453028.1 | 9161022 | 13-scf00114 | 13 |
| AX-157979759 | 5 | 50.209 | KV453028.1 | 9161971 | 13-scf00114 | 13 |
| AX-157979761 | 5 | 50.209 | KV453028.1 | 9163120 | 13-scf00114 | 13 |
| AX-157979766 | 5 | 50.209 | KV453028.1 | 9176064 | 13-scf00114 | 13 |
| AX-157979768 | 5 | 50.209 | KV453028.1 | 9177961 | 13-scf00114 | 13 |
| AX-157753686 | 5 | 50.209 | KV453028.1 | 9184766 | 13-scf00114 | 13 |
| AX-157855319 | 5 | 50.209 | KV453028.1 | 9188159 | 13-scf00114 | 13 |
| AX-158406867 | 5 | 50.209 | KV453028.1 | 9197042 | 13-scf00114 | 13 |
| AX-157749141 | 5 | 50.209 | KV453028.1 | 9198589 | 13-scf00114 | 13 |
| AX-157979775 | 5 | 50.209 | KV453028.1 | 9200723 | 13-scf00114 | 13 |

|              |   |        |            |         |             |    |
|--------------|---|--------|------------|---------|-------------|----|
| AX-157979778 | 5 | 50.209 | KV453028.1 | 9206915 | 13-scf00114 | 13 |
| AX-157979779 | 5 | 50.209 | KV453028.1 | 9208280 | 13-scf00114 | 13 |
| AX-157855320 | 5 | 50.209 | KV453028.1 | 9210565 | 13-scf00114 | 13 |
| AX-157979782 | 5 | 50.209 | KV453028.1 | 9210888 | 13-scf00114 | 13 |
| AX-157855321 | 5 | 50.209 | KV453028.1 | 9210945 | 13-scf00114 | 13 |
| AX-157855322 | 5 | 50.209 | KV453028.1 | 9211260 | 13-scf00114 | 13 |
| AX-157979784 | 5 | 50.209 | KV453028.1 | 9211841 | 13-scf00114 | 13 |
| AX-157855323 | 5 | 50.209 | KV453028.1 | 9213777 | 13-scf00114 | 13 |
| AX-157979788 | 5 | 50.209 | KV453028.1 | 9215119 | 13-scf00114 | 13 |
| AX-157855326 | 5 | 50.209 | KV453028.1 | 9215998 | 13-scf00114 | 13 |
| AX-157855327 | 5 | 50.209 | KV453028.1 | 9216075 | 13-scf00114 | 13 |
| AX-157979805 | 5 | 50.209 | KV453028.1 | 9241347 | 13-scf00114 | 13 |
| AX-157855336 | 5 | 50.209 | KV453028.1 | 9243880 | 13-scf00114 | 13 |
| AX-157884398 | 5 | 50.209 | KV453028.1 | 9247717 | 13-scf00114 | 13 |
| AX-157979808 | 5 | 50.209 | KV453028.1 | 9247823 | 13-scf00114 | 13 |
| AX-157855341 | 5 | 50.209 | KV453028.1 | 9251347 | 13-scf00114 | 13 |
| AX-157979817 | 5 | 50.209 | KV453028.1 | 9253632 | 13-scf00114 | 13 |
| AX-157884399 | 5 | 50.209 | KV453028.1 | 9253989 | 13-scf00114 | 13 |
| AX-157979818 | 5 | 50.209 | KV453028.1 | 9254128 | 13-scf00114 | 13 |
| AX-157703386 | 5 | 50.209 | KV453028.1 | 9254659 | 13-scf00114 | 13 |
| AX-157855344 | 5 | 50.209 | KV453028.1 | 9255914 | 13-scf00114 | 13 |
| AX-157979821 | 5 | 50.209 | KV453028.1 | 9257139 | 13-scf00114 | 13 |
| AX-157855346 | 5 | 50.209 | KV453028.1 | 9258619 | 13-scf00114 | 13 |
| AX-157979826 | 5 | 50.209 | KV453028.1 | 9270844 | 13-scf00114 | 13 |
| AX-157755122 | 5 | 50.209 | KV453028.1 | 9306278 | 13-scf00114 | 13 |
| AX-157979836 | 5 | 50.209 | KV453028.1 | 9311219 | 13-scf00114 | 13 |
| AX-157979837 | 5 | 50.209 | KV453028.1 | 9312728 | 13-scf00114 | 13 |
| AX-157979840 | 5 | 50.209 | KV453028.1 | 9315525 | 13-scf00114 | 13 |
| AX-157855348 | 5 | 50.209 | KV453028.1 | 9324726 | 13-scf00114 | 13 |
| AX-157979848 | 5 | 50.209 | KV453028.1 | 9329807 | 13-scf00114 | 13 |
| AX-157979854 | 5 | 50.209 | KV453028.1 | 9339491 | 13-scf00114 | 13 |
| AX-157979857 | 5 | 50.209 | KV453028.1 | 9346551 | 13-scf00114 | 13 |
| AX-157979858 | 5 | 50.209 | KV453028.1 | 9348414 | 13-scf00114 | 13 |
| AX-157979859 | 5 | 50.209 | KV453028.1 | 9348972 | 13-scf00114 | 13 |
| AX-157707225 | 5 | 50.209 | KV453028.1 | 9351024 | 13-scf00114 | 13 |
| AX-157979865 | 5 | 50.209 | KV453028.1 | 9359049 | 13-scf00114 | 13 |
| AX-157979867 | 5 | 50.209 | KV453028.1 | 9364897 | 13-scf00114 | 13 |
| AX-157979868 | 5 | 50.209 | KV453028.1 | 9365579 | 13-scf00114 | 13 |
| AX-157979874 | 5 | 50.209 | KV453028.1 | 9371848 | 13-scf00114 | 13 |
| AX-157979875 | 5 | 50.209 | KV453028.1 | 9374765 | 13-scf00114 | 13 |
| AX-157979877 | 5 | 50.209 | KV453028.1 | 9375365 | 13-scf00114 | 13 |
| AX-157979878 | 5 | 50.209 | KV453028.1 | 9377323 | 13-scf00114 | 13 |
| AX-157979887 | 5 | 50.209 | KV453028.1 | 9401334 | 13-scf00114 | 13 |
| AX-157979890 | 5 | 50.209 | KV453028.1 | 9414317 | 13-scf00114 | 13 |
| AX-157979892 | 5 | 50.209 | KV453028.1 | 9414829 | 13-scf00114 | 13 |
| AX-157979899 | 5 | 50.209 | KV453028.1 | 9424200 | 13-scf00114 | 13 |
| AX-157979902 | 5 | 50.209 | KV453028.1 | 9425082 | 13-scf00114 | 13 |
| AX-157855355 | 5 | 50.209 | KV453028.1 | 9425189 | 13-scf00114 | 13 |
| AX-158390433 | 5 | 50.209 | KV453028.1 | 9427516 | 13-scf00114 | 13 |
| AX-157884403 | 5 | 50.209 | KV453028.1 | 9429954 | 13-scf00114 | 13 |
| AX-157979918 | 5 | 50.209 | KV453028.1 | 9455326 | 13-scf00114 | 13 |



|              |   |        |            |         |             |    |
|--------------|---|--------|------------|---------|-------------|----|
| AX-157817568 | 5 | 50.209 | KV453028.1 | 9458889 | 13-scf00114 | 13 |
| AX-158406873 | 5 | 50.209 | KV453028.1 | 9472765 | 13-scf00114 | 13 |
| AX-157979926 | 5 | 50.209 | KV453028.1 | 9478724 | 13-scf00114 | 13 |
| AX-157979930 | 5 | 50.209 | KV453028.1 | 9482287 | 13-scf00114 | 13 |
| AX-157979936 | 5 | 50.209 | KV453028.1 | 9493768 | 13-scf00114 | 13 |
| AX-157979944 | 5 | 50.209 | KV453028.1 | 9511564 | 13-scf00114 | 13 |
| AX-158422148 | 5 | 50.209 | KV453028.1 | 9513470 | 13-scf00114 | 13 |
| AX-157979947 | 5 | 50.209 | KV453028.1 | 9514108 | 13-scf00114 | 13 |
| AX-157855359 | 5 | 50.209 | KV453028.1 | 9523891 | 13-scf00114 | 13 |
| AX-157855361 | 5 | 50.209 | KV453028.1 | 9526896 | 13-scf00114 | 13 |
| AX-157855362 | 5 | 50.209 | KV453028.1 | 9528363 | 13-scf00114 | 13 |
| AX-157695850 | 5 | 50.209 | KV453028.1 | 9532660 | 13-scf00114 | 13 |
| AX-157855363 | 5 | 50.209 | KV453028.1 | 9535744 | 13-scf00114 | 13 |
| AX-157979970 | 5 | 50.209 | KV453028.1 | 9551792 | 13-scf00114 | 13 |
| AX-157979971 | 5 | 50.209 | KV453028.1 | 9553938 | 13-scf00114 | 13 |
| AX-157740904 | 5 | 50.209 | KV453028.1 | 9561142 | 13-scf00114 | 13 |
| AX-157979979 | 5 | 50.209 | KV453028.1 | 9567516 | 13-scf00114 | 13 |
| AX-157979983 | 5 | 50.209 | KV453028.1 | 9569000 | 13-scf00114 | 13 |
| AX-157979986 | 5 | 50.209 | KV453028.1 | 9570597 | 13-scf00114 | 13 |
| AX-157979991 | 5 | 50.209 | KV453028.1 | 9575266 | 13-scf00114 | 13 |
| AX-158406876 | 5 | 50.209 | KV453028.1 | 9577201 | 13-scf00114 | 13 |
| AX-157979994 | 5 | 50.209 | KV453028.1 | 9589171 | 13-scf00114 | 13 |
| AX-157980002 | 5 | 50.209 | KV453028.1 | 9597815 | 13-scf00114 | 13 |
| AX-157694782 | 5 | 50.209 | KV453028.1 | 9605380 | 13-scf00114 | 13 |
| AX-157855366 | 5 | 50.209 | KV453028.1 | 9607775 | 13-scf00114 | 13 |
| AX-158406877 | 5 | 50.209 | KV453028.1 | 9610693 | 13-scf00114 | 13 |
| AX-157749329 | 5 | 50.209 | KV453028.1 | 9613008 | 13-scf00114 | 13 |
| AX-157757723 | 5 | 50.209 | KV453028.1 | 9614206 | 13-scf00114 | 13 |
| AX-157980010 | 5 | 50.209 | KV453028.1 | 9616095 | 13-scf00114 | 13 |
| AX-157855368 | 5 | 50.209 | KV453028.1 | 9626699 | 13-scf00114 | 13 |
| AX-157980016 | 5 | 50.209 | KV453028.1 | 9628038 | 13-scf00114 | 13 |
| AX-157980020 | 5 | 50.209 | KV453028.1 | 9635293 | 13-scf00114 | 13 |
| AX-157980022 | 5 | 50.209 | KV453028.1 | 9635685 | 13-scf00114 | 13 |
| AX-157724923 | 5 | 50.209 | KV453028.1 | 9637033 | 13-scf00114 | 13 |
| AX-157980026 | 5 | 50.209 | KV453028.1 | 9643728 | 13-scf00114 | 13 |
| AX-157980040 | 5 | 50.209 | KV453028.1 | 9659403 | 13-scf00114 | 13 |
| AX-157855369 | 5 | 50.209 | KV453028.1 | 9660158 | 13-scf00114 | 13 |
| AX-157817580 | 5 | 50.209 | KV453028.1 | 9662769 | 13-scf00114 | 13 |
| AX-157884407 | 5 | 50.209 | KV453028.1 | 9668485 | 13-scf00114 | 13 |
| AX-157980045 | 5 | 50.209 | KV453028.1 | 9673824 | 13-scf00114 | 13 |
| AX-157980049 | 5 | 50.209 | KV453028.1 | 9683710 | 13-scf00114 | 13 |
| AX-157749426 | 5 | 50.209 | KV453028.1 | 9691493 | 13-scf00114 | 13 |
| AX-157980056 | 5 | 50.209 | KV453028.1 | 9692117 | 13-scf00114 | 13 |
| AX-157980057 | 5 | 50.209 | KV453028.1 | 9692675 | 13-scf00114 | 13 |
| AX-157980061 | 5 | 50.209 | KV453028.1 | 9698248 | 13-scf00114 | 13 |
| AX-157980062 | 5 | 50.209 | KV453028.1 | 9701339 | 13-scf00114 | 13 |
| AX-157980065 | 5 | 50.209 | KV453028.1 | 9702941 | 13-scf00114 | 13 |
| AX-157817582 | 5 | 50.209 | KV453028.1 | 9710851 | 13-scf00114 | 13 |
| AX-157980071 | 5 | 50.209 | KV453028.1 | 9713282 | 13-scf00114 | 13 |
| AX-157884410 | 5 | 50.209 | KV453028.1 | 9714354 | 13-scf00114 | 13 |
| AX-157695284 | 5 | 50.209 | KV453028.1 | 9724102 | 13-scf00114 | 13 |

|              |   |        |            |         |             |    |
|--------------|---|--------|------------|---------|-------------|----|
| AX-157980088 | 5 | 50.209 | KV453028.1 | 9725816 | 13-scf00114 | 13 |
| AX-157718515 | 5 | 50.209 | KV453028.1 | 9733095 | 13-scf00114 | 13 |
| AX-157980094 | 5 | 50.209 | KV453028.1 | 9735600 | 13-scf00114 | 13 |
| AX-157980097 | 5 | 50.209 | KV453028.1 | 9740490 | 13-scf00114 | 13 |
| AX-157980098 | 5 | 50.209 | KV453028.1 | 9741468 | 13-scf00114 | 13 |
| AX-157980101 | 5 | 50.209 | KV453028.1 | 9742649 | 13-scf00114 | 13 |
| AX-157855373 | 5 | 50.209 | KV453028.1 | 9744524 | 13-scf00114 | 13 |
| AX-157980103 | 5 | 50.209 | KV453028.1 | 9745178 | 13-scf00114 | 13 |
| AX-157980104 | 5 | 50.209 | KV453028.1 | 9745769 | 13-scf00114 | 13 |
| AX-157980105 | 5 | 50.209 | KV453028.1 | 9747503 | 13-scf00114 | 13 |
| AX-157980107 | 5 | 50.209 | KV453028.1 | 9748098 | 13-scf00114 | 13 |
| AX-157980108 | 5 | 50.209 | KV453028.1 | 9748553 | 13-scf00114 | 13 |
| AX-157980114 | 5 | 50.209 | KV453028.1 | 9753880 | 13-scf00114 | 13 |
| AX-157980115 | 5 | 50.209 | KV453028.1 | 9755639 | 13-scf00114 | 13 |
| AX-157980117 | 5 | 50.209 | KV453028.1 | 9761562 | 13-scf00114 | 13 |
| AX-157980118 | 5 | 50.209 | KV453028.1 | 9762418 | 13-scf00114 | 13 |
| AX-157817584 | 5 | 50.209 | KV453028.1 | 9778116 | 13-scf00114 | 13 |
| AX-157980137 | 5 | 50.209 | KV453028.1 | 9778947 | 13-scf00114 | 13 |
| AX-157817585 | 5 | 50.209 | KV453028.1 | 9780673 | 13-scf00114 | 13 |
| AX-157817586 | 5 | 50.209 | KV453028.1 | 9782009 | 13-scf00114 | 13 |
| AX-157980143 | 5 | 50.209 | KV453028.1 | 9782831 | 13-scf00114 | 13 |
| AX-157980144 | 5 | 50.209 | KV453028.1 | 9783605 | 13-scf00114 | 13 |
| AX-157884412 | 5 | 50.209 | KV453028.1 | 9785170 | 13-scf00114 | 13 |
| AX-157980146 | 5 | 50.209 | KV453028.1 | 9786723 | 13-scf00114 | 13 |
| AX-157722241 | 5 | 50.209 | KV453028.1 | 9786868 | 13-scf00114 | 13 |
| AX-157855375 | 5 | 50.209 | KV453028.1 | 9788982 | 13-scf00114 | 13 |
| AX-157855376 | 5 | 50.209 | KV453028.1 | 9804775 | 13-scf00114 | 13 |
| AX-157862883 | 5 | 50.209 | KV453028.1 | 9807849 | 13-scf00114 | 13 |
| AX-157980166 | 5 | 50.209 | KV453028.1 | 9813221 | 13-scf00114 | 13 |
| AX-158383207 | 5 | 50.209 | KV453028.1 | 9815365 | 13-scf00114 | 13 |
| AX-157980168 | 5 | 50.209 | KV453028.1 | 9815689 | 13-scf00114 | 13 |
| AX-157980169 | 5 | 50.209 | KV453028.1 | 9820681 | 13-scf00114 | 13 |
| AX-157980172 | 5 | 50.209 | KV453028.1 | 9826060 | 13-scf00114 | 13 |
| AX-157980180 | 5 | 50.209 | KV453028.1 | 9829639 | 13-scf00114 | 13 |
| AX-157980181 | 5 | 50.209 | KV453028.1 | 9830178 | 13-scf00114 | 13 |
| AX-157980183 | 5 | 50.209 | KV453028.1 | 9831459 | 13-scf00114 | 13 |
| AX-157709297 | 5 | 50.209 | KV453028.1 | 9835822 | 13-scf00114 | 13 |
| AX-157980184 | 5 | 50.209 | KV453028.1 | 9835967 | 13-scf00114 | 13 |
| AX-157884416 | 5 | 50.209 | KV453028.1 | 9846034 | 13-scf00114 | 13 |
| AX-157817597 | 5 | 50.209 | KV453028.1 | 9846233 | 13-scf00114 | 13 |
| AX-157980191 | 5 | 50.209 | KV453028.1 | 9848543 | 13-scf00114 | 13 |
| AX-157980199 | 5 | 50.209 | KV453028.1 | 9861243 | 13-scf00114 | 13 |
| AX-157980206 | 5 | 50.209 | KV453028.1 | 9871198 | 13-scf00114 | 13 |
| AX-157817602 | 5 | 50.209 | KV453028.1 | 9875567 | 13-scf00114 | 13 |
| AX-157980212 | 5 | 50.209 | KV453028.1 | 9878800 | 13-scf00114 | 13 |
| AX-157980214 | 5 | 50.209 | KV453028.1 | 9879596 | 13-scf00114 | 13 |
| AX-157980219 | 5 | 50.209 | KV453028.1 | 9891615 | 13-scf00114 | 13 |
| AX-157855387 | 5 | 50.209 | KV453028.1 | 9898967 | 13-scf00114 | 13 |
| AX-157855388 | 5 | 50.209 | KV453028.1 | 9899765 | 13-scf00114 | 13 |
| AX-157980227 | 5 | 50.209 | KV453028.1 | 9900160 | 13-scf00114 | 13 |
| AX-157980228 | 5 | 50.209 | KV453028.1 | 9900608 | 13-scf00114 | 13 |

|              |   |        |            |          |             |    |
|--------------|---|--------|------------|----------|-------------|----|
| AX-157855389 | 5 | 50.209 | KV453028.1 | 9901255  | 13-scf00114 | 13 |
| AX-157817606 | 5 | 50.209 | KV453028.1 | 9916932  | 13-scf00114 | 13 |
| AX-157980240 | 5 | 50.209 | KV453028.1 | 9916980  | 13-scf00114 | 13 |
| AX-157693621 | 5 | 50.209 | KV453028.1 | 9930961  | 13-scf00114 | 13 |
| AX-157980260 | 5 | 50.209 | KV453028.1 | 9944877  | 13-scf00114 | 13 |
| AX-157980262 | 5 | 50.209 | KV453028.1 | 9946736  | 13-scf00114 | 13 |
| AX-157740607 | 5 | 50.209 | KV453028.1 | 9948349  | 13-scf00114 | 13 |
| AX-157980263 | 5 | 50.209 | KV453028.1 | 9948414  | 13-scf00114 | 13 |
| AX-157817613 | 5 | 50.209 | KV453028.1 | 9968542  | 13-scf00114 | 13 |
| AX-157717191 | 5 | 50.209 | KV453028.1 | 9971890  | 13-scf00114 | 13 |
| AX-157884420 | 5 | 50.209 | KV453028.1 | 9980528  | 13-scf00114 | 13 |
| AX-157817618 | 5 | 50.209 | KV453028.1 | 9984146  | 13-scf00114 | 13 |
| AX-157817620 | 5 | 50.209 | KV453028.1 | 9989420  | 13-scf00114 | 13 |
| AX-157980295 | 5 | 50.209 | KV453028.1 | 9997346  | 13-scf00114 | 13 |
| AX-157980296 | 5 | 50.209 | KV453028.1 | 9997807  | 13-scf00114 | 13 |
| AX-157980301 | 5 | 50.209 | KV453028.1 | 10004363 | 13-scf00114 | 13 |
| AX-157980307 | 5 | 50.209 | KV453028.1 | 10011980 | 13-scf00114 | 13 |
| AX-157980310 | 5 | 50.209 | KV453028.1 | 10017631 | 13-scf00114 | 13 |
| AX-157980311 | 5 | 50.209 | KV453028.1 | 10019268 | 13-scf00114 | 13 |
| AX-157980313 | 5 | 50.209 | KV453028.1 | 10020438 | 13-scf00114 | 13 |
| AX-157980315 | 5 | 50.209 | KV453028.1 | 10020855 | 13-scf00114 | 13 |
| AX-157980316 | 5 | 50.209 | KV453028.1 | 10021872 | 13-scf00114 | 13 |
| AX-157980321 | 5 | 50.209 | KV453028.1 | 10026932 | 13-scf00114 | 13 |
| AX-157980323 | 5 | 50.209 | KV453028.1 | 10027528 | 13-scf00114 | 13 |
| AX-157980324 | 5 | 50.209 | KV453028.1 | 10028651 | 13-scf00114 | 13 |
| AX-157980325 | 5 | 50.209 | KV453028.1 | 10029157 | 13-scf00114 | 13 |
| AX-157980328 | 5 | 50.209 | KV453028.1 | 10030145 | 13-scf00114 | 13 |
| AX-157980330 | 5 | 50.209 | KV453028.1 | 10030626 | 13-scf00114 | 13 |
| AX-157750126 | 5 | 50.209 | KV453028.1 | 10034510 | 13-scf00114 | 13 |
| AX-157980333 | 5 | 50.209 | KV453028.1 | 10034862 | 13-scf00114 | 13 |
| AX-157980335 | 5 | 50.209 | KV453028.1 | 10036138 | 13-scf00114 | 13 |
| AX-157980337 | 5 | 50.209 | KV453028.1 | 10039006 | 13-scf00114 | 13 |
| AX-157980340 | 5 | 50.209 | KV453028.1 | 10041284 | 13-scf00114 | 13 |
| AX-157980346 | 5 | 50.209 | KV453028.1 | 10047038 | 13-scf00114 | 13 |
| AX-157817625 | 5 | 50.209 | KV453028.1 | 10050951 | 13-scf00114 | 13 |
| AX-157980351 | 5 | 50.209 | KV453028.1 | 10053752 | 13-scf00114 | 13 |
| AX-157980352 | 5 | 50.209 | KV453028.1 | 10055897 | 13-scf00114 | 13 |
| AX-157980355 | 5 | 50.209 | KV453028.1 | 10057569 | 13-scf00114 | 13 |
| AX-157980356 | 5 | 50.209 | KV453028.1 | 10058136 | 13-scf00114 | 13 |
| AX-157980359 | 5 | 50.209 | KV453028.1 | 10062077 | 13-scf00114 | 13 |
| AX-157980363 | 5 | 50.209 | KV453028.1 | 10067441 | 13-scf00114 | 13 |
| AX-157980364 | 5 | 50.209 | KV453028.1 | 10068669 | 13-scf00114 | 13 |
| AX-157980366 | 5 | 50.209 | KV453028.1 | 10069019 | 13-scf00114 | 13 |
| AX-157980375 | 5 | 50.209 | KV453028.1 | 10078737 | 13-scf00114 | 13 |
| AX-157980386 | 5 | 50.209 | KV453028.1 | 10090531 | 13-scf00114 | 13 |
| AX-157980387 | 5 | 50.209 | KV453028.1 | 10091887 | 13-scf00114 | 13 |
| AX-157980392 | 5 | 50.209 | KV453028.1 | 10094993 | 13-scf00114 | 13 |
| AX-157980416 | 5 | 50.209 | KV453028.1 | 10122428 | 13-scf00114 | 13 |
| AX-157980418 | 5 | 50.209 | KV453028.1 | 10122867 | 13-scf00114 | 13 |
| AX-157980421 | 5 | 50.209 | KV453028.1 | 10124588 | 13-scf00114 | 13 |
| AX-157980426 | 5 | 50.209 | KV453028.1 | 10129225 | 13-scf00114 | 13 |

|              |   |        |            |          |             |    |
|--------------|---|--------|------------|----------|-------------|----|
| AX-157855420 | 5 | 50.209 | KV453028.1 | 10138362 | 13-scf00114 | 13 |
| AX-157980432 | 5 | 50.209 | KV453028.1 | 10140684 | 13-scf00114 | 13 |
| AX-157980436 | 5 | 50.209 | KV453028.1 | 10142124 | 13-scf00114 | 13 |
| AX-157980439 | 5 | 50.209 | KV453028.1 | 10143843 | 13-scf00114 | 13 |
| AX-157980442 | 5 | 50.209 | KV453028.1 | 10149531 | 13-scf00114 | 13 |
| AX-157980443 | 5 | 50.209 | KV453028.1 | 10151349 | 13-scf00114 | 13 |
| AX-157980444 | 5 | 50.209 | KV453028.1 | 10151910 | 13-scf00114 | 13 |
| AX-157980446 | 5 | 50.209 | KV453028.1 | 10152336 | 13-scf00114 | 13 |
| AX-157980454 | 5 | 50.209 | KV453028.1 | 10161428 | 13-scf00114 | 13 |
| AX-157980455 | 5 | 50.209 | KV453028.1 | 10161924 | 13-scf00114 | 13 |
| AX-157980456 | 5 | 50.209 | KV453028.1 | 10162293 | 13-scf00114 | 13 |
| AX-157980463 | 5 | 50.209 | KV453028.1 | 10168656 | 13-scf00114 | 13 |
| AX-157980472 | 5 | 50.209 | KV453028.1 | 10173638 | 13-scf00114 | 13 |
| AX-157980476 | 5 | 50.209 | KV453028.1 | 10174820 | 13-scf00114 | 13 |
| AX-157980480 | 5 | 50.209 | KV453028.1 | 10176982 | 13-scf00114 | 13 |
| AX-157817634 | 5 | 50.209 | KV453028.1 | 10177033 | 13-scf00114 | 13 |
| AX-157749066 | 5 | 50.209 | KV453028.1 | 10181483 | 13-scf00114 | 13 |
| AX-157980486 | 5 | 50.209 | KV453028.1 | 10185084 | 13-scf00114 | 13 |
| AX-157980487 | 5 | 50.209 | KV453028.1 | 10185420 | 13-scf00114 | 13 |
| AX-157980488 | 5 | 50.209 | KV453028.1 | 10187278 | 13-scf00114 | 13 |
| AX-157980490 | 5 | 50.209 | KV453028.1 | 10190645 | 13-scf00114 | 13 |
| AX-157980492 | 5 | 50.209 | KV453028.1 | 10192854 | 13-scf00114 | 13 |
| AX-157980494 | 5 | 50.209 | KV453028.1 | 10194205 | 13-scf00114 | 13 |
| AX-157817636 | 5 | 50.209 | KV453028.1 | 10202980 | 13-scf00114 | 13 |
| AX-157980497 | 5 | 50.209 | KV453028.1 | 10209107 | 13-scf00114 | 13 |
| AX-157980499 | 5 | 50.209 | KV453028.1 | 10212051 | 13-scf00114 | 13 |
| AX-157980502 | 5 | 50.209 | KV453028.1 | 10221494 | 13-scf00114 | 13 |
| AX-157746675 | 5 | 50.209 | KV453028.1 | 10237113 | 13-scf00114 | 13 |
| AX-157980512 | 5 | 50.209 | KV453028.1 | 10240253 | 13-scf00114 | 13 |
| AX-157980516 | 5 | 50.209 | KV453028.1 | 10255900 | 13-scf00114 | 13 |
| AX-157980529 | 5 | 50.209 | KV453028.1 | 10266501 | 13-scf00114 | 13 |
| AX-157980530 | 5 | 50.209 | KV453028.1 | 10266852 | 13-scf00114 | 13 |
| AX-157980574 | 5 | 50.209 | KV453028.1 | 10323102 | 13-scf00114 | 13 |
| AX-157980582 | 5 | 50.209 | KV453028.1 | 10328744 | 13-scf00114 | 13 |
| AX-157980583 | 5 | 50.209 | KV453028.1 | 10332082 | 13-scf00114 | 13 |
| AX-157744612 | 5 | 50.209 | KV453028.1 | 10332512 | 13-scf00114 | 13 |
| AX-157753392 | 5 | 50.209 | KV453028.1 | 10339633 | 13-scf00114 | 13 |
| AX-157980588 | 5 | 50.209 | KV453028.1 | 10350051 | 13-scf00114 | 13 |
| AX-157980590 | 5 | 50.209 | KV453028.1 | 10350576 | 13-scf00114 | 13 |
| AX-157980595 | 5 | 50.209 | KV453028.1 | 10354474 | 13-scf00114 | 13 |
| AX-157980597 | 5 | 50.209 | KV453028.1 | 10356381 | 13-scf00114 | 13 |
| AX-157715971 | 5 | 50.209 | KV453028.1 | 10359320 | 13-scf00114 | 13 |
| AX-157980600 | 5 | 50.209 | KV453028.1 | 10366181 | 13-scf00114 | 13 |
| AX-157980609 | 5 | 50.209 | KV453028.1 | 10386521 | 13-scf00114 | 13 |
| AX-157749045 | 5 | 50.209 | KV453028.1 | 10388497 | 13-scf00114 | 13 |
| AX-157980614 | 5 | 50.209 | KV453028.1 | 10399526 | 13-scf00114 | 13 |
| AX-157980619 | 5 | 50.209 | KV453028.1 | 10410361 | 13-scf00114 | 13 |
| AX-157869734 | 5 | 50.209 | KV453028.1 | 10424811 | 13-scf00114 | 13 |
| AX-157980626 | 5 | 50.209 | KV453028.1 | 10434148 | 13-scf00114 | 13 |
| AX-157980635 | 5 | 50.209 | KV453028.1 | 10455590 | 13-scf00114 | 13 |
| AX-157980649 | 5 | 50.209 | KV453028.1 | 10475847 | 13-scf00114 | 13 |

|              |   |        |            |          |             |    |
|--------------|---|--------|------------|----------|-------------|----|
| AX-157980670 | 5 | 50.209 | KV453028.1 | 10512774 | 13-scf00114 | 13 |
| AX-157980673 | 5 | 50.209 | KV453028.1 | 10514038 | 13-scf00114 | 13 |
| AX-157980674 | 5 | 50.209 | KV453028.1 | 10514984 | 13-scf00114 | 13 |
| AX-157980675 | 5 | 50.209 | KV453028.1 | 10515408 | 13-scf00114 | 13 |
| AX-157980685 | 5 | 50.209 | KV453028.1 | 10523499 | 13-scf00114 | 13 |
| AX-157980688 | 5 | 50.209 | KV453028.1 | 10528897 | 13-scf00114 | 13 |
| AX-157753979 | 5 | 50.209 | KV453028.1 | 10536118 | 13-scf00114 | 13 |
| AX-157980697 | 5 | 50.209 | KV453028.1 | 10537774 | 13-scf00114 | 13 |
| AX-157742147 | 5 | 50.209 | KV453028.1 | 10539561 | 13-scf00114 | 13 |
| AX-157980698 | 5 | 50.209 | KV453028.1 | 10541125 | 13-scf00114 | 13 |
| AX-157980699 | 5 | 50.209 | KV453028.1 | 10541637 | 13-scf00114 | 13 |
| AX-157747159 | 5 | 50.209 | KV453028.1 | 10556306 | 13-scf00114 | 13 |
| AX-157745324 | 5 | 50.209 | KV453028.1 | 10557440 | 13-scf00114 | 13 |
| AX-157980710 | 5 | 50.209 | KV453028.1 | 10563115 | 13-scf00114 | 13 |
| AX-158406915 | 5 | 50.209 | KV453028.1 | 10583476 | 13-scf00114 | 13 |
| AX-157980716 | 5 | 50.209 | KV453028.1 | 10592291 | 13-scf00114 | 13 |
| AX-157980726 | 5 | 50.209 | KV453028.1 | 10624584 | 13-scf00114 | 13 |
| AX-157980728 | 5 | 50.209 | KV453028.1 | 10631150 | 13-scf00114 | 13 |
| AX-157980730 | 5 | 50.209 | KV453028.1 | 10633527 | 13-scf00114 | 13 |
| AX-157980747 | 5 | 50.209 | KV453028.1 | 10658717 | 13-scf00114 | 13 |
| AX-157980749 | 5 | 50.209 | KV453028.1 | 10659364 | 13-scf00114 | 13 |
| AX-157980771 | 5 | 50.209 | KV453028.1 | 10688209 | 13-scf00114 | 13 |
| AX-157855509 | 5 | 50.209 | KV453028.1 | 10692239 | 13-scf00114 | 13 |
| AX-157980777 | 5 | 50.209 | KV453028.1 | 10694398 | 13-scf00114 | 13 |
| AX-157744499 | 5 | 50.209 | KV453028.1 | 10698879 | 13-scf00114 | 13 |
| AX-157980782 | 5 | 50.209 | KV453028.1 | 10703219 | 13-scf00114 | 13 |
| AX-157980784 | 5 | 50.209 | KV453028.1 | 10704179 | 13-scf00114 | 13 |
| AX-157817691 | 5 | 50.209 | KV453028.1 | 10706483 | 13-scf00114 | 13 |
| AX-157980785 | 5 | 50.209 | KV453028.1 | 10714784 | 13-scf00114 | 13 |
| AX-157980791 | 5 | 50.209 | KV453028.1 | 10730754 | 13-scf00114 | 13 |
| AX-157980803 | 5 | 50.209 | KV453028.1 | 10747590 | 13-scf00114 | 13 |
| AX-157980812 | 5 | 50.209 | KV453028.1 | 10753460 | 13-scf00114 | 13 |
| AX-157980815 | 5 | 50.209 | KV453028.1 | 10756278 | 13-scf00114 | 13 |
| AX-157980816 | 5 | 50.209 | KV453028.1 | 10756820 | 13-scf00114 | 13 |
| AX-157817694 | 5 | 50.209 | KV453028.1 | 10757034 | 13-scf00114 | 13 |
| AX-157855517 | 5 | 50.209 | KV453028.1 | 10760421 | 13-scf00114 | 13 |
| AX-157980818 | 5 | 50.209 | KV453028.1 | 10760683 | 13-scf00114 | 13 |
| AX-157980821 | 5 | 50.209 | KV453028.1 | 10764097 | 13-scf00114 | 13 |
| AX-157755746 | 5 | 50.209 | KV453028.1 | 10764719 | 13-scf00114 | 13 |
| AX-157980826 | 5 | 50.209 | KV453028.1 | 10771028 | 13-scf00114 | 13 |
| AX-157980828 | 5 | 50.209 | KV453028.1 | 10773408 | 13-scf00114 | 13 |
| AX-157817695 | 5 | 50.209 | KV453028.1 | 10775648 | 13-scf00114 | 13 |
| AX-157980831 | 5 | 50.209 | KV453028.1 | 10780053 | 13-scf00114 | 13 |
| AX-157980835 | 5 | 50.209 | KV453028.1 | 10784748 | 13-scf00114 | 13 |
| AX-157980845 | 5 | 50.209 | KV453028.1 | 10802323 | 13-scf00114 | 13 |
| AX-157980849 | 5 | 50.209 | KV453028.1 | 10807953 | 13-scf00114 | 13 |
| AX-157713755 | 5 | 50.209 | KV453028.1 | 10817666 | 13-scf00114 | 13 |
| AX-157725264 | 5 | 50.209 | KV453028.1 | 10819929 | 13-scf00114 | 13 |
| AX-157980856 | 5 | 50.209 | KV453028.1 | 10820319 | 13-scf00114 | 13 |
| AX-157980857 | 5 | 50.209 | KV453028.1 | 10822330 | 13-scf00114 | 13 |
| AX-157980874 | 5 | 50.209 | KV453028.1 | 10841278 | 13-scf00114 | 13 |

|              |   |        |             |          |               |    |
|--------------|---|--------|-------------|----------|---------------|----|
| AX-157980875 | 5 | 50.209 | KV453028.1  | 10841653 | 13-scf00114   | 13 |
| AX-157980879 | 5 | 50.209 | KV453028.1  | 10844954 | 13-scf00114   | 13 |
| AX-157980884 | 5 | 50.209 | KV453028.1  | 10856099 | 13-scf00114   | 13 |
| AX-157980892 | 5 | 50.209 | KV453028.1  | 10886558 | 13-scf00114   | 13 |
| AX-157980928 | 5 | 50.209 | KV453028.1  | 10927975 | 13-scf00114   | 13 |
| AX-157980947 | 5 | 50.209 | KV453028.1  | 10967429 | 13-scf00114   | 13 |
| AX-157981240 | 5 | 50.209 | KV453028.1  | 11247097 | 13-scf00114   | 13 |
| AX-157981247 | 5 | 50.209 | KV453028.1  | 11253877 | 13-scf00114   | 13 |
| AX-157817735 | 5 | 50.209 | KV453028.1  | 11277210 | 13-scf00114   | 13 |
| AX-157817736 | 5 | 50.209 | KV453028.1  | 11277867 | 13-scf00114   | 13 |
| AX-157817738 | 5 | 50.209 | KV453028.1  | 11279128 | 13-scf00114   | 13 |
| AX-158390445 | 5 | 50.209 | KV453028.1  | 11279410 | 13-scf00114   | 13 |
| AX-157981284 | 5 | 50.209 | KV453028.1  | 11295492 | 13-scf00114   | 13 |
| AX-157981316 | 5 | 50.209 | KV453028.1  | 11320408 | 13-scf00114   | 13 |
| AX-157817742 | 5 | 50.209 | KV453028.1  | 11322423 | 13-scf00114   | 13 |
| AX-157981361 | 5 | 50.209 | KV453028.1  | 11357989 | 13-scf00114   | 13 |
| AX-157981362 | 5 | 50.209 | KV453028.1  | 11358553 | 13-scf00114   | 13 |
| AX-157817765 | 5 | 50.209 | KV453028.1  | 11400000 | 13-scf00114   | 13 |
| AX-157981587 | 5 | 50.209 | KV453028.1  | 11541168 | 13-scf00114   | 13 |
| AX-157981610 | 5 | 50.209 | KV453028.1  | 11568967 | 13-scf00114   | 13 |
| AX-157981674 | 5 | 50.209 | KV453028.1  | 11646947 | 13-scf00114   | 13 |
| AX-157982010 | 5 | 50.209 | KV453028.1  | 12026871 | 13-scf00114   | 13 |
| AX-157982454 | 5 | 50.209 | KV453028.1  | 12685107 | 13-scf00114   | 13 |
| AX-157855591 | 5 | 50.209 | KV453028.1  | 12828511 | 13-scf00114   | 13 |
| AX-157982637 | 5 | 50.209 | KV453028.1  | 13245481 | 13-scf00114   | 13 |
| AX-157982985 | 5 | 50.209 | KV453028.1  | 13712551 | 13-scf00114   | 13 |
| AX-157707557 | 5 | 50.209 | KV453028.1  | 13776076 | 13-scf00114   | 13 |
| AX-157983211 | 5 | 50.209 | KV453028.1  | 13899069 | 13-scf00114   | 13 |
| AX-157983242 | 5 | 50.209 | KV453028.1  | 13926005 | 13-scf00114   | 13 |
| AX-157682872 | 5 | 50.209 | KV453027.1  | 20605    | 13-scf00116   | 13 |
| AX-157696198 | 5 | 50.209 | FI860516.1  | 556      | ORI212 lctalu | UN |
| AX-157711414 | 5 | 50.209 | FI865607.1  | 107      | ORI212 lctalu | UN |
| AX-157697604 | 5 | 50.209 | FI873171.1  | 37       | ORI212 lctalu | UN |
| AX-157694704 | 5 | 50.209 | FI873869.1  | 66       | ORI212 lctalu | UN |
| AX-157705908 | 5 | 50.209 | 3ML01031210 | 78       | scf06816_1    | UN |
| AX-157706281 | 5 | 50.209 | 3ML01031983 | 183      | scf07600_1    | UN |
| AX-157706282 | 5 | 50.209 | 3ML01031983 | 375      | scf07600_1    | UN |
| AX-157707342 | 5 | 50.209 | 3ML01034044 | 254      | scf09714_1    | UN |
| AX-157753893 | 5 | 50.21  | KV453028.1  | 6547104  | 13-scf00114   | 13 |
| AX-157979174 | 5 | 50.21  | KV453028.1  | 7802078  | 13-scf00114   | 13 |
| AX-157980866 | 5 | 50.21  | KV453028.1  | 10836133 | 13-scf00114   | 13 |
| AX-157980867 | 5 | 50.21  | KV453028.1  | 10837002 | 13-scf00114   | 13 |
| AX-157980869 | 5 | 50.21  | KV453028.1  | 10839388 | 13-scf00114   | 13 |
| AX-157980870 | 5 | 50.21  | KV453028.1  | 10840187 | 13-scf00114   | 13 |
| AX-157980911 | 5 | 50.536 | KV453028.1  | 10912578 | 13-scf00114   | 13 |
| AX-157817709 | 5 | 50.537 | KV453028.1  | 10942276 | 13-scf00114   | 13 |
| AX-157817710 | 5 | 50.537 | KV453028.1  | 10954725 | 13-scf00114   | 13 |
| AX-157749189 | 5 | 50.537 | KV453028.1  | 10955770 | 13-scf00114   | 13 |
| AX-157710715 | 5 | 50.537 | KV453028.1  | 10958750 | 13-scf00114   | 13 |
| AX-157980939 | 5 | 50.537 | KV453028.1  | 10959356 | 13-scf00114   | 13 |
| AX-157980944 | 5 | 50.537 | KV453028.1  | 10962493 | 13-scf00114   | 13 |

|              |   |        |            |          |                |    |
|--------------|---|--------|------------|----------|----------------|----|
| AX-157980954 | 5 | 50.755 | KV453028.1 | 10973088 | 13-scf00114    | 13 |
| AX-157980955 | 5 | 50.755 | KV453028.1 | 10973809 | 13-scf00114    | 13 |
| AX-157756260 | 5 | 50.755 | KV453028.1 | 10975637 | 13-scf00114    | 13 |
| AX-158406934 | 5 | 50.778 | KV453028.1 | 10981366 | 13-scf00114    | 13 |
| AX-157981031 | 5 | 50.778 | KV453028.1 | 11053680 | 13-scf00114    | 13 |
| AX-157980962 | 5 | 50.798 | KV453028.1 | 10983867 | 13-scf00114    | 13 |
| AX-157980963 | 5 | 50.808 | KV453028.1 | 10984553 | 13-scf00114    | 13 |
| AX-157757120 | 5 | 50.815 | KV453028.1 | 6077269  | 13-scf00114    | 13 |
| AX-157980896 | 5 | 50.815 | KV453028.1 | 10888355 | 13-scf00114    | 13 |
| AX-157980897 | 5 | 50.815 | KV453028.1 | 10889112 | 13-scf00114    | 13 |
| AX-157980905 | 5 | 50.815 | KV453028.1 | 10904625 | 13-scf00114    | 13 |
| AX-157980908 | 5 | 50.815 | KV453028.1 | 10905116 | 13-scf00114    | 13 |
| AX-157980917 | 5 | 50.815 | KV453028.1 | 10920160 | 13-scf00114    | 13 |
| AX-157980931 | 5 | 50.815 | KV453028.1 | 10932842 | 13-scf00114    | 13 |
| AX-157817711 | 5 | 50.815 | KV453028.1 | 10979296 | 13-scf00114    | 13 |
| AX-157817714 | 5 | 50.815 | KV453028.1 | 10983784 | 13-scf00114    | 13 |
| AX-157980967 | 5 | 50.815 | KV453028.1 | 10987973 | 13-scf00114    | 13 |
| AX-157980990 | 5 | 50.815 | KV453028.1 | 11014477 | 13-scf00114    | 13 |
| AX-157980998 | 5 | 50.815 | KV453028.1 | 11025700 | 13-scf00114    | 13 |
| AX-157980972 | 5 | 50.839 | KV453028.1 | 10992005 | 13-scf00114    | 13 |
| AX-157980973 | 5 | 50.839 | KV453028.1 | 10992420 | 13-scf00114    | 13 |
| AX-157980997 | 5 | 50.839 | KV453028.1 | 11024655 | 13-scf00114    | 13 |
| AX-157980980 | 5 | 50.864 | KV453028.1 | 10998314 | 13-scf00114    | 13 |
| AX-157980993 | 5 | 50.864 | KV453028.1 | 11016129 | 13-scf00114    | 13 |
| AX-157980994 | 5 | 50.864 | KV453028.1 | 11017582 | 13-scf00114    | 13 |
| AX-157981003 | 5 | 50.864 | KV453028.1 | 11028609 | 13-scf00114    | 13 |
| AX-157981005 | 5 | 50.864 | KV453028.1 | 11030237 | 13-scf00114    | 13 |
| AX-157981009 | 5 | 50.864 | KV453028.1 | 11037730 | 13-scf00114    | 13 |
| AX-157981012 | 5 | 50.864 | KV453028.1 | 11039847 | 13-scf00114    | 13 |
| AX-157981018 | 5 | 50.864 | KV453028.1 | 11044029 | 13-scf00114    | 13 |
| AX-157817717 | 5 | 50.864 | KV453028.1 | 11047367 | 13-scf00114    | 13 |
| AX-157981026 | 5 | 50.864 | KV453028.1 | 11048582 | 13-scf00114    | 13 |
| AX-157817718 | 5 | 50.864 | KV453028.1 | 11050961 | 13-scf00114    | 13 |
| AX-157981027 | 5 | 50.864 | KV453028.1 | 11051342 | 13-scf00114    | 13 |
| AX-157817719 | 5 | 50.864 | KV453028.1 | 11057892 | 13-scf00114    | 13 |
| AX-157817744 | 5 | 50.864 | KV453028.1 | 11326469 | 13-scf00114    | 13 |
| AX-157981578 | 5 | 50.864 | KV453028.1 | 11529722 | 13-scf00114    | 13 |
| AX-157981645 | 5 | 50.864 | KV453028.1 | 11615701 | 13-scf00114    | 13 |
| AX-157982456 | 5 | 50.864 | KV453028.1 | 12690598 | 13-scf00114    | 13 |
| AX-157982511 | 5 | 50.864 | KV453028.1 | 12794528 | 13-scf00114    | 13 |
| AX-157701868 | 5 | 50.864 | DX088245.1 | 136      | 10RI212 lctalk | UN |
| AX-157713045 | 5 | 50.945 | KV453028.1 | 11058144 | 13-scf00114    | 13 |
| AX-157981040 | 5 | 50.974 | KV453028.1 | 11064558 | 13-scf00114    | 13 |
| AX-157981042 | 5 | 50.974 | KV453028.1 | 11067428 | 13-scf00114    | 13 |
| AX-157774900 | 5 | 51.027 | KV453028.1 | 3859505  | 13-scf00114    | 13 |
| AX-158390399 | 5 | 51.027 | KV453028.1 | 5909671  | 13-scf00114    | 13 |
| AX-157855155 | 5 | 51.027 | KV453028.1 | 5968943  | 13-scf00114    | 13 |
| AX-157978769 | 5 | 51.027 | KV453028.1 | 6702418  | 13-scf00114    | 13 |
| AX-157981077 | 5 | 51.027 | KV453028.1 | 11095652 | 13-scf00114    | 13 |
| AX-157817452 | 5 | 51.083 | KV453028.1 | 6896347  | 13-scf00114    | 13 |
| AX-157980959 | 5 | 51.083 | KV453028.1 | 10979411 | 13-scf00114    | 13 |

|              |   |        |            |          |             |    |
|--------------|---|--------|------------|----------|-------------|----|
| AX-157980960 | 5 | 51.083 | KV453028.1 | 10981329 | 13-scf00114 | 13 |
| AX-157980979 | 5 | 51.083 | KV453028.1 | 10995281 | 13-scf00114 | 13 |
| AX-157981014 | 5 | 51.083 | KV453028.1 | 11042385 | 13-scf00114 | 13 |
| AX-157981051 | 5 | 51.083 | KV453028.1 | 11074843 | 13-scf00114 | 13 |
| AX-157981060 | 5 | 51.083 | KV453028.1 | 11082869 | 13-scf00114 | 13 |
| AX-157981068 | 5 | 51.083 | KV453028.1 | 11089596 | 13-scf00114 | 13 |
| AX-157751347 | 5 | 51.083 | KV453028.1 | 11093613 | 13-scf00114 | 13 |
| AX-157981081 | 5 | 51.083 | KV453028.1 | 11101352 | 13-scf00114 | 13 |
| AX-157981090 | 5 | 51.083 | KV453028.1 | 11109881 | 13-scf00114 | 13 |
| AX-157981103 | 5 | 51.083 | KV453028.1 | 11120290 | 13-scf00114 | 13 |
| AX-157981104 | 5 | 51.083 | KV453028.1 | 11120915 | 13-scf00114 | 13 |
| AX-157981107 | 5 | 51.083 | KV453028.1 | 11124137 | 13-scf00114 | 13 |
| AX-157710463 | 5 | 51.083 | KV453028.1 | 11126777 | 13-scf00114 | 13 |
| AX-157981133 | 5 | 51.083 | KV453028.1 | 11149322 | 13-scf00114 | 13 |
| AX-157981134 | 5 | 51.083 | KV453028.1 | 11149608 | 13-scf00114 | 13 |
| AX-157715141 | 5 | 51.083 | KV453028.1 | 11151234 | 13-scf00114 | 13 |
| AX-157981136 | 5 | 51.083 | KV453028.1 | 11153126 | 13-scf00114 | 13 |
| AX-157981141 | 5 | 51.083 | KV453028.1 | 11159432 | 13-scf00114 | 13 |
| AX-157981150 | 5 | 51.083 | KV453028.1 | 11165257 | 13-scf00114 | 13 |
| AX-157981155 | 5 | 51.083 | KV453028.1 | 11167550 | 13-scf00114 | 13 |
| AX-157981190 | 5 | 51.083 | KV453028.1 | 11185311 | 13-scf00114 | 13 |
| AX-157981197 | 5 | 51.083 | KV453028.1 | 11187532 | 13-scf00114 | 13 |
| AX-157981199 | 5 | 51.083 | KV453028.1 | 11187920 | 13-scf00114 | 13 |
| AX-157981200 | 5 | 51.083 | KV453028.1 | 11189340 | 13-scf00114 | 13 |
| AX-157981203 | 5 | 51.083 | KV453028.1 | 11190631 | 13-scf00114 | 13 |
| AX-157981212 | 5 | 51.083 | KV453028.1 | 11198409 | 13-scf00114 | 13 |
| AX-157981222 | 5 | 51.083 | KV453028.1 | 11220297 | 13-scf00114 | 13 |
| AX-157817727 | 5 | 51.083 | KV453028.1 | 11236789 | 13-scf00114 | 13 |
| AX-157747352 | 5 | 51.083 | KV453028.1 | 11246361 | 13-scf00114 | 13 |
| AX-157981246 | 5 | 51.083 | KV453028.1 | 11252947 | 13-scf00114 | 13 |
| AX-157981260 | 5 | 51.083 | KV453028.1 | 11264189 | 13-scf00114 | 13 |
| AX-157981262 | 5 | 51.083 | KV453028.1 | 11268542 | 13-scf00114 | 13 |
| AX-157817732 | 5 | 51.083 | KV453028.1 | 11271464 | 13-scf00114 | 13 |
| AX-157981268 | 5 | 51.083 | KV453028.1 | 11273081 | 13-scf00114 | 13 |
| AX-157771874 | 5 | 51.083 | KV453028.1 | 11288448 | 13-scf00114 | 13 |
| AX-157981278 | 5 | 51.083 | KV453028.1 | 11289513 | 13-scf00114 | 13 |
| AX-157981281 | 5 | 51.083 | KV453028.1 | 11292997 | 13-scf00114 | 13 |
| AX-157981282 | 5 | 51.083 | KV453028.1 | 11293210 | 13-scf00114 | 13 |
| AX-157981283 | 5 | 51.083 | KV453028.1 | 11293423 | 13-scf00114 | 13 |
| AX-158406938 | 5 | 51.083 | KV453028.1 | 11301612 | 13-scf00114 | 13 |
| AX-157884438 | 5 | 51.083 | KV453028.1 | 11302821 | 13-scf00114 | 13 |
| AX-157855525 | 5 | 51.083 | KV453028.1 | 11303216 | 13-scf00114 | 13 |
| AX-157981290 | 5 | 51.083 | KV453028.1 | 11304225 | 13-scf00114 | 13 |
| AX-157981291 | 5 | 51.083 | KV453028.1 | 11304698 | 13-scf00114 | 13 |
| AX-157981293 | 5 | 51.083 | KV453028.1 | 11305208 | 13-scf00114 | 13 |
| AX-157981295 | 5 | 51.083 | KV453028.1 | 11305878 | 13-scf00114 | 13 |
| AX-157981298 | 5 | 51.083 | KV453028.1 | 11308399 | 13-scf00114 | 13 |
| AX-157981304 | 5 | 51.083 | KV453028.1 | 11313192 | 13-scf00114 | 13 |
| AX-157981325 | 5 | 51.083 | KV453028.1 | 11326783 | 13-scf00114 | 13 |
| AX-157981327 | 5 | 51.083 | KV453028.1 | 11327369 | 13-scf00114 | 13 |
| AX-157981328 | 5 | 51.083 | KV453028.1 | 11327657 | 13-scf00114 | 13 |



|              |   |        |             |          |             |    |
|--------------|---|--------|-------------|----------|-------------|----|
| AX-157981330 | 5 | 51.083 | KV453028.1  | 11331379 | 13-scf00114 | 13 |
| AX-157981331 | 5 | 51.083 | KV453028.1  | 11332090 | 13-scf00114 | 13 |
| AX-157724211 | 5 | 51.083 | KV453028.1  | 11332905 | 13-scf00114 | 13 |
| AX-157981336 | 5 | 51.083 | KV453028.1  | 11337081 | 13-scf00114 | 13 |
| AX-157981339 | 5 | 51.083 | KV453028.1  | 11338775 | 13-scf00114 | 13 |
| AX-157981340 | 5 | 51.083 | KV453028.1  | 11339997 | 13-scf00114 | 13 |
| AX-157981344 | 5 | 51.083 | KV453028.1  | 11341129 | 13-scf00114 | 13 |
| AX-157817753 | 5 | 51.083 | KV453028.1  | 11351389 | 13-scf00114 | 13 |
| AX-157817754 | 5 | 51.083 | KV453028.1  | 11351427 | 13-scf00114 | 13 |
| AX-157817757 | 5 | 51.083 | KV453028.1  | 11358857 | 13-scf00114 | 13 |
| AX-157747295 | 5 | 51.083 | KV453028.1  | 11361105 | 13-scf00114 | 13 |
| AX-157981421 | 5 | 51.083 | KV453028.1  | 11411812 | 13-scf00114 | 13 |
| AX-157981458 | 5 | 51.083 | KV453028.1  | 11431837 | 13-scf00114 | 13 |
| AX-157981463 | 5 | 51.083 | KV453028.1  | 11432818 | 13-scf00114 | 13 |
| AX-157981465 | 5 | 51.083 | KV453028.1  | 11434494 | 13-scf00114 | 13 |
| AX-157750478 | 5 | 51.083 | KV453028.1  | 11453254 | 13-scf00114 | 13 |
| AX-157981538 | 5 | 51.083 | KV453028.1  | 11491604 | 13-scf00114 | 13 |
| AX-157981575 | 5 | 51.083 | KV453028.1  | 11528370 | 13-scf00114 | 13 |
| AX-157817778 | 5 | 51.083 | KV453028.1  | 11532915 | 13-scf00114 | 13 |
| AX-157981593 | 5 | 51.083 | KV453028.1  | 11548138 | 13-scf00114 | 13 |
| AX-157981603 | 5 | 51.083 | KV453028.1  | 11561756 | 13-scf00114 | 13 |
| AX-157981605 | 5 | 51.083 | KV453028.1  | 11563666 | 13-scf00114 | 13 |
| AX-157981613 | 5 | 51.083 | KV453028.1  | 11577284 | 13-scf00114 | 13 |
| AX-157981616 | 5 | 51.083 | KV453028.1  | 11581027 | 13-scf00114 | 13 |
| AX-157981621 | 5 | 51.083 | KV453028.1  | 11586669 | 13-scf00114 | 13 |
| AX-157981640 | 5 | 51.083 | KV453028.1  | 11613311 | 13-scf00114 | 13 |
| AX-157981642 | 5 | 51.083 | KV453028.1  | 11614465 | 13-scf00114 | 13 |
| AX-157981643 | 5 | 51.083 | KV453028.1  | 11614674 | 13-scf00114 | 13 |
| AX-157981654 | 5 | 51.083 | KV453028.1  | 11632275 | 13-scf00114 | 13 |
| AX-157746426 | 5 | 51.083 | KV453028.1  | 11656196 | 13-scf00114 | 13 |
| AX-157875774 | 5 | 51.083 | KV453028.1  | 13484495 | 13-scf00114 | 13 |
| AX-157982936 | 5 | 51.083 | KV453028.1  | 13678367 | 13-scf00114 | 13 |
| AX-157982963 | 5 | 51.083 | KV453028.1  | 13694309 | 13-scf00114 | 13 |
| AX-157982966 | 5 | 51.083 | KV453028.1  | 13695105 | 13-scf00114 | 13 |
| AX-157982971 | 5 | 51.083 | KV453028.1  | 13699184 | 13-scf00114 | 13 |
| AX-157982973 | 5 | 51.083 | KV453028.1  | 13702638 | 13-scf00114 | 13 |
| AX-157817934 | 5 | 51.083 | KV453028.1  | 13704077 | 13-scf00114 | 13 |
| AX-157875776 | 5 | 51.083 | KV453028.1  | 13709515 | 13-scf00114 | 13 |
| AX-157983048 | 5 | 51.083 | KV453028.1  | 13760911 | 13-scf00114 | 13 |
| AX-157983051 | 5 | 51.083 | KV453028.1  | 13763799 | 13-scf00114 | 13 |
| AX-157983083 | 5 | 51.083 | KV453028.1  | 13795313 | 13-scf00114 | 13 |
| AX-157983134 | 5 | 51.083 | KV453028.1  | 13843476 | 13-scf00114 | 13 |
| AX-157983137 | 5 | 51.083 | KV453028.1  | 13845947 | 13-scf00114 | 13 |
| AX-157983140 | 5 | 51.083 | KV453028.1  | 13849660 | 13-scf00114 | 13 |
| AX-158422160 | 5 | 51.083 | KV453028.1  | 13866640 | 13-scf00114 | 13 |
| AX-157983172 | 5 | 51.083 | KV453028.1  | 13869804 | 13-scf00114 | 13 |
| AX-157983174 | 5 | 51.083 | KV453028.1  | 13870223 | 13-scf00114 | 13 |
| AX-157706450 | 5 | 51.083 | 3ML01032257 | 389      | scf07872_1  | UN |
| AX-157981333 | 5 | 51.116 | KV453028.1  | 11334777 | 13-scf00114 | 13 |
| AX-157748786 | 5 | 51.149 | KV453028.1  | 11339488 | 13-scf00114 | 13 |
| AX-157981341 | 5 | 51.17  | KV453028.1  | 11340191 | 13-scf00114 | 13 |

|              |   |        |            |          |             |    |
|--------------|---|--------|------------|----------|-------------|----|
| AX-157980999 | 5 | 51.192 | KV453028.1 | 11026951 | 13-scf00114 | 13 |
| AX-157875755 | 5 | 51.192 | KV453028.1 | 11069251 | 13-scf00114 | 13 |
| AX-157981162 | 5 | 51.192 | KV453028.1 | 11169815 | 13-scf00114 | 13 |
| AX-157884437 | 5 | 51.192 | KV453028.1 | 11213057 | 13-scf00114 | 13 |
| AX-157981334 | 5 | 51.192 | KV453028.1 | 11336554 | 13-scf00114 | 13 |
| AX-157981343 | 5 | 51.192 | KV453028.1 | 11340683 | 13-scf00114 | 13 |
| AX-157714983 | 5 | 51.192 | KV453028.1 | 11351284 | 13-scf00114 | 13 |
| AX-157817755 | 5 | 51.192 | KV453028.1 | 11351824 | 13-scf00114 | 13 |
| AX-157981356 | 5 | 51.192 | KV453028.1 | 11355189 | 13-scf00114 | 13 |
| AX-157981360 | 5 | 51.192 | KV453028.1 | 11356514 | 13-scf00114 | 13 |
| AX-157817760 | 5 | 51.192 | KV453028.1 | 11368158 | 13-scf00114 | 13 |
| AX-157981371 | 5 | 51.192 | KV453028.1 | 11368929 | 13-scf00114 | 13 |
| AX-157720791 | 5 | 51.192 | KV453028.1 | 11371745 | 13-scf00114 | 13 |
| AX-157981372 | 5 | 51.192 | KV453028.1 | 11372571 | 13-scf00114 | 13 |
| AX-157981374 | 5 | 51.192 | KV453028.1 | 11376505 | 13-scf00114 | 13 |
| AX-157981380 | 5 | 51.192 | KV453028.1 | 11381447 | 13-scf00114 | 13 |
| AX-158406940 | 5 | 51.192 | KV453028.1 | 11382198 | 13-scf00114 | 13 |
| AX-157770185 | 5 | 51.192 | KV453028.1 | 11383538 | 13-scf00114 | 13 |
| AX-157981383 | 5 | 51.192 | KV453028.1 | 11384261 | 13-scf00114 | 13 |
| AX-158390446 | 5 | 51.192 | KV453028.1 | 11384538 | 13-scf00114 | 13 |
| AX-157875764 | 5 | 51.192 | KV453028.1 | 11384695 | 13-scf00114 | 13 |
| AX-157981385 | 5 | 51.192 | KV453028.1 | 11384760 | 13-scf00114 | 13 |
| AX-157981386 | 5 | 51.192 | KV453028.1 | 11386434 | 13-scf00114 | 13 |
| AX-157981389 | 5 | 51.192 | KV453028.1 | 11387371 | 13-scf00114 | 13 |
| AX-157981392 | 5 | 51.192 | KV453028.1 | 11390079 | 13-scf00114 | 13 |
| AX-157817762 | 5 | 51.192 | KV453028.1 | 11391041 | 13-scf00114 | 13 |
| AX-157817764 | 5 | 51.192 | KV453028.1 | 11394041 | 13-scf00114 | 13 |
| AX-157981397 | 5 | 51.192 | KV453028.1 | 11394278 | 13-scf00114 | 13 |
| AX-157981398 | 5 | 51.192 | KV453028.1 | 11394885 | 13-scf00114 | 13 |
| AX-157981403 | 5 | 51.192 | KV453028.1 | 11398281 | 13-scf00114 | 13 |
| AX-157981405 | 5 | 51.192 | KV453028.1 | 11398584 | 13-scf00114 | 13 |
| AX-157981410 | 5 | 51.192 | KV453028.1 | 11402421 | 13-scf00114 | 13 |
| AX-157817767 | 5 | 51.192 | KV453028.1 | 11406320 | 13-scf00114 | 13 |
| AX-157981456 | 5 | 51.192 | KV453028.1 | 11431164 | 13-scf00114 | 13 |
| AX-157981459 | 5 | 51.192 | KV453028.1 | 11432046 | 13-scf00114 | 13 |
| AX-157981479 | 5 | 51.192 | KV453028.1 | 11443383 | 13-scf00114 | 13 |
| AX-157981480 | 5 | 51.192 | KV453028.1 | 11443798 | 13-scf00114 | 13 |
| AX-157981491 | 5 | 51.192 | KV453028.1 | 11450638 | 13-scf00114 | 13 |
| AX-157817772 | 5 | 51.192 | KV453028.1 | 11489334 | 13-scf00114 | 13 |
| AX-157817777 | 5 | 51.192 | KV453028.1 | 11510678 | 13-scf00114 | 13 |
| AX-157981581 | 5 | 51.192 | KV453028.1 | 11531003 | 13-scf00114 | 13 |
| AX-157981582 | 5 | 51.192 | KV453028.1 | 11531933 | 13-scf00114 | 13 |
| AX-157981583 | 5 | 51.192 | KV453028.1 | 11532476 | 13-scf00114 | 13 |
| AX-157770878 | 5 | 51.192 | KV453028.1 | 11536732 | 13-scf00114 | 13 |
| AX-157756076 | 5 | 51.192 | KV453028.1 | 11538919 | 13-scf00114 | 13 |
| AX-157981586 | 5 | 51.192 | KV453028.1 | 11539089 | 13-scf00114 | 13 |
| AX-157981599 | 5 | 51.192 | KV453028.1 | 11555256 | 13-scf00114 | 13 |
| AX-157717917 | 5 | 51.192 | KV453028.1 | 11557568 | 13-scf00114 | 13 |
| AX-157981620 | 5 | 51.192 | KV453028.1 | 11585934 | 13-scf00114 | 13 |
| AX-157981622 | 5 | 51.192 | KV453028.1 | 11587289 | 13-scf00114 | 13 |
| AX-157981629 | 5 | 51.192 | KV453028.1 | 11593734 | 13-scf00114 | 13 |

|              |   |        |            |          |                |    |
|--------------|---|--------|------------|----------|----------------|----|
| AX-157981631 | 5 | 51.192 | KV453028.1 | 11598726 | 13-scf00114    | 13 |
| AX-157981635 | 5 | 51.192 | KV453028.1 | 11603952 | 13-scf00114    | 13 |
| AX-157981637 | 5 | 51.192 | KV453028.1 | 11606229 | 13-scf00114    | 13 |
| AX-157771891 | 5 | 51.192 | KV453028.1 | 11608981 | 13-scf00114    | 13 |
| AX-157981639 | 5 | 51.192 | KV453028.1 | 11612904 | 13-scf00114    | 13 |
| AX-157981646 | 5 | 51.192 | KV453028.1 | 11616202 | 13-scf00114    | 13 |
| AX-157981648 | 5 | 51.192 | KV453028.1 | 11616532 | 13-scf00114    | 13 |
| AX-157981649 | 5 | 51.192 | KV453028.1 | 11617155 | 13-scf00114    | 13 |
| AX-157725388 | 5 | 51.192 | KV453028.1 | 11627708 | 13-scf00114    | 13 |
| AX-157981657 | 5 | 51.192 | KV453028.1 | 11633791 | 13-scf00114    | 13 |
| AX-157744977 | 5 | 51.192 | KV453028.1 | 11634076 | 13-scf00114    | 13 |
| AX-157775667 | 5 | 51.192 | KV453028.1 | 11636248 | 13-scf00114    | 13 |
| AX-157981671 | 5 | 51.192 | KV453028.1 | 11645254 | 13-scf00114    | 13 |
| AX-157981676 | 5 | 51.192 | KV453028.1 | 11647308 | 13-scf00114    | 13 |
| AX-157981682 | 5 | 51.192 | KV453028.1 | 11653504 | 13-scf00114    | 13 |
| AX-157981688 | 5 | 51.192 | KV453028.1 | 11659973 | 13-scf00114    | 13 |
| AX-157981701 | 5 | 51.192 | KV453028.1 | 11669807 | 13-scf00114    | 13 |
| AX-157817785 | 5 | 51.192 | KV453028.1 | 11681931 | 13-scf00114    | 13 |
| AX-157981713 | 5 | 51.192 | KV453028.1 | 11682941 | 13-scf00114    | 13 |
| AX-157738701 | 5 | 51.192 | KV453028.1 | 11714234 | 13-scf00114    | 13 |
| AX-157981763 | 5 | 51.192 | KV453028.1 | 11731447 | 13-scf00114    | 13 |
| AX-157981774 | 5 | 51.192 | KV453028.1 | 11747604 | 13-scf00114    | 13 |
| AX-157981793 | 5 | 51.192 | KV453028.1 | 11776441 | 13-scf00114    | 13 |
| AX-157981795 | 5 | 51.192 | KV453028.1 | 11776887 | 13-scf00114    | 13 |
| AX-157981797 | 5 | 51.192 | KV453028.1 | 11777914 | 13-scf00114    | 13 |
| AX-157981801 | 5 | 51.192 | KV453028.1 | 11779051 | 13-scf00114    | 13 |
| AX-157981804 | 5 | 51.192 | KV453028.1 | 11783887 | 13-scf00114    | 13 |
| AX-158403935 | 5 | 51.192 | KV453028.1 | 11790420 | 13-scf00114    | 13 |
| AX-157981832 | 5 | 51.192 | KV453028.1 | 11816697 | 13-scf00114    | 13 |
| AX-157817787 | 5 | 51.192 | KV453028.1 | 11823626 | 13-scf00114    | 13 |
| AX-157981843 | 5 | 51.192 | KV453028.1 | 11829618 | 13-scf00114    | 13 |
| AX-157981845 | 5 | 51.192 | KV453028.1 | 11830214 | 13-scf00114    | 13 |
| AX-157981870 | 5 | 51.192 | KV453028.1 | 11860371 | 13-scf00114    | 13 |
| AX-157817788 | 5 | 51.192 | KV453028.1 | 11860477 | 13-scf00114    | 13 |
| AX-157981873 | 5 | 51.192 | KV453028.1 | 11861094 | 13-scf00114    | 13 |
| AX-157981874 | 5 | 51.192 | KV453028.1 | 11861490 | 13-scf00114    | 13 |
| AX-157982174 | 5 | 51.192 | KV453028.1 | 12271054 | 13-scf00114    | 13 |
| AX-157982345 | 5 | 51.192 | KV453028.1 | 12504153 | 13-scf00114    | 13 |
| AX-157982369 | 5 | 51.192 | KV453028.1 | 12533775 | 13-scf00114    | 13 |
| AX-157982471 | 5 | 51.192 | KV453028.1 | 12711801 | 13-scf00114    | 13 |
| AX-157982508 | 5 | 51.192 | KV453028.1 | 12790393 | 13-scf00114    | 13 |
| AX-157982717 | 5 | 51.192 | KV453028.1 | 13417527 | 13-scf00114    | 13 |
| AX-157983001 | 5 | 51.192 | KV453028.1 | 13723289 | 13-scf00114    | 13 |
| AX-157695649 | 5 | 51.192 | FI881355.1 | 60       | -ORI212 lctali | UN |
| AX-157981655 | 5 | 51.233 | KV453028.1 | 11633158 | 13-scf00114    | 13 |
| AX-157981658 | 5 | 51.268 | KV453028.1 | 11634425 | 13-scf00114    | 13 |
| AX-157817779 | 5 | 51.301 | KV453028.1 | 11534470 | 13-scf00114    | 13 |
| AX-157981601 | 5 | 51.301 | KV453028.1 | 11560888 | 13-scf00114    | 13 |
| AX-157981678 | 5 | 51.301 | KV453028.1 | 11649866 | 13-scf00114    | 13 |
| AX-157748344 | 5 | 51.301 | KV453028.1 | 11653910 | 13-scf00114    | 13 |
| AX-157981685 | 5 | 51.301 | KV453028.1 | 11657075 | 13-scf00114    | 13 |

|              |   |        |            |          |             |    |
|--------------|---|--------|------------|----------|-------------|----|
| AX-157981686 | 5 | 51.324 | KV453028.1 | 11658231 | 13-scf00114 | 13 |
| AX-157981692 | 5 | 51.352 | KV453028.1 | 11666524 | 13-scf00114 | 13 |
| AX-157981696 | 5 | 51.371 | KV453028.1 | 11668490 | 13-scf00114 | 13 |
| AX-158390448 | 5 | 51.371 | KV453028.1 | 11671308 | 13-scf00114 | 13 |
| AX-157981761 | 5 | 51.371 | KV453028.1 | 11727226 | 13-scf00114 | 13 |
| AX-157981765 | 5 | 51.371 | KV453028.1 | 11732028 | 13-scf00114 | 13 |
| AX-157982421 | 5 | 51.371 | KV453028.1 | 12610380 | 13-scf00114 | 13 |
| AX-157979607 | 5 | 51.41  | KV453028.1 | 8858985  | 13-scf00114 | 13 |
| AX-157980546 | 5 | 51.41  | KV453028.1 | 10291921 | 13-scf00114 | 13 |
| AX-157981348 | 5 | 51.41  | KV453028.1 | 11349457 | 13-scf00114 | 13 |
| AX-157981409 | 5 | 51.41  | KV453028.1 | 11399492 | 13-scf00114 | 13 |
| AX-157817766 | 5 | 51.41  | KV453028.1 | 11405638 | 13-scf00114 | 13 |
| AX-157981411 | 5 | 51.41  | KV453028.1 | 11405912 | 13-scf00114 | 13 |
| AX-157981579 | 5 | 51.41  | KV453028.1 | 11530012 | 13-scf00114 | 13 |
| AX-157981607 | 5 | 51.41  | KV453028.1 | 11565726 | 13-scf00114 | 13 |
| AX-157981627 | 5 | 51.41  | KV453028.1 | 11591784 | 13-scf00114 | 13 |
| AX-157981651 | 5 | 51.41  | KV453028.1 | 11628340 | 13-scf00114 | 13 |
| AX-157981666 | 5 | 51.41  | KV453028.1 | 11638542 | 13-scf00114 | 13 |
| AX-157981687 | 5 | 51.41  | KV453028.1 | 11658971 | 13-scf00114 | 13 |
| AX-157981699 | 5 | 51.41  | KV453028.1 | 11669166 | 13-scf00114 | 13 |
| AX-157817783 | 5 | 51.41  | KV453028.1 | 11670302 | 13-scf00114 | 13 |
| AX-157981710 | 5 | 51.41  | KV453028.1 | 11679119 | 13-scf00114 | 13 |
| AX-157981712 | 5 | 51.41  | KV453028.1 | 11679851 | 13-scf00114 | 13 |
| AX-157981715 | 5 | 51.41  | KV453028.1 | 11684339 | 13-scf00114 | 13 |
| AX-157981717 | 5 | 51.41  | KV453028.1 | 11684863 | 13-scf00114 | 13 |
| AX-157981719 | 5 | 51.41  | KV453028.1 | 11685270 | 13-scf00114 | 13 |
| AX-157981720 | 5 | 51.41  | KV453028.1 | 11686906 | 13-scf00114 | 13 |
| AX-157981722 | 5 | 51.41  | KV453028.1 | 11687498 | 13-scf00114 | 13 |
| AX-157981731 | 5 | 51.41  | KV453028.1 | 11695944 | 13-scf00114 | 13 |
| AX-157981748 | 5 | 51.41  | KV453028.1 | 11709434 | 13-scf00114 | 13 |
| AX-157981754 | 5 | 51.41  | KV453028.1 | 11721292 | 13-scf00114 | 13 |
| AX-157981759 | 5 | 51.41  | KV453028.1 | 11723020 | 13-scf00114 | 13 |
| AX-157981760 | 5 | 51.41  | KV453028.1 | 11723671 | 13-scf00114 | 13 |
| AX-157981767 | 5 | 51.41  | KV453028.1 | 11733314 | 13-scf00114 | 13 |
| AX-157981816 | 5 | 51.41  | KV453028.1 | 11795594 | 13-scf00114 | 13 |
| AX-157981838 | 5 | 51.41  | KV453028.1 | 11822257 | 13-scf00114 | 13 |
| AX-157981855 | 5 | 51.41  | KV453028.1 | 11841541 | 13-scf00114 | 13 |
| AX-157981856 | 5 | 51.41  | KV453028.1 | 11844973 | 13-scf00114 | 13 |
| AX-157981900 | 5 | 51.41  | KV453028.1 | 11900579 | 13-scf00114 | 13 |
| AX-157981903 | 5 | 51.41  | KV453028.1 | 11902648 | 13-scf00114 | 13 |
| AX-157981966 | 5 | 51.41  | KV453028.1 | 11971214 | 13-scf00114 | 13 |
| AX-157982007 | 5 | 51.41  | KV453028.1 | 12017647 | 13-scf00114 | 13 |
| AX-157817801 | 5 | 51.41  | KV453028.1 | 12070759 | 13-scf00114 | 13 |
| AX-157982075 | 5 | 51.41  | KV453028.1 | 12118688 | 13-scf00114 | 13 |
| AX-157982113 | 5 | 51.41  | KV453028.1 | 12172068 | 13-scf00114 | 13 |
| AX-157982141 | 5 | 51.41  | KV453028.1 | 12198966 | 13-scf00114 | 13 |
| AX-157982147 | 5 | 51.41  | KV453028.1 | 12202304 | 13-scf00114 | 13 |
| AX-157753335 | 5 | 51.41  | KV453028.1 | 12209410 | 13-scf00114 | 13 |
| AX-157982160 | 5 | 51.41  | KV453028.1 | 12238021 | 13-scf00114 | 13 |
| AX-157982163 | 5 | 51.41  | KV453028.1 | 12256054 | 13-scf00114 | 13 |
| AX-157982165 | 5 | 51.41  | KV453028.1 | 12258090 | 13-scf00114 | 13 |

|              |   |       |            |          |             |    |
|--------------|---|-------|------------|----------|-------------|----|
| AX-157865048 | 5 | 51.41 | KV453028.1 | 12311740 | 13-scf00114 | 13 |
| AX-157982256 | 5 | 51.41 | KV453028.1 | 12359418 | 13-scf00114 | 13 |
| AX-157982299 | 5 | 51.41 | KV453028.1 | 12403123 | 13-scf00114 | 13 |
| AX-157982301 | 5 | 51.41 | KV453028.1 | 12403401 | 13-scf00114 | 13 |
| AX-157982303 | 5 | 51.41 | KV453028.1 | 12404503 | 13-scf00114 | 13 |
| AX-158406968 | 5 | 51.41 | KV453028.1 | 12408056 | 13-scf00114 | 13 |
| AX-157982308 | 5 | 51.41 | KV453028.1 | 12410551 | 13-scf00114 | 13 |
| AX-157701894 | 5 | 51.41 | KV453028.1 | 12439180 | 13-scf00114 | 13 |
| AX-157982333 | 5 | 51.41 | KV453028.1 | 12445556 | 13-scf00114 | 13 |
| AX-157982335 | 5 | 51.41 | KV453028.1 | 12460240 | 13-scf00114 | 13 |
| AX-157742789 | 5 | 51.41 | KV453028.1 | 12516988 | 13-scf00114 | 13 |
| AX-157982382 | 5 | 51.41 | KV453028.1 | 12545263 | 13-scf00114 | 13 |
| AX-157982384 | 5 | 51.41 | KV453028.1 | 12550612 | 13-scf00114 | 13 |
| AX-157982385 | 5 | 51.41 | KV453028.1 | 12551082 | 13-scf00114 | 13 |
| AX-157742158 | 5 | 51.41 | KV453028.1 | 12552829 | 13-scf00114 | 13 |
| AX-157982387 | 5 | 51.41 | KV453028.1 | 12553288 | 13-scf00114 | 13 |
| AX-157982388 | 5 | 51.41 | KV453028.1 | 12554715 | 13-scf00114 | 13 |
| AX-157982389 | 5 | 51.41 | KV453028.1 | 12556067 | 13-scf00114 | 13 |
| AX-157982392 | 5 | 51.41 | KV453028.1 | 12565863 | 13-scf00114 | 13 |
| AX-157982395 | 5 | 51.41 | KV453028.1 | 12567870 | 13-scf00114 | 13 |
| AX-157982411 | 5 | 51.41 | KV453028.1 | 12587062 | 13-scf00114 | 13 |
| AX-157982419 | 5 | 51.41 | KV453028.1 | 12599013 | 13-scf00114 | 13 |
| AX-157982422 | 5 | 51.41 | KV453028.1 | 12614076 | 13-scf00114 | 13 |
| AX-157817838 | 5 | 51.41 | KV453028.1 | 12615989 | 13-scf00114 | 13 |
| AX-157855580 | 5 | 51.41 | KV453028.1 | 12622400 | 13-scf00114 | 13 |
| AX-157982430 | 5 | 51.41 | KV453028.1 | 12631724 | 13-scf00114 | 13 |
| AX-157982431 | 5 | 51.41 | KV453028.1 | 12633826 | 13-scf00114 | 13 |
| AX-157855581 | 5 | 51.41 | KV453028.1 | 12633995 | 13-scf00114 | 13 |
| AX-157817840 | 5 | 51.41 | KV453028.1 | 12634937 | 13-scf00114 | 13 |
| AX-157982432 | 5 | 51.41 | KV453028.1 | 12635727 | 13-scf00114 | 13 |
| AX-157855583 | 5 | 51.41 | KV453028.1 | 12667551 | 13-scf00114 | 13 |
| AX-157982441 | 5 | 51.41 | KV453028.1 | 12668803 | 13-scf00114 | 13 |
| AX-157982446 | 5 | 51.41 | KV453028.1 | 12671201 | 13-scf00114 | 13 |
| AX-157982447 | 5 | 51.41 | KV453028.1 | 12672382 | 13-scf00114 | 13 |
| AX-157982449 | 5 | 51.41 | KV453028.1 | 12674495 | 13-scf00114 | 13 |
| AX-157982451 | 5 | 51.41 | KV453028.1 | 12678444 | 13-scf00114 | 13 |
| AX-157982452 | 5 | 51.41 | KV453028.1 | 12678923 | 13-scf00114 | 13 |
| AX-157817841 | 5 | 51.41 | KV453028.1 | 12679131 | 13-scf00114 | 13 |
| AX-157982459 | 5 | 51.41 | KV453028.1 | 12697251 | 13-scf00114 | 13 |
| AX-157982463 | 5 | 51.41 | KV453028.1 | 12704047 | 13-scf00114 | 13 |
| AX-158406980 | 5 | 51.41 | KV453028.1 | 12705275 | 13-scf00114 | 13 |
| AX-158406981 | 5 | 51.41 | KV453028.1 | 12705656 | 13-scf00114 | 13 |
| AX-157982464 | 5 | 51.41 | KV453028.1 | 12705760 | 13-scf00114 | 13 |
| AX-157982466 | 5 | 51.41 | KV453028.1 | 12706978 | 13-scf00114 | 13 |
| AX-157982467 | 5 | 51.41 | KV453028.1 | 12707816 | 13-scf00114 | 13 |
| AX-157982468 | 5 | 51.41 | KV453028.1 | 12708787 | 13-scf00114 | 13 |
| AX-157817842 | 5 | 51.41 | KV453028.1 | 12710303 | 13-scf00114 | 13 |
| AX-157982470 | 5 | 51.41 | KV453028.1 | 12711357 | 13-scf00114 | 13 |
| AX-157982475 | 5 | 51.41 | KV453028.1 | 12716455 | 13-scf00114 | 13 |
| AX-157855584 | 5 | 51.41 | KV453028.1 | 12719818 | 13-scf00114 | 13 |
| AX-157982476 | 5 | 51.41 | KV453028.1 | 12720383 | 13-scf00114 | 13 |

|              |   |       |            |          |             |    |
|--------------|---|-------|------------|----------|-------------|----|
| AX-157982478 | 5 | 51.41 | KV453028.1 | 12722534 | 13-scf00114 | 13 |
| AX-157982481 | 5 | 51.41 | KV453028.1 | 12725973 | 13-scf00114 | 13 |
| AX-157982482 | 5 | 51.41 | KV453028.1 | 12727286 | 13-scf00114 | 13 |
| AX-157855585 | 5 | 51.41 | KV453028.1 | 12732591 | 13-scf00114 | 13 |
| AX-157855586 | 5 | 51.41 | KV453028.1 | 12734661 | 13-scf00114 | 13 |
| AX-157982485 | 5 | 51.41 | KV453028.1 | 12740610 | 13-scf00114 | 13 |
| AX-157982486 | 5 | 51.41 | KV453028.1 | 12743153 | 13-scf00114 | 13 |
| AX-157982487 | 5 | 51.41 | KV453028.1 | 12743584 | 13-scf00114 | 13 |
| AX-157982490 | 5 | 51.41 | KV453028.1 | 12748406 | 13-scf00114 | 13 |
| AX-157982492 | 5 | 51.41 | KV453028.1 | 12754282 | 13-scf00114 | 13 |
| AX-157982493 | 5 | 51.41 | KV453028.1 | 12757757 | 13-scf00114 | 13 |
| AX-157982494 | 5 | 51.41 | KV453028.1 | 12760736 | 13-scf00114 | 13 |
| AX-157817843 | 5 | 51.41 | KV453028.1 | 12764127 | 13-scf00114 | 13 |
| AX-157982496 | 5 | 51.41 | KV453028.1 | 12766929 | 13-scf00114 | 13 |
| AX-157982497 | 5 | 51.41 | KV453028.1 | 12767423 | 13-scf00114 | 13 |
| AX-157855587 | 5 | 51.41 | KV453028.1 | 12770887 | 13-scf00114 | 13 |
| AX-157982499 | 5 | 51.41 | KV453028.1 | 12770927 | 13-scf00114 | 13 |
| AX-157982500 | 5 | 51.41 | KV453028.1 | 12774888 | 13-scf00114 | 13 |
| AX-157982501 | 5 | 51.41 | KV453028.1 | 12776283 | 13-scf00114 | 13 |
| AX-157982503 | 5 | 51.41 | KV453028.1 | 12776911 | 13-scf00114 | 13 |
| AX-157982504 | 5 | 51.41 | KV453028.1 | 12777612 | 13-scf00114 | 13 |
| AX-158406982 | 5 | 51.41 | KV453028.1 | 12791840 | 13-scf00114 | 13 |
| AX-157982512 | 5 | 51.41 | KV453028.1 | 12795280 | 13-scf00114 | 13 |
| AX-157855588 | 5 | 51.41 | KV453028.1 | 12796903 | 13-scf00114 | 13 |
| AX-158379576 | 5 | 51.41 | KV453028.1 | 12798773 | 13-scf00114 | 13 |
| AX-157755460 | 5 | 51.41 | KV453028.1 | 12803793 | 13-scf00114 | 13 |
| AX-157982520 | 5 | 51.41 | KV453028.1 | 12809723 | 13-scf00114 | 13 |
| AX-157782601 | 5 | 51.41 | KV453028.1 | 12814610 | 13-scf00114 | 13 |
| AX-158406983 | 5 | 51.41 | KV453028.1 | 12814724 | 13-scf00114 | 13 |
| AX-157722759 | 5 | 51.41 | KV453028.1 | 12817868 | 13-scf00114 | 13 |
| AX-158405473 | 5 | 51.41 | KV453028.1 | 12818044 | 13-scf00114 | 13 |
| AX-157855589 | 5 | 51.41 | KV453028.1 | 12820365 | 13-scf00114 | 13 |
| AX-157855590 | 5 | 51.41 | KV453028.1 | 12823255 | 13-scf00114 | 13 |
| AX-157982525 | 5 | 51.41 | KV453028.1 | 12823748 | 13-scf00114 | 13 |
| AX-157982526 | 5 | 51.41 | KV453028.1 | 12824917 | 13-scf00114 | 13 |
| AX-157982527 | 5 | 51.41 | KV453028.1 | 12830461 | 13-scf00114 | 13 |
| AX-157817845 | 5 | 51.41 | KV453028.1 | 12836112 | 13-scf00114 | 13 |
| AX-158422156 | 5 | 51.41 | KV453028.1 | 12838810 | 13-scf00114 | 13 |
| AX-157817846 | 5 | 51.41 | KV453028.1 | 12840082 | 13-scf00114 | 13 |
| AX-157982529 | 5 | 51.41 | KV453028.1 | 12855394 | 13-scf00114 | 13 |
| AX-157865051 | 5 | 51.41 | KV453028.1 | 12867441 | 13-scf00114 | 13 |
| AX-157982532 | 5 | 51.41 | KV453028.1 | 12869414 | 13-scf00114 | 13 |
| AX-157982533 | 5 | 51.41 | KV453028.1 | 12870167 | 13-scf00114 | 13 |
| AX-157775755 | 5 | 51.41 | KV453028.1 | 12871264 | 13-scf00114 | 13 |
| AX-157982536 | 5 | 51.41 | KV453028.1 | 12873811 | 13-scf00114 | 13 |
| AX-157817847 | 5 | 51.41 | KV453028.1 | 12875629 | 13-scf00114 | 13 |
| AX-157865052 | 5 | 51.41 | KV453028.1 | 12878295 | 13-scf00114 | 13 |
| AX-157982537 | 5 | 51.41 | KV453028.1 | 12883759 | 13-scf00114 | 13 |
| AX-157982539 | 5 | 51.41 | KV453028.1 | 12884446 | 13-scf00114 | 13 |
| AX-157982540 | 5 | 51.41 | KV453028.1 | 12885906 | 13-scf00114 | 13 |
| AX-157982541 | 5 | 51.41 | KV453028.1 | 12886125 | 13-scf00114 | 13 |

|              |   |       |            |          |             |    |
|--------------|---|-------|------------|----------|-------------|----|
| AX-157982545 | 5 | 51.41 | KV453028.1 | 12894121 | 13-scf00114 | 13 |
| AX-157817848 | 5 | 51.41 | KV453028.1 | 12902958 | 13-scf00114 | 13 |
| AX-157982549 | 5 | 51.41 | KV453028.1 | 12911227 | 13-scf00114 | 13 |
| AX-157855592 | 5 | 51.41 | KV453028.1 | 12911915 | 13-scf00114 | 13 |
| AX-157855593 | 5 | 51.41 | KV453028.1 | 12913208 | 13-scf00114 | 13 |
| AX-157855596 | 5 | 51.41 | KV453028.1 | 12916193 | 13-scf00114 | 13 |
| AX-157855597 | 5 | 51.41 | KV453028.1 | 12917391 | 13-scf00114 | 13 |
| AX-157982553 | 5 | 51.41 | KV453028.1 | 12918912 | 13-scf00114 | 13 |
| AX-157855598 | 5 | 51.41 | KV453028.1 | 12919689 | 13-scf00114 | 13 |
| AX-157982555 | 5 | 51.41 | KV453028.1 | 12920679 | 13-scf00114 | 13 |
| AX-157982556 | 5 | 51.41 | KV453028.1 | 12922730 | 13-scf00114 | 13 |
| AX-157982558 | 5 | 51.41 | KV453028.1 | 12923330 | 13-scf00114 | 13 |
| AX-157982559 | 5 | 51.41 | KV453028.1 | 12923868 | 13-scf00114 | 13 |
| AX-157982561 | 5 | 51.41 | KV453028.1 | 12938932 | 13-scf00114 | 13 |
| AX-157699985 | 5 | 51.41 | KV453028.1 | 12943696 | 13-scf00114 | 13 |
| AX-157982565 | 5 | 51.41 | KV453028.1 | 12950155 | 13-scf00114 | 13 |
| AX-157982570 | 5 | 51.41 | KV453028.1 | 12960951 | 13-scf00114 | 13 |
| AX-157817849 | 5 | 51.41 | KV453028.1 | 12963852 | 13-scf00114 | 13 |
| AX-157982572 | 5 | 51.41 | KV453028.1 | 12966221 | 13-scf00114 | 13 |
| AX-157982573 | 5 | 51.41 | KV453028.1 | 12966526 | 13-scf00114 | 13 |
| AX-157817850 | 5 | 51.41 | KV453028.1 | 12969039 | 13-scf00114 | 13 |
| AX-157982576 | 5 | 51.41 | KV453028.1 | 12974237 | 13-scf00114 | 13 |
| AX-157855599 | 5 | 51.41 | KV453028.1 | 12978876 | 13-scf00114 | 13 |
| AX-157855600 | 5 | 51.41 | KV453028.1 | 12979364 | 13-scf00114 | 13 |
| AX-157817851 | 5 | 51.41 | KV453028.1 | 12979475 | 13-scf00114 | 13 |
| AX-157982577 | 5 | 51.41 | KV453028.1 | 12986374 | 13-scf00114 | 13 |
| AX-157982578 | 5 | 51.41 | KV453028.1 | 12998996 | 13-scf00114 | 13 |
| AX-157690582 | 5 | 51.41 | KV453028.1 | 13014882 | 13-scf00114 | 13 |
| AX-158406987 | 5 | 51.41 | KV453028.1 | 13016520 | 13-scf00114 | 13 |
| AX-158405475 | 5 | 51.41 | KV453028.1 | 13016643 | 13-scf00114 | 13 |
| AX-158405476 | 5 | 51.41 | KV453028.1 | 13016728 | 13-scf00114 | 13 |
| AX-158406988 | 5 | 51.41 | KV453028.1 | 13017753 | 13-scf00114 | 13 |
| AX-157982582 | 5 | 51.41 | KV453028.1 | 13020088 | 13-scf00114 | 13 |
| AX-158406989 | 5 | 51.41 | KV453028.1 | 13023237 | 13-scf00114 | 13 |
| AX-157720570 | 5 | 51.41 | KV453028.1 | 13038939 | 13-scf00114 | 13 |
| AX-157982590 | 5 | 51.41 | KV453028.1 | 13043455 | 13-scf00114 | 13 |
| AX-157817853 | 5 | 51.41 | KV453028.1 | 13049697 | 13-scf00114 | 13 |
| AX-158406990 | 5 | 51.41 | KV453028.1 | 13050689 | 13-scf00114 | 13 |
| AX-157817854 | 5 | 51.41 | KV453028.1 | 13051415 | 13-scf00114 | 13 |
| AX-157865053 | 5 | 51.41 | KV453028.1 | 13052600 | 13-scf00114 | 13 |
| AX-157710460 | 5 | 51.41 | KV453028.1 | 13054558 | 13-scf00114 | 13 |
| AX-157982592 | 5 | 51.41 | KV453028.1 | 13056971 | 13-scf00114 | 13 |
| AX-157982596 | 5 | 51.41 | KV453028.1 | 13071588 | 13-scf00114 | 13 |
| AX-157982597 | 5 | 51.41 | KV453028.1 | 13072367 | 13-scf00114 | 13 |
| AX-157982598 | 5 | 51.41 | KV453028.1 | 13079832 | 13-scf00114 | 13 |
| AX-158406993 | 5 | 51.41 | KV453028.1 | 13084321 | 13-scf00114 | 13 |
| AX-157982600 | 5 | 51.41 | KV453028.1 | 13084835 | 13-scf00114 | 13 |
| AX-157982601 | 5 | 51.41 | KV453028.1 | 13085090 | 13-scf00114 | 13 |
| AX-157982602 | 5 | 51.41 | KV453028.1 | 13090914 | 13-scf00114 | 13 |
| AX-158406995 | 5 | 51.41 | KV453028.1 | 13091605 | 13-scf00114 | 13 |
| AX-158406996 | 5 | 51.41 | KV453028.1 | 13091678 | 13-scf00114 | 13 |

|              |   |        |             |          |             |    |
|--------------|---|--------|-------------|----------|-------------|----|
| AX-157982603 | 5 | 51.41  | KV453028.1  | 13092975 | 13-scf00114 | 13 |
| AX-157698095 | 5 | 51.41  | KV453028.1  | 13093994 | 13-scf00114 | 13 |
| AX-157817855 | 5 | 51.41  | KV453028.1  | 13095705 | 13-scf00114 | 13 |
| AX-157817856 | 5 | 51.41  | KV453028.1  | 13099845 | 13-scf00114 | 13 |
| AX-157982606 | 5 | 51.41  | KV453028.1  | 13106357 | 13-scf00114 | 13 |
| AX-157982607 | 5 | 51.41  | KV453028.1  | 13106829 | 13-scf00114 | 13 |
| AX-157982608 | 5 | 51.41  | KV453028.1  | 13110756 | 13-scf00114 | 13 |
| AX-157855602 | 5 | 51.41  | KV453028.1  | 13119533 | 13-scf00114 | 13 |
| AX-157982611 | 5 | 51.41  | KV453028.1  | 13119805 | 13-scf00114 | 13 |
| AX-157855603 | 5 | 51.41  | KV453028.1  | 13120028 | 13-scf00114 | 13 |
| AX-157982612 | 5 | 51.41  | KV453028.1  | 13128367 | 13-scf00114 | 13 |
| AX-157982614 | 5 | 51.41  | KV453028.1  | 13130628 | 13-scf00114 | 13 |
| AX-157855604 | 5 | 51.41  | KV453028.1  | 13141799 | 13-scf00114 | 13 |
| AX-157982618 | 5 | 51.41  | KV453028.1  | 13144119 | 13-scf00114 | 13 |
| AX-158406998 | 5 | 51.41  | KV453028.1  | 13159534 | 13-scf00114 | 13 |
| AX-158405478 | 5 | 51.41  | KV453028.1  | 13167286 | 13-scf00114 | 13 |
| AX-158405480 | 5 | 51.41  | KV453028.1  | 13176024 | 13-scf00114 | 13 |
| AX-158407000 | 5 | 51.41  | KV453028.1  | 13176835 | 13-scf00114 | 13 |
| AX-158407003 | 5 | 51.41  | KV453028.1  | 13178170 | 13-scf00114 | 13 |
| AX-158407007 | 5 | 51.41  | KV453028.1  | 13184274 | 13-scf00114 | 13 |
| AX-157817860 | 5 | 51.41  | KV453028.1  | 13203733 | 13-scf00114 | 13 |
| AX-157817861 | 5 | 51.41  | KV453028.1  | 13205203 | 13-scf00114 | 13 |
| AX-157817862 | 5 | 51.41  | KV453028.1  | 13214525 | 13-scf00114 | 13 |
| AX-158407009 | 5 | 51.41  | KV453028.1  | 13216420 | 13-scf00114 | 13 |
| AX-157982632 | 5 | 51.41  | KV453028.1  | 13218769 | 13-scf00114 | 13 |
| AX-157817864 | 5 | 51.41  | KV453028.1  | 13229723 | 13-scf00114 | 13 |
| AX-157817865 | 5 | 51.41  | KV453028.1  | 13230080 | 13-scf00114 | 13 |
| AX-157711453 | 5 | 51.41  | KV453028.1  | 13239971 | 13-scf00114 | 13 |
| AX-157855617 | 5 | 51.41  | KV453028.1  | 13331381 | 13-scf00114 | 13 |
| AX-157982822 | 5 | 51.41  | KV453028.1  | 13569570 | 13-scf00114 | 13 |
| AX-157982846 | 5 | 51.41  | KV453028.1  | 13594567 | 13-scf00114 | 13 |
| AX-157983084 | 5 | 51.41  | KV453028.1  | 13798007 | 13-scf00114 | 13 |
| AX-157706675 | 5 | 51.41  | 3ML01032724 | 542      | scf08351_1  | UN |
| AX-157707040 | 5 | 51.41  | 3ML01033383 | 107      | scf09030_1  | UN |
| AX-157981704 | 5 | 51.629 | KV453028.1  | 11672736 | 13-scf00114 | 13 |
| AX-158405470 | 5 | 51.629 | KV453028.1  | 12602783 | 13-scf00114 | 13 |
| AX-157982427 | 5 | 51.629 | KV453028.1  | 12626369 | 13-scf00114 | 13 |
| AX-157982580 | 5 | 51.629 | KV453028.1  | 13000309 | 13-scf00114 | 13 |
| AX-157982583 | 5 | 51.629 | KV453028.1  | 13021653 | 13-scf00114 | 13 |
| AX-157755426 | 5 | 51.629 | KV453028.1  | 13035371 | 13-scf00114 | 13 |
| AX-157982709 | 5 | 51.629 | KV453028.1  | 13387753 | 13-scf00114 | 13 |
| AX-157744183 | 5 | 51.629 | KV453028.1  | 13391243 | 13-scf00114 | 13 |
| AX-157817888 | 5 | 51.629 | KV453028.1  | 13391361 | 13-scf00114 | 13 |
| AX-157817889 | 5 | 51.629 | KV453028.1  | 13391437 | 13-scf00114 | 13 |
| AX-157817890 | 5 | 51.629 | KV453028.1  | 13391593 | 13-scf00114 | 13 |
| AX-157817891 | 5 | 51.629 | KV453028.1  | 13395693 | 13-scf00114 | 13 |
| AX-158407016 | 5 | 51.629 | KV453028.1  | 13465662 | 13-scf00114 | 13 |
| AX-157817913 | 5 | 51.629 | KV453028.1  | 13540173 | 13-scf00114 | 13 |
| AX-157982786 | 5 | 51.629 | KV453028.1  | 13541095 | 13-scf00114 | 13 |
| AX-157817914 | 5 | 51.629 | KV453028.1  | 13541461 | 13-scf00114 | 13 |
| AX-157749951 | 5 | 51.629 | KV453028.1  | 13543572 | 13-scf00114 | 13 |



|              |   |        |            |          |             |    |
|--------------|---|--------|------------|----------|-------------|----|
| AX-157982887 | 5 | 51.629 | KV453028.1 | 13627263 | 13-scf00114 | 13 |
| AX-157982892 | 5 | 51.629 | KV453028.1 | 13631820 | 13-scf00114 | 13 |
| AX-157982942 | 5 | 51.629 | KV453028.1 | 13682748 | 13-scf00114 | 13 |
| AX-157982943 | 5 | 51.629 | KV453028.1 | 13683476 | 13-scf00114 | 13 |
| AX-157983279 | 5 | 51.629 | KV453028.1 | 13982628 | 13-scf00114 | 13 |
| AX-157758283 | 5 | 51.629 | KV453028.1 | 14027240 | 13-scf00114 | 13 |
| AX-157983376 | 5 | 51.629 | KV453028.1 | 14071588 | 13-scf00114 | 13 |
| AX-157983407 | 5 | 51.629 | KV453028.1 | 14099620 | 13-scf00114 | 13 |
| AX-157983411 | 5 | 51.629 | KV453028.1 | 14100744 | 13-scf00114 | 13 |
| AX-157755312 | 5 | 51.738 | KV453028.1 | 13388233 | 13-scf00114 | 13 |
| AX-157982710 | 5 | 51.738 | KV453028.1 | 13390270 | 13-scf00114 | 13 |
| AX-157982909 | 5 | 51.738 | KV453028.1 | 13651417 | 13-scf00114 | 13 |
| AX-157817924 | 5 | 51.738 | KV453028.1 | 13654023 | 13-scf00114 | 13 |
| AX-157817925 | 5 | 51.738 | KV453028.1 | 13654299 | 13-scf00114 | 13 |
| AX-157982912 | 5 | 51.738 | KV453028.1 | 13654535 | 13-scf00114 | 13 |
| AX-157982915 | 5 | 51.738 | KV453028.1 | 13655583 | 13-scf00114 | 13 |
| AX-157982921 | 5 | 51.738 | KV453028.1 | 13658598 | 13-scf00114 | 13 |
| AX-157982925 | 5 | 51.738 | KV453028.1 | 13663167 | 13-scf00114 | 13 |
| AX-157982927 | 5 | 51.738 | KV453028.1 | 13665695 | 13-scf00114 | 13 |
| AX-157817929 | 5 | 51.738 | KV453028.1 | 13672766 | 13-scf00114 | 13 |
| AX-157982933 | 5 | 51.738 | KV453028.1 | 13674769 | 13-scf00114 | 13 |
| AX-157982935 | 5 | 51.738 | KV453028.1 | 13675391 | 13-scf00114 | 13 |
| AX-157817930 | 5 | 51.738 | KV453028.1 | 13677092 | 13-scf00114 | 13 |
| AX-157982945 | 5 | 51.738 | KV453028.1 | 13684142 | 13-scf00114 | 13 |
| AX-157817932 | 5 | 51.738 | KV453028.1 | 13690244 | 13-scf00114 | 13 |
| AX-157982957 | 5 | 51.738 | KV453028.1 | 13692584 | 13-scf00114 | 13 |
| AX-157982959 | 5 | 51.738 | KV453028.1 | 13692952 | 13-scf00114 | 13 |
| AX-157982960 | 5 | 51.738 | KV453028.1 | 13693163 | 13-scf00114 | 13 |
| AX-157982962 | 5 | 51.738 | KV453028.1 | 13693967 | 13-scf00114 | 13 |
| AX-157982979 | 5 | 51.738 | KV453028.1 | 13707236 | 13-scf00114 | 13 |
| AX-157982997 | 5 | 51.738 | KV453028.1 | 13721706 | 13-scf00114 | 13 |
| AX-157983000 | 5 | 51.738 | KV453028.1 | 13722905 | 13-scf00114 | 13 |
| AX-157983011 | 5 | 51.738 | KV453028.1 | 13729997 | 13-scf00114 | 13 |
| AX-157983015 | 5 | 51.738 | KV453028.1 | 13732767 | 13-scf00114 | 13 |
| AX-157983039 | 5 | 51.738 | KV453028.1 | 13753975 | 13-scf00114 | 13 |
| AX-157983043 | 5 | 51.738 | KV453028.1 | 13755769 | 13-scf00114 | 13 |
| AX-157983085 | 5 | 51.738 | KV453028.1 | 13798653 | 13-scf00114 | 13 |
| AX-157709166 | 5 | 51.738 | KV453028.1 | 14004029 | 13-scf00114 | 13 |
| AX-157983671 | 5 | 51.738 | KV453028.1 | 14335294 | 13-scf00114 | 13 |
| AX-157983019 | 5 | 51.791 | KV453028.1 | 13736096 | 13-scf00114 | 13 |
| AX-157978640 | 5 | 51.847 | KV453028.1 | 6563300  | 13-scf00114 | 13 |
| AX-157716919 | 5 | 51.847 | KV453028.1 | 11343308 | 13-scf00114 | 13 |
| AX-157817751 | 5 | 51.847 | KV453028.1 | 11347724 | 13-scf00114 | 13 |
| AX-157981350 | 5 | 51.847 | KV453028.1 | 11351731 | 13-scf00114 | 13 |
| AX-157981352 | 5 | 51.847 | KV453028.1 | 11352662 | 13-scf00114 | 13 |
| AX-157981354 | 5 | 51.847 | KV453028.1 | 11353672 | 13-scf00114 | 13 |
| AX-157981355 | 5 | 51.847 | KV453028.1 | 11354702 | 13-scf00114 | 13 |
| AX-157981358 | 5 | 51.847 | KV453028.1 | 11356128 | 13-scf00114 | 13 |
| AX-157981368 | 5 | 51.847 | KV453028.1 | 11363878 | 13-scf00114 | 13 |
| AX-157981376 | 5 | 51.847 | KV453028.1 | 11377554 | 13-scf00114 | 13 |
| AX-157981395 | 5 | 51.847 | KV453028.1 | 11392380 | 13-scf00114 | 13 |

|              |   |        |            |          |             |    |
|--------------|---|--------|------------|----------|-------------|----|
| AX-157981418 | 5 | 51.847 | KV453028.1 | 11409540 | 13-scf00114 | 13 |
| AX-157981556 | 5 | 51.847 | KV453028.1 | 11517726 | 13-scf00114 | 13 |
| AX-157981594 | 5 | 51.847 | KV453028.1 | 11548503 | 13-scf00114 | 13 |
| AX-157981596 | 5 | 51.847 | KV453028.1 | 11550799 | 13-scf00114 | 13 |
| AX-157981707 | 5 | 51.847 | KV453028.1 | 11675737 | 13-scf00114 | 13 |
| AX-157981762 | 5 | 51.847 | KV453028.1 | 11729670 | 13-scf00114 | 13 |
| AX-157981775 | 5 | 51.847 | KV453028.1 | 11752867 | 13-scf00114 | 13 |
| AX-157981782 | 5 | 51.847 | KV453028.1 | 11762771 | 13-scf00114 | 13 |
| AX-157981799 | 5 | 51.847 | KV453028.1 | 11778556 | 13-scf00114 | 13 |
| AX-157817786 | 5 | 51.847 | KV453028.1 | 11781699 | 13-scf00114 | 13 |
| AX-157981817 | 5 | 51.847 | KV453028.1 | 11796510 | 13-scf00114 | 13 |
| AX-157981949 | 5 | 51.847 | KV453028.1 | 11954638 | 13-scf00114 | 13 |
| AX-157982166 | 5 | 51.847 | KV453028.1 | 12263085 | 13-scf00114 | 13 |
| AX-157982168 | 5 | 51.847 | KV453028.1 | 12264818 | 13-scf00114 | 13 |
| AX-157982170 | 5 | 51.847 | KV453028.1 | 12265649 | 13-scf00114 | 13 |
| AX-157982704 | 5 | 51.847 | KV453028.1 | 13376374 | 13-scf00114 | 13 |
| AX-157982906 | 5 | 51.847 | KV453028.1 | 13650730 | 13-scf00114 | 13 |
| AX-157982917 | 5 | 51.847 | KV453028.1 | 13656621 | 13-scf00114 | 13 |
| AX-157982984 | 5 | 51.847 | KV453028.1 | 13712059 | 13-scf00114 | 13 |
| AX-158405485 | 5 | 51.847 | KV453028.1 | 13744399 | 13-scf00114 | 13 |
| AX-157983027 | 5 | 51.847 | KV453028.1 | 13744862 | 13-scf00114 | 13 |
| AX-157983032 | 5 | 51.847 | KV453028.1 | 13748061 | 13-scf00114 | 13 |
| AX-157983033 | 5 | 51.847 | KV453028.1 | 13748455 | 13-scf00114 | 13 |
| AX-157983035 | 5 | 51.847 | KV453028.1 | 13749024 | 13-scf00114 | 13 |
| AX-157698026 | 5 | 51.847 | KV453028.1 | 13749628 | 13-scf00114 | 13 |
| AX-157983038 | 5 | 51.847 | KV453028.1 | 13752522 | 13-scf00114 | 13 |
| AX-157983053 | 5 | 51.847 | KV453028.1 | 13765528 | 13-scf00114 | 13 |
| AX-157875777 | 5 | 51.847 | KV453028.1 | 13766073 | 13-scf00114 | 13 |
| AX-157983054 | 5 | 51.847 | KV453028.1 | 13766365 | 13-scf00114 | 13 |
| AX-157983067 | 5 | 51.847 | KV453028.1 | 13781584 | 13-scf00114 | 13 |
| AX-157983070 | 5 | 51.847 | KV453028.1 | 13784696 | 13-scf00114 | 13 |
| AX-157983074 | 5 | 51.847 | KV453028.1 | 13786157 | 13-scf00114 | 13 |
| AX-157983080 | 5 | 51.847 | KV453028.1 | 13793236 | 13-scf00114 | 13 |
| AX-157817939 | 5 | 51.847 | KV453028.1 | 13796692 | 13-scf00114 | 13 |
| AX-157983087 | 5 | 51.847 | KV453028.1 | 13800382 | 13-scf00114 | 13 |
| AX-157983089 | 5 | 51.847 | KV453028.1 | 13803464 | 13-scf00114 | 13 |
| AX-157710489 | 5 | 51.847 | KV453028.1 | 13803823 | 13-scf00114 | 13 |
| AX-157817940 | 5 | 51.847 | KV453028.1 | 13804639 | 13-scf00114 | 13 |
| AX-157983090 | 5 | 51.847 | KV453028.1 | 13808264 | 13-scf00114 | 13 |
| AX-157983092 | 5 | 51.847 | KV453028.1 | 13810756 | 13-scf00114 | 13 |
| AX-157983093 | 5 | 51.847 | KV453028.1 | 13812649 | 13-scf00114 | 13 |
| AX-157983095 | 5 | 51.847 | KV453028.1 | 13815249 | 13-scf00114 | 13 |
| AX-157983096 | 5 | 51.847 | KV453028.1 | 13815953 | 13-scf00114 | 13 |
| AX-157716578 | 5 | 51.847 | KV453028.1 | 13817090 | 13-scf00114 | 13 |
| AX-157817944 | 5 | 51.847 | KV453028.1 | 13817684 | 13-scf00114 | 13 |
| AX-157983100 | 5 | 51.847 | KV453028.1 | 13818593 | 13-scf00114 | 13 |
| AX-157817945 | 5 | 51.847 | KV453028.1 | 13819432 | 13-scf00114 | 13 |
| AX-157817946 | 5 | 51.847 | KV453028.1 | 13819683 | 13-scf00114 | 13 |
| AX-157983101 | 5 | 51.847 | KV453028.1 | 13820280 | 13-scf00114 | 13 |
| AX-157983103 | 5 | 51.847 | KV453028.1 | 13823054 | 13-scf00114 | 13 |
| AX-157817947 | 5 | 51.847 | KV453028.1 | 13825443 | 13-scf00114 | 13 |

|              |   |        |            |          |             |    |
|--------------|---|--------|------------|----------|-------------|----|
| AX-157983108 | 5 | 51.847 | KV453028.1 | 13827497 | 13-scf00114 | 13 |
| AX-157983110 | 5 | 51.847 | KV453028.1 | 13828095 | 13-scf00114 | 13 |
| AX-157983115 | 5 | 51.847 | KV453028.1 | 13831274 | 13-scf00114 | 13 |
| AX-157724176 | 5 | 51.847 | KV453028.1 | 13831952 | 13-scf00114 | 13 |
| AX-157983118 | 5 | 51.847 | KV453028.1 | 13834378 | 13-scf00114 | 13 |
| AX-157983119 | 5 | 51.847 | KV453028.1 | 13835105 | 13-scf00114 | 13 |
| AX-157983122 | 5 | 51.847 | KV453028.1 | 13835969 | 13-scf00114 | 13 |
| AX-157983131 | 5 | 51.847 | KV453028.1 | 13841641 | 13-scf00114 | 13 |
| AX-157983133 | 5 | 51.847 | KV453028.1 | 13843375 | 13-scf00114 | 13 |
| AX-157983135 | 5 | 51.847 | KV453028.1 | 13844609 | 13-scf00114 | 13 |
| AX-157983142 | 5 | 51.847 | KV453028.1 | 13850198 | 13-scf00114 | 13 |
| AX-157983235 | 5 | 51.847 | KV453028.1 | 13919530 | 13-scf00114 | 13 |
| AX-157983253 | 5 | 51.847 | KV453028.1 | 13933143 | 13-scf00114 | 13 |
| AX-157982999 | 5 | 51.956 | KV453028.1 | 13722383 | 13-scf00114 | 13 |
| AX-157983062 | 5 | 51.956 | KV453028.1 | 13775146 | 13-scf00114 | 13 |
| AX-157983078 | 5 | 51.956 | KV453028.1 | 13791549 | 13-scf00114 | 13 |
| AX-157983082 | 5 | 51.956 | KV453028.1 | 13793594 | 13-scf00114 | 13 |
| AX-157740144 | 5 | 51.956 | KV453028.1 | 13833706 | 13-scf00114 | 13 |
| AX-157983151 | 5 | 51.956 | KV453028.1 | 13857086 | 13-scf00114 | 13 |
| AX-157983159 | 5 | 51.956 | KV453028.1 | 13859780 | 13-scf00114 | 13 |
| AX-157983165 | 5 | 51.956 | KV453028.1 | 13863927 | 13-scf00114 | 13 |
| AX-157983178 | 5 | 51.956 | KV453028.1 | 13873399 | 13-scf00114 | 13 |
| AX-157983179 | 5 | 51.956 | KV453028.1 | 13876898 | 13-scf00114 | 13 |
| AX-157983185 | 5 | 51.956 | KV453028.1 | 13880025 | 13-scf00114 | 13 |
| AX-157983187 | 5 | 51.956 | KV453028.1 | 13882038 | 13-scf00114 | 13 |
| AX-157745900 | 5 | 51.956 | KV453028.1 | 13884216 | 13-scf00114 | 13 |
| AX-157983193 | 5 | 51.956 | KV453028.1 | 13886916 | 13-scf00114 | 13 |
| AX-157983197 | 5 | 51.956 | KV453028.1 | 13890261 | 13-scf00114 | 13 |
| AX-157983199 | 5 | 51.956 | KV453028.1 | 13890797 | 13-scf00114 | 13 |
| AX-157717760 | 5 | 51.956 | KV453028.1 | 13891613 | 13-scf00114 | 13 |
| AX-157751280 | 5 | 51.956 | KV453028.1 | 13893179 | 13-scf00114 | 13 |
| AX-157983206 | 5 | 51.956 | KV453028.1 | 13895630 | 13-scf00114 | 13 |
| AX-157983209 | 5 | 51.956 | KV453028.1 | 13898297 | 13-scf00114 | 13 |
| AX-157983207 | 5 | 51.984 | KV453028.1 | 13896253 | 13-scf00114 | 13 |
| AX-157983041 | 5 | 52.066 | KV453028.1 | 13754870 | 13-scf00114 | 13 |
| AX-157983236 | 5 | 52.066 | KV453028.1 | 13919768 | 13-scf00114 | 13 |
| AX-157983238 | 5 | 52.066 | KV453028.1 | 13920484 | 13-scf00114 | 13 |
| AX-157983239 | 5 | 52.066 | KV453028.1 | 13920969 | 13-scf00114 | 13 |
| AX-158407027 | 5 | 52.066 | KV453028.1 | 13924422 | 13-scf00114 | 13 |
| AX-157983246 | 5 | 52.066 | KV453028.1 | 13928343 | 13-scf00114 | 13 |
| AX-157983248 | 5 | 52.066 | KV453028.1 | 13930195 | 13-scf00114 | 13 |
| AX-157983254 | 5 | 52.113 | KV453028.1 | 13934063 | 13-scf00114 | 13 |
| AX-157983255 | 5 | 52.149 | KV453028.1 | 13935045 | 13-scf00114 | 13 |
| AX-157982669 | 5 | 52.175 | KV453028.1 | 13294918 | 13-scf00114 | 13 |
| AX-157869743 | 5 | 52.175 | KV453028.1 | 13460873 | 13-scf00114 | 13 |
| AX-157983217 | 5 | 52.175 | KV453028.1 | 13906339 | 13-scf00114 | 13 |
| AX-157726608 | 5 | 52.175 | KV453028.1 | 13924502 | 13-scf00114 | 13 |
| AX-157983256 | 5 | 52.175 | KV453028.1 | 13936265 | 13-scf00114 | 13 |
| AX-157983259 | 5 | 52.175 | KV453028.1 | 13941754 | 13-scf00114 | 13 |
| AX-157983263 | 5 | 52.175 | KV453028.1 | 13949309 | 13-scf00114 | 13 |
| AX-157741834 | 5 | 52.175 | KV453028.1 | 13949710 | 13-scf00114 | 13 |

|              |   |        |            |          |             |    |
|--------------|---|--------|------------|----------|-------------|----|
| AX-157817953 | 5 | 52.175 | KV453028.1 | 13950799 | 13-scf00114 | 13 |
| AX-157817957 | 5 | 52.175 | KV453028.1 | 13959778 | 13-scf00114 | 13 |
| AX-157707573 | 5 | 52.175 | KV453028.1 | 14178114 | 13-scf00114 | 13 |
| AX-157982944 | 5 | 52.244 | KV453028.1 | 13683840 | 13-scf00114 | 13 |
| AX-157983026 | 5 | 52.244 | KV453028.1 | 13741478 | 13-scf00114 | 13 |
| AX-157744358 | 5 | 52.244 | KV453028.1 | 13762390 | 13-scf00114 | 13 |
| AX-157983218 | 5 | 52.244 | KV453028.1 | 13906979 | 13-scf00114 | 13 |
| AX-157983258 | 5 | 52.244 | KV453028.1 | 13941090 | 13-scf00114 | 13 |
| AX-157983264 | 5 | 52.244 | KV453028.1 | 13951292 | 13-scf00114 | 13 |
| AX-157747807 | 5 | 52.284 | KV453028.1 | 13723939 | 13-scf00114 | 13 |
| AX-157983143 | 5 | 52.284 | KV453028.1 | 13850404 | 13-scf00114 | 13 |
| AX-158407024 | 5 | 52.284 | KV453028.1 | 13853368 | 13-scf00114 | 13 |
| AX-157983251 | 5 | 52.284 | KV453028.1 | 13932637 | 13-scf00114 | 13 |
| AX-157983271 | 5 | 52.284 | KV453028.1 | 13964987 | 13-scf00114 | 13 |
| AX-157713478 | 5 | 52.284 | KV453028.1 | 13965625 | 13-scf00114 | 13 |
| AX-157983273 | 5 | 52.284 | KV453028.1 | 13969124 | 13-scf00114 | 13 |
| AX-157983275 | 5 | 52.284 | KV453028.1 | 13972155 | 13-scf00114 | 13 |
| AX-157983276 | 5 | 52.284 | KV453028.1 | 13974218 | 13-scf00114 | 13 |
| AX-157717523 | 5 | 52.284 | KV453028.1 | 13977119 | 13-scf00114 | 13 |
| AX-157983277 | 5 | 52.284 | KV453028.1 | 13979998 | 13-scf00114 | 13 |
| AX-157817959 | 5 | 52.284 | KV453028.1 | 13983924 | 13-scf00114 | 13 |
| AX-157983302 | 5 | 52.284 | KV453028.1 | 14009649 | 13-scf00114 | 13 |
| AX-157983160 | 5 | 52.393 | KV453028.1 | 13861323 | 13-scf00114 | 13 |
| AX-157983161 | 5 | 52.393 | KV453028.1 | 13861584 | 13-scf00114 | 13 |
| AX-157983205 | 5 | 52.393 | KV453028.1 | 13894357 | 13-scf00114 | 13 |
| AX-157983226 | 5 | 52.393 | KV453028.1 | 13910589 | 13-scf00114 | 13 |
| AX-157983280 | 5 | 52.393 | KV453028.1 | 13988305 | 13-scf00114 | 13 |
| AX-157983281 | 5 | 52.393 | KV453028.1 | 13989039 | 13-scf00114 | 13 |
| AX-157983298 | 5 | 52.393 | KV453028.1 | 14003492 | 13-scf00114 | 13 |
| AX-157983299 | 5 | 52.393 | KV453028.1 | 14006734 | 13-scf00114 | 13 |
| AX-157983372 | 5 | 52.393 | KV453028.1 | 14067274 | 13-scf00114 | 13 |
| AX-157983374 | 5 | 52.393 | KV453028.1 | 14071092 | 13-scf00114 | 13 |
| AX-157983395 | 5 | 52.393 | KV453028.1 | 14084592 | 13-scf00114 | 13 |
| AX-157750041 | 5 | 52.393 | KV453028.1 | 14090850 | 13-scf00114 | 13 |
| AX-158422161 | 5 | 52.393 | KV453028.1 | 14092752 | 13-scf00114 | 13 |
| AX-157983401 | 5 | 52.393 | KV453028.1 | 14093525 | 13-scf00114 | 13 |
| AX-157983417 | 5 | 52.393 | KV453028.1 | 14105642 | 13-scf00114 | 13 |
| AX-157983419 | 5 | 52.393 | KV453028.1 | 14109188 | 13-scf00114 | 13 |
| AX-157983432 | 5 | 52.393 | KV453028.1 | 14120366 | 13-scf00114 | 13 |
| AX-157983467 | 5 | 52.393 | KV453028.1 | 14159653 | 13-scf00114 | 13 |
| AX-157983495 | 5 | 52.393 | KV453028.1 | 14187223 | 13-scf00114 | 13 |
| AX-157983516 | 5 | 52.393 | KV453028.1 | 14202153 | 13-scf00114 | 13 |
| AX-157983526 | 5 | 52.393 | KV453028.1 | 14209645 | 13-scf00114 | 13 |
| AX-157817971 | 5 | 52.393 | KV453028.1 | 14222538 | 13-scf00114 | 13 |
| AX-157983576 | 5 | 52.393 | KV453028.1 | 14262618 | 13-scf00114 | 13 |
| AX-157983621 | 5 | 52.393 | KV453028.1 | 14301126 | 13-scf00114 | 13 |
| AX-157983739 | 5 | 52.393 | KV453028.1 | 14384533 | 13-scf00114 | 13 |
| AX-157983963 | 5 | 52.393 | KV453028.1 | 14590409 | 13-scf00114 | 13 |
| AX-157817961 | 5 | 52.502 | KV453028.1 | 13997458 | 13-scf00114 | 13 |
| AX-157983304 | 5 | 52.502 | KV453028.1 | 14011411 | 13-scf00114 | 13 |
| AX-157983308 | 5 | 52.502 | KV453028.1 | 14013240 | 13-scf00114 | 13 |

|              |   |        |            |          |             |    |
|--------------|---|--------|------------|----------|-------------|----|
| AX-157983309 | 5 | 52.502 | KV453028.1 | 14013886 | 13-scf00114 | 13 |
| AX-157983310 | 5 | 52.502 | KV453028.1 | 14014367 | 13-scf00114 | 13 |
| AX-157983312 | 5 | 52.502 | KV453028.1 | 14015453 | 13-scf00114 | 13 |
| AX-157983313 | 5 | 52.502 | KV453028.1 | 14015780 | 13-scf00114 | 13 |
| AX-157983317 | 5 | 52.502 | KV453028.1 | 14017833 | 13-scf00114 | 13 |
| AX-157983013 | 5 | 52.612 | KV453028.1 | 13731611 | 13-scf00114 | 13 |
| AX-157983098 | 5 | 52.612 | KV453028.1 | 13818086 | 13-scf00114 | 13 |
| AX-157817963 | 5 | 52.612 | KV453028.1 | 14024216 | 13-scf00114 | 13 |
| AX-157983324 | 5 | 52.612 | KV453028.1 | 14024746 | 13-scf00114 | 13 |
| AX-157983326 | 5 | 52.612 | KV453028.1 | 14025387 | 13-scf00114 | 13 |
| AX-157865057 | 5 | 52.612 | KV453028.1 | 14025893 | 13-scf00114 | 13 |
| AX-157983328 | 5 | 52.612 | KV453028.1 | 14026984 | 13-scf00114 | 13 |
| AX-157983329 | 5 | 52.612 | KV453028.1 | 14027444 | 13-scf00114 | 13 |
| AX-157983330 | 5 | 52.612 | KV453028.1 | 14029761 | 13-scf00114 | 13 |
| AX-157817964 | 5 | 52.612 | KV453028.1 | 14031443 | 13-scf00114 | 13 |
| AX-157983334 | 5 | 52.612 | KV453028.1 | 14033741 | 13-scf00114 | 13 |
| AX-157983337 | 5 | 52.612 | KV453028.1 | 14035760 | 13-scf00114 | 13 |
| AX-157983339 | 5 | 52.612 | KV453028.1 | 14037114 | 13-scf00114 | 13 |
| AX-157983340 | 5 | 52.612 | KV453028.1 | 14039452 | 13-scf00114 | 13 |
| AX-157983342 | 5 | 52.612 | KV453028.1 | 14040839 | 13-scf00114 | 13 |
| AX-157983343 | 5 | 52.612 | KV453028.1 | 14042860 | 13-scf00114 | 13 |
| AX-157983345 | 5 | 52.612 | KV453028.1 | 14043332 | 13-scf00114 | 13 |
| AX-157817965 | 5 | 52.612 | KV453028.1 | 14044059 | 13-scf00114 | 13 |
| AX-157983348 | 5 | 52.612 | KV453028.1 | 14045757 | 13-scf00114 | 13 |
| AX-157983349 | 5 | 52.612 | KV453028.1 | 14046321 | 13-scf00114 | 13 |
| AX-157983351 | 5 | 52.612 | KV453028.1 | 14047441 | 13-scf00114 | 13 |
| AX-158407030 | 5 | 52.612 | KV453028.1 | 14048804 | 13-scf00114 | 13 |
| AX-157983354 | 5 | 52.612 | KV453028.1 | 14050782 | 13-scf00114 | 13 |
| AX-157983360 | 5 | 52.612 | KV453028.1 | 14057935 | 13-scf00114 | 13 |
| AX-157983366 | 5 | 52.612 | KV453028.1 | 14063098 | 13-scf00114 | 13 |
| AX-157983369 | 5 | 52.612 | KV453028.1 | 14065214 | 13-scf00114 | 13 |
| AX-157983371 | 5 | 52.612 | KV453028.1 | 14066701 | 13-scf00114 | 13 |
| AX-157817966 | 5 | 52.612 | KV453028.1 | 14069674 | 13-scf00114 | 13 |
| AX-157817967 | 5 | 52.612 | KV453028.1 | 14069713 | 13-scf00114 | 13 |
| AX-157983378 | 5 | 52.612 | KV453028.1 | 14072109 | 13-scf00114 | 13 |
| AX-157983388 | 5 | 52.612 | KV453028.1 | 14081518 | 13-scf00114 | 13 |
| AX-157983390 | 5 | 52.612 | KV453028.1 | 14081658 | 13-scf00114 | 13 |
| AX-157983406 | 5 | 52.612 | KV453028.1 | 14098863 | 13-scf00114 | 13 |
| AX-157983409 | 5 | 52.612 | KV453028.1 | 14100049 | 13-scf00114 | 13 |
| AX-157983443 | 5 | 52.612 | KV453028.1 | 14129980 | 13-scf00114 | 13 |
| AX-157983445 | 5 | 52.612 | KV453028.1 | 14135171 | 13-scf00114 | 13 |
| AX-157983468 | 5 | 52.612 | KV453028.1 | 14164267 | 13-scf00114 | 13 |
| AX-157983469 | 5 | 52.612 | KV453028.1 | 14165140 | 13-scf00114 | 13 |
| AX-157983472 | 5 | 52.612 | KV453028.1 | 14168105 | 13-scf00114 | 13 |
| AX-157983477 | 5 | 52.612 | KV453028.1 | 14173264 | 13-scf00114 | 13 |
| AX-157983485 | 5 | 52.612 | KV453028.1 | 14179922 | 13-scf00114 | 13 |
| AX-157983490 | 5 | 52.612 | KV453028.1 | 14183819 | 13-scf00114 | 13 |
| AX-157983539 | 5 | 52.612 | KV453028.1 | 14221843 | 13-scf00114 | 13 |
| AX-157983663 | 5 | 52.612 | KV453028.1 | 14328270 | 13-scf00114 | 13 |
| AX-157983327 | 5 | 52.721 | KV453028.1 | 14026736 | 13-scf00114 | 13 |
| AX-157983352 | 5 | 52.721 | KV453028.1 | 14048369 | 13-scf00114 | 13 |

|              |   |        |            |          |             |    |
|--------------|---|--------|------------|----------|-------------|----|
| AX-157983412 | 5 | 52.721 | KV453028.1 | 14101287 | 13-scf00114 | 13 |
| AX-157983415 | 5 | 52.721 | KV453028.1 | 14103805 | 13-scf00114 | 13 |
| AX-157983423 | 5 | 52.721 | KV453028.1 | 14110884 | 13-scf00114 | 13 |
| AX-157983424 | 5 | 52.721 | KV453028.1 | 14111523 | 13-scf00114 | 13 |
| AX-157983428 | 5 | 52.721 | KV453028.1 | 14114654 | 13-scf00114 | 13 |
| AX-157983438 | 5 | 52.721 | KV453028.1 | 14124446 | 13-scf00114 | 13 |
| AX-157983440 | 5 | 52.721 | KV453028.1 | 14125389 | 13-scf00114 | 13 |
| AX-157983442 | 5 | 52.721 | KV453028.1 | 14129352 | 13-scf00114 | 13 |
| AX-157983448 | 5 | 52.721 | KV453028.1 | 14135860 | 13-scf00114 | 13 |
| AX-157983452 | 5 | 52.721 | KV453028.1 | 14137792 | 13-scf00114 | 13 |
| AX-157983464 | 5 | 52.721 | KV453028.1 | 14157641 | 13-scf00114 | 13 |
| AX-157817969 | 5 | 52.721 | KV453028.1 | 14158651 | 13-scf00114 | 13 |
| AX-157983465 | 5 | 52.721 | KV453028.1 | 14158868 | 13-scf00114 | 13 |
| AX-157983471 | 5 | 52.721 | KV453028.1 | 14166999 | 13-scf00114 | 13 |
| AX-157983475 | 5 | 52.721 | KV453028.1 | 14169735 | 13-scf00114 | 13 |
| AX-157983481 | 5 | 52.721 | KV453028.1 | 14175387 | 13-scf00114 | 13 |
| AX-157983487 | 5 | 52.721 | KV453028.1 | 14180360 | 13-scf00114 | 13 |
| AX-157983427 | 5 | 52.939 | KV453028.1 | 14114228 | 13-scf00114 | 13 |
| AX-157983430 | 5 | 52.939 | KV453028.1 | 14116525 | 13-scf00114 | 13 |
| AX-157983431 | 5 | 52.939 | KV453028.1 | 14118440 | 13-scf00114 | 13 |
| AX-157983433 | 5 | 52.939 | KV453028.1 | 14121811 | 13-scf00114 | 13 |
| AX-157983492 | 5 | 52.939 | KV453028.1 | 14184776 | 13-scf00114 | 13 |
| AX-157983502 | 5 | 52.939 | KV453028.1 | 14193164 | 13-scf00114 | 13 |
| AX-157983503 | 5 | 52.939 | KV453028.1 | 14193626 | 13-scf00114 | 13 |
| AX-157817970 | 5 | 52.939 | KV453028.1 | 14201539 | 13-scf00114 | 13 |
| AX-157983515 | 5 | 52.939 | KV453028.1 | 14201700 | 13-scf00114 | 13 |
| AX-157739736 | 5 | 52.939 | KV453028.1 | 14206747 | 13-scf00114 | 13 |
| AX-157983523 | 5 | 52.939 | KV453028.1 | 14207989 | 13-scf00114 | 13 |
| AX-157983525 | 5 | 52.939 | KV453028.1 | 14208602 | 13-scf00114 | 13 |
| AX-157983528 | 5 | 52.939 | KV453028.1 | 14211856 | 13-scf00114 | 13 |
| AX-157983531 | 5 | 52.939 | KV453028.1 | 14214456 | 13-scf00114 | 13 |
| AX-157983532 | 5 | 52.939 | KV453028.1 | 14215308 | 13-scf00114 | 13 |
| AX-157983534 | 5 | 52.939 | KV453028.1 | 14215691 | 13-scf00114 | 13 |
| AX-157983536 | 5 | 52.939 | KV453028.1 | 14219260 | 13-scf00114 | 13 |
| AX-157983540 | 5 | 52.939 | KV453028.1 | 14222803 | 13-scf00114 | 13 |
| AX-157983541 | 5 | 52.939 | KV453028.1 | 14223227 | 13-scf00114 | 13 |
| AX-157983542 | 5 | 52.939 | KV453028.1 | 14224435 | 13-scf00114 | 13 |
| AX-157983543 | 5 | 52.939 | KV453028.1 | 14228246 | 13-scf00114 | 13 |
| AX-157983544 | 5 | 52.939 | KV453028.1 | 14229042 | 13-scf00114 | 13 |
| AX-157983546 | 5 | 52.939 | KV453028.1 | 14232702 | 13-scf00114 | 13 |
| AX-157983549 | 5 | 52.939 | KV453028.1 | 14237117 | 13-scf00114 | 13 |
| AX-157983551 | 5 | 52.939 | KV453028.1 | 14238790 | 13-scf00114 | 13 |
| AX-157983553 | 5 | 52.939 | KV453028.1 | 14239878 | 13-scf00114 | 13 |
| AX-157983554 | 5 | 52.939 | KV453028.1 | 14240511 | 13-scf00114 | 13 |
| AX-157983555 | 5 | 52.939 | KV453028.1 | 14242487 | 13-scf00114 | 13 |
| AX-157775550 | 5 | 52.939 | KV453028.1 | 14245578 | 13-scf00114 | 13 |
| AX-157983564 | 5 | 52.939 | KV453028.1 | 14252051 | 13-scf00114 | 13 |
| AX-157983566 | 5 | 52.939 | KV453028.1 | 14253996 | 13-scf00114 | 13 |
| AX-157743862 | 5 | 52.939 | KV453028.1 | 14255990 | 13-scf00114 | 13 |
| AX-157983568 | 5 | 52.939 | KV453028.1 | 14256589 | 13-scf00114 | 13 |
| AX-157983615 | 5 | 52.939 | KV453028.1 | 14297731 | 13-scf00114 | 13 |

|              |   |        |            |          |             |    |
|--------------|---|--------|------------|----------|-------------|----|
| AX-157983626 | 5 | 52.939 | KV453028.1 | 14303391 | 13-scf00114 | 13 |
| AX-157983649 | 5 | 52.939 | KV453028.1 | 14318547 | 13-scf00114 | 13 |
| AX-157983665 | 5 | 52.939 | KV453028.1 | 14328911 | 13-scf00114 | 13 |
| AX-157983748 | 5 | 52.939 | KV453028.1 | 14392059 | 13-scf00114 | 13 |
| AX-157983776 | 5 | 52.939 | KV453028.1 | 14414982 | 13-scf00114 | 13 |
| AX-157983575 | 5 | 52.974 | KV453028.1 | 14261867 | 13-scf00114 | 13 |
| AX-157983577 | 5 | 53.009 | KV453028.1 | 14265062 | 13-scf00114 | 13 |
| AX-157983319 | 5 | 53.048 | KV453028.1 | 14018135 | 13-scf00114 | 13 |
| AX-157817973 | 5 | 53.048 | KV453028.1 | 14241437 | 13-scf00114 | 13 |
| AX-157983557 | 5 | 53.048 | KV453028.1 | 14243165 | 13-scf00114 | 13 |
| AX-157983565 | 5 | 53.048 | KV453028.1 | 14253459 | 13-scf00114 | 13 |
| AX-157708466 | 5 | 53.048 | KV453028.1 | 14257321 | 13-scf00114 | 13 |
| AX-157983578 | 5 | 53.048 | KV453028.1 | 14265358 | 13-scf00114 | 13 |
| AX-157983579 | 5 | 53.048 | KV453028.1 | 14266225 | 13-scf00114 | 13 |
| AX-157983580 | 5 | 53.048 | KV453028.1 | 14266388 | 13-scf00114 | 13 |
| AX-157983581 | 5 | 53.048 | KV453028.1 | 14267258 | 13-scf00114 | 13 |
| AX-157817976 | 5 | 53.048 | KV453028.1 | 14269163 | 13-scf00114 | 13 |
| AX-157983583 | 5 | 53.048 | KV453028.1 | 14270655 | 13-scf00114 | 13 |
| AX-157983584 | 5 | 53.048 | KV453028.1 | 14270859 | 13-scf00114 | 13 |
| AX-157983586 | 5 | 53.048 | KV453028.1 | 14272974 | 13-scf00114 | 13 |
| AX-157983588 | 5 | 53.048 | KV453028.1 | 14276136 | 13-scf00114 | 13 |
| AX-158407037 | 5 | 53.048 | KV453028.1 | 14276932 | 13-scf00114 | 13 |
| AX-157983589 | 5 | 53.048 | KV453028.1 | 14278340 | 13-scf00114 | 13 |
| AX-157817977 | 5 | 53.048 | KV453028.1 | 14278792 | 13-scf00114 | 13 |
| AX-157983590 | 5 | 53.048 | KV453028.1 | 14279063 | 13-scf00114 | 13 |
| AX-157983594 | 5 | 53.048 | KV453028.1 | 14281644 | 13-scf00114 | 13 |
| AX-157983601 | 5 | 53.048 | KV453028.1 | 14285834 | 13-scf00114 | 13 |
| AX-157983607 | 5 | 53.048 | KV453028.1 | 14287673 | 13-scf00114 | 13 |
| AX-157817978 | 5 | 53.048 | KV453028.1 | 14288577 | 13-scf00114 | 13 |
| AX-157983608 | 5 | 53.048 | KV453028.1 | 14289994 | 13-scf00114 | 13 |
| AX-157983610 | 5 | 53.048 | KV453028.1 | 14290480 | 13-scf00114 | 13 |
| AX-157983611 | 5 | 53.048 | KV453028.1 | 14290955 | 13-scf00114 | 13 |
| AX-157749262 | 5 | 53.048 | KV453028.1 | 14291998 | 13-scf00114 | 13 |
| AX-157983614 | 5 | 53.048 | KV453028.1 | 14296659 | 13-scf00114 | 13 |
| AX-157983628 | 5 | 53.048 | KV453028.1 | 14305508 | 13-scf00114 | 13 |
| AX-157983630 | 5 | 53.048 | KV453028.1 | 14306168 | 13-scf00114 | 13 |
| AX-157983631 | 5 | 53.048 | KV453028.1 | 14306876 | 13-scf00114 | 13 |
| AX-157983636 | 5 | 53.048 | KV453028.1 | 14309175 | 13-scf00114 | 13 |
| AX-157983637 | 5 | 53.048 | KV453028.1 | 14309609 | 13-scf00114 | 13 |
| AX-157983638 | 5 | 53.048 | KV453028.1 | 14310150 | 13-scf00114 | 13 |
| AX-157983640 | 5 | 53.048 | KV453028.1 | 14311689 | 13-scf00114 | 13 |
| AX-157983643 | 5 | 53.048 | KV453028.1 | 14314528 | 13-scf00114 | 13 |
| AX-157983646 | 5 | 53.048 | KV453028.1 | 14315875 | 13-scf00114 | 13 |
| AX-157983648 | 5 | 53.048 | KV453028.1 | 14317243 | 13-scf00114 | 13 |
| AX-157983650 | 5 | 53.048 | KV453028.1 | 14320879 | 13-scf00114 | 13 |
| AX-157983672 | 5 | 53.048 | KV453028.1 | 14336696 | 13-scf00114 | 13 |
| AX-157983725 | 5 | 53.048 | KV453028.1 | 14373609 | 13-scf00114 | 13 |
| AX-157817985 | 5 | 53.048 | KV453028.1 | 14393269 | 13-scf00114 | 13 |
| AX-157983759 | 5 | 53.048 | KV453028.1 | 14401671 | 13-scf00114 | 13 |
| AX-157817996 | 5 | 53.048 | KV453028.1 | 14488838 | 13-scf00114 | 13 |
| AX-157983871 | 5 | 53.048 | KV453028.1 | 14499814 | 13-scf00114 | 13 |

|              |   |        |            |          |             |    |
|--------------|---|--------|------------|----------|-------------|----|
| AX-157983968 | 5 | 53.048 | KV453028.1 | 14595375 | 13-scf00114 | 13 |
| AX-157884461 | 5 | 53.048 | KV453028.1 | 14817359 | 13-scf00114 | 13 |
| AX-158405501 | 5 | 53.048 | KV453028.1 | 14822280 | 13-scf00114 | 13 |
| AX-157984375 | 5 | 53.048 | KV453028.1 | 14977674 | 13-scf00114 | 13 |
| AX-157984444 | 5 | 53.048 | KV453028.1 | 15052032 | 13-scf00114 | 13 |
| AX-157984582 | 5 | 53.048 | KV453028.1 | 15154945 | 13-scf00114 | 13 |
| AX-157818084 | 5 | 53.048 | KV453028.1 | 15220059 | 13-scf00114 | 13 |
| AX-157984665 | 5 | 53.048 | KV453028.1 | 15221215 | 13-scf00114 | 13 |
| AX-157984670 | 5 | 53.048 | KV453028.1 | 15222414 | 13-scf00114 | 13 |
| AX-157984722 | 5 | 53.048 | KV453028.1 | 15266199 | 13-scf00114 | 13 |
| AX-157984811 | 5 | 53.048 | KV453028.1 | 15340799 | 13-scf00114 | 13 |
| AX-157984813 | 5 | 53.048 | KV453028.1 | 15342269 | 13-scf00114 | 13 |
| AX-157984959 | 5 | 53.048 | KV453028.1 | 15469578 | 13-scf00114 | 13 |
| AX-157984975 | 5 | 53.048 | KV453028.1 | 15480125 | 13-scf00114 | 13 |
| AX-158390457 | 5 | 53.048 | KV453028.1 | 15531803 | 13-scf00114 | 13 |
| AX-157985032 | 5 | 53.048 | KV453028.1 | 15540990 | 13-scf00114 | 13 |
| AX-157985041 | 5 | 53.048 | KV453028.1 | 15550869 | 13-scf00114 | 13 |
| AX-157985052 | 5 | 53.048 | KV453028.1 | 15562718 | 13-scf00114 | 13 |
| AX-157884468 | 5 | 53.048 | KV453028.1 | 15617481 | 13-scf00114 | 13 |
| AX-157985110 | 5 | 53.048 | KV453028.1 | 15619283 | 13-scf00114 | 13 |
| AX-157985294 | 5 | 53.048 | KV453028.1 | 15751735 | 13-scf00114 | 13 |
| AX-157818126 | 5 | 53.048 | KV453028.1 | 15765392 | 13-scf00114 | 13 |
| AX-157983676 | 5 | 53.166 | KV453028.1 | 14338104 | 13-scf00114 | 13 |
| AX-157983381 | 5 | 53.376 | KV453028.1 | 14074257 | 13-scf00114 | 13 |
| AX-157983559 | 5 | 53.376 | KV453028.1 | 14247426 | 13-scf00114 | 13 |
| AX-157983562 | 5 | 53.376 | KV453028.1 | 14248725 | 13-scf00114 | 13 |
| AX-157983597 | 5 | 53.376 | KV453028.1 | 14285181 | 13-scf00114 | 13 |
| AX-157983599 | 5 | 53.376 | KV453028.1 | 14285266 | 13-scf00114 | 13 |
| AX-157983603 | 5 | 53.376 | KV453028.1 | 14286771 | 13-scf00114 | 13 |
| AX-157983674 | 5 | 53.376 | KV453028.1 | 14337725 | 13-scf00114 | 13 |
| AX-157983684 | 5 | 53.376 | KV453028.1 | 14343459 | 13-scf00114 | 13 |
| AX-157817979 | 5 | 53.376 | KV453028.1 | 14343702 | 13-scf00114 | 13 |
| AX-157817980 | 5 | 53.376 | KV453028.1 | 14344309 | 13-scf00114 | 13 |
| AX-157983686 | 5 | 53.376 | KV453028.1 | 14348643 | 13-scf00114 | 13 |
| AX-157983688 | 5 | 53.376 | KV453028.1 | 14350202 | 13-scf00114 | 13 |
| AX-157983690 | 5 | 53.376 | KV453028.1 | 14350450 | 13-scf00114 | 13 |
| AX-157983696 | 5 | 53.376 | KV453028.1 | 14355055 | 13-scf00114 | 13 |
| AX-157983699 | 5 | 53.376 | KV453028.1 | 14357956 | 13-scf00114 | 13 |
| AX-157983705 | 5 | 53.376 | KV453028.1 | 14359127 | 13-scf00114 | 13 |
| AX-157983708 | 5 | 53.376 | KV453028.1 | 14361386 | 13-scf00114 | 13 |
| AX-157983711 | 5 | 53.376 | KV453028.1 | 14362515 | 13-scf00114 | 13 |
| AX-157817983 | 5 | 53.376 | KV453028.1 | 14364260 | 13-scf00114 | 13 |
| AX-157983714 | 5 | 53.376 | KV453028.1 | 14365564 | 13-scf00114 | 13 |
| AX-157983715 | 5 | 53.376 | KV453028.1 | 14366061 | 13-scf00114 | 13 |
| AX-157869747 | 5 | 53.376 | KV453028.1 | 14367883 | 13-scf00114 | 13 |
| AX-157983721 | 5 | 53.376 | KV453028.1 | 14370002 | 13-scf00114 | 13 |
| AX-157817984 | 5 | 53.376 | KV453028.1 | 14371153 | 13-scf00114 | 13 |
| AX-157983722 | 5 | 53.376 | KV453028.1 | 14371603 | 13-scf00114 | 13 |
| AX-157983724 | 5 | 53.376 | KV453028.1 | 14373034 | 13-scf00114 | 13 |
| AX-157983729 | 5 | 53.376 | KV453028.1 | 14378602 | 13-scf00114 | 13 |
| AX-157983730 | 5 | 53.376 | KV453028.1 | 14378886 | 13-scf00114 | 13 |



|              |   |        |            |          |             |    |
|--------------|---|--------|------------|----------|-------------|----|
| AX-157983734 | 5 | 53.376 | KV453028.1 | 14380624 | 13-scf00114 | 13 |
| AX-157983746 | 5 | 53.376 | KV453028.1 | 14391537 | 13-scf00114 | 13 |
| AX-157983752 | 5 | 53.376 | KV453028.1 | 14397100 | 13-scf00114 | 13 |
| AX-157983754 | 5 | 53.376 | KV453028.1 | 14398091 | 13-scf00114 | 13 |
| AX-157983755 | 5 | 53.376 | KV453028.1 | 14398667 | 13-scf00114 | 13 |
| AX-157983758 | 5 | 53.376 | KV453028.1 | 14400738 | 13-scf00114 | 13 |
| AX-157983761 | 5 | 53.376 | KV453028.1 | 14403248 | 13-scf00114 | 13 |
| AX-157817987 | 5 | 53.376 | KV453028.1 | 14404869 | 13-scf00114 | 13 |
| AX-157983766 | 5 | 53.376 | KV453028.1 | 14409361 | 13-scf00114 | 13 |
| AX-157983767 | 5 | 53.376 | KV453028.1 | 14409574 | 13-scf00114 | 13 |
| AX-157738799 | 5 | 53.376 | KV453028.1 | 14412431 | 13-scf00114 | 13 |
| AX-157983772 | 5 | 53.376 | KV453028.1 | 14412486 | 13-scf00114 | 13 |
| AX-157983784 | 5 | 53.376 | KV453028.1 | 14421811 | 13-scf00114 | 13 |
| AX-157698848 | 5 | 53.376 | KV453028.1 | 14422876 | 13-scf00114 | 13 |
| AX-157983786 | 5 | 53.376 | KV453028.1 | 14423249 | 13-scf00114 | 13 |
| AX-157983787 | 5 | 53.376 | KV453028.1 | 14423750 | 13-scf00114 | 13 |
| AX-157983812 | 5 | 53.376 | KV453028.1 | 14438944 | 13-scf00114 | 13 |
| AX-157983879 | 5 | 53.376 | KV453028.1 | 14510028 | 13-scf00114 | 13 |
| AX-157983897 | 5 | 53.376 | KV453028.1 | 14529043 | 13-scf00114 | 13 |
| AX-157983906 | 5 | 53.376 | KV453028.1 | 14539185 | 13-scf00114 | 13 |
| AX-157818001 | 5 | 53.376 | KV453028.1 | 14547272 | 13-scf00114 | 13 |
| AX-157983922 | 5 | 53.376 | KV453028.1 | 14551690 | 13-scf00114 | 13 |
| AX-157983985 | 5 | 53.376 | KV453028.1 | 14612618 | 13-scf00114 | 13 |
| AX-157754572 | 5 | 53.376 | KV453028.1 | 14631246 | 13-scf00114 | 13 |
| AX-157985176 | 5 | 53.376 | KV453028.1 | 15668817 | 13-scf00114 | 13 |
| AX-157983782 | 5 | 53.541 | KV453028.1 | 14420476 | 13-scf00114 | 13 |
| AX-157979585 | 5 | 53.704 | KV453028.1 | 8834950  | 13-scf00114 | 13 |
| AX-157979633 | 5 | 53.704 | KV453028.1 | 8894594  | 13-scf00114 | 13 |
| AX-157980702 | 5 | 53.704 | KV453028.1 | 10543608 | 13-scf00114 | 13 |
| AX-157981875 | 5 | 53.704 | KV453028.1 | 11862259 | 13-scf00114 | 13 |
| AX-157875771 | 5 | 53.704 | KV453028.1 | 13358124 | 13-scf00114 | 13 |
| AX-157875772 | 5 | 53.704 | KV453028.1 | 13361540 | 13-scf00114 | 13 |
| AX-157875773 | 5 | 53.704 | KV453028.1 | 13393389 | 13-scf00114 | 13 |
| AX-157752693 | 5 | 53.704 | KV453028.1 | 13396834 | 13-scf00114 | 13 |
| AX-157699304 | 5 | 53.704 | KV453028.1 | 13397298 | 13-scf00114 | 13 |
| AX-157983573 | 5 | 53.704 | KV453028.1 | 14261260 | 13-scf00114 | 13 |
| AX-157983738 | 5 | 53.704 | KV453028.1 | 14383485 | 13-scf00114 | 13 |
| AX-157983743 | 5 | 53.704 | KV453028.1 | 14388541 | 13-scf00114 | 13 |
| AX-157983751 | 5 | 53.704 | KV453028.1 | 14395254 | 13-scf00114 | 13 |
| AX-157983764 | 5 | 53.704 | KV453028.1 | 14407179 | 13-scf00114 | 13 |
| AX-157983801 | 5 | 53.704 | KV453028.1 | 14432888 | 13-scf00114 | 13 |
| AX-157983804 | 5 | 53.704 | KV453028.1 | 14434992 | 13-scf00114 | 13 |
| AX-157983805 | 5 | 53.704 | KV453028.1 | 14435779 | 13-scf00114 | 13 |
| AX-157983809 | 5 | 53.704 | KV453028.1 | 14437293 | 13-scf00114 | 13 |
| AX-157983811 | 5 | 53.704 | KV453028.1 | 14438288 | 13-scf00114 | 13 |
| AX-157983817 | 5 | 53.704 | KV453028.1 | 14441585 | 13-scf00114 | 13 |
| AX-157983819 | 5 | 53.704 | KV453028.1 | 14442775 | 13-scf00114 | 13 |
| AX-157817988 | 5 | 53.704 | KV453028.1 | 14443100 | 13-scf00114 | 13 |
| AX-157983822 | 5 | 53.704 | KV453028.1 | 14444779 | 13-scf00114 | 13 |
| AX-157983823 | 5 | 53.704 | KV453028.1 | 14447625 | 13-scf00114 | 13 |
| AX-157983825 | 5 | 53.704 | KV453028.1 | 14450184 | 13-scf00114 | 13 |

|              |   |        |            |          |             |    |
|--------------|---|--------|------------|----------|-------------|----|
| AX-157983826 | 5 | 53.704 | KV453028.1 | 14451791 | 13-scf00114 | 13 |
| AX-157983827 | 5 | 53.704 | KV453028.1 | 14452022 | 13-scf00114 | 13 |
| AX-157983828 | 5 | 53.704 | KV453028.1 | 14452264 | 13-scf00114 | 13 |
| AX-157753748 | 5 | 53.704 | KV453028.1 | 14457117 | 13-scf00114 | 13 |
| AX-157983831 | 5 | 53.704 | KV453028.1 | 14457759 | 13-scf00114 | 13 |
| AX-157817990 | 5 | 53.704 | KV453028.1 | 14460318 | 13-scf00114 | 13 |
| AX-157983839 | 5 | 53.704 | KV453028.1 | 14469061 | 13-scf00114 | 13 |
| AX-157983841 | 5 | 53.704 | KV453028.1 | 14470141 | 13-scf00114 | 13 |
| AX-158379582 | 5 | 53.704 | KV453028.1 | 14471474 | 13-scf00114 | 13 |
| AX-157745778 | 5 | 53.704 | KV453028.1 | 14475137 | 13-scf00114 | 13 |
| AX-157983844 | 5 | 53.704 | KV453028.1 | 14476213 | 13-scf00114 | 13 |
| AX-157983845 | 5 | 53.704 | KV453028.1 | 14478085 | 13-scf00114 | 13 |
| AX-157983846 | 5 | 53.704 | KV453028.1 | 14478395 | 13-scf00114 | 13 |
| AX-157983847 | 5 | 53.704 | KV453028.1 | 14478876 | 13-scf00114 | 13 |
| AX-157983848 | 5 | 53.704 | KV453028.1 | 14482188 | 13-scf00114 | 13 |
| AX-157983849 | 5 | 53.704 | KV453028.1 | 14483714 | 13-scf00114 | 13 |
| AX-157744296 | 5 | 53.704 | KV453028.1 | 14489305 | 13-scf00114 | 13 |
| AX-157983854 | 5 | 53.704 | KV453028.1 | 14491855 | 13-scf00114 | 13 |
| AX-157983858 | 5 | 53.704 | KV453028.1 | 14493613 | 13-scf00114 | 13 |
| AX-157983861 | 5 | 53.704 | KV453028.1 | 14495023 | 13-scf00114 | 13 |
| AX-157983866 | 5 | 53.704 | KV453028.1 | 14498256 | 13-scf00114 | 13 |
| AX-157983872 | 5 | 53.704 | KV453028.1 | 14504605 | 13-scf00114 | 13 |
| AX-157983875 | 5 | 53.704 | KV453028.1 | 14507392 | 13-scf00114 | 13 |
| AX-157983877 | 5 | 53.704 | KV453028.1 | 14509366 | 13-scf00114 | 13 |
| AX-158407040 | 5 | 53.704 | KV453028.1 | 14510960 | 13-scf00114 | 13 |
| AX-157758445 | 5 | 53.704 | KV453028.1 | 14512772 | 13-scf00114 | 13 |
| AX-157983883 | 5 | 53.704 | KV453028.1 | 14514719 | 13-scf00114 | 13 |
| AX-157855644 | 5 | 53.704 | KV453028.1 | 14517739 | 13-scf00114 | 13 |
| AX-157983887 | 5 | 53.704 | KV453028.1 | 14522811 | 13-scf00114 | 13 |
| AX-157983890 | 5 | 53.704 | KV453028.1 | 14523810 | 13-scf00114 | 13 |
| AX-157983893 | 5 | 53.704 | KV453028.1 | 14525625 | 13-scf00114 | 13 |
| AX-157983894 | 5 | 53.704 | KV453028.1 | 14526032 | 13-scf00114 | 13 |
| AX-157983896 | 5 | 53.704 | KV453028.1 | 14527755 | 13-scf00114 | 13 |
| AX-157983900 | 5 | 53.704 | KV453028.1 | 14530754 | 13-scf00114 | 13 |
| AX-157983905 | 5 | 53.704 | KV453028.1 | 14536559 | 13-scf00114 | 13 |
| AX-157983910 | 5 | 53.704 | KV453028.1 | 14541263 | 13-scf00114 | 13 |
| AX-157983912 | 5 | 53.704 | KV453028.1 | 14541775 | 13-scf00114 | 13 |
| AX-157748774 | 5 | 53.704 | KV453028.1 | 14544140 | 13-scf00114 | 13 |
| AX-157983914 | 5 | 53.704 | KV453028.1 | 14544967 | 13-scf00114 | 13 |
| AX-157817999 | 5 | 53.704 | KV453028.1 | 14545244 | 13-scf00114 | 13 |
| AX-157983918 | 5 | 53.704 | KV453028.1 | 14547596 | 13-scf00114 | 13 |
| AX-157983919 | 5 | 53.704 | KV453028.1 | 14550393 | 13-scf00114 | 13 |
| AX-157983930 | 5 | 53.704 | KV453028.1 | 14557617 | 13-scf00114 | 13 |
| AX-157818002 | 5 | 53.704 | KV453028.1 | 14558148 | 13-scf00114 | 13 |
| AX-157983932 | 5 | 53.704 | KV453028.1 | 14558270 | 13-scf00114 | 13 |
| AX-157983936 | 5 | 53.704 | KV453028.1 | 14560250 | 13-scf00114 | 13 |
| AX-157818003 | 5 | 53.704 | KV453028.1 | 14560399 | 13-scf00114 | 13 |
| AX-157983937 | 5 | 53.704 | KV453028.1 | 14562008 | 13-scf00114 | 13 |
| AX-157818004 | 5 | 53.704 | KV453028.1 | 14564664 | 13-scf00114 | 13 |
| AX-157983946 | 5 | 53.704 | KV453028.1 | 14565323 | 13-scf00114 | 13 |
| AX-157983948 | 5 | 53.704 | KV453028.1 | 14567851 | 13-scf00114 | 13 |

|              |   |        |            |          |             |    |
|--------------|---|--------|------------|----------|-------------|----|
| AX-157983951 | 5 | 53.704 | KV453028.1 | 14574595 | 13-scf00114 | 13 |
| AX-157983953 | 5 | 53.704 | KV453028.1 | 14576060 | 13-scf00114 | 13 |
| AX-157748380 | 5 | 53.704 | KV453028.1 | 14587755 | 13-scf00114 | 13 |
| AX-157983964 | 5 | 53.704 | KV453028.1 | 14592042 | 13-scf00114 | 13 |
| AX-157983969 | 5 | 53.704 | KV453028.1 | 14596751 | 13-scf00114 | 13 |
| AX-157818011 | 5 | 53.704 | KV453028.1 | 14597142 | 13-scf00114 | 13 |
| AX-157983970 | 5 | 53.704 | KV453028.1 | 14598952 | 13-scf00114 | 13 |
| AX-157983973 | 5 | 53.704 | KV453028.1 | 14599682 | 13-scf00114 | 13 |
| AX-157818012 | 5 | 53.704 | KV453028.1 | 14603470 | 13-scf00114 | 13 |
| AX-157983975 | 5 | 53.704 | KV453028.1 | 14604288 | 13-scf00114 | 13 |
| AX-157983981 | 5 | 53.704 | KV453028.1 | 14609352 | 13-scf00114 | 13 |
| AX-157983990 | 5 | 53.704 | KV453028.1 | 14615582 | 13-scf00114 | 13 |
| AX-157983991 | 5 | 53.704 | KV453028.1 | 14616558 | 13-scf00114 | 13 |
| AX-157818014 | 5 | 53.704 | KV453028.1 | 14618082 | 13-scf00114 | 13 |
| AX-157983999 | 5 | 53.704 | KV453028.1 | 14621092 | 13-scf00114 | 13 |
| AX-157984000 | 5 | 53.704 | KV453028.1 | 14623084 | 13-scf00114 | 13 |
| AX-157984003 | 5 | 53.704 | KV453028.1 | 14624780 | 13-scf00114 | 13 |
| AX-157984009 | 5 | 53.704 | KV453028.1 | 14627897 | 13-scf00114 | 13 |
| AX-157984012 | 5 | 53.704 | KV453028.1 | 14629884 | 13-scf00114 | 13 |
| AX-157984014 | 5 | 53.704 | KV453028.1 | 14630417 | 13-scf00114 | 13 |
| AX-157719714 | 5 | 53.704 | KV453028.1 | 14630907 | 13-scf00114 | 13 |
| AX-157818015 | 5 | 53.704 | KV453028.1 | 14633244 | 13-scf00114 | 13 |
| AX-157818016 | 5 | 53.704 | KV453028.1 | 14633523 | 13-scf00114 | 13 |
| AX-157984104 | 5 | 53.704 | KV453028.1 | 14726201 | 13-scf00114 | 13 |
| AX-157984165 | 5 | 53.704 | KV453028.1 | 14782629 | 13-scf00114 | 13 |
| AX-157984218 | 5 | 53.704 | KV453028.1 | 14856457 | 13-scf00114 | 13 |
| AX-157984220 | 5 | 53.704 | KV453028.1 | 14858024 | 13-scf00114 | 13 |
| AX-157984222 | 5 | 53.704 | KV453028.1 | 14859219 | 13-scf00114 | 13 |
| AX-157984227 | 5 | 53.704 | KV453028.1 | 14860847 | 13-scf00114 | 13 |
| AX-157818086 | 5 | 53.704 | KV453028.1 | 15225163 | 13-scf00114 | 13 |
| AX-157818088 | 5 | 53.704 | KV453028.1 | 15227359 | 13-scf00114 | 13 |
| AX-157818089 | 5 | 53.704 | KV453028.1 | 15228152 | 13-scf00114 | 13 |
| AX-157700219 | 5 | 53.704 | KV453028.1 | 15264601 | 13-scf00114 | 13 |
| AX-157818105 | 5 | 53.704 | KV453028.1 | 15340192 | 13-scf00114 | 13 |
| AX-157984890 | 5 | 53.704 | KV453028.1 | 15406845 | 13-scf00114 | 13 |
| AX-157985177 | 5 | 53.704 | KV453028.1 | 15669190 | 13-scf00114 | 13 |
| AX-157985222 | 5 | 53.704 | KV453028.1 | 15692862 | 13-scf00114 | 13 |
| AX-157755829 | 5 | 53.704 | KV453028.1 | 15779073 | 13-scf00114 | 13 |
| AX-157983923 | 5 | 53.813 | KV453028.1 | 14552409 | 13-scf00114 | 13 |
| AX-157983924 | 5 | 53.813 | KV453028.1 | 14553098 | 13-scf00114 | 13 |
| AX-157983926 | 5 | 53.813 | KV453028.1 | 14553986 | 13-scf00114 | 13 |
| AX-157983933 | 5 | 53.813 | KV453028.1 | 14559560 | 13-scf00114 | 13 |
| AX-157983941 | 5 | 53.813 | KV453028.1 | 14564229 | 13-scf00114 | 13 |
| AX-157818007 | 5 | 53.813 | KV453028.1 | 14583615 | 13-scf00114 | 13 |
| AX-157983956 | 5 | 53.813 | KV453028.1 | 14584389 | 13-scf00114 | 13 |
| AX-157983958 | 5 | 53.813 | KV453028.1 | 14587400 | 13-scf00114 | 13 |
| AX-157983961 | 5 | 53.813 | KV453028.1 | 14589664 | 13-scf00114 | 13 |
| AX-157983977 | 5 | 53.813 | KV453028.1 | 14606098 | 13-scf00114 | 13 |
| AX-157984007 | 5 | 53.813 | KV453028.1 | 14627369 | 13-scf00114 | 13 |
| AX-157984031 | 5 | 53.813 | KV453028.1 | 14648584 | 13-scf00114 | 13 |
| AX-157984033 | 5 | 53.813 | KV453028.1 | 14649567 | 13-scf00114 | 13 |

|              |   |        |            |          |             |    |
|--------------|---|--------|------------|----------|-------------|----|
| AX-157984034 | 5 | 53.813 | KV453028.1 | 14649999 | 13-scf00114 | 13 |
| AX-157743789 | 5 | 53.813 | KV453028.1 | 14654049 | 13-scf00114 | 13 |
| AX-157984039 | 5 | 53.813 | KV453028.1 | 14657599 | 13-scf00114 | 13 |
| AX-157818021 | 5 | 53.813 | KV453028.1 | 14661136 | 13-scf00114 | 13 |
| AX-157984043 | 5 | 53.813 | KV453028.1 | 14662156 | 13-scf00114 | 13 |
| AX-157984047 | 5 | 53.813 | KV453028.1 | 14663836 | 13-scf00114 | 13 |
| AX-157984048 | 5 | 53.813 | KV453028.1 | 14664211 | 13-scf00114 | 13 |
| AX-157739092 | 5 | 53.813 | KV453028.1 | 14678625 | 13-scf00114 | 13 |
| AX-157818023 | 5 | 53.813 | KV453028.1 | 14679851 | 13-scf00114 | 13 |
| AX-157984068 | 5 | 53.813 | KV453028.1 | 14692251 | 13-scf00114 | 13 |
| AX-157984050 | 5 | 53.814 | KV453028.1 | 14665000 | 13-scf00114 | 13 |
| AX-157984064 | 5 | 53.814 | KV453028.1 | 14682391 | 13-scf00114 | 13 |
| AX-157984065 | 5 | 53.814 | KV453028.1 | 14687128 | 13-scf00114 | 13 |
| AX-157818027 | 5 | 53.814 | KV453028.1 | 14691012 | 13-scf00114 | 13 |
| AX-157984261 | 5 | 53.814 | KV453028.1 | 14891084 | 13-scf00114 | 13 |
| AX-157984322 | 5 | 53.814 | KV453028.1 | 14936824 | 13-scf00114 | 13 |
| AX-157976844 | 5 | 54.066 | KV453028.1 | 4914721  | 13-scf00114 | 13 |
| AX-157976849 | 5 | 54.066 | KV453028.1 | 4929013  | 13-scf00114 | 13 |
| AX-157976914 | 5 | 54.066 | KV453028.1 | 5059939  | 13-scf00114 | 13 |
| AX-157817332 | 5 | 54.066 | KV453028.1 | 5395352  | 13-scf00114 | 13 |
| AX-157978142 | 5 | 54.066 | KV453028.1 | 6144188  | 13-scf00114 | 13 |
| AX-157817395 | 5 | 54.066 | KV453028.1 | 6235409  | 13-scf00114 | 13 |
| AX-157980913 | 5 | 54.066 | KV453028.1 | 10913053 | 13-scf00114 | 13 |
| AX-157817763 | 5 | 54.066 | KV453028.1 | 11393723 | 13-scf00114 | 13 |
| AX-157716207 | 5 | 54.066 | KV453028.1 | 11399391 | 13-scf00114 | 13 |
| AX-157981609 | 5 | 54.066 | KV453028.1 | 11567405 | 13-scf00114 | 13 |
| AX-157981632 | 5 | 54.066 | KV453028.1 | 11598920 | 13-scf00114 | 13 |
| AX-157981664 | 5 | 54.066 | KV453028.1 | 11637607 | 13-scf00114 | 13 |
| AX-157982575 | 5 | 54.066 | KV453028.1 | 12967518 | 13-scf00114 | 13 |
| AX-157983820 | 5 | 54.066 | KV453028.1 | 14444043 | 13-scf00114 | 13 |
| AX-157983835 | 5 | 54.066 | KV453028.1 | 14463033 | 13-scf00114 | 13 |
| AX-157817992 | 5 | 54.066 | KV453028.1 | 14465657 | 13-scf00114 | 13 |
| AX-157983837 | 5 | 54.066 | KV453028.1 | 14466017 | 13-scf00114 | 13 |
| AX-157983842 | 5 | 54.066 | KV453028.1 | 14473067 | 13-scf00114 | 13 |
| AX-157983851 | 5 | 54.066 | KV453028.1 | 14486463 | 13-scf00114 | 13 |
| AX-157983855 | 5 | 54.066 | KV453028.1 | 14492349 | 13-scf00114 | 13 |
| AX-157983859 | 5 | 54.066 | KV453028.1 | 14494190 | 13-scf00114 | 13 |
| AX-157983904 | 5 | 54.066 | KV453028.1 | 14532441 | 13-scf00114 | 13 |
| AX-157984052 | 5 | 54.066 | KV453028.1 | 14668000 | 13-scf00114 | 13 |
| AX-157984061 | 5 | 54.066 | KV453028.1 | 14677654 | 13-scf00114 | 13 |
| AX-157984074 | 5 | 54.066 | KV453028.1 | 14701788 | 13-scf00114 | 13 |
| AX-157984076 | 5 | 54.066 | KV453028.1 | 14703567 | 13-scf00114 | 13 |
| AX-157984079 | 5 | 54.066 | KV453028.1 | 14704536 | 13-scf00114 | 13 |
| AX-157984081 | 5 | 54.066 | KV453028.1 | 14705190 | 13-scf00114 | 13 |
| AX-157984082 | 5 | 54.066 | KV453028.1 | 14705706 | 13-scf00114 | 13 |
| AX-157984084 | 5 | 54.066 | KV453028.1 | 14707058 | 13-scf00114 | 13 |
| AX-157984085 | 5 | 54.066 | KV453028.1 | 14708112 | 13-scf00114 | 13 |
| AX-157984087 | 5 | 54.066 | KV453028.1 | 14709719 | 13-scf00114 | 13 |
| AX-157818028 | 5 | 54.066 | KV453028.1 | 14710396 | 13-scf00114 | 13 |
| AX-157717073 | 5 | 54.066 | KV453028.1 | 14711403 | 13-scf00114 | 13 |
| AX-157984090 | 5 | 54.066 | KV453028.1 | 14713859 | 13-scf00114 | 13 |

|              |   |        |            |          |             |    |
|--------------|---|--------|------------|----------|-------------|----|
| AX-157984091 | 5 | 54.066 | KV453028.1 | 14714685 | 13-scf00114 | 13 |
| AX-157984098 | 5 | 54.066 | KV453028.1 | 14721834 | 13-scf00114 | 13 |
| AX-157984100 | 5 | 54.066 | KV453028.1 | 14722314 | 13-scf00114 | 13 |
| AX-157984101 | 5 | 54.066 | KV453028.1 | 14723109 | 13-scf00114 | 13 |
| AX-157818030 | 5 | 54.066 | KV453028.1 | 14725855 | 13-scf00114 | 13 |
| AX-157984107 | 5 | 54.066 | KV453028.1 | 14731083 | 13-scf00114 | 13 |
| AX-157818031 | 5 | 54.066 | KV453028.1 | 14732762 | 13-scf00114 | 13 |
| AX-157818032 | 5 | 54.066 | KV453028.1 | 14734188 | 13-scf00114 | 13 |
| AX-157818033 | 5 | 54.066 | KV453028.1 | 14734659 | 13-scf00114 | 13 |
| AX-157984110 | 5 | 54.066 | KV453028.1 | 14735226 | 13-scf00114 | 13 |
| AX-157818034 | 5 | 54.066 | KV453028.1 | 14736753 | 13-scf00114 | 13 |
| AX-157984111 | 5 | 54.066 | KV453028.1 | 14737106 | 13-scf00114 | 13 |
| AX-157984113 | 5 | 54.066 | KV453028.1 | 14737987 | 13-scf00114 | 13 |
| AX-157984116 | 5 | 54.066 | KV453028.1 | 14738853 | 13-scf00114 | 13 |
| AX-157984117 | 5 | 54.066 | KV453028.1 | 14739203 | 13-scf00114 | 13 |
| AX-157984119 | 5 | 54.066 | KV453028.1 | 14739632 | 13-scf00114 | 13 |
| AX-157875790 | 5 | 54.066 | KV453028.1 | 14741207 | 13-scf00114 | 13 |
| AX-157984120 | 5 | 54.066 | KV453028.1 | 14741917 | 13-scf00114 | 13 |
| AX-157984124 | 5 | 54.066 | KV453028.1 | 14743219 | 13-scf00114 | 13 |
| AX-157745261 | 5 | 54.066 | KV453028.1 | 14752995 | 13-scf00114 | 13 |
| AX-158407043 | 5 | 54.066 | KV453028.1 | 14753389 | 13-scf00114 | 13 |
| AX-157984130 | 5 | 54.066 | KV453028.1 | 14754008 | 13-scf00114 | 13 |
| AX-157984131 | 5 | 54.066 | KV453028.1 | 14754980 | 13-scf00114 | 13 |
| AX-157984133 | 5 | 54.066 | KV453028.1 | 14755517 | 13-scf00114 | 13 |
| AX-157984134 | 5 | 54.066 | KV453028.1 | 14755954 | 13-scf00114 | 13 |
| AX-157984136 | 5 | 54.066 | KV453028.1 | 14756219 | 13-scf00114 | 13 |
| AX-157984138 | 5 | 54.066 | KV453028.1 | 14756523 | 13-scf00114 | 13 |
| AX-157984141 | 5 | 54.066 | KV453028.1 | 14757687 | 13-scf00114 | 13 |
| AX-157984142 | 5 | 54.066 | KV453028.1 | 14759416 | 13-scf00114 | 13 |
| AX-157984144 | 5 | 54.066 | KV453028.1 | 14760084 | 13-scf00114 | 13 |
| AX-157984146 | 5 | 54.066 | KV453028.1 | 14761275 | 13-scf00114 | 13 |
| AX-158379583 | 5 | 54.066 | KV453028.1 | 14763549 | 13-scf00114 | 13 |
| AX-157984148 | 5 | 54.066 | KV453028.1 | 14763798 | 13-scf00114 | 13 |
| AX-157984151 | 5 | 54.066 | KV453028.1 | 14765716 | 13-scf00114 | 13 |
| AX-157984152 | 5 | 54.066 | KV453028.1 | 14766214 | 13-scf00114 | 13 |
| AX-157984154 | 5 | 54.066 | KV453028.1 | 14767271 | 13-scf00114 | 13 |
| AX-157984156 | 5 | 54.066 | KV453028.1 | 14769344 | 13-scf00114 | 13 |
| AX-157720221 | 5 | 54.066 | KV453028.1 | 14769602 | 13-scf00114 | 13 |
| AX-157984159 | 5 | 54.066 | KV453028.1 | 14773102 | 13-scf00114 | 13 |
| AX-157984160 | 5 | 54.066 | KV453028.1 | 14773516 | 13-scf00114 | 13 |
| AX-157818035 | 5 | 54.066 | KV453028.1 | 14773789 | 13-scf00114 | 13 |
| AX-157984162 | 5 | 54.066 | KV453028.1 | 14777775 | 13-scf00114 | 13 |
| AX-157984163 | 5 | 54.066 | KV453028.1 | 14779858 | 13-scf00114 | 13 |
| AX-157984164 | 5 | 54.066 | KV453028.1 | 14781842 | 13-scf00114 | 13 |
| AX-157984166 | 5 | 54.066 | KV453028.1 | 14783491 | 13-scf00114 | 13 |
| AX-157984167 | 5 | 54.066 | KV453028.1 | 14784140 | 13-scf00114 | 13 |
| AX-157984169 | 5 | 54.066 | KV453028.1 | 14786217 | 13-scf00114 | 13 |
| AX-157984173 | 5 | 54.066 | KV453028.1 | 14791136 | 13-scf00114 | 13 |
| AX-157984174 | 5 | 54.066 | KV453028.1 | 14791607 | 13-scf00114 | 13 |
| AX-157984176 | 5 | 54.066 | KV453028.1 | 14791780 | 13-scf00114 | 13 |
| AX-157984177 | 5 | 54.066 | KV453028.1 | 14798171 | 13-scf00114 | 13 |

|              |   |        |            |          |             |    |
|--------------|---|--------|------------|----------|-------------|----|
| AX-157984178 | 5 | 54.066 | KV453028.1 | 14798735 | 13-scf00114 | 13 |
| AX-157984180 | 5 | 54.066 | KV453028.1 | 14799392 | 13-scf00114 | 13 |
| AX-157984181 | 5 | 54.066 | KV453028.1 | 14799886 | 13-scf00114 | 13 |
| AX-157984182 | 5 | 54.066 | KV453028.1 | 14800774 | 13-scf00114 | 13 |
| AX-157984183 | 5 | 54.066 | KV453028.1 | 14803013 | 13-scf00114 | 13 |
| AX-158407044 | 5 | 54.066 | KV453028.1 | 14804015 | 13-scf00114 | 13 |
| AX-158407045 | 5 | 54.066 | KV453028.1 | 14804057 | 13-scf00114 | 13 |
| AX-157984184 | 5 | 54.066 | KV453028.1 | 14805045 | 13-scf00114 | 13 |
| AX-157984186 | 5 | 54.066 | KV453028.1 | 14806673 | 13-scf00114 | 13 |
| AX-157984187 | 5 | 54.066 | KV453028.1 | 14807586 | 13-scf00114 | 13 |
| AX-157984189 | 5 | 54.066 | KV453028.1 | 14811208 | 13-scf00114 | 13 |
| AX-158407049 | 5 | 54.066 | KV453028.1 | 14821307 | 13-scf00114 | 13 |
| AX-158407054 | 5 | 54.066 | KV453028.1 | 14825926 | 13-scf00114 | 13 |
| AX-157984195 | 5 | 54.066 | KV453028.1 | 14827744 | 13-scf00114 | 13 |
| AX-157724273 | 5 | 54.066 | KV453028.1 | 14832422 | 13-scf00114 | 13 |
| AX-157702178 | 5 | 54.066 | KV453028.1 | 14838320 | 13-scf00114 | 13 |
| AX-157984206 | 5 | 54.066 | KV453028.1 | 14847343 | 13-scf00114 | 13 |
| AX-157984219 | 5 | 54.066 | KV453028.1 | 14857348 | 13-scf00114 | 13 |
| AX-157984226 | 5 | 54.066 | KV453028.1 | 14859988 | 13-scf00114 | 13 |
| AX-157875792 | 5 | 54.066 | KV453028.1 | 14860252 | 13-scf00114 | 13 |
| AX-157984233 | 5 | 54.066 | KV453028.1 | 14864796 | 13-scf00114 | 13 |
| AX-157984238 | 5 | 54.066 | KV453028.1 | 14866623 | 13-scf00114 | 13 |
| AX-157984239 | 5 | 54.066 | KV453028.1 | 14867085 | 13-scf00114 | 13 |
| AX-157984240 | 5 | 54.066 | KV453028.1 | 14868030 | 13-scf00114 | 13 |
| AX-157984254 | 5 | 54.066 | KV453028.1 | 14885999 | 13-scf00114 | 13 |
| AX-157818046 | 5 | 54.066 | KV453028.1 | 14886218 | 13-scf00114 | 13 |
| AX-157984255 | 5 | 54.066 | KV453028.1 | 14886857 | 13-scf00114 | 13 |
| AX-157984256 | 5 | 54.066 | KV453028.1 | 14887418 | 13-scf00114 | 13 |
| AX-157984257 | 5 | 54.066 | KV453028.1 | 14888881 | 13-scf00114 | 13 |
| AX-157984277 | 5 | 54.066 | KV453028.1 | 14901743 | 13-scf00114 | 13 |
| AX-157984296 | 5 | 54.066 | KV453028.1 | 14917051 | 13-scf00114 | 13 |
| AX-157984297 | 5 | 54.066 | KV453028.1 | 14917680 | 13-scf00114 | 13 |
| AX-157725976 | 5 | 54.066 | KV453028.1 | 14918655 | 13-scf00114 | 13 |
| AX-157984301 | 5 | 54.066 | KV453028.1 | 14923030 | 13-scf00114 | 13 |
| AX-157984308 | 5 | 54.066 | KV453028.1 | 14931091 | 13-scf00114 | 13 |
| AX-157984310 | 5 | 54.066 | KV453028.1 | 14931578 | 13-scf00114 | 13 |
| AX-157984312 | 5 | 54.066 | KV453028.1 | 14931865 | 13-scf00114 | 13 |
| AX-157984315 | 5 | 54.066 | KV453028.1 | 14932730 | 13-scf00114 | 13 |
| AX-157714100 | 5 | 54.066 | KV453028.1 | 14933069 | 13-scf00114 | 13 |
| AX-157818053 | 5 | 54.066 | KV453028.1 | 14933170 | 13-scf00114 | 13 |
| AX-157984316 | 5 | 54.066 | KV453028.1 | 14933882 | 13-scf00114 | 13 |
| AX-157818055 | 5 | 54.066 | KV453028.1 | 14934951 | 13-scf00114 | 13 |
| AX-157984318 | 5 | 54.066 | KV453028.1 | 14936027 | 13-scf00114 | 13 |
| AX-157984325 | 5 | 54.066 | KV453028.1 | 14938549 | 13-scf00114 | 13 |
| AX-157984326 | 5 | 54.066 | KV453028.1 | 14939729 | 13-scf00114 | 13 |
| AX-158407058 | 5 | 54.066 | KV453028.1 | 14939813 | 13-scf00114 | 13 |
| AX-158407059 | 5 | 54.066 | KV453028.1 | 14940264 | 13-scf00114 | 13 |
| AX-157984329 | 5 | 54.066 | KV453028.1 | 14940922 | 13-scf00114 | 13 |
| AX-157984330 | 5 | 54.066 | KV453028.1 | 14941959 | 13-scf00114 | 13 |
| AX-158415610 | 5 | 54.066 | KV453028.1 | 14946830 | 13-scf00114 | 13 |
| AX-157984342 | 5 | 54.066 | KV453028.1 | 14947685 | 13-scf00114 | 13 |

|              |   |        |            |          |             |    |
|--------------|---|--------|------------|----------|-------------|----|
| AX-157984348 | 5 | 54.066 | KV453028.1 | 14954916 | 13-scf00114 | 13 |
| AX-157984351 | 5 | 54.066 | KV453028.1 | 14957042 | 13-scf00114 | 13 |
| AX-157984357 | 5 | 54.066 | KV453028.1 | 14963165 | 13-scf00114 | 13 |
| AX-157984362 | 5 | 54.066 | KV453028.1 | 14967259 | 13-scf00114 | 13 |
| AX-157984366 | 5 | 54.066 | KV453028.1 | 14968828 | 13-scf00114 | 13 |
| AX-157984371 | 5 | 54.066 | KV453028.1 | 14973649 | 13-scf00114 | 13 |
| AX-157984373 | 5 | 54.066 | KV453028.1 | 14974454 | 13-scf00114 | 13 |
| AX-157818056 | 5 | 54.066 | KV453028.1 | 14975366 | 13-scf00114 | 13 |
| AX-157818057 | 5 | 54.066 | KV453028.1 | 14975592 | 13-scf00114 | 13 |
| AX-157753645 | 5 | 54.066 | KV453028.1 | 14975850 | 13-scf00114 | 13 |
| AX-157984379 | 5 | 54.066 | KV453028.1 | 14985970 | 13-scf00114 | 13 |
| AX-157984381 | 5 | 54.066 | KV453028.1 | 14986367 | 13-scf00114 | 13 |
| AX-157984382 | 5 | 54.066 | KV453028.1 | 14990022 | 13-scf00114 | 13 |
| AX-157984383 | 5 | 54.066 | KV453028.1 | 14990869 | 13-scf00114 | 13 |
| AX-157818058 | 5 | 54.066 | KV453028.1 | 14994212 | 13-scf00114 | 13 |
| AX-157818059 | 5 | 54.066 | KV453028.1 | 14996614 | 13-scf00114 | 13 |
| AX-157984386 | 5 | 54.066 | KV453028.1 | 14998935 | 13-scf00114 | 13 |
| AX-157745310 | 5 | 54.066 | KV453028.1 | 15002743 | 13-scf00114 | 13 |
| AX-157984390 | 5 | 54.066 | KV453028.1 | 15004788 | 13-scf00114 | 13 |
| AX-157818061 | 5 | 54.066 | KV453028.1 | 15005946 | 13-scf00114 | 13 |
| AX-157984392 | 5 | 54.066 | KV453028.1 | 15006639 | 13-scf00114 | 13 |
| AX-157984398 | 5 | 54.066 | KV453028.1 | 15012982 | 13-scf00114 | 13 |
| AX-157984409 | 5 | 54.066 | KV453028.1 | 15019536 | 13-scf00114 | 13 |
| AX-157984410 | 5 | 54.066 | KV453028.1 | 15021470 | 13-scf00114 | 13 |
| AX-157984416 | 5 | 54.066 | KV453028.1 | 15034454 | 13-scf00114 | 13 |
| AX-157984420 | 5 | 54.066 | KV453028.1 | 15036334 | 13-scf00114 | 13 |
| AX-157984421 | 5 | 54.066 | KV453028.1 | 15037165 | 13-scf00114 | 13 |
| AX-157818063 | 5 | 54.066 | KV453028.1 | 15039384 | 13-scf00114 | 13 |
| AX-157984426 | 5 | 54.066 | KV453028.1 | 15039952 | 13-scf00114 | 13 |
| AX-157818064 | 5 | 54.066 | KV453028.1 | 15044023 | 13-scf00114 | 13 |
| AX-157818065 | 5 | 54.066 | KV453028.1 | 15044748 | 13-scf00114 | 13 |
| AX-157984431 | 5 | 54.066 | KV453028.1 | 15045086 | 13-scf00114 | 13 |
| AX-157984433 | 5 | 54.066 | KV453028.1 | 15045553 | 13-scf00114 | 13 |
| AX-157984434 | 5 | 54.066 | KV453028.1 | 15046318 | 13-scf00114 | 13 |
| AX-157984436 | 5 | 54.066 | KV453028.1 | 15047373 | 13-scf00114 | 13 |
| AX-157984437 | 5 | 54.066 | KV453028.1 | 15048036 | 13-scf00114 | 13 |
| AX-157984439 | 5 | 54.066 | KV453028.1 | 15048749 | 13-scf00114 | 13 |
| AX-157716448 | 5 | 54.066 | KV453028.1 | 15054707 | 13-scf00114 | 13 |
| AX-157693047 | 5 | 54.066 | KV453028.1 | 15054750 | 13-scf00114 | 13 |
| AX-157818066 | 5 | 54.066 | KV453028.1 | 15058287 | 13-scf00114 | 13 |
| AX-157984449 | 5 | 54.066 | KV453028.1 | 15060939 | 13-scf00114 | 13 |
| AX-157984452 | 5 | 54.066 | KV453028.1 | 15061604 | 13-scf00114 | 13 |
| AX-157984453 | 5 | 54.066 | KV453028.1 | 15061972 | 13-scf00114 | 13 |
| AX-157984454 | 5 | 54.066 | KV453028.1 | 15062751 | 13-scf00114 | 13 |
| AX-157984464 | 5 | 54.066 | KV453028.1 | 15071238 | 13-scf00114 | 13 |
| AX-157984466 | 5 | 54.066 | KV453028.1 | 15072658 | 13-scf00114 | 13 |
| AX-157984467 | 5 | 54.066 | KV453028.1 | 15073111 | 13-scf00114 | 13 |
| AX-157984510 | 5 | 54.066 | KV453028.1 | 15107754 | 13-scf00114 | 13 |
| AX-157984512 | 5 | 54.066 | KV453028.1 | 15108340 | 13-scf00114 | 13 |
| AX-157984513 | 5 | 54.066 | KV453028.1 | 15108449 | 13-scf00114 | 13 |
| AX-157984525 | 5 | 54.066 | KV453028.1 | 15115372 | 13-scf00114 | 13 |

|              |   |        |            |          |             |    |
|--------------|---|--------|------------|----------|-------------|----|
| AX-157984543 | 5 | 54.066 | KV453028.1 | 15130145 | 13-scf00114 | 13 |
| AX-157818071 | 5 | 54.066 | KV453028.1 | 15132624 | 13-scf00114 | 13 |
| AX-157748834 | 5 | 54.066 | KV453028.1 | 15134624 | 13-scf00114 | 13 |
| AX-157984551 | 5 | 54.066 | KV453028.1 | 15140648 | 13-scf00114 | 13 |
| AX-157984586 | 5 | 54.066 | KV453028.1 | 15161153 | 13-scf00114 | 13 |
| AX-157984590 | 5 | 54.066 | KV453028.1 | 15164350 | 13-scf00114 | 13 |
| AX-157984593 | 5 | 54.066 | KV453028.1 | 15166149 | 13-scf00114 | 13 |
| AX-157984599 | 5 | 54.066 | KV453028.1 | 15169883 | 13-scf00114 | 13 |
| AX-157984628 | 5 | 54.066 | KV453028.1 | 15194248 | 13-scf00114 | 13 |
| AX-157984631 | 5 | 54.066 | KV453028.1 | 15196275 | 13-scf00114 | 13 |
| AX-157984634 | 5 | 54.066 | KV453028.1 | 15198791 | 13-scf00114 | 13 |
| AX-157984638 | 5 | 54.066 | KV453028.1 | 15205779 | 13-scf00114 | 13 |
| AX-157984640 | 5 | 54.066 | KV453028.1 | 15206789 | 13-scf00114 | 13 |
| AX-157984672 | 5 | 54.066 | KV453028.1 | 15226178 | 13-scf00114 | 13 |
| AX-157818092 | 5 | 54.066 | KV453028.1 | 15243807 | 13-scf00114 | 13 |
| AX-157984692 | 5 | 54.066 | KV453028.1 | 15246336 | 13-scf00114 | 13 |
| AX-157984694 | 5 | 54.066 | KV453028.1 | 15246587 | 13-scf00114 | 13 |
| AX-157869754 | 5 | 54.066 | KV453028.1 | 15247751 | 13-scf00114 | 13 |
| AX-157984723 | 5 | 54.066 | KV453028.1 | 15267050 | 13-scf00114 | 13 |
| AX-157818095 | 5 | 54.066 | KV453028.1 | 15278136 | 13-scf00114 | 13 |
| AX-157751419 | 5 | 54.066 | KV453028.1 | 15278868 | 13-scf00114 | 13 |
| AX-157818096 | 5 | 54.066 | KV453028.1 | 15279465 | 13-scf00114 | 13 |
| AX-157984744 | 5 | 54.066 | KV453028.1 | 15279543 | 13-scf00114 | 13 |
| AX-157718184 | 5 | 54.066 | KV453028.1 | 15287556 | 13-scf00114 | 13 |
| AX-157984752 | 5 | 54.066 | KV453028.1 | 15292455 | 13-scf00114 | 13 |
| AX-157984756 | 5 | 54.066 | KV453028.1 | 15293549 | 13-scf00114 | 13 |
| AX-157984758 | 5 | 54.066 | KV453028.1 | 15294667 | 13-scf00114 | 13 |
| AX-157718024 | 5 | 54.066 | KV453028.1 | 15295551 | 13-scf00114 | 13 |
| AX-157818102 | 5 | 54.066 | KV453028.1 | 15296596 | 13-scf00114 | 13 |
| AX-157984763 | 5 | 54.066 | KV453028.1 | 15300678 | 13-scf00114 | 13 |
| AX-157984788 | 5 | 54.066 | KV453028.1 | 15325126 | 13-scf00114 | 13 |
| AX-157984793 | 5 | 54.066 | KV453028.1 | 15328251 | 13-scf00114 | 13 |
| AX-157984816 | 5 | 54.066 | KV453028.1 | 15343551 | 13-scf00114 | 13 |
| AX-157984818 | 5 | 54.066 | KV453028.1 | 15344032 | 13-scf00114 | 13 |
| AX-157984821 | 5 | 54.066 | KV453028.1 | 15346268 | 13-scf00114 | 13 |
| AX-157984823 | 5 | 54.066 | KV453028.1 | 15347396 | 13-scf00114 | 13 |
| AX-157984850 | 5 | 54.066 | KV453028.1 | 15367546 | 13-scf00114 | 13 |
| AX-157984875 | 5 | 54.066 | KV453028.1 | 15389502 | 13-scf00114 | 13 |
| AX-157984877 | 5 | 54.066 | KV453028.1 | 15390242 | 13-scf00114 | 13 |
| AX-157984889 | 5 | 54.066 | KV453028.1 | 15405511 | 13-scf00114 | 13 |
| AX-157984934 | 5 | 54.066 | KV453028.1 | 15445929 | 13-scf00114 | 13 |
| AX-157720774 | 5 | 54.066 | KV453028.1 | 15452763 | 13-scf00114 | 13 |
| AX-157984943 | 5 | 54.066 | KV453028.1 | 15455281 | 13-scf00114 | 13 |
| AX-157984953 | 5 | 54.066 | KV453028.1 | 15463530 | 13-scf00114 | 13 |
| AX-157984958 | 5 | 54.066 | KV453028.1 | 15468634 | 13-scf00114 | 13 |
| AX-157984996 | 5 | 54.066 | KV453028.1 | 15497997 | 13-scf00114 | 13 |
| AX-157985011 | 5 | 54.066 | KV453028.1 | 15513306 | 13-scf00114 | 13 |
| AX-157985018 | 5 | 54.066 | KV453028.1 | 15522643 | 13-scf00114 | 13 |
| AX-157985060 | 5 | 54.066 | KV453028.1 | 15572676 | 13-scf00114 | 13 |
| AX-157884463 | 5 | 54.16  | KV453028.1 | 15007278 | 13-scf00114 | 13 |
| AX-157984442 | 5 | 54.16  | KV453028.1 | 15050199 | 13-scf00114 | 13 |



|              |   |        |            |          |             |    |
|--------------|---|--------|------------|----------|-------------|----|
| AX-157818077 | 5 | 54.16  | KV453028.1 | 15164419 | 13-scf00114 | 13 |
| AX-157984618 | 5 | 54.16  | KV453028.1 | 15187445 | 13-scf00114 | 13 |
| AX-157984865 | 5 | 54.16  | KV453028.1 | 15378269 | 13-scf00114 | 13 |
| AX-157985088 | 5 | 54.16  | KV453028.1 | 15607219 | 13-scf00114 | 13 |
| AX-157726420 | 5 | 54.16  | KV453028.1 | 15780713 | 13-scf00114 | 13 |
| AX-157984407 | 5 | 54.245 | KV453028.1 | 15019236 | 13-scf00114 | 13 |
| AX-157984473 | 5 | 54.245 | KV453028.1 | 15079067 | 13-scf00114 | 13 |
| AX-157984555 | 5 | 54.245 | KV453028.1 | 15141921 | 13-scf00114 | 13 |
| AX-157984564 | 5 | 54.245 | KV453028.1 | 15144888 | 13-scf00114 | 13 |
| AX-157984492 | 5 | 54.319 | KV453028.1 | 15096198 | 13-scf00114 | 13 |
| AX-157984522 | 5 | 54.319 | KV453028.1 | 15113797 | 13-scf00114 | 13 |
| AX-157984545 | 5 | 54.319 | KV453028.1 | 15131718 | 13-scf00114 | 13 |
| AX-157984553 | 5 | 54.319 | KV453028.1 | 15140947 | 13-scf00114 | 13 |
| AX-157984584 | 5 | 54.319 | KV453028.1 | 15160331 | 13-scf00114 | 13 |
| AX-157984594 | 5 | 54.319 | KV453028.1 | 15167006 | 13-scf00114 | 13 |
| AX-157855646 | 5 | 54.319 | KV453028.1 | 15173932 | 13-scf00114 | 13 |
| AX-157984605 | 5 | 54.319 | KV453028.1 | 15177421 | 13-scf00114 | 13 |
| AX-157984612 | 5 | 54.319 | KV453028.1 | 15180734 | 13-scf00114 | 13 |
| AX-157984637 | 5 | 54.319 | KV453028.1 | 15204525 | 13-scf00114 | 13 |
| AX-157984663 | 5 | 54.319 | KV453028.1 | 15219718 | 13-scf00114 | 13 |
| AX-157984668 | 5 | 54.319 | KV453028.1 | 15221915 | 13-scf00114 | 13 |
| AX-157984671 | 5 | 54.319 | KV453028.1 | 15224912 | 13-scf00114 | 13 |
| AX-157984677 | 5 | 54.319 | KV453028.1 | 15236030 | 13-scf00114 | 13 |
| AX-157984678 | 5 | 54.319 | KV453028.1 | 15237195 | 13-scf00114 | 13 |
| AX-157984695 | 5 | 54.319 | KV453028.1 | 15247546 | 13-scf00114 | 13 |
| AX-157984719 | 5 | 54.319 | KV453028.1 | 15263733 | 13-scf00114 | 13 |
| AX-157818093 | 5 | 54.319 | KV453028.1 | 15275737 | 13-scf00114 | 13 |
| AX-157984743 | 5 | 54.319 | KV453028.1 | 15278768 | 13-scf00114 | 13 |
| AX-157782768 | 5 | 54.319 | KV453028.1 | 15286649 | 13-scf00114 | 13 |
| AX-157984754 | 5 | 54.319 | KV453028.1 | 15292857 | 13-scf00114 | 13 |
| AX-157984757 | 5 | 54.319 | KV453028.1 | 15294286 | 13-scf00114 | 13 |
| AX-157984759 | 5 | 54.319 | KV453028.1 | 15297075 | 13-scf00114 | 13 |
| AX-157984809 | 5 | 54.319 | KV453028.1 | 15340151 | 13-scf00114 | 13 |
| AX-157984837 | 5 | 54.319 | KV453028.1 | 15360891 | 13-scf00114 | 13 |
| AX-157700355 | 5 | 54.351 | KV453028.1 | 15297713 | 13-scf00114 | 13 |
| AX-157983882 | 5 | 54.385 | KV453028.1 | 14513390 | 13-scf00114 | 13 |
| AX-157774412 | 5 | 54.385 | KV453028.1 | 14637324 | 13-scf00114 | 13 |
| AX-157984760 | 5 | 54.385 | KV453028.1 | 15298360 | 13-scf00114 | 13 |
| AX-157984842 | 5 | 54.385 | KV453028.1 | 15363315 | 13-scf00114 | 13 |
| AX-157984801 | 5 | 54.417 | KV453028.1 | 15333837 | 13-scf00114 | 13 |
| AX-157984822 | 5 | 54.445 | KV453028.1 | 15346621 | 13-scf00114 | 13 |
| AX-157984826 | 5 | 54.445 | KV453028.1 | 15350174 | 13-scf00114 | 13 |
| AX-157984841 | 5 | 54.445 | KV453028.1 | 15362720 | 13-scf00114 | 13 |
| AX-157884467 | 5 | 54.445 | KV453028.1 | 15563548 | 13-scf00114 | 13 |
| AX-157984147 | 5 | 54.496 | KV453028.1 | 14763406 | 13-scf00114 | 13 |
| AX-157984282 | 5 | 54.496 | KV453028.1 | 14906770 | 13-scf00114 | 13 |
| AX-157984851 | 5 | 54.496 | KV453028.1 | 15369020 | 13-scf00114 | 13 |
| AX-157984852 | 5 | 54.496 | KV453028.1 | 15370286 | 13-scf00114 | 13 |
| AX-157984853 | 5 | 54.496 | KV453028.1 | 15370695 | 13-scf00114 | 13 |
| AX-157984976 | 5 | 54.496 | KV453028.1 | 15480582 | 13-scf00114 | 13 |
| AX-157985027 | 5 | 54.496 | KV453028.1 | 15533649 | 13-scf00114 | 13 |

|              |   |        |            |          |             |    |
|--------------|---|--------|------------|----------|-------------|----|
| AX-157985071 | 5 | 54.496 | KV453028.1 | 15586464 | 13-scf00114 | 13 |
| AX-157984855 | 5 | 54.51  | KV453028.1 | 15372102 | 13-scf00114 | 13 |
| AX-157984504 | 5 | 54.56  | KV453028.1 | 15102195 | 13-scf00114 | 13 |
| AX-157984516 | 5 | 54.56  | KV453028.1 | 15110727 | 13-scf00114 | 13 |
| AX-157984868 | 5 | 54.56  | KV453028.1 | 15379470 | 13-scf00114 | 13 |
| AX-157984927 | 5 | 54.56  | KV453028.1 | 15439612 | 13-scf00114 | 13 |
| AX-157884466 | 5 | 54.571 | KV453028.1 | 15379326 | 13-scf00114 | 13 |
| AX-157984869 | 5 | 54.571 | KV453028.1 | 15381910 | 13-scf00114 | 13 |
| AX-157984872 | 5 | 54.571 | KV453028.1 | 15387091 | 13-scf00114 | 13 |
| AX-157818112 | 5 | 54.571 | KV453028.1 | 15388302 | 13-scf00114 | 13 |
| AX-157818113 | 5 | 54.571 | KV453028.1 | 15389586 | 13-scf00114 | 13 |
| AX-157984876 | 5 | 54.571 | KV453028.1 | 15389762 | 13-scf00114 | 13 |
| AX-157752205 | 5 | 54.571 | KV453028.1 | 15390688 | 13-scf00114 | 13 |
| AX-157984878 | 5 | 54.571 | KV453028.1 | 15391895 | 13-scf00114 | 13 |
| AX-157984879 | 5 | 54.571 | KV453028.1 | 15392904 | 13-scf00114 | 13 |
| AX-157984880 | 5 | 54.571 | KV453028.1 | 15394064 | 13-scf00114 | 13 |
| AX-157984881 | 5 | 54.571 | KV453028.1 | 15394513 | 13-scf00114 | 13 |
| AX-158407071 | 5 | 54.571 | KV453028.1 | 15396463 | 13-scf00114 | 13 |
| AX-158407072 | 5 | 54.571 | KV453028.1 | 15396522 | 13-scf00114 | 13 |
| AX-158407073 | 5 | 54.571 | KV453028.1 | 15396594 | 13-scf00114 | 13 |
| AX-157984884 | 5 | 54.571 | KV453028.1 | 15396696 | 13-scf00114 | 13 |
| AX-157984885 | 5 | 54.571 | KV453028.1 | 15397337 | 13-scf00114 | 13 |
| AX-157984886 | 5 | 54.571 | KV453028.1 | 15398181 | 13-scf00114 | 13 |
| AX-157984888 | 5 | 54.571 | KV453028.1 | 15402845 | 13-scf00114 | 13 |
| AX-157984892 | 5 | 54.571 | KV453028.1 | 15408472 | 13-scf00114 | 13 |
| AX-157869755 | 5 | 54.571 | KV453028.1 | 15411732 | 13-scf00114 | 13 |
| AX-157984895 | 5 | 54.571 | KV453028.1 | 15412598 | 13-scf00114 | 13 |
| AX-157984896 | 5 | 54.571 | KV453028.1 | 15417887 | 13-scf00114 | 13 |
| AX-157818115 | 5 | 54.571 | KV453028.1 | 15418767 | 13-scf00114 | 13 |
| AX-157727750 | 5 | 54.571 | KV453028.1 | 15419999 | 13-scf00114 | 13 |
| AX-157818117 | 5 | 54.571 | KV453028.1 | 15420466 | 13-scf00114 | 13 |
| AX-157984900 | 5 | 54.571 | KV453028.1 | 15421112 | 13-scf00114 | 13 |
| AX-157984902 | 5 | 54.571 | KV453028.1 | 15423405 | 13-scf00114 | 13 |
| AX-157754540 | 5 | 54.571 | KV453028.1 | 15423708 | 13-scf00114 | 13 |
| AX-157984903 | 5 | 54.571 | KV453028.1 | 15423794 | 13-scf00114 | 13 |
| AX-157984905 | 5 | 54.571 | KV453028.1 | 15424723 | 13-scf00114 | 13 |
| AX-157984910 | 5 | 54.571 | KV453028.1 | 15427112 | 13-scf00114 | 13 |
| AX-157984911 | 5 | 54.571 | KV453028.1 | 15427581 | 13-scf00114 | 13 |
| AX-157773910 | 5 | 54.571 | KV453028.1 | 15428147 | 13-scf00114 | 13 |
| AX-157984912 | 5 | 54.571 | KV453028.1 | 15428226 | 13-scf00114 | 13 |
| AX-157984915 | 5 | 54.571 | KV453028.1 | 15428777 | 13-scf00114 | 13 |
| AX-157984917 | 5 | 54.571 | KV453028.1 | 15429031 | 13-scf00114 | 13 |
| AX-157984920 | 5 | 54.571 | KV453028.1 | 15431588 | 13-scf00114 | 13 |
| AX-157984921 | 5 | 54.571 | KV453028.1 | 15432365 | 13-scf00114 | 13 |
| AX-157984922 | 5 | 54.571 | KV453028.1 | 15433548 | 13-scf00114 | 13 |
| AX-157818118 | 5 | 54.571 | KV453028.1 | 15434453 | 13-scf00114 | 13 |
| AX-157818119 | 5 | 54.571 | KV453028.1 | 15435541 | 13-scf00114 | 13 |
| AX-157745795 | 5 | 54.571 | KV453028.1 | 15436309 | 13-scf00114 | 13 |
| AX-157984925 | 5 | 54.571 | KV453028.1 | 15437037 | 13-scf00114 | 13 |
| AX-157984926 | 5 | 54.571 | KV453028.1 | 15439292 | 13-scf00114 | 13 |
| AX-157984929 | 5 | 54.571 | KV453028.1 | 15440747 | 13-scf00114 | 13 |

|              |   |        |            |          |             |    |
|--------------|---|--------|------------|----------|-------------|----|
| AX-157984932 | 5 | 54.571 | KV453028.1 | 15441922 | 13-scf00114 | 13 |
| AX-157984933 | 5 | 54.571 | KV453028.1 | 15442810 | 13-scf00114 | 13 |
| AX-157984936 | 5 | 54.571 | KV453028.1 | 15449042 | 13-scf00114 | 13 |
| AX-157728109 | 5 | 54.571 | KV453028.1 | 15450516 | 13-scf00114 | 13 |
| AX-157984942 | 5 | 54.571 | KV453028.1 | 15453601 | 13-scf00114 | 13 |
| AX-157984947 | 5 | 54.571 | KV453028.1 | 15457601 | 13-scf00114 | 13 |
| AX-157984949 | 5 | 54.571 | KV453028.1 | 15458045 | 13-scf00114 | 13 |
| AX-158407075 | 5 | 54.571 | KV453028.1 | 15461364 | 13-scf00114 | 13 |
| AX-157753310 | 5 | 54.571 | KV453028.1 | 15464718 | 13-scf00114 | 13 |
| AX-157984962 | 5 | 54.571 | KV453028.1 | 15471766 | 13-scf00114 | 13 |
| AX-157984963 | 5 | 54.571 | KV453028.1 | 15472838 | 13-scf00114 | 13 |
| AX-157984966 | 5 | 54.571 | KV453028.1 | 15473605 | 13-scf00114 | 13 |
| AX-157984969 | 5 | 54.571 | KV453028.1 | 15476010 | 13-scf00114 | 13 |
| AX-157984970 | 5 | 54.571 | KV453028.1 | 15476646 | 13-scf00114 | 13 |
| AX-157984973 | 5 | 54.571 | KV453028.1 | 15478560 | 13-scf00114 | 13 |
| AX-157984989 | 5 | 54.571 | KV453028.1 | 15493970 | 13-scf00114 | 13 |
| AX-157984993 | 5 | 54.571 | KV453028.1 | 15496288 | 13-scf00114 | 13 |
| AX-157985003 | 5 | 54.571 | KV453028.1 | 15503851 | 13-scf00114 | 13 |
| AX-157985016 | 5 | 54.571 | KV453028.1 | 15517282 | 13-scf00114 | 13 |
| AX-157985103 | 5 | 54.571 | KV453028.1 | 15615482 | 13-scf00114 | 13 |
| AX-157984994 | 5 | 54.614 | KV453028.1 | 15497368 | 13-scf00114 | 13 |
| AX-157984997 | 5 | 54.659 | KV453028.1 | 15498713 | 13-scf00114 | 13 |
| AX-157984071 | 5 | 54.697 | KV453028.1 | 14697712 | 13-scf00114 | 13 |
| AX-157984193 | 5 | 54.697 | KV453028.1 | 14816985 | 13-scf00114 | 13 |
| AX-157984506 | 5 | 54.697 | KV453028.1 | 15104315 | 13-scf00114 | 13 |
| AX-157984696 | 5 | 54.697 | KV453028.1 | 15248178 | 13-scf00114 | 13 |
| AX-157775505 | 5 | 54.697 | KV453028.1 | 15302490 | 13-scf00114 | 13 |
| AX-157984808 | 5 | 54.697 | KV453028.1 | 15337592 | 13-scf00114 | 13 |
| AX-157985006 | 5 | 54.697 | KV453028.1 | 15507483 | 13-scf00114 | 13 |
| AX-157985007 | 5 | 54.697 | KV453028.1 | 15508500 | 13-scf00114 | 13 |
| AX-157875801 | 5 | 54.697 | KV453028.1 | 15530019 | 13-scf00114 | 13 |
| AX-157985023 | 5 | 54.697 | KV453028.1 | 15530321 | 13-scf00114 | 13 |
| AX-157985026 | 5 | 54.697 | KV453028.1 | 15533078 | 13-scf00114 | 13 |
| AX-157985039 | 5 | 54.697 | KV453028.1 | 15549207 | 13-scf00114 | 13 |
| AX-157985040 | 5 | 54.697 | KV453028.1 | 15549764 | 13-scf00114 | 13 |
| AX-157985042 | 5 | 54.697 | KV453028.1 | 15552084 | 13-scf00114 | 13 |
| AX-157985046 | 5 | 54.697 | KV453028.1 | 15555137 | 13-scf00114 | 13 |
| AX-157985048 | 5 | 54.697 | KV453028.1 | 15558196 | 13-scf00114 | 13 |
| AX-157985050 | 5 | 54.697 | KV453028.1 | 15560137 | 13-scf00114 | 13 |
| AX-157985056 | 5 | 54.697 | KV453028.1 | 15568882 | 13-scf00114 | 13 |
| AX-157985057 | 5 | 54.697 | KV453028.1 | 15569612 | 13-scf00114 | 13 |
| AX-157985062 | 5 | 54.697 | KV453028.1 | 15578186 | 13-scf00114 | 13 |
| AX-157985064 | 5 | 54.697 | KV453028.1 | 15579453 | 13-scf00114 | 13 |
| AX-157985069 | 5 | 54.697 | KV453028.1 | 15585209 | 13-scf00114 | 13 |
| AX-157985070 | 5 | 54.697 | KV453028.1 | 15585981 | 13-scf00114 | 13 |
| AX-158379587 | 5 | 54.697 | KV453028.1 | 15586642 | 13-scf00114 | 13 |
| AX-157985072 | 5 | 54.697 | KV453028.1 | 15586738 | 13-scf00114 | 13 |
| AX-157985073 | 5 | 54.697 | KV453028.1 | 15587197 | 13-scf00114 | 13 |
| AX-157985081 | 5 | 54.697 | KV453028.1 | 15597133 | 13-scf00114 | 13 |
| AX-157985082 | 5 | 54.697 | KV453028.1 | 15598041 | 13-scf00114 | 13 |
| AX-157985083 | 5 | 54.697 | KV453028.1 | 15598830 | 13-scf00114 | 13 |

|              |   |        |            |          |             |    |
|--------------|---|--------|------------|----------|-------------|----|
| AX-157985095 | 5 | 54.697 | KV453028.1 | 15611925 | 13-scf00114 | 13 |
| AX-157985128 | 5 | 54.697 | KV453028.1 | 15633358 | 13-scf00114 | 13 |
| AX-157985130 | 5 | 54.697 | KV453028.1 | 15634624 | 13-scf00114 | 13 |
| AX-157984158 | 5 | 54.824 | KV453028.1 | 14770828 | 13-scf00114 | 13 |
| AX-157984531 | 5 | 54.824 | KV453028.1 | 15121570 | 13-scf00114 | 13 |
| AX-157984560 | 5 | 54.824 | KV453028.1 | 15143916 | 13-scf00114 | 13 |
| AX-157984858 | 5 | 54.824 | KV453028.1 | 15373943 | 13-scf00114 | 13 |
| AX-157984908 | 5 | 54.824 | KV453028.1 | 15426710 | 13-scf00114 | 13 |
| AX-157985015 | 5 | 54.824 | KV453028.1 | 15515550 | 13-scf00114 | 13 |
| AX-157985035 | 5 | 54.824 | KV453028.1 | 15543810 | 13-scf00114 | 13 |
| AX-157985044 | 5 | 54.824 | KV453028.1 | 15553715 | 13-scf00114 | 13 |
| AX-157985065 | 5 | 54.824 | KV453028.1 | 15580041 | 13-scf00114 | 13 |
| AX-157985087 | 5 | 54.824 | KV453028.1 | 15606243 | 13-scf00114 | 13 |
| AX-157985093 | 5 | 54.824 | KV453028.1 | 15611569 | 13-scf00114 | 13 |
| AX-157985096 | 5 | 54.824 | KV453028.1 | 15612321 | 13-scf00114 | 13 |
| AX-157985098 | 5 | 54.824 | KV453028.1 | 15613502 | 13-scf00114 | 13 |
| AX-157985100 | 5 | 54.824 | KV453028.1 | 15614418 | 13-scf00114 | 13 |
| AX-157985102 | 5 | 54.824 | KV453028.1 | 15614901 | 13-scf00114 | 13 |
| AX-157985109 | 5 | 54.824 | KV453028.1 | 15619042 | 13-scf00114 | 13 |
| AX-157985111 | 5 | 54.824 | KV453028.1 | 15620802 | 13-scf00114 | 13 |
| AX-157985120 | 5 | 54.824 | KV453028.1 | 15625779 | 13-scf00114 | 13 |
| AX-157985127 | 5 | 54.824 | KV453028.1 | 15632566 | 13-scf00114 | 13 |
| AX-157723723 | 5 | 54.824 | KV453028.1 | 15633592 | 13-scf00114 | 13 |
| AX-157985132 | 5 | 54.824 | KV453028.1 | 15636535 | 13-scf00114 | 13 |
| AX-157855653 | 5 | 54.824 | KV453028.1 | 15641723 | 13-scf00114 | 13 |
| AX-157985136 | 5 | 54.824 | KV453028.1 | 15642496 | 13-scf00114 | 13 |
| AX-157985139 | 5 | 54.824 | KV453028.1 | 15644282 | 13-scf00114 | 13 |
| AX-157716977 | 5 | 54.824 | KV453028.1 | 15644977 | 13-scf00114 | 13 |
| AX-157875805 | 5 | 54.824 | KV453028.1 | 15718302 | 13-scf00114 | 13 |
| AX-157984498 | 5 | 54.95  | KV453028.1 | 15098542 | 13-scf00114 | 13 |
| AX-157884465 | 5 | 54.95  | KV453028.1 | 15098822 | 13-scf00114 | 13 |
| AX-157984499 | 5 | 54.95  | KV453028.1 | 15099108 | 13-scf00114 | 13 |
| AX-157984533 | 5 | 54.95  | KV453028.1 | 15122139 | 13-scf00114 | 13 |
| AX-157985067 | 5 | 54.95  | KV453028.1 | 15582533 | 13-scf00114 | 13 |
| AX-157697548 | 5 | 54.95  | KV453028.1 | 15604504 | 13-scf00114 | 13 |
| AX-157985097 | 5 | 54.95  | KV453028.1 | 15612686 | 13-scf00114 | 13 |
| AX-157985133 | 5 | 54.95  | KV453028.1 | 15639619 | 13-scf00114 | 13 |
| AX-157985146 | 5 | 54.95  | KV453028.1 | 15648866 | 13-scf00114 | 13 |
| AX-157985148 | 5 | 54.95  | KV453028.1 | 15649720 | 13-scf00114 | 13 |
| AX-157875804 | 5 | 54.95  | KV453028.1 | 15650438 | 13-scf00114 | 13 |
| AX-157985150 | 5 | 54.95  | KV453028.1 | 15653304 | 13-scf00114 | 13 |
| AX-157985152 | 5 | 54.95  | KV453028.1 | 15653995 | 13-scf00114 | 13 |
| AX-157985153 | 5 | 54.95  | KV453028.1 | 15654989 | 13-scf00114 | 13 |
| AX-157985161 | 5 | 54.95  | KV453028.1 | 15660889 | 13-scf00114 | 13 |
| AX-157985168 | 5 | 54.95  | KV453028.1 | 15665768 | 13-scf00114 | 13 |
| AX-157985171 | 5 | 54.95  | KV453028.1 | 15666714 | 13-scf00114 | 13 |
| AX-157985172 | 5 | 54.95  | KV453028.1 | 15666990 | 13-scf00114 | 13 |
| AX-157985178 | 5 | 54.95  | KV453028.1 | 15669434 | 13-scf00114 | 13 |
| AX-157985179 | 5 | 54.95  | KV453028.1 | 15669818 | 13-scf00114 | 13 |
| AX-157869759 | 5 | 54.95  | KV453028.1 | 15670392 | 13-scf00114 | 13 |
| AX-157985180 | 5 | 54.95  | KV453028.1 | 15670895 | 13-scf00114 | 13 |

|              |   |        |            |          |             |    |
|--------------|---|--------|------------|----------|-------------|----|
| AX-157985183 | 5 | 54.95  | KV453028.1 | 15672083 | 13-scf00114 | 13 |
| AX-157985193 | 5 | 54.95  | KV453028.1 | 15676964 | 13-scf00114 | 13 |
| AX-157985198 | 5 | 54.95  | KV453028.1 | 15679797 | 13-scf00114 | 13 |
| AX-157985206 | 5 | 54.95  | KV453028.1 | 15686496 | 13-scf00114 | 13 |
| AX-157985351 | 5 | 54.95  | KV453028.1 | 15807370 | 13-scf00114 | 13 |
| AX-157985181 | 5 | 55.002 | KV453028.1 | 15671399 | 13-scf00114 | 13 |
| AX-157985184 | 5 | 55.202 | KV453028.1 | 15672290 | 13-scf00114 | 13 |
| AX-157744679 | 5 | 55.202 | KV453028.1 | 15675364 | 13-scf00114 | 13 |
| AX-157985191 | 5 | 55.202 | KV453028.1 | 15676497 | 13-scf00114 | 13 |
| AX-157985199 | 5 | 55.202 | KV453028.1 | 15680145 | 13-scf00114 | 13 |
| AX-157985201 | 5 | 55.202 | KV453028.1 | 15680635 | 13-scf00114 | 13 |
| AX-157985202 | 5 | 55.202 | KV453028.1 | 15681982 | 13-scf00114 | 13 |
| AX-157985204 | 5 | 55.202 | KV453028.1 | 15684175 | 13-scf00114 | 13 |
| AX-157985212 | 5 | 55.202 | KV453028.1 | 15689326 | 13-scf00114 | 13 |
| AX-157985214 | 5 | 55.202 | KV453028.1 | 15690959 | 13-scf00114 | 13 |
| AX-157985220 | 5 | 55.202 | KV453028.1 | 15692096 | 13-scf00114 | 13 |
| AX-157818123 | 5 | 55.202 | KV453028.1 | 15698050 | 13-scf00114 | 13 |
| AX-157985230 | 5 | 55.202 | KV453028.1 | 15699328 | 13-scf00114 | 13 |
| AX-157985233 | 5 | 55.202 | KV453028.1 | 15702699 | 13-scf00114 | 13 |
| AX-157985238 | 5 | 55.202 | KV453028.1 | 15708899 | 13-scf00114 | 13 |
| AX-157985247 | 5 | 55.202 | KV453028.1 | 15716832 | 13-scf00114 | 13 |
| AX-157985259 | 5 | 55.202 | KV453028.1 | 15725745 | 13-scf00114 | 13 |
| AX-157758238 | 5 | 55.455 | KV453028.1 | 15727798 | 13-scf00114 | 13 |
| AX-157985262 | 5 | 55.455 | KV453028.1 | 15728691 | 13-scf00114 | 13 |
| AX-157774595 | 5 | 55.455 | KV453028.1 | 15729491 | 13-scf00114 | 13 |
| AX-157985268 | 5 | 55.455 | KV453028.1 | 15735857 | 13-scf00114 | 13 |
| AX-157985272 | 5 | 55.455 | KV453028.1 | 15738730 | 13-scf00114 | 13 |
| AX-157985273 | 5 | 55.455 | KV453028.1 | 15739495 | 13-scf00114 | 13 |
| AX-157985285 | 5 | 55.455 | KV453028.1 | 15747530 | 13-scf00114 | 13 |
| AX-157985337 | 5 | 55.455 | KV453028.1 | 15791072 | 13-scf00114 | 13 |
| AX-157985208 | 5 | 55.564 | KV453028.1 | 15687373 | 13-scf00114 | 13 |
| AX-157985228 | 5 | 55.564 | KV453028.1 | 15699069 | 13-scf00114 | 13 |
| AX-157985257 | 5 | 55.564 | KV453028.1 | 15725037 | 13-scf00114 | 13 |
| AX-157985287 | 5 | 55.564 | KV453028.1 | 15747864 | 13-scf00114 | 13 |
| AX-157985289 | 5 | 55.564 | KV453028.1 | 15749494 | 13-scf00114 | 13 |
| AX-157985292 | 5 | 55.564 | KV453028.1 | 15751063 | 13-scf00114 | 13 |
| AX-157985307 | 5 | 55.564 | KV453028.1 | 15763404 | 13-scf00114 | 13 |
| AX-157985312 | 5 | 55.564 | KV453028.1 | 15765712 | 13-scf00114 | 13 |
| AX-157985313 | 5 | 55.564 | KV453028.1 | 15767298 | 13-scf00114 | 13 |
| AX-157985315 | 5 | 55.564 | KV453028.1 | 15769426 | 13-scf00114 | 13 |
| AX-157985316 | 5 | 55.564 | KV453028.1 | 15770402 | 13-scf00114 | 13 |
| AX-157985320 | 5 | 55.564 | KV453028.1 | 15774765 | 13-scf00114 | 13 |
| AX-157701540 | 5 | 55.564 | KV453028.1 | 15862167 | 13-scf00114 | 13 |
| AX-157714540 | 5 | 55.564 | KV453028.1 | 15863318 | 13-scf00114 | 13 |
| AX-157985439 | 5 | 55.564 | KV453028.1 | 15892150 | 13-scf00114 | 13 |
| AX-158405507 | 5 | 55.564 | KV453028.1 | 15896966 | 13-scf00114 | 13 |
| AX-157744392 | 5 | 55.564 | KV453028.1 | 15909355 | 13-scf00114 | 13 |
| AX-157985536 | 5 | 55.564 | KV453028.1 | 15974740 | 13-scf00114 | 13 |
| AX-157985538 | 5 | 55.564 | KV453028.1 | 15974943 | 13-scf00114 | 13 |
| AX-157985322 | 5 | 55.604 | KV453028.1 | 15775300 | 13-scf00114 | 13 |
| AX-157985324 | 5 | 55.635 | KV453028.1 | 15780085 | 13-scf00114 | 13 |

|              |   |        |            |          |             |    |
|--------------|---|--------|------------|----------|-------------|----|
| AX-157983869 | 5 | 55.673 | KV453028.1 | 14499014 | 13-scf00114 | 13 |
| AX-157985186 | 5 | 55.673 | KV453028.1 | 15673699 | 13-scf00114 | 13 |
| AX-157985242 | 5 | 55.673 | KV453028.1 | 15712304 | 13-scf00114 | 13 |
| AX-157985275 | 5 | 55.673 | KV453028.1 | 15740825 | 13-scf00114 | 13 |
| AX-157985282 | 5 | 55.673 | KV453028.1 | 15745054 | 13-scf00114 | 13 |
| AX-157818125 | 5 | 55.673 | KV453028.1 | 15748593 | 13-scf00114 | 13 |
| AX-157985309 | 5 | 55.673 | KV453028.1 | 15764923 | 13-scf00114 | 13 |
| AX-157985327 | 5 | 55.673 | KV453028.1 | 15786253 | 13-scf00114 | 13 |
| AX-157985331 | 5 | 55.673 | KV453028.1 | 15787617 | 13-scf00114 | 13 |
| AX-157985332 | 5 | 55.673 | KV453028.1 | 15788377 | 13-scf00114 | 13 |
| AX-157985333 | 5 | 55.673 | KV453028.1 | 15788854 | 13-scf00114 | 13 |
| AX-157985338 | 5 | 55.673 | KV453028.1 | 15792544 | 13-scf00114 | 13 |
| AX-157985339 | 5 | 55.673 | KV453028.1 | 15794179 | 13-scf00114 | 13 |
| AX-157985343 | 5 | 55.673 | KV453028.1 | 15798078 | 13-scf00114 | 13 |
| AX-157703385 | 5 | 55.673 | KV453028.1 | 15799282 | 13-scf00114 | 13 |
| AX-157985347 | 5 | 55.673 | KV453028.1 | 15802921 | 13-scf00114 | 13 |
| AX-157985348 | 5 | 55.673 | KV453028.1 | 15805063 | 13-scf00114 | 13 |
| AX-157985349 | 5 | 55.673 | KV453028.1 | 15805502 | 13-scf00114 | 13 |
| AX-157985350 | 5 | 55.673 | KV453028.1 | 15806863 | 13-scf00114 | 13 |
| AX-157985357 | 5 | 55.673 | KV453028.1 | 15812104 | 13-scf00114 | 13 |
| AX-157985360 | 5 | 55.673 | KV453028.1 | 15817608 | 13-scf00114 | 13 |
| AX-157985362 | 5 | 55.673 | KV453028.1 | 15819778 | 13-scf00114 | 13 |
| AX-157985363 | 5 | 55.673 | KV453028.1 | 15822244 | 13-scf00114 | 13 |
| AX-157985364 | 5 | 55.673 | KV453028.1 | 15825098 | 13-scf00114 | 13 |
| AX-157985378 | 5 | 55.673 | KV453028.1 | 15839237 | 13-scf00114 | 13 |
| AX-157818133 | 5 | 55.673 | KV453028.1 | 15884382 | 13-scf00114 | 13 |
| AX-157865069 | 5 | 55.673 | KV453028.1 | 16160736 | 13-scf00114 | 13 |
| AX-157985366 | 5 | 55.729 | KV453028.1 | 15825881 | 13-scf00114 | 13 |
| AX-157985367 | 5 | 55.782 | KV453028.1 | 15829213 | 13-scf00114 | 13 |
| AX-158379588 | 5 | 55.782 | KV453028.1 | 15835484 | 13-scf00114 | 13 |
| AX-157745667 | 5 | 55.782 | KV453028.1 | 15835727 | 13-scf00114 | 13 |
| AX-157985379 | 5 | 55.782 | KV453028.1 | 15840656 | 13-scf00114 | 13 |
| AX-157985381 | 5 | 55.782 | KV453028.1 | 15841263 | 13-scf00114 | 13 |
| AX-157818129 | 5 | 55.852 | KV453028.1 | 15847313 | 13-scf00114 | 13 |
| AX-157985239 | 5 | 55.892 | KV453028.1 | 15709258 | 13-scf00114 | 13 |
| AX-157818127 | 5 | 55.892 | KV453028.1 | 15830626 | 13-scf00114 | 13 |
| AX-157985430 | 5 | 55.892 | KV453028.1 | 15884743 | 13-scf00114 | 13 |
| AX-157717979 | 5 | 55.892 | KV453028.1 | 15886086 | 13-scf00114 | 13 |
| AX-157818138 | 5 | 55.892 | KV453028.1 | 15913036 | 13-scf00114 | 13 |
| AX-157985466 | 5 | 55.892 | KV453028.1 | 15926284 | 13-scf00114 | 13 |
| AX-157818134 | 5 | 55.908 | KV453028.1 | 15892981 | 13-scf00114 | 13 |
| AX-157985447 | 5 | 55.908 | KV453028.1 | 15898926 | 13-scf00114 | 13 |
| AX-157985454 | 5 | 55.908 | KV453028.1 | 15905095 | 13-scf00114 | 13 |
| AX-157818135 | 5 | 55.929 | KV453028.1 | 15894657 | 13-scf00114 | 13 |
| AX-157985446 | 5 | 55.964 | KV453028.1 | 15896559 | 13-scf00114 | 13 |
| AX-157818136 | 5 | 56.001 | KV453028.1 | 15901236 | 13-scf00114 | 13 |
| AX-157818137 | 5 | 56.001 | KV453028.1 | 15901988 | 13-scf00114 | 13 |
| AX-157985451 | 5 | 56.001 | KV453028.1 | 15903051 | 13-scf00114 | 13 |
| AX-157985455 | 5 | 56.001 | KV453028.1 | 15905401 | 13-scf00114 | 13 |
| AX-157985459 | 5 | 56.001 | KV453028.1 | 15907174 | 13-scf00114 | 13 |
| AX-157985464 | 5 | 56.11  | KV453028.1 | 15923456 | 13-scf00114 | 13 |

|              |   |        |            |          |                |    |
|--------------|---|--------|------------|----------|----------------|----|
| AX-157985468 | 5 | 56.11  | KV453028.1 | 15929687 | 13-scf00114    | 13 |
| AX-157757094 | 5 | 56.11  | KV453028.1 | 15931147 | 13-scf00114    | 13 |
| AX-157985471 | 5 | 56.11  | KV453028.1 | 15931506 | 13-scf00114    | 13 |
| AX-157985472 | 5 | 56.11  | KV453028.1 | 15933868 | 13-scf00114    | 13 |
| AX-157985473 | 5 | 56.11  | KV453028.1 | 15934193 | 13-scf00114    | 13 |
| AX-157985478 | 5 | 56.11  | KV453028.1 | 15935475 | 13-scf00114    | 13 |
| AX-157985485 | 5 | 56.11  | KV453028.1 | 15938071 | 13-scf00114    | 13 |
| AX-157985486 | 5 | 56.11  | KV453028.1 | 15938575 | 13-scf00114    | 13 |
| AX-157985491 | 5 | 56.11  | KV453028.1 | 15942401 | 13-scf00114    | 13 |
| AX-157985492 | 5 | 56.11  | KV453028.1 | 15946003 | 13-scf00114    | 13 |
| AX-157985493 | 5 | 56.11  | KV453028.1 | 15946320 | 13-scf00114    | 13 |
| AX-157985496 | 5 | 56.11  | KV453028.1 | 15947506 | 13-scf00114    | 13 |
| AX-157985498 | 5 | 56.11  | KV453028.1 | 15949401 | 13-scf00114    | 13 |
| AX-157985502 | 5 | 56.11  | KV453028.1 | 15951473 | 13-scf00114    | 13 |
| AX-157985513 | 5 | 56.11  | KV453028.1 | 15954773 | 13-scf00114    | 13 |
| AX-157985515 | 5 | 56.11  | KV453028.1 | 15957926 | 13-scf00114    | 13 |
| AX-157985523 | 5 | 56.11  | KV453028.1 | 15962633 | 13-scf00114    | 13 |
| AX-158405509 | 5 | 56.11  | KV453028.1 | 16005669 | 13-scf00114    | 13 |
| AX-157985575 | 5 | 56.11  | KV453028.1 | 16015094 | 13-scf00114    | 13 |
| AX-157985514 | 5 | 56.129 | KV453028.1 | 15957284 | 13-scf00114    | 13 |
| AX-157985434 | 5 | 56.156 | KV453028.1 | 15889111 | 13-scf00114    | 13 |
| AX-157985440 | 5 | 56.156 | KV453028.1 | 15892464 | 13-scf00114    | 13 |
| AX-157985463 | 5 | 56.156 | KV453028.1 | 15920939 | 13-scf00114    | 13 |
| AX-157985482 | 5 | 56.156 | KV453028.1 | 15937056 | 13-scf00114    | 13 |
| AX-157985504 | 5 | 56.156 | KV453028.1 | 15951758 | 13-scf00114    | 13 |
| AX-157985520 | 5 | 56.156 | KV453028.1 | 15960359 | 13-scf00114    | 13 |
| AX-157717025 | 5 | 56.156 | KV453028.1 | 15964802 | 13-scf00114    | 13 |
| AX-157985527 | 5 | 56.156 | KV453028.1 | 15967538 | 13-scf00114    | 13 |
| AX-157985583 | 5 | 56.156 | KV453028.1 | 16020149 | 13-scf00114    | 13 |
| AX-157985595 | 5 | 56.156 | KV453028.1 | 16026497 | 13-scf00114    | 13 |
| AX-157985609 | 5 | 56.156 | KV453028.1 | 16034419 | 13-scf00114    | 13 |
| AX-157985698 | 5 | 56.156 | KV453028.1 | 16100954 | 13-scf00114    | 13 |
| AX-157985745 | 5 | 56.156 | KV453028.1 | 16146191 | 13-scf00114    | 13 |
| AX-157985835 | 5 | 56.156 | KV453028.1 | 16238652 | 13-scf00114    | 13 |
| AX-157985926 | 5 | 56.156 | KV453028.1 | 16317761 | 13-scf00114    | 13 |
| AX-157715987 | 5 | 56.156 | KV453028.1 | 16321304 | 13-scf00114    | 13 |
| AX-157985969 | 5 | 56.156 | KV453028.1 | 16356433 | 13-scf00114    | 13 |
| AX-157986081 | 5 | 56.156 | KV453028.1 | 16465280 | 13-scf00114    | 13 |
| AX-157703637 | 5 | 56.156 | DX099590.1 | 207      | IORI212 lctalu | UN |
| AX-158405508 | 5 | 56.186 | KV453028.1 | 15973383 | 13-scf00114    | 13 |
| AX-157985270 | 5 | 56.219 | KV453028.1 | 15738093 | 13-scf00114    | 13 |
| AX-157985296 | 5 | 56.219 | KV453028.1 | 15756644 | 13-scf00114    | 13 |
| AX-157985438 | 5 | 56.219 | KV453028.1 | 15891792 | 13-scf00114    | 13 |
| AX-157985528 | 5 | 56.219 | KV453028.1 | 15969964 | 13-scf00114    | 13 |
| AX-157749092 | 5 | 56.219 | KV453028.1 | 15974240 | 13-scf00114    | 13 |
| AX-157985535 | 5 | 56.219 | KV453028.1 | 15974524 | 13-scf00114    | 13 |
| AX-157985539 | 5 | 56.219 | KV453028.1 | 15976943 | 13-scf00114    | 13 |
| AX-157985541 | 5 | 56.219 | KV453028.1 | 15979086 | 13-scf00114    | 13 |
| AX-157985545 | 5 | 56.219 | KV453028.1 | 15983005 | 13-scf00114    | 13 |
| AX-158407083 | 5 | 56.219 | KV453028.1 | 15983678 | 13-scf00114    | 13 |
| AX-157985546 | 5 | 56.219 | KV453028.1 | 15984880 | 13-scf00114    | 13 |

|              |   |        |            |          |             |    |
|--------------|---|--------|------------|----------|-------------|----|
| AX-157985550 | 5 | 56.219 | KV453028.1 | 15990729 | 13-scf00114 | 13 |
| AX-157985552 | 5 | 56.219 | KV453028.1 | 15991966 | 13-scf00114 | 13 |
| AX-157985554 | 5 | 56.219 | KV453028.1 | 15997392 | 13-scf00114 | 13 |
| AX-157985555 | 5 | 56.219 | KV453028.1 | 15997557 | 13-scf00114 | 13 |
| AX-157985557 | 5 | 56.219 | KV453028.1 | 15999204 | 13-scf00114 | 13 |
| AX-157985560 | 5 | 56.219 | KV453028.1 | 16001251 | 13-scf00114 | 13 |
| AX-157985561 | 5 | 56.219 | KV453028.1 | 16002177 | 13-scf00114 | 13 |
| AX-157985562 | 5 | 56.219 | KV453028.1 | 16002863 | 13-scf00114 | 13 |
| AX-158383244 | 5 | 56.219 | KV453028.1 | 16004203 | 13-scf00114 | 13 |
| AX-157985565 | 5 | 56.219 | KV453028.1 | 16004312 | 13-scf00114 | 13 |
| AX-157985567 | 5 | 56.219 | KV453028.1 | 16006692 | 13-scf00114 | 13 |
| AX-157985568 | 5 | 56.219 | KV453028.1 | 16007520 | 13-scf00114 | 13 |
| AX-157985572 | 5 | 56.219 | KV453028.1 | 16012924 | 13-scf00114 | 13 |
| AX-157985585 | 5 | 56.219 | KV453028.1 | 16020490 | 13-scf00114 | 13 |
| AX-157985612 | 5 | 56.219 | KV453028.1 | 16036920 | 13-scf00114 | 13 |
| AX-157818143 | 5 | 56.284 | KV453028.1 | 16009611 | 13-scf00114 | 13 |
| AX-157985577 | 5 | 56.329 | KV453028.1 | 16016154 | 13-scf00114 | 13 |
| AX-157985578 | 5 | 56.329 | KV453028.1 | 16016940 | 13-scf00114 | 13 |
| AX-157985587 | 5 | 56.329 | KV453028.1 | 16021298 | 13-scf00114 | 13 |
| AX-157985593 | 5 | 56.329 | KV453028.1 | 16026105 | 13-scf00114 | 13 |
| AX-157985602 | 5 | 56.329 | KV453028.1 | 16029931 | 13-scf00114 | 13 |
| AX-157985608 | 5 | 56.329 | KV453028.1 | 16033630 | 13-scf00114 | 13 |
| AX-157985592 | 5 | 56.426 | KV453028.1 | 16025205 | 13-scf00114 | 13 |
| AX-157773138 | 5 | 56.426 | KV453028.1 | 16046304 | 13-scf00114 | 13 |
| AX-157985626 | 5 | 56.426 | KV453028.1 | 16046748 | 13-scf00114 | 13 |
| AX-157985690 | 5 | 56.426 | KV453028.1 | 16090557 | 13-scf00114 | 13 |
| AX-157985695 | 5 | 56.426 | KV453028.1 | 16096227 | 13-scf00114 | 13 |
| AX-157818154 | 5 | 56.426 | KV453028.1 | 16155259 | 13-scf00114 | 13 |
| AX-157985746 | 5 | 56.426 | KV453028.1 | 16155433 | 13-scf00114 | 13 |
| AX-157985824 | 5 | 56.426 | KV453028.1 | 16227758 | 13-scf00114 | 13 |
| AX-157985904 | 5 | 56.426 | KV453028.1 | 16292551 | 13-scf00114 | 13 |
| AX-157985928 | 5 | 56.426 | KV453028.1 | 16324167 | 13-scf00114 | 13 |
| AX-157985943 | 5 | 56.426 | KV453028.1 | 16333024 | 13-scf00114 | 13 |
| AX-157818196 | 5 | 56.426 | KV453028.1 | 16440741 | 13-scf00114 | 13 |
| AX-157818211 | 5 | 56.426 | KV453028.1 | 16530891 | 13-scf00114 | 13 |
| AX-157985636 | 5 | 56.547 | KV453028.1 | 16051200 | 13-scf00114 | 13 |
| AX-157985637 | 5 | 56.547 | KV453028.1 | 16052840 | 13-scf00114 | 13 |
| AX-157985643 | 5 | 56.547 | KV453028.1 | 16055762 | 13-scf00114 | 13 |
| AX-158390462 | 5 | 56.547 | KV453028.1 | 16057800 | 13-scf00114 | 13 |
| AX-157875813 | 5 | 56.656 | KV453028.1 | 16027456 | 13-scf00114 | 13 |
| AX-157985615 | 5 | 56.656 | KV453028.1 | 16040150 | 13-scf00114 | 13 |
| AX-157985646 | 5 | 56.656 | KV453028.1 | 16058288 | 13-scf00114 | 13 |
| AX-157985651 | 5 | 56.656 | KV453028.1 | 16062087 | 13-scf00114 | 13 |
| AX-157985655 | 5 | 56.656 | KV453028.1 | 16064838 | 13-scf00114 | 13 |
| AX-157818144 | 5 | 56.656 | KV453028.1 | 16066503 | 13-scf00114 | 13 |
| AX-157716255 | 5 | 56.656 | KV453028.1 | 16113585 | 13-scf00114 | 13 |
| AX-157985794 | 5 | 56.656 | KV453028.1 | 16192837 | 13-scf00114 | 13 |
| AX-157986078 | 5 | 56.656 | KV453028.1 | 16461418 | 13-scf00114 | 13 |
| AX-157985661 | 5 | 56.748 | KV453028.1 | 16067761 | 13-scf00114 | 13 |
| AX-157985650 | 5 | 56.875 | KV453028.1 | 16061140 | 13-scf00114 | 13 |
| AX-157985662 | 5 | 56.875 | KV453028.1 | 16069283 | 13-scf00114 | 13 |



|              |   |        |            |          |             |    |
|--------------|---|--------|------------|----------|-------------|----|
| AX-157985664 | 5 | 56.875 | KV453028.1 | 16073620 | 13-scf00114 | 13 |
| AX-157985671 | 5 | 56.875 | KV453028.1 | 16078279 | 13-scf00114 | 13 |
| AX-157985673 | 5 | 56.875 | KV453028.1 | 16080665 | 13-scf00114 | 13 |
| AX-157985675 | 5 | 56.875 | KV453028.1 | 16081387 | 13-scf00114 | 13 |
| AX-157985678 | 5 | 56.875 | KV453028.1 | 16083018 | 13-scf00114 | 13 |
| AX-157985686 | 5 | 56.875 | KV453028.1 | 16087185 | 13-scf00114 | 13 |
| AX-157774001 | 5 | 56.875 | KV453028.1 | 16089903 | 13-scf00114 | 13 |
| AX-157985692 | 5 | 56.875 | KV453028.1 | 16092401 | 13-scf00114 | 13 |
| AX-157985693 | 5 | 56.875 | KV453028.1 | 16092993 | 13-scf00114 | 13 |
| AX-157742647 | 5 | 56.875 | KV453028.1 | 16094039 | 13-scf00114 | 13 |
| AX-157699088 | 5 | 56.875 | KV453028.1 | 16094609 | 13-scf00114 | 13 |
| AX-157985696 | 5 | 56.875 | KV453028.1 | 16096984 | 13-scf00114 | 13 |
| AX-157754259 | 5 | 56.875 | KV453028.1 | 16101285 | 13-scf00114 | 13 |
| AX-157985702 | 5 | 56.875 | KV453028.1 | 16105905 | 13-scf00114 | 13 |
| AX-157985703 | 5 | 56.875 | KV453028.1 | 16107233 | 13-scf00114 | 13 |
| AX-157985709 | 5 | 56.875 | KV453028.1 | 16109497 | 13-scf00114 | 13 |
| AX-157985713 | 5 | 56.875 | KV453028.1 | 16111601 | 13-scf00114 | 13 |
| AX-157773319 | 5 | 56.875 | KV453028.1 | 16149638 | 13-scf00114 | 13 |
| AX-157985751 | 5 | 56.875 | KV453028.1 | 16163652 | 13-scf00114 | 13 |
| AX-157985815 | 5 | 56.875 | KV453028.1 | 16217796 | 13-scf00114 | 13 |
| AX-157742875 | 5 | 56.875 | KV453028.1 | 16221781 | 13-scf00114 | 13 |
| AX-158407094 | 5 | 56.875 | KV453028.1 | 16251364 | 13-scf00114 | 13 |
| AX-157985711 | 5 | 56.914 | KV453028.1 | 16110079 | 13-scf00114 | 13 |
| AX-157985714 | 5 | 56.942 | KV453028.1 | 16113333 | 13-scf00114 | 13 |
| AX-157985667 | 5 | 56.984 | KV453028.1 | 16077602 | 13-scf00114 | 13 |
| AX-157985677 | 5 | 56.984 | KV453028.1 | 16082346 | 13-scf00114 | 13 |
| AX-157985718 | 5 | 56.984 | KV453028.1 | 16119090 | 13-scf00114 | 13 |
| AX-157985721 | 5 | 56.984 | KV453028.1 | 16120394 | 13-scf00114 | 13 |
| AX-157985730 | 5 | 56.984 | KV453028.1 | 16127211 | 13-scf00114 | 13 |
| AX-157714865 | 5 | 56.984 | KV453028.1 | 16127625 | 13-scf00114 | 13 |
| AX-157985732 | 5 | 56.984 | KV453028.1 | 16129046 | 13-scf00114 | 13 |
| AX-157985733 | 5 | 56.984 | KV453028.1 | 16130623 | 13-scf00114 | 13 |
| AX-157818147 | 5 | 56.984 | KV453028.1 | 16131511 | 13-scf00114 | 13 |
| AX-157985735 | 5 | 56.984 | KV453028.1 | 16132006 | 13-scf00114 | 13 |
| AX-157985737 | 5 | 56.984 | KV453028.1 | 16132679 | 13-scf00114 | 13 |
| AX-157818149 | 5 | 56.984 | KV453028.1 | 16136563 | 13-scf00114 | 13 |
| AX-157818150 | 5 | 56.984 | KV453028.1 | 16140301 | 13-scf00114 | 13 |
| AX-157818151 | 5 | 56.984 | KV453028.1 | 16141784 | 13-scf00114 | 13 |
| AX-157818152 | 5 | 56.984 | KV453028.1 | 16142207 | 13-scf00114 | 13 |
| AX-157715013 | 5 | 56.984 | KV453028.1 | 16145432 | 13-scf00114 | 13 |
| AX-157748151 | 5 | 56.984 | KV453028.1 | 16152128 | 13-scf00114 | 13 |
| AX-157818155 | 5 | 56.984 | KV453028.1 | 16156172 | 13-scf00114 | 13 |
| AX-157985748 | 5 | 56.984 | KV453028.1 | 16161059 | 13-scf00114 | 13 |
| AX-157715848 | 5 | 56.984 | KV453028.1 | 16161111 | 13-scf00114 | 13 |
| AX-157985750 | 5 | 56.984 | KV453028.1 | 16161601 | 13-scf00114 | 13 |
| AX-157985754 | 5 | 56.984 | KV453028.1 | 16164957 | 13-scf00114 | 13 |
| AX-157985761 | 5 | 56.984 | KV453028.1 | 16169135 | 13-scf00114 | 13 |
| AX-157818157 | 5 | 56.984 | KV453028.1 | 16169518 | 13-scf00114 | 13 |
| AX-157818158 | 5 | 56.984 | KV453028.1 | 16170540 | 13-scf00114 | 13 |
| AX-157985764 | 5 | 56.984 | KV453028.1 | 16171216 | 13-scf00114 | 13 |
| AX-157985902 | 5 | 56.984 | KV453028.1 | 16291753 | 13-scf00114 | 13 |

|              |   |        |             |          |             |    |
|--------------|---|--------|-------------|----------|-------------|----|
| AX-157985768 | 5 | 57.202 | KV453028.1  | 16174667 | 13-scf00114 | 13 |
| AX-157985771 | 5 | 57.202 | KV453028.1  | 16177461 | 13-scf00114 | 13 |
| AX-157985774 | 5 | 57.202 | KV453028.1  | 16178155 | 13-scf00114 | 13 |
| AX-157741857 | 5 | 57.202 | KV453028.1  | 16192428 | 13-scf00114 | 13 |
| AX-157985795 | 5 | 57.202 | KV453028.1  | 16197566 | 13-scf00114 | 13 |
| AX-158407089 | 5 | 57.202 | KV453028.1  | 16211125 | 13-scf00114 | 13 |
| AX-157985845 | 5 | 57.202 | KV453028.1  | 16245641 | 13-scf00114 | 13 |
| AX-157985847 | 5 | 57.202 | KV453028.1  | 16246722 | 13-scf00114 | 13 |
| AX-157985448 | 5 | 57.236 | KV453028.1  | 15899782 | 13-scf00114 | 13 |
| AX-157701710 | 5 | 57.236 | KV453028.1  | 16074474 | 13-scf00114 | 13 |
| AX-157985724 | 5 | 57.236 | KV453028.1  | 16122982 | 13-scf00114 | 13 |
| AX-157985726 | 5 | 57.236 | KV453028.1  | 16123207 | 13-scf00114 | 13 |
| AX-157985753 | 5 | 57.236 | KV453028.1  | 16164238 | 13-scf00114 | 13 |
| AX-157985775 | 5 | 57.236 | KV453028.1  | 16179492 | 13-scf00114 | 13 |
| AX-157985828 | 5 | 57.236 | KV453028.1  | 16233964 | 13-scf00114 | 13 |
| AX-157985781 | 5 | 57.257 | KV453028.1  | 16181496 | 13-scf00114 | 13 |
| AX-157985783 | 5 | 57.285 | KV453028.1  | 16182983 | 13-scf00114 | 13 |
| AX-157985852 | 5 | 57.285 | KV453028.1  | 16250662 | 13-scf00114 | 13 |
| AX-157985786 | 5 | 57.312 | KV453028.1  | 16184966 | 13-scf00114 | 13 |
| AX-157985789 | 5 | 57.334 | KV453028.1  | 16187151 | 13-scf00114 | 13 |
| AX-157985782 | 5 | 57.421 | KV453028.1  | 16182326 | 13-scf00114 | 13 |
| AX-157985792 | 5 | 57.421 | KV453028.1  | 16191870 | 13-scf00114 | 13 |
| AX-157985797 | 5 | 57.421 | KV453028.1  | 16199365 | 13-scf00114 | 13 |
| AX-157985798 | 5 | 57.421 | KV453028.1  | 16200454 | 13-scf00114 | 13 |
| AX-157865073 | 5 | 57.421 | KV453028.1  | 16204496 | 13-scf00114 | 13 |
| AX-157985805 | 5 | 57.421 | KV453028.1  | 16207364 | 13-scf00114 | 13 |
| AX-157818160 | 5 | 57.421 | KV453028.1  | 16208536 | 13-scf00114 | 13 |
| AX-157818161 | 5 | 57.421 | KV453028.1  | 16213148 | 13-scf00114 | 13 |
| AX-157985811 | 5 | 57.421 | KV453028.1  | 16213451 | 13-scf00114 | 13 |
| AX-157855656 | 5 | 57.421 | KV453028.1  | 16215067 | 13-scf00114 | 13 |
| AX-157985812 | 5 | 57.421 | KV453028.1  | 16216032 | 13-scf00114 | 13 |
| AX-157985817 | 5 | 57.421 | KV453028.1  | 16219216 | 13-scf00114 | 13 |
| AX-157985818 | 5 | 57.421 | KV453028.1  | 16222266 | 13-scf00114 | 13 |
| AX-158407091 | 5 | 57.421 | KV453028.1  | 16228077 | 13-scf00114 | 13 |
| AX-157711916 | 5 | 57.421 | 3ML01027382 | 1057     | scf02988_1  | UN |
| AX-157985837 | 5 | 57.451 | KV453028.1  | 16240711 | 13-scf00114 | 13 |
| AX-157985839 | 5 | 57.488 | KV453028.1  | 16242158 | 13-scf00114 | 13 |
| AX-157985842 | 5 | 57.53  | KV453028.1  | 16243647 | 13-scf00114 | 13 |
| AX-157818168 | 5 | 57.53  | KV453028.1  | 16247296 | 13-scf00114 | 13 |
| AX-157985840 | 5 | 57.639 | KV453028.1  | 16243494 | 13-scf00114 | 13 |
| AX-157985843 | 5 | 57.639 | KV453028.1  | 16244622 | 13-scf00114 | 13 |
| AX-157985851 | 5 | 57.639 | KV453028.1  | 16249953 | 13-scf00114 | 13 |
| AX-157985854 | 5 | 57.639 | KV453028.1  | 16252276 | 13-scf00114 | 13 |
| AX-157985857 | 5 | 57.639 | KV453028.1  | 16252787 | 13-scf00114 | 13 |
| AX-157985860 | 5 | 57.748 | KV453028.1  | 16253826 | 13-scf00114 | 13 |
| AX-157985864 | 5 | 57.748 | KV453028.1  | 16255176 | 13-scf00114 | 13 |
| AX-157985865 | 5 | 57.748 | KV453028.1  | 16255660 | 13-scf00114 | 13 |
| AX-157985867 | 5 | 57.748 | KV453028.1  | 16256133 | 13-scf00114 | 13 |
| AX-157985868 | 5 | 57.748 | KV453028.1  | 16257912 | 13-scf00114 | 13 |
| AX-157985874 | 5 | 57.748 | KV453028.1  | 16262902 | 13-scf00114 | 13 |
| AX-157985876 | 5 | 57.748 | KV453028.1  | 16263129 | 13-scf00114 | 13 |

|              |   |        |            |          |             |    |
|--------------|---|--------|------------|----------|-------------|----|
| AX-157818170 | 5 | 57.748 | KV453028.1 | 16291268 | 13-scf00114 | 13 |
| AX-157818173 | 5 | 57.748 | KV453028.1 | 16309679 | 13-scf00114 | 13 |
| AX-157985820 | 5 | 57.967 | KV453028.1 | 16223220 | 13-scf00114 | 13 |
| AX-158379590 | 5 | 57.967 | KV453028.1 | 16256869 | 13-scf00114 | 13 |
| AX-157985878 | 5 | 57.967 | KV453028.1 | 16266278 | 13-scf00114 | 13 |
| AX-157985881 | 5 | 57.967 | KV453028.1 | 16268379 | 13-scf00114 | 13 |
| AX-157985882 | 5 | 57.967 | KV453028.1 | 16268973 | 13-scf00114 | 13 |
| AX-157985884 | 5 | 57.967 | KV453028.1 | 16269503 | 13-scf00114 | 13 |
| AX-157985887 | 5 | 57.967 | KV453028.1 | 16273571 | 13-scf00114 | 13 |
| AX-157985888 | 5 | 57.967 | KV453028.1 | 16274301 | 13-scf00114 | 13 |
| AX-157985890 | 5 | 57.967 | KV453028.1 | 16275391 | 13-scf00114 | 13 |
| AX-157739436 | 5 | 57.967 | KV453028.1 | 16276995 | 13-scf00114 | 13 |
| AX-157985892 | 5 | 57.967 | KV453028.1 | 16277412 | 13-scf00114 | 13 |
| AX-157985895 | 5 | 57.967 | KV453028.1 | 16279605 | 13-scf00114 | 13 |
| AX-157985896 | 5 | 57.967 | KV453028.1 | 16283430 | 13-scf00114 | 13 |
| AX-157985897 | 5 | 57.967 | KV453028.1 | 16285239 | 13-scf00114 | 13 |
| AX-157985899 | 5 | 57.967 | KV453028.1 | 16285602 | 13-scf00114 | 13 |
| AX-157985900 | 5 | 57.967 | KV453028.1 | 16289776 | 13-scf00114 | 13 |
| AX-157985901 | 5 | 57.967 | KV453028.1 | 16291101 | 13-scf00114 | 13 |
| AX-157699487 | 5 | 57.967 | KV453028.1 | 16295310 | 13-scf00114 | 13 |
| AX-157985907 | 5 | 57.967 | KV453028.1 | 16295398 | 13-scf00114 | 13 |
| AX-157985909 | 5 | 57.967 | KV453028.1 | 16297556 | 13-scf00114 | 13 |
| AX-157818171 | 5 | 57.967 | KV453028.1 | 16297751 | 13-scf00114 | 13 |
| AX-157869763 | 5 | 57.967 | KV453028.1 | 16302757 | 13-scf00114 | 13 |
| AX-157985911 | 5 | 58.016 | KV453028.1 | 16299079 | 13-scf00114 | 13 |
| AX-157818172 | 5 | 58.032 | KV453028.1 | 16299507 | 13-scf00114 | 13 |
| AX-157985912 | 5 | 58.032 | KV453028.1 | 16302029 | 13-scf00114 | 13 |
| AX-157985914 | 5 | 58.05  | KV453028.1 | 16303418 | 13-scf00114 | 13 |
| AX-157985921 | 5 | 58.065 | KV453028.1 | 16310488 | 13-scf00114 | 13 |
| AX-157985922 | 5 | 58.076 | KV453028.1 | 16312154 | 13-scf00114 | 13 |
| AX-157985924 | 5 | 58.076 | KV453028.1 | 16312933 | 13-scf00114 | 13 |
| AX-157985932 | 5 | 58.295 | KV453028.1 | 16326519 | 13-scf00114 | 13 |
| AX-157985934 | 5 | 58.295 | KV453028.1 | 16327187 | 13-scf00114 | 13 |
| AX-157818176 | 5 | 58.295 | KV453028.1 | 16328025 | 13-scf00114 | 13 |
| AX-157985935 | 5 | 58.295 | KV453028.1 | 16328947 | 13-scf00114 | 13 |
| AX-157985938 | 5 | 58.295 | KV453028.1 | 16330666 | 13-scf00114 | 13 |
| AX-157985939 | 5 | 58.295 | KV453028.1 | 16331023 | 13-scf00114 | 13 |
| AX-157985940 | 5 | 58.32  | KV453028.1 | 16331210 | 13-scf00114 | 13 |
| AX-157985956 | 5 | 58.32  | KV453028.1 | 16344942 | 13-scf00114 | 13 |
| AX-157985937 | 5 | 58.354 | KV453028.1 | 16329761 | 13-scf00114 | 13 |
| AX-157985944 | 5 | 58.354 | KV453028.1 | 16334326 | 13-scf00114 | 13 |
| AX-157985947 | 5 | 58.404 | KV453028.1 | 16336556 | 13-scf00114 | 13 |
| AX-157985949 | 5 | 58.404 | KV453028.1 | 16338953 | 13-scf00114 | 13 |
| AX-157985952 | 5 | 58.404 | KV453028.1 | 16341105 | 13-scf00114 | 13 |
| AX-157985954 | 5 | 58.404 | KV453028.1 | 16342153 | 13-scf00114 | 13 |
| AX-157721361 | 5 | 58.404 | KV453028.1 | 16343020 | 13-scf00114 | 13 |
| AX-157818177 | 5 | 58.404 | KV453028.1 | 16345940 | 13-scf00114 | 13 |
| AX-157985958 | 5 | 58.404 | KV453028.1 | 16347190 | 13-scf00114 | 13 |
| AX-157985966 | 5 | 58.404 | KV453028.1 | 16353803 | 13-scf00114 | 13 |
| AX-158390463 | 5 | 58.404 | KV453028.1 | 16363091 | 13-scf00114 | 13 |
| AX-157818178 | 5 | 58.453 | KV453028.1 | 16356990 | 13-scf00114 | 13 |

|              |   |        |            |          |             |    |
|--------------|---|--------|------------|----------|-------------|----|
| AX-157985975 | 5 | 58.453 | KV453028.1 | 16360135 | 13-scf00114 | 13 |
| AX-157985979 | 5 | 58.513 | KV453028.1 | 16362574 | 13-scf00114 | 13 |
| AX-157985964 | 5 | 58.546 | KV453028.1 | 16353214 | 13-scf00114 | 13 |
| AX-157985980 | 5 | 58.546 | KV453028.1 | 16363053 | 13-scf00114 | 13 |
| AX-157985968 | 5 | 58.582 | KV453028.1 | 16354155 | 13-scf00114 | 13 |
| AX-157985977 | 5 | 58.582 | KV453028.1 | 16360839 | 13-scf00114 | 13 |
| AX-157744664 | 5 | 58.582 | KV453028.1 | 16364563 | 13-scf00114 | 13 |
| AX-157985984 | 5 | 58.622 | KV453028.1 | 16368447 | 13-scf00114 | 13 |
| AX-157985986 | 5 | 58.622 | KV453028.1 | 16370634 | 13-scf00114 | 13 |
| AX-157985989 | 5 | 58.622 | KV453028.1 | 16371480 | 13-scf00114 | 13 |
| AX-157708840 | 5 | 58.622 | KV453028.1 | 16372497 | 13-scf00114 | 13 |
| AX-157985990 | 5 | 58.622 | KV453028.1 | 16373368 | 13-scf00114 | 13 |
| AX-157985992 | 5 | 58.622 | KV453028.1 | 16374502 | 13-scf00114 | 13 |
| AX-157985993 | 5 | 58.622 | KV453028.1 | 16376511 | 13-scf00114 | 13 |
| AX-157985996 | 5 | 58.622 | KV453028.1 | 16377731 | 13-scf00114 | 13 |
| AX-157985999 | 5 | 58.622 | KV453028.1 | 16380160 | 13-scf00114 | 13 |
| AX-157986001 | 5 | 58.622 | KV453028.1 | 16380830 | 13-scf00114 | 13 |
| AX-157818181 | 5 | 58.622 | KV453028.1 | 16383351 | 13-scf00114 | 13 |
| AX-157986016 | 5 | 58.622 | KV453028.1 | 16394999 | 13-scf00114 | 13 |
| AX-157714035 | 5 | 58.732 | KV453028.1 | 16384279 | 13-scf00114 | 13 |
| AX-157818182 | 5 | 58.732 | KV453028.1 | 16384589 | 13-scf00114 | 13 |
| AX-157986005 | 5 | 58.732 | KV453028.1 | 16384794 | 13-scf00114 | 13 |
| AX-157986006 | 5 | 58.732 | KV453028.1 | 16388579 | 13-scf00114 | 13 |
| AX-157818183 | 5 | 58.732 | KV453028.1 | 16388899 | 13-scf00114 | 13 |
| AX-157986007 | 5 | 58.732 | KV453028.1 | 16388939 | 13-scf00114 | 13 |
| AX-157986008 | 5 | 58.732 | KV453028.1 | 16391651 | 13-scf00114 | 13 |
| AX-157986010 | 5 | 58.732 | KV453028.1 | 16392119 | 13-scf00114 | 13 |
| AX-157986012 | 5 | 58.732 | KV453028.1 | 16392617 | 13-scf00114 | 13 |
| AX-157818184 | 5 | 58.732 | KV453028.1 | 16393076 | 13-scf00114 | 13 |
| AX-157986015 | 5 | 58.732 | KV453028.1 | 16393120 | 13-scf00114 | 13 |
| AX-157986019 | 5 | 58.732 | KV453028.1 | 16396433 | 13-scf00114 | 13 |
| AX-157818188 | 5 | 58.732 | KV453028.1 | 16399155 | 13-scf00114 | 13 |
| AX-157986037 | 5 | 58.732 | KV453028.1 | 16412244 | 13-scf00114 | 13 |
| AX-157986050 | 5 | 58.732 | KV453028.1 | 16424559 | 13-scf00114 | 13 |
| AX-157709100 | 5 | 58.732 | KV453028.1 | 16425001 | 13-scf00114 | 13 |
| AX-157986056 | 5 | 58.732 | KV453028.1 | 16435119 | 13-scf00114 | 13 |
| AX-157986069 | 5 | 58.732 | KV453028.1 | 16451713 | 13-scf00114 | 13 |
| AX-157986018 | 5 | 58.95  | KV453028.1 | 16395437 | 13-scf00114 | 13 |
| AX-157818187 | 5 | 58.95  | KV453028.1 | 16395493 | 13-scf00114 | 13 |
| AX-158379591 | 5 | 58.95  | KV453028.1 | 16400422 | 13-scf00114 | 13 |
| AX-157986025 | 5 | 58.95  | KV453028.1 | 16401007 | 13-scf00114 | 13 |
| AX-157986027 | 5 | 58.95  | KV453028.1 | 16401950 | 13-scf00114 | 13 |
| AX-157986028 | 5 | 58.95  | KV453028.1 | 16402739 | 13-scf00114 | 13 |
| AX-157986029 | 5 | 58.95  | KV453028.1 | 16403568 | 13-scf00114 | 13 |
| AX-157986031 | 5 | 58.953 | KV453028.1 | 16404373 | 13-scf00114 | 13 |
| AX-157986034 | 5 | 59.386 | KV453028.1 | 16408274 | 13-scf00114 | 13 |
| AX-157713886 | 5 | 59.388 | KV453028.1 | 16414785 | 13-scf00114 | 13 |
| AX-157986045 | 5 | 59.612 | KV453028.1 | 16420825 | 13-scf00114 | 13 |
| AX-157818191 | 5 | 59.823 | KV453028.1 | 16421041 | 13-scf00114 | 13 |
| AX-157986041 | 5 | 59.826 | KV453028.1 | 16418777 | 13-scf00114 | 13 |
| AX-157855659 | 5 | 59.826 | KV453028.1 | 16421198 | 13-scf00114 | 13 |

|              |   |        |            |          |             |    |
|--------------|---|--------|------------|----------|-------------|----|
| AX-157986046 | 5 | 59.826 | KV453028.1 | 16422891 | 13-scf00114 | 13 |
| AX-157986047 | 5 | 59.826 | KV453028.1 | 16423461 | 13-scf00114 | 13 |
| AX-157986049 | 5 | 59.826 | KV453028.1 | 16424105 | 13-scf00114 | 13 |
| AX-157986055 | 5 | 59.826 | KV453028.1 | 16434083 | 13-scf00114 | 13 |
| AX-157818193 | 5 | 59.826 | KV453028.1 | 16437279 | 13-scf00114 | 13 |
| AX-157986059 | 5 | 59.826 | KV453028.1 | 16438309 | 13-scf00114 | 13 |
| AX-157818194 | 5 | 59.826 | KV453028.1 | 16439523 | 13-scf00114 | 13 |
| AX-157986061 | 5 | 59.935 | KV453028.1 | 16442032 | 13-scf00114 | 13 |
| AX-157986062 | 5 | 59.935 | KV453028.1 | 16442548 | 13-scf00114 | 13 |
| AX-157818197 | 5 | 59.935 | KV453028.1 | 16442856 | 13-scf00114 | 13 |
| AX-157818198 | 5 | 59.935 | KV453028.1 | 16444054 | 13-scf00114 | 13 |
| AX-157986065 | 5 | 59.935 | KV453028.1 | 16448256 | 13-scf00114 | 13 |
| AX-157719917 | 5 | 60.044 | KV453028.1 | 16450751 | 13-scf00114 | 13 |
| AX-157986072 | 5 | 60.044 | KV453028.1 | 16456778 | 13-scf00114 | 13 |
| AX-157986077 | 5 | 60.044 | KV453028.1 | 16459189 | 13-scf00114 | 13 |
| AX-157986099 | 5 | 60.044 | KV453028.1 | 16481682 | 13-scf00114 | 13 |
| AX-157986075 | 5 | 60.081 | KV453028.1 | 16457986 | 13-scf00114 | 13 |
| AX-157986079 | 5 | 60.154 | KV453028.1 | 16464691 | 13-scf00114 | 13 |
| AX-157986082 | 5 | 60.154 | KV453028.1 | 16465778 | 13-scf00114 | 13 |
| AX-157720494 | 5 | 60.154 | KV453028.1 | 16466427 | 13-scf00114 | 13 |
| AX-157986090 | 5 | 60.154 | KV453028.1 | 16475236 | 13-scf00114 | 13 |
| AX-157986092 | 5 | 60.154 | KV453028.1 | 16476576 | 13-scf00114 | 13 |
| AX-157986096 | 5 | 60.263 | KV453028.1 | 16479782 | 13-scf00114 | 13 |
| AX-157748361 | 5 | 60.263 | KV453028.1 | 16484508 | 13-scf00114 | 13 |
| AX-157818201 | 5 | 60.263 | KV453028.1 | 16484580 | 13-scf00114 | 13 |
| AX-157818202 | 5 | 60.263 | KV453028.1 | 16485244 | 13-scf00114 | 13 |
| AX-157986101 | 5 | 60.263 | KV453028.1 | 16488439 | 13-scf00114 | 13 |
| AX-157986120 | 5 | 60.263 | KV453028.1 | 16510996 | 13-scf00114 | 13 |
| AX-157986134 | 5 | 60.263 | KV453028.1 | 16523668 | 13-scf00114 | 13 |
| AX-157710188 | 5 | 60.263 | KV453028.1 | 16570857 | 13-scf00114 | 13 |
| AX-157986102 | 5 | 60.377 | KV453028.1 | 16490024 | 13-scf00114 | 13 |
| AX-157986105 | 5 | 60.377 | KV453028.1 | 16496683 | 13-scf00114 | 13 |
| AX-157744616 | 5 | 60.481 | KV453028.1 | 16497771 | 13-scf00114 | 13 |
| AX-157818206 | 5 | 60.481 | KV453028.1 | 16500763 | 13-scf00114 | 13 |
| AX-157986108 | 5 | 60.481 | KV453028.1 | 16503811 | 13-scf00114 | 13 |
| AX-157986110 | 5 | 60.481 | KV453028.1 | 16505905 | 13-scf00114 | 13 |
| AX-157986115 | 5 | 60.481 | KV453028.1 | 16506652 | 13-scf00114 | 13 |
| AX-157986152 | 5 | 60.481 | KV453028.1 | 16546919 | 13-scf00114 | 13 |
| AX-157986173 | 5 | 60.481 | KV453028.1 | 16566118 | 13-scf00114 | 13 |
| AX-157986196 | 5 | 60.481 | KV453028.1 | 16587509 | 13-scf00114 | 13 |
| AX-157986112 | 5 | 60.591 | KV453028.1 | 16506411 | 13-scf00114 | 13 |
| AX-157986119 | 5 | 60.591 | KV453028.1 | 16510399 | 13-scf00114 | 13 |
| AX-157818207 | 5 | 60.591 | KV453028.1 | 16515237 | 13-scf00114 | 13 |
| AX-157986125 | 5 | 60.591 | KV453028.1 | 16517111 | 13-scf00114 | 13 |
| AX-157818208 | 5 | 60.591 | KV453028.1 | 16517890 | 13-scf00114 | 13 |
| AX-157986126 | 5 | 60.591 | KV453028.1 | 16518268 | 13-scf00114 | 13 |
| AX-157986128 | 5 | 60.591 | KV453028.1 | 16519067 | 13-scf00114 | 13 |
| AX-157986129 | 5 | 60.591 | KV453028.1 | 16519968 | 13-scf00114 | 13 |
| AX-157986132 | 5 | 60.591 | KV453028.1 | 16522122 | 13-scf00114 | 13 |
| AX-157986135 | 5 | 60.591 | KV453028.1 | 16524293 | 13-scf00114 | 13 |
| AX-157818210 | 5 | 60.591 | KV453028.1 | 16525717 | 13-scf00114 | 13 |

|              |   |        |            |          |             |    |
|--------------|---|--------|------------|----------|-------------|----|
| AX-157986136 | 5 | 60.591 | KV453028.1 | 16527098 | 13-scf00114 | 13 |
| AX-157986138 | 5 | 60.591 | KV453028.1 | 16527355 | 13-scf00114 | 13 |
| AX-157986139 | 5 | 60.591 | KV453028.1 | 16529300 | 13-scf00114 | 13 |
| AX-157986143 | 5 | 60.591 | KV453028.1 | 16533373 | 13-scf00114 | 13 |
| AX-157818212 | 5 | 60.591 | KV453028.1 | 16536448 | 13-scf00114 | 13 |
| AX-157986145 | 5 | 60.591 | KV453028.1 | 16536701 | 13-scf00114 | 13 |
| AX-157747015 | 5 | 60.591 | KV453028.1 | 16538065 | 13-scf00114 | 13 |
| AX-157855663 | 5 | 60.591 | KV453028.1 | 16538171 | 13-scf00114 | 13 |
| AX-157742699 | 5 | 60.591 | KV453028.1 | 16538793 | 13-scf00114 | 13 |
| AX-157772400 | 5 | 60.591 | KV453028.1 | 16540310 | 13-scf00114 | 13 |
| AX-157986149 | 5 | 60.591 | KV453028.1 | 16541223 | 13-scf00114 | 13 |
| AX-157986150 | 5 | 60.591 | KV453028.1 | 16546440 | 13-scf00114 | 13 |
| AX-157734844 | 5 | 60.591 | KV453028.1 | 16553703 | 13-scf00114 | 13 |
| AX-157818213 | 5 | 60.591 | KV453028.1 | 16554050 | 13-scf00114 | 13 |
| AX-157759041 | 5 | 60.591 | KV453028.1 | 16555343 | 13-scf00114 | 13 |
| AX-157818215 | 5 | 60.591 | KV453028.1 | 16556522 | 13-scf00114 | 13 |
| AX-157986159 | 5 | 60.591 | KV453028.1 | 16558221 | 13-scf00114 | 13 |
| AX-157986160 | 5 | 60.591 | KV453028.1 | 16559940 | 13-scf00114 | 13 |
| AX-157986163 | 5 | 60.591 | KV453028.1 | 16561536 | 13-scf00114 | 13 |
| AX-157818217 | 5 | 60.591 | KV453028.1 | 16564191 | 13-scf00114 | 13 |
| AX-157986174 | 5 | 60.591 | KV453028.1 | 16566872 | 13-scf00114 | 13 |
| AX-157986175 | 5 | 60.591 | KV453028.1 | 16568707 | 13-scf00114 | 13 |
| AX-157986176 | 5 | 60.591 | KV453028.1 | 16569156 | 13-scf00114 | 13 |
| AX-157986182 | 5 | 60.591 | KV453028.1 | 16574340 | 13-scf00114 | 13 |
| AX-157986184 | 5 | 60.591 | KV453028.1 | 16577332 | 13-scf00114 | 13 |
| AX-157865078 | 5 | 60.591 | KV453028.1 | 16580456 | 13-scf00114 | 13 |
| AX-157986187 | 5 | 60.591 | KV453028.1 | 16581352 | 13-scf00114 | 13 |
| AX-157986200 | 5 | 60.591 | KV453028.1 | 16589132 | 13-scf00114 | 13 |
| AX-157818222 | 5 | 60.591 | KV453028.1 | 16595523 | 13-scf00114 | 13 |
| AX-157986188 | 5 | 60.709 | KV453028.1 | 16582394 | 13-scf00114 | 13 |
| AX-157714555 | 5 | 60.809 | KV453028.1 | 16582483 | 13-scf00114 | 13 |
| AX-157818219 | 5 | 60.809 | KV453028.1 | 16585346 | 13-scf00114 | 13 |
| AX-157782814 | 5 | 60.809 | KV453028.1 | 16585452 | 13-scf00114 | 13 |
| AX-157986191 | 5 | 60.809 | KV453028.1 | 16585857 | 13-scf00114 | 13 |
| AX-157986202 | 5 | 60.809 | KV453028.1 | 16591680 | 13-scf00114 | 13 |
| AX-157818225 | 5 | 60.857 | KV453028.1 | 16603011 | 13-scf00114 | 13 |
| AX-157986212 | 5 | 60.918 | KV453028.1 | 16603840 | 13-scf00114 | 13 |
| AX-157986213 | 5 | 60.918 | KV453028.1 | 16606360 | 13-scf00114 | 13 |
| AX-157818229 | 5 | 60.918 | KV453028.1 | 16607845 | 13-scf00114 | 13 |
| AX-157716568 | 5 | 60.918 | KV453028.1 | 16610566 | 13-scf00114 | 13 |
| AX-157986218 | 5 | 60.918 | KV453028.1 | 16611030 | 13-scf00114 | 13 |
| AX-157986219 | 5 | 60.918 | KV453028.1 | 16612989 | 13-scf00114 | 13 |
| AX-157715102 | 5 | 60.918 | KV453028.1 | 16617345 | 13-scf00114 | 13 |
| AX-157818234 | 5 | 60.918 | KV453028.1 | 16617991 | 13-scf00114 | 13 |
| AX-157986224 | 5 | 60.918 | KV453028.1 | 16618362 | 13-scf00114 | 13 |
| AX-157986225 | 5 | 60.918 | KV453028.1 | 16620707 | 13-scf00114 | 13 |
| AX-157986226 | 5 | 60.918 | KV453028.1 | 16621118 | 13-scf00114 | 13 |
| AX-157986227 | 5 | 60.918 | KV453028.1 | 16621714 | 13-scf00114 | 13 |
| AX-157986228 | 5 | 60.918 | KV453028.1 | 16623310 | 13-scf00114 | 13 |
| AX-157717086 | 5 | 60.918 | KV453028.1 | 16625990 | 13-scf00114 | 13 |
| AX-157986230 | 5 | 60.918 | KV453028.1 | 16627655 | 13-scf00114 | 13 |

|              |   |        |            |          |             |    |
|--------------|---|--------|------------|----------|-------------|----|
| AX-157986240 | 5 | 60.918 | KV453028.1 | 16640220 | 13-scf00114 | 13 |
| AX-157818238 | 5 | 60.918 | KV453028.1 | 16648239 | 13-scf00114 | 13 |
| AX-157818242 | 5 | 60.918 | KV453028.1 | 16655075 | 13-scf00114 | 13 |
| AX-157818245 | 5 | 60.918 | KV453028.1 | 16678994 | 13-scf00114 | 13 |
| AX-157986275 | 5 | 60.918 | KV453028.1 | 16679372 | 13-scf00114 | 13 |
| AX-157818237 | 5 | 61.028 | KV453028.1 | 16642074 | 13-scf00114 | 13 |
| AX-157986241 | 5 | 61.028 | KV453028.1 | 16642333 | 13-scf00114 | 13 |
| AX-157986242 | 5 | 61.028 | KV453028.1 | 16644367 | 13-scf00114 | 13 |
| AX-157986244 | 5 | 61.028 | KV453028.1 | 16645248 | 13-scf00114 | 13 |
| AX-157986245 | 5 | 61.028 | KV453028.1 | 16646665 | 13-scf00114 | 13 |
| AX-157986246 | 5 | 61.028 | KV453028.1 | 16647086 | 13-scf00114 | 13 |
| AX-158405518 | 5 | 61.064 | KV453028.1 | 16651928 | 13-scf00114 | 13 |
| AX-157818230 | 5 | 61.137 | KV453028.1 | 16608722 | 13-scf00114 | 13 |
| AX-157771337 | 5 | 61.137 | KV453028.1 | 16622319 | 13-scf00114 | 13 |
| AX-157986229 | 5 | 61.137 | KV453028.1 | 16627227 | 13-scf00114 | 13 |
| AX-157986250 | 5 | 61.137 | KV453028.1 | 16652412 | 13-scf00114 | 13 |
| AX-157986251 | 5 | 61.137 | KV453028.1 | 16652708 | 13-scf00114 | 13 |
| AX-157818240 | 5 | 61.137 | KV453028.1 | 16653500 | 13-scf00114 | 13 |
| AX-157986252 | 5 | 61.137 | KV453028.1 | 16654574 | 13-scf00114 | 13 |
| AX-157986257 | 5 | 61.137 | KV453028.1 | 16661263 | 13-scf00114 | 13 |
| AX-157986261 | 5 | 61.137 | KV453028.1 | 16664656 | 13-scf00114 | 13 |
| AX-157818243 | 5 | 61.137 | KV453028.1 | 16665049 | 13-scf00114 | 13 |
| AX-157986263 | 5 | 61.137 | KV453028.1 | 16670033 | 13-scf00114 | 13 |
| AX-157986265 | 5 | 61.137 | KV453028.1 | 16672770 | 13-scf00114 | 13 |
| AX-157986267 | 5 | 61.137 | KV453028.1 | 16673826 | 13-scf00114 | 13 |
| AX-157986268 | 5 | 61.137 | KV453028.1 | 16674112 | 13-scf00114 | 13 |
| AX-157986271 | 5 | 61.137 | KV453028.1 | 16676102 | 13-scf00114 | 13 |
| AX-157986272 | 5 | 61.137 | KV453028.1 | 16676248 | 13-scf00114 | 13 |
| AX-157986278 | 5 | 61.137 | KV453028.1 | 16681319 | 13-scf00114 | 13 |
| AX-157986286 | 5 | 61.137 | KV453028.1 | 16686646 | 13-scf00114 | 13 |
| AX-157986291 | 5 | 61.137 | KV453028.1 | 16691164 | 13-scf00114 | 13 |
| AX-158407103 | 5 | 61.137 | KV453028.1 | 16708767 | 13-scf00114 | 13 |
| AX-157986339 | 5 | 61.137 | KV453028.1 | 16740771 | 13-scf00114 | 13 |
| AX-157884477 | 5 | 61.235 | KV453028.1 | 16680154 | 13-scf00114 | 13 |
| AX-157986316 | 5 | 61.235 | KV453028.1 | 16718580 | 13-scf00114 | 13 |
| AX-157986336 | 5 | 61.235 | KV453028.1 | 16735961 | 13-scf00114 | 13 |
| AX-157986270 | 5 | 61.295 | KV453028.1 | 16675572 | 13-scf00114 | 13 |
| AX-157986281 | 5 | 61.295 | KV453028.1 | 16681923 | 13-scf00114 | 13 |
| AX-157986274 | 5 | 61.355 | KV453028.1 | 16678512 | 13-scf00114 | 13 |
| AX-157986288 | 5 | 61.355 | KV453028.1 | 16686935 | 13-scf00114 | 13 |
| AX-157986295 | 5 | 61.355 | KV453028.1 | 16692986 | 13-scf00114 | 13 |
| AX-157986299 | 5 | 61.355 | KV453028.1 | 16694429 | 13-scf00114 | 13 |
| AX-157986312 | 5 | 61.355 | KV453028.1 | 16712760 | 13-scf00114 | 13 |
| AX-157986301 | 5 | 61.574 | KV453028.1 | 16694647 | 13-scf00114 | 13 |
| AX-157869768 | 5 | 61.574 | KV453028.1 | 16695883 | 13-scf00114 | 13 |
| AX-157986303 | 5 | 61.574 | KV453028.1 | 16697754 | 13-scf00114 | 13 |
| AX-157818247 | 5 | 61.574 | KV453028.1 | 16701790 | 13-scf00114 | 13 |
| AX-157986308 | 5 | 61.574 | KV453028.1 | 16704540 | 13-scf00114 | 13 |
| AX-157986313 | 5 | 61.793 | KV453028.1 | 16715520 | 13-scf00114 | 13 |
| AX-157697997 | 5 | 61.793 | KV453028.1 | 16717239 | 13-scf00114 | 13 |
| AX-157739730 | 5 | 61.793 | KV453028.1 | 16719987 | 13-scf00114 | 13 |

|              |   |        |            |          |             |    |
|--------------|---|--------|------------|----------|-------------|----|
| AX-157986324 | 5 | 61.851 | KV453028.1 | 16727806 | 13-scf00114 | 13 |
| AX-157986254 | 5 | 61.875 | KV453028.1 | 16657217 | 13-scf00114 | 13 |
| AX-157753403 | 5 | 61.875 | KV453028.1 | 16728960 | 13-scf00114 | 13 |
| AX-157986325 | 5 | 61.902 | KV453028.1 | 16730060 | 13-scf00114 | 13 |
| AX-157986328 | 5 | 61.95  | KV453028.1 | 16731540 | 13-scf00114 | 13 |
| AX-157986331 | 5 | 62.011 | KV453028.1 | 16734962 | 13-scf00114 | 13 |
| AX-157747592 | 5 | 62.011 | KV453028.1 | 16735619 | 13-scf00114 | 13 |
| AX-157818250 | 5 | 62.011 | KV453028.1 | 16736897 | 13-scf00114 | 13 |
| AX-157986337 | 5 | 62.011 | KV453028.1 | 16739680 | 13-scf00114 | 13 |
| AX-157714494 | 5 | 62.011 | KV453028.1 | 16739737 | 13-scf00114 | 13 |
| AX-157986341 | 5 | 62.011 | KV453028.1 | 16741305 | 13-scf00114 | 13 |
| AX-157818252 | 5 | 62.011 | KV453028.1 | 16745227 | 13-scf00114 | 13 |
| AX-157986351 | 5 | 62.011 | KV453028.1 | 16751025 | 13-scf00114 | 13 |
| AX-157986352 | 5 | 62.011 | KV453028.1 | 16752378 | 13-scf00114 | 13 |
| AX-157986359 | 5 | 62.011 | KV453028.1 | 16759477 | 13-scf00114 | 13 |
| AX-157986360 | 5 | 62.011 | KV453028.1 | 16759829 | 13-scf00114 | 13 |
| AX-157745179 | 5 | 62.011 | KV453028.1 | 16760286 | 13-scf00114 | 13 |
| AX-157986432 | 5 | 62.011 | KV453028.1 | 16833435 | 13-scf00114 | 13 |
| AX-157744174 | 5 | 62.024 | KV453028.1 | 16762911 | 13-scf00114 | 13 |
| AX-157986362 | 5 | 62.026 | KV453028.1 | 16763400 | 13-scf00114 | 13 |
| AX-157719447 | 5 | 62.273 | KV453028.1 | 16733844 | 13-scf00114 | 13 |
| AX-157818251 | 5 | 62.273 | KV453028.1 | 16744860 | 13-scf00114 | 13 |
| AX-157986346 | 5 | 62.273 | KV453028.1 | 16747337 | 13-scf00114 | 13 |
| AX-157986368 | 5 | 62.273 | KV453028.1 | 16768899 | 13-scf00114 | 13 |
| AX-157986369 | 5 | 62.273 | KV453028.1 | 16769794 | 13-scf00114 | 13 |
| AX-157986370 | 5 | 62.273 | KV453028.1 | 16770504 | 13-scf00114 | 13 |
| AX-157986372 | 5 | 62.273 | KV453028.1 | 16772654 | 13-scf00114 | 13 |
| AX-157758852 | 5 | 62.273 | KV453028.1 | 16785174 | 13-scf00114 | 13 |
| AX-157986382 | 5 | 62.273 | KV453028.1 | 16786476 | 13-scf00114 | 13 |
| AX-157771322 | 5 | 62.273 | KV453028.1 | 16787851 | 13-scf00114 | 13 |
| AX-157986385 | 5 | 62.544 | KV453028.1 | 16790779 | 13-scf00114 | 13 |
| AX-157986386 | 5 | 62.648 | KV453028.1 | 16792061 | 13-scf00114 | 13 |
| AX-157986393 | 5 | 62.799 | KV453028.1 | 16804007 | 13-scf00114 | 13 |
| AX-157738410 | 5 | 62.804 | KV453028.1 | 16804130 | 13-scf00114 | 13 |
| AX-157986396 | 5 | 62.804 | KV453028.1 | 16807133 | 13-scf00114 | 13 |
| AX-157986411 | 5 | 62.804 | KV453028.1 | 16818359 | 13-scf00114 | 13 |
| AX-157986431 | 5 | 62.804 | KV453028.1 | 16831781 | 13-scf00114 | 13 |
| AX-157986440 | 5 | 62.804 | KV453028.1 | 16838687 | 13-scf00114 | 13 |
| AX-157986399 | 5 | 63.152 | KV453028.1 | 16809958 | 13-scf00114 | 13 |
| AX-157986400 | 5 | 63.153 | KV453028.1 | 16811770 | 13-scf00114 | 13 |
| AX-157818262 | 5 | 63.153 | KV453028.1 | 16813306 | 13-scf00114 | 13 |
| AX-157986408 | 5 | 63.317 | KV453028.1 | 16815805 | 13-scf00114 | 13 |
| AX-157986413 | 5 | 63.317 | KV453028.1 | 16818731 | 13-scf00114 | 13 |
| AX-157986414 | 5 | 63.317 | KV453028.1 | 16819472 | 13-scf00114 | 13 |
| AX-157986418 | 5 | 63.323 | KV453028.1 | 16820664 | 13-scf00114 | 13 |
| AX-157986424 | 5 | 63.324 | KV453028.1 | 16825106 | 13-scf00114 | 13 |
| AX-157818263 | 5 | 63.324 | KV453028.1 | 16825175 | 13-scf00114 | 13 |
| AX-157986427 | 5 | 63.324 | KV453028.1 | 16826878 | 13-scf00114 | 13 |
| AX-157986439 | 5 | 63.324 | KV453028.1 | 16838274 | 13-scf00114 | 13 |
| AX-158379594 | 5 | 63.524 | KV453028.1 | 16840112 | 13-scf00114 | 13 |
| AX-157986448 | 5 | 63.652 | KV453028.1 | 16845582 | 13-scf00114 | 13 |



|              |   |        |            |          |             |    |
|--------------|---|--------|------------|----------|-------------|----|
| AX-157986449 | 5 | 63.652 | KV453028.1 | 16846887 | 13-scf00114 | 13 |
| AX-157739527 | 5 | 63.652 | KV453028.1 | 16847445 | 13-scf00114 | 13 |
| AX-157818267 | 5 | 63.652 | KV453028.1 | 16850782 | 13-scf00114 | 13 |
| AX-157986452 | 5 | 63.652 | KV453028.1 | 16852720 | 13-scf00114 | 13 |
| AX-157865080 | 5 | 63.87  | KV453028.1 | 16855487 | 13-scf00114 | 13 |
| AX-157986465 | 5 | 63.87  | KV453028.1 | 16857825 | 13-scf00114 | 13 |
| AX-157869769 | 5 | 63.979 | KV453028.1 | 16797647 | 13-scf00114 | 13 |
| AX-157986443 | 5 | 63.979 | KV453028.1 | 16841194 | 13-scf00114 | 13 |
| AX-157986444 | 5 | 63.979 | KV453028.1 | 16841429 | 13-scf00114 | 13 |
| AX-157986462 | 5 | 63.979 | KV453028.1 | 16855247 | 13-scf00114 | 13 |
| AX-157986464 | 5 | 63.979 | KV453028.1 | 16856438 | 13-scf00114 | 13 |
| AX-157750249 | 5 | 63.979 | KV453028.1 | 16862654 | 13-scf00114 | 13 |
| AX-157818269 | 5 | 63.979 | KV453028.1 | 16862856 | 13-scf00114 | 13 |
| AX-157986470 | 5 | 63.979 | KV453028.1 | 16863485 | 13-scf00114 | 13 |
| AX-157986472 | 5 | 63.979 | KV453028.1 | 16864353 | 13-scf00114 | 13 |
| AX-157986477 | 5 | 63.979 | KV453028.1 | 16866818 | 13-scf00114 | 13 |
| AX-157986528 | 5 | 63.979 | KV453028.1 | 16930758 | 13-scf00114 | 13 |
| AX-157986546 | 5 | 63.979 | KV453028.1 | 16951515 | 13-scf00114 | 13 |
| AX-157818266 | 5 | 63.995 | KV453028.1 | 16847349 | 13-scf00114 | 13 |
| AX-157986474 | 5 | 63.995 | KV453028.1 | 16864824 | 13-scf00114 | 13 |
| AX-157818270 | 5 | 63.995 | KV453028.1 | 16865323 | 13-scf00114 | 13 |
| AX-157986506 | 5 | 63.995 | KV453028.1 | 16905875 | 13-scf00114 | 13 |
| AX-157986475 | 5 | 64.015 | KV453028.1 | 16865402 | 13-scf00114 | 13 |
| AX-157818268 | 5 | 64.037 | KV453028.1 | 16860212 | 13-scf00114 | 13 |
| AX-157986478 | 5 | 64.037 | KV453028.1 | 16868573 | 13-scf00114 | 13 |
| AX-157986479 | 5 | 64.062 | KV453028.1 | 16868895 | 13-scf00114 | 13 |
| AX-157818271 | 5 | 64.089 | KV453028.1 | 16869240 | 13-scf00114 | 13 |
| AX-157818272 | 5 | 64.089 | KV453028.1 | 16871443 | 13-scf00114 | 13 |
| AX-157818273 | 5 | 64.089 | KV453028.1 | 16872748 | 13-scf00114 | 13 |
| AX-157986494 | 5 | 64.089 | KV453028.1 | 16890664 | 13-scf00114 | 13 |
| AX-157986495 | 5 | 64.089 | KV453028.1 | 16891439 | 13-scf00114 | 13 |
| AX-157986496 | 5 | 64.089 | KV453028.1 | 16893398 | 13-scf00114 | 13 |
| AX-157710738 | 5 | 64.089 | KV453028.1 | 16896098 | 13-scf00114 | 13 |
| AX-157986499 | 5 | 64.174 | KV453028.1 | 16896618 | 13-scf00114 | 13 |
| AX-157986502 | 5 | 64.255 | KV453028.1 | 16898326 | 13-scf00114 | 13 |
| AX-157818274 | 5 | 64.255 | KV453028.1 | 16898660 | 13-scf00114 | 13 |
| AX-157986505 | 5 | 64.255 | KV453028.1 | 16900162 | 13-scf00114 | 13 |
| AX-157726563 | 5 | 64.255 | KV453028.1 | 16904998 | 13-scf00114 | 13 |
| AX-157726515 | 5 | 64.422 | KV453028.1 | 16907966 | 13-scf00114 | 13 |
| AX-158407110 | 5 | 64.422 | KV453028.1 | 16908870 | 13-scf00114 | 13 |
| AX-157986507 | 5 | 64.422 | KV453028.1 | 16910165 | 13-scf00114 | 13 |
| AX-157986509 | 5 | 64.422 | KV453028.1 | 16911095 | 13-scf00114 | 13 |
| AX-157986510 | 5 | 64.422 | KV453028.1 | 16912300 | 13-scf00114 | 13 |
| AX-157986527 | 5 | 64.422 | KV453028.1 | 16929510 | 13-scf00114 | 13 |
| AX-157986511 | 5 | 64.723 | KV453028.1 | 16913010 | 13-scf00114 | 13 |
| AX-157986518 | 5 | 64.948 | KV453028.1 | 16919362 | 13-scf00114 | 13 |
| AX-157722470 | 5 | 65.025 | KV453028.1 | 16922535 | 13-scf00114 | 13 |
| AX-157986521 | 5 | 65.025 | KV453028.1 | 16924601 | 13-scf00114 | 13 |
| AX-157986522 | 5 | 65.025 | KV453028.1 | 16925269 | 13-scf00114 | 13 |
| AX-157986525 | 5 | 65.025 | KV453028.1 | 16927278 | 13-scf00114 | 13 |
| AX-157986534 | 5 | 65.026 | KV453028.1 | 16938078 | 13-scf00114 | 13 |

|              |   |        |            |          |             |    |
|--------------|---|--------|------------|----------|-------------|----|
| AX-157986537 | 5 | 65.423 | KV453028.1 | 16943069 | 13-scf00114 | 13 |
| AX-157986538 | 5 | 65.425 | KV453028.1 | 16943549 | 13-scf00114 | 13 |
| AX-157986536 | 5 | 65.426 | KV453028.1 | 16939836 | 13-scf00114 | 13 |
| AX-157986540 | 5 | 65.426 | KV453028.1 | 16947458 | 13-scf00114 | 13 |
| AX-157986542 | 5 | 65.426 | KV453028.1 | 16949821 | 13-scf00114 | 13 |
| AX-157986545 | 5 | 65.426 | KV453028.1 | 16950958 | 13-scf00114 | 13 |
| AX-157986551 | 5 | 65.426 | KV453028.1 | 16959138 | 13-scf00114 | 13 |
| AX-158407111 | 5 | 65.426 | KV453028.1 | 16959273 | 13-scf00114 | 13 |
| AX-157875828 | 5 | 65.426 | KV453028.1 | 16959434 | 13-scf00114 | 13 |
| AX-157986555 | 5 | 65.426 | KV453028.1 | 16965386 | 13-scf00114 | 13 |
| AX-157818275 | 5 | 65.432 | KV453028.1 | 16927045 | 13-scf00114 | 13 |
| AX-157986543 | 5 | 65.432 | KV453028.1 | 16950511 | 13-scf00114 | 13 |
| AX-157986550 | 5 | 65.432 | KV453028.1 | 16957513 | 13-scf00114 | 13 |
| AX-157758689 | 5 | 65.432 | KV453028.1 | 16963121 | 13-scf00114 | 13 |
| AX-157986552 | 5 | 65.628 | KV453028.1 | 16963943 | 13-scf00114 | 13 |
| AX-157738364 | 5 | 65.628 | KV453028.1 | 16967116 | 13-scf00114 | 13 |
| AX-157986558 | 5 | 65.628 | KV453028.1 | 16967726 | 13-scf00114 | 13 |
| AX-157986559 | 5 | 65.628 | KV453028.1 | 16968090 | 13-scf00114 | 13 |
| AX-157986714 | 5 | 65.628 | KV453028.1 | 17126150 | 13-scf00114 | 13 |
| AX-157773912 | 5 | 66.156 | KV453028.1 | 16972197 | 13-scf00114 | 13 |
| AX-157986565 | 5 | 66.531 | KV453028.1 | 16974404 | 13-scf00114 | 13 |
| AX-157986571 | 5 | 66.614 | KV453028.1 | 16983952 | 13-scf00114 | 13 |
| AX-157986578 | 5 | 67.271 | KV453028.1 | 16991625 | 13-scf00114 | 13 |
| AX-157986579 | 5 | 67.271 | KV453028.1 | 16992240 | 13-scf00114 | 13 |
| AX-157986582 | 5 | 67.271 | KV453028.1 | 16992905 | 13-scf00114 | 13 |
| AX-157986585 | 5 | 67.271 | KV453028.1 | 16993534 | 13-scf00114 | 13 |
| AX-157701426 | 5 | 67.271 | KV453028.1 | 16995039 | 13-scf00114 | 13 |
| AX-157818278 | 5 | 67.271 | KV453028.1 | 16995481 | 13-scf00114 | 13 |
| AX-157986586 | 5 | 67.271 | KV453028.1 | 16997158 | 13-scf00114 | 13 |
| AX-157986587 | 5 | 67.271 | KV453028.1 | 17000912 | 13-scf00114 | 13 |
| AX-157986588 | 5 | 67.271 | KV453028.1 | 17001765 | 13-scf00114 | 13 |
| AX-157986590 | 5 | 67.271 | KV453028.1 | 17002742 | 13-scf00114 | 13 |
| AX-157986591 | 5 | 67.271 | KV453028.1 | 17003323 | 13-scf00114 | 13 |
| AX-157986601 | 5 | 67.271 | KV453028.1 | 17013816 | 13-scf00114 | 13 |
| AX-157742976 | 5 | 67.603 | KV453028.1 | 17015975 | 13-scf00114 | 13 |
| AX-157986563 | 5 | 67.604 | KV453028.1 | 16973239 | 13-scf00114 | 13 |
| AX-157818280 | 5 | 67.604 | KV453028.1 | 17017360 | 13-scf00114 | 13 |
| AX-157739975 | 5 | 67.604 | KV453028.1 | 17019746 | 13-scf00114 | 13 |
| AX-157818283 | 5 | 67.604 | KV453028.1 | 17022889 | 13-scf00114 | 13 |
| AX-157986607 | 5 | 67.604 | KV453028.1 | 17025425 | 13-scf00114 | 13 |
| AX-158390468 | 5 | 67.604 | KV453028.1 | 17027362 | 13-scf00114 | 13 |
| AX-157818284 | 5 | 67.604 | KV453028.1 | 17029131 | 13-scf00114 | 13 |
| AX-157986614 | 5 | 67.823 | KV453028.1 | 17037556 | 13-scf00114 | 13 |
| AX-157986615 | 5 | 67.823 | KV453028.1 | 17038319 | 13-scf00114 | 13 |
| AX-157740128 | 5 | 67.823 | KV453028.1 | 17038729 | 13-scf00114 | 13 |
| AX-157986620 | 5 | 67.861 | KV453028.1 | 17041020 | 13-scf00114 | 13 |
| AX-157986592 | 5 | 67.89  | KV453028.1 | 17006393 | 13-scf00114 | 13 |
| AX-157986630 | 5 | 67.89  | KV453028.1 | 17048869 | 13-scf00114 | 13 |
| AX-157986633 | 5 | 67.932 | KV453028.1 | 17051684 | 13-scf00114 | 13 |
| AX-157755883 | 5 | 67.947 | KV453028.1 | 17055088 | 13-scf00114 | 13 |
| AX-157986639 | 5 | 67.969 | KV453028.1 | 17057102 | 13-scf00114 | 13 |

|              |   |        |            |          |             |    |
|--------------|---|--------|------------|----------|-------------|----|
| AX-157772407 | 5 | 68.007 | KV453028.1 | 17049357 | 13-scf00114 | 13 |
| AX-157986640 | 5 | 68.007 | KV453028.1 | 17058525 | 13-scf00114 | 13 |
| AX-157986645 | 5 | 68.041 | KV453028.1 | 17061718 | 13-scf00114 | 13 |
| AX-157986646 | 5 | 68.041 | KV453028.1 | 17062181 | 13-scf00114 | 13 |
| AX-157986647 | 5 | 68.041 | KV453028.1 | 17064045 | 13-scf00114 | 13 |
| AX-157986648 | 5 | 68.041 | KV453028.1 | 17065220 | 13-scf00114 | 13 |
| AX-157986649 | 5 | 68.041 | KV453028.1 | 17066128 | 13-scf00114 | 13 |
| AX-157986651 | 5 | 68.041 | KV453028.1 | 17067094 | 13-scf00114 | 13 |
| AX-157986621 | 5 | 68.15  | KV453028.1 | 17042004 | 13-scf00114 | 13 |
| AX-157986653 | 5 | 68.15  | KV453028.1 | 17069652 | 13-scf00114 | 13 |
| AX-157986654 | 5 | 68.15  | KV453028.1 | 17071647 | 13-scf00114 | 13 |
| AX-157986660 | 5 | 68.15  | KV453028.1 | 17073796 | 13-scf00114 | 13 |
| AX-157986662 | 5 | 68.15  | KV453028.1 | 17078591 | 13-scf00114 | 13 |
| AX-157986683 | 5 | 68.15  | KV453028.1 | 17097255 | 13-scf00114 | 13 |
| AX-157986692 | 5 | 68.15  | KV453028.1 | 17101958 | 13-scf00114 | 13 |
| AX-157986666 | 5 | 68.182 | KV453028.1 | 17081284 | 13-scf00114 | 13 |
| AX-157986573 | 5 | 68.26  | KV453028.1 | 16985191 | 13-scf00114 | 13 |
| AX-157986597 | 5 | 68.26  | KV453028.1 | 17009526 | 13-scf00114 | 13 |
| AX-157986657 | 5 | 68.26  | KV453028.1 | 17072903 | 13-scf00114 | 13 |
| AX-157986659 | 5 | 68.26  | KV453028.1 | 17073294 | 13-scf00114 | 13 |
| AX-157986667 | 5 | 68.26  | KV453028.1 | 17083432 | 13-scf00114 | 13 |
| AX-157986668 | 5 | 68.26  | KV453028.1 | 17084027 | 13-scf00114 | 13 |
| AX-157986671 | 5 | 68.26  | KV453028.1 | 17085979 | 13-scf00114 | 13 |
| AX-157986674 | 5 | 68.26  | KV453028.1 | 17087910 | 13-scf00114 | 13 |
| AX-157986680 | 5 | 68.26  | KV453028.1 | 17094347 | 13-scf00114 | 13 |
| AX-157986690 | 5 | 68.26  | KV453028.1 | 17101427 | 13-scf00114 | 13 |
| AX-157986693 | 5 | 68.26  | KV453028.1 | 17102595 | 13-scf00114 | 13 |
| AX-157986694 | 5 | 68.26  | KV453028.1 | 17103074 | 13-scf00114 | 13 |
| AX-157986695 | 5 | 68.26  | KV453028.1 | 17105170 | 13-scf00114 | 13 |
| AX-157986696 | 5 | 68.26  | KV453028.1 | 17105397 | 13-scf00114 | 13 |
| AX-157986699 | 5 | 68.26  | KV453028.1 | 17106831 | 13-scf00114 | 13 |
| AX-157818286 | 5 | 68.26  | KV453028.1 | 17110917 | 13-scf00114 | 13 |
| AX-157986704 | 5 | 68.26  | KV453028.1 | 17111616 | 13-scf00114 | 13 |
| AX-157986707 | 5 | 68.26  | KV453028.1 | 17117754 | 13-scf00114 | 13 |
| AX-157986702 | 5 | 68.49  | KV453028.1 | 17111137 | 13-scf00114 | 13 |
| AX-157818285 | 5 | 68.587 | KV453028.1 | 17081522 | 13-scf00114 | 13 |
| AX-158407115 | 5 | 68.587 | KV453028.1 | 17082842 | 13-scf00114 | 13 |
| AX-157986679 | 5 | 68.587 | KV453028.1 | 17091978 | 13-scf00114 | 13 |
| AX-157986681 | 5 | 68.587 | KV453028.1 | 17096047 | 13-scf00114 | 13 |
| AX-157986708 | 5 | 68.587 | KV453028.1 | 17119141 | 13-scf00114 | 13 |
| AX-157986710 | 5 | 68.587 | KV453028.1 | 17120645 | 13-scf00114 | 13 |
| AX-157986711 | 5 | 68.587 | KV453028.1 | 17123004 | 13-scf00114 | 13 |
| AX-157986713 | 5 | 68.587 | KV453028.1 | 17123756 | 13-scf00114 | 13 |
| AX-157986716 | 5 | 68.587 | KV453028.1 | 17127395 | 13-scf00114 | 13 |
| AX-157773029 | 5 | 68.587 | KV453028.1 | 17136565 | 13-scf00114 | 13 |
| AX-158407120 | 5 | 68.587 | KV453028.1 | 17249950 | 13-scf00114 | 13 |
| AX-157986719 | 5 | 68.789 | KV453028.1 | 17130592 | 13-scf00114 | 13 |
| AX-157986722 | 5 | 68.812 | KV453028.1 | 17133351 | 13-scf00114 | 13 |
| AX-157986728 | 5 | 68.823 | KV453028.1 | 17139169 | 13-scf00114 | 13 |
| AX-157986731 | 5 | 69.025 | KV453028.1 | 17143539 | 13-scf00114 | 13 |
| AX-157818287 | 5 | 69.025 | KV453028.1 | 17146263 | 13-scf00114 | 13 |

|              |   |        |            |          |             |    |
|--------------|---|--------|------------|----------|-------------|----|
| AX-157772696 | 5 | 69.025 | KV453028.1 | 17146393 | 13-scf00114 | 13 |
| AX-157986734 | 5 | 69.025 | KV453028.1 | 17149817 | 13-scf00114 | 13 |
| AX-157986735 | 5 | 69.248 | KV453028.1 | 17152272 | 13-scf00114 | 13 |
| AX-157986738 | 5 | 69.248 | KV453028.1 | 17154730 | 13-scf00114 | 13 |
| AX-157986740 | 5 | 69.464 | KV453028.1 | 17156682 | 13-scf00114 | 13 |
| AX-157986742 | 5 | 69.467 | KV453028.1 | 17157870 | 13-scf00114 | 13 |
| AX-157986743 | 5 | 69.468 | KV453028.1 | 17159648 | 13-scf00114 | 13 |
| AX-157986744 | 5 | 69.757 | KV453028.1 | 17163292 | 13-scf00114 | 13 |
| AX-157986745 | 5 | 69.764 | KV453028.1 | 17165497 | 13-scf00114 | 13 |
| AX-157986748 | 5 | 69.964 | KV453028.1 | 17168351 | 13-scf00114 | 13 |
| AX-157818289 | 5 | 69.964 | KV453028.1 | 17168873 | 13-scf00114 | 13 |
| AX-157986749 | 5 | 69.964 | KV453028.1 | 17170862 | 13-scf00114 | 13 |
| AX-157986752 | 5 | 70.128 | KV453028.1 | 17173375 | 13-scf00114 | 13 |
| AX-157986753 | 5 | 70.311 | KV453028.1 | 17174612 | 13-scf00114 | 13 |
| AX-157986756 | 5 | 70.311 | KV453028.1 | 17180523 | 13-scf00114 | 13 |
| AX-157744776 | 5 | 70.311 | KV453028.1 | 17192264 | 13-scf00114 | 13 |
| AX-157986763 | 5 | 70.311 | KV453028.1 | 17193906 | 13-scf00114 | 13 |
| AX-157986764 | 5 | 70.311 | KV453028.1 | 17195233 | 13-scf00114 | 13 |
| AX-157986767 | 5 | 70.311 | KV453028.1 | 17195626 | 13-scf00114 | 13 |
| AX-157710977 | 5 | 70.311 | KV453028.1 | 17196394 | 13-scf00114 | 13 |
| AX-157986802 | 5 | 70.311 | KV453028.1 | 17264182 | 13-scf00114 | 13 |
| AX-157986758 | 5 | 70.443 | KV453028.1 | 17181076 | 13-scf00114 | 13 |
| AX-157986770 | 5 | 70.443 | KV453028.1 | 17198552 | 13-scf00114 | 13 |
| AX-157986761 | 5 | 70.445 | KV453028.1 | 17189231 | 13-scf00114 | 13 |
| AX-157714579 | 5 | 70.445 | KV453028.1 | 17208006 | 13-scf00114 | 13 |
| AX-157986772 | 5 | 70.447 | KV453028.1 | 17216270 | 13-scf00114 | 13 |
| AX-157714854 | 5 | 70.447 | KV453028.1 | 17218907 | 13-scf00114 | 13 |
| AX-157710620 | 5 | 70.45  | KV453028.1 | 17223926 | 13-scf00114 | 13 |
| AX-157986776 | 5 | 70.45  | KV453028.1 | 17224950 | 13-scf00114 | 13 |
| AX-157715331 | 5 | 70.45  | KV453028.1 | 17225404 | 13-scf00114 | 13 |
| AX-157986781 | 5 | 70.45  | KV453028.1 | 17238025 | 13-scf00114 | 13 |
| AX-157986787 | 5 | 70.45  | KV453028.1 | 17250475 | 13-scf00114 | 13 |
| AX-157986790 | 5 | 70.571 | KV453028.1 | 17253736 | 13-scf00114 | 13 |
| AX-157986762 | 5 | 70.668 | KV453028.1 | 17190593 | 13-scf00114 | 13 |
| AX-157986771 | 5 | 70.668 | KV453028.1 | 17207183 | 13-scf00114 | 13 |
| AX-157986778 | 5 | 70.668 | KV453028.1 | 17228747 | 13-scf00114 | 13 |
| AX-157986793 | 5 | 70.668 | KV453028.1 | 17257006 | 13-scf00114 | 13 |
| AX-157986794 | 5 | 70.668 | KV453028.1 | 17260488 | 13-scf00114 | 13 |
| AX-157986796 | 5 | 70.668 | KV453028.1 | 17260966 | 13-scf00114 | 13 |
| AX-157986800 | 5 | 70.668 | KV453028.1 | 17263240 | 13-scf00114 | 13 |
| AX-157720487 | 5 | 70.668 | KV453028.1 | 17270598 | 13-scf00114 | 13 |
| AX-157986805 | 5 | 70.668 | KV453028.1 | 17271789 | 13-scf00114 | 13 |
| AX-157986807 | 5 | 70.668 | KV453028.1 | 17274805 | 13-scf00114 | 13 |
| AX-157986810 | 5 | 70.668 | KV453028.1 | 17277848 | 13-scf00114 | 13 |
| AX-157986812 | 5 | 70.668 | KV453028.1 | 17279056 | 13-scf00114 | 13 |
| AX-157986813 | 5 | 70.668 | KV453028.1 | 17280848 | 13-scf00114 | 13 |
| AX-157986815 | 5 | 70.668 | KV453028.1 | 17287437 | 13-scf00114 | 13 |
| AX-157986816 | 5 | 70.668 | KV453028.1 | 17289606 | 13-scf00114 | 13 |
| AX-157752967 | 5 | 70.668 | KV453028.1 | 17290861 | 13-scf00114 | 13 |
| AX-157986826 | 5 | 71.107 | KV453028.1 | 17308904 | 13-scf00114 | 13 |
| AX-158383256 | 5 | 71.107 | KV453028.1 | 17320211 | 13-scf00114 | 13 |

|              |   |        |            |          |             |    |
|--------------|---|--------|------------|----------|-------------|----|
| AX-157986836 | 5 | 71.107 | KV453028.1 | 17330196 | 13-scf00114 | 13 |
| AX-157986863 | 5 | 71.107 | KV453028.1 | 17359129 | 13-scf00114 | 13 |
| AX-157986838 | 5 | 71.108 | KV453028.1 | 17335072 | 13-scf00114 | 13 |
| AX-157986841 | 5 | 71.185 | KV453028.1 | 17336412 | 13-scf00114 | 13 |
| AX-157986843 | 5 | 71.226 | KV453028.1 | 17337506 | 13-scf00114 | 13 |
| AX-157986851 | 5 | 71.324 | KV453028.1 | 17344380 | 13-scf00114 | 13 |
| AX-157986852 | 5 | 71.324 | KV453028.1 | 17346524 | 13-scf00114 | 13 |
| AX-157818296 | 5 | 71.324 | KV453028.1 | 17346846 | 13-scf00114 | 13 |
| AX-157818297 | 5 | 71.324 | KV453028.1 | 17347499 | 13-scf00114 | 13 |
| AX-157986854 | 5 | 71.324 | KV453028.1 | 17348905 | 13-scf00114 | 13 |
| AX-157986861 | 5 | 71.324 | KV453028.1 | 17357218 | 13-scf00114 | 13 |
| AX-157818298 | 5 | 71.324 | KV453028.1 | 17360363 | 13-scf00114 | 13 |
| AX-157986872 | 5 | 71.324 | KV453028.1 | 17363243 | 13-scf00114 | 13 |
| AX-157986877 | 5 | 71.324 | KV453028.1 | 17366367 | 13-scf00114 | 13 |
| AX-157818304 | 5 | 71.324 | KV453028.1 | 17398250 | 13-scf00114 | 13 |
| AX-157986914 | 5 | 71.324 | KV453028.1 | 17401353 | 13-scf00114 | 13 |
| AX-157987034 | 5 | 71.324 | KV453028.1 | 17575930 | 13-scf00114 | 13 |
| AX-157869800 | 5 | 71.324 | KV453031.1 | 421824   | 13-scf00117 | 13 |
| AX-157869801 | 5 | 71.324 | KV453031.1 | 423237   | 13-scf00117 | 13 |
| AX-157986878 | 5 | 71.377 | KV453028.1 | 17369934 | 13-scf00114 | 13 |
| AX-157818299 | 5 | 71.433 | KV453028.1 | 17361736 | 13-scf00114 | 13 |
| AX-157818302 | 5 | 71.433 | KV453028.1 | 17368435 | 13-scf00114 | 13 |
| AX-157986880 | 5 | 71.433 | KV453028.1 | 17370705 | 13-scf00114 | 13 |
| AX-157986882 | 5 | 71.433 | KV453028.1 | 17373878 | 13-scf00114 | 13 |
| AX-157986884 | 5 | 71.433 | KV453028.1 | 17375526 | 13-scf00114 | 13 |
| AX-157986885 | 5 | 71.433 | KV453028.1 | 17375985 | 13-scf00114 | 13 |
| AX-157986888 | 5 | 71.433 | KV453028.1 | 17378101 | 13-scf00114 | 13 |
| AX-157986890 | 5 | 71.433 | KV453028.1 | 17380078 | 13-scf00114 | 13 |
| AX-157986907 | 5 | 71.583 | KV453028.1 | 17393792 | 13-scf00114 | 13 |
| AX-157986909 | 5 | 71.835 | KV453028.1 | 17395752 | 13-scf00114 | 13 |
| AX-157986911 | 5 | 71.837 | KV453028.1 | 17398193 | 13-scf00114 | 13 |
| AX-157986912 | 5 | 71.838 | KV453028.1 | 17400144 | 13-scf00114 | 13 |
| AX-157986915 | 5 | 71.838 | KV453028.1 | 17401754 | 13-scf00114 | 13 |
| AX-157986917 | 5 | 71.838 | KV453028.1 | 17404378 | 13-scf00114 | 13 |
| AX-157986923 | 5 | 71.838 | KV453028.1 | 17414242 | 13-scf00114 | 13 |
| AX-157986920 | 5 | 71.839 | KV453028.1 | 17408066 | 13-scf00114 | 13 |
| AX-157715461 | 5 | 71.839 | KV453028.1 | 17414645 | 13-scf00114 | 13 |
| AX-158407123 | 5 | 71.84  | KV453028.1 | 17410943 | 13-scf00114 | 13 |
| AX-157986922 | 5 | 71.84  | KV453028.1 | 17413018 | 13-scf00114 | 13 |
| AX-157986926 | 5 | 71.888 | KV453028.1 | 17416805 | 13-scf00114 | 13 |
| AX-157986932 | 5 | 71.888 | KV453028.1 | 17431082 | 13-scf00114 | 13 |
| AX-158383258 | 5 | 71.939 | KV453028.1 | 17418907 | 13-scf00114 | 13 |
| AX-157818306 | 5 | 71.997 | KV453028.1 | 17426135 | 13-scf00114 | 13 |
| AX-157986967 | 5 | 72.165 | KV453028.1 | 17457307 | 13-scf00114 | 13 |
| AX-157746603 | 5 | 72.308 | KV453028.1 | 17387553 | 13-scf00114 | 13 |
| AX-157986936 | 5 | 72.308 | KV453028.1 | 17431821 | 13-scf00114 | 13 |
| AX-157986975 | 5 | 72.308 | KV453028.1 | 17462247 | 13-scf00114 | 13 |
| AX-157986977 | 5 | 72.308 | KV453028.1 | 17467073 | 13-scf00114 | 13 |
| AX-157714586 | 5 | 72.308 | KV453028.1 | 17469639 | 13-scf00114 | 13 |
| AX-157986979 | 5 | 72.308 | KV453028.1 | 17470382 | 13-scf00114 | 13 |
| AX-157986980 | 5 | 72.308 | KV453028.1 | 17471185 | 13-scf00114 | 13 |

|              |   |        |            |          |             |    |
|--------------|---|--------|------------|----------|-------------|----|
| AX-157986982 | 5 | 72.308 | KV453028.1 | 17472210 | 13-scf00114 | 13 |
| AX-157986985 | 5 | 72.308 | KV453028.1 | 17479451 | 13-scf00114 | 13 |
| AX-157818311 | 5 | 72.308 | KV453028.1 | 17480715 | 13-scf00114 | 13 |
| AX-157818312 | 5 | 72.308 | KV453028.1 | 17483049 | 13-scf00114 | 13 |
| AX-157986988 | 5 | 72.308 | KV453028.1 | 17487971 | 13-scf00114 | 13 |
| AX-157986990 | 5 | 72.308 | KV453028.1 | 17490474 | 13-scf00114 | 13 |
| AX-157986993 | 5 | 72.308 | KV453028.1 | 17492718 | 13-scf00114 | 13 |
| AX-157986994 | 5 | 72.308 | KV453028.1 | 17493049 | 13-scf00114 | 13 |
| AX-157742776 | 5 | 72.308 | KV453028.1 | 17520468 | 13-scf00114 | 13 |
| AX-157987003 | 5 | 72.308 | KV453028.1 | 17525732 | 13-scf00114 | 13 |
| AX-157818317 | 5 | 72.308 | KV453028.1 | 17527050 | 13-scf00114 | 13 |
| AX-157987008 | 5 | 72.308 | KV453028.1 | 17537694 | 13-scf00114 | 13 |
| AX-157986972 | 5 | 72.417 | KV453028.1 | 17460053 | 13-scf00114 | 13 |
| AX-157855669 | 5 | 72.417 | KV453028.1 | 17513534 | 13-scf00114 | 13 |
| AX-157986999 | 5 | 72.417 | KV453028.1 | 17521934 | 13-scf00114 | 13 |
| AX-157987004 | 5 | 72.417 | KV453028.1 | 17536282 | 13-scf00114 | 13 |
| AX-157987006 | 5 | 72.417 | KV453028.1 | 17537116 | 13-scf00114 | 13 |
| AX-157987010 | 5 | 72.417 | KV453028.1 | 17543537 | 13-scf00114 | 13 |
| AX-157987014 | 5 | 72.417 | KV453028.1 | 17548248 | 13-scf00114 | 13 |
| AX-157987017 | 5 | 72.417 | KV453028.1 | 17553199 | 13-scf00114 | 13 |
| AX-157987020 | 5 | 72.417 | KV453028.1 | 17557523 | 13-scf00114 | 13 |
| AX-157987111 | 5 | 72.417 | KV453028.1 | 17664437 | 13-scf00114 | 13 |
| AX-157987180 | 5 | 72.417 | KV453028.1 | 17737860 | 13-scf00114 | 13 |
| AX-157987238 | 5 | 72.417 | KV453028.1 | 17818959 | 13-scf00114 | 13 |
| AX-157987300 | 5 | 72.417 | KV453028.1 | 17929000 | 13-scf00114 | 13 |
| AX-157739695 | 5 | 72.417 | KV453028.1 | 17994333 | 13-scf00114 | 13 |
| AX-157987393 | 5 | 72.417 | KV453028.1 | 17996731 | 13-scf00114 | 13 |
| AX-157865089 | 5 | 72.417 | KV453031.1 | 358392   | 13-scf00117 | 13 |
| AX-157987025 | 5 | 72.467 | KV453028.1 | 17561650 | 13-scf00114 | 13 |
| AX-157987054 | 5 | 72.467 | KV453028.1 | 17590855 | 13-scf00114 | 13 |
| AX-157987091 | 5 | 72.467 | KV453028.1 | 17638397 | 13-scf00114 | 13 |
| AX-158407127 | 5 | 72.467 | KV453028.1 | 17644320 | 13-scf00114 | 13 |
| AX-157986887 | 5 | 72.519 | KV453028.1 | 17377715 | 13-scf00114 | 13 |
| AX-157987035 | 5 | 72.519 | KV453028.1 | 17580265 | 13-scf00114 | 13 |
| AX-157987211 | 5 | 72.519 | KV453028.1 | 17779246 | 13-scf00114 | 13 |
| AX-157987279 | 5 | 72.519 | KV453028.1 | 17903824 | 13-scf00114 | 13 |
| AX-157987674 | 5 | 72.519 | KV453028.1 | 18307224 | 13-scf00114 | 13 |
| AX-157987051 | 5 | 72.529 | KV453028.1 | 17589869 | 13-scf00114 | 13 |
| AX-157987058 | 5 | 72.581 | KV453028.1 | 17596674 | 13-scf00114 | 13 |
| AX-157987078 | 5 | 72.581 | KV453028.1 | 17629358 | 13-scf00114 | 13 |
| AX-157987081 | 5 | 72.581 | KV453028.1 | 17629760 | 13-scf00114 | 13 |
| AX-157987132 | 5 | 72.581 | KV453028.1 | 17682925 | 13-scf00114 | 13 |
| AX-157987248 | 5 | 72.581 | KV453028.1 | 17834543 | 13-scf00114 | 13 |
| AX-157772800 | 5 | 72.581 | KV453028.1 | 17836722 | 13-scf00114 | 13 |
| AX-157723181 | 5 | 72.581 | KV453028.1 | 17837178 | 13-scf00114 | 13 |
| AX-157987413 | 5 | 72.581 | KV453028.1 | 18015845 | 13-scf00114 | 13 |
| AX-157987491 | 5 | 72.581 | KV453028.1 | 18103327 | 13-scf00114 | 13 |
| AX-157988173 | 5 | 72.581 | KV453031.1 | 174121   | 13-scf00117 | 13 |
| AX-157988182 | 5 | 72.581 | KV453031.1 | 180511   | 13-scf00117 | 13 |
| AX-157986973 | 5 | 72.745 | KV453028.1 | 17461092 | 13-scf00114 | 13 |
| AX-157987018 | 5 | 72.745 | KV453028.1 | 17554423 | 13-scf00114 | 13 |

|              |   |        |            |          |             |    |
|--------------|---|--------|------------|----------|-------------|----|
| AX-157987036 | 5 | 72.745 | KV453028.1 | 17580753 | 13-scf00114 | 13 |
| AX-157987076 | 5 | 72.745 | KV453028.1 | 17620379 | 13-scf00114 | 13 |
| AX-157774353 | 5 | 72.745 | KV453028.1 | 17628685 | 13-scf00114 | 13 |
| AX-157987090 | 5 | 72.745 | KV453028.1 | 17637445 | 13-scf00114 | 13 |
| AX-157818322 | 5 | 72.745 | KV453028.1 | 17652132 | 13-scf00114 | 13 |
| AX-157987105 | 5 | 72.745 | KV453028.1 | 17658041 | 13-scf00114 | 13 |
| AX-157987108 | 5 | 72.745 | KV453028.1 | 17661706 | 13-scf00114 | 13 |
| AX-157987110 | 5 | 72.745 | KV453028.1 | 17663599 | 13-scf00114 | 13 |
| AX-157987128 | 5 | 72.745 | KV453028.1 | 17681240 | 13-scf00114 | 13 |
| AX-157987145 | 5 | 72.745 | KV453028.1 | 17696524 | 13-scf00114 | 13 |
| AX-157987174 | 5 | 72.745 | KV453028.1 | 17727204 | 13-scf00114 | 13 |
| AX-157987179 | 5 | 72.745 | KV453028.1 | 17735607 | 13-scf00114 | 13 |
| AX-157987191 | 5 | 72.745 | KV453028.1 | 17749651 | 13-scf00114 | 13 |
| AX-157987261 | 5 | 72.745 | KV453028.1 | 17882612 | 13-scf00114 | 13 |
| AX-157987322 | 5 | 72.745 | KV453028.1 | 17943701 | 13-scf00114 | 13 |
| AX-157988279 | 5 | 72.745 | KV453031.1 | 249470   | 13-scf00117 | 13 |
| AX-157988460 | 5 | 72.745 | KV453031.1 | 443475   | 13-scf00117 | 13 |
| AX-157818318 | 5 | 72.753 | KV453028.1 | 17549263 | 13-scf00114 | 13 |
| AX-157987197 | 5 | 72.753 | KV453028.1 | 17762801 | 13-scf00114 | 13 |
| AX-157724856 | 5 | 72.76  | KV453028.1 | 17763665 | 13-scf00114 | 13 |
| AX-157986986 | 5 | 72.804 | KV453028.1 | 17485819 | 13-scf00114 | 13 |
| AX-157987201 | 5 | 72.804 | KV453028.1 | 17772347 | 13-scf00114 | 13 |
| AX-157984199 | 5 | 72.854 | KV453028.1 | 14840921 | 13-scf00114 | 13 |
| AX-157984617 | 5 | 72.854 | KV453028.1 | 15185544 | 13-scf00114 | 13 |
| AX-157984859 | 5 | 72.854 | KV453028.1 | 15374193 | 13-scf00114 | 13 |
| AX-157985075 | 5 | 72.854 | KV453028.1 | 15592889 | 13-scf00114 | 13 |
| AX-157725492 | 5 | 72.854 | KV453028.1 | 15626714 | 13-scf00114 | 13 |
| AX-157986828 | 5 | 72.854 | KV453028.1 | 17312397 | 13-scf00114 | 13 |
| AX-157751259 | 5 | 72.854 | KV453028.1 | 17478305 | 13-scf00114 | 13 |
| AX-157987043 | 5 | 72.854 | KV453028.1 | 17587108 | 13-scf00114 | 13 |
| AX-157987050 | 5 | 72.854 | KV453028.1 | 17589496 | 13-scf00114 | 13 |
| AX-157987120 | 5 | 72.854 | KV453028.1 | 17673554 | 13-scf00114 | 13 |
| AX-157818324 | 5 | 72.854 | KV453028.1 | 17675360 | 13-scf00114 | 13 |
| AX-157987130 | 5 | 72.854 | KV453028.1 | 17681799 | 13-scf00114 | 13 |
| AX-157987144 | 5 | 72.854 | KV453028.1 | 17694348 | 13-scf00114 | 13 |
| AX-157987151 | 5 | 72.854 | KV453028.1 | 17699912 | 13-scf00114 | 13 |
| AX-157987164 | 5 | 72.854 | KV453028.1 | 17716271 | 13-scf00114 | 13 |
| AX-157755717 | 5 | 72.854 | KV453028.1 | 17721990 | 13-scf00114 | 13 |
| AX-157987194 | 5 | 72.854 | KV453028.1 | 17761403 | 13-scf00114 | 13 |
| AX-157987196 | 5 | 72.854 | KV453028.1 | 17762433 | 13-scf00114 | 13 |
| AX-157987215 | 5 | 72.854 | KV453028.1 | 17785166 | 13-scf00114 | 13 |
| AX-157987224 | 5 | 72.854 | KV453028.1 | 17790960 | 13-scf00114 | 13 |
| AX-157987225 | 5 | 72.854 | KV453028.1 | 17791327 | 13-scf00114 | 13 |
| AX-157987236 | 5 | 72.854 | KV453028.1 | 17812622 | 13-scf00114 | 13 |
| AX-157987243 | 5 | 72.854 | KV453028.1 | 17832362 | 13-scf00114 | 13 |
| AX-157987244 | 5 | 72.854 | KV453028.1 | 17832741 | 13-scf00114 | 13 |
| AX-157987246 | 5 | 72.854 | KV453028.1 | 17833631 | 13-scf00114 | 13 |
| AX-157987252 | 5 | 72.854 | KV453028.1 | 17860632 | 13-scf00114 | 13 |
| AX-157987304 | 5 | 72.854 | KV453028.1 | 17932544 | 13-scf00114 | 13 |
| AX-157987320 | 5 | 72.854 | KV453028.1 | 17940014 | 13-scf00114 | 13 |
| AX-157987341 | 5 | 72.854 | KV453028.1 | 17953856 | 13-scf00114 | 13 |

|              |   |        |            |          |             |    |
|--------------|---|--------|------------|----------|-------------|----|
| AX-157987347 | 5 | 72.854 | KV453028.1 | 17959392 | 13-scf00114 | 13 |
| AX-157987348 | 5 | 72.854 | KV453028.1 | 17961101 | 13-scf00114 | 13 |
| AX-157987362 | 5 | 72.854 | KV453028.1 | 17973280 | 13-scf00114 | 13 |
| AX-157987382 | 5 | 72.854 | KV453028.1 | 17989311 | 13-scf00114 | 13 |
| AX-157987404 | 5 | 72.854 | KV453028.1 | 18008856 | 13-scf00114 | 13 |
| AX-157752301 | 5 | 72.854 | KV453028.1 | 18021746 | 13-scf00114 | 13 |
| AX-157987474 | 5 | 72.854 | KV453028.1 | 18088374 | 13-scf00114 | 13 |
| AX-157741532 | 5 | 72.854 | KV453028.1 | 18094375 | 13-scf00114 | 13 |
| AX-157987481 | 5 | 72.854 | KV453028.1 | 18095509 | 13-scf00114 | 13 |
| AX-157987485 | 5 | 72.854 | KV453028.1 | 18099146 | 13-scf00114 | 13 |
| AX-157987488 | 5 | 72.854 | KV453028.1 | 18102159 | 13-scf00114 | 13 |
| AX-157987528 | 5 | 72.854 | KV453028.1 | 18149518 | 13-scf00114 | 13 |
| AX-157987553 | 5 | 72.854 | KV453028.1 | 18173442 | 13-scf00114 | 13 |
| AX-157987559 | 5 | 72.854 | KV453028.1 | 18180414 | 13-scf00114 | 13 |
| AX-157987560 | 5 | 72.854 | KV453028.1 | 18181680 | 13-scf00114 | 13 |
| AX-157987561 | 5 | 72.854 | KV453028.1 | 18184275 | 13-scf00114 | 13 |
| AX-157987569 | 5 | 72.854 | KV453028.1 | 18187844 | 13-scf00114 | 13 |
| AX-157987575 | 5 | 72.854 | KV453028.1 | 18193428 | 13-scf00114 | 13 |
| AX-157987637 | 5 | 72.854 | KV453028.1 | 18247362 | 13-scf00114 | 13 |
| AX-157987645 | 5 | 72.854 | KV453028.1 | 18253635 | 13-scf00114 | 13 |
| AX-157987646 | 5 | 72.854 | KV453028.1 | 18264075 | 13-scf00114 | 13 |
| AX-157987648 | 5 | 72.854 | KV453028.1 | 18268321 | 13-scf00114 | 13 |
| AX-157987655 | 5 | 72.854 | KV453028.1 | 18275301 | 13-scf00114 | 13 |
| AX-157987657 | 5 | 72.854 | KV453028.1 | 18276575 | 13-scf00114 | 13 |
| AX-157987667 | 5 | 72.854 | KV453028.1 | 18300667 | 13-scf00114 | 13 |
| AX-157987678 | 5 | 72.854 | KV453028.1 | 18309271 | 13-scf00114 | 13 |
| AX-157987680 | 5 | 72.854 | KV453028.1 | 18309735 | 13-scf00114 | 13 |
| AX-157987684 | 5 | 72.854 | KV453028.1 | 18316420 | 13-scf00114 | 13 |
| AX-157987699 | 5 | 72.854 | KV453028.1 | 18346415 | 13-scf00114 | 13 |
| AX-157987700 | 5 | 72.854 | KV453028.1 | 18349540 | 13-scf00114 | 13 |
| AX-157987758 | 5 | 72.854 | KV453028.1 | 18403494 | 13-scf00114 | 13 |
| AX-157855672 | 5 | 72.854 | KV453028.1 | 18546535 | 13-scf00114 | 13 |
| AX-157987908 | 5 | 72.854 | KV453028.1 | 18547569 | 13-scf00114 | 13 |
| AX-157988079 | 5 | 72.854 | KV453031.1 | 101072   | 13-scf00117 | 13 |
| AX-157719220 | 5 | 72.854 | KV453031.1 | 112776   | 13-scf00117 | 13 |
| AX-157988094 | 5 | 72.854 | KV453031.1 | 114671   | 13-scf00117 | 13 |
| AX-157988098 | 5 | 72.854 | KV453031.1 | 117898   | 13-scf00117 | 13 |
| AX-157988110 | 5 | 72.854 | KV453031.1 | 128559   | 13-scf00117 | 13 |
| AX-157988149 | 5 | 72.854 | KV453031.1 | 156008   | 13-scf00117 | 13 |
| AX-157988150 | 5 | 72.854 | KV453031.1 | 156750   | 13-scf00117 | 13 |
| AX-157988168 | 5 | 72.854 | KV453031.1 | 170558   | 13-scf00117 | 13 |
| AX-157988214 | 5 | 72.854 | KV453031.1 | 202475   | 13-scf00117 | 13 |
| AX-157988215 | 5 | 72.854 | KV453031.1 | 204302   | 13-scf00117 | 13 |
| AX-157988216 | 5 | 72.854 | KV453031.1 | 205257   | 13-scf00117 | 13 |
| AX-157988217 | 5 | 72.854 | KV453031.1 | 206158   | 13-scf00117 | 13 |
| AX-157988219 | 5 | 72.854 | KV453031.1 | 207906   | 13-scf00117 | 13 |
| AX-158383262 | 5 | 72.854 | KV453031.1 | 209662   | 13-scf00117 | 13 |
| AX-157988234 | 5 | 72.854 | KV453031.1 | 217987   | 13-scf00117 | 13 |
| AX-157988249 | 5 | 72.854 | KV453031.1 | 228179   | 13-scf00117 | 13 |
| AX-157988252 | 5 | 72.854 | KV453031.1 | 229310   | 13-scf00117 | 13 |
| AX-157988262 | 5 | 72.854 | KV453031.1 | 235869   | 13-scf00117 | 13 |



|              |   |        |            |          |             |    |
|--------------|---|--------|------------|----------|-------------|----|
| AX-157988305 | 5 | 72.854 | KV453031.1 | 263778   | 13-scf00117 | 13 |
| AX-157818350 | 5 | 72.854 | KV453031.1 | 266157   | 13-scf00117 | 13 |
| AX-158405537 | 5 | 72.854 | KV453031.1 | 268816   | 13-scf00117 | 13 |
| AX-157988313 | 5 | 72.854 | KV453031.1 | 276410   | 13-scf00117 | 13 |
| AX-157988314 | 5 | 72.854 | KV453031.1 | 276950   | 13-scf00117 | 13 |
| AX-157988319 | 5 | 72.854 | KV453031.1 | 287732   | 13-scf00117 | 13 |
| AX-157988370 | 5 | 72.854 | KV453031.1 | 338523   | 13-scf00117 | 13 |
| AX-157818360 | 5 | 72.854 | KV453031.1 | 355107   | 13-scf00117 | 13 |
| AX-158383263 | 5 | 72.854 | KV453031.1 | 364675   | 13-scf00117 | 13 |
| AX-157988395 | 5 | 72.854 | KV453031.1 | 374797   | 13-scf00117 | 13 |
| AX-157865091 | 5 | 72.854 | KV453031.1 | 423737   | 13-scf00117 | 13 |
| AX-157988467 | 5 | 72.854 | KV453031.1 | 452743   | 13-scf00117 | 13 |
| AX-157988474 | 5 | 72.854 | KV453031.1 | 460262   | 13-scf00117 | 13 |
| AX-157988484 | 5 | 72.854 | KV453031.1 | 467523   | 13-scf00117 | 13 |
| AX-157818386 | 5 | 72.854 | KV453031.1 | 541518   | 13-scf00117 | 13 |
| AX-157988627 | 5 | 72.854 | KV453031.1 | 598388   | 13-scf00117 | 13 |
| AX-157988628 | 5 | 72.854 | KV453031.1 | 599289   | 13-scf00117 | 13 |
| AX-157875839 | 5 | 72.854 | KV453031.1 | 618645   | 13-scf00117 | 13 |
| AX-157989123 | 5 | 72.854 | KV453032.1 | 465031   | 13-scf00118 | 13 |
| AX-157989271 | 5 | 72.854 | KV453032.1 | 638125   | 13-scf00118 | 13 |
| AX-157989295 | 5 | 72.854 | KV453032.1 | 660323   | 13-scf00118 | 13 |
| AX-157686793 | 5 | 72.854 | KV453030.1 | 880      | 13-scf00740 | 13 |
| AX-157687647 | 5 | 72.854 | KV453029.1 | 11321    | 13-scf02388 | 13 |
| AX-157774953 | 5 | 72.897 | KV453028.1 | 18160076 | 13-scf00114 | 13 |
| AX-157988126 | 5 | 72.897 | KV453031.1 | 140425   | 13-scf00117 | 13 |
| AX-157988302 | 5 | 72.897 | KV453031.1 | 262843   | 13-scf00117 | 13 |
| AX-158415643 | 5 | 72.897 | KV453031.1 | 273889   | 13-scf00117 | 13 |
| AX-157986837 | 5 | 72.963 | KV453028.1 | 17330878 | 13-scf00114 | 13 |
| AX-157986897 | 5 | 72.963 | KV453028.1 | 17382067 | 13-scf00114 | 13 |
| AX-157986943 | 5 | 72.963 | KV453028.1 | 17435362 | 13-scf00114 | 13 |
| AX-158379599 | 5 | 72.963 | KV453028.1 | 17828283 | 13-scf00114 | 13 |
| AX-157987770 | 5 | 72.963 | KV453028.1 | 18414517 | 13-scf00114 | 13 |
| AX-157987787 | 5 | 72.963 | KV453028.1 | 18426286 | 13-scf00114 | 13 |
| AX-157818351 | 5 | 72.963 | KV453031.1 | 267413   | 13-scf00117 | 13 |
| AX-157719931 | 5 | 72.963 | KV453031.1 | 276244   | 13-scf00117 | 13 |
| AX-157988318 | 5 | 72.963 | KV453031.1 | 280920   | 13-scf00117 | 13 |
| AX-157988324 | 5 | 72.963 | KV453031.1 | 289645   | 13-scf00117 | 13 |
| AX-157988325 | 5 | 72.963 | KV453031.1 | 289988   | 13-scf00117 | 13 |
| AX-157818353 | 5 | 72.963 | KV453031.1 | 292736   | 13-scf00117 | 13 |
| AX-157988361 | 5 | 72.963 | KV453031.1 | 329624   | 13-scf00117 | 13 |
| AX-157989304 | 5 | 72.963 | KV453032.1 | 680600   | 13-scf00118 | 13 |
| AX-157988336 | 5 | 72.984 | KV453031.1 | 301556   | 13-scf00117 | 13 |
| AX-157988312 | 5 | 73.005 | KV453031.1 | 274844   | 13-scf00117 | 13 |
| AX-157988342 | 5 | 73.005 | KV453031.1 | 307407   | 13-scf00117 | 13 |
| AX-157988344 | 5 | 73.015 | KV453031.1 | 308588   | 13-scf00117 | 13 |
| AX-157988349 | 5 | 73.037 | KV453031.1 | 313504   | 13-scf00117 | 13 |
| AX-157988360 | 5 | 73.073 | KV453031.1 | 329127   | 13-scf00117 | 13 |
| AX-157988363 | 5 | 73.073 | KV453031.1 | 330965   | 13-scf00117 | 13 |
| AX-157988372 | 5 | 73.11  | KV453031.1 | 340406   | 13-scf00117 | 13 |
| AX-157988373 | 5 | 73.15  | KV453031.1 | 341950   | 13-scf00117 | 13 |
| AX-157988376 | 5 | 73.182 | KV453031.1 | 343229   | 13-scf00117 | 13 |

|              |   |        |            |          |             |    |
|--------------|---|--------|------------|----------|-------------|----|
| AX-157818359 | 5 | 73.292 | KV453031.1 | 352828   | 13-scf00117 | 13 |
| AX-157818363 | 5 | 73.292 | KV453031.1 | 363871   | 13-scf00117 | 13 |
| AX-157986940 | 5 | 73.401 | KV453028.1 | 17433643 | 13-scf00114 | 13 |
| AX-157727893 | 5 | 73.401 | KV453031.1 | 381584   | 13-scf00117 | 13 |
| AX-157748385 | 5 | 73.401 | KV453031.1 | 381910   | 13-scf00117 | 13 |
| AX-157818365 | 5 | 73.401 | KV453031.1 | 383737   | 13-scf00117 | 13 |
| AX-157988407 | 5 | 73.401 | KV453031.1 | 388758   | 13-scf00117 | 13 |
| AX-157988410 | 5 | 73.401 | KV453031.1 | 393636   | 13-scf00117 | 13 |
| AX-157988412 | 5 | 73.401 | KV453031.1 | 394340   | 13-scf00117 | 13 |
| AX-157818366 | 5 | 73.401 | KV453031.1 | 394908   | 13-scf00117 | 13 |
| AX-157818367 | 5 | 73.401 | KV453031.1 | 395288   | 13-scf00117 | 13 |
| AX-157988415 | 5 | 73.401 | KV453031.1 | 401628   | 13-scf00117 | 13 |
| AX-157987168 | 5 | 73.438 | KV453028.1 | 17725127 | 13-scf00114 | 13 |
| AX-157745049 | 5 | 73.438 | KV453028.1 | 17766253 | 13-scf00114 | 13 |
| AX-157987375 | 5 | 73.438 | KV453028.1 | 17983810 | 13-scf00114 | 13 |
| AX-157754403 | 5 | 73.438 | KV453028.1 | 18176060 | 13-scf00114 | 13 |
| AX-157988269 | 5 | 73.438 | KV453031.1 | 240292   | 13-scf00117 | 13 |
| AX-157988416 | 5 | 73.438 | KV453031.1 | 403520   | 13-scf00117 | 13 |
| AX-157988420 | 5 | 73.472 | KV453031.1 | 409083   | 13-scf00117 | 13 |
| AX-157818331 | 5 | 73.51  | KV453028.1 | 17768544 | 13-scf00114 | 13 |
| AX-157988289 | 5 | 73.51  | KV453031.1 | 254655   | 13-scf00117 | 13 |
| AX-157988406 | 5 | 73.51  | KV453031.1 | 387735   | 13-scf00117 | 13 |
| AX-157988408 | 5 | 73.51  | KV453031.1 | 390786   | 13-scf00117 | 13 |
| AX-157818372 | 5 | 73.51  | KV453031.1 | 412335   | 13-scf00117 | 13 |
| AX-157772520 | 5 | 73.51  | KV453031.1 | 416324   | 13-scf00117 | 13 |
| AX-157988429 | 5 | 73.51  | KV453031.1 | 416707   | 13-scf00117 | 13 |
| AX-157988470 | 5 | 73.51  | KV453031.1 | 454586   | 13-scf00117 | 13 |
| AX-157869802 | 5 | 73.51  | KV453031.1 | 460537   | 13-scf00117 | 13 |
| AX-157988431 | 5 | 73.563 | KV453031.1 | 421353   | 13-scf00117 | 13 |
| AX-157988434 | 5 | 73.563 | KV453031.1 | 424353   | 13-scf00117 | 13 |
| AX-157974591 | 5 | 73.619 | KV453028.1 | 2261027  | 13-scf00114 | 13 |
| AX-157988366 | 5 | 73.619 | KV453031.1 | 333374   | 13-scf00117 | 13 |
| AX-157988422 | 5 | 73.619 | KV453031.1 | 410545   | 13-scf00117 | 13 |
| AX-157988437 | 5 | 73.619 | KV453031.1 | 425948   | 13-scf00117 | 13 |
| AX-157988438 | 5 | 73.619 | KV453031.1 | 426933   | 13-scf00117 | 13 |
| AX-157818375 | 5 | 73.619 | KV453031.1 | 429880   | 13-scf00117 | 13 |
| AX-157818376 | 5 | 73.619 | KV453031.1 | 430697   | 13-scf00117 | 13 |
| AX-157818377 | 5 | 73.619 | KV453031.1 | 431008   | 13-scf00117 | 13 |
| AX-157988444 | 5 | 73.619 | KV453031.1 | 431785   | 13-scf00117 | 13 |
| AX-157988445 | 5 | 73.619 | KV453031.1 | 432414   | 13-scf00117 | 13 |
| AX-157988447 | 5 | 73.619 | KV453031.1 | 433465   | 13-scf00117 | 13 |
| AX-157988449 | 5 | 73.619 | KV453031.1 | 436702   | 13-scf00117 | 13 |
| AX-157988454 | 5 | 73.619 | KV453031.1 | 440318   | 13-scf00117 | 13 |
| AX-157988462 | 5 | 73.619 | KV453031.1 | 448971   | 13-scf00117 | 13 |
| AX-157988468 | 5 | 73.619 | KV453031.1 | 453884   | 13-scf00117 | 13 |
| AX-157988471 | 5 | 73.619 | KV453031.1 | 456541   | 13-scf00117 | 13 |
| AX-157988472 | 5 | 73.619 | KV453031.1 | 457627   | 13-scf00117 | 13 |
| AX-157988476 | 5 | 73.619 | KV453031.1 | 461189   | 13-scf00117 | 13 |
| AX-157988479 | 5 | 73.619 | KV453031.1 | 465159   | 13-scf00117 | 13 |
| AX-157818382 | 5 | 73.619 | KV453031.1 | 467103   | 13-scf00117 | 13 |
| AX-157988503 | 5 | 73.619 | KV453031.1 | 490078   | 13-scf00117 | 13 |

|              |   |        |            |          |             |    |
|--------------|---|--------|------------|----------|-------------|----|
| AX-157988510 | 5 | 73.619 | KV453031.1 | 495713   | 13-scf00117 | 13 |
| AX-157742283 | 5 | 73.838 | KV453031.1 | 496383   | 13-scf00117 | 13 |
| AX-157988511 | 5 | 73.838 | KV453031.1 | 499999   | 13-scf00117 | 13 |
| AX-157988521 | 5 | 73.838 | KV453031.1 | 508189   | 13-scf00117 | 13 |
| AX-157756110 | 5 | 73.838 | KV453031.1 | 510756   | 13-scf00117 | 13 |
| AX-157988524 | 5 | 73.838 | KV453031.1 | 512063   | 13-scf00117 | 13 |
| AX-157988528 | 5 | 73.838 | KV453031.1 | 513211   | 13-scf00117 | 13 |
| AX-157988531 | 5 | 73.838 | KV453031.1 | 519836   | 13-scf00117 | 13 |
| AX-157988534 | 5 | 73.838 | KV453031.1 | 521589   | 13-scf00117 | 13 |
| AX-157988537 | 5 | 73.838 | KV453031.1 | 527966   | 13-scf00117 | 13 |
| AX-157818385 | 5 | 73.838 | KV453031.1 | 529736   | 13-scf00117 | 13 |
| AX-157988539 | 5 | 73.838 | KV453031.1 | 530361   | 13-scf00117 | 13 |
| AX-157988543 | 5 | 73.838 | KV453031.1 | 532999   | 13-scf00117 | 13 |
| AX-157988545 | 5 | 73.838 | KV453031.1 | 533744   | 13-scf00117 | 13 |
| AX-158390558 | 5 | 73.838 | KV453031.1 | 534040   | 13-scf00117 | 13 |
| AX-157727675 | 5 | 73.838 | KV453031.1 | 544642   | 13-scf00117 | 13 |
| AX-157988638 | 5 | 73.838 | KV453031.1 | 608788   | 13-scf00117 | 13 |
| AX-157988683 | 5 | 73.838 | KV453032.1 | 5308     | 13-scf00118 | 13 |
| AX-157723889 | 5 | 73.838 | KV453032.1 | 7415     | 13-scf00118 | 13 |
| AX-157988690 | 5 | 73.838 | KV453032.1 | 12038    | 13-scf00118 | 13 |
| AX-157988748 | 5 | 73.838 | KV453032.1 | 87612    | 13-scf00118 | 13 |
| AX-157988755 | 5 | 73.838 | KV453032.1 | 99764    | 13-scf00118 | 13 |
| AX-157989367 | 5 | 73.838 | KV453032.1 | 748644   | 13-scf00118 | 13 |
| AX-157989375 | 5 | 73.838 | KV453032.1 | 756044   | 13-scf00118 | 13 |
| AX-157726892 | 5 | 73.838 | KV453033.1 | 23571    | 13-scf00119 | 13 |
| AX-157988549 | 5 | 73.883 | KV453031.1 | 537168   | 13-scf00117 | 13 |
| AX-157818460 | 5 | 73.883 | KV453032.1 | 687663   | 13-scf00118 | 13 |
| AX-157988556 | 5 | 73.901 | KV453031.1 | 540520   | 13-scf00117 | 13 |
| AX-157987221 | 5 | 73.947 | KV453028.1 | 17789693 | 13-scf00114 | 13 |
| AX-157987230 | 5 | 73.947 | KV453028.1 | 17807733 | 13-scf00114 | 13 |
| AX-157988448 | 5 | 73.947 | KV453031.1 | 434811   | 13-scf00117 | 13 |
| AX-157708214 | 5 | 73.947 | KV453031.1 | 444539   | 13-scf00117 | 13 |
| AX-157988548 | 5 | 73.947 | KV453031.1 | 535566   | 13-scf00117 | 13 |
| AX-157988551 | 5 | 73.947 | KV453031.1 | 538127   | 13-scf00117 | 13 |
| AX-157988554 | 5 | 73.947 | KV453031.1 | 538938   | 13-scf00117 | 13 |
| AX-157988555 | 5 | 73.947 | KV453031.1 | 539508   | 13-scf00117 | 13 |
| AX-157988558 | 5 | 73.947 | KV453031.1 | 540896   | 13-scf00117 | 13 |
| AX-158383265 | 5 | 73.947 | KV453031.1 | 541689   | 13-scf00117 | 13 |
| AX-157988560 | 5 | 73.947 | KV453031.1 | 544486   | 13-scf00117 | 13 |
| AX-157988561 | 5 | 73.947 | KV453031.1 | 544868   | 13-scf00117 | 13 |
| AX-157988563 | 5 | 73.947 | KV453031.1 | 545141   | 13-scf00117 | 13 |
| AX-157988564 | 5 | 73.947 | KV453031.1 | 546323   | 13-scf00117 | 13 |
| AX-157988567 | 5 | 73.947 | KV453031.1 | 549136   | 13-scf00117 | 13 |
| AX-157988568 | 5 | 73.947 | KV453031.1 | 550083   | 13-scf00117 | 13 |
| AX-157988570 | 5 | 73.947 | KV453031.1 | 551263   | 13-scf00117 | 13 |
| AX-157818388 | 5 | 73.947 | KV453031.1 | 551547   | 13-scf00117 | 13 |
| AX-157818389 | 5 | 73.947 | KV453031.1 | 551767   | 13-scf00117 | 13 |
| AX-157988571 | 5 | 73.947 | KV453031.1 | 553988   | 13-scf00117 | 13 |
| AX-157818391 | 5 | 73.947 | KV453031.1 | 555851   | 13-scf00117 | 13 |
| AX-157988573 | 5 | 73.947 | KV453031.1 | 556184   | 13-scf00117 | 13 |
| AX-157988575 | 5 | 73.947 | KV453031.1 | 556659   | 13-scf00117 | 13 |

|              |   |        |            |        |             |    |
|--------------|---|--------|------------|--------|-------------|----|
| AX-157988576 | 5 | 73.947 | KV453031.1 | 557295 | 13-scf00117 | 13 |
| AX-157988578 | 5 | 73.947 | KV453031.1 | 558615 | 13-scf00117 | 13 |
| AX-157988579 | 5 | 73.947 | KV453031.1 | 559239 | 13-scf00117 | 13 |
| AX-157988582 | 5 | 73.947 | KV453031.1 | 560822 | 13-scf00117 | 13 |
| AX-157818392 | 5 | 73.947 | KV453031.1 | 562526 | 13-scf00117 | 13 |
| AX-157988584 | 5 | 73.947 | KV453031.1 | 564931 | 13-scf00117 | 13 |
| AX-157739372 | 5 | 73.947 | KV453031.1 | 566315 | 13-scf00117 | 13 |
| AX-157818393 | 5 | 73.947 | KV453031.1 | 566415 | 13-scf00117 | 13 |
| AX-157988596 | 5 | 73.947 | KV453031.1 | 573271 | 13-scf00117 | 13 |
| AX-157988605 | 5 | 73.947 | KV453031.1 | 575588 | 13-scf00117 | 13 |
| AX-157818394 | 5 | 73.947 | KV453031.1 | 576017 | 13-scf00117 | 13 |
| AX-157988608 | 5 | 73.947 | KV453031.1 | 579081 | 13-scf00117 | 13 |
| AX-157818395 | 5 | 73.947 | KV453031.1 | 579904 | 13-scf00117 | 13 |
| AX-157818396 | 5 | 73.947 | KV453031.1 | 581281 | 13-scf00117 | 13 |
| AX-157782899 | 5 | 73.947 | KV453031.1 | 585063 | 13-scf00117 | 13 |
| AX-157988614 | 5 | 73.947 | KV453031.1 | 588924 | 13-scf00117 | 13 |
| AX-157818397 | 5 | 73.947 | KV453031.1 | 589504 | 13-scf00117 | 13 |
| AX-157988615 | 5 | 73.947 | KV453031.1 | 590865 | 13-scf00117 | 13 |
| AX-157988618 | 5 | 73.947 | KV453031.1 | 593804 | 13-scf00117 | 13 |
| AX-157988620 | 5 | 73.947 | KV453031.1 | 594480 | 13-scf00117 | 13 |
| AX-157988624 | 5 | 73.947 | KV453031.1 | 595157 | 13-scf00117 | 13 |
| AX-157988625 | 5 | 73.947 | KV453031.1 | 596293 | 13-scf00117 | 13 |
| AX-157818398 | 5 | 73.947 | KV453031.1 | 603241 | 13-scf00117 | 13 |
| AX-157818399 | 5 | 73.947 | KV453031.1 | 603666 | 13-scf00117 | 13 |
| AX-157988636 | 5 | 73.947 | KV453031.1 | 606310 | 13-scf00117 | 13 |
| AX-157818401 | 5 | 73.947 | KV453031.1 | 606737 | 13-scf00117 | 13 |
| AX-157818402 | 5 | 73.947 | KV453031.1 | 609517 | 13-scf00117 | 13 |
| AX-157988640 | 5 | 73.947 | KV453031.1 | 610275 | 13-scf00117 | 13 |
| AX-157988646 | 5 | 73.947 | KV453031.1 | 614881 | 13-scf00117 | 13 |
| AX-157818404 | 5 | 73.947 | KV453031.1 | 614996 | 13-scf00117 | 13 |
| AX-157988647 | 5 | 73.947 | KV453031.1 | 615277 | 13-scf00117 | 13 |
| AX-157988648 | 5 | 73.947 | KV453031.1 | 616202 | 13-scf00117 | 13 |
| AX-157988649 | 5 | 73.947 | KV453031.1 | 616902 | 13-scf00117 | 13 |
| AX-157818405 | 5 | 73.947 | KV453031.1 | 619040 | 13-scf00117 | 13 |
| AX-157988650 | 5 | 73.947 | KV453031.1 | 619550 | 13-scf00117 | 13 |
| AX-157818406 | 5 | 73.947 | KV453031.1 | 623802 | 13-scf00117 | 13 |
| AX-157988654 | 5 | 73.947 | KV453031.1 | 624649 | 13-scf00117 | 13 |
| AX-157988656 | 5 | 73.947 | KV453031.1 | 625789 | 13-scf00117 | 13 |
| AX-157988664 | 5 | 73.947 | KV453031.1 | 630555 | 13-scf00117 | 13 |
| AX-157988666 | 5 | 73.947 | KV453031.1 | 631842 | 13-scf00117 | 13 |
| AX-157988668 | 5 | 73.947 | KV453031.1 | 632686 | 13-scf00117 | 13 |
| AX-157988669 | 5 | 73.947 | KV453031.1 | 633221 | 13-scf00117 | 13 |
| AX-157988670 | 5 | 73.947 | KV453031.1 | 634189 | 13-scf00117 | 13 |
| AX-157988673 | 5 | 73.947 | KV453031.1 | 636037 | 13-scf00117 | 13 |
| AX-157988674 | 5 | 73.947 | KV453031.1 | 637806 | 13-scf00117 | 13 |
| AX-157988675 | 5 | 73.947 | KV453031.1 | 638534 | 13-scf00117 | 13 |
| AX-157818408 | 5 | 73.947 | KV453031.1 | 640038 | 13-scf00117 | 13 |
| AX-157988676 | 5 | 73.947 | KV453031.1 | 643114 | 13-scf00117 | 13 |
| AX-157988678 | 5 | 73.947 | KV453031.1 | 660829 | 13-scf00117 | 13 |
| AX-157989356 | 5 | 73.947 | KV453032.1 | 740185 | 13-scf00118 | 13 |
| AX-157989360 | 5 | 73.947 | KV453032.1 | 742389 | 13-scf00118 | 13 |

|              |   |        |             |        |             |    |
|--------------|---|--------|-------------|--------|-------------|----|
| AX-157989365 | 5 | 73.947 | KV453032.1  | 746985 | 13-scf00118 | 13 |
| AX-157989366 | 5 | 73.947 | KV453032.1  | 747948 | 13-scf00118 | 13 |
| AX-157989368 | 5 | 73.947 | KV453032.1  | 749335 | 13-scf00118 | 13 |
| AX-157818466 | 5 | 73.947 | KV453032.1  | 750220 | 13-scf00118 | 13 |
| AX-157989369 | 5 | 73.947 | KV453032.1  | 752930 | 13-scf00118 | 13 |
| AX-157989370 | 5 | 73.947 | KV453032.1  | 753244 | 13-scf00118 | 13 |
| AX-157989373 | 5 | 73.947 | KV453032.1  | 755738 | 13-scf00118 | 13 |
| AX-157989377 | 5 | 73.947 | KV453032.1  | 756873 | 13-scf00118 | 13 |
| AX-157989381 | 5 | 73.947 | KV453032.1  | 757803 | 13-scf00118 | 13 |
| AX-157989382 | 5 | 73.947 | KV453032.1  | 758021 | 13-scf00118 | 13 |
| AX-157686992 | 5 | 73.947 | 3ML01024611 | 5308   | scf00770_1  | UN |
| AX-158420922 | 5 | 73.947 | 3ML01024611 | 13378  | scf00770_1  | UN |
| AX-157686999 | 5 | 73.947 | 3ML01024611 | 17379  | scf00770_1  | UN |
| AX-157687000 | 5 | 73.947 | 3ML01024611 | 18367  | scf00770_1  | UN |
| AX-157687001 | 5 | 73.951 | 3ML01024611 | 19686  | scf00770_1  | UN |
| AX-157686994 | 5 | 73.956 | 3ML01024611 | 8490   | scf00770_1  | UN |
| AX-157686993 | 5 | 73.961 | 3ML01024611 | 6879   | scf00770_1  | UN |
| AX-157988689 | 5 | 74.82  | KV453032.1  | 11002  | 13-scf00118 | 13 |
| AX-157988693 | 5 | 74.82  | KV453032.1  | 15734  | 13-scf00118 | 13 |
| AX-157855674 | 5 | 74.82  | KV453032.1  | 21963  | 13-scf00118 | 13 |
| AX-158407158 | 5 | 74.82  | KV453032.1  | 24204  | 13-scf00118 | 13 |
| AX-157988695 | 5 | 74.82  | KV453032.1  | 26324  | 13-scf00118 | 13 |
| AX-157988696 | 5 | 74.82  | KV453032.1  | 27128  | 13-scf00118 | 13 |
| AX-157988697 | 5 | 74.82  | KV453032.1  | 28611  | 13-scf00118 | 13 |
| AX-157988698 | 5 | 74.82  | KV453032.1  | 30379  | 13-scf00118 | 13 |
| AX-157988701 | 5 | 74.82  | KV453032.1  | 32499  | 13-scf00118 | 13 |
| AX-157726722 | 5 | 74.82  | KV453032.1  | 34028  | 13-scf00118 | 13 |
| AX-157988711 | 5 | 74.82  | KV453032.1  | 51088  | 13-scf00118 | 13 |
| AX-157988712 | 5 | 74.82  | KV453032.1  | 53833  | 13-scf00118 | 13 |
| AX-157988716 | 5 | 74.82  | KV453032.1  | 59391  | 13-scf00118 | 13 |
| AX-157988717 | 5 | 74.82  | KV453032.1  | 60097  | 13-scf00118 | 13 |
| AX-157988718 | 5 | 74.82  | KV453032.1  | 60522  | 13-scf00118 | 13 |
| AX-157988728 | 5 | 74.82  | KV453032.1  | 65867  | 13-scf00118 | 13 |
| AX-157988742 | 5 | 74.82  | KV453032.1  | 81948  | 13-scf00118 | 13 |
| AX-157988781 | 5 | 74.82  | KV453032.1  | 118381 | 13-scf00118 | 13 |
| AX-157989419 | 5 | 74.82  | KV453033.1  | 43026  | 13-scf00119 | 13 |
| AX-157989434 | 5 | 74.82  | KV453033.1  | 58769  | 13-scf00119 | 13 |
| AX-157989510 | 5 | 74.82  | KV453033.1  | 123718 | 13-scf00119 | 13 |
| AX-157727385 | 5 | 74.82  | KV453033.1  | 138591 | 13-scf00119 | 13 |
| AX-157989775 | 5 | 74.82  | KV453033.1  | 372920 | 13-scf00119 | 13 |
| AX-157989899 | 5 | 74.82  | KV453033.1  | 505867 | 13-scf00119 | 13 |
| AX-157989912 | 5 | 74.82  | KV453033.1  | 531729 | 13-scf00119 | 13 |
| AX-157990076 | 5 | 74.82  | KV453034.1  | 81469  | 13-scf00120 | 13 |
| AX-157990165 | 5 | 74.82  | KV453034.1  | 177637 | 13-scf00120 | 13 |
| AX-157884518 | 5 | 74.82  | KV453034.1  | 507702 | 13-scf00120 | 13 |
| AX-157988731 | 5 | 74.834 | KV453032.1  | 67560  | 13-scf00118 | 13 |
| AX-157989402 | 5 | 74.834 | KV453033.1  | 14408  | 13-scf00119 | 13 |
| AX-157988747 | 5 | 74.847 | KV453032.1  | 86861  | 13-scf00118 | 13 |
| AX-157988706 | 5 | 74.866 | KV453032.1  | 40970  | 13-scf00118 | 13 |
| AX-157988751 | 5 | 74.866 | KV453032.1  | 88920  | 13-scf00118 | 13 |
| AX-157989393 | 5 | 74.866 | KV453033.1  | 2435   | 13-scf00119 | 13 |

|              |   |        |            |        |             |    |
|--------------|---|--------|------------|--------|-------------|----|
| AX-157988752 | 5 | 74.884 | KV453032.1 | 93926  | 13-scf00118 | 13 |
| AX-157818412 | 5 | 74.899 | KV453032.1 | 100579 | 13-scf00118 | 13 |
| AX-157988778 | 5 | 74.913 | KV453032.1 | 117087 | 13-scf00118 | 13 |
| AX-157988790 | 5 | 74.93  | KV453032.1 | 127660 | 13-scf00118 | 13 |
| AX-157988798 | 5 | 74.93  | KV453032.1 | 133966 | 13-scf00118 | 13 |
| AX-158390563 | 5 | 74.93  | KV453032.1 | 137914 | 13-scf00118 | 13 |
| AX-157988803 | 5 | 74.93  | KV453032.1 | 140217 | 13-scf00118 | 13 |
| AX-157988804 | 5 | 74.93  | KV453032.1 | 140646 | 13-scf00118 | 13 |
| AX-157988805 | 5 | 74.93  | KV453032.1 | 142331 | 13-scf00118 | 13 |
| AX-157988806 | 5 | 74.93  | KV453032.1 | 142905 | 13-scf00118 | 13 |
| AX-157988807 | 5 | 74.93  | KV453032.1 | 145287 | 13-scf00118 | 13 |
| AX-157988810 | 5 | 74.93  | KV453032.1 | 147745 | 13-scf00118 | 13 |
| AX-157875841 | 5 | 74.93  | KV453032.1 | 149681 | 13-scf00118 | 13 |
| AX-157988816 | 5 | 74.93  | KV453032.1 | 151943 | 13-scf00118 | 13 |
| AX-157988817 | 5 | 74.93  | KV453032.1 | 152651 | 13-scf00118 | 13 |
| AX-157988820 | 5 | 74.93  | KV453032.1 | 154607 | 13-scf00118 | 13 |
| AX-157875842 | 5 | 74.93  | KV453032.1 | 154724 | 13-scf00118 | 13 |
| AX-157988821 | 5 | 74.93  | KV453032.1 | 157463 | 13-scf00118 | 13 |
| AX-157988822 | 5 | 74.93  | KV453032.1 | 158163 | 13-scf00118 | 13 |
| AX-157988825 | 5 | 74.93  | KV453032.1 | 161371 | 13-scf00118 | 13 |
| AX-157717960 | 5 | 74.93  | KV453032.1 | 164176 | 13-scf00118 | 13 |
| AX-157720714 | 5 | 74.93  | KV453032.1 | 165024 | 13-scf00118 | 13 |
| AX-157988828 | 5 | 74.93  | KV453032.1 | 165868 | 13-scf00118 | 13 |
| AX-157988829 | 5 | 74.93  | KV453032.1 | 166557 | 13-scf00118 | 13 |
| AX-157988830 | 5 | 74.93  | KV453032.1 | 167405 | 13-scf00118 | 13 |
| AX-158390565 | 5 | 74.93  | KV453032.1 | 168406 | 13-scf00118 | 13 |
| AX-157988832 | 5 | 74.93  | KV453032.1 | 168665 | 13-scf00118 | 13 |
| AX-157988841 | 5 | 74.93  | KV453032.1 | 188307 | 13-scf00118 | 13 |
| AX-157988846 | 5 | 74.93  | KV453032.1 | 191168 | 13-scf00118 | 13 |
| AX-157988852 | 5 | 74.93  | KV453032.1 | 194664 | 13-scf00118 | 13 |
| AX-157988853 | 5 | 74.93  | KV453032.1 | 195198 | 13-scf00118 | 13 |
| AX-157716958 | 5 | 74.93  | KV453032.1 | 202012 | 13-scf00118 | 13 |
| AX-157988861 | 5 | 74.93  | KV453032.1 | 203300 | 13-scf00118 | 13 |
| AX-157988862 | 5 | 74.93  | KV453032.1 | 203941 | 13-scf00118 | 13 |
| AX-157988865 | 5 | 74.93  | KV453032.1 | 206031 | 13-scf00118 | 13 |
| AX-157988866 | 5 | 74.93  | KV453032.1 | 208533 | 13-scf00118 | 13 |
| AX-157988867 | 5 | 74.93  | KV453032.1 | 209046 | 13-scf00118 | 13 |
| AX-157988868 | 5 | 74.93  | KV453032.1 | 209834 | 13-scf00118 | 13 |
| AX-157818416 | 5 | 74.93  | KV453032.1 | 210850 | 13-scf00118 | 13 |
| AX-157988871 | 5 | 74.93  | KV453032.1 | 211526 | 13-scf00118 | 13 |
| AX-157988874 | 5 | 74.93  | KV453032.1 | 214141 | 13-scf00118 | 13 |
| AX-157988876 | 5 | 74.93  | KV453032.1 | 214493 | 13-scf00118 | 13 |
| AX-157988879 | 5 | 74.93  | KV453032.1 | 217906 | 13-scf00118 | 13 |
| AX-157818417 | 5 | 74.93  | KV453032.1 | 218734 | 13-scf00118 | 13 |
| AX-157988882 | 5 | 74.93  | KV453032.1 | 220620 | 13-scf00118 | 13 |
| AX-157818418 | 5 | 74.93  | KV453032.1 | 222705 | 13-scf00118 | 13 |
| AX-157818419 | 5 | 74.93  | KV453032.1 | 222973 | 13-scf00118 | 13 |
| AX-157818420 | 5 | 74.93  | KV453032.1 | 224538 | 13-scf00118 | 13 |
| AX-157988890 | 5 | 74.93  | KV453032.1 | 227063 | 13-scf00118 | 13 |
| AX-157988894 | 5 | 74.93  | KV453032.1 | 230738 | 13-scf00118 | 13 |
| AX-157818422 | 5 | 74.93  | KV453032.1 | 231220 | 13-scf00118 | 13 |

|              |   |       |            |        |             |    |
|--------------|---|-------|------------|--------|-------------|----|
| AX-157988895 | 5 | 74.93 | KV453032.1 | 231606 | 13-scf00118 | 13 |
| AX-157988898 | 5 | 74.93 | KV453032.1 | 232132 | 13-scf00118 | 13 |
| AX-157988899 | 5 | 74.93 | KV453032.1 | 232631 | 13-scf00118 | 13 |
| AX-157988902 | 5 | 74.93 | KV453032.1 | 234726 | 13-scf00118 | 13 |
| AX-157818423 | 5 | 74.93 | KV453032.1 | 234982 | 13-scf00118 | 13 |
| AX-157988903 | 5 | 74.93 | KV453032.1 | 235340 | 13-scf00118 | 13 |
| AX-157988904 | 5 | 74.93 | KV453032.1 | 237339 | 13-scf00118 | 13 |
| AX-157988908 | 5 | 74.93 | KV453032.1 | 239258 | 13-scf00118 | 13 |
| AX-157988909 | 5 | 74.93 | KV453032.1 | 239708 | 13-scf00118 | 13 |
| AX-157818424 | 5 | 74.93 | KV453032.1 | 240011 | 13-scf00118 | 13 |
| AX-157988910 | 5 | 74.93 | KV453032.1 | 240483 | 13-scf00118 | 13 |
| AX-157988911 | 5 | 74.93 | KV453032.1 | 241693 | 13-scf00118 | 13 |
| AX-157988913 | 5 | 74.93 | KV453032.1 | 243357 | 13-scf00118 | 13 |
| AX-157988917 | 5 | 74.93 | KV453032.1 | 244755 | 13-scf00118 | 13 |
| AX-157988923 | 5 | 74.93 | KV453032.1 | 251326 | 13-scf00118 | 13 |
| AX-157988924 | 5 | 74.93 | KV453032.1 | 251710 | 13-scf00118 | 13 |
| AX-157988927 | 5 | 74.93 | KV453032.1 | 253880 | 13-scf00118 | 13 |
| AX-157988929 | 5 | 74.93 | KV453032.1 | 255443 | 13-scf00118 | 13 |
| AX-157988941 | 5 | 74.93 | KV453032.1 | 267403 | 13-scf00118 | 13 |
| AX-157988942 | 5 | 74.93 | KV453032.1 | 268834 | 13-scf00118 | 13 |
| AX-157988958 | 5 | 74.93 | KV453032.1 | 283783 | 13-scf00118 | 13 |
| AX-157713641 | 5 | 74.93 | KV453032.1 | 286993 | 13-scf00118 | 13 |
| AX-157988977 | 5 | 74.93 | KV453032.1 | 311019 | 13-scf00118 | 13 |
| AX-157989030 | 5 | 74.93 | KV453032.1 | 363253 | 13-scf00118 | 13 |
| AX-157989032 | 5 | 74.93 | KV453032.1 | 363962 | 13-scf00118 | 13 |
| AX-157989040 | 5 | 74.93 | KV453032.1 | 370357 | 13-scf00118 | 13 |
| AX-157989044 | 5 | 74.93 | KV453032.1 | 373010 | 13-scf00118 | 13 |
| AX-157989071 | 5 | 74.93 | KV453032.1 | 396524 | 13-scf00118 | 13 |
| AX-157989079 | 5 | 74.93 | KV453032.1 | 401155 | 13-scf00118 | 13 |
| AX-157989083 | 5 | 74.93 | KV453032.1 | 404365 | 13-scf00118 | 13 |
| AX-157989093 | 5 | 74.93 | KV453032.1 | 417232 | 13-scf00118 | 13 |
| AX-157989095 | 5 | 74.93 | KV453032.1 | 418123 | 13-scf00118 | 13 |
| AX-157989103 | 5 | 74.93 | KV453032.1 | 431790 | 13-scf00118 | 13 |
| AX-157989129 | 5 | 74.93 | KV453032.1 | 467146 | 13-scf00118 | 13 |
| AX-157989170 | 5 | 74.93 | KV453032.1 | 525217 | 13-scf00118 | 13 |
| AX-157989174 | 5 | 74.93 | KV453032.1 | 526616 | 13-scf00118 | 13 |
| AX-157989194 | 5 | 74.93 | KV453032.1 | 538833 | 13-scf00118 | 13 |
| AX-157989209 | 5 | 74.93 | KV453032.1 | 556332 | 13-scf00118 | 13 |
| AX-157989213 | 5 | 74.93 | KV453032.1 | 559404 | 13-scf00118 | 13 |
| AX-157818443 | 5 | 74.93 | KV453032.1 | 563183 | 13-scf00118 | 13 |
| AX-157989217 | 5 | 74.93 | KV453032.1 | 564870 | 13-scf00118 | 13 |
| AX-157989223 | 5 | 74.93 | KV453032.1 | 570830 | 13-scf00118 | 13 |
| AX-157989226 | 5 | 74.93 | KV453032.1 | 574774 | 13-scf00118 | 13 |
| AX-157989227 | 5 | 74.93 | KV453032.1 | 575207 | 13-scf00118 | 13 |
| AX-157989229 | 5 | 74.93 | KV453032.1 | 576433 | 13-scf00118 | 13 |
| AX-157818447 | 5 | 74.93 | KV453032.1 | 636581 | 13-scf00118 | 13 |
| AX-157989274 | 5 | 74.93 | KV453032.1 | 638982 | 13-scf00118 | 13 |
| AX-157818455 | 5 | 74.93 | KV453032.1 | 656957 | 13-scf00118 | 13 |
| AX-157738499 | 5 | 74.93 | KV453032.1 | 664523 | 13-scf00118 | 13 |
| AX-157989337 | 5 | 74.93 | KV453032.1 | 725076 | 13-scf00118 | 13 |
| AX-157989394 | 5 | 74.93 | KV453033.1 | 4148   | 13-scf00119 | 13 |

|              |   |        |             |          |             |    |
|--------------|---|--------|-------------|----------|-------------|----|
| AX-157757162 | 5 | 74.93  | KV453033.1  | 22946    | 13-scf00119 | 13 |
| AX-157989546 | 5 | 74.93  | KV453033.1  | 155106   | 13-scf00119 | 13 |
| AX-157989615 | 5 | 74.93  | KV453033.1  | 218500   | 13-scf00119 | 13 |
| AX-157989617 | 5 | 74.93  | KV453033.1  | 221057   | 13-scf00119 | 13 |
| AX-157989860 | 5 | 74.93  | KV453033.1  | 456820   | 13-scf00119 | 13 |
| AX-157991121 | 5 | 74.93  | KV453035.1  | 722592   | 13-scf00121 | 13 |
| AX-157991692 | 5 | 74.93  | KV453038.1  | 381343   | 13-scf00122 | 13 |
| AX-157681810 | 5 | 74.93  | 3ML01026914 | 165      | scf02516_1  | UN |
| AX-157688747 | 5 | 74.93  | 3ML01026914 | 240      | scf02516_1  | UN |
| AX-157988966 | 5 | 75.039 | KV453032.1  | 300636   | 13-scf00118 | 13 |
| AX-157988973 | 5 | 75.039 | KV453032.1  | 307619   | 13-scf00118 | 13 |
| AX-157869804 | 5 | 75.039 | KV453032.1  | 361924   | 13-scf00118 | 13 |
| AX-157884512 | 5 | 75.039 | KV453032.1  | 575261   | 13-scf00118 | 13 |
| AX-157989269 | 5 | 75.039 | KV453032.1  | 634673   | 13-scf00118 | 13 |
| AX-157989270 | 5 | 75.039 | KV453032.1  | 636071   | 13-scf00118 | 13 |
| AX-157989314 | 5 | 75.039 | KV453032.1  | 701284   | 13-scf00118 | 13 |
| AX-157987324 | 5 | 75.076 | KV453028.1  | 17943801 | 13-scf00114 | 13 |
| AX-157988346 | 5 | 75.076 | KV453031.1  | 309006   | 13-scf00117 | 13 |
| AX-157988351 | 5 | 75.076 | KV453031.1  | 314973   | 13-scf00117 | 13 |
| AX-157988969 | 5 | 75.076 | KV453032.1  | 302543   | 13-scf00118 | 13 |
| AX-158407162 | 5 | 75.076 | KV453032.1  | 313695   | 13-scf00118 | 13 |
| AX-157989161 | 5 | 75.076 | KV453032.1  | 518044   | 13-scf00118 | 13 |
| AX-157989009 | 5 | 75.111 | KV453032.1  | 342346   | 13-scf00118 | 13 |
| AX-157989023 | 5 | 75.148 | KV453032.1  | 358291   | 13-scf00118 | 13 |
| AX-157989026 | 5 | 75.148 | KV453032.1  | 361075   | 13-scf00118 | 13 |
| AX-157989027 | 5 | 75.148 | KV453032.1  | 361669   | 13-scf00118 | 13 |
| AX-157818430 | 5 | 75.148 | KV453032.1  | 362620   | 13-scf00118 | 13 |
| AX-158407169 | 5 | 75.148 | KV453032.1  | 563837   | 13-scf00118 | 13 |
| AX-157989031 | 5 | 75.189 | KV453032.1  | 363556   | 13-scf00118 | 13 |
| AX-158390495 | 5 | 75.257 | KV453028.1  | 17983896 | 13-scf00114 | 13 |
| AX-157987538 | 5 | 75.257 | KV453028.1  | 18160851 | 13-scf00114 | 13 |
| AX-157988379 | 5 | 75.257 | KV453031.1  | 348565   | 13-scf00117 | 13 |
| AX-157988398 | 5 | 75.257 | KV453031.1  | 376990   | 13-scf00117 | 13 |
| AX-157988512 | 5 | 75.257 | KV453031.1  | 503133   | 13-scf00117 | 13 |
| AX-158407156 | 5 | 75.257 | KV453031.1  | 642055   | 13-scf00117 | 13 |
| AX-157988795 | 5 | 75.257 | KV453032.1  | 130587   | 13-scf00118 | 13 |
| AX-157988819 | 5 | 75.257 | KV453032.1  | 153983   | 13-scf00118 | 13 |
| AX-157988840 | 5 | 75.257 | KV453032.1  | 187115   | 13-scf00118 | 13 |
| AX-157988850 | 5 | 75.257 | KV453032.1  | 193946   | 13-scf00118 | 13 |
| AX-157818415 | 5 | 75.257 | KV453032.1  | 200461   | 13-scf00118 | 13 |
| AX-157988860 | 5 | 75.257 | KV453032.1  | 202781   | 13-scf00118 | 13 |
| AX-157988880 | 5 | 75.257 | KV453032.1  | 219021   | 13-scf00118 | 13 |
| AX-157988892 | 5 | 75.257 | KV453032.1  | 229524   | 13-scf00118 | 13 |
| AX-157988893 | 5 | 75.257 | KV453032.1  | 230412   | 13-scf00118 | 13 |
| AX-157988906 | 5 | 75.257 | KV453032.1  | 238716   | 13-scf00118 | 13 |
| AX-157988916 | 5 | 75.257 | KV453032.1  | 244333   | 13-scf00118 | 13 |
| AX-157988918 | 5 | 75.257 | KV453032.1  | 246522   | 13-scf00118 | 13 |
| AX-157988921 | 5 | 75.257 | KV453032.1  | 249584   | 13-scf00118 | 13 |
| AX-157988922 | 5 | 75.257 | KV453032.1  | 250265   | 13-scf00118 | 13 |
| AX-157727661 | 5 | 75.257 | KV453032.1  | 250848   | 13-scf00118 | 13 |
| AX-157988925 | 5 | 75.257 | KV453032.1  | 252207   | 13-scf00118 | 13 |



|              |   |        |            |        |             |    |
|--------------|---|--------|------------|--------|-------------|----|
| AX-157988932 | 5 | 75.257 | KV453032.1 | 258767 | 13-scf00118 | 13 |
| AX-157988937 | 5 | 75.257 | KV453032.1 | 264014 | 13-scf00118 | 13 |
| AX-157988938 | 5 | 75.257 | KV453032.1 | 265069 | 13-scf00118 | 13 |
| AX-157755124 | 5 | 75.257 | KV453032.1 | 265500 | 13-scf00118 | 13 |
| AX-157988940 | 5 | 75.257 | KV453032.1 | 266073 | 13-scf00118 | 13 |
| AX-157988943 | 5 | 75.257 | KV453032.1 | 269383 | 13-scf00118 | 13 |
| AX-157988945 | 5 | 75.257 | KV453032.1 | 270126 | 13-scf00118 | 13 |
| AX-157818425 | 5 | 75.257 | KV453032.1 | 271300 | 13-scf00118 | 13 |
| AX-157988947 | 5 | 75.257 | KV453032.1 | 272468 | 13-scf00118 | 13 |
| AX-157988951 | 5 | 75.257 | KV453032.1 | 277025 | 13-scf00118 | 13 |
| AX-157988955 | 5 | 75.257 | KV453032.1 | 281615 | 13-scf00118 | 13 |
| AX-157988956 | 5 | 75.257 | KV453032.1 | 282695 | 13-scf00118 | 13 |
| AX-157988957 | 5 | 75.257 | KV453032.1 | 283278 | 13-scf00118 | 13 |
| AX-157988959 | 5 | 75.257 | KV453032.1 | 290347 | 13-scf00118 | 13 |
| AX-157721436 | 5 | 75.257 | KV453032.1 | 290834 | 13-scf00118 | 13 |
| AX-157988975 | 5 | 75.257 | KV453032.1 | 308661 | 13-scf00118 | 13 |
| AX-157988979 | 5 | 75.257 | KV453032.1 | 315757 | 13-scf00118 | 13 |
| AX-157774269 | 5 | 75.257 | KV453032.1 | 327671 | 13-scf00118 | 13 |
| AX-157989016 | 5 | 75.257 | KV453032.1 | 352905 | 13-scf00118 | 13 |
| AX-157818429 | 5 | 75.257 | KV453032.1 | 355031 | 13-scf00118 | 13 |
| AX-157989017 | 5 | 75.257 | KV453032.1 | 355163 | 13-scf00118 | 13 |
| AX-157989018 | 5 | 75.257 | KV453032.1 | 355710 | 13-scf00118 | 13 |
| AX-157989019 | 5 | 75.257 | KV453032.1 | 357194 | 13-scf00118 | 13 |
| AX-157989020 | 5 | 75.257 | KV453032.1 | 357662 | 13-scf00118 | 13 |
| AX-157989021 | 5 | 75.257 | KV453032.1 | 358017 | 13-scf00118 | 13 |
| AX-157989033 | 5 | 75.257 | KV453032.1 | 364436 | 13-scf00118 | 13 |
| AX-157989037 | 5 | 75.257 | KV453032.1 | 369886 | 13-scf00118 | 13 |
| AX-157989067 | 5 | 75.257 | KV453032.1 | 393277 | 13-scf00118 | 13 |
| AX-157989070 | 5 | 75.257 | KV453032.1 | 394747 | 13-scf00118 | 13 |
| AX-157989076 | 5 | 75.257 | KV453032.1 | 399019 | 13-scf00118 | 13 |
| AX-157989077 | 5 | 75.257 | KV453032.1 | 400591 | 13-scf00118 | 13 |
| AX-157989082 | 5 | 75.257 | KV453032.1 | 401752 | 13-scf00118 | 13 |
| AX-157989086 | 5 | 75.257 | KV453032.1 | 406518 | 13-scf00118 | 13 |
| AX-157989089 | 5 | 75.257 | KV453032.1 | 414367 | 13-scf00118 | 13 |
| AX-157989092 | 5 | 75.257 | KV453032.1 | 416033 | 13-scf00118 | 13 |
| AX-157818433 | 5 | 75.257 | KV453032.1 | 418779 | 13-scf00118 | 13 |
| AX-157989096 | 5 | 75.257 | KV453032.1 | 419066 | 13-scf00118 | 13 |
| AX-157989097 | 5 | 75.257 | KV453032.1 | 419736 | 13-scf00118 | 13 |
| AX-157989098 | 5 | 75.257 | KV453032.1 | 420189 | 13-scf00118 | 13 |
| AX-157818435 | 5 | 75.257 | KV453032.1 | 422041 | 13-scf00118 | 13 |
| AX-157818436 | 5 | 75.257 | KV453032.1 | 422578 | 13-scf00118 | 13 |
| AX-157989099 | 5 | 75.257 | KV453032.1 | 422973 | 13-scf00118 | 13 |
| AX-157989101 | 5 | 75.257 | KV453032.1 | 426297 | 13-scf00118 | 13 |
| AX-157989102 | 5 | 75.257 | KV453032.1 | 426839 | 13-scf00118 | 13 |
| AX-157989104 | 5 | 75.257 | KV453032.1 | 433252 | 13-scf00118 | 13 |
| AX-157750965 | 5 | 75.257 | KV453032.1 | 448399 | 13-scf00118 | 13 |
| AX-157989105 | 5 | 75.257 | KV453032.1 | 448511 | 13-scf00118 | 13 |
| AX-157772642 | 5 | 75.257 | KV453032.1 | 448578 | 13-scf00118 | 13 |
| AX-158407165 | 5 | 75.257 | KV453032.1 | 451964 | 13-scf00118 | 13 |
| AX-157989109 | 5 | 75.257 | KV453032.1 | 453245 | 13-scf00118 | 13 |
| AX-157818439 | 5 | 75.257 | KV453032.1 | 455869 | 13-scf00118 | 13 |

|              |   |        |            |        |             |    |
|--------------|---|--------|------------|--------|-------------|----|
| AX-157989113 | 5 | 75.257 | KV453032.1 | 458213 | 13-scf00118 | 13 |
| AX-157989117 | 5 | 75.257 | KV453032.1 | 460837 | 13-scf00118 | 13 |
| AX-157989122 | 5 | 75.257 | KV453032.1 | 464273 | 13-scf00118 | 13 |
| AX-157989132 | 5 | 75.257 | KV453032.1 | 468628 | 13-scf00118 | 13 |
| AX-157989137 | 5 | 75.257 | KV453032.1 | 473027 | 13-scf00118 | 13 |
| AX-157989138 | 5 | 75.257 | KV453032.1 | 473875 | 13-scf00118 | 13 |
| AX-157989148 | 5 | 75.257 | KV453032.1 | 499373 | 13-scf00118 | 13 |
| AX-157989150 | 5 | 75.257 | KV453032.1 | 501220 | 13-scf00118 | 13 |
| AX-157989154 | 5 | 75.257 | KV453032.1 | 510279 | 13-scf00118 | 13 |
| AX-157989156 | 5 | 75.257 | KV453032.1 | 514042 | 13-scf00118 | 13 |
| AX-157989157 | 5 | 75.257 | KV453032.1 | 514427 | 13-scf00118 | 13 |
| AX-157989158 | 5 | 75.257 | KV453032.1 | 514975 | 13-scf00118 | 13 |
| AX-157989160 | 5 | 75.257 | KV453032.1 | 515474 | 13-scf00118 | 13 |
| AX-157884511 | 5 | 75.257 | KV453032.1 | 519880 | 13-scf00118 | 13 |
| AX-157989163 | 5 | 75.257 | KV453032.1 | 521148 | 13-scf00118 | 13 |
| AX-157989168 | 5 | 75.257 | KV453032.1 | 524978 | 13-scf00118 | 13 |
| AX-157989171 | 5 | 75.257 | KV453032.1 | 525442 | 13-scf00118 | 13 |
| AX-157989172 | 5 | 75.257 | KV453032.1 | 526068 | 13-scf00118 | 13 |
| AX-157989175 | 5 | 75.257 | KV453032.1 | 527002 | 13-scf00118 | 13 |
| AX-157989176 | 5 | 75.257 | KV453032.1 | 527212 | 13-scf00118 | 13 |
| AX-157989180 | 5 | 75.257 | KV453032.1 | 528555 | 13-scf00118 | 13 |
| AX-157989182 | 5 | 75.257 | KV453032.1 | 528798 | 13-scf00118 | 13 |
| AX-157989185 | 5 | 75.257 | KV453032.1 | 531564 | 13-scf00118 | 13 |
| AX-157989188 | 5 | 75.257 | KV453032.1 | 534488 | 13-scf00118 | 13 |
| AX-157989191 | 5 | 75.257 | KV453032.1 | 538562 | 13-scf00118 | 13 |
| AX-157989197 | 5 | 75.257 | KV453032.1 | 540296 | 13-scf00118 | 13 |
| AX-157989199 | 5 | 75.257 | KV453032.1 | 540868 | 13-scf00118 | 13 |
| AX-157989201 | 5 | 75.257 | KV453032.1 | 541573 | 13-scf00118 | 13 |
| AX-157989202 | 5 | 75.257 | KV453032.1 | 542389 | 13-scf00118 | 13 |
| AX-157989203 | 5 | 75.257 | KV453032.1 | 547958 | 13-scf00118 | 13 |
| AX-157989204 | 5 | 75.257 | KV453032.1 | 548610 | 13-scf00118 | 13 |
| AX-157721099 | 5 | 75.257 | KV453032.1 | 549381 | 13-scf00118 | 13 |
| AX-157989206 | 5 | 75.257 | KV453032.1 | 552191 | 13-scf00118 | 13 |
| AX-157989207 | 5 | 75.257 | KV453032.1 | 553616 | 13-scf00118 | 13 |
| AX-157989210 | 5 | 75.257 | KV453032.1 | 556770 | 13-scf00118 | 13 |
| AX-157989212 | 5 | 75.257 | KV453032.1 | 558421 | 13-scf00118 | 13 |
| AX-157989215 | 5 | 75.257 | KV453032.1 | 561466 | 13-scf00118 | 13 |
| AX-157749959 | 5 | 75.257 | KV453032.1 | 564096 | 13-scf00118 | 13 |
| AX-157989245 | 5 | 75.257 | KV453032.1 | 594896 | 13-scf00118 | 13 |
| AX-157818444 | 5 | 75.257 | KV453032.1 | 598426 | 13-scf00118 | 13 |
| AX-157818445 | 5 | 75.257 | KV453032.1 | 598851 | 13-scf00118 | 13 |
| AX-157989252 | 5 | 75.257 | KV453032.1 | 612729 | 13-scf00118 | 13 |
| AX-157989259 | 5 | 75.257 | KV453032.1 | 623455 | 13-scf00118 | 13 |
| AX-157989263 | 5 | 75.257 | KV453032.1 | 629680 | 13-scf00118 | 13 |
| AX-157989266 | 5 | 75.257 | KV453032.1 | 630777 | 13-scf00118 | 13 |
| AX-157989267 | 5 | 75.257 | KV453032.1 | 632244 | 13-scf00118 | 13 |
| AX-157746874 | 5 | 75.257 | KV453032.1 | 633528 | 13-scf00118 | 13 |
| AX-157818449 | 5 | 75.257 | KV453032.1 | 637765 | 13-scf00118 | 13 |
| AX-157989276 | 5 | 75.257 | KV453032.1 | 639722 | 13-scf00118 | 13 |
| AX-157989278 | 5 | 75.257 | KV453032.1 | 640833 | 13-scf00118 | 13 |
| AX-157989281 | 5 | 75.257 | KV453032.1 | 641297 | 13-scf00118 | 13 |

|              |   |        |             |        |             |    |
|--------------|---|--------|-------------|--------|-------------|----|
| AX-157989282 | 5 | 75.257 | KV453032.1  | 641866 | 13-scf00118 | 13 |
| AX-157989288 | 5 | 75.257 | KV453032.1  | 644624 | 13-scf00118 | 13 |
| AX-157818450 | 5 | 75.257 | KV453032.1  | 649789 | 13-scf00118 | 13 |
| AX-157818451 | 5 | 75.257 | KV453032.1  | 650893 | 13-scf00118 | 13 |
| AX-157818452 | 5 | 75.257 | KV453032.1  | 651158 | 13-scf00118 | 13 |
| AX-157818453 | 5 | 75.257 | KV453032.1  | 652258 | 13-scf00118 | 13 |
| AX-157818454 | 5 | 75.257 | KV453032.1  | 656251 | 13-scf00118 | 13 |
| AX-157989293 | 5 | 75.257 | KV453032.1  | 657469 | 13-scf00118 | 13 |
| AX-157818456 | 5 | 75.257 | KV453032.1  | 657643 | 13-scf00118 | 13 |
| AX-157989298 | 5 | 75.257 | KV453032.1  | 666821 | 13-scf00118 | 13 |
| AX-157818458 | 5 | 75.257 | KV453032.1  | 672424 | 13-scf00118 | 13 |
| AX-157989303 | 5 | 75.257 | KV453032.1  | 679582 | 13-scf00118 | 13 |
| AX-158407172 | 5 | 75.257 | KV453032.1  | 680119 | 13-scf00118 | 13 |
| AX-157774257 | 5 | 75.257 | KV453032.1  | 686148 | 13-scf00118 | 13 |
| AX-157869806 | 5 | 75.257 | KV453032.1  | 687182 | 13-scf00118 | 13 |
| AX-157989307 | 5 | 75.257 | KV453032.1  | 687348 | 13-scf00118 | 13 |
| AX-157750857 | 5 | 75.257 | KV453032.1  | 688621 | 13-scf00118 | 13 |
| AX-157989308 | 5 | 75.257 | KV453032.1  | 689522 | 13-scf00118 | 13 |
| AX-157818462 | 5 | 75.257 | KV453032.1  | 689723 | 13-scf00118 | 13 |
| AX-157989311 | 5 | 75.257 | KV453032.1  | 694601 | 13-scf00118 | 13 |
| AX-157989316 | 5 | 75.257 | KV453032.1  | 701771 | 13-scf00118 | 13 |
| AX-157989317 | 5 | 75.257 | KV453032.1  | 702257 | 13-scf00118 | 13 |
| AX-157989323 | 5 | 75.257 | KV453032.1  | 705043 | 13-scf00118 | 13 |
| AX-157989324 | 5 | 75.257 | KV453032.1  | 706107 | 13-scf00118 | 13 |
| AX-157989325 | 5 | 75.257 | KV453032.1  | 707074 | 13-scf00118 | 13 |
| AX-157989329 | 5 | 75.257 | KV453032.1  | 708241 | 13-scf00118 | 13 |
| AX-157989331 | 5 | 75.257 | KV453032.1  | 714918 | 13-scf00118 | 13 |
| AX-157884514 | 5 | 75.257 | KV453032.1  | 717182 | 13-scf00118 | 13 |
| AX-157989333 | 5 | 75.257 | KV453032.1  | 718707 | 13-scf00118 | 13 |
| AX-157989334 | 5 | 75.257 | KV453032.1  | 719180 | 13-scf00118 | 13 |
| AX-157989341 | 5 | 75.257 | KV453032.1  | 726186 | 13-scf00118 | 13 |
| AX-157818463 | 5 | 75.257 | KV453032.1  | 730083 | 13-scf00118 | 13 |
| AX-157818464 | 5 | 75.257 | KV453032.1  | 731368 | 13-scf00118 | 13 |
| AX-157989344 | 5 | 75.257 | KV453032.1  | 732806 | 13-scf00118 | 13 |
| AX-157989349 | 5 | 75.257 | KV453032.1  | 735979 | 13-scf00118 | 13 |
| AX-157989351 | 5 | 75.257 | KV453032.1  | 738219 | 13-scf00118 | 13 |
| AX-157818467 | 5 | 75.257 | KV453033.1  | 25223  | 13-scf00119 | 13 |
| AX-157989446 | 5 | 75.257 | KV453033.1  | 69148  | 13-scf00119 | 13 |
| AX-157990194 | 5 | 75.257 | KV453034.1  | 225932 | 13-scf00120 | 13 |
| AX-157990770 | 5 | 75.257 | KV453035.1  | 293929 | 13-scf00121 | 13 |
| AX-157990772 | 5 | 75.257 | KV453035.1  | 305823 | 13-scf00121 | 13 |
| AX-157818559 | 5 | 75.257 | KV453035.1  | 343243 | 13-scf00121 | 13 |
| AX-157990892 | 5 | 75.257 | KV453035.1  | 426083 | 13-scf00121 | 13 |
| AX-157990897 | 5 | 75.257 | KV453035.1  | 433663 | 13-scf00121 | 13 |
| AX-158375842 | 5 | 75.257 | KV453039.1  | 339250 | 13-scf00569 | 13 |
| AX-158375844 | 5 | 75.257 | KV453039.1  | 345352 | 13-scf00569 | 13 |
| AX-158379041 | 5 | 75.257 | KV453039.1  | 368536 | 13-scf00569 | 13 |
| AX-158375864 | 5 | 75.257 | KV453039.1  | 376971 | 13-scf00569 | 13 |
| AX-158375904 | 5 | 75.257 | KV453039.1  | 413283 | 13-scf00569 | 13 |
| AX-157686995 | 5 | 75.257 | 3ML01024611 | 9461   | scf00770_1  | UN |
| AX-158420923 | 5 | 75.257 | 3ML01024611 | 15230  | scf00770_1  | UN |

|              |   |        |            |        |             |    |
|--------------|---|--------|------------|--------|-------------|----|
| AX-157989342 | 5 | 75.26  | KV453032.1 | 728728 | 13-scf00118 | 13 |
| AX-157989347 | 5 | 75.263 | KV453032.1 | 734893 | 13-scf00118 | 13 |
| AX-157989376 | 5 | 75.267 | KV453032.1 | 756526 | 13-scf00118 | 13 |
| AX-157988492 | 5 | 75.694 | KV453031.1 | 478512 | 13-scf00117 | 13 |
| AX-157988523 | 5 | 75.694 | KV453031.1 | 508730 | 13-scf00117 | 13 |
| AX-157988536 | 5 | 75.694 | KV453031.1 | 526973 | 13-scf00117 | 13 |
| AX-157988541 | 5 | 75.694 | KV453031.1 | 532469 | 13-scf00117 | 13 |
| AX-157818387 | 5 | 75.694 | KV453031.1 | 548851 | 13-scf00117 | 13 |
| AX-157988591 | 5 | 75.694 | KV453031.1 | 570834 | 13-scf00117 | 13 |
| AX-157988594 | 5 | 75.694 | KV453031.1 | 571494 | 13-scf00117 | 13 |
| AX-157988603 | 5 | 75.694 | KV453031.1 | 575253 | 13-scf00117 | 13 |
| AX-157723147 | 5 | 75.694 | KV453033.1 | 4723   | 13-scf00119 | 13 |
| AX-157989398 | 5 | 75.694 | KV453033.1 | 8299   | 13-scf00119 | 13 |
| AX-157989403 | 5 | 75.694 | KV453033.1 | 15482  | 13-scf00119 | 13 |
| AX-157989416 | 5 | 75.694 | KV453033.1 | 42113  | 13-scf00119 | 13 |
| AX-157989423 | 5 | 75.694 | KV453033.1 | 45649  | 13-scf00119 | 13 |
| AX-157989424 | 5 | 75.694 | KV453033.1 | 48330  | 13-scf00119 | 13 |
| AX-157989426 | 5 | 75.694 | KV453033.1 | 49228  | 13-scf00119 | 13 |
| AX-157738600 | 5 | 75.694 | KV453033.1 | 76365  | 13-scf00119 | 13 |
| AX-157989550 | 5 | 75.694 | KV453033.1 | 159983 | 13-scf00119 | 13 |
| AX-157989629 | 5 | 75.694 | KV453033.1 | 238162 | 13-scf00119 | 13 |
| AX-157989633 | 5 | 75.694 | KV453033.1 | 240102 | 13-scf00119 | 13 |
| AX-157989638 | 5 | 75.694 | KV453033.1 | 250192 | 13-scf00119 | 13 |
| AX-157989852 | 5 | 75.694 | KV453033.1 | 446693 | 13-scf00119 | 13 |
| AX-157989881 | 5 | 75.694 | KV453033.1 | 482054 | 13-scf00119 | 13 |
| AX-157990191 | 5 | 75.694 | KV453034.1 | 217564 | 13-scf00120 | 13 |
| AX-157988680 | 5 | 75.912 | KV453032.1 | 1436   | 13-scf00118 | 13 |
| AX-157988684 | 5 | 75.912 | KV453032.1 | 6754   | 13-scf00118 | 13 |
| AX-157988694 | 5 | 75.912 | KV453032.1 | 23509  | 13-scf00118 | 13 |
| AX-157988710 | 5 | 75.912 | KV453032.1 | 49742  | 13-scf00118 | 13 |
| AX-157988713 | 5 | 75.912 | KV453032.1 | 54623  | 13-scf00118 | 13 |
| AX-157988722 | 5 | 75.912 | KV453032.1 | 62651  | 13-scf00118 | 13 |
| AX-157988729 | 5 | 75.912 | KV453032.1 | 66219  | 13-scf00118 | 13 |
| AX-157988756 | 5 | 75.912 | KV453032.1 | 100455 | 13-scf00118 | 13 |
| AX-157988779 | 5 | 75.912 | KV453032.1 | 117708 | 13-scf00118 | 13 |
| AX-157988783 | 5 | 75.912 | KV453032.1 | 121340 | 13-scf00118 | 13 |
| AX-158407160 | 5 | 75.912 | KV453032.1 | 125264 | 13-scf00118 | 13 |
| AX-157989147 | 5 | 75.912 | KV453032.1 | 484060 | 13-scf00118 | 13 |
| AX-157989211 | 5 | 75.912 | KV453032.1 | 557492 | 13-scf00118 | 13 |
| AX-157727566 | 5 | 75.912 | KV453032.1 | 667158 | 13-scf00118 | 13 |
| AX-157989390 | 5 | 75.912 | KV453033.1 | 497    | 13-scf00119 | 13 |
| AX-158390573 | 5 | 75.912 | KV453033.1 | 10932  | 13-scf00119 | 13 |
| AX-158379601 | 5 | 75.912 | KV453033.1 | 49110  | 13-scf00119 | 13 |
| AX-157989437 | 5 | 75.912 | KV453033.1 | 61386  | 13-scf00119 | 13 |
| AX-157989440 | 5 | 75.912 | KV453033.1 | 63437  | 13-scf00119 | 13 |
| AX-157989441 | 5 | 75.912 | KV453033.1 | 65507  | 13-scf00119 | 13 |
| AX-157989452 | 5 | 75.912 | KV453033.1 | 74970  | 13-scf00119 | 13 |
| AX-157989460 | 5 | 75.912 | KV453033.1 | 80961  | 13-scf00119 | 13 |
| AX-157989461 | 5 | 75.912 | KV453033.1 | 83032  | 13-scf00119 | 13 |
| AX-157989462 | 5 | 75.912 | KV453033.1 | 83763  | 13-scf00119 | 13 |
| AX-157989468 | 5 | 75.912 | KV453033.1 | 88445  | 13-scf00119 | 13 |

|              |   |        |            |        |             |    |
|--------------|---|--------|------------|--------|-------------|----|
| AX-157989470 | 5 | 75.912 | KV453033.1 | 90467  | 13-scf00119 | 13 |
| AX-157989475 | 5 | 75.912 | KV453033.1 | 94619  | 13-scf00119 | 13 |
| AX-158383273 | 5 | 75.912 | KV453033.1 | 94915  | 13-scf00119 | 13 |
| AX-157989476 | 5 | 75.912 | KV453033.1 | 95989  | 13-scf00119 | 13 |
| AX-157989478 | 5 | 75.912 | KV453033.1 | 96768  | 13-scf00119 | 13 |
| AX-157989482 | 5 | 75.912 | KV453033.1 | 97764  | 13-scf00119 | 13 |
| AX-157989488 | 5 | 75.912 | KV453033.1 | 104669 | 13-scf00119 | 13 |
| AX-157989491 | 5 | 75.912 | KV453033.1 | 107015 | 13-scf00119 | 13 |
| AX-157989499 | 5 | 75.912 | KV453033.1 | 115691 | 13-scf00119 | 13 |
| AX-157989500 | 5 | 75.912 | KV453033.1 | 116069 | 13-scf00119 | 13 |
| AX-157989503 | 5 | 75.912 | KV453033.1 | 118206 | 13-scf00119 | 13 |
| AX-157989505 | 5 | 75.912 | KV453033.1 | 119246 | 13-scf00119 | 13 |
| AX-157989507 | 5 | 75.912 | KV453033.1 | 121801 | 13-scf00119 | 13 |
| AX-157989508 | 5 | 75.912 | KV453033.1 | 122885 | 13-scf00119 | 13 |
| AX-157989511 | 5 | 75.912 | KV453033.1 | 124322 | 13-scf00119 | 13 |
| AX-157772891 | 5 | 75.912 | KV453033.1 | 125212 | 13-scf00119 | 13 |
| AX-157989513 | 5 | 75.912 | KV453033.1 | 125964 | 13-scf00119 | 13 |
| AX-157989516 | 5 | 75.912 | KV453033.1 | 127817 | 13-scf00119 | 13 |
| AX-157989517 | 5 | 75.912 | KV453033.1 | 129872 | 13-scf00119 | 13 |
| AX-157989524 | 5 | 75.912 | KV453033.1 | 135916 | 13-scf00119 | 13 |
| AX-157989558 | 5 | 75.912 | KV453033.1 | 162534 | 13-scf00119 | 13 |
| AX-157855677 | 5 | 75.912 | KV453033.1 | 168151 | 13-scf00119 | 13 |
| AX-157989589 | 5 | 75.912 | KV453033.1 | 183781 | 13-scf00119 | 13 |
| AX-157989597 | 5 | 75.912 | KV453033.1 | 199762 | 13-scf00119 | 13 |
| AX-157989609 | 5 | 75.912 | KV453033.1 | 213495 | 13-scf00119 | 13 |
| AX-157989611 | 5 | 75.912 | KV453033.1 | 215677 | 13-scf00119 | 13 |
| AX-158383277 | 5 | 75.912 | KV453033.1 | 216376 | 13-scf00119 | 13 |
| AX-157989639 | 5 | 75.912 | KV453033.1 | 250978 | 13-scf00119 | 13 |
| AX-157989532 | 5 | 75.967 | KV453033.1 | 140931 | 13-scf00119 | 13 |
| AX-157989542 | 5 | 76.022 | KV453033.1 | 152551 | 13-scf00119 | 13 |
| AX-157989548 | 5 | 76.022 | KV453033.1 | 156474 | 13-scf00119 | 13 |
| AX-157989551 | 5 | 76.022 | KV453033.1 | 160281 | 13-scf00119 | 13 |
| AX-157989553 | 5 | 76.022 | KV453033.1 | 160734 | 13-scf00119 | 13 |
| AX-157989556 | 5 | 76.022 | KV453033.1 | 161480 | 13-scf00119 | 13 |
| AX-157989560 | 5 | 76.022 | KV453033.1 | 163699 | 13-scf00119 | 13 |
| AX-157989583 | 5 | 76.022 | KV453033.1 | 178038 | 13-scf00119 | 13 |
| AX-157989591 | 5 | 76.022 | KV453033.1 | 187015 | 13-scf00119 | 13 |
| AX-157818468 | 5 | 76.022 | KV453033.1 | 197264 | 13-scf00119 | 13 |
| AX-157989596 | 5 | 76.022 | KV453033.1 | 198372 | 13-scf00119 | 13 |
| AX-157989600 | 5 | 76.022 | KV453033.1 | 201475 | 13-scf00119 | 13 |
| AX-157989601 | 5 | 76.022 | KV453033.1 | 202327 | 13-scf00119 | 13 |
| AX-157989603 | 5 | 76.022 | KV453033.1 | 203860 | 13-scf00119 | 13 |
| AX-157989608 | 5 | 76.022 | KV453033.1 | 208785 | 13-scf00119 | 13 |
| AX-157989647 | 5 | 76.022 | KV453033.1 | 256604 | 13-scf00119 | 13 |
| AX-157989650 | 5 | 76.022 | KV453033.1 | 259629 | 13-scf00119 | 13 |
| AX-157988784 | 5 | 76.131 | KV453032.1 | 122270 | 13-scf00118 | 13 |
| AX-157989428 | 5 | 76.131 | KV453033.1 | 50291  | 13-scf00119 | 13 |
| AX-157989541 | 5 | 76.131 | KV453033.1 | 150737 | 13-scf00119 | 13 |
| AX-157989621 | 5 | 76.131 | KV453033.1 | 232177 | 13-scf00119 | 13 |
| AX-157989622 | 5 | 76.131 | KV453033.1 | 232369 | 13-scf00119 | 13 |
| AX-157989627 | 5 | 76.131 | KV453033.1 | 237721 | 13-scf00119 | 13 |

|              |   |        |            |        |             |    |
|--------------|---|--------|------------|--------|-------------|----|
| AX-157989635 | 5 | 76.131 | KV453033.1 | 246713 | 13-scf00119 | 13 |
| AX-158383278 | 5 | 76.131 | KV453033.1 | 250229 | 13-scf00119 | 13 |
| AX-157989641 | 5 | 76.131 | KV453033.1 | 251532 | 13-scf00119 | 13 |
| AX-157989643 | 5 | 76.131 | KV453033.1 | 253167 | 13-scf00119 | 13 |
| AX-157989645 | 5 | 76.131 | KV453033.1 | 253824 | 13-scf00119 | 13 |
| AX-157989666 | 5 | 76.131 | KV453033.1 | 271920 | 13-scf00119 | 13 |
| AX-157855678 | 5 | 76.131 | KV453033.1 | 274866 | 13-scf00119 | 13 |
| AX-157721869 | 5 | 76.131 | KV453033.1 | 282677 | 13-scf00119 | 13 |
| AX-157818472 | 5 | 76.131 | KV453033.1 | 287852 | 13-scf00119 | 13 |
| AX-158390574 | 5 | 76.131 | KV453033.1 | 288853 | 13-scf00119 | 13 |
| AX-157989685 | 5 | 76.131 | KV453033.1 | 292311 | 13-scf00119 | 13 |
| AX-157989695 | 5 | 76.131 | KV453033.1 | 296974 | 13-scf00119 | 13 |
| AX-157989708 | 5 | 76.131 | KV453033.1 | 311324 | 13-scf00119 | 13 |
| AX-157989802 | 5 | 76.131 | KV453033.1 | 407028 | 13-scf00119 | 13 |
| AX-157989885 | 5 | 76.131 | KV453033.1 | 491971 | 13-scf00119 | 13 |
| AX-157989888 | 5 | 76.131 | KV453033.1 | 496169 | 13-scf00119 | 13 |
| AX-157989918 | 5 | 76.131 | KV453033.1 | 535114 | 13-scf00119 | 13 |
| AX-157989712 | 5 | 76.422 | KV453033.1 | 313950 | 13-scf00119 | 13 |
| AX-157989717 | 5 | 76.422 | KV453033.1 | 323176 | 13-scf00119 | 13 |
| AX-157989701 | 5 | 76.568 | KV453033.1 | 302716 | 13-scf00119 | 13 |
| AX-157884516 | 5 | 76.568 | KV453033.1 | 308684 | 13-scf00119 | 13 |
| AX-157884517 | 5 | 76.568 | KV453033.1 | 308780 | 13-scf00119 | 13 |
| AX-157989727 | 5 | 76.568 | KV453033.1 | 330353 | 13-scf00119 | 13 |
| AX-157989728 | 5 | 76.568 | KV453033.1 | 332223 | 13-scf00119 | 13 |
| AX-157989731 | 5 | 76.568 | KV453033.1 | 334851 | 13-scf00119 | 13 |
| AX-157989732 | 5 | 76.568 | KV453033.1 | 335952 | 13-scf00119 | 13 |
| AX-157989737 | 5 | 76.568 | KV453033.1 | 338655 | 13-scf00119 | 13 |
| AX-157989738 | 5 | 76.568 | KV453033.1 | 339257 | 13-scf00119 | 13 |
| AX-157989743 | 5 | 76.568 | KV453033.1 | 340848 | 13-scf00119 | 13 |
| AX-157989744 | 5 | 76.568 | KV453033.1 | 341824 | 13-scf00119 | 13 |
| AX-157989746 | 5 | 76.568 | KV453033.1 | 344988 | 13-scf00119 | 13 |
| AX-157989752 | 5 | 76.568 | KV453033.1 | 351142 | 13-scf00119 | 13 |
| AX-157989755 | 5 | 76.568 | KV453033.1 | 351910 | 13-scf00119 | 13 |
| AX-157989756 | 5 | 76.568 | KV453033.1 | 353022 | 13-scf00119 | 13 |
| AX-157989757 | 5 | 76.568 | KV453033.1 | 353940 | 13-scf00119 | 13 |
| AX-157989758 | 5 | 76.568 | KV453033.1 | 354692 | 13-scf00119 | 13 |
| AX-157989762 | 5 | 76.568 | KV453033.1 | 358357 | 13-scf00119 | 13 |
| AX-157989765 | 5 | 76.568 | KV453033.1 | 360286 | 13-scf00119 | 13 |
| AX-157989767 | 5 | 76.568 | KV453033.1 | 362530 | 13-scf00119 | 13 |
| AX-157989768 | 5 | 76.568 | KV453033.1 | 363587 | 13-scf00119 | 13 |
| AX-157989771 | 5 | 76.568 | KV453033.1 | 367045 | 13-scf00119 | 13 |
| AX-157989772 | 5 | 76.568 | KV453033.1 | 367371 | 13-scf00119 | 13 |
| AX-157989773 | 5 | 76.568 | KV453033.1 | 369747 | 13-scf00119 | 13 |
| AX-157818476 | 5 | 76.568 | KV453033.1 | 370066 | 13-scf00119 | 13 |
| AX-157855680 | 5 | 76.568 | KV453033.1 | 370318 | 13-scf00119 | 13 |
| AX-157989774 | 5 | 76.568 | KV453033.1 | 371165 | 13-scf00119 | 13 |
| AX-157855681 | 5 | 76.568 | KV453033.1 | 371505 | 13-scf00119 | 13 |
| AX-157989778 | 5 | 76.568 | KV453033.1 | 378656 | 13-scf00119 | 13 |
| AX-157989779 | 5 | 76.568 | KV453033.1 | 378957 | 13-scf00119 | 13 |
| AX-157721267 | 5 | 76.568 | KV453033.1 | 381064 | 13-scf00119 | 13 |
| AX-157752460 | 5 | 76.568 | KV453033.1 | 381615 | 13-scf00119 | 13 |

|              |   |        |            |        |             |    |
|--------------|---|--------|------------|--------|-------------|----|
| AX-157989780 | 5 | 76.568 | KV453033.1 | 382054 | 13-scf00119 | 13 |
| AX-157989781 | 5 | 76.568 | KV453033.1 | 382683 | 13-scf00119 | 13 |
| AX-157989782 | 5 | 76.568 | KV453033.1 | 387116 | 13-scf00119 | 13 |
| AX-157989783 | 5 | 76.568 | KV453033.1 | 388268 | 13-scf00119 | 13 |
| AX-157989784 | 5 | 76.568 | KV453033.1 | 390253 | 13-scf00119 | 13 |
| AX-157723661 | 5 | 76.568 | KV453033.1 | 390417 | 13-scf00119 | 13 |
| AX-157989785 | 5 | 76.568 | KV453033.1 | 391680 | 13-scf00119 | 13 |
| AX-157989786 | 5 | 76.568 | KV453033.1 | 393950 | 13-scf00119 | 13 |
| AX-157818478 | 5 | 76.568 | KV453033.1 | 394748 | 13-scf00119 | 13 |
| AX-157818479 | 5 | 76.568 | KV453033.1 | 396356 | 13-scf00119 | 13 |
| AX-157989788 | 5 | 76.568 | KV453033.1 | 396899 | 13-scf00119 | 13 |
| AX-157989789 | 5 | 76.568 | KV453033.1 | 397559 | 13-scf00119 | 13 |
| AX-157989790 | 5 | 76.568 | KV453033.1 | 397983 | 13-scf00119 | 13 |
| AX-158390575 | 5 | 76.568 | KV453033.1 | 398252 | 13-scf00119 | 13 |
| AX-157989793 | 5 | 76.568 | KV453033.1 | 400650 | 13-scf00119 | 13 |
| AX-157989795 | 5 | 76.568 | KV453033.1 | 400913 | 13-scf00119 | 13 |
| AX-157989797 | 5 | 76.568 | KV453033.1 | 403008 | 13-scf00119 | 13 |
| AX-157989798 | 5 | 76.568 | KV453033.1 | 403320 | 13-scf00119 | 13 |
| AX-157989799 | 5 | 76.568 | KV453033.1 | 404157 | 13-scf00119 | 13 |
| AX-157989800 | 5 | 76.568 | KV453033.1 | 406129 | 13-scf00119 | 13 |
| AX-157989801 | 5 | 76.568 | KV453033.1 | 406605 | 13-scf00119 | 13 |
| AX-157989805 | 5 | 76.568 | KV453033.1 | 411610 | 13-scf00119 | 13 |
| AX-157989806 | 5 | 76.568 | KV453033.1 | 411743 | 13-scf00119 | 13 |
| AX-157989811 | 5 | 76.568 | KV453033.1 | 413873 | 13-scf00119 | 13 |
| AX-157989812 | 5 | 76.568 | KV453033.1 | 414563 | 13-scf00119 | 13 |
| AX-157989814 | 5 | 76.568 | KV453033.1 | 416807 | 13-scf00119 | 13 |
| AX-157989815 | 5 | 76.568 | KV453033.1 | 417213 | 13-scf00119 | 13 |
| AX-157989819 | 5 | 76.568 | KV453033.1 | 419836 | 13-scf00119 | 13 |
| AX-157989820 | 5 | 76.568 | KV453033.1 | 420150 | 13-scf00119 | 13 |
| AX-157989822 | 5 | 76.568 | KV453033.1 | 420380 | 13-scf00119 | 13 |
| AX-157989824 | 5 | 76.568 | KV453033.1 | 420873 | 13-scf00119 | 13 |
| AX-157989826 | 5 | 76.568 | KV453033.1 | 421322 | 13-scf00119 | 13 |
| AX-157989827 | 5 | 76.568 | KV453033.1 | 423271 | 13-scf00119 | 13 |
| AX-158407180 | 5 | 76.568 | KV453033.1 | 426097 | 13-scf00119 | 13 |
| AX-157989829 | 5 | 76.568 | KV453033.1 | 428245 | 13-scf00119 | 13 |
| AX-157989831 | 5 | 76.568 | KV453033.1 | 428944 | 13-scf00119 | 13 |
| AX-157989832 | 5 | 76.568 | KV453033.1 | 430104 | 13-scf00119 | 13 |
| AX-157875847 | 5 | 76.568 | KV453033.1 | 434300 | 13-scf00119 | 13 |
| AX-157989836 | 5 | 76.568 | KV453033.1 | 435131 | 13-scf00119 | 13 |
| AX-157989840 | 5 | 76.568 | KV453033.1 | 436812 | 13-scf00119 | 13 |
| AX-157989842 | 5 | 76.568 | KV453033.1 | 438685 | 13-scf00119 | 13 |
| AX-157989843 | 5 | 76.568 | KV453033.1 | 439139 | 13-scf00119 | 13 |
| AX-157989847 | 5 | 76.568 | KV453033.1 | 440429 | 13-scf00119 | 13 |
| AX-157989848 | 5 | 76.568 | KV453033.1 | 442211 | 13-scf00119 | 13 |
| AX-157989850 | 5 | 76.568 | KV453033.1 | 445080 | 13-scf00119 | 13 |
| AX-157989851 | 5 | 76.568 | KV453033.1 | 446142 | 13-scf00119 | 13 |
| AX-157989853 | 5 | 76.568 | KV453033.1 | 453078 | 13-scf00119 | 13 |
| AX-157989855 | 5 | 76.568 | KV453033.1 | 455545 | 13-scf00119 | 13 |
| AX-157989857 | 5 | 76.568 | KV453033.1 | 456030 | 13-scf00119 | 13 |
| AX-158390576 | 5 | 76.568 | KV453033.1 | 456492 | 13-scf00119 | 13 |
| AX-157989864 | 5 | 76.568 | KV453033.1 | 461133 | 13-scf00119 | 13 |

|              |   |        |            |        |             |    |
|--------------|---|--------|------------|--------|-------------|----|
| AX-157989867 | 5 | 76.568 | KV453033.1 | 462568 | 13-scf00119 | 13 |
| AX-157855682 | 5 | 76.568 | KV453033.1 | 467335 | 13-scf00119 | 13 |
| AX-157989875 | 5 | 76.568 | KV453033.1 | 474981 | 13-scf00119 | 13 |
| AX-157989876 | 5 | 76.568 | KV453033.1 | 476676 | 13-scf00119 | 13 |
| AX-157989879 | 5 | 76.568 | KV453033.1 | 479706 | 13-scf00119 | 13 |
| AX-157989882 | 5 | 76.568 | KV453033.1 | 482644 | 13-scf00119 | 13 |
| AX-157989884 | 5 | 76.568 | KV453033.1 | 484142 | 13-scf00119 | 13 |
| AX-157989887 | 5 | 76.568 | KV453033.1 | 495710 | 13-scf00119 | 13 |
| AX-157989891 | 5 | 76.568 | KV453033.1 | 498701 | 13-scf00119 | 13 |
| AX-157989893 | 5 | 76.568 | KV453033.1 | 502085 | 13-scf00119 | 13 |
| AX-157989894 | 5 | 76.568 | KV453033.1 | 502734 | 13-scf00119 | 13 |
| AX-157989896 | 5 | 76.568 | KV453033.1 | 503000 | 13-scf00119 | 13 |
| AX-157989897 | 5 | 76.568 | KV453033.1 | 504227 | 13-scf00119 | 13 |
| AX-157989898 | 5 | 76.568 | KV453033.1 | 505096 | 13-scf00119 | 13 |
| AX-157989900 | 5 | 76.568 | KV453033.1 | 513527 | 13-scf00119 | 13 |
| AX-157989903 | 5 | 76.568 | KV453033.1 | 515634 | 13-scf00119 | 13 |
| AX-157989937 | 5 | 76.568 | KV453033.1 | 549129 | 13-scf00119 | 13 |
| AX-157818484 | 5 | 76.568 | KV453033.1 | 554662 | 13-scf00119 | 13 |
| AX-157989947 | 5 | 76.568 | KV453033.1 | 560059 | 13-scf00119 | 13 |
| AX-157989957 | 5 | 76.568 | KV453033.1 | 570298 | 13-scf00119 | 13 |
| AX-157989964 | 5 | 76.568 | KV453033.1 | 577178 | 13-scf00119 | 13 |
| AX-157989966 | 5 | 76.568 | KV453033.1 | 578790 | 13-scf00119 | 13 |
| AX-157989967 | 5 | 76.568 | KV453033.1 | 579694 | 13-scf00119 | 13 |
| AX-157989972 | 5 | 76.568 | KV453033.1 | 583684 | 13-scf00119 | 13 |
| AX-157989974 | 5 | 76.568 | KV453033.1 | 585294 | 13-scf00119 | 13 |
| AX-157989977 | 5 | 76.568 | KV453033.1 | 589173 | 13-scf00119 | 13 |
| AX-157989979 | 5 | 76.568 | KV453033.1 | 589730 | 13-scf00119 | 13 |
| AX-157989980 | 5 | 76.568 | KV453033.1 | 590784 | 13-scf00119 | 13 |
| AX-157989982 | 5 | 76.568 | KV453033.1 | 592122 | 13-scf00119 | 13 |
| AX-157989985 | 5 | 76.568 | KV453033.1 | 592804 | 13-scf00119 | 13 |
| AX-157989988 | 5 | 76.568 | KV453033.1 | 595523 | 13-scf00119 | 13 |
| AX-157818490 | 5 | 76.568 | KV453033.1 | 596219 | 13-scf00119 | 13 |
| AX-157818491 | 5 | 76.568 | KV453033.1 | 597065 | 13-scf00119 | 13 |
| AX-157989990 | 5 | 76.568 | KV453033.1 | 597690 | 13-scf00119 | 13 |
| AX-157742907 | 5 | 76.568 | KV453033.1 | 598476 | 13-scf00119 | 13 |
| AX-157989991 | 5 | 76.568 | KV453033.1 | 599671 | 13-scf00119 | 13 |
| AX-157818492 | 5 | 76.568 | KV453033.1 | 603163 | 13-scf00119 | 13 |
| AX-158407184 | 5 | 76.568 | KV453033.1 | 604201 | 13-scf00119 | 13 |
| AX-157989995 | 5 | 76.568 | KV453033.1 | 605291 | 13-scf00119 | 13 |
| AX-157989997 | 5 | 76.568 | KV453033.1 | 605723 | 13-scf00119 | 13 |
| AX-157989998 | 5 | 76.568 | KV453033.1 | 606216 | 13-scf00119 | 13 |
| AX-157990003 | 5 | 76.568 | KV453033.1 | 612156 | 13-scf00119 | 13 |
| AX-157990007 | 5 | 76.568 | KV453033.1 | 614905 | 13-scf00119 | 13 |
| AX-157990010 | 5 | 76.568 | KV453033.1 | 618301 | 13-scf00119 | 13 |
| AX-157990013 | 5 | 76.568 | KV453033.1 | 625207 | 13-scf00119 | 13 |
| AX-157818499 | 5 | 76.568 | KV453034.1 | 14727  | 13-scf00120 | 13 |
| AX-158415662 | 5 | 76.568 | KV453034.1 | 18181  | 13-scf00120 | 13 |
| AX-157990048 | 5 | 76.568 | KV453034.1 | 50049  | 13-scf00120 | 13 |
| AX-157990050 | 5 | 76.568 | KV453034.1 | 53871  | 13-scf00120 | 13 |
| AX-157990066 | 5 | 76.568 | KV453034.1 | 72480  | 13-scf00120 | 13 |
| AX-157726788 | 5 | 76.568 | KV453034.1 | 105039 | 13-scf00120 | 13 |



|              |   |        |            |        |             |    |
|--------------|---|--------|------------|--------|-------------|----|
| AX-157990094 | 5 | 76.568 | KV453034.1 | 107453 | 13-scf00120 | 13 |
| AX-157990097 | 5 | 76.568 | KV453034.1 | 109267 | 13-scf00120 | 13 |
| AX-157818510 | 5 | 76.568 | KV453034.1 | 110728 | 13-scf00120 | 13 |
| AX-157990104 | 5 | 76.568 | KV453034.1 | 114612 | 13-scf00120 | 13 |
| AX-157990105 | 5 | 76.568 | KV453034.1 | 115043 | 13-scf00120 | 13 |
| AX-157990117 | 5 | 76.568 | KV453034.1 | 127297 | 13-scf00120 | 13 |
| AX-157990122 | 5 | 76.568 | KV453034.1 | 135565 | 13-scf00120 | 13 |
| AX-157990126 | 5 | 76.568 | KV453034.1 | 137775 | 13-scf00120 | 13 |
| AX-157990130 | 5 | 76.568 | KV453034.1 | 141217 | 13-scf00120 | 13 |
| AX-157818512 | 5 | 76.568 | KV453034.1 | 144147 | 13-scf00120 | 13 |
| AX-157990133 | 5 | 76.568 | KV453034.1 | 145077 | 13-scf00120 | 13 |
| AX-157990134 | 5 | 76.568 | KV453034.1 | 145758 | 13-scf00120 | 13 |
| AX-157990135 | 5 | 76.568 | KV453034.1 | 146352 | 13-scf00120 | 13 |
| AX-157990138 | 5 | 76.568 | KV453034.1 | 149489 | 13-scf00120 | 13 |
| AX-157990143 | 5 | 76.568 | KV453034.1 | 152514 | 13-scf00120 | 13 |
| AX-157990145 | 5 | 76.568 | KV453034.1 | 152721 | 13-scf00120 | 13 |
| AX-158390577 | 5 | 76.568 | KV453034.1 | 184936 | 13-scf00120 | 13 |
| AX-157990176 | 5 | 76.568 | KV453034.1 | 191649 | 13-scf00120 | 13 |
| AX-158407187 | 5 | 76.568 | KV453034.1 | 202285 | 13-scf00120 | 13 |
| AX-157990186 | 5 | 76.568 | KV453034.1 | 211063 | 13-scf00120 | 13 |
| AX-157990188 | 5 | 76.568 | KV453034.1 | 212210 | 13-scf00120 | 13 |
| AX-157990189 | 5 | 76.568 | KV453034.1 | 213263 | 13-scf00120 | 13 |
| AX-157990202 | 5 | 76.568 | KV453034.1 | 236183 | 13-scf00120 | 13 |
| AX-158390578 | 5 | 76.568 | KV453034.1 | 242082 | 13-scf00120 | 13 |
| AX-157990207 | 5 | 76.568 | KV453034.1 | 251435 | 13-scf00120 | 13 |
| AX-157990208 | 5 | 76.568 | KV453034.1 | 252056 | 13-scf00120 | 13 |
| AX-157990210 | 5 | 76.568 | KV453034.1 | 252846 | 13-scf00120 | 13 |
| AX-157990213 | 5 | 76.568 | KV453034.1 | 254957 | 13-scf00120 | 13 |
| AX-157990215 | 5 | 76.568 | KV453034.1 | 257169 | 13-scf00120 | 13 |
| AX-157990219 | 5 | 76.568 | KV453034.1 | 257585 | 13-scf00120 | 13 |
| AX-157990267 | 5 | 76.568 | KV453034.1 | 302089 | 13-scf00120 | 13 |
| AX-157711314 | 5 | 76.568 | KV453034.1 | 304270 | 13-scf00120 | 13 |
| AX-157818518 | 5 | 76.568 | KV453034.1 | 308333 | 13-scf00120 | 13 |
| AX-157818519 | 5 | 76.568 | KV453034.1 | 310327 | 13-scf00120 | 13 |
| AX-157990277 | 5 | 76.568 | KV453034.1 | 313467 | 13-scf00120 | 13 |
| AX-157818520 | 5 | 76.568 | KV453034.1 | 325040 | 13-scf00120 | 13 |
| AX-157990325 | 5 | 76.568 | KV453034.1 | 355535 | 13-scf00120 | 13 |
| AX-157990332 | 5 | 76.568 | KV453034.1 | 358442 | 13-scf00120 | 13 |
| AX-157990340 | 5 | 76.568 | KV453034.1 | 361694 | 13-scf00120 | 13 |
| AX-157990342 | 5 | 76.568 | KV453034.1 | 364111 | 13-scf00120 | 13 |
| AX-157990359 | 5 | 76.568 | KV453034.1 | 376842 | 13-scf00120 | 13 |
| AX-157990367 | 5 | 76.568 | KV453034.1 | 383542 | 13-scf00120 | 13 |
| AX-157990406 | 5 | 76.568 | KV453034.1 | 423602 | 13-scf00120 | 13 |
| AX-157745013 | 5 | 76.568 | KV453034.1 | 428854 | 13-scf00120 | 13 |
| AX-157990429 | 5 | 76.568 | KV453034.1 | 452841 | 13-scf00120 | 13 |
| AX-157990430 | 5 | 76.568 | KV453034.1 | 453229 | 13-scf00120 | 13 |
| AX-157990458 | 5 | 76.568 | KV453034.1 | 489136 | 13-scf00120 | 13 |
| AX-157990485 | 5 | 76.568 | KV453034.1 | 522947 | 13-scf00120 | 13 |
| AX-157990545 | 5 | 76.568 | KV453034.1 | 575799 | 13-scf00120 | 13 |
| AX-157990590 | 5 | 76.568 | KV453034.1 | 613747 | 13-scf00120 | 13 |
| AX-158390586 | 5 | 76.568 | KV453034.1 | 813109 | 13-scf00120 | 13 |

|              |   |        |            |        |             |    |
|--------------|---|--------|------------|--------|-------------|----|
| AX-157818547 | 5 | 76.568 | KV453035.1 | 321340 | 13-scf00121 | 13 |
| AX-157818549 | 5 | 76.568 | KV453035.1 | 323655 | 13-scf00121 | 13 |
| AX-157818550 | 5 | 76.568 | KV453035.1 | 324227 | 13-scf00121 | 13 |
| AX-157748383 | 5 | 76.568 | KV453035.1 | 354318 | 13-scf00121 | 13 |
| AX-157818576 | 5 | 76.568 | KV453035.1 | 482185 | 13-scf00121 | 13 |
| AX-157732047 | 5 | 76.568 | KV453035.1 | 502060 | 13-scf00121 | 13 |
| AX-157818589 | 5 | 76.568 | KV453035.1 | 547351 | 13-scf00121 | 13 |
| AX-157991374 | 5 | 76.568 | KV453035.1 | 954876 | 13-scf00121 | 13 |
| AX-157772285 | 5 | 76.568 | KV453035.1 | 956361 | 13-scf00121 | 13 |
| AX-158375849 | 5 | 76.568 | KV453039.1 | 354496 | 13-scf00569 | 13 |
| AX-158375860 | 5 | 76.568 | KV453039.1 | 371921 | 13-scf00569 | 13 |
| AX-158375865 | 5 | 76.568 | KV453039.1 | 377567 | 13-scf00569 | 13 |
| AX-158375868 | 5 | 76.568 | KV453039.1 | 378258 | 13-scf00569 | 13 |
| AX-158375870 | 5 | 76.568 | KV453039.1 | 379881 | 13-scf00569 | 13 |
| AX-158375871 | 5 | 76.568 | KV453039.1 | 381434 | 13-scf00569 | 13 |
| AX-158375873 | 5 | 76.568 | KV453039.1 | 382455 | 13-scf00569 | 13 |
| AX-158375876 | 5 | 76.568 | KV453039.1 | 384784 | 13-scf00569 | 13 |
| AX-158375884 | 5 | 76.568 | KV453039.1 | 388716 | 13-scf00569 | 13 |
| AX-158375885 | 5 | 76.568 | KV453039.1 | 390533 | 13-scf00569 | 13 |
| AX-158375887 | 5 | 76.568 | KV453039.1 | 395571 | 13-scf00569 | 13 |
| AX-157748872 | 5 | 76.568 | KV453039.1 | 400731 | 13-scf00569 | 13 |
| AX-157726955 | 5 | 76.568 | KV453039.1 | 408684 | 13-scf00569 | 13 |
| AX-158375898 | 5 | 76.568 | KV453039.1 | 409542 | 13-scf00569 | 13 |
| AX-158375912 | 5 | 76.568 | KV453039.1 | 418138 | 13-scf00569 | 13 |
| AX-158375923 | 5 | 76.568 | KV453039.1 | 435383 | 13-scf00569 | 13 |
| AX-158375949 | 5 | 76.568 | KV453039.1 | 471966 | 13-scf00569 | 13 |
| AX-158375950 | 5 | 76.568 | KV453039.1 | 472408 | 13-scf00569 | 13 |
| AX-158375955 | 5 | 76.568 | KV453039.1 | 480193 | 13-scf00569 | 13 |
| AX-157989907 | 5 | 76.853 | KV453033.1 | 523966 | 13-scf00119 | 13 |
| AX-157989910 | 5 | 76.853 | KV453033.1 | 531460 | 13-scf00119 | 13 |
| AX-157989919 | 5 | 76.853 | KV453033.1 | 535805 | 13-scf00119 | 13 |
| AX-157989920 | 5 | 76.853 | KV453033.1 | 536745 | 13-scf00119 | 13 |
| AX-157989924 | 5 | 76.853 | KV453033.1 | 541159 | 13-scf00119 | 13 |
| AX-157989925 | 5 | 76.853 | KV453033.1 | 542953 | 13-scf00119 | 13 |
| AX-157818482 | 5 | 76.853 | KV453033.1 | 543292 | 13-scf00119 | 13 |
| AX-157989926 | 5 | 76.853 | KV453033.1 | 543362 | 13-scf00119 | 13 |
| AX-157989929 | 5 | 76.853 | KV453033.1 | 544562 | 13-scf00119 | 13 |
| AX-157989934 | 5 | 76.853 | KV453033.1 | 547770 | 13-scf00119 | 13 |
| AX-157989939 | 5 | 76.853 | KV453033.1 | 550363 | 13-scf00119 | 13 |
| AX-157989942 | 5 | 76.853 | KV453033.1 | 552716 | 13-scf00119 | 13 |
| AX-157990161 | 5 | 76.853 | KV453034.1 | 170896 | 13-scf00120 | 13 |
| AX-157698023 | 5 | 76.854 | KV453033.1 | 553320 | 13-scf00119 | 13 |
| AX-157989971 | 5 | 76.854 | KV453033.1 | 583234 | 13-scf00119 | 13 |
| AX-157990000 | 5 | 76.854 | KV453033.1 | 609494 | 13-scf00119 | 13 |
| AX-157990001 | 5 | 76.854 | KV453033.1 | 609993 | 13-scf00119 | 13 |
| AX-157990018 | 5 | 76.886 | KV453033.1 | 637024 | 13-scf00119 | 13 |
| AX-157990128 | 5 | 76.886 | KV453034.1 | 140324 | 13-scf00120 | 13 |
| AX-157990362 | 5 | 76.886 | KV453034.1 | 381408 | 13-scf00120 | 13 |
| AX-157818533 | 5 | 76.886 | KV453034.1 | 614698 | 13-scf00120 | 13 |
| AX-157990056 | 5 | 76.915 | KV453034.1 | 63565  | 13-scf00120 | 13 |
| AX-157990024 | 5 | 76.934 | KV453033.1 | 650797 | 13-scf00119 | 13 |

|              |   |        |            |        |             |    |
|--------------|---|--------|------------|--------|-------------|----|
| AX-157818503 | 5 | 76.934 | KV453034.1 | 67528  | 13-scf00120 | 13 |
| AX-157990268 | 5 | 76.934 | KV453034.1 | 302906 | 13-scf00120 | 13 |
| AX-157990064 | 5 | 76.963 | KV453034.1 | 71230  | 13-scf00120 | 13 |
| AX-157990068 | 5 | 76.996 | KV453034.1 | 72838  | 13-scf00120 | 13 |
| AX-157818500 | 5 | 77.09  | KV453034.1 | 65111  | 13-scf00120 | 13 |
| AX-157990072 | 5 | 77.09  | KV453034.1 | 77915  | 13-scf00120 | 13 |
| AX-157990074 | 5 | 77.09  | KV453034.1 | 79355  | 13-scf00120 | 13 |
| AX-157990091 | 5 | 77.09  | KV453034.1 | 106232 | 13-scf00120 | 13 |
| AX-157990092 | 5 | 77.09  | KV453034.1 | 106892 | 13-scf00120 | 13 |
| AX-157990095 | 5 | 77.09  | KV453034.1 | 107900 | 13-scf00120 | 13 |
| AX-157818511 | 5 | 77.09  | KV453034.1 | 115193 | 13-scf00120 | 13 |
| AX-157725656 | 5 | 77.09  | KV453034.1 | 126645 | 13-scf00120 | 13 |
| AX-157990119 | 5 | 77.09  | KV453034.1 | 127786 | 13-scf00120 | 13 |
| AX-157701027 | 5 | 77.09  | KV453034.1 | 131724 | 13-scf00120 | 13 |
| AX-157990123 | 5 | 77.09  | KV453034.1 | 137155 | 13-scf00120 | 13 |
| AX-157990148 | 5 | 77.09  | KV453034.1 | 154470 | 13-scf00120 | 13 |
| AX-157990150 | 5 | 77.09  | KV453034.1 | 154821 | 13-scf00120 | 13 |
| AX-157990153 | 5 | 77.09  | KV453034.1 | 158406 | 13-scf00120 | 13 |
| AX-157818513 | 5 | 77.09  | KV453034.1 | 161166 | 13-scf00120 | 13 |
| AX-157990205 | 5 | 77.09  | KV453034.1 | 249677 | 13-scf00120 | 13 |
| AX-157990252 | 5 | 77.09  | KV453034.1 | 285063 | 13-scf00120 | 13 |
| AX-157990254 | 5 | 77.09  | KV453034.1 | 285724 | 13-scf00120 | 13 |
| AX-157990255 | 5 | 77.09  | KV453034.1 | 287866 | 13-scf00120 | 13 |
| AX-157990259 | 5 | 77.09  | KV453034.1 | 292705 | 13-scf00120 | 13 |
| AX-157990263 | 5 | 77.09  | KV453034.1 | 300121 | 13-scf00120 | 13 |
| AX-158390579 | 5 | 77.09  | KV453034.1 | 301660 | 13-scf00120 | 13 |
| AX-157990288 | 5 | 77.09  | KV453034.1 | 328839 | 13-scf00120 | 13 |
| AX-157990295 | 5 | 77.09  | KV453034.1 | 333982 | 13-scf00120 | 13 |
| AX-157990297 | 5 | 77.09  | KV453034.1 | 337303 | 13-scf00120 | 13 |
| AX-157990301 | 5 | 77.09  | KV453034.1 | 339126 | 13-scf00120 | 13 |
| AX-157990305 | 5 | 77.09  | KV453034.1 | 342762 | 13-scf00120 | 13 |
| AX-157990311 | 5 | 77.09  | KV453034.1 | 347525 | 13-scf00120 | 13 |
| AX-157990315 | 5 | 77.09  | KV453034.1 | 350703 | 13-scf00120 | 13 |
| AX-157990318 | 5 | 77.09  | KV453034.1 | 351627 | 13-scf00120 | 13 |
| AX-157990319 | 5 | 77.09  | KV453034.1 | 352990 | 13-scf00120 | 13 |
| AX-157990328 | 5 | 77.09  | KV453034.1 | 357581 | 13-scf00120 | 13 |
| AX-157990351 | 5 | 77.09  | KV453034.1 | 372884 | 13-scf00120 | 13 |
| AX-157818523 | 5 | 77.09  | KV453034.1 | 404730 | 13-scf00120 | 13 |
| AX-157771634 | 5 | 77.09  | KV453034.1 | 436290 | 13-scf00120 | 13 |
| AX-157990544 | 5 | 77.09  | KV453034.1 | 574308 | 13-scf00120 | 13 |
| AX-157989908 | 5 | 77.113 | KV453033.1 | 527381 | 13-scf00119 | 13 |
| AX-157818480 | 5 | 77.113 | KV453033.1 | 527899 | 13-scf00119 | 13 |
| AX-157989909 | 5 | 77.113 | KV453033.1 | 528125 | 13-scf00119 | 13 |
| AX-157989935 | 5 | 77.113 | KV453033.1 | 548286 | 13-scf00119 | 13 |
| AX-157990016 | 5 | 77.113 | KV453033.1 | 633415 | 13-scf00119 | 13 |
| AX-157818495 | 5 | 77.113 | KV453033.1 | 640506 | 13-scf00119 | 13 |
| AX-157818496 | 5 | 77.113 | KV453033.1 | 644339 | 13-scf00119 | 13 |
| AX-157990019 | 5 | 77.113 | KV453033.1 | 646587 | 13-scf00119 | 13 |
| AX-157990021 | 5 | 77.113 | KV453033.1 | 647248 | 13-scf00119 | 13 |
| AX-157990027 | 5 | 77.113 | KV453034.1 | 7387   | 13-scf00120 | 13 |
| AX-157990030 | 5 | 77.113 | KV453034.1 | 7494   | 13-scf00120 | 13 |

|              |   |        |            |        |                |    |
|--------------|---|--------|------------|--------|----------------|----|
| AX-157990032 | 5 | 77.113 | KV453034.1 | 12034  | 13-scf00120    | 13 |
| AX-157990053 | 5 | 77.113 | KV453034.1 | 61176  | 13-scf00120    | 13 |
| AX-157990054 | 5 | 77.113 | KV453034.1 | 61509  | 13-scf00120    | 13 |
| AX-157990057 | 5 | 77.113 | KV453034.1 | 64010  | 13-scf00120    | 13 |
| AX-157990059 | 5 | 77.113 | KV453034.1 | 64351  | 13-scf00120    | 13 |
| AX-157990061 | 5 | 77.113 | KV453034.1 | 64836  | 13-scf00120    | 13 |
| AX-157818501 | 5 | 77.113 | KV453034.1 | 66235  | 13-scf00120    | 13 |
| AX-157818502 | 5 | 77.113 | KV453034.1 | 67080  | 13-scf00120    | 13 |
| AX-157990062 | 5 | 77.113 | KV453034.1 | 69059  | 13-scf00120    | 13 |
| AX-157990063 | 5 | 77.113 | KV453034.1 | 69446  | 13-scf00120    | 13 |
| AX-157818515 | 5 | 77.113 | KV453034.1 | 255094 | 13-scf00120    | 13 |
| AX-157990274 | 5 | 77.113 | KV453034.1 | 309981 | 13-scf00120    | 13 |
| AX-157990324 | 5 | 77.113 | KV453034.1 | 355027 | 13-scf00120    | 13 |
| AX-157990335 | 5 | 77.113 | KV453034.1 | 359358 | 13-scf00120    | 13 |
| AX-157990337 | 5 | 77.113 | KV453034.1 | 359594 | 13-scf00120    | 13 |
| AX-157990341 | 5 | 77.113 | KV453034.1 | 363804 | 13-scf00120    | 13 |
| AX-157990468 | 5 | 77.113 | KV453034.1 | 503597 | 13-scf00120    | 13 |
| AX-157990477 | 5 | 77.113 | KV453034.1 | 514921 | 13-scf00120    | 13 |
| AX-157855692 | 5 | 77.113 | KV453035.1 | 316648 | 13-scf00121    | 13 |
| AX-157990821 | 5 | 77.113 | KV453035.1 | 351658 | 13-scf00121    | 13 |
| AX-157694642 | 5 | 77.113 | FI885053.1 | 102    | -ORI212 lctali | UN |
| AX-158390582 | 5 | 77.122 | KV453034.1 | 319949 | 13-scf00120    | 13 |
| AX-157990286 | 5 | 77.151 | KV453034.1 | 327084 | 13-scf00120    | 13 |
| AX-157990416 | 5 | 77.151 | KV453034.1 | 437653 | 13-scf00120    | 13 |
| AX-157990299 | 5 | 77.179 | KV453034.1 | 338456 | 13-scf00120    | 13 |
| AX-157990313 | 5 | 77.207 | KV453034.1 | 350413 | 13-scf00120    | 13 |
| AX-157990031 | 5 | 77.232 | KV453034.1 | 11727  | 13-scf00120    | 13 |
| AX-157990330 | 5 | 77.232 | KV453034.1 | 358152 | 13-scf00120    | 13 |
| AX-157990334 | 5 | 77.238 | KV453034.1 | 358716 | 13-scf00120    | 13 |
| AX-157990338 | 5 | 77.258 | KV453034.1 | 360243 | 13-scf00120    | 13 |
| AX-157989866 | 5 | 77.317 | KV453033.1 | 461929 | 13-scf00119    | 13 |
| AX-157758308 | 5 | 77.317 | KV453033.1 | 481601 | 13-scf00119    | 13 |
| AX-157990082 | 5 | 77.317 | KV453034.1 | 91693  | 13-scf00120    | 13 |
| AX-157990282 | 5 | 77.317 | KV453034.1 | 320393 | 13-scf00120    | 13 |
| AX-157990308 | 5 | 77.317 | KV453034.1 | 345150 | 13-scf00120    | 13 |
| AX-157990347 | 5 | 77.317 | KV453034.1 | 366240 | 13-scf00120    | 13 |
| AX-157818522 | 5 | 77.317 | KV453034.1 | 366514 | 13-scf00120    | 13 |
| AX-157990439 | 5 | 77.317 | KV453034.1 | 464505 | 13-scf00120    | 13 |
| AX-157990455 | 5 | 77.317 | KV453034.1 | 482391 | 13-scf00120    | 13 |
| AX-157884522 | 5 | 77.317 | KV453034.1 | 794212 | 13-scf00120    | 13 |
| AX-158375855 | 5 | 77.317 | KV453039.1 | 365196 | 13-scf00569    | 13 |
| AX-158375888 | 5 | 77.317 | KV453039.1 | 399238 | 13-scf00569    | 13 |
| AX-157695696 | 5 | 77.317 | KV453039.1 | 430650 | 13-scf00569    | 13 |
| AX-157990350 | 5 | 77.366 | KV453034.1 | 371575 | 13-scf00120    | 13 |
| AX-157990358 | 5 | 77.366 | KV453034.1 | 375202 | 13-scf00120    | 13 |
| AX-157990374 | 5 | 77.366 | KV453034.1 | 388023 | 13-scf00120    | 13 |
| AX-157990363 | 5 | 77.426 | KV453034.1 | 381803 | 13-scf00120    | 13 |
| AX-157990369 | 5 | 77.426 | KV453034.1 | 384269 | 13-scf00120    | 13 |
| AX-157990370 | 5 | 77.426 | KV453034.1 | 384840 | 13-scf00120    | 13 |
| AX-157990371 | 5 | 77.426 | KV453034.1 | 385269 | 13-scf00120    | 13 |
| AX-157990372 | 5 | 77.426 | KV453034.1 | 386139 | 13-scf00120    | 13 |

|              |   |        |            |        |             |    |
|--------------|---|--------|------------|--------|-------------|----|
| AX-157740905 | 5 | 77.426 | KV453034.1 | 389504 | 13-scf00120 | 13 |
| AX-157753853 | 5 | 77.426 | KV453034.1 | 409818 | 13-scf00120 | 13 |
| AX-157990571 | 5 | 77.426 | KV453034.1 | 588585 | 13-scf00120 | 13 |
| AX-157990610 | 5 | 77.426 | KV453034.1 | 628092 | 13-scf00120 | 13 |
| AX-157990611 | 5 | 77.426 | KV453034.1 | 628219 | 13-scf00120 | 13 |
| AX-157889300 | 5 | 77.426 | KV453039.1 | 490477 | 13-scf00569 | 13 |
| AX-157720168 | 5 | 77.555 | KV453034.1 | 397772 | 13-scf00120 | 13 |
| AX-157754778 | 5 | 77.595 | KV453034.1 | 282801 | 13-scf00120 | 13 |
| AX-157990293 | 5 | 77.595 | KV453034.1 | 333293 | 13-scf00120 | 13 |
| AX-157704143 | 5 | 77.595 | KV453034.1 | 337822 | 13-scf00120 | 13 |
| AX-157990312 | 5 | 77.595 | KV453034.1 | 348176 | 13-scf00120 | 13 |
| AX-157990366 | 5 | 77.595 | KV453034.1 | 382579 | 13-scf00120 | 13 |
| AX-157855683 | 5 | 77.595 | KV453034.1 | 407186 | 13-scf00120 | 13 |
| AX-157990385 | 5 | 77.595 | KV453034.1 | 409508 | 13-scf00120 | 13 |
| AX-157990387 | 5 | 77.595 | KV453034.1 | 411426 | 13-scf00120 | 13 |
| AX-157747858 | 5 | 77.595 | KV453034.1 | 413250 | 13-scf00120 | 13 |
| AX-157990394 | 5 | 77.595 | KV453034.1 | 417034 | 13-scf00120 | 13 |
| AX-157990413 | 5 | 77.595 | KV453034.1 | 431837 | 13-scf00120 | 13 |
| AX-157818525 | 5 | 77.595 | KV453034.1 | 433503 | 13-scf00120 | 13 |
| AX-157990414 | 5 | 77.595 | KV453034.1 | 435070 | 13-scf00120 | 13 |
| AX-158390584 | 5 | 77.595 | KV453034.1 | 454280 | 13-scf00120 | 13 |
| AX-157990433 | 5 | 77.595 | KV453034.1 | 454892 | 13-scf00120 | 13 |
| AX-157747922 | 5 | 77.595 | KV453034.1 | 461346 | 13-scf00120 | 13 |
| AX-157990437 | 5 | 77.595 | KV453034.1 | 462438 | 13-scf00120 | 13 |
| AX-157990440 | 5 | 77.595 | KV453034.1 | 466572 | 13-scf00120 | 13 |
| AX-157990446 | 5 | 77.595 | KV453034.1 | 467975 | 13-scf00120 | 13 |
| AX-157741488 | 5 | 77.595 | KV453034.1 | 483459 | 13-scf00120 | 13 |
| AX-157990466 | 5 | 77.595 | KV453034.1 | 502790 | 13-scf00120 | 13 |
| AX-157990478 | 5 | 77.595 | KV453034.1 | 515327 | 13-scf00120 | 13 |
| AX-157990479 | 5 | 77.595 | KV453034.1 | 516553 | 13-scf00120 | 13 |
| AX-157990481 | 5 | 77.595 | KV453034.1 | 517963 | 13-scf00120 | 13 |
| AX-157990482 | 5 | 77.595 | KV453034.1 | 518766 | 13-scf00120 | 13 |
| AX-157990486 | 5 | 77.595 | KV453034.1 | 523330 | 13-scf00120 | 13 |
| AX-157990487 | 5 | 77.595 | KV453034.1 | 523712 | 13-scf00120 | 13 |
| AX-157990488 | 5 | 77.595 | KV453034.1 | 525011 | 13-scf00120 | 13 |
| AX-157990489 | 5 | 77.595 | KV453034.1 | 526091 | 13-scf00120 | 13 |
| AX-157990492 | 5 | 77.595 | KV453034.1 | 529698 | 13-scf00120 | 13 |
| AX-157990496 | 5 | 77.595 | KV453034.1 | 531003 | 13-scf00120 | 13 |
| AX-157990499 | 5 | 77.595 | KV453034.1 | 532855 | 13-scf00120 | 13 |
| AX-157990500 | 5 | 77.595 | KV453034.1 | 533259 | 13-scf00120 | 13 |
| AX-157990502 | 5 | 77.595 | KV453034.1 | 533899 | 13-scf00120 | 13 |
| AX-157990503 | 5 | 77.595 | KV453034.1 | 534768 | 13-scf00120 | 13 |
| AX-157990512 | 5 | 77.595 | KV453034.1 | 543538 | 13-scf00120 | 13 |
| AX-157990526 | 5 | 77.595 | KV453034.1 | 554331 | 13-scf00120 | 13 |
| AX-157990527 | 5 | 77.595 | KV453034.1 | 554914 | 13-scf00120 | 13 |
| AX-157855686 | 5 | 77.595 | KV453034.1 | 556753 | 13-scf00120 | 13 |
| AX-157990530 | 5 | 77.595 | KV453034.1 | 558276 | 13-scf00120 | 13 |
| AX-157749253 | 5 | 77.595 | KV453034.1 | 575362 | 13-scf00120 | 13 |
| AX-157990546 | 5 | 77.595 | KV453034.1 | 576735 | 13-scf00120 | 13 |
| AX-157990548 | 5 | 77.595 | KV453034.1 | 578310 | 13-scf00120 | 13 |
| AX-157990553 | 5 | 77.595 | KV453034.1 | 580440 | 13-scf00120 | 13 |

|              |   |        |            |        |             |    |
|--------------|---|--------|------------|--------|-------------|----|
| AX-157721058 | 5 | 77.595 | KV453034.1 | 581002 | 13-scf00120 | 13 |
| AX-157990554 | 5 | 77.595 | KV453034.1 | 581393 | 13-scf00120 | 13 |
| AX-157990555 | 5 | 77.595 | KV453034.1 | 582022 | 13-scf00120 | 13 |
| AX-157990556 | 5 | 77.595 | KV453034.1 | 582744 | 13-scf00120 | 13 |
| AX-157990561 | 5 | 77.595 | KV453034.1 | 585381 | 13-scf00120 | 13 |
| AX-157990562 | 5 | 77.595 | KV453034.1 | 585890 | 13-scf00120 | 13 |
| AX-157990564 | 5 | 77.595 | KV453034.1 | 586846 | 13-scf00120 | 13 |
| AX-157990565 | 5 | 77.595 | KV453034.1 | 587393 | 13-scf00120 | 13 |
| AX-157818531 | 5 | 77.595 | KV453034.1 | 587571 | 13-scf00120 | 13 |
| AX-157990567 | 5 | 77.595 | KV453034.1 | 587726 | 13-scf00120 | 13 |
| AX-157990576 | 5 | 77.595 | KV453034.1 | 596726 | 13-scf00120 | 13 |
| AX-157990582 | 5 | 77.595 | KV453034.1 | 607511 | 13-scf00120 | 13 |
| AX-157990597 | 5 | 77.595 | KV453034.1 | 618533 | 13-scf00120 | 13 |
| AX-158407201 | 5 | 77.595 | KV453034.1 | 619921 | 13-scf00120 | 13 |
| AX-157990623 | 5 | 77.595 | KV453034.1 | 639681 | 13-scf00120 | 13 |
| AX-157884523 | 5 | 77.595 | KV453034.1 | 798490 | 13-scf00120 | 13 |
| AX-157727262 | 5 | 77.595 | KV453035.1 | 371500 | 13-scf00121 | 13 |
| AX-157990935 | 5 | 77.595 | KV453035.1 | 474222 | 13-scf00121 | 13 |
| AX-157990936 | 5 | 77.595 | KV453035.1 | 475205 | 13-scf00121 | 13 |
| AX-157818575 | 5 | 77.595 | KV453035.1 | 476420 | 13-scf00121 | 13 |
| AX-157990938 | 5 | 77.595 | KV453035.1 | 478269 | 13-scf00121 | 13 |
| AX-157990939 | 5 | 77.595 | KV453035.1 | 479280 | 13-scf00121 | 13 |
| AX-157990940 | 5 | 77.595 | KV453035.1 | 479518 | 13-scf00121 | 13 |
| AX-157990941 | 5 | 77.595 | KV453035.1 | 480397 | 13-scf00121 | 13 |
| AX-157990942 | 5 | 77.595 | KV453035.1 | 481223 | 13-scf00121 | 13 |
| AX-157990943 | 5 | 77.595 | KV453035.1 | 482771 | 13-scf00121 | 13 |
| AX-157990944 | 5 | 77.595 | KV453035.1 | 483389 | 13-scf00121 | 13 |
| AX-157990945 | 5 | 77.595 | KV453035.1 | 483742 | 13-scf00121 | 13 |
| AX-157990946 | 5 | 77.595 | KV453035.1 | 484004 | 13-scf00121 | 13 |
| AX-157990947 | 5 | 77.595 | KV453035.1 | 484426 | 13-scf00121 | 13 |
| AX-157990948 | 5 | 77.595 | KV453035.1 | 485259 | 13-scf00121 | 13 |
| AX-157869813 | 5 | 77.595 | KV453035.1 | 494813 | 13-scf00121 | 13 |
| AX-157990951 | 5 | 77.595 | KV453035.1 | 495919 | 13-scf00121 | 13 |
| AX-157869814 | 5 | 77.595 | KV453035.1 | 496863 | 13-scf00121 | 13 |
| AX-158390590 | 5 | 77.595 | KV453035.1 | 499257 | 13-scf00121 | 13 |
| AX-157990965 | 5 | 77.595 | KV453035.1 | 516121 | 13-scf00121 | 13 |
| AX-157990966 | 5 | 77.595 | KV453035.1 | 517325 | 13-scf00121 | 13 |
| AX-157990968 | 5 | 77.595 | KV453035.1 | 518967 | 13-scf00121 | 13 |
| AX-157990971 | 5 | 77.595 | KV453035.1 | 522563 | 13-scf00121 | 13 |
| AX-157990972 | 5 | 77.595 | KV453035.1 | 523168 | 13-scf00121 | 13 |
| AX-157990978 | 5 | 77.595 | KV453035.1 | 528146 | 13-scf00121 | 13 |
| AX-157990982 | 5 | 77.595 | KV453035.1 | 531468 | 13-scf00121 | 13 |
| AX-157990987 | 5 | 77.595 | KV453035.1 | 533564 | 13-scf00121 | 13 |
| AX-157990993 | 5 | 77.595 | KV453035.1 | 538451 | 13-scf00121 | 13 |
| AX-157990997 | 5 | 77.595 | KV453035.1 | 547316 | 13-scf00121 | 13 |
| AX-157818590 | 5 | 77.595 | KV453035.1 | 547792 | 13-scf00121 | 13 |
| AX-157990999 | 5 | 77.595 | KV453035.1 | 548647 | 13-scf00121 | 13 |
| AX-157991001 | 5 | 77.595 | KV453035.1 | 551233 | 13-scf00121 | 13 |
| AX-157991007 | 5 | 77.595 | KV453035.1 | 555519 | 13-scf00121 | 13 |
| AX-157991008 | 5 | 77.595 | KV453035.1 | 555954 | 13-scf00121 | 13 |
| AX-157991009 | 5 | 77.595 | KV453035.1 | 556449 | 13-scf00121 | 13 |

|              |   |        |            |        |               |    |
|--------------|---|--------|------------|--------|---------------|----|
| AX-157991011 | 5 | 77.595 | KV453035.1 | 557115 | 13-scf00121   | 13 |
| AX-157991014 | 5 | 77.595 | KV453035.1 | 561742 | 13-scf00121   | 13 |
| AX-157991027 | 5 | 77.595 | KV453035.1 | 586531 | 13-scf00121   | 13 |
| AX-157991030 | 5 | 77.595 | KV453035.1 | 588495 | 13-scf00121   | 13 |
| AX-157991031 | 5 | 77.595 | KV453035.1 | 589128 | 13-scf00121   | 13 |
| AX-157991044 | 5 | 77.595 | KV453035.1 | 624110 | 13-scf00121   | 13 |
| AX-157818594 | 5 | 77.595 | KV453035.1 | 655793 | 13-scf00121   | 13 |
| AX-157855695 | 5 | 77.595 | KV453035.1 | 758083 | 13-scf00121   | 13 |
| AX-157991258 | 5 | 77.595 | KV453035.1 | 868363 | 13-scf00121   | 13 |
| AX-157991500 | 5 | 77.595 | KV453038.1 | 172022 | 13-scf00122   | 13 |
| AX-157818644 | 5 | 77.595 | KV453038.1 | 228554 | 13-scf00122   | 13 |
| AX-157991617 | 5 | 77.595 | KV453038.1 | 268513 | 13-scf00122   | 13 |
| AX-157991676 | 5 | 77.595 | KV453038.1 | 362203 | 13-scf00122   | 13 |
| AX-157991783 | 5 | 77.595 | KV453040.1 | 51679  | 13-scf00123   | 13 |
| AX-157874159 | 5 | 77.595 | KV453039.1 | 140292 | 13-scf00569   | 13 |
| AX-157990578 | 5 | 77.596 | KV453034.1 | 605633 | 13-scf00120   | 13 |
| AX-157989651 | 5 | 77.931 | KV453033.1 | 260144 | 13-scf00119   | 13 |
| AX-157990107 | 5 | 77.931 | KV453034.1 | 115521 | 13-scf00120   | 13 |
| AX-157990108 | 5 | 77.931 | KV453034.1 | 115917 | 13-scf00120   | 13 |
| AX-157990110 | 5 | 77.931 | KV453034.1 | 116536 | 13-scf00120   | 13 |
| AX-157990112 | 5 | 77.931 | KV453034.1 | 117519 | 13-scf00120   | 13 |
| AX-157990113 | 5 | 77.931 | KV453034.1 | 118043 | 13-scf00120   | 13 |
| AX-157990241 | 5 | 77.931 | KV453034.1 | 275819 | 13-scf00120   | 13 |
| AX-157990244 | 5 | 77.931 | KV453034.1 | 277043 | 13-scf00120   | 13 |
| AX-157990245 | 5 | 77.931 | KV453034.1 | 277553 | 13-scf00120   | 13 |
| AX-157990249 | 5 | 77.931 | KV453034.1 | 281920 | 13-scf00120   | 13 |
| AX-158405556 | 5 | 77.931 | KV453034.1 | 287818 | 13-scf00120   | 13 |
| AX-157990260 | 5 | 77.931 | KV453034.1 | 293189 | 13-scf00120   | 13 |
| AX-157990266 | 5 | 77.931 | KV453034.1 | 301571 | 13-scf00120   | 13 |
| AX-157739437 | 5 | 77.931 | KV453034.1 | 400638 | 13-scf00120   | 13 |
| AX-157990449 | 5 | 77.931 | KV453034.1 | 469985 | 13-scf00120   | 13 |
| AX-157990465 | 5 | 77.931 | KV453034.1 | 501883 | 13-scf00120   | 13 |
| AX-157990497 | 5 | 77.931 | KV453034.1 | 531607 | 13-scf00120   | 13 |
| AX-157990522 | 5 | 77.931 | KV453034.1 | 552133 | 13-scf00120   | 13 |
| AX-157990592 | 5 | 77.931 | KV453034.1 | 615519 | 13-scf00120   | 13 |
| AX-157990593 | 5 | 77.931 | KV453034.1 | 615951 | 13-scf00120   | 13 |
| AX-157990596 | 5 | 77.931 | KV453034.1 | 617920 | 13-scf00120   | 13 |
| AX-157990609 | 5 | 77.931 | KV453034.1 | 626064 | 13-scf00120   | 13 |
| AX-157990616 | 5 | 77.931 | KV453034.1 | 634120 | 13-scf00120   | 13 |
| AX-157739814 | 5 | 77.931 | KV453034.1 | 634176 | 13-scf00120   | 13 |
| AX-157753855 | 5 | 77.931 | KV453034.1 | 635328 | 13-scf00120   | 13 |
| AX-157990617 | 5 | 77.931 | KV453034.1 | 635872 | 13-scf00120   | 13 |
| AX-157990620 | 5 | 77.931 | KV453034.1 | 636289 | 13-scf00120   | 13 |
| AX-157818537 | 5 | 77.931 | KV453034.1 | 641904 | 13-scf00120   | 13 |
| AX-157990625 | 5 | 77.931 | KV453034.1 | 646052 | 13-scf00120   | 13 |
| AX-157990657 | 5 | 77.931 | KV453034.1 | 704702 | 13-scf00120   | 13 |
| AX-157990860 | 5 | 77.931 | KV453035.1 | 383109 | 13-scf00121   | 13 |
| AX-157818595 | 5 | 77.931 | KV453035.1 | 666695 | 13-scf00121   | 13 |
| AX-157695436 | 5 | 77.931 | FI870642.1 | 100    | ORI212 Ictalu | UN |
| AX-157990026 | 5 | 78.099 | KV453033.1 | 651766 | 13-scf00119   | 13 |
| AX-157818497 | 5 | 78.099 | KV453034.1 | 7725   | 13-scf00120   | 13 |

|              |   |        |            |        |             |    |
|--------------|---|--------|------------|--------|-------------|----|
| AX-157818498 | 5 | 78.099 | KV453034.1 | 12569  | 13-scf00120 | 13 |
| AX-157990042 | 5 | 78.099 | KV453034.1 | 38905  | 13-scf00120 | 13 |
| AX-157990069 | 5 | 78.099 | KV453034.1 | 73803  | 13-scf00120 | 13 |
| AX-157990136 | 5 | 78.099 | KV453034.1 | 148043 | 13-scf00120 | 13 |
| AX-157990175 | 5 | 78.099 | KV453034.1 | 189745 | 13-scf00120 | 13 |
| AX-157990197 | 5 | 78.099 | KV453034.1 | 230588 | 13-scf00120 | 13 |
| AX-157990203 | 5 | 78.099 | KV453034.1 | 237799 | 13-scf00120 | 13 |
| AX-157990204 | 5 | 78.099 | KV453034.1 | 243459 | 13-scf00120 | 13 |
| AX-157990221 | 5 | 78.099 | KV453034.1 | 258237 | 13-scf00120 | 13 |
| AX-157990269 | 5 | 78.099 | KV453034.1 | 303687 | 13-scf00120 | 13 |
| AX-157990302 | 5 | 78.099 | KV453034.1 | 339418 | 13-scf00120 | 13 |
| AX-157990353 | 5 | 78.099 | KV453034.1 | 373154 | 13-scf00120 | 13 |
| AX-157990407 | 5 | 78.099 | KV453034.1 | 424007 | 13-scf00120 | 13 |
| AX-157990531 | 5 | 78.099 | KV453034.1 | 558665 | 13-scf00120 | 13 |
| AX-157748680 | 5 | 78.099 | KV453034.1 | 559000 | 13-scf00120 | 13 |
| AX-157990594 | 5 | 78.099 | KV453034.1 | 616455 | 13-scf00120 | 13 |
| AX-157990646 | 5 | 78.099 | KV453034.1 | 695445 | 13-scf00120 | 13 |
| AX-157818540 | 5 | 78.099 | KV453034.1 | 696596 | 13-scf00120 | 13 |
| AX-157990650 | 5 | 78.099 | KV453034.1 | 697308 | 13-scf00120 | 13 |
| AX-157990654 | 5 | 78.099 | KV453034.1 | 699567 | 13-scf00120 | 13 |
| AX-157990660 | 5 | 78.099 | KV453034.1 | 712436 | 13-scf00120 | 13 |
| AX-157865098 | 5 | 78.099 | KV453034.1 | 715783 | 13-scf00120 | 13 |
| AX-157990668 | 5 | 78.099 | KV453034.1 | 716000 | 13-scf00120 | 13 |
| AX-157990669 | 5 | 78.099 | KV453034.1 | 716397 | 13-scf00120 | 13 |
| AX-157990670 | 5 | 78.099 | KV453034.1 | 716761 | 13-scf00120 | 13 |
| AX-157775815 | 5 | 78.099 | KV453034.1 | 717129 | 13-scf00120 | 13 |
| AX-157990673 | 5 | 78.099 | KV453034.1 | 718155 | 13-scf00120 | 13 |
| AX-157721205 | 5 | 78.099 | KV453034.1 | 718572 | 13-scf00120 | 13 |
| AX-157990676 | 5 | 78.099 | KV453034.1 | 720673 | 13-scf00120 | 13 |
| AX-157990686 | 5 | 78.099 | KV453034.1 | 727450 | 13-scf00120 | 13 |
| AX-157990697 | 5 | 78.099 | KV453034.1 | 764466 | 13-scf00120 | 13 |
| AX-157990722 | 5 | 78.099 | KV453035.1 | 63588  | 13-scf00121 | 13 |
| AX-158407212 | 5 | 78.099 | KV453035.1 | 156592 | 13-scf00121 | 13 |
| AX-157990765 | 5 | 78.099 | KV453035.1 | 276635 | 13-scf00121 | 13 |
| AX-157990769 | 5 | 78.099 | KV453035.1 | 291734 | 13-scf00121 | 13 |
| AX-157990776 | 5 | 78.099 | KV453035.1 | 307429 | 13-scf00121 | 13 |
| AX-157990778 | 5 | 78.099 | KV453035.1 | 310385 | 13-scf00121 | 13 |
| AX-157855691 | 5 | 78.099 | KV453035.1 | 313847 | 13-scf00121 | 13 |
| AX-157855693 | 5 | 78.099 | KV453035.1 | 319166 | 13-scf00121 | 13 |
| AX-157990791 | 5 | 78.099 | KV453035.1 | 329151 | 13-scf00121 | 13 |
| AX-157990792 | 5 | 78.099 | KV453035.1 | 331050 | 13-scf00121 | 13 |
| AX-157818555 | 5 | 78.099 | KV453035.1 | 333736 | 13-scf00121 | 13 |
| AX-157990800 | 5 | 78.099 | KV453035.1 | 339455 | 13-scf00121 | 13 |
| AX-157818558 | 5 | 78.099 | KV453035.1 | 340003 | 13-scf00121 | 13 |
| AX-157716277 | 5 | 78.099 | KV453035.1 | 340387 | 13-scf00121 | 13 |
| AX-157990802 | 5 | 78.099 | KV453035.1 | 340964 | 13-scf00121 | 13 |
| AX-157990804 | 5 | 78.099 | KV453035.1 | 341301 | 13-scf00121 | 13 |
| AX-157990805 | 5 | 78.099 | KV453035.1 | 341589 | 13-scf00121 | 13 |
| AX-157990816 | 5 | 78.099 | KV453035.1 | 349630 | 13-scf00121 | 13 |
| AX-157990826 | 5 | 78.099 | KV453035.1 | 354114 | 13-scf00121 | 13 |
| AX-157723139 | 5 | 78.099 | KV453035.1 | 363105 | 13-scf00121 | 13 |



|              |   |        |            |        |             |    |
|--------------|---|--------|------------|--------|-------------|----|
| AX-157990834 | 5 | 78.099 | KV453035.1 | 366348 | 13-scf00121 | 13 |
| AX-157747070 | 5 | 78.099 | KV453035.1 | 371973 | 13-scf00121 | 13 |
| AX-157818562 | 5 | 78.099 | KV453035.1 | 372121 | 13-scf00121 | 13 |
| AX-157990845 | 5 | 78.099 | KV453035.1 | 376487 | 13-scf00121 | 13 |
| AX-157990848 | 5 | 78.099 | KV453035.1 | 377272 | 13-scf00121 | 13 |
| AX-157990850 | 5 | 78.099 | KV453035.1 | 377771 | 13-scf00121 | 13 |
| AX-157990856 | 5 | 78.099 | KV453035.1 | 380574 | 13-scf00121 | 13 |
| AX-157990857 | 5 | 78.099 | KV453035.1 | 380976 | 13-scf00121 | 13 |
| AX-157990859 | 5 | 78.099 | KV453035.1 | 381744 | 13-scf00121 | 13 |
| AX-157990865 | 5 | 78.099 | KV453035.1 | 392897 | 13-scf00121 | 13 |
| AX-157990866 | 5 | 78.099 | KV453035.1 | 394732 | 13-scf00121 | 13 |
| AX-157990867 | 5 | 78.099 | KV453035.1 | 397001 | 13-scf00121 | 13 |
| AX-157990868 | 5 | 78.099 | KV453035.1 | 397651 | 13-scf00121 | 13 |
| AX-157990870 | 5 | 78.099 | KV453035.1 | 397913 | 13-scf00121 | 13 |
| AX-157990871 | 5 | 78.099 | KV453035.1 | 399866 | 13-scf00121 | 13 |
| AX-157990873 | 5 | 78.099 | KV453035.1 | 400555 | 13-scf00121 | 13 |
| AX-157990908 | 5 | 78.099 | KV453035.1 | 446450 | 13-scf00121 | 13 |
| AX-157990914 | 5 | 78.099 | KV453035.1 | 452411 | 13-scf00121 | 13 |
| AX-157990915 | 5 | 78.099 | KV453035.1 | 453060 | 13-scf00121 | 13 |
| AX-157757613 | 5 | 78.099 | KV453035.1 | 453528 | 13-scf00121 | 13 |
| AX-157990918 | 5 | 78.099 | KV453035.1 | 454905 | 13-scf00121 | 13 |
| AX-157990920 | 5 | 78.099 | KV453035.1 | 455281 | 13-scf00121 | 13 |
| AX-157818572 | 5 | 78.099 | KV453035.1 | 456004 | 13-scf00121 | 13 |
| AX-157990924 | 5 | 78.099 | KV453035.1 | 466026 | 13-scf00121 | 13 |
| AX-157990925 | 5 | 78.099 | KV453035.1 | 466475 | 13-scf00121 | 13 |
| AX-157990926 | 5 | 78.099 | KV453035.1 | 466834 | 13-scf00121 | 13 |
| AX-157990928 | 5 | 78.099 | KV453035.1 | 468104 | 13-scf00121 | 13 |
| AX-157990929 | 5 | 78.099 | KV453035.1 | 468748 | 13-scf00121 | 13 |
| AX-157990931 | 5 | 78.099 | KV453035.1 | 470137 | 13-scf00121 | 13 |
| AX-157990932 | 5 | 78.099 | KV453035.1 | 470806 | 13-scf00121 | 13 |
| AX-157990933 | 5 | 78.099 | KV453035.1 | 471135 | 13-scf00121 | 13 |
| AX-157990934 | 5 | 78.099 | KV453035.1 | 473004 | 13-scf00121 | 13 |
| AX-157990937 | 5 | 78.099 | KV453035.1 | 476507 | 13-scf00121 | 13 |
| AX-157990949 | 5 | 78.099 | KV453035.1 | 487578 | 13-scf00121 | 13 |
| AX-157990952 | 5 | 78.099 | KV453035.1 | 497298 | 13-scf00121 | 13 |
| AX-157869815 | 5 | 78.099 | KV453035.1 | 503038 | 13-scf00121 | 13 |
| AX-157990958 | 5 | 78.099 | KV453035.1 | 504009 | 13-scf00121 | 13 |
| AX-157818577 | 5 | 78.099 | KV453035.1 | 507335 | 13-scf00121 | 13 |
| AX-157818578 | 5 | 78.099 | KV453035.1 | 507587 | 13-scf00121 | 13 |
| AX-157990961 | 5 | 78.099 | KV453035.1 | 509451 | 13-scf00121 | 13 |
| AX-157990963 | 5 | 78.099 | KV453035.1 | 510725 | 13-scf00121 | 13 |
| AX-157818581 | 5 | 78.099 | KV453035.1 | 515028 | 13-scf00121 | 13 |
| AX-157990964 | 5 | 78.099 | KV453035.1 | 515163 | 13-scf00121 | 13 |
| AX-157818583 | 5 | 78.099 | KV453035.1 | 521633 | 13-scf00121 | 13 |
| AX-157990990 | 5 | 78.099 | KV453035.1 | 537297 | 13-scf00121 | 13 |
| AX-157990991 | 5 | 78.099 | KV453035.1 | 538141 | 13-scf00121 | 13 |
| AX-157990994 | 5 | 78.099 | KV453035.1 | 539464 | 13-scf00121 | 13 |
| AX-158407221 | 5 | 78.099 | KV453035.1 | 562537 | 13-scf00121 | 13 |
| AX-157991016 | 5 | 78.099 | KV453035.1 | 562753 | 13-scf00121 | 13 |
| AX-157991021 | 5 | 78.099 | KV453035.1 | 577018 | 13-scf00121 | 13 |
| AX-158390591 | 5 | 78.099 | KV453035.1 | 602341 | 13-scf00121 | 13 |

|              |   |        |            |        |             |    |
|--------------|---|--------|------------|--------|-------------|----|
| AX-157991040 | 5 | 78.099 | KV453035.1 | 616395 | 13-scf00121 | 13 |
| AX-157991041 | 5 | 78.099 | KV453035.1 | 621962 | 13-scf00121 | 13 |
| AX-157991045 | 5 | 78.099 | KV453035.1 | 628133 | 13-scf00121 | 13 |
| AX-157991048 | 5 | 78.099 | KV453035.1 | 656841 | 13-scf00121 | 13 |
| AX-157991051 | 5 | 78.099 | KV453035.1 | 659718 | 13-scf00121 | 13 |
| AX-157991100 | 5 | 78.099 | KV453035.1 | 704849 | 13-scf00121 | 13 |
| AX-157991101 | 5 | 78.099 | KV453035.1 | 705584 | 13-scf00121 | 13 |
| AX-157991150 | 5 | 78.099 | KV453035.1 | 749227 | 13-scf00121 | 13 |
| AX-157749866 | 5 | 78.099 | KV453035.1 | 766443 | 13-scf00121 | 13 |
| AX-157750454 | 5 | 78.099 | KV453035.1 | 767365 | 13-scf00121 | 13 |
| AX-158390593 | 5 | 78.099 | KV453035.1 | 769886 | 13-scf00121 | 13 |
| AX-157740275 | 5 | 78.099 | KV453035.1 | 778424 | 13-scf00121 | 13 |
| AX-157991188 | 5 | 78.099 | KV453035.1 | 782856 | 13-scf00121 | 13 |
| AX-157991192 | 5 | 78.099 | KV453035.1 | 785441 | 13-scf00121 | 13 |
| AX-157818606 | 5 | 78.099 | KV453035.1 | 788453 | 13-scf00121 | 13 |
| AX-157991195 | 5 | 78.099 | KV453035.1 | 789315 | 13-scf00121 | 13 |
| AX-157818607 | 5 | 78.099 | KV453035.1 | 790104 | 13-scf00121 | 13 |
| AX-158390594 | 5 | 78.099 | KV453035.1 | 791225 | 13-scf00121 | 13 |
| AX-157991203 | 5 | 78.099 | KV453035.1 | 806666 | 13-scf00121 | 13 |
| AX-157991216 | 5 | 78.099 | KV453035.1 | 814773 | 13-scf00121 | 13 |
| AX-157991332 | 5 | 78.099 | KV453035.1 | 919962 | 13-scf00121 | 13 |
| AX-157991342 | 5 | 78.099 | KV453035.1 | 922528 | 13-scf00121 | 13 |
| AX-157991360 | 5 | 78.099 | KV453035.1 | 933718 | 13-scf00121 | 13 |
| AX-157991380 | 5 | 78.099 | KV453038.1 | 8013   | 13-scf00122 | 13 |
| AX-157818632 | 5 | 78.099 | KV453038.1 | 124294 | 13-scf00122 | 13 |
| AX-157991564 | 5 | 78.099 | KV453038.1 | 208672 | 13-scf00122 | 13 |
| AX-157991585 | 5 | 78.099 | KV453038.1 | 225881 | 13-scf00122 | 13 |
| AX-157745089 | 5 | 78.099 | KV453038.1 | 280042 | 13-scf00122 | 13 |
| AX-157991645 | 5 | 78.099 | KV453038.1 | 300244 | 13-scf00122 | 13 |
| AX-157739546 | 5 | 78.099 | KV453038.1 | 312497 | 13-scf00122 | 13 |
| AX-157991665 | 5 | 78.099 | KV453038.1 | 336990 | 13-scf00122 | 13 |
| AX-157991698 | 5 | 78.099 | KV453038.1 | 386605 | 13-scf00122 | 13 |
| AX-157991700 | 5 | 78.099 | KV453038.1 | 389182 | 13-scf00122 | 13 |
| AX-157991856 | 5 | 78.099 | KV453040.1 | 122204 | 13-scf00123 | 13 |
| AX-157991955 | 5 | 78.099 | KV453040.1 | 244672 | 13-scf00123 | 13 |
| AX-158375647 | 5 | 78.099 | KV453039.1 | 36018  | 13-scf00569 | 13 |
| AX-158375651 | 5 | 78.099 | KV453039.1 | 40038  | 13-scf00569 | 13 |
| AX-158375659 | 5 | 78.099 | KV453039.1 | 57794  | 13-scf00569 | 13 |
| AX-158375660 | 5 | 78.099 | KV453039.1 | 59704  | 13-scf00569 | 13 |
| AX-158375668 | 5 | 78.099 | KV453039.1 | 66841  | 13-scf00569 | 13 |
| AX-158375672 | 5 | 78.099 | KV453039.1 | 74078  | 13-scf00569 | 13 |
| AX-158375678 | 5 | 78.099 | KV453039.1 | 82687  | 13-scf00569 | 13 |
| AX-158375683 | 5 | 78.099 | KV453039.1 | 96943  | 13-scf00569 | 13 |
| AX-158375689 | 5 | 78.099 | KV453039.1 | 106702 | 13-scf00569 | 13 |
| AX-158375694 | 5 | 78.099 | KV453039.1 | 111113 | 13-scf00569 | 13 |
| AX-157727884 | 5 | 78.099 | KV453039.1 | 117081 | 13-scf00569 | 13 |
| AX-157853250 | 5 | 78.099 | KV453039.1 | 117130 | 13-scf00569 | 13 |
| AX-158375707 | 5 | 78.099 | KV453039.1 | 125509 | 13-scf00569 | 13 |
| AX-158375721 | 5 | 78.099 | KV453039.1 | 146352 | 13-scf00569 | 13 |
| AX-157715729 | 5 | 78.099 | KV453039.1 | 169557 | 13-scf00569 | 13 |
| AX-158375750 | 5 | 78.099 | KV453039.1 | 192091 | 13-scf00569 | 13 |

|              |   |        |            |        |             |    |
|--------------|---|--------|------------|--------|-------------|----|
| AX-158375754 | 5 | 78.099 | KV453039.1 | 201400 | 13-scf00569 | 13 |
| AX-158375758 | 5 | 78.099 | KV453039.1 | 206913 | 13-scf00569 | 13 |
| AX-158375810 | 5 | 78.099 | KV453039.1 | 287206 | 13-scf00569 | 13 |
| AX-158375813 | 5 | 78.099 | KV453039.1 | 293586 | 13-scf00569 | 13 |
| AX-158375816 | 5 | 78.099 | KV453039.1 | 300626 | 13-scf00569 | 13 |
| AX-158413783 | 5 | 78.099 | KV453039.1 | 379163 | 13-scf00569 | 13 |
| AX-158375928 | 5 | 78.099 | KV453039.1 | 439407 | 13-scf00569 | 13 |
| AX-158375965 | 5 | 78.099 | KV453039.1 | 494454 | 13-scf00569 | 13 |
| AX-157686276 | 5 | 78.099 | KV453036.1 | 47049  | 13-scf00681 | 13 |
| AX-157686279 | 5 | 78.099 | KV453036.1 | 52512  | 13-scf00681 | 13 |
| AX-157989570 | 5 | 78.221 | KV453033.1 | 171821 | 13-scf00119 | 13 |
| AX-157770668 | 5 | 78.221 | KV453034.1 | 141976 | 13-scf00120 | 13 |
| AX-158407190 | 5 | 78.221 | KV453034.1 | 288466 | 13-scf00120 | 13 |
| AX-157990375 | 5 | 78.221 | KV453034.1 | 390211 | 13-scf00120 | 13 |
| AX-157990782 | 5 | 78.221 | KV453035.1 | 314301 | 13-scf00121 | 13 |
| AX-157818553 | 5 | 78.221 | KV453035.1 | 329330 | 13-scf00121 | 13 |
| AX-157743946 | 5 | 78.221 | KV453035.1 | 334421 | 13-scf00121 | 13 |
| AX-157991056 | 5 | 78.221 | KV453035.1 | 666473 | 13-scf00121 | 13 |
| AX-157991063 | 5 | 78.221 | KV453035.1 | 682180 | 13-scf00121 | 13 |
| AX-157991090 | 5 | 78.221 | KV453035.1 | 698812 | 13-scf00121 | 13 |
| AX-157991102 | 5 | 78.221 | KV453035.1 | 706602 | 13-scf00121 | 13 |
| AX-157991108 | 5 | 78.221 | KV453035.1 | 712164 | 13-scf00121 | 13 |
| AX-157991109 | 5 | 78.221 | KV453035.1 | 712716 | 13-scf00121 | 13 |
| AX-157818599 | 5 | 78.221 | KV453035.1 | 713754 | 13-scf00121 | 13 |
| AX-157991110 | 5 | 78.221 | KV453035.1 | 714344 | 13-scf00121 | 13 |
| AX-157991111 | 5 | 78.221 | KV453035.1 | 714801 | 13-scf00121 | 13 |
| AX-157991112 | 5 | 78.221 | KV453035.1 | 715188 | 13-scf00121 | 13 |
| AX-157991113 | 5 | 78.221 | KV453035.1 | 716221 | 13-scf00121 | 13 |
| AX-157991117 | 5 | 78.221 | KV453035.1 | 718750 | 13-scf00121 | 13 |
| AX-157991119 | 5 | 78.221 | KV453035.1 | 720062 | 13-scf00121 | 13 |
| AX-157818600 | 5 | 78.221 | KV453035.1 | 720234 | 13-scf00121 | 13 |
| AX-157991120 | 5 | 78.221 | KV453035.1 | 722249 | 13-scf00121 | 13 |
| AX-157865100 | 5 | 78.221 | KV453035.1 | 722851 | 13-scf00121 | 13 |
| AX-157991124 | 5 | 78.221 | KV453035.1 | 725648 | 13-scf00121 | 13 |
| AX-157991126 | 5 | 78.221 | KV453035.1 | 726001 | 13-scf00121 | 13 |
| AX-157991127 | 5 | 78.221 | KV453035.1 | 726643 | 13-scf00121 | 13 |
| AX-157991128 | 5 | 78.221 | KV453035.1 | 726879 | 13-scf00121 | 13 |
| AX-157991129 | 5 | 78.221 | KV453035.1 | 728218 | 13-scf00121 | 13 |
| AX-157991130 | 5 | 78.221 | KV453035.1 | 730497 | 13-scf00121 | 13 |
| AX-157869817 | 5 | 78.221 | KV453035.1 | 730785 | 13-scf00121 | 13 |
| AX-157991133 | 5 | 78.221 | KV453035.1 | 733000 | 13-scf00121 | 13 |
| AX-157991134 | 5 | 78.221 | KV453035.1 | 735522 | 13-scf00121 | 13 |
| AX-157991135 | 5 | 78.221 | KV453035.1 | 735905 | 13-scf00121 | 13 |
| AX-157991137 | 5 | 78.221 | KV453035.1 | 737309 | 13-scf00121 | 13 |
| AX-158390592 | 5 | 78.221 | KV453035.1 | 737652 | 13-scf00121 | 13 |
| AX-157991140 | 5 | 78.221 | KV453035.1 | 738432 | 13-scf00121 | 13 |
| AX-157991147 | 5 | 78.221 | KV453035.1 | 744430 | 13-scf00121 | 13 |
| AX-157991152 | 5 | 78.221 | KV453035.1 | 753146 | 13-scf00121 | 13 |
| AX-157991166 | 5 | 78.221 | KV453035.1 | 763808 | 13-scf00121 | 13 |
| AX-157991172 | 5 | 78.221 | KV453035.1 | 765502 | 13-scf00121 | 13 |
| AX-157991175 | 5 | 78.221 | KV453035.1 | 766986 | 13-scf00121 | 13 |

|              |   |        |            |        |             |    |
|--------------|---|--------|------------|--------|-------------|----|
| AX-157818602 | 5 | 78.221 | KV453035.1 | 768178 | 13-scf00121 | 13 |
| AX-157991196 | 5 | 78.221 | KV453035.1 | 795395 | 13-scf00121 | 13 |
| AX-157991199 | 5 | 78.221 | KV453035.1 | 798657 | 13-scf00121 | 13 |
| AX-157991212 | 5 | 78.221 | KV453035.1 | 808974 | 13-scf00121 | 13 |
| AX-157991220 | 5 | 78.221 | KV453035.1 | 817236 | 13-scf00121 | 13 |
| AX-157991225 | 5 | 78.221 | KV453035.1 | 821584 | 13-scf00121 | 13 |
| AX-157716091 | 5 | 78.221 | KV453035.1 | 832277 | 13-scf00121 | 13 |
| AX-157818609 | 5 | 78.221 | KV453035.1 | 833844 | 13-scf00121 | 13 |
| AX-157991237 | 5 | 78.221 | KV453035.1 | 834229 | 13-scf00121 | 13 |
| AX-157855698 | 5 | 78.221 | KV453035.1 | 837934 | 13-scf00121 | 13 |
| AX-157747053 | 5 | 78.221 | KV453035.1 | 838330 | 13-scf00121 | 13 |
| AX-157991241 | 5 | 78.221 | KV453035.1 | 846753 | 13-scf00121 | 13 |
| AX-157991242 | 5 | 78.221 | KV453035.1 | 847575 | 13-scf00121 | 13 |
| AX-157748712 | 5 | 78.221 | KV453035.1 | 848943 | 13-scf00121 | 13 |
| AX-157818612 | 5 | 78.221 | KV453035.1 | 850187 | 13-scf00121 | 13 |
| AX-157991245 | 5 | 78.221 | KV453035.1 | 851708 | 13-scf00121 | 13 |
| AX-157772564 | 5 | 78.221 | KV453035.1 | 852267 | 13-scf00121 | 13 |
| AX-157991246 | 5 | 78.221 | KV453035.1 | 853506 | 13-scf00121 | 13 |
| AX-157991248 | 5 | 78.221 | KV453035.1 | 854868 | 13-scf00121 | 13 |
| AX-157991253 | 5 | 78.221 | KV453035.1 | 857034 | 13-scf00121 | 13 |
| AX-157991256 | 5 | 78.221 | KV453035.1 | 857828 | 13-scf00121 | 13 |
| AX-157991260 | 5 | 78.221 | KV453035.1 | 869838 | 13-scf00121 | 13 |
| AX-157991270 | 5 | 78.221 | KV453035.1 | 881360 | 13-scf00121 | 13 |
| AX-157991272 | 5 | 78.221 | KV453035.1 | 883141 | 13-scf00121 | 13 |
| AX-157991275 | 5 | 78.221 | KV453035.1 | 885043 | 13-scf00121 | 13 |
| AX-157991276 | 5 | 78.221 | KV453035.1 | 886522 | 13-scf00121 | 13 |
| AX-157774076 | 5 | 78.221 | KV453035.1 | 886961 | 13-scf00121 | 13 |
| AX-157991278 | 5 | 78.221 | KV453035.1 | 887657 | 13-scf00121 | 13 |
| AX-157818617 | 5 | 78.221 | KV453035.1 | 888023 | 13-scf00121 | 13 |
| AX-157991279 | 5 | 78.221 | KV453035.1 | 888303 | 13-scf00121 | 13 |
| AX-157991280 | 5 | 78.221 | KV453035.1 | 889134 | 13-scf00121 | 13 |
| AX-157991281 | 5 | 78.221 | KV453035.1 | 889493 | 13-scf00121 | 13 |
| AX-157818618 | 5 | 78.221 | KV453035.1 | 890166 | 13-scf00121 | 13 |
| AX-157991284 | 5 | 78.221 | KV453035.1 | 890436 | 13-scf00121 | 13 |
| AX-157991285 | 5 | 78.221 | KV453035.1 | 890960 | 13-scf00121 | 13 |
| AX-157991287 | 5 | 78.221 | KV453035.1 | 891874 | 13-scf00121 | 13 |
| AX-157991288 | 5 | 78.221 | KV453035.1 | 892302 | 13-scf00121 | 13 |
| AX-157991291 | 5 | 78.221 | KV453035.1 | 892691 | 13-scf00121 | 13 |
| AX-157991293 | 5 | 78.221 | KV453035.1 | 894128 | 13-scf00121 | 13 |
| AX-157991294 | 5 | 78.221 | KV453035.1 | 894754 | 13-scf00121 | 13 |
| AX-157991295 | 5 | 78.221 | KV453035.1 | 895154 | 13-scf00121 | 13 |
| AX-157991297 | 5 | 78.221 | KV453035.1 | 896601 | 13-scf00121 | 13 |
| AX-157991298 | 5 | 78.221 | KV453035.1 | 897374 | 13-scf00121 | 13 |
| AX-157991300 | 5 | 78.221 | KV453035.1 | 898140 | 13-scf00121 | 13 |
| AX-157991301 | 5 | 78.221 | KV453035.1 | 899010 | 13-scf00121 | 13 |
| AX-157991307 | 5 | 78.221 | KV453035.1 | 903802 | 13-scf00121 | 13 |
| AX-157748199 | 5 | 78.221 | KV453035.1 | 905396 | 13-scf00121 | 13 |
| AX-157991309 | 5 | 78.221 | KV453035.1 | 906017 | 13-scf00121 | 13 |
| AX-157818619 | 5 | 78.221 | KV453035.1 | 906621 | 13-scf00121 | 13 |
| AX-157991311 | 5 | 78.221 | KV453035.1 | 907002 | 13-scf00121 | 13 |
| AX-157991314 | 5 | 78.221 | KV453035.1 | 908797 | 13-scf00121 | 13 |

|              |   |        |            |        |             |    |
|--------------|---|--------|------------|--------|-------------|----|
| AX-157766527 | 5 | 78.221 | KV453035.1 | 909113 | 13-scf00121 | 13 |
| AX-157991315 | 5 | 78.221 | KV453035.1 | 911217 | 13-scf00121 | 13 |
| AX-157818620 | 5 | 78.221 | KV453035.1 | 911544 | 13-scf00121 | 13 |
| AX-157748430 | 5 | 78.221 | KV453038.1 | 258363 | 13-scf00122 | 13 |
| AX-157991660 | 5 | 78.221 | KV453038.1 | 325573 | 13-scf00122 | 13 |
| AX-158375662 | 5 | 78.221 | KV453039.1 | 61458  | 13-scf00569 | 13 |
| AX-158375878 | 5 | 78.221 | KV453039.1 | 385531 | 13-scf00569 | 13 |
| AX-158375986 | 5 | 78.221 | KV453039.1 | 527723 | 13-scf00569 | 13 |
| AX-158375989 | 5 | 78.221 | KV453039.1 | 531231 | 13-scf00569 | 13 |
| AX-157686247 | 5 | 78.221 | KV453036.1 | 1392   | 13-scf00681 | 13 |
| AX-157686248 | 5 | 78.221 | KV453036.1 | 2439   | 13-scf00681 | 13 |
| AX-157686250 | 5 | 78.221 | KV453036.1 | 5986   | 13-scf00681 | 13 |
| AX-157686252 | 5 | 78.221 | KV453036.1 | 7731   | 13-scf00681 | 13 |
| AX-157686255 | 5 | 78.221 | KV453036.1 | 16435  | 13-scf00681 | 13 |
| AX-157686262 | 5 | 78.221 | KV453036.1 | 23849  | 13-scf00681 | 13 |
| AX-157686263 | 5 | 78.221 | KV453036.1 | 26418  | 13-scf00681 | 13 |
| AX-157686264 | 5 | 78.221 | KV453036.1 | 27108  | 13-scf00681 | 13 |
| AX-157991344 | 5 | 78.288 | KV453035.1 | 922777 | 13-scf00121 | 13 |
| AX-157991361 | 5 | 78.342 | KV453035.1 | 938174 | 13-scf00121 | 13 |
| AX-157991365 | 5 | 78.342 | KV453035.1 | 940662 | 13-scf00121 | 13 |
| AX-157818624 | 5 | 78.342 | KV453035.1 | 944886 | 13-scf00121 | 13 |
| AX-157751828 | 5 | 78.342 | KV453035.1 | 947200 | 13-scf00121 | 13 |
| AX-157991369 | 5 | 78.342 | KV453035.1 | 947567 | 13-scf00121 | 13 |
| AX-157818625 | 5 | 78.342 | KV453035.1 | 947874 | 13-scf00121 | 13 |
| AX-157768798 | 5 | 78.342 | KV453035.1 | 948273 | 13-scf00121 | 13 |
| AX-157818626 | 5 | 78.342 | KV453035.1 | 951771 | 13-scf00121 | 13 |
| AX-157991372 | 5 | 78.342 | KV453035.1 | 952129 | 13-scf00121 | 13 |
| AX-157818627 | 5 | 78.342 | KV453035.1 | 953074 | 13-scf00121 | 13 |
| AX-157818628 | 5 | 78.342 | KV453035.1 | 953879 | 13-scf00121 | 13 |
| AX-157991376 | 5 | 78.342 | KV453035.1 | 958386 | 13-scf00121 | 13 |
| AX-157991378 | 5 | 78.342 | KV453035.1 | 958667 | 13-scf00121 | 13 |
| AX-158375872 | 5 | 78.342 | KV453039.1 | 382013 | 13-scf00569 | 13 |
| AX-157754180 | 5 | 78.342 | KV453039.1 | 387992 | 13-scf00569 | 13 |
| AX-157709569 | 5 | 78.342 | KV453039.1 | 399553 | 13-scf00569 | 13 |
| AX-158375891 | 5 | 78.342 | KV453039.1 | 402287 | 13-scf00569 | 13 |
| AX-158375910 | 5 | 78.342 | KV453039.1 | 416982 | 13-scf00569 | 13 |
| AX-158375916 | 5 | 78.342 | KV453039.1 | 425471 | 13-scf00569 | 13 |
| AX-157853272 | 5 | 78.342 | KV453039.1 | 435121 | 13-scf00569 | 13 |
| AX-157715380 | 5 | 78.342 | KV453039.1 | 436704 | 13-scf00569 | 13 |
| AX-158375924 | 5 | 78.342 | KV453039.1 | 437940 | 13-scf00569 | 13 |
| AX-158375942 | 5 | 78.342 | KV453039.1 | 460857 | 13-scf00569 | 13 |
| AX-158375943 | 5 | 78.342 | KV453039.1 | 462384 | 13-scf00569 | 13 |
| AX-158379042 | 5 | 78.342 | KV453039.1 | 466348 | 13-scf00569 | 13 |
| AX-157853281 | 5 | 78.342 | KV453039.1 | 585976 | 13-scf00569 | 13 |
| AX-158376015 | 5 | 78.342 | KV453039.1 | 587006 | 13-scf00569 | 13 |
| AX-158376016 | 5 | 78.342 | KV453039.1 | 589350 | 13-scf00569 | 13 |
| AX-158376018 | 5 | 78.342 | KV453039.1 | 593279 | 13-scf00569 | 13 |
| AX-158376020 | 5 | 78.342 | KV453039.1 | 595269 | 13-scf00569 | 13 |
| AX-158376021 | 5 | 78.342 | KV453039.1 | 595945 | 13-scf00569 | 13 |
| AX-158376022 | 5 | 78.342 | KV453039.1 | 596484 | 13-scf00569 | 13 |
| AX-157853282 | 5 | 78.342 | KV453039.1 | 597088 | 13-scf00569 | 13 |

|              |   |        |             |        |             |    |
|--------------|---|--------|-------------|--------|-------------|----|
| AX-158376023 | 5 | 78.342 | KV453039.1  | 599352 | 13-scf00569 | 13 |
| AX-158376025 | 5 | 78.342 | KV453039.1  | 599941 | 13-scf00569 | 13 |
| AX-158379044 | 5 | 78.342 | KV453039.1  | 600296 | 13-scf00569 | 13 |
| AX-158376026 | 5 | 78.342 | KV453039.1  | 600360 | 13-scf00569 | 13 |
| AX-157741445 | 5 | 78.342 | KV453039.1  | 602607 | 13-scf00569 | 13 |
| AX-158376030 | 5 | 78.342 | KV453039.1  | 608695 | 13-scf00569 | 13 |
| AX-157704968 | 5 | 78.342 | 3ML01028112 | 144    | scf03717_1  | UN |
| AX-157818629 | 5 | 78.413 | KV453035.1  | 958872 | 13-scf00121 | 13 |
| AX-157686261 | 5 | 78.438 | KV453036.1  | 23317  | 13-scf00681 | 13 |
| AX-157991033 | 5 | 78.463 | KV453035.1  | 594293 | 13-scf00121 | 13 |
| AX-157686265 | 5 | 78.463 | KV453036.1  | 28187  | 13-scf00681 | 13 |
| AX-157991114 | 5 | 78.464 | KV453035.1  | 716475 | 13-scf00121 | 13 |
| AX-157991153 | 5 | 78.464 | KV453035.1  | 755820 | 13-scf00121 | 13 |
| AX-157686267 | 5 | 78.464 | KV453036.1  | 38731  | 13-scf00681 | 13 |
| AX-157686271 | 5 | 78.464 | KV453036.1  | 41394  | 13-scf00681 | 13 |
| AX-157686272 | 5 | 78.464 | KV453036.1  | 42135  | 13-scf00681 | 13 |
| AX-157686273 | 5 | 78.464 | KV453036.1  | 43929  | 13-scf00681 | 13 |
| AX-157686274 | 5 | 78.464 | KV453036.1  | 44723  | 13-scf00681 | 13 |
| AX-157686275 | 5 | 78.464 | KV453036.1  | 46063  | 13-scf00681 | 13 |
| AX-157681758 | 5 | 78.464 | KV453037.1  | 10396  | 13-scf00855 | 13 |
| AX-157991398 | 5 | 78.707 | KV453038.1  | 64294  | 13-scf00122 | 13 |
| AX-157991379 | 5 | 78.724 | KV453038.1  | 2711   | 13-scf00122 | 13 |
| AX-157991402 | 5 | 78.724 | KV453038.1  | 73108  | 13-scf00122 | 13 |
| AX-157991411 | 5 | 78.724 | KV453038.1  | 91918  | 13-scf00122 | 13 |
| AX-157991414 | 5 | 78.724 | KV453038.1  | 101438 | 13-scf00122 | 13 |
| AX-157991421 | 5 | 78.724 | KV453038.1  | 106986 | 13-scf00122 | 13 |
| AX-157991426 | 5 | 78.724 | KV453038.1  | 114079 | 13-scf00122 | 13 |
| AX-157991438 | 5 | 78.724 | KV453038.1  | 129160 | 13-scf00122 | 13 |
| AX-157991482 | 5 | 78.724 | KV453038.1  | 157065 | 13-scf00122 | 13 |
| AX-157991484 | 5 | 78.724 | KV453038.1  | 160673 | 13-scf00122 | 13 |
| AX-157991486 | 5 | 78.724 | KV453038.1  | 161451 | 13-scf00122 | 13 |
| AX-157991489 | 5 | 78.724 | KV453038.1  | 162713 | 13-scf00122 | 13 |
| AX-157742794 | 5 | 78.724 | KV453038.1  | 164392 | 13-scf00122 | 13 |
| AX-157991491 | 5 | 78.724 | KV453038.1  | 166081 | 13-scf00122 | 13 |
| AX-157991492 | 5 | 78.724 | KV453038.1  | 168683 | 13-scf00122 | 13 |
| AX-157991494 | 5 | 78.724 | KV453038.1  | 169123 | 13-scf00122 | 13 |
| AX-157991496 | 5 | 78.724 | KV453038.1  | 171042 | 13-scf00122 | 13 |
| AX-157991498 | 5 | 78.724 | KV453038.1  | 171536 | 13-scf00122 | 13 |
| AX-157991528 | 5 | 78.724 | KV453038.1  | 192187 | 13-scf00122 | 13 |
| AX-157991529 | 5 | 78.724 | KV453038.1  | 192977 | 13-scf00122 | 13 |
| AX-157991532 | 5 | 78.724 | KV453038.1  | 193158 | 13-scf00122 | 13 |
| AX-157818643 | 5 | 78.724 | KV453038.1  | 193827 | 13-scf00122 | 13 |
| AX-157991535 | 5 | 78.724 | KV453038.1  | 195571 | 13-scf00122 | 13 |
| AX-157991538 | 5 | 78.724 | KV453038.1  | 195891 | 13-scf00122 | 13 |
| AX-157991540 | 5 | 78.724 | KV453038.1  | 196998 | 13-scf00122 | 13 |
| AX-157991558 | 5 | 78.724 | KV453038.1  | 206092 | 13-scf00122 | 13 |
| AX-157991570 | 5 | 78.724 | KV453038.1  | 214722 | 13-scf00122 | 13 |
| AX-157991593 | 5 | 78.724 | KV453038.1  | 242736 | 13-scf00122 | 13 |
| AX-157818645 | 5 | 78.724 | KV453038.1  | 244442 | 13-scf00122 | 13 |
| AX-157818646 | 5 | 78.724 | KV453038.1  | 250548 | 13-scf00122 | 13 |
| AX-157818647 | 5 | 78.724 | KV453038.1  | 250769 | 13-scf00122 | 13 |

|              |   |        |            |        |             |    |
|--------------|---|--------|------------|--------|-------------|----|
| AX-157818648 | 5 | 78.724 | KV453038.1 | 251003 | 13-scf00122 | 13 |
| AX-157991606 | 5 | 78.724 | KV453038.1 | 252703 | 13-scf00122 | 13 |
| AX-157774728 | 5 | 78.724 | KV453038.1 | 259780 | 13-scf00122 | 13 |
| AX-157991615 | 5 | 78.724 | KV453038.1 | 266807 | 13-scf00122 | 13 |
| AX-157991642 | 5 | 78.724 | KV453038.1 | 298113 | 13-scf00122 | 13 |
| AX-157991659 | 5 | 78.724 | KV453038.1 | 324314 | 13-scf00122 | 13 |
| AX-157991664 | 5 | 78.724 | KV453038.1 | 335605 | 13-scf00122 | 13 |
| AX-157884563 | 5 | 78.724 | KV453038.1 | 400407 | 13-scf00122 | 13 |
| AX-158375625 | 5 | 78.724 | KV453039.1 | 6566   | 13-scf00569 | 13 |
| AX-158375626 | 5 | 78.724 | KV453039.1 | 7011   | 13-scf00569 | 13 |
| AX-158375633 | 5 | 78.724 | KV453039.1 | 13463  | 13-scf00569 | 13 |
| AX-158375638 | 5 | 78.724 | KV453039.1 | 21288  | 13-scf00569 | 13 |
| AX-158375641 | 5 | 78.724 | KV453039.1 | 27420  | 13-scf00569 | 13 |
| AX-158375664 | 5 | 78.724 | KV453039.1 | 63244  | 13-scf00569 | 13 |
| AX-158375665 | 5 | 78.724 | KV453039.1 | 64052  | 13-scf00569 | 13 |
| AX-158375666 | 5 | 78.724 | KV453039.1 | 64505  | 13-scf00569 | 13 |
| AX-157874156 | 5 | 78.724 | KV453039.1 | 108990 | 13-scf00569 | 13 |
| AX-157874157 | 5 | 78.724 | KV453039.1 | 110100 | 13-scf00569 | 13 |
| AX-158375699 | 5 | 78.724 | KV453039.1 | 119016 | 13-scf00569 | 13 |
| AX-158375705 | 5 | 78.724 | KV453039.1 | 122392 | 13-scf00569 | 13 |
| AX-158375710 | 5 | 78.724 | KV453039.1 | 132157 | 13-scf00569 | 13 |
| AX-158375711 | 5 | 78.724 | KV453039.1 | 132990 | 13-scf00569 | 13 |
| AX-158375714 | 5 | 78.724 | KV453039.1 | 135069 | 13-scf00569 | 13 |
| AX-158375716 | 5 | 78.724 | KV453039.1 | 136943 | 13-scf00569 | 13 |
| AX-158375728 | 5 | 78.724 | KV453039.1 | 153114 | 13-scf00569 | 13 |
| AX-158375741 | 5 | 78.724 | KV453039.1 | 174327 | 13-scf00569 | 13 |
| AX-157853254 | 5 | 78.724 | KV453039.1 | 174551 | 13-scf00569 | 13 |
| AX-157853255 | 5 | 78.724 | KV453039.1 | 180774 | 13-scf00569 | 13 |
| AX-158375747 | 5 | 78.724 | KV453039.1 | 185302 | 13-scf00569 | 13 |
| AX-158375748 | 5 | 78.724 | KV453039.1 | 186406 | 13-scf00569 | 13 |
| AX-158375749 | 5 | 78.724 | KV453039.1 | 190714 | 13-scf00569 | 13 |
| AX-158375757 | 5 | 78.724 | KV453039.1 | 205795 | 13-scf00569 | 13 |
| AX-158375760 | 5 | 78.724 | KV453039.1 | 208807 | 13-scf00569 | 13 |
| AX-158375774 | 5 | 78.724 | KV453039.1 | 227325 | 13-scf00569 | 13 |
| AX-158375775 | 5 | 78.724 | KV453039.1 | 228220 | 13-scf00569 | 13 |
| AX-158375779 | 5 | 78.724 | KV453039.1 | 244900 | 13-scf00569 | 13 |
| AX-158375780 | 5 | 78.724 | KV453039.1 | 253263 | 13-scf00569 | 13 |
| AX-158375786 | 5 | 78.724 | KV453039.1 | 263302 | 13-scf00569 | 13 |
| AX-158375788 | 5 | 78.724 | KV453039.1 | 265719 | 13-scf00569 | 13 |
| AX-158375789 | 5 | 78.724 | KV453039.1 | 266331 | 13-scf00569 | 13 |
| AX-158375794 | 5 | 78.724 | KV453039.1 | 274460 | 13-scf00569 | 13 |
| AX-158375795 | 5 | 78.724 | KV453039.1 | 274900 | 13-scf00569 | 13 |
| AX-158375797 | 5 | 78.724 | KV453039.1 | 276430 | 13-scf00569 | 13 |
| AX-158375798 | 5 | 78.724 | KV453039.1 | 276801 | 13-scf00569 | 13 |
| AX-157874161 | 5 | 78.724 | KV453039.1 | 277731 | 13-scf00569 | 13 |
| AX-158375801 | 5 | 78.724 | KV453039.1 | 281340 | 13-scf00569 | 13 |
| AX-158375802 | 5 | 78.724 | KV453039.1 | 281973 | 13-scf00569 | 13 |
| AX-158375807 | 5 | 78.724 | KV453039.1 | 285135 | 13-scf00569 | 13 |
| AX-158375808 | 5 | 78.724 | KV453039.1 | 286358 | 13-scf00569 | 13 |
| AX-158375809 | 5 | 78.724 | KV453039.1 | 286551 | 13-scf00569 | 13 |
| AX-158375850 | 5 | 78.724 | KV453039.1 | 354715 | 13-scf00569 | 13 |

|              |   |        |            |        |             |    |
|--------------|---|--------|------------|--------|-------------|----|
| AX-158375851 | 5 | 78.724 | KV453039.1 | 355369 | 13-scf00569 | 13 |
| AX-158375852 | 5 | 78.724 | KV453039.1 | 357179 | 13-scf00569 | 13 |
| AX-158375853 | 5 | 78.724 | KV453039.1 | 358725 | 13-scf00569 | 13 |
| AX-158375854 | 5 | 78.724 | KV453039.1 | 363565 | 13-scf00569 | 13 |
| AX-158375856 | 5 | 78.724 | KV453039.1 | 367816 | 13-scf00569 | 13 |
| AX-158375857 | 5 | 78.724 | KV453039.1 | 369904 | 13-scf00569 | 13 |
| AX-158375858 | 5 | 78.724 | KV453039.1 | 370332 | 13-scf00569 | 13 |
| AX-158375859 | 5 | 78.724 | KV453039.1 | 370734 | 13-scf00569 | 13 |
| AX-158375879 | 5 | 78.724 | KV453039.1 | 385868 | 13-scf00569 | 13 |
| AX-157709568 | 5 | 78.724 | KV453039.1 | 399371 | 13-scf00569 | 13 |
| AX-158375895 | 5 | 78.724 | KV453039.1 | 406467 | 13-scf00569 | 13 |
| AX-158375897 | 5 | 78.724 | KV453039.1 | 408969 | 13-scf00569 | 13 |
| AX-158375905 | 5 | 78.724 | KV453039.1 | 413566 | 13-scf00569 | 13 |
| AX-158375911 | 5 | 78.724 | KV453039.1 | 417814 | 13-scf00569 | 13 |
| AX-158375914 | 5 | 78.724 | KV453039.1 | 423252 | 13-scf00569 | 13 |
| AX-158375915 | 5 | 78.724 | KV453039.1 | 423504 | 13-scf00569 | 13 |
| AX-157853273 | 5 | 78.724 | KV453039.1 | 436828 | 13-scf00569 | 13 |
| AX-157853274 | 5 | 78.724 | KV453039.1 | 437087 | 13-scf00569 | 13 |
| AX-158375931 | 5 | 78.724 | KV453039.1 | 444938 | 13-scf00569 | 13 |
| AX-157853277 | 5 | 78.724 | KV453039.1 | 446053 | 13-scf00569 | 13 |
| AX-158375933 | 5 | 78.724 | KV453039.1 | 451008 | 13-scf00569 | 13 |
| AX-158375936 | 5 | 78.724 | KV453039.1 | 453171 | 13-scf00569 | 13 |
| AX-158375946 | 5 | 78.724 | KV453039.1 | 466667 | 13-scf00569 | 13 |
| AX-158375948 | 5 | 78.724 | KV453039.1 | 469650 | 13-scf00569 | 13 |
| AX-158375951 | 5 | 78.724 | KV453039.1 | 475622 | 13-scf00569 | 13 |
| AX-158375953 | 5 | 78.724 | KV453039.1 | 476511 | 13-scf00569 | 13 |
| AX-158375954 | 5 | 78.724 | KV453039.1 | 479781 | 13-scf00569 | 13 |
| AX-158375957 | 5 | 78.724 | KV453039.1 | 485262 | 13-scf00569 | 13 |
| AX-158375961 | 5 | 78.724 | KV453039.1 | 488886 | 13-scf00569 | 13 |
| AX-158375962 | 5 | 78.724 | KV453039.1 | 489941 | 13-scf00569 | 13 |
| AX-158375964 | 5 | 78.724 | KV453039.1 | 491447 | 13-scf00569 | 13 |
| AX-158375966 | 5 | 78.724 | KV453039.1 | 495377 | 13-scf00569 | 13 |
| AX-158375967 | 5 | 78.724 | KV453039.1 | 498998 | 13-scf00569 | 13 |
| AX-157874165 | 5 | 78.724 | KV453039.1 | 505125 | 13-scf00569 | 13 |
| AX-157862520 | 5 | 78.724 | KV453039.1 | 505835 | 13-scf00569 | 13 |
| AX-158375968 | 5 | 78.724 | KV453039.1 | 506115 | 13-scf00569 | 13 |
| AX-158375969 | 5 | 78.724 | KV453039.1 | 506838 | 13-scf00569 | 13 |
| AX-158375972 | 5 | 78.724 | KV453039.1 | 508802 | 13-scf00569 | 13 |
| AX-158375977 | 5 | 78.724 | KV453039.1 | 514527 | 13-scf00569 | 13 |
| AX-158375980 | 5 | 78.724 | KV453039.1 | 522467 | 13-scf00569 | 13 |
| AX-158375981 | 5 | 78.724 | KV453039.1 | 523030 | 13-scf00569 | 13 |
| AX-158375983 | 5 | 78.724 | KV453039.1 | 524732 | 13-scf00569 | 13 |
| AX-158375984 | 5 | 78.724 | KV453039.1 | 526790 | 13-scf00569 | 13 |
| AX-158375987 | 5 | 78.724 | KV453039.1 | 528134 | 13-scf00569 | 13 |
| AX-158375991 | 5 | 78.724 | KV453039.1 | 533610 | 13-scf00569 | 13 |
| AX-158375994 | 5 | 78.724 | KV453039.1 | 536075 | 13-scf00569 | 13 |
| AX-158375995 | 5 | 78.724 | KV453039.1 | 538026 | 13-scf00569 | 13 |
| AX-157716215 | 5 | 78.724 | KV453039.1 | 539129 | 13-scf00569 | 13 |
| AX-158376002 | 5 | 78.724 | KV453039.1 | 548729 | 13-scf00569 | 13 |
| AX-158420483 | 5 | 78.724 | KV453039.1 | 558910 | 13-scf00569 | 13 |
| AX-158376008 | 5 | 78.724 | KV453039.1 | 561394 | 13-scf00569 | 13 |



|              |   |        |            |        |             |    |
|--------------|---|--------|------------|--------|-------------|----|
| AX-158376012 | 5 | 78.724 | KV453039.1 | 567243 | 13-scf00569 | 13 |
| AX-157694990 | 5 | 78.724 | FI881242.1 | 321    | 13-scf00122 | 13 |
| AX-158405569 | 5 | 78.74  | KV453038.1 | 89815  | 13-scf00122 | 13 |
| AX-157991409 | 5 | 78.756 | KV453038.1 | 90911  | 13-scf00122 | 13 |
| AX-157991434 | 5 | 78.756 | KV453038.1 | 119211 | 13-scf00122 | 13 |
| AX-157991410 | 5 | 78.774 | KV453038.1 | 91308  | 13-scf00122 | 13 |
| AX-157991419 | 5 | 78.776 | KV453038.1 | 105039 | 13-scf00122 | 13 |
| AX-157991428 | 5 | 78.794 | KV453038.1 | 114492 | 13-scf00122 | 13 |
| AX-157991431 | 5 | 78.795 | KV453038.1 | 116251 | 13-scf00122 | 13 |
| AX-158383287 | 5 | 78.795 | KV453038.1 | 181966 | 13-scf00122 | 13 |
| AX-157991552 | 5 | 78.795 | KV453038.1 | 202896 | 13-scf00122 | 13 |
| AX-157991560 | 5 | 78.795 | KV453038.1 | 207401 | 13-scf00122 | 13 |
| AX-157740502 | 5 | 78.795 | KV453038.1 | 213456 | 13-scf00122 | 13 |
| AX-157991569 | 5 | 78.795 | KV453038.1 | 214445 | 13-scf00122 | 13 |
| AX-157991580 | 5 | 78.795 | KV453038.1 | 222646 | 13-scf00122 | 13 |
| AX-157991581 | 5 | 78.795 | KV453038.1 | 223416 | 13-scf00122 | 13 |
| AX-157727966 | 5 | 78.795 | KV453038.1 | 247957 | 13-scf00122 | 13 |
| AX-157744406 | 5 | 78.795 | KV453038.1 | 254753 | 13-scf00122 | 13 |
| AX-157725993 | 5 | 78.795 | KV453038.1 | 270374 | 13-scf00122 | 13 |
| AX-157991624 | 5 | 78.795 | KV453038.1 | 272564 | 13-scf00122 | 13 |
| AX-157991638 | 5 | 78.795 | KV453038.1 | 291923 | 13-scf00122 | 13 |
| AX-157991648 | 5 | 78.795 | KV453038.1 | 309236 | 13-scf00122 | 13 |
| AX-157991650 | 5 | 78.795 | KV453038.1 | 309977 | 13-scf00122 | 13 |
| AX-157991670 | 5 | 78.795 | KV453038.1 | 346131 | 13-scf00122 | 13 |
| AX-157751098 | 5 | 78.795 | KV453038.1 | 370191 | 13-scf00122 | 13 |
| AX-157991699 | 5 | 78.795 | KV453038.1 | 387314 | 13-scf00122 | 13 |
| AX-158390599 | 5 | 78.795 | KV453038.1 | 405856 | 13-scf00122 | 13 |
| AX-158375631 | 5 | 78.795 | KV453039.1 | 12880  | 13-scf00569 | 13 |
| AX-158375639 | 5 | 78.795 | KV453039.1 | 21725  | 13-scf00569 | 13 |
| AX-158375674 | 5 | 78.795 | KV453039.1 | 77103  | 13-scf00569 | 13 |
| AX-158375677 | 5 | 78.795 | KV453039.1 | 80426  | 13-scf00569 | 13 |
| AX-158375679 | 5 | 78.795 | KV453039.1 | 84899  | 13-scf00569 | 13 |
| AX-158375688 | 5 | 78.795 | KV453039.1 | 105661 | 13-scf00569 | 13 |
| AX-158420481 | 5 | 78.795 | KV453039.1 | 458724 | 13-scf00569 | 13 |
| AX-158375940 | 5 | 78.795 | KV453039.1 | 459728 | 13-scf00569 | 13 |
| AX-158375971 | 5 | 78.795 | KV453039.1 | 508328 | 13-scf00569 | 13 |
| AX-158375973 | 5 | 78.795 | KV453039.1 | 510542 | 13-scf00569 | 13 |
| AX-158376007 | 5 | 78.795 | KV453039.1 | 560679 | 13-scf00569 | 13 |
| AX-157991435 | 5 | 78.822 | KV453038.1 | 120377 | 13-scf00122 | 13 |
| AX-157818639 | 5 | 78.823 | KV453038.1 | 157128 | 13-scf00122 | 13 |
| AX-157991488 | 5 | 78.823 | KV453038.1 | 162274 | 13-scf00122 | 13 |
| AX-157818640 | 5 | 78.824 | KV453038.1 | 163462 | 13-scf00122 | 13 |
| AX-157818642 | 5 | 78.825 | KV453038.1 | 183404 | 13-scf00122 | 13 |
| AX-157991516 | 5 | 78.825 | KV453038.1 | 184549 | 13-scf00122 | 13 |
| AX-157991517 | 5 | 78.825 | KV453038.1 | 184931 | 13-scf00122 | 13 |
| AX-157991519 | 5 | 78.825 | KV453038.1 | 185354 | 13-scf00122 | 13 |
| AX-157991520 | 5 | 78.825 | KV453038.1 | 185737 | 13-scf00122 | 13 |
| AX-157991522 | 5 | 78.825 | KV453038.1 | 187020 | 13-scf00122 | 13 |
| AX-157991523 | 5 | 78.825 | KV453038.1 | 188570 | 13-scf00122 | 13 |
| AX-157991525 | 5 | 78.825 | KV453038.1 | 190136 | 13-scf00122 | 13 |
| AX-157991541 | 5 | 78.825 | KV453038.1 | 197499 | 13-scf00122 | 13 |

|              |   |        |            |        |             |    |
|--------------|---|--------|------------|--------|-------------|----|
| AX-157991572 | 5 | 78.825 | KV453038.1 | 217130 | 13-scf00122 | 13 |
| AX-157818655 | 5 | 78.825 | KV453038.1 | 360356 | 13-scf00122 | 13 |
| AX-157991897 | 5 | 78.825 | KV453040.1 | 161720 | 13-scf00123 | 13 |
| AX-157991556 | 5 | 78.826 | KV453038.1 | 205604 | 13-scf00122 | 13 |
| AX-157775299 | 5 | 78.826 | KV453038.1 | 245251 | 13-scf00122 | 13 |
| AX-157818652 | 5 | 78.826 | KV453038.1 | 262920 | 13-scf00122 | 13 |
| AX-157750560 | 5 | 78.826 | KV453038.1 | 277888 | 13-scf00122 | 13 |
| AX-157991658 | 5 | 78.826 | KV453038.1 | 322927 | 13-scf00122 | 13 |
| AX-157869824 | 5 | 78.827 | KV453038.1 | 282272 | 13-scf00122 | 13 |
| AX-157991653 | 5 | 78.827 | KV453038.1 | 312394 | 13-scf00122 | 13 |
| AX-157991674 | 5 | 78.828 | KV453038.1 | 357947 | 13-scf00122 | 13 |
| AX-157991680 | 5 | 78.828 | KV453038.1 | 369213 | 13-scf00122 | 13 |
| AX-157991682 | 5 | 78.887 | KV453038.1 | 371630 | 13-scf00122 | 13 |
| AX-157991634 | 5 | 78.947 | KV453038.1 | 286860 | 13-scf00122 | 13 |
| AX-157991683 | 5 | 78.947 | KV453038.1 | 375555 | 13-scf00122 | 13 |
| AX-157991690 | 5 | 78.947 | KV453038.1 | 378409 | 13-scf00122 | 13 |
| AX-157991703 | 5 | 78.947 | KV453038.1 | 393231 | 13-scf00122 | 13 |
| AX-157991712 | 5 | 78.947 | KV453038.1 | 403317 | 13-scf00122 | 13 |
| AX-157991714 | 5 | 78.947 | KV453038.1 | 404181 | 13-scf00122 | 13 |
| AX-157991717 | 5 | 78.947 | KV453038.1 | 405598 | 13-scf00122 | 13 |
| AX-157991718 | 5 | 78.947 | KV453038.1 | 406567 | 13-scf00122 | 13 |
| AX-157991721 | 5 | 78.947 | KV453040.1 | 2539   | 13-scf00123 | 13 |
| AX-157722039 | 5 | 78.947 | KV453040.1 | 3165   | 13-scf00123 | 13 |
| AX-157991798 | 5 | 78.947 | KV453040.1 | 63750  | 13-scf00123 | 13 |
| AX-157991814 | 5 | 78.947 | KV453040.1 | 75897  | 13-scf00123 | 13 |
| AX-158375623 | 5 | 79.186 | KV453039.1 | 5382   | 13-scf00569 | 13 |
| AX-158375632 | 5 | 79.186 | KV453039.1 | 13256  | 13-scf00569 | 13 |
| AX-157991142 | 5 | 79.424 | KV453035.1 | 739078 | 13-scf00121 | 13 |
| AX-157991200 | 5 | 79.424 | KV453035.1 | 801725 | 13-scf00121 | 13 |
| AX-157818649 | 5 | 79.424 | KV453038.1 | 251888 | 13-scf00122 | 13 |
| AX-158375634 | 5 | 79.424 | KV453039.1 | 14818  | 13-scf00569 | 13 |
| AX-158375650 | 5 | 79.424 | KV453039.1 | 39568  | 13-scf00569 | 13 |
| AX-158375667 | 5 | 79.424 | KV453039.1 | 65378  | 13-scf00569 | 13 |
| AX-158375681 | 5 | 79.424 | KV453039.1 | 95270  | 13-scf00569 | 13 |
| AX-158375698 | 5 | 79.424 | KV453039.1 | 118416 | 13-scf00569 | 13 |
| AX-158375701 | 5 | 79.424 | KV453039.1 | 119939 | 13-scf00569 | 13 |
| AX-158375703 | 5 | 79.424 | KV453039.1 | 121407 | 13-scf00569 | 13 |
| AX-158375704 | 5 | 79.424 | KV453039.1 | 122162 | 13-scf00569 | 13 |
| AX-158375709 | 5 | 79.424 | KV453039.1 | 129756 | 13-scf00569 | 13 |
| AX-158421136 | 5 | 79.424 | KV453039.1 | 141867 | 13-scf00569 | 13 |
| AX-158375719 | 5 | 79.424 | KV453039.1 | 143963 | 13-scf00569 | 13 |
| AX-158375720 | 5 | 79.424 | KV453039.1 | 145404 | 13-scf00569 | 13 |
| AX-158375729 | 5 | 79.424 | KV453039.1 | 156423 | 13-scf00569 | 13 |
| AX-157763635 | 5 | 79.424 | KV453039.1 | 156500 | 13-scf00569 | 13 |
| AX-158375730 | 5 | 79.424 | KV453039.1 | 156645 | 13-scf00569 | 13 |
| AX-158375732 | 5 | 79.424 | KV453039.1 | 162067 | 13-scf00569 | 13 |
| AX-158375733 | 5 | 79.424 | KV453039.1 | 162617 | 13-scf00569 | 13 |
| AX-158375734 | 5 | 79.424 | KV453039.1 | 163078 | 13-scf00569 | 13 |
| AX-157853252 | 5 | 79.424 | KV453039.1 | 164909 | 13-scf00569 | 13 |
| AX-158420470 | 5 | 79.424 | KV453039.1 | 165648 | 13-scf00569 | 13 |
| AX-158375735 | 5 | 79.424 | KV453039.1 | 166130 | 13-scf00569 | 13 |

|              |   |        |             |        |             |    |
|--------------|---|--------|-------------|--------|-------------|----|
| AX-158375736 | 5 | 79.424 | KV453039.1  | 166590 | 13-scf00569 | 13 |
| AX-158375737 | 5 | 79.424 | KV453039.1  | 167061 | 13-scf00569 | 13 |
| AX-158375738 | 5 | 79.424 | KV453039.1  | 167541 | 13-scf00569 | 13 |
| AX-158375739 | 5 | 79.424 | KV453039.1  | 168858 | 13-scf00569 | 13 |
| AX-158375744 | 5 | 79.424 | KV453039.1  | 177826 | 13-scf00569 | 13 |
| AX-158379038 | 5 | 79.424 | KV453039.1  | 179290 | 13-scf00569 | 13 |
| AX-158375767 | 5 | 79.424 | KV453039.1  | 218873 | 13-scf00569 | 13 |
| AX-158375769 | 5 | 79.424 | KV453039.1  | 220826 | 13-scf00569 | 13 |
| AX-158375771 | 5 | 79.424 | KV453039.1  | 224372 | 13-scf00569 | 13 |
| AX-158375785 | 5 | 79.424 | KV453039.1  | 262795 | 13-scf00569 | 13 |
| AX-158375792 | 5 | 79.424 | KV453039.1  | 273107 | 13-scf00569 | 13 |
| AX-158375834 | 5 | 79.424 | KV453039.1  | 327822 | 13-scf00569 | 13 |
| AX-158375863 | 5 | 79.424 | KV453039.1  | 376064 | 13-scf00569 | 13 |
| AX-158375877 | 5 | 79.424 | KV453039.1  | 385427 | 13-scf00569 | 13 |
| AX-158375890 | 5 | 79.424 | KV453039.1  | 401353 | 13-scf00569 | 13 |
| AX-158375893 | 5 | 79.424 | KV453039.1  | 404189 | 13-scf00569 | 13 |
| AX-158375894 | 5 | 79.424 | KV453039.1  | 405480 | 13-scf00569 | 13 |
| AX-158375901 | 5 | 79.424 | KV453039.1  | 410878 | 13-scf00569 | 13 |
| AX-158375903 | 5 | 79.424 | KV453039.1  | 413016 | 13-scf00569 | 13 |
| AX-157853269 | 5 | 79.424 | KV453039.1  | 426809 | 13-scf00569 | 13 |
| AX-158375925 | 5 | 79.424 | KV453039.1  | 438295 | 13-scf00569 | 13 |
| AX-158375934 | 5 | 79.424 | KV453039.1  | 451515 | 13-scf00569 | 13 |
| AX-158375938 | 5 | 79.424 | KV453039.1  | 456027 | 13-scf00569 | 13 |
| AX-158375939 | 5 | 79.424 | KV453039.1  | 457201 | 13-scf00569 | 13 |
| AX-158375944 | 5 | 79.424 | KV453039.1  | 462784 | 13-scf00569 | 13 |
| AX-158375952 | 5 | 79.424 | KV453039.1  | 476263 | 13-scf00569 | 13 |
| AX-158375958 | 5 | 79.424 | KV453039.1  | 486189 | 13-scf00569 | 13 |
| AX-157772220 | 5 | 79.424 | KV453039.1  | 497236 | 13-scf00569 | 13 |
| AX-157722579 | 5 | 79.424 | KV453039.1  | 530336 | 13-scf00569 | 13 |
| AX-158375990 | 5 | 79.424 | KV453039.1  | 531975 | 13-scf00569 | 13 |
| AX-158375992 | 5 | 79.424 | KV453039.1  | 534943 | 13-scf00569 | 13 |
| AX-158376006 | 5 | 79.424 | KV453039.1  | 555765 | 13-scf00569 | 13 |
| AX-157680903 | 5 | 79.424 | KV453036.1  | 37937  | 13-scf00681 | 13 |
| AX-158421118 | 5 | 79.424 | 3ML01028112 | 340    | scf03717_1  | UN |
| AX-157991038 | 5 | 79.542 | KV453035.1  | 613928 | 13-scf00121 | 13 |
| AX-157991367 | 5 | 79.542 | KV453035.1  | 945884 | 13-scf00121 | 13 |
| AX-158375628 | 5 | 79.542 | KV453039.1  | 9731   | 13-scf00569 | 13 |
| AX-158375715 | 5 | 79.542 | KV453039.1  | 135932 | 13-scf00569 | 13 |
| AX-158375718 | 5 | 79.542 | KV453039.1  | 142922 | 13-scf00569 | 13 |
| AX-158376009 | 5 | 79.542 | KV453039.1  | 564980 | 13-scf00569 | 13 |
| AX-158420484 | 5 | 79.542 | KV453039.1  | 566323 | 13-scf00569 | 13 |
| AX-158376011 | 5 | 79.542 | KV453039.1  | 566589 | 13-scf00569 | 13 |
| AX-157874166 | 5 | 79.542 | KV453039.1  | 567849 | 13-scf00569 | 13 |
| AX-158376014 | 5 | 79.542 | KV453039.1  | 581730 | 13-scf00569 | 13 |
| AX-158376019 | 5 | 79.542 | KV453039.1  | 593966 | 13-scf00569 | 13 |
| AX-157853283 | 5 | 79.542 | KV453039.1  | 598664 | 13-scf00569 | 13 |
| AX-158376024 | 5 | 79.542 | KV453039.1  | 599846 | 13-scf00569 | 13 |
| AX-157991725 | 5 | 79.919 | KV453040.1  | 6365   | 13-scf00123 | 13 |
| AX-157991728 | 5 | 80.483 | KV453040.1  | 11600  | 13-scf00123 | 13 |
| AX-157991730 | 5 | 80.483 | KV453040.1  | 13245  | 13-scf00123 | 13 |
| AX-157991738 | 5 | 80.483 | KV453040.1  | 18987  | 13-scf00123 | 13 |

|              |   |        |             |        |                |    |
|--------------|---|--------|-------------|--------|----------------|----|
| AX-157991739 | 5 | 80.483 | KV453040.1  | 19034  | 13-scf00123    | 13 |
| AX-157991743 | 5 | 80.483 | KV453040.1  | 20891  | 13-scf00123    | 13 |
| AX-157991749 | 5 | 80.483 | KV453040.1  | 27122  | 13-scf00123    | 13 |
| AX-157991757 | 5 | 80.483 | KV453040.1  | 32700  | 13-scf00123    | 13 |
| AX-157772506 | 5 | 80.483 | KV453040.1  | 33319  | 13-scf00123    | 13 |
| AX-157991758 | 5 | 80.483 | KV453040.1  | 34357  | 13-scf00123    | 13 |
| AX-157991760 | 5 | 80.483 | KV453040.1  | 36042  | 13-scf00123    | 13 |
| AX-157818659 | 5 | 80.483 | KV453040.1  | 39326  | 13-scf00123    | 13 |
| AX-157991769 | 5 | 80.483 | KV453040.1  | 42088  | 13-scf00123    | 13 |
| AX-157991772 | 5 | 80.483 | KV453040.1  | 45132  | 13-scf00123    | 13 |
| AX-157991799 | 5 | 80.483 | KV453040.1  | 64467  | 13-scf00123    | 13 |
| AX-157991842 | 5 | 80.483 | KV453040.1  | 106306 | 13-scf00123    | 13 |
| AX-157818660 | 5 | 80.534 | KV453040.1  | 54991  | 13-scf00123    | 13 |
| AX-157991795 | 5 | 80.6   | KV453040.1  | 61270  | 13-scf00123    | 13 |
| AX-157991797 | 5 | 80.6   | KV453040.1  | 63043  | 13-scf00123    | 13 |
| AX-157991801 | 5 | 80.6   | KV453040.1  | 65046  | 13-scf00123    | 13 |
| AX-157991803 | 5 | 80.6   | KV453040.1  | 65954  | 13-scf00123    | 13 |
| AX-157818662 | 5 | 80.6   | KV453040.1  | 66999  | 13-scf00123    | 13 |
| AX-157818663 | 5 | 80.6   | KV453040.1  | 67103  | 13-scf00123    | 13 |
| AX-157754722 | 5 | 80.627 | KV453040.1  | 80221  | 13-scf00123    | 13 |
| AX-157991816 | 5 | 80.655 | KV453040.1  | 80913  | 13-scf00123    | 13 |
| AX-157991817 | 5 | 80.655 | KV453040.1  | 81525  | 13-scf00123    | 13 |
| AX-157818664 | 5 | 80.655 | KV453040.1  | 93342  | 13-scf00123    | 13 |
| AX-157991834 | 5 | 80.655 | KV453040.1  | 93565  | 13-scf00123    | 13 |
| AX-157991836 | 5 | 80.655 | KV453040.1  | 94369  | 13-scf00123    | 13 |
| AX-157991818 | 5 | 80.663 | KV453040.1  | 84017  | 13-scf00123    | 13 |
| AX-157991733 | 5 | 80.69  | KV453040.1  | 15096  | 13-scf00123    | 13 |
| AX-157991777 | 5 | 80.69  | KV453040.1  | 48784  | 13-scf00123    | 13 |
| AX-157991792 | 5 | 80.69  | KV453040.1  | 60060  | 13-scf00123    | 13 |
| AX-157991829 | 5 | 80.69  | KV453040.1  | 88991  | 13-scf00123    | 13 |
| AX-157991833 | 5 | 80.69  | KV453040.1  | 90293  | 13-scf00123    | 13 |
| AX-157991770 | 5 | 80.717 | KV453040.1  | 44971  | 13-scf00123    | 13 |
| AX-157991831 | 5 | 80.717 | KV453040.1  | 90047  | 13-scf00123    | 13 |
| AX-157818665 | 5 | 80.717 | KV453040.1  | 96550  | 13-scf00123    | 13 |
| AX-157818666 | 5 | 80.717 | KV453040.1  | 105944 | 13-scf00123    | 13 |
| AX-157991847 | 5 | 80.717 | KV453040.1  | 110030 | 13-scf00123    | 13 |
| AX-157991854 | 5 | 80.717 | KV453040.1  | 116886 | 13-scf00123    | 13 |
| AX-157706057 | 5 | 80.717 | 3ML01031515 | 268    | scf07130_1     | UN |
| AX-157991885 | 5 | 80.835 | KV453040.1  | 153899 | 13-scf00123    | 13 |
| AX-157991887 | 5 | 80.835 | KV453040.1  | 156789 | 13-scf00123    | 13 |
| AX-157991892 | 5 | 80.835 | KV453040.1  | 158664 | 13-scf00123    | 13 |
| AX-157991895 | 5 | 80.835 | KV453040.1  | 161095 | 13-scf00123    | 13 |
| AX-157991900 | 5 | 80.835 | KV453040.1  | 166573 | 13-scf00123    | 13 |
| AX-157991902 | 5 | 80.835 | KV453040.1  | 168381 | 13-scf00123    | 13 |
| AX-157703621 | 5 | 80.835 | DX099480.1  | 60     | IORI212 lctalu | UN |
| AX-157818657 | 5 | 80.945 | KV453040.1  | 16849  | 13-scf00123    | 13 |
| AX-157991904 | 5 | 80.945 | KV453040.1  | 170303 | 13-scf00123    | 13 |
| AX-157991905 | 5 | 80.952 | KV453040.1  | 171981 | 13-scf00123    | 13 |
| AX-157991911 | 5 | 80.952 | KV453040.1  | 174815 | 13-scf00123    | 13 |
| AX-157991912 | 5 | 80.952 | KV453040.1  | 176736 | 13-scf00123    | 13 |
| AX-157818672 | 5 | 80.952 | KV453040.1  | 177038 | 13-scf00123    | 13 |

|              |   |        |             |        |             |    |
|--------------|---|--------|-------------|--------|-------------|----|
| AX-157818674 | 5 | 80.952 | KV453040.1  | 186090 | 13-scf00123 | 13 |
| AX-157714806 | 5 | 81.104 | KV453040.1  | 196621 | 13-scf00123 | 13 |
| AX-157751249 | 5 | 81.108 | KV453040.1  | 198818 | 13-scf00123 | 13 |
| AX-157739432 | 5 | 81.112 | KV453040.1  | 199780 | 13-scf00123 | 13 |
| AX-157991927 | 5 | 81.564 | KV453040.1  | 200391 | 13-scf00123 | 13 |
| AX-157991928 | 5 | 81.564 | KV453040.1  | 201644 | 13-scf00123 | 13 |
| AX-157991929 | 5 | 81.717 | KV453040.1  | 203851 | 13-scf00123 | 13 |
| AX-157725074 | 5 | 81.717 | KV453040.1  | 206108 | 13-scf00123 | 13 |
| AX-157991932 | 5 | 81.717 | KV453040.1  | 208411 | 13-scf00123 | 13 |
| AX-158407250 | 5 | 81.717 | KV453040.1  | 219367 | 13-scf00123 | 13 |
| AX-157991940 | 5 | 81.717 | KV453040.1  | 220566 | 13-scf00123 | 13 |
| AX-157991944 | 5 | 81.717 | KV453040.1  | 227393 | 13-scf00123 | 13 |
| AX-157818677 | 5 | 81.717 | KV453040.1  | 228135 | 13-scf00123 | 13 |
| AX-157991947 | 5 | 81.826 | KV453040.1  | 229672 | 13-scf00123 | 13 |
| AX-157991950 | 5 | 81.826 | KV453040.1  | 230461 | 13-scf00123 | 13 |
| AX-157723710 | 5 | 81.826 | KV453040.1  | 233272 | 13-scf00123 | 13 |
| AX-157818700 | 5 | 81.826 | KV453042.1  | 1888   | 13-scf00125 | 13 |
| AX-157991819 | 5 | 81.903 | KV453040.1  | 84454  | 13-scf00123 | 13 |
| AX-157991968 | 5 | 81.903 | KV453040.1  | 264400 | 13-scf00123 | 13 |
| AX-157991974 | 5 | 81.951 | KV453040.1  | 272176 | 13-scf00123 | 13 |
| AX-157991975 | 5 | 81.968 | KV453040.1  | 272686 | 13-scf00123 | 13 |
| AX-157991977 | 5 | 82.044 | KV453040.1  | 278845 | 13-scf00123 | 13 |
| AX-157681185 | 5 | 82.044 | KV453041.1  | 64306  | 13-scf00626 | 13 |
| AX-157991983 | 5 | 82.045 | KV453040.1  | 282943 | 13-scf00123 | 13 |
| AX-157991936 | 5 | 82.052 | KV453040.1  | 211562 | 13-scf00123 | 13 |
| AX-157991993 | 5 | 82.052 | KV453040.1  | 289955 | 13-scf00123 | 13 |
| AX-157991995 | 5 | 82.052 | KV453040.1  | 294515 | 13-scf00123 | 13 |
| AX-157991996 | 5 | 82.059 | KV453040.1  | 296087 | 13-scf00123 | 13 |
| AX-157992000 | 5 | 82.065 | KV453040.1  | 298549 | 13-scf00123 | 13 |
| AX-157714281 | 5 | 82.07  | KV453040.1  | 300553 | 13-scf00123 | 13 |
| AX-157818686 | 5 | 82.073 | KV453040.1  | 310991 | 13-scf00123 | 13 |
| AX-157992017 | 5 | 82.073 | KV453040.1  | 324259 | 13-scf00123 | 13 |
| AX-157992006 | 5 | 82.079 | KV453040.1  | 311383 | 13-scf00123 | 13 |
| AX-157992001 | 5 | 82.086 | KV453040.1  | 298868 | 13-scf00123 | 13 |
| AX-157707376 | 5 | 82.086 | 3ML01034142 | 182    | scf09813_1  | UN |
| AX-157992033 | 5 | 82.093 | KV453040.1  | 338184 | 13-scf00123 | 13 |
| AX-157818679 | 5 | 82.104 | KV453040.1  | 254930 | 13-scf00123 | 13 |
| AX-157992036 | 5 | 82.104 | KV453040.1  | 339335 | 13-scf00123 | 13 |
| AX-157818688 | 5 | 82.104 | KV453040.1  | 348295 | 13-scf00123 | 13 |
| AX-157772136 | 5 | 82.104 | KV453040.1  | 397548 | 13-scf00123 | 13 |
| AX-157992040 | 5 | 82.106 | KV453040.1  | 342121 | 13-scf00123 | 13 |
| AX-157992050 | 5 | 82.111 | KV453040.1  | 346572 | 13-scf00123 | 13 |
| AX-157991948 | 5 | 82.115 | KV453040.1  | 230192 | 13-scf00123 | 13 |
| AX-157818687 | 5 | 82.115 | KV453040.1  | 348200 | 13-scf00123 | 13 |
| AX-157818691 | 5 | 82.116 | KV453040.1  | 389449 | 13-scf00123 | 13 |
| AX-157992066 | 5 | 82.121 | KV453040.1  | 390062 | 13-scf00123 | 13 |
| AX-157992068 | 5 | 82.126 | KV453040.1  | 394929 | 13-scf00123 | 13 |
| AX-157992069 | 5 | 82.131 | KV453040.1  | 396021 | 13-scf00123 | 13 |
| AX-157818693 | 5 | 82.136 | KV453040.1  | 397500 | 13-scf00123 | 13 |
| AX-157992181 | 5 | 82.136 | KV453042.1  | 175550 | 13-scf00125 | 13 |
| AX-157991782 | 5 | 82.141 | KV453040.1  | 51494  | 13-scf00123 | 13 |

|              |   |        |             |        |             |    |
|--------------|---|--------|-------------|--------|-------------|----|
| AX-157991808 | 5 | 82.141 | KV453040.1  | 72799  | 13-scf00123 | 13 |
| AX-157991925 | 5 | 82.141 | KV453040.1  | 197171 | 13-scf00123 | 13 |
| AX-157992034 | 5 | 82.141 | KV453040.1  | 338683 | 13-scf00123 | 13 |
| AX-157992070 | 5 | 82.141 | KV453040.1  | 404704 | 13-scf00123 | 13 |
| AX-157685575 | 5 | 82.141 | KV453041.1  | 39953  | 13-scf00626 | 13 |
| AX-157992075 | 5 | 82.147 | KV453040.1  | 406151 | 13-scf00123 | 13 |
| AX-157991766 | 5 | 82.154 | KV453040.1  | 39670  | 13-scf00123 | 13 |
| AX-157991780 | 5 | 82.154 | KV453040.1  | 49616  | 13-scf00123 | 13 |
| AX-157818661 | 5 | 82.154 | KV453040.1  | 66616  | 13-scf00123 | 13 |
| AX-157818667 | 5 | 82.154 | KV453040.1  | 106160 | 13-scf00123 | 13 |
| AX-157755973 | 5 | 82.154 | KV453040.1  | 152370 | 13-scf00123 | 13 |
| AX-157991965 | 5 | 82.154 | KV453040.1  | 262426 | 13-scf00123 | 13 |
| AX-157991970 | 5 | 82.154 | KV453040.1  | 269806 | 13-scf00123 | 13 |
| AX-157818681 | 5 | 82.154 | KV453040.1  | 293987 | 13-scf00123 | 13 |
| AX-157818682 | 5 | 82.154 | KV453040.1  | 300275 | 13-scf00123 | 13 |
| AX-157726258 | 5 | 82.154 | KV453040.1  | 315753 | 13-scf00123 | 13 |
| AX-157992024 | 5 | 82.154 | KV453040.1  | 328111 | 13-scf00123 | 13 |
| AX-157992028 | 5 | 82.154 | KV453040.1  | 331248 | 13-scf00123 | 13 |
| AX-157992055 | 5 | 82.154 | KV453040.1  | 349633 | 13-scf00123 | 13 |
| AX-158407253 | 5 | 82.154 | KV453040.1  | 412685 | 13-scf00123 | 13 |
| AX-158421234 | 5 | 82.154 | KV453040.1  | 413122 | 13-scf00123 | 13 |
| AX-157818697 | 5 | 82.154 | KV453040.1  | 417062 | 13-scf00123 | 13 |
| AX-157728748 | 5 | 82.154 | KV453042.1  | 48072  | 13-scf00125 | 13 |
| AX-157992163 | 5 | 82.154 | KV453042.1  | 127447 | 13-scf00125 | 13 |
| AX-157865111 | 5 | 82.154 | KV453042.1  | 132921 | 13-scf00125 | 13 |
| AX-157992182 | 5 | 82.154 | KV453042.1  | 176353 | 13-scf00125 | 13 |
| AX-157855709 | 5 | 82.154 | KV453042.1  | 208391 | 13-scf00125 | 13 |
| AX-157992259 | 5 | 82.154 | KV453042.1  | 265461 | 13-scf00125 | 13 |
| AX-157818723 | 5 | 82.154 | KV453042.1  | 274456 | 13-scf00125 | 13 |
| AX-158383294 | 5 | 82.154 | KV453042.1  | 325052 | 13-scf00125 | 13 |
| AX-157992300 | 5 | 82.154 | KV453042.1  | 326548 | 13-scf00125 | 13 |
| AX-157992314 | 5 | 82.154 | KV453042.1  | 332542 | 13-scf00125 | 13 |
| AX-157992383 | 5 | 82.154 | KV453042.1  | 383169 | 13-scf00125 | 13 |
| AX-157992387 | 5 | 82.154 | KV453042.1  | 386229 | 13-scf00125 | 13 |
| AX-157992471 | 5 | 82.154 | KV453042.1  | 476541 | 13-scf00125 | 13 |
| AX-157818731 | 5 | 82.154 | KV453042.1  | 490420 | 13-scf00125 | 13 |
| AX-157992490 | 5 | 82.154 | KV453042.1  | 514742 | 13-scf00125 | 13 |
| AX-157680265 | 5 | 82.154 | KV453041.1  | 42645  | 13-scf00626 | 13 |
| AX-157685579 | 5 | 82.154 | KV453041.1  | 57080  | 13-scf00626 | 13 |
| AX-157685580 | 5 | 82.154 | KV453041.1  | 65915  | 13-scf00626 | 13 |
| AX-157688048 | 5 | 82.154 | 3ML01025478 | 4800   | scf01191_1  | UN |
| AX-157818680 | 5 | 82.372 | KV453040.1  | 257943 | 13-scf00123 | 13 |
| AX-157769192 | 5 | 82.372 | KV453042.1  | 1499   | 13-scf00125 | 13 |
| AX-157712956 | 5 | 82.372 | KV453042.1  | 2256   | 13-scf00125 | 13 |
| AX-157992094 | 5 | 82.372 | KV453042.1  | 5982   | 13-scf00125 | 13 |
| AX-157818715 | 5 | 82.372 | KV453042.1  | 84253  | 13-scf00125 | 13 |
| AX-157818719 | 5 | 82.372 | KV453042.1  | 112918 | 13-scf00125 | 13 |
| AX-157992205 | 5 | 82.372 | KV453042.1  | 197644 | 13-scf00125 | 13 |
| AX-157685581 | 5 | 82.372 | KV453041.1  | 67374  | 13-scf00626 | 13 |
| AX-157685582 | 5 | 82.372 | KV453041.1  | 69201  | 13-scf00626 | 13 |
| AX-157685583 | 5 | 82.372 | KV453041.1  | 72457  | 13-scf00626 | 13 |

|              |   |        |            |        |             |    |
|--------------|---|--------|------------|--------|-------------|----|
| AX-157685584 | 5 | 82.372 | KV453041.1 | 74022  | 13-scf00626 | 13 |
| AX-157685585 | 5 | 82.372 | KV453041.1 | 81336  | 13-scf00626 | 13 |
| AX-157818701 | 5 | 82.481 | KV453042.1 | 6619   | 13-scf00125 | 13 |
| AX-157992096 | 5 | 82.481 | KV453042.1 | 8536   | 13-scf00125 | 13 |
| AX-157992107 | 5 | 82.483 | KV453042.1 | 20687  | 13-scf00125 | 13 |
| AX-157743818 | 5 | 82.629 | KV453042.1 | 24425  | 13-scf00125 | 13 |
| AX-157992114 | 5 | 82.687 | KV453042.1 | 28818  | 13-scf00125 | 13 |
| AX-157755481 | 5 | 82.687 | KV453042.1 | 30645  | 13-scf00125 | 13 |
| AX-157992117 | 5 | 82.734 | KV453042.1 | 31432  | 13-scf00125 | 13 |
| AX-157818704 | 5 | 82.777 | KV453042.1 | 35408  | 13-scf00125 | 13 |
| AX-157992045 | 5 | 82.843 | KV453040.1 | 345040 | 13-scf00123 | 13 |
| AX-157992118 | 5 | 82.843 | KV453042.1 | 39070  | 13-scf00125 | 13 |
| AX-157992120 | 5 | 82.843 | KV453042.1 | 45959  | 13-scf00125 | 13 |
| AX-157685588 | 5 | 82.843 | KV453041.1 | 97386  | 13-scf00626 | 13 |
| AX-158421185 | 5 | 82.843 | KV453041.1 | 100868 | 13-scf00626 | 13 |
| AX-157685593 | 5 | 82.843 | KV453041.1 | 108748 | 13-scf00626 | 13 |
| AX-157818705 | 5 | 82.902 | KV453042.1 | 40725  | 13-scf00125 | 13 |
| AX-157818706 | 5 | 82.903 | KV453042.1 | 41987  | 13-scf00125 | 13 |
| AX-157992122 | 5 | 82.903 | KV453042.1 | 46388  | 13-scf00125 | 13 |
| AX-157991785 | 5 | 82.913 | KV453040.1 | 55050  | 13-scf00123 | 13 |
| AX-157818709 | 5 | 82.913 | KV453042.1 | 53744  | 13-scf00125 | 13 |
| AX-157992364 | 5 | 82.913 | KV453042.1 | 371717 | 13-scf00125 | 13 |
| AX-157992388 | 5 | 82.913 | KV453042.1 | 391791 | 13-scf00125 | 13 |
| AX-157757121 | 5 | 82.913 | KV453039.1 | 312564 | 13-scf00569 | 13 |
| AX-157991761 | 5 | 82.922 | KV453040.1 | 36447  | 13-scf00123 | 13 |
| AX-157991786 | 5 | 82.922 | KV453040.1 | 56923  | 13-scf00123 | 13 |
| AX-157991791 | 5 | 82.922 | KV453040.1 | 59442  | 13-scf00123 | 13 |
| AX-157991806 | 5 | 82.922 | KV453040.1 | 68372  | 13-scf00123 | 13 |
| AX-158390600 | 5 | 82.922 | KV453040.1 | 88463  | 13-scf00123 | 13 |
| AX-157716078 | 5 | 82.922 | KV453040.1 | 119099 | 13-scf00123 | 13 |
| AX-157991915 | 5 | 82.922 | KV453040.1 | 181100 | 13-scf00123 | 13 |
| AX-157992027 | 5 | 82.922 | KV453040.1 | 330511 | 13-scf00123 | 13 |
| AX-157818711 | 5 | 82.922 | KV453042.1 | 55362  | 13-scf00125 | 13 |
| AX-157818712 | 5 | 82.922 | KV453042.1 | 61080  | 13-scf00125 | 13 |
| AX-157720318 | 5 | 82.922 | KV453042.1 | 115582 | 13-scf00125 | 13 |
| AX-157992212 | 5 | 82.922 | KV453042.1 | 208207 | 13-scf00125 | 13 |
| AX-157992279 | 5 | 82.922 | KV453042.1 | 299492 | 13-scf00125 | 13 |
| AX-157992395 | 5 | 82.922 | KV453042.1 | 398325 | 13-scf00125 | 13 |
| AX-157992415 | 5 | 82.922 | KV453042.1 | 418946 | 13-scf00125 | 13 |
| AX-157992125 | 5 | 83.236 | KV453042.1 | 62048  | 13-scf00125 | 13 |
| AX-157992134 | 5 | 83.395 | KV453042.1 | 71077  | 13-scf00125 | 13 |
| AX-157714871 | 5 | 83.631 | KV453042.1 | 72932  | 13-scf00125 | 13 |
| AX-157818714 | 5 | 83.631 | KV453042.1 | 83780  | 13-scf00125 | 13 |
| AX-157992139 | 5 | 83.631 | KV453042.1 | 88267  | 13-scf00125 | 13 |
| AX-157992142 | 5 | 83.631 | KV453042.1 | 97178  | 13-scf00125 | 13 |
| AX-157992143 | 5 | 83.631 | KV453042.1 | 97807  | 13-scf00125 | 13 |
| AX-158415699 | 5 | 83.631 | KV453042.1 | 103696 | 13-scf00125 | 13 |
| AX-157818718 | 5 | 83.631 | KV453042.1 | 110840 | 13-scf00125 | 13 |
| AX-157992147 | 5 | 83.631 | KV453042.1 | 113421 | 13-scf00125 | 13 |
| AX-157992150 | 5 | 83.631 | KV453042.1 | 117944 | 13-scf00125 | 13 |
| AX-157992153 | 5 | 83.631 | KV453042.1 | 119025 | 13-scf00125 | 13 |

|              |   |        |            |        |             |    |
|--------------|---|--------|------------|--------|-------------|----|
| AX-157992155 | 5 | 83.811 | KV453042.1 | 120908 | 13-scf00125 | 13 |
| AX-157992158 | 5 | 83.818 | KV453042.1 | 123308 | 13-scf00125 | 13 |
| AX-157992164 | 5 | 83.824 | KV453042.1 | 127629 | 13-scf00125 | 13 |
| AX-157719140 | 5 | 84.338 | KV453042.1 | 133693 | 13-scf00125 | 13 |
| AX-157714877 | 5 | 84.344 | KV453042.1 | 139823 | 13-scf00125 | 13 |
| AX-157992169 | 5 | 84.344 | KV453042.1 | 147297 | 13-scf00125 | 13 |
| AX-157992170 | 5 | 84.345 | KV453042.1 | 147829 | 13-scf00125 | 13 |
| AX-157992172 | 5 | 84.345 | KV453042.1 | 157261 | 13-scf00125 | 13 |
| AX-157992177 | 5 | 84.345 | KV453042.1 | 172809 | 13-scf00125 | 13 |
| AX-157992002 | 5 | 84.51  | KV453040.1 | 299142 | 13-scf00123 | 13 |
| AX-157992180 | 5 | 84.51  | KV453042.1 | 175060 | 13-scf00125 | 13 |
| AX-157992183 | 5 | 84.51  | KV453042.1 | 176755 | 13-scf00125 | 13 |
| AX-157992184 | 5 | 84.661 | KV453042.1 | 178016 | 13-scf00125 | 13 |
| AX-157992185 | 5 | 84.662 | KV453042.1 | 178435 | 13-scf00125 | 13 |
| AX-157990921 | 5 | 84.973 | KV453035.1 | 456651 | 13-scf00121 | 13 |
| AX-157991639 | 5 | 84.973 | KV453038.1 | 292049 | 13-scf00122 | 13 |
| AX-157992179 | 5 | 84.973 | KV453042.1 | 174572 | 13-scf00125 | 13 |
| AX-157992186 | 5 | 84.973 | KV453042.1 | 180010 | 13-scf00125 | 13 |
| AX-157992193 | 5 | 84.974 | KV453042.1 | 186160 | 13-scf00125 | 13 |
| AX-157865104 | 5 | 85.17  | KV453040.1 | 274614 | 13-scf00123 | 13 |
| AX-157749020 | 5 | 85.17  | KV453042.1 | 2708   | 13-scf00125 | 13 |
| AX-157992144 | 5 | 85.17  | KV453042.1 | 98322  | 13-scf00125 | 13 |
| AX-157992198 | 5 | 85.17  | KV453042.1 | 193266 | 13-scf00125 | 13 |
| AX-157992288 | 5 | 85.17  | KV453042.1 | 311888 | 13-scf00125 | 13 |
| AX-157685577 | 5 | 85.17  | KV453041.1 | 51595  | 13-scf00626 | 13 |
| AX-157679995 | 5 | 85.17  | KV453041.1 | 59109  | 13-scf00626 | 13 |
| AX-157992200 | 5 | 85.449 | KV453042.1 | 193823 | 13-scf00125 | 13 |
| AX-157720466 | 5 | 85.449 | KV453042.1 | 196190 | 13-scf00125 | 13 |
| AX-157992208 | 5 | 85.603 | KV453042.1 | 200548 | 13-scf00125 | 13 |
| AX-157754794 | 5 | 85.603 | KV453042.1 | 201478 | 13-scf00125 | 13 |
| AX-157992213 | 5 | 85.785 | KV453042.1 | 209232 | 13-scf00125 | 13 |
| AX-157992214 | 5 | 85.788 | KV453042.1 | 209632 | 13-scf00125 | 13 |
| AX-157757741 | 5 | 86.078 | KV453042.1 | 213435 | 13-scf00125 | 13 |
| AX-157992221 | 5 | 86.648 | KV453042.1 | 223788 | 13-scf00125 | 13 |
| AX-157992223 | 5 | 86.65  | KV453042.1 | 224422 | 13-scf00125 | 13 |
| AX-157992226 | 5 | 86.898 | KV453042.1 | 227917 | 13-scf00125 | 13 |
| AX-157992231 | 5 | 87.145 | KV453042.1 | 235853 | 13-scf00125 | 13 |
| AX-157992233 | 5 | 87.324 | KV453042.1 | 236993 | 13-scf00125 | 13 |
| AX-157992234 | 5 | 87.476 | KV453042.1 | 237721 | 13-scf00125 | 13 |
| AX-157992238 | 5 | 87.476 | KV453042.1 | 242564 | 13-scf00125 | 13 |
| AX-157724635 | 5 | 87.476 | KV453042.1 | 269148 | 13-scf00125 | 13 |
| AX-157992244 | 5 | 87.493 | KV453042.1 | 250967 | 13-scf00125 | 13 |
| AX-157992250 | 5 | 87.512 | KV453042.1 | 258778 | 13-scf00125 | 13 |
| AX-157992254 | 5 | 87.534 | KV453042.1 | 259968 | 13-scf00125 | 13 |
| AX-157818722 | 5 | 88.263 | KV453042.1 | 262310 | 13-scf00125 | 13 |
| AX-157992260 | 5 | 88.263 | KV453042.1 | 266241 | 13-scf00125 | 13 |
| AX-157992256 | 5 | 88.277 | KV453042.1 | 261079 | 13-scf00125 | 13 |
| AX-157992257 | 5 | 88.277 | KV453042.1 | 264390 | 13-scf00125 | 13 |
| AX-157992265 | 5 | 88.297 | KV453042.1 | 277200 | 13-scf00125 | 13 |
| AX-157992266 | 5 | 88.297 | KV453042.1 | 278384 | 13-scf00125 | 13 |
| AX-157992272 | 5 | 88.359 | KV453042.1 | 285050 | 13-scf00125 | 13 |



|              |   |        |            |        |             |    |
|--------------|---|--------|------------|--------|-------------|----|
| AX-157992281 | 5 | 88.359 | KV453042.1 | 301820 | 13-scf00125 | 13 |
| AX-157992273 | 5 | 88.438 | KV453042.1 | 285474 | 13-scf00125 | 13 |
| AX-157992286 | 5 | 88.438 | KV453042.1 | 310328 | 13-scf00125 | 13 |
| AX-157992297 | 5 | 89     | KV453042.1 | 324399 | 13-scf00125 | 13 |
| AX-157992298 | 5 | 89     | KV453042.1 | 324957 | 13-scf00125 | 13 |
| AX-157992299 | 5 | 89     | KV453042.1 | 325682 | 13-scf00125 | 13 |
| AX-157992303 | 5 | 89.068 | KV453042.1 | 328860 | 13-scf00125 | 13 |
| AX-157992309 | 5 | 89.141 | KV453042.1 | 329961 | 13-scf00125 | 13 |
| AX-157992317 | 5 | 89.284 | KV453042.1 | 336238 | 13-scf00125 | 13 |
| AX-157992320 | 5 | 89.379 | KV453042.1 | 337917 | 13-scf00125 | 13 |
| AX-157991985 | 5 | 89.467 | KV453040.1 | 283913 | 13-scf00123 | 13 |
| AX-157772419 | 5 | 89.467 | KV453040.1 | 302749 | 13-scf00123 | 13 |
| AX-157992007 | 5 | 89.467 | KV453040.1 | 313667 | 13-scf00123 | 13 |
| AX-157992020 | 5 | 89.467 | KV453040.1 | 325332 | 13-scf00123 | 13 |
| AX-157992115 | 5 | 89.467 | KV453042.1 | 29046  | 13-scf00125 | 13 |
| AX-157818707 | 5 | 89.467 | KV453042.1 | 42202  | 13-scf00125 | 13 |
| AX-157818708 | 5 | 89.467 | KV453042.1 | 42834  | 13-scf00125 | 13 |
| AX-157717175 | 5 | 89.467 | KV453042.1 | 50443  | 13-scf00125 | 13 |
| AX-157992313 | 5 | 89.467 | KV453042.1 | 332045 | 13-scf00125 | 13 |
| AX-157992326 | 5 | 89.467 | KV453042.1 | 340692 | 13-scf00125 | 13 |
| AX-157992327 | 5 | 89.548 | KV453042.1 | 341599 | 13-scf00125 | 13 |
| AX-157992330 | 5 | 89.55  | KV453042.1 | 342759 | 13-scf00125 | 13 |
| AX-157992332 | 5 | 89.551 | KV453042.1 | 343714 | 13-scf00125 | 13 |
| AX-157992339 | 5 | 89.739 | KV453042.1 | 350021 | 13-scf00125 | 13 |
| AX-157992340 | 5 | 89.945 | KV453042.1 | 350319 | 13-scf00125 | 13 |
| AX-157721284 | 5 | 89.953 | KV453042.1 | 350986 | 13-scf00125 | 13 |
| AX-157992342 | 5 | 89.953 | KV453042.1 | 353381 | 13-scf00125 | 13 |
| AX-157992343 | 5 | 89.953 | KV453042.1 | 354524 | 13-scf00125 | 13 |
| AX-157992349 | 5 | 90.121 | KV453042.1 | 357473 | 13-scf00125 | 13 |
| AX-157992350 | 5 | 90.215 | KV453042.1 | 358572 | 13-scf00125 | 13 |
| AX-157755974 | 5 | 90.215 | KV453042.1 | 361211 | 13-scf00125 | 13 |
| AX-157992352 | 5 | 90.215 | KV453042.1 | 362372 | 13-scf00125 | 13 |
| AX-157865113 | 5 | 90.215 | KV453042.1 | 365338 | 13-scf00125 | 13 |
| AX-157992359 | 5 | 90.215 | KV453042.1 | 367254 | 13-scf00125 | 13 |
| AX-157992404 | 5 | 90.215 | KV453042.1 | 409106 | 13-scf00125 | 13 |
| AX-157992361 | 5 | 90.218 | KV453042.1 | 369837 | 13-scf00125 | 13 |
| AX-157884572 | 5 | 90.218 | KV453042.1 | 371332 | 13-scf00125 | 13 |
| AX-157992372 | 5 | 90.609 | KV453042.1 | 375111 | 13-scf00125 | 13 |
| AX-157992376 | 5 | 90.61  | KV453042.1 | 376080 | 13-scf00125 | 13 |
| AX-157992379 | 5 | 90.619 | KV453042.1 | 378087 | 13-scf00125 | 13 |
| AX-157992382 | 5 | 90.623 | KV453042.1 | 381081 | 13-scf00125 | 13 |
| AX-157992386 | 5 | 91.134 | KV453042.1 | 384968 | 13-scf00125 | 13 |
| AX-157992389 | 5 | 91.134 | KV453042.1 | 392516 | 13-scf00125 | 13 |
| AX-157992393 | 5 | 91.134 | KV453042.1 | 395786 | 13-scf00125 | 13 |
| AX-157992398 | 5 | 91.134 | KV453042.1 | 403726 | 13-scf00125 | 13 |
| AX-157992403 | 5 | 91.14  | KV453042.1 | 407850 | 13-scf00125 | 13 |
| AX-157992417 | 5 | 91.14  | KV453042.1 | 419863 | 13-scf00125 | 13 |
| AX-157992405 | 5 | 91.147 | KV453042.1 | 409915 | 13-scf00125 | 13 |
| AX-157992407 | 5 | 91.154 | KV453042.1 | 410464 | 13-scf00125 | 13 |
| AX-157992414 | 5 | 91.154 | KV453042.1 | 418300 | 13-scf00125 | 13 |
| AX-157992423 | 5 | 91.361 | KV453042.1 | 423149 | 13-scf00125 | 13 |

|              |   |        |            |        |             |    |
|--------------|---|--------|------------|--------|-------------|----|
| AX-157992427 | 5 | 91.361 | KV453042.1 | 427834 | 13-scf00125 | 13 |
| AX-157992430 | 5 | 91.361 | KV453042.1 | 429469 | 13-scf00125 | 13 |
| AX-157992431 | 5 | 91.361 | KV453042.1 | 429882 | 13-scf00125 | 13 |
| AX-157992435 | 5 | 91.361 | KV453042.1 | 432665 | 13-scf00125 | 13 |
| AX-157992442 | 5 | 91.361 | KV453042.1 | 440093 | 13-scf00125 | 13 |
| AX-157992447 | 5 | 91.361 | KV453042.1 | 443489 | 13-scf00125 | 13 |
| AX-157992448 | 5 | 91.361 | KV453042.1 | 445570 | 13-scf00125 | 13 |
| AX-157992450 | 5 | 91.361 | KV453042.1 | 449609 | 13-scf00125 | 13 |
| AX-157992451 | 5 | 91.361 | KV453042.1 | 452037 | 13-scf00125 | 13 |
| AX-157992453 | 5 | 91.361 | KV453042.1 | 453059 | 13-scf00125 | 13 |
| AX-157992454 | 5 | 91.361 | KV453042.1 | 453508 | 13-scf00125 | 13 |
| AX-157754822 | 5 | 91.361 | KV453042.1 | 454153 | 13-scf00125 | 13 |
| AX-157992455 | 5 | 91.361 | KV453042.1 | 454664 | 13-scf00125 | 13 |
| AX-157992457 | 5 | 91.361 | KV453042.1 | 455589 | 13-scf00125 | 13 |
| AX-157875873 | 5 | 91.361 | KV453042.1 | 455833 | 13-scf00125 | 13 |
| AX-157992458 | 5 | 91.361 | KV453042.1 | 457698 | 13-scf00125 | 13 |
| AX-158390602 | 5 | 91.361 | KV453042.1 | 464238 | 13-scf00125 | 13 |
| AX-157726135 | 5 | 91.659 | KV453042.1 | 459985 | 13-scf00125 | 13 |
| AX-157992460 | 5 | 91.659 | KV453042.1 | 463468 | 13-scf00125 | 13 |
| AX-157726568 | 5 | 91.659 | KV453042.1 | 465653 | 13-scf00125 | 13 |
| AX-157992466 | 5 | 91.659 | KV453042.1 | 467078 | 13-scf00125 | 13 |
| AX-157992480 | 5 | 91.659 | KV453042.1 | 498226 | 13-scf00125 | 13 |
| AX-157992486 | 5 | 91.659 | KV453042.1 | 508255 | 13-scf00125 | 13 |
| AX-157818728 | 5 | 91.681 | KV453042.1 | 483716 | 13-scf00125 | 13 |
| AX-157992488 | 5 | 91.681 | KV453042.1 | 512256 | 13-scf00125 | 13 |
| AX-157992489 | 5 | 91.681 | KV453042.1 | 512809 | 13-scf00125 | 13 |
| AX-157818733 | 5 | 91.681 | KV453042.1 | 515294 | 13-scf00125 | 13 |
| AX-157743899 | 5 | 91.712 | KV453042.1 | 490472 | 13-scf00125 | 13 |
| AX-157992496 | 5 | 91.712 | KV453042.1 | 533066 | 13-scf00125 | 13 |
| AX-157750239 | 6 | 0      | KV452768.1 | 144938 | 3-scf00127  | 3  |
| AX-157818751 | 6 | 0      | KV452768.1 | 154394 | 3-scf00127  | 3  |
| AX-157992826 | 6 | 0      | KV452768.1 | 158411 | 3-scf00127  | 3  |
| AX-157992933 | 6 | 0.145  | KV452768.1 | 11689  | 3-scf00127  | 3  |
| AX-157992911 | 6 | 0.145  | KV452768.1 | 43248  | 3-scf00127  | 3  |
| AX-157992902 | 6 | 0.145  | KV452768.1 | 52108  | 3-scf00127  | 3  |
| AX-157992897 | 6 | 0.145  | KV452768.1 | 56201  | 3-scf00127  | 3  |
| AX-157992885 | 6 | 0.145  | KV452768.1 | 72464  | 3-scf00127  | 3  |
| AX-157992883 | 6 | 0.145  | KV452768.1 | 73904  | 3-scf00127  | 3  |
| AX-157992874 | 6 | 0.145  | KV452768.1 | 80425  | 3-scf00127  | 3  |
| AX-157992873 | 6 | 0.145  | KV452768.1 | 83035  | 3-scf00127  | 3  |
| AX-157992870 | 6 | 0.145  | KV452768.1 | 84976  | 3-scf00127  | 3  |
| AX-157992864 | 6 | 0.145  | KV452768.1 | 93908  | 3-scf00127  | 3  |
| AX-157818755 | 6 | 0.145  | KV452768.1 | 98482  | 3-scf00127  | 3  |
| AX-157992863 | 6 | 0.145  | KV452768.1 | 99447  | 3-scf00127  | 3  |
| AX-157865117 | 6 | 0.145  | KV452768.1 | 103260 | 3-scf00127  | 3  |
| AX-157992862 | 6 | 0.145  | KV452768.1 | 106244 | 3-scf00127  | 3  |
| AX-157992858 | 6 | 0.145  | KV452768.1 | 113675 | 3-scf00127  | 3  |
| AX-157992855 | 6 | 0.145  | KV452768.1 | 118824 | 3-scf00127  | 3  |
| AX-157992852 | 6 | 0.145  | KV452768.1 | 121515 | 3-scf00127  | 3  |
| AX-157992851 | 6 | 0.145  | KV452768.1 | 123880 | 3-scf00127  | 3  |
| AX-157992849 | 6 | 0.145  | KV452768.1 | 124903 | 3-scf00127  | 3  |

|              |   |       |             |        |            |    |
|--------------|---|-------|-------------|--------|------------|----|
| AX-158379607 | 6 | 0.145 | KV452768.1  | 127657 | 3-scf00127 | 3  |
| AX-157992846 | 6 | 0.145 | KV452768.1  | 127812 | 3-scf00127 | 3  |
| AX-157743903 | 6 | 0.145 | KV452768.1  | 138341 | 3-scf00127 | 3  |
| AX-157992812 | 6 | 0.145 | KV452768.1  | 184338 | 3-scf00127 | 3  |
| AX-157992686 | 6 | 0.145 | KV452768.1  | 418851 | 3-scf00127 | 3  |
| AX-157740185 | 6 | 0.145 | KV452768.1  | 420533 | 3-scf00127 | 3  |
| AX-157992685 | 6 | 0.145 | KV452768.1  | 421166 | 3-scf00127 | 3  |
| AX-157992655 | 6 | 0.145 | KV452768.1  | 475280 | 3-scf00127 | 3  |
| AX-157993080 | 6 | 0.145 | KV452771.1  | 186264 | 3-scf00130 | 3  |
| AX-157993089 | 6 | 0.145 | KV452771.1  | 194315 | 3-scf00130 | 3  |
| AX-157992919 | 6 | 0.364 | KV452768.1  | 30278  | 3-scf00127 | 3  |
| AX-157992915 | 6 | 0.364 | KV452768.1  | 37876  | 3-scf00127 | 3  |
| AX-157992912 | 6 | 0.364 | KV452768.1  | 41129  | 3-scf00127 | 3  |
| AX-157992909 | 6 | 0.364 | KV452768.1  | 44544  | 3-scf00127 | 3  |
| AX-157992906 | 6 | 0.364 | KV452768.1  | 50589  | 3-scf00127 | 3  |
| AX-157992901 | 6 | 0.364 | KV452768.1  | 53740  | 3-scf00127 | 3  |
| AX-157992899 | 6 | 0.364 | KV452768.1  | 54267  | 3-scf00127 | 3  |
| AX-158407287 | 6 | 0.364 | KV452768.1  | 59225  | 3-scf00127 | 3  |
| AX-158407285 | 6 | 0.364 | KV452768.1  | 59762  | 3-scf00127 | 3  |
| AX-157992894 | 6 | 0.364 | KV452768.1  | 60700  | 3-scf00127 | 3  |
| AX-157992889 | 6 | 0.364 | KV452768.1  | 70004  | 3-scf00127 | 3  |
| AX-157992888 | 6 | 0.364 | KV452768.1  | 71769  | 3-scf00127 | 3  |
| AX-157992941 | 6 | 0.473 | KV452768.1  | 2625   | 3-scf00127 | 3  |
| AX-157992938 | 6 | 0.473 | KV452768.1  | 5671   | 3-scf00127 | 3  |
| AX-157727303 | 6 | 0.473 | KV452768.1  | 11168  | 3-scf00127 | 3  |
| AX-157875882 | 6 | 0.473 | KV452768.1  | 20652  | 3-scf00127 | 3  |
| AX-157992923 | 6 | 0.473 | KV452768.1  | 25451  | 3-scf00127 | 3  |
| AX-157992921 | 6 | 0.473 | KV452768.1  | 27755  | 3-scf00127 | 3  |
| AX-157992881 | 6 | 0.473 | KV452768.1  | 74842  | 3-scf00127 | 3  |
| AX-157682917 | 6 | 0.473 | KV452770.1  | 14570  | 3-scf00132 | 3  |
| AX-157992803 | 6 | 1.11  | KV452768.1  | 197134 | 3-scf00127 | 3  |
| AX-157992715 | 6 | 1.11  | KV452768.1  | 358210 | 3-scf00127 | 3  |
| AX-157992696 | 6 | 1.11  | KV452768.1  | 389171 | 3-scf00127 | 3  |
| AX-157992683 | 6 | 1.11  | KV452768.1  | 424825 | 3-scf00127 | 3  |
| AX-158383297 | 6 | 1.11  | KV452768.1  | 431680 | 3-scf00127 | 3  |
| AX-157865115 | 6 | 1.11  | KV452768.1  | 438909 | 3-scf00127 | 3  |
| AX-157992675 | 6 | 1.11  | KV452768.1  | 445080 | 3-scf00127 | 3  |
| AX-158383296 | 6 | 1.11  | KV452768.1  | 454562 | 3-scf00127 | 3  |
| AX-157992666 | 6 | 1.11  | KV452768.1  | 460937 | 3-scf00127 | 3  |
| AX-157992660 | 6 | 1.11  | KV452768.1  | 466877 | 3-scf00127 | 3  |
| AX-157992659 | 6 | 1.11  | KV452768.1  | 472641 | 3-scf00127 | 3  |
| AX-157992657 | 6 | 1.11  | KV452768.1  | 473774 | 3-scf00127 | 3  |
| AX-157992651 | 6 | 1.11  | KV452768.1  | 477046 | 3-scf00127 | 3  |
| AX-157992650 | 6 | 1.11  | KV452768.1  | 477614 | 3-scf00127 | 3  |
| AX-157992643 | 6 | 1.11  | KV452768.1  | 486830 | 3-scf00127 | 3  |
| AX-157992642 | 6 | 1.11  | KV452768.1  | 487571 | 3-scf00127 | 3  |
| AX-157992638 | 6 | 1.11  | KV452768.1  | 491391 | 3-scf00127 | 3  |
| AX-157681436 | 6 | 1.11  | KV452778.1  | 5264   | 3-scf00612 | 3  |
| AX-157705913 | 6 | 1.11  | 3ML01031214 | 616    | scf06820_1 | UN |
| AX-157992871 | 6 | 1.237 | KV452768.1  | 84579  | 3-scf00127 | 3  |
| AX-157992829 | 6 | 1.237 | KV452768.1  | 141580 | 3-scf00127 | 3  |

|              |   |       |            |        |            |   |
|--------------|---|-------|------------|--------|------------|---|
| AX-157773144 | 6 | 1.237 | KV452768.1 | 142890 | 3-scf00127 | 3 |
| AX-157818753 | 6 | 1.237 | KV452768.1 | 145274 | 3-scf00127 | 3 |
| AX-157992814 | 6 | 1.237 | KV452768.1 | 181186 | 3-scf00127 | 3 |
| AX-157818748 | 6 | 1.237 | KV452768.1 | 232678 | 3-scf00127 | 3 |
| AX-157992786 | 6 | 1.237 | KV452768.1 | 242045 | 3-scf00127 | 3 |
| AX-157992785 | 6 | 1.237 | KV452768.1 | 243358 | 3-scf00127 | 3 |
| AX-157992782 | 6 | 1.237 | KV452768.1 | 247434 | 3-scf00127 | 3 |
| AX-157992779 | 6 | 1.237 | KV452768.1 | 250270 | 3-scf00127 | 3 |
| AX-157992777 | 6 | 1.237 | KV452768.1 | 250929 | 3-scf00127 | 3 |
| AX-157992776 | 6 | 1.237 | KV452768.1 | 252169 | 3-scf00127 | 3 |
| AX-157992772 | 6 | 1.237 | KV452768.1 | 253529 | 3-scf00127 | 3 |
| AX-157992771 | 6 | 1.237 | KV452768.1 | 254516 | 3-scf00127 | 3 |
| AX-157992769 | 6 | 1.237 | KV452768.1 | 256962 | 3-scf00127 | 3 |
| AX-157992763 | 6 | 1.237 | KV452768.1 | 265759 | 3-scf00127 | 3 |
| AX-157992752 | 6 | 1.237 | KV452768.1 | 281296 | 3-scf00127 | 3 |
| AX-157992750 | 6 | 1.237 | KV452768.1 | 284502 | 3-scf00127 | 3 |
| AX-157992749 | 6 | 1.237 | KV452768.1 | 285623 | 3-scf00127 | 3 |
| AX-157992747 | 6 | 1.237 | KV452768.1 | 287912 | 3-scf00127 | 3 |
| AX-157992745 | 6 | 1.237 | KV452768.1 | 291085 | 3-scf00127 | 3 |
| AX-157992744 | 6 | 1.237 | KV452768.1 | 298495 | 3-scf00127 | 3 |
| AX-157716743 | 6 | 1.237 | KV452768.1 | 304214 | 3-scf00127 | 3 |
| AX-157992742 | 6 | 1.237 | KV452768.1 | 310681 | 3-scf00127 | 3 |
| AX-157707803 | 6 | 1.237 | KV452768.1 | 320994 | 3-scf00127 | 3 |
| AX-157818743 | 6 | 1.237 | KV452768.1 | 329625 | 3-scf00127 | 3 |
| AX-157710840 | 6 | 1.237 | KV452768.1 | 332954 | 3-scf00127 | 3 |
| AX-157992727 | 6 | 1.237 | KV452768.1 | 345746 | 3-scf00127 | 3 |
| AX-157992721 | 6 | 1.237 | KV452768.1 | 350671 | 3-scf00127 | 3 |
| AX-157992718 | 6 | 1.237 | KV452768.1 | 352386 | 3-scf00127 | 3 |
| AX-157992714 | 6 | 1.237 | KV452768.1 | 364286 | 3-scf00127 | 3 |
| AX-157992712 | 6 | 1.237 | KV452768.1 | 365124 | 3-scf00127 | 3 |
| AX-157992711 | 6 | 1.237 | KV452768.1 | 366584 | 3-scf00127 | 3 |
| AX-157992709 | 6 | 1.237 | KV452768.1 | 366846 | 3-scf00127 | 3 |
| AX-157992708 | 6 | 1.237 | KV452768.1 | 367969 | 3-scf00127 | 3 |
| AX-157992703 | 6 | 1.237 | KV452768.1 | 375946 | 3-scf00127 | 3 |
| AX-157992700 | 6 | 1.237 | KV452768.1 | 383799 | 3-scf00127 | 3 |
| AX-157992677 | 6 | 1.237 | KV452768.1 | 442314 | 3-scf00127 | 3 |
| AX-157992664 | 6 | 1.237 | KV452768.1 | 465354 | 3-scf00127 | 3 |
| AX-157992519 | 6 | 1.237 | KV452768.1 | 632348 | 3-scf00127 | 3 |
| AX-157992513 | 6 | 1.237 | KV452768.1 | 639520 | 3-scf00127 | 3 |
| AX-157992511 | 6 | 1.237 | KV452768.1 | 646641 | 3-scf00127 | 3 |
| AX-157682912 | 6 | 1.237 | KV452770.1 | 4999   | 3-scf00132 | 3 |
| AX-157685341 | 6 | 1.237 | KV452778.1 | 3085   | 3-scf00612 | 3 |
| AX-157685344 | 6 | 1.237 | KV452778.1 | 8088   | 3-scf00612 | 3 |
| AX-157685345 | 6 | 1.237 | KV452778.1 | 8680   | 3-scf00612 | 3 |
| AX-157680830 | 6 | 1.237 | KV452778.1 | 27084  | 3-scf00612 | 3 |
| AX-158420716 | 6 | 1.237 | KV452778.1 | 126634 | 3-scf00612 | 3 |
| AX-157685359 | 6 | 1.237 | KV452778.1 | 130099 | 3-scf00612 | 3 |
| AX-157685362 | 6 | 1.237 | KV452778.1 | 140225 | 3-scf00612 | 3 |
| AX-157687940 | 6 | 1.237 | KV452766.1 | 1551   | 3-scf01112 | 3 |
| AX-157681034 | 6 | 1.237 | KV452766.1 | 1677   | 3-scf01112 | 3 |
| AX-157687941 | 6 | 1.237 | KV452766.1 | 3314   | 3-scf01112 | 3 |

|              |   |       |             |        |            |    |
|--------------|---|-------|-------------|--------|------------|----|
| AX-157688405 | 6 | 1.237 | KV452767.1  | 1436   | 3-scf01689 | 3  |
| AX-157686006 | 6 | 1.237 | KV453380.1  | 56672  | scf00662   | UN |
| AX-157686007 | 6 | 1.237 | KV453380.1  | 58012  | scf00662   | UN |
| AX-157686012 | 6 | 1.237 | KV453380.1  | 61204  | scf00662   | UN |
| AX-157686013 | 6 | 1.237 | KV453380.1  | 62742  | scf00662   | UN |
| AX-157686920 | 6 | 1.237 | 3ML01024574 | 11928  | scf00759_1 | UN |
| AX-157686921 | 6 | 1.237 | 3ML01024574 | 15965  | scf00759_1 | UN |
| AX-157709850 | 6 | 1.237 | 3ML01024574 | 21138  | scf00759_1 | UN |
| AX-157686928 | 6 | 1.237 | 3ML01024574 | 26389  | scf00759_1 | UN |
| AX-157680392 | 6 | 1.237 | 3ML01024574 | 27352  | scf00759_1 | UN |
| AX-157687926 | 6 | 1.237 | 3ML01025343 | 741    | scf01102_1 | UN |
| AX-157992789 | 6 | 1.258 | KV452768.1  | 234226 | 3-scf00127 | 3  |
| AX-157992781 | 6 | 1.258 | KV452768.1  | 247835 | 3-scf00127 | 3  |
| AX-157992697 | 6 | 1.258 | KV452768.1  | 387112 | 3-scf00127 | 3  |
| AX-157818739 | 6 | 1.258 | KV452768.1  | 558420 | 3-scf00127 | 3  |
| AX-157992505 | 6 | 1.258 | KV452768.1  | 649888 | 3-scf00127 | 3  |
| AX-157992794 | 6 | 1.306 | KV452768.1  | 228259 | 3-scf00127 | 3  |
| AX-157992809 | 6 | 1.347 | KV452768.1  | 187252 | 3-scf00127 | 3  |
| AX-157992797 | 6 | 1.347 | KV452768.1  | 217651 | 3-scf00127 | 3  |
| AX-157992796 | 6 | 1.347 | KV452768.1  | 218185 | 3-scf00127 | 3  |
| AX-157818749 | 6 | 1.347 | KV452768.1  | 219292 | 3-scf00127 | 3  |
| AX-157720479 | 6 | 1.347 | KV452768.1  | 368470 | 3-scf00127 | 3  |
| AX-157992854 | 6 | 1.881 | KV452768.1  | 120215 | 3-scf00127 | 3  |
| AX-157992848 | 6 | 1.881 | KV452768.1  | 125384 | 3-scf00127 | 3  |
| AX-157682896 | 6 | 1.881 | KV452772.1  | 11655  | 3-scf00131 | 3  |
| AX-157682887 | 6 | 1.881 |             | 93     | scf00129   | UN |
| AX-157687744 | 6 | 1.881 | KV453590.1  | 7378   | scf00993   | UN |
| AX-157682882 | 6 | 1.892 | KV452769.1  | 5991   | 3-scf00128 | 3  |
| AX-157682885 | 6 | 1.892 | KV452769.1  | 8830   | 3-scf00128 | 3  |
| AX-157993062 | 6 | 1.892 | KV452771.1  | 168054 | 3-scf00130 | 3  |
| AX-157682886 | 6 | 1.893 | KV452769.1  | 9080   | 3-scf00128 | 3  |
| AX-157682893 | 6 | 2.088 | KV452772.1  | 8149   | 3-scf00131 | 3  |
| AX-157682900 | 6 | 2.33  | KV452772.1  | 24919  | 3-scf00131 | 3  |
| AX-157682903 | 6 | 2.33  | KV452772.1  | 32838  | 3-scf00131 | 3  |
| AX-157682915 | 6 | 2.33  | KV452770.1  | 10055  | 3-scf00132 | 3  |
| AX-157687961 | 6 | 2.33  | KV453659.1  | 4088   | scf01121   | UN |
| AX-157682904 | 6 | 2.351 | KV452772.1  | 34508  | 3-scf00131 | 3  |
| AX-157682907 | 6 | 2.375 | KV452772.1  | 41233  | 3-scf00131 | 3  |
| AX-158407289 | 6 | 2.394 | KV452770.1  | 7888   | 3-scf00132 | 3  |
| AX-157680038 | 6 | 2.414 | KV452770.1  | 9441   | 3-scf00132 | 3  |
| AX-157682905 | 6 | 2.439 | KV452772.1  | 36710  | 3-scf00131 | 3  |
| AX-157682908 | 6 | 2.439 | KV452772.1  | 43252  | 3-scf00131 | 3  |
| AX-157687741 | 6 | 2.439 | KV453590.1  | 2385   | scf00993   | UN |
| AX-157687959 | 6 | 2.439 | KV453659.1  | 2230   | scf01121   | UN |
| AX-157687960 | 6 | 2.439 | KV453659.1  | 3694   | scf01121   | UN |
| AX-157681337 | 6 | 2.444 | KV452770.1  | 23783  | 3-scf00132 | 3  |
| AX-157681338 | 6 | 2.444 | KV452770.1  | 23840  | 3-scf00132 | 3  |
| AX-157992947 | 6 | 2.872 | KV452771.1  | 16227  | 3-scf00130 | 3  |
| AX-157992946 | 6 | 2.876 | KV452771.1  | 14722  | 3-scf00130 | 3  |
| AX-157992948 | 6 | 2.876 | KV452771.1  | 17626  | 3-scf00130 | 3  |
| AX-157992952 | 6 | 2.876 | KV452771.1  | 27402  | 3-scf00130 | 3  |

|              |   |       |            |        |            |    |
|--------------|---|-------|------------|--------|------------|----|
| AX-157992958 | 6 | 2.876 | KV452771.1 | 32029  | 3-scf00130 | 3  |
| AX-157992959 | 6 | 2.876 | KV452771.1 | 32798  | 3-scf00130 | 3  |
| AX-157992964 | 6 | 2.876 | KV452771.1 | 37937  | 3-scf00130 | 3  |
| AX-157992965 | 6 | 2.876 | KV452771.1 | 38816  | 3-scf00130 | 3  |
| AX-157818758 | 6 | 2.876 | KV452771.1 | 38904  | 3-scf00130 | 3  |
| AX-157992967 | 6 | 2.876 | KV452771.1 | 39253  | 3-scf00130 | 3  |
| AX-157992971 | 6 | 2.876 | KV452771.1 | 40423  | 3-scf00130 | 3  |
| AX-157992973 | 6 | 2.876 | KV452771.1 | 42750  | 3-scf00130 | 3  |
| AX-157992975 | 6 | 2.876 | KV452771.1 | 42952  | 3-scf00130 | 3  |
| AX-157992983 | 6 | 2.876 | KV452771.1 | 51239  | 3-scf00130 | 3  |
| AX-157992988 | 6 | 2.876 | KV452771.1 | 56613  | 3-scf00130 | 3  |
| AX-157993017 | 6 | 2.876 | KV452771.1 | 94518  | 3-scf00130 | 3  |
| AX-157687743 | 6 | 2.876 | KV453590.1 | 6849   | scf00993   | UN |
| AX-157992991 | 6 | 3.094 | KV452771.1 | 63347  | 3-scf00130 | 3  |
| AX-157992992 | 6 | 3.094 | KV452771.1 | 64226  | 3-scf00130 | 3  |
| AX-157992994 | 6 | 3.094 | KV452771.1 | 65981  | 3-scf00130 | 3  |
| AX-157992997 | 6 | 3.094 | KV452771.1 | 68319  | 3-scf00130 | 3  |
| AX-157993000 | 6 | 3.094 | KV452771.1 | 76024  | 3-scf00130 | 3  |
| AX-157993001 | 6 | 3.094 | KV452771.1 | 76888  | 3-scf00130 | 3  |
| AX-157993003 | 6 | 3.094 | KV452771.1 | 80658  | 3-scf00130 | 3  |
| AX-157993004 | 6 | 3.094 | KV452771.1 | 81467  | 3-scf00130 | 3  |
| AX-157993006 | 6 | 3.094 | KV452771.1 | 85452  | 3-scf00130 | 3  |
| AX-157993011 | 6 | 3.094 | KV452771.1 | 89587  | 3-scf00130 | 3  |
| AX-157993012 | 6 | 3.094 | KV452771.1 | 90480  | 3-scf00130 | 3  |
| AX-157865119 | 6 | 3.094 | KV452771.1 | 97421  | 3-scf00130 | 3  |
| AX-157993021 | 6 | 3.133 | KV452771.1 | 102705 | 3-scf00130 | 3  |
| AX-157993022 | 6 | 3.172 | KV452771.1 | 103317 | 3-scf00130 | 3  |
| AX-157818760 | 6 | 3.313 | KV452771.1 | 114309 | 3-scf00130 | 3  |
| AX-157993026 | 6 | 3.313 | KV452771.1 | 118454 | 3-scf00130 | 3  |
| AX-157993029 | 6 | 3.479 | KV452771.1 | 121098 | 3-scf00130 | 3  |
| AX-157993032 | 6 | 3.479 | KV452771.1 | 126803 | 3-scf00130 | 3  |
| AX-157993033 | 6 | 3.479 | KV452771.1 | 130256 | 3-scf00130 | 3  |
| AX-157993034 | 6 | 3.479 | KV452771.1 | 130647 | 3-scf00130 | 3  |
| AX-157993037 | 6 | 3.479 | KV452771.1 | 133099 | 3-scf00130 | 3  |
| AX-157993040 | 6 | 3.479 | KV452771.1 | 141783 | 3-scf00130 | 3  |
| AX-157993051 | 6 | 3.635 | KV452771.1 | 153109 | 3-scf00130 | 3  |
| AX-157993054 | 6 | 3.635 | KV452771.1 | 155105 | 3-scf00130 | 3  |
| AX-157993056 | 6 | 3.637 | KV452771.1 | 158735 | 3-scf00130 | 3  |
| AX-157993053 | 6 | 3.64  | KV452771.1 | 154218 | 3-scf00130 | 3  |
| AX-157993057 | 6 | 3.64  | KV452771.1 | 159724 | 3-scf00130 | 3  |
| AX-157993061 | 6 | 3.64  | KV452771.1 | 166159 | 3-scf00130 | 3  |
| AX-157993066 | 6 | 3.64  | KV452771.1 | 170437 | 3-scf00130 | 3  |
| AX-157993245 | 6 | 3.64  | KV452782.1 | 48826  | 3-scf00136 | 3  |
| AX-157993069 | 6 | 3.672 | KV452771.1 | 175612 | 3-scf00130 | 3  |
| AX-157993076 | 6 | 3.704 | KV452771.1 | 182461 | 3-scf00130 | 3  |
| AX-157993078 | 6 | 3.75  | KV452771.1 | 183254 | 3-scf00130 | 3  |
| AX-157993074 | 6 | 3.812 | KV452771.1 | 177572 | 3-scf00130 | 3  |
| AX-157993081 | 6 | 3.812 | KV452771.1 | 186830 | 3-scf00130 | 3  |
| AX-157993087 | 6 | 3.812 | KV452771.1 | 192446 | 3-scf00130 | 3  |
| AX-158383299 | 6 | 3.86  | KV452771.1 | 190810 | 3-scf00130 | 3  |
| AX-157993088 | 6 | 3.86  | KV452771.1 | 192979 | 3-scf00130 | 3  |

|              |   |       |             |        |            |    |
|--------------|---|-------|-------------|--------|------------|----|
| AX-157993092 | 6 | 3.86  | KV452771.1  | 200262 | 3-scf00130 | 3  |
| AX-157993096 | 6 | 3.86  | KV452771.1  | 209333 | 3-scf00130 | 3  |
| AX-157875884 | 6 | 3.86  | KV452771.1  | 209444 | 3-scf00130 | 3  |
| AX-157993100 | 6 | 3.86  | KV452771.1  | 212069 | 3-scf00130 | 3  |
| AX-157993077 | 6 | 3.88  | KV452771.1  | 182890 | 3-scf00130 | 3  |
| AX-157993093 | 6 | 3.962 | KV452771.1  | 201033 | 3-scf00130 | 3  |
| AX-157993095 | 6 | 4.028 | KV452771.1  | 206522 | 3-scf00130 | 3  |
| AX-157993097 | 6 | 4.028 | KV452771.1  | 209987 | 3-scf00130 | 3  |
| AX-157993101 | 6 | 4.179 | KV452771.1  | 213518 | 3-scf00130 | 3  |
| AX-157818752 | 6 | 4.18  | KV452768.1  | 153914 | 3-scf00127 | 3  |
| AX-157993065 | 6 | 4.18  | KV452771.1  | 169289 | 3-scf00130 | 3  |
| AX-157725867 | 6 | 4.18  | KV452771.1  | 215298 | 3-scf00130 | 3  |
| AX-157993104 | 6 | 4.184 | KV452771.1  | 223137 | 3-scf00130 | 3  |
| AX-157993031 | 6 | 4.189 | KV452771.1  | 121605 | 3-scf00130 | 3  |
| AX-157993106 | 6 | 4.189 | KV452771.1  | 225660 | 3-scf00130 | 3  |
| AX-157755067 | 6 | 4.189 | KV452771.1  | 233741 | 3-scf00130 | 3  |
| AX-157993111 | 6 | 4.555 | KV452771.1  | 236672 | 3-scf00130 | 3  |
| AX-157993118 | 6 | 4.555 | KV452771.1  | 240597 | 3-scf00130 | 3  |
| AX-157993170 | 6 | 4.555 | KV452775.1  | 67413  | 3-scf00133 | 3  |
| AX-157993115 | 6 | 4.556 | KV452771.1  | 238307 | 3-scf00130 | 3  |
| AX-157884579 | 6 | 4.557 | KV452775.1  | 1589   | 3-scf00133 | 3  |
| AX-157855717 | 6 | 4.557 | KV452775.1  | 51162  | 3-scf00133 | 3  |
| AX-157993122 | 6 | 4.559 | KV452775.1  | 2293   | 3-scf00133 | 3  |
| AX-157993123 | 6 | 4.559 | KV452775.1  | 4267   | 3-scf00133 | 3  |
| AX-157742382 | 6 | 4.559 | KV452775.1  | 7296   | 3-scf00133 | 3  |
| AX-157725671 | 6 | 4.559 | KV452775.1  | 10598  | 3-scf00133 | 3  |
| AX-157993134 | 6 | 4.559 | KV452775.1  | 12990  | 3-scf00133 | 3  |
| AX-157993136 | 6 | 4.729 | KV452775.1  | 16562  | 3-scf00133 | 3  |
| AX-157884581 | 6 | 4.733 | KV452775.1  | 24256  | 3-scf00133 | 3  |
| AX-157749714 | 6 | 5.004 | KV452775.1  | 35740  | 3-scf00133 | 3  |
| AX-157993139 | 6 | 5.175 | KV452775.1  | 19656  | 3-scf00133 | 3  |
| AX-157993147 | 6 | 5.175 | KV452775.1  | 41033  | 3-scf00133 | 3  |
| AX-157993156 | 6 | 5.175 | KV452775.1  | 52246  | 3-scf00133 | 3  |
| AX-157993157 | 6 | 5.175 | KV452775.1  | 52522  | 3-scf00133 | 3  |
| AX-157742666 | 6 | 5.175 | KV452775.1  | 53623  | 3-scf00133 | 3  |
| AX-157993158 | 6 | 5.175 | KV452775.1  | 55744  | 3-scf00133 | 3  |
| AX-157993163 | 6 | 5.175 | KV452775.1  | 57522  | 3-scf00133 | 3  |
| AX-157993164 | 6 | 5.175 | KV452775.1  | 58006  | 3-scf00133 | 3  |
| AX-157818761 | 6 | 5.175 | KV452775.1  | 63967  | 3-scf00133 | 3  |
| AX-157738841 | 6 | 5.175 | KV452775.1  | 66154  | 3-scf00133 | 3  |
| AX-157993169 | 6 | 5.175 | KV452775.1  | 66725  | 3-scf00133 | 3  |
| AX-157687583 | 6 | 5.175 | KV453558.1  | 2903   | scf00938   | UN |
| AX-157689852 | 6 | 5.175 | 3ML01033632 | 186    | scf09291_1 | UN |
| AX-158383302 | 6 | 5.284 | KV452775.1  | 78213  | 3-scf00133 | 3  |
| AX-157993181 | 6 | 5.284 | KV452775.1  | 79586  | 3-scf00133 | 3  |
| AX-157716028 | 6 | 5.284 | KV452775.1  | 81048  | 3-scf00133 | 3  |
| AX-157993184 | 6 | 5.284 | KV452775.1  | 82900  | 3-scf00133 | 3  |
| AX-157818763 | 6 | 5.328 | KV452775.1  | 83664  | 3-scf00133 | 3  |
| AX-157993186 | 6 | 5.393 | KV452775.1  | 86521  | 3-scf00133 | 3  |
| AX-157993187 | 6 | 5.393 | KV452775.1  | 87455  | 3-scf00133 | 3  |
| AX-157818764 | 6 | 5.393 | KV452775.1  | 87858  | 3-scf00133 | 3  |

|              |   |       |            |       |            |    |
|--------------|---|-------|------------|-------|------------|----|
| AX-157993188 | 6 | 5.393 | KV452775.1 | 88834 | 3-scf00133 | 3  |
| AX-157993189 | 6 | 5.394 | KV452775.1 | 95317 | 3-scf00133 | 3  |
| AX-157993190 | 6 | 5.478 | KV452775.1 | 95787 | 3-scf00133 | 3  |
| AX-157687584 | 6 | 5.557 | KV453558.1 | 4060  | scf00938   | UN |
| AX-157680632 | 6 | 5.722 | KV452776.1 | 10891 | 3-scf00135 | 3  |
| AX-157680633 | 6 | 5.722 | KV452776.1 | 13471 | 3-scf00135 | 3  |
| AX-157682931 | 6 | 5.722 | KV452776.1 | 15410 | 3-scf00135 | 3  |
| AX-157682934 | 6 | 5.722 | KV452776.1 | 18699 | 3-scf00135 | 3  |
| AX-157682940 | 6 | 5.722 | KV452776.1 | 27982 | 3-scf00135 | 3  |
| AX-157682943 | 6 | 5.722 | KV452776.1 | 30248 | 3-scf00135 | 3  |
| AX-157680122 | 6 | 5.722 | KV452776.1 | 33324 | 3-scf00135 | 3  |
| AX-157682946 | 6 | 5.722 | KV452776.1 | 40577 | 3-scf00135 | 3  |
| AX-157680485 | 6 | 5.722 | KV452776.1 | 41118 | 3-scf00135 | 3  |
| AX-157680324 | 6 | 5.722 | KV452776.1 | 41798 | 3-scf00135 | 3  |
| AX-157682949 | 6 | 5.722 | KV452776.1 | 43199 | 3-scf00135 | 3  |
| AX-157682951 | 6 | 5.722 | KV452776.1 | 46234 | 3-scf00135 | 3  |
| AX-157682952 | 6 | 5.722 | KV452776.1 | 47171 | 3-scf00135 | 3  |
| AX-157682953 | 6 | 5.722 | KV452776.1 | 48631 | 3-scf00135 | 3  |
| AX-157682954 | 6 | 5.722 | KV452776.1 | 49596 | 3-scf00135 | 3  |
| AX-157682956 | 6 | 5.722 | KV452776.1 | 52370 | 3-scf00135 | 3  |
| AX-157682958 | 6 | 5.722 | KV452776.1 | 54171 | 3-scf00135 | 3  |
| AX-157682960 | 6 | 5.722 | KV452776.1 | 55778 | 3-scf00135 | 3  |
| AX-157679972 | 6 | 5.722 | KV452776.1 | 57643 | 3-scf00135 | 3  |
| AX-157682961 | 6 | 5.722 | KV452776.1 | 59146 | 3-scf00135 | 3  |
| AX-157682962 | 6 | 5.722 | KV452776.1 | 59585 | 3-scf00135 | 3  |
| AX-157993213 | 6 | 5.722 | KV452782.1 | 12670 | 3-scf00136 | 3  |
| AX-157993214 | 6 | 5.722 | KV452782.1 | 14233 | 3-scf00136 | 3  |
| AX-157745192 | 6 | 5.722 | KV452782.1 | 18153 | 3-scf00136 | 3  |
| AX-157818769 | 6 | 5.722 | KV452782.1 | 20946 | 3-scf00136 | 3  |
| AX-157993215 | 6 | 5.722 | KV452782.1 | 21608 | 3-scf00136 | 3  |
| AX-157993229 | 6 | 5.722 | KV452782.1 | 32897 | 3-scf00136 | 3  |
| AX-157741246 | 6 | 5.787 | KV452782.1 | 25282 | 3-scf00136 | 3  |
| AX-157993218 | 6 | 5.787 | KV452782.1 | 26775 | 3-scf00136 | 3  |
| AX-157993217 | 6 | 5.831 | KV452782.1 | 26069 | 3-scf00136 | 3  |
| AX-157818770 | 6 | 5.831 | KV452782.1 | 27270 | 3-scf00136 | 3  |
| AX-157993219 | 6 | 5.831 | KV452782.1 | 28214 | 3-scf00136 | 3  |
| AX-157993224 | 6 | 5.831 | KV452782.1 | 31175 | 3-scf00136 | 3  |
| AX-157993225 | 6 | 5.831 | KV452782.1 | 31426 | 3-scf00136 | 3  |
| AX-157993231 | 6 | 5.831 | KV452782.1 | 33197 | 3-scf00136 | 3  |
| AX-157993235 | 6 | 5.94  | KV452782.1 | 41313 | 3-scf00136 | 3  |
| AX-157993243 | 6 | 6.049 | KV452782.1 | 47416 | 3-scf00136 | 3  |
| AX-157993246 | 6 | 6.049 | KV452782.1 | 50071 | 3-scf00136 | 3  |
| AX-157993249 | 6 | 6.049 | KV452782.1 | 59338 | 3-scf00136 | 3  |
| AX-157783095 | 6 | 6.049 | KV452782.1 | 61042 | 3-scf00136 | 3  |
| AX-157993251 | 6 | 6.049 | KV452782.1 | 63157 | 3-scf00136 | 3  |
| AX-157818773 | 6 | 6.049 | KV452782.1 | 64851 | 3-scf00136 | 3  |
| AX-157993262 | 6 | 6.049 | KV452782.1 | 80843 | 3-scf00136 | 3  |
| AX-157993256 | 6 | 6.081 | KV452782.1 | 68350 | 3-scf00136 | 3  |
| AX-157818774 | 6 | 6.107 | KV452782.1 | 71030 | 3-scf00136 | 3  |
| AX-157993250 | 6 | 6.158 | KV452782.1 | 59886 | 3-scf00136 | 3  |
| AX-157818775 | 6 | 6.158 | KV452782.1 | 71328 | 3-scf00136 | 3  |



|              |   |       |            |        |            |   |
|--------------|---|-------|------------|--------|------------|---|
| AX-157754001 | 6 | 6.158 | KV452782.1 | 75665  | 3-scf00136 | 3 |
| AX-157993261 | 6 | 6.158 | KV452782.1 | 76370  | 3-scf00136 | 3 |
| AX-157682948 | 6 | 6.304 | KV452776.1 | 42417  | 3-scf00135 | 3 |
| AX-157721851 | 6 | 6.304 | KV452782.1 | 30617  | 3-scf00136 | 3 |
| AX-157993247 | 6 | 6.304 | KV452782.1 | 51642  | 3-scf00136 | 3 |
| AX-157993264 | 6 | 6.304 | KV452782.1 | 82170  | 3-scf00136 | 3 |
| AX-157993265 | 6 | 6.304 | KV452782.1 | 82772  | 3-scf00136 | 3 |
| AX-157993266 | 6 | 6.304 | KV452782.1 | 82856  | 3-scf00136 | 3 |
| AX-157993268 | 6 | 6.304 | KV452782.1 | 83565  | 3-scf00136 | 3 |
| AX-157993283 | 6 | 6.304 | KV452782.1 | 108245 | 3-scf00136 | 3 |
| AX-157993291 | 6 | 6.304 | KV452782.1 | 116562 | 3-scf00136 | 3 |
| AX-157714019 | 6 | 6.304 | KV452782.1 | 163701 | 3-scf00136 | 3 |
| AX-157738617 | 6 | 6.304 | KV452782.1 | 170469 | 3-scf00136 | 3 |
| AX-157993271 | 6 | 6.596 | KV452782.1 | 91662  | 3-scf00136 | 3 |
| AX-157680631 | 6 | 6.705 | KV452776.1 | 10241  | 3-scf00135 | 3 |
| AX-157682935 | 6 | 6.705 | KV452776.1 | 19490  | 3-scf00135 | 3 |
| AX-157752356 | 6 | 6.705 | KV452782.1 | 27874  | 3-scf00136 | 3 |
| AX-157818776 | 6 | 6.705 | KV452782.1 | 85442  | 3-scf00136 | 3 |
| AX-157993272 | 6 | 6.705 | KV452782.1 | 94396  | 3-scf00136 | 3 |
| AX-157993274 | 6 | 6.705 | KV452782.1 | 96142  | 3-scf00136 | 3 |
| AX-157818777 | 6 | 6.705 | KV452782.1 | 96928  | 3-scf00136 | 3 |
| AX-157993276 | 6 | 6.705 | KV452782.1 | 97950  | 3-scf00136 | 3 |
| AX-157993277 | 6 | 6.705 | KV452782.1 | 100132 | 3-scf00136 | 3 |
| AX-157884583 | 6 | 6.705 | KV452782.1 | 106281 | 3-scf00136 | 3 |
| AX-157993285 | 6 | 6.705 | KV452782.1 | 110183 | 3-scf00136 | 3 |
| AX-157993286 | 6 | 6.705 | KV452782.1 | 112210 | 3-scf00136 | 3 |
| AX-157993287 | 6 | 6.705 | KV452782.1 | 112711 | 3-scf00136 | 3 |
| AX-157993290 | 6 | 6.705 | KV452782.1 | 115385 | 3-scf00136 | 3 |
| AX-157993296 | 6 | 6.705 | KV452782.1 | 122445 | 3-scf00136 | 3 |
| AX-157993350 | 6 | 6.705 | KV452782.1 | 207195 | 3-scf00136 | 3 |
| AX-157993302 | 6 | 6.814 | KV452782.1 | 133694 | 3-scf00136 | 3 |
| AX-157752875 | 6 | 6.814 | KV452782.1 | 134591 | 3-scf00136 | 3 |
| AX-157993304 | 6 | 6.814 | KV452782.1 | 134946 | 3-scf00136 | 3 |
| AX-157772028 | 6 | 6.923 | KV452782.1 | 142468 | 3-scf00136 | 3 |
| AX-157993310 | 6 | 6.923 | KV452782.1 | 148776 | 3-scf00136 | 3 |
| AX-157775836 | 6 | 6.923 | KV452782.1 | 151366 | 3-scf00136 | 3 |
| AX-157993315 | 6 | 6.923 | KV452782.1 | 156863 | 3-scf00136 | 3 |
| AX-157993320 | 6 | 6.923 | KV452782.1 | 168674 | 3-scf00136 | 3 |
| AX-157720933 | 6 | 6.99  | KV452782.1 | 157597 | 3-scf00136 | 3 |
| AX-157993316 | 6 | 7.061 | KV452782.1 | 157644 | 3-scf00136 | 3 |
| AX-157993307 | 6 | 7.142 | KV452782.1 | 144094 | 3-scf00136 | 3 |
| AX-157993309 | 6 | 7.142 | KV452782.1 | 146997 | 3-scf00136 | 3 |
| AX-157993311 | 6 | 7.142 | KV452782.1 | 149656 | 3-scf00136 | 3 |
| AX-157818782 | 6 | 7.142 | KV452782.1 | 161768 | 3-scf00136 | 3 |
| AX-157745540 | 6 | 7.142 | KV452782.1 | 162496 | 3-scf00136 | 3 |
| AX-157818783 | 6 | 7.142 | KV452782.1 | 170054 | 3-scf00136 | 3 |
| AX-157993321 | 6 | 7.142 | KV452782.1 | 171470 | 3-scf00136 | 3 |
| AX-157818785 | 6 | 7.142 | KV452782.1 | 172573 | 3-scf00136 | 3 |
| AX-157745929 | 6 | 7.142 | KV452782.1 | 173340 | 3-scf00136 | 3 |
| AX-157993323 | 6 | 7.142 | KV452782.1 | 176247 | 3-scf00136 | 3 |
| AX-157993324 | 6 | 7.142 | KV452782.1 | 177502 | 3-scf00136 | 3 |

|              |   |       |            |        |            |   |
|--------------|---|-------|------------|--------|------------|---|
| AX-157993325 | 6 | 7.142 | KV452782.1 | 180058 | 3-scf00136 | 3 |
| AX-157993327 | 6 | 7.142 | KV452782.1 | 183686 | 3-scf00136 | 3 |
| AX-157993329 | 6 | 7.142 | KV452782.1 | 184942 | 3-scf00136 | 3 |
| AX-157993330 | 6 | 7.142 | KV452782.1 | 185501 | 3-scf00136 | 3 |
| AX-157993332 | 6 | 7.142 | KV452782.1 | 186162 | 3-scf00136 | 3 |
| AX-157714755 | 6 | 7.142 | KV452782.1 | 191227 | 3-scf00136 | 3 |
| AX-157993341 | 6 | 7.162 | KV452782.1 | 199834 | 3-scf00136 | 3 |
| AX-157993356 | 6 | 7.472 | KV452782.1 | 213266 | 3-scf00136 | 3 |
| AX-157993362 | 6 | 7.472 | KV452782.1 | 216425 | 3-scf00136 | 3 |
| AX-157993372 | 6 | 7.75  | KV452782.1 | 223019 | 3-scf00136 | 3 |
| AX-157993375 | 6 | 7.772 | KV452782.1 | 224100 | 3-scf00136 | 3 |
| AX-157855719 | 6 | 7.772 | KV452782.1 | 226074 | 3-scf00136 | 3 |
| AX-157993378 | 6 | 7.782 | KV452782.1 | 228976 | 3-scf00136 | 3 |
| AX-157682968 | 6 | 7.782 | KV452782.1 | 277200 | 3-scf00136 | 3 |
| AX-157993387 | 6 | 7.789 | KV452782.1 | 238679 | 3-scf00136 | 3 |
| AX-157993394 | 6 | 7.819 | KV452782.1 | 247855 | 3-scf00136 | 3 |
| AX-157724560 | 6 | 7.82  | KV452782.1 | 247945 | 3-scf00136 | 3 |
| AX-157993401 | 6 | 8.016 | KV452782.1 | 261692 | 3-scf00136 | 3 |
| AX-157993404 | 6 | 8.016 | KV452782.1 | 263725 | 3-scf00136 | 3 |
| AX-157682967 | 6 | 8.016 | KV452782.1 | 278701 | 3-scf00136 | 3 |
| AX-157993531 | 6 | 8.016 | KV452782.1 | 443398 | 3-scf00136 | 3 |
| AX-157689078 | 6 | 8.016 | KV452774.1 | 731    | 3-scf03675 | 3 |
| AX-157680513 | 6 | 8.019 | KV452777.1 | 10081  | 3-scf00920 | 3 |
| AX-157710178 | 6 | 8.021 | KV452782.1 | 133524 | 3-scf00136 | 3 |
| AX-157682970 | 6 | 8.021 | KV452782.1 | 272804 | 3-scf00136 | 3 |
| AX-157993407 | 6 | 8.021 | KV452782.1 | 284180 | 3-scf00136 | 3 |
| AX-157993395 | 6 | 8.453 | KV452782.1 | 248748 | 3-scf00136 | 3 |
| AX-157993398 | 6 | 8.453 | KV452782.1 | 253161 | 3-scf00136 | 3 |
| AX-157993413 | 6 | 8.453 | KV452782.1 | 290243 | 3-scf00136 | 3 |
| AX-157993417 | 6 | 8.453 | KV452782.1 | 294016 | 3-scf00136 | 3 |
| AX-157993423 | 6 | 8.453 | KV452782.1 | 308401 | 3-scf00136 | 3 |
| AX-157818794 | 6 | 8.453 | KV452782.1 | 309563 | 3-scf00136 | 3 |
| AX-157993427 | 6 | 8.453 | KV452782.1 | 312087 | 3-scf00136 | 3 |
| AX-157710125 | 6 | 8.453 | KV452782.1 | 312474 | 3-scf00136 | 3 |
| AX-157993437 | 6 | 8.453 | KV452782.1 | 340173 | 3-scf00136 | 3 |
| AX-157993438 | 6 | 8.453 | KV452782.1 | 341382 | 3-scf00136 | 3 |
| AX-157993439 | 6 | 8.453 | KV452782.1 | 341921 | 3-scf00136 | 3 |
| AX-157772615 | 6 | 8.453 | KV452782.1 | 346364 | 3-scf00136 | 3 |
| AX-157993451 | 6 | 8.453 | KV452782.1 | 349268 | 3-scf00136 | 3 |
| AX-157993453 | 6 | 8.453 | KV452782.1 | 350632 | 3-scf00136 | 3 |
| AX-157993456 | 6 | 8.453 | KV452782.1 | 352514 | 3-scf00136 | 3 |
| AX-157855720 | 6 | 8.453 | KV452782.1 | 356003 | 3-scf00136 | 3 |
| AX-157993461 | 6 | 8.453 | KV452782.1 | 357302 | 3-scf00136 | 3 |
| AX-157993462 | 6 | 8.453 | KV452782.1 | 357973 | 3-scf00136 | 3 |
| AX-157993465 | 6 | 8.453 | KV452782.1 | 362821 | 3-scf00136 | 3 |
| AX-157993468 | 6 | 8.453 | KV452782.1 | 363557 | 3-scf00136 | 3 |
| AX-157993469 | 6 | 8.453 | KV452782.1 | 364229 | 3-scf00136 | 3 |
| AX-157993470 | 6 | 8.453 | KV452782.1 | 364823 | 3-scf00136 | 3 |
| AX-157993471 | 6 | 8.453 | KV452782.1 | 366484 | 3-scf00136 | 3 |
| AX-157855722 | 6 | 8.453 | KV452782.1 | 369839 | 3-scf00136 | 3 |
| AX-157993478 | 6 | 8.468 | KV452782.1 | 373657 | 3-scf00136 | 3 |

|              |   |       |             |        |            |    |
|--------------|---|-------|-------------|--------|------------|----|
| AX-157993519 | 6 | 8.468 | KV452782.1  | 428562 | 3-scf00136 | 3  |
| AX-157993480 | 6 | 8.486 | KV452782.1  | 378512 | 3-scf00136 | 3  |
| AX-157993483 | 6 | 8.517 | KV452782.1  | 380368 | 3-scf00136 | 3  |
| AX-158422200 | 6 | 8.531 | KV452782.1  | 384554 | 3-scf00136 | 3  |
| AX-157993491 | 6 | 8.562 | KV452782.1  | 390176 | 3-scf00136 | 3  |
| AX-157993492 | 6 | 8.562 | KV452782.1  | 390741 | 3-scf00136 | 3  |
| AX-157993496 | 6 | 8.562 | KV452782.1  | 401916 | 3-scf00136 | 3  |
| AX-157993503 | 6 | 8.562 | KV452782.1  | 412319 | 3-scf00136 | 3  |
| AX-157993510 | 6 | 8.781 | KV452782.1  | 418417 | 3-scf00136 | 3  |
| AX-157884585 | 6 | 8.781 | KV452782.1  | 421997 | 3-scf00136 | 3  |
| AX-157993514 | 6 | 8.781 | KV452782.1  | 423236 | 3-scf00136 | 3  |
| AX-157993516 | 6 | 8.781 | KV452782.1  | 423656 | 3-scf00136 | 3  |
| AX-157993523 | 6 | 8.781 | KV452782.1  | 436787 | 3-scf00136 | 3  |
| AX-157993527 | 6 | 8.781 | KV452782.1  | 439585 | 3-scf00136 | 3  |
| AX-157708294 | 6 | 8.783 | KV452782.1  | 399759 | 3-scf00136 | 3  |
| AX-157993517 | 6 | 8.783 | KV452782.1  | 427149 | 3-scf00136 | 3  |
| AX-157993518 | 6 | 8.783 | KV452782.1  | 428377 | 3-scf00136 | 3  |
| AX-157993520 | 6 | 8.783 | KV452782.1  | 429562 | 3-scf00136 | 3  |
| AX-157993522 | 6 | 8.783 | KV452782.1  | 434337 | 3-scf00136 | 3  |
| AX-157993521 | 6 | 8.786 | KV452782.1  | 430276 | 3-scf00136 | 3  |
| AX-157724201 | 6 | 8.92  | KV452782.1  | 434004 | 3-scf00136 | 3  |
| AX-157993539 | 6 | 9.062 | KV452782.1  | 458858 | 3-scf00136 | 3  |
| AX-157753277 | 6 | 9.062 | KV452782.1  | 465566 | 3-scf00136 | 3  |
| AX-157993505 | 6 | 9.267 | KV452782.1  | 414160 | 3-scf00136 | 3  |
| AX-157993541 | 6 | 9.267 | KV452782.1  | 459389 | 3-scf00136 | 3  |
| AX-157771331 | 6 | 9.267 | KV452782.1  | 460577 | 3-scf00136 | 3  |
| AX-157993547 | 6 | 9.267 | KV452782.1  | 465243 | 3-scf00136 | 3  |
| AX-157993549 | 6 | 9.267 | KV452782.1  | 467645 | 3-scf00136 | 3  |
| AX-157993560 | 6 | 9.267 | KV452782.1  | 479439 | 3-scf00136 | 3  |
| AX-157715394 | 6 | 9.267 | KV452782.1  | 491330 | 3-scf00136 | 3  |
| AX-157993553 | 6 | 9.306 | KV452782.1  | 470615 | 3-scf00136 | 3  |
| AX-157993556 | 6 | 9.355 | KV452782.1  | 473216 | 3-scf00136 | 3  |
| AX-157993563 | 6 | 9.411 | KV452782.1  | 481369 | 3-scf00136 | 3  |
| AX-157993564 | 6 | 9.411 | KV452782.1  | 485391 | 3-scf00136 | 3  |
| AX-157993571 | 6 | 9.486 | KV452782.1  | 517926 | 3-scf00136 | 3  |
| AX-157993534 | 6 | 9.554 | KV452782.1  | 448250 | 3-scf00136 | 3  |
| AX-157993562 | 6 | 9.554 | KV452782.1  | 479907 | 3-scf00136 | 3  |
| AX-157993569 | 6 | 9.554 | KV452782.1  | 490247 | 3-scf00136 | 3  |
| AX-157993574 | 6 | 9.554 | KV452782.1  | 523097 | 3-scf00136 | 3  |
| AX-157993580 | 6 | 9.554 | KV452782.1  | 527354 | 3-scf00136 | 3  |
| AX-157993582 | 6 | 9.554 | KV452782.1  | 530558 | 3-scf00136 | 3  |
| AX-157993583 | 6 | 9.554 | KV452782.1  | 536236 | 3-scf00136 | 3  |
| AX-157993586 | 6 | 9.554 | KV452782.1  | 538009 | 3-scf00136 | 3  |
| AX-157993589 | 6 | 9.554 | KV452782.1  | 541603 | 3-scf00136 | 3  |
| AX-157706390 | 6 | 9.554 | 3ML01032168 | 136    | scf07782_1 | UN |
| AX-157993591 | 6 | 9.618 | KV452782.1  | 543006 | 3-scf00136 | 3  |
| AX-157708872 | 6 | 9.842 | KV452782.1  | 544236 | 3-scf00136 | 3  |
| AX-157993594 | 6 | 9.843 | KV452782.1  | 549717 | 3-scf00136 | 3  |
| AX-157993598 | 6 | 9.984 | KV452782.1  | 552295 | 3-scf00136 | 3  |
| AX-157884587 | 6 | 9.984 | KV452782.1  | 553559 | 3-scf00136 | 3  |
| AX-157993599 | 6 | 9.984 | KV452782.1  | 554919 | 3-scf00136 | 3  |

|              |   |        |             |        |            |    |
|--------------|---|--------|-------------|--------|------------|----|
| AX-157855723 | 6 | 9.984  | KV452782.1  | 555351 | 3-scf00136 | 3  |
| AX-157855724 | 6 | 9.984  | KV452782.1  | 556524 | 3-scf00136 | 3  |
| AX-157884588 | 6 | 9.985  | KV452782.1  | 562541 | 3-scf00136 | 3  |
| AX-158378344 | 6 | 11.003 | KV452782.1  | 581881 | 3-scf00136 | 3  |
| AX-158378340 | 6 | 11.003 | KV452782.1  | 586893 | 3-scf00136 | 3  |
| AX-158378334 | 6 | 11.003 | KV452782.1  | 602251 | 3-scf00136 | 3  |
| AX-158378319 | 6 | 11.003 | KV452782.1  | 622825 | 3-scf00136 | 3  |
| AX-158378338 | 6 | 11.26  | KV452782.1  | 593019 | 3-scf00136 | 3  |
| AX-158378336 | 6 | 11.26  | KV452782.1  | 599558 | 3-scf00136 | 3  |
| AX-158378331 | 6 | 11.26  | KV452782.1  | 605841 | 3-scf00136 | 3  |
| AX-158378330 | 6 | 11.26  | KV452782.1  | 607603 | 3-scf00136 | 3  |
| AX-158378326 | 6 | 11.26  | KV452782.1  | 613757 | 3-scf00136 | 3  |
| AX-158378324 | 6 | 11.441 | KV452782.1  | 614618 | 3-scf00136 | 3  |
| AX-158378332 | 6 | 11.632 | KV452782.1  | 605038 | 3-scf00136 | 3  |
| AX-158378313 | 6 | 11.895 | KV452782.1  | 634148 | 3-scf00136 | 3  |
| AX-158378321 | 6 | 12.395 | KV452782.1  | 621182 | 3-scf00136 | 3  |
| AX-158378320 | 6 | 12.395 | KV452782.1  | 622671 | 3-scf00136 | 3  |
| AX-158378318 | 6 | 12.395 | KV452782.1  | 625661 | 3-scf00136 | 3  |
| AX-158378311 | 6 | 12.395 | KV452782.1  | 642558 | 3-scf00136 | 3  |
| AX-158378308 | 6 | 12.395 | KV452782.1  | 647948 | 3-scf00136 | 3  |
| AX-158378305 | 6 | 12.395 | KV452782.1  | 651198 | 3-scf00136 | 3  |
| AX-158378304 | 6 | 12.395 | KV452782.1  | 653901 | 3-scf00136 | 3  |
| AX-158378303 | 6 | 12.395 | KV452782.1  | 654407 | 3-scf00136 | 3  |
| AX-158378297 | 6 | 12.395 | KV452782.1  | 665187 | 3-scf00136 | 3  |
| AX-157689717 | 6 | 12.395 | 3ML01031615 | 249    | scf07232_1 | UN |
| AX-158420519 | 6 | 12.724 | KV452782.1  | 679768 | 3-scf00136 | 3  |
| AX-158420521 | 6 | 12.725 | KV452782.1  | 678360 | 3-scf00136 | 3  |
| AX-158413792 | 6 | 12.725 | KV452782.1  | 678751 | 3-scf00136 | 3  |
| AX-158378298 | 6 | 13.197 | KV452782.1  | 663840 | 3-scf00136 | 3  |
| AX-158378279 | 6 | 13.197 | KV452782.1  | 698936 | 3-scf00136 | 3  |
| AX-158378275 | 6 | 13.197 | KV452782.1  | 700946 | 3-scf00136 | 3  |
| AX-158378274 | 6 | 13.197 | KV452782.1  | 702086 | 3-scf00136 | 3  |
| AX-158378269 | 6 | 13.197 | KV452782.1  | 710267 | 3-scf00136 | 3  |
| AX-158378267 | 6 | 13.197 | KV452782.1  | 711019 | 3-scf00136 | 3  |
| AX-158378228 | 6 | 13.197 | KV452782.1  | 774738 | 3-scf00136 | 3  |
| AX-158378273 | 6 | 13.237 | KV452782.1  | 702784 | 3-scf00136 | 3  |
| AX-158378286 | 6 | 13.238 | KV452782.1  | 684556 | 3-scf00136 | 3  |
| AX-158378277 | 6 | 13.238 | KV452782.1  | 700101 | 3-scf00136 | 3  |
| AX-158378270 | 6 | 13.238 | KV452782.1  | 706952 | 3-scf00136 | 3  |
| AX-158378204 | 6 | 13.238 | KV452782.1  | 809148 | 3-scf00136 | 3  |
| AX-158378265 | 6 | 13.399 | KV452782.1  | 712746 | 3-scf00136 | 3  |
| AX-158378255 | 6 | 13.813 | KV452782.1  | 735427 | 3-scf00136 | 3  |
| AX-158378263 | 6 | 14.333 | KV452782.1  | 724626 | 3-scf00136 | 3  |
| AX-158378248 | 6 | 14.333 | KV452782.1  | 748206 | 3-scf00136 | 3  |
| AX-158378238 | 6 | 14.333 | KV452782.1  | 761153 | 3-scf00136 | 3  |
| AX-158378237 | 6 | 14.333 | KV452782.1  | 762291 | 3-scf00136 | 3  |
| AX-158378223 | 6 | 14.333 | KV452782.1  | 779889 | 3-scf00136 | 3  |
| AX-158378247 | 6 | 14.856 | KV452782.1  | 748878 | 3-scf00136 | 3  |
| AX-158378242 | 6 | 14.856 | KV452782.1  | 754500 | 3-scf00136 | 3  |
| AX-158378224 | 6 | 14.856 | KV452782.1  | 777933 | 3-scf00136 | 3  |
| AX-158378222 | 6 | 14.856 | KV452782.1  | 780450 | 3-scf00136 | 3  |

|              |   |        |            |         |            |   |
|--------------|---|--------|------------|---------|------------|---|
| AX-158378211 | 6 | 14.856 | KV452782.1 | 794942  | 3-scf00136 | 3 |
| AX-158378200 | 6 | 14.856 | KV452782.1 | 812781  | 3-scf00136 | 3 |
| AX-158378253 | 6 | 14.857 | KV452782.1 | 738442  | 3-scf00136 | 3 |
| AX-158378241 | 6 | 14.857 | KV452782.1 | 757514  | 3-scf00136 | 3 |
| AX-158378230 | 6 | 14.857 | KV452782.1 | 771812  | 3-scf00136 | 3 |
| AX-158378216 | 6 | 14.857 | KV452782.1 | 786782  | 3-scf00136 | 3 |
| AX-158378209 | 6 | 14.857 | KV452782.1 | 798447  | 3-scf00136 | 3 |
| AX-158378196 | 6 | 14.857 | KV452782.1 | 822303  | 3-scf00136 | 3 |
| AX-158378198 | 6 | 15.627 | KV452782.1 | 813979  | 3-scf00136 | 3 |
| AX-158378202 | 6 | 15.628 | KV452782.1 | 811182  | 3-scf00136 | 3 |
| AX-158378199 | 6 | 15.628 | KV452782.1 | 813145  | 3-scf00136 | 3 |
| AX-158378192 | 6 | 16.318 | KV452782.1 | 832439  | 3-scf00136 | 3 |
| AX-158378183 | 6 | 17.156 | KV452782.1 | 850425  | 3-scf00136 | 3 |
| AX-158378179 | 6 | 17.156 | KV452782.1 | 857068  | 3-scf00136 | 3 |
| AX-158378180 | 6 | 17.469 | KV452782.1 | 856651  | 3-scf00136 | 3 |
| AX-158378176 | 6 | 17.469 | KV452782.1 | 868135  | 3-scf00136 | 3 |
| AX-158378175 | 6 | 17.471 | KV452782.1 | 872815  | 3-scf00136 | 3 |
| AX-158378377 | 6 | 17.471 | KV452782.1 | 903795  | 3-scf00136 | 3 |
| AX-158378177 | 6 | 17.663 | KV452782.1 | 867170  | 3-scf00136 | 3 |
| AX-158378201 | 6 | 18.12  | KV452782.1 | 811741  | 3-scf00136 | 3 |
| AX-158378376 | 6 | 18.12  | KV452782.1 | 905236  | 3-scf00136 | 3 |
| AX-158378375 | 6 | 18.12  | KV452782.1 | 906193  | 3-scf00136 | 3 |
| AX-158378360 | 6 | 18.729 | KV452782.1 | 939938  | 3-scf00136 | 3 |
| AX-158378364 | 6 | 18.905 | KV452782.1 | 929304  | 3-scf00136 | 3 |
| AX-158378367 | 6 | 18.924 | KV452782.1 | 924800  | 3-scf00136 | 3 |
| AX-158378164 | 6 | 18.942 | KV452782.1 | 888419  | 3-scf00136 | 3 |
| AX-158378361 | 6 | 19.033 | KV452782.1 | 936729  | 3-scf00136 | 3 |
| AX-158378365 | 6 | 19.1   | KV452782.1 | 928626  | 3-scf00136 | 3 |
| AX-158378357 | 6 | 19.1   | KV452782.1 | 941083  | 3-scf00136 | 3 |
| AX-158378355 | 6 | 19.1   | KV452782.1 | 945394  | 3-scf00136 | 3 |
| AX-158378282 | 6 | 19.1   | KV452782.1 | 967951  | 3-scf00136 | 3 |
| AX-158378349 | 6 | 19.577 | KV452782.1 | 951604  | 3-scf00136 | 3 |
| AX-158378348 | 6 | 19.577 | KV452782.1 | 953101  | 3-scf00136 | 3 |
| AX-158378343 | 6 | 19.577 | KV452782.1 | 957084  | 3-scf00136 | 3 |
| AX-158378335 | 6 | 19.577 | KV452782.1 | 958694  | 3-scf00136 | 3 |
| AX-157993609 | 6 | 19.577 | KV452782.1 | 1001550 | 3-scf00136 | 3 |
| AX-158378351 | 6 | 20.19  | KV452782.1 | 950240  | 3-scf00136 | 3 |
| AX-158378244 | 6 | 20.19  | KV452782.1 | 973933  | 3-scf00136 | 3 |
| AX-158378215 | 6 | 20.19  | KV452782.1 | 977417  | 3-scf00136 | 3 |
| AX-158378203 | 6 | 20.19  | KV452782.1 | 979760  | 3-scf00136 | 3 |
| AX-158378193 | 6 | 20.19  | KV452782.1 | 981664  | 3-scf00136 | 3 |
| AX-158378352 | 6 | 20.616 | KV452782.1 | 993563  | 3-scf00136 | 3 |
| AX-157993604 | 6 | 20.926 | KV452782.1 | 999387  | 3-scf00136 | 3 |
| AX-157993606 | 6 | 20.926 | KV452782.1 | 999849  | 3-scf00136 | 3 |
| AX-157993615 | 6 | 20.926 | KV452782.1 | 1006922 | 3-scf00136 | 3 |
| AX-158378327 | 6 | 20.927 | KV452782.1 | 994638  | 3-scf00136 | 3 |
| AX-157993616 | 6 | 20.927 | KV452782.1 | 1007874 | 3-scf00136 | 3 |
| AX-158378167 | 6 | 20.928 | KV452782.1 | 987153  | 3-scf00136 | 3 |
| AX-157993630 | 6 | 20.928 | KV452782.1 | 1021986 | 3-scf00136 | 3 |
| AX-158378378 | 6 | 20.929 | KV452782.1 | 988837  | 3-scf00136 | 3 |
| AX-158378363 | 6 | 20.929 | KV452782.1 | 991791  | 3-scf00136 | 3 |

|              |   |        |            |         |            |   |
|--------------|---|--------|------------|---------|------------|---|
| AX-157855726 | 6 | 21.011 | KV452782.1 | 1014306 | 3-scf00136 | 3 |
| AX-157993628 | 6 | 21.368 | KV452782.1 | 1021361 | 3-scf00136 | 3 |
| AX-157993632 | 6 | 21.369 | KV452782.1 | 1026318 | 3-scf00136 | 3 |
| AX-157993636 | 6 | 21.37  | KV452782.1 | 1029768 | 3-scf00136 | 3 |
| AX-157993631 | 6 | 21.644 | KV452782.1 | 1025314 | 3-scf00136 | 3 |
| AX-157993637 | 6 | 21.644 | KV452782.1 | 1031026 | 3-scf00136 | 3 |
| AX-157993639 | 6 | 21.644 | KV452782.1 | 1031494 | 3-scf00136 | 3 |
| AX-157993646 | 6 | 21.644 | KV452782.1 | 1037207 | 3-scf00136 | 3 |
| AX-157993725 | 6 | 21.644 | KV452782.1 | 1114053 | 3-scf00136 | 3 |
| AX-157993640 | 6 | 21.727 | KV452782.1 | 1033095 | 3-scf00136 | 3 |
| AX-157993642 | 6 | 21.728 | KV452782.1 | 1034918 | 3-scf00136 | 3 |
| AX-157993645 | 6 | 21.728 | KV452782.1 | 1035507 | 3-scf00136 | 3 |
| AX-157993653 | 6 | 21.907 | KV452782.1 | 1046039 | 3-scf00136 | 3 |
| AX-157993654 | 6 | 22.016 | KV452782.1 | 1047275 | 3-scf00136 | 3 |
| AX-157993657 | 6 | 22.083 | KV452782.1 | 1050212 | 3-scf00136 | 3 |
| AX-157993667 | 6 | 22.086 | KV452782.1 | 1057017 | 3-scf00136 | 3 |
| AX-158383309 | 6 | 22.339 | KV452782.1 | 1058539 | 3-scf00136 | 3 |
| AX-157993672 | 6 | 22.557 | KV452782.1 | 1060960 | 3-scf00136 | 3 |
| AX-157993674 | 6 | 22.569 | KV452782.1 | 1063406 | 3-scf00136 | 3 |
| AX-157993660 | 6 | 22.581 | KV452782.1 | 1054832 | 3-scf00136 | 3 |
| AX-157993682 | 6 | 22.581 | KV452782.1 | 1067151 | 3-scf00136 | 3 |
| AX-157993683 | 6 | 22.581 | KV452782.1 | 1067731 | 3-scf00136 | 3 |
| AX-158383314 | 6 | 22.581 | KV452782.1 | 1107706 | 3-scf00136 | 3 |
| AX-157993764 | 6 | 22.581 | KV452782.1 | 1150424 | 3-scf00136 | 3 |
| AX-158383311 | 6 | 22.606 | KV452782.1 | 1068238 | 3-scf00136 | 3 |
| AX-157993676 | 6 | 22.676 | KV452782.1 | 1063812 | 3-scf00136 | 3 |
| AX-157993688 | 6 | 22.676 | KV452782.1 | 1069090 | 3-scf00136 | 3 |
| AX-157993689 | 6 | 22.676 | KV452782.1 | 1069554 | 3-scf00136 | 3 |
| AX-157993710 | 6 | 22.676 | KV452782.1 | 1098710 | 3-scf00136 | 3 |
| AX-157993695 | 6 | 22.71  | KV452782.1 | 1081970 | 3-scf00136 | 3 |
| AX-157993696 | 6 | 22.712 | KV452782.1 | 1082938 | 3-scf00136 | 3 |
| AX-157714352 | 6 | 22.712 | KV452782.1 | 1087769 | 3-scf00136 | 3 |
| AX-157993706 | 6 | 22.712 | KV452782.1 | 1096132 | 3-scf00136 | 3 |
| AX-157993662 | 6 | 22.792 | KV452782.1 | 1055201 | 3-scf00136 | 3 |
| AX-157993699 | 6 | 22.792 | KV452782.1 | 1084074 | 3-scf00136 | 3 |
| AX-157993704 | 6 | 22.792 | KV452782.1 | 1095221 | 3-scf00136 | 3 |
| AX-157993714 | 6 | 22.821 | KV452782.1 | 1102465 | 3-scf00136 | 3 |
| AX-157993715 | 6 | 22.821 | KV452782.1 | 1104321 | 3-scf00136 | 3 |
| AX-158383313 | 6 | 22.972 | KV452782.1 | 1104920 | 3-scf00136 | 3 |
| AX-157742421 | 6 | 22.972 | KV452782.1 | 1120215 | 3-scf00136 | 3 |
| AX-157993730 | 6 | 22.972 | KV452782.1 | 1124116 | 3-scf00136 | 3 |
| AX-157993731 | 6 | 22.972 | KV452782.1 | 1125001 | 3-scf00136 | 3 |
| AX-157993737 | 6 | 22.972 | KV452782.1 | 1128848 | 3-scf00136 | 3 |
| AX-157993739 | 6 | 22.972 | KV452782.1 | 1129910 | 3-scf00136 | 3 |
| AX-157993740 | 6 | 22.972 | KV452782.1 | 1130600 | 3-scf00136 | 3 |
| AX-157723869 | 6 | 22.972 | KV452782.1 | 1132672 | 3-scf00136 | 3 |
| AX-157993743 | 6 | 22.972 | KV452782.1 | 1133231 | 3-scf00136 | 3 |
| AX-157993745 | 6 | 23.219 | KV452782.1 | 1133822 | 3-scf00136 | 3 |
| AX-157993747 | 6 | 23.219 | KV452782.1 | 1135091 | 3-scf00136 | 3 |
| AX-157756034 | 6 | 23.219 | KV452782.1 | 1138620 | 3-scf00136 | 3 |
| AX-157721340 | 6 | 23.219 | KV452782.1 | 1140651 | 3-scf00136 | 3 |

|              |   |        |            |         |            |   |
|--------------|---|--------|------------|---------|------------|---|
| AX-157993801 | 6 | 23.219 | KV452782.1 | 1177758 | 3-scf00136 | 3 |
| AX-157993809 | 6 | 23.219 | KV452782.1 | 1185435 | 3-scf00136 | 3 |
| AX-157993766 | 6 | 23.225 | KV452782.1 | 1151445 | 3-scf00136 | 3 |
| AX-157993785 | 6 | 23.68  | KV452782.1 | 1161888 | 3-scf00136 | 3 |
| AX-157993769 | 6 | 24.135 | KV452782.1 | 1152328 | 3-scf00136 | 3 |
| AX-157993789 | 6 | 24.135 | KV452782.1 | 1166579 | 3-scf00136 | 3 |
| AX-157748139 | 6 | 24.135 | KV452782.1 | 1168374 | 3-scf00136 | 3 |
| AX-157993795 | 6 | 24.135 | KV452782.1 | 1169735 | 3-scf00136 | 3 |
| AX-157993796 | 6 | 24.135 | KV452782.1 | 1172803 | 3-scf00136 | 3 |
| AX-157855731 | 6 | 24.244 | KV452782.1 | 1178811 | 3-scf00136 | 3 |
| AX-157993807 | 6 | 24.354 | KV452782.1 | 1181474 | 3-scf00136 | 3 |
| AX-158415711 | 6 | 24.354 | KV452782.1 | 1181925 | 3-scf00136 | 3 |
| AX-157771707 | 6 | 24.354 | KV452782.1 | 1260874 | 3-scf00136 | 3 |
| AX-157993917 | 6 | 24.354 | KV452782.1 | 1277190 | 3-scf00136 | 3 |
| AX-157818798 | 6 | 24.518 | KV452782.1 | 1184433 | 3-scf00136 | 3 |
| AX-157993813 | 6 | 24.597 | KV452782.1 | 1189463 | 3-scf00136 | 3 |
| AX-157993873 | 6 | 24.597 | KV452782.1 | 1243411 | 3-scf00136 | 3 |
| AX-157993956 | 6 | 24.597 | KV452782.1 | 1323108 | 3-scf00136 | 3 |
| AX-157774984 | 6 | 24.597 | KV452782.1 | 1417582 | 3-scf00136 | 3 |
| AX-157994035 | 6 | 24.597 | KV452782.1 | 1429216 | 3-scf00136 | 3 |
| AX-158379611 | 6 | 24.681 | KV452782.1 | 1198737 | 3-scf00136 | 3 |
| AX-157993826 | 6 | 24.681 | KV452782.1 | 1198865 | 3-scf00136 | 3 |
| AX-157993827 | 6 | 24.681 | KV452782.1 | 1201339 | 3-scf00136 | 3 |
| AX-157993830 | 6 | 24.681 | KV452782.1 | 1203051 | 3-scf00136 | 3 |
| AX-157993838 | 6 | 24.681 | KV452782.1 | 1208536 | 3-scf00136 | 3 |
| AX-157994047 | 6 | 24.681 | KV452782.1 | 1438222 | 3-scf00136 | 3 |
| AX-157993828 | 6 | 24.683 | KV452782.1 | 1201752 | 3-scf00136 | 3 |
| AX-157993839 | 6 | 24.683 | KV452782.1 | 1210096 | 3-scf00136 | 3 |
| AX-157993843 | 6 | 24.683 | KV452782.1 | 1212792 | 3-scf00136 | 3 |
| AX-157993845 | 6 | 24.683 | KV452782.1 | 1213876 | 3-scf00136 | 3 |
| AX-157993846 | 6 | 24.683 | KV452782.1 | 1214833 | 3-scf00136 | 3 |
| AX-157993887 | 6 | 24.683 | KV452782.1 | 1252389 | 3-scf00136 | 3 |
| AX-157993901 | 6 | 24.683 | KV452782.1 | 1261474 | 3-scf00136 | 3 |
| AX-157993906 | 6 | 24.683 | KV452782.1 | 1264212 | 3-scf00136 | 3 |
| AX-157993855 | 6 | 24.784 | KV452782.1 | 1225312 | 3-scf00136 | 3 |
| AX-157993859 | 6 | 24.901 | KV452782.1 | 1226837 | 3-scf00136 | 3 |
| AX-157993862 | 6 | 24.901 | KV452782.1 | 1229517 | 3-scf00136 | 3 |
| AX-157993852 | 6 | 24.951 | KV452782.1 | 1224074 | 3-scf00136 | 3 |
| AX-157772341 | 6 | 24.951 | KV452782.1 | 1233791 | 3-scf00136 | 3 |
| AX-157993900 | 6 | 24.951 | KV452782.1 | 1260404 | 3-scf00136 | 3 |
| AX-157818800 | 6 | 24.951 | KV452782.1 | 1272087 | 3-scf00136 | 3 |
| AX-157993866 | 6 | 24.986 | KV452782.1 | 1235705 | 3-scf00136 | 3 |
| AX-157875903 | 6 | 25.01  | KV452782.1 | 1197731 | 3-scf00136 | 3 |
| AX-157855732 | 6 | 25.01  | KV452782.1 | 1198524 | 3-scf00136 | 3 |
| AX-157993864 | 6 | 25.01  | KV452782.1 | 1230151 | 3-scf00136 | 3 |
| AX-157993868 | 6 | 25.01  | KV452782.1 | 1236655 | 3-scf00136 | 3 |
| AX-157993876 | 6 | 25.01  | KV452782.1 | 1245500 | 3-scf00136 | 3 |
| AX-157993882 | 6 | 25.01  | KV452782.1 | 1249044 | 3-scf00136 | 3 |
| AX-157993884 | 6 | 25.01  | KV452782.1 | 1249792 | 3-scf00136 | 3 |
| AX-157993885 | 6 | 25.01  | KV452782.1 | 1250575 | 3-scf00136 | 3 |
| AX-157993890 | 6 | 25.01  | KV452782.1 | 1255540 | 3-scf00136 | 3 |

|              |   |        |            |         |            |   |
|--------------|---|--------|------------|---------|------------|---|
| AX-157743945 | 6 | 25.01  | KV452782.1 | 1255941 | 3-scf00136 | 3 |
| AX-157993894 | 6 | 25.01  | KV452782.1 | 1257490 | 3-scf00136 | 3 |
| AX-157993896 | 6 | 25.01  | KV452782.1 | 1258857 | 3-scf00136 | 3 |
| AX-157993907 | 6 | 25.01  | KV452782.1 | 1264716 | 3-scf00136 | 3 |
| AX-157884597 | 6 | 25.01  | KV452782.1 | 1265781 | 3-scf00136 | 3 |
| AX-157719278 | 6 | 25.01  | KV452782.1 | 1267808 | 3-scf00136 | 3 |
| AX-157993913 | 6 | 25.01  | KV452782.1 | 1270248 | 3-scf00136 | 3 |
| AX-157993914 | 6 | 25.01  | KV452782.1 | 1272487 | 3-scf00136 | 3 |
| AX-157993921 | 6 | 25.01  | KV452782.1 | 1283640 | 3-scf00136 | 3 |
| AX-157818804 | 6 | 25.01  | KV452782.1 | 1323494 | 3-scf00136 | 3 |
| AX-157993960 | 6 | 25.01  | KV452782.1 | 1326609 | 3-scf00136 | 3 |
| AX-157745202 | 6 | 25.01  | KV452782.1 | 1343534 | 3-scf00136 | 3 |
| AX-157884599 | 6 | 25.01  | KV452782.1 | 1367320 | 3-scf00136 | 3 |
| AX-157993924 | 6 | 25.228 | KV452782.1 | 1286147 | 3-scf00136 | 3 |
| AX-157993928 | 6 | 25.228 | KV452782.1 | 1289799 | 3-scf00136 | 3 |
| AX-157993931 | 6 | 25.228 | KV452782.1 | 1292972 | 3-scf00136 | 3 |
| AX-157993932 | 6 | 25.228 | KV452782.1 | 1293478 | 3-scf00136 | 3 |
| AX-157993933 | 6 | 25.228 | KV452782.1 | 1294352 | 3-scf00136 | 3 |
| AX-157818803 | 6 | 25.228 | KV452782.1 | 1299825 | 3-scf00136 | 3 |
| AX-157993940 | 6 | 25.228 | KV452782.1 | 1302292 | 3-scf00136 | 3 |
| AX-157993947 | 6 | 25.228 | KV452782.1 | 1313609 | 3-scf00136 | 3 |
| AX-157993948 | 6 | 25.228 | KV452782.1 | 1315352 | 3-scf00136 | 3 |
| AX-157743265 | 6 | 25.228 | KV452782.1 | 1316593 | 3-scf00136 | 3 |
| AX-157993952 | 6 | 25.228 | KV452782.1 | 1318952 | 3-scf00136 | 3 |
| AX-157993954 | 6 | 25.228 | KV452782.1 | 1322291 | 3-scf00136 | 3 |
| AX-157818806 | 6 | 25.228 | KV452782.1 | 1324531 | 3-scf00136 | 3 |
| AX-157993958 | 6 | 25.228 | KV452782.1 | 1325449 | 3-scf00136 | 3 |
| AX-157993961 | 6 | 25.228 | KV452782.1 | 1326884 | 3-scf00136 | 3 |
| AX-157818809 | 6 | 25.228 | KV452782.1 | 1341389 | 3-scf00136 | 3 |
| AX-157993971 | 6 | 25.228 | KV452782.1 | 1345519 | 3-scf00136 | 3 |
| AX-157993979 | 6 | 25.325 | KV452782.1 | 1359898 | 3-scf00136 | 3 |
| AX-157993985 | 6 | 25.399 | KV452782.1 | 1361868 | 3-scf00136 | 3 |
| AX-157994003 | 6 | 25.399 | KV452782.1 | 1392042 | 3-scf00136 | 3 |
| AX-157994004 | 6 | 25.399 | KV452782.1 | 1392450 | 3-scf00136 | 3 |
| AX-157994009 | 6 | 25.399 | KV452782.1 | 1401171 | 3-scf00136 | 3 |
| AX-157994012 | 6 | 25.399 | KV452782.1 | 1404879 | 3-scf00136 | 3 |
| AX-157740080 | 6 | 25.449 | KV452782.1 | 1389472 | 3-scf00136 | 3 |
| AX-157994006 | 6 | 25.449 | KV452782.1 | 1397060 | 3-scf00136 | 3 |
| AX-157994015 | 6 | 25.535 | KV452782.1 | 1406533 | 3-scf00136 | 3 |
| AX-157994017 | 6 | 25.565 | KV452782.1 | 1408170 | 3-scf00136 | 3 |
| AX-157994000 | 6 | 25.584 | KV452782.1 | 1390052 | 3-scf00136 | 3 |
| AX-157855736 | 6 | 25.584 | KV452782.1 | 1410561 | 3-scf00136 | 3 |
| AX-157994063 | 6 | 25.584 | KV452782.1 | 1451906 | 3-scf00136 | 3 |
| AX-157884601 | 6 | 25.606 | KV452782.1 | 1411071 | 3-scf00136 | 3 |
| AX-157994019 | 6 | 25.651 | KV452782.1 | 1413572 | 3-scf00136 | 3 |
| AX-157994020 | 6 | 25.718 | KV452782.1 | 1415119 | 3-scf00136 | 3 |
| AX-157994084 | 6 | 25.718 | KV452782.1 | 1471299 | 3-scf00136 | 3 |
| AX-157993814 | 6 | 25.871 | KV452782.1 | 1190409 | 3-scf00136 | 3 |
| AX-157740336 | 6 | 25.871 | KV452782.1 | 1203228 | 3-scf00136 | 3 |
| AX-157698155 | 6 | 25.871 | KV452782.1 | 1244367 | 3-scf00136 | 3 |
| AX-157994030 | 6 | 25.871 | KV452782.1 | 1420917 | 3-scf00136 | 3 |



|              |   |        |            |         |            |   |
|--------------|---|--------|------------|---------|------------|---|
| AX-157994040 | 6 | 25.871 | KV452782.1 | 1431057 | 3-scf00136 | 3 |
| AX-157994041 | 6 | 25.871 | KV452782.1 | 1433063 | 3-scf00136 | 3 |
| AX-157994083 | 6 | 25.871 | KV452782.1 | 1469397 | 3-scf00136 | 3 |
| AX-157994055 | 6 | 25.889 | KV452782.1 | 1442184 | 3-scf00136 | 3 |
| AX-157993860 | 6 | 25.913 | KV452782.1 | 1227728 | 3-scf00136 | 3 |
| AX-157993904 | 6 | 25.913 | KV452782.1 | 1262218 | 3-scf00136 | 3 |
| AX-157993967 | 6 | 25.913 | KV452782.1 | 1338368 | 3-scf00136 | 3 |
| AX-157994022 | 6 | 25.913 | KV452782.1 | 1415704 | 3-scf00136 | 3 |
| AX-157994057 | 6 | 25.913 | KV452782.1 | 1445486 | 3-scf00136 | 3 |
| AX-157993934 | 6 | 26.212 | KV452782.1 | 1298796 | 3-scf00136 | 3 |
| AX-157993966 | 6 | 26.212 | KV452782.1 | 1331405 | 3-scf00136 | 3 |
| AX-157818810 | 6 | 26.212 | KV452782.1 | 1343975 | 3-scf00136 | 3 |
| AX-157993976 | 6 | 26.212 | KV452782.1 | 1355340 | 3-scf00136 | 3 |
| AX-157993981 | 6 | 26.212 | KV452782.1 | 1360232 | 3-scf00136 | 3 |
| AX-157994046 | 6 | 26.212 | KV452782.1 | 1437132 | 3-scf00136 | 3 |
| AX-157994068 | 6 | 26.212 | KV452782.1 | 1455053 | 3-scf00136 | 3 |
| AX-157994069 | 6 | 26.212 | KV452782.1 | 1456024 | 3-scf00136 | 3 |
| AX-157994071 | 6 | 26.212 | KV452782.1 | 1459699 | 3-scf00136 | 3 |
| AX-157994076 | 6 | 26.212 | KV452782.1 | 1463521 | 3-scf00136 | 3 |
| AX-157994079 | 6 | 26.212 | KV452782.1 | 1466012 | 3-scf00136 | 3 |
| AX-157994089 | 6 | 26.212 | KV452782.1 | 1472717 | 3-scf00136 | 3 |
| AX-157994090 | 6 | 26.212 | KV452782.1 | 1473472 | 3-scf00136 | 3 |
| AX-157994091 | 6 | 26.212 | KV452782.1 | 1474795 | 3-scf00136 | 3 |
| AX-157994092 | 6 | 26.212 | KV452782.1 | 1475419 | 3-scf00136 | 3 |
| AX-157818815 | 6 | 26.212 | KV452782.1 | 1476622 | 3-scf00136 | 3 |
| AX-157994094 | 6 | 26.212 | KV452782.1 | 1476916 | 3-scf00136 | 3 |
| AX-157994097 | 6 | 26.212 | KV452782.1 | 1479116 | 3-scf00136 | 3 |
| AX-157994098 | 6 | 26.27  | KV452782.1 | 1480950 | 3-scf00136 | 3 |
| AX-157994099 | 6 | 26.333 | KV452782.1 | 1481878 | 3-scf00136 | 3 |
| AX-157818816 | 6 | 26.36  | KV452782.1 | 1487580 | 3-scf00136 | 3 |
| AX-157994102 | 6 | 26.43  | KV452782.1 | 1493371 | 3-scf00136 | 3 |
| AX-157993951 | 6 | 26.431 | KV452782.1 | 1317870 | 3-scf00136 | 3 |
| AX-157709802 | 6 | 26.431 | KV452782.1 | 1346592 | 3-scf00136 | 3 |
| AX-157994013 | 6 | 26.431 | KV452782.1 | 1405102 | 3-scf00136 | 3 |
| AX-157994033 | 6 | 26.431 | KV452782.1 | 1428139 | 3-scf00136 | 3 |
| AX-157994051 | 6 | 26.431 | KV452782.1 | 1440579 | 3-scf00136 | 3 |
| AX-157994103 | 6 | 26.431 | KV452782.1 | 1493838 | 3-scf00136 | 3 |
| AX-157994106 | 6 | 26.431 | KV452782.1 | 1499741 | 3-scf00136 | 3 |
| AX-157994107 | 6 | 26.431 | KV452782.1 | 1500419 | 3-scf00136 | 3 |
| AX-157994108 | 6 | 26.431 | KV452782.1 | 1501246 | 3-scf00136 | 3 |
| AX-157994117 | 6 | 26.431 | KV452782.1 | 1506490 | 3-scf00136 | 3 |
| AX-157994175 | 6 | 26.431 | KV452782.1 | 1557775 | 3-scf00136 | 3 |
| AX-157757036 | 6 | 26.601 | KV452782.1 | 1505204 | 3-scf00136 | 3 |
| AX-157994128 | 6 | 26.602 | KV452782.1 | 1512253 | 3-scf00136 | 3 |
| AX-157994130 | 6 | 26.942 | KV452782.1 | 1512694 | 3-scf00136 | 3 |
| AX-157994133 | 6 | 26.942 | KV452782.1 | 1517156 | 3-scf00136 | 3 |
| AX-157994149 | 6 | 26.942 | KV452782.1 | 1532532 | 3-scf00136 | 3 |
| AX-157994134 | 6 | 26.996 | KV452782.1 | 1518427 | 3-scf00136 | 3 |
| AX-157994147 | 6 | 26.996 | KV452782.1 | 1529832 | 3-scf00136 | 3 |
| AX-158383325 | 6 | 27.07  | KV452782.1 | 1503225 | 3-scf00136 | 3 |
| AX-157994144 | 6 | 27.07  | KV452782.1 | 1527802 | 3-scf00136 | 3 |

|              |   |        |            |         |            |   |
|--------------|---|--------|------------|---------|------------|---|
| AX-157994148 | 6 | 27.07  | KV452782.1 | 1530200 | 3-scf00136 | 3 |
| AX-157726219 | 6 | 27.184 | KV452782.1 | 1531458 | 3-scf00136 | 3 |
| AX-157994163 | 6 | 27.196 | KV452782.1 | 1548925 | 3-scf00136 | 3 |
| AX-157994168 | 6 | 27.196 | KV452782.1 | 1552965 | 3-scf00136 | 3 |
| AX-157994172 | 6 | 27.196 | KV452782.1 | 1554353 | 3-scf00136 | 3 |
| AX-158390626 | 6 | 27.196 | KV452782.1 | 1555730 | 3-scf00136 | 3 |
| AX-157994174 | 6 | 27.196 | KV452782.1 | 1555800 | 3-scf00136 | 3 |
| AX-157994176 | 6 | 27.196 | KV452782.1 | 1561983 | 3-scf00136 | 3 |
| AX-157994178 | 6 | 27.196 | KV452782.1 | 1564272 | 3-scf00136 | 3 |
| AX-157994180 | 6 | 27.196 | KV452782.1 | 1566205 | 3-scf00136 | 3 |
| AX-157994184 | 6 | 27.196 | KV452782.1 | 1573785 | 3-scf00136 | 3 |
| AX-157994192 | 6 | 27.383 | KV452782.1 | 1579948 | 3-scf00136 | 3 |
| AX-157994195 | 6 | 27.385 | KV452782.1 | 1581083 | 3-scf00136 | 3 |
| AX-157994206 | 6 | 27.715 | KV452782.1 | 1590945 | 3-scf00136 | 3 |
| AX-157994223 | 6 | 27.715 | KV452782.1 | 1601023 | 3-scf00136 | 3 |
| AX-157994209 | 6 | 27.743 | KV452782.1 | 1591034 | 3-scf00136 | 3 |
| AX-157994214 | 6 | 27.743 | KV452782.1 | 1593896 | 3-scf00136 | 3 |
| AX-157994215 | 6 | 27.744 | KV452782.1 | 1594768 | 3-scf00136 | 3 |
| AX-157994217 | 6 | 27.745 | KV452782.1 | 1595752 | 3-scf00136 | 3 |
| AX-157994222 | 6 | 28.069 | KV452782.1 | 1599134 | 3-scf00136 | 3 |
| AX-157994224 | 6 | 28.069 | KV452782.1 | 1601202 | 3-scf00136 | 3 |
| AX-157994228 | 6 | 28.069 | KV452782.1 | 1602840 | 3-scf00136 | 3 |
| AX-157994233 | 6 | 28.069 | KV452782.1 | 1603874 | 3-scf00136 | 3 |
| AX-157994234 | 6 | 28.072 | KV452782.1 | 1605505 | 3-scf00136 | 3 |
| AX-157994238 | 6 | 28.072 | KV452782.1 | 1607397 | 3-scf00136 | 3 |
| AX-157994203 | 6 | 28.168 | KV452782.1 | 1589013 | 3-scf00136 | 3 |
| AX-157994235 | 6 | 28.168 | KV452782.1 | 1605835 | 3-scf00136 | 3 |
| AX-157994240 | 6 | 28.168 | KV452782.1 | 1610836 | 3-scf00136 | 3 |
| AX-157994303 | 6 | 28.168 | KV452782.1 | 1674564 | 3-scf00136 | 3 |
| AX-157994241 | 6 | 28.258 | KV452782.1 | 1611341 | 3-scf00136 | 3 |
| AX-158383329 | 6 | 28.258 | KV452782.1 | 1665077 | 3-scf00136 | 3 |
| AX-157994254 | 6 | 28.289 | KV452782.1 | 1619494 | 3-scf00136 | 3 |
| AX-157994262 | 6 | 28.289 | KV452782.1 | 1629828 | 3-scf00136 | 3 |
| AX-157994263 | 6 | 28.289 | KV452782.1 | 1630472 | 3-scf00136 | 3 |
| AX-157994264 | 6 | 28.289 | KV452782.1 | 1631057 | 3-scf00136 | 3 |
| AX-157727489 | 6 | 28.289 | KV452782.1 | 1632595 | 3-scf00136 | 3 |
| AX-157994267 | 6 | 28.289 | KV452782.1 | 1634539 | 3-scf00136 | 3 |
| AX-157994271 | 6 | 28.296 | KV452782.1 | 1637051 | 3-scf00136 | 3 |
| AX-157994247 | 6 | 28.31  | KV452782.1 | 1613462 | 3-scf00136 | 3 |
| AX-157994250 | 6 | 28.31  | KV452782.1 | 1617346 | 3-scf00136 | 3 |
| AX-157994273 | 6 | 28.31  | KV452782.1 | 1638118 | 3-scf00136 | 3 |
| AX-157994282 | 6 | 28.31  | KV452782.1 | 1646574 | 3-scf00136 | 3 |
| AX-157994277 | 6 | 28.344 | KV452782.1 | 1639879 | 3-scf00136 | 3 |
| AX-157994280 | 6 | 28.361 | KV452782.1 | 1644762 | 3-scf00136 | 3 |
| AX-157994281 | 6 | 28.398 | KV452782.1 | 1645994 | 3-scf00136 | 3 |
| AX-157818818 | 6 | 28.398 | KV452782.1 | 1647407 | 3-scf00136 | 3 |
| AX-157720102 | 6 | 28.398 | KV452782.1 | 1652902 | 3-scf00136 | 3 |
| AX-157752299 | 6 | 28.398 | KV452782.1 | 1653129 | 3-scf00136 | 3 |
| AX-157994181 | 6 | 28.548 | KV452782.1 | 1566822 | 3-scf00136 | 3 |
| AX-157994274 | 6 | 28.548 | KV452782.1 | 1638339 | 3-scf00136 | 3 |
| AX-157709591 | 6 | 28.548 | KV452782.1 | 1659773 | 3-scf00136 | 3 |

|              |   |        |            |         |            |   |
|--------------|---|--------|------------|---------|------------|---|
| AX-157994300 | 6 | 28.548 | KV452782.1 | 1671142 | 3-scf00136 | 3 |
| AX-157994301 | 6 | 28.548 | KV452782.1 | 1672675 | 3-scf00136 | 3 |
| AX-157994304 | 6 | 28.548 | KV452782.1 | 1674778 | 3-scf00136 | 3 |
| AX-157994306 | 6 | 28.548 | KV452782.1 | 1675041 | 3-scf00136 | 3 |
| AX-157994307 | 6 | 28.548 | KV452782.1 | 1676366 | 3-scf00136 | 3 |
| AX-157994313 | 6 | 28.548 | KV452782.1 | 1683693 | 3-scf00136 | 3 |
| AX-158383331 | 6 | 28.548 | KV452782.1 | 1713941 | 3-scf00136 | 3 |
| AX-157994402 | 6 | 28.548 | KV452782.1 | 1778272 | 3-scf00136 | 3 |
| AX-157818826 | 6 | 28.548 | KV452782.1 | 1819207 | 3-scf00136 | 3 |
| AX-158404087 | 6 | 28.548 | KV452782.1 | 1851481 | 3-scf00136 | 3 |
| AX-157818822 | 6 | 28.799 | KV452782.1 | 1692734 | 3-scf00136 | 3 |
| AX-157818823 | 6 | 28.799 | KV452782.1 | 1698164 | 3-scf00136 | 3 |
| AX-157757546 | 6 | 28.799 | KV452782.1 | 1703412 | 3-scf00136 | 3 |
| AX-157994341 | 6 | 28.949 | KV452782.1 | 1714677 | 3-scf00136 | 3 |
| AX-157994344 | 6 | 28.949 | KV452782.1 | 1716588 | 3-scf00136 | 3 |
| AX-157994347 | 6 | 28.949 | KV452782.1 | 1720427 | 3-scf00136 | 3 |
| AX-157994358 | 6 | 28.949 | KV452782.1 | 1737518 | 3-scf00136 | 3 |
| AX-157994357 | 6 | 28.951 | KV452782.1 | 1737155 | 3-scf00136 | 3 |
| AX-157994362 | 6 | 28.953 | KV452782.1 | 1741847 | 3-scf00136 | 3 |
| AX-157994368 | 6 | 28.956 | KV452782.1 | 1745693 | 3-scf00136 | 3 |
| AX-157994371 | 6 | 29.278 | KV452782.1 | 1747263 | 3-scf00136 | 3 |
| AX-157994373 | 6 | 29.404 | KV452782.1 | 1749409 | 3-scf00136 | 3 |
| AX-157994374 | 6 | 29.407 | KV452782.1 | 1749939 | 3-scf00136 | 3 |
| AX-157994376 | 6 | 29.445 | KV452782.1 | 1752423 | 3-scf00136 | 3 |
| AX-157994378 | 6 | 29.56  | KV452782.1 | 1754327 | 3-scf00136 | 3 |
| AX-157994387 | 6 | 29.56  | KV452782.1 | 1763780 | 3-scf00136 | 3 |
| AX-157994390 | 6 | 29.56  | KV452782.1 | 1764749 | 3-scf00136 | 3 |
| AX-157994416 | 6 | 29.56  | KV452782.1 | 1788114 | 3-scf00136 | 3 |
| AX-157994395 | 6 | 29.781 | KV452782.1 | 1770022 | 3-scf00136 | 3 |
| AX-157994412 | 6 | 29.781 | KV452782.1 | 1785287 | 3-scf00136 | 3 |
| AX-157994413 | 6 | 29.781 | KV452782.1 | 1786107 | 3-scf00136 | 3 |
| AX-157994418 | 6 | 29.781 | KV452782.1 | 1793383 | 3-scf00136 | 3 |
| AX-157994419 | 6 | 29.781 | KV452782.1 | 1794197 | 3-scf00136 | 3 |
| AX-157994421 | 6 | 29.781 | KV452782.1 | 1796172 | 3-scf00136 | 3 |
| AX-157855747 | 6 | 30.001 | KV452782.1 | 1804656 | 3-scf00136 | 3 |
| AX-157994432 | 6 | 30.001 | KV452782.1 | 1806114 | 3-scf00136 | 3 |
| AX-157994435 | 6 | 30.001 | KV452782.1 | 1807323 | 3-scf00136 | 3 |
| AX-157884613 | 6 | 30.001 | KV452782.1 | 1807487 | 3-scf00136 | 3 |
| AX-157994436 | 6 | 30.001 | KV452782.1 | 1810214 | 3-scf00136 | 3 |
| AX-157994441 | 6 | 30.001 | KV452782.1 | 1813836 | 3-scf00136 | 3 |
| AX-157994451 | 6 | 30.001 | KV452782.1 | 1819424 | 3-scf00136 | 3 |
| AX-157818827 | 6 | 30.001 | KV452782.1 | 1822224 | 3-scf00136 | 3 |
| AX-157994457 | 6 | 30.001 | KV452782.1 | 1822356 | 3-scf00136 | 3 |
| AX-157718176 | 6 | 30.001 | KV452782.1 | 1851324 | 3-scf00136 | 3 |
| AX-157875919 | 6 | 30.058 | KV452782.1 | 1798171 | 3-scf00136 | 3 |
| AX-157753863 | 6 | 30.058 | KV452782.1 | 1799269 | 3-scf00136 | 3 |
| AX-157994427 | 6 | 30.058 | KV452782.1 | 1802195 | 3-scf00136 | 3 |
| AX-157994437 | 6 | 30.058 | KV452782.1 | 1810637 | 3-scf00136 | 3 |
| AX-157994447 | 6 | 30.058 | KV452782.1 | 1816303 | 3-scf00136 | 3 |
| AX-157994450 | 6 | 30.058 | KV452782.1 | 1817201 | 3-scf00136 | 3 |
| AX-157994476 | 6 | 30.058 | KV452782.1 | 1853128 | 3-scf00136 | 3 |

|              |   |        |            |         |            |   |
|--------------|---|--------|------------|---------|------------|---|
| AX-157994492 | 6 | 30.058 | KV452782.1 | 1871057 | 3-scf00136 | 3 |
| AX-157994448 | 6 | 30.06  | KV452782.1 | 1816680 | 3-scf00136 | 3 |
| AX-157994454 | 6 | 30.074 | KV452782.1 | 1820558 | 3-scf00136 | 3 |
| AX-157747137 | 6 | 30.087 | KV452782.1 | 1825925 | 3-scf00136 | 3 |
| AX-157994445 | 6 | 30.213 | KV452782.1 | 1815648 | 3-scf00136 | 3 |
| AX-157818828 | 6 | 30.213 | KV452782.1 | 1827320 | 3-scf00136 | 3 |
| AX-157994465 | 6 | 30.213 | KV452782.1 | 1831412 | 3-scf00136 | 3 |
| AX-157994475 | 6 | 30.214 | KV452782.1 | 1852300 | 3-scf00136 | 3 |
| AX-157994480 | 6 | 30.309 | KV452782.1 | 1859440 | 3-scf00136 | 3 |
| AX-157994487 | 6 | 30.883 | KV452782.1 | 1866912 | 3-scf00136 | 3 |
| AX-157994498 | 6 | 30.886 | KV452782.1 | 1879144 | 3-scf00136 | 3 |
| AX-157884616 | 6 | 31.15  | KV452782.1 | 1888419 | 3-scf00136 | 3 |
| AX-157884617 | 6 | 31.311 | KV452782.1 | 1896393 | 3-scf00136 | 3 |
| AX-158383338 | 6 | 31.345 | KV452782.1 | 1896459 | 3-scf00136 | 3 |
| AX-157994425 | 6 | 31.394 | KV452782.1 | 1800238 | 3-scf00136 | 3 |
| AX-157884615 | 6 | 31.394 | KV452782.1 | 1832590 | 3-scf00136 | 3 |
| AX-157994490 | 6 | 31.394 | KV452782.1 | 1868569 | 3-scf00136 | 3 |
| AX-157994493 | 6 | 31.394 | KV452782.1 | 1873457 | 3-scf00136 | 3 |
| AX-157994510 | 6 | 31.394 | KV452782.1 | 1897749 | 3-scf00136 | 3 |
| AX-157741932 | 6 | 31.394 | KV452782.1 | 1903065 | 3-scf00136 | 3 |
| AX-157994514 | 6 | 31.394 | KV452782.1 | 1908572 | 3-scf00136 | 3 |
| AX-157855749 | 6 | 31.394 | KV452782.1 | 1911390 | 3-scf00136 | 3 |
| AX-157994517 | 6 | 31.394 | KV452782.1 | 1911640 | 3-scf00136 | 3 |
| AX-157994519 | 6 | 31.394 | KV452782.1 | 1913308 | 3-scf00136 | 3 |
| AX-157717062 | 6 | 31.394 | KV452782.1 | 1914174 | 3-scf00136 | 3 |
| AX-157994530 | 6 | 31.394 | KV452782.1 | 1921851 | 3-scf00136 | 3 |
| AX-157722023 | 6 | 31.394 | KV452782.1 | 1948284 | 3-scf00136 | 3 |
| AX-157994569 | 6 | 31.394 | KV452782.1 | 1970873 | 3-scf00136 | 3 |
| AX-157994570 | 6 | 31.394 | KV452782.1 | 1971228 | 3-scf00136 | 3 |
| AX-157994575 | 6 | 31.394 | KV452782.1 | 1976075 | 3-scf00136 | 3 |
| AX-157744956 | 6 | 31.394 | KV452782.1 | 1993196 | 3-scf00136 | 3 |
| AX-157994541 | 6 | 31.794 | KV452782.1 | 1932207 | 3-scf00136 | 3 |
| AX-158407307 | 6 | 31.794 | KV452782.1 | 1933401 | 3-scf00136 | 3 |
| AX-157994543 | 6 | 32.039 | KV452782.1 | 1936179 | 3-scf00136 | 3 |
| AX-157994548 | 6 | 32.039 | KV452782.1 | 1937166 | 3-scf00136 | 3 |
| AX-157994551 | 6 | 32.041 | KV452782.1 | 1944264 | 3-scf00136 | 3 |
| AX-157994558 | 6 | 32.184 | KV452782.1 | 1951769 | 3-scf00136 | 3 |
| AX-157994559 | 6 | 32.928 | KV452782.1 | 1953064 | 3-scf00136 | 3 |
| AX-157994561 | 6 | 33.051 | KV452782.1 | 1960393 | 3-scf00136 | 3 |
| AX-157994582 | 6 | 33.134 | KV452782.1 | 1982541 | 3-scf00136 | 3 |
| AX-157714085 | 6 | 33.388 | KV452782.1 | 1984518 | 3-scf00136 | 3 |
| AX-157994586 | 6 | 33.577 | KV452782.1 | 1986666 | 3-scf00136 | 3 |
| AX-157994588 | 6 | 34.054 | KV452782.1 | 1987504 | 3-scf00136 | 3 |
| AX-157994591 | 6 | 34.057 | KV452782.1 | 1992580 | 3-scf00136 | 3 |
| AX-157994592 | 6 | 34.057 | KV452782.1 | 1993621 | 3-scf00136 | 3 |
| AX-157994593 | 6 | 34.057 | KV452782.1 | 1995176 | 3-scf00136 | 3 |
| AX-157994596 | 6 | 34.057 | KV452782.1 | 1996526 | 3-scf00136 | 3 |
| AX-157994602 | 6 | 34.057 | KV452782.1 | 1998554 | 3-scf00136 | 3 |
| AX-157994607 | 6 | 34.14  | KV452782.1 | 2002445 | 3-scf00136 | 3 |
| AX-157994609 | 6 | 34.215 | KV452782.1 | 2003918 | 3-scf00136 | 3 |
| AX-157994633 | 6 | 34.531 | KV452782.1 | 2020844 | 3-scf00136 | 3 |

|              |   |        |            |         |            |   |
|--------------|---|--------|------------|---------|------------|---|
| AX-157994636 | 6 | 34.531 | KV452782.1 | 2021951 | 3-scf00136 | 3 |
| AX-157994639 | 6 | 34.531 | KV452782.1 | 2023276 | 3-scf00136 | 3 |
| AX-157818830 | 6 | 34.531 | KV452782.1 | 2024359 | 3-scf00136 | 3 |
| AX-157994641 | 6 | 34.531 | KV452782.1 | 2025747 | 3-scf00136 | 3 |
| AX-157994650 | 6 | 35.005 | KV452782.1 | 2037118 | 3-scf00136 | 3 |
| AX-157994653 | 6 | 35.005 | KV452782.1 | 2039072 | 3-scf00136 | 3 |
| AX-157994654 | 6 | 35.005 | KV452782.1 | 2040938 | 3-scf00136 | 3 |
| AX-157994659 | 6 | 35.005 | KV452782.1 | 2044490 | 3-scf00136 | 3 |
| AX-157994660 | 6 | 35.005 | KV452782.1 | 2045218 | 3-scf00136 | 3 |
| AX-157719265 | 6 | 35.005 | KV452782.1 | 2045611 | 3-scf00136 | 3 |
| AX-157994665 | 6 | 35.368 | KV452782.1 | 2051911 | 3-scf00136 | 3 |
| AX-157994662 | 6 | 35.37  | KV452782.1 | 2050048 | 3-scf00136 | 3 |
| AX-157994666 | 6 | 35.37  | KV452782.1 | 2052995 | 3-scf00136 | 3 |
| AX-157994673 | 6 | 35.37  | KV452782.1 | 2055507 | 3-scf00136 | 3 |
| AX-157994698 | 6 | 35.37  | KV452782.1 | 2071226 | 3-scf00136 | 3 |
| AX-157994676 | 6 | 35.447 | KV452782.1 | 2059802 | 3-scf00136 | 3 |
| AX-157994678 | 6 | 35.519 | KV452782.1 | 2060531 | 3-scf00136 | 3 |
| AX-157994668 | 6 | 35.552 | KV452782.1 | 2053350 | 3-scf00136 | 3 |
| AX-157994685 | 6 | 35.552 | KV452782.1 | 2064156 | 3-scf00136 | 3 |
| AX-157994688 | 6 | 35.552 | KV452782.1 | 2065280 | 3-scf00136 | 3 |
| AX-157994691 | 6 | 35.552 | KV452782.1 | 2067393 | 3-scf00136 | 3 |
| AX-157773806 | 6 | 35.552 | KV452782.1 | 2069291 | 3-scf00136 | 3 |
| AX-157994695 | 6 | 35.552 | KV452782.1 | 2070723 | 3-scf00136 | 3 |
| AX-157994699 | 6 | 35.552 | KV452782.1 | 2075201 | 3-scf00136 | 3 |
| AX-157994700 | 6 | 35.552 | KV452782.1 | 2075801 | 3-scf00136 | 3 |
| AX-157994703 | 6 | 35.552 | KV452782.1 | 2077246 | 3-scf00136 | 3 |
| AX-157994704 | 6 | 35.552 | KV452782.1 | 2081410 | 3-scf00136 | 3 |
| AX-157994737 | 6 | 35.552 | KV452782.1 | 2108369 | 3-scf00136 | 3 |
| AX-157994797 | 6 | 35.552 | KV452782.1 | 2166144 | 3-scf00136 | 3 |
| AX-157994811 | 6 | 35.552 | KV452782.1 | 2177685 | 3-scf00136 | 3 |
| AX-157994709 | 6 | 35.734 | KV452782.1 | 2085046 | 3-scf00136 | 3 |
| AX-157994712 | 6 | 36.029 | KV452782.1 | 2086745 | 3-scf00136 | 3 |
| AX-157994714 | 6 | 36.029 | KV452782.1 | 2088101 | 3-scf00136 | 3 |
| AX-157994717 | 6 | 36.03  | KV452782.1 | 2090220 | 3-scf00136 | 3 |
| AX-157994723 | 6 | 36.198 | KV452782.1 | 2093739 | 3-scf00136 | 3 |
| AX-157994724 | 6 | 36.208 | KV452782.1 | 2094314 | 3-scf00136 | 3 |
| AX-157720509 | 6 | 36.208 | KV452782.1 | 2097773 | 3-scf00136 | 3 |
| AX-157994729 | 6 | 36.208 | KV452782.1 | 2098455 | 3-scf00136 | 3 |
| AX-157994758 | 6 | 36.208 | KV452782.1 | 2125043 | 3-scf00136 | 3 |
| AX-157994734 | 6 | 36.426 | KV452782.1 | 2102877 | 3-scf00136 | 3 |
| AX-157994742 | 6 | 36.426 | KV452782.1 | 2111823 | 3-scf00136 | 3 |
| AX-157994757 | 6 | 36.481 | KV452782.1 | 2122885 | 3-scf00136 | 3 |
| AX-157994732 | 6 | 36.536 | KV452782.1 | 2099880 | 3-scf00136 | 3 |
| AX-157994763 | 6 | 36.536 | KV452782.1 | 2126907 | 3-scf00136 | 3 |
| AX-157994765 | 6 | 36.536 | KV452782.1 | 2128691 | 3-scf00136 | 3 |
| AX-157994768 | 6 | 36.536 | KV452782.1 | 2131698 | 3-scf00136 | 3 |
| AX-157994770 | 6 | 36.536 | KV452782.1 | 2135061 | 3-scf00136 | 3 |
| AX-158390635 | 6 | 36.536 | KV452782.1 | 2135611 | 3-scf00136 | 3 |
| AX-157994771 | 6 | 36.536 | KV452782.1 | 2138573 | 3-scf00136 | 3 |
| AX-157994794 | 6 | 36.536 | KV452782.1 | 2161751 | 3-scf00136 | 3 |
| AX-157994795 | 6 | 36.536 | KV452782.1 | 2163551 | 3-scf00136 | 3 |

|              |   |        |            |         |            |   |
|--------------|---|--------|------------|---------|------------|---|
| AX-157994778 | 6 | 36.57  | KV452782.1 | 2146298 | 3-scf00136 | 3 |
| AX-157994781 | 6 | 36.603 | KV452782.1 | 2150534 | 3-scf00136 | 3 |
| AX-157994774 | 6 | 36.645 | KV452782.1 | 2141612 | 3-scf00136 | 3 |
| AX-157994777 | 6 | 36.645 | KV452782.1 | 2144289 | 3-scf00136 | 3 |
| AX-157994784 | 6 | 36.645 | KV452782.1 | 2152854 | 3-scf00136 | 3 |
| AX-157994787 | 6 | 36.645 | KV452782.1 | 2153854 | 3-scf00136 | 3 |
| AX-157994790 | 6 | 36.645 | KV452782.1 | 2157118 | 3-scf00136 | 3 |
| AX-157739033 | 6 | 36.645 | KV452782.1 | 2158679 | 3-scf00136 | 3 |
| AX-157994791 | 6 | 36.645 | KV452782.1 | 2159468 | 3-scf00136 | 3 |
| AX-157741105 | 6 | 36.645 | KV452782.1 | 2171142 | 3-scf00136 | 3 |
| AX-157994804 | 6 | 36.645 | KV452782.1 | 2174416 | 3-scf00136 | 3 |
| AX-157994806 | 6 | 36.645 | KV452782.1 | 2175177 | 3-scf00136 | 3 |
| AX-157994810 | 6 | 36.645 | KV452782.1 | 2177320 | 3-scf00136 | 3 |
| AX-157994814 | 6 | 36.645 | KV452782.1 | 2179440 | 3-scf00136 | 3 |
| AX-157994831 | 6 | 36.645 | KV452782.1 | 2197269 | 3-scf00136 | 3 |
| AX-157994829 | 6 | 36.755 | KV452782.1 | 2195132 | 3-scf00136 | 3 |
| AX-157994837 | 6 | 36.755 | KV452782.1 | 2203374 | 3-scf00136 | 3 |
| AX-157994849 | 6 | 36.866 | KV452782.1 | 2210669 | 3-scf00136 | 3 |
| AX-157994853 | 6 | 36.977 | KV452782.1 | 2216633 | 3-scf00136 | 3 |
| AX-157994859 | 6 | 37.085 | KV452782.1 | 2223387 | 3-scf00136 | 3 |
| AX-157994860 | 6 | 37.087 | KV452782.1 | 2223753 | 3-scf00136 | 3 |
| AX-157994861 | 6 | 37.087 | KV452782.1 | 2229282 | 3-scf00136 | 3 |
| AX-157775239 | 6 | 37.087 | KV452782.1 | 2230718 | 3-scf00136 | 3 |
| AX-157994867 | 6 | 37.147 | KV452782.1 | 2233196 | 3-scf00136 | 3 |
| AX-157994819 | 6 | 37.29  | KV452782.1 | 2182704 | 3-scf00136 | 3 |
| AX-157994822 | 6 | 37.29  | KV452782.1 | 2185143 | 3-scf00136 | 3 |
| AX-157994838 | 6 | 37.29  | KV452782.1 | 2204190 | 3-scf00136 | 3 |
| AX-157994869 | 6 | 37.29  | KV452782.1 | 2238245 | 3-scf00136 | 3 |
| AX-157994875 | 6 | 37.302 | KV452782.1 | 2245041 | 3-scf00136 | 3 |
| AX-157994878 | 6 | 37.302 | KV452782.1 | 2246750 | 3-scf00136 | 3 |
| AX-157994879 | 6 | 37.302 | KV452782.1 | 2248115 | 3-scf00136 | 3 |
| AX-157994950 | 6 | 37.302 | KV452782.1 | 2335033 | 3-scf00136 | 3 |
| AX-157994854 | 6 | 37.411 | KV452782.1 | 2217173 | 3-scf00136 | 3 |
| AX-157727305 | 6 | 37.411 | KV452782.1 | 2250449 | 3-scf00136 | 3 |
| AX-157994885 | 6 | 37.411 | KV452782.1 | 2257010 | 3-scf00136 | 3 |
| AX-157994895 | 6 | 37.411 | KV452782.1 | 2261798 | 3-scf00136 | 3 |
| AX-157994896 | 6 | 37.411 | KV452782.1 | 2263006 | 3-scf00136 | 3 |
| AX-157994897 | 6 | 37.411 | KV452782.1 | 2264189 | 3-scf00136 | 3 |
| AX-157994900 | 6 | 37.411 | KV452782.1 | 2267085 | 3-scf00136 | 3 |
| AX-157994904 | 6 | 37.411 | KV452782.1 | 2270387 | 3-scf00136 | 3 |
| AX-157994906 | 6 | 37.411 | KV452782.1 | 2273970 | 3-scf00136 | 3 |
| AX-158407318 | 6 | 37.411 | KV452782.1 | 2280075 | 3-scf00136 | 3 |
| AX-157994949 | 6 | 37.411 | KV452782.1 | 2332530 | 3-scf00136 | 3 |
| AX-157994956 | 6 | 37.411 | KV452782.1 | 2345646 | 3-scf00136 | 3 |
| AX-157994990 | 6 | 37.411 | KV452782.1 | 2375351 | 3-scf00136 | 3 |
| AX-157995025 | 6 | 37.411 | KV452782.1 | 2408662 | 3-scf00136 | 3 |
| AX-157995028 | 6 | 37.411 | KV452782.1 | 2410794 | 3-scf00136 | 3 |
| AX-157995078 | 6 | 37.411 | KV452782.1 | 2452251 | 3-scf00136 | 3 |
| AX-157995105 | 6 | 37.411 | KV452782.1 | 2473355 | 3-scf00136 | 3 |
| AX-157719038 | 6 | 37.52  | KV452782.1 | 2187541 | 3-scf00136 | 3 |
| AX-157855758 | 6 | 37.52  | KV452782.1 | 2258325 | 3-scf00136 | 3 |

|              |   |        |             |         |                |    |
|--------------|---|--------|-------------|---------|----------------|----|
| AX-157994891 | 6 | 37.52  | KV452782.1  | 2260039 | 3-scf00136     | 3  |
| AX-157855759 | 6 | 37.52  | KV452782.1  | 2260801 | 3-scf00136     | 3  |
| AX-157994908 | 6 | 37.52  | KV452782.1  | 2274500 | 3-scf00136     | 3  |
| AX-157994910 | 6 | 37.52  | KV452782.1  | 2275191 | 3-scf00136     | 3  |
| AX-157994912 | 6 | 37.52  | KV452782.1  | 2283776 | 3-scf00136     | 3  |
| AX-157994914 | 6 | 37.52  | KV452782.1  | 2285519 | 3-scf00136     | 3  |
| AX-157994916 | 6 | 37.52  | KV452782.1  | 2286720 | 3-scf00136     | 3  |
| AX-157994925 | 6 | 37.52  | KV452782.1  | 2293623 | 3-scf00136     | 3  |
| AX-157994934 | 6 | 37.52  | KV452782.1  | 2309778 | 3-scf00136     | 3  |
| AX-157994941 | 6 | 37.52  | KV452782.1  | 2328360 | 3-scf00136     | 3  |
| AX-157994944 | 6 | 37.52  | KV452782.1  | 2329591 | 3-scf00136     | 3  |
| AX-157994945 | 6 | 37.52  | KV452782.1  | 2330787 | 3-scf00136     | 3  |
| AX-157994980 | 6 | 37.52  | KV452782.1  | 2368689 | 3-scf00136     | 3  |
| AX-157995013 | 6 | 37.52  | KV452782.1  | 2401499 | 3-scf00136     | 3  |
| AX-157753394 | 6 | 37.52  | KV452782.1  | 2476244 | 3-scf00136     | 3  |
| AX-157818839 | 6 | 37.52  | KV452782.1  | 2486289 | 3-scf00136     | 3  |
| AX-157703137 | 6 | 37.52  | DX096470.1  | 477     | IORI212 lctalu | UN |
| AX-157706330 | 6 | 37.52  | 3ML01032074 | 245     | scf07687_1     | UN |
| AX-157818836 | 6 | 37.521 | KV452782.1  | 2331560 | 3-scf00136     | 3  |
| AX-157994947 | 6 | 37.521 | KV452782.1  | 2331642 | 3-scf00136     | 3  |
| AX-157994952 | 6 | 37.521 | KV452782.1  | 2337624 | 3-scf00136     | 3  |
| AX-157818837 | 6 | 37.521 | KV452782.1  | 2343869 | 3-scf00136     | 3  |
| AX-157727332 | 6 | 37.521 | KV452782.1  | 2347111 | 3-scf00136     | 3  |
| AX-157994957 | 6 | 37.521 | KV452782.1  | 2347567 | 3-scf00136     | 3  |
| AX-158407319 | 6 | 37.766 | KV452782.1  | 2350970 | 3-scf00136     | 3  |
| AX-157994997 | 6 | 37.848 | KV452782.1  | 2378168 | 3-scf00136     | 3  |
| AX-157994998 | 6 | 37.848 | KV452782.1  | 2378946 | 3-scf00136     | 3  |
| AX-157995001 | 6 | 37.848 | KV452782.1  | 2380639 | 3-scf00136     | 3  |
| AX-157995018 | 6 | 37.909 | KV452782.1  | 2403215 | 3-scf00136     | 3  |
| AX-157995019 | 6 | 37.957 | KV452782.1  | 2404273 | 3-scf00136     | 3  |
| AX-157995024 | 6 | 37.957 | KV452782.1  | 2407989 | 3-scf00136     | 3  |
| AX-157742435 | 6 | 37.957 | KV452782.1  | 2447120 | 3-scf00136     | 3  |
| AX-157995139 | 6 | 37.957 | KV452782.1  | 2495398 | 3-scf00136     | 3  |
| AX-157995029 | 6 | 37.987 | KV452782.1  | 2412405 | 3-scf00136     | 3  |
| AX-157995016 | 6 | 38.014 | KV452782.1  | 2402699 | 3-scf00136     | 3  |
| AX-157995030 | 6 | 38.014 | KV452782.1  | 2413314 | 3-scf00136     | 3  |
| AX-157995059 | 6 | 38.014 | KV452782.1  | 2433838 | 3-scf00136     | 3  |
| AX-157818838 | 6 | 38.014 | KV452782.1  | 2444719 | 3-scf00136     | 3  |
| AX-157995032 | 6 | 38.022 | KV452782.1  | 2413653 | 3-scf00136     | 3  |
| AX-157995038 | 6 | 38.022 | KV452782.1  | 2418857 | 3-scf00136     | 3  |
| AX-157995015 | 6 | 38.044 | KV452782.1  | 2402109 | 3-scf00136     | 3  |
| AX-157995036 | 6 | 38.044 | KV452782.1  | 2416922 | 3-scf00136     | 3  |
| AX-157994824 | 6 | 38.066 | KV452782.1  | 2188645 | 3-scf00136     | 3  |
| AX-157994953 | 6 | 38.066 | KV452782.1  | 2340449 | 3-scf00136     | 3  |
| AX-157994978 | 6 | 38.066 | KV452782.1  | 2367757 | 3-scf00136     | 3  |
| AX-157994985 | 6 | 38.066 | KV452782.1  | 2371588 | 3-scf00136     | 3  |
| AX-157995008 | 6 | 38.066 | KV452782.1  | 2388437 | 3-scf00136     | 3  |
| AX-157725924 | 6 | 38.066 | KV452782.1  | 2397394 | 3-scf00136     | 3  |
| AX-157995041 | 6 | 38.066 | KV452782.1  | 2420851 | 3-scf00136     | 3  |
| AX-157995046 | 6 | 38.066 | KV452782.1  | 2423657 | 3-scf00136     | 3  |
| AX-157995052 | 6 | 38.066 | KV452782.1  | 2431183 | 3-scf00136     | 3  |

|              |   |        |            |         |                |    |
|--------------|---|--------|------------|---------|----------------|----|
| AX-157995060 | 6 | 38.066 | KV452782.1 | 2434313 | 3-scf00136     | 3  |
| AX-157995062 | 6 | 38.066 | KV452782.1 | 2435487 | 3-scf00136     | 3  |
| AX-157755451 | 6 | 38.066 | KV452782.1 | 2435901 | 3-scf00136     | 3  |
| AX-157995068 | 6 | 38.066 | KV452782.1 | 2445532 | 3-scf00136     | 3  |
| AX-157995069 | 6 | 38.066 | KV452782.1 | 2446067 | 3-scf00136     | 3  |
| AX-157995070 | 6 | 38.066 | KV452782.1 | 2446222 | 3-scf00136     | 3  |
| AX-157995077 | 6 | 38.066 | KV452782.1 | 2449857 | 3-scf00136     | 3  |
| AX-157771501 | 6 | 38.066 | KV452782.1 | 2453934 | 3-scf00136     | 3  |
| AX-157995081 | 6 | 38.066 | KV452782.1 | 2456692 | 3-scf00136     | 3  |
| AX-158390641 | 6 | 38.066 | KV452782.1 | 2459951 | 3-scf00136     | 3  |
| AX-157995090 | 6 | 38.066 | KV452782.1 | 2462970 | 3-scf00136     | 3  |
| AX-157995092 | 6 | 38.066 | KV452782.1 | 2463959 | 3-scf00136     | 3  |
| AX-157995095 | 6 | 38.066 | KV452782.1 | 2464427 | 3-scf00136     | 3  |
| AX-157724080 | 6 | 38.066 | KV452782.1 | 2465864 | 3-scf00136     | 3  |
| AX-157995098 | 6 | 38.066 | KV452782.1 | 2466511 | 3-scf00136     | 3  |
| AX-157995100 | 6 | 38.066 | KV452782.1 | 2467635 | 3-scf00136     | 3  |
| AX-157995102 | 6 | 38.066 | KV452782.1 | 2469644 | 3-scf00136     | 3  |
| AX-157995104 | 6 | 38.066 | KV452782.1 | 2472079 | 3-scf00136     | 3  |
| AX-157995108 | 6 | 38.066 | KV452782.1 | 2474221 | 3-scf00136     | 3  |
| AX-157995134 | 6 | 38.066 | KV452782.1 | 2490772 | 3-scf00136     | 3  |
| AX-157995143 | 6 | 38.066 | KV452782.1 | 2498244 | 3-scf00136     | 3  |
| AX-157995152 | 6 | 38.066 | KV452782.1 | 2507263 | 3-scf00136     | 3  |
| AX-157995171 | 6 | 38.066 | KV452782.1 | 2528129 | 3-scf00136     | 3  |
| AX-157995177 | 6 | 38.066 | KV452782.1 | 2532035 | 3-scf00136     | 3  |
| AX-157995178 | 6 | 38.066 | KV452782.1 | 2532261 | 3-scf00136     | 3  |
| AX-157995232 | 6 | 38.066 | KV452782.1 | 2575207 | 3-scf00136     | 3  |
| AX-157699579 | 6 | 38.066 | FI895369.1 | 419     | FORI212 Ictali | UN |
| AX-157995053 | 6 | 38.151 | KV452782.1 | 2431911 | 3-scf00136     | 3  |
| AX-157995113 | 6 | 38.151 | KV452782.1 | 2479031 | 3-scf00136     | 3  |
| AX-157995131 | 6 | 38.151 | KV452782.1 | 2489360 | 3-scf00136     | 3  |
| AX-157884627 | 6 | 38.23  | KV452782.1 | 2486631 | 3-scf00136     | 3  |
| AX-157995129 | 6 | 38.23  | KV452782.1 | 2488519 | 3-scf00136     | 3  |
| AX-157995132 | 6 | 38.23  | KV452782.1 | 2490049 | 3-scf00136     | 3  |
| AX-157855767 | 6 | 38.278 | KV452782.1 | 2505195 | 3-scf00136     | 3  |
| AX-157995145 | 6 | 38.337 | KV452782.1 | 2499378 | 3-scf00136     | 3  |
| AX-157995154 | 6 | 38.337 | KV452782.1 | 2509164 | 3-scf00136     | 3  |
| AX-157995235 | 6 | 38.337 | KV452782.1 | 2577031 | 3-scf00136     | 3  |
| AX-157995291 | 6 | 38.337 | KV452782.1 | 2639205 | 3-scf00136     | 3  |
| AX-157995334 | 6 | 38.337 | KV452782.1 | 2671933 | 3-scf00136     | 3  |
| AX-157995005 | 6 | 38.394 | KV452782.1 | 2383069 | 3-scf00136     | 3  |
| AX-157995120 | 6 | 38.394 | KV452782.1 | 2482414 | 3-scf00136     | 3  |
| AX-157995141 | 6 | 38.394 | KV452782.1 | 2495882 | 3-scf00136     | 3  |
| AX-157995157 | 6 | 38.394 | KV452782.1 | 2510387 | 3-scf00136     | 3  |
| AX-157995158 | 6 | 38.394 | KV452782.1 | 2512681 | 3-scf00136     | 3  |
| AX-157995164 | 6 | 38.394 | KV452782.1 | 2516259 | 3-scf00136     | 3  |
| AX-157995165 | 6 | 38.394 | KV452782.1 | 2517936 | 3-scf00136     | 3  |
| AX-157995167 | 6 | 38.394 | KV452782.1 | 2520018 | 3-scf00136     | 3  |
| AX-157995168 | 6 | 38.394 | KV452782.1 | 2525027 | 3-scf00136     | 3  |
| AX-157995170 | 6 | 38.394 | KV452782.1 | 2526417 | 3-scf00136     | 3  |
| AX-157995173 | 6 | 38.394 | KV452782.1 | 2529006 | 3-scf00136     | 3  |
| AX-157995175 | 6 | 38.394 | KV452782.1 | 2530374 | 3-scf00136     | 3  |



|              |   |        |             |         |            |    |
|--------------|---|--------|-------------|---------|------------|----|
| AX-157995183 | 6 | 38.394 | KV452782.1  | 2535152 | 3-scf00136 | 3  |
| AX-157995189 | 6 | 38.394 | KV452782.1  | 2536730 | 3-scf00136 | 3  |
| AX-157995190 | 6 | 38.394 | KV452782.1  | 2537182 | 3-scf00136 | 3  |
| AX-157855769 | 6 | 38.394 | KV452782.1  | 2538105 | 3-scf00136 | 3  |
| AX-157995194 | 6 | 38.394 | KV452782.1  | 2538355 | 3-scf00136 | 3  |
| AX-157754073 | 6 | 38.394 | KV452782.1  | 2541123 | 3-scf00136 | 3  |
| AX-157995199 | 6 | 38.394 | KV452782.1  | 2543834 | 3-scf00136 | 3  |
| AX-157705840 | 6 | 38.394 | 3ML01031026 | 532     | scf06630_1 | UN |
| AX-157995207 | 6 | 38.576 | KV452782.1  | 2550851 | 3-scf00136 | 3  |
| AX-157995209 | 6 | 38.576 | KV452782.1  | 2553343 | 3-scf00136 | 3  |
| AX-157995213 | 6 | 38.576 | KV452782.1  | 2556785 | 3-scf00136 | 3  |
| AX-158415740 | 6 | 38.576 | KV452782.1  | 2558431 | 3-scf00136 | 3  |
| AX-157995217 | 6 | 38.576 | KV452782.1  | 2559587 | 3-scf00136 | 3  |
| AX-157995218 | 6 | 38.576 | KV452782.1  | 2559810 | 3-scf00136 | 3  |
| AX-157995223 | 6 | 38.576 | KV452782.1  | 2563173 | 3-scf00136 | 3  |
| AX-157818841 | 6 | 38.576 | KV452782.1  | 2564427 | 3-scf00136 | 3  |
| AX-157995225 | 6 | 38.576 | KV452782.1  | 2566490 | 3-scf00136 | 3  |
| AX-157995226 | 6 | 38.576 | KV452782.1  | 2571256 | 3-scf00136 | 3  |
| AX-157865128 | 6 | 38.667 | KV452782.1  | 2558253 | 3-scf00136 | 3  |
| AX-157818842 | 6 | 38.667 | KV452782.1  | 2567586 | 3-scf00136 | 3  |
| AX-157725817 | 6 | 38.667 | KV452782.1  | 2569653 | 3-scf00136 | 3  |
| AX-158405620 | 6 | 38.758 | KV452782.1  | 2572623 | 3-scf00136 | 3  |
| AX-157994918 | 6 | 38.94  | KV452782.1  | 2287101 | 3-scf00136 | 3  |
| AX-157995009 | 6 | 38.94  | KV452782.1  | 2389249 | 3-scf00136 | 3  |
| AX-157995230 | 6 | 38.94  | KV452782.1  | 2574124 | 3-scf00136 | 3  |
| AX-157714599 | 6 | 38.94  | KV452782.1  | 2577663 | 3-scf00136 | 3  |
| AX-157995236 | 6 | 38.94  | KV452782.1  | 2577824 | 3-scf00136 | 3  |
| AX-157774030 | 6 | 38.94  | KV452782.1  | 2578504 | 3-scf00136 | 3  |
| AX-157995244 | 6 | 38.94  | KV452782.1  | 2591684 | 3-scf00136 | 3  |
| AX-157758422 | 6 | 38.94  | KV452782.1  | 2592228 | 3-scf00136 | 3  |
| AX-157995245 | 6 | 38.94  | KV452782.1  | 2592694 | 3-scf00136 | 3  |
| AX-157995247 | 6 | 38.94  | KV452782.1  | 2593055 | 3-scf00136 | 3  |
| AX-157995248 | 6 | 38.94  | KV452782.1  | 2593984 | 3-scf00136 | 3  |
| AX-157995254 | 6 | 38.94  | KV452782.1  | 2599470 | 3-scf00136 | 3  |
| AX-157995257 | 6 | 38.94  | KV452782.1  | 2603674 | 3-scf00136 | 3  |
| AX-157995259 | 6 | 38.94  | KV452782.1  | 2604511 | 3-scf00136 | 3  |
| AX-157995262 | 6 | 38.94  | KV452782.1  | 2610732 | 3-scf00136 | 3  |
| AX-157995266 | 6 | 38.94  | KV452782.1  | 2615813 | 3-scf00136 | 3  |
| AX-157995269 | 6 | 38.94  | KV452782.1  | 2616737 | 3-scf00136 | 3  |
| AX-157995270 | 6 | 38.94  | KV452782.1  | 2617739 | 3-scf00136 | 3  |
| AX-157995275 | 6 | 38.94  | KV452782.1  | 2621148 | 3-scf00136 | 3  |
| AX-157755149 | 6 | 39.023 | KV452782.1  | 2622912 | 3-scf00136 | 3  |
| AX-157855771 | 6 | 39.05  | KV452782.1  | 2574394 | 3-scf00136 | 3  |
| AX-157739573 | 6 | 39.05  | KV452782.1  | 2618437 | 3-scf00136 | 3  |
| AX-157715212 | 6 | 39.05  | KV452782.1  | 2631142 | 3-scf00136 | 3  |
| AX-157995289 | 6 | 39.05  | KV452782.1  | 2633197 | 3-scf00136 | 3  |
| AX-157818847 | 6 | 39.05  | KV452782.1  | 2635953 | 3-scf00136 | 3  |
| AX-157995290 | 6 | 39.05  | KV452782.1  | 2638772 | 3-scf00136 | 3  |
| AX-157995297 | 6 | 39.05  | KV452782.1  | 2641854 | 3-scf00136 | 3  |
| AX-157995298 | 6 | 39.05  | KV452782.1  | 2642252 | 3-scf00136 | 3  |
| AX-157995299 | 6 | 39.05  | KV452782.1  | 2642619 | 3-scf00136 | 3  |

|              |   |        |            |         |            |   |
|--------------|---|--------|------------|---------|------------|---|
| AX-157995313 | 6 | 39.05  | KV452782.1 | 2656281 | 3-scf00136 | 3 |
| AX-157995317 | 6 | 39.05  | KV452782.1 | 2658387 | 3-scf00136 | 3 |
| AX-157995323 | 6 | 39.05  | KV452782.1 | 2662938 | 3-scf00136 | 3 |
| AX-157995324 | 6 | 39.05  | KV452782.1 | 2663907 | 3-scf00136 | 3 |
| AX-157709633 | 6 | 39.05  | KV452782.1 | 2681689 | 3-scf00136 | 3 |
| AX-157995352 | 6 | 39.05  | KV452782.1 | 2687044 | 3-scf00136 | 3 |
| AX-157995358 | 6 | 39.05  | KV452782.1 | 2689962 | 3-scf00136 | 3 |
| AX-157995320 | 6 | 39.121 | KV452782.1 | 2661326 | 3-scf00136 | 3 |
| AX-157995325 | 6 | 39.199 | KV452782.1 | 2667569 | 3-scf00136 | 3 |
| AX-157995335 | 6 | 39.199 | KV452782.1 | 2672486 | 3-scf00136 | 3 |
| AX-157995339 | 6 | 39.199 | KV452782.1 | 2674844 | 3-scf00136 | 3 |
| AX-157995344 | 6 | 39.199 | KV452782.1 | 2680996 | 3-scf00136 | 3 |
| AX-157995363 | 6 | 39.498 | KV452782.1 | 2695096 | 3-scf00136 | 3 |
| AX-157995367 | 6 | 39.498 | KV452782.1 | 2697425 | 3-scf00136 | 3 |
| AX-157995371 | 6 | 39.498 | KV452782.1 | 2700086 | 3-scf00136 | 3 |
| AX-157995374 | 6 | 39.498 | KV452782.1 | 2702718 | 3-scf00136 | 3 |
| AX-157995382 | 6 | 39.498 | KV452782.1 | 2710682 | 3-scf00136 | 3 |
| AX-157995383 | 6 | 39.499 | KV452782.1 | 2711230 | 3-scf00136 | 3 |
| AX-157995385 | 6 | 39.503 | KV452782.1 | 2712908 | 3-scf00136 | 3 |
| AX-157995340 | 6 | 39.51  | KV452782.1 | 2676322 | 3-scf00136 | 3 |
| AX-157995372 | 6 | 39.51  | KV452782.1 | 2702005 | 3-scf00136 | 3 |
| AX-157995389 | 6 | 39.51  | KV452782.1 | 2718598 | 3-scf00136 | 3 |
| AX-157995393 | 6 | 40.084 | KV452782.1 | 2725599 | 3-scf00136 | 3 |
| AX-157995411 | 6 | 40.092 | KV452782.1 | 2742981 | 3-scf00136 | 3 |
| AX-157754387 | 6 | 40.099 | KV452782.1 | 2742265 | 3-scf00136 | 3 |
| AX-157995415 | 6 | 40.099 | KV452782.1 | 2746507 | 3-scf00136 | 3 |
| AX-157995417 | 6 | 40.1   | KV452782.1 | 2748776 | 3-scf00136 | 3 |
| AX-157818849 | 6 | 40.26  | KV452782.1 | 2753199 | 3-scf00136 | 3 |
| AX-157995391 | 6 | 40.307 | KV452782.1 | 2724753 | 3-scf00136 | 3 |
| AX-157875938 | 6 | 40.307 | KV452782.1 | 2735193 | 3-scf00136 | 3 |
| AX-157995405 | 6 | 40.307 | KV452782.1 | 2736384 | 3-scf00136 | 3 |
| AX-157818850 | 6 | 40.307 | KV452782.1 | 2754120 | 3-scf00136 | 3 |
| AX-157995423 | 6 | 40.307 | KV452782.1 | 2758882 | 3-scf00136 | 3 |
| AX-157995440 | 6 | 40.307 | KV452782.1 | 2771787 | 3-scf00136 | 3 |
| AX-157995433 | 6 | 40.62  | KV452782.1 | 2768285 | 3-scf00136 | 3 |
| AX-157995435 | 6 | 40.632 | KV452782.1 | 2769328 | 3-scf00136 | 3 |
| AX-157995448 | 6 | 41.345 | KV452782.1 | 2781286 | 3-scf00136 | 3 |
| AX-157995450 | 6 | 41.345 | KV452782.1 | 2786219 | 3-scf00136 | 3 |
| AX-157995455 | 6 | 41.756 | KV452782.1 | 2792868 | 3-scf00136 | 3 |
| AX-157995459 | 6 | 42.329 | KV452782.1 | 2795938 | 3-scf00136 | 3 |
| AX-157855774 | 6 | 42.396 | KV452782.1 | 2796341 | 3-scf00136 | 3 |
| AX-157995460 | 6 | 42.462 | KV452782.1 | 2796801 | 3-scf00136 | 3 |
| AX-157995461 | 6 | 42.462 | KV452782.1 | 2797024 | 3-scf00136 | 3 |
| AX-157995462 | 6 | 42.531 | KV452782.1 | 2799139 | 3-scf00136 | 3 |
| AX-157995466 | 6 | 42.595 | KV452782.1 | 2801716 | 3-scf00136 | 3 |
| AX-157720513 | 6 | 42.595 | KV452782.1 | 2803791 | 3-scf00136 | 3 |
| AX-157750038 | 6 | 42.861 | KV452782.1 | 2809136 | 3-scf00136 | 3 |
| AX-157738004 | 6 | 42.861 | KV452782.1 | 2809590 | 3-scf00136 | 3 |
| AX-157995471 | 6 | 42.861 | KV452782.1 | 2816814 | 3-scf00136 | 3 |
| AX-157995478 | 6 | 43.123 | KV452782.1 | 2823996 | 3-scf00136 | 3 |
| AX-157818854 | 6 | 43.123 | KV452782.1 | 2825774 | 3-scf00136 | 3 |

|              |   |        |             |         |            |    |
|--------------|---|--------|-------------|---------|------------|----|
| AX-157995480 | 6 | 43.123 | KV452782.1  | 2826449 | 3-scf00136 | 3  |
| AX-157995469 | 6 | 43.13  | KV452782.1  | 2815841 | 3-scf00136 | 3  |
| AX-157995483 | 6 | 43.13  | KV452782.1  | 2830988 | 3-scf00136 | 3  |
| AX-157995484 | 6 | 43.13  | KV452782.1  | 2832173 | 3-scf00136 | 3  |
| AX-157740871 | 6 | 43.13  | KV452782.1  | 2836486 | 3-scf00136 | 3  |
| AX-157995492 | 6 | 43.13  | KV452782.1  | 2840174 | 3-scf00136 | 3  |
| AX-157995494 | 6 | 43.13  | KV452782.1  | 2841598 | 3-scf00136 | 3  |
| AX-157995497 | 6 | 43.13  | KV452782.1  | 2844179 | 3-scf00136 | 3  |
| AX-157706667 | 6 | 43.13  | 3ML01032712 | 126     | scf08339_1 | UN |
| AX-157995498 | 6 | 43.557 | KV452782.1  | 2845603 | 3-scf00136 | 3  |
| AX-157862920 | 6 | 43.558 | KV452782.1  | 2857365 | 3-scf00136 | 3  |
| AX-157995505 | 6 | 43.963 | KV452782.1  | 2859441 | 3-scf00136 | 3  |
| AX-158405623 | 6 | 44.198 | KV452782.1  | 2887870 | 3-scf00136 | 3  |
| AX-157818861 | 6 | 44.198 | KV452782.1  | 2896400 | 3-scf00136 | 3  |
| AX-158415745 | 6 | 44.202 | KV452782.1  | 2891498 | 3-scf00136 | 3  |
| AX-157818857 | 6 | 44.223 | KV452782.1  | 2858623 | 3-scf00136 | 3  |
| AX-157818859 | 6 | 44.223 | KV452782.1  | 2878720 | 3-scf00136 | 3  |
| AX-158383365 | 6 | 44.223 | KV452782.1  | 2891772 | 3-scf00136 | 3  |
| AX-157995520 | 6 | 44.223 | KV452782.1  | 2894483 | 3-scf00136 | 3  |
| AX-157995521 | 6 | 44.223 | KV452782.1  | 2897041 | 3-scf00136 | 3  |
| AX-157995522 | 6 | 44.223 | KV452782.1  | 2898489 | 3-scf00136 | 3  |
| AX-157995523 | 6 | 44.223 | KV452782.1  | 2898971 | 3-scf00136 | 3  |
| AX-157995525 | 6 | 44.223 | KV452782.1  | 2901018 | 3-scf00136 | 3  |
| AX-157855776 | 6 | 44.223 | KV452782.1  | 2901074 | 3-scf00136 | 3  |
| AX-157995530 | 6 | 44.223 | KV452782.1  | 2904969 | 3-scf00136 | 3  |
| AX-157995531 | 6 | 44.223 | KV452782.1  | 2905989 | 3-scf00136 | 3  |
| AX-157818863 | 6 | 44.223 | KV452782.1  | 2906471 | 3-scf00136 | 3  |
| AX-158407332 | 6 | 44.223 | KV452782.1  | 2907570 | 3-scf00136 | 3  |
| AX-157995532 | 6 | 44.223 | KV452782.1  | 2907719 | 3-scf00136 | 3  |
| AX-157995534 | 6 | 44.223 | KV452782.1  | 2908934 | 3-scf00136 | 3  |
| AX-157995540 | 6 | 44.223 | KV452782.1  | 2917722 | 3-scf00136 | 3  |
| AX-157995546 | 6 | 44.223 | KV452782.1  | 2922304 | 3-scf00136 | 3  |
| AX-157884635 | 6 | 44.278 | KV452782.1  | 2910039 | 3-scf00136 | 3  |
| AX-157995508 | 6 | 44.349 | KV452782.1  | 2873783 | 3-scf00136 | 3  |
| AX-157995527 | 6 | 44.349 | KV452782.1  | 2902528 | 3-scf00136 | 3  |
| AX-157743470 | 6 | 44.349 | KV452782.1  | 2926675 | 3-scf00136 | 3  |
| AX-157995560 | 6 | 44.349 | KV452782.1  | 2940519 | 3-scf00136 | 3  |
| AX-157754834 | 6 | 44.441 | KV452782.1  | 2931473 | 3-scf00136 | 3  |
| AX-157727134 | 6 | 44.441 | KV452782.1  | 2933320 | 3-scf00136 | 3  |
| AX-157995556 | 6 | 44.441 | KV452782.1  | 2936915 | 3-scf00136 | 3  |
| AX-157995557 | 6 | 44.441 | KV452782.1  | 2937720 | 3-scf00136 | 3  |
| AX-157995558 | 6 | 44.496 | KV452782.1  | 2938281 | 3-scf00136 | 3  |
| AX-157773813 | 6 | 44.496 | KV452782.1  | 2942945 | 3-scf00136 | 3  |
| AX-157995561 | 6 | 44.659 | KV452782.1  | 2940953 | 3-scf00136 | 3  |
| AX-157995566 | 6 | 44.659 | KV452782.1  | 2946935 | 3-scf00136 | 3  |
| AX-157995568 | 6 | 44.66  | KV452782.1  | 2947416 | 3-scf00136 | 3  |
| AX-157772772 | 6 | 44.66  | KV452782.1  | 2950010 | 3-scf00136 | 3  |
| AX-157743859 | 6 | 44.66  | KV452782.1  | 2951463 | 3-scf00136 | 3  |
| AX-157995572 | 6 | 44.796 | KV452782.1  | 2953475 | 3-scf00136 | 3  |
| AX-157725064 | 6 | 44.796 | KV452782.1  | 2955155 | 3-scf00136 | 3  |
| AX-157818864 | 6 | 44.796 | KV452782.1  | 2957113 | 3-scf00136 | 3  |

|              |   |        |             |         |            |    |
|--------------|---|--------|-------------|---------|------------|----|
| AX-157995574 | 6 | 45.203 | KV452782.1  | 2958691 | 3-scf00136 | 3  |
| AX-157995575 | 6 | 45.206 | KV452782.1  | 2959101 | 3-scf00136 | 3  |
| AX-157995578 | 6 | 45.206 | KV452782.1  | 2961314 | 3-scf00136 | 3  |
| AX-157995581 | 6 | 45.206 | KV452782.1  | 2965958 | 3-scf00136 | 3  |
| AX-157995582 | 6 | 45.315 | KV452782.1  | 2966617 | 3-scf00136 | 3  |
| AX-157995584 | 6 | 45.315 | KV452782.1  | 2967321 | 3-scf00136 | 3  |
| AX-157995589 | 6 | 45.334 | KV452782.1  | 2972610 | 3-scf00136 | 3  |
| AX-157995590 | 6 | 45.37  | KV452782.1  | 2976500 | 3-scf00136 | 3  |
| AX-157995592 | 6 | 45.395 | KV452782.1  | 2977007 | 3-scf00136 | 3  |
| AX-157745688 | 6 | 45.424 | KV452782.1  | 2979251 | 3-scf00136 | 3  |
| AX-157865133 | 6 | 45.424 | KV452782.1  | 2980156 | 3-scf00136 | 3  |
| AX-157720401 | 6 | 45.424 | KV452782.1  | 2980965 | 3-scf00136 | 3  |
| AX-157995586 | 6 | 45.534 | KV452782.1  | 2968680 | 3-scf00136 | 3  |
| AX-157995593 | 6 | 45.534 | KV452782.1  | 2987957 | 3-scf00136 | 3  |
| AX-157709797 | 6 | 45.534 | KV452782.1  | 2990416 | 3-scf00136 | 3  |
| AX-157995595 | 6 | 45.534 | KV452782.1  | 2991487 | 3-scf00136 | 3  |
| AX-157818868 | 6 | 45.534 | KV452782.1  | 3002434 | 3-scf00136 | 3  |
| AX-158390646 | 6 | 45.534 | KV452782.1  | 3049031 | 3-scf00136 | 3  |
| AX-157995672 | 6 | 45.534 | KV452782.1  | 3055065 | 3-scf00136 | 3  |
| AX-157995700 | 6 | 45.534 | KV452782.1  | 3074729 | 3-scf00136 | 3  |
| AX-157995704 | 6 | 45.534 | KV452782.1  | 3079008 | 3-scf00136 | 3  |
| AX-157995768 | 6 | 45.534 | KV452782.1  | 3141513 | 3-scf00136 | 3  |
| AX-157995793 | 6 | 45.534 | KV452782.1  | 3170039 | 3-scf00136 | 3  |
| AX-157706542 | 6 | 45.534 | 3ML01032419 | 376     | scf08039_1 | UN |
| AX-157995599 | 6 | 45.559 | KV452782.1  | 2998214 | 3-scf00136 | 3  |
| AX-157995609 | 6 | 45.577 | KV452782.1  | 3003684 | 3-scf00136 | 3  |
| AX-157995585 | 6 | 45.601 | KV452782.1  | 2967788 | 3-scf00136 | 3  |
| AX-157855777 | 6 | 45.601 | KV452782.1  | 3007037 | 3-scf00136 | 3  |
| AX-157995616 | 6 | 45.625 | KV452782.1  | 3008787 | 3-scf00136 | 3  |
| AX-157995624 | 6 | 45.643 | KV452782.1  | 3014285 | 3-scf00136 | 3  |
| AX-157818869 | 6 | 45.643 | KV452782.1  | 3016480 | 3-scf00136 | 3  |
| AX-157995627 | 6 | 45.643 | KV452782.1  | 3021568 | 3-scf00136 | 3  |
| AX-157995632 | 6 | 45.643 | KV452782.1  | 3023329 | 3-scf00136 | 3  |
| AX-157995633 | 6 | 45.643 | KV452782.1  | 3024754 | 3-scf00136 | 3  |
| AX-157995634 | 6 | 45.643 | KV452782.1  | 3025427 | 3-scf00136 | 3  |
| AX-157995648 | 6 | 45.701 | KV452782.1  | 3035499 | 3-scf00136 | 3  |
| AX-157995604 | 6 | 45.752 | KV452782.1  | 3000752 | 3-scf00136 | 3  |
| AX-157995644 | 6 | 45.752 | KV452782.1  | 3033412 | 3-scf00136 | 3  |
| AX-157721243 | 6 | 45.752 | KV452782.1  | 3038438 | 3-scf00136 | 3  |
| AX-158405627 | 6 | 45.752 | KV452782.1  | 3046766 | 3-scf00136 | 3  |
| AX-157995665 | 6 | 45.752 | KV452782.1  | 3050373 | 3-scf00136 | 3  |
| AX-157995666 | 6 | 45.772 | KV452782.1  | 3051696 | 3-scf00136 | 3  |
| AX-157995671 | 6 | 45.862 | KV452782.1  | 3054591 | 3-scf00136 | 3  |
| AX-157995673 | 6 | 45.862 | KV452782.1  | 3055460 | 3-scf00136 | 3  |
| AX-157884641 | 6 | 45.971 | KV452782.1  | 3057161 | 3-scf00136 | 3  |
| AX-157995681 | 6 | 45.971 | KV452782.1  | 3060212 | 3-scf00136 | 3  |
| AX-157995683 | 6 | 45.971 | KV452782.1  | 3062556 | 3-scf00136 | 3  |
| AX-157995684 | 6 | 45.971 | KV452782.1  | 3063552 | 3-scf00136 | 3  |
| AX-157995685 | 6 | 45.971 | KV452782.1  | 3064674 | 3-scf00136 | 3  |
| AX-157995690 | 6 | 45.971 | KV452782.1  | 3069399 | 3-scf00136 | 3  |
| AX-157995693 | 6 | 45.971 | KV452782.1  | 3070859 | 3-scf00136 | 3  |

|              |   |        |             |         |            |    |
|--------------|---|--------|-------------|---------|------------|----|
| AX-157995751 | 6 | 45.971 | KV452782.1  | 3119227 | 3-scf00136 | 3  |
| AX-157884647 | 6 | 45.971 | KV452782.1  | 3171402 | 3-scf00136 | 3  |
| AX-157995613 | 6 | 46.08  | KV452782.1  | 3006529 | 3-scf00136 | 3  |
| AX-157995680 | 6 | 46.08  | KV452782.1  | 3057760 | 3-scf00136 | 3  |
| AX-157875946 | 6 | 46.08  | KV452782.1  | 3071070 | 3-scf00136 | 3  |
| AX-157995694 | 6 | 46.08  | KV452782.1  | 3071957 | 3-scf00136 | 3  |
| AX-157995698 | 6 | 46.08  | KV452782.1  | 3073932 | 3-scf00136 | 3  |
| AX-157995708 | 6 | 46.08  | KV452782.1  | 3085938 | 3-scf00136 | 3  |
| AX-157995711 | 6 | 46.08  | KV452782.1  | 3088716 | 3-scf00136 | 3  |
| AX-157995712 | 6 | 46.08  | KV452782.1  | 3090474 | 3-scf00136 | 3  |
| AX-157995714 | 6 | 46.08  | KV452782.1  | 3092784 | 3-scf00136 | 3  |
| AX-157995717 | 6 | 46.08  | KV452782.1  | 3096730 | 3-scf00136 | 3  |
| AX-157995718 | 6 | 46.08  | KV452782.1  | 3098223 | 3-scf00136 | 3  |
| AX-157995721 | 6 | 46.08  | KV452782.1  | 3101198 | 3-scf00136 | 3  |
| AX-157995725 | 6 | 46.08  | KV452782.1  | 3103693 | 3-scf00136 | 3  |
| AX-157995727 | 6 | 46.08  | KV452782.1  | 3106044 | 3-scf00136 | 3  |
| AX-157995729 | 6 | 46.08  | KV452782.1  | 3106475 | 3-scf00136 | 3  |
| AX-157995742 | 6 | 46.08  | KV452782.1  | 3114860 | 3-scf00136 | 3  |
| AX-157995748 | 6 | 46.08  | KV452782.1  | 3118000 | 3-scf00136 | 3  |
| AX-157995752 | 6 | 46.08  | KV452782.1  | 3119869 | 3-scf00136 | 3  |
| AX-157995755 | 6 | 46.08  | KV452782.1  | 3126022 | 3-scf00136 | 3  |
| AX-157995758 | 6 | 46.08  | KV452782.1  | 3128571 | 3-scf00136 | 3  |
| AX-157995759 | 6 | 46.08  | KV452782.1  | 3131278 | 3-scf00136 | 3  |
| AX-157706325 | 6 | 46.08  | 3ML01032068 | 178     | scf07681_1 | UN |
| AX-157755130 | 6 | 46.298 | KV452782.1  | 3132132 | 3-scf00136 | 3  |
| AX-157995761 | 6 | 46.298 | KV452782.1  | 3134030 | 3-scf00136 | 3  |
| AX-157995764 | 6 | 46.298 | KV452782.1  | 3139307 | 3-scf00136 | 3  |
| AX-157995765 | 6 | 46.298 | KV452782.1  | 3140040 | 3-scf00136 | 3  |
| AX-157995767 | 6 | 46.298 | KV452782.1  | 3140496 | 3-scf00136 | 3  |
| AX-157995770 | 6 | 46.298 | KV452782.1  | 3141871 | 3-scf00136 | 3  |
| AX-157995771 | 6 | 46.298 | KV452782.1  | 3142937 | 3-scf00136 | 3  |
| AX-157995772 | 6 | 46.298 | KV452782.1  | 3147817 | 3-scf00136 | 3  |
| AX-157995776 | 6 | 46.298 | KV452782.1  | 3154593 | 3-scf00136 | 3  |
| AX-157995777 | 6 | 46.298 | KV452782.1  | 3155269 | 3-scf00136 | 3  |
| AX-157995782 | 6 | 46.298 | KV452782.1  | 3158158 | 3-scf00136 | 3  |
| AX-157995783 | 6 | 46.298 | KV452782.1  | 3158840 | 3-scf00136 | 3  |
| AX-157995784 | 6 | 46.298 | KV452782.1  | 3159459 | 3-scf00136 | 3  |
| AX-157995786 | 6 | 46.298 | KV452782.1  | 3161166 | 3-scf00136 | 3  |
| AX-157995789 | 6 | 46.298 | KV452782.1  | 3163017 | 3-scf00136 | 3  |
| AX-157995799 | 6 | 46.298 | KV452782.1  | 3178865 | 3-scf00136 | 3  |
| AX-157995691 | 6 | 46.36  | KV452782.1  | 3070092 | 3-scf00136 | 3  |
| AX-157707258 | 6 | 46.36  | 3ML01033835 | 493     | scf09501_1 | UN |
| AX-157696965 | 6 | 46.407 | KV452782.1  | 3166271 | 3-scf00136 | 3  |
| AX-157995790 | 6 | 46.407 | KV452782.1  | 3166438 | 3-scf00136 | 3  |
| AX-157995791 | 6 | 46.409 | KV452782.1  | 3166911 | 3-scf00136 | 3  |
| AX-157995792 | 6 | 46.411 | KV452782.1  | 3169496 | 3-scf00136 | 3  |
| AX-157995797 | 6 | 46.414 | KV452782.1  | 3176342 | 3-scf00136 | 3  |
| AX-157995811 | 6 | 46.414 | KV452782.1  | 3192985 | 3-scf00136 | 3  |
| AX-157995875 | 6 | 46.414 | KV452782.1  | 3244433 | 3-scf00136 | 3  |
| AX-157995787 | 6 | 46.655 | KV452782.1  | 3161736 | 3-scf00136 | 3  |
| AX-157995800 | 6 | 46.655 | KV452782.1  | 3183013 | 3-scf00136 | 3  |

|              |   |        |            |         |            |   |
|--------------|---|--------|------------|---------|------------|---|
| AX-157995808 | 6 | 46.842 | KV452782.1 | 3189253 | 3-scf00136 | 3 |
| AX-157995809 | 6 | 46.846 | KV452782.1 | 3191548 | 3-scf00136 | 3 |
| AX-157995814 | 6 | 46.846 | KV452782.1 | 3194275 | 3-scf00136 | 3 |
| AX-157995817 | 6 | 46.846 | KV452782.1 | 3196564 | 3-scf00136 | 3 |
| AX-157995819 | 6 | 46.846 | KV452782.1 | 3198393 | 3-scf00136 | 3 |
| AX-158383372 | 6 | 46.846 | KV452782.1 | 3200439 | 3-scf00136 | 3 |
| AX-157995825 | 6 | 46.846 | KV452782.1 | 3201134 | 3-scf00136 | 3 |
| AX-157855781 | 6 | 46.846 | KV452782.1 | 3201571 | 3-scf00136 | 3 |
| AX-157995737 | 6 | 47.05  | KV452782.1 | 3109975 | 3-scf00136 | 3 |
| AX-157995826 | 6 | 47.05  | KV452782.1 | 3203178 | 3-scf00136 | 3 |
| AX-157726400 | 6 | 47.255 | KV452782.1 | 3207195 | 3-scf00136 | 3 |
| AX-157995835 | 6 | 47.392 | KV452782.1 | 3212925 | 3-scf00136 | 3 |
| AX-157995836 | 6 | 47.392 | KV452782.1 | 3215900 | 3-scf00136 | 3 |
| AX-157995837 | 6 | 47.392 | KV452782.1 | 3217373 | 3-scf00136 | 3 |
| AX-157995838 | 6 | 47.392 | KV452782.1 | 3217776 | 3-scf00136 | 3 |
| AX-157740265 | 6 | 47.392 | KV452782.1 | 3218400 | 3-scf00136 | 3 |
| AX-157995842 | 6 | 47.392 | KV452782.1 | 3219319 | 3-scf00136 | 3 |
| AX-157995847 | 6 | 47.392 | KV452782.1 | 3224361 | 3-scf00136 | 3 |
| AX-158407340 | 6 | 47.392 | KV452782.1 | 3224539 | 3-scf00136 | 3 |
| AX-157995848 | 6 | 47.392 | KV452782.1 | 3226287 | 3-scf00136 | 3 |
| AX-157995849 | 6 | 47.392 | KV452782.1 | 3226687 | 3-scf00136 | 3 |
| AX-157995863 | 6 | 47.392 | KV452782.1 | 3237209 | 3-scf00136 | 3 |
| AX-158383373 | 6 | 47.392 | KV452782.1 | 3238833 | 3-scf00136 | 3 |
| AX-157995870 | 6 | 47.392 | KV452782.1 | 3240583 | 3-scf00136 | 3 |
| AX-157995871 | 6 | 47.392 | KV452782.1 | 3241041 | 3-scf00136 | 3 |
| AX-157995959 | 6 | 47.392 | KV452782.1 | 3328494 | 3-scf00136 | 3 |
| AX-157995851 | 6 | 47.394 | KV452782.1 | 3227377 | 3-scf00136 | 3 |
| AX-157995853 | 6 | 47.396 | KV452782.1 | 3230316 | 3-scf00136 | 3 |
| AX-157995858 | 6 | 47.536 | KV452782.1 | 3235717 | 3-scf00136 | 3 |
| AX-157995860 | 6 | 47.536 | KV452782.1 | 3236675 | 3-scf00136 | 3 |
| AX-157995868 | 6 | 47.536 | KV452782.1 | 3239844 | 3-scf00136 | 3 |
| AX-157995894 | 6 | 47.536 | KV452782.1 | 3268146 | 3-scf00136 | 3 |
| AX-157995921 | 6 | 47.536 | KV452782.1 | 3288588 | 3-scf00136 | 3 |
| AX-157995864 | 6 | 47.63  | KV452782.1 | 3237794 | 3-scf00136 | 3 |
| AX-157995867 | 6 | 47.724 | KV452782.1 | 3239190 | 3-scf00136 | 3 |
| AX-157995880 | 6 | 47.829 | KV452782.1 | 3250743 | 3-scf00136 | 3 |
| AX-157995882 | 6 | 47.829 | KV452782.1 | 3251905 | 3-scf00136 | 3 |
| AX-157884648 | 6 | 47.829 | KV452782.1 | 3253659 | 3-scf00136 | 3 |
| AX-157995884 | 6 | 47.829 | KV452782.1 | 3255051 | 3-scf00136 | 3 |
| AX-157995885 | 6 | 47.829 | KV452782.1 | 3255662 | 3-scf00136 | 3 |
| AX-157995888 | 6 | 47.829 | KV452782.1 | 3264329 | 3-scf00136 | 3 |
| AX-157995889 | 6 | 47.829 | KV452782.1 | 3265612 | 3-scf00136 | 3 |
| AX-157995891 | 6 | 47.829 | KV452782.1 | 3265966 | 3-scf00136 | 3 |
| AX-157995895 | 6 | 47.829 | KV452782.1 | 3268657 | 3-scf00136 | 3 |
| AX-157995899 | 6 | 47.829 | KV452782.1 | 3272971 | 3-scf00136 | 3 |
| AX-157995902 | 6 | 47.829 | KV452782.1 | 3274779 | 3-scf00136 | 3 |
| AX-157995903 | 6 | 47.829 | KV452782.1 | 3275272 | 3-scf00136 | 3 |
| AX-157995913 | 6 | 47.829 | KV452782.1 | 3284219 | 3-scf00136 | 3 |
| AX-157722205 | 6 | 47.829 | KV452782.1 | 3284613 | 3-scf00136 | 3 |
| AX-157995904 | 6 | 47.848 | KV452782.1 | 3275638 | 3-scf00136 | 3 |
| AX-157995907 | 6 | 47.878 | KV452782.1 | 3277020 | 3-scf00136 | 3 |

|              |   |        |            |         |            |   |
|--------------|---|--------|------------|---------|------------|---|
| AX-157995910 | 6 | 47.903 | KV452782.1 | 3278662 | 3-scf00136 | 3 |
| AX-157995915 | 6 | 47.938 | KV452782.1 | 3285760 | 3-scf00136 | 3 |
| AX-157995919 | 6 | 47.969 | KV452782.1 | 3287567 | 3-scf00136 | 3 |
| AX-157995926 | 6 | 47.984 | KV452782.1 | 3293417 | 3-scf00136 | 3 |
| AX-158379627 | 6 | 47.995 | KV452782.1 | 3294968 | 3-scf00136 | 3 |
| AX-157995932 | 6 | 48.011 | KV452782.1 | 3298035 | 3-scf00136 | 3 |
| AX-157995918 | 6 | 48.047 | KV452782.1 | 3287032 | 3-scf00136 | 3 |
| AX-157855782 | 6 | 48.047 | KV452782.1 | 3301837 | 3-scf00136 | 3 |
| AX-157995938 | 6 | 48.047 | KV452782.1 | 3303737 | 3-scf00136 | 3 |
| AX-157694785 | 6 | 48.047 | KV452782.1 | 3304244 | 3-scf00136 | 3 |
| AX-157995941 | 6 | 48.047 | KV452782.1 | 3305267 | 3-scf00136 | 3 |
| AX-157995942 | 6 | 48.047 | KV452782.1 | 3305342 | 3-scf00136 | 3 |
| AX-157995944 | 6 | 48.047 | KV452782.1 | 3305772 | 3-scf00136 | 3 |
| AX-157995949 | 6 | 48.115 | KV452782.1 | 3316798 | 3-scf00136 | 3 |
| AX-157995952 | 6 | 48.183 | KV452782.1 | 3320307 | 3-scf00136 | 3 |
| AX-157995953 | 6 | 48.183 | KV452782.1 | 3321085 | 3-scf00136 | 3 |
| AX-157995956 | 6 | 48.183 | KV452782.1 | 3325887 | 3-scf00136 | 3 |
| AX-157995963 | 6 | 48.588 | KV452782.1 | 3330795 | 3-scf00136 | 3 |
| AX-157818870 | 6 | 48.588 | KV452782.1 | 3354471 | 3-scf00136 | 3 |
| AX-157996000 | 6 | 48.588 | KV452782.1 | 3361935 | 3-scf00136 | 3 |
| AX-157995970 | 6 | 48.594 | KV452782.1 | 3333436 | 3-scf00136 | 3 |
| AX-157995972 | 6 | 48.594 | KV452782.1 | 3334686 | 3-scf00136 | 3 |
| AX-157995975 | 6 | 48.625 | KV452782.1 | 3336227 | 3-scf00136 | 3 |
| AX-157995988 | 6 | 48.703 | KV452782.1 | 3346612 | 3-scf00136 | 3 |
| AX-157995997 | 6 | 48.703 | KV452782.1 | 3353738 | 3-scf00136 | 3 |
| AX-157995999 | 6 | 48.703 | KV452782.1 | 3361468 | 3-scf00136 | 3 |
| AX-157996007 | 6 | 48.703 | KV452782.1 | 3369787 | 3-scf00136 | 3 |
| AX-157726296 | 6 | 48.704 | KV452782.1 | 3354792 | 3-scf00136 | 3 |
| AX-157996011 | 6 | 48.704 | KV452782.1 | 3378571 | 3-scf00136 | 3 |
| AX-157996016 | 6 | 48.704 | KV452782.1 | 3382385 | 3-scf00136 | 3 |
| AX-157996018 | 6 | 48.704 | KV452782.1 | 3385656 | 3-scf00136 | 3 |
| AX-157996019 | 6 | 49.031 | KV452782.1 | 3390308 | 3-scf00136 | 3 |
| AX-157818872 | 6 | 49.031 | KV452782.1 | 3390797 | 3-scf00136 | 3 |
| AX-157996020 | 6 | 49.031 | KV452782.1 | 3390957 | 3-scf00136 | 3 |
| AX-157996022 | 6 | 49.031 | KV452782.1 | 3393913 | 3-scf00136 | 3 |
| AX-157996006 | 6 | 49.035 | KV452782.1 | 3368834 | 3-scf00136 | 3 |
| AX-157996025 | 6 | 49.035 | KV452782.1 | 3397123 | 3-scf00136 | 3 |
| AX-157884649 | 6 | 49.459 | KV452782.1 | 3400690 | 3-scf00136 | 3 |
| AX-157996028 | 6 | 49.467 | KV452782.1 | 3401473 | 3-scf00136 | 3 |
| AX-157995829 | 6 | 49.688 | KV452782.1 | 3208120 | 3-scf00136 | 3 |
| AX-157995843 | 6 | 49.688 | KV452782.1 | 3219852 | 3-scf00136 | 3 |
| AX-157721920 | 6 | 49.688 | KV452782.1 | 3405227 | 3-scf00136 | 3 |
| AX-157996030 | 6 | 49.688 | KV452782.1 | 3407108 | 3-scf00136 | 3 |
| AX-157996032 | 6 | 49.688 | KV452782.1 | 3408376 | 3-scf00136 | 3 |
| AX-157996040 | 6 | 49.688 | KV452782.1 | 3414902 | 3-scf00136 | 3 |
| AX-157751672 | 6 | 49.688 | KV452782.1 | 3415338 | 3-scf00136 | 3 |
| AX-157996041 | 6 | 49.688 | KV452782.1 | 3416238 | 3-scf00136 | 3 |
| AX-157996043 | 6 | 49.688 | KV452782.1 | 3421218 | 3-scf00136 | 3 |
| AX-157996044 | 6 | 49.688 | KV452782.1 | 3423542 | 3-scf00136 | 3 |
| AX-157996099 | 6 | 49.688 | KV452782.1 | 3515441 | 3-scf00136 | 3 |
| AX-157996046 | 6 | 49.904 | KV452782.1 | 3428502 | 3-scf00136 | 3 |

|              |   |        |            |         |            |   |
|--------------|---|--------|------------|---------|------------|---|
| AX-157996047 | 6 | 49.904 | KV452782.1 | 3429723 | 3-scf00136 | 3 |
| AX-157758256 | 6 | 49.904 | KV452782.1 | 3429998 | 3-scf00136 | 3 |
| AX-157996052 | 6 | 49.904 | KV452782.1 | 3436672 | 3-scf00136 | 3 |
| AX-157996055 | 6 | 49.908 | KV452782.1 | 3439338 | 3-scf00136 | 3 |
| AX-157996058 | 6 | 49.908 | KV452782.1 | 3444504 | 3-scf00136 | 3 |
| AX-157770881 | 6 | 49.908 | KV452782.1 | 3447283 | 3-scf00136 | 3 |
| AX-157996064 | 6 | 49.908 | KV452782.1 | 3463142 | 3-scf00136 | 3 |
| AX-157996467 | 6 | 49.908 | KV452782.1 | 3878902 | 3-scf00136 | 3 |
| AX-157996062 | 6 | 50.093 | KV452782.1 | 3457126 | 3-scf00136 | 3 |
| AX-157996066 | 6 | 50.115 | KV452782.1 | 3464860 | 3-scf00136 | 3 |
| AX-157996071 | 6 | 50.131 | KV452782.1 | 3468994 | 3-scf00136 | 3 |
| AX-157996069 | 6 | 50.167 | KV452782.1 | 3468105 | 3-scf00136 | 3 |
| AX-157709558 | 6 | 50.167 | KV452782.1 | 3471594 | 3-scf00136 | 3 |
| AX-157818876 | 6 | 50.889 | KV452782.1 | 3496771 | 3-scf00136 | 3 |
| AX-157740921 | 6 | 50.889 | KV452782.1 | 3498647 | 3-scf00136 | 3 |
| AX-157996089 | 6 | 50.957 | KV452782.1 | 3501647 | 3-scf00136 | 3 |
| AX-157996090 | 6 | 51.025 | KV452782.1 | 3503959 | 3-scf00136 | 3 |
| AX-157996092 | 6 | 51.025 | KV452782.1 | 3505776 | 3-scf00136 | 3 |
| AX-157996093 | 6 | 51.025 | KV452782.1 | 3508848 | 3-scf00136 | 3 |
| AX-157996096 | 6 | 51.025 | KV452782.1 | 3511198 | 3-scf00136 | 3 |
| AX-157720517 | 6 | 51.025 | KV452782.1 | 3514206 | 3-scf00136 | 3 |
| AX-157996097 | 6 | 51.025 | KV452782.1 | 3514869 | 3-scf00136 | 3 |
| AX-157855786 | 6 | 51.025 | KV452782.1 | 3516353 | 3-scf00136 | 3 |
| AX-157996100 | 6 | 51.025 | KV452782.1 | 3517406 | 3-scf00136 | 3 |
| AX-157996113 | 6 | 51.025 | KV452782.1 | 3525677 | 3-scf00136 | 3 |
| AX-157996115 | 6 | 51.025 | KV452782.1 | 3526242 | 3-scf00136 | 3 |
| AX-157996126 | 6 | 51.025 | KV452782.1 | 3537397 | 3-scf00136 | 3 |
| AX-157855788 | 6 | 51.025 | KV452782.1 | 3541205 | 3-scf00136 | 3 |
| AX-157996132 | 6 | 51.025 | KV452782.1 | 3542495 | 3-scf00136 | 3 |
| AX-157884653 | 6 | 51.025 | KV452782.1 | 3578324 | 3-scf00136 | 3 |
| AX-157996164 | 6 | 51.025 | KV452782.1 | 3587193 | 3-scf00136 | 3 |
| AX-157996187 | 6 | 51.025 | KV452782.1 | 3605588 | 3-scf00136 | 3 |
| AX-157865140 | 6 | 51.297 | KV452782.1 | 3548160 | 3-scf00136 | 3 |
| AX-157996150 | 6 | 51.297 | KV452782.1 | 3575677 | 3-scf00136 | 3 |
| AX-157996152 | 6 | 51.297 | KV452782.1 | 3578658 | 3-scf00136 | 3 |
| AX-157996154 | 6 | 51.297 | KV452782.1 | 3579287 | 3-scf00136 | 3 |
| AX-157996155 | 6 | 51.297 | KV452782.1 | 3579658 | 3-scf00136 | 3 |
| AX-157996156 | 6 | 51.297 | KV452782.1 | 3579820 | 3-scf00136 | 3 |
| AX-157996157 | 6 | 51.297 | KV452782.1 | 3582752 | 3-scf00136 | 3 |
| AX-157996168 | 6 | 51.297 | KV452782.1 | 3589936 | 3-scf00136 | 3 |
| AX-157996172 | 6 | 51.433 | KV452782.1 | 3592405 | 3-scf00136 | 3 |
| AX-157996178 | 6 | 51.433 | KV452782.1 | 3597034 | 3-scf00136 | 3 |
| AX-157996180 | 6 | 51.433 | KV452782.1 | 3597502 | 3-scf00136 | 3 |
| AX-157996181 | 6 | 51.433 | KV452782.1 | 3598115 | 3-scf00136 | 3 |
| AX-157996183 | 6 | 51.433 | KV452782.1 | 3601135 | 3-scf00136 | 3 |
| AX-157725374 | 6 | 51.433 | KV452782.1 | 3604210 | 3-scf00136 | 3 |
| AX-157996184 | 6 | 51.443 | KV452782.1 | 3601687 | 3-scf00136 | 3 |
| AX-157996191 | 6 | 51.529 | KV452782.1 | 3611965 | 3-scf00136 | 3 |
| AX-157996199 | 6 | 51.529 | KV452782.1 | 3619225 | 3-scf00136 | 3 |
| AX-157996192 | 6 | 51.643 | KV452782.1 | 3613886 | 3-scf00136 | 3 |
| AX-157996194 | 6 | 51.643 | KV452782.1 | 3615033 | 3-scf00136 | 3 |



|              |   |        |            |         |               |    |
|--------------|---|--------|------------|---------|---------------|----|
| AX-157818883 | 6 | 51.763 | KV452782.1 | 3617425 | 3-scf00136    | 3  |
| AX-157757415 | 6 | 51.763 | KV452782.1 | 3618308 | 3-scf00136    | 3  |
| AX-157996197 | 6 | 51.763 | KV452782.1 | 3618891 | 3-scf00136    | 3  |
| AX-157724214 | 6 | 51.763 | KV452782.1 | 3620692 | 3-scf00136    | 3  |
| AX-157996204 | 6 | 51.763 | KV452782.1 | 3623531 | 3-scf00136    | 3  |
| AX-157996211 | 6 | 51.763 | KV452782.1 | 3626696 | 3-scf00136    | 3  |
| AX-157996106 | 6 | 51.782 | KV452782.1 | 3522501 | 3-scf00136    | 3  |
| AX-157996169 | 6 | 51.782 | KV452782.1 | 3590320 | 3-scf00136    | 3  |
| AX-157996215 | 6 | 51.782 | KV452782.1 | 3629683 | 3-scf00136    | 3  |
| AX-157996219 | 6 | 51.873 | KV452782.1 | 3633971 | 3-scf00136    | 3  |
| AX-157996220 | 6 | 51.873 | KV452782.1 | 3637979 | 3-scf00136    | 3  |
| AX-157996223 | 6 | 51.873 | KV452782.1 | 3640628 | 3-scf00136    | 3  |
| AX-157996224 | 6 | 51.873 | KV452782.1 | 3641039 | 3-scf00136    | 3  |
| AX-157996226 | 6 | 51.873 | KV452782.1 | 3641508 | 3-scf00136    | 3  |
| AX-157996266 | 6 | 51.873 | KV452782.1 | 3680197 | 3-scf00136    | 3  |
| AX-157996274 | 6 | 51.873 | KV452782.1 | 3686895 | 3-scf00136    | 3  |
| AX-157996350 | 6 | 51.873 | KV452782.1 | 3776147 | 3-scf00136    | 3  |
| AX-157996352 | 6 | 51.873 | KV452782.1 | 3776664 | 3-scf00136    | 3  |
| AX-157716688 | 6 | 51.873 | KV452782.1 | 3813355 | 3-scf00136    | 3  |
| AX-158390656 | 6 | 51.873 | KV452782.1 | 3839121 | 3-scf00136    | 3  |
| AX-157855791 | 6 | 51.982 | KV452782.1 | 3642937 | 3-scf00136    | 3  |
| AX-157996228 | 6 | 51.982 | KV452782.1 | 3643530 | 3-scf00136    | 3  |
| AX-157996240 | 6 | 51.982 | KV452782.1 | 3652987 | 3-scf00136    | 3  |
| AX-157996243 | 6 | 51.982 | KV452782.1 | 3655011 | 3-scf00136    | 3  |
| AX-157996246 | 6 | 51.982 | KV452782.1 | 3655820 | 3-scf00136    | 3  |
| AX-157996249 | 6 | 51.982 | KV452782.1 | 3656597 | 3-scf00136    | 3  |
| AX-157996253 | 6 | 51.982 | KV452782.1 | 3663255 | 3-scf00136    | 3  |
| AX-157996259 | 6 | 51.982 | KV452782.1 | 3674175 | 3-scf00136    | 3  |
| AX-157996260 | 6 | 51.982 | KV452782.1 | 3674979 | 3-scf00136    | 3  |
| AX-157996261 | 6 | 51.982 | KV452782.1 | 3675540 | 3-scf00136    | 3  |
| AX-157996291 | 6 | 51.982 | KV452782.1 | 3710031 | 3-scf00136    | 3  |
| AX-158390653 | 6 | 51.982 | KV452782.1 | 3723978 | 3-scf00136    | 3  |
| AX-157996304 | 6 | 51.982 | KV452782.1 | 3733464 | 3-scf00136    | 3  |
| AX-157996360 | 6 | 51.982 | KV452782.1 | 3783751 | 3-scf00136    | 3  |
| AX-157996372 | 6 | 51.982 | KV452782.1 | 3797348 | 3-scf00136    | 3  |
| AX-157996381 | 6 | 51.982 | KV452782.1 | 3804410 | 3-scf00136    | 3  |
| AX-157996428 | 6 | 51.982 | KV452782.1 | 3847304 | 3-scf00136    | 3  |
| AX-157996485 | 6 | 51.982 | KV452782.1 | 3900955 | 3-scf00136    | 3  |
| AX-158390659 | 6 | 51.982 | KV452782.1 | 3929546 | 3-scf00136    | 3  |
| AX-157996524 | 6 | 51.982 | KV452782.1 | 3947410 | 3-scf00136    | 3  |
| AX-158390661 | 6 | 51.982 | KV452782.1 | 3952526 | 3-scf00136    | 3  |
| AX-157996533 | 6 | 51.982 | KV452782.1 | 3960483 | 3-scf00136    | 3  |
| AX-157884656 | 6 | 51.982 | KV452782.1 | 3962719 | 3-scf00136    | 3  |
| AX-157818915 | 6 | 51.982 | KV452782.1 | 4011936 | 3-scf00136    | 3  |
| AX-157884658 | 6 | 51.982 | KV452782.1 | 4066546 | 3-scf00136    | 3  |
| AX-157999733 | 6 | 51.982 | KV452782.1 | 7390924 | 3-scf00136    | 3  |
| AX-158000207 | 6 | 51.982 | KV452782.1 | 7871945 | 3-scf00136    | 3  |
| AX-158000322 | 6 | 51.982 | KV452782.1 | 7985748 | 3-scf00136    | 3  |
| AX-157703426 | 6 | 51.982 | DX098250.1 | 154     | ORI212 lctalu | UN |
| AX-157996254 | 6 | 52.091 | KV452782.1 | 3663881 | 3-scf00136    | 3  |
| AX-157996263 | 6 | 52.091 | KV452782.1 | 3677793 | 3-scf00136    | 3  |

|              |   |        |            |         |            |   |
|--------------|---|--------|------------|---------|------------|---|
| AX-157996265 | 6 | 52.091 | KV452782.1 | 3679659 | 3-scf00136 | 3 |
| AX-157996283 | 6 | 52.091 | KV452782.1 | 3700361 | 3-scf00136 | 3 |
| AX-157996297 | 6 | 52.091 | KV452782.1 | 3719898 | 3-scf00136 | 3 |
| AX-157749641 | 6 | 52.091 | KV452782.1 | 3721457 | 3-scf00136 | 3 |
| AX-157996307 | 6 | 52.091 | KV452782.1 | 3736532 | 3-scf00136 | 3 |
| AX-157996308 | 6 | 52.091 | KV452782.1 | 3736943 | 3-scf00136 | 3 |
| AX-157996314 | 6 | 52.091 | KV452782.1 | 3747507 | 3-scf00136 | 3 |
| AX-157996316 | 6 | 52.091 | KV452782.1 | 3748083 | 3-scf00136 | 3 |
| AX-157996319 | 6 | 52.091 | KV452782.1 | 3751607 | 3-scf00136 | 3 |
| AX-157996333 | 6 | 52.091 | KV452782.1 | 3759817 | 3-scf00136 | 3 |
| AX-157996334 | 6 | 52.091 | KV452782.1 | 3762021 | 3-scf00136 | 3 |
| AX-157996361 | 6 | 52.091 | KV452782.1 | 3784315 | 3-scf00136 | 3 |
| AX-157996377 | 6 | 52.091 | KV452782.1 | 3799920 | 3-scf00136 | 3 |
| AX-157996395 | 6 | 52.091 | KV452782.1 | 3823974 | 3-scf00136 | 3 |
| AX-157996454 | 6 | 52.091 | KV452782.1 | 3868354 | 3-scf00136 | 3 |
| AX-157996490 | 6 | 52.091 | KV452782.1 | 3903746 | 3-scf00136 | 3 |
| AX-157996491 | 6 | 52.091 | KV452782.1 | 3905156 | 3-scf00136 | 3 |
| AX-157996509 | 6 | 52.091 | KV452782.1 | 3929467 | 3-scf00136 | 3 |
| AX-157996514 | 6 | 52.091 | KV452782.1 | 3933310 | 3-scf00136 | 3 |
| AX-157996521 | 6 | 52.091 | KV452782.1 | 3936937 | 3-scf00136 | 3 |
| AX-158390660 | 6 | 52.091 | KV452782.1 | 3946181 | 3-scf00136 | 3 |
| AX-157718651 | 6 | 52.091 | KV452782.1 | 4366868 | 3-scf00136 | 3 |
| AX-157996353 | 6 | 52.114 | KV452782.1 | 3776976 | 3-scf00136 | 3 |
| AX-157855787 | 6 | 52.146 | KV452782.1 | 3533221 | 3-scf00136 | 3 |
| AX-157996342 | 6 | 52.146 | KV452782.1 | 3768125 | 3-scf00136 | 3 |
| AX-157996346 | 6 | 52.146 | KV452782.1 | 3770423 | 3-scf00136 | 3 |
| AX-157996349 | 6 | 52.146 | KV452782.1 | 3775125 | 3-scf00136 | 3 |
| AX-157996355 | 6 | 52.146 | KV452782.1 | 3781084 | 3-scf00136 | 3 |
| AX-157996366 | 6 | 52.146 | KV452782.1 | 3787266 | 3-scf00136 | 3 |
| AX-157996419 | 6 | 52.146 | KV452782.1 | 3842459 | 3-scf00136 | 3 |
| AX-157996475 | 6 | 52.146 | KV452782.1 | 3892593 | 3-scf00136 | 3 |
| AX-157996560 | 6 | 52.146 | KV452782.1 | 4015452 | 3-scf00136 | 3 |
| AX-157996367 | 6 | 52.173 | KV452782.1 | 3787794 | 3-scf00136 | 3 |
| AX-157996239 | 6 | 52.2   | KV452782.1 | 3652555 | 3-scf00136 | 3 |
| AX-157996295 | 6 | 52.2   | KV452782.1 | 3716770 | 3-scf00136 | 3 |
| AX-157996323 | 6 | 52.2   | KV452782.1 | 3755411 | 3-scf00136 | 3 |
| AX-157818886 | 6 | 52.2   | KV452782.1 | 3789079 | 3-scf00136 | 3 |
| AX-157996368 | 6 | 52.2   | KV452782.1 | 3790779 | 3-scf00136 | 3 |
| AX-157996370 | 6 | 52.2   | KV452782.1 | 3793099 | 3-scf00136 | 3 |
| AX-157996371 | 6 | 52.2   | KV452782.1 | 3796677 | 3-scf00136 | 3 |
| AX-157996383 | 6 | 52.2   | KV452782.1 | 3805496 | 3-scf00136 | 3 |
| AX-157996387 | 6 | 52.2   | KV452782.1 | 3819082 | 3-scf00136 | 3 |
| AX-157996388 | 6 | 52.2   | KV452782.1 | 3819898 | 3-scf00136 | 3 |
| AX-157996390 | 6 | 52.2   | KV452782.1 | 3820051 | 3-scf00136 | 3 |
| AX-157996398 | 6 | 52.2   | KV452782.1 | 3827054 | 3-scf00136 | 3 |
| AX-157996399 | 6 | 52.2   | KV452782.1 | 3830383 | 3-scf00136 | 3 |
| AX-157996402 | 6 | 52.2   | KV452782.1 | 3830798 | 3-scf00136 | 3 |
| AX-157996404 | 6 | 52.2   | KV452782.1 | 3833158 | 3-scf00136 | 3 |
| AX-157996415 | 6 | 52.2   | KV452782.1 | 3840845 | 3-scf00136 | 3 |
| AX-157996418 | 6 | 52.2   | KV452782.1 | 3842073 | 3-scf00136 | 3 |
| AX-157996422 | 6 | 52.2   | KV452782.1 | 3844497 | 3-scf00136 | 3 |

|              |   |        |            |         |            |   |
|--------------|---|--------|------------|---------|------------|---|
| AX-157996427 | 6 | 52.2   | KV452782.1 | 3846672 | 3-scf00136 | 3 |
| AX-157996434 | 6 | 52.2   | KV452782.1 | 3849680 | 3-scf00136 | 3 |
| AX-157996437 | 6 | 52.2   | KV452782.1 | 3851173 | 3-scf00136 | 3 |
| AX-157996441 | 6 | 52.2   | KV452782.1 | 3853139 | 3-scf00136 | 3 |
| AX-157996446 | 6 | 52.2   | KV452782.1 | 3860257 | 3-scf00136 | 3 |
| AX-157783214 | 6 | 52.2   | KV452782.1 | 3895930 | 3-scf00136 | 3 |
| AX-157996566 | 6 | 52.2   | KV452782.1 | 4019743 | 3-scf00136 | 3 |
| AX-157996618 | 6 | 52.2   | KV452782.1 | 4069329 | 3-scf00136 | 3 |
| AX-157996636 | 6 | 52.2   | KV452782.1 | 4086925 | 3-scf00136 | 3 |
| AX-157996638 | 6 | 52.2   | KV452782.1 | 4087216 | 3-scf00136 | 3 |
| AX-157996659 | 6 | 52.2   | KV452782.1 | 4105908 | 3-scf00136 | 3 |
| AX-157996917 | 6 | 52.2   | KV452782.1 | 4311425 | 3-scf00136 | 3 |
| AX-157997254 | 6 | 52.2   | KV452782.1 | 4618962 | 3-scf00136 | 3 |
| AX-157818962 | 6 | 52.2   | KV452782.1 | 4813046 | 3-scf00136 | 3 |
| AX-157998014 | 6 | 52.2   | KV452782.1 | 5462188 | 3-scf00136 | 3 |
| AX-157716470 | 6 | 52.2   | KV452782.1 | 5486619 | 3-scf00136 | 3 |
| AX-157998141 | 6 | 52.2   | KV452782.1 | 5554943 | 3-scf00136 | 3 |
| AX-157998288 | 6 | 52.2   | KV452782.1 | 5737694 | 3-scf00136 | 3 |
| AX-157819010 | 6 | 52.2   | KV452782.1 | 5738234 | 3-scf00136 | 3 |
| AX-157718920 | 6 | 52.2   | KV452782.1 | 5858712 | 3-scf00136 | 3 |
| AX-157819064 | 6 | 52.2   | KV452782.1 | 6605353 | 3-scf00136 | 3 |
| AX-157855941 | 6 | 52.2   | KV452782.1 | 7222698 | 3-scf00136 | 3 |
| AX-157999960 | 6 | 52.2   | KV452782.1 | 7597778 | 3-scf00136 | 3 |
| AX-157876043 | 6 | 52.2   | KV452782.1 | 7882491 | 3-scf00136 | 3 |
| AX-157996449 | 6 | 52.251 | KV452782.1 | 3861182 | 3-scf00136 | 3 |
| AX-157996455 | 6 | 52.304 | KV452782.1 | 3869636 | 3-scf00136 | 3 |
| AX-157996457 | 6 | 52.366 | KV452782.1 | 3870798 | 3-scf00136 | 3 |
| AX-157996299 | 6 | 52.419 | KV452782.1 | 3722212 | 3-scf00136 | 3 |
| AX-157996344 | 6 | 52.419 | KV452782.1 | 3769968 | 3-scf00136 | 3 |
| AX-157996430 | 6 | 52.419 | KV452782.1 | 3847811 | 3-scf00136 | 3 |
| AX-157996438 | 6 | 52.419 | KV452782.1 | 3852471 | 3-scf00136 | 3 |
| AX-157996443 | 6 | 52.419 | KV452782.1 | 3854198 | 3-scf00136 | 3 |
| AX-157996448 | 6 | 52.419 | KV452782.1 | 3860766 | 3-scf00136 | 3 |
| AX-157818892 | 6 | 52.419 | KV452782.1 | 3878633 | 3-scf00136 | 3 |
| AX-157996474 | 6 | 52.419 | KV452782.1 | 3891362 | 3-scf00136 | 3 |
| AX-157996477 | 6 | 52.419 | KV452782.1 | 3894956 | 3-scf00136 | 3 |
| AX-157996482 | 6 | 52.419 | KV452782.1 | 3898914 | 3-scf00136 | 3 |
| AX-157996484 | 6 | 52.419 | KV452782.1 | 3900138 | 3-scf00136 | 3 |
| AX-157996487 | 6 | 52.419 | KV452782.1 | 3901573 | 3-scf00136 | 3 |
| AX-157996488 | 6 | 52.419 | KV452782.1 | 3902236 | 3-scf00136 | 3 |
| AX-157818899 | 6 | 52.419 | KV452782.1 | 3902473 | 3-scf00136 | 3 |
| AX-157996492 | 6 | 52.419 | KV452782.1 | 3906028 | 3-scf00136 | 3 |
| AX-157996494 | 6 | 52.419 | KV452782.1 | 3909529 | 3-scf00136 | 3 |
| AX-157818901 | 6 | 52.419 | KV452782.1 | 3910128 | 3-scf00136 | 3 |
| AX-157818904 | 6 | 52.419 | KV452782.1 | 3951003 | 3-scf00136 | 3 |
| AX-157996528 | 6 | 52.419 | KV452782.1 | 3951470 | 3-scf00136 | 3 |
| AX-157996529 | 6 | 52.419 | KV452782.1 | 3952450 | 3-scf00136 | 3 |
| AX-157751501 | 6 | 52.419 | KV452782.1 | 3971002 | 3-scf00136 | 3 |
| AX-157996236 | 6 | 52.488 | KV452782.1 | 3649901 | 3-scf00136 | 3 |
| AX-157996320 | 6 | 52.488 | KV452782.1 | 3753310 | 3-scf00136 | 3 |
| AX-157996357 | 6 | 52.488 | KV452782.1 | 3781754 | 3-scf00136 | 3 |

|              |   |        |            |         |            |   |
|--------------|---|--------|------------|---------|------------|---|
| AX-157996378 | 6 | 52.488 | KV452782.1 | 3803084 | 3-scf00136 | 3 |
| AX-157818896 | 6 | 52.488 | KV452782.1 | 3894242 | 3-scf00136 | 3 |
| AX-157996505 | 6 | 52.488 | KV452782.1 | 3919440 | 3-scf00136 | 3 |
| AX-157996538 | 6 | 52.488 | KV452782.1 | 3971887 | 3-scf00136 | 3 |
| AX-157884657 | 6 | 52.488 | KV452782.1 | 4021578 | 3-scf00136 | 3 |
| AX-157996630 | 6 | 52.488 | KV452782.1 | 4077933 | 3-scf00136 | 3 |
| AX-157996754 | 6 | 52.488 | KV452782.1 | 4180275 | 3-scf00136 | 3 |
| AX-157996784 | 6 | 52.488 | KV452782.1 | 4199542 | 3-scf00136 | 3 |
| AX-157996881 | 6 | 52.488 | KV452782.1 | 4289221 | 3-scf00136 | 3 |
| AX-157996904 | 6 | 52.488 | KV452782.1 | 4303072 | 3-scf00136 | 3 |
| AX-157996920 | 6 | 52.488 | KV452782.1 | 4312398 | 3-scf00136 | 3 |
| AX-157996966 | 6 | 52.488 | KV452782.1 | 4345651 | 3-scf00136 | 3 |
| AX-157997053 | 6 | 52.488 | KV452782.1 | 4435784 | 3-scf00136 | 3 |
| AX-157997269 | 6 | 52.488 | KV452782.1 | 4641907 | 3-scf00136 | 3 |
| AX-157997270 | 6 | 52.488 | KV452782.1 | 4642145 | 3-scf00136 | 3 |
| AX-157997398 | 6 | 52.488 | KV452782.1 | 4747489 | 3-scf00136 | 3 |
| AX-158405664 | 6 | 52.488 | KV452782.1 | 4940614 | 3-scf00136 | 3 |
| AX-157997782 | 6 | 52.488 | KV452782.1 | 5255357 | 3-scf00136 | 3 |
| AX-157997845 | 6 | 52.488 | KV452782.1 | 5315063 | 3-scf00136 | 3 |
| AX-157865163 | 6 | 52.488 | KV452782.1 | 5396976 | 3-scf00136 | 3 |
| AX-157997952 | 6 | 52.488 | KV452782.1 | 5404280 | 3-scf00136 | 3 |
| AX-157997956 | 6 | 52.488 | KV452782.1 | 5405555 | 3-scf00136 | 3 |
| AX-158383400 | 6 | 52.488 | KV452782.1 | 5422114 | 3-scf00136 | 3 |
| AX-157997995 | 6 | 52.488 | KV452782.1 | 5441397 | 3-scf00136 | 3 |
| AX-157998037 | 6 | 52.488 | KV452782.1 | 5481134 | 3-scf00136 | 3 |
| AX-157884682 | 6 | 52.488 | KV452782.1 | 5578348 | 3-scf00136 | 3 |
| AX-158383408 | 6 | 52.488 | KV452782.1 | 5686170 | 3-scf00136 | 3 |
| AX-158383409 | 6 | 52.488 | KV452782.1 | 5693446 | 3-scf00136 | 3 |
| AX-157998295 | 6 | 52.488 | KV452782.1 | 5741361 | 3-scf00136 | 3 |
| AX-157819028 | 6 | 52.488 | KV452782.1 | 5908725 | 3-scf00136 | 3 |
| AX-158378715 | 6 | 52.488 | KV452782.1 | 6028685 | 3-scf00136 | 3 |
| AX-157998551 | 6 | 52.488 | KV452782.1 | 6057546 | 3-scf00136 | 3 |
| AX-157998939 | 6 | 52.488 | KV452782.1 | 6437915 | 3-scf00136 | 3 |
| AX-157709779 | 6 | 52.488 | KV452782.1 | 6469124 | 3-scf00136 | 3 |
| AX-157875985 | 6 | 52.488 | KV452782.1 | 6471651 | 3-scf00136 | 3 |
| AX-157998985 | 6 | 52.488 | KV452782.1 | 6480451 | 3-scf00136 | 3 |
| AX-157875986 | 6 | 52.488 | KV452782.1 | 6481851 | 3-scf00136 | 3 |
| AX-157999176 | 6 | 52.488 | KV452782.1 | 6681460 | 3-scf00136 | 3 |
| AX-157819070 | 6 | 52.488 | KV452782.1 | 6757506 | 3-scf00136 | 3 |
| AX-157999256 | 6 | 52.488 | KV452782.1 | 6779052 | 3-scf00136 | 3 |
| AX-157999259 | 6 | 52.488 | KV452782.1 | 6781859 | 3-scf00136 | 3 |
| AX-157999260 | 6 | 52.488 | KV452782.1 | 6782247 | 3-scf00136 | 3 |
| AX-157999379 | 6 | 52.488 | KV452782.1 | 6937038 | 3-scf00136 | 3 |
| AX-157999487 | 6 | 52.488 | KV452782.1 | 7126013 | 3-scf00136 | 3 |
| AX-157999523 | 6 | 52.488 | KV452782.1 | 7164542 | 3-scf00136 | 3 |
| AX-157999528 | 6 | 52.488 | KV452782.1 | 7167583 | 3-scf00136 | 3 |
| AX-157999533 | 6 | 52.488 | KV452782.1 | 7171639 | 3-scf00136 | 3 |
| AX-157999858 | 6 | 52.488 | KV452782.1 | 7507818 | 3-scf00136 | 3 |
| AX-158405726 | 6 | 52.488 | KV452782.1 | 7651221 | 3-scf00136 | 3 |
| AX-158000299 | 6 | 52.488 | KV452782.1 | 7954441 | 3-scf00136 | 3 |
| AX-158000300 | 6 | 52.488 | KV452782.1 | 7954603 | 3-scf00136 | 3 |

|              |   |        |            |         |            |   |
|--------------|---|--------|------------|---------|------------|---|
| AX-157996436 | 6 | 52.528 | KV452782.1 | 3850621 | 3-scf00136 | 3 |
| AX-157818906 | 6 | 52.528 | KV452782.1 | 3974949 | 3-scf00136 | 3 |
| AX-157996545 | 6 | 52.528 | KV452782.1 | 3975121 | 3-scf00136 | 3 |
| AX-157752252 | 6 | 52.528 | KV452782.1 | 3976012 | 3-scf00136 | 3 |
| AX-157818909 | 6 | 52.528 | KV452782.1 | 3979966 | 3-scf00136 | 3 |
| AX-157996647 | 6 | 52.528 | KV452782.1 | 4095475 | 3-scf00136 | 3 |
| AX-157717244 | 6 | 52.576 | KV452782.1 | 3990218 | 3-scf00136 | 3 |
| AX-157996270 | 6 | 52.62  | KV452782.1 | 3682487 | 3-scf00136 | 3 |
| AX-157996554 | 6 | 52.62  | KV452782.1 | 4004020 | 3-scf00136 | 3 |
| AX-157996643 | 6 | 52.62  | KV452782.1 | 4090863 | 3-scf00136 | 3 |
| AX-157997402 | 6 | 52.62  | KV452782.1 | 4751143 | 3-scf00136 | 3 |
| AX-157999181 | 6 | 52.62  | KV452782.1 | 6685405 | 3-scf00136 | 3 |
| AX-158000212 | 6 | 52.62  | KV452782.1 | 7874174 | 3-scf00136 | 3 |
| AX-157996392 | 6 | 52.637 | KV452782.1 | 3821790 | 3-scf00136 | 3 |
| AX-157996476 | 6 | 52.637 | KV452782.1 | 3893819 | 3-scf00136 | 3 |
| AX-157702956 | 6 | 52.637 | KV452782.1 | 4042797 | 3-scf00136 | 3 |
| AX-157996596 | 6 | 52.637 | KV452782.1 | 4052664 | 3-scf00136 | 3 |
| AX-157996604 | 6 | 52.637 | KV452782.1 | 4059591 | 3-scf00136 | 3 |
| AX-157729256 | 6 | 52.637 | KV452782.1 | 4060022 | 3-scf00136 | 3 |
| AX-157996607 | 6 | 52.637 | KV452782.1 | 4062586 | 3-scf00136 | 3 |
| AX-157996610 | 6 | 52.637 | KV452782.1 | 4063445 | 3-scf00136 | 3 |
| AX-157996613 | 6 | 52.637 | KV452782.1 | 4065119 | 3-scf00136 | 3 |
| AX-157996615 | 6 | 52.637 | KV452782.1 | 4068588 | 3-scf00136 | 3 |
| AX-157996617 | 6 | 52.637 | KV452782.1 | 4069124 | 3-scf00136 | 3 |
| AX-157996624 | 6 | 52.637 | KV452782.1 | 4072369 | 3-scf00136 | 3 |
| AX-157749682 | 6 | 52.637 | KV452782.1 | 4083986 | 3-scf00136 | 3 |
| AX-157996634 | 6 | 52.637 | KV452782.1 | 4084678 | 3-scf00136 | 3 |
| AX-157996639 | 6 | 52.637 | KV452782.1 | 4087717 | 3-scf00136 | 3 |
| AX-157818924 | 6 | 52.637 | KV452782.1 | 4089717 | 3-scf00136 | 3 |
| AX-157996645 | 6 | 52.637 | KV452782.1 | 4093680 | 3-scf00136 | 3 |
| AX-157996672 | 6 | 52.856 | KV452782.1 | 4114566 | 3-scf00136 | 3 |
| AX-157996673 | 6 | 52.856 | KV452782.1 | 4115681 | 3-scf00136 | 3 |
| AX-157996650 | 6 | 52.857 | KV452782.1 | 4098598 | 3-scf00136 | 3 |
| AX-157996663 | 6 | 52.857 | KV452782.1 | 4107623 | 3-scf00136 | 3 |
| AX-157996675 | 6 | 52.857 | KV452782.1 | 4116497 | 3-scf00136 | 3 |
| AX-157996752 | 6 | 52.857 | KV452782.1 | 4178905 | 3-scf00136 | 3 |
| AX-157996840 | 6 | 52.857 | KV452782.1 | 4246280 | 3-scf00136 | 3 |
| AX-157996890 | 6 | 52.857 | KV452782.1 | 4293084 | 3-scf00136 | 3 |
| AX-157996706 | 6 | 52.992 | KV452782.1 | 4139391 | 3-scf00136 | 3 |
| AX-157996713 | 6 | 53.294 | KV452782.1 | 4143399 | 3-scf00136 | 3 |
| AX-157996715 | 6 | 53.294 | KV452782.1 | 4145998 | 3-scf00136 | 3 |
| AX-157997218 | 6 | 53.294 | KV452782.1 | 4592951 | 3-scf00136 | 3 |
| AX-157996731 | 6 | 53.33  | KV452782.1 | 4157660 | 3-scf00136 | 3 |
| AX-157996732 | 6 | 53.372 | KV452782.1 | 4161168 | 3-scf00136 | 3 |
| AX-157996709 | 6 | 53.404 | KV452782.1 | 4141371 | 3-scf00136 | 3 |
| AX-157996738 | 6 | 53.404 | KV452782.1 | 4166982 | 3-scf00136 | 3 |
| AX-157996739 | 6 | 53.404 | KV452782.1 | 4167401 | 3-scf00136 | 3 |
| AX-157996741 | 6 | 53.404 | KV452782.1 | 4167985 | 3-scf00136 | 3 |
| AX-158407359 | 6 | 53.404 | KV452782.1 | 4170422 | 3-scf00136 | 3 |
| AX-157996742 | 6 | 53.404 | KV452782.1 | 4171704 | 3-scf00136 | 3 |
| AX-157996746 | 6 | 53.404 | KV452782.1 | 4173968 | 3-scf00136 | 3 |

|              |   |        |            |         |            |   |
|--------------|---|--------|------------|---------|------------|---|
| AX-157996748 | 6 | 53.404 | KV452782.1 | 4175031 | 3-scf00136 | 3 |
| AX-157996757 | 6 | 53.404 | KV452782.1 | 4185793 | 3-scf00136 | 3 |
| AX-157996765 | 6 | 53.404 | KV452782.1 | 4189661 | 3-scf00136 | 3 |
| AX-157996900 | 6 | 53.404 | KV452782.1 | 4302114 | 3-scf00136 | 3 |
| AX-157818953 | 6 | 53.404 | KV452782.1 | 4643125 | 3-scf00136 | 3 |
| AX-157998444 | 6 | 53.404 | KV452782.1 | 5945116 | 3-scf00136 | 3 |
| AX-157745958 | 6 | 53.622 | KV452782.1 | 3910412 | 3-scf00136 | 3 |
| AX-157996729 | 6 | 53.622 | KV452782.1 | 4157283 | 3-scf00136 | 3 |
| AX-157996769 | 6 | 53.622 | KV452782.1 | 4190932 | 3-scf00136 | 3 |
| AX-157996776 | 6 | 53.622 | KV452782.1 | 4195054 | 3-scf00136 | 3 |
| AX-157996779 | 6 | 53.622 | KV452782.1 | 4196390 | 3-scf00136 | 3 |
| AX-157996801 | 6 | 53.622 | KV452782.1 | 4211533 | 3-scf00136 | 3 |
| AX-157996802 | 6 | 53.622 | KV452782.1 | 4211982 | 3-scf00136 | 3 |
| AX-157996817 | 6 | 53.622 | KV452782.1 | 4222964 | 3-scf00136 | 3 |
| AX-157996833 | 6 | 53.622 | KV452782.1 | 4238176 | 3-scf00136 | 3 |
| AX-157996836 | 6 | 53.622 | KV452782.1 | 4242448 | 3-scf00136 | 3 |
| AX-157996850 | 6 | 53.622 | KV452782.1 | 4260183 | 3-scf00136 | 3 |
| AX-157996867 | 6 | 53.622 | KV452782.1 | 4277618 | 3-scf00136 | 3 |
| AX-157996868 | 6 | 53.622 | KV452782.1 | 4278187 | 3-scf00136 | 3 |
| AX-157818927 | 6 | 53.622 | KV452782.1 | 4278364 | 3-scf00136 | 3 |
| AX-157996927 | 6 | 53.622 | KV452782.1 | 4314530 | 3-scf00136 | 3 |
| AX-157996928 | 6 | 53.622 | KV452782.1 | 4315656 | 3-scf00136 | 3 |
| AX-157996942 | 6 | 53.622 | KV452782.1 | 4329282 | 3-scf00136 | 3 |
| AX-157855803 | 6 | 53.622 | KV452782.1 | 4526911 | 3-scf00136 | 3 |
| AX-157818887 | 6 | 53.731 | KV452782.1 | 3854728 | 3-scf00136 | 3 |
| AX-157996627 | 6 | 53.731 | KV452782.1 | 4073527 | 3-scf00136 | 3 |
| AX-157996712 | 6 | 53.731 | KV452782.1 | 4143069 | 3-scf00136 | 3 |
| AX-157996718 | 6 | 53.731 | KV452782.1 | 4149924 | 3-scf00136 | 3 |
| AX-157996756 | 6 | 53.731 | KV452782.1 | 4183032 | 3-scf00136 | 3 |
| AX-157996772 | 6 | 53.731 | KV452782.1 | 4191138 | 3-scf00136 | 3 |
| AX-157996782 | 6 | 53.731 | KV452782.1 | 4198161 | 3-scf00136 | 3 |
| AX-157996787 | 6 | 53.731 | KV452782.1 | 4204389 | 3-scf00136 | 3 |
| AX-157996788 | 6 | 53.731 | KV452782.1 | 4205394 | 3-scf00136 | 3 |
| AX-157996795 | 6 | 53.731 | KV452782.1 | 4208606 | 3-scf00136 | 3 |
| AX-157996796 | 6 | 53.731 | KV452782.1 | 4209030 | 3-scf00136 | 3 |
| AX-157996797 | 6 | 53.731 | KV452782.1 | 4209643 | 3-scf00136 | 3 |
| AX-158379632 | 6 | 53.731 | KV452782.1 | 4211000 | 3-scf00136 | 3 |
| AX-157996804 | 6 | 53.731 | KV452782.1 | 4212524 | 3-scf00136 | 3 |
| AX-157996809 | 6 | 53.731 | KV452782.1 | 4216127 | 3-scf00136 | 3 |
| AX-157996818 | 6 | 53.731 | KV452782.1 | 4223827 | 3-scf00136 | 3 |
| AX-157996821 | 6 | 53.731 | KV452782.1 | 4226180 | 3-scf00136 | 3 |
| AX-157996824 | 6 | 53.731 | KV452782.1 | 4230313 | 3-scf00136 | 3 |
| AX-157996825 | 6 | 53.731 | KV452782.1 | 4231082 | 3-scf00136 | 3 |
| AX-157996827 | 6 | 53.731 | KV452782.1 | 4233044 | 3-scf00136 | 3 |
| AX-157996828 | 6 | 53.731 | KV452782.1 | 4234007 | 3-scf00136 | 3 |
| AX-157996834 | 6 | 53.731 | KV452782.1 | 4238920 | 3-scf00136 | 3 |
| AX-157996839 | 6 | 53.731 | KV452782.1 | 4245844 | 3-scf00136 | 3 |
| AX-158383387 | 6 | 53.731 | KV452782.1 | 4251863 | 3-scf00136 | 3 |
| AX-157758833 | 6 | 53.731 | KV452782.1 | 4256566 | 3-scf00136 | 3 |
| AX-157996857 | 6 | 53.731 | KV452782.1 | 4267988 | 3-scf00136 | 3 |
| AX-157996860 | 6 | 53.731 | KV452782.1 | 4270929 | 3-scf00136 | 3 |

|              |   |        |            |         |            |   |
|--------------|---|--------|------------|---------|------------|---|
| AX-157996866 | 6 | 53.731 | KV452782.1 | 4276883 | 3-scf00136 | 3 |
| AX-157757899 | 6 | 53.731 | KV452782.1 | 4282380 | 3-scf00136 | 3 |
| AX-157996875 | 6 | 53.731 | KV452782.1 | 4283207 | 3-scf00136 | 3 |
| AX-157996876 | 6 | 53.731 | KV452782.1 | 4284545 | 3-scf00136 | 3 |
| AX-157996878 | 6 | 53.731 | KV452782.1 | 4285368 | 3-scf00136 | 3 |
| AX-157996885 | 6 | 53.731 | KV452782.1 | 4291212 | 3-scf00136 | 3 |
| AX-157996895 | 6 | 53.731 | KV452782.1 | 4298093 | 3-scf00136 | 3 |
| AX-157996897 | 6 | 53.731 | KV452782.1 | 4299187 | 3-scf00136 | 3 |
| AX-157758885 | 6 | 53.731 | KV452782.1 | 4301117 | 3-scf00136 | 3 |
| AX-157996899 | 6 | 53.731 | KV452782.1 | 4301515 | 3-scf00136 | 3 |
| AX-157996907 | 6 | 53.731 | KV452782.1 | 4305401 | 3-scf00136 | 3 |
| AX-157996909 | 6 | 53.731 | KV452782.1 | 4307496 | 3-scf00136 | 3 |
| AX-157996912 | 6 | 53.731 | KV452782.1 | 4309617 | 3-scf00136 | 3 |
| AX-157996914 | 6 | 53.731 | KV452782.1 | 4310359 | 3-scf00136 | 3 |
| AX-157996923 | 6 | 53.731 | KV452782.1 | 4313590 | 3-scf00136 | 3 |
| AX-157996925 | 6 | 53.731 | KV452782.1 | 4314049 | 3-scf00136 | 3 |
| AX-157996930 | 6 | 53.731 | KV452782.1 | 4316665 | 3-scf00136 | 3 |
| AX-157818928 | 6 | 53.731 | KV452782.1 | 4317367 | 3-scf00136 | 3 |
| AX-157996934 | 6 | 53.731 | KV452782.1 | 4322255 | 3-scf00136 | 3 |
| AX-157996953 | 6 | 53.731 | KV452782.1 | 4335077 | 3-scf00136 | 3 |
| AX-157996954 | 6 | 53.731 | KV452782.1 | 4336066 | 3-scf00136 | 3 |
| AX-157997085 | 6 | 53.731 | KV452782.1 | 4458413 | 3-scf00136 | 3 |
| AX-157997205 | 6 | 53.731 | KV452782.1 | 4580880 | 3-scf00136 | 3 |
| AX-157997226 | 6 | 53.731 | KV452782.1 | 4599040 | 3-scf00136 | 3 |
| AX-157818957 | 6 | 53.731 | KV452782.1 | 4652667 | 3-scf00136 | 3 |
| AX-157997285 | 6 | 53.731 | KV452782.1 | 4653249 | 3-scf00136 | 3 |
| AX-157997401 | 6 | 53.731 | KV452782.1 | 4748424 | 3-scf00136 | 3 |
| AX-157997415 | 6 | 53.731 | KV452782.1 | 4761829 | 3-scf00136 | 3 |
| AX-157862930 | 6 | 53.731 | KV452782.1 | 5577918 | 3-scf00136 | 3 |
| AX-157855901 | 6 | 53.731 | KV452782.1 | 6592029 | 3-scf00136 | 3 |
| AX-157999576 | 6 | 53.731 | KV452782.1 | 7230883 | 3-scf00136 | 3 |
| AX-157855943 | 6 | 53.731 | KV452782.1 | 7236647 | 3-scf00136 | 3 |
| AX-157999672 | 6 | 53.731 | KV452782.1 | 7344174 | 3-scf00136 | 3 |
| AX-157996936 | 6 | 53.783 | KV452782.1 | 4325028 | 3-scf00136 | 3 |
| AX-157996944 | 6 | 53.841 | KV452782.1 | 4331320 | 3-scf00136 | 3 |
| AX-157996946 | 6 | 53.841 | KV452782.1 | 4331791 | 3-scf00136 | 3 |
| AX-157996948 | 6 | 53.841 | KV452782.1 | 4332303 | 3-scf00136 | 3 |
| AX-157745924 | 6 | 53.841 | KV452782.1 | 4339908 | 3-scf00136 | 3 |
| AX-157996962 | 6 | 53.841 | KV452782.1 | 4342032 | 3-scf00136 | 3 |
| AX-157996969 | 6 | 53.841 | KV452782.1 | 4347037 | 3-scf00136 | 3 |
| AX-157996971 | 6 | 53.841 | KV452782.1 | 4347780 | 3-scf00136 | 3 |
| AX-157996972 | 6 | 53.841 | KV452782.1 | 4349576 | 3-scf00136 | 3 |
| AX-157996974 | 6 | 53.841 | KV452782.1 | 4352290 | 3-scf00136 | 3 |
| AX-157997022 | 6 | 53.841 | KV452782.1 | 4406696 | 3-scf00136 | 3 |
| AX-157997086 | 6 | 53.841 | KV452782.1 | 4458776 | 3-scf00136 | 3 |
| AX-157997089 | 6 | 53.841 | KV452782.1 | 4459835 | 3-scf00136 | 3 |
| AX-157818931 | 6 | 53.913 | KV452782.1 | 4360349 | 3-scf00136 | 3 |
| AX-157996982 | 6 | 53.99  | KV452782.1 | 4364197 | 3-scf00136 | 3 |
| AX-157996959 | 6 | 54.059 | KV452782.1 | 4338768 | 3-scf00136 | 3 |
| AX-157996979 | 6 | 54.059 | KV452782.1 | 4361618 | 3-scf00136 | 3 |
| AX-157996985 | 6 | 54.059 | KV452782.1 | 4365705 | 3-scf00136 | 3 |

|              |   |        |            |         |            |   |
|--------------|---|--------|------------|---------|------------|---|
| AX-157996986 | 6 | 54.059 | KV452782.1 | 4369956 | 3-scf00136 | 3 |
| AX-157996989 | 6 | 54.059 | KV452782.1 | 4372569 | 3-scf00136 | 3 |
| AX-157996990 | 6 | 54.059 | KV452782.1 | 4374261 | 3-scf00136 | 3 |
| AX-157996992 | 6 | 54.059 | KV452782.1 | 4375022 | 3-scf00136 | 3 |
| AX-157996998 | 6 | 54.059 | KV452782.1 | 4379463 | 3-scf00136 | 3 |
| AX-157997005 | 6 | 54.059 | KV452782.1 | 4384607 | 3-scf00136 | 3 |
| AX-157997006 | 6 | 54.059 | KV452782.1 | 4387062 | 3-scf00136 | 3 |
| AX-157997011 | 6 | 54.059 | KV452782.1 | 4389947 | 3-scf00136 | 3 |
| AX-157997013 | 6 | 54.059 | KV452782.1 | 4390696 | 3-scf00136 | 3 |
| AX-157997016 | 6 | 54.059 | KV452782.1 | 4396224 | 3-scf00136 | 3 |
| AX-157997019 | 6 | 54.059 | KV452782.1 | 4402916 | 3-scf00136 | 3 |
| AX-157997032 | 6 | 54.059 | KV452782.1 | 4412240 | 3-scf00136 | 3 |
| AX-157997034 | 6 | 54.059 | KV452782.1 | 4414324 | 3-scf00136 | 3 |
| AX-157997036 | 6 | 54.059 | KV452782.1 | 4422828 | 3-scf00136 | 3 |
| AX-157997037 | 6 | 54.059 | KV452782.1 | 4423277 | 3-scf00136 | 3 |
| AX-157997119 | 6 | 54.059 | KV452782.1 | 4492734 | 3-scf00136 | 3 |
| AX-157997121 | 6 | 54.059 | KV452782.1 | 4493036 | 3-scf00136 | 3 |
| AX-157818935 | 6 | 54.059 | KV452782.1 | 4495610 | 3-scf00136 | 3 |
| AX-157997141 | 6 | 54.059 | KV452782.1 | 4504684 | 3-scf00136 | 3 |
| AX-157818939 | 6 | 54.059 | KV452782.1 | 4520682 | 3-scf00136 | 3 |
| AX-157818940 | 6 | 54.059 | KV452782.1 | 4520991 | 3-scf00136 | 3 |
| AX-157997167 | 6 | 54.059 | KV452782.1 | 4530043 | 3-scf00136 | 3 |
| AX-158407378 | 6 | 54.059 | KV452782.1 | 4966991 | 3-scf00136 | 3 |
| AX-157997859 | 6 | 54.059 | KV452782.1 | 5329784 | 3-scf00136 | 3 |
| AX-157998161 | 6 | 54.059 | KV452782.1 | 5573835 | 3-scf00136 | 3 |
| AX-157998296 | 6 | 54.059 | KV452782.1 | 5741576 | 3-scf00136 | 3 |
| AX-158000187 | 6 | 54.059 | KV452782.1 | 7851196 | 3-scf00136 | 3 |
| AX-157876037 | 6 | 54.059 | KV452782.1 | 7851277 | 3-scf00136 | 3 |
| AX-157855983 | 6 | 54.059 | KV452782.1 | 7897349 | 3-scf00136 | 3 |
| AX-157997033 | 6 | 54.118 | KV452782.1 | 4412745 | 3-scf00136 | 3 |
| AX-157997186 | 6 | 54.118 | KV452782.1 | 4555260 | 3-scf00136 | 3 |
| AX-157999748 | 6 | 54.118 | KV452782.1 | 7401687 | 3-scf00136 | 3 |
| AX-157996416 | 6 | 54.168 | KV452782.1 | 3841196 | 3-scf00136 | 3 |
| AX-157996996 | 6 | 54.168 | KV452782.1 | 4379285 | 3-scf00136 | 3 |
| AX-157997040 | 6 | 54.168 | KV452782.1 | 4426245 | 3-scf00136 | 3 |
| AX-157997061 | 6 | 54.168 | KV452782.1 | 4445395 | 3-scf00136 | 3 |
| AX-157997062 | 6 | 54.168 | KV452782.1 | 4446253 | 3-scf00136 | 3 |
| AX-157997064 | 6 | 54.168 | KV452782.1 | 4446873 | 3-scf00136 | 3 |
| AX-157997065 | 6 | 54.168 | KV452782.1 | 4447775 | 3-scf00136 | 3 |
| AX-157997069 | 6 | 54.168 | KV452782.1 | 4450210 | 3-scf00136 | 3 |
| AX-157997071 | 6 | 54.168 | KV452782.1 | 4451118 | 3-scf00136 | 3 |
| AX-157997077 | 6 | 54.168 | KV452782.1 | 4452929 | 3-scf00136 | 3 |
| AX-157997083 | 6 | 54.168 | KV452782.1 | 4456840 | 3-scf00136 | 3 |
| AX-157997087 | 6 | 54.168 | KV452782.1 | 4459228 | 3-scf00136 | 3 |
| AX-157740105 | 6 | 54.168 | KV452782.1 | 4467265 | 3-scf00136 | 3 |
| AX-157997113 | 6 | 54.168 | KV452782.1 | 4481775 | 3-scf00136 | 3 |
| AX-157997145 | 6 | 54.168 | KV452782.1 | 4508403 | 3-scf00136 | 3 |
| AX-157997108 | 6 | 54.2   | KV452782.1 | 4478267 | 3-scf00136 | 3 |
| AX-157997109 | 6 | 54.228 | KV452782.1 | 4478932 | 3-scf00136 | 3 |
| AX-157748120 | 6 | 54.255 | KV452782.1 | 4481236 | 3-scf00136 | 3 |
| AX-157997046 | 6 | 54.277 | KV452782.1 | 4429721 | 3-scf00136 | 3 |



|              |   |        |            |         |            |   |
|--------------|---|--------|------------|---------|------------|---|
| AX-157757804 | 6 | 54.277 | KV452782.1 | 4482361 | 3-scf00136 | 3 |
| AX-157997116 | 6 | 54.319 | KV452782.1 | 4485418 | 3-scf00136 | 3 |
| AX-157997106 | 6 | 54.339 | KV452782.1 | 4474375 | 3-scf00136 | 3 |
| AX-157869849 | 6 | 54.339 | KV452782.1 | 4487411 | 3-scf00136 | 3 |
| AX-158390670 | 6 | 54.339 | KV452782.1 | 4562881 | 3-scf00136 | 3 |
| AX-157997190 | 6 | 54.339 | KV452782.1 | 4567650 | 3-scf00136 | 3 |
| AX-157996884 | 6 | 54.387 | KV452782.1 | 4290335 | 3-scf00136 | 3 |
| AX-157996988 | 6 | 54.387 | KV452782.1 | 4371881 | 3-scf00136 | 3 |
| AX-157997118 | 6 | 54.387 | KV452782.1 | 4489551 | 3-scf00136 | 3 |
| AX-157997122 | 6 | 54.387 | KV452782.1 | 4493754 | 3-scf00136 | 3 |
| AX-157997127 | 6 | 54.387 | KV452782.1 | 4496255 | 3-scf00136 | 3 |
| AX-157997137 | 6 | 54.387 | KV452782.1 | 4501865 | 3-scf00136 | 3 |
| AX-157997144 | 6 | 54.387 | KV452782.1 | 4505907 | 3-scf00136 | 3 |
| AX-157855798 | 6 | 54.387 | KV452782.1 | 4509663 | 3-scf00136 | 3 |
| AX-157818937 | 6 | 54.387 | KV452782.1 | 4510460 | 3-scf00136 | 3 |
| AX-157855799 | 6 | 54.387 | KV452782.1 | 4511689 | 3-scf00136 | 3 |
| AX-157997151 | 6 | 54.387 | KV452782.1 | 4514447 | 3-scf00136 | 3 |
| AX-157997152 | 6 | 54.387 | KV452782.1 | 4516903 | 3-scf00136 | 3 |
| AX-157997180 | 6 | 54.387 | KV452782.1 | 4546485 | 3-scf00136 | 3 |
| AX-157716329 | 6 | 54.387 | KV452782.1 | 5904760 | 3-scf00136 | 3 |
| AX-157999759 | 6 | 54.387 | KV452782.1 | 7413990 | 3-scf00136 | 3 |
| AX-157997157 | 6 | 54.435 | KV452782.1 | 4520458 | 3-scf00136 | 3 |
| AX-157997018 | 6 | 54.489 | KV452782.1 | 4402175 | 3-scf00136 | 3 |
| AX-157855800 | 6 | 54.489 | KV452782.1 | 4524771 | 3-scf00136 | 3 |
| AX-157855801 | 6 | 54.489 | KV452782.1 | 4525685 | 3-scf00136 | 3 |
| AX-157855802 | 6 | 54.489 | KV452782.1 | 4526146 | 3-scf00136 | 3 |
| AX-158383395 | 6 | 54.537 | KV452782.1 | 4536241 | 3-scf00136 | 3 |
| AX-157997181 | 6 | 54.605 | KV452782.1 | 4547431 | 3-scf00136 | 3 |
| AX-157707688 | 6 | 54.605 | KV452782.1 | 4554322 | 3-scf00136 | 3 |
| AX-157716056 | 6 | 54.605 | KV452782.1 | 4561974 | 3-scf00136 | 3 |
| AX-157818946 | 6 | 54.605 | KV452782.1 | 4591326 | 3-scf00136 | 3 |
| AX-157997307 | 6 | 54.605 | KV452782.1 | 4674877 | 3-scf00136 | 3 |
| AX-157997337 | 6 | 54.605 | KV452782.1 | 4706250 | 3-scf00136 | 3 |
| AX-157997348 | 6 | 54.605 | KV452782.1 | 4714438 | 3-scf00136 | 3 |
| AX-157752727 | 6 | 54.605 | KV452782.1 | 4734671 | 3-scf00136 | 3 |
| AX-157997453 | 6 | 54.605 | KV452782.1 | 4788545 | 3-scf00136 | 3 |
| AX-157997193 | 6 | 54.653 | KV452782.1 | 4569707 | 3-scf00136 | 3 |
| AX-158407368 | 6 | 54.653 | KV452782.1 | 4569996 | 3-scf00136 | 3 |
| AX-157752158 | 6 | 54.714 | KV452782.1 | 4570531 | 3-scf00136 | 3 |
| AX-157997984 | 6 | 54.714 | KV452782.1 | 5426216 | 3-scf00136 | 3 |
| AX-157997208 | 6 | 54.761 | KV452782.1 | 4585743 | 3-scf00136 | 3 |
| AX-157818941 | 6 | 54.824 | KV452782.1 | 4521293 | 3-scf00136 | 3 |
| AX-157997215 | 6 | 54.824 | KV452782.1 | 4591395 | 3-scf00136 | 3 |
| AX-157818947 | 6 | 54.824 | KV452782.1 | 4594318 | 3-scf00136 | 3 |
| AX-157997222 | 6 | 54.824 | KV452782.1 | 4596300 | 3-scf00136 | 3 |
| AX-157997223 | 6 | 54.824 | KV452782.1 | 4596821 | 3-scf00136 | 3 |
| AX-157997224 | 6 | 54.824 | KV452782.1 | 4597214 | 3-scf00136 | 3 |
| AX-157818949 | 6 | 54.824 | KV452782.1 | 4600982 | 3-scf00136 | 3 |
| AX-157997227 | 6 | 54.824 | KV452782.1 | 4601130 | 3-scf00136 | 3 |
| AX-157997231 | 6 | 54.824 | KV452782.1 | 4603078 | 3-scf00136 | 3 |
| AX-157997235 | 6 | 54.824 | KV452782.1 | 4604989 | 3-scf00136 | 3 |

|              |   |        |            |         |            |   |
|--------------|---|--------|------------|---------|------------|---|
| AX-157997242 | 6 | 54.824 | KV452782.1 | 4611253 | 3-scf00136 | 3 |
| AX-157744576 | 6 | 54.824 | KV452782.1 | 4613735 | 3-scf00136 | 3 |
| AX-157997246 | 6 | 54.824 | KV452782.1 | 4614128 | 3-scf00136 | 3 |
| AX-157997253 | 6 | 54.824 | KV452782.1 | 4618605 | 3-scf00136 | 3 |
| AX-157997257 | 6 | 54.824 | KV452782.1 | 4619963 | 3-scf00136 | 3 |
| AX-157997258 | 6 | 54.824 | KV452782.1 | 4620449 | 3-scf00136 | 3 |
| AX-157818951 | 6 | 54.824 | KV452782.1 | 4620501 | 3-scf00136 | 3 |
| AX-157818952 | 6 | 54.824 | KV452782.1 | 4621031 | 3-scf00136 | 3 |
| AX-157997260 | 6 | 54.824 | KV452782.1 | 4625988 | 3-scf00136 | 3 |
| AX-157997261 | 6 | 54.824 | KV452782.1 | 4626764 | 3-scf00136 | 3 |
| AX-157997262 | 6 | 54.824 | KV452782.1 | 4627586 | 3-scf00136 | 3 |
| AX-157753631 | 6 | 54.824 | KV452782.1 | 4627880 | 3-scf00136 | 3 |
| AX-157997281 | 6 | 54.824 | KV452782.1 | 4651792 | 3-scf00136 | 3 |
| AX-157997295 | 6 | 54.824 | KV452782.1 | 4663210 | 3-scf00136 | 3 |
| AX-157746470 | 6 | 54.824 | KV452782.1 | 4709317 | 3-scf00136 | 3 |
| AX-157997365 | 6 | 54.824 | KV452782.1 | 4728966 | 3-scf00136 | 3 |
| AX-157997375 | 6 | 54.824 | KV452782.1 | 4735880 | 3-scf00136 | 3 |
| AX-157997377 | 6 | 54.824 | KV452782.1 | 4736919 | 3-scf00136 | 3 |
| AX-157997404 | 6 | 54.824 | KV452782.1 | 4752693 | 3-scf00136 | 3 |
| AX-157997414 | 6 | 54.824 | KV452782.1 | 4761237 | 3-scf00136 | 3 |
| AX-157997418 | 6 | 54.824 | KV452782.1 | 4763278 | 3-scf00136 | 3 |
| AX-157997457 | 6 | 54.824 | KV452782.1 | 4792833 | 3-scf00136 | 3 |
| AX-157818961 | 6 | 54.824 | KV452782.1 | 4793143 | 3-scf00136 | 3 |
| AX-157997279 | 6 | 54.838 | KV452782.1 | 4650676 | 3-scf00136 | 3 |
| AX-157996394 | 6 | 54.854 | KV452782.1 | 3822952 | 3-scf00136 | 3 |
| AX-157996597 | 6 | 54.854 | KV452782.1 | 4053192 | 3-scf00136 | 3 |
| AX-157746190 | 6 | 54.854 | KV452782.1 | 4635059 | 3-scf00136 | 3 |
| AX-157997283 | 6 | 54.854 | KV452782.1 | 4652157 | 3-scf00136 | 3 |
| AX-157997072 | 6 | 54.869 | KV452782.1 | 4451759 | 3-scf00136 | 3 |
| AX-157997146 | 6 | 54.869 | KV452782.1 | 4510054 | 3-scf00136 | 3 |
| AX-157997289 | 6 | 54.869 | KV452782.1 | 4658368 | 3-scf00136 | 3 |
| AX-157738316 | 6 | 54.883 | KV452782.1 | 4573900 | 3-scf00136 | 3 |
| AX-157875963 | 6 | 54.883 | KV452782.1 | 4608450 | 3-scf00136 | 3 |
| AX-157997303 | 6 | 54.883 | KV452782.1 | 4671953 | 3-scf00136 | 3 |
| AX-157997322 | 6 | 54.883 | KV452782.1 | 4684284 | 3-scf00136 | 3 |
| AX-157997357 | 6 | 54.883 | KV452782.1 | 4723433 | 3-scf00136 | 3 |
| AX-157997362 | 6 | 54.883 | KV452782.1 | 4725593 | 3-scf00136 | 3 |
| AX-157997314 | 6 | 54.901 | KV452782.1 | 4681692 | 3-scf00136 | 3 |
| AX-157997315 | 6 | 54.914 | KV452782.1 | 4682347 | 3-scf00136 | 3 |
| AX-157997328 | 6 | 54.933 | KV452782.1 | 4695508 | 3-scf00136 | 3 |
| AX-157997336 | 6 | 54.933 | KV452782.1 | 4705854 | 3-scf00136 | 3 |
| AX-157997338 | 6 | 54.933 | KV452782.1 | 4707174 | 3-scf00136 | 3 |
| AX-157997340 | 6 | 54.933 | KV452782.1 | 4709463 | 3-scf00136 | 3 |
| AX-157997342 | 6 | 54.933 | KV452782.1 | 4710196 | 3-scf00136 | 3 |
| AX-157997347 | 6 | 54.933 | KV452782.1 | 4713950 | 3-scf00136 | 3 |
| AX-157997553 | 6 | 54.933 | KV452782.1 | 4875405 | 3-scf00136 | 3 |
| AX-157997996 | 6 | 54.933 | KV452782.1 | 5443334 | 3-scf00136 | 3 |
| AX-157998398 | 6 | 54.933 | KV452782.1 | 5877746 | 3-scf00136 | 3 |
| AX-157999114 | 6 | 54.933 | KV452782.1 | 6611454 | 3-scf00136 | 3 |
| AX-157997350 | 6 | 54.963 | KV452782.1 | 4716703 | 3-scf00136 | 3 |
| AX-157997353 | 6 | 54.985 | KV452782.1 | 4720783 | 3-scf00136 | 3 |

|              |   |        |            |          |            |   |
|--------------|---|--------|------------|----------|------------|---|
| AX-157997343 | 6 | 55.017 | KV452782.1 | 4710618  | 3-scf00136 | 3 |
| AX-157997364 | 6 | 55.017 | KV452782.1 | 4727531  | 3-scf00136 | 3 |
| AX-157997637 | 6 | 55.017 | KV452782.1 | 5115105  | 3-scf00136 | 3 |
| AX-157818994 | 6 | 55.017 | KV452782.1 | 5270322  | 3-scf00136 | 3 |
| AX-157818995 | 6 | 55.017 | KV452782.1 | 5285182  | 3-scf00136 | 3 |
| AX-157997866 | 6 | 55.017 | KV452782.1 | 5335237  | 3-scf00136 | 3 |
| AX-157718181 | 6 | 55.017 | KV452782.1 | 5828810  | 3-scf00136 | 3 |
| AX-157998390 | 6 | 55.017 | KV452782.1 | 5866771  | 3-scf00136 | 3 |
| AX-157998420 | 6 | 55.017 | KV452782.1 | 5913370  | 3-scf00136 | 3 |
| AX-157757397 | 6 | 55.017 | KV452782.1 | 6785225  | 3-scf00136 | 3 |
| AX-157999264 | 6 | 55.017 | KV452782.1 | 6785501  | 3-scf00136 | 3 |
| AX-157999296 | 6 | 55.017 | KV452782.1 | 6825668  | 3-scf00136 | 3 |
| AX-157742357 | 6 | 55.017 | KV452782.1 | 7262947  | 3-scf00136 | 3 |
| AX-157819408 | 6 | 55.017 | KV452782.1 | 11533601 | 3-scf00136 | 3 |
| AX-158009729 | 6 | 55.017 | KV452784.1 | 8821989  | 3-scf00141 | 3 |
| AX-158010790 | 6 | 55.017 | KV452784.1 | 9905389  | 3-scf00141 | 3 |
| AX-157996459 | 6 | 55.042 | KV452782.1 | 3871213  | 3-scf00136 | 3 |
| AX-157996547 | 6 | 55.042 | KV452782.1 | 3993087  | 3-scf00136 | 3 |
| AX-157997129 | 6 | 55.042 | KV452782.1 | 4496636  | 3-scf00136 | 3 |
| AX-157997197 | 6 | 55.042 | KV452782.1 | 4573275  | 3-scf00136 | 3 |
| AX-157997219 | 6 | 55.042 | KV452782.1 | 4593737  | 3-scf00136 | 3 |
| AX-157997247 | 6 | 55.042 | KV452782.1 | 4614597  | 3-scf00136 | 3 |
| AX-157818955 | 6 | 55.042 | KV452782.1 | 4648374  | 3-scf00136 | 3 |
| AX-157775924 | 6 | 55.042 | KV452782.1 | 4648570  | 3-scf00136 | 3 |
| AX-157818956 | 6 | 55.042 | KV452782.1 | 4649373  | 3-scf00136 | 3 |
| AX-157997278 | 6 | 55.042 | KV452782.1 | 4650145  | 3-scf00136 | 3 |
| AX-157997327 | 6 | 55.042 | KV452782.1 | 4694046  | 3-scf00136 | 3 |
| AX-157997367 | 6 | 55.042 | KV452782.1 | 4730400  | 3-scf00136 | 3 |
| AX-157997369 | 6 | 55.042 | KV452782.1 | 4731223  | 3-scf00136 | 3 |
| AX-157997372 | 6 | 55.042 | KV452782.1 | 4733116  | 3-scf00136 | 3 |
| AX-157997373 | 6 | 55.042 | KV452782.1 | 4733917  | 3-scf00136 | 3 |
| AX-157997383 | 6 | 55.042 | KV452782.1 | 4740601  | 3-scf00136 | 3 |
| AX-157997389 | 6 | 55.042 | KV452782.1 | 4743617  | 3-scf00136 | 3 |
| AX-157997390 | 6 | 55.042 | KV452782.1 | 4744248  | 3-scf00136 | 3 |
| AX-157997410 | 6 | 55.042 | KV452782.1 | 4759945  | 3-scf00136 | 3 |
| AX-157997422 | 6 | 55.042 | KV452782.1 | 4770654  | 3-scf00136 | 3 |
| AX-157997424 | 6 | 55.042 | KV452782.1 | 4771336  | 3-scf00136 | 3 |
| AX-157997540 | 6 | 55.042 | KV452782.1 | 4870650  | 3-scf00136 | 3 |
| AX-157997551 | 6 | 55.042 | KV452782.1 | 4875112  | 3-scf00136 | 3 |
| AX-158415765 | 6 | 55.042 | KV452782.1 | 5087127  | 3-scf00136 | 3 |
| AX-157997639 | 6 | 55.042 | KV452782.1 | 5116433  | 3-scf00136 | 3 |
| AX-157997641 | 6 | 55.042 | KV452782.1 | 5117010  | 3-scf00136 | 3 |
| AX-157997642 | 6 | 55.042 | KV452782.1 | 5117317  | 3-scf00136 | 3 |
| AX-158405668 | 6 | 55.042 | KV452782.1 | 5121957  | 3-scf00136 | 3 |
| AX-157774991 | 6 | 55.042 | KV452782.1 | 5130876  | 3-scf00136 | 3 |
| AX-157997662 | 6 | 55.042 | KV452782.1 | 5151454  | 3-scf00136 | 3 |
| AX-157998285 | 6 | 55.042 | KV452782.1 | 5731606  | 3-scf00136 | 3 |
| AX-157724734 | 6 | 55.042 | KV452782.1 | 5843249  | 3-scf00136 | 3 |
| AX-157756462 | 6 | 55.075 | KV452782.1 | 4677274  | 3-scf00136 | 3 |
| AX-157997309 | 6 | 55.075 | KV452782.1 | 4678859  | 3-scf00136 | 3 |
| AX-157997428 | 6 | 55.075 | KV452782.1 | 4774754  | 3-scf00136 | 3 |

|              |   |        |            |         |            |   |
|--------------|---|--------|------------|---------|------------|---|
| AX-157997431 | 6 | 55.075 | KV452782.1 | 4776681 | 3-scf00136 | 3 |
| AX-157997446 | 6 | 55.075 | KV452782.1 | 4783196 | 3-scf00136 | 3 |
| AX-157997456 | 6 | 55.075 | KV452782.1 | 4791912 | 3-scf00136 | 3 |
| AX-157997135 | 6 | 55.151 | KV452782.1 | 4501608 | 3-scf00136 | 3 |
| AX-157715597 | 6 | 55.151 | KV452782.1 | 4617134 | 3-scf00136 | 3 |
| AX-157997255 | 6 | 55.151 | KV452782.1 | 4619351 | 3-scf00136 | 3 |
| AX-157997396 | 6 | 55.151 | KV452782.1 | 4746718 | 3-scf00136 | 3 |
| AX-157997439 | 6 | 55.151 | KV452782.1 | 4781210 | 3-scf00136 | 3 |
| AX-157997444 | 6 | 55.151 | KV452782.1 | 4782230 | 3-scf00136 | 3 |
| AX-157997448 | 6 | 55.151 | KV452782.1 | 4783463 | 3-scf00136 | 3 |
| AX-157869851 | 6 | 55.151 | KV452782.1 | 4784650 | 3-scf00136 | 3 |
| AX-157997451 | 6 | 55.151 | KV452782.1 | 4785891 | 3-scf00136 | 3 |
| AX-157997460 | 6 | 55.151 | KV452782.1 | 4796038 | 3-scf00136 | 3 |
| AX-157997463 | 6 | 55.151 | KV452782.1 | 4798374 | 3-scf00136 | 3 |
| AX-157997606 | 6 | 55.151 | KV452782.1 | 4947013 | 3-scf00136 | 3 |
| AX-157997665 | 6 | 55.151 | KV452782.1 | 5152523 | 3-scf00136 | 3 |
| AX-157997766 | 6 | 55.151 | KV452782.1 | 5240385 | 3-scf00136 | 3 |
| AX-157998134 | 6 | 55.151 | KV452782.1 | 5549152 | 3-scf00136 | 3 |
| AX-157819017 | 6 | 55.151 | KV452782.1 | 5856630 | 3-scf00136 | 3 |
| AX-157996413 | 6 | 55.204 | KV452782.1 | 3840482 | 3-scf00136 | 3 |
| AX-157997462 | 6 | 55.204 | KV452782.1 | 4797903 | 3-scf00136 | 3 |
| AX-157819026 | 6 | 55.204 | KV452782.1 | 5905174 | 3-scf00136 | 3 |
| AX-157855818 | 6 | 55.204 | KV452782.1 | 6008480 | 3-scf00136 | 3 |
| AX-157997178 | 6 | 55.261 | KV452782.1 | 4545587 | 3-scf00136 | 3 |
| AX-157747190 | 6 | 55.261 | KV452782.1 | 4665951 | 3-scf00136 | 3 |
| AX-157997355 | 6 | 55.261 | KV452782.1 | 4722685 | 3-scf00136 | 3 |
| AX-157997388 | 6 | 55.261 | KV452782.1 | 4742976 | 3-scf00136 | 3 |
| AX-157997412 | 6 | 55.261 | KV452782.1 | 4760179 | 3-scf00136 | 3 |
| AX-157997425 | 6 | 55.261 | KV452782.1 | 4772116 | 3-scf00136 | 3 |
| AX-157997427 | 6 | 55.261 | KV452782.1 | 4772586 | 3-scf00136 | 3 |
| AX-157997459 | 6 | 55.261 | KV452782.1 | 4795518 | 3-scf00136 | 3 |
| AX-157997464 | 6 | 55.261 | KV452782.1 | 4798853 | 3-scf00136 | 3 |
| AX-157997466 | 6 | 55.261 | KV452782.1 | 4799235 | 3-scf00136 | 3 |
| AX-157997467 | 6 | 55.261 | KV452782.1 | 4801206 | 3-scf00136 | 3 |
| AX-157997469 | 6 | 55.261 | KV452782.1 | 4802384 | 3-scf00136 | 3 |
| AX-157716205 | 6 | 55.261 | KV452782.1 | 4812404 | 3-scf00136 | 3 |
| AX-157818963 | 6 | 55.261 | KV452782.1 | 4813379 | 3-scf00136 | 3 |
| AX-157997478 | 6 | 55.261 | KV452782.1 | 4813991 | 3-scf00136 | 3 |
| AX-157997479 | 6 | 55.261 | KV452782.1 | 4815864 | 3-scf00136 | 3 |
| AX-157997480 | 6 | 55.261 | KV452782.1 | 4817864 | 3-scf00136 | 3 |
| AX-157997481 | 6 | 55.261 | KV452782.1 | 4819995 | 3-scf00136 | 3 |
| AX-157997493 | 6 | 55.261 | KV452782.1 | 4833829 | 3-scf00136 | 3 |
| AX-157997494 | 6 | 55.261 | KV452782.1 | 4834623 | 3-scf00136 | 3 |
| AX-157997499 | 6 | 55.261 | KV452782.1 | 4837880 | 3-scf00136 | 3 |
| AX-157865155 | 6 | 55.261 | KV452782.1 | 4842303 | 3-scf00136 | 3 |
| AX-157997503 | 6 | 55.261 | KV452782.1 | 4844237 | 3-scf00136 | 3 |
| AX-157997505 | 6 | 55.261 | KV452782.1 | 4844448 | 3-scf00136 | 3 |
| AX-157997514 | 6 | 55.261 | KV452782.1 | 4849085 | 3-scf00136 | 3 |
| AX-157997519 | 6 | 55.261 | KV452782.1 | 4855427 | 3-scf00136 | 3 |
| AX-157997529 | 6 | 55.261 | KV452782.1 | 4862099 | 3-scf00136 | 3 |
| AX-157743548 | 6 | 55.261 | KV452782.1 | 4863353 | 3-scf00136 | 3 |

|              |   |        |            |         |            |   |
|--------------|---|--------|------------|---------|------------|---|
| AX-157997531 | 6 | 55.261 | KV452782.1 | 4865619 | 3-scf00136 | 3 |
| AX-157997532 | 6 | 55.261 | KV452782.1 | 4865762 | 3-scf00136 | 3 |
| AX-157997533 | 6 | 55.261 | KV452782.1 | 4866238 | 3-scf00136 | 3 |
| AX-157818967 | 6 | 55.261 | KV452782.1 | 4866717 | 3-scf00136 | 3 |
| AX-157997534 | 6 | 55.261 | KV452782.1 | 4866851 | 3-scf00136 | 3 |
| AX-157997547 | 6 | 55.261 | KV452782.1 | 4874302 | 3-scf00136 | 3 |
| AX-157997549 | 6 | 55.261 | KV452782.1 | 4874587 | 3-scf00136 | 3 |
| AX-157818970 | 6 | 55.261 | KV452782.1 | 4875662 | 3-scf00136 | 3 |
| AX-157997554 | 6 | 55.261 | KV452782.1 | 4876329 | 3-scf00136 | 3 |
| AX-157997555 | 6 | 55.261 | KV452782.1 | 4876677 | 3-scf00136 | 3 |
| AX-157997557 | 6 | 55.261 | KV452782.1 | 4877076 | 3-scf00136 | 3 |
| AX-157997559 | 6 | 55.261 | KV452782.1 | 4879299 | 3-scf00136 | 3 |
| AX-158407371 | 6 | 55.261 | KV452782.1 | 4880926 | 3-scf00136 | 3 |
| AX-157997565 | 6 | 55.261 | KV452782.1 | 4883072 | 3-scf00136 | 3 |
| AX-157997566 | 6 | 55.261 | KV452782.1 | 4884824 | 3-scf00136 | 3 |
| AX-157997568 | 6 | 55.261 | KV452782.1 | 4885049 | 3-scf00136 | 3 |
| AX-157997570 | 6 | 55.261 | KV452782.1 | 4886832 | 3-scf00136 | 3 |
| AX-157997572 | 6 | 55.261 | KV452782.1 | 4888507 | 3-scf00136 | 3 |
| AX-157997574 | 6 | 55.261 | KV452782.1 | 4892868 | 3-scf00136 | 3 |
| AX-157997580 | 6 | 55.261 | KV452782.1 | 4895405 | 3-scf00136 | 3 |
| AX-157818974 | 6 | 55.261 | KV452782.1 | 4899853 | 3-scf00136 | 3 |
| AX-157818975 | 6 | 55.261 | KV452782.1 | 4899897 | 3-scf00136 | 3 |
| AX-157997586 | 6 | 55.261 | KV452782.1 | 4902481 | 3-scf00136 | 3 |
| AX-157997588 | 6 | 55.261 | KV452782.1 | 4904031 | 3-scf00136 | 3 |
| AX-157997597 | 6 | 55.261 | KV452782.1 | 4907552 | 3-scf00136 | 3 |
| AX-157997598 | 6 | 55.261 | KV452782.1 | 4907987 | 3-scf00136 | 3 |
| AX-158415764 | 6 | 55.261 | KV452782.1 | 4940719 | 3-scf00136 | 3 |
| AX-158407374 | 6 | 55.261 | KV452782.1 | 4942408 | 3-scf00136 | 3 |
| AX-158422209 | 6 | 55.261 | KV452782.1 | 4942484 | 3-scf00136 | 3 |
| AX-158405666 | 6 | 55.261 | KV452782.1 | 4943405 | 3-scf00136 | 3 |
| AX-157997608 | 6 | 55.261 | KV452782.1 | 4954782 | 3-scf00136 | 3 |
| AX-157818978 | 6 | 55.261 | KV452782.1 | 4964790 | 3-scf00136 | 3 |
| AX-158422210 | 6 | 55.261 | KV452782.1 | 5021898 | 3-scf00136 | 3 |
| AX-157818982 | 6 | 55.261 | KV452782.1 | 5103240 | 3-scf00136 | 3 |
| AX-157997631 | 6 | 55.261 | KV452782.1 | 5103559 | 3-scf00136 | 3 |
| AX-157707789 | 6 | 55.261 | KV452782.1 | 5105906 | 3-scf00136 | 3 |
| AX-157818983 | 6 | 55.261 | KV452782.1 | 5109164 | 3-scf00136 | 3 |
| AX-157855808 | 6 | 55.261 | KV452782.1 | 5109665 | 3-scf00136 | 3 |
| AX-157997635 | 6 | 55.261 | KV452782.1 | 5113092 | 3-scf00136 | 3 |
| AX-157997636 | 6 | 55.261 | KV452782.1 | 5114236 | 3-scf00136 | 3 |
| AX-157997644 | 6 | 55.261 | KV452782.1 | 5120839 | 3-scf00136 | 3 |
| AX-157997649 | 6 | 55.261 | KV452782.1 | 5130693 | 3-scf00136 | 3 |
| AX-157818984 | 6 | 55.261 | KV452782.1 | 5135683 | 3-scf00136 | 3 |
| AX-157997653 | 6 | 55.261 | KV452782.1 | 5137800 | 3-scf00136 | 3 |
| AX-157818986 | 6 | 55.261 | KV452782.1 | 5140926 | 3-scf00136 | 3 |
| AX-157997658 | 6 | 55.261 | KV452782.1 | 5146151 | 3-scf00136 | 3 |
| AX-157997670 | 6 | 55.261 | KV452782.1 | 5155377 | 3-scf00136 | 3 |
| AX-157997727 | 6 | 55.261 | KV452782.1 | 5210011 | 3-scf00136 | 3 |
| AX-157997732 | 6 | 55.261 | KV452782.1 | 5212479 | 3-scf00136 | 3 |
| AX-157997755 | 6 | 55.261 | KV452782.1 | 5231330 | 3-scf00136 | 3 |
| AX-157997756 | 6 | 55.261 | KV452782.1 | 5231766 | 3-scf00136 | 3 |

|              |   |        |            |         |            |    |
|--------------|---|--------|------------|---------|------------|----|
| AX-157997763 | 6 | 55.261 | KV452782.1 | 5237051 | 3-scf00136 | 3  |
| AX-157997778 | 6 | 55.261 | KV452782.1 | 5251629 | 3-scf00136 | 3  |
| AX-157997793 | 6 | 55.261 | KV452782.1 | 5264624 | 3-scf00136 | 3  |
| AX-157997841 | 6 | 55.261 | KV452782.1 | 5311472 | 3-scf00136 | 3  |
| AX-157997853 | 6 | 55.261 | KV452782.1 | 5321975 | 3-scf00136 | 3  |
| AX-157997887 | 6 | 55.261 | KV452782.1 | 5354381 | 3-scf00136 | 3  |
| AX-157997902 | 6 | 55.261 | KV452782.1 | 5363790 | 3-scf00136 | 3  |
| AX-157997903 | 6 | 55.261 | KV452782.1 | 5364110 | 3-scf00136 | 3  |
| AX-157997928 | 6 | 55.261 | KV452782.1 | 5389487 | 3-scf00136 | 3  |
| AX-157855850 | 6 | 55.261 | KV452782.1 | 6412314 | 3-scf00136 | 3  |
| AX-157686601 | 6 | 55.261 | KV453406.1 | 41425   | scf00706   | UN |
| AX-157686602 | 6 | 55.261 | KV453406.1 | 42468   | scf00706   | UN |
| AX-158421646 | 6 | 55.303 | KV452782.1 | 5138923 | 3-scf00136 | 3  |
| AX-157818985 | 6 | 55.326 | KV452782.1 | 5139813 | 3-scf00136 | 3  |
| AX-157714477 | 6 | 55.37  | KV452782.1 | 4462930 | 3-scf00136 | 3  |
| AX-157997098 | 6 | 55.37  | KV452782.1 | 4469128 | 3-scf00136 | 3  |
| AX-157713575 | 6 | 55.37  | KV452782.1 | 4509569 | 3-scf00136 | 3  |
| AX-157997171 | 6 | 55.37  | KV452782.1 | 4538226 | 3-scf00136 | 3  |
| AX-157875965 | 6 | 55.37  | KV452782.1 | 4645972 | 3-scf00136 | 3  |
| AX-157997275 | 6 | 55.37  | KV452782.1 | 4646088 | 3-scf00136 | 3  |
| AX-158390672 | 6 | 55.37  | KV452782.1 | 4661884 | 3-scf00136 | 3  |
| AX-157756564 | 6 | 55.37  | KV452782.1 | 4698198 | 3-scf00136 | 3  |
| AX-157997331 | 6 | 55.37  | KV452782.1 | 4701536 | 3-scf00136 | 3  |
| AX-157997360 | 6 | 55.37  | KV452782.1 | 4724795 | 3-scf00136 | 3  |
| AX-157997374 | 6 | 55.37  | KV452782.1 | 4735071 | 3-scf00136 | 3  |
| AX-157997393 | 6 | 55.37  | KV452782.1 | 4745893 | 3-scf00136 | 3  |
| AX-157997420 | 6 | 55.37  | KV452782.1 | 4765826 | 3-scf00136 | 3  |
| AX-157997477 | 6 | 55.37  | KV452782.1 | 4813779 | 3-scf00136 | 3  |
| AX-157818971 | 6 | 55.37  | KV452782.1 | 4880513 | 3-scf00136 | 3  |
| AX-157997593 | 6 | 55.37  | KV452782.1 | 4906363 | 3-scf00136 | 3  |
| AX-157997595 | 6 | 55.37  | KV452782.1 | 4906637 | 3-scf00136 | 3  |
| AX-157772272 | 6 | 55.37  | KV452782.1 | 4907032 | 3-scf00136 | 3  |
| AX-157997629 | 6 | 55.37  | KV452782.1 | 5101801 | 3-scf00136 | 3  |
| AX-157997632 | 6 | 55.37  | KV452782.1 | 5105646 | 3-scf00136 | 3  |
| AX-157997683 | 6 | 55.37  | KV452782.1 | 5169682 | 3-scf00136 | 3  |
| AX-157997686 | 6 | 55.37  | KV452782.1 | 5175506 | 3-scf00136 | 3  |
| AX-157997689 | 6 | 55.37  | KV452782.1 | 5177890 | 3-scf00136 | 3  |
| AX-157997692 | 6 | 55.37  | KV452782.1 | 5179987 | 3-scf00136 | 3  |
| AX-157997693 | 6 | 55.37  | KV452782.1 | 5181712 | 3-scf00136 | 3  |
| AX-157997697 | 6 | 55.37  | KV452782.1 | 5182726 | 3-scf00136 | 3  |
| AX-157997700 | 6 | 55.37  | KV452782.1 | 5187362 | 3-scf00136 | 3  |
| AX-157997701 | 6 | 55.37  | KV452782.1 | 5188953 | 3-scf00136 | 3  |
| AX-157818987 | 6 | 55.37  | KV452782.1 | 5189153 | 3-scf00136 | 3  |
| AX-157818989 | 6 | 55.37  | KV452782.1 | 5190076 | 3-scf00136 | 3  |
| AX-157997702 | 6 | 55.37  | KV452782.1 | 5192845 | 3-scf00136 | 3  |
| AX-157997707 | 6 | 55.37  | KV452782.1 | 5198577 | 3-scf00136 | 3  |
| AX-157997720 | 6 | 55.37  | KV452782.1 | 5206292 | 3-scf00136 | 3  |
| AX-157997721 | 6 | 55.37  | KV452782.1 | 5206376 | 3-scf00136 | 3  |
| AX-157997724 | 6 | 55.37  | KV452782.1 | 5208576 | 3-scf00136 | 3  |
| AX-157997730 | 6 | 55.37  | KV452782.1 | 5211072 | 3-scf00136 | 3  |
| AX-157997735 | 6 | 55.37  | KV452782.1 | 5213902 | 3-scf00136 | 3  |

|              |   |        |            |         |            |   |
|--------------|---|--------|------------|---------|------------|---|
| AX-157739746 | 6 | 55.37  | KV452782.1 | 5237797 | 3-scf00136 | 3 |
| AX-157818993 | 6 | 55.37  | KV452782.1 | 5269206 | 3-scf00136 | 3 |
| AX-157997824 | 6 | 55.37  | KV452782.1 | 5296280 | 3-scf00136 | 3 |
| AX-157998070 | 6 | 55.37  | KV452782.1 | 5502200 | 3-scf00136 | 3 |
| AX-157999186 | 6 | 55.37  | KV452782.1 | 6690941 | 3-scf00136 | 3 |
| AX-157999691 | 6 | 55.37  | KV452782.1 | 7353664 | 3-scf00136 | 3 |
| AX-157999713 | 6 | 55.37  | KV452782.1 | 7372774 | 3-scf00136 | 3 |
| AX-157997736 | 6 | 55.401 | KV452782.1 | 5214885 | 3-scf00136 | 3 |
| AX-157997739 | 6 | 55.434 | KV452782.1 | 5216883 | 3-scf00136 | 3 |
| AX-157773960 | 6 | 55.479 | KV452782.1 | 5219970 | 3-scf00136 | 3 |
| AX-157997742 | 6 | 55.479 | KV452782.1 | 5220020 | 3-scf00136 | 3 |
| AX-157997744 | 6 | 55.479 | KV452782.1 | 5222123 | 3-scf00136 | 3 |
| AX-157997747 | 6 | 55.479 | KV452782.1 | 5224016 | 3-scf00136 | 3 |
| AX-157997965 | 6 | 55.479 | KV452782.1 | 5411649 | 3-scf00136 | 3 |
| AX-157998035 | 6 | 55.479 | KV452782.1 | 5479783 | 3-scf00136 | 3 |
| AX-157997752 | 6 | 55.505 | KV452782.1 | 5229383 | 3-scf00136 | 3 |
| AX-157997911 | 6 | 55.505 | KV452782.1 | 5370067 | 3-scf00136 | 3 |
| AX-157997759 | 6 | 55.523 | KV452782.1 | 5234340 | 3-scf00136 | 3 |
| AX-157818990 | 6 | 55.523 | KV452782.1 | 5238254 | 3-scf00136 | 3 |
| AX-157997761 | 6 | 55.539 | KV452782.1 | 5236733 | 3-scf00136 | 3 |
| AX-157997776 | 6 | 55.551 | KV452782.1 | 5249263 | 3-scf00136 | 3 |
| AX-157997785 | 6 | 55.572 | KV452782.1 | 5258842 | 3-scf00136 | 3 |
| AX-157997791 | 6 | 55.572 | KV452782.1 | 5262620 | 3-scf00136 | 3 |
| AX-157998045 | 6 | 55.572 | KV452782.1 | 5488053 | 3-scf00136 | 3 |
| AX-157997610 | 6 | 55.588 | KV452782.1 | 4963517 | 3-scf00136 | 3 |
| AX-157997787 | 6 | 55.588 | KV452782.1 | 5259321 | 3-scf00136 | 3 |
| AX-157818991 | 6 | 55.588 | KV452782.1 | 5261310 | 3-scf00136 | 3 |
| AX-157997790 | 6 | 55.628 | KV452782.1 | 5261819 | 3-scf00136 | 3 |
| AX-157996303 | 6 | 55.698 | KV452782.1 | 3731617 | 3-scf00136 | 3 |
| AX-157997483 | 6 | 55.698 | KV452782.1 | 4822395 | 3-scf00136 | 3 |
| AX-157997599 | 6 | 55.698 | KV452782.1 | 4908218 | 3-scf00136 | 3 |
| AX-157997625 | 6 | 55.698 | KV452782.1 | 5094810 | 3-scf00136 | 3 |
| AX-157997696 | 6 | 55.698 | KV452782.1 | 5182437 | 3-scf00136 | 3 |
| AX-157721968 | 6 | 55.698 | KV452782.1 | 5196240 | 3-scf00136 | 3 |
| AX-157997718 | 6 | 55.698 | KV452782.1 | 5205610 | 3-scf00136 | 3 |
| AX-157997754 | 6 | 55.698 | KV452782.1 | 5230943 | 3-scf00136 | 3 |
| AX-157997780 | 6 | 55.698 | KV452782.1 | 5254709 | 3-scf00136 | 3 |
| AX-157997807 | 6 | 55.698 | KV452782.1 | 5278396 | 3-scf00136 | 3 |
| AX-157997811 | 6 | 55.698 | KV452782.1 | 5282674 | 3-scf00136 | 3 |
| AX-157997814 | 6 | 55.698 | KV452782.1 | 5289216 | 3-scf00136 | 3 |
| AX-157997819 | 6 | 55.698 | KV452782.1 | 5293518 | 3-scf00136 | 3 |
| AX-157997820 | 6 | 55.698 | KV452782.1 | 5294214 | 3-scf00136 | 3 |
| AX-157997821 | 6 | 55.698 | KV452782.1 | 5294825 | 3-scf00136 | 3 |
| AX-157997854 | 6 | 55.698 | KV452782.1 | 5324524 | 3-scf00136 | 3 |
| AX-157997855 | 6 | 55.698 | KV452782.1 | 5326646 | 3-scf00136 | 3 |
| AX-157997869 | 6 | 55.698 | KV452782.1 | 5339480 | 3-scf00136 | 3 |
| AX-157997882 | 6 | 55.698 | KV452782.1 | 5348618 | 3-scf00136 | 3 |
| AX-157818997 | 6 | 55.698 | KV452782.1 | 5355670 | 3-scf00136 | 3 |
| AX-157739174 | 6 | 55.698 | KV452782.1 | 5355998 | 3-scf00136 | 3 |
| AX-157997891 | 6 | 55.698 | KV452782.1 | 5358709 | 3-scf00136 | 3 |
| AX-157997893 | 6 | 55.698 | KV452782.1 | 5358864 | 3-scf00136 | 3 |

|              |   |        |            |         |            |    |
|--------------|---|--------|------------|---------|------------|----|
| AX-157997895 | 6 | 55.698 | KV452782.1 | 5360688 | 3-scf00136 | 3  |
| AX-157818999 | 6 | 55.698 | KV452782.1 | 5362796 | 3-scf00136 | 3  |
| AX-157997905 | 6 | 55.698 | KV452782.1 | 5365380 | 3-scf00136 | 3  |
| AX-157997913 | 6 | 55.698 | KV452782.1 | 5371674 | 3-scf00136 | 3  |
| AX-157997918 | 6 | 55.698 | KV452782.1 | 5374018 | 3-scf00136 | 3  |
| AX-157997919 | 6 | 55.698 | KV452782.1 | 5374312 | 3-scf00136 | 3  |
| AX-157716561 | 6 | 55.698 | KV452782.1 | 5379427 | 3-scf00136 | 3  |
| AX-157997922 | 6 | 55.698 | KV452782.1 | 5387794 | 3-scf00136 | 3  |
| AX-157997924 | 6 | 55.698 | KV452782.1 | 5388331 | 3-scf00136 | 3  |
| AX-157997927 | 6 | 55.698 | KV452782.1 | 5389182 | 3-scf00136 | 3  |
| AX-157997932 | 6 | 55.698 | KV452782.1 | 5391399 | 3-scf00136 | 3  |
| AX-157997934 | 6 | 55.698 | KV452782.1 | 5391687 | 3-scf00136 | 3  |
| AX-157997936 | 6 | 55.698 | KV452782.1 | 5392839 | 3-scf00136 | 3  |
| AX-157997937 | 6 | 55.698 | KV452782.1 | 5394203 | 3-scf00136 | 3  |
| AX-157997943 | 6 | 55.698 | KV452782.1 | 5398504 | 3-scf00136 | 3  |
| AX-157997944 | 6 | 55.698 | KV452782.1 | 5399271 | 3-scf00136 | 3  |
| AX-157997946 | 6 | 55.698 | KV452782.1 | 5400468 | 3-scf00136 | 3  |
| AX-157997948 | 6 | 55.698 | KV452782.1 | 5400675 | 3-scf00136 | 3  |
| AX-157745417 | 6 | 55.698 | KV452782.1 | 5402509 | 3-scf00136 | 3  |
| AX-157998062 | 6 | 55.698 | KV452782.1 | 5499435 | 3-scf00136 | 3  |
| AX-157998065 | 6 | 55.698 | KV452782.1 | 5500077 | 3-scf00136 | 3  |
| AX-157819004 | 6 | 55.698 | KV452782.1 | 5512945 | 3-scf00136 | 3  |
| AX-157869855 | 6 | 55.698 | KV452782.1 | 5524365 | 3-scf00136 | 3  |
| AX-157998100 | 6 | 55.698 | KV452782.1 | 5525768 | 3-scf00136 | 3  |
| AX-157998108 | 6 | 55.698 | KV452782.1 | 5532072 | 3-scf00136 | 3  |
| AX-157998121 | 6 | 55.698 | KV452782.1 | 5540617 | 3-scf00136 | 3  |
| AX-157998144 | 6 | 55.698 | KV452782.1 | 5557613 | 3-scf00136 | 3  |
| AX-157998151 | 6 | 55.698 | KV452782.1 | 5562638 | 3-scf00136 | 3  |
| AX-157998155 | 6 | 55.698 | KV452782.1 | 5566839 | 3-scf00136 | 3  |
| AX-157998171 | 6 | 55.698 | KV452782.1 | 5591576 | 3-scf00136 | 3  |
| AX-157998183 | 6 | 55.698 | KV452782.1 | 5601990 | 3-scf00136 | 3  |
| AX-157998270 | 6 | 55.698 | KV452782.1 | 5724061 | 3-scf00136 | 3  |
| AX-157998277 | 6 | 55.698 | KV452782.1 | 5728027 | 3-scf00136 | 3  |
| AX-157998331 | 6 | 55.698 | KV452782.1 | 5794780 | 3-scf00136 | 3  |
| AX-157998333 | 6 | 55.698 | KV452782.1 | 5797737 | 3-scf00136 | 3  |
| AX-157998409 | 6 | 55.698 | KV452782.1 | 5893633 | 3-scf00136 | 3  |
| AX-157998445 | 6 | 55.698 | KV452782.1 | 5946040 | 3-scf00136 | 3  |
| AX-157998774 | 6 | 55.698 | KV452782.1 | 6273872 | 3-scf00136 | 3  |
| AX-157855904 | 6 | 55.698 | KV452782.1 | 6634948 | 3-scf00136 | 3  |
| AX-158000174 | 6 | 55.698 | KV452782.1 | 7835610 | 3-scf00136 | 3  |
| AX-157680456 | 6 | 55.698 |            | 383     | scf00140   | UN |
| AX-157997959 | 6 | 55.758 | KV452782.1 | 5407298 | 3-scf00136 | 3  |
| AX-157996861 | 6 | 55.807 | KV452782.1 | 4272624 | 3-scf00136 | 3  |
| AX-157997485 | 6 | 55.807 | KV452782.1 | 4827254 | 3-scf00136 | 3  |
| AX-158379637 | 6 | 55.807 | KV452782.1 | 5095414 | 3-scf00136 | 3  |
| AX-157756279 | 6 | 55.807 | KV452782.1 | 5239309 | 3-scf00136 | 3  |
| AX-157724204 | 6 | 55.807 | KV452782.1 | 5286013 | 3-scf00136 | 3  |
| AX-158390676 | 6 | 55.807 | KV452782.1 | 5330136 | 3-scf00136 | 3  |
| AX-157997873 | 6 | 55.807 | KV452782.1 | 5343823 | 3-scf00136 | 3  |
| AX-157997890 | 6 | 55.807 | KV452782.1 | 5357795 | 3-scf00136 | 3  |
| AX-157997897 | 6 | 55.807 | KV452782.1 | 5361052 | 3-scf00136 | 3  |



|              |   |        |            |         |            |   |
|--------------|---|--------|------------|---------|------------|---|
| AX-157875970 | 6 | 55.807 | KV452782.1 | 5371174 | 3-scf00136 | 3 |
| AX-157997958 | 6 | 55.807 | KV452782.1 | 5406382 | 3-scf00136 | 3 |
| AX-157757820 | 6 | 55.807 | KV452782.1 | 5410099 | 3-scf00136 | 3 |
| AX-157997967 | 6 | 55.807 | KV452782.1 | 5412411 | 3-scf00136 | 3 |
| AX-157997969 | 6 | 55.807 | KV452782.1 | 5413817 | 3-scf00136 | 3 |
| AX-157997971 | 6 | 55.807 | KV452782.1 | 5414461 | 3-scf00136 | 3 |
| AX-157997973 | 6 | 55.807 | KV452782.1 | 5414817 | 3-scf00136 | 3 |
| AX-157997974 | 6 | 55.807 | KV452782.1 | 5415728 | 3-scf00136 | 3 |
| AX-157997976 | 6 | 55.807 | KV452782.1 | 5418805 | 3-scf00136 | 3 |
| AX-157997978 | 6 | 55.807 | KV452782.1 | 5419443 | 3-scf00136 | 3 |
| AX-157997986 | 6 | 55.807 | KV452782.1 | 5428836 | 3-scf00136 | 3 |
| AX-157997994 | 6 | 55.807 | KV452782.1 | 5440354 | 3-scf00136 | 3 |
| AX-158383401 | 6 | 55.807 | KV452782.1 | 5441637 | 3-scf00136 | 3 |
| AX-157884676 | 6 | 55.807 | KV452782.1 | 5444048 | 3-scf00136 | 3 |
| AX-157997998 | 6 | 55.807 | KV452782.1 | 5444804 | 3-scf00136 | 3 |
| AX-157998000 | 6 | 55.807 | KV452782.1 | 5445657 | 3-scf00136 | 3 |
| AX-157998001 | 6 | 55.807 | KV452782.1 | 5447257 | 3-scf00136 | 3 |
| AX-157998002 | 6 | 55.807 | KV452782.1 | 5449018 | 3-scf00136 | 3 |
| AX-157819003 | 6 | 55.807 | KV452782.1 | 5451530 | 3-scf00136 | 3 |
| AX-157998005 | 6 | 55.807 | KV452782.1 | 5453669 | 3-scf00136 | 3 |
| AX-157998008 | 6 | 55.807 | KV452782.1 | 5454527 | 3-scf00136 | 3 |
| AX-157998010 | 6 | 55.807 | KV452782.1 | 5457710 | 3-scf00136 | 3 |
| AX-157998011 | 6 | 55.807 | KV452782.1 | 5458713 | 3-scf00136 | 3 |
| AX-157998013 | 6 | 55.807 | KV452782.1 | 5460863 | 3-scf00136 | 3 |
| AX-157998019 | 6 | 55.807 | KV452782.1 | 5466516 | 3-scf00136 | 3 |
| AX-158383402 | 6 | 55.807 | KV452782.1 | 5467926 | 3-scf00136 | 3 |
| AX-157998020 | 6 | 55.807 | KV452782.1 | 5468088 | 3-scf00136 | 3 |
| AX-157998022 | 6 | 55.807 | KV452782.1 | 5469530 | 3-scf00136 | 3 |
| AX-157998029 | 6 | 55.807 | KV452782.1 | 5472183 | 3-scf00136 | 3 |
| AX-157998032 | 6 | 55.807 | KV452782.1 | 5476927 | 3-scf00136 | 3 |
| AX-157998033 | 6 | 55.807 | KV452782.1 | 5478923 | 3-scf00136 | 3 |
| AX-157758915 | 6 | 55.807 | KV452782.1 | 5479203 | 3-scf00136 | 3 |
| AX-157998040 | 6 | 55.807 | KV452782.1 | 5482187 | 3-scf00136 | 3 |
| AX-157998043 | 6 | 55.807 | KV452782.1 | 5485062 | 3-scf00136 | 3 |
| AX-157998046 | 6 | 55.807 | KV452782.1 | 5488830 | 3-scf00136 | 3 |
| AX-157998047 | 6 | 55.807 | KV452782.1 | 5490400 | 3-scf00136 | 3 |
| AX-157998049 | 6 | 55.807 | KV452782.1 | 5492548 | 3-scf00136 | 3 |
| AX-157998057 | 6 | 55.807 | KV452782.1 | 5495738 | 3-scf00136 | 3 |
| AX-157998066 | 6 | 55.807 | KV452782.1 | 5500978 | 3-scf00136 | 3 |
| AX-157998067 | 6 | 55.807 | KV452782.1 | 5501276 | 3-scf00136 | 3 |
| AX-157998090 | 6 | 55.807 | KV452782.1 | 5518339 | 3-scf00136 | 3 |
| AX-157998096 | 6 | 55.807 | KV452782.1 | 5523965 | 3-scf00136 | 3 |
| AX-157865164 | 6 | 55.807 | KV452782.1 | 5527060 | 3-scf00136 | 3 |
| AX-157998102 | 6 | 55.807 | KV452782.1 | 5527720 | 3-scf00136 | 3 |
| AX-157998145 | 6 | 55.807 | KV452782.1 | 5558504 | 3-scf00136 | 3 |
| AX-157998152 | 6 | 55.807 | KV452782.1 | 5564984 | 3-scf00136 | 3 |
| AX-157998158 | 6 | 55.807 | KV452782.1 | 5571615 | 3-scf00136 | 3 |
| AX-157998164 | 6 | 55.807 | KV452782.1 | 5575071 | 3-scf00136 | 3 |
| AX-157715919 | 6 | 55.807 | KV452782.1 | 5585901 | 3-scf00136 | 3 |
| AX-157998166 | 6 | 55.807 | KV452782.1 | 5586106 | 3-scf00136 | 3 |
| AX-157720281 | 6 | 55.807 | KV452782.1 | 5586839 | 3-scf00136 | 3 |

|              |   |        |             |         |            |    |
|--------------|---|--------|-------------|---------|------------|----|
| AX-158379639 | 6 | 55.807 | KV452782.1  | 5586981 | 3-scf00136 | 3  |
| AX-157884683 | 6 | 55.807 | KV452782.1  | 5588919 | 3-scf00136 | 3  |
| AX-157998179 | 6 | 55.807 | KV452782.1  | 5598690 | 3-scf00136 | 3  |
| AX-157998194 | 6 | 55.807 | KV452782.1  | 5619254 | 3-scf00136 | 3  |
| AX-157998196 | 6 | 55.807 | KV452782.1  | 5620092 | 3-scf00136 | 3  |
| AX-157998204 | 6 | 55.807 | KV452782.1  | 5632751 | 3-scf00136 | 3  |
| AX-157998210 | 6 | 55.807 | KV452782.1  | 5640484 | 3-scf00136 | 3  |
| AX-157855814 | 6 | 55.807 | KV452782.1  | 5640856 | 3-scf00136 | 3  |
| AX-158383406 | 6 | 55.807 | KV452782.1  | 5646798 | 3-scf00136 | 3  |
| AX-157998228 | 6 | 55.807 | KV452782.1  | 5663690 | 3-scf00136 | 3  |
| AX-157998231 | 6 | 55.807 | KV452782.1  | 5669757 | 3-scf00136 | 3  |
| AX-157754885 | 6 | 55.807 | KV452782.1  | 5718384 | 3-scf00136 | 3  |
| AX-157998275 | 6 | 55.807 | KV452782.1  | 5726550 | 3-scf00136 | 3  |
| AX-157819009 | 6 | 55.807 | KV452782.1  | 5735820 | 3-scf00136 | 3  |
| AX-157998304 | 6 | 55.807 | KV452782.1  | 5750548 | 3-scf00136 | 3  |
| AX-157819014 | 6 | 55.807 | KV452782.1  | 5795571 | 3-scf00136 | 3  |
| AX-157998351 | 6 | 55.807 | KV452782.1  | 5834485 | 3-scf00136 | 3  |
| AX-157998354 | 6 | 55.807 | KV452782.1  | 5836873 | 3-scf00136 | 3  |
| AX-157998364 | 6 | 55.807 | KV452782.1  | 5844639 | 3-scf00136 | 3  |
| AX-157998370 | 6 | 55.807 | KV452782.1  | 5847906 | 3-scf00136 | 3  |
| AX-157704729 | 6 | 55.807 | 3ML01027171 | 1336    | scf02776_1 | UN |
| AX-157682125 | 6 | 55.807 |             | 154     | scf11279   | UN |
| AX-157996811 | 6 | 56.025 | KV452782.1  | 4218157 | 3-scf00136 | 3  |
| AX-157996956 | 6 | 56.025 | KV452782.1  | 4337261 | 3-scf00136 | 3  |
| AX-157997515 | 6 | 56.025 | KV452782.1  | 4849502 | 3-scf00136 | 3  |
| AX-157997611 | 6 | 56.025 | KV452782.1  | 4967095 | 3-scf00136 | 3  |
| AX-157997672 | 6 | 56.025 | KV452782.1  | 5156177 | 3-scf00136 | 3  |
| AX-157998015 | 6 | 56.025 | KV452782.1  | 5462848 | 3-scf00136 | 3  |
| AX-157819008 | 6 | 56.025 | KV452782.1  | 5611991 | 3-scf00136 | 3  |
| AX-157998193 | 6 | 56.025 | KV452782.1  | 5617144 | 3-scf00136 | 3  |
| AX-157998198 | 6 | 56.025 | KV452782.1  | 5622581 | 3-scf00136 | 3  |
| AX-157738055 | 6 | 56.025 | KV452782.1  | 5625789 | 3-scf00136 | 3  |
| AX-157855813 | 6 | 56.025 | KV452782.1  | 5626902 | 3-scf00136 | 3  |
| AX-157998200 | 6 | 56.025 | KV452782.1  | 5627144 | 3-scf00136 | 3  |
| AX-157998201 | 6 | 56.025 | KV452782.1  | 5629162 | 3-scf00136 | 3  |
| AX-157998218 | 6 | 56.025 | KV452782.1  | 5649436 | 3-scf00136 | 3  |
| AX-157998222 | 6 | 56.025 | KV452782.1  | 5651741 | 3-scf00136 | 3  |
| AX-157998229 | 6 | 56.025 | KV452782.1  | 5665374 | 3-scf00136 | 3  |
| AX-157998232 | 6 | 56.025 | KV452782.1  | 5672287 | 3-scf00136 | 3  |
| AX-157998239 | 6 | 56.025 | KV452782.1  | 5678933 | 3-scf00136 | 3  |
| AX-157998240 | 6 | 56.025 | KV452782.1  | 5679606 | 3-scf00136 | 3  |
| AX-157998242 | 6 | 56.025 | KV452782.1  | 5682846 | 3-scf00136 | 3  |
| AX-157998262 | 6 | 56.025 | KV452782.1  | 5707597 | 3-scf00136 | 3  |
| AX-157998264 | 6 | 56.025 | KV452782.1  | 5711545 | 3-scf00136 | 3  |
| AX-157998266 | 6 | 56.025 | KV452782.1  | 5713159 | 3-scf00136 | 3  |
| AX-158383411 | 6 | 56.025 | KV452782.1  | 5717384 | 3-scf00136 | 3  |
| AX-157998280 | 6 | 56.025 | KV452782.1  | 5728746 | 3-scf00136 | 3  |
| AX-157998281 | 6 | 56.025 | KV452782.1  | 5729493 | 3-scf00136 | 3  |
| AX-157998283 | 6 | 56.025 | KV452782.1  | 5730317 | 3-scf00136 | 3  |
| AX-157774317 | 6 | 56.025 | KV452782.1  | 5742283 | 3-scf00136 | 3  |
| AX-157998297 | 6 | 56.025 | KV452782.1  | 5743497 | 3-scf00136 | 3  |

|              |   |        |            |         |            |   |
|--------------|---|--------|------------|---------|------------|---|
| AX-157998303 | 6 | 56.025 | KV452782.1 | 5747403 | 3-scf00136 | 3 |
| AX-157998307 | 6 | 56.025 | KV452782.1 | 5756342 | 3-scf00136 | 3 |
| AX-157998310 | 6 | 56.025 | KV452782.1 | 5758043 | 3-scf00136 | 3 |
| AX-157998311 | 6 | 56.025 | KV452782.1 | 5761892 | 3-scf00136 | 3 |
| AX-157998315 | 6 | 56.025 | KV452782.1 | 5773159 | 3-scf00136 | 3 |
| AX-157998316 | 6 | 56.025 | KV452782.1 | 5773609 | 3-scf00136 | 3 |
| AX-157998332 | 6 | 56.025 | KV452782.1 | 5795441 | 3-scf00136 | 3 |
| AX-157744084 | 6 | 56.025 | KV452782.1 | 5797096 | 3-scf00136 | 3 |
| AX-157998342 | 6 | 56.025 | KV452782.1 | 5824308 | 3-scf00136 | 3 |
| AX-157998345 | 6 | 56.025 | KV452782.1 | 5828104 | 3-scf00136 | 3 |
| AX-157746858 | 6 | 56.025 | KV452782.1 | 5832850 | 3-scf00136 | 3 |
| AX-157998350 | 6 | 56.025 | KV452782.1 | 5833729 | 3-scf00136 | 3 |
| AX-157998352 | 6 | 56.025 | KV452782.1 | 5835840 | 3-scf00136 | 3 |
| AX-157998355 | 6 | 56.025 | KV452782.1 | 5837658 | 3-scf00136 | 3 |
| AX-157998356 | 6 | 56.025 | KV452782.1 | 5838940 | 3-scf00136 | 3 |
| AX-157998358 | 6 | 56.025 | KV452782.1 | 5839690 | 3-scf00136 | 3 |
| AX-157998360 | 6 | 56.025 | KV452782.1 | 5843313 | 3-scf00136 | 3 |
| AX-157998362 | 6 | 56.025 | KV452782.1 | 5843829 | 3-scf00136 | 3 |
| AX-157998363 | 6 | 56.025 | KV452782.1 | 5844277 | 3-scf00136 | 3 |
| AX-157998368 | 6 | 56.025 | KV452782.1 | 5846399 | 3-scf00136 | 3 |
| AX-157998377 | 6 | 56.025 | KV452782.1 | 5850995 | 3-scf00136 | 3 |
| AX-157998379 | 6 | 56.025 | KV452782.1 | 5851332 | 3-scf00136 | 3 |
| AX-157998380 | 6 | 56.025 | KV452782.1 | 5852115 | 3-scf00136 | 3 |
| AX-157819016 | 6 | 56.025 | KV452782.1 | 5852870 | 3-scf00136 | 3 |
| AX-157998381 | 6 | 56.025 | KV452782.1 | 5854879 | 3-scf00136 | 3 |
| AX-157998384 | 6 | 56.025 | KV452782.1 | 5856214 | 3-scf00136 | 3 |
| AX-157998549 | 6 | 56.025 | KV452782.1 | 6055342 | 3-scf00136 | 3 |
| AX-157998737 | 6 | 56.025 | KV452782.1 | 6236739 | 3-scf00136 | 3 |
| AX-157998794 | 6 | 56.025 | KV452782.1 | 6297131 | 3-scf00136 | 3 |
| AX-157999934 | 6 | 56.025 | KV452782.1 | 7569050 | 3-scf00136 | 3 |
| AX-157681039 | 6 | 56.025 | KV452801.1 | 3556    | 3-scf01193 | 3 |
| AX-157771999 | 6 | 56.113 | KV452782.1 | 5858280 | 3-scf00136 | 3 |
| AX-157998117 | 6 | 56.244 | KV452782.1 | 5539010 | 3-scf00136 | 3 |
| AX-157998348 | 6 | 56.244 | KV452782.1 | 5831534 | 3-scf00136 | 3 |
| AX-158407392 | 6 | 56.244 | KV452782.1 | 5864988 | 3-scf00136 | 3 |
| AX-157819021 | 6 | 56.244 | KV452782.1 | 5871291 | 3-scf00136 | 3 |
| AX-157998393 | 6 | 56.244 | KV452782.1 | 5872906 | 3-scf00136 | 3 |
| AX-157819023 | 6 | 56.244 | KV452782.1 | 5879785 | 3-scf00136 | 3 |
| AX-157998403 | 6 | 56.244 | KV452782.1 | 5881336 | 3-scf00136 | 3 |
| AX-157819024 | 6 | 56.244 | KV452782.1 | 5881690 | 3-scf00136 | 3 |
| AX-157998406 | 6 | 56.244 | KV452782.1 | 5889252 | 3-scf00136 | 3 |
| AX-157998408 | 6 | 56.244 | KV452782.1 | 5892603 | 3-scf00136 | 3 |
| AX-157998411 | 6 | 56.244 | KV452782.1 | 5899082 | 3-scf00136 | 3 |
| AX-157998415 | 6 | 56.244 | KV452782.1 | 5908164 | 3-scf00136 | 3 |
| AX-157998455 | 6 | 56.244 | KV452782.1 | 5953755 | 3-scf00136 | 3 |
| AX-157855817 | 6 | 56.462 | KV452782.1 | 5910740 | 3-scf00136 | 3 |
| AX-157998418 | 6 | 56.462 | KV452782.1 | 5911831 | 3-scf00136 | 3 |
| AX-157998423 | 6 | 56.462 | KV452782.1 | 5917351 | 3-scf00136 | 3 |
| AX-157998424 | 6 | 56.462 | KV452782.1 | 5917749 | 3-scf00136 | 3 |
| AX-157819031 | 6 | 56.462 | KV452782.1 | 5923175 | 3-scf00136 | 3 |
| AX-157819032 | 6 | 56.462 | KV452782.1 | 5924886 | 3-scf00136 | 3 |

|              |   |        |             |         |            |    |
|--------------|---|--------|-------------|---------|------------|----|
| AX-157998429 | 6 | 56.462 | KV452782.1  | 5926457 | 3-scf00136 | 3  |
| AX-157998432 | 6 | 56.462 | KV452782.1  | 5928479 | 3-scf00136 | 3  |
| AX-157998448 | 6 | 56.462 | KV452782.1  | 5948170 | 3-scf00136 | 3  |
| AX-157998523 | 6 | 56.462 | KV452782.1  | 6022996 | 3-scf00136 | 3  |
| AX-157998435 | 6 | 56.658 | KV452782.1  | 5935920 | 3-scf00136 | 3  |
| AX-157998437 | 6 | 56.658 | KV452782.1  | 5937269 | 3-scf00136 | 3  |
| AX-157998439 | 6 | 56.658 | KV452782.1  | 5941204 | 3-scf00136 | 3  |
| AX-157819033 | 6 | 56.707 | KV452782.1  | 5941463 | 3-scf00136 | 3  |
| AX-157713519 | 6 | 56.87  | KV452782.1  | 5950949 | 3-scf00136 | 3  |
| AX-157998450 | 6 | 56.924 | KV452782.1  | 5949539 | 3-scf00136 | 3  |
| AX-157998458 | 6 | 56.924 | KV452782.1  | 5955327 | 3-scf00136 | 3  |
| AX-157998463 | 6 | 56.924 | KV452782.1  | 5964588 | 3-scf00136 | 3  |
| AX-157998465 | 6 | 56.924 | KV452782.1  | 5965158 | 3-scf00136 | 3  |
| AX-157998467 | 6 | 56.924 | KV452782.1  | 5965482 | 3-scf00136 | 3  |
| AX-157998469 | 6 | 56.924 | KV452782.1  | 5966690 | 3-scf00136 | 3  |
| AX-158378713 | 6 | 56.924 | KV452782.1  | 5978844 | 3-scf00136 | 3  |
| AX-157998474 | 6 | 57.117 | KV452782.1  | 5975708 | 3-scf00136 | 3  |
| AX-157998476 | 6 | 57.117 | KV452782.1  | 5976159 | 3-scf00136 | 3  |
| AX-157819034 | 6 | 57.117 | KV452782.1  | 5980225 | 3-scf00136 | 3  |
| AX-157998483 | 6 | 57.117 | KV452782.1  | 5981551 | 3-scf00136 | 3  |
| AX-157998486 | 6 | 57.117 | KV452782.1  | 5983343 | 3-scf00136 | 3  |
| AX-157998490 | 6 | 57.117 | KV452782.1  | 5984095 | 3-scf00136 | 3  |
| AX-157998494 | 6 | 57.117 | KV452782.1  | 5987784 | 3-scf00136 | 3  |
| AX-157819035 | 6 | 57.117 | KV452782.1  | 5988352 | 3-scf00136 | 3  |
| AX-157999253 | 6 | 57.154 | KV452782.1  | 6770631 | 3-scf00136 | 3  |
| AX-157705404 | 6 | 57.154 | 3ML01029743 | 892     | scf05365_1 | UN |
| AX-157711961 | 6 | 57.187 | 3ML01029743 | 262     | scf05365_1 | UN |
| AX-157998495 | 6 | 57.227 | KV452782.1  | 5993410 | 3-scf00136 | 3  |
| AX-157745037 | 6 | 57.227 | KV452782.1  | 6000433 | 3-scf00136 | 3  |
| AX-157998501 | 6 | 57.227 | KV452782.1  | 6001771 | 3-scf00136 | 3  |
| AX-157998503 | 6 | 57.227 | KV452782.1  | 6002311 | 3-scf00136 | 3  |
| AX-158407394 | 6 | 57.227 | KV452782.1  | 6005909 | 3-scf00136 | 3  |
| AX-157819036 | 6 | 57.227 | KV452782.1  | 6008440 | 3-scf00136 | 3  |
| AX-157998509 | 6 | 57.227 | KV452782.1  | 6008762 | 3-scf00136 | 3  |
| AX-157998286 | 6 | 57.502 | KV452782.1  | 5737096 | 3-scf00136 | 3  |
| AX-157819019 | 6 | 57.502 | KV452782.1  | 5859339 | 3-scf00136 | 3  |
| AX-157998387 | 6 | 57.502 | KV452782.1  | 5859426 | 3-scf00136 | 3  |
| AX-157819027 | 6 | 57.502 | KV452782.1  | 5908633 | 3-scf00136 | 3  |
| AX-157998426 | 6 | 57.502 | KV452782.1  | 5923220 | 3-scf00136 | 3  |
| AX-157998525 | 6 | 57.502 | KV452782.1  | 6026396 | 3-scf00136 | 3  |
| AX-157999843 | 6 | 57.502 | KV452782.1  | 7485295 | 3-scf00136 | 3  |
| AX-157855820 | 6 | 57.769 | KV452782.1  | 6028860 | 3-scf00136 | 3  |
| AX-157998531 | 6 | 57.773 | KV452782.1  | 6031532 | 3-scf00136 | 3  |
| AX-157819038 | 6 | 57.773 | KV452782.1  | 6033060 | 3-scf00136 | 3  |
| AX-157998534 | 6 | 57.773 | KV452782.1  | 6035300 | 3-scf00136 | 3  |
| AX-157998535 | 6 | 57.773 | KV452782.1  | 6035953 | 3-scf00136 | 3  |
| AX-157998536 | 6 | 57.773 | KV452782.1  | 6037681 | 3-scf00136 | 3  |
| AX-157998537 | 6 | 57.773 | KV452782.1  | 6038434 | 3-scf00136 | 3  |
| AX-157724036 | 6 | 57.773 | KV452782.1  | 6039821 | 3-scf00136 | 3  |
| AX-157998540 | 6 | 57.773 | KV452782.1  | 6041826 | 3-scf00136 | 3  |
| AX-157998543 | 6 | 57.773 | KV452782.1  | 6043698 | 3-scf00136 | 3  |

|              |   |        |             |         |            |    |
|--------------|---|--------|-------------|---------|------------|----|
| AX-157998544 | 6 | 57.773 | KV452782.1  | 6045532 | 3-scf00136 | 3  |
| AX-157998545 | 6 | 57.773 | KV452782.1  | 6047836 | 3-scf00136 | 3  |
| AX-157998559 | 6 | 57.773 | KV452782.1  | 6065706 | 3-scf00136 | 3  |
| AX-157819040 | 6 | 58.21  | KV452782.1  | 6054710 | 3-scf00136 | 3  |
| AX-157998552 | 6 | 58.21  | KV452782.1  | 6058239 | 3-scf00136 | 3  |
| AX-157713330 | 6 | 58.21  | KV452782.1  | 6058848 | 3-scf00136 | 3  |
| AX-157998553 | 6 | 58.21  | KV452782.1  | 6059209 | 3-scf00136 | 3  |
| AX-157998554 | 6 | 58.21  | KV452782.1  | 6060190 | 3-scf00136 | 3  |
| AX-157998555 | 6 | 58.21  | KV452782.1  | 6061747 | 3-scf00136 | 3  |
| AX-157855822 | 6 | 58.21  | KV452782.1  | 6062300 | 3-scf00136 | 3  |
| AX-157998557 | 6 | 58.21  | KV452782.1  | 6064846 | 3-scf00136 | 3  |
| AX-157998563 | 6 | 58.21  | KV452782.1  | 6069489 | 3-scf00136 | 3  |
| AX-157998564 | 6 | 58.214 | KV452782.1  | 6070431 | 3-scf00136 | 3  |
| AX-157998574 | 6 | 58.698 | KV452782.1  | 6077534 | 3-scf00136 | 3  |
| AX-157998575 | 6 | 58.702 | KV452782.1  | 6078274 | 3-scf00136 | 3  |
| AX-157998583 | 6 | 58.702 | KV452782.1  | 6088258 | 3-scf00136 | 3  |
| AX-157706512 | 6 | 58.702 | 3ML01032360 | 446     | scf07976_1 | UN |
| AX-157998571 | 6 | 58.865 | KV452782.1  | 6075851 | 3-scf00136 | 3  |
| AX-157998584 | 6 | 58.865 | KV452782.1  | 6090215 | 3-scf00136 | 3  |
| AX-157998586 | 6 | 58.865 | KV452782.1  | 6091412 | 3-scf00136 | 3  |
| AX-157998588 | 6 | 58.865 | KV452782.1  | 6092068 | 3-scf00136 | 3  |
| AX-157998593 | 6 | 58.865 | KV452782.1  | 6100439 | 3-scf00136 | 3  |
| AX-157998594 | 6 | 58.865 | KV452782.1  | 6101593 | 3-scf00136 | 3  |
| AX-157998596 | 6 | 58.865 | KV452782.1  | 6103003 | 3-scf00136 | 3  |
| AX-157998601 | 6 | 58.865 | KV452782.1  | 6106221 | 3-scf00136 | 3  |
| AX-157998602 | 6 | 58.865 | KV452782.1  | 6108712 | 3-scf00136 | 3  |
| AX-157998607 | 6 | 58.865 | KV452782.1  | 6112203 | 3-scf00136 | 3  |
| AX-157855825 | 6 | 58.865 | KV452782.1  | 6119822 | 3-scf00136 | 3  |
| AX-157819045 | 6 | 58.865 | KV452782.1  | 6121805 | 3-scf00136 | 3  |
| AX-157998624 | 6 | 58.865 | KV452782.1  | 6135644 | 3-scf00136 | 3  |
| AX-157998626 | 6 | 58.865 | KV452782.1  | 6136091 | 3-scf00136 | 3  |
| AX-157998635 | 6 | 58.865 | KV452782.1  | 6151393 | 3-scf00136 | 3  |
| AX-157819049 | 6 | 58.865 | KV452782.1  | 6168379 | 3-scf00136 | 3  |
| AX-157998651 | 6 | 58.865 | KV452782.1  | 6168832 | 3-scf00136 | 3  |
| AX-157998662 | 6 | 58.865 | KV452782.1  | 6180265 | 3-scf00136 | 3  |
| AX-157998663 | 6 | 58.865 | KV452782.1  | 6180963 | 3-scf00136 | 3  |
| AX-157998668 | 6 | 58.865 | KV452782.1  | 6184780 | 3-scf00136 | 3  |
| AX-157998674 | 6 | 58.865 | KV452782.1  | 6190731 | 3-scf00136 | 3  |
| AX-157998676 | 6 | 58.865 | KV452782.1  | 6191376 | 3-scf00136 | 3  |
| AX-157998679 | 6 | 58.865 | KV452782.1  | 6193918 | 3-scf00136 | 3  |
| AX-157998680 | 6 | 58.865 | KV452782.1  | 6195197 | 3-scf00136 | 3  |
| AX-157998682 | 6 | 58.865 | KV452782.1  | 6199604 | 3-scf00136 | 3  |
| AX-157719156 | 6 | 58.865 | KV452782.1  | 6200570 | 3-scf00136 | 3  |
| AX-157998685 | 6 | 58.865 | KV452782.1  | 6201950 | 3-scf00136 | 3  |
| AX-157757706 | 6 | 58.865 | KV452782.1  | 6203009 | 3-scf00136 | 3  |
| AX-157819052 | 6 | 58.865 | KV452782.1  | 6203248 | 3-scf00136 | 3  |
| AX-157998702 | 6 | 58.865 | KV452782.1  | 6216171 | 3-scf00136 | 3  |
| AX-157998708 | 6 | 58.865 | KV452782.1  | 6217547 | 3-scf00136 | 3  |
| AX-157998715 | 6 | 58.865 | KV452782.1  | 6222539 | 3-scf00136 | 3  |
| AX-157998723 | 6 | 58.865 | KV452782.1  | 6225216 | 3-scf00136 | 3  |
| AX-157819054 | 6 | 58.865 | KV452782.1  | 6238561 | 3-scf00136 | 3  |

|              |   |        |            |         |            |   |
|--------------|---|--------|------------|---------|------------|---|
| AX-157998741 | 6 | 58.865 | KV452782.1 | 6242005 | 3-scf00136 | 3 |
| AX-157884693 | 6 | 58.865 | KV452782.1 | 6258958 | 3-scf00136 | 3 |
| AX-157998756 | 6 | 58.865 | KV452782.1 | 6259427 | 3-scf00136 | 3 |
| AX-157998760 | 6 | 58.865 | KV452782.1 | 6263625 | 3-scf00136 | 3 |
| AX-157998764 | 6 | 58.865 | KV452782.1 | 6266064 | 3-scf00136 | 3 |
| AX-157998773 | 6 | 58.865 | KV452782.1 | 6271286 | 3-scf00136 | 3 |
| AX-157998869 | 6 | 58.865 | KV452782.1 | 6357335 | 3-scf00136 | 3 |
| AX-157819059 | 6 | 58.865 | KV452782.1 | 6381418 | 3-scf00136 | 3 |
| AX-157998972 | 6 | 58.865 | KV452782.1 | 6468301 | 3-scf00136 | 3 |
| AX-157999031 | 6 | 58.865 | KV452782.1 | 6519219 | 3-scf00136 | 3 |
| AX-157753881 | 6 | 58.865 | KV452782.1 | 6571132 | 3-scf00136 | 3 |
| AX-157999104 | 6 | 58.865 | KV452782.1 | 6606984 | 3-scf00136 | 3 |
| AX-157999128 | 6 | 58.865 | KV452782.1 | 6619476 | 3-scf00136 | 3 |
| AX-157999130 | 6 | 58.865 | KV452782.1 | 6620765 | 3-scf00136 | 3 |
| AX-157999132 | 6 | 58.865 | KV452782.1 | 6621319 | 3-scf00136 | 3 |
| AX-157999185 | 6 | 58.865 | KV452782.1 | 6690288 | 3-scf00136 | 3 |
| AX-157999234 | 6 | 58.865 | KV452782.1 | 6749582 | 3-scf00136 | 3 |
| AX-157999240 | 6 | 58.865 | KV452782.1 | 6751481 | 3-scf00136 | 3 |
| AX-157999247 | 6 | 58.865 | KV452782.1 | 6762986 | 3-scf00136 | 3 |
| AX-157999269 | 6 | 58.865 | KV452782.1 | 6789345 | 3-scf00136 | 3 |
| AX-157999274 | 6 | 58.865 | KV452782.1 | 6792913 | 3-scf00136 | 3 |
| AX-157999276 | 6 | 58.865 | KV452782.1 | 6793304 | 3-scf00136 | 3 |
| AX-157999297 | 6 | 58.865 | KV452782.1 | 6826234 | 3-scf00136 | 3 |
| AX-157999419 | 6 | 58.865 | KV452782.1 | 6985135 | 3-scf00136 | 3 |
| AX-157999460 | 6 | 58.865 | KV452782.1 | 7080270 | 3-scf00136 | 3 |
| AX-157999501 | 6 | 58.865 | KV452782.1 | 7146713 | 3-scf00136 | 3 |
| AX-157819100 | 6 | 58.865 | KV452782.1 | 7149007 | 3-scf00136 | 3 |
| AX-157999604 | 6 | 58.865 | KV452782.1 | 7278182 | 3-scf00136 | 3 |
| AX-157999817 | 6 | 58.865 | KV452782.1 | 7469134 | 3-scf00136 | 3 |
| AX-157999848 | 6 | 58.865 | KV452782.1 | 7494918 | 3-scf00136 | 3 |
| AX-158000217 | 6 | 58.865 | KV452782.1 | 7876257 | 3-scf00136 | 3 |
| AX-158000221 | 6 | 58.865 | KV452782.1 | 7880938 | 3-scf00136 | 3 |
| AX-158000541 | 6 | 58.865 | KV452782.1 | 8181568 | 3-scf00136 | 3 |
| AX-158000580 | 6 | 58.865 | KV452782.1 | 8206345 | 3-scf00136 | 3 |
| AX-158000582 | 6 | 58.865 | KV452782.1 | 8207726 | 3-scf00136 | 3 |
| AX-158000730 | 6 | 58.865 | KV452782.1 | 8386510 | 3-scf00136 | 3 |
| AX-158000973 | 6 | 58.865 | KV452782.1 | 8660289 | 3-scf00136 | 3 |
| AX-157717008 | 6 | 58.865 | KV452782.1 | 8663187 | 3-scf00136 | 3 |
| AX-158000977 | 6 | 58.865 | KV452782.1 | 8668555 | 3-scf00136 | 3 |
| AX-157998757 | 6 | 58.866 | KV452782.1 | 6260839 | 3-scf00136 | 3 |
| AX-157998772 | 6 | 58.866 | KV452782.1 | 6269765 | 3-scf00136 | 3 |
| AX-157998789 | 6 | 58.866 | KV452782.1 | 6294556 | 3-scf00136 | 3 |
| AX-157998854 | 6 | 58.866 | KV452782.1 | 6348651 | 3-scf00136 | 3 |
| AX-157855838 | 6 | 58.866 | KV452782.1 | 6353656 | 3-scf00136 | 3 |
| AX-157998868 | 6 | 58.866 | KV452782.1 | 6356879 | 3-scf00136 | 3 |
| AX-157855840 | 6 | 58.866 | KV452782.1 | 6369252 | 3-scf00136 | 3 |
| AX-157998883 | 6 | 58.866 | KV452782.1 | 6379138 | 3-scf00136 | 3 |
| AX-157998890 | 6 | 58.866 | KV452782.1 | 6385214 | 3-scf00136 | 3 |
| AX-157998891 | 6 | 58.866 | KV452782.1 | 6385660 | 3-scf00136 | 3 |
| AX-157998910 | 6 | 58.866 | KV452782.1 | 6403407 | 3-scf00136 | 3 |
| AX-157855849 | 6 | 58.866 | KV452782.1 | 6408449 | 3-scf00136 | 3 |

|              |   |        |            |         |            |   |
|--------------|---|--------|------------|---------|------------|---|
| AX-157855856 | 6 | 58.866 | KV452782.1 | 6433989 | 3-scf00136 | 3 |
| AX-157998943 | 6 | 58.866 | KV452782.1 | 6441005 | 3-scf00136 | 3 |
| AX-157998947 | 6 | 58.866 | KV452782.1 | 6444440 | 3-scf00136 | 3 |
| AX-157998956 | 6 | 58.866 | KV452782.1 | 6452902 | 3-scf00136 | 3 |
| AX-157998968 | 6 | 58.866 | KV452782.1 | 6463962 | 3-scf00136 | 3 |
| AX-157998974 | 6 | 58.866 | KV452782.1 | 6469769 | 3-scf00136 | 3 |
| AX-157855899 | 6 | 58.866 | KV452782.1 | 6582741 | 3-scf00136 | 3 |
| AX-157999143 | 6 | 58.866 | KV452782.1 | 6634045 | 3-scf00136 | 3 |
| AX-157855916 | 6 | 58.866 | KV452782.1 | 6871581 | 3-scf00136 | 3 |
| AX-157999411 | 6 | 58.866 | KV452782.1 | 6971580 | 3-scf00136 | 3 |
| AX-157855923 | 6 | 58.866 | KV452782.1 | 6971617 | 3-scf00136 | 3 |
| AX-157855924 | 6 | 58.866 | KV452782.1 | 6976381 | 3-scf00136 | 3 |
| AX-157999416 | 6 | 58.866 | KV452782.1 | 6977722 | 3-scf00136 | 3 |
| AX-157999417 | 6 | 58.866 | KV452782.1 | 6984359 | 3-scf00136 | 3 |
| AX-157855925 | 6 | 58.866 | KV452782.1 | 6986192 | 3-scf00136 | 3 |
| AX-157855926 | 6 | 58.866 | KV452782.1 | 6996437 | 3-scf00136 | 3 |
| AX-157855928 | 6 | 58.866 | KV452782.1 | 7024125 | 3-scf00136 | 3 |
| AX-157999436 | 6 | 58.866 | KV452782.1 | 7027556 | 3-scf00136 | 3 |
| AX-157999438 | 6 | 58.866 | KV452782.1 | 7031496 | 3-scf00136 | 3 |
| AX-157999439 | 6 | 58.866 | KV452782.1 | 7035315 | 3-scf00136 | 3 |
| AX-157855929 | 6 | 58.866 | KV452782.1 | 7047143 | 3-scf00136 | 3 |
| AX-157819094 | 6 | 58.866 | KV452782.1 | 7061664 | 3-scf00136 | 3 |
| AX-157999447 | 6 | 58.866 | KV452782.1 | 7062807 | 3-scf00136 | 3 |
| AX-157999448 | 6 | 58.866 | KV452782.1 | 7063438 | 3-scf00136 | 3 |
| AX-157999449 | 6 | 58.866 | KV452782.1 | 7063899 | 3-scf00136 | 3 |
| AX-157999451 | 6 | 58.866 | KV452782.1 | 7067360 | 3-scf00136 | 3 |
| AX-157999452 | 6 | 58.866 | KV452782.1 | 7067891 | 3-scf00136 | 3 |
| AX-157999453 | 6 | 58.866 | KV452782.1 | 7072381 | 3-scf00136 | 3 |
| AX-157999456 | 6 | 58.866 | KV452782.1 | 7076939 | 3-scf00136 | 3 |
| AX-157999457 | 6 | 58.866 | KV452782.1 | 7077465 | 3-scf00136 | 3 |
| AX-157999459 | 6 | 58.866 | KV452782.1 | 7078356 | 3-scf00136 | 3 |
| AX-157999670 | 6 | 58.866 | KV452782.1 | 7341099 | 3-scf00136 | 3 |
| AX-157999941 | 6 | 58.866 | KV452782.1 | 7579314 | 3-scf00136 | 3 |
| AX-157819141 | 6 | 58.866 | KV452782.1 | 7704850 | 3-scf00136 | 3 |
| AX-157876031 | 6 | 58.866 | KV452782.1 | 7791245 | 3-scf00136 | 3 |
| AX-157855861 | 6 | 58.889 | KV452782.1 | 6471411 | 3-scf00136 | 3 |
| AX-157998991 | 6 | 58.909 | KV452782.1 | 6483868 | 3-scf00136 | 3 |
| AX-158407397 | 6 | 58.928 | KV452782.1 | 6358398 | 3-scf00136 | 3 |
| AX-157999036 | 6 | 58.928 | KV452782.1 | 6522874 | 3-scf00136 | 3 |
| AX-157999068 | 6 | 58.928 | KV452782.1 | 6567113 | 3-scf00136 | 3 |
| AX-157999321 | 6 | 58.928 | KV452782.1 | 6845061 | 3-scf00136 | 3 |
| AX-157999326 | 6 | 58.928 | KV452782.1 | 6849490 | 3-scf00136 | 3 |
| AX-157855917 | 6 | 58.928 | KV452782.1 | 6891964 | 3-scf00136 | 3 |
| AX-157999044 | 6 | 58.947 | KV452782.1 | 6542329 | 3-scf00136 | 3 |
| AX-157999074 | 6 | 58.986 | KV452782.1 | 6572933 | 3-scf00136 | 3 |
| AX-157855898 | 6 | 59.023 | KV452782.1 | 6580897 | 3-scf00136 | 3 |
| AX-157999082 | 6 | 59.061 | KV452782.1 | 6582080 | 3-scf00136 | 3 |
| AX-157997472 | 6 | 59.098 | KV452782.1 | 4807965 | 3-scf00136 | 3 |
| AX-157875980 | 6 | 59.098 | KV452782.1 | 6079965 | 3-scf00136 | 3 |
| AX-157998776 | 6 | 59.098 | KV452782.1 | 6277382 | 3-scf00136 | 3 |
| AX-157998780 | 6 | 59.098 | KV452782.1 | 6284655 | 3-scf00136 | 3 |

|              |   |        |            |         |            |   |
|--------------|---|--------|------------|---------|------------|---|
| AX-157998785 | 6 | 59.098 | KV452782.1 | 6292596 | 3-scf00136 | 3 |
| AX-157998788 | 6 | 59.098 | KV452782.1 | 6292985 | 3-scf00136 | 3 |
| AX-157998887 | 6 | 59.098 | KV452782.1 | 6381260 | 3-scf00136 | 3 |
| AX-157999091 | 6 | 59.098 | KV452782.1 | 6591021 | 3-scf00136 | 3 |
| AX-157819105 | 6 | 59.098 | KV452782.1 | 7217147 | 3-scf00136 | 3 |
| AX-157721617 | 6 | 59.135 | KV452782.1 | 6598507 | 3-scf00136 | 3 |
| AX-157999116 | 6 | 59.161 | KV452782.1 | 6611546 | 3-scf00136 | 3 |
| AX-157998567 | 6 | 59.193 | KV452782.1 | 6073692 | 3-scf00136 | 3 |
| AX-157998579 | 6 | 59.193 | KV452782.1 | 6086503 | 3-scf00136 | 3 |
| AX-157998581 | 6 | 59.193 | KV452782.1 | 6086991 | 3-scf00136 | 3 |
| AX-157998599 | 6 | 59.193 | KV452782.1 | 6104859 | 3-scf00136 | 3 |
| AX-157998605 | 6 | 59.193 | KV452782.1 | 6110932 | 3-scf00136 | 3 |
| AX-157998612 | 6 | 59.193 | KV452782.1 | 6116819 | 3-scf00136 | 3 |
| AX-157998613 | 6 | 59.193 | KV452782.1 | 6117658 | 3-scf00136 | 3 |
| AX-157819043 | 6 | 59.193 | KV452782.1 | 6120257 | 3-scf00136 | 3 |
| AX-157819046 | 6 | 59.193 | KV452782.1 | 6127106 | 3-scf00136 | 3 |
| AX-157998621 | 6 | 59.193 | KV452782.1 | 6131210 | 3-scf00136 | 3 |
| AX-157998629 | 6 | 59.193 | KV452782.1 | 6137013 | 3-scf00136 | 3 |
| AX-157998630 | 6 | 59.193 | KV452782.1 | 6137416 | 3-scf00136 | 3 |
| AX-157703822 | 6 | 59.193 | KV452782.1 | 6144960 | 3-scf00136 | 3 |
| AX-157998631 | 6 | 59.193 | KV452782.1 | 6145335 | 3-scf00136 | 3 |
| AX-157998632 | 6 | 59.193 | KV452782.1 | 6145832 | 3-scf00136 | 3 |
| AX-157998637 | 6 | 59.193 | KV452782.1 | 6156142 | 3-scf00136 | 3 |
| AX-157998653 | 6 | 59.193 | KV452782.1 | 6171826 | 3-scf00136 | 3 |
| AX-157998660 | 6 | 59.193 | KV452782.1 | 6179869 | 3-scf00136 | 3 |
| AX-157998671 | 6 | 59.193 | KV452782.1 | 6189358 | 3-scf00136 | 3 |
| AX-157998673 | 6 | 59.193 | KV452782.1 | 6189701 | 3-scf00136 | 3 |
| AX-157741812 | 6 | 59.193 | KV452782.1 | 6197697 | 3-scf00136 | 3 |
| AX-157819051 | 6 | 59.193 | KV452782.1 | 6198078 | 3-scf00136 | 3 |
| AX-157998681 | 6 | 59.193 | KV452782.1 | 6198332 | 3-scf00136 | 3 |
| AX-157998714 | 6 | 59.193 | KV452782.1 | 6220875 | 3-scf00136 | 3 |
| AX-157998734 | 6 | 59.193 | KV452782.1 | 6233893 | 3-scf00136 | 3 |
| AX-157998747 | 6 | 59.193 | KV452782.1 | 6246758 | 3-scf00136 | 3 |
| AX-157998753 | 6 | 59.193 | KV452782.1 | 6256416 | 3-scf00136 | 3 |
| AX-157855826 | 6 | 59.193 | KV452782.1 | 6257342 | 3-scf00136 | 3 |
| AX-157998754 | 6 | 59.193 | KV452782.1 | 6257533 | 3-scf00136 | 3 |
| AX-157855827 | 6 | 59.193 | KV452782.1 | 6257837 | 3-scf00136 | 3 |
| AX-157998767 | 6 | 59.193 | KV452782.1 | 6267127 | 3-scf00136 | 3 |
| AX-157998777 | 6 | 59.193 | KV452782.1 | 6278071 | 3-scf00136 | 3 |
| AX-157998818 | 6 | 59.193 | KV452782.1 | 6323675 | 3-scf00136 | 3 |
| AX-157855831 | 6 | 59.193 | KV452782.1 | 6326619 | 3-scf00136 | 3 |
| AX-157998825 | 6 | 59.193 | KV452782.1 | 6331922 | 3-scf00136 | 3 |
| AX-157998834 | 6 | 59.193 | KV452782.1 | 6335530 | 3-scf00136 | 3 |
| AX-157855832 | 6 | 59.193 | KV452782.1 | 6335974 | 3-scf00136 | 3 |
| AX-157998837 | 6 | 59.193 | KV452782.1 | 6337157 | 3-scf00136 | 3 |
| AX-157998838 | 6 | 59.193 | KV452782.1 | 6337540 | 3-scf00136 | 3 |
| AX-157855833 | 6 | 59.193 | KV452782.1 | 6338260 | 3-scf00136 | 3 |
| AX-157998840 | 6 | 59.193 | KV452782.1 | 6339049 | 3-scf00136 | 3 |
| AX-157755028 | 6 | 59.193 | KV452782.1 | 6339960 | 3-scf00136 | 3 |
| AX-157998843 | 6 | 59.193 | KV452782.1 | 6340821 | 3-scf00136 | 3 |
| AX-157998847 | 6 | 59.193 | KV452782.1 | 6343018 | 3-scf00136 | 3 |



|              |   |        |            |         |            |   |
|--------------|---|--------|------------|---------|------------|---|
| AX-157998851 | 6 | 59.193 | KV452782.1 | 6347112 | 3-scf00136 | 3 |
| AX-157998856 | 6 | 59.193 | KV452782.1 | 6348773 | 3-scf00136 | 3 |
| AX-157998859 | 6 | 59.193 | KV452782.1 | 6349665 | 3-scf00136 | 3 |
| AX-157998861 | 6 | 59.193 | KV452782.1 | 6350291 | 3-scf00136 | 3 |
| AX-157855837 | 6 | 59.193 | KV452782.1 | 6351469 | 3-scf00136 | 3 |
| AX-157708196 | 6 | 59.193 | KV452782.1 | 6353389 | 3-scf00136 | 3 |
| AX-157998864 | 6 | 59.193 | KV452782.1 | 6354724 | 3-scf00136 | 3 |
| AX-157998865 | 6 | 59.193 | KV452782.1 | 6355404 | 3-scf00136 | 3 |
| AX-157855839 | 6 | 59.193 | KV452782.1 | 6359197 | 3-scf00136 | 3 |
| AX-157998871 | 6 | 59.193 | KV452782.1 | 6364715 | 3-scf00136 | 3 |
| AX-157757708 | 6 | 59.193 | KV452782.1 | 6370940 | 3-scf00136 | 3 |
| AX-157998874 | 6 | 59.193 | KV452782.1 | 6371612 | 3-scf00136 | 3 |
| AX-157855841 | 6 | 59.193 | KV452782.1 | 6371944 | 3-scf00136 | 3 |
| AX-157998876 | 6 | 59.193 | KV452782.1 | 6374542 | 3-scf00136 | 3 |
| AX-157855843 | 6 | 59.193 | KV452782.1 | 6374652 | 3-scf00136 | 3 |
| AX-157998879 | 6 | 59.193 | KV452782.1 | 6375503 | 3-scf00136 | 3 |
| AX-157998881 | 6 | 59.193 | KV452782.1 | 6377978 | 3-scf00136 | 3 |
| AX-158407398 | 6 | 59.193 | KV452782.1 | 6381757 | 3-scf00136 | 3 |
| AX-158407401 | 6 | 59.193 | KV452782.1 | 6382867 | 3-scf00136 | 3 |
| AX-158407402 | 6 | 59.193 | KV452782.1 | 6391923 | 3-scf00136 | 3 |
| AX-157855847 | 6 | 59.193 | KV452782.1 | 6402039 | 3-scf00136 | 3 |
| AX-157998913 | 6 | 59.193 | KV452782.1 | 6404445 | 3-scf00136 | 3 |
| AX-157855848 | 6 | 59.193 | KV452782.1 | 6406257 | 3-scf00136 | 3 |
| AX-157998918 | 6 | 59.193 | KV452782.1 | 6412259 | 3-scf00136 | 3 |
| AX-157998920 | 6 | 59.193 | KV452782.1 | 6420544 | 3-scf00136 | 3 |
| AX-157723816 | 6 | 59.193 | KV452782.1 | 6420936 | 3-scf00136 | 3 |
| AX-157998925 | 6 | 59.193 | KV452782.1 | 6427056 | 3-scf00136 | 3 |
| AX-157855855 | 6 | 59.193 | KV452782.1 | 6429820 | 3-scf00136 | 3 |
| AX-157998926 | 6 | 59.193 | KV452782.1 | 6430261 | 3-scf00136 | 3 |
| AX-157998933 | 6 | 59.193 | KV452782.1 | 6433909 | 3-scf00136 | 3 |
| AX-157855857 | 6 | 59.193 | KV452782.1 | 6434404 | 3-scf00136 | 3 |
| AX-157998942 | 6 | 59.193 | KV452782.1 | 6440473 | 3-scf00136 | 3 |
| AX-157998945 | 6 | 59.193 | KV452782.1 | 6442356 | 3-scf00136 | 3 |
| AX-157998949 | 6 | 59.193 | KV452782.1 | 6445188 | 3-scf00136 | 3 |
| AX-157998957 | 6 | 59.193 | KV452782.1 | 6453402 | 3-scf00136 | 3 |
| AX-157998959 | 6 | 59.193 | KV452782.1 | 6454402 | 3-scf00136 | 3 |
| AX-157998961 | 6 | 59.193 | KV452782.1 | 6454953 | 3-scf00136 | 3 |
| AX-157771523 | 6 | 59.193 | KV452782.1 | 6460530 | 3-scf00136 | 3 |
| AX-157998970 | 6 | 59.193 | KV452782.1 | 6464715 | 3-scf00136 | 3 |
| AX-158407406 | 6 | 59.193 | KV452782.1 | 6466653 | 3-scf00136 | 3 |
| AX-158390692 | 6 | 59.193 | KV452782.1 | 6471907 | 3-scf00136 | 3 |
| AX-157998975 | 6 | 59.193 | KV452782.1 | 6472365 | 3-scf00136 | 3 |
| AX-157998980 | 6 | 59.193 | KV452782.1 | 6476288 | 3-scf00136 | 3 |
| AX-157855866 | 6 | 59.193 | KV452782.1 | 6477999 | 3-scf00136 | 3 |
| AX-157855868 | 6 | 59.193 | KV452782.1 | 6478686 | 3-scf00136 | 3 |
| AX-157998988 | 6 | 59.193 | KV452782.1 | 6482025 | 3-scf00136 | 3 |
| AX-157998992 | 6 | 59.193 | KV452782.1 | 6487411 | 3-scf00136 | 3 |
| AX-157998996 | 6 | 59.193 | KV452782.1 | 6491335 | 3-scf00136 | 3 |
| AX-157998998 | 6 | 59.193 | KV452782.1 | 6492282 | 3-scf00136 | 3 |
| AX-157998999 | 6 | 59.193 | KV452782.1 | 6493190 | 3-scf00136 | 3 |
| AX-157999004 | 6 | 59.193 | KV452782.1 | 6497045 | 3-scf00136 | 3 |

|              |   |        |            |         |            |   |
|--------------|---|--------|------------|---------|------------|---|
| AX-157696496 | 6 | 59.193 | KV452782.1 | 6499809 | 3-scf00136 | 3 |
| AX-157999017 | 6 | 59.193 | KV452782.1 | 6504821 | 3-scf00136 | 3 |
| AX-157999019 | 6 | 59.193 | KV452782.1 | 6508375 | 3-scf00136 | 3 |
| AX-158390693 | 6 | 59.193 | KV452782.1 | 6511451 | 3-scf00136 | 3 |
| AX-157999034 | 6 | 59.193 | KV452782.1 | 6520543 | 3-scf00136 | 3 |
| AX-158415770 | 6 | 59.193 | KV452782.1 | 6523546 | 3-scf00136 | 3 |
| AX-157855877 | 6 | 59.193 | KV452782.1 | 6524313 | 3-scf00136 | 3 |
| AX-157855878 | 6 | 59.193 | KV452782.1 | 6533128 | 3-scf00136 | 3 |
| AX-157855879 | 6 | 59.193 | KV452782.1 | 6533279 | 3-scf00136 | 3 |
| AX-157875988 | 6 | 59.193 | KV452782.1 | 6534619 | 3-scf00136 | 3 |
| AX-157855881 | 6 | 59.193 | KV452782.1 | 6536986 | 3-scf00136 | 3 |
| AX-157999043 | 6 | 59.193 | KV452782.1 | 6540875 | 3-scf00136 | 3 |
| AX-157855883 | 6 | 59.193 | KV452782.1 | 6542679 | 3-scf00136 | 3 |
| AX-157999047 | 6 | 59.193 | KV452782.1 | 6545010 | 3-scf00136 | 3 |
| AX-157855887 | 6 | 59.193 | KV452782.1 | 6545221 | 3-scf00136 | 3 |
| AX-157999052 | 6 | 59.193 | KV452782.1 | 6552217 | 3-scf00136 | 3 |
| AX-158407407 | 6 | 59.193 | KV452782.1 | 6553734 | 3-scf00136 | 3 |
| AX-157999060 | 6 | 59.193 | KV452782.1 | 6557889 | 3-scf00136 | 3 |
| AX-157999063 | 6 | 59.193 | KV452782.1 | 6560977 | 3-scf00136 | 3 |
| AX-157855895 | 6 | 59.193 | KV452782.1 | 6568527 | 3-scf00136 | 3 |
| AX-157855896 | 6 | 59.193 | KV452782.1 | 6569303 | 3-scf00136 | 3 |
| AX-157999077 | 6 | 59.193 | KV452782.1 | 6574996 | 3-scf00136 | 3 |
| AX-157999085 | 6 | 59.193 | KV452782.1 | 6584612 | 3-scf00136 | 3 |
| AX-157770973 | 6 | 59.193 | KV452782.1 | 6585531 | 3-scf00136 | 3 |
| AX-157999090 | 6 | 59.193 | KV452782.1 | 6590721 | 3-scf00136 | 3 |
| AX-157999092 | 6 | 59.193 | KV452782.1 | 6594439 | 3-scf00136 | 3 |
| AX-157819062 | 6 | 59.193 | KV452782.1 | 6595836 | 3-scf00136 | 3 |
| AX-157999095 | 6 | 59.193 | KV452782.1 | 6598701 | 3-scf00136 | 3 |
| AX-157999096 | 6 | 59.193 | KV452782.1 | 6599276 | 3-scf00136 | 3 |
| AX-157999099 | 6 | 59.193 | KV452782.1 | 6603763 | 3-scf00136 | 3 |
| AX-157999107 | 6 | 59.193 | KV452782.1 | 6609396 | 3-scf00136 | 3 |
| AX-157999119 | 6 | 59.193 | KV452782.1 | 6613487 | 3-scf00136 | 3 |
| AX-157999121 | 6 | 59.193 | KV452782.1 | 6614774 | 3-scf00136 | 3 |
| AX-157999137 | 6 | 59.193 | KV452782.1 | 6623757 | 3-scf00136 | 3 |
| AX-157999147 | 6 | 59.193 | KV452782.1 | 6637082 | 3-scf00136 | 3 |
| AX-157999150 | 6 | 59.193 | KV452782.1 | 6638931 | 3-scf00136 | 3 |
| AX-157999151 | 6 | 59.193 | KV452782.1 | 6641345 | 3-scf00136 | 3 |
| AX-157999152 | 6 | 59.193 | KV452782.1 | 6642655 | 3-scf00136 | 3 |
| AX-157999154 | 6 | 59.193 | KV452782.1 | 6643498 | 3-scf00136 | 3 |
| AX-157722748 | 6 | 59.193 | KV452782.1 | 6651436 | 3-scf00136 | 3 |
| AX-157999159 | 6 | 59.193 | KV452782.1 | 6657413 | 3-scf00136 | 3 |
| AX-157999167 | 6 | 59.193 | KV452782.1 | 6666596 | 3-scf00136 | 3 |
| AX-157999169 | 6 | 59.193 | KV452782.1 | 6667712 | 3-scf00136 | 3 |
| AX-157999172 | 6 | 59.193 | KV452782.1 | 6672370 | 3-scf00136 | 3 |
| AX-157999173 | 6 | 59.193 | KV452782.1 | 6675448 | 3-scf00136 | 3 |
| AX-157999174 | 6 | 59.193 | KV452782.1 | 6677033 | 3-scf00136 | 3 |
| AX-157819066 | 6 | 59.193 | KV452782.1 | 6679474 | 3-scf00136 | 3 |
| AX-157999175 | 6 | 59.193 | KV452782.1 | 6679625 | 3-scf00136 | 3 |
| AX-157999183 | 6 | 59.193 | KV452782.1 | 6687645 | 3-scf00136 | 3 |
| AX-157999184 | 6 | 59.193 | KV452782.1 | 6688222 | 3-scf00136 | 3 |
| AX-157855907 | 6 | 59.193 | KV452782.1 | 6689905 | 3-scf00136 | 3 |

|              |   |        |            |         |            |   |
|--------------|---|--------|------------|---------|------------|---|
| AX-157999192 | 6 | 59.193 | KV452782.1 | 6694231 | 3-scf00136 | 3 |
| AX-157999196 | 6 | 59.193 | KV452782.1 | 6695348 | 3-scf00136 | 3 |
| AX-157999197 | 6 | 59.193 | KV452782.1 | 6696603 | 3-scf00136 | 3 |
| AX-157999198 | 6 | 59.193 | KV452782.1 | 6697405 | 3-scf00136 | 3 |
| AX-157999199 | 6 | 59.193 | KV452782.1 | 6699611 | 3-scf00136 | 3 |
| AX-157999208 | 6 | 59.193 | KV452782.1 | 6707157 | 3-scf00136 | 3 |
| AX-157999210 | 6 | 59.193 | KV452782.1 | 6709900 | 3-scf00136 | 3 |
| AX-157819068 | 6 | 59.193 | KV452782.1 | 6710184 | 3-scf00136 | 3 |
| AX-157875996 | 6 | 59.193 | KV452782.1 | 6712501 | 3-scf00136 | 3 |
| AX-157739579 | 6 | 59.193 | KV452782.1 | 6715518 | 3-scf00136 | 3 |
| AX-157999216 | 6 | 59.193 | KV452782.1 | 6718101 | 3-scf00136 | 3 |
| AX-157819069 | 6 | 59.193 | KV452782.1 | 6719818 | 3-scf00136 | 3 |
| AX-157999218 | 6 | 59.193 | KV452782.1 | 6720373 | 3-scf00136 | 3 |
| AX-157999219 | 6 | 59.193 | KV452782.1 | 6721313 | 3-scf00136 | 3 |
| AX-157999223 | 6 | 59.193 | KV452782.1 | 6722783 | 3-scf00136 | 3 |
| AX-157855913 | 6 | 59.193 | KV452782.1 | 6736358 | 3-scf00136 | 3 |
| AX-157999228 | 6 | 59.193 | KV452782.1 | 6737758 | 3-scf00136 | 3 |
| AX-157855914 | 6 | 59.193 | KV452782.1 | 6749301 | 3-scf00136 | 3 |
| AX-157999242 | 6 | 59.193 | KV452782.1 | 6757771 | 3-scf00136 | 3 |
| AX-157999249 | 6 | 59.193 | KV452782.1 | 6764677 | 3-scf00136 | 3 |
| AX-157999250 | 6 | 59.193 | KV452782.1 | 6767796 | 3-scf00136 | 3 |
| AX-157999255 | 6 | 59.193 | KV452782.1 | 6774166 | 3-scf00136 | 3 |
| AX-157999263 | 6 | 59.193 | KV452782.1 | 6783833 | 3-scf00136 | 3 |
| AX-157999266 | 6 | 59.193 | KV452782.1 | 6786617 | 3-scf00136 | 3 |
| AX-157999268 | 6 | 59.193 | KV452782.1 | 6788995 | 3-scf00136 | 3 |
| AX-157999277 | 6 | 59.193 | KV452782.1 | 6795402 | 3-scf00136 | 3 |
| AX-157999279 | 6 | 59.193 | KV452782.1 | 6795740 | 3-scf00136 | 3 |
| AX-157999280 | 6 | 59.193 | KV452782.1 | 6796253 | 3-scf00136 | 3 |
| AX-157999281 | 6 | 59.193 | KV452782.1 | 6797350 | 3-scf00136 | 3 |
| AX-157999283 | 6 | 59.193 | KV452782.1 | 6797606 | 3-scf00136 | 3 |
| AX-157819072 | 6 | 59.193 | KV452782.1 | 6812606 | 3-scf00136 | 3 |
| AX-157999305 | 6 | 59.193 | KV452782.1 | 6835952 | 3-scf00136 | 3 |
| AX-157999312 | 6 | 59.193 | KV452782.1 | 6838648 | 3-scf00136 | 3 |
| AX-157999314 | 6 | 59.193 | KV452782.1 | 6839425 | 3-scf00136 | 3 |
| AX-157999316 | 6 | 59.193 | KV452782.1 | 6841171 | 3-scf00136 | 3 |
| AX-157999325 | 6 | 59.193 | KV452782.1 | 6848567 | 3-scf00136 | 3 |
| AX-158422214 | 6 | 59.193 | KV452782.1 | 6862445 | 3-scf00136 | 3 |
| AX-157999337 | 6 | 59.193 | KV452782.1 | 6875764 | 3-scf00136 | 3 |
| AX-158407413 | 6 | 59.193 | KV452782.1 | 6880529 | 3-scf00136 | 3 |
| AX-158407414 | 6 | 59.193 | KV452782.1 | 6880689 | 3-scf00136 | 3 |
| AX-158415771 | 6 | 59.193 | KV452782.1 | 6881060 | 3-scf00136 | 3 |
| AX-158407415 | 6 | 59.193 | KV452782.1 | 6881197 | 3-scf00136 | 3 |
| AX-157999338 | 6 | 59.193 | KV452782.1 | 6881785 | 3-scf00136 | 3 |
| AX-157999340 | 6 | 59.193 | KV452782.1 | 6882153 | 3-scf00136 | 3 |
| AX-157999341 | 6 | 59.193 | KV452782.1 | 6884031 | 3-scf00136 | 3 |
| AX-157999344 | 6 | 59.193 | KV452782.1 | 6886185 | 3-scf00136 | 3 |
| AX-157999349 | 6 | 59.193 | KV452782.1 | 6894298 | 3-scf00136 | 3 |
| AX-157999352 | 6 | 59.193 | KV452782.1 | 6896960 | 3-scf00136 | 3 |
| AX-157855918 | 6 | 59.193 | KV452782.1 | 6899131 | 3-scf00136 | 3 |
| AX-157999364 | 6 | 59.193 | KV452782.1 | 6919941 | 3-scf00136 | 3 |
| AX-157751217 | 6 | 59.193 | KV452782.1 | 6926537 | 3-scf00136 | 3 |

|              |   |        |            |         |            |   |
|--------------|---|--------|------------|---------|------------|---|
| AX-157999375 | 6 | 59.193 | KV452782.1 | 6933735 | 3-scf00136 | 3 |
| AX-157855920 | 6 | 59.193 | KV452782.1 | 6937476 | 3-scf00136 | 3 |
| AX-157999383 | 6 | 59.193 | KV452782.1 | 6940824 | 3-scf00136 | 3 |
| AX-157855921 | 6 | 59.193 | KV452782.1 | 6942903 | 3-scf00136 | 3 |
| AX-157999384 | 6 | 59.193 | KV452782.1 | 6944563 | 3-scf00136 | 3 |
| AX-157819074 | 6 | 59.193 | KV452782.1 | 6946478 | 3-scf00136 | 3 |
| AX-157999385 | 6 | 59.193 | KV452782.1 | 6946996 | 3-scf00136 | 3 |
| AX-157999389 | 6 | 59.193 | KV452782.1 | 6953126 | 3-scf00136 | 3 |
| AX-157819075 | 6 | 59.193 | KV452782.1 | 6954544 | 3-scf00136 | 3 |
| AX-157999392 | 6 | 59.193 | KV452782.1 | 6956531 | 3-scf00136 | 3 |
| AX-157819076 | 6 | 59.193 | KV452782.1 | 6957763 | 3-scf00136 | 3 |
| AX-157999393 | 6 | 59.193 | KV452782.1 | 6957944 | 3-scf00136 | 3 |
| AX-157999401 | 6 | 59.193 | KV452782.1 | 6961675 | 3-scf00136 | 3 |
| AX-157999402 | 6 | 59.193 | KV452782.1 | 6962578 | 3-scf00136 | 3 |
| AX-157819077 | 6 | 59.193 | KV452782.1 | 6963001 | 3-scf00136 | 3 |
| AX-157999403 | 6 | 59.193 | KV452782.1 | 6963343 | 3-scf00136 | 3 |
| AX-157819078 | 6 | 59.193 | KV452782.1 | 6963595 | 3-scf00136 | 3 |
| AX-157999405 | 6 | 59.193 | KV452782.1 | 6965069 | 3-scf00136 | 3 |
| AX-157819079 | 6 | 59.193 | KV452782.1 | 6967196 | 3-scf00136 | 3 |
| AX-157999408 | 6 | 59.193 | KV452782.1 | 6968745 | 3-scf00136 | 3 |
| AX-157999409 | 6 | 59.193 | KV452782.1 | 6969783 | 3-scf00136 | 3 |
| AX-157819080 | 6 | 59.193 | KV452782.1 | 6969901 | 3-scf00136 | 3 |
| AX-158407418 | 6 | 59.193 | KV452782.1 | 6970569 | 3-scf00136 | 3 |
| AX-157999412 | 6 | 59.193 | KV452782.1 | 6973135 | 3-scf00136 | 3 |
| AX-157999413 | 6 | 59.193 | KV452782.1 | 6974256 | 3-scf00136 | 3 |
| AX-157999414 | 6 | 59.193 | KV452782.1 | 6974969 | 3-scf00136 | 3 |
| AX-157819082 | 6 | 59.193 | KV452782.1 | 6978854 | 3-scf00136 | 3 |
| AX-157819084 | 6 | 59.193 | KV452782.1 | 6981682 | 3-scf00136 | 3 |
| AX-157999421 | 6 | 59.193 | KV452782.1 | 6986102 | 3-scf00136 | 3 |
| AX-157999423 | 6 | 59.193 | KV452782.1 | 6991629 | 3-scf00136 | 3 |
| AX-157999425 | 6 | 59.193 | KV452782.1 | 6992095 | 3-scf00136 | 3 |
| AX-157999428 | 6 | 59.193 | KV452782.1 | 7008233 | 3-scf00136 | 3 |
| AX-157999434 | 6 | 59.193 | KV452782.1 | 7020693 | 3-scf00136 | 3 |
| AX-157819090 | 6 | 59.193 | KV452782.1 | 7032558 | 3-scf00136 | 3 |
| AX-157720372 | 6 | 59.193 | KV452782.1 | 7045844 | 3-scf00136 | 3 |
| AX-157819092 | 6 | 59.193 | KV452782.1 | 7047078 | 3-scf00136 | 3 |
| AX-157999450 | 6 | 59.193 | KV452782.1 | 7064820 | 3-scf00136 | 3 |
| AX-157999454 | 6 | 59.193 | KV452782.1 | 7072646 | 3-scf00136 | 3 |
| AX-157999458 | 6 | 59.193 | KV452782.1 | 7077931 | 3-scf00136 | 3 |
| AX-157855931 | 6 | 59.193 | KV452782.1 | 7080234 | 3-scf00136 | 3 |
| AX-157855932 | 6 | 59.193 | KV452782.1 | 7080460 | 3-scf00136 | 3 |
| AX-157999463 | 6 | 59.193 | KV452782.1 | 7081529 | 3-scf00136 | 3 |
| AX-157819096 | 6 | 59.193 | KV452782.1 | 7082125 | 3-scf00136 | 3 |
| AX-157999467 | 6 | 59.193 | KV452782.1 | 7086013 | 3-scf00136 | 3 |
| AX-157999468 | 6 | 59.193 | KV452782.1 | 7086110 | 3-scf00136 | 3 |
| AX-157999469 | 6 | 59.193 | KV452782.1 | 7088343 | 3-scf00136 | 3 |
| AX-157855934 | 6 | 59.193 | KV452782.1 | 7089529 | 3-scf00136 | 3 |
| AX-157999470 | 6 | 59.193 | KV452782.1 | 7090673 | 3-scf00136 | 3 |
| AX-157999474 | 6 | 59.193 | KV452782.1 | 7104332 | 3-scf00136 | 3 |
| AX-157855936 | 6 | 59.193 | KV452782.1 | 7108117 | 3-scf00136 | 3 |
| AX-157999476 | 6 | 59.193 | KV452782.1 | 7110569 | 3-scf00136 | 3 |

|              |   |        |            |         |            |   |
|--------------|---|--------|------------|---------|------------|---|
| AX-157999478 | 6 | 59.193 | KV452782.1 | 7111909 | 3-scf00136 | 3 |
| AX-157999479 | 6 | 59.193 | KV452782.1 | 7112506 | 3-scf00136 | 3 |
| AX-157999480 | 6 | 59.193 | KV452782.1 | 7113313 | 3-scf00136 | 3 |
| AX-157999481 | 6 | 59.193 | KV452782.1 | 7113768 | 3-scf00136 | 3 |
| AX-157999482 | 6 | 59.193 | KV452782.1 | 7114277 | 3-scf00136 | 3 |
| AX-157999484 | 6 | 59.193 | KV452782.1 | 7118169 | 3-scf00136 | 3 |
| AX-157855937 | 6 | 59.193 | KV452782.1 | 7119681 | 3-scf00136 | 3 |
| AX-157999486 | 6 | 59.193 | KV452782.1 | 7122162 | 3-scf00136 | 3 |
| AX-157819098 | 6 | 59.193 | KV452782.1 | 7122631 | 3-scf00136 | 3 |
| AX-157999489 | 6 | 59.193 | KV452782.1 | 7126673 | 3-scf00136 | 3 |
| AX-157999492 | 6 | 59.193 | KV452782.1 | 7131191 | 3-scf00136 | 3 |
| AX-157855938 | 6 | 59.193 | KV452782.1 | 7131796 | 3-scf00136 | 3 |
| AX-157999498 | 6 | 59.193 | KV452782.1 | 7143136 | 3-scf00136 | 3 |
| AX-157999502 | 6 | 59.193 | KV452782.1 | 7147931 | 3-scf00136 | 3 |
| AX-157999505 | 6 | 59.193 | KV452782.1 | 7149629 | 3-scf00136 | 3 |
| AX-157999508 | 6 | 59.193 | KV452782.1 | 7152090 | 3-scf00136 | 3 |
| AX-157999510 | 6 | 59.193 | KV452782.1 | 7152783 | 3-scf00136 | 3 |
| AX-158415776 | 6 | 59.193 | KV452782.1 | 7155360 | 3-scf00136 | 3 |
| AX-157999515 | 6 | 59.193 | KV452782.1 | 7156691 | 3-scf00136 | 3 |
| AX-157999516 | 6 | 59.193 | KV452782.1 | 7157260 | 3-scf00136 | 3 |
| AX-157855940 | 6 | 59.193 | KV452782.1 | 7157596 | 3-scf00136 | 3 |
| AX-157999517 | 6 | 59.193 | KV452782.1 | 7158475 | 3-scf00136 | 3 |
| AX-157999521 | 6 | 59.193 | KV452782.1 | 7162487 | 3-scf00136 | 3 |
| AX-157999526 | 6 | 59.193 | KV452782.1 | 7167204 | 3-scf00136 | 3 |
| AX-157999529 | 6 | 59.193 | KV452782.1 | 7168000 | 3-scf00136 | 3 |
| AX-157744930 | 6 | 59.193 | KV452782.1 | 7177236 | 3-scf00136 | 3 |
| AX-157999534 | 6 | 59.193 | KV452782.1 | 7178250 | 3-scf00136 | 3 |
| AX-157999536 | 6 | 59.193 | KV452782.1 | 7181772 | 3-scf00136 | 3 |
| AX-157999537 | 6 | 59.193 | KV452782.1 | 7183422 | 3-scf00136 | 3 |
| AX-157999538 | 6 | 59.193 | KV452782.1 | 7186484 | 3-scf00136 | 3 |
| AX-157999539 | 6 | 59.193 | KV452782.1 | 7189380 | 3-scf00136 | 3 |
| AX-157819103 | 6 | 59.193 | KV452782.1 | 7190702 | 3-scf00136 | 3 |
| AX-157999540 | 6 | 59.193 | KV452782.1 | 7191331 | 3-scf00136 | 3 |
| AX-157999541 | 6 | 59.193 | KV452782.1 | 7192034 | 3-scf00136 | 3 |
| AX-157999542 | 6 | 59.193 | KV452782.1 | 7193269 | 3-scf00136 | 3 |
| AX-157999543 | 6 | 59.193 | KV452782.1 | 7193822 | 3-scf00136 | 3 |
| AX-157999544 | 6 | 59.193 | KV452782.1 | 7194280 | 3-scf00136 | 3 |
| AX-157999546 | 6 | 59.193 | KV452782.1 | 7195964 | 3-scf00136 | 3 |
| AX-157999547 | 6 | 59.193 | KV452782.1 | 7197730 | 3-scf00136 | 3 |
| AX-157999549 | 6 | 59.193 | KV452782.1 | 7198464 | 3-scf00136 | 3 |
| AX-157999550 | 6 | 59.193 | KV452782.1 | 7198776 | 3-scf00136 | 3 |
| AX-157999552 | 6 | 59.193 | KV452782.1 | 7206429 | 3-scf00136 | 3 |
| AX-157999554 | 6 | 59.193 | KV452782.1 | 7206745 | 3-scf00136 | 3 |
| AX-157999556 | 6 | 59.193 | KV452782.1 | 7207248 | 3-scf00136 | 3 |
| AX-157999559 | 6 | 59.193 | KV452782.1 | 7212328 | 3-scf00136 | 3 |
| AX-157999562 | 6 | 59.193 | KV452782.1 | 7213254 | 3-scf00136 | 3 |
| AX-157999563 | 6 | 59.193 | KV452782.1 | 7213871 | 3-scf00136 | 3 |
| AX-157999564 | 6 | 59.193 | KV452782.1 | 7214666 | 3-scf00136 | 3 |
| AX-157999566 | 6 | 59.193 | KV452782.1 | 7215037 | 3-scf00136 | 3 |
| AX-157999567 | 6 | 59.193 | KV452782.1 | 7215307 | 3-scf00136 | 3 |
| AX-157819104 | 6 | 59.193 | KV452782.1 | 7216747 | 3-scf00136 | 3 |

|              |   |        |            |         |            |   |
|--------------|---|--------|------------|---------|------------|---|
| AX-157999568 | 6 | 59.193 | KV452782.1 | 7218017 | 3-scf00136 | 3 |
| AX-157999570 | 6 | 59.193 | KV452782.1 | 7223721 | 3-scf00136 | 3 |
| AX-157999573 | 6 | 59.193 | KV452782.1 | 7225263 | 3-scf00136 | 3 |
| AX-157999574 | 6 | 59.193 | KV452782.1 | 7229874 | 3-scf00136 | 3 |
| AX-157694134 | 6 | 59.193 | KV452782.1 | 7235234 | 3-scf00136 | 3 |
| AX-157999577 | 6 | 59.193 | KV452782.1 | 7235526 | 3-scf00136 | 3 |
| AX-157999582 | 6 | 59.193 | KV452782.1 | 7241842 | 3-scf00136 | 3 |
| AX-158407422 | 6 | 59.193 | KV452782.1 | 7247589 | 3-scf00136 | 3 |
| AX-158407423 | 6 | 59.193 | KV452782.1 | 7247641 | 3-scf00136 | 3 |
| AX-157855944 | 6 | 59.193 | KV452782.1 | 7248761 | 3-scf00136 | 3 |
| AX-157999593 | 6 | 59.193 | KV452782.1 | 7264060 | 3-scf00136 | 3 |
| AX-157999597 | 6 | 59.193 | KV452782.1 | 7265379 | 3-scf00136 | 3 |
| AX-157999600 | 6 | 59.193 | KV452782.1 | 7267286 | 3-scf00136 | 3 |
| AX-157999601 | 6 | 59.193 | KV452782.1 | 7268336 | 3-scf00136 | 3 |
| AX-157736975 | 6 | 59.193 | KV452782.1 | 7280655 | 3-scf00136 | 3 |
| AX-157999629 | 6 | 59.193 | KV452782.1 | 7304053 | 3-scf00136 | 3 |
| AX-157999646 | 6 | 59.193 | KV452782.1 | 7314279 | 3-scf00136 | 3 |
| AX-157876006 | 6 | 59.193 | KV452782.1 | 7321608 | 3-scf00136 | 3 |
| AX-157999662 | 6 | 59.193 | KV452782.1 | 7334032 | 3-scf00136 | 3 |
| AX-157999664 | 6 | 59.193 | KV452782.1 | 7335843 | 3-scf00136 | 3 |
| AX-157999667 | 6 | 59.193 | KV452782.1 | 7337593 | 3-scf00136 | 3 |
| AX-157999668 | 6 | 59.193 | KV452782.1 | 7339334 | 3-scf00136 | 3 |
| AX-157855955 | 6 | 59.193 | KV452782.1 | 7342242 | 3-scf00136 | 3 |
| AX-157855956 | 6 | 59.193 | KV452782.1 | 7342340 | 3-scf00136 | 3 |
| AX-157999677 | 6 | 59.193 | KV452782.1 | 7348811 | 3-scf00136 | 3 |
| AX-157855957 | 6 | 59.193 | KV452782.1 | 7348904 | 3-scf00136 | 3 |
| AX-157999697 | 6 | 59.193 | KV452782.1 | 7358078 | 3-scf00136 | 3 |
| AX-157865171 | 6 | 59.193 | KV452782.1 | 7358282 | 3-scf00136 | 3 |
| AX-157999699 | 6 | 59.193 | KV452782.1 | 7358501 | 3-scf00136 | 3 |
| AX-157855958 | 6 | 59.193 | KV452782.1 | 7358840 | 3-scf00136 | 3 |
| AX-157999700 | 6 | 59.193 | KV452782.1 | 7360900 | 3-scf00136 | 3 |
| AX-157999701 | 6 | 59.193 | KV452782.1 | 7361258 | 3-scf00136 | 3 |
| AX-157884707 | 6 | 59.193 | KV452782.1 | 7361378 | 3-scf00136 | 3 |
| AX-157999704 | 6 | 59.193 | KV452782.1 | 7362502 | 3-scf00136 | 3 |
| AX-157999705 | 6 | 59.193 | KV452782.1 | 7363232 | 3-scf00136 | 3 |
| AX-157999707 | 6 | 59.193 | KV452782.1 | 7363861 | 3-scf00136 | 3 |
| AX-157999708 | 6 | 59.193 | KV452782.1 | 7364858 | 3-scf00136 | 3 |
| AX-157819109 | 6 | 59.193 | KV452782.1 | 7366375 | 3-scf00136 | 3 |
| AX-157999709 | 6 | 59.193 | KV452782.1 | 7367079 | 3-scf00136 | 3 |
| AX-157999711 | 6 | 59.193 | KV452782.1 | 7368334 | 3-scf00136 | 3 |
| AX-157999715 | 6 | 59.193 | KV452782.1 | 7374653 | 3-scf00136 | 3 |
| AX-157999730 | 6 | 59.193 | KV452782.1 | 7385263 | 3-scf00136 | 3 |
| AX-157855960 | 6 | 59.193 | KV452782.1 | 7388549 | 3-scf00136 | 3 |
| AX-157999736 | 6 | 59.193 | KV452782.1 | 7393321 | 3-scf00136 | 3 |
| AX-157999737 | 6 | 59.193 | KV452782.1 | 7394196 | 3-scf00136 | 3 |
| AX-157999739 | 6 | 59.193 | KV452782.1 | 7394576 | 3-scf00136 | 3 |
| AX-157876011 | 6 | 59.193 | KV452782.1 | 7398073 | 3-scf00136 | 3 |
| AX-157999786 | 6 | 59.193 | KV452782.1 | 7443240 | 3-scf00136 | 3 |
| AX-157819115 | 6 | 59.193 | KV452782.1 | 7443571 | 3-scf00136 | 3 |
| AX-157999788 | 6 | 59.193 | KV452782.1 | 7444555 | 3-scf00136 | 3 |
| AX-157999800 | 6 | 59.193 | KV452782.1 | 7458267 | 3-scf00136 | 3 |

|              |   |        |             |         |            |    |
|--------------|---|--------|-------------|---------|------------|----|
| AX-157999808 | 6 | 59.193 | KV452782.1  | 7464127 | 3-scf00136 | 3  |
| AX-157999809 | 6 | 59.193 | KV452782.1  | 7464720 | 3-scf00136 | 3  |
| AX-157999824 | 6 | 59.193 | KV452782.1  | 7475871 | 3-scf00136 | 3  |
| AX-157999849 | 6 | 59.193 | KV452782.1  | 7495983 | 3-scf00136 | 3  |
| AX-157999859 | 6 | 59.193 | KV452782.1  | 7509371 | 3-scf00136 | 3  |
| AX-157999862 | 6 | 59.193 | KV452782.1  | 7513045 | 3-scf00136 | 3  |
| AX-157999917 | 6 | 59.193 | KV452782.1  | 7557108 | 3-scf00136 | 3  |
| AX-157999940 | 6 | 59.193 | KV452782.1  | 7578381 | 3-scf00136 | 3  |
| AX-157999950 | 6 | 59.193 | KV452782.1  | 7586872 | 3-scf00136 | 3  |
| AX-157855967 | 6 | 59.193 | KV452782.1  | 7602044 | 3-scf00136 | 3  |
| AX-157999965 | 6 | 59.193 | KV452782.1  | 7603405 | 3-scf00136 | 3  |
| AX-157999982 | 6 | 59.193 | KV452782.1  | 7618877 | 3-scf00136 | 3  |
| AX-158000014 | 6 | 59.193 | KV452782.1  | 7665559 | 3-scf00136 | 3  |
| AX-157819136 | 6 | 59.193 | KV452782.1  | 7670112 | 3-scf00136 | 3  |
| AX-157855977 | 6 | 59.193 | KV452782.1  | 7835699 | 3-scf00136 | 3  |
| AX-158000175 | 6 | 59.193 | KV452782.1  | 7836235 | 3-scf00136 | 3  |
| AX-158000179 | 6 | 59.193 | KV452782.1  | 7840663 | 3-scf00136 | 3  |
| AX-157855980 | 6 | 59.193 | KV452782.1  | 7843448 | 3-scf00136 | 3  |
| AX-158407434 | 6 | 59.193 | KV452782.1  | 7857521 | 3-scf00136 | 3  |
| AX-157876040 | 6 | 59.193 | KV452782.1  | 7863655 | 3-scf00136 | 3  |
| AX-158000227 | 6 | 59.193 | KV452782.1  | 7889581 | 3-scf00136 | 3  |
| AX-158000229 | 6 | 59.193 | KV452782.1  | 7890012 | 3-scf00136 | 3  |
| AX-157876045 | 6 | 59.193 | KV452782.1  | 7890266 | 3-scf00136 | 3  |
| AX-158001275 | 6 | 59.193 | KV452782.1  | 8989336 | 3-scf00136 | 3  |
| AX-157704578 | 6 | 59.193 | 3ML01026649 | 761     | scf02248_1 | UN |
| AX-157999745 | 6 | 59.212 | KV452782.1  | 7400788 | 3-scf00136 | 3  |
| AX-158390699 | 6 | 59.236 | KV452782.1  | 7404065 | 3-scf00136 | 3  |
| AX-157999237 | 6 | 59.303 | KV452782.1  | 6750459 | 3-scf00136 | 3  |
| AX-157999426 | 6 | 59.303 | KV452782.1  | 6995740 | 3-scf00136 | 3  |
| AX-157999755 | 6 | 59.303 | KV452782.1  | 7405564 | 3-scf00136 | 3  |
| AX-157748291 | 6 | 59.303 | KV452782.1  | 7407775 | 3-scf00136 | 3  |
| AX-157999758 | 6 | 59.303 | KV452782.1  | 7411416 | 3-scf00136 | 3  |
| AX-157999767 | 6 | 59.303 | KV452782.1  | 7415874 | 3-scf00136 | 3  |
| AX-157999770 | 6 | 59.303 | KV452782.1  | 7419092 | 3-scf00136 | 3  |
| AX-157999775 | 6 | 59.303 | KV452782.1  | 7426783 | 3-scf00136 | 3  |
| AX-157999778 | 6 | 59.303 | KV452782.1  | 7431207 | 3-scf00136 | 3  |
| AX-157999791 | 6 | 59.303 | KV452782.1  | 7445652 | 3-scf00136 | 3  |
| AX-157999796 | 6 | 59.303 | KV452782.1  | 7452670 | 3-scf00136 | 3  |
| AX-157999801 | 6 | 59.303 | KV452782.1  | 7458576 | 3-scf00136 | 3  |
| AX-157999811 | 6 | 59.303 | KV452782.1  | 7465525 | 3-scf00136 | 3  |
| AX-157999812 | 6 | 59.303 | KV452782.1  | 7465708 | 3-scf00136 | 3  |
| AX-157999836 | 6 | 59.303 | KV452782.1  | 7478214 | 3-scf00136 | 3  |
| AX-157749618 | 6 | 59.303 | KV452782.1  | 7484538 | 3-scf00136 | 3  |
| AX-157819121 | 6 | 59.303 | KV452782.1  | 7497929 | 3-scf00136 | 3  |
| AX-158006447 | 6 | 59.303 | KV452784.1  | 3738260 | 3-scf00141 | 3  |
| AX-157999591 | 6 | 59.412 | KV452782.1  | 7258038 | 3-scf00136 | 3  |
| AX-157747972 | 6 | 59.412 | KV452782.1  | 7510115 | 3-scf00136 | 3  |
| AX-157739602 | 6 | 59.412 | KV452782.1  | 7512230 | 3-scf00136 | 3  |
| AX-157999867 | 6 | 59.412 | KV452782.1  | 7517197 | 3-scf00136 | 3  |
| AX-157999869 | 6 | 59.412 | KV452782.1  | 7518836 | 3-scf00136 | 3  |
| AX-157999872 | 6 | 59.412 | KV452782.1  | 7521626 | 3-scf00136 | 3  |

|              |   |        |             |         |            |    |
|--------------|---|--------|-------------|---------|------------|----|
| AX-157999875 | 6 | 59.412 | KV452782.1  | 7521829 | 3-scf00136 | 3  |
| AX-157999881 | 6 | 59.412 | KV452782.1  | 7527425 | 3-scf00136 | 3  |
| AX-157999883 | 6 | 59.412 | KV452782.1  | 7527866 | 3-scf00136 | 3  |
| AX-157999888 | 6 | 59.412 | KV452782.1  | 7531935 | 3-scf00136 | 3  |
| AX-157716628 | 6 | 59.412 | KV452782.1  | 7532298 | 3-scf00136 | 3  |
| AX-157819130 | 6 | 59.412 | KV452782.1  | 7534926 | 3-scf00136 | 3  |
| AX-157999890 | 6 | 59.412 | KV452782.1  | 7537097 | 3-scf00136 | 3  |
| AX-158383430 | 6 | 59.412 | KV452782.1  | 7541224 | 3-scf00136 | 3  |
| AX-158405721 | 6 | 59.412 | KV452782.1  | 7541373 | 3-scf00136 | 3  |
| AX-157999899 | 6 | 59.412 | KV452782.1  | 7546224 | 3-scf00136 | 3  |
| AX-157999924 | 6 | 59.412 | KV452782.1  | 7560752 | 3-scf00136 | 3  |
| AX-157999927 | 6 | 59.412 | KV452782.1  | 7562216 | 3-scf00136 | 3  |
| AX-157999928 | 6 | 59.412 | KV452782.1  | 7563897 | 3-scf00136 | 3  |
| AX-157999929 | 6 | 59.412 | KV452782.1  | 7565073 | 3-scf00136 | 3  |
| AX-157999933 | 6 | 59.412 | KV452782.1  | 7568809 | 3-scf00136 | 3  |
| AX-157750574 | 6 | 59.412 | KV452782.1  | 7570814 | 3-scf00136 | 3  |
| AX-157999946 | 6 | 59.412 | KV452782.1  | 7582267 | 3-scf00136 | 3  |
| AX-157999973 | 6 | 59.412 | KV452782.1  | 7609115 | 3-scf00136 | 3  |
| AX-158000000 | 6 | 59.412 | KV452782.1  | 7654915 | 3-scf00136 | 3  |
| AX-157705202 | 6 | 59.412 | 3ML01028986 | 565     | scf04603_1 | UN |
| AX-157999919 | 6 | 59.436 | KV452782.1  | 7557981 | 3-scf00136 | 3  |
| AX-157999951 | 6 | 59.521 | KV452782.1  | 7589053 | 3-scf00136 | 3  |
| AX-157999968 | 6 | 59.521 | KV452782.1  | 7603658 | 3-scf00136 | 3  |
| AX-157724550 | 6 | 59.521 | KV452782.1  | 7605104 | 3-scf00136 | 3  |
| AX-157999969 | 6 | 59.521 | KV452782.1  | 7606623 | 3-scf00136 | 3  |
| AX-157999970 | 6 | 59.521 | KV452782.1  | 7607527 | 3-scf00136 | 3  |
| AX-157999972 | 6 | 59.576 | KV452782.1  | 7608706 | 3-scf00136 | 3  |
| AX-157999994 | 6 | 59.635 | KV452782.1  | 7643855 | 3-scf00136 | 3  |
| AX-157999997 | 6 | 59.694 | KV452782.1  | 7653396 | 3-scf00136 | 3  |
| AX-157999998 | 6 | 59.756 | KV452782.1  | 7654349 | 3-scf00136 | 3  |
| AX-158000006 | 6 | 59.813 | KV452782.1  | 7660075 | 3-scf00136 | 3  |
| AX-158000007 | 6 | 59.813 | KV452782.1  | 7660270 | 3-scf00136 | 3  |
| AX-158000022 | 6 | 59.895 | KV452782.1  | 7675742 | 3-scf00136 | 3  |
| AX-158000033 | 6 | 59.895 | KV452782.1  | 7690562 | 3-scf00136 | 3  |
| AX-157999938 | 6 | 59.958 | KV452782.1  | 7577252 | 3-scf00136 | 3  |
| AX-157869868 | 6 | 59.958 | KV452782.1  | 7674543 | 3-scf00136 | 3  |
| AX-158000024 | 6 | 59.958 | KV452782.1  | 7676264 | 3-scf00136 | 3  |
| AX-157709340 | 6 | 59.958 | KV452782.1  | 7676713 | 3-scf00136 | 3  |
| AX-158000025 | 6 | 59.958 | KV452782.1  | 7678951 | 3-scf00136 | 3  |
| AX-157869869 | 6 | 59.958 | KV452782.1  | 7681865 | 3-scf00136 | 3  |
| AX-158000028 | 6 | 59.958 | KV452782.1  | 7682929 | 3-scf00136 | 3  |
| AX-158000031 | 6 | 59.958 | KV452782.1  | 7687266 | 3-scf00136 | 3  |
| AX-158000032 | 6 | 59.958 | KV452782.1  | 7689058 | 3-scf00136 | 3  |
| AX-158000037 | 6 | 59.958 | KV452782.1  | 7694441 | 3-scf00136 | 3  |
| AX-158000040 | 6 | 59.958 | KV452782.1  | 7697215 | 3-scf00136 | 3  |
| AX-158000045 | 6 | 59.958 | KV452782.1  | 7699070 | 3-scf00136 | 3  |
| AX-157819140 | 6 | 59.958 | KV452782.1  | 7700348 | 3-scf00136 | 3  |
| AX-158000099 | 6 | 59.958 | KV452782.1  | 7760782 | 3-scf00136 | 3  |
| AX-158000100 | 6 | 59.958 | KV452782.1  | 7761578 | 3-scf00136 | 3  |
| AX-158000046 | 6 | 60.069 | KV452782.1  | 7702682 | 3-scf00136 | 3  |
| AX-157716907 | 6 | 60.069 | KV452782.1  | 7705314 | 3-scf00136 | 3  |



|              |   |        |            |         |            |   |
|--------------|---|--------|------------|---------|------------|---|
| AX-157819142 | 6 | 60.125 | KV452782.1 | 7709303 | 3-scf00136 | 3 |
| AX-158000054 | 6 | 60.18  | KV452782.1 | 7710488 | 3-scf00136 | 3 |
| AX-158000055 | 6 | 60.18  | KV452782.1 | 7711856 | 3-scf00136 | 3 |
| AX-158000064 | 6 | 60.238 | KV452782.1 | 7724058 | 3-scf00136 | 3 |
| AX-158000288 | 6 | 60.238 | KV452782.1 | 7936339 | 3-scf00136 | 3 |
| AX-158000065 | 6 | 60.286 | KV452782.1 | 7724735 | 3-scf00136 | 3 |
| AX-158000067 | 6 | 60.286 | KV452782.1 | 7725639 | 3-scf00136 | 3 |
| AX-158000068 | 6 | 60.286 | KV452782.1 | 7726450 | 3-scf00136 | 3 |
| AX-157819144 | 6 | 60.286 | KV452782.1 | 7726650 | 3-scf00136 | 3 |
| AX-158000076 | 6 | 60.286 | KV452782.1 | 7736804 | 3-scf00136 | 3 |
| AX-158000082 | 6 | 60.286 | KV452782.1 | 7740917 | 3-scf00136 | 3 |
| AX-158000084 | 6 | 60.286 | KV452782.1 | 7742786 | 3-scf00136 | 3 |
| AX-158000085 | 6 | 60.286 | KV452782.1 | 7744406 | 3-scf00136 | 3 |
| AX-158000087 | 6 | 60.286 | KV452782.1 | 7745426 | 3-scf00136 | 3 |
| AX-157751371 | 6 | 60.286 | KV452782.1 | 7750586 | 3-scf00136 | 3 |
| AX-157819148 | 6 | 60.286 | KV452782.1 | 7751365 | 3-scf00136 | 3 |
| AX-158000092 | 6 | 60.286 | KV452782.1 | 7753580 | 3-scf00136 | 3 |
| AX-158000096 | 6 | 60.286 | KV452782.1 | 7755494 | 3-scf00136 | 3 |
| AX-158000098 | 6 | 60.286 | KV452782.1 | 7755705 | 3-scf00136 | 3 |
| AX-157819150 | 6 | 60.286 | KV452782.1 | 7756581 | 3-scf00136 | 3 |
| AX-157748984 | 6 | 60.286 | KV452782.1 | 7757263 | 3-scf00136 | 3 |
| AX-158000262 | 6 | 60.286 | KV452782.1 | 7911572 | 3-scf00136 | 3 |
| AX-157819215 | 6 | 60.286 | KV452782.1 | 8689439 | 3-scf00136 | 3 |
| AX-158000089 | 6 | 60.313 | KV452782.1 | 7746697 | 3-scf00136 | 3 |
| AX-157869871 | 6 | 60.313 | KV452782.1 | 7751725 | 3-scf00136 | 3 |
| AX-157716758 | 6 | 60.313 | KV452782.1 | 7773163 | 3-scf00136 | 3 |
| AX-157819166 | 6 | 60.313 | KV452782.1 | 7979122 | 3-scf00136 | 3 |
| AX-158000109 | 6 | 60.338 | KV452782.1 | 7773794 | 3-scf00136 | 3 |
| AX-158000075 | 6 | 60.363 | KV452782.1 | 7736201 | 3-scf00136 | 3 |
| AX-157747240 | 6 | 60.363 | KV452782.1 | 7785196 | 3-scf00136 | 3 |
| AX-158000129 | 6 | 60.395 | KV452782.1 | 7793463 | 3-scf00136 | 3 |
| AX-157746213 | 6 | 60.505 | KV452782.1 | 4967694 | 3-scf00136 | 3 |
| AX-157998654 | 6 | 60.505 | KV452782.1 | 6173804 | 3-scf00136 | 3 |
| AX-157998727 | 6 | 60.505 | KV452782.1 | 6227382 | 3-scf00136 | 3 |
| AX-157998814 | 6 | 60.505 | KV452782.1 | 6319578 | 3-scf00136 | 3 |
| AX-157998873 | 6 | 60.505 | KV452782.1 | 6370471 | 3-scf00136 | 3 |
| AX-157998893 | 6 | 60.505 | KV452782.1 | 6386999 | 3-scf00136 | 3 |
| AX-157855845 | 6 | 60.505 | KV452782.1 | 6388712 | 3-scf00136 | 3 |
| AX-157998894 | 6 | 60.505 | KV452782.1 | 6393079 | 3-scf00136 | 3 |
| AX-157855851 | 6 | 60.505 | KV452782.1 | 6417209 | 3-scf00136 | 3 |
| AX-158407404 | 6 | 60.505 | KV452782.1 | 6422993 | 3-scf00136 | 3 |
| AX-157998951 | 6 | 60.505 | KV452782.1 | 6447586 | 3-scf00136 | 3 |
| AX-157998958 | 6 | 60.505 | KV452782.1 | 6453914 | 3-scf00136 | 3 |
| AX-157998982 | 6 | 60.505 | KV452782.1 | 6477275 | 3-scf00136 | 3 |
| AX-157855872 | 6 | 60.505 | KV452782.1 | 6492831 | 3-scf00136 | 3 |
| AX-157999030 | 6 | 60.505 | KV452782.1 | 6517376 | 3-scf00136 | 3 |
| AX-157855886 | 6 | 60.505 | KV452782.1 | 6544387 | 3-scf00136 | 3 |
| AX-157855889 | 6 | 60.505 | KV452782.1 | 6551691 | 3-scf00136 | 3 |
| AX-157855909 | 6 | 60.505 | KV452782.1 | 6708077 | 3-scf00136 | 3 |
| AX-157713186 | 6 | 60.505 | KV452782.1 | 6806984 | 3-scf00136 | 3 |
| AX-157722336 | 6 | 60.505 | KV452782.1 | 7258715 | 3-scf00136 | 3 |

|              |   |        |            |         |            |   |
|--------------|---|--------|------------|---------|------------|---|
| AX-157999921 | 6 | 60.505 | KV452782.1 | 7558876 | 3-scf00136 | 3 |
| AX-157876023 | 6 | 60.505 | KV452782.1 | 7579249 | 3-scf00136 | 3 |
| AX-158000016 | 6 | 60.505 | KV452782.1 | 7668233 | 3-scf00136 | 3 |
| AX-157716900 | 6 | 60.505 | KV452782.1 | 7672814 | 3-scf00136 | 3 |
| AX-157741731 | 6 | 60.505 | KV452782.1 | 7708967 | 3-scf00136 | 3 |
| AX-158000053 | 6 | 60.505 | KV452782.1 | 7709476 | 3-scf00136 | 3 |
| AX-158000070 | 6 | 60.505 | KV452782.1 | 7733072 | 3-scf00136 | 3 |
| AX-157819147 | 6 | 60.505 | KV452782.1 | 7738035 | 3-scf00136 | 3 |
| AX-158000079 | 6 | 60.505 | KV452782.1 | 7739377 | 3-scf00136 | 3 |
| AX-158000094 | 6 | 60.505 | KV452782.1 | 7753957 | 3-scf00136 | 3 |
| AX-157819151 | 6 | 60.505 | KV452782.1 | 7759264 | 3-scf00136 | 3 |
| AX-157819152 | 6 | 60.505 | KV452782.1 | 7760470 | 3-scf00136 | 3 |
| AX-158000103 | 6 | 60.505 | KV452782.1 | 7764018 | 3-scf00136 | 3 |
| AX-158000121 | 6 | 60.505 | KV452782.1 | 7786541 | 3-scf00136 | 3 |
| AX-158000132 | 6 | 60.505 | KV452782.1 | 7796614 | 3-scf00136 | 3 |
| AX-158000135 | 6 | 60.505 | KV452782.1 | 7797968 | 3-scf00136 | 3 |
| AX-158000136 | 6 | 60.505 | KV452782.1 | 7800505 | 3-scf00136 | 3 |
| AX-158000140 | 6 | 60.505 | KV452782.1 | 7805057 | 3-scf00136 | 3 |
| AX-158000142 | 6 | 60.505 | KV452782.1 | 7806024 | 3-scf00136 | 3 |
| AX-158000143 | 6 | 60.505 | KV452782.1 | 7807097 | 3-scf00136 | 3 |
| AX-158000145 | 6 | 60.505 | KV452782.1 | 7808844 | 3-scf00136 | 3 |
| AX-157742279 | 6 | 60.505 | KV452782.1 | 7812697 | 3-scf00136 | 3 |
| AX-158000150 | 6 | 60.505 | KV452782.1 | 7814368 | 3-scf00136 | 3 |
| AX-158000152 | 6 | 60.505 | KV452782.1 | 7815374 | 3-scf00136 | 3 |
| AX-158000153 | 6 | 60.505 | KV452782.1 | 7816967 | 3-scf00136 | 3 |
| AX-157819156 | 6 | 60.505 | KV452782.1 | 7817692 | 3-scf00136 | 3 |
| AX-158000157 | 6 | 60.505 | KV452782.1 | 7819762 | 3-scf00136 | 3 |
| AX-158000158 | 6 | 60.505 | KV452782.1 | 7820534 | 3-scf00136 | 3 |
| AX-158000164 | 6 | 60.505 | KV452782.1 | 7822959 | 3-scf00136 | 3 |
| AX-158000165 | 6 | 60.505 | KV452782.1 | 7825816 | 3-scf00136 | 3 |
| AX-158407433 | 6 | 60.505 | KV452782.1 | 7830445 | 3-scf00136 | 3 |
| AX-158000168 | 6 | 60.505 | KV452782.1 | 7830863 | 3-scf00136 | 3 |
| AX-158000169 | 6 | 60.505 | KV452782.1 | 7831677 | 3-scf00136 | 3 |
| AX-158000173 | 6 | 60.505 | KV452782.1 | 7835123 | 3-scf00136 | 3 |
| AX-158000178 | 6 | 60.505 | KV452782.1 | 7838448 | 3-scf00136 | 3 |
| AX-157819160 | 6 | 60.505 | KV452782.1 | 7842709 | 3-scf00136 | 3 |
| AX-158000195 | 6 | 60.505 | KV452782.1 | 7858346 | 3-scf00136 | 3 |
| AX-158000206 | 6 | 60.505 | KV452782.1 | 7870771 | 3-scf00136 | 3 |
| AX-157758303 | 6 | 60.505 | KV452782.1 | 7882697 | 3-scf00136 | 3 |
| AX-158000222 | 6 | 60.505 | KV452782.1 | 7883608 | 3-scf00136 | 3 |
| AX-158000223 | 6 | 60.505 | KV452782.1 | 7886073 | 3-scf00136 | 3 |
| AX-158000226 | 6 | 60.505 | KV452782.1 | 7889099 | 3-scf00136 | 3 |
| AX-158000232 | 6 | 60.505 | KV452782.1 | 7892492 | 3-scf00136 | 3 |
| AX-158000234 | 6 | 60.505 | KV452782.1 | 7893303 | 3-scf00136 | 3 |
| AX-158000235 | 6 | 60.505 | KV452782.1 | 7894057 | 3-scf00136 | 3 |
| AX-158000236 | 6 | 60.505 | KV452782.1 | 7895713 | 3-scf00136 | 3 |
| AX-158000238 | 6 | 60.505 | KV452782.1 | 7896228 | 3-scf00136 | 3 |
| AX-158000240 | 6 | 60.505 | KV452782.1 | 7898019 | 3-scf00136 | 3 |
| AX-158000241 | 6 | 60.505 | KV452782.1 | 7899077 | 3-scf00136 | 3 |
| AX-158000247 | 6 | 60.505 | KV452782.1 | 7901590 | 3-scf00136 | 3 |
| AX-158000251 | 6 | 60.505 | KV452782.1 | 7903268 | 3-scf00136 | 3 |

|              |   |        |            |         |            |   |
|--------------|---|--------|------------|---------|------------|---|
| AX-158000253 | 6 | 60.505 | KV452782.1 | 7903966 | 3-scf00136 | 3 |
| AX-158000255 | 6 | 60.505 | KV452782.1 | 7905372 | 3-scf00136 | 3 |
| AX-158000257 | 6 | 60.505 | KV452782.1 | 7906042 | 3-scf00136 | 3 |
| AX-158000260 | 6 | 60.505 | KV452782.1 | 7909500 | 3-scf00136 | 3 |
| AX-158000261 | 6 | 60.505 | KV452782.1 | 7910711 | 3-scf00136 | 3 |
| AX-158383438 | 6 | 60.505 | KV452782.1 | 7912524 | 3-scf00136 | 3 |
| AX-158000265 | 6 | 60.505 | KV452782.1 | 7913467 | 3-scf00136 | 3 |
| AX-158000270 | 6 | 60.505 | KV452782.1 | 7916928 | 3-scf00136 | 3 |
| AX-158000273 | 6 | 60.505 | KV452782.1 | 7921030 | 3-scf00136 | 3 |
| AX-158000274 | 6 | 60.505 | KV452782.1 | 7921687 | 3-scf00136 | 3 |
| AX-158000276 | 6 | 60.505 | KV452782.1 | 7922463 | 3-scf00136 | 3 |
| AX-158000279 | 6 | 60.505 | KV452782.1 | 7923263 | 3-scf00136 | 3 |
| AX-158000281 | 6 | 60.505 | KV452782.1 | 7923713 | 3-scf00136 | 3 |
| AX-158000282 | 6 | 60.505 | KV452782.1 | 7924137 | 3-scf00136 | 3 |
| AX-157884724 | 6 | 60.505 | KV452782.1 | 7929896 | 3-scf00136 | 3 |
| AX-158000287 | 6 | 60.505 | KV452782.1 | 7930624 | 3-scf00136 | 3 |
| AX-158000292 | 6 | 60.505 | KV452782.1 | 7942953 | 3-scf00136 | 3 |
| AX-157727058 | 6 | 60.505 | KV452782.1 | 7945865 | 3-scf00136 | 3 |
| AX-157723007 | 6 | 60.505 | KV452782.1 | 7952127 | 3-scf00136 | 3 |
| AX-158000296 | 6 | 60.505 | KV452782.1 | 7953231 | 3-scf00136 | 3 |
| AX-158000298 | 6 | 60.505 | KV452782.1 | 7953429 | 3-scf00136 | 3 |
| AX-158000308 | 6 | 60.505 | KV452782.1 | 7964633 | 3-scf00136 | 3 |
| AX-157819162 | 6 | 60.505 | KV452782.1 | 7964987 | 3-scf00136 | 3 |
| AX-158000313 | 6 | 60.505 | KV452782.1 | 7976258 | 3-scf00136 | 3 |
| AX-157819165 | 6 | 60.505 | KV452782.1 | 7977931 | 3-scf00136 | 3 |
| AX-158000317 | 6 | 60.505 | KV452782.1 | 7979555 | 3-scf00136 | 3 |
| AX-158000321 | 6 | 60.505 | KV452782.1 | 7983860 | 3-scf00136 | 3 |
| AX-157757997 | 6 | 60.505 | KV452782.1 | 7986494 | 3-scf00136 | 3 |
| AX-158000328 | 6 | 60.505 | KV452782.1 | 7988583 | 3-scf00136 | 3 |
| AX-158000332 | 6 | 60.505 | KV452782.1 | 7995459 | 3-scf00136 | 3 |
| AX-158000338 | 6 | 60.505 | KV452782.1 | 8001484 | 3-scf00136 | 3 |
| AX-158000359 | 6 | 60.505 | KV452782.1 | 8032297 | 3-scf00136 | 3 |
| AX-158000421 | 6 | 60.505 | KV452782.1 | 8099414 | 3-scf00136 | 3 |
| AX-157819169 | 6 | 60.505 | KV452782.1 | 8101362 | 3-scf00136 | 3 |
| AX-158000485 | 6 | 60.505 | KV452782.1 | 8142520 | 3-scf00136 | 3 |
| AX-158000487 | 6 | 60.505 | KV452782.1 | 8143911 | 3-scf00136 | 3 |
| AX-158000550 | 6 | 60.505 | KV452782.1 | 8193578 | 3-scf00136 | 3 |
| AX-158000581 | 6 | 60.505 | KV452782.1 | 8207093 | 3-scf00136 | 3 |
| AX-158000623 | 6 | 60.505 | KV452782.1 | 8236919 | 3-scf00136 | 3 |
| AX-158000736 | 6 | 60.505 | KV452782.1 | 8396597 | 3-scf00136 | 3 |
| AX-158000737 | 6 | 60.505 | KV452782.1 | 8397083 | 3-scf00136 | 3 |
| AX-158000738 | 6 | 60.505 | KV452782.1 | 8403729 | 3-scf00136 | 3 |
| AX-158000740 | 6 | 60.505 | KV452782.1 | 8409290 | 3-scf00136 | 3 |
| AX-158000741 | 6 | 60.505 | KV452782.1 | 8409612 | 3-scf00136 | 3 |
| AX-157819181 | 6 | 60.505 | KV452782.1 | 8425232 | 3-scf00136 | 3 |
| AX-157819182 | 6 | 60.505 | KV452782.1 | 8425436 | 3-scf00136 | 3 |
| AX-158000760 | 6 | 60.505 | KV452782.1 | 8425727 | 3-scf00136 | 3 |
| AX-158000761 | 6 | 60.505 | KV452782.1 | 8426314 | 3-scf00136 | 3 |
| AX-157819183 | 6 | 60.505 | KV452782.1 | 8428681 | 3-scf00136 | 3 |
| AX-158000765 | 6 | 60.505 | KV452782.1 | 8429221 | 3-scf00136 | 3 |
| AX-158383456 | 6 | 60.505 | KV452782.1 | 8485587 | 3-scf00136 | 3 |

|              |   |        |            |          |                |    |
|--------------|---|--------|------------|----------|----------------|----|
| AX-158000828 | 6 | 60.505 | KV452782.1 | 8515746  | 3-scf00136     | 3  |
| AX-158000833 | 6 | 60.505 | KV452782.1 | 8518044  | 3-scf00136     | 3  |
| AX-157876068 | 6 | 60.505 | KV452782.1 | 8521274  | 3-scf00136     | 3  |
| AX-158000836 | 6 | 60.505 | KV452782.1 | 8521690  | 3-scf00136     | 3  |
| AX-158000838 | 6 | 60.505 | KV452782.1 | 8522967  | 3-scf00136     | 3  |
| AX-157819196 | 6 | 60.505 | KV452782.1 | 8524831  | 3-scf00136     | 3  |
| AX-158000857 | 6 | 60.505 | KV452782.1 | 8548549  | 3-scf00136     | 3  |
| AX-157819167 | 6 | 60.555 | KV452782.1 | 7992415  | 3-scf00136     | 3  |
| AX-157749606 | 6 | 60.614 | KV452782.1 | 8004285  | 3-scf00136     | 3  |
| AX-158000340 | 6 | 60.614 | KV452782.1 | 8004850  | 3-scf00136     | 3  |
| AX-158000345 | 6 | 60.64  | KV452782.1 | 8008018  | 3-scf00136     | 3  |
| AX-158000346 | 6 | 60.64  | KV452782.1 | 8008909  | 3-scf00136     | 3  |
| AX-158000451 | 6 | 60.64  | KV452782.1 | 8121171  | 3-scf00136     | 3  |
| AX-158000611 | 6 | 60.64  | KV452782.1 | 8224094  | 3-scf00136     | 3  |
| AX-158001807 | 6 | 60.64  | KV452782.1 | 9539550  | 3-scf00136     | 3  |
| AX-158002461 | 6 | 60.64  | KV452782.1 | 10474301 | 3-scf00136     | 3  |
| AX-157819359 | 6 | 60.64  | KV452782.1 | 10508417 | 3-scf00136     | 3  |
| AX-158004502 | 6 | 60.64  | KV452784.1 | 1477203  | 3-scf00141     | 3  |
| AX-158007482 | 6 | 60.64  | KV452784.1 | 6201609  | 3-scf00141     | 3  |
| AX-157694769 | 6 | 60.64  | FI873932.1 | 41       | IORI212 lctalu | UN |
| AX-157721670 | 6 | 60.659 | KV452782.1 | 8010379  | 3-scf00136     | 3  |
| AX-158379649 | 6 | 60.659 | KV452782.1 | 8115653  | 3-scf00136     | 3  |
| AX-158000803 | 6 | 60.659 | KV452782.1 | 8484058  | 3-scf00136     | 3  |
| AX-158000805 | 6 | 60.659 | KV452782.1 | 8488600  | 3-scf00136     | 3  |
| AX-157741713 | 6 | 60.659 | KV452782.1 | 8489342  | 3-scf00136     | 3  |
| AX-158000353 | 6 | 60.682 | KV452782.1 | 8018762  | 3-scf00136     | 3  |
| AX-158000378 | 6 | 60.705 | KV452782.1 | 8048439  | 3-scf00136     | 3  |
| AX-158000666 | 6 | 60.705 | KV452782.1 | 8283763  | 3-scf00136     | 3  |
| AX-157998684 | 6 | 60.723 | KV452782.1 | 6201437  | 3-scf00136     | 3  |
| AX-157999246 | 6 | 60.723 | KV452782.1 | 6761657  | 3-scf00136     | 3  |
| AX-157999318 | 6 | 60.723 | KV452782.1 | 6841685  | 3-scf00136     | 3  |
| AX-157855915 | 6 | 60.723 | KV452782.1 | 6850079  | 3-scf00136     | 3  |
| AX-157999342 | 6 | 60.723 | KV452782.1 | 6885097  | 3-scf00136     | 3  |
| AX-157999345 | 6 | 60.723 | KV452782.1 | 6889719  | 3-scf00136     | 3  |
| AX-157999366 | 6 | 60.723 | KV452782.1 | 6920372  | 3-scf00136     | 3  |
| AX-158000160 | 6 | 60.723 | KV452782.1 | 7821353  | 3-scf00136     | 3  |
| AX-158000170 | 6 | 60.723 | KV452782.1 | 7832208  | 3-scf00136     | 3  |
| AX-157723313 | 6 | 60.723 | KV452782.1 | 7887792  | 3-scf00136     | 3  |
| AX-158000343 | 6 | 60.723 | KV452782.1 | 8005973  | 3-scf00136     | 3  |
| AX-157855988 | 6 | 60.723 | KV452782.1 | 8028682  | 3-scf00136     | 3  |
| AX-158000365 | 6 | 60.723 | KV452782.1 | 8035432  | 3-scf00136     | 3  |
| AX-158000368 | 6 | 60.723 | KV452782.1 | 8038394  | 3-scf00136     | 3  |
| AX-158000369 | 6 | 60.723 | KV452782.1 | 8041558  | 3-scf00136     | 3  |
| AX-158000387 | 6 | 60.723 | KV452782.1 | 8066035  | 3-scf00136     | 3  |
| AX-158000389 | 6 | 60.723 | KV452782.1 | 8066915  | 3-scf00136     | 3  |
| AX-158000426 | 6 | 60.723 | KV452782.1 | 8103617  | 3-scf00136     | 3  |
| AX-158000434 | 6 | 60.723 | KV452782.1 | 8108794  | 3-scf00136     | 3  |
| AX-158000435 | 6 | 60.723 | KV452782.1 | 8109301  | 3-scf00136     | 3  |
| AX-158000438 | 6 | 60.723 | KV452782.1 | 8109741  | 3-scf00136     | 3  |
| AX-158000439 | 6 | 60.723 | KV452782.1 | 8110488  | 3-scf00136     | 3  |
| AX-157704074 | 6 | 60.723 | KV452782.1 | 8113632  | 3-scf00136     | 3  |

|              |   |        |            |         |            |   |
|--------------|---|--------|------------|---------|------------|---|
| AX-158000445 | 6 | 60.723 | KV452782.1 | 8119056 | 3-scf00136 | 3 |
| AX-158000447 | 6 | 60.723 | KV452782.1 | 8119815 | 3-scf00136 | 3 |
| AX-158000449 | 6 | 60.723 | KV452782.1 | 8120435 | 3-scf00136 | 3 |
| AX-158000463 | 6 | 60.723 | KV452782.1 | 8126776 | 3-scf00136 | 3 |
| AX-158000466 | 6 | 60.723 | KV452782.1 | 8128520 | 3-scf00136 | 3 |
| AX-158000475 | 6 | 60.723 | KV452782.1 | 8133357 | 3-scf00136 | 3 |
| AX-158000508 | 6 | 60.723 | KV452782.1 | 8160908 | 3-scf00136 | 3 |
| AX-158000514 | 6 | 60.723 | KV452782.1 | 8163179 | 3-scf00136 | 3 |
| AX-158000515 | 6 | 60.723 | KV452782.1 | 8163445 | 3-scf00136 | 3 |
| AX-158000516 | 6 | 60.723 | KV452782.1 | 8165020 | 3-scf00136 | 3 |
| AX-158000522 | 6 | 60.723 | KV452782.1 | 8169262 | 3-scf00136 | 3 |
| AX-158000525 | 6 | 60.723 | KV452782.1 | 8170741 | 3-scf00136 | 3 |
| AX-158000529 | 6 | 60.723 | KV452782.1 | 8173560 | 3-scf00136 | 3 |
| AX-158000537 | 6 | 60.723 | KV452782.1 | 8177152 | 3-scf00136 | 3 |
| AX-158383448 | 6 | 60.723 | KV452782.1 | 8180172 | 3-scf00136 | 3 |
| AX-158000540 | 6 | 60.723 | KV452782.1 | 8180412 | 3-scf00136 | 3 |
| AX-158000544 | 6 | 60.723 | KV452782.1 | 8185712 | 3-scf00136 | 3 |
| AX-158000564 | 6 | 60.723 | KV452782.1 | 8197484 | 3-scf00136 | 3 |
| AX-158000565 | 6 | 60.723 | KV452782.1 | 8197861 | 3-scf00136 | 3 |
| AX-158390719 | 6 | 60.723 | KV452782.1 | 8199232 | 3-scf00136 | 3 |
| AX-157710878 | 6 | 60.723 | KV452782.1 | 8200172 | 3-scf00136 | 3 |
| AX-158000569 | 6 | 60.723 | KV452782.1 | 8200307 | 3-scf00136 | 3 |
| AX-158000573 | 6 | 60.723 | KV452782.1 | 8201712 | 3-scf00136 | 3 |
| AX-158000575 | 6 | 60.723 | KV452782.1 | 8203132 | 3-scf00136 | 3 |
| AX-158000576 | 6 | 60.723 | KV452782.1 | 8204565 | 3-scf00136 | 3 |
| AX-157884733 | 6 | 60.723 | KV452782.1 | 8216956 | 3-scf00136 | 3 |
| AX-157710332 | 6 | 60.723 | KV452782.1 | 8217816 | 3-scf00136 | 3 |
| AX-158000596 | 6 | 60.723 | KV452782.1 | 8218609 | 3-scf00136 | 3 |
| AX-158390720 | 6 | 60.723 | KV452782.1 | 8220891 | 3-scf00136 | 3 |
| AX-158000603 | 6 | 60.723 | KV452782.1 | 8221097 | 3-scf00136 | 3 |
| AX-158000604 | 6 | 60.723 | KV452782.1 | 8221572 | 3-scf00136 | 3 |
| AX-158000606 | 6 | 60.723 | KV452782.1 | 8222114 | 3-scf00136 | 3 |
| AX-158383453 | 6 | 60.723 | KV452782.1 | 8228111 | 3-scf00136 | 3 |
| AX-158000618 | 6 | 60.723 | KV452782.1 | 8232323 | 3-scf00136 | 3 |
| AX-158000620 | 6 | 60.723 | KV452782.1 | 8234272 | 3-scf00136 | 3 |
| AX-158000624 | 6 | 60.723 | KV452782.1 | 8239412 | 3-scf00136 | 3 |
| AX-158415793 | 6 | 60.723 | KV452782.1 | 8240332 | 3-scf00136 | 3 |
| AX-158000626 | 6 | 60.723 | KV452782.1 | 8242332 | 3-scf00136 | 3 |
| AX-158000627 | 6 | 60.723 | KV452782.1 | 8243092 | 3-scf00136 | 3 |
| AX-158000628 | 6 | 60.723 | KV452782.1 | 8243178 | 3-scf00136 | 3 |
| AX-158000630 | 6 | 60.723 | KV452782.1 | 8245234 | 3-scf00136 | 3 |
| AX-158000631 | 6 | 60.723 | KV452782.1 | 8246666 | 3-scf00136 | 3 |
| AX-157709281 | 6 | 60.723 | KV452782.1 | 8250146 | 3-scf00136 | 3 |
| AX-157869885 | 6 | 60.723 | KV452782.1 | 8250394 | 3-scf00136 | 3 |
| AX-158000633 | 6 | 60.723 | KV452782.1 | 8252467 | 3-scf00136 | 3 |
| AX-158000637 | 6 | 60.723 | KV452782.1 | 8254409 | 3-scf00136 | 3 |
| AX-158000639 | 6 | 60.723 | KV452782.1 | 8256640 | 3-scf00136 | 3 |
| AX-158407437 | 6 | 60.723 | KV452782.1 | 8257606 | 3-scf00136 | 3 |
| AX-158000643 | 6 | 60.723 | KV452782.1 | 8259847 | 3-scf00136 | 3 |
| AX-158000646 | 6 | 60.723 | KV452782.1 | 8261621 | 3-scf00136 | 3 |
| AX-157869897 | 6 | 60.723 | KV452782.1 | 8277831 | 3-scf00136 | 3 |

|              |   |        |            |          |            |   |
|--------------|---|--------|------------|----------|------------|---|
| AX-157869899 | 6 | 60.723 | KV452782.1 | 8279501  | 3-scf00136 | 3 |
| AX-157869900 | 6 | 60.723 | KV452782.1 | 8280121  | 3-scf00136 | 3 |
| AX-158000664 | 6 | 60.723 | KV452782.1 | 8281585  | 3-scf00136 | 3 |
| AX-158000680 | 6 | 60.723 | KV452782.1 | 8297850  | 3-scf00136 | 3 |
| AX-158000681 | 6 | 60.723 | KV452782.1 | 8299672  | 3-scf00136 | 3 |
| AX-157819173 | 6 | 60.723 | KV452782.1 | 8307329  | 3-scf00136 | 3 |
| AX-158000687 | 6 | 60.723 | KV452782.1 | 8308197  | 3-scf00136 | 3 |
| AX-157725508 | 6 | 60.723 | KV452782.1 | 8309185  | 3-scf00136 | 3 |
| AX-158000690 | 6 | 60.723 | KV452782.1 | 8310444  | 3-scf00136 | 3 |
| AX-158000691 | 6 | 60.723 | KV452782.1 | 8314855  | 3-scf00136 | 3 |
| AX-157723303 | 6 | 60.723 | KV452782.1 | 8317443  | 3-scf00136 | 3 |
| AX-158000694 | 6 | 60.723 | KV452782.1 | 8326806  | 3-scf00136 | 3 |
| AX-158000701 | 6 | 60.723 | KV452782.1 | 8333890  | 3-scf00136 | 3 |
| AX-158000708 | 6 | 60.723 | KV452782.1 | 8347820  | 3-scf00136 | 3 |
| AX-157757766 | 6 | 60.723 | KV452782.1 | 8350959  | 3-scf00136 | 3 |
| AX-158000715 | 6 | 60.723 | KV452782.1 | 8361830  | 3-scf00136 | 3 |
| AX-158000727 | 6 | 60.723 | KV452782.1 | 8380118  | 3-scf00136 | 3 |
| AX-158000734 | 6 | 60.723 | KV452782.1 | 8392012  | 3-scf00136 | 3 |
| AX-158000794 | 6 | 60.723 | KV452782.1 | 8465143  | 3-scf00136 | 3 |
| AX-158000795 | 6 | 60.723 | KV452782.1 | 8466509  | 3-scf00136 | 3 |
| AX-157819187 | 6 | 60.723 | KV452782.1 | 8466901  | 3-scf00136 | 3 |
| AX-158000797 | 6 | 60.723 | KV452782.1 | 8476262  | 3-scf00136 | 3 |
| AX-158000804 | 6 | 60.723 | KV452782.1 | 8487456  | 3-scf00136 | 3 |
| AX-157819197 | 6 | 60.723 | KV452782.1 | 8526521  | 3-scf00136 | 3 |
| AX-157819198 | 6 | 60.723 | KV452782.1 | 8527213  | 3-scf00136 | 3 |
| AX-158000841 | 6 | 60.723 | KV452782.1 | 8528565  | 3-scf00136 | 3 |
| AX-158000875 | 6 | 60.723 | KV452782.1 | 8557828  | 3-scf00136 | 3 |
| AX-158390725 | 6 | 60.723 | KV452782.1 | 8576426  | 3-scf00136 | 3 |
| AX-158000898 | 6 | 60.723 | KV452782.1 | 8588610  | 3-scf00136 | 3 |
| AX-158000930 | 6 | 60.723 | KV452782.1 | 8617659  | 3-scf00136 | 3 |
| AX-158000966 | 6 | 60.723 | KV452782.1 | 8645840  | 3-scf00136 | 3 |
| AX-158001097 | 6 | 60.723 | KV452782.1 | 8802161  | 3-scf00136 | 3 |
| AX-158001269 | 6 | 60.723 | KV452782.1 | 8981179  | 3-scf00136 | 3 |
| AX-158001396 | 6 | 60.723 | KV452782.1 | 9101324  | 3-scf00136 | 3 |
| AX-158001472 | 6 | 60.723 | KV452782.1 | 9183584  | 3-scf00136 | 3 |
| AX-158001487 | 6 | 60.723 | KV452782.1 | 9195684  | 3-scf00136 | 3 |
| AX-157876087 | 6 | 60.723 | KV452782.1 | 9247442  | 3-scf00136 | 3 |
| AX-158001741 | 6 | 60.723 | KV452782.1 | 9485116  | 3-scf00136 | 3 |
| AX-158001935 | 6 | 60.723 | KV452782.1 | 9675782  | 3-scf00136 | 3 |
| AX-157819326 | 6 | 60.723 | KV452782.1 | 9779179  | 3-scf00136 | 3 |
| AX-158002815 | 6 | 60.723 | KV452782.1 | 11146570 | 3-scf00136 | 3 |
| AX-158002870 | 6 | 60.723 | KV452782.1 | 11214489 | 3-scf00136 | 3 |
| AX-158003170 | 6 | 60.723 | KV452782.1 | 11530143 | 3-scf00136 | 3 |
| AX-158003174 | 6 | 60.723 | KV452782.1 | 11534321 | 3-scf00136 | 3 |
| AX-157819423 | 6 | 60.723 | KV452782.1 | 11855994 | 3-scf00136 | 3 |
| AX-158003566 | 6 | 60.723 | KV452782.1 | 12176324 | 3-scf00136 | 3 |
| AX-158005585 | 6 | 60.723 | KV452784.1 | 2602961  | 3-scf00141 | 3 |
| AX-158009651 | 6 | 60.723 | KV452784.1 | 8755962  | 3-scf00141 | 3 |
| AX-158009886 | 6 | 60.723 | KV452784.1 | 9021732  | 3-scf00141 | 3 |
| AX-158009921 | 6 | 60.723 | KV452784.1 | 9063422  | 3-scf00141 | 3 |
| AX-158010004 | 6 | 60.723 | KV452784.1 | 9128760  | 3-scf00141 | 3 |

|              |   |        |            |          |            |   |
|--------------|---|--------|------------|----------|------------|---|
| AX-158010046 | 6 | 60.723 | KV452784.1 | 9158214  | 3-scf00141 | 3 |
| AX-158010065 | 6 | 60.723 | KV452784.1 | 9176878  | 3-scf00141 | 3 |
| AX-158010075 | 6 | 60.723 | KV452784.1 | 9194763  | 3-scf00141 | 3 |
| AX-157820123 | 6 | 60.723 | KV452784.1 | 10494002 | 3-scf00141 | 3 |
| AX-158011575 | 6 | 60.723 | KV452784.1 | 10838356 | 3-scf00141 | 3 |
| AX-158011656 | 6 | 60.723 | KV452784.1 | 10902697 | 3-scf00141 | 3 |
| AX-158012050 | 6 | 60.723 | KV452784.1 | 11417479 | 3-scf00141 | 3 |
| AX-158012293 | 6 | 60.723 | KV452788.1 | 336749   | 3-scf00145 | 3 |
| AX-158012298 | 6 | 60.723 | KV452788.1 | 340236   | 3-scf00145 | 3 |
| AX-158012535 | 6 | 60.723 | KV452788.1 | 510285   | 3-scf00145 | 3 |
| AX-157710214 | 6 | 60.723 | KV452788.1 | 530628   | 3-scf00145 | 3 |
| AX-158012669 | 6 | 60.723 | KV452788.1 | 612104   | 3-scf00145 | 3 |
| AX-157865271 | 6 | 60.723 | KV452788.1 | 615002   | 3-scf00145 | 3 |
| AX-158012778 | 6 | 60.723 | KV452788.1 | 746326   | 3-scf00145 | 3 |
| AX-158012779 | 6 | 60.723 | KV452788.1 | 746608   | 3-scf00145 | 3 |
| AX-158012780 | 6 | 60.723 | KV452788.1 | 746994   | 3-scf00145 | 3 |
| AX-158014547 | 6 | 60.723 | KV452786.1 | 170140   | 3-scf00146 | 3 |
| AX-157714380 | 6 | 60.723 | KV452786.1 | 480552   | 3-scf00146 | 3 |
| AX-157684949 | 6 | 60.723 | KV452792.1 | 391788   | 3-scf00572 | 3 |
| AX-158000798 | 6 | 60.806 | KV452782.1 | 8477191  | 3-scf00136 | 3 |
| AX-158000176 | 6 | 60.887 | KV452782.1 | 7836658  | 3-scf00136 | 3 |
| AX-157819161 | 6 | 60.887 | KV452782.1 | 7845455  | 3-scf00136 | 3 |
| AX-158000424 | 6 | 60.887 | KV452782.1 | 8102523  | 3-scf00136 | 3 |
| AX-158000531 | 6 | 60.887 | KV452782.1 | 8175545  | 3-scf00136 | 3 |
| AX-158000602 | 6 | 60.887 | KV452782.1 | 8220629  | 3-scf00136 | 3 |
| AX-157819200 | 6 | 60.887 | KV452782.1 | 8527862  | 3-scf00136 | 3 |
| AX-158000849 | 6 | 60.887 | KV452782.1 | 8536325  | 3-scf00136 | 3 |
| AX-158000870 | 6 | 60.887 | KV452782.1 | 8553450  | 3-scf00136 | 3 |
| AX-158000874 | 6 | 60.887 | KV452782.1 | 8555432  | 3-scf00136 | 3 |
| AX-157719254 | 6 | 60.887 | KV452782.1 | 8562825  | 3-scf00136 | 3 |
| AX-158000879 | 6 | 60.887 | KV452782.1 | 8563285  | 3-scf00136 | 3 |
| AX-158000883 | 6 | 60.887 | KV452782.1 | 8572068  | 3-scf00136 | 3 |
| AX-158000889 | 6 | 60.887 | KV452782.1 | 8577731  | 3-scf00136 | 3 |
| AX-158000891 | 6 | 60.887 | KV452782.1 | 8581041  | 3-scf00136 | 3 |
| AX-158000901 | 6 | 60.887 | KV452782.1 | 8592007  | 3-scf00136 | 3 |
| AX-158000908 | 6 | 60.887 | KV452782.1 | 8596487  | 3-scf00136 | 3 |
| AX-158000910 | 6 | 60.887 | KV452782.1 | 8597723  | 3-scf00136 | 3 |
| AX-158000913 | 6 | 60.887 | KV452782.1 | 8603290  | 3-scf00136 | 3 |
| AX-158000924 | 6 | 60.887 | KV452782.1 | 8611972  | 3-scf00136 | 3 |
| AX-157819208 | 6 | 60.887 | KV452782.1 | 8612081  | 3-scf00136 | 3 |
| AX-158000925 | 6 | 60.887 | KV452782.1 | 8613622  | 3-scf00136 | 3 |
| AX-158000927 | 6 | 60.887 | KV452782.1 | 8614140  | 3-scf00136 | 3 |
| AX-158000928 | 6 | 60.887 | KV452782.1 | 8615614  | 3-scf00136 | 3 |
| AX-158000932 | 6 | 60.887 | KV452782.1 | 8618583  | 3-scf00136 | 3 |
| AX-158000934 | 6 | 60.887 | KV452782.1 | 8619146  | 3-scf00136 | 3 |
| AX-157819209 | 6 | 60.887 | KV452782.1 | 8626845  | 3-scf00136 | 3 |
| AX-158000948 | 6 | 60.887 | KV452782.1 | 8628867  | 3-scf00136 | 3 |
| AX-158000960 | 6 | 60.887 | KV452782.1 | 8644292  | 3-scf00136 | 3 |
| AX-158000962 | 6 | 60.887 | KV452782.1 | 8644812  | 3-scf00136 | 3 |
| AX-158000979 | 6 | 60.887 | KV452782.1 | 8672634  | 3-scf00136 | 3 |
| AX-158000980 | 6 | 60.887 | KV452782.1 | 8673095  | 3-scf00136 | 3 |

|              |   |        |            |          |            |   |
|--------------|---|--------|------------|----------|------------|---|
| AX-158000982 | 6 | 60.887 | KV452782.1 | 8673290  | 3-scf00136 | 3 |
| AX-158000984 | 6 | 60.887 | KV452782.1 | 8673766  | 3-scf00136 | 3 |
| AX-158000989 | 6 | 60.887 | KV452782.1 | 8675806  | 3-scf00136 | 3 |
| AX-158000991 | 6 | 60.887 | KV452782.1 | 8677084  | 3-scf00136 | 3 |
| AX-158000992 | 6 | 60.887 | KV452782.1 | 8678460  | 3-scf00136 | 3 |
| AX-158001002 | 6 | 60.887 | KV452782.1 | 8685555  | 3-scf00136 | 3 |
| AX-158001010 | 6 | 60.887 | KV452782.1 | 8696138  | 3-scf00136 | 3 |
| AX-158001141 | 6 | 60.887 | KV452782.1 | 8835105  | 3-scf00136 | 3 |
| AX-157775641 | 6 | 60.887 | KV452782.1 | 8869906  | 3-scf00136 | 3 |
| AX-158001218 | 6 | 60.887 | KV452782.1 | 8921961  | 3-scf00136 | 3 |
| AX-157714155 | 6 | 60.924 | KV452782.1 | 6599880  | 3-scf00136 | 3 |
| AX-157999290 | 6 | 60.924 | KV452782.1 | 6817893  | 3-scf00136 | 3 |
| AX-157819159 | 6 | 60.924 | KV452782.1 | 7826041  | 3-scf00136 | 3 |
| AX-158000470 | 6 | 60.924 | KV452782.1 | 8129511  | 3-scf00136 | 3 |
| AX-158001022 | 6 | 60.924 | KV452782.1 | 8724681  | 3-scf00136 | 3 |
| AX-158001488 | 6 | 60.924 | KV452782.1 | 9198110  | 3-scf00136 | 3 |
| AX-158003048 | 6 | 60.924 | KV452782.1 | 11379540 | 3-scf00136 | 3 |
| AX-158009988 | 6 | 60.924 | KV452784.1 | 9120305  | 3-scf00141 | 3 |
| AX-157819227 | 6 | 60.975 | KV452782.1 | 8733341  | 3-scf00136 | 3 |
| AX-158001031 | 6 | 61.025 | KV452782.1 | 8739944  | 3-scf00136 | 3 |
| AX-158001045 | 6 | 61.051 | KV452782.1 | 8752337  | 3-scf00136 | 3 |
| AX-157819230 | 6 | 61.051 | KV452782.1 | 8757684  | 3-scf00136 | 3 |
| AX-157819231 | 6 | 61.051 | KV452782.1 | 8758231  | 3-scf00136 | 3 |
| AX-158001047 | 6 | 61.051 | KV452782.1 | 8760082  | 3-scf00136 | 3 |
| AX-158001049 | 6 | 61.051 | KV452782.1 | 8761294  | 3-scf00136 | 3 |
| AX-157819232 | 6 | 61.051 | KV452782.1 | 8761351  | 3-scf00136 | 3 |
| AX-157717400 | 6 | 61.133 | KV452782.1 | 8762889  | 3-scf00136 | 3 |
| AX-158000432 | 6 | 61.16  | KV452782.1 | 8106993  | 3-scf00136 | 3 |
| AX-158000839 | 6 | 61.16  | KV452782.1 | 8525988  | 3-scf00136 | 3 |
| AX-158000850 | 6 | 61.16  | KV452782.1 | 8537744  | 3-scf00136 | 3 |
| AX-157772875 | 6 | 61.16  | KV452782.1 | 8545238  | 3-scf00136 | 3 |
| AX-158000860 | 6 | 61.16  | KV452782.1 | 8549221  | 3-scf00136 | 3 |
| AX-158000865 | 6 | 61.16  | KV452782.1 | 8550835  | 3-scf00136 | 3 |
| AX-158000867 | 6 | 61.16  | KV452782.1 | 8551260  | 3-scf00136 | 3 |
| AX-158000877 | 6 | 61.16  | KV452782.1 | 8559392  | 3-scf00136 | 3 |
| AX-157819221 | 6 | 61.16  | KV452782.1 | 8715215  | 3-scf00136 | 3 |
| AX-158001054 | 6 | 61.16  | KV452782.1 | 8766336  | 3-scf00136 | 3 |
| AX-158001067 | 6 | 61.16  | KV452782.1 | 8772741  | 3-scf00136 | 3 |
| AX-157774570 | 6 | 61.16  | KV452782.1 | 8777523  | 3-scf00136 | 3 |
| AX-158001074 | 6 | 61.16  | KV452782.1 | 8781572  | 3-scf00136 | 3 |
| AX-158001080 | 6 | 61.16  | KV452782.1 | 8785341  | 3-scf00136 | 3 |
| AX-158001082 | 6 | 61.16  | KV452782.1 | 8786235  | 3-scf00136 | 3 |
| AX-158001086 | 6 | 61.16  | KV452782.1 | 8788638  | 3-scf00136 | 3 |
| AX-158001136 | 6 | 61.16  | KV452782.1 | 8830576  | 3-scf00136 | 3 |
| AX-158001170 | 6 | 61.16  | KV452782.1 | 8862062  | 3-scf00136 | 3 |
| AX-158001215 | 6 | 61.16  | KV452782.1 | 8916131  | 3-scf00136 | 3 |
| AX-158001698 | 6 | 61.16  | KV452782.1 | 9443011  | 3-scf00136 | 3 |
| AX-158001087 | 6 | 61.215 | KV452782.1 | 8791818  | 3-scf00136 | 3 |
| AX-157997047 | 6 | 61.269 | KV452782.1 | 4430694  | 3-scf00136 | 3 |
| AX-157998123 | 6 | 61.269 | KV452782.1 | 5540970  | 3-scf00136 | 3 |
| AX-158000122 | 6 | 61.269 | KV452782.1 | 7787053  | 3-scf00136 | 3 |



|              |   |        |            |         |            |   |
|--------------|---|--------|------------|---------|------------|---|
| AX-157774714 | 6 | 61.269 | KV452782.1 | 7862163 | 3-scf00136 | 3 |
| AX-157855989 | 6 | 61.269 | KV452782.1 | 8042284 | 3-scf00136 | 3 |
| AX-158000370 | 6 | 61.269 | KV452782.1 | 8042848 | 3-scf00136 | 3 |
| AX-158000371 | 6 | 61.269 | KV452782.1 | 8044145 | 3-scf00136 | 3 |
| AX-158000372 | 6 | 61.269 | KV452782.1 | 8044774 | 3-scf00136 | 3 |
| AX-157855990 | 6 | 61.269 | KV452782.1 | 8047107 | 3-scf00136 | 3 |
| AX-157714310 | 6 | 61.269 | KV452782.1 | 8047254 | 3-scf00136 | 3 |
| AX-158000375 | 6 | 61.269 | KV452782.1 | 8047763 | 3-scf00136 | 3 |
| AX-158000376 | 6 | 61.269 | KV452782.1 | 8048174 | 3-scf00136 | 3 |
| AX-158000380 | 6 | 61.269 | KV452782.1 | 8053946 | 3-scf00136 | 3 |
| AX-157819168 | 6 | 61.269 | KV452782.1 | 8053987 | 3-scf00136 | 3 |
| AX-158000393 | 6 | 61.269 | KV452782.1 | 8067807 | 3-scf00136 | 3 |
| AX-158000431 | 6 | 61.269 | KV452782.1 | 8105952 | 3-scf00136 | 3 |
| AX-157819171 | 6 | 61.269 | KV452782.1 | 8119624 | 3-scf00136 | 3 |
| AX-158000446 | 6 | 61.269 | KV452782.1 | 8119697 | 3-scf00136 | 3 |
| AX-158000458 | 6 | 61.269 | KV452782.1 | 8125988 | 3-scf00136 | 3 |
| AX-158000460 | 6 | 61.269 | KV452782.1 | 8126358 | 3-scf00136 | 3 |
| AX-158000546 | 6 | 61.269 | KV452782.1 | 8186563 | 3-scf00136 | 3 |
| AX-158000876 | 6 | 61.269 | KV452782.1 | 8558581 | 3-scf00136 | 3 |
| AX-158000886 | 6 | 61.269 | KV452782.1 | 8576091 | 3-scf00136 | 3 |
| AX-157755026 | 6 | 61.269 | KV452782.1 | 8589383 | 3-scf00136 | 3 |
| AX-157819228 | 6 | 61.269 | KV452782.1 | 8735462 | 3-scf00136 | 3 |
| AX-157717041 | 6 | 61.269 | KV452782.1 | 8791987 | 3-scf00136 | 3 |
| AX-158001090 | 6 | 61.269 | KV452782.1 | 8795338 | 3-scf00136 | 3 |
| AX-157772784 | 6 | 61.269 | KV452782.1 | 8798906 | 3-scf00136 | 3 |
| AX-157743630 | 6 | 61.269 | KV452782.1 | 8799282 | 3-scf00136 | 3 |
| AX-157819237 | 6 | 61.269 | KV452782.1 | 8801789 | 3-scf00136 | 3 |
| AX-158001103 | 6 | 61.269 | KV452782.1 | 8806036 | 3-scf00136 | 3 |
| AX-158001109 | 6 | 61.269 | KV452782.1 | 8810965 | 3-scf00136 | 3 |
| AX-158001110 | 6 | 61.269 | KV452782.1 | 8811767 | 3-scf00136 | 3 |
| AX-158001123 | 6 | 61.269 | KV452782.1 | 8820426 | 3-scf00136 | 3 |
| AX-158001124 | 6 | 61.269 | KV452782.1 | 8821295 | 3-scf00136 | 3 |
| AX-158001126 | 6 | 61.269 | KV452782.1 | 8822113 | 3-scf00136 | 3 |
| AX-158001132 | 6 | 61.269 | KV452782.1 | 8824617 | 3-scf00136 | 3 |
| AX-157770900 | 6 | 61.269 | KV452782.1 | 8825236 | 3-scf00136 | 3 |
| AX-158407444 | 6 | 61.269 | KV452782.1 | 8826207 | 3-scf00136 | 3 |
| AX-158001137 | 6 | 61.269 | KV452782.1 | 8831356 | 3-scf00136 | 3 |
| AX-158001138 | 6 | 61.269 | KV452782.1 | 8833696 | 3-scf00136 | 3 |
| AX-158001139 | 6 | 61.269 | KV452782.1 | 8834108 | 3-scf00136 | 3 |
| AX-158001142 | 6 | 61.269 | KV452782.1 | 8835877 | 3-scf00136 | 3 |
| AX-158001143 | 6 | 61.269 | KV452782.1 | 8836716 | 3-scf00136 | 3 |
| AX-158001146 | 6 | 61.269 | KV452782.1 | 8840040 | 3-scf00136 | 3 |
| AX-158001147 | 6 | 61.269 | KV452782.1 | 8841730 | 3-scf00136 | 3 |
| AX-158001149 | 6 | 61.269 | KV452782.1 | 8845427 | 3-scf00136 | 3 |
| AX-158001150 | 6 | 61.269 | KV452782.1 | 8847464 | 3-scf00136 | 3 |
| AX-158001153 | 6 | 61.269 | KV452782.1 | 8850938 | 3-scf00136 | 3 |
| AX-158001155 | 6 | 61.269 | KV452782.1 | 8853383 | 3-scf00136 | 3 |
| AX-158001177 | 6 | 61.269 | KV452782.1 | 8865981 | 3-scf00136 | 3 |
| AX-157819241 | 6 | 61.269 | KV452782.1 | 8868730 | 3-scf00136 | 3 |
| AX-158001179 | 6 | 61.269 | KV452782.1 | 8870639 | 3-scf00136 | 3 |
| AX-158001180 | 6 | 61.269 | KV452782.1 | 8871136 | 3-scf00136 | 3 |

|              |   |        |            |          |                |    |
|--------------|---|--------|------------|----------|----------------|----|
| AX-157744470 | 6 | 61.269 | KV452782.1 | 8872895  | 3-scf00136     | 3  |
| AX-157819244 | 6 | 61.269 | KV452782.1 | 8873639  | 3-scf00136     | 3  |
| AX-157758988 | 6 | 61.269 | KV452782.1 | 8873936  | 3-scf00136     | 3  |
| AX-157819245 | 6 | 61.269 | KV452782.1 | 8874787  | 3-scf00136     | 3  |
| AX-158001183 | 6 | 61.269 | KV452782.1 | 8875414  | 3-scf00136     | 3  |
| AX-158001186 | 6 | 61.269 | KV452782.1 | 8878194  | 3-scf00136     | 3  |
| AX-158001322 | 6 | 61.269 | KV452782.1 | 9021832  | 3-scf00136     | 3  |
| AX-158001491 | 6 | 61.269 | KV452782.1 | 9199729  | 3-scf00136     | 3  |
| AX-158001536 | 6 | 61.269 | KV452782.1 | 9238267  | 3-scf00136     | 3  |
| AX-158001542 | 6 | 61.269 | KV452782.1 | 9240495  | 3-scf00136     | 3  |
| AX-158002040 | 6 | 61.269 | KV452782.1 | 9764366  | 3-scf00136     | 3  |
| AX-158002472 | 6 | 61.269 | KV452782.1 | 10509030 | 3-scf00136     | 3  |
| AX-158002596 | 6 | 61.269 | KV452782.1 | 10877222 | 3-scf00136     | 3  |
| AX-158002732 | 6 | 61.269 | KV452782.1 | 11025686 | 3-scf00136     | 3  |
| AX-158003612 | 6 | 61.269 | KV452782.1 | 12234382 | 3-scf00136     | 3  |
| AX-158009559 | 6 | 61.269 | KV452784.1 | 8676189  | 3-scf00141     | 3  |
| AX-158001188 | 6 | 61.488 | KV452782.1 | 8882639  | 3-scf00136     | 3  |
| AX-158001191 | 6 | 61.488 | KV452782.1 | 8886281  | 3-scf00136     | 3  |
| AX-158001193 | 6 | 61.488 | KV452782.1 | 8893995  | 3-scf00136     | 3  |
| AX-158001195 | 6 | 61.488 | KV452782.1 | 8894420  | 3-scf00136     | 3  |
| AX-158001196 | 6 | 61.488 | KV452782.1 | 8897099  | 3-scf00136     | 3  |
| AX-158001197 | 6 | 61.488 | KV452782.1 | 8897914  | 3-scf00136     | 3  |
| AX-158001200 | 6 | 61.488 | KV452782.1 | 8898951  | 3-scf00136     | 3  |
| AX-158001201 | 6 | 61.488 | KV452782.1 | 8900857  | 3-scf00136     | 3  |
| AX-158001204 | 6 | 61.488 | KV452782.1 | 8902890  | 3-scf00136     | 3  |
| AX-158407446 | 6 | 61.488 | KV452782.1 | 8907480  | 3-scf00136     | 3  |
| AX-158415803 | 6 | 61.488 | KV452782.1 | 8907532  | 3-scf00136     | 3  |
| AX-158001209 | 6 | 61.488 | KV452782.1 | 8908403  | 3-scf00136     | 3  |
| AX-157723299 | 6 | 61.488 | KV452782.1 | 8910435  | 3-scf00136     | 3  |
| AX-158001212 | 6 | 61.488 | KV452782.1 | 8912815  | 3-scf00136     | 3  |
| AX-158001245 | 6 | 61.488 | KV452782.1 | 8949071  | 3-scf00136     | 3  |
| AX-157695496 | 6 | 61.488 | FI890855.1 | 73       | 10RI212 lctalk | UN |
| AX-158001227 | 6 | 61.597 | KV452782.1 | 8937199  | 3-scf00136     | 3  |
| AX-158001229 | 6 | 61.597 | KV452782.1 | 8937600  | 3-scf00136     | 3  |
| AX-158001230 | 6 | 61.597 | KV452782.1 | 8938139  | 3-scf00136     | 3  |
| AX-158001232 | 6 | 61.597 | KV452782.1 | 8939017  | 3-scf00136     | 3  |
| AX-158001233 | 6 | 61.597 | KV452782.1 | 8939553  | 3-scf00136     | 3  |
| AX-158001236 | 6 | 61.597 | KV452782.1 | 8940146  | 3-scf00136     | 3  |
| AX-158001241 | 6 | 61.597 | KV452782.1 | 8946718  | 3-scf00136     | 3  |
| AX-158001247 | 6 | 61.597 | KV452782.1 | 8950628  | 3-scf00136     | 3  |
| AX-157717911 | 6 | 61.597 | KV452782.1 | 8957962  | 3-scf00136     | 3  |
| AX-158001253 | 6 | 61.597 | KV452782.1 | 8959881  | 3-scf00136     | 3  |
| AX-158001259 | 6 | 61.597 | KV452782.1 | 8973727  | 3-scf00136     | 3  |
| AX-158001260 | 6 | 61.597 | KV452782.1 | 8974294  | 3-scf00136     | 3  |
| AX-158001286 | 6 | 61.597 | KV452782.1 | 8997709  | 3-scf00136     | 3  |
| AX-158001299 | 6 | 61.597 | KV452782.1 | 9001900  | 3-scf00136     | 3  |
| AX-157884746 | 6 | 61.597 | KV452782.1 | 9187124  | 3-scf00136     | 3  |
| AX-158001730 | 6 | 61.597 | KV452782.1 | 9458602  | 3-scf00136     | 3  |
| AX-158001189 | 6 | 61.67  | KV452782.1 | 8884699  | 3-scf00136     | 3  |
| AX-158001263 | 6 | 61.67  | KV452782.1 | 8976078  | 3-scf00136     | 3  |
| AX-158001353 | 6 | 61.67  | KV452782.1 | 9054308  | 3-scf00136     | 3  |

|              |   |        |            |          |            |   |
|--------------|---|--------|------------|----------|------------|---|
| AX-157856149 | 6 | 61.67  | KV452782.1 | 11029874 | 3-scf00136 | 3 |
| AX-157862958 | 6 | 61.67  | KV452782.1 | 11077278 | 3-scf00136 | 3 |
| AX-157819412 | 6 | 61.67  | KV452782.1 | 11573519 | 3-scf00136 | 3 |
| AX-157726171 | 6 | 61.67  | KV452784.1 | 9077661  | 3-scf00141 | 3 |
| AX-158010628 | 6 | 61.67  | KV452784.1 | 9764346  | 3-scf00141 | 3 |
| AX-157724948 | 6 | 61.67  | KV452784.1 | 9900087  | 3-scf00141 | 3 |
| AX-158001265 | 6 | 61.704 | KV452782.1 | 8977250  | 3-scf00136 | 3 |
| AX-158001271 | 6 | 61.762 | KV452782.1 | 8983723  | 3-scf00136 | 3 |
| AX-157758437 | 6 | 61.815 | KV452782.1 | 8738637  | 3-scf00136 | 3 |
| AX-158001205 | 6 | 61.815 | KV452782.1 | 8903824  | 3-scf00136 | 3 |
| AX-158001235 | 6 | 61.815 | KV452782.1 | 8939790  | 3-scf00136 | 3 |
| AX-158001266 | 6 | 61.815 | KV452782.1 | 8979404  | 3-scf00136 | 3 |
| AX-158407451 | 6 | 61.815 | KV452782.1 | 8987609  | 3-scf00136 | 3 |
| AX-158001274 | 6 | 61.815 | KV452782.1 | 8989042  | 3-scf00136 | 3 |
| AX-158001278 | 6 | 61.815 | KV452782.1 | 8991096  | 3-scf00136 | 3 |
| AX-158001280 | 6 | 61.815 | KV452782.1 | 8992505  | 3-scf00136 | 3 |
| AX-157876076 | 6 | 61.815 | KV452782.1 | 8995252  | 3-scf00136 | 3 |
| AX-158001284 | 6 | 61.815 | KV452782.1 | 8996290  | 3-scf00136 | 3 |
| AX-158001292 | 6 | 61.815 | KV452782.1 | 9000103  | 3-scf00136 | 3 |
| AX-158001293 | 6 | 61.815 | KV452782.1 | 9000739  | 3-scf00136 | 3 |
| AX-158001300 | 6 | 61.815 | KV452782.1 | 9002833  | 3-scf00136 | 3 |
| AX-158001303 | 6 | 61.815 | KV452782.1 | 9003991  | 3-scf00136 | 3 |
| AX-158001304 | 6 | 61.815 | KV452782.1 | 9005518  | 3-scf00136 | 3 |
| AX-157741995 | 6 | 61.815 | KV452782.1 | 9008827  | 3-scf00136 | 3 |
| AX-158001312 | 6 | 61.815 | KV452782.1 | 9012869  | 3-scf00136 | 3 |
| AX-158001316 | 6 | 61.815 | KV452782.1 | 9015563  | 3-scf00136 | 3 |
| AX-158001317 | 6 | 61.815 | KV452782.1 | 9016429  | 3-scf00136 | 3 |
| AX-157713127 | 6 | 61.815 | KV452782.1 | 9023436  | 3-scf00136 | 3 |
| AX-158001325 | 6 | 61.815 | KV452782.1 | 9024245  | 3-scf00136 | 3 |
| AX-158001327 | 6 | 61.815 | KV452782.1 | 9026723  | 3-scf00136 | 3 |
| AX-158001329 | 6 | 61.815 | KV452782.1 | 9027473  | 3-scf00136 | 3 |
| AX-158001330 | 6 | 61.815 | KV452782.1 | 9027969  | 3-scf00136 | 3 |
| AX-158001334 | 6 | 61.815 | KV452782.1 | 9029376  | 3-scf00136 | 3 |
| AX-158001337 | 6 | 61.815 | KV452782.1 | 9032357  | 3-scf00136 | 3 |
| AX-158001340 | 6 | 61.815 | KV452782.1 | 9036083  | 3-scf00136 | 3 |
| AX-158001347 | 6 | 61.815 | KV452782.1 | 9044326  | 3-scf00136 | 3 |
| AX-158001348 | 6 | 61.815 | KV452782.1 | 9044787  | 3-scf00136 | 3 |
| AX-158001349 | 6 | 61.815 | KV452782.1 | 9045117  | 3-scf00136 | 3 |
| AX-157708745 | 6 | 61.815 | KV452782.1 | 9047498  | 3-scf00136 | 3 |
| AX-157819249 | 6 | 61.815 | KV452782.1 | 9052013  | 3-scf00136 | 3 |
| AX-158001356 | 6 | 61.815 | KV452782.1 | 9063416  | 3-scf00136 | 3 |
| AX-158001357 | 6 | 61.815 | KV452782.1 | 9065047  | 3-scf00136 | 3 |
| AX-157744143 | 6 | 61.815 | KV452782.1 | 9066391  | 3-scf00136 | 3 |
| AX-157714196 | 6 | 61.815 | KV452782.1 | 9068083  | 3-scf00136 | 3 |
| AX-157819253 | 6 | 61.815 | KV452782.1 | 9070065  | 3-scf00136 | 3 |
| AX-158001360 | 6 | 61.815 | KV452782.1 | 9070320  | 3-scf00136 | 3 |
| AX-158001372 | 6 | 61.815 | KV452782.1 | 9081633  | 3-scf00136 | 3 |
| AX-158001378 | 6 | 61.815 | KV452782.1 | 9087702  | 3-scf00136 | 3 |
| AX-158001385 | 6 | 61.815 | KV452782.1 | 9095664  | 3-scf00136 | 3 |
| AX-158001407 | 6 | 61.815 | KV452782.1 | 9114476  | 3-scf00136 | 3 |
| AX-158001412 | 6 | 61.815 | KV452782.1 | 9119205  | 3-scf00136 | 3 |

|              |   |        |            |          |                |    |
|--------------|---|--------|------------|----------|----------------|----|
| AX-158001417 | 6 | 61.815 | KV452782.1 | 9121975  | 3-scf00136     | 3  |
| AX-158001431 | 6 | 61.815 | KV452782.1 | 9143077  | 3-scf00136     | 3  |
| AX-157750425 | 6 | 61.815 | KV452782.1 | 9147014  | 3-scf00136     | 3  |
| AX-158001436 | 6 | 61.815 | KV452782.1 | 9148013  | 3-scf00136     | 3  |
| AX-158001445 | 6 | 61.815 | KV452782.1 | 9153978  | 3-scf00136     | 3  |
| AX-157720985 | 6 | 61.815 | KV452782.1 | 9160688  | 3-scf00136     | 3  |
| AX-158001574 | 6 | 61.815 | KV452782.1 | 9272211  | 3-scf00136     | 3  |
| AX-157819280 | 6 | 61.815 | KV452782.1 | 9285728  | 3-scf00136     | 3  |
| AX-158001594 | 6 | 61.815 | KV452782.1 | 9294443  | 3-scf00136     | 3  |
| AX-158001765 | 6 | 61.815 | KV452782.1 | 9505892  | 3-scf00136     | 3  |
| AX-158002019 | 6 | 61.815 | KV452782.1 | 9741431  | 3-scf00136     | 3  |
| AX-157715113 | 6 | 61.815 | KV452782.1 | 9808071  | 3-scf00136     | 3  |
| AX-158002592 | 6 | 61.815 | KV452782.1 | 10872486 | 3-scf00136     | 3  |
| AX-158002747 | 6 | 61.815 | KV452782.1 | 11039404 | 3-scf00136     | 3  |
| AX-158002824 | 6 | 61.815 | KV452782.1 | 11164086 | 3-scf00136     | 3  |
| AX-158002918 | 6 | 61.815 | KV452782.1 | 11258038 | 3-scf00136     | 3  |
| AX-158003822 | 6 | 61.815 | KV452784.1 | 226719   | 3-scf00141     | 3  |
| AX-158005003 | 6 | 61.815 | KV452784.1 | 2015728  | 3-scf00141     | 3  |
| AX-158006444 | 6 | 61.815 | KV452784.1 | 3723530  | 3-scf00141     | 3  |
| AX-158007306 | 6 | 61.815 | KV452784.1 | 5986376  | 3-scf00141     | 3  |
| AX-157775426 | 6 | 61.815 | KV452784.1 | 8597638  | 3-scf00141     | 3  |
| AX-158009527 | 6 | 61.815 | KV452784.1 | 8645730  | 3-scf00141     | 3  |
| AX-158009958 | 6 | 61.815 | KV452784.1 | 9095798  | 3-scf00141     | 3  |
| AX-158379652 | 6 | 61.925 | KV452782.1 | 9071439  | 3-scf00136     | 3  |
| AX-158001369 | 6 | 61.925 | KV452782.1 | 9078122  | 3-scf00136     | 3  |
| AX-157819258 | 6 | 61.925 | KV452782.1 | 9081561  | 3-scf00136     | 3  |
| AX-158001381 | 6 | 61.925 | KV452782.1 | 9091288  | 3-scf00136     | 3  |
| AX-158001382 | 6 | 61.925 | KV452782.1 | 9091754  | 3-scf00136     | 3  |
| AX-157695975 | 6 | 61.925 | FI897376.1 | 206      | FORI212 lctalt | UN |
| AX-158001389 | 6 | 61.946 | KV452782.1 | 9096912  | 3-scf00136     | 3  |
| AX-158001440 | 6 | 61.946 | KV452782.1 | 9149354  | 3-scf00136     | 3  |
| AX-158001484 | 6 | 61.946 | KV452782.1 | 9194389  | 3-scf00136     | 3  |
| AX-158001398 | 6 | 61.978 | KV452782.1 | 9102287  | 3-scf00136     | 3  |
| AX-157884725 | 6 | 62.006 | KV452782.1 | 7968125  | 3-scf00136     | 3  |
| AX-158001399 | 6 | 62.006 | KV452782.1 | 9102789  | 3-scf00136     | 3  |
| AX-157819268 | 6 | 62.006 | KV452782.1 | 9137721  | 3-scf00136     | 3  |
| AX-157819263 | 6 | 62.034 | KV452782.1 | 9116733  | 3-scf00136     | 3  |
| AX-158001411 | 6 | 62.034 | KV452782.1 | 9118844  | 3-scf00136     | 3  |
| AX-158000453 | 6 | 62.143 | KV452782.1 | 8123102  | 3-scf00136     | 3  |
| AX-158001414 | 6 | 62.143 | KV452782.1 | 9121030  | 3-scf00136     | 3  |
| AX-157819264 | 6 | 62.143 | KV452782.1 | 9121609  | 3-scf00136     | 3  |
| AX-157819265 | 6 | 62.143 | KV452782.1 | 9122318  | 3-scf00136     | 3  |
| AX-158001419 | 6 | 62.143 | KV452782.1 | 9123996  | 3-scf00136     | 3  |
| AX-158001425 | 6 | 62.143 | KV452782.1 | 9132997  | 3-scf00136     | 3  |
| AX-158001428 | 6 | 62.143 | KV452782.1 | 9138185  | 3-scf00136     | 3  |
| AX-158001429 | 6 | 62.143 | KV452782.1 | 9140115  | 3-scf00136     | 3  |
| AX-158001432 | 6 | 62.143 | KV452782.1 | 9143212  | 3-scf00136     | 3  |
| AX-158001443 | 6 | 62.143 | KV452782.1 | 9150378  | 3-scf00136     | 3  |
| AX-158001554 | 6 | 62.143 | KV452782.1 | 9251099  | 3-scf00136     | 3  |
| AX-158000429 | 6 | 62.252 | KV452782.1 | 8104863  | 3-scf00136     | 3  |
| AX-158001261 | 6 | 62.252 | KV452782.1 | 8975021  | 3-scf00136     | 3  |

|              |   |        |             |         |            |    |
|--------------|---|--------|-------------|---------|------------|----|
| AX-158001341 | 6 | 62.252 | KV452782.1  | 9036768 | 3-scf00136 | 3  |
| AX-157819248 | 6 | 62.252 | KV452782.1  | 9040615 | 3-scf00136 | 3  |
| AX-157856014 | 6 | 62.252 | KV452782.1  | 9077827 | 3-scf00136 | 3  |
| AX-157775783 | 6 | 62.252 | KV452782.1  | 9133375 | 3-scf00136 | 3  |
| AX-158001434 | 6 | 62.252 | KV452782.1  | 9146798 | 3-scf00136 | 3  |
| AX-157754796 | 6 | 62.252 | KV452782.1  | 9152189 | 3-scf00136 | 3  |
| AX-158001446 | 6 | 62.252 | KV452782.1  | 9156707 | 3-scf00136 | 3  |
| AX-157819269 | 6 | 62.252 | KV452782.1  | 9157029 | 3-scf00136 | 3  |
| AX-158001448 | 6 | 62.252 | KV452782.1  | 9157196 | 3-scf00136 | 3  |
| AX-158383464 | 6 | 62.252 | KV452782.1  | 9157604 | 3-scf00136 | 3  |
| AX-158001451 | 6 | 62.252 | KV452782.1  | 9160262 | 3-scf00136 | 3  |
| AX-158001454 | 6 | 62.252 | KV452782.1  | 9161819 | 3-scf00136 | 3  |
| AX-157756057 | 6 | 62.252 | KV452782.1  | 9162143 | 3-scf00136 | 3  |
| AX-157884745 | 6 | 62.252 | KV452782.1  | 9162769 | 3-scf00136 | 3  |
| AX-158001455 | 6 | 62.252 | KV452782.1  | 9165013 | 3-scf00136 | 3  |
| AX-158001460 | 6 | 62.252 | KV452782.1  | 9174738 | 3-scf00136 | 3  |
| AX-158001462 | 6 | 62.252 | KV452782.1  | 9175439 | 3-scf00136 | 3  |
| AX-158001467 | 6 | 62.252 | KV452782.1  | 9178657 | 3-scf00136 | 3  |
| AX-157748237 | 6 | 62.252 | KV452782.1  | 9180886 | 3-scf00136 | 3  |
| AX-158001469 | 6 | 62.252 | KV452782.1  | 9181321 | 3-scf00136 | 3  |
| AX-158001477 | 6 | 62.252 | KV452782.1  | 9189747 | 3-scf00136 | 3  |
| AX-158001479 | 6 | 62.252 | KV452782.1  | 9192006 | 3-scf00136 | 3  |
| AX-158001485 | 6 | 62.252 | KV452782.1  | 9195178 | 3-scf00136 | 3  |
| AX-157856016 | 6 | 62.252 | KV452782.1  | 9199134 | 3-scf00136 | 3  |
| AX-158001580 | 6 | 62.252 | KV452782.1  | 9278206 | 3-scf00136 | 3  |
| AX-158001583 | 6 | 62.252 | KV452782.1  | 9279164 | 3-scf00136 | 3  |
| AX-157705989 | 6 | 62.252 | 3ML01031378 | 317     | scf06990_1 | UN |
| AX-158001481 | 6 | 62.298 | KV452782.1  | 9193181 | 3-scf00136 | 3  |
| AX-158001508 | 6 | 62.298 | KV452782.1  | 9209995 | 3-scf00136 | 3  |
| AX-157865186 | 6 | 62.361 | KV452782.1  | 9170260 | 3-scf00136 | 3  |
| AX-158001490 | 6 | 62.361 | KV452782.1  | 9198783 | 3-scf00136 | 3  |
| AX-158001492 | 6 | 62.361 | KV452782.1  | 9200458 | 3-scf00136 | 3  |
| AX-158001494 | 6 | 62.361 | KV452782.1  | 9201397 | 3-scf00136 | 3  |
| AX-158001496 | 6 | 62.361 | KV452782.1  | 9202785 | 3-scf00136 | 3  |
| AX-158001500 | 6 | 62.361 | KV452782.1  | 9203945 | 3-scf00136 | 3  |
| AX-157819271 | 6 | 62.361 | KV452782.1  | 9210081 | 3-scf00136 | 3  |
| AX-158001515 | 6 | 62.361 | KV452782.1  | 9216135 | 3-scf00136 | 3  |
| AX-157710428 | 6 | 62.361 | KV452782.1  | 9218678 | 3-scf00136 | 3  |
| AX-158001522 | 6 | 62.361 | KV452782.1  | 9222651 | 3-scf00136 | 3  |
| AX-158001687 | 6 | 62.361 | KV452782.1  | 9433421 | 3-scf00136 | 3  |
| AX-158001882 | 6 | 62.361 | KV452782.1  | 9608191 | 3-scf00136 | 3  |
| AX-158001530 | 6 | 62.383 | KV452782.1  | 9231126 | 3-scf00136 | 3  |
| AX-157820049 | 6 | 62.383 | KV452784.1  | 9379488 | 3-scf00141 | 3  |
| AX-158001537 | 6 | 62.4   | KV452782.1  | 9238651 | 3-scf00136 | 3  |
| AX-158001881 | 6 | 62.4   | KV452782.1  | 9605200 | 3-scf00136 | 3  |
| AX-158001539 | 6 | 62.424 | KV452782.1  | 9239364 | 3-scf00136 | 3  |
| AX-158001546 | 6 | 62.45  | KV452782.1  | 9242810 | 3-scf00136 | 3  |
| AX-157999464 | 6 | 62.471 | KV452782.1  | 7082022 | 3-scf00136 | 3  |
| AX-157774675 | 6 | 62.471 | KV452782.1  | 7201184 | 3-scf00136 | 3  |
| AX-157855952 | 6 | 62.471 | KV452782.1  | 7322543 | 3-scf00136 | 3  |
| AX-157999674 | 6 | 62.471 | KV452782.1  | 7345026 | 3-scf00136 | 3  |

|              |   |        |            |         |            |   |
|--------------|---|--------|------------|---------|------------|---|
| AX-157999816 | 6 | 62.471 | KV452782.1 | 7468976 | 3-scf00136 | 3 |
| AX-158000013 | 6 | 62.471 | KV452782.1 | 7663415 | 3-scf00136 | 3 |
| AX-158000111 | 6 | 62.471 | KV452782.1 | 7774919 | 3-scf00136 | 3 |
| AX-157819164 | 6 | 62.471 | KV452782.1 | 7977843 | 3-scf00136 | 3 |
| AX-158001023 | 6 | 62.471 | KV452782.1 | 8733695 | 3-scf00136 | 3 |
| AX-157727732 | 6 | 62.471 | KV452782.1 | 8969117 | 3-scf00136 | 3 |
| AX-157819266 | 6 | 62.471 | KV452782.1 | 9125173 | 3-scf00136 | 3 |
| AX-158001476 | 6 | 62.471 | KV452782.1 | 9187447 | 3-scf00136 | 3 |
| AX-158001503 | 6 | 62.471 | KV452782.1 | 9206892 | 3-scf00136 | 3 |
| AX-158001507 | 6 | 62.471 | KV452782.1 | 9208976 | 3-scf00136 | 3 |
| AX-158001510 | 6 | 62.471 | KV452782.1 | 9210497 | 3-scf00136 | 3 |
| AX-158001516 | 6 | 62.471 | KV452782.1 | 9216733 | 3-scf00136 | 3 |
| AX-158001521 | 6 | 62.471 | KV452782.1 | 9221112 | 3-scf00136 | 3 |
| AX-157819272 | 6 | 62.471 | KV452782.1 | 9222430 | 3-scf00136 | 3 |
| AX-157747796 | 6 | 62.471 | KV452782.1 | 9224104 | 3-scf00136 | 3 |
| AX-158001525 | 6 | 62.471 | KV452782.1 | 9224715 | 3-scf00136 | 3 |
| AX-157819273 | 6 | 62.471 | KV452782.1 | 9225196 | 3-scf00136 | 3 |
| AX-157856018 | 6 | 62.471 | KV452782.1 | 9232095 | 3-scf00136 | 3 |
| AX-158001549 | 6 | 62.471 | KV452782.1 | 9244209 | 3-scf00136 | 3 |
| AX-158001551 | 6 | 62.471 | KV452782.1 | 9246013 | 3-scf00136 | 3 |
| AX-158001552 | 6 | 62.471 | KV452782.1 | 9248617 | 3-scf00136 | 3 |
| AX-158001555 | 6 | 62.471 | KV452782.1 | 9251239 | 3-scf00136 | 3 |
| AX-158001556 | 6 | 62.471 | KV452782.1 | 9252630 | 3-scf00136 | 3 |
| AX-158001558 | 6 | 62.471 | KV452782.1 | 9254121 | 3-scf00136 | 3 |
| AX-158001559 | 6 | 62.471 | KV452782.1 | 9256837 | 3-scf00136 | 3 |
| AX-158001560 | 6 | 62.471 | KV452782.1 | 9257039 | 3-scf00136 | 3 |
| AX-157819276 | 6 | 62.471 | KV452782.1 | 9257367 | 3-scf00136 | 3 |
| AX-157740829 | 6 | 62.471 | KV452782.1 | 9258584 | 3-scf00136 | 3 |
| AX-158001562 | 6 | 62.471 | KV452782.1 | 9259029 | 3-scf00136 | 3 |
| AX-158001563 | 6 | 62.471 | KV452782.1 | 9260033 | 3-scf00136 | 3 |
| AX-158001564 | 6 | 62.471 | KV452782.1 | 9260656 | 3-scf00136 | 3 |
| AX-157819277 | 6 | 62.471 | KV452782.1 | 9263890 | 3-scf00136 | 3 |
| AX-157819278 | 6 | 62.471 | KV452782.1 | 9266727 | 3-scf00136 | 3 |
| AX-158001570 | 6 | 62.471 | KV452782.1 | 9267809 | 3-scf00136 | 3 |
| AX-158001578 | 6 | 62.471 | KV452782.1 | 9274006 | 3-scf00136 | 3 |
| AX-158001584 | 6 | 62.471 | KV452782.1 | 9280567 | 3-scf00136 | 3 |
| AX-158001585 | 6 | 62.471 | KV452782.1 | 9281451 | 3-scf00136 | 3 |
| AX-157739947 | 6 | 62.471 | KV452782.1 | 9283615 | 3-scf00136 | 3 |
| AX-158001587 | 6 | 62.471 | KV452782.1 | 9285942 | 3-scf00136 | 3 |
| AX-158001590 | 6 | 62.471 | KV452782.1 | 9287193 | 3-scf00136 | 3 |
| AX-158001592 | 6 | 62.471 | KV452782.1 | 9289156 | 3-scf00136 | 3 |
| AX-158001595 | 6 | 62.471 | KV452782.1 | 9295469 | 3-scf00136 | 3 |
| AX-158001599 | 6 | 62.471 | KV452782.1 | 9302400 | 3-scf00136 | 3 |
| AX-158001602 | 6 | 62.471 | KV452782.1 | 9307065 | 3-scf00136 | 3 |
| AX-158001613 | 6 | 62.471 | KV452782.1 | 9315351 | 3-scf00136 | 3 |
| AX-158001621 | 6 | 62.471 | KV452782.1 | 9341664 | 3-scf00136 | 3 |
| AX-157746692 | 6 | 62.471 | KV452782.1 | 9345213 | 3-scf00136 | 3 |
| AX-158001624 | 6 | 62.471 | KV452782.1 | 9353041 | 3-scf00136 | 3 |
| AX-157819283 | 6 | 62.471 | KV452782.1 | 9358155 | 3-scf00136 | 3 |
| AX-158001625 | 6 | 62.471 | KV452782.1 | 9358605 | 3-scf00136 | 3 |
| AX-158001626 | 6 | 62.471 | KV452782.1 | 9359410 | 3-scf00136 | 3 |

|              |   |        |            |          |            |   |
|--------------|---|--------|------------|----------|------------|---|
| AX-158001629 | 6 | 62.471 | KV452782.1 | 9360628  | 3-scf00136 | 3 |
| AX-158001633 | 6 | 62.471 | KV452782.1 | 9362617  | 3-scf00136 | 3 |
| AX-158001634 | 6 | 62.471 | KV452782.1 | 9367238  | 3-scf00136 | 3 |
| AX-158001636 | 6 | 62.471 | KV452782.1 | 9368688  | 3-scf00136 | 3 |
| AX-158001639 | 6 | 62.471 | KV452782.1 | 9369479  | 3-scf00136 | 3 |
| AX-157819285 | 6 | 62.471 | KV452782.1 | 9372087  | 3-scf00136 | 3 |
| AX-158001646 | 6 | 62.471 | KV452782.1 | 9377381  | 3-scf00136 | 3 |
| AX-158001647 | 6 | 62.471 | KV452782.1 | 9379263  | 3-scf00136 | 3 |
| AX-158001650 | 6 | 62.471 | KV452782.1 | 9380918  | 3-scf00136 | 3 |
| AX-158001656 | 6 | 62.471 | KV452782.1 | 9387803  | 3-scf00136 | 3 |
| AX-157856019 | 6 | 62.471 | KV452782.1 | 9388743  | 3-scf00136 | 3 |
| AX-158001660 | 6 | 62.471 | KV452782.1 | 9389317  | 3-scf00136 | 3 |
| AX-158001663 | 6 | 62.471 | KV452782.1 | 9392650  | 3-scf00136 | 3 |
| AX-158422219 | 6 | 62.471 | KV452782.1 | 9428288  | 3-scf00136 | 3 |
| AX-157819293 | 6 | 62.471 | KV452782.1 | 9428779  | 3-scf00136 | 3 |
| AX-158001688 | 6 | 62.471 | KV452782.1 | 9434829  | 3-scf00136 | 3 |
| AX-158407458 | 6 | 62.471 | KV452782.1 | 9435882  | 3-scf00136 | 3 |
| AX-158001701 | 6 | 62.471 | KV452782.1 | 9443308  | 3-scf00136 | 3 |
| AX-157721733 | 6 | 62.471 | KV452782.1 | 9491573  | 3-scf00136 | 3 |
| AX-158001755 | 6 | 62.471 | KV452782.1 | 9500775  | 3-scf00136 | 3 |
| AX-158001805 | 6 | 62.471 | KV452782.1 | 9535603  | 3-scf00136 | 3 |
| AX-158001828 | 6 | 62.471 | KV452782.1 | 9556614  | 3-scf00136 | 3 |
| AX-157856024 | 6 | 62.471 | KV452782.1 | 9562981  | 3-scf00136 | 3 |
| AX-157819305 | 6 | 62.471 | KV452782.1 | 9608947  | 3-scf00136 | 3 |
| AX-158407459 | 6 | 62.471 | KV452782.1 | 9635815  | 3-scf00136 | 3 |
| AX-158001921 | 6 | 62.471 | KV452782.1 | 9661847  | 3-scf00136 | 3 |
| AX-157819317 | 6 | 62.471 | KV452782.1 | 9731719  | 3-scf00136 | 3 |
| AX-158002013 | 6 | 62.471 | KV452782.1 | 9738307  | 3-scf00136 | 3 |
| AX-158002014 | 6 | 62.471 | KV452782.1 | 9739772  | 3-scf00136 | 3 |
| AX-158002017 | 6 | 62.471 | KV452782.1 | 9740026  | 3-scf00136 | 3 |
| AX-157819320 | 6 | 62.471 | KV452782.1 | 9747971  | 3-scf00136 | 3 |
| AX-158002026 | 6 | 62.471 | KV452782.1 | 9748387  | 3-scf00136 | 3 |
| AX-158002027 | 6 | 62.471 | KV452782.1 | 9748662  | 3-scf00136 | 3 |
| AX-157819321 | 6 | 62.471 | KV452782.1 | 9748929  | 3-scf00136 | 3 |
| AX-158002030 | 6 | 62.471 | KV452782.1 | 9749377  | 3-scf00136 | 3 |
| AX-158002031 | 6 | 62.471 | KV452782.1 | 9750076  | 3-scf00136 | 3 |
| AX-158002033 | 6 | 62.471 | KV452782.1 | 9750825  | 3-scf00136 | 3 |
| AX-158002037 | 6 | 62.471 | KV452782.1 | 9754120  | 3-scf00136 | 3 |
| AX-158002043 | 6 | 62.471 | KV452782.1 | 9769958  | 3-scf00136 | 3 |
| AX-158002105 | 6 | 62.471 | KV452782.1 | 9842477  | 3-scf00136 | 3 |
| AX-157819336 | 6 | 62.471 | KV452782.1 | 9883923  | 3-scf00136 | 3 |
| AX-157856150 | 6 | 62.471 | KV452782.1 | 11037404 | 3-scf00136 | 3 |
| AX-157856152 | 6 | 62.471 | KV452782.1 | 11069994 | 3-scf00136 | 3 |
| AX-157856154 | 6 | 62.471 | KV452782.1 | 11072214 | 3-scf00136 | 3 |
| AX-158002849 | 6 | 62.471 | KV452782.1 | 11193453 | 3-scf00136 | 3 |
| AX-157819379 | 6 | 62.471 | KV452782.1 | 11219174 | 3-scf00136 | 3 |
| AX-157876129 | 6 | 62.471 | KV452782.1 | 11512636 | 3-scf00136 | 3 |
| AX-158003161 | 6 | 62.471 | KV452782.1 | 11517105 | 3-scf00136 | 3 |
| AX-158003332 | 6 | 62.471 | KV452782.1 | 11738925 | 3-scf00136 | 3 |
| AX-158003367 | 6 | 62.471 | KV452782.1 | 11783317 | 3-scf00136 | 3 |
| AX-158003539 | 6 | 62.471 | KV452782.1 | 12151471 | 3-scf00136 | 3 |

|              |   |        |            |         |            |   |
|--------------|---|--------|------------|---------|------------|---|
| AX-157819985 | 6 | 62.471 | KV452784.1 | 8521468 | 3-scf00141 | 3 |
| AX-158009553 | 6 | 62.471 | KV452784.1 | 8667666 | 3-scf00141 | 3 |
| AX-157773568 | 6 | 62.471 | KV452784.1 | 8799377 | 3-scf00141 | 3 |
| AX-158000106 | 6 | 62.58  | KV452782.1 | 7767143 | 3-scf00136 | 3 |
| AX-158001390 | 6 | 62.58  | KV452782.1 | 9097735 | 3-scf00136 | 3 |
| AX-157819267 | 6 | 62.58  | KV452782.1 | 9133903 | 3-scf00136 | 3 |
| AX-158001499 | 6 | 62.58  | KV452782.1 | 9203220 | 3-scf00136 | 3 |
| AX-157819274 | 6 | 62.58  | KV452782.1 | 9229331 | 3-scf00136 | 3 |
| AX-158001547 | 6 | 62.58  | KV452782.1 | 9243935 | 3-scf00136 | 3 |
| AX-158383468 | 6 | 62.58  | KV452782.1 | 9272517 | 3-scf00136 | 3 |
| AX-158001596 | 6 | 62.58  | KV452782.1 | 9296977 | 3-scf00136 | 3 |
| AX-158001616 | 6 | 62.58  | KV452782.1 | 9318069 | 3-scf00136 | 3 |
| AX-158001619 | 6 | 62.58  | KV452782.1 | 9327810 | 3-scf00136 | 3 |
| AX-158001635 | 6 | 62.58  | KV452782.1 | 9367328 | 3-scf00136 | 3 |
| AX-158001641 | 6 | 62.58  | KV452782.1 | 9373750 | 3-scf00136 | 3 |
| AX-158001681 | 6 | 62.58  | KV452782.1 | 9417754 | 3-scf00136 | 3 |
| AX-157819292 | 6 | 62.58  | KV452782.1 | 9425954 | 3-scf00136 | 3 |
| AX-158001682 | 6 | 62.58  | KV452782.1 | 9426382 | 3-scf00136 | 3 |
| AX-158001684 | 6 | 62.58  | KV452782.1 | 9431783 | 3-scf00136 | 3 |
| AX-157713921 | 6 | 62.58  | KV452782.1 | 9434694 | 3-scf00136 | 3 |
| AX-158001691 | 6 | 62.58  | KV452782.1 | 9435588 | 3-scf00136 | 3 |
| AX-157819294 | 6 | 62.58  | KV452782.1 | 9436357 | 3-scf00136 | 3 |
| AX-158001692 | 6 | 62.58  | KV452782.1 | 9437123 | 3-scf00136 | 3 |
| AX-158001696 | 6 | 62.58  | KV452782.1 | 9437392 | 3-scf00136 | 3 |
| AX-158001697 | 6 | 62.58  | KV452782.1 | 9439780 | 3-scf00136 | 3 |
| AX-158001723 | 6 | 62.58  | KV452782.1 | 9455684 | 3-scf00136 | 3 |
| AX-158001728 | 6 | 62.58  | KV452782.1 | 9457998 | 3-scf00136 | 3 |
| AX-158001729 | 6 | 62.58  | KV452782.1 | 9458203 | 3-scf00136 | 3 |
| AX-158001731 | 6 | 62.58  | KV452782.1 | 9460265 | 3-scf00136 | 3 |
| AX-158001732 | 6 | 62.58  | KV452782.1 | 9460739 | 3-scf00136 | 3 |
| AX-158001743 | 6 | 62.58  | KV452782.1 | 9489570 | 3-scf00136 | 3 |
| AX-158001744 | 6 | 62.58  | KV452782.1 | 9491357 | 3-scf00136 | 3 |
| AX-158001747 | 6 | 62.58  | KV452782.1 | 9495613 | 3-scf00136 | 3 |
| AX-158001758 | 6 | 62.58  | KV452782.1 | 9502655 | 3-scf00136 | 3 |
| AX-158001759 | 6 | 62.58  | KV452782.1 | 9503208 | 3-scf00136 | 3 |
| AX-158001760 | 6 | 62.58  | KV452782.1 | 9504142 | 3-scf00136 | 3 |
| AX-158001761 | 6 | 62.58  | KV452782.1 | 9504870 | 3-scf00136 | 3 |
| AX-157726956 | 6 | 62.58  | KV452782.1 | 9506537 | 3-scf00136 | 3 |
| AX-157856020 | 6 | 62.58  | KV452782.1 | 9506689 | 3-scf00136 | 3 |
| AX-158001767 | 6 | 62.58  | KV452782.1 | 9507521 | 3-scf00136 | 3 |
| AX-158001768 | 6 | 62.58  | KV452782.1 | 9510437 | 3-scf00136 | 3 |
| AX-158001769 | 6 | 62.58  | KV452782.1 | 9510901 | 3-scf00136 | 3 |
| AX-158001772 | 6 | 62.58  | KV452782.1 | 9511516 | 3-scf00136 | 3 |
| AX-158001774 | 6 | 62.58  | KV452782.1 | 9511922 | 3-scf00136 | 3 |
| AX-158001780 | 6 | 62.58  | KV452782.1 | 9513652 | 3-scf00136 | 3 |
| AX-158001781 | 6 | 62.58  | KV452782.1 | 9514082 | 3-scf00136 | 3 |
| AX-157819297 | 6 | 62.58  | KV452782.1 | 9526143 | 3-scf00136 | 3 |
| AX-158001798 | 6 | 62.58  | KV452782.1 | 9526189 | 3-scf00136 | 3 |
| AX-158001804 | 6 | 62.58  | KV452782.1 | 9533276 | 3-scf00136 | 3 |
| AX-158001816 | 6 | 62.58  | KV452782.1 | 9551788 | 3-scf00136 | 3 |
| AX-158001819 | 6 | 62.58  | KV452782.1 | 9552292 | 3-scf00136 | 3 |



|              |   |       |            |         |            |   |
|--------------|---|-------|------------|---------|------------|---|
| AX-158001820 | 6 | 62.58 | KV452782.1 | 9553253 | 3-scf00136 | 3 |
| AX-158001821 | 6 | 62.58 | KV452782.1 | 9553806 | 3-scf00136 | 3 |
| AX-158001822 | 6 | 62.58 | KV452782.1 | 9554549 | 3-scf00136 | 3 |
| AX-157819299 | 6 | 62.58 | KV452782.1 | 9554725 | 3-scf00136 | 3 |
| AX-158001840 | 6 | 62.58 | KV452782.1 | 9562066 | 3-scf00136 | 3 |
| AX-158001841 | 6 | 62.58 | KV452782.1 | 9562451 | 3-scf00136 | 3 |
| AX-158001844 | 6 | 62.58 | KV452782.1 | 9563515 | 3-scf00136 | 3 |
| AX-158001852 | 6 | 62.58 | KV452782.1 | 9566542 | 3-scf00136 | 3 |
| AX-158001859 | 6 | 62.58 | KV452782.1 | 9570739 | 3-scf00136 | 3 |
| AX-158001861 | 6 | 62.58 | KV452782.1 | 9573259 | 3-scf00136 | 3 |
| AX-158001862 | 6 | 62.58 | KV452782.1 | 9575338 | 3-scf00136 | 3 |
| AX-158001864 | 6 | 62.58 | KV452782.1 | 9576577 | 3-scf00136 | 3 |
| AX-157856025 | 6 | 62.58 | KV452782.1 | 9577535 | 3-scf00136 | 3 |
| AX-158001866 | 6 | 62.58 | KV452782.1 | 9579218 | 3-scf00136 | 3 |
| AX-158001867 | 6 | 62.58 | KV452782.1 | 9579597 | 3-scf00136 | 3 |
| AX-158001869 | 6 | 62.58 | KV452782.1 | 9584985 | 3-scf00136 | 3 |
| AX-158001870 | 6 | 62.58 | KV452782.1 | 9586187 | 3-scf00136 | 3 |
| AX-157819301 | 6 | 62.58 | KV452782.1 | 9586418 | 3-scf00136 | 3 |
| AX-158001871 | 6 | 62.58 | KV452782.1 | 9587260 | 3-scf00136 | 3 |
| AX-158001876 | 6 | 62.58 | KV452782.1 | 9593151 | 3-scf00136 | 3 |
| AX-157819302 | 6 | 62.58 | KV452782.1 | 9594106 | 3-scf00136 | 3 |
| AX-158001877 | 6 | 62.58 | KV452782.1 | 9594995 | 3-scf00136 | 3 |
| AX-157753446 | 6 | 62.58 | KV452782.1 | 9599215 | 3-scf00136 | 3 |
| AX-158001879 | 6 | 62.58 | KV452782.1 | 9600593 | 3-scf00136 | 3 |
| AX-157819303 | 6 | 62.58 | KV452782.1 | 9603368 | 3-scf00136 | 3 |
| AX-158001884 | 6 | 62.58 | KV452782.1 | 9617331 | 3-scf00136 | 3 |
| AX-157819309 | 6 | 62.58 | KV452782.1 | 9622198 | 3-scf00136 | 3 |
| AX-158001885 | 6 | 62.58 | KV452782.1 | 9622759 | 3-scf00136 | 3 |
| AX-158001889 | 6 | 62.58 | KV452782.1 | 9627926 | 3-scf00136 | 3 |
| AX-158001896 | 6 | 62.58 | KV452782.1 | 9633905 | 3-scf00136 | 3 |
| AX-158001901 | 6 | 62.58 | KV452782.1 | 9638423 | 3-scf00136 | 3 |
| AX-158001905 | 6 | 62.58 | KV452782.1 | 9641535 | 3-scf00136 | 3 |
| AX-158001909 | 6 | 62.58 | KV452782.1 | 9645995 | 3-scf00136 | 3 |
| AX-158001912 | 6 | 62.58 | KV452782.1 | 9650598 | 3-scf00136 | 3 |
| AX-158001913 | 6 | 62.58 | KV452782.1 | 9652806 | 3-scf00136 | 3 |
| AX-158001914 | 6 | 62.58 | KV452782.1 | 9653374 | 3-scf00136 | 3 |
| AX-158001923 | 6 | 62.58 | KV452782.1 | 9665940 | 3-scf00136 | 3 |
| AX-158001925 | 6 | 62.58 | KV452782.1 | 9668843 | 3-scf00136 | 3 |
| AX-158001926 | 6 | 62.58 | KV452782.1 | 9669228 | 3-scf00136 | 3 |
| AX-158001936 | 6 | 62.58 | KV452782.1 | 9676453 | 3-scf00136 | 3 |
| AX-158001959 | 6 | 62.58 | KV452782.1 | 9679188 | 3-scf00136 | 3 |
| AX-157713141 | 6 | 62.58 | KV452782.1 | 9716200 | 3-scf00136 | 3 |
| AX-158002012 | 6 | 62.58 | KV452782.1 | 9731220 | 3-scf00136 | 3 |
| AX-157819322 | 6 | 62.58 | KV452782.1 | 9753037 | 3-scf00136 | 3 |
| AX-158002055 | 6 | 62.58 | KV452782.1 | 9774564 | 3-scf00136 | 3 |
| AX-158002056 | 6 | 62.58 | KV452782.1 | 9781578 | 3-scf00136 | 3 |
| AX-158002063 | 6 | 62.58 | KV452782.1 | 9789883 | 3-scf00136 | 3 |
| AX-158002071 | 6 | 62.58 | KV452782.1 | 9799206 | 3-scf00136 | 3 |
| AX-158002073 | 6 | 62.58 | KV452782.1 | 9800355 | 3-scf00136 | 3 |
| AX-158002074 | 6 | 62.58 | KV452782.1 | 9801572 | 3-scf00136 | 3 |
| AX-158002089 | 6 | 62.58 | KV452782.1 | 9815535 | 3-scf00136 | 3 |

|              |   |        |            |          |            |   |
|--------------|---|--------|------------|----------|------------|---|
| AX-158002097 | 6 | 62.58  | KV452782.1 | 9829634  | 3-scf00136 | 3 |
| AX-158002102 | 6 | 62.58  | KV452782.1 | 9839917  | 3-scf00136 | 3 |
| AX-158002113 | 6 | 62.58  | KV452782.1 | 9850906  | 3-scf00136 | 3 |
| AX-158002118 | 6 | 62.58  | KV452782.1 | 9862925  | 3-scf00136 | 3 |
| AX-158002351 | 6 | 62.58  | KV452782.1 | 10149910 | 3-scf00136 | 3 |
| AX-157694722 | 6 | 62.58  | KV452782.1 | 10163503 | 3-scf00136 | 3 |
| AX-157856123 | 6 | 62.58  | KV452782.1 | 10174709 | 3-scf00136 | 3 |
| AX-158002372 | 6 | 62.58  | KV452782.1 | 10186961 | 3-scf00136 | 3 |
| AX-157856148 | 6 | 62.58  | KV452782.1 | 10692593 | 3-scf00136 | 3 |
| AX-158002659 | 6 | 62.58  | KV452782.1 | 10959253 | 3-scf00136 | 3 |
| AX-158002698 | 6 | 62.58  | KV452782.1 | 10994281 | 3-scf00136 | 3 |
| AX-157819371 | 6 | 62.58  | KV452782.1 | 10995948 | 3-scf00136 | 3 |
| AX-157876119 | 6 | 62.58  | KV452782.1 | 11019172 | 3-scf00136 | 3 |
| AX-158002778 | 6 | 62.58  | KV452782.1 | 11083842 | 3-scf00136 | 3 |
| AX-158002805 | 6 | 62.58  | KV452782.1 | 11132915 | 3-scf00136 | 3 |
| AX-158002822 | 6 | 62.58  | KV452782.1 | 11152730 | 3-scf00136 | 3 |
| AX-158002898 | 6 | 62.58  | KV452782.1 | 11244118 | 3-scf00136 | 3 |
| AX-158002901 | 6 | 62.58  | KV452782.1 | 11245448 | 3-scf00136 | 3 |
| AX-157759028 | 6 | 62.58  | KV452782.1 | 11266024 | 3-scf00136 | 3 |
| AX-158002928 | 6 | 62.58  | KV452782.1 | 11269075 | 3-scf00136 | 3 |
| AX-158002980 | 6 | 62.58  | KV452782.1 | 11317552 | 3-scf00136 | 3 |
| AX-158002982 | 6 | 62.58  | KV452782.1 | 11321791 | 3-scf00136 | 3 |
| AX-158003200 | 6 | 62.58  | KV452782.1 | 11568542 | 3-scf00136 | 3 |
| AX-157856161 | 6 | 62.58  | KV452782.1 | 11576372 | 3-scf00136 | 3 |
| AX-158415837 | 6 | 62.58  | KV452782.1 | 11737743 | 3-scf00136 | 3 |
| AX-158003599 | 6 | 62.58  | KV452782.1 | 12221008 | 3-scf00136 | 3 |
| AX-158003683 | 6 | 62.58  | KV452784.1 | 66911    | 3-scf00141 | 3 |
| AX-158003694 | 6 | 62.58  | KV452784.1 | 85381    | 3-scf00141 | 3 |
| AX-157741141 | 6 | 62.58  | KV452784.1 | 9087753  | 3-scf00141 | 3 |
| AX-158010030 | 6 | 62.58  | KV452784.1 | 9147895  | 3-scf00141 | 3 |
| AX-157819282 | 6 | 62.689 | KV452782.1 | 9303136  | 3-scf00136 | 3 |
| AX-158001623 | 6 | 62.689 | KV452782.1 | 9346061  | 3-scf00136 | 3 |
| AX-157819284 | 6 | 62.689 | KV452782.1 | 9363328  | 3-scf00136 | 3 |
| AX-158001735 | 6 | 62.689 | KV452782.1 | 9473643  | 3-scf00136 | 3 |
| AX-158001737 | 6 | 62.689 | KV452782.1 | 9474598  | 3-scf00136 | 3 |
| AX-158001738 | 6 | 62.689 | KV452782.1 | 9475139  | 3-scf00136 | 3 |
| AX-158001808 | 6 | 62.689 | KV452782.1 | 9544870  | 3-scf00136 | 3 |
| AX-158001886 | 6 | 62.689 | KV452782.1 | 9625729  | 3-scf00136 | 3 |
| AX-158001887 | 6 | 62.689 | KV452782.1 | 9626431  | 3-scf00136 | 3 |
| AX-158001916 | 6 | 62.689 | KV452782.1 | 9655880  | 3-scf00136 | 3 |
| AX-158001917 | 6 | 62.689 | KV452782.1 | 9657970  | 3-scf00136 | 3 |
| AX-158001918 | 6 | 62.689 | KV452782.1 | 9658777  | 3-scf00136 | 3 |
| AX-158001919 | 6 | 62.689 | KV452782.1 | 9659246  | 3-scf00136 | 3 |
| AX-158001922 | 6 | 62.689 | KV452782.1 | 9664492  | 3-scf00136 | 3 |
| AX-157725691 | 6 | 62.689 | KV452782.1 | 9665405  | 3-scf00136 | 3 |
| AX-158001927 | 6 | 62.689 | KV452782.1 | 9669630  | 3-scf00136 | 3 |
| AX-158001937 | 6 | 62.689 | KV452782.1 | 9677015  | 3-scf00136 | 3 |
| AX-158001938 | 6 | 62.689 | KV452782.1 | 9677605  | 3-scf00136 | 3 |
| AX-158001961 | 6 | 62.689 | KV452782.1 | 9680300  | 3-scf00136 | 3 |
| AX-158001963 | 6 | 62.689 | KV452782.1 | 9683234  | 3-scf00136 | 3 |
| AX-157747605 | 6 | 62.689 | KV452782.1 | 9683967  | 3-scf00136 | 3 |

|              |   |        |            |         |            |   |
|--------------|---|--------|------------|---------|------------|---|
| AX-158001964 | 6 | 62.689 | KV452782.1 | 9684857 | 3-scf00136 | 3 |
| AX-158001966 | 6 | 62.689 | KV452782.1 | 9685780 | 3-scf00136 | 3 |
| AX-158001971 | 6 | 62.689 | KV452782.1 | 9690952 | 3-scf00136 | 3 |
| AX-158001977 | 6 | 62.689 | KV452782.1 | 9703464 | 3-scf00136 | 3 |
| AX-158001979 | 6 | 62.689 | KV452782.1 | 9705892 | 3-scf00136 | 3 |
| AX-157724568 | 6 | 62.689 | KV452782.1 | 9709572 | 3-scf00136 | 3 |
| AX-158001982 | 6 | 62.689 | KV452782.1 | 9712855 | 3-scf00136 | 3 |
| AX-158001984 | 6 | 62.689 | KV452782.1 | 9713979 | 3-scf00136 | 3 |
| AX-158001986 | 6 | 62.689 | KV452782.1 | 9714714 | 3-scf00136 | 3 |
| AX-157819314 | 6 | 62.689 | KV452782.1 | 9715045 | 3-scf00136 | 3 |
| AX-158001989 | 6 | 62.689 | KV452782.1 | 9715445 | 3-scf00136 | 3 |
| AX-158001991 | 6 | 62.689 | KV452782.1 | 9717270 | 3-scf00136 | 3 |
| AX-158001996 | 6 | 62.689 | KV452782.1 | 9717632 | 3-scf00136 | 3 |
| AX-158001997 | 6 | 62.689 | KV452782.1 | 9718092 | 3-scf00136 | 3 |
| AX-157819315 | 6 | 62.689 | KV452782.1 | 9718573 | 3-scf00136 | 3 |
| AX-158002002 | 6 | 62.689 | KV452782.1 | 9719281 | 3-scf00136 | 3 |
| AX-158002003 | 6 | 62.689 | KV452782.1 | 9720220 | 3-scf00136 | 3 |
| AX-157819316 | 6 | 62.689 | KV452782.1 | 9720570 | 3-scf00136 | 3 |
| AX-158002004 | 6 | 62.689 | KV452782.1 | 9721539 | 3-scf00136 | 3 |
| AX-158002005 | 6 | 62.689 | KV452782.1 | 9728381 | 3-scf00136 | 3 |
| AX-158002009 | 6 | 62.689 | KV452782.1 | 9729314 | 3-scf00136 | 3 |
| AX-158002010 | 6 | 62.689 | KV452782.1 | 9729513 | 3-scf00136 | 3 |
| AX-158002011 | 6 | 62.689 | KV452782.1 | 9730617 | 3-scf00136 | 3 |
| AX-158002018 | 6 | 62.689 | KV452782.1 | 9741140 | 3-scf00136 | 3 |
| AX-158002021 | 6 | 62.689 | KV452782.1 | 9741704 | 3-scf00136 | 3 |
| AX-157716265 | 6 | 62.689 | KV452782.1 | 9741884 | 3-scf00136 | 3 |
| AX-158002023 | 6 | 62.689 | KV452782.1 | 9745578 | 3-scf00136 | 3 |
| AX-158002039 | 6 | 62.689 | KV452782.1 | 9762897 | 3-scf00136 | 3 |
| AX-158002041 | 6 | 62.689 | KV452782.1 | 9765152 | 3-scf00136 | 3 |
| AX-157819323 | 6 | 62.689 | KV452782.1 | 9766822 | 3-scf00136 | 3 |
| AX-158002042 | 6 | 62.689 | KV452782.1 | 9768695 | 3-scf00136 | 3 |
| AX-158002044 | 6 | 62.689 | KV452782.1 | 9770309 | 3-scf00136 | 3 |
| AX-157819324 | 6 | 62.689 | KV452782.1 | 9771388 | 3-scf00136 | 3 |
| AX-158002045 | 6 | 62.689 | KV452782.1 | 9772417 | 3-scf00136 | 3 |
| AX-157819325 | 6 | 62.689 | KV452782.1 | 9776873 | 3-scf00136 | 3 |
| AX-157746964 | 6 | 62.689 | KV452782.1 | 9777559 | 3-scf00136 | 3 |
| AX-158415812 | 6 | 62.689 | KV452782.1 | 9780620 | 3-scf00136 | 3 |
| AX-157819327 | 6 | 62.689 | KV452782.1 | 9782665 | 3-scf00136 | 3 |
| AX-157819328 | 6 | 62.689 | KV452782.1 | 9784247 | 3-scf00136 | 3 |
| AX-158407464 | 6 | 62.689 | KV452782.1 | 9803169 | 3-scf00136 | 3 |
| AX-158002088 | 6 | 62.689 | KV452782.1 | 9813934 | 3-scf00136 | 3 |
| AX-158422221 | 6 | 62.689 | KV452782.1 | 9816967 | 3-scf00136 | 3 |
| AX-158002090 | 6 | 62.689 | KV452782.1 | 9817664 | 3-scf00136 | 3 |
| AX-157856027 | 6 | 62.689 | KV452782.1 | 9817838 | 3-scf00136 | 3 |
| AX-158002092 | 6 | 62.689 | KV452782.1 | 9819166 | 3-scf00136 | 3 |
| AX-158002093 | 6 | 62.689 | KV452782.1 | 9821062 | 3-scf00136 | 3 |
| AX-158002094 | 6 | 62.689 | KV452782.1 | 9821663 | 3-scf00136 | 3 |
| AX-158002096 | 6 | 62.689 | KV452782.1 | 9822563 | 3-scf00136 | 3 |
| AX-157819332 | 6 | 62.689 | KV452782.1 | 9837302 | 3-scf00136 | 3 |
| AX-158002100 | 6 | 62.689 | KV452782.1 | 9838196 | 3-scf00136 | 3 |
| AX-157856029 | 6 | 62.689 | KV452782.1 | 9841335 | 3-scf00136 | 3 |

|              |   |        |             |          |            |    |
|--------------|---|--------|-------------|----------|------------|----|
| AX-157819333 | 6 | 62.689 | KV452782.1  | 9851298  | 3-scf00136 | 3  |
| AX-158002549 | 6 | 62.689 | KV452782.1  | 10727425 | 3-scf00136 | 3  |
| AX-158003237 | 6 | 62.689 | KV452782.1  | 11613969 | 3-scf00136 | 3  |
| AX-157819451 | 6 | 62.689 | KV452782.1  | 12220788 | 3-scf00136 | 3  |
| AX-157748230 | 6 | 62.689 | KV452784.1  | 9379598  | 3-scf00141 | 3  |
| AX-157687137 | 6 | 62.689 | KV453469.1  | 2526     | scf00803   | UN |
| AX-157705395 | 6 | 62.689 | 3ML01029650 | 709      | scf05272_1 | UN |
| AX-157856026 | 6 | 62.708 | KV452782.1  | 9807836  | 3-scf00136 | 3  |
| AX-157856028 | 6 | 62.729 | KV452782.1  | 9819488  | 3-scf00136 | 3  |
| AX-158002104 | 6 | 62.756 | KV452782.1  | 9841933  | 3-scf00136 | 3  |
| AX-157723515 | 6 | 62.778 | KV452782.1  | 9843995  | 3-scf00136 | 3  |
| AX-158002109 | 6 | 62.798 | KV452782.1  | 9845148  | 3-scf00136 | 3  |
| AX-158002110 | 6 | 62.798 | KV452782.1  | 9845855  | 3-scf00136 | 3  |
| AX-158002112 | 6 | 62.798 | KV452782.1  | 9848780  | 3-scf00136 | 3  |
| AX-158407466 | 6 | 62.798 | KV452782.1  | 9855355  | 3-scf00136 | 3  |
| AX-158002120 | 6 | 62.798 | KV452782.1  | 9865763  | 3-scf00136 | 3  |
| AX-158002121 | 6 | 62.798 | KV452782.1  | 9866191  | 3-scf00136 | 3  |
| AX-158002122 | 6 | 62.798 | KV452782.1  | 9868810  | 3-scf00136 | 3  |
| AX-157819334 | 6 | 63.017 | KV452782.1  | 9866422  | 3-scf00136 | 3  |
| AX-157819335 | 6 | 63.017 | KV452782.1  | 9867436  | 3-scf00136 | 3  |
| AX-158002123 | 6 | 63.017 | KV452782.1  | 9869759  | 3-scf00136 | 3  |
| AX-158002125 | 6 | 63.017 | KV452782.1  | 9872796  | 3-scf00136 | 3  |
| AX-157856030 | 6 | 63.017 | KV452782.1  | 9876587  | 3-scf00136 | 3  |
| AX-158002128 | 6 | 63.017 | KV452782.1  | 9878513  | 3-scf00136 | 3  |
| AX-158002132 | 6 | 63.017 | KV452782.1  | 9885012  | 3-scf00136 | 3  |
| AX-158002334 | 6 | 63.017 | KV452782.1  | 10135462 | 3-scf00136 | 3  |
| AX-158002377 | 6 | 63.017 | KV452782.1  | 10207099 | 3-scf00136 | 3  |
| AX-158383483 | 6 | 63.017 | KV452782.1  | 10232380 | 3-scf00136 | 3  |
| AX-158002428 | 6 | 63.017 | KV452782.1  | 10359442 | 3-scf00136 | 3  |
| AX-158002569 | 6 | 63.017 | KV452782.1  | 10809816 | 3-scf00136 | 3  |
| AX-157869924 | 6 | 63.017 | KV452782.1  | 10845254 | 3-scf00136 | 3  |
| AX-158002133 | 6 | 63.073 | KV452782.1  | 9887169  | 3-scf00136 | 3  |
| AX-158000477 | 6 | 63.126 | KV452782.1  | 8133783  | 3-scf00136 | 3  |
| AX-157855995 | 6 | 63.126 | KV452782.1  | 8168236  | 3-scf00136 | 3  |
| AX-158383449 | 6 | 63.126 | KV452782.1  | 8191949  | 3-scf00136 | 3  |
| AX-158000548 | 6 | 63.126 | KV452782.1  | 8192532  | 3-scf00136 | 3  |
| AX-158000563 | 6 | 63.126 | KV452782.1  | 8196706  | 3-scf00136 | 3  |
| AX-158000567 | 6 | 63.126 | KV452782.1  | 8198702  | 3-scf00136 | 3  |
| AX-158000572 | 6 | 63.126 | KV452782.1  | 8201081  | 3-scf00136 | 3  |
| AX-158000577 | 6 | 63.126 | KV452782.1  | 8205284  | 3-scf00136 | 3  |
| AX-158000579 | 6 | 63.126 | KV452782.1  | 8205772  | 3-scf00136 | 3  |
| AX-158000592 | 6 | 63.126 | KV452782.1  | 8214450  | 3-scf00136 | 3  |
| AX-158000792 | 6 | 63.126 | KV452782.1  | 8459404  | 3-scf00136 | 3  |
| AX-158001026 | 6 | 63.126 | KV452782.1  | 8737551  | 3-scf00136 | 3  |
| AX-158001030 | 6 | 63.126 | KV452782.1  | 8739051  | 3-scf00136 | 3  |
| AX-158001033 | 6 | 63.126 | KV452782.1  | 8741248  | 3-scf00136 | 3  |
| AX-158002117 | 6 | 63.126 | KV452782.1  | 9862334  | 3-scf00136 | 3  |
| AX-158002124 | 6 | 63.126 | KV452782.1  | 9871568  | 3-scf00136 | 3  |
| AX-157819337 | 6 | 63.126 | KV452782.1  | 9887011  | 3-scf00136 | 3  |
| AX-158390733 | 6 | 63.126 | KV452782.1  | 9890722  | 3-scf00136 | 3  |
| AX-158002135 | 6 | 63.126 | KV452782.1  | 9894316  | 3-scf00136 | 3  |

|              |   |        |            |         |            |   |
|--------------|---|--------|------------|---------|------------|---|
| AX-157819338 | 6 | 63.126 | KV452782.1 | 9898184 | 3-scf00136 | 3 |
| AX-158002142 | 6 | 63.126 | KV452782.1 | 9901621 | 3-scf00136 | 3 |
| AX-158002144 | 6 | 63.126 | KV452782.1 | 9902098 | 3-scf00136 | 3 |
| AX-158002151 | 6 | 63.126 | KV452782.1 | 9902616 | 3-scf00136 | 3 |
| AX-157856033 | 6 | 63.126 | KV452782.1 | 9904932 | 3-scf00136 | 3 |
| AX-158002152 | 6 | 63.126 | KV452782.1 | 9907737 | 3-scf00136 | 3 |
| AX-157856034 | 6 | 63.126 | KV452782.1 | 9909416 | 3-scf00136 | 3 |
| AX-157819339 | 6 | 63.126 | KV452782.1 | 9910276 | 3-scf00136 | 3 |
| AX-158002153 | 6 | 63.126 | KV452782.1 | 9912668 | 3-scf00136 | 3 |
| AX-157819340 | 6 | 63.126 | KV452782.1 | 9914416 | 3-scf00136 | 3 |
| AX-158002154 | 6 | 63.126 | KV452782.1 | 9915052 | 3-scf00136 | 3 |
| AX-157753219 | 6 | 63.126 | KV452782.1 | 9918259 | 3-scf00136 | 3 |
| AX-157819341 | 6 | 63.126 | KV452782.1 | 9918543 | 3-scf00136 | 3 |
| AX-157856035 | 6 | 63.126 | KV452782.1 | 9919778 | 3-scf00136 | 3 |
| AX-157856036 | 6 | 63.126 | KV452782.1 | 9922123 | 3-scf00136 | 3 |
| AX-157819342 | 6 | 63.126 | KV452782.1 | 9924450 | 3-scf00136 | 3 |
| AX-157856037 | 6 | 63.126 | KV452782.1 | 9926360 | 3-scf00136 | 3 |
| AX-157856038 | 6 | 63.126 | KV452782.1 | 9928512 | 3-scf00136 | 3 |
| AX-157856039 | 6 | 63.126 | KV452782.1 | 9929598 | 3-scf00136 | 3 |
| AX-158002157 | 6 | 63.126 | KV452782.1 | 9932382 | 3-scf00136 | 3 |
| AX-158002158 | 6 | 63.126 | KV452782.1 | 9933456 | 3-scf00136 | 3 |
| AX-158002159 | 6 | 63.126 | KV452782.1 | 9934217 | 3-scf00136 | 3 |
| AX-157856041 | 6 | 63.126 | KV452782.1 | 9937101 | 3-scf00136 | 3 |
| AX-157856042 | 6 | 63.126 | KV452782.1 | 9938650 | 3-scf00136 | 3 |
| AX-158002165 | 6 | 63.126 | KV452782.1 | 9939174 | 3-scf00136 | 3 |
| AX-157856043 | 6 | 63.126 | KV452782.1 | 9941406 | 3-scf00136 | 3 |
| AX-158002167 | 6 | 63.126 | KV452782.1 | 9945286 | 3-scf00136 | 3 |
| AX-157856044 | 6 | 63.126 | KV452782.1 | 9946916 | 3-scf00136 | 3 |
| AX-157856045 | 6 | 63.126 | KV452782.1 | 9948968 | 3-scf00136 | 3 |
| AX-158002168 | 6 | 63.126 | KV452782.1 | 9949006 | 3-scf00136 | 3 |
| AX-158002169 | 6 | 63.126 | KV452782.1 | 9950513 | 3-scf00136 | 3 |
| AX-158002170 | 6 | 63.126 | KV452782.1 | 9951232 | 3-scf00136 | 3 |
| AX-158002171 | 6 | 63.126 | KV452782.1 | 9951958 | 3-scf00136 | 3 |
| AX-157819343 | 6 | 63.126 | KV452782.1 | 9956235 | 3-scf00136 | 3 |
| AX-157819344 | 6 | 63.126 | KV452782.1 | 9957286 | 3-scf00136 | 3 |
| AX-157819345 | 6 | 63.126 | KV452782.1 | 9958507 | 3-scf00136 | 3 |
| AX-158002172 | 6 | 63.126 | KV452782.1 | 9960179 | 3-scf00136 | 3 |
| AX-157819347 | 6 | 63.126 | KV452782.1 | 9961404 | 3-scf00136 | 3 |
| AX-157745523 | 6 | 63.126 | KV452782.1 | 9965658 | 3-scf00136 | 3 |
| AX-158002173 | 6 | 63.126 | KV452782.1 | 9966143 | 3-scf00136 | 3 |
| AX-158002174 | 6 | 63.126 | KV452782.1 | 9966757 | 3-scf00136 | 3 |
| AX-157771768 | 6 | 63.126 | KV452782.1 | 9967613 | 3-scf00136 | 3 |
| AX-158002176 | 6 | 63.126 | KV452782.1 | 9970790 | 3-scf00136 | 3 |
| AX-158002177 | 6 | 63.126 | KV452782.1 | 9972144 | 3-scf00136 | 3 |
| AX-158002178 | 6 | 63.126 | KV452782.1 | 9975215 | 3-scf00136 | 3 |
| AX-158002179 | 6 | 63.126 | KV452782.1 | 9975849 | 3-scf00136 | 3 |
| AX-157717751 | 6 | 63.126 | KV452782.1 | 9978732 | 3-scf00136 | 3 |
| AX-158002181 | 6 | 63.126 | KV452782.1 | 9978806 | 3-scf00136 | 3 |
| AX-158002182 | 6 | 63.126 | KV452782.1 | 9979642 | 3-scf00136 | 3 |
| AX-157856046 | 6 | 63.126 | KV452782.1 | 9980690 | 3-scf00136 | 3 |
| AX-157819350 | 6 | 63.126 | KV452782.1 | 9982448 | 3-scf00136 | 3 |

|              |   |        |            |          |            |   |
|--------------|---|--------|------------|----------|------------|---|
| AX-157856047 | 6 | 63.126 | KV452782.1 | 9983351  | 3-scf00136 | 3 |
| AX-157856048 | 6 | 63.126 | KV452782.1 | 9984496  | 3-scf00136 | 3 |
| AX-157856049 | 6 | 63.126 | KV452782.1 | 9984983  | 3-scf00136 | 3 |
| AX-157856050 | 6 | 63.126 | KV452782.1 | 9985126  | 3-scf00136 | 3 |
| AX-157856051 | 6 | 63.126 | KV452782.1 | 9985628  | 3-scf00136 | 3 |
| AX-157819352 | 6 | 63.126 | KV452782.1 | 9986141  | 3-scf00136 | 3 |
| AX-157819353 | 6 | 63.126 | KV452782.1 | 9986381  | 3-scf00136 | 3 |
| AX-158002186 | 6 | 63.126 | KV452782.1 | 9986911  | 3-scf00136 | 3 |
| AX-158002187 | 6 | 63.126 | KV452782.1 | 9987614  | 3-scf00136 | 3 |
| AX-158002188 | 6 | 63.126 | KV452782.1 | 9989204  | 3-scf00136 | 3 |
| AX-158002189 | 6 | 63.126 | KV452782.1 | 9989798  | 3-scf00136 | 3 |
| AX-158002191 | 6 | 63.126 | KV452782.1 | 9991620  | 3-scf00136 | 3 |
| AX-158002200 | 6 | 63.126 | KV452782.1 | 9993160  | 3-scf00136 | 3 |
| AX-158002201 | 6 | 63.126 | KV452782.1 | 9993650  | 3-scf00136 | 3 |
| AX-157856052 | 6 | 63.126 | KV452782.1 | 9993793  | 3-scf00136 | 3 |
| AX-158002207 | 6 | 63.126 | KV452782.1 | 9995245  | 3-scf00136 | 3 |
| AX-158002208 | 6 | 63.126 | KV452782.1 | 9996140  | 3-scf00136 | 3 |
| AX-157856053 | 6 | 63.126 | KV452782.1 | 9997628  | 3-scf00136 | 3 |
| AX-157819355 | 6 | 63.126 | KV452782.1 | 9999864  | 3-scf00136 | 3 |
| AX-157856054 | 6 | 63.126 | KV452782.1 | 9999963  | 3-scf00136 | 3 |
| AX-157856055 | 6 | 63.126 | KV452782.1 | 10000263 | 3-scf00136 | 3 |
| AX-158002210 | 6 | 63.126 | KV452782.1 | 10002235 | 3-scf00136 | 3 |
| AX-158002211 | 6 | 63.126 | KV452782.1 | 10002514 | 3-scf00136 | 3 |
| AX-157856056 | 6 | 63.126 | KV452782.1 | 10002857 | 3-scf00136 | 3 |
| AX-157856057 | 6 | 63.126 | KV452782.1 | 10003672 | 3-scf00136 | 3 |
| AX-158002213 | 6 | 63.126 | KV452782.1 | 10004065 | 3-scf00136 | 3 |
| AX-158002214 | 6 | 63.126 | KV452782.1 | 10005401 | 3-scf00136 | 3 |
| AX-158002215 | 6 | 63.126 | KV452782.1 | 10005780 | 3-scf00136 | 3 |
| AX-158002216 | 6 | 63.126 | KV452782.1 | 10006589 | 3-scf00136 | 3 |
| AX-157856058 | 6 | 63.126 | KV452782.1 | 10006686 | 3-scf00136 | 3 |
| AX-157856059 | 6 | 63.126 | KV452782.1 | 10007240 | 3-scf00136 | 3 |
| AX-157856060 | 6 | 63.126 | KV452782.1 | 10007765 | 3-scf00136 | 3 |
| AX-157856061 | 6 | 63.126 | KV452782.1 | 10008205 | 3-scf00136 | 3 |
| AX-157856062 | 6 | 63.126 | KV452782.1 | 10008259 | 3-scf00136 | 3 |
| AX-157856063 | 6 | 63.126 | KV452782.1 | 10008328 | 3-scf00136 | 3 |
| AX-157856064 | 6 | 63.126 | KV452782.1 | 10009181 | 3-scf00136 | 3 |
| AX-158002217 | 6 | 63.126 | KV452782.1 | 10009634 | 3-scf00136 | 3 |
| AX-157856065 | 6 | 63.126 | KV452782.1 | 10010308 | 3-scf00136 | 3 |
| AX-157856066 | 6 | 63.126 | KV452782.1 | 10011040 | 3-scf00136 | 3 |
| AX-158002218 | 6 | 63.126 | KV452782.1 | 10011383 | 3-scf00136 | 3 |
| AX-157856067 | 6 | 63.126 | KV452782.1 | 10013240 | 3-scf00136 | 3 |
| AX-157856068 | 6 | 63.126 | KV452782.1 | 10013787 | 3-scf00136 | 3 |
| AX-158002222 | 6 | 63.126 | KV452782.1 | 10014388 | 3-scf00136 | 3 |
| AX-157856069 | 6 | 63.126 | KV452782.1 | 10015126 | 3-scf00136 | 3 |
| AX-157856070 | 6 | 63.126 | KV452782.1 | 10015788 | 3-scf00136 | 3 |
| AX-158002224 | 6 | 63.126 | KV452782.1 | 10017731 | 3-scf00136 | 3 |
| AX-158002227 | 6 | 63.126 | KV452782.1 | 10018531 | 3-scf00136 | 3 |
| AX-158002228 | 6 | 63.126 | KV452782.1 | 10018833 | 3-scf00136 | 3 |
| AX-158002230 | 6 | 63.126 | KV452782.1 | 10019832 | 3-scf00136 | 3 |
| AX-158002232 | 6 | 63.126 | KV452782.1 | 10022764 | 3-scf00136 | 3 |
| AX-158002236 | 6 | 63.126 | KV452782.1 | 10023113 | 3-scf00136 | 3 |

|              |   |        |            |          |            |   |
|--------------|---|--------|------------|----------|------------|---|
| AX-157856071 | 6 | 63.126 | KV452782.1 | 10023448 | 3-scf00136 | 3 |
| AX-157856072 | 6 | 63.126 | KV452782.1 | 10024610 | 3-scf00136 | 3 |
| AX-158002237 | 6 | 63.126 | KV452782.1 | 10025224 | 3-scf00136 | 3 |
| AX-157856073 | 6 | 63.126 | KV452782.1 | 10026034 | 3-scf00136 | 3 |
| AX-158002238 | 6 | 63.126 | KV452782.1 | 10026280 | 3-scf00136 | 3 |
| AX-158002240 | 6 | 63.126 | KV452782.1 | 10027113 | 3-scf00136 | 3 |
| AX-157856075 | 6 | 63.126 | KV452782.1 | 10028859 | 3-scf00136 | 3 |
| AX-158002243 | 6 | 63.126 | KV452782.1 | 10029608 | 3-scf00136 | 3 |
| AX-157856076 | 6 | 63.126 | KV452782.1 | 10030570 | 3-scf00136 | 3 |
| AX-158002247 | 6 | 63.126 | KV452782.1 | 10031887 | 3-scf00136 | 3 |
| AX-158002248 | 6 | 63.126 | KV452782.1 | 10034263 | 3-scf00136 | 3 |
| AX-157856078 | 6 | 63.126 | KV452782.1 | 10036089 | 3-scf00136 | 3 |
| AX-157856080 | 6 | 63.126 | KV452782.1 | 10042999 | 3-scf00136 | 3 |
| AX-157856084 | 6 | 63.126 | KV452782.1 | 10052497 | 3-scf00136 | 3 |
| AX-158002268 | 6 | 63.126 | KV452782.1 | 10062656 | 3-scf00136 | 3 |
| AX-157856090 | 6 | 63.126 | KV452782.1 | 10069030 | 3-scf00136 | 3 |
| AX-157856092 | 6 | 63.126 | KV452782.1 | 10072279 | 3-scf00136 | 3 |
| AX-158002282 | 6 | 63.126 | KV452782.1 | 10073192 | 3-scf00136 | 3 |
| AX-157856096 | 6 | 63.126 | KV452782.1 | 10075260 | 3-scf00136 | 3 |
| AX-157856097 | 6 | 63.126 | KV452782.1 | 10080297 | 3-scf00136 | 3 |
| AX-157856098 | 6 | 63.126 | KV452782.1 | 10083966 | 3-scf00136 | 3 |
| AX-157856099 | 6 | 63.126 | KV452782.1 | 10084107 | 3-scf00136 | 3 |
| AX-157856100 | 6 | 63.126 | KV452782.1 | 10084160 | 3-scf00136 | 3 |
| AX-158002300 | 6 | 63.126 | KV452782.1 | 10096503 | 3-scf00136 | 3 |
| AX-158002303 | 6 | 63.126 | KV452782.1 | 10102996 | 3-scf00136 | 3 |
| AX-157856102 | 6 | 63.126 | KV452782.1 | 10105910 | 3-scf00136 | 3 |
| AX-158002304 | 6 | 63.126 | KV452782.1 | 10106547 | 3-scf00136 | 3 |
| AX-158002309 | 6 | 63.126 | KV452782.1 | 10112813 | 3-scf00136 | 3 |
| AX-157856103 | 6 | 63.126 | KV452782.1 | 10113261 | 3-scf00136 | 3 |
| AX-157856104 | 6 | 63.126 | KV452782.1 | 10114773 | 3-scf00136 | 3 |
| AX-157856105 | 6 | 63.126 | KV452782.1 | 10114809 | 3-scf00136 | 3 |
| AX-157856106 | 6 | 63.126 | KV452782.1 | 10114889 | 3-scf00136 | 3 |
| AX-158002311 | 6 | 63.126 | KV452782.1 | 10116003 | 3-scf00136 | 3 |
| AX-158002312 | 6 | 63.126 | KV452782.1 | 10116605 | 3-scf00136 | 3 |
| AX-157856107 | 6 | 63.126 | KV452782.1 | 10119293 | 3-scf00136 | 3 |
| AX-157856108 | 6 | 63.126 | KV452782.1 | 10119611 | 3-scf00136 | 3 |
| AX-158002321 | 6 | 63.126 | KV452782.1 | 10120069 | 3-scf00136 | 3 |
| AX-157856109 | 6 | 63.126 | KV452782.1 | 10123492 | 3-scf00136 | 3 |
| AX-158002323 | 6 | 63.126 | KV452782.1 | 10127189 | 3-scf00136 | 3 |
| AX-157856110 | 6 | 63.126 | KV452782.1 | 10128338 | 3-scf00136 | 3 |
| AX-158002324 | 6 | 63.126 | KV452782.1 | 10128580 | 3-scf00136 | 3 |
| AX-158002327 | 6 | 63.126 | KV452782.1 | 10130193 | 3-scf00136 | 3 |
| AX-157856111 | 6 | 63.126 | KV452782.1 | 10131676 | 3-scf00136 | 3 |
| AX-158002330 | 6 | 63.126 | KV452782.1 | 10133532 | 3-scf00136 | 3 |
| AX-158002331 | 6 | 63.126 | KV452782.1 | 10133968 | 3-scf00136 | 3 |
| AX-158002333 | 6 | 63.126 | KV452782.1 | 10134372 | 3-scf00136 | 3 |
| AX-157856112 | 6 | 63.126 | KV452782.1 | 10134752 | 3-scf00136 | 3 |
| AX-158002335 | 6 | 63.126 | KV452782.1 | 10136470 | 3-scf00136 | 3 |
| AX-157856114 | 6 | 63.126 | KV452782.1 | 10136956 | 3-scf00136 | 3 |
| AX-157856115 | 6 | 63.126 | KV452782.1 | 10138736 | 3-scf00136 | 3 |
| AX-157856116 | 6 | 63.126 | KV452782.1 | 10139239 | 3-scf00136 | 3 |

|              |   |        |            |          |            |   |
|--------------|---|--------|------------|----------|------------|---|
| AX-158002338 | 6 | 63.126 | KV452782.1 | 10140215 | 3-scf00136 | 3 |
| AX-158002341 | 6 | 63.126 | KV452782.1 | 10141257 | 3-scf00136 | 3 |
| AX-157856117 | 6 | 63.126 | KV452782.1 | 10142045 | 3-scf00136 | 3 |
| AX-158002344 | 6 | 63.126 | KV452782.1 | 10142897 | 3-scf00136 | 3 |
| AX-158002345 | 6 | 63.126 | KV452782.1 | 10143356 | 3-scf00136 | 3 |
| AX-158002347 | 6 | 63.126 | KV452782.1 | 10147334 | 3-scf00136 | 3 |
| AX-158002348 | 6 | 63.126 | KV452782.1 | 10148529 | 3-scf00136 | 3 |
| AX-157856118 | 6 | 63.126 | KV452782.1 | 10148867 | 3-scf00136 | 3 |
| AX-158002350 | 6 | 63.126 | KV452782.1 | 10149151 | 3-scf00136 | 3 |
| AX-157856119 | 6 | 63.126 | KV452782.1 | 10149649 | 3-scf00136 | 3 |
| AX-158002354 | 6 | 63.126 | KV452782.1 | 10156738 | 3-scf00136 | 3 |
| AX-157856120 | 6 | 63.126 | KV452782.1 | 10156969 | 3-scf00136 | 3 |
| AX-158002356 | 6 | 63.126 | KV452782.1 | 10158700 | 3-scf00136 | 3 |
| AX-158002358 | 6 | 63.126 | KV452782.1 | 10159428 | 3-scf00136 | 3 |
| AX-158002359 | 6 | 63.126 | KV452782.1 | 10160399 | 3-scf00136 | 3 |
| AX-157856121 | 6 | 63.126 | KV452782.1 | 10167252 | 3-scf00136 | 3 |
| AX-158002364 | 6 | 63.126 | KV452782.1 | 10168916 | 3-scf00136 | 3 |
| AX-158002365 | 6 | 63.126 | KV452782.1 | 10171756 | 3-scf00136 | 3 |
| AX-157856122 | 6 | 63.126 | KV452782.1 | 10173109 | 3-scf00136 | 3 |
| AX-158002366 | 6 | 63.126 | KV452782.1 | 10173943 | 3-scf00136 | 3 |
| AX-158002368 | 6 | 63.126 | KV452782.1 | 10179881 | 3-scf00136 | 3 |
| AX-157856124 | 6 | 63.126 | KV452782.1 | 10182080 | 3-scf00136 | 3 |
| AX-158002369 | 6 | 63.126 | KV452782.1 | 10182507 | 3-scf00136 | 3 |
| AX-157856125 | 6 | 63.126 | KV452782.1 | 10182686 | 3-scf00136 | 3 |
| AX-157856126 | 6 | 63.126 | KV452782.1 | 10185288 | 3-scf00136 | 3 |
| AX-157819357 | 6 | 63.126 | KV452782.1 | 10200365 | 3-scf00136 | 3 |
| AX-158002376 | 6 | 63.126 | KV452782.1 | 10202885 | 3-scf00136 | 3 |
| AX-157856128 | 6 | 63.126 | KV452782.1 | 10206241 | 3-scf00136 | 3 |
| AX-157856129 | 6 | 63.126 | KV452782.1 | 10208361 | 3-scf00136 | 3 |
| AX-157856130 | 6 | 63.126 | KV452782.1 | 10208718 | 3-scf00136 | 3 |
| AX-158002380 | 6 | 63.126 | KV452782.1 | 10210844 | 3-scf00136 | 3 |
| AX-158002383 | 6 | 63.126 | KV452782.1 | 10221946 | 3-scf00136 | 3 |
| AX-157856131 | 6 | 63.126 | KV452782.1 | 10224029 | 3-scf00136 | 3 |
| AX-157757957 | 6 | 63.126 | KV452782.1 | 10226291 | 3-scf00136 | 3 |
| AX-158002384 | 6 | 63.126 | KV452782.1 | 10227174 | 3-scf00136 | 3 |
| AX-158002385 | 6 | 63.126 | KV452782.1 | 10227628 | 3-scf00136 | 3 |
| AX-157699948 | 6 | 63.126 | KV452782.1 | 10228823 | 3-scf00136 | 3 |
| AX-158002386 | 6 | 63.126 | KV452782.1 | 10229911 | 3-scf00136 | 3 |
| AX-158002387 | 6 | 63.126 | KV452782.1 | 10231886 | 3-scf00136 | 3 |
| AX-158002391 | 6 | 63.126 | KV452782.1 | 10236334 | 3-scf00136 | 3 |
| AX-158422222 | 6 | 63.126 | KV452782.1 | 10238403 | 3-scf00136 | 3 |
| AX-158407471 | 6 | 63.126 | KV452782.1 | 10238586 | 3-scf00136 | 3 |
| AX-158405751 | 6 | 63.126 | KV452782.1 | 10239035 | 3-scf00136 | 3 |
| AX-158405752 | 6 | 63.126 | KV452782.1 | 10239470 | 3-scf00136 | 3 |
| AX-157695746 | 6 | 63.126 | KV452782.1 | 10242506 | 3-scf00136 | 3 |
| AX-158407473 | 6 | 63.126 | KV452782.1 | 10242560 | 3-scf00136 | 3 |
| AX-157856132 | 6 | 63.126 | KV452782.1 | 10249042 | 3-scf00136 | 3 |
| AX-158407475 | 6 | 63.126 | KV452782.1 | 10252730 | 3-scf00136 | 3 |
| AX-158002397 | 6 | 63.126 | KV452782.1 | 10271939 | 3-scf00136 | 3 |
| AX-158002399 | 6 | 63.126 | KV452782.1 | 10276735 | 3-scf00136 | 3 |
| AX-158407476 | 6 | 63.126 | KV452782.1 | 10278489 | 3-scf00136 | 3 |



|              |   |        |            |          |            |   |
|--------------|---|--------|------------|----------|------------|---|
| AX-158407477 | 6 | 63.126 | KV452782.1 | 10278769 | 3-scf00136 | 3 |
| AX-158002402 | 6 | 63.126 | KV452782.1 | 10280575 | 3-scf00136 | 3 |
| AX-158002403 | 6 | 63.126 | KV452782.1 | 10281946 | 3-scf00136 | 3 |
| AX-158407479 | 6 | 63.126 | KV452782.1 | 10283305 | 3-scf00136 | 3 |
| AX-158407480 | 6 | 63.126 | KV452782.1 | 10283342 | 3-scf00136 | 3 |
| AX-158407481 | 6 | 63.126 | KV452782.1 | 10283427 | 3-scf00136 | 3 |
| AX-158002405 | 6 | 63.126 | KV452782.1 | 10284537 | 3-scf00136 | 3 |
| AX-157819358 | 6 | 63.126 | KV452782.1 | 10288820 | 3-scf00136 | 3 |
| AX-158002407 | 6 | 63.126 | KV452782.1 | 10289113 | 3-scf00136 | 3 |
| AX-158002408 | 6 | 63.126 | KV452782.1 | 10291756 | 3-scf00136 | 3 |
| AX-158002410 | 6 | 63.126 | KV452782.1 | 10302820 | 3-scf00136 | 3 |
| AX-158002411 | 6 | 63.126 | KV452782.1 | 10305695 | 3-scf00136 | 3 |
| AX-158002412 | 6 | 63.126 | KV452782.1 | 10310634 | 3-scf00136 | 3 |
| AX-158002413 | 6 | 63.126 | KV452782.1 | 10320686 | 3-scf00136 | 3 |
| AX-158002415 | 6 | 63.126 | KV452782.1 | 10326711 | 3-scf00136 | 3 |
| AX-158002416 | 6 | 63.126 | KV452782.1 | 10331139 | 3-scf00136 | 3 |
| AX-158002417 | 6 | 63.126 | KV452782.1 | 10331563 | 3-scf00136 | 3 |
| AX-157856133 | 6 | 63.126 | KV452782.1 | 10333339 | 3-scf00136 | 3 |
| AX-158002418 | 6 | 63.126 | KV452782.1 | 10342568 | 3-scf00136 | 3 |
| AX-158002419 | 6 | 63.126 | KV452782.1 | 10343179 | 3-scf00136 | 3 |
| AX-158002421 | 6 | 63.126 | KV452782.1 | 10346792 | 3-scf00136 | 3 |
| AX-158407483 | 6 | 63.126 | KV452782.1 | 10352463 | 3-scf00136 | 3 |
| AX-158002422 | 6 | 63.126 | KV452782.1 | 10352805 | 3-scf00136 | 3 |
| AX-158002424 | 6 | 63.126 | KV452782.1 | 10355009 | 3-scf00136 | 3 |
| AX-158407484 | 6 | 63.126 | KV452782.1 | 10360837 | 3-scf00136 | 3 |
| AX-158002431 | 6 | 63.126 | KV452782.1 | 10365998 | 3-scf00136 | 3 |
| AX-157856134 | 6 | 63.126 | KV452782.1 | 10367965 | 3-scf00136 | 3 |
| AX-158002433 | 6 | 63.126 | KV452782.1 | 10369081 | 3-scf00136 | 3 |
| AX-158002434 | 6 | 63.126 | KV452782.1 | 10371061 | 3-scf00136 | 3 |
| AX-158002437 | 6 | 63.126 | KV452782.1 | 10376353 | 3-scf00136 | 3 |
| AX-158002438 | 6 | 63.126 | KV452782.1 | 10377595 | 3-scf00136 | 3 |
| AX-158002441 | 6 | 63.126 | KV452782.1 | 10390768 | 3-scf00136 | 3 |
| AX-158002442 | 6 | 63.126 | KV452782.1 | 10402297 | 3-scf00136 | 3 |
| AX-158002446 | 6 | 63.126 | KV452782.1 | 10407873 | 3-scf00136 | 3 |
| AX-157698019 | 6 | 63.126 | KV452782.1 | 10409530 | 3-scf00136 | 3 |
| AX-157856137 | 6 | 63.126 | KV452782.1 | 10417314 | 3-scf00136 | 3 |
| AX-158002454 | 6 | 63.126 | KV452782.1 | 10441478 | 3-scf00136 | 3 |
| AX-158407487 | 6 | 63.126 | KV452782.1 | 10444169 | 3-scf00136 | 3 |
| AX-158407488 | 6 | 63.126 | KV452782.1 | 10444340 | 3-scf00136 | 3 |
| AX-157694086 | 6 | 63.126 | KV452782.1 | 10448055 | 3-scf00136 | 3 |
| AX-158002456 | 6 | 63.126 | KV452782.1 | 10455399 | 3-scf00136 | 3 |
| AX-158002460 | 6 | 63.126 | KV452782.1 | 10470461 | 3-scf00136 | 3 |
| AX-158002463 | 6 | 63.126 | KV452782.1 | 10484126 | 3-scf00136 | 3 |
| AX-158002467 | 6 | 63.126 | KV452782.1 | 10490958 | 3-scf00136 | 3 |
| AX-158002473 | 6 | 63.126 | KV452782.1 | 10509990 | 3-scf00136 | 3 |
| AX-158002479 | 6 | 63.126 | KV452782.1 | 10545099 | 3-scf00136 | 3 |
| AX-158002483 | 6 | 63.126 | KV452782.1 | 10548404 | 3-scf00136 | 3 |
| AX-157856142 | 6 | 63.126 | KV452782.1 | 10553382 | 3-scf00136 | 3 |
| AX-157856144 | 6 | 63.126 | KV452782.1 | 10561561 | 3-scf00136 | 3 |
| AX-157856145 | 6 | 63.126 | KV452782.1 | 10562869 | 3-scf00136 | 3 |
| AX-157856146 | 6 | 63.126 | KV452782.1 | 10567238 | 3-scf00136 | 3 |

|              |   |        |            |          |            |   |
|--------------|---|--------|------------|----------|------------|---|
| AX-157856147 | 6 | 63.126 | KV452782.1 | 10569698 | 3-scf00136 | 3 |
| AX-158002490 | 6 | 63.126 | KV452782.1 | 10571562 | 3-scf00136 | 3 |
| AX-157819361 | 6 | 63.126 | KV452782.1 | 10596139 | 3-scf00136 | 3 |
| AX-158002494 | 6 | 63.126 | KV452782.1 | 10598520 | 3-scf00136 | 3 |
| AX-158002498 | 6 | 63.126 | KV452782.1 | 10611012 | 3-scf00136 | 3 |
| AX-158002499 | 6 | 63.126 | KV452782.1 | 10628105 | 3-scf00136 | 3 |
| AX-158002500 | 6 | 63.126 | KV452782.1 | 10629812 | 3-scf00136 | 3 |
| AX-158002504 | 6 | 63.126 | KV452782.1 | 10643585 | 3-scf00136 | 3 |
| AX-158002505 | 6 | 63.126 | KV452782.1 | 10643684 | 3-scf00136 | 3 |
| AX-158002508 | 6 | 63.126 | KV452782.1 | 10651173 | 3-scf00136 | 3 |
| AX-158002511 | 6 | 63.126 | KV452782.1 | 10659437 | 3-scf00136 | 3 |
| AX-158002512 | 6 | 63.126 | KV452782.1 | 10660585 | 3-scf00136 | 3 |
| AX-158002513 | 6 | 63.126 | KV452782.1 | 10666152 | 3-scf00136 | 3 |
| AX-158002514 | 6 | 63.126 | KV452782.1 | 10667283 | 3-scf00136 | 3 |
| AX-158002530 | 6 | 63.126 | KV452782.1 | 10689707 | 3-scf00136 | 3 |
| AX-158002531 | 6 | 63.126 | KV452782.1 | 10690338 | 3-scf00136 | 3 |
| AX-158002547 | 6 | 63.126 | KV452782.1 | 10719611 | 3-scf00136 | 3 |
| AX-158002556 | 6 | 63.126 | KV452782.1 | 10743537 | 3-scf00136 | 3 |
| AX-157869923 | 6 | 63.126 | KV452782.1 | 10752996 | 3-scf00136 | 3 |
| AX-158002564 | 6 | 63.126 | KV452782.1 | 10777276 | 3-scf00136 | 3 |
| AX-158002565 | 6 | 63.126 | KV452782.1 | 10778159 | 3-scf00136 | 3 |
| AX-158002566 | 6 | 63.126 | KV452782.1 | 10778603 | 3-scf00136 | 3 |
| AX-158002574 | 6 | 63.126 | KV452782.1 | 10819918 | 3-scf00136 | 3 |
| AX-158002591 | 6 | 63.126 | KV452782.1 | 10870906 | 3-scf00136 | 3 |
| AX-158002595 | 6 | 63.126 | KV452782.1 | 10876146 | 3-scf00136 | 3 |
| AX-158002603 | 6 | 63.126 | KV452782.1 | 10893097 | 3-scf00136 | 3 |
| AX-158002604 | 6 | 63.126 | KV452782.1 | 10897881 | 3-scf00136 | 3 |
| AX-157819365 | 6 | 63.126 | KV452782.1 | 10900367 | 3-scf00136 | 3 |
| AX-158002607 | 6 | 63.126 | KV452782.1 | 10904777 | 3-scf00136 | 3 |
| AX-157747594 | 6 | 63.126 | KV452782.1 | 10908386 | 3-scf00136 | 3 |
| AX-158002617 | 6 | 63.126 | KV452782.1 | 10916987 | 3-scf00136 | 3 |
| AX-158002618 | 6 | 63.126 | KV452782.1 | 10917734 | 3-scf00136 | 3 |
| AX-158002620 | 6 | 63.126 | KV452782.1 | 10919202 | 3-scf00136 | 3 |
| AX-158002622 | 6 | 63.126 | KV452782.1 | 10920155 | 3-scf00136 | 3 |
| AX-158002624 | 6 | 63.126 | KV452782.1 | 10922715 | 3-scf00136 | 3 |
| AX-158002626 | 6 | 63.126 | KV452782.1 | 10924740 | 3-scf00136 | 3 |
| AX-158002628 | 6 | 63.126 | KV452782.1 | 10925768 | 3-scf00136 | 3 |
| AX-158002631 | 6 | 63.126 | KV452782.1 | 10927175 | 3-scf00136 | 3 |
| AX-158002650 | 6 | 63.126 | KV452782.1 | 10955035 | 3-scf00136 | 3 |
| AX-158002655 | 6 | 63.126 | KV452782.1 | 10957725 | 3-scf00136 | 3 |
| AX-158002668 | 6 | 63.126 | KV452782.1 | 10969220 | 3-scf00136 | 3 |
| AX-158002671 | 6 | 63.126 | KV452782.1 | 10973192 | 3-scf00136 | 3 |
| AX-158002685 | 6 | 63.126 | KV452782.1 | 10985146 | 3-scf00136 | 3 |
| AX-158002689 | 6 | 63.126 | KV452782.1 | 10988943 | 3-scf00136 | 3 |
| AX-158002691 | 6 | 63.126 | KV452782.1 | 10989742 | 3-scf00136 | 3 |
| AX-158002692 | 6 | 63.126 | KV452782.1 | 10991687 | 3-scf00136 | 3 |
| AX-158002694 | 6 | 63.126 | KV452782.1 | 10992022 | 3-scf00136 | 3 |
| AX-158002696 | 6 | 63.126 | KV452782.1 | 10992680 | 3-scf00136 | 3 |
| AX-158002697 | 6 | 63.126 | KV452782.1 | 10993135 | 3-scf00136 | 3 |
| AX-158002704 | 6 | 63.126 | KV452782.1 | 10998707 | 3-scf00136 | 3 |
| AX-158002705 | 6 | 63.126 | KV452782.1 | 10999481 | 3-scf00136 | 3 |

|              |   |        |            |          |            |   |
|--------------|---|--------|------------|----------|------------|---|
| AX-157819372 | 6 | 63.126 | KV452782.1 | 11001669 | 3-scf00136 | 3 |
| AX-158002712 | 6 | 63.126 | KV452782.1 | 11008469 | 3-scf00136 | 3 |
| AX-158002716 | 6 | 63.126 | KV452782.1 | 11009344 | 3-scf00136 | 3 |
| AX-158002718 | 6 | 63.126 | KV452782.1 | 11009883 | 3-scf00136 | 3 |
| AX-158002722 | 6 | 63.126 | KV452782.1 | 11013871 | 3-scf00136 | 3 |
| AX-157819373 | 6 | 63.126 | KV452782.1 | 11016972 | 3-scf00136 | 3 |
| AX-158002726 | 6 | 63.126 | KV452782.1 | 11017851 | 3-scf00136 | 3 |
| AX-158002730 | 6 | 63.126 | KV452782.1 | 11023558 | 3-scf00136 | 3 |
| AX-158002736 | 6 | 63.126 | KV452782.1 | 11027914 | 3-scf00136 | 3 |
| AX-158002737 | 6 | 63.126 | KV452782.1 | 11028998 | 3-scf00136 | 3 |
| AX-157762410 | 6 | 63.126 | KV452782.1 | 11031945 | 3-scf00136 | 3 |
| AX-158002745 | 6 | 63.126 | KV452782.1 | 11038207 | 3-scf00136 | 3 |
| AX-158002780 | 6 | 63.126 | KV452782.1 | 11089316 | 3-scf00136 | 3 |
| AX-158002787 | 6 | 63.126 | KV452782.1 | 11100697 | 3-scf00136 | 3 |
| AX-158002792 | 6 | 63.126 | KV452782.1 | 11113490 | 3-scf00136 | 3 |
| AX-158002840 | 6 | 63.126 | KV452782.1 | 11183408 | 3-scf00136 | 3 |
| AX-158002848 | 6 | 63.126 | KV452782.1 | 11192820 | 3-scf00136 | 3 |
| AX-158002859 | 6 | 63.126 | KV452782.1 | 11203447 | 3-scf00136 | 3 |
| AX-158002860 | 6 | 63.126 | KV452782.1 | 11206273 | 3-scf00136 | 3 |
| AX-158002866 | 6 | 63.126 | KV452782.1 | 11210435 | 3-scf00136 | 3 |
| AX-158002868 | 6 | 63.126 | KV452782.1 | 11211180 | 3-scf00136 | 3 |
| AX-157723557 | 6 | 63.126 | KV452782.1 | 11220098 | 3-scf00136 | 3 |
| AX-158002896 | 6 | 63.126 | KV452782.1 | 11242987 | 3-scf00136 | 3 |
| AX-158002902 | 6 | 63.126 | KV452782.1 | 11246322 | 3-scf00136 | 3 |
| AX-158002914 | 6 | 63.126 | KV452782.1 | 11253695 | 3-scf00136 | 3 |
| AX-158407509 | 6 | 63.126 | KV452782.1 | 11255939 | 3-scf00136 | 3 |
| AX-157884757 | 6 | 63.126 | KV452782.1 | 11262450 | 3-scf00136 | 3 |
| AX-157819384 | 6 | 63.126 | KV452782.1 | 11275473 | 3-scf00136 | 3 |
| AX-157751659 | 6 | 63.126 | KV452782.1 | 11276744 | 3-scf00136 | 3 |
| AX-158002950 | 6 | 63.126 | KV452782.1 | 11285022 | 3-scf00136 | 3 |
| AX-158002969 | 6 | 63.126 | KV452782.1 | 11302091 | 3-scf00136 | 3 |
| AX-158002973 | 6 | 63.126 | KV452782.1 | 11312103 | 3-scf00136 | 3 |
| AX-158002976 | 6 | 63.126 | KV452782.1 | 11314220 | 3-scf00136 | 3 |
| AX-158003030 | 6 | 63.126 | KV452782.1 | 11357510 | 3-scf00136 | 3 |
| AX-157719072 | 6 | 63.126 | KV452782.1 | 11443374 | 3-scf00136 | 3 |
| AX-157775351 | 6 | 63.126 | KV452782.1 | 11447299 | 3-scf00136 | 3 |
| AX-158003125 | 6 | 63.126 | KV452782.1 | 11472200 | 3-scf00136 | 3 |
| AX-157876127 | 6 | 63.126 | KV452782.1 | 11475742 | 3-scf00136 | 3 |
| AX-158003131 | 6 | 63.126 | KV452782.1 | 11476987 | 3-scf00136 | 3 |
| AX-157819400 | 6 | 63.126 | KV452782.1 | 11487445 | 3-scf00136 | 3 |
| AX-158003210 | 6 | 63.126 | KV452782.1 | 11586365 | 3-scf00136 | 3 |
| AX-158003221 | 6 | 63.126 | KV452782.1 | 11598549 | 3-scf00136 | 3 |
| AX-158003223 | 6 | 63.126 | KV452782.1 | 11600575 | 3-scf00136 | 3 |
| AX-158003231 | 6 | 63.126 | KV452782.1 | 11608606 | 3-scf00136 | 3 |
| AX-158003242 | 6 | 63.126 | KV452782.1 | 11618379 | 3-scf00136 | 3 |
| AX-158003250 | 6 | 63.126 | KV452782.1 | 11622176 | 3-scf00136 | 3 |
| AX-158003270 | 6 | 63.126 | KV452782.1 | 11638861 | 3-scf00136 | 3 |
| AX-158003296 | 6 | 63.126 | KV452782.1 | 11662806 | 3-scf00136 | 3 |
| AX-158003352 | 6 | 63.126 | KV452782.1 | 11764895 | 3-scf00136 | 3 |
| AX-157714594 | 6 | 63.126 | KV452782.1 | 11972486 | 3-scf00136 | 3 |
| AX-158383509 | 6 | 63.126 | KV452782.1 | 12019973 | 3-scf00136 | 3 |

|              |   |        |            |          |            |   |
|--------------|---|--------|------------|----------|------------|---|
| AX-157819437 | 6 | 63.126 | KV452782.1 | 12054813 | 3-scf00136 | 3 |
| AX-158003515 | 6 | 63.126 | KV452782.1 | 12085602 | 3-scf00136 | 3 |
| AX-158003537 | 6 | 63.126 | KV452782.1 | 12145105 | 3-scf00136 | 3 |
| AX-158003571 | 6 | 63.126 | KV452782.1 | 12180490 | 3-scf00136 | 3 |
| AX-157865206 | 6 | 63.126 | KV452782.1 | 12194407 | 3-scf00136 | 3 |
| AX-158003594 | 6 | 63.126 | KV452782.1 | 12209500 | 3-scf00136 | 3 |
| AX-158003648 | 6 | 63.126 | KV452784.1 | 21955    | 3-scf00141 | 3 |
| AX-158002742 | 6 | 63.161 | KV452782.1 | 11034132 | 3-scf00136 | 3 |
| AX-157702199 | 6 | 63.2   | KV452782.1 | 10630791 | 3-scf00136 | 3 |
| AX-158002748 | 6 | 63.2   | KV452782.1 | 11040390 | 3-scf00136 | 3 |
| AX-158002885 | 6 | 63.2   | KV452782.1 | 11230512 | 3-scf00136 | 3 |
| AX-158002601 | 6 | 63.235 | KV452782.1 | 10887292 | 3-scf00136 | 3 |
| AX-158002645 | 6 | 63.235 | KV452782.1 | 10950517 | 3-scf00136 | 3 |
| AX-157753587 | 6 | 63.235 | KV452782.1 | 10964757 | 3-scf00136 | 3 |
| AX-158002781 | 6 | 63.235 | KV452782.1 | 11093258 | 3-scf00136 | 3 |
| AX-158002785 | 6 | 63.235 | KV452782.1 | 11097564 | 3-scf00136 | 3 |
| AX-158002813 | 6 | 63.235 | KV452782.1 | 11145254 | 3-scf00136 | 3 |
| AX-158011204 | 6 | 63.235 | KV452784.1 | 10350227 | 3-scf00141 | 3 |
| AX-157865270 | 6 | 63.235 | KV452788.1 | 606030   | 3-scf00145 | 3 |
| AX-158002786 | 6 | 63.268 | KV452782.1 | 11098142 | 3-scf00136 | 3 |
| AX-157744203 | 6 | 63.295 | KV452782.1 | 10884889 | 3-scf00136 | 3 |
| AX-158002642 | 6 | 63.295 | KV452782.1 | 10947217 | 3-scf00136 | 3 |
| AX-157819374 | 6 | 63.295 | KV452782.1 | 11099632 | 3-scf00136 | 3 |
| AX-158002812 | 6 | 63.295 | KV452782.1 | 11144648 | 3-scf00136 | 3 |
| AX-157819386 | 6 | 63.295 | KV452782.1 | 11289352 | 3-scf00136 | 3 |
| AX-158003073 | 6 | 63.295 | KV452782.1 | 11407549 | 3-scf00136 | 3 |
| AX-158011431 | 6 | 63.295 | KV452784.1 | 10651137 | 3-scf00141 | 3 |
| AX-158011432 | 6 | 63.295 | KV452784.1 | 10652785 | 3-scf00141 | 3 |
| AX-158011443 | 6 | 63.295 | KV452784.1 | 10666381 | 3-scf00141 | 3 |
| AX-157716070 | 6 | 63.312 | KV452782.1 | 11122444 | 3-scf00136 | 3 |
| AX-157819375 | 6 | 63.312 | KV452782.1 | 11122614 | 3-scf00136 | 3 |
| AX-158003475 | 6 | 63.312 | KV452782.1 | 11968377 | 3-scf00136 | 3 |
| AX-158009636 | 6 | 63.312 | KV452784.1 | 8744698  | 3-scf00141 | 3 |
| AX-158002808 | 6 | 63.328 | KV452782.1 | 11141609 | 3-scf00136 | 3 |
| AX-158001531 | 6 | 63.344 | KV452782.1 | 9233511  | 3-scf00136 | 3 |
| AX-158001672 | 6 | 63.344 | KV452782.1 | 9399360  | 3-scf00136 | 3 |
| AX-158002636 | 6 | 63.344 | KV452782.1 | 10933452 | 3-scf00136 | 3 |
| AX-158002796 | 6 | 63.344 | KV452782.1 | 11122041 | 3-scf00136 | 3 |
| AX-157819376 | 6 | 63.344 | KV452782.1 | 11137708 | 3-scf00136 | 3 |
| AX-157819377 | 6 | 63.344 | KV452782.1 | 11162685 | 3-scf00136 | 3 |
| AX-158002823 | 6 | 63.344 | KV452782.1 | 11163069 | 3-scf00136 | 3 |
| AX-158002828 | 6 | 63.344 | KV452782.1 | 11170228 | 3-scf00136 | 3 |
| AX-157856156 | 6 | 63.344 | KV452782.1 | 11171136 | 3-scf00136 | 3 |
| AX-157856157 | 6 | 63.344 | KV452782.1 | 11171987 | 3-scf00136 | 3 |
| AX-158002831 | 6 | 63.344 | KV452782.1 | 11174079 | 3-scf00136 | 3 |
| AX-157856158 | 6 | 63.344 | KV452782.1 | 11174537 | 3-scf00136 | 3 |
| AX-158002843 | 6 | 63.344 | KV452782.1 | 11185360 | 3-scf00136 | 3 |
| AX-158002850 | 6 | 63.344 | KV452782.1 | 11198125 | 3-scf00136 | 3 |
| AX-158002852 | 6 | 63.344 | KV452782.1 | 11200354 | 3-scf00136 | 3 |
| AX-158002853 | 6 | 63.344 | KV452782.1 | 11200666 | 3-scf00136 | 3 |
| AX-158002856 | 6 | 63.344 | KV452782.1 | 11202653 | 3-scf00136 | 3 |

|              |   |        |            |          |            |   |
|--------------|---|--------|------------|----------|------------|---|
| AX-158002863 | 6 | 63.344 | KV452782.1 | 11207414 | 3-scf00136 | 3 |
| AX-158002865 | 6 | 63.344 | KV452782.1 | 11208574 | 3-scf00136 | 3 |
| AX-158002876 | 6 | 63.344 | KV452782.1 | 11223051 | 3-scf00136 | 3 |
| AX-158002881 | 6 | 63.344 | KV452782.1 | 11228638 | 3-scf00136 | 3 |
| AX-157819380 | 6 | 63.344 | KV452782.1 | 11230840 | 3-scf00136 | 3 |
| AX-158002886 | 6 | 63.344 | KV452782.1 | 11231143 | 3-scf00136 | 3 |
| AX-158002887 | 6 | 63.344 | KV452782.1 | 11231551 | 3-scf00136 | 3 |
| AX-158002888 | 6 | 63.344 | KV452782.1 | 11231955 | 3-scf00136 | 3 |
| AX-158002890 | 6 | 63.344 | KV452782.1 | 11235153 | 3-scf00136 | 3 |
| AX-158002895 | 6 | 63.344 | KV452782.1 | 11241663 | 3-scf00136 | 3 |
| AX-158002897 | 6 | 63.344 | KV452782.1 | 11243570 | 3-scf00136 | 3 |
| AX-158002904 | 6 | 63.344 | KV452782.1 | 11247771 | 3-scf00136 | 3 |
| AX-158002906 | 6 | 63.344 | KV452782.1 | 11249152 | 3-scf00136 | 3 |
| AX-158002907 | 6 | 63.344 | KV452782.1 | 11249703 | 3-scf00136 | 3 |
| AX-158002910 | 6 | 63.344 | KV452782.1 | 11252469 | 3-scf00136 | 3 |
| AX-158002912 | 6 | 63.344 | KV452782.1 | 11253052 | 3-scf00136 | 3 |
| AX-158002915 | 6 | 63.344 | KV452782.1 | 11253976 | 3-scf00136 | 3 |
| AX-158002939 | 6 | 63.344 | KV452782.1 | 11275731 | 3-scf00136 | 3 |
| AX-158379657 | 6 | 63.344 | KV452782.1 | 11306119 | 3-scf00136 | 3 |
| AX-158002983 | 6 | 63.344 | KV452782.1 | 11322423 | 3-scf00136 | 3 |
| AX-158003095 | 6 | 63.344 | KV452782.1 | 11426862 | 3-scf00136 | 3 |
| AX-158003374 | 6 | 63.344 | KV452782.1 | 11804433 | 3-scf00136 | 3 |
| AX-158003376 | 6 | 63.344 | KV452782.1 | 11808378 | 3-scf00136 | 3 |
| AX-158003569 | 6 | 63.344 | KV452782.1 | 12177203 | 3-scf00136 | 3 |
| AX-158003613 | 6 | 63.344 | KV452782.1 | 12237757 | 3-scf00136 | 3 |
| AX-158003647 | 6 | 63.344 | KV452784.1 | 20971    | 3-scf00141 | 3 |
| AX-158000379 | 6 | 63.37  | KV452782.1 | 8048781  | 3-scf00136 | 3 |
| AX-158000545 | 6 | 63.37  | KV452782.1 | 8186152  | 3-scf00136 | 3 |
| AX-158000775 | 6 | 63.37  | KV452782.1 | 8439095  | 3-scf00136 | 3 |
| AX-157756562 | 6 | 63.37  | KV452782.1 | 8460024  | 3-scf00136 | 3 |
| AX-157819186 | 6 | 63.37  | KV452782.1 | 8460270  | 3-scf00136 | 3 |
| AX-158000890 | 6 | 63.37  | KV452782.1 | 8578706  | 3-scf00136 | 3 |
| AX-158000894 | 6 | 63.37  | KV452782.1 | 8583463  | 3-scf00136 | 3 |
| AX-158002495 | 6 | 63.37  | KV452782.1 | 10605005 | 3-scf00136 | 3 |
| AX-158002516 | 6 | 63.37  | KV452782.1 | 10670579 | 3-scf00136 | 3 |
| AX-158002521 | 6 | 63.37  | KV452782.1 | 10680005 | 3-scf00136 | 3 |
| AX-158407490 | 6 | 63.37  | KV452782.1 | 10686774 | 3-scf00136 | 3 |
| AX-158002534 | 6 | 63.37  | KV452782.1 | 10693967 | 3-scf00136 | 3 |
| AX-158002538 | 6 | 63.37  | KV452782.1 | 10700150 | 3-scf00136 | 3 |
| AX-158002666 | 6 | 63.37  | KV452782.1 | 10960748 | 3-scf00136 | 3 |
| AX-158002750 | 6 | 63.37  | KV452782.1 | 11042927 | 3-scf00136 | 3 |
| AX-158002777 | 6 | 63.37  | KV452782.1 | 11080386 | 3-scf00136 | 3 |
| AX-158002869 | 6 | 63.37  | KV452782.1 | 11213518 | 3-scf00136 | 3 |
| AX-158002871 | 6 | 63.37  | KV452782.1 | 11214705 | 3-scf00136 | 3 |
| AX-157819382 | 6 | 63.37  | KV452782.1 | 11254761 | 3-scf00136 | 3 |
| AX-157819383 | 6 | 63.37  | KV452782.1 | 11254804 | 3-scf00136 | 3 |
| AX-158004501 | 6 | 63.37  | KV452784.1 | 1474237  | 3-scf00141 | 3 |
| AX-157819782 | 6 | 63.37  | KV452784.1 | 5933927  | 3-scf00141 | 3 |
| AX-157819869 | 6 | 63.37  | KV452784.1 | 6995519  | 3-scf00141 | 3 |
| AX-158008101 | 6 | 63.37  | KV452784.1 | 7027649  | 3-scf00141 | 3 |
| AX-158009675 | 6 | 63.37  | KV452784.1 | 8783454  | 3-scf00141 | 3 |

|              |   |        |            |          |            |   |
|--------------|---|--------|------------|----------|------------|---|
| AX-158011358 | 6 | 63.37  | KV452784.1 | 10543919 | 3-scf00141 | 3 |
| AX-158002921 | 6 | 63.408 | KV452782.1 | 11258739 | 3-scf00136 | 3 |
| AX-158415817 | 6 | 63.454 | KV452782.1 | 10718663 | 3-scf00136 | 3 |
| AX-158002923 | 6 | 63.454 | KV452782.1 | 11260179 | 3-scf00136 | 3 |
| AX-158002924 | 6 | 63.454 | KV452782.1 | 11262003 | 3-scf00136 | 3 |
| AX-158002925 | 6 | 63.454 | KV452782.1 | 11263334 | 3-scf00136 | 3 |
| AX-157713341 | 6 | 63.454 | KV452782.1 | 11269381 | 3-scf00136 | 3 |
| AX-158002929 | 6 | 63.454 | KV452782.1 | 11271633 | 3-scf00136 | 3 |
| AX-158002933 | 6 | 63.454 | KV452782.1 | 11272806 | 3-scf00136 | 3 |
| AX-158002934 | 6 | 63.454 | KV452782.1 | 11273447 | 3-scf00136 | 3 |
| AX-158002942 | 6 | 63.454 | KV452782.1 | 11276146 | 3-scf00136 | 3 |
| AX-158002943 | 6 | 63.454 | KV452782.1 | 11277576 | 3-scf00136 | 3 |
| AX-158002945 | 6 | 63.454 | KV452782.1 | 11279639 | 3-scf00136 | 3 |
| AX-157856159 | 6 | 63.454 | KV452782.1 | 11283116 | 3-scf00136 | 3 |
| AX-158002952 | 6 | 63.454 | KV452782.1 | 11288563 | 3-scf00136 | 3 |
| AX-158002955 | 6 | 63.454 | KV452782.1 | 11289465 | 3-scf00136 | 3 |
| AX-157773638 | 6 | 63.454 | KV452782.1 | 11291097 | 3-scf00136 | 3 |
| AX-158002957 | 6 | 63.454 | KV452782.1 | 11291876 | 3-scf00136 | 3 |
| AX-158002961 | 6 | 63.454 | KV452782.1 | 11296166 | 3-scf00136 | 3 |
| AX-158002965 | 6 | 63.454 | KV452782.1 | 11298337 | 3-scf00136 | 3 |
| AX-157856160 | 6 | 63.454 | KV452782.1 | 11303060 | 3-scf00136 | 3 |
| AX-158002970 | 6 | 63.454 | KV452782.1 | 11304822 | 3-scf00136 | 3 |
| AX-158002975 | 6 | 63.454 | KV452782.1 | 11312448 | 3-scf00136 | 3 |
| AX-157819388 | 6 | 63.454 | KV452782.1 | 11312818 | 3-scf00136 | 3 |
| AX-158003631 | 6 | 63.454 | KV452782.1 | 12257632 | 3-scf00136 | 3 |
| AX-158003740 | 6 | 63.454 | KV452784.1 | 141718   | 3-scf00141 | 3 |
| AX-158002977 | 6 | 63.563 | KV452782.1 | 11316163 | 3-scf00136 | 3 |
| AX-158002978 | 6 | 63.563 | KV452782.1 | 11316630 | 3-scf00136 | 3 |
| AX-158002984 | 6 | 63.563 | KV452782.1 | 11323480 | 3-scf00136 | 3 |
| AX-158002988 | 6 | 63.563 | KV452782.1 | 11326459 | 3-scf00136 | 3 |
| AX-158002991 | 6 | 63.591 | KV452782.1 | 11328975 | 3-scf00136 | 3 |
| AX-158002993 | 6 | 63.633 | KV452782.1 | 11330409 | 3-scf00136 | 3 |
| AX-158002998 | 6 | 63.672 | KV452782.1 | 11333283 | 3-scf00136 | 3 |
| AX-158003002 | 6 | 63.672 | KV452782.1 | 11335573 | 3-scf00136 | 3 |
| AX-157865195 | 6 | 63.672 | KV452782.1 | 11335852 | 3-scf00136 | 3 |
| AX-158003003 | 6 | 63.672 | KV452782.1 | 11338812 | 3-scf00136 | 3 |
| AX-158003005 | 6 | 63.672 | KV452782.1 | 11339089 | 3-scf00136 | 3 |
| AX-158003008 | 6 | 63.672 | KV452782.1 | 11343385 | 3-scf00136 | 3 |
| AX-158003010 | 6 | 63.672 | KV452782.1 | 11343837 | 3-scf00136 | 3 |
| AX-158003013 | 6 | 63.672 | KV452782.1 | 11346323 | 3-scf00136 | 3 |
| AX-158003015 | 6 | 63.672 | KV452782.1 | 11346974 | 3-scf00136 | 3 |
| AX-157752223 | 6 | 63.672 | KV452782.1 | 11384565 | 3-scf00136 | 3 |
| AX-157744640 | 6 | 63.672 | KV452782.1 | 11449954 | 3-scf00136 | 3 |
| AX-157884762 | 6 | 63.672 | KV452782.1 | 11563653 | 3-scf00136 | 3 |
| AX-157876135 | 6 | 63.672 | KV452782.1 | 12051804 | 3-scf00136 | 3 |
| AX-158003669 | 6 | 63.672 | KV452784.1 | 43404    | 3-scf00141 | 3 |
| AX-158003671 | 6 | 63.672 | KV452784.1 | 47167    | 3-scf00141 | 3 |
| AX-157757763 | 6 | 63.672 | KV452784.1 | 53459    | 3-scf00141 | 3 |
| AX-157819460 | 6 | 63.672 | KV452784.1 | 63075    | 3-scf00141 | 3 |
| AX-157710691 | 6 | 63.672 | KV452784.1 | 63306    | 3-scf00141 | 3 |
| AX-158010218 | 6 | 63.672 | KV452784.1 | 9354613  | 3-scf00141 | 3 |

|              |   |        |            |          |            |   |
|--------------|---|--------|------------|----------|------------|---|
| AX-158003026 | 6 | 63.781 | KV452782.1 | 11354633 | 3-scf00136 | 3 |
| AX-158003027 | 6 | 63.781 | KV452782.1 | 11355510 | 3-scf00136 | 3 |
| AX-158003033 | 6 | 63.781 | KV452782.1 | 11359319 | 3-scf00136 | 3 |
| AX-157819390 | 6 | 63.781 | KV452782.1 | 11360824 | 3-scf00136 | 3 |
| AX-158003034 | 6 | 63.781 | KV452782.1 | 11361021 | 3-scf00136 | 3 |
| AX-158003035 | 6 | 63.781 | KV452782.1 | 11364385 | 3-scf00136 | 3 |
| AX-158003037 | 6 | 63.781 | KV452782.1 | 11365810 | 3-scf00136 | 3 |
| AX-158003039 | 6 | 63.89  | KV452782.1 | 11369019 | 3-scf00136 | 3 |
| AX-158003052 | 6 | 63.89  | KV452782.1 | 11381619 | 3-scf00136 | 3 |
| AX-158003060 | 6 | 63.89  | KV452782.1 | 11391568 | 3-scf00136 | 3 |
| AX-158003061 | 6 | 63.89  | KV452782.1 | 11392023 | 3-scf00136 | 3 |
| AX-158003064 | 6 | 63.89  | KV452782.1 | 11397113 | 3-scf00136 | 3 |
| AX-158003076 | 6 | 63.89  | KV452782.1 | 11409710 | 3-scf00136 | 3 |
| AX-158407516 | 6 | 63.89  | KV452782.1 | 11409837 | 3-scf00136 | 3 |
| AX-158003077 | 6 | 63.89  | KV452782.1 | 11410438 | 3-scf00136 | 3 |
| AX-158003080 | 6 | 63.89  | KV452782.1 | 11414760 | 3-scf00136 | 3 |
| AX-158003083 | 6 | 63.89  | KV452782.1 | 11415998 | 3-scf00136 | 3 |
| AX-158003089 | 6 | 63.89  | KV452782.1 | 11419830 | 3-scf00136 | 3 |
| AX-158003096 | 6 | 63.89  | KV452782.1 | 11427417 | 3-scf00136 | 3 |
| AX-157876126 | 6 | 63.89  | KV452782.1 | 11428192 | 3-scf00136 | 3 |
| AX-157713849 | 6 | 63.89  | KV452782.1 | 11467551 | 3-scf00136 | 3 |
| AX-158407541 | 6 | 63.89  | KV452782.1 | 12137715 | 3-scf00136 | 3 |
| AX-158003535 | 6 | 63.89  | KV452782.1 | 12143707 | 3-scf00136 | 3 |
| AX-158010024 | 6 | 63.89  | KV452784.1 | 9143320  | 3-scf00141 | 3 |
| AX-158002633 | 6 | 63.923 | KV452782.1 | 10930254 | 3-scf00136 | 3 |
| AX-158002709 | 6 | 63.923 | KV452782.1 | 11006439 | 3-scf00136 | 3 |
| AX-158002909 | 6 | 63.923 | KV452782.1 | 11251014 | 3-scf00136 | 3 |
| AX-158003098 | 6 | 63.923 | KV452782.1 | 11430323 | 3-scf00136 | 3 |
| AX-157749079 | 6 | 63.923 | KV452782.1 | 11953223 | 3-scf00136 | 3 |
| AX-158003529 | 6 | 63.923 | KV452782.1 | 12120495 | 3-scf00136 | 3 |
| AX-157819456 | 6 | 63.923 | KV452782.1 | 12247608 | 3-scf00136 | 3 |
| AX-158004530 | 6 | 63.923 | KV452784.1 | 1509322  | 3-scf00141 | 3 |
| AX-157743442 | 6 | 63.947 | KV452782.1 | 11449361 | 3-scf00136 | 3 |
| AX-158003105 | 6 | 63.963 | KV452782.1 | 11452276 | 3-scf00136 | 3 |
| AX-158003084 | 6 | 63.977 | KV452782.1 | 11416468 | 3-scf00136 | 3 |
| AX-157819396 | 6 | 63.977 | KV452782.1 | 11451297 | 3-scf00136 | 3 |
| AX-157819397 | 6 | 63.977 | KV452782.1 | 11461214 | 3-scf00136 | 3 |
| AX-158003114 | 6 | 63.977 | KV452782.1 | 11464491 | 3-scf00136 | 3 |
| AX-158003298 | 6 | 63.977 | KV452782.1 | 11666869 | 3-scf00136 | 3 |
| AX-158003380 | 6 | 63.977 | KV452782.1 | 11813375 | 3-scf00136 | 3 |
| AX-158003469 | 6 | 63.977 | KV452782.1 | 11953587 | 3-scf00136 | 3 |
| AX-157819431 | 6 | 63.977 | KV452782.1 | 11953896 | 3-scf00136 | 3 |
| AX-158003674 | 6 | 63.977 | KV452784.1 | 53886    | 3-scf00141 | 3 |
| AX-158000334 | 6 | 64     | KV452782.1 | 7995693  | 3-scf00136 | 3 |
| AX-158000482 | 6 | 64     | KV452782.1 | 8139854  | 3-scf00136 | 3 |
| AX-158000684 | 6 | 64     | KV452782.1 | 8301845  | 3-scf00136 | 3 |
| AX-158000905 | 6 | 64     | KV452782.1 | 8595349  | 3-scf00136 | 3 |
| AX-157739103 | 6 | 64     | KV452782.1 | 8736163  | 3-scf00136 | 3 |
| AX-157714977 | 6 | 64     | KV452782.1 | 8741087  | 3-scf00136 | 3 |
| AX-158001386 | 6 | 64     | KV452782.1 | 9096200  | 3-scf00136 | 3 |
| AX-157703140 | 6 | 64     | KV452782.1 | 9107093  | 3-scf00136 | 3 |

|              |   |    |            |          |            |   |
|--------------|---|----|------------|----------|------------|---|
| AX-158001652 | 6 | 64 | KV452782.1 | 9382260  | 3-scf00136 | 3 |
| AX-158002543 | 6 | 64 | KV452782.1 | 10716344 | 3-scf00136 | 3 |
| AX-158002710 | 6 | 64 | KV452782.1 | 11007574 | 3-scf00136 | 3 |
| AX-158002714 | 6 | 64 | KV452782.1 | 11009073 | 3-scf00136 | 3 |
| AX-158405760 | 6 | 64 | KV452782.1 | 11106652 | 3-scf00136 | 3 |
| AX-158002947 | 6 | 64 | KV452782.1 | 11280845 | 3-scf00136 | 3 |
| AX-158002953 | 6 | 64 | KV452782.1 | 11288884 | 3-scf00136 | 3 |
| AX-158003007 | 6 | 64 | KV452782.1 | 11343067 | 3-scf00136 | 3 |
| AX-158003029 | 6 | 64 | KV452782.1 | 11356172 | 3-scf00136 | 3 |
| AX-158003065 | 6 | 64 | KV452782.1 | 11400774 | 3-scf00136 | 3 |
| AX-158003070 | 6 | 64 | KV452782.1 | 11405909 | 3-scf00136 | 3 |
| AX-158003099 | 6 | 64 | KV452782.1 | 11431632 | 3-scf00136 | 3 |
| AX-157819394 | 6 | 64 | KV452782.1 | 11441985 | 3-scf00136 | 3 |
| AX-157819395 | 6 | 64 | KV452782.1 | 11445153 | 3-scf00136 | 3 |
| AX-158003118 | 6 | 64 | KV452782.1 | 11468783 | 3-scf00136 | 3 |
| AX-158003120 | 6 | 64 | KV452782.1 | 11469719 | 3-scf00136 | 3 |
| AX-158003123 | 6 | 64 | KV452782.1 | 11471375 | 3-scf00136 | 3 |
| AX-158003128 | 6 | 64 | KV452782.1 | 11475293 | 3-scf00136 | 3 |
| AX-158003132 | 6 | 64 | KV452782.1 | 11477594 | 3-scf00136 | 3 |
| AX-158003136 | 6 | 64 | KV452782.1 | 11479394 | 3-scf00136 | 3 |
| AX-158003137 | 6 | 64 | KV452782.1 | 11479885 | 3-scf00136 | 3 |
| AX-157819399 | 6 | 64 | KV452782.1 | 11480803 | 3-scf00136 | 3 |
| AX-158003141 | 6 | 64 | KV452782.1 | 11489316 | 3-scf00136 | 3 |
| AX-158003147 | 6 | 64 | KV452782.1 | 11496172 | 3-scf00136 | 3 |
| AX-158003149 | 6 | 64 | KV452782.1 | 11499466 | 3-scf00136 | 3 |
| AX-158003151 | 6 | 64 | KV452782.1 | 11502169 | 3-scf00136 | 3 |
| AX-157819402 | 6 | 64 | KV452782.1 | 11503754 | 3-scf00136 | 3 |
| AX-158003153 | 6 | 64 | KV452782.1 | 11506690 | 3-scf00136 | 3 |
| AX-158003158 | 6 | 64 | KV452782.1 | 11509687 | 3-scf00136 | 3 |
| AX-157819403 | 6 | 64 | KV452782.1 | 11511505 | 3-scf00136 | 3 |
| AX-157716395 | 6 | 64 | KV452782.1 | 11525173 | 3-scf00136 | 3 |
| AX-157754009 | 6 | 64 | KV452782.1 | 11526043 | 3-scf00136 | 3 |
| AX-157862960 | 6 | 64 | KV452782.1 | 11526258 | 3-scf00136 | 3 |
| AX-158003167 | 6 | 64 | KV452782.1 | 11526620 | 3-scf00136 | 3 |
| AX-157772379 | 6 | 64 | KV452782.1 | 11537940 | 3-scf00136 | 3 |
| AX-158003175 | 6 | 64 | KV452782.1 | 11540750 | 3-scf00136 | 3 |
| AX-157819409 | 6 | 64 | KV452782.1 | 11541237 | 3-scf00136 | 3 |
| AX-157819410 | 6 | 64 | KV452782.1 | 11549057 | 3-scf00136 | 3 |
| AX-158003186 | 6 | 64 | KV452782.1 | 11556898 | 3-scf00136 | 3 |
| AX-158003190 | 6 | 64 | KV452782.1 | 11559665 | 3-scf00136 | 3 |
| AX-158003193 | 6 | 64 | KV452782.1 | 11561999 | 3-scf00136 | 3 |
| AX-158003195 | 6 | 64 | KV452782.1 | 11563936 | 3-scf00136 | 3 |
| AX-158003198 | 6 | 64 | KV452782.1 | 11566917 | 3-scf00136 | 3 |
| AX-157773603 | 6 | 64 | KV452782.1 | 11570886 | 3-scf00136 | 3 |
| AX-158003204 | 6 | 64 | KV452782.1 | 11571538 | 3-scf00136 | 3 |
| AX-158003207 | 6 | 64 | KV452782.1 | 11577128 | 3-scf00136 | 3 |
| AX-157869929 | 6 | 64 | KV452782.1 | 11581526 | 3-scf00136 | 3 |
| AX-158003212 | 6 | 64 | KV452782.1 | 11590430 | 3-scf00136 | 3 |
| AX-158003219 | 6 | 64 | KV452782.1 | 11594217 | 3-scf00136 | 3 |
| AX-158003222 | 6 | 64 | KV452782.1 | 11600352 | 3-scf00136 | 3 |
| AX-158003226 | 6 | 64 | KV452782.1 | 11600975 | 3-scf00136 | 3 |



|              |   |    |            |          |            |   |
|--------------|---|----|------------|----------|------------|---|
| AX-158003227 | 6 | 64 | KV452782.1 | 11601906 | 3-scf00136 | 3 |
| AX-158003230 | 6 | 64 | KV452782.1 | 11607236 | 3-scf00136 | 3 |
| AX-158003243 | 6 | 64 | KV452782.1 | 11618951 | 3-scf00136 | 3 |
| AX-158003246 | 6 | 64 | KV452782.1 | 11620563 | 3-scf00136 | 3 |
| AX-158003247 | 6 | 64 | KV452782.1 | 11620914 | 3-scf00136 | 3 |
| AX-158003248 | 6 | 64 | KV452782.1 | 11621297 | 3-scf00136 | 3 |
| AX-158003252 | 6 | 64 | KV452782.1 | 11622586 | 3-scf00136 | 3 |
| AX-158003253 | 6 | 64 | KV452782.1 | 11623105 | 3-scf00136 | 3 |
| AX-158003254 | 6 | 64 | KV452782.1 | 11623712 | 3-scf00136 | 3 |
| AX-158003257 | 6 | 64 | KV452782.1 | 11628369 | 3-scf00136 | 3 |
| AX-158003260 | 6 | 64 | KV452782.1 | 11631541 | 3-scf00136 | 3 |
| AX-158003277 | 6 | 64 | KV452782.1 | 11646558 | 3-scf00136 | 3 |
| AX-158003279 | 6 | 64 | KV452782.1 | 11647068 | 3-scf00136 | 3 |
| AX-158003283 | 6 | 64 | KV452782.1 | 11654879 | 3-scf00136 | 3 |
| AX-158003287 | 6 | 64 | KV452782.1 | 11656806 | 3-scf00136 | 3 |
| AX-158003293 | 6 | 64 | KV452782.1 | 11658696 | 3-scf00136 | 3 |
| AX-158003299 | 6 | 64 | KV452782.1 | 11668186 | 3-scf00136 | 3 |
| AX-158003304 | 6 | 64 | KV452782.1 | 11670173 | 3-scf00136 | 3 |
| AX-158003310 | 6 | 64 | KV452782.1 | 11677244 | 3-scf00136 | 3 |
| AX-158003312 | 6 | 64 | KV452782.1 | 11680640 | 3-scf00136 | 3 |
| AX-158003315 | 6 | 64 | KV452782.1 | 11682222 | 3-scf00136 | 3 |
| AX-158003317 | 6 | 64 | KV452782.1 | 11684030 | 3-scf00136 | 3 |
| AX-157719804 | 6 | 64 | KV452782.1 | 11684466 | 3-scf00136 | 3 |
| AX-157819414 | 6 | 64 | KV452782.1 | 11689384 | 3-scf00136 | 3 |
| AX-158407524 | 6 | 64 | KV452782.1 | 11734338 | 3-scf00136 | 3 |
| AX-158003327 | 6 | 64 | KV452782.1 | 11734725 | 3-scf00136 | 3 |
| AX-158003335 | 6 | 64 | KV452782.1 | 11743475 | 3-scf00136 | 3 |
| AX-158415838 | 6 | 64 | KV452782.1 | 11749798 | 3-scf00136 | 3 |
| AX-158003339 | 6 | 64 | KV452782.1 | 11753039 | 3-scf00136 | 3 |
| AX-158003343 | 6 | 64 | KV452782.1 | 11758191 | 3-scf00136 | 3 |
| AX-158003354 | 6 | 64 | KV452782.1 | 11765332 | 3-scf00136 | 3 |
| AX-158003358 | 6 | 64 | KV452782.1 | 11772218 | 3-scf00136 | 3 |
| AX-158003362 | 6 | 64 | KV452782.1 | 11777577 | 3-scf00136 | 3 |
| AX-158003364 | 6 | 64 | KV452782.1 | 11777744 | 3-scf00136 | 3 |
| AX-157819417 | 6 | 64 | KV452782.1 | 11778253 | 3-scf00136 | 3 |
| AX-158003365 | 6 | 64 | KV452782.1 | 11778460 | 3-scf00136 | 3 |
| AX-157819418 | 6 | 64 | KV452782.1 | 11778640 | 3-scf00136 | 3 |
| AX-158003370 | 6 | 64 | KV452782.1 | 11788718 | 3-scf00136 | 3 |
| AX-157819421 | 6 | 64 | KV452782.1 | 11798700 | 3-scf00136 | 3 |
| AX-158003375 | 6 | 64 | KV452782.1 | 11807883 | 3-scf00136 | 3 |
| AX-158003377 | 6 | 64 | KV452782.1 | 11809358 | 3-scf00136 | 3 |
| AX-157750197 | 6 | 64 | KV452782.1 | 11810256 | 3-scf00136 | 3 |
| AX-157819422 | 6 | 64 | KV452782.1 | 11810352 | 3-scf00136 | 3 |
| AX-158003379 | 6 | 64 | KV452782.1 | 11811520 | 3-scf00136 | 3 |
| AX-157747536 | 6 | 64 | KV452782.1 | 11814719 | 3-scf00136 | 3 |
| AX-157856162 | 6 | 64 | KV452782.1 | 11821928 | 3-scf00136 | 3 |
| AX-158003385 | 6 | 64 | KV452782.1 | 11822156 | 3-scf00136 | 3 |
| AX-158003411 | 6 | 64 | KV452782.1 | 11859343 | 3-scf00136 | 3 |
| AX-158003413 | 6 | 64 | KV452782.1 | 11859791 | 3-scf00136 | 3 |
| AX-158003414 | 6 | 64 | KV452782.1 | 11862187 | 3-scf00136 | 3 |
| AX-158003415 | 6 | 64 | KV452782.1 | 11864122 | 3-scf00136 | 3 |

|              |   |    |            |          |            |   |
|--------------|---|----|------------|----------|------------|---|
| AX-158003417 | 6 | 64 | KV452782.1 | 11866661 | 3-scf00136 | 3 |
| AX-157876133 | 6 | 64 | KV452782.1 | 11872500 | 3-scf00136 | 3 |
| AX-158003422 | 6 | 64 | KV452782.1 | 11873876 | 3-scf00136 | 3 |
| AX-158003425 | 6 | 64 | KV452782.1 | 11879509 | 3-scf00136 | 3 |
| AX-158003428 | 6 | 64 | KV452782.1 | 11888164 | 3-scf00136 | 3 |
| AX-157819425 | 6 | 64 | KV452782.1 | 11889178 | 3-scf00136 | 3 |
| AX-157819426 | 6 | 64 | KV452782.1 | 11889659 | 3-scf00136 | 3 |
| AX-157819427 | 6 | 64 | KV452782.1 | 11893648 | 3-scf00136 | 3 |
| AX-158003434 | 6 | 64 | KV452782.1 | 11893716 | 3-scf00136 | 3 |
| AX-157862963 | 6 | 64 | KV452782.1 | 11895231 | 3-scf00136 | 3 |
| AX-157744993 | 6 | 64 | KV452782.1 | 11895625 | 3-scf00136 | 3 |
| AX-158003435 | 6 | 64 | KV452782.1 | 11895809 | 3-scf00136 | 3 |
| AX-158003439 | 6 | 64 | KV452782.1 | 11900294 | 3-scf00136 | 3 |
| AX-158003440 | 6 | 64 | KV452782.1 | 11902152 | 3-scf00136 | 3 |
| AX-157819428 | 6 | 64 | KV452782.1 | 11903214 | 3-scf00136 | 3 |
| AX-158003442 | 6 | 64 | KV452782.1 | 11904366 | 3-scf00136 | 3 |
| AX-158003443 | 6 | 64 | KV452782.1 | 11904957 | 3-scf00136 | 3 |
| AX-158003446 | 6 | 64 | KV452782.1 | 11905946 | 3-scf00136 | 3 |
| AX-158003447 | 6 | 64 | KV452782.1 | 11907414 | 3-scf00136 | 3 |
| AX-157819429 | 6 | 64 | KV452782.1 | 11907655 | 3-scf00136 | 3 |
| AX-158003448 | 6 | 64 | KV452782.1 | 11908201 | 3-scf00136 | 3 |
| AX-158003452 | 6 | 64 | KV452782.1 | 11922106 | 3-scf00136 | 3 |
| AX-158003453 | 6 | 64 | KV452782.1 | 11923955 | 3-scf00136 | 3 |
| AX-158003457 | 6 | 64 | KV452782.1 | 11939423 | 3-scf00136 | 3 |
| AX-158003460 | 6 | 64 | KV452782.1 | 11941921 | 3-scf00136 | 3 |
| AX-157740690 | 6 | 64 | KV452782.1 | 11943634 | 3-scf00136 | 3 |
| AX-157819430 | 6 | 64 | KV452782.1 | 11945017 | 3-scf00136 | 3 |
| AX-158003462 | 6 | 64 | KV452782.1 | 11946025 | 3-scf00136 | 3 |
| AX-158003463 | 6 | 64 | KV452782.1 | 11946611 | 3-scf00136 | 3 |
| AX-158003464 | 6 | 64 | KV452782.1 | 11947659 | 3-scf00136 | 3 |
| AX-158003467 | 6 | 64 | KV452782.1 | 11948992 | 3-scf00136 | 3 |
| AX-158003468 | 6 | 64 | KV452782.1 | 11949336 | 3-scf00136 | 3 |
| AX-158003470 | 6 | 64 | KV452782.1 | 11953974 | 3-scf00136 | 3 |
| AX-157772403 | 6 | 64 | KV452782.1 | 11957407 | 3-scf00136 | 3 |
| AX-157819432 | 6 | 64 | KV452782.1 | 11957955 | 3-scf00136 | 3 |
| AX-157819434 | 6 | 64 | KV452782.1 | 11963097 | 3-scf00136 | 3 |
| AX-158003473 | 6 | 64 | KV452782.1 | 11965370 | 3-scf00136 | 3 |
| AX-158003480 | 6 | 64 | KV452782.1 | 11993456 | 3-scf00136 | 3 |
| AX-158003481 | 6 | 64 | KV452782.1 | 12001496 | 3-scf00136 | 3 |
| AX-158003483 | 6 | 64 | KV452782.1 | 12002564 | 3-scf00136 | 3 |
| AX-158003484 | 6 | 64 | KV452782.1 | 12003128 | 3-scf00136 | 3 |
| AX-158003486 | 6 | 64 | KV452782.1 | 12009030 | 3-scf00136 | 3 |
| AX-157819435 | 6 | 64 | KV452782.1 | 12009452 | 3-scf00136 | 3 |
| AX-158003489 | 6 | 64 | KV452782.1 | 12010171 | 3-scf00136 | 3 |
| AX-158003490 | 6 | 64 | KV452782.1 | 12010975 | 3-scf00136 | 3 |
| AX-158003491 | 6 | 64 | KV452782.1 | 12011302 | 3-scf00136 | 3 |
| AX-157819436 | 6 | 64 | KV452782.1 | 12011842 | 3-scf00136 | 3 |
| AX-158003493 | 6 | 64 | KV452782.1 | 12013761 | 3-scf00136 | 3 |
| AX-158003494 | 6 | 64 | KV452782.1 | 12014754 | 3-scf00136 | 3 |
| AX-158003496 | 6 | 64 | KV452782.1 | 12019283 | 3-scf00136 | 3 |
| AX-158003497 | 6 | 64 | KV452782.1 | 12020147 | 3-scf00136 | 3 |

|              |   |    |            |          |            |   |
|--------------|---|----|------------|----------|------------|---|
| AX-158407537 | 6 | 64 | KV452782.1 | 12033130 | 3-scf00136 | 3 |
| AX-158003509 | 6 | 64 | KV452782.1 | 12072622 | 3-scf00136 | 3 |
| AX-157819439 | 6 | 64 | KV452782.1 | 12077704 | 3-scf00136 | 3 |
| AX-157819440 | 6 | 64 | KV452782.1 | 12079539 | 3-scf00136 | 3 |
| AX-158003512 | 6 | 64 | KV452782.1 | 12080669 | 3-scf00136 | 3 |
| AX-158003513 | 6 | 64 | KV452782.1 | 12081397 | 3-scf00136 | 3 |
| AX-158405781 | 6 | 64 | KV452782.1 | 12119563 | 3-scf00136 | 3 |
| AX-158003530 | 6 | 64 | KV452782.1 | 12120751 | 3-scf00136 | 3 |
| AX-158003531 | 6 | 64 | KV452782.1 | 12122248 | 3-scf00136 | 3 |
| AX-157819441 | 6 | 64 | KV452782.1 | 12128447 | 3-scf00136 | 3 |
| AX-157716083 | 6 | 64 | KV452782.1 | 12129522 | 3-scf00136 | 3 |
| AX-158407539 | 6 | 64 | KV452782.1 | 12134050 | 3-scf00136 | 3 |
| AX-158003533 | 6 | 64 | KV452782.1 | 12141581 | 3-scf00136 | 3 |
| AX-158003536 | 6 | 64 | KV452782.1 | 12144191 | 3-scf00136 | 3 |
| AX-158003540 | 6 | 64 | KV452782.1 | 12154519 | 3-scf00136 | 3 |
| AX-158003541 | 6 | 64 | KV452782.1 | 12155164 | 3-scf00136 | 3 |
| AX-158003544 | 6 | 64 | KV452782.1 | 12161700 | 3-scf00136 | 3 |
| AX-158003546 | 6 | 64 | KV452782.1 | 12162741 | 3-scf00136 | 3 |
| AX-158003547 | 6 | 64 | KV452782.1 | 12163053 | 3-scf00136 | 3 |
| AX-158003549 | 6 | 64 | KV452782.1 | 12163460 | 3-scf00136 | 3 |
| AX-157749038 | 6 | 64 | KV452782.1 | 12164496 | 3-scf00136 | 3 |
| AX-158003552 | 6 | 64 | KV452782.1 | 12164926 | 3-scf00136 | 3 |
| AX-158003553 | 6 | 64 | KV452782.1 | 12165521 | 3-scf00136 | 3 |
| AX-158003556 | 6 | 64 | KV452782.1 | 12168079 | 3-scf00136 | 3 |
| AX-158003558 | 6 | 64 | KV452782.1 | 12169777 | 3-scf00136 | 3 |
| AX-158003560 | 6 | 64 | KV452782.1 | 12170210 | 3-scf00136 | 3 |
| AX-157819444 | 6 | 64 | KV452782.1 | 12172100 | 3-scf00136 | 3 |
| AX-158003562 | 6 | 64 | KV452782.1 | 12174361 | 3-scf00136 | 3 |
| AX-158003565 | 6 | 64 | KV452782.1 | 12175824 | 3-scf00136 | 3 |
| AX-158003570 | 6 | 64 | KV452782.1 | 12177944 | 3-scf00136 | 3 |
| AX-157739738 | 6 | 64 | KV452782.1 | 12179717 | 3-scf00136 | 3 |
| AX-158003574 | 6 | 64 | KV452782.1 | 12182654 | 3-scf00136 | 3 |
| AX-158003575 | 6 | 64 | KV452782.1 | 12184316 | 3-scf00136 | 3 |
| AX-158003578 | 6 | 64 | KV452782.1 | 12184793 | 3-scf00136 | 3 |
| AX-157819445 | 6 | 64 | KV452782.1 | 12184833 | 3-scf00136 | 3 |
| AX-157713923 | 6 | 64 | KV452782.1 | 12185213 | 3-scf00136 | 3 |
| AX-158003580 | 6 | 64 | KV452782.1 | 12187547 | 3-scf00136 | 3 |
| AX-158003581 | 6 | 64 | KV452782.1 | 12187841 | 3-scf00136 | 3 |
| AX-158003588 | 6 | 64 | KV452782.1 | 12193237 | 3-scf00136 | 3 |
| AX-158003590 | 6 | 64 | KV452782.1 | 12202624 | 3-scf00136 | 3 |
| AX-157819448 | 6 | 64 | KV452782.1 | 12203308 | 3-scf00136 | 3 |
| AX-157726519 | 6 | 64 | KV452782.1 | 12204658 | 3-scf00136 | 3 |
| AX-157819449 | 6 | 64 | KV452782.1 | 12205010 | 3-scf00136 | 3 |
| AX-158003598 | 6 | 64 | KV452782.1 | 12211869 | 3-scf00136 | 3 |
| AX-158003600 | 6 | 64 | KV452782.1 | 12221396 | 3-scf00136 | 3 |
| AX-158003604 | 6 | 64 | KV452782.1 | 12229787 | 3-scf00136 | 3 |
| AX-158003614 | 6 | 64 | KV452782.1 | 12239901 | 3-scf00136 | 3 |
| AX-158003617 | 6 | 64 | KV452782.1 | 12241428 | 3-scf00136 | 3 |
| AX-158003620 | 6 | 64 | KV452782.1 | 12242945 | 3-scf00136 | 3 |
| AX-157819457 | 6 | 64 | KV452782.1 | 12255216 | 3-scf00136 | 3 |
| AX-158003630 | 6 | 64 | KV452782.1 | 12257097 | 3-scf00136 | 3 |

|              |   |        |             |          |            |    |
|--------------|---|--------|-------------|----------|------------|----|
| AX-158003635 | 6 | 64     | KV452784.1  | 4889     | 3-scf00141 | 3  |
| AX-158003638 | 6 | 64     | KV452784.1  | 7774     | 3-scf00141 | 3  |
| AX-158003640 | 6 | 64     | KV452784.1  | 8166     | 3-scf00141 | 3  |
| AX-158003644 | 6 | 64     | KV452784.1  | 16472    | 3-scf00141 | 3  |
| AX-158003646 | 6 | 64     | KV452784.1  | 17512    | 3-scf00141 | 3  |
| AX-157739589 | 6 | 64     | KV452784.1  | 22370    | 3-scf00141 | 3  |
| AX-158003650 | 6 | 64     | KV452784.1  | 23302    | 3-scf00141 | 3  |
| AX-158003651 | 6 | 64     | KV452784.1  | 24509    | 3-scf00141 | 3  |
| AX-157747340 | 6 | 64     | KV452784.1  | 29660    | 3-scf00141 | 3  |
| AX-158003660 | 6 | 64     | KV452784.1  | 30435    | 3-scf00141 | 3  |
| AX-158003664 | 6 | 64     | KV452784.1  | 33572    | 3-scf00141 | 3  |
| AX-157752375 | 6 | 64     | KV452784.1  | 35526    | 3-scf00141 | 3  |
| AX-158003668 | 6 | 64     | KV452784.1  | 41872    | 3-scf00141 | 3  |
| AX-158003672 | 6 | 64     | KV452784.1  | 50513    | 3-scf00141 | 3  |
| AX-158009707 | 6 | 64     | KV452784.1  | 8811231  | 3-scf00141 | 3  |
| AX-158009709 | 6 | 64     | KV452784.1  | 8811741  | 3-scf00141 | 3  |
| AX-157884829 | 6 | 64     | KV452784.1  | 8866370  | 3-scf00141 | 3  |
| AX-158009907 | 6 | 64     | KV452784.1  | 9054627  | 3-scf00141 | 3  |
| AX-158010979 | 6 | 64     | KV452784.1  | 10081822 | 3-scf00141 | 3  |
| AX-158011584 | 6 | 64     | KV452784.1  | 10848426 | 3-scf00141 | 3  |
| AX-158012066 | 6 | 64     | KV452784.1  | 11722990 | 3-scf00141 | 3  |
| AX-158003676 | 6 | 64.328 | KV452784.1  | 55717    | 3-scf00141 | 3  |
| AX-158003681 | 6 | 64.328 | KV452784.1  | 66121    | 3-scf00141 | 3  |
| AX-158003684 | 6 | 64.328 | KV452784.1  | 74007    | 3-scf00141 | 3  |
| AX-158003685 | 6 | 64.328 | KV452784.1  | 76370    | 3-scf00141 | 3  |
| AX-158003689 | 6 | 64.328 | KV452784.1  | 80360    | 3-scf00141 | 3  |
| AX-157770767 | 6 | 64.328 | KV452784.1  | 80636    | 3-scf00141 | 3  |
| AX-158003703 | 6 | 64.328 | KV452784.1  | 95032    | 3-scf00141 | 3  |
| AX-157712095 | 6 | 64.328 | 3ML01034286 | 60       | scf09956_1 | UN |
| AX-158003691 | 6 | 64.437 | KV452784.1  | 84378    | 3-scf00141 | 3  |
| AX-158003692 | 6 | 64.488 | KV452784.1  | 84890    | 3-scf00141 | 3  |
| AX-158003696 | 6 | 64.546 | KV452784.1  | 87255    | 3-scf00141 | 3  |
| AX-158003697 | 6 | 64.546 | KV452784.1  | 88590    | 3-scf00141 | 3  |
| AX-158003699 | 6 | 64.546 | KV452784.1  | 90989    | 3-scf00141 | 3  |
| AX-157819463 | 6 | 64.546 | KV452784.1  | 93769    | 3-scf00141 | 3  |
| AX-158003714 | 6 | 64.546 | KV452784.1  | 109852   | 3-scf00141 | 3  |
| AX-158003704 | 6 | 64.621 | KV452784.1  | 97229    | 3-scf00141 | 3  |
| AX-158003705 | 6 | 64.664 | KV452784.1  | 100716   | 3-scf00141 | 3  |
| AX-158003707 | 6 | 64.764 | KV452784.1  | 105236   | 3-scf00141 | 3  |
| AX-158003708 | 6 | 64.764 | KV452784.1  | 106419   | 3-scf00141 | 3  |
| AX-158003710 | 6 | 64.764 | KV452784.1  | 106987   | 3-scf00141 | 3  |
| AX-158003711 | 6 | 64.764 | KV452784.1  | 107520   | 3-scf00141 | 3  |
| AX-158003712 | 6 | 64.764 | KV452784.1  | 109375   | 3-scf00141 | 3  |
| AX-157731897 | 6 | 64.764 | KV452784.1  | 114698   | 3-scf00141 | 3  |
| AX-158003716 | 6 | 64.764 | KV452784.1  | 114743   | 3-scf00141 | 3  |
| AX-158003718 | 6 | 64.764 | KV452784.1  | 117489   | 3-scf00141 | 3  |
| AX-158003721 | 6 | 64.764 | KV452784.1  | 122628   | 3-scf00141 | 3  |
| AX-157819464 | 6 | 64.764 | KV452784.1  | 123812   | 3-scf00141 | 3  |
| AX-157819389 | 6 | 64.983 | KV452782.1  | 11317019 | 3-scf00136 | 3  |
| AX-158003042 | 6 | 64.983 | KV452782.1  | 11372881 | 3-scf00136 | 3  |
| AX-158003063 | 6 | 64.983 | KV452782.1  | 11393054 | 3-scf00136 | 3  |

|              |   |        |            |          |            |   |
|--------------|---|--------|------------|----------|------------|---|
| AX-158003086 | 6 | 64.983 | KV452782.1 | 11416829 | 3-scf00136 | 3 |
| AX-158003307 | 6 | 64.983 | KV452782.1 | 11671621 | 3-scf00136 | 3 |
| AX-158003325 | 6 | 64.983 | KV452782.1 | 11723524 | 3-scf00136 | 3 |
| AX-158003400 | 6 | 64.983 | KV452782.1 | 11845174 | 3-scf00136 | 3 |
| AX-158003517 | 6 | 64.983 | KV452782.1 | 12086262 | 3-scf00136 | 3 |
| AX-158003677 | 6 | 64.983 | KV452784.1 | 56669    | 3-scf00141 | 3 |
| AX-157716768 | 6 | 64.983 | KV452784.1 | 125658   | 3-scf00141 | 3 |
| AX-158003728 | 6 | 64.983 | KV452784.1 | 126857   | 3-scf00141 | 3 |
| AX-158003731 | 6 | 64.983 | KV452784.1 | 131533   | 3-scf00141 | 3 |
| AX-158003732 | 6 | 64.983 | KV452784.1 | 134003   | 3-scf00141 | 3 |
| AX-158003735 | 6 | 64.983 | KV452784.1 | 135501   | 3-scf00141 | 3 |
| AX-158003738 | 6 | 64.983 | KV452784.1 | 137377   | 3-scf00141 | 3 |
| AX-157819466 | 6 | 64.983 | KV452784.1 | 143897   | 3-scf00141 | 3 |
| AX-158003737 | 6 | 65.033 | KV452784.1 | 136744   | 3-scf00141 | 3 |
| AX-158003744 | 6 | 65.033 | KV452784.1 | 146341   | 3-scf00141 | 3 |
| AX-158003747 | 6 | 65.241 | KV452784.1 | 149890   | 3-scf00141 | 3 |
| AX-157819467 | 6 | 65.605 | KV452784.1 | 152822   | 3-scf00141 | 3 |
| AX-157819468 | 6 | 65.613 | KV452784.1 | 162693   | 3-scf00141 | 3 |
| AX-157819469 | 6 | 65.613 | KV452784.1 | 164039   | 3-scf00141 | 3 |
| AX-158003903 | 6 | 65.613 | KV452784.1 | 344393   | 3-scf00141 | 3 |
| AX-158003764 | 6 | 65.743 | KV452784.1 | 166713   | 3-scf00141 | 3 |
| AX-158003771 | 6 | 65.743 | KV452784.1 | 171303   | 3-scf00141 | 3 |
| AX-157819470 | 6 | 65.747 | KV452784.1 | 166931   | 3-scf00141 | 3 |
| AX-158003765 | 6 | 65.75  | KV452784.1 | 167180   | 3-scf00141 | 3 |
| AX-158390752 | 6 | 65.75  | KV452784.1 | 175460   | 3-scf00141 | 3 |
| AX-158003758 | 6 | 65.849 | KV452784.1 | 158952   | 3-scf00141 | 3 |
| AX-158003779 | 6 | 65.849 | KV452784.1 | 180710   | 3-scf00141 | 3 |
| AX-158003812 | 6 | 65.849 | KV452784.1 | 217047   | 3-scf00141 | 3 |
| AX-158003827 | 6 | 65.849 | KV452784.1 | 230704   | 3-scf00141 | 3 |
| AX-158003888 | 6 | 65.849 | KV452784.1 | 311148   | 3-scf00141 | 3 |
| AX-158003990 | 6 | 65.849 | KV452784.1 | 463341   | 3-scf00141 | 3 |
| AX-158003773 | 6 | 65.86  | KV452784.1 | 172108   | 3-scf00141 | 3 |
| AX-158003785 | 6 | 65.86  | KV452784.1 | 184833   | 3-scf00141 | 3 |
| AX-157745486 | 6 | 65.86  | KV452784.1 | 186019   | 3-scf00141 | 3 |
| AX-158003789 | 6 | 65.86  | KV452784.1 | 188556   | 3-scf00141 | 3 |
| AX-158003791 | 6 | 65.86  | KV452784.1 | 190090   | 3-scf00141 | 3 |
| AX-158003793 | 6 | 65.86  | KV452784.1 | 190786   | 3-scf00141 | 3 |
| AX-158003794 | 6 | 65.86  | KV452784.1 | 191447   | 3-scf00141 | 3 |
| AX-158003798 | 6 | 65.86  | KV452784.1 | 194422   | 3-scf00141 | 3 |
| AX-158003803 | 6 | 65.86  | KV452784.1 | 197600   | 3-scf00141 | 3 |
| AX-158003806 | 6 | 65.86  | KV452784.1 | 199160   | 3-scf00141 | 3 |
| AX-158003807 | 6 | 65.86  | KV452784.1 | 200924   | 3-scf00141 | 3 |
| AX-157819476 | 6 | 65.86  | KV452784.1 | 207285   | 3-scf00141 | 3 |
| AX-157819478 | 6 | 65.86  | KV452784.1 | 211092   | 3-scf00141 | 3 |
| AX-157819481 | 6 | 65.86  | KV452784.1 | 212367   | 3-scf00141 | 3 |
| AX-157709089 | 6 | 65.86  | KV452784.1 | 214905   | 3-scf00141 | 3 |
| AX-158003814 | 6 | 65.86  | KV452784.1 | 218987   | 3-scf00141 | 3 |
| AX-158003821 | 6 | 65.86  | KV452784.1 | 225431   | 3-scf00141 | 3 |
| AX-158003823 | 6 | 65.86  | KV452784.1 | 227093   | 3-scf00141 | 3 |
| AX-157819483 | 6 | 65.86  | KV452784.1 | 227842   | 3-scf00141 | 3 |
| AX-158003824 | 6 | 65.86  | KV452784.1 | 228368   | 3-scf00141 | 3 |

|              |   |        |            |          |            |   |
|--------------|---|--------|------------|----------|------------|---|
| AX-158003833 | 6 | 65.86  | KV452784.1 | 235038   | 3-scf00141 | 3 |
| AX-158003839 | 6 | 65.86  | KV452784.1 | 242949   | 3-scf00141 | 3 |
| AX-158003847 | 6 | 65.86  | KV452784.1 | 248555   | 3-scf00141 | 3 |
| AX-158003849 | 6 | 65.86  | KV452784.1 | 250792   | 3-scf00141 | 3 |
| AX-158003855 | 6 | 65.86  | KV452784.1 | 256641   | 3-scf00141 | 3 |
| AX-158003883 | 6 | 65.86  | KV452784.1 | 300419   | 3-scf00141 | 3 |
| AX-157819496 | 6 | 65.86  | KV452784.1 | 322924   | 3-scf00141 | 3 |
| AX-158003894 | 6 | 65.86  | KV452784.1 | 333962   | 3-scf00141 | 3 |
| AX-158003897 | 6 | 65.86  | KV452784.1 | 337581   | 3-scf00141 | 3 |
| AX-158003908 | 6 | 65.86  | KV452784.1 | 351318   | 3-scf00141 | 3 |
| AX-158003993 | 6 | 65.86  | KV452784.1 | 464137   | 3-scf00141 | 3 |
| AX-158004065 | 6 | 65.86  | KV452784.1 | 537171   | 3-scf00141 | 3 |
| AX-158004296 | 6 | 65.86  | KV452784.1 | 1073615  | 3-scf00141 | 3 |
| AX-158004347 | 6 | 65.86  | KV452784.1 | 1157791  | 3-scf00141 | 3 |
| AX-158004381 | 6 | 65.86  | KV452784.1 | 1198492  | 3-scf00141 | 3 |
| AX-158004572 | 6 | 65.86  | KV452784.1 | 1560665  | 3-scf00141 | 3 |
| AX-157819554 | 6 | 65.86  | KV452784.1 | 1670543  | 3-scf00141 | 3 |
| AX-158004827 | 6 | 65.86  | KV452784.1 | 1847201  | 3-scf00141 | 3 |
| AX-158004835 | 6 | 65.86  | KV452784.1 | 1854916  | 3-scf00141 | 3 |
| AX-158004843 | 6 | 65.86  | KV452784.1 | 1859236  | 3-scf00141 | 3 |
| AX-157723208 | 6 | 65.861 | KV452784.1 | 229309   | 3-scf00141 | 3 |
| AX-157819484 | 6 | 65.861 | KV452784.1 | 236451   | 3-scf00141 | 3 |
| AX-158407801 | 6 | 65.862 | KV452784.1 | 11337751 | 3-scf00141 | 3 |
| AX-158012122 | 6 | 65.862 | KV452788.1 | 143687   | 3-scf00145 | 3 |
| AX-158012123 | 6 | 65.862 | KV452788.1 | 144345   | 3-scf00145 | 3 |
| AX-158012131 | 6 | 65.862 | KV452788.1 | 155318   | 3-scf00145 | 3 |
| AX-158375553 | 6 | 65.862 | KV452785.1 | 58232    | 3-scf05654 | 3 |
| AX-158003778 | 6 | 65.97  | KV452784.1 | 179867   | 3-scf00141 | 3 |
| AX-158003782 | 6 | 65.97  | KV452784.1 | 182338   | 3-scf00141 | 3 |
| AX-158003787 | 6 | 65.97  | KV452784.1 | 187035   | 3-scf00141 | 3 |
| AX-157869937 | 6 | 65.97  | KV452784.1 | 209912   | 3-scf00141 | 3 |
| AX-158003816 | 6 | 65.97  | KV452784.1 | 221924   | 3-scf00141 | 3 |
| AX-158003825 | 6 | 65.97  | KV452784.1 | 229142   | 3-scf00141 | 3 |
| AX-158003826 | 6 | 65.97  | KV452784.1 | 229473   | 3-scf00141 | 3 |
| AX-158003861 | 6 | 65.97  | KV452784.1 | 258468   | 3-scf00141 | 3 |
| AX-158003905 | 6 | 65.97  | KV452784.1 | 345179   | 3-scf00141 | 3 |
| AX-158003906 | 6 | 65.97  | KV452784.1 | 345606   | 3-scf00141 | 3 |
| AX-158003907 | 6 | 65.97  | KV452784.1 | 348559   | 3-scf00141 | 3 |
| AX-158003909 | 6 | 65.97  | KV452784.1 | 352358   | 3-scf00141 | 3 |
| AX-158003911 | 6 | 65.97  | KV452784.1 | 354256   | 3-scf00141 | 3 |
| AX-157753723 | 6 | 65.97  | KV452784.1 | 363081   | 3-scf00141 | 3 |
| AX-158003925 | 6 | 65.97  | KV452784.1 | 375370   | 3-scf00141 | 3 |
| AX-157739639 | 6 | 65.97  | KV452784.1 | 376894   | 3-scf00141 | 3 |
| AX-158003927 | 6 | 65.97  | KV452784.1 | 377827   | 3-scf00141 | 3 |
| AX-157744045 | 6 | 65.97  | KV452784.1 | 380146   | 3-scf00141 | 3 |
| AX-157819500 | 6 | 65.97  | KV452784.1 | 390711   | 3-scf00141 | 3 |
| AX-158003936 | 6 | 65.97  | KV452784.1 | 390921   | 3-scf00141 | 3 |
| AX-157819502 | 6 | 65.97  | KV452784.1 | 394465   | 3-scf00141 | 3 |
| AX-158004036 | 6 | 65.97  | KV452784.1 | 502798   | 3-scf00141 | 3 |
| AX-157723918 | 6 | 65.97  | KV452784.1 | 579410   | 3-scf00141 | 3 |
| AX-158004140 | 6 | 65.97  | KV452784.1 | 639023   | 3-scf00141 | 3 |

|              |   |        |            |          |            |   |
|--------------|---|--------|------------|----------|------------|---|
| AX-158004172 | 6 | 65.97  | KV452784.1 | 717656   | 3-scf00141 | 3 |
| AX-158004317 | 6 | 65.97  | KV452784.1 | 1127111  | 3-scf00141 | 3 |
| AX-158004320 | 6 | 65.97  | KV452784.1 | 1131095  | 3-scf00141 | 3 |
| AX-158004321 | 6 | 65.97  | KV452784.1 | 1132128  | 3-scf00141 | 3 |
| AX-158004346 | 6 | 65.97  | KV452784.1 | 1156759  | 3-scf00141 | 3 |
| AX-158004520 | 6 | 65.97  | KV452784.1 | 1500466  | 3-scf00141 | 3 |
| AX-158004526 | 6 | 65.97  | KV452784.1 | 1504487  | 3-scf00141 | 3 |
| AX-158004578 | 6 | 65.97  | KV452784.1 | 1564939  | 3-scf00141 | 3 |
| AX-158004629 | 6 | 65.97  | KV452784.1 | 1624880  | 3-scf00141 | 3 |
| AX-158004684 | 6 | 65.97  | KV452784.1 | 1685189  | 3-scf00141 | 3 |
| AX-157758416 | 6 | 65.97  | KV452784.1 | 1699878  | 3-scf00141 | 3 |
| AX-158003939 | 6 | 66.027 | KV452784.1 | 398660   | 3-scf00141 | 3 |
| AX-157999224 | 6 | 66.08  | KV452782.1 | 6727794  | 3-scf00136 | 3 |
| AX-158001533 | 6 | 66.08  | KV452782.1 | 9234009  | 3-scf00136 | 3 |
| AX-157745401 | 6 | 66.08  | KV452782.1 | 9416669  | 3-scf00136 | 3 |
| AX-157709478 | 6 | 66.08  | KV452782.1 | 9417220  | 3-scf00136 | 3 |
| AX-158002379 | 6 | 66.08  | KV452782.1 | 10209047 | 3-scf00136 | 3 |
| AX-158002465 | 6 | 66.08  | KV452782.1 | 10484566 | 3-scf00136 | 3 |
| AX-158002586 | 6 | 66.08  | KV452782.1 | 10846838 | 3-scf00136 | 3 |
| AX-158002588 | 6 | 66.08  | KV452782.1 | 10857233 | 3-scf00136 | 3 |
| AX-158003081 | 6 | 66.08  | KV452782.1 | 11415402 | 3-scf00136 | 3 |
| AX-158003107 | 6 | 66.08  | KV452782.1 | 11452882 | 3-scf00136 | 3 |
| AX-157717358 | 6 | 66.08  | KV452782.1 | 11487222 | 3-scf00136 | 3 |
| AX-158003386 | 6 | 66.08  | KV452782.1 | 11822822 | 3-scf00136 | 3 |
| AX-157865201 | 6 | 66.08  | KV452782.1 | 11836202 | 3-scf00136 | 3 |
| AX-158003392 | 6 | 66.08  | KV452782.1 | 11838254 | 3-scf00136 | 3 |
| AX-158003401 | 6 | 66.08  | KV452782.1 | 11846148 | 3-scf00136 | 3 |
| AX-158383508 | 6 | 66.08  | KV452782.1 | 11846207 | 3-scf00136 | 3 |
| AX-158003583 | 6 | 66.08  | KV452782.1 | 12188529 | 3-scf00136 | 3 |
| AX-158003585 | 6 | 66.08  | KV452782.1 | 12192744 | 3-scf00136 | 3 |
| AX-158003597 | 6 | 66.08  | KV452782.1 | 12211031 | 3-scf00136 | 3 |
| AX-157716599 | 6 | 66.08  | KV452782.1 | 12247696 | 3-scf00136 | 3 |
| AX-158003622 | 6 | 66.08  | KV452782.1 | 12248295 | 3-scf00136 | 3 |
| AX-157819461 | 6 | 66.08  | KV452784.1 | 92392    | 3-scf00141 | 3 |
| AX-158003801 | 6 | 66.08  | KV452784.1 | 196300   | 3-scf00141 | 3 |
| AX-158003808 | 6 | 66.08  | KV452784.1 | 201551   | 3-scf00141 | 3 |
| AX-157819482 | 6 | 66.08  | KV452784.1 | 212633   | 3-scf00141 | 3 |
| AX-158003829 | 6 | 66.08  | KV452784.1 | 232626   | 3-scf00141 | 3 |
| AX-158003835 | 6 | 66.08  | KV452784.1 | 239681   | 3-scf00141 | 3 |
| AX-158003858 | 6 | 66.08  | KV452784.1 | 257538   | 3-scf00141 | 3 |
| AX-158003862 | 6 | 66.08  | KV452784.1 | 261747   | 3-scf00141 | 3 |
| AX-157743896 | 6 | 66.08  | KV452784.1 | 299702   | 3-scf00141 | 3 |
| AX-158003885 | 6 | 66.08  | KV452784.1 | 303003   | 3-scf00141 | 3 |
| AX-158003893 | 6 | 66.08  | KV452784.1 | 328306   | 3-scf00141 | 3 |
| AX-158003901 | 6 | 66.08  | KV452784.1 | 338687   | 3-scf00141 | 3 |
| AX-158003902 | 6 | 66.08  | KV452784.1 | 344042   | 3-scf00141 | 3 |
| AX-158003948 | 6 | 66.08  | KV452784.1 | 407939   | 3-scf00141 | 3 |
| AX-158003958 | 6 | 66.08  | KV452784.1 | 420672   | 3-scf00141 | 3 |
| AX-157819505 | 6 | 66.08  | KV452784.1 | 422708   | 3-scf00141 | 3 |
| AX-157819506 | 6 | 66.08  | KV452784.1 | 427150   | 3-scf00141 | 3 |
| AX-158003975 | 6 | 66.08  | KV452784.1 | 454096   | 3-scf00141 | 3 |

|              |   |       |            |         |            |   |
|--------------|---|-------|------------|---------|------------|---|
| AX-157754951 | 6 | 66.08 | KV452784.1 | 454502  | 3-scf00141 | 3 |
| AX-158003979 | 6 | 66.08 | KV452784.1 | 456472  | 3-scf00141 | 3 |
| AX-158003985 | 6 | 66.08 | KV452784.1 | 459249  | 3-scf00141 | 3 |
| AX-158003988 | 6 | 66.08 | KV452784.1 | 460932  | 3-scf00141 | 3 |
| AX-158003996 | 6 | 66.08 | KV452784.1 | 468170  | 3-scf00141 | 3 |
| AX-158004010 | 6 | 66.08 | KV452784.1 | 480165  | 3-scf00141 | 3 |
| AX-158004040 | 6 | 66.08 | KV452784.1 | 505552  | 3-scf00141 | 3 |
| AX-158004042 | 6 | 66.08 | KV452784.1 | 509961  | 3-scf00141 | 3 |
| AX-158390768 | 6 | 66.08 | KV452784.1 | 511758  | 3-scf00141 | 3 |
| AX-158004064 | 6 | 66.08 | KV452784.1 | 535265  | 3-scf00141 | 3 |
| AX-158390770 | 6 | 66.08 | KV452784.1 | 535580  | 3-scf00141 | 3 |
| AX-158004067 | 6 | 66.08 | KV452784.1 | 537999  | 3-scf00141 | 3 |
| AX-157869968 | 6 | 66.08 | KV452784.1 | 581659  | 3-scf00141 | 3 |
| AX-157724087 | 6 | 66.08 | KV452784.1 | 582191  | 3-scf00141 | 3 |
| AX-158004113 | 6 | 66.08 | KV452784.1 | 588400  | 3-scf00141 | 3 |
| AX-158390776 | 6 | 66.08 | KV452784.1 | 588930  | 3-scf00141 | 3 |
| AX-158004129 | 6 | 66.08 | KV452784.1 | 621239  | 3-scf00141 | 3 |
| AX-157869970 | 6 | 66.08 | KV452784.1 | 643105  | 3-scf00141 | 3 |
| AX-158004148 | 6 | 66.08 | KV452784.1 | 653388  | 3-scf00141 | 3 |
| AX-158004149 | 6 | 66.08 | KV452784.1 | 656111  | 3-scf00141 | 3 |
| AX-157819519 | 6 | 66.08 | KV452784.1 | 694673  | 3-scf00141 | 3 |
| AX-158004168 | 6 | 66.08 | KV452784.1 | 713145  | 3-scf00141 | 3 |
| AX-158004171 | 6 | 66.08 | KV452784.1 | 716883  | 3-scf00141 | 3 |
| AX-158004173 | 6 | 66.08 | KV452784.1 | 722223  | 3-scf00141 | 3 |
| AX-158004177 | 6 | 66.08 | KV452784.1 | 734925  | 3-scf00141 | 3 |
| AX-158004186 | 6 | 66.08 | KV452784.1 | 759081  | 3-scf00141 | 3 |
| AX-158004208 | 6 | 66.08 | KV452784.1 | 839472  | 3-scf00141 | 3 |
| AX-158390789 | 6 | 66.08 | KV452784.1 | 900446  | 3-scf00141 | 3 |
| AX-158004223 | 6 | 66.08 | KV452784.1 | 906776  | 3-scf00141 | 3 |
| AX-158004225 | 6 | 66.08 | KV452784.1 | 910652  | 3-scf00141 | 3 |
| AX-157819521 | 6 | 66.08 | KV452784.1 | 924643  | 3-scf00141 | 3 |
| AX-158004253 | 6 | 66.08 | KV452784.1 | 985900  | 3-scf00141 | 3 |
| AX-158004260 | 6 | 66.08 | KV452784.1 | 990498  | 3-scf00141 | 3 |
| AX-158004272 | 6 | 66.08 | KV452784.1 | 1015976 | 3-scf00141 | 3 |
| AX-158004279 | 6 | 66.08 | KV452784.1 | 1030542 | 3-scf00141 | 3 |
| AX-158004285 | 6 | 66.08 | KV452784.1 | 1041554 | 3-scf00141 | 3 |
| AX-158390798 | 6 | 66.08 | KV452784.1 | 1044317 | 3-scf00141 | 3 |
| AX-158004288 | 6 | 66.08 | KV452784.1 | 1044728 | 3-scf00141 | 3 |
| AX-158004297 | 6 | 66.08 | KV452784.1 | 1077291 | 3-scf00141 | 3 |
| AX-157856166 | 6 | 66.08 | KV452784.1 | 1096392 | 3-scf00141 | 3 |
| AX-158004302 | 6 | 66.08 | KV452784.1 | 1098055 | 3-scf00141 | 3 |
| AX-158004303 | 6 | 66.08 | KV452784.1 | 1098747 | 3-scf00141 | 3 |
| AX-157819532 | 6 | 66.08 | KV452784.1 | 1099875 | 3-scf00141 | 3 |
| AX-158004307 | 6 | 66.08 | KV452784.1 | 1103329 | 3-scf00141 | 3 |
| AX-158004310 | 6 | 66.08 | KV452784.1 | 1108790 | 3-scf00141 | 3 |
| AX-157752607 | 6 | 66.08 | KV452784.1 | 1110194 | 3-scf00141 | 3 |
| AX-158407560 | 6 | 66.08 | KV452784.1 | 1110807 | 3-scf00141 | 3 |
| AX-158004311 | 6 | 66.08 | KV452784.1 | 1110847 | 3-scf00141 | 3 |
| AX-157865214 | 6 | 66.08 | KV452784.1 | 1114614 | 3-scf00141 | 3 |
| AX-157819533 | 6 | 66.08 | KV452784.1 | 1120615 | 3-scf00141 | 3 |
| AX-157819534 | 6 | 66.08 | KV452784.1 | 1121473 | 3-scf00141 | 3 |



|              |   |       |            |         |            |   |
|--------------|---|-------|------------|---------|------------|---|
| AX-157819535 | 6 | 66.08 | KV452784.1 | 1122949 | 3-scf00141 | 3 |
| AX-157723690 | 6 | 66.08 | KV452784.1 | 1126582 | 3-scf00141 | 3 |
| AX-158004324 | 6 | 66.08 | KV452784.1 | 1134986 | 3-scf00141 | 3 |
| AX-158004328 | 6 | 66.08 | KV452784.1 | 1140708 | 3-scf00141 | 3 |
| AX-158004333 | 6 | 66.08 | KV452784.1 | 1144313 | 3-scf00141 | 3 |
| AX-158004334 | 6 | 66.08 | KV452784.1 | 1144916 | 3-scf00141 | 3 |
| AX-158004339 | 6 | 66.08 | KV452784.1 | 1148694 | 3-scf00141 | 3 |
| AX-158004342 | 6 | 66.08 | KV452784.1 | 1154760 | 3-scf00141 | 3 |
| AX-158004351 | 6 | 66.08 | KV452784.1 | 1163133 | 3-scf00141 | 3 |
| AX-158004353 | 6 | 66.08 | KV452784.1 | 1164058 | 3-scf00141 | 3 |
| AX-158004355 | 6 | 66.08 | KV452784.1 | 1164387 | 3-scf00141 | 3 |
| AX-158390801 | 6 | 66.08 | KV452784.1 | 1165252 | 3-scf00141 | 3 |
| AX-158004358 | 6 | 66.08 | KV452784.1 | 1172162 | 3-scf00141 | 3 |
| AX-158004367 | 6 | 66.08 | KV452784.1 | 1185211 | 3-scf00141 | 3 |
| AX-158004389 | 6 | 66.08 | KV452784.1 | 1212599 | 3-scf00141 | 3 |
| AX-158004394 | 6 | 66.08 | KV452784.1 | 1218228 | 3-scf00141 | 3 |
| AX-158004399 | 6 | 66.08 | KV452784.1 | 1227007 | 3-scf00141 | 3 |
| AX-157757924 | 6 | 66.08 | KV452784.1 | 1229880 | 3-scf00141 | 3 |
| AX-158004404 | 6 | 66.08 | KV452784.1 | 1238543 | 3-scf00141 | 3 |
| AX-157772663 | 6 | 66.08 | KV452784.1 | 1251586 | 3-scf00141 | 3 |
| AX-158004415 | 6 | 66.08 | KV452784.1 | 1254719 | 3-scf00141 | 3 |
| AX-158004417 | 6 | 66.08 | KV452784.1 | 1262749 | 3-scf00141 | 3 |
| AX-157819539 | 6 | 66.08 | KV452784.1 | 1274094 | 3-scf00141 | 3 |
| AX-158004420 | 6 | 66.08 | KV452784.1 | 1275459 | 3-scf00141 | 3 |
| AX-157755173 | 6 | 66.08 | KV452784.1 | 1279178 | 3-scf00141 | 3 |
| AX-158407566 | 6 | 66.08 | KV452784.1 | 1292374 | 3-scf00141 | 3 |
| AX-158004423 | 6 | 66.08 | KV452784.1 | 1294215 | 3-scf00141 | 3 |
| AX-158004439 | 6 | 66.08 | KV452784.1 | 1339618 | 3-scf00141 | 3 |
| AX-158004456 | 6 | 66.08 | KV452784.1 | 1378384 | 3-scf00141 | 3 |
| AX-157751902 | 6 | 66.08 | KV452784.1 | 1412389 | 3-scf00141 | 3 |
| AX-158004481 | 6 | 66.08 | KV452784.1 | 1412938 | 3-scf00141 | 3 |
| AX-157742915 | 6 | 66.08 | KV452784.1 | 1420244 | 3-scf00141 | 3 |
| AX-158004489 | 6 | 66.08 | KV452784.1 | 1431034 | 3-scf00141 | 3 |
| AX-158004491 | 6 | 66.08 | KV452784.1 | 1434845 | 3-scf00141 | 3 |
| AX-158004493 | 6 | 66.08 | KV452784.1 | 1436723 | 3-scf00141 | 3 |
| AX-158004496 | 6 | 66.08 | KV452784.1 | 1444590 | 3-scf00141 | 3 |
| AX-158004498 | 6 | 66.08 | KV452784.1 | 1453760 | 3-scf00141 | 3 |
| AX-157819544 | 6 | 66.08 | KV452784.1 | 1465704 | 3-scf00141 | 3 |
| AX-158004503 | 6 | 66.08 | KV452784.1 | 1477546 | 3-scf00141 | 3 |
| AX-158004504 | 6 | 66.08 | KV452784.1 | 1478241 | 3-scf00141 | 3 |
| AX-158004510 | 6 | 66.08 | KV452784.1 | 1491839 | 3-scf00141 | 3 |
| AX-158004514 | 6 | 66.08 | KV452784.1 | 1495476 | 3-scf00141 | 3 |
| AX-158004515 | 6 | 66.08 | KV452784.1 | 1495950 | 3-scf00141 | 3 |
| AX-158004517 | 6 | 66.08 | KV452784.1 | 1497829 | 3-scf00141 | 3 |
| AX-157722152 | 6 | 66.08 | KV452784.1 | 1508614 | 3-scf00141 | 3 |
| AX-158004535 | 6 | 66.08 | KV452784.1 | 1510991 | 3-scf00141 | 3 |
| AX-158004542 | 6 | 66.08 | KV452784.1 | 1521337 | 3-scf00141 | 3 |
| AX-158004544 | 6 | 66.08 | KV452784.1 | 1524242 | 3-scf00141 | 3 |
| AX-158407577 | 6 | 66.08 | KV452784.1 | 1583873 | 3-scf00141 | 3 |
| AX-158004660 | 6 | 66.08 | KV452784.1 | 1653115 | 3-scf00141 | 3 |
| AX-158004661 | 6 | 66.08 | KV452784.1 | 1657505 | 3-scf00141 | 3 |

|              |   |       |            |         |            |   |
|--------------|---|-------|------------|---------|------------|---|
| AX-158004705 | 6 | 66.08 | KV452784.1 | 1703249 | 3-scf00141 | 3 |
| AX-158004813 | 6 | 66.08 | KV452784.1 | 1826884 | 3-scf00141 | 3 |
| AX-158005083 | 6 | 66.08 | KV452784.1 | 2098416 | 3-scf00141 | 3 |
| AX-157856176 | 6 | 66.08 | KV452784.1 | 2277725 | 3-scf00141 | 3 |
| AX-158005311 | 6 | 66.08 | KV452784.1 | 2334358 | 3-scf00141 | 3 |
| AX-158005319 | 6 | 66.08 | KV452784.1 | 2345176 | 3-scf00141 | 3 |
| AX-158005322 | 6 | 66.08 | KV452784.1 | 2350830 | 3-scf00141 | 3 |
| AX-158005325 | 6 | 66.08 | KV452784.1 | 2352924 | 3-scf00141 | 3 |
| AX-158005332 | 6 | 66.08 | KV452784.1 | 2359978 | 3-scf00141 | 3 |
| AX-158005351 | 6 | 66.08 | KV452784.1 | 2369463 | 3-scf00141 | 3 |
| AX-158005354 | 6 | 66.08 | KV452784.1 | 2370605 | 3-scf00141 | 3 |
| AX-158005372 | 6 | 66.08 | KV452784.1 | 2397707 | 3-scf00141 | 3 |
| AX-158390828 | 6 | 66.08 | KV452784.1 | 2410669 | 3-scf00141 | 3 |
| AX-158005441 | 6 | 66.08 | KV452784.1 | 2467202 | 3-scf00141 | 3 |
| AX-157719125 | 6 | 66.08 | KV452784.1 | 2467843 | 3-scf00141 | 3 |
| AX-158005528 | 6 | 66.08 | KV452784.1 | 2539501 | 3-scf00141 | 3 |
| AX-157819626 | 6 | 66.08 | KV452784.1 | 2553258 | 3-scf00141 | 3 |
| AX-158005622 | 6 | 66.08 | KV452784.1 | 2631568 | 3-scf00141 | 3 |
| AX-158005716 | 6 | 66.08 | KV452784.1 | 2746026 | 3-scf00141 | 3 |
| AX-158005718 | 6 | 66.08 | KV452784.1 | 2749792 | 3-scf00141 | 3 |
| AX-158005728 | 6 | 66.08 | KV452784.1 | 2769176 | 3-scf00141 | 3 |
| AX-158390844 | 6 | 66.08 | KV452784.1 | 2788296 | 3-scf00141 | 3 |
| AX-158390845 | 6 | 66.08 | KV452784.1 | 2794884 | 3-scf00141 | 3 |
| AX-158005755 | 6 | 66.08 | KV452784.1 | 2822610 | 3-scf00141 | 3 |
| AX-158005767 | 6 | 66.08 | KV452784.1 | 2862282 | 3-scf00141 | 3 |
| AX-158005793 | 6 | 66.08 | KV452784.1 | 2901101 | 3-scf00141 | 3 |
| AX-158005799 | 6 | 66.08 | KV452784.1 | 2910877 | 3-scf00141 | 3 |
| AX-158005822 | 6 | 66.08 | KV452784.1 | 2929815 | 3-scf00141 | 3 |
| AX-158005855 | 6 | 66.08 | KV452784.1 | 2954122 | 3-scf00141 | 3 |
| AX-158005883 | 6 | 66.08 | KV452784.1 | 2975574 | 3-scf00141 | 3 |
| AX-158005895 | 6 | 66.08 | KV452784.1 | 2982292 | 3-scf00141 | 3 |
| AX-158005916 | 6 | 66.08 | KV452784.1 | 3004107 | 3-scf00141 | 3 |
| AX-158005934 | 6 | 66.08 | KV452784.1 | 3018186 | 3-scf00141 | 3 |
| AX-157757833 | 6 | 66.08 | KV452784.1 | 3126786 | 3-scf00141 | 3 |
| AX-158006154 | 6 | 66.08 | KV452784.1 | 3182178 | 3-scf00141 | 3 |
| AX-157711543 | 6 | 66.08 | KV452784.1 | 3195445 | 3-scf00141 | 3 |
| AX-158006357 | 6 | 66.08 | KV452784.1 | 3449101 | 3-scf00141 | 3 |
| AX-158006503 | 6 | 66.08 | KV452784.1 | 4081185 | 3-scf00141 | 3 |
| AX-158006850 | 6 | 66.08 | KV452784.1 | 5225356 | 3-scf00141 | 3 |
| AX-158006851 | 6 | 66.08 | KV452784.1 | 5229683 | 3-scf00141 | 3 |
| AX-157870024 | 6 | 66.08 | KV452784.1 | 5243973 | 3-scf00141 | 3 |
| AX-158006861 | 6 | 66.08 | KV452784.1 | 5260950 | 3-scf00141 | 3 |
| AX-158006881 | 6 | 66.08 | KV452784.1 | 5335083 | 3-scf00141 | 3 |
| AX-158007847 | 6 | 66.08 | KV452784.1 | 6706412 | 3-scf00141 | 3 |
| AX-158007897 | 6 | 66.08 | KV452784.1 | 6763016 | 3-scf00141 | 3 |
| AX-157819894 | 6 | 66.08 | KV452784.1 | 7176369 | 3-scf00141 | 3 |
| AX-158008203 | 6 | 66.08 | KV452784.1 | 7176860 | 3-scf00141 | 3 |
| AX-158008225 | 6 | 66.08 | KV452784.1 | 7216259 | 3-scf00141 | 3 |
| AX-157750569 | 6 | 66.08 | KV452784.1 | 7218723 | 3-scf00141 | 3 |
| AX-158008227 | 6 | 66.08 | KV452784.1 | 7221750 | 3-scf00141 | 3 |
| AX-157819895 | 6 | 66.08 | KV452784.1 | 7225526 | 3-scf00141 | 3 |

|              |   |       |            |          |            |   |
|--------------|---|-------|------------|----------|------------|---|
| AX-158008230 | 6 | 66.08 | KV452784.1 | 7226509  | 3-scf00141 | 3 |
| AX-158008251 | 6 | 66.08 | KV452784.1 | 7250710  | 3-scf00141 | 3 |
| AX-158008274 | 6 | 66.08 | KV452784.1 | 7290169  | 3-scf00141 | 3 |
| AX-158407708 | 6 | 66.08 | KV452784.1 | 7301602  | 3-scf00141 | 3 |
| AX-157747806 | 6 | 66.08 | KV452784.1 | 7307185  | 3-scf00141 | 3 |
| AX-158008288 | 6 | 66.08 | KV452784.1 | 7310846  | 3-scf00141 | 3 |
| AX-158008293 | 6 | 66.08 | KV452784.1 | 7315667  | 3-scf00141 | 3 |
| AX-158008309 | 6 | 66.08 | KV452784.1 | 7340411  | 3-scf00141 | 3 |
| AX-158008386 | 6 | 66.08 | KV452784.1 | 7474209  | 3-scf00141 | 3 |
| AX-158008387 | 6 | 66.08 | KV452784.1 | 7476775  | 3-scf00141 | 3 |
| AX-158008405 | 6 | 66.08 | KV452784.1 | 7510408  | 3-scf00141 | 3 |
| AX-158008406 | 6 | 66.08 | KV452784.1 | 7517410  | 3-scf00141 | 3 |
| AX-158008579 | 6 | 66.08 | KV452784.1 | 7672090  | 3-scf00141 | 3 |
| AX-158008591 | 6 | 66.08 | KV452784.1 | 7684446  | 3-scf00141 | 3 |
| AX-157819919 | 6 | 66.08 | KV452784.1 | 7729976  | 3-scf00141 | 3 |
| AX-158008820 | 6 | 66.08 | KV452784.1 | 7890236  | 3-scf00141 | 3 |
| AX-158008903 | 6 | 66.08 | KV452784.1 | 7977121  | 3-scf00141 | 3 |
| AX-158011449 | 6 | 66.08 | KV452784.1 | 10674067 | 3-scf00141 | 3 |
| AX-157819545 | 6 | 66.19 | KV452784.1 | 1466468  | 3-scf00141 | 3 |
| AX-158004499 | 6 | 66.19 | KV452784.1 | 1471882  | 3-scf00141 | 3 |
| AX-158004525 | 6 | 66.19 | KV452784.1 | 1503989  | 3-scf00141 | 3 |
| AX-158004529 | 6 | 66.19 | KV452784.1 | 1505882  | 3-scf00141 | 3 |
| AX-158004554 | 6 | 66.19 | KV452784.1 | 1536629  | 3-scf00141 | 3 |
| AX-158003970 | 6 | 66.41 | KV452784.1 | 444560   | 3-scf00141 | 3 |
| AX-158004001 | 6 | 66.41 | KV452784.1 | 470444   | 3-scf00141 | 3 |
| AX-158004012 | 6 | 66.41 | KV452784.1 | 482799   | 3-scf00141 | 3 |
| AX-157869962 | 6 | 66.41 | KV452784.1 | 514889   | 3-scf00141 | 3 |
| AX-158004110 | 6 | 66.41 | KV452784.1 | 577854   | 3-scf00141 | 3 |
| AX-158004132 | 6 | 66.41 | KV452784.1 | 631179   | 3-scf00141 | 3 |
| AX-157819518 | 6 | 66.41 | KV452784.1 | 637550   | 3-scf00141 | 3 |
| AX-157869971 | 6 | 66.41 | KV452784.1 | 643603   | 3-scf00141 | 3 |
| AX-158004145 | 6 | 66.41 | KV452784.1 | 644475   | 3-scf00141 | 3 |
| AX-158004244 | 6 | 66.41 | KV452784.1 | 958991   | 3-scf00141 | 3 |
| AX-157819529 | 6 | 66.41 | KV452784.1 | 1062936  | 3-scf00141 | 3 |
| AX-157865215 | 6 | 66.41 | KV452784.1 | 1122034  | 3-scf00141 | 3 |
| AX-158004361 | 6 | 66.41 | KV452784.1 | 1173525  | 3-scf00141 | 3 |
| AX-158004379 | 6 | 66.41 | KV452784.1 | 1196653  | 3-scf00141 | 3 |
| AX-158415850 | 6 | 66.41 | KV452784.1 | 1292068  | 3-scf00141 | 3 |
| AX-157856168 | 6 | 66.41 | KV452784.1 | 1458330  | 3-scf00141 | 3 |
| AX-158004545 | 6 | 66.41 | KV452784.1 | 1524989  | 3-scf00141 | 3 |
| AX-158004546 | 6 | 66.41 | KV452784.1 | 1526602  | 3-scf00141 | 3 |
| AX-158004548 | 6 | 66.41 | KV452784.1 | 1528211  | 3-scf00141 | 3 |
| AX-158004553 | 6 | 66.41 | KV452784.1 | 1536149  | 3-scf00141 | 3 |
| AX-158004557 | 6 | 66.41 | KV452784.1 | 1544059  | 3-scf00141 | 3 |
| AX-158004558 | 6 | 66.41 | KV452784.1 | 1545537  | 3-scf00141 | 3 |
| AX-158004562 | 6 | 66.41 | KV452784.1 | 1546602  | 3-scf00141 | 3 |
| AX-158004566 | 6 | 66.41 | KV452784.1 | 1549551  | 3-scf00141 | 3 |
| AX-157856169 | 6 | 66.41 | KV452784.1 | 1551730  | 3-scf00141 | 3 |
| AX-158004568 | 6 | 66.41 | KV452784.1 | 1556936  | 3-scf00141 | 3 |
| AX-158004584 | 6 | 66.41 | KV452784.1 | 1578939  | 3-scf00141 | 3 |
| AX-158004587 | 6 | 66.41 | KV452784.1 | 1580566  | 3-scf00141 | 3 |

|              |   |       |            |         |            |   |
|--------------|---|-------|------------|---------|------------|---|
| AX-158004605 | 6 | 66.41 | KV452784.1 | 1600698 | 3-scf00141 | 3 |
| AX-158004609 | 6 | 66.41 | KV452784.1 | 1604619 | 3-scf00141 | 3 |
| AX-158004614 | 6 | 66.41 | KV452784.1 | 1611573 | 3-scf00141 | 3 |
| AX-158004616 | 6 | 66.41 | KV452784.1 | 1614211 | 3-scf00141 | 3 |
| AX-158004617 | 6 | 66.41 | KV452784.1 | 1615033 | 3-scf00141 | 3 |
| AX-158004632 | 6 | 66.41 | KV452784.1 | 1628029 | 3-scf00141 | 3 |
| AX-158004637 | 6 | 66.41 | KV452784.1 | 1632491 | 3-scf00141 | 3 |
| AX-158004643 | 6 | 66.41 | KV452784.1 | 1636765 | 3-scf00141 | 3 |
| AX-158004646 | 6 | 66.41 | KV452784.1 | 1638713 | 3-scf00141 | 3 |
| AX-157721079 | 6 | 66.41 | KV452784.1 | 1640323 | 3-scf00141 | 3 |
| AX-158004648 | 6 | 66.41 | KV452784.1 | 1641657 | 3-scf00141 | 3 |
| AX-158004658 | 6 | 66.41 | KV452784.1 | 1651760 | 3-scf00141 | 3 |
| AX-157819552 | 6 | 66.41 | KV452784.1 | 1657899 | 3-scf00141 | 3 |
| AX-158004673 | 6 | 66.41 | KV452784.1 | 1671588 | 3-scf00141 | 3 |
| AX-158004674 | 6 | 66.41 | KV452784.1 | 1672179 | 3-scf00141 | 3 |
| AX-158004675 | 6 | 66.41 | KV452784.1 | 1678501 | 3-scf00141 | 3 |
| AX-158004685 | 6 | 66.41 | KV452784.1 | 1686751 | 3-scf00141 | 3 |
| AX-158004690 | 6 | 66.41 | KV452784.1 | 1690251 | 3-scf00141 | 3 |
| AX-158004702 | 6 | 66.41 | KV452784.1 | 1701375 | 3-scf00141 | 3 |
| AX-158004725 | 6 | 66.41 | KV452784.1 | 1726776 | 3-scf00141 | 3 |
| AX-158004727 | 6 | 66.41 | KV452784.1 | 1727616 | 3-scf00141 | 3 |
| AX-158004732 | 6 | 66.41 | KV452784.1 | 1729724 | 3-scf00141 | 3 |
| AX-158004735 | 6 | 66.41 | KV452784.1 | 1732230 | 3-scf00141 | 3 |
| AX-158004742 | 6 | 66.41 | KV452784.1 | 1735543 | 3-scf00141 | 3 |
| AX-158004747 | 6 | 66.41 | KV452784.1 | 1740151 | 3-scf00141 | 3 |
| AX-158004752 | 6 | 66.41 | KV452784.1 | 1757070 | 3-scf00141 | 3 |
| AX-158004753 | 6 | 66.41 | KV452784.1 | 1758162 | 3-scf00141 | 3 |
| AX-157819558 | 6 | 66.41 | KV452784.1 | 1760909 | 3-scf00141 | 3 |
| AX-158004756 | 6 | 66.41 | KV452784.1 | 1761188 | 3-scf00141 | 3 |
| AX-157819560 | 6 | 66.41 | KV452784.1 | 1763527 | 3-scf00141 | 3 |
| AX-157748217 | 6 | 66.41 | KV452784.1 | 1772175 | 3-scf00141 | 3 |
| AX-158004764 | 6 | 66.41 | KV452784.1 | 1775507 | 3-scf00141 | 3 |
| AX-157819569 | 6 | 66.41 | KV452784.1 | 1782093 | 3-scf00141 | 3 |
| AX-157773225 | 6 | 66.41 | KV452784.1 | 1782345 | 3-scf00141 | 3 |
| AX-158004772 | 6 | 66.41 | KV452784.1 | 1788732 | 3-scf00141 | 3 |
| AX-158004791 | 6 | 66.41 | KV452784.1 | 1807192 | 3-scf00141 | 3 |
| AX-157745706 | 6 | 66.41 | KV452784.1 | 1837882 | 3-scf00141 | 3 |
| AX-158004816 | 6 | 66.41 | KV452784.1 | 1838868 | 3-scf00141 | 3 |
| AX-158004824 | 6 | 66.41 | KV452784.1 | 1845409 | 3-scf00141 | 3 |
| AX-158004828 | 6 | 66.41 | KV452784.1 | 1849788 | 3-scf00141 | 3 |
| AX-158004830 | 6 | 66.41 | KV452784.1 | 1850491 | 3-scf00141 | 3 |
| AX-158004834 | 6 | 66.41 | KV452784.1 | 1853778 | 3-scf00141 | 3 |
| AX-158004850 | 6 | 66.41 | KV452784.1 | 1862570 | 3-scf00141 | 3 |
| AX-158004852 | 6 | 66.41 | KV452784.1 | 1863542 | 3-scf00141 | 3 |
| AX-158004864 | 6 | 66.41 | KV452784.1 | 1873046 | 3-scf00141 | 3 |
| AX-157819578 | 6 | 66.41 | KV452784.1 | 1905093 | 3-scf00141 | 3 |
| AX-158005595 | 6 | 66.41 | KV452784.1 | 2611946 | 3-scf00141 | 3 |
| AX-158005844 | 6 | 66.41 | KV452784.1 | 2946184 | 3-scf00141 | 3 |
| AX-158005845 | 6 | 66.41 | KV452784.1 | 2946819 | 3-scf00141 | 3 |
| AX-158006024 | 6 | 66.41 | KV452784.1 | 3087054 | 3-scf00141 | 3 |
| AX-158006327 | 6 | 66.41 | KV452784.1 | 3397618 | 3-scf00141 | 3 |

|              |   |        |            |         |            |   |
|--------------|---|--------|------------|---------|------------|---|
| AX-157819689 | 6 | 66.41  | KV452784.1 | 3506513 | 3-scf00141 | 3 |
| AX-157726862 | 6 | 66.41  | KV452784.1 | 5790617 | 3-scf00141 | 3 |
| AX-158007357 | 6 | 66.41  | KV452784.1 | 6027186 | 3-scf00141 | 3 |
| AX-157819568 | 6 | 66.432 | KV452784.1 | 1775145 | 3-scf00141 | 3 |
| AX-158004549 | 6 | 66.52  | KV452784.1 | 1531852 | 3-scf00141 | 3 |
| AX-158004550 | 6 | 66.52  | KV452784.1 | 1533703 | 3-scf00141 | 3 |
| AX-158004551 | 6 | 66.52  | KV452784.1 | 1534363 | 3-scf00141 | 3 |
| AX-157775930 | 6 | 66.52  | KV452784.1 | 1555063 | 3-scf00141 | 3 |
| AX-158004589 | 6 | 66.52  | KV452784.1 | 1584566 | 3-scf00141 | 3 |
| AX-158004623 | 6 | 66.52  | KV452784.1 | 1621597 | 3-scf00141 | 3 |
| AX-158004738 | 6 | 66.52  | KV452784.1 | 1733708 | 3-scf00141 | 3 |
| AX-157819571 | 6 | 66.52  | KV452784.1 | 1786447 | 3-scf00141 | 3 |
| AX-158004771 | 6 | 66.52  | KV452784.1 | 1786950 | 3-scf00141 | 3 |
| AX-158004783 | 6 | 66.52  | KV452784.1 | 1799265 | 3-scf00141 | 3 |
| AX-158004786 | 6 | 66.52  | KV452784.1 | 1802440 | 3-scf00141 | 3 |
| AX-158004787 | 6 | 66.52  | KV452784.1 | 1804251 | 3-scf00141 | 3 |
| AX-158004788 | 6 | 66.52  | KV452784.1 | 1804796 | 3-scf00141 | 3 |
| AX-158004792 | 6 | 66.52  | KV452784.1 | 1809705 | 3-scf00141 | 3 |
| AX-158004794 | 6 | 66.52  | KV452784.1 | 1809960 | 3-scf00141 | 3 |
| AX-158004799 | 6 | 66.52  | KV452784.1 | 1813195 | 3-scf00141 | 3 |
| AX-158004804 | 6 | 66.52  | KV452784.1 | 1814569 | 3-scf00141 | 3 |
| AX-157819573 | 6 | 66.52  | KV452784.1 | 1816389 | 3-scf00141 | 3 |
| AX-157746060 | 6 | 66.52  | KV452784.1 | 1816803 | 3-scf00141 | 3 |
| AX-157741585 | 6 | 66.52  | KV452784.1 | 1818097 | 3-scf00141 | 3 |
| AX-157869992 | 6 | 66.52  | KV452784.1 | 1819943 | 3-scf00141 | 3 |
| AX-158004815 | 6 | 66.52  | KV452784.1 | 1833838 | 3-scf00141 | 3 |
| AX-158004819 | 6 | 66.52  | KV452784.1 | 1841444 | 3-scf00141 | 3 |
| AX-158004821 | 6 | 66.52  | KV452784.1 | 1842661 | 3-scf00141 | 3 |
| AX-158004825 | 6 | 66.52  | KV452784.1 | 1846501 | 3-scf00141 | 3 |
| AX-158004838 | 6 | 66.52  | KV452784.1 | 1855984 | 3-scf00141 | 3 |
| AX-158004842 | 6 | 66.52  | KV452784.1 | 1859037 | 3-scf00141 | 3 |
| AX-158004845 | 6 | 66.52  | KV452784.1 | 1859671 | 3-scf00141 | 3 |
| AX-158004848 | 6 | 66.52  | KV452784.1 | 1860435 | 3-scf00141 | 3 |
| AX-158004861 | 6 | 66.52  | KV452784.1 | 1869848 | 3-scf00141 | 3 |
| AX-158004879 | 6 | 66.52  | KV452784.1 | 1880759 | 3-scf00141 | 3 |
| AX-158004880 | 6 | 66.52  | KV452784.1 | 1881681 | 3-scf00141 | 3 |
| AX-158004882 | 6 | 66.52  | KV452784.1 | 1882058 | 3-scf00141 | 3 |
| AX-158004883 | 6 | 66.52  | KV452784.1 | 1885009 | 3-scf00141 | 3 |
| AX-158004884 | 6 | 66.52  | KV452784.1 | 1887588 | 3-scf00141 | 3 |
| AX-158004900 | 6 | 66.52  | KV452784.1 | 1902336 | 3-scf00141 | 3 |
| AX-158005025 | 6 | 66.52  | KV452784.1 | 2034258 | 3-scf00141 | 3 |
| AX-158004892 | 6 | 66.583 | KV452784.1 | 1895531 | 3-scf00141 | 3 |
| AX-157869993 | 6 | 66.593 | KV452784.1 | 1896867 | 3-scf00141 | 3 |
| AX-158004897 | 6 | 66.603 | KV452784.1 | 1897747 | 3-scf00141 | 3 |
| AX-157775374 | 6 | 66.607 | KV452784.1 | 1898128 | 3-scf00141 | 3 |
| AX-158004906 | 6 | 66.633 | KV452784.1 | 1904235 | 3-scf00141 | 3 |
| AX-158004907 | 6 | 66.633 | KV452784.1 | 1905931 | 3-scf00141 | 3 |
| AX-158003952 | 6 | 66.745 | KV452784.1 | 413958  | 3-scf00141 | 3 |
| AX-158004231 | 6 | 66.745 | KV452784.1 | 920249  | 3-scf00141 | 3 |
| AX-158004344 | 6 | 66.745 | KV452784.1 | 1155700 | 3-scf00141 | 3 |
| AX-158004487 | 6 | 66.745 | KV452784.1 | 1424077 | 3-scf00141 | 3 |

|              |   |        |            |         |            |   |
|--------------|---|--------|------------|---------|------------|---|
| AX-158004785 | 6 | 66.745 | KV452784.1 | 1800161 | 3-scf00141 | 3 |
| AX-158004870 | 6 | 66.745 | KV452784.1 | 1875549 | 3-scf00141 | 3 |
| AX-158004871 | 6 | 66.745 | KV452784.1 | 1876032 | 3-scf00141 | 3 |
| AX-158004873 | 6 | 66.745 | KV452784.1 | 1876717 | 3-scf00141 | 3 |
| AX-158004874 | 6 | 66.745 | KV452784.1 | 1877045 | 3-scf00141 | 3 |
| AX-158004875 | 6 | 66.745 | KV452784.1 | 1877309 | 3-scf00141 | 3 |
| AX-158004876 | 6 | 66.745 | KV452784.1 | 1878290 | 3-scf00141 | 3 |
| AX-158004909 | 6 | 66.745 | KV452784.1 | 1907984 | 3-scf00141 | 3 |
| AX-158004911 | 6 | 66.745 | KV452784.1 | 1913502 | 3-scf00141 | 3 |
| AX-158004912 | 6 | 66.745 | KV452784.1 | 1913995 | 3-scf00141 | 3 |
| AX-158004913 | 6 | 66.745 | KV452784.1 | 1914504 | 3-scf00141 | 3 |
| AX-158004914 | 6 | 66.745 | KV452784.1 | 1914969 | 3-scf00141 | 3 |
| AX-158004916 | 6 | 66.745 | KV452784.1 | 1918046 | 3-scf00141 | 3 |
| AX-158004918 | 6 | 66.745 | KV452784.1 | 1919144 | 3-scf00141 | 3 |
| AX-157819579 | 6 | 66.745 | KV452784.1 | 1919455 | 3-scf00141 | 3 |
| AX-158004924 | 6 | 66.745 | KV452784.1 | 1924956 | 3-scf00141 | 3 |
| AX-157710683 | 6 | 66.745 | KV452784.1 | 1925120 | 3-scf00141 | 3 |
| AX-158004958 | 6 | 66.745 | KV452784.1 | 1954975 | 3-scf00141 | 3 |
| AX-158004959 | 6 | 66.745 | KV452784.1 | 1955578 | 3-scf00141 | 3 |
| AX-157771846 | 6 | 66.745 | KV452784.1 | 1956595 | 3-scf00141 | 3 |
| AX-158004969 | 6 | 66.745 | KV452784.1 | 1967102 | 3-scf00141 | 3 |
| AX-158004975 | 6 | 66.745 | KV452784.1 | 1975493 | 3-scf00141 | 3 |
| AX-158004977 | 6 | 66.745 | KV452784.1 | 1976726 | 3-scf00141 | 3 |
| AX-158390816 | 6 | 66.745 | KV452784.1 | 1976882 | 3-scf00141 | 3 |
| AX-157724901 | 6 | 66.745 | KV452784.1 | 1982590 | 3-scf00141 | 3 |
| AX-158390817 | 6 | 66.745 | KV452784.1 | 1982725 | 3-scf00141 | 3 |
| AX-158004980 | 6 | 66.745 | KV452784.1 | 1985473 | 3-scf00141 | 3 |
| AX-158004983 | 6 | 66.745 | KV452784.1 | 1990863 | 3-scf00141 | 3 |
| AX-158004990 | 6 | 66.745 | KV452784.1 | 2000322 | 3-scf00141 | 3 |
| AX-158004991 | 6 | 66.745 | KV452784.1 | 2002765 | 3-scf00141 | 3 |
| AX-158004998 | 6 | 66.745 | KV452784.1 | 2010160 | 3-scf00141 | 3 |
| AX-158005015 | 6 | 66.745 | KV452784.1 | 2022153 | 3-scf00141 | 3 |
| AX-158390819 | 6 | 66.745 | KV452784.1 | 2024393 | 3-scf00141 | 3 |
| AX-158005017 | 6 | 66.745 | KV452784.1 | 2024909 | 3-scf00141 | 3 |
| AX-158005020 | 6 | 66.745 | KV452784.1 | 2026105 | 3-scf00141 | 3 |
| AX-158005021 | 6 | 66.745 | KV452784.1 | 2027617 | 3-scf00141 | 3 |
| AX-158005043 | 6 | 66.745 | KV452784.1 | 2049302 | 3-scf00141 | 3 |
| AX-158005045 | 6 | 66.745 | KV452784.1 | 2050561 | 3-scf00141 | 3 |
| AX-157748800 | 6 | 66.745 | KV452784.1 | 3175342 | 3-scf00141 | 3 |
| AX-158006941 | 6 | 66.745 | KV452784.1 | 5511106 | 3-scf00141 | 3 |
| AX-158004841 | 6 | 66.855 | KV452784.1 | 1857897 | 3-scf00141 | 3 |
| AX-158004877 | 6 | 66.855 | KV452784.1 | 1879229 | 3-scf00141 | 3 |
| AX-158004885 | 6 | 66.855 | KV452784.1 | 1890212 | 3-scf00141 | 3 |
| AX-158004893 | 6 | 66.855 | KV452784.1 | 1895988 | 3-scf00141 | 3 |
| AX-158004917 | 6 | 66.855 | KV452784.1 | 1918617 | 3-scf00141 | 3 |
| AX-158004920 | 6 | 66.855 | KV452784.1 | 1920668 | 3-scf00141 | 3 |
| AX-158004925 | 6 | 66.855 | KV452784.1 | 1925632 | 3-scf00141 | 3 |
| AX-158004927 | 6 | 66.855 | KV452784.1 | 1926130 | 3-scf00141 | 3 |
| AX-158004931 | 6 | 66.855 | KV452784.1 | 1927836 | 3-scf00141 | 3 |
| AX-158004934 | 6 | 66.855 | KV452784.1 | 1931672 | 3-scf00141 | 3 |
| AX-158004937 | 6 | 66.855 | KV452784.1 | 1933663 | 3-scf00141 | 3 |

|              |   |        |             |         |            |    |
|--------------|---|--------|-------------|---------|------------|----|
| AX-158004938 | 6 | 66.855 | KV452784.1  | 1934540 | 3-scf00141 | 3  |
| AX-157745333 | 6 | 66.855 | KV452784.1  | 1935266 | 3-scf00141 | 3  |
| AX-158004948 | 6 | 66.855 | KV452784.1  | 1941344 | 3-scf00141 | 3  |
| AX-158004949 | 6 | 66.855 | KV452784.1  | 1941597 | 3-scf00141 | 3  |
| AX-158004954 | 6 | 66.855 | KV452784.1  | 1952763 | 3-scf00141 | 3  |
| AX-158004955 | 6 | 66.855 | KV452784.1  | 1953125 | 3-scf00141 | 3  |
| AX-158004956 | 6 | 66.855 | KV452784.1  | 1953505 | 3-scf00141 | 3  |
| AX-158004974 | 6 | 66.855 | KV452784.1  | 1975042 | 3-scf00141 | 3  |
| AX-158422234 | 6 | 66.855 | KV452784.1  | 1977285 | 3-scf00141 | 3  |
| AX-158004979 | 6 | 66.855 | KV452784.1  | 1983874 | 3-scf00141 | 3  |
| AX-158004992 | 6 | 66.855 | KV452784.1  | 2003359 | 3-scf00141 | 3  |
| AX-158004995 | 6 | 66.855 | KV452784.1  | 2005827 | 3-scf00141 | 3  |
| AX-157739433 | 6 | 66.855 | KV452784.1  | 2008565 | 3-scf00141 | 3  |
| AX-158005001 | 6 | 66.855 | KV452784.1  | 2012958 | 3-scf00141 | 3  |
| AX-158005002 | 6 | 66.855 | KV452784.1  | 2013693 | 3-scf00141 | 3  |
| AX-158005008 | 6 | 66.855 | KV452784.1  | 2018847 | 3-scf00141 | 3  |
| AX-158005041 | 6 | 66.855 | KV452784.1  | 2048428 | 3-scf00141 | 3  |
| AX-157719552 | 6 | 66.855 | KV452784.1  | 2057864 | 3-scf00141 | 3  |
| AX-157724886 | 6 | 66.855 | KV452784.1  | 2538246 | 3-scf00141 | 3  |
| AX-158005531 | 6 | 66.855 | KV452784.1  | 2545215 | 3-scf00141 | 3  |
| AX-157753051 | 6 | 66.855 | KV452784.1  | 3328929 | 3-scf00141 | 3  |
| AX-158006453 | 6 | 66.855 | KV452784.1  | 3763404 | 3-scf00141 | 3  |
| AX-157819697 | 6 | 66.855 | KV452784.1  | 3800025 | 3-scf00141 | 3  |
| AX-157693779 | 6 | 66.855 | KV452784.1  | 3847188 | 3-scf00141 | 3  |
| AX-158006478 | 6 | 66.855 | KV452784.1  | 3978841 | 3-scf00141 | 3  |
| AX-158006481 | 6 | 66.855 | KV452784.1  | 3985292 | 3-scf00141 | 3  |
| AX-157819736 | 6 | 66.855 | KV452784.1  | 5549841 | 3-scf00141 | 3  |
| AX-158006976 | 6 | 66.855 | KV452784.1  | 5555398 | 3-scf00141 | 3  |
| AX-158006980 | 6 | 66.855 | KV452784.1  | 5573628 | 3-scf00141 | 3  |
| AX-158390884 | 6 | 66.855 | KV452784.1  | 6398958 | 3-scf00141 | 3  |
| AX-158007987 | 6 | 66.855 | KV452784.1  | 6880227 | 3-scf00141 | 3  |
| AX-158004211 | 6 | 66.967 | KV452784.1  | 841570  | 3-scf00141 | 3  |
| AX-158005005 | 6 | 66.967 | KV452784.1  | 2016297 | 3-scf00141 | 3  |
| AX-158005013 | 6 | 66.967 | KV452784.1  | 2021791 | 3-scf00141 | 3  |
| AX-158005018 | 6 | 66.967 | KV452784.1  | 2025281 | 3-scf00141 | 3  |
| AX-158005030 | 6 | 66.967 | KV452784.1  | 2038890 | 3-scf00141 | 3  |
| AX-158005038 | 6 | 66.967 | KV452784.1  | 2045639 | 3-scf00141 | 3  |
| AX-158005187 | 6 | 66.967 | KV452784.1  | 2206922 | 3-scf00141 | 3  |
| AX-158005610 | 6 | 66.967 | KV452784.1  | 2623759 | 3-scf00141 | 3  |
| AX-158005611 | 6 | 66.967 | KV452784.1  | 2624034 | 3-scf00141 | 3  |
| AX-157751686 | 6 | 66.967 | KV452784.1  | 2972889 | 3-scf00141 | 3  |
| AX-158006068 | 6 | 66.967 | KV452784.1  | 3117151 | 3-scf00141 | 3  |
| AX-158006118 | 6 | 66.967 | KV452784.1  | 3150277 | 3-scf00141 | 3  |
| AX-158006709 | 6 | 66.967 | KV452784.1  | 4655347 | 3-scf00141 | 3  |
| AX-157706047 | 6 | 66.967 | 3ML01031500 | 72      | scf07114_1 | UN |
| AX-157819587 | 6 | 67.021 | KV452784.1  | 2084014 | 3-scf00141 | 3  |
| AX-157752440 | 6 | 67.078 | KV452784.1  | 1890462 | 3-scf00141 | 3  |
| AX-158004903 | 6 | 67.078 | KV452784.1  | 1902559 | 3-scf00141 | 3  |
| AX-157715120 | 6 | 67.078 | KV452784.1  | 1936685 | 3-scf00141 | 3  |
| AX-158390818 | 6 | 67.078 | KV452784.1  | 1985514 | 3-scf00141 | 3  |
| AX-158004981 | 6 | 67.078 | KV452784.1  | 1989320 | 3-scf00141 | 3  |

|              |   |        |            |         |            |   |
|--------------|---|--------|------------|---------|------------|---|
| AX-158005044 | 6 | 67.078 | KV452784.1 | 2050154 | 3-scf00141 | 3 |
| AX-158005065 | 6 | 67.078 | KV452784.1 | 2066190 | 3-scf00141 | 3 |
| AX-158005072 | 6 | 67.078 | KV452784.1 | 2076876 | 3-scf00141 | 3 |
| AX-158005076 | 6 | 67.078 | KV452784.1 | 2083165 | 3-scf00141 | 3 |
| AX-158005079 | 6 | 67.078 | KV452784.1 | 2096112 | 3-scf00141 | 3 |
| AX-158005082 | 6 | 67.078 | KV452784.1 | 2098267 | 3-scf00141 | 3 |
| AX-158005085 | 6 | 67.078 | KV452784.1 | 2099342 | 3-scf00141 | 3 |
| AX-158005086 | 6 | 67.078 | KV452784.1 | 2099691 | 3-scf00141 | 3 |
| AX-158005091 | 6 | 67.078 | KV452784.1 | 2112183 | 3-scf00141 | 3 |
| AX-158005092 | 6 | 67.078 | KV452784.1 | 2112641 | 3-scf00141 | 3 |
| AX-158005094 | 6 | 67.078 | KV452784.1 | 2117250 | 3-scf00141 | 3 |
| AX-158005095 | 6 | 67.078 | KV452784.1 | 2118464 | 3-scf00141 | 3 |
| AX-158005097 | 6 | 67.078 | KV452784.1 | 2119560 | 3-scf00141 | 3 |
| AX-158005098 | 6 | 67.078 | KV452784.1 | 2120368 | 3-scf00141 | 3 |
| AX-158005099 | 6 | 67.078 | KV452784.1 | 2121272 | 3-scf00141 | 3 |
| AX-158005112 | 6 | 67.078 | KV452784.1 | 2138366 | 3-scf00141 | 3 |
| AX-158005114 | 6 | 67.078 | KV452784.1 | 2138705 | 3-scf00141 | 3 |
| AX-158005115 | 6 | 67.078 | KV452784.1 | 2138761 | 3-scf00141 | 3 |
| AX-157819591 | 6 | 67.078 | KV452784.1 | 2139351 | 3-scf00141 | 3 |
| AX-158005117 | 6 | 67.078 | KV452784.1 | 2140034 | 3-scf00141 | 3 |
| AX-158005120 | 6 | 67.078 | KV452784.1 | 2141483 | 3-scf00141 | 3 |
| AX-158005121 | 6 | 67.078 | KV452784.1 | 2141816 | 3-scf00141 | 3 |
| AX-157747409 | 6 | 67.078 | KV452784.1 | 2142732 | 3-scf00141 | 3 |
| AX-158005123 | 6 | 67.078 | KV452784.1 | 2143301 | 3-scf00141 | 3 |
| AX-157819592 | 6 | 67.078 | KV452784.1 | 2143737 | 3-scf00141 | 3 |
| AX-158005124 | 6 | 67.078 | KV452784.1 | 2144099 | 3-scf00141 | 3 |
| AX-157819594 | 6 | 67.078 | KV452784.1 | 2145011 | 3-scf00141 | 3 |
| AX-158005129 | 6 | 67.078 | KV452784.1 | 2147557 | 3-scf00141 | 3 |
| AX-158005130 | 6 | 67.078 | KV452784.1 | 2147938 | 3-scf00141 | 3 |
| AX-158005131 | 6 | 67.078 | KV452784.1 | 2148452 | 3-scf00141 | 3 |
| AX-158005133 | 6 | 67.078 | KV452784.1 | 2148970 | 3-scf00141 | 3 |
| AX-158005142 | 6 | 67.078 | KV452784.1 | 2154796 | 3-scf00141 | 3 |
| AX-158005146 | 6 | 67.078 | KV452784.1 | 2158677 | 3-scf00141 | 3 |
| AX-158005150 | 6 | 67.078 | KV452784.1 | 2163285 | 3-scf00141 | 3 |
| AX-158005152 | 6 | 67.078 | KV452784.1 | 2163885 | 3-scf00141 | 3 |
| AX-157819598 | 6 | 67.078 | KV452784.1 | 2168969 | 3-scf00141 | 3 |
| AX-158005160 | 6 | 67.078 | KV452784.1 | 2171722 | 3-scf00141 | 3 |
| AX-158005166 | 6 | 67.078 | KV452784.1 | 2175999 | 3-scf00141 | 3 |
| AX-157819604 | 6 | 67.078 | KV452784.1 | 2182701 | 3-scf00141 | 3 |
| AX-158005174 | 6 | 67.078 | KV452784.1 | 2198127 | 3-scf00141 | 3 |
| AX-158005175 | 6 | 67.078 | KV452784.1 | 2199476 | 3-scf00141 | 3 |
| AX-158005177 | 6 | 67.078 | KV452784.1 | 2200295 | 3-scf00141 | 3 |
| AX-158005178 | 6 | 67.078 | KV452784.1 | 2200524 | 3-scf00141 | 3 |
| AX-158005180 | 6 | 67.078 | KV452784.1 | 2201162 | 3-scf00141 | 3 |
| AX-158005181 | 6 | 67.078 | KV452784.1 | 2203441 | 3-scf00141 | 3 |
| AX-158005184 | 6 | 67.078 | KV452784.1 | 2204688 | 3-scf00141 | 3 |
| AX-158005194 | 6 | 67.078 | KV452784.1 | 2212233 | 3-scf00141 | 3 |
| AX-158005204 | 6 | 67.078 | KV452784.1 | 2230624 | 3-scf00141 | 3 |
| AX-157819610 | 6 | 67.078 | KV452784.1 | 2234327 | 3-scf00141 | 3 |
| AX-157856174 | 6 | 67.078 | KV452784.1 | 2244414 | 3-scf00141 | 3 |
| AX-158005217 | 6 | 67.078 | KV452784.1 | 2245562 | 3-scf00141 | 3 |



|              |   |        |            |         |            |   |
|--------------|---|--------|------------|---------|------------|---|
| AX-158005218 | 6 | 67.078 | KV452784.1 | 2246969 | 3-scf00141 | 3 |
| AX-158005222 | 6 | 67.078 | KV452784.1 | 2248830 | 3-scf00141 | 3 |
| AX-158005224 | 6 | 67.078 | KV452784.1 | 2251627 | 3-scf00141 | 3 |
| AX-158005225 | 6 | 67.078 | KV452784.1 | 2252026 | 3-scf00141 | 3 |
| AX-157819614 | 6 | 67.078 | KV452784.1 | 2257567 | 3-scf00141 | 3 |
| AX-158005229 | 6 | 67.078 | KV452784.1 | 2260260 | 3-scf00141 | 3 |
| AX-158005239 | 6 | 67.078 | KV452784.1 | 2273291 | 3-scf00141 | 3 |
| AX-158005240 | 6 | 67.078 | KV452784.1 | 2274005 | 3-scf00141 | 3 |
| AX-158005241 | 6 | 67.078 | KV452784.1 | 2275117 | 3-scf00141 | 3 |
| AX-158005244 | 6 | 67.078 | KV452784.1 | 2275660 | 3-scf00141 | 3 |
| AX-158005245 | 6 | 67.078 | KV452784.1 | 2276238 | 3-scf00141 | 3 |
| AX-158005246 | 6 | 67.078 | KV452784.1 | 2276694 | 3-scf00141 | 3 |
| AX-157856175 | 6 | 67.078 | KV452784.1 | 2277651 | 3-scf00141 | 3 |
| AX-157748679 | 6 | 67.078 | KV452784.1 | 2282031 | 3-scf00141 | 3 |
| AX-158005247 | 6 | 67.078 | KV452784.1 | 2283194 | 3-scf00141 | 3 |
| AX-157819616 | 6 | 67.078 | KV452784.1 | 2286817 | 3-scf00141 | 3 |
| AX-158005256 | 6 | 67.078 | KV452784.1 | 2292546 | 3-scf00141 | 3 |
| AX-157741194 | 6 | 67.078 | KV452784.1 | 2292870 | 3-scf00141 | 3 |
| AX-158005257 | 6 | 67.078 | KV452784.1 | 2293232 | 3-scf00141 | 3 |
| AX-158005259 | 6 | 67.078 | KV452784.1 | 2293714 | 3-scf00141 | 3 |
| AX-158005260 | 6 | 67.078 | KV452784.1 | 2294215 | 3-scf00141 | 3 |
| AX-158005261 | 6 | 67.078 | KV452784.1 | 2295576 | 3-scf00141 | 3 |
| AX-158005263 | 6 | 67.078 | KV452784.1 | 2296550 | 3-scf00141 | 3 |
| AX-158005264 | 6 | 67.078 | KV452784.1 | 2297081 | 3-scf00141 | 3 |
| AX-157718368 | 6 | 67.078 | KV452784.1 | 2297837 | 3-scf00141 | 3 |
| AX-158407587 | 6 | 67.078 | KV452784.1 | 2298499 | 3-scf00141 | 3 |
| AX-157819617 | 6 | 67.078 | KV452784.1 | 2300143 | 3-scf00141 | 3 |
| AX-158005266 | 6 | 67.078 | KV452784.1 | 2300759 | 3-scf00141 | 3 |
| AX-158005269 | 6 | 67.078 | KV452784.1 | 2301489 | 3-scf00141 | 3 |
| AX-158005271 | 6 | 67.078 | KV452784.1 | 2304238 | 3-scf00141 | 3 |
| AX-158005273 | 6 | 67.078 | KV452784.1 | 2305378 | 3-scf00141 | 3 |
| AX-158005275 | 6 | 67.078 | KV452784.1 | 2305802 | 3-scf00141 | 3 |
| AX-158005276 | 6 | 67.078 | KV452784.1 | 2306137 | 3-scf00141 | 3 |
| AX-158005277 | 6 | 67.078 | KV452784.1 | 2309051 | 3-scf00141 | 3 |
| AX-158005279 | 6 | 67.078 | KV452784.1 | 2309784 | 3-scf00141 | 3 |
| AX-158005282 | 6 | 67.078 | KV452784.1 | 2311573 | 3-scf00141 | 3 |
| AX-158005283 | 6 | 67.078 | KV452784.1 | 2313992 | 3-scf00141 | 3 |
| AX-158005285 | 6 | 67.078 | KV452784.1 | 2316660 | 3-scf00141 | 3 |
| AX-158005287 | 6 | 67.078 | KV452784.1 | 2319576 | 3-scf00141 | 3 |
| AX-158005289 | 6 | 67.078 | KV452784.1 | 2320908 | 3-scf00141 | 3 |
| AX-158005291 | 6 | 67.078 | KV452784.1 | 2321076 | 3-scf00141 | 3 |
| AX-158005292 | 6 | 67.078 | KV452784.1 | 2321685 | 3-scf00141 | 3 |
| AX-158005293 | 6 | 67.078 | KV452784.1 | 2321846 | 3-scf00141 | 3 |
| AX-158005295 | 6 | 67.078 | KV452784.1 | 2322403 | 3-scf00141 | 3 |
| AX-157819618 | 6 | 67.078 | KV452784.1 | 2323974 | 3-scf00141 | 3 |
| AX-158005298 | 6 | 67.078 | KV452784.1 | 2325140 | 3-scf00141 | 3 |
| AX-157876160 | 6 | 67.078 | KV452784.1 | 2325654 | 3-scf00141 | 3 |
| AX-158005300 | 6 | 67.078 | KV452784.1 | 2325771 | 3-scf00141 | 3 |
| AX-158005303 | 6 | 67.078 | KV452784.1 | 2328344 | 3-scf00141 | 3 |
| AX-158005304 | 6 | 67.078 | KV452784.1 | 2329411 | 3-scf00141 | 3 |
| AX-158005305 | 6 | 67.078 | KV452784.1 | 2330476 | 3-scf00141 | 3 |

|              |   |        |            |         |            |   |
|--------------|---|--------|------------|---------|------------|---|
| AX-158005306 | 6 | 67.078 | KV452784.1 | 2332334 | 3-scf00141 | 3 |
| AX-158005310 | 6 | 67.078 | KV452784.1 | 2333688 | 3-scf00141 | 3 |
| AX-158005313 | 6 | 67.078 | KV452784.1 | 2336506 | 3-scf00141 | 3 |
| AX-157710669 | 6 | 67.078 | KV452784.1 | 2337782 | 3-scf00141 | 3 |
| AX-158005314 | 6 | 67.078 | KV452784.1 | 2339827 | 3-scf00141 | 3 |
| AX-157819619 | 6 | 67.078 | KV452784.1 | 2342337 | 3-scf00141 | 3 |
| AX-158005316 | 6 | 67.078 | KV452784.1 | 2343574 | 3-scf00141 | 3 |
| AX-158005318 | 6 | 67.078 | KV452784.1 | 2344100 | 3-scf00141 | 3 |
| AX-158005321 | 6 | 67.078 | KV452784.1 | 2348918 | 3-scf00141 | 3 |
| AX-157699959 | 6 | 67.078 | KV452784.1 | 2350058 | 3-scf00141 | 3 |
| AX-157819622 | 6 | 67.078 | KV452784.1 | 2350631 | 3-scf00141 | 3 |
| AX-158005324 | 6 | 67.078 | KV452784.1 | 2352835 | 3-scf00141 | 3 |
| AX-158005327 | 6 | 67.078 | KV452784.1 | 2355974 | 3-scf00141 | 3 |
| AX-158005337 | 6 | 67.078 | KV452784.1 | 2362703 | 3-scf00141 | 3 |
| AX-158005339 | 6 | 67.078 | KV452784.1 | 2363451 | 3-scf00141 | 3 |
| AX-158005344 | 6 | 67.078 | KV452784.1 | 2366316 | 3-scf00141 | 3 |
| AX-158005355 | 6 | 67.078 | KV452784.1 | 2371086 | 3-scf00141 | 3 |
| AX-158005356 | 6 | 67.078 | KV452784.1 | 2372406 | 3-scf00141 | 3 |
| AX-157753866 | 6 | 67.078 | KV452784.1 | 2376287 | 3-scf00141 | 3 |
| AX-158005360 | 6 | 67.078 | KV452784.1 | 2377041 | 3-scf00141 | 3 |
| AX-158390826 | 6 | 67.078 | KV452784.1 | 2379379 | 3-scf00141 | 3 |
| AX-158005362 | 6 | 67.078 | KV452784.1 | 2382994 | 3-scf00141 | 3 |
| AX-158005363 | 6 | 67.078 | KV452784.1 | 2385331 | 3-scf00141 | 3 |
| AX-158005371 | 6 | 67.078 | KV452784.1 | 2394109 | 3-scf00141 | 3 |
| AX-158390827 | 6 | 67.078 | KV452784.1 | 2394611 | 3-scf00141 | 3 |
| AX-158005377 | 6 | 67.078 | KV452784.1 | 2408687 | 3-scf00141 | 3 |
| AX-157753184 | 6 | 67.078 | KV452784.1 | 2410350 | 3-scf00141 | 3 |
| AX-158005379 | 6 | 67.078 | KV452784.1 | 2411714 | 3-scf00141 | 3 |
| AX-158005383 | 6 | 67.078 | KV452784.1 | 2415610 | 3-scf00141 | 3 |
| AX-158005384 | 6 | 67.078 | KV452784.1 | 2416061 | 3-scf00141 | 3 |
| AX-158005386 | 6 | 67.078 | KV452784.1 | 2418200 | 3-scf00141 | 3 |
| AX-158005395 | 6 | 67.078 | KV452784.1 | 2424045 | 3-scf00141 | 3 |
| AX-158390829 | 6 | 67.078 | KV452784.1 | 2424710 | 3-scf00141 | 3 |
| AX-158005398 | 6 | 67.078 | KV452784.1 | 2425726 | 3-scf00141 | 3 |
| AX-158005399 | 6 | 67.078 | KV452784.1 | 2426739 | 3-scf00141 | 3 |
| AX-158005400 | 6 | 67.078 | KV452784.1 | 2427684 | 3-scf00141 | 3 |
| AX-158005402 | 6 | 67.078 | KV452784.1 | 2428819 | 3-scf00141 | 3 |
| AX-158005403 | 6 | 67.078 | KV452784.1 | 2429870 | 3-scf00141 | 3 |
| AX-158005405 | 6 | 67.078 | KV452784.1 | 2430112 | 3-scf00141 | 3 |
| AX-158005406 | 6 | 67.078 | KV452784.1 | 2431071 | 3-scf00141 | 3 |
| AX-158005408 | 6 | 67.078 | KV452784.1 | 2433513 | 3-scf00141 | 3 |
| AX-157865220 | 6 | 67.078 | KV452784.1 | 2435993 | 3-scf00141 | 3 |
| AX-158005410 | 6 | 67.078 | KV452784.1 | 2436571 | 3-scf00141 | 3 |
| AX-158005412 | 6 | 67.078 | KV452784.1 | 2438099 | 3-scf00141 | 3 |
| AX-158005413 | 6 | 67.078 | KV452784.1 | 2439386 | 3-scf00141 | 3 |
| AX-158005414 | 6 | 67.078 | KV452784.1 | 2439749 | 3-scf00141 | 3 |
| AX-158005417 | 6 | 67.078 | KV452784.1 | 2443012 | 3-scf00141 | 3 |
| AX-158005418 | 6 | 67.078 | KV452784.1 | 2443391 | 3-scf00141 | 3 |
| AX-158005419 | 6 | 67.078 | KV452784.1 | 2445969 | 3-scf00141 | 3 |
| AX-158407589 | 6 | 67.078 | KV452784.1 | 2446623 | 3-scf00141 | 3 |
| AX-158005421 | 6 | 67.078 | KV452784.1 | 2449956 | 3-scf00141 | 3 |

|              |   |        |            |         |            |   |
|--------------|---|--------|------------|---------|------------|---|
| AX-158005423 | 6 | 67.078 | KV452784.1 | 2451876 | 3-scf00141 | 3 |
| AX-158005425 | 6 | 67.078 | KV452784.1 | 2454634 | 3-scf00141 | 3 |
| AX-158005433 | 6 | 67.078 | KV452784.1 | 2463399 | 3-scf00141 | 3 |
| AX-158005436 | 6 | 67.078 | KV452784.1 | 2464566 | 3-scf00141 | 3 |
| AX-158005438 | 6 | 67.078 | KV452784.1 | 2465280 | 3-scf00141 | 3 |
| AX-158390830 | 6 | 67.078 | KV452784.1 | 2465432 | 3-scf00141 | 3 |
| AX-158005439 | 6 | 67.078 | KV452784.1 | 2465878 | 3-scf00141 | 3 |
| AX-158390831 | 6 | 67.078 | KV452784.1 | 2468057 | 3-scf00141 | 3 |
| AX-158005445 | 6 | 67.078 | KV452784.1 | 2469065 | 3-scf00141 | 3 |
| AX-158005450 | 6 | 67.078 | KV452784.1 | 2470953 | 3-scf00141 | 3 |
| AX-158005451 | 6 | 67.078 | KV452784.1 | 2471325 | 3-scf00141 | 3 |
| AX-158390832 | 6 | 67.078 | KV452784.1 | 2472077 | 3-scf00141 | 3 |
| AX-158005452 | 6 | 67.078 | KV452784.1 | 2472850 | 3-scf00141 | 3 |
| AX-157819624 | 6 | 67.078 | KV452784.1 | 2473695 | 3-scf00141 | 3 |
| AX-158005454 | 6 | 67.078 | KV452784.1 | 2473877 | 3-scf00141 | 3 |
| AX-157774841 | 6 | 67.078 | KV452784.1 | 2474414 | 3-scf00141 | 3 |
| AX-158005457 | 6 | 67.078 | KV452784.1 | 2475562 | 3-scf00141 | 3 |
| AX-158005460 | 6 | 67.078 | KV452784.1 | 2476844 | 3-scf00141 | 3 |
| AX-158005463 | 6 | 67.078 | KV452784.1 | 2479982 | 3-scf00141 | 3 |
| AX-157819625 | 6 | 67.078 | KV452784.1 | 2480353 | 3-scf00141 | 3 |
| AX-158005466 | 6 | 67.078 | KV452784.1 | 2480649 | 3-scf00141 | 3 |
| AX-158005468 | 6 | 67.078 | KV452784.1 | 2481232 | 3-scf00141 | 3 |
| AX-158005471 | 6 | 67.078 | KV452784.1 | 2484098 | 3-scf00141 | 3 |
| AX-157693464 | 6 | 67.078 | KV452784.1 | 2484738 | 3-scf00141 | 3 |
| AX-158005473 | 6 | 67.078 | KV452784.1 | 2485985 | 3-scf00141 | 3 |
| AX-158005476 | 6 | 67.078 | KV452784.1 | 2487581 | 3-scf00141 | 3 |
| AX-158005477 | 6 | 67.078 | KV452784.1 | 2488986 | 3-scf00141 | 3 |
| AX-158005479 | 6 | 67.078 | KV452784.1 | 2489909 | 3-scf00141 | 3 |
| AX-158005483 | 6 | 67.078 | KV452784.1 | 2492917 | 3-scf00141 | 3 |
| AX-157709956 | 6 | 67.078 | KV452784.1 | 2493372 | 3-scf00141 | 3 |
| AX-158005484 | 6 | 67.078 | KV452784.1 | 2493619 | 3-scf00141 | 3 |
| AX-158005486 | 6 | 67.078 | KV452784.1 | 2494133 | 3-scf00141 | 3 |
| AX-158005488 | 6 | 67.078 | KV452784.1 | 2498038 | 3-scf00141 | 3 |
| AX-158005490 | 6 | 67.078 | KV452784.1 | 2498692 | 3-scf00141 | 3 |
| AX-158390834 | 6 | 67.078 | KV452784.1 | 2499906 | 3-scf00141 | 3 |
| AX-158005491 | 6 | 67.078 | KV452784.1 | 2500409 | 3-scf00141 | 3 |
| AX-158005493 | 6 | 67.078 | KV452784.1 | 2501875 | 3-scf00141 | 3 |
| AX-157721573 | 6 | 67.078 | KV452784.1 | 2502729 | 3-scf00141 | 3 |
| AX-158005496 | 6 | 67.078 | KV452784.1 | 2503604 | 3-scf00141 | 3 |
| AX-158390835 | 6 | 67.078 | KV452784.1 | 2505975 | 3-scf00141 | 3 |
| AX-158005499 | 6 | 67.078 | KV452784.1 | 2506775 | 3-scf00141 | 3 |
| AX-158005500 | 6 | 67.078 | KV452784.1 | 2507361 | 3-scf00141 | 3 |
| AX-158005501 | 6 | 67.078 | KV452784.1 | 2507976 | 3-scf00141 | 3 |
| AX-158005502 | 6 | 67.078 | KV452784.1 | 2511156 | 3-scf00141 | 3 |
| AX-158390836 | 6 | 67.078 | KV452784.1 | 2515956 | 3-scf00141 | 3 |
| AX-158005508 | 6 | 67.078 | KV452784.1 | 2516007 | 3-scf00141 | 3 |
| AX-158005509 | 6 | 67.078 | KV452784.1 | 2517068 | 3-scf00141 | 3 |
| AX-158005518 | 6 | 67.078 | KV452784.1 | 2526828 | 3-scf00141 | 3 |
| AX-158005521 | 6 | 67.078 | KV452784.1 | 2529424 | 3-scf00141 | 3 |
| AX-157726878 | 6 | 67.078 | KV452784.1 | 2532011 | 3-scf00141 | 3 |
| AX-158005523 | 6 | 67.078 | KV452784.1 | 2533336 | 3-scf00141 | 3 |

|              |   |        |            |         |            |   |
|--------------|---|--------|------------|---------|------------|---|
| AX-158390839 | 6 | 67.078 | KV452784.1 | 2533471 | 3-scf00141 | 3 |
| AX-158005524 | 6 | 67.078 | KV452784.1 | 2533946 | 3-scf00141 | 3 |
| AX-158005526 | 6 | 67.078 | KV452784.1 | 2537787 | 3-scf00141 | 3 |
| AX-158005527 | 6 | 67.078 | KV452784.1 | 2538835 | 3-scf00141 | 3 |
| AX-158005530 | 6 | 67.078 | KV452784.1 | 2541186 | 3-scf00141 | 3 |
| AX-158005533 | 6 | 67.078 | KV452784.1 | 2547063 | 3-scf00141 | 3 |
| AX-158005538 | 6 | 67.078 | KV452784.1 | 2550562 | 3-scf00141 | 3 |
| AX-158005539 | 6 | 67.078 | KV452784.1 | 2551564 | 3-scf00141 | 3 |
| AX-158005540 | 6 | 67.078 | KV452784.1 | 2551893 | 3-scf00141 | 3 |
| AX-158005541 | 6 | 67.078 | KV452784.1 | 2553748 | 3-scf00141 | 3 |
| AX-157819627 | 6 | 67.078 | KV452784.1 | 2555648 | 3-scf00141 | 3 |
| AX-158005544 | 6 | 67.078 | KV452784.1 | 2555922 | 3-scf00141 | 3 |
| AX-158005547 | 6 | 67.078 | KV452784.1 | 2562980 | 3-scf00141 | 3 |
| AX-158005550 | 6 | 67.078 | KV452784.1 | 2564424 | 3-scf00141 | 3 |
| AX-158005551 | 6 | 67.078 | KV452784.1 | 2564802 | 3-scf00141 | 3 |
| AX-157869999 | 6 | 67.078 | KV452784.1 | 2565860 | 3-scf00141 | 3 |
| AX-157870000 | 6 | 67.078 | KV452784.1 | 2566360 | 3-scf00141 | 3 |
| AX-158005553 | 6 | 67.078 | KV452784.1 | 2567289 | 3-scf00141 | 3 |
| AX-158005554 | 6 | 67.078 | KV452784.1 | 2568235 | 3-scf00141 | 3 |
| AX-157755444 | 6 | 67.078 | KV452784.1 | 2571370 | 3-scf00141 | 3 |
| AX-157870001 | 6 | 67.078 | KV452784.1 | 2571812 | 3-scf00141 | 3 |
| AX-157819630 | 6 | 67.078 | KV452784.1 | 2573578 | 3-scf00141 | 3 |
| AX-158005559 | 6 | 67.078 | KV452784.1 | 2573941 | 3-scf00141 | 3 |
| AX-157819631 | 6 | 67.078 | KV452784.1 | 2575632 | 3-scf00141 | 3 |
| AX-158005561 | 6 | 67.078 | KV452784.1 | 2576368 | 3-scf00141 | 3 |
| AX-157819632 | 6 | 67.078 | KV452784.1 | 2577765 | 3-scf00141 | 3 |
| AX-158005563 | 6 | 67.078 | KV452784.1 | 2578650 | 3-scf00141 | 3 |
| AX-158005566 | 6 | 67.078 | KV452784.1 | 2582132 | 3-scf00141 | 3 |
| AX-158005568 | 6 | 67.078 | KV452784.1 | 2582439 | 3-scf00141 | 3 |
| AX-158005569 | 6 | 67.078 | KV452784.1 | 2583131 | 3-scf00141 | 3 |
| AX-157870002 | 6 | 67.078 | KV452784.1 | 2585700 | 3-scf00141 | 3 |
| AX-158005571 | 6 | 67.078 | KV452784.1 | 2586479 | 3-scf00141 | 3 |
| AX-158005572 | 6 | 67.078 | KV452784.1 | 2587099 | 3-scf00141 | 3 |
| AX-157819633 | 6 | 67.078 | KV452784.1 | 2587462 | 3-scf00141 | 3 |
| AX-157744286 | 6 | 67.078 | KV452784.1 | 2590289 | 3-scf00141 | 3 |
| AX-158005574 | 6 | 67.078 | KV452784.1 | 2590556 | 3-scf00141 | 3 |
| AX-158390840 | 6 | 67.078 | KV452784.1 | 2597211 | 3-scf00141 | 3 |
| AX-158005579 | 6 | 67.078 | KV452784.1 | 2597677 | 3-scf00141 | 3 |
| AX-158005581 | 6 | 67.078 | KV452784.1 | 2599849 | 3-scf00141 | 3 |
| AX-158005583 | 6 | 67.078 | KV452784.1 | 2601858 | 3-scf00141 | 3 |
| AX-157870004 | 6 | 67.078 | KV452784.1 | 2602599 | 3-scf00141 | 3 |
| AX-158005586 | 6 | 67.078 | KV452784.1 | 2603755 | 3-scf00141 | 3 |
| AX-158005590 | 6 | 67.078 | KV452784.1 | 2605221 | 3-scf00141 | 3 |
| AX-158005591 | 6 | 67.078 | KV452784.1 | 2605868 | 3-scf00141 | 3 |
| AX-157870005 | 6 | 67.078 | KV452784.1 | 2608914 | 3-scf00141 | 3 |
| AX-158005593 | 6 | 67.078 | KV452784.1 | 2609427 | 3-scf00141 | 3 |
| AX-158005597 | 6 | 67.078 | KV452784.1 | 2614271 | 3-scf00141 | 3 |
| AX-158005600 | 6 | 67.078 | KV452784.1 | 2615520 | 3-scf00141 | 3 |
| AX-158005601 | 6 | 67.078 | KV452784.1 | 2616969 | 3-scf00141 | 3 |
| AX-157819634 | 6 | 67.078 | KV452784.1 | 2617231 | 3-scf00141 | 3 |
| AX-158005602 | 6 | 67.078 | KV452784.1 | 2617540 | 3-scf00141 | 3 |

|              |   |        |            |         |            |   |
|--------------|---|--------|------------|---------|------------|---|
| AX-158005603 | 6 | 67.078 | KV452784.1 | 2617902 | 3-scf00141 | 3 |
| AX-158005605 | 6 | 67.078 | KV452784.1 | 2618154 | 3-scf00141 | 3 |
| AX-158005608 | 6 | 67.078 | KV452784.1 | 2619819 | 3-scf00141 | 3 |
| AX-158005609 | 6 | 67.078 | KV452784.1 | 2622169 | 3-scf00141 | 3 |
| AX-157819636 | 6 | 67.078 | KV452784.1 | 2622979 | 3-scf00141 | 3 |
| AX-158005613 | 6 | 67.078 | KV452784.1 | 2624478 | 3-scf00141 | 3 |
| AX-158005615 | 6 | 67.078 | KV452784.1 | 2625337 | 3-scf00141 | 3 |
| AX-157819638 | 6 | 67.078 | KV452784.1 | 2626490 | 3-scf00141 | 3 |
| AX-158005616 | 6 | 67.078 | KV452784.1 | 2627286 | 3-scf00141 | 3 |
| AX-158005617 | 6 | 67.078 | KV452784.1 | 2627847 | 3-scf00141 | 3 |
| AX-158005619 | 6 | 67.078 | KV452784.1 | 2628887 | 3-scf00141 | 3 |
| AX-158005623 | 6 | 67.078 | KV452784.1 | 2632870 | 3-scf00141 | 3 |
| AX-158005625 | 6 | 67.078 | KV452784.1 | 2635455 | 3-scf00141 | 3 |
| AX-158005631 | 6 | 67.078 | KV452784.1 | 2640753 | 3-scf00141 | 3 |
| AX-158005632 | 6 | 67.078 | KV452784.1 | 2641512 | 3-scf00141 | 3 |
| AX-158005634 | 6 | 67.078 | KV452784.1 | 2642759 | 3-scf00141 | 3 |
| AX-158005647 | 6 | 67.078 | KV452784.1 | 2660131 | 3-scf00141 | 3 |
| AX-157819641 | 6 | 67.078 | KV452784.1 | 2661106 | 3-scf00141 | 3 |
| AX-158005650 | 6 | 67.078 | KV452784.1 | 2661846 | 3-scf00141 | 3 |
| AX-158005656 | 6 | 67.078 | KV452784.1 | 2674084 | 3-scf00141 | 3 |
| AX-158005657 | 6 | 67.078 | KV452784.1 | 2678088 | 3-scf00141 | 3 |
| AX-158005662 | 6 | 67.078 | KV452784.1 | 2681551 | 3-scf00141 | 3 |
| AX-158405796 | 6 | 67.078 | KV452784.1 | 2683180 | 3-scf00141 | 3 |
| AX-158407595 | 6 | 67.078 | KV452784.1 | 2684645 | 3-scf00141 | 3 |
| AX-158005663 | 6 | 67.078 | KV452784.1 | 2685802 | 3-scf00141 | 3 |
| AX-158005665 | 6 | 67.078 | KV452784.1 | 2686209 | 3-scf00141 | 3 |
| AX-158005666 | 6 | 67.078 | KV452784.1 | 2686777 | 3-scf00141 | 3 |
| AX-158005667 | 6 | 67.078 | KV452784.1 | 2687667 | 3-scf00141 | 3 |
| AX-158005668 | 6 | 67.078 | KV452784.1 | 2688198 | 3-scf00141 | 3 |
| AX-157819642 | 6 | 67.078 | KV452784.1 | 2689531 | 3-scf00141 | 3 |
| AX-158005670 | 6 | 67.078 | KV452784.1 | 2690210 | 3-scf00141 | 3 |
| AX-157870007 | 6 | 67.078 | KV452784.1 | 2691604 | 3-scf00141 | 3 |
| AX-158005671 | 6 | 67.078 | KV452784.1 | 2692511 | 3-scf00141 | 3 |
| AX-157870008 | 6 | 67.078 | KV452784.1 | 2693344 | 3-scf00141 | 3 |
| AX-158005674 | 6 | 67.078 | KV452784.1 | 2694149 | 3-scf00141 | 3 |
| AX-158005677 | 6 | 67.078 | KV452784.1 | 2695743 | 3-scf00141 | 3 |
| AX-157819643 | 6 | 67.078 | KV452784.1 | 2697243 | 3-scf00141 | 3 |
| AX-158390841 | 6 | 67.078 | KV452784.1 | 2697609 | 3-scf00141 | 3 |
| AX-158383524 | 6 | 67.078 | KV452784.1 | 2698140 | 3-scf00141 | 3 |
| AX-158005682 | 6 | 67.078 | KV452784.1 | 2700822 | 3-scf00141 | 3 |
| AX-158005685 | 6 | 67.078 | KV452784.1 | 2704423 | 3-scf00141 | 3 |
| AX-158005686 | 6 | 67.078 | KV452784.1 | 2706828 | 3-scf00141 | 3 |
| AX-158005687 | 6 | 67.078 | KV452784.1 | 2710292 | 3-scf00141 | 3 |
| AX-158005690 | 6 | 67.078 | KV452784.1 | 2711639 | 3-scf00141 | 3 |
| AX-158005692 | 6 | 67.078 | KV452784.1 | 2712134 | 3-scf00141 | 3 |
| AX-158005693 | 6 | 67.078 | KV452784.1 | 2712477 | 3-scf00141 | 3 |
| AX-158005697 | 6 | 67.078 | KV452784.1 | 2715610 | 3-scf00141 | 3 |
| AX-158005705 | 6 | 67.078 | KV452784.1 | 2727959 | 3-scf00141 | 3 |
| AX-158005708 | 6 | 67.078 | KV452784.1 | 2732565 | 3-scf00141 | 3 |
| AX-158390842 | 6 | 67.078 | KV452784.1 | 2736212 | 3-scf00141 | 3 |
| AX-158005712 | 6 | 67.078 | KV452784.1 | 2737339 | 3-scf00141 | 3 |

|              |   |        |            |         |            |   |
|--------------|---|--------|------------|---------|------------|---|
| AX-157870009 | 6 | 67.078 | KV452784.1 | 2741195 | 3-scf00141 | 3 |
| AX-158005714 | 6 | 67.078 | KV452784.1 | 2742842 | 3-scf00141 | 3 |
| AX-158005720 | 6 | 67.078 | KV452784.1 | 2752791 | 3-scf00141 | 3 |
| AX-158005725 | 6 | 67.078 | KV452784.1 | 2765820 | 3-scf00141 | 3 |
| AX-158005727 | 6 | 67.078 | KV452784.1 | 2766390 | 3-scf00141 | 3 |
| AX-158390843 | 6 | 67.078 | KV452784.1 | 2781139 | 3-scf00141 | 3 |
| AX-158005731 | 6 | 67.078 | KV452784.1 | 2781926 | 3-scf00141 | 3 |
| AX-158005732 | 6 | 67.078 | KV452784.1 | 2787054 | 3-scf00141 | 3 |
| AX-158005733 | 6 | 67.078 | KV452784.1 | 2799685 | 3-scf00141 | 3 |
| AX-158005736 | 6 | 67.078 | KV452784.1 | 2802067 | 3-scf00141 | 3 |
| AX-158005738 | 6 | 67.078 | KV452784.1 | 2802934 | 3-scf00141 | 3 |
| AX-158005739 | 6 | 67.078 | KV452784.1 | 2803481 | 3-scf00141 | 3 |
| AX-158005740 | 6 | 67.078 | KV452784.1 | 2804519 | 3-scf00141 | 3 |
| AX-158005742 | 6 | 67.078 | KV452784.1 | 2806847 | 3-scf00141 | 3 |
| AX-158005743 | 6 | 67.078 | KV452784.1 | 2810527 | 3-scf00141 | 3 |
| AX-158390847 | 6 | 67.078 | KV452784.1 | 2813326 | 3-scf00141 | 3 |
| AX-158005745 | 6 | 67.078 | KV452784.1 | 2813538 | 3-scf00141 | 3 |
| AX-158005746 | 6 | 67.078 | KV452784.1 | 2814159 | 3-scf00141 | 3 |
| AX-158005747 | 6 | 67.078 | KV452784.1 | 2814868 | 3-scf00141 | 3 |
| AX-158005748 | 6 | 67.078 | KV452784.1 | 2816341 | 3-scf00141 | 3 |
| AX-158390848 | 6 | 67.078 | KV452784.1 | 2816668 | 3-scf00141 | 3 |
| AX-158005751 | 6 | 67.078 | KV452784.1 | 2817399 | 3-scf00141 | 3 |
| AX-158005752 | 6 | 67.078 | KV452784.1 | 2817830 | 3-scf00141 | 3 |
| AX-158005754 | 6 | 67.078 | KV452784.1 | 2821042 | 3-scf00141 | 3 |
| AX-157718187 | 6 | 67.078 | KV452784.1 | 2821895 | 3-scf00141 | 3 |
| AX-158005756 | 6 | 67.078 | KV452784.1 | 2826113 | 3-scf00141 | 3 |
| AX-157756256 | 6 | 67.078 | KV452784.1 | 2827094 | 3-scf00141 | 3 |
| AX-158005759 | 6 | 67.078 | KV452784.1 | 2843597 | 3-scf00141 | 3 |
| AX-158005760 | 6 | 67.078 | KV452784.1 | 2844940 | 3-scf00141 | 3 |
| AX-157699734 | 6 | 67.078 | KV452784.1 | 2845750 | 3-scf00141 | 3 |
| AX-158005762 | 6 | 67.078 | KV452784.1 | 2856253 | 3-scf00141 | 3 |
| AX-157865224 | 6 | 67.078 | KV452784.1 | 2868506 | 3-scf00141 | 3 |
| AX-158005768 | 6 | 67.078 | KV452784.1 | 2868728 | 3-scf00141 | 3 |
| AX-158405797 | 6 | 67.078 | KV452784.1 | 2869740 | 3-scf00141 | 3 |
| AX-158005769 | 6 | 67.078 | KV452784.1 | 2870970 | 3-scf00141 | 3 |
| AX-158005770 | 6 | 67.078 | KV452784.1 | 2872153 | 3-scf00141 | 3 |
| AX-158005771 | 6 | 67.078 | KV452784.1 | 2874284 | 3-scf00141 | 3 |
| AX-158005773 | 6 | 67.078 | KV452784.1 | 2874721 | 3-scf00141 | 3 |
| AX-158005775 | 6 | 67.078 | KV452784.1 | 2875403 | 3-scf00141 | 3 |
| AX-158005776 | 6 | 67.078 | KV452784.1 | 2877632 | 3-scf00141 | 3 |
| AX-158005778 | 6 | 67.078 | KV452784.1 | 2880307 | 3-scf00141 | 3 |
| AX-158005779 | 6 | 67.078 | KV452784.1 | 2883803 | 3-scf00141 | 3 |
| AX-158005781 | 6 | 67.078 | KV452784.1 | 2887685 | 3-scf00141 | 3 |
| AX-158005783 | 6 | 67.078 | KV452784.1 | 2889144 | 3-scf00141 | 3 |
| AX-158005788 | 6 | 67.078 | KV452784.1 | 2894641 | 3-scf00141 | 3 |
| AX-157710915 | 6 | 67.078 | KV452784.1 | 2898870 | 3-scf00141 | 3 |
| AX-158005791 | 6 | 67.078 | KV452784.1 | 2900043 | 3-scf00141 | 3 |
| AX-158005794 | 6 | 67.078 | KV452784.1 | 2903055 | 3-scf00141 | 3 |
| AX-158005796 | 6 | 67.078 | KV452784.1 | 2904399 | 3-scf00141 | 3 |
| AX-158005800 | 6 | 67.078 | KV452784.1 | 2911556 | 3-scf00141 | 3 |
| AX-158005803 | 6 | 67.078 | KV452784.1 | 2914677 | 3-scf00141 | 3 |

|              |   |        |            |         |            |   |
|--------------|---|--------|------------|---------|------------|---|
| AX-158005805 | 6 | 67.078 | KV452784.1 | 2915906 | 3-scf00141 | 3 |
| AX-158005806 | 6 | 67.078 | KV452784.1 | 2916566 | 3-scf00141 | 3 |
| AX-158005808 | 6 | 67.078 | KV452784.1 | 2917021 | 3-scf00141 | 3 |
| AX-158005809 | 6 | 67.078 | KV452784.1 | 2918333 | 3-scf00141 | 3 |
| AX-158005810 | 6 | 67.078 | KV452784.1 | 2920341 | 3-scf00141 | 3 |
| AX-158005812 | 6 | 67.078 | KV452784.1 | 2921580 | 3-scf00141 | 3 |
| AX-158005813 | 6 | 67.078 | KV452784.1 | 2922413 | 3-scf00141 | 3 |
| AX-158005814 | 6 | 67.078 | KV452784.1 | 2924305 | 3-scf00141 | 3 |
| AX-158005815 | 6 | 67.078 | KV452784.1 | 2926085 | 3-scf00141 | 3 |
| AX-158005817 | 6 | 67.078 | KV452784.1 | 2926481 | 3-scf00141 | 3 |
| AX-158005818 | 6 | 67.078 | KV452784.1 | 2927107 | 3-scf00141 | 3 |
| AX-158005825 | 6 | 67.078 | KV452784.1 | 2931566 | 3-scf00141 | 3 |
| AX-158005826 | 6 | 67.078 | KV452784.1 | 2932293 | 3-scf00141 | 3 |
| AX-158005829 | 6 | 67.078 | KV452784.1 | 2935840 | 3-scf00141 | 3 |
| AX-158005830 | 6 | 67.078 | KV452784.1 | 2936168 | 3-scf00141 | 3 |
| AX-157713633 | 6 | 67.078 | KV452784.1 | 2937257 | 3-scf00141 | 3 |
| AX-158005832 | 6 | 67.078 | KV452784.1 | 2937420 | 3-scf00141 | 3 |
| AX-157819644 | 6 | 67.078 | KV452784.1 | 2938697 | 3-scf00141 | 3 |
| AX-158005834 | 6 | 67.078 | KV452784.1 | 2938996 | 3-scf00141 | 3 |
| AX-158005835 | 6 | 67.078 | KV452784.1 | 2939577 | 3-scf00141 | 3 |
| AX-158005837 | 6 | 67.078 | KV452784.1 | 2941207 | 3-scf00141 | 3 |
| AX-158005840 | 6 | 67.078 | KV452784.1 | 2943751 | 3-scf00141 | 3 |
| AX-158005842 | 6 | 67.078 | KV452784.1 | 2944118 | 3-scf00141 | 3 |
| AX-157819645 | 6 | 67.078 | KV452784.1 | 2949772 | 3-scf00141 | 3 |
| AX-158005848 | 6 | 67.078 | KV452784.1 | 2950518 | 3-scf00141 | 3 |
| AX-157870012 | 6 | 67.078 | KV452784.1 | 2952539 | 3-scf00141 | 3 |
| AX-157819646 | 6 | 67.078 | KV452784.1 | 2953391 | 3-scf00141 | 3 |
| AX-158407599 | 6 | 67.078 | KV452784.1 | 2955597 | 3-scf00141 | 3 |
| AX-158005856 | 6 | 67.078 | KV452784.1 | 2955663 | 3-scf00141 | 3 |
| AX-158005857 | 6 | 67.078 | KV452784.1 | 2956393 | 3-scf00141 | 3 |
| AX-158005859 | 6 | 67.078 | KV452784.1 | 2956940 | 3-scf00141 | 3 |
| AX-157870013 | 6 | 67.078 | KV452784.1 | 2957586 | 3-scf00141 | 3 |
| AX-158005861 | 6 | 67.078 | KV452784.1 | 2957807 | 3-scf00141 | 3 |
| AX-158005866 | 6 | 67.078 | KV452784.1 | 2959550 | 3-scf00141 | 3 |
| AX-158005869 | 6 | 67.078 | KV452784.1 | 2961231 | 3-scf00141 | 3 |
| AX-158005870 | 6 | 67.078 | KV452784.1 | 2961902 | 3-scf00141 | 3 |
| AX-158005873 | 6 | 67.078 | KV452784.1 | 2965371 | 3-scf00141 | 3 |
| AX-158005875 | 6 | 67.078 | KV452784.1 | 2965731 | 3-scf00141 | 3 |
| AX-158390850 | 6 | 67.078 | KV452784.1 | 2966316 | 3-scf00141 | 3 |
| AX-158005876 | 6 | 67.078 | KV452784.1 | 2971147 | 3-scf00141 | 3 |
| AX-158005877 | 6 | 67.078 | KV452784.1 | 2971717 | 3-scf00141 | 3 |
| AX-158005880 | 6 | 67.078 | KV452784.1 | 2973417 | 3-scf00141 | 3 |
| AX-157749841 | 6 | 67.078 | KV452784.1 | 2974168 | 3-scf00141 | 3 |
| AX-158005881 | 6 | 67.078 | KV452784.1 | 2974753 | 3-scf00141 | 3 |
| AX-158005884 | 6 | 67.078 | KV452784.1 | 2976431 | 3-scf00141 | 3 |
| AX-158005886 | 6 | 67.078 | KV452784.1 | 2977862 | 3-scf00141 | 3 |
| AX-158005887 | 6 | 67.078 | KV452784.1 | 2979284 | 3-scf00141 | 3 |
| AX-158005889 | 6 | 67.078 | KV452784.1 | 2980578 | 3-scf00141 | 3 |
| AX-158005890 | 6 | 67.078 | KV452784.1 | 2981121 | 3-scf00141 | 3 |
| AX-158005892 | 6 | 67.078 | KV452784.1 | 2981350 | 3-scf00141 | 3 |
| AX-158005893 | 6 | 67.078 | KV452784.1 | 2981580 | 3-scf00141 | 3 |

|              |   |        |            |         |            |   |
|--------------|---|--------|------------|---------|------------|---|
| AX-158005897 | 6 | 67.078 | KV452784.1 | 2983702 | 3-scf00141 | 3 |
| AX-158005898 | 6 | 67.078 | KV452784.1 | 2984600 | 3-scf00141 | 3 |
| AX-158005899 | 6 | 67.078 | KV452784.1 | 2985015 | 3-scf00141 | 3 |
| AX-158005900 | 6 | 67.078 | KV452784.1 | 2985734 | 3-scf00141 | 3 |
| AX-157819649 | 6 | 67.078 | KV452784.1 | 2986365 | 3-scf00141 | 3 |
| AX-158005902 | 6 | 67.078 | KV452784.1 | 2986698 | 3-scf00141 | 3 |
| AX-157819650 | 6 | 67.078 | KV452784.1 | 2986982 | 3-scf00141 | 3 |
| AX-157724804 | 6 | 67.078 | KV452784.1 | 2987076 | 3-scf00141 | 3 |
| AX-158005906 | 6 | 67.078 | KV452784.1 | 2988592 | 3-scf00141 | 3 |
| AX-158005908 | 6 | 67.078 | KV452784.1 | 2988914 | 3-scf00141 | 3 |
| AX-158005909 | 6 | 67.078 | KV452784.1 | 2990714 | 3-scf00141 | 3 |
| AX-158005911 | 6 | 67.078 | KV452784.1 | 2992007 | 3-scf00141 | 3 |
| AX-158005913 | 6 | 67.078 | KV452784.1 | 2994340 | 3-scf00141 | 3 |
| AX-157865225 | 6 | 67.078 | KV452784.1 | 2995896 | 3-scf00141 | 3 |
| AX-158005914 | 6 | 67.078 | KV452784.1 | 2997323 | 3-scf00141 | 3 |
| AX-158005915 | 6 | 67.078 | KV452784.1 | 3000551 | 3-scf00141 | 3 |
| AX-158407601 | 6 | 67.078 | KV452784.1 | 3002025 | 3-scf00141 | 3 |
| AX-158005917 | 6 | 67.078 | KV452784.1 | 3005314 | 3-scf00141 | 3 |
| AX-158005919 | 6 | 67.078 | KV452784.1 | 3008002 | 3-scf00141 | 3 |
| AX-158005920 | 6 | 67.078 | KV452784.1 | 3009376 | 3-scf00141 | 3 |
| AX-158005923 | 6 | 67.078 | KV452784.1 | 3010765 | 3-scf00141 | 3 |
| AX-158005926 | 6 | 67.078 | KV452784.1 | 3012089 | 3-scf00141 | 3 |
| AX-158005927 | 6 | 67.078 | KV452784.1 | 3012946 | 3-scf00141 | 3 |
| AX-158005928 | 6 | 67.078 | KV452784.1 | 3013740 | 3-scf00141 | 3 |
| AX-157819651 | 6 | 67.078 | KV452784.1 | 3015724 | 3-scf00141 | 3 |
| AX-158005930 | 6 | 67.078 | KV452784.1 | 3015766 | 3-scf00141 | 3 |
| AX-158005931 | 6 | 67.078 | KV452784.1 | 3016146 | 3-scf00141 | 3 |
| AX-158005932 | 6 | 67.078 | KV452784.1 | 3016832 | 3-scf00141 | 3 |
| AX-158005933 | 6 | 67.078 | KV452784.1 | 3017799 | 3-scf00141 | 3 |
| AX-158005936 | 6 | 67.078 | KV452784.1 | 3019199 | 3-scf00141 | 3 |
| AX-158005937 | 6 | 67.078 | KV452784.1 | 3019812 | 3-scf00141 | 3 |
| AX-158005939 | 6 | 67.078 | KV452784.1 | 3020251 | 3-scf00141 | 3 |
| AX-158005942 | 6 | 67.078 | KV452784.1 | 3021580 | 3-scf00141 | 3 |
| AX-158005944 | 6 | 67.078 | KV452784.1 | 3022022 | 3-scf00141 | 3 |
| AX-158005945 | 6 | 67.078 | KV452784.1 | 3022566 | 3-scf00141 | 3 |
| AX-158005946 | 6 | 67.078 | KV452784.1 | 3023575 | 3-scf00141 | 3 |
| AX-158005948 | 6 | 67.078 | KV452784.1 | 3025194 | 3-scf00141 | 3 |
| AX-158005949 | 6 | 67.078 | KV452784.1 | 3026104 | 3-scf00141 | 3 |
| AX-158005950 | 6 | 67.078 | KV452784.1 | 3027069 | 3-scf00141 | 3 |
| AX-158005952 | 6 | 67.078 | KV452784.1 | 3027463 | 3-scf00141 | 3 |
| AX-158005953 | 6 | 67.078 | KV452784.1 | 3029804 | 3-scf00141 | 3 |
| AX-158005956 | 6 | 67.078 | KV452784.1 | 3030685 | 3-scf00141 | 3 |
| AX-158005958 | 6 | 67.078 | KV452784.1 | 3031221 | 3-scf00141 | 3 |
| AX-158005959 | 6 | 67.078 | KV452784.1 | 3031508 | 3-scf00141 | 3 |
| AX-158005961 | 6 | 67.078 | KV452784.1 | 3032433 | 3-scf00141 | 3 |
| AX-158005963 | 6 | 67.078 | KV452784.1 | 3032878 | 3-scf00141 | 3 |
| AX-158005964 | 6 | 67.078 | KV452784.1 | 3033345 | 3-scf00141 | 3 |
| AX-158005965 | 6 | 67.078 | KV452784.1 | 3033617 | 3-scf00141 | 3 |
| AX-157870015 | 6 | 67.078 | KV452784.1 | 3034476 | 3-scf00141 | 3 |
| AX-158005967 | 6 | 67.078 | KV452784.1 | 3034964 | 3-scf00141 | 3 |
| AX-158005968 | 6 | 67.078 | KV452784.1 | 3035209 | 3-scf00141 | 3 |



|              |   |        |            |         |            |   |
|--------------|---|--------|------------|---------|------------|---|
| AX-158005970 | 6 | 67.078 | KV452784.1 | 3036013 | 3-scf00141 | 3 |
| AX-157870017 | 6 | 67.078 | KV452784.1 | 3040778 | 3-scf00141 | 3 |
| AX-158005976 | 6 | 67.078 | KV452784.1 | 3041300 | 3-scf00141 | 3 |
| AX-158005977 | 6 | 67.078 | KV452784.1 | 3041857 | 3-scf00141 | 3 |
| AX-158005980 | 6 | 67.078 | KV452784.1 | 3045050 | 3-scf00141 | 3 |
| AX-158005982 | 6 | 67.078 | KV452784.1 | 3045399 | 3-scf00141 | 3 |
| AX-158005983 | 6 | 67.078 | KV452784.1 | 3046562 | 3-scf00141 | 3 |
| AX-158005984 | 6 | 67.078 | KV452784.1 | 3046711 | 3-scf00141 | 3 |
| AX-158005985 | 6 | 67.078 | KV452784.1 | 3050095 | 3-scf00141 | 3 |
| AX-158005986 | 6 | 67.078 | KV452784.1 | 3051799 | 3-scf00141 | 3 |
| AX-158005987 | 6 | 67.078 | KV452784.1 | 3052668 | 3-scf00141 | 3 |
| AX-158005988 | 6 | 67.078 | KV452784.1 | 3054249 | 3-scf00141 | 3 |
| AX-158005989 | 6 | 67.078 | KV452784.1 | 3055211 | 3-scf00141 | 3 |
| AX-157856178 | 6 | 67.078 | KV452784.1 | 3055438 | 3-scf00141 | 3 |
| AX-158005990 | 6 | 67.078 | KV452784.1 | 3056410 | 3-scf00141 | 3 |
| AX-158005993 | 6 | 67.078 | KV452784.1 | 3057048 | 3-scf00141 | 3 |
| AX-158005994 | 6 | 67.078 | KV452784.1 | 3058429 | 3-scf00141 | 3 |
| AX-158005995 | 6 | 67.078 | KV452784.1 | 3059208 | 3-scf00141 | 3 |
| AX-158005996 | 6 | 67.078 | KV452784.1 | 3060016 | 3-scf00141 | 3 |
| AX-157756725 | 6 | 67.078 | KV452784.1 | 3061368 | 3-scf00141 | 3 |
| AX-158390851 | 6 | 67.078 | KV452784.1 | 3061877 | 3-scf00141 | 3 |
| AX-158005997 | 6 | 67.078 | KV452784.1 | 3062712 | 3-scf00141 | 3 |
| AX-158006000 | 6 | 67.078 | KV452784.1 | 3065291 | 3-scf00141 | 3 |
| AX-157819654 | 6 | 67.078 | KV452784.1 | 3066760 | 3-scf00141 | 3 |
| AX-157819655 | 6 | 67.078 | KV452784.1 | 3066987 | 3-scf00141 | 3 |
| AX-158006002 | 6 | 67.078 | KV452784.1 | 3070270 | 3-scf00141 | 3 |
| AX-158006005 | 6 | 67.078 | KV452784.1 | 3075155 | 3-scf00141 | 3 |
| AX-158006006 | 6 | 67.078 | KV452784.1 | 3075479 | 3-scf00141 | 3 |
| AX-158006007 | 6 | 67.078 | KV452784.1 | 3077613 | 3-scf00141 | 3 |
| AX-157819656 | 6 | 67.078 | KV452784.1 | 3077849 | 3-scf00141 | 3 |
| AX-158006009 | 6 | 67.078 | KV452784.1 | 3077894 | 3-scf00141 | 3 |
| AX-158006012 | 6 | 67.078 | KV452784.1 | 3078676 | 3-scf00141 | 3 |
| AX-158006013 | 6 | 67.078 | KV452784.1 | 3079307 | 3-scf00141 | 3 |
| AX-158006015 | 6 | 67.078 | KV452784.1 | 3079782 | 3-scf00141 | 3 |
| AX-158006016 | 6 | 67.078 | KV452784.1 | 3080303 | 3-scf00141 | 3 |
| AX-158006018 | 6 | 67.078 | KV452784.1 | 3081209 | 3-scf00141 | 3 |
| AX-158006020 | 6 | 67.078 | KV452784.1 | 3083810 | 3-scf00141 | 3 |
| AX-158006021 | 6 | 67.078 | KV452784.1 | 3084072 | 3-scf00141 | 3 |
| AX-158006026 | 6 | 67.078 | KV452784.1 | 3087421 | 3-scf00141 | 3 |
| AX-157819657 | 6 | 67.078 | KV452784.1 | 3087718 | 3-scf00141 | 3 |
| AX-158006028 | 6 | 67.078 | KV452784.1 | 3089121 | 3-scf00141 | 3 |
| AX-158006031 | 6 | 67.078 | KV452784.1 | 3090047 | 3-scf00141 | 3 |
| AX-157772332 | 6 | 67.078 | KV452784.1 | 3090510 | 3-scf00141 | 3 |
| AX-158006032 | 6 | 67.078 | KV452784.1 | 3090599 | 3-scf00141 | 3 |
| AX-158006034 | 6 | 67.078 | KV452784.1 | 3091010 | 3-scf00141 | 3 |
| AX-158006035 | 6 | 67.078 | KV452784.1 | 3091195 | 3-scf00141 | 3 |
| AX-157723463 | 6 | 67.078 | KV452784.1 | 3091287 | 3-scf00141 | 3 |
| AX-158006037 | 6 | 67.078 | KV452784.1 | 3092016 | 3-scf00141 | 3 |
| AX-158006038 | 6 | 67.078 | KV452784.1 | 3092992 | 3-scf00141 | 3 |
| AX-158006040 | 6 | 67.078 | KV452784.1 | 3093302 | 3-scf00141 | 3 |
| AX-158006044 | 6 | 67.078 | KV452784.1 | 3094429 | 3-scf00141 | 3 |

|              |   |        |            |         |            |   |
|--------------|---|--------|------------|---------|------------|---|
| AX-158006048 | 6 | 67.078 | KV452784.1 | 3097198 | 3-scf00141 | 3 |
| AX-158006053 | 6 | 67.078 | KV452784.1 | 3103333 | 3-scf00141 | 3 |
| AX-158006055 | 6 | 67.078 | KV452784.1 | 3104672 | 3-scf00141 | 3 |
| AX-158390852 | 6 | 67.078 | KV452784.1 | 3104713 | 3-scf00141 | 3 |
| AX-158006056 | 6 | 67.078 | KV452784.1 | 3106493 | 3-scf00141 | 3 |
| AX-158006058 | 6 | 67.078 | KV452784.1 | 3106708 | 3-scf00141 | 3 |
| AX-158006059 | 6 | 67.078 | KV452784.1 | 3107185 | 3-scf00141 | 3 |
| AX-157771069 | 6 | 67.078 | KV452784.1 | 3108930 | 3-scf00141 | 3 |
| AX-158006061 | 6 | 67.078 | KV452784.1 | 3111617 | 3-scf00141 | 3 |
| AX-158006065 | 6 | 67.078 | KV452784.1 | 3115910 | 3-scf00141 | 3 |
| AX-158006067 | 6 | 67.078 | KV452784.1 | 3116271 | 3-scf00141 | 3 |
| AX-158006073 | 6 | 67.078 | KV452784.1 | 3119713 | 3-scf00141 | 3 |
| AX-158006081 | 6 | 67.078 | KV452784.1 | 3124642 | 3-scf00141 | 3 |
| AX-158390853 | 6 | 67.078 | KV452784.1 | 3125172 | 3-scf00141 | 3 |
| AX-158006082 | 6 | 67.078 | KV452784.1 | 3125244 | 3-scf00141 | 3 |
| AX-158006085 | 6 | 67.078 | KV452784.1 | 3127549 | 3-scf00141 | 3 |
| AX-158006086 | 6 | 67.078 | KV452784.1 | 3127991 | 3-scf00141 | 3 |
| AX-158006087 | 6 | 67.078 | KV452784.1 | 3128696 | 3-scf00141 | 3 |
| AX-157819660 | 6 | 67.078 | KV452784.1 | 3129334 | 3-scf00141 | 3 |
| AX-158006116 | 6 | 67.078 | KV452784.1 | 3148300 | 3-scf00141 | 3 |
| AX-158006123 | 6 | 67.078 | KV452784.1 | 3152005 | 3-scf00141 | 3 |
| AX-158006130 | 6 | 67.078 | KV452784.1 | 3157822 | 3-scf00141 | 3 |
| AX-158006140 | 6 | 67.078 | KV452784.1 | 3170276 | 3-scf00141 | 3 |
| AX-158390859 | 6 | 67.078 | KV452784.1 | 3170504 | 3-scf00141 | 3 |
| AX-158006143 | 6 | 67.078 | KV452784.1 | 3174040 | 3-scf00141 | 3 |
| AX-158006146 | 6 | 67.078 | KV452784.1 | 3176528 | 3-scf00141 | 3 |
| AX-158006148 | 6 | 67.078 | KV452784.1 | 3177211 | 3-scf00141 | 3 |
| AX-158390860 | 6 | 67.078 | KV452784.1 | 3177451 | 3-scf00141 | 3 |
| AX-158006150 | 6 | 67.078 | KV452784.1 | 3180034 | 3-scf00141 | 3 |
| AX-158006151 | 6 | 67.078 | KV452784.1 | 3180539 | 3-scf00141 | 3 |
| AX-158006155 | 6 | 67.078 | KV452784.1 | 3182737 | 3-scf00141 | 3 |
| AX-158006156 | 6 | 67.078 | KV452784.1 | 3184066 | 3-scf00141 | 3 |
| AX-158006158 | 6 | 67.078 | KV452784.1 | 3184966 | 3-scf00141 | 3 |
| AX-158006159 | 6 | 67.078 | KV452784.1 | 3185695 | 3-scf00141 | 3 |
| AX-158006162 | 6 | 67.078 | KV452784.1 | 3186473 | 3-scf00141 | 3 |
| AX-158006164 | 6 | 67.078 | KV452784.1 | 3187350 | 3-scf00141 | 3 |
| AX-157819662 | 6 | 67.078 | KV452784.1 | 3187917 | 3-scf00141 | 3 |
| AX-158006165 | 6 | 67.078 | KV452784.1 | 3188247 | 3-scf00141 | 3 |
| AX-158006167 | 6 | 67.078 | KV452784.1 | 3189388 | 3-scf00141 | 3 |
| AX-158006168 | 6 | 67.078 | KV452784.1 | 3190693 | 3-scf00141 | 3 |
| AX-158006169 | 6 | 67.078 | KV452784.1 | 3191388 | 3-scf00141 | 3 |
| AX-158006170 | 6 | 67.078 | KV452784.1 | 3192171 | 3-scf00141 | 3 |
| AX-158006172 | 6 | 67.078 | KV452784.1 | 3193364 | 3-scf00141 | 3 |
| AX-158006175 | 6 | 67.078 | KV452784.1 | 3194013 | 3-scf00141 | 3 |
| AX-157718680 | 6 | 67.078 | KV452784.1 | 3195387 | 3-scf00141 | 3 |
| AX-158006176 | 6 | 67.078 | KV452784.1 | 3196019 | 3-scf00141 | 3 |
| AX-157819664 | 6 | 67.078 | KV452784.1 | 3197117 | 3-scf00141 | 3 |
| AX-158006178 | 6 | 67.078 | KV452784.1 | 3198055 | 3-scf00141 | 3 |
| AX-158006180 | 6 | 67.078 | KV452784.1 | 3198990 | 3-scf00141 | 3 |
| AX-158006181 | 6 | 67.078 | KV452784.1 | 3200123 | 3-scf00141 | 3 |
| AX-158006183 | 6 | 67.078 | KV452784.1 | 3202048 | 3-scf00141 | 3 |

|              |   |        |            |         |            |   |
|--------------|---|--------|------------|---------|------------|---|
| AX-158006184 | 6 | 67.078 | KV452784.1 | 3202637 | 3-scf00141 | 3 |
| AX-157819665 | 6 | 67.078 | KV452784.1 | 3204914 | 3-scf00141 | 3 |
| AX-158006186 | 6 | 67.078 | KV452784.1 | 3205378 | 3-scf00141 | 3 |
| AX-158006187 | 6 | 67.078 | KV452784.1 | 3206744 | 3-scf00141 | 3 |
| AX-158006193 | 6 | 67.078 | KV452784.1 | 3208463 | 3-scf00141 | 3 |
| AX-158006194 | 6 | 67.078 | KV452784.1 | 3210129 | 3-scf00141 | 3 |
| AX-158006197 | 6 | 67.078 | KV452784.1 | 3211725 | 3-scf00141 | 3 |
| AX-157884785 | 6 | 67.078 | KV452784.1 | 3220821 | 3-scf00141 | 3 |
| AX-158006202 | 6 | 67.078 | KV452784.1 | 3221445 | 3-scf00141 | 3 |
| AX-158006206 | 6 | 67.078 | KV452784.1 | 3222739 | 3-scf00141 | 3 |
| AX-157856180 | 6 | 67.078 | KV452784.1 | 3230171 | 3-scf00141 | 3 |
| AX-158006231 | 6 | 67.078 | KV452784.1 | 3241933 | 3-scf00141 | 3 |
| AX-157876163 | 6 | 67.078 | KV452784.1 | 3254469 | 3-scf00141 | 3 |
| AX-158006242 | 6 | 67.078 | KV452784.1 | 3264736 | 3-scf00141 | 3 |
| AX-158006244 | 6 | 67.078 | KV452784.1 | 3268775 | 3-scf00141 | 3 |
| AX-157774563 | 6 | 67.078 | KV452784.1 | 3276555 | 3-scf00141 | 3 |
| AX-158006247 | 6 | 67.078 | KV452784.1 | 3277399 | 3-scf00141 | 3 |
| AX-158006248 | 6 | 67.078 | KV452784.1 | 3277752 | 3-scf00141 | 3 |
| AX-158006254 | 6 | 67.078 | KV452784.1 | 3282122 | 3-scf00141 | 3 |
| AX-158006278 | 6 | 67.078 | KV452784.1 | 3337908 | 3-scf00141 | 3 |
| AX-158006279 | 6 | 67.078 | KV452784.1 | 3338652 | 3-scf00141 | 3 |
| AX-158006280 | 6 | 67.078 | KV452784.1 | 3344977 | 3-scf00141 | 3 |
| AX-158006284 | 6 | 67.078 | KV452784.1 | 3354535 | 3-scf00141 | 3 |
| AX-158006308 | 6 | 67.078 | KV452784.1 | 3378290 | 3-scf00141 | 3 |
| AX-158006335 | 6 | 67.078 | KV452784.1 | 3412184 | 3-scf00141 | 3 |
| AX-158407607 | 6 | 67.078 | KV452784.1 | 3416356 | 3-scf00141 | 3 |
| AX-158006409 | 6 | 67.078 | KV452784.1 | 3551100 | 3-scf00141 | 3 |
| AX-158006414 | 6 | 67.078 | KV452784.1 | 3553550 | 3-scf00141 | 3 |
| AX-157819695 | 6 | 67.078 | KV452784.1 | 3607572 | 3-scf00141 | 3 |
| AX-158006446 | 6 | 67.078 | KV452784.1 | 3729339 | 3-scf00141 | 3 |
| AX-157856183 | 6 | 67.078 | KV452784.1 | 3731788 | 3-scf00141 | 3 |
| AX-158006449 | 6 | 67.078 | KV452784.1 | 3744840 | 3-scf00141 | 3 |
| AX-158006490 | 6 | 67.078 | KV452784.1 | 4028607 | 3-scf00141 | 3 |
| AX-158006498 | 6 | 67.078 | KV452784.1 | 4065819 | 3-scf00141 | 3 |
| AX-158006501 | 6 | 67.078 | KV452784.1 | 4071318 | 3-scf00141 | 3 |
| AX-158006507 | 6 | 67.078 | KV452784.1 | 4087001 | 3-scf00141 | 3 |
| AX-158006563 | 6 | 67.078 | KV452784.1 | 4255179 | 3-scf00141 | 3 |
| AX-158006565 | 6 | 67.078 | KV452784.1 | 4256075 | 3-scf00141 | 3 |
| AX-158006575 | 6 | 67.078 | KV452784.1 | 4268218 | 3-scf00141 | 3 |
| AX-158006607 | 6 | 67.078 | KV452784.1 | 4414434 | 3-scf00141 | 3 |
| AX-158006608 | 6 | 67.078 | KV452784.1 | 4414853 | 3-scf00141 | 3 |
| AX-158006610 | 6 | 67.078 | KV452784.1 | 4415116 | 3-scf00141 | 3 |
| AX-158006707 | 6 | 67.078 | KV452784.1 | 4644752 | 3-scf00141 | 3 |
| AX-158390864 | 6 | 67.078 | KV452784.1 | 4822619 | 3-scf00141 | 3 |
| AX-158006741 | 6 | 67.078 | KV452784.1 | 4839467 | 3-scf00141 | 3 |
| AX-158407648 | 6 | 67.078 | KV452784.1 | 5030834 | 3-scf00141 | 3 |
| AX-158006801 | 6 | 67.078 | KV452784.1 | 5035465 | 3-scf00141 | 3 |
| AX-158006913 | 6 | 67.078 | KV452784.1 | 5464875 | 3-scf00141 | 3 |
| AX-158006921 | 6 | 67.078 | KV452784.1 | 5497725 | 3-scf00141 | 3 |
| AX-158006922 | 6 | 67.078 | KV452784.1 | 5499367 | 3-scf00141 | 3 |
| AX-158006923 | 6 | 67.078 | KV452784.1 | 5499712 | 3-scf00141 | 3 |

|              |   |        |            |         |            |   |
|--------------|---|--------|------------|---------|------------|---|
| AX-157819730 | 6 | 67.078 | KV452784.1 | 5500600 | 3-scf00141 | 3 |
| AX-157819731 | 6 | 67.078 | KV452784.1 | 5501611 | 3-scf00141 | 3 |
| AX-157743193 | 6 | 67.078 | KV452784.1 | 5502215 | 3-scf00141 | 3 |
| AX-158006925 | 6 | 67.078 | KV452784.1 | 5503269 | 3-scf00141 | 3 |
| AX-157819732 | 6 | 67.078 | KV452784.1 | 5504190 | 3-scf00141 | 3 |
| AX-158006928 | 6 | 67.078 | KV452784.1 | 5505309 | 3-scf00141 | 3 |
| AX-158006929 | 6 | 67.078 | KV452784.1 | 5505690 | 3-scf00141 | 3 |
| AX-158006930 | 6 | 67.078 | KV452784.1 | 5506070 | 3-scf00141 | 3 |
| AX-158006931 | 6 | 67.078 | KV452784.1 | 5506488 | 3-scf00141 | 3 |
| AX-158006935 | 6 | 67.078 | KV452784.1 | 5507256 | 3-scf00141 | 3 |
| AX-158006938 | 6 | 67.078 | KV452784.1 | 5509067 | 3-scf00141 | 3 |
| AX-158006939 | 6 | 67.078 | KV452784.1 | 5509797 | 3-scf00141 | 3 |
| AX-158006940 | 6 | 67.078 | KV452784.1 | 5510003 | 3-scf00141 | 3 |
| AX-158006942 | 6 | 67.078 | KV452784.1 | 5511452 | 3-scf00141 | 3 |
| AX-157819733 | 6 | 67.078 | KV452784.1 | 5512699 | 3-scf00141 | 3 |
| AX-158006946 | 6 | 67.078 | KV452784.1 | 5516001 | 3-scf00141 | 3 |
| AX-158006949 | 6 | 67.078 | KV452784.1 | 5516364 | 3-scf00141 | 3 |
| AX-158006950 | 6 | 67.078 | KV452784.1 | 5516594 | 3-scf00141 | 3 |
| AX-158006952 | 6 | 67.078 | KV452784.1 | 5516837 | 3-scf00141 | 3 |
| AX-157819734 | 6 | 67.078 | KV452784.1 | 5518190 | 3-scf00141 | 3 |
| AX-158006956 | 6 | 67.078 | KV452784.1 | 5518489 | 3-scf00141 | 3 |
| AX-157743841 | 6 | 67.078 | KV452784.1 | 5525903 | 3-scf00141 | 3 |
| AX-158006962 | 6 | 67.078 | KV452784.1 | 5533252 | 3-scf00141 | 3 |
| AX-158006963 | 6 | 67.078 | KV452784.1 | 5538669 | 3-scf00141 | 3 |
| AX-158006968 | 6 | 67.078 | KV452784.1 | 5542931 | 3-scf00141 | 3 |
| AX-158006978 | 6 | 67.078 | KV452784.1 | 5564531 | 3-scf00141 | 3 |
| AX-158006986 | 6 | 67.078 | KV452784.1 | 5586925 | 3-scf00141 | 3 |
| AX-158007007 | 6 | 67.078 | KV452784.1 | 5631915 | 3-scf00141 | 3 |
| AX-158007022 | 6 | 67.078 | KV452784.1 | 5681365 | 3-scf00141 | 3 |
| AX-158007079 | 6 | 67.078 | KV452784.1 | 5766517 | 3-scf00141 | 3 |
| AX-158007109 | 6 | 67.078 | KV452784.1 | 5799499 | 3-scf00141 | 3 |
| AX-158007115 | 6 | 67.078 | KV452784.1 | 5803656 | 3-scf00141 | 3 |
| AX-158007123 | 6 | 67.078 | KV452784.1 | 5810304 | 3-scf00141 | 3 |
| AX-158007137 | 6 | 67.078 | KV452784.1 | 5814963 | 3-scf00141 | 3 |
| AX-158007167 | 6 | 67.078 | KV452784.1 | 5843876 | 3-scf00141 | 3 |
| AX-158007171 | 6 | 67.078 | KV452784.1 | 5846245 | 3-scf00141 | 3 |
| AX-158007173 | 6 | 67.078 | KV452784.1 | 5846835 | 3-scf00141 | 3 |
| AX-158007178 | 6 | 67.078 | KV452784.1 | 5850131 | 3-scf00141 | 3 |
| AX-158007181 | 6 | 67.078 | KV452784.1 | 5851871 | 3-scf00141 | 3 |
| AX-158007200 | 6 | 67.078 | KV452784.1 | 5869117 | 3-scf00141 | 3 |
| AX-158007223 | 6 | 67.078 | KV452784.1 | 5901241 | 3-scf00141 | 3 |
| AX-158007228 | 6 | 67.078 | KV452784.1 | 5903267 | 3-scf00141 | 3 |
| AX-157740685 | 6 | 67.078 | KV452784.1 | 5915462 | 3-scf00141 | 3 |
| AX-158007243 | 6 | 67.078 | KV452784.1 | 5915798 | 3-scf00141 | 3 |
| AX-158007250 | 6 | 67.078 | KV452784.1 | 5923716 | 3-scf00141 | 3 |
| AX-157819780 | 6 | 67.078 | KV452784.1 | 5925695 | 3-scf00141 | 3 |
| AX-158007258 | 6 | 67.078 | KV452784.1 | 5931922 | 3-scf00141 | 3 |
| AX-158007281 | 6 | 67.078 | KV452784.1 | 5956087 | 3-scf00141 | 3 |
| AX-157876201 | 6 | 67.078 | KV452784.1 | 5972842 | 3-scf00141 | 3 |
| AX-158007305 | 6 | 67.078 | KV452784.1 | 5985532 | 3-scf00141 | 3 |
| AX-158007307 | 6 | 67.078 | KV452784.1 | 5986926 | 3-scf00141 | 3 |

|              |   |        |             |         |            |    |
|--------------|---|--------|-------------|---------|------------|----|
| AX-158007318 | 6 | 67.078 | KV452784.1  | 5995518 | 3-scf00141 | 3  |
| AX-158007319 | 6 | 67.078 | KV452784.1  | 5998875 | 3-scf00141 | 3  |
| AX-158007332 | 6 | 67.078 | KV452784.1  | 6007806 | 3-scf00141 | 3  |
| AX-158007353 | 6 | 67.078 | KV452784.1  | 6020859 | 3-scf00141 | 3  |
| AX-158007372 | 6 | 67.078 | KV452784.1  | 6042139 | 3-scf00141 | 3  |
| AX-158007373 | 6 | 67.078 | KV452784.1  | 6042631 | 3-scf00141 | 3  |
| AX-157716630 | 6 | 67.078 | KV452784.1  | 6100729 | 3-scf00141 | 3  |
| AX-158007509 | 6 | 67.078 | KV452784.1  | 6232621 | 3-scf00141 | 3  |
| AX-158007510 | 6 | 67.078 | KV452784.1  | 6234049 | 3-scf00141 | 3  |
| AX-158007514 | 6 | 67.078 | KV452784.1  | 6240577 | 3-scf00141 | 3  |
| AX-158007539 | 6 | 67.078 | KV452784.1  | 6288882 | 3-scf00141 | 3  |
| AX-158407676 | 6 | 67.078 | KV452784.1  | 6307549 | 3-scf00141 | 3  |
| AX-158007572 | 6 | 67.078 | KV452784.1  | 6336055 | 3-scf00141 | 3  |
| AX-158407677 | 6 | 67.078 | KV452784.1  | 6378228 | 3-scf00141 | 3  |
| AX-158007619 | 6 | 67.078 | KV452784.1  | 6412129 | 3-scf00141 | 3  |
| AX-157694593 | 6 | 67.078 | KV452784.1  | 6731479 | 3-scf00141 | 3  |
| AX-158007916 | 6 | 67.078 | KV452784.1  | 6781431 | 3-scf00141 | 3  |
| AX-157819863 | 6 | 67.078 | KV452784.1  | 6858146 | 3-scf00141 | 3  |
| AX-158390895 | 6 | 67.078 | KV452784.1  | 6858396 | 3-scf00141 | 3  |
| AX-158007977 | 6 | 67.078 | KV452784.1  | 6861808 | 3-scf00141 | 3  |
| AX-158007982 | 6 | 67.078 | KV452784.1  | 6873262 | 3-scf00141 | 3  |
| AX-158007983 | 6 | 67.078 | KV452784.1  | 6873942 | 3-scf00141 | 3  |
| AX-157819864 | 6 | 67.078 | KV452784.1  | 6882756 | 3-scf00141 | 3  |
| AX-158008025 | 6 | 67.078 | KV452784.1  | 6916319 | 3-scf00141 | 3  |
| AX-157704988 | 6 | 67.078 | 3ML01028378 | 276     | scf03985_1 | UN |
| AX-158000811 | 6 | 67.188 | KV452782.1  | 8498184 | 3-scf00136 | 3  |
| AX-158004329 | 6 | 67.188 | KV452784.1  | 1141121 | 3-scf00141 | 3  |
| AX-158004533 | 6 | 67.188 | KV452784.1  | 1510320 | 3-scf00141 | 3  |
| AX-158004612 | 6 | 67.188 | KV452784.1  | 1605436 | 3-scf00141 | 3  |
| AX-158004672 | 6 | 67.188 | KV452784.1  | 1671160 | 3-scf00141 | 3  |
| AX-158004682 | 6 | 67.188 | KV452784.1  | 1684836 | 3-scf00141 | 3  |
| AX-158004712 | 6 | 67.188 | KV452784.1  | 1713657 | 3-scf00141 | 3  |
| AX-157819574 | 6 | 67.188 | KV452784.1  | 1865364 | 3-scf00141 | 3  |
| AX-158004869 | 6 | 67.188 | KV452784.1  | 1874397 | 3-scf00141 | 3  |
| AX-158004908 | 6 | 67.188 | KV452784.1  | 1907281 | 3-scf00141 | 3  |
| AX-158004964 | 6 | 67.188 | KV452784.1  | 1962626 | 3-scf00141 | 3  |
| AX-158004978 | 6 | 67.188 | KV452784.1  | 1981840 | 3-scf00141 | 3  |
| AX-158005022 | 6 | 67.188 | KV452784.1  | 2028374 | 3-scf00141 | 3  |
| AX-158005033 | 6 | 67.188 | KV452784.1  | 2042550 | 3-scf00141 | 3  |
| AX-158005062 | 6 | 67.188 | KV452784.1  | 2065343 | 3-scf00141 | 3  |
| AX-158005066 | 6 | 67.188 | KV452784.1  | 2067625 | 3-scf00141 | 3  |
| AX-158005156 | 6 | 67.188 | KV452784.1  | 2167017 | 3-scf00141 | 3  |
| AX-158005185 | 6 | 67.188 | KV452784.1  | 2205252 | 3-scf00141 | 3  |
| AX-158005189 | 6 | 67.188 | KV452784.1  | 2208170 | 3-scf00141 | 3  |
| AX-157754910 | 6 | 67.188 | KV452784.1  | 2209861 | 3-scf00141 | 3  |
| AX-157743991 | 6 | 67.188 | KV452784.1  | 2317846 | 3-scf00141 | 3  |
| AX-157865221 | 6 | 67.188 | KV452784.1  | 2563471 | 3-scf00141 | 3  |
| AX-158005594 | 6 | 67.188 | KV452784.1  | 2611683 | 3-scf00141 | 3  |
| AX-157713558 | 6 | 67.188 | KV452784.1  | 2613672 | 3-scf00141 | 3  |
| AX-158005599 | 6 | 67.188 | KV452784.1  | 2614912 | 3-scf00141 | 3  |
| AX-157819635 | 6 | 67.188 | KV452784.1  | 2622656 | 3-scf00141 | 3  |

|              |   |        |            |         |            |   |
|--------------|---|--------|------------|---------|------------|---|
| AX-157819637 | 6 | 67.188 | KV452784.1 | 2623551 | 3-scf00141 | 3 |
| AX-157819639 | 6 | 67.188 | KV452784.1 | 2628374 | 3-scf00141 | 3 |
| AX-158005797 | 6 | 67.188 | KV452784.1 | 2908186 | 3-scf00141 | 3 |
| AX-158005850 | 6 | 67.188 | KV452784.1 | 2951299 | 3-scf00141 | 3 |
| AX-157773177 | 6 | 67.188 | KV452784.1 | 3060871 | 3-scf00141 | 3 |
| AX-157819653 | 6 | 67.188 | KV452784.1 | 3062538 | 3-scf00141 | 3 |
| AX-158006004 | 6 | 67.188 | KV452784.1 | 3071613 | 3-scf00141 | 3 |
| AX-158006041 | 6 | 67.188 | KV452784.1 | 3093544 | 3-scf00141 | 3 |
| AX-158006144 | 6 | 67.188 | KV452784.1 | 3175814 | 3-scf00141 | 3 |
| AX-158006152 | 6 | 67.188 | KV452784.1 | 3180673 | 3-scf00141 | 3 |
| AX-157757393 | 6 | 67.188 | KV452784.1 | 3261279 | 3-scf00141 | 3 |
| AX-158006256 | 6 | 67.188 | KV452784.1 | 3287679 | 3-scf00141 | 3 |
| AX-157856181 | 6 | 67.188 | KV452784.1 | 3298141 | 3-scf00141 | 3 |
| AX-158006263 | 6 | 67.188 | KV452784.1 | 3304813 | 3-scf00141 | 3 |
| AX-157884786 | 6 | 67.188 | KV452784.1 | 3328868 | 3-scf00141 | 3 |
| AX-158006282 | 6 | 67.188 | KV452784.1 | 3345651 | 3-scf00141 | 3 |
| AX-158006285 | 6 | 67.188 | KV452784.1 | 3355220 | 3-scf00141 | 3 |
| AX-157819677 | 6 | 67.188 | KV452784.1 | 3364470 | 3-scf00141 | 3 |
| AX-157819681 | 6 | 67.188 | KV452784.1 | 3378938 | 3-scf00141 | 3 |
| AX-158006313 | 6 | 67.188 | KV452784.1 | 3382991 | 3-scf00141 | 3 |
| AX-158006328 | 6 | 67.188 | KV452784.1 | 3398670 | 3-scf00141 | 3 |
| AX-158006330 | 6 | 67.188 | KV452784.1 | 3400057 | 3-scf00141 | 3 |
| AX-158006337 | 6 | 67.188 | KV452784.1 | 3414650 | 3-scf00141 | 3 |
| AX-158006339 | 6 | 67.188 | KV452784.1 | 3423925 | 3-scf00141 | 3 |
| AX-158006341 | 6 | 67.188 | KV452784.1 | 3425968 | 3-scf00141 | 3 |
| AX-158006350 | 6 | 67.188 | KV452784.1 | 3443271 | 3-scf00141 | 3 |
| AX-158006353 | 6 | 67.188 | KV452784.1 | 3446260 | 3-scf00141 | 3 |
| AX-158006354 | 6 | 67.188 | KV452784.1 | 3446686 | 3-scf00141 | 3 |
| AX-158006356 | 6 | 67.188 | KV452784.1 | 3448874 | 3-scf00141 | 3 |
| AX-157714234 | 6 | 67.188 | KV452784.1 | 3457092 | 3-scf00141 | 3 |
| AX-157819687 | 6 | 67.188 | KV452784.1 | 3463200 | 3-scf00141 | 3 |
| AX-158006368 | 6 | 67.188 | KV452784.1 | 3469549 | 3-scf00141 | 3 |
| AX-158006370 | 6 | 67.188 | KV452784.1 | 3474435 | 3-scf00141 | 3 |
| AX-158006377 | 6 | 67.188 | KV452784.1 | 3485229 | 3-scf00141 | 3 |
| AX-158006378 | 6 | 67.188 | KV452784.1 | 3488778 | 3-scf00141 | 3 |
| AX-158006380 | 6 | 67.188 | KV452784.1 | 3492264 | 3-scf00141 | 3 |
| AX-157717291 | 6 | 67.188 | KV452784.1 | 3508806 | 3-scf00141 | 3 |
| AX-158006389 | 6 | 67.188 | KV452784.1 | 3511896 | 3-scf00141 | 3 |
| AX-158006396 | 6 | 67.188 | KV452784.1 | 3535576 | 3-scf00141 | 3 |
| AX-158006399 | 6 | 67.188 | KV452784.1 | 3542627 | 3-scf00141 | 3 |
| AX-158006407 | 6 | 67.188 | KV452784.1 | 3550522 | 3-scf00141 | 3 |
| AX-158006417 | 6 | 67.188 | KV452784.1 | 3564343 | 3-scf00141 | 3 |
| AX-158006418 | 6 | 67.188 | KV452784.1 | 3567991 | 3-scf00141 | 3 |
| AX-157819693 | 6 | 67.188 | KV452784.1 | 3577131 | 3-scf00141 | 3 |
| AX-158006420 | 6 | 67.188 | KV452784.1 | 3578528 | 3-scf00141 | 3 |
| AX-157748910 | 6 | 67.188 | KV452784.1 | 3587522 | 3-scf00141 | 3 |
| AX-158006424 | 6 | 67.188 | KV452784.1 | 3612277 | 3-scf00141 | 3 |
| AX-157708696 | 6 | 67.188 | KV452784.1 | 3614526 | 3-scf00141 | 3 |
| AX-158006427 | 6 | 67.188 | KV452784.1 | 3619952 | 3-scf00141 | 3 |
| AX-157856182 | 6 | 67.188 | KV452784.1 | 3633341 | 3-scf00141 | 3 |
| AX-158006430 | 6 | 67.188 | KV452784.1 | 3635216 | 3-scf00141 | 3 |

|              |   |        |            |         |            |   |
|--------------|---|--------|------------|---------|------------|---|
| AX-158006431 | 6 | 67.188 | KV452784.1 | 3647039 | 3-scf00141 | 3 |
| AX-158006436 | 6 | 67.188 | KV452784.1 | 3666694 | 3-scf00141 | 3 |
| AX-158006443 | 6 | 67.188 | KV452784.1 | 3712147 | 3-scf00141 | 3 |
| AX-158407609 | 6 | 67.188 | KV452784.1 | 3719760 | 3-scf00141 | 3 |
| AX-158006448 | 6 | 67.188 | KV452784.1 | 3740885 | 3-scf00141 | 3 |
| AX-157754220 | 6 | 67.188 | KV452784.1 | 4069961 | 3-scf00141 | 3 |
| AX-158006499 | 6 | 67.188 | KV452784.1 | 4070252 | 3-scf00141 | 3 |
| AX-158006509 | 6 | 67.188 | KV452784.1 | 4098580 | 3-scf00141 | 3 |
| AX-158006511 | 6 | 67.188 | KV452784.1 | 4099319 | 3-scf00141 | 3 |
| AX-158006516 | 6 | 67.188 | KV452784.1 | 4118372 | 3-scf00141 | 3 |
| AX-157718864 | 6 | 67.188 | KV452784.1 | 4121059 | 3-scf00141 | 3 |
| AX-158006518 | 6 | 67.188 | KV452784.1 | 4123340 | 3-scf00141 | 3 |
| AX-158006540 | 6 | 67.188 | KV452784.1 | 4234331 | 3-scf00141 | 3 |
| AX-158006543 | 6 | 67.188 | KV452784.1 | 4237981 | 3-scf00141 | 3 |
| AX-158006545 | 6 | 67.188 | KV452784.1 | 4238217 | 3-scf00141 | 3 |
| AX-158006546 | 6 | 67.188 | KV452784.1 | 4239830 | 3-scf00141 | 3 |
| AX-158006548 | 6 | 67.188 | KV452784.1 | 4240162 | 3-scf00141 | 3 |
| AX-158006549 | 6 | 67.188 | KV452784.1 | 4240442 | 3-scf00141 | 3 |
| AX-158006550 | 6 | 67.188 | KV452784.1 | 4244223 | 3-scf00141 | 3 |
| AX-158006556 | 6 | 67.188 | KV452784.1 | 4248818 | 3-scf00141 | 3 |
| AX-158006557 | 6 | 67.188 | KV452784.1 | 4251124 | 3-scf00141 | 3 |
| AX-158006558 | 6 | 67.188 | KV452784.1 | 4251731 | 3-scf00141 | 3 |
| AX-158006560 | 6 | 67.188 | KV452784.1 | 4251934 | 3-scf00141 | 3 |
| AX-157708664 | 6 | 67.188 | KV452784.1 | 4287948 | 3-scf00141 | 3 |
| AX-157708663 | 6 | 67.188 | KV452784.1 | 4288063 | 3-scf00141 | 3 |
| AX-158006587 | 6 | 67.188 | KV452784.1 | 4310328 | 3-scf00141 | 3 |
| AX-158006596 | 6 | 67.188 | KV452784.1 | 4323346 | 3-scf00141 | 3 |
| AX-158006615 | 6 | 67.188 | KV452784.1 | 4418912 | 3-scf00141 | 3 |
| AX-158006618 | 6 | 67.188 | KV452784.1 | 4431543 | 3-scf00141 | 3 |
| AX-158006621 | 6 | 67.188 | KV452784.1 | 4439309 | 3-scf00141 | 3 |
| AX-158006624 | 6 | 67.188 | KV452784.1 | 4443675 | 3-scf00141 | 3 |
| AX-157819710 | 6 | 67.188 | KV452784.1 | 4449492 | 3-scf00141 | 3 |
| AX-158006632 | 6 | 67.188 | KV452784.1 | 4462620 | 3-scf00141 | 3 |
| AX-158006634 | 6 | 67.188 | KV452784.1 | 4472098 | 3-scf00141 | 3 |
| AX-158006640 | 6 | 67.188 | KV452784.1 | 4483273 | 3-scf00141 | 3 |
| AX-158006651 | 6 | 67.188 | KV452784.1 | 4518166 | 3-scf00141 | 3 |
| AX-158006671 | 6 | 67.188 | KV452784.1 | 4572048 | 3-scf00141 | 3 |
| AX-158006672 | 6 | 67.188 | KV452784.1 | 4572796 | 3-scf00141 | 3 |
| AX-158006674 | 6 | 67.188 | KV452784.1 | 4575048 | 3-scf00141 | 3 |
| AX-158006678 | 6 | 67.188 | KV452784.1 | 4582070 | 3-scf00141 | 3 |
| AX-158006680 | 6 | 67.188 | KV452784.1 | 4583482 | 3-scf00141 | 3 |
| AX-158006683 | 6 | 67.188 | KV452784.1 | 4589070 | 3-scf00141 | 3 |
| AX-158006685 | 6 | 67.188 | KV452784.1 | 4592258 | 3-scf00141 | 3 |
| AX-157819715 | 6 | 67.188 | KV452784.1 | 4592317 | 3-scf00141 | 3 |
| AX-158006687 | 6 | 67.188 | KV452784.1 | 4599028 | 3-scf00141 | 3 |
| AX-157722810 | 6 | 67.188 | KV452784.1 | 4601130 | 3-scf00141 | 3 |
| AX-158006690 | 6 | 67.188 | KV452784.1 | 4603822 | 3-scf00141 | 3 |
| AX-158006692 | 6 | 67.188 | KV452784.1 | 4605733 | 3-scf00141 | 3 |
| AX-158405827 | 6 | 67.188 | KV452784.1 | 4615902 | 3-scf00141 | 3 |
| AX-158006694 | 6 | 67.188 | KV452784.1 | 4619663 | 3-scf00141 | 3 |
| AX-158006695 | 6 | 67.188 | KV452784.1 | 4625871 | 3-scf00141 | 3 |

|              |   |        |            |         |            |   |
|--------------|---|--------|------------|---------|------------|---|
| AX-158006697 | 6 | 67.188 | KV452784.1 | 4626996 | 3-scf00141 | 3 |
| AX-158006704 | 6 | 67.188 | KV452784.1 | 4632405 | 3-scf00141 | 3 |
| AX-158006705 | 6 | 67.188 | KV452784.1 | 4643190 | 3-scf00141 | 3 |
| AX-158006708 | 6 | 67.188 | KV452784.1 | 4647783 | 3-scf00141 | 3 |
| AX-157819716 | 6 | 67.188 | KV452784.1 | 4651690 | 3-scf00141 | 3 |
| AX-158006716 | 6 | 67.188 | KV452784.1 | 4685502 | 3-scf00141 | 3 |
| AX-158006724 | 6 | 67.188 | KV452784.1 | 4768435 | 3-scf00141 | 3 |
| AX-158006726 | 6 | 67.188 | KV452784.1 | 4787713 | 3-scf00141 | 3 |
| AX-158006731 | 6 | 67.188 | KV452784.1 | 4808085 | 3-scf00141 | 3 |
| AX-158006732 | 6 | 67.188 | KV452784.1 | 4812583 | 3-scf00141 | 3 |
| AX-157856186 | 6 | 67.188 | KV452784.1 | 4814657 | 3-scf00141 | 3 |
| AX-158006736 | 6 | 67.188 | KV452784.1 | 4818704 | 3-scf00141 | 3 |
| AX-158006738 | 6 | 67.188 | KV452784.1 | 4821646 | 3-scf00141 | 3 |
| AX-158006739 | 6 | 67.188 | KV452784.1 | 4834235 | 3-scf00141 | 3 |
| AX-158006744 | 6 | 67.188 | KV452784.1 | 4843623 | 3-scf00141 | 3 |
| AX-158006746 | 6 | 67.188 | KV452784.1 | 4851470 | 3-scf00141 | 3 |
| AX-158006752 | 6 | 67.188 | KV452784.1 | 4857335 | 3-scf00141 | 3 |
| AX-158006753 | 6 | 67.188 | KV452784.1 | 4857715 | 3-scf00141 | 3 |
| AX-158006758 | 6 | 67.188 | KV452784.1 | 4863049 | 3-scf00141 | 3 |
| AX-158006761 | 6 | 67.188 | KV452784.1 | 4867464 | 3-scf00141 | 3 |
| AX-158006762 | 6 | 67.188 | KV452784.1 | 4870734 | 3-scf00141 | 3 |
| AX-158006764 | 6 | 67.188 | KV452784.1 | 4873758 | 3-scf00141 | 3 |
| AX-158006765 | 6 | 67.188 | KV452784.1 | 4874109 | 3-scf00141 | 3 |
| AX-158006767 | 6 | 67.188 | KV452784.1 | 4874629 | 3-scf00141 | 3 |
| AX-158006769 | 6 | 67.188 | KV452784.1 | 4876476 | 3-scf00141 | 3 |
| AX-158006771 | 6 | 67.188 | KV452784.1 | 4881201 | 3-scf00141 | 3 |
| AX-158006772 | 6 | 67.188 | KV452784.1 | 4883670 | 3-scf00141 | 3 |
| AX-158006773 | 6 | 67.188 | KV452784.1 | 4890571 | 3-scf00141 | 3 |
| AX-158006775 | 6 | 67.188 | KV452784.1 | 4907763 | 3-scf00141 | 3 |
| AX-158006776 | 6 | 67.188 | KV452784.1 | 4915589 | 3-scf00141 | 3 |
| AX-158006777 | 6 | 67.188 | KV452784.1 | 4919663 | 3-scf00141 | 3 |
| AX-158006780 | 6 | 67.188 | KV452784.1 | 4931280 | 3-scf00141 | 3 |
| AX-158006784 | 6 | 67.188 | KV452784.1 | 4955560 | 3-scf00141 | 3 |
| AX-158006785 | 6 | 67.188 | KV452784.1 | 4974809 | 3-scf00141 | 3 |
| AX-158006786 | 6 | 67.188 | KV452784.1 | 4975886 | 3-scf00141 | 3 |
| AX-158006787 | 6 | 67.188 | KV452784.1 | 4979775 | 3-scf00141 | 3 |
| AX-158006790 | 6 | 67.188 | KV452784.1 | 4986432 | 3-scf00141 | 3 |
| AX-158006792 | 6 | 67.188 | KV452784.1 | 4993822 | 3-scf00141 | 3 |
| AX-158006795 | 6 | 67.188 | KV452784.1 | 5012753 | 3-scf00141 | 3 |
| AX-158006796 | 6 | 67.188 | KV452784.1 | 5017550 | 3-scf00141 | 3 |
| AX-158006798 | 6 | 67.188 | KV452784.1 | 5018449 | 3-scf00141 | 3 |
| AX-158390865 | 6 | 67.188 | KV452784.1 | 5035637 | 3-scf00141 | 3 |
| AX-158006804 | 6 | 67.188 | KV452784.1 | 5052288 | 3-scf00141 | 3 |
| AX-158006805 | 6 | 67.188 | KV452784.1 | 5055069 | 3-scf00141 | 3 |
| AX-158006808 | 6 | 67.188 | KV452784.1 | 5068428 | 3-scf00141 | 3 |
| AX-158006809 | 6 | 67.188 | KV452784.1 | 5071554 | 3-scf00141 | 3 |
| AX-158006810 | 6 | 67.188 | KV452784.1 | 5082842 | 3-scf00141 | 3 |
| AX-158006812 | 6 | 67.188 | KV452784.1 | 5085629 | 3-scf00141 | 3 |
| AX-158006813 | 6 | 67.188 | KV452784.1 | 5085863 | 3-scf00141 | 3 |
| AX-158006818 | 6 | 67.188 | KV452784.1 | 5100318 | 3-scf00141 | 3 |
| AX-158006821 | 6 | 67.188 | KV452784.1 | 5134986 | 3-scf00141 | 3 |



|              |   |        |            |         |            |   |
|--------------|---|--------|------------|---------|------------|---|
| AX-158006823 | 6 | 67.188 | KV452784.1 | 5135610 | 3-scf00141 | 3 |
| AX-158006827 | 6 | 67.188 | KV452784.1 | 5141589 | 3-scf00141 | 3 |
| AX-158006830 | 6 | 67.188 | KV452784.1 | 5153104 | 3-scf00141 | 3 |
| AX-157819718 | 6 | 67.188 | KV452784.1 | 5153638 | 3-scf00141 | 3 |
| AX-158006831 | 6 | 67.188 | KV452784.1 | 5155777 | 3-scf00141 | 3 |
| AX-158006832 | 6 | 67.188 | KV452784.1 | 5162784 | 3-scf00141 | 3 |
| AX-158006839 | 6 | 67.188 | KV452784.1 | 5199076 | 3-scf00141 | 3 |
| AX-158006840 | 6 | 67.188 | KV452784.1 | 5210881 | 3-scf00141 | 3 |
| AX-158006842 | 6 | 67.188 | KV452784.1 | 5212200 | 3-scf00141 | 3 |
| AX-158006844 | 6 | 67.188 | KV452784.1 | 5213389 | 3-scf00141 | 3 |
| AX-158006845 | 6 | 67.188 | KV452784.1 | 5216094 | 3-scf00141 | 3 |
| AX-158006847 | 6 | 67.188 | KV452784.1 | 5222479 | 3-scf00141 | 3 |
| AX-158006867 | 6 | 67.188 | KV452784.1 | 5290093 | 3-scf00141 | 3 |
| AX-158006876 | 6 | 67.188 | KV452784.1 | 5316041 | 3-scf00141 | 3 |
| AX-158006877 | 6 | 67.188 | KV452784.1 | 5320410 | 3-scf00141 | 3 |
| AX-157755606 | 6 | 67.188 | KV452784.1 | 5329620 | 3-scf00141 | 3 |
| AX-158390866 | 6 | 67.188 | KV452784.1 | 5332765 | 3-scf00141 | 3 |
| AX-158006883 | 6 | 67.188 | KV452784.1 | 5388098 | 3-scf00141 | 3 |
| AX-158006884 | 6 | 67.188 | KV452784.1 | 5388386 | 3-scf00141 | 3 |
| AX-158006887 | 6 | 67.188 | KV452784.1 | 5396062 | 3-scf00141 | 3 |
| AX-157856187 | 6 | 67.188 | KV452784.1 | 5411871 | 3-scf00141 | 3 |
| AX-158006899 | 6 | 67.188 | KV452784.1 | 5433720 | 3-scf00141 | 3 |
| AX-157749328 | 6 | 67.188 | KV452784.1 | 5442865 | 3-scf00141 | 3 |
| AX-158006919 | 6 | 67.188 | KV452784.1 | 5497239 | 3-scf00141 | 3 |
| AX-158006924 | 6 | 67.188 | KV452784.1 | 5499972 | 3-scf00141 | 3 |
| AX-158006933 | 6 | 67.188 | KV452784.1 | 5507103 | 3-scf00141 | 3 |
| AX-157744150 | 6 | 67.188 | KV452784.1 | 5510360 | 3-scf00141 | 3 |
| AX-158407656 | 6 | 67.188 | KV452784.1 | 5510782 | 3-scf00141 | 3 |
| AX-158006945 | 6 | 67.188 | KV452784.1 | 5514416 | 3-scf00141 | 3 |
| AX-158006965 | 6 | 67.188 | KV452784.1 | 5541231 | 3-scf00141 | 3 |
| AX-158006970 | 6 | 67.188 | KV452784.1 | 5544786 | 3-scf00141 | 3 |
| AX-158006973 | 6 | 67.188 | KV452784.1 | 5551253 | 3-scf00141 | 3 |
| AX-158006975 | 6 | 67.188 | KV452784.1 | 5552812 | 3-scf00141 | 3 |
| AX-158006982 | 6 | 67.188 | KV452784.1 | 5580057 | 3-scf00141 | 3 |
| AX-158006983 | 6 | 67.188 | KV452784.1 | 5583478 | 3-scf00141 | 3 |
| AX-158006987 | 6 | 67.188 | KV452784.1 | 5588464 | 3-scf00141 | 3 |
| AX-158006998 | 6 | 67.188 | KV452784.1 | 5613891 | 3-scf00141 | 3 |
| AX-157819741 | 6 | 67.188 | KV452784.1 | 5618141 | 3-scf00141 | 3 |
| AX-158007016 | 6 | 67.188 | KV452784.1 | 5655319 | 3-scf00141 | 3 |
| AX-158407663 | 6 | 67.188 | KV452784.1 | 5655927 | 3-scf00141 | 3 |
| AX-158007060 | 6 | 67.188 | KV452784.1 | 5730695 | 3-scf00141 | 3 |
| AX-158007061 | 6 | 67.188 | KV452784.1 | 5730840 | 3-scf00141 | 3 |
| AX-157741256 | 6 | 67.188 | KV452784.1 | 5732113 | 3-scf00141 | 3 |
| AX-158007065 | 6 | 67.188 | KV452784.1 | 5735354 | 3-scf00141 | 3 |
| AX-158007067 | 6 | 67.188 | KV452784.1 | 5735650 | 3-scf00141 | 3 |
| AX-158007069 | 6 | 67.188 | KV452784.1 | 5748140 | 3-scf00141 | 3 |
| AX-158007072 | 6 | 67.188 | KV452784.1 | 5755209 | 3-scf00141 | 3 |
| AX-158007146 | 6 | 67.188 | KV452784.1 | 5822197 | 3-scf00141 | 3 |
| AX-157725664 | 6 | 67.188 | KV452784.1 | 5860493 | 3-scf00141 | 3 |
| AX-158007230 | 6 | 67.188 | KV452784.1 | 5906536 | 3-scf00141 | 3 |
| AX-158007242 | 6 | 67.188 | KV452784.1 | 5915294 | 3-scf00141 | 3 |

|              |   |        |             |         |                 |    |
|--------------|---|--------|-------------|---------|-----------------|----|
| AX-158007254 | 6 | 67.188 | KV452784.1  | 5929830 | 3-scf00141      | 3  |
| AX-158007275 | 6 | 67.188 | KV452784.1  | 5947752 | 3-scf00141      | 3  |
| AX-158007276 | 6 | 67.188 | KV452784.1  | 5949312 | 3-scf00141      | 3  |
| AX-158007310 | 6 | 67.188 | KV452784.1  | 5990682 | 3-scf00141      | 3  |
| AX-157770980 | 6 | 67.188 | KV452784.1  | 6005366 | 3-scf00141      | 3  |
| AX-158007334 | 6 | 67.188 | KV452784.1  | 6008193 | 3-scf00141      | 3  |
| AX-158007344 | 6 | 67.188 | KV452784.1  | 6014195 | 3-scf00141      | 3  |
| AX-158007352 | 6 | 67.188 | KV452784.1  | 6019416 | 3-scf00141      | 3  |
| AX-158007361 | 6 | 67.188 | KV452784.1  | 6031253 | 3-scf00141      | 3  |
| AX-158007412 | 6 | 67.188 | KV452784.1  | 6088209 | 3-scf00141      | 3  |
| AX-158007540 | 6 | 67.188 | KV452784.1  | 6292974 | 3-scf00141      | 3  |
| AX-158007545 | 6 | 67.188 | KV452784.1  | 6298253 | 3-scf00141      | 3  |
| AX-158007547 | 6 | 67.188 | KV452784.1  | 6302433 | 3-scf00141      | 3  |
| AX-158007583 | 6 | 67.188 | KV452784.1  | 6348281 | 3-scf00141      | 3  |
| AX-157819794 | 6 | 67.188 | KV452784.1  | 6376494 | 3-scf00141      | 3  |
| AX-158007597 | 6 | 67.188 | KV452784.1  | 6381440 | 3-scf00141      | 3  |
| AX-158007618 | 6 | 67.188 | KV452784.1  | 6410879 | 3-scf00141      | 3  |
| AX-158007624 | 6 | 67.188 | KV452784.1  | 6423434 | 3-scf00141      | 3  |
| AX-158007626 | 6 | 67.188 | KV452784.1  | 6426828 | 3-scf00141      | 3  |
| AX-158007630 | 6 | 67.188 | KV452784.1  | 6430773 | 3-scf00141      | 3  |
| AX-158007648 | 6 | 67.188 | KV452784.1  | 6467179 | 3-scf00141      | 3  |
| AX-157819798 | 6 | 67.188 | KV452784.1  | 6473015 | 3-scf00141      | 3  |
| AX-158007714 | 6 | 67.188 | KV452784.1  | 6540545 | 3-scf00141      | 3  |
| AX-158390889 | 6 | 67.188 | KV452784.1  | 6560973 | 3-scf00141      | 3  |
| AX-158007733 | 6 | 67.188 | KV452784.1  | 6561352 | 3-scf00141      | 3  |
| AX-157819809 | 6 | 67.188 | KV452784.1  | 6561513 | 3-scf00141      | 3  |
| AX-157819824 | 6 | 67.188 | KV452784.1  | 6639063 | 3-scf00141      | 3  |
| AX-158007848 | 6 | 67.188 | KV452784.1  | 6707604 | 3-scf00141      | 3  |
| AX-158007850 | 6 | 67.188 | KV452784.1  | 6711259 | 3-scf00141      | 3  |
| AX-158007856 | 6 | 67.188 | KV452784.1  | 6712831 | 3-scf00141      | 3  |
| AX-157870041 | 6 | 67.188 | KV452784.1  | 6713958 | 3-scf00141      | 3  |
| AX-158007860 | 6 | 67.188 | KV452784.1  | 6717462 | 3-scf00141      | 3  |
| AX-157819836 | 6 | 67.188 | KV452784.1  | 6717695 | 3-scf00141      | 3  |
| AX-158007923 | 6 | 67.188 | KV452784.1  | 6786661 | 3-scf00141      | 3  |
| AX-158007958 | 6 | 67.188 | KV452784.1  | 6848407 | 3-scf00141      | 3  |
| AX-158007989 | 6 | 67.188 | KV452784.1  | 6880603 | 3-scf00141      | 3  |
| AX-158007992 | 6 | 67.188 | KV452784.1  | 6885244 | 3-scf00141      | 3  |
| AX-158008071 | 6 | 67.188 | KV452784.1  | 6983743 | 3-scf00141      | 3  |
| AX-157819873 | 6 | 67.188 | KV452784.1  | 7011258 | 3-scf00141      | 3  |
| AX-157719166 | 6 | 67.188 | KV452784.1  | 7061938 | 3-scf00141      | 3  |
| AX-158008132 | 6 | 67.188 | KV452784.1  | 7072357 | 3-scf00141      | 3  |
| AX-157884818 | 6 | 67.188 | KV452784.1  | 7733383 | 3-scf00141      | 3  |
| AX-158407719 | 6 | 67.188 | KV452784.1  | 7768147 | 3-scf00141      | 3  |
| AX-158009352 | 6 | 67.188 | KV452784.1  | 8399781 | 3-scf00141      | 3  |
| AX-158009432 | 6 | 67.188 | KV452784.1  | 8499049 | 3-scf00141      | 3  |
| AX-157702068 | 6 | 67.188 | DX089679.1  | 284     | -HORI212 lctali | UN |
| AX-157704766 | 6 | 67.188 | 3ML01027318 | 1213    | scf02924_1      | UN |
| AX-157706690 | 6 | 67.188 | 3ML01032741 | 123     | scf08369_1      | UN |
| AX-157819750 | 6 | 67.252 | KV452784.1  | 5726417 | 3-scf00141      | 3  |
| AX-158007114 | 6 | 67.298 | KV452784.1  | 5802937 | 3-scf00141      | 3  |
| AX-158007119 | 6 | 67.298 | KV452784.1  | 5806225 | 3-scf00141      | 3  |

|              |   |        |            |         |            |   |
|--------------|---|--------|------------|---------|------------|---|
| AX-158007180 | 6 | 67.347 | KV452784.1 | 5850534 | 3-scf00141 | 3 |
| AX-157819607 | 6 | 67.408 | KV452784.1 | 2222411 | 3-scf00141 | 3 |
| AX-158005213 | 6 | 67.408 | KV452784.1 | 2237252 | 3-scf00141 | 3 |
| AX-158005297 | 6 | 67.408 | KV452784.1 | 2324084 | 3-scf00141 | 3 |
| AX-158005367 | 6 | 67.408 | KV452784.1 | 2390080 | 3-scf00141 | 3 |
| AX-158390837 | 6 | 67.408 | KV452784.1 | 2518868 | 3-scf00141 | 3 |
| AX-158005512 | 6 | 67.408 | KV452784.1 | 2523577 | 3-scf00141 | 3 |
| AX-158005560 | 6 | 67.408 | KV452784.1 | 2575245 | 3-scf00141 | 3 |
| AX-157870010 | 6 | 67.408 | KV452784.1 | 2862530 | 3-scf00141 | 3 |
| AX-158005941 | 6 | 67.408 | KV452784.1 | 3021315 | 3-scf00141 | 3 |
| AX-158006163 | 6 | 67.408 | KV452784.1 | 3186919 | 3-scf00141 | 3 |
| AX-158006207 | 6 | 67.408 | KV452784.1 | 3223712 | 3-scf00141 | 3 |
| AX-158006227 | 6 | 67.408 | KV452784.1 | 3239696 | 3-scf00141 | 3 |
| AX-158006264 | 6 | 67.408 | KV452784.1 | 3306540 | 3-scf00141 | 3 |
| AX-158006411 | 6 | 67.408 | KV452784.1 | 3552170 | 3-scf00141 | 3 |
| AX-158006415 | 6 | 67.408 | KV452784.1 | 3557604 | 3-scf00141 | 3 |
| AX-158006581 | 6 | 67.408 | KV452784.1 | 4291495 | 3-scf00141 | 3 |
| AX-158006584 | 6 | 67.408 | KV452784.1 | 4299344 | 3-scf00141 | 3 |
| AX-158006699 | 6 | 67.408 | KV452784.1 | 4627853 | 3-scf00141 | 3 |
| AX-158006722 | 6 | 67.408 | KV452784.1 | 4742229 | 3-scf00141 | 3 |
| AX-158006903 | 6 | 67.408 | KV452784.1 | 5435959 | 3-scf00141 | 3 |
| AX-157819735 | 6 | 67.408 | KV452784.1 | 5540913 | 3-scf00141 | 3 |
| AX-158006966 | 6 | 67.408 | KV452784.1 | 5541633 | 3-scf00141 | 3 |
| AX-157819738 | 6 | 67.408 | KV452784.1 | 5592097 | 3-scf00141 | 3 |
| AX-158006991 | 6 | 67.408 | KV452784.1 | 5593537 | 3-scf00141 | 3 |
| AX-158007008 | 6 | 67.408 | KV452784.1 | 5635166 | 3-scf00141 | 3 |
| AX-157876197 | 6 | 67.408 | KV452784.1 | 5646104 | 3-scf00141 | 3 |
| AX-158007011 | 6 | 67.408 | KV452784.1 | 5649436 | 3-scf00141 | 3 |
| AX-158007120 | 6 | 67.408 | KV452784.1 | 5806584 | 3-scf00141 | 3 |
| AX-157819767 | 6 | 67.408 | KV452784.1 | 5877032 | 3-scf00141 | 3 |
| AX-157819769 | 6 | 67.408 | KV452784.1 | 5882560 | 3-scf00141 | 3 |
| AX-157819774 | 6 | 67.408 | KV452784.1 | 5889560 | 3-scf00141 | 3 |
| AX-158007213 | 6 | 67.408 | KV452784.1 | 5891562 | 3-scf00141 | 3 |
| AX-158007229 | 6 | 67.408 | KV452784.1 | 5904930 | 3-scf00141 | 3 |
| AX-158007232 | 6 | 67.408 | KV452784.1 | 5908818 | 3-scf00141 | 3 |
| AX-158007233 | 6 | 67.408 | KV452784.1 | 5909183 | 3-scf00141 | 3 |
| AX-158007234 | 6 | 67.408 | KV452784.1 | 5910483 | 3-scf00141 | 3 |
| AX-158007235 | 6 | 67.408 | KV452784.1 | 5911511 | 3-scf00141 | 3 |
| AX-158007236 | 6 | 67.408 | KV452784.1 | 5911806 | 3-scf00141 | 3 |
| AX-158007239 | 6 | 67.408 | KV452784.1 | 5913438 | 3-scf00141 | 3 |
| AX-158007240 | 6 | 67.408 | KV452784.1 | 5914368 | 3-scf00141 | 3 |
| AX-157819776 | 6 | 67.408 | KV452784.1 | 5919505 | 3-scf00141 | 3 |
| AX-157819779 | 6 | 67.408 | KV452784.1 | 5925471 | 3-scf00141 | 3 |
| AX-158007273 | 6 | 67.408 | KV452784.1 | 5946437 | 3-scf00141 | 3 |
| AX-158007290 | 6 | 67.408 | KV452784.1 | 5964759 | 3-scf00141 | 3 |
| AX-158007292 | 6 | 67.408 | KV452784.1 | 5970882 | 3-scf00141 | 3 |
| AX-158007298 | 6 | 67.408 | KV452784.1 | 5973666 | 3-scf00141 | 3 |
| AX-158007299 | 6 | 67.408 | KV452784.1 | 5974389 | 3-scf00141 | 3 |
| AX-158007302 | 6 | 67.408 | KV452784.1 | 5978389 | 3-scf00141 | 3 |
| AX-158007303 | 6 | 67.408 | KV452784.1 | 5980808 | 3-scf00141 | 3 |
| AX-158007311 | 6 | 67.408 | KV452784.1 | 5991245 | 3-scf00141 | 3 |

|              |   |        |            |         |            |   |
|--------------|---|--------|------------|---------|------------|---|
| AX-158007312 | 6 | 67.408 | KV452784.1 | 5991763 | 3-scf00141 | 3 |
| AX-158007313 | 6 | 67.408 | KV452784.1 | 5991939 | 3-scf00141 | 3 |
| AX-158007323 | 6 | 67.408 | KV452784.1 | 6002681 | 3-scf00141 | 3 |
| AX-158007326 | 6 | 67.408 | KV452784.1 | 6003380 | 3-scf00141 | 3 |
| AX-158007345 | 6 | 67.408 | KV452784.1 | 6014992 | 3-scf00141 | 3 |
| AX-158007359 | 6 | 67.408 | KV452784.1 | 6030751 | 3-scf00141 | 3 |
| AX-158007362 | 6 | 67.408 | KV452784.1 | 6035429 | 3-scf00141 | 3 |
| AX-158007365 | 6 | 67.408 | KV452784.1 | 6036776 | 3-scf00141 | 3 |
| AX-158007370 | 6 | 67.408 | KV452784.1 | 6041329 | 3-scf00141 | 3 |
| AX-158007396 | 6 | 67.408 | KV452784.1 | 6066805 | 3-scf00141 | 3 |
| AX-158007398 | 6 | 67.408 | KV452784.1 | 6067583 | 3-scf00141 | 3 |
| AX-158007402 | 6 | 67.408 | KV452784.1 | 6073366 | 3-scf00141 | 3 |
| AX-158007406 | 6 | 67.408 | KV452784.1 | 6075583 | 3-scf00141 | 3 |
| AX-158007415 | 6 | 67.408 | KV452784.1 | 6095129 | 3-scf00141 | 3 |
| AX-158007418 | 6 | 67.408 | KV452784.1 | 6097316 | 3-scf00141 | 3 |
| AX-158007451 | 6 | 67.408 | KV452784.1 | 6165944 | 3-scf00141 | 3 |
| AX-157819786 | 6 | 67.408 | KV452784.1 | 6168199 | 3-scf00141 | 3 |
| AX-158007490 | 6 | 67.408 | KV452784.1 | 6208940 | 3-scf00141 | 3 |
| AX-157703957 | 6 | 67.408 | KV452784.1 | 6233144 | 3-scf00141 | 3 |
| AX-157819814 | 6 | 67.408 | KV452784.1 | 6593185 | 3-scf00141 | 3 |
| AX-158007773 | 6 | 67.408 | KV452784.1 | 6601399 | 3-scf00141 | 3 |
| AX-157745626 | 6 | 67.408 | KV452784.1 | 6601687 | 3-scf00141 | 3 |
| AX-157819843 | 6 | 67.408 | KV452784.1 | 6734316 | 3-scf00141 | 3 |
| AX-158005991 | 6 | 67.519 | KV452784.1 | 3056747 | 3-scf00141 | 3 |
| AX-157819717 | 6 | 67.519 | KV452784.1 | 5143487 | 3-scf00141 | 3 |
| AX-157819753 | 6 | 67.519 | KV452784.1 | 5734101 | 3-scf00141 | 3 |
| AX-158007338 | 6 | 67.519 | KV452784.1 | 6010347 | 3-scf00141 | 3 |
| AX-158007343 | 6 | 67.519 | KV452784.1 | 6013585 | 3-scf00141 | 3 |
| AX-158007368 | 6 | 67.519 | KV452784.1 | 6040410 | 3-scf00141 | 3 |
| AX-158007369 | 6 | 67.519 | KV452784.1 | 6041014 | 3-scf00141 | 3 |
| AX-158007429 | 6 | 67.519 | KV452784.1 | 6131040 | 3-scf00141 | 3 |
| AX-158007450 | 6 | 67.519 | KV452784.1 | 6165367 | 3-scf00141 | 3 |
| AX-157876206 | 6 | 67.519 | KV452784.1 | 6187249 | 3-scf00141 | 3 |
| AX-157876207 | 6 | 67.519 | KV452784.1 | 6191598 | 3-scf00141 | 3 |
| AX-158007474 | 6 | 67.519 | KV452784.1 | 6195837 | 3-scf00141 | 3 |
| AX-158007480 | 6 | 67.519 | KV452784.1 | 6201263 | 3-scf00141 | 3 |
| AX-158007488 | 6 | 67.519 | KV452784.1 | 6206880 | 3-scf00141 | 3 |
| AX-158007492 | 6 | 67.519 | KV452784.1 | 6213384 | 3-scf00141 | 3 |
| AX-158007506 | 6 | 67.519 | KV452784.1 | 6226964 | 3-scf00141 | 3 |
| AX-158007508 | 6 | 67.519 | KV452784.1 | 6228162 | 3-scf00141 | 3 |
| AX-158007513 | 6 | 67.519 | KV452784.1 | 6238790 | 3-scf00141 | 3 |
| AX-158007515 | 6 | 67.519 | KV452784.1 | 6245130 | 3-scf00141 | 3 |
| AX-158007517 | 6 | 67.519 | KV452784.1 | 6247802 | 3-scf00141 | 3 |
| AX-158007518 | 6 | 67.519 | KV452784.1 | 6249313 | 3-scf00141 | 3 |
| AX-158007519 | 6 | 67.519 | KV452784.1 | 6250456 | 3-scf00141 | 3 |
| AX-158007520 | 6 | 67.519 | KV452784.1 | 6253913 | 3-scf00141 | 3 |
| AX-158007523 | 6 | 67.519 | KV452784.1 | 6258810 | 3-scf00141 | 3 |
| AX-158007524 | 6 | 67.519 | KV452784.1 | 6259239 | 3-scf00141 | 3 |
| AX-157819577 | 6 | 67.629 | KV452784.1 | 1889175 | 3-scf00141 | 3 |
| AX-158004888 | 6 | 67.629 | KV452784.1 | 1890596 | 3-scf00141 | 3 |
| AX-158004910 | 6 | 67.629 | KV452784.1 | 1909097 | 3-scf00141 | 3 |

|              |   |        |            |         |            |   |
|--------------|---|--------|------------|---------|------------|---|
| AX-158005089 | 6 | 67.629 | KV452784.1 | 2106040 | 3-scf00141 | 3 |
| AX-158005137 | 6 | 67.629 | KV452784.1 | 2150140 | 3-scf00141 | 3 |
| AX-158005374 | 6 | 67.629 | KV452784.1 | 2404035 | 3-scf00141 | 3 |
| AX-158005455 | 6 | 67.629 | KV452784.1 | 2475156 | 3-scf00141 | 3 |
| AX-158005564 | 6 | 67.629 | KV452784.1 | 2580981 | 3-scf00141 | 3 |
| AX-158005565 | 6 | 67.629 | KV452784.1 | 2581206 | 3-scf00141 | 3 |
| AX-158005570 | 6 | 67.629 | KV452784.1 | 2583810 | 3-scf00141 | 3 |
| AX-158005587 | 6 | 67.629 | KV452784.1 | 2604260 | 3-scf00141 | 3 |
| AX-158005867 | 6 | 67.629 | KV452784.1 | 2960337 | 3-scf00141 | 3 |
| AX-158006250 | 6 | 67.629 | KV452784.1 | 3279174 | 3-scf00141 | 3 |
| AX-157819672 | 6 | 67.629 | KV452784.1 | 3329950 | 3-scf00141 | 3 |
| AX-157819673 | 6 | 67.629 | KV452784.1 | 3332591 | 3-scf00141 | 3 |
| AX-158006333 | 6 | 67.629 | KV452784.1 | 3409708 | 3-scf00141 | 3 |
| AX-158006406 | 6 | 67.629 | KV452784.1 | 3549619 | 3-scf00141 | 3 |
| AX-158006451 | 6 | 67.629 | KV452784.1 | 3760012 | 3-scf00141 | 3 |
| AX-158006452 | 6 | 67.629 | KV452784.1 | 3760792 | 3-scf00141 | 3 |
| AX-157856184 | 6 | 67.629 | KV452784.1 | 3770651 | 3-scf00141 | 3 |
| AX-158006458 | 6 | 67.629 | KV452784.1 | 3809844 | 3-scf00141 | 3 |
| AX-158006461 | 6 | 67.629 | KV452784.1 | 3842382 | 3-scf00141 | 3 |
| AX-158006467 | 6 | 67.629 | KV452784.1 | 3932813 | 3-scf00141 | 3 |
| AX-158006476 | 6 | 67.629 | KV452784.1 | 3970233 | 3-scf00141 | 3 |
| AX-158006677 | 6 | 67.629 | KV452784.1 | 4577429 | 3-scf00141 | 3 |
| AX-158006721 | 6 | 67.629 | KV452784.1 | 4732068 | 3-scf00141 | 3 |
| AX-158006748 | 6 | 67.629 | KV452784.1 | 4856432 | 3-scf00141 | 3 |
| AX-158006807 | 6 | 67.629 | KV452784.1 | 5059921 | 3-scf00141 | 3 |
| AX-158006824 | 6 | 67.629 | KV452784.1 | 5139218 | 3-scf00141 | 3 |
| AX-158006828 | 6 | 67.629 | KV452784.1 | 5145327 | 3-scf00141 | 3 |
| AX-158006833 | 6 | 67.629 | KV452784.1 | 5167620 | 3-scf00141 | 3 |
| AX-158006871 | 6 | 67.629 | KV452784.1 | 5302482 | 3-scf00141 | 3 |
| AX-157724268 | 6 | 67.629 | KV452784.1 | 5458991 | 3-scf00141 | 3 |
| AX-158006958 | 6 | 67.629 | KV452784.1 | 5520863 | 3-scf00141 | 3 |
| AX-158006969 | 6 | 67.629 | KV452784.1 | 5543420 | 3-scf00141 | 3 |
| AX-157870028 | 6 | 67.629 | KV452784.1 | 5729010 | 3-scf00141 | 3 |
| AX-158007170 | 6 | 67.629 | KV452784.1 | 5845172 | 3-scf00141 | 3 |
| AX-158007316 | 6 | 67.629 | KV452784.1 | 5994557 | 3-scf00141 | 3 |
| AX-158007405 | 6 | 67.629 | KV452784.1 | 6074934 | 3-scf00141 | 3 |
| AX-158007468 | 6 | 67.629 | KV452784.1 | 6188612 | 3-scf00141 | 3 |
| AX-158007470 | 6 | 67.629 | KV452784.1 | 6189873 | 3-scf00141 | 3 |
| AX-158007525 | 6 | 67.629 | KV452784.1 | 6261809 | 3-scf00141 | 3 |
| AX-158007526 | 6 | 67.629 | KV452784.1 | 6266758 | 3-scf00141 | 3 |
| AX-158007532 | 6 | 67.629 | KV452784.1 | 6280765 | 3-scf00141 | 3 |
| AX-158007534 | 6 | 67.629 | KV452784.1 | 6281411 | 3-scf00141 | 3 |
| AX-158007535 | 6 | 67.629 | KV452784.1 | 6282548 | 3-scf00141 | 3 |
| AX-158007542 | 6 | 67.629 | KV452784.1 | 6295012 | 3-scf00141 | 3 |
| AX-158390883 | 6 | 67.629 | KV452784.1 | 6295635 | 3-scf00141 | 3 |
| AX-158007556 | 6 | 67.629 | KV452784.1 | 6316567 | 3-scf00141 | 3 |
| AX-158007560 | 6 | 67.629 | KV452784.1 | 6319966 | 3-scf00141 | 3 |
| AX-158007563 | 6 | 67.629 | KV452784.1 | 6324198 | 3-scf00141 | 3 |
| AX-157819788 | 6 | 67.629 | KV452784.1 | 6328753 | 3-scf00141 | 3 |
| AX-158007569 | 6 | 67.629 | KV452784.1 | 6334340 | 3-scf00141 | 3 |
| AX-158007576 | 6 | 67.629 | KV452784.1 | 6340237 | 3-scf00141 | 3 |

|              |   |        |             |         |            |    |
|--------------|---|--------|-------------|---------|------------|----|
| AX-158007581 | 6 | 67.629 | KV452784.1  | 6347247 | 3-scf00141 | 3  |
| AX-158007584 | 6 | 67.629 | KV452784.1  | 6353563 | 3-scf00141 | 3  |
| AX-158007585 | 6 | 67.629 | KV452784.1  | 6354099 | 3-scf00141 | 3  |
| AX-157856194 | 6 | 67.629 | KV452784.1  | 6356224 | 3-scf00141 | 3  |
| AX-158007595 | 6 | 67.629 | KV452784.1  | 6367170 | 3-scf00141 | 3  |
| AX-157819792 | 6 | 67.629 | KV452784.1  | 6368095 | 3-scf00141 | 3  |
| AX-157713952 | 6 | 67.629 | KV452784.1  | 6368289 | 3-scf00141 | 3  |
| AX-157819795 | 6 | 67.629 | KV452784.1  | 6380444 | 3-scf00141 | 3  |
| AX-158379663 | 6 | 67.629 | KV452784.1  | 6387516 | 3-scf00141 | 3  |
| AX-158007604 | 6 | 67.629 | KV452784.1  | 6391457 | 3-scf00141 | 3  |
| AX-158007605 | 6 | 67.629 | KV452784.1  | 6395994 | 3-scf00141 | 3  |
| AX-158007609 | 6 | 67.629 | KV452784.1  | 6399820 | 3-scf00141 | 3  |
| AX-158007610 | 6 | 67.629 | KV452784.1  | 6401444 | 3-scf00141 | 3  |
| AX-158007612 | 6 | 67.629 | KV452784.1  | 6402650 | 3-scf00141 | 3  |
| AX-158007615 | 6 | 67.629 | KV452784.1  | 6407294 | 3-scf00141 | 3  |
| AX-158007616 | 6 | 67.629 | KV452784.1  | 6407691 | 3-scf00141 | 3  |
| AX-158007620 | 6 | 67.629 | KV452784.1  | 6415137 | 3-scf00141 | 3  |
| AX-158007623 | 6 | 67.629 | KV452784.1  | 6421076 | 3-scf00141 | 3  |
| AX-158007625 | 6 | 67.629 | KV452784.1  | 6425021 | 3-scf00141 | 3  |
| AX-158007628 | 6 | 67.629 | KV452784.1  | 6429128 | 3-scf00141 | 3  |
| AX-157774270 | 6 | 67.629 | KV452784.1  | 6480790 | 3-scf00141 | 3  |
| AX-158007680 | 6 | 67.629 | KV452784.1  | 6510696 | 3-scf00141 | 3  |
| AX-158007791 | 6 | 67.629 | KV452784.1  | 6632840 | 3-scf00141 | 3  |
| AX-157746801 | 6 | 67.629 | KV452784.1  | 6632998 | 3-scf00141 | 3  |
| AX-157819823 | 6 | 67.629 | KV452784.1  | 6633626 | 3-scf00141 | 3  |
| AX-158007912 | 6 | 67.629 | KV452784.1  | 6776970 | 3-scf00141 | 3  |
| AX-158008011 | 6 | 67.629 | KV452784.1  | 6910662 | 3-scf00141 | 3  |
| AX-158008078 | 6 | 67.629 | KV452784.1  | 7000413 | 3-scf00141 | 3  |
| AX-158008136 | 6 | 67.629 | KV452784.1  | 7074101 | 3-scf00141 | 3  |
| AX-157819941 | 6 | 67.629 | KV452784.1  | 8061718 | 3-scf00141 | 3  |
| AX-158009385 | 6 | 67.629 | KV452784.1  | 8438106 | 3-scf00141 | 3  |
| AX-158009399 | 6 | 67.629 | KV452784.1  | 8449487 | 3-scf00141 | 3  |
| AX-157689817 | 6 | 67.629 | 3ML01032868 | 454     | scf08499_1 | UN |
| AX-158007631 | 6 | 67.739 | KV452784.1  | 6432942 | 3-scf00141 | 3  |
| AX-158007633 | 6 | 67.795 | KV452784.1  | 6434328 | 3-scf00141 | 3  |
| AX-158003942 | 6 | 67.849 | KV452784.1  | 402145  | 3-scf00141 | 3  |
| AX-158004201 | 6 | 67.849 | KV452784.1  | 827608  | 3-scf00141 | 3  |
| AX-158004451 | 6 | 67.849 | KV452784.1  | 1362238 | 3-scf00141 | 3  |
| AX-158004651 | 6 | 67.849 | KV452784.1  | 1645519 | 3-scf00141 | 3  |
| AX-158004696 | 6 | 67.849 | KV452784.1  | 1697532 | 3-scf00141 | 3  |
| AX-158004713 | 6 | 67.849 | KV452784.1  | 1714854 | 3-scf00141 | 3  |
| AX-158004807 | 6 | 67.849 | KV452784.1  | 1820642 | 3-scf00141 | 3  |
| AX-158006310 | 6 | 67.849 | KV452784.1  | 3379132 | 3-scf00141 | 3  |
| AX-158006743 | 6 | 67.849 | KV452784.1  | 4841189 | 3-scf00141 | 3  |
| AX-158007641 | 6 | 67.849 | KV452784.1  | 6456028 | 3-scf00141 | 3  |
| AX-158007642 | 6 | 67.849 | KV452784.1  | 6457630 | 3-scf00141 | 3  |
| AX-158007644 | 6 | 67.849 | KV452784.1  | 6458586 | 3-scf00141 | 3  |
| AX-158007647 | 6 | 67.849 | KV452784.1  | 6460936 | 3-scf00141 | 3  |
| AX-157819797 | 6 | 67.849 | KV452784.1  | 6471689 | 3-scf00141 | 3  |
| AX-158007663 | 6 | 67.849 | KV452784.1  | 6478635 | 3-scf00141 | 3  |
| AX-158007667 | 6 | 67.849 | KV452784.1  | 6483487 | 3-scf00141 | 3  |

|              |   |        |            |         |                |    |
|--------------|---|--------|------------|---------|----------------|----|
| AX-158007700 | 6 | 67.849 | KV452784.1 | 6523214 | 3-scf00141     | 3  |
| AX-157717663 | 6 | 67.849 | KV452784.1 | 6748029 | 3-scf00141     | 3  |
| AX-158007934 | 6 | 67.849 | KV452784.1 | 6812261 | 3-scf00141     | 3  |
| AX-158008141 | 6 | 67.849 | KV452784.1 | 7079276 | 3-scf00141     | 3  |
| AX-157819890 | 6 | 67.849 | KV452784.1 | 7162286 | 3-scf00141     | 3  |
| AX-158008272 | 6 | 67.849 | KV452784.1 | 7285554 | 3-scf00141     | 3  |
| AX-158008308 | 6 | 67.849 | KV452784.1 | 7339222 | 3-scf00141     | 3  |
| AX-157743208 | 6 | 67.849 | KV452784.1 | 7828312 | 3-scf00141     | 3  |
| AX-158008810 | 6 | 67.849 | KV452784.1 | 7884153 | 3-scf00141     | 3  |
| AX-157711467 | 6 | 67.849 | KV452784.1 | 7984915 | 3-scf00141     | 3  |
| AX-157714703 | 6 | 67.849 | KV452784.1 | 7989036 | 3-scf00141     | 3  |
| AX-158009191 | 6 | 67.849 | KV452784.1 | 8270226 | 3-scf00141     | 3  |
| AX-157702144 | 6 | 67.849 | DX090191.1 | 161     | 4ORI212 lctalt | UN |
| AX-158007679 | 6 | 67.865 | KV452784.1 | 6508706 | 3-scf00141     | 3  |
| AX-157755613 | 6 | 67.865 | KV452784.1 | 6882582 | 3-scf00141     | 3  |
| AX-158008436 | 6 | 67.865 | KV452784.1 | 7556377 | 3-scf00141     | 3  |
| AX-158407575 | 6 | 67.959 | KV452784.1 | 1510865 | 3-scf00141     | 3  |
| AX-158005090 | 6 | 67.959 | KV452784.1 | 2110190 | 3-scf00141     | 3  |
| AX-158005101 | 6 | 67.959 | KV452784.1 | 2122885 | 3-scf00141     | 3  |
| AX-158005198 | 6 | 67.959 | KV452784.1 | 2218187 | 3-scf00141     | 3  |
| AX-158005267 | 6 | 67.959 | KV452784.1 | 2301152 | 3-scf00141     | 3  |
| AX-158005385 | 6 | 67.959 | KV452784.1 | 2417543 | 3-scf00141     | 3  |
| AX-158005387 | 6 | 67.959 | KV452784.1 | 2418748 | 3-scf00141     | 3  |
| AX-158407590 | 6 | 67.959 | KV452784.1 | 2452650 | 3-scf00141     | 3  |
| AX-158005475 | 6 | 67.959 | KV452784.1 | 2487027 | 3-scf00141     | 3  |
| AX-158005480 | 6 | 67.959 | KV452784.1 | 2491513 | 3-scf00141     | 3  |
| AX-158005497 | 6 | 67.959 | KV452784.1 | 2504890 | 3-scf00141     | 3  |
| AX-158005498 | 6 | 67.959 | KV452784.1 | 2505777 | 3-scf00141     | 3  |
| AX-158005507 | 6 | 67.959 | KV452784.1 | 2514968 | 3-scf00141     | 3  |
| AX-157753741 | 6 | 67.959 | KV452784.1 | 2661936 | 3-scf00141     | 3  |
| AX-158005678 | 6 | 67.959 | KV452784.1 | 2698577 | 3-scf00141     | 3  |
| AX-158005706 | 6 | 67.959 | KV452784.1 | 2730092 | 3-scf00141     | 3  |
| AX-158005715 | 6 | 67.959 | KV452784.1 | 2744806 | 3-scf00141     | 3  |
| AX-158005723 | 6 | 67.959 | KV452784.1 | 2762667 | 3-scf00141     | 3  |
| AX-158005757 | 6 | 67.959 | KV452784.1 | 2827922 | 3-scf00141     | 3  |
| AX-158005761 | 6 | 67.959 | KV452784.1 | 2847545 | 3-scf00141     | 3  |
| AX-158006050 | 6 | 67.959 | KV452784.1 | 3098816 | 3-scf00141     | 3  |
| AX-158006051 | 6 | 67.959 | KV452784.1 | 3098989 | 3-scf00141     | 3  |
| AX-157819658 | 6 | 67.959 | KV452784.1 | 3099324 | 3-scf00141     | 3  |
| AX-157819659 | 6 | 67.959 | KV452784.1 | 3107517 | 3-scf00141     | 3  |
| AX-158006090 | 6 | 67.959 | KV452784.1 | 3130302 | 3-scf00141     | 3  |
| AX-158006091 | 6 | 67.959 | KV452784.1 | 3131418 | 3-scf00141     | 3  |
| AX-158006111 | 6 | 67.959 | KV452784.1 | 3143476 | 3-scf00141     | 3  |
| AX-158006138 | 6 | 67.959 | KV452784.1 | 3162935 | 3-scf00141     | 3  |
| AX-158006198 | 6 | 67.959 | KV452784.1 | 3212313 | 3-scf00141     | 3  |
| AX-158006321 | 6 | 67.959 | KV452784.1 | 3386563 | 3-scf00141     | 3  |
| AX-157819690 | 6 | 67.959 | KV452784.1 | 3531526 | 3-scf00141     | 3  |
| AX-157819691 | 6 | 67.959 | KV452784.1 | 3531610 | 3-scf00141     | 3  |
| AX-158006412 | 6 | 67.959 | KV452784.1 | 3552545 | 3-scf00141     | 3  |
| AX-158006439 | 6 | 67.959 | KV452784.1 | 3692931 | 3-scf00141     | 3  |
| AX-158006496 | 6 | 67.959 | KV452784.1 | 4065539 | 3-scf00141     | 3  |

|              |   |        |            |         |            |   |
|--------------|---|--------|------------|---------|------------|---|
| AX-158006522 | 6 | 67.959 | KV452784.1 | 4157829 | 3-scf00141 | 3 |
| AX-158006523 | 6 | 67.959 | KV452784.1 | 4159823 | 3-scf00141 | 3 |
| AX-158006525 | 6 | 67.959 | KV452784.1 | 4162872 | 3-scf00141 | 3 |
| AX-158006526 | 6 | 67.959 | KV452784.1 | 4164999 | 3-scf00141 | 3 |
| AX-158006527 | 6 | 67.959 | KV452784.1 | 4168988 | 3-scf00141 | 3 |
| AX-158006566 | 6 | 67.959 | KV452784.1 | 4256667 | 3-scf00141 | 3 |
| AX-158006570 | 6 | 67.959 | KV452784.1 | 4258634 | 3-scf00141 | 3 |
| AX-158006573 | 6 | 67.959 | KV452784.1 | 4265782 | 3-scf00141 | 3 |
| AX-158006578 | 6 | 67.959 | KV452784.1 | 4269886 | 3-scf00141 | 3 |
| AX-158006580 | 6 | 67.959 | KV452784.1 | 4274148 | 3-scf00141 | 3 |
| AX-157819712 | 6 | 67.959 | KV452784.1 | 4453053 | 3-scf00141 | 3 |
| AX-158006627 | 6 | 67.959 | KV452784.1 | 4453254 | 3-scf00141 | 3 |
| AX-157876178 | 6 | 67.959 | KV452784.1 | 4584025 | 3-scf00141 | 3 |
| AX-158407637 | 6 | 67.959 | KV452784.1 | 4605415 | 3-scf00141 | 3 |
| AX-158007020 | 6 | 67.959 | KV452784.1 | 5680839 | 3-scf00141 | 3 |
| AX-157819752 | 6 | 67.959 | KV452784.1 | 5730297 | 3-scf00141 | 3 |
| AX-158007081 | 6 | 67.959 | KV452784.1 | 5766950 | 3-scf00141 | 3 |
| AX-158007265 | 6 | 67.959 | KV452784.1 | 5939279 | 3-scf00141 | 3 |
| AX-158007268 | 6 | 67.959 | KV452784.1 | 5941544 | 3-scf00141 | 3 |
| AX-158007277 | 6 | 67.959 | KV452784.1 | 5951437 | 3-scf00141 | 3 |
| AX-158007284 | 6 | 67.959 | KV452784.1 | 5958336 | 3-scf00141 | 3 |
| AX-158007297 | 6 | 67.959 | KV452784.1 | 5973043 | 3-scf00141 | 3 |
| AX-157718518 | 6 | 67.959 | KV452784.1 | 6038062 | 3-scf00141 | 3 |
| AX-158007380 | 6 | 67.959 | KV452784.1 | 6049913 | 3-scf00141 | 3 |
| AX-158007384 | 6 | 67.959 | KV452784.1 | 6052271 | 3-scf00141 | 3 |
| AX-158007385 | 6 | 67.959 | KV452784.1 | 6053076 | 3-scf00141 | 3 |
| AX-158007478 | 6 | 67.959 | KV452784.1 | 6198548 | 3-scf00141 | 3 |
| AX-158007487 | 6 | 67.959 | KV452784.1 | 6203023 | 3-scf00141 | 3 |
| AX-157773536 | 6 | 67.959 | KV452784.1 | 6217300 | 3-scf00141 | 3 |
| AX-158007549 | 6 | 67.959 | KV452784.1 | 6306834 | 3-scf00141 | 3 |
| AX-158007589 | 6 | 67.959 | KV452784.1 | 6357743 | 3-scf00141 | 3 |
| AX-158007622 | 6 | 67.959 | KV452784.1 | 6416226 | 3-scf00141 | 3 |
| AX-158007627 | 6 | 67.959 | KV452784.1 | 6427146 | 3-scf00141 | 3 |
| AX-158007674 | 6 | 67.959 | KV452784.1 | 6500201 | 3-scf00141 | 3 |
| AX-157819799 | 6 | 67.959 | KV452784.1 | 6502814 | 3-scf00141 | 3 |
| AX-157748708 | 6 | 67.959 | KV452784.1 | 6507104 | 3-scf00141 | 3 |
| AX-157819802 | 6 | 67.959 | KV452784.1 | 6510164 | 3-scf00141 | 3 |
| AX-158007684 | 6 | 67.959 | KV452784.1 | 6511915 | 3-scf00141 | 3 |
| AX-157748315 | 6 | 67.959 | KV452784.1 | 6512622 | 3-scf00141 | 3 |
| AX-158007691 | 6 | 67.959 | KV452784.1 | 6517196 | 3-scf00141 | 3 |
| AX-158007694 | 6 | 67.959 | KV452784.1 | 6518362 | 3-scf00141 | 3 |
| AX-158007695 | 6 | 67.959 | KV452784.1 | 6518616 | 3-scf00141 | 3 |
| AX-157716220 | 6 | 67.959 | KV452784.1 | 6526774 | 3-scf00141 | 3 |
| AX-158007705 | 6 | 67.959 | KV452784.1 | 6529519 | 3-scf00141 | 3 |
| AX-158007706 | 6 | 67.959 | KV452784.1 | 6533539 | 3-scf00141 | 3 |
| AX-158007710 | 6 | 67.959 | KV452784.1 | 6537167 | 3-scf00141 | 3 |
| AX-158007713 | 6 | 67.959 | KV452784.1 | 6539745 | 3-scf00141 | 3 |
| AX-158007725 | 6 | 67.959 | KV452784.1 | 6554309 | 3-scf00141 | 3 |
| AX-158007727 | 6 | 67.959 | KV452784.1 | 6554684 | 3-scf00141 | 3 |
| AX-158007729 | 6 | 67.959 | KV452784.1 | 6555634 | 3-scf00141 | 3 |
| AX-158007730 | 6 | 67.959 | KV452784.1 | 6556571 | 3-scf00141 | 3 |



|              |   |        |            |         |            |   |
|--------------|---|--------|------------|---------|------------|---|
| AX-157856197 | 6 | 67.959 | KV452784.1 | 6561725 | 3-scf00141 | 3 |
| AX-158007734 | 6 | 67.959 | KV452784.1 | 6563885 | 3-scf00141 | 3 |
| AX-158007736 | 6 | 67.959 | KV452784.1 | 6564564 | 3-scf00141 | 3 |
| AX-158007742 | 6 | 67.959 | KV452784.1 | 6567795 | 3-scf00141 | 3 |
| AX-157819812 | 6 | 67.959 | KV452784.1 | 6569655 | 3-scf00141 | 3 |
| AX-158007747 | 6 | 67.959 | KV452784.1 | 6571783 | 3-scf00141 | 3 |
| AX-157739774 | 6 | 67.959 | KV452784.1 | 6572482 | 3-scf00141 | 3 |
| AX-158007750 | 6 | 67.959 | KV452784.1 | 6575358 | 3-scf00141 | 3 |
| AX-158007762 | 6 | 67.959 | KV452784.1 | 6584755 | 3-scf00141 | 3 |
| AX-158007766 | 6 | 67.959 | KV452784.1 | 6588731 | 3-scf00141 | 3 |
| AX-158007768 | 6 | 67.959 | KV452784.1 | 6589911 | 3-scf00141 | 3 |
| AX-158007770 | 6 | 67.959 | KV452784.1 | 6590316 | 3-scf00141 | 3 |
| AX-158007774 | 6 | 67.959 | KV452784.1 | 6603607 | 3-scf00141 | 3 |
| AX-158007798 | 6 | 67.959 | KV452784.1 | 6641939 | 3-scf00141 | 3 |
| AX-158007800 | 6 | 67.959 | KV452784.1 | 6642298 | 3-scf00141 | 3 |
| AX-157819826 | 6 | 67.959 | KV452784.1 | 6644307 | 3-scf00141 | 3 |
| AX-158007808 | 6 | 67.959 | KV452784.1 | 6647634 | 3-scf00141 | 3 |
| AX-158007813 | 6 | 67.959 | KV452784.1 | 6650106 | 3-scf00141 | 3 |
| AX-157819827 | 6 | 67.959 | KV452784.1 | 6651976 | 3-scf00141 | 3 |
| AX-158007819 | 6 | 67.959 | KV452784.1 | 6654341 | 3-scf00141 | 3 |
| AX-158007822 | 6 | 67.959 | KV452784.1 | 6655809 | 3-scf00141 | 3 |
| AX-158007827 | 6 | 67.959 | KV452784.1 | 6669477 | 3-scf00141 | 3 |
| AX-157819830 | 6 | 67.959 | KV452784.1 | 6681877 | 3-scf00141 | 3 |
| AX-157819831 | 6 | 67.959 | KV452784.1 | 6682117 | 3-scf00141 | 3 |
| AX-157713074 | 6 | 67.959 | KV452784.1 | 6685386 | 3-scf00141 | 3 |
| AX-158007834 | 6 | 67.959 | KV452784.1 | 6688045 | 3-scf00141 | 3 |
| AX-158007840 | 6 | 67.959 | KV452784.1 | 6696142 | 3-scf00141 | 3 |
| AX-158007841 | 6 | 67.959 | KV452784.1 | 6696833 | 3-scf00141 | 3 |
| AX-157819835 | 6 | 67.959 | KV452784.1 | 6701360 | 3-scf00141 | 3 |
| AX-158007844 | 6 | 67.959 | KV452784.1 | 6703364 | 3-scf00141 | 3 |
| AX-158007862 | 6 | 67.959 | KV452784.1 | 6720040 | 3-scf00141 | 3 |
| AX-157819839 | 6 | 67.959 | KV452784.1 | 6722887 | 3-scf00141 | 3 |
| AX-158007866 | 6 | 67.959 | KV452784.1 | 6723946 | 3-scf00141 | 3 |
| AX-158007868 | 6 | 67.959 | KV452784.1 | 6727324 | 3-scf00141 | 3 |
| AX-158007869 | 6 | 67.959 | KV452784.1 | 6729096 | 3-scf00141 | 3 |
| AX-158007872 | 6 | 67.959 | KV452784.1 | 6730306 | 3-scf00141 | 3 |
| AX-158007873 | 6 | 67.959 | KV452784.1 | 6732026 | 3-scf00141 | 3 |
| AX-158007882 | 6 | 67.959 | KV452784.1 | 6741931 | 3-scf00141 | 3 |
| AX-157717279 | 6 | 67.959 | KV452784.1 | 6755072 | 3-scf00141 | 3 |
| AX-158007891 | 6 | 67.959 | KV452784.1 | 6757057 | 3-scf00141 | 3 |
| AX-158007892 | 6 | 67.959 | KV452784.1 | 6757725 | 3-scf00141 | 3 |
| AX-157819850 | 6 | 67.959 | KV452784.1 | 6758219 | 3-scf00141 | 3 |
| AX-158007895 | 6 | 67.959 | KV452784.1 | 6760593 | 3-scf00141 | 3 |
| AX-158007902 | 6 | 67.959 | KV452784.1 | 6767659 | 3-scf00141 | 3 |
| AX-158007903 | 6 | 67.959 | KV452784.1 | 6770457 | 3-scf00141 | 3 |
| AX-158007907 | 6 | 67.959 | KV452784.1 | 6775295 | 3-scf00141 | 3 |
| AX-158007910 | 6 | 67.959 | KV452784.1 | 6776702 | 3-scf00141 | 3 |
| AX-158007917 | 6 | 67.959 | KV452784.1 | 6781542 | 3-scf00141 | 3 |
| AX-157819853 | 6 | 67.959 | KV452784.1 | 6786267 | 3-scf00141 | 3 |
| AX-158007930 | 6 | 67.959 | KV452784.1 | 6807264 | 3-scf00141 | 3 |
| AX-157706551 | 6 | 67.959 | KV452784.1 | 6808204 | 3-scf00141 | 3 |

|              |   |        |            |         |            |   |
|--------------|---|--------|------------|---------|------------|---|
| AX-158007932 | 6 | 67.959 | KV452784.1 | 6809771 | 3-scf00141 | 3 |
| AX-158007933 | 6 | 67.959 | KV452784.1 | 6810872 | 3-scf00141 | 3 |
| AX-158007935 | 6 | 67.959 | KV452784.1 | 6813271 | 3-scf00141 | 3 |
| AX-157756469 | 6 | 67.959 | KV452784.1 | 6814287 | 3-scf00141 | 3 |
| AX-157819855 | 6 | 67.959 | KV452784.1 | 6817154 | 3-scf00141 | 3 |
| AX-158007939 | 6 | 67.959 | KV452784.1 | 6820818 | 3-scf00141 | 3 |
| AX-158007949 | 6 | 67.959 | KV452784.1 | 6841562 | 3-scf00141 | 3 |
| AX-158007990 | 6 | 67.959 | KV452784.1 | 6880968 | 3-scf00141 | 3 |
| AX-158379665 | 6 | 67.959 | KV452784.1 | 6882823 | 3-scf00141 | 3 |
| AX-157719459 | 6 | 67.959 | KV452784.1 | 6883883 | 3-scf00141 | 3 |
| AX-158008000 | 6 | 67.959 | KV452784.1 | 6893678 | 3-scf00141 | 3 |
| AX-158008003 | 6 | 67.959 | KV452784.1 | 6897878 | 3-scf00141 | 3 |
| AX-158008004 | 6 | 67.959 | KV452784.1 | 6899024 | 3-scf00141 | 3 |
| AX-158008006 | 6 | 67.959 | KV452784.1 | 6905555 | 3-scf00141 | 3 |
| AX-158008008 | 6 | 67.959 | KV452784.1 | 6906331 | 3-scf00141 | 3 |
| AX-158008010 | 6 | 67.959 | KV452784.1 | 6908115 | 3-scf00141 | 3 |
| AX-158390896 | 6 | 67.959 | KV452784.1 | 6919992 | 3-scf00141 | 3 |
| AX-157752380 | 6 | 67.959 | KV452784.1 | 6920629 | 3-scf00141 | 3 |
| AX-157819867 | 6 | 67.959 | KV452784.1 | 6922832 | 3-scf00141 | 3 |
| AX-158008030 | 6 | 67.959 | KV452784.1 | 6924072 | 3-scf00141 | 3 |
| AX-158008032 | 6 | 67.959 | KV452784.1 | 6926260 | 3-scf00141 | 3 |
| AX-158008036 | 6 | 67.959 | KV452784.1 | 6930833 | 3-scf00141 | 3 |
| AX-158008038 | 6 | 67.959 | KV452784.1 | 6933326 | 3-scf00141 | 3 |
| AX-158008039 | 6 | 67.959 | KV452784.1 | 6933938 | 3-scf00141 | 3 |
| AX-158008044 | 6 | 67.959 | KV452784.1 | 6946771 | 3-scf00141 | 3 |
| AX-158008049 | 6 | 67.959 | KV452784.1 | 6953487 | 3-scf00141 | 3 |
| AX-158008050 | 6 | 67.959 | KV452784.1 | 6954778 | 3-scf00141 | 3 |
| AX-158008052 | 6 | 67.959 | KV452784.1 | 6956052 | 3-scf00141 | 3 |
| AX-158008056 | 6 | 67.959 | KV452784.1 | 6961090 | 3-scf00141 | 3 |
| AX-157819868 | 6 | 67.959 | KV452784.1 | 6978052 | 3-scf00141 | 3 |
| AX-158008068 | 6 | 67.959 | KV452784.1 | 6981681 | 3-scf00141 | 3 |
| AX-158008070 | 6 | 67.959 | KV452784.1 | 6982821 | 3-scf00141 | 3 |
| AX-158008076 | 6 | 67.959 | KV452784.1 | 6992215 | 3-scf00141 | 3 |
| AX-158008079 | 6 | 67.959 | KV452784.1 | 7002397 | 3-scf00141 | 3 |
| AX-158008086 | 6 | 67.959 | KV452784.1 | 7017579 | 3-scf00141 | 3 |
| AX-158008091 | 6 | 67.959 | KV452784.1 | 7020999 | 3-scf00141 | 3 |
| AX-158008093 | 6 | 67.959 | KV452784.1 | 7021697 | 3-scf00141 | 3 |
| AX-158008103 | 6 | 67.959 | KV452784.1 | 7030573 | 3-scf00141 | 3 |
| AX-158008104 | 6 | 67.959 | KV452784.1 | 7031904 | 3-scf00141 | 3 |
| AX-158390899 | 6 | 67.959 | KV452784.1 | 7032182 | 3-scf00141 | 3 |
| AX-158008106 | 6 | 67.959 | KV452784.1 | 7033647 | 3-scf00141 | 3 |
| AX-158008107 | 6 | 67.959 | KV452784.1 | 7035375 | 3-scf00141 | 3 |
| AX-157870050 | 6 | 67.959 | KV452784.1 | 7036174 | 3-scf00141 | 3 |
| AX-157819881 | 6 | 67.959 | KV452784.1 | 7037634 | 3-scf00141 | 3 |
| AX-158008108 | 6 | 67.959 | KV452784.1 | 7038691 | 3-scf00141 | 3 |
| AX-158008110 | 6 | 67.959 | KV452784.1 | 7040074 | 3-scf00141 | 3 |
| AX-158008115 | 6 | 67.959 | KV452784.1 | 7049634 | 3-scf00141 | 3 |
| AX-158390900 | 6 | 67.959 | KV452784.1 | 7054455 | 3-scf00141 | 3 |
| AX-158008119 | 6 | 67.959 | KV452784.1 | 7054792 | 3-scf00141 | 3 |
| AX-158008120 | 6 | 67.959 | KV452784.1 | 7055104 | 3-scf00141 | 3 |
| AX-158008121 | 6 | 67.959 | KV452784.1 | 7056263 | 3-scf00141 | 3 |

|              |   |        |            |         |            |   |
|--------------|---|--------|------------|---------|------------|---|
| AX-157819886 | 6 | 67.959 | KV452784.1 | 7088257 | 3-scf00141 | 3 |
| AX-157819887 | 6 | 67.959 | KV452784.1 | 7088614 | 3-scf00141 | 3 |
| AX-157819888 | 6 | 67.959 | KV452784.1 | 7128669 | 3-scf00141 | 3 |
| AX-158008268 | 6 | 67.959 | KV452784.1 | 7279934 | 3-scf00141 | 3 |
| AX-158008421 | 6 | 67.959 | KV452784.1 | 7535294 | 3-scf00141 | 3 |
| AX-158008442 | 6 | 67.959 | KV452784.1 | 7558544 | 3-scf00141 | 3 |
| AX-158008448 | 6 | 67.959 | KV452784.1 | 7566539 | 3-scf00141 | 3 |
| AX-158407680 | 6 | 67.986 | KV452784.1 | 6503110 | 3-scf00141 | 3 |
| AX-158008041 | 6 | 67.986 | KV452784.1 | 6942910 | 3-scf00141 | 3 |
| AX-158008450 | 6 | 67.986 | KV452784.1 | 7567158 | 3-scf00141 | 3 |
| AX-158008460 | 6 | 67.986 | KV452784.1 | 7575932 | 3-scf00141 | 3 |
| AX-158008045 | 6 | 68.015 | KV452784.1 | 6948802 | 3-scf00141 | 3 |
| AX-158008077 | 6 | 68.043 | KV452784.1 | 6994204 | 3-scf00141 | 3 |
| AX-157819810 | 6 | 68.069 | KV452784.1 | 6566024 | 3-scf00141 | 3 |
| AX-158007843 | 6 | 68.069 | KV452784.1 | 6702096 | 3-scf00141 | 3 |
| AX-158007904 | 6 | 68.069 | KV452784.1 | 6771581 | 3-scf00141 | 3 |
| AX-158008031 | 6 | 68.069 | KV452784.1 | 6925298 | 3-scf00141 | 3 |
| AX-158008081 | 6 | 68.069 | KV452784.1 | 7012834 | 3-scf00141 | 3 |
| AX-158008094 | 6 | 68.069 | KV452784.1 | 7022055 | 3-scf00141 | 3 |
| AX-158008096 | 6 | 68.069 | KV452784.1 | 7023636 | 3-scf00141 | 3 |
| AX-157819885 | 6 | 68.069 | KV452784.1 | 7073083 | 3-scf00141 | 3 |
| AX-158008147 | 6 | 68.069 | KV452784.1 | 7088321 | 3-scf00141 | 3 |
| AX-157819900 | 6 | 68.069 | KV452784.1 | 7300401 | 3-scf00141 | 3 |
| AX-158008291 | 6 | 68.069 | KV452784.1 | 7315098 | 3-scf00141 | 3 |
| AX-158008389 | 6 | 68.069 | KV452784.1 | 7482092 | 3-scf00141 | 3 |
| AX-158415891 | 6 | 68.089 | KV452784.1 | 7090901 | 3-scf00141 | 3 |
| AX-157819492 | 6 | 68.179 | KV452784.1 | 306993  | 3-scf00141 | 3 |
| AX-158004678 | 6 | 68.179 | KV452784.1 | 1680643 | 3-scf00141 | 3 |
| AX-158005545 | 6 | 68.179 | KV452784.1 | 2558123 | 3-scf00141 | 3 |
| AX-158005695 | 6 | 68.179 | KV452784.1 | 2714779 | 3-scf00141 | 3 |
| AX-158006344 | 6 | 68.179 | KV452784.1 | 3430682 | 3-scf00141 | 3 |
| AX-158006345 | 6 | 68.179 | KV452784.1 | 3437678 | 3-scf00141 | 3 |
| AX-158007527 | 6 | 68.179 | KV452784.1 | 6267189 | 3-scf00141 | 3 |
| AX-157819787 | 6 | 68.179 | KV452784.1 | 6285085 | 3-scf00141 | 3 |
| AX-158007564 | 6 | 68.179 | KV452784.1 | 6324679 | 3-scf00141 | 3 |
| AX-158407681 | 6 | 68.179 | KV452784.1 | 6503201 | 3-scf00141 | 3 |
| AX-158007682 | 6 | 68.179 | KV452784.1 | 6511483 | 3-scf00141 | 3 |
| AX-158007716 | 6 | 68.179 | KV452784.1 | 6544971 | 3-scf00141 | 3 |
| AX-158007732 | 6 | 68.179 | KV452784.1 | 6557724 | 3-scf00141 | 3 |
| AX-157856198 | 6 | 68.179 | KV452784.1 | 6575951 | 3-scf00141 | 3 |
| AX-158007921 | 6 | 68.179 | KV452784.1 | 6786108 | 3-scf00141 | 3 |
| AX-158007928 | 6 | 68.179 | KV452784.1 | 6802785 | 3-scf00141 | 3 |
| AX-158007929 | 6 | 68.179 | KV452784.1 | 6803505 | 3-scf00141 | 3 |
| AX-158007936 | 6 | 68.179 | KV452784.1 | 6816306 | 3-scf00141 | 3 |
| AX-157745837 | 6 | 68.179 | KV452784.1 | 6842811 | 3-scf00141 | 3 |
| AX-158008009 | 6 | 68.179 | KV452784.1 | 6907184 | 3-scf00141 | 3 |
| AX-158008027 | 6 | 68.179 | KV452784.1 | 6916757 | 3-scf00141 | 3 |
| AX-157744535 | 6 | 68.179 | KV452784.1 | 7004577 | 3-scf00141 | 3 |
| AX-157819874 | 6 | 68.179 | KV452784.1 | 7011706 | 3-scf00141 | 3 |
| AX-158008090 | 6 | 68.179 | KV452784.1 | 7019849 | 3-scf00141 | 3 |
| AX-157819877 | 6 | 68.179 | KV452784.1 | 7022859 | 3-scf00141 | 3 |

|              |   |        |            |         |            |   |
|--------------|---|--------|------------|---------|------------|---|
| AX-157819883 | 6 | 68.179 | KV452784.1 | 7043249 | 3-scf00141 | 3 |
| AX-158008122 | 6 | 68.179 | KV452784.1 | 7058981 | 3-scf00141 | 3 |
| AX-158008125 | 6 | 68.179 | KV452784.1 | 7061442 | 3-scf00141 | 3 |
| AX-158008129 | 6 | 68.179 | KV452784.1 | 7071174 | 3-scf00141 | 3 |
| AX-158008133 | 6 | 68.179 | KV452784.1 | 7072691 | 3-scf00141 | 3 |
| AX-158008135 | 6 | 68.179 | KV452784.1 | 7073686 | 3-scf00141 | 3 |
| AX-157870051 | 6 | 68.179 | KV452784.1 | 7077299 | 3-scf00141 | 3 |
| AX-158008138 | 6 | 68.179 | KV452784.1 | 7078250 | 3-scf00141 | 3 |
| AX-158008139 | 6 | 68.179 | KV452784.1 | 7078681 | 3-scf00141 | 3 |
| AX-158008149 | 6 | 68.179 | KV452784.1 | 7090838 | 3-scf00141 | 3 |
| AX-158008150 | 6 | 68.179 | KV452784.1 | 7091473 | 3-scf00141 | 3 |
| AX-158008151 | 6 | 68.179 | KV452784.1 | 7091941 | 3-scf00141 | 3 |
| AX-158008153 | 6 | 68.179 | KV452784.1 | 7092596 | 3-scf00141 | 3 |
| AX-158008155 | 6 | 68.179 | KV452784.1 | 7095033 | 3-scf00141 | 3 |
| AX-158008156 | 6 | 68.179 | KV452784.1 | 7096384 | 3-scf00141 | 3 |
| AX-158008157 | 6 | 68.179 | KV452784.1 | 7098061 | 3-scf00141 | 3 |
| AX-158008158 | 6 | 68.179 | KV452784.1 | 7100438 | 3-scf00141 | 3 |
| AX-158008160 | 6 | 68.179 | KV452784.1 | 7106092 | 3-scf00141 | 3 |
| AX-158008162 | 6 | 68.179 | KV452784.1 | 7113676 | 3-scf00141 | 3 |
| AX-158008163 | 6 | 68.179 | KV452784.1 | 7115690 | 3-scf00141 | 3 |
| AX-158008165 | 6 | 68.179 | KV452784.1 | 7116680 | 3-scf00141 | 3 |
| AX-157750726 | 6 | 68.179 | KV452784.1 | 7123504 | 3-scf00141 | 3 |
| AX-158008167 | 6 | 68.179 | KV452784.1 | 7127890 | 3-scf00141 | 3 |
| AX-158008169 | 6 | 68.179 | KV452784.1 | 7128360 | 3-scf00141 | 3 |
| AX-158008171 | 6 | 68.179 | KV452784.1 | 7130323 | 3-scf00141 | 3 |
| AX-158390901 | 6 | 68.179 | KV452784.1 | 7133008 | 3-scf00141 | 3 |
| AX-158008173 | 6 | 68.179 | KV452784.1 | 7133243 | 3-scf00141 | 3 |
| AX-158008176 | 6 | 68.179 | KV452784.1 | 7135081 | 3-scf00141 | 3 |
| AX-157713307 | 6 | 68.179 | KV452784.1 | 7138407 | 3-scf00141 | 3 |
| AX-157870053 | 6 | 68.179 | KV452784.1 | 7140808 | 3-scf00141 | 3 |
| AX-158008178 | 6 | 68.179 | KV452784.1 | 7141922 | 3-scf00141 | 3 |
| AX-158008184 | 6 | 68.179 | KV452784.1 | 7153316 | 3-scf00141 | 3 |
| AX-158008188 | 6 | 68.179 | KV452784.1 | 7155563 | 3-scf00141 | 3 |
| AX-158008190 | 6 | 68.179 | KV452784.1 | 7155840 | 3-scf00141 | 3 |
| AX-158008191 | 6 | 68.179 | KV452784.1 | 7156303 | 3-scf00141 | 3 |
| AX-158008192 | 6 | 68.179 | KV452784.1 | 7156512 | 3-scf00141 | 3 |
| AX-158008193 | 6 | 68.179 | KV452784.1 | 7157157 | 3-scf00141 | 3 |
| AX-158008195 | 6 | 68.179 | KV452784.1 | 7158991 | 3-scf00141 | 3 |
| AX-158008197 | 6 | 68.179 | KV452784.1 | 7159590 | 3-scf00141 | 3 |
| AX-158008198 | 6 | 68.179 | KV452784.1 | 7160126 | 3-scf00141 | 3 |
| AX-158008199 | 6 | 68.179 | KV452784.1 | 7160738 | 3-scf00141 | 3 |
| AX-158008201 | 6 | 68.179 | KV452784.1 | 7161524 | 3-scf00141 | 3 |
| AX-158407696 | 6 | 68.179 | KV452784.1 | 7168691 | 3-scf00141 | 3 |
| AX-158008206 | 6 | 68.179 | KV452784.1 | 7187802 | 3-scf00141 | 3 |
| AX-158008207 | 6 | 68.179 | KV452784.1 | 7189097 | 3-scf00141 | 3 |
| AX-158008212 | 6 | 68.179 | KV452784.1 | 7197931 | 3-scf00141 | 3 |
| AX-158008219 | 6 | 68.179 | KV452784.1 | 7203115 | 3-scf00141 | 3 |
| AX-158008220 | 6 | 68.179 | KV452784.1 | 7204286 | 3-scf00141 | 3 |
| AX-158008223 | 6 | 68.179 | KV452784.1 | 7209637 | 3-scf00141 | 3 |
| AX-158008229 | 6 | 68.179 | KV452784.1 | 7223839 | 3-scf00141 | 3 |
| AX-157819896 | 6 | 68.179 | KV452784.1 | 7226452 | 3-scf00141 | 3 |

|              |   |        |            |         |            |   |
|--------------|---|--------|------------|---------|------------|---|
| AX-158407701 | 6 | 68.179 | KV452784.1 | 7227400 | 3-scf00141 | 3 |
| AX-158008232 | 6 | 68.179 | KV452784.1 | 7228008 | 3-scf00141 | 3 |
| AX-158008233 | 6 | 68.179 | KV452784.1 | 7228762 | 3-scf00141 | 3 |
| AX-158008237 | 6 | 68.179 | KV452784.1 | 7231538 | 3-scf00141 | 3 |
| AX-158008239 | 6 | 68.179 | KV452784.1 | 7234019 | 3-scf00141 | 3 |
| AX-158008240 | 6 | 68.179 | KV452784.1 | 7234485 | 3-scf00141 | 3 |
| AX-158008241 | 6 | 68.179 | KV452784.1 | 7234848 | 3-scf00141 | 3 |
| AX-157758532 | 6 | 68.179 | KV452784.1 | 7237106 | 3-scf00141 | 3 |
| AX-158008246 | 6 | 68.179 | KV452784.1 | 7241831 | 3-scf00141 | 3 |
| AX-158008247 | 6 | 68.179 | KV452784.1 | 7243206 | 3-scf00141 | 3 |
| AX-158008258 | 6 | 68.179 | KV452784.1 | 7264011 | 3-scf00141 | 3 |
| AX-158008260 | 6 | 68.179 | KV452784.1 | 7267144 | 3-scf00141 | 3 |
| AX-158008261 | 6 | 68.179 | KV452784.1 | 7267653 | 3-scf00141 | 3 |
| AX-158008263 | 6 | 68.179 | KV452784.1 | 7271250 | 3-scf00141 | 3 |
| AX-158008265 | 6 | 68.179 | KV452784.1 | 7273159 | 3-scf00141 | 3 |
| AX-158008266 | 6 | 68.179 | KV452784.1 | 7276432 | 3-scf00141 | 3 |
| AX-158008267 | 6 | 68.179 | KV452784.1 | 7276926 | 3-scf00141 | 3 |
| AX-158008270 | 6 | 68.179 | KV452784.1 | 7284597 | 3-scf00141 | 3 |
| AX-157819899 | 6 | 68.179 | KV452784.1 | 7286139 | 3-scf00141 | 3 |
| AX-158008276 | 6 | 68.179 | KV452784.1 | 7290428 | 3-scf00141 | 3 |
| AX-157723640 | 6 | 68.179 | KV452784.1 | 7291722 | 3-scf00141 | 3 |
| AX-158415892 | 6 | 68.179 | KV452784.1 | 7293751 | 3-scf00141 | 3 |
| AX-158008277 | 6 | 68.179 | KV452784.1 | 7295701 | 3-scf00141 | 3 |
| AX-158008279 | 6 | 68.179 | KV452784.1 | 7296522 | 3-scf00141 | 3 |
| AX-158008281 | 6 | 68.179 | KV452784.1 | 7298524 | 3-scf00141 | 3 |
| AX-158008282 | 6 | 68.179 | KV452784.1 | 7299805 | 3-scf00141 | 3 |
| AX-158008283 | 6 | 68.179 | KV452784.1 | 7300062 | 3-scf00141 | 3 |
| AX-158008287 | 6 | 68.179 | KV452784.1 | 7309817 | 3-scf00141 | 3 |
| AX-158008294 | 6 | 68.179 | KV452784.1 | 7316264 | 3-scf00141 | 3 |
| AX-158008295 | 6 | 68.179 | KV452784.1 | 7318650 | 3-scf00141 | 3 |
| AX-158008296 | 6 | 68.179 | KV452784.1 | 7319628 | 3-scf00141 | 3 |
| AX-157775405 | 6 | 68.179 | KV452784.1 | 7321145 | 3-scf00141 | 3 |
| AX-158008299 | 6 | 68.179 | KV452784.1 | 7322694 | 3-scf00141 | 3 |
| AX-158008300 | 6 | 68.179 | KV452784.1 | 7325769 | 3-scf00141 | 3 |
| AX-158008302 | 6 | 68.179 | KV452784.1 | 7327031 | 3-scf00141 | 3 |
| AX-158008303 | 6 | 68.179 | KV452784.1 | 7337168 | 3-scf00141 | 3 |
| AX-158008319 | 6 | 68.179 | KV452784.1 | 7363052 | 3-scf00141 | 3 |
| AX-157723660 | 6 | 68.179 | KV452784.1 | 7363739 | 3-scf00141 | 3 |
| AX-158008321 | 6 | 68.179 | KV452784.1 | 7369345 | 3-scf00141 | 3 |
| AX-157720600 | 6 | 68.179 | KV452784.1 | 7372609 | 3-scf00141 | 3 |
| AX-158008324 | 6 | 68.179 | KV452784.1 | 7375753 | 3-scf00141 | 3 |
| AX-158008325 | 6 | 68.179 | KV452784.1 | 7376446 | 3-scf00141 | 3 |
| AX-158008326 | 6 | 68.179 | KV452784.1 | 7378442 | 3-scf00141 | 3 |
| AX-158008329 | 6 | 68.179 | KV452784.1 | 7380488 | 3-scf00141 | 3 |
| AX-158008330 | 6 | 68.179 | KV452784.1 | 7381429 | 3-scf00141 | 3 |
| AX-158008331 | 6 | 68.179 | KV452784.1 | 7382349 | 3-scf00141 | 3 |
| AX-158008333 | 6 | 68.179 | KV452784.1 | 7385665 | 3-scf00141 | 3 |
| AX-158008334 | 6 | 68.179 | KV452784.1 | 7386314 | 3-scf00141 | 3 |
| AX-158008335 | 6 | 68.179 | KV452784.1 | 7386964 | 3-scf00141 | 3 |
| AX-158008336 | 6 | 68.179 | KV452784.1 | 7387129 | 3-scf00141 | 3 |
| AX-158008337 | 6 | 68.179 | KV452784.1 | 7387663 | 3-scf00141 | 3 |

|              |   |        |            |         |            |   |
|--------------|---|--------|------------|---------|------------|---|
| AX-158008338 | 6 | 68.179 | KV452784.1 | 7389079 | 3-scf00141 | 3 |
| AX-158008339 | 6 | 68.179 | KV452784.1 | 7389483 | 3-scf00141 | 3 |
| AX-158008340 | 6 | 68.179 | KV452784.1 | 7391005 | 3-scf00141 | 3 |
| AX-158008341 | 6 | 68.179 | KV452784.1 | 7391100 | 3-scf00141 | 3 |
| AX-158008343 | 6 | 68.179 | KV452784.1 | 7391599 | 3-scf00141 | 3 |
| AX-157819902 | 6 | 68.179 | KV452784.1 | 7394387 | 3-scf00141 | 3 |
| AX-158008344 | 6 | 68.179 | KV452784.1 | 7395079 | 3-scf00141 | 3 |
| AX-158008347 | 6 | 68.179 | KV452784.1 | 7396832 | 3-scf00141 | 3 |
| AX-158008349 | 6 | 68.179 | KV452784.1 | 7404055 | 3-scf00141 | 3 |
| AX-158008361 | 6 | 68.179 | KV452784.1 | 7425221 | 3-scf00141 | 3 |
| AX-158008363 | 6 | 68.179 | KV452784.1 | 7428993 | 3-scf00141 | 3 |
| AX-158008366 | 6 | 68.179 | KV452784.1 | 7432550 | 3-scf00141 | 3 |
| AX-158008374 | 6 | 68.179 | KV452784.1 | 7444204 | 3-scf00141 | 3 |
| AX-157723669 | 6 | 68.179 | KV452784.1 | 7447657 | 3-scf00141 | 3 |
| AX-158008375 | 6 | 68.179 | KV452784.1 | 7449128 | 3-scf00141 | 3 |
| AX-158008378 | 6 | 68.179 | KV452784.1 | 7450659 | 3-scf00141 | 3 |
| AX-157752456 | 6 | 68.179 | KV452784.1 | 7464842 | 3-scf00141 | 3 |
| AX-158008384 | 6 | 68.179 | KV452784.1 | 7466402 | 3-scf00141 | 3 |
| AX-158008392 | 6 | 68.179 | KV452784.1 | 7486086 | 3-scf00141 | 3 |
| AX-158008397 | 6 | 68.179 | KV452784.1 | 7497853 | 3-scf00141 | 3 |
| AX-158008398 | 6 | 68.179 | KV452784.1 | 7500797 | 3-scf00141 | 3 |
| AX-158008407 | 6 | 68.179 | KV452784.1 | 7523182 | 3-scf00141 | 3 |
| AX-157771120 | 6 | 68.179 | KV452784.1 | 7529210 | 3-scf00141 | 3 |
| AX-158008413 | 6 | 68.179 | KV452784.1 | 7529618 | 3-scf00141 | 3 |
| AX-158008417 | 6 | 68.179 | KV452784.1 | 7533600 | 3-scf00141 | 3 |
| AX-158008419 | 6 | 68.179 | KV452784.1 | 7534459 | 3-scf00141 | 3 |
| AX-158008422 | 6 | 68.179 | KV452784.1 | 7535696 | 3-scf00141 | 3 |
| AX-158008423 | 6 | 68.179 | KV452784.1 | 7536489 | 3-scf00141 | 3 |
| AX-158008425 | 6 | 68.179 | KV452784.1 | 7538844 | 3-scf00141 | 3 |
| AX-158008428 | 6 | 68.179 | KV452784.1 | 7540117 | 3-scf00141 | 3 |
| AX-158008429 | 6 | 68.179 | KV452784.1 | 7542144 | 3-scf00141 | 3 |
| AX-158008430 | 6 | 68.179 | KV452784.1 | 7544897 | 3-scf00141 | 3 |
| AX-158008435 | 6 | 68.179 | KV452784.1 | 7555107 | 3-scf00141 | 3 |
| AX-158008440 | 6 | 68.179 | KV452784.1 | 7557488 | 3-scf00141 | 3 |
| AX-158008454 | 6 | 68.179 | KV452784.1 | 7569832 | 3-scf00141 | 3 |
| AX-157819905 | 6 | 68.179 | KV452784.1 | 7573717 | 3-scf00141 | 3 |
| AX-158008459 | 6 | 68.179 | KV452784.1 | 7573861 | 3-scf00141 | 3 |
| AX-158008461 | 6 | 68.179 | KV452784.1 | 7576699 | 3-scf00141 | 3 |
| AX-158008463 | 6 | 68.179 | KV452784.1 | 7577285 | 3-scf00141 | 3 |
| AX-158008464 | 6 | 68.179 | KV452784.1 | 7577869 | 3-scf00141 | 3 |
| AX-158008465 | 6 | 68.179 | KV452784.1 | 7579866 | 3-scf00141 | 3 |
| AX-158008466 | 6 | 68.179 | KV452784.1 | 7580633 | 3-scf00141 | 3 |
| AX-158008467 | 6 | 68.179 | KV452784.1 | 7580978 | 3-scf00141 | 3 |
| AX-157819907 | 6 | 68.179 | KV452784.1 | 7581538 | 3-scf00141 | 3 |
| AX-158008468 | 6 | 68.179 | KV452784.1 | 7581937 | 3-scf00141 | 3 |
| AX-158008469 | 6 | 68.179 | KV452784.1 | 7582262 | 3-scf00141 | 3 |
| AX-157819908 | 6 | 68.179 | KV452784.1 | 7582703 | 3-scf00141 | 3 |
| AX-158008471 | 6 | 68.179 | KV452784.1 | 7583653 | 3-scf00141 | 3 |
| AX-158008473 | 6 | 68.179 | KV452784.1 | 7584509 | 3-scf00141 | 3 |
| AX-158008474 | 6 | 68.179 | KV452784.1 | 7585663 | 3-scf00141 | 3 |
| AX-157819909 | 6 | 68.179 | KV452784.1 | 7588198 | 3-scf00141 | 3 |

|              |   |        |            |         |            |   |
|--------------|---|--------|------------|---------|------------|---|
| AX-158008476 | 6 | 68.179 | KV452784.1 | 7588754 | 3-scf00141 | 3 |
| AX-158008477 | 6 | 68.179 | KV452784.1 | 7589719 | 3-scf00141 | 3 |
| AX-158008481 | 6 | 68.179 | KV452784.1 | 7591067 | 3-scf00141 | 3 |
| AX-158008484 | 6 | 68.179 | KV452784.1 | 7592488 | 3-scf00141 | 3 |
| AX-158008486 | 6 | 68.179 | KV452784.1 | 7593486 | 3-scf00141 | 3 |
| AX-158008487 | 6 | 68.179 | KV452784.1 | 7593999 | 3-scf00141 | 3 |
| AX-158008489 | 6 | 68.179 | KV452784.1 | 7594377 | 3-scf00141 | 3 |
| AX-158008491 | 6 | 68.179 | KV452784.1 | 7597600 | 3-scf00141 | 3 |
| AX-157819910 | 6 | 68.179 | KV452784.1 | 7597861 | 3-scf00141 | 3 |
| AX-158008492 | 6 | 68.179 | KV452784.1 | 7598301 | 3-scf00141 | 3 |
| AX-158008493 | 6 | 68.179 | KV452784.1 | 7600152 | 3-scf00141 | 3 |
| AX-158008494 | 6 | 68.179 | KV452784.1 | 7601603 | 3-scf00141 | 3 |
| AX-158008495 | 6 | 68.179 | KV452784.1 | 7602475 | 3-scf00141 | 3 |
| AX-158008496 | 6 | 68.179 | KV452784.1 | 7602962 | 3-scf00141 | 3 |
| AX-157819911 | 6 | 68.179 | KV452784.1 | 7603736 | 3-scf00141 | 3 |
| AX-158008499 | 6 | 68.179 | KV452784.1 | 7604332 | 3-scf00141 | 3 |
| AX-158008501 | 6 | 68.179 | KV452784.1 | 7605504 | 3-scf00141 | 3 |
| AX-158008503 | 6 | 68.179 | KV452784.1 | 7606420 | 3-scf00141 | 3 |
| AX-158008504 | 6 | 68.179 | KV452784.1 | 7607748 | 3-scf00141 | 3 |
| AX-158008505 | 6 | 68.179 | KV452784.1 | 7607980 | 3-scf00141 | 3 |
| AX-158008506 | 6 | 68.179 | KV452784.1 | 7608663 | 3-scf00141 | 3 |
| AX-158008508 | 6 | 68.179 | KV452784.1 | 7609293 | 3-scf00141 | 3 |
| AX-158008514 | 6 | 68.179 | KV452784.1 | 7615396 | 3-scf00141 | 3 |
| AX-158008519 | 6 | 68.179 | KV452784.1 | 7616917 | 3-scf00141 | 3 |
| AX-158008521 | 6 | 68.179 | KV452784.1 | 7619602 | 3-scf00141 | 3 |
| AX-158008522 | 6 | 68.179 | KV452784.1 | 7620890 | 3-scf00141 | 3 |
| AX-158008524 | 6 | 68.179 | KV452784.1 | 7621561 | 3-scf00141 | 3 |
| AX-158008525 | 6 | 68.179 | KV452784.1 | 7622301 | 3-scf00141 | 3 |
| AX-158008526 | 6 | 68.179 | KV452784.1 | 7623923 | 3-scf00141 | 3 |
| AX-158008532 | 6 | 68.179 | KV452784.1 | 7628980 | 3-scf00141 | 3 |
| AX-158008535 | 6 | 68.179 | KV452784.1 | 7635799 | 3-scf00141 | 3 |
| AX-158008538 | 6 | 68.179 | KV452784.1 | 7636833 | 3-scf00141 | 3 |
| AX-158008539 | 6 | 68.179 | KV452784.1 | 7640585 | 3-scf00141 | 3 |
| AX-157819912 | 6 | 68.179 | KV452784.1 | 7641005 | 3-scf00141 | 3 |
| AX-158008543 | 6 | 68.179 | KV452784.1 | 7642998 | 3-scf00141 | 3 |
| AX-158008574 | 6 | 68.179 | KV452784.1 | 7661502 | 3-scf00141 | 3 |
| AX-158008578 | 6 | 68.179 | KV452784.1 | 7670623 | 3-scf00141 | 3 |
| AX-158008580 | 6 | 68.179 | KV452784.1 | 7673748 | 3-scf00141 | 3 |
| AX-158008581 | 6 | 68.179 | KV452784.1 | 7674997 | 3-scf00141 | 3 |
| AX-158008583 | 6 | 68.179 | KV452784.1 | 7675199 | 3-scf00141 | 3 |
| AX-158008584 | 6 | 68.179 | KV452784.1 | 7677422 | 3-scf00141 | 3 |
| AX-157819915 | 6 | 68.179 | KV452784.1 | 7681388 | 3-scf00141 | 3 |
| AX-158008630 | 6 | 68.179 | KV452784.1 | 7729711 | 3-scf00141 | 3 |
| AX-158008642 | 6 | 68.179 | KV452784.1 | 7738718 | 3-scf00141 | 3 |
| AX-158008731 | 6 | 68.179 | KV452784.1 | 7809515 | 3-scf00141 | 3 |
| AX-158008770 | 6 | 68.179 | KV452784.1 | 7838144 | 3-scf00141 | 3 |
| AX-158008782 | 6 | 68.179 | KV452784.1 | 7848030 | 3-scf00141 | 3 |
| AX-158008870 | 6 | 68.179 | KV452784.1 | 7947166 | 3-scf00141 | 3 |
| AX-158009247 | 6 | 68.179 | KV452784.1 | 8315771 | 3-scf00141 | 3 |
| AX-158009347 | 6 | 68.179 | KV452784.1 | 8396248 | 3-scf00141 | 3 |
| AX-157819975 | 6 | 68.179 | KV452784.1 | 8415240 | 3-scf00141 | 3 |

|              |   |        |            |          |                |    |
|--------------|---|--------|------------|----------|----------------|----|
| AX-158011679 | 6 | 68.179 | KV452784.1 | 10932988 | 3-scf00141     | 3  |
| AX-158011688 | 6 | 68.179 | KV452784.1 | 10936783 | 3-scf00141     | 3  |
| AX-158011690 | 6 | 68.179 | KV452784.1 | 10937563 | 3-scf00141     | 3  |
| AX-157697945 | 6 | 68.179 | FI894470.1 | 599      | 10RI212 lctalk | UN |
| AX-158008537 | 6 | 68.18  | KV452784.1 | 7636093  | 3-scf00141     | 3  |
| AX-158008540 | 6 | 68.399 | KV452784.1 | 7641221  | 3-scf00141     | 3  |
| AX-157819913 | 6 | 68.399 | KV452784.1 | 7643782  | 3-scf00141     | 3  |
| AX-158008544 | 6 | 68.399 | KV452784.1 | 7644739  | 3-scf00141     | 3  |
| AX-158008545 | 6 | 68.399 | KV452784.1 | 7645942  | 3-scf00141     | 3  |
| AX-158008546 | 6 | 68.399 | KV452784.1 | 7646278  | 3-scf00141     | 3  |
| AX-158008550 | 6 | 68.399 | KV452784.1 | 7647507  | 3-scf00141     | 3  |
| AX-158008551 | 6 | 68.399 | KV452784.1 | 7649082  | 3-scf00141     | 3  |
| AX-158008552 | 6 | 68.399 | KV452784.1 | 7649519  | 3-scf00141     | 3  |
| AX-158008554 | 6 | 68.399 | KV452784.1 | 7649885  | 3-scf00141     | 3  |
| AX-158008559 | 6 | 68.399 | KV452784.1 | 7651658  | 3-scf00141     | 3  |
| AX-158008562 | 6 | 68.399 | KV452784.1 | 7653047  | 3-scf00141     | 3  |
| AX-158008564 | 6 | 68.399 | KV452784.1 | 7653356  | 3-scf00141     | 3  |
| AX-157716801 | 6 | 68.399 | KV452784.1 | 7654673  | 3-scf00141     | 3  |
| AX-158008590 | 6 | 68.399 | KV452784.1 | 7683931  | 3-scf00141     | 3  |
| AX-158008615 | 6 | 68.399 | KV452784.1 | 7715020  | 3-scf00141     | 3  |
| AX-158008636 | 6 | 68.399 | KV452784.1 | 7732468  | 3-scf00141     | 3  |
| AX-158008639 | 6 | 68.399 | KV452784.1 | 7734059  | 3-scf00141     | 3  |
| AX-157819920 | 6 | 68.399 | KV452784.1 | 7734801  | 3-scf00141     | 3  |
| AX-157702143 | 6 | 68.399 | KV452784.1 | 7736838  | 3-scf00141     | 3  |
| AX-158008644 | 6 | 68.399 | KV452784.1 | 7740319  | 3-scf00141     | 3  |
| AX-158008645 | 6 | 68.399 | KV452784.1 | 7741551  | 3-scf00141     | 3  |
| AX-158008647 | 6 | 68.399 | KV452784.1 | 7742069  | 3-scf00141     | 3  |
| AX-158008648 | 6 | 68.399 | KV452784.1 | 7742514  | 3-scf00141     | 3  |
| AX-158008654 | 6 | 68.399 | KV452784.1 | 7744387  | 3-scf00141     | 3  |
| AX-158008655 | 6 | 68.399 | KV452784.1 | 7744881  | 3-scf00141     | 3  |
| AX-158008660 | 6 | 68.399 | KV452784.1 | 7747679  | 3-scf00141     | 3  |
| AX-158008565 | 6 | 68.509 | KV452784.1 | 7655072  | 3-scf00141     | 3  |
| AX-158008587 | 6 | 68.509 | KV452784.1 | 7682412  | 3-scf00141     | 3  |
| AX-157741770 | 6 | 68.509 | KV452784.1 | 7689018  | 3-scf00141     | 3  |
| AX-158008601 | 6 | 68.619 | KV452784.1 | 7697391  | 3-scf00141     | 3  |
| AX-158008603 | 6 | 68.619 | KV452784.1 | 7699976  | 3-scf00141     | 3  |
| AX-158008617 | 6 | 68.619 | KV452784.1 | 7717832  | 3-scf00141     | 3  |
| AX-158008619 | 6 | 68.619 | KV452784.1 | 7718165  | 3-scf00141     | 3  |
| AX-158008621 | 6 | 68.619 | KV452784.1 | 7719671  | 3-scf00141     | 3  |
| AX-158008623 | 6 | 68.619 | KV452784.1 | 7722400  | 3-scf00141     | 3  |
| AX-157744547 | 6 | 68.619 | KV452784.1 | 7722599  | 3-scf00141     | 3  |
| AX-157856210 | 6 | 68.619 | KV452784.1 | 7725634  | 3-scf00141     | 3  |
| AX-158008637 | 6 | 68.619 | KV452784.1 | 7733427  | 3-scf00141     | 3  |
| AX-158008650 | 6 | 68.619 | KV452784.1 | 7743478  | 3-scf00141     | 3  |
| AX-158008658 | 6 | 68.619 | KV452784.1 | 7746518  | 3-scf00141     | 3  |
| AX-158008762 | 6 | 68.619 | KV452784.1 | 7834694  | 3-scf00141     | 3  |
| AX-158415905 | 6 | 68.619 | KV452784.1 | 7941413  | 3-scf00141     | 3  |
| AX-157739504 | 6 | 68.729 | KV452784.1 | 6082544  | 3-scf00141     | 3  |
| AX-158007828 | 6 | 68.729 | KV452784.1 | 6670562  | 3-scf00141     | 3  |
| AX-158007859 | 6 | 68.729 | KV452784.1 | 6715309  | 3-scf00141     | 3  |
| AX-158008015 | 6 | 68.729 | KV452784.1 | 6912105  | 3-scf00141     | 3  |



|              |   |        |            |         |            |   |
|--------------|---|--------|------------|---------|------------|---|
| AX-158008033 | 6 | 68.729 | KV452784.1 | 6927572 | 3-scf00141 | 3 |
| AX-158008037 | 6 | 68.729 | KV452784.1 | 6931338 | 3-scf00141 | 3 |
| AX-157819880 | 6 | 68.729 | KV452784.1 | 7036681 | 3-scf00141 | 3 |
| AX-158008530 | 6 | 68.729 | KV452784.1 | 7628318 | 3-scf00141 | 3 |
| AX-158008573 | 6 | 68.729 | KV452784.1 | 7661195 | 3-scf00141 | 3 |
| AX-157819918 | 6 | 68.729 | KV452784.1 | 7704131 | 3-scf00141 | 3 |
| AX-158008665 | 6 | 68.729 | KV452784.1 | 7750123 | 3-scf00141 | 3 |
| AX-158008671 | 6 | 68.729 | KV452784.1 | 7752733 | 3-scf00141 | 3 |
| AX-158008674 | 6 | 68.729 | KV452784.1 | 7754185 | 3-scf00141 | 3 |
| AX-158008685 | 6 | 68.729 | KV452784.1 | 7762678 | 3-scf00141 | 3 |
| AX-158008686 | 6 | 68.729 | KV452784.1 | 7763268 | 3-scf00141 | 3 |
| AX-158008688 | 6 | 68.729 | KV452784.1 | 7763752 | 3-scf00141 | 3 |
| AX-158008691 | 6 | 68.729 | KV452784.1 | 7766454 | 3-scf00141 | 3 |
| AX-157856211 | 6 | 68.729 | KV452784.1 | 7772089 | 3-scf00141 | 3 |
| AX-158008693 | 6 | 68.729 | KV452784.1 | 7774921 | 3-scf00141 | 3 |
| AX-157753427 | 6 | 68.729 | KV452784.1 | 7775850 | 3-scf00141 | 3 |
| AX-158008695 | 6 | 68.729 | KV452784.1 | 7779986 | 3-scf00141 | 3 |
| AX-158008696 | 6 | 68.729 | KV452784.1 | 7780625 | 3-scf00141 | 3 |
| AX-158008697 | 6 | 68.729 | KV452784.1 | 7781244 | 3-scf00141 | 3 |
| AX-157856212 | 6 | 68.729 | KV452784.1 | 7785251 | 3-scf00141 | 3 |
| AX-158008700 | 6 | 68.729 | KV452784.1 | 7786036 | 3-scf00141 | 3 |
| AX-157856213 | 6 | 68.729 | KV452784.1 | 7787303 | 3-scf00141 | 3 |
| AX-158008701 | 6 | 68.729 | KV452784.1 | 7787600 | 3-scf00141 | 3 |
| AX-158008704 | 6 | 68.729 | KV452784.1 | 7788383 | 3-scf00141 | 3 |
| AX-157743267 | 6 | 68.729 | KV452784.1 | 7791938 | 3-scf00141 | 3 |
| AX-158008706 | 6 | 68.729 | KV452784.1 | 7794594 | 3-scf00141 | 3 |
| AX-158008708 | 6 | 68.729 | KV452784.1 | 7794950 | 3-scf00141 | 3 |
| AX-158008709 | 6 | 68.729 | KV452784.1 | 7795496 | 3-scf00141 | 3 |
| AX-157819923 | 6 | 68.729 | KV452784.1 | 7796964 | 3-scf00141 | 3 |
| AX-158008712 | 6 | 68.729 | KV452784.1 | 7797756 | 3-scf00141 | 3 |
| AX-157713655 | 6 | 68.729 | KV452784.1 | 7797858 | 3-scf00141 | 3 |
| AX-158008713 | 6 | 68.729 | KV452784.1 | 7798563 | 3-scf00141 | 3 |
| AX-158008717 | 6 | 68.729 | KV452784.1 | 7801070 | 3-scf00141 | 3 |
| AX-158008720 | 6 | 68.729 | KV452784.1 | 7802569 | 3-scf00141 | 3 |
| AX-158008722 | 6 | 68.729 | KV452784.1 | 7802986 | 3-scf00141 | 3 |
| AX-157856214 | 6 | 68.729 | KV452784.1 | 7806043 | 3-scf00141 | 3 |
| AX-158008728 | 6 | 68.729 | KV452784.1 | 7808423 | 3-scf00141 | 3 |
| AX-158008729 | 6 | 68.729 | KV452784.1 | 7808782 | 3-scf00141 | 3 |
| AX-158008734 | 6 | 68.729 | KV452784.1 | 7810424 | 3-scf00141 | 3 |
| AX-158008737 | 6 | 68.729 | KV452784.1 | 7812642 | 3-scf00141 | 3 |
| AX-158008742 | 6 | 68.729 | KV452784.1 | 7820299 | 3-scf00141 | 3 |
| AX-158008765 | 6 | 68.729 | KV452784.1 | 7835520 | 3-scf00141 | 3 |
| AX-158008787 | 6 | 68.729 | KV452784.1 | 7857746 | 3-scf00141 | 3 |
| AX-158008861 | 6 | 68.729 | KV452784.1 | 7936701 | 3-scf00141 | 3 |
| AX-158008917 | 6 | 68.729 | KV452784.1 | 7997253 | 3-scf00141 | 3 |
| AX-158009059 | 6 | 68.729 | KV452784.1 | 8125095 | 3-scf00141 | 3 |
| AX-158007945 | 6 | 68.84  | KV452784.1 | 6835263 | 3-scf00141 | 3 |
| AX-158008046 | 6 | 68.84  | KV452784.1 | 6950569 | 3-scf00141 | 3 |
| AX-157819875 | 6 | 68.84  | KV452784.1 | 7014590 | 3-scf00141 | 3 |
| AX-157870052 | 6 | 68.84  | KV452784.1 | 7134289 | 3-scf00141 | 3 |
| AX-158008183 | 6 | 68.84  | KV452784.1 | 7152999 | 3-scf00141 | 3 |

|              |   |       |            |         |            |   |
|--------------|---|-------|------------|---------|------------|---|
| AX-157856202 | 6 | 68.84 | KV452784.1 | 7162007 | 3-scf00141 | 3 |
| AX-158008451 | 6 | 68.84 | KV452784.1 | 7567542 | 3-scf00141 | 3 |
| AX-158008456 | 6 | 68.84 | KV452784.1 | 7570807 | 3-scf00141 | 3 |
| AX-158008490 | 6 | 68.84 | KV452784.1 | 7595639 | 3-scf00141 | 3 |
| AX-158008528 | 6 | 68.84 | KV452784.1 | 7625596 | 3-scf00141 | 3 |
| AX-158008529 | 6 | 68.84 | KV452784.1 | 7626878 | 3-scf00141 | 3 |
| AX-158008566 | 6 | 68.84 | KV452784.1 | 7656168 | 3-scf00141 | 3 |
| AX-158008571 | 6 | 68.84 | KV452784.1 | 7659632 | 3-scf00141 | 3 |
| AX-158008586 | 6 | 68.84 | KV452784.1 | 7681023 | 3-scf00141 | 3 |
| AX-157758831 | 6 | 68.84 | KV452784.1 | 7690541 | 3-scf00141 | 3 |
| AX-158008598 | 6 | 68.84 | KV452784.1 | 7694683 | 3-scf00141 | 3 |
| AX-158008610 | 6 | 68.84 | KV452784.1 | 7708306 | 3-scf00141 | 3 |
| AX-158008611 | 6 | 68.84 | KV452784.1 | 7710788 | 3-scf00141 | 3 |
| AX-158008657 | 6 | 68.84 | KV452784.1 | 7745562 | 3-scf00141 | 3 |
| AX-158379668 | 6 | 68.84 | KV452784.1 | 7753052 | 3-scf00141 | 3 |
| AX-158008675 | 6 | 68.84 | KV452784.1 | 7755061 | 3-scf00141 | 3 |
| AX-158008679 | 6 | 68.84 | KV452784.1 | 7757468 | 3-scf00141 | 3 |
| AX-157819922 | 6 | 68.84 | KV452784.1 | 7776100 | 3-scf00141 | 3 |
| AX-158008716 | 6 | 68.84 | KV452784.1 | 7800397 | 3-scf00141 | 3 |
| AX-158008739 | 6 | 68.84 | KV452784.1 | 7816968 | 3-scf00141 | 3 |
| AX-158008749 | 6 | 68.84 | KV452784.1 | 7822921 | 3-scf00141 | 3 |
| AX-158383563 | 6 | 68.84 | KV452784.1 | 7823153 | 3-scf00141 | 3 |
| AX-158008751 | 6 | 68.84 | KV452784.1 | 7825347 | 3-scf00141 | 3 |
| AX-158008753 | 6 | 68.84 | KV452784.1 | 7827433 | 3-scf00141 | 3 |
| AX-158008756 | 6 | 68.84 | KV452784.1 | 7832371 | 3-scf00141 | 3 |
| AX-158008758 | 6 | 68.84 | KV452784.1 | 7833639 | 3-scf00141 | 3 |
| AX-158008764 | 6 | 68.84 | KV452784.1 | 7835161 | 3-scf00141 | 3 |
| AX-158008773 | 6 | 68.84 | KV452784.1 | 7840674 | 3-scf00141 | 3 |
| AX-158008774 | 6 | 68.84 | KV452784.1 | 7841491 | 3-scf00141 | 3 |
| AX-158008776 | 6 | 68.84 | KV452784.1 | 7844324 | 3-scf00141 | 3 |
| AX-158008777 | 6 | 68.84 | KV452784.1 | 7844736 | 3-scf00141 | 3 |
| AX-158008783 | 6 | 68.84 | KV452784.1 | 7852812 | 3-scf00141 | 3 |
| AX-158008784 | 6 | 68.84 | KV452784.1 | 7854781 | 3-scf00141 | 3 |
| AX-158008792 | 6 | 68.84 | KV452784.1 | 7862834 | 3-scf00141 | 3 |
| AX-158008793 | 6 | 68.84 | KV452784.1 | 7863892 | 3-scf00141 | 3 |
| AX-158008794 | 6 | 68.84 | KV452784.1 | 7865833 | 3-scf00141 | 3 |
| AX-158008798 | 6 | 68.84 | KV452784.1 | 7871943 | 3-scf00141 | 3 |
| AX-158008800 | 6 | 68.84 | KV452784.1 | 7872955 | 3-scf00141 | 3 |
| AX-158008804 | 6 | 68.84 | KV452784.1 | 7878313 | 3-scf00141 | 3 |
| AX-158008807 | 6 | 68.84 | KV452784.1 | 7882271 | 3-scf00141 | 3 |
| AX-158008809 | 6 | 68.84 | KV452784.1 | 7882970 | 3-scf00141 | 3 |
| AX-158008827 | 6 | 68.84 | KV452784.1 | 7895628 | 3-scf00141 | 3 |
| AX-158008829 | 6 | 68.84 | KV452784.1 | 7896591 | 3-scf00141 | 3 |
| AX-158008833 | 6 | 68.84 | KV452784.1 | 7899157 | 3-scf00141 | 3 |
| AX-158008836 | 6 | 68.84 | KV452784.1 | 7899566 | 3-scf00141 | 3 |
| AX-158008838 | 6 | 68.84 | KV452784.1 | 7902329 | 3-scf00141 | 3 |
| AX-158008845 | 6 | 68.84 | KV452784.1 | 7911500 | 3-scf00141 | 3 |
| AX-158008846 | 6 | 68.84 | KV452784.1 | 7916196 | 3-scf00141 | 3 |
| AX-158008848 | 6 | 68.84 | KV452784.1 | 7917025 | 3-scf00141 | 3 |
| AX-158008852 | 6 | 68.84 | KV452784.1 | 7922872 | 3-scf00141 | 3 |
| AX-158008854 | 6 | 68.84 | KV452784.1 | 7925298 | 3-scf00141 | 3 |

|              |   |        |            |         |            |   |
|--------------|---|--------|------------|---------|------------|---|
| AX-158008856 | 6 | 68.84  | KV452784.1 | 7930692 | 3-scf00141 | 3 |
| AX-158008857 | 6 | 68.84  | KV452784.1 | 7931735 | 3-scf00141 | 3 |
| AX-158008863 | 6 | 68.84  | KV452784.1 | 7944874 | 3-scf00141 | 3 |
| AX-158008864 | 6 | 68.84  | KV452784.1 | 7945590 | 3-scf00141 | 3 |
| AX-158008871 | 6 | 68.84  | KV452784.1 | 7950058 | 3-scf00141 | 3 |
| AX-158008872 | 6 | 68.84  | KV452784.1 | 7950782 | 3-scf00141 | 3 |
| AX-158008878 | 6 | 68.84  | KV452784.1 | 7953882 | 3-scf00141 | 3 |
| AX-158008880 | 6 | 68.84  | KV452784.1 | 7957318 | 3-scf00141 | 3 |
| AX-158008881 | 6 | 68.84  | KV452784.1 | 7958064 | 3-scf00141 | 3 |
| AX-158008884 | 6 | 68.84  | KV452784.1 | 7959702 | 3-scf00141 | 3 |
| AX-158008890 | 6 | 68.84  | KV452784.1 | 7964046 | 3-scf00141 | 3 |
| AX-157757995 | 6 | 68.84  | KV452784.1 | 7965123 | 3-scf00141 | 3 |
| AX-157819924 | 6 | 68.84  | KV452784.1 | 7975603 | 3-scf00141 | 3 |
| AX-157819925 | 6 | 68.84  | KV452784.1 | 7976646 | 3-scf00141 | 3 |
| AX-158008905 | 6 | 68.84  | KV452784.1 | 7982171 | 3-scf00141 | 3 |
| AX-158008906 | 6 | 68.84  | KV452784.1 | 7983590 | 3-scf00141 | 3 |
| AX-157819927 | 6 | 68.84  | KV452784.1 | 7987392 | 3-scf00141 | 3 |
| AX-158008915 | 6 | 68.84  | KV452784.1 | 7996609 | 3-scf00141 | 3 |
| AX-158008947 | 6 | 68.84  | KV452784.1 | 8019816 | 3-scf00141 | 3 |
| AX-157865249 | 6 | 68.84  | KV452784.1 | 8069951 | 3-scf00141 | 3 |
| AX-158009013 | 6 | 68.84  | KV452784.1 | 8087319 | 3-scf00141 | 3 |
| AX-157819951 | 6 | 68.84  | KV452784.1 | 8100532 | 3-scf00141 | 3 |
| AX-157722014 | 6 | 68.84  | KV452784.1 | 8138103 | 3-scf00141 | 3 |
| AX-158009111 | 6 | 68.84  | KV452784.1 | 8188420 | 3-scf00141 | 3 |
| AX-158009441 | 6 | 68.84  | KV452784.1 | 8508953 | 3-scf00141 | 3 |
| AX-158008914 | 6 | 68.95  | KV452784.1 | 7996263 | 3-scf00141 | 3 |
| AX-157819935 | 6 | 68.95  | KV452784.1 | 8033806 | 3-scf00141 | 3 |
| AX-158008984 | 6 | 68.95  | KV452784.1 | 8051526 | 3-scf00141 | 3 |
| AX-158008926 | 6 | 69.005 | KV452784.1 | 8006232 | 3-scf00141 | 3 |
| AX-157819878 | 6 | 69.06  | KV452784.1 | 7024664 | 3-scf00141 | 3 |
| AX-158008894 | 6 | 69.06  | KV452784.1 | 7968358 | 3-scf00141 | 3 |
| AX-158008922 | 6 | 69.06  | KV452784.1 | 8002745 | 3-scf00141 | 3 |
| AX-158008923 | 6 | 69.06  | KV452784.1 | 8003477 | 3-scf00141 | 3 |
| AX-158008930 | 6 | 69.06  | KV452784.1 | 8007262 | 3-scf00141 | 3 |
| AX-158008935 | 6 | 69.06  | KV452784.1 | 8012215 | 3-scf00141 | 3 |
| AX-158008937 | 6 | 69.06  | KV452784.1 | 8012675 | 3-scf00141 | 3 |
| AX-158008943 | 6 | 69.06  | KV452784.1 | 8017651 | 3-scf00141 | 3 |
| AX-157819931 | 6 | 69.06  | KV452784.1 | 8019942 | 3-scf00141 | 3 |
| AX-158008949 | 6 | 69.06  | KV452784.1 | 8020395 | 3-scf00141 | 3 |
| AX-158008950 | 6 | 69.06  | KV452784.1 | 8021985 | 3-scf00141 | 3 |
| AX-158008956 | 6 | 69.06  | KV452784.1 | 8028535 | 3-scf00141 | 3 |
| AX-157819934 | 6 | 69.06  | KV452784.1 | 8033560 | 3-scf00141 | 3 |
| AX-158008959 | 6 | 69.06  | KV452784.1 | 8034284 | 3-scf00141 | 3 |
| AX-158008961 | 6 | 69.06  | KV452784.1 | 8035536 | 3-scf00141 | 3 |
| AX-158008965 | 6 | 69.06  | KV452784.1 | 8038675 | 3-scf00141 | 3 |
| AX-158008966 | 6 | 69.06  | KV452784.1 | 8039133 | 3-scf00141 | 3 |
| AX-158008968 | 6 | 69.06  | KV452784.1 | 8039668 | 3-scf00141 | 3 |
| AX-158008973 | 6 | 69.06  | KV452784.1 | 8040586 | 3-scf00141 | 3 |
| AX-158008974 | 6 | 69.06  | KV452784.1 | 8042097 | 3-scf00141 | 3 |
| AX-157721648 | 6 | 69.06  | KV452784.1 | 8043570 | 3-scf00141 | 3 |
| AX-158008976 | 6 | 69.06  | KV452784.1 | 8044139 | 3-scf00141 | 3 |

|              |   |       |            |         |            |   |
|--------------|---|-------|------------|---------|------------|---|
| AX-158008977 | 6 | 69.06 | KV452784.1 | 8044383 | 3-scf00141 | 3 |
| AX-158008979 | 6 | 69.06 | KV452784.1 | 8045022 | 3-scf00141 | 3 |
| AX-157819936 | 6 | 69.06 | KV452784.1 | 8045549 | 3-scf00141 | 3 |
| AX-158008980 | 6 | 69.06 | KV452784.1 | 8046187 | 3-scf00141 | 3 |
| AX-157819938 | 6 | 69.06 | KV452784.1 | 8048926 | 3-scf00141 | 3 |
| AX-158008983 | 6 | 69.06 | KV452784.1 | 8050172 | 3-scf00141 | 3 |
| AX-158008987 | 6 | 69.06 | KV452784.1 | 8054503 | 3-scf00141 | 3 |
| AX-158008989 | 6 | 69.06 | KV452784.1 | 8055090 | 3-scf00141 | 3 |
| AX-158008993 | 6 | 69.06 | KV452784.1 | 8057902 | 3-scf00141 | 3 |
| AX-158008996 | 6 | 69.06 | KV452784.1 | 8060917 | 3-scf00141 | 3 |
| AX-158009000 | 6 | 69.06 | KV452784.1 | 8067099 | 3-scf00141 | 3 |
| AX-158009001 | 6 | 69.06 | KV452784.1 | 8068731 | 3-scf00141 | 3 |
| AX-158009002 | 6 | 69.06 | KV452784.1 | 8071723 | 3-scf00141 | 3 |
| AX-157819947 | 6 | 69.06 | KV452784.1 | 8075717 | 3-scf00141 | 3 |
| AX-158009009 | 6 | 69.06 | KV452784.1 | 8078089 | 3-scf00141 | 3 |
| AX-157819948 | 6 | 69.06 | KV452784.1 | 8079392 | 3-scf00141 | 3 |
| AX-158009010 | 6 | 69.06 | KV452784.1 | 8080024 | 3-scf00141 | 3 |
| AX-157748571 | 6 | 69.06 | KV452784.1 | 8082826 | 3-scf00141 | 3 |
| AX-158009018 | 6 | 69.06 | KV452784.1 | 8090654 | 3-scf00141 | 3 |
| AX-158009039 | 6 | 69.06 | KV452784.1 | 8110136 | 3-scf00141 | 3 |
| AX-157819953 | 6 | 69.06 | KV452784.1 | 8110449 | 3-scf00141 | 3 |
| AX-158009040 | 6 | 69.06 | KV452784.1 | 8111603 | 3-scf00141 | 3 |
| AX-157876231 | 6 | 69.06 | KV452784.1 | 8113856 | 3-scf00141 | 3 |
| AX-158009052 | 6 | 69.06 | KV452784.1 | 8120260 | 3-scf00141 | 3 |
| AX-158009054 | 6 | 69.06 | KV452784.1 | 8122046 | 3-scf00141 | 3 |
| AX-158009061 | 6 | 69.06 | KV452784.1 | 8129606 | 3-scf00141 | 3 |
| AX-157751619 | 6 | 69.06 | KV452784.1 | 8132590 | 3-scf00141 | 3 |
| AX-157747950 | 6 | 69.06 | KV452784.1 | 8134755 | 3-scf00141 | 3 |
| AX-158009069 | 6 | 69.06 | KV452784.1 | 8135233 | 3-scf00141 | 3 |
| AX-158009072 | 6 | 69.06 | KV452784.1 | 8138231 | 3-scf00141 | 3 |
| AX-158009077 | 6 | 69.06 | KV452784.1 | 8144307 | 3-scf00141 | 3 |
| AX-158009080 | 6 | 69.06 | KV452784.1 | 8146904 | 3-scf00141 | 3 |
| AX-158009086 | 6 | 69.06 | KV452784.1 | 8159380 | 3-scf00141 | 3 |
| AX-158009089 | 6 | 69.06 | KV452784.1 | 8160583 | 3-scf00141 | 3 |
| AX-158009102 | 6 | 69.06 | KV452784.1 | 8173840 | 3-scf00141 | 3 |
| AX-158009109 | 6 | 69.06 | KV452784.1 | 8187911 | 3-scf00141 | 3 |
| AX-158009115 | 6 | 69.06 | KV452784.1 | 8195518 | 3-scf00141 | 3 |
| AX-158009119 | 6 | 69.06 | KV452784.1 | 8197564 | 3-scf00141 | 3 |
| AX-158009121 | 6 | 69.06 | KV452784.1 | 8199639 | 3-scf00141 | 3 |
| AX-158009129 | 6 | 69.06 | KV452784.1 | 8204715 | 3-scf00141 | 3 |
| AX-157819961 | 6 | 69.06 | KV452784.1 | 8204982 | 3-scf00141 | 3 |
| AX-158009168 | 6 | 69.06 | KV452784.1 | 8230995 | 3-scf00141 | 3 |
| AX-157747011 | 6 | 69.06 | KV452784.1 | 8241987 | 3-scf00141 | 3 |
| AX-157819966 | 6 | 69.06 | KV452784.1 | 8258113 | 3-scf00141 | 3 |
| AX-158009201 | 6 | 69.06 | KV452784.1 | 8279382 | 3-scf00141 | 3 |
| AX-158009218 | 6 | 69.06 | KV452784.1 | 8295383 | 3-scf00141 | 3 |
| AX-158009220 | 6 | 69.06 | KV452784.1 | 8298349 | 3-scf00141 | 3 |
| AX-158009222 | 6 | 69.06 | KV452784.1 | 8299052 | 3-scf00141 | 3 |
| AX-158009223 | 6 | 69.06 | KV452784.1 | 8301347 | 3-scf00141 | 3 |
| AX-158009224 | 6 | 69.06 | KV452784.1 | 8301765 | 3-scf00141 | 3 |
| AX-157819970 | 6 | 69.06 | KV452784.1 | 8302803 | 3-scf00141 | 3 |

|              |   |       |            |         |            |   |
|--------------|---|-------|------------|---------|------------|---|
| AX-157819971 | 6 | 69.06 | KV452784.1 | 8303247 | 3-scf00141 | 3 |
| AX-158009227 | 6 | 69.06 | KV452784.1 | 8303383 | 3-scf00141 | 3 |
| AX-157819972 | 6 | 69.06 | KV452784.1 | 8304404 | 3-scf00141 | 3 |
| AX-158009230 | 6 | 69.06 | KV452784.1 | 8305559 | 3-scf00141 | 3 |
| AX-158009233 | 6 | 69.06 | KV452784.1 | 8309056 | 3-scf00141 | 3 |
| AX-158009234 | 6 | 69.06 | KV452784.1 | 8309495 | 3-scf00141 | 3 |
| AX-158009238 | 6 | 69.06 | KV452784.1 | 8311844 | 3-scf00141 | 3 |
| AX-158009241 | 6 | 69.06 | KV452784.1 | 8312834 | 3-scf00141 | 3 |
| AX-158009242 | 6 | 69.06 | KV452784.1 | 8313817 | 3-scf00141 | 3 |
| AX-158407727 | 6 | 69.06 | KV452784.1 | 8316528 | 3-scf00141 | 3 |
| AX-158009248 | 6 | 69.06 | KV452784.1 | 8318628 | 3-scf00141 | 3 |
| AX-158009250 | 6 | 69.06 | KV452784.1 | 8319292 | 3-scf00141 | 3 |
| AX-158009283 | 6 | 69.06 | KV452784.1 | 8348956 | 3-scf00141 | 3 |
| AX-157819979 | 6 | 69.06 | KV452784.1 | 8421277 | 3-scf00141 | 3 |
| AX-158009372 | 6 | 69.06 | KV452784.1 | 8424649 | 3-scf00141 | 3 |
| AX-157819980 | 6 | 69.06 | KV452784.1 | 8425107 | 3-scf00141 | 3 |
| AX-158009376 | 6 | 69.06 | KV452784.1 | 8427497 | 3-scf00141 | 3 |
| AX-158407732 | 6 | 69.06 | KV452784.1 | 8430642 | 3-scf00141 | 3 |
| AX-158009378 | 6 | 69.06 | KV452784.1 | 8430756 | 3-scf00141 | 3 |
| AX-158009381 | 6 | 69.06 | KV452784.1 | 8435867 | 3-scf00141 | 3 |
| AX-158009384 | 6 | 69.06 | KV452784.1 | 8437618 | 3-scf00141 | 3 |
| AX-158009386 | 6 | 69.06 | KV452784.1 | 8438872 | 3-scf00141 | 3 |
| AX-158009389 | 6 | 69.06 | KV452784.1 | 8444469 | 3-scf00141 | 3 |
| AX-158009392 | 6 | 69.06 | KV452784.1 | 8446570 | 3-scf00141 | 3 |
| AX-158009394 | 6 | 69.06 | KV452784.1 | 8447492 | 3-scf00141 | 3 |
| AX-158009398 | 6 | 69.06 | KV452784.1 | 8448743 | 3-scf00141 | 3 |
| AX-158009401 | 6 | 69.06 | KV452784.1 | 8450698 | 3-scf00141 | 3 |
| AX-158009402 | 6 | 69.06 | KV452784.1 | 8453939 | 3-scf00141 | 3 |
| AX-157819981 | 6 | 69.06 | KV452784.1 | 8457594 | 3-scf00141 | 3 |
| AX-158009403 | 6 | 69.06 | KV452784.1 | 8458390 | 3-scf00141 | 3 |
| AX-158009404 | 6 | 69.06 | KV452784.1 | 8460593 | 3-scf00141 | 3 |
| AX-158009405 | 6 | 69.06 | KV452784.1 | 8461586 | 3-scf00141 | 3 |
| AX-158009408 | 6 | 69.06 | KV452784.1 | 8464180 | 3-scf00141 | 3 |
| AX-158009409 | 6 | 69.06 | KV452784.1 | 8466090 | 3-scf00141 | 3 |
| AX-158009418 | 6 | 69.06 | KV452784.1 | 8478794 | 3-scf00141 | 3 |
| AX-158009419 | 6 | 69.06 | KV452784.1 | 8480362 | 3-scf00141 | 3 |
| AX-157819984 | 6 | 69.06 | KV452784.1 | 8482406 | 3-scf00141 | 3 |
| AX-158009420 | 6 | 69.06 | KV452784.1 | 8482682 | 3-scf00141 | 3 |
| AX-158009423 | 6 | 69.06 | KV452784.1 | 8484067 | 3-scf00141 | 3 |
| AX-158009424 | 6 | 69.06 | KV452784.1 | 8487352 | 3-scf00141 | 3 |
| AX-158009425 | 6 | 69.06 | KV452784.1 | 8489194 | 3-scf00141 | 3 |
| AX-157856221 | 6 | 69.06 | KV452784.1 | 8550323 | 3-scf00141 | 3 |
| AX-158009473 | 6 | 69.06 | KV452784.1 | 8591415 | 3-scf00141 | 3 |
| AX-157819991 | 6 | 69.06 | KV452784.1 | 8594025 | 3-scf00141 | 3 |
| AX-158009525 | 6 | 69.06 | KV452784.1 | 8644965 | 3-scf00141 | 3 |
| AX-157856222 | 6 | 69.06 | KV452784.1 | 8652593 | 3-scf00141 | 3 |
| AX-158009544 | 6 | 69.06 | KV452784.1 | 8660393 | 3-scf00141 | 3 |
| AX-158009547 | 6 | 69.06 | KV452784.1 | 8661005 | 3-scf00141 | 3 |
| AX-157744596 | 6 | 69.06 | KV452784.1 | 8661992 | 3-scf00141 | 3 |
| AX-158009592 | 6 | 69.06 | KV452784.1 | 8703819 | 3-scf00141 | 3 |
| AX-158010222 | 6 | 69.06 | KV452784.1 | 9357254 | 3-scf00141 | 3 |

|              |   |        |            |         |            |   |
|--------------|---|--------|------------|---------|------------|---|
| AX-158009084 | 6 | 69.112 | KV452784.1 | 8157303 | 3-scf00141 | 3 |
| AX-157819851 | 6 | 69.17  | KV452784.1 | 6769679 | 3-scf00141 | 3 |
| AX-158008001 | 6 | 69.17  | KV452784.1 | 6896571 | 3-scf00141 | 3 |
| AX-158008597 | 6 | 69.17  | KV452784.1 | 7694452 | 3-scf00141 | 3 |
| AX-157819929 | 6 | 69.17  | KV452784.1 | 8005840 | 3-scf00141 | 3 |
| AX-158008933 | 6 | 69.17  | KV452784.1 | 8011951 | 3-scf00141 | 3 |
| AX-158008940 | 6 | 69.17  | KV452784.1 | 8014982 | 3-scf00141 | 3 |
| AX-157751155 | 6 | 69.17  | KV452784.1 | 8015645 | 3-scf00141 | 3 |
| AX-158008960 | 6 | 69.17  | KV452784.1 | 8035177 | 3-scf00141 | 3 |
| AX-157744978 | 6 | 69.17  | KV452784.1 | 8037791 | 3-scf00141 | 3 |
| AX-157819937 | 6 | 69.17  | KV452784.1 | 8048136 | 3-scf00141 | 3 |
| AX-158008990 | 6 | 69.17  | KV452784.1 | 8055942 | 3-scf00141 | 3 |
| AX-158008995 | 6 | 69.17  | KV452784.1 | 8060046 | 3-scf00141 | 3 |
| AX-157773342 | 6 | 69.17  | KV452784.1 | 8063278 | 3-scf00141 | 3 |
| AX-157819946 | 6 | 69.17  | KV452784.1 | 8074745 | 3-scf00141 | 3 |
| AX-158009008 | 6 | 69.17  | KV452784.1 | 8076484 | 3-scf00141 | 3 |
| AX-158009011 | 6 | 69.17  | KV452784.1 | 8083814 | 3-scf00141 | 3 |
| AX-157819950 | 6 | 69.17  | KV452784.1 | 8090162 | 3-scf00141 | 3 |
| AX-158009066 | 6 | 69.17  | KV452784.1 | 8131503 | 3-scf00141 | 3 |
| AX-158009074 | 6 | 69.17  | KV452784.1 | 8142422 | 3-scf00141 | 3 |
| AX-158009099 | 6 | 69.17  | KV452784.1 | 8169289 | 3-scf00141 | 3 |
| AX-158009134 | 6 | 69.17  | KV452784.1 | 8210271 | 3-scf00141 | 3 |
| AX-158009137 | 6 | 69.17  | KV452784.1 | 8218543 | 3-scf00141 | 3 |
| AX-158009141 | 6 | 69.17  | KV452784.1 | 8219966 | 3-scf00141 | 3 |
| AX-157819964 | 6 | 69.17  | KV452784.1 | 8234778 | 3-scf00141 | 3 |
| AX-158009176 | 6 | 69.17  | KV452784.1 | 8238812 | 3-scf00141 | 3 |
| AX-158009179 | 6 | 69.17  | KV452784.1 | 8245767 | 3-scf00141 | 3 |
| AX-158009187 | 6 | 69.17  | KV452784.1 | 8263027 | 3-scf00141 | 3 |
| AX-158009190 | 6 | 69.17  | KV452784.1 | 8269458 | 3-scf00141 | 3 |
| AX-158009193 | 6 | 69.17  | KV452784.1 | 8271156 | 3-scf00141 | 3 |
| AX-158009195 | 6 | 69.17  | KV452784.1 | 8276333 | 3-scf00141 | 3 |
| AX-157738967 | 6 | 69.17  | KV452784.1 | 8277735 | 3-scf00141 | 3 |
| AX-158009202 | 6 | 69.17  | KV452784.1 | 8279828 | 3-scf00141 | 3 |
| AX-158009205 | 6 | 69.17  | KV452784.1 | 8281983 | 3-scf00141 | 3 |
| AX-157819969 | 6 | 69.17  | KV452784.1 | 8289211 | 3-scf00141 | 3 |
| AX-158009229 | 6 | 69.17  | KV452784.1 | 8304564 | 3-scf00141 | 3 |
| AX-158009231 | 6 | 69.17  | KV452784.1 | 8307860 | 3-scf00141 | 3 |
| AX-158009237 | 6 | 69.17  | KV452784.1 | 8311640 | 3-scf00141 | 3 |
| AX-158009244 | 6 | 69.17  | KV452784.1 | 8314272 | 3-scf00141 | 3 |
| AX-158009256 | 6 | 69.17  | KV452784.1 | 8327559 | 3-scf00141 | 3 |
| AX-157774015 | 6 | 69.17  | KV452784.1 | 8330288 | 3-scf00141 | 3 |
| AX-158009293 | 6 | 69.17  | KV452784.1 | 8356707 | 3-scf00141 | 3 |
| AX-158009349 | 6 | 69.17  | KV452784.1 | 8397957 | 3-scf00141 | 3 |
| AX-158009374 | 6 | 69.17  | KV452784.1 | 8425541 | 3-scf00141 | 3 |
| AX-157747953 | 6 | 69.17  | KV452784.1 | 8459601 | 3-scf00141 | 3 |
| AX-157742456 | 6 | 69.17  | KV452784.1 | 8462280 | 3-scf00141 | 3 |
| AX-157819982 | 6 | 69.17  | KV452784.1 | 8468388 | 3-scf00141 | 3 |
| AX-158009412 | 6 | 69.17  | KV452784.1 | 8474248 | 3-scf00141 | 3 |
| AX-158009414 | 6 | 69.17  | KV452784.1 | 8475658 | 3-scf00141 | 3 |
| AX-158009417 | 6 | 69.17  | KV452784.1 | 8475989 | 3-scf00141 | 3 |
| AX-157819983 | 6 | 69.17  | KV452784.1 | 8477502 | 3-scf00141 | 3 |

|              |   |       |            |         |            |   |
|--------------|---|-------|------------|---------|------------|---|
| AX-158009427 | 6 | 69.17 | KV452784.1 | 8494851 | 3-scf00141 | 3 |
| AX-158009429 | 6 | 69.17 | KV452784.1 | 8496424 | 3-scf00141 | 3 |
| AX-158009430 | 6 | 69.17 | KV452784.1 | 8496798 | 3-scf00141 | 3 |
| AX-158009431 | 6 | 69.17 | KV452784.1 | 8498480 | 3-scf00141 | 3 |
| AX-158009434 | 6 | 69.17 | KV452784.1 | 8499501 | 3-scf00141 | 3 |
| AX-157717802 | 6 | 69.17 | KV452784.1 | 8500953 | 3-scf00141 | 3 |
| AX-158009438 | 6 | 69.17 | KV452784.1 | 8504182 | 3-scf00141 | 3 |
| AX-157771053 | 6 | 69.17 | KV452784.1 | 8508100 | 3-scf00141 | 3 |
| AX-158009442 | 6 | 69.17 | KV452784.1 | 8514838 | 3-scf00141 | 3 |
| AX-158009444 | 6 | 69.17 | KV452784.1 | 8517452 | 3-scf00141 | 3 |
| AX-158009447 | 6 | 69.17 | KV452784.1 | 8521214 | 3-scf00141 | 3 |
| AX-158009449 | 6 | 69.17 | KV452784.1 | 8532522 | 3-scf00141 | 3 |
| AX-158009451 | 6 | 69.17 | KV452784.1 | 8533518 | 3-scf00141 | 3 |
| AX-158009452 | 6 | 69.17 | KV452784.1 | 8536831 | 3-scf00141 | 3 |
| AX-157819987 | 6 | 69.17 | KV452784.1 | 8538544 | 3-scf00141 | 3 |
| AX-158009459 | 6 | 69.17 | KV452784.1 | 8556228 | 3-scf00141 | 3 |
| AX-158009460 | 6 | 69.17 | KV452784.1 | 8557852 | 3-scf00141 | 3 |
| AX-158009465 | 6 | 69.17 | KV452784.1 | 8562054 | 3-scf00141 | 3 |
| AX-157757678 | 6 | 69.17 | KV452784.1 | 8572373 | 3-scf00141 | 3 |
| AX-158009469 | 6 | 69.17 | KV452784.1 | 8574981 | 3-scf00141 | 3 |
| AX-158009471 | 6 | 69.17 | KV452784.1 | 8579568 | 3-scf00141 | 3 |
| AX-158009474 | 6 | 69.17 | KV452784.1 | 8593511 | 3-scf00141 | 3 |
| AX-158009479 | 6 | 69.17 | KV452784.1 | 8598462 | 3-scf00141 | 3 |
| AX-158009492 | 6 | 69.17 | KV452784.1 | 8614692 | 3-scf00141 | 3 |
| AX-158009494 | 6 | 69.17 | KV452784.1 | 8618063 | 3-scf00141 | 3 |
| AX-158009495 | 6 | 69.17 | KV452784.1 | 8618467 | 3-scf00141 | 3 |
| AX-157819994 | 6 | 69.17 | KV452784.1 | 8619318 | 3-scf00141 | 3 |
| AX-158009497 | 6 | 69.17 | KV452784.1 | 8621078 | 3-scf00141 | 3 |
| AX-157819995 | 6 | 69.17 | KV452784.1 | 8624043 | 3-scf00141 | 3 |
| AX-158009502 | 6 | 69.17 | KV452784.1 | 8627122 | 3-scf00141 | 3 |
| AX-158009507 | 6 | 69.17 | KV452784.1 | 8628708 | 3-scf00141 | 3 |
| AX-158009510 | 6 | 69.17 | KV452784.1 | 8630902 | 3-scf00141 | 3 |
| AX-158407737 | 6 | 69.17 | KV452784.1 | 8632740 | 3-scf00141 | 3 |
| AX-158009516 | 6 | 69.17 | KV452784.1 | 8636237 | 3-scf00141 | 3 |
| AX-158009517 | 6 | 69.17 | KV452784.1 | 8636845 | 3-scf00141 | 3 |
| AX-157876236 | 6 | 69.17 | KV452784.1 | 8638930 | 3-scf00141 | 3 |
| AX-158009521 | 6 | 69.17 | KV452784.1 | 8641592 | 3-scf00141 | 3 |
| AX-157819997 | 6 | 69.17 | KV452784.1 | 8643232 | 3-scf00141 | 3 |
| AX-157819998 | 6 | 69.17 | KV452784.1 | 8645001 | 3-scf00141 | 3 |
| AX-157876237 | 6 | 69.17 | KV452784.1 | 8647425 | 3-scf00141 | 3 |
| AX-158009528 | 6 | 69.17 | KV452784.1 | 8647534 | 3-scf00141 | 3 |
| AX-158009530 | 6 | 69.17 | KV452784.1 | 8648722 | 3-scf00141 | 3 |
| AX-158009537 | 6 | 69.17 | KV452784.1 | 8653925 | 3-scf00141 | 3 |
| AX-157819999 | 6 | 69.17 | KV452784.1 | 8655821 | 3-scf00141 | 3 |
| AX-158009539 | 6 | 69.17 | KV452784.1 | 8656365 | 3-scf00141 | 3 |
| AX-158009541 | 6 | 69.17 | KV452784.1 | 8656640 | 3-scf00141 | 3 |
| AX-158009546 | 6 | 69.17 | KV452784.1 | 8660641 | 3-scf00141 | 3 |
| AX-158009554 | 6 | 69.17 | KV452784.1 | 8668978 | 3-scf00141 | 3 |
| AX-158009558 | 6 | 69.17 | KV452784.1 | 8672268 | 3-scf00141 | 3 |
| AX-158009570 | 6 | 69.17 | KV452784.1 | 8688436 | 3-scf00141 | 3 |
| AX-158009576 | 6 | 69.17 | KV452784.1 | 8693485 | 3-scf00141 | 3 |

|              |   |        |            |         |            |   |
|--------------|---|--------|------------|---------|------------|---|
| AX-157820002 | 6 | 69.17  | KV452784.1 | 8701847 | 3-scf00141 | 3 |
| AX-158009597 | 6 | 69.17  | KV452784.1 | 8707287 | 3-scf00141 | 3 |
| AX-158009598 | 6 | 69.17  | KV452784.1 | 8708685 | 3-scf00141 | 3 |
| AX-158009617 | 6 | 69.17  | KV452784.1 | 8719797 | 3-scf00141 | 3 |
| AX-158009565 | 6 | 69.227 | KV452784.1 | 8686124 | 3-scf00141 | 3 |
| AX-158009566 | 6 | 69.279 | KV452784.1 | 8687146 | 3-scf00141 | 3 |
| AX-158009573 | 6 | 69.279 | KV452784.1 | 8691813 | 3-scf00141 | 3 |
| AX-158009577 | 6 | 69.279 | KV452784.1 | 8693869 | 3-scf00141 | 3 |
| AX-158009580 | 6 | 69.279 | KV452784.1 | 8696028 | 3-scf00141 | 3 |
| AX-158009583 | 6 | 69.279 | KV452784.1 | 8697673 | 3-scf00141 | 3 |
| AX-158009587 | 6 | 69.279 | KV452784.1 | 8698922 | 3-scf00141 | 3 |
| AX-157820004 | 6 | 69.279 | KV452784.1 | 8707431 | 3-scf00141 | 3 |
| AX-158009600 | 6 | 69.279 | KV452784.1 | 8711174 | 3-scf00141 | 3 |
| AX-157820006 | 6 | 69.279 | KV452784.1 | 8713189 | 3-scf00141 | 3 |
| AX-158009606 | 6 | 69.279 | KV452784.1 | 8713599 | 3-scf00141 | 3 |
| AX-158009608 | 6 | 69.279 | KV452784.1 | 8714588 | 3-scf00141 | 3 |
| AX-158009609 | 6 | 69.279 | KV452784.1 | 8715375 | 3-scf00141 | 3 |
| AX-158009612 | 6 | 69.279 | KV452784.1 | 8717891 | 3-scf00141 | 3 |
| AX-158009614 | 6 | 69.279 | KV452784.1 | 8718710 | 3-scf00141 | 3 |
| AX-158009659 | 6 | 69.279 | KV452784.1 | 8761889 | 3-scf00141 | 3 |
| AX-158009755 | 6 | 69.279 | KV452784.1 | 8852241 | 3-scf00141 | 3 |
| AX-158009771 | 6 | 69.279 | KV452784.1 | 8870292 | 3-scf00141 | 3 |
| AX-158009620 | 6 | 69.498 | KV452784.1 | 8722392 | 3-scf00141 | 3 |
| AX-158009628 | 6 | 69.498 | KV452784.1 | 8732267 | 3-scf00141 | 3 |
| AX-158009630 | 6 | 69.498 | KV452784.1 | 8735986 | 3-scf00141 | 3 |
| AX-157820007 | 6 | 69.498 | KV452784.1 | 8739669 | 3-scf00141 | 3 |
| AX-158009631 | 6 | 69.498 | KV452784.1 | 8739725 | 3-scf00141 | 3 |
| AX-158009633 | 6 | 69.498 | KV452784.1 | 8742117 | 3-scf00141 | 3 |
| AX-157710615 | 6 | 69.498 | KV452784.1 | 8742368 | 3-scf00141 | 3 |
| AX-158009639 | 6 | 69.498 | KV452784.1 | 8745906 | 3-scf00141 | 3 |
| AX-158009642 | 6 | 69.498 | KV452784.1 | 8748159 | 3-scf00141 | 3 |
| AX-158009643 | 6 | 69.498 | KV452784.1 | 8749670 | 3-scf00141 | 3 |
| AX-158009645 | 6 | 69.498 | KV452784.1 | 8751533 | 3-scf00141 | 3 |
| AX-158407738 | 6 | 69.498 | KV452784.1 | 8756218 | 3-scf00141 | 3 |
| AX-157743011 | 6 | 69.498 | KV452784.1 | 8769155 | 3-scf00141 | 3 |
| AX-158009661 | 6 | 69.498 | KV452784.1 | 8771310 | 3-scf00141 | 3 |
| AX-158009662 | 6 | 69.498 | KV452784.1 | 8771608 | 3-scf00141 | 3 |
| AX-158009663 | 6 | 69.498 | KV452784.1 | 8772402 | 3-scf00141 | 3 |
| AX-158009670 | 6 | 69.498 | KV452784.1 | 8780493 | 3-scf00141 | 3 |
| AX-158009678 | 6 | 69.498 | KV452784.1 | 8787311 | 3-scf00141 | 3 |
| AX-158009679 | 6 | 69.498 | KV452784.1 | 8789241 | 3-scf00141 | 3 |
| AX-157752705 | 6 | 69.498 | KV452784.1 | 8790084 | 3-scf00141 | 3 |
| AX-158009682 | 6 | 69.629 | KV452784.1 | 8793054 | 3-scf00141 | 3 |
| AX-158009183 | 6 | 69.716 | KV452784.1 | 8256809 | 3-scf00141 | 3 |
| AX-158009251 | 6 | 69.716 | KV452784.1 | 8319840 | 3-scf00141 | 3 |
| AX-158009632 | 6 | 69.716 | KV452784.1 | 8741322 | 3-scf00141 | 3 |
| AX-158009655 | 6 | 69.716 | KV452784.1 | 8759723 | 3-scf00141 | 3 |
| AX-157703519 | 6 | 69.716 | KV452784.1 | 8762583 | 3-scf00141 | 3 |
| AX-157714468 | 6 | 69.716 | KV452784.1 | 8793674 | 3-scf00141 | 3 |
| AX-158009685 | 6 | 69.716 | KV452784.1 | 8795143 | 3-scf00141 | 3 |
| AX-158009689 | 6 | 69.716 | KV452784.1 | 8797303 | 3-scf00141 | 3 |



|              |   |        |             |          |            |    |
|--------------|---|--------|-------------|----------|------------|----|
| AX-158009691 | 6 | 69.716 | KV452784.1  | 8801478  | 3-scf00141 | 3  |
| AX-158009696 | 6 | 69.716 | KV452784.1  | 8804514  | 3-scf00141 | 3  |
| AX-158009697 | 6 | 69.716 | KV452784.1  | 8804906  | 3-scf00141 | 3  |
| AX-158009699 | 6 | 69.716 | KV452784.1  | 8806234  | 3-scf00141 | 3  |
| AX-158009704 | 6 | 69.716 | KV452784.1  | 8809710  | 3-scf00141 | 3  |
| AX-158009721 | 6 | 69.716 | KV452784.1  | 8818122  | 3-scf00141 | 3  |
| AX-158009727 | 6 | 69.716 | KV452784.1  | 8820596  | 3-scf00141 | 3  |
| AX-158009819 | 6 | 69.716 | KV452784.1  | 8921359  | 3-scf00141 | 3  |
| AX-158009711 | 6 | 69.934 | KV452784.1  | 8812305  | 3-scf00141 | 3  |
| AX-158009712 | 6 | 69.934 | KV452784.1  | 8812725  | 3-scf00141 | 3  |
| AX-158009715 | 6 | 69.934 | KV452784.1  | 8813167  | 3-scf00141 | 3  |
| AX-158009717 | 6 | 69.934 | KV452784.1  | 8814147  | 3-scf00141 | 3  |
| AX-158009718 | 6 | 69.934 | KV452784.1  | 8814901  | 3-scf00141 | 3  |
| AX-157820010 | 6 | 69.934 | KV452784.1  | 8815053  | 3-scf00141 | 3  |
| AX-157820011 | 6 | 69.934 | KV452784.1  | 8815227  | 3-scf00141 | 3  |
| AX-158009724 | 6 | 70.052 | KV452784.1  | 8819006  | 3-scf00141 | 3  |
| AX-158009728 | 6 | 70.153 | KV452784.1  | 8821499  | 3-scf00141 | 3  |
| AX-158009720 | 6 | 70.262 | KV452784.1  | 8817524  | 3-scf00141 | 3  |
| AX-158009731 | 6 | 70.262 | KV452784.1  | 8829659  | 3-scf00141 | 3  |
| AX-158383571 | 6 | 70.262 | KV452784.1  | 8830140  | 3-scf00141 | 3  |
| AX-158009734 | 6 | 70.262 | KV452784.1  | 8834589  | 3-scf00141 | 3  |
| AX-158009737 | 6 | 70.262 | KV452784.1  | 8837579  | 3-scf00141 | 3  |
| AX-158009742 | 6 | 70.262 | KV452784.1  | 8839524  | 3-scf00141 | 3  |
| AX-158009745 | 6 | 70.262 | KV452784.1  | 8841139  | 3-scf00141 | 3  |
| AX-158009747 | 6 | 70.262 | KV452784.1  | 8843112  | 3-scf00141 | 3  |
| AX-158009748 | 6 | 70.262 | KV452784.1  | 8843889  | 3-scf00141 | 3  |
| AX-158009749 | 6 | 70.262 | KV452784.1  | 8844993  | 3-scf00141 | 3  |
| AX-157820012 | 6 | 70.262 | KV452784.1  | 8845491  | 3-scf00141 | 3  |
| AX-157884830 | 6 | 70.262 | KV452784.1  | 8869824  | 3-scf00141 | 3  |
| AX-158010230 | 6 | 70.262 | KV452784.1  | 9363130  | 3-scf00141 | 3  |
| AX-158011549 | 6 | 70.262 | KV452784.1  | 10813559 | 3-scf00141 | 3  |
| AX-157706385 | 6 | 70.262 | 3ML01032162 | 426      | scf07776_1 | UN |
| AX-158009736 | 6 | 70.372 | KV452784.1  | 8836703  | 3-scf00141 | 3  |
| AX-158009752 | 6 | 70.372 | KV452784.1  | 8848618  | 3-scf00141 | 3  |
| AX-158009754 | 6 | 70.372 | KV452784.1  | 8851401  | 3-scf00141 | 3  |
| AX-157752198 | 6 | 70.372 | KV452784.1  | 8855541  | 3-scf00141 | 3  |
| AX-158009759 | 6 | 70.372 | KV452784.1  | 8857237  | 3-scf00141 | 3  |
| AX-158009762 | 6 | 70.372 | KV452784.1  | 8862042  | 3-scf00141 | 3  |
| AX-158009763 | 6 | 70.372 | KV452784.1  | 8862430  | 3-scf00141 | 3  |
| AX-158009764 | 6 | 70.372 | KV452784.1  | 8863412  | 3-scf00141 | 3  |
| AX-158009765 | 6 | 70.372 | KV452784.1  | 8864352  | 3-scf00141 | 3  |
| AX-158009770 | 6 | 70.372 | KV452784.1  | 8869220  | 3-scf00141 | 3  |
| AX-158009773 | 6 | 70.372 | KV452784.1  | 8871004  | 3-scf00141 | 3  |
| AX-158009774 | 6 | 70.372 | KV452784.1  | 8874443  | 3-scf00141 | 3  |
| AX-158009798 | 6 | 70.372 | KV452784.1  | 8901769  | 3-scf00141 | 3  |
| AX-158009743 | 6 | 70.481 | KV452784.1  | 8840696  | 3-scf00141 | 3  |
| AX-158009782 | 6 | 70.481 | KV452784.1  | 8886297  | 3-scf00141 | 3  |
| AX-158009784 | 6 | 70.481 | KV452784.1  | 8888501  | 3-scf00141 | 3  |
| AX-158009787 | 6 | 70.535 | KV452784.1  | 8891429  | 3-scf00141 | 3  |
| AX-158009810 | 6 | 70.535 | KV452784.1  | 8916922  | 3-scf00141 | 3  |
| AX-158009788 | 6 | 70.545 | KV452784.1  | 8891895  | 3-scf00141 | 3  |

|              |   |        |            |         |               |    |
|--------------|---|--------|------------|---------|---------------|----|
| AX-158009615 | 6 | 70.59  | KV452784.1 | 8719213 | 3-scf00141    | 3  |
| AX-157884828 | 6 | 70.59  | KV452784.1 | 8828647 | 3-scf00141    | 3  |
| AX-158009740 | 6 | 70.59  | KV452784.1 | 8838920 | 3-scf00141    | 3  |
| AX-158009751 | 6 | 70.59  | KV452784.1 | 8846625 | 3-scf00141    | 3  |
| AX-158009790 | 6 | 70.59  | KV452784.1 | 8895866 | 3-scf00141    | 3  |
| AX-158009795 | 6 | 70.59  | KV452784.1 | 8900231 | 3-scf00141    | 3  |
| AX-158009800 | 6 | 70.59  | KV452784.1 | 8903162 | 3-scf00141    | 3  |
| AX-157751000 | 6 | 70.59  | KV452784.1 | 8912032 | 3-scf00141    | 3  |
| AX-158009805 | 6 | 70.59  | KV452784.1 | 8912688 | 3-scf00141    | 3  |
| AX-158009808 | 6 | 70.59  | KV452784.1 | 8916525 | 3-scf00141    | 3  |
| AX-157870070 | 6 | 70.59  | KV452784.1 | 8917244 | 3-scf00141    | 3  |
| AX-158009830 | 6 | 70.59  | KV452784.1 | 8930902 | 3-scf00141    | 3  |
| AX-158009833 | 6 | 70.59  | KV452784.1 | 8932912 | 3-scf00141    | 3  |
| AX-158009885 | 6 | 70.59  | KV452784.1 | 9019673 | 3-scf00141    | 3  |
| AX-157718342 | 6 | 70.59  | KV452784.1 | 9063088 | 3-scf00141    | 3  |
| AX-158010182 | 6 | 70.59  | KV452784.1 | 9306099 | 3-scf00141    | 3  |
| AX-157693000 | 6 | 70.59  |            | 826     | :216772_g4_i: | UN |
| AX-158009818 | 6 | 70.639 | KV452784.1 | 8919664 | 3-scf00141    | 3  |
| AX-158009794 | 6 | 70.699 | KV452784.1 | 8898209 | 3-scf00141    | 3  |
| AX-157747447 | 6 | 70.699 | KV452784.1 | 8925538 | 3-scf00141    | 3  |
| AX-158009824 | 6 | 70.699 | KV452784.1 | 8927287 | 3-scf00141    | 3  |
| AX-158009827 | 6 | 70.699 | KV452784.1 | 8930050 | 3-scf00141    | 3  |
| AX-158009828 | 6 | 70.699 | KV452784.1 | 8930416 | 3-scf00141    | 3  |
| AX-158009832 | 6 | 70.699 | KV452784.1 | 8931564 | 3-scf00141    | 3  |
| AX-158383576 | 6 | 70.699 | KV452784.1 | 8945000 | 3-scf00141    | 3  |
| AX-158009839 | 6 | 70.755 | KV452784.1 | 8945362 | 3-scf00141    | 3  |
| AX-158009850 | 6 | 70.808 | KV452784.1 | 8958775 | 3-scf00141    | 3  |
| AX-158009854 | 6 | 70.808 | KV452784.1 | 8964722 | 3-scf00141    | 3  |
| AX-158009856 | 6 | 70.808 | KV452784.1 | 8966317 | 3-scf00141    | 3  |
| AX-158009940 | 6 | 70.808 | KV452784.1 | 9080631 | 3-scf00141    | 3  |
| AX-158009733 | 6 | 70.918 | KV452784.1 | 8832983 | 3-scf00141    | 3  |
| AX-157876245 | 6 | 70.918 | KV452784.1 | 8834913 | 3-scf00141    | 3  |
| AX-158383572 | 6 | 70.918 | KV452784.1 | 8836527 | 3-scf00141    | 3  |
| AX-158383575 | 6 | 70.918 | KV452784.1 | 8941931 | 3-scf00141    | 3  |
| AX-158009869 | 6 | 70.918 | KV452784.1 | 8990583 | 3-scf00141    | 3  |
| AX-158009870 | 6 | 70.918 | KV452784.1 | 8995214 | 3-scf00141    | 3  |
| AX-158009873 | 6 | 70.918 | KV452784.1 | 9003950 | 3-scf00141    | 3  |
| AX-158009879 | 6 | 70.918 | KV452784.1 | 9014290 | 3-scf00141    | 3  |
| AX-158009888 | 6 | 70.918 | KV452784.1 | 9021941 | 3-scf00141    | 3  |
| AX-158009890 | 6 | 70.918 | KV452784.1 | 9023563 | 3-scf00141    | 3  |
| AX-158009891 | 6 | 70.918 | KV452784.1 | 9023820 | 3-scf00141    | 3  |
| AX-157820024 | 6 | 70.918 | KV452784.1 | 9032183 | 3-scf00141    | 3  |
| AX-158009896 | 6 | 70.918 | KV452784.1 | 9034601 | 3-scf00141    | 3  |
| AX-158009897 | 6 | 70.918 | KV452784.1 | 9037618 | 3-scf00141    | 3  |
| AX-158009898 | 6 | 70.918 | KV452784.1 | 9038879 | 3-scf00141    | 3  |
| AX-157744307 | 6 | 70.918 | KV452784.1 | 9042840 | 3-scf00141    | 3  |
| AX-157820026 | 6 | 70.918 | KV452784.1 | 9045668 | 3-scf00141    | 3  |
| AX-158009899 | 6 | 70.918 | KV452784.1 | 9046337 | 3-scf00141    | 3  |
| AX-158009906 | 6 | 70.918 | KV452784.1 | 9053654 | 3-scf00141    | 3  |
| AX-158009916 | 6 | 70.918 | KV452784.1 | 9059974 | 3-scf00141    | 3  |
| AX-157820029 | 6 | 70.918 | KV452784.1 | 9060145 | 3-scf00141    | 3  |

|              |   |        |            |          |               |    |
|--------------|---|--------|------------|----------|---------------|----|
| AX-158009919 | 6 | 70.918 | KV452784.1 | 9062971  | 3-scf00141    | 3  |
| AX-157820031 | 6 | 70.918 | KV452784.1 | 9070322  | 3-scf00141    | 3  |
| AX-158009931 | 6 | 70.918 | KV452784.1 | 9070643  | 3-scf00141    | 3  |
| AX-158009932 | 6 | 70.918 | KV452784.1 | 9071523  | 3-scf00141    | 3  |
| AX-158009933 | 6 | 70.918 | KV452784.1 | 9072183  | 3-scf00141    | 3  |
| AX-158009999 | 6 | 70.918 | KV452784.1 | 9125930  | 3-scf00141    | 3  |
| AX-158010017 | 6 | 70.918 | KV452784.1 | 9135891  | 3-scf00141    | 3  |
| AX-157820036 | 6 | 70.918 | KV452784.1 | 9138260  | 3-scf00141    | 3  |
| AX-158407783 | 6 | 70.918 | KV452784.1 | 10794840 | 3-scf00141    | 3  |
| AX-158011555 | 6 | 70.918 | KV452784.1 | 10816522 | 3-scf00141    | 3  |
| AX-158011556 | 6 | 70.918 | KV452784.1 | 10817716 | 3-scf00141    | 3  |
| AX-158009626 | 6 | 71.023 | KV452784.1 | 8725095  | 3-scf00141    | 3  |
| AX-158009934 | 6 | 71.023 | KV452784.1 | 9072628  | 3-scf00141    | 3  |
| AX-158009868 | 6 | 71.136 | KV452784.1 | 8989750  | 3-scf00141    | 3  |
| AX-158009923 | 6 | 71.136 | KV452784.1 | 9064248  | 3-scf00141    | 3  |
| AX-158009942 | 6 | 71.136 | KV452784.1 | 9082831  | 3-scf00141    | 3  |
| AX-157717300 | 6 | 71.136 | KV452784.1 | 9094563  | 3-scf00141    | 3  |
| AX-158383573 | 6 | 71.183 | KV452784.1 | 8842495  | 3-scf00141    | 3  |
| AX-157747847 | 6 | 71.183 | KV452784.1 | 9083176  | 3-scf00141    | 3  |
| AX-157692998 | 6 | 71.183 |            | 145      | :216772_g4_i: | UN |
| AX-158009944 | 6 | 71.245 | KV452784.1 | 9087158  | 3-scf00141    | 3  |
| AX-158009946 | 6 | 71.245 | KV452784.1 | 9087457  | 3-scf00141    | 3  |
| AX-158009947 | 6 | 71.245 | KV452784.1 | 9088395  | 3-scf00141    | 3  |
| AX-158009948 | 6 | 71.245 | KV452784.1 | 9088953  | 3-scf00141    | 3  |
| AX-157820032 | 6 | 71.245 | KV452784.1 | 9089744  | 3-scf00141    | 3  |
| AX-158009950 | 6 | 71.245 | KV452784.1 | 9090580  | 3-scf00141    | 3  |
| AX-158009953 | 6 | 71.245 | KV452784.1 | 9093031  | 3-scf00141    | 3  |
| AX-158009954 | 6 | 71.245 | KV452784.1 | 9094517  | 3-scf00141    | 3  |
| AX-158009956 | 6 | 71.245 | KV452784.1 | 9094692  | 3-scf00141    | 3  |
| AX-158009967 | 6 | 71.245 | KV452784.1 | 9102750  | 3-scf00141    | 3  |
| AX-158009971 | 6 | 71.245 | KV452784.1 | 9104621  | 3-scf00141    | 3  |
| AX-158009973 | 6 | 71.245 | KV452784.1 | 9107467  | 3-scf00141    | 3  |
| AX-158010022 | 6 | 71.245 | KV452784.1 | 9143131  | 3-scf00141    | 3  |
| AX-158010219 | 6 | 71.245 | KV452784.1 | 9356316  | 3-scf00141    | 3  |
| AX-158010234 | 6 | 71.245 | KV452784.1 | 9364557  | 3-scf00141    | 3  |
| AX-158002485 | 6 | 71.296 | KV452782.1 | 10549159 | 3-scf00136    | 3  |
| AX-158002563 | 6 | 71.296 | KV452782.1 | 10771329 | 3-scf00136    | 3  |
| AX-158002962 | 6 | 71.296 | KV452782.1 | 11296822 | 3-scf00136    | 3  |
| AX-158003356 | 6 | 71.296 | KV452782.1 | 11765824 | 3-scf00136    | 3  |
| AX-158003505 | 6 | 71.296 | KV452782.1 | 12057894 | 3-scf00136    | 3  |
| AX-158003506 | 6 | 71.296 | KV452782.1 | 12062756 | 3-scf00136    | 3  |
| AX-158003520 | 6 | 71.296 | KV452782.1 | 12096920 | 3-scf00136    | 3  |
| AX-157819442 | 6 | 71.296 | KV452782.1 | 12148087 | 3-scf00136    | 3  |
| AX-157820023 | 6 | 71.296 | KV452784.1 | 9028168  | 3-scf00141    | 3  |
| AX-158009974 | 6 | 71.296 | KV452784.1 | 9111888  | 3-scf00141    | 3  |
| AX-158010052 | 6 | 71.296 | KV452784.1 | 9165901  | 3-scf00141    | 3  |
| AX-157884833 | 6 | 71.296 | KV452784.1 | 9198297  | 3-scf00141    | 3  |
| AX-157758038 | 6 | 71.296 | KV452784.1 | 10219320 | 3-scf00141    | 3  |
| AX-158011084 | 6 | 71.296 | KV452784.1 | 10220045 | 3-scf00141    | 3  |
| AX-158011087 | 6 | 71.296 | KV452784.1 | 10220929 | 3-scf00141    | 3  |
| AX-158011089 | 6 | 71.296 | KV452784.1 | 10221747 | 3-scf00141    | 3  |

|              |   |        |            |          |            |   |
|--------------|---|--------|------------|----------|------------|---|
| AX-158011441 | 6 | 71.296 | KV452784.1 | 10663907 | 3-scf00141 | 3 |
| AX-158012484 | 6 | 71.296 | KV452788.1 | 475878   | 3-scf00145 | 3 |
| AX-158014596 | 6 | 71.296 | KV452786.1 | 262276   | 3-scf00146 | 3 |
| AX-157682974 | 6 | 71.296 | KV452790.1 | 43109    | 3-scf00149 | 3 |
| AX-157684943 | 6 | 71.296 | KV452792.1 | 174827   | 3-scf00572 | 3 |
| AX-157723163 | 6 | 71.296 | KV452785.1 | 473255   | 3-scf05654 | 3 |
| AX-158009964 | 6 | 71.355 | KV452784.1 | 9101195  | 3-scf00141 | 3 |
| AX-158009965 | 6 | 71.355 | KV452784.1 | 9101572  | 3-scf00141 | 3 |
| AX-158009969 | 6 | 71.355 | KV452784.1 | 9103331  | 3-scf00141 | 3 |
| AX-158009970 | 6 | 71.355 | KV452784.1 | 9103906  | 3-scf00141 | 3 |
| AX-158009981 | 6 | 71.355 | KV452784.1 | 9114376  | 3-scf00141 | 3 |
| AX-158009989 | 6 | 71.355 | KV452784.1 | 9122234  | 3-scf00141 | 3 |
| AX-158009992 | 6 | 71.355 | KV452784.1 | 9124455  | 3-scf00141 | 3 |
| AX-158009994 | 6 | 71.355 | KV452784.1 | 9125060  | 3-scf00141 | 3 |
| AX-158009996 | 6 | 71.355 | KV452784.1 | 9125334  | 3-scf00141 | 3 |
| AX-158010000 | 6 | 71.355 | KV452784.1 | 9126820  | 3-scf00141 | 3 |
| AX-158010001 | 6 | 71.355 | KV452784.1 | 9127078  | 3-scf00141 | 3 |
| AX-158010002 | 6 | 71.355 | KV452784.1 | 9127936  | 3-scf00141 | 3 |
| AX-157713806 | 6 | 71.355 | KV452784.1 | 9128118  | 3-scf00141 | 3 |
| AX-158010005 | 6 | 71.355 | KV452784.1 | 9130712  | 3-scf00141 | 3 |
| AX-158010008 | 6 | 71.355 | KV452784.1 | 9131679  | 3-scf00141 | 3 |
| AX-158010013 | 6 | 71.355 | KV452784.1 | 9133979  | 3-scf00141 | 3 |
| AX-158010015 | 6 | 71.355 | KV452784.1 | 9135601  | 3-scf00141 | 3 |
| AX-158010027 | 6 | 71.355 | KV452784.1 | 9144782  | 3-scf00141 | 3 |
| AX-158010031 | 6 | 71.355 | KV452784.1 | 9147994  | 3-scf00141 | 3 |
| AX-158010036 | 6 | 71.355 | KV452784.1 | 9150020  | 3-scf00141 | 3 |
| AX-158010321 | 6 | 71.355 | KV452784.1 | 9444139  | 3-scf00141 | 3 |
| AX-158010050 | 6 | 71.385 | KV452784.1 | 9164288  | 3-scf00141 | 3 |
| AX-158010053 | 6 | 71.518 | KV452784.1 | 9166864  | 3-scf00141 | 3 |
| AX-158010059 | 6 | 71.518 | KV452784.1 | 9170889  | 3-scf00141 | 3 |
| AX-158390921 | 6 | 71.682 | KV452784.1 | 9173763  | 3-scf00141 | 3 |
| AX-158010061 | 6 | 71.682 | KV452784.1 | 9174159  | 3-scf00141 | 3 |
| AX-158010062 | 6 | 71.682 | KV452784.1 | 9175769  | 3-scf00141 | 3 |
| AX-158010067 | 6 | 71.682 | KV452784.1 | 9180909  | 3-scf00141 | 3 |
| AX-158010072 | 6 | 71.682 | KV452784.1 | 9183428  | 3-scf00141 | 3 |
| AX-157820037 | 6 | 71.682 | KV452784.1 | 9187737  | 3-scf00141 | 3 |
| AX-158010074 | 6 | 71.682 | KV452784.1 | 9188350  | 3-scf00141 | 3 |
| AX-157775937 | 6 | 71.723 | KV452784.1 | 9192834  | 3-scf00141 | 3 |
| AX-158010078 | 6 | 71.771 | KV452784.1 | 9199217  | 3-scf00141 | 3 |
| AX-157740686 | 6 | 71.792 | KV452784.1 | 8878951  | 3-scf00141 | 3 |
| AX-158010079 | 6 | 71.792 | KV452784.1 | 9200673  | 3-scf00141 | 3 |
| AX-158010083 | 6 | 71.792 | KV452784.1 | 9204120  | 3-scf00141 | 3 |
| AX-158010210 | 6 | 71.792 | KV452784.1 | 9336791  | 3-scf00141 | 3 |
| AX-158010462 | 6 | 71.792 | KV452784.1 | 9581451  | 3-scf00141 | 3 |
| AX-158010082 | 6 | 71.826 | KV452784.1 | 9202665  | 3-scf00141 | 3 |
| AX-158010086 | 6 | 71.854 | KV452784.1 | 9205892  | 3-scf00141 | 3 |
| AX-158010206 | 6 | 71.854 | KV452784.1 | 9331139  | 3-scf00141 | 3 |
| AX-158010087 | 6 | 71.88  | KV452784.1 | 9206551  | 3-scf00141 | 3 |
| AX-158011554 | 6 | 71.88  | KV452784.1 | 10816339 | 3-scf00141 | 3 |
| AX-158010088 | 6 | 71.901 | KV452784.1 | 9208723  | 3-scf00141 | 3 |
| AX-158010089 | 6 | 71.901 | KV452784.1 | 9209361  | 3-scf00141 | 3 |

|              |   |        |            |         |            |   |
|--------------|---|--------|------------|---------|------------|---|
| AX-158010090 | 6 | 71.901 | KV452784.1 | 9210125 | 3-scf00141 | 3 |
| AX-157747017 | 6 | 71.901 | KV452784.1 | 9210863 | 3-scf00141 | 3 |
| AX-158010095 | 6 | 71.901 | KV452784.1 | 9212630 | 3-scf00141 | 3 |
| AX-158010096 | 6 | 71.901 | KV452784.1 | 9214384 | 3-scf00141 | 3 |
| AX-157739002 | 6 | 71.901 | KV452784.1 | 9217756 | 3-scf00141 | 3 |
| AX-157820040 | 6 | 71.901 | KV452784.1 | 9221589 | 3-scf00141 | 3 |
| AX-158010124 | 6 | 71.901 | KV452784.1 | 9244767 | 3-scf00141 | 3 |
| AX-158010156 | 6 | 71.901 | KV452784.1 | 9275162 | 3-scf00141 | 3 |
| AX-158010103 | 6 | 71.919 | KV452784.1 | 9221737 | 3-scf00141 | 3 |
| AX-158010104 | 6 | 71.923 | KV452784.1 | 9222422 | 3-scf00141 | 3 |
| AX-158010105 | 6 | 71.944 | KV452784.1 | 9224207 | 3-scf00141 | 3 |
| AX-158379676 | 6 | 71.964 | KV452784.1 | 9224424 | 3-scf00141 | 3 |
| AX-157884834 | 6 | 71.964 | KV452784.1 | 9233854 | 3-scf00141 | 3 |
| AX-157820044 | 6 | 71.964 | KV452784.1 | 9241520 | 3-scf00141 | 3 |
| AX-158010125 | 6 | 71.964 | KV452784.1 | 9245713 | 3-scf00141 | 3 |
| AX-158010116 | 6 | 71.981 | KV452784.1 | 9234612 | 3-scf00141 | 3 |
| AX-158010139 | 6 | 71.981 | KV452784.1 | 9256213 | 3-scf00141 | 3 |
| AX-158013347 | 6 | 71.981 | KV452788.1 | 1303394 | 3-scf00145 | 3 |
| AX-158010007 | 6 | 72.01  | KV452784.1 | 9131206 | 3-scf00141 | 3 |
| AX-158010120 | 6 | 72.01  | KV452784.1 | 9238967 | 3-scf00141 | 3 |
| AX-158010121 | 6 | 72.01  | KV452784.1 | 9240697 | 3-scf00141 | 3 |
| AX-157820043 | 6 | 72.01  | KV452784.1 | 9241429 | 3-scf00141 | 3 |
| AX-158010127 | 6 | 72.01  | KV452784.1 | 9246113 | 3-scf00141 | 3 |
| AX-158010128 | 6 | 72.01  | KV452784.1 | 9246386 | 3-scf00141 | 3 |
| AX-157820045 | 6 | 72.01  | KV452784.1 | 9250444 | 3-scf00141 | 3 |
| AX-158010135 | 6 | 72.01  | KV452784.1 | 9253029 | 3-scf00141 | 3 |
| AX-158010138 | 6 | 72.01  | KV452784.1 | 9253866 | 3-scf00141 | 3 |
| AX-158010141 | 6 | 72.01  | KV452784.1 | 9256540 | 3-scf00141 | 3 |
| AX-158010145 | 6 | 72.01  | KV452784.1 | 9262259 | 3-scf00141 | 3 |
| AX-158010150 | 6 | 72.01  | KV452784.1 | 9265187 | 3-scf00141 | 3 |
| AX-158010153 | 6 | 72.01  | KV452784.1 | 9268725 | 3-scf00141 | 3 |
| AX-158010154 | 6 | 72.01  | KV452784.1 | 9271238 | 3-scf00141 | 3 |
| AX-158010161 | 6 | 72.01  | KV452784.1 | 9280661 | 3-scf00141 | 3 |
| AX-158010163 | 6 | 72.01  | KV452784.1 | 9281565 | 3-scf00141 | 3 |
| AX-158010164 | 6 | 72.01  | KV452784.1 | 9282105 | 3-scf00141 | 3 |
| AX-158010228 | 6 | 72.01  | KV452784.1 | 9362378 | 3-scf00141 | 3 |
| AX-157772354 | 6 | 72.119 | KV452784.1 | 9183846 | 3-scf00141 | 3 |
| AX-158010165 | 6 | 72.119 | KV452784.1 | 9285504 | 3-scf00141 | 3 |
| AX-158010166 | 6 | 72.119 | KV452784.1 | 9289529 | 3-scf00141 | 3 |
| AX-158010168 | 6 | 72.119 | KV452784.1 | 9292444 | 3-scf00141 | 3 |
| AX-158010170 | 6 | 72.119 | KV452784.1 | 9293421 | 3-scf00141 | 3 |
| AX-157741134 | 6 | 72.119 | KV452784.1 | 9299934 | 3-scf00141 | 3 |
| AX-158010180 | 6 | 72.119 | KV452784.1 | 9305200 | 3-scf00141 | 3 |
| AX-158010183 | 6 | 72.119 | KV452784.1 | 9307103 | 3-scf00141 | 3 |
| AX-158010204 | 6 | 72.119 | KV452784.1 | 9330611 | 3-scf00141 | 3 |
| AX-157820046 | 6 | 72.119 | KV452784.1 | 9333745 | 3-scf00141 | 3 |
| AX-158010227 | 6 | 72.119 | KV452784.1 | 9361716 | 3-scf00141 | 3 |
| AX-157820048 | 6 | 72.119 | KV452784.1 | 9368525 | 3-scf00141 | 3 |
| AX-158010274 | 6 | 72.119 | KV452784.1 | 9400750 | 3-scf00141 | 3 |
| AX-158012295 | 6 | 72.119 | KV452788.1 | 337065  | 3-scf00145 | 3 |
| AX-157752570 | 6 | 72.223 | KV452784.1 | 9343003 | 3-scf00141 | 3 |

|              |   |        |            |         |            |   |
|--------------|---|--------|------------|---------|------------|---|
| AX-158010211 | 6 | 72.258 | KV452784.1 | 9343885 | 3-scf00141 | 3 |
| AX-158010215 | 6 | 72.338 | KV452784.1 | 9348934 | 3-scf00141 | 3 |
| AX-158010224 | 6 | 72.338 | KV452784.1 | 9357902 | 3-scf00141 | 3 |
| AX-158010231 | 6 | 72.338 | KV452784.1 | 9363611 | 3-scf00141 | 3 |
| AX-158010233 | 6 | 72.338 | KV452784.1 | 9364321 | 3-scf00141 | 3 |
| AX-158010239 | 6 | 72.338 | KV452784.1 | 9369056 | 3-scf00141 | 3 |
| AX-158010243 | 6 | 72.338 | KV452784.1 | 9370133 | 3-scf00141 | 3 |
| AX-158010247 | 6 | 72.338 | KV452784.1 | 9374741 | 3-scf00141 | 3 |
| AX-158010251 | 6 | 72.447 | KV452784.1 | 9382086 | 3-scf00141 | 3 |
| AX-158010252 | 6 | 72.485 | KV452784.1 | 9382559 | 3-scf00141 | 3 |
| AX-158010255 | 6 | 72.556 | KV452784.1 | 9385783 | 3-scf00141 | 3 |
| AX-158010257 | 6 | 72.556 | KV452784.1 | 9386981 | 3-scf00141 | 3 |
| AX-158010259 | 6 | 72.556 | KV452784.1 | 9388071 | 3-scf00141 | 3 |
| AX-158010260 | 6 | 72.556 | KV452784.1 | 9388915 | 3-scf00141 | 3 |
| AX-158010213 | 6 | 72.666 | KV452784.1 | 9344855 | 3-scf00141 | 3 |
| AX-158010263 | 6 | 72.666 | KV452784.1 | 9392657 | 3-scf00141 | 3 |
| AX-158010268 | 6 | 72.666 | KV452784.1 | 9396190 | 3-scf00141 | 3 |
| AX-158010271 | 6 | 72.666 | KV452784.1 | 9397727 | 3-scf00141 | 3 |
| AX-157856225 | 6 | 72.666 | KV452784.1 | 9399987 | 3-scf00141 | 3 |
| AX-158010277 | 6 | 72.666 | KV452784.1 | 9406847 | 3-scf00141 | 3 |
| AX-158010278 | 6 | 72.666 | KV452784.1 | 9408289 | 3-scf00141 | 3 |
| AX-158010280 | 6 | 72.666 | KV452784.1 | 9408667 | 3-scf00141 | 3 |
| AX-158010281 | 6 | 72.666 | KV452784.1 | 9409069 | 3-scf00141 | 3 |
| AX-158010283 | 6 | 72.666 | KV452784.1 | 9409767 | 3-scf00141 | 3 |
| AX-158010284 | 6 | 72.666 | KV452784.1 | 9410241 | 3-scf00141 | 3 |
| AX-157721669 | 6 | 72.666 | KV452784.1 | 9412492 | 3-scf00141 | 3 |
| AX-158010286 | 6 | 72.666 | KV452784.1 | 9413251 | 3-scf00141 | 3 |
| AX-158010288 | 6 | 72.666 | KV452784.1 | 9413634 | 3-scf00141 | 3 |
| AX-158010293 | 6 | 72.666 | KV452784.1 | 9418422 | 3-scf00141 | 3 |
| AX-158010294 | 6 | 72.666 | KV452784.1 | 9418721 | 3-scf00141 | 3 |
| AX-157856226 | 6 | 72.666 | KV452784.1 | 9419360 | 3-scf00141 | 3 |
| AX-158010303 | 6 | 72.666 | KV452784.1 | 9428896 | 3-scf00141 | 3 |
| AX-158010310 | 6 | 72.666 | KV452784.1 | 9435112 | 3-scf00141 | 3 |
| AX-157722202 | 6 | 72.666 | KV452784.1 | 9436246 | 3-scf00141 | 3 |
| AX-158010325 | 6 | 72.666 | KV452784.1 | 9447407 | 3-scf00141 | 3 |
| AX-158379677 | 6 | 72.666 | KV452784.1 | 9465638 | 3-scf00141 | 3 |
| AX-158010333 | 6 | 72.666 | KV452784.1 | 9465821 | 3-scf00141 | 3 |
| AX-158010336 | 6 | 72.666 | KV452784.1 | 9467643 | 3-scf00141 | 3 |
| AX-158010352 | 6 | 72.666 | KV452784.1 | 9487012 | 3-scf00141 | 3 |
| AX-158010357 | 6 | 72.666 | KV452784.1 | 9489623 | 3-scf00141 | 3 |
| AX-158010362 | 6 | 72.666 | KV452784.1 | 9493093 | 3-scf00141 | 3 |
| AX-158010365 | 6 | 72.666 | KV452784.1 | 9496166 | 3-scf00141 | 3 |
| AX-158010366 | 6 | 72.666 | KV452784.1 | 9496940 | 3-scf00141 | 3 |
| AX-158010368 | 6 | 72.666 | KV452784.1 | 9498183 | 3-scf00141 | 3 |
| AX-158010370 | 6 | 72.666 | KV452784.1 | 9499419 | 3-scf00141 | 3 |
| AX-158010375 | 6 | 72.666 | KV452784.1 | 9505016 | 3-scf00141 | 3 |
| AX-157724127 | 6 | 72.666 | KV452784.1 | 9505647 | 3-scf00141 | 3 |
| AX-158010389 | 6 | 72.666 | KV452784.1 | 9514361 | 3-scf00141 | 3 |
| AX-158010390 | 6 | 72.666 | KV452784.1 | 9515434 | 3-scf00141 | 3 |
| AX-158010410 | 6 | 72.666 | KV452784.1 | 9534158 | 3-scf00141 | 3 |
| AX-157820052 | 6 | 72.666 | KV452784.1 | 9569196 | 3-scf00141 | 3 |

|              |   |        |            |          |            |   |
|--------------|---|--------|------------|----------|------------|---|
| AX-157820054 | 6 | 72.666 | KV452784.1 | 9574714  | 3-scf00141 | 3 |
| AX-158010492 | 6 | 72.666 | KV452784.1 | 9607818  | 3-scf00141 | 3 |
| AX-157820074 | 6 | 72.666 | KV452784.1 | 9746313  | 3-scf00141 | 3 |
| AX-157720825 | 6 | 72.666 | KV452784.1 | 9751758  | 3-scf00141 | 3 |
| AX-158407754 | 6 | 72.666 | KV452784.1 | 9770102  | 3-scf00141 | 3 |
| AX-158010642 | 6 | 72.666 | KV452784.1 | 9779246  | 3-scf00141 | 3 |
| AX-158010658 | 6 | 72.666 | KV452784.1 | 9789936  | 3-scf00141 | 3 |
| AX-157758268 | 6 | 72.666 | KV452784.1 | 9800086  | 3-scf00141 | 3 |
| AX-158010687 | 6 | 72.666 | KV452784.1 | 9809628  | 3-scf00141 | 3 |
| AX-158010689 | 6 | 72.666 | KV452784.1 | 9809817  | 3-scf00141 | 3 |
| AX-157739612 | 6 | 72.666 | KV452784.1 | 9812446  | 3-scf00141 | 3 |
| AX-158010694 | 6 | 72.666 | KV452784.1 | 9813594  | 3-scf00141 | 3 |
| AX-157718228 | 6 | 72.666 | KV452784.1 | 9816409  | 3-scf00141 | 3 |
| AX-157820080 | 6 | 72.666 | KV452784.1 | 9821595  | 3-scf00141 | 3 |
| AX-158010713 | 6 | 72.666 | KV452784.1 | 9827665  | 3-scf00141 | 3 |
| AX-158010726 | 6 | 72.666 | KV452784.1 | 9837910  | 3-scf00141 | 3 |
| AX-158383584 | 6 | 72.666 | KV452784.1 | 9848894  | 3-scf00141 | 3 |
| AX-158010745 | 6 | 72.666 | KV452784.1 | 9864160  | 3-scf00141 | 3 |
| AX-157744810 | 6 | 72.666 | KV452784.1 | 9868110  | 3-scf00141 | 3 |
| AX-157739274 | 6 | 72.666 | KV452784.1 | 9871411  | 3-scf00141 | 3 |
| AX-158010765 | 6 | 72.666 | KV452784.1 | 9883622  | 3-scf00141 | 3 |
| AX-158010767 | 6 | 72.666 | KV452784.1 | 9884820  | 3-scf00141 | 3 |
| AX-158010794 | 6 | 72.666 | KV452784.1 | 9912098  | 3-scf00141 | 3 |
| AX-158010809 | 6 | 72.666 | KV452784.1 | 9926603  | 3-scf00141 | 3 |
| AX-157876252 | 6 | 72.666 | KV452784.1 | 9964987  | 3-scf00141 | 3 |
| AX-157820093 | 6 | 72.666 | KV452784.1 | 9967874  | 3-scf00141 | 3 |
| AX-157707733 | 6 | 72.666 | KV452784.1 | 9978883  | 3-scf00141 | 3 |
| AX-158010870 | 6 | 72.666 | KV452784.1 | 9987270  | 3-scf00141 | 3 |
| AX-158010875 | 6 | 72.666 | KV452784.1 | 9990385  | 3-scf00141 | 3 |
| AX-158010876 | 6 | 72.666 | KV452784.1 | 9990990  | 3-scf00141 | 3 |
| AX-158010882 | 6 | 72.666 | KV452784.1 | 9995073  | 3-scf00141 | 3 |
| AX-157820096 | 6 | 72.666 | KV452784.1 | 9995208  | 3-scf00141 | 3 |
| AX-157820097 | 6 | 72.666 | KV452784.1 | 9995685  | 3-scf00141 | 3 |
| AX-157738267 | 6 | 72.666 | KV452784.1 | 9996183  | 3-scf00141 | 3 |
| AX-158010887 | 6 | 72.666 | KV452784.1 | 9997192  | 3-scf00141 | 3 |
| AX-158010889 | 6 | 72.666 | KV452784.1 | 9998122  | 3-scf00141 | 3 |
| AX-158010893 | 6 | 72.666 | KV452784.1 | 10000607 | 3-scf00141 | 3 |
| AX-158010895 | 6 | 72.666 | KV452784.1 | 10001203 | 3-scf00141 | 3 |
| AX-158010901 | 6 | 72.666 | KV452784.1 | 10004750 | 3-scf00141 | 3 |
| AX-158010905 | 6 | 72.666 | KV452784.1 | 10008690 | 3-scf00141 | 3 |
| AX-158010913 | 6 | 72.666 | KV452784.1 | 10015904 | 3-scf00141 | 3 |
| AX-158010914 | 6 | 72.666 | KV452784.1 | 10020655 | 3-scf00141 | 3 |
| AX-158010917 | 6 | 72.666 | KV452784.1 | 10023510 | 3-scf00141 | 3 |
| AX-158010918 | 6 | 72.666 | KV452784.1 | 10026048 | 3-scf00141 | 3 |
| AX-158010922 | 6 | 72.666 | KV452784.1 | 10030177 | 3-scf00141 | 3 |
| AX-158010927 | 6 | 72.666 | KV452784.1 | 10033383 | 3-scf00141 | 3 |
| AX-157751876 | 6 | 72.666 | KV452784.1 | 10058166 | 3-scf00141 | 3 |
| AX-158010948 | 6 | 72.666 | KV452784.1 | 10060834 | 3-scf00141 | 3 |
| AX-158010949 | 6 | 72.666 | KV452784.1 | 10063395 | 3-scf00141 | 3 |
| AX-157770895 | 6 | 72.666 | KV452784.1 | 10063925 | 3-scf00141 | 3 |
| AX-158010951 | 6 | 72.666 | KV452784.1 | 10063973 | 3-scf00141 | 3 |

|              |   |        |            |          |            |   |
|--------------|---|--------|------------|----------|------------|---|
| AX-158010953 | 6 | 72.666 | KV452784.1 | 10064272 | 3-scf00141 | 3 |
| AX-158010956 | 6 | 72.666 | KV452784.1 | 10064893 | 3-scf00141 | 3 |
| AX-158010958 | 6 | 72.666 | KV452784.1 | 10068324 | 3-scf00141 | 3 |
| AX-158422250 | 6 | 72.666 | KV452784.1 | 10069821 | 3-scf00141 | 3 |
| AX-158010960 | 6 | 72.666 | KV452784.1 | 10072456 | 3-scf00141 | 3 |
| AX-158010965 | 6 | 72.666 | KV452784.1 | 10074366 | 3-scf00141 | 3 |
| AX-158010968 | 6 | 72.666 | KV452784.1 | 10075535 | 3-scf00141 | 3 |
| AX-158010983 | 6 | 72.666 | KV452784.1 | 10084752 | 3-scf00141 | 3 |
| AX-158010995 | 6 | 72.666 | KV452784.1 | 10091690 | 3-scf00141 | 3 |
| AX-158010996 | 6 | 72.666 | KV452784.1 | 10092061 | 3-scf00141 | 3 |
| AX-158011002 | 6 | 72.666 | KV452784.1 | 10097735 | 3-scf00141 | 3 |
| AX-158011006 | 6 | 72.666 | KV452784.1 | 10108430 | 3-scf00141 | 3 |
| AX-157746321 | 6 | 72.666 | KV452784.1 | 10110597 | 3-scf00141 | 3 |
| AX-157750645 | 6 | 72.666 | KV452784.1 | 10124042 | 3-scf00141 | 3 |
| AX-158011015 | 6 | 72.666 | KV452784.1 | 10124857 | 3-scf00141 | 3 |
| AX-158011018 | 6 | 72.666 | KV452784.1 | 10126043 | 3-scf00141 | 3 |
| AX-158011025 | 6 | 72.666 | KV452784.1 | 10129869 | 3-scf00141 | 3 |
| AX-158011032 | 6 | 72.666 | KV452784.1 | 10143869 | 3-scf00141 | 3 |
| AX-157722238 | 6 | 72.666 | KV452784.1 | 10143986 | 3-scf00141 | 3 |
| AX-158011124 | 6 | 72.666 | KV452784.1 | 10260684 | 3-scf00141 | 3 |
| AX-158011125 | 6 | 72.666 | KV452784.1 | 10261118 | 3-scf00141 | 3 |
| AX-158011663 | 6 | 72.666 | KV452784.1 | 10910832 | 3-scf00141 | 3 |
| AX-158011677 | 6 | 72.666 | KV452784.1 | 10930299 | 3-scf00141 | 3 |
| AX-158011683 | 6 | 72.666 | KV452784.1 | 10935982 | 3-scf00141 | 3 |
| AX-158011701 | 6 | 72.666 | KV452784.1 | 10943758 | 3-scf00141 | 3 |
| AX-158011814 | 6 | 72.666 | KV452784.1 | 11047474 | 3-scf00141 | 3 |
| AX-158011989 | 6 | 72.666 | KV452784.1 | 11297694 | 3-scf00141 | 3 |
| AX-157756337 | 6 | 72.666 | KV452784.1 | 11321862 | 3-scf00141 | 3 |
| AX-158012186 | 6 | 72.666 | KV452788.1 | 233042   | 3-scf00145 | 3 |
| AX-157748637 | 6 | 72.666 | KV452788.1 | 238083   | 3-scf00145 | 3 |
| AX-157772502 | 6 | 72.666 | KV452788.1 | 239368   | 3-scf00145 | 3 |
| AX-157820202 | 6 | 72.666 | KV452788.1 | 240436   | 3-scf00145 | 3 |
| AX-157820203 | 6 | 72.666 | KV452788.1 | 240801   | 3-scf00145 | 3 |
| AX-157718004 | 6 | 72.666 | KV452788.1 | 242686   | 3-scf00145 | 3 |
| AX-157713358 | 6 | 72.666 | KV452788.1 | 244961   | 3-scf00145 | 3 |
| AX-157757629 | 6 | 72.666 | KV452788.1 | 279264   | 3-scf00145 | 3 |
| AX-158012227 | 6 | 72.666 | KV452788.1 | 291210   | 3-scf00145 | 3 |
| AX-157709263 | 6 | 72.666 | KV452788.1 | 326845   | 3-scf00145 | 3 |
| AX-158012591 | 6 | 72.666 | KV452788.1 | 546253   | 3-scf00145 | 3 |
| AX-158012691 | 6 | 72.666 | KV452788.1 | 638104   | 3-scf00145 | 3 |
| AX-158012713 | 6 | 72.666 | KV452788.1 | 666767   | 3-scf00145 | 3 |
| AX-158012727 | 6 | 72.666 | KV452788.1 | 686776   | 3-scf00145 | 3 |
| AX-158012730 | 6 | 72.666 | KV452788.1 | 687707   | 3-scf00145 | 3 |
| AX-158012773 | 6 | 72.666 | KV452788.1 | 743083   | 3-scf00145 | 3 |
| AX-158012849 | 6 | 72.666 | KV452788.1 | 818178   | 3-scf00145 | 3 |
| AX-158012882 | 6 | 72.666 | KV452788.1 | 855707   | 3-scf00145 | 3 |
| AX-157856235 | 6 | 72.666 | KV452788.1 | 1250721  | 3-scf00145 | 3 |
| AX-158014496 | 6 | 72.666 | KV452786.1 | 99339    | 3-scf00146 | 3 |
| AX-158014598 | 6 | 72.666 | KV452786.1 | 263089   | 3-scf00146 | 3 |
| AX-158014621 | 6 | 72.666 | KV452786.1 | 301762   | 3-scf00146 | 3 |
| AX-158014657 | 6 | 72.666 | KV452786.1 | 416871   | 3-scf00146 | 3 |



|              |   |        |            |          |            |   |
|--------------|---|--------|------------|----------|------------|---|
| AX-158014659 | 6 | 72.666 | KV452786.1 | 422286   | 3-scf00146 | 3 |
| AX-158405944 | 6 | 72.666 | KV452786.1 | 427604   | 3-scf00146 | 3 |
| AX-158014662 | 6 | 72.666 | KV452786.1 | 428723   | 3-scf00146 | 3 |
| AX-158014665 | 6 | 72.666 | KV452786.1 | 435059   | 3-scf00146 | 3 |
| AX-158014666 | 6 | 72.666 | KV452786.1 | 436716   | 3-scf00146 | 3 |
| AX-158014710 | 6 | 72.666 | KV452786.1 | 521463   | 3-scf00146 | 3 |
| AX-158014857 | 6 | 72.666 | KV452789.1 | 498981   | 3-scf00147 | 3 |
| AX-157820398 | 6 | 72.666 | KV452789.1 | 509764   | 3-scf00147 | 3 |
| AX-157682985 | 6 | 72.666 | KV452791.1 | 6897     | 3-scf00150 | 3 |
| AX-158000667 | 6 | 72.775 | KV452782.1 | 8284854  | 3-scf00136 | 3 |
| AX-158000970 | 6 | 72.775 | KV452782.1 | 8648219  | 3-scf00136 | 3 |
| AX-158000993 | 6 | 72.775 | KV452782.1 | 8678991  | 3-scf00136 | 3 |
| AX-158001294 | 6 | 72.775 | KV452782.1 | 9001256  | 3-scf00136 | 3 |
| AX-158001402 | 6 | 72.775 | KV452782.1 | 9108685  | 3-scf00136 | 3 |
| AX-158002621 | 6 | 72.775 | KV452782.1 | 10919401 | 3-scf00136 | 3 |
| AX-158002640 | 6 | 72.775 | KV452782.1 | 10940226 | 3-scf00136 | 3 |
| AX-158002711 | 6 | 72.775 | KV452782.1 | 11008002 | 3-scf00136 | 3 |
| AX-158003634 | 6 | 72.775 | KV452782.1 | 12261456 | 3-scf00136 | 3 |
| AX-158004472 | 6 | 72.775 | KV452784.1 | 1399781  | 3-scf00141 | 3 |
| AX-158007267 | 6 | 72.775 | KV452784.1 | 5939999  | 3-scf00141 | 3 |
| AX-158007270 | 6 | 72.775 | KV452784.1 | 5943034  | 3-scf00141 | 3 |
| AX-158007364 | 6 | 72.775 | KV452784.1 | 6035897  | 3-scf00141 | 3 |
| AX-158007425 | 6 | 72.775 | KV452784.1 | 6106932  | 3-scf00141 | 3 |
| AX-158009033 | 6 | 72.775 | KV452784.1 | 8105150  | 3-scf00141 | 3 |
| AX-158009778 | 6 | 72.775 | KV452784.1 | 8879837  | 3-scf00141 | 3 |
| AX-157745984 | 6 | 72.775 | KV452784.1 | 9107774  | 3-scf00141 | 3 |
| AX-158010038 | 6 | 72.775 | KV452784.1 | 9152235  | 3-scf00141 | 3 |
| AX-158011036 | 6 | 72.775 | KV452784.1 | 10146711 | 3-scf00141 | 3 |
| AX-158011053 | 6 | 72.775 | KV452784.1 | 10170686 | 3-scf00141 | 3 |
| AX-158011069 | 6 | 72.775 | KV452784.1 | 10193349 | 3-scf00141 | 3 |
| AX-158011071 | 6 | 72.775 | KV452784.1 | 10197024 | 3-scf00141 | 3 |
| AX-158011072 | 6 | 72.775 | KV452784.1 | 10200447 | 3-scf00141 | 3 |
| AX-157753701 | 6 | 72.775 | KV452784.1 | 10206129 | 3-scf00141 | 3 |
| AX-158011094 | 6 | 72.775 | KV452784.1 | 10228359 | 3-scf00141 | 3 |
| AX-157820105 | 6 | 72.775 | KV452784.1 | 10232489 | 3-scf00141 | 3 |
| AX-158011118 | 6 | 72.775 | KV452784.1 | 10252583 | 3-scf00141 | 3 |
| AX-158011119 | 6 | 72.775 | KV452784.1 | 10253592 | 3-scf00141 | 3 |
| AX-158011151 | 6 | 72.775 | KV452784.1 | 10288445 | 3-scf00141 | 3 |
| AX-157753400 | 6 | 72.775 | KV452784.1 | 10294910 | 3-scf00141 | 3 |
| AX-158011174 | 6 | 72.775 | KV452784.1 | 10311840 | 3-scf00141 | 3 |
| AX-158379679 | 6 | 72.775 | KV452784.1 | 10312096 | 3-scf00141 | 3 |
| AX-158011176 | 6 | 72.775 | KV452784.1 | 10312890 | 3-scf00141 | 3 |
| AX-158011179 | 6 | 72.775 | KV452784.1 | 10314949 | 3-scf00141 | 3 |
| AX-157820109 | 6 | 72.775 | KV452784.1 | 10317137 | 3-scf00141 | 3 |
| AX-158011183 | 6 | 72.775 | KV452784.1 | 10320470 | 3-scf00141 | 3 |
| AX-157717896 | 6 | 72.775 | KV452784.1 | 10321929 | 3-scf00141 | 3 |
| AX-158011186 | 6 | 72.775 | KV452784.1 | 10322433 | 3-scf00141 | 3 |
| AX-157726234 | 6 | 72.775 | KV452784.1 | 10327549 | 3-scf00141 | 3 |
| AX-158011192 | 6 | 72.775 | KV452784.1 | 10335208 | 3-scf00141 | 3 |
| AX-157708465 | 6 | 72.775 | KV452784.1 | 10335682 | 3-scf00141 | 3 |
| AX-157820111 | 6 | 72.775 | KV452784.1 | 10336964 | 3-scf00141 | 3 |

|              |   |        |            |          |            |   |
|--------------|---|--------|------------|----------|------------|---|
| AX-158011195 | 6 | 72.775 | KV452784.1 | 10343071 | 3-scf00141 | 3 |
| AX-158011214 | 6 | 72.775 | KV452784.1 | 10356216 | 3-scf00141 | 3 |
| AX-158011215 | 6 | 72.775 | KV452784.1 | 10357994 | 3-scf00141 | 3 |
| AX-158011224 | 6 | 72.775 | KV452784.1 | 10369418 | 3-scf00141 | 3 |
| AX-157747675 | 6 | 72.775 | KV452784.1 | 10487187 | 3-scf00141 | 3 |
| AX-158011326 | 6 | 72.775 | KV452784.1 | 10489733 | 3-scf00141 | 3 |
| AX-157820122 | 6 | 72.775 | KV452784.1 | 10491205 | 3-scf00141 | 3 |
| AX-158011363 | 6 | 72.775 | KV452784.1 | 10555731 | 3-scf00141 | 3 |
| AX-158379680 | 6 | 72.775 | KV452784.1 | 10561322 | 3-scf00141 | 3 |
| AX-158011373 | 6 | 72.775 | KV452784.1 | 10578607 | 3-scf00141 | 3 |
| AX-158011379 | 6 | 72.775 | KV452784.1 | 10583511 | 3-scf00141 | 3 |
| AX-158011381 | 6 | 72.775 | KV452784.1 | 10584834 | 3-scf00141 | 3 |
| AX-158011389 | 6 | 72.775 | KV452784.1 | 10593741 | 3-scf00141 | 3 |
| AX-158011437 | 6 | 72.775 | KV452784.1 | 10658147 | 3-scf00141 | 3 |
| AX-158011481 | 6 | 72.775 | KV452784.1 | 10708900 | 3-scf00141 | 3 |
| AX-158011484 | 6 | 72.775 | KV452784.1 | 10709987 | 3-scf00141 | 3 |
| AX-157775801 | 6 | 72.775 | KV452784.1 | 10710396 | 3-scf00141 | 3 |
| AX-158011497 | 6 | 72.775 | KV452784.1 | 10735382 | 3-scf00141 | 3 |
| AX-157820136 | 6 | 72.775 | KV452784.1 | 10757524 | 3-scf00141 | 3 |
| AX-157820143 | 6 | 72.775 | KV452784.1 | 10810396 | 3-scf00141 | 3 |
| AX-158011551 | 6 | 72.775 | KV452784.1 | 10815144 | 3-scf00141 | 3 |
| AX-158011557 | 6 | 72.775 | KV452784.1 | 10818800 | 3-scf00141 | 3 |
| AX-158011560 | 6 | 72.775 | KV452784.1 | 10819586 | 3-scf00141 | 3 |
| AX-158011563 | 6 | 72.775 | KV452784.1 | 10820395 | 3-scf00141 | 3 |
| AX-158011565 | 6 | 72.775 | KV452784.1 | 10825951 | 3-scf00141 | 3 |
| AX-158011566 | 6 | 72.775 | KV452784.1 | 10826342 | 3-scf00141 | 3 |
| AX-158011585 | 6 | 72.775 | KV452784.1 | 10849076 | 3-scf00141 | 3 |
| AX-158011587 | 6 | 72.775 | KV452784.1 | 10849560 | 3-scf00141 | 3 |
| AX-158011616 | 6 | 72.775 | KV452784.1 | 10876006 | 3-scf00141 | 3 |
| AX-158011619 | 6 | 72.775 | KV452784.1 | 10878945 | 3-scf00141 | 3 |
| AX-158011622 | 6 | 72.775 | KV452784.1 | 10879801 | 3-scf00141 | 3 |
| AX-158011623 | 6 | 72.775 | KV452784.1 | 10879887 | 3-scf00141 | 3 |
| AX-157820145 | 6 | 72.775 | KV452784.1 | 10881100 | 3-scf00141 | 3 |
| AX-158011624 | 6 | 72.775 | KV452784.1 | 10882037 | 3-scf00141 | 3 |
| AX-158011627 | 6 | 72.775 | KV452784.1 | 10883521 | 3-scf00141 | 3 |
| AX-157722377 | 6 | 72.775 | KV452784.1 | 10887382 | 3-scf00141 | 3 |
| AX-158011632 | 6 | 72.775 | KV452784.1 | 10888193 | 3-scf00141 | 3 |
| AX-158011655 | 6 | 72.775 | KV452784.1 | 10902490 | 3-scf00141 | 3 |
| AX-158011667 | 6 | 72.775 | KV452784.1 | 10916542 | 3-scf00141 | 3 |
| AX-158011668 | 6 | 72.775 | KV452784.1 | 10917261 | 3-scf00141 | 3 |
| AX-157820148 | 6 | 72.775 | KV452784.1 | 10929729 | 3-scf00141 | 3 |
| AX-158379681 | 6 | 72.775 | KV452784.1 | 10936325 | 3-scf00141 | 3 |
| AX-158011705 | 6 | 72.775 | KV452784.1 | 10950128 | 3-scf00141 | 3 |
| AX-158011707 | 6 | 72.775 | KV452784.1 | 10950835 | 3-scf00141 | 3 |
| AX-158011710 | 6 | 72.775 | KV452784.1 | 10952485 | 3-scf00141 | 3 |
| AX-158011711 | 6 | 72.775 | KV452784.1 | 10953585 | 3-scf00141 | 3 |
| AX-158407785 | 6 | 72.775 | KV452784.1 | 10955867 | 3-scf00141 | 3 |
| AX-158011727 | 6 | 72.775 | KV452784.1 | 10972956 | 3-scf00141 | 3 |
| AX-158011736 | 6 | 72.775 | KV452784.1 | 10977936 | 3-scf00141 | 3 |
| AX-158011737 | 6 | 72.775 | KV452784.1 | 10978748 | 3-scf00141 | 3 |
| AX-158011781 | 6 | 72.775 | KV452784.1 | 11018356 | 3-scf00141 | 3 |

|              |   |        |            |          |            |    |
|--------------|---|--------|------------|----------|------------|----|
| AX-158011787 | 6 | 72.775 | KV452784.1 | 11024764 | 3-scf00141 | 3  |
| AX-158011792 | 6 | 72.775 | KV452784.1 | 11026449 | 3-scf00141 | 3  |
| AX-158011793 | 6 | 72.775 | KV452784.1 | 11026835 | 3-scf00141 | 3  |
| AX-158011797 | 6 | 72.775 | KV452784.1 | 11032114 | 3-scf00141 | 3  |
| AX-158011804 | 6 | 72.775 | KV452784.1 | 11042254 | 3-scf00141 | 3  |
| AX-158011807 | 6 | 72.775 | KV452784.1 | 11044390 | 3-scf00141 | 3  |
| AX-157702781 | 6 | 72.775 | KV452784.1 | 11194365 | 3-scf00141 | 3  |
| AX-158011906 | 6 | 72.775 | KV452784.1 | 11203654 | 3-scf00141 | 3  |
| AX-157876256 | 6 | 72.775 | KV452784.1 | 11208036 | 3-scf00141 | 3  |
| AX-158011910 | 6 | 72.775 | KV452784.1 | 11213760 | 3-scf00141 | 3  |
| AX-158383602 | 6 | 72.775 | KV452784.1 | 11640995 | 3-scf00141 | 3  |
| AX-157865265 | 6 | 72.775 | KV452784.1 | 11710600 | 3-scf00141 | 3  |
| AX-157865266 | 6 | 72.775 | KV452784.1 | 11734886 | 3-scf00141 | 3  |
| AX-158383604 | 6 | 72.775 | KV452784.1 | 11748401 | 3-scf00141 | 3  |
| AX-157820184 | 6 | 72.775 | KV452788.1 | 43751    | 3-scf00145 | 3  |
| AX-158012085 | 6 | 72.775 | KV452788.1 | 87548    | 3-scf00145 | 3  |
| AX-157884843 | 6 | 72.775 | KV452788.1 | 311842   | 3-scf00145 | 3  |
| AX-158012459 | 6 | 72.775 | KV452788.1 | 454389   | 3-scf00145 | 3  |
| AX-158012501 | 6 | 72.775 | KV452788.1 | 495398   | 3-scf00145 | 3  |
| AX-158012502 | 6 | 72.775 | KV452788.1 | 495831   | 3-scf00145 | 3  |
| AX-158012738 | 6 | 72.775 | KV452788.1 | 697323   | 3-scf00145 | 3  |
| AX-158012917 | 6 | 72.775 | KV452788.1 | 901470   | 3-scf00145 | 3  |
| AX-157820267 | 6 | 72.775 | KV452788.1 | 1048689  | 3-scf00145 | 3  |
| AX-157820281 | 6 | 72.775 | KV452788.1 | 1274952  | 3-scf00145 | 3  |
| AX-157755561 | 6 | 72.775 | KV452788.1 | 1320316  | 3-scf00145 | 3  |
| AX-158014521 | 6 | 72.775 | KV452786.1 | 116783   | 3-scf00146 | 3  |
| AX-158014742 | 6 | 72.775 | KV452789.1 | 153655   | 3-scf00147 | 3  |
| AX-158014844 | 6 | 72.775 | KV452789.1 | 484730   | 3-scf00147 | 3  |
| AX-157682981 | 6 | 72.775 | KV452790.1 | 92923    | 3-scf00149 | 3  |
| AX-157682982 | 6 | 72.775 | KV452790.1 | 109690   | 3-scf00149 | 3  |
| AX-157684942 | 6 | 72.775 | KV452792.1 | 109325   | 3-scf00572 | 3  |
| AX-157681411 | 6 | 72.775 | KV452792.1 | 301504   | 3-scf00572 | 3  |
| AX-157681412 | 6 | 72.775 | KV452792.1 | 408031   | 3-scf00572 | 3  |
| AX-157681413 | 6 | 72.775 | KV452792.1 | 440893   | 3-scf00572 | 3  |
| AX-157681414 | 6 | 72.775 | KV452792.1 | 488124   | 3-scf00572 | 3  |
| AX-157681415 | 6 | 72.775 | KV452792.1 | 506161   | 3-scf00572 | 3  |
| AX-157681416 | 6 | 72.775 | KV452792.1 | 516571   | 3-scf00572 | 3  |
| AX-157868430 | 6 | 72.775 | KV452785.1 | 653996   | 3-scf05654 | 3  |
| AX-157684996 | 6 | 72.775 | KV453358.1 | 217575   | scf00579   | UN |
| AX-157681427 | 6 | 72.775 | KV453358.1 | 344228   | scf00579   | UN |
| AX-157681444 | 6 | 72.775 | KV453377.1 | 10710    | scf00653   | UN |
| AX-158011822 | 6 | 72.993 | KV452784.1 | 11054733 | 3-scf00141 | 3  |
| AX-157820151 | 6 | 72.993 | KV452784.1 | 11068973 | 3-scf00141 | 3  |
| AX-157703990 | 6 | 72.993 | KV452784.1 | 11081823 | 3-scf00141 | 3  |
| AX-157820153 | 6 | 73.025 | KV452784.1 | 11086428 | 3-scf00141 | 3  |
| AX-157694606 | 6 | 73.053 | KV452784.1 | 10058780 | 3-scf00141 | 3  |
| AX-157884840 | 6 | 73.053 | KV452784.1 | 11114575 | 3-scf00141 | 3  |
| AX-158013362 | 6 | 73.053 | KV452788.1 | 1315519  | 3-scf00145 | 3  |
| AX-158013630 | 6 | 73.053 | KV452788.1 | 1526233  | 3-scf00145 | 3  |
| AX-158011889 | 6 | 73.085 | KV452784.1 | 11170098 | 3-scf00141 | 3  |
| AX-157745171 | 6 | 73.085 | KV452788.1 | 772264   | 3-scf00145 | 3  |

|              |   |        |            |          |            |   |
|--------------|---|--------|------------|----------|------------|---|
| AX-158013006 | 6 | 73.085 | KV452788.1 | 1007746  | 3-scf00145 | 3 |
| AX-157820265 | 6 | 73.085 | KV452788.1 | 1010827  | 3-scf00145 | 3 |
| AX-158013071 | 6 | 73.085 | KV452788.1 | 1073283  | 3-scf00145 | 3 |
| AX-158013351 | 6 | 73.085 | KV452788.1 | 1307598  | 3-scf00145 | 3 |
| AX-158001678 | 6 | 73.102 | KV452782.1 | 9405275  | 3-scf00136 | 3 |
| AX-158002087 | 6 | 73.102 | KV452782.1 | 9808952  | 3-scf00136 | 3 |
| AX-157819370 | 6 | 73.102 | KV452782.1 | 10943144 | 3-scf00136 | 3 |
| AX-158002728 | 6 | 73.102 | KV452782.1 | 11019031 | 3-scf00136 | 3 |
| AX-157754231 | 6 | 73.102 | KV452784.1 | 299125   | 3-scf00141 | 3 |
| AX-158007590 | 6 | 73.102 | KV452784.1 | 6358931  | 3-scf00141 | 3 |
| AX-157819954 | 6 | 73.102 | KV452784.1 | 8120747  | 3-scf00141 | 3 |
| AX-158009836 | 6 | 73.102 | KV452784.1 | 8933450  | 3-scf00141 | 3 |
| AX-158379674 | 6 | 73.102 | KV452784.1 | 9026077  | 3-scf00141 | 3 |
| AX-158010040 | 6 | 73.102 | KV452784.1 | 9153898  | 3-scf00141 | 3 |
| AX-158010217 | 6 | 73.102 | KV452784.1 | 9349189  | 3-scf00141 | 3 |
| AX-158011062 | 6 | 73.102 | KV452784.1 | 10179671 | 3-scf00141 | 3 |
| AX-158011090 | 6 | 73.102 | KV452784.1 | 10224039 | 3-scf00141 | 3 |
| AX-158011362 | 6 | 73.102 | KV452784.1 | 10551468 | 3-scf00141 | 3 |
| AX-157724360 | 6 | 73.102 | KV452784.1 | 10658387 | 3-scf00141 | 3 |
| AX-158011833 | 6 | 73.102 | KV452784.1 | 11064114 | 3-scf00141 | 3 |
| AX-158011836 | 6 | 73.102 | KV452784.1 | 11070265 | 3-scf00141 | 3 |
| AX-158011837 | 6 | 73.102 | KV452784.1 | 11073734 | 3-scf00141 | 3 |
| AX-157820154 | 6 | 73.102 | KV452784.1 | 11110442 | 3-scf00141 | 3 |
| AX-158011891 | 6 | 73.102 | KV452784.1 | 11171613 | 3-scf00141 | 3 |
| AX-157820159 | 6 | 73.102 | KV452784.1 | 11171890 | 3-scf00141 | 3 |
| AX-157715318 | 6 | 73.102 | KV452784.1 | 11185086 | 3-scf00141 | 3 |
| AX-158011905 | 6 | 73.102 | KV452784.1 | 11200161 | 3-scf00141 | 3 |
| AX-158011907 | 6 | 73.102 | KV452784.1 | 11206048 | 3-scf00141 | 3 |
| AX-158011909 | 6 | 73.102 | KV452784.1 | 11211564 | 3-scf00141 | 3 |
| AX-158011919 | 6 | 73.102 | KV452784.1 | 11222635 | 3-scf00141 | 3 |
| AX-158011920 | 6 | 73.102 | KV452784.1 | 11225859 | 3-scf00141 | 3 |
| AX-158011921 | 6 | 73.102 | KV452784.1 | 11228315 | 3-scf00141 | 3 |
| AX-157884841 | 6 | 73.102 | KV452784.1 | 11234073 | 3-scf00141 | 3 |
| AX-158011940 | 6 | 73.102 | KV452784.1 | 11253457 | 3-scf00141 | 3 |
| AX-158011942 | 6 | 73.102 | KV452784.1 | 11256094 | 3-scf00141 | 3 |
| AX-158011955 | 6 | 73.102 | KV452784.1 | 11264766 | 3-scf00141 | 3 |
| AX-158011956 | 6 | 73.102 | KV452784.1 | 11266253 | 3-scf00141 | 3 |
| AX-158011958 | 6 | 73.102 | KV452784.1 | 11266833 | 3-scf00141 | 3 |
| AX-158011963 | 6 | 73.102 | KV452784.1 | 11270502 | 3-scf00141 | 3 |
| AX-158011964 | 6 | 73.102 | KV452784.1 | 11271985 | 3-scf00141 | 3 |
| AX-158011967 | 6 | 73.102 | KV452784.1 | 11275309 | 3-scf00141 | 3 |
| AX-158011971 | 6 | 73.102 | KV452784.1 | 11282368 | 3-scf00141 | 3 |
| AX-158011992 | 6 | 73.102 | KV452784.1 | 11302285 | 3-scf00141 | 3 |
| AX-158012005 | 6 | 73.102 | KV452784.1 | 11313772 | 3-scf00141 | 3 |
| AX-158012016 | 6 | 73.102 | KV452784.1 | 11330529 | 3-scf00141 | 3 |
| AX-158407806 | 6 | 73.102 | KV452784.1 | 11339595 | 3-scf00141 | 3 |
| AX-157820178 | 6 | 73.102 | KV452784.1 | 11397245 | 3-scf00141 | 3 |
| AX-158012053 | 6 | 73.102 | KV452784.1 | 11454558 | 3-scf00141 | 3 |
| AX-158012055 | 6 | 73.102 | KV452784.1 | 11469798 | 3-scf00141 | 3 |
| AX-158422253 | 6 | 73.102 | KV452784.1 | 11477098 | 3-scf00141 | 3 |
| AX-158012056 | 6 | 73.102 | KV452784.1 | 11478980 | 3-scf00141 | 3 |

|              |   |        |            |          |            |   |
|--------------|---|--------|------------|----------|------------|---|
| AX-158012059 | 6 | 73.102 | KV452784.1 | 11563871 | 3-scf00141 | 3 |
| AX-157820180 | 6 | 73.102 | KV452784.1 | 11564005 | 3-scf00141 | 3 |
| AX-157820181 | 6 | 73.102 | KV452784.1 | 11589567 | 3-scf00141 | 3 |
| AX-157876257 | 6 | 73.102 | KV452784.1 | 11645360 | 3-scf00141 | 3 |
| AX-158012062 | 6 | 73.102 | KV452784.1 | 11668136 | 3-scf00141 | 3 |
| AX-158012069 | 6 | 73.102 | KV452788.1 | 1771     | 3-scf00145 | 3 |
| AX-158012071 | 6 | 73.102 | KV452788.1 | 14454    | 3-scf00145 | 3 |
| AX-158012075 | 6 | 73.102 | KV452788.1 | 59832    | 3-scf00145 | 3 |
| AX-158012076 | 6 | 73.102 | KV452788.1 | 65491    | 3-scf00145 | 3 |
| AX-158012077 | 6 | 73.102 | KV452788.1 | 66036    | 3-scf00145 | 3 |
| AX-158012084 | 6 | 73.102 | KV452788.1 | 82866    | 3-scf00145 | 3 |
| AX-158012100 | 6 | 73.102 | KV452788.1 | 116205   | 3-scf00145 | 3 |
| AX-158012110 | 6 | 73.102 | KV452788.1 | 123882   | 3-scf00145 | 3 |
| AX-158012125 | 6 | 73.102 | KV452788.1 | 145324   | 3-scf00145 | 3 |
| AX-158012129 | 6 | 73.102 | KV452788.1 | 151934   | 3-scf00145 | 3 |
| AX-158012132 | 6 | 73.102 | KV452788.1 | 156876   | 3-scf00145 | 3 |
| AX-158407812 | 6 | 73.102 | KV452788.1 | 176470   | 3-scf00145 | 3 |
| AX-157820190 | 6 | 73.102 | KV452788.1 | 180644   | 3-scf00145 | 3 |
| AX-158012139 | 6 | 73.102 | KV452788.1 | 181972   | 3-scf00145 | 3 |
| AX-158012141 | 6 | 73.102 | KV452788.1 | 183292   | 3-scf00145 | 3 |
| AX-158012142 | 6 | 73.102 | KV452788.1 | 183825   | 3-scf00145 | 3 |
| AX-157865267 | 6 | 73.102 | KV452788.1 | 186933   | 3-scf00145 | 3 |
| AX-157711142 | 6 | 73.102 | KV452788.1 | 187685   | 3-scf00145 | 3 |
| AX-158012145 | 6 | 73.102 | KV452788.1 | 189352   | 3-scf00145 | 3 |
| AX-158012146 | 6 | 73.102 | KV452788.1 | 189905   | 3-scf00145 | 3 |
| AX-157820192 | 6 | 73.102 | KV452788.1 | 190651   | 3-scf00145 | 3 |
| AX-158012147 | 6 | 73.102 | KV452788.1 | 191213   | 3-scf00145 | 3 |
| AX-157820193 | 6 | 73.102 | KV452788.1 | 191716   | 3-scf00145 | 3 |
| AX-158012149 | 6 | 73.102 | KV452788.1 | 192568   | 3-scf00145 | 3 |
| AX-158012150 | 6 | 73.102 | KV452788.1 | 192950   | 3-scf00145 | 3 |
| AX-158012155 | 6 | 73.102 | KV452788.1 | 197376   | 3-scf00145 | 3 |
| AX-158012158 | 6 | 73.102 | KV452788.1 | 202025   | 3-scf00145 | 3 |
| AX-158012248 | 6 | 73.102 | KV452788.1 | 307488   | 3-scf00145 | 3 |
| AX-158012251 | 6 | 73.102 | KV452788.1 | 308544   | 3-scf00145 | 3 |
| AX-158012288 | 6 | 73.102 | KV452788.1 | 327785   | 3-scf00145 | 3 |
| AX-158012291 | 6 | 73.102 | KV452788.1 | 331077   | 3-scf00145 | 3 |
| AX-158012310 | 6 | 73.102 | KV452788.1 | 354466   | 3-scf00145 | 3 |
| AX-158391032 | 6 | 73.102 | KV452788.1 | 370260   | 3-scf00145 | 3 |
| AX-158012335 | 6 | 73.102 | KV452788.1 | 377801   | 3-scf00145 | 3 |
| AX-158012354 | 6 | 73.102 | KV452788.1 | 396707   | 3-scf00145 | 3 |
| AX-158012375 | 6 | 73.102 | KV452788.1 | 408116   | 3-scf00145 | 3 |
| AX-158012428 | 6 | 73.102 | KV452788.1 | 429923   | 3-scf00145 | 3 |
| AX-157725307 | 6 | 73.102 | KV452788.1 | 433568   | 3-scf00145 | 3 |
| AX-158012456 | 6 | 73.102 | KV452788.1 | 452624   | 3-scf00145 | 3 |
| AX-157820215 | 6 | 73.102 | KV452788.1 | 456996   | 3-scf00145 | 3 |
| AX-157820218 | 6 | 73.102 | KV452788.1 | 462872   | 3-scf00145 | 3 |
| AX-157820224 | 6 | 73.102 | KV452788.1 | 472758   | 3-scf00145 | 3 |
| AX-158012478 | 6 | 73.102 | KV452788.1 | 472989   | 3-scf00145 | 3 |
| AX-158012480 | 6 | 73.102 | KV452788.1 | 473408   | 3-scf00145 | 3 |
| AX-158012670 | 6 | 73.102 | KV452788.1 | 612991   | 3-scf00145 | 3 |
| AX-158012709 | 6 | 73.102 | KV452788.1 | 660509   | 3-scf00145 | 3 |

|              |   |        |            |         |            |   |
|--------------|---|--------|------------|---------|------------|---|
| AX-158012710 | 6 | 73.102 | KV452788.1 | 661030  | 3-scf00145 | 3 |
| AX-157771145 | 6 | 73.102 | KV452788.1 | 661962  | 3-scf00145 | 3 |
| AX-158012731 | 6 | 73.102 | KV452788.1 | 688288  | 3-scf00145 | 3 |
| AX-158012737 | 6 | 73.102 | KV452788.1 | 697048  | 3-scf00145 | 3 |
| AX-158012746 | 6 | 73.102 | KV452788.1 | 707540  | 3-scf00145 | 3 |
| AX-158012767 | 6 | 73.102 | KV452788.1 | 731300  | 3-scf00145 | 3 |
| AX-158012782 | 6 | 73.102 | KV452788.1 | 750049  | 3-scf00145 | 3 |
| AX-158012793 | 6 | 73.102 | KV452788.1 | 769554  | 3-scf00145 | 3 |
| AX-158012804 | 6 | 73.102 | KV452788.1 | 779711  | 3-scf00145 | 3 |
| AX-158012805 | 6 | 73.102 | KV452788.1 | 780294  | 3-scf00145 | 3 |
| AX-158012819 | 6 | 73.102 | KV452788.1 | 793778  | 3-scf00145 | 3 |
| AX-158012830 | 6 | 73.102 | KV452788.1 | 806816  | 3-scf00145 | 3 |
| AX-158012939 | 6 | 73.102 | KV452788.1 | 924325  | 3-scf00145 | 3 |
| AX-158012948 | 6 | 73.102 | KV452788.1 | 932893  | 3-scf00145 | 3 |
| AX-157820256 | 6 | 73.102 | KV452788.1 | 937412  | 3-scf00145 | 3 |
| AX-158012963 | 6 | 73.102 | KV452788.1 | 944920  | 3-scf00145 | 3 |
| AX-158012964 | 6 | 73.102 | KV452788.1 | 945586  | 3-scf00145 | 3 |
| AX-158012970 | 6 | 73.102 | KV452788.1 | 951839  | 3-scf00145 | 3 |
| AX-158013018 | 6 | 73.102 | KV452788.1 | 1024106 | 3-scf00145 | 3 |
| AX-158013114 | 6 | 73.102 | KV452788.1 | 1102850 | 3-scf00145 | 3 |
| AX-158013136 | 6 | 73.102 | KV452788.1 | 1125470 | 3-scf00145 | 3 |
| AX-158013406 | 6 | 73.102 | KV452788.1 | 1348426 | 3-scf00145 | 3 |
| AX-158013422 | 6 | 73.102 | KV452788.1 | 1358209 | 3-scf00145 | 3 |
| AX-158013433 | 6 | 73.102 | KV452788.1 | 1366930 | 3-scf00145 | 3 |
| AX-158013442 | 6 | 73.102 | KV452788.1 | 1375405 | 3-scf00145 | 3 |
| AX-157856236 | 6 | 73.102 | KV452788.1 | 1464299 | 3-scf00145 | 3 |
| AX-158013776 | 6 | 73.102 | KV452788.1 | 1644468 | 3-scf00145 | 3 |
| AX-158014431 | 6 | 73.102 | KV452786.1 | 16098   | 3-scf00146 | 3 |
| AX-157856239 | 6 | 73.102 | KV452786.1 | 16481   | 3-scf00146 | 3 |
| AX-158014432 | 6 | 73.102 | KV452786.1 | 18154   | 3-scf00146 | 3 |
| AX-158014438 | 6 | 73.102 | KV452786.1 | 22459   | 3-scf00146 | 3 |
| AX-157754141 | 6 | 73.102 | KV452786.1 | 26053   | 3-scf00146 | 3 |
| AX-158014440 | 6 | 73.102 | KV452786.1 | 26485   | 3-scf00146 | 3 |
| AX-158014441 | 6 | 73.102 | KV452786.1 | 29499   | 3-scf00146 | 3 |
| AX-158014458 | 6 | 73.102 | KV452786.1 | 50082   | 3-scf00146 | 3 |
| AX-158014461 | 6 | 73.102 | KV452786.1 | 51586   | 3-scf00146 | 3 |
| AX-157820344 | 6 | 73.102 | KV452786.1 | 53700   | 3-scf00146 | 3 |
| AX-157747050 | 6 | 73.102 | KV452786.1 | 55001   | 3-scf00146 | 3 |
| AX-158014482 | 6 | 73.102 | KV452786.1 | 86158   | 3-scf00146 | 3 |
| AX-158014484 | 6 | 73.102 | KV452786.1 | 90369   | 3-scf00146 | 3 |
| AX-158014493 | 6 | 73.102 | KV452786.1 | 98175   | 3-scf00146 | 3 |
| AX-157820351 | 6 | 73.102 | KV452786.1 | 98468   | 3-scf00146 | 3 |
| AX-158014499 | 6 | 73.102 | KV452786.1 | 100293  | 3-scf00146 | 3 |
| AX-158014505 | 6 | 73.102 | KV452786.1 | 106066  | 3-scf00146 | 3 |
| AX-158014509 | 6 | 73.102 | KV452786.1 | 107591  | 3-scf00146 | 3 |
| AX-158014510 | 6 | 73.102 | KV452786.1 | 107964  | 3-scf00146 | 3 |
| AX-158014512 | 6 | 73.102 | KV452786.1 | 108540  | 3-scf00146 | 3 |
| AX-158014513 | 6 | 73.102 | KV452786.1 | 109149  | 3-scf00146 | 3 |
| AX-158014519 | 6 | 73.102 | KV452786.1 | 113232  | 3-scf00146 | 3 |
| AX-157724800 | 6 | 73.102 | KV452786.1 | 115207  | 3-scf00146 | 3 |
| AX-158014528 | 6 | 73.102 | KV452786.1 | 126935  | 3-scf00146 | 3 |

|              |   |        |            |        |            |   |
|--------------|---|--------|------------|--------|------------|---|
| AX-158014539 | 6 | 73.102 | KV452786.1 | 157039 | 3-scf00146 | 3 |
| AX-158014541 | 6 | 73.102 | KV452786.1 | 161332 | 3-scf00146 | 3 |
| AX-158014549 | 6 | 73.102 | KV452786.1 | 171442 | 3-scf00146 | 3 |
| AX-158014557 | 6 | 73.102 | KV452786.1 | 182860 | 3-scf00146 | 3 |
| AX-158014559 | 6 | 73.102 | KV452786.1 | 183498 | 3-scf00146 | 3 |
| AX-158014561 | 6 | 73.102 | KV452786.1 | 189356 | 3-scf00146 | 3 |
| AX-157718115 | 6 | 73.102 | KV452786.1 | 194659 | 3-scf00146 | 3 |
| AX-157820354 | 6 | 73.102 | KV452786.1 | 198473 | 3-scf00146 | 3 |
| AX-158014586 | 6 | 73.102 | KV452786.1 | 246616 | 3-scf00146 | 3 |
| AX-158014587 | 6 | 73.102 | KV452786.1 | 249223 | 3-scf00146 | 3 |
| AX-158014588 | 6 | 73.102 | KV452786.1 | 249662 | 3-scf00146 | 3 |
| AX-158407842 | 6 | 73.102 | KV452786.1 | 250766 | 3-scf00146 | 3 |
| AX-158014600 | 6 | 73.102 | KV452786.1 | 269950 | 3-scf00146 | 3 |
| AX-157820372 | 6 | 73.102 | KV452786.1 | 288896 | 3-scf00146 | 3 |
| AX-158014611 | 6 | 73.102 | KV452786.1 | 289999 | 3-scf00146 | 3 |
| AX-158014613 | 6 | 73.102 | KV452786.1 | 291269 | 3-scf00146 | 3 |
| AX-158014615 | 6 | 73.102 | KV452786.1 | 291821 | 3-scf00146 | 3 |
| AX-158014626 | 6 | 73.102 | KV452786.1 | 303214 | 3-scf00146 | 3 |
| AX-157856243 | 6 | 73.102 | KV452786.1 | 327217 | 3-scf00146 | 3 |
| AX-158014633 | 6 | 73.102 | KV452786.1 | 338974 | 3-scf00146 | 3 |
| AX-158014634 | 6 | 73.102 | KV452786.1 | 341824 | 3-scf00146 | 3 |
| AX-158014636 | 6 | 73.102 | KV452786.1 | 342050 | 3-scf00146 | 3 |
| AX-157721643 | 6 | 73.102 | KV452786.1 | 345113 | 3-scf00146 | 3 |
| AX-158014637 | 6 | 73.102 | KV452786.1 | 346134 | 3-scf00146 | 3 |
| AX-158014638 | 6 | 73.102 | KV452786.1 | 348280 | 3-scf00146 | 3 |
| AX-158014642 | 6 | 73.102 | KV452786.1 | 352399 | 3-scf00146 | 3 |
| AX-158014649 | 6 | 73.102 | KV452786.1 | 371803 | 3-scf00146 | 3 |
| AX-158014650 | 6 | 73.102 | KV452786.1 | 373111 | 3-scf00146 | 3 |
| AX-158014653 | 6 | 73.102 | KV452786.1 | 388053 | 3-scf00146 | 3 |
| AX-158014655 | 6 | 73.102 | KV452786.1 | 402366 | 3-scf00146 | 3 |
| AX-158014664 | 6 | 73.102 | KV452786.1 | 432943 | 3-scf00146 | 3 |
| AX-158014668 | 6 | 73.102 | KV452786.1 | 442418 | 3-scf00146 | 3 |
| AX-158014669 | 6 | 73.102 | KV452786.1 | 443031 | 3-scf00146 | 3 |
| AX-158014670 | 6 | 73.102 | KV452786.1 | 443499 | 3-scf00146 | 3 |
| AX-158014673 | 6 | 73.102 | KV452786.1 | 446154 | 3-scf00146 | 3 |
| AX-157710652 | 6 | 73.102 | KV452786.1 | 450911 | 3-scf00146 | 3 |
| AX-158014684 | 6 | 73.102 | KV452786.1 | 457029 | 3-scf00146 | 3 |
| AX-158014691 | 6 | 73.102 | KV452786.1 | 469447 | 3-scf00146 | 3 |
| AX-158014692 | 6 | 73.102 | KV452786.1 | 470892 | 3-scf00146 | 3 |
| AX-158014693 | 6 | 73.102 | KV452786.1 | 476050 | 3-scf00146 | 3 |
| AX-158014694 | 6 | 73.102 | KV452786.1 | 481728 | 3-scf00146 | 3 |
| AX-158014695 | 6 | 73.102 | KV452786.1 | 482098 | 3-scf00146 | 3 |
| AX-157820376 | 6 | 73.102 | KV452786.1 | 483050 | 3-scf00146 | 3 |
| AX-158014700 | 6 | 73.102 | KV452786.1 | 485988 | 3-scf00146 | 3 |
| AX-158014702 | 6 | 73.102 | KV452786.1 | 486837 | 3-scf00146 | 3 |
| AX-158014704 | 6 | 73.102 | KV452786.1 | 498234 | 3-scf00146 | 3 |
| AX-158014706 | 6 | 73.102 | KV452786.1 | 499147 | 3-scf00146 | 3 |
| AX-158014707 | 6 | 73.102 | KV452786.1 | 506230 | 3-scf00146 | 3 |
| AX-157820378 | 6 | 73.102 | KV452786.1 | 507988 | 3-scf00146 | 3 |
| AX-158014709 | 6 | 73.102 | KV452786.1 | 510409 | 3-scf00146 | 3 |
| AX-158014712 | 6 | 73.102 | KV452786.1 | 521895 | 3-scf00146 | 3 |

|              |   |        |            |          |            |    |
|--------------|---|--------|------------|----------|------------|----|
| AX-157856245 | 6 | 73.102 | KV452786.1 | 524910   | 3-scf00146 | 3  |
| AX-158014713 | 6 | 73.102 | KV452786.1 | 525093   | 3-scf00146 | 3  |
| AX-157708257 | 6 | 73.102 | KV452786.1 | 550541   | 3-scf00146 | 3  |
| AX-158014721 | 6 | 73.102 | KV452786.1 | 566538   | 3-scf00146 | 3  |
| AX-158014723 | 6 | 73.102 | KV452786.1 | 572095   | 3-scf00146 | 3  |
| AX-158014724 | 6 | 73.102 | KV452786.1 | 574939   | 3-scf00146 | 3  |
| AX-158014726 | 6 | 73.102 | KV452786.1 | 581411   | 3-scf00146 | 3  |
| AX-158014729 | 6 | 73.102 | KV452789.1 | 83609    | 3-scf00147 | 3  |
| AX-158014731 | 6 | 73.102 | KV452789.1 | 88923    | 3-scf00147 | 3  |
| AX-158014738 | 6 | 73.102 | KV452789.1 | 128812   | 3-scf00147 | 3  |
| AX-158014745 | 6 | 73.102 | KV452789.1 | 155328   | 3-scf00147 | 3  |
| AX-158014746 | 6 | 73.102 | KV452789.1 | 166275   | 3-scf00147 | 3  |
| AX-158014748 | 6 | 73.102 | KV452789.1 | 185177   | 3-scf00147 | 3  |
| AX-158014757 | 6 | 73.102 | KV452789.1 | 323344   | 3-scf00147 | 3  |
| AX-157820383 | 6 | 73.102 | KV452789.1 | 356805   | 3-scf00147 | 3  |
| AX-158014772 | 6 | 73.102 | KV452789.1 | 383477   | 3-scf00147 | 3  |
| AX-158014831 | 6 | 73.102 | KV452789.1 | 461218   | 3-scf00147 | 3  |
| AX-158014856 | 6 | 73.102 | KV452789.1 | 498344   | 3-scf00147 | 3  |
| AX-158014860 | 6 | 73.102 | KV452789.1 | 504282   | 3-scf00147 | 3  |
| AX-158014862 | 6 | 73.102 | KV452789.1 | 505391   | 3-scf00147 | 3  |
| AX-157682976 | 6 | 73.102 | KV452790.1 | 65512    | 3-scf00149 | 3  |
| AX-157682986 | 6 | 73.102 | KV452791.1 | 12577    | 3-scf00150 | 3  |
| AX-158420498 | 6 | 73.102 | KV452792.1 | 185798   | 3-scf00572 | 3  |
| AX-157684948 | 6 | 73.102 | KV452792.1 | 388170   | 3-scf00572 | 3  |
| AX-158375552 | 6 | 73.102 | KV452785.1 | 38533    | 3-scf05654 | 3  |
| AX-158375555 | 6 | 73.102 | KV452785.1 | 187696   | 3-scf05654 | 3  |
| AX-158420452 | 6 | 73.102 | KV452785.1 | 240622   | 3-scf05654 | 3  |
| AX-157684990 | 6 | 73.102 | KV453358.1 | 94767    | scf00579   | UN |
| AX-158413799 | 6 | 73.102 | KV453358.1 | 105432   | scf00579   | UN |
| AX-157685160 | 6 | 73.102 | KV453362.1 | 95248    | scf00592   | UN |
| AX-158014686 | 6 | 73.212 | KV452786.1 | 460927   | 3-scf00146 | 3  |
| AX-158014689 | 6 | 73.212 | KV452786.1 | 467148   | 3-scf00146 | 3  |
| AX-158011232 | 6 | 73.321 | KV452784.1 | 10377235 | 3-scf00141 | 3  |
| AX-158011274 | 6 | 73.321 | KV452784.1 | 10421892 | 3-scf00141 | 3  |
| AX-158011541 | 6 | 73.321 | KV452784.1 | 10803166 | 3-scf00141 | 3  |
| AX-157752007 | 6 | 73.321 | KV452788.1 | 1013123  | 3-scf00145 | 3  |
| AX-158014476 | 6 | 73.321 | KV452786.1 | 80486    | 3-scf00146 | 3  |
| AX-157820361 | 6 | 73.321 | KV452786.1 | 207190   | 3-scf00146 | 3  |
| AX-158014593 | 6 | 73.321 | KV452786.1 | 255276   | 3-scf00146 | 3  |
| AX-158014739 | 6 | 73.321 | KV452789.1 | 137717   | 3-scf00147 | 3  |
| AX-157757488 | 6 | 73.321 | KV452789.1 | 360292   | 3-scf00147 | 3  |
| AX-158014768 | 6 | 73.321 | KV452789.1 | 379368   | 3-scf00147 | 3  |
| AX-158014774 | 6 | 73.321 | KV452789.1 | 390265   | 3-scf00147 | 3  |
| AX-158014794 | 6 | 73.321 | KV452789.1 | 416314   | 3-scf00147 | 3  |
| AX-158014799 | 6 | 73.321 | KV452789.1 | 425015   | 3-scf00147 | 3  |
| AX-158014805 | 6 | 73.321 | KV452789.1 | 433070   | 3-scf00147 | 3  |
| AX-158014817 | 6 | 73.321 | KV452789.1 | 439199   | 3-scf00147 | 3  |
| AX-158010774 | 6 | 73.335 | KV452784.1 | 9889652  | 3-scf00141 | 3  |
| AX-158014733 | 6 | 73.335 | KV452789.1 | 104058   | 3-scf00147 | 3  |
| AX-157684946 | 6 | 73.335 | KV452792.1 | 273545   | 3-scf00572 | 3  |
| AX-157684950 | 6 | 73.335 | KV452792.1 | 431431   | 3-scf00572 | 3  |



|              |   |        |            |          |            |   |
|--------------|---|--------|------------|----------|------------|---|
| AX-158012296 | 6 | 73.353 | KV452788.1 | 337835   | 3-scf00145 | 3 |
| AX-158012308 | 6 | 73.353 | KV452788.1 | 346834   | 3-scf00145 | 3 |
| AX-158012329 | 6 | 73.353 | KV452788.1 | 372815   | 3-scf00145 | 3 |
| AX-158012775 | 6 | 73.353 | KV452788.1 | 745437   | 3-scf00145 | 3 |
| AX-158012776 | 6 | 73.353 | KV452788.1 | 745829   | 3-scf00145 | 3 |
| AX-157820251 | 6 | 73.353 | KV452788.1 | 841562   | 3-scf00145 | 3 |
| AX-158013447 | 6 | 73.353 | KV452788.1 | 1379201  | 3-scf00145 | 3 |
| AX-158013533 | 6 | 73.353 | KV452788.1 | 1429658  | 3-scf00145 | 3 |
| AX-157820284 | 6 | 73.353 | KV452788.1 | 1513709  | 3-scf00145 | 3 |
| AX-158014616 | 6 | 73.353 | KV452786.1 | 295942   | 3-scf00146 | 3 |
| AX-158014618 | 6 | 73.353 | KV452786.1 | 297863   | 3-scf00146 | 3 |
| AX-158014619 | 6 | 73.353 | KV452786.1 | 300653   | 3-scf00146 | 3 |
| AX-157719358 | 6 | 73.374 | KV452784.1 | 11243823 | 3-scf00141 | 3 |
| AX-158011938 | 6 | 73.374 | KV452784.1 | 11250818 | 3-scf00141 | 3 |
| AX-158012476 | 6 | 73.374 | KV452788.1 | 469977   | 3-scf00145 | 3 |
| AX-158012498 | 6 | 73.374 | KV452788.1 | 492082   | 3-scf00145 | 3 |
| AX-158012569 | 6 | 73.374 | KV452788.1 | 530966   | 3-scf00145 | 3 |
| AX-158379683 | 6 | 73.374 | KV452786.1 | 255053   | 3-scf00146 | 3 |
| AX-158012490 | 6 | 73.402 | KV452788.1 | 484288   | 3-scf00145 | 3 |
| AX-158010313 | 6 | 73.43  | KV452784.1 | 9437005  | 3-scf00141 | 3 |
| AX-158011588 | 6 | 73.43  | KV452784.1 | 10850417 | 3-scf00141 | 3 |
| AX-158011841 | 6 | 73.43  | KV452784.1 | 11086983 | 3-scf00141 | 3 |
| AX-158011959 | 6 | 73.43  | KV452784.1 | 11267379 | 3-scf00141 | 3 |
| AX-158421731 | 6 | 73.43  | KV452784.1 | 11292659 | 3-scf00141 | 3 |
| AX-158011997 | 6 | 73.43  | KV452784.1 | 11307811 | 3-scf00141 | 3 |
| AX-158012282 | 6 | 73.43  | KV452788.1 | 324355   | 3-scf00145 | 3 |
| AX-157758112 | 6 | 73.43  | KV452788.1 | 446542   | 3-scf00145 | 3 |
| AX-157820222 | 6 | 73.43  | KV452788.1 | 470677   | 3-scf00145 | 3 |
| AX-158012477 | 6 | 73.43  | KV452788.1 | 472490   | 3-scf00145 | 3 |
| AX-158012487 | 6 | 73.43  | KV452788.1 | 481570   | 3-scf00145 | 3 |
| AX-158012488 | 6 | 73.43  | KV452788.1 | 482867   | 3-scf00145 | 3 |
| AX-158012492 | 6 | 73.43  | KV452788.1 | 485474   | 3-scf00145 | 3 |
| AX-158012511 | 6 | 73.43  | KV452788.1 | 500180   | 3-scf00145 | 3 |
| AX-157722800 | 6 | 73.43  | KV452788.1 | 563076   | 3-scf00145 | 3 |
| AX-158012623 | 6 | 73.43  | KV452788.1 | 568721   | 3-scf00145 | 3 |
| AX-158012626 | 6 | 73.43  | KV452788.1 | 575701   | 3-scf00145 | 3 |
| AX-158012637 | 6 | 73.43  | KV452788.1 | 583952   | 3-scf00145 | 3 |
| AX-158012683 | 6 | 73.43  | KV452788.1 | 631057   | 3-scf00145 | 3 |
| AX-158012684 | 6 | 73.43  | KV452788.1 | 632099   | 3-scf00145 | 3 |
| AX-158012699 | 6 | 73.43  | KV452788.1 | 651261   | 3-scf00145 | 3 |
| AX-158012700 | 6 | 73.43  | KV452788.1 | 652073   | 3-scf00145 | 3 |
| AX-158012708 | 6 | 73.43  | KV452788.1 | 660233   | 3-scf00145 | 3 |
| AX-157820231 | 6 | 73.43  | KV452788.1 | 674027   | 3-scf00145 | 3 |
| AX-158012734 | 6 | 73.43  | KV452788.1 | 694015   | 3-scf00145 | 3 |
| AX-158012735 | 6 | 73.43  | KV452788.1 | 694712   | 3-scf00145 | 3 |
| AX-157820238 | 6 | 73.43  | KV452788.1 | 707339   | 3-scf00145 | 3 |
| AX-158012749 | 6 | 73.43  | KV452788.1 | 708632   | 3-scf00145 | 3 |
| AX-158012751 | 6 | 73.43  | KV452788.1 | 712210   | 3-scf00145 | 3 |
| AX-158012752 | 6 | 73.43  | KV452788.1 | 712840   | 3-scf00145 | 3 |
| AX-158012753 | 6 | 73.43  | KV452788.1 | 713670   | 3-scf00145 | 3 |
| AX-158012754 | 6 | 73.43  | KV452788.1 | 714083   | 3-scf00145 | 3 |

|              |   |       |            |         |            |   |
|--------------|---|-------|------------|---------|------------|---|
| AX-158012755 | 6 | 73.43 | KV452788.1 | 714169  | 3-scf00145 | 3 |
| AX-158012756 | 6 | 73.43 | KV452788.1 | 714724  | 3-scf00145 | 3 |
| AX-157820239 | 6 | 73.43 | KV452788.1 | 716391  | 3-scf00145 | 3 |
| AX-157820240 | 6 | 73.43 | KV452788.1 | 720995  | 3-scf00145 | 3 |
| AX-158012760 | 6 | 73.43 | KV452788.1 | 721239  | 3-scf00145 | 3 |
| AX-158012761 | 6 | 73.43 | KV452788.1 | 723457  | 3-scf00145 | 3 |
| AX-158012763 | 6 | 73.43 | KV452788.1 | 726363  | 3-scf00145 | 3 |
| AX-157820241 | 6 | 73.43 | KV452788.1 | 731106  | 3-scf00145 | 3 |
| AX-157820244 | 6 | 73.43 | KV452788.1 | 750619  | 3-scf00145 | 3 |
| AX-158012790 | 6 | 73.43 | KV452788.1 | 765980  | 3-scf00145 | 3 |
| AX-158012791 | 6 | 73.43 | KV452788.1 | 766470  | 3-scf00145 | 3 |
| AX-158012792 | 6 | 73.43 | KV452788.1 | 767120  | 3-scf00145 | 3 |
| AX-157749532 | 6 | 73.43 | KV452788.1 | 772891  | 3-scf00145 | 3 |
| AX-158012810 | 6 | 73.43 | KV452788.1 | 784680  | 3-scf00145 | 3 |
| AX-158012817 | 6 | 73.43 | KV452788.1 | 790510  | 3-scf00145 | 3 |
| AX-158012818 | 6 | 73.43 | KV452788.1 | 792841  | 3-scf00145 | 3 |
| AX-158012822 | 6 | 73.43 | KV452788.1 | 799016  | 3-scf00145 | 3 |
| AX-157820247 | 6 | 73.43 | KV452788.1 | 803848  | 3-scf00145 | 3 |
| AX-158012826 | 6 | 73.43 | KV452788.1 | 804185  | 3-scf00145 | 3 |
| AX-158012827 | 6 | 73.43 | KV452788.1 | 805459  | 3-scf00145 | 3 |
| AX-158012829 | 6 | 73.43 | KV452788.1 | 806518  | 3-scf00145 | 3 |
| AX-158012832 | 6 | 73.43 | KV452788.1 | 808914  | 3-scf00145 | 3 |
| AX-158012837 | 6 | 73.43 | KV452788.1 | 810416  | 3-scf00145 | 3 |
| AX-158012838 | 6 | 73.43 | KV452788.1 | 811910  | 3-scf00145 | 3 |
| AX-158012840 | 6 | 73.43 | KV452788.1 | 812000  | 3-scf00145 | 3 |
| AX-158012842 | 6 | 73.43 | KV452788.1 | 814395  | 3-scf00145 | 3 |
| AX-157820248 | 6 | 73.43 | KV452788.1 | 815384  | 3-scf00145 | 3 |
| AX-158012843 | 6 | 73.43 | KV452788.1 | 815537  | 3-scf00145 | 3 |
| AX-158012848 | 6 | 73.43 | KV452788.1 | 817118  | 3-scf00145 | 3 |
| AX-158012850 | 6 | 73.43 | KV452788.1 | 818596  | 3-scf00145 | 3 |
| AX-157820249 | 6 | 73.43 | KV452788.1 | 818919  | 3-scf00145 | 3 |
| AX-158012853 | 6 | 73.43 | KV452788.1 | 820718  | 3-scf00145 | 3 |
| AX-158012854 | 6 | 73.43 | KV452788.1 | 822483  | 3-scf00145 | 3 |
| AX-158012861 | 6 | 73.43 | KV452788.1 | 826011  | 3-scf00145 | 3 |
| AX-158012862 | 6 | 73.43 | KV452788.1 | 826413  | 3-scf00145 | 3 |
| AX-158012865 | 6 | 73.43 | KV452788.1 | 830368  | 3-scf00145 | 3 |
| AX-158012867 | 6 | 73.43 | KV452788.1 | 830428  | 3-scf00145 | 3 |
| AX-158012869 | 6 | 73.43 | KV452788.1 | 834741  | 3-scf00145 | 3 |
| AX-158012952 | 6 | 73.43 | KV452788.1 | 934828  | 3-scf00145 | 3 |
| AX-158012977 | 6 | 73.43 | KV452788.1 | 959384  | 3-scf00145 | 3 |
| AX-158013085 | 6 | 73.43 | KV452788.1 | 1084074 | 3-scf00145 | 3 |
| AX-158013104 | 6 | 73.43 | KV452788.1 | 1097179 | 3-scf00145 | 3 |
| AX-158013132 | 6 | 73.43 | KV452788.1 | 1123254 | 3-scf00145 | 3 |
| AX-158013209 | 6 | 73.43 | KV452788.1 | 1180604 | 3-scf00145 | 3 |
| AX-158013252 | 6 | 73.43 | KV452788.1 | 1231144 | 3-scf00145 | 3 |
| AX-158013264 | 6 | 73.43 | KV452788.1 | 1239878 | 3-scf00145 | 3 |
| AX-158013582 | 6 | 73.43 | KV452788.1 | 1478584 | 3-scf00145 | 3 |
| AX-158013931 | 6 | 73.43 | KV452788.1 | 1764748 | 3-scf00145 | 3 |
| AX-158014546 | 6 | 73.43 | KV452786.1 | 168813  | 3-scf00146 | 3 |
| AX-158014594 | 6 | 73.43 | KV452786.1 | 258827  | 3-scf00146 | 3 |
| AX-158014627 | 6 | 73.43 | KV452786.1 | 306097  | 3-scf00146 | 3 |

|              |   |        |            |          |            |   |
|--------------|---|--------|------------|----------|------------|---|
| AX-158014646 | 6 | 73.43  | KV452786.1 | 365173   | 3-scf00146 | 3 |
| AX-157724725 | 6 | 73.43  | KV452786.1 | 366971   | 3-scf00146 | 3 |
| AX-157820380 | 6 | 73.43  | KV452789.1 | 46371    | 3-scf00147 | 3 |
| AX-158014754 | 6 | 73.43  | KV452789.1 | 316147   | 3-scf00147 | 3 |
| AX-157820384 | 6 | 73.43  | KV452789.1 | 359333   | 3-scf00147 | 3 |
| AX-158391044 | 6 | 73.454 | KV452788.1 | 787659   | 3-scf00145 | 3 |
| AX-158012873 | 6 | 73.479 | KV452788.1 | 846289   | 3-scf00145 | 3 |
| AX-158012874 | 6 | 73.5   | KV452788.1 | 846558   | 3-scf00145 | 3 |
| AX-158012876 | 6 | 73.52  | KV452788.1 | 849417   | 3-scf00145 | 3 |
| AX-157757776 | 6 | 73.539 | KV452784.1 | 9499918  | 3-scf00141 | 3 |
| AX-158010371 | 6 | 73.539 | KV452784.1 | 9500606  | 3-scf00141 | 3 |
| AX-158010984 | 6 | 73.539 | KV452784.1 | 10086699 | 3-scf00141 | 3 |
| AX-158011875 | 6 | 73.539 | KV452784.1 | 11154140 | 3-scf00141 | 3 |
| AX-158011929 | 6 | 73.539 | KV452784.1 | 11237674 | 3-scf00141 | 3 |
| AX-157713407 | 6 | 73.539 | KV452784.1 | 11246646 | 3-scf00141 | 3 |
| AX-158011946 | 6 | 73.539 | KV452784.1 | 11259003 | 3-scf00141 | 3 |
| AX-158011948 | 6 | 73.539 | KV452784.1 | 11261897 | 3-scf00141 | 3 |
| AX-158012064 | 6 | 73.539 | KV452784.1 | 11712842 | 3-scf00141 | 3 |
| AX-158012769 | 6 | 73.539 | KV452788.1 | 739327   | 3-scf00145 | 3 |
| AX-158012785 | 6 | 73.539 | KV452788.1 | 757402   | 3-scf00145 | 3 |
| AX-158012795 | 6 | 73.539 | KV452788.1 | 774627   | 3-scf00145 | 3 |
| AX-158012815 | 6 | 73.539 | KV452788.1 | 788778   | 3-scf00145 | 3 |
| AX-158012821 | 6 | 73.539 | KV452788.1 | 796524   | 3-scf00145 | 3 |
| AX-158012845 | 6 | 73.539 | KV452788.1 | 816036   | 3-scf00145 | 3 |
| AX-157750104 | 6 | 73.539 | KV452788.1 | 817813   | 3-scf00145 | 3 |
| AX-158012868 | 6 | 73.539 | KV452788.1 | 832135   | 3-scf00145 | 3 |
| AX-158012877 | 6 | 73.539 | KV452788.1 | 852468   | 3-scf00145 | 3 |
| AX-158012878 | 6 | 73.539 | KV452788.1 | 853762   | 3-scf00145 | 3 |
| AX-158012879 | 6 | 73.539 | KV452788.1 | 854481   | 3-scf00145 | 3 |
| AX-158012880 | 6 | 73.539 | KV452788.1 | 854987   | 3-scf00145 | 3 |
| AX-158012881 | 6 | 73.539 | KV452788.1 | 855499   | 3-scf00145 | 3 |
| AX-158012933 | 6 | 73.539 | KV452788.1 | 919893   | 3-scf00145 | 3 |
| AX-158012976 | 6 | 73.539 | KV452788.1 | 957525   | 3-scf00145 | 3 |
| AX-157745170 | 6 | 73.539 | KV452788.1 | 1021391  | 3-scf00145 | 3 |
| AX-158013030 | 6 | 73.539 | KV452788.1 | 1036256  | 3-scf00145 | 3 |
| AX-158013031 | 6 | 73.539 | KV452788.1 | 1037094  | 3-scf00145 | 3 |
| AX-158013033 | 6 | 73.539 | KV452788.1 | 1037718  | 3-scf00145 | 3 |
| AX-158013041 | 6 | 73.539 | KV452788.1 | 1047783  | 3-scf00145 | 3 |
| AX-158013043 | 6 | 73.539 | KV452788.1 | 1049395  | 3-scf00145 | 3 |
| AX-158013046 | 6 | 73.539 | KV452788.1 | 1051003  | 3-scf00145 | 3 |
| AX-158013050 | 6 | 73.539 | KV452788.1 | 1053350  | 3-scf00145 | 3 |
| AX-158013052 | 6 | 73.539 | KV452788.1 | 1053930  | 3-scf00145 | 3 |
| AX-158013053 | 6 | 73.539 | KV452788.1 | 1054597  | 3-scf00145 | 3 |
| AX-158013057 | 6 | 73.539 | KV452788.1 | 1058017  | 3-scf00145 | 3 |
| AX-158013079 | 6 | 73.539 | KV452788.1 | 1078705  | 3-scf00145 | 3 |
| AX-157740577 | 6 | 73.539 | KV452788.1 | 1080673  | 3-scf00145 | 3 |
| AX-158013096 | 6 | 73.539 | KV452788.1 | 1091166  | 3-scf00145 | 3 |
| AX-158013101 | 6 | 73.539 | KV452788.1 | 1094911  | 3-scf00145 | 3 |
| AX-157758552 | 6 | 73.539 | KV452788.1 | 1108506  | 3-scf00145 | 3 |
| AX-158013123 | 6 | 73.539 | KV452788.1 | 1113120  | 3-scf00145 | 3 |
| AX-158013124 | 6 | 73.539 | KV452788.1 | 1113344  | 3-scf00145 | 3 |

|              |   |        |            |          |            |    |
|--------------|---|--------|------------|----------|------------|----|
| AX-158013147 | 6 | 73.539 | KV452788.1 | 1131329  | 3-scf00145 | 3  |
| AX-158013157 | 6 | 73.539 | KV452788.1 | 1138561  | 3-scf00145 | 3  |
| AX-158013187 | 6 | 73.539 | KV452788.1 | 1160297  | 3-scf00145 | 3  |
| AX-158013188 | 6 | 73.539 | KV452788.1 | 1160955  | 3-scf00145 | 3  |
| AX-158013191 | 6 | 73.539 | KV452788.1 | 1162772  | 3-scf00145 | 3  |
| AX-158013198 | 6 | 73.539 | KV452788.1 | 1165330  | 3-scf00145 | 3  |
| AX-158013208 | 6 | 73.539 | KV452788.1 | 1177171  | 3-scf00145 | 3  |
| AX-157725968 | 6 | 73.539 | KV452788.1 | 1181196  | 3-scf00145 | 3  |
| AX-158013215 | 6 | 73.539 | KV452788.1 | 1187074  | 3-scf00145 | 3  |
| AX-158013216 | 6 | 73.539 | KV452788.1 | 1187578  | 3-scf00145 | 3  |
| AX-158013218 | 6 | 73.539 | KV452788.1 | 1189248  | 3-scf00145 | 3  |
| AX-157820271 | 6 | 73.539 | KV452788.1 | 1192504  | 3-scf00145 | 3  |
| AX-158013221 | 6 | 73.539 | KV452788.1 | 1197173  | 3-scf00145 | 3  |
| AX-158013222 | 6 | 73.539 | KV452788.1 | 1198325  | 3-scf00145 | 3  |
| AX-158013245 | 6 | 73.539 | KV452788.1 | 1220502  | 3-scf00145 | 3  |
| AX-158013247 | 6 | 73.539 | KV452788.1 | 1222508  | 3-scf00145 | 3  |
| AX-158013248 | 6 | 73.539 | KV452788.1 | 1222904  | 3-scf00145 | 3  |
| AX-157775928 | 6 | 73.539 | KV452788.1 | 1225734  | 3-scf00145 | 3  |
| AX-158013253 | 6 | 73.539 | KV452788.1 | 1231422  | 3-scf00145 | 3  |
| AX-158013254 | 6 | 73.539 | KV452788.1 | 1231690  | 3-scf00145 | 3  |
| AX-158013260 | 6 | 73.539 | KV452788.1 | 1236144  | 3-scf00145 | 3  |
| AX-157773771 | 6 | 73.539 | KV452788.1 | 1252032  | 3-scf00145 | 3  |
| AX-158013280 | 6 | 73.539 | KV452788.1 | 1252095  | 3-scf00145 | 3  |
| AX-158013282 | 6 | 73.539 | KV452788.1 | 1252565  | 3-scf00145 | 3  |
| AX-158013291 | 6 | 73.539 | KV452788.1 | 1261097  | 3-scf00145 | 3  |
| AX-158013321 | 6 | 73.539 | KV452788.1 | 1280784  | 3-scf00145 | 3  |
| AX-158383610 | 6 | 73.539 | KV452788.1 | 1289378  | 3-scf00145 | 3  |
| AX-158013389 | 6 | 73.539 | KV452788.1 | 1336338  | 3-scf00145 | 3  |
| AX-158013435 | 6 | 73.539 | KV452788.1 | 1368357  | 3-scf00145 | 3  |
| AX-158013444 | 6 | 73.539 | KV452788.1 | 1377242  | 3-scf00145 | 3  |
| AX-158013499 | 6 | 73.539 | KV452788.1 | 1414789  | 3-scf00145 | 3  |
| AX-158013502 | 6 | 73.539 | KV452788.1 | 1415742  | 3-scf00145 | 3  |
| AX-158013503 | 6 | 73.539 | KV452788.1 | 1416130  | 3-scf00145 | 3  |
| AX-158013526 | 6 | 73.539 | KV452788.1 | 1425567  | 3-scf00145 | 3  |
| AX-158013542 | 6 | 73.539 | KV452788.1 | 1436186  | 3-scf00145 | 3  |
| AX-157724461 | 6 | 73.539 | KV452788.1 | 1539343  | 3-scf00145 | 3  |
| AX-158013657 | 6 | 73.539 | KV452788.1 | 1553584  | 3-scf00145 | 3  |
| AX-158013681 | 6 | 73.539 | KV452788.1 | 1570096  | 3-scf00145 | 3  |
| AX-158014069 | 6 | 73.539 | KV452788.1 | 1876532  | 3-scf00145 | 3  |
| AX-158415972 | 6 | 73.539 | KV452786.1 | 2275     | 3-scf00146 | 3  |
| AX-157820338 | 6 | 73.539 | KV452786.1 | 29887    | 3-scf00146 | 3  |
| AX-158014867 | 6 | 73.539 | KV452789.1 | 518069   | 3-scf00147 | 3  |
| AX-157684989 | 6 | 73.539 | KV453358.1 | 64651    | scf00579   | UN |
| AX-158010395 | 6 | 73.758 | KV452784.1 | 9517536  | 3-scf00141 | 3  |
| AX-158011108 | 6 | 73.758 | KV452784.1 | 10244107 | 3-scf00141 | 3  |
| AX-158011116 | 6 | 73.758 | KV452784.1 | 10250005 | 3-scf00141 | 3  |
| AX-158011485 | 6 | 73.758 | KV452784.1 | 10711227 | 3-scf00141 | 3  |
| AX-157820152 | 6 | 73.758 | KV452784.1 | 11085132 | 3-scf00141 | 3  |
| AX-158012789 | 6 | 73.758 | KV452788.1 | 760655   | 3-scf00145 | 3  |
| AX-158012796 | 6 | 73.758 | KV452788.1 | 775772   | 3-scf00145 | 3  |
| AX-158012932 | 6 | 73.758 | KV452788.1 | 918399   | 3-scf00145 | 3  |

|              |   |        |            |         |            |   |
|--------------|---|--------|------------|---------|------------|---|
| AX-158012941 | 6 | 73.758 | KV452788.1 | 926082  | 3-scf00145 | 3 |
| AX-158013004 | 6 | 73.758 | KV452788.1 | 1003124 | 3-scf00145 | 3 |
| AX-158013074 | 6 | 73.758 | KV452788.1 | 1075254 | 3-scf00145 | 3 |
| AX-158013076 | 6 | 73.758 | KV452788.1 | 1076484 | 3-scf00145 | 3 |
| AX-158013078 | 6 | 73.758 | KV452788.1 | 1077896 | 3-scf00145 | 3 |
| AX-158013125 | 6 | 73.758 | KV452788.1 | 1114606 | 3-scf00145 | 3 |
| AX-158013158 | 6 | 73.758 | KV452788.1 | 1139340 | 3-scf00145 | 3 |
| AX-158013162 | 6 | 73.758 | KV452788.1 | 1141227 | 3-scf00145 | 3 |
| AX-158013200 | 6 | 73.758 | KV452788.1 | 1170871 | 3-scf00145 | 3 |
| AX-157820270 | 6 | 73.758 | KV452788.1 | 1188815 | 3-scf00145 | 3 |
| AX-158013219 | 6 | 73.758 | KV452788.1 | 1190453 | 3-scf00145 | 3 |
| AX-158013244 | 6 | 73.758 | KV452788.1 | 1219528 | 3-scf00145 | 3 |
| AX-158013298 | 6 | 73.758 | KV452788.1 | 1270703 | 3-scf00145 | 3 |
| AX-157884845 | 6 | 73.758 | KV452788.1 | 1271767 | 3-scf00145 | 3 |
| AX-158013303 | 6 | 73.758 | KV452788.1 | 1273545 | 3-scf00145 | 3 |
| AX-158013322 | 6 | 73.758 | KV452788.1 | 1282176 | 3-scf00145 | 3 |
| AX-158013323 | 6 | 73.758 | KV452788.1 | 1282274 | 3-scf00145 | 3 |
| AX-157725391 | 6 | 73.758 | KV452788.1 | 1282859 | 3-scf00145 | 3 |
| AX-158013340 | 6 | 73.758 | KV452788.1 | 1296157 | 3-scf00145 | 3 |
| AX-158013346 | 6 | 73.758 | KV452788.1 | 1301993 | 3-scf00145 | 3 |
| AX-158013357 | 6 | 73.758 | KV452788.1 | 1310388 | 3-scf00145 | 3 |
| AX-157752236 | 6 | 73.758 | KV452788.1 | 1315030 | 3-scf00145 | 3 |
| AX-158013372 | 6 | 73.758 | KV452788.1 | 1327608 | 3-scf00145 | 3 |
| AX-158013385 | 6 | 73.758 | KV452788.1 | 1334429 | 3-scf00145 | 3 |
| AX-158013388 | 6 | 73.758 | KV452788.1 | 1336003 | 3-scf00145 | 3 |
| AX-158013394 | 6 | 73.758 | KV452788.1 | 1339892 | 3-scf00145 | 3 |
| AX-158013395 | 6 | 73.758 | KV452788.1 | 1340868 | 3-scf00145 | 3 |
| AX-158013402 | 6 | 73.758 | KV452788.1 | 1346028 | 3-scf00145 | 3 |
| AX-158013412 | 6 | 73.758 | KV452788.1 | 1353162 | 3-scf00145 | 3 |
| AX-158013414 | 6 | 73.758 | KV452788.1 | 1354856 | 3-scf00145 | 3 |
| AX-158013415 | 6 | 73.758 | KV452788.1 | 1355503 | 3-scf00145 | 3 |
| AX-158013418 | 6 | 73.758 | KV452788.1 | 1356401 | 3-scf00145 | 3 |
| AX-158013419 | 6 | 73.758 | KV452788.1 | 1357024 | 3-scf00145 | 3 |
| AX-158013427 | 6 | 73.758 | KV452788.1 | 1362216 | 3-scf00145 | 3 |
| AX-158013432 | 6 | 73.758 | KV452788.1 | 1365734 | 3-scf00145 | 3 |
| AX-158013445 | 6 | 73.758 | KV452788.1 | 1378812 | 3-scf00145 | 3 |
| AX-157739543 | 6 | 73.758 | KV452788.1 | 1390634 | 3-scf00145 | 3 |
| AX-158013465 | 6 | 73.758 | KV452788.1 | 1391912 | 3-scf00145 | 3 |
| AX-158013469 | 6 | 73.758 | KV452788.1 | 1394552 | 3-scf00145 | 3 |
| AX-158013475 | 6 | 73.758 | KV452788.1 | 1398092 | 3-scf00145 | 3 |
| AX-158013478 | 6 | 73.758 | KV452788.1 | 1399728 | 3-scf00145 | 3 |
| AX-158013495 | 6 | 73.758 | KV452788.1 | 1409537 | 3-scf00145 | 3 |
| AX-158013496 | 6 | 73.758 | KV452788.1 | 1411188 | 3-scf00145 | 3 |
| AX-158013505 | 6 | 73.758 | KV452788.1 | 1416553 | 3-scf00145 | 3 |
| AX-158013508 | 6 | 73.758 | KV452788.1 | 1417861 | 3-scf00145 | 3 |
| AX-158013515 | 6 | 73.758 | KV452788.1 | 1420995 | 3-scf00145 | 3 |
| AX-158013518 | 6 | 73.758 | KV452788.1 | 1421642 | 3-scf00145 | 3 |
| AX-158013520 | 6 | 73.758 | KV452788.1 | 1422315 | 3-scf00145 | 3 |
| AX-158013555 | 6 | 73.758 | KV452788.1 | 1449992 | 3-scf00145 | 3 |
| AX-158013576 | 6 | 73.758 | KV452788.1 | 1473715 | 3-scf00145 | 3 |
| AX-158013590 | 6 | 73.758 | KV452788.1 | 1491847 | 3-scf00145 | 3 |

|              |   |        |            |          |            |   |
|--------------|---|--------|------------|----------|------------|---|
| AX-158013596 | 6 | 73.758 | KV452788.1 | 1497679  | 3-scf00145 | 3 |
| AX-158013611 | 6 | 73.758 | KV452788.1 | 1509124  | 3-scf00145 | 3 |
| AX-158013619 | 6 | 73.758 | KV452788.1 | 1519913  | 3-scf00145 | 3 |
| AX-158013624 | 6 | 73.758 | KV452788.1 | 1522611  | 3-scf00145 | 3 |
| AX-158013637 | 6 | 73.758 | KV452788.1 | 1531436  | 3-scf00145 | 3 |
| AX-158013639 | 6 | 73.758 | KV452788.1 | 1531947  | 3-scf00145 | 3 |
| AX-158013904 | 6 | 73.758 | KV452788.1 | 1742118  | 3-scf00145 | 3 |
| AX-157709897 | 6 | 73.758 | KV452786.1 | 23164    | 3-scf00146 | 3 |
| AX-158014443 | 6 | 73.758 | KV452786.1 | 30248    | 3-scf00146 | 3 |
| AX-158014764 | 6 | 73.758 | KV452789.1 | 354070   | 3-scf00147 | 3 |
| AX-158012599 | 6 | 73.789 | KV452788.1 | 555080   | 3-scf00145 | 3 |
| AX-158013527 | 6 | 73.789 | KV452788.1 | 1426816  | 3-scf00145 | 3 |
| AX-157820282 | 6 | 73.789 | KV452788.1 | 1429129  | 3-scf00145 | 3 |
| AX-158013587 | 6 | 73.789 | KV452788.1 | 1486350  | 3-scf00145 | 3 |
| AX-158013602 | 6 | 73.789 | KV452788.1 | 1500269  | 3-scf00145 | 3 |
| AX-158013531 | 6 | 73.828 | KV452788.1 | 1429206  | 3-scf00145 | 3 |
| AX-157723539 | 6 | 73.867 | KV452784.1 | 10254925 | 3-scf00141 | 3 |
| AX-157756921 | 6 | 73.867 | KV452784.1 | 10270596 | 3-scf00141 | 3 |
| AX-157884844 | 6 | 73.867 | KV452788.1 | 727835   | 3-scf00145 | 3 |
| AX-158012770 | 6 | 73.867 | KV452788.1 | 741977   | 3-scf00145 | 3 |
| AX-158012814 | 6 | 73.867 | KV452788.1 | 787177   | 3-scf00145 | 3 |
| AX-158013199 | 6 | 73.867 | KV452788.1 | 1166764  | 3-scf00145 | 3 |
| AX-158405929 | 6 | 73.867 | KV452788.1 | 1324340  | 3-scf00145 | 3 |
| AX-158013379 | 6 | 73.867 | KV452788.1 | 1330634  | 3-scf00145 | 3 |
| AX-158013381 | 6 | 73.867 | KV452788.1 | 1331812  | 3-scf00145 | 3 |
| AX-158013398 | 6 | 73.867 | KV452788.1 | 1343100  | 3-scf00145 | 3 |
| AX-158013400 | 6 | 73.867 | KV452788.1 | 1344244  | 3-scf00145 | 3 |
| AX-158013410 | 6 | 73.867 | KV452788.1 | 1352098  | 3-scf00145 | 3 |
| AX-158013421 | 6 | 73.867 | KV452788.1 | 1357589  | 3-scf00145 | 3 |
| AX-158013462 | 6 | 73.867 | KV452788.1 | 1391074  | 3-scf00145 | 3 |
| AX-158013514 | 6 | 73.867 | KV452788.1 | 1420460  | 3-scf00145 | 3 |
| AX-158013517 | 6 | 73.867 | KV452788.1 | 1421108  | 3-scf00145 | 3 |
| AX-158013521 | 6 | 73.867 | KV452788.1 | 1422984  | 3-scf00145 | 3 |
| AX-158013528 | 6 | 73.867 | KV452788.1 | 1427981  | 3-scf00145 | 3 |
| AX-157820283 | 6 | 73.867 | KV452788.1 | 1430255  | 3-scf00145 | 3 |
| AX-158013537 | 6 | 73.867 | KV452788.1 | 1434229  | 3-scf00145 | 3 |
| AX-157863015 | 6 | 73.867 | KV452788.1 | 1438896  | 3-scf00145 | 3 |
| AX-158013544 | 6 | 73.867 | KV452788.1 | 1439558  | 3-scf00145 | 3 |
| AX-157742125 | 6 | 73.867 | KV452788.1 | 1440719  | 3-scf00145 | 3 |
| AX-158013547 | 6 | 73.867 | KV452788.1 | 1442553  | 3-scf00145 | 3 |
| AX-158013551 | 6 | 73.867 | KV452788.1 | 1447699  | 3-scf00145 | 3 |
| AX-158013553 | 6 | 73.867 | KV452788.1 | 1448816  | 3-scf00145 | 3 |
| AX-158013561 | 6 | 73.867 | KV452788.1 | 1458374  | 3-scf00145 | 3 |
| AX-158013572 | 6 | 73.867 | KV452788.1 | 1468508  | 3-scf00145 | 3 |
| AX-158013573 | 6 | 73.867 | KV452788.1 | 1469954  | 3-scf00145 | 3 |
| AX-158013575 | 6 | 73.867 | KV452788.1 | 1473174  | 3-scf00145 | 3 |
| AX-157723759 | 6 | 73.867 | KV452788.1 | 1477260  | 3-scf00145 | 3 |
| AX-158013585 | 6 | 73.867 | KV452788.1 | 1484424  | 3-scf00145 | 3 |
| AX-158013586 | 6 | 73.867 | KV452788.1 | 1485164  | 3-scf00145 | 3 |
| AX-158013591 | 6 | 73.867 | KV452788.1 | 1494857  | 3-scf00145 | 3 |
| AX-158013595 | 6 | 73.867 | KV452788.1 | 1497280  | 3-scf00145 | 3 |

|              |   |        |            |         |            |   |
|--------------|---|--------|------------|---------|------------|---|
| AX-158013600 | 6 | 73.867 | KV452788.1 | 1499534 | 3-scf00145 | 3 |
| AX-158013603 | 6 | 73.867 | KV452788.1 | 1501680 | 3-scf00145 | 3 |
| AX-158013604 | 6 | 73.867 | KV452788.1 | 1504940 | 3-scf00145 | 3 |
| AX-158013608 | 6 | 73.867 | KV452788.1 | 1507203 | 3-scf00145 | 3 |
| AX-158013612 | 6 | 73.867 | KV452788.1 | 1510366 | 3-scf00145 | 3 |
| AX-158013622 | 6 | 73.867 | KV452788.1 | 1522125 | 3-scf00145 | 3 |
| AX-158013635 | 6 | 73.867 | KV452788.1 | 1530291 | 3-scf00145 | 3 |
| AX-158013642 | 6 | 73.867 | KV452788.1 | 1537774 | 3-scf00145 | 3 |
| AX-158013753 | 6 | 73.867 | KV452788.1 | 1623060 | 3-scf00145 | 3 |
| AX-158013626 | 6 | 73.911 | KV452788.1 | 1523717 | 3-scf00145 | 3 |
| AX-158013641 | 6 | 73.94  | KV452788.1 | 1535280 | 3-scf00145 | 3 |
| AX-158013506 | 6 | 73.976 | KV452788.1 | 1417397 | 3-scf00145 | 3 |
| AX-158013636 | 6 | 73.976 | KV452788.1 | 1530650 | 3-scf00145 | 3 |
| AX-158013645 | 6 | 73.976 | KV452788.1 | 1540406 | 3-scf00145 | 3 |
| AX-158013648 | 6 | 73.976 | KV452788.1 | 1543066 | 3-scf00145 | 3 |
| AX-158013649 | 6 | 73.976 | KV452788.1 | 1545298 | 3-scf00145 | 3 |
| AX-158013656 | 6 | 73.976 | KV452788.1 | 1552962 | 3-scf00145 | 3 |
| AX-158013868 | 6 | 73.976 | KV452788.1 | 1717605 | 3-scf00145 | 3 |
| AX-158013661 | 6 | 74.069 | KV452788.1 | 1557337 | 3-scf00145 | 3 |
| AX-158012645 | 6 | 74.195 | KV452788.1 | 592737  | 3-scf00145 | 3 |
| AX-158012687 | 6 | 74.195 | KV452788.1 | 636261  | 3-scf00145 | 3 |
| AX-157820230 | 6 | 74.195 | KV452788.1 | 649061  | 3-scf00145 | 3 |
| AX-158013659 | 6 | 74.195 | KV452788.1 | 1555403 | 3-scf00145 | 3 |
| AX-158013666 | 6 | 74.195 | KV452788.1 | 1560734 | 3-scf00145 | 3 |
| AX-158013669 | 6 | 74.195 | KV452788.1 | 1562703 | 3-scf00145 | 3 |
| AX-158013673 | 6 | 74.195 | KV452788.1 | 1565088 | 3-scf00145 | 3 |
| AX-158013675 | 6 | 74.195 | KV452788.1 | 1565843 | 3-scf00145 | 3 |
| AX-157750911 | 6 | 74.195 | KV452788.1 | 1569971 | 3-scf00145 | 3 |
| AX-158013690 | 6 | 74.195 | KV452788.1 | 1578131 | 3-scf00145 | 3 |
| AX-158013691 | 6 | 74.195 | KV452788.1 | 1580322 | 3-scf00145 | 3 |
| AX-158013692 | 6 | 74.195 | KV452788.1 | 1580694 | 3-scf00145 | 3 |
| AX-158013694 | 6 | 74.195 | KV452788.1 | 1580980 | 3-scf00145 | 3 |
| AX-158013695 | 6 | 74.195 | KV452788.1 | 1581453 | 3-scf00145 | 3 |
| AX-157723059 | 6 | 74.195 | KV452788.1 | 1582144 | 3-scf00145 | 3 |
| AX-157726966 | 6 | 74.195 | KV452788.1 | 1594067 | 3-scf00145 | 3 |
| AX-158013717 | 6 | 74.195 | KV452788.1 | 1597305 | 3-scf00145 | 3 |
| AX-158013719 | 6 | 74.195 | KV452788.1 | 1599491 | 3-scf00145 | 3 |
| AX-158013721 | 6 | 74.195 | KV452788.1 | 1601246 | 3-scf00145 | 3 |
| AX-158013732 | 6 | 74.195 | KV452788.1 | 1608162 | 3-scf00145 | 3 |
| AX-158013733 | 6 | 74.195 | KV452788.1 | 1608757 | 3-scf00145 | 3 |
| AX-158013734 | 6 | 74.195 | KV452788.1 | 1609039 | 3-scf00145 | 3 |
| AX-158013740 | 6 | 74.195 | KV452788.1 | 1613029 | 3-scf00145 | 3 |
| AX-158013748 | 6 | 74.195 | KV452788.1 | 1620311 | 3-scf00145 | 3 |
| AX-157753304 | 6 | 74.195 | KV452788.1 | 1637368 | 3-scf00145 | 3 |
| AX-158013782 | 6 | 74.195 | KV452788.1 | 1652840 | 3-scf00145 | 3 |
| AX-156365110 | 6 | 74.195 | KV452788.1 | 1686446 | 3-scf00145 | 3 |
| AX-158013888 | 6 | 74.195 | KV452788.1 | 1734361 | 3-scf00145 | 3 |
| AX-158014053 | 6 | 74.195 | KV452788.1 | 1864061 | 3-scf00145 | 3 |
| AX-158014072 | 6 | 74.195 | KV452788.1 | 1878471 | 3-scf00145 | 3 |
| AX-157820293 | 6 | 74.195 | KV452788.1 | 1920967 | 3-scf00145 | 3 |
| AX-158014129 | 6 | 74.195 | KV452788.1 | 1946551 | 3-scf00145 | 3 |

|              |   |        |            |         |            |   |
|--------------|---|--------|------------|---------|------------|---|
| AX-158014258 | 6 | 74.195 | KV452788.1 | 2070147 | 3-scf00145 | 3 |
| AX-158014375 | 6 | 74.195 | KV452788.1 | 2192585 | 3-scf00145 | 3 |
| AX-158013667 | 6 | 74.222 | KV452788.1 | 1561057 | 3-scf00145 | 3 |
| AX-158013672 | 6 | 74.222 | KV452788.1 | 1563452 | 3-scf00145 | 3 |
| AX-158013711 | 6 | 74.222 | KV452788.1 | 1592709 | 3-scf00145 | 3 |
| AX-158013749 | 6 | 74.222 | KV452788.1 | 1621935 | 3-scf00145 | 3 |
| AX-157756179 | 6 | 74.222 | KV452788.1 | 1653274 | 3-scf00145 | 3 |
| AX-158013787 | 6 | 74.222 | KV452788.1 | 1660306 | 3-scf00145 | 3 |
| AX-158013827 | 6 | 74.222 | KV452788.1 | 1688063 | 3-scf00145 | 3 |
| AX-158013875 | 6 | 74.222 | KV452788.1 | 1722458 | 3-scf00145 | 3 |
| AX-158407831 | 6 | 74.244 | KV452788.1 | 1641952 | 3-scf00145 | 3 |
| AX-158013772 | 6 | 74.267 | KV452788.1 | 1642351 | 3-scf00145 | 3 |
| AX-158013592 | 6 | 74.304 | KV452788.1 | 1495735 | 3-scf00145 | 3 |
| AX-158013618 | 6 | 74.304 | KV452788.1 | 1519339 | 3-scf00145 | 3 |
| AX-158013783 | 6 | 74.304 | KV452788.1 | 1653681 | 3-scf00145 | 3 |
| AX-158013786 | 6 | 74.304 | KV452788.1 | 1659938 | 3-scf00145 | 3 |
| AX-158013788 | 6 | 74.304 | KV452788.1 | 1660997 | 3-scf00145 | 3 |
| AX-157758472 | 6 | 74.304 | KV452788.1 | 1663175 | 3-scf00145 | 3 |
| AX-158013791 | 6 | 74.304 | KV452788.1 | 1664507 | 3-scf00145 | 3 |
| AX-158013792 | 6 | 74.304 | KV452788.1 | 1665925 | 3-scf00145 | 3 |
| AX-158013794 | 6 | 74.304 | KV452788.1 | 1667294 | 3-scf00145 | 3 |
| AX-158013800 | 6 | 74.304 | KV452788.1 | 1672647 | 3-scf00145 | 3 |
| AX-158013803 | 6 | 74.304 | KV452788.1 | 1673562 | 3-scf00145 | 3 |
| AX-158013806 | 6 | 74.304 | KV452788.1 | 1676559 | 3-scf00145 | 3 |
| AX-158013876 | 6 | 74.304 | KV452788.1 | 1722897 | 3-scf00145 | 3 |
| AX-158014011 | 6 | 74.304 | KV452788.1 | 1829367 | 3-scf00145 | 3 |
| AX-158014017 | 6 | 74.304 | KV452788.1 | 1832087 | 3-scf00145 | 3 |
| AX-158014042 | 6 | 74.304 | KV452788.1 | 1856447 | 3-scf00145 | 3 |
| AX-158014051 | 6 | 74.304 | KV452788.1 | 1860446 | 3-scf00145 | 3 |
| AX-158014074 | 6 | 74.304 | KV452788.1 | 1880572 | 3-scf00145 | 3 |
| AX-158014085 | 6 | 74.304 | KV452788.1 | 1891626 | 3-scf00145 | 3 |
| AX-158013809 | 6 | 74.36  | KV452788.1 | 1678817 | 3-scf00145 | 3 |
| AX-158013811 | 6 | 74.413 | KV452788.1 | 1681962 | 3-scf00145 | 3 |
| AX-158013815 | 6 | 74.413 | KV452788.1 | 1685060 | 3-scf00145 | 3 |
| AX-158013839 | 6 | 74.465 | KV452788.1 | 1694069 | 3-scf00145 | 3 |
| AX-158013566 | 6 | 74.522 | KV452788.1 | 1462007 | 3-scf00145 | 3 |
| AX-157740463 | 6 | 74.522 | KV452788.1 | 1550188 | 3-scf00145 | 3 |
| AX-157870177 | 6 | 74.522 | KV452788.1 | 1573148 | 3-scf00145 | 3 |
| AX-158013698 | 6 | 74.522 | KV452788.1 | 1584325 | 3-scf00145 | 3 |
| AX-158013741 | 6 | 74.522 | KV452788.1 | 1614398 | 3-scf00145 | 3 |
| AX-158013810 | 6 | 74.522 | KV452788.1 | 1680137 | 3-scf00145 | 3 |
| AX-158013837 | 6 | 74.522 | KV452788.1 | 1693534 | 3-scf00145 | 3 |
| AX-158013843 | 6 | 74.522 | KV452788.1 | 1696868 | 3-scf00145 | 3 |
| AX-158013844 | 6 | 74.522 | KV452788.1 | 1697640 | 3-scf00145 | 3 |
| AX-158013850 | 6 | 74.522 | KV452788.1 | 1702883 | 3-scf00145 | 3 |
| AX-158013854 | 6 | 74.522 | KV452788.1 | 1703361 | 3-scf00145 | 3 |
| AX-158013855 | 6 | 74.522 | KV452788.1 | 1703854 | 3-scf00145 | 3 |
| AX-158013856 | 6 | 74.522 | KV452788.1 | 1704379 | 3-scf00145 | 3 |
| AX-158013858 | 6 | 74.522 | KV452788.1 | 1704782 | 3-scf00145 | 3 |
| AX-158013859 | 6 | 74.522 | KV452788.1 | 1707095 | 3-scf00145 | 3 |
| AX-157739516 | 6 | 74.522 | KV452788.1 | 1707833 | 3-scf00145 | 3 |



|              |   |        |            |         |            |   |
|--------------|---|--------|------------|---------|------------|---|
| AX-157884846 | 6 | 74.522 | KV452788.1 | 1707942 | 3-scf00145 | 3 |
| AX-158013860 | 6 | 74.522 | KV452788.1 | 1708278 | 3-scf00145 | 3 |
| AX-158013861 | 6 | 74.522 | KV452788.1 | 1709368 | 3-scf00145 | 3 |
| AX-158013865 | 6 | 74.522 | KV452788.1 | 1711277 | 3-scf00145 | 3 |
| AX-158013866 | 6 | 74.522 | KV452788.1 | 1714375 | 3-scf00145 | 3 |
| AX-158013869 | 6 | 74.522 | KV452788.1 | 1718671 | 3-scf00145 | 3 |
| AX-158013871 | 6 | 74.522 | KV452788.1 | 1719284 | 3-scf00145 | 3 |
| AX-158013873 | 6 | 74.522 | KV452788.1 | 1720936 | 3-scf00145 | 3 |
| AX-157820285 | 6 | 74.522 | KV452788.1 | 1724762 | 3-scf00145 | 3 |
| AX-158013877 | 6 | 74.522 | KV452788.1 | 1726361 | 3-scf00145 | 3 |
| AX-158013878 | 6 | 74.522 | KV452788.1 | 1726799 | 3-scf00145 | 3 |
| AX-158013882 | 6 | 74.522 | KV452788.1 | 1728836 | 3-scf00145 | 3 |
| AX-158013884 | 6 | 74.522 | KV452788.1 | 1730072 | 3-scf00145 | 3 |
| AX-158013885 | 6 | 74.522 | KV452788.1 | 1730695 | 3-scf00145 | 3 |
| AX-158391060 | 6 | 74.522 | KV452788.1 | 1732923 | 3-scf00145 | 3 |
| AX-158013887 | 6 | 74.522 | KV452788.1 | 1733466 | 3-scf00145 | 3 |
| AX-158013893 | 6 | 74.522 | KV452788.1 | 1736328 | 3-scf00145 | 3 |
| AX-158013901 | 6 | 74.522 | KV452788.1 | 1739658 | 3-scf00145 | 3 |
| AX-158013919 | 6 | 74.522 | KV452788.1 | 1753328 | 3-scf00145 | 3 |
| AX-158013920 | 6 | 74.522 | KV452788.1 | 1753869 | 3-scf00145 | 3 |
| AX-158013922 | 6 | 74.522 | KV452788.1 | 1755416 | 3-scf00145 | 3 |
| AX-158013924 | 6 | 74.522 | KV452788.1 | 1758074 | 3-scf00145 | 3 |
| AX-158013926 | 6 | 74.522 | KV452788.1 | 1758397 | 3-scf00145 | 3 |
| AX-158013935 | 6 | 74.522 | KV452788.1 | 1769432 | 3-scf00145 | 3 |
| AX-158013939 | 6 | 74.522 | KV452788.1 | 1771698 | 3-scf00145 | 3 |
| AX-158013941 | 6 | 74.522 | KV452788.1 | 1772493 | 3-scf00145 | 3 |
| AX-158013942 | 6 | 74.522 | KV452788.1 | 1774918 | 3-scf00145 | 3 |
| AX-158013949 | 6 | 74.522 | KV452788.1 | 1782382 | 3-scf00145 | 3 |
| AX-158013959 | 6 | 74.522 | KV452788.1 | 1788668 | 3-scf00145 | 3 |
| AX-158013962 | 6 | 74.522 | KV452788.1 | 1789925 | 3-scf00145 | 3 |
| AX-158013963 | 6 | 74.522 | KV452788.1 | 1790523 | 3-scf00145 | 3 |
| AX-157820286 | 6 | 74.522 | KV452788.1 | 1794732 | 3-scf00145 | 3 |
| AX-158013972 | 6 | 74.522 | KV452788.1 | 1797184 | 3-scf00145 | 3 |
| AX-158013973 | 6 | 74.522 | KV452788.1 | 1798918 | 3-scf00145 | 3 |
| AX-158013975 | 6 | 74.522 | KV452788.1 | 1800548 | 3-scf00145 | 3 |
| AX-158013976 | 6 | 74.522 | KV452788.1 | 1801062 | 3-scf00145 | 3 |
| AX-158013981 | 6 | 74.522 | KV452788.1 | 1803480 | 3-scf00145 | 3 |
| AX-158013982 | 6 | 74.522 | KV452788.1 | 1806033 | 3-scf00145 | 3 |
| AX-158013984 | 6 | 74.522 | KV452788.1 | 1806619 | 3-scf00145 | 3 |
| AX-157775297 | 6 | 74.522 | KV452788.1 | 1807961 | 3-scf00145 | 3 |
| AX-158013987 | 6 | 74.522 | KV452788.1 | 1808103 | 3-scf00145 | 3 |
| AX-158013990 | 6 | 74.522 | KV452788.1 | 1811054 | 3-scf00145 | 3 |
| AX-158013991 | 6 | 74.522 | KV452788.1 | 1811998 | 3-scf00145 | 3 |
| AX-158013996 | 6 | 74.522 | KV452788.1 | 1817002 | 3-scf00145 | 3 |
| AX-158014002 | 6 | 74.522 | KV452788.1 | 1822122 | 3-scf00145 | 3 |
| AX-158014003 | 6 | 74.522 | KV452788.1 | 1822898 | 3-scf00145 | 3 |
| AX-158014004 | 6 | 74.522 | KV452788.1 | 1824846 | 3-scf00145 | 3 |
| AX-158014010 | 6 | 74.522 | KV452788.1 | 1829155 | 3-scf00145 | 3 |
| AX-158014014 | 6 | 74.522 | KV452788.1 | 1830830 | 3-scf00145 | 3 |
| AX-158014018 | 6 | 74.522 | KV452788.1 | 1833896 | 3-scf00145 | 3 |
| AX-158014024 | 6 | 74.522 | KV452788.1 | 1836075 | 3-scf00145 | 3 |

|              |   |        |            |         |            |   |
|--------------|---|--------|------------|---------|------------|---|
| AX-158014025 | 6 | 74.522 | KV452788.1 | 1838250 | 3-scf00145 | 3 |
| AX-158014032 | 6 | 74.522 | KV452788.1 | 1843789 | 3-scf00145 | 3 |
| AX-157820288 | 6 | 74.522 | KV452788.1 | 1844384 | 3-scf00145 | 3 |
| AX-158014046 | 6 | 74.522 | KV452788.1 | 1858314 | 3-scf00145 | 3 |
| AX-158014052 | 6 | 74.522 | KV452788.1 | 1863489 | 3-scf00145 | 3 |
| AX-158014062 | 6 | 74.522 | KV452788.1 | 1869979 | 3-scf00145 | 3 |
| AX-157755321 | 6 | 74.522 | KV452788.1 | 1984528 | 3-scf00145 | 3 |
| AX-158014228 | 6 | 74.522 | KV452788.1 | 2050413 | 3-scf00145 | 3 |
| AX-157714581 | 6 | 74.522 | KV452788.1 | 2056908 | 3-scf00145 | 3 |
| AX-158014251 | 6 | 74.522 | KV452788.1 | 2065194 | 3-scf00145 | 3 |
| AX-157820304 | 6 | 74.522 | KV452788.1 | 2074165 | 3-scf00145 | 3 |
| AX-158014280 | 6 | 74.522 | KV452788.1 | 2081211 | 3-scf00145 | 3 |
| AX-158014285 | 6 | 74.522 | KV452788.1 | 2086334 | 3-scf00145 | 3 |
| AX-158014311 | 6 | 74.522 | KV452788.1 | 2112721 | 3-scf00145 | 3 |
| AX-158014379 | 6 | 74.522 | KV452788.1 | 2196337 | 3-scf00145 | 3 |
| AX-157774482 | 6 | 74.522 | KV452788.1 | 2217683 | 3-scf00145 | 3 |
| AX-158383615 | 6 | 74.632 | KV452788.1 | 1650762 | 3-scf00145 | 3 |
| AX-157740667 | 6 | 74.632 | KV452788.1 | 1702263 | 3-scf00145 | 3 |
| AX-158013978 | 6 | 74.632 | KV452788.1 | 1801814 | 3-scf00145 | 3 |
| AX-158013994 | 6 | 74.632 | KV452788.1 | 1814438 | 3-scf00145 | 3 |
| AX-158014036 | 6 | 74.632 | KV452788.1 | 1850918 | 3-scf00145 | 3 |
| AX-158014038 | 6 | 74.632 | KV452788.1 | 1851960 | 3-scf00145 | 3 |
| AX-158014040 | 6 | 74.632 | KV452788.1 | 1854300 | 3-scf00145 | 3 |
| AX-158014044 | 6 | 74.632 | KV452788.1 | 1857840 | 3-scf00145 | 3 |
| AX-158014049 | 6 | 74.632 | KV452788.1 | 1859214 | 3-scf00145 | 3 |
| AX-157820289 | 6 | 74.632 | KV452788.1 | 1865332 | 3-scf00145 | 3 |
| AX-158014055 | 6 | 74.632 | KV452788.1 | 1865622 | 3-scf00145 | 3 |
| AX-158014056 | 6 | 74.632 | KV452788.1 | 1866334 | 3-scf00145 | 3 |
| AX-158014060 | 6 | 74.632 | KV452788.1 | 1868508 | 3-scf00145 | 3 |
| AX-158014061 | 6 | 74.632 | KV452788.1 | 1869522 | 3-scf00145 | 3 |
| AX-157722862 | 6 | 74.632 | KV452788.1 | 1873506 | 3-scf00145 | 3 |
| AX-158014066 | 6 | 74.632 | KV452788.1 | 1875060 | 3-scf00145 | 3 |
| AX-157742148 | 6 | 74.632 | KV452788.1 | 1881072 | 3-scf00145 | 3 |
| AX-158014077 | 6 | 74.632 | KV452788.1 | 1884256 | 3-scf00145 | 3 |
| AX-158014079 | 6 | 74.632 | KV452788.1 | 1884749 | 3-scf00145 | 3 |
| AX-158014201 | 6 | 74.632 | KV452788.1 | 2024697 | 3-scf00145 | 3 |
| AX-158014087 | 6 | 74.679 | KV452788.1 | 1893230 | 3-scf00145 | 3 |
| AX-158014093 | 6 | 74.741 | KV452788.1 | 1900136 | 3-scf00145 | 3 |
| AX-157743553 | 6 | 74.741 | KV452788.1 | 1900211 | 3-scf00145 | 3 |
| AX-158014095 | 6 | 74.741 | KV452788.1 | 1900593 | 3-scf00145 | 3 |
| AX-158014097 | 6 | 74.741 | KV452788.1 | 1912103 | 3-scf00145 | 3 |
| AX-158014098 | 6 | 74.741 | KV452788.1 | 1912528 | 3-scf00145 | 3 |
| AX-157820292 | 6 | 74.85  | KV452788.1 | 1920899 | 3-scf00145 | 3 |
| AX-158407834 | 6 | 74.85  | KV452788.1 | 1921962 | 3-scf00145 | 3 |
| AX-157820294 | 6 | 74.85  | KV452788.1 | 1924271 | 3-scf00145 | 3 |
| AX-158014109 | 6 | 74.891 | KV452788.1 | 1932684 | 3-scf00145 | 3 |
| AX-158014111 | 6 | 74.959 | KV452788.1 | 1933658 | 3-scf00145 | 3 |
| AX-158014113 | 6 | 74.959 | KV452788.1 | 1934680 | 3-scf00145 | 3 |
| AX-158014116 | 6 | 74.959 | KV452788.1 | 1936254 | 3-scf00145 | 3 |
| AX-158014117 | 6 | 74.959 | KV452788.1 | 1937045 | 3-scf00145 | 3 |
| AX-158014102 | 6 | 75.011 | KV452788.1 | 1926249 | 3-scf00145 | 3 |

|              |   |        |            |         |            |   |
|--------------|---|--------|------------|---------|------------|---|
| AX-158014122 | 6 | 75.011 | KV452788.1 | 1939445 | 3-scf00145 | 3 |
| AX-158013149 | 6 | 75.069 | KV452788.1 | 1134125 | 3-scf00145 | 3 |
| AX-157721016 | 6 | 75.069 | KV452788.1 | 1944752 | 3-scf00145 | 3 |
| AX-158014136 | 6 | 75.069 | KV452788.1 | 1952358 | 3-scf00145 | 3 |
| AX-158014137 | 6 | 75.069 | KV452788.1 | 1957525 | 3-scf00145 | 3 |
| AX-158014139 | 6 | 75.069 | KV452788.1 | 1957976 | 3-scf00145 | 3 |
| AX-158014140 | 6 | 75.069 | KV452788.1 | 1958422 | 3-scf00145 | 3 |
| AX-158014142 | 6 | 75.069 | KV452788.1 | 1959412 | 3-scf00145 | 3 |
| AX-158014145 | 6 | 75.069 | KV452788.1 | 1960837 | 3-scf00145 | 3 |
| AX-158014148 | 6 | 75.069 | KV452788.1 | 1964491 | 3-scf00145 | 3 |
| AX-158014152 | 6 | 75.069 | KV452788.1 | 1969223 | 3-scf00145 | 3 |
| AX-158014158 | 6 | 75.069 | KV452788.1 | 1972205 | 3-scf00145 | 3 |
| AX-158014270 | 6 | 75.069 | KV452788.1 | 2076336 | 3-scf00145 | 3 |
| AX-158014161 | 6 | 75.116 | KV452788.1 | 1973501 | 3-scf00145 | 3 |
| AX-158014165 | 6 | 75.133 | KV452788.1 | 1979763 | 3-scf00145 | 3 |
| AX-157820296 | 6 | 75.178 | KV452788.1 | 1982251 | 3-scf00145 | 3 |
| AX-158391068 | 6 | 75.235 | KV452788.1 | 1986139 | 3-scf00145 | 3 |
| AX-158014167 | 6 | 75.287 | KV452788.1 | 1982141 | 3-scf00145 | 3 |
| AX-158014170 | 6 | 75.287 | KV452788.1 | 1987382 | 3-scf00145 | 3 |
| AX-158014171 | 6 | 75.287 | KV452788.1 | 1991913 | 3-scf00145 | 3 |
| AX-158014180 | 6 | 75.287 | KV452788.1 | 1999098 | 3-scf00145 | 3 |
| AX-158014181 | 6 | 75.287 | KV452788.1 | 1999531 | 3-scf00145 | 3 |
| AX-158014182 | 6 | 75.317 | KV452788.1 | 2000949 | 3-scf00145 | 3 |
| AX-158014183 | 6 | 75.317 | KV452788.1 | 2002432 | 3-scf00145 | 3 |
| AX-158014250 | 6 | 75.317 | KV452788.1 | 2064410 | 3-scf00145 | 3 |
| AX-157753319 | 6 | 75.354 | KV452788.1 | 2007164 | 3-scf00145 | 3 |
| AX-158013266 | 6 | 75.396 | KV452788.1 | 1241030 | 3-scf00145 | 3 |
| AX-158014164 | 6 | 75.396 | KV452788.1 | 1975384 | 3-scf00145 | 3 |
| AX-158014169 | 6 | 75.396 | KV452788.1 | 1985184 | 3-scf00145 | 3 |
| AX-158014174 | 6 | 75.396 | KV452788.1 | 1992363 | 3-scf00145 | 3 |
| AX-158014189 | 6 | 75.396 | KV452788.1 | 2009514 | 3-scf00145 | 3 |
| AX-158014190 | 6 | 75.396 | KV452788.1 | 2010580 | 3-scf00145 | 3 |
| AX-158014191 | 6 | 75.396 | KV452788.1 | 2011003 | 3-scf00145 | 3 |
| AX-158014194 | 6 | 75.396 | KV452788.1 | 2013485 | 3-scf00145 | 3 |
| AX-158014195 | 6 | 75.396 | KV452788.1 | 2014760 | 3-scf00145 | 3 |
| AX-158014196 | 6 | 75.396 | KV452788.1 | 2015976 | 3-scf00145 | 3 |
| AX-158014197 | 6 | 75.396 | KV452788.1 | 2018279 | 3-scf00145 | 3 |
| AX-158014200 | 6 | 75.396 | KV452788.1 | 2020450 | 3-scf00145 | 3 |
| AX-157755838 | 6 | 75.396 | KV452788.1 | 2021616 | 3-scf00145 | 3 |
| AX-157742119 | 6 | 75.396 | KV452788.1 | 2022300 | 3-scf00145 | 3 |
| AX-158014202 | 6 | 75.396 | KV452788.1 | 2025833 | 3-scf00145 | 3 |
| AX-158014203 | 6 | 75.396 | KV452788.1 | 2026742 | 3-scf00145 | 3 |
| AX-158391069 | 6 | 75.396 | KV452788.1 | 2028438 | 3-scf00145 | 3 |
| AX-158014208 | 6 | 75.396 | KV452788.1 | 2034439 | 3-scf00145 | 3 |
| AX-157770936 | 6 | 75.396 | KV452788.1 | 2035622 | 3-scf00145 | 3 |
| AX-158014209 | 6 | 75.396 | KV452788.1 | 2036832 | 3-scf00145 | 3 |
| AX-158014210 | 6 | 75.396 | KV452788.1 | 2037379 | 3-scf00145 | 3 |
| AX-158014212 | 6 | 75.396 | KV452788.1 | 2040585 | 3-scf00145 | 3 |
| AX-158014213 | 6 | 75.396 | KV452788.1 | 2040911 | 3-scf00145 | 3 |
| AX-158014218 | 6 | 75.396 | KV452788.1 | 2044809 | 3-scf00145 | 3 |
| AX-158014219 | 6 | 75.396 | KV452788.1 | 2045259 | 3-scf00145 | 3 |

|              |   |        |            |         |            |   |
|--------------|---|--------|------------|---------|------------|---|
| AX-158014222 | 6 | 75.396 | KV452788.1 | 2046764 | 3-scf00145 | 3 |
| AX-158014223 | 6 | 75.396 | KV452788.1 | 2046989 | 3-scf00145 | 3 |
| AX-158014227 | 6 | 75.396 | KV452788.1 | 2047543 | 3-scf00145 | 3 |
| AX-158014229 | 6 | 75.396 | KV452788.1 | 2050861 | 3-scf00145 | 3 |
| AX-158014231 | 6 | 75.396 | KV452788.1 | 2051367 | 3-scf00145 | 3 |
| AX-158014235 | 6 | 75.396 | KV452788.1 | 2052540 | 3-scf00145 | 3 |
| AX-157870179 | 6 | 75.396 | KV452788.1 | 2052957 | 3-scf00145 | 3 |
| AX-158014237 | 6 | 75.396 | KV452788.1 | 2053984 | 3-scf00145 | 3 |
| AX-158014239 | 6 | 75.396 | KV452788.1 | 2054913 | 3-scf00145 | 3 |
| AX-158014244 | 6 | 75.396 | KV452788.1 | 2058874 | 3-scf00145 | 3 |
| AX-158383619 | 6 | 75.396 | KV452788.1 | 2060574 | 3-scf00145 | 3 |
| AX-158014245 | 6 | 75.396 | KV452788.1 | 2060786 | 3-scf00145 | 3 |
| AX-158014248 | 6 | 75.396 | KV452788.1 | 2063541 | 3-scf00145 | 3 |
| AX-158014254 | 6 | 75.396 | KV452788.1 | 2067930 | 3-scf00145 | 3 |
| AX-158014255 | 6 | 75.396 | KV452788.1 | 2068346 | 3-scf00145 | 3 |
| AX-158014257 | 6 | 75.396 | KV452788.1 | 2069571 | 3-scf00145 | 3 |
| AX-158014262 | 6 | 75.396 | KV452788.1 | 2071180 | 3-scf00145 | 3 |
| AX-158014267 | 6 | 75.396 | KV452788.1 | 2074403 | 3-scf00145 | 3 |
| AX-158407837 | 6 | 75.396 | KV452788.1 | 2074564 | 3-scf00145 | 3 |
| AX-157820305 | 6 | 75.396 | KV452788.1 | 2079428 | 3-scf00145 | 3 |
| AX-158014274 | 6 | 75.396 | KV452788.1 | 2079784 | 3-scf00145 | 3 |
| AX-157820306 | 6 | 75.396 | KV452788.1 | 2080462 | 3-scf00145 | 3 |
| AX-158014277 | 6 | 75.396 | KV452788.1 | 2080699 | 3-scf00145 | 3 |
| AX-157876267 | 6 | 75.396 | KV452788.1 | 2084679 | 3-scf00145 | 3 |
| AX-157820308 | 6 | 75.396 | KV452788.1 | 2089437 | 3-scf00145 | 3 |
| AX-157820325 | 6 | 75.396 | KV452788.1 | 2201150 | 3-scf00145 | 3 |
| AX-158014286 | 6 | 75.505 | KV452788.1 | 2092078 | 3-scf00145 | 3 |
| AX-158014287 | 6 | 75.505 | KV452788.1 | 2094406 | 3-scf00145 | 3 |
| AX-158014289 | 6 | 75.505 | KV452788.1 | 2094653 | 3-scf00145 | 3 |
| AX-158014290 | 6 | 75.505 | KV452788.1 | 2095760 | 3-scf00145 | 3 |
| AX-157820310 | 6 | 75.505 | KV452788.1 | 2109614 | 3-scf00145 | 3 |
| AX-157714097 | 6 | 75.604 | KV452788.1 | 2097414 | 3-scf00145 | 3 |
| AX-158014292 | 6 | 75.724 | KV452788.1 | 2097967 | 3-scf00145 | 3 |
| AX-158014295 | 6 | 75.724 | KV452788.1 | 2099940 | 3-scf00145 | 3 |
| AX-158014296 | 6 | 75.724 | KV452788.1 | 2100295 | 3-scf00145 | 3 |
| AX-158014298 | 6 | 75.724 | KV452788.1 | 2103747 | 3-scf00145 | 3 |
| AX-158014299 | 6 | 75.724 | KV452788.1 | 2105740 | 3-scf00145 | 3 |
| AX-157748418 | 6 | 75.724 | KV452788.1 | 2107681 | 3-scf00145 | 3 |
| AX-157820309 | 6 | 75.724 | KV452788.1 | 2108509 | 3-scf00145 | 3 |
| AX-158014302 | 6 | 75.942 | KV452788.1 | 2111185 | 3-scf00145 | 3 |
| AX-158014305 | 6 | 75.942 | KV452788.1 | 2112431 | 3-scf00145 | 3 |
| AX-158014312 | 6 | 75.942 | KV452788.1 | 2113493 | 3-scf00145 | 3 |
| AX-158014346 | 6 | 75.942 | KV452788.1 | 2159424 | 3-scf00145 | 3 |
| AX-158014374 | 6 | 75.942 | KV452788.1 | 2191582 | 3-scf00145 | 3 |
| AX-157744323 | 6 | 75.999 | KV452788.1 | 2116204 | 3-scf00145 | 3 |
| AX-158014316 | 6 | 75.999 | KV452788.1 | 2117432 | 3-scf00145 | 3 |
| AX-157820314 | 6 | 75.999 | KV452788.1 | 2143418 | 3-scf00145 | 3 |
| AX-158014318 | 6 | 76.052 | KV452788.1 | 2119858 | 3-scf00145 | 3 |
| AX-157820311 | 6 | 76.052 | KV452788.1 | 2121457 | 3-scf00145 | 3 |
| AX-158014321 | 6 | 76.052 | KV452788.1 | 2122147 | 3-scf00145 | 3 |
| AX-157775458 | 6 | 76.161 | KV452788.1 | 2119004 | 3-scf00145 | 3 |

|              |   |        |            |         |            |   |
|--------------|---|--------|------------|---------|------------|---|
| AX-158014322 | 6 | 76.161 | KV452788.1 | 2125084 | 3-scf00145 | 3 |
| AX-158014324 | 6 | 76.161 | KV452788.1 | 2127786 | 3-scf00145 | 3 |
| AX-158014325 | 6 | 76.161 | KV452788.1 | 2132231 | 3-scf00145 | 3 |
| AX-158014327 | 6 | 76.161 | KV452788.1 | 2133293 | 3-scf00145 | 3 |
| AX-158014329 | 6 | 76.161 | KV452788.1 | 2135172 | 3-scf00145 | 3 |
| AX-157721839 | 6 | 76.161 | KV452788.1 | 2142960 | 3-scf00145 | 3 |
| AX-158014333 | 6 | 76.161 | KV452788.1 | 2148838 | 3-scf00145 | 3 |
| AX-158014334 | 6 | 76.161 | KV452788.1 | 2149925 | 3-scf00145 | 3 |
| AX-158014336 | 6 | 76.161 | KV452788.1 | 2150585 | 3-scf00145 | 3 |
| AX-158014341 | 6 | 76.161 | KV452788.1 | 2152951 | 3-scf00145 | 3 |
| AX-158014345 | 6 | 76.161 | KV452788.1 | 2155432 | 3-scf00145 | 3 |
| AX-157771865 | 6 | 76.161 | KV452788.1 | 2158641 | 3-scf00145 | 3 |
| AX-158014353 | 6 | 76.161 | KV452788.1 | 2162971 | 3-scf00145 | 3 |
| AX-158014354 | 6 | 76.161 | KV452788.1 | 2163700 | 3-scf00145 | 3 |
| AX-158014357 | 6 | 76.161 | KV452788.1 | 2165443 | 3-scf00145 | 3 |
| AX-158014358 | 6 | 76.161 | KV452788.1 | 2165835 | 3-scf00145 | 3 |
| AX-158014359 | 6 | 76.161 | KV452788.1 | 2166501 | 3-scf00145 | 3 |
| AX-158014361 | 6 | 76.161 | KV452788.1 | 2167321 | 3-scf00145 | 3 |
| AX-158014364 | 6 | 76.161 | KV452788.1 | 2169323 | 3-scf00145 | 3 |
| AX-158014366 | 6 | 76.161 | KV452788.1 | 2171314 | 3-scf00145 | 3 |
| AX-157820316 | 6 | 76.161 | KV452788.1 | 2172002 | 3-scf00145 | 3 |
| AX-157746182 | 6 | 76.161 | KV452788.1 | 2174986 | 3-scf00145 | 3 |
| AX-157820317 | 6 | 76.161 | KV452788.1 | 2177164 | 3-scf00145 | 3 |
| AX-158014372 | 6 | 76.161 | KV452788.1 | 2191272 | 3-scf00145 | 3 |
| AX-157740262 | 6 | 76.161 | KV452793.1 | 37507   | 3-scf00148 | 3 |
| AX-157748737 | 6 | 76.161 | KV452793.1 | 37944   | 3-scf00148 | 3 |
| AX-158014886 | 6 | 76.161 | KV452793.1 | 39991   | 3-scf00148 | 3 |
| AX-158014928 | 6 | 76.161 | KV452793.1 | 84517   | 3-scf00148 | 3 |
| AX-158014968 | 6 | 76.161 | KV452793.1 | 136316  | 3-scf00148 | 3 |
| AX-158015014 | 6 | 76.161 | KV452793.1 | 192409  | 3-scf00148 | 3 |
| AX-157716896 | 6 | 76.185 | KV452788.1 | 2180696 | 3-scf00145 | 3 |
| AX-158014368 | 6 | 76.222 | KV452788.1 | 2182489 | 3-scf00145 | 3 |
| AX-158415970 | 6 | 76.27  | KV452788.1 | 2184139 | 3-scf00145 | 3 |
| AX-157820318 | 6 | 76.27  | KV452788.1 | 2184905 | 3-scf00145 | 3 |
| AX-157820319 | 6 | 76.27  | KV452788.1 | 2186731 | 3-scf00145 | 3 |
| AX-157820321 | 6 | 76.27  | KV452788.1 | 2188706 | 3-scf00145 | 3 |
| AX-158014175 | 6 | 76.379 | KV452788.1 | 1992912 | 3-scf00145 | 3 |
| AX-157820303 | 6 | 76.379 | KV452788.1 | 2059742 | 3-scf00145 | 3 |
| AX-158014378 | 6 | 76.379 | KV452788.1 | 2193708 | 3-scf00145 | 3 |
| AX-157722793 | 6 | 76.379 | KV452788.1 | 2195581 | 3-scf00145 | 3 |
| AX-158014875 | 6 | 76.598 | KV452793.1 | 9839    | 3-scf00148 | 3 |
| AX-158014879 | 6 | 76.598 | KV452793.1 | 29887   | 3-scf00148 | 3 |
| AX-158014880 | 6 | 76.598 | KV452793.1 | 32570   | 3-scf00148 | 3 |
| AX-158014881 | 6 | 76.598 | KV452793.1 | 33347   | 3-scf00148 | 3 |
| AX-158014882 | 6 | 76.598 | KV452793.1 | 34196   | 3-scf00148 | 3 |
| AX-158014883 | 6 | 76.598 | KV452793.1 | 34474   | 3-scf00148 | 3 |
| AX-158014884 | 6 | 76.598 | KV452793.1 | 35459   | 3-scf00148 | 3 |
| AX-157720731 | 6 | 76.598 | KV452793.1 | 40765   | 3-scf00148 | 3 |
| AX-158014887 | 6 | 76.641 | KV452793.1 | 42147   | 3-scf00148 | 3 |
| AX-158014892 | 6 | 76.677 | KV452793.1 | 48909   | 3-scf00148 | 3 |
| AX-157820405 | 6 | 76.707 | KV452793.1 | 42713   | 3-scf00148 | 3 |

|              |   |        |            |        |            |   |
|--------------|---|--------|------------|--------|------------|---|
| AX-158014889 | 6 | 76.707 | KV452793.1 | 45872  | 3-scf00148 | 3 |
| AX-158014890 | 6 | 76.707 | KV452793.1 | 46213  | 3-scf00148 | 3 |
| AX-158014893 | 6 | 76.707 | KV452793.1 | 50521  | 3-scf00148 | 3 |
| AX-158014894 | 6 | 76.707 | KV452793.1 | 51149  | 3-scf00148 | 3 |
| AX-158014895 | 6 | 76.707 | KV452793.1 | 52721  | 3-scf00148 | 3 |
| AX-158014897 | 6 | 76.707 | KV452793.1 | 54649  | 3-scf00148 | 3 |
| AX-158014898 | 6 | 76.707 | KV452793.1 | 57010  | 3-scf00148 | 3 |
| AX-158014901 | 6 | 76.707 | KV452793.1 | 60423  | 3-scf00148 | 3 |
| AX-158014902 | 6 | 76.707 | KV452793.1 | 61437  | 3-scf00148 | 3 |
| AX-158014905 | 6 | 76.707 | KV452793.1 | 63062  | 3-scf00148 | 3 |
| AX-158014906 | 6 | 76.707 | KV452793.1 | 64021  | 3-scf00148 | 3 |
| AX-158014907 | 6 | 76.707 | KV452793.1 | 64698  | 3-scf00148 | 3 |
| AX-158014912 | 6 | 76.707 | KV452793.1 | 69114  | 3-scf00148 | 3 |
| AX-158014915 | 6 | 76.707 | KV452793.1 | 71022  | 3-scf00148 | 3 |
| AX-158014918 | 6 | 76.707 | KV452793.1 | 73761  | 3-scf00148 | 3 |
| AX-158014920 | 6 | 76.707 | KV452793.1 | 77355  | 3-scf00148 | 3 |
| AX-157856249 | 6 | 76.707 | KV452793.1 | 78509  | 3-scf00148 | 3 |
| AX-158014921 | 6 | 76.707 | KV452793.1 | 78563  | 3-scf00148 | 3 |
| AX-158014923 | 6 | 76.707 | KV452793.1 | 79471  | 3-scf00148 | 3 |
| AX-158014925 | 6 | 76.707 | KV452793.1 | 80704  | 3-scf00148 | 3 |
| AX-158014926 | 6 | 76.707 | KV452793.1 | 81170  | 3-scf00148 | 3 |
| AX-158014929 | 6 | 76.707 | KV452793.1 | 86416  | 3-scf00148 | 3 |
| AX-157884854 | 6 | 76.707 | KV452793.1 | 90182  | 3-scf00148 | 3 |
| AX-158014933 | 6 | 76.707 | KV452793.1 | 93731  | 3-scf00148 | 3 |
| AX-158014937 | 6 | 76.707 | KV452793.1 | 98069  | 3-scf00148 | 3 |
| AX-157820406 | 6 | 76.707 | KV452793.1 | 99861  | 3-scf00148 | 3 |
| AX-158014940 | 6 | 76.707 | KV452793.1 | 100863 | 3-scf00148 | 3 |
| AX-158014941 | 6 | 76.707 | KV452793.1 | 102858 | 3-scf00148 | 3 |
| AX-158014943 | 6 | 76.707 | KV452793.1 | 103797 | 3-scf00148 | 3 |
| AX-157751964 | 6 | 76.707 | KV452793.1 | 104366 | 3-scf00148 | 3 |
| AX-158014944 | 6 | 76.707 | KV452793.1 | 107292 | 3-scf00148 | 3 |
| AX-157820408 | 6 | 76.707 | KV452793.1 | 107440 | 3-scf00148 | 3 |
| AX-158014947 | 6 | 76.707 | KV452793.1 | 112045 | 3-scf00148 | 3 |
| AX-158014950 | 6 | 76.707 | KV452793.1 | 116729 | 3-scf00148 | 3 |
| AX-158014952 | 6 | 76.707 | KV452793.1 | 117616 | 3-scf00148 | 3 |
| AX-158014957 | 6 | 76.707 | KV452793.1 | 122500 | 3-scf00148 | 3 |
| AX-158014959 | 6 | 76.707 | KV452793.1 | 123052 | 3-scf00148 | 3 |
| AX-158014960 | 6 | 76.707 | KV452793.1 | 123454 | 3-scf00148 | 3 |
| AX-158014961 | 6 | 76.707 | KV452793.1 | 124214 | 3-scf00148 | 3 |
| AX-158014964 | 6 | 76.707 | KV452793.1 | 130097 | 3-scf00148 | 3 |
| AX-157709370 | 6 | 76.707 | KV452793.1 | 130563 | 3-scf00148 | 3 |
| AX-158014965 | 6 | 76.707 | KV452793.1 | 130948 | 3-scf00148 | 3 |
| AX-158014966 | 6 | 76.707 | KV452793.1 | 133045 | 3-scf00148 | 3 |
| AX-158014967 | 6 | 76.707 | KV452793.1 | 133723 | 3-scf00148 | 3 |
| AX-157756518 | 6 | 76.707 | KV452793.1 | 136909 | 3-scf00148 | 3 |
| AX-158014970 | 6 | 76.707 | KV452793.1 | 140766 | 3-scf00148 | 3 |
| AX-158014971 | 6 | 76.707 | KV452793.1 | 141437 | 3-scf00148 | 3 |
| AX-157820410 | 6 | 76.707 | KV452793.1 | 142561 | 3-scf00148 | 3 |
| AX-158014973 | 6 | 76.707 | KV452793.1 | 149066 | 3-scf00148 | 3 |
| AX-158014975 | 6 | 76.707 | KV452793.1 | 150704 | 3-scf00148 | 3 |
| AX-158014976 | 6 | 76.707 | KV452793.1 | 151824 | 3-scf00148 | 3 |

|              |   |        |             |         |                |    |
|--------------|---|--------|-------------|---------|----------------|----|
| AX-158014982 | 6 | 76.707 | KV452793.1  | 161785  | 3-scf00148     | 3  |
| AX-158014987 | 6 | 76.707 | KV452793.1  | 164464  | 3-scf00148     | 3  |
| AX-158015004 | 6 | 76.707 | KV452793.1  | 178123  | 3-scf00148     | 3  |
| AX-157721341 | 6 | 76.707 | KV452793.1  | 179630  | 3-scf00148     | 3  |
| AX-158015007 | 6 | 76.707 | KV452793.1  | 184334  | 3-scf00148     | 3  |
| AX-158015008 | 6 | 76.707 | KV452793.1  | 184845  | 3-scf00148     | 3  |
| AX-157697368 | 6 | 76.707 | FI859307.1  | 117     | IORI212 lctalu | UN |
| AX-157707259 | 6 | 76.707 | 3ML01033840 | 278     | scf09506_1     | UN |
| AX-158014981 | 6 | 76.816 | KV452793.1  | 161346  | 3-scf00148     | 3  |
| AX-158014989 | 6 | 76.926 | KV452793.1  | 166326  | 3-scf00148     | 3  |
| AX-158014992 | 6 | 76.984 | KV452793.1  | 168550  | 3-scf00148     | 3  |
| AX-158014205 | 6 | 77.035 | KV452788.1  | 2028943 | 3-scf00145     | 3  |
| AX-158407858 | 6 | 77.035 | KV452793.1  | 169460  | 3-scf00148     | 3  |
| AX-158014994 | 6 | 77.035 | KV452793.1  | 170212  | 3-scf00148     | 3  |
| AX-158014996 | 6 | 77.035 | KV452793.1  | 171251  | 3-scf00148     | 3  |
| AX-157750341 | 6 | 77.035 | KV452793.1  | 172213  | 3-scf00148     | 3  |
| AX-158014997 | 6 | 77.035 | KV452793.1  | 173781  | 3-scf00148     | 3  |
| AX-158015005 | 6 | 77.035 | KV452793.1  | 178868  | 3-scf00148     | 3  |
| AX-157774517 | 6 | 77.035 | KV452793.1  | 181623  | 3-scf00148     | 3  |
| AX-158015009 | 6 | 77.035 | KV452793.1  | 186672  | 3-scf00148     | 3  |
| AX-158015012 | 6 | 77.055 | KV452793.1  | 189270  | 3-scf00148     | 3  |
| AX-158015016 | 6 | 77.427 | KV452793.1  | 195315  | 3-scf00148     | 3  |
| AX-157750515 | 6 | 77.682 | KV452793.1  | 201347  | 3-scf00148     | 3  |
| AX-158015023 | 6 | 77.69  | KV452793.1  | 201707  | 3-scf00148     | 3  |
| AX-158379686 | 6 | 77.69  | KV452793.1  | 205009  | 3-scf00148     | 3  |
| AX-158015025 | 6 | 77.69  | KV452793.1  | 207994  | 3-scf00148     | 3  |
| AX-158015028 | 6 | 77.69  | KV452793.1  | 209279  | 3-scf00148     | 3  |
| AX-158015029 | 6 | 77.69  | KV452793.1  | 211347  | 3-scf00148     | 3  |
| AX-158015031 | 6 | 77.69  | KV452793.1  | 211712  | 3-scf00148     | 3  |
| AX-157820312 | 6 | 77.797 | KV452788.1  | 2135534 | 3-scf00145     | 3  |
| AX-158015032 | 6 | 77.797 | KV452793.1  | 212402  | 3-scf00148     | 3  |
| AX-158015036 | 6 | 77.909 | KV452793.1  | 216980  | 3-scf00148     | 3  |
| AX-158015039 | 6 | 77.909 | KV452793.1  | 218823  | 3-scf00148     | 3  |
| AX-158015041 | 6 | 77.909 | KV452793.1  | 219847  | 3-scf00148     | 3  |
| AX-157739452 | 6 | 77.909 | KV452793.1  | 221774  | 3-scf00148     | 3  |
| AX-158015043 | 6 | 77.909 | KV452793.1  | 222418  | 3-scf00148     | 3  |
| AX-158015044 | 6 | 77.909 | KV452793.1  | 224781  | 3-scf00148     | 3  |
| AX-157884855 | 6 | 77.909 | KV452793.1  | 224846  | 3-scf00148     | 3  |
| AX-158015045 | 6 | 77.909 | KV452793.1  | 226312  | 3-scf00148     | 3  |
| AX-158015051 | 6 | 77.909 | KV452793.1  | 234053  | 3-scf00148     | 3  |
| AX-158015055 | 6 | 78.072 | KV452793.1  | 238284  | 3-scf00148     | 3  |
| AX-158015058 | 6 | 78.236 | KV452793.1  | 242115  | 3-scf00148     | 3  |
| AX-158015060 | 6 | 78.236 | KV452793.1  | 243471  | 3-scf00148     | 3  |
| AX-158015061 | 6 | 78.236 | KV452793.1  | 244040  | 3-scf00148     | 3  |
| AX-158015065 | 6 | 78.236 | KV452793.1  | 246817  | 3-scf00148     | 3  |
| AX-157709427 | 6 | 78.236 | KV452793.1  | 247413  | 3-scf00148     | 3  |
| AX-157722323 | 6 | 78.236 | KV452793.1  | 248066  | 3-scf00148     | 3  |
| AX-158015066 | 6 | 78.236 | KV452793.1  | 249360  | 3-scf00148     | 3  |
| AX-157739203 | 6 | 78.236 | KV452793.1  | 250888  | 3-scf00148     | 3  |
| AX-158015070 | 6 | 78.236 | KV452793.1  | 252761  | 3-scf00148     | 3  |
| AX-158015072 | 6 | 78.236 | KV452793.1  | 253492  | 3-scf00148     | 3  |

|              |   |        |            |        |            |   |
|--------------|---|--------|------------|--------|------------|---|
| AX-158015074 | 6 | 78.236 | KV452793.1 | 256268 | 3-scf00148 | 3 |
| AX-158015079 | 6 | 78.236 | KV452793.1 | 261221 | 3-scf00148 | 3 |
| AX-158015082 | 6 | 78.236 | KV452793.1 | 266097 | 3-scf00148 | 3 |
| AX-158015106 | 6 | 78.236 | KV452793.1 | 289361 | 3-scf00148 | 3 |
| AX-158407861 | 6 | 78.236 | KV452793.1 | 291947 | 3-scf00148 | 3 |
| AX-158015076 | 6 | 78.346 | KV452793.1 | 258835 | 3-scf00148 | 3 |
| AX-158015083 | 6 | 78.346 | KV452793.1 | 266673 | 3-scf00148 | 3 |
| AX-158015024 | 6 | 78.564 | KV452793.1 | 204510 | 3-scf00148 | 3 |
| AX-158391106 | 6 | 78.564 | KV452793.1 | 227647 | 3-scf00148 | 3 |
| AX-158015047 | 6 | 78.564 | KV452793.1 | 232060 | 3-scf00148 | 3 |
| AX-157720575 | 6 | 78.564 | KV452793.1 | 235074 | 3-scf00148 | 3 |
| AX-158015054 | 6 | 78.564 | KV452793.1 | 237529 | 3-scf00148 | 3 |
| AX-157820413 | 6 | 78.564 | KV452793.1 | 242165 | 3-scf00148 | 3 |
| AX-157713375 | 6 | 78.564 | KV452793.1 | 274079 | 3-scf00148 | 3 |
| AX-158015090 | 6 | 78.564 | KV452793.1 | 275042 | 3-scf00148 | 3 |
| AX-158015091 | 6 | 78.564 | KV452793.1 | 275153 | 3-scf00148 | 3 |
| AX-158015098 | 6 | 78.564 | KV452793.1 | 281639 | 3-scf00148 | 3 |
| AX-158015121 | 6 | 78.564 | KV452793.1 | 303140 | 3-scf00148 | 3 |
| AX-157758091 | 6 | 78.564 | KV452793.1 | 316434 | 3-scf00148 | 3 |
| AX-158015164 | 6 | 78.564 | KV452793.1 | 338304 | 3-scf00148 | 3 |
| AX-157758733 | 6 | 78.595 | KV452793.1 | 277645 | 3-scf00148 | 3 |
| AX-158015094 | 6 | 78.631 | KV452793.1 | 278201 | 3-scf00148 | 3 |
| AX-158015095 | 6 | 78.674 | KV452793.1 | 279763 | 3-scf00148 | 3 |
| AX-157820418 | 6 | 78.715 | KV452793.1 | 281120 | 3-scf00148 | 3 |
| AX-158015099 | 6 | 78.715 | KV452793.1 | 284520 | 3-scf00148 | 3 |
| AX-157820414 | 6 | 78.783 | KV452793.1 | 243181 | 3-scf00148 | 3 |
| AX-158015101 | 6 | 78.783 | KV452793.1 | 285893 | 3-scf00148 | 3 |
| AX-158015103 | 6 | 78.783 | KV452793.1 | 287476 | 3-scf00148 | 3 |
| AX-158015104 | 6 | 78.783 | KV452793.1 | 287924 | 3-scf00148 | 3 |
| AX-158015108 | 6 | 78.783 | KV452793.1 | 290517 | 3-scf00148 | 3 |
| AX-158015109 | 6 | 78.783 | KV452793.1 | 291211 | 3-scf00148 | 3 |
| AX-158015114 | 6 | 78.783 | KV452793.1 | 292981 | 3-scf00148 | 3 |
| AX-158015119 | 6 | 78.783 | KV452793.1 | 300334 | 3-scf00148 | 3 |
| AX-157820417 | 6 | 78.829 | KV452793.1 | 280972 | 3-scf00148 | 3 |
| AX-158015123 | 6 | 78.829 | KV452793.1 | 303752 | 3-scf00148 | 3 |
| AX-158015125 | 6 | 78.866 | KV452793.1 | 306279 | 3-scf00148 | 3 |
| AX-158015127 | 6 | 78.923 | KV452793.1 | 306929 | 3-scf00148 | 3 |
| AX-157820420 | 6 | 79.002 | KV452793.1 | 298040 | 3-scf00148 | 3 |
| AX-158015128 | 6 | 79.002 | KV452793.1 | 310759 | 3-scf00148 | 3 |
| AX-158015129 | 6 | 79.002 | KV452793.1 | 311930 | 3-scf00148 | 3 |
| AX-158015130 | 6 | 79.002 | KV452793.1 | 312810 | 3-scf00148 | 3 |
| AX-158015131 | 6 | 79.002 | KV452793.1 | 314057 | 3-scf00148 | 3 |
| AX-158015162 | 6 | 79.002 | KV452793.1 | 336701 | 3-scf00148 | 3 |
| AX-158015136 | 6 | 79.428 | KV452793.1 | 322000 | 3-scf00148 | 3 |
| AX-158015138 | 6 | 79.439 | KV452793.1 | 322516 | 3-scf00148 | 3 |
| AX-158015139 | 6 | 79.439 | KV452793.1 | 323184 | 3-scf00148 | 3 |
| AX-158015141 | 6 | 79.439 | KV452793.1 | 324102 | 3-scf00148 | 3 |
| AX-158015142 | 6 | 79.439 | KV452793.1 | 325411 | 3-scf00148 | 3 |
| AX-158015143 | 6 | 79.439 | KV452793.1 | 326395 | 3-scf00148 | 3 |
| AX-158015145 | 6 | 79.439 | KV452793.1 | 329592 | 3-scf00148 | 3 |
| AX-158015149 | 6 | 79.439 | KV452793.1 | 330666 | 3-scf00148 | 3 |



|              |   |        |            |        |            |   |
|--------------|---|--------|------------|--------|------------|---|
| AX-158015153 | 6 | 79.439 | KV452793.1 | 332656 | 3-scf00148 | 3 |
| AX-158015156 | 6 | 79.439 | KV452793.1 | 333801 | 3-scf00148 | 3 |
| AX-158015159 | 6 | 79.439 | KV452793.1 | 335548 | 3-scf00148 | 3 |
| AX-158015161 | 6 | 79.439 | KV452793.1 | 336381 | 3-scf00148 | 3 |
| AX-158379687 | 6 | 79.439 | KV452793.1 | 336550 | 3-scf00148 | 3 |
| AX-158015163 | 6 | 79.439 | KV452793.1 | 337224 | 3-scf00148 | 3 |
| AX-157709329 | 6 | 79.721 | KV452793.1 | 341741 | 3-scf00148 | 3 |
| AX-158015168 | 6 | 79.721 | KV452793.1 | 341879 | 3-scf00148 | 3 |
| AX-158015172 | 6 | 79.863 | KV452793.1 | 343760 | 3-scf00148 | 3 |
| AX-158015175 | 6 | 79.92  | KV452793.1 | 346077 | 3-scf00148 | 3 |
| AX-158015178 | 6 | 79.92  | KV452793.1 | 347398 | 3-scf00148 | 3 |
| AX-158015204 | 6 | 79.92  | KV452793.1 | 373867 | 3-scf00148 | 3 |
| AX-158015179 | 6 | 79.921 | KV452793.1 | 347758 | 3-scf00148 | 3 |
| AX-158015181 | 6 | 79.922 | KV452793.1 | 349446 | 3-scf00148 | 3 |
| AX-157876276 | 6 | 80.018 | KV452793.1 | 350101 | 3-scf00148 | 3 |
| AX-157720001 | 6 | 80.144 | KV452793.1 | 350253 | 3-scf00148 | 3 |
| AX-158015182 | 6 | 80.416 | KV452793.1 | 354498 | 3-scf00148 | 3 |
| AX-158015184 | 6 | 80.423 | KV452793.1 | 355274 | 3-scf00148 | 3 |
| AX-158015189 | 6 | 80.464 | KV452793.1 | 360444 | 3-scf00148 | 3 |
| AX-158015198 | 6 | 80.471 | KV452793.1 | 368928 | 3-scf00148 | 3 |
| AX-158015201 | 6 | 80.495 | KV452793.1 | 369702 | 3-scf00148 | 3 |
| AX-158015167 | 6 | 80.532 | KV452793.1 | 340458 | 3-scf00148 | 3 |
| AX-158015203 | 6 | 80.532 | KV452793.1 | 372004 | 3-scf00148 | 3 |
| AX-157729228 | 6 | 80.532 | KV452793.1 | 374957 | 3-scf00148 | 3 |
| AX-158015209 | 6 | 80.532 | KV452793.1 | 375738 | 3-scf00148 | 3 |
| AX-158015215 | 6 | 80.751 | KV452793.1 | 381001 | 3-scf00148 | 3 |
| AX-158015220 | 6 | 80.751 | KV452793.1 | 386830 | 3-scf00148 | 3 |
| AX-158015221 | 6 | 80.751 | KV452793.1 | 387627 | 3-scf00148 | 3 |
| AX-157820422 | 6 | 80.751 | KV452793.1 | 387892 | 3-scf00148 | 3 |
| AX-158015226 | 6 | 80.751 | KV452793.1 | 388895 | 3-scf00148 | 3 |
| AX-158015230 | 6 | 80.86  | KV452793.1 | 390706 | 3-scf00148 | 3 |
| AX-158015231 | 6 | 80.86  | KV452793.1 | 391386 | 3-scf00148 | 3 |
| AX-158015234 | 6 | 80.912 | KV452793.1 | 392516 | 3-scf00148 | 3 |
| AX-158015200 | 6 | 80.969 | KV452793.1 | 369327 | 3-scf00148 | 3 |
| AX-158383639 | 6 | 80.969 | KV452793.1 | 379571 | 3-scf00148 | 3 |
| AX-158015238 | 6 | 80.969 | KV452793.1 | 393760 | 3-scf00148 | 3 |
| AX-158015239 | 6 | 80.969 | KV452793.1 | 397769 | 3-scf00148 | 3 |
| AX-158015242 | 6 | 80.969 | KV452793.1 | 401802 | 3-scf00148 | 3 |
| AX-158015243 | 6 | 80.97  | KV452793.1 | 402644 | 3-scf00148 | 3 |
| AX-158015248 | 6 | 81.396 | KV452793.1 | 408379 | 3-scf00148 | 3 |
| AX-158015253 | 6 | 81.396 | KV452793.1 | 412238 | 3-scf00148 | 3 |
| AX-158015249 | 6 | 81.399 | KV452793.1 | 409802 | 3-scf00148 | 3 |
| AX-158015250 | 6 | 81.401 | KV452793.1 | 410201 | 3-scf00148 | 3 |
| AX-158015252 | 6 | 81.419 | KV452793.1 | 411752 | 3-scf00148 | 3 |
| AX-158015257 | 6 | 81.419 | KV452793.1 | 423639 | 3-scf00148 | 3 |
| AX-158015260 | 6 | 81.733 | KV452793.1 | 430789 | 3-scf00148 | 3 |
| AX-158015262 | 6 | 81.733 | KV452793.1 | 434614 | 3-scf00148 | 3 |
| AX-158405950 | 6 | 81.733 | KV452793.1 | 434915 | 3-scf00148 | 3 |
| AX-158015269 | 6 | 81.733 | KV452793.1 | 439007 | 3-scf00148 | 3 |
| AX-158015270 | 6 | 81.733 | KV452793.1 | 439747 | 3-scf00148 | 3 |
| AX-158015272 | 6 | 81.733 | KV452793.1 | 440677 | 3-scf00148 | 3 |

|              |   |        |            |        |            |   |
|--------------|---|--------|------------|--------|------------|---|
| AX-157884861 | 6 | 81.733 | KV452793.1 | 444491 | 3-scf00148 | 3 |
| AX-158015276 | 6 | 81.733 | KV452793.1 | 445091 | 3-scf00148 | 3 |
| AX-158015278 | 6 | 81.733 | KV452793.1 | 451050 | 3-scf00148 | 3 |
| AX-158015282 | 6 | 81.733 | KV452793.1 | 453482 | 3-scf00148 | 3 |
| AX-158015284 | 6 | 81.733 | KV452793.1 | 456557 | 3-scf00148 | 3 |
| AX-158015286 | 6 | 81.733 | KV452793.1 | 458689 | 3-scf00148 | 3 |
| AX-158015287 | 6 | 81.733 | KV452793.1 | 459416 | 3-scf00148 | 3 |
| AX-158415987 | 6 | 81.733 | KV452793.1 | 481994 | 3-scf00148 | 3 |
| AX-158015305 | 6 | 81.733 | KV452793.1 | 484178 | 3-scf00148 | 3 |
| AX-158015288 | 6 | 81.842 | KV452793.1 | 467447 | 3-scf00148 | 3 |
| AX-158015291 | 6 | 81.842 | KV452793.1 | 471242 | 3-scf00148 | 3 |
| AX-158015292 | 6 | 81.842 | KV452793.1 | 472589 | 3-scf00148 | 3 |
| AX-158015293 | 6 | 81.842 | KV452793.1 | 474859 | 3-scf00148 | 3 |
| AX-158015294 | 6 | 81.842 | KV452793.1 | 479327 | 3-scf00148 | 3 |
| AX-158015295 | 6 | 81.842 | KV452793.1 | 479700 | 3-scf00148 | 3 |
| AX-158015299 | 6 | 81.842 | KV452793.1 | 481122 | 3-scf00148 | 3 |
| AX-158015303 | 6 | 81.842 | KV452793.1 | 482929 | 3-scf00148 | 3 |
| AX-158015304 | 6 | 81.842 | KV452793.1 | 483638 | 3-scf00148 | 3 |
| AX-158015307 | 6 | 81.842 | KV452793.1 | 486492 | 3-scf00148 | 3 |
| AX-158015313 | 6 | 81.952 | KV452793.1 | 491370 | 3-scf00148 | 3 |
| AX-157722082 | 6 | 81.952 | KV452793.1 | 498860 | 3-scf00148 | 3 |
| AX-158015322 | 6 | 81.952 | KV452793.1 | 500969 | 3-scf00148 | 3 |
| AX-158015323 | 6 | 81.952 | KV452793.1 | 502129 | 3-scf00148 | 3 |
| AX-158015327 | 6 | 82.242 | KV452793.1 | 505853 | 3-scf00148 | 3 |
| AX-158015328 | 6 | 82.242 | KV452793.1 | 506710 | 3-scf00148 | 3 |
| AX-158015329 | 6 | 82.243 | KV452793.1 | 507214 | 3-scf00148 | 3 |
| AX-158015338 | 6 | 82.243 | KV452793.1 | 511516 | 3-scf00148 | 3 |
| AX-158015340 | 6 | 82.389 | KV452793.1 | 514039 | 3-scf00148 | 3 |
| AX-158015342 | 6 | 82.389 | KV452793.1 | 514915 | 3-scf00148 | 3 |
| AX-158015343 | 6 | 82.389 | KV452793.1 | 515574 | 3-scf00148 | 3 |
| AX-158015350 | 6 | 82.389 | KV452793.1 | 521487 | 3-scf00148 | 3 |
| AX-158015352 | 6 | 82.389 | KV452793.1 | 523672 | 3-scf00148 | 3 |
| AX-158015355 | 6 | 82.389 | KV452793.1 | 525292 | 3-scf00148 | 3 |
| AX-158015358 | 6 | 82.389 | KV452793.1 | 527339 | 3-scf00148 | 3 |
| AX-158015359 | 6 | 82.389 | KV452793.1 | 527769 | 3-scf00148 | 3 |
| AX-158015361 | 6 | 82.389 | KV452793.1 | 530620 | 3-scf00148 | 3 |
| AX-158015362 | 6 | 82.389 | KV452793.1 | 531270 | 3-scf00148 | 3 |
| AX-158015367 | 6 | 82.389 | KV452793.1 | 540464 | 3-scf00148 | 3 |
| AX-158015369 | 6 | 82.389 | KV452793.1 | 543549 | 3-scf00148 | 3 |
| AX-157820424 | 6 | 82.389 | KV452793.1 | 544357 | 3-scf00148 | 3 |
| AX-158015448 | 6 | 82.389 | KV452793.1 | 602686 | 3-scf00148 | 3 |
| AX-158015363 | 6 | 82.498 | KV452793.1 | 532237 | 3-scf00148 | 3 |
| AX-158015370 | 6 | 82.498 | KV452793.1 | 546469 | 3-scf00148 | 3 |
| AX-158015373 | 6 | 82.607 | KV452793.1 | 549233 | 3-scf00148 | 3 |
| AX-158015379 | 6 | 82.652 | KV452793.1 | 553261 | 3-scf00148 | 3 |
| AX-158015375 | 6 | 82.716 | KV452793.1 | 552970 | 3-scf00148 | 3 |
| AX-158015383 | 6 | 82.716 | KV452793.1 | 554865 | 3-scf00148 | 3 |
| AX-158015385 | 6 | 82.716 | KV452793.1 | 555597 | 3-scf00148 | 3 |
| AX-158015390 | 6 | 82.825 | KV452793.1 | 559491 | 3-scf00148 | 3 |
| AX-158015395 | 6 | 82.825 | KV452793.1 | 562667 | 3-scf00148 | 3 |
| AX-158015397 | 6 | 82.825 | KV452793.1 | 564447 | 3-scf00148 | 3 |

|              |   |        |            |        |            |   |
|--------------|---|--------|------------|--------|------------|---|
| AX-157753254 | 6 | 82.869 | KV452793.1 | 565402 | 3-scf00148 | 3 |
| AX-158015345 | 6 | 82.935 | KV452793.1 | 517361 | 3-scf00148 | 3 |
| AX-157716759 | 6 | 82.935 | KV452793.1 | 533972 | 3-scf00148 | 3 |
| AX-157750888 | 6 | 82.935 | KV452793.1 | 549859 | 3-scf00148 | 3 |
| AX-157774996 | 6 | 82.935 | KV452793.1 | 568415 | 3-scf00148 | 3 |
| AX-158015402 | 6 | 82.935 | KV452793.1 | 572206 | 3-scf00148 | 3 |
| AX-157876278 | 6 | 82.935 | KV452793.1 | 573452 | 3-scf00148 | 3 |
| AX-158015408 | 6 | 82.935 | KV452793.1 | 574890 | 3-scf00148 | 3 |
| AX-158015411 | 6 | 82.935 | KV452793.1 | 576597 | 3-scf00148 | 3 |
| AX-158391112 | 6 | 82.935 | KV452793.1 | 588334 | 3-scf00148 | 3 |
| AX-158015415 | 6 | 83.044 | KV452793.1 | 578483 | 3-scf00148 | 3 |
| AX-158015417 | 6 | 83.044 | KV452793.1 | 580250 | 3-scf00148 | 3 |
| AX-158015418 | 6 | 83.044 | KV452793.1 | 580929 | 3-scf00148 | 3 |
| AX-158015419 | 6 | 83.044 | KV452793.1 | 582427 | 3-scf00148 | 3 |
| AX-158015420 | 6 | 83.044 | KV452793.1 | 582797 | 3-scf00148 | 3 |
| AX-158015421 | 6 | 83.044 | KV452793.1 | 583705 | 3-scf00148 | 3 |
| AX-158015422 | 6 | 83.044 | KV452793.1 | 584693 | 3-scf00148 | 3 |
| AX-158015424 | 6 | 83.044 | KV452793.1 | 585606 | 3-scf00148 | 3 |
| AX-158015426 | 6 | 83.044 | KV452793.1 | 586657 | 3-scf00148 | 3 |
| AX-158015428 | 6 | 83.044 | KV452793.1 | 587737 | 3-scf00148 | 3 |
| AX-158015431 | 6 | 83.044 | KV452793.1 | 589358 | 3-scf00148 | 3 |
| AX-158015432 | 6 | 83.044 | KV452793.1 | 589715 | 3-scf00148 | 3 |
| AX-158015435 | 6 | 83.044 | KV452793.1 | 592751 | 3-scf00148 | 3 |
| AX-158391113 | 6 | 83.044 | KV452793.1 | 604564 | 3-scf00148 | 3 |
| AX-158015404 | 6 | 83.153 | KV452793.1 | 573045 | 3-scf00148 | 3 |
| AX-157714388 | 6 | 83.153 | KV452793.1 | 585174 | 3-scf00148 | 3 |
| AX-158015425 | 6 | 83.153 | KV452793.1 | 585999 | 3-scf00148 | 3 |
| AX-158015427 | 6 | 83.153 | KV452793.1 | 587142 | 3-scf00148 | 3 |
| AX-158015436 | 6 | 83.153 | KV452793.1 | 594047 | 3-scf00148 | 3 |
| AX-158015437 | 6 | 83.153 | KV452793.1 | 594384 | 3-scf00148 | 3 |
| AX-158015438 | 6 | 83.153 | KV452793.1 | 595239 | 3-scf00148 | 3 |
| AX-158015442 | 6 | 83.153 | KV452793.1 | 598181 | 3-scf00148 | 3 |
| AX-158015445 | 6 | 83.153 | KV452793.1 | 598952 | 3-scf00148 | 3 |
| AX-158015446 | 6 | 83.153 | KV452793.1 | 601185 | 3-scf00148 | 3 |
| AX-158015449 | 6 | 83.153 | KV452793.1 | 603156 | 3-scf00148 | 3 |
| AX-158015451 | 6 | 83.153 | KV452793.1 | 607042 | 3-scf00148 | 3 |
| AX-157820425 | 6 | 83.153 | KV452793.1 | 609659 | 3-scf00148 | 3 |
| AX-158015456 | 6 | 83.153 | KV452793.1 | 611283 | 3-scf00148 | 3 |
| AX-157820426 | 6 | 83.153 | KV452793.1 | 611366 | 3-scf00148 | 3 |
| AX-158015458 | 6 | 83.153 | KV452793.1 | 612836 | 3-scf00148 | 3 |
| AX-157856255 | 6 | 83.153 | KV452793.1 | 709260 | 3-scf00148 | 3 |
| AX-158015463 | 6 | 83.479 | KV452793.1 | 617079 | 3-scf00148 | 3 |
| AX-158015466 | 6 | 83.48  | KV452793.1 | 620918 | 3-scf00148 | 3 |
| AX-158015470 | 6 | 83.48  | KV452793.1 | 624159 | 3-scf00148 | 3 |
| AX-158015484 | 6 | 83.48  | KV452793.1 | 640404 | 3-scf00148 | 3 |
| AX-158015500 | 6 | 83.48  | KV452793.1 | 662036 | 3-scf00148 | 3 |
| AX-158015522 | 6 | 83.48  | KV452793.1 | 701082 | 3-scf00148 | 3 |
| AX-157884863 | 6 | 83.48  | KV452793.1 | 728341 | 3-scf00148 | 3 |
| AX-158015473 | 6 | 83.481 | KV452793.1 | 628019 | 3-scf00148 | 3 |
| AX-158015474 | 6 | 83.481 | KV452793.1 | 628476 | 3-scf00148 | 3 |
| AX-158015475 | 6 | 83.481 | KV452793.1 | 629320 | 3-scf00148 | 3 |

|              |   |        |            |        |            |   |
|--------------|---|--------|------------|--------|------------|---|
| AX-158015479 | 6 | 83.481 | KV452793.1 | 633035 | 3-scf00148 | 3 |
| AX-158015480 | 6 | 83.481 | KV452793.1 | 633458 | 3-scf00148 | 3 |
| AX-158015481 | 6 | 83.481 | KV452793.1 | 635131 | 3-scf00148 | 3 |
| AX-158015483 | 6 | 83.481 | KV452793.1 | 639472 | 3-scf00148 | 3 |
| AX-158383645 | 6 | 83.481 | KV452793.1 | 640951 | 3-scf00148 | 3 |
| AX-158015486 | 6 | 83.481 | KV452793.1 | 643739 | 3-scf00148 | 3 |
| AX-158015464 | 6 | 83.699 | KV452793.1 | 617490 | 3-scf00148 | 3 |
| AX-158015465 | 6 | 83.699 | KV452793.1 | 618692 | 3-scf00148 | 3 |
| AX-158015489 | 6 | 83.699 | KV452793.1 | 646491 | 3-scf00148 | 3 |
| AX-158015490 | 6 | 83.699 | KV452793.1 | 647091 | 3-scf00148 | 3 |
| AX-158015493 | 6 | 83.699 | KV452793.1 | 653658 | 3-scf00148 | 3 |
| AX-158015497 | 6 | 83.699 | KV452793.1 | 655213 | 3-scf00148 | 3 |
| AX-158015498 | 6 | 83.699 | KV452793.1 | 658474 | 3-scf00148 | 3 |
| AX-157820428 | 6 | 83.699 | KV452793.1 | 660966 | 3-scf00148 | 3 |
| AX-158383646 | 6 | 83.699 | KV452793.1 | 668586 | 3-scf00148 | 3 |
| AX-157724488 | 6 | 83.699 | KV452793.1 | 672127 | 3-scf00148 | 3 |
| AX-158015551 | 6 | 83.699 | KV452793.1 | 749719 | 3-scf00148 | 3 |
| AX-158015505 | 6 | 83.738 | KV452793.1 | 672846 | 3-scf00148 | 3 |
| AX-158015491 | 6 | 83.774 | KV452793.1 | 647526 | 3-scf00148 | 3 |
| AX-158015495 | 6 | 83.774 | KV452793.1 | 654650 | 3-scf00148 | 3 |
| AX-157744762 | 6 | 83.774 | KV452793.1 | 686907 | 3-scf00148 | 3 |
| AX-158415989 | 6 | 83.808 | KV452793.1 | 681951 | 3-scf00148 | 3 |
| AX-158015508 | 6 | 83.808 | KV452793.1 | 690246 | 3-scf00148 | 3 |
| AX-158015510 | 6 | 83.808 | KV452793.1 | 690973 | 3-scf00148 | 3 |
| AX-158015513 | 6 | 83.808 | KV452793.1 | 695188 | 3-scf00148 | 3 |
| AX-158015514 | 6 | 83.808 | KV452793.1 | 697000 | 3-scf00148 | 3 |
| AX-158015516 | 6 | 83.808 | KV452793.1 | 698269 | 3-scf00148 | 3 |
| AX-158015518 | 6 | 83.808 | KV452793.1 | 699037 | 3-scf00148 | 3 |
| AX-158015521 | 6 | 83.808 | KV452793.1 | 699725 | 3-scf00148 | 3 |
| AX-158015524 | 6 | 83.808 | KV452793.1 | 707003 | 3-scf00148 | 3 |
| AX-158015525 | 6 | 83.808 | KV452793.1 | 708022 | 3-scf00148 | 3 |
| AX-158015527 | 6 | 83.808 | KV452793.1 | 710271 | 3-scf00148 | 3 |
| AX-158015528 | 6 | 83.808 | KV452793.1 | 710456 | 3-scf00148 | 3 |
| AX-157708653 | 6 | 83.808 | KV452793.1 | 711297 | 3-scf00148 | 3 |
| AX-157743721 | 6 | 83.808 | KV452793.1 | 711726 | 3-scf00148 | 3 |
| AX-157772714 | 6 | 83.808 | KV452793.1 | 713174 | 3-scf00148 | 3 |
| AX-158015531 | 6 | 83.808 | KV452793.1 | 717120 | 3-scf00148 | 3 |
| AX-158015545 | 6 | 83.808 | KV452793.1 | 740807 | 3-scf00148 | 3 |
| AX-158015507 | 6 | 83.917 | KV452793.1 | 682079 | 3-scf00148 | 3 |
| AX-158379689 | 6 | 83.917 | KV452793.1 | 716181 | 3-scf00148 | 3 |
| AX-158015532 | 6 | 83.917 | KV452793.1 | 718948 | 3-scf00148 | 3 |
| AX-158015535 | 6 | 83.917 | KV452793.1 | 721086 | 3-scf00148 | 3 |
| AX-157750776 | 6 | 83.917 | KV452793.1 | 723761 | 3-scf00148 | 3 |
| AX-158015538 | 6 | 83.972 | KV452793.1 | 727334 | 3-scf00148 | 3 |
| AX-158015506 | 6 | 84.027 | KV452793.1 | 674170 | 3-scf00148 | 3 |
| AX-157694075 | 6 | 84.027 | KV452793.1 | 729635 | 3-scf00148 | 3 |
| AX-157751364 | 6 | 84.027 | KV452793.1 | 730232 | 3-scf00148 | 3 |
| AX-157876280 | 6 | 84.027 | KV452793.1 | 731768 | 3-scf00148 | 3 |
| AX-158015542 | 6 | 84.027 | KV452793.1 | 734761 | 3-scf00148 | 3 |
| AX-158407866 | 6 | 84.027 | KV452793.1 | 736586 | 3-scf00148 | 3 |
| AX-158015543 | 6 | 84.027 | KV452793.1 | 737181 | 3-scf00148 | 3 |

|              |   |        |            |         |            |   |
|--------------|---|--------|------------|---------|------------|---|
| AX-158015547 | 6 | 84.027 | KV452793.1 | 743292  | 3-scf00148 | 3 |
| AX-158015548 | 6 | 84.027 | KV452793.1 | 746652  | 3-scf00148 | 3 |
| AX-158015549 | 6 | 84.027 | KV452793.1 | 747424  | 3-scf00148 | 3 |
| AX-158015550 | 6 | 84.027 | KV452793.1 | 748930  | 3-scf00148 | 3 |
| AX-158015552 | 6 | 84.027 | KV452793.1 | 750324  | 3-scf00148 | 3 |
| AX-158015554 | 6 | 84.027 | KV452793.1 | 751759  | 3-scf00148 | 3 |
| AX-158015555 | 6 | 84.027 | KV452793.1 | 753124  | 3-scf00148 | 3 |
| AX-157720082 | 6 | 84.027 | KV452793.1 | 754364  | 3-scf00148 | 3 |
| AX-158015556 | 6 | 84.027 | KV452793.1 | 754952  | 3-scf00148 | 3 |
| AX-158015557 | 6 | 84.027 | KV452793.1 | 756661  | 3-scf00148 | 3 |
| AX-157766326 | 6 | 84.027 | KV452793.1 | 761864  | 3-scf00148 | 3 |
| AX-158015560 | 6 | 84.027 | KV452793.1 | 762600  | 3-scf00148 | 3 |
| AX-158015561 | 6 | 84.027 | KV452793.1 | 762974  | 3-scf00148 | 3 |
| AX-158015563 | 6 | 84.027 | KV452793.1 | 765769  | 3-scf00148 | 3 |
| AX-158015564 | 6 | 84.027 | KV452793.1 | 767244  | 3-scf00148 | 3 |
| AX-158015647 | 6 | 84.027 | KV452793.1 | 867308  | 3-scf00148 | 3 |
| AX-157884865 | 6 | 84.027 | KV452793.1 | 888434  | 3-scf00148 | 3 |
| AX-157884866 | 6 | 84.027 | KV452793.1 | 1010205 | 3-scf00148 | 3 |
| AX-158015494 | 6 | 84.028 | KV452793.1 | 654152  | 3-scf00148 | 3 |
| AX-158015565 | 6 | 84.028 | KV452793.1 | 767778  | 3-scf00148 | 3 |
| AX-157743057 | 6 | 84.437 | KV452793.1 | 769039  | 3-scf00148 | 3 |
| AX-157724826 | 6 | 84.488 | KV452793.1 | 773075  | 3-scf00148 | 3 |
| AX-158015568 | 6 | 84.526 | KV452793.1 | 778720  | 3-scf00148 | 3 |
| AX-158015541 | 6 | 84.54  | KV452793.1 | 734177  | 3-scf00148 | 3 |
| AX-158015572 | 6 | 84.54  | KV452793.1 | 782492  | 3-scf00148 | 3 |
| AX-158015575 | 6 | 84.54  | KV452793.1 | 786719  | 3-scf00148 | 3 |
| AX-158015573 | 6 | 84.573 | KV452793.1 | 782851  | 3-scf00148 | 3 |
| AX-158015576 | 6 | 84.573 | KV452793.1 | 787590  | 3-scf00148 | 3 |
| AX-158015577 | 6 | 84.644 | KV452793.1 | 788790  | 3-scf00148 | 3 |
| AX-158015579 | 6 | 84.714 | KV452793.1 | 792002  | 3-scf00148 | 3 |
| AX-158015580 | 6 | 84.792 | KV452793.1 | 792685  | 3-scf00148 | 3 |
| AX-158015582 | 6 | 84.792 | KV452793.1 | 796167  | 3-scf00148 | 3 |
| AX-158015635 | 6 | 84.792 | KV452793.1 | 860663  | 3-scf00148 | 3 |
| AX-158015583 | 6 | 84.901 | KV452793.1 | 799683  | 3-scf00148 | 3 |
| AX-158015584 | 6 | 84.901 | KV452793.1 | 801666  | 3-scf00148 | 3 |
| AX-157709154 | 6 | 84.902 | KV452793.1 | 802021  | 3-scf00148 | 3 |
| AX-158015585 | 6 | 84.902 | KV452793.1 | 805068  | 3-scf00148 | 3 |
| AX-158015587 | 6 | 85.065 | KV452793.1 | 808775  | 3-scf00148 | 3 |
| AX-157856256 | 6 | 85.229 | KV452793.1 | 810649  | 3-scf00148 | 3 |
| AX-158015588 | 6 | 85.229 | KV452793.1 | 811517  | 3-scf00148 | 3 |
| AX-158015589 | 6 | 85.229 | KV452793.1 | 812176  | 3-scf00148 | 3 |
| AX-158015591 | 6 | 85.229 | KV452793.1 | 814275  | 3-scf00148 | 3 |
| AX-158015593 | 6 | 85.229 | KV452793.1 | 816642  | 3-scf00148 | 3 |
| AX-157720759 | 6 | 85.229 | KV452793.1 | 818843  | 3-scf00148 | 3 |
| AX-158015595 | 6 | 85.287 | KV452793.1 | 823422  | 3-scf00148 | 3 |
| AX-158015597 | 6 | 85.339 | KV452793.1 | 824954  | 3-scf00148 | 3 |
| AX-158015598 | 6 | 85.419 | KV452793.1 | 826555  | 3-scf00148 | 3 |
| AX-158015631 | 6 | 85.419 | KV452793.1 | 858749  | 3-scf00148 | 3 |
| AX-158015599 | 6 | 85.493 | KV452793.1 | 828242  | 3-scf00148 | 3 |
| AX-157719322 | 6 | 85.557 | KV452793.1 | 832344  | 3-scf00148 | 3 |
| AX-158015605 | 6 | 85.557 | KV452793.1 | 836501  | 3-scf00148 | 3 |

|              |   |        |            |        |            |   |
|--------------|---|--------|------------|--------|------------|---|
| AX-158015606 | 6 | 85.557 | KV452793.1 | 837653 | 3-scf00148 | 3 |
| AX-158015608 | 6 | 85.666 | KV452793.1 | 839439 | 3-scf00148 | 3 |
| AX-158015609 | 6 | 85.666 | KV452793.1 | 839884 | 3-scf00148 | 3 |
| AX-158015610 | 6 | 85.666 | KV452793.1 | 841163 | 3-scf00148 | 3 |
| AX-157715762 | 6 | 85.666 | KV452793.1 | 843448 | 3-scf00148 | 3 |
| AX-158015612 | 6 | 85.666 | KV452793.1 | 844597 | 3-scf00148 | 3 |
| AX-158015613 | 6 | 85.666 | KV452793.1 | 845409 | 3-scf00148 | 3 |
| AX-158015614 | 6 | 85.666 | KV452793.1 | 846958 | 3-scf00148 | 3 |
| AX-157755258 | 6 | 85.666 | KV452793.1 | 847373 | 3-scf00148 | 3 |
| AX-158015615 | 6 | 85.666 | KV452793.1 | 847750 | 3-scf00148 | 3 |
| AX-158015616 | 6 | 85.666 | KV452793.1 | 850121 | 3-scf00148 | 3 |
| AX-158015617 | 6 | 85.666 | KV452793.1 | 850792 | 3-scf00148 | 3 |
| AX-158015618 | 6 | 85.666 | KV452793.1 | 851403 | 3-scf00148 | 3 |
| AX-158015619 | 6 | 85.666 | KV452793.1 | 852731 | 3-scf00148 | 3 |
| AX-157820434 | 6 | 85.666 | KV452793.1 | 853368 | 3-scf00148 | 3 |
| AX-158015620 | 6 | 85.666 | KV452793.1 | 853405 | 3-scf00148 | 3 |
| AX-158015623 | 6 | 85.666 | KV452793.1 | 854425 | 3-scf00148 | 3 |
| AX-158015624 | 6 | 85.666 | KV452793.1 | 855288 | 3-scf00148 | 3 |
| AX-158015629 | 6 | 85.666 | KV452793.1 | 857737 | 3-scf00148 | 3 |
| AX-158015633 | 6 | 85.666 | KV452793.1 | 859127 | 3-scf00148 | 3 |
| AX-158015634 | 6 | 85.666 | KV452793.1 | 860348 | 3-scf00148 | 3 |
| AX-158015638 | 6 | 85.666 | KV452793.1 | 861939 | 3-scf00148 | 3 |
| AX-157758499 | 6 | 85.666 | KV452793.1 | 862219 | 3-scf00148 | 3 |
| AX-158015643 | 6 | 85.666 | KV452793.1 | 865720 | 3-scf00148 | 3 |
| AX-158015645 | 6 | 85.666 | KV452793.1 | 865938 | 3-scf00148 | 3 |
| AX-158379690 | 6 | 85.666 | KV452793.1 | 867710 | 3-scf00148 | 3 |
| AX-158015648 | 6 | 85.666 | KV452793.1 | 869676 | 3-scf00148 | 3 |
| AX-158015657 | 6 | 85.666 | KV452793.1 | 873905 | 3-scf00148 | 3 |
| AX-157720750 | 6 | 85.666 | KV452793.1 | 874450 | 3-scf00148 | 3 |
| AX-158015659 | 6 | 85.666 | KV452793.1 | 875442 | 3-scf00148 | 3 |
| AX-158015662 | 6 | 85.666 | KV452793.1 | 879124 | 3-scf00148 | 3 |
| AX-158015673 | 6 | 85.666 | KV452793.1 | 890104 | 3-scf00148 | 3 |
| AX-158015691 | 6 | 85.666 | KV452793.1 | 906352 | 3-scf00148 | 3 |
| AX-158015596 | 6 | 85.885 | KV452793.1 | 824044 | 3-scf00148 | 3 |
| AX-158015622 | 6 | 85.885 | KV452793.1 | 853845 | 3-scf00148 | 3 |
| AX-158015650 | 6 | 85.885 | KV452793.1 | 871252 | 3-scf00148 | 3 |
| AX-158015654 | 6 | 85.885 | KV452793.1 | 872190 | 3-scf00148 | 3 |
| AX-158015660 | 6 | 85.885 | KV452793.1 | 876466 | 3-scf00148 | 3 |
| AX-157771497 | 6 | 85.885 | KV452793.1 | 876709 | 3-scf00148 | 3 |
| AX-158015661 | 6 | 85.885 | KV452793.1 | 876871 | 3-scf00148 | 3 |
| AX-158015664 | 6 | 85.885 | KV452793.1 | 881321 | 3-scf00148 | 3 |
| AX-157884864 | 6 | 85.885 | KV452793.1 | 883221 | 3-scf00148 | 3 |
| AX-158015665 | 6 | 85.885 | KV452793.1 | 883995 | 3-scf00148 | 3 |
| AX-158015667 | 6 | 85.885 | KV452793.1 | 886849 | 3-scf00148 | 3 |
| AX-158015671 | 6 | 85.885 | KV452793.1 | 888729 | 3-scf00148 | 3 |
| AX-158015672 | 6 | 85.885 | KV452793.1 | 889476 | 3-scf00148 | 3 |
| AX-157722921 | 6 | 85.885 | KV452793.1 | 890870 | 3-scf00148 | 3 |
| AX-158015675 | 6 | 85.885 | KV452793.1 | 891157 | 3-scf00148 | 3 |
| AX-158015677 | 6 | 85.885 | KV452793.1 | 892815 | 3-scf00148 | 3 |
| AX-158015678 | 6 | 85.885 | KV452793.1 | 893221 | 3-scf00148 | 3 |
| AX-158015679 | 6 | 85.885 | KV452793.1 | 893370 | 3-scf00148 | 3 |

|              |   |        |            |        |            |   |
|--------------|---|--------|------------|--------|------------|---|
| AX-158015680 | 6 | 85.885 | KV452793.1 | 894116 | 3-scf00148 | 3 |
| AX-157856258 | 6 | 85.885 | KV452793.1 | 914002 | 3-scf00148 | 3 |
| AX-158015699 | 6 | 85.885 | KV452793.1 | 917503 | 3-scf00148 | 3 |
| AX-158015701 | 6 | 85.885 | KV452793.1 | 920013 | 3-scf00148 | 3 |
| AX-158015681 | 6 | 85.938 | KV452793.1 | 900504 | 3-scf00148 | 3 |
| AX-158015685 | 6 | 86.212 | KV452793.1 | 902130 | 3-scf00148 | 3 |
| AX-158015690 | 6 | 86.212 | KV452793.1 | 905895 | 3-scf00148 | 3 |
| AX-157714606 | 6 | 86.212 | KV452793.1 | 907262 | 3-scf00148 | 3 |
| AX-157743205 | 6 | 86.212 | KV452793.1 | 908768 | 3-scf00148 | 3 |
| AX-158015693 | 6 | 86.212 | KV452793.1 | 911547 | 3-scf00148 | 3 |
| AX-158015694 | 6 | 86.213 | KV452793.1 | 911876 | 3-scf00148 | 3 |
| AX-158015696 | 6 | 86.213 | KV452793.1 | 914910 | 3-scf00148 | 3 |
| AX-158015755 | 6 | 86.213 | KV452793.1 | 988749 | 3-scf00148 | 3 |
| AX-158015758 | 6 | 86.213 | KV452793.1 | 992980 | 3-scf00148 | 3 |
| AX-158015702 | 6 | 86.54  | KV452793.1 | 920994 | 3-scf00148 | 3 |
| AX-158015703 | 6 | 86.54  | KV452793.1 | 925019 | 3-scf00148 | 3 |
| AX-158015706 | 6 | 86.54  | KV452793.1 | 926899 | 3-scf00148 | 3 |
| AX-158015707 | 6 | 86.54  | KV452793.1 | 927349 | 3-scf00148 | 3 |
| AX-158015723 | 6 | 86.54  | KV452793.1 | 946141 | 3-scf00148 | 3 |
| AX-158015708 | 6 | 86.557 | KV452793.1 | 927492 | 3-scf00148 | 3 |
| AX-158015705 | 6 | 86.583 | KV452793.1 | 926478 | 3-scf00148 | 3 |
| AX-157724372 | 6 | 86.583 | KV452793.1 | 929892 | 3-scf00148 | 3 |
| AX-157755877 | 6 | 86.612 | KV452793.1 | 930992 | 3-scf00148 | 3 |
| AX-158015711 | 6 | 86.612 | KV452793.1 | 934701 | 3-scf00148 | 3 |
| AX-158015748 | 6 | 86.612 | KV452793.1 | 981237 | 3-scf00148 | 3 |
| AX-158015712 | 6 | 86.631 | KV452793.1 | 935691 | 3-scf00148 | 3 |
| AX-157771286 | 6 | 86.649 | KV452793.1 | 938868 | 3-scf00148 | 3 |
| AX-158015714 | 6 | 86.649 | KV452793.1 | 939054 | 3-scf00148 | 3 |
| AX-158015718 | 6 | 86.649 | KV452793.1 | 943827 | 3-scf00148 | 3 |
| AX-158015720 | 6 | 86.649 | KV452793.1 | 945075 | 3-scf00148 | 3 |
| AX-158015721 | 6 | 86.649 | KV452793.1 | 945375 | 3-scf00148 | 3 |
| AX-158015722 | 6 | 86.649 | KV452793.1 | 945798 | 3-scf00148 | 3 |
| AX-158015716 | 6 | 86.758 | KV452793.1 | 942725 | 3-scf00148 | 3 |
| AX-158015724 | 6 | 86.758 | KV452793.1 | 949807 | 3-scf00148 | 3 |
| AX-158015725 | 6 | 86.758 | KV452793.1 | 950533 | 3-scf00148 | 3 |
| AX-157820436 | 6 | 86.758 | KV452793.1 | 952279 | 3-scf00148 | 3 |
| AX-157820437 | 6 | 86.758 | KV452793.1 | 953269 | 3-scf00148 | 3 |
| AX-158015727 | 6 | 86.758 | KV452793.1 | 953814 | 3-scf00148 | 3 |
| AX-158015730 | 6 | 86.758 | KV452793.1 | 956588 | 3-scf00148 | 3 |
| AX-158015732 | 6 | 86.758 | KV452793.1 | 958208 | 3-scf00148 | 3 |
| AX-158015733 | 6 | 86.758 | KV452793.1 | 960006 | 3-scf00148 | 3 |
| AX-158015734 | 6 | 86.758 | KV452793.1 | 961337 | 3-scf00148 | 3 |
| AX-158015737 | 6 | 86.758 | KV452793.1 | 963985 | 3-scf00148 | 3 |
| AX-158015739 | 6 | 86.758 | KV452793.1 | 966552 | 3-scf00148 | 3 |
| AX-158015747 | 6 | 86.758 | KV452793.1 | 980247 | 3-scf00148 | 3 |
| AX-157876287 | 6 | 86.798 | KV452793.1 | 966933 | 3-scf00148 | 3 |
| AX-158015742 | 6 | 86.89  | KV452793.1 | 972553 | 3-scf00148 | 3 |
| AX-158015745 | 6 | 86.977 | KV452793.1 | 976872 | 3-scf00148 | 3 |
| AX-158015746 | 6 | 86.977 | KV452793.1 | 978142 | 3-scf00148 | 3 |
| AX-158015750 | 6 | 87.086 | KV452793.1 | 982895 | 3-scf00148 | 3 |
| AX-158015751 | 6 | 87.151 | KV452793.1 | 984208 | 3-scf00148 | 3 |

|              |   |        |             |         |            |    |
|--------------|---|--------|-------------|---------|------------|----|
| AX-158015752 | 6 | 87.195 | KV452793.1  | 985778  | 3-scf00148 | 3  |
| AX-158015753 | 6 | 87.195 | KV452793.1  | 986250  | 3-scf00148 | 3  |
| AX-158015754 | 6 | 87.195 | KV452793.1  | 988119  | 3-scf00148 | 3  |
| AX-158015757 | 6 | 87.195 | KV452793.1  | 990014  | 3-scf00148 | 3  |
| AX-157722353 | 6 | 87.3   | KV452793.1  | 991435  | 3-scf00148 | 3  |
| AX-157707953 | 6 | 87.3   | KV452793.1  | 1004349 | 3-scf00148 | 3  |
| AX-158015760 | 6 | 87.414 | KV452793.1  | 995611  | 3-scf00148 | 3  |
| AX-158015761 | 6 | 87.414 | KV452793.1  | 996077  | 3-scf00148 | 3  |
| AX-158015762 | 6 | 87.414 | KV452793.1  | 999300  | 3-scf00148 | 3  |
| AX-158015763 | 6 | 87.414 | KV452793.1  | 1001008 | 3-scf00148 | 3  |
| AX-158015771 | 6 | 87.414 | KV452793.1  | 1009123 | 3-scf00148 | 3  |
| AX-158015764 | 6 | 87.444 | KV452793.1  | 1002075 | 3-scf00148 | 3  |
| AX-158015784 | 6 | 87.444 | KV452793.1  | 1022833 | 3-scf00148 | 3  |
| AX-158015765 | 6 | 87.464 | KV452793.1  | 1002711 | 3-scf00148 | 3  |
| AX-158015766 | 6 | 87.464 | KV452793.1  | 1004568 | 3-scf00148 | 3  |
| AX-158015779 | 6 | 87.464 | KV452793.1  | 1018135 | 3-scf00148 | 3  |
| AX-158405959 | 6 | 87.464 | KV452793.1  | 1030065 | 3-scf00148 | 3  |
| AX-158015768 | 6 | 87.498 | KV452793.1  | 1005483 | 3-scf00148 | 3  |
| AX-158015756 | 6 | 87.523 | KV452793.1  | 989880  | 3-scf00148 | 3  |
| AX-158015769 | 6 | 87.523 | KV452793.1  | 1006359 | 3-scf00148 | 3  |
| AX-157770779 | 6 | 87.523 | KV452793.1  | 1009666 | 3-scf00148 | 3  |
| AX-157756625 | 6 | 87.523 | KV452793.1  | 1011018 | 3-scf00148 | 3  |
| AX-158015774 | 6 | 87.523 | KV452793.1  | 1014427 | 3-scf00148 | 3  |
| AX-157876290 | 6 | 87.523 | KV452793.1  | 1015668 | 3-scf00148 | 3  |
| AX-158015777 | 6 | 87.523 | KV452793.1  | 1016582 | 3-scf00148 | 3  |
| AX-158015778 | 6 | 87.523 | KV452793.1  | 1017642 | 3-scf00148 | 3  |
| AX-158015780 | 6 | 87.523 | KV452793.1  | 1019009 | 3-scf00148 | 3  |
| AX-158015782 | 6 | 87.523 | KV452793.1  | 1021512 | 3-scf00148 | 3  |
| AX-158015785 | 6 | 87.523 | KV452793.1  | 1024775 | 3-scf00148 | 3  |
| AX-158015788 | 6 | 87.523 | KV452793.1  | 1027782 | 3-scf00148 | 3  |
| AX-158015792 | 6 | 87.523 | KV452793.1  | 1031503 | 3-scf00148 | 3  |
| AX-157705597 | 6 | 87.523 | 3ML01030344 | 732     | scf05940_1 | UN |
| AX-157705598 | 6 | 87.523 | 3ML01030344 | 776     | scf05940_1 | UN |
| AX-158015789 | 6 | 87.687 | KV452793.1  | 1028772 | 3-scf00148 | 3  |
| AX-158015793 | 6 | 87.687 | KV452793.1  | 1032101 | 3-scf00148 | 3  |
| AX-158015794 | 6 | 87.687 | KV452793.1  | 1032752 | 3-scf00148 | 3  |
| AX-158015795 | 6 | 87.851 | KV452793.1  | 1033775 | 3-scf00148 | 3  |
| AX-158015798 | 6 | 87.851 | KV452793.1  | 1037096 | 3-scf00148 | 3  |
| AX-157752170 | 6 | 87.851 | KV452793.1  | 1038422 | 3-scf00148 | 3  |
| AX-158015799 | 6 | 87.851 | KV452793.1  | 1039963 | 3-scf00148 | 3  |
| AX-158015804 | 6 | 87.851 | KV452793.1  | 1042898 | 3-scf00148 | 3  |
| AX-157741177 | 6 | 87.851 | KV452793.1  | 1045939 | 3-scf00148 | 3  |
| AX-158015805 | 6 | 87.852 | KV452793.1  | 1047532 | 3-scf00148 | 3  |
| AX-157725377 | 6 | 88.178 | KV452793.1  | 1052470 | 3-scf00148 | 3  |
| AX-158015808 | 6 | 88.179 | KV452793.1  | 1052596 | 3-scf00148 | 3  |
| AX-158015810 | 6 | 88.179 | KV452793.1  | 1053410 | 3-scf00148 | 3  |
| AX-158015812 | 6 | 88.179 | KV452793.1  | 1054189 | 3-scf00148 | 3  |
| AX-158015813 | 6 | 88.179 | KV452793.1  | 1056441 | 3-scf00148 | 3  |
| AX-158015817 | 6 | 88.179 | KV452793.1  | 1060271 | 3-scf00148 | 3  |
| AX-158015818 | 6 | 88.179 | KV452793.1  | 1060829 | 3-scf00148 | 3  |
| AX-158015819 | 6 | 88.397 | KV452793.1  | 1061297 | 3-scf00148 | 3  |



|              |   |        |            |         |            |   |
|--------------|---|--------|------------|---------|------------|---|
| AX-158416000 | 6 | 88.397 | KV452793.1 | 1062005 | 3-scf00148 | 3 |
| AX-158015822 | 6 | 88.397 | KV452793.1 | 1066239 | 3-scf00148 | 3 |
| AX-157820439 | 6 | 88.397 | KV452793.1 | 1071078 | 3-scf00148 | 3 |
| AX-158015827 | 6 | 88.448 | KV452793.1 | 1071198 | 3-scf00148 | 3 |
| AX-158015826 | 6 | 88.506 | KV452793.1 | 1070620 | 3-scf00148 | 3 |
| AX-157750651 | 6 | 88.506 | KV452793.1 | 1072995 | 3-scf00148 | 3 |
| AX-158015831 | 6 | 88.506 | KV452793.1 | 1075196 | 3-scf00148 | 3 |
| AX-158015832 | 6 | 88.506 | KV452793.1 | 1077056 | 3-scf00148 | 3 |
| AX-158015833 | 6 | 88.506 | KV452793.1 | 1077784 | 3-scf00148 | 3 |
| AX-158015834 | 6 | 88.506 | KV452793.1 | 1078315 | 3-scf00148 | 3 |
| AX-158015835 | 6 | 88.506 | KV452793.1 | 1078710 | 3-scf00148 | 3 |
| AX-157722319 | 6 | 88.616 | KV452793.1 | 1048110 | 3-scf00148 | 3 |
| AX-158015809 | 6 | 88.616 | KV452793.1 | 1052960 | 3-scf00148 | 3 |
| AX-158015823 | 6 | 88.616 | KV452793.1 | 1066790 | 3-scf00148 | 3 |
| AX-158015838 | 6 | 88.616 | KV452793.1 | 1086831 | 3-scf00148 | 3 |
| AX-158015839 | 6 | 88.616 | KV452793.1 | 1087547 | 3-scf00148 | 3 |
| AX-158015840 | 6 | 88.616 | KV452793.1 | 1088391 | 3-scf00148 | 3 |
| AX-158015841 | 6 | 88.616 | KV452793.1 | 1090171 | 3-scf00148 | 3 |
| AX-158015842 | 6 | 88.616 | KV452793.1 | 1091534 | 3-scf00148 | 3 |
| AX-158015843 | 6 | 88.616 | KV452793.1 | 1093044 | 3-scf00148 | 3 |
| AX-157758490 | 6 | 88.616 | KV452793.1 | 1094278 | 3-scf00148 | 3 |
| AX-158383655 | 6 | 88.725 | KV452793.1 | 1099260 | 3-scf00148 | 3 |
| AX-158015847 | 6 | 88.725 | KV452793.1 | 1100585 | 3-scf00148 | 3 |
| AX-158015850 | 6 | 88.725 | KV452793.1 | 1102721 | 3-scf00148 | 3 |
| AX-158015855 | 6 | 88.941 | KV452793.1 | 1105582 | 3-scf00148 | 3 |
| AX-157739151 | 6 | 88.943 | KV452793.1 | 1107507 | 3-scf00148 | 3 |
| AX-158379691 | 6 | 88.944 | KV452793.1 | 1088268 | 3-scf00148 | 3 |
| AX-157723735 | 6 | 88.944 | KV452793.1 | 1109716 | 3-scf00148 | 3 |
| AX-158015856 | 6 | 88.944 | KV452793.1 | 1111174 | 3-scf00148 | 3 |
| AX-157742284 | 6 | 88.944 | KV452793.1 | 1112374 | 3-scf00148 | 3 |
| AX-158015857 | 6 | 89.193 | KV452793.1 | 1113276 | 3-scf00148 | 3 |
| AX-158015861 | 6 | 89.377 | KV452793.1 | 1118422 | 3-scf00148 | 3 |
| AX-158015866 | 6 | 89.38  | KV452793.1 | 1121441 | 3-scf00148 | 3 |
| AX-158015869 | 6 | 89.38  | KV452793.1 | 1124680 | 3-scf00148 | 3 |
| AX-158015870 | 6 | 89.38  | KV452793.1 | 1125521 | 3-scf00148 | 3 |
| AX-158015873 | 6 | 89.38  | KV452793.1 | 1127337 | 3-scf00148 | 3 |
| AX-158015874 | 6 | 89.38  | KV452793.1 | 1129578 | 3-scf00148 | 3 |
| AX-158015877 | 6 | 89.38  | KV452793.1 | 1132257 | 3-scf00148 | 3 |
| AX-157719633 | 6 | 89.38  | KV452793.1 | 1164971 | 3-scf00148 | 3 |
| AX-157820440 | 6 | 89.417 | KV452793.1 | 1130804 | 3-scf00148 | 3 |
| AX-158015875 | 6 | 89.417 | KV452793.1 | 1130867 | 3-scf00148 | 3 |
| AX-158015882 | 6 | 89.417 | KV452793.1 | 1136344 | 3-scf00148 | 3 |
| AX-158015898 | 6 | 89.417 | KV452793.1 | 1157155 | 3-scf00148 | 3 |
| AX-158015881 | 6 | 89.468 | KV452793.1 | 1134909 | 3-scf00148 | 3 |
| AX-158016000 | 6 | 89.468 | KV452793.1 | 1264514 | 3-scf00148 | 3 |
| AX-158015885 | 6 | 89.538 | KV452793.1 | 1141681 | 3-scf00148 | 3 |
| AX-158015864 | 6 | 89.599 | KV452793.1 | 1120228 | 3-scf00148 | 3 |
| AX-158015865 | 6 | 89.599 | KV452793.1 | 1120533 | 3-scf00148 | 3 |
| AX-158015878 | 6 | 89.599 | KV452793.1 | 1132711 | 3-scf00148 | 3 |
| AX-157722670 | 6 | 89.599 | KV452793.1 | 1144874 | 3-scf00148 | 3 |
| AX-158015888 | 6 | 89.599 | KV452793.1 | 1147325 | 3-scf00148 | 3 |

|              |   |        |            |         |            |   |
|--------------|---|--------|------------|---------|------------|---|
| AX-158407874 | 6 | 89.599 | KV452793.1 | 1149083 | 3-scf00148 | 3 |
| AX-158015890 | 6 | 89.599 | KV452793.1 | 1150100 | 3-scf00148 | 3 |
| AX-158015892 | 6 | 89.599 | KV452793.1 | 1151796 | 3-scf00148 | 3 |
| AX-158383659 | 6 | 89.599 | KV452793.1 | 1152006 | 3-scf00148 | 3 |
| AX-158015894 | 6 | 89.599 | KV452793.1 | 1153037 | 3-scf00148 | 3 |
| AX-158015895 | 6 | 89.599 | KV452793.1 | 1153682 | 3-scf00148 | 3 |
| AX-158015899 | 6 | 89.599 | KV452793.1 | 1157871 | 3-scf00148 | 3 |
| AX-157758417 | 6 | 89.599 | KV452793.1 | 1159526 | 3-scf00148 | 3 |
| AX-158015900 | 6 | 89.599 | KV452793.1 | 1159979 | 3-scf00148 | 3 |
| AX-158015904 | 6 | 89.599 | KV452793.1 | 1164185 | 3-scf00148 | 3 |
| AX-158015907 | 6 | 89.599 | KV452793.1 | 1166094 | 3-scf00148 | 3 |
| AX-158015912 | 6 | 89.599 | KV452793.1 | 1167934 | 3-scf00148 | 3 |
| AX-158015913 | 6 | 89.599 | KV452793.1 | 1168858 | 3-scf00148 | 3 |
| AX-158015914 | 6 | 89.599 | KV452793.1 | 1170145 | 3-scf00148 | 3 |
| AX-158015917 | 6 | 89.599 | KV452793.1 | 1172019 | 3-scf00148 | 3 |
| AX-158015920 | 6 | 89.599 | KV452793.1 | 1175515 | 3-scf00148 | 3 |
| AX-157771355 | 6 | 89.599 | KV452793.1 | 1175860 | 3-scf00148 | 3 |
| AX-158015921 | 6 | 89.599 | KV452793.1 | 1177175 | 3-scf00148 | 3 |
| AX-158015925 | 6 | 89.599 | KV452793.1 | 1179597 | 3-scf00148 | 3 |
| AX-158015936 | 6 | 89.599 | KV452793.1 | 1192860 | 3-scf00148 | 3 |
| AX-158015939 | 6 | 89.599 | KV452793.1 | 1193999 | 3-scf00148 | 3 |
| AX-158015944 | 6 | 89.599 | KV452793.1 | 1195705 | 3-scf00148 | 3 |
| AX-158015974 | 6 | 89.599 | KV452793.1 | 1232802 | 3-scf00148 | 3 |
| AX-158015985 | 6 | 89.599 | KV452793.1 | 1242526 | 3-scf00148 | 3 |
| AX-158016004 | 6 | 89.599 | KV452793.1 | 1273103 | 3-scf00148 | 3 |
| AX-157820452 | 6 | 89.599 | KV452793.1 | 1323394 | 3-scf00148 | 3 |
| AX-158016080 | 6 | 89.599 | KV452793.1 | 1358958 | 3-scf00148 | 3 |
| AX-158016135 | 6 | 89.599 | KV452793.1 | 1425173 | 3-scf00148 | 3 |
| AX-158015924 | 6 | 89.817 | KV452793.1 | 1178621 | 3-scf00148 | 3 |
| AX-157757556 | 6 | 89.817 | KV452793.1 | 1178992 | 3-scf00148 | 3 |
| AX-158015927 | 6 | 89.817 | KV452793.1 | 1181953 | 3-scf00148 | 3 |
| AX-158015928 | 6 | 89.817 | KV452793.1 | 1183037 | 3-scf00148 | 3 |
| AX-158015929 | 6 | 89.817 | KV452793.1 | 1183885 | 3-scf00148 | 3 |
| AX-158015930 | 6 | 89.817 | KV452793.1 | 1185364 | 3-scf00148 | 3 |
| AX-158015933 | 6 | 89.817 | KV452793.1 | 1190148 | 3-scf00148 | 3 |
| AX-158015935 | 6 | 89.817 | KV452793.1 | 1192397 | 3-scf00148 | 3 |
| AX-158015941 | 6 | 89.817 | KV452793.1 | 1194642 | 3-scf00148 | 3 |
| AX-158015947 | 6 | 89.817 | KV452793.1 | 1197863 | 3-scf00148 | 3 |
| AX-158015948 | 6 | 89.817 | KV452793.1 | 1198980 | 3-scf00148 | 3 |
| AX-158015953 | 6 | 89.817 | KV452793.1 | 1206211 | 3-scf00148 | 3 |
| AX-158015956 | 6 | 89.817 | KV452793.1 | 1207855 | 3-scf00148 | 3 |
| AX-157744692 | 6 | 89.817 | KV452793.1 | 1239911 | 3-scf00148 | 3 |
| AX-157758978 | 6 | 89.868 | KV452793.1 | 1184271 | 3-scf00148 | 3 |
| AX-158379692 | 6 | 89.868 | KV452793.1 | 1208634 | 3-scf00148 | 3 |
| AX-158015966 | 6 | 89.926 | KV452793.1 | 1225893 | 3-scf00148 | 3 |
| AX-158015967 | 6 | 89.926 | KV452793.1 | 1228644 | 3-scf00148 | 3 |
| AX-158015970 | 6 | 89.926 | KV452793.1 | 1230544 | 3-scf00148 | 3 |
| AX-158015972 | 6 | 89.926 | KV452793.1 | 1231695 | 3-scf00148 | 3 |
| AX-158015978 | 6 | 89.926 | KV452793.1 | 1235708 | 3-scf00148 | 3 |
| AX-158015981 | 6 | 89.926 | KV452793.1 | 1237452 | 3-scf00148 | 3 |
| AX-158015984 | 6 | 89.926 | KV452793.1 | 1241310 | 3-scf00148 | 3 |

|              |   |        |            |         |            |   |
|--------------|---|--------|------------|---------|------------|---|
| AX-158015989 | 6 | 90.036 | KV452793.1 | 1249939 | 3-scf00148 | 3 |
| AX-158015990 | 6 | 90.036 | KV452793.1 | 1250864 | 3-scf00148 | 3 |
| AX-158015937 | 6 | 90.076 | KV452793.1 | 1193470 | 3-scf00148 | 3 |
| AX-158015942 | 6 | 90.076 | KV452793.1 | 1195096 | 3-scf00148 | 3 |
| AX-158015945 | 6 | 90.076 | KV452793.1 | 1197415 | 3-scf00148 | 3 |
| AX-157740914 | 6 | 90.076 | KV452793.1 | 1254060 | 3-scf00148 | 3 |
| AX-158015998 | 6 | 90.076 | KV452793.1 | 1262745 | 3-scf00148 | 3 |
| AX-158016025 | 6 | 90.076 | KV452793.1 | 1307236 | 3-scf00148 | 3 |
| AX-158016065 | 6 | 90.076 | KV452793.1 | 1350745 | 3-scf00148 | 3 |
| AX-158016085 | 6 | 90.076 | KV452793.1 | 1368580 | 3-scf00148 | 3 |
| AX-158016086 | 6 | 90.076 | KV452793.1 | 1368708 | 3-scf00148 | 3 |
| AX-158015993 | 6 | 90.119 | KV452793.1 | 1257272 | 3-scf00148 | 3 |
| AX-158015871 | 6 | 90.145 | KV452793.1 | 1126410 | 3-scf00148 | 3 |
| AX-158015926 | 6 | 90.145 | KV452793.1 | 1180749 | 3-scf00148 | 3 |
| AX-158015932 | 6 | 90.145 | KV452793.1 | 1189305 | 3-scf00148 | 3 |
| AX-158015952 | 6 | 90.145 | KV452793.1 | 1203310 | 3-scf00148 | 3 |
| AX-158015976 | 6 | 90.145 | KV452793.1 | 1234156 | 3-scf00148 | 3 |
| AX-158015987 | 6 | 90.145 | KV452793.1 | 1247711 | 3-scf00148 | 3 |
| AX-158015994 | 6 | 90.145 | KV452793.1 | 1260210 | 3-scf00148 | 3 |
| AX-158015995 | 6 | 90.145 | KV452793.1 | 1260566 | 3-scf00148 | 3 |
| AX-158016002 | 6 | 90.145 | KV452793.1 | 1268694 | 3-scf00148 | 3 |
| AX-157715164 | 6 | 90.145 | KV452793.1 | 1271685 | 3-scf00148 | 3 |
| AX-157721048 | 6 | 90.145 | KV452793.1 | 1274445 | 3-scf00148 | 3 |
| AX-157747659 | 6 | 90.145 | KV452793.1 | 1276769 | 3-scf00148 | 3 |
| AX-157820442 | 6 | 90.145 | KV452793.1 | 1278861 | 3-scf00148 | 3 |
| AX-157746049 | 6 | 90.145 | KV452793.1 | 1280616 | 3-scf00148 | 3 |
| AX-158016010 | 6 | 90.145 | KV452793.1 | 1286532 | 3-scf00148 | 3 |
| AX-158016011 | 6 | 90.145 | KV452793.1 | 1288735 | 3-scf00148 | 3 |
| AX-158016012 | 6 | 90.145 | KV452793.1 | 1288942 | 3-scf00148 | 3 |
| AX-157746907 | 6 | 90.145 | KV452793.1 | 1296608 | 3-scf00148 | 3 |
| AX-158016130 | 6 | 90.145 | KV452793.1 | 1416471 | 3-scf00148 | 3 |
| AX-157747316 | 6 | 90.254 | KV452793.1 | 1300250 | 3-scf00148 | 3 |
| AX-158016015 | 6 | 90.254 | KV452793.1 | 1301017 | 3-scf00148 | 3 |
| AX-158016016 | 6 | 90.254 | KV452793.1 | 1301455 | 3-scf00148 | 3 |
| AX-158016017 | 6 | 90.254 | KV452793.1 | 1301995 | 3-scf00148 | 3 |
| AX-158016018 | 6 | 90.254 | KV452793.1 | 1302199 | 3-scf00148 | 3 |
| AX-158016021 | 6 | 90.254 | KV452793.1 | 1303853 | 3-scf00148 | 3 |
| AX-158016006 | 6 | 90.28  | KV452793.1 | 1282538 | 3-scf00148 | 3 |
| AX-158016027 | 6 | 90.28  | KV452793.1 | 1308288 | 3-scf00148 | 3 |
| AX-158016029 | 6 | 90.307 | KV452793.1 | 1309520 | 3-scf00148 | 3 |
| AX-158016038 | 6 | 90.32  | KV452793.1 | 1316061 | 3-scf00148 | 3 |
| AX-157820450 | 6 | 90.32  | KV452793.1 | 1321939 | 3-scf00148 | 3 |
| AX-157820455 | 6 | 90.32  | KV452793.1 | 1371959 | 3-scf00148 | 3 |
| AX-157820451 | 6 | 90.342 | KV452793.1 | 1322192 | 3-scf00148 | 3 |
| AX-158015853 | 6 | 90.363 | KV452793.1 | 1104297 | 3-scf00148 | 3 |
| AX-158015931 | 6 | 90.363 | KV452793.1 | 1187972 | 3-scf00148 | 3 |
| AX-158015979 | 6 | 90.363 | KV452793.1 | 1236342 | 3-scf00148 | 3 |
| AX-158015997 | 6 | 90.363 | KV452793.1 | 1261703 | 3-scf00148 | 3 |
| AX-157856259 | 6 | 90.363 | KV452793.1 | 1287032 | 3-scf00148 | 3 |
| AX-157820447 | 6 | 90.363 | KV452793.1 | 1293091 | 3-scf00148 | 3 |
| AX-158016031 | 6 | 90.363 | KV452793.1 | 1312063 | 3-scf00148 | 3 |

|              |   |        |            |         |            |   |
|--------------|---|--------|------------|---------|------------|---|
| AX-157820449 | 6 | 90.363 | KV452793.1 | 1320356 | 3-scf00148 | 3 |
| AX-158016042 | 6 | 90.363 | KV452793.1 | 1322514 | 3-scf00148 | 3 |
| AX-158016046 | 6 | 90.363 | KV452793.1 | 1329654 | 3-scf00148 | 3 |
| AX-158016049 | 6 | 90.363 | KV452793.1 | 1333448 | 3-scf00148 | 3 |
| AX-157820453 | 6 | 90.363 | KV452793.1 | 1335208 | 3-scf00148 | 3 |
| AX-157739972 | 6 | 90.363 | KV452793.1 | 1335547 | 3-scf00148 | 3 |
| AX-158016052 | 6 | 90.423 | KV452793.1 | 1336814 | 3-scf00148 | 3 |
| AX-158016022 | 6 | 90.473 | KV452793.1 | 1305236 | 3-scf00148 | 3 |
| AX-158016056 | 6 | 90.473 | KV452793.1 | 1340822 | 3-scf00148 | 3 |
| AX-158016057 | 6 | 90.473 | KV452793.1 | 1341396 | 3-scf00148 | 3 |
| AX-158016058 | 6 | 90.473 | KV452793.1 | 1342709 | 3-scf00148 | 3 |
| AX-158016062 | 6 | 90.473 | KV452793.1 | 1348387 | 3-scf00148 | 3 |
| AX-158016064 | 6 | 90.473 | KV452793.1 | 1350168 | 3-scf00148 | 3 |
| AX-158016069 | 6 | 90.473 | KV452793.1 | 1353367 | 3-scf00148 | 3 |
| AX-158016072 | 6 | 90.473 | KV452793.1 | 1355213 | 3-scf00148 | 3 |
| AX-158016075 | 6 | 90.473 | KV452793.1 | 1356840 | 3-scf00148 | 3 |
| AX-158016076 | 6 | 90.473 | KV452793.1 | 1357452 | 3-scf00148 | 3 |
| AX-158016079 | 6 | 90.473 | KV452793.1 | 1358598 | 3-scf00148 | 3 |
| AX-158016082 | 6 | 90.473 | KV452793.1 | 1364865 | 3-scf00148 | 3 |
| AX-158016088 | 6 | 90.473 | KV452793.1 | 1369716 | 3-scf00148 | 3 |
| AX-158016095 | 6 | 90.473 | KV452793.1 | 1378504 | 3-scf00148 | 3 |
| AX-158016097 | 6 | 90.473 | KV452793.1 | 1378892 | 3-scf00148 | 3 |
| AX-158016098 | 6 | 90.473 | KV452793.1 | 1381624 | 3-scf00148 | 3 |
| AX-157773965 | 6 | 90.473 | KV452793.1 | 1382502 | 3-scf00148 | 3 |
| AX-158016102 | 6 | 90.473 | KV452793.1 | 1385326 | 3-scf00148 | 3 |
| AX-158016103 | 6 | 90.473 | KV452793.1 | 1386049 | 3-scf00148 | 3 |
| AX-158016119 | 6 | 90.473 | KV452793.1 | 1406064 | 3-scf00148 | 3 |
| AX-158016124 | 6 | 90.473 | KV452793.1 | 1408150 | 3-scf00148 | 3 |
| AX-158016149 | 6 | 90.473 | KV452793.1 | 1438547 | 3-scf00148 | 3 |
| AX-157884871 | 6 | 90.473 | KV452793.1 | 1438798 | 3-scf00148 | 3 |
| AX-158016157 | 6 | 90.473 | KV452793.1 | 1444666 | 3-scf00148 | 3 |
| AX-158016158 | 6 | 90.473 | KV452793.1 | 1445210 | 3-scf00148 | 3 |
| AX-158016167 | 6 | 90.473 | KV452793.1 | 1455402 | 3-scf00148 | 3 |
| AX-158016169 | 6 | 90.473 | KV452793.1 | 1459584 | 3-scf00148 | 3 |
| AX-158016183 | 6 | 90.473 | KV452793.1 | 1473838 | 3-scf00148 | 3 |
| AX-158016192 | 6 | 90.473 | KV452793.1 | 1484793 | 3-scf00148 | 3 |
| AX-157820467 | 6 | 90.473 | KV452793.1 | 1516051 | 3-scf00148 | 3 |
| AX-158016212 | 6 | 90.473 | KV452793.1 | 1520465 | 3-scf00148 | 3 |
| AX-158016221 | 6 | 90.473 | KV452793.1 | 1532620 | 3-scf00148 | 3 |
| AX-157865293 | 6 | 90.473 | KV452793.1 | 1541268 | 3-scf00148 | 3 |
| AX-158016231 | 6 | 90.473 | KV452793.1 | 1543999 | 3-scf00148 | 3 |
| AX-158016240 | 6 | 90.473 | KV452793.1 | 1559664 | 3-scf00148 | 3 |
| AX-158016253 | 6 | 90.473 | KV452793.1 | 1574796 | 3-scf00148 | 3 |
| AX-158016063 | 6 | 90.691 | KV452793.1 | 1349813 | 3-scf00148 | 3 |
| AX-157751729 | 6 | 90.691 | KV452793.1 | 1390301 | 3-scf00148 | 3 |
| AX-158016108 | 6 | 90.691 | KV452793.1 | 1391264 | 3-scf00148 | 3 |
| AX-158016110 | 6 | 90.691 | KV452793.1 | 1392082 | 3-scf00148 | 3 |
| AX-157820460 | 6 | 90.691 | KV452793.1 | 1400286 | 3-scf00148 | 3 |
| AX-158016136 | 6 | 90.691 | KV452793.1 | 1425624 | 3-scf00148 | 3 |
| AX-158016116 | 6 | 90.713 | KV452793.1 | 1402175 | 3-scf00148 | 3 |
| AX-158016178 | 6 | 90.713 | KV452793.1 | 1466392 | 3-scf00148 | 3 |

|              |   |        |            |         |            |   |
|--------------|---|--------|------------|---------|------------|---|
| AX-157865291 | 6 | 90.713 | KV452793.1 | 1473518 | 3-scf00148 | 3 |
| AX-158016207 | 6 | 90.713 | KV452793.1 | 1505042 | 3-scf00148 | 3 |
| AX-157820465 | 6 | 90.713 | KV452793.1 | 1506631 | 3-scf00148 | 3 |
| AX-158016215 | 6 | 90.713 | KV452793.1 | 1523265 | 3-scf00148 | 3 |
| AX-158016121 | 6 | 90.761 | KV452793.1 | 1406531 | 3-scf00148 | 3 |
| AX-158016125 | 6 | 90.8   | KV452793.1 | 1408814 | 3-scf00148 | 3 |
| AX-157741816 | 6 | 90.909 | KV452793.1 | 1394575 | 3-scf00148 | 3 |
| AX-158016129 | 6 | 90.909 | KV452793.1 | 1415730 | 3-scf00148 | 3 |
| AX-158016131 | 6 | 90.909 | KV452793.1 | 1419125 | 3-scf00148 | 3 |
| AX-158016132 | 6 | 90.909 | KV452793.1 | 1419274 | 3-scf00148 | 3 |
| AX-157741313 | 6 | 90.909 | KV452793.1 | 1424577 | 3-scf00148 | 3 |
| AX-158016138 | 6 | 90.909 | KV452793.1 | 1428403 | 3-scf00148 | 3 |
| AX-158016139 | 6 | 90.909 | KV452793.1 | 1428535 | 3-scf00148 | 3 |
| AX-158016142 | 6 | 90.909 | KV452793.1 | 1431919 | 3-scf00148 | 3 |
| AX-158016153 | 6 | 90.909 | KV452793.1 | 1441949 | 3-scf00148 | 3 |
| AX-158016154 | 6 | 90.909 | KV452793.1 | 1442303 | 3-scf00148 | 3 |
| AX-158016159 | 6 | 90.909 | KV452793.1 | 1445821 | 3-scf00148 | 3 |
| AX-157693424 | 6 | 90.909 | KV452793.1 | 1449879 | 3-scf00148 | 3 |
| AX-158016164 | 6 | 90.909 | KV452793.1 | 1450662 | 3-scf00148 | 3 |
| AX-158016166 | 6 | 90.909 | KV452793.1 | 1451642 | 3-scf00148 | 3 |
| AX-158016175 | 6 | 90.909 | KV452793.1 | 1464327 | 3-scf00148 | 3 |
| AX-157725362 | 6 | 90.909 | KV452793.1 | 1469002 | 3-scf00148 | 3 |
| AX-157713448 | 6 | 90.909 | KV452793.1 | 1472569 | 3-scf00148 | 3 |
| AX-158016184 | 6 | 90.909 | KV452793.1 | 1474535 | 3-scf00148 | 3 |
| AX-157820462 | 6 | 90.909 | KV452793.1 | 1475461 | 3-scf00148 | 3 |
| AX-157865292 | 6 | 90.909 | KV452793.1 | 1475845 | 3-scf00148 | 3 |
| AX-158016186 | 6 | 90.909 | KV452793.1 | 1476074 | 3-scf00148 | 3 |
| AX-157820463 | 6 | 90.909 | KV452793.1 | 1478862 | 3-scf00148 | 3 |
| AX-158016187 | 6 | 90.909 | KV452793.1 | 1479518 | 3-scf00148 | 3 |
| AX-158016188 | 6 | 90.909 | KV452793.1 | 1481926 | 3-scf00148 | 3 |
| AX-158016189 | 6 | 90.909 | KV452793.1 | 1483663 | 3-scf00148 | 3 |
| AX-158016202 | 6 | 90.909 | KV452793.1 | 1494736 | 3-scf00148 | 3 |
| AX-158016203 | 6 | 90.909 | KV452793.1 | 1495111 | 3-scf00148 | 3 |
| AX-157738655 | 6 | 90.909 | KV452793.1 | 1497504 | 3-scf00148 | 3 |
| AX-157747607 | 6 | 90.909 | KV452793.1 | 1510670 | 3-scf00148 | 3 |
| AX-158016206 | 6 | 91.036 | KV452793.1 | 1500181 | 3-scf00148 | 3 |
| AX-158016143 | 6 | 91.128 | KV452793.1 | 1432660 | 3-scf00148 | 3 |
| AX-157720253 | 6 | 91.128 | KV452793.1 | 1515812 | 3-scf00148 | 3 |
| AX-158016210 | 6 | 91.128 | KV452793.1 | 1517243 | 3-scf00148 | 3 |
| AX-157746601 | 6 | 91.128 | KV452793.1 | 1517849 | 3-scf00148 | 3 |
| AX-158016211 | 6 | 91.128 | KV452793.1 | 1518477 | 3-scf00148 | 3 |
| AX-158016213 | 6 | 91.128 | KV452793.1 | 1521067 | 3-scf00148 | 3 |
| AX-158016214 | 6 | 91.128 | KV452793.1 | 1522681 | 3-scf00148 | 3 |
| AX-158016216 | 6 | 91.128 | KV452793.1 | 1525431 | 3-scf00148 | 3 |
| AX-158016217 | 6 | 91.128 | KV452793.1 | 1526637 | 3-scf00148 | 3 |
| AX-158016218 | 6 | 91.128 | KV452793.1 | 1527702 | 3-scf00148 | 3 |
| AX-157719789 | 6 | 91.128 | KV452793.1 | 1528445 | 3-scf00148 | 3 |
| AX-158016224 | 6 | 91.128 | KV452793.1 | 1536445 | 3-scf00148 | 3 |
| AX-158016237 | 6 | 91.128 | KV452793.1 | 1554194 | 3-scf00148 | 3 |
| AX-158016219 | 6 | 91.28  | KV452793.1 | 1527968 | 3-scf00148 | 3 |
| AX-158016209 | 6 | 91.44  | KV452793.1 | 1514674 | 3-scf00148 | 3 |

|              |   |        |             |         |            |    |
|--------------|---|--------|-------------|---------|------------|----|
| AX-157710512 | 6 | 91.44  | KV452793.1  | 1523662 | 3-scf00148 | 3  |
| AX-158016228 | 6 | 91.44  | KV452793.1  | 1540114 | 3-scf00148 | 3  |
| AX-158016233 | 6 | 91.44  | KV452793.1  | 1546576 | 3-scf00148 | 3  |
| AX-158016234 | 6 | 91.462 | KV452793.1  | 1547898 | 3-scf00148 | 3  |
| AX-158016238 | 6 | 91.462 | KV452793.1  | 1555079 | 3-scf00148 | 3  |
| AX-158016244 | 6 | 91.605 | KV452793.1  | 1562330 | 3-scf00148 | 3  |
| AX-158016248 | 6 | 91.605 | KV452793.1  | 1564760 | 3-scf00148 | 3  |
| AX-157876305 | 6 | 91.893 | KV452793.1  | 1554712 | 3-scf00148 | 3  |
| AX-158016250 | 6 | 91.893 | KV452793.1  | 1570357 | 3-scf00148 | 3  |
| AX-158016251 | 6 | 91.893 | KV452793.1  | 1570787 | 3-scf00148 | 3  |
| AX-158379694 | 6 | 91.893 | KV452793.1  | 1572781 | 3-scf00148 | 3  |
| AX-157738685 | 6 | 91.893 | KV452793.1  | 1574181 | 3-scf00148 | 3  |
| AX-158016254 | 6 | 91.893 | KV452793.1  | 1576078 | 3-scf00148 | 3  |
| AX-158016257 | 6 | 91.893 | KV452793.1  | 1578188 | 3-scf00148 | 3  |
| AX-158016259 | 6 | 91.893 | KV452793.1  | 1584732 | 3-scf00148 | 3  |
| AX-158016264 | 6 | 91.893 | KV452793.1  | 1594653 | 3-scf00148 | 3  |
| AX-158016278 | 6 | 91.893 | KV452793.1  | 1617114 | 3-scf00148 | 3  |
| AX-157754777 | 6 | 91.893 | KV452793.1  | 1621722 | 3-scf00148 | 3  |
| AX-158016294 | 6 | 91.893 | KV452793.1  | 1643351 | 3-scf00148 | 3  |
| AX-158016258 | 6 | 91.944 | KV452793.1  | 1582971 | 3-scf00148 | 3  |
| AX-158016260 | 6 | 92.002 | KV452793.1  | 1586557 | 3-scf00148 | 3  |
| AX-158016261 | 6 | 92.002 | KV452793.1  | 1590064 | 3-scf00148 | 3  |
| AX-158016262 | 6 | 92.221 | KV452793.1  | 1590861 | 3-scf00148 | 3  |
| AX-158016263 | 6 | 92.221 | KV452793.1  | 1592715 | 3-scf00148 | 3  |
| AX-158016245 | 6 | 92.439 | KV452793.1  | 1563064 | 3-scf00148 | 3  |
| AX-158016266 | 6 | 92.439 | KV452793.1  | 1597160 | 3-scf00148 | 3  |
| AX-158405962 | 6 | 92.439 | KV452793.1  | 1598664 | 3-scf00148 | 3  |
| AX-157720292 | 6 | 92.439 | KV452793.1  | 1601823 | 3-scf00148 | 3  |
| AX-158016267 | 6 | 92.439 | KV452793.1  | 1602765 | 3-scf00148 | 3  |
| AX-158016268 | 6 | 92.439 | KV452793.1  | 1603575 | 3-scf00148 | 3  |
| AX-158016269 | 6 | 92.439 | KV452793.1  | 1605024 | 3-scf00148 | 3  |
| AX-157773407 | 6 | 92.439 | KV452793.1  | 1611627 | 3-scf00148 | 3  |
| AX-158016275 | 6 | 92.439 | KV452793.1  | 1612873 | 3-scf00148 | 3  |
| AX-158016277 | 6 | 92.439 | KV452793.1  | 1616788 | 3-scf00148 | 3  |
| AX-158016279 | 6 | 92.439 | KV452793.1  | 1618778 | 3-scf00148 | 3  |
| AX-158016281 | 6 | 92.439 | KV452793.1  | 1621020 | 3-scf00148 | 3  |
| AX-158016284 | 6 | 92.439 | KV452793.1  | 1626449 | 3-scf00148 | 3  |
| AX-158016286 | 6 | 92.439 | KV452793.1  | 1627602 | 3-scf00148 | 3  |
| AX-157750579 | 6 | 92.439 | KV452793.1  | 1628465 | 3-scf00148 | 3  |
| AX-158016287 | 6 | 92.439 | KV452793.1  | 1629114 | 3-scf00148 | 3  |
| AX-157884872 | 6 | 92.439 | KV452793.1  | 1632932 | 3-scf00148 | 3  |
| AX-157820468 | 6 | 92.439 | KV452793.1  | 1636403 | 3-scf00148 | 3  |
| AX-158016325 | 6 | 92.439 | KV452793.1  | 1671420 | 3-scf00148 | 3  |
| AX-157706202 | 6 | 92.439 | 3ML01031812 | 387     | scf07433_1 | UN |
| AX-157706203 | 6 | 92.439 | 3ML01031812 | 629     | scf07433_1 | UN |
| AX-157856262 | 6 | 92.49  | KV452793.1  | 1633391 | 3-scf00148 | 3  |
| AX-158016290 | 6 | 92.549 | KV452793.1  | 1633648 | 3-scf00148 | 3  |
| AX-158016291 | 6 | 92.549 | KV452793.1  | 1637611 | 3-scf00148 | 3  |
| AX-158016295 | 6 | 92.549 | KV452793.1  | 1644729 | 3-scf00148 | 3  |
| AX-158016333 | 6 | 92.549 | KV452793.1  | 1682521 | 3-scf00148 | 3  |
| AX-157705869 | 6 | 92.549 | 3ML01031116 | 682     | scf06722_1 | UN |

|              |   |        |            |         |            |   |
|--------------|---|--------|------------|---------|------------|---|
| AX-158016297 | 6 | 92.612 | KV452793.1 | 1645883 | 3-scf00148 | 3 |
| AX-158016303 | 6 | 92.612 | KV452793.1 | 1652642 | 3-scf00148 | 3 |
| AX-158016299 | 6 | 92.658 | KV452793.1 | 1649809 | 3-scf00148 | 3 |
| AX-158016300 | 6 | 92.658 | KV452793.1 | 1650540 | 3-scf00148 | 3 |
| AX-158016301 | 6 | 92.659 | KV452793.1 | 1651183 | 3-scf00148 | 3 |
| AX-158016304 | 6 | 92.661 | KV452793.1 | 1653546 | 3-scf00148 | 3 |
| AX-158016305 | 6 | 92.803 | KV452793.1 | 1653725 | 3-scf00148 | 3 |
| AX-158016308 | 6 | 92.803 | KV452793.1 | 1657224 | 3-scf00148 | 3 |
| AX-158016309 | 6 | 92.803 | KV452793.1 | 1657839 | 3-scf00148 | 3 |
| AX-158016310 | 6 | 92.803 | KV452793.1 | 1658379 | 3-scf00148 | 3 |
| AX-158016311 | 6 | 92.803 | KV452793.1 | 1661157 | 3-scf00148 | 3 |
| AX-158016312 | 6 | 92.803 | KV452793.1 | 1661794 | 3-scf00148 | 3 |
| AX-158016314 | 6 | 92.803 | KV452793.1 | 1662660 | 3-scf00148 | 3 |
| AX-158016318 | 6 | 92.803 | KV452793.1 | 1666242 | 3-scf00148 | 3 |
| AX-158016321 | 6 | 92.803 | KV452793.1 | 1668734 | 3-scf00148 | 3 |
| AX-158016322 | 6 | 92.803 | KV452793.1 | 1669267 | 3-scf00148 | 3 |
| AX-158016326 | 6 | 92.803 | KV452793.1 | 1673072 | 3-scf00148 | 3 |
| AX-158016329 | 6 | 92.803 | KV452793.1 | 1678569 | 3-scf00148 | 3 |
| AX-157716836 | 6 | 92.803 | KV452793.1 | 1719528 | 3-scf00148 | 3 |
| AX-158016336 | 6 | 92.949 | KV452793.1 | 1687194 | 3-scf00148 | 3 |
| AX-157820469 | 6 | 93.066 | KV452793.1 | 1688962 | 3-scf00148 | 3 |
| AX-158016338 | 6 | 93.095 | KV452793.1 | 1688258 | 3-scf00148 | 3 |
| AX-158016339 | 6 | 93.095 | KV452793.1 | 1689485 | 3-scf00148 | 3 |
| AX-157820470 | 6 | 93.095 | KV452793.1 | 1689785 | 3-scf00148 | 3 |
| AX-158016341 | 6 | 93.095 | KV452793.1 | 1690501 | 3-scf00148 | 3 |
| AX-158016342 | 6 | 93.095 | KV452793.1 | 1691415 | 3-scf00148 | 3 |
| AX-158016343 | 6 | 93.095 | KV452793.1 | 1691535 | 3-scf00148 | 3 |
| AX-158016344 | 6 | 93.095 | KV452793.1 | 1693445 | 3-scf00148 | 3 |
| AX-157820471 | 6 | 93.095 | KV452793.1 | 1699231 | 3-scf00148 | 3 |
| AX-158016347 | 6 | 93.095 | KV452793.1 | 1700195 | 3-scf00148 | 3 |
| AX-158016348 | 6 | 93.095 | KV452793.1 | 1700565 | 3-scf00148 | 3 |
| AX-158016349 | 6 | 93.095 | KV452793.1 | 1701435 | 3-scf00148 | 3 |
| AX-158016351 | 6 | 93.095 | KV452793.1 | 1707069 | 3-scf00148 | 3 |
| AX-158016354 | 6 | 93.095 | KV452793.1 | 1707742 | 3-scf00148 | 3 |
| AX-158016355 | 6 | 93.095 | KV452793.1 | 1709165 | 3-scf00148 | 3 |
| AX-158016356 | 6 | 93.095 | KV452793.1 | 1711562 | 3-scf00148 | 3 |
| AX-158016359 | 6 | 93.095 | KV452793.1 | 1712365 | 3-scf00148 | 3 |
| AX-157876309 | 6 | 93.095 | KV452793.1 | 1712516 | 3-scf00148 | 3 |
| AX-158016384 | 6 | 93.095 | KV452793.1 | 1737968 | 3-scf00148 | 3 |
| AX-158016363 | 6 | 93.386 | KV452793.1 | 1718835 | 3-scf00148 | 3 |
| AX-157820472 | 6 | 93.386 | KV452793.1 | 1721874 | 3-scf00148 | 3 |
| AX-158016365 | 6 | 93.386 | KV452793.1 | 1722112 | 3-scf00148 | 3 |
| AX-158016416 | 6 | 93.386 | KV452793.1 | 1778379 | 3-scf00148 | 3 |
| AX-157820481 | 6 | 93.386 | KV452793.1 | 1779451 | 3-scf00148 | 3 |
| AX-157820485 | 6 | 93.386 | KV452793.1 | 1818126 | 3-scf00148 | 3 |
| AX-158016449 | 6 | 93.386 | KV452793.1 | 1835238 | 3-scf00148 | 3 |
| AX-157750735 | 6 | 93.532 | KV452793.1 | 1727297 | 3-scf00148 | 3 |
| AX-157820475 | 6 | 93.532 | KV452793.1 | 1727679 | 3-scf00148 | 3 |
| AX-158016370 | 6 | 93.532 | KV452793.1 | 1728815 | 3-scf00148 | 3 |
| AX-158016372 | 6 | 93.532 | KV452793.1 | 1731420 | 3-scf00148 | 3 |
| AX-158016373 | 6 | 93.532 | KV452793.1 | 1731845 | 3-scf00148 | 3 |

|              |   |        |            |         |            |   |
|--------------|---|--------|------------|---------|------------|---|
| AX-158016376 | 6 | 93.532 | KV452793.1 | 1733659 | 3-scf00148 | 3 |
| AX-158016379 | 6 | 93.532 | KV452793.1 | 1734831 | 3-scf00148 | 3 |
| AX-157747818 | 6 | 93.532 | KV452793.1 | 1736968 | 3-scf00148 | 3 |
| AX-157820477 | 6 | 93.532 | KV452793.1 | 1737200 | 3-scf00148 | 3 |
| AX-157820479 | 6 | 93.532 | KV452793.1 | 1742929 | 3-scf00148 | 3 |
| AX-158016398 | 6 | 93.532 | KV452793.1 | 1752959 | 3-scf00148 | 3 |
| AX-158016400 | 6 | 93.532 | KV452793.1 | 1754566 | 3-scf00148 | 3 |
| AX-158016413 | 6 | 93.532 | KV452793.1 | 1768134 | 3-scf00148 | 3 |
| AX-158016402 | 6 | 93.588 | KV452793.1 | 1755969 | 3-scf00148 | 3 |
| AX-157754491 | 6 | 93.641 | KV452793.1 | 1542328 | 3-scf00148 | 3 |
| AX-157820474 | 6 | 93.641 | KV452793.1 | 1726650 | 3-scf00148 | 3 |
| AX-158016385 | 6 | 93.641 | KV452793.1 | 1741043 | 3-scf00148 | 3 |
| AX-158016387 | 6 | 93.641 | KV452793.1 | 1742100 | 3-scf00148 | 3 |
| AX-158016406 | 6 | 93.641 | KV452793.1 | 1758527 | 3-scf00148 | 3 |
| AX-158016407 | 6 | 93.641 | KV452793.1 | 1759256 | 3-scf00148 | 3 |
| AX-158016408 | 6 | 93.641 | KV452793.1 | 1762452 | 3-scf00148 | 3 |
| AX-158016410 | 6 | 93.641 | KV452793.1 | 1764407 | 3-scf00148 | 3 |
| AX-158016412 | 6 | 93.641 | KV452793.1 | 1766853 | 3-scf00148 | 3 |
| AX-157725754 | 6 | 93.641 | KV452793.1 | 1768526 | 3-scf00148 | 3 |
| AX-157747197 | 6 | 93.641 | KV452793.1 | 1780211 | 3-scf00148 | 3 |
| AX-158016421 | 6 | 93.641 | KV452793.1 | 1784868 | 3-scf00148 | 3 |
| AX-158016422 | 6 | 93.641 | KV452793.1 | 1785657 | 3-scf00148 | 3 |
| AX-158016423 | 6 | 93.641 | KV452793.1 | 1788346 | 3-scf00148 | 3 |
| AX-158016425 | 6 | 93.641 | KV452793.1 | 1791337 | 3-scf00148 | 3 |
| AX-158016426 | 6 | 93.641 | KV452793.1 | 1793108 | 3-scf00148 | 3 |
| AX-158016429 | 6 | 93.641 | KV452793.1 | 1798774 | 3-scf00148 | 3 |
| AX-158016430 | 6 | 93.641 | KV452793.1 | 1799183 | 3-scf00148 | 3 |
| AX-158016431 | 6 | 93.641 | KV452793.1 | 1803153 | 3-scf00148 | 3 |
| AX-158016432 | 6 | 93.641 | KV452793.1 | 1805588 | 3-scf00148 | 3 |
| AX-158016434 | 6 | 93.641 | KV452793.1 | 1814893 | 3-scf00148 | 3 |
| AX-157741759 | 6 | 93.641 | KV452793.1 | 1818817 | 3-scf00148 | 3 |
| AX-158016437 | 6 | 93.641 | KV452793.1 | 1821062 | 3-scf00148 | 3 |
| AX-158016439 | 6 | 93.641 | KV452793.1 | 1825543 | 3-scf00148 | 3 |
| AX-158016441 | 6 | 93.641 | KV452793.1 | 1827319 | 3-scf00148 | 3 |
| AX-158016443 | 6 | 93.641 | KV452793.1 | 1829150 | 3-scf00148 | 3 |
| AX-158016447 | 6 | 93.641 | KV452793.1 | 1833960 | 3-scf00148 | 3 |
| AX-158016454 | 6 | 93.641 | KV452793.1 | 1849955 | 3-scf00148 | 3 |
| AX-157757515 | 6 | 93.641 | KV452793.1 | 1851776 | 3-scf00148 | 3 |
| AX-158016457 | 6 | 93.641 | KV452793.1 | 1852727 | 3-scf00148 | 3 |
| AX-158016458 | 6 | 93.75  | KV452793.1 | 1853728 | 3-scf00148 | 3 |
| AX-158016459 | 6 | 93.766 | KV452793.1 | 1854423 | 3-scf00148 | 3 |
| AX-158016485 | 6 | 93.766 | KV452793.1 | 1888035 | 3-scf00148 | 3 |
| AX-157747756 | 6 | 93.766 | KV452793.1 | 1904310 | 3-scf00148 | 3 |
| AX-158016505 | 6 | 93.766 | KV452793.1 | 1904890 | 3-scf00148 | 3 |
| AX-158016538 | 6 | 93.766 | KV452793.1 | 1951120 | 3-scf00148 | 3 |
| AX-157757456 | 6 | 93.805 | KV452793.1 | 1854815 | 3-scf00148 | 3 |
| AX-157716532 | 6 | 93.805 | KV452793.1 | 1903784 | 3-scf00148 | 3 |
| AX-158016509 | 6 | 93.805 | KV452793.1 | 1910822 | 3-scf00148 | 3 |
| AX-157755950 | 6 | 93.86  | KV452793.1 | 1856986 | 3-scf00148 | 3 |
| AX-158016461 | 6 | 93.86  | KV452793.1 | 1858372 | 3-scf00148 | 3 |
| AX-158016462 | 6 | 94.078 | KV452793.1 | 1864235 | 3-scf00148 | 3 |



|              |   |        |            |         |            |   |
|--------------|---|--------|------------|---------|------------|---|
| AX-158016463 | 6 | 94.078 | KV452793.1 | 1864406 | 3-scf00148 | 3 |
| AX-158016465 | 6 | 94.078 | KV452793.1 | 1869788 | 3-scf00148 | 3 |
| AX-158016466 | 6 | 94.078 | KV452793.1 | 1870561 | 3-scf00148 | 3 |
| AX-158016469 | 6 | 94.078 | KV452793.1 | 1872827 | 3-scf00148 | 3 |
| AX-158016472 | 6 | 94.078 | KV452793.1 | 1878708 | 3-scf00148 | 3 |
| AX-158016475 | 6 | 94.078 | KV452793.1 | 1880754 | 3-scf00148 | 3 |
| AX-158016476 | 6 | 94.078 | KV452793.1 | 1882667 | 3-scf00148 | 3 |
| AX-158016477 | 6 | 94.078 | KV452793.1 | 1883510 | 3-scf00148 | 3 |
| AX-158016486 | 6 | 94.078 | KV452793.1 | 1891335 | 3-scf00148 | 3 |
| AX-158016488 | 6 | 94.078 | KV452793.1 | 1893485 | 3-scf00148 | 3 |
| AX-158016495 | 6 | 94.078 | KV452793.1 | 1897450 | 3-scf00148 | 3 |
| AX-158016502 | 6 | 94.078 | KV452793.1 | 1902795 | 3-scf00148 | 3 |
| AX-158016504 | 6 | 94.078 | KV452793.1 | 1904475 | 3-scf00148 | 3 |
| AX-158016513 | 6 | 94.078 | KV452793.1 | 1911749 | 3-scf00148 | 3 |
| AX-157820491 | 6 | 94.078 | KV452793.1 | 1920856 | 3-scf00148 | 3 |
| AX-158379696 | 6 | 94.078 | KV452793.1 | 1971677 | 3-scf00148 | 3 |
| AX-157820502 | 6 | 94.078 | KV452793.1 | 1980903 | 3-scf00148 | 3 |
| AX-158016590 | 6 | 94.078 | KV452793.1 | 1998884 | 3-scf00148 | 3 |
| AX-158016633 | 6 | 94.078 | KV452793.1 | 2054296 | 3-scf00148 | 3 |
| AX-158016719 | 6 | 94.078 | KV452793.1 | 2162356 | 3-scf00148 | 3 |
| AX-158016506 | 6 | 94.138 | KV452793.1 | 1907596 | 3-scf00148 | 3 |
| AX-158016511 | 6 | 94.187 | KV452793.1 | 1911259 | 3-scf00148 | 3 |
| AX-158016516 | 6 | 94.187 | KV452793.1 | 1915456 | 3-scf00148 | 3 |
| AX-158016518 | 6 | 94.187 | KV452793.1 | 1917062 | 3-scf00148 | 3 |
| AX-158016526 | 6 | 94.187 | KV452793.1 | 1926956 | 3-scf00148 | 3 |
| AX-158016570 | 6 | 94.187 | KV452793.1 | 1981503 | 3-scf00148 | 3 |
| AX-158016600 | 6 | 94.187 | KV452793.1 | 2019411 | 3-scf00148 | 3 |
| AX-158016613 | 6 | 94.187 | KV452793.1 | 2033517 | 3-scf00148 | 3 |
| AX-158016733 | 6 | 94.187 | KV452793.1 | 2189113 | 3-scf00148 | 3 |
| AX-158016508 | 6 | 94.296 | KV452793.1 | 1909933 | 3-scf00148 | 3 |
| AX-157820489 | 6 | 94.296 | KV452793.1 | 1918167 | 3-scf00148 | 3 |
| AX-157820490 | 6 | 94.296 | KV452793.1 | 1920152 | 3-scf00148 | 3 |
| AX-158016523 | 6 | 94.296 | KV452793.1 | 1924395 | 3-scf00148 | 3 |
| AX-158016527 | 6 | 94.296 | KV452793.1 | 1928527 | 3-scf00148 | 3 |
| AX-157714459 | 6 | 94.296 | KV452793.1 | 1928661 | 3-scf00148 | 3 |
| AX-157775365 | 6 | 94.296 | KV452793.1 | 1929210 | 3-scf00148 | 3 |
| AX-157820494 | 6 | 94.296 | KV452793.1 | 1931534 | 3-scf00148 | 3 |
| AX-158016530 | 6 | 94.296 | KV452793.1 | 1932719 | 3-scf00148 | 3 |
| AX-158016534 | 6 | 94.296 | KV452793.1 | 1939280 | 3-scf00148 | 3 |
| AX-157773228 | 6 | 94.296 | KV452793.1 | 1944077 | 3-scf00148 | 3 |
| AX-157820496 | 6 | 94.296 | KV452793.1 | 1944778 | 3-scf00148 | 3 |
| AX-157820498 | 6 | 94.296 | KV452793.1 | 1950562 | 3-scf00148 | 3 |
| AX-158016539 | 6 | 94.296 | KV452793.1 | 1953509 | 3-scf00148 | 3 |
| AX-158016626 | 6 | 94.296 | KV452793.1 | 2046260 | 3-scf00148 | 3 |
| AX-158016494 | 6 | 94.406 | KV452793.1 | 1896846 | 3-scf00148 | 3 |
| AX-158016499 | 6 | 94.406 | KV452793.1 | 1899895 | 3-scf00148 | 3 |
| AX-157820487 | 6 | 94.406 | KV452793.1 | 1906373 | 3-scf00148 | 3 |
| AX-158016525 | 6 | 94.406 | KV452793.1 | 1925522 | 3-scf00148 | 3 |
| AX-158016528 | 6 | 94.406 | KV452793.1 | 1931047 | 3-scf00148 | 3 |
| AX-158016529 | 6 | 94.406 | KV452793.1 | 1932262 | 3-scf00148 | 3 |
| AX-158016540 | 6 | 94.406 | KV452793.1 | 1954625 | 3-scf00148 | 3 |

|              |   |        |            |         |            |   |
|--------------|---|--------|------------|---------|------------|---|
| AX-158016541 | 6 | 94.406 | KV452793.1 | 1955529 | 3-scf00148 | 3 |
| AX-158016542 | 6 | 94.406 | KV452793.1 | 1956438 | 3-scf00148 | 3 |
| AX-158016544 | 6 | 94.406 | KV452793.1 | 1958905 | 3-scf00148 | 3 |
| AX-158016545 | 6 | 94.406 | KV452793.1 | 1959185 | 3-scf00148 | 3 |
| AX-158016547 | 6 | 94.406 | KV452793.1 | 1959680 | 3-scf00148 | 3 |
| AX-157717336 | 6 | 94.406 | KV452793.1 | 1961120 | 3-scf00148 | 3 |
| AX-157820499 | 6 | 94.406 | KV452793.1 | 1961712 | 3-scf00148 | 3 |
| AX-158016549 | 6 | 94.406 | KV452793.1 | 1962038 | 3-scf00148 | 3 |
| AX-158016550 | 6 | 94.406 | KV452793.1 | 1962903 | 3-scf00148 | 3 |
| AX-158016552 | 6 | 94.406 | KV452793.1 | 1963452 | 3-scf00148 | 3 |
| AX-158016554 | 6 | 94.406 | KV452793.1 | 1964836 | 3-scf00148 | 3 |
| AX-157870218 | 6 | 94.406 | KV452793.1 | 1967994 | 3-scf00148 | 3 |
| AX-157716175 | 6 | 94.406 | KV452793.1 | 1968336 | 3-scf00148 | 3 |
| AX-157820500 | 6 | 94.406 | KV452793.1 | 1969163 | 3-scf00148 | 3 |
| AX-158016558 | 6 | 94.406 | KV452793.1 | 1970081 | 3-scf00148 | 3 |
| AX-158016564 | 6 | 94.406 | KV452793.1 | 1976785 | 3-scf00148 | 3 |
| AX-158016566 | 6 | 94.406 | KV452793.1 | 1978091 | 3-scf00148 | 3 |
| AX-158016567 | 6 | 94.406 | KV452793.1 | 1979734 | 3-scf00148 | 3 |
| AX-158016568 | 6 | 94.406 | KV452793.1 | 1980764 | 3-scf00148 | 3 |
| AX-158016571 | 6 | 94.406 | KV452793.1 | 1982418 | 3-scf00148 | 3 |
| AX-158016573 | 6 | 94.406 | KV452793.1 | 1982941 | 3-scf00148 | 3 |
| AX-157710400 | 6 | 94.406 | KV452793.1 | 1984885 | 3-scf00148 | 3 |
| AX-158016575 | 6 | 94.406 | KV452793.1 | 1985915 | 3-scf00148 | 3 |
| AX-158016577 | 6 | 94.406 | KV452793.1 | 1988211 | 3-scf00148 | 3 |
| AX-158016579 | 6 | 94.406 | KV452793.1 | 1988724 | 3-scf00148 | 3 |
| AX-158016582 | 6 | 94.406 | KV452793.1 | 1991040 | 3-scf00148 | 3 |
| AX-158016585 | 6 | 94.406 | KV452793.1 | 1994153 | 3-scf00148 | 3 |
| AX-158016587 | 6 | 94.406 | KV452793.1 | 1995033 | 3-scf00148 | 3 |
| AX-158016588 | 6 | 94.406 | KV452793.1 | 1995478 | 3-scf00148 | 3 |
| AX-158016593 | 6 | 94.406 | KV452793.1 | 2006653 | 3-scf00148 | 3 |
| AX-158379697 | 6 | 94.406 | KV452793.1 | 2007522 | 3-scf00148 | 3 |
| AX-157820504 | 6 | 94.406 | KV452793.1 | 2007923 | 3-scf00148 | 3 |
| AX-158016595 | 6 | 94.406 | KV452793.1 | 2013378 | 3-scf00148 | 3 |
| AX-158016597 | 6 | 94.406 | KV452793.1 | 2017304 | 3-scf00148 | 3 |
| AX-158016599 | 6 | 94.406 | KV452793.1 | 2018372 | 3-scf00148 | 3 |
| AX-158016602 | 6 | 94.406 | KV452793.1 | 2021878 | 3-scf00148 | 3 |
| AX-158016603 | 6 | 94.406 | KV452793.1 | 2022897 | 3-scf00148 | 3 |
| AX-158016622 | 6 | 94.406 | KV452793.1 | 2038458 | 3-scf00148 | 3 |
| AX-158016685 | 6 | 94.406 | KV452793.1 | 2119104 | 3-scf00148 | 3 |
| AX-158016726 | 6 | 94.406 | KV452793.1 | 2174748 | 3-scf00148 | 3 |
| AX-158016594 | 6 | 94.5   | KV452793.1 | 2008949 | 3-scf00148 | 3 |
| AX-157715385 | 6 | 94.528 | KV452793.1 | 2010884 | 3-scf00148 | 3 |
| AX-158016639 | 6 | 94.528 | KV452793.1 | 2061529 | 3-scf00148 | 3 |
| AX-158016604 | 6 | 94.624 | KV452793.1 | 2025237 | 3-scf00148 | 3 |
| AX-158016605 | 6 | 94.624 | KV452793.1 | 2028851 | 3-scf00148 | 3 |
| AX-158016607 | 6 | 94.624 | KV452793.1 | 2030295 | 3-scf00148 | 3 |
| AX-158016609 | 6 | 94.624 | KV452793.1 | 2031666 | 3-scf00148 | 3 |
| AX-158016618 | 6 | 94.624 | KV452793.1 | 2036000 | 3-scf00148 | 3 |
| AX-158016623 | 6 | 94.624 | KV452793.1 | 2039397 | 3-scf00148 | 3 |
| AX-157722756 | 6 | 94.624 | KV452793.1 | 2040414 | 3-scf00148 | 3 |
| AX-158016625 | 6 | 94.624 | KV452793.1 | 2045092 | 3-scf00148 | 3 |

|              |   |        |            |         |            |   |
|--------------|---|--------|------------|---------|------------|---|
| AX-158016628 | 6 | 94.624 | KV452793.1 | 2046534 | 3-scf00148 | 3 |
| AX-158016631 | 6 | 94.624 | KV452793.1 | 2048478 | 3-scf00148 | 3 |
| AX-157856263 | 6 | 94.624 | KV452793.1 | 2051861 | 3-scf00148 | 3 |
| AX-157820507 | 6 | 94.624 | KV452793.1 | 2053858 | 3-scf00148 | 3 |
| AX-158016635 | 6 | 94.624 | KV452793.1 | 2056631 | 3-scf00148 | 3 |
| AX-158016636 | 6 | 94.624 | KV452793.1 | 2059907 | 3-scf00148 | 3 |
| AX-158016640 | 6 | 94.624 | KV452793.1 | 2062401 | 3-scf00148 | 3 |
| AX-157714114 | 6 | 94.624 | KV452793.1 | 2066121 | 3-scf00148 | 3 |
| AX-158016647 | 6 | 94.624 | KV452793.1 | 2069405 | 3-scf00148 | 3 |
| AX-158016649 | 6 | 94.624 | KV452793.1 | 2069966 | 3-scf00148 | 3 |
| AX-158391120 | 6 | 94.624 | KV452793.1 | 2073367 | 3-scf00148 | 3 |
| AX-158016650 | 6 | 94.624 | KV452793.1 | 2074653 | 3-scf00148 | 3 |
| AX-157702890 | 6 | 94.733 | KV452793.1 | 2075167 | 3-scf00148 | 3 |
| AX-158016651 | 6 | 94.733 | KV452793.1 | 2075611 | 3-scf00148 | 3 |
| AX-158016652 | 6 | 94.733 | KV452793.1 | 2080225 | 3-scf00148 | 3 |
| AX-158016653 | 6 | 94.733 | KV452793.1 | 2081041 | 3-scf00148 | 3 |
| AX-158016655 | 6 | 94.733 | KV452793.1 | 2083241 | 3-scf00148 | 3 |
| AX-158016658 | 6 | 94.897 | KV452793.1 | 2088442 | 3-scf00148 | 3 |
| AX-157856266 | 6 | 94.897 | KV452793.1 | 2088559 | 3-scf00148 | 3 |
| AX-158016664 | 6 | 95.012 | KV452793.1 | 2094825 | 3-scf00148 | 3 |
| AX-158016667 | 6 | 95.061 | KV452793.1 | 2096528 | 3-scf00148 | 3 |
| AX-158016668 | 6 | 95.061 | KV452793.1 | 2097156 | 3-scf00148 | 3 |
| AX-158016672 | 6 | 95.061 | KV452793.1 | 2102016 | 3-scf00148 | 3 |
| AX-158016676 | 6 | 95.061 | KV452793.1 | 2105805 | 3-scf00148 | 3 |
| AX-158016677 | 6 | 95.061 | KV452793.1 | 2107393 | 3-scf00148 | 3 |
| AX-158016679 | 6 | 95.061 | KV452793.1 | 2109867 | 3-scf00148 | 3 |
| AX-158016680 | 6 | 95.061 | KV452793.1 | 2110884 | 3-scf00148 | 3 |
| AX-158016709 | 6 | 95.061 | KV452793.1 | 2145654 | 3-scf00148 | 3 |
| AX-158016731 | 6 | 95.061 | KV452793.1 | 2186027 | 3-scf00148 | 3 |
| AX-158016732 | 6 | 95.061 | KV452793.1 | 2186753 | 3-scf00148 | 3 |
| AX-158016670 | 6 | 95.121 | KV452793.1 | 2099592 | 3-scf00148 | 3 |
| AX-158016683 | 6 | 95.121 | KV452793.1 | 2114326 | 3-scf00148 | 3 |
| AX-158016686 | 6 | 95.17  | KV452793.1 | 2120457 | 3-scf00148 | 3 |
| AX-158016687 | 6 | 95.17  | KV452793.1 | 2122019 | 3-scf00148 | 3 |
| AX-158016690 | 6 | 95.17  | KV452793.1 | 2128232 | 3-scf00148 | 3 |
| AX-158016691 | 6 | 95.17  | KV452793.1 | 2131159 | 3-scf00148 | 3 |
| AX-158016693 | 6 | 95.17  | KV452793.1 | 2132127 | 3-scf00148 | 3 |
| AX-158016694 | 6 | 95.17  | KV452793.1 | 2132712 | 3-scf00148 | 3 |
| AX-158016697 | 6 | 95.17  | KV452793.1 | 2135062 | 3-scf00148 | 3 |
| AX-158016699 | 6 | 95.17  | KV452793.1 | 2136379 | 3-scf00148 | 3 |
| AX-158016700 | 6 | 95.17  | KV452793.1 | 2137908 | 3-scf00148 | 3 |
| AX-158016701 | 6 | 95.17  | KV452793.1 | 2138414 | 3-scf00148 | 3 |
| AX-158016707 | 6 | 95.17  | KV452793.1 | 2142352 | 3-scf00148 | 3 |
| AX-158016708 | 6 | 95.17  | KV452793.1 | 2143873 | 3-scf00148 | 3 |
| AX-158016710 | 6 | 95.17  | KV452793.1 | 2147921 | 3-scf00148 | 3 |
| AX-158016711 | 6 | 95.17  | KV452793.1 | 2148328 | 3-scf00148 | 3 |
| AX-158016729 | 6 | 95.17  | KV452793.1 | 2182383 | 3-scf00148 | 3 |
| AX-158016753 | 6 | 95.17  | KV452793.1 | 2207367 | 3-scf00148 | 3 |
| AX-158016715 | 6 | 95.217 | KV452793.1 | 2155933 | 3-scf00148 | 3 |
| AX-158379698 | 6 | 95.28  | KV452793.1 | 2162936 | 3-scf00148 | 3 |
| AX-158016720 | 6 | 95.28  | KV452793.1 | 2163071 | 3-scf00148 | 3 |

|              |   |        |            |         |            |   |
|--------------|---|--------|------------|---------|------------|---|
| AX-158016725 | 6 | 95.498 | KV452793.1 | 2172966 | 3-scf00148 | 3 |
| AX-158016727 | 6 | 95.607 | KV452793.1 | 2176803 | 3-scf00148 | 3 |
| AX-157751226 | 6 | 95.607 | KV452793.1 | 2190514 | 3-scf00148 | 3 |
| AX-157820510 | 6 | 95.642 | KV452793.1 | 2194441 | 3-scf00148 | 3 |
| AX-158016738 | 6 | 95.668 | KV452793.1 | 2198055 | 3-scf00148 | 3 |
| AX-158016740 | 6 | 95.688 | KV452793.1 | 2199714 | 3-scf00148 | 3 |
| AX-158016403 | 6 | 95.717 | KV452793.1 | 1756742 | 3-scf00148 | 3 |
| AX-158016576 | 6 | 95.717 | KV452793.1 | 1986485 | 3-scf00148 | 3 |
| AX-157753084 | 6 | 95.717 | KV452793.1 | 2125785 | 3-scf00148 | 3 |
| AX-158016713 | 6 | 95.717 | KV452793.1 | 2153979 | 3-scf00148 | 3 |
| AX-158016717 | 6 | 95.717 | KV452793.1 | 2159096 | 3-scf00148 | 3 |
| AX-158016722 | 6 | 95.717 | KV452793.1 | 2166574 | 3-scf00148 | 3 |
| AX-157716211 | 6 | 95.717 | KV452793.1 | 2196270 | 3-scf00148 | 3 |
| AX-158016741 | 6 | 95.717 | KV452793.1 | 2201211 | 3-scf00148 | 3 |
| AX-158016744 | 6 | 95.717 | KV452793.1 | 2201947 | 3-scf00148 | 3 |
| AX-158016747 | 6 | 95.717 | KV452793.1 | 2203456 | 3-scf00148 | 3 |
| AX-158016757 | 6 | 95.826 | KV452793.1 | 2215110 | 3-scf00148 | 3 |
| AX-158016760 | 6 | 95.826 | KV452793.1 | 2217570 | 3-scf00148 | 3 |
| AX-158016762 | 6 | 95.826 | KV452793.1 | 2218919 | 3-scf00148 | 3 |
| AX-158016763 | 6 | 95.826 | KV452793.1 | 2220690 | 3-scf00148 | 3 |
| AX-157772492 | 6 | 95.826 | KV452793.1 | 2221462 | 3-scf00148 | 3 |
| AX-158016765 | 6 | 95.826 | KV452793.1 | 2221735 | 3-scf00148 | 3 |
| AX-158016768 | 6 | 95.826 | KV452793.1 | 2224113 | 3-scf00148 | 3 |
| AX-158016771 | 6 | 95.826 | KV452793.1 | 2225199 | 3-scf00148 | 3 |
| AX-158016774 | 6 | 95.826 | KV452793.1 | 2227369 | 3-scf00148 | 3 |
| AX-158016775 | 6 | 95.826 | KV452793.1 | 2228308 | 3-scf00148 | 3 |
| AX-158016776 | 6 | 95.947 | KV452793.1 | 2230621 | 3-scf00148 | 3 |
| AX-157758284 | 6 | 96.153 | KV452793.1 | 2231377 | 3-scf00148 | 3 |
| AX-158016777 | 6 | 96.153 | KV452793.1 | 2232941 | 3-scf00148 | 3 |
| AX-158016778 | 6 | 96.153 | KV452793.1 | 2235446 | 3-scf00148 | 3 |
| AX-158379699 | 6 | 96.153 | KV452793.1 | 2253727 | 3-scf00148 | 3 |
| AX-158016787 | 6 | 96.154 | KV452793.1 | 2242812 | 3-scf00148 | 3 |
| AX-157757562 | 6 | 96.154 | KV452793.1 | 2245990 | 3-scf00148 | 3 |
| AX-157750267 | 6 | 96.154 | KV452793.1 | 2249459 | 3-scf00148 | 3 |
| AX-157699001 | 6 | 96.154 | KV452793.1 | 2250280 | 3-scf00148 | 3 |
| AX-157725945 | 6 | 96.154 | KV452793.1 | 2256007 | 3-scf00148 | 3 |
| AX-158016792 | 6 | 96.156 | KV452793.1 | 2253406 | 3-scf00148 | 3 |
| AX-158016794 | 6 | 96.159 | KV452793.1 | 2255550 | 3-scf00148 | 3 |
| AX-158016797 | 6 | 96.159 | KV452793.1 | 2261382 | 3-scf00148 | 3 |
| AX-158016796 | 6 | 96.591 | KV452793.1 | 2260779 | 3-scf00148 | 3 |
| AX-158016799 | 6 | 96.591 | KV452793.1 | 2266177 | 3-scf00148 | 3 |
| AX-158016800 | 6 | 96.591 | KV452793.1 | 2268585 | 3-scf00148 | 3 |
| AX-158016801 | 6 | 96.591 | KV452793.1 | 2270817 | 3-scf00148 | 3 |
| AX-158016809 | 6 | 96.591 | KV452793.1 | 2284064 | 3-scf00148 | 3 |
| AX-157713631 | 6 | 96.736 | KV452793.1 | 2275793 | 3-scf00148 | 3 |
| AX-158016803 | 6 | 96.759 | KV452793.1 | 2280466 | 3-scf00148 | 3 |
| AX-157717148 | 6 | 96.79  | KV452793.1 | 2280698 | 3-scf00148 | 3 |
| AX-158016826 | 6 | 96.79  | KV452793.1 | 2301461 | 3-scf00148 | 3 |
| AX-158016831 | 6 | 96.79  | KV452793.1 | 2306716 | 3-scf00148 | 3 |
| AX-158016883 | 6 | 96.79  | KV452793.1 | 2357539 | 3-scf00148 | 3 |
| AX-158016939 | 6 | 96.79  | KV452793.1 | 2419732 | 3-scf00148 | 3 |

|              |   |        |            |         |            |   |
|--------------|---|--------|------------|---------|------------|---|
| AX-157865294 | 6 | 96.82  | KV452793.1 | 2282235 | 3-scf00148 | 3 |
| AX-157773191 | 6 | 96.849 | KV452793.1 | 2282768 | 3-scf00148 | 3 |
| AX-158016830 | 6 | 96.849 | KV452793.1 | 2306059 | 3-scf00148 | 3 |
| AX-157820514 | 6 | 96.882 | KV452793.1 | 2276332 | 3-scf00148 | 3 |
| AX-158016807 | 6 | 96.882 | KV452793.1 | 2283184 | 3-scf00148 | 3 |
| AX-158016808 | 6 | 96.882 | KV452793.1 | 2283269 | 3-scf00148 | 3 |
| AX-158016810 | 6 | 96.882 | KV452793.1 | 2286292 | 3-scf00148 | 3 |
| AX-158016811 | 6 | 96.882 | KV452793.1 | 2286533 | 3-scf00148 | 3 |
| AX-158016818 | 6 | 96.915 | KV452793.1 | 2294053 | 3-scf00148 | 3 |
| AX-158016821 | 6 | 96.966 | KV452793.1 | 2296726 | 3-scf00148 | 3 |
| AX-158016823 | 6 | 97.027 | KV452793.1 | 2299032 | 3-scf00148 | 3 |
| AX-158016824 | 6 | 97.027 | KV452793.1 | 2299455 | 3-scf00148 | 3 |
| AX-158016827 | 6 | 97.028 | KV452793.1 | 2301869 | 3-scf00148 | 3 |
| AX-157771690 | 6 | 97.028 | KV452793.1 | 2308110 | 3-scf00148 | 3 |
| AX-158016834 | 6 | 97.137 | KV452793.1 | 2313784 | 3-scf00148 | 3 |
| AX-158016835 | 6 | 97.137 | KV452793.1 | 2315893 | 3-scf00148 | 3 |
| AX-158016837 | 6 | 97.137 | KV452793.1 | 2316045 | 3-scf00148 | 3 |
| AX-157820516 | 6 | 97.137 | KV452793.1 | 2318091 | 3-scf00148 | 3 |
| AX-158016840 | 6 | 97.137 | KV452793.1 | 2320721 | 3-scf00148 | 3 |
| AX-158016841 | 6 | 97.137 | KV452793.1 | 2321226 | 3-scf00148 | 3 |
| AX-158016843 | 6 | 97.137 | KV452793.1 | 2322578 | 3-scf00148 | 3 |
| AX-158016844 | 6 | 97.137 | KV452793.1 | 2326134 | 3-scf00148 | 3 |
| AX-158016847 | 6 | 97.137 | KV452793.1 | 2330790 | 3-scf00148 | 3 |
| AX-158016849 | 6 | 97.137 | KV452793.1 | 2332989 | 3-scf00148 | 3 |
| AX-158016853 | 6 | 97.137 | KV452793.1 | 2335184 | 3-scf00148 | 3 |
| AX-158016855 | 6 | 97.137 | KV452793.1 | 2336230 | 3-scf00148 | 3 |
| AX-158016857 | 6 | 97.137 | KV452793.1 | 2337891 | 3-scf00148 | 3 |
| AX-158016860 | 6 | 97.137 | KV452793.1 | 2339998 | 3-scf00148 | 3 |
| AX-158016861 | 6 | 97.137 | KV452793.1 | 2341080 | 3-scf00148 | 3 |
| AX-158016864 | 6 | 97.137 | KV452793.1 | 2343409 | 3-scf00148 | 3 |
| AX-158016865 | 6 | 97.137 | KV452793.1 | 2344254 | 3-scf00148 | 3 |
| AX-158016867 | 6 | 97.137 | KV452793.1 | 2344494 | 3-scf00148 | 3 |
| AX-158016868 | 6 | 97.137 | KV452793.1 | 2347052 | 3-scf00148 | 3 |
| AX-157718474 | 6 | 97.137 | KV452793.1 | 2350587 | 3-scf00148 | 3 |
| AX-158016875 | 6 | 97.137 | KV452793.1 | 2351118 | 3-scf00148 | 3 |
| AX-158016879 | 6 | 97.137 | KV452793.1 | 2356029 | 3-scf00148 | 3 |
| AX-158016882 | 6 | 97.137 | KV452793.1 | 2356611 | 3-scf00148 | 3 |
| AX-157743834 | 6 | 97.236 | KV452793.1 | 2361054 | 3-scf00148 | 3 |
| AX-158016911 | 6 | 97.236 | KV452793.1 | 2385745 | 3-scf00148 | 3 |
| AX-158016832 | 6 | 97.464 | KV452793.1 | 2309569 | 3-scf00148 | 3 |
| AX-158016888 | 6 | 97.464 | KV452793.1 | 2363696 | 3-scf00148 | 3 |
| AX-158016894 | 6 | 97.465 | KV452793.1 | 2368820 | 3-scf00148 | 3 |
| AX-158016897 | 6 | 97.542 | KV452793.1 | 2371361 | 3-scf00148 | 3 |
| AX-158016898 | 6 | 97.594 | KV452793.1 | 2371803 | 3-scf00148 | 3 |
| AX-158016902 | 6 | 97.723 | KV452793.1 | 2375304 | 3-scf00148 | 3 |
| AX-158016903 | 6 | 97.723 | KV452793.1 | 2375970 | 3-scf00148 | 3 |
| AX-157715759 | 6 | 97.982 | KV452793.1 | 2377626 | 3-scf00148 | 3 |
| AX-158016905 | 6 | 97.982 | KV452793.1 | 2378927 | 3-scf00148 | 3 |
| AX-158016914 | 6 | 97.982 | KV452793.1 | 2389078 | 3-scf00148 | 3 |
| AX-158016915 | 6 | 98.004 | KV452793.1 | 2392341 | 3-scf00148 | 3 |
| AX-158016938 | 6 | 98.004 | KV452793.1 | 2419003 | 3-scf00148 | 3 |

|              |   |        |            |         |            |   |
|--------------|---|--------|------------|---------|------------|---|
| AX-158016917 | 6 | 98.176 | KV452793.1 | 2394145 | 3-scf00148 | 3 |
| AX-158016918 | 6 | 98.18  | KV452793.1 | 2395050 | 3-scf00148 | 3 |
| AX-158016921 | 6 | 98.371 | KV452793.1 | 2397040 | 3-scf00148 | 3 |
| AX-158016922 | 6 | 98.372 | KV452793.1 | 2397791 | 3-scf00148 | 3 |
| AX-158016924 | 6 | 98.373 | KV452793.1 | 2399923 | 3-scf00148 | 3 |
| AX-158016926 | 6 | 98.374 | KV452793.1 | 2401940 | 3-scf00148 | 3 |
| AX-158016927 | 6 | 98.375 | KV452793.1 | 2402569 | 3-scf00148 | 3 |
| AX-158016928 | 6 | 98.375 | KV452793.1 | 2403311 | 3-scf00148 | 3 |
| AX-158016930 | 6 | 98.375 | KV452793.1 | 2409307 | 3-scf00148 | 3 |
| AX-158016932 | 6 | 98.375 | KV452793.1 | 2412905 | 3-scf00148 | 3 |
| AX-158016935 | 6 | 98.375 | KV452793.1 | 2413817 | 3-scf00148 | 3 |
| AX-157758173 | 6 | 98.477 | KV452793.1 | 2410327 | 3-scf00148 | 3 |
| AX-158016936 | 6 | 98.477 | KV452793.1 | 2417012 | 3-scf00148 | 3 |
| AX-158016945 | 6 | 98.477 | KV452793.1 | 2427641 | 3-scf00148 | 3 |
| AX-157775540 | 6 | 98.578 | KV452793.1 | 2417792 | 3-scf00148 | 3 |
| AX-158016943 | 6 | 98.773 | KV452793.1 | 2424535 | 3-scf00148 | 3 |
| AX-158016947 | 6 | 98.775 | KV452793.1 | 2428360 | 3-scf00148 | 3 |
| AX-157739551 | 6 | 98.777 | KV452793.1 | 2434715 | 3-scf00148 | 3 |
| AX-158016953 | 6 | 98.777 | KV452793.1 | 2435337 | 3-scf00148 | 3 |
| AX-158016956 | 6 | 98.778 | KV452793.1 | 2437213 | 3-scf00148 | 3 |
| AX-158016961 | 6 | 98.778 | KV452793.1 | 2440488 | 3-scf00148 | 3 |
| AX-158016970 | 6 | 99.214 | KV452793.1 | 2449940 | 3-scf00148 | 3 |
| AX-158016971 | 6 | 99.214 | KV452793.1 | 2451186 | 3-scf00148 | 3 |
| AX-158016974 | 6 | 99.214 | KV452793.1 | 2452787 | 3-scf00148 | 3 |
| AX-158016975 | 6 | 99.214 | KV452793.1 | 2453659 | 3-scf00148 | 3 |
| AX-158016977 | 6 | 99.214 | KV452793.1 | 2454609 | 3-scf00148 | 3 |
| AX-158016980 | 6 | 99.214 | KV452793.1 | 2458553 | 3-scf00148 | 3 |
| AX-158016983 | 6 | 99.214 | KV452793.1 | 2459702 | 3-scf00148 | 3 |
| AX-158016984 | 6 | 99.214 | KV452793.1 | 2461699 | 3-scf00148 | 3 |
| AX-158016987 | 6 | 99.214 | KV452793.1 | 2463630 | 3-scf00148 | 3 |
| AX-158016988 | 6 | 99.214 | KV452793.1 | 2465890 | 3-scf00148 | 3 |
| AX-157756134 | 6 | 99.214 | KV452793.1 | 2468302 | 3-scf00148 | 3 |
| AX-157865295 | 6 | 99.214 | KV452793.1 | 2471243 | 3-scf00148 | 3 |
| AX-158017001 | 6 | 99.214 | KV452793.1 | 2476647 | 3-scf00148 | 3 |
| AX-157870222 | 6 | 99.214 | KV452793.1 | 2480583 | 3-scf00148 | 3 |
| AX-157755723 | 6 | 99.214 | KV452793.1 | 2480935 | 3-scf00148 | 3 |
| AX-158017018 | 6 | 99.214 | KV452793.1 | 2500472 | 3-scf00148 | 3 |
| AX-158379701 | 6 | 99.259 | KV452793.1 | 2467285 | 3-scf00148 | 3 |
| AX-158016989 | 6 | 99.276 | KV452793.1 | 2466894 | 3-scf00148 | 3 |
| AX-157753132 | 6 | 99.276 | KV452793.1 | 2472917 | 3-scf00148 | 3 |
| AX-158016978 | 6 | 99.323 | KV452793.1 | 2456231 | 3-scf00148 | 3 |
| AX-158016995 | 6 | 99.323 | KV452793.1 | 2473386 | 3-scf00148 | 3 |
| AX-158016996 | 6 | 99.323 | KV452793.1 | 2473783 | 3-scf00148 | 3 |
| AX-157715710 | 6 | 99.323 | KV452793.1 | 2475733 | 3-scf00148 | 3 |
| AX-158016991 | 6 | 99.432 | KV452793.1 | 2469704 | 3-scf00148 | 3 |
| AX-158017005 | 6 | 99.432 | KV452793.1 | 2484615 | 3-scf00148 | 3 |
| AX-158017006 | 6 | 99.432 | KV452793.1 | 2485781 | 3-scf00148 | 3 |
| AX-158017007 | 6 | 99.432 | KV452793.1 | 2486700 | 3-scf00148 | 3 |
| AX-158017008 | 6 | 99.432 | KV452793.1 | 2489618 | 3-scf00148 | 3 |
| AX-158017009 | 6 | 99.432 | KV452793.1 | 2490597 | 3-scf00148 | 3 |
| AX-158017012 | 6 | 99.432 | KV452793.1 | 2492518 | 3-scf00148 | 3 |

|              |   |         |            |         |            |   |
|--------------|---|---------|------------|---------|------------|---|
| AX-158017013 | 6 | 99.432  | KV452793.1 | 2493486 | 3-scf00148 | 3 |
| AX-158017014 | 6 | 99.432  | KV452793.1 | 2493991 | 3-scf00148 | 3 |
| AX-158017015 | 6 | 99.432  | KV452793.1 | 2497092 | 3-scf00148 | 3 |
| AX-158017016 | 6 | 99.432  | KV452793.1 | 2498487 | 3-scf00148 | 3 |
| AX-158017017 | 6 | 99.432  | KV452793.1 | 2498955 | 3-scf00148 | 3 |
| AX-158017035 | 6 | 99.432  | KV452793.1 | 2524513 | 3-scf00148 | 3 |
| AX-158017020 | 6 | 99.542  | KV452793.1 | 2506151 | 3-scf00148 | 3 |
| AX-158017021 | 6 | 99.572  | KV452793.1 | 2508344 | 3-scf00148 | 3 |
| AX-158017022 | 6 | 99.572  | KV452793.1 | 2509000 | 3-scf00148 | 3 |
| AX-158017026 | 6 | 99.616  | KV452793.1 | 2513299 | 3-scf00148 | 3 |
| AX-158017024 | 6 | 99.651  | KV452793.1 | 2510931 | 3-scf00148 | 3 |
| AX-158017028 | 6 | 99.651  | KV452793.1 | 2516597 | 3-scf00148 | 3 |
| AX-158017029 | 6 | 99.651  | KV452793.1 | 2517605 | 3-scf00148 | 3 |
| AX-158017031 | 6 | 99.651  | KV452793.1 | 2519947 | 3-scf00148 | 3 |
| AX-158383685 | 6 | 99.651  | KV452793.1 | 2521235 | 3-scf00148 | 3 |
| AX-158017032 | 6 | 99.651  | KV452793.1 | 2521303 | 3-scf00148 | 3 |
| AX-158017033 | 6 | 99.661  | KV452793.1 | 2522053 | 3-scf00148 | 3 |
| AX-158017038 | 6 | 100.197 | KV452793.1 | 2527488 | 3-scf00148 | 3 |
| AX-158017040 | 6 | 100.197 | KV452793.1 | 2532258 | 3-scf00148 | 3 |
| AX-158017041 | 6 | 100.197 | KV452793.1 | 2532909 | 3-scf00148 | 3 |
| AX-158017042 | 6 | 100.197 | KV452793.1 | 2536182 | 3-scf00148 | 3 |
| AX-157820519 | 6 | 100.197 | KV452793.1 | 2536888 | 3-scf00148 | 3 |
| AX-157884878 | 6 | 100.197 | KV452793.1 | 2538161 | 3-scf00148 | 3 |
| AX-158017043 | 6 | 100.197 | KV452793.1 | 2539327 | 3-scf00148 | 3 |
| AX-158017049 | 6 | 100.197 | KV452793.1 | 2544472 | 3-scf00148 | 3 |
| AX-158383687 | 6 | 100.197 | KV452793.1 | 2551104 | 3-scf00148 | 3 |
| AX-158017075 | 6 | 100.197 | KV452793.1 | 2571479 | 3-scf00148 | 3 |
| AX-158017037 | 6 | 100.221 | KV452793.1 | 2526659 | 3-scf00148 | 3 |
| AX-158017047 | 6 | 100.221 | KV452793.1 | 2542801 | 3-scf00148 | 3 |
| AX-158017050 | 6 | 100.251 | KV452793.1 | 2545192 | 3-scf00148 | 3 |
| AX-158017058 | 6 | 100.251 | KV452793.1 | 2555687 | 3-scf00148 | 3 |
| AX-158017065 | 6 | 100.251 | KV452793.1 | 2561977 | 3-scf00148 | 3 |
| AX-158017080 | 6 | 100.251 | KV452793.1 | 2578038 | 3-scf00148 | 3 |
| AX-158017051 | 6 | 100.279 | KV452793.1 | 2546001 | 3-scf00148 | 3 |
| AX-157751811 | 6 | 100.306 | KV452793.1 | 2547029 | 3-scf00148 | 3 |
| AX-158017048 | 6 | 100.416 | KV452793.1 | 2543725 | 3-scf00148 | 3 |
| AX-158017053 | 6 | 100.416 | KV452793.1 | 2548272 | 3-scf00148 | 3 |
| AX-158407898 | 6 | 100.416 | KV452793.1 | 2548363 | 3-scf00148 | 3 |
| AX-157820520 | 6 | 100.416 | KV452793.1 | 2548908 | 3-scf00148 | 3 |
| AX-158017054 | 6 | 100.416 | KV452793.1 | 2550878 | 3-scf00148 | 3 |
| AX-158017055 | 6 | 100.416 | KV452793.1 | 2551267 | 3-scf00148 | 3 |
| AX-158017057 | 6 | 100.416 | KV452793.1 | 2555104 | 3-scf00148 | 3 |
| AX-158017059 | 6 | 100.416 | KV452793.1 | 2556238 | 3-scf00148 | 3 |
| AX-158017061 | 6 | 100.416 | KV452793.1 | 2557486 | 3-scf00148 | 3 |
| AX-158017062 | 6 | 100.416 | KV452793.1 | 2557930 | 3-scf00148 | 3 |
| AX-158017063 | 6 | 100.416 | KV452793.1 | 2558641 | 3-scf00148 | 3 |
| AX-157725599 | 6 | 100.416 | KV452793.1 | 2558913 | 3-scf00148 | 3 |
| AX-158017064 | 6 | 100.416 | KV452793.1 | 2559092 | 3-scf00148 | 3 |
| AX-158017066 | 6 | 100.416 | KV452793.1 | 2562262 | 3-scf00148 | 3 |
| AX-158017067 | 6 | 100.416 | KV452793.1 | 2562622 | 3-scf00148 | 3 |
| AX-157703360 | 6 | 100.416 | KV452793.1 | 2563245 | 3-scf00148 | 3 |

|              |   |         |            |         |            |   |
|--------------|---|---------|------------|---------|------------|---|
| AX-158379702 | 6 | 100.416 | KV452793.1 | 2565062 | 3-scf00148 | 3 |
| AX-157695352 | 6 | 100.416 | KV452793.1 | 2569442 | 3-scf00148 | 3 |
| AX-158017078 | 6 | 100.416 | KV452793.1 | 2575711 | 3-scf00148 | 3 |
| AX-158017074 | 6 | 100.479 | KV452793.1 | 2571085 | 3-scf00148 | 3 |
| AX-158017082 | 6 | 100.634 | KV452793.1 | 2578961 | 3-scf00148 | 3 |
| AX-158017086 | 6 | 100.634 | KV452793.1 | 2582641 | 3-scf00148 | 3 |
| AX-158407899 | 6 | 100.743 | KV452793.1 | 2584697 | 3-scf00148 | 3 |
| AX-158017088 | 6 | 100.743 | KV452793.1 | 2584982 | 3-scf00148 | 3 |
| AX-158017089 | 6 | 100.743 | KV452793.1 | 2586198 | 3-scf00148 | 3 |
| AX-158017091 | 6 | 100.743 | KV452793.1 | 2587383 | 3-scf00148 | 3 |
| AX-158017094 | 6 | 100.743 | KV452793.1 | 2588458 | 3-scf00148 | 3 |
| AX-158407901 | 6 | 100.743 | KV452793.1 | 2589092 | 3-scf00148 | 3 |
| AX-158017098 | 6 | 100.744 | KV452793.1 | 2593040 | 3-scf00148 | 3 |
| AX-158017099 | 6 | 100.744 | KV452793.1 | 2593468 | 3-scf00148 | 3 |
| AX-158017101 | 6 | 100.744 | KV452793.1 | 2593854 | 3-scf00148 | 3 |
| AX-158017102 | 6 | 100.798 | KV452793.1 | 2595509 | 3-scf00148 | 3 |
| AX-158017105 | 6 | 100.906 | KV452793.1 | 2599932 | 3-scf00148 | 3 |
| AX-158422261 | 6 | 100.984 | KV452793.1 | 2602338 | 3-scf00148 | 3 |
| AX-158017108 | 6 | 100.984 | KV452793.1 | 2605665 | 3-scf00148 | 3 |
| AX-157884879 | 6 | 100.984 | KV452793.1 | 2615513 | 3-scf00148 | 3 |
| AX-158017109 | 6 | 101.015 | KV452793.1 | 2606579 | 3-scf00148 | 3 |
| AX-158017110 | 6 | 101.069 | KV452793.1 | 2606975 | 3-scf00148 | 3 |
| AX-158017111 | 6 | 101.069 | KV452793.1 | 2608961 | 3-scf00148 | 3 |
| AX-158017114 | 6 | 101.072 | KV452793.1 | 2610575 | 3-scf00148 | 3 |
| AX-158017096 | 6 | 101.075 | KV452793.1 | 2592438 | 3-scf00148 | 3 |
| AX-158017115 | 6 | 101.075 | KV452793.1 | 2610985 | 3-scf00148 | 3 |
| AX-158017118 | 6 | 101.075 | KV452793.1 | 2614495 | 3-scf00148 | 3 |
| AX-158017120 | 6 | 101.075 | KV452793.1 | 2614829 | 3-scf00148 | 3 |
| AX-158017124 | 6 | 101.075 | KV452793.1 | 2619035 | 3-scf00148 | 3 |
| AX-158017123 | 6 | 101.143 | KV452793.1 | 2616884 | 3-scf00148 | 3 |
| AX-158017127 | 6 | 101.198 | KV452793.1 | 2623411 | 3-scf00148 | 3 |
| AX-158017128 | 6 | 101.29  | KV452793.1 | 2625870 | 3-scf00148 | 3 |
| AX-158017129 | 6 | 101.29  | KV452793.1 | 2626320 | 3-scf00148 | 3 |
| AX-158017131 | 6 | 101.29  | KV452793.1 | 2628529 | 3-scf00148 | 3 |
| AX-158017132 | 6 | 101.29  | KV452793.1 | 2629179 | 3-scf00148 | 3 |
| AX-158017133 | 6 | 101.399 | KV452793.1 | 2629806 | 3-scf00148 | 3 |
| AX-158017135 | 6 | 101.399 | KV452793.1 | 2632594 | 3-scf00148 | 3 |
| AX-158017136 | 6 | 101.399 | KV452793.1 | 2633286 | 3-scf00148 | 3 |
| AX-158017138 | 6 | 101.399 | KV452793.1 | 2635106 | 3-scf00148 | 3 |
| AX-157856268 | 6 | 101.399 | KV452793.1 | 2636732 | 3-scf00148 | 3 |
| AX-158017141 | 6 | 101.399 | KV452793.1 | 2640191 | 3-scf00148 | 3 |
| AX-158017142 | 6 | 101.399 | KV452793.1 | 2640944 | 3-scf00148 | 3 |
| AX-158017143 | 6 | 101.399 | KV452793.1 | 2642659 | 3-scf00148 | 3 |
| AX-158017144 | 6 | 101.399 | KV452793.1 | 2643960 | 3-scf00148 | 3 |
| AX-158017183 | 6 | 101.399 | KV452793.1 | 2694620 | 3-scf00148 | 3 |
| AX-158017197 | 6 | 101.399 | KV452793.1 | 2714078 | 3-scf00148 | 3 |
| AX-158017200 | 6 | 101.399 | KV452793.1 | 2719370 | 3-scf00148 | 3 |
| AX-158017203 | 6 | 101.399 | KV452793.1 | 2722824 | 3-scf00148 | 3 |
| AX-158017214 | 6 | 101.399 | KV452793.1 | 2735764 | 3-scf00148 | 3 |
| AX-158017145 | 6 | 101.446 | KV452793.1 | 2644623 | 3-scf00148 | 3 |
| AX-157743411 | 6 | 101.473 | KV452793.1 | 2646650 | 3-scf00148 | 3 |



|              |   |         |             |         |            |    |
|--------------|---|---------|-------------|---------|------------|----|
| AX-158017106 | 6 | 101.508 | KV452793.1  | 2603636 | 3-scf00148 | 3  |
| AX-158017147 | 6 | 101.508 | KV452793.1  | 2649615 | 3-scf00148 | 3  |
| AX-158017148 | 6 | 101.508 | KV452793.1  | 2650966 | 3-scf00148 | 3  |
| AX-158017149 | 6 | 101.508 | KV452793.1  | 2652024 | 3-scf00148 | 3  |
| AX-158017151 | 6 | 101.508 | KV452793.1  | 2653373 | 3-scf00148 | 3  |
| AX-158017152 | 6 | 101.508 | KV452793.1  | 2654292 | 3-scf00148 | 3  |
| AX-158017154 | 6 | 101.508 | KV452793.1  | 2655431 | 3-scf00148 | 3  |
| AX-158017156 | 6 | 101.508 | KV452793.1  | 2656487 | 3-scf00148 | 3  |
| AX-158017169 | 6 | 101.877 | KV452793.1  | 2676200 | 3-scf00148 | 3  |
| AX-157876329 | 6 | 101.878 | KV452793.1  | 2677352 | 3-scf00148 | 3  |
| AX-158017170 | 6 | 101.889 | KV452793.1  | 2678675 | 3-scf00148 | 3  |
| AX-158017171 | 6 | 102.376 | KV452793.1  | 2679564 | 3-scf00148 | 3  |
| AX-158017174 | 6 | 102.383 | KV452793.1  | 2682407 | 3-scf00148 | 3  |
| AX-158017176 | 6 | 102.383 | KV452793.1  | 2684301 | 3-scf00148 | 3  |
| AX-158017177 | 6 | 102.601 | KV452793.1  | 2689670 | 3-scf00148 | 3  |
| AX-158017179 | 6 | 102.601 | KV452793.1  | 2691481 | 3-scf00148 | 3  |
| AX-158379703 | 6 | 102.601 | KV452793.1  | 2691894 | 3-scf00148 | 3  |
| AX-158017181 | 6 | 102.601 | KV452793.1  | 2693322 | 3-scf00148 | 3  |
| AX-157707523 | 6 | 102.601 | 3ML01034480 | 65      | scf10155_1 | UN |
| AX-158017182 | 6 | 102.639 | KV452793.1  | 2694252 | 3-scf00148 | 3  |
| AX-158017184 | 6 | 102.711 | KV452793.1  | 2697719 | 3-scf00148 | 3  |
| AX-158017185 | 6 | 102.711 | KV452793.1  | 2698261 | 3-scf00148 | 3  |
| AX-157763482 | 6 | 102.711 | KV452793.1  | 2698845 | 3-scf00148 | 3  |
| AX-158017186 | 6 | 102.739 | KV452793.1  | 2698988 | 3-scf00148 | 3  |
| AX-158017187 | 6 | 102.785 | KV452793.1  | 2700439 | 3-scf00148 | 3  |
| AX-158017188 | 6 | 102.82  | KV452793.1  | 2701328 | 3-scf00148 | 3  |
| AX-158017189 | 6 | 102.82  | KV452793.1  | 2701686 | 3-scf00148 | 3  |
| AX-158017190 | 6 | 102.82  | KV452793.1  | 2702523 | 3-scf00148 | 3  |
| AX-158017192 | 6 | 102.82  | KV452793.1  | 2704330 | 3-scf00148 | 3  |
| AX-158017198 | 6 | 102.953 | KV452793.1  | 2715223 | 3-scf00148 | 3  |
| AX-158017199 | 6 | 102.984 | KV452793.1  | 2716869 | 3-scf00148 | 3  |
| AX-157771414 | 6 | 102.984 | KV452793.1  | 2729363 | 3-scf00148 | 3  |
| AX-158017202 | 6 | 103.037 | KV452793.1  | 2720080 | 3-scf00148 | 3  |
| AX-158017206 | 6 | 103.147 | KV452793.1  | 2725717 | 3-scf00148 | 3  |
| AX-157750514 | 6 | 103.148 | KV452793.1  | 2708206 | 3-scf00148 | 3  |
| AX-157876330 | 6 | 103.148 | KV452793.1  | 2725792 | 3-scf00148 | 3  |
| AX-158017207 | 6 | 103.148 | KV452793.1  | 2727509 | 3-scf00148 | 3  |
| AX-157741225 | 6 | 103.148 | KV452793.1  | 2728405 | 3-scf00148 | 3  |
| AX-158017212 | 6 | 103.148 | KV452793.1  | 2734420 | 3-scf00148 | 3  |
| AX-158383697 | 6 | 103.148 | KV452793.1  | 2743384 | 3-scf00148 | 3  |
| AX-158017224 | 6 | 103.148 | KV452793.1  | 2745856 | 3-scf00148 | 3  |
| AX-158017195 | 6 | 103.366 | KV452793.1  | 2709563 | 3-scf00148 | 3  |
| AX-157709923 | 6 | 103.366 | KV452793.1  | 2712739 | 3-scf00148 | 3  |
| AX-158017210 | 6 | 103.366 | KV452793.1  | 2731274 | 3-scf00148 | 3  |
| AX-158017211 | 6 | 103.366 | KV452793.1  | 2732646 | 3-scf00148 | 3  |
| AX-158017215 | 6 | 103.366 | KV452793.1  | 2736538 | 3-scf00148 | 3  |
| AX-158017217 | 6 | 103.366 | KV452793.1  | 2738802 | 3-scf00148 | 3  |
| AX-158017219 | 6 | 103.366 | KV452793.1  | 2741482 | 3-scf00148 | 3  |
| AX-158017220 | 6 | 103.366 | KV452793.1  | 2742412 | 3-scf00148 | 3  |
| AX-158017230 | 6 | 103.366 | KV452793.1  | 2750904 | 3-scf00148 | 3  |
| AX-158017233 | 6 | 103.366 | KV452793.1  | 2751338 | 3-scf00148 | 3  |

|              |   |         |            |         |            |   |
|--------------|---|---------|------------|---------|------------|---|
| AX-158017234 | 6 | 103.366 | KV452793.1 | 2752973 | 3-scf00148 | 3 |
| AX-158017236 | 6 | 103.366 | KV452793.1 | 2754028 | 3-scf00148 | 3 |
| AX-158017237 | 6 | 103.366 | KV452793.1 | 2754873 | 3-scf00148 | 3 |
| AX-158017266 | 6 | 104.895 | KV452793.1 | 2786593 | 3-scf00148 | 3 |
| AX-157717290 | 6 | 104.895 | KV452793.1 | 2787241 | 3-scf00148 | 3 |
| AX-158017267 | 6 | 104.895 | KV452793.1 | 2787748 | 3-scf00148 | 3 |
| AX-158017268 | 6 | 104.895 | KV452793.1 | 2788003 | 3-scf00148 | 3 |
| AX-158017269 | 6 | 104.895 | KV452793.1 | 2788920 | 3-scf00148 | 3 |
| AX-158017270 | 6 | 104.895 | KV452793.1 | 2789603 | 3-scf00148 | 3 |
| AX-158017291 | 6 | 104.895 | KV452793.1 | 2806425 | 3-scf00148 | 3 |
| AX-158017274 | 6 | 105.004 | KV452793.1 | 2795791 | 3-scf00148 | 3 |
| AX-158017272 | 6 | 105.114 | KV452793.1 | 2792223 | 3-scf00148 | 3 |
| AX-158017275 | 6 | 105.114 | KV452793.1 | 2796486 | 3-scf00148 | 3 |
| AX-157820523 | 6 | 105.114 | KV452793.1 | 2797116 | 3-scf00148 | 3 |
| AX-158017277 | 6 | 105.114 | KV452793.1 | 2797866 | 3-scf00148 | 3 |
| AX-158017280 | 6 | 105.196 | KV452793.1 | 2799798 | 3-scf00148 | 3 |
| AX-158017284 | 6 | 105.274 | KV452793.1 | 2803341 | 3-scf00148 | 3 |
| AX-158017299 | 6 | 105.274 | KV452793.1 | 2811648 | 3-scf00148 | 3 |
| AX-158017271 | 6 | 105.369 | KV452793.1 | 2791472 | 3-scf00148 | 3 |
| AX-157820524 | 6 | 105.369 | KV452793.1 | 2803942 | 3-scf00148 | 3 |
| AX-158017289 | 6 | 105.369 | KV452793.1 | 2805287 | 3-scf00148 | 3 |
| AX-158017295 | 6 | 105.369 | KV452793.1 | 2808985 | 3-scf00148 | 3 |
| AX-158017302 | 6 | 105.625 | KV452793.1 | 2819366 | 3-scf00148 | 3 |
| AX-158017292 | 6 | 105.88  | KV452793.1 | 2807954 | 3-scf00148 | 3 |
| AX-158017305 | 6 | 105.88  | KV452793.1 | 2824106 | 3-scf00148 | 3 |
| AX-158017307 | 6 | 105.88  | KV452793.1 | 2824579 | 3-scf00148 | 3 |
| AX-158017308 | 6 | 105.88  | KV452793.1 | 2825155 | 3-scf00148 | 3 |
| AX-158017309 | 6 | 105.88  | KV452793.1 | 2825588 | 3-scf00148 | 3 |
| AX-158017338 | 6 | 105.88  | KV452793.1 | 2849536 | 3-scf00148 | 3 |
| AX-157752280 | 6 | 105.993 | KV452793.1 | 2827924 | 3-scf00148 | 3 |
| AX-157773892 | 6 | 106.098 | KV452793.1 | 2828921 | 3-scf00148 | 3 |
| AX-158017312 | 6 | 106.098 | KV452793.1 | 2830147 | 3-scf00148 | 3 |
| AX-158017313 | 6 | 106.098 | KV452793.1 | 2830927 | 3-scf00148 | 3 |
| AX-158017319 | 6 | 106.223 | KV452793.1 | 2834382 | 3-scf00148 | 3 |
| AX-158017321 | 6 | 106.223 | KV452793.1 | 2834829 | 3-scf00148 | 3 |
| AX-158017329 | 6 | 106.523 | KV452793.1 | 2842406 | 3-scf00148 | 3 |
| AX-158017331 | 6 | 106.523 | KV452793.1 | 2844800 | 3-scf00148 | 3 |
| AX-158017334 | 6 | 106.523 | KV452793.1 | 2847055 | 3-scf00148 | 3 |
| AX-158017336 | 6 | 106.805 | KV452793.1 | 2848237 | 3-scf00148 | 3 |
| AX-158017337 | 6 | 106.967 | KV452793.1 | 2849033 | 3-scf00148 | 3 |
| AX-158017339 | 6 | 106.97  | KV452793.1 | 2851008 | 3-scf00148 | 3 |
| AX-158017341 | 6 | 106.971 | KV452793.1 | 2852406 | 3-scf00148 | 3 |
| AX-158391132 | 6 | 106.973 | KV452793.1 | 2852467 | 3-scf00148 | 3 |
| AX-158383699 | 6 | 106.973 | KV452793.1 | 2854999 | 3-scf00148 | 3 |
| AX-158017343 | 6 | 106.973 | KV452793.1 | 2855040 | 3-scf00148 | 3 |
| AX-157752699 | 6 | 106.973 | KV452793.1 | 2856652 | 3-scf00148 | 3 |
| AX-158017344 | 6 | 107.093 | KV452793.1 | 2859030 | 3-scf00148 | 3 |
| AX-158017346 | 6 | 107.192 | KV452793.1 | 2860314 | 3-scf00148 | 3 |
| AX-157742650 | 6 | 107.356 | KV452793.1 | 2865381 | 3-scf00148 | 3 |
| AX-158017351 | 6 | 107.356 | KV452793.1 | 2867123 | 3-scf00148 | 3 |
| AX-158017353 | 6 | 107.52  | KV452793.1 | 2868435 | 3-scf00148 | 3 |

|              |   |         |            |         |               |    |
|--------------|---|---------|------------|---------|---------------|----|
| AX-157856272 | 6 | 107.52  | KV452793.1 | 2869378 | 3-scf00148    | 3  |
| AX-158017355 | 6 | 107.52  | KV452793.1 | 2869977 | 3-scf00148    | 3  |
| AX-158017356 | 6 | 107.52  | KV452793.1 | 2870498 | 3-scf00148    | 3  |
| AX-158017362 | 6 | 107.52  | KV452793.1 | 2876663 | 3-scf00148    | 3  |
| AX-157820526 | 6 | 107.633 | KV452793.1 | 2877495 | 3-scf00148    | 3  |
| AX-157772957 | 6 | 107.738 | KV452793.1 | 2879360 | 3-scf00148    | 3  |
| AX-158407911 | 6 | 107.847 | KV452793.1 | 2879500 | 3-scf00148    | 3  |
| AX-158017363 | 6 | 107.904 | KV452793.1 | 2882826 | 3-scf00148    | 3  |
| AX-157820529 | 6 | 107.904 | KV452793.1 | 2900892 | 3-scf00148    | 3  |
| AX-158017366 | 6 | 107.913 | KV452793.1 | 2885641 | 3-scf00148    | 3  |
| AX-158017348 | 6 | 107.957 | KV452793.1 | 2861673 | 3-scf00148    | 3  |
| AX-158383700 | 6 | 107.957 | KV452793.1 | 2870616 | 3-scf00148    | 3  |
| AX-158017365 | 6 | 107.957 | KV452793.1 | 2885040 | 3-scf00148    | 3  |
| AX-158383702 | 6 | 107.957 | KV452793.1 | 2885948 | 3-scf00148    | 3  |
| AX-158017367 | 6 | 107.957 | KV452793.1 | 2886152 | 3-scf00148    | 3  |
| AX-158017371 | 6 | 107.957 | KV452793.1 | 2891934 | 3-scf00148    | 3  |
| AX-158017372 | 6 | 107.957 | KV452793.1 | 2892631 | 3-scf00148    | 3  |
| AX-158017374 | 6 | 107.957 | KV452793.1 | 2893975 | 3-scf00148    | 3  |
| AX-158017377 | 6 | 107.957 | KV452793.1 | 2897031 | 3-scf00148    | 3  |
| AX-158017378 | 6 | 107.957 | KV452793.1 | 2897397 | 3-scf00148    | 3  |
| AX-158017380 | 6 | 107.957 | KV452793.1 | 2898885 | 3-scf00148    | 3  |
| AX-158017381 | 6 | 107.957 | KV452793.1 | 2899243 | 3-scf00148    | 3  |
| AX-157820527 | 6 | 107.957 | KV452793.1 | 2899387 | 3-scf00148    | 3  |
| AX-157820528 | 6 | 107.957 | KV452793.1 | 2900751 | 3-scf00148    | 3  |
| AX-158017387 | 6 | 107.957 | KV452793.1 | 2911820 | 3-scf00148    | 3  |
| AX-157723066 | 6 | 108.001 | KV452793.1 | 2884022 | 3-scf00148    | 3  |
| AX-158017383 | 6 | 108.001 | KV452793.1 | 2901009 | 3-scf00148    | 3  |
| AX-158017357 | 6 | 108.066 | KV452793.1 | 2871102 | 3-scf00148    | 3  |
| AX-158383703 | 6 | 108.066 | KV452793.1 | 2892250 | 3-scf00148    | 3  |
| AX-158017385 | 6 | 108.066 | KV452793.1 | 2908085 | 3-scf00148    | 3  |
| AX-158017388 | 6 | 108.066 | KV452793.1 | 2913473 | 3-scf00148    | 3  |
| AX-158017389 | 6 | 108.066 | KV452793.1 | 2913931 | 3-scf00148    | 3  |
| AX-157708559 | 6 | 108.066 | KV452793.1 | 2915086 | 3-scf00148    | 3  |
| AX-158017391 | 6 | 108.066 | KV452793.1 | 2915485 | 3-scf00148    | 3  |
| AX-158017392 | 6 | 108.066 | KV452793.1 | 2915977 | 3-scf00148    | 3  |
| AX-158017394 | 6 | 108.284 | KV452793.1 | 2918212 | 3-scf00148    | 3  |
| AX-158017395 | 6 | 108.325 | KV452793.1 | 2920424 | 3-scf00148    | 3  |
| AX-158017396 | 6 | 108.346 | KV452793.1 | 2922244 | 3-scf00148    | 3  |
| AX-158383704 | 6 | 108.394 | KV452793.1 | 2926057 | 3-scf00148    | 3  |
| AX-158017397 | 6 | 108.394 | KV452793.1 | 2926677 | 3-scf00148    | 3  |
| AX-158017399 | 6 | 108.394 | KV452793.1 | 2930551 | 3-scf00148    | 3  |
| AX-158017403 | 6 | 108.54  | KV452793.1 | 2936019 | 3-scf00148    | 3  |
| AX-158017405 | 6 | 108.831 | KV452793.1 | 2938129 | 3-scf00148    | 3  |
| AX-157856273 | 6 | 108.831 | KV452793.1 | 2940211 | 3-scf00148    | 3  |
| AX-158017406 | 6 | 108.831 | KV452793.1 | 2941450 | 3-scf00148    | 3  |
| AX-158017434 | 6 | 108.831 | KV452793.1 | 2974122 | 3-scf00148    | 3  |
| AX-158017408 | 6 | 108.861 | KV452793.1 | 2943488 | 3-scf00148    | 3  |
| AX-157695532 | 6 | 108.906 | FI884302.1 | 228     | 10R1212 lctal | UN |
| AX-158017410 | 6 | 108.941 | KV452793.1 | 2947784 | 3-scf00148    | 3  |
| AX-158017411 | 6 | 109.05  | KV452793.1 | 2948418 | 3-scf00148    | 3  |
| AX-158017412 | 6 | 109.05  | KV452793.1 | 2949375 | 3-scf00148    | 3  |

|              |   |         |            |         |            |   |
|--------------|---|---------|------------|---------|------------|---|
| AX-158017413 | 6 | 109.109 | KV452793.1 | 2950292 | 3-scf00148 | 3 |
| AX-158421449 | 6 | 109.109 | KV452793.1 | 2957070 | 3-scf00148 | 3 |
| AX-158017415 | 6 | 109.159 | KV452793.1 | 2951752 | 3-scf00148 | 3 |
| AX-158017416 | 6 | 109.159 | KV452793.1 | 2951966 | 3-scf00148 | 3 |
| AX-158017417 | 6 | 109.159 | KV452793.1 | 2953122 | 3-scf00148 | 3 |
| AX-158017418 | 6 | 109.159 | KV452793.1 | 2953567 | 3-scf00148 | 3 |
| AX-158017419 | 6 | 109.159 | KV452793.1 | 2955224 | 3-scf00148 | 3 |
| AX-158017420 | 6 | 109.159 | KV452793.1 | 2955743 | 3-scf00148 | 3 |
| AX-158383706 | 6 | 109.159 | KV452793.1 | 2960627 | 3-scf00148 | 3 |
| AX-158017424 | 6 | 109.305 | KV452793.1 | 2958165 | 3-scf00148 | 3 |
| AX-158017425 | 6 | 109.305 | KV452793.1 | 2958552 | 3-scf00148 | 3 |
| AX-158017426 | 6 | 109.305 | KV452793.1 | 2959245 | 3-scf00148 | 3 |
| AX-158017427 | 6 | 109.504 | KV452793.1 | 2962040 | 3-scf00148 | 3 |
| AX-158017430 | 6 | 109.593 | KV452793.1 | 2968453 | 3-scf00148 | 3 |
| AX-158017431 | 6 | 109.596 | KV452793.1 | 2970565 | 3-scf00148 | 3 |
| AX-158017432 | 6 | 109.596 | KV452793.1 | 2970993 | 3-scf00148 | 3 |
| AX-158017433 | 6 | 109.596 | KV452793.1 | 2971778 | 3-scf00148 | 3 |
| AX-158017435 | 6 | 109.596 | KV452793.1 | 2975220 | 3-scf00148 | 3 |
| AX-157739675 | 6 | 109.596 | KV452793.1 | 2975691 | 3-scf00148 | 3 |
| AX-157756792 | 6 | 109.596 | KV452793.1 | 2981271 | 3-scf00148 | 3 |
| AX-158017437 | 6 | 109.596 | KV452793.1 | 2981324 | 3-scf00148 | 3 |
| AX-158017440 | 6 | 109.596 | KV452793.1 | 2984699 | 3-scf00148 | 3 |
| AX-158017444 | 6 | 109.72  | KV452793.1 | 2989647 | 3-scf00148 | 3 |
| AX-158017445 | 6 | 109.815 | KV452793.1 | 2990033 | 3-scf00148 | 3 |
| AX-158017449 | 6 | 109.815 | KV452793.1 | 2995131 | 3-scf00148 | 3 |
| AX-157820530 | 6 | 109.815 | KV452793.1 | 2998005 | 3-scf00148 | 3 |
| AX-158017450 | 6 | 109.815 | KV452793.1 | 2998331 | 3-scf00148 | 3 |
| AX-158017456 | 6 | 109.815 | KV452793.1 | 3006913 | 3-scf00148 | 3 |
| AX-157876338 | 6 | 110.033 | KV452793.1 | 3010798 | 3-scf00148 | 3 |
| AX-158017443 | 6 | 110.034 | KV452793.1 | 2989101 | 3-scf00148 | 3 |
| AX-158017460 | 6 | 110.034 | KV452793.1 | 3012057 | 3-scf00148 | 3 |
| AX-158017461 | 6 | 110.034 | KV452793.1 | 3012831 | 3-scf00148 | 3 |
| AX-158017462 | 6 | 110.034 | KV452793.1 | 3013443 | 3-scf00148 | 3 |
| AX-157714668 | 6 | 110.034 | KV452793.1 | 3017830 | 3-scf00148 | 3 |
| AX-158407914 | 6 | 110.034 | KV452793.1 | 3019953 | 3-scf00148 | 3 |
| AX-158017465 | 6 | 110.034 | KV452793.1 | 3033055 | 3-scf00148 | 3 |
| AX-157820531 | 6 | 110.034 | KV452793.1 | 3037748 | 3-scf00148 | 3 |
| AX-158017467 | 6 | 110.034 | KV452793.1 | 3039508 | 3-scf00148 | 3 |
| AX-158017468 | 6 | 110.034 | KV452793.1 | 3040145 | 3-scf00148 | 3 |
| AX-157820532 | 6 | 110.034 | KV452793.1 | 3040426 | 3-scf00148 | 3 |
| AX-157820533 | 6 | 110.034 | KV452793.1 | 3044024 | 3-scf00148 | 3 |
| AX-158017469 | 6 | 110.034 | KV452793.1 | 3044641 | 3-scf00148 | 3 |
| AX-158017470 | 6 | 110.034 | KV452793.1 | 3052793 | 3-scf00148 | 3 |
| AX-158017502 | 6 | 110.034 | KV452793.1 | 3118427 | 3-scf00148 | 3 |
| AX-157820541 | 6 | 110.034 | KV452793.1 | 3127922 | 3-scf00148 | 3 |
| AX-157739075 | 6 | 110.143 | KV452793.1 | 3048110 | 3-scf00148 | 3 |
| AX-157723909 | 6 | 110.143 | KV452793.1 | 3050522 | 3-scf00148 | 3 |
| AX-157753785 | 6 | 110.143 | KV452793.1 | 3052296 | 3-scf00148 | 3 |
| AX-157717881 | 6 | 110.143 | KV452793.1 | 3053604 | 3-scf00148 | 3 |
| AX-158017471 | 6 | 110.143 | KV452793.1 | 3054184 | 3-scf00148 | 3 |
| AX-158017472 | 6 | 110.252 | KV452793.1 | 3058894 | 3-scf00148 | 3 |

|              |   |         |            |         |            |   |
|--------------|---|---------|------------|---------|------------|---|
| AX-158017474 | 6 | 110.252 | KV452793.1 | 3061774 | 3-scf00148 | 3 |
| AX-158017475 | 6 | 110.272 | KV452793.1 | 3063868 | 3-scf00148 | 3 |
| AX-158017501 | 6 | 110.272 | KV452793.1 | 3116438 | 3-scf00148 | 3 |
| AX-157773661 | 6 | 110.292 | KV452793.1 | 3064693 | 3-scf00148 | 3 |
| AX-158407916 | 6 | 110.313 | KV452793.1 | 3068686 | 3-scf00148 | 3 |
| AX-158017476 | 6 | 110.334 | KV452793.1 | 3071733 | 3-scf00148 | 3 |
| AX-157725907 | 6 | 110.361 | KV452793.1 | 3073072 | 3-scf00148 | 3 |
| AX-157713667 | 6 | 110.361 | KV452793.1 | 3077587 | 3-scf00148 | 3 |
| AX-157739936 | 6 | 110.361 | KV452793.1 | 3078064 | 3-scf00148 | 3 |
| AX-158017478 | 6 | 110.361 | KV452793.1 | 3078616 | 3-scf00148 | 3 |
| AX-158017480 | 6 | 110.361 | KV452793.1 | 3080347 | 3-scf00148 | 3 |
| AX-158017482 | 6 | 110.361 | KV452793.1 | 3085342 | 3-scf00148 | 3 |
| AX-157746294 | 6 | 110.361 | KV452793.1 | 3087199 | 3-scf00148 | 3 |
| AX-158017491 | 6 | 110.361 | KV452793.1 | 3105761 | 3-scf00148 | 3 |
| AX-158017485 | 6 | 110.38  | KV452793.1 | 3093370 | 3-scf00148 | 3 |
| AX-158407919 | 6 | 110.391 | KV452793.1 | 3098575 | 3-scf00148 | 3 |
| AX-158017492 | 6 | 110.414 | KV452793.1 | 3107073 | 3-scf00148 | 3 |
| AX-158017499 | 6 | 110.414 | KV452793.1 | 3114122 | 3-scf00148 | 3 |
| AX-158017493 | 6 | 110.442 | KV452793.1 | 3108730 | 3-scf00148 | 3 |
| AX-157741660 | 6 | 110.47  | KV452793.1 | 3110279 | 3-scf00148 | 3 |
| AX-158017496 | 6 | 110.47  | KV452793.1 | 3112836 | 3-scf00148 | 3 |
| AX-158017498 | 6 | 110.47  | KV452793.1 | 3113652 | 3-scf00148 | 3 |
| AX-158017500 | 6 | 110.47  | KV452793.1 | 3115766 | 3-scf00148 | 3 |
| AX-158017508 | 6 | 110.47  | KV452793.1 | 3124403 | 3-scf00148 | 3 |
| AX-158379707 | 6 | 110.58  | KV452793.1 | 3129273 | 3-scf00148 | 3 |
| AX-158017497 | 6 | 110.631 | KV452793.1 | 3113241 | 3-scf00148 | 3 |
| AX-158017515 | 6 | 110.631 | KV452793.1 | 3132074 | 3-scf00148 | 3 |
| AX-158017561 | 6 | 110.631 | KV452793.1 | 3185801 | 3-scf00148 | 3 |
| AX-157884884 | 6 | 110.666 | KV452793.1 | 3132935 | 3-scf00148 | 3 |
| AX-157752075 | 6 | 110.689 | KV452793.1 | 3062520 | 3-scf00148 | 3 |
| AX-158017518 | 6 | 110.689 | KV452793.1 | 3138348 | 3-scf00148 | 3 |
| AX-158017520 | 6 | 110.689 | KV452793.1 | 3142145 | 3-scf00148 | 3 |
| AX-158017452 | 6 | 110.715 | KV452793.1 | 3000613 | 3-scf00148 | 3 |
| AX-158017455 | 6 | 110.715 | KV452793.1 | 3003405 | 3-scf00148 | 3 |
| AX-158407915 | 6 | 110.715 | KV452793.1 | 3038142 | 3-scf00148 | 3 |
| AX-158017514 | 6 | 110.715 | KV452793.1 | 3131316 | 3-scf00148 | 3 |
| AX-158017519 | 6 | 110.715 | KV452793.1 | 3141398 | 3-scf00148 | 3 |
| AX-158017522 | 6 | 110.715 | KV452793.1 | 3144922 | 3-scf00148 | 3 |
| AX-158383710 | 6 | 110.715 | KV452793.1 | 3154042 | 3-scf00148 | 3 |
| AX-158407923 | 6 | 110.715 | KV452793.1 | 3207613 | 3-scf00148 | 3 |
| AX-158017527 | 6 | 110.754 | KV452793.1 | 3153858 | 3-scf00148 | 3 |
| AX-158017528 | 6 | 110.798 | KV452793.1 | 3155826 | 3-scf00148 | 3 |
| AX-158017530 | 6 | 110.851 | KV452793.1 | 3157431 | 3-scf00148 | 3 |
| AX-158017548 | 6 | 110.851 | KV452793.1 | 3174646 | 3-scf00148 | 3 |
| AX-158017494 | 6 | 110.907 | KV452793.1 | 3109131 | 3-scf00148 | 3 |
| AX-158017531 | 6 | 110.907 | KV452793.1 | 3159386 | 3-scf00148 | 3 |
| AX-158017532 | 6 | 110.907 | KV452793.1 | 3160459 | 3-scf00148 | 3 |
| AX-157820545 | 6 | 110.907 | KV452793.1 | 3163129 | 3-scf00148 | 3 |
| AX-158017534 | 6 | 110.907 | KV452793.1 | 3164517 | 3-scf00148 | 3 |
| AX-157820546 | 6 | 110.907 | KV452793.1 | 3164716 | 3-scf00148 | 3 |
| AX-158017537 | 6 | 110.907 | KV452793.1 | 3165403 | 3-scf00148 | 3 |

|              |   |         |            |         |            |   |
|--------------|---|---------|------------|---------|------------|---|
| AX-158017539 | 6 | 110.907 | KV452793.1 | 3167608 | 3-scf00148 | 3 |
| AX-158017540 | 6 | 110.907 | KV452793.1 | 3168794 | 3-scf00148 | 3 |
| AX-158017543 | 6 | 111.126 | KV452793.1 | 3172542 | 3-scf00148 | 3 |
| AX-158017549 | 6 | 111.126 | KV452793.1 | 3177686 | 3-scf00148 | 3 |
| AX-158017552 | 6 | 111.126 | KV452793.1 | 3179433 | 3-scf00148 | 3 |
| AX-158017558 | 6 | 111.126 | KV452793.1 | 3183723 | 3-scf00148 | 3 |
| AX-158017563 | 6 | 111.126 | KV452793.1 | 3187046 | 3-scf00148 | 3 |
| AX-158017565 | 6 | 111.126 | KV452793.1 | 3187917 | 3-scf00148 | 3 |
| AX-158017566 | 6 | 111.126 | KV452793.1 | 3188842 | 3-scf00148 | 3 |
| AX-158017569 | 6 | 111.126 | KV452793.1 | 3190585 | 3-scf00148 | 3 |
| AX-157720265 | 6 | 111.126 | KV452793.1 | 3193388 | 3-scf00148 | 3 |
| AX-158017572 | 6 | 111.126 | KV452793.1 | 3195626 | 3-scf00148 | 3 |
| AX-158017547 | 6 | 111.15  | KV452793.1 | 3174137 | 3-scf00148 | 3 |
| AX-158017557 | 6 | 111.15  | KV452793.1 | 3181020 | 3-scf00148 | 3 |
| AX-158017573 | 6 | 111.15  | KV452793.1 | 3198011 | 3-scf00148 | 3 |
| AX-157721100 | 6 | 111.194 | KV452793.1 | 3201562 | 3-scf00148 | 3 |
| AX-158017574 | 6 | 111.235 | KV452793.1 | 3198532 | 3-scf00148 | 3 |
| AX-157876342 | 6 | 111.235 | KV452793.1 | 3201656 | 3-scf00148 | 3 |
| AX-158017576 | 6 | 111.235 | KV452793.1 | 3202336 | 3-scf00148 | 3 |
| AX-158017579 | 6 | 111.235 | KV452793.1 | 3205485 | 3-scf00148 | 3 |
| AX-158405986 | 6 | 111.235 | KV452793.1 | 3207817 | 3-scf00148 | 3 |
| AX-158407927 | 6 | 111.235 | KV452793.1 | 3208783 | 3-scf00148 | 3 |
| AX-158407929 | 6 | 111.235 | KV452793.1 | 3209453 | 3-scf00148 | 3 |
| AX-158407930 | 6 | 111.453 | KV452793.1 | 3209650 | 3-scf00148 | 3 |
| AX-158017583 | 6 | 111.453 | KV452793.1 | 3212906 | 3-scf00148 | 3 |
| AX-157773492 | 6 | 111.453 | KV452793.1 | 3213372 | 3-scf00148 | 3 |
| AX-157772867 | 6 | 111.454 | KV452793.1 | 3213890 | 3-scf00148 | 3 |
| AX-158017584 | 6 | 111.89  | KV452793.1 | 3218741 | 3-scf00148 | 3 |
| AX-158017586 | 6 | 111.89  | KV452793.1 | 3220513 | 3-scf00148 | 3 |
| AX-157757977 | 6 | 111.89  | KV452793.1 | 3223175 | 3-scf00148 | 3 |
| AX-158017589 | 6 | 111.89  | KV452793.1 | 3225820 | 3-scf00148 | 3 |
| AX-158017595 | 6 | 111.89  | KV452793.1 | 3231956 | 3-scf00148 | 3 |
| AX-158017598 | 6 | 111.89  | KV452793.1 | 3233802 | 3-scf00148 | 3 |
| AX-158017600 | 6 | 111.89  | KV452793.1 | 3234117 | 3-scf00148 | 3 |
| AX-157820547 | 6 | 111.89  | KV452793.1 | 3234816 | 3-scf00148 | 3 |
| AX-157820548 | 6 | 111.89  | KV452793.1 | 3236698 | 3-scf00148 | 3 |
| AX-157856277 | 6 | 111.89  | KV452793.1 | 3243796 | 3-scf00148 | 3 |
| AX-157774445 | 6 | 111.892 | KV452793.1 | 3237083 | 3-scf00148 | 3 |
| AX-158017601 | 6 | 111.894 | KV452793.1 | 3238545 | 3-scf00148 | 3 |
| AX-158017606 | 6 | 112.129 | KV452793.1 | 3242427 | 3-scf00148 | 3 |
| AX-158017608 | 6 | 112.325 | KV452793.1 | 3243712 | 3-scf00148 | 3 |
| AX-158017609 | 6 | 112.329 | KV452793.1 | 3245002 | 3-scf00148 | 3 |
| AX-157740154 | 6 | 112.329 | KV452793.1 | 3245466 | 3-scf00148 | 3 |
| AX-158407935 | 6 | 112.33  | KV452793.1 | 3248426 | 3-scf00148 | 3 |
| AX-158017614 | 6 | 112.763 | KV452793.1 | 3250967 | 3-scf00148 | 3 |
| AX-158017622 | 6 | 112.984 | KV452793.1 | 3268767 | 3-scf00148 | 3 |
| AX-158017623 | 6 | 112.984 | KV452793.1 | 3269525 | 3-scf00148 | 3 |
| AX-158383713 | 6 | 112.984 | KV452793.1 | 3270316 | 3-scf00148 | 3 |
| AX-158017625 | 6 | 112.984 | KV452793.1 | 3270730 | 3-scf00148 | 3 |
| AX-158379708 | 6 | 112.984 | KV452793.1 | 3272334 | 3-scf00148 | 3 |
| AX-158017619 | 6 | 113.085 | KV452793.1 | 3261594 | 3-scf00148 | 3 |

|              |   |         |            |         |            |   |
|--------------|---|---------|------------|---------|------------|---|
| AX-158017626 | 6 | 113.085 | KV452793.1 | 3272647 | 3-scf00148 | 3 |
| AX-158017637 | 6 | 113.085 | KV452793.1 | 3294303 | 3-scf00148 | 3 |
| AX-157754656 | 6 | 113.085 | KV452793.1 | 3302432 | 3-scf00148 | 3 |
| AX-158017628 | 6 | 113.353 | KV452793.1 | 3283467 | 3-scf00148 | 3 |
| AX-157721120 | 6 | 113.353 | KV452793.1 | 3284844 | 3-scf00148 | 3 |
| AX-158017630 | 6 | 113.353 | KV452793.1 | 3285170 | 3-scf00148 | 3 |
| AX-158017638 | 6 | 113.353 | KV452793.1 | 3294570 | 3-scf00148 | 3 |
| AX-157772076 | 6 | 113.354 | KV452793.1 | 3294650 | 3-scf00148 | 3 |
| AX-158017647 | 6 | 113.967 | KV452793.1 | 3307640 | 3-scf00148 | 3 |
| AX-158017649 | 6 | 113.967 | KV452793.1 | 3309106 | 3-scf00148 | 3 |
| AX-158017652 | 6 | 113.967 | KV452793.1 | 3311424 | 3-scf00148 | 3 |
| AX-158017653 | 6 | 113.967 | KV452793.1 | 3311880 | 3-scf00148 | 3 |
| AX-158017655 | 6 | 113.967 | KV452793.1 | 3314069 | 3-scf00148 | 3 |
| AX-158017656 | 6 | 113.967 | KV452793.1 | 3314958 | 3-scf00148 | 3 |
| AX-158017659 | 6 | 113.967 | KV452793.1 | 3317553 | 3-scf00148 | 3 |
| AX-157820551 | 6 | 113.967 | KV452793.1 | 3335352 | 3-scf00148 | 3 |
| AX-157876344 | 6 | 114.147 | KV452793.1 | 3319159 | 3-scf00148 | 3 |
| AX-158017662 | 6 | 114.241 | KV452793.1 | 3321453 | 3-scf00148 | 3 |
| AX-158017667 | 6 | 114.241 | KV452793.1 | 3323770 | 3-scf00148 | 3 |
| AX-158017669 | 6 | 114.362 | KV452793.1 | 3325080 | 3-scf00148 | 3 |
| AX-157757371 | 6 | 114.362 | KV452793.1 | 3325290 | 3-scf00148 | 3 |
| AX-157750256 | 6 | 114.362 | KV452793.1 | 3328036 | 3-scf00148 | 3 |
| AX-158017673 | 6 | 114.362 | KV452793.1 | 3329488 | 3-scf00148 | 3 |
| AX-158017672 | 6 | 114.471 | KV452793.1 | 3328731 | 3-scf00148 | 3 |
| AX-157746503 | 6 | 116.151 | KV452793.1 | 3386361 | 3-scf00148 | 3 |
| AX-158017738 | 6 | 116.151 | KV452793.1 | 3399411 | 3-scf00148 | 3 |
| AX-157820559 | 6 | 116.155 | KV452793.1 | 3389124 | 3-scf00148 | 3 |
| AX-157755801 | 6 | 116.155 | KV452793.1 | 3390604 | 3-scf00148 | 3 |
| AX-157743682 | 6 | 116.155 | KV452793.1 | 3392780 | 3-scf00148 | 3 |
| AX-158407939 | 6 | 116.155 | KV452793.1 | 3394268 | 3-scf00148 | 3 |
| AX-158407941 | 6 | 116.155 | KV452793.1 | 3394772 | 3-scf00148 | 3 |
| AX-158017735 | 6 | 116.155 | KV452793.1 | 3397330 | 3-scf00148 | 3 |
| AX-158017736 | 6 | 116.155 | KV452793.1 | 3399198 | 3-scf00148 | 3 |
| AX-158017739 | 6 | 116.155 | KV452793.1 | 3400695 | 3-scf00148 | 3 |
| AX-158017741 | 6 | 116.155 | KV452793.1 | 3400940 | 3-scf00148 | 3 |
| AX-158017743 | 6 | 116.155 | KV452793.1 | 3402168 | 3-scf00148 | 3 |
| AX-158017744 | 6 | 116.155 | KV452793.1 | 3402455 | 3-scf00148 | 3 |
| AX-158017745 | 6 | 116.155 | KV452793.1 | 3404890 | 3-scf00148 | 3 |
| AX-158017748 | 6 | 116.155 | KV452793.1 | 3417468 | 3-scf00148 | 3 |
| AX-158017749 | 6 | 116.409 | KV452793.1 | 3418264 | 3-scf00148 | 3 |
| AX-158017754 | 6 | 116.409 | KV452793.1 | 3421677 | 3-scf00148 | 3 |
| AX-158017755 | 6 | 116.409 | KV452793.1 | 3427469 | 3-scf00148 | 3 |
| AX-158017757 | 6 | 116.409 | KV452793.1 | 3427848 | 3-scf00148 | 3 |
| AX-158017762 | 6 | 116.913 | KV452793.1 | 3432942 | 3-scf00148 | 3 |
| AX-158017764 | 6 | 116.917 | KV452793.1 | 3434875 | 3-scf00148 | 3 |
| AX-158017767 | 6 | 116.927 | KV452793.1 | 3436956 | 3-scf00148 | 3 |
| AX-158017770 | 6 | 116.927 | KV452793.1 | 3438633 | 3-scf00148 | 3 |
| AX-158017773 | 6 | 116.927 | KV452793.1 | 3441050 | 3-scf00148 | 3 |
| AX-158017822 | 6 | 116.927 | KV452793.1 | 3489120 | 3-scf00148 | 3 |
| AX-157820564 | 6 | 116.927 | KV452793.1 | 3495153 | 3-scf00148 | 3 |
| AX-158017844 | 6 | 116.927 | KV452793.1 | 3509080 | 3-scf00148 | 3 |

|              |   |         |            |         |            |    |
|--------------|---|---------|------------|---------|------------|----|
| AX-157689967 | 6 | 116.927 |            | 89      | scf17016   | UN |
| AX-158017777 | 6 | 117.357 | KV452793.1 | 3444891 | 3-scf00148 | 3  |
| AX-157865300 | 6 | 117.357 | KV452793.1 | 3445259 | 3-scf00148 | 3  |
| AX-158017778 | 6 | 117.357 | KV452793.1 | 3446076 | 3-scf00148 | 3  |
| AX-158017779 | 6 | 117.357 | KV452793.1 | 3448854 | 3-scf00148 | 3  |
| AX-158017781 | 6 | 117.357 | KV452793.1 | 3449792 | 3-scf00148 | 3  |
| AX-158017782 | 6 | 117.357 | KV452793.1 | 3451554 | 3-scf00148 | 3  |
| AX-158017784 | 6 | 117.357 | KV452793.1 | 3459856 | 3-scf00148 | 3  |
| AX-158017788 | 6 | 117.357 | KV452793.1 | 3463379 | 3-scf00148 | 3  |
| AX-157742538 | 6 | 117.357 | KV452793.1 | 3464192 | 3-scf00148 | 3  |
| AX-158017793 | 6 | 117.357 | KV452793.1 | 3471307 | 3-scf00148 | 3  |
| AX-157739610 | 6 | 117.357 | KV452793.1 | 3473108 | 3-scf00148 | 3  |
| AX-157884885 | 6 | 117.357 | KV452793.1 | 3473487 | 3-scf00148 | 3  |
| AX-158017795 | 6 | 117.357 | KV452793.1 | 3474231 | 3-scf00148 | 3  |
| AX-158017801 | 6 | 117.357 | KV452793.1 | 3475999 | 3-scf00148 | 3  |
| AX-158017805 | 6 | 117.357 | KV452793.1 | 3479514 | 3-scf00148 | 3  |
| AX-158017807 | 6 | 117.357 | KV452793.1 | 3480763 | 3-scf00148 | 3  |
| AX-158017808 | 6 | 117.357 | KV452793.1 | 3481373 | 3-scf00148 | 3  |
| AX-158017810 | 6 | 117.357 | KV452793.1 | 3482605 | 3-scf00148 | 3  |
| AX-158017811 | 6 | 117.357 | KV452793.1 | 3483008 | 3-scf00148 | 3  |
| AX-158017813 | 6 | 117.357 | KV452793.1 | 3483736 | 3-scf00148 | 3  |
| AX-158017814 | 6 | 117.357 | KV452793.1 | 3484349 | 3-scf00148 | 3  |
| AX-158017825 | 6 | 117.357 | KV452793.1 | 3489541 | 3-scf00148 | 3  |
| AX-158017828 | 6 | 117.357 | KV452793.1 | 3490611 | 3-scf00148 | 3  |
| AX-158017829 | 6 | 117.357 | KV452793.1 | 3490857 | 3-scf00148 | 3  |
| AX-157820562 | 6 | 117.357 | KV452793.1 | 3491785 | 3-scf00148 | 3  |
| AX-157820563 | 6 | 117.357 | KV452793.1 | 3492625 | 3-scf00148 | 3  |
| AX-158391136 | 6 | 117.357 | KV452793.1 | 3494388 | 3-scf00148 | 3  |
| AX-158017832 | 6 | 117.357 | KV452793.1 | 3498645 | 3-scf00148 | 3  |
| AX-158017835 | 6 | 117.357 | KV452793.1 | 3499360 | 3-scf00148 | 3  |
| AX-157743373 | 6 | 117.357 | KV452793.1 | 3501481 | 3-scf00148 | 3  |
| AX-158017838 | 6 | 117.357 | KV452793.1 | 3504266 | 3-scf00148 | 3  |
| AX-157820566 | 6 | 117.357 | KV452793.1 | 3505332 | 3-scf00148 | 3  |
| AX-157820567 | 6 | 117.357 | KV452793.1 | 3505381 | 3-scf00148 | 3  |
| AX-157820569 | 6 | 117.357 | KV452793.1 | 3506213 | 3-scf00148 | 3  |
| AX-158017842 | 6 | 117.357 | KV452793.1 | 3507537 | 3-scf00148 | 3  |
| AX-158017846 | 6 | 117.357 | KV452793.1 | 3510688 | 3-scf00148 | 3  |
| AX-157820572 | 6 | 117.357 | KV452793.1 | 3512843 | 3-scf00148 | 3  |
| AX-157820573 | 6 | 117.357 | KV452793.1 | 3512905 | 3-scf00148 | 3  |
| AX-158017849 | 6 | 117.357 | KV452793.1 | 3513125 | 3-scf00148 | 3  |
| AX-158017851 | 6 | 117.357 | KV452793.1 | 3515645 | 3-scf00148 | 3  |
| AX-158017856 | 6 | 117.357 | KV452793.1 | 3519407 | 3-scf00148 | 3  |
| AX-157820578 | 6 | 117.357 | KV452793.1 | 3519563 | 3-scf00148 | 3  |
| AX-158017857 | 6 | 117.357 | KV452793.1 | 3520043 | 3-scf00148 | 3  |
| AX-157820579 | 6 | 117.357 | KV452793.1 | 3520104 | 3-scf00148 | 3  |
| AX-157884886 | 6 | 117.357 | KV452793.1 | 3521756 | 3-scf00148 | 3  |
| AX-158017859 | 6 | 117.357 | KV452793.1 | 3522474 | 3-scf00148 | 3  |
| AX-158017860 | 6 | 117.357 | KV452793.1 | 3523366 | 3-scf00148 | 3  |
| AX-158017861 | 6 | 117.357 | KV452793.1 | 3524170 | 3-scf00148 | 3  |
| AX-158017862 | 6 | 117.357 | KV452793.1 | 3524530 | 3-scf00148 | 3  |
| AX-158017863 | 6 | 117.357 | KV452793.1 | 3528096 | 3-scf00148 | 3  |



|              |   |         |            |         |            |   |
|--------------|---|---------|------------|---------|------------|---|
| AX-158017864 | 6 | 117.357 | KV452793.1 | 3528566 | 3-scf00148 | 3 |
| AX-158017865 | 6 | 117.357 | KV452793.1 | 3529426 | 3-scf00148 | 3 |
| AX-157820580 | 6 | 117.357 | KV452793.1 | 3531328 | 3-scf00148 | 3 |
| AX-158017867 | 6 | 117.357 | KV452793.1 | 3533870 | 3-scf00148 | 3 |
| AX-158017869 | 6 | 117.357 | KV452793.1 | 3536671 | 3-scf00148 | 3 |
| AX-158017870 | 6 | 117.357 | KV452793.1 | 3537817 | 3-scf00148 | 3 |
| AX-158017873 | 6 | 117.357 | KV452793.1 | 3539520 | 3-scf00148 | 3 |
| AX-158017875 | 6 | 117.357 | KV452793.1 | 3541121 | 3-scf00148 | 3 |
| AX-157745809 | 6 | 117.357 | KV452793.1 | 3603517 | 3-scf00148 | 3 |
| AX-157707592 | 6 | 117.357 | KV452793.1 | 3716511 | 3-scf00148 | 3 |
| AX-158017872 | 6 | 117.466 | KV452793.1 | 3538677 | 3-scf00148 | 3 |
| AX-158017878 | 6 | 117.794 | KV452793.1 | 3545567 | 3-scf00148 | 3 |
| AX-158017879 | 6 | 117.794 | KV452793.1 | 3545799 | 3-scf00148 | 3 |
| AX-158017957 | 6 | 117.794 | KV452793.1 | 3628346 | 3-scf00148 | 3 |
| AX-158017877 | 6 | 117.903 | KV452793.1 | 3544350 | 3-scf00148 | 3 |
| AX-158017893 | 6 | 117.903 | KV452793.1 | 3558979 | 3-scf00148 | 3 |
| AX-158017895 | 6 | 117.903 | KV452793.1 | 3559290 | 3-scf00148 | 3 |
| AX-157865301 | 6 | 117.903 | KV452793.1 | 3560394 | 3-scf00148 | 3 |
| AX-158017896 | 6 | 117.903 | KV452793.1 | 3560601 | 3-scf00148 | 3 |
| AX-157820582 | 6 | 117.903 | KV452793.1 | 3563315 | 3-scf00148 | 3 |
| AX-158017903 | 6 | 117.903 | KV452793.1 | 3565184 | 3-scf00148 | 3 |
| AX-158017905 | 6 | 117.903 | KV452793.1 | 3565803 | 3-scf00148 | 3 |
| AX-158017906 | 6 | 117.903 | KV452793.1 | 3567296 | 3-scf00148 | 3 |
| AX-158017907 | 6 | 117.903 | KV452793.1 | 3568062 | 3-scf00148 | 3 |
| AX-157751252 | 6 | 117.903 | KV452793.1 | 3568196 | 3-scf00148 | 3 |
| AX-157870225 | 6 | 117.903 | KV452793.1 | 3569181 | 3-scf00148 | 3 |
| AX-158017908 | 6 | 117.903 | KV452793.1 | 3569680 | 3-scf00148 | 3 |
| AX-158017909 | 6 | 117.903 | KV452793.1 | 3570268 | 3-scf00148 | 3 |
| AX-158017912 | 6 | 117.903 | KV452793.1 | 3573202 | 3-scf00148 | 3 |
| AX-157723340 | 6 | 117.903 | KV452793.1 | 3573408 | 3-scf00148 | 3 |
| AX-157771438 | 6 | 117.903 | KV452793.1 | 3577457 | 3-scf00148 | 3 |
| AX-158017918 | 6 | 117.903 | KV452793.1 | 3579948 | 3-scf00148 | 3 |
| AX-157740935 | 6 | 117.903 | KV452793.1 | 3580419 | 3-scf00148 | 3 |
| AX-157820583 | 6 | 117.903 | KV452793.1 | 3580590 | 3-scf00148 | 3 |
| AX-158017921 | 6 | 117.903 | KV452793.1 | 3586038 | 3-scf00148 | 3 |
| AX-157820584 | 6 | 117.903 | KV452793.1 | 3587842 | 3-scf00148 | 3 |
| AX-157752414 | 6 | 117.903 | KV452793.1 | 3594853 | 3-scf00148 | 3 |
| AX-158017932 | 6 | 117.903 | KV452793.1 | 3595501 | 3-scf00148 | 3 |
| AX-158017933 | 6 | 117.903 | KV452793.1 | 3596042 | 3-scf00148 | 3 |
| AX-157820586 | 6 | 117.903 | KV452793.1 | 3630001 | 3-scf00148 | 3 |
| AX-158018027 | 6 | 117.903 | KV452793.1 | 3709098 | 3-scf00148 | 3 |
| AX-158017934 | 6 | 117.957 | KV452793.1 | 3596731 | 3-scf00148 | 3 |
| AX-158017843 | 6 | 118.012 | KV452793.1 | 3508308 | 3-scf00148 | 3 |
| AX-158017939 | 6 | 118.012 | KV452793.1 | 3602738 | 3-scf00148 | 3 |
| AX-158017941 | 6 | 118.012 | KV452793.1 | 3604471 | 3-scf00148 | 3 |
| AX-158017944 | 6 | 118.012 | KV452793.1 | 3606190 | 3-scf00148 | 3 |
| AX-158017946 | 6 | 118.012 | KV452793.1 | 3613441 | 3-scf00148 | 3 |
| AX-158017948 | 6 | 118.031 | KV452793.1 | 3614801 | 3-scf00148 | 3 |
| AX-158017951 | 6 | 118.051 | KV452793.1 | 3617817 | 3-scf00148 | 3 |
| AX-157749700 | 6 | 118.072 | KV452793.1 | 3620577 | 3-scf00148 | 3 |
| AX-158017955 | 6 | 118.072 | KV452793.1 | 3627825 | 3-scf00148 | 3 |

|              |   |         |             |         |            |    |
|--------------|---|---------|-------------|---------|------------|----|
| AX-158017958 | 6 | 118.082 | KV452793.1  | 3630778 | 3-scf00148 | 3  |
| AX-157719662 | 6 | 118.089 | KV452793.1  | 3647461 | 3-scf00148 | 3  |
| AX-158017962 | 6 | 118.109 | KV452793.1  | 3651191 | 3-scf00148 | 3  |
| AX-158017882 | 6 | 118.121 | KV452793.1  | 3548406 | 3-scf00148 | 3  |
| AX-158017920 | 6 | 118.121 | KV452793.1  | 3584461 | 3-scf00148 | 3  |
| AX-158017942 | 6 | 118.121 | KV452793.1  | 3605548 | 3-scf00148 | 3  |
| AX-157820587 | 6 | 118.121 | KV452793.1  | 3636619 | 3-scf00148 | 3  |
| AX-158017960 | 6 | 118.121 | KV452793.1  | 3647508 | 3-scf00148 | 3  |
| AX-157721050 | 6 | 118.121 | KV452793.1  | 3652695 | 3-scf00148 | 3  |
| AX-158017969 | 6 | 118.121 | KV452793.1  | 3658896 | 3-scf00148 | 3  |
| AX-158017970 | 6 | 118.121 | KV452793.1  | 3660830 | 3-scf00148 | 3  |
| AX-158017973 | 6 | 118.121 | KV452793.1  | 3663104 | 3-scf00148 | 3  |
| AX-158017974 | 6 | 118.121 | KV452793.1  | 3663619 | 3-scf00148 | 3  |
| AX-157762598 | 6 | 118.121 | KV452793.1  | 3668184 | 3-scf00148 | 3  |
| AX-157744030 | 6 | 118.121 | KV452793.1  | 3668633 | 3-scf00148 | 3  |
| AX-158391140 | 6 | 118.121 | KV452793.1  | 3668680 | 3-scf00148 | 3  |
| AX-157735354 | 6 | 118.121 | KV452793.1  | 3668747 | 3-scf00148 | 3  |
| AX-158017983 | 6 | 118.121 | KV452793.1  | 3670964 | 3-scf00148 | 3  |
| AX-157720656 | 6 | 118.121 | KV452793.1  | 3674115 | 3-scf00148 | 3  |
| AX-158017986 | 6 | 118.121 | KV452793.1  | 3680029 | 3-scf00148 | 3  |
| AX-158017990 | 6 | 118.121 | KV452793.1  | 3681833 | 3-scf00148 | 3  |
| AX-158018260 | 6 | 118.121 | KV452793.1  | 3977462 | 3-scf00148 | 3  |
| AX-157706895 | 6 | 118.121 | 3ML01033116 | 229     | scf08752_1 | UN |
| AX-158017997 | 6 | 118.285 | KV452793.1  | 3685873 | 3-scf00148 | 3  |
| AX-158018000 | 6 | 118.285 | KV452793.1  | 3687692 | 3-scf00148 | 3  |
| AX-157707484 | 6 | 118.318 | 3ML01034380 | 377     | scf10054_1 | UN |
| AX-158017925 | 6 | 118.449 | KV452793.1  | 3589710 | 3-scf00148 | 3  |
| AX-158017945 | 6 | 118.449 | KV452793.1  | 3609228 | 3-scf00148 | 3  |
| AX-158017953 | 6 | 118.449 | KV452793.1  | 3623535 | 3-scf00148 | 3  |
| AX-158018003 | 6 | 118.449 | KV452793.1  | 3688573 | 3-scf00148 | 3  |
| AX-158018008 | 6 | 118.449 | KV452793.1  | 3693394 | 3-scf00148 | 3  |
| AX-158018009 | 6 | 118.449 | KV452793.1  | 3694584 | 3-scf00148 | 3  |
| AX-157758081 | 6 | 118.449 | KV452793.1  | 3695127 | 3-scf00148 | 3  |
| AX-158018010 | 6 | 118.449 | KV452793.1  | 3695216 | 3-scf00148 | 3  |
| AX-158018012 | 6 | 118.449 | KV452793.1  | 3696088 | 3-scf00148 | 3  |
| AX-157773613 | 6 | 118.449 | KV452793.1  | 3696134 | 3-scf00148 | 3  |
| AX-158018013 | 6 | 118.449 | KV452793.1  | 3696553 | 3-scf00148 | 3  |
| AX-158018015 | 6 | 118.449 | KV452793.1  | 3697288 | 3-scf00148 | 3  |
| AX-157820590 | 6 | 118.449 | KV452793.1  | 3697761 | 3-scf00148 | 3  |
| AX-158018016 | 6 | 118.449 | KV452793.1  | 3700530 | 3-scf00148 | 3  |
| AX-158018018 | 6 | 118.449 | KV452793.1  | 3701608 | 3-scf00148 | 3  |
| AX-158018019 | 6 | 118.449 | KV452793.1  | 3703732 | 3-scf00148 | 3  |
| AX-158018025 | 6 | 118.449 | KV452793.1  | 3708614 | 3-scf00148 | 3  |
| AX-158018028 | 6 | 118.449 | KV452793.1  | 3709938 | 3-scf00148 | 3  |
| AX-158407949 | 6 | 118.449 | KV452793.1  | 3710125 | 3-scf00148 | 3  |
| AX-158018029 | 6 | 118.449 | KV452793.1  | 3710827 | 3-scf00148 | 3  |
| AX-158018030 | 6 | 118.449 | KV452793.1  | 3711325 | 3-scf00148 | 3  |
| AX-158018035 | 6 | 118.449 | KV452793.1  | 3712488 | 3-scf00148 | 3  |
| AX-158383717 | 6 | 118.449 | KV452793.1  | 3745466 | 3-scf00148 | 3  |
| AX-158018036 | 6 | 118.472 | KV452793.1  | 3713675 | 3-scf00148 | 3  |
| AX-158018051 | 6 | 118.472 | KV452793.1  | 3732188 | 3-scf00148 | 3  |

|              |   |         |            |         |            |   |
|--------------|---|---------|------------|---------|------------|---|
| AX-158018040 | 6 | 118.515 | KV452793.1 | 3721156 | 3-scf00148 | 3 |
| AX-158018043 | 6 | 118.558 | KV452793.1 | 3724469 | 3-scf00148 | 3 |
| AX-157820594 | 6 | 118.623 | KV452793.1 | 3724565 | 3-scf00148 | 3 |
| AX-157750395 | 6 | 118.668 | KV452793.1 | 3726684 | 3-scf00148 | 3 |
| AX-158018049 | 6 | 118.668 | KV452793.1 | 3727503 | 3-scf00148 | 3 |
| AX-158018050 | 6 | 118.668 | KV452793.1 | 3728855 | 3-scf00148 | 3 |
| AX-157820596 | 6 | 118.668 | KV452793.1 | 3729061 | 3-scf00148 | 3 |
| AX-158018052 | 6 | 118.668 | KV452793.1 | 3737329 | 3-scf00148 | 3 |
| AX-158018055 | 6 | 118.681 | KV452793.1 | 3739823 | 3-scf00148 | 3 |
| AX-158018056 | 6 | 118.724 | KV452793.1 | 3740055 | 3-scf00148 | 3 |
| AX-158018057 | 6 | 118.76  | KV452793.1 | 3741878 | 3-scf00148 | 3 |
| AX-157865303 | 6 | 118.76  | KV452793.1 | 3742654 | 3-scf00148 | 3 |
| AX-158018060 | 6 | 118.76  | KV452793.1 | 3743851 | 3-scf00148 | 3 |
| AX-157738604 | 6 | 118.777 | KV452793.1 | 3741019 | 3-scf00148 | 3 |
| AX-158018058 | 6 | 118.777 | KV452793.1 | 3742199 | 3-scf00148 | 3 |
| AX-158018059 | 6 | 118.777 | KV452793.1 | 3743212 | 3-scf00148 | 3 |
| AX-158018061 | 6 | 118.777 | KV452793.1 | 3744739 | 3-scf00148 | 3 |
| AX-157748346 | 6 | 118.839 | KV452793.1 | 3745908 | 3-scf00148 | 3 |
| AX-158018062 | 6 | 118.886 | KV452793.1 | 3746959 | 3-scf00148 | 3 |
| AX-158018063 | 6 | 118.886 | KV452793.1 | 3748210 | 3-scf00148 | 3 |
| AX-158018066 | 6 | 118.886 | KV452793.1 | 3756560 | 3-scf00148 | 3 |
| AX-157752973 | 6 | 118.886 | KV452793.1 | 3757987 | 3-scf00148 | 3 |
| AX-157718749 | 6 | 118.886 | KV452793.1 | 3897197 | 3-scf00148 | 3 |
| AX-157820604 | 6 | 118.995 | KV452793.1 | 3762284 | 3-scf00148 | 3 |
| AX-158018073 | 6 | 119.052 | KV452793.1 | 3769035 | 3-scf00148 | 3 |
| AX-158018074 | 6 | 119.105 | KV452793.1 | 3769503 | 3-scf00148 | 3 |
| AX-158018077 | 6 | 119.105 | KV452793.1 | 3772048 | 3-scf00148 | 3 |
| AX-158018078 | 6 | 119.105 | KV452793.1 | 3773552 | 3-scf00148 | 3 |
| AX-157772500 | 6 | 119.105 | KV452793.1 | 3774382 | 3-scf00148 | 3 |
| AX-157820606 | 6 | 119.105 | KV452793.1 | 3781238 | 3-scf00148 | 3 |
| AX-157741339 | 6 | 119.105 | KV452793.1 | 3785695 | 3-scf00148 | 3 |
| AX-158018071 | 6 | 119.187 | KV452793.1 | 3760932 | 3-scf00148 | 3 |
| AX-158018088 | 6 | 119.187 | KV452793.1 | 3782638 | 3-scf00148 | 3 |
| AX-157820608 | 6 | 119.187 | KV452793.1 | 3793581 | 3-scf00148 | 3 |
| AX-158018091 | 6 | 119.214 | KV452793.1 | 3786121 | 3-scf00148 | 3 |
| AX-157820607 | 6 | 119.214 | KV452793.1 | 3788259 | 3-scf00148 | 3 |
| AX-157752523 | 6 | 119.214 | KV452793.1 | 3790710 | 3-scf00148 | 3 |
| AX-158018094 | 6 | 119.214 | KV452793.1 | 3794184 | 3-scf00148 | 3 |
| AX-158018101 | 6 | 119.214 | KV452793.1 | 3798207 | 3-scf00148 | 3 |
| AX-157820610 | 6 | 119.214 | KV452793.1 | 3800724 | 3-scf00148 | 3 |
| AX-158018079 | 6 | 119.215 | KV452793.1 | 3774154 | 3-scf00148 | 3 |
| AX-158018086 | 6 | 119.215 | KV452793.1 | 3781743 | 3-scf00148 | 3 |
| AX-158018089 | 6 | 119.215 | KV452793.1 | 3783026 | 3-scf00148 | 3 |
| AX-158018106 | 6 | 119.215 | KV452793.1 | 3805957 | 3-scf00148 | 3 |
| AX-157820611 | 6 | 119.215 | KV452793.1 | 3806666 | 3-scf00148 | 3 |
| AX-158018109 | 6 | 119.408 | KV452793.1 | 3808193 | 3-scf00148 | 3 |
| AX-158018115 | 6 | 119.408 | KV452793.1 | 3812266 | 3-scf00148 | 3 |
| AX-158018145 | 6 | 119.408 | KV452793.1 | 3847744 | 3-scf00148 | 3 |
| AX-158018065 | 6 | 119.427 | KV452793.1 | 3755842 | 3-scf00148 | 3 |
| AX-158018067 | 6 | 119.427 | KV452793.1 | 3758299 | 3-scf00148 | 3 |
| AX-158018117 | 6 | 119.427 | KV452793.1 | 3816353 | 3-scf00148 | 3 |

|              |   |         |            |         |            |   |
|--------------|---|---------|------------|---------|------------|---|
| AX-158018124 | 6 | 119.458 | KV452793.1 | 3824526 | 3-scf00148 | 3 |
| AX-157751106 | 6 | 119.458 | KV452793.1 | 3826459 | 3-scf00148 | 3 |
| AX-158018128 | 6 | 119.458 | KV452793.1 | 3827778 | 3-scf00148 | 3 |
| AX-158018129 | 6 | 119.458 | KV452793.1 | 3828083 | 3-scf00148 | 3 |
| AX-158018130 | 6 | 119.458 | KV452793.1 | 3831680 | 3-scf00148 | 3 |
| AX-158018131 | 6 | 119.458 | KV452793.1 | 3831881 | 3-scf00148 | 3 |
| AX-158018133 | 6 | 119.458 | KV452793.1 | 3832976 | 3-scf00148 | 3 |
| AX-158018139 | 6 | 119.458 | KV452793.1 | 3843159 | 3-scf00148 | 3 |
| AX-158018127 | 6 | 119.664 | KV452793.1 | 3826375 | 3-scf00148 | 3 |
| AX-158018142 | 6 | 119.664 | KV452793.1 | 3845341 | 3-scf00148 | 3 |
| AX-158018143 | 6 | 119.664 | KV452793.1 | 3846636 | 3-scf00148 | 3 |
| AX-158018151 | 6 | 119.664 | KV452793.1 | 3851430 | 3-scf00148 | 3 |
| AX-158018141 | 6 | 119.869 | KV452793.1 | 3844983 | 3-scf00148 | 3 |
| AX-158018154 | 6 | 119.869 | KV452793.1 | 3852859 | 3-scf00148 | 3 |
| AX-157820614 | 6 | 119.869 | KV452793.1 | 3854732 | 3-scf00148 | 3 |
| AX-157820615 | 6 | 119.869 | KV452793.1 | 3855040 | 3-scf00148 | 3 |
| AX-158018155 | 6 | 119.869 | KV452793.1 | 3855311 | 3-scf00148 | 3 |
| AX-157742199 | 6 | 119.869 | KV452793.1 | 3857655 | 3-scf00148 | 3 |
| AX-158018158 | 6 | 119.869 | KV452793.1 | 3859685 | 3-scf00148 | 3 |
| AX-157820616 | 6 | 119.869 | KV452793.1 | 3866931 | 3-scf00148 | 3 |
| AX-158018166 | 6 | 119.869 | KV452793.1 | 3869720 | 3-scf00148 | 3 |
| AX-158018169 | 6 | 119.869 | KV452793.1 | 3873063 | 3-scf00148 | 3 |
| AX-158018173 | 6 | 119.869 | KV452793.1 | 3876006 | 3-scf00148 | 3 |
| AX-158018174 | 6 | 119.869 | KV452793.1 | 3877014 | 3-scf00148 | 3 |
| AX-158018177 | 6 | 119.869 | KV452793.1 | 3879706 | 3-scf00148 | 3 |
| AX-158018179 | 6 | 119.869 | KV452793.1 | 3881047 | 3-scf00148 | 3 |
| AX-157820617 | 6 | 119.869 | KV452793.1 | 3881273 | 3-scf00148 | 3 |
| AX-158018199 | 6 | 119.869 | KV452793.1 | 3915192 | 3-scf00148 | 3 |
| AX-158018180 | 6 | 119.874 | KV452793.1 | 3881736 | 3-scf00148 | 3 |
| AX-157820618 | 6 | 119.878 | KV452793.1 | 3882880 | 3-scf00148 | 3 |
| AX-158018081 | 6 | 120.012 | KV452793.1 | 3775103 | 3-scf00148 | 3 |
| AX-158018134 | 6 | 120.012 | KV452793.1 | 3835656 | 3-scf00148 | 3 |
| AX-158018181 | 6 | 120.012 | KV452793.1 | 3886111 | 3-scf00148 | 3 |
| AX-158018186 | 6 | 120.012 | KV452793.1 | 3893415 | 3-scf00148 | 3 |
| AX-157743093 | 6 | 120.012 | KV452793.1 | 3898104 | 3-scf00148 | 3 |
| AX-157713385 | 6 | 120.168 | KV452793.1 | 3898666 | 3-scf00148 | 3 |
| AX-157856283 | 6 | 120.307 | KV452793.1 | 3900222 | 3-scf00148 | 3 |
| AX-158018190 | 6 | 120.307 | KV452793.1 | 3903889 | 3-scf00148 | 3 |
| AX-157820621 | 6 | 120.307 | KV452793.1 | 3904167 | 3-scf00148 | 3 |
| AX-157820622 | 6 | 120.307 | KV452793.1 | 3904458 | 3-scf00148 | 3 |
| AX-158018191 | 6 | 120.307 | KV452793.1 | 3905136 | 3-scf00148 | 3 |
| AX-158018192 | 6 | 120.378 | KV452793.1 | 3905965 | 3-scf00148 | 3 |
| AX-158018196 | 6 | 120.416 | KV452793.1 | 3909660 | 3-scf00148 | 3 |
| AX-158018197 | 6 | 120.416 | KV452793.1 | 3910701 | 3-scf00148 | 3 |
| AX-158018202 | 6 | 120.635 | KV452793.1 | 3916811 | 3-scf00148 | 3 |
| AX-157876357 | 6 | 120.635 | KV452793.1 | 3918623 | 3-scf00148 | 3 |
| AX-157710119 | 6 | 120.74  | KV452793.1 | 3918234 | 3-scf00148 | 3 |
| AX-157717350 | 6 | 120.74  | KV452793.1 | 3918782 | 3-scf00148 | 3 |
| AX-158018204 | 6 | 120.853 | KV452793.1 | 3922335 | 3-scf00148 | 3 |
| AX-158018210 | 6 | 120.853 | KV452793.1 | 3926833 | 3-scf00148 | 3 |
| AX-158018212 | 6 | 120.853 | KV452793.1 | 3927603 | 3-scf00148 | 3 |

|              |   |         |             |         |            |    |
|--------------|---|---------|-------------|---------|------------|----|
| AX-158018213 | 6 | 120.853 | KV452793.1  | 3929346 | 3-scf00148 | 3  |
| AX-158018216 | 6 | 120.853 | KV452793.1  | 3930743 | 3-scf00148 | 3  |
| AX-158018221 | 6 | 120.853 | KV452793.1  | 3934041 | 3-scf00148 | 3  |
| AX-158018223 | 6 | 120.899 | KV452793.1  | 3935231 | 3-scf00148 | 3  |
| AX-158018229 | 6 | 120.922 | KV452793.1  | 3939901 | 3-scf00148 | 3  |
| AX-158018225 | 6 | 120.962 | KV452793.1  | 3936629 | 3-scf00148 | 3  |
| AX-157752287 | 6 | 120.962 | KV452793.1  | 3941549 | 3-scf00148 | 3  |
| AX-158018232 | 6 | 120.962 | KV452793.1  | 3944424 | 3-scf00148 | 3  |
| AX-158018236 | 6 | 120.962 | KV452793.1  | 3948300 | 3-scf00148 | 3  |
| AX-158018238 | 6 | 120.962 | KV452793.1  | 3949244 | 3-scf00148 | 3  |
| AX-157820623 | 6 | 120.962 | KV452793.1  | 3950719 | 3-scf00148 | 3  |
| AX-158018241 | 6 | 120.962 | KV452793.1  | 3952989 | 3-scf00148 | 3  |
| AX-158018242 | 6 | 120.962 | KV452793.1  | 3953342 | 3-scf00148 | 3  |
| AX-158018244 | 6 | 120.962 | KV452793.1  | 3954197 | 3-scf00148 | 3  |
| AX-158018245 | 6 | 120.962 | KV452793.1  | 3954987 | 3-scf00148 | 3  |
| AX-157820625 | 6 | 120.962 | KV452793.1  | 3961200 | 3-scf00148 | 3  |
| AX-158018250 | 6 | 120.962 | KV452793.1  | 3963768 | 3-scf00148 | 3  |
| AX-158391143 | 6 | 120.962 | KV452793.1  | 3967112 | 3-scf00148 | 3  |
| AX-158406009 | 6 | 120.962 | KV452793.1  | 4017721 | 3-scf00148 | 3  |
| AX-157706967 | 6 | 120.962 | 3ML01033253 | 156     | scf08894_1 | UN |
| AX-158018253 | 6 | 121.072 | KV452793.1  | 3966590 | 3-scf00148 | 3  |
| AX-157820626 | 6 | 121.072 | KV452793.1  | 3966757 | 3-scf00148 | 3  |
| AX-158018254 | 6 | 121.072 | KV452793.1  | 3967162 | 3-scf00148 | 3  |
| AX-157820629 | 6 | 121.234 | KV452793.1  | 3981425 | 3-scf00148 | 3  |
| AX-158018268 | 6 | 121.399 | KV452793.1  | 3982666 | 3-scf00148 | 3  |
| AX-158018270 | 6 | 121.399 | KV452793.1  | 3984877 | 3-scf00148 | 3  |
| AX-158018271 | 6 | 121.399 | KV452793.1  | 3986759 | 3-scf00148 | 3  |
| AX-157746210 | 6 | 121.399 | KV452793.1  | 3987544 | 3-scf00148 | 3  |
| AX-157717178 | 6 | 121.399 | KV452793.1  | 3989012 | 3-scf00148 | 3  |
| AX-157758296 | 6 | 121.618 | KV452793.1  | 3967681 | 3-scf00148 | 3  |
| AX-157820630 | 6 | 121.618 | KV452793.1  | 3993711 | 3-scf00148 | 3  |
| AX-157820634 | 6 | 121.618 | KV452793.1  | 3997655 | 3-scf00148 | 3  |
| AX-158018273 | 6 | 121.618 | KV452793.1  | 4000544 | 3-scf00148 | 3  |
| AX-158018274 | 6 | 121.618 | KV452793.1  | 4001365 | 3-scf00148 | 3  |
| AX-158018276 | 6 | 121.618 | KV452793.1  | 4002988 | 3-scf00148 | 3  |
| AX-158018277 | 6 | 121.618 | KV452793.1  | 4003345 | 3-scf00148 | 3  |
| AX-157820636 | 6 | 121.618 | KV452793.1  | 4004462 | 3-scf00148 | 3  |
| AX-158018279 | 6 | 121.618 | KV452793.1  | 4009280 | 3-scf00148 | 3  |
| AX-158018281 | 6 | 121.618 | KV452793.1  | 4009996 | 3-scf00148 | 3  |
| AX-158018283 | 6 | 121.618 | KV452793.1  | 4010601 | 3-scf00148 | 3  |
| AX-157757214 | 6 | 121.618 | KV452793.1  | 4012850 | 3-scf00148 | 3  |
| AX-158018284 | 6 | 121.618 | KV452793.1  | 4016967 | 3-scf00148 | 3  |
| AX-158407956 | 6 | 121.618 | KV452793.1  | 4018417 | 3-scf00148 | 3  |
| AX-158018285 | 6 | 121.618 | KV452793.1  | 4021879 | 3-scf00148 | 3  |
| AX-158018286 | 6 | 121.618 | KV452793.1  | 4024660 | 3-scf00148 | 3  |
| AX-158018287 | 6 | 121.618 | KV452793.1  | 4025946 | 3-scf00148 | 3  |
| AX-158018289 | 6 | 121.618 | KV452793.1  | 4028423 | 3-scf00148 | 3  |
| AX-158018290 | 6 | 121.618 | KV452793.1  | 4030466 | 3-scf00148 | 3  |
| AX-158018291 | 6 | 121.618 | KV452793.1  | 4031516 | 3-scf00148 | 3  |
| AX-158018331 | 6 | 121.618 | KV452793.1  | 4076524 | 3-scf00148 | 3  |
| AX-158018340 | 6 | 121.618 | KV452793.1  | 4091554 | 3-scf00148 | 3  |

|              |   |         |            |         |            |   |
|--------------|---|---------|------------|---------|------------|---|
| AX-157820640 | 6 | 121.618 | KV452793.1 | 4100390 | 3-scf00148 | 3 |
| AX-158018367 | 6 | 121.618 | KV452793.1 | 4118519 | 3-scf00148 | 3 |
| AX-158018293 | 6 | 121.62  | KV452793.1 | 4036991 | 3-scf00148 | 3 |
| AX-158018337 | 6 | 121.62  | KV452793.1 | 4083445 | 3-scf00148 | 3 |
| AX-158018298 | 6 | 121.621 | KV452793.1 | 4042601 | 3-scf00148 | 3 |
| AX-158018299 | 6 | 121.824 | KV452793.1 | 4044074 | 3-scf00148 | 3 |
| AX-158018303 | 6 | 122.055 | KV452793.1 | 4046807 | 3-scf00148 | 3 |
| AX-158018308 | 6 | 122.055 | KV452793.1 | 4049044 | 3-scf00148 | 3 |
| AX-158018310 | 6 | 122.055 | KV452793.1 | 4049701 | 3-scf00148 | 3 |
| AX-158018311 | 6 | 122.165 | KV452793.1 | 4054565 | 3-scf00148 | 3 |
| AX-158018314 | 6 | 122.165 | KV452793.1 | 4057640 | 3-scf00148 | 3 |
| AX-158018318 | 6 | 122.165 | KV452793.1 | 4059700 | 3-scf00148 | 3 |
| AX-158018319 | 6 | 122.165 | KV452793.1 | 4060160 | 3-scf00148 | 3 |
| AX-158018321 | 6 | 122.165 | KV452793.1 | 4062132 | 3-scf00148 | 3 |
| AX-157714090 | 6 | 122.165 | KV452793.1 | 4062523 | 3-scf00148 | 3 |
| AX-158018323 | 6 | 122.165 | KV452793.1 | 4063015 | 3-scf00148 | 3 |
| AX-158018377 | 6 | 122.165 | KV452793.1 | 4125308 | 3-scf00148 | 3 |
| AX-158018259 | 6 | 122.274 | KV452793.1 | 3977227 | 3-scf00148 | 3 |
| AX-158018305 | 6 | 122.274 | KV452793.1 | 4048366 | 3-scf00148 | 3 |
| AX-158018326 | 6 | 122.274 | KV452793.1 | 4070495 | 3-scf00148 | 3 |
| AX-158018329 | 6 | 122.274 | KV452793.1 | 4074327 | 3-scf00148 | 3 |
| AX-158018330 | 6 | 122.274 | KV452793.1 | 4075626 | 3-scf00148 | 3 |
| AX-157714299 | 6 | 122.274 | KV452793.1 | 4081889 | 3-scf00148 | 3 |
| AX-158018344 | 6 | 122.274 | KV452793.1 | 4100012 | 3-scf00148 | 3 |
| AX-158018332 | 6 | 122.383 | KV452793.1 | 4078287 | 3-scf00148 | 3 |
| AX-158018335 | 6 | 122.383 | KV452793.1 | 4082838 | 3-scf00148 | 3 |
| AX-157820639 | 6 | 122.383 | KV452793.1 | 4091226 | 3-scf00148 | 3 |
| AX-158018341 | 6 | 122.383 | KV452793.1 | 4092240 | 3-scf00148 | 3 |
| AX-157773166 | 6 | 122.383 | KV452793.1 | 4099018 | 3-scf00148 | 3 |
| AX-158018348 | 6 | 122.383 | KV452793.1 | 4106470 | 3-scf00148 | 3 |
| AX-157742004 | 6 | 122.383 | KV452793.1 | 4107187 | 3-scf00148 | 3 |
| AX-158018349 | 6 | 122.383 | KV452793.1 | 4107307 | 3-scf00148 | 3 |
| AX-158018351 | 6 | 122.383 | KV452793.1 | 4107664 | 3-scf00148 | 3 |
| AX-158018352 | 6 | 122.383 | KV452793.1 | 4108674 | 3-scf00148 | 3 |
| AX-158018353 | 6 | 122.383 | KV452793.1 | 4108945 | 3-scf00148 | 3 |
| AX-158018406 | 6 | 122.383 | KV452795.1 | 2154    | 3-scf00151 | 3 |
| AX-157727723 | 6 | 122.411 | KV452793.1 | 4115206 | 3-scf00148 | 3 |
| AX-158018378 | 6 | 122.436 | KV452793.1 | 4128746 | 3-scf00148 | 3 |
| AX-158018380 | 6 | 122.465 | KV452793.1 | 4130544 | 3-scf00148 | 3 |
| AX-158406012 | 6 | 122.492 | KV452793.1 | 4132367 | 3-scf00148 | 3 |
| AX-158018383 | 6 | 122.492 | KV452793.1 | 4135641 | 3-scf00148 | 3 |
| AX-157820638 | 6 | 122.82  | KV452793.1 | 4089138 | 3-scf00148 | 3 |
| AX-158018387 | 6 | 122.82  | KV452793.1 | 4139479 | 3-scf00148 | 3 |
| AX-158018389 | 6 | 122.82  | KV452793.1 | 4142117 | 3-scf00148 | 3 |
| AX-158018392 | 6 | 122.82  | KV452793.1 | 4150312 | 3-scf00148 | 3 |
| AX-158018393 | 6 | 122.82  | KV452793.1 | 4151047 | 3-scf00148 | 3 |
| AX-158018394 | 6 | 122.82  | KV452793.1 | 4152143 | 3-scf00148 | 3 |
| AX-157725911 | 6 | 122.82  | KV452793.1 | 4152520 | 3-scf00148 | 3 |
| AX-158018395 | 6 | 122.82  | KV452793.1 | 4153985 | 3-scf00148 | 3 |
| AX-158018396 | 6 | 122.82  | KV452793.1 | 4155502 | 3-scf00148 | 3 |
| AX-157741985 | 6 | 122.82  | KV452793.1 | 4155901 | 3-scf00148 | 3 |

|              |   |         |            |         |            |    |
|--------------|---|---------|------------|---------|------------|----|
| AX-158018397 | 6 | 122.82  | KV452793.1 | 4156068 | 3-scf00148 | 3  |
| AX-158018398 | 6 | 122.82  | KV452793.1 | 4156250 | 3-scf00148 | 3  |
| AX-158018399 | 6 | 122.82  | KV452793.1 | 4157243 | 3-scf00148 | 3  |
| AX-158018401 | 6 | 122.82  | KV452793.1 | 4157587 | 3-scf00148 | 3  |
| AX-157820642 | 6 | 122.82  | KV452795.1 | 9503    | 3-scf00151 | 3  |
| AX-158018481 | 6 | 122.82  | KV452795.1 | 88832   | 3-scf00151 | 3  |
| AX-158018497 | 6 | 122.82  | KV452795.1 | 126751  | 3-scf00151 | 3  |
| AX-158018405 | 6 | 122.929 | KV452795.1 | 1681    | 3-scf00151 | 3  |
| AX-158018412 | 6 | 122.929 | KV452795.1 | 8653    | 3-scf00151 | 3  |
| AX-157750108 | 6 | 122.929 | KV452795.1 | 11153   | 3-scf00151 | 3  |
| AX-158018449 | 6 | 122.929 | KV452795.1 | 47143   | 3-scf00151 | 3  |
| AX-157820656 | 6 | 122.929 | KV452795.1 | 411456  | 3-scf00151 | 3  |
| AX-157720371 | 6 | 122.929 | KV452795.1 | 466715  | 3-scf00151 | 3  |
| AX-158018753 | 6 | 122.929 | KV452795.1 | 502078  | 3-scf00151 | 3  |
| AX-157884894 | 6 | 122.929 | KV452795.1 | 516162  | 3-scf00151 | 3  |
| AX-158018760 | 6 | 122.929 | KV452795.1 | 522383  | 3-scf00151 | 3  |
| AX-158018762 | 6 | 122.929 | KV452795.1 | 523361  | 3-scf00151 | 3  |
| AX-157686084 | 6 | 122.929 | KV452795.1 | 559789  | 3-scf00151 | 3  |
| AX-157686075 | 6 | 122.929 | KV452795.1 | 578872  | 3-scf00151 | 3  |
| AX-157682997 | 6 | 122.929 | KV452799.1 | 15519   | 3-scf00153 | 3  |
| AX-157683000 | 6 | 122.929 | KV452799.1 | 22947   | 3-scf00153 | 3  |
| AX-157683007 | 6 | 122.929 | KV452799.1 | 34255   | 3-scf00153 | 3  |
| AX-157687466 | 6 | 122.929 | KV452794.1 | 1740    | 3-scf00891 | 3  |
| AX-157680309 | 6 | 122.929 | KV452794.1 | 5826    | 3-scf00891 | 3  |
| AX-157689957 | 6 | 122.929 |            | 94      | scf16230   | UN |
| AX-158018441 | 6 | 122.963 | KV452795.1 | 41907   | 3-scf00151 | 3  |
| AX-158018445 | 6 | 122.988 | KV452795.1 | 44341   | 3-scf00151 | 3  |
| AX-157723358 | 6 | 122.988 | KV452795.1 | 86887   | 3-scf00151 | 3  |
| AX-158018587 | 6 | 122.988 | KV452795.1 | 259792  | 3-scf00151 | 3  |
| AX-158018447 | 6 | 123.01  | KV452795.1 | 45232   | 3-scf00151 | 3  |
| AX-158018452 | 6 | 123.023 | KV452795.1 | 51369   | 3-scf00151 | 3  |
| AX-158018436 | 6 | 123.038 | KV452795.1 | 37697   | 3-scf00151 | 3  |
| AX-158018454 | 6 | 123.038 | KV452795.1 | 53059   | 3-scf00151 | 3  |
| AX-157746602 | 6 | 123.038 | KV452795.1 | 53444   | 3-scf00151 | 3  |
| AX-158018456 | 6 | 123.038 | KV452795.1 | 55514   | 3-scf00151 | 3  |
| AX-157721856 | 6 | 123.038 | KV452795.1 | 60261   | 3-scf00151 | 3  |
| AX-158018464 | 6 | 123.038 | KV452795.1 | 67805   | 3-scf00151 | 3  |
| AX-158018466 | 6 | 123.038 | KV452795.1 | 74063   | 3-scf00151 | 3  |
| AX-158391147 | 6 | 123.038 | KV452795.1 | 75070   | 3-scf00151 | 3  |
| AX-158018469 | 6 | 123.038 | KV452795.1 | 78853   | 3-scf00151 | 3  |
| AX-158018471 | 6 | 123.038 | KV452795.1 | 79459   | 3-scf00151 | 3  |
| AX-158018472 | 6 | 123.038 | KV452795.1 | 80390   | 3-scf00151 | 3  |
| AX-158018473 | 6 | 123.038 | KV452795.1 | 81569   | 3-scf00151 | 3  |
| AX-158018485 | 6 | 123.038 | KV452795.1 | 94432   | 3-scf00151 | 3  |
| AX-158018484 | 6 | 123.202 | KV452795.1 | 91283   | 3-scf00151 | 3  |
| AX-157708827 | 6 | 123.254 | KV452795.1 | 146490  | 3-scf00151 | 3  |
| AX-157708826 | 6 | 123.31  | KV452795.1 | 146358  | 3-scf00151 | 3  |
| AX-158018486 | 6 | 123.323 | KV452795.1 | 95838   | 3-scf00151 | 3  |
| AX-158018489 | 6 | 123.366 | KV452795.1 | 97735   | 3-scf00151 | 3  |
| AX-157749936 | 6 | 123.366 | KV452795.1 | 107659  | 3-scf00151 | 3  |
| AX-158018491 | 6 | 123.366 | KV452795.1 | 109078  | 3-scf00151 | 3  |

|              |   |         |             |         |            |    |
|--------------|---|---------|-------------|---------|------------|----|
| AX-158018493 | 6 | 123.367 | KV452795.1  | 109820  | 3-scf00151 | 3  |
| AX-157743538 | 6 | 123.624 | KV452795.1  | 111913  | 3-scf00151 | 3  |
| AX-158018496 | 6 | 123.878 | KV452795.1  | 126278  | 3-scf00151 | 3  |
| AX-158018499 | 6 | 123.883 | KV452795.1  | 127287  | 3-scf00151 | 3  |
| AX-158018507 | 6 | 123.885 | KV452795.1  | 144246  | 3-scf00151 | 3  |
| AX-158018508 | 6 | 123.889 | KV452795.1  | 146719  | 3-scf00151 | 3  |
| AX-158018513 | 6 | 123.893 | KV452795.1  | 156919  | 3-scf00151 | 3  |
| AX-158018516 | 6 | 124.02  | KV452795.1  | 158496  | 3-scf00151 | 3  |
| AX-158018494 | 6 | 124.023 | KV452795.1  | 114838  | 3-scf00151 | 3  |
| AX-158018519 | 6 | 124.023 | KV452795.1  | 160285  | 3-scf00151 | 3  |
| AX-157820644 | 6 | 124.023 | KV452795.1  | 161813  | 3-scf00151 | 3  |
| AX-158018520 | 6 | 124.023 | KV452795.1  | 162024  | 3-scf00151 | 3  |
| AX-158018522 | 6 | 124.023 | KV452795.1  | 163074  | 3-scf00151 | 3  |
| AX-158018525 | 6 | 124.023 | KV452795.1  | 166065  | 3-scf00151 | 3  |
| AX-157750142 | 6 | 124.023 | KV452795.1  | 173023  | 3-scf00151 | 3  |
| AX-158018535 | 6 | 124.023 | KV452795.1  | 178817  | 3-scf00151 | 3  |
| AX-157742130 | 6 | 124.023 | KV452795.1  | 203655  | 3-scf00151 | 3  |
| AX-158018547 | 6 | 124.023 | KV452795.1  | 204540  | 3-scf00151 | 3  |
| AX-158018556 | 6 | 124.023 | KV452795.1  | 212760  | 3-scf00151 | 3  |
| AX-158018569 | 6 | 124.023 | KV452795.1  | 234286  | 3-scf00151 | 3  |
| AX-157681273 | 6 | 124.023 | 3ML01032761 | 474     | scf08390_1 | UN |
| AX-158018548 | 6 | 124.036 | KV452795.1  | 204780  | 3-scf00151 | 3  |
| AX-158018372 | 6 | 124.082 | KV452793.1  | 4120137 | 3-scf00148 | 3  |
| AX-158018539 | 6 | 124.082 | KV452795.1  | 187519  | 3-scf00151 | 3  |
| AX-158018550 | 6 | 124.082 | KV452795.1  | 208621  | 3-scf00151 | 3  |
| AX-158018599 | 6 | 124.082 | KV452795.1  | 274528  | 3-scf00151 | 3  |
| AX-158018553 | 6 | 124.133 | KV452795.1  | 210768  | 3-scf00151 | 3  |
| AX-158018565 | 6 | 124.242 | KV452795.1  | 227081  | 3-scf00151 | 3  |
| AX-158018567 | 6 | 124.351 | KV452795.1  | 233176  | 3-scf00151 | 3  |
| AX-158018573 | 6 | 124.351 | KV452795.1  | 242886  | 3-scf00151 | 3  |
| AX-158018574 | 6 | 124.351 | KV452795.1  | 244609  | 3-scf00151 | 3  |
| AX-157746178 | 6 | 124.351 | KV452795.1  | 277167  | 3-scf00151 | 3  |
| AX-157689806 | 6 | 124.351 | 3ML01032761 | 99      | scf08390_1 | UN |
| AX-158018575 | 6 | 124.389 | KV452795.1  | 245465  | 3-scf00151 | 3  |
| AX-158018581 | 6 | 124.389 | KV452795.1  | 249905  | 3-scf00151 | 3  |
| AX-158018577 | 6 | 124.46  | KV452795.1  | 246330  | 3-scf00151 | 3  |
| AX-158018580 | 6 | 124.46  | KV452795.1  | 249579  | 3-scf00151 | 3  |
| AX-158018584 | 6 | 124.46  | KV452795.1  | 255579  | 3-scf00151 | 3  |
| AX-158018585 | 6 | 124.46  | KV452795.1  | 257899  | 3-scf00151 | 3  |
| AX-158018586 | 6 | 124.46  | KV452795.1  | 258559  | 3-scf00151 | 3  |
| AX-158018604 | 6 | 124.477 | KV452795.1  | 280986  | 3-scf00151 | 3  |
| AX-157820654 | 6 | 124.477 | KV452795.1  | 387637  | 3-scf00151 | 3  |
| AX-158018605 | 6 | 124.57  | KV452795.1  | 281497  | 3-scf00151 | 3  |
| AX-157727170 | 6 | 124.607 | KV452795.1  | 284630  | 3-scf00151 | 3  |
| AX-158018609 | 6 | 124.646 | KV452795.1  | 285736  | 3-scf00151 | 3  |
| AX-158018610 | 6 | 124.679 | KV452795.1  | 286556  | 3-scf00151 | 3  |
| AX-158018616 | 6 | 124.679 | KV452795.1  | 290222  | 3-scf00151 | 3  |
| AX-158018618 | 6 | 124.679 | KV452795.1  | 291574  | 3-scf00151 | 3  |
| AX-158018619 | 6 | 124.679 | KV452795.1  | 292126  | 3-scf00151 | 3  |
| AX-157751104 | 6 | 124.679 | KV452795.1  | 303677  | 3-scf00151 | 3  |
| AX-158018630 | 6 | 124.897 | KV452795.1  | 314085  | 3-scf00151 | 3  |



|              |   |         |             |        |            |    |
|--------------|---|---------|-------------|--------|------------|----|
| AX-157771745 | 6 | 124.897 | KV452795.1  | 335285 | 3-scf00151 | 3  |
| AX-158018643 | 6 | 124.904 | KV452795.1  | 338000 | 3-scf00151 | 3  |
| AX-157744642 | 6 | 124.907 | KV452795.1  | 341407 | 3-scf00151 | 3  |
| AX-157774479 | 6 | 125.177 | KV452795.1  | 343114 | 3-scf00151 | 3  |
| AX-157724650 | 6 | 125.177 | KV452795.1  | 403431 | 3-scf00151 | 3  |
| AX-158018722 | 6 | 125.177 | KV452795.1  | 462058 | 3-scf00151 | 3  |
| AX-157820652 | 6 | 125.445 | KV452795.1  | 352969 | 3-scf00151 | 3  |
| AX-158018657 | 6 | 125.445 | KV452795.1  | 361511 | 3-scf00151 | 3  |
| AX-158018658 | 6 | 125.445 | KV452795.1  | 361888 | 3-scf00151 | 3  |
| AX-158018661 | 6 | 125.445 | KV452795.1  | 364292 | 3-scf00151 | 3  |
| AX-158018666 | 6 | 125.445 | KV452795.1  | 367353 | 3-scf00151 | 3  |
| AX-158018669 | 6 | 125.445 | KV452795.1  | 368888 | 3-scf00151 | 3  |
| AX-157724837 | 6 | 125.445 | KV452795.1  | 373143 | 3-scf00151 | 3  |
| AX-158018673 | 6 | 125.445 | KV452795.1  | 377433 | 3-scf00151 | 3  |
| AX-158018676 | 6 | 125.445 | KV452795.1  | 387691 | 3-scf00151 | 3  |
| AX-158018678 | 6 | 125.445 | KV452795.1  | 389183 | 3-scf00151 | 3  |
| AX-157856291 | 6 | 125.445 | KV452795.1  | 390812 | 3-scf00151 | 3  |
| AX-158018680 | 6 | 125.445 | KV452795.1  | 392353 | 3-scf00151 | 3  |
| AX-158018708 | 6 | 125.445 | KV452795.1  | 443966 | 3-scf00151 | 3  |
| AX-158018683 | 6 | 125.663 | KV452795.1  | 398527 | 3-scf00151 | 3  |
| AX-158018686 | 6 | 125.663 | KV452795.1  | 399297 | 3-scf00151 | 3  |
| AX-158018687 | 6 | 125.663 | KV452795.1  | 402058 | 3-scf00151 | 3  |
| AX-158018690 | 6 | 125.663 | KV452795.1  | 409903 | 3-scf00151 | 3  |
| AX-158422274 | 6 | 125.663 | KV452795.1  | 416400 | 3-scf00151 | 3  |
| AX-157863023 | 6 | 125.663 | KV452795.1  | 420565 | 3-scf00151 | 3  |
| AX-158018702 | 6 | 125.663 | KV452795.1  | 429215 | 3-scf00151 | 3  |
| AX-158018703 | 6 | 125.663 | KV452795.1  | 430287 | 3-scf00151 | 3  |
| AX-158018780 | 6 | 125.663 | KV452795.1  | 543932 | 3-scf00151 | 3  |
| AX-157716007 | 6 | 125.663 | KV452796.1  | 10338  | 3-scf00152 | 3  |
| AX-158422275 | 6 | 125.696 | KV452795.1  | 431303 | 3-scf00151 | 3  |
| AX-158018706 | 6 | 125.773 | KV452795.1  | 437893 | 3-scf00151 | 3  |
| AX-158018707 | 6 | 125.773 | KV452795.1  | 439892 | 3-scf00151 | 3  |
| AX-158018710 | 6 | 125.773 | KV452795.1  | 449111 | 3-scf00151 | 3  |
| AX-158018711 | 6 | 125.773 | KV452795.1  | 452751 | 3-scf00151 | 3  |
| AX-157750948 | 6 | 125.773 | KV452795.1  | 454353 | 3-scf00151 | 3  |
| AX-158018718 | 6 | 125.773 | KV452795.1  | 460254 | 3-scf00151 | 3  |
| AX-158018719 | 6 | 125.773 | KV452795.1  | 460898 | 3-scf00151 | 3  |
| AX-157686077 | 6 | 125.773 | KV452795.1  | 575593 | 3-scf00151 | 3  |
| AX-157682992 | 6 | 125.773 | KV452799.1  | 3268   | 3-scf00153 | 3  |
| AX-157706609 | 6 | 125.773 | 3ML01032575 | 316    | scf08198_1 | UN |
| AX-157706610 | 6 | 125.773 | 3ML01032575 | 460    | scf08198_1 | UN |
| AX-158018724 | 6 | 125.882 | KV452795.1  | 464683 | 3-scf00151 | 3  |
| AX-158018728 | 6 | 125.882 | KV452795.1  | 466389 | 3-scf00151 | 3  |
| AX-158018730 | 6 | 125.882 | KV452795.1  | 467494 | 3-scf00151 | 3  |
| AX-158018734 | 6 | 125.939 | KV452795.1  | 470099 | 3-scf00151 | 3  |
| AX-158018725 | 6 | 125.991 | KV452795.1  | 465025 | 3-scf00151 | 3  |
| AX-157820659 | 6 | 125.991 | KV452795.1  | 479233 | 3-scf00151 | 3  |
| AX-157770665 | 6 | 125.991 | KV452795.1  | 483354 | 3-scf00151 | 3  |
| AX-158018741 | 6 | 125.991 | KV452795.1  | 484599 | 3-scf00151 | 3  |
| AX-158018746 | 6 | 125.991 | KV452795.1  | 494538 | 3-scf00151 | 3  |
| AX-158018748 | 6 | 125.991 | KV452795.1  | 495415 | 3-scf00151 | 3  |

|              |   |         |            |        |            |   |
|--------------|---|---------|------------|--------|------------|---|
| AX-158018749 | 6 | 125.991 | KV452795.1 | 499130 | 3-scf00151 | 3 |
| AX-158018752 | 6 | 125.991 | KV452795.1 | 501784 | 3-scf00151 | 3 |
| AX-158018754 | 6 | 125.991 | KV452795.1 | 510810 | 3-scf00151 | 3 |
| AX-158018756 | 6 | 125.991 | KV452795.1 | 514855 | 3-scf00151 | 3 |
| AX-158018758 | 6 | 125.991 | KV452795.1 | 517739 | 3-scf00151 | 3 |
| AX-158018759 | 6 | 125.991 | KV452795.1 | 521376 | 3-scf00151 | 3 |
| AX-158018767 | 6 | 125.991 | KV452795.1 | 525821 | 3-scf00151 | 3 |
| AX-158018769 | 6 | 125.991 | KV452795.1 | 529878 | 3-scf00151 | 3 |
| AX-157820661 | 6 | 125.991 | KV452795.1 | 530975 | 3-scf00151 | 3 |
| AX-158018770 | 6 | 125.991 | KV452795.1 | 532491 | 3-scf00151 | 3 |
| AX-158018772 | 6 | 125.991 | KV452795.1 | 533245 | 3-scf00151 | 3 |
| AX-158018774 | 6 | 125.991 | KV452795.1 | 539466 | 3-scf00151 | 3 |
| AX-158018775 | 6 | 125.992 | KV452795.1 | 540581 | 3-scf00151 | 3 |
| AX-158018778 | 6 | 126.155 | KV452795.1 | 542339 | 3-scf00151 | 3 |
| AX-158018781 | 6 | 126.211 | KV452795.1 | 545076 | 3-scf00151 | 3 |
| AX-157686082 | 6 | 126.211 | KV452795.1 | 566954 | 3-scf00151 | 3 |
| AX-157715344 | 6 | 126.211 | KV452796.1 | 7614   | 3-scf00152 | 3 |
| AX-157743388 | 6 | 126.211 | KV452796.1 | 90216  | 3-scf00152 | 3 |
| AX-158018783 | 6 | 126.261 | KV452795.1 | 545979 | 3-scf00151 | 3 |
| AX-158018697 | 6 | 126.319 | KV452795.1 | 424367 | 3-scf00151 | 3 |
| AX-158018733 | 6 | 126.319 | KV452795.1 | 469481 | 3-scf00151 | 3 |
| AX-158018736 | 6 | 126.319 | KV452795.1 | 472944 | 3-scf00151 | 3 |
| AX-158018782 | 6 | 126.319 | KV452795.1 | 545433 | 3-scf00151 | 3 |
| AX-157708503 | 6 | 126.319 | KV452795.1 | 546414 | 3-scf00151 | 3 |
| AX-158018784 | 6 | 126.319 | KV452795.1 | 549230 | 3-scf00151 | 3 |
| AX-157686089 | 6 | 126.319 | KV452795.1 | 554964 | 3-scf00151 | 3 |
| AX-157686086 | 6 | 126.319 | KV452795.1 | 556998 | 3-scf00151 | 3 |
| AX-157686079 | 6 | 126.319 | KV452795.1 | 573214 | 3-scf00151 | 3 |
| AX-157680255 | 6 | 126.319 | KV452795.1 | 573865 | 3-scf00151 | 3 |
| AX-157681197 | 6 | 126.319 | KV452795.1 | 576222 | 3-scf00151 | 3 |
| AX-157680886 | 6 | 126.319 | KV452795.1 | 589950 | 3-scf00151 | 3 |
| AX-157686072 | 6 | 126.319 | KV452795.1 | 591657 | 3-scf00151 | 3 |
| AX-157680340 | 6 | 126.319 | KV452795.1 | 593702 | 3-scf00151 | 3 |
| AX-157686071 | 6 | 126.319 | KV452795.1 | 597758 | 3-scf00151 | 3 |
| AX-157686063 | 6 | 126.319 | KV452795.1 | 612329 | 3-scf00151 | 3 |
| AX-157680884 | 6 | 126.319 | KV452795.1 | 616579 | 3-scf00151 | 3 |
| AX-158018788 | 6 | 126.319 | KV452796.1 | 2052   | 3-scf00152 | 3 |
| AX-157820662 | 6 | 126.319 | KV452796.1 | 2849   | 3-scf00152 | 3 |
| AX-157820663 | 6 | 126.319 | KV452796.1 | 4855   | 3-scf00152 | 3 |
| AX-157820664 | 6 | 126.319 | KV452796.1 | 5657   | 3-scf00152 | 3 |
| AX-158018789 | 6 | 126.319 | KV452796.1 | 11368  | 3-scf00152 | 3 |
| AX-158018793 | 6 | 126.319 | KV452796.1 | 22830  | 3-scf00152 | 3 |
| AX-158018794 | 6 | 126.319 | KV452796.1 | 24316  | 3-scf00152 | 3 |
| AX-158018797 | 6 | 126.319 | KV452796.1 | 30956  | 3-scf00152 | 3 |
| AX-157865308 | 6 | 126.319 | KV452796.1 | 31450  | 3-scf00152 | 3 |
| AX-158018799 | 6 | 126.319 | KV452796.1 | 34231  | 3-scf00152 | 3 |
| AX-157820666 | 6 | 126.319 | KV452796.1 | 37856  | 3-scf00152 | 3 |
| AX-158018803 | 6 | 126.319 | KV452796.1 | 55697  | 3-scf00152 | 3 |
| AX-157820670 | 6 | 126.319 | KV452796.1 | 58058  | 3-scf00152 | 3 |
| AX-158018804 | 6 | 126.319 | KV452796.1 | 62974  | 3-scf00152 | 3 |
| AX-158018806 | 6 | 126.319 | KV452796.1 | 63185  | 3-scf00152 | 3 |

|              |   |         |            |        |            |    |
|--------------|---|---------|------------|--------|------------|----|
| AX-158018807 | 6 | 126.319 | KV452796.1 | 63536  | 3-scf00152 | 3  |
| AX-158018808 | 6 | 126.319 | KV452796.1 | 64696  | 3-scf00152 | 3  |
| AX-158018811 | 6 | 126.319 | KV452796.1 | 73002  | 3-scf00152 | 3  |
| AX-158018813 | 6 | 126.319 | KV452796.1 | 73503  | 3-scf00152 | 3  |
| AX-157820671 | 6 | 126.319 | KV452796.1 | 77411  | 3-scf00152 | 3  |
| AX-158018815 | 6 | 126.319 | KV452796.1 | 77796  | 3-scf00152 | 3  |
| AX-158018816 | 6 | 126.319 | KV452796.1 | 80208  | 3-scf00152 | 3  |
| AX-158018819 | 6 | 126.319 | KV452796.1 | 84288  | 3-scf00152 | 3  |
| AX-157747468 | 6 | 126.319 | KV452796.1 | 86665  | 3-scf00152 | 3  |
| AX-157820672 | 6 | 126.319 | KV452796.1 | 90416  | 3-scf00152 | 3  |
| AX-158018821 | 6 | 126.319 | KV452796.1 | 91115  | 3-scf00152 | 3  |
| AX-157820673 | 6 | 126.319 | KV452796.1 | 92318  | 3-scf00152 | 3  |
| AX-158018822 | 6 | 126.319 | KV452796.1 | 93849  | 3-scf00152 | 3  |
| AX-158018824 | 6 | 126.319 | KV452796.1 | 101767 | 3-scf00152 | 3  |
| AX-158018825 | 6 | 126.319 | KV452796.1 | 102701 | 3-scf00152 | 3  |
| AX-158018828 | 6 | 126.319 | KV452796.1 | 105920 | 3-scf00152 | 3  |
| AX-158018829 | 6 | 126.319 | KV452796.1 | 110369 | 3-scf00152 | 3  |
| AX-158018830 | 6 | 126.319 | KV452796.1 | 115305 | 3-scf00152 | 3  |
| AX-158018831 | 6 | 126.319 | KV452796.1 | 116040 | 3-scf00152 | 3  |
| AX-157820674 | 6 | 126.319 | KV452796.1 | 117298 | 3-scf00152 | 3  |
| AX-157884896 | 6 | 126.319 | KV452796.1 | 121475 | 3-scf00152 | 3  |
| AX-157763930 | 6 | 126.319 | KV452796.1 | 129660 | 3-scf00152 | 3  |
| AX-157820675 | 6 | 126.319 | KV452796.1 | 133491 | 3-scf00152 | 3  |
| AX-158018835 | 6 | 126.319 | KV452796.1 | 133957 | 3-scf00152 | 3  |
| AX-157884897 | 6 | 126.319 | KV452796.1 | 136244 | 3-scf00152 | 3  |
| AX-157682991 | 6 | 126.319 | KV452799.1 | 1544   | 3-scf00153 | 3  |
| AX-157682993 | 6 | 126.319 | KV452799.1 | 8952   | 3-scf00153 | 3  |
| AX-157682994 | 6 | 126.319 | KV452799.1 | 9275   | 3-scf00153 | 3  |
| AX-157682995 | 6 | 126.319 | KV452799.1 | 11744  | 3-scf00153 | 3  |
| AX-157682996 | 6 | 126.319 | KV452799.1 | 12852  | 3-scf00153 | 3  |
| AX-157680484 | 6 | 126.319 | KV452799.1 | 20934  | 3-scf00153 | 3  |
| AX-157683001 | 6 | 126.319 | KV452799.1 | 23868  | 3-scf00153 | 3  |
| AX-157683003 | 6 | 126.319 | KV452799.1 | 25155  | 3-scf00153 | 3  |
| AX-157683004 | 6 | 126.319 | KV452799.1 | 25979  | 3-scf00153 | 3  |
| AX-157683009 | 6 | 126.319 | KV452797.1 | 5525   | 3-scf00154 | 3  |
| AX-157683010 | 6 | 126.319 | KV452797.1 | 6264   | 3-scf00154 | 3  |
| AX-157683011 | 6 | 126.319 | KV452797.1 | 11140  | 3-scf00154 | 3  |
| AX-157709696 | 6 | 126.319 | KV452797.1 | 12196  | 3-scf00154 | 3  |
| AX-158407978 | 6 | 126.319 | KV452797.1 | 16593  | 3-scf00154 | 3  |
| AX-157683015 | 6 | 126.319 | KV452800.1 | 507    | 3-scf00155 | 3  |
| AX-157679957 | 6 | 126.319 | KV452794.1 | 3800   | 3-scf00891 | 3  |
| AX-157687470 | 6 | 126.319 | KV452794.1 | 10745  | 3-scf00891 | 3  |
| AX-157679954 | 6 | 126.319 | KV452798.1 | 4045   | 3-scf00987 | 3  |
| AX-157680313 | 6 | 126.319 | KV453405.1 | 1292   | scf00703   | UN |
| AX-158420888 | 6 | 126.319 | KV453405.1 | 23718  | scf00703   | UN |
| AX-157686589 | 6 | 126.319 | KV453405.1 | 29022  | scf00703   | UN |
| AX-157686586 | 6 | 126.319 | KV453405.1 | 38648  | scf00703   | UN |
| AX-157686585 | 6 | 126.319 | KV453405.1 | 39225  | scf00703   | UN |
| AX-157686584 | 6 | 126.319 | KV453405.1 | 40998  | scf00703   | UN |
| AX-157687575 | 6 | 126.319 | KV453555.1 | 4042   | scf00934   | UN |
| AX-157681217 | 6 | 126.319 | KV453555.1 | 6537   | scf00934   | UN |

|              |   |         |             |        |             |    |
|--------------|---|---------|-------------|--------|-------------|----|
| AX-157687577 | 6 | 126.319 | KV453555.1  | 10952  | scf00934    | UN |
| AX-157687732 | 6 | 126.319 | 3ML01025135 | 1232   | scf00990_1  | UN |
| AX-157687733 | 6 | 126.319 | 3ML01025135 | 1351   | scf00990_1  | UN |
| AX-157687734 | 6 | 126.319 | 3ML01025135 | 2328   | scf00990_1  | UN |
| AX-157687737 | 6 | 126.319 | 3ML01025135 | 7351   | scf00990_1  | UN |
| AX-157712164 | 6 | 126.319 | KV453835.1  | 1591   | scf07649    | UN |
| AX-157687562 | 6 | 126.319 | KV453835.1  | 4484   | scf07649    | UN |
| AX-157687563 | 6 | 126.319 | KV453835.1  | 7690   | scf07649    | UN |
| AX-157689895 | 6 | 126.319 |             | 151    | scf11314    | UN |
| AX-158407979 | 6 | 126.625 | KV452797.1  | 17034  | 3-scf00154  | 3  |
| AX-158018838 | 7 | 0       | KV452996.1  | 4695   | 11-scf00156 | 11 |
| AX-158018893 | 7 | 0       | KV452996.1  | 148473 | 11-scf00156 | 11 |
| AX-158018927 | 7 | 0       | KV452996.1  | 211758 | 11-scf00156 | 11 |
| AX-158018934 | 7 | 0       | KV452996.1  | 223676 | 11-scf00156 | 11 |
| AX-158019073 | 7 | 0       | KV452996.1  | 423189 | 11-scf00156 | 11 |
| AX-158019103 | 7 | 0       | KV452996.1  | 468038 | 11-scf00156 | 11 |
| AX-158019261 | 7 | 0       | KV452996.1  | 671060 | 11-scf00156 | 11 |
| AX-157820676 | 7 | 0.054   | KV452996.1  | 6140   | 11-scf00156 | 11 |
| AX-158018840 | 7 | 0.108   | KV452996.1  | 11049  | 11-scf00156 | 11 |
| AX-157820677 | 7 | 0.108   | KV452996.1  | 18533  | 11-scf00156 | 11 |
| AX-158018843 | 7 | 0.108   | KV452996.1  | 25328  | 11-scf00156 | 11 |
| AX-158018844 | 7 | 0.108   | KV452996.1  | 26076  | 11-scf00156 | 11 |
| AX-158018845 | 7 | 0.108   | KV452996.1  | 27740  | 11-scf00156 | 11 |
| AX-158018852 | 7 | 0.108   | KV452996.1  | 47120  | 11-scf00156 | 11 |
| AX-158018854 | 7 | 0.108   | KV452996.1  | 53594  | 11-scf00156 | 11 |
| AX-158018855 | 7 | 0.108   | KV452996.1  | 56833  | 11-scf00156 | 11 |
| AX-158018857 | 7 | 0.108   | KV452996.1  | 59043  | 11-scf00156 | 11 |
| AX-158018859 | 7 | 0.108   | KV452996.1  | 59500  | 11-scf00156 | 11 |
| AX-158018862 | 7 | 0.108   | KV452996.1  | 71913  | 11-scf00156 | 11 |
| AX-158018865 | 7 | 0.108   | KV452996.1  | 81113  | 11-scf00156 | 11 |
| AX-158018866 | 7 | 0.108   | KV452996.1  | 82286  | 11-scf00156 | 11 |
| AX-157820679 | 7 | 0.108   | KV452996.1  | 86825  | 11-scf00156 | 11 |
| AX-158018869 | 7 | 0.108   | KV452996.1  | 87670  | 11-scf00156 | 11 |
| AX-158018871 | 7 | 0.108   | KV452996.1  | 88030  | 11-scf00156 | 11 |
| AX-158018877 | 7 | 0.108   | KV452996.1  | 108868 | 11-scf00156 | 11 |
| AX-158018878 | 7 | 0.108   | KV452996.1  | 115251 | 11-scf00156 | 11 |
| AX-158018879 | 7 | 0.108   | KV452996.1  | 115836 | 11-scf00156 | 11 |
| AX-158018881 | 7 | 0.108   | KV452996.1  | 118452 | 11-scf00156 | 11 |
| AX-158018882 | 7 | 0.108   | KV452996.1  | 120868 | 11-scf00156 | 11 |
| AX-158018885 | 7 | 0.108   | KV452996.1  | 132370 | 11-scf00156 | 11 |
| AX-158018887 | 7 | 0.108   | KV452996.1  | 138615 | 11-scf00156 | 11 |
| AX-158018898 | 7 | 0.108   | KV452996.1  | 153954 | 11-scf00156 | 11 |
| AX-158422276 | 7 | 0.108   | KV452996.1  | 161631 | 11-scf00156 | 11 |
| AX-158422277 | 7 | 0.108   | KV452996.1  | 162031 | 11-scf00156 | 11 |
| AX-158018902 | 7 | 0.108   | KV452996.1  | 163426 | 11-scf00156 | 11 |
| AX-158018905 | 7 | 0.108   | KV452996.1  | 172823 | 11-scf00156 | 11 |
| AX-158018906 | 7 | 0.108   | KV452996.1  | 173648 | 11-scf00156 | 11 |
| AX-158018907 | 7 | 0.108   | KV452996.1  | 176522 | 11-scf00156 | 11 |
| AX-158018908 | 7 | 0.108   | KV452996.1  | 176934 | 11-scf00156 | 11 |
| AX-158018910 | 7 | 0.108   | KV452996.1  | 179448 | 11-scf00156 | 11 |
| AX-158018914 | 7 | 0.108   | KV452996.1  | 182722 | 11-scf00156 | 11 |

|              |   |       |            |        |             |    |
|--------------|---|-------|------------|--------|-------------|----|
| AX-158018916 | 7 | 0.108 | KV452996.1 | 185134 | 11-scf00156 | 11 |
| AX-158018919 | 7 | 0.108 | KV452996.1 | 187265 | 11-scf00156 | 11 |
| AX-158018920 | 7 | 0.108 | KV452996.1 | 192311 | 11-scf00156 | 11 |
| AX-158018922 | 7 | 0.108 | KV452996.1 | 196490 | 11-scf00156 | 11 |
| AX-158018923 | 7 | 0.108 | KV452996.1 | 197187 | 11-scf00156 | 11 |
| AX-157820680 | 7 | 0.108 | KV452996.1 | 202804 | 11-scf00156 | 11 |
| AX-158379717 | 7 | 0.108 | KV452996.1 | 207684 | 11-scf00156 | 11 |
| AX-157750426 | 7 | 0.108 | KV452996.1 | 209386 | 11-scf00156 | 11 |
| AX-158018929 | 7 | 0.108 | KV452996.1 | 212591 | 11-scf00156 | 11 |
| AX-158018930 | 7 | 0.108 | KV452996.1 | 212681 | 11-scf00156 | 11 |
| AX-158018931 | 7 | 0.108 | KV452996.1 | 214418 | 11-scf00156 | 11 |
| AX-158018939 | 7 | 0.108 | KV452996.1 | 236282 | 11-scf00156 | 11 |
| AX-158018940 | 7 | 0.108 | KV452996.1 | 240859 | 11-scf00156 | 11 |
| AX-158018945 | 7 | 0.108 | KV452996.1 | 245438 | 11-scf00156 | 11 |
| AX-158018954 | 7 | 0.108 | KV452996.1 | 269737 | 11-scf00156 | 11 |
| AX-158018955 | 7 | 0.108 | KV452996.1 | 278042 | 11-scf00156 | 11 |
| AX-158018957 | 7 | 0.108 | KV452996.1 | 278932 | 11-scf00156 | 11 |
| AX-158018958 | 7 | 0.108 | KV452996.1 | 279962 | 11-scf00156 | 11 |
| AX-158018960 | 7 | 0.108 | KV452996.1 | 284163 | 11-scf00156 | 11 |
| AX-158018964 | 7 | 0.108 | KV452996.1 | 289796 | 11-scf00156 | 11 |
| AX-158018966 | 7 | 0.108 | KV452996.1 | 290241 | 11-scf00156 | 11 |
| AX-157820681 | 7 | 0.108 | KV452996.1 | 297212 | 11-scf00156 | 11 |
| AX-158018972 | 7 | 0.108 | KV452996.1 | 303726 | 11-scf00156 | 11 |
| AX-157748616 | 7 | 0.108 | KV452996.1 | 305976 | 11-scf00156 | 11 |
| AX-158018975 | 7 | 0.108 | KV452996.1 | 308458 | 11-scf00156 | 11 |
| AX-158018978 | 7 | 0.108 | KV452996.1 | 311360 | 11-scf00156 | 11 |
| AX-158018979 | 7 | 0.108 | KV452996.1 | 314012 | 11-scf00156 | 11 |
| AX-158018981 | 7 | 0.108 | KV452996.1 | 316783 | 11-scf00156 | 11 |
| AX-158018984 | 7 | 0.108 | KV452996.1 | 318192 | 11-scf00156 | 11 |
| AX-158018993 | 7 | 0.108 | KV452996.1 | 328188 | 11-scf00156 | 11 |
| AX-158018996 | 7 | 0.108 | KV452996.1 | 329461 | 11-scf00156 | 11 |
| AX-157716268 | 7 | 0.108 | KV452996.1 | 329578 | 11-scf00156 | 11 |
| AX-158019005 | 7 | 0.108 | KV452996.1 | 340824 | 11-scf00156 | 11 |
| AX-158019009 | 7 | 0.108 | KV452996.1 | 346628 | 11-scf00156 | 11 |
| AX-158019010 | 7 | 0.108 | KV452996.1 | 349737 | 11-scf00156 | 11 |
| AX-158019013 | 7 | 0.108 | KV452996.1 | 351504 | 11-scf00156 | 11 |
| AX-158019015 | 7 | 0.108 | KV452996.1 | 352611 | 11-scf00156 | 11 |
| AX-158019016 | 7 | 0.108 | KV452996.1 | 353994 | 11-scf00156 | 11 |
| AX-158019019 | 7 | 0.108 | KV452996.1 | 357533 | 11-scf00156 | 11 |
| AX-157820686 | 7 | 0.108 | KV452996.1 | 377360 | 11-scf00156 | 11 |
| AX-158019024 | 7 | 0.108 | KV452996.1 | 381436 | 11-scf00156 | 11 |
| AX-158019028 | 7 | 0.108 | KV452996.1 | 384472 | 11-scf00156 | 11 |
| AX-157820687 | 7 | 0.108 | KV452996.1 | 385275 | 11-scf00156 | 11 |
| AX-158019033 | 7 | 0.108 | KV452996.1 | 388364 | 11-scf00156 | 11 |
| AX-158019036 | 7 | 0.108 | KV452996.1 | 389729 | 11-scf00156 | 11 |
| AX-158019037 | 7 | 0.108 | KV452996.1 | 390588 | 11-scf00156 | 11 |
| AX-158019039 | 7 | 0.108 | KV452996.1 | 391643 | 11-scf00156 | 11 |
| AX-158019040 | 7 | 0.108 | KV452996.1 | 392066 | 11-scf00156 | 11 |
| AX-158019043 | 7 | 0.108 | KV452996.1 | 393574 | 11-scf00156 | 11 |
| AX-158019044 | 7 | 0.108 | KV452996.1 | 394451 | 11-scf00156 | 11 |
| AX-158019045 | 7 | 0.108 | KV452996.1 | 395007 | 11-scf00156 | 11 |

|              |   |       |            |         |             |    |
|--------------|---|-------|------------|---------|-------------|----|
| AX-158019046 | 7 | 0.108 | KV452996.1 | 400365  | 11-scf00156 | 11 |
| AX-158019047 | 7 | 0.108 | KV452996.1 | 401420  | 11-scf00156 | 11 |
| AX-158019048 | 7 | 0.108 | KV452996.1 | 402308  | 11-scf00156 | 11 |
| AX-158019049 | 7 | 0.108 | KV452996.1 | 403051  | 11-scf00156 | 11 |
| AX-158019053 | 7 | 0.108 | KV452996.1 | 405423  | 11-scf00156 | 11 |
| AX-158019060 | 7 | 0.108 | KV452996.1 | 407826  | 11-scf00156 | 11 |
| AX-158019062 | 7 | 0.108 | KV452996.1 | 410860  | 11-scf00156 | 11 |
| AX-158019063 | 7 | 0.108 | KV452996.1 | 412241  | 11-scf00156 | 11 |
| AX-158019078 | 7 | 0.108 | KV452996.1 | 425854  | 11-scf00156 | 11 |
| AX-158019079 | 7 | 0.108 | KV452996.1 | 426465  | 11-scf00156 | 11 |
| AX-158019083 | 7 | 0.108 | KV452996.1 | 430099  | 11-scf00156 | 11 |
| AX-158019086 | 7 | 0.108 | KV452996.1 | 434072  | 11-scf00156 | 11 |
| AX-158019088 | 7 | 0.108 | KV452996.1 | 434619  | 11-scf00156 | 11 |
| AX-157820688 | 7 | 0.108 | KV452996.1 | 447019  | 11-scf00156 | 11 |
| AX-158019100 | 7 | 0.108 | KV452996.1 | 457495  | 11-scf00156 | 11 |
| AX-157820689 | 7 | 0.108 | KV452996.1 | 460035  | 11-scf00156 | 11 |
| AX-157856293 | 7 | 0.108 | KV452996.1 | 465921  | 11-scf00156 | 11 |
| AX-158019104 | 7 | 0.108 | KV452996.1 | 468455  | 11-scf00156 | 11 |
| AX-157820690 | 7 | 0.108 | KV452996.1 | 471717  | 11-scf00156 | 11 |
| AX-158019116 | 7 | 0.108 | KV452996.1 | 484373  | 11-scf00156 | 11 |
| AX-158019117 | 7 | 0.108 | KV452996.1 | 484803  | 11-scf00156 | 11 |
| AX-157820695 | 7 | 0.108 | KV452996.1 | 521809  | 11-scf00156 | 11 |
| AX-158019159 | 7 | 0.108 | KV452996.1 | 540839  | 11-scf00156 | 11 |
| AX-158019168 | 7 | 0.108 | KV452996.1 | 551621  | 11-scf00156 | 11 |
| AX-158019186 | 7 | 0.108 | KV452996.1 | 576772  | 11-scf00156 | 11 |
| AX-158019207 | 7 | 0.108 | KV452996.1 | 602384  | 11-scf00156 | 11 |
| AX-157754953 | 7 | 0.108 | KV452996.1 | 700496  | 11-scf00156 | 11 |
| AX-158019293 | 7 | 0.108 | KV452996.1 | 710166  | 11-scf00156 | 11 |
| AX-158019306 | 7 | 0.108 | KV452996.1 | 726038  | 11-scf00156 | 11 |
| AX-158019318 | 7 | 0.108 | KV452996.1 | 743385  | 11-scf00156 | 11 |
| AX-158019505 | 7 | 0.108 | KV452996.1 | 948828  | 11-scf00156 | 11 |
| AX-158019530 | 7 | 0.108 | KV452996.1 | 1008269 | 11-scf00156 | 11 |
| AX-158019118 | 7 | 0.132 | KV452996.1 | 485451  | 11-scf00156 | 11 |
| AX-158018876 | 7 | 0.217 | KV452996.1 | 96961   | 11-scf00156 | 11 |
| AX-158018897 | 7 | 0.217 | KV452996.1 | 151346  | 11-scf00156 | 11 |
| AX-158018911 | 7 | 0.217 | KV452996.1 | 179604  | 11-scf00156 | 11 |
| AX-158019120 | 7 | 0.217 | KV452996.1 | 486378  | 11-scf00156 | 11 |
| AX-158019125 | 7 | 0.217 | KV452996.1 | 489217  | 11-scf00156 | 11 |
| AX-158019128 | 7 | 0.217 | KV452996.1 | 491812  | 11-scf00156 | 11 |
| AX-158019129 | 7 | 0.217 | KV452996.1 | 492125  | 11-scf00156 | 11 |
| AX-158019130 | 7 | 0.217 | KV452996.1 | 492793  | 11-scf00156 | 11 |
| AX-158019131 | 7 | 0.217 | KV452996.1 | 494029  | 11-scf00156 | 11 |
| AX-158019134 | 7 | 0.217 | KV452996.1 | 496708  | 11-scf00156 | 11 |
| AX-157820693 | 7 | 0.217 | KV452996.1 | 497122  | 11-scf00156 | 11 |
| AX-158019136 | 7 | 0.217 | KV452996.1 | 498802  | 11-scf00156 | 11 |
| AX-158019137 | 7 | 0.217 | KV452996.1 | 503042  | 11-scf00156 | 11 |
| AX-157763023 | 7 | 0.217 | KV452996.1 | 520982  | 11-scf00156 | 11 |
| AX-157863024 | 7 | 0.217 | KV452996.1 | 521563  | 11-scf00156 | 11 |
| AX-158019148 | 7 | 0.217 | KV452996.1 | 530466  | 11-scf00156 | 11 |
| AX-158019149 | 7 | 0.217 | KV452996.1 | 531852  | 11-scf00156 | 11 |
| AX-158019151 | 7 | 0.217 | KV452996.1 | 532308  | 11-scf00156 | 11 |

|              |   |       |            |        |             |    |
|--------------|---|-------|------------|--------|-------------|----|
| AX-158019154 | 7 | 0.217 | KV452996.1 | 538015 | 11-scf00156 | 11 |
| AX-158019155 | 7 | 0.217 | KV452996.1 | 538864 | 11-scf00156 | 11 |
| AX-158019157 | 7 | 0.217 | KV452996.1 | 539423 | 11-scf00156 | 11 |
| AX-158019161 | 7 | 0.217 | KV452996.1 | 548583 | 11-scf00156 | 11 |
| AX-158019163 | 7 | 0.217 | KV452996.1 | 549203 | 11-scf00156 | 11 |
| AX-158019165 | 7 | 0.217 | KV452996.1 | 549348 | 11-scf00156 | 11 |
| AX-158019166 | 7 | 0.217 | KV452996.1 | 549813 | 11-scf00156 | 11 |
| AX-158019169 | 7 | 0.217 | KV452996.1 | 556498 | 11-scf00156 | 11 |
| AX-157820698 | 7 | 0.217 | KV452996.1 | 564684 | 11-scf00156 | 11 |
| AX-158019182 | 7 | 0.217 | KV452996.1 | 568731 | 11-scf00156 | 11 |
| AX-158019190 | 7 | 0.217 | KV452996.1 | 585977 | 11-scf00156 | 11 |
| AX-158019191 | 7 | 0.217 | KV452996.1 | 586875 | 11-scf00156 | 11 |
| AX-158019193 | 7 | 0.217 | KV452996.1 | 587267 | 11-scf00156 | 11 |
| AX-157820700 | 7 | 0.217 | KV452996.1 | 591485 | 11-scf00156 | 11 |
| AX-158019200 | 7 | 0.217 | KV452996.1 | 592870 | 11-scf00156 | 11 |
| AX-158019218 | 7 | 0.217 | KV452996.1 | 613869 | 11-scf00156 | 11 |
| AX-158019221 | 7 | 0.217 | KV452996.1 | 616321 | 11-scf00156 | 11 |
| AX-158019222 | 7 | 0.217 | KV452996.1 | 616657 | 11-scf00156 | 11 |
| AX-158019224 | 7 | 0.217 | KV452996.1 | 617659 | 11-scf00156 | 11 |
| AX-158379718 | 7 | 0.217 | KV452996.1 | 618063 | 11-scf00156 | 11 |
| AX-158019228 | 7 | 0.217 | KV452996.1 | 621279 | 11-scf00156 | 11 |
| AX-158019230 | 7 | 0.217 | KV452996.1 | 622641 | 11-scf00156 | 11 |
| AX-157884944 | 7 | 0.217 | KV452996.1 | 622868 | 11-scf00156 | 11 |
| AX-157820702 | 7 | 0.217 | KV452996.1 | 624881 | 11-scf00156 | 11 |
| AX-157820704 | 7 | 0.217 | KV452996.1 | 627293 | 11-scf00156 | 11 |
| AX-158019233 | 7 | 0.217 | KV452996.1 | 629157 | 11-scf00156 | 11 |
| AX-158019234 | 7 | 0.217 | KV452996.1 | 637294 | 11-scf00156 | 11 |
| AX-158019236 | 7 | 0.217 | KV452996.1 | 637918 | 11-scf00156 | 11 |
| AX-158019238 | 7 | 0.217 | KV452996.1 | 641916 | 11-scf00156 | 11 |
| AX-157820706 | 7 | 0.217 | KV452996.1 | 652627 | 11-scf00156 | 11 |
| AX-158019254 | 7 | 0.217 | KV452996.1 | 664479 | 11-scf00156 | 11 |
| AX-158019259 | 7 | 0.217 | KV452996.1 | 670132 | 11-scf00156 | 11 |
| AX-157820713 | 7 | 0.217 | KV452996.1 | 672625 | 11-scf00156 | 11 |
| AX-157747916 | 7 | 0.217 | KV452996.1 | 674568 | 11-scf00156 | 11 |
| AX-158019264 | 7 | 0.217 | KV452996.1 | 681147 | 11-scf00156 | 11 |
| AX-158019265 | 7 | 0.217 | KV452996.1 | 681251 | 11-scf00156 | 11 |
| AX-157820717 | 7 | 0.217 | KV452996.1 | 681745 | 11-scf00156 | 11 |
| AX-158019267 | 7 | 0.217 | KV452996.1 | 681816 | 11-scf00156 | 11 |
| AX-157820718 | 7 | 0.217 | KV452996.1 | 682561 | 11-scf00156 | 11 |
| AX-158019268 | 7 | 0.217 | KV452996.1 | 683346 | 11-scf00156 | 11 |
| AX-158019270 | 7 | 0.217 | KV452996.1 | 687368 | 11-scf00156 | 11 |
| AX-158019271 | 7 | 0.217 | KV452996.1 | 690221 | 11-scf00156 | 11 |
| AX-158019461 | 7 | 0.217 | KV452996.1 | 879207 | 11-scf00156 | 11 |
| AX-158019498 | 7 | 0.217 | KV452996.1 | 929918 | 11-scf00156 | 11 |
| AX-158018861 | 7 | 0.326 | KV452996.1 | 59917  | 11-scf00156 | 11 |
| AX-158018977 | 7 | 0.326 | KV452996.1 | 310140 | 11-scf00156 | 11 |
| AX-158019025 | 7 | 0.326 | KV452996.1 | 383172 | 11-scf00156 | 11 |
| AX-158019180 | 7 | 0.326 | KV452996.1 | 567377 | 11-scf00156 | 11 |
| AX-158019273 | 7 | 0.326 | KV452996.1 | 693991 | 11-scf00156 | 11 |
| AX-158019274 | 7 | 0.326 | KV452996.1 | 694209 | 11-scf00156 | 11 |
| AX-158019276 | 7 | 0.326 | KV452996.1 | 694914 | 11-scf00156 | 11 |

|              |   |       |            |        |             |    |
|--------------|---|-------|------------|--------|-------------|----|
| AX-158019277 | 7 | 0.326 | KV452996.1 | 695351 | 11-scf00156 | 11 |
| AX-158019279 | 7 | 0.326 | KV452996.1 | 696969 | 11-scf00156 | 11 |
| AX-158019280 | 7 | 0.326 | KV452996.1 | 698523 | 11-scf00156 | 11 |
| AX-158019288 | 7 | 0.326 | KV452996.1 | 705614 | 11-scf00156 | 11 |
| AX-158019290 | 7 | 0.326 | KV452996.1 | 707947 | 11-scf00156 | 11 |
| AX-158019292 | 7 | 0.326 | KV452996.1 | 709800 | 11-scf00156 | 11 |
| AX-157820721 | 7 | 0.326 | KV452996.1 | 715612 | 11-scf00156 | 11 |
| AX-157820722 | 7 | 0.326 | KV452996.1 | 716044 | 11-scf00156 | 11 |
| AX-158019294 | 7 | 0.326 | KV452996.1 | 717634 | 11-scf00156 | 11 |
| AX-158019295 | 7 | 0.326 | KV452996.1 | 718383 | 11-scf00156 | 11 |
| AX-158019300 | 7 | 0.326 | KV452996.1 | 721448 | 11-scf00156 | 11 |
| AX-158019302 | 7 | 0.326 | KV452996.1 | 721808 | 11-scf00156 | 11 |
| AX-158019310 | 7 | 0.326 | KV452996.1 | 727468 | 11-scf00156 | 11 |
| AX-157820724 | 7 | 0.326 | KV452996.1 | 730773 | 11-scf00156 | 11 |
| AX-158019313 | 7 | 0.326 | KV452996.1 | 732799 | 11-scf00156 | 11 |
| AX-157820725 | 7 | 0.326 | KV452996.1 | 733318 | 11-scf00156 | 11 |
| AX-158019314 | 7 | 0.326 | KV452996.1 | 739956 | 11-scf00156 | 11 |
| AX-158019315 | 7 | 0.326 | KV452996.1 | 740808 | 11-scf00156 | 11 |
| AX-157717819 | 7 | 0.326 | KV452996.1 | 741440 | 11-scf00156 | 11 |
| AX-158019316 | 7 | 0.326 | KV452996.1 | 741989 | 11-scf00156 | 11 |
| AX-157820727 | 7 | 0.326 | KV452996.1 | 745372 | 11-scf00156 | 11 |
| AX-158019319 | 7 | 0.326 | KV452996.1 | 745968 | 11-scf00156 | 11 |
| AX-158019320 | 7 | 0.326 | KV452996.1 | 748733 | 11-scf00156 | 11 |
| AX-158019321 | 7 | 0.326 | KV452996.1 | 749281 | 11-scf00156 | 11 |
| AX-158019322 | 7 | 0.326 | KV452996.1 | 750701 | 11-scf00156 | 11 |
| AX-158019323 | 7 | 0.326 | KV452996.1 | 751537 | 11-scf00156 | 11 |
| AX-158019324 | 7 | 0.326 | KV452996.1 | 752415 | 11-scf00156 | 11 |
| AX-158019325 | 7 | 0.326 | KV452996.1 | 753037 | 11-scf00156 | 11 |
| AX-158019326 | 7 | 0.326 | KV452996.1 | 753611 | 11-scf00156 | 11 |
| AX-158019327 | 7 | 0.326 | KV452996.1 | 754331 | 11-scf00156 | 11 |
| AX-158019328 | 7 | 0.326 | KV452996.1 | 754699 | 11-scf00156 | 11 |
| AX-158019331 | 7 | 0.326 | KV452996.1 | 757498 | 11-scf00156 | 11 |
| AX-157820728 | 7 | 0.326 | KV452996.1 | 758066 | 11-scf00156 | 11 |
| AX-158019332 | 7 | 0.326 | KV452996.1 | 758556 | 11-scf00156 | 11 |
| AX-158019335 | 7 | 0.326 | KV452996.1 | 760328 | 11-scf00156 | 11 |
| AX-158019337 | 7 | 0.326 | KV452996.1 | 760919 | 11-scf00156 | 11 |
| AX-158019338 | 7 | 0.326 | KV452996.1 | 761345 | 11-scf00156 | 11 |
| AX-158019340 | 7 | 0.326 | KV452996.1 | 762999 | 11-scf00156 | 11 |
| AX-158019344 | 7 | 0.326 | KV452996.1 | 765016 | 11-scf00156 | 11 |
| AX-158019355 | 7 | 0.326 | KV452996.1 | 771634 | 11-scf00156 | 11 |
| AX-158019358 | 7 | 0.326 | KV452996.1 | 773080 | 11-scf00156 | 11 |
| AX-158019361 | 7 | 0.326 | KV452996.1 | 774670 | 11-scf00156 | 11 |
| AX-158019364 | 7 | 0.326 | KV452996.1 | 775636 | 11-scf00156 | 11 |
| AX-158019366 | 7 | 0.326 | KV452996.1 | 776828 | 11-scf00156 | 11 |
| AX-158019368 | 7 | 0.326 | KV452996.1 | 777531 | 11-scf00156 | 11 |
| AX-158019370 | 7 | 0.326 | KV452996.1 | 778488 | 11-scf00156 | 11 |
| AX-158019371 | 7 | 0.326 | KV452996.1 | 778613 | 11-scf00156 | 11 |
| AX-158019372 | 7 | 0.326 | KV452996.1 | 779188 | 11-scf00156 | 11 |
| AX-158019374 | 7 | 0.326 | KV452996.1 | 779687 | 11-scf00156 | 11 |
| AX-158019375 | 7 | 0.326 | KV452996.1 | 781992 | 11-scf00156 | 11 |
| AX-158019376 | 7 | 0.326 | KV452996.1 | 784908 | 11-scf00156 | 11 |



|              |   |       |            |        |             |    |
|--------------|---|-------|------------|--------|-------------|----|
| AX-158019377 | 7 | 0.326 | KV452996.1 | 785445 | 11-scf00156 | 11 |
| AX-158019379 | 7 | 0.326 | KV452996.1 | 785883 | 11-scf00156 | 11 |
| AX-158019380 | 7 | 0.326 | KV452996.1 | 786067 | 11-scf00156 | 11 |
| AX-158019382 | 7 | 0.326 | KV452996.1 | 786714 | 11-scf00156 | 11 |
| AX-157820729 | 7 | 0.326 | KV452996.1 | 786767 | 11-scf00156 | 11 |
| AX-158019384 | 7 | 0.326 | KV452996.1 | 787104 | 11-scf00156 | 11 |
| AX-158019385 | 7 | 0.326 | KV452996.1 | 787618 | 11-scf00156 | 11 |
| AX-158019388 | 7 | 0.326 | KV452996.1 | 789305 | 11-scf00156 | 11 |
| AX-157820730 | 7 | 0.326 | KV452996.1 | 790779 | 11-scf00156 | 11 |
| AX-158019390 | 7 | 0.326 | KV452996.1 | 791763 | 11-scf00156 | 11 |
| AX-158019391 | 7 | 0.326 | KV452996.1 | 792188 | 11-scf00156 | 11 |
| AX-158019392 | 7 | 0.326 | KV452996.1 | 792807 | 11-scf00156 | 11 |
| AX-158019394 | 7 | 0.326 | KV452996.1 | 793413 | 11-scf00156 | 11 |
| AX-158019395 | 7 | 0.326 | KV452996.1 | 794362 | 11-scf00156 | 11 |
| AX-158019399 | 7 | 0.326 | KV452996.1 | 799699 | 11-scf00156 | 11 |
| AX-157820733 | 7 | 0.326 | KV452996.1 | 802633 | 11-scf00156 | 11 |
| AX-157820734 | 7 | 0.326 | KV452996.1 | 805761 | 11-scf00156 | 11 |
| AX-158019401 | 7 | 0.326 | KV452996.1 | 806961 | 11-scf00156 | 11 |
| AX-158019402 | 7 | 0.326 | KV452996.1 | 809285 | 11-scf00156 | 11 |
| AX-157820736 | 7 | 0.326 | KV452996.1 | 811605 | 11-scf00156 | 11 |
| AX-157820737 | 7 | 0.326 | KV452996.1 | 812399 | 11-scf00156 | 11 |
| AX-158019404 | 7 | 0.326 | KV452996.1 | 814096 | 11-scf00156 | 11 |
| AX-158019406 | 7 | 0.326 | KV452996.1 | 815278 | 11-scf00156 | 11 |
| AX-157725603 | 7 | 0.326 | KV452996.1 | 815858 | 11-scf00156 | 11 |
| AX-157820738 | 7 | 0.326 | KV452996.1 | 816101 | 11-scf00156 | 11 |
| AX-157707761 | 7 | 0.326 | KV452996.1 | 816506 | 11-scf00156 | 11 |
| AX-158019408 | 7 | 0.326 | KV452996.1 | 818548 | 11-scf00156 | 11 |
| AX-158019409 | 7 | 0.326 | KV452996.1 | 819191 | 11-scf00156 | 11 |
| AX-158019412 | 7 | 0.326 | KV452996.1 | 820026 | 11-scf00156 | 11 |
| AX-158019416 | 7 | 0.326 | KV452996.1 | 822273 | 11-scf00156 | 11 |
| AX-158019419 | 7 | 0.326 | KV452996.1 | 825723 | 11-scf00156 | 11 |
| AX-158019420 | 7 | 0.326 | KV452996.1 | 826343 | 11-scf00156 | 11 |
| AX-157820739 | 7 | 0.326 | KV452996.1 | 827189 | 11-scf00156 | 11 |
| AX-158019421 | 7 | 0.326 | KV452996.1 | 830955 | 11-scf00156 | 11 |
| AX-158019422 | 7 | 0.326 | KV452996.1 | 832195 | 11-scf00156 | 11 |
| AX-158019423 | 7 | 0.326 | KV452996.1 | 833418 | 11-scf00156 | 11 |
| AX-158019425 | 7 | 0.326 | KV452996.1 | 833822 | 11-scf00156 | 11 |
| AX-157820740 | 7 | 0.326 | KV452996.1 | 834497 | 11-scf00156 | 11 |
| AX-158019426 | 7 | 0.326 | KV452996.1 | 834645 | 11-scf00156 | 11 |
| AX-158019429 | 7 | 0.326 | KV452996.1 | 839101 | 11-scf00156 | 11 |
| AX-158019432 | 7 | 0.326 | KV452996.1 | 843477 | 11-scf00156 | 11 |
| AX-158019435 | 7 | 0.326 | KV452996.1 | 848206 | 11-scf00156 | 11 |
| AX-158019436 | 7 | 0.326 | KV452996.1 | 849400 | 11-scf00156 | 11 |
| AX-158019443 | 7 | 0.326 | KV452996.1 | 861645 | 11-scf00156 | 11 |
| AX-158019446 | 7 | 0.326 | KV452996.1 | 866040 | 11-scf00156 | 11 |
| AX-158019456 | 7 | 0.326 | KV452996.1 | 876378 | 11-scf00156 | 11 |
| AX-158019458 | 7 | 0.326 | KV452996.1 | 877445 | 11-scf00156 | 11 |
| AX-158019468 | 7 | 0.326 | KV452996.1 | 885513 | 11-scf00156 | 11 |
| AX-157820744 | 7 | 0.326 | KV452996.1 | 887860 | 11-scf00156 | 11 |
| AX-158019471 | 7 | 0.326 | KV452996.1 | 890980 | 11-scf00156 | 11 |
| AX-158019474 | 7 | 0.326 | KV452996.1 | 893952 | 11-scf00156 | 11 |

|              |   |       |            |         |             |    |
|--------------|---|-------|------------|---------|-------------|----|
| AX-157820745 | 7 | 0.326 | KV452996.1 | 894809  | 11-scf00156 | 11 |
| AX-158019475 | 7 | 0.326 | KV452996.1 | 896917  | 11-scf00156 | 11 |
| AX-158019476 | 7 | 0.326 | KV452996.1 | 898301  | 11-scf00156 | 11 |
| AX-157820746 | 7 | 0.326 | KV452996.1 | 899335  | 11-scf00156 | 11 |
| AX-158019477 | 7 | 0.326 | KV452996.1 | 901200  | 11-scf00156 | 11 |
| AX-157820747 | 7 | 0.326 | KV452996.1 | 901260  | 11-scf00156 | 11 |
| AX-157820748 | 7 | 0.326 | KV452996.1 | 901343  | 11-scf00156 | 11 |
| AX-158019479 | 7 | 0.326 | KV452996.1 | 902325  | 11-scf00156 | 11 |
| AX-157820749 | 7 | 0.326 | KV452996.1 | 903268  | 11-scf00156 | 11 |
| AX-158019480 | 7 | 0.326 | KV452996.1 | 905873  | 11-scf00156 | 11 |
| AX-158019482 | 7 | 0.326 | KV452996.1 | 906702  | 11-scf00156 | 11 |
| AX-158019483 | 7 | 0.326 | KV452996.1 | 910367  | 11-scf00156 | 11 |
| AX-158416025 | 7 | 0.326 | KV452996.1 | 913224  | 11-scf00156 | 11 |
| AX-158019485 | 7 | 0.326 | KV452996.1 | 914162  | 11-scf00156 | 11 |
| AX-158019486 | 7 | 0.326 | KV452996.1 | 915306  | 11-scf00156 | 11 |
| AX-157820751 | 7 | 0.326 | KV452996.1 | 915986  | 11-scf00156 | 11 |
| AX-157820752 | 7 | 0.326 | KV452996.1 | 916314  | 11-scf00156 | 11 |
| AX-158019488 | 7 | 0.326 | KV452996.1 | 917750  | 11-scf00156 | 11 |
| AX-157820753 | 7 | 0.326 | KV452996.1 | 918110  | 11-scf00156 | 11 |
| AX-158019490 | 7 | 0.326 | KV452996.1 | 919559  | 11-scf00156 | 11 |
| AX-158019493 | 7 | 0.326 | KV452996.1 | 920246  | 11-scf00156 | 11 |
| AX-158019497 | 7 | 0.326 | KV452996.1 | 924011  | 11-scf00156 | 11 |
| AX-158019500 | 7 | 0.326 | KV452996.1 | 930712  | 11-scf00156 | 11 |
| AX-157820755 | 7 | 0.326 | KV452996.1 | 931157  | 11-scf00156 | 11 |
| AX-158019502 | 7 | 0.326 | KV452996.1 | 932071  | 11-scf00156 | 11 |
| AX-158019506 | 7 | 0.326 | KV452996.1 | 956114  | 11-scf00156 | 11 |
| AX-158019508 | 7 | 0.326 | KV452996.1 | 972640  | 11-scf00156 | 11 |
| AX-158019509 | 7 | 0.326 | KV452996.1 | 980218  | 11-scf00156 | 11 |
| AX-158391150 | 7 | 0.326 | KV452996.1 | 981810  | 11-scf00156 | 11 |
| AX-157820756 | 7 | 0.326 | KV452996.1 | 982169  | 11-scf00156 | 11 |
| AX-157820757 | 7 | 0.326 | KV452996.1 | 983063  | 11-scf00156 | 11 |
| AX-158019511 | 7 | 0.326 | KV452996.1 | 986629  | 11-scf00156 | 11 |
| AX-158019512 | 7 | 0.326 | KV452996.1 | 988863  | 11-scf00156 | 11 |
| AX-158019514 | 7 | 0.326 | KV452996.1 | 989382  | 11-scf00156 | 11 |
| AX-158019516 | 7 | 0.326 | KV452996.1 | 989852  | 11-scf00156 | 11 |
| AX-158019520 | 7 | 0.326 | KV452996.1 | 997443  | 11-scf00156 | 11 |
| AX-158019521 | 7 | 0.326 | KV452996.1 | 999030  | 11-scf00156 | 11 |
| AX-158019523 | 7 | 0.326 | KV452996.1 | 999921  | 11-scf00156 | 11 |
| AX-158019524 | 7 | 0.326 | KV452996.1 | 1000429 | 11-scf00156 | 11 |
| AX-158019527 | 7 | 0.326 | KV452996.1 | 1005162 | 11-scf00156 | 11 |
| AX-158019529 | 7 | 0.326 | KV452996.1 | 1007543 | 11-scf00156 | 11 |
| AX-157820759 | 7 | 0.326 | KV452996.1 | 1007710 | 11-scf00156 | 11 |
| AX-158019537 | 7 | 0.326 | KV452996.1 | 1016696 | 11-scf00156 | 11 |
| AX-157820760 | 7 | 0.326 | KV452996.1 | 1019382 | 11-scf00156 | 11 |
| AX-158019538 | 7 | 0.326 | KV452996.1 | 1021055 | 11-scf00156 | 11 |
| AX-158019540 | 7 | 0.326 | KV452996.1 | 1021744 | 11-scf00156 | 11 |
| AX-158406027 | 7 | 0.326 | KV452996.1 | 1025611 | 11-scf00156 | 11 |
| AX-158019541 | 7 | 0.326 | KV452996.1 | 1027154 | 11-scf00156 | 11 |
| AX-158019545 | 7 | 0.326 | KV452996.1 | 1028032 | 11-scf00156 | 11 |
| AX-157820761 | 7 | 0.326 | KV452996.1 | 1030936 | 11-scf00156 | 11 |
| AX-158019546 | 7 | 0.326 | KV452996.1 | 1033579 | 11-scf00156 | 11 |

|              |   |       |             |         |             |    |
|--------------|---|-------|-------------|---------|-------------|----|
| AX-157820762 | 7 | 0.326 | KV452996.1  | 1036005 | 11-scf00156 | 11 |
| AX-158019555 | 7 | 0.326 | KV452996.1  | 1040446 | 11-scf00156 | 11 |
| AX-158019557 | 7 | 0.326 | KV452996.1  | 1041046 | 11-scf00156 | 11 |
| AX-157820763 | 7 | 0.326 | KV452996.1  | 1044534 | 11-scf00156 | 11 |
| AX-158019564 | 7 | 0.326 | KV452996.1  | 1049323 | 11-scf00156 | 11 |
| AX-158019566 | 7 | 0.326 | KV452996.1  | 1056604 | 11-scf00156 | 11 |
| AX-158019576 | 7 | 0.326 | KV452996.1  | 1071041 | 11-scf00156 | 11 |
| AX-157711054 | 7 | 0.326 | FI883249.1  | 211     | 11-scf00156 | UN |
| AX-157712079 | 7 | 0.326 | 3ML01033700 | 317     | scf09361_1  | UN |
| AX-157712080 | 7 | 0.326 | 3ML01033700 | 392     | scf09361_1  | UN |
| AX-158018985 | 7 | 0.545 | KV452996.1  | 322568  | 11-scf00156 | 11 |
| AX-158019144 | 7 | 0.545 | KV452996.1  | 515729  | 11-scf00156 | 11 |
| AX-157724174 | 7 | 0.545 | KV452996.1  | 533082  | 11-scf00156 | 11 |
| AX-158019201 | 7 | 0.545 | KV452996.1  | 593952  | 11-scf00156 | 11 |
| AX-158019203 | 7 | 0.545 | KV452996.1  | 596374  | 11-scf00156 | 11 |
| AX-158019231 | 7 | 0.545 | KV452996.1  | 623676  | 11-scf00156 | 11 |
| AX-157716602 | 7 | 0.545 | KV452996.1  | 629688  | 11-scf00156 | 11 |
| AX-158019240 | 7 | 0.545 | KV452996.1  | 647277  | 11-scf00156 | 11 |
| AX-158019242 | 7 | 0.545 | KV452996.1  | 649339  | 11-scf00156 | 11 |
| AX-157820716 | 7 | 0.545 | KV452996.1  | 677983  | 11-scf00156 | 11 |
| AX-158019263 | 7 | 0.545 | KV452996.1  | 678800  | 11-scf00156 | 11 |
| AX-158019345 | 7 | 0.545 | KV452996.1  | 766024  | 11-scf00156 | 11 |
| AX-158019348 | 7 | 0.545 | KV452996.1  | 767333  | 11-scf00156 | 11 |
| AX-157820742 | 7 | 0.545 | KV452996.1  | 860161  | 11-scf00156 | 11 |
| AX-158019534 | 7 | 0.545 | KV452996.1  | 1015126 | 11-scf00156 | 11 |
| AX-158019549 | 7 | 0.545 | KV452996.1  | 1036588 | 11-scf00156 | 11 |
| AX-157713233 | 7 | 0.545 | KV452996.1  | 1036770 | 11-scf00156 | 11 |
| AX-158019553 | 7 | 0.545 | KV452996.1  | 1037627 | 11-scf00156 | 11 |
| AX-158019558 | 7 | 0.545 | KV452996.1  | 1042955 | 11-scf00156 | 11 |
| AX-157820765 | 7 | 0.545 | KV452996.1  | 1052467 | 11-scf00156 | 11 |
| AX-158019567 | 7 | 0.545 | KV452996.1  | 1058161 | 11-scf00156 | 11 |
| AX-157743403 | 7 | 0.545 | KV452996.1  | 1058712 | 11-scf00156 | 11 |
| AX-158019569 | 7 | 0.545 | KV452996.1  | 1058952 | 11-scf00156 | 11 |
| AX-158019571 | 7 | 0.545 | KV452996.1  | 1061636 | 11-scf00156 | 11 |
| AX-158019572 | 7 | 0.545 | KV452996.1  | 1061901 | 11-scf00156 | 11 |
| AX-158019574 | 7 | 0.545 | KV452996.1  | 1069100 | 11-scf00156 | 11 |
| AX-158019577 | 7 | 0.545 | KV452996.1  | 1071631 | 11-scf00156 | 11 |
| AX-157820769 | 7 | 0.545 | KV452996.1  | 1078924 | 11-scf00156 | 11 |
| AX-158019681 | 7 | 0.545 | KV452996.1  | 1180914 | 11-scf00156 | 11 |
| AX-158019700 | 7 | 0.545 | KV452996.1  | 1215492 | 11-scf00156 | 11 |
| AX-158019709 | 7 | 0.545 | KV452996.1  | 1222577 | 11-scf00156 | 11 |
| AX-157745774 | 7 | 0.545 | KV452996.1  | 1234854 | 11-scf00156 | 11 |
| AX-157742691 | 7 | 0.567 | KV452996.1  | 1080536 | 11-scf00156 | 11 |
| AX-158019586 | 7 | 0.601 | KV452996.1  | 1085268 | 11-scf00156 | 11 |
| AX-158018850 | 7 | 0.613 | KV452996.1  | 37681   | 11-scf00156 | 11 |
| AX-158019000 | 7 | 0.613 | KV452996.1  | 336331  | 11-scf00156 | 11 |
| AX-158019097 | 7 | 0.613 | KV452996.1  | 451569  | 11-scf00156 | 11 |
| AX-157720689 | 7 | 0.613 | KV452996.1  | 638420  | 11-scf00156 | 11 |
| AX-158019309 | 7 | 0.613 | KV452996.1  | 727185  | 11-scf00156 | 11 |
| AX-158019594 | 7 | 0.613 | KV452996.1  | 1094614 | 11-scf00156 | 11 |
| AX-158019633 | 7 | 0.613 | KV452996.1  | 1131495 | 11-scf00156 | 11 |

|              |   |       |            |         |             |    |
|--------------|---|-------|------------|---------|-------------|----|
| AX-158019644 | 7 | 0.613 | KV452996.1 | 1146904 | 11-scf00156 | 11 |
| AX-158019575 | 7 | 0.632 | KV452996.1 | 1069983 | 11-scf00156 | 11 |
| AX-157773062 | 7 | 0.632 | KV452996.1 | 1077146 | 11-scf00156 | 11 |
| AX-157719829 | 7 | 0.632 | KV452996.1 | 1095123 | 11-scf00156 | 11 |
| AX-157771311 | 7 | 0.632 | KV452996.1 | 1188039 | 11-scf00156 | 11 |
| AX-158019584 | 7 | 0.654 | KV452996.1 | 1084359 | 11-scf00156 | 11 |
| AX-158019589 | 7 | 0.654 | KV452996.1 | 1086429 | 11-scf00156 | 11 |
| AX-158019590 | 7 | 0.654 | KV452996.1 | 1087142 | 11-scf00156 | 11 |
| AX-158019597 | 7 | 0.654 | KV452996.1 | 1095534 | 11-scf00156 | 11 |
| AX-157771158 | 7 | 0.654 | KV452996.1 | 1097751 | 11-scf00156 | 11 |
| AX-158019599 | 7 | 0.654 | KV452996.1 | 1100881 | 11-scf00156 | 11 |
| AX-157870233 | 7 | 0.654 | KV452996.1 | 1101976 | 11-scf00156 | 11 |
| AX-158019603 | 7 | 0.654 | KV452996.1 | 1103589 | 11-scf00156 | 11 |
| AX-158019615 | 7 | 0.654 | KV452996.1 | 1110259 | 11-scf00156 | 11 |
| AX-158019616 | 7 | 0.654 | KV452996.1 | 1112050 | 11-scf00156 | 11 |
| AX-158019617 | 7 | 0.654 | KV452996.1 | 1113019 | 11-scf00156 | 11 |
| AX-157765150 | 7 | 0.654 | KV452996.1 | 1116623 | 11-scf00156 | 11 |
| AX-158019619 | 7 | 0.654 | KV452996.1 | 1116926 | 11-scf00156 | 11 |
| AX-157820772 | 7 | 0.654 | KV452996.1 | 1128573 | 11-scf00156 | 11 |
| AX-158019667 | 7 | 0.654 | KV452996.1 | 1162096 | 11-scf00156 | 11 |
| AX-158019729 | 7 | 0.654 | KV452996.1 | 1244141 | 11-scf00156 | 11 |
| AX-158019730 | 7 | 0.654 | KV452996.1 | 1244971 | 11-scf00156 | 11 |
| AX-158019622 | 7 | 0.763 | KV452996.1 | 1119631 | 11-scf00156 | 11 |
| AX-158019627 | 7 | 0.763 | KV452996.1 | 1127634 | 11-scf00156 | 11 |
| AX-158019636 | 7 | 0.763 | KV452996.1 | 1138787 | 11-scf00156 | 11 |
| AX-158019638 | 7 | 0.763 | KV452996.1 | 1139102 | 11-scf00156 | 11 |
| AX-157757882 | 7 | 0.872 | KV452996.1 | 1148252 | 11-scf00156 | 11 |
| AX-158019649 | 7 | 0.872 | KV452996.1 | 1149956 | 11-scf00156 | 11 |
| AX-158019652 | 7 | 0.872 | KV452996.1 | 1155933 | 11-scf00156 | 11 |
| AX-158019653 | 7 | 0.872 | KV452996.1 | 1156159 | 11-scf00156 | 11 |
| AX-158019656 | 7 | 0.872 | KV452996.1 | 1156550 | 11-scf00156 | 11 |
| AX-158019659 | 7 | 0.872 | KV452996.1 | 1158674 | 11-scf00156 | 11 |
| AX-158019669 | 7 | 0.872 | KV452996.1 | 1163115 | 11-scf00156 | 11 |
| AX-158379721 | 7 | 0.872 | KV452996.1 | 1164589 | 11-scf00156 | 11 |
| AX-157717694 | 7 | 0.872 | KV452996.1 | 1165070 | 11-scf00156 | 11 |
| AX-158019678 | 7 | 0.872 | KV452996.1 | 1177408 | 11-scf00156 | 11 |
| AX-157820779 | 7 | 0.982 | KV452996.1 | 1183878 | 11-scf00156 | 11 |
| AX-158019683 | 7 | 0.982 | KV452996.1 | 1191707 | 11-scf00156 | 11 |
| AX-158019688 | 7 | 1.037 | KV452996.1 | 1198100 | 11-scf00156 | 11 |
| AX-158019642 | 7 | 1.091 | KV452996.1 | 1142947 | 11-scf00156 | 11 |
| AX-158019690 | 7 | 1.091 | KV452996.1 | 1201789 | 11-scf00156 | 11 |
| AX-158019697 | 7 | 1.091 | KV452996.1 | 1209494 | 11-scf00156 | 11 |
| AX-158019706 | 7 | 1.091 | KV452996.1 | 1219664 | 11-scf00156 | 11 |
| AX-157723978 | 7 | 1.091 | KV452996.1 | 1223341 | 11-scf00156 | 11 |
| AX-157820782 | 7 | 1.091 | KV452996.1 | 1228369 | 11-scf00156 | 11 |
| AX-158019715 | 7 | 1.091 | KV452996.1 | 1229787 | 11-scf00156 | 11 |
| AX-158019716 | 7 | 1.091 | KV452996.1 | 1232056 | 11-scf00156 | 11 |
| AX-157714979 | 7 | 1.091 | KV452996.1 | 1233063 | 11-scf00156 | 11 |
| AX-158019720 | 7 | 1.091 | KV452996.1 | 1235286 | 11-scf00156 | 11 |
| AX-158019721 | 7 | 1.091 | KV452996.1 | 1236935 | 11-scf00156 | 11 |
| AX-158019722 | 7 | 1.091 | KV452996.1 | 1238806 | 11-scf00156 | 11 |

|              |   |       |            |         |             |    |
|--------------|---|-------|------------|---------|-------------|----|
| AX-158019725 | 7 | 1.091 | KV452996.1 | 1241074 | 11-scf00156 | 11 |
| AX-158019726 | 7 | 1.091 | KV452996.1 | 1242925 | 11-scf00156 | 11 |
| AX-158019732 | 7 | 1.091 | KV452996.1 | 1245388 | 11-scf00156 | 11 |
| AX-158019735 | 7 | 1.091 | KV452996.1 | 1246951 | 11-scf00156 | 11 |
| AX-158019738 | 7 | 1.2   | KV452996.1 | 1253567 | 11-scf00156 | 11 |
| AX-157820785 | 7 | 1.31  | KV452996.1 | 1254019 | 11-scf00156 | 11 |
| AX-157770941 | 7 | 1.528 | KV452996.1 | 1277768 | 11-scf00156 | 11 |
| AX-158019763 | 7 | 1.528 | KV452996.1 | 1283406 | 11-scf00156 | 11 |
| AX-158019768 | 7 | 1.528 | KV452996.1 | 1286885 | 11-scf00156 | 11 |
| AX-158019770 | 7 | 1.528 | KV452996.1 | 1289039 | 11-scf00156 | 11 |
| AX-157755103 | 7 | 1.528 | KV452996.1 | 1289465 | 11-scf00156 | 11 |
| AX-158019771 | 7 | 1.528 | KV452996.1 | 1292615 | 11-scf00156 | 11 |
| AX-158019773 | 7 | 1.528 | KV452996.1 | 1293587 | 11-scf00156 | 11 |
| AX-158019776 | 7 | 1.637 | KV452996.1 | 1296026 | 11-scf00156 | 11 |
| AX-158019778 | 7 | 1.637 | KV452996.1 | 1299777 | 11-scf00156 | 11 |
| AX-158019855 | 7 | 1.637 | KV452996.1 | 1367934 | 11-scf00156 | 11 |
| AX-158019740 | 7 | 1.747 | KV452996.1 | 1254072 | 11-scf00156 | 11 |
| AX-158019783 | 7 | 1.747 | KV452996.1 | 1307345 | 11-scf00156 | 11 |
| AX-158406029 | 7 | 1.747 | KV452996.1 | 1307549 | 11-scf00156 | 11 |
| AX-158019788 | 7 | 1.807 | KV452996.1 | 1316347 | 11-scf00156 | 11 |
| AX-158019789 | 7 | 1.856 | KV452996.1 | 1319686 | 11-scf00156 | 11 |
| AX-158019791 | 7 | 1.856 | KV452996.1 | 1320058 | 11-scf00156 | 11 |
| AX-158019795 | 7 | 1.856 | KV452996.1 | 1322684 | 11-scf00156 | 11 |
| AX-158019592 | 7 | 1.857 | KV452996.1 | 1089241 | 11-scf00156 | 11 |
| AX-158019799 | 7 | 1.857 | KV452996.1 | 1324313 | 11-scf00156 | 11 |
| AX-158019825 | 7 | 2.183 | KV452996.1 | 1346064 | 11-scf00156 | 11 |
| AX-158019827 | 7 | 2.184 | KV452996.1 | 1346472 | 11-scf00156 | 11 |
| AX-158019832 | 7 | 2.293 | KV452996.1 | 1351246 | 11-scf00156 | 11 |
| AX-158019836 | 7 | 2.293 | KV452996.1 | 1354192 | 11-scf00156 | 11 |
| AX-158019834 | 7 | 2.311 | KV452996.1 | 1353423 | 11-scf00156 | 11 |
| AX-158019874 | 7 | 2.311 | KV452996.1 | 1378569 | 11-scf00156 | 11 |
| AX-157740955 | 7 | 2.33  | KV452996.1 | 1356557 | 11-scf00156 | 11 |
| AX-158019872 | 7 | 2.33  | KV452996.1 | 1378318 | 11-scf00156 | 11 |
| AX-158019881 | 7 | 2.33  | KV452996.1 | 1384376 | 11-scf00156 | 11 |
| AX-158019842 | 7 | 2.357 | KV452996.1 | 1358460 | 11-scf00156 | 11 |
| AX-158019845 | 7 | 2.384 | KV452996.1 | 1361817 | 11-scf00156 | 11 |
| AX-158019846 | 7 | 2.403 | KV452996.1 | 1362232 | 11-scf00156 | 11 |
| AX-158019849 | 7 | 2.403 | KV452996.1 | 1363371 | 11-scf00156 | 11 |
| AX-158379723 | 7 | 2.512 | KV452996.1 | 1356518 | 11-scf00156 | 11 |
| AX-158019852 | 7 | 2.512 | KV452996.1 | 1364751 | 11-scf00156 | 11 |
| AX-158019853 | 7 | 2.512 | KV452996.1 | 1367542 | 11-scf00156 | 11 |
| AX-158019856 | 7 | 2.512 | KV452996.1 | 1368001 | 11-scf00156 | 11 |
| AX-158019857 | 7 | 2.512 | KV452996.1 | 1369077 | 11-scf00156 | 11 |
| AX-158019858 | 7 | 2.512 | KV452996.1 | 1369844 | 11-scf00156 | 11 |
| AX-158019859 | 7 | 2.512 | KV452996.1 | 1370074 | 11-scf00156 | 11 |
| AX-158019861 | 7 | 2.512 | KV452996.1 | 1370371 | 11-scf00156 | 11 |
| AX-158019862 | 7 | 2.512 | KV452996.1 | 1371030 | 11-scf00156 | 11 |
| AX-158019863 | 7 | 2.512 | KV452996.1 | 1371360 | 11-scf00156 | 11 |
| AX-158019865 | 7 | 2.658 | KV452996.1 | 1371954 | 11-scf00156 | 11 |
| AX-158019871 | 7 | 2.658 | KV452996.1 | 1377913 | 11-scf00156 | 11 |
| AX-157774344 | 7 | 2.658 | KV452996.1 | 1379634 | 11-scf00156 | 11 |

|              |   |       |            |         |             |    |
|--------------|---|-------|------------|---------|-------------|----|
| AX-157758717 | 7 | 2.803 | KV452996.1 | 1382639 | 11-scf00156 | 11 |
| AX-157757730 | 7 | 2.803 | KV452996.1 | 1387928 | 11-scf00156 | 11 |
| AX-157741871 | 7 | 2.803 | KV452996.1 | 1390061 | 11-scf00156 | 11 |
| AX-158019890 | 7 | 2.803 | KV452996.1 | 1392427 | 11-scf00156 | 11 |
| AX-158019893 | 7 | 2.949 | KV452996.1 | 1396502 | 11-scf00156 | 11 |
| AX-157884955 | 7 | 2.949 | KV452996.1 | 1397292 | 11-scf00156 | 11 |
| AX-158019894 | 7 | 2.949 | KV452996.1 | 1398791 | 11-scf00156 | 11 |
| AX-158019896 | 7 | 2.949 | KV452996.1 | 1406418 | 11-scf00156 | 11 |
| AX-158019900 | 7 | 2.949 | KV452996.1 | 1414530 | 11-scf00156 | 11 |
| AX-158019909 | 7 | 3.113 | KV452996.1 | 1417172 | 11-scf00156 | 11 |
| AX-158019912 | 7 | 3.113 | KV452996.1 | 1421256 | 11-scf00156 | 11 |
| AX-158019917 | 7 | 3.277 | KV452996.1 | 1424957 | 11-scf00156 | 11 |
| AX-158019922 | 7 | 3.277 | KV452996.1 | 1429842 | 11-scf00156 | 11 |
| AX-158019925 | 7 | 3.345 | KV452996.1 | 1432395 | 11-scf00156 | 11 |
| AX-158019956 | 7 | 3.345 | KV452996.1 | 1464753 | 11-scf00156 | 11 |
| AX-158019926 | 7 | 3.387 | KV452996.1 | 1432817 | 11-scf00156 | 11 |
| AX-158019927 | 7 | 3.387 | KV452996.1 | 1436065 | 11-scf00156 | 11 |
| AX-158019928 | 7 | 3.387 | KV452996.1 | 1436502 | 11-scf00156 | 11 |
| AX-158019923 | 7 | 3.496 | KV452996.1 | 1431329 | 11-scf00156 | 11 |
| AX-158019929 | 7 | 3.496 | KV452996.1 | 1437126 | 11-scf00156 | 11 |
| AX-158019933 | 7 | 3.496 | KV452996.1 | 1442247 | 11-scf00156 | 11 |
| AX-158019937 | 7 | 3.496 | KV452996.1 | 1446384 | 11-scf00156 | 11 |
| AX-158019939 | 7 | 3.496 | KV452996.1 | 1446809 | 11-scf00156 | 11 |
| AX-158019941 | 7 | 3.496 | KV452996.1 | 1448308 | 11-scf00156 | 11 |
| AX-158019946 | 7 | 3.496 | KV452996.1 | 1453046 | 11-scf00156 | 11 |
| AX-158019948 | 7 | 3.496 | KV452996.1 | 1455412 | 11-scf00156 | 11 |
| AX-158019954 | 7 | 3.496 | KV452996.1 | 1463440 | 11-scf00156 | 11 |
| AX-158019960 | 7 | 3.496 | KV452996.1 | 1465663 | 11-scf00156 | 11 |
| AX-158019992 | 7 | 3.496 | KV452996.1 | 1497777 | 11-scf00156 | 11 |
| AX-158019958 | 7 | 3.605 | KV452996.1 | 1465347 | 11-scf00156 | 11 |
| AX-158019961 | 7 | 3.605 | KV452996.1 | 1466857 | 11-scf00156 | 11 |
| AX-158019962 | 7 | 3.605 | KV452996.1 | 1467084 | 11-scf00156 | 11 |
| AX-158019968 | 7 | 3.605 | KV452996.1 | 1469762 | 11-scf00156 | 11 |
| AX-157856300 | 7 | 3.605 | KV452996.1 | 1470453 | 11-scf00156 | 11 |
| AX-158019971 | 7 | 3.605 | KV452996.1 | 1475447 | 11-scf00156 | 11 |
| AX-158019972 | 7 | 3.752 | KV452996.1 | 1480250 | 11-scf00156 | 11 |
| AX-157865315 | 7 | 3.752 | KV452996.1 | 1481223 | 11-scf00156 | 11 |
| AX-157726274 | 7 | 3.752 | KV452996.1 | 1481523 | 11-scf00156 | 11 |
| AX-158019983 | 7 | 3.752 | KV452996.1 | 1490631 | 11-scf00156 | 11 |
| AX-158019979 | 7 | 4.037 | KV452996.1 | 1485954 | 11-scf00156 | 11 |
| AX-157751734 | 7 | 4.043 | KV452996.1 | 1486921 | 11-scf00156 | 11 |
| AX-158019980 | 7 | 4.043 | KV452996.1 | 1488648 | 11-scf00156 | 11 |
| AX-158019984 | 7 | 4.043 | KV452996.1 | 1492222 | 11-scf00156 | 11 |
| AX-158019987 | 7 | 4.043 | KV452996.1 | 1493465 | 11-scf00156 | 11 |
| AX-158019989 | 7 | 4.043 | KV452996.1 | 1495197 | 11-scf00156 | 11 |
| AX-158019991 | 7 | 4.043 | KV452996.1 | 1495793 | 11-scf00156 | 11 |
| AX-158019996 | 7 | 4.261 | KV452996.1 | 1503903 | 11-scf00156 | 11 |
| AX-158020002 | 7 | 4.261 | KV452996.1 | 1508724 | 11-scf00156 | 11 |
| AX-158020005 | 7 | 4.261 | KV452996.1 | 1514653 | 11-scf00156 | 11 |
| AX-158020006 | 7 | 4.261 | KV452996.1 | 1515206 | 11-scf00156 | 11 |
| AX-158020012 | 7 | 4.261 | KV452996.1 | 1518048 | 11-scf00156 | 11 |

|              |   |       |            |         |             |    |
|--------------|---|-------|------------|---------|-------------|----|
| AX-158020060 | 7 | 4.261 | KV452996.1 | 1576419 | 11-scf00156 | 11 |
| AX-158020008 | 7 | 4.276 | KV452996.1 | 1515623 | 11-scf00156 | 11 |
| AX-158020016 | 7 | 4.276 | KV452996.1 | 1522308 | 11-scf00156 | 11 |
| AX-158020021 | 7 | 4.527 | KV452996.1 | 1534271 | 11-scf00156 | 11 |
| AX-158020024 | 7 | 4.527 | KV452996.1 | 1537615 | 11-scf00156 | 11 |
| AX-158020025 | 7 | 4.662 | KV452996.1 | 1539516 | 11-scf00156 | 11 |
| AX-158020026 | 7 | 4.85  | KV452996.1 | 1542271 | 11-scf00156 | 11 |
| AX-158379724 | 7 | 4.85  | KV452996.1 | 1542706 | 11-scf00156 | 11 |
| AX-158020027 | 7 | 4.85  | KV452996.1 | 1545153 | 11-scf00156 | 11 |
| AX-158020029 | 7 | 4.85  | KV452996.1 | 1546450 | 11-scf00156 | 11 |
| AX-157740489 | 7 | 5.132 | KV452996.1 | 1547485 | 11-scf00156 | 11 |
| AX-158020033 | 7 | 5.132 | KV452996.1 | 1550941 | 11-scf00156 | 11 |
| AX-158020036 | 7 | 5.132 | KV452996.1 | 1551329 | 11-scf00156 | 11 |
| AX-158020044 | 7 | 5.132 | KV452996.1 | 1557215 | 11-scf00156 | 11 |
| AX-158020047 | 7 | 5.132 | KV452996.1 | 1564348 | 11-scf00156 | 11 |
| AX-158020057 | 7 | 5.132 | KV452996.1 | 1574971 | 11-scf00156 | 11 |
| AX-158020053 | 7 | 5.142 | KV452996.1 | 1569611 | 11-scf00156 | 11 |
| AX-158020056 | 7 | 5.152 | KV452996.1 | 1574123 | 11-scf00156 | 11 |
| AX-158020069 | 7 | 5.639 | KV452996.1 | 1583889 | 11-scf00156 | 11 |
| AX-158020072 | 7 | 5.668 | KV452996.1 | 1585023 | 11-scf00156 | 11 |
| AX-158020074 | 7 | 5.876 | KV452996.1 | 1589237 | 11-scf00156 | 11 |
| AX-158020079 | 7 | 5.939 | KV452996.1 | 1595512 | 11-scf00156 | 11 |
| AX-157884956 | 7 | 5.939 | KV452996.1 | 1596343 | 11-scf00156 | 11 |
| AX-158020104 | 7 | 6.037 | KV452996.1 | 1613067 | 11-scf00156 | 11 |
| AX-157884959 | 7 | 6.037 | KV452996.1 | 1634895 | 11-scf00156 | 11 |
| AX-157740823 | 7 | 6.143 | KV452996.1 | 1617004 | 11-scf00156 | 11 |
| AX-158020106 | 7 | 6.143 | KV452996.1 | 1619834 | 11-scf00156 | 11 |
| AX-158020108 | 7 | 6.143 | KV452996.1 | 1620366 | 11-scf00156 | 11 |
| AX-158020118 | 7 | 6.336 | KV452996.1 | 1633928 | 11-scf00156 | 11 |
| AX-158020120 | 7 | 6.528 | KV452996.1 | 1636280 | 11-scf00156 | 11 |
| AX-158020125 | 7 | 6.574 | KV452996.1 | 1642750 | 11-scf00156 | 11 |
| AX-158020127 | 7 | 6.574 | KV452996.1 | 1643567 | 11-scf00156 | 11 |
| AX-158020129 | 7 | 6.574 | KV452996.1 | 1646508 | 11-scf00156 | 11 |
| AX-157727371 | 7 | 6.627 | KV452996.1 | 1649433 | 11-scf00156 | 11 |
| AX-157683017 | 7 | 6.627 | KV452997.1 | 298     | 11-scf00157 | 11 |
| AX-158020132 | 7 | 6.667 | KV452996.1 | 1649836 | 11-scf00156 | 11 |
| AX-158020137 | 7 | 6.776 | KV452996.1 | 1655852 | 11-scf00156 | 11 |
| AX-158020140 | 7 | 6.915 | KV452996.1 | 1656311 | 11-scf00156 | 11 |
| AX-158020141 | 7 | 7.026 | KV452996.1 | 1657063 | 11-scf00156 | 11 |
| AX-158020143 | 7 | 7.026 | KV452996.1 | 1662088 | 11-scf00156 | 11 |
| AX-158379725 | 7 | 7.026 | KV452996.1 | 1669047 | 11-scf00156 | 11 |
| AX-158020128 | 7 | 7.104 | KV452996.1 | 1644869 | 11-scf00156 | 11 |
| AX-158020146 | 7 | 7.104 | KV452996.1 | 1663741 | 11-scf00156 | 11 |
| AX-158020147 | 7 | 7.129 | KV452996.1 | 1664253 | 11-scf00156 | 11 |
| AX-158020149 | 7 | 7.129 | KV452996.1 | 1666600 | 11-scf00156 | 11 |
| AX-158020150 | 7 | 7.161 | KV452996.1 | 1668485 | 11-scf00156 | 11 |
| AX-158020154 | 7 | 7.18  | KV452996.1 | 1671572 | 11-scf00156 | 11 |
| AX-158020157 | 7 | 7.18  | KV452996.1 | 1673035 | 11-scf00156 | 11 |
| AX-158020076 | 7 | 7.213 | KV452996.1 | 1591183 | 11-scf00156 | 11 |
| AX-158020112 | 7 | 7.213 | KV452996.1 | 1624662 | 11-scf00156 | 11 |
| AX-158020161 | 7 | 7.213 | KV452996.1 | 1675060 | 11-scf00156 | 11 |

|              |   |       |            |         |             |    |
|--------------|---|-------|------------|---------|-------------|----|
| AX-158020169 | 7 | 7.213 | KV452996.1 | 1685787 | 11-scf00156 | 11 |
| AX-158020171 | 7 | 7.213 | KV452996.1 | 1686323 | 11-scf00156 | 11 |
| AX-157680046 | 7 | 7.213 | KV452997.1 | 447     | 11-scf00157 | 11 |
| AX-157689553 | 7 | 7.213 | KV452998.1 | 682     | 11-scf06087 | 11 |
| AX-158021004 | 7 | 7.868 | KV452998.1 | 29008   | 11-scf06087 | 11 |
| AX-157773157 | 7 | 7.868 | KV452998.1 | 35591   | 11-scf06087 | 11 |
| AX-158021010 | 7 | 7.868 | KV452998.1 | 36138   | 11-scf06087 | 11 |
| AX-158021018 | 7 | 7.978 | KV452998.1 | 42079   | 11-scf06087 | 11 |
| AX-158021021 | 7 | 7.978 | KV452998.1 | 44838   | 11-scf06087 | 11 |
| AX-158021025 | 7 | 7.978 | KV452998.1 | 47883   | 11-scf06087 | 11 |
| AX-158021028 | 7 | 7.978 | KV452998.1 | 50024   | 11-scf06087 | 11 |
| AX-158021030 | 7 | 7.978 | KV452998.1 | 52934   | 11-scf06087 | 11 |
| AX-158021061 | 7 | 7.978 | KV452998.1 | 83262   | 11-scf06087 | 11 |
| AX-158021034 | 7 | 8.074 | KV452998.1 | 54979   | 11-scf06087 | 11 |
| AX-158021035 | 7 | 8.196 | KV452998.1 | 55665   | 11-scf06087 | 11 |
| AX-157725872 | 7 | 8.196 | KV452998.1 | 57811   | 11-scf06087 | 11 |
| AX-158408030 | 7 | 8.306 | KV452998.1 | 61761   | 11-scf06087 | 11 |
| AX-158021039 | 7 | 8.306 | KV452998.1 | 62213   | 11-scf06087 | 11 |
| AX-158021041 | 7 | 8.306 | KV452998.1 | 63137   | 11-scf06087 | 11 |
| AX-158021042 | 7 | 8.306 | KV452998.1 | 64324   | 11-scf06087 | 11 |
| AX-158021043 | 7 | 8.306 | KV452998.1 | 65730   | 11-scf06087 | 11 |
| AX-158021045 | 7 | 8.306 | KV452998.1 | 66780   | 11-scf06087 | 11 |
| AX-157741079 | 7 | 8.306 | KV452998.1 | 67841   | 11-scf06087 | 11 |
| AX-158383749 | 7 | 8.306 | KV452998.1 | 69128   | 11-scf06087 | 11 |
| AX-158021049 | 7 | 8.433 | KV452998.1 | 70292   | 11-scf06087 | 11 |
| AX-157719375 | 7 | 8.433 | KV452998.1 | 77298   | 11-scf06087 | 11 |
| AX-158021062 | 7 | 8.433 | KV452998.1 | 85204   | 11-scf06087 | 11 |
| AX-157820856 | 7 | 8.962 | KV452998.1 | 87715   | 11-scf06087 | 11 |
| AX-157820859 | 7 | 9.085 | KV452998.1 | 96347   | 11-scf06087 | 11 |
| AX-158021078 | 7 | 9.085 | KV452998.1 | 107323  | 11-scf06087 | 11 |
| AX-157773964 | 7 | 9.093 | KV452998.1 | 114876  | 11-scf06087 | 11 |
| AX-158021084 | 7 | 9.093 | KV452998.1 | 115196  | 11-scf06087 | 11 |
| AX-158021087 | 7 | 9.093 | KV452998.1 | 116428  | 11-scf06087 | 11 |
| AX-158021090 | 7 | 9.093 | KV452998.1 | 119790  | 11-scf06087 | 11 |
| AX-158021092 | 7 | 9.093 | KV452998.1 | 121420  | 11-scf06087 | 11 |
| AX-158021097 | 7 | 9.093 | KV452998.1 | 127974  | 11-scf06087 | 11 |
| AX-158379732 | 7 | 9.094 | KV452998.1 | 130286  | 11-scf06087 | 11 |
| AX-158021100 | 7 | 9.094 | KV452998.1 | 130893  | 11-scf06087 | 11 |
| AX-158021116 | 7 | 9.411 | KV452998.1 | 140888  | 11-scf06087 | 11 |
| AX-158021117 | 7 | 9.411 | KV452998.1 | 141423  | 11-scf06087 | 11 |
| AX-158021119 | 7 | 9.728 | KV452998.1 | 148082  | 11-scf06087 | 11 |
| AX-158021124 | 7 | 9.728 | KV452998.1 | 152870  | 11-scf06087 | 11 |
| AX-157820865 | 7 | 9.728 | KV452998.1 | 156318  | 11-scf06087 | 11 |
| AX-158021125 | 7 | 9.728 | KV452998.1 | 157115  | 11-scf06087 | 11 |
| AX-158021126 | 7 | 9.728 | KV452998.1 | 158405  | 11-scf06087 | 11 |
| AX-157758942 | 7 | 9.728 | KV452998.1 | 158757  | 11-scf06087 | 11 |
| AX-157715468 | 7 | 9.728 | KV452998.1 | 164749  | 11-scf06087 | 11 |
| AX-158021128 | 7 | 9.728 | KV452998.1 | 165002  | 11-scf06087 | 11 |
| AX-157763021 | 7 | 9.728 | KV452998.1 | 166329  | 11-scf06087 | 11 |
| AX-158021129 | 7 | 9.728 | KV452998.1 | 166603  | 11-scf06087 | 11 |
| AX-158021131 | 7 | 9.728 | KV452998.1 | 168703  | 11-scf06087 | 11 |



|              |   |        |            |        |             |    |
|--------------|---|--------|------------|--------|-------------|----|
| AX-158021132 | 7 | 9.728  | KV452998.1 | 169305 | 11-scf06087 | 11 |
| AX-158021135 | 7 | 9.728  | KV452998.1 | 170647 | 11-scf06087 | 11 |
| AX-158021136 | 7 | 9.728  | KV452998.1 | 172083 | 11-scf06087 | 11 |
| AX-158021141 | 7 | 9.728  | KV452998.1 | 175755 | 11-scf06087 | 11 |
| AX-158021145 | 7 | 9.728  | KV452998.1 | 178401 | 11-scf06087 | 11 |
| AX-158021149 | 7 | 9.786  | KV452998.1 | 179248 | 11-scf06087 | 11 |
| AX-157739041 | 7 | 10.041 | KV452998.1 | 184349 | 11-scf06087 | 11 |
| AX-158021152 | 7 | 10.041 | KV452998.1 | 184534 | 11-scf06087 | 11 |
| AX-158021156 | 7 | 10.11  | KV452998.1 | 187929 | 11-scf06087 | 11 |
| AX-158021161 | 7 | 10.135 | KV452998.1 | 191290 | 11-scf06087 | 11 |
| AX-158021163 | 7 | 10.201 | KV452998.1 | 196911 | 11-scf06087 | 11 |
| AX-158408033 | 7 | 10.201 | KV452998.1 | 198005 | 11-scf06087 | 11 |
| AX-157738913 | 7 | 10.521 | KV452998.1 | 199542 | 11-scf06087 | 11 |
| AX-157820870 | 7 | 10.681 | KV452998.1 | 200811 | 11-scf06087 | 11 |
| AX-157820872 | 7 | 10.681 | KV452998.1 | 204026 | 11-scf06087 | 11 |
| AX-157744638 | 7 | 10.681 | KV452998.1 | 204295 | 11-scf06087 | 11 |
| AX-157725750 | 7 | 11.033 | KV452998.1 | 207891 | 11-scf06087 | 11 |
| AX-158021183 | 7 | 11.033 | KV452998.1 | 218268 | 11-scf06087 | 11 |
| AX-158021168 | 7 | 11.042 | KV452998.1 | 209858 | 11-scf06087 | 11 |
| AX-157719974 | 7 | 11.042 | KV452998.1 | 210380 | 11-scf06087 | 11 |
| AX-158021169 | 7 | 11.042 | KV452998.1 | 210902 | 11-scf06087 | 11 |
| AX-158383750 | 7 | 11.042 | KV452998.1 | 211766 | 11-scf06087 | 11 |
| AX-158021172 | 7 | 11.042 | KV452998.1 | 214055 | 11-scf06087 | 11 |
| AX-158021174 | 7 | 11.042 | KV452998.1 | 214709 | 11-scf06087 | 11 |
| AX-158021177 | 7 | 11.042 | KV452998.1 | 216723 | 11-scf06087 | 11 |
| AX-158021178 | 7 | 11.042 | KV452998.1 | 217420 | 11-scf06087 | 11 |
| AX-157820877 | 7 | 11.042 | KV452998.1 | 218583 | 11-scf06087 | 11 |
| AX-158021184 | 7 | 11.042 | KV452998.1 | 222261 | 11-scf06087 | 11 |
| AX-157770802 | 7 | 11.042 | KV452998.1 | 222754 | 11-scf06087 | 11 |
| AX-158021185 | 7 | 11.042 | KV452998.1 | 222843 | 11-scf06087 | 11 |
| AX-158021186 | 7 | 11.042 | KV452998.1 | 224855 | 11-scf06087 | 11 |
| AX-158021187 | 7 | 11.042 | KV452998.1 | 225944 | 11-scf06087 | 11 |
| AX-157772548 | 7 | 11.042 | KV452998.1 | 226681 | 11-scf06087 | 11 |
| AX-158021189 | 7 | 11.042 | KV452998.1 | 227723 | 11-scf06087 | 11 |
| AX-157712998 | 7 | 11.046 | KV452998.1 | 230142 | 11-scf06087 | 11 |
| AX-158021201 | 7 | 11.79  | KV452998.1 | 239213 | 11-scf06087 | 11 |
| AX-157772679 | 7 | 11.916 | KV452998.1 | 239445 | 11-scf06087 | 11 |
| AX-158021207 | 7 | 12.136 | KV452998.1 | 242025 | 11-scf06087 | 11 |
| AX-158021208 | 7 | 12.136 | KV452998.1 | 243212 | 11-scf06087 | 11 |
| AX-158021210 | 7 | 12.136 | KV452998.1 | 245699 | 11-scf06087 | 11 |
| AX-158379733 | 7 | 12.136 | KV452998.1 | 246202 | 11-scf06087 | 11 |
| AX-157884976 | 7 | 12.213 | KV452998.1 | 247042 | 11-scf06087 | 11 |
| AX-158021215 | 7 | 12.267 | KV452998.1 | 254111 | 11-scf06087 | 11 |
| AX-158021205 | 7 | 12.354 | KV452998.1 | 241154 | 11-scf06087 | 11 |
| AX-158021218 | 7 | 12.354 | KV452998.1 | 256362 | 11-scf06087 | 11 |
| AX-158021220 | 7 | 12.354 | KV452998.1 | 258166 | 11-scf06087 | 11 |
| AX-158021221 | 7 | 12.354 | KV452998.1 | 259042 | 11-scf06087 | 11 |
| AX-158021224 | 7 | 12.354 | KV452998.1 | 262205 | 11-scf06087 | 11 |
| AX-158021227 | 7 | 12.354 | KV452998.1 | 264923 | 11-scf06087 | 11 |
| AX-158021230 | 7 | 12.354 | KV452998.1 | 268188 | 11-scf06087 | 11 |
| AX-158021233 | 7 | 12.354 | KV452998.1 | 272219 | 11-scf06087 | 11 |

|              |   |        |             |        |             |    |
|--------------|---|--------|-------------|--------|-------------|----|
| AX-158021234 | 7 | 12.354 | KV452998.1  | 272673 | 11-scf06087 | 11 |
| AX-157820879 | 7 | 12.354 | KV452998.1  | 274408 | 11-scf06087 | 11 |
| AX-157865329 | 7 | 12.354 | KV452998.1  | 275331 | 11-scf06087 | 11 |
| AX-158021235 | 7 | 12.354 | KV452998.1  | 275915 | 11-scf06087 | 11 |
| AX-158021237 | 7 | 12.354 | KV452998.1  | 277184 | 11-scf06087 | 11 |
| AX-157820883 | 7 | 12.354 | KV452998.1  | 284743 | 11-scf06087 | 11 |
| AX-157719824 | 7 | 12.354 | KV452998.1  | 286097 | 11-scf06087 | 11 |
| AX-158021245 | 7 | 12.354 | KV452998.1  | 292355 | 11-scf06087 | 11 |
| AX-158021260 | 7 | 12.354 | KV452998.1  | 306237 | 11-scf06087 | 11 |
| AX-157706719 | 7 | 12.354 | 3ML01032789 | 538    | scf08419_1  | UN |
| AX-158021246 | 7 | 12.355 | KV452998.1  | 293500 | 11-scf06087 | 11 |
| AX-158021248 | 7 | 12.967 | KV452998.1  | 299489 | 11-scf06087 | 11 |
| AX-158021250 | 7 | 12.967 | KV452998.1  | 300782 | 11-scf06087 | 11 |
| AX-158021255 | 7 | 12.967 | KV452998.1  | 302431 | 11-scf06087 | 11 |
| AX-157876400 | 7 | 12.967 | KV452998.1  | 308559 | 11-scf06087 | 11 |
| AX-158021262 | 7 | 12.967 | KV452998.1  | 309219 | 11-scf06087 | 11 |
| AX-158021265 | 7 | 12.967 | KV452998.1  | 309867 | 11-scf06087 | 11 |
| AX-158021270 | 7 | 12.967 | KV452998.1  | 313476 | 11-scf06087 | 11 |
| AX-158021269 | 7 | 12.97  | KV452998.1  | 313153 | 11-scf06087 | 11 |
| AX-158021274 | 7 | 13.337 | KV452998.1  | 320239 | 11-scf06087 | 11 |
| AX-158379734 | 7 | 13.337 | KV452998.1  | 320288 | 11-scf06087 | 11 |
| AX-157820891 | 7 | 13.338 | KV452998.1  | 321159 | 11-scf06087 | 11 |
| AX-158021275 | 7 | 13.338 | KV452998.1  | 322646 | 11-scf06087 | 11 |
| AX-157820892 | 7 | 13.338 | KV452998.1  | 325852 | 11-scf06087 | 11 |
| AX-158021278 | 7 | 13.338 | KV452998.1  | 328668 | 11-scf06087 | 11 |
| AX-158021280 | 7 | 13.338 | KV452998.1  | 331345 | 11-scf06087 | 11 |
| AX-158021212 | 7 | 13.416 | KV452998.1  | 249720 | 11-scf06087 | 11 |
| AX-158021288 | 7 | 13.416 | KV452998.1  | 342137 | 11-scf06087 | 11 |
| AX-158021291 | 7 | 13.702 | KV452998.1  | 350635 | 11-scf06087 | 11 |
| AX-157746020 | 7 | 13.799 | KV452998.1  | 351570 | 11-scf06087 | 11 |
| AX-158021292 | 7 | 14.007 | KV452998.1  | 352073 | 11-scf06087 | 11 |
| AX-158021302 | 7 | 14.105 | KV452998.1  | 360386 | 11-scf06087 | 11 |
| AX-158021306 | 7 | 14.108 | KV452998.1  | 362277 | 11-scf06087 | 11 |
| AX-158021308 | 7 | 14.244 | KV452998.1  | 363989 | 11-scf06087 | 11 |
| AX-158422287 | 7 | 14.244 | KV452998.1  | 366443 | 11-scf06087 | 11 |
| AX-158021310 | 7 | 14.244 | KV452998.1  | 370229 | 11-scf06087 | 11 |
| AX-158021314 | 7 | 14.244 | KV452998.1  | 373456 | 11-scf06087 | 11 |
| AX-158021313 | 7 | 14.422 | KV452998.1  | 373042 | 11-scf06087 | 11 |
| AX-158021315 | 7 | 14.606 | KV452998.1  | 374330 | 11-scf06087 | 11 |
| AX-158021319 | 7 | 14.606 | KV452998.1  | 376467 | 11-scf06087 | 11 |
| AX-158021321 | 7 | 14.606 | KV452998.1  | 378967 | 11-scf06087 | 11 |
| AX-158021322 | 7 | 14.606 | KV452998.1  | 379824 | 11-scf06087 | 11 |
| AX-157820897 | 7 | 14.606 | KV452998.1  | 380047 | 11-scf06087 | 11 |
| AX-158021327 | 7 | 14.606 | KV452998.1  | 388258 | 11-scf06087 | 11 |
| AX-157820899 | 7 | 14.87  | KV452998.1  | 386824 | 11-scf06087 | 11 |
| AX-158021328 | 7 | 14.87  | KV452998.1  | 388646 | 11-scf06087 | 11 |
| AX-158021329 | 7 | 14.87  | KV452998.1  | 389598 | 11-scf06087 | 11 |
| AX-158021331 | 7 | 14.87  | KV452998.1  | 392220 | 11-scf06087 | 11 |
| AX-158021333 | 7 | 14.87  | KV452998.1  | 392630 | 11-scf06087 | 11 |
| AX-157739793 | 7 | 14.87  | KV452998.1  | 394475 | 11-scf06087 | 11 |
| AX-158021335 | 7 | 14.976 | KV452998.1  | 394972 | 11-scf06087 | 11 |

|              |   |        |            |        |             |    |
|--------------|---|--------|------------|--------|-------------|----|
| AX-158021339 | 7 | 15.089 | KV452998.1 | 397652 | 11-scf06087 | 11 |
| AX-158021342 | 7 | 15.089 | KV452998.1 | 397892 | 11-scf06087 | 11 |
| AX-158021343 | 7 | 15.089 | KV452998.1 | 398568 | 11-scf06087 | 11 |
| AX-157820900 | 7 | 15.248 | KV452998.1 | 401245 | 11-scf06087 | 11 |
| AX-158021348 | 7 | 15.248 | KV452998.1 | 402014 | 11-scf06087 | 11 |
| AX-157774486 | 7 | 15.248 | KV452998.1 | 404285 | 11-scf06087 | 11 |
| AX-158021352 | 7 | 15.715 | KV452998.1 | 403723 | 11-scf06087 | 11 |
| AX-158021355 | 7 | 15.737 | KV452998.1 | 404797 | 11-scf06087 | 11 |
| AX-158021356 | 7 | 15.737 | KV452998.1 | 405299 | 11-scf06087 | 11 |
| AX-158021357 | 7 | 15.738 | KV452998.1 | 406698 | 11-scf06087 | 11 |
| AX-158021359 | 7 | 15.738 | KV452998.1 | 409830 | 11-scf06087 | 11 |
| AX-158021360 | 7 | 15.887 | KV452998.1 | 413279 | 11-scf06087 | 11 |
| AX-158021362 | 7 | 15.923 | KV452998.1 | 415975 | 11-scf06087 | 11 |
| AX-158021363 | 7 | 16.461 | KV452998.1 | 416513 | 11-scf06087 | 11 |
| AX-158021366 | 7 | 16.461 | KV452998.1 | 422051 | 11-scf06087 | 11 |
| AX-158021370 | 7 | 16.461 | KV452998.1 | 427407 | 11-scf06087 | 11 |
| AX-158021373 | 7 | 16.461 | KV452998.1 | 428183 | 11-scf06087 | 11 |
| AX-157773134 | 7 | 16.461 | KV452998.1 | 461300 | 11-scf06087 | 11 |
| AX-158021416 | 7 | 16.461 | KV452998.1 | 481811 | 11-scf06087 | 11 |
| AX-158021378 | 7 | 16.622 | KV452998.1 | 434272 | 11-scf06087 | 11 |
| AX-158021379 | 7 | 16.622 | KV452998.1 | 436370 | 11-scf06087 | 11 |
| AX-158021372 | 7 | 16.669 | KV452998.1 | 427789 | 11-scf06087 | 11 |
| AX-158021384 | 7 | 16.669 | KV452998.1 | 444410 | 11-scf06087 | 11 |
| AX-158021388 | 7 | 16.731 | KV452998.1 | 446907 | 11-scf06087 | 11 |
| AX-158021391 | 7 | 16.731 | KV452998.1 | 452068 | 11-scf06087 | 11 |
| AX-158021393 | 7 | 16.731 | KV452998.1 | 453532 | 11-scf06087 | 11 |
| AX-158021394 | 7 | 16.84  | KV452998.1 | 455985 | 11-scf06087 | 11 |
| AX-158021397 | 7 | 16.84  | KV452998.1 | 457273 | 11-scf06087 | 11 |
| AX-158021400 | 7 | 16.84  | KV452998.1 | 459480 | 11-scf06087 | 11 |
| AX-158021377 | 7 | 16.996 | KV452998.1 | 432307 | 11-scf06087 | 11 |
| AX-158021402 | 7 | 16.996 | KV452998.1 | 465553 | 11-scf06087 | 11 |
| AX-158021405 | 7 | 16.996 | KV452998.1 | 466813 | 11-scf06087 | 11 |
| AX-158021406 | 7 | 16.996 | KV452998.1 | 470512 | 11-scf06087 | 11 |
| AX-158021408 | 7 | 16.996 | KV452998.1 | 472600 | 11-scf06087 | 11 |
| AX-158021410 | 7 | 17.103 | KV452998.1 | 473959 | 11-scf06087 | 11 |
| AX-158021412 | 7 | 17.189 | KV452998.1 | 477188 | 11-scf06087 | 11 |
| AX-158021418 | 7 | 17.202 | KV452998.1 | 484107 | 11-scf06087 | 11 |
| AX-158021421 | 7 | 17.446 | KV452998.1 | 485372 | 11-scf06087 | 11 |
| AX-158021422 | 7 | 17.446 | KV452998.1 | 486121 | 11-scf06087 | 11 |
| AX-157719305 | 7 | 17.446 | KV452998.1 | 486422 | 11-scf06087 | 11 |
| AX-157876402 | 7 | 17.446 | KV452998.1 | 486604 | 11-scf06087 | 11 |
| AX-158021424 | 7 | 17.446 | KV452998.1 | 488677 | 11-scf06087 | 11 |
| AX-158021425 | 7 | 17.698 | KV452998.1 | 489290 | 11-scf06087 | 11 |
| AX-158021426 | 7 | 17.698 | KV452998.1 | 491549 | 11-scf06087 | 11 |
| AX-157742486 | 7 | 17.734 | KV452998.1 | 492523 | 11-scf06087 | 11 |
| AX-158021430 | 7 | 17.822 | KV452998.1 | 493772 | 11-scf06087 | 11 |
| AX-158021431 | 7 | 17.822 | KV452998.1 | 494466 | 11-scf06087 | 11 |
| AX-157758534 | 7 | 17.831 | KV452998.1 | 496295 | 11-scf06087 | 11 |
| AX-158021434 | 7 | 17.838 | KV452998.1 | 499985 | 11-scf06087 | 11 |
| AX-158021435 | 7 | 17.842 | KV452998.1 | 501302 | 11-scf06087 | 11 |
| AX-158021383 | 7 | 18.366 | KV452998.1 | 440080 | 11-scf06087 | 11 |

|              |   |        |            |        |             |    |
|--------------|---|--------|------------|--------|-------------|----|
| AX-158021436 | 7 | 18.366 | KV452998.1 | 501757 | 11-scf06087 | 11 |
| AX-157742303 | 7 | 18.367 | KV452998.1 | 504120 | 11-scf06087 | 11 |
| AX-158021441 | 7 | 18.374 | KV452998.1 | 505844 | 11-scf06087 | 11 |
| AX-158021445 | 7 | 18.637 | KV452998.1 | 507792 | 11-scf06087 | 11 |
| AX-158021450 | 7 | 19.092 | KV452998.1 | 515331 | 11-scf06087 | 11 |
| AX-158021456 | 7 | 19.114 | KV452998.1 | 520075 | 11-scf06087 | 11 |
| AX-158021475 | 7 | 19.114 | KV452998.1 | 551100 | 11-scf06087 | 11 |
| AX-157716128 | 7 | 19.137 | KV452998.1 | 523187 | 11-scf06087 | 11 |
| AX-157717644 | 7 | 19.137 | KV452998.1 | 525438 | 11-scf06087 | 11 |
| AX-158021457 | 7 | 19.137 | KV452998.1 | 529351 | 11-scf06087 | 11 |
| AX-157714753 | 7 | 19.291 | KV452998.1 | 528001 | 11-scf06087 | 11 |
| AX-158021458 | 7 | 19.463 | KV452998.1 | 531358 | 11-scf06087 | 11 |
| AX-158021460 | 7 | 19.515 | KV452998.1 | 531752 | 11-scf06087 | 11 |
| AX-158021448 | 7 | 19.516 | KV452998.1 | 514952 | 11-scf06087 | 11 |
| AX-158021461 | 7 | 19.516 | KV452998.1 | 534159 | 11-scf06087 | 11 |
| AX-158021462 | 7 | 19.516 | KV452998.1 | 537608 | 11-scf06087 | 11 |
| AX-157722903 | 7 | 19.516 | KV452998.1 | 543650 | 11-scf06087 | 11 |
| AX-158021466 | 7 | 19.516 | KV452998.1 | 544650 | 11-scf06087 | 11 |
| AX-158021467 | 7 | 19.516 | KV452998.1 | 545004 | 11-scf06087 | 11 |
| AX-158021468 | 7 | 19.516 | KV452998.1 | 547195 | 11-scf06087 | 11 |
| AX-158021470 | 7 | 19.516 | KV452998.1 | 547555 | 11-scf06087 | 11 |
| AX-157820903 | 7 | 19.516 | KV452998.1 | 550128 | 11-scf06087 | 11 |
| AX-158021471 | 7 | 19.524 | KV452998.1 | 548100 | 11-scf06087 | 11 |
| AX-158021473 | 7 | 19.524 | KV452998.1 | 548457 | 11-scf06087 | 11 |
| AX-158021479 | 7 | 19.75  | KV452998.1 | 553056 | 11-scf06087 | 11 |
| AX-157820905 | 7 | 19.75  | KV452998.1 | 559708 | 11-scf06087 | 11 |
| AX-158021486 | 7 | 19.763 | KV452998.1 | 562689 | 11-scf06087 | 11 |
| AX-157820907 | 7 | 19.771 | KV452998.1 | 563420 | 11-scf06087 | 11 |
| AX-158021487 | 7 | 20.079 | KV452998.1 | 565360 | 11-scf06087 | 11 |
| AX-157856311 | 7 | 20.079 | KV452998.1 | 565457 | 11-scf06087 | 11 |
| AX-158021490 | 7 | 20.079 | KV452998.1 | 567570 | 11-scf06087 | 11 |
| AX-158021494 | 7 | 20.079 | KV452998.1 | 569412 | 11-scf06087 | 11 |
| AX-158021491 | 7 | 20.327 | KV452998.1 | 568294 | 11-scf06087 | 11 |
| AX-158021498 | 7 | 20.327 | KV452998.1 | 572380 | 11-scf06087 | 11 |
| AX-158021500 | 7 | 20.327 | KV452998.1 | 573451 | 11-scf06087 | 11 |
| AX-158021503 | 7 | 20.327 | KV452998.1 | 578594 | 11-scf06087 | 11 |
| AX-158021507 | 7 | 20.38  | KV452998.1 | 582278 | 11-scf06087 | 11 |
| AX-158021515 | 7 | 20.438 | KV452998.1 | 587505 | 11-scf06087 | 11 |
| AX-158021496 | 7 | 20.443 | KV452998.1 | 572240 | 11-scf06087 | 11 |
| AX-157820909 | 7 | 20.443 | KV452998.1 | 583522 | 11-scf06087 | 11 |
| AX-157870245 | 7 | 20.443 | KV452998.1 | 588130 | 11-scf06087 | 11 |
| AX-158021516 | 7 | 20.443 | KV452998.1 | 589326 | 11-scf06087 | 11 |
| AX-158021524 | 7 | 20.443 | KV452998.1 | 595676 | 11-scf06087 | 11 |
| AX-158021536 | 7 | 20.443 | KV452998.1 | 601474 | 11-scf06087 | 11 |
| AX-158021540 | 7 | 20.443 | KV452998.1 | 605274 | 11-scf06087 | 11 |
| AX-157876403 | 7 | 20.443 | KV452998.1 | 622007 | 11-scf06087 | 11 |
| AX-157820910 | 7 | 20.449 | KV452998.1 | 592373 | 11-scf06087 | 11 |
| AX-158021520 | 7 | 20.559 | KV452998.1 | 593432 | 11-scf06087 | 11 |
| AX-158021521 | 7 | 20.559 | KV452998.1 | 594237 | 11-scf06087 | 11 |
| AX-158021535 | 7 | 20.559 | KV452998.1 | 600513 | 11-scf06087 | 11 |
| AX-158021537 | 7 | 20.559 | KV452998.1 | 601784 | 11-scf06087 | 11 |

|              |   |        |            |        |             |    |
|--------------|---|--------|------------|--------|-------------|----|
| AX-158021539 | 7 | 20.559 | KV452998.1 | 604245 | 11-scf06087 | 11 |
| AX-158021544 | 7 | 20.834 | KV452998.1 | 611177 | 11-scf06087 | 11 |
| AX-158021542 | 7 | 21.216 | KV452998.1 | 608564 | 11-scf06087 | 11 |
| AX-158021545 | 7 | 21.216 | KV452998.1 | 613220 | 11-scf06087 | 11 |
| AX-158021546 | 7 | 21.216 | KV452998.1 | 614561 | 11-scf06087 | 11 |
| AX-158021547 | 7 | 21.216 | KV452998.1 | 615477 | 11-scf06087 | 11 |
| AX-158021551 | 7 | 21.216 | KV452998.1 | 623441 | 11-scf06087 | 11 |
| AX-158021556 | 7 | 21.516 | KV452998.1 | 626062 | 11-scf06087 | 11 |
| AX-158021559 | 7 | 21.735 | KV452998.1 | 634347 | 11-scf06087 | 11 |
| AX-158021563 | 7 | 21.735 | KV452998.1 | 639230 | 11-scf06087 | 11 |
| AX-158021564 | 7 | 21.735 | KV452998.1 | 640254 | 11-scf06087 | 11 |
| AX-158021570 | 7 | 21.735 | KV452998.1 | 643733 | 11-scf06087 | 11 |
| AX-158021573 | 7 | 21.735 | KV452998.1 | 645415 | 11-scf06087 | 11 |
| AX-158021580 | 7 | 21.735 | KV452998.1 | 652792 | 11-scf06087 | 11 |
| AX-157876404 | 7 | 21.811 | KV452998.1 | 649666 | 11-scf06087 | 11 |
| AX-158021586 | 7 | 22.093 | KV452998.1 | 660595 | 11-scf06087 | 11 |
| AX-158021589 | 7 | 22.201 | KV452998.1 | 661954 | 11-scf06087 | 11 |
| AX-158021590 | 7 | 22.201 | KV452998.1 | 662851 | 11-scf06087 | 11 |
| AX-158021592 | 7 | 22.201 | KV452998.1 | 665262 | 11-scf06087 | 11 |
| AX-157820912 | 7 | 22.201 | KV452998.1 | 670581 | 11-scf06087 | 11 |
| AX-158021600 | 7 | 22.201 | KV452998.1 | 670736 | 11-scf06087 | 11 |
| AX-158021595 | 7 | 22.737 | KV452998.1 | 667624 | 11-scf06087 | 11 |
| AX-158021596 | 7 | 22.737 | KV452998.1 | 668060 | 11-scf06087 | 11 |
| AX-158021612 | 7 | 22.737 | KV452998.1 | 683936 | 11-scf06087 | 11 |
| AX-158021632 | 7 | 22.737 | KV452998.1 | 705611 | 11-scf06087 | 11 |
| AX-158021601 | 7 | 22.747 | KV452998.1 | 671555 | 11-scf06087 | 11 |
| AX-158379736 | 7 | 22.747 | KV452998.1 | 677191 | 11-scf06087 | 11 |
| AX-158021608 | 7 | 22.747 | KV452998.1 | 681796 | 11-scf06087 | 11 |
| AX-158021611 | 7 | 22.747 | KV452998.1 | 683057 | 11-scf06087 | 11 |
| AX-158021593 | 7 | 22.748 | KV452998.1 | 666318 | 11-scf06087 | 11 |
| AX-158021602 | 7 | 22.748 | KV452998.1 | 673848 | 11-scf06087 | 11 |
| AX-157752795 | 7 | 22.748 | KV452998.1 | 686691 | 11-scf06087 | 11 |
| AX-158021606 | 7 | 23.17  | KV452998.1 | 677283 | 11-scf06087 | 11 |
| AX-158021617 | 7 | 23.17  | KV452998.1 | 691257 | 11-scf06087 | 11 |
| AX-158021622 | 7 | 23.17  | KV452998.1 | 695753 | 11-scf06087 | 11 |
| AX-158021624 | 7 | 23.174 | KV452998.1 | 697524 | 11-scf06087 | 11 |
| AX-158021630 | 7 | 23.219 | KV452998.1 | 704262 | 11-scf06087 | 11 |
| AX-158021636 | 7 | 23.26  | KV452998.1 | 709184 | 11-scf06087 | 11 |
| AX-158408041 | 7 | 23.314 | KV452998.1 | 709393 | 11-scf06087 | 11 |
| AX-158021646 | 7 | 23.483 | KV452998.1 | 724134 | 11-scf06087 | 11 |
| AX-158021654 | 7 | 23.729 | KV452998.1 | 728134 | 11-scf06087 | 11 |
| AX-158021661 | 7 | 23.729 | KV452998.1 | 731884 | 11-scf06087 | 11 |
| AX-158021643 | 7 | 23.731 | KV452998.1 | 719334 | 11-scf06087 | 11 |
| AX-158021649 | 7 | 23.731 | KV452998.1 | 725870 | 11-scf06087 | 11 |
| AX-158021657 | 7 | 23.731 | KV452998.1 | 729638 | 11-scf06087 | 11 |
| AX-158021660 | 7 | 23.731 | KV452998.1 | 730228 | 11-scf06087 | 11 |
| AX-157820913 | 7 | 23.731 | KV452998.1 | 733336 | 11-scf06087 | 11 |
| AX-157750989 | 7 | 23.731 | KV452998.1 | 736213 | 11-scf06087 | 11 |
| AX-157739842 | 7 | 23.731 | KV452998.1 | 739649 | 11-scf06087 | 11 |
| AX-158021667 | 7 | 23.731 | KV452998.1 | 742775 | 11-scf06087 | 11 |
| AX-158021670 | 7 | 23.731 | KV452998.1 | 744368 | 11-scf06087 | 11 |

|              |   |        |            |        |             |    |
|--------------|---|--------|------------|--------|-------------|----|
| AX-157876405 | 7 | 23.84  | KV452998.1 | 726906 | 11-scf06087 | 11 |
| AX-158021669 | 7 | 23.84  | KV452998.1 | 744093 | 11-scf06087 | 11 |
| AX-158021671 | 7 | 23.84  | KV452998.1 | 749080 | 11-scf06087 | 11 |
| AX-158021672 | 7 | 23.84  | KV452998.1 | 749931 | 11-scf06087 | 11 |
| AX-158021673 | 7 | 23.84  | KV452998.1 | 750335 | 11-scf06087 | 11 |
| AX-158021676 | 7 | 23.84  | KV452998.1 | 753067 | 11-scf06087 | 11 |
| AX-158021677 | 7 | 23.84  | KV452998.1 | 753932 | 11-scf06087 | 11 |
| AX-157820915 | 7 | 23.84  | KV452998.1 | 758883 | 11-scf06087 | 11 |
| AX-158021680 | 7 | 23.84  | KV452998.1 | 759317 | 11-scf06087 | 11 |
| AX-157820916 | 7 | 23.84  | KV452998.1 | 761963 | 11-scf06087 | 11 |
| AX-158021685 | 7 | 23.84  | KV452998.1 | 766545 | 11-scf06087 | 11 |
| AX-157820920 | 7 | 23.84  | KV452998.1 | 768299 | 11-scf06087 | 11 |
| AX-158021664 | 7 | 24.059 | KV452998.1 | 734121 | 11-scf06087 | 11 |
| AX-158021679 | 7 | 24.059 | KV452998.1 | 757280 | 11-scf06087 | 11 |
| AX-158021687 | 7 | 24.059 | KV452998.1 | 769152 | 11-scf06087 | 11 |
| AX-158021688 | 7 | 24.059 | KV452998.1 | 769398 | 11-scf06087 | 11 |
| AX-157820921 | 7 | 24.059 | KV452998.1 | 770422 | 11-scf06087 | 11 |
| AX-158021689 | 7 | 24.059 | KV452998.1 | 770737 | 11-scf06087 | 11 |
| AX-158021694 | 7 | 24.059 | KV452998.1 | 774927 | 11-scf06087 | 11 |
| AX-157820922 | 7 | 24.059 | KV452998.1 | 778359 | 11-scf06087 | 11 |
| AX-157719936 | 7 | 24.059 | KV452998.1 | 779066 | 11-scf06087 | 11 |
| AX-157739170 | 7 | 24.059 | KV452998.1 | 781060 | 11-scf06087 | 11 |
| AX-158021697 | 7 | 24.059 | KV452998.1 | 781121 | 11-scf06087 | 11 |
| AX-158021698 | 7 | 24.059 | KV452998.1 | 785140 | 11-scf06087 | 11 |
| AX-158021700 | 7 | 24.059 | KV452998.1 | 785670 | 11-scf06087 | 11 |
| AX-158021706 | 7 | 24.059 | KV452998.1 | 792489 | 11-scf06087 | 11 |
| AX-158021707 | 7 | 24.059 | KV452998.1 | 798207 | 11-scf06087 | 11 |
| AX-158021711 | 7 | 24.059 | KV452998.1 | 800573 | 11-scf06087 | 11 |
| AX-158021714 | 7 | 24.059 | KV452998.1 | 802558 | 11-scf06087 | 11 |
| AX-158021715 | 7 | 24.059 | KV452998.1 | 803463 | 11-scf06087 | 11 |
| AX-158021720 | 7 | 24.059 | KV452998.1 | 807548 | 11-scf06087 | 11 |
| AX-158021721 | 7 | 24.059 | KV452998.1 | 811814 | 11-scf06087 | 11 |
| AX-158021727 | 7 | 24.35  | KV452998.1 | 817361 | 11-scf06087 | 11 |
| AX-158021735 | 7 | 24.399 | KV452998.1 | 835083 | 11-scf06087 | 11 |
| AX-158021743 | 7 | 24.399 | KV452998.1 | 839257 | 11-scf06087 | 11 |
| AX-158021734 | 7 | 24.496 | KV452998.1 | 834444 | 11-scf06087 | 11 |
| AX-158021740 | 7 | 24.496 | KV452998.1 | 838159 | 11-scf06087 | 11 |
| AX-157721432 | 7 | 24.496 | KV452998.1 | 842657 | 11-scf06087 | 11 |
| AX-158379737 | 7 | 24.496 | KV452998.1 | 842716 | 11-scf06087 | 11 |
| AX-157820925 | 7 | 24.496 | KV452998.1 | 843335 | 11-scf06087 | 11 |
| AX-158021747 | 7 | 24.496 | KV452998.1 | 843441 | 11-scf06087 | 11 |
| AX-158021748 | 7 | 24.515 | KV452998.1 | 844564 | 11-scf06087 | 11 |
| AX-158021752 | 7 | 24.539 | KV452998.1 | 849278 | 11-scf06087 | 11 |
| AX-158021794 | 7 | 24.539 | KV452998.1 | 897458 | 11-scf06087 | 11 |
| AX-157687796 | 7 | 24.554 | KV453613.1 | 6895   | scf01027    | UN |
| AX-157719164 | 7 | 24.582 | KV452998.1 | 852774 | 11-scf06087 | 11 |
| AX-158021755 | 7 | 24.605 | KV452998.1 | 855448 | 11-scf06087 | 11 |
| AX-157751596 | 7 | 24.714 | KV452998.1 | 861565 | 11-scf06087 | 11 |
| AX-157747286 | 7 | 24.714 | KV452998.1 | 862453 | 11-scf06087 | 11 |
| AX-157820926 | 7 | 24.714 | KV452998.1 | 863155 | 11-scf06087 | 11 |
| AX-158021757 | 7 | 24.714 | KV452998.1 | 863218 | 11-scf06087 | 11 |

|              |   |        |            |        |             |    |
|--------------|---|--------|------------|--------|-------------|----|
| AX-158021759 | 7 | 24.714 | KV452998.1 | 865206 | 11-scf06087 | 11 |
| AX-157820927 | 7 | 24.714 | KV452998.1 | 869712 | 11-scf06087 | 11 |
| AX-158021762 | 7 | 24.714 | KV452998.1 | 872315 | 11-scf06087 | 11 |
| AX-158021765 | 7 | 24.714 | KV452998.1 | 873421 | 11-scf06087 | 11 |
| AX-158021768 | 7 | 24.714 | KV452998.1 | 874683 | 11-scf06087 | 11 |
| AX-158021769 | 7 | 24.714 | KV452998.1 | 876494 | 11-scf06087 | 11 |
| AX-158021775 | 7 | 24.714 | KV452998.1 | 879031 | 11-scf06087 | 11 |
| AX-158021778 | 7 | 24.714 | KV452998.1 | 884760 | 11-scf06087 | 11 |
| AX-158021781 | 7 | 24.714 | KV452998.1 | 886151 | 11-scf06087 | 11 |
| AX-157884981 | 7 | 24.824 | KV452998.1 | 882608 | 11-scf06087 | 11 |
| AX-157754561 | 7 | 24.824 | KV452998.1 | 882872 | 11-scf06087 | 11 |
| AX-157709035 | 7 | 24.824 | KV452998.1 | 885775 | 11-scf06087 | 11 |
| AX-157820928 | 7 | 24.824 | KV452998.1 | 909010 | 11-scf06087 | 11 |
| AX-158021788 | 7 | 24.933 | KV452998.1 | 890069 | 11-scf06087 | 11 |
| AX-158021774 | 7 | 25.042 | KV452998.1 | 878196 | 11-scf06087 | 11 |
| AX-158021783 | 7 | 25.042 | KV452998.1 | 888458 | 11-scf06087 | 11 |
| AX-158021790 | 7 | 25.042 | KV452998.1 | 892266 | 11-scf06087 | 11 |
| AX-158021791 | 7 | 25.042 | KV452998.1 | 893555 | 11-scf06087 | 11 |
| AX-158021796 | 7 | 25.042 | KV452998.1 | 897976 | 11-scf06087 | 11 |
| AX-158021798 | 7 | 25.042 | KV452998.1 | 899757 | 11-scf06087 | 11 |
| AX-158021803 | 7 | 25.152 | KV452998.1 | 902491 | 11-scf06087 | 11 |
| AX-158021810 | 7 | 25.152 | KV452998.1 | 908250 | 11-scf06087 | 11 |
| AX-158021815 | 7 | 25.479 | KV452998.1 | 913583 | 11-scf06087 | 11 |
| AX-157752381 | 7 | 25.48  | KV452998.1 | 914317 | 11-scf06087 | 11 |
| AX-158021760 | 7 | 25.589 | KV452998.1 | 867160 | 11-scf06087 | 11 |
| AX-158021822 | 7 | 25.589 | KV452998.1 | 923749 | 11-scf06087 | 11 |
| AX-158021824 | 7 | 25.589 | KV452998.1 | 926224 | 11-scf06087 | 11 |
| AX-158021825 | 7 | 25.589 | KV452998.1 | 927095 | 11-scf06087 | 11 |
| AX-158021828 | 7 | 25.589 | KV452998.1 | 927528 | 11-scf06087 | 11 |
| AX-158021830 | 7 | 25.589 | KV452998.1 | 928308 | 11-scf06087 | 11 |
| AX-158021831 | 7 | 25.589 | KV452998.1 | 930222 | 11-scf06087 | 11 |
| AX-158021835 | 7 | 25.735 | KV452998.1 | 934642 | 11-scf06087 | 11 |
| AX-158021836 | 7 | 25.735 | KV452998.1 | 935428 | 11-scf06087 | 11 |
| AX-158021841 | 7 | 25.735 | KV452998.1 | 944018 | 11-scf06087 | 11 |
| AX-157743251 | 7 | 26.026 | KV452998.1 | 947790 | 11-scf06087 | 11 |
| AX-158021844 | 7 | 26.026 | KV452998.1 | 949351 | 11-scf06087 | 11 |
| AX-158021847 | 7 | 26.026 | KV452998.1 | 950373 | 11-scf06087 | 11 |
| AX-158021850 | 7 | 26.026 | KV452998.1 | 951763 | 11-scf06087 | 11 |
| AX-158021851 | 7 | 26.026 | KV452998.1 | 952010 | 11-scf06087 | 11 |
| AX-157820929 | 7 | 26.026 | KV452998.1 | 953559 | 11-scf06087 | 11 |
| AX-158021852 | 7 | 26.026 | KV452998.1 | 954489 | 11-scf06087 | 11 |
| AX-158021853 | 7 | 26.026 | KV452998.1 | 955381 | 11-scf06087 | 11 |
| AX-158021855 | 7 | 26.026 | KV452998.1 | 957735 | 11-scf06087 | 11 |
| AX-158021859 | 7 | 26.135 | KV452998.1 | 964215 | 11-scf06087 | 11 |
| AX-158021861 | 7 | 26.135 | KV452998.1 | 969805 | 11-scf06087 | 11 |
| AX-157856318 | 7 | 26.135 | KV452998.1 | 970600 | 11-scf06087 | 11 |
| AX-158021865 | 7 | 26.144 | KV452998.1 | 971585 | 11-scf06087 | 11 |
| AX-158021872 | 7 | 26.681 | KV452998.1 | 975224 | 11-scf06087 | 11 |
| AX-158021875 | 7 | 26.681 | KV452998.1 | 976807 | 11-scf06087 | 11 |
| AX-158021877 | 7 | 26.681 | KV452998.1 | 978413 | 11-scf06087 | 11 |
| AX-158021878 | 7 | 26.681 | KV452998.1 | 979088 | 11-scf06087 | 11 |

|              |   |        |            |         |             |    |
|--------------|---|--------|------------|---------|-------------|----|
| AX-158021882 | 7 | 26.785 | KV452998.1 | 986737  | 11-scf06087 | 11 |
| AX-158021879 | 7 | 27.009 | KV452998.1 | 982663  | 11-scf06087 | 11 |
| AX-158021885 | 7 | 27.009 | KV452998.1 | 987236  | 11-scf06087 | 11 |
| AX-158021887 | 7 | 27.009 | KV452998.1 | 990209  | 11-scf06087 | 11 |
| AX-158021889 | 7 | 27.009 | KV452998.1 | 993204  | 11-scf06087 | 11 |
| AX-157770712 | 7 | 27.113 | KV452998.1 | 994175  | 11-scf06087 | 11 |
| AX-157720970 | 7 | 27.226 | KV452998.1 | 999449  | 11-scf06087 | 11 |
| AX-158379738 | 7 | 27.298 | KV452998.1 | 1000395 | 11-scf06087 | 11 |
| AX-158021897 | 7 | 27.35  | KV452998.1 | 1000700 | 11-scf06087 | 11 |
| AX-158021902 | 7 | 27.447 | KV452998.1 | 1005433 | 11-scf06087 | 11 |
| AX-158021904 | 7 | 27.447 | KV452998.1 | 1006340 | 11-scf06087 | 11 |
| AX-158021905 | 7 | 27.447 | KV452998.1 | 1006871 | 11-scf06087 | 11 |
| AX-158021906 | 7 | 27.447 | KV452998.1 | 1007868 | 11-scf06087 | 11 |
| AX-158021908 | 7 | 27.447 | KV452998.1 | 1008471 | 11-scf06087 | 11 |
| AX-157748581 | 7 | 27.447 | KV452998.1 | 1009384 | 11-scf06087 | 11 |
| AX-158021909 | 7 | 27.447 | KV452998.1 | 1009981 | 11-scf06087 | 11 |
| AX-157856319 | 7 | 27.447 | KV452998.1 | 1018679 | 11-scf06087 | 11 |
| AX-158021915 | 7 | 27.453 | KV452998.1 | 1023366 | 11-scf06087 | 11 |
| AX-158021893 | 7 | 27.629 | KV452998.1 | 997261  | 11-scf06087 | 11 |
| AX-158021917 | 7 | 27.629 | KV452998.1 | 1023804 | 11-scf06087 | 11 |
| AX-158021923 | 7 | 27.983 | KV452998.1 | 1028469 | 11-scf06087 | 11 |
| AX-158383760 | 7 | 27.983 | KV452998.1 | 1038800 | 11-scf06087 | 11 |
| AX-157773256 | 7 | 27.994 | KV452998.1 | 1029263 | 11-scf06087 | 11 |
| AX-158021926 | 7 | 27.994 | KV452998.1 | 1034987 | 11-scf06087 | 11 |
| AX-158021924 | 7 | 28.212 | KV452998.1 | 1030913 | 11-scf06087 | 11 |
| AX-157727473 | 7 | 28.212 | KV452998.1 | 1043666 | 11-scf06087 | 11 |
| AX-158021933 | 7 | 28.212 | KV452998.1 | 1046023 | 11-scf06087 | 11 |
| AX-158021935 | 7 | 28.212 | KV452998.1 | 1047990 | 11-scf06087 | 11 |
| AX-158021938 | 7 | 28.321 | KV452998.1 | 1049501 | 11-scf06087 | 11 |
| AX-158021939 | 7 | 28.321 | KV452998.1 | 1050291 | 11-scf06087 | 11 |
| AX-158021941 | 7 | 28.321 | KV452998.1 | 1051375 | 11-scf06087 | 11 |
| AX-158021942 | 7 | 28.321 | KV452998.1 | 1051911 | 11-scf06087 | 11 |
| AX-158408044 | 7 | 28.431 | KV452998.1 | 1056176 | 11-scf06087 | 11 |
| AX-158021953 | 7 | 28.433 | KV452998.1 | 1061320 | 11-scf06087 | 11 |
| AX-158021956 | 7 | 28.743 | KV452998.1 | 1063365 | 11-scf06087 | 11 |
| AX-158021959 | 7 | 28.743 | KV452998.1 | 1064725 | 11-scf06087 | 11 |
| AX-158021961 | 7 | 28.743 | KV452998.1 | 1067636 | 11-scf06087 | 11 |
| AX-157856321 | 7 | 28.743 | KV452998.1 | 1069846 | 11-scf06087 | 11 |
| AX-157722101 | 7 | 28.743 | KV452998.1 | 1070156 | 11-scf06087 | 11 |
| AX-158021965 | 7 | 28.743 | KV452998.1 | 1072632 | 11-scf06087 | 11 |
| AX-158021967 | 7 | 28.791 | KV452998.1 | 1074041 | 11-scf06087 | 11 |
| AX-158021968 | 7 | 28.791 | KV452998.1 | 1074718 | 11-scf06087 | 11 |
| AX-158021962 | 7 | 28.912 | KV452998.1 | 1068724 | 11-scf06087 | 11 |
| AX-158021969 | 7 | 28.912 | KV452998.1 | 1079192 | 11-scf06087 | 11 |
| AX-158021973 | 7 | 28.912 | KV452998.1 | 1083037 | 11-scf06087 | 11 |
| AX-157820931 | 7 | 28.912 | KV452998.1 | 1084002 | 11-scf06087 | 11 |
| AX-158021974 | 7 | 28.912 | KV452998.1 | 1084970 | 11-scf06087 | 11 |
| AX-158408045 | 7 | 29.086 | KV452998.1 | 1090234 | 11-scf06087 | 11 |
| AX-158021982 | 7 | 29.086 | KV452998.1 | 1096019 | 11-scf06087 | 11 |
| AX-158020966 | 7 | 29.086 | KV452999.1 | 5428    | 11-scf22000 | 11 |
| AX-158020965 | 7 | 29.086 | KV452999.1 | 6490    | 11-scf22000 | 11 |



|              |   |        |             |         |             |    |
|--------------|---|--------|-------------|---------|-------------|----|
| AX-157721166 | 7 | 29.086 | KV452999.1  | 8308    | 11-scf22000 | 11 |
| AX-158020963 | 7 | 29.086 | KV452999.1  | 9714    | 11-scf22000 | 11 |
| AX-157680068 | 7 | 29.086 | KV453613.1  | 3525    | scf01027    | UN |
| AX-157687793 | 7 | 29.086 | KV453613.1  | 4396    | scf01027    | UN |
| AX-157681088 | 7 | 29.086 | 3ML01027446 | 744     | scf03052_1  | UN |
| AX-158020962 | 7 | 29.128 | KV452999.1  | 13315   | 11-scf22000 | 11 |
| AX-157750281 | 7 | 29.166 | KV452998.1  | 1081691 | 11-scf06087 | 11 |
| AX-158020961 | 7 | 29.166 | KV452999.1  | 14766   | 11-scf22000 | 11 |
| AX-158021976 | 7 | 29.195 | KV452998.1  | 1086469 | 11-scf06087 | 11 |
| AX-157748843 | 7 | 29.195 | KV452999.1  | 14595   | 11-scf22000 | 11 |
| AX-158020960 | 7 | 29.195 | KV452999.1  | 15171   | 11-scf22000 | 11 |
| AX-158020958 | 7 | 29.195 | KV452999.1  | 17408   | 11-scf22000 | 11 |
| AX-158020957 | 7 | 29.195 | KV452999.1  | 20747   | 11-scf22000 | 11 |
| AX-158020956 | 7 | 29.195 | KV452999.1  | 21722   | 11-scf22000 | 11 |
| AX-158020949 | 7 | 29.195 | KV452999.1  | 23371   | 11-scf22000 | 11 |
| AX-158020948 | 7 | 29.195 | KV452999.1  | 23979   | 11-scf22000 | 11 |
| AX-158020946 | 7 | 29.195 | KV452999.1  | 24403   | 11-scf22000 | 11 |
| AX-158020945 | 7 | 29.195 | KV452999.1  | 25029   | 11-scf22000 | 11 |
| AX-157771807 | 7 | 29.195 | KV452999.1  | 25693   | 11-scf22000 | 11 |
| AX-157820854 | 7 | 29.195 | KV452999.1  | 26363   | 11-scf22000 | 11 |
| AX-157699850 | 7 | 29.195 | KV452999.1  | 34390   | 11-scf22000 | 11 |
| AX-157727943 | 7 | 29.196 | KV452999.1  | 23603   | 11-scf22000 | 11 |
| AX-158020943 | 7 | 29.196 | KV452999.1  | 29230   | 11-scf22000 | 11 |
| AX-158020942 | 7 | 29.196 | KV452999.1  | 29810   | 11-scf22000 | 11 |
| AX-157820852 | 7 | 29.523 | KV452999.1  | 38323   | 11-scf22000 | 11 |
| AX-157820851 | 7 | 29.523 | KV452999.1  | 39914   | 11-scf22000 | 11 |
| AX-158408028 | 7 | 29.523 | KV452999.1  | 43382   | 11-scf22000 | 11 |
| AX-158020928 | 7 | 29.523 | KV452999.1  | 46757   | 11-scf22000 | 11 |
| AX-157750969 | 7 | 29.525 | KV452999.1  | 49868   | 11-scf22000 | 11 |
| AX-158020921 | 7 | 29.85  | KV452999.1  | 59588   | 11-scf22000 | 11 |
| AX-158020916 | 7 | 29.851 | KV452999.1  | 61837   | 11-scf22000 | 11 |
| AX-158020911 | 7 | 29.851 | KV452999.1  | 63414   | 11-scf22000 | 11 |
| AX-158020909 | 7 | 29.851 | KV452999.1  | 69631   | 11-scf22000 | 11 |
| AX-158020907 | 7 | 29.851 | KV452999.1  | 71167   | 11-scf22000 | 11 |
| AX-158020904 | 7 | 29.851 | KV452999.1  | 72050   | 11-scf22000 | 11 |
| AX-158020903 | 7 | 29.851 | KV452999.1  | 74122   | 11-scf22000 | 11 |
| AX-158020901 | 7 | 29.851 | KV452999.1  | 75667   | 11-scf22000 | 11 |
| AX-158020899 | 7 | 29.851 | KV452999.1  | 77629   | 11-scf22000 | 11 |
| AX-158020897 | 7 | 29.851 | KV452999.1  | 77671   | 11-scf22000 | 11 |
| AX-157876394 | 7 | 29.851 | KV452999.1  | 79728   | 11-scf22000 | 11 |
| AX-157707251 | 7 | 29.851 | 3ML01033813 | 298     | scf09479_1  | UN |
| AX-157772706 | 7 | 29.974 | KV452999.1  | 80410   | 11-scf22000 | 11 |
| AX-158020847 | 7 | 30.359 | KV452999.1  | 109413  | 11-scf22000 | 11 |
| AX-157820849 | 7 | 30.724 | KV452999.1  | 108598  | 11-scf22000 | 11 |
| AX-158020842 | 7 | 30.724 | KV452999.1  | 111292  | 11-scf22000 | 11 |
| AX-158020855 | 7 | 30.728 | KV452999.1  | 107101  | 11-scf22000 | 11 |
| AX-158020845 | 7 | 30.728 | KV452999.1  | 109888  | 11-scf22000 | 11 |
| AX-158020841 | 7 | 30.728 | KV452999.1  | 111530  | 11-scf22000 | 11 |
| AX-157752303 | 7 | 30.728 | KV452999.1  | 115909  | 11-scf22000 | 11 |
| AX-158020836 | 7 | 30.728 | KV452999.1  | 116448  | 11-scf22000 | 11 |
| AX-158020833 | 7 | 30.728 | KV452999.1  | 117475  | 11-scf22000 | 11 |

|              |   |        |            |        |             |    |
|--------------|---|--------|------------|--------|-------------|----|
| AX-158020832 | 7 | 30.728 | KV452999.1 | 118241 | 11-scf22000 | 11 |
| AX-157738633 | 7 | 30.728 | KV452999.1 | 118601 | 11-scf22000 | 11 |
| AX-158020831 | 7 | 30.728 | KV452999.1 | 119150 | 11-scf22000 | 11 |
| AX-157751684 | 7 | 30.728 | KV452999.1 | 120519 | 11-scf22000 | 11 |
| AX-158020828 | 7 | 30.728 | KV452999.1 | 121879 | 11-scf22000 | 11 |
| AX-158020827 | 7 | 30.728 | KV452999.1 | 122722 | 11-scf22000 | 11 |
| AX-158020823 | 7 | 30.728 | KV452999.1 | 123481 | 11-scf22000 | 11 |
| AX-158020820 | 7 | 30.728 | KV452999.1 | 125471 | 11-scf22000 | 11 |
| AX-158020819 | 7 | 30.728 | KV452999.1 | 126960 | 11-scf22000 | 11 |
| AX-158020814 | 7 | 30.728 | KV452999.1 | 132563 | 11-scf22000 | 11 |
| AX-158020811 | 7 | 30.728 | KV452999.1 | 135512 | 11-scf22000 | 11 |
| AX-157745584 | 7 | 30.728 | KV452999.1 | 137417 | 11-scf22000 | 11 |
| AX-158020799 | 7 | 30.733 | KV452999.1 | 144972 | 11-scf22000 | 11 |
| AX-158020795 | 7 | 31.601 | KV452999.1 | 149793 | 11-scf22000 | 11 |
| AX-158020791 | 7 | 31.601 | KV452999.1 | 153022 | 11-scf22000 | 11 |
| AX-158020790 | 7 | 31.601 | KV452999.1 | 154374 | 11-scf22000 | 11 |
| AX-158020788 | 7 | 31.601 | KV452999.1 | 155365 | 11-scf22000 | 11 |
| AX-157725328 | 7 | 31.601 | KV452999.1 | 156023 | 11-scf22000 | 11 |
| AX-158020787 | 7 | 31.601 | KV452999.1 | 156749 | 11-scf22000 | 11 |
| AX-158020786 | 7 | 31.601 | KV452999.1 | 157767 | 11-scf22000 | 11 |
| AX-158020784 | 7 | 31.601 | KV452999.1 | 159721 | 11-scf22000 | 11 |
| AX-157820848 | 7 | 31.603 | KV452999.1 | 161132 | 11-scf22000 | 11 |
| AX-157884973 | 7 | 31.603 | KV452999.1 | 161838 | 11-scf22000 | 11 |
| AX-158020826 | 7 | 32.031 | KV452999.1 | 122974 | 11-scf22000 | 11 |
| AX-158020781 | 7 | 32.031 | KV452999.1 | 165654 | 11-scf22000 | 11 |
| AX-157820847 | 7 | 32.031 | KV452999.1 | 167913 | 11-scf22000 | 11 |
| AX-158020773 | 7 | 32.031 | KV452999.1 | 175486 | 11-scf22000 | 11 |
| AX-157884972 | 7 | 32.032 | KV452999.1 | 173650 | 11-scf22000 | 11 |
| AX-158020774 | 7 | 32.034 | KV452999.1 | 174473 | 11-scf22000 | 11 |
| AX-158020771 | 7 | 32.035 | KV452999.1 | 176330 | 11-scf22000 | 11 |
| AX-158020770 | 7 | 32.04  | KV452999.1 | 176858 | 11-scf22000 | 11 |
| AX-158020838 | 7 | 32.365 | KV452999.1 | 111733 | 11-scf22000 | 11 |
| AX-158020765 | 7 | 32.365 | KV452999.1 | 180093 | 11-scf22000 | 11 |
| AX-158020764 | 7 | 32.365 | KV452999.1 | 180675 | 11-scf22000 | 11 |
| AX-158020760 | 7 | 32.365 | KV452999.1 | 186282 | 11-scf22000 | 11 |
| AX-158020759 | 7 | 32.365 | KV452999.1 | 186861 | 11-scf22000 | 11 |
| AX-157870239 | 7 | 32.365 | KV452999.1 | 188551 | 11-scf22000 | 11 |
| AX-157820845 | 7 | 32.365 | KV452999.1 | 190121 | 11-scf22000 | 11 |
| AX-158408025 | 7 | 32.365 | KV452999.1 | 191398 | 11-scf22000 | 11 |
| AX-158020755 | 7 | 32.365 | KV452999.1 | 194526 | 11-scf22000 | 11 |
| AX-158020753 | 7 | 32.365 | KV452999.1 | 196126 | 11-scf22000 | 11 |
| AX-158020752 | 7 | 32.365 | KV452999.1 | 197983 | 11-scf22000 | 11 |
| AX-158020749 | 7 | 32.365 | KV452999.1 | 200171 | 11-scf22000 | 11 |
| AX-158020748 | 7 | 32.365 | KV452999.1 | 200749 | 11-scf22000 | 11 |
| AX-158020744 | 7 | 32.365 | KV452999.1 | 201082 | 11-scf22000 | 11 |
| AX-158020741 | 7 | 32.365 | KV452999.1 | 202083 | 11-scf22000 | 11 |
| AX-158020736 | 7 | 32.365 | KV452999.1 | 206029 | 11-scf22000 | 11 |
| AX-158020734 | 7 | 32.365 | KV452999.1 | 208166 | 11-scf22000 | 11 |
| AX-158020733 | 7 | 32.365 | KV452999.1 | 213513 | 11-scf22000 | 11 |
| AX-157725170 | 7 | 32.365 | KV452999.1 | 213994 | 11-scf22000 | 11 |
| AX-157716119 | 7 | 32.365 | KV452999.1 | 216602 | 11-scf22000 | 11 |

|              |   |        |            |        |               |    |
|--------------|---|--------|------------|--------|---------------|----|
| AX-158020717 | 7 | 32.365 | KV452999.1 | 225178 | 11-scf22000   | 11 |
| AX-158020731 | 7 | 32.612 | KV452999.1 | 215952 | 11-scf22000   | 11 |
| AX-157820844 | 7 | 32.612 | KV452999.1 | 219341 | 11-scf22000   | 11 |
| AX-157756209 | 7 | 32.612 | KV452999.1 | 220867 | 11-scf22000   | 11 |
| AX-157820843 | 7 | 32.612 | KV452999.1 | 221043 | 11-scf22000   | 11 |
| AX-158020723 | 7 | 32.612 | KV452999.1 | 221690 | 11-scf22000   | 11 |
| AX-158020721 | 7 | 32.797 | KV452999.1 | 222453 | 11-scf22000   | 11 |
| AX-158020726 | 7 | 32.801 | KV452999.1 | 218987 | 11-scf22000   | 11 |
| AX-158020719 | 7 | 32.801 | KV452999.1 | 223452 | 11-scf22000   | 11 |
| AX-158020714 | 7 | 32.805 | KV452999.1 | 228575 | 11-scf22000   | 11 |
| AX-158020713 | 7 | 33.091 | KV452999.1 | 232605 | 11-scf22000   | 11 |
| AX-158020712 | 7 | 33.094 | KV452999.1 | 233514 | 11-scf22000   | 11 |
| AX-158020709 | 7 | 33.239 | KV452999.1 | 237950 | 11-scf22000   | 11 |
| AX-157820841 | 7 | 33.239 | KV452999.1 | 241195 | 11-scf22000   | 11 |
| AX-158020457 | 7 | 33.239 | KV452999.1 | 546412 | 11-scf22000   | 11 |
| AX-158379729 | 7 | 33.24  | KV452999.1 | 247958 | 11-scf22000   | 11 |
| AX-158020703 | 7 | 33.24  | KV452999.1 | 248511 | 11-scf22000   | 11 |
| AX-158020701 | 7 | 33.349 | KV452999.1 | 250709 | 11-scf22000   | 11 |
| AX-158020699 | 7 | 33.349 | KV452999.1 | 257478 | 11-scf22000   | 11 |
| AX-158020695 | 7 | 33.349 | KV452999.1 | 260467 | 11-scf22000   | 11 |
| AX-158020693 | 7 | 33.349 | KV452999.1 | 262377 | 11-scf22000   | 11 |
| AX-158020690 | 7 | 33.349 | KV452999.1 | 265391 | 11-scf22000   | 11 |
| AX-157820838 | 7 | 33.349 | KV452999.1 | 266113 | 11-scf22000   | 11 |
| AX-158020705 | 7 | 33.459 | KV452999.1 | 245886 | 11-scf22000   | 11 |
| AX-158020697 | 7 | 33.459 | KV452999.1 | 258246 | 11-scf22000   | 11 |
| AX-157884970 | 7 | 33.459 | KV452999.1 | 260929 | 11-scf22000   | 11 |
| AX-158020688 | 7 | 33.459 | KV452999.1 | 267262 | 11-scf22000   | 11 |
| AX-157715883 | 7 | 33.459 | KV452999.1 | 269530 | 11-scf22000   | 11 |
| AX-158020686 | 7 | 33.459 | KV452999.1 | 270053 | 11-scf22000   | 11 |
| AX-158020679 | 7 | 33.459 | KV452999.1 | 275664 | 11-scf22000   | 11 |
| AX-157820837 | 7 | 33.459 | KV452999.1 | 277579 | 11-scf22000   | 11 |
| AX-158020678 | 7 | 33.459 | KV452999.1 | 278047 | 11-scf22000   | 11 |
| AX-157754484 | 7 | 33.673 | KV452999.1 | 286205 | 11-scf22000   | 11 |
| AX-157820836 | 7 | 33.675 | KV452999.1 | 289229 | 11-scf22000   | 11 |
| AX-158020671 | 7 | 33.675 | KV452999.1 | 301381 | 11-scf22000   | 11 |
| AX-157746791 | 7 | 34.156 | KV452999.1 | 301436 | 11-scf22000   | 11 |
| AX-158020658 | 7 | 34.156 | KV452999.1 | 313640 | 11-scf22000   | 11 |
| AX-158020638 | 7 | 34.156 | KV452999.1 | 331053 | 11-scf22000   | 11 |
| AX-158020628 | 7 | 34.156 | KV452999.1 | 339653 | 11-scf22000   | 11 |
| AX-157884968 | 7 | 34.156 | KV452999.1 | 349605 | 11-scf22000   | 11 |
| AX-157820831 | 7 | 34.156 | KV452999.1 | 368780 | 11-scf22000   | 11 |
| AX-157865321 | 7 | 34.162 | KV452999.1 | 332624 | 11-scf22000   | 11 |
| AX-157693694 | 7 | 34.162 | FI858535.1 | 63     | ORI212 lctalu | UN |
| AX-157739184 | 7 | 34.164 | KV452999.1 | 304963 | 11-scf22000   | 11 |
| AX-158020667 | 7 | 34.169 | KV452999.1 | 305715 | 11-scf22000   | 11 |
| AX-158020666 | 7 | 34.169 | KV452999.1 | 306176 | 11-scf22000   | 11 |
| AX-157884969 | 7 | 34.184 | KV452999.1 | 307212 | 11-scf22000   | 11 |
| AX-158020660 | 7 | 34.225 | KV452999.1 | 309125 | 11-scf22000   | 11 |
| AX-157870238 | 7 | 34.292 | KV452999.1 | 298400 | 11-scf22000   | 11 |
| AX-158020657 | 7 | 34.292 | KV452999.1 | 314258 | 11-scf22000   | 11 |
| AX-158020655 | 7 | 34.292 | KV452999.1 | 315219 | 11-scf22000   | 11 |

|              |   |        |            |        |             |    |
|--------------|---|--------|------------|--------|-------------|----|
| AX-158020654 | 7 | 34.292 | KV452999.1 | 315618 | 11-scf22000 | 11 |
| AX-157820826 | 7 | 34.292 | KV452999.1 | 405276 | 11-scf22000 | 11 |
| AX-158020652 | 7 | 34.538 | KV452999.1 | 317303 | 11-scf22000 | 11 |
| AX-158020651 | 7 | 34.538 | KV452999.1 | 318076 | 11-scf22000 | 11 |
| AX-158020648 | 7 | 34.538 | KV452999.1 | 319632 | 11-scf22000 | 11 |
| AX-158020647 | 7 | 34.538 | KV452999.1 | 321320 | 11-scf22000 | 11 |
| AX-158020644 | 7 | 34.538 | KV452999.1 | 324075 | 11-scf22000 | 11 |
| AX-158020640 | 7 | 34.661 | KV452999.1 | 328952 | 11-scf22000 | 11 |
| AX-158020637 | 7 | 34.661 | KV452999.1 | 331301 | 11-scf22000 | 11 |
| AX-158020632 | 7 | 34.661 | KV452999.1 | 336396 | 11-scf22000 | 11 |
| AX-157739202 | 7 | 34.661 | KV452999.1 | 341091 | 11-scf22000 | 11 |
| AX-158020624 | 7 | 34.661 | KV452999.1 | 346151 | 11-scf22000 | 11 |
| AX-158020621 | 7 | 34.824 | KV452999.1 | 348154 | 11-scf22000 | 11 |
| AX-157755964 | 7 | 34.879 | KV452999.1 | 351261 | 11-scf22000 | 11 |
| AX-158020618 | 7 | 34.914 | KV452999.1 | 355562 | 11-scf22000 | 11 |
| AX-158020611 | 7 | 34.987 | KV452999.1 | 364822 | 11-scf22000 | 11 |
| AX-157771973 | 7 | 34.987 | KV452999.1 | 365030 | 11-scf22000 | 11 |
| AX-158020629 | 7 | 34.99  | KV452999.1 | 338680 | 11-scf22000 | 11 |
| AX-158020610 | 7 | 34.99  | KV452999.1 | 365961 | 11-scf22000 | 11 |
| AX-157785007 | 7 | 34.992 | KV452999.1 | 372820 | 11-scf22000 | 11 |
| AX-157820830 | 7 | 34.994 | KV452999.1 | 373893 | 11-scf22000 | 11 |
| AX-157731364 | 7 | 35.208 | KV453000.1 | 50536  | 11-scf00159 | 11 |
| AX-158022012 | 7 | 35.208 | KV453000.1 | 70306  | 11-scf00159 | 11 |
| AX-158020676 | 7 | 35.208 | KV452999.1 | 285741 | 11-scf22000 | 11 |
| AX-157719069 | 7 | 35.208 | KV452999.1 | 370219 | 11-scf22000 | 11 |
| AX-158020587 | 7 | 35.208 | KV452999.1 | 401728 | 11-scf22000 | 11 |
| AX-158020586 | 7 | 35.208 | KV452999.1 | 403041 | 11-scf22000 | 11 |
| AX-158020584 | 7 | 35.208 | KV452999.1 | 403566 | 11-scf22000 | 11 |
| AX-158020583 | 7 | 35.208 | KV452999.1 | 404049 | 11-scf22000 | 11 |
| AX-158020581 | 7 | 35.208 | KV452999.1 | 406523 | 11-scf22000 | 11 |
| AX-158020580 | 7 | 35.208 | KV452999.1 | 409264 | 11-scf22000 | 11 |
| AX-157884967 | 7 | 35.208 | KV452999.1 | 412035 | 11-scf22000 | 11 |
| AX-158020577 | 7 | 35.208 | KV452999.1 | 413916 | 11-scf22000 | 11 |
| AX-158020575 | 7 | 35.208 | KV452999.1 | 414312 | 11-scf22000 | 11 |
| AX-158020572 | 7 | 35.208 | KV452999.1 | 418674 | 11-scf22000 | 11 |
| AX-157726797 | 7 | 35.208 | KV452999.1 | 449578 | 11-scf22000 | 11 |
| AX-158020562 | 7 | 35.208 | KV452999.1 | 452813 | 11-scf22000 | 11 |
| AX-158020559 | 7 | 35.208 | KV452999.1 | 453428 | 11-scf22000 | 11 |
| AX-158020556 | 7 | 35.208 | KV452999.1 | 454412 | 11-scf22000 | 11 |
| AX-157738744 | 7 | 35.208 | KV452999.1 | 462166 | 11-scf22000 | 11 |
| AX-157820823 | 7 | 35.208 | KV452999.1 | 464023 | 11-scf22000 | 11 |
| AX-157820822 | 7 | 35.208 | KV452999.1 | 464414 | 11-scf22000 | 11 |
| AX-158020551 | 7 | 35.208 | KV452999.1 | 465214 | 11-scf22000 | 11 |
| AX-158020548 | 7 | 35.208 | KV452999.1 | 469414 | 11-scf22000 | 11 |
| AX-158020547 | 7 | 35.208 | KV452999.1 | 473687 | 11-scf22000 | 11 |
| AX-158020545 | 7 | 35.208 | KV452999.1 | 474450 | 11-scf22000 | 11 |
| AX-157876389 | 7 | 35.208 | KV452999.1 | 479671 | 11-scf22000 | 11 |
| AX-158020539 | 7 | 35.208 | KV452999.1 | 479928 | 11-scf22000 | 11 |
| AX-157727469 | 7 | 35.208 | KV452999.1 | 480734 | 11-scf22000 | 11 |
| AX-158422281 | 7 | 35.208 | KV452999.1 | 480978 | 11-scf22000 | 11 |
| AX-158020536 | 7 | 35.208 | KV452999.1 | 483841 | 11-scf22000 | 11 |

|              |   |        |             |        |             |    |
|--------------|---|--------|-------------|--------|-------------|----|
| AX-157754623 | 7 | 35.208 | KV452999.1  | 484259 | 11-scf22000 | 11 |
| AX-158020534 | 7 | 35.208 | KV452999.1  | 487798 | 11-scf22000 | 11 |
| AX-158020532 | 7 | 35.208 | KV452999.1  | 488468 | 11-scf22000 | 11 |
| AX-158020501 | 7 | 35.208 | KV452999.1  | 514821 | 11-scf22000 | 11 |
| AX-158408015 | 7 | 35.208 | KV452999.1  | 549412 | 11-scf22000 | 11 |
| AX-158020448 | 7 | 35.208 | KV452999.1  | 557768 | 11-scf22000 | 11 |
| AX-158020362 | 7 | 35.208 | KV452999.1  | 691802 | 11-scf22000 | 11 |
| AX-158020340 | 7 | 35.208 | KV452999.1  | 718373 | 11-scf22000 | 11 |
| AX-157688677 | 7 | 35.208 | 3ML01026719 | 1097   | scf02319_1  | UN |
| AX-158020530 | 7 | 35.426 | KV452999.1  | 490516 | 11-scf22000 | 11 |
| AX-158020527 | 7 | 35.426 | KV452999.1  | 490921 | 11-scf22000 | 11 |
| AX-158020524 | 7 | 35.536 | KV452999.1  | 496183 | 11-scf22000 | 11 |
| AX-158022001 | 7 | 35.645 | KV453000.1  | 48567  | 11-scf00159 | 11 |
| AX-157820936 | 7 | 35.645 | KV453000.1  | 59006  | 11-scf00159 | 11 |
| AX-158022015 | 7 | 35.645 | KV453000.1  | 75188  | 11-scf00159 | 11 |
| AX-157715074 | 7 | 35.645 | KV453000.1  | 79260  | 11-scf00159 | 11 |
| AX-158022018 | 7 | 35.645 | KV453000.1  | 80357  | 11-scf00159 | 11 |
| AX-158022036 | 7 | 35.645 | KV453000.1  | 106536 | 11-scf00159 | 11 |
| AX-157876407 | 7 | 35.645 | KV453000.1  | 160164 | 11-scf00159 | 11 |
| AX-158020565 | 7 | 35.645 | KV452999.1  | 451656 | 11-scf22000 | 11 |
| AX-158020525 | 7 | 35.645 | KV452999.1  | 495180 | 11-scf22000 | 11 |
| AX-157884966 | 7 | 35.645 | KV452999.1  | 498963 | 11-scf22000 | 11 |
| AX-158020515 | 7 | 35.645 | KV452999.1  | 501330 | 11-scf22000 | 11 |
| AX-158020513 | 7 | 35.645 | KV452999.1  | 503453 | 11-scf22000 | 11 |
| AX-158020510 | 7 | 35.645 | KV452999.1  | 506131 | 11-scf22000 | 11 |
| AX-158020504 | 7 | 35.645 | KV452999.1  | 511773 | 11-scf22000 | 11 |
| AX-157876388 | 7 | 35.645 | KV452999.1  | 516102 | 11-scf22000 | 11 |
| AX-158020498 | 7 | 35.645 | KV452999.1  | 518481 | 11-scf22000 | 11 |
| AX-158020495 | 7 | 35.645 | KV452999.1  | 523024 | 11-scf22000 | 11 |
| AX-158020494 | 7 | 35.645 | KV452999.1  | 524296 | 11-scf22000 | 11 |
| AX-158020491 | 7 | 35.645 | KV452999.1  | 526125 | 11-scf22000 | 11 |
| AX-158020489 | 7 | 35.645 | KV452999.1  | 527794 | 11-scf22000 | 11 |
| AX-158020483 | 7 | 35.645 | KV452999.1  | 531806 | 11-scf22000 | 11 |
| AX-158020480 | 7 | 35.645 | KV452999.1  | 533068 | 11-scf22000 | 11 |
| AX-158020479 | 7 | 35.645 | KV452999.1  | 533468 | 11-scf22000 | 11 |
| AX-158020476 | 7 | 35.645 | KV452999.1  | 535205 | 11-scf22000 | 11 |
| AX-158020475 | 7 | 35.645 | KV452999.1  | 535555 | 11-scf22000 | 11 |
| AX-158020471 | 7 | 35.645 | KV452999.1  | 537805 | 11-scf22000 | 11 |
| AX-158020470 | 7 | 35.645 | KV452999.1  | 539545 | 11-scf22000 | 11 |
| AX-158020456 | 7 | 35.645 | KV452999.1  | 547178 | 11-scf22000 | 11 |
| AX-158020454 | 7 | 35.645 | KV452999.1  | 547946 | 11-scf22000 | 11 |
| AX-158020453 | 7 | 35.645 | KV452999.1  | 550452 | 11-scf22000 | 11 |
| AX-158020450 | 7 | 35.645 | KV452999.1  | 551150 | 11-scf22000 | 11 |
| AX-157720257 | 7 | 35.645 | KV452999.1  | 555407 | 11-scf22000 | 11 |
| AX-157820818 | 7 | 35.645 | KV452999.1  | 560717 | 11-scf22000 | 11 |
| AX-158020446 | 7 | 35.645 | KV452999.1  | 561632 | 11-scf22000 | 11 |
| AX-158408014 | 7 | 35.645 | KV452999.1  | 562975 | 11-scf22000 | 11 |
| AX-157820817 | 7 | 35.645 | KV452999.1  | 564586 | 11-scf22000 | 11 |
| AX-157820816 | 7 | 35.645 | KV452999.1  | 564850 | 11-scf22000 | 11 |
| AX-158020441 | 7 | 35.645 | KV452999.1  | 579316 | 11-scf22000 | 11 |
| AX-158020440 | 7 | 35.645 | KV452999.1  | 581788 | 11-scf22000 | 11 |

|              |   |        |            |        |             |    |
|--------------|---|--------|------------|--------|-------------|----|
| AX-158020439 | 7 | 35.645 | KV452999.1 | 582447 | 11-scf22000 | 11 |
| AX-158408011 | 7 | 35.645 | KV452999.1 | 582720 | 11-scf22000 | 11 |
| AX-158020429 | 7 | 35.645 | KV452999.1 | 599007 | 11-scf22000 | 11 |
| AX-158020422 | 7 | 35.645 | KV452999.1 | 627917 | 11-scf22000 | 11 |
| AX-158020420 | 7 | 35.645 | KV452999.1 | 628965 | 11-scf22000 | 11 |
| AX-158020419 | 7 | 35.645 | KV452999.1 | 632726 | 11-scf22000 | 11 |
| AX-158020415 | 7 | 35.645 | KV452999.1 | 644030 | 11-scf22000 | 11 |
| AX-158020413 | 7 | 35.645 | KV452999.1 | 645872 | 11-scf22000 | 11 |
| AX-157772442 | 7 | 35.645 | KV452999.1 | 646258 | 11-scf22000 | 11 |
| AX-158020411 | 7 | 35.645 | KV452999.1 | 646334 | 11-scf22000 | 11 |
| AX-158020408 | 7 | 35.645 | KV452999.1 | 648783 | 11-scf22000 | 11 |
| AX-158020407 | 7 | 35.645 | KV452999.1 | 649445 | 11-scf22000 | 11 |
| AX-158020405 | 7 | 35.645 | KV452999.1 | 649656 | 11-scf22000 | 11 |
| AX-157820813 | 7 | 35.645 | KV452999.1 | 650463 | 11-scf22000 | 11 |
| AX-157717709 | 7 | 35.645 | KV452999.1 | 651586 | 11-scf22000 | 11 |
| AX-158020392 | 7 | 35.645 | KV452999.1 | 667802 | 11-scf22000 | 11 |
| AX-158020391 | 7 | 35.645 | KV452999.1 | 673265 | 11-scf22000 | 11 |
| AX-158020388 | 7 | 35.645 | KV452999.1 | 673910 | 11-scf22000 | 11 |
| AX-158020387 | 7 | 35.645 | KV452999.1 | 677151 | 11-scf22000 | 11 |
| AX-158020383 | 7 | 35.645 | KV452999.1 | 679409 | 11-scf22000 | 11 |
| AX-157820808 | 7 | 35.645 | KV452999.1 | 682729 | 11-scf22000 | 11 |
| AX-158020371 | 7 | 35.645 | KV452999.1 | 685222 | 11-scf22000 | 11 |
| AX-157820807 | 7 | 35.645 | KV452999.1 | 686304 | 11-scf22000 | 11 |
| AX-158020368 | 7 | 35.645 | KV452999.1 | 687530 | 11-scf22000 | 11 |
| AX-158020360 | 7 | 35.645 | KV452999.1 | 694398 | 11-scf22000 | 11 |
| AX-157820806 | 7 | 35.645 | KV452999.1 | 694795 | 11-scf22000 | 11 |
| AX-158020352 | 7 | 35.645 | KV452999.1 | 705273 | 11-scf22000 | 11 |
| AX-158020351 | 7 | 35.645 | KV452999.1 | 707680 | 11-scf22000 | 11 |
| AX-158020349 | 7 | 35.645 | KV452999.1 | 708454 | 11-scf22000 | 11 |
| AX-158020348 | 7 | 35.645 | KV452999.1 | 709246 | 11-scf22000 | 11 |
| AX-157744882 | 7 | 35.645 | KV452999.1 | 710164 | 11-scf22000 | 11 |
| AX-157820803 | 7 | 35.645 | KV452999.1 | 713793 | 11-scf22000 | 11 |
| AX-158020339 | 7 | 35.645 | KV452999.1 | 720595 | 11-scf22000 | 11 |
| AX-158020338 | 7 | 35.645 | KV452999.1 | 721568 | 11-scf22000 | 11 |
| AX-158020337 | 7 | 35.645 | KV452999.1 | 724856 | 11-scf22000 | 11 |
| AX-158020326 | 7 | 35.645 | KV452999.1 | 764445 | 11-scf22000 | 11 |
| AX-158020323 | 7 | 35.645 | KV452999.1 | 766620 | 11-scf22000 | 11 |
| AX-158020321 | 7 | 35.645 | KV452999.1 | 767838 | 11-scf22000 | 11 |
| AX-158020318 | 7 | 35.645 | KV452999.1 | 769248 | 11-scf22000 | 11 |
| AX-157785001 | 7 | 35.645 | KV452999.1 | 770149 | 11-scf22000 | 11 |
| AX-158020316 | 7 | 35.645 | KV452999.1 | 770298 | 11-scf22000 | 11 |
| AX-158020314 | 7 | 35.645 | KV452999.1 | 773587 | 11-scf22000 | 11 |
| AX-158020313 | 7 | 35.645 | KV452999.1 | 774926 | 11-scf22000 | 11 |
| AX-158020310 | 7 | 35.645 | KV452999.1 | 779637 | 11-scf22000 | 11 |
| AX-158020308 | 7 | 35.645 | KV452999.1 | 780343 | 11-scf22000 | 11 |
| AX-157820799 | 7 | 35.645 | KV452999.1 | 781997 | 11-scf22000 | 11 |
| AX-157726585 | 7 | 35.645 | KV452999.1 | 785001 | 11-scf22000 | 11 |
| AX-157746721 | 7 | 35.645 | KV452999.1 | 786942 | 11-scf22000 | 11 |
| AX-158020277 | 7 | 35.645 | KV452999.1 | 813226 | 11-scf22000 | 11 |
| AX-158020253 | 7 | 35.645 | KV452999.1 | 833397 | 11-scf22000 | 11 |
| AX-158020248 | 7 | 35.645 | KV452999.1 | 836210 | 11-scf22000 | 11 |

|              |   |        |            |        |             |    |
|--------------|---|--------|------------|--------|-------------|----|
| AX-158020247 | 7 | 35.645 | KV452999.1 | 836964 | 11-scf22000 | 11 |
| AX-158021986 | 7 | 35.863 | KV453000.1 | 17952  | 11-scf00159 | 11 |
| AX-157820934 | 7 | 35.863 | KV453000.1 | 43341  | 11-scf00159 | 11 |
| AX-157721022 | 7 | 35.863 | KV453000.1 | 49648  | 11-scf00159 | 11 |
| AX-158022009 | 7 | 35.863 | KV453000.1 | 63991  | 11-scf00159 | 11 |
| AX-157774567 | 7 | 35.863 | KV453000.1 | 127497 | 11-scf00159 | 11 |
| AX-157714774 | 7 | 35.863 | KV453000.1 | 152689 | 11-scf00159 | 11 |
| AX-157725474 | 7 | 35.863 | KV452999.1 | 472813 | 11-scf22000 | 11 |
| AX-158020357 | 7 | 35.863 | KV452999.1 | 696655 | 11-scf22000 | 11 |
| AX-158020320 | 7 | 35.863 | KV452999.1 | 768434 | 11-scf22000 | 11 |
| AX-158020305 | 7 | 35.863 | KV452999.1 | 788978 | 11-scf22000 | 11 |
| AX-158020302 | 7 | 35.863 | KV452999.1 | 791400 | 11-scf22000 | 11 |
| AX-158020298 | 7 | 35.863 | KV452999.1 | 795618 | 11-scf22000 | 11 |
| AX-158020293 | 7 | 35.863 | KV452999.1 | 797932 | 11-scf22000 | 11 |
| AX-158020289 | 7 | 35.863 | KV452999.1 | 802370 | 11-scf22000 | 11 |
| AX-158020286 | 7 | 35.863 | KV452999.1 | 803796 | 11-scf22000 | 11 |
| AX-158020284 | 7 | 35.863 | KV452999.1 | 806052 | 11-scf22000 | 11 |
| AX-158020275 | 7 | 35.863 | KV452999.1 | 816500 | 11-scf22000 | 11 |
| AX-157820797 | 7 | 35.863 | KV452999.1 | 817601 | 11-scf22000 | 11 |
| AX-158020267 | 7 | 35.863 | KV452999.1 | 824360 | 11-scf22000 | 11 |
| AX-157820796 | 7 | 35.863 | KV452999.1 | 827130 | 11-scf22000 | 11 |
| AX-158020261 | 7 | 35.863 | KV452999.1 | 828435 | 11-scf22000 | 11 |
| AX-158020257 | 7 | 35.863 | KV452999.1 | 830664 | 11-scf22000 | 11 |
| AX-158020255 | 7 | 35.863 | KV452999.1 | 831283 | 11-scf22000 | 11 |
| AX-158020244 | 7 | 35.863 | KV452999.1 | 838038 | 11-scf22000 | 11 |
| AX-158020239 | 7 | 35.863 | KV452999.1 | 841488 | 11-scf22000 | 11 |
| AX-158020237 | 7 | 35.863 | KV452999.1 | 844445 | 11-scf22000 | 11 |
| AX-158020229 | 7 | 35.863 | KV452999.1 | 853969 | 11-scf22000 | 11 |
| AX-158020226 | 7 | 35.863 | KV452999.1 | 855300 | 11-scf22000 | 11 |
| AX-158020225 | 7 | 35.863 | KV452999.1 | 855799 | 11-scf22000 | 11 |
| AX-157820794 | 7 | 35.863 | KV452999.1 | 856192 | 11-scf22000 | 11 |
| AX-158020222 | 7 | 35.863 | KV452999.1 | 861043 | 11-scf22000 | 11 |
| AX-158020221 | 7 | 35.863 | KV452999.1 | 861658 | 11-scf22000 | 11 |
| AX-157715708 | 7 | 35.864 | KV453000.1 | 55290  | 11-scf00159 | 11 |
| AX-158022031 | 7 | 35.864 | KV453000.1 | 91217  | 11-scf00159 | 11 |
| AX-157820948 | 7 | 35.864 | KV453000.1 | 151843 | 11-scf00159 | 11 |
| AX-158408048 | 7 | 35.864 | KV453000.1 | 214217 | 11-scf00159 | 11 |
| AX-158020538 | 7 | 35.864 | KV452999.1 | 483561 | 11-scf22000 | 11 |
| AX-158020520 | 7 | 35.864 | KV452999.1 | 497395 | 11-scf22000 | 11 |
| AX-158020426 | 7 | 35.864 | KV452999.1 | 603225 | 11-scf22000 | 11 |
| AX-158020317 | 7 | 35.864 | KV452999.1 | 769516 | 11-scf22000 | 11 |
| AX-158020309 | 7 | 35.864 | KV452999.1 | 779700 | 11-scf22000 | 11 |
| AX-158020259 | 7 | 35.864 | KV452999.1 | 829628 | 11-scf22000 | 11 |
| AX-158020251 | 7 | 35.864 | KV452999.1 | 834776 | 11-scf22000 | 11 |
| AX-158020231 | 7 | 35.864 | KV452999.1 | 853020 | 11-scf22000 | 11 |
| AX-157820939 | 7 | 35.914 | KV453000.1 | 66034  | 11-scf00159 | 11 |
| AX-157856323 | 7 | 35.914 | KV453000.1 | 74511  | 11-scf00159 | 11 |
| AX-157771774 | 7 | 35.914 | KV453000.1 | 104575 | 11-scf00159 | 11 |
| AX-157820834 | 7 | 35.914 | KV452999.1 | 361510 | 11-scf22000 | 11 |
| AX-158379726 | 7 | 35.914 | KV452999.1 | 792124 | 11-scf22000 | 11 |
| AX-158020278 | 7 | 35.914 | KV452999.1 | 810472 | 11-scf22000 | 11 |

|              |   |        |            |        |             |    |
|--------------|---|--------|------------|--------|-------------|----|
| AX-158020266 | 7 | 35.914 | KV452999.1 | 826038 | 11-scf22000 | 11 |
| AX-158020252 | 7 | 35.914 | KV452999.1 | 833890 | 11-scf22000 | 11 |
| AX-158020245 | 7 | 35.914 | KV452999.1 | 837541 | 11-scf22000 | 11 |
| AX-158020241 | 7 | 35.914 | KV452999.1 | 840149 | 11-scf22000 | 11 |
| AX-157713376 | 7 | 35.914 | KV452999.1 | 860034 | 11-scf22000 | 11 |
| AX-157856304 | 7 | 35.914 | KV452999.1 | 866476 | 11-scf22000 | 11 |
| AX-158022010 | 7 | 35.956 | KV453000.1 | 66262  | 11-scf00159 | 11 |
| AX-157727714 | 7 | 36.027 | KV453000.1 | 60205  | 11-scf00159 | 11 |
| AX-157820937 | 7 | 36.027 | KV453000.1 | 60942  | 11-scf00159 | 11 |
| AX-157820941 | 7 | 36.027 | KV453000.1 | 68125  | 11-scf00159 | 11 |
| AX-157714072 | 7 | 36.027 | KV453000.1 | 71941  | 11-scf00159 | 11 |
| AX-158022013 | 7 | 36.027 | KV453000.1 | 72764  | 11-scf00159 | 11 |
| AX-158020180 | 7 | 36.027 | KV452999.1 | 913847 | 11-scf22000 | 11 |
| AX-158022019 | 7 | 36.109 | KV453000.1 | 80689  | 11-scf00159 | 11 |
| AX-157748094 | 7 | 36.191 | KV453000.1 | 81204  | 11-scf00159 | 11 |
| AX-158022020 | 7 | 36.191 | KV453000.1 | 82119  | 11-scf00159 | 11 |
| AX-158022022 | 7 | 36.191 | KV453000.1 | 82812  | 11-scf00159 | 11 |
| AX-158022024 | 7 | 36.191 | KV453000.1 | 83513  | 11-scf00159 | 11 |
| AX-158022030 | 7 | 36.191 | KV453000.1 | 90994  | 11-scf00159 | 11 |
| AX-158022034 | 7 | 36.191 | KV453000.1 | 99473  | 11-scf00159 | 11 |
| AX-158022026 | 7 | 36.737 | KV453000.1 | 84717  | 11-scf00159 | 11 |
| AX-158022041 | 7 | 36.737 | KV453000.1 | 113471 | 11-scf00159 | 11 |
| AX-157743717 | 7 | 36.737 | KV453000.1 | 115073 | 11-scf00159 | 11 |
| AX-158022046 | 7 | 36.737 | KV453000.1 | 118293 | 11-scf00159 | 11 |
| AX-158022049 | 7 | 36.737 | KV453000.1 | 119685 | 11-scf00159 | 11 |
| AX-158022051 | 7 | 36.737 | KV453000.1 | 120795 | 11-scf00159 | 11 |
| AX-158022053 | 7 | 36.737 | KV453000.1 | 121514 | 11-scf00159 | 11 |
| AX-158022057 | 7 | 36.737 | KV453000.1 | 125091 | 11-scf00159 | 11 |
| AX-158022060 | 7 | 36.737 | KV453000.1 | 132422 | 11-scf00159 | 11 |
| AX-158022073 | 7 | 36.737 | KV453000.1 | 158637 | 11-scf00159 | 11 |
| AX-157820944 | 7 | 36.785 | KV453000.1 | 135710 | 11-scf00159 | 11 |
| AX-158022061 | 7 | 36.889 | KV453000.1 | 135921 | 11-scf00159 | 11 |
| AX-157820943 | 7 | 36.955 | KV453000.1 | 134833 | 11-scf00159 | 11 |
| AX-158022062 | 7 | 36.955 | KV453000.1 | 136621 | 11-scf00159 | 11 |
| AX-158022063 | 7 | 36.955 | KV453000.1 | 138700 | 11-scf00159 | 11 |
| AX-158022065 | 7 | 36.955 | KV453000.1 | 142570 | 11-scf00159 | 11 |
| AX-158022066 | 7 | 36.955 | KV453000.1 | 144614 | 11-scf00159 | 11 |
| AX-158022067 | 7 | 36.955 | KV453000.1 | 144989 | 11-scf00159 | 11 |
| AX-158022069 | 7 | 36.991 | KV453000.1 | 146427 | 11-scf00159 | 11 |
| AX-158022072 | 7 | 37.027 | KV453000.1 | 158240 | 11-scf00159 | 11 |
| AX-158022044 | 7 | 37.051 | KV453000.1 | 115733 | 11-scf00159 | 11 |
| AX-157774443 | 7 | 37.051 | KV453000.1 | 158750 | 11-scf00159 | 11 |
| AX-158022074 | 7 | 37.065 | KV453000.1 | 163501 | 11-scf00159 | 11 |
| AX-157721010 | 7 | 37.097 | KV453000.1 | 168144 | 11-scf00159 | 11 |
| AX-158379740 | 7 | 37.11  | KV453000.1 | 168676 | 11-scf00159 | 11 |
| AX-157820949 | 7 | 37.155 | KV453000.1 | 169844 | 11-scf00159 | 11 |
| AX-158022093 | 7 | 37.155 | KV453000.1 | 200324 | 11-scf00159 | 11 |
| AX-158022097 | 7 | 37.155 | KV453000.1 | 207227 | 11-scf00159 | 11 |
| AX-157744092 | 7 | 37.174 | KV453000.1 | 170131 | 11-scf00159 | 11 |
| AX-158022077 | 7 | 37.174 | KV453000.1 | 173293 | 11-scf00159 | 11 |
| AX-157820951 | 7 | 37.174 | KV453000.1 | 179573 | 11-scf00159 | 11 |



|              |   |        |            |        |             |    |
|--------------|---|--------|------------|--------|-------------|----|
| AX-158022082 | 7 | 37.174 | KV453000.1 | 185420 | 11-scf00159 | 11 |
| AX-158022084 | 7 | 37.174 | KV453000.1 | 190205 | 11-scf00159 | 11 |
| AX-158022086 | 7 | 37.174 | KV453000.1 | 190613 | 11-scf00159 | 11 |
| AX-158022088 | 7 | 37.174 | KV453000.1 | 193901 | 11-scf00159 | 11 |
| AX-157856324 | 7 | 37.174 | KV453000.1 | 194189 | 11-scf00159 | 11 |
| AX-158022089 | 7 | 37.174 | KV453000.1 | 194623 | 11-scf00159 | 11 |
| AX-158022092 | 7 | 37.174 | KV453000.1 | 196570 | 11-scf00159 | 11 |
| AX-157751743 | 7 | 37.174 | KV453000.1 | 205516 | 11-scf00159 | 11 |
| AX-158022114 | 7 | 37.174 | KV453000.1 | 223147 | 11-scf00159 | 11 |
| AX-158022103 | 7 | 37.254 | KV453000.1 | 216530 | 11-scf00159 | 11 |
| AX-158022106 | 7 | 37.32  | KV453000.1 | 217777 | 11-scf00159 | 11 |
| AX-158022109 | 7 | 37.392 | KV453000.1 | 219384 | 11-scf00159 | 11 |
| AX-158022110 | 7 | 37.392 | KV453000.1 | 220462 | 11-scf00159 | 11 |
| AX-158022116 | 7 | 37.392 | KV453000.1 | 225862 | 11-scf00159 | 11 |
| AX-158022118 | 7 | 37.392 | KV453000.1 | 226749 | 11-scf00159 | 11 |
| AX-158022119 | 7 | 37.392 | KV453000.1 | 227524 | 11-scf00159 | 11 |
| AX-158022125 | 7 | 37.392 | KV453000.1 | 231742 | 11-scf00159 | 11 |
| AX-158391168 | 7 | 37.392 | KV453000.1 | 232176 | 11-scf00159 | 11 |
| AX-158022142 | 7 | 37.392 | KV453000.1 | 243858 | 11-scf00159 | 11 |
| AX-158022165 | 7 | 37.392 | KV453000.1 | 271527 | 11-scf00159 | 11 |
| AX-158022132 | 7 | 37.396 | KV453000.1 | 238945 | 11-scf00159 | 11 |
| AX-158022138 | 7 | 37.531 | KV453000.1 | 241227 | 11-scf00159 | 11 |
| AX-158022145 | 7 | 37.531 | KV453000.1 | 244711 | 11-scf00159 | 11 |
| AX-158022147 | 7 | 37.531 | KV453000.1 | 245702 | 11-scf00159 | 11 |
| AX-158022148 | 7 | 37.531 | KV453000.1 | 245956 | 11-scf00159 | 11 |
| AX-158022150 | 7 | 37.887 | KV453000.1 | 249440 | 11-scf00159 | 11 |
| AX-158022151 | 7 | 37.888 | KV453000.1 | 250791 | 11-scf00159 | 11 |
| AX-158022155 | 7 | 37.888 | KV453000.1 | 253919 | 11-scf00159 | 11 |
| AX-158022153 | 7 | 37.889 | KV453000.1 | 252221 | 11-scf00159 | 11 |
| AX-158022161 | 7 | 37.889 | KV453000.1 | 263759 | 11-scf00159 | 11 |
| AX-158022162 | 7 | 37.889 | KV453000.1 | 265056 | 11-scf00159 | 11 |
| AX-157722266 | 7 | 37.889 | KV453000.1 | 266193 | 11-scf00159 | 11 |
| AX-158022168 | 7 | 37.889 | KV453000.1 | 272066 | 11-scf00159 | 11 |
| AX-158022171 | 7 | 37.889 | KV453000.1 | 273117 | 11-scf00159 | 11 |
| AX-158022172 | 7 | 37.889 | KV453000.1 | 273491 | 11-scf00159 | 11 |
| AX-158022175 | 7 | 37.995 | KV453000.1 | 276607 | 11-scf00159 | 11 |
| AX-158022177 | 7 | 37.995 | KV453000.1 | 276689 | 11-scf00159 | 11 |
| AX-158022182 | 7 | 38.041 | KV453000.1 | 278764 | 11-scf00159 | 11 |
| AX-158022185 | 7 | 38.294 | KV453000.1 | 279724 | 11-scf00159 | 11 |
| AX-157820954 | 7 | 38.294 | KV453000.1 | 285727 | 11-scf00159 | 11 |
| AX-157747376 | 7 | 38.294 | KV453000.1 | 285805 | 11-scf00159 | 11 |
| AX-158022188 | 7 | 38.44  | KV453000.1 | 286481 | 11-scf00159 | 11 |
| AX-157743125 | 7 | 39.033 | KV453000.1 | 293583 | 11-scf00159 | 11 |
| AX-158022197 | 7 | 39.033 | KV453000.1 | 299626 | 11-scf00159 | 11 |
| AX-158022200 | 7 | 39.033 | KV453000.1 | 305877 | 11-scf00159 | 11 |
| AX-158022204 | 7 | 39.033 | KV453000.1 | 308300 | 11-scf00159 | 11 |
| AX-158022206 | 7 | 39.033 | KV453000.1 | 309230 | 11-scf00159 | 11 |
| AX-158022209 | 7 | 39.033 | KV453000.1 | 312890 | 11-scf00159 | 11 |
| AX-158022210 | 7 | 39.033 | KV453000.1 | 313576 | 11-scf00159 | 11 |
| AX-158022211 | 7 | 39.033 | KV453000.1 | 313751 | 11-scf00159 | 11 |
| AX-158022214 | 7 | 39.033 | KV453000.1 | 316183 | 11-scf00159 | 11 |

|              |   |        |            |        |             |    |
|--------------|---|--------|------------|--------|-------------|----|
| AX-158022217 | 7 | 39.252 | KV453000.1 | 318027 | 11-scf00159 | 11 |
| AX-158022220 | 7 | 39.29  | KV453000.1 | 319035 | 11-scf00159 | 11 |
| AX-158022228 | 7 | 39.338 | KV453000.1 | 326343 | 11-scf00159 | 11 |
| AX-158022234 | 7 | 39.361 | KV453000.1 | 332365 | 11-scf00159 | 11 |
| AX-157725165 | 7 | 39.361 | KV453000.1 | 334620 | 11-scf00159 | 11 |
| AX-158022236 | 7 | 39.361 | KV453000.1 | 341491 | 11-scf00159 | 11 |
| AX-158022237 | 7 | 39.361 | KV453000.1 | 342656 | 11-scf00159 | 11 |
| AX-158022238 | 7 | 39.361 | KV453000.1 | 343327 | 11-scf00159 | 11 |
| AX-158022249 | 7 | 39.361 | KV453000.1 | 355077 | 11-scf00159 | 11 |
| AX-158022239 | 7 | 39.429 | KV453000.1 | 347176 | 11-scf00159 | 11 |
| AX-158022255 | 7 | 39.498 | KV453000.1 | 358524 | 11-scf00159 | 11 |
| AX-158022257 | 7 | 39.498 | KV453000.1 | 361083 | 11-scf00159 | 11 |
| AX-158022264 | 7 | 39.498 | KV453000.1 | 364152 | 11-scf00159 | 11 |
| AX-158022332 | 7 | 39.498 | KV453000.1 | 422554 | 11-scf00159 | 11 |
| AX-158022262 | 7 | 39.635 | KV453000.1 | 363582 | 11-scf00159 | 11 |
| AX-158022275 | 7 | 39.773 | KV453000.1 | 369862 | 11-scf00159 | 11 |
| AX-158022276 | 7 | 39.844 | KV453000.1 | 371947 | 11-scf00159 | 11 |
| AX-158022290 | 7 | 39.9   | KV453000.1 | 381276 | 11-scf00159 | 11 |
| AX-158022298 | 7 | 39.9   | KV453000.1 | 389050 | 11-scf00159 | 11 |
| AX-158022304 | 7 | 39.9   | KV453000.1 | 391950 | 11-scf00159 | 11 |
| AX-158022307 | 7 | 39.9   | KV453000.1 | 395936 | 11-scf00159 | 11 |
| AX-158022311 | 7 | 39.9   | KV453000.1 | 402695 | 11-scf00159 | 11 |
| AX-158022322 | 7 | 39.9   | KV453000.1 | 417572 | 11-scf00159 | 11 |
| AX-158022316 | 7 | 39.901 | KV453000.1 | 408885 | 11-scf00159 | 11 |
| AX-158022317 | 7 | 39.903 | KV453000.1 | 410456 | 11-scf00159 | 11 |
| AX-158022261 | 7 | 39.904 | KV453000.1 | 363165 | 11-scf00159 | 11 |
| AX-158022318 | 7 | 39.904 | KV453000.1 | 413083 | 11-scf00159 | 11 |
| AX-157752614 | 7 | 39.906 | KV453000.1 | 370486 | 11-scf00159 | 11 |
| AX-158022284 | 7 | 39.906 | KV453000.1 | 376219 | 11-scf00159 | 11 |
| AX-158022306 | 7 | 39.906 | KV453000.1 | 394029 | 11-scf00159 | 11 |
| AX-157738674 | 7 | 39.906 | KV453000.1 | 414297 | 11-scf00159 | 11 |
| AX-158022267 | 7 | 39.908 | KV453000.1 | 365850 | 11-scf00159 | 11 |
| AX-158022330 | 7 | 39.908 | KV453000.1 | 422102 | 11-scf00159 | 11 |
| AX-158022337 | 7 | 39.908 | KV453000.1 | 423352 | 11-scf00159 | 11 |
| AX-158022340 | 7 | 39.908 | KV453000.1 | 424843 | 11-scf00159 | 11 |
| AX-158022272 | 7 | 40.017 | KV453000.1 | 368144 | 11-scf00159 | 11 |
| AX-157772324 | 7 | 40.017 | KV453000.1 | 398568 | 11-scf00159 | 11 |
| AX-158022344 | 7 | 40.017 | KV453000.1 | 428980 | 11-scf00159 | 11 |
| AX-158022349 | 7 | 40.017 | KV453000.1 | 430522 | 11-scf00159 | 11 |
| AX-158022351 | 7 | 40.017 | KV453000.1 | 431001 | 11-scf00159 | 11 |
| AX-158022353 | 7 | 40.017 | KV453000.1 | 431912 | 11-scf00159 | 11 |
| AX-158022479 | 7 | 40.017 | KV453000.1 | 549268 | 11-scf00159 | 11 |
| AX-158022319 | 7 | 40.235 | KV453000.1 | 414080 | 11-scf00159 | 11 |
| AX-158022355 | 7 | 40.235 | KV453000.1 | 435898 | 11-scf00159 | 11 |
| AX-157723831 | 7 | 40.235 | KV453000.1 | 450357 | 11-scf00159 | 11 |
| AX-158379743 | 7 | 40.235 | KV453000.1 | 455371 | 11-scf00159 | 11 |
| AX-158022373 | 7 | 40.235 | KV453000.1 | 455719 | 11-scf00159 | 11 |
| AX-158022378 | 7 | 40.235 | KV453000.1 | 457799 | 11-scf00159 | 11 |
| AX-158022382 | 7 | 40.235 | KV453000.1 | 465041 | 11-scf00159 | 11 |
| AX-158022387 | 7 | 40.235 | KV453000.1 | 468176 | 11-scf00159 | 11 |
| AX-158022094 | 7 | 40.672 | KV453000.1 | 201480 | 11-scf00159 | 11 |

|              |   |        |             |         |             |    |
|--------------|---|--------|-------------|---------|-------------|----|
| AX-158022357 | 7 | 40.672 | KV453000.1  | 437328  | 11-scf00159 | 11 |
| AX-158022367 | 7 | 40.672 | KV453000.1  | 451299  | 11-scf00159 | 11 |
| AX-157757154 | 7 | 40.672 | KV453000.1  | 469590  | 11-scf00159 | 11 |
| AX-158022392 | 7 | 40.672 | KV453000.1  | 474572  | 11-scf00159 | 11 |
| AX-157876415 | 7 | 40.672 | KV453000.1  | 475944  | 11-scf00159 | 11 |
| AX-158022395 | 7 | 40.672 | KV453000.1  | 477807  | 11-scf00159 | 11 |
| AX-158022397 | 7 | 40.672 | KV453000.1  | 478369  | 11-scf00159 | 11 |
| AX-158022398 | 7 | 40.672 | KV453000.1  | 478914  | 11-scf00159 | 11 |
| AX-158022407 | 7 | 40.672 | KV453000.1  | 487538  | 11-scf00159 | 11 |
| AX-157757189 | 7 | 40.672 | KV453000.1  | 496948  | 11-scf00159 | 11 |
| AX-158022414 | 7 | 40.672 | KV453000.1  | 499693  | 11-scf00159 | 11 |
| AX-158022417 | 7 | 40.672 | KV453000.1  | 501033  | 11-scf00159 | 11 |
| AX-158383768 | 7 | 40.672 | KV453000.1  | 502186  | 11-scf00159 | 11 |
| AX-157720842 | 7 | 40.672 | KV453000.1  | 504035  | 11-scf00159 | 11 |
| AX-158022418 | 7 | 40.672 | KV453000.1  | 504866  | 11-scf00159 | 11 |
| AX-158022420 | 7 | 40.672 | KV453000.1  | 505670  | 11-scf00159 | 11 |
| AX-158022424 | 7 | 40.672 | KV453000.1  | 508206  | 11-scf00159 | 11 |
| AX-158022429 | 7 | 40.672 | KV453000.1  | 511702  | 11-scf00159 | 11 |
| AX-158022449 | 7 | 40.672 | KV453000.1  | 529849  | 11-scf00159 | 11 |
| AX-158022457 | 7 | 40.672 | KV453000.1  | 532997  | 11-scf00159 | 11 |
| AX-158022471 | 7 | 40.672 | KV453000.1  | 541053  | 11-scf00159 | 11 |
| AX-158022493 | 7 | 40.672 | KV453000.1  | 561037  | 11-scf00159 | 11 |
| AX-158022468 | 7 | 40.755 | KV453000.1  | 539567  | 11-scf00159 | 11 |
| AX-158022372 | 7 | 40.854 | KV453000.1  | 454959  | 11-scf00159 | 11 |
| AX-158022413 | 7 | 40.854 | KV453000.1  | 499265  | 11-scf00159 | 11 |
| AX-157758197 | 7 | 40.854 | KV453000.1  | 541897  | 11-scf00159 | 11 |
| AX-158023079 | 7 | 40.854 | KV453000.1  | 1130671 | 11-scf00159 | 11 |
| AX-158023088 | 7 | 40.854 | KV453000.1  | 1144167 | 11-scf00159 | 11 |
| AX-158023090 | 7 | 40.854 | KV453000.1  | 1144773 | 11-scf00159 | 11 |
| AX-158023097 | 7 | 40.854 | KV453000.1  | 1151169 | 11-scf00159 | 11 |
| AX-158023442 | 7 | 40.854 | KV453000.1  | 1673299 | 11-scf00159 | 11 |
| AX-157705337 | 7 | 40.854 | 3ML01029436 | 115     | scf05059_1  | UN |
| AX-158022157 | 7 | 40.888 | KV453000.1  | 257465  | 11-scf00159 | 11 |
| AX-158022225 | 7 | 40.888 | KV453000.1  | 323473  | 11-scf00159 | 11 |
| AX-158022294 | 7 | 40.888 | KV453000.1  | 383987  | 11-scf00159 | 11 |
| AX-158022328 | 7 | 40.888 | KV453000.1  | 418841  | 11-scf00159 | 11 |
| AX-158022342 | 7 | 40.888 | KV453000.1  | 426360  | 11-scf00159 | 11 |
| AX-157820955 | 7 | 40.888 | KV453000.1  | 437437  | 11-scf00159 | 11 |
| AX-158022362 | 7 | 40.888 | KV453000.1  | 448602  | 11-scf00159 | 11 |
| AX-158022386 | 7 | 40.888 | KV453000.1  | 467769  | 11-scf00159 | 11 |
| AX-158022401 | 7 | 40.888 | KV453000.1  | 481751  | 11-scf00159 | 11 |
| AX-158022436 | 7 | 40.888 | KV453000.1  | 518071  | 11-scf00159 | 11 |
| AX-158022473 | 7 | 40.888 | KV453000.1  | 544628  | 11-scf00159 | 11 |
| AX-158022476 | 7 | 40.888 | KV453000.1  | 547538  | 11-scf00159 | 11 |
| AX-158022480 | 7 | 40.888 | KV453000.1  | 550256  | 11-scf00159 | 11 |
| AX-158022487 | 7 | 40.888 | KV453000.1  | 553761  | 11-scf00159 | 11 |
| AX-158022490 | 7 | 40.888 | KV453000.1  | 559092  | 11-scf00159 | 11 |
| AX-158022492 | 7 | 40.888 | KV453000.1  | 560269  | 11-scf00159 | 11 |
| AX-158022512 | 7 | 40.888 | KV453000.1  | 574871  | 11-scf00159 | 11 |
| AX-158022495 | 7 | 40.892 | KV453000.1  | 564416  | 11-scf00159 | 11 |
| AX-158022497 | 7 | 40.892 | KV453000.1  | 565156  | 11-scf00159 | 11 |

|              |   |        |            |         |             |    |
|--------------|---|--------|------------|---------|-------------|----|
| AX-158022498 | 7 | 40.892 | KV453000.1 | 568866  | 11-scf00159 | 11 |
| AX-158022502 | 7 | 41.219 | KV453000.1 | 573108  | 11-scf00159 | 11 |
| AX-158022511 | 7 | 41.219 | KV453000.1 | 573908  | 11-scf00159 | 11 |
| AX-158022513 | 7 | 41.219 | KV453000.1 | 576965  | 11-scf00159 | 11 |
| AX-158408050 | 7 | 41.219 | KV453000.1 | 581844  | 11-scf00159 | 11 |
| AX-158022519 | 7 | 41.328 | KV453000.1 | 579613  | 11-scf00159 | 11 |
| AX-158022520 | 7 | 41.328 | KV453000.1 | 580669  | 11-scf00159 | 11 |
| AX-158022529 | 7 | 41.328 | KV453000.1 | 586032  | 11-scf00159 | 11 |
| AX-158022534 | 7 | 41.328 | KV453000.1 | 589077  | 11-scf00159 | 11 |
| AX-158022545 | 7 | 41.328 | KV453000.1 | 609864  | 11-scf00159 | 11 |
| AX-158022561 | 7 | 41.328 | KV453000.1 | 621044  | 11-scf00159 | 11 |
| AX-158022569 | 7 | 41.328 | KV453000.1 | 629088  | 11-scf00159 | 11 |
| AX-158022578 | 7 | 41.328 | KV453000.1 | 632220  | 11-scf00159 | 11 |
| AX-158022610 | 7 | 41.328 | KV453000.1 | 665942  | 11-scf00159 | 11 |
| AX-158022644 | 7 | 41.328 | KV453000.1 | 686722  | 11-scf00159 | 11 |
| AX-158022680 | 7 | 41.328 | KV453000.1 | 724843  | 11-scf00159 | 11 |
| AX-158023234 | 7 | 41.328 | KV453000.1 | 1389080 | 11-scf00159 | 11 |
| AX-158022500 | 7 | 41.437 | KV453000.1 | 569755  | 11-scf00159 | 11 |
| AX-158022528 | 7 | 41.437 | KV453000.1 | 585308  | 11-scf00159 | 11 |
| AX-158022548 | 7 | 41.437 | KV453000.1 | 610835  | 11-scf00159 | 11 |
| AX-158022549 | 7 | 41.437 | KV453000.1 | 612440  | 11-scf00159 | 11 |
| AX-158022550 | 7 | 41.437 | KV453000.1 | 612684  | 11-scf00159 | 11 |
| AX-158022552 | 7 | 41.437 | KV453000.1 | 613231  | 11-scf00159 | 11 |
| AX-158022554 | 7 | 41.437 | KV453000.1 | 614126  | 11-scf00159 | 11 |
| AX-158022558 | 7 | 41.437 | KV453000.1 | 616602  | 11-scf00159 | 11 |
| AX-158022559 | 7 | 41.437 | KV453000.1 | 618857  | 11-scf00159 | 11 |
| AX-157714672 | 7 | 41.437 | KV453000.1 | 621241  | 11-scf00159 | 11 |
| AX-158022564 | 7 | 41.437 | KV453000.1 | 625018  | 11-scf00159 | 11 |
| AX-158022565 | 7 | 41.437 | KV453000.1 | 625493  | 11-scf00159 | 11 |
| AX-158022571 | 7 | 41.437 | KV453000.1 | 630237  | 11-scf00159 | 11 |
| AX-158022587 | 7 | 41.437 | KV453000.1 | 650425  | 11-scf00159 | 11 |
| AX-157752739 | 7 | 41.437 | KV453000.1 | 653715  | 11-scf00159 | 11 |
| AX-158022594 | 7 | 41.437 | KV453000.1 | 655188  | 11-scf00159 | 11 |
| AX-158022597 | 7 | 41.437 | KV453000.1 | 657991  | 11-scf00159 | 11 |
| AX-158022599 | 7 | 41.437 | KV453000.1 | 658692  | 11-scf00159 | 11 |
| AX-158022600 | 7 | 41.437 | KV453000.1 | 658880  | 11-scf00159 | 11 |
| AX-158022601 | 7 | 41.437 | KV453000.1 | 659649  | 11-scf00159 | 11 |
| AX-158022602 | 7 | 41.437 | KV453000.1 | 660407  | 11-scf00159 | 11 |
| AX-158022604 | 7 | 41.437 | KV453000.1 | 661794  | 11-scf00159 | 11 |
| AX-158022606 | 7 | 41.437 | KV453000.1 | 664734  | 11-scf00159 | 11 |
| AX-158022609 | 7 | 41.437 | KV453000.1 | 665712  | 11-scf00159 | 11 |
| AX-158022618 | 7 | 41.437 | KV453000.1 | 668940  | 11-scf00159 | 11 |
| AX-158022622 | 7 | 41.437 | KV453000.1 | 671226  | 11-scf00159 | 11 |
| AX-157709420 | 7 | 41.437 | KV453000.1 | 684325  | 11-scf00159 | 11 |
| AX-158022641 | 7 | 41.437 | KV453000.1 | 685081  | 11-scf00159 | 11 |
| AX-158022643 | 7 | 41.437 | KV453000.1 | 685628  | 11-scf00159 | 11 |
| AX-158022647 | 7 | 41.437 | KV453000.1 | 687498  | 11-scf00159 | 11 |
| AX-158022649 | 7 | 41.437 | KV453000.1 | 691223  | 11-scf00159 | 11 |
| AX-158022673 | 7 | 41.437 | KV453000.1 | 712982  | 11-scf00159 | 11 |
| AX-158022678 | 7 | 41.437 | KV453000.1 | 722080  | 11-scf00159 | 11 |
| AX-158022679 | 7 | 41.437 | KV453000.1 | 724126  | 11-scf00159 | 11 |

|              |   |        |            |        |             |    |
|--------------|---|--------|------------|--------|-------------|----|
| AX-157820958 | 7 | 41.437 | KV453000.1 | 731633 | 11-scf00159 | 11 |
| AX-157820960 | 7 | 41.437 | KV453000.1 | 734944 | 11-scf00159 | 11 |
| AX-158022691 | 7 | 41.437 | KV453000.1 | 738103 | 11-scf00159 | 11 |
| AX-158022692 | 7 | 41.437 | KV453000.1 | 740022 | 11-scf00159 | 11 |
| AX-158022693 | 7 | 41.437 | KV453000.1 | 740942 | 11-scf00159 | 11 |
| AX-158022695 | 7 | 41.437 | KV453000.1 | 741794 | 11-scf00159 | 11 |
| AX-157820963 | 7 | 41.437 | KV453000.1 | 742506 | 11-scf00159 | 11 |
| AX-158022698 | 7 | 41.437 | KV453000.1 | 747624 | 11-scf00159 | 11 |
| AX-158022703 | 7 | 41.437 | KV453000.1 | 757646 | 11-scf00159 | 11 |
| AX-158022705 | 7 | 41.437 | KV453000.1 | 758890 | 11-scf00159 | 11 |
| AX-158022709 | 7 | 41.437 | KV453000.1 | 763214 | 11-scf00159 | 11 |
| AX-158022710 | 7 | 41.437 | KV453000.1 | 764436 | 11-scf00159 | 11 |
| AX-158022713 | 7 | 41.437 | KV453000.1 | 768165 | 11-scf00159 | 11 |
| AX-158022719 | 7 | 41.437 | KV453000.1 | 778673 | 11-scf00159 | 11 |
| AX-158022722 | 7 | 41.437 | KV453000.1 | 781526 | 11-scf00159 | 11 |
| AX-158022728 | 7 | 41.437 | KV453000.1 | 784950 | 11-scf00159 | 11 |
| AX-158022729 | 7 | 41.437 | KV453000.1 | 785636 | 11-scf00159 | 11 |
| AX-157753536 | 7 | 41.437 | KV453000.1 | 786216 | 11-scf00159 | 11 |
| AX-158022731 | 7 | 41.437 | KV453000.1 | 787268 | 11-scf00159 | 11 |
| AX-158022733 | 7 | 41.437 | KV453000.1 | 790865 | 11-scf00159 | 11 |
| AX-158406068 | 7 | 41.437 | KV453000.1 | 799523 | 11-scf00159 | 11 |
| AX-158022751 | 7 | 41.437 | KV453000.1 | 812560 | 11-scf00159 | 11 |
| AX-158022757 | 7 | 41.437 | KV453000.1 | 831804 | 11-scf00159 | 11 |
| AX-158022761 | 7 | 41.437 | KV453000.1 | 834435 | 11-scf00159 | 11 |
| AX-157770803 | 7 | 41.437 | KV453000.1 | 837176 | 11-scf00159 | 11 |
| AX-158022764 | 7 | 41.437 | KV453000.1 | 838500 | 11-scf00159 | 11 |
| AX-158022772 | 7 | 41.437 | KV453000.1 | 845846 | 11-scf00159 | 11 |
| AX-158022779 | 7 | 41.437 | KV453000.1 | 853681 | 11-scf00159 | 11 |
| AX-158391171 | 7 | 41.437 | KV453000.1 | 859440 | 11-scf00159 | 11 |
| AX-158022788 | 7 | 41.437 | KV453000.1 | 860640 | 11-scf00159 | 11 |
| AX-158022790 | 7 | 41.437 | KV453000.1 | 861586 | 11-scf00159 | 11 |
| AX-158022791 | 7 | 41.437 | KV453000.1 | 862667 | 11-scf00159 | 11 |
| AX-158022796 | 7 | 41.437 | KV453000.1 | 867066 | 11-scf00159 | 11 |
| AX-158408062 | 7 | 41.437 | KV453000.1 | 868294 | 11-scf00159 | 11 |
| AX-158022799 | 7 | 41.437 | KV453000.1 | 872128 | 11-scf00159 | 11 |
| AX-158022803 | 7 | 41.437 | KV453000.1 | 876137 | 11-scf00159 | 11 |
| AX-158383775 | 7 | 41.437 | KV453000.1 | 879584 | 11-scf00159 | 11 |
| AX-158022808 | 7 | 41.437 | KV453000.1 | 881242 | 11-scf00159 | 11 |
| AX-158022813 | 7 | 41.437 | KV453000.1 | 882785 | 11-scf00159 | 11 |
| AX-158022814 | 7 | 41.437 | KV453000.1 | 883332 | 11-scf00159 | 11 |
| AX-158022826 | 7 | 41.437 | KV453000.1 | 891891 | 11-scf00159 | 11 |
| AX-158022827 | 7 | 41.437 | KV453000.1 | 892427 | 11-scf00159 | 11 |
| AX-158022829 | 7 | 41.437 | KV453000.1 | 892596 | 11-scf00159 | 11 |
| AX-158408064 | 7 | 41.437 | KV453000.1 | 892953 | 11-scf00159 | 11 |
| AX-158022835 | 7 | 41.437 | KV453000.1 | 897759 | 11-scf00159 | 11 |
| AX-158022836 | 7 | 41.437 | KV453000.1 | 898442 | 11-scf00159 | 11 |
| AX-158022837 | 7 | 41.437 | KV453000.1 | 901688 | 11-scf00159 | 11 |
| AX-158022839 | 7 | 41.437 | KV453000.1 | 904057 | 11-scf00159 | 11 |
| AX-158022845 | 7 | 41.437 | KV453000.1 | 908980 | 11-scf00159 | 11 |
| AX-158022888 | 7 | 41.437 | KV453000.1 | 941298 | 11-scf00159 | 11 |
| AX-158022907 | 7 | 41.437 | KV453000.1 | 956412 | 11-scf00159 | 11 |

|              |   |        |            |         |             |    |
|--------------|---|--------|------------|---------|-------------|----|
| AX-158022924 | 7 | 41.437 | KV453000.1 | 966069  | 11-scf00159 | 11 |
| AX-158022925 | 7 | 41.437 | KV453000.1 | 969630  | 11-scf00159 | 11 |
| AX-158023027 | 7 | 41.437 | KV453000.1 | 1044343 | 11-scf00159 | 11 |
| AX-158023032 | 7 | 41.437 | KV453000.1 | 1052727 | 11-scf00159 | 11 |
| AX-158023037 | 7 | 41.437 | KV453000.1 | 1056408 | 11-scf00159 | 11 |
| AX-158023119 | 7 | 41.437 | KV453000.1 | 1187085 | 11-scf00159 | 11 |
| AX-158023123 | 7 | 41.437 | KV453000.1 | 1193621 | 11-scf00159 | 11 |
| AX-157820969 | 7 | 41.437 | KV453000.1 | 1198345 | 11-scf00159 | 11 |
| AX-158023142 | 7 | 41.437 | KV453000.1 | 1227848 | 11-scf00159 | 11 |
| AX-158023143 | 7 | 41.437 | KV453000.1 | 1232568 | 11-scf00159 | 11 |
| AX-158023182 | 7 | 41.437 | KV453000.1 | 1295224 | 11-scf00159 | 11 |
| AX-158023189 | 7 | 41.437 | KV453000.1 | 1315660 | 11-scf00159 | 11 |
| AX-158023190 | 7 | 41.437 | KV453000.1 | 1316947 | 11-scf00159 | 11 |
| AX-158023199 | 7 | 41.437 | KV453000.1 | 1320858 | 11-scf00159 | 11 |
| AX-158023201 | 7 | 41.437 | KV453000.1 | 1321881 | 11-scf00159 | 11 |
| AX-158023204 | 7 | 41.437 | KV453000.1 | 1327267 | 11-scf00159 | 11 |
| AX-158023219 | 7 | 41.437 | KV453000.1 | 1357763 | 11-scf00159 | 11 |
| AX-158023221 | 7 | 41.437 | KV453000.1 | 1359879 | 11-scf00159 | 11 |
| AX-157743852 | 7 | 41.437 | KV453000.1 | 1360242 | 11-scf00159 | 11 |
| AX-158023222 | 7 | 41.437 | KV453000.1 | 1363824 | 11-scf00159 | 11 |
| AX-158023226 | 7 | 41.437 | KV453000.1 | 1368563 | 11-scf00159 | 11 |
| AX-158408072 | 7 | 41.437 | KV453000.1 | 1432898 | 11-scf00159 | 11 |
| AX-158023287 | 7 | 41.437 | KV453000.1 | 1441223 | 11-scf00159 | 11 |
| AX-158023294 | 7 | 41.437 | KV453000.1 | 1450622 | 11-scf00159 | 11 |
| AX-158023303 | 7 | 41.437 | KV453000.1 | 1462329 | 11-scf00159 | 11 |
| AX-158023305 | 7 | 41.437 | KV453000.1 | 1463191 | 11-scf00159 | 11 |
| AX-158023309 | 7 | 41.437 | KV453000.1 | 1465781 | 11-scf00159 | 11 |
| AX-157884994 | 7 | 41.437 | KV453000.1 | 1479960 | 11-scf00159 | 11 |
| AX-158023330 | 7 | 41.437 | KV453000.1 | 1489115 | 11-scf00159 | 11 |
| AX-158023333 | 7 | 41.437 | KV453000.1 | 1494978 | 11-scf00159 | 11 |
| AX-158023406 | 7 | 41.437 | KV453000.1 | 1620325 | 11-scf00159 | 11 |
| AX-158023482 | 7 | 41.437 | KV453000.1 | 1723920 | 11-scf00159 | 11 |
| AX-158023489 | 7 | 41.437 | KV453000.1 | 1727860 | 11-scf00159 | 11 |
| AX-158408084 | 7 | 41.437 | KV453000.1 | 1729960 | 11-scf00159 | 11 |
| AX-158023511 | 7 | 41.437 | KV453000.1 | 1752566 | 11-scf00159 | 11 |
| AX-158023515 | 7 | 41.437 | KV453000.1 | 1756884 | 11-scf00159 | 11 |
| AX-158023584 | 7 | 41.437 | KV453000.1 | 1903264 | 11-scf00159 | 11 |
| AX-158023616 | 7 | 41.437 | KV453000.1 | 1937977 | 11-scf00159 | 11 |
| AX-158023625 | 7 | 41.437 | KV453000.1 | 1948185 | 11-scf00159 | 11 |
| AX-158023641 | 7 | 41.437 | KV453000.1 | 1964609 | 11-scf00159 | 11 |
| AX-158023650 | 7 | 41.437 | KV453000.1 | 1969874 | 11-scf00159 | 11 |
| AX-158023668 | 7 | 41.437 | KV453000.1 | 1990771 | 11-scf00159 | 11 |
| AX-157772814 | 7 | 41.437 | KV453000.1 | 1995168 | 11-scf00159 | 11 |
| AX-158023682 | 7 | 41.437 | KV453000.1 | 2004147 | 11-scf00159 | 11 |
| AX-158023703 | 7 | 41.437 | KV453000.1 | 2036458 | 11-scf00159 | 11 |
| AX-158023707 | 7 | 41.437 | KV453000.1 | 2038244 | 11-scf00159 | 11 |
| AX-158023711 | 7 | 41.437 | KV453000.1 | 2047683 | 11-scf00159 | 11 |
| AX-158023720 | 7 | 41.437 | KV453000.1 | 2069535 | 11-scf00159 | 11 |
| AX-158023745 | 7 | 41.437 | KV453000.1 | 2088657 | 11-scf00159 | 11 |
| AX-158023837 | 7 | 41.437 | KV453000.1 | 2206688 | 11-scf00159 | 11 |
| AX-158023840 | 7 | 41.437 | KV453000.1 | 2210962 | 11-scf00159 | 11 |

|              |   |        |             |         |             |    |
|--------------|---|--------|-------------|---------|-------------|----|
| AX-158023844 | 7 | 41.437 | KV453000.1  | 2223446 | 11-scf00159 | 11 |
| AX-158023846 | 7 | 41.437 | KV453000.1  | 2225700 | 11-scf00159 | 11 |
| AX-158023859 | 7 | 41.437 | KV453000.1  | 2237235 | 11-scf00159 | 11 |
| AX-158391232 | 7 | 41.437 | KV453000.1  | 2263730 | 11-scf00159 | 11 |
| AX-158023898 | 7 | 41.437 | KV453000.1  | 2271499 | 11-scf00159 | 11 |
| AX-157884997 | 7 | 41.437 | KV453000.1  | 2275205 | 11-scf00159 | 11 |
| AX-158023920 | 7 | 41.437 | KV453000.1  | 2291325 | 11-scf00159 | 11 |
| AX-158023924 | 7 | 41.437 | KV453000.1  | 2294958 | 11-scf00159 | 11 |
| AX-158023928 | 7 | 41.437 | KV453000.1  | 2300342 | 11-scf00159 | 11 |
| AX-158023932 | 7 | 41.437 | KV453000.1  | 2302867 | 11-scf00159 | 11 |
| AX-158023933 | 7 | 41.437 | KV453000.1  | 2305155 | 11-scf00159 | 11 |
| AX-158023937 | 7 | 41.437 | KV453000.1  | 2307502 | 11-scf00159 | 11 |
| AX-158023943 | 7 | 41.437 | KV453000.1  | 2310482 | 11-scf00159 | 11 |
| AX-158023949 | 7 | 41.437 | KV453000.1  | 2314333 | 11-scf00159 | 11 |
| AX-158023982 | 7 | 41.437 | KV453000.1  | 2344038 | 11-scf00159 | 11 |
| AX-158023986 | 7 | 41.437 | KV453000.1  | 2346829 | 11-scf00159 | 11 |
| AX-157705293 | 7 | 41.437 | 3ML01029326 | 664     | scf04947_1  | UN |
| AX-158022739 | 7 | 41.488 | KV453000.1  | 801100  | 11-scf00159 | 11 |
| AX-158022776 | 7 | 41.488 | KV453000.1  | 852215  | 11-scf00159 | 11 |
| AX-158023013 | 7 | 41.488 | KV453000.1  | 1035838 | 11-scf00159 | 11 |
| AX-158023364 | 7 | 41.488 | KV453000.1  | 1545597 | 11-scf00159 | 11 |
| AX-158023390 | 7 | 41.488 | KV453000.1  | 1591678 | 11-scf00159 | 11 |
| AX-158022740 | 7 | 41.54  | KV453000.1  | 802720  | 11-scf00159 | 11 |
| AX-158022717 | 7 | 41.596 | KV453000.1  | 775125  | 11-scf00159 | 11 |
| AX-158022742 | 7 | 41.596 | KV453000.1  | 803974  | 11-scf00159 | 11 |
| AX-158023520 | 7 | 41.596 | KV453000.1  | 1762186 | 11-scf00159 | 11 |
| AX-158023556 | 7 | 41.596 | KV453000.1  | 1846525 | 11-scf00159 | 11 |
| AX-158022760 | 7 | 41.656 | KV453000.1  | 833932  | 11-scf00159 | 11 |
| AX-158022766 | 7 | 41.656 | KV453000.1  | 838964  | 11-scf00159 | 11 |
| AX-157758375 | 7 | 41.656 | KV453000.1  | 842947  | 11-scf00159 | 11 |
| AX-158022774 | 7 | 41.656 | KV453000.1  | 848986  | 11-scf00159 | 11 |
| AX-158022777 | 7 | 41.656 | KV453000.1  | 853024  | 11-scf00159 | 11 |
| AX-158022783 | 7 | 41.673 | KV453000.1  | 854793  | 11-scf00159 | 11 |
| AX-158022785 | 7 | 41.691 | KV453000.1  | 858571  | 11-scf00159 | 11 |
| AX-158022797 | 7 | 41.709 | KV453000.1  | 867526  | 11-scf00159 | 11 |
| AX-158023784 | 7 | 41.709 | KV453000.1  | 2166555 | 11-scf00159 | 11 |
| AX-158022820 | 7 | 41.724 | KV453000.1  | 890134  | 11-scf00159 | 11 |
| AX-158022830 | 7 | 41.739 | KV453000.1  | 893358  | 11-scf00159 | 11 |
| AX-158023191 | 7 | 41.739 | KV453000.1  | 1318386 | 11-scf00159 | 11 |
| AX-158023350 | 7 | 41.739 | KV453000.1  | 1528017 | 11-scf00159 | 11 |
| AX-158022847 | 7 | 41.742 | KV453000.1  | 910884  | 11-scf00159 | 11 |
| AX-158023206 | 7 | 41.742 | KV453000.1  | 1331792 | 11-scf00159 | 11 |
| AX-158379745 | 7 | 41.751 | KV453000.1  | 950552  | 11-scf00159 | 11 |
| AX-158022501 | 7 | 41.758 | KV453000.1  | 571948  | 11-scf00159 | 11 |
| AX-158022577 | 7 | 41.758 | KV453000.1  | 631482  | 11-scf00159 | 11 |
| AX-158022756 | 7 | 41.758 | KV453000.1  | 829734  | 11-scf00159 | 11 |
| AX-158022804 | 7 | 41.758 | KV453000.1  | 876494  | 11-scf00159 | 11 |
| AX-158022817 | 7 | 41.758 | KV453000.1  | 884671  | 11-scf00159 | 11 |
| AX-157856326 | 7 | 41.758 | KV453000.1  | 884921  | 11-scf00159 | 11 |
| AX-158022824 | 7 | 41.758 | KV453000.1  | 891476  | 11-scf00159 | 11 |
| AX-158022842 | 7 | 41.758 | KV453000.1  | 906434  | 11-scf00159 | 11 |

|              |   |        |            |         |             |    |
|--------------|---|--------|------------|---------|-------------|----|
| AX-158022848 | 7 | 41.758 | KV453000.1 | 911954  | 11-scf00159 | 11 |
| AX-158022904 | 7 | 41.758 | KV453000.1 | 953116  | 11-scf00159 | 11 |
| AX-158022906 | 7 | 41.758 | KV453000.1 | 954295  | 11-scf00159 | 11 |
| AX-158022928 | 7 | 41.758 | KV453000.1 | 971215  | 11-scf00159 | 11 |
| AX-157755137 | 7 | 41.758 | KV453000.1 | 1060645 | 11-scf00159 | 11 |
| AX-158023041 | 7 | 41.758 | KV453000.1 | 1061823 | 11-scf00159 | 11 |
| AX-158023212 | 7 | 41.758 | KV453000.1 | 1346903 | 11-scf00159 | 11 |
| AX-158023254 | 7 | 41.758 | KV453000.1 | 1400899 | 11-scf00159 | 11 |
| AX-158023262 | 7 | 41.758 | KV453000.1 | 1409491 | 11-scf00159 | 11 |
| AX-158023268 | 7 | 41.758 | KV453000.1 | 1416746 | 11-scf00159 | 11 |
| AX-158023277 | 7 | 41.758 | KV453000.1 | 1422065 | 11-scf00159 | 11 |
| AX-158023314 | 7 | 41.758 | KV453000.1 | 1472370 | 11-scf00159 | 11 |
| AX-158023319 | 7 | 41.758 | KV453000.1 | 1479325 | 11-scf00159 | 11 |
| AX-158023324 | 7 | 41.758 | KV453000.1 | 1481713 | 11-scf00159 | 11 |
| AX-158023332 | 7 | 41.758 | KV453000.1 | 1491249 | 11-scf00159 | 11 |
| AX-158023339 | 7 | 41.758 | KV453000.1 | 1511645 | 11-scf00159 | 11 |
| AX-158023340 | 7 | 41.758 | KV453000.1 | 1516015 | 11-scf00159 | 11 |
| AX-158023344 | 7 | 41.758 | KV453000.1 | 1520458 | 11-scf00159 | 11 |
| AX-158023405 | 7 | 41.758 | KV453000.1 | 1619000 | 11-scf00159 | 11 |
| AX-158023533 | 7 | 41.758 | KV453000.1 | 1798276 | 11-scf00159 | 11 |
| AX-158023669 | 7 | 41.758 | KV453000.1 | 1993233 | 11-scf00159 | 11 |
| AX-158023697 | 7 | 41.758 | KV453000.1 | 2016491 | 11-scf00159 | 11 |
| AX-158023753 | 7 | 41.758 | KV453000.1 | 2098256 | 11-scf00159 | 11 |
| AX-157820979 | 7 | 41.758 | KV453000.1 | 2156550 | 11-scf00159 | 11 |
| AX-158023801 | 7 | 41.758 | KV453000.1 | 2178101 | 11-scf00159 | 11 |
| AX-158379748 | 7 | 41.758 | KV453000.1 | 2281737 | 11-scf00159 | 11 |
| AX-158023927 | 7 | 41.758 | KV453000.1 | 2296115 | 11-scf00159 | 11 |
| AX-157743032 | 7 | 41.758 | KV453000.1 | 2310707 | 11-scf00159 | 11 |
| AX-157723875 | 7 | 41.765 | KV453000.1 | 595854  | 11-scf00159 | 11 |
| AX-158022630 | 7 | 41.765 | KV453000.1 | 674457  | 11-scf00159 | 11 |
| AX-158022675 | 7 | 41.765 | KV453000.1 | 713614  | 11-scf00159 | 11 |
| AX-158022701 | 7 | 41.765 | KV453000.1 | 749922  | 11-scf00159 | 11 |
| AX-158022743 | 7 | 41.765 | KV453000.1 | 804520  | 11-scf00159 | 11 |
| AX-158022752 | 7 | 41.765 | KV453000.1 | 813768  | 11-scf00159 | 11 |
| AX-158022755 | 7 | 41.765 | KV453000.1 | 819206  | 11-scf00159 | 11 |
| AX-158022787 | 7 | 41.765 | KV453000.1 | 859480  | 11-scf00159 | 11 |
| AX-158022798 | 7 | 41.765 | KV453000.1 | 869814  | 11-scf00159 | 11 |
| AX-158022889 | 7 | 41.765 | KV453000.1 | 941685  | 11-scf00159 | 11 |
| AX-157756081 | 7 | 41.765 | KV453000.1 | 990961  | 11-scf00159 | 11 |
| AX-157754430 | 7 | 41.765 | KV453000.1 | 995028  | 11-scf00159 | 11 |
| AX-158022972 | 7 | 41.765 | KV453000.1 | 995814  | 11-scf00159 | 11 |
| AX-158023012 | 7 | 41.765 | KV453000.1 | 1033630 | 11-scf00159 | 11 |
| AX-158023030 | 7 | 41.765 | KV453000.1 | 1045401 | 11-scf00159 | 11 |
| AX-158023034 | 7 | 41.765 | KV453000.1 | 1053400 | 11-scf00159 | 11 |
| AX-158023036 | 7 | 41.765 | KV453000.1 | 1054673 | 11-scf00159 | 11 |
| AX-157884992 | 7 | 41.765 | KV453000.1 | 1057307 | 11-scf00159 | 11 |
| AX-158023040 | 7 | 41.765 | KV453000.1 | 1058575 | 11-scf00159 | 11 |
| AX-158023044 | 7 | 41.765 | KV453000.1 | 1069090 | 11-scf00159 | 11 |
| AX-157884993 | 7 | 41.765 | KV453000.1 | 1070165 | 11-scf00159 | 11 |
| AX-158023046 | 7 | 41.765 | KV453000.1 | 1071427 | 11-scf00159 | 11 |
| AX-158023047 | 7 | 41.765 | KV453000.1 | 1073531 | 11-scf00159 | 11 |



|              |   |        |            |         |             |    |
|--------------|---|--------|------------|---------|-------------|----|
| AX-157727439 | 7 | 41.765 | KV453000.1 | 1075675 | 11-scf00159 | 11 |
| AX-158023049 | 7 | 41.765 | KV453000.1 | 1076552 | 11-scf00159 | 11 |
| AX-158023051 | 7 | 41.765 | KV453000.1 | 1079279 | 11-scf00159 | 11 |
| AX-158023052 | 7 | 41.765 | KV453000.1 | 1079763 | 11-scf00159 | 11 |
| AX-158023056 | 7 | 41.765 | KV453000.1 | 1082414 | 11-scf00159 | 11 |
| AX-158023058 | 7 | 41.765 | KV453000.1 | 1090410 | 11-scf00159 | 11 |
| AX-158023063 | 7 | 41.765 | KV453000.1 | 1099072 | 11-scf00159 | 11 |
| AX-158023066 | 7 | 41.765 | KV453000.1 | 1102013 | 11-scf00159 | 11 |
| AX-158023068 | 7 | 41.765 | KV453000.1 | 1102948 | 11-scf00159 | 11 |
| AX-158023069 | 7 | 41.765 | KV453000.1 | 1104856 | 11-scf00159 | 11 |
| AX-158023078 | 7 | 41.765 | KV453000.1 | 1128778 | 11-scf00159 | 11 |
| AX-158023086 | 7 | 41.765 | KV453000.1 | 1141481 | 11-scf00159 | 11 |
| AX-158023087 | 7 | 41.765 | KV453000.1 | 1141894 | 11-scf00159 | 11 |
| AX-158023100 | 7 | 41.765 | KV453000.1 | 1160600 | 11-scf00159 | 11 |
| AX-158023102 | 7 | 41.765 | KV453000.1 | 1162238 | 11-scf00159 | 11 |
| AX-158023105 | 7 | 41.765 | KV453000.1 | 1166505 | 11-scf00159 | 11 |
| AX-158023110 | 7 | 41.765 | KV453000.1 | 1174173 | 11-scf00159 | 11 |
| AX-158023111 | 7 | 41.765 | KV453000.1 | 1176883 | 11-scf00159 | 11 |
| AX-158023112 | 7 | 41.765 | KV453000.1 | 1177744 | 11-scf00159 | 11 |
| AX-158023113 | 7 | 41.765 | KV453000.1 | 1178474 | 11-scf00159 | 11 |
| AX-158023115 | 7 | 41.765 | KV453000.1 | 1179550 | 11-scf00159 | 11 |
| AX-158023117 | 7 | 41.765 | KV453000.1 | 1184164 | 11-scf00159 | 11 |
| AX-158023120 | 7 | 41.765 | KV453000.1 | 1188467 | 11-scf00159 | 11 |
| AX-158023121 | 7 | 41.765 | KV453000.1 | 1192197 | 11-scf00159 | 11 |
| AX-158023126 | 7 | 41.765 | KV453000.1 | 1195858 | 11-scf00159 | 11 |
| AX-158023127 | 7 | 41.765 | KV453000.1 | 1196508 | 11-scf00159 | 11 |
| AX-158023129 | 7 | 41.765 | KV453000.1 | 1198677 | 11-scf00159 | 11 |
| AX-158023132 | 7 | 41.765 | KV453000.1 | 1207310 | 11-scf00159 | 11 |
| AX-158023133 | 7 | 41.765 | KV453000.1 | 1208028 | 11-scf00159 | 11 |
| AX-158023135 | 7 | 41.765 | KV453000.1 | 1209560 | 11-scf00159 | 11 |
| AX-158023137 | 7 | 41.765 | KV453000.1 | 1211481 | 11-scf00159 | 11 |
| AX-158023146 | 7 | 41.765 | KV453000.1 | 1234309 | 11-scf00159 | 11 |
| AX-158023150 | 7 | 41.765 | KV453000.1 | 1237916 | 11-scf00159 | 11 |
| AX-158023162 | 7 | 41.765 | KV453000.1 | 1255181 | 11-scf00159 | 11 |
| AX-158023166 | 7 | 41.765 | KV453000.1 | 1266971 | 11-scf00159 | 11 |
| AX-158023170 | 7 | 41.765 | KV453000.1 | 1276538 | 11-scf00159 | 11 |
| AX-157820971 | 7 | 41.765 | KV453000.1 | 1287386 | 11-scf00159 | 11 |
| AX-157774633 | 7 | 41.765 | KV453000.1 | 1292711 | 11-scf00159 | 11 |
| AX-158023183 | 7 | 41.765 | KV453000.1 | 1303392 | 11-scf00159 | 11 |
| AX-158023184 | 7 | 41.765 | KV453000.1 | 1303978 | 11-scf00159 | 11 |
| AX-158023193 | 7 | 41.765 | KV453000.1 | 1318968 | 11-scf00159 | 11 |
| AX-158023205 | 7 | 41.765 | KV453000.1 | 1330765 | 11-scf00159 | 11 |
| AX-157771607 | 7 | 41.765 | KV453000.1 | 1334902 | 11-scf00159 | 11 |
| AX-157753413 | 7 | 41.765 | KV453000.1 | 1337320 | 11-scf00159 | 11 |
| AX-158023208 | 7 | 41.765 | KV453000.1 | 1339577 | 11-scf00159 | 11 |
| AX-158023209 | 7 | 41.765 | KV453000.1 | 1340207 | 11-scf00159 | 11 |
| AX-157724710 | 7 | 41.765 | KV453000.1 | 1346444 | 11-scf00159 | 11 |
| AX-157741798 | 7 | 41.765 | KV453000.1 | 1352493 | 11-scf00159 | 11 |
| AX-157714724 | 7 | 41.765 | KV453000.1 | 1378442 | 11-scf00159 | 11 |
| AX-158408071 | 7 | 41.765 | KV453000.1 | 1384859 | 11-scf00159 | 11 |
| AX-158023231 | 7 | 41.765 | KV453000.1 | 1387200 | 11-scf00159 | 11 |

|              |   |        |            |         |             |    |
|--------------|---|--------|------------|---------|-------------|----|
| AX-158023232 | 7 | 41.765 | KV453000.1 | 1388091 | 11-scf00159 | 11 |
| AX-157820974 | 7 | 41.765 | KV453000.1 | 1388328 | 11-scf00159 | 11 |
| AX-158023235 | 7 | 41.765 | KV453000.1 | 1389862 | 11-scf00159 | 11 |
| AX-158023239 | 7 | 41.765 | KV453000.1 | 1391690 | 11-scf00159 | 11 |
| AX-158023242 | 7 | 41.765 | KV453000.1 | 1392380 | 11-scf00159 | 11 |
| AX-158023244 | 7 | 41.765 | KV453000.1 | 1392956 | 11-scf00159 | 11 |
| AX-158023245 | 7 | 41.765 | KV453000.1 | 1393081 | 11-scf00159 | 11 |
| AX-158023246 | 7 | 41.765 | KV453000.1 | 1394048 | 11-scf00159 | 11 |
| AX-158023247 | 7 | 41.765 | KV453000.1 | 1394998 | 11-scf00159 | 11 |
| AX-158023249 | 7 | 41.765 | KV453000.1 | 1396236 | 11-scf00159 | 11 |
| AX-158023250 | 7 | 41.765 | KV453000.1 | 1397049 | 11-scf00159 | 11 |
| AX-158023252 | 7 | 41.765 | KV453000.1 | 1397877 | 11-scf00159 | 11 |
| AX-158023258 | 7 | 41.765 | KV453000.1 | 1405462 | 11-scf00159 | 11 |
| AX-158023260 | 7 | 41.765 | KV453000.1 | 1406039 | 11-scf00159 | 11 |
| AX-158023261 | 7 | 41.765 | KV453000.1 | 1407825 | 11-scf00159 | 11 |
| AX-158379746 | 7 | 41.765 | KV453000.1 | 1436657 | 11-scf00159 | 11 |
| AX-158023292 | 7 | 41.765 | KV453000.1 | 1450308 | 11-scf00159 | 11 |
| AX-158023316 | 7 | 41.765 | KV453000.1 | 1477170 | 11-scf00159 | 11 |
| AX-158023317 | 7 | 41.765 | KV453000.1 | 1478223 | 11-scf00159 | 11 |
| AX-158023321 | 7 | 41.765 | KV453000.1 | 1480219 | 11-scf00159 | 11 |
| AX-158023323 | 7 | 41.765 | KV453000.1 | 1480886 | 11-scf00159 | 11 |
| AX-158023329 | 7 | 41.765 | KV453000.1 | 1488288 | 11-scf00159 | 11 |
| AX-157718388 | 7 | 41.765 | KV453000.1 | 1492732 | 11-scf00159 | 11 |
| AX-158023334 | 7 | 41.765 | KV453000.1 | 1496709 | 11-scf00159 | 11 |
| AX-158023335 | 7 | 41.765 | KV453000.1 | 1501682 | 11-scf00159 | 11 |
| AX-158023336 | 7 | 41.765 | KV453000.1 | 1502013 | 11-scf00159 | 11 |
| AX-158023337 | 7 | 41.765 | KV453000.1 | 1503366 | 11-scf00159 | 11 |
| AX-158023338 | 7 | 41.765 | KV453000.1 | 1504673 | 11-scf00159 | 11 |
| AX-158023341 | 7 | 41.765 | KV453000.1 | 1517058 | 11-scf00159 | 11 |
| AX-158023342 | 7 | 41.765 | KV453000.1 | 1519402 | 11-scf00159 | 11 |
| AX-158023343 | 7 | 41.765 | KV453000.1 | 1519782 | 11-scf00159 | 11 |
| AX-158023345 | 7 | 41.765 | KV453000.1 | 1521184 | 11-scf00159 | 11 |
| AX-158023348 | 7 | 41.765 | KV453000.1 | 1524081 | 11-scf00159 | 11 |
| AX-158023351 | 7 | 41.765 | KV453000.1 | 1528496 | 11-scf00159 | 11 |
| AX-158023353 | 7 | 41.765 | KV453000.1 | 1531081 | 11-scf00159 | 11 |
| AX-158023358 | 7 | 41.765 | KV453000.1 | 1537833 | 11-scf00159 | 11 |
| AX-158023365 | 7 | 41.765 | KV453000.1 | 1548452 | 11-scf00159 | 11 |
| AX-158023373 | 7 | 41.765 | KV453000.1 | 1557248 | 11-scf00159 | 11 |
| AX-158023380 | 7 | 41.765 | KV453000.1 | 1572654 | 11-scf00159 | 11 |
| AX-158023384 | 7 | 41.765 | KV453000.1 | 1582082 | 11-scf00159 | 11 |
| AX-158023385 | 7 | 41.765 | KV453000.1 | 1584596 | 11-scf00159 | 11 |
| AX-157751543 | 7 | 41.765 | KV453000.1 | 1604549 | 11-scf00159 | 11 |
| AX-158023397 | 7 | 41.765 | KV453000.1 | 1606234 | 11-scf00159 | 11 |
| AX-157820975 | 7 | 41.765 | KV453000.1 | 1608557 | 11-scf00159 | 11 |
| AX-158023399 | 7 | 41.765 | KV453000.1 | 1610527 | 11-scf00159 | 11 |
| AX-158023401 | 7 | 41.765 | KV453000.1 | 1612251 | 11-scf00159 | 11 |
| AX-158023408 | 7 | 41.765 | KV453000.1 | 1631471 | 11-scf00159 | 11 |
| AX-158023416 | 7 | 41.765 | KV453000.1 | 1642546 | 11-scf00159 | 11 |
| AX-158023417 | 7 | 41.765 | KV453000.1 | 1644566 | 11-scf00159 | 11 |
| AX-158023421 | 7 | 41.765 | KV453000.1 | 1650942 | 11-scf00159 | 11 |
| AX-158023422 | 7 | 41.765 | KV453000.1 | 1652666 | 11-scf00159 | 11 |

|              |   |        |            |         |             |    |
|--------------|---|--------|------------|---------|-------------|----|
| AX-158023423 | 7 | 41.765 | KV453000.1 | 1653405 | 11-scf00159 | 11 |
| AX-158023425 | 7 | 41.765 | KV453000.1 | 1653894 | 11-scf00159 | 11 |
| AX-157722563 | 7 | 41.765 | KV453000.1 | 1654847 | 11-scf00159 | 11 |
| AX-158023427 | 7 | 41.765 | KV453000.1 | 1656153 | 11-scf00159 | 11 |
| AX-158023430 | 7 | 41.765 | KV453000.1 | 1657954 | 11-scf00159 | 11 |
| AX-158023431 | 7 | 41.765 | KV453000.1 | 1659901 | 11-scf00159 | 11 |
| AX-158023432 | 7 | 41.765 | KV453000.1 | 1660902 | 11-scf00159 | 11 |
| AX-158023445 | 7 | 41.765 | KV453000.1 | 1679887 | 11-scf00159 | 11 |
| AX-158023454 | 7 | 41.765 | KV453000.1 | 1696242 | 11-scf00159 | 11 |
| AX-158023457 | 7 | 41.765 | KV453000.1 | 1703260 | 11-scf00159 | 11 |
| AX-158023458 | 7 | 41.765 | KV453000.1 | 1704308 | 11-scf00159 | 11 |
| AX-158023460 | 7 | 41.765 | KV453000.1 | 1705155 | 11-scf00159 | 11 |
| AX-158023464 | 7 | 41.765 | KV453000.1 | 1707395 | 11-scf00159 | 11 |
| AX-158023465 | 7 | 41.765 | KV453000.1 | 1708082 | 11-scf00159 | 11 |
| AX-158023466 | 7 | 41.765 | KV453000.1 | 1708731 | 11-scf00159 | 11 |
| AX-158023467 | 7 | 41.765 | KV453000.1 | 1709758 | 11-scf00159 | 11 |
| AX-158023469 | 7 | 41.765 | KV453000.1 | 1710755 | 11-scf00159 | 11 |
| AX-157884995 | 7 | 41.765 | KV453000.1 | 1711043 | 11-scf00159 | 11 |
| AX-158023471 | 7 | 41.765 | KV453000.1 | 1713407 | 11-scf00159 | 11 |
| AX-158023472 | 7 | 41.765 | KV453000.1 | 1714381 | 11-scf00159 | 11 |
| AX-158023476 | 7 | 41.765 | KV453000.1 | 1719301 | 11-scf00159 | 11 |
| AX-158023479 | 7 | 41.765 | KV453000.1 | 1720081 | 11-scf00159 | 11 |
| AX-158023485 | 7 | 41.765 | KV453000.1 | 1725506 | 11-scf00159 | 11 |
| AX-158023488 | 7 | 41.765 | KV453000.1 | 1727086 | 11-scf00159 | 11 |
| AX-158023491 | 7 | 41.765 | KV453000.1 | 1728543 | 11-scf00159 | 11 |
| AX-158023495 | 7 | 41.765 | KV453000.1 | 1732977 | 11-scf00159 | 11 |
| AX-158023497 | 7 | 41.765 | KV453000.1 | 1735517 | 11-scf00159 | 11 |
| AX-158023498 | 7 | 41.765 | KV453000.1 | 1736475 | 11-scf00159 | 11 |
| AX-158023500 | 7 | 41.765 | KV453000.1 | 1739058 | 11-scf00159 | 11 |
| AX-158023502 | 7 | 41.765 | KV453000.1 | 1740352 | 11-scf00159 | 11 |
| AX-158023503 | 7 | 41.765 | KV453000.1 | 1742184 | 11-scf00159 | 11 |
| AX-158023504 | 7 | 41.765 | KV453000.1 | 1742876 | 11-scf00159 | 11 |
| AX-158023505 | 7 | 41.765 | KV453000.1 | 1745365 | 11-scf00159 | 11 |
| AX-157701772 | 7 | 41.765 | KV453000.1 | 1745933 | 11-scf00159 | 11 |
| AX-158023508 | 7 | 41.765 | KV453000.1 | 1748062 | 11-scf00159 | 11 |
| AX-158023510 | 7 | 41.765 | KV453000.1 | 1750102 | 11-scf00159 | 11 |
| AX-157755365 | 7 | 41.765 | KV453000.1 | 1750815 | 11-scf00159 | 11 |
| AX-158023518 | 7 | 41.765 | KV453000.1 | 1761407 | 11-scf00159 | 11 |
| AX-158023521 | 7 | 41.765 | KV453000.1 | 1763222 | 11-scf00159 | 11 |
| AX-158023522 | 7 | 41.765 | KV453000.1 | 1766563 | 11-scf00159 | 11 |
| AX-158023527 | 7 | 41.765 | KV453000.1 | 1783340 | 11-scf00159 | 11 |
| AX-158023528 | 7 | 41.765 | KV453000.1 | 1784439 | 11-scf00159 | 11 |
| AX-158023530 | 7 | 41.765 | KV453000.1 | 1784923 | 11-scf00159 | 11 |
| AX-158023531 | 7 | 41.765 | KV453000.1 | 1789064 | 11-scf00159 | 11 |
| AX-158023538 | 7 | 41.765 | KV453000.1 | 1819262 | 11-scf00159 | 11 |
| AX-158023541 | 7 | 41.765 | KV453000.1 | 1822539 | 11-scf00159 | 11 |
| AX-158023542 | 7 | 41.765 | KV453000.1 | 1824161 | 11-scf00159 | 11 |
| AX-158023543 | 7 | 41.765 | KV453000.1 | 1827573 | 11-scf00159 | 11 |
| AX-158023544 | 7 | 41.765 | KV453000.1 | 1830098 | 11-scf00159 | 11 |
| AX-158023546 | 7 | 41.765 | KV453000.1 | 1832618 | 11-scf00159 | 11 |
| AX-158023548 | 7 | 41.765 | KV453000.1 | 1833886 | 11-scf00159 | 11 |

|              |   |        |            |         |             |    |
|--------------|---|--------|------------|---------|-------------|----|
| AX-158023549 | 7 | 41.765 | KV453000.1 | 1834364 | 11-scf00159 | 11 |
| AX-157773902 | 7 | 41.765 | KV453000.1 | 1836756 | 11-scf00159 | 11 |
| AX-158023552 | 7 | 41.765 | KV453000.1 | 1842863 | 11-scf00159 | 11 |
| AX-158023553 | 7 | 41.765 | KV453000.1 | 1843237 | 11-scf00159 | 11 |
| AX-158023555 | 7 | 41.765 | KV453000.1 | 1843618 | 11-scf00159 | 11 |
| AX-158023557 | 7 | 41.765 | KV453000.1 | 1847241 | 11-scf00159 | 11 |
| AX-158023559 | 7 | 41.765 | KV453000.1 | 1853997 | 11-scf00159 | 11 |
| AX-158023562 | 7 | 41.765 | KV453000.1 | 1858718 | 11-scf00159 | 11 |
| AX-158023563 | 7 | 41.765 | KV453000.1 | 1859423 | 11-scf00159 | 11 |
| AX-158408087 | 7 | 41.765 | KV453000.1 | 1865203 | 11-scf00159 | 11 |
| AX-158023565 | 7 | 41.765 | KV453000.1 | 1882073 | 11-scf00159 | 11 |
| AX-158023587 | 7 | 41.765 | KV453000.1 | 1903830 | 11-scf00159 | 11 |
| AX-158379747 | 7 | 41.765 | KV453000.1 | 1915302 | 11-scf00159 | 11 |
| AX-158023612 | 7 | 41.765 | KV453000.1 | 1934815 | 11-scf00159 | 11 |
| AX-158023615 | 7 | 41.765 | KV453000.1 | 1937255 | 11-scf00159 | 11 |
| AX-158023621 | 7 | 41.765 | KV453000.1 | 1941374 | 11-scf00159 | 11 |
| AX-158023622 | 7 | 41.765 | KV453000.1 | 1942215 | 11-scf00159 | 11 |
| AX-158023630 | 7 | 41.765 | KV453000.1 | 1953170 | 11-scf00159 | 11 |
| AX-157740709 | 7 | 41.765 | KV453000.1 | 1955570 | 11-scf00159 | 11 |
| AX-158023649 | 7 | 41.765 | KV453000.1 | 1968393 | 11-scf00159 | 11 |
| AX-158023654 | 7 | 41.765 | KV453000.1 | 1971383 | 11-scf00159 | 11 |
| AX-158023658 | 7 | 41.765 | KV453000.1 | 1979039 | 11-scf00159 | 11 |
| AX-158023661 | 7 | 41.765 | KV453000.1 | 1983234 | 11-scf00159 | 11 |
| AX-158023667 | 7 | 41.765 | KV453000.1 | 1990206 | 11-scf00159 | 11 |
| AX-158023674 | 7 | 41.765 | KV453000.1 | 1998644 | 11-scf00159 | 11 |
| AX-158023675 | 7 | 41.765 | KV453000.1 | 1999660 | 11-scf00159 | 11 |
| AX-158023677 | 7 | 41.765 | KV453000.1 | 2001582 | 11-scf00159 | 11 |
| AX-158023687 | 7 | 41.765 | KV453000.1 | 2008576 | 11-scf00159 | 11 |
| AX-158023690 | 7 | 41.765 | KV453000.1 | 2010489 | 11-scf00159 | 11 |
| AX-158023691 | 7 | 41.765 | KV453000.1 | 2013107 | 11-scf00159 | 11 |
| AX-158023692 | 7 | 41.765 | KV453000.1 | 2013774 | 11-scf00159 | 11 |
| AX-158023722 | 7 | 41.765 | KV453000.1 | 2071291 | 11-scf00159 | 11 |
| AX-158023731 | 7 | 41.765 | KV453000.1 | 2074895 | 11-scf00159 | 11 |
| AX-158023758 | 7 | 41.765 | KV453000.1 | 2109177 | 11-scf00159 | 11 |
| AX-158023760 | 7 | 41.765 | KV453000.1 | 2112378 | 11-scf00159 | 11 |
| AX-158023762 | 7 | 41.765 | KV453000.1 | 2115635 | 11-scf00159 | 11 |
| AX-158023764 | 7 | 41.765 | KV453000.1 | 2121943 | 11-scf00159 | 11 |
| AX-158023765 | 7 | 41.765 | KV453000.1 | 2134266 | 11-scf00159 | 11 |
| AX-158023769 | 7 | 41.765 | KV453000.1 | 2136034 | 11-scf00159 | 11 |
| AX-158023774 | 7 | 41.765 | KV453000.1 | 2149072 | 11-scf00159 | 11 |
| AX-158023775 | 7 | 41.765 | KV453000.1 | 2151567 | 11-scf00159 | 11 |
| AX-158023780 | 7 | 41.765 | KV453000.1 | 2159062 | 11-scf00159 | 11 |
| AX-158023782 | 7 | 41.765 | KV453000.1 | 2159859 | 11-scf00159 | 11 |
| AX-158023806 | 7 | 41.765 | KV453000.1 | 2183906 | 11-scf00159 | 11 |
| AX-158023807 | 7 | 41.765 | KV453000.1 | 2185623 | 11-scf00159 | 11 |
| AX-158023816 | 7 | 41.765 | KV453000.1 | 2191838 | 11-scf00159 | 11 |
| AX-158023853 | 7 | 41.765 | KV453000.1 | 2232587 | 11-scf00159 | 11 |
| AX-158023855 | 7 | 41.765 | KV453000.1 | 2232890 | 11-scf00159 | 11 |
| AX-158023856 | 7 | 41.765 | KV453000.1 | 2233524 | 11-scf00159 | 11 |
| AX-158023890 | 7 | 41.765 | KV453000.1 | 2265907 | 11-scf00159 | 11 |
| AX-158023899 | 7 | 41.765 | KV453000.1 | 2272008 | 11-scf00159 | 11 |

|              |   |        |            |         |                |    |
|--------------|---|--------|------------|---------|----------------|----|
| AX-158023922 | 7 | 41.765 | KV453000.1 | 2292996 | 11-scf00159    | 11 |
| AX-158023925 | 7 | 41.765 | KV453000.1 | 2295319 | 11-scf00159    | 11 |
| AX-158023930 | 7 | 41.765 | KV453000.1 | 2302417 | 11-scf00159    | 11 |
| AX-158383785 | 7 | 41.765 | KV453000.1 | 2310445 | 11-scf00159    | 11 |
| AX-158023950 | 7 | 41.765 | KV453000.1 | 2315970 | 11-scf00159    | 11 |
| AX-157696911 | 7 | 41.765 | FI881849.1 | 98      | 10RI212 lctalt | UN |
| AX-158023815 | 7 | 41.783 | KV453000.1 | 2190702 | 11-scf00159    | 11 |
| AX-158022522 | 7 | 41.801 | KV453000.1 | 582410  | 11-scf00159    | 11 |
| AX-158022648 | 7 | 41.801 | KV453000.1 | 689213  | 11-scf00159    | 11 |
| AX-158022807 | 7 | 41.801 | KV453000.1 | 880282  | 11-scf00159    | 11 |
| AX-157884991 | 7 | 41.801 | KV453000.1 | 1043791 | 11-scf00159    | 11 |
| AX-157820967 | 7 | 41.801 | KV453000.1 | 1152184 | 11-scf00159    | 11 |
| AX-158408070 | 7 | 41.801 | KV453000.1 | 1156351 | 11-scf00159    | 11 |
| AX-157772627 | 7 | 41.801 | KV453000.1 | 1938723 | 11-scf00159    | 11 |
| AX-158023624 | 7 | 41.801 | KV453000.1 | 1944721 | 11-scf00159    | 11 |
| AX-158023672 | 7 | 41.801 | KV453000.1 | 1995285 | 11-scf00159    | 11 |
| AX-158023676 | 7 | 41.801 | KV453000.1 | 2000492 | 11-scf00159    | 11 |
| AX-157884996 | 7 | 41.801 | KV453000.1 | 2214566 | 11-scf00159    | 11 |
| AX-158023842 | 7 | 41.801 | KV453000.1 | 2215444 | 11-scf00159    | 11 |
| AX-158023843 | 7 | 41.801 | KV453000.1 | 2215748 | 11-scf00159    | 11 |
| AX-158023845 | 7 | 41.801 | KV453000.1 | 2225158 | 11-scf00159    | 11 |
| AX-158416055 | 7 | 41.801 | KV453000.1 | 2250400 | 11-scf00159    | 11 |
| AX-158023873 | 7 | 41.801 | KV453000.1 | 2251284 | 11-scf00159    | 11 |
| AX-158023878 | 7 | 41.801 | KV453000.1 | 2256664 | 11-scf00159    | 11 |
| AX-158023883 | 7 | 41.801 | KV453000.1 | 2261912 | 11-scf00159    | 11 |
| AX-158023891 | 7 | 41.801 | KV453000.1 | 2267738 | 11-scf00159    | 11 |
| AX-158023945 | 7 | 41.801 | KV453000.1 | 2311237 | 11-scf00159    | 11 |
| AX-158023848 | 7 | 41.821 | KV453000.1 | 2226761 | 11-scf00159    | 11 |
| AX-158023861 | 7 | 41.837 | KV453000.1 | 2237481 | 11-scf00159    | 11 |
| AX-158023863 | 7 | 41.837 | KV453000.1 | 2238395 | 11-scf00159    | 11 |
| AX-158023875 | 7 | 41.874 | KV453000.1 | 2253486 | 11-scf00159    | 11 |
| AX-158023849 | 7 | 41.983 | KV453000.1 | 2230161 | 11-scf00159    | 11 |
| AX-158023887 | 7 | 41.983 | KV453000.1 | 2264636 | 11-scf00159    | 11 |
| AX-158023896 | 7 | 41.983 | KV453000.1 | 2269455 | 11-scf00159    | 11 |
| AX-158023907 | 7 | 41.983 | KV453000.1 | 2279371 | 11-scf00159    | 11 |
| AX-158023908 | 7 | 41.983 | KV453000.1 | 2281027 | 11-scf00159    | 11 |
| AX-158023911 | 7 | 41.983 | KV453000.1 | 2282771 | 11-scf00159    | 11 |
| AX-158023912 | 7 | 41.983 | KV453000.1 | 2283505 | 11-scf00159    | 11 |
| AX-158023915 | 7 | 41.983 | KV453000.1 | 2285244 | 11-scf00159    | 11 |
| AX-158023918 | 7 | 41.983 | KV453000.1 | 2289318 | 11-scf00159    | 11 |
| AX-158023921 | 7 | 41.983 | KV453000.1 | 2291793 | 11-scf00159    | 11 |
| AX-158023939 | 7 | 42.092 | KV453000.1 | 2308365 | 11-scf00159    | 11 |
| AX-158023940 | 7 | 42.142 | KV453000.1 | 2308941 | 11-scf00159    | 11 |
| AX-158023947 | 7 | 42.202 | KV453000.1 | 2313739 | 11-scf00159    | 11 |
| AX-158023960 | 7 | 42.202 | KV453000.1 | 2326961 | 11-scf00159    | 11 |
| AX-158023961 | 7 | 42.202 | KV453000.1 | 2327481 | 11-scf00159    | 11 |
| AX-158023964 | 7 | 42.202 | KV453000.1 | 2327962 | 11-scf00159    | 11 |
| AX-158023968 | 7 | 42.202 | KV453000.1 | 2330268 | 11-scf00159    | 11 |
| AX-158023969 | 7 | 42.202 | KV453000.1 | 2331213 | 11-scf00159    | 11 |
| AX-158383788 | 7 | 42.202 | KV453000.1 | 2332750 | 11-scf00159    | 11 |
| AX-158023979 | 7 | 42.202 | KV453000.1 | 2341428 | 11-scf00159    | 11 |

|              |   |        |            |         |             |    |
|--------------|---|--------|------------|---------|-------------|----|
| AX-158023985 | 7 | 42.202 | KV453000.1 | 2346460 | 11-scf00159 | 11 |
| AX-158023987 | 7 | 42.202 | KV453000.1 | 2348039 | 11-scf00159 | 11 |
| AX-158024008 | 7 | 42.202 | KV453000.1 | 2368838 | 11-scf00159 | 11 |
| AX-158024024 | 7 | 42.202 | KV453000.1 | 2386757 | 11-scf00159 | 11 |
| AX-158416058 | 7 | 42.348 | KV453000.1 | 2351663 | 11-scf00159 | 11 |
| AX-158023997 | 7 | 42.457 | KV453000.1 | 2360129 | 11-scf00159 | 11 |
| AX-158024005 | 7 | 42.457 | KV453000.1 | 2367035 | 11-scf00159 | 11 |
| AX-158024006 | 7 | 42.457 | KV453000.1 | 2368454 | 11-scf00159 | 11 |
| AX-157820984 | 7 | 42.457 | KV453000.1 | 2370176 | 11-scf00159 | 11 |
| AX-158024014 | 7 | 42.638 | KV453000.1 | 2375640 | 11-scf00159 | 11 |
| AX-158023786 | 7 | 42.712 | KV453000.1 | 2167787 | 11-scf00159 | 11 |
| AX-158023996 | 7 | 42.712 | KV453000.1 | 2358852 | 11-scf00159 | 11 |
| AX-158024009 | 7 | 42.712 | KV453000.1 | 2371760 | 11-scf00159 | 11 |
| AX-158024015 | 7 | 42.712 | KV453000.1 | 2376201 | 11-scf00159 | 11 |
| AX-158024020 | 7 | 42.712 | KV453000.1 | 2378431 | 11-scf00159 | 11 |
| AX-158024021 | 7 | 42.712 | KV453000.1 | 2381393 | 11-scf00159 | 11 |
| AX-157699844 | 7 | 42.712 | KV453000.1 | 2384471 | 11-scf00159 | 11 |
| AX-157820985 | 7 | 42.712 | KV453000.1 | 2387592 | 11-scf00159 | 11 |
| AX-158024028 | 7 | 42.712 | KV453000.1 | 2390873 | 11-scf00159 | 11 |
| AX-158024039 | 7 | 42.712 | KV453000.1 | 2399916 | 11-scf00159 | 11 |
| AX-158024041 | 7 | 42.967 | KV453000.1 | 2404105 | 11-scf00159 | 11 |
| AX-158024042 | 7 | 42.967 | KV453000.1 | 2404362 | 11-scf00159 | 11 |
| AX-158024044 | 7 | 42.967 | KV453000.1 | 2406505 | 11-scf00159 | 11 |
| AX-158024056 | 7 | 42.967 | KV453000.1 | 2408514 | 11-scf00159 | 11 |
| AX-158024057 | 7 | 42.967 | KV453000.1 | 2408757 | 11-scf00159 | 11 |
| AX-158024059 | 7 | 42.967 | KV453000.1 | 2408990 | 11-scf00159 | 11 |
| AX-158024061 | 7 | 42.967 | KV453000.1 | 2410694 | 11-scf00159 | 11 |
| AX-158024064 | 7 | 42.967 | KV453000.1 | 2412075 | 11-scf00159 | 11 |
| AX-158024070 | 7 | 42.967 | KV453000.1 | 2414939 | 11-scf00159 | 11 |
| AX-158024074 | 7 | 42.967 | KV453000.1 | 2416172 | 11-scf00159 | 11 |
| AX-158024090 | 7 | 42.967 | KV453000.1 | 2430871 | 11-scf00159 | 11 |
| AX-158024095 | 7 | 42.967 | KV453000.1 | 2434172 | 11-scf00159 | 11 |
| AX-157746851 | 7 | 42.967 | KV453000.1 | 2475575 | 11-scf00159 | 11 |
| AX-158024161 | 7 | 42.967 | KV453000.1 | 2515530 | 11-scf00159 | 11 |
| AX-158023995 | 7 | 43.186 | KV453000.1 | 2357518 | 11-scf00159 | 11 |
| AX-158024080 | 7 | 43.186 | KV453000.1 | 2419011 | 11-scf00159 | 11 |
| AX-158024081 | 7 | 43.186 | KV453000.1 | 2420288 | 11-scf00159 | 11 |
| AX-158024220 | 7 | 43.196 | KV453000.1 | 2550037 | 11-scf00159 | 11 |
| AX-158024092 | 7 | 43.225 | KV453000.1 | 2431672 | 11-scf00159 | 11 |
| AX-158024096 | 7 | 43.252 | KV453000.1 | 2434484 | 11-scf00159 | 11 |
| AX-158024099 | 7 | 43.281 | KV453000.1 | 2435870 | 11-scf00159 | 11 |
| AX-158024117 | 7 | 43.281 | KV453000.1 | 2460535 | 11-scf00159 | 11 |
| AX-158024221 | 7 | 43.281 | KV453000.1 | 2550355 | 11-scf00159 | 11 |
| AX-158024098 | 7 | 43.295 | KV453000.1 | 2435087 | 11-scf00159 | 11 |
| AX-157820989 | 7 | 43.295 | KV453000.1 | 2437377 | 11-scf00159 | 11 |
| AX-158024109 | 7 | 43.295 | KV453000.1 | 2446158 | 11-scf00159 | 11 |
| AX-158024112 | 7 | 43.295 | KV453000.1 | 2449772 | 11-scf00159 | 11 |
| AX-158024113 | 7 | 43.295 | KV453000.1 | 2452491 | 11-scf00159 | 11 |
| AX-158379749 | 7 | 43.344 | KV453000.1 | 2463228 | 11-scf00159 | 11 |
| AX-158024086 | 7 | 43.404 | KV453000.1 | 2429353 | 11-scf00159 | 11 |
| AX-158024089 | 7 | 43.404 | KV453000.1 | 2429763 | 11-scf00159 | 11 |

|              |   |        |            |         |             |    |
|--------------|---|--------|------------|---------|-------------|----|
| AX-157749908 | 7 | 43.404 | KV453000.1 | 2466683 | 11-scf00159 | 11 |
| AX-157715082 | 7 | 43.404 | KV453000.1 | 2468615 | 11-scf00159 | 11 |
| AX-157820994 | 7 | 43.404 | KV453000.1 | 2471517 | 11-scf00159 | 11 |
| AX-158024123 | 7 | 43.404 | KV453000.1 | 2477809 | 11-scf00159 | 11 |
| AX-158024125 | 7 | 43.404 | KV453000.1 | 2479991 | 11-scf00159 | 11 |
| AX-158024128 | 7 | 43.404 | KV453000.1 | 2483187 | 11-scf00159 | 11 |
| AX-158024131 | 7 | 43.404 | KV453000.1 | 2484562 | 11-scf00159 | 11 |
| AX-157775910 | 7 | 43.404 | KV453000.1 | 2485028 | 11-scf00159 | 11 |
| AX-158024132 | 7 | 43.404 | KV453000.1 | 2485360 | 11-scf00159 | 11 |
| AX-157774898 | 7 | 43.404 | KV453000.1 | 2486065 | 11-scf00159 | 11 |
| AX-157756990 | 7 | 43.404 | KV453000.1 | 2493894 | 11-scf00159 | 11 |
| AX-157820998 | 7 | 43.404 | KV453000.1 | 2499127 | 11-scf00159 | 11 |
| AX-157821022 | 7 | 43.404 | KV453000.1 | 2678743 | 11-scf00159 | 11 |
| AX-158024134 | 7 | 43.466 | KV453000.1 | 2486797 | 11-scf00159 | 11 |
| AX-158024139 | 7 | 43.513 | KV453000.1 | 2498065 | 11-scf00159 | 11 |
| AX-157713706 | 7 | 43.513 | KV453000.1 | 2501756 | 11-scf00159 | 11 |
| AX-158024152 | 7 | 43.542 | KV453000.1 | 2508772 | 11-scf00159 | 11 |
| AX-158024149 | 7 | 43.587 | KV453000.1 | 2507431 | 11-scf00159 | 11 |
| AX-158024158 | 7 | 43.587 | KV453000.1 | 2513551 | 11-scf00159 | 11 |
| AX-158024122 | 7 | 43.623 | KV453000.1 | 2475638 | 11-scf00159 | 11 |
| AX-158024141 | 7 | 43.623 | KV453000.1 | 2499374 | 11-scf00159 | 11 |
| AX-158024159 | 7 | 43.623 | KV453000.1 | 2514198 | 11-scf00159 | 11 |
| AX-158024160 | 7 | 43.623 | KV453000.1 | 2515034 | 11-scf00159 | 11 |
| AX-158024167 | 7 | 43.623 | KV453000.1 | 2518426 | 11-scf00159 | 11 |
| AX-158024171 | 7 | 43.623 | KV453000.1 | 2521810 | 11-scf00159 | 11 |
| AX-158024176 | 7 | 43.623 | KV453000.1 | 2524868 | 11-scf00159 | 11 |
| AX-158024180 | 7 | 43.623 | KV453000.1 | 2527257 | 11-scf00159 | 11 |
| AX-158024195 | 7 | 43.623 | KV453000.1 | 2537764 | 11-scf00159 | 11 |
| AX-158024198 | 7 | 43.623 | KV453000.1 | 2538614 | 11-scf00159 | 11 |
| AX-158024199 | 7 | 43.623 | KV453000.1 | 2539764 | 11-scf00159 | 11 |
| AX-157752326 | 7 | 43.623 | KV453000.1 | 2540033 | 11-scf00159 | 11 |
| AX-158024200 | 7 | 43.623 | KV453000.1 | 2540287 | 11-scf00159 | 11 |
| AX-158024204 | 7 | 43.623 | KV453000.1 | 2540910 | 11-scf00159 | 11 |
| AX-158024205 | 7 | 43.623 | KV453000.1 | 2541383 | 11-scf00159 | 11 |
| AX-158024208 | 7 | 43.623 | KV453000.1 | 2542498 | 11-scf00159 | 11 |
| AX-158024210 | 7 | 43.623 | KV453000.1 | 2542732 | 11-scf00159 | 11 |
| AX-158024213 | 7 | 43.623 | KV453000.1 | 2544347 | 11-scf00159 | 11 |
| AX-158024215 | 7 | 43.623 | KV453000.1 | 2546407 | 11-scf00159 | 11 |
| AX-157751244 | 7 | 43.623 | KV453000.1 | 2548351 | 11-scf00159 | 11 |
| AX-157738304 | 7 | 43.623 | KV453000.1 | 2548773 | 11-scf00159 | 11 |
| AX-157821003 | 7 | 43.623 | KV453000.1 | 2548987 | 11-scf00159 | 11 |
| AX-158024218 | 7 | 43.623 | KV453000.1 | 2549586 | 11-scf00159 | 11 |
| AX-158024223 | 7 | 43.623 | KV453000.1 | 2551230 | 11-scf00159 | 11 |
| AX-157742854 | 7 | 43.623 | KV453000.1 | 2551538 | 11-scf00159 | 11 |
| AX-158024229 | 7 | 43.623 | KV453000.1 | 2557557 | 11-scf00159 | 11 |
| AX-158408097 | 7 | 43.623 | KV453000.1 | 2559775 | 11-scf00159 | 11 |
| AX-158024235 | 7 | 43.623 | KV453000.1 | 2561155 | 11-scf00159 | 11 |
| AX-158024240 | 7 | 43.623 | KV453000.1 | 2565412 | 11-scf00159 | 11 |
| AX-158024243 | 7 | 43.623 | KV453000.1 | 2573767 | 11-scf00159 | 11 |
| AX-158024244 | 7 | 43.623 | KV453000.1 | 2574251 | 11-scf00159 | 11 |
| AX-158024245 | 7 | 43.623 | KV453000.1 | 2575147 | 11-scf00159 | 11 |

|              |   |        |            |         |             |    |
|--------------|---|--------|------------|---------|-------------|----|
| AX-157821007 | 7 | 43.623 | KV453000.1 | 2576327 | 11-scf00159 | 11 |
| AX-158024248 | 7 | 43.623 | KV453000.1 | 2576693 | 11-scf00159 | 11 |
| AX-157821009 | 7 | 43.623 | KV453000.1 | 2577185 | 11-scf00159 | 11 |
| AX-158024348 | 7 | 43.623 | KV453000.1 | 2689952 | 11-scf00159 | 11 |
| AX-158024261 | 7 | 43.841 | KV453000.1 | 2604056 | 11-scf00159 | 11 |
| AX-158024264 | 7 | 43.841 | KV453000.1 | 2608606 | 11-scf00159 | 11 |
| AX-158024267 | 7 | 43.841 | KV453000.1 | 2613737 | 11-scf00159 | 11 |
| AX-158024272 | 7 | 43.95  | KV453000.1 | 2620895 | 11-scf00159 | 11 |
| AX-158024273 | 7 | 43.95  | KV453000.1 | 2622762 | 11-scf00159 | 11 |
| AX-158024278 | 7 | 43.95  | KV453000.1 | 2625351 | 11-scf00159 | 11 |
| AX-157742112 | 7 | 43.95  | KV453000.1 | 2682657 | 11-scf00159 | 11 |
| AX-158024281 | 7 | 43.986 | KV453000.1 | 2626497 | 11-scf00159 | 11 |
| AX-158406079 | 7 | 43.986 | KV453000.1 | 2635315 | 11-scf00159 | 11 |
| AX-158024283 | 7 | 44.016 | KV453000.1 | 2627415 | 11-scf00159 | 11 |
| AX-158024270 | 7 | 44.059 | KV453000.1 | 2618286 | 11-scf00159 | 11 |
| AX-157757020 | 7 | 44.059 | KV453000.1 | 2619894 | 11-scf00159 | 11 |
| AX-158024275 | 7 | 44.059 | KV453000.1 | 2623849 | 11-scf00159 | 11 |
| AX-158024285 | 7 | 44.059 | KV453000.1 | 2629206 | 11-scf00159 | 11 |
| AX-158408100 | 7 | 44.059 | KV453000.1 | 2635350 | 11-scf00159 | 11 |
| AX-157741941 | 7 | 44.059 | KV453000.1 | 2639269 | 11-scf00159 | 11 |
| AX-157748195 | 7 | 44.059 | KV453000.1 | 2647081 | 11-scf00159 | 11 |
| AX-157821017 | 7 | 44.059 | KV453000.1 | 2648816 | 11-scf00159 | 11 |
| AX-158024303 | 7 | 44.059 | KV453000.1 | 2650735 | 11-scf00159 | 11 |
| AX-158024307 | 7 | 44.059 | KV453000.1 | 2655132 | 11-scf00159 | 11 |
| AX-158024310 | 7 | 44.059 | KV453000.1 | 2655832 | 11-scf00159 | 11 |
| AX-157743707 | 7 | 44.059 | KV453000.1 | 2656312 | 11-scf00159 | 11 |
| AX-157821019 | 7 | 44.059 | KV453000.1 | 2657372 | 11-scf00159 | 11 |
| AX-158024314 | 7 | 44.059 | KV453000.1 | 2659169 | 11-scf00159 | 11 |
| AX-158408101 | 7 | 44.059 | KV453000.1 | 2660422 | 11-scf00159 | 11 |
| AX-158024320 | 7 | 44.059 | KV453000.1 | 2665326 | 11-scf00159 | 11 |
| AX-158024321 | 7 | 44.059 | KV453000.1 | 2665582 | 11-scf00159 | 11 |
| AX-158024323 | 7 | 44.059 | KV453000.1 | 2666762 | 11-scf00159 | 11 |
| AX-158024324 | 7 | 44.059 | KV453000.1 | 2667339 | 11-scf00159 | 11 |
| AX-158024326 | 7 | 44.059 | KV453000.1 | 2668648 | 11-scf00159 | 11 |
| AX-158024329 | 7 | 44.059 | KV453000.1 | 2671058 | 11-scf00159 | 11 |
| AX-158024332 | 7 | 44.059 | KV453000.1 | 2673426 | 11-scf00159 | 11 |
| AX-157821024 | 7 | 44.059 | KV453000.1 | 2683388 | 11-scf00159 | 11 |
| AX-158024339 | 7 | 44.059 | KV453000.1 | 2685111 | 11-scf00159 | 11 |
| AX-158024354 | 7 | 44.059 | KV453000.1 | 2694062 | 11-scf00159 | 11 |
| AX-158024448 | 7 | 44.059 | KV453000.1 | 2759840 | 11-scf00159 | 11 |
| AX-157821012 | 7 | 44.278 | KV453000.1 | 2592285 | 11-scf00159 | 11 |
| AX-157715008 | 7 | 44.278 | KV453000.1 | 2677413 | 11-scf00159 | 11 |
| AX-158024335 | 7 | 44.278 | KV453000.1 | 2677891 | 11-scf00159 | 11 |
| AX-158024337 | 7 | 44.278 | KV453000.1 | 2679757 | 11-scf00159 | 11 |
| AX-158024342 | 7 | 44.278 | KV453000.1 | 2686567 | 11-scf00159 | 11 |
| AX-158024350 | 7 | 44.278 | KV453000.1 | 2691823 | 11-scf00159 | 11 |
| AX-158024351 | 7 | 44.278 | KV453000.1 | 2692888 | 11-scf00159 | 11 |
| AX-157754584 | 7 | 44.278 | KV453000.1 | 2752154 | 11-scf00159 | 11 |
| AX-158024353 | 7 | 44.395 | KV453000.1 | 2693548 | 11-scf00159 | 11 |
| AX-158024370 | 7 | 44.395 | KV453000.1 | 2707758 | 11-scf00159 | 11 |
| AX-158024400 | 7 | 44.395 | KV453000.1 | 2733631 | 11-scf00159 | 11 |



|              |   |        |            |         |             |    |
|--------------|---|--------|------------|---------|-------------|----|
| AX-157719892 | 7 | 44.496 | KV453000.1 | 2697036 | 11-scf00159 | 11 |
| AX-157865335 | 7 | 44.496 | KV453000.1 | 2698007 | 11-scf00159 | 11 |
| AX-158024357 | 7 | 44.496 | KV453000.1 | 2698551 | 11-scf00159 | 11 |
| AX-158024358 | 7 | 44.496 | KV453000.1 | 2699171 | 11-scf00159 | 11 |
| AX-158024364 | 7 | 44.496 | KV453000.1 | 2703740 | 11-scf00159 | 11 |
| AX-158024366 | 7 | 44.496 | KV453000.1 | 2704316 | 11-scf00159 | 11 |
| AX-158024367 | 7 | 44.496 | KV453000.1 | 2706832 | 11-scf00159 | 11 |
| AX-157821006 | 7 | 44.605 | KV453000.1 | 2566827 | 11-scf00159 | 11 |
| AX-158024374 | 7 | 44.605 | KV453000.1 | 2710520 | 11-scf00159 | 11 |
| AX-158024377 | 7 | 44.605 | KV453000.1 | 2711426 | 11-scf00159 | 11 |
| AX-158024383 | 7 | 44.605 | KV453000.1 | 2718676 | 11-scf00159 | 11 |
| AX-157821026 | 7 | 44.605 | KV453000.1 | 2722101 | 11-scf00159 | 11 |
| AX-158024389 | 7 | 44.605 | KV453000.1 | 2722922 | 11-scf00159 | 11 |
| AX-158024391 | 7 | 44.605 | KV453000.1 | 2723477 | 11-scf00159 | 11 |
| AX-158024398 | 7 | 44.605 | KV453000.1 | 2729285 | 11-scf00159 | 11 |
| AX-157750003 | 7 | 44.605 | KV453000.1 | 2732707 | 11-scf00159 | 11 |
| AX-158024410 | 7 | 44.605 | KV453000.1 | 2734959 | 11-scf00159 | 11 |
| AX-158024411 | 7 | 44.605 | KV453000.1 | 2736455 | 11-scf00159 | 11 |
| AX-157821028 | 7 | 44.605 | KV453000.1 | 2736636 | 11-scf00159 | 11 |
| AX-157821032 | 7 | 44.605 | KV453000.1 | 2821075 | 11-scf00159 | 11 |
| AX-158024535 | 7 | 44.605 | KV453000.1 | 2842878 | 11-scf00159 | 11 |
| AX-158024567 | 7 | 44.605 | KV453000.1 | 2877925 | 11-scf00159 | 11 |
| AX-158024295 | 7 | 44.824 | KV453000.1 | 2639984 | 11-scf00159 | 11 |
| AX-158024317 | 7 | 44.824 | KV453000.1 | 2661568 | 11-scf00159 | 11 |
| AX-158024415 | 7 | 44.824 | KV453000.1 | 2737742 | 11-scf00159 | 11 |
| AX-158024422 | 7 | 44.824 | KV453000.1 | 2740318 | 11-scf00159 | 11 |
| AX-158024423 | 7 | 44.824 | KV453000.1 | 2742429 | 11-scf00159 | 11 |
| AX-158024429 | 7 | 44.824 | KV453000.1 | 2745829 | 11-scf00159 | 11 |
| AX-158024433 | 7 | 44.824 | KV453000.1 | 2747087 | 11-scf00159 | 11 |
| AX-158024434 | 7 | 44.824 | KV453000.1 | 2747902 | 11-scf00159 | 11 |
| AX-158408103 | 7 | 44.824 | KV453000.1 | 2749470 | 11-scf00159 | 11 |
| AX-158406081 | 7 | 44.824 | KV453000.1 | 2749662 | 11-scf00159 | 11 |
| AX-158024437 | 7 | 44.824 | KV453000.1 | 2749895 | 11-scf00159 | 11 |
| AX-157821029 | 7 | 44.824 | KV453000.1 | 2753384 | 11-scf00159 | 11 |
| AX-158024439 | 7 | 44.824 | KV453000.1 | 2753891 | 11-scf00159 | 11 |
| AX-158024440 | 7 | 44.824 | KV453000.1 | 2754818 | 11-scf00159 | 11 |
| AX-158024444 | 7 | 44.824 | KV453000.1 | 2757069 | 11-scf00159 | 11 |
| AX-158024454 | 7 | 44.824 | KV453000.1 | 2772290 | 11-scf00159 | 11 |
| AX-158024503 | 7 | 44.824 | KV453000.1 | 2813396 | 11-scf00159 | 11 |
| AX-158024449 | 7 | 44.825 | KV453000.1 | 2762024 | 11-scf00159 | 11 |
| AX-157727609 | 7 | 44.944 | KV453000.1 | 2764036 | 11-scf00159 | 11 |
| AX-157774737 | 7 | 45.088 | KV453000.1 | 2773361 | 11-scf00159 | 11 |
| AX-158024455 | 7 | 45.088 | KV453000.1 | 2774745 | 11-scf00159 | 11 |
| AX-158024458 | 7 | 45.193 | KV453000.1 | 2779012 | 11-scf00159 | 11 |
| AX-158024460 | 7 | 45.37  | KV453000.1 | 2781728 | 11-scf00159 | 11 |
| AX-158024463 | 7 | 45.37  | KV453000.1 | 2784408 | 11-scf00159 | 11 |
| AX-158024466 | 7 | 45.37  | KV453000.1 | 2785654 | 11-scf00159 | 11 |
| AX-158024477 | 7 | 45.37  | KV453000.1 | 2795389 | 11-scf00159 | 11 |
| AX-158024478 | 7 | 45.37  | KV453000.1 | 2795886 | 11-scf00159 | 11 |
| AX-158024392 | 7 | 45.371 | KV453000.1 | 2724976 | 11-scf00159 | 11 |
| AX-158024469 | 7 | 45.371 | KV453000.1 | 2787543 | 11-scf00159 | 11 |

|              |   |        |            |         |             |    |
|--------------|---|--------|------------|---------|-------------|----|
| AX-158024479 | 7 | 45.371 | KV453000.1 | 2797717 | 11-scf00159 | 11 |
| AX-158024484 | 7 | 45.371 | KV453000.1 | 2801061 | 11-scf00159 | 11 |
| AX-158024486 | 7 | 45.371 | KV453000.1 | 2804342 | 11-scf00159 | 11 |
| AX-158024491 | 7 | 45.371 | KV453000.1 | 2807437 | 11-scf00159 | 11 |
| AX-157725410 | 7 | 45.371 | KV453000.1 | 2808062 | 11-scf00159 | 11 |
| AX-158024492 | 7 | 45.371 | KV453000.1 | 2808769 | 11-scf00159 | 11 |
| AX-158024494 | 7 | 45.371 | KV453000.1 | 2808839 | 11-scf00159 | 11 |
| AX-158024496 | 7 | 45.371 | KV453000.1 | 2810120 | 11-scf00159 | 11 |
| AX-158024502 | 7 | 45.371 | KV453000.1 | 2812417 | 11-scf00159 | 11 |
| AX-158024511 | 7 | 45.371 | KV453000.1 | 2815292 | 11-scf00159 | 11 |
| AX-158024512 | 7 | 45.371 | KV453000.1 | 2815912 | 11-scf00159 | 11 |
| AX-158024513 | 7 | 45.371 | KV453000.1 | 2816687 | 11-scf00159 | 11 |
| AX-158024746 | 7 | 45.371 | KV453000.1 | 3034145 | 11-scf00159 | 11 |
| AX-158379752 | 7 | 45.589 | KV453000.1 | 2817502 | 11-scf00159 | 11 |
| AX-158024520 | 7 | 45.589 | KV453000.1 | 2830693 | 11-scf00159 | 11 |
| AX-158024523 | 7 | 45.589 | KV453000.1 | 2833169 | 11-scf00159 | 11 |
| AX-158024530 | 7 | 45.589 | KV453000.1 | 2839109 | 11-scf00159 | 11 |
| AX-158024546 | 7 | 45.589 | KV453000.1 | 2853790 | 11-scf00159 | 11 |
| AX-157717997 | 7 | 45.589 | KV453000.1 | 3023761 | 11-scf00159 | 11 |
| AX-157773148 | 7 | 45.652 | KV453000.1 | 2855187 | 11-scf00159 | 11 |
| AX-158024545 | 7 | 45.698 | KV453000.1 | 2852049 | 11-scf00159 | 11 |
| AX-158024553 | 7 | 45.698 | KV453000.1 | 2859309 | 11-scf00159 | 11 |
| AX-157720439 | 7 | 45.698 | KV453000.1 | 2862272 | 11-scf00159 | 11 |
| AX-157745426 | 7 | 45.698 | KV453000.1 | 2862662 | 11-scf00159 | 11 |
| AX-158024560 | 7 | 45.698 | KV453000.1 | 2871648 | 11-scf00159 | 11 |
| AX-157710563 | 7 | 45.698 | KV453000.1 | 2876125 | 11-scf00159 | 11 |
| AX-157753031 | 7 | 45.698 | KV453000.1 | 2887186 | 11-scf00159 | 11 |
| AX-158024578 | 7 | 45.698 | KV453000.1 | 2892146 | 11-scf00159 | 11 |
| AX-158024582 | 7 | 45.698 | KV453000.1 | 2895107 | 11-scf00159 | 11 |
| AX-158024583 | 7 | 45.698 | KV453000.1 | 2895688 | 11-scf00159 | 11 |
| AX-158024588 | 7 | 45.698 | KV453000.1 | 2896998 | 11-scf00159 | 11 |
| AX-157885001 | 7 | 45.698 | KV453000.1 | 2910631 | 11-scf00159 | 11 |
| AX-158024589 | 7 | 45.807 | KV453000.1 | 2897917 | 11-scf00159 | 11 |
| AX-158024590 | 7 | 45.807 | KV453000.1 | 2898460 | 11-scf00159 | 11 |
| AX-158024591 | 7 | 45.809 | KV453000.1 | 2899174 | 11-scf00159 | 11 |
| AX-158024605 | 7 | 45.809 | KV453000.1 | 2908195 | 11-scf00159 | 11 |
| AX-158024592 | 7 | 45.81  | KV453000.1 | 2899894 | 11-scf00159 | 11 |
| AX-158024760 | 7 | 45.81  | KV453000.1 | 3049299 | 11-scf00159 | 11 |
| AX-158024586 | 7 | 45.811 | KV453000.1 | 2896624 | 11-scf00159 | 11 |
| AX-157821036 | 7 | 45.811 | KV453000.1 | 2905792 | 11-scf00159 | 11 |
| AX-158024621 | 7 | 45.811 | KV453000.1 | 2920520 | 11-scf00159 | 11 |
| AX-158024625 | 7 | 45.811 | KV453000.1 | 2923239 | 11-scf00159 | 11 |
| AX-158024603 | 7 | 45.812 | KV453000.1 | 2907825 | 11-scf00159 | 11 |
| AX-158024480 | 7 | 45.955 | KV453000.1 | 2799189 | 11-scf00159 | 11 |
| AX-157751915 | 7 | 46.246 | KV453000.1 | 2921702 | 11-scf00159 | 11 |
| AX-158024623 | 7 | 46.356 | KV453000.1 | 2922597 | 11-scf00159 | 11 |
| AX-158024630 | 7 | 46.356 | KV453000.1 | 2923881 | 11-scf00159 | 11 |
| AX-158024525 | 7 | 46.412 | KV453000.1 | 2833525 | 11-scf00159 | 11 |
| AX-158024526 | 7 | 46.412 | KV453000.1 | 2833908 | 11-scf00159 | 11 |
| AX-158024529 | 7 | 46.412 | KV453000.1 | 2837219 | 11-scf00159 | 11 |
| AX-158024556 | 7 | 46.412 | KV453000.1 | 2861916 | 11-scf00159 | 11 |

|              |   |        |             |         |             |    |
|--------------|---|--------|-------------|---------|-------------|----|
| AX-158024564 | 7 | 46.412 | KV453000.1  | 2874596 | 11-scf00159 | 11 |
| AX-158024570 | 7 | 46.412 | KV453000.1  | 2881872 | 11-scf00159 | 11 |
| AX-158024618 | 7 | 46.412 | KV453000.1  | 2917676 | 11-scf00159 | 11 |
| AX-158024636 | 7 | 46.412 | KV453000.1  | 2930259 | 11-scf00159 | 11 |
| AX-158024637 | 7 | 46.466 | KV453000.1  | 2930447 | 11-scf00159 | 11 |
| AX-158024641 | 7 | 46.479 | KV453000.1  | 2931939 | 11-scf00159 | 11 |
| AX-157719673 | 7 | 46.68  | KV453000.1  | 2935435 | 11-scf00159 | 11 |
| AX-158024665 | 7 | 46.68  | KV453000.1  | 2955037 | 11-scf00159 | 11 |
| AX-157708522 | 7 | 46.68  | KV453000.1  | 2956712 | 11-scf00159 | 11 |
| AX-158024736 | 7 | 46.68  | KV453000.1  | 3019985 | 11-scf00159 | 11 |
| AX-158024739 | 7 | 46.68  | KV453000.1  | 3024987 | 11-scf00159 | 11 |
| AX-158024742 | 7 | 46.68  | KV453000.1  | 3030677 | 11-scf00159 | 11 |
| AX-157821045 | 7 | 46.68  | KV453000.1  | 3040105 | 11-scf00159 | 11 |
| AX-157708521 | 7 | 46.758 | KV453000.1  | 2956931 | 11-scf00159 | 11 |
| AX-157707051 | 7 | 46.84  | 3ML01033414 | 209     | scf09063_1  | UN |
| AX-157876441 | 7 | 46.902 | KV453000.1  | 2961023 | 11-scf00159 | 11 |
| AX-158024723 | 7 | 46.902 | KV453000.1  | 3008166 | 11-scf00159 | 11 |
| AX-157821048 | 7 | 46.902 | KV453000.1  | 3060675 | 11-scf00159 | 11 |
| AX-158024379 | 7 | 46.905 | KV453000.1  | 2711823 | 11-scf00159 | 11 |
| AX-158024388 | 7 | 46.905 | KV453000.1  | 2722139 | 11-scf00159 | 11 |
| AX-158024677 | 7 | 46.905 | KV453000.1  | 2964714 | 11-scf00159 | 11 |
| AX-158024684 | 7 | 46.905 | KV453000.1  | 2971668 | 11-scf00159 | 11 |
| AX-158024687 | 7 | 46.905 | KV453000.1  | 2973021 | 11-scf00159 | 11 |
| AX-158024660 | 7 | 47.123 | KV453000.1  | 2949599 | 11-scf00159 | 11 |
| AX-158024662 | 7 | 47.123 | KV453000.1  | 2951097 | 11-scf00159 | 11 |
| AX-158024698 | 7 | 47.123 | KV453000.1  | 2980414 | 11-scf00159 | 11 |
| AX-158024700 | 7 | 47.123 | KV453000.1  | 2981129 | 11-scf00159 | 11 |
| AX-158024704 | 7 | 47.123 | KV453000.1  | 2984726 | 11-scf00159 | 11 |
| AX-157756487 | 7 | 47.123 | KV453000.1  | 2984858 | 11-scf00159 | 11 |
| AX-158024706 | 7 | 47.123 | KV453000.1  | 2986418 | 11-scf00159 | 11 |
| AX-157821037 | 7 | 47.123 | KV453000.1  | 2997059 | 11-scf00159 | 11 |
| AX-158024715 | 7 | 47.123 | KV453000.1  | 2998097 | 11-scf00159 | 11 |
| AX-157716677 | 7 | 47.123 | KV453000.1  | 3000077 | 11-scf00159 | 11 |
| AX-157821038 | 7 | 47.123 | KV453000.1  | 3000501 | 11-scf00159 | 11 |
| AX-158024719 | 7 | 47.123 | KV453000.1  | 3001672 | 11-scf00159 | 11 |
| AX-157714421 | 7 | 47.123 | KV453000.1  | 3006748 | 11-scf00159 | 11 |
| AX-158024721 | 7 | 47.123 | KV453000.1  | 3007420 | 11-scf00159 | 11 |
| AX-158024725 | 7 | 47.123 | KV453000.1  | 3011983 | 11-scf00159 | 11 |
| AX-158024727 | 7 | 47.123 | KV453000.1  | 3013363 | 11-scf00159 | 11 |
| AX-158379754 | 7 | 47.123 | KV453000.1  | 3021867 | 11-scf00159 | 11 |
| AX-157821040 | 7 | 47.123 | KV453000.1  | 3022880 | 11-scf00159 | 11 |
| AX-158024738 | 7 | 47.123 | KV453000.1  | 3024333 | 11-scf00159 | 11 |
| AX-157821041 | 7 | 47.123 | KV453000.1  | 3024599 | 11-scf00159 | 11 |
| AX-157821042 | 7 | 47.123 | KV453000.1  | 3025896 | 11-scf00159 | 11 |
| AX-157821043 | 7 | 47.123 | KV453000.1  | 3027235 | 11-scf00159 | 11 |
| AX-158024740 | 7 | 47.123 | KV453000.1  | 3028099 | 11-scf00159 | 11 |
| AX-158024748 | 7 | 47.123 | KV453000.1  | 3036008 | 11-scf00159 | 11 |
| AX-158024751 | 7 | 47.123 | KV453000.1  | 3036675 | 11-scf00159 | 11 |
| AX-157751833 | 7 | 47.123 | KV453000.1  | 3037148 | 11-scf00159 | 11 |
| AX-157821046 | 7 | 47.123 | KV453000.1  | 3041005 | 11-scf00159 | 11 |
| AX-158024753 | 7 | 47.123 | KV453000.1  | 3044000 | 11-scf00159 | 11 |

|              |   |        |            |         |             |    |
|--------------|---|--------|------------|---------|-------------|----|
| AX-158024754 | 7 | 47.123 | KV453000.1 | 3044443 | 11-scf00159 | 11 |
| AX-157876444 | 7 | 47.123 | KV453000.1 | 3053999 | 11-scf00159 | 11 |
| AX-158024853 | 7 | 47.123 | KV453000.1 | 3136389 | 11-scf00159 | 11 |
| AX-158024757 | 7 | 47.19  | KV453000.1 | 3048120 | 11-scf00159 | 11 |
| AX-158024768 | 7 | 47.205 | KV453000.1 | 3055795 | 11-scf00159 | 11 |
| AX-158024776 | 7 | 47.232 | KV453000.1 | 3060878 | 11-scf00159 | 11 |
| AX-157821050 | 7 | 47.254 | KV453000.1 | 3065059 | 11-scf00159 | 11 |
| AX-158024789 | 7 | 47.295 | KV453000.1 | 3069856 | 11-scf00159 | 11 |
| AX-158024828 | 7 | 47.295 | KV453000.1 | 3110732 | 11-scf00159 | 11 |
| AX-158024845 | 7 | 47.295 | KV453000.1 | 3130634 | 11-scf00159 | 11 |
| AX-157885003 | 7 | 47.295 | KV453000.1 | 3160707 | 11-scf00159 | 11 |
| AX-158024694 | 7 | 47.341 | KV453000.1 | 2977073 | 11-scf00159 | 11 |
| AX-158024801 | 7 | 47.341 | KV453000.1 | 3084939 | 11-scf00159 | 11 |
| AX-158024805 | 7 | 47.341 | KV453000.1 | 3086430 | 11-scf00159 | 11 |
| AX-157821056 | 7 | 47.341 | KV453000.1 | 3089552 | 11-scf00159 | 11 |
| AX-157821059 | 7 | 47.341 | KV453000.1 | 3091868 | 11-scf00159 | 11 |
| AX-157821060 | 7 | 47.341 | KV453000.1 | 3094352 | 11-scf00159 | 11 |
| AX-158024814 | 7 | 47.341 | KV453000.1 | 3095689 | 11-scf00159 | 11 |
| AX-158024819 | 7 | 47.341 | KV453000.1 | 3100153 | 11-scf00159 | 11 |
| AX-158024821 | 7 | 47.341 | KV453000.1 | 3103681 | 11-scf00159 | 11 |
| AX-157721314 | 7 | 47.341 | KV453000.1 | 3115567 | 11-scf00159 | 11 |
| AX-157821063 | 7 | 47.341 | KV453000.1 | 3130747 | 11-scf00159 | 11 |
| AX-158024859 | 7 | 47.341 | KV453000.1 | 3143971 | 11-scf00159 | 11 |
| AX-157723511 | 7 | 47.341 | KV453000.1 | 3195934 | 11-scf00159 | 11 |
| AX-158024905 | 7 | 47.341 | KV453000.1 | 3196893 | 11-scf00159 | 11 |
| AX-158024921 | 7 | 47.341 | KV453000.1 | 3221657 | 11-scf00159 | 11 |
| AX-158024925 | 7 | 47.341 | KV453000.1 | 3226282 | 11-scf00159 | 11 |
| AX-158024633 | 7 | 47.451 | KV453000.1 | 2925941 | 11-scf00159 | 11 |
| AX-158024708 | 7 | 47.451 | KV453000.1 | 2987159 | 11-scf00159 | 11 |
| AX-158024720 | 7 | 47.451 | KV453000.1 | 3006310 | 11-scf00159 | 11 |
| AX-158024743 | 7 | 47.451 | KV453000.1 | 3031491 | 11-scf00159 | 11 |
| AX-158024770 | 7 | 47.451 | KV453000.1 | 3057621 | 11-scf00159 | 11 |
| AX-158024774 | 7 | 47.451 | KV453000.1 | 3060265 | 11-scf00159 | 11 |
| AX-157821054 | 7 | 47.451 | KV453000.1 | 3079013 | 11-scf00159 | 11 |
| AX-157821055 | 7 | 47.451 | KV453000.1 | 3080339 | 11-scf00159 | 11 |
| AX-157723051 | 7 | 47.451 | KV453000.1 | 3097005 | 11-scf00159 | 11 |
| AX-158024822 | 7 | 47.451 | KV453000.1 | 3105511 | 11-scf00159 | 11 |
| AX-158024823 | 7 | 47.451 | KV453000.1 | 3105742 | 11-scf00159 | 11 |
| AX-158024841 | 7 | 47.451 | KV453000.1 | 3126885 | 11-scf00159 | 11 |
| AX-158024850 | 7 | 47.451 | KV453000.1 | 3135563 | 11-scf00159 | 11 |
| AX-158024851 | 7 | 47.451 | KV453000.1 | 3135817 | 11-scf00159 | 11 |
| AX-158024852 | 7 | 47.451 | KV453000.1 | 3136070 | 11-scf00159 | 11 |
| AX-158024856 | 7 | 47.451 | KV453000.1 | 3137840 | 11-scf00159 | 11 |
| AX-157821065 | 7 | 47.451 | KV453000.1 | 3142788 | 11-scf00159 | 11 |
| AX-158024860 | 7 | 47.451 | KV453000.1 | 3146697 | 11-scf00159 | 11 |
| AX-158024863 | 7 | 47.451 | KV453000.1 | 3150609 | 11-scf00159 | 11 |
| AX-158024875 | 7 | 47.451 | KV453000.1 | 3157755 | 11-scf00159 | 11 |
| AX-158024876 | 7 | 47.451 | KV453000.1 | 3161415 | 11-scf00159 | 11 |
| AX-158024880 | 7 | 47.451 | KV453000.1 | 3166277 | 11-scf00159 | 11 |
| AX-158024881 | 7 | 47.451 | KV453000.1 | 3168795 | 11-scf00159 | 11 |
| AX-158024882 | 7 | 47.451 | KV453000.1 | 3170725 | 11-scf00159 | 11 |

|              |   |        |            |         |             |    |
|--------------|---|--------|------------|---------|-------------|----|
| AX-158024885 | 7 | 47.451 | KV453000.1 | 3172840 | 11-scf00159 | 11 |
| AX-157876446 | 7 | 47.451 | KV453000.1 | 3178335 | 11-scf00159 | 11 |
| AX-158024891 | 7 | 47.451 | KV453000.1 | 3180054 | 11-scf00159 | 11 |
| AX-158024895 | 7 | 47.451 | KV453000.1 | 3182363 | 11-scf00159 | 11 |
| AX-158024896 | 7 | 47.451 | KV453000.1 | 3183780 | 11-scf00159 | 11 |
| AX-158024899 | 7 | 47.451 | KV453000.1 | 3185996 | 11-scf00159 | 11 |
| AX-158024906 | 7 | 47.451 | KV453000.1 | 3201670 | 11-scf00159 | 11 |
| AX-158024908 | 7 | 47.451 | KV453000.1 | 3202314 | 11-scf00159 | 11 |
| AX-158024912 | 7 | 47.451 | KV453000.1 | 3206380 | 11-scf00159 | 11 |
| AX-158024918 | 7 | 47.451 | KV453000.1 | 3219289 | 11-scf00159 | 11 |
| AX-158024920 | 7 | 47.451 | KV453000.1 | 3220301 | 11-scf00159 | 11 |
| AX-158024923 | 7 | 47.451 | KV453000.1 | 3224732 | 11-scf00159 | 11 |
| AX-158024924 | 7 | 47.451 | KV453000.1 | 3225668 | 11-scf00159 | 11 |
| AX-158024928 | 7 | 47.451 | KV453000.1 | 3228310 | 11-scf00159 | 11 |
| AX-157742591 | 7 | 47.451 | KV453000.1 | 3233463 | 11-scf00159 | 11 |
| AX-157699307 | 7 | 47.451 | KV453000.1 | 3235499 | 11-scf00159 | 11 |
| AX-158024933 | 7 | 47.596 | KV453000.1 | 3236813 | 11-scf00159 | 11 |
| AX-157821066 | 7 | 47.742 | KV453000.1 | 3240683 | 11-scf00159 | 11 |
| AX-158024858 | 7 | 47.888 | KV453000.1 | 3143315 | 11-scf00159 | 11 |
| AX-158024941 | 7 | 47.888 | KV453000.1 | 3243047 | 11-scf00159 | 11 |
| AX-158024943 | 7 | 47.888 | KV453000.1 | 3246038 | 11-scf00159 | 11 |
| AX-158024946 | 7 | 47.888 | KV453000.1 | 3247832 | 11-scf00159 | 11 |
| AX-158024947 | 7 | 47.888 | KV453000.1 | 3248556 | 11-scf00159 | 11 |
| AX-158024949 | 7 | 47.888 | KV453000.1 | 3250143 | 11-scf00159 | 11 |
| AX-158024951 | 7 | 47.888 | KV453000.1 | 3253226 | 11-scf00159 | 11 |
| AX-158024952 | 7 | 47.888 | KV453000.1 | 3254638 | 11-scf00159 | 11 |
| AX-158024954 | 7 | 47.888 | KV453000.1 | 3258268 | 11-scf00159 | 11 |
| AX-158024957 | 7 | 47.888 | KV453000.1 | 3259488 | 11-scf00159 | 11 |
| AX-158024958 | 7 | 47.888 | KV453000.1 | 3260527 | 11-scf00159 | 11 |
| AX-158024962 | 7 | 47.888 | KV453000.1 | 3263164 | 11-scf00159 | 11 |
| AX-157763218 | 7 | 47.888 | KV453000.1 | 3265805 | 11-scf00159 | 11 |
| AX-157718029 | 7 | 47.888 | KV453000.1 | 3267482 | 11-scf00159 | 11 |
| AX-158024967 | 7 | 47.888 | KV453000.1 | 3268269 | 11-scf00159 | 11 |
| AX-158024973 | 7 | 47.888 | KV453000.1 | 3273025 | 11-scf00159 | 11 |
| AX-158024976 | 7 | 47.888 | KV453000.1 | 3274052 | 11-scf00159 | 11 |
| AX-158024978 | 7 | 47.888 | KV453000.1 | 3276981 | 11-scf00159 | 11 |
| AX-158024979 | 7 | 47.888 | KV453000.1 | 3277585 | 11-scf00159 | 11 |
| AX-158024991 | 7 | 47.888 | KV453000.1 | 3285768 | 11-scf00159 | 11 |
| AX-158024998 | 7 | 47.888 | KV453000.1 | 3289083 | 11-scf00159 | 11 |
| AX-158025001 | 7 | 47.888 | KV453000.1 | 3291082 | 11-scf00159 | 11 |
| AX-157701526 | 7 | 47.888 | KV453000.1 | 3291244 | 11-scf00159 | 11 |
| AX-158025002 | 7 | 47.888 | KV453000.1 | 3293074 | 11-scf00159 | 11 |
| AX-158025022 | 7 | 47.888 | KV453000.1 | 3312290 | 11-scf00159 | 11 |
| AX-158025049 | 7 | 47.888 | KV453000.1 | 3336784 | 11-scf00159 | 11 |
| AX-158025072 | 7 | 47.888 | KV453000.1 | 3359385 | 11-scf00159 | 11 |
| AX-158025156 | 7 | 47.888 | KV453000.1 | 3451372 | 11-scf00159 | 11 |
| AX-158025157 | 7 | 47.888 | KV453000.1 | 3452786 | 11-scf00159 | 11 |
| AX-158025160 | 7 | 47.888 | KV453000.1 | 3454388 | 11-scf00159 | 11 |
| AX-158025278 | 7 | 47.888 | KV453000.1 | 3575539 | 11-scf00159 | 11 |
| AX-158025298 | 7 | 47.888 | KV453000.1 | 3592266 | 11-scf00159 | 11 |
| AX-157724739 | 7 | 47.888 | KV453000.1 | 3666275 | 11-scf00159 | 11 |

|              |   |        |            |         |             |    |
|--------------|---|--------|------------|---------|-------------|----|
| AX-157756719 | 7 | 47.948 | KV453000.1 | 3292527 | 11-scf00159 | 11 |
| AX-158024648 | 7 | 47.997 | KV453000.1 | 2936854 | 11-scf00159 | 11 |
| AX-158024980 | 7 | 47.997 | KV453000.1 | 3279233 | 11-scf00159 | 11 |
| AX-158025011 | 7 | 47.997 | KV453000.1 | 3303769 | 11-scf00159 | 11 |
| AX-158025013 | 7 | 47.997 | KV453000.1 | 3307989 | 11-scf00159 | 11 |
| AX-157821071 | 7 | 47.997 | KV453000.1 | 3308098 | 11-scf00159 | 11 |
| AX-158025016 | 7 | 47.997 | KV453000.1 | 3310319 | 11-scf00159 | 11 |
| AX-158025019 | 7 | 47.997 | KV453000.1 | 3311586 | 11-scf00159 | 11 |
| AX-157744040 | 7 | 47.997 | KV453000.1 | 3311846 | 11-scf00159 | 11 |
| AX-158025027 | 7 | 47.997 | KV453000.1 | 3316953 | 11-scf00159 | 11 |
| AX-158025028 | 7 | 47.997 | KV453000.1 | 3317571 | 11-scf00159 | 11 |
| AX-158025029 | 7 | 47.997 | KV453000.1 | 3318505 | 11-scf00159 | 11 |
| AX-158025031 | 7 | 47.997 | KV453000.1 | 3321119 | 11-scf00159 | 11 |
| AX-158025034 | 7 | 47.997 | KV453000.1 | 3323203 | 11-scf00159 | 11 |
| AX-158025063 | 7 | 47.997 | KV453000.1 | 3341876 | 11-scf00159 | 11 |
| AX-158024729 | 7 | 48.046 | KV453000.1 | 3014084 | 11-scf00159 | 11 |
| AX-157772053 | 7 | 48.046 | KV453000.1 | 3042647 | 11-scf00159 | 11 |
| AX-158024791 | 7 | 48.046 | KV453000.1 | 3073629 | 11-scf00159 | 11 |
| AX-158024887 | 7 | 48.046 | KV453000.1 | 3173726 | 11-scf00159 | 11 |
| AX-158024914 | 7 | 48.046 | KV453000.1 | 3211611 | 11-scf00159 | 11 |
| AX-158024944 | 7 | 48.046 | KV453000.1 | 3246738 | 11-scf00159 | 11 |
| AX-158024994 | 7 | 48.046 | KV453000.1 | 3288008 | 11-scf00159 | 11 |
| AX-158025003 | 7 | 48.046 | KV453000.1 | 3293835 | 11-scf00159 | 11 |
| AX-157731358 | 7 | 48.046 | KV453000.1 | 3327065 | 11-scf00159 | 11 |
| AX-158025107 | 7 | 48.046 | KV453000.1 | 3397487 | 11-scf00159 | 11 |
| AX-158025118 | 7 | 48.046 | KV453000.1 | 3409244 | 11-scf00159 | 11 |
| AX-157714031 | 7 | 48.046 | KV453000.1 | 3443567 | 11-scf00159 | 11 |
| AX-158025184 | 7 | 48.046 | KV453000.1 | 3483613 | 11-scf00159 | 11 |
| AX-158025230 | 7 | 48.046 | KV453000.1 | 3520056 | 11-scf00159 | 11 |
| AX-158025272 | 7 | 48.046 | KV453000.1 | 3569262 | 11-scf00159 | 11 |
| AX-158025344 | 7 | 48.046 | KV453000.1 | 3632571 | 11-scf00159 | 11 |
| AX-158025355 | 7 | 48.046 | KV453000.1 | 3643497 | 11-scf00159 | 11 |
| AX-158379758 | 7 | 48.046 | KV453000.1 | 3648115 | 11-scf00159 | 11 |
| AX-157821102 | 7 | 48.046 | KV453000.1 | 3673839 | 11-scf00159 | 11 |
| AX-158025581 | 7 | 48.046 | KV453000.1 | 3834103 | 11-scf00159 | 11 |
| AX-158025041 | 7 | 48.106 | KV453000.1 | 3327904 | 11-scf00159 | 11 |
| AX-158025044 | 7 | 48.106 | KV453000.1 | 3330826 | 11-scf00159 | 11 |
| AX-157743179 | 7 | 48.106 | KV453000.1 | 3331539 | 11-scf00159 | 11 |
| AX-157870263 | 7 | 48.106 | KV453000.1 | 3332703 | 11-scf00159 | 11 |
| AX-158025048 | 7 | 48.106 | KV453000.1 | 3336299 | 11-scf00159 | 11 |
| AX-158025051 | 7 | 48.106 | KV453000.1 | 3337034 | 11-scf00159 | 11 |
| AX-158025053 | 7 | 48.106 | KV453000.1 | 3338077 | 11-scf00159 | 11 |
| AX-158025055 | 7 | 48.106 | KV453000.1 | 3338393 | 11-scf00159 | 11 |
| AX-158025057 | 7 | 48.106 | KV453000.1 | 3339309 | 11-scf00159 | 11 |
| AX-158025062 | 7 | 48.106 | KV453000.1 | 3341464 | 11-scf00159 | 11 |
| AX-158025064 | 7 | 48.106 | KV453000.1 | 3344916 | 11-scf00159 | 11 |
| AX-158025066 | 7 | 48.106 | KV453000.1 | 3352054 | 11-scf00159 | 11 |
| AX-158025067 | 7 | 48.106 | KV453000.1 | 3353753 | 11-scf00159 | 11 |
| AX-158025069 | 7 | 48.106 | KV453000.1 | 3356987 | 11-scf00159 | 11 |
| AX-158025073 | 7 | 48.106 | KV453000.1 | 3361111 | 11-scf00159 | 11 |
| AX-158025074 | 7 | 48.106 | KV453000.1 | 3364900 | 11-scf00159 | 11 |

|              |   |        |            |         |             |    |
|--------------|---|--------|------------|---------|-------------|----|
| AX-158025077 | 7 | 48.106 | KV453000.1 | 3371361 | 11-scf00159 | 11 |
| AX-158025087 | 7 | 48.106 | KV453000.1 | 3382573 | 11-scf00159 | 11 |
| AX-158025088 | 7 | 48.106 | KV453000.1 | 3384863 | 11-scf00159 | 11 |
| AX-158025092 | 7 | 48.106 | KV453000.1 | 3387477 | 11-scf00159 | 11 |
| AX-157772178 | 7 | 48.106 | KV453000.1 | 3389906 | 11-scf00159 | 11 |
| AX-158025090 | 7 | 48.326 | KV453000.1 | 3385331 | 11-scf00159 | 11 |
| AX-158025091 | 7 | 48.326 | KV453000.1 | 3386316 | 11-scf00159 | 11 |
| AX-158025100 | 7 | 48.326 | KV453000.1 | 3393849 | 11-scf00159 | 11 |
| AX-158025121 | 7 | 48.326 | KV453000.1 | 3410273 | 11-scf00159 | 11 |
| AX-158025306 | 7 | 48.326 | KV453000.1 | 3600326 | 11-scf00159 | 11 |
| AX-158025102 | 7 | 48.541 | KV453000.1 | 3394827 | 11-scf00159 | 11 |
| AX-158025106 | 7 | 48.544 | KV453000.1 | 3396894 | 11-scf00159 | 11 |
| AX-158025113 | 7 | 48.544 | KV453000.1 | 3404154 | 11-scf00159 | 11 |
| AX-158025122 | 7 | 48.544 | KV453000.1 | 3411115 | 11-scf00159 | 11 |
| AX-158025123 | 7 | 48.544 | KV453000.1 | 3412254 | 11-scf00159 | 11 |
| AX-157723480 | 7 | 48.762 | KV453000.1 | 3437888 | 11-scf00159 | 11 |
| AX-158025149 | 7 | 48.762 | KV453000.1 | 3437995 | 11-scf00159 | 11 |
| AX-158025151 | 7 | 48.762 | KV453000.1 | 3448295 | 11-scf00159 | 11 |
| AX-158025153 | 7 | 48.762 | KV453000.1 | 3450486 | 11-scf00159 | 11 |
| AX-157747804 | 7 | 48.762 | KV453000.1 | 3711652 | 11-scf00159 | 11 |
| AX-158025454 | 7 | 48.762 | KV453000.1 | 3739335 | 11-scf00159 | 11 |
| AX-158025155 | 7 | 48.822 | KV453000.1 | 3451167 | 11-scf00159 | 11 |
| AX-158025159 | 7 | 48.871 | KV453000.1 | 3453672 | 11-scf00159 | 11 |
| AX-158025163 | 7 | 48.871 | KV453000.1 | 3456680 | 11-scf00159 | 11 |
| AX-158025170 | 7 | 48.871 | KV453000.1 | 3466874 | 11-scf00159 | 11 |
| AX-158025171 | 7 | 48.871 | KV453000.1 | 3468316 | 11-scf00159 | 11 |
| AX-158025202 | 7 | 48.871 | KV453000.1 | 3495510 | 11-scf00159 | 11 |
| AX-158025178 | 7 | 48.897 | KV453000.1 | 3478697 | 11-scf00159 | 11 |
| AX-158025190 | 7 | 48.916 | KV453000.1 | 3488980 | 11-scf00159 | 11 |
| AX-158025198 | 7 | 48.935 | KV453000.1 | 3494122 | 11-scf00159 | 11 |
| AX-158025201 | 7 | 48.958 | KV453000.1 | 3495219 | 11-scf00159 | 11 |
| AX-158025204 | 7 | 48.981 | KV453000.1 | 3497746 | 11-scf00159 | 11 |
| AX-158025205 | 7 | 48.981 | KV453000.1 | 3498490 | 11-scf00159 | 11 |
| AX-158025150 | 7 | 49.09  | KV453000.1 | 3444664 | 11-scf00159 | 11 |
| AX-158025179 | 7 | 49.09  | KV453000.1 | 3479355 | 11-scf00159 | 11 |
| AX-158025186 | 7 | 49.09  | KV453000.1 | 3485325 | 11-scf00159 | 11 |
| AX-158025206 | 7 | 49.09  | KV453000.1 | 3499181 | 11-scf00159 | 11 |
| AX-158025209 | 7 | 49.09  | KV453000.1 | 3500085 | 11-scf00159 | 11 |
| AX-158025214 | 7 | 49.09  | KV453000.1 | 3503300 | 11-scf00159 | 11 |
| AX-158025215 | 7 | 49.09  | KV453000.1 | 3503999 | 11-scf00159 | 11 |
| AX-157821075 | 7 | 49.09  | KV453000.1 | 3510355 | 11-scf00159 | 11 |
| AX-158025218 | 7 | 49.09  | KV453000.1 | 3511544 | 11-scf00159 | 11 |
| AX-158025219 | 7 | 49.09  | KV453000.1 | 3512221 | 11-scf00159 | 11 |
| AX-158025225 | 7 | 49.09  | KV453000.1 | 3517638 | 11-scf00159 | 11 |
| AX-158025227 | 7 | 49.09  | KV453000.1 | 3519183 | 11-scf00159 | 11 |
| AX-157821079 | 7 | 49.09  | KV453000.1 | 3520699 | 11-scf00159 | 11 |
| AX-158025233 | 7 | 49.09  | KV453000.1 | 3523816 | 11-scf00159 | 11 |
| AX-158025235 | 7 | 49.09  | KV453000.1 | 3525131 | 11-scf00159 | 11 |
| AX-157821082 | 7 | 49.09  | KV453000.1 | 3527521 | 11-scf00159 | 11 |
| AX-158025238 | 7 | 49.09  | KV453000.1 | 3527871 | 11-scf00159 | 11 |
| AX-158025241 | 7 | 49.09  | KV453000.1 | 3529970 | 11-scf00159 | 11 |

|              |   |        |            |         |             |    |
|--------------|---|--------|------------|---------|-------------|----|
| AX-158025242 | 7 | 49.09  | KV453000.1 | 3530215 | 11-scf00159 | 11 |
| AX-158025243 | 7 | 49.09  | KV453000.1 | 3531221 | 11-scf00159 | 11 |
| AX-158025244 | 7 | 49.09  | KV453000.1 | 3532786 | 11-scf00159 | 11 |
| AX-157821084 | 7 | 49.09  | KV453000.1 | 3533865 | 11-scf00159 | 11 |
| AX-158025245 | 7 | 49.09  | KV453000.1 | 3536131 | 11-scf00159 | 11 |
| AX-158025246 | 7 | 49.09  | KV453000.1 | 3537342 | 11-scf00159 | 11 |
| AX-157759323 | 7 | 49.09  | KV453000.1 | 3538147 | 11-scf00159 | 11 |
| AX-158408113 | 7 | 49.09  | KV453000.1 | 3539960 | 11-scf00159 | 11 |
| AX-158025249 | 7 | 49.09  | KV453000.1 | 3541143 | 11-scf00159 | 11 |
| AX-158025251 | 7 | 49.09  | KV453000.1 | 3541242 | 11-scf00159 | 11 |
| AX-158025252 | 7 | 49.09  | KV453000.1 | 3542003 | 11-scf00159 | 11 |
| AX-158025254 | 7 | 49.09  | KV453000.1 | 3543632 | 11-scf00159 | 11 |
| AX-158025255 | 7 | 49.09  | KV453000.1 | 3544093 | 11-scf00159 | 11 |
| AX-157709674 | 7 | 49.09  | KV453000.1 | 3545030 | 11-scf00159 | 11 |
| AX-157751590 | 7 | 49.09  | KV453000.1 | 3545851 | 11-scf00159 | 11 |
| AX-158025257 | 7 | 49.09  | KV453000.1 | 3546479 | 11-scf00159 | 11 |
| AX-158025258 | 7 | 49.09  | KV453000.1 | 3547071 | 11-scf00159 | 11 |
| AX-158025264 | 7 | 49.09  | KV453000.1 | 3555192 | 11-scf00159 | 11 |
| AX-158025265 | 7 | 49.09  | KV453000.1 | 3557378 | 11-scf00159 | 11 |
| AX-157821085 | 7 | 49.09  | KV453000.1 | 3561111 | 11-scf00159 | 11 |
| AX-158025266 | 7 | 49.09  | KV453000.1 | 3561376 | 11-scf00159 | 11 |
| AX-157722095 | 7 | 49.09  | KV453000.1 | 3572012 | 11-scf00159 | 11 |
| AX-158025323 | 7 | 49.09  | KV453000.1 | 3617681 | 11-scf00159 | 11 |
| AX-158025360 | 7 | 49.09  | KV453000.1 | 3648447 | 11-scf00159 | 11 |
| AX-158025409 | 7 | 49.09  | KV453000.1 | 3702981 | 11-scf00159 | 11 |
| AX-158025444 | 7 | 49.09  | KV453000.1 | 3733260 | 11-scf00159 | 11 |
| AX-158025475 | 7 | 49.09  | KV453000.1 | 3753943 | 11-scf00159 | 11 |
| AX-158025477 | 7 | 49.09  | KV453000.1 | 3754848 | 11-scf00159 | 11 |
| AX-158025938 | 7 | 49.09  | KV453000.1 | 4172280 | 11-scf00159 | 11 |
| AX-158024892 | 7 | 49.308 | KV453000.1 | 3180999 | 11-scf00159 | 11 |
| AX-158025038 | 7 | 49.308 | KV453000.1 | 3326449 | 11-scf00159 | 11 |
| AX-158025103 | 7 | 49.308 | KV453000.1 | 3395596 | 11-scf00159 | 11 |
| AX-158025148 | 7 | 49.308 | KV453000.1 | 3437482 | 11-scf00159 | 11 |
| AX-158025260 | 7 | 49.308 | KV453000.1 | 3547805 | 11-scf00159 | 11 |
| AX-157738780 | 7 | 49.308 | KV453000.1 | 3562800 | 11-scf00159 | 11 |
| AX-157821086 | 7 | 49.308 | KV453000.1 | 3564406 | 11-scf00159 | 11 |
| AX-158025268 | 7 | 49.308 | KV453000.1 | 3565476 | 11-scf00159 | 11 |
| AX-158025275 | 7 | 49.308 | KV453000.1 | 3573391 | 11-scf00159 | 11 |
| AX-158379757 | 7 | 49.308 | KV453000.1 | 3574422 | 11-scf00159 | 11 |
| AX-158025279 | 7 | 49.308 | KV453000.1 | 3575693 | 11-scf00159 | 11 |
| AX-157821087 | 7 | 49.308 | KV453000.1 | 3577301 | 11-scf00159 | 11 |
| AX-157821088 | 7 | 49.308 | KV453000.1 | 3577726 | 11-scf00159 | 11 |
| AX-157821089 | 7 | 49.308 | KV453000.1 | 3578360 | 11-scf00159 | 11 |
| AX-158025281 | 7 | 49.308 | KV453000.1 | 3579034 | 11-scf00159 | 11 |
| AX-157715689 | 7 | 49.308 | KV453000.1 | 3579899 | 11-scf00159 | 11 |
| AX-158025282 | 7 | 49.308 | KV453000.1 | 3582209 | 11-scf00159 | 11 |
| AX-158025284 | 7 | 49.308 | KV453000.1 | 3582649 | 11-scf00159 | 11 |
| AX-158025287 | 7 | 49.308 | KV453000.1 | 3584713 | 11-scf00159 | 11 |
| AX-158025292 | 7 | 49.308 | KV453000.1 | 3587476 | 11-scf00159 | 11 |
| AX-157821094 | 7 | 49.308 | KV453000.1 | 3590567 | 11-scf00159 | 11 |
| AX-158025296 | 7 | 49.308 | KV453000.1 | 3591741 | 11-scf00159 | 11 |



|              |   |        |            |         |             |    |
|--------------|---|--------|------------|---------|-------------|----|
| AX-158025302 | 7 | 49.308 | KV453000.1 | 3595543 | 11-scf00159 | 11 |
| AX-158025303 | 7 | 49.308 | KV453000.1 | 3596346 | 11-scf00159 | 11 |
| AX-157744658 | 7 | 49.308 | KV453000.1 | 3598373 | 11-scf00159 | 11 |
| AX-158025305 | 7 | 49.308 | KV453000.1 | 3600171 | 11-scf00159 | 11 |
| AX-158025310 | 7 | 49.308 | KV453000.1 | 3602704 | 11-scf00159 | 11 |
| AX-158025311 | 7 | 49.308 | KV453000.1 | 3604669 | 11-scf00159 | 11 |
| AX-158025315 | 7 | 49.308 | KV453000.1 | 3606033 | 11-scf00159 | 11 |
| AX-158025318 | 7 | 49.308 | KV453000.1 | 3611908 | 11-scf00159 | 11 |
| AX-157821097 | 7 | 49.308 | KV453000.1 | 3612230 | 11-scf00159 | 11 |
| AX-158025320 | 7 | 49.308 | KV453000.1 | 3614682 | 11-scf00159 | 11 |
| AX-158025322 | 7 | 49.308 | KV453000.1 | 3615309 | 11-scf00159 | 11 |
| AX-157747174 | 7 | 49.308 | KV453000.1 | 3615674 | 11-scf00159 | 11 |
| AX-158025326 | 7 | 49.308 | KV453000.1 | 3618158 | 11-scf00159 | 11 |
| AX-158025329 | 7 | 49.308 | KV453000.1 | 3622219 | 11-scf00159 | 11 |
| AX-158025332 | 7 | 49.308 | KV453000.1 | 3624429 | 11-scf00159 | 11 |
| AX-158025334 | 7 | 49.308 | KV453000.1 | 3626707 | 11-scf00159 | 11 |
| AX-158025335 | 7 | 49.308 | KV453000.1 | 3628236 | 11-scf00159 | 11 |
| AX-157885009 | 7 | 49.308 | KV453000.1 | 3629580 | 11-scf00159 | 11 |
| AX-158025338 | 7 | 49.308 | KV453000.1 | 3629843 | 11-scf00159 | 11 |
| AX-158025339 | 7 | 49.308 | KV453000.1 | 3630270 | 11-scf00159 | 11 |
| AX-158025340 | 7 | 49.308 | KV453000.1 | 3630999 | 11-scf00159 | 11 |
| AX-157821099 | 7 | 49.308 | KV453000.1 | 3640744 | 11-scf00159 | 11 |
| AX-157885010 | 7 | 49.308 | KV453000.1 | 3641117 | 11-scf00159 | 11 |
| AX-158025353 | 7 | 49.308 | KV453000.1 | 3642625 | 11-scf00159 | 11 |
| AX-158025356 | 7 | 49.308 | KV453000.1 | 3644257 | 11-scf00159 | 11 |
| AX-158383797 | 7 | 49.308 | KV453000.1 | 3646187 | 11-scf00159 | 11 |
| AX-158025358 | 7 | 49.308 | KV453000.1 | 3647390 | 11-scf00159 | 11 |
| AX-158025359 | 7 | 49.308 | KV453000.1 | 3647925 | 11-scf00159 | 11 |
| AX-158025363 | 7 | 49.308 | KV453000.1 | 3650310 | 11-scf00159 | 11 |
| AX-158025365 | 7 | 49.308 | KV453000.1 | 3651090 | 11-scf00159 | 11 |
| AX-157745344 | 7 | 49.308 | KV453000.1 | 3651759 | 11-scf00159 | 11 |
| AX-158025373 | 7 | 49.308 | KV453000.1 | 3660254 | 11-scf00159 | 11 |
| AX-157821100 | 7 | 49.308 | KV453000.1 | 3664292 | 11-scf00159 | 11 |
| AX-158025375 | 7 | 49.308 | KV453000.1 | 3668428 | 11-scf00159 | 11 |
| AX-157726940 | 7 | 49.308 | KV453000.1 | 3668685 | 11-scf00159 | 11 |
| AX-158025376 | 7 | 49.308 | KV453000.1 | 3672293 | 11-scf00159 | 11 |
| AX-158025379 | 7 | 49.308 | KV453000.1 | 3672804 | 11-scf00159 | 11 |
| AX-158025381 | 7 | 49.308 | KV453000.1 | 3674118 | 11-scf00159 | 11 |
| AX-158025385 | 7 | 49.308 | KV453000.1 | 3681377 | 11-scf00159 | 11 |
| AX-158025386 | 7 | 49.308 | KV453000.1 | 3682529 | 11-scf00159 | 11 |
| AX-158025388 | 7 | 49.308 | KV453000.1 | 3683115 | 11-scf00159 | 11 |
| AX-158025394 | 7 | 49.308 | KV453000.1 | 3688181 | 11-scf00159 | 11 |
| AX-158025395 | 7 | 49.308 | KV453000.1 | 3689301 | 11-scf00159 | 11 |
| AX-158025396 | 7 | 49.308 | KV453000.1 | 3690118 | 11-scf00159 | 11 |
| AX-157821105 | 7 | 49.308 | KV453000.1 | 3694773 | 11-scf00159 | 11 |
| AX-158025403 | 7 | 49.308 | KV453000.1 | 3697487 | 11-scf00159 | 11 |
| AX-157821106 | 7 | 49.308 | KV453000.1 | 3702664 | 11-scf00159 | 11 |
| AX-158025410 | 7 | 49.308 | KV453000.1 | 3705037 | 11-scf00159 | 11 |
| AX-157821107 | 7 | 49.308 | KV453000.1 | 3705594 | 11-scf00159 | 11 |
| AX-158025411 | 7 | 49.308 | KV453000.1 | 3705925 | 11-scf00159 | 11 |
| AX-157821108 | 7 | 49.308 | KV453000.1 | 3707975 | 11-scf00159 | 11 |

|              |   |        |             |         |             |    |
|--------------|---|--------|-------------|---------|-------------|----|
| AX-158025425 | 7 | 49.308 | KV453000.1  | 3712210 | 11-scf00159 | 11 |
| AX-157821109 | 7 | 49.308 | KV453000.1  | 3714831 | 11-scf00159 | 11 |
| AX-158025428 | 7 | 49.308 | KV453000.1  | 3719680 | 11-scf00159 | 11 |
| AX-158025432 | 7 | 49.308 | KV453000.1  | 3721002 | 11-scf00159 | 11 |
| AX-158025434 | 7 | 49.308 | KV453000.1  | 3721445 | 11-scf00159 | 11 |
| AX-158025435 | 7 | 49.308 | KV453000.1  | 3721831 | 11-scf00159 | 11 |
| AX-158025436 | 7 | 49.308 | KV453000.1  | 3723254 | 11-scf00159 | 11 |
| AX-158025437 | 7 | 49.308 | KV453000.1  | 3723956 | 11-scf00159 | 11 |
| AX-158025439 | 7 | 49.308 | KV453000.1  | 3724994 | 11-scf00159 | 11 |
| AX-158025441 | 7 | 49.308 | KV453000.1  | 3728047 | 11-scf00159 | 11 |
| AX-158025443 | 7 | 49.308 | KV453000.1  | 3732178 | 11-scf00159 | 11 |
| AX-158025446 | 7 | 49.308 | KV453000.1  | 3735199 | 11-scf00159 | 11 |
| AX-158025506 | 7 | 49.308 | KV453000.1  | 3777936 | 11-scf00159 | 11 |
| AX-157707514 | 7 | 49.308 | 3ML01034450 | 323     | scf10125_1  | UN |
| AX-158025448 | 7 | 49.527 | KV453000.1  | 3735904 | 11-scf00159 | 11 |
| AX-158025451 | 7 | 49.527 | KV453000.1  | 3738253 | 11-scf00159 | 11 |
| AX-158025458 | 7 | 49.527 | KV453000.1  | 3741419 | 11-scf00159 | 11 |
| AX-157885012 | 7 | 49.745 | KV453000.1  | 3742609 | 11-scf00159 | 11 |
| AX-158025460 | 7 | 49.745 | KV453000.1  | 3744269 | 11-scf00159 | 11 |
| AX-158025462 | 7 | 49.745 | KV453000.1  | 3744992 | 11-scf00159 | 11 |
| AX-158025463 | 7 | 49.745 | KV453000.1  | 3747066 | 11-scf00159 | 11 |
| AX-158025464 | 7 | 49.745 | KV453000.1  | 3748277 | 11-scf00159 | 11 |
| AX-158025469 | 7 | 49.745 | KV453000.1  | 3750021 | 11-scf00159 | 11 |
| AX-158025471 | 7 | 49.794 | KV453000.1  | 3751311 | 11-scf00159 | 11 |
| AX-158025473 | 7 | 49.854 | KV453000.1  | 3752827 | 11-scf00159 | 11 |
| AX-158025476 | 7 | 49.854 | KV453000.1  | 3754308 | 11-scf00159 | 11 |
| AX-158391248 | 7 | 49.854 | KV453000.1  | 3756031 | 11-scf00159 | 11 |
| AX-158025481 | 7 | 49.854 | KV453000.1  | 3758763 | 11-scf00159 | 11 |
| AX-158408116 | 7 | 49.854 | KV453000.1  | 3759352 | 11-scf00159 | 11 |
| AX-158025483 | 7 | 49.854 | KV453000.1  | 3760010 | 11-scf00159 | 11 |
| AX-158025484 | 7 | 49.854 | KV453000.1  | 3760591 | 11-scf00159 | 11 |
| AX-158025485 | 7 | 49.854 | KV453000.1  | 3761514 | 11-scf00159 | 11 |
| AX-158025486 | 7 | 49.854 | KV453000.1  | 3761932 | 11-scf00159 | 11 |
| AX-158025494 | 7 | 49.854 | KV453000.1  | 3767407 | 11-scf00159 | 11 |
| AX-158025511 | 7 | 49.854 | KV453000.1  | 3780430 | 11-scf00159 | 11 |
| AX-158025489 | 7 | 49.964 | KV453000.1  | 3764344 | 11-scf00159 | 11 |
| AX-158025496 | 7 | 49.964 | KV453000.1  | 3770618 | 11-scf00159 | 11 |
| AX-158025497 | 7 | 49.964 | KV453000.1  | 3771221 | 11-scf00159 | 11 |
| AX-158025499 | 7 | 49.964 | KV453000.1  | 3772566 | 11-scf00159 | 11 |
| AX-158025500 | 7 | 49.964 | KV453000.1  | 3772726 | 11-scf00159 | 11 |
| AX-157885013 | 7 | 49.964 | KV453000.1  | 3776759 | 11-scf00159 | 11 |
| AX-157744134 | 7 | 49.964 | KV453000.1  | 3797820 | 11-scf00159 | 11 |
| AX-158025535 | 7 | 49.964 | KV453000.1  | 3799102 | 11-scf00159 | 11 |
| AX-158025515 | 7 | 50.291 | KV453000.1  | 3783837 | 11-scf00159 | 11 |
| AX-157726095 | 7 | 50.291 | KV453000.1  | 3784001 | 11-scf00159 | 11 |
| AX-158025517 | 7 | 50.291 | KV453000.1  | 3784168 | 11-scf00159 | 11 |
| AX-158025518 | 7 | 50.291 | KV453000.1  | 3784347 | 11-scf00159 | 11 |
| AX-157821115 | 7 | 50.291 | KV453000.1  | 3885513 | 11-scf00159 | 11 |
| AX-157821076 | 7 | 50.401 | KV453000.1  | 3513476 | 11-scf00159 | 11 |
| AX-158025520 | 7 | 50.401 | KV453000.1  | 3785330 | 11-scf00159 | 11 |
| AX-158025657 | 7 | 50.401 | KV453000.1  | 3902549 | 11-scf00159 | 11 |

|              |   |        |            |         |             |    |
|--------------|---|--------|------------|---------|-------------|----|
| AX-157821111 | 7 | 50.51  | KV453000.1 | 3770148 | 11-scf00159 | 11 |
| AX-157716545 | 7 | 50.51  | KV453000.1 | 3789350 | 11-scf00159 | 11 |
| AX-158025526 | 7 | 50.51  | KV453000.1 | 3794207 | 11-scf00159 | 11 |
| AX-158025530 | 7 | 50.51  | KV453000.1 | 3795340 | 11-scf00159 | 11 |
| AX-158025531 | 7 | 50.51  | KV453000.1 | 3796858 | 11-scf00159 | 11 |
| AX-158025532 | 7 | 50.51  | KV453000.1 | 3797270 | 11-scf00159 | 11 |
| AX-158025534 | 7 | 50.51  | KV453000.1 | 3798480 | 11-scf00159 | 11 |
| AX-158025537 | 7 | 50.51  | KV453000.1 | 3799394 | 11-scf00159 | 11 |
| AX-157741200 | 7 | 50.51  | KV453000.1 | 3799703 | 11-scf00159 | 11 |
| AX-158025538 | 7 | 50.51  | KV453000.1 | 3799939 | 11-scf00159 | 11 |
| AX-158025553 | 7 | 50.51  | KV453000.1 | 3808210 | 11-scf00159 | 11 |
| AX-158025592 | 7 | 50.51  | KV453000.1 | 3840959 | 11-scf00159 | 11 |
| AX-158025594 | 7 | 50.51  | KV453000.1 | 3842025 | 11-scf00159 | 11 |
| AX-158025655 | 7 | 50.51  | KV453000.1 | 3895216 | 11-scf00159 | 11 |
| AX-158025681 | 7 | 50.51  | KV453000.1 | 3932725 | 11-scf00159 | 11 |
| AX-158025699 | 7 | 50.51  | KV453000.1 | 3950396 | 11-scf00159 | 11 |
| AX-158025707 | 7 | 50.51  | KV453000.1 | 3963807 | 11-scf00159 | 11 |
| AX-158025711 | 7 | 50.51  | KV453000.1 | 3967803 | 11-scf00159 | 11 |
| AX-158025539 | 7 | 50.524 | KV453000.1 | 3800774 | 11-scf00159 | 11 |
| AX-158025651 | 7 | 50.524 | KV453000.1 | 3893886 | 11-scf00159 | 11 |
| AX-158025541 | 7 | 50.537 | KV453000.1 | 3801120 | 11-scf00159 | 11 |
| AX-158025555 | 7 | 50.55  | KV453000.1 | 3809052 | 11-scf00159 | 11 |
| AX-157821112 | 7 | 50.55  | KV453000.1 | 3810559 | 11-scf00159 | 11 |
| AX-158025599 | 7 | 50.55  | KV453000.1 | 3844874 | 11-scf00159 | 11 |
| AX-158025523 | 7 | 50.571 | KV453000.1 | 3790090 | 11-scf00159 | 11 |
| AX-158025525 | 7 | 50.571 | KV453000.1 | 3792270 | 11-scf00159 | 11 |
| AX-158025557 | 7 | 50.571 | KV453000.1 | 3812029 | 11-scf00159 | 11 |
| AX-157870265 | 7 | 50.597 | KV453000.1 | 3818821 | 11-scf00159 | 11 |
| AX-158025566 | 7 | 50.619 | KV453000.1 | 3821304 | 11-scf00159 | 11 |
| AX-158025567 | 7 | 50.619 | KV453000.1 | 3821850 | 11-scf00159 | 11 |
| AX-158025568 | 7 | 50.635 | KV453000.1 | 3822178 | 11-scf00159 | 11 |
| AX-158025578 | 7 | 50.641 | KV453000.1 | 3832209 | 11-scf00159 | 11 |
| AX-158025582 | 7 | 50.655 | KV453000.1 | 3834652 | 11-scf00159 | 11 |
| AX-158025584 | 7 | 50.672 | KV453000.1 | 3835450 | 11-scf00159 | 11 |
| AX-158025586 | 7 | 50.689 | KV453000.1 | 3837675 | 11-scf00159 | 11 |
| AX-158025590 | 7 | 50.707 | KV453000.1 | 3840039 | 11-scf00159 | 11 |
| AX-158025600 | 7 | 50.707 | KV453000.1 | 3845808 | 11-scf00159 | 11 |
| AX-158025597 | 7 | 50.728 | KV453000.1 | 3844203 | 11-scf00159 | 11 |
| AX-158025602 | 7 | 50.728 | KV453000.1 | 3849363 | 11-scf00159 | 11 |
| AX-158025527 | 7 | 50.786 | KV453000.1 | 3794822 | 11-scf00159 | 11 |
| AX-158025579 | 7 | 50.786 | KV453000.1 | 3833088 | 11-scf00159 | 11 |
| AX-158025603 | 7 | 50.786 | KV453000.1 | 3849955 | 11-scf00159 | 11 |
| AX-158025608 | 7 | 50.827 | KV453000.1 | 3851444 | 11-scf00159 | 11 |
| AX-157821113 | 7 | 50.827 | KV453000.1 | 3851741 | 11-scf00159 | 11 |
| AX-157821114 | 7 | 50.838 | KV453000.1 | 3851781 | 11-scf00159 | 11 |
| AX-158025613 | 7 | 50.838 | KV453000.1 | 3859076 | 11-scf00159 | 11 |
| AX-158025614 | 7 | 50.838 | KV453000.1 | 3860442 | 11-scf00159 | 11 |
| AX-157709093 | 7 | 50.838 | KV453000.1 | 3860903 | 11-scf00159 | 11 |
| AX-158025616 | 7 | 50.838 | KV453000.1 | 3861233 | 11-scf00159 | 11 |
| AX-158025621 | 7 | 50.838 | KV453000.1 | 3863800 | 11-scf00159 | 11 |
| AX-158025623 | 7 | 50.838 | KV453000.1 | 3864750 | 11-scf00159 | 11 |

|              |   |        |            |         |             |    |
|--------------|---|--------|------------|---------|-------------|----|
| AX-158025624 | 7 | 50.838 | KV453000.1 | 3865942 | 11-scf00159 | 11 |
| AX-158025626 | 7 | 50.838 | KV453000.1 | 3866710 | 11-scf00159 | 11 |
| AX-158025628 | 7 | 50.838 | KV453000.1 | 3868941 | 11-scf00159 | 11 |
| AX-158025632 | 7 | 50.838 | KV453000.1 | 3870943 | 11-scf00159 | 11 |
| AX-158025633 | 7 | 50.838 | KV453000.1 | 3873558 | 11-scf00159 | 11 |
| AX-158025637 | 7 | 50.838 | KV453000.1 | 3878396 | 11-scf00159 | 11 |
| AX-158025638 | 7 | 50.838 | KV453000.1 | 3879481 | 11-scf00159 | 11 |
| AX-158025639 | 7 | 50.838 | KV453000.1 | 3880519 | 11-scf00159 | 11 |
| AX-158025643 | 7 | 50.838 | KV453000.1 | 3884641 | 11-scf00159 | 11 |
| AX-157715131 | 7 | 50.838 | KV453000.1 | 3891024 | 11-scf00159 | 11 |
| AX-157821117 | 7 | 50.838 | KV453000.1 | 3895900 | 11-scf00159 | 11 |
| AX-157745402 | 7 | 50.838 | KV453000.1 | 3897643 | 11-scf00159 | 11 |
| AX-158025656 | 7 | 50.838 | KV453000.1 | 3900552 | 11-scf00159 | 11 |
| AX-157713090 | 7 | 50.838 | KV453000.1 | 3901959 | 11-scf00159 | 11 |
| AX-158025660 | 7 | 50.838 | KV453000.1 | 3907386 | 11-scf00159 | 11 |
| AX-158025661 | 7 | 50.838 | KV453000.1 | 3908802 | 11-scf00159 | 11 |
| AX-158025663 | 7 | 50.838 | KV453000.1 | 3913159 | 11-scf00159 | 11 |
| AX-158025665 | 7 | 50.838 | KV453000.1 | 3913940 | 11-scf00159 | 11 |
| AX-157821118 | 7 | 50.838 | KV453000.1 | 3915076 | 11-scf00159 | 11 |
| AX-158025667 | 7 | 50.838 | KV453000.1 | 3915509 | 11-scf00159 | 11 |
| AX-158025668 | 7 | 50.838 | KV453000.1 | 3916113 | 11-scf00159 | 11 |
| AX-158025694 | 7 | 50.838 | KV453000.1 | 3948920 | 11-scf00159 | 11 |
| AX-158025811 | 7 | 50.838 | KV453000.1 | 4073420 | 11-scf00159 | 11 |
| AX-157707780 | 7 | 50.93  | KV453000.1 | 3920187 | 11-scf00159 | 11 |
| AX-157740020 | 7 | 50.954 | KV453000.1 | 3880724 | 11-scf00159 | 11 |
| AX-158025647 | 7 | 50.954 | KV453000.1 | 3891759 | 11-scf00159 | 11 |
| AX-157856339 | 7 | 50.954 | KV453000.1 | 3921904 | 11-scf00159 | 11 |
| AX-158025849 | 7 | 50.954 | KV453000.1 | 4102403 | 11-scf00159 | 11 |
| AX-158025669 | 7 | 51.056 | KV453000.1 | 3917827 | 11-scf00159 | 11 |
| AX-158025684 | 7 | 51.056 | KV453000.1 | 3935300 | 11-scf00159 | 11 |
| AX-157740945 | 7 | 51.056 | KV453000.1 | 3940284 | 11-scf00159 | 11 |
| AX-158025692 | 7 | 51.056 | KV453000.1 | 3947234 | 11-scf00159 | 11 |
| AX-158025701 | 7 | 51.056 | KV453000.1 | 3953464 | 11-scf00159 | 11 |
| AX-158025704 | 7 | 51.056 | KV453000.1 | 3959745 | 11-scf00159 | 11 |
| AX-158025706 | 7 | 51.056 | KV453000.1 | 3960222 | 11-scf00159 | 11 |
| AX-158025710 | 7 | 51.166 | KV453000.1 | 3965110 | 11-scf00159 | 11 |
| AX-157821122 | 7 | 51.166 | KV453000.1 | 3966460 | 11-scf00159 | 11 |
| AX-157821123 | 7 | 51.241 | KV453000.1 | 3968607 | 11-scf00159 | 11 |
| AX-158025720 | 7 | 51.296 | KV453000.1 | 3985986 | 11-scf00159 | 11 |
| AX-158025735 | 7 | 51.33  | KV453000.1 | 3998965 | 11-scf00159 | 11 |
| AX-158408126 | 7 | 51.33  | KV453000.1 | 4000765 | 11-scf00159 | 11 |
| AX-157753368 | 7 | 51.493 | KV453000.1 | 4002918 | 11-scf00159 | 11 |
| AX-158025736 | 7 | 51.493 | KV453000.1 | 4007619 | 11-scf00159 | 11 |
| AX-158025737 | 7 | 51.493 | KV453000.1 | 4008464 | 11-scf00159 | 11 |
| AX-158025740 | 7 | 51.493 | KV453000.1 | 4014405 | 11-scf00159 | 11 |
| AX-158406094 | 7 | 51.493 | KV453000.1 | 4014440 | 11-scf00159 | 11 |
| AX-157856340 | 7 | 51.493 | KV453000.1 | 4016103 | 11-scf00159 | 11 |
| AX-158025758 | 7 | 51.493 | KV453000.1 | 4031251 | 11-scf00159 | 11 |
| AX-158379761 | 7 | 51.493 | KV453000.1 | 4078611 | 11-scf00159 | 11 |
| AX-158026106 | 7 | 51.493 | KV453000.1 | 4340835 | 11-scf00159 | 11 |
| AX-158026133 | 7 | 51.493 | KV453000.1 | 4366821 | 11-scf00159 | 11 |

|              |   |        |            |         |             |    |
|--------------|---|--------|------------|---------|-------------|----|
| AX-158025744 | 7 | 51.494 | KV453000.1 | 4019442 | 11-scf00159 | 11 |
| AX-158025747 | 7 | 51.494 | KV453000.1 | 4021177 | 11-scf00159 | 11 |
| AX-157885015 | 7 | 51.494 | KV453000.1 | 4034959 | 11-scf00159 | 11 |
| AX-157774082 | 7 | 51.505 | KV453000.1 | 4023233 | 11-scf00159 | 11 |
| AX-158025754 | 7 | 51.513 | KV453000.1 | 4028923 | 11-scf00159 | 11 |
| AX-158025766 | 7 | 51.54  | KV453000.1 | 4039908 | 11-scf00159 | 11 |
| AX-158025767 | 7 | 51.559 | KV453000.1 | 4041290 | 11-scf00159 | 11 |
| AX-158025769 | 7 | 51.581 | KV453000.1 | 4043636 | 11-scf00159 | 11 |
| AX-158025771 | 7 | 51.603 | KV453000.1 | 4045228 | 11-scf00159 | 11 |
| AX-158025774 | 7 | 51.603 | KV453000.1 | 4048074 | 11-scf00159 | 11 |
| AX-158025776 | 7 | 51.603 | KV453000.1 | 4051240 | 11-scf00159 | 11 |
| AX-158025779 | 7 | 51.655 | KV453000.1 | 4053974 | 11-scf00159 | 11 |
| AX-158025784 | 7 | 51.712 | KV453000.1 | 4055608 | 11-scf00159 | 11 |
| AX-158025785 | 7 | 51.712 | KV453000.1 | 4056230 | 11-scf00159 | 11 |
| AX-158025798 | 7 | 51.712 | KV453000.1 | 4068037 | 11-scf00159 | 11 |
| AX-158025815 | 7 | 51.712 | KV453000.1 | 4075954 | 11-scf00159 | 11 |
| AX-158025819 | 7 | 51.712 | KV453000.1 | 4077882 | 11-scf00159 | 11 |
| AX-158025821 | 7 | 51.712 | KV453000.1 | 4077965 | 11-scf00159 | 11 |
| AX-158025823 | 7 | 51.712 | KV453000.1 | 4079161 | 11-scf00159 | 11 |
| AX-158025827 | 7 | 51.712 | KV453000.1 | 4080994 | 11-scf00159 | 11 |
| AX-158025832 | 7 | 51.712 | KV453000.1 | 4086380 | 11-scf00159 | 11 |
| AX-158025833 | 7 | 51.712 | KV453000.1 | 4087003 | 11-scf00159 | 11 |
| AX-157708637 | 7 | 51.712 | KV453000.1 | 4087469 | 11-scf00159 | 11 |
| AX-158025834 | 7 | 51.712 | KV453000.1 | 4087698 | 11-scf00159 | 11 |
| AX-158025835 | 7 | 51.712 | KV453000.1 | 4087851 | 11-scf00159 | 11 |
| AX-157821126 | 7 | 51.712 | KV453000.1 | 4091041 | 11-scf00159 | 11 |
| AX-158025840 | 7 | 51.712 | KV453000.1 | 4092090 | 11-scf00159 | 11 |
| AX-158025841 | 7 | 51.712 | KV453000.1 | 4092857 | 11-scf00159 | 11 |
| AX-158025847 | 7 | 51.712 | KV453000.1 | 4100141 | 11-scf00159 | 11 |
| AX-158025851 | 7 | 51.712 | KV453000.1 | 4104649 | 11-scf00159 | 11 |
| AX-158025858 | 7 | 51.712 | KV453000.1 | 4112295 | 11-scf00159 | 11 |
| AX-158025861 | 7 | 51.712 | KV453000.1 | 4113975 | 11-scf00159 | 11 |
| AX-158025863 | 7 | 51.712 | KV453000.1 | 4114892 | 11-scf00159 | 11 |
| AX-157752618 | 7 | 51.712 | KV453000.1 | 4115321 | 11-scf00159 | 11 |
| AX-158025865 | 7 | 51.712 | KV453000.1 | 4115545 | 11-scf00159 | 11 |
| AX-158025866 | 7 | 51.712 | KV453000.1 | 4116138 | 11-scf00159 | 11 |
| AX-157821128 | 7 | 51.712 | KV453000.1 | 4127360 | 11-scf00159 | 11 |
| AX-158025935 | 7 | 51.712 | KV453000.1 | 4171172 | 11-scf00159 | 11 |
| AX-158025942 | 7 | 51.712 | KV453000.1 | 4176096 | 11-scf00159 | 11 |
| AX-158025946 | 7 | 51.712 | KV453000.1 | 4182715 | 11-scf00159 | 11 |
| AX-158025951 | 7 | 51.712 | KV453000.1 | 4189738 | 11-scf00159 | 11 |
| AX-158026007 | 7 | 51.712 | KV453000.1 | 4241913 | 11-scf00159 | 11 |
| AX-157700434 | 7 | 51.712 | KV453000.1 | 4246617 | 11-scf00159 | 11 |
| AX-158026021 | 7 | 51.712 | KV453000.1 | 4250248 | 11-scf00159 | 11 |
| AX-158026034 | 7 | 51.712 | KV453000.1 | 4265050 | 11-scf00159 | 11 |
| AX-158026099 | 7 | 51.712 | KV453000.1 | 4333063 | 11-scf00159 | 11 |
| AX-158026129 | 7 | 51.712 | KV453000.1 | 4363797 | 11-scf00159 | 11 |
| AX-158026170 | 7 | 51.712 | KV453000.1 | 4392737 | 11-scf00159 | 11 |
| AX-158026315 | 7 | 51.712 | KV453000.1 | 4555098 | 11-scf00159 | 11 |
| AX-158025856 | 7 | 51.736 | KV453000.1 | 4110245 | 11-scf00159 | 11 |
| AX-158025874 | 7 | 51.736 | KV453000.1 | 4122558 | 11-scf00159 | 11 |

|              |   |        |            |         |             |    |
|--------------|---|--------|------------|---------|-------------|----|
| AX-157720256 | 7 | 51.736 | KV453000.1 | 4127828 | 11-scf00159 | 11 |
| AX-158025881 | 7 | 51.736 | KV453000.1 | 4127906 | 11-scf00159 | 11 |
| AX-158025882 | 7 | 51.736 | KV453000.1 | 4128481 | 11-scf00159 | 11 |
| AX-157821129 | 7 | 51.736 | KV453000.1 | 4137643 | 11-scf00159 | 11 |
| AX-158026305 | 7 | 51.736 | KV453000.1 | 4541887 | 11-scf00159 | 11 |
| AX-158025875 | 7 | 51.758 | KV453000.1 | 4124561 | 11-scf00159 | 11 |
| AX-158025782 | 7 | 51.787 | KV453000.1 | 4054869 | 11-scf00159 | 11 |
| AX-158025837 | 7 | 51.787 | KV453000.1 | 4091422 | 11-scf00159 | 11 |
| AX-157746083 | 7 | 51.787 | KV453000.1 | 4126763 | 11-scf00159 | 11 |
| AX-158025730 | 7 | 51.821 | KV453000.1 | 3996245 | 11-scf00159 | 11 |
| AX-157757727 | 7 | 51.821 | KV453000.1 | 4010333 | 11-scf00159 | 11 |
| AX-158025817 | 7 | 51.821 | KV453000.1 | 4076907 | 11-scf00159 | 11 |
| AX-158025825 | 7 | 51.821 | KV453000.1 | 4079794 | 11-scf00159 | 11 |
| AX-157775154 | 7 | 51.821 | KV453000.1 | 4127419 | 11-scf00159 | 11 |
| AX-158025890 | 7 | 51.821 | KV453000.1 | 4133962 | 11-scf00159 | 11 |
| AX-158025893 | 7 | 51.821 | KV453000.1 | 4136229 | 11-scf00159 | 11 |
| AX-158025903 | 7 | 51.821 | KV453000.1 | 4142537 | 11-scf00159 | 11 |
| AX-158025904 | 7 | 51.821 | KV453000.1 | 4144609 | 11-scf00159 | 11 |
| AX-158025909 | 7 | 51.821 | KV453000.1 | 4145849 | 11-scf00159 | 11 |
| AX-158025911 | 7 | 51.821 | KV453000.1 | 4147676 | 11-scf00159 | 11 |
| AX-158416067 | 7 | 51.821 | KV453000.1 | 4150795 | 11-scf00159 | 11 |
| AX-158025931 | 7 | 51.821 | KV453000.1 | 4168657 | 11-scf00159 | 11 |
| AX-158025934 | 7 | 51.821 | KV453000.1 | 4170288 | 11-scf00159 | 11 |
| AX-158025941 | 7 | 51.821 | KV453000.1 | 4174962 | 11-scf00159 | 11 |
| AX-157821134 | 7 | 51.821 | KV453000.1 | 4178632 | 11-scf00159 | 11 |
| AX-157821135 | 7 | 51.821 | KV453000.1 | 4184219 | 11-scf00159 | 11 |
| AX-158025947 | 7 | 51.821 | KV453000.1 | 4184939 | 11-scf00159 | 11 |
| AX-158025955 | 7 | 51.821 | KV453000.1 | 4190941 | 11-scf00159 | 11 |
| AX-157821136 | 7 | 51.821 | KV453000.1 | 4192004 | 11-scf00159 | 11 |
| AX-158025974 | 7 | 51.821 | KV453000.1 | 4208584 | 11-scf00159 | 11 |
| AX-158025983 | 7 | 51.821 | KV453000.1 | 4218332 | 11-scf00159 | 11 |
| AX-158026178 | 7 | 51.821 | KV453000.1 | 4401786 | 11-scf00159 | 11 |
| AX-158025191 | 7 | 51.93  | KV453000.1 | 3489361 | 11-scf00159 | 11 |
| AX-158025274 | 7 | 51.93  | KV453000.1 | 3572589 | 11-scf00159 | 11 |
| AX-158025542 | 7 | 51.93  | KV453000.1 | 3801546 | 11-scf00159 | 11 |
| AX-158025570 | 7 | 51.93  | KV453000.1 | 3823427 | 11-scf00159 | 11 |
| AX-157723561 | 7 | 51.93  | KV453000.1 | 3992583 | 11-scf00159 | 11 |
| AX-158025814 | 7 | 51.93  | KV453000.1 | 4075291 | 11-scf00159 | 11 |
| AX-158025828 | 7 | 51.93  | KV453000.1 | 4082156 | 11-scf00159 | 11 |
| AX-158025872 | 7 | 51.93  | KV453000.1 | 4122183 | 11-scf00159 | 11 |
| AX-158025892 | 7 | 51.93  | KV453000.1 | 4134770 | 11-scf00159 | 11 |
| AX-158025895 | 7 | 51.93  | KV453000.1 | 4137025 | 11-scf00159 | 11 |
| AX-158025897 | 7 | 51.93  | KV453000.1 | 4138284 | 11-scf00159 | 11 |
| AX-158025900 | 7 | 51.93  | KV453000.1 | 4140378 | 11-scf00159 | 11 |
| AX-157876455 | 7 | 51.93  | KV453000.1 | 4141938 | 11-scf00159 | 11 |
| AX-158025910 | 7 | 51.93  | KV453000.1 | 4146221 | 11-scf00159 | 11 |
| AX-158025920 | 7 | 51.93  | KV453000.1 | 4153340 | 11-scf00159 | 11 |
| AX-158379762 | 7 | 51.93  | KV453000.1 | 4153577 | 11-scf00159 | 11 |
| AX-158408130 | 7 | 51.93  | KV453000.1 | 4162051 | 11-scf00159 | 11 |
| AX-158025939 | 7 | 51.93  | KV453000.1 | 4173461 | 11-scf00159 | 11 |
| AX-157821131 | 7 | 51.93  | KV453000.1 | 4173957 | 11-scf00159 | 11 |

|              |   |       |            |         |             |    |
|--------------|---|-------|------------|---------|-------------|----|
| AX-158025943 | 7 | 51.93 | KV453000.1 | 4178944 | 11-scf00159 | 11 |
| AX-158422297 | 7 | 51.93 | KV453000.1 | 4188118 | 11-scf00159 | 11 |
| AX-158025954 | 7 | 51.93 | KV453000.1 | 4190538 | 11-scf00159 | 11 |
| AX-158025962 | 7 | 51.93 | KV453000.1 | 4200171 | 11-scf00159 | 11 |
| AX-157821137 | 7 | 51.93 | KV453000.1 | 4200604 | 11-scf00159 | 11 |
| AX-157758741 | 7 | 51.93 | KV453000.1 | 4201854 | 11-scf00159 | 11 |
| AX-157760886 | 7 | 51.93 | KV453000.1 | 4205234 | 11-scf00159 | 11 |
| AX-158025969 | 7 | 51.93 | KV453000.1 | 4205966 | 11-scf00159 | 11 |
| AX-158025970 | 7 | 51.93 | KV453000.1 | 4207472 | 11-scf00159 | 11 |
| AX-158025979 | 7 | 51.93 | KV453000.1 | 4214853 | 11-scf00159 | 11 |
| AX-158025980 | 7 | 51.93 | KV453000.1 | 4215653 | 11-scf00159 | 11 |
| AX-158025987 | 7 | 51.93 | KV453000.1 | 4220931 | 11-scf00159 | 11 |
| AX-158025988 | 7 | 51.93 | KV453000.1 | 4223128 | 11-scf00159 | 11 |
| AX-158025991 | 7 | 51.93 | KV453000.1 | 4226603 | 11-scf00159 | 11 |
| AX-158025994 | 7 | 51.93 | KV453000.1 | 4228326 | 11-scf00159 | 11 |
| AX-157821138 | 7 | 51.93 | KV453000.1 | 4228772 | 11-scf00159 | 11 |
| AX-158026002 | 7 | 51.93 | KV453000.1 | 4237579 | 11-scf00159 | 11 |
| AX-157821140 | 7 | 51.93 | KV453000.1 | 4241353 | 11-scf00159 | 11 |
| AX-158026010 | 7 | 51.93 | KV453000.1 | 4244279 | 11-scf00159 | 11 |
| AX-158026013 | 7 | 51.93 | KV453000.1 | 4247438 | 11-scf00159 | 11 |
| AX-158026014 | 7 | 51.93 | KV453000.1 | 4247992 | 11-scf00159 | 11 |
| AX-158026016 | 7 | 51.93 | KV453000.1 | 4248436 | 11-scf00159 | 11 |
| AX-158026018 | 7 | 51.93 | KV453000.1 | 4248669 | 11-scf00159 | 11 |
| AX-158026022 | 7 | 51.93 | KV453000.1 | 4250462 | 11-scf00159 | 11 |
| AX-158026025 | 7 | 51.93 | KV453000.1 | 4257630 | 11-scf00159 | 11 |
| AX-158026027 | 7 | 51.93 | KV453000.1 | 4260283 | 11-scf00159 | 11 |
| AX-158026029 | 7 | 51.93 | KV453000.1 | 4260939 | 11-scf00159 | 11 |
| AX-158026031 | 7 | 51.93 | KV453000.1 | 4262132 | 11-scf00159 | 11 |
| AX-158026033 | 7 | 51.93 | KV453000.1 | 4264702 | 11-scf00159 | 11 |
| AX-157821142 | 7 | 51.93 | KV453000.1 | 4265348 | 11-scf00159 | 11 |
| AX-158026038 | 7 | 51.93 | KV453000.1 | 4267166 | 11-scf00159 | 11 |
| AX-158026039 | 7 | 51.93 | KV453000.1 | 4270232 | 11-scf00159 | 11 |
| AX-158026041 | 7 | 51.93 | KV453000.1 | 4270753 | 11-scf00159 | 11 |
| AX-158026043 | 7 | 51.93 | KV453000.1 | 4274100 | 11-scf00159 | 11 |
| AX-158026056 | 7 | 51.93 | KV453000.1 | 4287537 | 11-scf00159 | 11 |
| AX-158026061 | 7 | 51.93 | KV453000.1 | 4289616 | 11-scf00159 | 11 |
| AX-158026062 | 7 | 51.93 | KV453000.1 | 4290104 | 11-scf00159 | 11 |
| AX-158026067 | 7 | 51.93 | KV453000.1 | 4293514 | 11-scf00159 | 11 |
| AX-158026072 | 7 | 51.93 | KV453000.1 | 4302971 | 11-scf00159 | 11 |
| AX-158026077 | 7 | 51.93 | KV453000.1 | 4306035 | 11-scf00159 | 11 |
| AX-158026078 | 7 | 51.93 | KV453000.1 | 4308148 | 11-scf00159 | 11 |
| AX-158026081 | 7 | 51.93 | KV453000.1 | 4311824 | 11-scf00159 | 11 |
| AX-158026084 | 7 | 51.93 | KV453000.1 | 4317224 | 11-scf00159 | 11 |
| AX-158026085 | 7 | 51.93 | KV453000.1 | 4321820 | 11-scf00159 | 11 |
| AX-158026088 | 7 | 51.93 | KV453000.1 | 4324328 | 11-scf00159 | 11 |
| AX-158026089 | 7 | 51.93 | KV453000.1 | 4326548 | 11-scf00159 | 11 |
| AX-158026094 | 7 | 51.93 | KV453000.1 | 4330955 | 11-scf00159 | 11 |
| AX-158026102 | 7 | 51.93 | KV453000.1 | 4335754 | 11-scf00159 | 11 |
| AX-158026107 | 7 | 51.93 | KV453000.1 | 4341305 | 11-scf00159 | 11 |
| AX-158026113 | 7 | 51.93 | KV453000.1 | 4350272 | 11-scf00159 | 11 |
| AX-158026114 | 7 | 51.93 | KV453000.1 | 4351604 | 11-scf00159 | 11 |

|              |   |        |             |         |             |    |
|--------------|---|--------|-------------|---------|-------------|----|
| AX-158026115 | 7 | 51.93  | KV453000.1  | 4352327 | 11-scf00159 | 11 |
| AX-158026117 | 7 | 51.93  | KV453000.1  | 4352966 | 11-scf00159 | 11 |
| AX-158026122 | 7 | 51.93  | KV453000.1  | 4360270 | 11-scf00159 | 11 |
| AX-158026123 | 7 | 51.93  | KV453000.1  | 4360646 | 11-scf00159 | 11 |
| AX-158026134 | 7 | 51.93  | KV453000.1  | 4368108 | 11-scf00159 | 11 |
| AX-158026136 | 7 | 51.93  | KV453000.1  | 4368480 | 11-scf00159 | 11 |
| AX-158026137 | 7 | 51.93  | KV453000.1  | 4369259 | 11-scf00159 | 11 |
| AX-158026138 | 7 | 51.93  | KV453000.1  | 4370660 | 11-scf00159 | 11 |
| AX-158026142 | 7 | 51.93  | KV453000.1  | 4373153 | 11-scf00159 | 11 |
| AX-158026145 | 7 | 51.93  | KV453000.1  | 4376779 | 11-scf00159 | 11 |
| AX-158026159 | 7 | 51.93  | KV453000.1  | 4388634 | 11-scf00159 | 11 |
| AX-158026171 | 7 | 51.93  | KV453000.1  | 4394338 | 11-scf00159 | 11 |
| AX-158026188 | 7 | 51.93  | KV453000.1  | 4412311 | 11-scf00159 | 11 |
| AX-158026198 | 7 | 51.93  | KV453000.1  | 4429703 | 11-scf00159 | 11 |
| AX-158026201 | 7 | 51.93  | KV453000.1  | 4431039 | 11-scf00159 | 11 |
| AX-157876460 | 7 | 51.93  | KV453000.1  | 4433880 | 11-scf00159 | 11 |
| AX-158026208 | 7 | 51.93  | KV453000.1  | 4438969 | 11-scf00159 | 11 |
| AX-158026213 | 7 | 51.93  | KV453000.1  | 4448541 | 11-scf00159 | 11 |
| AX-157856344 | 7 | 51.93  | KV453000.1  | 4462413 | 11-scf00159 | 11 |
| AX-158026228 | 7 | 51.93  | KV453000.1  | 4463491 | 11-scf00159 | 11 |
| AX-158026233 | 7 | 51.93  | KV453000.1  | 4466972 | 11-scf00159 | 11 |
| AX-158026235 | 7 | 51.93  | KV453000.1  | 4467829 | 11-scf00159 | 11 |
| AX-157821153 | 7 | 51.93  | KV453000.1  | 4496914 | 11-scf00159 | 11 |
| AX-157710364 | 7 | 51.93  | KV453000.1  | 4510907 | 11-scf00159 | 11 |
| AX-158026300 | 7 | 51.93  | KV453000.1  | 4536322 | 11-scf00159 | 11 |
| AX-158026329 | 7 | 51.93  | KV453000.1  | 4567489 | 11-scf00159 | 11 |
| AX-158026333 | 7 | 51.93  | KV453000.1  | 4571419 | 11-scf00159 | 11 |
| AX-158026428 | 7 | 51.93  | KV453000.1  | 4656666 | 11-scf00159 | 11 |
| AX-158026477 | 7 | 51.93  | KV453000.1  | 4705183 | 11-scf00159 | 11 |
| AX-158026479 | 7 | 51.93  | KV453000.1  | 4709059 | 11-scf00159 | 11 |
| AX-158026480 | 7 | 51.93  | KV453000.1  | 4709601 | 11-scf00159 | 11 |
| AX-157707437 | 7 | 51.93  | 3ML01034288 | 294     | scf09958_1  | UN |
| AX-158026162 | 7 | 52.005 | KV453000.1  | 4389552 | 11-scf00159 | 11 |
| AX-158026293 | 7 | 52.005 | KV453000.1  | 4529446 | 11-scf00159 | 11 |
| AX-158026165 | 7 | 52.053 | KV453000.1  | 4390493 | 11-scf00159 | 11 |
| AX-158026167 | 7 | 52.053 | KV453000.1  | 4391152 | 11-scf00159 | 11 |
| AX-158026187 | 7 | 52.097 | KV453000.1  | 4409926 | 11-scf00159 | 11 |
| AX-158025855 | 7 | 52.149 | KV453000.1  | 4108114 | 11-scf00159 | 11 |
| AX-158025968 | 7 | 52.149 | KV453000.1  | 4204828 | 11-scf00159 | 11 |
| AX-157743367 | 7 | 52.149 | KV453000.1  | 4415569 | 11-scf00159 | 11 |
| AX-158026191 | 7 | 52.149 | KV453000.1  | 4416988 | 11-scf00159 | 11 |
| AX-158026197 | 7 | 52.149 | KV453000.1  | 4427675 | 11-scf00159 | 11 |
| AX-157821144 | 7 | 52.149 | KV453000.1  | 4430461 | 11-scf00159 | 11 |
| AX-158026200 | 7 | 52.149 | KV453000.1  | 4430817 | 11-scf00159 | 11 |
| AX-158026202 | 7 | 52.149 | KV453000.1  | 4431548 | 11-scf00159 | 11 |
| AX-158026209 | 7 | 52.149 | KV453000.1  | 4439761 | 11-scf00159 | 11 |
| AX-158026220 | 7 | 52.149 | KV453000.1  | 4455927 | 11-scf00159 | 11 |
| AX-158026223 | 7 | 52.149 | KV453000.1  | 4458942 | 11-scf00159 | 11 |
| AX-158026241 | 7 | 52.149 | KV453000.1  | 4475585 | 11-scf00159 | 11 |
| AX-158026326 | 7 | 52.149 | KV453000.1  | 4565541 | 11-scf00159 | 11 |
| AX-158026384 | 7 | 52.149 | KV453000.1  | 4611845 | 11-scf00159 | 11 |



|              |   |        |            |         |             |    |
|--------------|---|--------|------------|---------|-------------|----|
| AX-158416069 | 7 | 52.153 | KV453000.1 | 4458543 | 11-scf00159 | 11 |
| AX-157742695 | 7 | 52.16  | KV453000.1 | 4460794 | 11-scf00159 | 11 |
| AX-158026229 | 7 | 52.17  | KV453000.1 | 4464049 | 11-scf00159 | 11 |
| AX-158026234 | 7 | 52.179 | KV453000.1 | 4467454 | 11-scf00159 | 11 |
| AX-158026238 | 7 | 52.179 | KV453000.1 | 4471439 | 11-scf00159 | 11 |
| AX-158026242 | 7 | 52.179 | KV453000.1 | 4478274 | 11-scf00159 | 11 |
| AX-158026313 | 7 | 52.179 | KV453000.1 | 4552172 | 11-scf00159 | 11 |
| AX-157821149 | 7 | 52.186 | KV453000.1 | 4470575 | 11-scf00159 | 11 |
| AX-157738798 | 7 | 52.191 | KV453000.1 | 4471753 | 11-scf00159 | 11 |
| AX-158026247 | 7 | 52.201 | KV453000.1 | 4487232 | 11-scf00159 | 11 |
| AX-158026254 | 7 | 52.201 | KV453000.1 | 4489705 | 11-scf00159 | 11 |
| AX-158026314 | 7 | 52.201 | KV453000.1 | 4554120 | 11-scf00159 | 11 |
| AX-158026255 | 7 | 52.209 | KV453000.1 | 4490874 | 11-scf00159 | 11 |
| AX-158026069 | 7 | 52.222 | KV453000.1 | 4294502 | 11-scf00159 | 11 |
| AX-157744949 | 7 | 52.222 | KV453000.1 | 4501155 | 11-scf00159 | 11 |
| AX-158026393 | 7 | 52.222 | KV453000.1 | 4622890 | 11-scf00159 | 11 |
| AX-157885017 | 7 | 52.222 | KV453000.1 | 4633464 | 11-scf00159 | 11 |
| AX-158026466 | 7 | 52.222 | KV453000.1 | 4698507 | 11-scf00159 | 11 |
| AX-158026492 | 7 | 52.222 | KV453000.1 | 4726107 | 11-scf00159 | 11 |
| AX-158026499 | 7 | 52.222 | KV453000.1 | 4731321 | 11-scf00159 | 11 |
| AX-158026270 | 7 | 52.245 | KV453000.1 | 4508189 | 11-scf00159 | 11 |
| AX-158026207 | 7 | 52.258 | KV453000.1 | 4438508 | 11-scf00159 | 11 |
| AX-158026252 | 7 | 52.258 | KV453000.1 | 4488698 | 11-scf00159 | 11 |
| AX-158026272 | 7 | 52.258 | KV453000.1 | 4513877 | 11-scf00159 | 11 |
| AX-158026274 | 7 | 52.258 | KV453000.1 | 4517416 | 11-scf00159 | 11 |
| AX-158026278 | 7 | 52.258 | KV453000.1 | 4521829 | 11-scf00159 | 11 |
| AX-158026279 | 7 | 52.258 | KV453000.1 | 4521977 | 11-scf00159 | 11 |
| AX-158026283 | 7 | 52.258 | KV453000.1 | 4523401 | 11-scf00159 | 11 |
| AX-158026288 | 7 | 52.258 | KV453000.1 | 4525523 | 11-scf00159 | 11 |
| AX-158026290 | 7 | 52.258 | KV453000.1 | 4527557 | 11-scf00159 | 11 |
| AX-158026297 | 7 | 52.258 | KV453000.1 | 4531443 | 11-scf00159 | 11 |
| AX-158026298 | 7 | 52.258 | KV453000.1 | 4535484 | 11-scf00159 | 11 |
| AX-158026301 | 7 | 52.258 | KV453000.1 | 4538159 | 11-scf00159 | 11 |
| AX-158026302 | 7 | 52.258 | KV453000.1 | 4538971 | 11-scf00159 | 11 |
| AX-158026303 | 7 | 52.258 | KV453000.1 | 4539842 | 11-scf00159 | 11 |
| AX-158026304 | 7 | 52.258 | KV453000.1 | 4541024 | 11-scf00159 | 11 |
| AX-158026308 | 7 | 52.258 | KV453000.1 | 4545945 | 11-scf00159 | 11 |
| AX-158026310 | 7 | 52.258 | KV453000.1 | 4549245 | 11-scf00159 | 11 |
| AX-158026311 | 7 | 52.258 | KV453000.1 | 4550539 | 11-scf00159 | 11 |
| AX-158026316 | 7 | 52.258 | KV453000.1 | 4556285 | 11-scf00159 | 11 |
| AX-158026321 | 7 | 52.258 | KV453000.1 | 4562314 | 11-scf00159 | 11 |
| AX-158026330 | 7 | 52.258 | KV453000.1 | 4568602 | 11-scf00159 | 11 |
| AX-158026335 | 7 | 52.258 | KV453000.1 | 4573781 | 11-scf00159 | 11 |
| AX-158026340 | 7 | 52.258 | KV453000.1 | 4578924 | 11-scf00159 | 11 |
| AX-158026342 | 7 | 52.258 | KV453000.1 | 4579983 | 11-scf00159 | 11 |
| AX-158026343 | 7 | 52.258 | KV453000.1 | 4581460 | 11-scf00159 | 11 |
| AX-158026349 | 7 | 52.258 | KV453000.1 | 4584093 | 11-scf00159 | 11 |
| AX-158026352 | 7 | 52.258 | KV453000.1 | 4586122 | 11-scf00159 | 11 |
| AX-158026401 | 7 | 52.258 | KV453000.1 | 4630418 | 11-scf00159 | 11 |
| AX-158026431 | 7 | 52.258 | KV453000.1 | 4664446 | 11-scf00159 | 11 |
| AX-158026550 | 7 | 52.258 | KV453000.1 | 4767814 | 11-scf00159 | 11 |

|              |   |        |            |         |             |    |
|--------------|---|--------|------------|---------|-------------|----|
| AX-158026358 | 7 | 52.301 | KV453000.1 | 4591701 | 11-scf00159 | 11 |
| AX-158026361 | 7 | 52.317 | KV453000.1 | 4595270 | 11-scf00159 | 11 |
| AX-158026362 | 7 | 52.367 | KV453000.1 | 4596945 | 11-scf00159 | 11 |
| AX-158026363 | 7 | 52.367 | KV453000.1 | 4597903 | 11-scf00159 | 11 |
| AX-158026365 | 7 | 52.367 | KV453000.1 | 4598257 | 11-scf00159 | 11 |
| AX-158026366 | 7 | 52.367 | KV453000.1 | 4598625 | 11-scf00159 | 11 |
| AX-158026370 | 7 | 52.488 | KV453000.1 | 4601162 | 11-scf00159 | 11 |
| AX-157714562 | 7 | 52.586 | KV453000.1 | 4192433 | 11-scf00159 | 11 |
| AX-158025995 | 7 | 52.586 | KV453000.1 | 4229940 | 11-scf00159 | 11 |
| AX-158026064 | 7 | 52.586 | KV453000.1 | 4291115 | 11-scf00159 | 11 |
| AX-157876458 | 7 | 52.586 | KV453000.1 | 4291668 | 11-scf00159 | 11 |
| AX-158026132 | 7 | 52.586 | KV453000.1 | 4365437 | 11-scf00159 | 11 |
| AX-158026180 | 7 | 52.586 | KV453000.1 | 4404360 | 11-scf00159 | 11 |
| AX-157821147 | 7 | 52.586 | KV453000.1 | 4445883 | 11-scf00159 | 11 |
| AX-157870268 | 7 | 52.586 | KV453000.1 | 4473434 | 11-scf00159 | 11 |
| AX-158026244 | 7 | 52.586 | KV453000.1 | 4480031 | 11-scf00159 | 11 |
| AX-157856345 | 7 | 52.586 | KV453000.1 | 4535418 | 11-scf00159 | 11 |
| AX-158026341 | 7 | 52.586 | KV453000.1 | 4579502 | 11-scf00159 | 11 |
| AX-158026376 | 7 | 52.586 | KV453000.1 | 4606741 | 11-scf00159 | 11 |
| AX-158026377 | 7 | 52.586 | KV453000.1 | 4607243 | 11-scf00159 | 11 |
| AX-158026378 | 7 | 52.586 | KV453000.1 | 4609869 | 11-scf00159 | 11 |
| AX-158026381 | 7 | 52.586 | KV453000.1 | 4611155 | 11-scf00159 | 11 |
| AX-158026386 | 7 | 52.586 | KV453000.1 | 4612828 | 11-scf00159 | 11 |
| AX-158026387 | 7 | 52.586 | KV453000.1 | 4614338 | 11-scf00159 | 11 |
| AX-157821157 | 7 | 52.586 | KV453000.1 | 4621300 | 11-scf00159 | 11 |
| AX-157876463 | 7 | 52.586 | KV453000.1 | 4630461 | 11-scf00159 | 11 |
| AX-158026403 | 7 | 52.695 | KV453000.1 | 4633622 | 11-scf00159 | 11 |
| AX-158026408 | 7 | 52.695 | KV453000.1 | 4636246 | 11-scf00159 | 11 |
| AX-158026410 | 7 | 52.695 | KV453000.1 | 4637503 | 11-scf00159 | 11 |
| AX-158026411 | 7 | 52.695 | KV453000.1 | 4637697 | 11-scf00159 | 11 |
| AX-158026427 | 7 | 52.914 | KV453000.1 | 4654019 | 11-scf00159 | 11 |
| AX-158026435 | 7 | 53.133 | KV453000.1 | 4669079 | 11-scf00159 | 11 |
| AX-158026437 | 7 | 53.133 | KV453000.1 | 4670009 | 11-scf00159 | 11 |
| AX-158026438 | 7 | 53.133 | KV453000.1 | 4670067 | 11-scf00159 | 11 |
| AX-158026440 | 7 | 53.133 | KV453000.1 | 4671493 | 11-scf00159 | 11 |
| AX-157727600 | 7 | 53.133 | KV453000.1 | 4675246 | 11-scf00159 | 11 |
| AX-157719995 | 7 | 53.133 | KV453000.1 | 4676121 | 11-scf00159 | 11 |
| AX-158026455 | 7 | 53.133 | KV453000.1 | 4691242 | 11-scf00159 | 11 |
| AX-158026443 | 7 | 53.24  | KV453000.1 | 4677538 | 11-scf00159 | 11 |
| AX-158026454 | 7 | 53.28  | KV453000.1 | 4690435 | 11-scf00159 | 11 |
| AX-158026457 | 7 | 53.28  | KV453000.1 | 4692533 | 11-scf00159 | 11 |
| AX-158026461 | 7 | 53.56  | KV453000.1 | 4694265 | 11-scf00159 | 11 |
| AX-157870269 | 7 | 53.56  | KV453000.1 | 4695404 | 11-scf00159 | 11 |
| AX-158025924 | 7 | 53.563 | KV453000.1 | 4157969 | 11-scf00159 | 11 |
| AX-158026462 | 7 | 53.563 | KV453000.1 | 4695975 | 11-scf00159 | 11 |
| AX-158026264 | 7 | 53.566 | KV453000.1 | 4500354 | 11-scf00159 | 11 |
| AX-158026266 | 7 | 53.566 | KV453000.1 | 4501702 | 11-scf00159 | 11 |
| AX-157710363 | 7 | 53.566 | KV453000.1 | 4510954 | 11-scf00159 | 11 |
| AX-158026468 | 7 | 53.566 | KV453000.1 | 4700469 | 11-scf00159 | 11 |
| AX-158026498 | 7 | 53.566 | KV453000.1 | 4730906 | 11-scf00159 | 11 |
| AX-158026531 | 7 | 53.566 | KV453000.1 | 4754924 | 11-scf00159 | 11 |

|              |   |        |            |         |             |    |
|--------------|---|--------|------------|---------|-------------|----|
| AX-158026474 | 7 | 53.57  | KV453000.1 | 4702622 | 11-scf00159 | 11 |
| AX-158026486 | 7 | 53.628 | KV453000.1 | 4718735 | 11-scf00159 | 11 |
| AX-158026556 | 7 | 53.628 | KV453000.1 | 4774439 | 11-scf00159 | 11 |
| AX-158026045 | 7 | 53.679 | KV453000.1 | 4277432 | 11-scf00159 | 11 |
| AX-158026193 | 7 | 53.679 | KV453000.1 | 4417667 | 11-scf00159 | 11 |
| AX-158026212 | 7 | 53.679 | KV453000.1 | 4444403 | 11-scf00159 | 11 |
| AX-158026215 | 7 | 53.679 | KV453000.1 | 4451467 | 11-scf00159 | 11 |
| AX-157694469 | 7 | 53.679 | KV453000.1 | 4714059 | 11-scf00159 | 11 |
| AX-158026487 | 7 | 53.679 | KV453000.1 | 4719141 | 11-scf00159 | 11 |
| AX-157885020 | 7 | 53.679 | KV453000.1 | 4722940 | 11-scf00159 | 11 |
| AX-158026488 | 7 | 53.679 | KV453000.1 | 4723055 | 11-scf00159 | 11 |
| AX-158026489 | 7 | 53.679 | KV453000.1 | 4724588 | 11-scf00159 | 11 |
| AX-158026493 | 7 | 53.774 | KV453000.1 | 4728738 | 11-scf00159 | 11 |
| AX-157722187 | 7 | 53.843 | KV453000.1 | 4731168 | 11-scf00159 | 11 |
| AX-158026509 | 7 | 54.007 | KV453000.1 | 4738612 | 11-scf00159 | 11 |
| AX-157821158 | 7 | 54.007 | KV453000.1 | 4741330 | 11-scf00159 | 11 |
| AX-158026515 | 7 | 54.007 | KV453000.1 | 4742680 | 11-scf00159 | 11 |
| AX-157870271 | 7 | 54.009 | KV453000.1 | 4744092 | 11-scf00159 | 11 |
| AX-158026521 | 7 | 54.012 | KV453000.1 | 4747571 | 11-scf00159 | 11 |
| AX-158026527 | 7 | 54.142 | KV453000.1 | 4751381 | 11-scf00159 | 11 |
| AX-158026528 | 7 | 54.142 | KV453000.1 | 4751957 | 11-scf00159 | 11 |
| AX-158026532 | 7 | 54.553 | KV453000.1 | 4755940 | 11-scf00159 | 11 |
| AX-158026534 | 7 | 54.553 | KV453000.1 | 4759688 | 11-scf00159 | 11 |
| AX-158026535 | 7 | 54.553 | KV453000.1 | 4760272 | 11-scf00159 | 11 |
| AX-158026537 | 7 | 54.553 | KV453000.1 | 4761095 | 11-scf00159 | 11 |
| AX-158026538 | 7 | 54.553 | KV453000.1 | 4761557 | 11-scf00159 | 11 |
| AX-158026541 | 7 | 54.553 | KV453000.1 | 4763660 | 11-scf00159 | 11 |
| AX-158026553 | 7 | 54.553 | KV453000.1 | 4771703 | 11-scf00159 | 11 |
| AX-158026544 | 7 | 54.689 | KV453000.1 | 4764898 | 11-scf00159 | 11 |
| AX-158026547 | 7 | 54.689 | KV453000.1 | 4765789 | 11-scf00159 | 11 |
| AX-158026548 | 7 | 54.689 | KV453000.1 | 4766128 | 11-scf00159 | 11 |
| AX-158026558 | 7 | 54.689 | KV453000.1 | 4774633 | 11-scf00159 | 11 |
| AX-158026745 | 7 | 54.689 | KV453000.1 | 4975802 | 11-scf00159 | 11 |
| AX-158026997 | 7 | 54.689 | KV453000.1 | 5182104 | 11-scf00159 | 11 |
| AX-157821192 | 7 | 54.689 | KV453000.1 | 5206599 | 11-scf00159 | 11 |
| AX-158027581 | 7 | 54.689 | KV453000.1 | 5741631 | 11-scf00159 | 11 |
| AX-158026560 | 7 | 54.691 | KV453000.1 | 4777058 | 11-scf00159 | 11 |
| AX-158026421 | 7 | 55.099 | KV453000.1 | 4647658 | 11-scf00159 | 11 |
| AX-158026554 | 7 | 55.099 | KV453000.1 | 4773364 | 11-scf00159 | 11 |
| AX-158026561 | 7 | 55.099 | KV453000.1 | 4777847 | 11-scf00159 | 11 |
| AX-158026563 | 7 | 55.099 | KV453000.1 | 4781182 | 11-scf00159 | 11 |
| AX-158026573 | 7 | 55.099 | KV453000.1 | 4787089 | 11-scf00159 | 11 |
| AX-158383814 | 7 | 55.099 | KV453000.1 | 4787132 | 11-scf00159 | 11 |
| AX-158026574 | 7 | 55.099 | KV453000.1 | 4788454 | 11-scf00159 | 11 |
| AX-157754986 | 7 | 55.099 | KV453000.1 | 4789623 | 11-scf00159 | 11 |
| AX-158026577 | 7 | 55.099 | KV453000.1 | 4791366 | 11-scf00159 | 11 |
| AX-158026578 | 7 | 55.099 | KV453000.1 | 4794127 | 11-scf00159 | 11 |
| AX-158026588 | 7 | 55.099 | KV453000.1 | 4803622 | 11-scf00159 | 11 |
| AX-158026590 | 7 | 55.099 | KV453000.1 | 4805002 | 11-scf00159 | 11 |
| AX-158026597 | 7 | 55.099 | KV453000.1 | 4811442 | 11-scf00159 | 11 |
| AX-157876467 | 7 | 55.099 | KV453000.1 | 4811645 | 11-scf00159 | 11 |

|              |   |        |             |         |             |    |
|--------------|---|--------|-------------|---------|-------------|----|
| AX-158026599 | 7 | 55.099 | KV453000.1  | 4812482 | 11-scf00159 | 11 |
| AX-157885021 | 7 | 55.099 | KV453000.1  | 4812538 | 11-scf00159 | 11 |
| AX-158026602 | 7 | 55.099 | KV453000.1  | 4816892 | 11-scf00159 | 11 |
| AX-158026603 | 7 | 55.099 | KV453000.1  | 4818597 | 11-scf00159 | 11 |
| AX-158026605 | 7 | 55.099 | KV453000.1  | 4819482 | 11-scf00159 | 11 |
| AX-158026607 | 7 | 55.099 | KV453000.1  | 4820665 | 11-scf00159 | 11 |
| AX-158026609 | 7 | 55.099 | KV453000.1  | 4821206 | 11-scf00159 | 11 |
| AX-158026610 | 7 | 55.099 | KV453000.1  | 4822380 | 11-scf00159 | 11 |
| AX-158026611 | 7 | 55.099 | KV453000.1  | 4823138 | 11-scf00159 | 11 |
| AX-158026613 | 7 | 55.099 | KV453000.1  | 4823735 | 11-scf00159 | 11 |
| AX-158026614 | 7 | 55.099 | KV453000.1  | 4824602 | 11-scf00159 | 11 |
| AX-158026618 | 7 | 55.099 | KV453000.1  | 4825281 | 11-scf00159 | 11 |
| AX-158026619 | 7 | 55.099 | KV453000.1  | 4825815 | 11-scf00159 | 11 |
| AX-158026623 | 7 | 55.099 | KV453000.1  | 4828525 | 11-scf00159 | 11 |
| AX-158026638 | 7 | 55.099 | KV453000.1  | 4842198 | 11-scf00159 | 11 |
| AX-158026640 | 7 | 55.099 | KV453000.1  | 4843172 | 11-scf00159 | 11 |
| AX-158026669 | 7 | 55.099 | KV453000.1  | 4892416 | 11-scf00159 | 11 |
| AX-157821171 | 7 | 55.099 | KV453000.1  | 4921498 | 11-scf00159 | 11 |
| AX-158026689 | 7 | 55.099 | KV453000.1  | 4924094 | 11-scf00159 | 11 |
| AX-158026758 | 7 | 55.099 | KV453000.1  | 4984135 | 11-scf00159 | 11 |
| AX-158026798 | 7 | 55.099 | KV453000.1  | 5015402 | 11-scf00159 | 11 |
| AX-158026803 | 7 | 55.099 | KV453000.1  | 5018166 | 11-scf00159 | 11 |
| AX-157821181 | 7 | 55.099 | KV453000.1  | 5042722 | 11-scf00159 | 11 |
| AX-158026902 | 7 | 55.099 | KV453000.1  | 5090655 | 11-scf00159 | 11 |
| AX-158026907 | 7 | 55.099 | KV453000.1  | 5094092 | 11-scf00159 | 11 |
| AX-158026977 | 7 | 55.099 | KV453000.1  | 5155521 | 11-scf00159 | 11 |
| AX-157694253 | 7 | 55.099 | KV453000.1  | 5159996 | 11-scf00159 | 11 |
| AX-158026983 | 7 | 55.099 | KV453000.1  | 5166336 | 11-scf00159 | 11 |
| AX-158027001 | 7 | 55.099 | KV453000.1  | 5189606 | 11-scf00159 | 11 |
| AX-158027010 | 7 | 55.099 | KV453000.1  | 5200816 | 11-scf00159 | 11 |
| AX-158027020 | 7 | 55.099 | KV453000.1  | 5207420 | 11-scf00159 | 11 |
| AX-158027022 | 7 | 55.099 | KV453000.1  | 5208522 | 11-scf00159 | 11 |
| AX-158026624 | 7 | 55.207 | KV453000.1  | 4829647 | 11-scf00159 | 11 |
| AX-158026626 | 7 | 55.207 | KV453000.1  | 4830943 | 11-scf00159 | 11 |
| AX-157715173 | 7 | 55.207 | KV453000.1  | 4831835 | 11-scf00159 | 11 |
| AX-158026966 | 7 | 55.207 | KV453000.1  | 5146670 | 11-scf00159 | 11 |
| AX-158027003 | 7 | 55.207 | KV453000.1  | 5194006 | 11-scf00159 | 11 |
| AX-158026630 | 7 | 55.236 | KV453000.1  | 4832404 | 11-scf00159 | 11 |
| AX-157856348 | 7 | 55.256 | KV453000.1  | 4835513 | 11-scf00159 | 11 |
| AX-158026854 | 7 | 55.256 | KV453000.1  | 5060179 | 11-scf00159 | 11 |
| AX-157707255 | 7 | 55.256 | 3ML01033823 | 353     | scf09489_1  | UN |
| AX-158026637 | 7 | 55.276 | KV453000.1  | 4840180 | 11-scf00159 | 11 |
| AX-158026641 | 7 | 55.289 | KV453000.1  | 4853482 | 11-scf00159 | 11 |
| AX-157774974 | 7 | 55.303 | KV453000.1  | 4858373 | 11-scf00159 | 11 |
| AX-158026645 | 7 | 55.317 | KV453000.1  | 4859670 | 11-scf00159 | 11 |
| AX-158026651 | 7 | 55.317 | KV453000.1  | 4864683 | 11-scf00159 | 11 |
| AX-158026653 | 7 | 55.317 | KV453000.1  | 4865942 | 11-scf00159 | 11 |
| AX-157821164 | 7 | 55.339 | KV453000.1  | 4866103 | 11-scf00159 | 11 |
| AX-158026655 | 7 | 55.355 | KV453000.1  | 4868571 | 11-scf00159 | 11 |
| AX-157718080 | 7 | 55.369 | KV453000.1  | 4872275 | 11-scf00159 | 11 |
| AX-157870272 | 7 | 55.377 | KV453000.1  | 4884586 | 11-scf00159 | 11 |

|              |   |        |            |         |             |    |
|--------------|---|--------|------------|---------|-------------|----|
| AX-157821172 | 7 | 55.377 | KV453000.1 | 4921735 | 11-scf00159 | 11 |
| AX-158026666 | 7 | 55.391 | KV453000.1 | 4885567 | 11-scf00159 | 11 |
| AX-158026663 | 7 | 55.412 | KV453000.1 | 4879530 | 11-scf00159 | 11 |
| AX-158026671 | 7 | 55.412 | KV453000.1 | 4894947 | 11-scf00159 | 11 |
| AX-158026673 | 7 | 55.412 | KV453000.1 | 4895972 | 11-scf00159 | 11 |
| AX-157716587 | 7 | 55.412 | KV453000.1 | 4898073 | 11-scf00159 | 11 |
| AX-157821167 | 7 | 55.427 | KV453000.1 | 4897127 | 11-scf00159 | 11 |
| AX-157821168 | 7 | 55.427 | KV453000.1 | 4898341 | 11-scf00159 | 11 |
| AX-158026678 | 7 | 55.448 | KV453000.1 | 4904347 | 11-scf00159 | 11 |
| AX-158026681 | 7 | 55.47  | KV453000.1 | 4908279 | 11-scf00159 | 11 |
| AX-158026587 | 7 | 55.485 | KV453000.1 | 4799754 | 11-scf00159 | 11 |
| AX-158026633 | 7 | 55.485 | KV453000.1 | 4834266 | 11-scf00159 | 11 |
| AX-157821165 | 7 | 55.485 | KV453000.1 | 4870284 | 11-scf00159 | 11 |
| AX-158026683 | 7 | 55.485 | KV453000.1 | 4910142 | 11-scf00159 | 11 |
| AX-158026789 | 7 | 55.485 | KV453000.1 | 5009434 | 11-scf00159 | 11 |
| AX-158026975 | 7 | 55.485 | KV453000.1 | 5154255 | 11-scf00159 | 11 |
| AX-158026684 | 7 | 55.536 | KV453000.1 | 4913693 | 11-scf00159 | 11 |
| AX-157821170 | 7 | 55.536 | KV453000.1 | 4918226 | 11-scf00159 | 11 |
| AX-157821173 | 7 | 55.536 | KV453000.1 | 4925346 | 11-scf00159 | 11 |
| AX-158026690 | 7 | 55.536 | KV453000.1 | 4925655 | 11-scf00159 | 11 |
| AX-157821190 | 7 | 55.536 | KV453000.1 | 5149537 | 11-scf00159 | 11 |
| AX-158026697 | 7 | 55.754 | KV453000.1 | 4932566 | 11-scf00159 | 11 |
| AX-158026702 | 7 | 55.754 | KV453000.1 | 4936574 | 11-scf00159 | 11 |
| AX-158026710 | 7 | 55.754 | KV453000.1 | 4952366 | 11-scf00159 | 11 |
| AX-158026711 | 7 | 55.754 | KV453000.1 | 4953418 | 11-scf00159 | 11 |
| AX-158026712 | 7 | 55.754 | KV453000.1 | 4953816 | 11-scf00159 | 11 |
| AX-158026713 | 7 | 55.754 | KV453000.1 | 4954019 | 11-scf00159 | 11 |
| AX-158026714 | 7 | 55.754 | KV453000.1 | 4954320 | 11-scf00159 | 11 |
| AX-158026716 | 7 | 55.754 | KV453000.1 | 4955899 | 11-scf00159 | 11 |
| AX-158026717 | 7 | 55.754 | KV453000.1 | 4956404 | 11-scf00159 | 11 |
| AX-158026719 | 7 | 55.754 | KV453000.1 | 4957356 | 11-scf00159 | 11 |
| AX-158026725 | 7 | 55.754 | KV453000.1 | 4964136 | 11-scf00159 | 11 |
| AX-158026729 | 7 | 55.754 | KV453000.1 | 4967229 | 11-scf00159 | 11 |
| AX-157696746 | 7 | 55.754 | KV453000.1 | 4996738 | 11-scf00159 | 11 |
| AX-158026836 | 7 | 55.754 | KV453000.1 | 5042044 | 11-scf00159 | 11 |
| AX-158026938 | 7 | 55.754 | KV453000.1 | 5117904 | 11-scf00159 | 11 |
| AX-158026958 | 7 | 55.754 | KV453000.1 | 5139415 | 11-scf00159 | 11 |
| AX-158026979 | 7 | 55.754 | KV453000.1 | 5158874 | 11-scf00159 | 11 |
| AX-158026740 | 7 | 55.812 | KV453000.1 | 4972731 | 11-scf00159 | 11 |
| AX-158026682 | 7 | 55.863 | KV453000.1 | 4909634 | 11-scf00159 | 11 |
| AX-158026698 | 7 | 55.863 | KV453000.1 | 4933525 | 11-scf00159 | 11 |
| AX-158026718 | 7 | 55.863 | KV453000.1 | 4956729 | 11-scf00159 | 11 |
| AX-158026743 | 7 | 55.863 | KV453000.1 | 4974573 | 11-scf00159 | 11 |
| AX-158026755 | 7 | 55.863 | KV453000.1 | 4982180 | 11-scf00159 | 11 |
| AX-158026760 | 7 | 55.863 | KV453000.1 | 4986479 | 11-scf00159 | 11 |
| AX-157718011 | 7 | 55.863 | KV453000.1 | 4987354 | 11-scf00159 | 11 |
| AX-158026764 | 7 | 55.863 | KV453000.1 | 4989578 | 11-scf00159 | 11 |
| AX-158026765 | 7 | 55.863 | KV453000.1 | 4991141 | 11-scf00159 | 11 |
| AX-157774678 | 7 | 55.863 | KV453000.1 | 4997469 | 11-scf00159 | 11 |
| AX-158379767 | 7 | 55.863 | KV453000.1 | 4997665 | 11-scf00159 | 11 |
| AX-158026774 | 7 | 55.863 | KV453000.1 | 5000395 | 11-scf00159 | 11 |

|              |   |        |            |         |             |    |
|--------------|---|--------|------------|---------|-------------|----|
| AX-158026778 | 7 | 55.863 | KV453000.1 | 5003108 | 11-scf00159 | 11 |
| AX-158026779 | 7 | 55.863 | KV453000.1 | 5005374 | 11-scf00159 | 11 |
| AX-158026781 | 7 | 55.863 | KV453000.1 | 5005866 | 11-scf00159 | 11 |
| AX-158026783 | 7 | 55.863 | KV453000.1 | 5006494 | 11-scf00159 | 11 |
| AX-158026793 | 7 | 55.863 | KV453000.1 | 5012785 | 11-scf00159 | 11 |
| AX-158026796 | 7 | 55.863 | KV453000.1 | 5014064 | 11-scf00159 | 11 |
| AX-158026800 | 7 | 55.863 | KV453000.1 | 5015985 | 11-scf00159 | 11 |
| AX-158026804 | 7 | 55.863 | KV453000.1 | 5019666 | 11-scf00159 | 11 |
| AX-158026807 | 7 | 55.863 | KV453000.1 | 5021466 | 11-scf00159 | 11 |
| AX-158026813 | 7 | 55.863 | KV453000.1 | 5024492 | 11-scf00159 | 11 |
| AX-158026819 | 7 | 55.863 | KV453000.1 | 5028240 | 11-scf00159 | 11 |
| AX-157821179 | 7 | 55.863 | KV453000.1 | 5030092 | 11-scf00159 | 11 |
| AX-158026824 | 7 | 55.863 | KV453000.1 | 5032385 | 11-scf00159 | 11 |
| AX-158026837 | 7 | 55.863 | KV453000.1 | 5043456 | 11-scf00159 | 11 |
| AX-158026839 | 7 | 55.863 | KV453000.1 | 5044899 | 11-scf00159 | 11 |
| AX-158026843 | 7 | 55.863 | KV453000.1 | 5048787 | 11-scf00159 | 11 |
| AX-158026853 | 7 | 55.863 | KV453000.1 | 5058471 | 11-scf00159 | 11 |
| AX-157876468 | 7 | 55.863 | KV453000.1 | 5068058 | 11-scf00159 | 11 |
| AX-158026865 | 7 | 55.863 | KV453000.1 | 5068393 | 11-scf00159 | 11 |
| AX-158026875 | 7 | 55.863 | KV453000.1 | 5072721 | 11-scf00159 | 11 |
| AX-158026884 | 7 | 55.863 | KV453000.1 | 5075869 | 11-scf00159 | 11 |
| AX-158026885 | 7 | 55.863 | KV453000.1 | 5076524 | 11-scf00159 | 11 |
| AX-158026888 | 7 | 55.863 | KV453000.1 | 5079617 | 11-scf00159 | 11 |
| AX-158026889 | 7 | 55.863 | KV453000.1 | 5080875 | 11-scf00159 | 11 |
| AX-158026892 | 7 | 55.863 | KV453000.1 | 5083406 | 11-scf00159 | 11 |
| AX-157821183 | 7 | 55.863 | KV453000.1 | 5083468 | 11-scf00159 | 11 |
| AX-157768708 | 7 | 55.863 | KV453000.1 | 5087041 | 11-scf00159 | 11 |
| AX-157821185 | 7 | 55.863 | KV453000.1 | 5095204 | 11-scf00159 | 11 |
| AX-157747876 | 7 | 55.863 | KV453000.1 | 5095808 | 11-scf00159 | 11 |
| AX-157821186 | 7 | 55.863 | KV453000.1 | 5097806 | 11-scf00159 | 11 |
| AX-157739532 | 7 | 55.863 | KV453000.1 | 5100670 | 11-scf00159 | 11 |
| AX-158026914 | 7 | 55.863 | KV453000.1 | 5102391 | 11-scf00159 | 11 |
| AX-158026917 | 7 | 55.863 | KV453000.1 | 5104134 | 11-scf00159 | 11 |
| AX-158026921 | 7 | 55.863 | KV453000.1 | 5105669 | 11-scf00159 | 11 |
| AX-158026924 | 7 | 55.863 | KV453000.1 | 5107789 | 11-scf00159 | 11 |
| AX-158026925 | 7 | 55.863 | KV453000.1 | 5108419 | 11-scf00159 | 11 |
| AX-158026928 | 7 | 55.863 | KV453000.1 | 5108878 | 11-scf00159 | 11 |
| AX-158026933 | 7 | 55.863 | KV453000.1 | 5114084 | 11-scf00159 | 11 |
| AX-158026936 | 7 | 55.863 | KV453000.1 | 5115411 | 11-scf00159 | 11 |
| AX-158026945 | 7 | 55.863 | KV453000.1 | 5125758 | 11-scf00159 | 11 |
| AX-158026973 | 7 | 55.863 | KV453000.1 | 5153811 | 11-scf00159 | 11 |
| AX-158026976 | 7 | 55.863 | KV453000.1 | 5154896 | 11-scf00159 | 11 |
| AX-158027004 | 7 | 55.863 | KV453000.1 | 5194627 | 11-scf00159 | 11 |
| AX-158027007 | 7 | 55.863 | KV453000.1 | 5198718 | 11-scf00159 | 11 |
| AX-157821200 | 7 | 55.863 | KV453000.1 | 5317435 | 11-scf00159 | 11 |
| AX-158027250 | 7 | 55.863 | KV453000.1 | 5448186 | 11-scf00159 | 11 |
| AX-158027374 | 7 | 55.863 | KV453000.1 | 5553239 | 11-scf00159 | 11 |
| AX-158027415 | 7 | 55.863 | KV453000.1 | 5584385 | 11-scf00159 | 11 |
| AX-158027611 | 7 | 55.863 | KV453000.1 | 5784385 | 11-scf00159 | 11 |
| AX-157821233 | 7 | 55.863 | KV453000.1 | 5803534 | 11-scf00159 | 11 |
| AX-158027730 | 7 | 55.863 | KV453000.1 | 5887258 | 11-scf00159 | 11 |

|              |   |        |            |         |             |    |
|--------------|---|--------|------------|---------|-------------|----|
| AX-157725935 | 7 | 55.973 | KV453000.1 | 5110643 | 11-scf00159 | 11 |
| AX-157713078 | 7 | 55.973 | KV453000.1 | 5114997 | 11-scf00159 | 11 |
| AX-158026941 | 7 | 55.973 | KV453000.1 | 5121021 | 11-scf00159 | 11 |
| AX-157771264 | 7 | 55.973 | KV453000.1 | 5122198 | 11-scf00159 | 11 |
| AX-158026942 | 7 | 55.973 | KV453000.1 | 5123673 | 11-scf00159 | 11 |
| AX-158026944 | 7 | 55.973 | KV453000.1 | 5124579 | 11-scf00159 | 11 |
| AX-158026949 | 7 | 55.973 | KV453000.1 | 5128369 | 11-scf00159 | 11 |
| AX-158026950 | 7 | 55.973 | KV453000.1 | 5129178 | 11-scf00159 | 11 |
| AX-158026951 | 7 | 55.973 | KV453000.1 | 5131451 | 11-scf00159 | 11 |
| AX-158026953 | 7 | 55.973 | KV453000.1 | 5132181 | 11-scf00159 | 11 |
| AX-157821188 | 7 | 55.973 | KV453000.1 | 5133796 | 11-scf00159 | 11 |
| AX-157722700 | 7 | 55.973 | KV453000.1 | 5135904 | 11-scf00159 | 11 |
| AX-158026961 | 7 | 55.973 | KV453000.1 | 5141531 | 11-scf00159 | 11 |
| AX-158026970 | 7 | 55.973 | KV453000.1 | 5148672 | 11-scf00159 | 11 |
| AX-158026978 | 7 | 55.973 | KV453000.1 | 5157558 | 11-scf00159 | 11 |
| AX-158026989 | 7 | 55.973 | KV453000.1 | 5173126 | 11-scf00159 | 11 |
| AX-158027219 | 7 | 55.973 | KV453000.1 | 5412203 | 11-scf00159 | 11 |
| AX-157821177 | 7 | 56.191 | KV453000.1 | 4971292 | 11-scf00159 | 11 |
| AX-158026787 | 7 | 56.191 | KV453000.1 | 5009119 | 11-scf00159 | 11 |
| AX-158026792 | 7 | 56.191 | KV453000.1 | 5011494 | 11-scf00159 | 11 |
| AX-158026797 | 7 | 56.191 | KV453000.1 | 5014959 | 11-scf00159 | 11 |
| AX-158026805 | 7 | 56.191 | KV453000.1 | 5020756 | 11-scf00159 | 11 |
| AX-157821182 | 7 | 56.191 | KV453000.1 | 5044991 | 11-scf00159 | 11 |
| AX-158026846 | 7 | 56.191 | KV453000.1 | 5050565 | 11-scf00159 | 11 |
| AX-158026874 | 7 | 56.191 | KV453000.1 | 5072563 | 11-scf00159 | 11 |
| AX-158026894 | 7 | 56.191 | KV453000.1 | 5083733 | 11-scf00159 | 11 |
| AX-158408153 | 7 | 56.191 | KV453000.1 | 5156084 | 11-scf00159 | 11 |
| AX-158026984 | 7 | 56.191 | KV453000.1 | 5167865 | 11-scf00159 | 11 |
| AX-157719932 | 7 | 56.191 | KV453000.1 | 5168113 | 11-scf00159 | 11 |
| AX-158026985 | 7 | 56.191 | KV453000.1 | 5169683 | 11-scf00159 | 11 |
| AX-158026986 | 7 | 56.191 | KV453000.1 | 5170882 | 11-scf00159 | 11 |
| AX-158026987 | 7 | 56.191 | KV453000.1 | 5171262 | 11-scf00159 | 11 |
| AX-158026991 | 7 | 56.191 | KV453000.1 | 5176191 | 11-scf00159 | 11 |
| AX-158026993 | 7 | 56.191 | KV453000.1 | 5176554 | 11-scf00159 | 11 |
| AX-158026994 | 7 | 56.191 | KV453000.1 | 5177223 | 11-scf00159 | 11 |
| AX-158026995 | 7 | 56.191 | KV453000.1 | 5178728 | 11-scf00159 | 11 |
| AX-158027005 | 7 | 56.191 | KV453000.1 | 5195114 | 11-scf00159 | 11 |
| AX-157885025 | 7 | 56.191 | KV453000.1 | 5198096 | 11-scf00159 | 11 |
| AX-157876469 | 7 | 56.191 | KV453000.1 | 5202295 | 11-scf00159 | 11 |
| AX-158027013 | 7 | 56.191 | KV453000.1 | 5202367 | 11-scf00159 | 11 |
| AX-157856350 | 7 | 56.191 | KV453000.1 | 5202448 | 11-scf00159 | 11 |
| AX-158027015 | 7 | 56.191 | KV453000.1 | 5204450 | 11-scf00159 | 11 |
| AX-158027048 | 7 | 56.191 | KV453000.1 | 5234326 | 11-scf00159 | 11 |
| AX-158027016 | 7 | 56.192 | KV453000.1 | 5205217 | 11-scf00159 | 11 |
| AX-158027046 | 7 | 56.518 | KV453000.1 | 5232624 | 11-scf00159 | 11 |
| AX-158027047 | 7 | 56.518 | KV453000.1 | 5233123 | 11-scf00159 | 11 |
| AX-157740318 | 7 | 56.566 | KV453000.1 | 5234630 | 11-scf00159 | 11 |
| AX-157821193 | 7 | 56.628 | KV453000.1 | 5224654 | 11-scf00159 | 11 |
| AX-158027052 | 7 | 56.628 | KV453000.1 | 5238395 | 11-scf00159 | 11 |
| AX-158027059 | 7 | 56.628 | KV453000.1 | 5244841 | 11-scf00159 | 11 |
| AX-158027172 | 7 | 56.628 | KV453000.1 | 5364875 | 11-scf00159 | 11 |

|              |   |        |            |         |             |    |
|--------------|---|--------|------------|---------|-------------|----|
| AX-158027060 | 7 | 56.671 | KV453000.1 | 5247709 | 11-scf00159 | 11 |
| AX-157744094 | 7 | 56.706 | KV453000.1 | 5251704 | 11-scf00159 | 11 |
| AX-158027151 | 7 | 56.706 | KV453000.1 | 5339376 | 11-scf00159 | 11 |
| AX-158027064 | 7 | 56.737 | KV453000.1 | 5256964 | 11-scf00159 | 11 |
| AX-158027065 | 7 | 56.737 | KV453000.1 | 5258471 | 11-scf00159 | 11 |
| AX-158027066 | 7 | 56.737 | KV453000.1 | 5259592 | 11-scf00159 | 11 |
| AX-158027174 | 7 | 56.737 | KV453000.1 | 5365198 | 11-scf00159 | 11 |
| AX-157865350 | 7 | 56.737 | KV453000.1 | 5400569 | 11-scf00159 | 11 |
| AX-158027232 | 7 | 56.737 | KV453000.1 | 5427372 | 11-scf00159 | 11 |
| AX-158027264 | 7 | 56.737 | KV453000.1 | 5461395 | 11-scf00159 | 11 |
| AX-158027308 | 7 | 56.737 | KV453000.1 | 5494204 | 11-scf00159 | 11 |
| AX-158027313 | 7 | 56.737 | KV453000.1 | 5496491 | 11-scf00159 | 11 |
| AX-158408161 | 7 | 56.737 | KV453000.1 | 5497467 | 11-scf00159 | 11 |
| AX-157821219 | 7 | 56.737 | KV453000.1 | 5518853 | 11-scf00159 | 11 |
| AX-157821223 | 7 | 56.737 | KV453000.1 | 5532893 | 11-scf00159 | 11 |
| AX-157821224 | 7 | 56.737 | KV453000.1 | 5533647 | 11-scf00159 | 11 |
| AX-158027349 | 7 | 56.737 | KV453000.1 | 5535491 | 11-scf00159 | 11 |
| AX-158027392 | 7 | 56.737 | KV453000.1 | 5567389 | 11-scf00159 | 11 |
| AX-158027424 | 7 | 56.737 | KV453000.1 | 5600753 | 11-scf00159 | 11 |
| AX-158027745 | 7 | 56.737 | KV453000.1 | 5900015 | 11-scf00159 | 11 |
| AX-158028212 | 7 | 56.737 | KV453000.1 | 6312329 | 11-scf00159 | 11 |
| AX-158027030 | 7 | 56.846 | KV453000.1 | 5213373 | 11-scf00159 | 11 |
| AX-158027038 | 7 | 56.846 | KV453000.1 | 5219783 | 11-scf00159 | 11 |
| AX-158027043 | 7 | 56.846 | KV453000.1 | 5228402 | 11-scf00159 | 11 |
| AX-158027062 | 7 | 56.846 | KV453000.1 | 5250051 | 11-scf00159 | 11 |
| AX-158027067 | 7 | 56.846 | KV453000.1 | 5260413 | 11-scf00159 | 11 |
| AX-158027068 | 7 | 56.846 | KV453000.1 | 5265768 | 11-scf00159 | 11 |
| AX-157708528 | 7 | 56.846 | KV453000.1 | 5272028 | 11-scf00159 | 11 |
| AX-158027077 | 7 | 56.846 | KV453000.1 | 5277027 | 11-scf00159 | 11 |
| AX-158027079 | 7 | 56.846 | KV453000.1 | 5277900 | 11-scf00159 | 11 |
| AX-158027080 | 7 | 56.846 | KV453000.1 | 5279146 | 11-scf00159 | 11 |
| AX-158027083 | 7 | 56.846 | KV453000.1 | 5280386 | 11-scf00159 | 11 |
| AX-158027087 | 7 | 56.846 | KV453000.1 | 5282211 | 11-scf00159 | 11 |
| AX-158027088 | 7 | 56.846 | KV453000.1 | 5283118 | 11-scf00159 | 11 |
| AX-158027090 | 7 | 56.846 | KV453000.1 | 5284293 | 11-scf00159 | 11 |
| AX-158027095 | 7 | 56.846 | KV453000.1 | 5286824 | 11-scf00159 | 11 |
| AX-158027096 | 7 | 56.846 | KV453000.1 | 5287566 | 11-scf00159 | 11 |
| AX-158027099 | 7 | 56.846 | KV453000.1 | 5289036 | 11-scf00159 | 11 |
| AX-158027112 | 7 | 56.846 | KV453000.1 | 5297996 | 11-scf00159 | 11 |
| AX-158027119 | 7 | 56.846 | KV453000.1 | 5303121 | 11-scf00159 | 11 |
| AX-158027120 | 7 | 56.846 | KV453000.1 | 5304049 | 11-scf00159 | 11 |
| AX-158027122 | 7 | 56.846 | KV453000.1 | 5306941 | 11-scf00159 | 11 |
| AX-158027124 | 7 | 56.846 | KV453000.1 | 5307501 | 11-scf00159 | 11 |
| AX-158027125 | 7 | 56.846 | KV453000.1 | 5308717 | 11-scf00159 | 11 |
| AX-158027127 | 7 | 56.846 | KV453000.1 | 5309905 | 11-scf00159 | 11 |
| AX-158027128 | 7 | 56.846 | KV453000.1 | 5310370 | 11-scf00159 | 11 |
| AX-158027131 | 7 | 56.846 | KV453000.1 | 5314346 | 11-scf00159 | 11 |
| AX-158027133 | 7 | 56.846 | KV453000.1 | 5315632 | 11-scf00159 | 11 |
| AX-158027135 | 7 | 56.846 | KV453000.1 | 5317920 | 11-scf00159 | 11 |
| AX-158027138 | 7 | 56.846 | KV453000.1 | 5321510 | 11-scf00159 | 11 |
| AX-157821201 | 7 | 56.846 | KV453000.1 | 5323040 | 11-scf00159 | 11 |



|              |   |        |            |         |             |    |
|--------------|---|--------|------------|---------|-------------|----|
| AX-158027140 | 7 | 56.846 | KV453000.1 | 5324094 | 11-scf00159 | 11 |
| AX-157742618 | 7 | 56.846 | KV453000.1 | 5332677 | 11-scf00159 | 11 |
| AX-158027150 | 7 | 56.846 | KV453000.1 | 5334083 | 11-scf00159 | 11 |
| AX-158027179 | 7 | 56.846 | KV453000.1 | 5373833 | 11-scf00159 | 11 |
| AX-158406108 | 7 | 56.846 | KV453000.1 | 5375056 | 11-scf00159 | 11 |
| AX-158027187 | 7 | 56.846 | KV453000.1 | 5380149 | 11-scf00159 | 11 |
| AX-158027190 | 7 | 56.846 | KV453000.1 | 5382452 | 11-scf00159 | 11 |
| AX-158027195 | 7 | 56.846 | KV453000.1 | 5385263 | 11-scf00159 | 11 |
| AX-157821207 | 7 | 56.846 | KV453000.1 | 5388734 | 11-scf00159 | 11 |
| AX-157821210 | 7 | 56.846 | KV453000.1 | 5397531 | 11-scf00159 | 11 |
| AX-158027205 | 7 | 56.846 | KV453000.1 | 5398753 | 11-scf00159 | 11 |
| AX-157870273 | 7 | 56.846 | KV453000.1 | 5401249 | 11-scf00159 | 11 |
| AX-158027208 | 7 | 56.846 | KV453000.1 | 5402115 | 11-scf00159 | 11 |
| AX-158027211 | 7 | 56.846 | KV453000.1 | 5403335 | 11-scf00159 | 11 |
| AX-158027212 | 7 | 56.846 | KV453000.1 | 5406604 | 11-scf00159 | 11 |
| AX-158027215 | 7 | 56.846 | KV453000.1 | 5408095 | 11-scf00159 | 11 |
| AX-158027216 | 7 | 56.846 | KV453000.1 | 5409898 | 11-scf00159 | 11 |
| AX-158027217 | 7 | 56.846 | KV453000.1 | 5410245 | 11-scf00159 | 11 |
| AX-158027228 | 7 | 56.846 | KV453000.1 | 5422264 | 11-scf00159 | 11 |
| AX-157821212 | 7 | 56.846 | KV453000.1 | 5422591 | 11-scf00159 | 11 |
| AX-158027231 | 7 | 56.846 | KV453000.1 | 5424443 | 11-scf00159 | 11 |
| AX-158027233 | 7 | 56.846 | KV453000.1 | 5428480 | 11-scf00159 | 11 |
| AX-158027238 | 7 | 56.846 | KV453000.1 | 5435254 | 11-scf00159 | 11 |
| AX-158027239 | 7 | 56.846 | KV453000.1 | 5436529 | 11-scf00159 | 11 |
| AX-158027240 | 7 | 56.846 | KV453000.1 | 5438076 | 11-scf00159 | 11 |
| AX-158027241 | 7 | 56.846 | KV453000.1 | 5438794 | 11-scf00159 | 11 |
| AX-157821215 | 7 | 56.846 | KV453000.1 | 5440540 | 11-scf00159 | 11 |
| AX-158027244 | 7 | 56.846 | KV453000.1 | 5441095 | 11-scf00159 | 11 |
| AX-158027248 | 7 | 56.846 | KV453000.1 | 5446594 | 11-scf00159 | 11 |
| AX-158027251 | 7 | 56.846 | KV453000.1 | 5448970 | 11-scf00159 | 11 |
| AX-158027254 | 7 | 56.846 | KV453000.1 | 5450773 | 11-scf00159 | 11 |
| AX-158027255 | 7 | 56.846 | KV453000.1 | 5451014 | 11-scf00159 | 11 |
| AX-158027256 | 7 | 56.846 | KV453000.1 | 5451235 | 11-scf00159 | 11 |
| AX-158027261 | 7 | 56.846 | KV453000.1 | 5460428 | 11-scf00159 | 11 |
| AX-158027262 | 7 | 56.846 | KV453000.1 | 5461311 | 11-scf00159 | 11 |
| AX-158027269 | 7 | 56.846 | KV453000.1 | 5466566 | 11-scf00159 | 11 |
| AX-158027271 | 7 | 56.846 | KV453000.1 | 5468454 | 11-scf00159 | 11 |
| AX-158027273 | 7 | 56.846 | KV453000.1 | 5469718 | 11-scf00159 | 11 |
| AX-158027274 | 7 | 56.846 | KV453000.1 | 5470236 | 11-scf00159 | 11 |
| AX-158027296 | 7 | 56.846 | KV453000.1 | 5484867 | 11-scf00159 | 11 |
| AX-157821221 | 7 | 56.846 | KV453000.1 | 5519561 | 11-scf00159 | 11 |
| AX-158391266 | 7 | 56.846 | KV453000.1 | 5523459 | 11-scf00159 | 11 |
| AX-158027381 | 7 | 56.846 | KV453000.1 | 5558928 | 11-scf00159 | 11 |
| AX-157727017 | 7 | 56.846 | KV453000.1 | 5594358 | 11-scf00159 | 11 |
| AX-158027470 | 7 | 56.846 | KV453000.1 | 5635419 | 11-scf00159 | 11 |
| AX-158027576 | 7 | 56.846 | KV453000.1 | 5735867 | 11-scf00159 | 11 |
| AX-157722006 | 7 | 56.846 | KV453000.1 | 5977704 | 11-scf00159 | 11 |
| AX-158027289 | 7 | 56.9   | KV453000.1 | 5481189 | 11-scf00159 | 11 |
| AX-158027106 | 7 | 56.955 | KV453000.1 | 5295256 | 11-scf00159 | 11 |
| AX-158027286 | 7 | 56.955 | KV453000.1 | 5477950 | 11-scf00159 | 11 |
| AX-158027291 | 7 | 56.955 | KV453000.1 | 5482130 | 11-scf00159 | 11 |

|              |   |        |            |         |             |    |
|--------------|---|--------|------------|---------|-------------|----|
| AX-158027293 | 7 | 56.955 | KV453000.1 | 5482856 | 11-scf00159 | 11 |
| AX-158027302 | 7 | 56.955 | KV453000.1 | 5489885 | 11-scf00159 | 11 |
| AX-158027304 | 7 | 56.955 | KV453000.1 | 5491224 | 11-scf00159 | 11 |
| AX-158027315 | 7 | 56.955 | KV453000.1 | 5497787 | 11-scf00159 | 11 |
| AX-158027317 | 7 | 56.955 | KV453000.1 | 5499586 | 11-scf00159 | 11 |
| AX-158027318 | 7 | 56.955 | KV453000.1 | 5502473 | 11-scf00159 | 11 |
| AX-157753494 | 7 | 56.955 | KV453000.1 | 5505280 | 11-scf00159 | 11 |
| AX-157821220 | 7 | 56.955 | KV453000.1 | 5519498 | 11-scf00159 | 11 |
| AX-158027417 | 7 | 56.955 | KV453000.1 | 5590607 | 11-scf00159 | 11 |
| AX-158027421 | 7 | 56.955 | KV453000.1 | 5598228 | 11-scf00159 | 11 |
| AX-158027327 | 7 | 56.961 | KV453000.1 | 5513098 | 11-scf00159 | 11 |
| AX-158027328 | 7 | 56.968 | KV453000.1 | 5514235 | 11-scf00159 | 11 |
| AX-158027334 | 7 | 57.033 | KV453000.1 | 5523130 | 11-scf00159 | 11 |
| AX-158027352 | 7 | 57.033 | KV453000.1 | 5538219 | 11-scf00159 | 11 |
| AX-158408158 | 7 | 57.065 | KV453000.1 | 5375756 | 11-scf00159 | 11 |
| AX-158027330 | 7 | 57.065 | KV453000.1 | 5515966 | 11-scf00159 | 11 |
| AX-157821222 | 7 | 57.065 | KV453000.1 | 5524189 | 11-scf00159 | 11 |
| AX-158027338 | 7 | 57.065 | KV453000.1 | 5524768 | 11-scf00159 | 11 |
| AX-158027341 | 7 | 57.065 | KV453000.1 | 5528506 | 11-scf00159 | 11 |
| AX-158027344 | 7 | 57.065 | KV453000.1 | 5533220 | 11-scf00159 | 11 |
| AX-158027348 | 7 | 57.065 | KV453000.1 | 5534799 | 11-scf00159 | 11 |
| AX-157747085 | 7 | 57.065 | KV453000.1 | 5536817 | 11-scf00159 | 11 |
| AX-158027362 | 7 | 57.065 | KV453000.1 | 5544213 | 11-scf00159 | 11 |
| AX-158027367 | 7 | 57.065 | KV453000.1 | 5550034 | 11-scf00159 | 11 |
| AX-158027369 | 7 | 57.065 | KV453000.1 | 5550445 | 11-scf00159 | 11 |
| AX-158027373 | 7 | 57.065 | KV453000.1 | 5552343 | 11-scf00159 | 11 |
| AX-157743703 | 7 | 57.065 | KV453000.1 | 5552459 | 11-scf00159 | 11 |
| AX-158027380 | 7 | 57.065 | KV453000.1 | 5558779 | 11-scf00159 | 11 |
| AX-158027397 | 7 | 57.065 | KV453000.1 | 5570456 | 11-scf00159 | 11 |
| AX-158027403 | 7 | 57.065 | KV453000.1 | 5573147 | 11-scf00159 | 11 |
| AX-158027407 | 7 | 57.065 | KV453000.1 | 5577115 | 11-scf00159 | 11 |
| AX-158027409 | 7 | 57.065 | KV453000.1 | 5579069 | 11-scf00159 | 11 |
| AX-158027445 | 7 | 57.065 | KV453000.1 | 5610584 | 11-scf00159 | 11 |
| AX-158027538 | 7 | 57.065 | KV453000.1 | 5705946 | 11-scf00159 | 11 |
| AX-158027416 | 7 | 57.115 | KV453000.1 | 5590171 | 11-scf00159 | 11 |
| AX-158027405 | 7 | 57.151 | KV453000.1 | 5575894 | 11-scf00159 | 11 |
| AX-158027430 | 7 | 57.151 | KV453000.1 | 5602520 | 11-scf00159 | 11 |
| AX-158027447 | 7 | 57.151 | KV453000.1 | 5612668 | 11-scf00159 | 11 |
| AX-158027479 | 7 | 57.151 | KV453000.1 | 5642202 | 11-scf00159 | 11 |
| AX-157700593 | 7 | 57.151 | KV453000.1 | 5869704 | 11-scf00159 | 11 |
| AX-158408164 | 7 | 57.182 | KV453000.1 | 5616336 | 11-scf00159 | 11 |
| AX-158027464 | 7 | 57.227 | KV453000.1 | 5629742 | 11-scf00159 | 11 |
| AX-158027136 | 7 | 57.283 | KV453000.1 | 5319004 | 11-scf00159 | 11 |
| AX-158027292 | 7 | 57.283 | KV453000.1 | 5482488 | 11-scf00159 | 11 |
| AX-158027294 | 7 | 57.283 | KV453000.1 | 5484332 | 11-scf00159 | 11 |
| AX-158027342 | 7 | 57.283 | KV453000.1 | 5531531 | 11-scf00159 | 11 |
| AX-158027345 | 7 | 57.283 | KV453000.1 | 5533921 | 11-scf00159 | 11 |
| AX-157821226 | 7 | 57.283 | KV453000.1 | 5538955 | 11-scf00159 | 11 |
| AX-158027370 | 7 | 57.283 | KV453000.1 | 5550890 | 11-scf00159 | 11 |
| AX-158027378 | 7 | 57.283 | KV453000.1 | 5557384 | 11-scf00159 | 11 |
| AX-158027382 | 7 | 57.283 | KV453000.1 | 5559528 | 11-scf00159 | 11 |

|              |   |        |            |         |             |    |
|--------------|---|--------|------------|---------|-------------|----|
| AX-158027384 | 7 | 57.283 | KV453000.1 | 5559848 | 11-scf00159 | 11 |
| AX-158027385 | 7 | 57.283 | KV453000.1 | 5559938 | 11-scf00159 | 11 |
| AX-158027387 | 7 | 57.283 | KV453000.1 | 5562896 | 11-scf00159 | 11 |
| AX-158027394 | 7 | 57.283 | KV453000.1 | 5568758 | 11-scf00159 | 11 |
| AX-158027400 | 7 | 57.283 | KV453000.1 | 5571477 | 11-scf00159 | 11 |
| AX-158027418 | 7 | 57.283 | KV453000.1 | 5593149 | 11-scf00159 | 11 |
| AX-158027419 | 7 | 57.283 | KV453000.1 | 5593704 | 11-scf00159 | 11 |
| AX-158027423 | 7 | 57.283 | KV453000.1 | 5599740 | 11-scf00159 | 11 |
| AX-158027427 | 7 | 57.283 | KV453000.1 | 5601897 | 11-scf00159 | 11 |
| AX-158027436 | 7 | 57.283 | KV453000.1 | 5605572 | 11-scf00159 | 11 |
| AX-158027441 | 7 | 57.283 | KV453000.1 | 5609542 | 11-scf00159 | 11 |
| AX-158027452 | 7 | 57.283 | KV453000.1 | 5617260 | 11-scf00159 | 11 |
| AX-158408165 | 7 | 57.283 | KV453000.1 | 5625911 | 11-scf00159 | 11 |
| AX-158027467 | 7 | 57.283 | KV453000.1 | 5632037 | 11-scf00159 | 11 |
| AX-158027472 | 7 | 57.283 | KV453000.1 | 5638366 | 11-scf00159 | 11 |
| AX-158027482 | 7 | 57.283 | KV453000.1 | 5643209 | 11-scf00159 | 11 |
| AX-158027483 | 7 | 57.283 | KV453000.1 | 5645356 | 11-scf00159 | 11 |
| AX-158027484 | 7 | 57.283 | KV453000.1 | 5647144 | 11-scf00159 | 11 |
| AX-158379772 | 7 | 57.283 | KV453000.1 | 5662089 | 11-scf00159 | 11 |
| AX-158027495 | 7 | 57.283 | KV453000.1 | 5664473 | 11-scf00159 | 11 |
| AX-158027514 | 7 | 57.283 | KV453000.1 | 5680021 | 11-scf00159 | 11 |
| AX-158027515 | 7 | 57.283 | KV453000.1 | 5681384 | 11-scf00159 | 11 |
| AX-158027517 | 7 | 57.283 | KV453000.1 | 5681526 | 11-scf00159 | 11 |
| AX-158027524 | 7 | 57.283 | KV453000.1 | 5696289 | 11-scf00159 | 11 |
| AX-158027526 | 7 | 57.283 | KV453000.1 | 5698501 | 11-scf00159 | 11 |
| AX-158027528 | 7 | 57.283 | KV453000.1 | 5699570 | 11-scf00159 | 11 |
| AX-158027532 | 7 | 57.283 | KV453000.1 | 5702121 | 11-scf00159 | 11 |
| AX-158027539 | 7 | 57.283 | KV453000.1 | 5706152 | 11-scf00159 | 11 |
| AX-158027544 | 7 | 57.283 | KV453000.1 | 5712054 | 11-scf00159 | 11 |
| AX-158408166 | 7 | 57.283 | KV453000.1 | 5713228 | 11-scf00159 | 11 |
| AX-158027552 | 7 | 57.283 | KV453000.1 | 5718246 | 11-scf00159 | 11 |
| AX-158027567 | 7 | 57.283 | KV453000.1 | 5728053 | 11-scf00159 | 11 |
| AX-158027591 | 7 | 57.283 | KV453000.1 | 5750289 | 11-scf00159 | 11 |
| AX-157717992 | 7 | 57.283 | KV453000.1 | 5760203 | 11-scf00159 | 11 |
| AX-158027647 | 7 | 57.283 | KV453000.1 | 5819697 | 11-scf00159 | 11 |
| AX-158027657 | 7 | 57.283 | KV453000.1 | 5831279 | 11-scf00159 | 11 |
| AX-158027687 | 7 | 57.283 | KV453000.1 | 5853974 | 11-scf00159 | 11 |
| AX-158027688 | 7 | 57.283 | KV453000.1 | 5855354 | 11-scf00159 | 11 |
| AX-158027924 | 7 | 57.283 | KV453000.1 | 6071873 | 11-scf00159 | 11 |
| AX-158027952 | 7 | 57.283 | KV453000.1 | 6095038 | 11-scf00159 | 11 |
| AX-157740817 | 7 | 57.283 | KV453000.1 | 6155450 | 11-scf00159 | 11 |
| AX-157754204 | 7 | 57.391 | KV453000.1 | 5721323 | 11-scf00159 | 11 |
| AX-158027141 | 7 | 57.502 | KV453000.1 | 5324371 | 11-scf00159 | 11 |
| AX-158027276 | 7 | 57.502 | KV453000.1 | 5470792 | 11-scf00159 | 11 |
| AX-158027420 | 7 | 57.502 | KV453000.1 | 5596093 | 11-scf00159 | 11 |
| AX-158406113 | 7 | 57.502 | KV453000.1 | 5616063 | 11-scf00159 | 11 |
| AX-158027454 | 7 | 57.502 | KV453000.1 | 5618185 | 11-scf00159 | 11 |
| AX-158027500 | 7 | 57.502 | KV453000.1 | 5668623 | 11-scf00159 | 11 |
| AX-158027560 | 7 | 57.502 | KV453000.1 | 5721898 | 11-scf00159 | 11 |
| AX-158027566 | 7 | 57.502 | KV453000.1 | 5727607 | 11-scf00159 | 11 |
| AX-158027579 | 7 | 57.502 | KV453000.1 | 5740436 | 11-scf00159 | 11 |

|              |   |        |            |         |             |    |
|--------------|---|--------|------------|---------|-------------|----|
| AX-158027593 | 7 | 57.502 | KV453000.1 | 5751207 | 11-scf00159 | 11 |
| AX-158027596 | 7 | 57.502 | KV453000.1 | 5754585 | 11-scf00159 | 11 |
| AX-158408167 | 7 | 57.502 | KV453000.1 | 5757284 | 11-scf00159 | 11 |
| AX-158421722 | 7 | 57.502 | KV453000.1 | 5759691 | 11-scf00159 | 11 |
| AX-158027602 | 7 | 57.502 | KV453000.1 | 5764231 | 11-scf00159 | 11 |
| AX-158027608 | 7 | 57.502 | KV453000.1 | 5773183 | 11-scf00159 | 11 |
| AX-158408169 | 7 | 57.502 | KV453000.1 | 5780057 | 11-scf00159 | 11 |
| AX-158027609 | 7 | 57.502 | KV453000.1 | 5780423 | 11-scf00159 | 11 |
| AX-158027610 | 7 | 57.502 | KV453000.1 | 5782429 | 11-scf00159 | 11 |
| AX-158027615 | 7 | 57.502 | KV453000.1 | 5789828 | 11-scf00159 | 11 |
| AX-157821231 | 7 | 57.502 | KV453000.1 | 5791292 | 11-scf00159 | 11 |
| AX-157821232 | 7 | 57.502 | KV453000.1 | 5791705 | 11-scf00159 | 11 |
| AX-158027620 | 7 | 57.502 | KV453000.1 | 5792347 | 11-scf00159 | 11 |
| AX-158027621 | 7 | 57.502 | KV453000.1 | 5793151 | 11-scf00159 | 11 |
| AX-158027629 | 7 | 57.502 | KV453000.1 | 5798453 | 11-scf00159 | 11 |
| AX-158027632 | 7 | 57.502 | KV453000.1 | 5799869 | 11-scf00159 | 11 |
| AX-158027635 | 7 | 57.502 | KV453000.1 | 5804073 | 11-scf00159 | 11 |
| AX-158027641 | 7 | 57.502 | KV453000.1 | 5812355 | 11-scf00159 | 11 |
| AX-158408171 | 7 | 57.502 | KV453000.1 | 5815781 | 11-scf00159 | 11 |
| AX-158416071 | 7 | 57.502 | KV453000.1 | 5816392 | 11-scf00159 | 11 |
| AX-158027644 | 7 | 57.502 | KV453000.1 | 5817945 | 11-scf00159 | 11 |
| AX-158027646 | 7 | 57.502 | KV453000.1 | 5819060 | 11-scf00159 | 11 |
| AX-158027649 | 7 | 57.502 | KV453000.1 | 5820312 | 11-scf00159 | 11 |
| AX-158027651 | 7 | 57.502 | KV453000.1 | 5820747 | 11-scf00159 | 11 |
| AX-158027653 | 7 | 57.502 | KV453000.1 | 5827472 | 11-scf00159 | 11 |
| AX-158027656 | 7 | 57.502 | KV453000.1 | 5830750 | 11-scf00159 | 11 |
| AX-158027659 | 7 | 57.502 | KV453000.1 | 5832972 | 11-scf00159 | 11 |
| AX-157821235 | 7 | 57.502 | KV453000.1 | 5836521 | 11-scf00159 | 11 |
| AX-157821236 | 7 | 57.502 | KV453000.1 | 5838193 | 11-scf00159 | 11 |
| AX-158027667 | 7 | 57.502 | KV453000.1 | 5842010 | 11-scf00159 | 11 |
| AX-158027671 | 7 | 57.502 | KV453000.1 | 5843043 | 11-scf00159 | 11 |
| AX-158027672 | 7 | 57.502 | KV453000.1 | 5843884 | 11-scf00159 | 11 |
| AX-158027693 | 7 | 57.502 | KV453000.1 | 5858607 | 11-scf00159 | 11 |
| AX-158027694 | 7 | 57.502 | KV453000.1 | 5859479 | 11-scf00159 | 11 |
| AX-158027696 | 7 | 57.502 | KV453000.1 | 5859882 | 11-scf00159 | 11 |
| AX-158027697 | 7 | 57.502 | KV453000.1 | 5860956 | 11-scf00159 | 11 |
| AX-158027701 | 7 | 57.502 | KV453000.1 | 5862308 | 11-scf00159 | 11 |
| AX-158027705 | 7 | 57.502 | KV453000.1 | 5863775 | 11-scf00159 | 11 |
| AX-158027706 | 7 | 57.502 | KV453000.1 | 5865477 | 11-scf00159 | 11 |
| AX-158027709 | 7 | 57.502 | KV453000.1 | 5870073 | 11-scf00159 | 11 |
| AX-158027711 | 7 | 57.502 | KV453000.1 | 5870960 | 11-scf00159 | 11 |
| AX-158027712 | 7 | 57.502 | KV453000.1 | 5872420 | 11-scf00159 | 11 |
| AX-158027714 | 7 | 57.502 | KV453000.1 | 5873318 | 11-scf00159 | 11 |
| AX-158027717 | 7 | 57.502 | KV453000.1 | 5874908 | 11-scf00159 | 11 |
| AX-158027718 | 7 | 57.502 | KV453000.1 | 5876168 | 11-scf00159 | 11 |
| AX-158027719 | 7 | 57.502 | KV453000.1 | 5877159 | 11-scf00159 | 11 |
| AX-158027725 | 7 | 57.502 | KV453000.1 | 5882749 | 11-scf00159 | 11 |
| AX-158027726 | 7 | 57.502 | KV453000.1 | 5884798 | 11-scf00159 | 11 |
| AX-158027737 | 7 | 57.502 | KV453000.1 | 5894645 | 11-scf00159 | 11 |
| AX-158406118 | 7 | 57.502 | KV453000.1 | 5895628 | 11-scf00159 | 11 |
| AX-158027741 | 7 | 57.502 | KV453000.1 | 5897118 | 11-scf00159 | 11 |

|              |   |        |            |         |             |    |
|--------------|---|--------|------------|---------|-------------|----|
| AX-158027753 | 7 | 57.502 | KV453000.1 | 5907328 | 11-scf00159 | 11 |
| AX-158027764 | 7 | 57.502 | KV453000.1 | 5914614 | 11-scf00159 | 11 |
| AX-158027767 | 7 | 57.502 | KV453000.1 | 5915530 | 11-scf00159 | 11 |
| AX-158027777 | 7 | 57.502 | KV453000.1 | 5932021 | 11-scf00159 | 11 |
| AX-157752892 | 7 | 57.502 | KV453000.1 | 5936746 | 11-scf00159 | 11 |
| AX-157821239 | 7 | 57.502 | KV453000.1 | 5939664 | 11-scf00159 | 11 |
| AX-157885027 | 7 | 57.502 | KV453000.1 | 5940441 | 11-scf00159 | 11 |
| AX-157821240 | 7 | 57.502 | KV453000.1 | 5947166 | 11-scf00159 | 11 |
| AX-158027787 | 7 | 57.502 | KV453000.1 | 5958768 | 11-scf00159 | 11 |
| AX-158027790 | 7 | 57.502 | KV453000.1 | 5960821 | 11-scf00159 | 11 |
| AX-157821241 | 7 | 57.502 | KV453000.1 | 5968228 | 11-scf00159 | 11 |
| AX-158027794 | 7 | 57.502 | KV453000.1 | 5969201 | 11-scf00159 | 11 |
| AX-158027799 | 7 | 57.502 | KV453000.1 | 5989128 | 11-scf00159 | 11 |
| AX-158027815 | 7 | 57.502 | KV453000.1 | 5999378 | 11-scf00159 | 11 |
| AX-158027819 | 7 | 57.502 | KV453000.1 | 6002702 | 11-scf00159 | 11 |
| AX-158027853 | 7 | 57.502 | KV453000.1 | 6026354 | 11-scf00159 | 11 |
| AX-158027861 | 7 | 57.502 | KV453000.1 | 6031102 | 11-scf00159 | 11 |
| AX-158027864 | 7 | 57.502 | KV453000.1 | 6031969 | 11-scf00159 | 11 |
| AX-158027866 | 7 | 57.502 | KV453000.1 | 6032472 | 11-scf00159 | 11 |
| AX-158027898 | 7 | 57.502 | KV453000.1 | 6055325 | 11-scf00159 | 11 |
| AX-158027904 | 7 | 57.502 | KV453000.1 | 6057664 | 11-scf00159 | 11 |
| AX-158027906 | 7 | 57.502 | KV453000.1 | 6059459 | 11-scf00159 | 11 |
| AX-158027908 | 7 | 57.502 | KV453000.1 | 6060191 | 11-scf00159 | 11 |
| AX-158027912 | 7 | 57.502 | KV453000.1 | 6063178 | 11-scf00159 | 11 |
| AX-158027916 | 7 | 57.502 | KV453000.1 | 6065045 | 11-scf00159 | 11 |
| AX-158027929 | 7 | 57.502 | KV453000.1 | 6075870 | 11-scf00159 | 11 |
| AX-158027930 | 7 | 57.502 | KV453000.1 | 6076864 | 11-scf00159 | 11 |
| AX-158027935 | 7 | 57.502 | KV453000.1 | 6081418 | 11-scf00159 | 11 |
| AX-158027950 | 7 | 57.502 | KV453000.1 | 6092720 | 11-scf00159 | 11 |
| AX-158027951 | 7 | 57.502 | KV453000.1 | 6093992 | 11-scf00159 | 11 |
| AX-158027962 | 7 | 57.502 | KV453000.1 | 6110214 | 11-scf00159 | 11 |
| AX-158028006 | 7 | 57.502 | KV453000.1 | 6139994 | 11-scf00159 | 11 |
| AX-158028007 | 7 | 57.502 | KV453000.1 | 6140434 | 11-scf00159 | 11 |
| AX-157715639 | 7 | 57.502 | KV453000.1 | 6140691 | 11-scf00159 | 11 |
| AX-157821254 | 7 | 57.502 | KV453000.1 | 6140852 | 11-scf00159 | 11 |
| AX-158028031 | 7 | 57.502 | KV453000.1 | 6166965 | 11-scf00159 | 11 |
| AX-158028061 | 7 | 57.502 | KV453000.1 | 6197963 | 11-scf00159 | 11 |
| AX-158028097 | 7 | 57.502 | KV453000.1 | 6235633 | 11-scf00159 | 11 |
| AX-158028208 | 7 | 57.502 | KV453000.1 | 6308196 | 11-scf00159 | 11 |
| AX-158028214 | 7 | 57.502 | KV453000.1 | 6313246 | 11-scf00159 | 11 |
| AX-158028345 | 7 | 57.502 | KV453000.1 | 6443572 | 11-scf00159 | 11 |
| AX-158028804 | 7 | 57.502 | KV453000.1 | 6863347 | 11-scf00159 | 11 |
| AX-158040581 | 7 | 57.502 | KV453001.1 | 230189  | 11-scf00161 | 11 |
| AX-158041278 | 7 | 57.502 | KV453001.1 | 760809  | 11-scf00161 | 11 |
| AX-158041868 | 7 | 57.502 | KV453001.1 | 1238506 | 11-scf00161 | 11 |
| AX-158042269 | 7 | 57.502 | KV453001.1 | 1738397 | 11-scf00161 | 11 |
| AX-158042322 | 7 | 57.502 | KV453001.1 | 1798588 | 11-scf00161 | 11 |
| AX-158029879 | 7 | 57.502 | KV453001.1 | 2161967 | 11-scf00161 | 11 |
| AX-158032378 | 7 | 57.502 | KV453001.1 | 4818503 | 11-scf00161 | 11 |
| AX-158027925 | 7 | 57.556 | KV453000.1 | 6071993 | 11-scf00159 | 11 |
| AX-158028333 | 7 | 57.556 | KV453000.1 | 6427528 | 11-scf00159 | 11 |

|              |   |        |            |         |             |    |
|--------------|---|--------|------------|---------|-------------|----|
| AX-158027364 | 7 | 57.72  | KV453000.1 | 5548399 | 11-scf00159 | 11 |
| AX-158027401 | 7 | 57.72  | KV453000.1 | 5572165 | 11-scf00159 | 11 |
| AX-158027412 | 7 | 57.72  | KV453000.1 | 5582178 | 11-scf00159 | 11 |
| AX-158027434 | 7 | 57.72  | KV453000.1 | 5604667 | 11-scf00159 | 11 |
| AX-158027504 | 7 | 57.72  | KV453000.1 | 5671467 | 11-scf00159 | 11 |
| AX-158027506 | 7 | 57.72  | KV453000.1 | 5672773 | 11-scf00159 | 11 |
| AX-158027660 | 7 | 57.72  | KV453000.1 | 5833601 | 11-scf00159 | 11 |
| AX-158027721 | 7 | 57.72  | KV453000.1 | 5878275 | 11-scf00159 | 11 |
| AX-158027769 | 7 | 57.72  | KV453000.1 | 5917430 | 11-scf00159 | 11 |
| AX-158027931 | 7 | 57.72  | KV453000.1 | 6077096 | 11-scf00159 | 11 |
| AX-158027934 | 7 | 57.72  | KV453000.1 | 6079804 | 11-scf00159 | 11 |
| AX-158027939 | 7 | 57.72  | KV453000.1 | 6085065 | 11-scf00159 | 11 |
| AX-158027941 | 7 | 57.72  | KV453000.1 | 6085678 | 11-scf00159 | 11 |
| AX-158027944 | 7 | 57.72  | KV453000.1 | 6086432 | 11-scf00159 | 11 |
| AX-158027949 | 7 | 57.72  | KV453000.1 | 6091575 | 11-scf00159 | 11 |
| AX-158027959 | 7 | 57.72  | KV453000.1 | 6107581 | 11-scf00159 | 11 |
| AX-158027961 | 7 | 57.72  | KV453000.1 | 6109080 | 11-scf00159 | 11 |
| AX-158027964 | 7 | 57.72  | KV453000.1 | 6111927 | 11-scf00159 | 11 |
| AX-158027965 | 7 | 57.72  | KV453000.1 | 6114994 | 11-scf00159 | 11 |
| AX-158027968 | 7 | 57.72  | KV453000.1 | 6115998 | 11-scf00159 | 11 |
| AX-158027971 | 7 | 57.72  | KV453000.1 | 6117611 | 11-scf00159 | 11 |
| AX-158027975 | 7 | 57.72  | KV453000.1 | 6121247 | 11-scf00159 | 11 |
| AX-158027983 | 7 | 57.72  | KV453000.1 | 6124400 | 11-scf00159 | 11 |
| AX-158027989 | 7 | 57.72  | KV453000.1 | 6127754 | 11-scf00159 | 11 |
| AX-158027992 | 7 | 57.72  | KV453000.1 | 6129086 | 11-scf00159 | 11 |
| AX-158027999 | 7 | 57.72  | KV453000.1 | 6133942 | 11-scf00159 | 11 |
| AX-157821255 | 7 | 57.72  | KV453000.1 | 6144066 | 11-scf00159 | 11 |
| AX-158028020 | 7 | 57.72  | KV453000.1 | 6152965 | 11-scf00159 | 11 |
| AX-157821257 | 7 | 57.72  | KV453000.1 | 6156616 | 11-scf00159 | 11 |
| AX-157725109 | 7 | 57.72  | KV453000.1 | 6157201 | 11-scf00159 | 11 |
| AX-157821259 | 7 | 57.72  | KV453000.1 | 6161237 | 11-scf00159 | 11 |
| AX-157821260 | 7 | 57.72  | KV453000.1 | 6161472 | 11-scf00159 | 11 |
| AX-158028033 | 7 | 57.72  | KV453000.1 | 6176624 | 11-scf00159 | 11 |
| AX-157821263 | 7 | 57.72  | KV453000.1 | 6181642 | 11-scf00159 | 11 |
| AX-157821264 | 7 | 57.72  | KV453000.1 | 6182812 | 11-scf00159 | 11 |
| AX-158028055 | 7 | 57.72  | KV453000.1 | 6190700 | 11-scf00159 | 11 |
| AX-158379774 | 7 | 57.72  | KV453000.1 | 6213995 | 11-scf00159 | 11 |
| AX-158028120 | 7 | 57.72  | KV453000.1 | 6245584 | 11-scf00159 | 11 |
| AX-158028275 | 7 | 57.72  | KV453000.1 | 6378840 | 11-scf00159 | 11 |
| AX-157720103 | 7 | 57.72  | KV453000.1 | 7009094 | 11-scf00159 | 11 |
| AX-158028012 | 7 | 57.74  | KV453000.1 | 6144379 | 11-scf00159 | 11 |
| AX-157785234 | 7 | 57.74  | KV453000.1 | 6194315 | 11-scf00159 | 11 |
| AX-158028464 | 7 | 57.74  | KV453000.1 | 6566700 | 11-scf00159 | 11 |
| AX-158028559 | 7 | 57.74  | KV453000.1 | 6665152 | 11-scf00159 | 11 |
| AX-157821268 | 7 | 57.757 | KV453000.1 | 6208478 | 11-scf00159 | 11 |
| AX-158028110 | 7 | 57.757 | KV453000.1 | 6240934 | 11-scf00159 | 11 |
| AX-157739178 | 7 | 57.757 | KV453000.1 | 6248086 | 11-scf00159 | 11 |
| AX-158028069 | 7 | 57.778 | KV453000.1 | 6208868 | 11-scf00159 | 11 |
| AX-158028071 | 7 | 57.785 | KV453000.1 | 6209424 | 11-scf00159 | 11 |
| AX-158028072 | 7 | 57.803 | KV453000.1 | 6210901 | 11-scf00159 | 11 |
| AX-158028151 | 7 | 57.829 | KV453000.1 | 6263584 | 11-scf00159 | 11 |

|              |   |        |            |         |             |    |
|--------------|---|--------|------------|---------|-------------|----|
| AX-158028177 | 7 | 57.829 | KV453000.1 | 6294330 | 11-scf00159 | 11 |
| AX-158028194 | 7 | 57.829 | KV453000.1 | 6300976 | 11-scf00159 | 11 |
| AX-158028195 | 7 | 57.829 | KV453000.1 | 6301479 | 11-scf00159 | 11 |
| AX-158028209 | 7 | 57.829 | KV453000.1 | 6310200 | 11-scf00159 | 11 |
| AX-158028246 | 7 | 57.829 | KV453000.1 | 6341432 | 11-scf00159 | 11 |
| AX-158028291 | 7 | 57.829 | KV453000.1 | 6395407 | 11-scf00159 | 11 |
| AX-158028296 | 7 | 57.829 | KV453000.1 | 6402244 | 11-scf00159 | 11 |
| AX-158028361 | 7 | 57.829 | KV453000.1 | 6460635 | 11-scf00159 | 11 |
| AX-158028387 | 7 | 57.829 | KV453000.1 | 6483631 | 11-scf00159 | 11 |
| AX-157744232 | 7 | 57.829 | KV453000.1 | 6666338 | 11-scf00159 | 11 |
| AX-157751594 | 7 | 57.829 | KV453000.1 | 6667065 | 11-scf00159 | 11 |
| AX-158028594 | 7 | 57.829 | KV453000.1 | 6696317 | 11-scf00159 | 11 |
| AX-158028651 | 7 | 57.829 | KV453000.1 | 6743951 | 11-scf00159 | 11 |
| AX-158027564 | 7 | 57.939 | KV453000.1 | 5725447 | 11-scf00159 | 11 |
| AX-158027569 | 7 | 57.939 | KV453000.1 | 5732920 | 11-scf00159 | 11 |
| AX-158027918 | 7 | 57.939 | KV453000.1 | 6067426 | 11-scf00159 | 11 |
| AX-158027976 | 7 | 57.939 | KV453000.1 | 6121753 | 11-scf00159 | 11 |
| AX-157771306 | 7 | 57.939 | KV453000.1 | 6163411 | 11-scf00159 | 11 |
| AX-158028037 | 7 | 57.939 | KV453000.1 | 6178657 | 11-scf00159 | 11 |
| AX-158028038 | 7 | 57.939 | KV453000.1 | 6179101 | 11-scf00159 | 11 |
| AX-158028232 | 7 | 57.939 | KV453000.1 | 6331392 | 11-scf00159 | 11 |
| AX-158028234 | 7 | 57.939 | KV453000.1 | 6332524 | 11-scf00159 | 11 |
| AX-158028235 | 7 | 57.939 | KV453000.1 | 6332686 | 11-scf00159 | 11 |
| AX-157821280 | 7 | 57.939 | KV453000.1 | 6333049 | 11-scf00159 | 11 |
| AX-158028242 | 7 | 57.939 | KV453000.1 | 6335389 | 11-scf00159 | 11 |
| AX-158028249 | 7 | 57.939 | KV453000.1 | 6345681 | 11-scf00159 | 11 |
| AX-158028250 | 7 | 57.939 | KV453000.1 | 6353718 | 11-scf00159 | 11 |
| AX-158028251 | 7 | 57.939 | KV453000.1 | 6353873 | 11-scf00159 | 11 |
| AX-158028255 | 7 | 57.939 | KV453000.1 | 6358416 | 11-scf00159 | 11 |
| AX-158028257 | 7 | 57.939 | KV453000.1 | 6360265 | 11-scf00159 | 11 |
| AX-158028258 | 7 | 57.939 | KV453000.1 | 6361583 | 11-scf00159 | 11 |
| AX-158028260 | 7 | 57.939 | KV453000.1 | 6362596 | 11-scf00159 | 11 |
| AX-158028261 | 7 | 57.939 | KV453000.1 | 6365758 | 11-scf00159 | 11 |
| AX-158028264 | 7 | 57.939 | KV453000.1 | 6366488 | 11-scf00159 | 11 |
| AX-158028265 | 7 | 57.939 | KV453000.1 | 6368935 | 11-scf00159 | 11 |
| AX-157870282 | 7 | 57.939 | KV453000.1 | 6370259 | 11-scf00159 | 11 |
| AX-158028269 | 7 | 57.939 | KV453000.1 | 6371209 | 11-scf00159 | 11 |
| AX-158028271 | 7 | 57.939 | KV453000.1 | 6371805 | 11-scf00159 | 11 |
| AX-158028274 | 7 | 57.939 | KV453000.1 | 6375525 | 11-scf00159 | 11 |
| AX-158028277 | 7 | 57.939 | KV453000.1 | 6381101 | 11-scf00159 | 11 |
| AX-158028278 | 7 | 57.939 | KV453000.1 | 6382375 | 11-scf00159 | 11 |
| AX-158028320 | 7 | 57.939 | KV453000.1 | 6418216 | 11-scf00159 | 11 |
| AX-158028321 | 7 | 57.939 | KV453000.1 | 6419004 | 11-scf00159 | 11 |
| AX-158028368 | 7 | 57.939 | KV453000.1 | 6464430 | 11-scf00159 | 11 |
| AX-158028392 | 7 | 57.939 | KV453000.1 | 6490362 | 11-scf00159 | 11 |
| AX-157700661 | 7 | 57.939 | KV453000.1 | 6496307 | 11-scf00159 | 11 |
| AX-158028402 | 7 | 57.939 | KV453000.1 | 6497036 | 11-scf00159 | 11 |
| AX-158028437 | 7 | 57.939 | KV453000.1 | 6523994 | 11-scf00159 | 11 |
| AX-157876482 | 7 | 57.939 | KV453000.1 | 6539145 | 11-scf00159 | 11 |
| AX-157725812 | 7 | 57.939 | KV453000.1 | 6567272 | 11-scf00159 | 11 |
| AX-158028467 | 7 | 57.939 | KV453000.1 | 6567591 | 11-scf00159 | 11 |

|              |   |        |            |         |             |    |
|--------------|---|--------|------------|---------|-------------|----|
| AX-158028510 | 7 | 57.939 | KV453000.1 | 6616636 | 11-scf00159 | 11 |
| AX-157821300 | 7 | 57.939 | KV453000.1 | 6651441 | 11-scf00159 | 11 |
| AX-158379776 | 7 | 57.939 | KV453000.1 | 6665978 | 11-scf00159 | 11 |
| AX-157821304 | 7 | 57.939 | KV453000.1 | 6690026 | 11-scf00159 | 11 |
| AX-158028583 | 7 | 57.939 | KV453000.1 | 6690403 | 11-scf00159 | 11 |
| AX-157856355 | 7 | 57.939 | KV453000.1 | 6743400 | 11-scf00159 | 11 |
| AX-158028839 | 7 | 57.939 | KV453000.1 | 6893207 | 11-scf00159 | 11 |
| AX-158029098 | 7 | 57.939 | KV453000.1 | 7089190 | 11-scf00159 | 11 |
| AX-158029143 | 7 | 57.939 | KV453000.1 | 7124421 | 11-scf00159 | 11 |
| AX-157773355 | 7 | 58.048 | KV453000.1 | 5560444 | 11-scf00159 | 11 |
| AX-158028284 | 7 | 58.048 | KV453000.1 | 6388105 | 11-scf00159 | 11 |
| AX-157821283 | 7 | 58.048 | KV453000.1 | 6390993 | 11-scf00159 | 11 |
| AX-158027797 | 7 | 58.157 | KV453000.1 | 5976441 | 11-scf00159 | 11 |
| AX-158028300 | 7 | 58.157 | KV453000.1 | 6405944 | 11-scf00159 | 11 |
| AX-158028307 | 7 | 58.157 | KV453000.1 | 6408581 | 11-scf00159 | 11 |
| AX-157721684 | 7 | 58.157 | KV453000.1 | 6409120 | 11-scf00159 | 11 |
| AX-157821284 | 7 | 58.157 | KV453000.1 | 6410142 | 11-scf00159 | 11 |
| AX-158028308 | 7 | 58.157 | KV453000.1 | 6411072 | 11-scf00159 | 11 |
| AX-158028322 | 7 | 58.157 | KV453000.1 | 6419601 | 11-scf00159 | 11 |
| AX-158028327 | 7 | 58.157 | KV453000.1 | 6422905 | 11-scf00159 | 11 |
| AX-158028330 | 7 | 58.157 | KV453000.1 | 6424177 | 11-scf00159 | 11 |
| AX-157821286 | 7 | 58.157 | KV453000.1 | 6433396 | 11-scf00159 | 11 |
| AX-158028342 | 7 | 58.157 | KV453000.1 | 6435450 | 11-scf00159 | 11 |
| AX-158028347 | 7 | 58.157 | KV453000.1 | 6444783 | 11-scf00159 | 11 |
| AX-158028348 | 7 | 58.157 | KV453000.1 | 6450293 | 11-scf00159 | 11 |
| AX-158028350 | 7 | 58.157 | KV453000.1 | 6450504 | 11-scf00159 | 11 |
| AX-158028352 | 7 | 58.157 | KV453000.1 | 6450966 | 11-scf00159 | 11 |
| AX-158028363 | 7 | 58.157 | KV453000.1 | 6460922 | 11-scf00159 | 11 |
| AX-158028370 | 7 | 58.157 | KV453000.1 | 6467331 | 11-scf00159 | 11 |
| AX-158028373 | 7 | 58.157 | KV453000.1 | 6468366 | 11-scf00159 | 11 |
| AX-157746331 | 7 | 58.157 | KV453000.1 | 6514846 | 11-scf00159 | 11 |
| AX-158028424 | 7 | 58.157 | KV453000.1 | 6515870 | 11-scf00159 | 11 |
| AX-158028427 | 7 | 58.157 | KV453000.1 | 6518323 | 11-scf00159 | 11 |
| AX-158028448 | 7 | 58.157 | KV453000.1 | 6538818 | 11-scf00159 | 11 |
| AX-157748831 | 7 | 58.157 | KV453000.1 | 6539910 | 11-scf00159 | 11 |
| AX-158028452 | 7 | 58.157 | KV453000.1 | 6547276 | 11-scf00159 | 11 |
| AX-158028453 | 7 | 58.157 | KV453000.1 | 6549849 | 11-scf00159 | 11 |
| AX-158028455 | 7 | 58.157 | KV453000.1 | 6553625 | 11-scf00159 | 11 |
| AX-158028457 | 7 | 58.157 | KV453000.1 | 6554497 | 11-scf00159 | 11 |
| AX-158028459 | 7 | 58.157 | KV453000.1 | 6562532 | 11-scf00159 | 11 |
| AX-158028463 | 7 | 58.157 | KV453000.1 | 6566176 | 11-scf00159 | 11 |
| AX-157742117 | 7 | 58.157 | KV453000.1 | 6566644 | 11-scf00159 | 11 |
| AX-158028469 | 7 | 58.157 | KV453000.1 | 6570297 | 11-scf00159 | 11 |
| AX-158028511 | 7 | 58.157 | KV453000.1 | 6617325 | 11-scf00159 | 11 |
| AX-157725182 | 7 | 58.157 | KV453000.1 | 6617715 | 11-scf00159 | 11 |
| AX-158028514 | 7 | 58.157 | KV453000.1 | 6618788 | 11-scf00159 | 11 |
| AX-158028529 | 7 | 58.157 | KV453000.1 | 6633920 | 11-scf00159 | 11 |
| AX-158028530 | 7 | 58.157 | KV453000.1 | 6634361 | 11-scf00159 | 11 |
| AX-158028549 | 7 | 58.157 | KV453000.1 | 6651617 | 11-scf00159 | 11 |
| AX-158028551 | 7 | 58.157 | KV453000.1 | 6652578 | 11-scf00159 | 11 |
| AX-158028572 | 7 | 58.157 | KV453000.1 | 6676552 | 11-scf00159 | 11 |



|              |   |        |            |         |             |    |
|--------------|---|--------|------------|---------|-------------|----|
| AX-158028646 | 7 | 58.157 | KV453000.1 | 6739846 | 11-scf00159 | 11 |
| AX-158028666 | 7 | 58.157 | KV453000.1 | 6749723 | 11-scf00159 | 11 |
| AX-158028668 | 7 | 58.157 | KV453000.1 | 6751070 | 11-scf00159 | 11 |
| AX-158028669 | 7 | 58.157 | KV453000.1 | 6751344 | 11-scf00159 | 11 |
| AX-158028670 | 7 | 58.157 | KV453000.1 | 6751951 | 11-scf00159 | 11 |
| AX-158028681 | 7 | 58.157 | KV453000.1 | 6755984 | 11-scf00159 | 11 |
| AX-157725658 | 7 | 58.157 | KV453000.1 | 6757271 | 11-scf00159 | 11 |
| AX-158028697 | 7 | 58.157 | KV453000.1 | 6767462 | 11-scf00159 | 11 |
| AX-158028702 | 7 | 58.157 | KV453000.1 | 6770122 | 11-scf00159 | 11 |
| AX-158028705 | 7 | 58.157 | KV453000.1 | 6771204 | 11-scf00159 | 11 |
| AX-158028729 | 7 | 58.157 | KV453000.1 | 6793182 | 11-scf00159 | 11 |
| AX-158028730 | 7 | 58.157 | KV453000.1 | 6793535 | 11-scf00159 | 11 |
| AX-157717824 | 7 | 58.157 | KV453000.1 | 6795716 | 11-scf00159 | 11 |
| AX-158028733 | 7 | 58.157 | KV453000.1 | 6797696 | 11-scf00159 | 11 |
| AX-158028751 | 7 | 58.157 | KV453000.1 | 6815340 | 11-scf00159 | 11 |
| AX-158028778 | 7 | 58.157 | KV453000.1 | 6841425 | 11-scf00159 | 11 |
| AX-158028794 | 7 | 58.157 | KV453000.1 | 6855875 | 11-scf00159 | 11 |
| AX-158028797 | 7 | 58.157 | KV453000.1 | 6859793 | 11-scf00159 | 11 |
| AX-157876486 | 7 | 58.157 | KV453000.1 | 6876218 | 11-scf00159 | 11 |
| AX-158028820 | 7 | 58.157 | KV453000.1 | 6877515 | 11-scf00159 | 11 |
| AX-158028824 | 7 | 58.157 | KV453000.1 | 6880736 | 11-scf00159 | 11 |
| AX-157821315 | 7 | 58.157 | KV453000.1 | 6883746 | 11-scf00159 | 11 |
| AX-157775024 | 7 | 58.157 | KV453000.1 | 6884243 | 11-scf00159 | 11 |
| AX-158028835 | 7 | 58.157 | KV453000.1 | 6889796 | 11-scf00159 | 11 |
| AX-157821316 | 7 | 58.157 | KV453000.1 | 6890768 | 11-scf00159 | 11 |
| AX-158028838 | 7 | 58.157 | KV453000.1 | 6891396 | 11-scf00159 | 11 |
| AX-157821317 | 7 | 58.157 | KV453000.1 | 6893848 | 11-scf00159 | 11 |
| AX-158028849 | 7 | 58.157 | KV453000.1 | 6901254 | 11-scf00159 | 11 |
| AX-158028853 | 7 | 58.157 | KV453000.1 | 6903884 | 11-scf00159 | 11 |
| AX-158028855 | 7 | 58.157 | KV453000.1 | 6904495 | 11-scf00159 | 11 |
| AX-158028866 | 7 | 58.157 | KV453000.1 | 6910294 | 11-scf00159 | 11 |
| AX-158028869 | 7 | 58.157 | KV453000.1 | 6912514 | 11-scf00159 | 11 |
| AX-158028872 | 7 | 58.157 | KV453000.1 | 6919121 | 11-scf00159 | 11 |
| AX-158028874 | 7 | 58.157 | KV453000.1 | 6920752 | 11-scf00159 | 11 |
| AX-157821320 | 7 | 58.157 | KV453000.1 | 6928912 | 11-scf00159 | 11 |
| AX-158028886 | 7 | 58.157 | KV453000.1 | 6932036 | 11-scf00159 | 11 |
| AX-157821323 | 7 | 58.157 | KV453000.1 | 6932278 | 11-scf00159 | 11 |
| AX-158028887 | 7 | 58.157 | KV453000.1 | 6933153 | 11-scf00159 | 11 |
| AX-158028888 | 7 | 58.157 | KV453000.1 | 6934216 | 11-scf00159 | 11 |
| AX-158028904 | 7 | 58.157 | KV453000.1 | 6944050 | 11-scf00159 | 11 |
| AX-158028913 | 7 | 58.157 | KV453000.1 | 6948875 | 11-scf00159 | 11 |
| AX-158028919 | 7 | 58.157 | KV453000.1 | 6951289 | 11-scf00159 | 11 |
| AX-158028920 | 7 | 58.157 | KV453000.1 | 6952431 | 11-scf00159 | 11 |
| AX-157755959 | 7 | 58.157 | KV453000.1 | 6956723 | 11-scf00159 | 11 |
| AX-157821327 | 7 | 58.157 | KV453000.1 | 6959586 | 11-scf00159 | 11 |
| AX-157821328 | 7 | 58.157 | KV453000.1 | 6961242 | 11-scf00159 | 11 |
| AX-157821311 | 7 | 58.171 | KV453000.1 | 6819668 | 11-scf00159 | 11 |
| AX-157821287 | 7 | 58.236 | KV453000.1 | 6453486 | 11-scf00159 | 11 |
| AX-158028415 | 7 | 58.236 | KV453000.1 | 6509985 | 11-scf00159 | 11 |
| AX-157821292 | 7 | 58.236 | KV453000.1 | 6558277 | 11-scf00159 | 11 |
| AX-158028780 | 7 | 58.236 | KV453000.1 | 6843619 | 11-scf00159 | 11 |

|              |   |        |            |         |             |    |
|--------------|---|--------|------------|---------|-------------|----|
| AX-157740902 | 7 | 58.236 | KV453000.1 | 7120314 | 11-scf00159 | 11 |
| AX-158029156 | 7 | 58.236 | KV453000.1 | 7143081 | 11-scf00159 | 11 |
| AX-157744436 | 7 | 58.296 | KV453000.1 | 6425716 | 11-scf00159 | 11 |
| AX-158028553 | 7 | 58.296 | KV453000.1 | 6655647 | 11-scf00159 | 11 |
| AX-158028796 | 7 | 58.296 | KV453000.1 | 6857916 | 11-scf00159 | 11 |
| AX-158028813 | 7 | 58.296 | KV453000.1 | 6868670 | 11-scf00159 | 11 |
| AX-158028814 | 7 | 58.296 | KV453000.1 | 6870428 | 11-scf00159 | 11 |
| AX-158028816 | 7 | 58.296 | KV453000.1 | 6872500 | 11-scf00159 | 11 |
| AX-158028822 | 7 | 58.296 | KV453000.1 | 6878712 | 11-scf00159 | 11 |
| AX-158028826 | 7 | 58.296 | KV453000.1 | 6881537 | 11-scf00159 | 11 |
| AX-158028829 | 7 | 58.296 | KV453000.1 | 6884732 | 11-scf00159 | 11 |
| AX-158028834 | 7 | 58.296 | KV453000.1 | 6887533 | 11-scf00159 | 11 |
| AX-158028863 | 7 | 58.296 | KV453000.1 | 6908325 | 11-scf00159 | 11 |
| AX-158028868 | 7 | 58.296 | KV453000.1 | 6911935 | 11-scf00159 | 11 |
| AX-158028873 | 7 | 58.296 | KV453000.1 | 6920287 | 11-scf00159 | 11 |
| AX-158028876 | 7 | 58.296 | KV453000.1 | 6922872 | 11-scf00159 | 11 |
| AX-157821319 | 7 | 58.296 | KV453000.1 | 6925809 | 11-scf00159 | 11 |
| AX-158028884 | 7 | 58.296 | KV453000.1 | 6931622 | 11-scf00159 | 11 |
| AX-158028909 | 7 | 58.296 | KV453000.1 | 6946193 | 11-scf00159 | 11 |
| AX-158028934 | 7 | 58.296 | KV453000.1 | 6964041 | 11-scf00159 | 11 |
| AX-157821318 | 7 | 58.297 | KV453000.1 | 6922072 | 11-scf00159 | 11 |
| AX-158028608 | 7 | 58.575 | KV453000.1 | 6705048 | 11-scf00159 | 11 |
| AX-157821331 | 7 | 58.575 | KV453000.1 | 6977403 | 11-scf00159 | 11 |
| AX-158028950 | 7 | 58.575 | KV453000.1 | 6982908 | 11-scf00159 | 11 |
| AX-157821336 | 7 | 58.575 | KV453000.1 | 6992973 | 11-scf00159 | 11 |
| AX-158028978 | 7 | 58.575 | KV453000.1 | 7003064 | 11-scf00159 | 11 |
| AX-157717493 | 7 | 58.575 | KV453000.1 | 7003359 | 11-scf00159 | 11 |
| AX-157821339 | 7 | 58.575 | KV453000.1 | 7003409 | 11-scf00159 | 11 |
| AX-158028980 | 7 | 58.575 | KV453000.1 | 7004326 | 11-scf00159 | 11 |
| AX-157821346 | 7 | 58.575 | KV453000.1 | 7042258 | 11-scf00159 | 11 |
| AX-158029048 | 7 | 58.575 | KV453000.1 | 7046157 | 11-scf00159 | 11 |
| AX-158029089 | 7 | 58.575 | KV453000.1 | 7079978 | 11-scf00159 | 11 |
| AX-158029128 | 7 | 58.575 | KV453000.1 | 7113365 | 11-scf00159 | 11 |
| AX-158029130 | 7 | 58.575 | KV453000.1 | 7114523 | 11-scf00159 | 11 |
| AX-158029145 | 7 | 58.575 | KV453000.1 | 7125601 | 11-scf00159 | 11 |
| AX-158029163 | 7 | 58.575 | KV453000.1 | 7148968 | 11-scf00159 | 11 |
| AX-158029164 | 7 | 58.575 | KV453000.1 | 7149519 | 11-scf00159 | 11 |
| AX-158029176 | 7 | 58.575 | KV453000.1 | 7164467 | 11-scf00159 | 11 |
| AX-158029205 | 7 | 58.575 | KV453000.1 | 7204394 | 11-scf00159 | 11 |
| AX-158029211 | 7 | 58.575 | KV453000.1 | 7214107 | 11-scf00159 | 11 |
| AX-158029217 | 7 | 58.575 | KV453000.1 | 7226879 | 11-scf00159 | 11 |
| AX-158029234 | 7 | 58.575 | KV453000.1 | 7248751 | 11-scf00159 | 11 |
| AX-158029269 | 7 | 58.575 | KV453000.1 | 7277678 | 11-scf00159 | 11 |
| AX-158029329 | 7 | 58.575 | KV453000.1 | 7318105 | 11-scf00159 | 11 |
| AX-158029351 | 7 | 58.575 | KV453000.1 | 7331091 | 11-scf00159 | 11 |
| AX-157752167 | 7 | 58.575 | KV453001.1 | 70271   | 11-scf00161 | 11 |
| AX-157822048 | 7 | 58.575 | KV453001.1 | 77494   | 11-scf00161 | 11 |
| AX-158040420 | 7 | 58.575 | KV453001.1 | 105522  | 11-scf00161 | 11 |
| AX-158040426 | 7 | 58.575 | KV453001.1 | 108078  | 11-scf00161 | 11 |
| AX-157822055 | 7 | 58.575 | KV453001.1 | 134503  | 11-scf00161 | 11 |
| AX-158040464 | 7 | 58.575 | KV453001.1 | 134624  | 11-scf00161 | 11 |

|              |   |        |            |         |             |    |
|--------------|---|--------|------------|---------|-------------|----|
| AX-158040465 | 7 | 58.575 | KV453001.1 | 135773  | 11-scf00161 | 11 |
| AX-158040466 | 7 | 58.575 | KV453001.1 | 136836  | 11-scf00161 | 11 |
| AX-158040471 | 7 | 58.575 | KV453001.1 | 140792  | 11-scf00161 | 11 |
| AX-158041329 | 7 | 58.575 | KV453001.1 | 801854  | 11-scf00161 | 11 |
| AX-157821345 | 7 | 58.594 | KV453000.1 | 7040638 | 11-scf00159 | 11 |
| AX-158029070 | 7 | 58.614 | KV453000.1 | 7064599 | 11-scf00159 | 11 |
| AX-158029153 | 7 | 58.688 | KV453000.1 | 7142650 | 11-scf00159 | 11 |
| AX-158029159 | 7 | 58.759 | KV453000.1 | 7147086 | 11-scf00159 | 11 |
| AX-158029170 | 7 | 58.77  | KV453000.1 | 7154861 | 11-scf00159 | 11 |
| AX-158042301 | 7 | 58.77  | KV453001.1 | 1763664 | 11-scf00161 | 11 |
| AX-158030820 | 7 | 58.77  | KV453001.1 | 3113191 | 11-scf00161 | 11 |
| AX-158030821 | 7 | 58.77  | KV453001.1 | 3114261 | 11-scf00161 | 11 |
| AX-158033182 | 7 | 58.77  | KV453001.1 | 5626190 | 11-scf00161 | 11 |
| AX-158028828 | 7 | 58.854 | KV453000.1 | 6881892 | 11-scf00159 | 11 |
| AX-158028870 | 7 | 58.854 | KV453000.1 | 6914069 | 11-scf00159 | 11 |
| AX-158028905 | 7 | 58.854 | KV453000.1 | 6944656 | 11-scf00159 | 11 |
| AX-158028922 | 7 | 58.854 | KV453000.1 | 6956416 | 11-scf00159 | 11 |
| AX-158029081 | 7 | 58.854 | KV453000.1 | 7070679 | 11-scf00159 | 11 |
| AX-158029180 | 7 | 58.854 | KV453000.1 | 7175436 | 11-scf00159 | 11 |
| AX-157865360 | 7 | 58.854 | KV453000.1 | 7198844 | 11-scf00159 | 11 |
| AX-158029199 | 7 | 58.854 | KV453000.1 | 7199996 | 11-scf00159 | 11 |
| AX-158029209 | 7 | 58.854 | KV453000.1 | 7211543 | 11-scf00159 | 11 |
| AX-157708910 | 7 | 58.854 | KV453000.1 | 7212062 | 11-scf00159 | 11 |
| AX-158029210 | 7 | 58.854 | KV453000.1 | 7213492 | 11-scf00159 | 11 |
| AX-158029216 | 7 | 58.854 | KV453000.1 | 7223368 | 11-scf00159 | 11 |
| AX-158029219 | 7 | 58.854 | KV453000.1 | 7228454 | 11-scf00159 | 11 |
| AX-158029225 | 7 | 58.854 | KV453000.1 | 7236511 | 11-scf00159 | 11 |
| AX-158030144 | 7 | 58.854 | KV453001.1 | 2391498 | 11-scf00161 | 11 |
| AX-158032010 | 7 | 58.854 | KV453001.1 | 4524376 | 11-scf00161 | 11 |
| AX-158032322 | 7 | 58.854 | KV453001.1 | 4779274 | 11-scf00161 | 11 |
| AX-158032601 | 7 | 58.854 | KV453001.1 | 4992721 | 11-scf00161 | 11 |
| AX-158029087 | 7 | 58.945 | KV453000.1 | 7079461 | 11-scf00159 | 11 |
| AX-158406133 | 7 | 58.945 | KV453000.1 | 7085340 | 11-scf00159 | 11 |
| AX-158029207 | 7 | 58.945 | KV453000.1 | 7208182 | 11-scf00159 | 11 |
| AX-158029251 | 7 | 58.945 | KV453000.1 | 7260718 | 11-scf00159 | 11 |
| AX-158029321 | 7 | 58.945 | KV453000.1 | 7314544 | 11-scf00159 | 11 |
| AX-158042045 | 7 | 58.945 | KV453001.1 | 1408505 | 11-scf00161 | 11 |
| AX-158029138 | 7 | 58.95  | KV453000.1 | 7120426 | 11-scf00159 | 11 |
| AX-158029260 | 7 | 58.95  | KV453000.1 | 7267535 | 11-scf00159 | 11 |
| AX-157719517 | 7 | 59.021 | KV453000.1 | 7268019 | 11-scf00159 | 11 |
| AX-157742992 | 7 | 59.021 | KV453001.1 | 64335   | 11-scf00161 | 11 |
| AX-158029302 | 7 | 59.086 | KV453000.1 | 7305161 | 11-scf00159 | 11 |
| AX-158029342 | 7 | 59.086 | KV453000.1 | 7324648 | 11-scf00159 | 11 |
| AX-158379780 | 7 | 59.086 | KV453000.1 | 7357046 | 11-scf00159 | 11 |
| AX-158029388 | 7 | 59.086 | KV453000.1 | 7358585 | 11-scf00159 | 11 |
| AX-158029389 | 7 | 59.086 | KV453000.1 | 7359956 | 11-scf00159 | 11 |
| AX-158029392 | 7 | 59.086 | KV453000.1 | 7360694 | 11-scf00159 | 11 |
| AX-158029393 | 7 | 59.086 | KV453000.1 | 7361300 | 11-scf00159 | 11 |
| AX-158029395 | 7 | 59.086 | KV453000.1 | 7362105 | 11-scf00159 | 11 |
| AX-157756533 | 7 | 59.086 | KV453000.1 | 7365126 | 11-scf00159 | 11 |
| AX-158029400 | 7 | 59.086 | KV453000.1 | 7365599 | 11-scf00159 | 11 |

|              |   |        |            |         |             |    |
|--------------|---|--------|------------|---------|-------------|----|
| AX-158029404 | 7 | 59.086 | KV453000.1 | 7368156 | 11-scf00159 | 11 |
| AX-157753511 | 7 | 59.086 | KV453000.1 | 7379147 | 11-scf00159 | 11 |
| AX-158040302 | 7 | 59.086 | KV453001.1 | 18246   | 11-scf00161 | 11 |
| AX-157785764 | 7 | 59.086 | KV453001.1 | 24758   | 11-scf00161 | 11 |
| AX-158040308 | 7 | 59.086 | KV453001.1 | 25779   | 11-scf00161 | 11 |
| AX-157747009 | 7 | 59.086 | KV453001.1 | 272856  | 11-scf00161 | 11 |
| AX-158040653 | 7 | 59.086 | KV453001.1 | 282590  | 11-scf00161 | 11 |
| AX-158028428 | 7 | 59.202 | KV453000.1 | 6518609 | 11-scf00159 | 11 |
| AX-158028999 | 7 | 59.202 | KV453000.1 | 7017645 | 11-scf00159 | 11 |
| AX-158029035 | 7 | 59.202 | KV453000.1 | 7037073 | 11-scf00159 | 11 |
| AX-157821344 | 7 | 59.202 | KV453000.1 | 7039598 | 11-scf00159 | 11 |
| AX-158029111 | 7 | 59.202 | KV453000.1 | 7105518 | 11-scf00159 | 11 |
| AX-158029246 | 7 | 59.202 | KV453000.1 | 7258790 | 11-scf00159 | 11 |
| AX-157716496 | 7 | 59.202 | KV453000.1 | 7271503 | 11-scf00159 | 11 |
| AX-158029348 | 7 | 59.202 | KV453000.1 | 7327836 | 11-scf00159 | 11 |
| AX-158029350 | 7 | 59.202 | KV453000.1 | 7329263 | 11-scf00159 | 11 |
| AX-158029357 | 7 | 59.202 | KV453000.1 | 7337352 | 11-scf00159 | 11 |
| AX-158029382 | 7 | 59.202 | KV453000.1 | 7353739 | 11-scf00159 | 11 |
| AX-158029406 | 7 | 59.202 | KV453000.1 | 7370990 | 11-scf00159 | 11 |
| AX-158029414 | 7 | 59.202 | KV453000.1 | 7376170 | 11-scf00159 | 11 |
| AX-158040291 | 7 | 59.202 | KV453001.1 | 13987   | 11-scf00161 | 11 |
| AX-158040294 | 7 | 59.202 | KV453001.1 | 14761   | 11-scf00161 | 11 |
| AX-158040306 | 7 | 59.202 | KV453001.1 | 24522   | 11-scf00161 | 11 |
| AX-157715997 | 7 | 59.202 | KV453001.1 | 27582   | 11-scf00161 | 11 |
| AX-158040315 | 7 | 59.202 | KV453001.1 | 36481   | 11-scf00161 | 11 |
| AX-157856409 | 7 | 59.202 | KV453001.1 | 40388   | 11-scf00161 | 11 |
| AX-158040322 | 7 | 59.202 | KV453001.1 | 40831   | 11-scf00161 | 11 |
| AX-158379830 | 7 | 59.202 | KV453001.1 | 68285   | 11-scf00161 | 11 |
| AX-157758094 | 7 | 59.202 | KV453001.1 | 71092   | 11-scf00161 | 11 |
| AX-158040367 | 7 | 59.202 | KV453001.1 | 73238   | 11-scf00161 | 11 |
| AX-158040370 | 7 | 59.202 | KV453001.1 | 73972   | 11-scf00161 | 11 |
| AX-157822051 | 7 | 59.202 | KV453001.1 | 121613  | 11-scf00161 | 11 |
| AX-158040449 | 7 | 59.202 | KV453001.1 | 123377  | 11-scf00161 | 11 |
| AX-157709442 | 7 | 59.202 | KV453001.1 | 126692  | 11-scf00161 | 11 |
| AX-158040460 | 7 | 59.202 | KV453001.1 | 131234  | 11-scf00161 | 11 |
| AX-157822053 | 7 | 59.202 | KV453001.1 | 132365  | 11-scf00161 | 11 |
| AX-158040463 | 7 | 59.202 | KV453001.1 | 133765  | 11-scf00161 | 11 |
| AX-157822054 | 7 | 59.202 | KV453001.1 | 134325  | 11-scf00161 | 11 |
| AX-157741805 | 7 | 59.202 | KV453001.1 | 138138  | 11-scf00161 | 11 |
| AX-157822056 | 7 | 59.202 | KV453001.1 | 138272  | 11-scf00161 | 11 |
| AX-158040470 | 7 | 59.202 | KV453001.1 | 139696  | 11-scf00161 | 11 |
| AX-157822062 | 7 | 59.202 | KV453001.1 | 183680  | 11-scf00161 | 11 |
| AX-158040523 | 7 | 59.202 | KV453001.1 | 184485  | 11-scf00161 | 11 |
| AX-158040526 | 7 | 59.202 | KV453001.1 | 185131  | 11-scf00161 | 11 |
| AX-158040527 | 7 | 59.202 | KV453001.1 | 185575  | 11-scf00161 | 11 |
| AX-158041968 | 7 | 59.202 | KV453001.1 | 1330607 | 11-scf00161 | 11 |
| AX-157718412 | 7 | 59.228 | KV453001.1 | 122494  | 11-scf00161 | 11 |
| AX-158040461 | 7 | 59.228 | KV453001.1 | 131592  | 11-scf00161 | 11 |
| AX-158040455 | 7 | 59.255 | KV453001.1 | 128185  | 11-scf00161 | 11 |
| AX-158040473 | 7 | 59.274 | KV453001.1 | 142814  | 11-scf00161 | 11 |
| AX-158040478 | 7 | 59.318 | KV453001.1 | 144505  | 11-scf00161 | 11 |

|              |   |        |            |         |             |    |
|--------------|---|--------|------------|---------|-------------|----|
| AX-157822063 | 7 | 59.362 | KV453001.1 | 186213  | 11-scf00161 | 11 |
| AX-158040533 | 7 | 59.387 | KV453001.1 | 190195  | 11-scf00161 | 11 |
| AX-158040536 | 7 | 59.387 | KV453001.1 | 191921  | 11-scf00161 | 11 |
| AX-158040537 | 7 | 59.387 | KV453001.1 | 192568  | 11-scf00161 | 11 |
| AX-158041150 | 7 | 59.387 | KV453001.1 | 672164  | 11-scf00161 | 11 |
| AX-158041379 | 7 | 59.387 | KV453001.1 | 849271  | 11-scf00161 | 11 |
| AX-158041421 | 7 | 59.387 | KV453001.1 | 870993  | 11-scf00161 | 11 |
| AX-158041967 | 7 | 59.387 | KV453001.1 | 1324674 | 11-scf00161 | 11 |
| AX-158040428 | 7 | 59.412 | KV453001.1 | 109094  | 11-scf00161 | 11 |
| AX-158040535 | 7 | 59.412 | KV453001.1 | 190976  | 11-scf00161 | 11 |
| AX-158041965 | 7 | 59.412 | KV453001.1 | 1319495 | 11-scf00161 | 11 |
| AX-158027113 | 7 | 59.434 | KV453000.1 | 5298878 | 11-scf00159 | 11 |
| AX-158027258 | 7 | 59.434 | KV453000.1 | 5453250 | 11-scf00159 | 11 |
| AX-158027359 | 7 | 59.434 | KV453000.1 | 5542510 | 11-scf00159 | 11 |
| AX-158027391 | 7 | 59.434 | KV453000.1 | 5566512 | 11-scf00159 | 11 |
| AX-158027508 | 7 | 59.434 | KV453000.1 | 5674420 | 11-scf00159 | 11 |
| AX-158027827 | 7 | 59.434 | KV453000.1 | 6005619 | 11-scf00159 | 11 |
| AX-158027876 | 7 | 59.434 | KV453000.1 | 6040582 | 11-scf00159 | 11 |
| AX-158028626 | 7 | 59.434 | KV453000.1 | 6721633 | 11-scf00159 | 11 |
| AX-158028789 | 7 | 59.434 | KV453000.1 | 6848732 | 11-scf00159 | 11 |
| AX-158029271 | 7 | 59.434 | KV453000.1 | 7278199 | 11-scf00159 | 11 |
| AX-158029286 | 7 | 59.434 | KV453000.1 | 7287726 | 11-scf00159 | 11 |
| AX-158040329 | 7 | 59.434 | KV453001.1 | 44316   | 11-scf00161 | 11 |
| AX-158040332 | 7 | 59.434 | KV453001.1 | 47029   | 11-scf00161 | 11 |
| AX-158040480 | 7 | 59.434 | KV453001.1 | 148460  | 11-scf00161 | 11 |
| AX-158040513 | 7 | 59.434 | KV453001.1 | 174147  | 11-scf00161 | 11 |
| AX-157774204 | 7 | 59.434 | KV453001.1 | 198867  | 11-scf00161 | 11 |
| AX-157707967 | 7 | 59.434 | KV453001.1 | 206965  | 11-scf00161 | 11 |
| AX-158040589 | 7 | 59.434 | KV453001.1 | 235449  | 11-scf00161 | 11 |
| AX-158040593 | 7 | 59.434 | KV453001.1 | 237834  | 11-scf00161 | 11 |
| AX-158040602 | 7 | 59.434 | KV453001.1 | 241845  | 11-scf00161 | 11 |
| AX-158040611 | 7 | 59.434 | KV453001.1 | 247465  | 11-scf00161 | 11 |
| AX-158040613 | 7 | 59.434 | KV453001.1 | 249028  | 11-scf00161 | 11 |
| AX-158040615 | 7 | 59.434 | KV453001.1 | 249764  | 11-scf00161 | 11 |
| AX-157747193 | 7 | 59.434 | KV453001.1 | 254650  | 11-scf00161 | 11 |
| AX-158040638 | 7 | 59.434 | KV453001.1 | 270701  | 11-scf00161 | 11 |
| AX-158040647 | 7 | 59.434 | KV453001.1 | 275130  | 11-scf00161 | 11 |
| AX-157716655 | 7 | 59.434 | KV453001.1 | 288889  | 11-scf00161 | 11 |
| AX-157856411 | 7 | 59.434 | KV453001.1 | 305517  | 11-scf00161 | 11 |
| AX-158040723 | 7 | 59.434 | KV453001.1 | 339681  | 11-scf00161 | 11 |
| AX-157876537 | 7 | 59.434 | KV453001.1 | 394543  | 11-scf00161 | 11 |
| AX-158040802 | 7 | 59.434 | KV453001.1 | 397133  | 11-scf00161 | 11 |
| AX-158040807 | 7 | 59.434 | KV453001.1 | 398545  | 11-scf00161 | 11 |
| AX-157743730 | 7 | 59.434 | KV453001.1 | 418187  | 11-scf00161 | 11 |
| AX-158040843 | 7 | 59.434 | KV453001.1 | 428743  | 11-scf00161 | 11 |
| AX-158040847 | 7 | 59.434 | KV453001.1 | 431909  | 11-scf00161 | 11 |
| AX-158040848 | 7 | 59.434 | KV453001.1 | 432399  | 11-scf00161 | 11 |
| AX-158040851 | 7 | 59.434 | KV453001.1 | 435222  | 11-scf00161 | 11 |
| AX-158040861 | 7 | 59.434 | KV453001.1 | 442512  | 11-scf00161 | 11 |
| AX-157713069 | 7 | 59.434 | KV453001.1 | 454116  | 11-scf00161 | 11 |
| AX-158040881 | 7 | 59.434 | KV453001.1 | 455084  | 11-scf00161 | 11 |

|              |   |        |            |         |             |    |
|--------------|---|--------|------------|---------|-------------|----|
| AX-158040883 | 7 | 59.434 | KV453001.1 | 455566  | 11-scf00161 | 11 |
| AX-158040889 | 7 | 59.434 | KV453001.1 | 458872  | 11-scf00161 | 11 |
| AX-157822092 | 7 | 59.434 | KV453001.1 | 478028  | 11-scf00161 | 11 |
| AX-158040926 | 7 | 59.434 | KV453001.1 | 484632  | 11-scf00161 | 11 |
| AX-158040927 | 7 | 59.434 | KV453001.1 | 485023  | 11-scf00161 | 11 |
| AX-158040929 | 7 | 59.434 | KV453001.1 | 488449  | 11-scf00161 | 11 |
| AX-158040932 | 7 | 59.434 | KV453001.1 | 490485  | 11-scf00161 | 11 |
| AX-158040935 | 7 | 59.434 | KV453001.1 | 491958  | 11-scf00161 | 11 |
| AX-158040996 | 7 | 59.434 | KV453001.1 | 542625  | 11-scf00161 | 11 |
| AX-158041009 | 7 | 59.434 | KV453001.1 | 553656  | 11-scf00161 | 11 |
| AX-158041011 | 7 | 59.434 | KV453001.1 | 553949  | 11-scf00161 | 11 |
| AX-158041036 | 7 | 59.434 | KV453001.1 | 570904  | 11-scf00161 | 11 |
| AX-158041050 | 7 | 59.434 | KV453001.1 | 585258  | 11-scf00161 | 11 |
| AX-158408474 | 7 | 59.434 | KV453001.1 | 588043  | 11-scf00161 | 11 |
| AX-158041218 | 7 | 59.434 | KV453001.1 | 715836  | 11-scf00161 | 11 |
| AX-158041229 | 7 | 59.434 | KV453001.1 | 728238  | 11-scf00161 | 11 |
| AX-158041285 | 7 | 59.434 | KV453001.1 | 766483  | 11-scf00161 | 11 |
| AX-157725490 | 7 | 59.434 | KV453001.1 | 772745  | 11-scf00161 | 11 |
| AX-157856415 | 7 | 59.434 | KV453001.1 | 792527  | 11-scf00161 | 11 |
| AX-158408483 | 7 | 59.434 | KV453001.1 | 848422  | 11-scf00161 | 11 |
| AX-158041378 | 7 | 59.434 | KV453001.1 | 848694  | 11-scf00161 | 11 |
| AX-158041380 | 7 | 59.434 | KV453001.1 | 849542  | 11-scf00161 | 11 |
| AX-158041414 | 7 | 59.434 | KV453001.1 | 868384  | 11-scf00161 | 11 |
| AX-157822107 | 7 | 59.434 | KV453001.1 | 869049  | 11-scf00161 | 11 |
| AX-157822108 | 7 | 59.434 | KV453001.1 | 869368  | 11-scf00161 | 11 |
| AX-158041417 | 7 | 59.434 | KV453001.1 | 869752  | 11-scf00161 | 11 |
| AX-158041419 | 7 | 59.434 | KV453001.1 | 870393  | 11-scf00161 | 11 |
| AX-158041423 | 7 | 59.434 | KV453001.1 | 873168  | 11-scf00161 | 11 |
| AX-157744563 | 7 | 59.434 | KV453001.1 | 873263  | 11-scf00161 | 11 |
| AX-158041427 | 7 | 59.434 | KV453001.1 | 875113  | 11-scf00161 | 11 |
| AX-158041435 | 7 | 59.434 | KV453001.1 | 882898  | 11-scf00161 | 11 |
| AX-157822110 | 7 | 59.434 | KV453001.1 | 921222  | 11-scf00161 | 11 |
| AX-158041501 | 7 | 59.434 | KV453001.1 | 934900  | 11-scf00161 | 11 |
| AX-158041502 | 7 | 59.434 | KV453001.1 | 937373  | 11-scf00161 | 11 |
| AX-158041534 | 7 | 59.434 | KV453001.1 | 971010  | 11-scf00161 | 11 |
| AX-157757247 | 7 | 59.434 | KV453001.1 | 973297  | 11-scf00161 | 11 |
| AX-158041575 | 7 | 59.434 | KV453001.1 | 1008783 | 11-scf00161 | 11 |
| AX-158041590 | 7 | 59.434 | KV453001.1 | 1025578 | 11-scf00161 | 11 |
| AX-158041626 | 7 | 59.434 | KV453001.1 | 1052022 | 11-scf00161 | 11 |
| AX-158041756 | 7 | 59.434 | KV453001.1 | 1148795 | 11-scf00161 | 11 |
| AX-158041765 | 7 | 59.434 | KV453001.1 | 1162066 | 11-scf00161 | 11 |
| AX-157885102 | 7 | 59.434 | KV453001.1 | 1292953 | 11-scf00161 | 11 |
| AX-158041966 | 7 | 59.434 | KV453001.1 | 1323234 | 11-scf00161 | 11 |
| AX-158042004 | 7 | 59.434 | KV453001.1 | 1356567 | 11-scf00161 | 11 |
| AX-158042049 | 7 | 59.434 | KV453001.1 | 1420327 | 11-scf00161 | 11 |
| AX-158042223 | 7 | 59.434 | KV453001.1 | 1669783 | 11-scf00161 | 11 |
| AX-158042314 | 7 | 59.434 | KV453001.1 | 1782524 | 11-scf00161 | 11 |
| AX-157856359 | 7 | 59.434 | KV453001.1 | 2418368 | 11-scf00161 | 11 |
| AX-158030175 | 7 | 59.434 | KV453001.1 | 2418719 | 11-scf00161 | 11 |
| AX-158030463 | 7 | 59.434 | KV453001.1 | 2653321 | 11-scf00161 | 11 |
| AX-158030540 | 7 | 59.434 | KV453001.1 | 2737707 | 11-scf00161 | 11 |

|              |   |        |            |         |             |    |
|--------------|---|--------|------------|---------|-------------|----|
| AX-158030654 | 7 | 59.434 | KV453001.1 | 2899888 | 11-scf00161 | 11 |
| AX-158030657 | 7 | 59.434 | KV453001.1 | 2900652 | 11-scf00161 | 11 |
| AX-157876492 | 7 | 59.434 | KV453001.1 | 3037162 | 11-scf00161 | 11 |
| AX-158030796 | 7 | 59.434 | KV453001.1 | 3088654 | 11-scf00161 | 11 |
| AX-158030928 | 7 | 59.434 | KV453001.1 | 3309704 | 11-scf00161 | 11 |
| AX-157821476 | 7 | 59.434 | KV453001.1 | 3482697 | 11-scf00161 | 11 |
| AX-158031108 | 7 | 59.434 | KV453001.1 | 3678929 | 11-scf00161 | 11 |
| AX-158031709 | 7 | 59.434 | KV453001.1 | 4286096 | 11-scf00161 | 11 |
| AX-157716106 | 7 | 59.434 | KV453001.1 | 4289652 | 11-scf00161 | 11 |
| AX-158031726 | 7 | 59.434 | KV453001.1 | 4303493 | 11-scf00161 | 11 |
| AX-158031776 | 7 | 59.434 | KV453001.1 | 4344767 | 11-scf00161 | 11 |
| AX-158031808 | 7 | 59.434 | KV453001.1 | 4368523 | 11-scf00161 | 11 |
| AX-158032431 | 7 | 59.434 | KV453001.1 | 4859066 | 11-scf00161 | 11 |
| AX-158032549 | 7 | 59.434 | KV453001.1 | 4941192 | 11-scf00161 | 11 |
| AX-158032559 | 7 | 59.434 | KV453001.1 | 4947498 | 11-scf00161 | 11 |
| AX-158032603 | 7 | 59.434 | KV453001.1 | 4993864 | 11-scf00161 | 11 |
| AX-158032698 | 7 | 59.434 | KV453001.1 | 5063193 | 11-scf00161 | 11 |
| AX-158032741 | 7 | 59.434 | KV453001.1 | 5092474 | 11-scf00161 | 11 |
| AX-158032752 | 7 | 59.434 | KV453001.1 | 5103538 | 11-scf00161 | 11 |
| AX-158032803 | 7 | 59.434 | KV453001.1 | 5179307 | 11-scf00161 | 11 |
| AX-158032941 | 7 | 59.434 | KV453001.1 | 5344639 | 11-scf00161 | 11 |
| AX-158033005 | 7 | 59.434 | KV453001.1 | 5422730 | 11-scf00161 | 11 |
| AX-158033012 | 7 | 59.434 | KV453001.1 | 5427853 | 11-scf00161 | 11 |
| AX-157771319 | 7 | 59.434 | KV453001.1 | 5489419 | 11-scf00161 | 11 |
| AX-157870448 | 7 | 59.434 | KV453001.1 | 5499388 | 11-scf00161 | 11 |
| AX-158033087 | 7 | 59.434 | KV453001.1 | 5528795 | 11-scf00161 | 11 |
| AX-158033097 | 7 | 59.434 | KV453001.1 | 5540148 | 11-scf00161 | 11 |
| AX-158033227 | 7 | 59.434 | KV453001.1 | 5658274 | 11-scf00161 | 11 |
| AX-157821599 | 7 | 59.434 | KV453001.1 | 5691585 | 11-scf00161 | 11 |
| AX-158033445 | 7 | 59.434 | KV453001.1 | 5822406 | 11-scf00161 | 11 |
| AX-158033567 | 7 | 59.434 | KV453001.1 | 5909042 | 11-scf00161 | 11 |
| AX-158033658 | 7 | 59.434 | KV453001.1 | 5976458 | 11-scf00161 | 11 |
| AX-157710458 | 7 | 59.434 | KV453001.1 | 6000831 | 11-scf00161 | 11 |
| AX-158033786 | 7 | 59.434 | KV453001.1 | 6103373 | 11-scf00161 | 11 |
| AX-158040548 | 7 | 59.48  | KV453001.1 | 204745  | 11-scf00161 | 11 |
| AX-158040685 | 7 | 59.48  | KV453001.1 | 311707  | 11-scf00161 | 11 |
| AX-158040795 | 7 | 59.48  | KV453001.1 | 391753  | 11-scf00161 | 11 |
| AX-157747525 | 7 | 59.48  | KV453001.1 | 513306  | 11-scf00161 | 11 |
| AX-158040961 | 7 | 59.48  | KV453001.1 | 516912  | 11-scf00161 | 11 |
| AX-158040975 | 7 | 59.48  | KV453001.1 | 526026  | 11-scf00161 | 11 |
| AX-158040983 | 7 | 59.48  | KV453001.1 | 530609  | 11-scf00161 | 11 |
| AX-158041023 | 7 | 59.48  | KV453001.1 | 563330  | 11-scf00161 | 11 |
| AX-158041029 | 7 | 59.48  | KV453001.1 | 566370  | 11-scf00161 | 11 |
| AX-158041034 | 7 | 59.48  | KV453001.1 | 569816  | 11-scf00161 | 11 |
| AX-157752612 | 7 | 59.48  | KV453001.1 | 571010  | 11-scf00161 | 11 |
| AX-157856416 | 7 | 59.48  | KV453001.1 | 871618  | 11-scf00161 | 11 |
| AX-157772232 | 7 | 59.48  | KV453001.1 | 1173469 | 11-scf00161 | 11 |
| AX-158041776 | 7 | 59.48  | KV453001.1 | 1174828 | 11-scf00161 | 11 |
| AX-158041867 | 7 | 59.48  | KV453001.1 | 1237510 | 11-scf00161 | 11 |
| AX-158040978 | 7 | 59.513 | KV453001.1 | 527175  | 11-scf00161 | 11 |
| AX-158040543 | 7 | 59.55  | KV453001.1 | 197565  | 11-scf00161 | 11 |

|              |   |       |            |         |             |    |
|--------------|---|-------|------------|---------|-------------|----|
| AX-158040572 | 7 | 59.55 | KV453001.1 | 226626  | 11-scf00161 | 11 |
| AX-158040574 | 7 | 59.55 | KV453001.1 | 227923  | 11-scf00161 | 11 |
| AX-158040601 | 7 | 59.55 | KV453001.1 | 241571  | 11-scf00161 | 11 |
| AX-158040606 | 7 | 59.55 | KV453001.1 | 243880  | 11-scf00161 | 11 |
| AX-158040774 | 7 | 59.55 | KV453001.1 | 378551  | 11-scf00161 | 11 |
| AX-158041194 | 7 | 59.55 | KV453001.1 | 699572  | 11-scf00161 | 11 |
| AX-158041197 | 7 | 59.55 | KV453001.1 | 700977  | 11-scf00161 | 11 |
| AX-158041200 | 7 | 59.55 | KV453001.1 | 702253  | 11-scf00161 | 11 |
| AX-158041228 | 7 | 59.55 | KV453001.1 | 727477  | 11-scf00161 | 11 |
| AX-158041264 | 7 | 59.55 | KV453001.1 | 752644  | 11-scf00161 | 11 |
| AX-158041277 | 7 | 59.55 | KV453001.1 | 760194  | 11-scf00161 | 11 |
| AX-158041328 | 7 | 59.55 | KV453001.1 | 801214  | 11-scf00161 | 11 |
| AX-158408482 | 7 | 59.55 | KV453001.1 | 848356  | 11-scf00161 | 11 |
| AX-157738935 | 7 | 59.55 | KV453001.1 | 858732  | 11-scf00161 | 11 |
| AX-158041399 | 7 | 59.55 | KV453001.1 | 861723  | 11-scf00161 | 11 |
| AX-158041400 | 7 | 59.55 | KV453001.1 | 862088  | 11-scf00161 | 11 |
| AX-158041402 | 7 | 59.55 | KV453001.1 | 862502  | 11-scf00161 | 11 |
| AX-157756631 | 7 | 59.55 | KV453001.1 | 862616  | 11-scf00161 | 11 |
| AX-158041413 | 7 | 59.55 | KV453001.1 | 868096  | 11-scf00161 | 11 |
| AX-157719256 | 7 | 59.55 | KV453001.1 | 870802  | 11-scf00161 | 11 |
| AX-158041426 | 7 | 59.55 | KV453001.1 | 873710  | 11-scf00161 | 11 |
| AX-157718536 | 7 | 59.55 | KV453001.1 | 873981  | 11-scf00161 | 11 |
| AX-158379834 | 7 | 59.55 | KV453001.1 | 874228  | 11-scf00161 | 11 |
| AX-158041491 | 7 | 59.55 | KV453001.1 | 926922  | 11-scf00161 | 11 |
| AX-158041517 | 7 | 59.55 | KV453001.1 | 955013  | 11-scf00161 | 11 |
| AX-158041533 | 7 | 59.55 | KV453001.1 | 970357  | 11-scf00161 | 11 |
| AX-158041546 | 7 | 59.55 | KV453001.1 | 980525  | 11-scf00161 | 11 |
| AX-157724345 | 7 | 59.55 | KV453001.1 | 981385  | 11-scf00161 | 11 |
| AX-157771267 | 7 | 59.55 | KV453001.1 | 982675  | 11-scf00161 | 11 |
| AX-158041549 | 7 | 59.55 | KV453001.1 | 984524  | 11-scf00161 | 11 |
| AX-158041551 | 7 | 59.55 | KV453001.1 | 986465  | 11-scf00161 | 11 |
| AX-158041572 | 7 | 59.55 | KV453001.1 | 1006476 | 11-scf00161 | 11 |
| AX-158041585 | 7 | 59.55 | KV453001.1 | 1018978 | 11-scf00161 | 11 |
| AX-157724076 | 7 | 59.55 | KV453001.1 | 1048142 | 11-scf00161 | 11 |
| AX-158041624 | 7 | 59.55 | KV453001.1 | 1050579 | 11-scf00161 | 11 |
| AX-158041672 | 7 | 59.55 | KV453001.1 | 1078215 | 11-scf00161 | 11 |
| AX-158041720 | 7 | 59.55 | KV453001.1 | 1121604 | 11-scf00161 | 11 |
| AX-157757642 | 7 | 59.55 | KV453001.1 | 1122209 | 11-scf00161 | 11 |
| AX-158041723 | 7 | 59.55 | KV453001.1 | 1124341 | 11-scf00161 | 11 |
| AX-158041740 | 7 | 59.55 | KV453001.1 | 1139680 | 11-scf00161 | 11 |
| AX-157749508 | 7 | 59.55 | KV453001.1 | 1142400 | 11-scf00161 | 11 |
| AX-158041752 | 7 | 59.55 | KV453001.1 | 1145638 | 11-scf00161 | 11 |
| AX-158041754 | 7 | 59.55 | KV453001.1 | 1147808 | 11-scf00161 | 11 |
| AX-157822122 | 7 | 59.55 | KV453001.1 | 1167588 | 11-scf00161 | 11 |
| AX-157742281 | 7 | 59.55 | KV453001.1 | 1169892 | 11-scf00161 | 11 |
| AX-158041774 | 7 | 59.55 | KV453001.1 | 1170865 | 11-scf00161 | 11 |
| AX-158041781 | 7 | 59.55 | KV453001.1 | 1177159 | 11-scf00161 | 11 |
| AX-158041797 | 7 | 59.55 | KV453001.1 | 1187419 | 11-scf00161 | 11 |
| AX-158041817 | 7 | 59.55 | KV453001.1 | 1203159 | 11-scf00161 | 11 |
| AX-157752424 | 7 | 59.55 | KV453001.1 | 1203740 | 11-scf00161 | 11 |
| AX-158041822 | 7 | 59.55 | KV453001.1 | 1206902 | 11-scf00161 | 11 |



|              |   |        |            |         |             |    |
|--------------|---|--------|------------|---------|-------------|----|
| AX-158041840 | 7 | 59.55  | KV453001.1 | 1219792 | 11-scf00161 | 11 |
| AX-158041849 | 7 | 59.55  | KV453001.1 | 1225856 | 11-scf00161 | 11 |
| AX-158041936 | 7 | 59.55  | KV453001.1 | 1294047 | 11-scf00161 | 11 |
| AX-158041971 | 7 | 59.55  | KV453001.1 | 1331522 | 11-scf00161 | 11 |
| AX-158041972 | 7 | 59.55  | KV453001.1 | 1332158 | 11-scf00161 | 11 |
| AX-157758442 | 7 | 59.55  | KV453001.1 | 1394167 | 11-scf00161 | 11 |
| AX-158042254 | 7 | 59.55  | KV453001.1 | 1703662 | 11-scf00161 | 11 |
| AX-158042257 | 7 | 59.55  | KV453001.1 | 1706209 | 11-scf00161 | 11 |
| AX-157745210 | 7 | 59.55  | KV453001.1 | 2402025 | 11-scf00161 | 11 |
| AX-157821457 | 7 | 59.55  | KV453001.1 | 3237764 | 11-scf00161 | 11 |
| AX-158032888 | 7 | 59.55  | KV453001.1 | 5284723 | 11-scf00161 | 11 |
| AX-158041977 | 7 | 59.665 | KV453001.1 | 1335726 | 11-scf00161 | 11 |
| AX-158041981 | 7 | 59.665 | KV453001.1 | 1338768 | 11-scf00161 | 11 |
| AX-158041982 | 7 | 59.665 | KV453001.1 | 1340385 | 11-scf00161 | 11 |
| AX-158041983 | 7 | 59.665 | KV453001.1 | 1341053 | 11-scf00161 | 11 |
| AX-158041984 | 7 | 59.665 | KV453001.1 | 1341533 | 11-scf00161 | 11 |
| AX-158041986 | 7 | 59.665 | KV453001.1 | 1342788 | 11-scf00161 | 11 |
| AX-158030135 | 7 | 59.665 | KV453001.1 | 2386810 | 11-scf00161 | 11 |
| AX-158041992 | 7 | 59.781 | KV453001.1 | 1347676 | 11-scf00161 | 11 |
| AX-158041994 | 7 | 59.781 | KV453001.1 | 1350405 | 11-scf00161 | 11 |
| AX-158041995 | 7 | 59.781 | KV453001.1 | 1351060 | 11-scf00161 | 11 |
| AX-158041997 | 7 | 59.781 | KV453001.1 | 1351636 | 11-scf00161 | 11 |
| AX-158042000 | 7 | 59.781 | KV453001.1 | 1352731 | 11-scf00161 | 11 |
| AX-158042001 | 7 | 59.781 | KV453001.1 | 1353218 | 11-scf00161 | 11 |
| AX-158042003 | 7 | 59.781 | KV453001.1 | 1354416 | 11-scf00161 | 11 |
| AX-158042029 | 7 | 59.781 | KV453001.1 | 1393171 | 11-scf00161 | 11 |
| AX-158042046 | 7 | 59.781 | KV453001.1 | 1409052 | 11-scf00161 | 11 |
| AX-158042063 | 7 | 59.781 | KV453001.1 | 1441718 | 11-scf00161 | 11 |
| AX-158042064 | 7 | 59.781 | KV453001.1 | 1443570 | 11-scf00161 | 11 |
| AX-157722253 | 7 | 59.781 | KV453001.1 | 1449489 | 11-scf00161 | 11 |
| AX-158042078 | 7 | 59.781 | KV453001.1 | 1458371 | 11-scf00161 | 11 |
| AX-158042089 | 7 | 59.781 | KV453001.1 | 1472391 | 11-scf00161 | 11 |
| AX-158042090 | 7 | 59.781 | KV453001.1 | 1473628 | 11-scf00161 | 11 |
| AX-158042091 | 7 | 59.781 | KV453001.1 | 1474921 | 11-scf00161 | 11 |
| AX-158042111 | 7 | 59.781 | KV453001.1 | 1500004 | 11-scf00161 | 11 |
| AX-158042113 | 7 | 59.781 | KV453001.1 | 1501287 | 11-scf00161 | 11 |
| AX-158042143 | 7 | 59.781 | KV453001.1 | 1537764 | 11-scf00161 | 11 |
| AX-158042166 | 7 | 59.781 | KV453001.1 | 1571280 | 11-scf00161 | 11 |
| AX-157716845 | 7 | 59.781 | KV453001.1 | 1625155 | 11-scf00161 | 11 |
| AX-158042215 | 7 | 59.781 | KV453001.1 | 1647295 | 11-scf00161 | 11 |
| AX-158042219 | 7 | 59.781 | KV453001.1 | 1656072 | 11-scf00161 | 11 |
| AX-158042226 | 7 | 59.781 | KV453001.1 | 1672707 | 11-scf00161 | 11 |
| AX-158042245 | 7 | 59.781 | KV453001.1 | 1697057 | 11-scf00161 | 11 |
| AX-158042248 | 7 | 59.781 | KV453001.1 | 1698552 | 11-scf00161 | 11 |
| AX-157822131 | 7 | 59.781 | KV453001.1 | 1707047 | 11-scf00161 | 11 |
| AX-158042258 | 7 | 59.781 | KV453001.1 | 1708937 | 11-scf00161 | 11 |
| AX-158042260 | 7 | 59.781 | KV453001.1 | 1709810 | 11-scf00161 | 11 |
| AX-158042283 | 7 | 59.781 | KV453001.1 | 1752248 | 11-scf00161 | 11 |
| AX-157821351 | 7 | 59.781 | KV453001.1 | 1809591 | 11-scf00161 | 11 |
| AX-158029431 | 7 | 59.781 | KV453001.1 | 1812650 | 11-scf00161 | 11 |
| AX-158029434 | 7 | 59.781 | KV453001.1 | 1814038 | 11-scf00161 | 11 |

|              |   |        |            |         |             |    |
|--------------|---|--------|------------|---------|-------------|----|
| AX-158030092 | 7 | 59.781 | KV453001.1 | 2347976 | 11-scf00161 | 11 |
| AX-157724054 | 7 | 59.781 | KV453001.1 | 2556924 | 11-scf00161 | 11 |
| AX-158030509 | 7 | 59.781 | KV453001.1 | 2698309 | 11-scf00161 | 11 |
| AX-158030839 | 7 | 59.781 | KV453001.1 | 3136339 | 11-scf00161 | 11 |
| AX-158030855 | 7 | 59.781 | KV453001.1 | 3163981 | 11-scf00161 | 11 |
| AX-158030885 | 7 | 59.781 | KV453001.1 | 3215510 | 11-scf00161 | 11 |
| AX-157743547 | 7 | 59.781 | KV453001.1 | 3320629 | 11-scf00161 | 11 |
| AX-158030971 | 7 | 59.781 | KV453001.1 | 3379583 | 11-scf00161 | 11 |
| AX-157714336 | 7 | 59.781 | KV453001.1 | 3397574 | 11-scf00161 | 11 |
| AX-158030984 | 7 | 59.781 | KV453001.1 | 3402882 | 11-scf00161 | 11 |
| AX-158408246 | 7 | 59.781 | KV453001.1 | 3459650 | 11-scf00161 | 11 |
| AX-158031022 | 7 | 59.781 | KV453001.1 | 3468365 | 11-scf00161 | 11 |
| AX-158031062 | 7 | 59.781 | KV453001.1 | 3565295 | 11-scf00161 | 11 |
| AX-157748833 | 7 | 59.781 | KV453001.1 | 3827677 | 11-scf00161 | 11 |
| AX-158031228 | 7 | 59.781 | KV453001.1 | 3896063 | 11-scf00161 | 11 |
| AX-158031280 | 7 | 59.781 | KV453001.1 | 3971744 | 11-scf00161 | 11 |
| AX-158031386 | 7 | 59.781 | KV453001.1 | 4079435 | 11-scf00161 | 11 |
| AX-158031674 | 7 | 59.781 | KV453001.1 | 4263767 | 11-scf00161 | 11 |
| AX-158031836 | 7 | 59.781 | KV453001.1 | 4397583 | 11-scf00161 | 11 |
| AX-158031913 | 7 | 59.781 | KV453001.1 | 4441539 | 11-scf00161 | 11 |
| AX-158031925 | 7 | 59.781 | KV453001.1 | 4452929 | 11-scf00161 | 11 |
| AX-158032257 | 7 | 59.781 | KV453001.1 | 4724715 | 11-scf00161 | 11 |
| AX-158032367 | 7 | 59.781 | KV453001.1 | 4807823 | 11-scf00161 | 11 |
| AX-157710472 | 7 | 59.781 |            | 232     | scf18932    | UN |
| AX-158029426 | 7 | 59.954 | KV453001.1 | 1809005 | 11-scf00161 | 11 |
| AX-158029501 | 7 | 59.954 | KV453001.1 | 1862962 | 11-scf00161 | 11 |
| AX-158029650 | 7 | 59.954 | KV453001.1 | 1974500 | 11-scf00161 | 11 |
| AX-158029652 | 7 | 59.954 | KV453001.1 | 1975602 | 11-scf00161 | 11 |
| AX-158029905 | 7 | 59.954 | KV453001.1 | 2197568 | 11-scf00161 | 11 |
| AX-157821380 | 7 | 59.954 | KV453001.1 | 2199423 | 11-scf00161 | 11 |
| AX-158029907 | 7 | 59.954 | KV453001.1 | 2199912 | 11-scf00161 | 11 |
| AX-158029936 | 7 | 59.954 | KV453001.1 | 2220752 | 11-scf00161 | 11 |
| AX-158029937 | 7 | 59.954 | KV453001.1 | 2221850 | 11-scf00161 | 11 |
| AX-158030012 | 7 | 59.954 | KV453001.1 | 2278800 | 11-scf00161 | 11 |
| AX-158030576 | 7 | 59.954 | KV453001.1 | 2795519 | 11-scf00161 | 11 |
| AX-157773423 | 7 | 59.954 | KV453001.1 | 2932681 | 11-scf00161 | 11 |
| AX-158030708 | 7 | 59.954 | KV453001.1 | 2958290 | 11-scf00161 | 11 |
| AX-158030709 | 7 | 59.954 | KV453001.1 | 2961476 | 11-scf00161 | 11 |
| AX-158030940 | 7 | 59.954 | KV453001.1 | 3340150 | 11-scf00161 | 11 |
| AX-158030942 | 7 | 59.954 | KV453001.1 | 3345637 | 11-scf00161 | 11 |
| AX-158031202 | 7 | 59.954 | KV453001.1 | 3845228 | 11-scf00161 | 11 |
| AX-158031381 | 7 | 59.954 | KV453001.1 | 4078676 | 11-scf00161 | 11 |
| AX-158028555 | 7 | 60.128 | KV453000.1 | 6658296 | 11-scf00159 | 11 |
| AX-158041247 | 7 | 60.128 | KV453001.1 | 741091  | 11-scf00161 | 11 |
| AX-157754412 | 7 | 60.128 | KV453001.1 | 1458895 | 11-scf00161 | 11 |
| AX-158042081 | 7 | 60.128 | KV453001.1 | 1461233 | 11-scf00161 | 11 |
| AX-157775333 | 7 | 60.128 | KV453001.1 | 1462297 | 11-scf00161 | 11 |
| AX-158042083 | 7 | 60.128 | KV453001.1 | 1463438 | 11-scf00161 | 11 |
| AX-158042184 | 7 | 60.128 | KV453001.1 | 1590186 | 11-scf00161 | 11 |
| AX-158042265 | 7 | 60.128 | KV453001.1 | 1731236 | 11-scf00161 | 11 |
| AX-157741664 | 7 | 60.128 | KV453001.1 | 1868337 | 11-scf00161 | 11 |

|              |   |        |            |         |             |    |
|--------------|---|--------|------------|---------|-------------|----|
| AX-158029600 | 7 | 60.128 | KV453001.1 | 1936052 | 11-scf00161 | 11 |
| AX-158029658 | 7 | 60.128 | KV453001.1 | 1978963 | 11-scf00161 | 11 |
| AX-158029660 | 7 | 60.128 | KV453001.1 | 1979779 | 11-scf00161 | 11 |
| AX-158029672 | 7 | 60.128 | KV453001.1 | 1985120 | 11-scf00161 | 11 |
| AX-158029805 | 7 | 60.128 | KV453001.1 | 2094647 | 11-scf00161 | 11 |
| AX-158029871 | 7 | 60.128 | KV453001.1 | 2154415 | 11-scf00161 | 11 |
| AX-158029910 | 7 | 60.128 | KV453001.1 | 2201799 | 11-scf00161 | 11 |
| AX-157754021 | 7 | 60.128 | KV453001.1 | 2207380 | 11-scf00161 | 11 |
| AX-158029928 | 7 | 60.128 | KV453001.1 | 2213661 | 11-scf00161 | 11 |
| AX-158029972 | 7 | 60.128 | KV453001.1 | 2243353 | 11-scf00161 | 11 |
| AX-158029978 | 7 | 60.128 | KV453001.1 | 2252615 | 11-scf00161 | 11 |
| AX-158030015 | 7 | 60.128 | KV453001.1 | 2280160 | 11-scf00161 | 11 |
| AX-158030030 | 7 | 60.128 | KV453001.1 | 2297337 | 11-scf00161 | 11 |
| AX-157821388 | 7 | 60.128 | KV453001.1 | 2321302 | 11-scf00161 | 11 |
| AX-158030095 | 7 | 60.128 | KV453001.1 | 2351904 | 11-scf00161 | 11 |
| AX-158030110 | 7 | 60.128 | KV453001.1 | 2367462 | 11-scf00161 | 11 |
| AX-158030111 | 7 | 60.128 | KV453001.1 | 2369628 | 11-scf00161 | 11 |
| AX-158379782 | 7 | 60.128 | KV453001.1 | 2370031 | 11-scf00161 | 11 |
| AX-158030141 | 7 | 60.128 | KV453001.1 | 2389764 | 11-scf00161 | 11 |
| AX-157721723 | 7 | 60.128 | KV453001.1 | 2396070 | 11-scf00161 | 11 |
| AX-157713260 | 7 | 60.128 | KV453001.1 | 2402388 | 11-scf00161 | 11 |
| AX-157758406 | 7 | 60.128 | KV453001.1 | 2403801 | 11-scf00161 | 11 |
| AX-157718804 | 7 | 60.128 | KV453001.1 | 2411098 | 11-scf00161 | 11 |
| AX-157772441 | 7 | 60.128 | KV453001.1 | 2413760 | 11-scf00161 | 11 |
| AX-158030173 | 7 | 60.128 | KV453001.1 | 2416449 | 11-scf00161 | 11 |
| AX-157821398 | 7 | 60.128 | KV453001.1 | 2420880 | 11-scf00161 | 11 |
| AX-158030280 | 7 | 60.128 | KV453001.1 | 2501261 | 11-scf00161 | 11 |
| AX-158030439 | 7 | 60.128 | KV453001.1 | 2629233 | 11-scf00161 | 11 |
| AX-158030533 | 7 | 60.128 | KV453001.1 | 2731370 | 11-scf00161 | 11 |
| AX-158030547 | 7 | 60.128 | KV453001.1 | 2745886 | 11-scf00161 | 11 |
| AX-158030551 | 7 | 60.128 | KV453001.1 | 2759495 | 11-scf00161 | 11 |
| AX-158408208 | 7 | 60.128 | KV453001.1 | 2761209 | 11-scf00161 | 11 |
| AX-158416100 | 7 | 60.128 | KV453001.1 | 2853920 | 11-scf00161 | 11 |
| AX-158030617 | 7 | 60.128 | KV453001.1 | 2856240 | 11-scf00161 | 11 |
| AX-157726078 | 7 | 60.128 | KV453001.1 | 2871643 | 11-scf00161 | 11 |
| AX-158030633 | 7 | 60.128 | KV453001.1 | 2871681 | 11-scf00161 | 11 |
| AX-158030634 | 7 | 60.128 | KV453001.1 | 2874031 | 11-scf00161 | 11 |
| AX-158030635 | 7 | 60.128 | KV453001.1 | 2874802 | 11-scf00161 | 11 |
| AX-158030636 | 7 | 60.128 | KV453001.1 | 2875240 | 11-scf00161 | 11 |
| AX-158030645 | 7 | 60.128 | KV453001.1 | 2882152 | 11-scf00161 | 11 |
| AX-158030653 | 7 | 60.128 | KV453001.1 | 2898812 | 11-scf00161 | 11 |
| AX-158030688 | 7 | 60.128 | KV453001.1 | 2937991 | 11-scf00161 | 11 |
| AX-158030710 | 7 | 60.128 | KV453001.1 | 2963632 | 11-scf00161 | 11 |
| AX-158030712 | 7 | 60.128 | KV453001.1 | 2965658 | 11-scf00161 | 11 |
| AX-158030713 | 7 | 60.128 | KV453001.1 | 2965820 | 11-scf00161 | 11 |
| AX-158030741 | 7 | 60.128 | KV453001.1 | 3008677 | 11-scf00161 | 11 |
| AX-157821430 | 7 | 60.128 | KV453001.1 | 3054767 | 11-scf00161 | 11 |
| AX-158030785 | 7 | 60.128 | KV453001.1 | 3072546 | 11-scf00161 | 11 |
| AX-158030805 | 7 | 60.128 | KV453001.1 | 3097872 | 11-scf00161 | 11 |
| AX-158030812 | 7 | 60.128 | KV453001.1 | 3102751 | 11-scf00161 | 11 |
| AX-157821439 | 7 | 60.128 | KV453001.1 | 3142714 | 11-scf00161 | 11 |

|              |   |        |            |         |             |    |
|--------------|---|--------|------------|---------|-------------|----|
| AX-158030853 | 7 | 60.128 | KV453001.1 | 3160407 | 11-scf00161 | 11 |
| AX-157885044 | 7 | 60.128 | KV453001.1 | 3162042 | 11-scf00161 | 11 |
| AX-157885045 | 7 | 60.128 | KV453001.1 | 3164050 | 11-scf00161 | 11 |
| AX-158030892 | 7 | 60.128 | KV453001.1 | 3222220 | 11-scf00161 | 11 |
| AX-157821459 | 7 | 60.128 | KV453001.1 | 3283803 | 11-scf00161 | 11 |
| AX-158030964 | 7 | 60.128 | KV453001.1 | 3370497 | 11-scf00161 | 11 |
| AX-158030974 | 7 | 60.128 | KV453001.1 | 3383097 | 11-scf00161 | 11 |
| AX-158030997 | 7 | 60.128 | KV453001.1 | 3425214 | 11-scf00161 | 11 |
| AX-158031012 | 7 | 60.128 | KV453001.1 | 3443804 | 11-scf00161 | 11 |
| AX-158031029 | 7 | 60.128 | KV453001.1 | 3475719 | 11-scf00161 | 11 |
| AX-158031052 | 7 | 60.128 | KV453001.1 | 3549657 | 11-scf00161 | 11 |
| AX-158031055 | 7 | 60.128 | KV453001.1 | 3557356 | 11-scf00161 | 11 |
| AX-158031056 | 7 | 60.128 | KV453001.1 | 3557777 | 11-scf00161 | 11 |
| AX-158031057 | 7 | 60.128 | KV453001.1 | 3559967 | 11-scf00161 | 11 |
| AX-158031059 | 7 | 60.128 | KV453001.1 | 3560519 | 11-scf00161 | 11 |
| AX-158031061 | 7 | 60.128 | KV453001.1 | 3564087 | 11-scf00161 | 11 |
| AX-157754265 | 7 | 60.128 | KV453001.1 | 3564305 | 11-scf00161 | 11 |
| AX-158031064 | 7 | 60.128 | KV453001.1 | 3565524 | 11-scf00161 | 11 |
| AX-157821490 | 7 | 60.128 | KV453001.1 | 3638170 | 11-scf00161 | 11 |
| AX-158031099 | 7 | 60.128 | KV453001.1 | 3659994 | 11-scf00161 | 11 |
| AX-158031181 | 7 | 60.128 | KV453001.1 | 3796067 | 11-scf00161 | 11 |
| AX-157876496 | 7 | 60.128 | KV453001.1 | 3798903 | 11-scf00161 | 11 |
| AX-158408275 | 7 | 60.128 | KV453001.1 | 3807909 | 11-scf00161 | 11 |
| AX-158031185 | 7 | 60.128 | KV453001.1 | 3808020 | 11-scf00161 | 11 |
| AX-158031186 | 7 | 60.128 | KV453001.1 | 3815186 | 11-scf00161 | 11 |
| AX-157750216 | 7 | 60.128 | KV453001.1 | 3820390 | 11-scf00161 | 11 |
| AX-158031213 | 7 | 60.128 | KV453001.1 | 3858877 | 11-scf00161 | 11 |
| AX-158031256 | 7 | 60.128 | KV453001.1 | 3945153 | 11-scf00161 | 11 |
| AX-158031351 | 7 | 60.128 | KV453001.1 | 4052569 | 11-scf00161 | 11 |
| AX-157749342 | 7 | 60.128 | KV453001.1 | 4096868 | 11-scf00161 | 11 |
| AX-158031446 | 7 | 60.128 | KV453001.1 | 4111000 | 11-scf00161 | 11 |
| AX-158031585 | 7 | 60.128 | KV453001.1 | 4197376 | 11-scf00161 | 11 |
| AX-158032128 | 7 | 60.128 | KV453001.1 | 4602016 | 11-scf00161 | 11 |
| AX-158032280 | 7 | 60.128 | KV453001.1 | 4743208 | 11-scf00161 | 11 |
| AX-158032400 | 7 | 60.128 | KV453001.1 | 4835844 | 11-scf00161 | 11 |
| AX-158032404 | 7 | 60.128 | KV453001.1 | 4838575 | 11-scf00161 | 11 |
| AX-158032575 | 7 | 60.128 | KV453001.1 | 4965049 | 11-scf00161 | 11 |
| AX-158032629 | 7 | 60.128 | KV453001.1 | 5018593 | 11-scf00161 | 11 |
| AX-158032649 | 7 | 60.128 | KV453001.1 | 5030165 | 11-scf00161 | 11 |
| AX-157742975 | 7 | 60.128 | KV453001.1 | 5036834 | 11-scf00161 | 11 |
| AX-158032696 | 7 | 60.128 | KV453001.1 | 5061987 | 11-scf00161 | 11 |
| AX-158032718 | 7 | 60.128 | KV453001.1 | 5075341 | 11-scf00161 | 11 |
| AX-158032763 | 7 | 60.128 | KV453001.1 | 5118215 | 11-scf00161 | 11 |
| AX-158032775 | 7 | 60.128 | KV453001.1 | 5145938 | 11-scf00161 | 11 |
| AX-158032875 | 7 | 60.128 | KV453001.1 | 5267110 | 11-scf00161 | 11 |
| AX-158032900 | 7 | 60.128 | KV453001.1 | 5296934 | 11-scf00161 | 11 |
| AX-158028706 | 7 | 60.244 | KV453000.1 | 6772051 | 11-scf00159 | 11 |
| AX-158040493 | 7 | 60.244 | KV453001.1 | 161181  | 11-scf00161 | 11 |
| AX-158041134 | 7 | 60.244 | KV453001.1 | 660788  | 11-scf00161 | 11 |
| AX-158041183 | 7 | 60.244 | KV453001.1 | 691396  | 11-scf00161 | 11 |
| AX-158041205 | 7 | 60.244 | KV453001.1 | 704649  | 11-scf00161 | 11 |

|              |   |        |            |         |             |    |
|--------------|---|--------|------------|---------|-------------|----|
| AX-158041829 | 7 | 60.244 | KV453001.1 | 1209568 | 11-scf00161 | 11 |
| AX-158041843 | 7 | 60.244 | KV453001.1 | 1222026 | 11-scf00161 | 11 |
| AX-158042075 | 7 | 60.244 | KV453001.1 | 1451807 | 11-scf00161 | 11 |
| AX-158042085 | 7 | 60.244 | KV453001.1 | 1466869 | 11-scf00161 | 11 |
| AX-158029525 | 7 | 60.244 | KV453001.1 | 1878647 | 11-scf00161 | 11 |
| AX-158029530 | 7 | 60.244 | KV453001.1 | 1886661 | 11-scf00161 | 11 |
| AX-157821387 | 7 | 60.244 | KV453001.1 | 2311031 | 11-scf00161 | 11 |
| AX-158030050 | 7 | 60.244 | KV453001.1 | 2318357 | 11-scf00161 | 11 |
| AX-158030052 | 7 | 60.244 | KV453001.1 | 2318641 | 11-scf00161 | 11 |
| AX-158030057 | 7 | 60.244 | KV453001.1 | 2320868 | 11-scf00161 | 11 |
| AX-158030078 | 7 | 60.244 | KV453001.1 | 2335802 | 11-scf00161 | 11 |
| AX-157714951 | 7 | 60.244 | KV453001.1 | 2359194 | 11-scf00161 | 11 |
| AX-158030202 | 7 | 60.244 | KV453001.1 | 2443905 | 11-scf00161 | 11 |
| AX-158030210 | 7 | 60.244 | KV453001.1 | 2448724 | 11-scf00161 | 11 |
| AX-158030493 | 7 | 60.244 | KV453001.1 | 2679331 | 11-scf00161 | 11 |
| AX-157722717 | 7 | 60.244 | KV453001.1 | 2684436 | 11-scf00161 | 11 |
| AX-158030505 | 7 | 60.244 | KV453001.1 | 2695660 | 11-scf00161 | 11 |
| AX-158030506 | 7 | 60.244 | KV453001.1 | 2696202 | 11-scf00161 | 11 |
| AX-158030564 | 7 | 60.244 | KV453001.1 | 2778456 | 11-scf00161 | 11 |
| AX-158030632 | 7 | 60.244 | KV453001.1 | 2870582 | 11-scf00161 | 11 |
| AX-158030676 | 7 | 60.244 | KV453001.1 | 2927914 | 11-scf00161 | 11 |
| AX-158030677 | 7 | 60.244 | KV453001.1 | 2928585 | 11-scf00161 | 11 |
| AX-158030691 | 7 | 60.244 | KV453001.1 | 2940226 | 11-scf00161 | 11 |
| AX-158030693 | 7 | 60.244 | KV453001.1 | 2941703 | 11-scf00161 | 11 |
| AX-158030695 | 7 | 60.244 | KV453001.1 | 2942444 | 11-scf00161 | 11 |
| AX-157744330 | 7 | 60.244 | KV453001.1 | 2942573 | 11-scf00161 | 11 |
| AX-158030698 | 7 | 60.244 | KV453001.1 | 2945281 | 11-scf00161 | 11 |
| AX-158030715 | 7 | 60.244 | KV453001.1 | 2968386 | 11-scf00161 | 11 |
| AX-157821418 | 7 | 60.244 | KV453001.1 | 2969047 | 11-scf00161 | 11 |
| AX-158030716 | 7 | 60.244 | KV453001.1 | 2969288 | 11-scf00161 | 11 |
| AX-158030733 | 7 | 60.244 | KV453001.1 | 2991357 | 11-scf00161 | 11 |
| AX-158030763 | 7 | 60.244 | KV453001.1 | 3040570 | 11-scf00161 | 11 |
| AX-158030773 | 7 | 60.244 | KV453001.1 | 3065146 | 11-scf00161 | 11 |
| AX-158030780 | 7 | 60.244 | KV453001.1 | 3069871 | 11-scf00161 | 11 |
| AX-158030794 | 7 | 60.244 | KV453001.1 | 3085701 | 11-scf00161 | 11 |
| AX-157856361 | 7 | 60.244 | KV453001.1 | 3098143 | 11-scf00161 | 11 |
| AX-158030837 | 7 | 60.244 | KV453001.1 | 3134844 | 11-scf00161 | 11 |
| AX-157821441 | 7 | 60.244 | KV453001.1 | 3144333 | 11-scf00161 | 11 |
| AX-158030856 | 7 | 60.244 | KV453001.1 | 3164934 | 11-scf00161 | 11 |
| AX-158030859 | 7 | 60.244 | KV453001.1 | 3173300 | 11-scf00161 | 11 |
| AX-158030861 | 7 | 60.244 | KV453001.1 | 3175102 | 11-scf00161 | 11 |
| AX-157821445 | 7 | 60.244 | KV453001.1 | 3175739 | 11-scf00161 | 11 |
| AX-158030862 | 7 | 60.244 | KV453001.1 | 3176391 | 11-scf00161 | 11 |
| AX-157755017 | 7 | 60.244 | KV453001.1 | 3204662 | 11-scf00161 | 11 |
| AX-158030881 | 7 | 60.244 | KV453001.1 | 3207921 | 11-scf00161 | 11 |
| AX-157785331 | 7 | 60.244 | KV453001.1 | 3214977 | 11-scf00161 | 11 |
| AX-158030888 | 7 | 60.244 | KV453001.1 | 3217986 | 11-scf00161 | 11 |
| AX-158030889 | 7 | 60.244 | KV453001.1 | 3219023 | 11-scf00161 | 11 |
| AX-157821453 | 7 | 60.244 | KV453001.1 | 3227897 | 11-scf00161 | 11 |
| AX-157821455 | 7 | 60.244 | KV453001.1 | 3229751 | 11-scf00161 | 11 |
| AX-158030896 | 7 | 60.244 | KV453001.1 | 3230059 | 11-scf00161 | 11 |

|              |   |        |            |         |             |    |
|--------------|---|--------|------------|---------|-------------|----|
| AX-157750186 | 7 | 60.244 | KV453001.1 | 3230948 | 11-scf00161 | 11 |
| AX-158030898 | 7 | 60.244 | KV453001.1 | 3231316 | 11-scf00161 | 11 |
| AX-158030899 | 7 | 60.244 | KV453001.1 | 3232858 | 11-scf00161 | 11 |
| AX-157821456 | 7 | 60.244 | KV453001.1 | 3234799 | 11-scf00161 | 11 |
| AX-158030913 | 7 | 60.244 | KV453001.1 | 3259791 | 11-scf00161 | 11 |
| AX-157772954 | 7 | 60.244 | KV453001.1 | 3264823 | 11-scf00161 | 11 |
| AX-158030915 | 7 | 60.244 | KV453001.1 | 3272210 | 11-scf00161 | 11 |
| AX-157757709 | 7 | 60.244 | KV453001.1 | 3278856 | 11-scf00161 | 11 |
| AX-158030918 | 7 | 60.244 | KV453001.1 | 3286480 | 11-scf00161 | 11 |
| AX-158408232 | 7 | 60.244 | KV453001.1 | 3307984 | 11-scf00161 | 11 |
| AX-158030938 | 7 | 60.244 | KV453001.1 | 3331236 | 11-scf00161 | 11 |
| AX-157821468 | 7 | 60.244 | KV453001.1 | 3350336 | 11-scf00161 | 11 |
| AX-157821469 | 7 | 60.244 | KV453001.1 | 3351570 | 11-scf00161 | 11 |
| AX-158030949 | 7 | 60.244 | KV453001.1 | 3352340 | 11-scf00161 | 11 |
| AX-157749026 | 7 | 60.244 | KV453001.1 | 3354027 | 11-scf00161 | 11 |
| AX-158030952 | 7 | 60.244 | KV453001.1 | 3360432 | 11-scf00161 | 11 |
| AX-158030985 | 7 | 60.244 | KV453001.1 | 3406983 | 11-scf00161 | 11 |
| AX-158030989 | 7 | 60.244 | KV453001.1 | 3411663 | 11-scf00161 | 11 |
| AX-158406171 | 7 | 60.244 | KV453001.1 | 3433918 | 11-scf00161 | 11 |
| AX-158406174 | 7 | 60.244 | KV453001.1 | 3459558 | 11-scf00161 | 11 |
| AX-157821475 | 7 | 60.244 | KV453001.1 | 3477134 | 11-scf00161 | 11 |
| AX-158031030 | 7 | 60.244 | KV453001.1 | 3477628 | 11-scf00161 | 11 |
| AX-158031043 | 7 | 60.244 | KV453001.1 | 3509773 | 11-scf00161 | 11 |
| AX-157821480 | 7 | 60.244 | KV453001.1 | 3525126 | 11-scf00161 | 11 |
| AX-157821481 | 7 | 60.244 | KV453001.1 | 3525968 | 11-scf00161 | 11 |
| AX-158031054 | 7 | 60.244 | KV453001.1 | 3555806 | 11-scf00161 | 11 |
| AX-158408258 | 7 | 60.244 | KV453001.1 | 3596689 | 11-scf00161 | 11 |
| AX-158031083 | 7 | 60.244 | KV453001.1 | 3612937 | 11-scf00161 | 11 |
| AX-157821491 | 7 | 60.244 | KV453001.1 | 3673245 | 11-scf00161 | 11 |
| AX-158031105 | 7 | 60.244 | KV453001.1 | 3675816 | 11-scf00161 | 11 |
| AX-158031107 | 7 | 60.244 | KV453001.1 | 3676857 | 11-scf00161 | 11 |
| AX-158031156 | 7 | 60.244 | KV453001.1 | 3748561 | 11-scf00161 | 11 |
| AX-158031163 | 7 | 60.244 | KV453001.1 | 3757899 | 11-scf00161 | 11 |
| AX-158031175 | 7 | 60.244 | KV453001.1 | 3786680 | 11-scf00161 | 11 |
| AX-158031193 | 7 | 60.244 | KV453001.1 | 3835130 | 11-scf00161 | 11 |
| AX-157722883 | 7 | 60.244 | KV453001.1 | 3915678 | 11-scf00161 | 11 |
| AX-158031246 | 7 | 60.244 | KV453001.1 | 3920897 | 11-scf00161 | 11 |
| AX-158031247 | 7 | 60.244 | KV453001.1 | 3923708 | 11-scf00161 | 11 |
| AX-157743487 | 7 | 60.244 | KV453001.1 | 3947876 | 11-scf00161 | 11 |
| AX-158031262 | 7 | 60.244 | KV453001.1 | 3955810 | 11-scf00161 | 11 |
| AX-157722282 | 7 | 60.244 | KV453001.1 | 3965212 | 11-scf00161 | 11 |
| AX-158031276 | 7 | 60.244 | KV453001.1 | 3966045 | 11-scf00161 | 11 |
| AX-158031286 | 7 | 60.244 | KV453001.1 | 3979383 | 11-scf00161 | 11 |
| AX-158031295 | 7 | 60.244 | KV453001.1 | 3988286 | 11-scf00161 | 11 |
| AX-158031296 | 7 | 60.244 | KV453001.1 | 3989328 | 11-scf00161 | 11 |
| AX-158031312 | 7 | 60.244 | KV453001.1 | 4016183 | 11-scf00161 | 11 |
| AX-158031319 | 7 | 60.244 | KV453001.1 | 4021669 | 11-scf00161 | 11 |
| AX-157726802 | 7 | 60.244 | KV453001.1 | 4022327 | 11-scf00161 | 11 |
| AX-158031320 | 7 | 60.244 | KV453001.1 | 4023639 | 11-scf00161 | 11 |
| AX-158031328 | 7 | 60.244 | KV453001.1 | 4026774 | 11-scf00161 | 11 |
| AX-158031409 | 7 | 60.244 | KV453001.1 | 4092291 | 11-scf00161 | 11 |

|              |   |        |            |         |             |    |
|--------------|---|--------|------------|---------|-------------|----|
| AX-157725153 | 7 | 60.244 | KV453001.1 | 4100898 | 11-scf00161 | 11 |
| AX-158031431 | 7 | 60.244 | KV453001.1 | 4105139 | 11-scf00161 | 11 |
| AX-158031533 | 7 | 60.244 | KV453001.1 | 4165185 | 11-scf00161 | 11 |
| AX-158031540 | 7 | 60.244 | KV453001.1 | 4170880 | 11-scf00161 | 11 |
| AX-158031625 | 7 | 60.244 | KV453001.1 | 4233862 | 11-scf00161 | 11 |
| AX-158031636 | 7 | 60.244 | KV453001.1 | 4241730 | 11-scf00161 | 11 |
| AX-158031662 | 7 | 60.244 | KV453001.1 | 4258526 | 11-scf00161 | 11 |
| AX-158031664 | 7 | 60.244 | KV453001.1 | 4258970 | 11-scf00161 | 11 |
| AX-158031705 | 7 | 60.244 | KV453001.1 | 4283968 | 11-scf00161 | 11 |
| AX-158031724 | 7 | 60.244 | KV453001.1 | 4300708 | 11-scf00161 | 11 |
| AX-158383849 | 7 | 60.244 | KV453001.1 | 4304304 | 11-scf00161 | 11 |
| AX-157713813 | 7 | 60.244 | KV453001.1 | 4311673 | 11-scf00161 | 11 |
| AX-158031746 | 7 | 60.244 | KV453001.1 | 4319284 | 11-scf00161 | 11 |
| AX-158031749 | 7 | 60.244 | KV453001.1 | 4319737 | 11-scf00161 | 11 |
| AX-158031750 | 7 | 60.244 | KV453001.1 | 4320622 | 11-scf00161 | 11 |
| AX-158031763 | 7 | 60.244 | KV453001.1 | 4335636 | 11-scf00161 | 11 |
| AX-157821523 | 7 | 60.244 | KV453001.1 | 4336843 | 11-scf00161 | 11 |
| AX-158031768 | 7 | 60.244 | KV453001.1 | 4339399 | 11-scf00161 | 11 |
| AX-157821524 | 7 | 60.244 | KV453001.1 | 4341107 | 11-scf00161 | 11 |
| AX-158031775 | 7 | 60.244 | KV453001.1 | 4344472 | 11-scf00161 | 11 |
| AX-158031781 | 7 | 60.244 | KV453001.1 | 4346967 | 11-scf00161 | 11 |
| AX-157713956 | 7 | 60.244 | KV453001.1 | 4353347 | 11-scf00161 | 11 |
| AX-158031792 | 7 | 60.244 | KV453001.1 | 4356373 | 11-scf00161 | 11 |
| AX-158031812 | 7 | 60.244 | KV453001.1 | 4372935 | 11-scf00161 | 11 |
| AX-158032255 | 7 | 60.244 | KV453001.1 | 4723465 | 11-scf00161 | 11 |
| AX-158032256 | 7 | 60.244 | KV453001.1 | 4723935 | 11-scf00161 | 11 |
| AX-158032403 | 7 | 60.244 | KV453001.1 | 4838261 | 11-scf00161 | 11 |
| AX-158032724 | 7 | 60.244 | KV453001.1 | 5080949 | 11-scf00161 | 11 |
| AX-158032725 | 7 | 60.244 | KV453001.1 | 5081894 | 11-scf00161 | 11 |
| AX-158032747 | 7 | 60.244 | KV453001.1 | 5098093 | 11-scf00161 | 11 |
| AX-157747786 | 7 | 60.244 | KV453001.1 | 5196589 | 11-scf00161 | 11 |
| AX-158032830 | 7 | 60.244 | KV453001.1 | 5218298 | 11-scf00161 | 11 |
| AX-158032887 | 7 | 60.244 | KV453001.1 | 5284017 | 11-scf00161 | 11 |
| AX-158031828 | 7 | 60.262 | KV453001.1 | 4387859 | 11-scf00161 | 11 |
| AX-158031993 | 7 | 60.288 | KV453001.1 | 4512018 | 11-scf00161 | 11 |
| AX-158030979 | 7 | 60.318 | KV453001.1 | 3397473 | 11-scf00161 | 11 |
| AX-158032002 | 7 | 60.318 | KV453001.1 | 4517880 | 11-scf00161 | 11 |
| AX-158032003 | 7 | 60.318 | KV453001.1 | 4519666 | 11-scf00161 | 11 |
| AX-158032071 | 7 | 60.318 | KV453001.1 | 4562515 | 11-scf00161 | 11 |
| AX-158032075 | 7 | 60.318 | KV453001.1 | 4565019 | 11-scf00161 | 11 |
| AX-158030790 | 7 | 60.336 | KV453001.1 | 3078036 | 11-scf00161 | 11 |
| AX-158030884 | 7 | 60.336 | KV453001.1 | 3214021 | 11-scf00161 | 11 |
| AX-157821461 | 7 | 60.336 | KV453001.1 | 3302822 | 11-scf00161 | 11 |
| AX-158030931 | 7 | 60.336 | KV453001.1 | 3312520 | 11-scf00161 | 11 |
| AX-157821471 | 7 | 60.336 | KV453001.1 | 3437517 | 11-scf00161 | 11 |
| AX-158031014 | 7 | 60.336 | KV453001.1 | 3445850 | 11-scf00161 | 11 |
| AX-157740512 | 7 | 60.336 | KV453001.1 | 3446041 | 11-scf00161 | 11 |
| AX-158031015 | 7 | 60.336 | KV453001.1 | 3447875 | 11-scf00161 | 11 |
| AX-158031016 | 7 | 60.336 | KV453001.1 | 3448350 | 11-scf00161 | 11 |
| AX-158031071 | 7 | 60.336 | KV453001.1 | 3575016 | 11-scf00161 | 11 |
| AX-158031073 | 7 | 60.336 | KV453001.1 | 3575618 | 11-scf00161 | 11 |

|              |   |        |            |         |               |    |
|--------------|---|--------|------------|---------|---------------|----|
| AX-158031134 | 7 | 60.336 | KV453001.1 | 3708472 | 11-scf00161   | 11 |
| AX-158031148 | 7 | 60.336 | KV453001.1 | 3733514 | 11-scf00161   | 11 |
| AX-158031649 | 7 | 60.336 | KV453001.1 | 4251026 | 11-scf00161   | 11 |
| AX-158031767 | 7 | 60.336 | KV453001.1 | 4337971 | 11-scf00161   | 11 |
| AX-158031825 | 7 | 60.336 | KV453001.1 | 4384333 | 11-scf00161   | 11 |
| AX-157770812 | 7 | 60.336 | KV453001.1 | 4385666 | 11-scf00161   | 11 |
| AX-158032007 | 7 | 60.336 | KV453001.1 | 4521514 | 11-scf00161   | 11 |
| AX-158032234 | 7 | 60.336 | KV453001.1 | 4691854 | 11-scf00161   | 11 |
| AX-158032236 | 7 | 60.336 | KV453001.1 | 4693243 | 11-scf00161   | 11 |
| AX-158032610 | 7 | 60.336 | KV453001.1 | 4998424 | 11-scf00161   | 11 |
| AX-157774632 | 7 | 60.336 | KV453001.1 | 5012832 | 11-scf00161   | 11 |
| AX-157704216 | 7 | 60.336 | DX102999.1 | 329     | ORI212 lctalu | UN |
| AX-158032050 | 7 | 60.344 | KV453001.1 | 4552236 | 11-scf00161   | 11 |
| AX-158032416 | 7 | 60.344 | KV453001.1 | 4848612 | 11-scf00161   | 11 |
| AX-158032186 | 7 | 60.348 | KV453001.1 | 4648581 | 11-scf00161   | 11 |
| AX-157725381 | 7 | 60.359 | KV453000.1 | 7332466 | 11-scf00159   | 11 |
| AX-157754601 | 7 | 60.359 | KV453001.1 | 1194837 | 11-scf00161   | 11 |
| AX-158041878 | 7 | 60.359 | KV453001.1 | 1247130 | 11-scf00161   | 11 |
| AX-158041883 | 7 | 60.359 | KV453001.1 | 1251936 | 11-scf00161   | 11 |
| AX-158042074 | 7 | 60.359 | KV453001.1 | 1448794 | 11-scf00161   | 11 |
| AX-158029955 | 7 | 60.359 | KV453001.1 | 2234996 | 11-scf00161   | 11 |
| AX-157745480 | 7 | 60.359 | KV453001.1 | 2323133 | 11-scf00161   | 11 |
| AX-158030176 | 7 | 60.359 | KV453001.1 | 2419296 | 11-scf00161   | 11 |
| AX-158030719 | 7 | 60.359 | KV453001.1 | 2971749 | 11-scf00161   | 11 |
| AX-158030738 | 7 | 60.359 | KV453001.1 | 3005580 | 11-scf00161   | 11 |
| AX-158030755 | 7 | 60.359 | KV453001.1 | 3031246 | 11-scf00161   | 11 |
| AX-157716444 | 7 | 60.359 | KV453001.1 | 3039765 | 11-scf00161   | 11 |
| AX-158030760 | 7 | 60.359 | KV453001.1 | 3040038 | 11-scf00161   | 11 |
| AX-157723594 | 7 | 60.359 | KV453001.1 | 3140304 | 11-scf00161   | 11 |
| AX-157712260 | 7 | 60.359 | KV453001.1 | 3241366 | 11-scf00161   | 11 |
| AX-158030911 | 7 | 60.359 | KV453001.1 | 3259044 | 11-scf00161   | 11 |
| AX-158030926 | 7 | 60.359 | KV453001.1 | 3307660 | 11-scf00161   | 11 |
| AX-158031524 | 7 | 60.359 | KV453001.1 | 4160445 | 11-scf00161   | 11 |
| AX-158032191 | 7 | 60.359 | KV453001.1 | 4655821 | 11-scf00161   | 11 |
| AX-158032267 | 7 | 60.359 | KV453001.1 | 4731793 | 11-scf00161   | 11 |
| AX-158032274 | 7 | 60.359 | KV453001.1 | 4737564 | 11-scf00161   | 11 |
| AX-158032275 | 7 | 60.359 | KV453001.1 | 4738975 | 11-scf00161   | 11 |
| AX-158032278 | 7 | 60.359 | KV453001.1 | 4740927 | 11-scf00161   | 11 |
| AX-157742182 | 7 | 60.359 | KV453001.1 | 4750484 | 11-scf00161   | 11 |
| AX-158032300 | 7 | 60.359 | KV453001.1 | 4757656 | 11-scf00161   | 11 |
| AX-158032303 | 7 | 60.359 | KV453001.1 | 4763868 | 11-scf00161   | 11 |
| AX-158032308 | 7 | 60.359 | KV453001.1 | 4767420 | 11-scf00161   | 11 |
| AX-158032317 | 7 | 60.359 | KV453001.1 | 4774140 | 11-scf00161   | 11 |
| AX-158032319 | 7 | 60.359 | KV453001.1 | 4775346 | 11-scf00161   | 11 |
| AX-158032368 | 7 | 60.359 | KV453001.1 | 4808283 | 11-scf00161   | 11 |
| AX-158032372 | 7 | 60.359 | KV453001.1 | 4811214 | 11-scf00161   | 11 |
| AX-158032407 | 7 | 60.359 | KV453001.1 | 4840588 | 11-scf00161   | 11 |
| AX-158032408 | 7 | 60.359 | KV453001.1 | 4841204 | 11-scf00161   | 11 |
| AX-158032409 | 7 | 60.359 | KV453001.1 | 4841811 | 11-scf00161   | 11 |
| AX-158032410 | 7 | 60.359 | KV453001.1 | 4843061 | 11-scf00161   | 11 |
| AX-158032434 | 7 | 60.359 | KV453001.1 | 4865112 | 11-scf00161   | 11 |



|              |   |        |            |         |                |    |
|--------------|---|--------|------------|---------|----------------|----|
| AX-157722506 | 7 | 60.359 | KV453001.1 | 4868138 | 11-scf00161    | 11 |
| AX-158032566 | 7 | 60.359 | KV453001.1 | 4952202 | 11-scf00161    | 11 |
| AX-157821563 | 7 | 60.359 | KV453001.1 | 4954159 | 11-scf00161    | 11 |
| AX-158032567 | 7 | 60.359 | KV453001.1 | 4956999 | 11-scf00161    | 11 |
| AX-158032609 | 7 | 60.359 | KV453001.1 | 4997707 | 11-scf00161    | 11 |
| AX-158032740 | 7 | 60.359 | KV453001.1 | 5091170 | 11-scf00161    | 11 |
| AX-158032827 | 7 | 60.359 | KV453001.1 | 5211885 | 11-scf00161    | 11 |
| AX-158379795 | 7 | 60.359 | KV453001.1 | 5332669 | 11-scf00161    | 11 |
| AX-158033190 | 7 | 60.359 | KV453001.1 | 5634868 | 11-scf00161    | 11 |
| AX-157694406 | 7 | 60.359 | FI892406.1 | 278     | 10RI212 lctalk | UN |
| AX-158032600 | 7 | 60.45  | KV453001.1 | 4991153 | 11-scf00161    | 11 |
| AX-158029417 | 7 | 60.475 | KV453000.1 | 7378503 | 11-scf00159    | 11 |
| AX-157774575 | 7 | 60.475 | KV453001.1 | 12506   | 11-scf00161    | 11 |
| AX-158040287 | 7 | 60.475 | KV453001.1 | 12894   | 11-scf00161    | 11 |
| AX-157822045 | 7 | 60.475 | KV453001.1 | 14145   | 11-scf00161    | 11 |
| AX-158040448 | 7 | 60.475 | KV453001.1 | 122970  | 11-scf00161    | 11 |
| AX-158040960 | 7 | 60.475 | KV453001.1 | 514172  | 11-scf00161    | 11 |
| AX-158030831 | 7 | 60.475 | KV453001.1 | 3129921 | 11-scf00161    | 11 |
| AX-158030920 | 7 | 60.475 | KV453001.1 | 3289469 | 11-scf00161    | 11 |
| AX-158030960 | 7 | 60.475 | KV453001.1 | 3365351 | 11-scf00161    | 11 |
| AX-158031007 | 7 | 60.475 | KV453001.1 | 3434295 | 11-scf00161    | 11 |
| AX-157821472 | 7 | 60.475 | KV453001.1 | 3441362 | 11-scf00161    | 11 |
| AX-158031031 | 7 | 60.475 | KV453001.1 | 3485396 | 11-scf00161    | 11 |
| AX-158031100 | 7 | 60.475 | KV453001.1 | 3666606 | 11-scf00161    | 11 |
| AX-158031267 | 7 | 60.475 | KV453001.1 | 3957558 | 11-scf00161    | 11 |
| AX-157723058 | 7 | 60.475 | KV453001.1 | 4058377 | 11-scf00161    | 11 |
| AX-158031570 | 7 | 60.475 | KV453001.1 | 4187214 | 11-scf00161    | 11 |
| AX-157821528 | 7 | 60.475 | KV453001.1 | 4387187 | 11-scf00161    | 11 |
| AX-158032103 | 7 | 60.475 | KV453001.1 | 4585070 | 11-scf00161    | 11 |
| AX-157775234 | 7 | 60.475 | KV453001.1 | 4721529 | 11-scf00161    | 11 |
| AX-158032273 | 7 | 60.475 | KV453001.1 | 4734970 | 11-scf00161    | 11 |
| AX-158032283 | 7 | 60.475 | KV453001.1 | 4745000 | 11-scf00161    | 11 |
| AX-158032312 | 7 | 60.475 | KV453001.1 | 4770645 | 11-scf00161    | 11 |
| AX-158032314 | 7 | 60.475 | KV453001.1 | 4771521 | 11-scf00161    | 11 |
| AX-157775851 | 7 | 60.475 | KV453001.1 | 4854855 | 11-scf00161    | 11 |
| AX-158032616 | 7 | 60.475 | KV453001.1 | 5002899 | 11-scf00161    | 11 |
| AX-158032617 | 7 | 60.475 | KV453001.1 | 5004138 | 11-scf00161    | 11 |
| AX-158032672 | 7 | 60.475 | KV453001.1 | 5048952 | 11-scf00161    | 11 |
| AX-158032750 | 7 | 60.475 | KV453001.1 | 5102044 | 11-scf00161    | 11 |
| AX-157821568 | 7 | 60.475 | KV453001.1 | 5102172 | 11-scf00161    | 11 |
| AX-158032755 | 7 | 60.475 | KV453001.1 | 5107459 | 11-scf00161    | 11 |
| AX-157697337 | 7 | 60.475 | KV453001.1 | 5121852 | 11-scf00161    | 11 |
| AX-158032765 | 7 | 60.475 | KV453001.1 | 5123906 | 11-scf00161    | 11 |
| AX-158408321 | 7 | 60.475 | KV453001.1 | 5124089 | 11-scf00161    | 11 |
| AX-158032767 | 7 | 60.475 | KV453001.1 | 5129984 | 11-scf00161    | 11 |
| AX-158032768 | 7 | 60.475 | KV453001.1 | 5130342 | 11-scf00161    | 11 |
| AX-158032769 | 7 | 60.475 | KV453001.1 | 5131328 | 11-scf00161    | 11 |
| AX-158032773 | 7 | 60.475 | KV453001.1 | 5144272 | 11-scf00161    | 11 |
| AX-158032790 | 7 | 60.475 | KV453001.1 | 5164033 | 11-scf00161    | 11 |
| AX-158033744 | 7 | 60.475 | KV453001.1 | 6057740 | 11-scf00161    | 11 |
| AX-157821462 | 7 | 60.537 | KV453001.1 | 3312447 | 11-scf00161    | 11 |

|              |   |        |             |         |             |    |
|--------------|---|--------|-------------|---------|-------------|----|
| AX-157725292 | 7 | 60.537 | KV453001.1  | 4785871 | 11-scf00161 | 11 |
| AX-158032665 | 7 | 60.537 | KV453001.1  | 5042264 | 11-scf00161 | 11 |
| AX-158032669 | 7 | 60.537 | KV453001.1  | 5044704 | 11-scf00161 | 11 |
| AX-157746996 | 7 | 60.537 | KV453001.1  | 5163586 | 11-scf00161 | 11 |
| AX-157713829 | 7 | 60.537 | KV453001.1  | 5182576 | 11-scf00161 | 11 |
| AX-157725047 | 7 | 60.537 | KV453001.1  | 5208513 | 11-scf00161 | 11 |
| AX-158032893 | 7 | 60.537 | KV453001.1  | 5288898 | 11-scf00161 | 11 |
| AX-158041914 | 7 | 60.591 | KV453001.1  | 1277465 | 11-scf00161 | 11 |
| AX-157822141 | 7 | 60.591 | KV453001.1  | 1776706 | 11-scf00161 | 11 |
| AX-158030799 | 7 | 60.591 | KV453001.1  | 3094750 | 11-scf00161 | 11 |
| AX-158031042 | 7 | 60.591 | KV453001.1  | 3500848 | 11-scf00161 | 11 |
| AX-158031102 | 7 | 60.591 | KV453001.1  | 3673849 | 11-scf00161 | 11 |
| AX-158031728 | 7 | 60.591 | KV453001.1  | 4305272 | 11-scf00161 | 11 |
| AX-157821522 | 7 | 60.591 | KV453001.1  | 4305357 | 11-scf00161 | 11 |
| AX-158379790 | 7 | 60.591 | KV453001.1  | 4305427 | 11-scf00161 | 11 |
| AX-158032635 | 7 | 60.591 | KV453001.1  | 5022275 | 11-scf00161 | 11 |
| AX-157821580 | 7 | 60.591 | KV453001.1  | 5181815 | 11-scf00161 | 11 |
| AX-158032807 | 7 | 60.591 | KV453001.1  | 5184570 | 11-scf00161 | 11 |
| AX-157748077 | 7 | 60.591 | KV453001.1  | 5193389 | 11-scf00161 | 11 |
| AX-158032815 | 7 | 60.591 | KV453001.1  | 5194337 | 11-scf00161 | 11 |
| AX-158032817 | 7 | 60.591 | KV453001.1  | 5194712 | 11-scf00161 | 11 |
| AX-158032818 | 7 | 60.591 | KV453001.1  | 5197726 | 11-scf00161 | 11 |
| AX-157821583 | 7 | 60.591 | KV453001.1  | 5199280 | 11-scf00161 | 11 |
| AX-158032822 | 7 | 60.591 | KV453001.1  | 5201692 | 11-scf00161 | 11 |
| AX-158032824 | 7 | 60.591 | KV453001.1  | 5202815 | 11-scf00161 | 11 |
| AX-157744479 | 7 | 60.591 | KV453001.1  | 5204379 | 11-scf00161 | 11 |
| AX-158032826 | 7 | 60.591 | KV453001.1  | 5211548 | 11-scf00161 | 11 |
| AX-158032834 | 7 | 60.591 | KV453001.1  | 5221867 | 11-scf00161 | 11 |
| AX-158032842 | 7 | 60.591 | KV453001.1  | 5232732 | 11-scf00161 | 11 |
| AX-158032843 | 7 | 60.591 | KV453001.1  | 5234343 | 11-scf00161 | 11 |
| AX-158032846 | 7 | 60.591 | KV453001.1  | 5237685 | 11-scf00161 | 11 |
| AX-157723675 | 7 | 60.591 | KV453001.1  | 5281615 | 11-scf00161 | 11 |
| AX-158033115 | 7 | 60.591 | KV453001.1  | 5562084 | 11-scf00161 | 11 |
| AX-158033236 | 7 | 60.591 | KV453001.1  | 5664746 | 11-scf00161 | 11 |
| AX-157821618 | 7 | 60.591 | KV453001.1  | 6019647 | 11-scf00161 | 11 |
| AX-158033799 | 7 | 60.591 | KV453001.1  | 6116811 | 11-scf00161 | 11 |
| AX-158033818 | 7 | 60.591 | KV453001.1  | 6134824 | 11-scf00161 | 11 |
| AX-157706360 | 7 | 60.591 | 3ML01032135 | 636     | scf07748_1  | UN |
| AX-158030968 | 7 | 60.94  | KV453001.1  | 3375901 | 11-scf00161 | 11 |
| AX-157745830 | 7 | 60.94  | KV453001.1  | 3437959 | 11-scf00161 | 11 |
| AX-157749007 | 7 | 60.94  | KV453001.1  | 3980705 | 11-scf00161 | 11 |
| AX-158032853 | 7 | 60.94  | KV453001.1  | 5250841 | 11-scf00161 | 11 |
| AX-158031584 | 7 | 61.285 | KV453001.1  | 4196402 | 11-scf00161 | 11 |
| AX-158031732 | 7 | 61.285 | KV453001.1  | 4307438 | 11-scf00161 | 11 |
| AX-158032861 | 7 | 61.285 | KV453001.1  | 5260580 | 11-scf00161 | 11 |
| AX-158032865 | 7 | 61.285 | KV453001.1  | 5262132 | 11-scf00161 | 11 |
| AX-158032867 | 7 | 61.285 | KV453001.1  | 5263832 | 11-scf00161 | 11 |
| AX-158032868 | 7 | 61.285 | KV453001.1  | 5264820 | 11-scf00161 | 11 |
| AX-158032871 | 7 | 61.285 | KV453001.1  | 5265502 | 11-scf00161 | 11 |
| AX-158032873 | 7 | 61.285 | KV453001.1  | 5266708 | 11-scf00161 | 11 |
| AX-158032878 | 7 | 61.285 | KV453001.1  | 5272784 | 11-scf00161 | 11 |

|              |   |        |            |          |             |    |
|--------------|---|--------|------------|----------|-------------|----|
| AX-158032882 | 7 | 61.285 | KV453001.1 | 5278113  | 11-scf00161 | 11 |
| AX-158032884 | 7 | 61.285 | KV453001.1 | 5281099  | 11-scf00161 | 11 |
| AX-158032885 | 7 | 61.285 | KV453001.1 | 5282006  | 11-scf00161 | 11 |
| AX-158032890 | 7 | 61.285 | KV453001.1 | 5286288  | 11-scf00161 | 11 |
| AX-158032896 | 7 | 61.285 | KV453001.1 | 5294931  | 11-scf00161 | 11 |
| AX-158032942 | 7 | 61.285 | KV453001.1 | 5345997  | 11-scf00161 | 11 |
| AX-158032944 | 7 | 61.285 | KV453001.1 | 5349116  | 11-scf00161 | 11 |
| AX-157821587 | 7 | 61.317 | KV453001.1 | 5299459  | 11-scf00161 | 11 |
| AX-158032904 | 7 | 61.322 | KV453001.1 | 5301880  | 11-scf00161 | 11 |
| AX-158032905 | 7 | 61.358 | KV453001.1 | 5302343  | 11-scf00161 | 11 |
| AX-158032929 | 7 | 61.358 | KV453001.1 | 5326629  | 11-scf00161 | 11 |
| AX-158032952 | 7 | 61.358 | KV453001.1 | 5360786  | 11-scf00161 | 11 |
| AX-158032828 | 7 | 61.401 | KV453001.1 | 5217761  | 11-scf00161 | 11 |
| AX-158032907 | 7 | 61.401 | KV453001.1 | 5303235  | 11-scf00161 | 11 |
| AX-158032916 | 7 | 61.401 | KV453001.1 | 5315069  | 11-scf00161 | 11 |
| AX-158032946 | 7 | 61.401 | KV453001.1 | 5350254  | 11-scf00161 | 11 |
| AX-158032918 | 7 | 61.402 | KV453001.1 | 5317314  | 11-scf00161 | 11 |
| AX-158032930 | 7 | 61.403 | KV453001.1 | 5327902  | 11-scf00161 | 11 |
| AX-158032935 | 7 | 61.748 | KV453001.1 | 5332290  | 11-scf00161 | 11 |
| AX-158032938 | 7 | 61.748 | KV453001.1 | 5336870  | 11-scf00161 | 11 |
| AX-157751633 | 7 | 61.98  | KV453001.1 | 5345235  | 11-scf00161 | 11 |
| AX-158032950 | 7 | 62.096 | KV453001.1 | 5357146  | 11-scf00161 | 11 |
| AX-158032954 | 7 | 62.096 | KV453001.1 | 5362150  | 11-scf00161 | 11 |
| AX-158032955 | 7 | 62.096 | KV453001.1 | 5362844  | 11-scf00161 | 11 |
| AX-158032962 | 7 | 62.211 | KV453001.1 | 5369490  | 11-scf00161 | 11 |
| AX-158032978 | 7 | 62.211 | KV453001.1 | 5393414  | 11-scf00161 | 11 |
| AX-158032963 | 7 | 62.214 | KV453001.1 | 5370780  | 11-scf00161 | 11 |
| AX-158032964 | 7 | 62.217 | KV453001.1 | 5372852  | 11-scf00161 | 11 |
| AX-158032974 | 7 | 62.366 | KV453001.1 | 5386634  | 11-scf00161 | 11 |
| AX-158032969 | 7 | 62.367 | KV453001.1 | 5382397  | 11-scf00161 | 11 |
| AX-158032984 | 7 | 62.367 | KV453001.1 | 5399658  | 11-scf00161 | 11 |
| AX-158032991 | 7 | 62.367 | KV453001.1 | 5405661  | 11-scf00161 | 11 |
| AX-158032997 | 7 | 62.368 | KV453001.1 | 5413528  | 11-scf00161 | 11 |
| AX-157758889 | 7 | 62.657 | KV453001.1 | 5417419  | 11-scf00161 | 11 |
| AX-158033002 | 7 | 62.657 | KV453001.1 | 5420581  | 11-scf00161 | 11 |
| AX-158033008 | 7 | 62.657 | KV453001.1 | 5424410  | 11-scf00161 | 11 |
| AX-158031642 | 7 | 62.794 | KV453001.1 | 4246623  | 11-scf00161 | 11 |
| AX-158033013 | 7 | 62.794 | KV453001.1 | 5428454  | 11-scf00161 | 11 |
| AX-158033015 | 7 | 62.862 | KV453001.1 | 5429070  | 11-scf00161 | 11 |
| AX-158033018 | 7 | 62.862 | KV453001.1 | 5435589  | 11-scf00161 | 11 |
| AX-158033104 | 7 | 62.862 | KV453001.1 | 5552124  | 11-scf00161 | 11 |
| AX-158033020 | 7 | 63.067 | KV453001.1 | 5441130  | 11-scf00161 | 11 |
| AX-158033025 | 7 | 63.138 | KV453001.1 | 5447260  | 11-scf00161 | 11 |
| AX-157821879 | 7 | 63.138 | KV453001.1 | 10531973 | 11-scf00161 | 11 |
| AX-158033003 | 7 | 63.204 | KV453001.1 | 5421518  | 11-scf00161 | 11 |
| AX-157821591 | 7 | 63.204 | KV453001.1 | 5461204  | 11-scf00161 | 11 |
| AX-158033036 | 7 | 63.204 | KV453001.1 | 5463668  | 11-scf00161 | 11 |
| AX-158033042 | 7 | 63.204 | KV453001.1 | 5471127  | 11-scf00161 | 11 |
| AX-158033044 | 7 | 63.204 | KV453001.1 | 5474083  | 11-scf00161 | 11 |
| AX-158041243 | 7 | 63.313 | KV453001.1 | 736062   | 11-scf00161 | 11 |
| AX-158041308 | 7 | 63.313 | KV453001.1 | 782446   | 11-scf00161 | 11 |

|              |   |        |            |         |             |    |
|--------------|---|--------|------------|---------|-------------|----|
| AX-157822094 | 7 | 63.313 | KV453001.1 | 783496  | 11-scf00161 | 11 |
| AX-158041313 | 7 | 63.313 | KV453001.1 | 783859  | 11-scf00161 | 11 |
| AX-158041459 | 7 | 63.313 | KV453001.1 | 902365  | 11-scf00161 | 11 |
| AX-158041905 | 7 | 63.313 | KV453001.1 | 1272822 | 11-scf00161 | 11 |
| AX-158041911 | 7 | 63.313 | KV453001.1 | 1275521 | 11-scf00161 | 11 |
| AX-157714309 | 7 | 63.313 | KV453001.1 | 1392944 | 11-scf00161 | 11 |
| AX-158029450 | 7 | 63.313 | KV453001.1 | 1831575 | 11-scf00161 | 11 |
| AX-158030058 | 7 | 63.313 | KV453001.1 | 2321070 | 11-scf00161 | 11 |
| AX-158030481 | 7 | 63.313 | KV453001.1 | 2668629 | 11-scf00161 | 11 |
| AX-158030761 | 7 | 63.313 | KV453001.1 | 3040176 | 11-scf00161 | 11 |
| AX-158030921 | 7 | 63.313 | KV453001.1 | 3293538 | 11-scf00161 | 11 |
| AX-158031011 | 7 | 63.313 | KV453001.1 | 3438934 | 11-scf00161 | 11 |
| AX-158031365 | 7 | 63.313 | KV453001.1 | 4067386 | 11-scf00161 | 11 |
| AX-158031433 | 7 | 63.313 | KV453001.1 | 4105341 | 11-scf00161 | 11 |
| AX-158031578 | 7 | 63.313 | KV453001.1 | 4192750 | 11-scf00161 | 11 |
| AX-157821530 | 7 | 63.313 | KV453001.1 | 4403776 | 11-scf00161 | 11 |
| AX-157720424 | 7 | 63.313 | KV453001.1 | 4648497 | 11-scf00161 | 11 |
| AX-157745363 | 7 | 63.313 | KV453001.1 | 4649493 | 11-scf00161 | 11 |
| AX-157821549 | 7 | 63.313 | KV453001.1 | 4652496 | 11-scf00161 | 11 |
| AX-158032464 | 7 | 63.313 | KV453001.1 | 4888364 | 11-scf00161 | 11 |
| AX-158032468 | 7 | 63.313 | KV453001.1 | 4892657 | 11-scf00161 | 11 |
| AX-158032562 | 7 | 63.313 | KV453001.1 | 4949926 | 11-scf00161 | 11 |
| AX-158032771 | 7 | 63.313 | KV453001.1 | 5135390 | 11-scf00161 | 11 |
| AX-158032971 | 7 | 63.313 | KV453001.1 | 5384079 | 11-scf00161 | 11 |
| AX-158033045 | 7 | 63.313 | KV453001.1 | 5475546 | 11-scf00161 | 11 |
| AX-158033047 | 7 | 63.313 | KV453001.1 | 5476720 | 11-scf00161 | 11 |
| AX-158033050 | 7 | 63.313 | KV453001.1 | 5486162 | 11-scf00161 | 11 |
| AX-158033051 | 7 | 63.313 | KV453001.1 | 5487632 | 11-scf00161 | 11 |
| AX-158033055 | 7 | 63.313 | KV453001.1 | 5491143 | 11-scf00161 | 11 |
| AX-158033058 | 7 | 63.313 | KV453001.1 | 5494404 | 11-scf00161 | 11 |
| AX-158033107 | 7 | 63.313 | KV453001.1 | 5557513 | 11-scf00161 | 11 |
| AX-158033142 | 7 | 63.313 | KV453001.1 | 5591076 | 11-scf00161 | 11 |
| AX-157821598 | 7 | 63.313 | KV453001.1 | 5680955 | 11-scf00161 | 11 |
| AX-158033430 | 7 | 63.313 | KV453001.1 | 5812120 | 11-scf00161 | 11 |
| AX-158033066 | 7 | 63.422 | KV453001.1 | 5510645 | 11-scf00161 | 11 |
| AX-158033068 | 7 | 63.422 | KV453001.1 | 5518777 | 11-scf00161 | 11 |
| AX-158033076 | 7 | 63.422 | KV453001.1 | 5523956 | 11-scf00161 | 11 |
| AX-158033080 | 7 | 63.422 | KV453001.1 | 5525329 | 11-scf00161 | 11 |
| AX-158033081 | 7 | 63.422 | KV453001.1 | 5525973 | 11-scf00161 | 11 |
| AX-158033083 | 7 | 63.422 | KV453001.1 | 5526490 | 11-scf00161 | 11 |
| AX-158033089 | 7 | 63.422 | KV453001.1 | 5531803 | 11-scf00161 | 11 |
| AX-158033164 | 7 | 63.422 | KV453001.1 | 5612864 | 11-scf00161 | 11 |
| AX-157821613 | 7 | 63.422 | KV453001.1 | 5983499 | 11-scf00161 | 11 |
| AX-158033084 | 7 | 63.44  | KV453001.1 | 5527871 | 11-scf00161 | 11 |
| AX-158408336 | 7 | 63.468 | KV453001.1 | 5529354 | 11-scf00161 | 11 |
| AX-158033110 | 7 | 63.468 | KV453001.1 | 5559447 | 11-scf00161 | 11 |
| AX-158033090 | 7 | 63.499 | KV453001.1 | 5532497 | 11-scf00161 | 11 |
| AX-158033161 | 7 | 63.499 | KV453001.1 | 5609643 | 11-scf00161 | 11 |
| AX-157708867 | 7 | 63.532 | KV453001.1 | 1250804 | 11-scf00161 | 11 |
| AX-158041928 | 7 | 63.532 | KV453001.1 | 1286322 | 11-scf00161 | 11 |
| AX-158031560 | 7 | 63.532 | KV453001.1 | 4180470 | 11-scf00161 | 11 |

|              |   |        |            |         |             |    |
|--------------|---|--------|------------|---------|-------------|----|
| AX-158032958 | 7 | 63.532 | KV453001.1 | 5366388 | 11-scf00161 | 11 |
| AX-158032965 | 7 | 63.532 | KV453001.1 | 5374297 | 11-scf00161 | 11 |
| AX-157750858 | 7 | 63.532 | KV453001.1 | 5501167 | 11-scf00161 | 11 |
| AX-158379797 | 7 | 63.532 | KV453001.1 | 5513178 | 11-scf00161 | 11 |
| AX-158033095 | 7 | 63.532 | KV453001.1 | 5538867 | 11-scf00161 | 11 |
| AX-158033105 | 7 | 63.532 | KV453001.1 | 5556486 | 11-scf00161 | 11 |
| AX-158033108 | 7 | 63.532 | KV453001.1 | 5559033 | 11-scf00161 | 11 |
| AX-158033116 | 7 | 63.532 | KV453001.1 | 5564377 | 11-scf00161 | 11 |
| AX-158033126 | 7 | 63.532 | KV453001.1 | 5571869 | 11-scf00161 | 11 |
| AX-158033139 | 7 | 63.532 | KV453001.1 | 5589217 | 11-scf00161 | 11 |
| AX-158033144 | 7 | 63.532 | KV453001.1 | 5591930 | 11-scf00161 | 11 |
| AX-158033152 | 7 | 63.532 | KV453001.1 | 5596966 | 11-scf00161 | 11 |
| AX-158033153 | 7 | 63.532 | KV453001.1 | 5598020 | 11-scf00161 | 11 |
| AX-158033156 | 7 | 63.532 | KV453001.1 | 5602532 | 11-scf00161 | 11 |
| AX-157754845 | 7 | 63.532 | KV453001.1 | 5603724 | 11-scf00161 | 11 |
| AX-157721779 | 7 | 63.532 | KV453001.1 | 5605435 | 11-scf00161 | 11 |
| AX-157821597 | 7 | 63.532 | KV453001.1 | 5654275 | 11-scf00161 | 11 |
| AX-158033249 | 7 | 63.532 | KV453001.1 | 5684838 | 11-scf00161 | 11 |
| AX-158033250 | 7 | 63.532 | KV453001.1 | 5685736 | 11-scf00161 | 11 |
| AX-158033298 | 7 | 63.532 | KV453001.1 | 5722100 | 11-scf00161 | 11 |
| AX-158379789 | 7 | 63.641 | KV453001.1 | 4134586 | 11-scf00161 | 11 |
| AX-158031994 | 7 | 63.641 | KV453001.1 | 4512714 | 11-scf00161 | 11 |
| AX-158033092 | 7 | 63.641 | KV453001.1 | 5533506 | 11-scf00161 | 11 |
| AX-158033118 | 7 | 63.641 | KV453001.1 | 5565941 | 11-scf00161 | 11 |
| AX-158033119 | 7 | 63.641 | KV453001.1 | 5567324 | 11-scf00161 | 11 |
| AX-158033122 | 7 | 63.641 | KV453001.1 | 5568509 | 11-scf00161 | 11 |
| AX-157821594 | 7 | 63.641 | KV453001.1 | 5580467 | 11-scf00161 | 11 |
| AX-158033133 | 7 | 63.641 | KV453001.1 | 5580642 | 11-scf00161 | 11 |
| AX-158033137 | 7 | 63.641 | KV453001.1 | 5588407 | 11-scf00161 | 11 |
| AX-158033154 | 7 | 63.641 | KV453001.1 | 5598725 | 11-scf00161 | 11 |
| AX-158033158 | 7 | 63.641 | KV453001.1 | 5606364 | 11-scf00161 | 11 |
| AX-158033169 | 7 | 63.641 | KV453001.1 | 5616954 | 11-scf00161 | 11 |
| AX-158033175 | 7 | 63.641 | KV453001.1 | 5620932 | 11-scf00161 | 11 |
| AX-158033178 | 7 | 63.641 | KV453001.1 | 5623519 | 11-scf00161 | 11 |
| AX-158033179 | 7 | 63.641 | KV453001.1 | 5624359 | 11-scf00161 | 11 |
| AX-158033183 | 7 | 63.641 | KV453001.1 | 5628112 | 11-scf00161 | 11 |
| AX-158033185 | 7 | 63.641 | KV453001.1 | 5630720 | 11-scf00161 | 11 |
| AX-158033186 | 7 | 63.641 | KV453001.1 | 5631272 | 11-scf00161 | 11 |
| AX-158033189 | 7 | 63.641 | KV453001.1 | 5631956 | 11-scf00161 | 11 |
| AX-158033195 | 7 | 63.641 | KV453001.1 | 5635782 | 11-scf00161 | 11 |
| AX-158033199 | 7 | 63.641 | KV453001.1 | 5641749 | 11-scf00161 | 11 |
| AX-158033207 | 7 | 63.641 | KV453001.1 | 5644049 | 11-scf00161 | 11 |
| AX-158033208 | 7 | 63.641 | KV453001.1 | 5644399 | 11-scf00161 | 11 |
| AX-157720388 | 7 | 63.641 | KV453001.1 | 5648737 | 11-scf00161 | 11 |
| AX-158033216 | 7 | 63.641 | KV453001.1 | 5650365 | 11-scf00161 | 11 |
| AX-158033217 | 7 | 63.641 | KV453001.1 | 5650855 | 11-scf00161 | 11 |
| AX-158033218 | 7 | 63.641 | KV453001.1 | 5651360 | 11-scf00161 | 11 |
| AX-158033220 | 7 | 63.641 | KV453001.1 | 5652812 | 11-scf00161 | 11 |
| AX-158033224 | 7 | 63.641 | KV453001.1 | 5656048 | 11-scf00161 | 11 |
| AX-158033225 | 7 | 63.641 | KV453001.1 | 5657508 | 11-scf00161 | 11 |
| AX-158033238 | 7 | 63.641 | KV453001.1 | 5666992 | 11-scf00161 | 11 |

|              |   |        |            |         |             |    |
|--------------|---|--------|------------|---------|-------------|----|
| AX-158033245 | 7 | 63.641 | KV453001.1 | 5673811 | 11-scf00161 | 11 |
| AX-157870452 | 7 | 63.641 | KV453001.1 | 5677121 | 11-scf00161 | 11 |
| AX-158033247 | 7 | 63.641 | KV453001.1 | 5684608 | 11-scf00161 | 11 |
| AX-158033251 | 7 | 63.641 | KV453001.1 | 5686704 | 11-scf00161 | 11 |
| AX-158033254 | 7 | 63.641 | KV453001.1 | 5689255 | 11-scf00161 | 11 |
| AX-158033255 | 7 | 63.641 | KV453001.1 | 5689584 | 11-scf00161 | 11 |
| AX-158033259 | 7 | 63.641 | KV453001.1 | 5695435 | 11-scf00161 | 11 |
| AX-158033264 | 7 | 63.641 | KV453001.1 | 5698133 | 11-scf00161 | 11 |
| AX-158408337 | 7 | 63.641 | KV453001.1 | 5701147 | 11-scf00161 | 11 |
| AX-158033266 | 7 | 63.641 | KV453001.1 | 5701605 | 11-scf00161 | 11 |
| AX-158033269 | 7 | 63.641 | KV453001.1 | 5704651 | 11-scf00161 | 11 |
| AX-158033272 | 7 | 63.641 | KV453001.1 | 5708879 | 11-scf00161 | 11 |
| AX-158033275 | 7 | 63.641 | KV453001.1 | 5711756 | 11-scf00161 | 11 |
| AX-158033276 | 7 | 63.641 | KV453001.1 | 5712064 | 11-scf00161 | 11 |
| AX-158033280 | 7 | 63.641 | KV453001.1 | 5712823 | 11-scf00161 | 11 |
| AX-158033283 | 7 | 63.641 | KV453001.1 | 5714115 | 11-scf00161 | 11 |
| AX-158033294 | 7 | 63.641 | KV453001.1 | 5719525 | 11-scf00161 | 11 |
| AX-158033330 | 7 | 63.641 | KV453001.1 | 5748110 | 11-scf00161 | 11 |
| AX-158033347 | 7 | 63.641 | KV453001.1 | 5759883 | 11-scf00161 | 11 |
| AX-158033352 | 7 | 63.641 | KV453001.1 | 5762494 | 11-scf00161 | 11 |
| AX-158033353 | 7 | 63.641 | KV453001.1 | 5763640 | 11-scf00161 | 11 |
| AX-157821603 | 7 | 63.641 | KV453001.1 | 5764502 | 11-scf00161 | 11 |
| AX-158033355 | 7 | 63.641 | KV453001.1 | 5766000 | 11-scf00161 | 11 |
| AX-157821604 | 7 | 63.641 | KV453001.1 | 5767929 | 11-scf00161 | 11 |
| AX-157744784 | 7 | 63.641 | KV453001.1 | 5768059 | 11-scf00161 | 11 |
| AX-158033356 | 7 | 63.641 | KV453001.1 | 5768497 | 11-scf00161 | 11 |
| AX-158033357 | 7 | 63.641 | KV453001.1 | 5770496 | 11-scf00161 | 11 |
| AX-158033358 | 7 | 63.641 | KV453001.1 | 5770858 | 11-scf00161 | 11 |
| AX-158033359 | 7 | 63.641 | KV453001.1 | 5773134 | 11-scf00161 | 11 |
| AX-158033360 | 7 | 63.641 | KV453001.1 | 5773893 | 11-scf00161 | 11 |
| AX-157821605 | 7 | 63.641 | KV453001.1 | 5775167 | 11-scf00161 | 11 |
| AX-157745314 | 7 | 63.641 | KV453001.1 | 5775443 | 11-scf00161 | 11 |
| AX-157821606 | 7 | 63.641 | KV453001.1 | 5775713 | 11-scf00161 | 11 |
| AX-158033362 | 7 | 63.641 | KV453001.1 | 5775802 | 11-scf00161 | 11 |
| AX-158033363 | 7 | 63.641 | KV453001.1 | 5776378 | 11-scf00161 | 11 |
| AX-158033365 | 7 | 63.641 | KV453001.1 | 5776914 | 11-scf00161 | 11 |
| AX-158033371 | 7 | 63.641 | KV453001.1 | 5777605 | 11-scf00161 | 11 |
| AX-158033373 | 7 | 63.641 | KV453001.1 | 5778586 | 11-scf00161 | 11 |
| AX-158033374 | 7 | 63.641 | KV453001.1 | 5779257 | 11-scf00161 | 11 |
| AX-158033375 | 7 | 63.641 | KV453001.1 | 5779917 | 11-scf00161 | 11 |
| AX-158033377 | 7 | 63.641 | KV453001.1 | 5780012 | 11-scf00161 | 11 |
| AX-158033379 | 7 | 63.641 | KV453001.1 | 5780615 | 11-scf00161 | 11 |
| AX-157856382 | 7 | 63.641 | KV453001.1 | 5780713 | 11-scf00161 | 11 |
| AX-158033381 | 7 | 63.641 | KV453001.1 | 5782232 | 11-scf00161 | 11 |
| AX-158033382 | 7 | 63.641 | KV453001.1 | 5782897 | 11-scf00161 | 11 |
| AX-158033383 | 7 | 63.641 | KV453001.1 | 5783629 | 11-scf00161 | 11 |
| AX-158033384 | 7 | 63.641 | KV453001.1 | 5783834 | 11-scf00161 | 11 |
| AX-158033387 | 7 | 63.641 | KV453001.1 | 5784073 | 11-scf00161 | 11 |
| AX-158033389 | 7 | 63.641 | KV453001.1 | 5784868 | 11-scf00161 | 11 |
| AX-158033390 | 7 | 63.641 | KV453001.1 | 5785357 | 11-scf00161 | 11 |
| AX-158033393 | 7 | 63.641 | KV453001.1 | 5787049 | 11-scf00161 | 11 |

|              |   |        |            |         |             |    |
|--------------|---|--------|------------|---------|-------------|----|
| AX-157821607 | 7 | 63.641 | KV453001.1 | 5787390 | 11-scf00161 | 11 |
| AX-158033396 | 7 | 63.641 | KV453001.1 | 5788981 | 11-scf00161 | 11 |
| AX-158033399 | 7 | 63.641 | KV453001.1 | 5790175 | 11-scf00161 | 11 |
| AX-158033401 | 7 | 63.641 | KV453001.1 | 5790592 | 11-scf00161 | 11 |
| AX-158033402 | 7 | 63.641 | KV453001.1 | 5790912 | 11-scf00161 | 11 |
| AX-158033403 | 7 | 63.641 | KV453001.1 | 5791326 | 11-scf00161 | 11 |
| AX-158033404 | 7 | 63.641 | KV453001.1 | 5791764 | 11-scf00161 | 11 |
| AX-158033405 | 7 | 63.641 | KV453001.1 | 5792443 | 11-scf00161 | 11 |
| AX-158033407 | 7 | 63.641 | KV453001.1 | 5794535 | 11-scf00161 | 11 |
| AX-157821608 | 7 | 63.641 | KV453001.1 | 5795743 | 11-scf00161 | 11 |
| AX-158033408 | 7 | 63.641 | KV453001.1 | 5796291 | 11-scf00161 | 11 |
| AX-158033409 | 7 | 63.641 | KV453001.1 | 5796567 | 11-scf00161 | 11 |
| AX-158033411 | 7 | 63.641 | KV453001.1 | 5797068 | 11-scf00161 | 11 |
| AX-158033413 | 7 | 63.641 | KV453001.1 | 5797401 | 11-scf00161 | 11 |
| AX-158033414 | 7 | 63.641 | KV453001.1 | 5798176 | 11-scf00161 | 11 |
| AX-158033417 | 7 | 63.641 | KV453001.1 | 5798857 | 11-scf00161 | 11 |
| AX-158033418 | 7 | 63.641 | KV453001.1 | 5799669 | 11-scf00161 | 11 |
| AX-158033420 | 7 | 63.641 | KV453001.1 | 5803240 | 11-scf00161 | 11 |
| AX-158033421 | 7 | 63.641 | KV453001.1 | 5804745 | 11-scf00161 | 11 |
| AX-158033423 | 7 | 63.641 | KV453001.1 | 5805959 | 11-scf00161 | 11 |
| AX-158033425 | 7 | 63.641 | KV453001.1 | 5808761 | 11-scf00161 | 11 |
| AX-158033429 | 7 | 63.641 | KV453001.1 | 5811271 | 11-scf00161 | 11 |
| AX-158033434 | 7 | 63.641 | KV453001.1 | 5814811 | 11-scf00161 | 11 |
| AX-158033438 | 7 | 63.641 | KV453001.1 | 5816388 | 11-scf00161 | 11 |
| AX-158033459 | 7 | 63.641 | KV453001.1 | 5834569 | 11-scf00161 | 11 |
| AX-158033470 | 7 | 63.641 | KV453001.1 | 5840438 | 11-scf00161 | 11 |
| AX-158033476 | 7 | 63.641 | KV453001.1 | 5846699 | 11-scf00161 | 11 |
| AX-158033480 | 7 | 63.641 | KV453001.1 | 5848015 | 11-scf00161 | 11 |
| AX-158033491 | 7 | 63.641 | KV453001.1 | 5854250 | 11-scf00161 | 11 |
| AX-158033494 | 7 | 63.641 | KV453001.1 | 5855562 | 11-scf00161 | 11 |
| AX-158033504 | 7 | 63.641 | KV453001.1 | 5861694 | 11-scf00161 | 11 |
| AX-158033524 | 7 | 63.641 | KV453001.1 | 5873892 | 11-scf00161 | 11 |
| AX-158033530 | 7 | 63.641 | KV453001.1 | 5877112 | 11-scf00161 | 11 |
| AX-158033532 | 7 | 63.641 | KV453001.1 | 5877551 | 11-scf00161 | 11 |
| AX-158033533 | 7 | 63.641 | KV453001.1 | 5878517 | 11-scf00161 | 11 |
| AX-158033547 | 7 | 63.641 | KV453001.1 | 5889033 | 11-scf00161 | 11 |
| AX-158033548 | 7 | 63.641 | KV453001.1 | 5889541 | 11-scf00161 | 11 |
| AX-158033550 | 7 | 63.641 | KV453001.1 | 5889997 | 11-scf00161 | 11 |
| AX-158033551 | 7 | 63.641 | KV453001.1 | 5890569 | 11-scf00161 | 11 |
| AX-158033554 | 7 | 63.641 | KV453001.1 | 5897176 | 11-scf00161 | 11 |
| AX-158033555 | 7 | 63.641 | KV453001.1 | 5897584 | 11-scf00161 | 11 |
| AX-158033558 | 7 | 63.641 | KV453001.1 | 5902577 | 11-scf00161 | 11 |
| AX-158033559 | 7 | 63.641 | KV453001.1 | 5904506 | 11-scf00161 | 11 |
| AX-158033560 | 7 | 63.641 | KV453001.1 | 5905784 | 11-scf00161 | 11 |
| AX-158033562 | 7 | 63.641 | KV453001.1 | 5906479 | 11-scf00161 | 11 |
| AX-158033564 | 7 | 63.641 | KV453001.1 | 5906967 | 11-scf00161 | 11 |
| AX-158033566 | 7 | 63.641 | KV453001.1 | 5907441 | 11-scf00161 | 11 |
| AX-158033571 | 7 | 63.641 | KV453001.1 | 5912483 | 11-scf00161 | 11 |
| AX-158033574 | 7 | 63.641 | KV453001.1 | 5913774 | 11-scf00161 | 11 |
| AX-158033575 | 7 | 63.641 | KV453001.1 | 5915228 | 11-scf00161 | 11 |
| AX-158033578 | 7 | 63.641 | KV453001.1 | 5917526 | 11-scf00161 | 11 |

|              |   |        |            |         |                |    |
|--------------|---|--------|------------|---------|----------------|----|
| AX-158033581 | 7 | 63.641 | KV453001.1 | 5921397 | 11-scf00161    | 11 |
| AX-158033582 | 7 | 63.641 | KV453001.1 | 5923616 | 11-scf00161    | 11 |
| AX-158033636 | 7 | 63.641 | KV453001.1 | 5962387 | 11-scf00161    | 11 |
| AX-158033668 | 7 | 63.641 | KV453001.1 | 5983686 | 11-scf00161    | 11 |
| AX-158033708 | 7 | 63.641 | KV453001.1 | 6021712 | 11-scf00161    | 11 |
| AX-158033752 | 7 | 63.641 | KV453001.1 | 6064551 | 11-scf00161    | 11 |
| AX-157701019 | 7 | 63.641 | FI898313.1 | 503     | -ORI212 lctali | UN |
| AX-157742989 | 7 | 63.75  | KV453001.1 | 4247272 | 11-scf00161    | 11 |
| AX-158033063 | 7 | 63.75  | KV453001.1 | 5505543 | 11-scf00161    | 11 |
| AX-157870449 | 7 | 63.75  | KV453001.1 | 5511138 | 11-scf00161    | 11 |
| AX-158033067 | 7 | 63.75  | KV453001.1 | 5512444 | 11-scf00161    | 11 |
| AX-158033134 | 7 | 63.75  | KV453001.1 | 5581152 | 11-scf00161    | 11 |
| AX-157856380 | 7 | 63.75  | KV453001.1 | 5681065 | 11-scf00161    | 11 |
| AX-158033262 | 7 | 63.75  | KV453001.1 | 5696933 | 11-scf00161    | 11 |
| AX-158033303 | 7 | 63.75  | KV453001.1 | 5727270 | 11-scf00161    | 11 |
| AX-158033312 | 7 | 63.75  | KV453001.1 | 5735074 | 11-scf00161    | 11 |
| AX-158033335 | 7 | 63.75  | KV453001.1 | 5750585 | 11-scf00161    | 11 |
| AX-158033419 | 7 | 63.75  | KV453001.1 | 5802843 | 11-scf00161    | 11 |
| AX-158033427 | 7 | 63.75  | KV453001.1 | 5810278 | 11-scf00161    | 11 |
| AX-158406199 | 7 | 63.75  | KV453001.1 | 5813047 | 11-scf00161    | 11 |
| AX-158033431 | 7 | 63.75  | KV453001.1 | 5813574 | 11-scf00161    | 11 |
| AX-158033432 | 7 | 63.75  | KV453001.1 | 5813785 | 11-scf00161    | 11 |
| AX-158033437 | 7 | 63.75  | KV453001.1 | 5815992 | 11-scf00161    | 11 |
| AX-158033441 | 7 | 63.75  | KV453001.1 | 5818054 | 11-scf00161    | 11 |
| AX-158033442 | 7 | 63.75  | KV453001.1 | 5821140 | 11-scf00161    | 11 |
| AX-158033446 | 7 | 63.75  | KV453001.1 | 5823023 | 11-scf00161    | 11 |
| AX-158033447 | 7 | 63.75  | KV453001.1 | 5823244 | 11-scf00161    | 11 |
| AX-158033448 | 7 | 63.75  | KV453001.1 | 5823708 | 11-scf00161    | 11 |
| AX-158033449 | 7 | 63.75  | KV453001.1 | 5823826 | 11-scf00161    | 11 |
| AX-158033451 | 7 | 63.75  | KV453001.1 | 5826801 | 11-scf00161    | 11 |
| AX-158408340 | 7 | 63.75  | KV453001.1 | 5830623 | 11-scf00161    | 11 |
| AX-158033455 | 7 | 63.75  | KV453001.1 | 5830810 | 11-scf00161    | 11 |
| AX-158033456 | 7 | 63.75  | KV453001.1 | 5831761 | 11-scf00161    | 11 |
| AX-158033458 | 7 | 63.75  | KV453001.1 | 5833981 | 11-scf00161    | 11 |
| AX-158033460 | 7 | 63.75  | KV453001.1 | 5835101 | 11-scf00161    | 11 |
| AX-158033463 | 7 | 63.75  | KV453001.1 | 5837940 | 11-scf00161    | 11 |
| AX-158033465 | 7 | 63.75  | KV453001.1 | 5839188 | 11-scf00161    | 11 |
| AX-158033466 | 7 | 63.75  | KV453001.1 | 5839589 | 11-scf00161    | 11 |
| AX-158033471 | 7 | 63.75  | KV453001.1 | 5841180 | 11-scf00161    | 11 |
| AX-158033472 | 7 | 63.75  | KV453001.1 | 5842469 | 11-scf00161    | 11 |
| AX-158033475 | 7 | 63.75  | KV453001.1 | 5846292 | 11-scf00161    | 11 |
| AX-158033477 | 7 | 63.75  | KV453001.1 | 5847138 | 11-scf00161    | 11 |
| AX-158033479 | 7 | 63.75  | KV453001.1 | 5847540 | 11-scf00161    | 11 |
| AX-158033482 | 7 | 63.75  | KV453001.1 | 5849058 | 11-scf00161    | 11 |
| AX-158033484 | 7 | 63.75  | KV453001.1 | 5849961 | 11-scf00161    | 11 |
| AX-158033485 | 7 | 63.75  | KV453001.1 | 5851493 | 11-scf00161    | 11 |
| AX-158033487 | 7 | 63.75  | KV453001.1 | 5851857 | 11-scf00161    | 11 |
| AX-158033488 | 7 | 63.75  | KV453001.1 | 5853014 | 11-scf00161    | 11 |
| AX-158033489 | 7 | 63.75  | KV453001.1 | 5853743 | 11-scf00161    | 11 |
| AX-158033492 | 7 | 63.75  | KV453001.1 | 5855029 | 11-scf00161    | 11 |
| AX-158033495 | 7 | 63.75  | KV453001.1 | 5856764 | 11-scf00161    | 11 |



|              |   |       |            |         |             |    |
|--------------|---|-------|------------|---------|-------------|----|
| AX-158033497 | 7 | 63.75 | KV453001.1 | 5857812 | 11-scf00161 | 11 |
| AX-158033499 | 7 | 63.75 | KV453001.1 | 5858232 | 11-scf00161 | 11 |
| AX-158033501 | 7 | 63.75 | KV453001.1 | 5859291 | 11-scf00161 | 11 |
| AX-158033502 | 7 | 63.75 | KV453001.1 | 5860754 | 11-scf00161 | 11 |
| AX-158033503 | 7 | 63.75 | KV453001.1 | 5861097 | 11-scf00161 | 11 |
| AX-158033506 | 7 | 63.75 | KV453001.1 | 5862307 | 11-scf00161 | 11 |
| AX-158033507 | 7 | 63.75 | KV453001.1 | 5863206 | 11-scf00161 | 11 |
| AX-158033508 | 7 | 63.75 | KV453001.1 | 5863859 | 11-scf00161 | 11 |
| AX-158033510 | 7 | 63.75 | KV453001.1 | 5864855 | 11-scf00161 | 11 |
| AX-158033511 | 7 | 63.75 | KV453001.1 | 5865752 | 11-scf00161 | 11 |
| AX-158033513 | 7 | 63.75 | KV453001.1 | 5866409 | 11-scf00161 | 11 |
| AX-158033515 | 7 | 63.75 | KV453001.1 | 5866970 | 11-scf00161 | 11 |
| AX-158033516 | 7 | 63.75 | KV453001.1 | 5867392 | 11-scf00161 | 11 |
| AX-158033517 | 7 | 63.75 | KV453001.1 | 5867920 | 11-scf00161 | 11 |
| AX-158033518 | 7 | 63.75 | KV453001.1 | 5868748 | 11-scf00161 | 11 |
| AX-158033519 | 7 | 63.75 | KV453001.1 | 5869246 | 11-scf00161 | 11 |
| AX-158033523 | 7 | 63.75 | KV453001.1 | 5872708 | 11-scf00161 | 11 |
| AX-158033525 | 7 | 63.75 | KV453001.1 | 5875127 | 11-scf00161 | 11 |
| AX-158033527 | 7 | 63.75 | KV453001.1 | 5875763 | 11-scf00161 | 11 |
| AX-158033529 | 7 | 63.75 | KV453001.1 | 5876761 | 11-scf00161 | 11 |
| AX-158033535 | 7 | 63.75 | KV453001.1 | 5880604 | 11-scf00161 | 11 |
| AX-158033537 | 7 | 63.75 | KV453001.1 | 5882318 | 11-scf00161 | 11 |
| AX-158033539 | 7 | 63.75 | KV453001.1 | 5884127 | 11-scf00161 | 11 |
| AX-158033544 | 7 | 63.75 | KV453001.1 | 5885671 | 11-scf00161 | 11 |
| AX-158033545 | 7 | 63.75 | KV453001.1 | 5888631 | 11-scf00161 | 11 |
| AX-158033552 | 7 | 63.75 | KV453001.1 | 5894807 | 11-scf00161 | 11 |
| AX-158033572 | 7 | 63.75 | KV453001.1 | 5913386 | 11-scf00161 | 11 |
| AX-158033577 | 7 | 63.75 | KV453001.1 | 5915853 | 11-scf00161 | 11 |
| AX-157885057 | 7 | 63.75 | KV453001.1 | 5916764 | 11-scf00161 | 11 |
| AX-158033579 | 7 | 63.75 | KV453001.1 | 5920866 | 11-scf00161 | 11 |
| AX-158033584 | 7 | 63.75 | KV453001.1 | 5924333 | 11-scf00161 | 11 |
| AX-158033585 | 7 | 63.75 | KV453001.1 | 5924701 | 11-scf00161 | 11 |
| AX-158033586 | 7 | 63.75 | KV453001.1 | 5926253 | 11-scf00161 | 11 |
| AX-158033590 | 7 | 63.75 | KV453001.1 | 5930085 | 11-scf00161 | 11 |
| AX-158033595 | 7 | 63.75 | KV453001.1 | 5935260 | 11-scf00161 | 11 |
| AX-158033597 | 7 | 63.75 | KV453001.1 | 5936715 | 11-scf00161 | 11 |
| AX-157821610 | 7 | 63.75 | KV453001.1 | 5938611 | 11-scf00161 | 11 |
| AX-158033600 | 7 | 63.75 | KV453001.1 | 5941070 | 11-scf00161 | 11 |
| AX-158033602 | 7 | 63.75 | KV453001.1 | 5942794 | 11-scf00161 | 11 |
| AX-157785458 | 7 | 63.75 | KV453001.1 | 5943580 | 11-scf00161 | 11 |
| AX-158033605 | 7 | 63.75 | KV453001.1 | 5945155 | 11-scf00161 | 11 |
| AX-158033608 | 7 | 63.75 | KV453001.1 | 5949298 | 11-scf00161 | 11 |
| AX-158033610 | 7 | 63.75 | KV453001.1 | 5949601 | 11-scf00161 | 11 |
| AX-158033614 | 7 | 63.75 | KV453001.1 | 5951521 | 11-scf00161 | 11 |
| AX-158033617 | 7 | 63.75 | KV453001.1 | 5954622 | 11-scf00161 | 11 |
| AX-158033619 | 7 | 63.75 | KV453001.1 | 5955582 | 11-scf00161 | 11 |
| AX-158033620 | 7 | 63.75 | KV453001.1 | 5956343 | 11-scf00161 | 11 |
| AX-158033622 | 7 | 63.75 | KV453001.1 | 5956774 | 11-scf00161 | 11 |
| AX-158033627 | 7 | 63.75 | KV453001.1 | 5958799 | 11-scf00161 | 11 |
| AX-158033628 | 7 | 63.75 | KV453001.1 | 5959183 | 11-scf00161 | 11 |
| AX-158033630 | 7 | 63.75 | KV453001.1 | 5959622 | 11-scf00161 | 11 |

|              |   |        |            |         |             |    |
|--------------|---|--------|------------|---------|-------------|----|
| AX-158033631 | 7 | 63.75  | KV453001.1 | 5960163 | 11-scf00161 | 11 |
| AX-158391437 | 7 | 63.75  | KV453001.1 | 5961474 | 11-scf00161 | 11 |
| AX-158033638 | 7 | 63.75  | KV453001.1 | 5963096 | 11-scf00161 | 11 |
| AX-158033639 | 7 | 63.75  | KV453001.1 | 5963471 | 11-scf00161 | 11 |
| AX-157752840 | 7 | 63.75  | KV453001.1 | 5966415 | 11-scf00161 | 11 |
| AX-158033644 | 7 | 63.75  | KV453001.1 | 5967475 | 11-scf00161 | 11 |
| AX-158033648 | 7 | 63.75  | KV453001.1 | 5969173 | 11-scf00161 | 11 |
| AX-158033653 | 7 | 63.75  | KV453001.1 | 5971330 | 11-scf00161 | 11 |
| AX-158033656 | 7 | 63.75  | KV453001.1 | 5976056 | 11-scf00161 | 11 |
| AX-158033659 | 7 | 63.75  | KV453001.1 | 5977177 | 11-scf00161 | 11 |
| AX-158033662 | 7 | 63.75  | KV453001.1 | 5978623 | 11-scf00161 | 11 |
| AX-158033664 | 7 | 63.75  | KV453001.1 | 5979672 | 11-scf00161 | 11 |
| AX-158033666 | 7 | 63.75  | KV453001.1 | 5981974 | 11-scf00161 | 11 |
| AX-157747096 | 7 | 63.75  | KV453001.1 | 5983130 | 11-scf00161 | 11 |
| AX-158033672 | 7 | 63.75  | KV453001.1 | 5991594 | 11-scf00161 | 11 |
| AX-158033675 | 7 | 63.75  | KV453001.1 | 5992563 | 11-scf00161 | 11 |
| AX-158033680 | 7 | 63.75  | KV453001.1 | 5999339 | 11-scf00161 | 11 |
| AX-158033685 | 7 | 63.75  | KV453001.1 | 6003994 | 11-scf00161 | 11 |
| AX-158033688 | 7 | 63.75  | KV453001.1 | 6005414 | 11-scf00161 | 11 |
| AX-157821619 | 7 | 63.75  | KV453001.1 | 6019953 | 11-scf00161 | 11 |
| AX-158033706 | 7 | 63.75  | KV453001.1 | 6021123 | 11-scf00161 | 11 |
| AX-158033725 | 7 | 63.75  | KV453001.1 | 6036875 | 11-scf00161 | 11 |
| AX-158033736 | 7 | 63.75  | KV453001.1 | 6046721 | 11-scf00161 | 11 |
| AX-158033737 | 7 | 63.75  | KV453001.1 | 6048636 | 11-scf00161 | 11 |
| AX-157821617 | 7 | 63.786 | KV453001.1 | 6012572 | 11-scf00161 | 11 |
| AX-158033697 | 7 | 63.809 | KV453001.1 | 6013735 | 11-scf00161 | 11 |
| AX-158033716 | 7 | 63.834 | KV453001.1 | 6030803 | 11-scf00161 | 11 |
| AX-158033322 | 7 | 63.859 | KV453001.1 | 5743370 | 11-scf00161 | 11 |
| AX-158033592 | 7 | 63.859 | KV453001.1 | 5933604 | 11-scf00161 | 11 |
| AX-158033594 | 7 | 63.859 | KV453001.1 | 5934328 | 11-scf00161 | 11 |
| AX-158033598 | 7 | 63.859 | KV453001.1 | 5939950 | 11-scf00161 | 11 |
| AX-158033694 | 7 | 63.859 | KV453001.1 | 6010712 | 11-scf00161 | 11 |
| AX-158033712 | 7 | 63.859 | KV453001.1 | 6025743 | 11-scf00161 | 11 |
| AX-158033719 | 7 | 63.859 | KV453001.1 | 6033177 | 11-scf00161 | 11 |
| AX-158033722 | 7 | 63.859 | KV453001.1 | 6034047 | 11-scf00161 | 11 |
| AX-158033726 | 7 | 63.859 | KV453001.1 | 6037383 | 11-scf00161 | 11 |
| AX-158033729 | 7 | 63.859 | KV453001.1 | 6038771 | 11-scf00161 | 11 |
| AX-158033732 | 7 | 63.859 | KV453001.1 | 6039458 | 11-scf00161 | 11 |
| AX-157716254 | 7 | 63.859 | KV453001.1 | 6043487 | 11-scf00161 | 11 |
| AX-157870453 | 7 | 63.859 | KV453001.1 | 6061427 | 11-scf00161 | 11 |
| AX-158033738 | 7 | 63.968 | KV453001.1 | 6048797 | 11-scf00161 | 11 |
| AX-158033740 | 7 | 63.968 | KV453001.1 | 6049198 | 11-scf00161 | 11 |
| AX-158033743 | 7 | 63.968 | KV453001.1 | 6052367 | 11-scf00161 | 11 |
| AX-158033746 | 7 | 63.968 | KV453001.1 | 6059399 | 11-scf00161 | 11 |
| AX-158033751 | 7 | 63.968 | KV453001.1 | 6062235 | 11-scf00161 | 11 |
| AX-158033753 | 7 | 63.968 | KV453001.1 | 6067013 | 11-scf00161 | 11 |
| AX-158033762 | 7 | 63.968 | KV453001.1 | 6072508 | 11-scf00161 | 11 |
| AX-158033756 | 7 | 64.078 | KV453001.1 | 6067854 | 11-scf00161 | 11 |
| AX-157694260 | 7 | 64.078 | KV453001.1 | 6071698 | 11-scf00161 | 11 |
| AX-157720935 | 7 | 64.176 | KV453001.1 | 6080551 | 11-scf00161 | 11 |
| AX-158033767 | 7 | 64.248 | KV453001.1 | 6081073 | 11-scf00161 | 11 |

|              |   |        |            |         |                |    |
|--------------|---|--------|------------|---------|----------------|----|
| AX-157821621 | 7 | 64.323 | KV453001.1 | 6081161 | 11-scf00161    | 11 |
| AX-158379799 | 7 | 64.406 | KV453001.1 | 6014381 | 11-scf00161    | 11 |
| AX-158033701 | 7 | 64.406 | KV453001.1 | 6017319 | 11-scf00161    | 11 |
| AX-158033702 | 7 | 64.406 | KV453001.1 | 6017627 | 11-scf00161    | 11 |
| AX-158033768 | 7 | 64.406 | KV453001.1 | 6081621 | 11-scf00161    | 11 |
| AX-158033771 | 7 | 64.406 | KV453001.1 | 6084197 | 11-scf00161    | 11 |
| AX-158033773 | 7 | 64.406 | KV453001.1 | 6087710 | 11-scf00161    | 11 |
| AX-158033777 | 7 | 64.406 | KV453001.1 | 6092540 | 11-scf00161    | 11 |
| AX-158033780 | 7 | 64.406 | KV453001.1 | 6096200 | 11-scf00161    | 11 |
| AX-158033764 | 7 | 64.415 | KV453001.1 | 6078164 | 11-scf00161    | 11 |
| AX-158033784 | 7 | 64.415 | KV453001.1 | 6100207 | 11-scf00161    | 11 |
| AX-157856384 | 7 | 64.422 | KV453001.1 | 6100857 | 11-scf00161    | 11 |
| AX-158033787 | 7 | 64.425 | KV453001.1 | 6104114 | 11-scf00161    | 11 |
| AX-158033791 | 7 | 64.435 | KV453001.1 | 6110223 | 11-scf00161    | 11 |
| AX-157757305 | 7 | 64.473 | KV453001.1 | 6110875 | 11-scf00161    | 11 |
| AX-158033792 | 7 | 64.529 | KV453001.1 | 6111416 | 11-scf00161    | 11 |
| AX-158033798 | 7 | 64.69  | KV453001.1 | 6116004 | 11-scf00161    | 11 |
| AX-158033802 | 7 | 65.011 | KV453001.1 | 6117712 | 11-scf00161    | 11 |
| AX-158033803 | 7 | 65.011 | KV453001.1 | 6118443 | 11-scf00161    | 11 |
| AX-158033805 | 7 | 65.011 | KV453001.1 | 6122269 | 11-scf00161    | 11 |
| AX-158033814 | 7 | 65.011 | KV453001.1 | 6131032 | 11-scf00161    | 11 |
| AX-158033807 | 7 | 65.111 | KV453001.1 | 6123921 | 11-scf00161    | 11 |
| AX-158033810 | 7 | 65.172 | KV453001.1 | 6128580 | 11-scf00161    | 11 |
| AX-158033813 | 7 | 65.172 | KV453001.1 | 6130133 | 11-scf00161    | 11 |
| AX-157821348 | 7 | 65.305 | KV453000.1 | 7241830 | 11-scf00159    | 11 |
| AX-158029309 | 7 | 65.305 | KV453000.1 | 7307304 | 11-scf00159    | 11 |
| AX-158040761 | 7 | 65.305 | KV453001.1 | 369377  | 11-scf00161    | 11 |
| AX-158030593 | 7 | 65.305 | KV453001.1 | 2810314 | 11-scf00161    | 11 |
| AX-157756877 | 7 | 65.305 | KV453001.1 | 3414329 | 11-scf00161    | 11 |
| AX-158030990 | 7 | 65.305 | KV453001.1 | 3415874 | 11-scf00161    | 11 |
| AX-158032017 | 7 | 65.305 | KV453001.1 | 4529262 | 11-scf00161    | 11 |
| AX-158033816 | 7 | 65.305 | KV453001.1 | 6132437 | 11-scf00161    | 11 |
| AX-157698358 | 7 | 65.305 | FI884178.1 | 344     | 10RI212 lctalk | UN |
| AX-158033833 | 7 | 65.391 | KV453001.1 | 6153800 | 11-scf00161    | 11 |
| AX-157717143 | 7 | 65.391 | KV453001.1 | 6157698 | 11-scf00161    | 11 |
| AX-158033841 | 7 | 65.391 | KV453001.1 | 6160975 | 11-scf00161    | 11 |
| AX-157716115 | 7 | 65.391 | KV453001.1 | 6164127 | 11-scf00161    | 11 |
| AX-157713660 | 7 | 65.391 | KV453001.1 | 6202436 | 11-scf00161    | 11 |
| AX-158035342 | 7 | 65.391 | KV453001.1 | 7576588 | 11-scf00161    | 11 |
| AX-158033848 | 7 | 65.417 | KV453001.1 | 6174889 | 11-scf00161    | 11 |
| AX-157708792 | 7 | 65.417 | KV453001.1 | 6315603 | 11-scf00161    | 11 |
| AX-158034589 | 7 | 65.417 | KV453001.1 | 6898960 | 11-scf00161    | 11 |
| AX-157821682 | 7 | 65.417 | KV453001.1 | 6962356 | 11-scf00161    | 11 |
| AX-158034950 | 7 | 65.417 | KV453001.1 | 7260985 | 11-scf00161    | 11 |
| AX-158035793 | 7 | 65.417 | KV453001.1 | 7903927 | 11-scf00161    | 11 |
| AX-158033849 | 7 | 65.443 | KV453001.1 | 6181071 | 11-scf00161    | 11 |
| AX-158033854 | 7 | 65.5   | KV453001.1 | 6194526 | 11-scf00161    | 11 |
| AX-157738648 | 7 | 65.5   | KV453001.1 | 6196572 | 11-scf00161    | 11 |
| AX-157821627 | 7 | 65.5   | KV453001.1 | 6209320 | 11-scf00161    | 11 |
| AX-158033872 | 7 | 65.5   | KV453001.1 | 6213645 | 11-scf00161    | 11 |
| AX-157785480 | 7 | 65.5   | KV453001.1 | 6214594 | 11-scf00161    | 11 |

|              |   |        |            |          |             |    |
|--------------|---|--------|------------|----------|-------------|----|
| AX-157885061 | 7 | 65.5   | KV453001.1 | 6229975  | 11-scf00161 | 11 |
| AX-158033888 | 7 | 65.5   | KV453001.1 | 6235581  | 11-scf00161 | 11 |
| AX-157821629 | 7 | 65.5   | KV453001.1 | 6236764  | 11-scf00161 | 11 |
| AX-158033892 | 7 | 65.5   | KV453001.1 | 6238707  | 11-scf00161 | 11 |
| AX-158033920 | 7 | 65.5   | KV453001.1 | 6264385  | 11-scf00161 | 11 |
| AX-158034264 | 7 | 65.5   | KV453001.1 | 6581917  | 11-scf00161 | 11 |
| AX-158034509 | 7 | 65.5   | KV453001.1 | 6805508  | 11-scf00161 | 11 |
| AX-158034618 | 7 | 65.5   | KV453001.1 | 6924210  | 11-scf00161 | 11 |
| AX-158034707 | 7 | 65.5   | KV453001.1 | 7001236  | 11-scf00161 | 11 |
| AX-157744187 | 7 | 65.5   | KV453001.1 | 8160348  | 11-scf00161 | 11 |
| AX-157821765 | 7 | 65.5   | KV453001.1 | 8556010  | 11-scf00161 | 11 |
| AX-158036562 | 7 | 65.5   | KV453001.1 | 8724276  | 11-scf00161 | 11 |
| AX-158036565 | 7 | 65.5   | KV453001.1 | 8727518  | 11-scf00161 | 11 |
| AX-158408395 | 7 | 65.5   | KV453001.1 | 9205687  | 11-scf00161 | 11 |
| AX-157821816 | 7 | 65.5   | KV453001.1 | 9274229  | 11-scf00161 | 11 |
| AX-158037783 | 7 | 65.5   | KV453001.1 | 10486814 | 11-scf00161 | 11 |
| AX-158037975 | 7 | 65.5   | KV453001.1 | 10675140 | 11-scf00161 | 11 |
| AX-158038094 | 7 | 65.5   | KV453001.1 | 10798564 | 11-scf00161 | 11 |
| AX-157821900 | 7 | 65.5   | KV453001.1 | 10802202 | 11-scf00161 | 11 |
| AX-158038097 | 7 | 65.5   | KV453001.1 | 10802440 | 11-scf00161 | 11 |
| AX-158038098 | 7 | 65.5   | KV453001.1 | 10802864 | 11-scf00161 | 11 |
| AX-157856395 | 7 | 65.5   | KV453001.1 | 10821878 | 11-scf00161 | 11 |
| AX-158038112 | 7 | 65.5   | KV453001.1 | 10823374 | 11-scf00161 | 11 |
| AX-158038115 | 7 | 65.5   | KV453001.1 | 10825739 | 11-scf00161 | 11 |
| AX-158038118 | 7 | 65.5   | KV453001.1 | 10833297 | 11-scf00161 | 11 |
| AX-158038119 | 7 | 65.5   | KV453001.1 | 10833368 | 11-scf00161 | 11 |
| AX-158038121 | 7 | 65.5   | KV453001.1 | 10834496 | 11-scf00161 | 11 |
| AX-158038129 | 7 | 65.5   | KV453001.1 | 10837349 | 11-scf00161 | 11 |
| AX-158038131 | 7 | 65.5   | KV453001.1 | 10837657 | 11-scf00161 | 11 |
| AX-158038132 | 7 | 65.5   | KV453001.1 | 10838966 | 11-scf00161 | 11 |
| AX-158038133 | 7 | 65.5   | KV453001.1 | 10840088 | 11-scf00161 | 11 |
| AX-158038135 | 7 | 65.5   | KV453001.1 | 10841308 | 11-scf00161 | 11 |
| AX-158033855 | 7 | 65.609 | KV453001.1 | 6196047  | 11-scf00161 | 11 |
| AX-157771815 | 7 | 65.609 | KV453001.1 | 6242393  | 11-scf00161 | 11 |
| AX-158033896 | 7 | 65.609 | KV453001.1 | 6243824  | 11-scf00161 | 11 |
| AX-158408345 | 7 | 65.609 | KV453001.1 | 6244774  | 11-scf00161 | 11 |
| AX-158033905 | 7 | 65.609 | KV453001.1 | 6251117  | 11-scf00161 | 11 |
| AX-158033911 | 7 | 65.609 | KV453001.1 | 6255885  | 11-scf00161 | 11 |
| AX-157821631 | 7 | 65.609 | KV453001.1 | 6256564  | 11-scf00161 | 11 |
| AX-157770693 | 7 | 65.609 | KV453001.1 | 6256666  | 11-scf00161 | 11 |
| AX-158033917 | 7 | 65.609 | KV453001.1 | 6261954  | 11-scf00161 | 11 |
| AX-158033918 | 7 | 65.609 | KV453001.1 | 6262283  | 11-scf00161 | 11 |
| AX-157748976 | 7 | 65.609 | KV453001.1 | 6265381  | 11-scf00161 | 11 |
| AX-157821632 | 7 | 65.609 | KV453001.1 | 6266375  | 11-scf00161 | 11 |
| AX-158033926 | 7 | 65.609 | KV453001.1 | 6269417  | 11-scf00161 | 11 |
| AX-157821633 | 7 | 65.609 | KV453001.1 | 6272095  | 11-scf00161 | 11 |
| AX-158033929 | 7 | 65.609 | KV453001.1 | 6275509  | 11-scf00161 | 11 |
| AX-157717269 | 7 | 65.609 | KV453001.1 | 6276179  | 11-scf00161 | 11 |
| AX-158033930 | 7 | 65.609 | KV453001.1 | 6276970  | 11-scf00161 | 11 |
| AX-158033933 | 7 | 65.609 | KV453001.1 | 6280889  | 11-scf00161 | 11 |
| AX-158033935 | 7 | 65.609 | KV453001.1 | 6282118  | 11-scf00161 | 11 |

|              |   |        |            |         |             |    |
|--------------|---|--------|------------|---------|-------------|----|
| AX-158033942 | 7 | 65.609 | KV453001.1 | 6292863 | 11-scf00161 | 11 |
| AX-158033944 | 7 | 65.609 | KV453001.1 | 6294272 | 11-scf00161 | 11 |
| AX-158033945 | 7 | 65.609 | KV453001.1 | 6295186 | 11-scf00161 | 11 |
| AX-158033951 | 7 | 65.609 | KV453001.1 | 6301137 | 11-scf00161 | 11 |
| AX-157821635 | 7 | 65.609 | KV453001.1 | 6307835 | 11-scf00161 | 11 |
| AX-158033957 | 7 | 65.609 | KV453001.1 | 6311172 | 11-scf00161 | 11 |
| AX-158033968 | 7 | 65.609 | KV453001.1 | 6318749 | 11-scf00161 | 11 |
| AX-158033970 | 7 | 65.609 | KV453001.1 | 6319636 | 11-scf00161 | 11 |
| AX-158033971 | 7 | 65.609 | KV453001.1 | 6320016 | 11-scf00161 | 11 |
| AX-158033973 | 7 | 65.609 | KV453001.1 | 6321224 | 11-scf00161 | 11 |
| AX-158033975 | 7 | 65.609 | KV453001.1 | 6321653 | 11-scf00161 | 11 |
| AX-157821636 | 7 | 65.609 | KV453001.1 | 6322678 | 11-scf00161 | 11 |
| AX-158033980 | 7 | 65.609 | KV453001.1 | 6323376 | 11-scf00161 | 11 |
| AX-158033984 | 7 | 65.609 | KV453001.1 | 6325657 | 11-scf00161 | 11 |
| AX-158033990 | 7 | 65.609 | KV453001.1 | 6330899 | 11-scf00161 | 11 |
| AX-158033996 | 7 | 65.609 | KV453001.1 | 6335893 | 11-scf00161 | 11 |
| AX-158034000 | 7 | 65.609 | KV453001.1 | 6340341 | 11-scf00161 | 11 |
| AX-157718295 | 7 | 65.609 | KV453001.1 | 6341002 | 11-scf00161 | 11 |
| AX-158034001 | 7 | 65.609 | KV453001.1 | 6342006 | 11-scf00161 | 11 |
| AX-158034002 | 7 | 65.609 | KV453001.1 | 6343404 | 11-scf00161 | 11 |
| AX-158034003 | 7 | 65.609 | KV453001.1 | 6343863 | 11-scf00161 | 11 |
| AX-158408349 | 7 | 65.609 | KV453001.1 | 6344458 | 11-scf00161 | 11 |
| AX-158034005 | 7 | 65.609 | KV453001.1 | 6346278 | 11-scf00161 | 11 |
| AX-158034012 | 7 | 65.609 | KV453001.1 | 6349133 | 11-scf00161 | 11 |
| AX-158034016 | 7 | 65.609 | KV453001.1 | 6352938 | 11-scf00161 | 11 |
| AX-158034022 | 7 | 65.609 | KV453001.1 | 6356106 | 11-scf00161 | 11 |
| AX-158034031 | 7 | 65.609 | KV453001.1 | 6363241 | 11-scf00161 | 11 |
| AX-158034067 | 7 | 65.609 | KV453001.1 | 6400591 | 11-scf00161 | 11 |
| AX-158034087 | 7 | 65.609 | KV453001.1 | 6417356 | 11-scf00161 | 11 |
| AX-158034088 | 7 | 65.609 | KV453001.1 | 6417989 | 11-scf00161 | 11 |
| AX-158034089 | 7 | 65.609 | KV453001.1 | 6418398 | 11-scf00161 | 11 |
| AX-158416129 | 7 | 65.609 | KV453001.1 | 6634134 | 11-scf00161 | 11 |
| AX-157722561 | 7 | 65.609 | KV453001.1 | 6658758 | 11-scf00161 | 11 |
| AX-158034416 | 7 | 65.609 | KV453001.1 | 6705324 | 11-scf00161 | 11 |
| AX-157745746 | 7 | 65.609 | KV453001.1 | 6790968 | 11-scf00161 | 11 |
| AX-157821663 | 7 | 65.609 | KV453001.1 | 6794440 | 11-scf00161 | 11 |
| AX-158034528 | 7 | 65.609 | KV453001.1 | 6832439 | 11-scf00161 | 11 |
| AX-157821669 | 7 | 65.609 | KV453001.1 | 6835398 | 11-scf00161 | 11 |
| AX-158034531 | 7 | 65.609 | KV453001.1 | 6835496 | 11-scf00161 | 11 |
| AX-158034534 | 7 | 65.609 | KV453001.1 | 6838980 | 11-scf00161 | 11 |
| AX-158034549 | 7 | 65.609 | KV453001.1 | 6854464 | 11-scf00161 | 11 |
| AX-157821672 | 7 | 65.609 | KV453001.1 | 6857317 | 11-scf00161 | 11 |
| AX-158034554 | 7 | 65.609 | KV453001.1 | 6862866 | 11-scf00161 | 11 |
| AX-158034555 | 7 | 65.609 | KV453001.1 | 6863197 | 11-scf00161 | 11 |
| AX-158034557 | 7 | 65.609 | KV453001.1 | 6865432 | 11-scf00161 | 11 |
| AX-158034563 | 7 | 65.609 | KV453001.1 | 6877579 | 11-scf00161 | 11 |
| AX-158034566 | 7 | 65.609 | KV453001.1 | 6880274 | 11-scf00161 | 11 |
| AX-158034570 | 7 | 65.609 | KV453001.1 | 6882036 | 11-scf00161 | 11 |
| AX-158034572 | 7 | 65.609 | KV453001.1 | 6882497 | 11-scf00161 | 11 |
| AX-158034574 | 7 | 65.609 | KV453001.1 | 6884871 | 11-scf00161 | 11 |
| AX-157750819 | 7 | 65.609 | KV453001.1 | 6895685 | 11-scf00161 | 11 |

|              |   |        |             |         |             |    |
|--------------|---|--------|-------------|---------|-------------|----|
| AX-158034586 | 7 | 65.609 | KV453001.1  | 6896216 | 11-scf00161 | 11 |
| AX-158034592 | 7 | 65.609 | KV453001.1  | 6903031 | 11-scf00161 | 11 |
| AX-158034596 | 7 | 65.609 | KV453001.1  | 6905006 | 11-scf00161 | 11 |
| AX-157821674 | 7 | 65.609 | KV453001.1  | 6905207 | 11-scf00161 | 11 |
| AX-158034607 | 7 | 65.609 | KV453001.1  | 6916806 | 11-scf00161 | 11 |
| AX-158034620 | 7 | 65.609 | KV453001.1  | 6924775 | 11-scf00161 | 11 |
| AX-158034623 | 7 | 65.609 | KV453001.1  | 6926793 | 11-scf00161 | 11 |
| AX-158034633 | 7 | 65.609 | KV453001.1  | 6932921 | 11-scf00161 | 11 |
| AX-158034635 | 7 | 65.609 | KV453001.1  | 6933676 | 11-scf00161 | 11 |
| AX-158034640 | 7 | 65.609 | KV453001.1  | 6934912 | 11-scf00161 | 11 |
| AX-158034641 | 7 | 65.609 | KV453001.1  | 6937099 | 11-scf00161 | 11 |
| AX-158034652 | 7 | 65.609 | KV453001.1  | 6945794 | 11-scf00161 | 11 |
| AX-158034655 | 7 | 65.609 | KV453001.1  | 6946828 | 11-scf00161 | 11 |
| AX-157821686 | 7 | 65.609 | KV453001.1  | 6966248 | 11-scf00161 | 11 |
| AX-158034673 | 7 | 65.609 | KV453001.1  | 6975002 | 11-scf00161 | 11 |
| AX-158034677 | 7 | 65.609 | KV453001.1  | 6977735 | 11-scf00161 | 11 |
| AX-158034680 | 7 | 65.609 | KV453001.1  | 6978387 | 11-scf00161 | 11 |
| AX-158034688 | 7 | 65.609 | KV453001.1  | 6982362 | 11-scf00161 | 11 |
| AX-157821689 | 7 | 65.609 | KV453001.1  | 7002574 | 11-scf00161 | 11 |
| AX-158034713 | 7 | 65.609 | KV453001.1  | 7003227 | 11-scf00161 | 11 |
| AX-158034725 | 7 | 65.609 | KV453001.1  | 7010886 | 11-scf00161 | 11 |
| AX-158034752 | 7 | 65.609 | KV453001.1  | 7032123 | 11-scf00161 | 11 |
| AX-157821696 | 7 | 65.609 | KV453001.1  | 7079439 | 11-scf00161 | 11 |
| AX-158034923 | 7 | 65.609 | KV453001.1  | 7215873 | 11-scf00161 | 11 |
| AX-158035133 | 7 | 65.609 | KV453001.1  | 7432506 | 11-scf00161 | 11 |
| AX-158035207 | 7 | 65.609 | KV453001.1  | 7480316 | 11-scf00161 | 11 |
| AX-157821707 | 7 | 65.609 | KV453001.1  | 7486421 | 11-scf00161 | 11 |
| AX-158035235 | 7 | 65.609 | KV453001.1  | 7496716 | 11-scf00161 | 11 |
| AX-158035298 | 7 | 65.609 | KV453001.1  | 7540714 | 11-scf00161 | 11 |
| AX-158035321 | 7 | 65.609 | KV453001.1  | 7561312 | 11-scf00161 | 11 |
| AX-158035323 | 7 | 65.609 | KV453001.1  | 7562853 | 11-scf00161 | 11 |
| AX-157821713 | 7 | 65.609 | KV453001.1  | 7566808 | 11-scf00161 | 11 |
| AX-158035329 | 7 | 65.609 | KV453001.1  | 7567452 | 11-scf00161 | 11 |
| AX-158035338 | 7 | 65.609 | KV453001.1  | 7575664 | 11-scf00161 | 11 |
| AX-158035475 | 7 | 65.609 | KV453001.1  | 7676080 | 11-scf00161 | 11 |
| AX-158035477 | 7 | 65.609 | KV453001.1  | 7679023 | 11-scf00161 | 11 |
| AX-158035567 | 7 | 65.609 | KV453001.1  | 7746460 | 11-scf00161 | 11 |
| AX-158035762 | 7 | 65.609 | KV453001.1  | 7883471 | 11-scf00161 | 11 |
| AX-157712017 | 7 | 65.609 | 3ML01031487 | 318     | scf07101_1  | UN |
| AX-158034691 | 7 | 65.653 | KV453001.1  | 6988515 | 11-scf00161 | 11 |
| AX-158034736 | 7 | 65.653 | KV453001.1  | 7021304 | 11-scf00161 | 11 |
| AX-158035103 | 7 | 65.653 | KV453001.1  | 7412027 | 11-scf00161 | 11 |
| AX-158034700 | 7 | 65.679 | KV453001.1  | 6994703 | 11-scf00161 | 11 |
| AX-158033857 | 7 | 65.718 | KV453001.1  | 6198210 | 11-scf00161 | 11 |
| AX-158033876 | 7 | 65.718 | KV453001.1  | 6215295 | 11-scf00161 | 11 |
| AX-158033923 | 7 | 65.718 | KV453001.1  | 6267225 | 11-scf00161 | 11 |
| AX-158033949 | 7 | 65.718 | KV453001.1  | 6297219 | 11-scf00161 | 11 |
| AX-158408348 | 7 | 65.718 | KV453001.1  | 6314735 | 11-scf00161 | 11 |
| AX-158033967 | 7 | 65.718 | KV453001.1  | 6317907 | 11-scf00161 | 11 |
| AX-158034508 | 7 | 65.718 | KV453001.1  | 6804963 | 11-scf00161 | 11 |
| AX-157821665 | 7 | 65.718 | KV453001.1  | 6805701 | 11-scf00161 | 11 |

|              |   |        |            |         |             |    |
|--------------|---|--------|------------|---------|-------------|----|
| AX-157733768 | 7 | 65.718 | KV453001.1 | 6831826 | 11-scf00161 | 11 |
| AX-158034625 | 7 | 65.718 | KV453001.1 | 6927519 | 11-scf00161 | 11 |
| AX-158391444 | 7 | 65.718 | KV453001.1 | 6943120 | 11-scf00161 | 11 |
| AX-158034665 | 7 | 65.718 | KV453001.1 | 6960240 | 11-scf00161 | 11 |
| AX-158034701 | 7 | 65.718 | KV453001.1 | 6996632 | 11-scf00161 | 11 |
| AX-157722829 | 7 | 65.718 | KV453001.1 | 7000522 | 11-scf00161 | 11 |
| AX-158034709 | 7 | 65.718 | KV453001.1 | 7001591 | 11-scf00161 | 11 |
| AX-157821712 | 7 | 65.718 | KV453001.1 | 7564008 | 11-scf00161 | 11 |
| AX-158035325 | 7 | 65.718 | KV453001.1 | 7564245 | 11-scf00161 | 11 |
| AX-158035733 | 7 | 65.718 | KV453001.1 | 7869786 | 11-scf00161 | 11 |
| AX-158035734 | 7 | 65.718 | KV453001.1 | 7870042 | 11-scf00161 | 11 |
| AX-158035769 | 7 | 65.718 | KV453001.1 | 7889272 | 11-scf00161 | 11 |
| AX-158035797 | 7 | 65.718 | KV453001.1 | 7907027 | 11-scf00161 | 11 |
| AX-158035802 | 7 | 65.718 | KV453001.1 | 7908451 | 11-scf00161 | 11 |
| AX-158408377 | 7 | 65.718 | KV453001.1 | 7908974 | 11-scf00161 | 11 |
| AX-158035818 | 7 | 65.718 | KV453001.1 | 7922033 | 11-scf00161 | 11 |
| AX-158035862 | 7 | 65.718 | KV453001.1 | 7951003 | 11-scf00161 | 11 |
| AX-158035870 | 7 | 65.718 | KV453001.1 | 7960120 | 11-scf00161 | 11 |
| AX-158036175 | 7 | 65.718 | KV453001.1 | 8270884 | 11-scf00161 | 11 |
| AX-158036237 | 7 | 65.718 | KV453001.1 | 8329733 | 11-scf00161 | 11 |
| AX-158034719 | 7 | 65.721 | KV453001.1 | 7008650 | 11-scf00161 | 11 |
| AX-157758398 | 7 | 65.721 | KV453001.1 | 7044694 | 11-scf00161 | 11 |
| AX-158034723 | 7 | 65.74  | KV453001.1 | 7010071 | 11-scf00161 | 11 |
| AX-158034734 | 7 | 65.767 | KV453001.1 | 7020751 | 11-scf00161 | 11 |
| AX-157715277 | 7 | 65.767 | KV453001.1 | 7030882 | 11-scf00161 | 11 |
| AX-158034754 | 7 | 65.767 | KV453001.1 | 7032495 | 11-scf00161 | 11 |
| AX-158034757 | 7 | 65.767 | KV453001.1 | 7032919 | 11-scf00161 | 11 |
| AX-158034758 | 7 | 65.767 | KV453001.1 | 7033352 | 11-scf00161 | 11 |
| AX-158034764 | 7 | 65.767 | KV453001.1 | 7035733 | 11-scf00161 | 11 |
| AX-158034768 | 7 | 65.767 | KV453001.1 | 7036973 | 11-scf00161 | 11 |
| AX-158034769 | 7 | 65.767 | KV453001.1 | 7038984 | 11-scf00161 | 11 |
| AX-158034772 | 7 | 65.767 | KV453001.1 | 7041623 | 11-scf00161 | 11 |
| AX-158034774 | 7 | 65.767 | KV453001.1 | 7043224 | 11-scf00161 | 11 |
| AX-158034776 | 7 | 65.767 | KV453001.1 | 7044162 | 11-scf00161 | 11 |
| AX-158034778 | 7 | 65.767 | KV453001.1 | 7045065 | 11-scf00161 | 11 |
| AX-158034779 | 7 | 65.767 | KV453001.1 | 7045629 | 11-scf00161 | 11 |
| AX-158034792 | 7 | 65.767 | KV453001.1 | 7056697 | 11-scf00161 | 11 |
| AX-158034795 | 7 | 65.767 | KV453001.1 | 7058295 | 11-scf00161 | 11 |
| AX-157821699 | 7 | 65.767 | KV453001.1 | 7091940 | 11-scf00161 | 11 |
| AX-157713531 | 7 | 65.767 | KV453001.1 | 7105566 | 11-scf00161 | 11 |
| AX-158034871 | 7 | 65.767 | KV453001.1 | 7124948 | 11-scf00161 | 11 |
| AX-158034874 | 7 | 65.767 | KV453001.1 | 7127453 | 11-scf00161 | 11 |
| AX-158383868 | 7 | 65.767 | KV453001.1 | 7137930 | 11-scf00161 | 11 |
| AX-158034904 | 7 | 65.767 | KV453001.1 | 7156531 | 11-scf00161 | 11 |
| AX-158035796 | 7 | 65.767 | KV453001.1 | 7906229 | 11-scf00161 | 11 |
| AX-158035859 | 7 | 65.767 | KV453001.1 | 7950037 | 11-scf00161 | 11 |
| AX-157870467 | 7 | 65.767 | KV453001.1 | 7987009 | 11-scf00161 | 11 |
| AX-158035908 | 7 | 65.767 | KV453001.1 | 7988308 | 11-scf00161 | 11 |
| AX-158035925 | 7 | 65.767 | KV453001.1 | 8000277 | 11-scf00161 | 11 |
| AX-157821739 | 7 | 65.767 | KV453001.1 | 8001019 | 11-scf00161 | 11 |
| AX-158035930 | 7 | 65.767 | KV453001.1 | 8004392 | 11-scf00161 | 11 |

|              |   |        |            |          |             |    |
|--------------|---|--------|------------|----------|-------------|----|
| AX-158035995 | 7 | 65.767 | KV453001.1 | 8077715  | 11-scf00161 | 11 |
| AX-157775237 | 7 | 65.767 | KV453001.1 | 8157599  | 11-scf00161 | 11 |
| AX-158034780 | 7 | 65.795 | KV453001.1 | 7045997  | 11-scf00161 | 11 |
| AX-158033850 | 7 | 65.828 | KV453001.1 | 6182959  | 11-scf00161 | 11 |
| AX-158033916 | 7 | 65.828 | KV453001.1 | 6260995  | 11-scf00161 | 11 |
| AX-158033994 | 7 | 65.828 | KV453001.1 | 6335630  | 11-scf00161 | 11 |
| AX-158034007 | 7 | 65.828 | KV453001.1 | 6347714  | 11-scf00161 | 11 |
| AX-158034026 | 7 | 65.828 | KV453001.1 | 6359250  | 11-scf00161 | 11 |
| AX-158034421 | 7 | 65.828 | KV453001.1 | 6707332  | 11-scf00161 | 11 |
| AX-158034504 | 7 | 65.828 | KV453001.1 | 6798170  | 11-scf00161 | 11 |
| AX-157753584 | 7 | 65.828 | KV453001.1 | 7015186  | 11-scf00161 | 11 |
| AX-158034785 | 7 | 65.828 | KV453001.1 | 7052649  | 11-scf00161 | 11 |
| AX-157757341 | 7 | 65.828 | KV453001.1 | 7052813  | 11-scf00161 | 11 |
| AX-157821693 | 7 | 65.828 | KV453001.1 | 7064182  | 11-scf00161 | 11 |
| AX-158034804 | 7 | 65.828 | KV453001.1 | 7068446  | 11-scf00161 | 11 |
| AX-157724744 | 7 | 65.828 | KV453001.1 | 7070091  | 11-scf00161 | 11 |
| AX-158034806 | 7 | 65.828 | KV453001.1 | 7070332  | 11-scf00161 | 11 |
| AX-158034899 | 7 | 65.828 | KV453001.1 | 7149117  | 11-scf00161 | 11 |
| AX-158035066 | 7 | 65.828 | KV453001.1 | 7381462  | 11-scf00161 | 11 |
| AX-158035083 | 7 | 65.828 | KV453001.1 | 7390196  | 11-scf00161 | 11 |
| AX-158035190 | 7 | 65.828 | KV453001.1 | 7473347  | 11-scf00161 | 11 |
| AX-158035240 | 7 | 65.828 | KV453001.1 | 7500353  | 11-scf00161 | 11 |
| AX-158035259 | 7 | 65.828 | KV453001.1 | 7510576  | 11-scf00161 | 11 |
| AX-158035295 | 7 | 65.828 | KV453001.1 | 7536816  | 11-scf00161 | 11 |
| AX-158035327 | 7 | 65.828 | KV453001.1 | 7564817  | 11-scf00161 | 11 |
| AX-158035848 | 7 | 65.828 | KV453001.1 | 7940279  | 11-scf00161 | 11 |
| AX-158036033 | 7 | 65.828 | KV453001.1 | 8118874  | 11-scf00161 | 11 |
| AX-158036035 | 7 | 65.828 | KV453001.1 | 8119854  | 11-scf00161 | 11 |
| AX-158036057 | 7 | 65.828 | KV453001.1 | 8151052  | 11-scf00161 | 11 |
| AX-158036156 | 7 | 65.828 | KV453001.1 | 8249849  | 11-scf00161 | 11 |
| AX-158036183 | 7 | 65.828 | KV453001.1 | 8274739  | 11-scf00161 | 11 |
| AX-158036192 | 7 | 65.828 | KV453001.1 | 8282105  | 11-scf00161 | 11 |
| AX-158036250 | 7 | 65.828 | KV453001.1 | 8348991  | 11-scf00161 | 11 |
| AX-158036349 | 7 | 65.828 | KV453001.1 | 8466700  | 11-scf00161 | 11 |
| AX-158036383 | 7 | 65.828 | KV453001.1 | 8500850  | 11-scf00161 | 11 |
| AX-157885069 | 7 | 65.828 | KV453001.1 | 8502708  | 11-scf00161 | 11 |
| AX-158036467 | 7 | 65.828 | KV453001.1 | 8600312  | 11-scf00161 | 11 |
| AX-158036587 | 7 | 65.828 | KV453001.1 | 8743951  | 11-scf00161 | 11 |
| AX-158036598 | 7 | 65.828 | KV453001.1 | 8756524  | 11-scf00161 | 11 |
| AX-158036642 | 7 | 65.828 | KV453001.1 | 8810463  | 11-scf00161 | 11 |
| AX-158036679 | 7 | 65.828 | KV453001.1 | 8841250  | 11-scf00161 | 11 |
| AX-158036786 | 7 | 65.828 | KV453001.1 | 8964840  | 11-scf00161 | 11 |
| AX-158383882 | 7 | 65.828 | KV453001.1 | 8996368  | 11-scf00161 | 11 |
| AX-158036899 | 7 | 65.828 | KV453001.1 | 9133616  | 11-scf00161 | 11 |
| AX-158036914 | 7 | 65.828 | KV453001.1 | 9157407  | 11-scf00161 | 11 |
| AX-158036969 | 7 | 65.828 | KV453001.1 | 9215049  | 11-scf00161 | 11 |
| AX-158037077 | 7 | 65.828 | KV453001.1 | 9358059  | 11-scf00161 | 11 |
| AX-158037165 | 7 | 65.828 | KV453001.1 | 9485059  | 11-scf00161 | 11 |
| AX-158037760 | 7 | 65.828 | KV453001.1 | 10459296 | 11-scf00161 | 11 |
| AX-157821871 | 7 | 65.828 | KV453001.1 | 10461912 | 11-scf00161 | 11 |
| AX-158037896 | 7 | 65.828 | KV453001.1 | 10626295 | 11-scf00161 | 11 |



|              |   |        |            |          |             |    |
|--------------|---|--------|------------|----------|-------------|----|
| AX-158038141 | 7 | 65.828 | KV453001.1 | 10844863 | 11-scf00161 | 11 |
| AX-158383893 | 7 | 65.828 | KV453001.1 | 10848044 | 11-scf00161 | 11 |
| AX-158038234 | 7 | 65.828 | KV453001.1 | 10981771 | 11-scf00161 | 11 |
| AX-157821695 | 7 | 65.833 | KV453001.1 | 7074852  | 11-scf00161 | 11 |
| AX-158034858 | 7 | 65.838 | KV453001.1 | 7115042  | 11-scf00161 | 11 |
| AX-158038140 | 7 | 65.838 | KV453001.1 | 10844319 | 11-scf00161 | 11 |
| AX-158038405 | 7 | 65.838 | KV453001.1 | 11166420 | 11-scf00161 | 11 |
| AX-158034863 | 7 | 65.852 | KV453001.1 | 7119659  | 11-scf00161 | 11 |
| AX-158034869 | 7 | 65.867 | KV453001.1 | 7123379  | 11-scf00161 | 11 |
| AX-158034870 | 7 | 65.879 | KV453001.1 | 7124387  | 11-scf00161 | 11 |
| AX-158034884 | 7 | 65.891 | KV453001.1 | 7135288  | 11-scf00161 | 11 |
| AX-158034891 | 7 | 65.903 | KV453001.1 | 7141770  | 11-scf00161 | 11 |
| AX-158034894 | 7 | 65.915 | KV453001.1 | 7143625  | 11-scf00161 | 11 |
| AX-158034695 | 7 | 65.926 | KV453001.1 | 6991423  | 11-scf00161 | 11 |
| AX-158034897 | 7 | 65.926 | KV453001.1 | 7146021  | 11-scf00161 | 11 |
| AX-158034907 | 7 | 65.932 | KV453001.1 | 7160078  | 11-scf00161 | 11 |
| AX-158033965 | 7 | 65.937 | KV453001.1 | 6317281  | 11-scf00161 | 11 |
| AX-158034049 | 7 | 65.937 | KV453001.1 | 6377114  | 11-scf00161 | 11 |
| AX-157725813 | 7 | 65.937 | KV453001.1 | 6850066  | 11-scf00161 | 11 |
| AX-157772820 | 7 | 65.937 | KV453001.1 | 7164034  | 11-scf00161 | 11 |
| AX-158383870 | 7 | 65.937 | KV453001.1 | 7165171  | 11-scf00161 | 11 |
| AX-158034914 | 7 | 65.937 | KV453001.1 | 7188125  | 11-scf00161 | 11 |
| AX-158034918 | 7 | 65.937 | KV453001.1 | 7206234  | 11-scf00161 | 11 |
| AX-158034953 | 7 | 65.937 | KV453001.1 | 7269335  | 11-scf00161 | 11 |
| AX-158034955 | 7 | 65.937 | KV453001.1 | 7272409  | 11-scf00161 | 11 |
| AX-157865375 | 7 | 65.937 | KV453001.1 | 7288801  | 11-scf00161 | 11 |
| AX-158034958 | 7 | 65.937 | KV453001.1 | 7297816  | 11-scf00161 | 11 |
| AX-158034963 | 7 | 65.937 | KV453001.1 | 7301291  | 11-scf00161 | 11 |
| AX-158034964 | 7 | 65.937 | KV453001.1 | 7313363  | 11-scf00161 | 11 |
| AX-158034969 | 7 | 65.937 | KV453001.1 | 7318587  | 11-scf00161 | 11 |
| AX-158034973 | 7 | 65.937 | KV453001.1 | 7320561  | 11-scf00161 | 11 |
| AX-158034987 | 7 | 65.937 | KV453001.1 | 7332700  | 11-scf00161 | 11 |
| AX-158034989 | 7 | 65.937 | KV453001.1 | 7333098  | 11-scf00161 | 11 |
| AX-158034991 | 7 | 65.937 | KV453001.1 | 7334780  | 11-scf00161 | 11 |
| AX-158034996 | 7 | 65.937 | KV453001.1 | 7337701  | 11-scf00161 | 11 |
| AX-158034998 | 7 | 65.937 | KV453001.1 | 7341060  | 11-scf00161 | 11 |
| AX-158035423 | 7 | 65.937 | KV453001.1 | 7638006  | 11-scf00161 | 11 |
| AX-158035428 | 7 | 65.937 | KV453001.1 | 7639463  | 11-scf00161 | 11 |
| AX-158035495 | 7 | 65.937 | KV453001.1 | 7690226  | 11-scf00161 | 11 |
| AX-158035617 | 7 | 65.937 | KV453001.1 | 7781023  | 11-scf00161 | 11 |
| AX-158035620 | 7 | 65.937 | KV453001.1 | 7783703  | 11-scf00161 | 11 |
| AX-157821732 | 7 | 65.937 | KV453001.1 | 7794382  | 11-scf00161 | 11 |
| AX-158035642 | 7 | 65.937 | KV453001.1 | 7809059  | 11-scf00161 | 11 |
| AX-158035654 | 7 | 65.937 | KV453001.1 | 7819538  | 11-scf00161 | 11 |
| AX-158035658 | 7 | 65.937 | KV453001.1 | 7821829  | 11-scf00161 | 11 |
| AX-158035661 | 7 | 65.937 | KV453001.1 | 7822979  | 11-scf00161 | 11 |
| AX-158035678 | 7 | 65.937 | KV453001.1 | 7832710  | 11-scf00161 | 11 |
| AX-158035689 | 7 | 65.937 | KV453001.1 | 7835357  | 11-scf00161 | 11 |
| AX-157821733 | 7 | 65.937 | KV453001.1 | 7850458  | 11-scf00161 | 11 |
| AX-157715244 | 7 | 65.937 | KV453001.1 | 7852164  | 11-scf00161 | 11 |
| AX-157755437 | 7 | 65.937 | KV453001.1 | 7859322  | 11-scf00161 | 11 |

|              |   |        |            |          |             |    |
|--------------|---|--------|------------|----------|-------------|----|
| AX-158035718 | 7 | 65.937 | KV453001.1 | 7860701  | 11-scf00161 | 11 |
| AX-158035719 | 7 | 65.937 | KV453001.1 | 7860923  | 11-scf00161 | 11 |
| AX-158035721 | 7 | 65.937 | KV453001.1 | 7861489  | 11-scf00161 | 11 |
| AX-158406256 | 7 | 65.937 | KV453001.1 | 7864628  | 11-scf00161 | 11 |
| AX-158408376 | 7 | 65.937 | KV453001.1 | 7884129  | 11-scf00161 | 11 |
| AX-158035773 | 7 | 65.937 | KV453001.1 | 7891955  | 11-scf00161 | 11 |
| AX-158035777 | 7 | 65.937 | KV453001.1 | 7893611  | 11-scf00161 | 11 |
| AX-158035965 | 7 | 65.937 | KV453001.1 | 8048393  | 11-scf00161 | 11 |
| AX-158036264 | 7 | 65.937 | KV453001.1 | 8373947  | 11-scf00161 | 11 |
| AX-157821906 | 7 | 65.937 | KV453001.1 | 10831300 | 11-scf00161 | 11 |
| AX-158035053 | 7 | 65.953 | KV453001.1 | 7373216  | 11-scf00161 | 11 |
| AX-158035120 | 7 | 65.983 | KV453001.1 | 7422267  | 11-scf00161 | 11 |
| AX-158035189 | 7 | 66.015 | KV453001.1 | 7471129  | 11-scf00161 | 11 |
| AX-158035292 | 7 | 66.046 | KV453001.1 | 7535830  | 11-scf00161 | 11 |
| AX-158035293 | 7 | 66.046 | KV453001.1 | 7536181  | 11-scf00161 | 11 |
| AX-158035304 | 7 | 66.046 | KV453001.1 | 7544850  | 11-scf00161 | 11 |
| AX-158035318 | 7 | 66.046 | KV453001.1 | 7550989  | 11-scf00161 | 11 |
| AX-157885068 | 7 | 66.046 | KV453001.1 | 8487561  | 11-scf00161 | 11 |
| AX-158037801 | 7 | 66.046 | KV453001.1 | 10508469 | 11-scf00161 | 11 |
| AX-158033921 | 7 | 66.155 | KV453001.1 | 6264790  | 11-scf00161 | 11 |
| AX-158033978 | 7 | 66.155 | KV453001.1 | 6322276  | 11-scf00161 | 11 |
| AX-158033982 | 7 | 66.155 | KV453001.1 | 6324581  | 11-scf00161 | 11 |
| AX-158034547 | 7 | 66.155 | KV453001.1 | 6850425  | 11-scf00161 | 11 |
| AX-157757024 | 7 | 66.155 | KV453001.1 | 7089223  | 11-scf00161 | 11 |
| AX-158034974 | 7 | 66.155 | KV453001.1 | 7320967  | 11-scf00161 | 11 |
| AX-158034980 | 7 | 66.155 | KV453001.1 | 7327652  | 11-scf00161 | 11 |
| AX-158379805 | 7 | 66.155 | KV453001.1 | 7452055  | 11-scf00161 | 11 |
| AX-157725821 | 7 | 66.155 | KV453001.1 | 7538784  | 11-scf00161 | 11 |
| AX-158035308 | 7 | 66.155 | KV453001.1 | 7546474  | 11-scf00161 | 11 |
| AX-158035310 | 7 | 66.155 | KV453001.1 | 7547849  | 11-scf00161 | 11 |
| AX-157821709 | 7 | 66.155 | KV453001.1 | 7550697  | 11-scf00161 | 11 |
| AX-157821711 | 7 | 66.155 | KV453001.1 | 7560225  | 11-scf00161 | 11 |
| AX-158035350 | 7 | 66.155 | KV453001.1 | 7580992  | 11-scf00161 | 11 |
| AX-157744783 | 7 | 66.155 | KV453001.1 | 7583270  | 11-scf00161 | 11 |
| AX-158035358 | 7 | 66.155 | KV453001.1 | 7586926  | 11-scf00161 | 11 |
| AX-158035363 | 7 | 66.155 | KV453001.1 | 7589555  | 11-scf00161 | 11 |
| AX-158035371 | 7 | 66.155 | KV453001.1 | 7598527  | 11-scf00161 | 11 |
| AX-157719729 | 7 | 66.155 | KV453001.1 | 7600011  | 11-scf00161 | 11 |
| AX-158035373 | 7 | 66.155 | KV453001.1 | 7600599  | 11-scf00161 | 11 |
| AX-158035394 | 7 | 66.155 | KV453001.1 | 7615988  | 11-scf00161 | 11 |
| AX-158035439 | 7 | 66.155 | KV453001.1 | 7647489  | 11-scf00161 | 11 |
| AX-158035451 | 7 | 66.155 | KV453001.1 | 7653999  | 11-scf00161 | 11 |
| AX-157752530 | 7 | 66.155 | KV453001.1 | 7656488  | 11-scf00161 | 11 |
| AX-158035469 | 7 | 66.155 | KV453001.1 | 7671782  | 11-scf00161 | 11 |
| AX-157821724 | 7 | 66.155 | KV453001.1 | 7688760  | 11-scf00161 | 11 |
| AX-157755687 | 7 | 66.155 | KV453001.1 | 7693194  | 11-scf00161 | 11 |
| AX-158035510 | 7 | 66.155 | KV453001.1 | 7700180  | 11-scf00161 | 11 |
| AX-158035526 | 7 | 66.155 | KV453001.1 | 7712020  | 11-scf00161 | 11 |
| AX-158383873 | 7 | 66.155 | KV453001.1 | 7718888  | 11-scf00161 | 11 |
| AX-157821727 | 7 | 66.155 | KV453001.1 | 7725122  | 11-scf00161 | 11 |
| AX-158035548 | 7 | 66.155 | KV453001.1 | 7730678  | 11-scf00161 | 11 |

|              |   |        |            |         |             |    |
|--------------|---|--------|------------|---------|-------------|----|
| AX-158035561 | 7 | 66.155 | KV453001.1 | 7739341 | 11-scf00161 | 11 |
| AX-158035564 | 7 | 66.155 | KV453001.1 | 7742718 | 11-scf00161 | 11 |
| AX-158035587 | 7 | 66.155 | KV453001.1 | 7765010 | 11-scf00161 | 11 |
| AX-158035588 | 7 | 66.155 | KV453001.1 | 7765181 | 11-scf00161 | 11 |
| AX-158035590 | 7 | 66.155 | KV453001.1 | 7766869 | 11-scf00161 | 11 |
| AX-158035591 | 7 | 66.155 | KV453001.1 | 7767552 | 11-scf00161 | 11 |
| AX-158035592 | 7 | 66.155 | KV453001.1 | 7768285 | 11-scf00161 | 11 |
| AX-158035597 | 7 | 66.155 | KV453001.1 | 7769361 | 11-scf00161 | 11 |
| AX-158035601 | 7 | 66.155 | KV453001.1 | 7772667 | 11-scf00161 | 11 |
| AX-158035602 | 7 | 66.155 | KV453001.1 | 7773360 | 11-scf00161 | 11 |
| AX-158035604 | 7 | 66.155 | KV453001.1 | 7773949 | 11-scf00161 | 11 |
| AX-158035605 | 7 | 66.155 | KV453001.1 | 7775684 | 11-scf00161 | 11 |
| AX-157821729 | 7 | 66.155 | KV453001.1 | 7776087 | 11-scf00161 | 11 |
| AX-158035607 | 7 | 66.155 | KV453001.1 | 7777877 | 11-scf00161 | 11 |
| AX-158035609 | 7 | 66.155 | KV453001.1 | 7778217 | 11-scf00161 | 11 |
| AX-158035610 | 7 | 66.155 | KV453001.1 | 7778538 | 11-scf00161 | 11 |
| AX-158035613 | 7 | 66.155 | KV453001.1 | 7779000 | 11-scf00161 | 11 |
| AX-158035614 | 7 | 66.155 | KV453001.1 | 7780207 | 11-scf00161 | 11 |
| AX-158035615 | 7 | 66.155 | KV453001.1 | 7780284 | 11-scf00161 | 11 |
| AX-158035619 | 7 | 66.155 | KV453001.1 | 7781805 | 11-scf00161 | 11 |
| AX-158035623 | 7 | 66.155 | KV453001.1 | 7784517 | 11-scf00161 | 11 |
| AX-158035624 | 7 | 66.155 | KV453001.1 | 7785830 | 11-scf00161 | 11 |
| AX-158035626 | 7 | 66.155 | KV453001.1 | 7786936 | 11-scf00161 | 11 |
| AX-158035629 | 7 | 66.155 | KV453001.1 | 7792012 | 11-scf00161 | 11 |
| AX-157821730 | 7 | 66.155 | KV453001.1 | 7792358 | 11-scf00161 | 11 |
| AX-157821731 | 7 | 66.155 | KV453001.1 | 7793025 | 11-scf00161 | 11 |
| AX-158035632 | 7 | 66.155 | KV453001.1 | 7797722 | 11-scf00161 | 11 |
| AX-158035638 | 7 | 66.155 | KV453001.1 | 7807086 | 11-scf00161 | 11 |
| AX-158035639 | 7 | 66.155 | KV453001.1 | 7807387 | 11-scf00161 | 11 |
| AX-158383874 | 7 | 66.155 | KV453001.1 | 7808730 | 11-scf00161 | 11 |
| AX-158035643 | 7 | 66.155 | KV453001.1 | 7811425 | 11-scf00161 | 11 |
| AX-158035645 | 7 | 66.155 | KV453001.1 | 7811959 | 11-scf00161 | 11 |
| AX-158035647 | 7 | 66.155 | KV453001.1 | 7814259 | 11-scf00161 | 11 |
| AX-158035648 | 7 | 66.155 | KV453001.1 | 7815118 | 11-scf00161 | 11 |
| AX-158035651 | 7 | 66.155 | KV453001.1 | 7817232 | 11-scf00161 | 11 |
| AX-158035652 | 7 | 66.155 | KV453001.1 | 7818271 | 11-scf00161 | 11 |
| AX-158035653 | 7 | 66.155 | KV453001.1 | 7818901 | 11-scf00161 | 11 |
| AX-158035659 | 7 | 66.155 | KV453001.1 | 7822282 | 11-scf00161 | 11 |
| AX-158035660 | 7 | 66.155 | KV453001.1 | 7822618 | 11-scf00161 | 11 |
| AX-158035662 | 7 | 66.155 | KV453001.1 | 7823282 | 11-scf00161 | 11 |
| AX-158035676 | 7 | 66.155 | KV453001.1 | 7832092 | 11-scf00161 | 11 |
| AX-158035682 | 7 | 66.155 | KV453001.1 | 7833052 | 11-scf00161 | 11 |
| AX-158035691 | 7 | 66.155 | KV453001.1 | 7838992 | 11-scf00161 | 11 |
| AX-158035693 | 7 | 66.155 | KV453001.1 | 7840072 | 11-scf00161 | 11 |
| AX-158035698 | 7 | 66.155 | KV453001.1 | 7842490 | 11-scf00161 | 11 |
| AX-158391455 | 7 | 66.155 | KV453001.1 | 7851952 | 11-scf00161 | 11 |
| AX-158035709 | 7 | 66.155 | KV453001.1 | 7854011 | 11-scf00161 | 11 |
| AX-158035713 | 7 | 66.155 | KV453001.1 | 7857712 | 11-scf00161 | 11 |
| AX-158035726 | 7 | 66.155 | KV453001.1 | 7865627 | 11-scf00161 | 11 |
| AX-158035729 | 7 | 66.155 | KV453001.1 | 7866857 | 11-scf00161 | 11 |
| AX-158035730 | 7 | 66.155 | KV453001.1 | 7867636 | 11-scf00161 | 11 |

|              |   |        |            |          |              |    |
|--------------|---|--------|------------|----------|--------------|----|
| AX-158035731 | 7 | 66.155 | KV453001.1 | 7868195  | 11-scf00161  | 11 |
| AX-158035745 | 7 | 66.155 | KV453001.1 | 7873453  | 11-scf00161  | 11 |
| AX-158035785 | 7 | 66.155 | KV453001.1 | 7898557  | 11-scf00161  | 11 |
| AX-158408380 | 7 | 66.155 | KV453001.1 | 7912998  | 11-scf00161  | 11 |
| AX-158035850 | 7 | 66.155 | KV453001.1 | 7941364  | 11-scf00161  | 11 |
| AX-158391457 | 7 | 66.155 | KV453001.1 | 7951712  | 11-scf00161  | 11 |
| AX-157740760 | 7 | 66.155 | KV453001.1 | 7952286  | 11-scf00161  | 11 |
| AX-158035869 | 7 | 66.155 | KV453001.1 | 7959622  | 11-scf00161  | 11 |
| AX-158035884 | 7 | 66.155 | KV453001.1 | 7967400  | 11-scf00161  | 11 |
| AX-158035967 | 7 | 66.155 | KV453001.1 | 8049791  | 11-scf00161  | 11 |
| AX-158035977 | 7 | 66.155 | KV453001.1 | 8054788  | 11-scf00161  | 11 |
| AX-158036017 | 7 | 66.155 | KV453001.1 | 8093978  | 11-scf00161  | 11 |
| AX-157716484 | 7 | 66.155 | KV453001.1 | 8137496  | 11-scf00161  | 11 |
| AX-158036052 | 7 | 66.155 | KV453001.1 | 8148118  | 11-scf00161  | 11 |
| AX-158036054 | 7 | 66.155 | KV453001.1 | 8150013  | 11-scf00161  | 11 |
| AX-158036196 | 7 | 66.155 | KV453001.1 | 8284974  | 11-scf00161  | 11 |
| AX-158037647 | 7 | 66.155 | KV453001.1 | 10325325 | 11-scf00161  | 11 |
| AX-157693100 | 7 | 66.155 |            | 4002     | :232935_g4_i | UN |
| AX-158035656 | 7 | 66.173 | KV453001.1 | 7820256  | 11-scf00161  | 11 |
| AX-158035699 | 7 | 66.191 | KV453001.1 | 7845937  | 11-scf00161  | 11 |
| AX-158035701 | 7 | 66.191 | KV453001.1 | 7846281  | 11-scf00161  | 11 |
| AX-158035702 | 7 | 66.208 | KV453001.1 | 7847505  | 11-scf00161  | 11 |
| AX-158035704 | 7 | 66.226 | KV453001.1 | 7848061  | 11-scf00161  | 11 |
| AX-158035712 | 7 | 66.246 | KV453001.1 | 7856177  | 11-scf00161  | 11 |
| AX-157821653 | 7 | 66.264 | KV453001.1 | 6478454  | 11-scf00161  | 11 |
| AX-158034188 | 7 | 66.264 | KV453001.1 | 6515798  | 11-scf00161  | 11 |
| AX-158034191 | 7 | 66.264 | KV453001.1 | 6518424  | 11-scf00161  | 11 |
| AX-158034280 | 7 | 66.264 | KV453001.1 | 6589955  | 11-scf00161  | 11 |
| AX-157821662 | 7 | 66.264 | KV453001.1 | 6785711  | 11-scf00161  | 11 |
| AX-158034522 | 7 | 66.264 | KV453001.1 | 6819415  | 11-scf00161  | 11 |
| AX-158034740 | 7 | 66.264 | KV453001.1 | 7023647  | 11-scf00161  | 11 |
| AX-157754325 | 7 | 66.264 | KV453001.1 | 7064115  | 11-scf00161  | 11 |
| AX-158034810 | 7 | 66.264 | KV453001.1 | 7076393  | 11-scf00161  | 11 |
| AX-158035674 | 7 | 66.264 | KV453001.1 | 7830342  | 11-scf00161  | 11 |
| AX-158035686 | 7 | 66.264 | KV453001.1 | 7834041  | 11-scf00161  | 11 |
| AX-158035714 | 7 | 66.264 | KV453001.1 | 7858376  | 11-scf00161  | 11 |
| AX-158035728 | 7 | 66.264 | KV453001.1 | 7866525  | 11-scf00161  | 11 |
| AX-158035739 | 7 | 66.264 | KV453001.1 | 7871112  | 11-scf00161  | 11 |
| AX-158035751 | 7 | 66.264 | KV453001.1 | 7876510  | 11-scf00161  | 11 |
| AX-158035756 | 7 | 66.264 | KV453001.1 | 7878201  | 11-scf00161  | 11 |
| AX-158035764 | 7 | 66.264 | KV453001.1 | 7885623  | 11-scf00161  | 11 |
| AX-158035779 | 7 | 66.264 | KV453001.1 | 7894124  | 11-scf00161  | 11 |
| AX-158035788 | 7 | 66.264 | KV453001.1 | 7900464  | 11-scf00161  | 11 |
| AX-158408378 | 7 | 66.264 | KV453001.1 | 7909360  | 11-scf00161  | 11 |
| AX-158416139 | 7 | 66.264 | KV453001.1 | 7909710  | 11-scf00161  | 11 |
| AX-158035804 | 7 | 66.264 | KV453001.1 | 7910611  | 11-scf00161  | 11 |
| AX-158035805 | 7 | 66.264 | KV453001.1 | 7911762  | 11-scf00161  | 11 |
| AX-158035806 | 7 | 66.264 | KV453001.1 | 7912466  | 11-scf00161  | 11 |
| AX-158035809 | 7 | 66.264 | KV453001.1 | 7914677  | 11-scf00161  | 11 |
| AX-158035812 | 7 | 66.264 | KV453001.1 | 7918004  | 11-scf00161  | 11 |
| AX-158035822 | 7 | 66.264 | KV453001.1 | 7924336  | 11-scf00161  | 11 |

|              |   |        |            |         |             |    |
|--------------|---|--------|------------|---------|-------------|----|
| AX-158035825 | 7 | 66.264 | KV453001.1 | 7925031 | 11-scf00161 | 11 |
| AX-157729466 | 7 | 66.264 | KV453001.1 | 8136691 | 11-scf00161 | 11 |
| AX-158036091 | 7 | 66.264 | KV453001.1 | 8186257 | 11-scf00161 | 11 |
| AX-158391460 | 7 | 66.264 | KV453001.1 | 8191569 | 11-scf00161 | 11 |
| AX-158035827 | 7 | 66.277 | KV453001.1 | 7925428 | 11-scf00161 | 11 |
| AX-158035865 | 7 | 66.336 | KV453001.1 | 7957340 | 11-scf00161 | 11 |
| AX-158035875 | 7 | 66.402 | KV453001.1 | 7962142 | 11-scf00161 | 11 |
| AX-157745661 | 7 | 66.483 | KV453001.1 | 6186901 | 11-scf00161 | 11 |
| AX-158033937 | 7 | 66.483 | KV453001.1 | 6286627 | 11-scf00161 | 11 |
| AX-158033987 | 7 | 66.483 | KV453001.1 | 6329218 | 11-scf00161 | 11 |
| AX-158034354 | 7 | 66.483 | KV453001.1 | 6663916 | 11-scf00161 | 11 |
| AX-158034839 | 7 | 66.483 | KV453001.1 | 7099333 | 11-scf00161 | 11 |
| AX-157821700 | 7 | 66.483 | KV453001.1 | 7108331 | 11-scf00161 | 11 |
| AX-157727433 | 7 | 66.483 | KV453001.1 | 7445099 | 11-scf00161 | 11 |
| AX-158035195 | 7 | 66.483 | KV453001.1 | 7475453 | 11-scf00161 | 11 |
| AX-158383872 | 7 | 66.483 | KV453001.1 | 7491981 | 11-scf00161 | 11 |
| AX-158035333 | 7 | 66.483 | KV453001.1 | 7572576 | 11-scf00161 | 11 |
| AX-158035360 | 7 | 66.483 | KV453001.1 | 7587918 | 11-scf00161 | 11 |
| AX-157771153 | 7 | 66.483 | KV453001.1 | 7588768 | 11-scf00161 | 11 |
| AX-157723547 | 7 | 66.483 | KV453001.1 | 7590570 | 11-scf00161 | 11 |
| AX-157724751 | 7 | 66.483 | KV453001.1 | 7611828 | 11-scf00161 | 11 |
| AX-158035404 | 7 | 66.483 | KV453001.1 | 7622829 | 11-scf00161 | 11 |
| AX-158035473 | 7 | 66.483 | KV453001.1 | 7673065 | 11-scf00161 | 11 |
| AX-158035687 | 7 | 66.483 | KV453001.1 | 7834815 | 11-scf00161 | 11 |
| AX-158035735 | 7 | 66.483 | KV453001.1 | 7870423 | 11-scf00161 | 11 |
| AX-158035738 | 7 | 66.483 | KV453001.1 | 7870738 | 11-scf00161 | 11 |
| AX-158035743 | 7 | 66.483 | KV453001.1 | 7872686 | 11-scf00161 | 11 |
| AX-158035747 | 7 | 66.483 | KV453001.1 | 7874540 | 11-scf00161 | 11 |
| AX-158035749 | 7 | 66.483 | KV453001.1 | 7875381 | 11-scf00161 | 11 |
| AX-158035750 | 7 | 66.483 | KV453001.1 | 7876347 | 11-scf00161 | 11 |
| AX-158035752 | 7 | 66.483 | KV453001.1 | 7876879 | 11-scf00161 | 11 |
| AX-158035761 | 7 | 66.483 | KV453001.1 | 7880973 | 11-scf00161 | 11 |
| AX-158035763 | 7 | 66.483 | KV453001.1 | 7885044 | 11-scf00161 | 11 |
| AX-158035767 | 7 | 66.483 | KV453001.1 | 7888727 | 11-scf00161 | 11 |
| AX-158035772 | 7 | 66.483 | KV453001.1 | 7891654 | 11-scf00161 | 11 |
| AX-158035776 | 7 | 66.483 | KV453001.1 | 7893085 | 11-scf00161 | 11 |
| AX-158035781 | 7 | 66.483 | KV453001.1 | 7894486 | 11-scf00161 | 11 |
| AX-158035786 | 7 | 66.483 | KV453001.1 | 7899502 | 11-scf00161 | 11 |
| AX-158035790 | 7 | 66.483 | KV453001.1 | 7901176 | 11-scf00161 | 11 |
| AX-158035799 | 7 | 66.483 | KV453001.1 | 7907473 | 11-scf00161 | 11 |
| AX-158408381 | 7 | 66.483 | KV453001.1 | 7913734 | 11-scf00161 | 11 |
| AX-158035810 | 7 | 66.483 | KV453001.1 | 7915946 | 11-scf00161 | 11 |
| AX-158035813 | 7 | 66.483 | KV453001.1 | 7918365 | 11-scf00161 | 11 |
| AX-158035816 | 7 | 66.483 | KV453001.1 | 7920346 | 11-scf00161 | 11 |
| AX-158035820 | 7 | 66.483 | KV453001.1 | 7923330 | 11-scf00161 | 11 |
| AX-158035821 | 7 | 66.483 | KV453001.1 | 7923745 | 11-scf00161 | 11 |
| AX-158035858 | 7 | 66.483 | KV453001.1 | 7947911 | 11-scf00161 | 11 |
| AX-158035863 | 7 | 66.483 | KV453001.1 | 7954145 | 11-scf00161 | 11 |
| AX-158035864 | 7 | 66.483 | KV453001.1 | 7956611 | 11-scf00161 | 11 |
| AX-158035866 | 7 | 66.483 | KV453001.1 | 7958255 | 11-scf00161 | 11 |
| AX-158035868 | 7 | 66.483 | KV453001.1 | 7958862 | 11-scf00161 | 11 |

|              |   |        |            |         |             |    |
|--------------|---|--------|------------|---------|-------------|----|
| AX-158391458 | 7 | 66.483 | KV453001.1 | 7959709 | 11-scf00161 | 11 |
| AX-158035873 | 7 | 66.483 | KV453001.1 | 7961165 | 11-scf00161 | 11 |
| AX-158035876 | 7 | 66.483 | KV453001.1 | 7963077 | 11-scf00161 | 11 |
| AX-158035878 | 7 | 66.483 | KV453001.1 | 7963470 | 11-scf00161 | 11 |
| AX-158035879 | 7 | 66.483 | KV453001.1 | 7965241 | 11-scf00161 | 11 |
| AX-158035880 | 7 | 66.483 | KV453001.1 | 7965599 | 11-scf00161 | 11 |
| AX-158035883 | 7 | 66.483 | KV453001.1 | 7966887 | 11-scf00161 | 11 |
| AX-158035886 | 7 | 66.483 | KV453001.1 | 7967851 | 11-scf00161 | 11 |
| AX-158035890 | 7 | 66.483 | KV453001.1 | 7969343 | 11-scf00161 | 11 |
| AX-158035894 | 7 | 66.483 | KV453001.1 | 7971782 | 11-scf00161 | 11 |
| AX-158035896 | 7 | 66.483 | KV453001.1 | 7973048 | 11-scf00161 | 11 |
| AX-157870469 | 7 | 66.483 | KV453001.1 | 7989213 | 11-scf00161 | 11 |
| AX-158035913 | 7 | 66.483 | KV453001.1 | 7990722 | 11-scf00161 | 11 |
| AX-158035918 | 7 | 66.483 | KV453001.1 | 7993496 | 11-scf00161 | 11 |
| AX-157770636 | 7 | 66.483 | KV453001.1 | 8005016 | 11-scf00161 | 11 |
| AX-158035932 | 7 | 66.483 | KV453001.1 | 8005117 | 11-scf00161 | 11 |
| AX-158035935 | 7 | 66.483 | KV453001.1 | 8013565 | 11-scf00161 | 11 |
| AX-158035936 | 7 | 66.483 | KV453001.1 | 8014570 | 11-scf00161 | 11 |
| AX-157821740 | 7 | 66.483 | KV453001.1 | 8016025 | 11-scf00161 | 11 |
| AX-158035947 | 7 | 66.483 | KV453001.1 | 8033732 | 11-scf00161 | 11 |
| AX-158035952 | 7 | 66.483 | KV453001.1 | 8037259 | 11-scf00161 | 11 |
| AX-158035957 | 7 | 66.483 | KV453001.1 | 8042141 | 11-scf00161 | 11 |
| AX-158035958 | 7 | 66.483 | KV453001.1 | 8044465 | 11-scf00161 | 11 |
| AX-158035959 | 7 | 66.483 | KV453001.1 | 8045183 | 11-scf00161 | 11 |
| AX-158035963 | 7 | 66.483 | KV453001.1 | 8047333 | 11-scf00161 | 11 |
| AX-158035966 | 7 | 66.483 | KV453001.1 | 8049032 | 11-scf00161 | 11 |
| AX-158035969 | 7 | 66.483 | KV453001.1 | 8050167 | 11-scf00161 | 11 |
| AX-158035976 | 7 | 66.483 | KV453001.1 | 8054359 | 11-scf00161 | 11 |
| AX-158035979 | 7 | 66.483 | KV453001.1 | 8057563 | 11-scf00161 | 11 |
| AX-158035982 | 7 | 66.483 | KV453001.1 | 8059341 | 11-scf00161 | 11 |
| AX-158035984 | 7 | 66.483 | KV453001.1 | 8061575 | 11-scf00161 | 11 |
| AX-157713293 | 7 | 66.483 | KV453001.1 | 8063077 | 11-scf00161 | 11 |
| AX-158035988 | 7 | 66.483 | KV453001.1 | 8066097 | 11-scf00161 | 11 |
| AX-158036003 | 7 | 66.483 | KV453001.1 | 8086189 | 11-scf00161 | 11 |
| AX-158036005 | 7 | 66.483 | KV453001.1 | 8086422 | 11-scf00161 | 11 |
| AX-158379807 | 7 | 66.483 | KV453001.1 | 8086584 | 11-scf00161 | 11 |
| AX-158036011 | 7 | 66.483 | KV453001.1 | 8090416 | 11-scf00161 | 11 |
| AX-158036014 | 7 | 66.483 | KV453001.1 | 8091744 | 11-scf00161 | 11 |
| AX-158036016 | 7 | 66.483 | KV453001.1 | 8092482 | 11-scf00161 | 11 |
| AX-158036018 | 7 | 66.483 | KV453001.1 | 8095033 | 11-scf00161 | 11 |
| AX-158036021 | 7 | 66.483 | KV453001.1 | 8101108 | 11-scf00161 | 11 |
| AX-157754523 | 7 | 66.483 | KV453001.1 | 8102008 | 11-scf00161 | 11 |
| AX-158036034 | 7 | 66.483 | KV453001.1 | 8119465 | 11-scf00161 | 11 |
| AX-158408384 | 7 | 66.483 | KV453001.1 | 8131855 | 11-scf00161 | 11 |
| AX-157739422 | 7 | 66.483 | KV453001.1 | 8134103 | 11-scf00161 | 11 |
| AX-158036044 | 7 | 66.483 | KV453001.1 | 8143452 | 11-scf00161 | 11 |
| AX-158036047 | 7 | 66.483 | KV453001.1 | 8144932 | 11-scf00161 | 11 |
| AX-158036058 | 7 | 66.483 | KV453001.1 | 8151346 | 11-scf00161 | 11 |
| AX-158036060 | 7 | 66.483 | KV453001.1 | 8153345 | 11-scf00161 | 11 |
| AX-158036063 | 7 | 66.483 | KV453001.1 | 8158203 | 11-scf00161 | 11 |
| AX-158036105 | 7 | 66.483 | KV453001.1 | 8200141 | 11-scf00161 | 11 |

|              |   |        |            |          |             |    |
|--------------|---|--------|------------|----------|-------------|----|
| AX-158036225 | 7 | 66.483 | KV453001.1 | 8308728  | 11-scf00161 | 11 |
| AX-158036460 | 7 | 66.483 | KV453001.1 | 8588023  | 11-scf00161 | 11 |
| AX-158038050 | 7 | 66.483 | KV453001.1 | 10749677 | 11-scf00161 | 11 |
| AX-158036061 | 7 | 66.51  | KV453001.1 | 8153723  | 11-scf00161 | 11 |
| AX-158036065 | 7 | 66.529 | KV453001.1 | 8161217  | 11-scf00161 | 11 |
| AX-158036066 | 7 | 66.553 | KV453001.1 | 8161859  | 11-scf00161 | 11 |
| AX-158035330 | 7 | 66.567 | KV453001.1 | 7567614  | 11-scf00161 | 11 |
| AX-157714423 | 7 | 66.567 | KV453001.1 | 8164579  | 11-scf00161 | 11 |
| AX-158036070 | 7 | 66.579 | KV453001.1 | 8169727  | 11-scf00161 | 11 |
| AX-158035911 | 7 | 66.592 | KV453001.1 | 7989880  | 11-scf00161 | 11 |
| AX-158035972 | 7 | 66.592 | KV453001.1 | 8052446  | 11-scf00161 | 11 |
| AX-158035973 | 7 | 66.592 | KV453001.1 | 8053453  | 11-scf00161 | 11 |
| AX-158036009 | 7 | 66.592 | KV453001.1 | 8088906  | 11-scf00161 | 11 |
| AX-157710550 | 7 | 66.592 | KV453001.1 | 8177488  | 11-scf00161 | 11 |
| AX-158379808 | 7 | 66.592 | KV453001.1 | 8179718  | 11-scf00161 | 11 |
| AX-158036096 | 7 | 66.592 | KV453001.1 | 8190451  | 11-scf00161 | 11 |
| AX-158036321 | 7 | 66.592 | KV453001.1 | 8431785  | 11-scf00161 | 11 |
| AX-158036337 | 7 | 66.592 | KV453001.1 | 8450602  | 11-scf00161 | 11 |
| AX-158033885 | 7 | 66.811 | KV453001.1 | 6230362  | 11-scf00161 | 11 |
| AX-158034436 | 7 | 66.811 | KV453001.1 | 6718486  | 11-scf00161 | 11 |
| AX-158034737 | 7 | 66.811 | KV453001.1 | 7022057  | 11-scf00161 | 11 |
| AX-158034911 | 7 | 66.811 | KV453001.1 | 7166264  | 11-scf00161 | 11 |
| AX-158035633 | 7 | 66.811 | KV453001.1 | 7798518  | 11-scf00161 | 11 |
| AX-158391454 | 7 | 66.811 | KV453001.1 | 7839142  | 11-scf00161 | 11 |
| AX-158035882 | 7 | 66.811 | KV453001.1 | 7966019  | 11-scf00161 | 11 |
| AX-158036079 | 7 | 66.811 | KV453001.1 | 8177807  | 11-scf00161 | 11 |
| AX-158036097 | 7 | 66.811 | KV453001.1 | 8191008  | 11-scf00161 | 11 |
| AX-158036098 | 7 | 66.811 | KV453001.1 | 8193237  | 11-scf00161 | 11 |
| AX-158036100 | 7 | 66.811 | KV453001.1 | 8196064  | 11-scf00161 | 11 |
| AX-158036102 | 7 | 66.811 | KV453001.1 | 8196709  | 11-scf00161 | 11 |
| AX-158036107 | 7 | 66.811 | KV453001.1 | 8200269  | 11-scf00161 | 11 |
| AX-158036113 | 7 | 66.811 | KV453001.1 | 8209377  | 11-scf00161 | 11 |
| AX-158036118 | 7 | 66.811 | KV453001.1 | 8217550  | 11-scf00161 | 11 |
| AX-158036120 | 7 | 66.811 | KV453001.1 | 8220680  | 11-scf00161 | 11 |
| AX-158036127 | 7 | 66.811 | KV453001.1 | 8233292  | 11-scf00161 | 11 |
| AX-158036130 | 7 | 66.811 | KV453001.1 | 8236487  | 11-scf00161 | 11 |
| AX-158036137 | 7 | 66.811 | KV453001.1 | 8238139  | 11-scf00161 | 11 |
| AX-158036141 | 7 | 66.811 | KV453001.1 | 8241194  | 11-scf00161 | 11 |
| AX-158036147 | 7 | 66.811 | KV453001.1 | 8246894  | 11-scf00161 | 11 |
| AX-158036150 | 7 | 66.811 | KV453001.1 | 8249380  | 11-scf00161 | 11 |
| AX-157774291 | 7 | 66.811 | KV453001.1 | 8254256  | 11-scf00161 | 11 |
| AX-158036163 | 7 | 66.811 | KV453001.1 | 8256954  | 11-scf00161 | 11 |
| AX-158036182 | 7 | 66.811 | KV453001.1 | 8274268  | 11-scf00161 | 11 |
| AX-158036184 | 7 | 66.811 | KV453001.1 | 8276929  | 11-scf00161 | 11 |
| AX-158036186 | 7 | 66.811 | KV453001.1 | 8280747  | 11-scf00161 | 11 |
| AX-158036188 | 7 | 66.811 | KV453001.1 | 8281370  | 11-scf00161 | 11 |
| AX-158036201 | 7 | 66.811 | KV453001.1 | 8286874  | 11-scf00161 | 11 |
| AX-158036202 | 7 | 66.811 | KV453001.1 | 8287858  | 11-scf00161 | 11 |
| AX-158036206 | 7 | 66.811 | KV453001.1 | 8290321  | 11-scf00161 | 11 |
| AX-157772108 | 7 | 66.811 | KV453001.1 | 8291504  | 11-scf00161 | 11 |
| AX-158036209 | 7 | 66.811 | KV453001.1 | 8295542  | 11-scf00161 | 11 |

|              |   |        |            |          |             |    |
|--------------|---|--------|------------|----------|-------------|----|
| AX-158036210 | 7 | 66.811 | KV453001.1 | 8297042  | 11-scf00161 | 11 |
| AX-157727509 | 7 | 66.811 | KV453001.1 | 8302785  | 11-scf00161 | 11 |
| AX-158036244 | 7 | 66.811 | KV453001.1 | 8340186  | 11-scf00161 | 11 |
| AX-158036269 | 7 | 66.811 | KV453001.1 | 8381385  | 11-scf00161 | 11 |
| AX-158036278 | 7 | 66.811 | KV453001.1 | 8389562  | 11-scf00161 | 11 |
| AX-157821758 | 7 | 66.811 | KV453001.1 | 8401802  | 11-scf00161 | 11 |
| AX-158036310 | 7 | 66.811 | KV453001.1 | 8420833  | 11-scf00161 | 11 |
| AX-158036438 | 7 | 66.811 | KV453001.1 | 8562160  | 11-scf00161 | 11 |
| AX-157726503 | 7 | 66.811 | KV453001.1 | 9182980  | 11-scf00161 | 11 |
| AX-158379815 | 7 | 66.811 | KV453001.1 | 9486001  | 11-scf00161 | 11 |
| AX-157719739 | 7 | 66.811 | KV453001.1 | 10548600 | 11-scf00161 | 11 |
| AX-158037889 | 7 | 66.811 | KV453001.1 | 10619564 | 11-scf00161 | 11 |
| AX-158038051 | 7 | 66.811 | KV453001.1 | 10749975 | 11-scf00161 | 11 |
| AX-158038100 | 7 | 66.811 | KV453001.1 | 10804663 | 11-scf00161 | 11 |
| AX-158038142 | 7 | 66.811 | KV453001.1 | 10845399 | 11-scf00161 | 11 |
| AX-158038382 | 7 | 66.811 | KV453001.1 | 11143039 | 11-scf00161 | 11 |
| AX-158036168 | 7 | 66.923 | KV453001.1 | 8266159  | 11-scf00161 | 11 |
| AX-158036227 | 7 | 66.923 | KV453001.1 | 8315424  | 11-scf00161 | 11 |
| AX-158034728 | 7 | 67.029 | KV453001.1 | 7015766  | 11-scf00161 | 11 |
| AX-157708243 | 7 | 67.029 | KV453001.1 | 7016836  | 11-scf00161 | 11 |
| AX-158034730 | 7 | 67.029 | KV453001.1 | 7018071  | 11-scf00161 | 11 |
| AX-158034784 | 7 | 67.029 | KV453001.1 | 7047291  | 11-scf00161 | 11 |
| AX-158034786 | 7 | 67.029 | KV453001.1 | 7053456  | 11-scf00161 | 11 |
| AX-158034797 | 7 | 67.029 | KV453001.1 | 7059782  | 11-scf00161 | 11 |
| AX-158034798 | 7 | 67.029 | KV453001.1 | 7060094  | 11-scf00161 | 11 |
| AX-157821691 | 7 | 67.029 | KV453001.1 | 7060515  | 11-scf00161 | 11 |
| AX-158034799 | 7 | 67.029 | KV453001.1 | 7061235  | 11-scf00161 | 11 |
| AX-157821692 | 7 | 67.029 | KV453001.1 | 7063101  | 11-scf00161 | 11 |
| AX-158034802 | 7 | 67.029 | KV453001.1 | 7067766  | 11-scf00161 | 11 |
| AX-158034829 | 7 | 67.029 | KV453001.1 | 7094436  | 11-scf00161 | 11 |
| AX-157870459 | 7 | 67.029 | KV453001.1 | 7097447  | 11-scf00161 | 11 |
| AX-158034836 | 7 | 67.029 | KV453001.1 | 7098428  | 11-scf00161 | 11 |
| AX-158034837 | 7 | 67.029 | KV453001.1 | 7098913  | 11-scf00161 | 11 |
| AX-158034841 | 7 | 67.029 | KV453001.1 | 7100740  | 11-scf00161 | 11 |
| AX-158034844 | 7 | 67.029 | KV453001.1 | 7101581  | 11-scf00161 | 11 |
| AX-158034846 | 7 | 67.029 | KV453001.1 | 7102539  | 11-scf00161 | 11 |
| AX-158034859 | 7 | 67.029 | KV453001.1 | 7115407  | 11-scf00161 | 11 |
| AX-158034866 | 7 | 67.029 | KV453001.1 | 7121927  | 11-scf00161 | 11 |
| AX-158034868 | 7 | 67.029 | KV453001.1 | 7123022  | 11-scf00161 | 11 |
| AX-158034872 | 7 | 67.029 | KV453001.1 | 7125965  | 11-scf00161 | 11 |
| AX-158034873 | 7 | 67.029 | KV453001.1 | 7126889  | 11-scf00161 | 11 |
| AX-158034875 | 7 | 67.029 | KV453001.1 | 7128307  | 11-scf00161 | 11 |
| AX-158034878 | 7 | 67.029 | KV453001.1 | 7130741  | 11-scf00161 | 11 |
| AX-158034880 | 7 | 67.029 | KV453001.1 | 7132207  | 11-scf00161 | 11 |
| AX-158034881 | 7 | 67.029 | KV453001.1 | 7132623  | 11-scf00161 | 11 |
| AX-158391446 | 7 | 67.029 | KV453001.1 | 7134866  | 11-scf00161 | 11 |
| AX-158034886 | 7 | 67.029 | KV453001.1 | 7139036  | 11-scf00161 | 11 |
| AX-158034889 | 7 | 67.029 | KV453001.1 | 7140620  | 11-scf00161 | 11 |
| AX-158034890 | 7 | 67.029 | KV453001.1 | 7141022  | 11-scf00161 | 11 |
| AX-158034893 | 7 | 67.029 | KV453001.1 | 7142883  | 11-scf00161 | 11 |
| AX-158034895 | 7 | 67.029 | KV453001.1 | 7144157  | 11-scf00161 | 11 |



|              |   |        |            |         |             |    |
|--------------|---|--------|------------|---------|-------------|----|
| AX-158034896 | 7 | 67.029 | KV453001.1 | 7144635 | 11-scf00161 | 11 |
| AX-157821701 | 7 | 67.029 | KV453001.1 | 7145624 | 11-scf00161 | 11 |
| AX-158034901 | 7 | 67.029 | KV453001.1 | 7150860 | 11-scf00161 | 11 |
| AX-158034902 | 7 | 67.029 | KV453001.1 | 7153376 | 11-scf00161 | 11 |
| AX-158034905 | 7 | 67.029 | KV453001.1 | 7157997 | 11-scf00161 | 11 |
| AX-158034906 | 7 | 67.029 | KV453001.1 | 7159512 | 11-scf00161 | 11 |
| AX-158034908 | 7 | 67.029 | KV453001.1 | 7160897 | 11-scf00161 | 11 |
| AX-158035742 | 7 | 67.029 | KV453001.1 | 7872204 | 11-scf00161 | 11 |
| AX-158035766 | 7 | 67.029 | KV453001.1 | 7886129 | 11-scf00161 | 11 |
| AX-158035852 | 7 | 67.029 | KV453001.1 | 7943475 | 11-scf00161 | 11 |
| AX-158035860 | 7 | 67.029 | KV453001.1 | 7950645 | 11-scf00161 | 11 |
| AX-158035893 | 7 | 67.029 | KV453001.1 | 7971337 | 11-scf00161 | 11 |
| AX-158035897 | 7 | 67.029 | KV453001.1 | 7973934 | 11-scf00161 | 11 |
| AX-158035901 | 7 | 67.029 | KV453001.1 | 7979077 | 11-scf00161 | 11 |
| AX-158035903 | 7 | 67.029 | KV453001.1 | 7980244 | 11-scf00161 | 11 |
| AX-158035904 | 7 | 67.029 | KV453001.1 | 7980626 | 11-scf00161 | 11 |
| AX-158035905 | 7 | 67.029 | KV453001.1 | 7981143 | 11-scf00161 | 11 |
| AX-157870466 | 7 | 67.029 | KV453001.1 | 7985843 | 11-scf00161 | 11 |
| AX-158035915 | 7 | 67.029 | KV453001.1 | 7991325 | 11-scf00161 | 11 |
| AX-158035917 | 7 | 67.029 | KV453001.1 | 7991961 | 11-scf00161 | 11 |
| AX-157870470 | 7 | 67.029 | KV453001.1 | 7997916 | 11-scf00161 | 11 |
| AX-158035922 | 7 | 67.029 | KV453001.1 | 7998469 | 11-scf00161 | 11 |
| AX-158035926 | 7 | 67.029 | KV453001.1 | 8002611 | 11-scf00161 | 11 |
| AX-158035933 | 7 | 67.029 | KV453001.1 | 8007354 | 11-scf00161 | 11 |
| AX-158035934 | 7 | 67.029 | KV453001.1 | 8012794 | 11-scf00161 | 11 |
| AX-157821743 | 7 | 67.029 | KV453001.1 | 8026195 | 11-scf00161 | 11 |
| AX-157856386 | 7 | 67.029 | KV453001.1 | 8026422 | 11-scf00161 | 11 |
| AX-158035990 | 7 | 67.029 | KV453001.1 | 8067731 | 11-scf00161 | 11 |
| AX-158035993 | 7 | 67.029 | KV453001.1 | 8075537 | 11-scf00161 | 11 |
| AX-158036029 | 7 | 67.029 | KV453001.1 | 8108624 | 11-scf00161 | 11 |
| AX-157821754 | 7 | 67.029 | KV453001.1 | 8170837 | 11-scf00161 | 11 |
| AX-158036074 | 7 | 67.029 | KV453001.1 | 8176048 | 11-scf00161 | 11 |
| AX-158036099 | 7 | 67.029 | KV453001.1 | 8195065 | 11-scf00161 | 11 |
| AX-158036108 | 7 | 67.029 | KV453001.1 | 8200866 | 11-scf00161 | 11 |
| AX-158036129 | 7 | 67.029 | KV453001.1 | 8235784 | 11-scf00161 | 11 |
| AX-158036139 | 7 | 67.029 | KV453001.1 | 8238574 | 11-scf00161 | 11 |
| AX-158036172 | 7 | 67.029 | KV453001.1 | 8268942 | 11-scf00161 | 11 |
| AX-158036173 | 7 | 67.029 | KV453001.1 | 8269152 | 11-scf00161 | 11 |
| AX-158036193 | 7 | 67.029 | KV453001.1 | 8283044 | 11-scf00161 | 11 |
| AX-158036199 | 7 | 67.029 | KV453001.1 | 8285749 | 11-scf00161 | 11 |
| AX-158036207 | 7 | 67.029 | KV453001.1 | 8294323 | 11-scf00161 | 11 |
| AX-158036214 | 7 | 67.029 | KV453001.1 | 8301192 | 11-scf00161 | 11 |
| AX-158036222 | 7 | 67.029 | KV453001.1 | 8307143 | 11-scf00161 | 11 |
| AX-158036232 | 7 | 67.029 | KV453001.1 | 8319904 | 11-scf00161 | 11 |
| AX-158036233 | 7 | 67.029 | KV453001.1 | 8322594 | 11-scf00161 | 11 |
| AX-158036236 | 7 | 67.029 | KV453001.1 | 8328075 | 11-scf00161 | 11 |
| AX-158036240 | 7 | 67.029 | KV453001.1 | 8337861 | 11-scf00161 | 11 |
| AX-158036241 | 7 | 67.029 | KV453001.1 | 8338127 | 11-scf00161 | 11 |
| AX-158036245 | 7 | 67.029 | KV453001.1 | 8341233 | 11-scf00161 | 11 |
| AX-158036247 | 7 | 67.029 | KV453001.1 | 8343451 | 11-scf00161 | 11 |
| AX-158036249 | 7 | 67.029 | KV453001.1 | 8346093 | 11-scf00161 | 11 |

|              |   |        |            |         |             |    |
|--------------|---|--------|------------|---------|-------------|----|
| AX-157756971 | 7 | 67.029 | KV453001.1 | 8351877 | 11-scf00161 | 11 |
| AX-157856390 | 7 | 67.029 | KV453001.1 | 8357443 | 11-scf00161 | 11 |
| AX-157821757 | 7 | 67.029 | KV453001.1 | 8358279 | 11-scf00161 | 11 |
| AX-158036268 | 7 | 67.029 | KV453001.1 | 8377286 | 11-scf00161 | 11 |
| AX-157772398 | 7 | 67.029 | KV453001.1 | 8384194 | 11-scf00161 | 11 |
| AX-158036274 | 7 | 67.029 | KV453001.1 | 8385064 | 11-scf00161 | 11 |
| AX-158036282 | 7 | 67.029 | KV453001.1 | 8395272 | 11-scf00161 | 11 |
| AX-158379809 | 7 | 67.029 | KV453001.1 | 8400471 | 11-scf00161 | 11 |
| AX-158036288 | 7 | 67.029 | KV453001.1 | 8402643 | 11-scf00161 | 11 |
| AX-158036296 | 7 | 67.029 | KV453001.1 | 8405258 | 11-scf00161 | 11 |
| AX-158036299 | 7 | 67.029 | KV453001.1 | 8412606 | 11-scf00161 | 11 |
| AX-158036313 | 7 | 67.029 | KV453001.1 | 8425364 | 11-scf00161 | 11 |
| AX-158036317 | 7 | 67.029 | KV453001.1 | 8428541 | 11-scf00161 | 11 |
| AX-158036318 | 7 | 67.029 | KV453001.1 | 8429395 | 11-scf00161 | 11 |
| AX-158036320 | 7 | 67.029 | KV453001.1 | 8429848 | 11-scf00161 | 11 |
| AX-158036347 | 7 | 67.029 | KV453001.1 | 8464710 | 11-scf00161 | 11 |
| AX-158036350 | 7 | 67.029 | KV453001.1 | 8467327 | 11-scf00161 | 11 |
| AX-158036377 | 7 | 67.029 | KV453001.1 | 8494938 | 11-scf00161 | 11 |
| AX-158036412 | 7 | 67.029 | KV453001.1 | 8535164 | 11-scf00161 | 11 |
| AX-157771595 | 7 | 67.029 | KV453001.1 | 8926859 | 11-scf00161 | 11 |
| AX-157821821 | 7 | 67.029 | KV453001.1 | 9293154 | 11-scf00161 | 11 |
| AX-158036335 | 7 | 67.082 | KV453001.1 | 8449998 | 11-scf00161 | 11 |
| AX-158036322 | 7 | 67.138 | KV453001.1 | 8435666 | 11-scf00161 | 11 |
| AX-157821759 | 7 | 67.138 | KV453001.1 | 8457151 | 11-scf00161 | 11 |
| AX-157821760 | 7 | 67.138 | KV453001.1 | 8457201 | 11-scf00161 | 11 |
| AX-158036235 | 7 | 67.248 | KV453001.1 | 8327845 | 11-scf00161 | 11 |
| AX-158036357 | 7 | 67.248 | KV453001.1 | 8476977 | 11-scf00161 | 11 |
| AX-158036360 | 7 | 67.248 | KV453001.1 | 8478072 | 11-scf00161 | 11 |
| AX-158036362 | 7 | 67.248 | KV453001.1 | 8479536 | 11-scf00161 | 11 |
| AX-158036364 | 7 | 67.248 | KV453001.1 | 8480919 | 11-scf00161 | 11 |
| AX-158036366 | 7 | 67.248 | KV453001.1 | 8484787 | 11-scf00161 | 11 |
| AX-158036371 | 7 | 67.248 | KV453001.1 | 8487036 | 11-scf00161 | 11 |
| AX-158036372 | 7 | 67.248 | KV453001.1 | 8488063 | 11-scf00161 | 11 |
| AX-158036374 | 7 | 67.248 | KV453001.1 | 8489341 | 11-scf00161 | 11 |
| AX-158036375 | 7 | 67.248 | KV453001.1 | 8490822 | 11-scf00161 | 11 |
| AX-158036376 | 7 | 67.248 | KV453001.1 | 8492208 | 11-scf00161 | 11 |
| AX-158408386 | 7 | 67.248 | KV453001.1 | 8497791 | 11-scf00161 | 11 |
| AX-158036380 | 7 | 67.248 | KV453001.1 | 8498480 | 11-scf00161 | 11 |
| AX-157740488 | 7 | 67.248 | KV453001.1 | 8499800 | 11-scf00161 | 11 |
| AX-158036385 | 7 | 67.248 | KV453001.1 | 8502094 | 11-scf00161 | 11 |
| AX-158036388 | 7 | 67.248 | KV453001.1 | 8506938 | 11-scf00161 | 11 |
| AX-157726165 | 7 | 67.248 | KV453001.1 | 8508658 | 11-scf00161 | 11 |
| AX-158036390 | 7 | 67.248 | KV453001.1 | 8512109 | 11-scf00161 | 11 |
| AX-158036391 | 7 | 67.248 | KV453001.1 | 8513070 | 11-scf00161 | 11 |
| AX-158036394 | 7 | 67.248 | KV453001.1 | 8513750 | 11-scf00161 | 11 |
| AX-157771591 | 7 | 67.248 | KV453001.1 | 8522055 | 11-scf00161 | 11 |
| AX-158036404 | 7 | 67.248 | KV453001.1 | 8525258 | 11-scf00161 | 11 |
| AX-157821762 | 7 | 67.248 | KV453001.1 | 8526203 | 11-scf00161 | 11 |
| AX-158036411 | 7 | 67.248 | KV453001.1 | 8534785 | 11-scf00161 | 11 |
| AX-158036418 | 7 | 67.248 | KV453001.1 | 8540220 | 11-scf00161 | 11 |
| AX-158036422 | 7 | 67.248 | KV453001.1 | 8551195 | 11-scf00161 | 11 |

|              |   |        |            |          |             |    |
|--------------|---|--------|------------|----------|-------------|----|
| AX-158036426 | 7 | 67.248 | KV453001.1 | 8553188  | 11-scf00161 | 11 |
| AX-158036427 | 7 | 67.248 | KV453001.1 | 8553919  | 11-scf00161 | 11 |
| AX-158036428 | 7 | 67.248 | KV453001.1 | 8554311  | 11-scf00161 | 11 |
| AX-158036432 | 7 | 67.248 | KV453001.1 | 8556962  | 11-scf00161 | 11 |
| AX-158036497 | 7 | 67.248 | KV453001.1 | 8650618  | 11-scf00161 | 11 |
| AX-158036508 | 7 | 67.248 | KV453001.1 | 8669773  | 11-scf00161 | 11 |
| AX-158036529 | 7 | 67.248 | KV453001.1 | 8696036  | 11-scf00161 | 11 |
| AX-158036579 | 7 | 67.248 | KV453001.1 | 8741076  | 11-scf00161 | 11 |
| AX-158036584 | 7 | 67.248 | KV453001.1 | 8742692  | 11-scf00161 | 11 |
| AX-157821785 | 7 | 67.248 | KV453001.1 | 8751281  | 11-scf00161 | 11 |
| AX-158036594 | 7 | 67.248 | KV453001.1 | 8753044  | 11-scf00161 | 11 |
| AX-158036627 | 7 | 67.248 | KV453001.1 | 8791478  | 11-scf00161 | 11 |
| AX-158036650 | 7 | 67.248 | KV453001.1 | 8817895  | 11-scf00161 | 11 |
| AX-158036651 | 7 | 67.248 | KV453001.1 | 8818332  | 11-scf00161 | 11 |
| AX-158036653 | 7 | 67.248 | KV453001.1 | 8818715  | 11-scf00161 | 11 |
| AX-158036691 | 7 | 67.248 | KV453001.1 | 8860091  | 11-scf00161 | 11 |
| AX-158036783 | 7 | 67.248 | KV453001.1 | 8956568  | 11-scf00161 | 11 |
| AX-158408392 | 7 | 67.248 | KV453001.1 | 8956865  | 11-scf00161 | 11 |
| AX-158036791 | 7 | 67.248 | KV453001.1 | 8965622  | 11-scf00161 | 11 |
| AX-158038046 | 7 | 67.248 | KV453001.1 | 10748679 | 11-scf00161 | 11 |
| AX-157742054 | 7 | 67.338 | KV453001.1 | 8555592  | 11-scf00161 | 11 |
| AX-158036820 | 7 | 67.338 | KV453001.1 | 8997818  | 11-scf00161 | 11 |
| AX-157755516 | 7 | 67.338 | KV453001.1 | 10397502 | 11-scf00161 | 11 |
| AX-158036441 | 7 | 67.412 | KV453001.1 | 8568814  | 11-scf00161 | 11 |
| AX-158036446 | 7 | 67.412 | KV453001.1 | 8570895  | 11-scf00161 | 11 |
| AX-158036620 | 7 | 67.412 | KV453001.1 | 8786693  | 11-scf00161 | 11 |
| AX-158036648 | 7 | 67.412 | KV453001.1 | 8816094  | 11-scf00161 | 11 |
| AX-158036453 | 7 | 67.469 | KV453001.1 | 8577543  | 11-scf00161 | 11 |
| AX-158034856 | 7 | 67.575 | KV453001.1 | 7113737  | 11-scf00161 | 11 |
| AX-158035829 | 7 | 67.575 | KV453001.1 | 7926761  | 11-scf00161 | 11 |
| AX-158035832 | 7 | 67.575 | KV453001.1 | 7928602  | 11-scf00161 | 11 |
| AX-158035944 | 7 | 67.575 | KV453001.1 | 8032291  | 11-scf00161 | 11 |
| AX-158035945 | 7 | 67.575 | KV453001.1 | 8032797  | 11-scf00161 | 11 |
| AX-157752997 | 7 | 67.575 | KV453001.1 | 8072671  | 11-scf00161 | 11 |
| AX-158035999 | 7 | 67.575 | KV453001.1 | 8082627  | 11-scf00161 | 11 |
| AX-158036027 | 7 | 67.575 | KV453001.1 | 8107778  | 11-scf00161 | 11 |
| AX-158036109 | 7 | 67.575 | KV453001.1 | 8202109  | 11-scf00161 | 11 |
| AX-158036160 | 7 | 67.575 | KV453001.1 | 8255444  | 11-scf00161 | 11 |
| AX-158036255 | 7 | 67.575 | KV453001.1 | 8355731  | 11-scf00161 | 11 |
| AX-158036294 | 7 | 67.575 | KV453001.1 | 8404390  | 11-scf00161 | 11 |
| AX-158036359 | 7 | 67.575 | KV453001.1 | 8477507  | 11-scf00161 | 11 |
| AX-158036399 | 7 | 67.575 | KV453001.1 | 8518238  | 11-scf00161 | 11 |
| AX-158036401 | 7 | 67.575 | KV453001.1 | 8518812  | 11-scf00161 | 11 |
| AX-157821766 | 7 | 67.575 | KV453001.1 | 8560214  | 11-scf00161 | 11 |
| AX-157773431 | 7 | 67.575 | KV453001.1 | 8574956  | 11-scf00161 | 11 |
| AX-158036451 | 7 | 67.575 | KV453001.1 | 8576940  | 11-scf00161 | 11 |
| AX-158036457 | 7 | 67.575 | KV453001.1 | 8584992  | 11-scf00161 | 11 |
| AX-158379810 | 7 | 67.575 | KV453001.1 | 8585558  | 11-scf00161 | 11 |
| AX-158036464 | 7 | 67.575 | KV453001.1 | 8597814  | 11-scf00161 | 11 |
| AX-158036465 | 7 | 67.575 | KV453001.1 | 8598698  | 11-scf00161 | 11 |
| AX-157821771 | 7 | 67.575 | KV453001.1 | 8601257  | 11-scf00161 | 11 |

|              |   |        |            |         |             |    |
|--------------|---|--------|------------|---------|-------------|----|
| AX-158036469 | 7 | 67.575 | KV453001.1 | 8601922 | 11-scf00161 | 11 |
| AX-157821773 | 7 | 67.575 | KV453001.1 | 8603779 | 11-scf00161 | 11 |
| AX-158036472 | 7 | 67.575 | KV453001.1 | 8604956 | 11-scf00161 | 11 |
| AX-158036473 | 7 | 67.575 | KV453001.1 | 8605764 | 11-scf00161 | 11 |
| AX-158036474 | 7 | 67.575 | KV453001.1 | 8610222 | 11-scf00161 | 11 |
| AX-158036477 | 7 | 67.575 | KV453001.1 | 8613347 | 11-scf00161 | 11 |
| AX-158036480 | 7 | 67.575 | KV453001.1 | 8614264 | 11-scf00161 | 11 |
| AX-157821776 | 7 | 67.575 | KV453001.1 | 8615349 | 11-scf00161 | 11 |
| AX-158036486 | 7 | 67.575 | KV453001.1 | 8627308 | 11-scf00161 | 11 |
| AX-158036488 | 7 | 67.575 | KV453001.1 | 8628378 | 11-scf00161 | 11 |
| AX-157821779 | 7 | 67.575 | KV453001.1 | 8631716 | 11-scf00161 | 11 |
| AX-158036491 | 7 | 67.575 | KV453001.1 | 8640216 | 11-scf00161 | 11 |
| AX-157744317 | 7 | 67.575 | KV453001.1 | 8650034 | 11-scf00161 | 11 |
| AX-158036502 | 7 | 67.575 | KV453001.1 | 8664150 | 11-scf00161 | 11 |
| AX-158036506 | 7 | 67.575 | KV453001.1 | 8669272 | 11-scf00161 | 11 |
| AX-158036510 | 7 | 67.575 | KV453001.1 | 8673169 | 11-scf00161 | 11 |
| AX-158036512 | 7 | 67.575 | KV453001.1 | 8674267 | 11-scf00161 | 11 |
| AX-158036513 | 7 | 67.575 | KV453001.1 | 8679190 | 11-scf00161 | 11 |
| AX-158036518 | 7 | 67.575 | KV453001.1 | 8683159 | 11-scf00161 | 11 |
| AX-158036523 | 7 | 67.575 | KV453001.1 | 8689164 | 11-scf00161 | 11 |
| AX-158036524 | 7 | 67.575 | KV453001.1 | 8691612 | 11-scf00161 | 11 |
| AX-158036525 | 7 | 67.575 | KV453001.1 | 8692799 | 11-scf00161 | 11 |
| AX-158036532 | 7 | 67.575 | KV453001.1 | 8696625 | 11-scf00161 | 11 |
| AX-158036533 | 7 | 67.575 | KV453001.1 | 8697419 | 11-scf00161 | 11 |
| AX-158036536 | 7 | 67.575 | KV453001.1 | 8698192 | 11-scf00161 | 11 |
| AX-158036538 | 7 | 67.575 | KV453001.1 | 8699098 | 11-scf00161 | 11 |
| AX-158036539 | 7 | 67.575 | KV453001.1 | 8701773 | 11-scf00161 | 11 |
| AX-158036540 | 7 | 67.575 | KV453001.1 | 8701986 | 11-scf00161 | 11 |
| AX-158036543 | 7 | 67.575 | KV453001.1 | 8703630 | 11-scf00161 | 11 |
| AX-158036544 | 7 | 67.575 | KV453001.1 | 8704069 | 11-scf00161 | 11 |
| AX-158036547 | 7 | 67.575 | KV453001.1 | 8710497 | 11-scf00161 | 11 |
| AX-158036548 | 7 | 67.575 | KV453001.1 | 8714481 | 11-scf00161 | 11 |
| AX-158422323 | 7 | 67.575 | KV453001.1 | 8732435 | 11-scf00161 | 11 |
| AX-158036570 | 7 | 67.575 | KV453001.1 | 8733557 | 11-scf00161 | 11 |
| AX-157821784 | 7 | 67.575 | KV453001.1 | 8735070 | 11-scf00161 | 11 |
| AX-158036572 | 7 | 67.575 | KV453001.1 | 8735299 | 11-scf00161 | 11 |
| AX-158036575 | 7 | 67.575 | KV453001.1 | 8738220 | 11-scf00161 | 11 |
| AX-158036577 | 7 | 67.575 | KV453001.1 | 8739614 | 11-scf00161 | 11 |
| AX-158408390 | 7 | 67.575 | KV453001.1 | 8742623 | 11-scf00161 | 11 |
| AX-158036585 | 7 | 67.575 | KV453001.1 | 8743299 | 11-scf00161 | 11 |
| AX-158036588 | 7 | 67.575 | KV453001.1 | 8748539 | 11-scf00161 | 11 |
| AX-158036597 | 7 | 67.575 | KV453001.1 | 8755108 | 11-scf00161 | 11 |
| AX-158036605 | 7 | 67.575 | KV453001.1 | 8766113 | 11-scf00161 | 11 |
| AX-157726150 | 7 | 67.575 | KV453001.1 | 8770543 | 11-scf00161 | 11 |
| AX-157724485 | 7 | 67.575 | KV453001.1 | 8772736 | 11-scf00161 | 11 |
| AX-158036610 | 7 | 67.575 | KV453001.1 | 8775509 | 11-scf00161 | 11 |
| AX-158036613 | 7 | 67.575 | KV453001.1 | 8777688 | 11-scf00161 | 11 |
| AX-158036616 | 7 | 67.575 | KV453001.1 | 8782209 | 11-scf00161 | 11 |
| AX-158036617 | 7 | 67.575 | KV453001.1 | 8783108 | 11-scf00161 | 11 |
| AX-158036621 | 7 | 67.575 | KV453001.1 | 8787577 | 11-scf00161 | 11 |
| AX-158036622 | 7 | 67.575 | KV453001.1 | 8789003 | 11-scf00161 | 11 |

|              |   |        |            |          |             |    |
|--------------|---|--------|------------|----------|-------------|----|
| AX-158036628 | 7 | 67.575 | KV453001.1 | 8793730  | 11-scf00161 | 11 |
| AX-158036633 | 7 | 67.575 | KV453001.1 | 8797948  | 11-scf00161 | 11 |
| AX-158036634 | 7 | 67.575 | KV453001.1 | 8798684  | 11-scf00161 | 11 |
| AX-158036635 | 7 | 67.575 | KV453001.1 | 8800122  | 11-scf00161 | 11 |
| AX-158036636 | 7 | 67.575 | KV453001.1 | 8800546  | 11-scf00161 | 11 |
| AX-157725155 | 7 | 67.575 | KV453001.1 | 8823645  | 11-scf00161 | 11 |
| AX-158036664 | 7 | 67.575 | KV453001.1 | 8828222  | 11-scf00161 | 11 |
| AX-158036667 | 7 | 67.575 | KV453001.1 | 8829952  | 11-scf00161 | 11 |
| AX-158036670 | 7 | 67.575 | KV453001.1 | 8831748  | 11-scf00161 | 11 |
| AX-158036671 | 7 | 67.575 | KV453001.1 | 8832437  | 11-scf00161 | 11 |
| AX-158036672 | 7 | 67.575 | KV453001.1 | 8833045  | 11-scf00161 | 11 |
| AX-158036673 | 7 | 67.575 | KV453001.1 | 8834547  | 11-scf00161 | 11 |
| AX-158036678 | 7 | 67.575 | KV453001.1 | 8839388  | 11-scf00161 | 11 |
| AX-158036681 | 7 | 67.575 | KV453001.1 | 8842446  | 11-scf00161 | 11 |
| AX-158036682 | 7 | 67.575 | KV453001.1 | 8845489  | 11-scf00161 | 11 |
| AX-158383880 | 7 | 67.575 | KV453001.1 | 8862591  | 11-scf00161 | 11 |
| AX-158036695 | 7 | 67.575 | KV453001.1 | 8867295  | 11-scf00161 | 11 |
| AX-158036696 | 7 | 67.575 | KV453001.1 | 8868909  | 11-scf00161 | 11 |
| AX-158036697 | 7 | 67.575 | KV453001.1 | 8870446  | 11-scf00161 | 11 |
| AX-157821790 | 7 | 67.575 | KV453001.1 | 8872100  | 11-scf00161 | 11 |
| AX-158036713 | 7 | 67.575 | KV453001.1 | 8882372  | 11-scf00161 | 11 |
| AX-158036718 | 7 | 67.575 | KV453001.1 | 8884389  | 11-scf00161 | 11 |
| AX-158036739 | 7 | 67.575 | KV453001.1 | 8908164  | 11-scf00161 | 11 |
| AX-157758502 | 7 | 67.575 | KV453001.1 | 8914003  | 11-scf00161 | 11 |
| AX-157749820 | 7 | 67.575 | KV453001.1 | 8931620  | 11-scf00161 | 11 |
| AX-158036762 | 7 | 67.575 | KV453001.1 | 8935742  | 11-scf00161 | 11 |
| AX-158036767 | 7 | 67.575 | KV453001.1 | 8937911  | 11-scf00161 | 11 |
| AX-158036769 | 7 | 67.575 | KV453001.1 | 8942141  | 11-scf00161 | 11 |
| AX-158036772 | 7 | 67.575 | KV453001.1 | 8945611  | 11-scf00161 | 11 |
| AX-158406270 | 7 | 67.575 | KV453001.1 | 8957132  | 11-scf00161 | 11 |
| AX-158036829 | 7 | 67.575 | KV453001.1 | 9010535  | 11-scf00161 | 11 |
| AX-158036830 | 7 | 67.575 | KV453001.1 | 9011009  | 11-scf00161 | 11 |
| AX-158037003 | 7 | 67.575 | KV453001.1 | 9251119  | 11-scf00161 | 11 |
| AX-158037004 | 7 | 67.575 | KV453001.1 | 9251468  | 11-scf00161 | 11 |
| AX-157727762 | 7 | 67.575 | KV453001.1 | 9309529  | 11-scf00161 | 11 |
| AX-158037641 | 7 | 67.575 | KV453001.1 | 10318833 | 11-scf00161 | 11 |
| AX-158037643 | 7 | 67.575 | KV453001.1 | 10321468 | 11-scf00161 | 11 |
| AX-157821903 | 7 | 67.575 | KV453001.1 | 10808391 | 11-scf00161 | 11 |
| AX-158038125 | 7 | 67.575 | KV453001.1 | 10835560 | 11-scf00161 | 11 |
| AX-158383895 | 7 | 67.575 | KV453001.1 | 10987584 | 11-scf00161 | 11 |
| AX-158379819 | 7 | 67.575 | KV453001.1 | 11038761 | 11-scf00161 | 11 |
| AX-158036676 | 7 | 67.6   | KV453001.1 | 8836753  | 11-scf00161 | 11 |
| AX-158034855 | 7 | 67.626 | KV453001.1 | 7113245  | 11-scf00161 | 11 |
| AX-158408367 | 7 | 67.626 | KV453001.1 | 7409158  | 11-scf00161 | 11 |
| AX-158036694 | 7 | 67.626 | KV453001.1 | 8864731  | 11-scf00161 | 11 |
| AX-157739526 | 7 | 67.626 | KV453001.1 | 8865444  | 11-scf00161 | 11 |
| AX-158036724 | 7 | 67.626 | KV453001.1 | 8890530  | 11-scf00161 | 11 |
| AX-158036765 | 7 | 67.626 | KV453001.1 | 8936997  | 11-scf00161 | 11 |
| AX-158036902 | 7 | 67.626 | KV453001.1 | 9142637  | 11-scf00161 | 11 |
| AX-158037158 | 7 | 67.626 | KV453001.1 | 9478404  | 11-scf00161 | 11 |
| AX-158037733 | 7 | 67.626 | KV453001.1 | 10403940 | 11-scf00161 | 11 |

|              |   |        |            |          |             |    |
|--------------|---|--------|------------|----------|-------------|----|
| AX-158037914 | 7 | 67.626 | KV453001.1 | 10638781 | 11-scf00161 | 11 |
| AX-158036700 | 7 | 67.645 | KV453001.1 | 8873454  | 11-scf00161 | 11 |
| AX-158036721 | 7 | 67.645 | KV453001.1 | 8889205  | 11-scf00161 | 11 |
| AX-158037953 | 7 | 67.645 | KV453001.1 | 10658100 | 11-scf00161 | 11 |
| AX-158036707 | 7 | 67.663 | KV453001.1 | 8878955  | 11-scf00161 | 11 |
| AX-158036437 | 7 | 67.685 | KV453001.1 | 8559361  | 11-scf00161 | 11 |
| AX-157752254 | 7 | 67.685 | KV453001.1 | 8565126  | 11-scf00161 | 11 |
| AX-158036504 | 7 | 67.685 | KV453001.1 | 8665770  | 11-scf00161 | 11 |
| AX-157821783 | 7 | 67.685 | KV453001.1 | 8667251  | 11-scf00161 | 11 |
| AX-158036509 | 7 | 67.685 | KV453001.1 | 8672935  | 11-scf00161 | 11 |
| AX-158036581 | 7 | 67.685 | KV453001.1 | 8741808  | 11-scf00161 | 11 |
| AX-158036607 | 7 | 67.685 | KV453001.1 | 8767077  | 11-scf00161 | 11 |
| AX-158036701 | 7 | 67.685 | KV453001.1 | 8874066  | 11-scf00161 | 11 |
| AX-158036714 | 7 | 67.685 | KV453001.1 | 8883503  | 11-scf00161 | 11 |
| AX-158036719 | 7 | 67.685 | KV453001.1 | 8885689  | 11-scf00161 | 11 |
| AX-158036722 | 7 | 67.685 | KV453001.1 | 8889780  | 11-scf00161 | 11 |
| AX-158036725 | 7 | 67.685 | KV453001.1 | 8891312  | 11-scf00161 | 11 |
| AX-158036727 | 7 | 67.685 | KV453001.1 | 8895916  | 11-scf00161 | 11 |
| AX-158036730 | 7 | 67.685 | KV453001.1 | 8900686  | 11-scf00161 | 11 |
| AX-157821791 | 7 | 67.685 | KV453001.1 | 8902197  | 11-scf00161 | 11 |
| AX-158036744 | 7 | 67.685 | KV453001.1 | 8915821  | 11-scf00161 | 11 |
| AX-158036745 | 7 | 67.685 | KV453001.1 | 8916841  | 11-scf00161 | 11 |
| AX-158036748 | 7 | 67.685 | KV453001.1 | 8923141  | 11-scf00161 | 11 |
| AX-157821796 | 7 | 67.685 | KV453001.1 | 8923410  | 11-scf00161 | 11 |
| AX-158036760 | 7 | 67.685 | KV453001.1 | 8934150  | 11-scf00161 | 11 |
| AX-157694404 | 7 | 67.685 | KV453001.1 | 8947828  | 11-scf00161 | 11 |
| AX-158036775 | 7 | 67.685 | KV453001.1 | 8949166  | 11-scf00161 | 11 |
| AX-158036777 | 7 | 67.685 | KV453001.1 | 8949540  | 11-scf00161 | 11 |
| AX-158406271 | 7 | 67.685 | KV453001.1 | 8957438  | 11-scf00161 | 11 |
| AX-158038139 | 7 | 67.685 | KV453001.1 | 10843126 | 11-scf00161 | 11 |
| AX-158036780 | 7 | 67.903 | KV453001.1 | 8953393  | 11-scf00161 | 11 |
| AX-158408391 | 7 | 67.903 | KV453001.1 | 8956779  | 11-scf00161 | 11 |
| AX-158383881 | 7 | 68.025 | KV453001.1 | 8966952  | 11-scf00161 | 11 |
| AX-158036302 | 7 | 68.122 | KV453001.1 | 8413853  | 11-scf00161 | 11 |
| AX-158036554 | 7 | 68.122 | KV453001.1 | 8722382  | 11-scf00161 | 11 |
| AX-158036557 | 7 | 68.122 | KV453001.1 | 8723350  | 11-scf00161 | 11 |
| AX-158036560 | 7 | 68.122 | KV453001.1 | 8723956  | 11-scf00161 | 11 |
| AX-158036591 | 7 | 68.122 | KV453001.1 | 8751700  | 11-scf00161 | 11 |
| AX-158036592 | 7 | 68.122 | KV453001.1 | 8752443  | 11-scf00161 | 11 |
| AX-158036789 | 7 | 68.122 | KV453001.1 | 8965254  | 11-scf00161 | 11 |
| AX-158036794 | 7 | 68.122 | KV453001.1 | 8968565  | 11-scf00161 | 11 |
| AX-158036795 | 7 | 68.122 | KV453001.1 | 8969747  | 11-scf00161 | 11 |
| AX-158036797 | 7 | 68.122 | KV453001.1 | 8970370  | 11-scf00161 | 11 |
| AX-158036798 | 7 | 68.122 | KV453001.1 | 8973103  | 11-scf00161 | 11 |
| AX-158036808 | 7 | 68.122 | KV453001.1 | 8986568  | 11-scf00161 | 11 |
| AX-158036814 | 7 | 68.122 | KV453001.1 | 8990422  | 11-scf00161 | 11 |
| AX-157716591 | 7 | 68.122 | KV453001.1 | 9000954  | 11-scf00161 | 11 |
| AX-158036822 | 7 | 68.122 | KV453001.1 | 9001888  | 11-scf00161 | 11 |
| AX-158036825 | 7 | 68.122 | KV453001.1 | 9004380  | 11-scf00161 | 11 |
| AX-158036826 | 7 | 68.122 | KV453001.1 | 9009388  | 11-scf00161 | 11 |
| AX-158037787 | 7 | 68.122 | KV453001.1 | 10490443 | 11-scf00161 | 11 |

|              |   |        |            |          |             |    |
|--------------|---|--------|------------|----------|-------------|----|
| AX-158036827 | 7 | 68.219 | KV453001.1 | 9009765  | 11-scf00161 | 11 |
| AX-158036845 | 7 | 68.219 | KV453001.1 | 9033731  | 11-scf00161 | 11 |
| AX-157725288 | 7 | 68.341 | KV453001.1 | 9015866  | 11-scf00161 | 11 |
| AX-158036835 | 7 | 68.418 | KV453001.1 | 9021199  | 11-scf00161 | 11 |
| AX-157821802 | 7 | 68.56  | KV453001.1 | 9023535  | 11-scf00161 | 11 |
| AX-158036839 | 7 | 68.56  | KV453001.1 | 9025847  | 11-scf00161 | 11 |
| AX-158036842 | 7 | 68.704 | KV453001.1 | 9028612  | 11-scf00161 | 11 |
| AX-158036867 | 7 | 69.939 | KV453001.1 | 9060116  | 11-scf00161 | 11 |
| AX-157716310 | 7 | 69.944 | KV453001.1 | 9072094  | 11-scf00161 | 11 |
| AX-158036873 | 7 | 69.953 | KV453001.1 | 9072985  | 11-scf00161 | 11 |
| AX-158036874 | 7 | 69.995 | KV453001.1 | 9073565  | 11-scf00161 | 11 |
| AX-157722713 | 7 | 70.032 | KV453001.1 | 9077872  | 11-scf00161 | 11 |
| AX-157775602 | 7 | 70.278 | KV453001.1 | 9081237  | 11-scf00161 | 11 |
| AX-158036884 | 7 | 70.279 | KV453001.1 | 9083204  | 11-scf00161 | 11 |
| AX-157715278 | 7 | 70.42  | KV453001.1 | 9085566  | 11-scf00161 | 11 |
| AX-158036886 | 7 | 70.42  | KV453001.1 | 9093269  | 11-scf00161 | 11 |
| AX-158036887 | 7 | 70.42  | KV453001.1 | 9094718  | 11-scf00161 | 11 |
| AX-157718705 | 7 | 70.428 | KV453001.1 | 9099170  | 11-scf00161 | 11 |
| AX-158036888 | 7 | 70.649 | KV453001.1 | 9101009  | 11-scf00161 | 11 |
| AX-158036890 | 7 | 70.794 | KV453001.1 | 9109337  | 11-scf00161 | 11 |
| AX-157856391 | 7 | 70.883 | KV453001.1 | 9110894  | 11-scf00161 | 11 |
| AX-158036892 | 7 | 70.883 | KV453001.1 | 9111905  | 11-scf00161 | 11 |
| AX-158036904 | 7 | 71.186 | KV453001.1 | 9143529  | 11-scf00161 | 11 |
| AX-158036905 | 7 | 71.186 | KV453001.1 | 9144118  | 11-scf00161 | 11 |
| AX-158036908 | 7 | 71.186 | KV453001.1 | 9149578  | 11-scf00161 | 11 |
| AX-158036909 | 7 | 71.186 | KV453001.1 | 9151142  | 11-scf00161 | 11 |
| AX-157724982 | 7 | 71.186 | KV453001.1 | 9154736  | 11-scf00161 | 11 |
| AX-158036912 | 7 | 71.186 | KV453001.1 | 9156802  | 11-scf00161 | 11 |
| AX-158036915 | 7 | 71.186 | KV453001.1 | 9158204  | 11-scf00161 | 11 |
| AX-158036917 | 7 | 71.186 | KV453001.1 | 9158975  | 11-scf00161 | 11 |
| AX-158036918 | 7 | 71.186 | KV453001.1 | 9159250  | 11-scf00161 | 11 |
| AX-158036920 | 7 | 71.186 | KV453001.1 | 9159950  | 11-scf00161 | 11 |
| AX-157870472 | 7 | 71.186 | KV453001.1 | 9175869  | 11-scf00161 | 11 |
| AX-158036947 | 7 | 71.186 | KV453001.1 | 9199387  | 11-scf00161 | 11 |
| AX-158036949 | 7 | 71.186 | KV453001.1 | 9200682  | 11-scf00161 | 11 |
| AX-157821824 | 7 | 71.186 | KV453001.1 | 9324465  | 11-scf00161 | 11 |
| AX-157821854 | 7 | 71.186 | KV453001.1 | 10194732 | 11-scf00161 | 11 |
| AX-158037548 | 7 | 71.186 | KV453001.1 | 10194925 | 11-scf00161 | 11 |
| AX-158037604 | 7 | 71.186 | KV453001.1 | 10267900 | 11-scf00161 | 11 |
| AX-158037605 | 7 | 71.186 | KV453001.1 | 10268306 | 11-scf00161 | 11 |
| AX-158037708 | 7 | 71.186 | KV453001.1 | 10382876 | 11-scf00161 | 11 |
| AX-158037709 | 7 | 71.186 | KV453001.1 | 10383797 | 11-scf00161 | 11 |
| AX-158037711 | 7 | 71.186 | KV453001.1 | 10384729 | 11-scf00161 | 11 |
| AX-158037860 | 7 | 71.186 | KV453001.1 | 10587679 | 11-scf00161 | 11 |
| AX-158408440 | 7 | 71.186 | KV453001.1 | 11096636 | 11-scf00161 | 11 |
| AX-158034435 | 7 | 71.295 | KV453001.1 | 6717767  | 11-scf00161 | 11 |
| AX-158036085 | 7 | 71.295 | KV453001.1 | 8180165  | 11-scf00161 | 11 |
| AX-158036885 | 7 | 71.295 | KV453001.1 | 9091333  | 11-scf00161 | 11 |
| AX-158036889 | 7 | 71.295 | KV453001.1 | 9104857  | 11-scf00161 | 11 |
| AX-158036938 | 7 | 71.295 | KV453001.1 | 9180694  | 11-scf00161 | 11 |
| AX-158036944 | 7 | 71.295 | KV453001.1 | 9191399  | 11-scf00161 | 11 |

|              |   |        |            |         |             |    |
|--------------|---|--------|------------|---------|-------------|----|
| AX-158036952 | 7 | 71.295 | KV453001.1 | 9201942 | 11-scf00161 | 11 |
| AX-158036953 | 7 | 71.295 | KV453001.1 | 9202603 | 11-scf00161 | 11 |
| AX-158036954 | 7 | 71.295 | KV453001.1 | 9203607 | 11-scf00161 | 11 |
| AX-158036955 | 7 | 71.295 | KV453001.1 | 9204886 | 11-scf00161 | 11 |
| AX-157821810 | 7 | 71.295 | KV453001.1 | 9206140 | 11-scf00161 | 11 |
| AX-158036957 | 7 | 71.295 | KV453001.1 | 9206249 | 11-scf00161 | 11 |
| AX-158036958 | 7 | 71.295 | KV453001.1 | 9206678 | 11-scf00161 | 11 |
| AX-158036962 | 7 | 71.295 | KV453001.1 | 9210224 | 11-scf00161 | 11 |
| AX-158036968 | 7 | 71.295 | KV453001.1 | 9212442 | 11-scf00161 | 11 |
| AX-157821811 | 7 | 71.295 | KV453001.1 | 9213219 | 11-scf00161 | 11 |
| AX-158036974 | 7 | 71.295 | KV453001.1 | 9220908 | 11-scf00161 | 11 |
| AX-158036977 | 7 | 71.295 | KV453001.1 | 9222594 | 11-scf00161 | 11 |
| AX-158036980 | 7 | 71.295 | KV453001.1 | 9223450 | 11-scf00161 | 11 |
| AX-158036981 | 7 | 71.295 | KV453001.1 | 9224741 | 11-scf00161 | 11 |
| AX-158036984 | 7 | 71.295 | KV453001.1 | 9228810 | 11-scf00161 | 11 |
| AX-157742050 | 7 | 71.295 | KV453001.1 | 9237627 | 11-scf00161 | 11 |
| AX-158036995 | 7 | 71.295 | KV453001.1 | 9245323 | 11-scf00161 | 11 |
| AX-158036996 | 7 | 71.295 | KV453001.1 | 9246122 | 11-scf00161 | 11 |
| AX-158036998 | 7 | 71.295 | KV453001.1 | 9247024 | 11-scf00161 | 11 |
| AX-158037002 | 7 | 71.295 | KV453001.1 | 9250174 | 11-scf00161 | 11 |
| AX-158037007 | 7 | 71.295 | KV453001.1 | 9252506 | 11-scf00161 | 11 |
| AX-158037011 | 7 | 71.295 | KV453001.1 | 9255056 | 11-scf00161 | 11 |
| AX-157865388 | 7 | 71.295 | KV453001.1 | 9255532 | 11-scf00161 | 11 |
| AX-158037013 | 7 | 71.295 | KV453001.1 | 9257528 | 11-scf00161 | 11 |
| AX-158037014 | 7 | 71.295 | KV453001.1 | 9258547 | 11-scf00161 | 11 |
| AX-157821813 | 7 | 71.295 | KV453001.1 | 9260018 | 11-scf00161 | 11 |
| AX-157747140 | 7 | 71.295 | KV453001.1 | 9261533 | 11-scf00161 | 11 |
| AX-158037016 | 7 | 71.295 | KV453001.1 | 9261956 | 11-scf00161 | 11 |
| AX-158037020 | 7 | 71.295 | KV453001.1 | 9266097 | 11-scf00161 | 11 |
| AX-158037025 | 7 | 71.295 | KV453001.1 | 9270878 | 11-scf00161 | 11 |
| AX-158037026 | 7 | 71.295 | KV453001.1 | 9271905 | 11-scf00161 | 11 |
| AX-158408396 | 7 | 71.295 | KV453001.1 | 9272480 | 11-scf00161 | 11 |
| AX-157715206 | 7 | 71.295 | KV453001.1 | 9273849 | 11-scf00161 | 11 |
| AX-157821817 | 7 | 71.295 | KV453001.1 | 9277680 | 11-scf00161 | 11 |
| AX-157741514 | 7 | 71.295 | KV453001.1 | 9282361 | 11-scf00161 | 11 |
| AX-158037033 | 7 | 71.295 | KV453001.1 | 9283275 | 11-scf00161 | 11 |
| AX-158037038 | 7 | 71.295 | KV453001.1 | 9286248 | 11-scf00161 | 11 |
| AX-158037039 | 7 | 71.295 | KV453001.1 | 9286998 | 11-scf00161 | 11 |
| AX-157821819 | 7 | 71.295 | KV453001.1 | 9288388 | 11-scf00161 | 11 |
| AX-158037041 | 7 | 71.295 | KV453001.1 | 9290944 | 11-scf00161 | 11 |
| AX-158391468 | 7 | 71.295 | KV453001.1 | 9294209 | 11-scf00161 | 11 |
| AX-157821822 | 7 | 71.295 | KV453001.1 | 9296266 | 11-scf00161 | 11 |
| AX-158037042 | 7 | 71.295 | KV453001.1 | 9299175 | 11-scf00161 | 11 |
| AX-158037049 | 7 | 71.295 | KV453001.1 | 9310140 | 11-scf00161 | 11 |
| AX-158037050 | 7 | 71.295 | KV453001.1 | 9310423 | 11-scf00161 | 11 |
| AX-158037051 | 7 | 71.295 | KV453001.1 | 9314540 | 11-scf00161 | 11 |
| AX-158037052 | 7 | 71.295 | KV453001.1 | 9316478 | 11-scf00161 | 11 |
| AX-158037054 | 7 | 71.295 | KV453001.1 | 9317033 | 11-scf00161 | 11 |
| AX-158037056 | 7 | 71.295 | KV453001.1 | 9317766 | 11-scf00161 | 11 |
| AX-157870474 | 7 | 71.295 | KV453001.1 | 9318158 | 11-scf00161 | 11 |
| AX-157870475 | 7 | 71.295 | KV453001.1 | 9324834 | 11-scf00161 | 11 |



|              |   |        |            |         |             |    |
|--------------|---|--------|------------|---------|-------------|----|
| AX-157821825 | 7 | 71.295 | KV453001.1 | 9332862 | 11-scf00161 | 11 |
| AX-158037062 | 7 | 71.295 | KV453001.1 | 9336648 | 11-scf00161 | 11 |
| AX-158037065 | 7 | 71.295 | KV453001.1 | 9339262 | 11-scf00161 | 11 |
| AX-158037070 | 7 | 71.295 | KV453001.1 | 9345703 | 11-scf00161 | 11 |
| AX-158037071 | 7 | 71.295 | KV453001.1 | 9347443 | 11-scf00161 | 11 |
| AX-158037073 | 7 | 71.295 | KV453001.1 | 9350204 | 11-scf00161 | 11 |
| AX-157693555 | 7 | 71.295 | KV453001.1 | 9354666 | 11-scf00161 | 11 |
| AX-158037074 | 7 | 71.295 | KV453001.1 | 9355886 | 11-scf00161 | 11 |
| AX-158037078 | 7 | 71.295 | KV453001.1 | 9358512 | 11-scf00161 | 11 |
| AX-158037086 | 7 | 71.295 | KV453001.1 | 9372729 | 11-scf00161 | 11 |
| AX-158037090 | 7 | 71.295 | KV453001.1 | 9377476 | 11-scf00161 | 11 |
| AX-158037091 | 7 | 71.295 | KV453001.1 | 9377989 | 11-scf00161 | 11 |
| AX-158037093 | 7 | 71.295 | KV453001.1 | 9379878 | 11-scf00161 | 11 |
| AX-158037095 | 7 | 71.295 | KV453001.1 | 9382125 | 11-scf00161 | 11 |
| AX-158037096 | 7 | 71.295 | KV453001.1 | 9383325 | 11-scf00161 | 11 |
| AX-158037101 | 7 | 71.295 | KV453001.1 | 9394248 | 11-scf00161 | 11 |
| AX-158391469 | 7 | 71.295 | KV453001.1 | 9396106 | 11-scf00161 | 11 |
| AX-158416146 | 7 | 71.295 | KV453001.1 | 9396740 | 11-scf00161 | 11 |
| AX-158037104 | 7 | 71.295 | KV453001.1 | 9402841 | 11-scf00161 | 11 |
| AX-158037105 | 7 | 71.295 | KV453001.1 | 9403552 | 11-scf00161 | 11 |
| AX-158391470 | 7 | 71.295 | KV453001.1 | 9404870 | 11-scf00161 | 11 |
| AX-158037110 | 7 | 71.295 | KV453001.1 | 9408071 | 11-scf00161 | 11 |
| AX-158391471 | 7 | 71.295 | KV453001.1 | 9412396 | 11-scf00161 | 11 |
| AX-158037115 | 7 | 71.295 | KV453001.1 | 9416952 | 11-scf00161 | 11 |
| AX-158037117 | 7 | 71.295 | KV453001.1 | 9418867 | 11-scf00161 | 11 |
| AX-158037120 | 7 | 71.295 | KV453001.1 | 9424219 | 11-scf00161 | 11 |
| AX-158037121 | 7 | 71.295 | KV453001.1 | 9425135 | 11-scf00161 | 11 |
| AX-158037126 | 7 | 71.295 | KV453001.1 | 9431328 | 11-scf00161 | 11 |
| AX-158037128 | 7 | 71.295 | KV453001.1 | 9432255 | 11-scf00161 | 11 |
| AX-158408398 | 7 | 71.295 | KV453001.1 | 9432699 | 11-scf00161 | 11 |
| AX-158037130 | 7 | 71.295 | KV453001.1 | 9436483 | 11-scf00161 | 11 |
| AX-158391472 | 7 | 71.295 | KV453001.1 | 9437484 | 11-scf00161 | 11 |
| AX-158037131 | 7 | 71.295 | KV453001.1 | 9437622 | 11-scf00161 | 11 |
| AX-158037133 | 7 | 71.295 | KV453001.1 | 9438195 | 11-scf00161 | 11 |
| AX-158037135 | 7 | 71.295 | KV453001.1 | 9439794 | 11-scf00161 | 11 |
| AX-158037136 | 7 | 71.295 | KV453001.1 | 9441256 | 11-scf00161 | 11 |
| AX-158037137 | 7 | 71.295 | KV453001.1 | 9442429 | 11-scf00161 | 11 |
| AX-158037138 | 7 | 71.295 | KV453001.1 | 9446937 | 11-scf00161 | 11 |
| AX-158037140 | 7 | 71.295 | KV453001.1 | 9447823 | 11-scf00161 | 11 |
| AX-158037142 | 7 | 71.295 | KV453001.1 | 9449147 | 11-scf00161 | 11 |
| AX-158422325 | 7 | 71.295 | KV453001.1 | 9450787 | 11-scf00161 | 11 |
| AX-158037148 | 7 | 71.295 | KV453001.1 | 9456670 | 11-scf00161 | 11 |
| AX-157693605 | 7 | 71.295 | KV453001.1 | 9457722 | 11-scf00161 | 11 |
| AX-158391473 | 7 | 71.295 | KV453001.1 | 9458672 | 11-scf00161 | 11 |
| AX-158037149 | 7 | 71.295 | KV453001.1 | 9459983 | 11-scf00161 | 11 |
| AX-158037150 | 7 | 71.295 | KV453001.1 | 9461056 | 11-scf00161 | 11 |
| AX-158037151 | 7 | 71.295 | KV453001.1 | 9463533 | 11-scf00161 | 11 |
| AX-158037152 | 7 | 71.295 | KV453001.1 | 9463926 | 11-scf00161 | 11 |
| AX-158037154 | 7 | 71.295 | KV453001.1 | 9468061 | 11-scf00161 | 11 |
| AX-158037155 | 7 | 71.295 | KV453001.1 | 9469974 | 11-scf00161 | 11 |
| AX-158037157 | 7 | 71.295 | KV453001.1 | 9477855 | 11-scf00161 | 11 |

|              |   |        |            |          |             |    |
|--------------|---|--------|------------|----------|-------------|----|
| AX-158037161 | 7 | 71.295 | KV453001.1 | 9481116  | 11-scf00161 | 11 |
| AX-157821829 | 7 | 71.295 | KV453001.1 | 9507999  | 11-scf00161 | 11 |
| AX-158037175 | 7 | 71.295 | KV453001.1 | 9517193  | 11-scf00161 | 11 |
| AX-157856392 | 7 | 71.295 | KV453001.1 | 9530426  | 11-scf00161 | 11 |
| AX-158037188 | 7 | 71.295 | KV453001.1 | 9540885  | 11-scf00161 | 11 |
| AX-157876520 | 7 | 71.295 | KV453001.1 | 9553249  | 11-scf00161 | 11 |
| AX-158037193 | 7 | 71.295 | KV453001.1 | 9558422  | 11-scf00161 | 11 |
| AX-157758327 | 7 | 71.295 | KV453001.1 | 9562327  | 11-scf00161 | 11 |
| AX-158037201 | 7 | 71.295 | KV453001.1 | 9568500  | 11-scf00161 | 11 |
| AX-158037205 | 7 | 71.295 | KV453001.1 | 9574690  | 11-scf00161 | 11 |
| AX-158037218 | 7 | 71.295 | KV453001.1 | 9585380  | 11-scf00161 | 11 |
| AX-158037227 | 7 | 71.295 | KV453001.1 | 9594807  | 11-scf00161 | 11 |
| AX-158037236 | 7 | 71.295 | KV453001.1 | 9604696  | 11-scf00161 | 11 |
| AX-158037241 | 7 | 71.295 | KV453001.1 | 9607704  | 11-scf00161 | 11 |
| AX-158037243 | 7 | 71.295 | KV453001.1 | 9609130  | 11-scf00161 | 11 |
| AX-158037256 | 7 | 71.295 | KV453001.1 | 9622868  | 11-scf00161 | 11 |
| AX-158037257 | 7 | 71.295 | KV453001.1 | 9626467  | 11-scf00161 | 11 |
| AX-157753799 | 7 | 71.295 | KV453001.1 | 9631511  | 11-scf00161 | 11 |
| AX-158037269 | 7 | 71.295 | KV453001.1 | 9641495  | 11-scf00161 | 11 |
| AX-158037272 | 7 | 71.295 | KV453001.1 | 9643661  | 11-scf00161 | 11 |
| AX-158037295 | 7 | 71.295 | KV453001.1 | 9667418  | 11-scf00161 | 11 |
| AX-158037303 | 7 | 71.295 | KV453001.1 | 9680226  | 11-scf00161 | 11 |
| AX-158037307 | 7 | 71.295 | KV453001.1 | 9685920  | 11-scf00161 | 11 |
| AX-158037308 | 7 | 71.295 | KV453001.1 | 9687250  | 11-scf00161 | 11 |
| AX-158037309 | 7 | 71.295 | KV453001.1 | 9687520  | 11-scf00161 | 11 |
| AX-158037311 | 7 | 71.295 | KV453001.1 | 9694399  | 11-scf00161 | 11 |
| AX-158037313 | 7 | 71.295 | KV453001.1 | 9695482  | 11-scf00161 | 11 |
| AX-158037315 | 7 | 71.295 | KV453001.1 | 9696795  | 11-scf00161 | 11 |
| AX-158037319 | 7 | 71.295 | KV453001.1 | 9708418  | 11-scf00161 | 11 |
| AX-158037320 | 7 | 71.295 | KV453001.1 | 9708947  | 11-scf00161 | 11 |
| AX-158037333 | 7 | 71.295 | KV453001.1 | 9729104  | 11-scf00161 | 11 |
| AX-158037340 | 7 | 71.295 | KV453001.1 | 9744321  | 11-scf00161 | 11 |
| AX-158037360 | 7 | 71.295 | KV453001.1 | 9793098  | 11-scf00161 | 11 |
| AX-158037365 | 7 | 71.295 | KV453001.1 | 9813384  | 11-scf00161 | 11 |
| AX-158037366 | 7 | 71.295 | KV453001.1 | 9817326  | 11-scf00161 | 11 |
| AX-158037393 | 7 | 71.295 | KV453001.1 | 9949327  | 11-scf00161 | 11 |
| AX-158037399 | 7 | 71.295 | KV453001.1 | 9965817  | 11-scf00161 | 11 |
| AX-158037402 | 7 | 71.295 | KV453001.1 | 9973007  | 11-scf00161 | 11 |
| AX-158037406 | 7 | 71.295 | KV453001.1 | 9977282  | 11-scf00161 | 11 |
| AX-157758246 | 7 | 71.295 | KV453001.1 | 9986866  | 11-scf00161 | 11 |
| AX-158037419 | 7 | 71.295 | KV453001.1 | 10000545 | 11-scf00161 | 11 |
| AX-158037423 | 7 | 71.295 | KV453001.1 | 10009905 | 11-scf00161 | 11 |
| AX-157747975 | 7 | 71.295 | KV453001.1 | 10020637 | 11-scf00161 | 11 |
| AX-158037427 | 7 | 71.295 | KV453001.1 | 10027479 | 11-scf00161 | 11 |
| AX-158037432 | 7 | 71.295 | KV453001.1 | 10030311 | 11-scf00161 | 11 |
| AX-158037457 | 7 | 71.295 | KV453001.1 | 10076869 | 11-scf00161 | 11 |
| AX-158037472 | 7 | 71.295 | KV453001.1 | 10106057 | 11-scf00161 | 11 |
| AX-157821848 | 7 | 71.295 | KV453001.1 | 10111604 | 11-scf00161 | 11 |
| AX-158408415 | 7 | 71.295 | KV453001.1 | 10112432 | 11-scf00161 | 11 |
| AX-158037475 | 7 | 71.295 | KV453001.1 | 10112769 | 11-scf00161 | 11 |
| AX-158037476 | 7 | 71.295 | KV453001.1 | 10113557 | 11-scf00161 | 11 |

|              |   |        |            |          |             |    |
|--------------|---|--------|------------|----------|-------------|----|
| AX-158037480 | 7 | 71.295 | KV453001.1 | 10124553 | 11-scf00161 | 11 |
| AX-158037481 | 7 | 71.295 | KV453001.1 | 10125509 | 11-scf00161 | 11 |
| AX-158037482 | 7 | 71.295 | KV453001.1 | 10126239 | 11-scf00161 | 11 |
| AX-158037483 | 7 | 71.295 | KV453001.1 | 10127584 | 11-scf00161 | 11 |
| AX-158037487 | 7 | 71.295 | KV453001.1 | 10135089 | 11-scf00161 | 11 |
| AX-158037489 | 7 | 71.295 | KV453001.1 | 10136192 | 11-scf00161 | 11 |
| AX-158037490 | 7 | 71.295 | KV453001.1 | 10138881 | 11-scf00161 | 11 |
| AX-158037491 | 7 | 71.295 | KV453001.1 | 10140225 | 11-scf00161 | 11 |
| AX-158037492 | 7 | 71.295 | KV453001.1 | 10141161 | 11-scf00161 | 11 |
| AX-158037493 | 7 | 71.295 | KV453001.1 | 10142125 | 11-scf00161 | 11 |
| AX-158037494 | 7 | 71.295 | KV453001.1 | 10142722 | 11-scf00161 | 11 |
| AX-158037495 | 7 | 71.295 | KV453001.1 | 10143943 | 11-scf00161 | 11 |
| AX-158037496 | 7 | 71.295 | KV453001.1 | 10144746 | 11-scf00161 | 11 |
| AX-158037498 | 7 | 71.295 | KV453001.1 | 10146444 | 11-scf00161 | 11 |
| AX-158037499 | 7 | 71.295 | KV453001.1 | 10147189 | 11-scf00161 | 11 |
| AX-158037500 | 7 | 71.295 | KV453001.1 | 10147824 | 11-scf00161 | 11 |
| AX-158037502 | 7 | 71.295 | KV453001.1 | 10148893 | 11-scf00161 | 11 |
| AX-158037503 | 7 | 71.295 | KV453001.1 | 10149368 | 11-scf00161 | 11 |
| AX-158391533 | 7 | 71.295 | KV453001.1 | 10149580 | 11-scf00161 | 11 |
| AX-158037504 | 7 | 71.295 | KV453001.1 | 10150071 | 11-scf00161 | 11 |
| AX-158037507 | 7 | 71.295 | KV453001.1 | 10152655 | 11-scf00161 | 11 |
| AX-158037508 | 7 | 71.295 | KV453001.1 | 10153026 | 11-scf00161 | 11 |
| AX-158037510 | 7 | 71.295 | KV453001.1 | 10157927 | 11-scf00161 | 11 |
| AX-158037511 | 7 | 71.295 | KV453001.1 | 10159822 | 11-scf00161 | 11 |
| AX-158037513 | 7 | 71.295 | KV453001.1 | 10160769 | 11-scf00161 | 11 |
| AX-158037514 | 7 | 71.295 | KV453001.1 | 10161411 | 11-scf00161 | 11 |
| AX-157821849 | 7 | 71.295 | KV453001.1 | 10162154 | 11-scf00161 | 11 |
| AX-158037516 | 7 | 71.295 | KV453001.1 | 10163522 | 11-scf00161 | 11 |
| AX-158037518 | 7 | 71.295 | KV453001.1 | 10166103 | 11-scf00161 | 11 |
| AX-158037519 | 7 | 71.295 | KV453001.1 | 10166917 | 11-scf00161 | 11 |
| AX-158037523 | 7 | 71.295 | KV453001.1 | 10174379 | 11-scf00161 | 11 |
| AX-158037524 | 7 | 71.295 | KV453001.1 | 10174573 | 11-scf00161 | 11 |
| AX-158037525 | 7 | 71.295 | KV453001.1 | 10175341 | 11-scf00161 | 11 |
| AX-158037526 | 7 | 71.295 | KV453001.1 | 10176886 | 11-scf00161 | 11 |
| AX-158037527 | 7 | 71.295 | KV453001.1 | 10178797 | 11-scf00161 | 11 |
| AX-158037528 | 7 | 71.295 | KV453001.1 | 10179060 | 11-scf00161 | 11 |
| AX-158037529 | 7 | 71.295 | KV453001.1 | 10179838 | 11-scf00161 | 11 |
| AX-158037530 | 7 | 71.295 | KV453001.1 | 10180729 | 11-scf00161 | 11 |
| AX-158037531 | 7 | 71.295 | KV453001.1 | 10181695 | 11-scf00161 | 11 |
| AX-158037532 | 7 | 71.295 | KV453001.1 | 10182397 | 11-scf00161 | 11 |
| AX-158037533 | 7 | 71.295 | KV453001.1 | 10182809 | 11-scf00161 | 11 |
| AX-157885076 | 7 | 71.295 | KV453001.1 | 10184441 | 11-scf00161 | 11 |
| AX-158037536 | 7 | 71.295 | KV453001.1 | 10185093 | 11-scf00161 | 11 |
| AX-157821852 | 7 | 71.295 | KV453001.1 | 10187040 | 11-scf00161 | 11 |
| AX-158037537 | 7 | 71.295 | KV453001.1 | 10187221 | 11-scf00161 | 11 |
| AX-158037540 | 7 | 71.295 | KV453001.1 | 10189324 | 11-scf00161 | 11 |
| AX-158037543 | 7 | 71.295 | KV453001.1 | 10191467 | 11-scf00161 | 11 |
| AX-158037545 | 7 | 71.295 | KV453001.1 | 10193070 | 11-scf00161 | 11 |
| AX-158037546 | 7 | 71.295 | KV453001.1 | 10193550 | 11-scf00161 | 11 |
| AX-157870490 | 7 | 71.295 | KV453001.1 | 10196903 | 11-scf00161 | 11 |
| AX-158037550 | 7 | 71.295 | KV453001.1 | 10200646 | 11-scf00161 | 11 |

|              |   |        |            |          |             |    |
|--------------|---|--------|------------|----------|-------------|----|
| AX-158037551 | 7 | 71.295 | KV453001.1 | 10202434 | 11-scf00161 | 11 |
| AX-158037553 | 7 | 71.295 | KV453001.1 | 10203276 | 11-scf00161 | 11 |
| AX-158037556 | 7 | 71.295 | KV453001.1 | 10204423 | 11-scf00161 | 11 |
| AX-157696879 | 7 | 71.295 | KV453001.1 | 10206586 | 11-scf00161 | 11 |
| AX-158037562 | 7 | 71.295 | KV453001.1 | 10207166 | 11-scf00161 | 11 |
| AX-158037563 | 7 | 71.295 | KV453001.1 | 10207659 | 11-scf00161 | 11 |
| AX-158037564 | 7 | 71.295 | KV453001.1 | 10208087 | 11-scf00161 | 11 |
| AX-158037565 | 7 | 71.295 | KV453001.1 | 10208786 | 11-scf00161 | 11 |
| AX-158037566 | 7 | 71.295 | KV453001.1 | 10209679 | 11-scf00161 | 11 |
| AX-158037567 | 7 | 71.295 | KV453001.1 | 10210445 | 11-scf00161 | 11 |
| AX-158416154 | 7 | 71.295 | KV453001.1 | 10213705 | 11-scf00161 | 11 |
| AX-158037569 | 7 | 71.295 | KV453001.1 | 10213754 | 11-scf00161 | 11 |
| AX-157695453 | 7 | 71.295 | KV453001.1 | 10214211 | 11-scf00161 | 11 |
| AX-158037571 | 7 | 71.295 | KV453001.1 | 10214641 | 11-scf00161 | 11 |
| AX-158037572 | 7 | 71.295 | KV453001.1 | 10215458 | 11-scf00161 | 11 |
| AX-158037573 | 7 | 71.295 | KV453001.1 | 10216660 | 11-scf00161 | 11 |
| AX-158037575 | 7 | 71.295 | KV453001.1 | 10217593 | 11-scf00161 | 11 |
| AX-158037577 | 7 | 71.295 | KV453001.1 | 10220778 | 11-scf00161 | 11 |
| AX-158037580 | 7 | 71.295 | KV453001.1 | 10223556 | 11-scf00161 | 11 |
| AX-158037582 | 7 | 71.295 | KV453001.1 | 10224093 | 11-scf00161 | 11 |
| AX-158037585 | 7 | 71.295 | KV453001.1 | 10226771 | 11-scf00161 | 11 |
| AX-158037586 | 7 | 71.295 | KV453001.1 | 10227365 | 11-scf00161 | 11 |
| AX-157821857 | 7 | 71.295 | KV453001.1 | 10227565 | 11-scf00161 | 11 |
| AX-157821858 | 7 | 71.295 | KV453001.1 | 10228841 | 11-scf00161 | 11 |
| AX-158037587 | 7 | 71.295 | KV453001.1 | 10229348 | 11-scf00161 | 11 |
| AX-158037588 | 7 | 71.295 | KV453001.1 | 10232006 | 11-scf00161 | 11 |
| AX-158037591 | 7 | 71.295 | KV453001.1 | 10236445 | 11-scf00161 | 11 |
| AX-158037592 | 7 | 71.295 | KV453001.1 | 10236918 | 11-scf00161 | 11 |
| AX-158037593 | 7 | 71.295 | KV453001.1 | 10238666 | 11-scf00161 | 11 |
| AX-158037594 | 7 | 71.295 | KV453001.1 | 10238876 | 11-scf00161 | 11 |
| AX-158037595 | 7 | 71.295 | KV453001.1 | 10241630 | 11-scf00161 | 11 |
| AX-158383888 | 7 | 71.295 | KV453001.1 | 10252205 | 11-scf00161 | 11 |
| AX-157724523 | 7 | 71.295 | KV453001.1 | 10255729 | 11-scf00161 | 11 |
| AX-158037599 | 7 | 71.295 | KV453001.1 | 10261214 | 11-scf00161 | 11 |
| AX-158391536 | 7 | 71.295 | KV453001.1 | 10261749 | 11-scf00161 | 11 |
| AX-158037601 | 7 | 71.295 | KV453001.1 | 10265474 | 11-scf00161 | 11 |
| AX-158037602 | 7 | 71.295 | KV453001.1 | 10266126 | 11-scf00161 | 11 |
| AX-158037606 | 7 | 71.295 | KV453001.1 | 10270771 | 11-scf00161 | 11 |
| AX-158037607 | 7 | 71.295 | KV453001.1 | 10271617 | 11-scf00161 | 11 |
| AX-158037608 | 7 | 71.295 | KV453001.1 | 10273822 | 11-scf00161 | 11 |
| AX-158037609 | 7 | 71.295 | KV453001.1 | 10275024 | 11-scf00161 | 11 |
| AX-158037610 | 7 | 71.295 | KV453001.1 | 10277395 | 11-scf00161 | 11 |
| AX-158037611 | 7 | 71.295 | KV453001.1 | 10278369 | 11-scf00161 | 11 |
| AX-158037612 | 7 | 71.295 | KV453001.1 | 10279321 | 11-scf00161 | 11 |
| AX-158037615 | 7 | 71.295 | KV453001.1 | 10288184 | 11-scf00161 | 11 |
| AX-158391538 | 7 | 71.295 | KV453001.1 | 10292554 | 11-scf00161 | 11 |
| AX-158037619 | 7 | 71.295 | KV453001.1 | 10295546 | 11-scf00161 | 11 |
| AX-158037621 | 7 | 71.295 | KV453001.1 | 10296230 | 11-scf00161 | 11 |
| AX-158391539 | 7 | 71.295 | KV453001.1 | 10300017 | 11-scf00161 | 11 |
| AX-158379816 | 7 | 71.295 | KV453001.1 | 10301444 | 11-scf00161 | 11 |
| AX-158037625 | 7 | 71.295 | KV453001.1 | 10301561 | 11-scf00161 | 11 |

|              |   |        |            |          |             |    |
|--------------|---|--------|------------|----------|-------------|----|
| AX-158037626 | 7 | 71.295 | KV453001.1 | 10301912 | 11-scf00161 | 11 |
| AX-158037627 | 7 | 71.295 | KV453001.1 | 10302421 | 11-scf00161 | 11 |
| AX-157773874 | 7 | 71.295 | KV453001.1 | 10303531 | 11-scf00161 | 11 |
| AX-158037628 | 7 | 71.295 | KV453001.1 | 10304109 | 11-scf00161 | 11 |
| AX-158037629 | 7 | 71.295 | KV453001.1 | 10306842 | 11-scf00161 | 11 |
| AX-158037633 | 7 | 71.295 | KV453001.1 | 10311272 | 11-scf00161 | 11 |
| AX-157821859 | 7 | 71.295 | KV453001.1 | 10311433 | 11-scf00161 | 11 |
| AX-158037634 | 7 | 71.295 | KV453001.1 | 10311974 | 11-scf00161 | 11 |
| AX-158383889 | 7 | 71.295 | KV453001.1 | 10312362 | 11-scf00161 | 11 |
| AX-158037636 | 7 | 71.295 | KV453001.1 | 10313822 | 11-scf00161 | 11 |
| AX-158037637 | 7 | 71.295 | KV453001.1 | 10314292 | 11-scf00161 | 11 |
| AX-158037638 | 7 | 71.295 | KV453001.1 | 10315302 | 11-scf00161 | 11 |
| AX-158037640 | 7 | 71.295 | KV453001.1 | 10317631 | 11-scf00161 | 11 |
| AX-158037646 | 7 | 71.295 | KV453001.1 | 10323564 | 11-scf00161 | 11 |
| AX-158037649 | 7 | 71.295 | KV453001.1 | 10331206 | 11-scf00161 | 11 |
| AX-158037650 | 7 | 71.295 | KV453001.1 | 10332064 | 11-scf00161 | 11 |
| AX-158037651 | 7 | 71.295 | KV453001.1 | 10332490 | 11-scf00161 | 11 |
| AX-158037655 | 7 | 71.295 | KV453001.1 | 10338769 | 11-scf00161 | 11 |
| AX-158037656 | 7 | 71.295 | KV453001.1 | 10350241 | 11-scf00161 | 11 |
| AX-158037657 | 7 | 71.295 | KV453001.1 | 10351053 | 11-scf00161 | 11 |
| AX-158037658 | 7 | 71.295 | KV453001.1 | 10351355 | 11-scf00161 | 11 |
| AX-158037660 | 7 | 71.295 | KV453001.1 | 10352979 | 11-scf00161 | 11 |
| AX-158037661 | 7 | 71.295 | KV453001.1 | 10353154 | 11-scf00161 | 11 |
| AX-158037662 | 7 | 71.295 | KV453001.1 | 10353552 | 11-scf00161 | 11 |
| AX-158037663 | 7 | 71.295 | KV453001.1 | 10353938 | 11-scf00161 | 11 |
| AX-158037665 | 7 | 71.295 | KV453001.1 | 10354384 | 11-scf00161 | 11 |
| AX-158037666 | 7 | 71.295 | KV453001.1 | 10355339 | 11-scf00161 | 11 |
| AX-158408420 | 7 | 71.295 | KV453001.1 | 10357107 | 11-scf00161 | 11 |
| AX-158391540 | 7 | 71.295 | KV453001.1 | 10358745 | 11-scf00161 | 11 |
| AX-158037673 | 7 | 71.295 | KV453001.1 | 10358955 | 11-scf00161 | 11 |
| AX-158037674 | 7 | 71.295 | KV453001.1 | 10359301 | 11-scf00161 | 11 |
| AX-158037679 | 7 | 71.295 | KV453001.1 | 10361277 | 11-scf00161 | 11 |
| AX-158037680 | 7 | 71.295 | KV453001.1 | 10362252 | 11-scf00161 | 11 |
| AX-158037683 | 7 | 71.295 | KV453001.1 | 10364350 | 11-scf00161 | 11 |
| AX-158037686 | 7 | 71.295 | KV453001.1 | 10367615 | 11-scf00161 | 11 |
| AX-158037687 | 7 | 71.295 | KV453001.1 | 10368172 | 11-scf00161 | 11 |
| AX-158037688 | 7 | 71.295 | KV453001.1 | 10369493 | 11-scf00161 | 11 |
| AX-158391542 | 7 | 71.295 | KV453001.1 | 10370184 | 11-scf00161 | 11 |
| AX-158037689 | 7 | 71.295 | KV453001.1 | 10370281 | 11-scf00161 | 11 |
| AX-158037690 | 7 | 71.295 | KV453001.1 | 10370714 | 11-scf00161 | 11 |
| AX-158391543 | 7 | 71.295 | KV453001.1 | 10372050 | 11-scf00161 | 11 |
| AX-158037692 | 7 | 71.295 | KV453001.1 | 10372183 | 11-scf00161 | 11 |
| AX-158037693 | 7 | 71.295 | KV453001.1 | 10372556 | 11-scf00161 | 11 |
| AX-158037698 | 7 | 71.295 | KV453001.1 | 10373802 | 11-scf00161 | 11 |
| AX-158416157 | 7 | 71.295 | KV453001.1 | 10374684 | 11-scf00161 | 11 |
| AX-158037699 | 7 | 71.295 | KV453001.1 | 10375081 | 11-scf00161 | 11 |
| AX-158037705 | 7 | 71.295 | KV453001.1 | 10380707 | 11-scf00161 | 11 |
| AX-158037706 | 7 | 71.295 | KV453001.1 | 10381585 | 11-scf00161 | 11 |
| AX-158037712 | 7 | 71.295 | KV453001.1 | 10385096 | 11-scf00161 | 11 |
| AX-158037713 | 7 | 71.295 | KV453001.1 | 10387063 | 11-scf00161 | 11 |
| AX-158037715 | 7 | 71.295 | KV453001.1 | 10389334 | 11-scf00161 | 11 |

|              |   |        |            |          |             |    |
|--------------|---|--------|------------|----------|-------------|----|
| AX-158037716 | 7 | 71.295 | KV453001.1 | 10390761 | 11-scf00161 | 11 |
| AX-157821860 | 7 | 71.295 | KV453001.1 | 10392783 | 11-scf00161 | 11 |
| AX-158037719 | 7 | 71.295 | KV453001.1 | 10393448 | 11-scf00161 | 11 |
| AX-158037720 | 7 | 71.295 | KV453001.1 | 10394900 | 11-scf00161 | 11 |
| AX-158037722 | 7 | 71.295 | KV453001.1 | 10395521 | 11-scf00161 | 11 |
| AX-158037723 | 7 | 71.295 | KV453001.1 | 10395721 | 11-scf00161 | 11 |
| AX-158037724 | 7 | 71.295 | KV453001.1 | 10396481 | 11-scf00161 | 11 |
| AX-157821861 | 7 | 71.295 | KV453001.1 | 10397550 | 11-scf00161 | 11 |
| AX-158037730 | 7 | 71.295 | KV453001.1 | 10401014 | 11-scf00161 | 11 |
| AX-158037731 | 7 | 71.295 | KV453001.1 | 10401300 | 11-scf00161 | 11 |
| AX-157713320 | 7 | 71.295 | KV453001.1 | 10412048 | 11-scf00161 | 11 |
| AX-158037739 | 7 | 71.295 | KV453001.1 | 10422773 | 11-scf00161 | 11 |
| AX-157821865 | 7 | 71.295 | KV453001.1 | 10424754 | 11-scf00161 | 11 |
| AX-158037740 | 7 | 71.295 | KV453001.1 | 10425268 | 11-scf00161 | 11 |
| AX-158037743 | 7 | 71.295 | KV453001.1 | 10428290 | 11-scf00161 | 11 |
| AX-158037744 | 7 | 71.295 | KV453001.1 | 10428879 | 11-scf00161 | 11 |
| AX-158037746 | 7 | 71.295 | KV453001.1 | 10433800 | 11-scf00161 | 11 |
| AX-157821866 | 7 | 71.295 | KV453001.1 | 10435637 | 11-scf00161 | 11 |
| AX-158037748 | 7 | 71.295 | KV453001.1 | 10439328 | 11-scf00161 | 11 |
| AX-157821867 | 7 | 71.295 | KV453001.1 | 10440517 | 11-scf00161 | 11 |
| AX-158037750 | 7 | 71.295 | KV453001.1 | 10445030 | 11-scf00161 | 11 |
| AX-157821868 | 7 | 71.295 | KV453001.1 | 10445972 | 11-scf00161 | 11 |
| AX-158037753 | 7 | 71.295 | KV453001.1 | 10449508 | 11-scf00161 | 11 |
| AX-158037754 | 7 | 71.295 | KV453001.1 | 10452827 | 11-scf00161 | 11 |
| AX-158037755 | 7 | 71.295 | KV453001.1 | 10454768 | 11-scf00161 | 11 |
| AX-157821869 | 7 | 71.295 | KV453001.1 | 10455691 | 11-scf00161 | 11 |
| AX-158037757 | 7 | 71.295 | KV453001.1 | 10456400 | 11-scf00161 | 11 |
| AX-158037758 | 7 | 71.295 | KV453001.1 | 10456939 | 11-scf00161 | 11 |
| AX-158037762 | 7 | 71.295 | KV453001.1 | 10460883 | 11-scf00161 | 11 |
| AX-158037768 | 7 | 71.295 | KV453001.1 | 10464222 | 11-scf00161 | 11 |
| AX-157821872 | 7 | 71.295 | KV453001.1 | 10464339 | 11-scf00161 | 11 |
| AX-157821873 | 7 | 71.295 | KV453001.1 | 10464777 | 11-scf00161 | 11 |
| AX-158037770 | 7 | 71.295 | KV453001.1 | 10468167 | 11-scf00161 | 11 |
| AX-158037774 | 7 | 71.295 | KV453001.1 | 10470393 | 11-scf00161 | 11 |
| AX-158037775 | 7 | 71.295 | KV453001.1 | 10471526 | 11-scf00161 | 11 |
| AX-158037776 | 7 | 71.295 | KV453001.1 | 10474459 | 11-scf00161 | 11 |
| AX-158037777 | 7 | 71.295 | KV453001.1 | 10474822 | 11-scf00161 | 11 |
| AX-158037778 | 7 | 71.295 | KV453001.1 | 10476823 | 11-scf00161 | 11 |
| AX-158037779 | 7 | 71.295 | KV453001.1 | 10479229 | 11-scf00161 | 11 |
| AX-158037780 | 7 | 71.295 | KV453001.1 | 10479816 | 11-scf00161 | 11 |
| AX-158037781 | 7 | 71.295 | KV453001.1 | 10480388 | 11-scf00161 | 11 |
| AX-158037782 | 7 | 71.295 | KV453001.1 | 10484638 | 11-scf00161 | 11 |
| AX-158037784 | 7 | 71.295 | KV453001.1 | 10487622 | 11-scf00161 | 11 |
| AX-158037785 | 7 | 71.295 | KV453001.1 | 10487953 | 11-scf00161 | 11 |
| AX-158037786 | 7 | 71.295 | KV453001.1 | 10488577 | 11-scf00161 | 11 |
| AX-158037788 | 7 | 71.295 | KV453001.1 | 10490828 | 11-scf00161 | 11 |
| AX-158037789 | 7 | 71.295 | KV453001.1 | 10491195 | 11-scf00161 | 11 |
| AX-157870492 | 7 | 71.295 | KV453001.1 | 10492598 | 11-scf00161 | 11 |
| AX-157870493 | 7 | 71.295 | KV453001.1 | 10494258 | 11-scf00161 | 11 |
| AX-158037790 | 7 | 71.295 | KV453001.1 | 10494756 | 11-scf00161 | 11 |
| AX-158037791 | 7 | 71.295 | KV453001.1 | 10494972 | 11-scf00161 | 11 |

|              |   |        |            |          |             |    |
|--------------|---|--------|------------|----------|-------------|----|
| AX-158037795 | 7 | 71.295 | KV453001.1 | 10501613 | 11-scf00161 | 11 |
| AX-158408423 | 7 | 71.295 | KV453001.1 | 10502850 | 11-scf00161 | 11 |
| AX-158037796 | 7 | 71.295 | KV453001.1 | 10504979 | 11-scf00161 | 11 |
| AX-158037797 | 7 | 71.295 | KV453001.1 | 10505679 | 11-scf00161 | 11 |
| AX-158037799 | 7 | 71.295 | KV453001.1 | 10507151 | 11-scf00161 | 11 |
| AX-157821875 | 7 | 71.295 | KV453001.1 | 10509401 | 11-scf00161 | 11 |
| AX-157821876 | 7 | 71.295 | KV453001.1 | 10509597 | 11-scf00161 | 11 |
| AX-158037803 | 7 | 71.295 | KV453001.1 | 10513473 | 11-scf00161 | 11 |
| AX-158037804 | 7 | 71.295 | KV453001.1 | 10514201 | 11-scf00161 | 11 |
| AX-157821877 | 7 | 71.295 | KV453001.1 | 10515341 | 11-scf00161 | 11 |
| AX-158037807 | 7 | 71.295 | KV453001.1 | 10517110 | 11-scf00161 | 11 |
| AX-158037809 | 7 | 71.295 | KV453001.1 | 10519104 | 11-scf00161 | 11 |
| AX-158037810 | 7 | 71.295 | KV453001.1 | 10519657 | 11-scf00161 | 11 |
| AX-158037812 | 7 | 71.295 | KV453001.1 | 10525384 | 11-scf00161 | 11 |
| AX-157821878 | 7 | 71.295 | KV453001.1 | 10525986 | 11-scf00161 | 11 |
| AX-158037814 | 7 | 71.295 | KV453001.1 | 10529348 | 11-scf00161 | 11 |
| AX-158379817 | 7 | 71.295 | KV453001.1 | 10530759 | 11-scf00161 | 11 |
| AX-157821880 | 7 | 71.295 | KV453001.1 | 10540111 | 11-scf00161 | 11 |
| AX-157821881 | 7 | 71.295 | KV453001.1 | 10540855 | 11-scf00161 | 11 |
| AX-158037816 | 7 | 71.295 | KV453001.1 | 10544236 | 11-scf00161 | 11 |
| AX-158037817 | 7 | 71.295 | KV453001.1 | 10548107 | 11-scf00161 | 11 |
| AX-158037818 | 7 | 71.295 | KV453001.1 | 10549150 | 11-scf00161 | 11 |
| AX-158037820 | 7 | 71.295 | KV453001.1 | 10550529 | 11-scf00161 | 11 |
| AX-158037821 | 7 | 71.295 | KV453001.1 | 10551260 | 11-scf00161 | 11 |
| AX-158037822 | 7 | 71.295 | KV453001.1 | 10551823 | 11-scf00161 | 11 |
| AX-158037823 | 7 | 71.295 | KV453001.1 | 10552184 | 11-scf00161 | 11 |
| AX-158037825 | 7 | 71.295 | KV453001.1 | 10554673 | 11-scf00161 | 11 |
| AX-158037826 | 7 | 71.295 | KV453001.1 | 10555282 | 11-scf00161 | 11 |
| AX-158037827 | 7 | 71.295 | KV453001.1 | 10558785 | 11-scf00161 | 11 |
| AX-158037828 | 7 | 71.295 | KV453001.1 | 10559054 | 11-scf00161 | 11 |
| AX-158037829 | 7 | 71.295 | KV453001.1 | 10559283 | 11-scf00161 | 11 |
| AX-158037832 | 7 | 71.295 | KV453001.1 | 10561292 | 11-scf00161 | 11 |
| AX-158037833 | 7 | 71.295 | KV453001.1 | 10562043 | 11-scf00161 | 11 |
| AX-158037834 | 7 | 71.295 | KV453001.1 | 10564445 | 11-scf00161 | 11 |
| AX-158037835 | 7 | 71.295 | KV453001.1 | 10564927 | 11-scf00161 | 11 |
| AX-158037836 | 7 | 71.295 | KV453001.1 | 10565252 | 11-scf00161 | 11 |
| AX-158037837 | 7 | 71.295 | KV453001.1 | 10566114 | 11-scf00161 | 11 |
| AX-158037838 | 7 | 71.295 | KV453001.1 | 10567099 | 11-scf00161 | 11 |
| AX-158037839 | 7 | 71.295 | KV453001.1 | 10567452 | 11-scf00161 | 11 |
| AX-157748780 | 7 | 71.295 | KV453001.1 | 10568533 | 11-scf00161 | 11 |
| AX-157743501 | 7 | 71.295 | KV453001.1 | 10569456 | 11-scf00161 | 11 |
| AX-157747230 | 7 | 71.295 | KV453001.1 | 10570821 | 11-scf00161 | 11 |
| AX-158037842 | 7 | 71.295 | KV453001.1 | 10571509 | 11-scf00161 | 11 |
| AX-158037843 | 7 | 71.295 | KV453001.1 | 10573126 | 11-scf00161 | 11 |
| AX-158383890 | 7 | 71.295 | KV453001.1 | 10574628 | 11-scf00161 | 11 |
| AX-158037845 | 7 | 71.295 | KV453001.1 | 10574823 | 11-scf00161 | 11 |
| AX-158037846 | 7 | 71.295 | KV453001.1 | 10576257 | 11-scf00161 | 11 |
| AX-158037849 | 7 | 71.295 | KV453001.1 | 10577456 | 11-scf00161 | 11 |
| AX-158037851 | 7 | 71.295 | KV453001.1 | 10578464 | 11-scf00161 | 11 |
| AX-158037854 | 7 | 71.295 | KV453001.1 | 10581688 | 11-scf00161 | 11 |
| AX-158037855 | 7 | 71.295 | KV453001.1 | 10582745 | 11-scf00161 | 11 |

|              |   |        |            |          |             |    |
|--------------|---|--------|------------|----------|-------------|----|
| AX-158391544 | 7 | 71.295 | KV453001.1 | 10584540 | 11-scf00161 | 11 |
| AX-158037856 | 7 | 71.295 | KV453001.1 | 10585019 | 11-scf00161 | 11 |
| AX-158037857 | 7 | 71.295 | KV453001.1 | 10585523 | 11-scf00161 | 11 |
| AX-158037861 | 7 | 71.295 | KV453001.1 | 10588157 | 11-scf00161 | 11 |
| AX-158037862 | 7 | 71.295 | KV453001.1 | 10589167 | 11-scf00161 | 11 |
| AX-158037863 | 7 | 71.295 | KV453001.1 | 10591818 | 11-scf00161 | 11 |
| AX-158037864 | 7 | 71.295 | KV453001.1 | 10592948 | 11-scf00161 | 11 |
| AX-158037865 | 7 | 71.295 | KV453001.1 | 10594077 | 11-scf00161 | 11 |
| AX-158037867 | 7 | 71.295 | KV453001.1 | 10600979 | 11-scf00161 | 11 |
| AX-158037868 | 7 | 71.295 | KV453001.1 | 10601446 | 11-scf00161 | 11 |
| AX-158037871 | 7 | 71.295 | KV453001.1 | 10601910 | 11-scf00161 | 11 |
| AX-158037873 | 7 | 71.295 | KV453001.1 | 10602358 | 11-scf00161 | 11 |
| AX-158037874 | 7 | 71.295 | KV453001.1 | 10604348 | 11-scf00161 | 11 |
| AX-158037876 | 7 | 71.295 | KV453001.1 | 10605521 | 11-scf00161 | 11 |
| AX-158037877 | 7 | 71.295 | KV453001.1 | 10605751 | 11-scf00161 | 11 |
| AX-158037879 | 7 | 71.295 | KV453001.1 | 10607303 | 11-scf00161 | 11 |
| AX-158391545 | 7 | 71.295 | KV453001.1 | 10608367 | 11-scf00161 | 11 |
| AX-158037882 | 7 | 71.295 | KV453001.1 | 10608519 | 11-scf00161 | 11 |
| AX-158037883 | 7 | 71.295 | KV453001.1 | 10609710 | 11-scf00161 | 11 |
| AX-157821882 | 7 | 71.295 | KV453001.1 | 10610304 | 11-scf00161 | 11 |
| AX-158037886 | 7 | 71.295 | KV453001.1 | 10612767 | 11-scf00161 | 11 |
| AX-158037898 | 7 | 71.295 | KV453001.1 | 10627909 | 11-scf00161 | 11 |
| AX-158037899 | 7 | 71.295 | KV453001.1 | 10628631 | 11-scf00161 | 11 |
| AX-157821886 | 7 | 71.295 | KV453001.1 | 10629148 | 11-scf00161 | 11 |
| AX-158037901 | 7 | 71.295 | KV453001.1 | 10629360 | 11-scf00161 | 11 |
| AX-158037909 | 7 | 71.295 | KV453001.1 | 10636687 | 11-scf00161 | 11 |
| AX-158037915 | 7 | 71.295 | KV453001.1 | 10639324 | 11-scf00161 | 11 |
| AX-158037916 | 7 | 71.295 | KV453001.1 | 10639735 | 11-scf00161 | 11 |
| AX-158037918 | 7 | 71.295 | KV453001.1 | 10640287 | 11-scf00161 | 11 |
| AX-158037924 | 7 | 71.295 | KV453001.1 | 10643393 | 11-scf00161 | 11 |
| AX-158037926 | 7 | 71.295 | KV453001.1 | 10643620 | 11-scf00161 | 11 |
| AX-158037927 | 7 | 71.295 | KV453001.1 | 10644100 | 11-scf00161 | 11 |
| AX-158037928 | 7 | 71.295 | KV453001.1 | 10644538 | 11-scf00161 | 11 |
| AX-158037929 | 7 | 71.295 | KV453001.1 | 10644761 | 11-scf00161 | 11 |
| AX-158037931 | 7 | 71.295 | KV453001.1 | 10645043 | 11-scf00161 | 11 |
| AX-158037933 | 7 | 71.295 | KV453001.1 | 10645509 | 11-scf00161 | 11 |
| AX-158037936 | 7 | 71.295 | KV453001.1 | 10648621 | 11-scf00161 | 11 |
| AX-158037937 | 7 | 71.295 | KV453001.1 | 10649299 | 11-scf00161 | 11 |
| AX-158037938 | 7 | 71.295 | KV453001.1 | 10649819 | 11-scf00161 | 11 |
| AX-158037942 | 7 | 71.295 | KV453001.1 | 10651797 | 11-scf00161 | 11 |
| AX-158037944 | 7 | 71.295 | KV453001.1 | 10654076 | 11-scf00161 | 11 |
| AX-158037946 | 7 | 71.295 | KV453001.1 | 10655642 | 11-scf00161 | 11 |
| AX-158037947 | 7 | 71.295 | KV453001.1 | 10655991 | 11-scf00161 | 11 |
| AX-157770659 | 7 | 71.295 | KV453001.1 | 10656362 | 11-scf00161 | 11 |
| AX-158037950 | 7 | 71.295 | KV453001.1 | 10656806 | 11-scf00161 | 11 |
| AX-158037954 | 7 | 71.295 | KV453001.1 | 10658566 | 11-scf00161 | 11 |
| AX-158037956 | 7 | 71.295 | KV453001.1 | 10658835 | 11-scf00161 | 11 |
| AX-158037957 | 7 | 71.295 | KV453001.1 | 10659154 | 11-scf00161 | 11 |
| AX-158037958 | 7 | 71.295 | KV453001.1 | 10659623 | 11-scf00161 | 11 |
| AX-158037962 | 7 | 71.295 | KV453001.1 | 10661642 | 11-scf00161 | 11 |
| AX-158037963 | 7 | 71.295 | KV453001.1 | 10662630 | 11-scf00161 | 11 |



|              |   |        |            |          |             |    |
|--------------|---|--------|------------|----------|-------------|----|
| AX-158037964 | 7 | 71.295 | KV453001.1 | 10664604 | 11-scf00161 | 11 |
| AX-158037968 | 7 | 71.295 | KV453001.1 | 10667096 | 11-scf00161 | 11 |
| AX-158037972 | 7 | 71.295 | KV453001.1 | 10669647 | 11-scf00161 | 11 |
| AX-157821888 | 7 | 71.295 | KV453001.1 | 10673906 | 11-scf00161 | 11 |
| AX-158037976 | 7 | 71.295 | KV453001.1 | 10675463 | 11-scf00161 | 11 |
| AX-158037978 | 7 | 71.295 | KV453001.1 | 10676409 | 11-scf00161 | 11 |
| AX-157821889 | 7 | 71.295 | KV453001.1 | 10676463 | 11-scf00161 | 11 |
| AX-158037982 | 7 | 71.295 | KV453001.1 | 10677824 | 11-scf00161 | 11 |
| AX-158037985 | 7 | 71.295 | KV453001.1 | 10679311 | 11-scf00161 | 11 |
| AX-158037988 | 7 | 71.295 | KV453001.1 | 10681469 | 11-scf00161 | 11 |
| AX-158037989 | 7 | 71.295 | KV453001.1 | 10681881 | 11-scf00161 | 11 |
| AX-158037991 | 7 | 71.295 | KV453001.1 | 10682781 | 11-scf00161 | 11 |
| AX-158037992 | 7 | 71.295 | KV453001.1 | 10683243 | 11-scf00161 | 11 |
| AX-158037995 | 7 | 71.295 | KV453001.1 | 10688924 | 11-scf00161 | 11 |
| AX-158038005 | 7 | 71.295 | KV453001.1 | 10696411 | 11-scf00161 | 11 |
| AX-158038006 | 7 | 71.295 | KV453001.1 | 10697198 | 11-scf00161 | 11 |
| AX-158038007 | 7 | 71.295 | KV453001.1 | 10697625 | 11-scf00161 | 11 |
| AX-158038009 | 7 | 71.295 | KV453001.1 | 10701635 | 11-scf00161 | 11 |
| AX-158391547 | 7 | 71.295 | KV453001.1 | 10701824 | 11-scf00161 | 11 |
| AX-158038010 | 7 | 71.295 | KV453001.1 | 10702319 | 11-scf00161 | 11 |
| AX-158038011 | 7 | 71.295 | KV453001.1 | 10704131 | 11-scf00161 | 11 |
| AX-158038012 | 7 | 71.295 | KV453001.1 | 10704567 | 11-scf00161 | 11 |
| AX-158038015 | 7 | 71.295 | KV453001.1 | 10706071 | 11-scf00161 | 11 |
| AX-158038017 | 7 | 71.295 | KV453001.1 | 10707420 | 11-scf00161 | 11 |
| AX-158038018 | 7 | 71.295 | KV453001.1 | 10707943 | 11-scf00161 | 11 |
| AX-158038019 | 7 | 71.295 | KV453001.1 | 10709138 | 11-scf00161 | 11 |
| AX-158038021 | 7 | 71.295 | KV453001.1 | 10710957 | 11-scf00161 | 11 |
| AX-158038022 | 7 | 71.295 | KV453001.1 | 10711514 | 11-scf00161 | 11 |
| AX-158038023 | 7 | 71.295 | KV453001.1 | 10711902 | 11-scf00161 | 11 |
| AX-158038025 | 7 | 71.295 | KV453001.1 | 10713585 | 11-scf00161 | 11 |
| AX-158038034 | 7 | 71.295 | KV453001.1 | 10722460 | 11-scf00161 | 11 |
| AX-158038039 | 7 | 71.295 | KV453001.1 | 10724315 | 11-scf00161 | 11 |
| AX-157821892 | 7 | 71.295 | KV453001.1 | 10731502 | 11-scf00161 | 11 |
| AX-158038052 | 7 | 71.295 | KV453001.1 | 10751378 | 11-scf00161 | 11 |
| AX-158038054 | 7 | 71.295 | KV453001.1 | 10755487 | 11-scf00161 | 11 |
| AX-158038056 | 7 | 71.295 | KV453001.1 | 10756641 | 11-scf00161 | 11 |
| AX-158038057 | 7 | 71.295 | KV453001.1 | 10758458 | 11-scf00161 | 11 |
| AX-158038064 | 7 | 71.295 | KV453001.1 | 10761790 | 11-scf00161 | 11 |
| AX-157821896 | 7 | 71.295 | KV453001.1 | 10762078 | 11-scf00161 | 11 |
| AX-158038065 | 7 | 71.295 | KV453001.1 | 10762148 | 11-scf00161 | 11 |
| AX-158038067 | 7 | 71.295 | KV453001.1 | 10763253 | 11-scf00161 | 11 |
| AX-158038070 | 7 | 71.295 | KV453001.1 | 10765620 | 11-scf00161 | 11 |
| AX-157821899 | 7 | 71.295 | KV453001.1 | 10781965 | 11-scf00161 | 11 |
| AX-158038090 | 7 | 71.295 | KV453001.1 | 10789616 | 11-scf00161 | 11 |
| AX-157821904 | 7 | 71.295 | KV453001.1 | 10811351 | 11-scf00161 | 11 |
| AX-158038105 | 7 | 71.295 | KV453001.1 | 10811400 | 11-scf00161 | 11 |
| AX-158038149 | 7 | 71.295 | KV453001.1 | 10857215 | 11-scf00161 | 11 |
| AX-158038174 | 7 | 71.295 | KV453001.1 | 10878978 | 11-scf00161 | 11 |
| AX-158038175 | 7 | 71.295 | KV453001.1 | 10879836 | 11-scf00161 | 11 |
| AX-157821907 | 7 | 71.295 | KV453001.1 | 10881562 | 11-scf00161 | 11 |
| AX-157717950 | 7 | 71.295 | KV453001.1 | 10883334 | 11-scf00161 | 11 |

|              |   |        |             |          |                |    |
|--------------|---|--------|-------------|----------|----------------|----|
| AX-158038210 | 7 | 71.295 | KV453001.1  | 10951908 | 11-scf00161    | 11 |
| AX-158038238 | 7 | 71.295 | KV453001.1  | 10984185 | 11-scf00161    | 11 |
| AX-158038242 | 7 | 71.295 | KV453001.1  | 10990286 | 11-scf00161    | 11 |
| AX-158038253 | 7 | 71.295 | KV453001.1  | 11001916 | 11-scf00161    | 11 |
| AX-158406281 | 7 | 71.295 | KV453001.1  | 11009342 | 11-scf00161    | 11 |
| AX-157753566 | 7 | 71.295 | KV453001.1  | 11035660 | 11-scf00161    | 11 |
| AX-158038292 | 7 | 71.295 | KV453001.1  | 11037470 | 11-scf00161    | 11 |
| AX-157870510 | 7 | 71.295 | KV453001.1  | 11038171 | 11-scf00161    | 11 |
| AX-158038311 | 7 | 71.295 | KV453001.1  | 11052931 | 11-scf00161    | 11 |
| AX-158038383 | 7 | 71.295 | KV453001.1  | 11144638 | 11-scf00161    | 11 |
| AX-157700403 | 7 | 71.295 | FI876594.1  | 269      | IORI212 lctalu | UN |
| AX-157706268 | 7 | 71.295 | 3ML01032044 | 645      | scf07656_1     | UN |
| AX-157752951 | 7 | 71.313 | KV453001.1  | 9593960  | 11-scf00161    | 11 |
| AX-158037659 | 7 | 71.313 | KV453001.1  | 10352572 | 11-scf00161    | 11 |
| AX-158037682 | 7 | 71.313 | KV453001.1  | 10363834 | 11-scf00161    | 11 |
| AX-158037695 | 7 | 71.313 | KV453001.1  | 10372592 | 11-scf00161    | 11 |
| AX-157821891 | 7 | 71.313 | KV453001.1  | 10682703 | 11-scf00161    | 11 |
| AX-158038000 | 7 | 71.313 | KV453001.1  | 10692695 | 11-scf00161    | 11 |
| AX-158038001 | 7 | 71.313 | KV453001.1  | 10693669 | 11-scf00161    | 11 |
| AX-158038020 | 7 | 71.313 | KV453001.1  | 10709558 | 11-scf00161    | 11 |
| AX-158038167 | 7 | 71.313 | KV453001.1  | 10870983 | 11-scf00161    | 11 |
| AX-157739677 | 7 | 71.313 | KV453001.1  | 11040739 | 11-scf00161    | 11 |
| AX-158038003 | 7 | 71.322 | KV453001.1  | 10695735 | 11-scf00161    | 11 |
| AX-158038014 | 7 | 71.341 | KV453001.1  | 10705139 | 11-scf00161    | 11 |
| AX-158037792 | 7 | 71.362 | KV453001.1  | 10496731 | 11-scf00161    | 11 |
| AX-158038024 | 7 | 71.362 | KV453001.1  | 10712416 | 11-scf00161    | 11 |
| AX-157753922 | 7 | 71.362 | KV453001.1  | 10713071 | 11-scf00161    | 11 |
| AX-158038027 | 7 | 71.362 | KV453001.1  | 10714143 | 11-scf00161    | 11 |
| AX-158038530 | 7 | 71.362 | KV453001.1  | 11278268 | 11-scf00161    | 11 |
| AX-158038033 | 7 | 71.383 | KV453001.1  | 10721901 | 11-scf00161    | 11 |
| AX-158036978 | 7 | 71.404 | KV453001.1  | 9223293  | 11-scf00161    | 11 |
| AX-158038044 | 7 | 71.404 | KV453001.1  | 10730752 | 11-scf00161    | 11 |
| AX-157757406 | 7 | 71.404 | KV453001.1  | 10739670 | 11-scf00161    | 11 |
| AX-157716464 | 7 | 71.404 | KV453001.1  | 10745437 | 11-scf00161    | 11 |
| AX-157821894 | 7 | 71.404 | KV453001.1  | 10751639 | 11-scf00161    | 11 |
| AX-157758732 | 7 | 71.404 | KV453001.1  | 11045522 | 11-scf00161    | 11 |
| AX-158031399 | 7 | 71.513 | KV453001.1  | 4086743  | 11-scf00161    | 11 |
| AX-157876498 | 7 | 71.513 | KV453001.1  | 4122402  | 11-scf00161    | 11 |
| AX-158032751 | 7 | 71.513 | KV453001.1  | 5102427  | 11-scf00161    | 11 |
| AX-158379794 | 7 | 71.513 | KV453001.1  | 5103280  | 11-scf00161    | 11 |
| AX-157821710 | 7 | 71.513 | KV453001.1  | 7553754  | 11-scf00161    | 11 |
| AX-157821751 | 7 | 71.513 | KV453001.1  | 8138067  | 11-scf00161    | 11 |
| AX-158036801 | 7 | 71.513 | KV453001.1  | 8977321  | 11-scf00161    | 11 |
| AX-158037082 | 7 | 71.513 | KV453001.1  | 9366803  | 11-scf00161    | 11 |
| AX-157701899 | 7 | 71.513 | KV453001.1  | 10106665 | 11-scf00161    | 11 |
| AX-158037747 | 7 | 71.513 | KV453001.1  | 10436073 | 11-scf00161    | 11 |
| AX-158038058 | 7 | 71.513 | KV453001.1  | 10758873 | 11-scf00161    | 11 |
| AX-158038061 | 7 | 71.513 | KV453001.1  | 10760041 | 11-scf00161    | 11 |
| AX-158038062 | 7 | 71.513 | KV453001.1  | 10760458 | 11-scf00161    | 11 |
| AX-158038088 | 7 | 71.513 | KV453001.1  | 10788711 | 11-scf00161    | 11 |
| AX-157725716 | 7 | 71.513 | KV453001.1  | 10795210 | 11-scf00161    | 11 |

|              |   |        |             |          |             |    |
|--------------|---|--------|-------------|----------|-------------|----|
| AX-158038096 | 7 | 71.513 | KV453001.1  | 10799113 | 11-scf00161 | 11 |
| AX-157719282 | 7 | 71.513 | KV453001.1  | 10799699 | 11-scf00161 | 11 |
| AX-158038134 | 7 | 71.513 | KV453001.1  | 10840661 | 11-scf00161 | 11 |
| AX-158038137 | 7 | 71.513 | KV453001.1  | 10842557 | 11-scf00161 | 11 |
| AX-158038154 | 7 | 71.513 | KV453001.1  | 10861133 | 11-scf00161 | 11 |
| AX-157821908 | 7 | 71.513 | KV453001.1  | 10885336 | 11-scf00161 | 11 |
| AX-158038181 | 7 | 71.513 | KV453001.1  | 10909744 | 11-scf00161 | 11 |
| AX-157821915 | 7 | 71.513 | KV453001.1  | 10936764 | 11-scf00161 | 11 |
| AX-157726661 | 7 | 71.513 | KV453001.1  | 10942502 | 11-scf00161 | 11 |
| AX-157821917 | 7 | 71.513 | KV453001.1  | 10949792 | 11-scf00161 | 11 |
| AX-158038206 | 7 | 71.513 | KV453001.1  | 10950009 | 11-scf00161 | 11 |
| AX-158038207 | 7 | 71.513 | KV453001.1  | 10951187 | 11-scf00161 | 11 |
| AX-157745874 | 7 | 71.513 | KV453001.1  | 10955634 | 11-scf00161 | 11 |
| AX-158038217 | 7 | 71.513 | KV453001.1  | 10956708 | 11-scf00161 | 11 |
| AX-157821918 | 7 | 71.513 | KV453001.1  | 10964809 | 11-scf00161 | 11 |
| AX-157865391 | 7 | 71.513 | KV453001.1  | 10975975 | 11-scf00161 | 11 |
| AX-158038226 | 7 | 71.513 | KV453001.1  | 10976182 | 11-scf00161 | 11 |
| AX-158038235 | 7 | 71.513 | KV453001.1  | 10982542 | 11-scf00161 | 11 |
| AX-158038237 | 7 | 71.513 | KV453001.1  | 10983143 | 11-scf00161 | 11 |
| AX-158038241 | 7 | 71.513 | KV453001.1  | 10988215 | 11-scf00161 | 11 |
| AX-158038243 | 7 | 71.513 | KV453001.1  | 10991948 | 11-scf00161 | 11 |
| AX-157865392 | 7 | 71.513 | KV453001.1  | 10992563 | 11-scf00161 | 11 |
| AX-158038246 | 7 | 71.513 | KV453001.1  | 10994256 | 11-scf00161 | 11 |
| AX-158038247 | 7 | 71.513 | KV453001.1  | 10998011 | 11-scf00161 | 11 |
| AX-157719103 | 7 | 71.513 | KV453001.1  | 11000694 | 11-scf00161 | 11 |
| AX-158038255 | 7 | 71.513 | KV453001.1  | 11002406 | 11-scf00161 | 11 |
| AX-157821919 | 7 | 71.513 | KV453001.1  | 11014221 | 11-scf00161 | 11 |
| AX-157713413 | 7 | 71.513 | KV453001.1  | 11015419 | 11-scf00161 | 11 |
| AX-158038259 | 7 | 71.513 | KV453001.1  | 11017237 | 11-scf00161 | 11 |
| AX-158038267 | 7 | 71.513 | KV453001.1  | 11020250 | 11-scf00161 | 11 |
| AX-157710568 | 7 | 71.513 | KV453001.1  | 11022451 | 11-scf00161 | 11 |
| AX-158038270 | 7 | 71.513 | KV453001.1  | 11022657 | 11-scf00161 | 11 |
| AX-158038271 | 7 | 71.513 | KV453001.1  | 11023051 | 11-scf00161 | 11 |
| AX-158038273 | 7 | 71.513 | KV453001.1  | 11023500 | 11-scf00161 | 11 |
| AX-158038284 | 7 | 71.513 | KV453001.1  | 11031310 | 11-scf00161 | 11 |
| AX-158038287 | 7 | 71.513 | KV453001.1  | 11033240 | 11-scf00161 | 11 |
| AX-158038291 | 7 | 71.513 | KV453001.1  | 11036489 | 11-scf00161 | 11 |
| AX-157865394 | 7 | 71.513 | KV453001.1  | 11036723 | 11-scf00161 | 11 |
| AX-158038296 | 7 | 71.513 | KV453001.1  | 11039887 | 11-scf00161 | 11 |
| AX-157821921 | 7 | 71.513 | KV453001.1  | 11040814 | 11-scf00161 | 11 |
| AX-158038300 | 7 | 71.513 | KV453001.1  | 11042152 | 11-scf00161 | 11 |
| AX-158038308 | 7 | 71.513 | KV453001.1  | 11046617 | 11-scf00161 | 11 |
| AX-158038313 | 7 | 71.513 | KV453001.1  | 11055046 | 11-scf00161 | 11 |
| AX-158038316 | 7 | 71.513 | KV453001.1  | 11056793 | 11-scf00161 | 11 |
| AX-158038320 | 7 | 71.513 | KV453001.1  | 11058184 | 11-scf00161 | 11 |
| AX-157785670 | 7 | 71.513 | KV453001.1  | 11087118 | 11-scf00161 | 11 |
| AX-158391554 | 7 | 71.513 | KV453001.1  | 11140039 | 11-scf00161 | 11 |
| AX-157821931 | 7 | 71.513 | KV453001.1  | 11178463 | 11-scf00161 | 11 |
| AX-158038451 | 7 | 71.513 | KV453001.1  | 11203455 | 11-scf00161 | 11 |
| AX-158038506 | 7 | 71.513 | KV453001.1  | 11252246 | 11-scf00161 | 11 |
| AX-157712096 | 7 | 71.513 | 3ML01034289 | 218      | scf09959_1  | UN |

|              |   |        |            |          |             |    |
|--------------|---|--------|------------|----------|-------------|----|
| AX-158037160 | 7 | 71.57  | KV453001.1 | 9479852  | 11-scf00161 | 11 |
| AX-158037512 | 7 | 71.57  | KV453001.1 | 10160097 | 11-scf00161 | 11 |
| AX-158037576 | 7 | 71.57  | KV453001.1 | 10219234 | 11-scf00161 | 11 |
| AX-158037667 | 7 | 71.57  | KV453001.1 | 10355931 | 11-scf00161 | 11 |
| AX-158037677 | 7 | 71.57  | KV453001.1 | 10360274 | 11-scf00161 | 11 |
| AX-158037684 | 7 | 71.57  | KV453001.1 | 10365200 | 11-scf00161 | 11 |
| AX-158037806 | 7 | 71.57  | KV453001.1 | 10515305 | 11-scf00161 | 11 |
| AX-158038331 | 7 | 71.57  | KV453001.1 | 11074503 | 11-scf00161 | 11 |
| AX-158037424 | 7 | 71.623 | KV453001.1 | 10022364 | 11-scf00161 | 11 |
| AX-157821838 | 7 | 71.623 | KV453001.1 | 10034605 | 11-scf00161 | 11 |
| AX-157821839 | 7 | 71.623 | KV453001.1 | 10035751 | 11-scf00161 | 11 |
| AX-158037435 | 7 | 71.623 | KV453001.1 | 10035891 | 11-scf00161 | 11 |
| AX-158037439 | 7 | 71.623 | KV453001.1 | 10038453 | 11-scf00161 | 11 |
| AX-158037440 | 7 | 71.623 | KV453001.1 | 10038845 | 11-scf00161 | 11 |
| AX-158037447 | 7 | 71.623 | KV453001.1 | 10053865 | 11-scf00161 | 11 |
| AX-158037454 | 7 | 71.623 | KV453001.1 | 10068693 | 11-scf00161 | 11 |
| AX-158037462 | 7 | 71.623 | KV453001.1 | 10091701 | 11-scf00161 | 11 |
| AX-158037467 | 7 | 71.623 | KV453001.1 | 10095248 | 11-scf00161 | 11 |
| AX-157764073 | 7 | 71.623 | KV453001.1 | 10097842 | 11-scf00161 | 11 |
| AX-158037738 | 7 | 71.623 | KV453001.1 | 10411814 | 11-scf00161 | 11 |
| AX-158038113 | 7 | 71.623 | KV453001.1 | 10824501 | 11-scf00161 | 11 |
| AX-158038256 | 7 | 71.623 | KV453001.1 | 11006977 | 11-scf00161 | 11 |
| AX-157753384 | 7 | 71.623 | KV453001.1 | 11088322 | 11-scf00161 | 11 |
| AX-158038340 | 7 | 71.623 | KV453001.1 | 11091036 | 11-scf00161 | 11 |
| AX-158038354 | 7 | 71.623 | KV453001.1 | 11105083 | 11-scf00161 | 11 |
| AX-158038356 | 7 | 71.623 | KV453001.1 | 11107862 | 11-scf00161 | 11 |
| AX-158038358 | 7 | 71.623 | KV453001.1 | 11112637 | 11-scf00161 | 11 |
| AX-157717156 | 7 | 71.623 | KV453001.1 | 11113687 | 11-scf00161 | 11 |
| AX-158038360 | 7 | 71.623 | KV453001.1 | 11119701 | 11-scf00161 | 11 |
| AX-158038362 | 7 | 71.623 | KV453001.1 | 11122483 | 11-scf00161 | 11 |
| AX-158038364 | 7 | 71.623 | KV453001.1 | 11124620 | 11-scf00161 | 11 |
| AX-158038365 | 7 | 71.623 | KV453001.1 | 11124858 | 11-scf00161 | 11 |
| AX-157821929 | 7 | 71.623 | KV453001.1 | 11126098 | 11-scf00161 | 11 |
| AX-157821930 | 7 | 71.623 | KV453001.1 | 11133983 | 11-scf00161 | 11 |
| AX-158038379 | 7 | 71.623 | KV453001.1 | 11141239 | 11-scf00161 | 11 |
| AX-158038385 | 7 | 71.623 | KV453001.1 | 11147455 | 11-scf00161 | 11 |
| AX-158038390 | 7 | 71.623 | KV453001.1 | 11150429 | 11-scf00161 | 11 |
| AX-158037122 | 7 | 71.841 | KV453001.1 | 9426763  | 11-scf00161 | 11 |
| AX-158037652 | 7 | 71.841 | KV453001.1 | 10333125 | 11-scf00161 | 11 |
| AX-158038398 | 7 | 71.841 | KV453001.1 | 11159894 | 11-scf00161 | 11 |
| AX-157750464 | 7 | 71.841 | KV453001.1 | 11160917 | 11-scf00161 | 11 |
| AX-158038400 | 7 | 71.841 | KV453001.1 | 11161382 | 11-scf00161 | 11 |
| AX-158038409 | 7 | 71.841 | KV453001.1 | 11170781 | 11-scf00161 | 11 |
| AX-158038412 | 7 | 71.841 | KV453001.1 | 11173339 | 11-scf00161 | 11 |
| AX-158038420 | 7 | 71.95  | KV453001.1 | 11178238 | 11-scf00161 | 11 |
| AX-158038422 | 7 | 71.95  | KV453001.1 | 11179889 | 11-scf00161 | 11 |
| AX-158038424 | 7 | 71.95  | KV453001.1 | 11182056 | 11-scf00161 | 11 |
| AX-158038441 | 7 | 71.95  | KV453001.1 | 11198140 | 11-scf00161 | 11 |
| AX-158038461 | 7 | 71.95  | KV453001.1 | 11211186 | 11-scf00161 | 11 |
| AX-158038426 | 7 | 72.02  | KV453001.1 | 11184504 | 11-scf00161 | 11 |
| AX-158038417 | 7 | 72.06  | KV453001.1 | 11176940 | 11-scf00161 | 11 |

|              |   |        |            |          |             |    |
|--------------|---|--------|------------|----------|-------------|----|
| AX-157741371 | 7 | 72.06  | KV453001.1 | 11186560 | 11-scf00161 | 11 |
| AX-158038430 | 7 | 72.06  | KV453001.1 | 11188304 | 11-scf00161 | 11 |
| AX-157821932 | 7 | 72.06  | KV453001.1 | 11189369 | 11-scf00161 | 11 |
| AX-158038431 | 7 | 72.06  | KV453001.1 | 11189578 | 11-scf00161 | 11 |
| AX-157821933 | 7 | 72.06  | KV453001.1 | 11189754 | 11-scf00161 | 11 |
| AX-158038432 | 7 | 72.06  | KV453001.1 | 11190820 | 11-scf00161 | 11 |
| AX-158038437 | 7 | 72.06  | KV453001.1 | 11194643 | 11-scf00161 | 11 |
| AX-158038439 | 7 | 72.06  | KV453001.1 | 11196579 | 11-scf00161 | 11 |
| AX-158038446 | 7 | 72.06  | KV453001.1 | 11201015 | 11-scf00161 | 11 |
| AX-158038457 | 7 | 72.06  | KV453001.1 | 11208040 | 11-scf00161 | 11 |
| AX-158038463 | 7 | 72.06  | KV453001.1 | 11212715 | 11-scf00161 | 11 |
| AX-158038474 | 7 | 72.06  | KV453001.1 | 11220363 | 11-scf00161 | 11 |
| AX-158038492 | 7 | 72.06  | KV453001.1 | 11234261 | 11-scf00161 | 11 |
| AX-158038505 | 7 | 72.06  | KV453001.1 | 11251835 | 11-scf00161 | 11 |
| AX-158038539 | 7 | 72.06  | KV453001.1 | 11286541 | 11-scf00161 | 11 |
| AX-158038585 | 7 | 72.06  | KV453001.1 | 11325818 | 11-scf00161 | 11 |
| AX-158038630 | 7 | 72.06  | KV453001.1 | 11370726 | 11-scf00161 | 11 |
| AX-158038680 | 7 | 72.06  | KV453001.1 | 11420441 | 11-scf00161 | 11 |
| AX-158038467 | 7 | 72.107 | KV453001.1 | 11215653 | 11-scf00161 | 11 |
| AX-157885081 | 7 | 72.169 | KV453001.1 | 11217962 | 11-scf00161 | 11 |
| AX-158038471 | 7 | 72.169 | KV453001.1 | 11218575 | 11-scf00161 | 11 |
| AX-158038478 | 7 | 72.169 | KV453001.1 | 11224040 | 11-scf00161 | 11 |
| AX-158038479 | 7 | 72.169 | KV453001.1 | 11224451 | 11-scf00161 | 11 |
| AX-158391556 | 7 | 72.169 | KV453001.1 | 11224506 | 11-scf00161 | 11 |
| AX-158038490 | 7 | 72.169 | KV453001.1 | 11233736 | 11-scf00161 | 11 |
| AX-158383896 | 7 | 72.169 | KV453001.1 | 11235003 | 11-scf00161 | 11 |
| AX-158038493 | 7 | 72.169 | KV453001.1 | 11236824 | 11-scf00161 | 11 |
| AX-158038497 | 7 | 72.169 | KV453001.1 | 11239427 | 11-scf00161 | 11 |
| AX-158038499 | 7 | 72.169 | KV453001.1 | 11243685 | 11-scf00161 | 11 |
| AX-157821934 | 7 | 72.169 | KV453001.1 | 11245073 | 11-scf00161 | 11 |
| AX-158038502 | 7 | 72.169 | KV453001.1 | 11246948 | 11-scf00161 | 11 |
| AX-158038540 | 7 | 72.169 | KV453001.1 | 11290518 | 11-scf00161 | 11 |
| AX-158038832 | 7 | 72.169 | KV453001.1 | 11619293 | 11-scf00161 | 11 |
| AX-158038503 | 7 | 72.278 | KV453001.1 | 11250085 | 11-scf00161 | 11 |
| AX-157856396 | 7 | 72.278 | KV453001.1 | 11250893 | 11-scf00161 | 11 |
| AX-158038509 | 7 | 72.278 | KV453001.1 | 11255612 | 11-scf00161 | 11 |
| AX-158038511 | 7 | 72.278 | KV453001.1 | 11256061 | 11-scf00161 | 11 |
| AX-158038512 | 7 | 72.278 | KV453001.1 | 11257162 | 11-scf00161 | 11 |
| AX-158038519 | 7 | 72.278 | KV453001.1 | 11263448 | 11-scf00161 | 11 |
| AX-158038483 | 7 | 72.299 | KV453001.1 | 11229013 | 11-scf00161 | 11 |
| AX-158038495 | 7 | 72.299 | KV453001.1 | 11237966 | 11-scf00161 | 11 |
| AX-158038500 | 7 | 72.299 | KV453001.1 | 11245464 | 11-scf00161 | 11 |
| AX-157743723 | 7 | 72.299 | KV453001.1 | 11259068 | 11-scf00161 | 11 |
| AX-158038515 | 7 | 72.299 | KV453001.1 | 11261878 | 11-scf00161 | 11 |
| AX-157856398 | 7 | 72.299 | KV453001.1 | 11372704 | 11-scf00161 | 11 |
| AX-157856399 | 7 | 72.299 | KV453001.1 | 11394180 | 11-scf00161 | 11 |
| AX-158038514 | 7 | 72.418 | KV453001.1 | 11261364 | 11-scf00161 | 11 |
| AX-158038442 | 7 | 72.497 | KV453001.1 | 11199844 | 11-scf00161 | 11 |
| AX-158408442 | 7 | 72.497 | KV453001.1 | 11264508 | 11-scf00161 | 11 |
| AX-158038521 | 7 | 72.497 | KV453001.1 | 11265073 | 11-scf00161 | 11 |
| AX-157748510 | 7 | 72.497 | KV453001.1 | 11270701 | 11-scf00161 | 11 |

|              |   |        |            |          |             |    |
|--------------|---|--------|------------|----------|-------------|----|
| AX-158038524 | 7 | 72.497 | KV453001.1 | 11271427 | 11-scf00161 | 11 |
| AX-157714613 | 7 | 72.497 | KV453001.1 | 11273208 | 11-scf00161 | 11 |
| AX-158038526 | 7 | 72.497 | KV453001.1 | 11274868 | 11-scf00161 | 11 |
| AX-158038534 | 7 | 72.497 | KV453001.1 | 11283204 | 11-scf00161 | 11 |
| AX-158038543 | 7 | 72.497 | KV453001.1 | 11292650 | 11-scf00161 | 11 |
| AX-158038549 | 7 | 72.497 | KV453001.1 | 11296524 | 11-scf00161 | 11 |
| AX-158038551 | 7 | 72.497 | KV453001.1 | 11300275 | 11-scf00161 | 11 |
| AX-158038554 | 7 | 72.497 | KV453001.1 | 11302527 | 11-scf00161 | 11 |
| AX-157750169 | 7 | 72.497 | KV453001.1 | 11304641 | 11-scf00161 | 11 |
| AX-157747544 | 7 | 72.567 | KV453001.1 | 11301040 | 11-scf00161 | 11 |
| AX-157885083 | 7 | 72.567 | KV453001.1 | 11301741 | 11-scf00161 | 11 |
| AX-158391557 | 7 | 72.606 | KV453001.1 | 11303362 | 11-scf00161 | 11 |
| AX-158038556 | 7 | 72.606 | KV453001.1 | 11303494 | 11-scf00161 | 11 |
| AX-158038561 | 7 | 72.606 | KV453001.1 | 11307778 | 11-scf00161 | 11 |
| AX-157856397 | 7 | 72.715 | KV453001.1 | 11310371 | 11-scf00161 | 11 |
| AX-158038564 | 7 | 72.715 | KV453001.1 | 11310507 | 11-scf00161 | 11 |
| AX-158038429 | 7 | 72.717 | KV453001.1 | 11187616 | 11-scf00161 | 11 |
| AX-158038481 | 7 | 72.717 | KV453001.1 | 11226508 | 11-scf00161 | 11 |
| AX-157750387 | 7 | 72.717 | KV453001.1 | 11247716 | 11-scf00161 | 11 |
| AX-158038568 | 7 | 72.717 | KV453001.1 | 11316432 | 11-scf00161 | 11 |
| AX-158038631 | 7 | 72.717 | KV453001.1 | 11371767 | 11-scf00161 | 11 |
| AX-158038569 | 7 | 72.786 | KV453001.1 | 11317108 | 11-scf00161 | 11 |
| AX-158038580 | 7 | 72.875 | KV453001.1 | 11323687 | 11-scf00161 | 11 |
| AX-158038587 | 7 | 72.969 | KV453001.1 | 11327619 | 11-scf00161 | 11 |
| AX-158038591 | 7 | 73.29  | KV453001.1 | 11335317 | 11-scf00161 | 11 |
| AX-158038586 | 7 | 73.482 | KV453001.1 | 11326675 | 11-scf00161 | 11 |
| AX-158038594 | 7 | 73.482 | KV453001.1 | 11338757 | 11-scf00161 | 11 |
| AX-158038597 | 7 | 73.482 | KV453001.1 | 11340147 | 11-scf00161 | 11 |
| AX-158038598 | 7 | 73.591 | KV453001.1 | 11341205 | 11-scf00161 | 11 |
| AX-158038600 | 7 | 73.591 | KV453001.1 | 11342707 | 11-scf00161 | 11 |
| AX-158038601 | 7 | 73.591 | KV453001.1 | 11343634 | 11-scf00161 | 11 |
| AX-158038634 | 7 | 73.591 | KV453001.1 | 11375840 | 11-scf00161 | 11 |
| AX-158038648 | 7 | 73.591 | KV453001.1 | 11397828 | 11-scf00161 | 11 |
| AX-158038608 | 7 | 73.758 | KV453001.1 | 11352989 | 11-scf00161 | 11 |
| AX-158038639 | 7 | 73.758 | KV453001.1 | 11386595 | 11-scf00161 | 11 |
| AX-158038618 | 7 | 73.918 | KV453001.1 | 11359954 | 11-scf00161 | 11 |
| AX-157726587 | 7 | 73.918 | KV453001.1 | 11361686 | 11-scf00161 | 11 |
| AX-158038621 | 7 | 73.918 | KV453001.1 | 11363932 | 11-scf00161 | 11 |
| AX-157775467 | 7 | 73.918 | KV453001.1 | 11365688 | 11-scf00161 | 11 |
| AX-158038649 | 7 | 73.918 | KV453001.1 | 11398312 | 11-scf00161 | 11 |
| AX-158038627 | 7 | 73.919 | KV453001.1 | 11370228 | 11-scf00161 | 11 |
| AX-158038633 | 7 | 73.919 | KV453001.1 | 11374265 | 11-scf00161 | 11 |
| AX-158038522 | 7 | 73.959 | KV453001.1 | 11266445 | 11-scf00161 | 11 |
| AX-158038610 | 7 | 73.959 | KV453001.1 | 11355079 | 11-scf00161 | 11 |
| AX-158038636 | 7 | 73.959 | KV453001.1 | 11378308 | 11-scf00161 | 11 |
| AX-158038609 | 7 | 73.987 | KV453001.1 | 11353966 | 11-scf00161 | 11 |
| AX-158038641 | 7 | 73.987 | KV453001.1 | 11388073 | 11-scf00161 | 11 |
| AX-158038617 | 7 | 74.012 | KV453001.1 | 11359288 | 11-scf00161 | 11 |
| AX-157741991 | 7 | 74.012 | KV453001.1 | 11383294 | 11-scf00161 | 11 |
| AX-158038655 | 7 | 74.012 | KV453001.1 | 11402207 | 11-scf00161 | 11 |
| AX-158379821 | 7 | 74.012 | KV453001.1 | 11403459 | 11-scf00161 | 11 |

|              |   |        |            |          |             |    |
|--------------|---|--------|------------|----------|-------------|----|
| AX-158038657 | 7 | 74.012 | KV453001.1 | 11403559 | 11-scf00161 | 11 |
| AX-158038659 | 7 | 74.012 | KV453001.1 | 11404034 | 11-scf00161 | 11 |
| AX-158038677 | 7 | 74.012 | KV453001.1 | 11419593 | 11-scf00161 | 11 |
| AX-158038626 | 7 | 74.028 | KV453001.1 | 11369607 | 11-scf00161 | 11 |
| AX-158038642 | 7 | 74.028 | KV453001.1 | 11389470 | 11-scf00161 | 11 |
| AX-158038666 | 7 | 74.028 | KV453001.1 | 11409057 | 11-scf00161 | 11 |
| AX-158038667 | 7 | 74.028 | KV453001.1 | 11411178 | 11-scf00161 | 11 |
| AX-158038670 | 7 | 74.028 | KV453001.1 | 11413897 | 11-scf00161 | 11 |
| AX-158038673 | 7 | 74.028 | KV453001.1 | 11417209 | 11-scf00161 | 11 |
| AX-158038675 | 7 | 74.028 | KV453001.1 | 11419103 | 11-scf00161 | 11 |
| AX-158038676 | 7 | 74.028 | KV453001.1 | 11419189 | 11-scf00161 | 11 |
| AX-158038685 | 7 | 74.028 | KV453001.1 | 11425450 | 11-scf00161 | 11 |
| AX-158038689 | 7 | 74.191 | KV453001.1 | 11427603 | 11-scf00161 | 11 |
| AX-157719773 | 7 | 74.356 | KV453001.1 | 11350569 | 11-scf00161 | 11 |
| AX-157727316 | 7 | 74.356 | KV453001.1 | 11432307 | 11-scf00161 | 11 |
| AX-158038693 | 7 | 74.356 | KV453001.1 | 11433534 | 11-scf00161 | 11 |
| AX-158038694 | 7 | 74.356 | KV453001.1 | 11434379 | 11-scf00161 | 11 |
| AX-157739545 | 7 | 74.356 | KV453001.1 | 11434881 | 11-scf00161 | 11 |
| AX-157727132 | 7 | 74.356 | KV453001.1 | 11436654 | 11-scf00161 | 11 |
| AX-158038697 | 7 | 74.356 | KV453001.1 | 11437717 | 11-scf00161 | 11 |
| AX-158038698 | 7 | 74.356 | KV453001.1 | 11438204 | 11-scf00161 | 11 |
| AX-158038702 | 7 | 74.356 | KV453001.1 | 11440185 | 11-scf00161 | 11 |
| AX-158038716 | 7 | 74.356 | KV453001.1 | 11454838 | 11-scf00161 | 11 |
| AX-158038718 | 7 | 74.356 | KV453001.1 | 11456946 | 11-scf00161 | 11 |
| AX-158038721 | 7 | 74.356 | KV453001.1 | 11458743 | 11-scf00161 | 11 |
| AX-158038727 | 7 | 74.356 | KV453001.1 | 11461399 | 11-scf00161 | 11 |
| AX-158038728 | 7 | 74.356 | KV453001.1 | 11463075 | 11-scf00161 | 11 |
| AX-158408445 | 7 | 74.356 | KV453001.1 | 11466047 | 11-scf00161 | 11 |
| AX-157821943 | 7 | 74.356 | KV453001.1 | 11469668 | 11-scf00161 | 11 |
| AX-158038750 | 7 | 74.356 | KV453001.1 | 11502767 | 11-scf00161 | 11 |
| AX-158038757 | 7 | 74.356 | KV453001.1 | 11510725 | 11-scf00161 | 11 |
| AX-158408447 | 7 | 74.356 | KV453001.1 | 11513614 | 11-scf00161 | 11 |
| AX-158038758 | 7 | 74.356 | KV453001.1 | 11514946 | 11-scf00161 | 11 |
| AX-158038760 | 7 | 74.356 | KV453001.1 | 11515224 | 11-scf00161 | 11 |
| AX-158038761 | 7 | 74.356 | KV453001.1 | 11515582 | 11-scf00161 | 11 |
| AX-158038769 | 7 | 74.356 | KV453001.1 | 11519018 | 11-scf00161 | 11 |
| AX-157870511 | 7 | 74.356 | KV453001.1 | 11520710 | 11-scf00161 | 11 |
| AX-157821947 | 7 | 74.356 | KV453001.1 | 11521694 | 11-scf00161 | 11 |
| AX-158038770 | 7 | 74.356 | KV453001.1 | 11522973 | 11-scf00161 | 11 |
| AX-158038776 | 7 | 74.356 | KV453001.1 | 11527656 | 11-scf00161 | 11 |
| AX-158038786 | 7 | 74.356 | KV453001.1 | 11534142 | 11-scf00161 | 11 |
| AX-158038798 | 7 | 74.356 | KV453001.1 | 11549787 | 11-scf00161 | 11 |
| AX-158038801 | 7 | 74.356 | KV453001.1 | 11553361 | 11-scf00161 | 11 |
| AX-158038802 | 7 | 74.356 | KV453001.1 | 11556696 | 11-scf00161 | 11 |
| AX-157744482 | 7 | 74.356 | KV453001.1 | 11557313 | 11-scf00161 | 11 |
| AX-158038803 | 7 | 74.356 | KV453001.1 | 11558237 | 11-scf00161 | 11 |
| AX-158038804 | 7 | 74.356 | KV453001.1 | 11558527 | 11-scf00161 | 11 |
| AX-158038808 | 7 | 74.356 | KV453001.1 | 11565055 | 11-scf00161 | 11 |
| AX-158038809 | 7 | 74.356 | KV453001.1 | 11567780 | 11-scf00161 | 11 |
| AX-158038810 | 7 | 74.356 | KV453001.1 | 11571194 | 11-scf00161 | 11 |
| AX-158038812 | 7 | 74.356 | KV453001.1 | 11574347 | 11-scf00161 | 11 |

|              |   |        |            |          |             |    |
|--------------|---|--------|------------|----------|-------------|----|
| AX-158038813 | 7 | 74.356 | KV453001.1 | 11575059 | 11-scf00161 | 11 |
| AX-157752316 | 7 | 74.356 | KV453001.1 | 11580597 | 11-scf00161 | 11 |
| AX-157743957 | 7 | 74.356 | KV453001.1 | 11583269 | 11-scf00161 | 11 |
| AX-158038816 | 7 | 74.356 | KV453001.1 | 11586173 | 11-scf00161 | 11 |
| AX-158038817 | 7 | 74.356 | KV453001.1 | 11587301 | 11-scf00161 | 11 |
| AX-157821952 | 7 | 74.356 | KV453001.1 | 11587670 | 11-scf00161 | 11 |
| AX-158038821 | 7 | 74.356 | KV453001.1 | 11591053 | 11-scf00161 | 11 |
| AX-158038822 | 7 | 74.356 | KV453001.1 | 11591966 | 11-scf00161 | 11 |
| AX-157821953 | 7 | 74.356 | KV453001.1 | 11592077 | 11-scf00161 | 11 |
| AX-158038824 | 7 | 74.356 | KV453001.1 | 11597108 | 11-scf00161 | 11 |
| AX-157821954 | 7 | 74.356 | KV453001.1 | 11598612 | 11-scf00161 | 11 |
| AX-158038825 | 7 | 74.356 | KV453001.1 | 11599528 | 11-scf00161 | 11 |
| AX-158038827 | 7 | 74.356 | KV453001.1 | 11605773 | 11-scf00161 | 11 |
| AX-158038830 | 7 | 74.356 | KV453001.1 | 11608638 | 11-scf00161 | 11 |
| AX-157821963 | 7 | 74.356 | KV453001.1 | 11716101 | 11-scf00161 | 11 |
| AX-158038919 | 7 | 74.356 | KV453001.1 | 11739425 | 11-scf00161 | 11 |
| AX-157717068 | 7 | 74.356 | KV453001.1 | 11742052 | 11-scf00161 | 11 |
| AX-158039013 | 7 | 74.356 | KV453001.1 | 11825909 | 11-scf00161 | 11 |
| AX-158039046 | 7 | 74.356 | KV453001.1 | 11863020 | 11-scf00161 | 11 |
| AX-157856404 | 7 | 74.356 | KV453001.1 | 11872507 | 11-scf00161 | 11 |
| AX-158039100 | 7 | 74.356 | KV453001.1 | 11905839 | 11-scf00161 | 11 |
| AX-157774976 | 7 | 74.356 | KV453001.1 | 11938928 | 11-scf00161 | 11 |
| AX-158039258 | 7 | 74.356 | KV453001.1 | 12072986 | 11-scf00161 | 11 |
| AX-157821994 | 7 | 74.356 | KV453001.1 | 12122449 | 11-scf00161 | 11 |
| AX-158039359 | 7 | 74.356 | KV453001.1 | 12197946 | 11-scf00161 | 11 |
| AX-158039362 | 7 | 74.356 | KV453001.1 | 12202092 | 11-scf00161 | 11 |
| AX-158039398 | 7 | 74.356 | KV453001.1 | 12236523 | 11-scf00161 | 11 |
| AX-158039418 | 7 | 74.356 | KV453001.1 | 12255766 | 11-scf00161 | 11 |
| AX-158039422 | 7 | 74.356 | KV453001.1 | 12263536 | 11-scf00161 | 11 |
| AX-157822007 | 7 | 74.356 | KV453001.1 | 12343026 | 11-scf00161 | 11 |
| AX-157822009 | 7 | 74.356 | KV453001.1 | 12345951 | 11-scf00161 | 11 |
| AX-158039488 | 7 | 74.356 | KV453001.1 | 12362392 | 11-scf00161 | 11 |
| AX-158039508 | 7 | 74.356 | KV453001.1 | 12374891 | 11-scf00161 | 11 |
| AX-158039536 | 7 | 74.356 | KV453001.1 | 12407660 | 11-scf00161 | 11 |
| AX-158039650 | 7 | 74.356 | KV453001.1 | 12525902 | 11-scf00161 | 11 |
| AX-158039666 | 7 | 74.356 | KV453001.1 | 12538355 | 11-scf00161 | 11 |
| AX-158039682 | 7 | 74.356 | KV453001.1 | 12564525 | 11-scf00161 | 11 |
| AX-158039705 | 7 | 74.356 | KV453001.1 | 12619052 | 11-scf00161 | 11 |
| AX-158039785 | 7 | 74.356 | KV453001.1 | 12740770 | 11-scf00161 | 11 |
| AX-158039815 | 7 | 74.356 | KV453001.1 | 12763794 | 11-scf00161 | 11 |
| AX-158039885 | 7 | 74.356 | KV453001.1 | 12848606 | 11-scf00161 | 11 |
| AX-158038835 | 7 | 74.574 | KV453001.1 | 11639785 | 11-scf00161 | 11 |
| AX-158038837 | 7 | 74.574 | KV453001.1 | 11647301 | 11-scf00161 | 11 |
| AX-158038841 | 7 | 74.574 | KV453001.1 | 11655513 | 11-scf00161 | 11 |
| AX-158038847 | 7 | 74.574 | KV453001.1 | 11663013 | 11-scf00161 | 11 |
| AX-158038849 | 7 | 74.574 | KV453001.1 | 11666604 | 11-scf00161 | 11 |
| AX-158038853 | 7 | 74.574 | KV453001.1 | 11668968 | 11-scf00161 | 11 |
| AX-158038861 | 7 | 74.574 | KV453001.1 | 11683243 | 11-scf00161 | 11 |
| AX-158038865 | 7 | 74.574 | KV453001.1 | 11691207 | 11-scf00161 | 11 |
| AX-158038871 | 7 | 74.574 | KV453001.1 | 11693460 | 11-scf00161 | 11 |
| AX-157785701 | 7 | 74.574 | KV453001.1 | 11696497 | 11-scf00161 | 11 |



|              |   |        |            |          |             |    |
|--------------|---|--------|------------|----------|-------------|----|
| AX-157720270 | 7 | 74.574 | KV453001.1 | 11700192 | 11-scf00161 | 11 |
| AX-158038877 | 7 | 74.574 | KV453001.1 | 11702124 | 11-scf00161 | 11 |
| AX-157774272 | 7 | 74.574 | KV453001.1 | 11709942 | 11-scf00161 | 11 |
| AX-157821961 | 7 | 74.574 | KV453001.1 | 11715229 | 11-scf00161 | 11 |
| AX-157821962 | 7 | 74.574 | KV453001.1 | 11716010 | 11-scf00161 | 11 |
| AX-158038892 | 7 | 74.574 | KV453001.1 | 11717278 | 11-scf00161 | 11 |
| AX-158038899 | 7 | 74.574 | KV453001.1 | 11719907 | 11-scf00161 | 11 |
| AX-158383901 | 7 | 74.574 | KV453001.1 | 11724330 | 11-scf00161 | 11 |
| AX-158391560 | 7 | 74.574 | KV453001.1 | 11736549 | 11-scf00161 | 11 |
| AX-158038917 | 7 | 74.574 | KV453001.1 | 11737589 | 11-scf00161 | 11 |
| AX-157715781 | 7 | 74.574 | KV453001.1 | 11740667 | 11-scf00161 | 11 |
| AX-158038925 | 7 | 74.574 | KV453001.1 | 11747365 | 11-scf00161 | 11 |
| AX-157821970 | 7 | 74.574 | KV453001.1 | 11767148 | 11-scf00161 | 11 |
| AX-158038951 | 7 | 74.574 | KV453001.1 | 11781881 | 11-scf00161 | 11 |
| AX-158038954 | 7 | 74.574 | KV453001.1 | 11788231 | 11-scf00161 | 11 |
| AX-158038956 | 7 | 74.574 | KV453001.1 | 11789023 | 11-scf00161 | 11 |
| AX-157757989 | 7 | 74.574 | KV453001.1 | 11790501 | 11-scf00161 | 11 |
| AX-158038977 | 7 | 74.574 | KV453001.1 | 11801410 | 11-scf00161 | 11 |
| AX-158038982 | 7 | 74.574 | KV453001.1 | 11805500 | 11-scf00161 | 11 |
| AX-158039027 | 7 | 74.574 | KV453001.1 | 11837998 | 11-scf00161 | 11 |
| AX-158039064 | 7 | 74.574 | KV453001.1 | 11875270 | 11-scf00161 | 11 |
| AX-157821983 | 7 | 74.574 | KV453001.1 | 11912013 | 11-scf00161 | 11 |
| AX-158039701 | 7 | 74.574 | KV453001.1 | 12610493 | 11-scf00161 | 11 |
| AX-158039819 | 7 | 74.574 | KV453001.1 | 12768211 | 11-scf00161 | 11 |
| AX-157713539 | 7 | 74.792 | KV453001.1 | 11726835 | 11-scf00161 | 11 |
| AX-158038907 | 7 | 74.792 | KV453001.1 | 11728244 | 11-scf00161 | 11 |
| AX-157715606 | 7 | 74.792 | KV453001.1 | 11730006 | 11-scf00161 | 11 |
| AX-158038920 | 7 | 74.792 | KV453001.1 | 11740301 | 11-scf00161 | 11 |
| AX-158038922 | 7 | 74.792 | KV453001.1 | 11744644 | 11-scf00161 | 11 |
| AX-157821968 | 7 | 74.792 | KV453001.1 | 11750590 | 11-scf00161 | 11 |
| AX-157715739 | 7 | 74.792 | KV453001.1 | 11753737 | 11-scf00161 | 11 |
| AX-158038936 | 7 | 75.12  | KV453001.1 | 11760532 | 11-scf00161 | 11 |
| AX-157821969 | 7 | 75.12  | KV453001.1 | 11760799 | 11-scf00161 | 11 |
| AX-158038941 | 7 | 75.12  | KV453001.1 | 11764177 | 11-scf00161 | 11 |
| AX-157821973 | 7 | 75.12  | KV453001.1 | 11773487 | 11-scf00161 | 11 |
| AX-158038945 | 7 | 75.12  | KV453001.1 | 11775247 | 11-scf00161 | 11 |
| AX-158383903 | 7 | 75.12  | KV453001.1 | 11780698 | 11-scf00161 | 11 |
| AX-158038953 | 7 | 75.12  | KV453001.1 | 11782389 | 11-scf00161 | 11 |
| AX-158038962 | 7 | 75.156 | KV453001.1 | 11792648 | 11-scf00161 | 11 |
| AX-158038963 | 7 | 75.195 | KV453001.1 | 11793830 | 11-scf00161 | 11 |
| AX-158038856 | 7 | 75.229 | KV453001.1 | 11671715 | 11-scf00161 | 11 |
| AX-158038881 | 7 | 75.229 | KV453001.1 | 11707130 | 11-scf00161 | 11 |
| AX-157821966 | 7 | 75.229 | KV453001.1 | 11733879 | 11-scf00161 | 11 |
| AX-158038959 | 7 | 75.229 | KV453001.1 | 11790203 | 11-scf00161 | 11 |
| AX-158038960 | 7 | 75.229 | KV453001.1 | 11790347 | 11-scf00161 | 11 |
| AX-158038965 | 7 | 75.229 | KV453001.1 | 11793986 | 11-scf00161 | 11 |
| AX-158038967 | 7 | 75.229 | KV453001.1 | 11796135 | 11-scf00161 | 11 |
| AX-157821975 | 7 | 75.229 | KV453001.1 | 11797273 | 11-scf00161 | 11 |
| AX-158038970 | 7 | 75.229 | KV453001.1 | 11798151 | 11-scf00161 | 11 |
| AX-158038972 | 7 | 75.229 | KV453001.1 | 11799601 | 11-scf00161 | 11 |
| AX-158038978 | 7 | 75.229 | KV453001.1 | 11802444 | 11-scf00161 | 11 |

|              |   |        |            |          |             |    |
|--------------|---|--------|------------|----------|-------------|----|
| AX-157821976 | 7 | 75.229 | KV453001.1 | 11803310 | 11-scf00161 | 11 |
| AX-158038981 | 7 | 75.229 | KV453001.1 | 11804581 | 11-scf00161 | 11 |
| AX-158406294 | 7 | 75.229 | KV453001.1 | 11810371 | 11-scf00161 | 11 |
| AX-158038992 | 7 | 75.229 | KV453001.1 | 11811871 | 11-scf00161 | 11 |
| AX-158038994 | 7 | 75.229 | KV453001.1 | 11812674 | 11-scf00161 | 11 |
| AX-158038998 | 7 | 75.229 | KV453001.1 | 11816863 | 11-scf00161 | 11 |
| AX-157773164 | 7 | 75.229 | KV453001.1 | 11822751 | 11-scf00161 | 11 |
| AX-158039023 | 7 | 75.229 | KV453001.1 | 11831616 | 11-scf00161 | 11 |
| AX-158039096 | 7 | 75.229 | KV453001.1 | 11904038 | 11-scf00161 | 11 |
| AX-158039155 | 7 | 75.229 | KV453001.1 | 11954941 | 11-scf00161 | 11 |
| AX-158039462 | 7 | 75.229 | KV453001.1 | 12329652 | 11-scf00161 | 11 |
| AX-158039012 | 7 | 75.559 | KV453001.1 | 11825172 | 11-scf00161 | 11 |
| AX-158039014 | 7 | 76.348 | KV453001.1 | 11826390 | 11-scf00161 | 11 |
| AX-158039025 | 7 | 76.91  | KV453001.1 | 11834306 | 11-scf00161 | 11 |
| AX-158038939 | 7 | 77.702 | KV453001.1 | 11762420 | 11-scf00161 | 11 |
| AX-157723138 | 7 | 77.702 | KV453001.1 | 11846511 | 11-scf00161 | 11 |
| AX-158039073 | 7 | 77.702 | KV453001.1 | 11886050 | 11-scf00161 | 11 |
| AX-158039147 | 7 | 77.702 | KV453001.1 | 11949064 | 11-scf00161 | 11 |
| AX-158039211 | 7 | 77.702 | KV453001.1 | 12022280 | 11-scf00161 | 11 |
| AX-158039695 | 7 | 77.702 | KV453001.1 | 12590640 | 11-scf00161 | 11 |
| AX-158039781 | 7 | 77.702 | KV453001.1 | 12734377 | 11-scf00161 | 11 |
| AX-158038735 | 7 | 78.215 | KV453001.1 | 11473365 | 11-scf00161 | 11 |
| AX-157821951 | 7 | 78.215 | KV453001.1 | 11548483 | 11-scf00161 | 11 |
| AX-158038916 | 7 | 78.215 | KV453001.1 | 11736593 | 11-scf00161 | 11 |
| AX-158039035 | 7 | 78.215 | KV453001.1 | 11855215 | 11-scf00161 | 11 |
| AX-157856403 | 7 | 78.215 | KV453001.1 | 11863722 | 11-scf00161 | 11 |
| AX-158039070 | 7 | 78.215 | KV453001.1 | 11884232 | 11-scf00161 | 11 |
| AX-158039230 | 7 | 78.215 | KV453001.1 | 12040490 | 11-scf00161 | 11 |
| AX-158379825 | 7 | 78.215 | KV453001.1 | 12052606 | 11-scf00161 | 11 |
| AX-158039262 | 7 | 78.215 | KV453001.1 | 12080791 | 11-scf00161 | 11 |
| AX-158039302 | 7 | 78.215 | KV453001.1 | 12124565 | 11-scf00161 | 11 |
| AX-158039369 | 7 | 78.215 | KV453001.1 | 12211092 | 11-scf00161 | 11 |
| AX-158039617 | 7 | 78.215 | KV453001.1 | 12487208 | 11-scf00161 | 11 |
| AX-158039624 | 7 | 78.215 | KV453001.1 | 12494140 | 11-scf00161 | 11 |
| AX-158039696 | 7 | 78.215 | KV453001.1 | 12593277 | 11-scf00161 | 11 |
| AX-157822018 | 7 | 78.215 | KV453001.1 | 12623269 | 11-scf00161 | 11 |
| AX-158039712 | 7 | 78.215 | KV453001.1 | 12623590 | 11-scf00161 | 11 |
| AX-158039716 | 7 | 78.215 | KV453001.1 | 12626829 | 11-scf00161 | 11 |
| AX-158039728 | 7 | 78.215 | KV453001.1 | 12649101 | 11-scf00161 | 11 |
| AX-158039732 | 7 | 78.215 | KV453001.1 | 12658621 | 11-scf00161 | 11 |
| AX-158039825 | 7 | 78.215 | KV453001.1 | 12773107 | 11-scf00161 | 11 |
| AX-158039828 | 7 | 78.215 | KV453001.1 | 12778423 | 11-scf00161 | 11 |
| AX-158039912 | 7 | 78.215 | KV453001.1 | 12870241 | 11-scf00161 | 11 |
| AX-158039915 | 7 | 78.215 | KV453001.1 | 12872563 | 11-scf00161 | 11 |
| AX-157772900 | 7 | 78.463 | KV453001.1 | 11251480 | 11-scf00161 | 11 |
| AX-158038537 | 7 | 78.463 | KV453001.1 | 11286110 | 11-scf00161 | 11 |
| AX-157821940 | 7 | 78.463 | KV453001.1 | 11376827 | 11-scf00161 | 11 |
| AX-158038656 | 7 | 78.463 | KV453001.1 | 11402740 | 11-scf00161 | 11 |
| AX-158038880 | 7 | 78.463 | KV453001.1 | 11702889 | 11-scf00161 | 11 |
| AX-158038888 | 7 | 78.463 | KV453001.1 | 11710477 | 11-scf00161 | 11 |
| AX-157821967 | 7 | 78.463 | KV453001.1 | 11743026 | 11-scf00161 | 11 |

|              |   |        |            |          |             |    |
|--------------|---|--------|------------|----------|-------------|----|
| AX-157739071 | 7 | 78.463 | KV453001.1 | 11745771 | 11-scf00161 | 11 |
| AX-158038937 | 7 | 78.463 | KV453001.1 | 11761604 | 11-scf00161 | 11 |
| AX-158039021 | 7 | 78.463 | KV453001.1 | 11830553 | 11-scf00161 | 11 |
| AX-157821978 | 7 | 78.463 | KV453001.1 | 11859881 | 11-scf00161 | 11 |
| AX-158039042 | 7 | 78.71  | KV453001.1 | 11860843 | 11-scf00161 | 11 |
| AX-158039141 | 7 | 78.71  | KV453001.1 | 11941873 | 11-scf00161 | 11 |
| AX-158039315 | 7 | 78.71  | KV453001.1 | 12151828 | 11-scf00161 | 11 |
| AX-158039333 | 7 | 78.71  | KV453001.1 | 12169292 | 11-scf00161 | 11 |
| AX-158039863 | 7 | 78.71  | KV453001.1 | 12817126 | 11-scf00161 | 11 |
| AX-158038765 | 7 | 78.895 | KV453001.1 | 11517983 | 11-scf00161 | 11 |
| AX-157754070 | 7 | 78.895 | KV453001.1 | 11701814 | 11-scf00161 | 11 |
| AX-158038879 | 7 | 78.895 | KV453001.1 | 11702509 | 11-scf00161 | 11 |
| AX-158038932 | 7 | 78.895 | KV453001.1 | 11752388 | 11-scf00161 | 11 |
| AX-158038938 | 7 | 78.895 | KV453001.1 | 11761965 | 11-scf00161 | 11 |
| AX-158039007 | 7 | 78.895 | KV453001.1 | 11818943 | 11-scf00161 | 11 |
| AX-158039048 | 7 | 78.895 | KV453001.1 | 11866186 | 11-scf00161 | 11 |
| AX-158038700 | 7 | 79.811 | KV453001.1 | 11439414 | 11-scf00161 | 11 |
| AX-158038872 | 7 | 79.811 | KV453001.1 | 11696601 | 11-scf00161 | 11 |
| AX-158038934 | 7 | 79.811 | KV453001.1 | 11756697 | 11-scf00161 | 11 |
| AX-157775695 | 7 | 79.811 | KV453001.1 | 11774414 | 11-scf00161 | 11 |
| AX-158038996 | 7 | 79.811 | KV453001.1 | 11815416 | 11-scf00161 | 11 |
| AX-158039002 | 7 | 79.811 | KV453001.1 | 11817804 | 11-scf00161 | 11 |
| AX-158039010 | 7 | 79.811 | KV453001.1 | 11822273 | 11-scf00161 | 11 |
| AX-158039031 | 7 | 79.811 | KV453001.1 | 11846580 | 11-scf00161 | 11 |
| AX-158039040 | 7 | 79.811 | KV453001.1 | 11859221 | 11-scf00161 | 11 |
| AX-158039063 | 7 | 79.811 | KV453001.1 | 11873657 | 11-scf00161 | 11 |
| AX-157709556 | 7 | 79.811 | KV453001.1 | 11874910 | 11-scf00161 | 11 |
| AX-158039066 | 7 | 79.811 | KV453001.1 | 11880245 | 11-scf00161 | 11 |
| AX-158039078 | 7 | 79.811 | KV453001.1 | 11889914 | 11-scf00161 | 11 |
| AX-158039085 | 7 | 79.811 | KV453001.1 | 11894644 | 11-scf00161 | 11 |
| AX-158039086 | 7 | 79.811 | KV453001.1 | 11896377 | 11-scf00161 | 11 |
| AX-157821982 | 7 | 79.811 | KV453001.1 | 11897314 | 11-scf00161 | 11 |
| AX-158039087 | 7 | 79.811 | KV453001.1 | 11897866 | 11-scf00161 | 11 |
| AX-158039099 | 7 | 79.811 | KV453001.1 | 11905436 | 11-scf00161 | 11 |
| AX-157694037 | 7 | 79.811 | KV453001.1 | 11907972 | 11-scf00161 | 11 |
| AX-158039103 | 7 | 79.811 | KV453001.1 | 11914084 | 11-scf00161 | 11 |
| AX-158039104 | 7 | 79.811 | KV453001.1 | 11915577 | 11-scf00161 | 11 |
| AX-158039108 | 7 | 79.811 | KV453001.1 | 11919129 | 11-scf00161 | 11 |
| AX-158039110 | 7 | 79.811 | KV453001.1 | 11919781 | 11-scf00161 | 11 |
| AX-158039115 | 7 | 79.811 | KV453001.1 | 11923908 | 11-scf00161 | 11 |
| AX-158039119 | 7 | 79.811 | KV453001.1 | 11929761 | 11-scf00161 | 11 |
| AX-158039124 | 7 | 79.811 | KV453001.1 | 11931875 | 11-scf00161 | 11 |
| AX-158039133 | 7 | 79.811 | KV453001.1 | 11937616 | 11-scf00161 | 11 |
| AX-158039136 | 7 | 79.811 | KV453001.1 | 11938121 | 11-scf00161 | 11 |
| AX-158039150 | 7 | 79.811 | KV453001.1 | 11951118 | 11-scf00161 | 11 |
| AX-158039151 | 7 | 79.811 | KV453001.1 | 11951788 | 11-scf00161 | 11 |
| AX-158039255 | 7 | 79.811 | KV453001.1 | 12070311 | 11-scf00161 | 11 |
| AX-158039339 | 7 | 79.811 | KV453001.1 | 12177085 | 11-scf00161 | 11 |
| AX-158039344 | 7 | 79.811 | KV453001.1 | 12180968 | 11-scf00161 | 11 |
| AX-158039153 | 7 | 79.988 | KV453001.1 | 11953343 | 11-scf00161 | 11 |
| AX-158039154 | 7 | 79.988 | KV453001.1 | 11954278 | 11-scf00161 | 11 |

|              |   |        |            |          |             |    |
|--------------|---|--------|------------|----------|-------------|----|
| AX-158039069 | 7 | 80.343 | KV453001.1 | 11883512 | 11-scf00161 | 11 |
| AX-158039159 | 7 | 80.343 | KV453001.1 | 11959946 | 11-scf00161 | 11 |
| AX-158039165 | 7 | 80.343 | KV453001.1 | 11964895 | 11-scf00161 | 11 |
| AX-158039167 | 7 | 80.343 | KV453001.1 | 11967491 | 11-scf00161 | 11 |
| AX-158039171 | 7 | 80.343 | KV453001.1 | 11971379 | 11-scf00161 | 11 |
| AX-158039172 | 7 | 80.343 | KV453001.1 | 11974925 | 11-scf00161 | 11 |
| AX-157716562 | 7 | 80.343 | KV453001.1 | 11975349 | 11-scf00161 | 11 |
| AX-158039181 | 7 | 80.343 | KV453001.1 | 11988219 | 11-scf00161 | 11 |
| AX-158039183 | 7 | 80.343 | KV453001.1 | 11992005 | 11-scf00161 | 11 |
| AX-158039191 | 7 | 80.343 | KV453001.1 | 12004233 | 11-scf00161 | 11 |
| AX-158039194 | 7 | 80.343 | KV453001.1 | 12006037 | 11-scf00161 | 11 |
| AX-158039200 | 7 | 80.343 | KV453001.1 | 12009922 | 11-scf00161 | 11 |
| AX-157856405 | 7 | 80.343 | KV453001.1 | 12014453 | 11-scf00161 | 11 |
| AX-158039205 | 7 | 80.343 | KV453001.1 | 12014742 | 11-scf00161 | 11 |
| AX-158039207 | 7 | 80.343 | KV453001.1 | 12017351 | 11-scf00161 | 11 |
| AX-158039208 | 7 | 80.343 | KV453001.1 | 12018127 | 11-scf00161 | 11 |
| AX-158039209 | 7 | 80.343 | KV453001.1 | 12018693 | 11-scf00161 | 11 |
| AX-157885088 | 7 | 80.343 | KV453001.1 | 12018999 | 11-scf00161 | 11 |
| AX-158039212 | 7 | 80.343 | KV453001.1 | 12022660 | 11-scf00161 | 11 |
| AX-158039213 | 7 | 80.343 | KV453001.1 | 12024644 | 11-scf00161 | 11 |
| AX-158039215 | 7 | 80.343 | KV453001.1 | 12025317 | 11-scf00161 | 11 |
| AX-157722065 | 7 | 80.343 | KV453001.1 | 12025722 | 11-scf00161 | 11 |
| AX-158039224 | 7 | 80.343 | KV453001.1 | 12035993 | 11-scf00161 | 11 |
| AX-158039226 | 7 | 80.343 | KV453001.1 | 12036670 | 11-scf00161 | 11 |
| AX-158039227 | 7 | 80.343 | KV453001.1 | 12038079 | 11-scf00161 | 11 |
| AX-158039231 | 7 | 80.343 | KV453001.1 | 12042253 | 11-scf00161 | 11 |
| AX-158039233 | 7 | 80.343 | KV453001.1 | 12044021 | 11-scf00161 | 11 |
| AX-158039244 | 7 | 80.343 | KV453001.1 | 12056745 | 11-scf00161 | 11 |
| AX-158039246 | 7 | 80.343 | KV453001.1 | 12062347 | 11-scf00161 | 11 |
| AX-157756258 | 7 | 80.343 | KV453001.1 | 12063428 | 11-scf00161 | 11 |
| AX-158039250 | 7 | 80.343 | KV453001.1 | 12067354 | 11-scf00161 | 11 |
| AX-158039254 | 7 | 80.343 | KV453001.1 | 12069502 | 11-scf00161 | 11 |
| AX-157748595 | 7 | 80.343 | KV453001.1 | 12091875 | 11-scf00161 | 11 |
| AX-158039267 | 7 | 80.343 | KV453001.1 | 12093399 | 11-scf00161 | 11 |
| AX-157775727 | 7 | 80.343 | KV453001.1 | 12093772 | 11-scf00161 | 11 |
| AX-158039269 | 7 | 80.343 | KV453001.1 | 12094564 | 11-scf00161 | 11 |
| AX-158039271 | 7 | 80.343 | KV453001.1 | 12094937 | 11-scf00161 | 11 |
| AX-158039272 | 7 | 80.343 | KV453001.1 | 12099999 | 11-scf00161 | 11 |
| AX-158039276 | 7 | 80.343 | KV453001.1 | 12101115 | 11-scf00161 | 11 |
| AX-158039313 | 7 | 80.343 | KV453001.1 | 12136583 | 11-scf00161 | 11 |
| AX-158039314 | 7 | 80.343 | KV453001.1 | 12148276 | 11-scf00161 | 11 |
| AX-157821996 | 7 | 80.343 | KV453001.1 | 12169127 | 11-scf00161 | 11 |
| AX-157821998 | 7 | 80.343 | KV453001.1 | 12187254 | 11-scf00161 | 11 |
| AX-157821999 | 7 | 80.343 | KV453001.1 | 12187505 | 11-scf00161 | 11 |
| AX-158039402 | 7 | 80.343 | KV453001.1 | 12239661 | 11-scf00161 | 11 |
| AX-158039403 | 7 | 80.343 | KV453001.1 | 12241157 | 11-scf00161 | 11 |
| AX-158039406 | 7 | 80.343 | KV453001.1 | 12241956 | 11-scf00161 | 11 |
| AX-158379826 | 7 | 80.343 | KV453001.1 | 12263810 | 11-scf00161 | 11 |
| AX-158039439 | 7 | 80.343 | KV453001.1 | 12303565 | 11-scf00161 | 11 |
| AX-158039481 | 7 | 80.343 | KV453001.1 | 12356108 | 11-scf00161 | 11 |
| AX-158039492 | 7 | 80.343 | KV453001.1 | 12365947 | 11-scf00161 | 11 |

|              |   |        |            |          |             |    |
|--------------|---|--------|------------|----------|-------------|----|
| AX-158039511 | 7 | 80.343 | KV453001.1 | 12377516 | 11-scf00161 | 11 |
| AX-158039512 | 7 | 80.343 | KV453001.1 | 12377873 | 11-scf00161 | 11 |
| AX-158039557 | 7 | 80.343 | KV453001.1 | 12429416 | 11-scf00161 | 11 |
| AX-158039563 | 7 | 80.343 | KV453001.1 | 12437158 | 11-scf00161 | 11 |
| AX-158039588 | 7 | 80.343 | KV453001.1 | 12461815 | 11-scf00161 | 11 |
| AX-158039593 | 7 | 80.343 | KV453001.1 | 12464096 | 11-scf00161 | 11 |
| AX-158039638 | 7 | 80.343 | KV453001.1 | 12514586 | 11-scf00161 | 11 |
| AX-157822013 | 7 | 80.343 | KV453001.1 | 12536481 | 11-scf00161 | 11 |
| AX-158039668 | 7 | 80.343 | KV453001.1 | 12545198 | 11-scf00161 | 11 |
| AX-158039688 | 7 | 80.343 | KV453001.1 | 12573892 | 11-scf00161 | 11 |
| AX-158039727 | 7 | 80.343 | KV453001.1 | 12639114 | 11-scf00161 | 11 |
| AX-158039729 | 7 | 80.343 | KV453001.1 | 12650788 | 11-scf00161 | 11 |
| AX-158039730 | 7 | 80.343 | KV453001.1 | 12651956 | 11-scf00161 | 11 |
| AX-157885091 | 7 | 80.343 | KV453001.1 | 12657304 | 11-scf00161 | 11 |
| AX-158039738 | 7 | 80.343 | KV453001.1 | 12668680 | 11-scf00161 | 11 |
| AX-157822022 | 7 | 80.343 | KV453001.1 | 12698582 | 11-scf00161 | 11 |
| AX-158039760 | 7 | 80.343 | KV453001.1 | 12715228 | 11-scf00161 | 11 |
| AX-157744787 | 7 | 80.343 | KV453001.1 | 12813783 | 11-scf00161 | 11 |
| AX-157822024 | 7 | 80.343 | KV453001.1 | 12825790 | 11-scf00161 | 11 |
| AX-158039873 | 7 | 80.343 | KV453001.1 | 12836473 | 11-scf00161 | 11 |
| AX-158039874 | 7 | 80.343 | KV453001.1 | 12836710 | 11-scf00161 | 11 |
| AX-157714379 | 7 | 80.343 | KV453001.1 | 12876604 | 11-scf00161 | 11 |
| AX-158039943 | 7 | 80.343 | KV453001.1 | 12905152 | 11-scf00161 | 11 |
| AX-158039947 | 7 | 80.343 | KV453001.1 | 12908983 | 11-scf00161 | 11 |
| AX-158039950 | 7 | 80.343 | KV453001.1 | 12913658 | 11-scf00161 | 11 |
| AX-157745074 | 7 | 80.343 | KV453001.1 | 12924325 | 11-scf00161 | 11 |
| AX-158379829 | 7 | 80.343 | KV453001.1 | 12930146 | 11-scf00161 | 11 |
| AX-157822032 | 7 | 80.343 | KV453001.1 | 12957044 | 11-scf00161 | 11 |
| AX-158040102 | 7 | 80.343 | KV453001.1 | 13103721 | 11-scf00161 | 11 |
| AX-158040118 | 7 | 80.343 | KV453001.1 | 13128706 | 11-scf00161 | 11 |
| AX-158040123 | 7 | 80.343 | KV453001.1 | 13132858 | 11-scf00161 | 11 |
| AX-158040263 | 7 | 80.343 | KV453001.1 | 13423413 | 11-scf00161 | 11 |
| AX-158040268 | 7 | 80.343 | KV453001.1 | 13452631 | 11-scf00161 | 11 |
| AX-158039284 | 7 | 80.405 | KV453001.1 | 12108929 | 11-scf00161 | 11 |
| AX-158038732 | 7 | 80.46  | KV453001.1 | 11472206 | 11-scf00161 | 11 |
| AX-158038753 | 7 | 80.46  | KV453001.1 | 11505841 | 11-scf00161 | 11 |
| AX-157821950 | 7 | 80.46  | KV453001.1 | 11545243 | 11-scf00161 | 11 |
| AX-158038814 | 7 | 80.46  | KV453001.1 | 11579879 | 11-scf00161 | 11 |
| AX-158038836 | 7 | 80.46  | KV453001.1 | 11642892 | 11-scf00161 | 11 |
| AX-158038855 | 7 | 80.46  | KV453001.1 | 11669879 | 11-scf00161 | 11 |
| AX-158383900 | 7 | 80.46  | KV453001.1 | 11685908 | 11-scf00161 | 11 |
| AX-158038909 | 7 | 80.46  | KV453001.1 | 11729039 | 11-scf00161 | 11 |
| AX-158038913 | 7 | 80.46  | KV453001.1 | 11734267 | 11-scf00161 | 11 |
| AX-158038933 | 7 | 80.46  | KV453001.1 | 11756137 | 11-scf00161 | 11 |
| AX-158039018 | 7 | 80.46  | KV453001.1 | 11828906 | 11-scf00161 | 11 |
| AX-157821980 | 7 | 80.46  | KV453001.1 | 11887800 | 11-scf00161 | 11 |
| AX-157741864 | 7 | 80.46  | KV453001.1 | 11894479 | 11-scf00161 | 11 |
| AX-158039106 | 7 | 80.46  | KV453001.1 | 11916348 | 11-scf00161 | 11 |
| AX-158039126 | 7 | 80.46  | KV453001.1 | 11933179 | 11-scf00161 | 11 |
| AX-158039175 | 7 | 80.46  | KV453001.1 | 11979979 | 11-scf00161 | 11 |
| AX-157717582 | 7 | 80.46  | KV453001.1 | 11986277 | 11-scf00161 | 11 |

|              |   |       |            |          |             |    |
|--------------|---|-------|------------|----------|-------------|----|
| AX-158039204 | 7 | 80.46 | KV453001.1 | 12013559 | 11-scf00161 | 11 |
| AX-158039219 | 7 | 80.46 | KV453001.1 | 12028821 | 11-scf00161 | 11 |
| AX-158039247 | 7 | 80.46 | KV453001.1 | 12066456 | 11-scf00161 | 11 |
| AX-158039259 | 7 | 80.46 | KV453001.1 | 12073898 | 11-scf00161 | 11 |
| AX-158039286 | 7 | 80.46 | KV453001.1 | 12109530 | 11-scf00161 | 11 |
| AX-158039287 | 7 | 80.46 | KV453001.1 | 12111372 | 11-scf00161 | 11 |
| AX-158039290 | 7 | 80.46 | KV453001.1 | 12112343 | 11-scf00161 | 11 |
| AX-158039292 | 7 | 80.46 | KV453001.1 | 12112503 | 11-scf00161 | 11 |
| AX-158039293 | 7 | 80.46 | KV453001.1 | 12113450 | 11-scf00161 | 11 |
| AX-157821993 | 7 | 80.46 | KV453001.1 | 12114162 | 11-scf00161 | 11 |
| AX-158039312 | 7 | 80.46 | KV453001.1 | 12133834 | 11-scf00161 | 11 |
| AX-157744485 | 7 | 80.46 | KV453001.1 | 12138399 | 11-scf00161 | 11 |
| AX-158039326 | 7 | 80.46 | KV453001.1 | 12164290 | 11-scf00161 | 11 |
| AX-158039334 | 7 | 80.46 | KV453001.1 | 12170045 | 11-scf00161 | 11 |
| AX-158039340 | 7 | 80.46 | KV453001.1 | 12178032 | 11-scf00161 | 11 |
| AX-158039347 | 7 | 80.46 | KV453001.1 | 12185844 | 11-scf00161 | 11 |
| AX-158039349 | 7 | 80.46 | KV453001.1 | 12186572 | 11-scf00161 | 11 |
| AX-158039352 | 7 | 80.46 | KV453001.1 | 12189770 | 11-scf00161 | 11 |
| AX-158039356 | 7 | 80.46 | KV453001.1 | 12193320 | 11-scf00161 | 11 |
| AX-158039364 | 7 | 80.46 | KV453001.1 | 12203884 | 11-scf00161 | 11 |
| AX-158039366 | 7 | 80.46 | KV453001.1 | 12207093 | 11-scf00161 | 11 |
| AX-158039384 | 7 | 80.46 | KV453001.1 | 12224529 | 11-scf00161 | 11 |
| AX-158039392 | 7 | 80.46 | KV453001.1 | 12234005 | 11-scf00161 | 11 |
| AX-158039397 | 7 | 80.46 | KV453001.1 | 12236075 | 11-scf00161 | 11 |
| AX-157822002 | 7 | 80.46 | KV453001.1 | 12243280 | 11-scf00161 | 11 |
| AX-158391567 | 7 | 80.46 | KV453001.1 | 12264224 | 11-scf00161 | 11 |
| AX-157757152 | 7 | 80.46 | KV453001.1 | 12264312 | 11-scf00161 | 11 |
| AX-158039423 | 7 | 80.46 | KV453001.1 | 12269712 | 11-scf00161 | 11 |
| AX-158039428 | 7 | 80.46 | KV453001.1 | 12285411 | 11-scf00161 | 11 |
| AX-158039433 | 7 | 80.46 | KV453001.1 | 12297140 | 11-scf00161 | 11 |
| AX-158039438 | 7 | 80.46 | KV453001.1 | 12299149 | 11-scf00161 | 11 |
| AX-158039440 | 7 | 80.46 | KV453001.1 | 12304566 | 11-scf00161 | 11 |
| AX-157822004 | 7 | 80.46 | KV453001.1 | 12319211 | 11-scf00161 | 11 |
| AX-157740697 | 7 | 80.46 | KV453001.1 | 12321428 | 11-scf00161 | 11 |
| AX-158039457 | 7 | 80.46 | KV453001.1 | 12325925 | 11-scf00161 | 11 |
| AX-158039459 | 7 | 80.46 | KV453001.1 | 12326382 | 11-scf00161 | 11 |
| AX-157822006 | 7 | 80.46 | KV453001.1 | 12337747 | 11-scf00161 | 11 |
| AX-158039466 | 7 | 80.46 | KV453001.1 | 12340377 | 11-scf00161 | 11 |
| AX-157734550 | 7 | 80.46 | KV453001.1 | 12341819 | 11-scf00161 | 11 |
| AX-158039470 | 7 | 80.46 | KV453001.1 | 12343295 | 11-scf00161 | 11 |
| AX-158039474 | 7 | 80.46 | KV453001.1 | 12348233 | 11-scf00161 | 11 |
| AX-158039480 | 7 | 80.46 | KV453001.1 | 12353070 | 11-scf00161 | 11 |
| AX-157822010 | 7 | 80.46 | KV453001.1 | 12354205 | 11-scf00161 | 11 |
| AX-158039482 | 7 | 80.46 | KV453001.1 | 12357198 | 11-scf00161 | 11 |
| AX-158039487 | 7 | 80.46 | KV453001.1 | 12361668 | 11-scf00161 | 11 |
| AX-158039493 | 7 | 80.46 | KV453001.1 | 12367265 | 11-scf00161 | 11 |
| AX-158039495 | 7 | 80.46 | KV453001.1 | 12367564 | 11-scf00161 | 11 |
| AX-158039498 | 7 | 80.46 | KV453001.1 | 12369337 | 11-scf00161 | 11 |
| AX-158039503 | 7 | 80.46 | KV453001.1 | 12371077 | 11-scf00161 | 11 |
| AX-158039510 | 7 | 80.46 | KV453001.1 | 12376371 | 11-scf00161 | 11 |
| AX-158039514 | 7 | 80.46 | KV453001.1 | 12378714 | 11-scf00161 | 11 |

|              |   |       |            |          |             |    |
|--------------|---|-------|------------|----------|-------------|----|
| AX-158039515 | 7 | 80.46 | KV453001.1 | 12381445 | 11-scf00161 | 11 |
| AX-158039519 | 7 | 80.46 | KV453001.1 | 12389109 | 11-scf00161 | 11 |
| AX-158039523 | 7 | 80.46 | KV453001.1 | 12397559 | 11-scf00161 | 11 |
| AX-158039531 | 7 | 80.46 | KV453001.1 | 12404001 | 11-scf00161 | 11 |
| AX-158039533 | 7 | 80.46 | KV453001.1 | 12405905 | 11-scf00161 | 11 |
| AX-158039540 | 7 | 80.46 | KV453001.1 | 12410297 | 11-scf00161 | 11 |
| AX-158039545 | 7 | 80.46 | KV453001.1 | 12415195 | 11-scf00161 | 11 |
| AX-158039548 | 7 | 80.46 | KV453001.1 | 12420941 | 11-scf00161 | 11 |
| AX-158039559 | 7 | 80.46 | KV453001.1 | 12432588 | 11-scf00161 | 11 |
| AX-158039564 | 7 | 80.46 | KV453001.1 | 12437965 | 11-scf00161 | 11 |
| AX-158039566 | 7 | 80.46 | KV453001.1 | 12438152 | 11-scf00161 | 11 |
| AX-158039570 | 7 | 80.46 | KV453001.1 | 12440513 | 11-scf00161 | 11 |
| AX-158039573 | 7 | 80.46 | KV453001.1 | 12442636 | 11-scf00161 | 11 |
| AX-158039574 | 7 | 80.46 | KV453001.1 | 12444837 | 11-scf00161 | 11 |
| AX-158039577 | 7 | 80.46 | KV453001.1 | 12452752 | 11-scf00161 | 11 |
| AX-158039578 | 7 | 80.46 | KV453001.1 | 12455754 | 11-scf00161 | 11 |
| AX-158039584 | 7 | 80.46 | KV453001.1 | 12458193 | 11-scf00161 | 11 |
| AX-158039589 | 7 | 80.46 | KV453001.1 | 12462160 | 11-scf00161 | 11 |
| AX-158039591 | 7 | 80.46 | KV453001.1 | 12463284 | 11-scf00161 | 11 |
| AX-158039595 | 7 | 80.46 | KV453001.1 | 12464958 | 11-scf00161 | 11 |
| AX-158039600 | 7 | 80.46 | KV453001.1 | 12467467 | 11-scf00161 | 11 |
| AX-158039603 | 7 | 80.46 | KV453001.1 | 12469002 | 11-scf00161 | 11 |
| AX-158039605 | 7 | 80.46 | KV453001.1 | 12470584 | 11-scf00161 | 11 |
| AX-157720804 | 7 | 80.46 | KV453001.1 | 12475637 | 11-scf00161 | 11 |
| AX-158039610 | 7 | 80.46 | KV453001.1 | 12482022 | 11-scf00161 | 11 |
| AX-158039613 | 7 | 80.46 | KV453001.1 | 12482884 | 11-scf00161 | 11 |
| AX-158039615 | 7 | 80.46 | KV453001.1 | 12484350 | 11-scf00161 | 11 |
| AX-158039618 | 7 | 80.46 | KV453001.1 | 12489195 | 11-scf00161 | 11 |
| AX-158039622 | 7 | 80.46 | KV453001.1 | 12492423 | 11-scf00161 | 11 |
| AX-158039627 | 7 | 80.46 | KV453001.1 | 12496030 | 11-scf00161 | 11 |
| AX-158039628 | 7 | 80.46 | KV453001.1 | 12497122 | 11-scf00161 | 11 |
| AX-158039630 | 7 | 80.46 | KV453001.1 | 12503424 | 11-scf00161 | 11 |
| AX-158039632 | 7 | 80.46 | KV453001.1 | 12510601 | 11-scf00161 | 11 |
| AX-158039635 | 7 | 80.46 | KV453001.1 | 12513226 | 11-scf00161 | 11 |
| AX-158039640 | 7 | 80.46 | KV453001.1 | 12516162 | 11-scf00161 | 11 |
| AX-158379827 | 7 | 80.46 | KV453001.1 | 12526326 | 11-scf00161 | 11 |
| AX-158039652 | 7 | 80.46 | KV453001.1 | 12526668 | 11-scf00161 | 11 |
| AX-158039654 | 7 | 80.46 | KV453001.1 | 12527473 | 11-scf00161 | 11 |
| AX-158039665 | 7 | 80.46 | KV453001.1 | 12537339 | 11-scf00161 | 11 |
| AX-158039671 | 7 | 80.46 | KV453001.1 | 12546249 | 11-scf00161 | 11 |
| AX-158039673 | 7 | 80.46 | KV453001.1 | 12552508 | 11-scf00161 | 11 |
| AX-157714685 | 7 | 80.46 | KV453001.1 | 12553837 | 11-scf00161 | 11 |
| AX-158039676 | 7 | 80.46 | KV453001.1 | 12556840 | 11-scf00161 | 11 |
| AX-158039693 | 7 | 80.46 | KV453001.1 | 12577862 | 11-scf00161 | 11 |
| AX-158039694 | 7 | 80.46 | KV453001.1 | 12587484 | 11-scf00161 | 11 |
| AX-157720389 | 7 | 80.46 | KV453001.1 | 12597418 | 11-scf00161 | 11 |
| AX-157745564 | 7 | 80.46 | KV453001.1 | 12606183 | 11-scf00161 | 11 |
| AX-158379828 | 7 | 80.46 | KV453001.1 | 12613188 | 11-scf00161 | 11 |
| AX-158039707 | 7 | 80.46 | KV453001.1 | 12621494 | 11-scf00161 | 11 |
| AX-158039709 | 7 | 80.46 | KV453001.1 | 12622412 | 11-scf00161 | 11 |
| AX-158039717 | 7 | 80.46 | KV453001.1 | 12628493 | 11-scf00161 | 11 |

|              |   |       |            |          |             |    |
|--------------|---|-------|------------|----------|-------------|----|
| AX-158039721 | 7 | 80.46 | KV453001.1 | 12632116 | 11-scf00161 | 11 |
| AX-157725693 | 7 | 80.46 | KV453001.1 | 12645787 | 11-scf00161 | 11 |
| AX-157710982 | 7 | 80.46 | KV453001.1 | 12651145 | 11-scf00161 | 11 |
| AX-157720617 | 7 | 80.46 | KV453001.1 | 12655411 | 11-scf00161 | 11 |
| AX-158039731 | 7 | 80.46 | KV453001.1 | 12658451 | 11-scf00161 | 11 |
| AX-158039733 | 7 | 80.46 | KV453001.1 | 12659057 | 11-scf00161 | 11 |
| AX-158039736 | 7 | 80.46 | KV453001.1 | 12663435 | 11-scf00161 | 11 |
| AX-158039737 | 7 | 80.46 | KV453001.1 | 12665647 | 11-scf00161 | 11 |
| AX-157822019 | 7 | 80.46 | KV453001.1 | 12666689 | 11-scf00161 | 11 |
| AX-157822020 | 7 | 80.46 | KV453001.1 | 12669350 | 11-scf00161 | 11 |
| AX-158039739 | 7 | 80.46 | KV453001.1 | 12670719 | 11-scf00161 | 11 |
| AX-158039740 | 7 | 80.46 | KV453001.1 | 12671881 | 11-scf00161 | 11 |
| AX-157775718 | 7 | 80.46 | KV453001.1 | 12682316 | 11-scf00161 | 11 |
| AX-158039749 | 7 | 80.46 | KV453001.1 | 12690182 | 11-scf00161 | 11 |
| AX-158039754 | 7 | 80.46 | KV453001.1 | 12701596 | 11-scf00161 | 11 |
| AX-158039756 | 7 | 80.46 | KV453001.1 | 12702856 | 11-scf00161 | 11 |
| AX-158039758 | 7 | 80.46 | KV453001.1 | 12703770 | 11-scf00161 | 11 |
| AX-158039761 | 7 | 80.46 | KV453001.1 | 12715601 | 11-scf00161 | 11 |
| AX-158039773 | 7 | 80.46 | KV453001.1 | 12726374 | 11-scf00161 | 11 |
| AX-158039775 | 7 | 80.46 | KV453001.1 | 12728072 | 11-scf00161 | 11 |
| AX-158039782 | 7 | 80.46 | KV453001.1 | 12735804 | 11-scf00161 | 11 |
| AX-158039783 | 7 | 80.46 | KV453001.1 | 12737124 | 11-scf00161 | 11 |
| AX-157721749 | 7 | 80.46 | KV453001.1 | 12740324 | 11-scf00161 | 11 |
| AX-158039788 | 7 | 80.46 | KV453001.1 | 12742017 | 11-scf00161 | 11 |
| AX-158039789 | 7 | 80.46 | KV453001.1 | 12742738 | 11-scf00161 | 11 |
| AX-158039790 | 7 | 80.46 | KV453001.1 | 12743272 | 11-scf00161 | 11 |
| AX-157726697 | 7 | 80.46 | KV453001.1 | 12745995 | 11-scf00161 | 11 |
| AX-158039793 | 7 | 80.46 | KV453001.1 | 12748079 | 11-scf00161 | 11 |
| AX-158039798 | 7 | 80.46 | KV453001.1 | 12751060 | 11-scf00161 | 11 |
| AX-158039799 | 7 | 80.46 | KV453001.1 | 12751648 | 11-scf00161 | 11 |
| AX-158039807 | 7 | 80.46 | KV453001.1 | 12755838 | 11-scf00161 | 11 |
| AX-158039830 | 7 | 80.46 | KV453001.1 | 12779180 | 11-scf00161 | 11 |
| AX-158039831 | 7 | 80.46 | KV453001.1 | 12781704 | 11-scf00161 | 11 |
| AX-158039834 | 7 | 80.46 | KV453001.1 | 12784827 | 11-scf00161 | 11 |
| AX-158039849 | 7 | 80.46 | KV453001.1 | 12800154 | 11-scf00161 | 11 |
| AX-158039851 | 7 | 80.46 | KV453001.1 | 12800710 | 11-scf00161 | 11 |
| AX-158039865 | 7 | 80.46 | KV453001.1 | 12818113 | 11-scf00161 | 11 |
| AX-158039868 | 7 | 80.46 | KV453001.1 | 12826523 | 11-scf00161 | 11 |
| AX-158039870 | 7 | 80.46 | KV453001.1 | 12829482 | 11-scf00161 | 11 |
| AX-158039938 | 7 | 80.46 | KV453001.1 | 12900475 | 11-scf00161 | 11 |
| AX-157713822 | 7 | 80.46 | KV453001.1 | 12926726 | 11-scf00161 | 11 |
| AX-158039966 | 7 | 80.46 | KV453001.1 | 12935962 | 11-scf00161 | 11 |
| AX-158039975 | 7 | 80.46 | KV453001.1 | 12941230 | 11-scf00161 | 11 |
| AX-158408458 | 7 | 80.46 | KV453001.1 | 12945466 | 11-scf00161 | 11 |
| AX-158039979 | 7 | 80.46 | KV453001.1 | 12950145 | 11-scf00161 | 11 |
| AX-158383923 | 7 | 80.46 | KV453001.1 | 12993672 | 11-scf00161 | 11 |
| AX-158040031 | 7 | 80.46 | KV453001.1 | 13003119 | 11-scf00161 | 11 |
| AX-158383924 | 7 | 80.46 | KV453001.1 | 13004868 | 11-scf00161 | 11 |
| AX-158040055 | 7 | 80.46 | KV453001.1 | 13032051 | 11-scf00161 | 11 |
| AX-158040112 | 7 | 80.46 | KV453001.1 | 13117301 | 11-scf00161 | 11 |
| AX-158042335 | 7 | 80.46 | KV453004.1 | 12008    | 11-scf00162 | 11 |



|              |   |        |             |          |             |    |
|--------------|---|--------|-------------|----------|-------------|----|
| AX-157686163 | 7 | 80.46  | KV453003.1  | 40269    | 11-scf00676 | 11 |
| AX-158039804 | 7 | 80.577 | KV453001.1  | 12753415 | 11-scf00161 | 11 |
| AX-158039806 | 7 | 80.577 | KV453001.1  | 12755440 | 11-scf00161 | 11 |
| AX-158039065 | 7 | 80.81  | KV453001.1  | 11877774 | 11-scf00161 | 11 |
| AX-158039268 | 7 | 80.81  | KV453001.1  | 12094299 | 11-scf00161 | 11 |
| AX-158039278 | 7 | 80.81  | KV453001.1  | 12106222 | 11-scf00161 | 11 |
| AX-157822021 | 7 | 80.81  | KV453001.1  | 12697304 | 11-scf00161 | 11 |
| AX-157726602 | 7 | 80.81  | KV453001.1  | 12766297 | 11-scf00161 | 11 |
| AX-158039821 | 7 | 80.81  | KV453001.1  | 12770365 | 11-scf00161 | 11 |
| AX-158039822 | 7 | 80.81  | KV453001.1  | 12770768 | 11-scf00161 | 11 |
| AX-158039823 | 7 | 80.81  | KV453001.1  | 12771987 | 11-scf00161 | 11 |
| AX-158039827 | 7 | 80.81  | KV453001.1  | 12777852 | 11-scf00161 | 11 |
| AX-158039832 | 7 | 80.81  | KV453001.1  | 12782643 | 11-scf00161 | 11 |
| AX-158039841 | 7 | 80.81  | KV453001.1  | 12790365 | 11-scf00161 | 11 |
| AX-158039843 | 7 | 80.81  | KV453001.1  | 12793405 | 11-scf00161 | 11 |
| AX-158039852 | 7 | 80.81  | KV453001.1  | 12802351 | 11-scf00161 | 11 |
| AX-158039857 | 7 | 80.81  | KV453001.1  | 12807853 | 11-scf00161 | 11 |
| AX-158039934 | 7 | 80.81  | KV453001.1  | 12897644 | 11-scf00161 | 11 |
| AX-157705555 | 7 | 80.81  | 3ML01030216 | 660      | scf05809_1  | UN |
| AX-157721258 | 7 | 80.928 | KV453001.1  | 12823387 | 11-scf00161 | 11 |
| AX-157719075 | 7 | 80.928 | KV453001.1  | 12829782 | 11-scf00161 | 11 |
| AX-158039875 | 7 | 80.973 | KV453001.1  | 12837570 | 11-scf00161 | 11 |
| AX-158039876 | 7 | 81.044 | KV453001.1  | 12841304 | 11-scf00161 | 11 |
| AX-158039879 | 7 | 81.044 | KV453001.1  | 12843375 | 11-scf00161 | 11 |
| AX-158039880 | 7 | 81.044 | KV453001.1  | 12844772 | 11-scf00161 | 11 |
| AX-158039882 | 7 | 81.044 | KV453001.1  | 12845966 | 11-scf00161 | 11 |
| AX-158039888 | 7 | 81.162 | KV453001.1  | 12853490 | 11-scf00161 | 11 |
| AX-158039891 | 7 | 81.162 | KV453001.1  | 12854840 | 11-scf00161 | 11 |
| AX-158039892 | 7 | 81.163 | KV453001.1  | 12855511 | 11-scf00161 | 11 |
| AX-158039385 | 7 | 81.317 | KV453001.1  | 12225702 | 11-scf00161 | 11 |
| AX-158039906 | 7 | 81.317 | KV453001.1  | 12866484 | 11-scf00161 | 11 |
| AX-158039908 | 7 | 81.317 | KV453001.1  | 12868535 | 11-scf00161 | 11 |
| AX-158039911 | 7 | 81.317 | KV453001.1  | 12869771 | 11-scf00161 | 11 |
| AX-158039924 | 7 | 81.317 | KV453001.1  | 12883702 | 11-scf00161 | 11 |
| AX-158039945 | 7 | 81.317 | KV453001.1  | 12905353 | 11-scf00161 | 11 |
| AX-158039951 | 7 | 81.317 | KV453001.1  | 12914796 | 11-scf00161 | 11 |
| AX-158039972 | 7 | 81.317 | KV453001.1  | 12939828 | 11-scf00161 | 11 |
| AX-158039989 | 7 | 81.317 | KV453001.1  | 12959798 | 11-scf00161 | 11 |
| AX-158040010 | 7 | 81.317 | KV453001.1  | 12984578 | 11-scf00161 | 11 |
| AX-158040086 | 7 | 81.317 | KV453001.1  | 13083812 | 11-scf00161 | 11 |
| AX-158040107 | 7 | 81.317 | KV453001.1  | 13107282 | 11-scf00161 | 11 |
| AX-158040108 | 7 | 81.317 | KV453001.1  | 13107927 | 11-scf00161 | 11 |
| AX-158040201 | 7 | 81.317 | KV453001.1  | 13271640 | 11-scf00161 | 11 |
| AX-158039054 | 7 | 81.63  | KV453001.1  | 11867919 | 11-scf00161 | 11 |
| AX-157821995 | 7 | 81.63  | KV453001.1  | 12126025 | 11-scf00161 | 11 |
| AX-158039413 | 7 | 81.63  | KV453001.1  | 12248942 | 11-scf00161 | 11 |
| AX-158039490 | 7 | 81.63  | KV453001.1  | 12365632 | 11-scf00161 | 11 |
| AX-158039575 | 7 | 81.63  | KV453001.1  | 12448190 | 11-scf00161 | 11 |
| AX-157710135 | 7 | 81.63  | KV453001.1  | 12632627 | 11-scf00161 | 11 |
| AX-157722081 | 7 | 81.63  | KV453001.1  | 12819675 | 11-scf00161 | 11 |
| AX-158039932 | 7 | 81.63  | KV453001.1  | 12894827 | 11-scf00161 | 11 |

|              |   |        |             |          |             |    |
|--------------|---|--------|-------------|----------|-------------|----|
| AX-158039937 | 7 | 81.63  | KV453001.1  | 12900101 | 11-scf00161 | 11 |
| AX-157822028 | 7 | 81.63  | KV453001.1  | 12909663 | 11-scf00161 | 11 |
| AX-158039954 | 7 | 81.63  | KV453001.1  | 12915947 | 11-scf00161 | 11 |
| AX-158039955 | 7 | 81.63  | KV453001.1  | 12916420 | 11-scf00161 | 11 |
| AX-157772046 | 7 | 81.63  | KV453001.1  | 12923959 | 11-scf00161 | 11 |
| AX-158416188 | 7 | 81.63  | KV453001.1  | 13000651 | 11-scf00161 | 11 |
| AX-158040042 | 7 | 81.63  | KV453001.1  | 13012574 | 11-scf00161 | 11 |
| AX-158040075 | 7 | 81.63  | KV453001.1  | 13052674 | 11-scf00161 | 11 |
| AX-158408460 | 7 | 81.63  | KV453001.1  | 13131200 | 11-scf00161 | 11 |
| AX-158042368 | 7 | 81.63  | KV453004.1  | 81600    | 11-scf00162 | 11 |
| AX-158042538 | 7 | 81.63  | KV453004.1  | 838090   | 11-scf00162 | 11 |
| AX-158042544 | 7 | 81.63  | KV453004.1  | 847553   | 11-scf00162 | 11 |
| AX-158042565 | 7 | 81.63  | KV453004.1  | 925959   | 11-scf00162 | 11 |
| AX-158042568 | 7 | 81.63  | KV453004.1  | 929863   | 11-scf00162 | 11 |
| AX-158042589 | 7 | 81.63  | KV453004.1  | 986269   | 11-scf00162 | 11 |
| AX-158042629 | 7 | 81.63  | KV453004.1  | 1092714  | 11-scf00162 | 11 |
| AX-158042660 | 7 | 81.63  | KV453004.1  | 1181611  | 11-scf00162 | 11 |
| AX-157726981 | 7 | 81.63  | KV453005.1  | 258636   | 11-scf00163 | 11 |
| AX-158406340 | 7 | 81.63  | KV453005.1  | 260248   | 11-scf00163 | 11 |
| AX-157775608 | 7 | 81.63  | KV453005.1  | 263648   | 11-scf00163 | 11 |
| AX-158408549 | 7 | 81.63  | KV453005.1  | 276247   | 11-scf00163 | 11 |
| AX-158042755 | 7 | 81.63  | KV453005.1  | 276817   | 11-scf00163 | 11 |
| AX-158406341 | 7 | 81.63  | KV453005.1  | 277350   | 11-scf00163 | 11 |
| AX-158042762 | 7 | 81.63  | KV453005.1  | 282232   | 11-scf00163 | 11 |
| AX-157680963 | 7 | 81.63  | 3ML01024601 | 20038    | scf00767_1  | UN |
| AX-158039960 | 7 | 81.747 | KV453001.1  | 12925624 | 11-scf00161 | 11 |
| AX-158039962 | 7 | 81.747 | KV453001.1  | 12927313 | 11-scf00161 | 11 |
| AX-158039965 | 7 | 81.747 | KV453001.1  | 12935186 | 11-scf00161 | 11 |
| AX-158039969 | 7 | 81.747 | KV453001.1  | 12939010 | 11-scf00161 | 11 |
| AX-158039971 | 7 | 81.747 | KV453001.1  | 12939434 | 11-scf00161 | 11 |
| AX-158039973 | 7 | 81.747 | KV453001.1  | 12940809 | 11-scf00161 | 11 |
| AX-158039985 | 7 | 81.747 | KV453001.1  | 12953967 | 11-scf00161 | 11 |
| AX-158040003 | 7 | 81.747 | KV453001.1  | 12973174 | 11-scf00161 | 11 |
| AX-158040061 | 7 | 81.747 | KV453001.1  | 13040182 | 11-scf00161 | 11 |
| AX-158040199 | 7 | 81.747 | KV453001.1  | 13268562 | 11-scf00161 | 11 |
| AX-158040216 | 7 | 81.747 | KV453001.1  | 13302667 | 11-scf00161 | 11 |
| AX-158040220 | 7 | 81.747 | KV453001.1  | 13320538 | 11-scf00161 | 11 |
| AX-158040222 | 7 | 81.747 | KV453001.1  | 13324953 | 11-scf00161 | 11 |
| AX-157822043 | 7 | 81.747 | KV453001.1  | 13328281 | 11-scf00161 | 11 |
| AX-158040230 | 7 | 81.747 | KV453001.1  | 13339153 | 11-scf00161 | 11 |
| AX-158040241 | 7 | 81.747 | KV453001.1  | 13357354 | 11-scf00161 | 11 |
| AX-158040253 | 7 | 81.747 | KV453001.1  | 13383053 | 11-scf00161 | 11 |
| AX-158039988 | 7 | 81.748 | KV453001.1  | 12956781 | 11-scf00161 | 11 |
| AX-158040054 | 7 | 81.748 | KV453001.1  | 13030874 | 11-scf00161 | 11 |
| AX-158039993 | 7 | 81.75  | KV453001.1  | 12961490 | 11-scf00161 | 11 |
| AX-158039461 | 7 | 81.993 | KV453001.1  | 12328860 | 11-scf00161 | 11 |
| AX-158039777 | 7 | 81.993 | KV453001.1  | 12731479 | 11-scf00161 | 11 |
| AX-158039893 | 7 | 81.993 | KV453001.1  | 12856492 | 11-scf00161 | 11 |
| AX-158039982 | 7 | 81.993 | KV453001.1  | 12951464 | 11-scf00161 | 11 |
| AX-158039994 | 7 | 81.993 | KV453001.1  | 12962919 | 11-scf00161 | 11 |
| AX-158039995 | 7 | 81.993 | KV453001.1  | 12963477 | 11-scf00161 | 11 |

|              |   |        |            |          |             |    |
|--------------|---|--------|------------|----------|-------------|----|
| AX-158039998 | 7 | 81.993 | KV453001.1 | 12966929 | 11-scf00161 | 11 |
| AX-158040001 | 7 | 81.993 | KV453001.1 | 12970043 | 11-scf00161 | 11 |
| AX-157822033 | 7 | 81.993 | KV453001.1 | 12974122 | 11-scf00161 | 11 |
| AX-157775580 | 7 | 81.993 | KV453001.1 | 12976675 | 11-scf00161 | 11 |
| AX-158040014 | 7 | 81.993 | KV453001.1 | 12988901 | 11-scf00161 | 11 |
| AX-158040019 | 7 | 81.993 | KV453001.1 | 12990614 | 11-scf00161 | 11 |
| AX-158040021 | 7 | 81.993 | KV453001.1 | 12992442 | 11-scf00161 | 11 |
| AX-158040023 | 7 | 81.993 | KV453001.1 | 12994218 | 11-scf00161 | 11 |
| AX-158040024 | 7 | 81.993 | KV453001.1 | 12995175 | 11-scf00161 | 11 |
| AX-158040026 | 7 | 81.993 | KV453001.1 | 12998077 | 11-scf00161 | 11 |
| AX-158406311 | 7 | 81.993 | KV453001.1 | 13000616 | 11-scf00161 | 11 |
| AX-157718506 | 7 | 81.993 | KV453001.1 | 13001013 | 11-scf00161 | 11 |
| AX-157822035 | 7 | 81.993 | KV453001.1 | 13001968 | 11-scf00161 | 11 |
| AX-158040030 | 7 | 81.993 | KV453001.1 | 13002864 | 11-scf00161 | 11 |
| AX-158040037 | 7 | 81.993 | KV453001.1 | 13007167 | 11-scf00161 | 11 |
| AX-158040039 | 7 | 81.993 | KV453001.1 | 13007609 | 11-scf00161 | 11 |
| AX-157822036 | 7 | 81.993 | KV453001.1 | 13017369 | 11-scf00161 | 11 |
| AX-158040043 | 7 | 81.993 | KV453001.1 | 13017867 | 11-scf00161 | 11 |
| AX-158040044 | 7 | 81.993 | KV453001.1 | 13018110 | 11-scf00161 | 11 |
| AX-158040046 | 7 | 81.993 | KV453001.1 | 13025427 | 11-scf00161 | 11 |
| AX-158040050 | 7 | 81.993 | KV453001.1 | 13026714 | 11-scf00161 | 11 |
| AX-158040053 | 7 | 81.993 | KV453001.1 | 13028516 | 11-scf00161 | 11 |
| AX-158040059 | 7 | 81.993 | KV453001.1 | 13038838 | 11-scf00161 | 11 |
| AX-158040062 | 7 | 81.993 | KV453001.1 | 13043066 | 11-scf00161 | 11 |
| AX-158040064 | 7 | 81.993 | KV453001.1 | 13044903 | 11-scf00161 | 11 |
| AX-158040065 | 7 | 81.993 | KV453001.1 | 13045241 | 11-scf00161 | 11 |
| AX-158040067 | 7 | 81.993 | KV453001.1 | 13046249 | 11-scf00161 | 11 |
| AX-158040070 | 7 | 81.993 | KV453001.1 | 13049278 | 11-scf00161 | 11 |
| AX-158040072 | 7 | 81.993 | KV453001.1 | 13050418 | 11-scf00161 | 11 |
| AX-157876536 | 7 | 81.993 | KV453001.1 | 13057581 | 11-scf00161 | 11 |
| AX-158040076 | 7 | 81.993 | KV453001.1 | 13060117 | 11-scf00161 | 11 |
| AX-158416189 | 7 | 81.993 | KV453001.1 | 13113230 | 11-scf00161 | 11 |
| AX-158040111 | 7 | 81.993 | KV453001.1 | 13114661 | 11-scf00161 | 11 |
| AX-158040114 | 7 | 81.993 | KV453001.1 | 13117871 | 11-scf00161 | 11 |
| AX-158040115 | 7 | 81.993 | KV453001.1 | 13122384 | 11-scf00161 | 11 |
| AX-158040117 | 7 | 81.993 | KV453001.1 | 13128068 | 11-scf00161 | 11 |
| AX-158040121 | 7 | 81.993 | KV453001.1 | 13130226 | 11-scf00161 | 11 |
| AX-158040126 | 7 | 81.993 | KV453001.1 | 13136745 | 11-scf00161 | 11 |
| AX-158040129 | 7 | 81.993 | KV453001.1 | 13139931 | 11-scf00161 | 11 |
| AX-158040132 | 7 | 81.993 | KV453001.1 | 13156609 | 11-scf00161 | 11 |
| AX-157772623 | 7 | 81.993 | KV453001.1 | 13157093 | 11-scf00161 | 11 |
| AX-158040133 | 7 | 81.993 | KV453001.1 | 13159982 | 11-scf00161 | 11 |
| AX-158040136 | 7 | 81.993 | KV453001.1 | 13167812 | 11-scf00161 | 11 |
| AX-158040139 | 7 | 81.993 | KV453001.1 | 13170848 | 11-scf00161 | 11 |
| AX-158040141 | 7 | 81.993 | KV453001.1 | 13171275 | 11-scf00161 | 11 |
| AX-158040142 | 7 | 81.993 | KV453001.1 | 13173156 | 11-scf00161 | 11 |
| AX-157856408 | 7 | 81.993 | KV453001.1 | 13239789 | 11-scf00161 | 11 |
| AX-158040190 | 7 | 81.993 | KV453001.1 | 13257135 | 11-scf00161 | 11 |
| AX-158040193 | 7 | 81.993 | KV453001.1 | 13259338 | 11-scf00161 | 11 |
| AX-158040200 | 7 | 81.993 | KV453001.1 | 13271146 | 11-scf00161 | 11 |
| AX-158040204 | 7 | 81.993 | KV453001.1 | 13276774 | 11-scf00161 | 11 |

|              |   |        |            |          |             |    |
|--------------|---|--------|------------|----------|-------------|----|
| AX-157739906 | 7 | 81.993 | KV453001.1 | 13290868 | 11-scf00161 | 11 |
| AX-158040228 | 7 | 81.993 | KV453001.1 | 13334338 | 11-scf00161 | 11 |
| AX-158040229 | 7 | 81.993 | KV453001.1 | 13338668 | 11-scf00161 | 11 |
| AX-158040231 | 7 | 81.993 | KV453001.1 | 13340176 | 11-scf00161 | 11 |
| AX-158040233 | 7 | 81.993 | KV453001.1 | 13341113 | 11-scf00161 | 11 |
| AX-158040259 | 7 | 81.993 | KV453001.1 | 13412106 | 11-scf00161 | 11 |
| AX-158040262 | 7 | 81.993 | KV453001.1 | 13418976 | 11-scf00161 | 11 |
| AX-158042339 | 7 | 81.993 | KV453004.1 | 39776    | 11-scf00162 | 11 |
| AX-158042364 | 7 | 81.993 | KV453004.1 | 72188    | 11-scf00162 | 11 |
| AX-158042379 | 7 | 81.993 | KV453004.1 | 104375   | 11-scf00162 | 11 |
| AX-158042410 | 7 | 81.993 | KV453004.1 | 238058   | 11-scf00162 | 11 |
| AX-157822148 | 7 | 81.993 | KV453004.1 | 244343   | 11-scf00162 | 11 |
| AX-158042427 | 7 | 81.993 | KV453004.1 | 307824   | 11-scf00162 | 11 |
| AX-158042428 | 7 | 81.993 | KV453004.1 | 309324   | 11-scf00162 | 11 |
| AX-158042438 | 7 | 81.993 | KV453004.1 | 367941   | 11-scf00162 | 11 |
| AX-158042454 | 7 | 81.993 | KV453004.1 | 456709   | 11-scf00162 | 11 |
| AX-158042469 | 7 | 81.993 | KV453004.1 | 522901   | 11-scf00162 | 11 |
| AX-158042503 | 7 | 81.993 | KV453004.1 | 635150   | 11-scf00162 | 11 |
| AX-158042507 | 7 | 81.993 | KV453004.1 | 668933   | 11-scf00162 | 11 |
| AX-158042510 | 7 | 81.993 | KV453004.1 | 675397   | 11-scf00162 | 11 |
| AX-158042513 | 7 | 81.993 | KV453004.1 | 690299   | 11-scf00162 | 11 |
| AX-158042515 | 7 | 81.993 | KV453004.1 | 698530   | 11-scf00162 | 11 |
| AX-158042530 | 7 | 81.993 | KV453004.1 | 768690   | 11-scf00162 | 11 |
| AX-158042531 | 7 | 81.993 | KV453004.1 | 775635   | 11-scf00162 | 11 |
| AX-158042533 | 7 | 81.993 | KV453004.1 | 785739   | 11-scf00162 | 11 |
| AX-158042547 | 7 | 81.993 | KV453004.1 | 853690   | 11-scf00162 | 11 |
| AX-158042551 | 7 | 81.993 | KV453004.1 | 868449   | 11-scf00162 | 11 |
| AX-158408531 | 7 | 81.993 | KV453004.1 | 870144   | 11-scf00162 | 11 |
| AX-158042558 | 7 | 81.993 | KV453004.1 | 887887   | 11-scf00162 | 11 |
| AX-158042559 | 7 | 81.993 | KV453004.1 | 889179   | 11-scf00162 | 11 |
| AX-158042560 | 7 | 81.993 | KV453004.1 | 894757   | 11-scf00162 | 11 |
| AX-157701248 | 7 | 81.993 | KV453004.1 | 936787   | 11-scf00162 | 11 |
| AX-158042577 | 7 | 81.993 | KV453004.1 | 960510   | 11-scf00162 | 11 |
| AX-158042582 | 7 | 81.993 | KV453004.1 | 971629   | 11-scf00162 | 11 |
| AX-158042583 | 7 | 81.993 | KV453004.1 | 973152   | 11-scf00162 | 11 |
| AX-158042586 | 7 | 81.993 | KV453004.1 | 976284   | 11-scf00162 | 11 |
| AX-158042590 | 7 | 81.993 | KV453004.1 | 1000362  | 11-scf00162 | 11 |
| AX-158042591 | 7 | 81.993 | KV453004.1 | 1008249  | 11-scf00162 | 11 |
| AX-158042593 | 7 | 81.993 | KV453004.1 | 1012653  | 11-scf00162 | 11 |
| AX-158042595 | 7 | 81.993 | KV453004.1 | 1016010  | 11-scf00162 | 11 |
| AX-158042596 | 7 | 81.993 | KV453004.1 | 1020921  | 11-scf00162 | 11 |
| AX-158042600 | 7 | 81.993 | KV453004.1 | 1032372  | 11-scf00162 | 11 |
| AX-158042605 | 7 | 81.993 | KV453004.1 | 1039755  | 11-scf00162 | 11 |
| AX-158408533 | 7 | 81.993 | KV453004.1 | 1044128  | 11-scf00162 | 11 |
| AX-158422345 | 7 | 81.993 | KV453004.1 | 1044539  | 11-scf00162 | 11 |
| AX-158042611 | 7 | 81.993 | KV453004.1 | 1050708  | 11-scf00162 | 11 |
| AX-158042612 | 7 | 81.993 | KV453004.1 | 1051384  | 11-scf00162 | 11 |
| AX-158042615 | 7 | 81.993 | KV453004.1 | 1059581  | 11-scf00162 | 11 |
| AX-158042620 | 7 | 81.993 | KV453004.1 | 1074358  | 11-scf00162 | 11 |
| AX-158042622 | 7 | 81.993 | KV453004.1 | 1074844  | 11-scf00162 | 11 |
| AX-158042626 | 7 | 81.993 | KV453004.1 | 1083586  | 11-scf00162 | 11 |

|              |   |        |             |          |             |    |
|--------------|---|--------|-------------|----------|-------------|----|
| AX-158042627 | 7 | 81.993 | KV453004.1  | 1085818  | 11-scf00162 | 11 |
| AX-158042628 | 7 | 81.993 | KV453004.1  | 1089521  | 11-scf00162 | 11 |
| AX-158042631 | 7 | 81.993 | KV453004.1  | 1102805  | 11-scf00162 | 11 |
| AX-158042634 | 7 | 81.993 | KV453004.1  | 1105223  | 11-scf00162 | 11 |
| AX-158042637 | 7 | 81.993 | KV453004.1  | 1133051  | 11-scf00162 | 11 |
| AX-158042642 | 7 | 81.993 | KV453004.1  | 1142478  | 11-scf00162 | 11 |
| AX-158042645 | 7 | 81.993 | KV453004.1  | 1145863  | 11-scf00162 | 11 |
| AX-158042647 | 7 | 81.993 | KV453004.1  | 1153154  | 11-scf00162 | 11 |
| AX-158042654 | 7 | 81.993 | KV453004.1  | 1163355  | 11-scf00162 | 11 |
| AX-158042658 | 7 | 81.993 | KV453004.1  | 1176044  | 11-scf00162 | 11 |
| AX-158042661 | 7 | 81.993 | KV453004.1  | 1184427  | 11-scf00162 | 11 |
| AX-158042665 | 7 | 81.993 | KV453004.1  | 1192389  | 11-scf00162 | 11 |
| AX-158042666 | 7 | 81.993 | KV453004.1  | 1194724  | 11-scf00162 | 11 |
| AX-158042667 | 7 | 81.993 | KV453004.1  | 1196016  | 11-scf00162 | 11 |
| AX-158042707 | 7 | 81.993 | KV453005.1  | 155160   | 11-scf00163 | 11 |
| AX-158042752 | 7 | 81.993 | KV453005.1  | 267466   | 11-scf00163 | 11 |
| AX-158042772 | 7 | 81.993 | KV453005.1  | 320233   | 11-scf00163 | 11 |
| AX-158042867 | 7 | 81.993 | KV453006.1  | 214644   | 11-scf00164 | 11 |
| AX-158042898 | 7 | 81.993 | KV453006.1  | 392042   | 11-scf00164 | 11 |
| AX-158042904 | 7 | 81.993 | KV453006.1  | 426895   | 11-scf00164 | 11 |
| AX-158042914 | 7 | 81.993 | KV453006.1  | 457402   | 11-scf00164 | 11 |
| AX-158042936 | 7 | 81.993 | KV453006.1  | 596328   | 11-scf00164 | 11 |
| AX-158383936 | 7 | 81.993 | KV453006.1  | 633505   | 11-scf00164 | 11 |
| AX-158042978 | 7 | 81.993 | KV453006.1  | 742660   | 11-scf00164 | 11 |
| AX-158043029 | 7 | 81.993 | KV453006.1  | 849903   | 11-scf00164 | 11 |
| AX-158043042 | 7 | 81.993 | KV453006.1  | 876930   | 11-scf00164 | 11 |
| AX-158043092 | 7 | 81.993 | KV453006.1  | 989322   | 11-scf00164 | 11 |
| AX-158376549 | 7 | 81.993 | KV453002.1  | 76610    | 11-scf00587 | 11 |
| AX-158376551 | 7 | 81.993 | KV453002.1  | 80708    | 11-scf00587 | 11 |
| AX-158376556 | 7 | 81.993 | KV453002.1  | 116985   | 11-scf00587 | 11 |
| AX-157889311 | 7 | 81.993 | KV453002.1  | 151316   | 11-scf00587 | 11 |
| AX-158376569 | 7 | 81.993 | KV453002.1  | 154378   | 11-scf00587 | 11 |
| AX-158376576 | 7 | 81.993 | KV453002.1  | 172678   | 11-scf00587 | 11 |
| AX-158376590 | 7 | 81.993 | KV453002.1  | 211204   | 11-scf00587 | 11 |
| AX-158376591 | 7 | 81.993 | KV453002.1  | 212311   | 11-scf00587 | 11 |
| AX-158376592 | 7 | 81.993 | KV453002.1  | 213828   | 11-scf00587 | 11 |
| AX-158376593 | 7 | 81.993 | KV453002.1  | 214957   | 11-scf00587 | 11 |
| AX-158376594 | 7 | 81.993 | KV453002.1  | 217584   | 11-scf00587 | 11 |
| AX-158376608 | 7 | 81.993 | KV453002.1  | 259832   | 11-scf00587 | 11 |
| AX-158376610 | 7 | 81.993 | KV453002.1  | 264583   | 11-scf00587 | 11 |
| AX-157686162 | 7 | 81.993 | KV453003.1  | 38885    | 11-scf00676 | 11 |
| AX-157686977 | 7 | 81.993 | 3ML01024601 | 24152    | scf00767_1  | UN |
| AX-157687127 | 7 | 81.993 | KV453465.1  | 18345    | scf00799    | UN |
| AX-157743091 | 7 | 82.116 | KV453001.1  | 11997369 | 11-scf00161 | 11 |
| AX-157822003 | 7 | 82.116 | KV453001.1  | 12257603 | 11-scf00161 | 11 |
| AX-158040040 | 7 | 82.116 | KV453001.1  | 13009996 | 11-scf00161 | 11 |
| AX-157822037 | 7 | 82.116 | KV453001.1  | 13020907 | 11-scf00161 | 11 |
| AX-158040056 | 7 | 82.116 | KV453001.1  | 13032738 | 11-scf00161 | 11 |
| AX-158040082 | 7 | 82.116 | KV453001.1  | 13078070 | 11-scf00161 | 11 |
| AX-158040181 | 7 | 82.116 | KV453001.1  | 13242512 | 11-scf00161 | 11 |
| AX-158040194 | 7 | 82.116 | KV453001.1  | 13260318 | 11-scf00161 | 11 |

|              |   |        |            |          |             |    |
|--------------|---|--------|------------|----------|-------------|----|
| AX-158040218 | 7 | 82.116 | KV453001.1 | 13308809 | 11-scf00161 | 11 |
| AX-158040248 | 7 | 82.116 | KV453001.1 | 13367985 | 11-scf00161 | 11 |
| AX-158040252 | 7 | 82.116 | KV453001.1 | 13380412 | 11-scf00161 | 11 |
| AX-158042351 | 7 | 82.116 | KV453004.1 | 57235    | 11-scf00162 | 11 |
| AX-158042358 | 7 | 82.116 | KV453004.1 | 65209    | 11-scf00162 | 11 |
| AX-158042367 | 7 | 82.116 | KV453004.1 | 78933    | 11-scf00162 | 11 |
| AX-158042373 | 7 | 82.116 | KV453004.1 | 96845    | 11-scf00162 | 11 |
| AX-158042380 | 7 | 82.116 | KV453004.1 | 107441   | 11-scf00162 | 11 |
| AX-158042381 | 7 | 82.116 | KV453004.1 | 111698   | 11-scf00162 | 11 |
| AX-158042382 | 7 | 82.116 | KV453004.1 | 116977   | 11-scf00162 | 11 |
| AX-158042384 | 7 | 82.116 | KV453004.1 | 118708   | 11-scf00162 | 11 |
| AX-157822145 | 7 | 82.116 | KV453004.1 | 130190   | 11-scf00162 | 11 |
| AX-158042386 | 7 | 82.116 | KV453004.1 | 132306   | 11-scf00162 | 11 |
| AX-158408523 | 7 | 82.116 | KV453004.1 | 140377   | 11-scf00162 | 11 |
| AX-158042388 | 7 | 82.116 | KV453004.1 | 142145   | 11-scf00162 | 11 |
| AX-158042391 | 7 | 82.116 | KV453004.1 | 145909   | 11-scf00162 | 11 |
| AX-158383935 | 7 | 82.116 | KV453004.1 | 148088   | 11-scf00162 | 11 |
| AX-158042395 | 7 | 82.116 | KV453004.1 | 168256   | 11-scf00162 | 11 |
| AX-158042397 | 7 | 82.116 | KV453004.1 | 174767   | 11-scf00162 | 11 |
| AX-158042402 | 7 | 82.116 | KV453004.1 | 184810   | 11-scf00162 | 11 |
| AX-158042407 | 7 | 82.116 | KV453004.1 | 222966   | 11-scf00162 | 11 |
| AX-158042412 | 7 | 82.116 | KV453004.1 | 244048   | 11-scf00162 | 11 |
| AX-158042414 | 7 | 82.116 | KV453004.1 | 250431   | 11-scf00162 | 11 |
| AX-158042417 | 7 | 82.116 | KV453004.1 | 258481   | 11-scf00162 | 11 |
| AX-158042419 | 7 | 82.116 | KV453004.1 | 262875   | 11-scf00162 | 11 |
| AX-158042420 | 7 | 82.116 | KV453004.1 | 292604   | 11-scf00162 | 11 |
| AX-158042422 | 7 | 82.116 | KV453004.1 | 292957   | 11-scf00162 | 11 |
| AX-158042424 | 7 | 82.116 | KV453004.1 | 298411   | 11-scf00162 | 11 |
| AX-158042433 | 7 | 82.116 | KV453004.1 | 334396   | 11-scf00162 | 11 |
| AX-158042436 | 7 | 82.116 | KV453004.1 | 360088   | 11-scf00162 | 11 |
| AX-158042445 | 7 | 82.116 | KV453004.1 | 385280   | 11-scf00162 | 11 |
| AX-158042446 | 7 | 82.116 | KV453004.1 | 389689   | 11-scf00162 | 11 |
| AX-158042448 | 7 | 82.116 | KV453004.1 | 427970   | 11-scf00162 | 11 |
| AX-157822150 | 7 | 82.116 | KV453004.1 | 429046   | 11-scf00162 | 11 |
| AX-158042450 | 7 | 82.116 | KV453004.1 | 437054   | 11-scf00162 | 11 |
| AX-158042453 | 7 | 82.116 | KV453004.1 | 444769   | 11-scf00162 | 11 |
| AX-158042458 | 7 | 82.116 | KV453004.1 | 468054   | 11-scf00162 | 11 |
| AX-158042459 | 7 | 82.116 | KV453004.1 | 469459   | 11-scf00162 | 11 |
| AX-158042470 | 7 | 82.116 | KV453004.1 | 527881   | 11-scf00162 | 11 |
| AX-158042473 | 7 | 82.116 | KV453004.1 | 557020   | 11-scf00162 | 11 |
| AX-158042478 | 7 | 82.116 | KV453004.1 | 580139   | 11-scf00162 | 11 |
| AX-158042479 | 7 | 82.116 | KV453004.1 | 584492   | 11-scf00162 | 11 |
| AX-157715114 | 7 | 82.116 | KV453004.1 | 586333   | 11-scf00162 | 11 |
| AX-158042483 | 7 | 82.116 | KV453004.1 | 594042   | 11-scf00162 | 11 |
| AX-158042490 | 7 | 82.116 | KV453004.1 | 604281   | 11-scf00162 | 11 |
| AX-158042497 | 7 | 82.116 | KV453004.1 | 616749   | 11-scf00162 | 11 |
| AX-157822153 | 7 | 82.116 | KV453004.1 | 617600   | 11-scf00162 | 11 |
| AX-158042511 | 7 | 82.116 | KV453004.1 | 676174   | 11-scf00162 | 11 |
| AX-157822156 | 7 | 82.116 | KV453004.1 | 693244   | 11-scf00162 | 11 |
| AX-158042514 | 7 | 82.116 | KV453004.1 | 697936   | 11-scf00162 | 11 |
| AX-158042516 | 7 | 82.116 | KV453004.1 | 699333   | 11-scf00162 | 11 |

|              |   |        |            |         |             |    |
|--------------|---|--------|------------|---------|-------------|----|
| AX-158042518 | 7 | 82.116 | KV453004.1 | 709031  | 11-scf00162 | 11 |
| AX-158042522 | 7 | 82.116 | KV453004.1 | 720692  | 11-scf00162 | 11 |
| AX-158042523 | 7 | 82.116 | KV453004.1 | 723563  | 11-scf00162 | 11 |
| AX-158042525 | 7 | 82.116 | KV453004.1 | 728589  | 11-scf00162 | 11 |
| AX-158042527 | 7 | 82.116 | KV453004.1 | 749273  | 11-scf00162 | 11 |
| AX-158042529 | 7 | 82.116 | KV453004.1 | 755182  | 11-scf00162 | 11 |
| AX-157822157 | 7 | 82.116 | KV453004.1 | 755466  | 11-scf00162 | 11 |
| AX-157713062 | 7 | 82.116 | KV453004.1 | 770168  | 11-scf00162 | 11 |
| AX-157822159 | 7 | 82.116 | KV453004.1 | 777704  | 11-scf00162 | 11 |
| AX-158042532 | 7 | 82.116 | KV453004.1 | 778572  | 11-scf00162 | 11 |
| AX-157822160 | 7 | 82.116 | KV453004.1 | 785310  | 11-scf00162 | 11 |
| AX-158042545 | 7 | 82.116 | KV453004.1 | 850294  | 11-scf00162 | 11 |
| AX-158042564 | 7 | 82.116 | KV453004.1 | 924118  | 11-scf00162 | 11 |
| AX-158042607 | 7 | 82.116 | KV453004.1 | 1043609 | 11-scf00162 | 11 |
| AX-158042609 | 7 | 82.116 | KV453004.1 | 1049610 | 11-scf00162 | 11 |
| AX-158042664 | 7 | 82.116 | KV453004.1 | 1190919 | 11-scf00162 | 11 |
| AX-158042678 | 7 | 82.116 | KV453005.1 | 101870  | 11-scf00163 | 11 |
| AX-158042679 | 7 | 82.116 | KV453005.1 | 103025  | 11-scf00163 | 11 |
| AX-158042680 | 7 | 82.116 | KV453005.1 | 104225  | 11-scf00163 | 11 |
| AX-158042681 | 7 | 82.116 | KV453005.1 | 104734  | 11-scf00163 | 11 |
| AX-158042684 | 7 | 82.116 | KV453005.1 | 108827  | 11-scf00163 | 11 |
| AX-158042685 | 7 | 82.116 | KV453005.1 | 109903  | 11-scf00163 | 11 |
| AX-158042687 | 7 | 82.116 | KV453005.1 | 111994  | 11-scf00163 | 11 |
| AX-158042689 | 7 | 82.116 | KV453005.1 | 115980  | 11-scf00163 | 11 |
| AX-158042700 | 7 | 82.116 | KV453005.1 | 136506  | 11-scf00163 | 11 |
| AX-158042701 | 7 | 82.116 | KV453005.1 | 140785  | 11-scf00163 | 11 |
| AX-158042704 | 7 | 82.116 | KV453005.1 | 142883  | 11-scf00163 | 11 |
| AX-158042705 | 7 | 82.116 | KV453005.1 | 144517  | 11-scf00163 | 11 |
| AX-158042711 | 7 | 82.116 | KV453005.1 | 166865  | 11-scf00163 | 11 |
| AX-157876542 | 7 | 82.116 | KV453005.1 | 167196  | 11-scf00163 | 11 |
| AX-158042716 | 7 | 82.116 | KV453005.1 | 181190  | 11-scf00163 | 11 |
| AX-158042720 | 7 | 82.116 | KV453005.1 | 183705  | 11-scf00163 | 11 |
| AX-158042733 | 7 | 82.116 | KV453005.1 | 209539  | 11-scf00163 | 11 |
| AX-158042739 | 7 | 82.116 | KV453005.1 | 214722  | 11-scf00163 | 11 |
| AX-157775048 | 7 | 82.116 | KV453005.1 | 225820  | 11-scf00163 | 11 |
| AX-158042753 | 7 | 82.116 | KV453005.1 | 271971  | 11-scf00163 | 11 |
| AX-158042757 | 7 | 82.116 | KV453005.1 | 277639  | 11-scf00163 | 11 |
| AX-158042758 | 7 | 82.116 | KV453005.1 | 279389  | 11-scf00163 | 11 |
| AX-158042759 | 7 | 82.116 | KV453005.1 | 279849  | 11-scf00163 | 11 |
| AX-158042760 | 7 | 82.116 | KV453005.1 | 281025  | 11-scf00163 | 11 |
| AX-158042763 | 7 | 82.116 | KV453005.1 | 284792  | 11-scf00163 | 11 |
| AX-158042764 | 7 | 82.116 | KV453005.1 | 290643  | 11-scf00163 | 11 |
| AX-158042766 | 7 | 82.116 | KV453005.1 | 293445  | 11-scf00163 | 11 |
| AX-158042769 | 7 | 82.116 | KV453005.1 | 302182  | 11-scf00163 | 11 |
| AX-158042771 | 7 | 82.116 | KV453005.1 | 305345  | 11-scf00163 | 11 |
| AX-158376540 | 7 | 82.116 | KV453002.1 | 39268   | 11-scf00587 | 11 |
| AX-158376547 | 7 | 82.116 | KV453002.1 | 75691   | 11-scf00587 | 11 |
| AX-158376548 | 7 | 82.116 | KV453002.1 | 76141   | 11-scf00587 | 11 |
| AX-158376560 | 7 | 82.116 | KV453002.1 | 122398  | 11-scf00587 | 11 |
| AX-158376568 | 7 | 82.116 | KV453002.1 | 153733  | 11-scf00587 | 11 |
| AX-158376574 | 7 | 82.116 | KV453002.1 | 163881  | 11-scf00587 | 11 |

|              |   |        |             |          |             |    |
|--------------|---|--------|-------------|----------|-------------|----|
| AX-157686149 | 7 | 82.116 | KV453003.1  | 13589    | 11-scf00676 | 11 |
| AX-157686150 | 7 | 82.116 | KV453003.1  | 16894    | 11-scf00676 | 11 |
| AX-157686161 | 7 | 82.116 | KV453003.1  | 34420    | 11-scf00676 | 11 |
| AX-158420857 | 7 | 82.116 | KV453003.1  | 49104    | 11-scf00676 | 11 |
| AX-157688411 | 7 | 82.116 | 3ML01026109 | 1191     | scf01708_1  | UN |
| AX-158042786 | 7 | 82.182 | KV453005.1  | 361853   | 11-scf00163 | 11 |
| AX-158042858 | 7 | 82.742 | KV453006.1  | 165024   | 11-scf00164 | 11 |
| AX-158042865 | 7 | 82.756 | KV453006.1  | 193125   | 11-scf00164 | 11 |
| AX-158042868 | 7 | 82.756 | KV453006.1  | 224007   | 11-scf00164 | 11 |
| AX-158376561 | 7 | 82.756 | KV453002.1  | 124011   | 11-scf00587 | 11 |
| AX-158376577 | 7 | 82.756 | KV453002.1  | 174098   | 11-scf00587 | 11 |
| AX-158040276 | 7 | 82.778 | KV453001.1  | 13507323 | 11-scf00161 | 11 |
| AX-157822170 | 7 | 82.778 | KV453006.1  | 13699    | 11-scf00164 | 11 |
| AX-158042841 | 7 | 82.778 | KV453006.1  | 67825    | 11-scf00164 | 11 |
| AX-158042844 | 7 | 82.778 | KV453006.1  | 99596    | 11-scf00164 | 11 |
| AX-158042846 | 7 | 82.778 | KV453006.1  | 116098   | 11-scf00164 | 11 |
| AX-158042853 | 7 | 82.778 | KV453006.1  | 136473   | 11-scf00164 | 11 |
| AX-158042854 | 7 | 82.778 | KV453006.1  | 136926   | 11-scf00164 | 11 |
| AX-158042861 | 7 | 82.778 | KV453006.1  | 177754   | 11-scf00164 | 11 |
| AX-158042872 | 7 | 82.778 | KV453006.1  | 240403   | 11-scf00164 | 11 |
| AX-158042875 | 7 | 82.778 | KV453006.1  | 264159   | 11-scf00164 | 11 |
| AX-158042878 | 7 | 82.778 | KV453006.1  | 271953   | 11-scf00164 | 11 |
| AX-158042888 | 7 | 82.778 | KV453006.1  | 343318   | 11-scf00164 | 11 |
| AX-158042894 | 7 | 82.778 | KV453006.1  | 387401   | 11-scf00164 | 11 |
| AX-158042901 | 7 | 82.778 | KV453006.1  | 401037   | 11-scf00164 | 11 |
| AX-158042905 | 7 | 82.778 | KV453006.1  | 431766   | 11-scf00164 | 11 |
| AX-158042906 | 7 | 82.778 | KV453006.1  | 443397   | 11-scf00164 | 11 |
| AX-158042911 | 7 | 82.778 | KV453006.1  | 455041   | 11-scf00164 | 11 |
| AX-158042912 | 7 | 82.778 | KV453006.1  | 455641   | 11-scf00164 | 11 |
| AX-158042920 | 7 | 82.778 | KV453006.1  | 499924   | 11-scf00164 | 11 |
| AX-158042927 | 7 | 82.778 | KV453006.1  | 556848   | 11-scf00164 | 11 |
| AX-158042930 | 7 | 82.778 | KV453006.1  | 583345   | 11-scf00164 | 11 |
| AX-158042947 | 7 | 82.778 | KV453006.1  | 634231   | 11-scf00164 | 11 |
| AX-158042949 | 7 | 82.778 | KV453006.1  | 648551   | 11-scf00164 | 11 |
| AX-158042964 | 7 | 82.778 | KV453006.1  | 702344   | 11-scf00164 | 11 |
| AX-158042994 | 7 | 82.778 | KV453006.1  | 780964   | 11-scf00164 | 11 |
| AX-158376541 | 7 | 82.778 | KV453002.1  | 49925    | 11-scf00587 | 11 |
| AX-158376542 | 7 | 82.778 | KV453002.1  | 50788    | 11-scf00587 | 11 |
| AX-158376543 | 7 | 82.778 | KV453002.1  | 62647    | 11-scf00587 | 11 |
| AX-158376544 | 7 | 82.778 | KV453002.1  | 68320    | 11-scf00587 | 11 |
| AX-158376559 | 7 | 82.778 | KV453002.1  | 120151   | 11-scf00587 | 11 |
| AX-158376567 | 7 | 82.778 | KV453002.1  | 153208   | 11-scf00587 | 11 |
| AX-158376571 | 7 | 82.778 | KV453002.1  | 156637   | 11-scf00587 | 11 |
| AX-158376575 | 7 | 82.778 | KV453002.1  | 170257   | 11-scf00587 | 11 |
| AX-158376581 | 7 | 82.778 | KV453002.1  | 184416   | 11-scf00587 | 11 |
| AX-158376584 | 7 | 82.778 | KV453002.1  | 194204   | 11-scf00587 | 11 |
| AX-158376595 | 7 | 82.778 | KV453002.1  | 218024   | 11-scf00587 | 11 |
| AX-158376596 | 7 | 82.778 | KV453002.1  | 220421   | 11-scf00587 | 11 |
| AX-158376602 | 7 | 82.778 | KV453002.1  | 236466   | 11-scf00587 | 11 |
| AX-158376605 | 7 | 82.778 | KV453002.1  | 243507   | 11-scf00587 | 11 |
| AX-157680962 | 7 | 82.778 | 3ML01024601 | 3625     | scf00767_1  | UN |



|              |   |        |             |        |             |    |
|--------------|---|--------|-------------|--------|-------------|----|
| AX-158042916 | 7 | 82.803 | KV453006.1  | 468500 | 11-scf00164 | 11 |
| AX-158042945 | 7 | 82.808 | KV453006.1  | 631295 | 11-scf00164 | 11 |
| AX-158043099 | 7 | 83.681 | KV453006.1  | 995088 | 11-scf00164 | 11 |
| AX-158043590 | 8 | 0      | KV452897.1  | 233921 | 7-scf00166  | 7  |
| AX-158043624 | 8 | 0      | KV452897.1  | 263414 | 7-scf00166  | 7  |
| AX-158043638 | 8 | 0      | KV452897.1  | 280310 | 7-scf00166  | 7  |
| AX-158043639 | 8 | 0      | KV452897.1  | 283166 | 7-scf00166  | 7  |
| AX-158043664 | 8 | 0      | KV452897.1  | 306479 | 7-scf00166  | 7  |
| AX-157683029 | 8 | 0      | KV452896.1  | 91029  | 7-scf00167  | 7  |
| AX-157683032 | 8 | 0      | KV452896.1  | 96455  | 7-scf00167  | 7  |
| AX-157683045 | 8 | 0      | KV452896.1  | 127482 | 7-scf00167  | 7  |
| AX-157683048 | 8 | 0      | KV452896.1  | 134141 | 7-scf00167  | 7  |
| AX-157680217 | 8 | 0      | KV452899.1  | 2519   | 7-scf00170  | 7  |
| AX-158408591 | 8 | 0.004  | KV452896.1  | 151741 | 7-scf00167  | 7  |
| AX-157683060 | 8 | 0.019  | KV452896.1  | 158011 | 7-scf00167  | 7  |
| AX-157683073 | 8 | 0.598  | KV452898.1  | 21113  | 7-scf00169  | 7  |
| AX-157680487 | 8 | 0.598  | KV452898.1  | 21999  | 7-scf00169  | 7  |
| AX-157683078 | 8 | 0.598  | KV452898.1  | 33736  | 7-scf00169  | 7  |
| AX-157683079 | 8 | 0.598  | KV452898.1  | 34833  | 7-scf00169  | 7  |
| AX-157683081 | 8 | 0.598  | KV452898.1  | 36583  | 7-scf00169  | 7  |
| AX-157683086 | 8 | 0.598  | KV452898.1  | 48263  | 7-scf00169  | 7  |
| AX-158408644 | 8 | 0.6    | KV452898.1  | 40807  | 7-scf00169  | 7  |
| AX-157679974 | 8 | 0.629  | KV452898.1  | 47296  | 7-scf00169  | 7  |
| AX-158043406 | 8 | 1.367  | KV452897.1  | 53458  | 7-scf00166  | 7  |
| AX-157735438 | 8 | 1.367  | KV452897.1  | 55675  | 7-scf00166  | 7  |
| AX-158043409 | 8 | 1.367  | KV452897.1  | 62488  | 7-scf00166  | 7  |
| AX-158043413 | 8 | 1.367  | KV452897.1  | 65276  | 7-scf00166  | 7  |
| AX-158043417 | 8 | 1.367  | KV452897.1  | 67998  | 7-scf00166  | 7  |
| AX-157822193 | 8 | 1.367  | KV452897.1  | 76471  | 7-scf00166  | 7  |
| AX-158043420 | 8 | 1.367  | KV452897.1  | 77407  | 7-scf00166  | 7  |
| AX-158043422 | 8 | 1.367  | KV452897.1  | 78328  | 7-scf00166  | 7  |
| AX-158043424 | 8 | 1.367  | KV452897.1  | 78632  | 7-scf00166  | 7  |
| AX-158043583 | 8 | 1.367  | KV452897.1  | 227099 | 7-scf00166  | 7  |
| AX-158043418 | 8 | 1.477  | KV452897.1  | 68885  | 7-scf00166  | 7  |
| AX-157856424 | 8 | 1.477  | KV452897.1  | 109690 | 7-scf00166  | 7  |
| AX-158043449 | 8 | 1.477  | KV452897.1  | 110521 | 7-scf00166  | 7  |
| AX-158043451 | 8 | 1.477  | KV452897.1  | 115260 | 7-scf00166  | 7  |
| AX-158043455 | 8 | 1.477  | KV452897.1  | 120678 | 7-scf00166  | 7  |
| AX-158043477 | 8 | 1.477  | KV452897.1  | 144086 | 7-scf00166  | 7  |
| AX-158043573 | 8 | 1.477  | KV452897.1  | 214615 | 7-scf00166  | 7  |
| AX-157704970 | 8 | 1.477  | 3ML01028120 | 667    | scf03725_1  | UN |
| AX-158383946 | 8 | 1.586  | KV452897.1  | 121066 | 7-scf00166  | 7  |
| AX-158043457 | 8 | 1.586  | KV452897.1  | 124233 | 7-scf00166  | 7  |
| AX-158043459 | 8 | 1.586  | KV452897.1  | 125239 | 7-scf00166  | 7  |
| AX-158043460 | 8 | 1.586  | KV452897.1  | 126582 | 7-scf00166  | 7  |
| AX-158416237 | 8 | 1.586  | KV452897.1  | 128833 | 7-scf00166  | 7  |
| AX-158043464 | 8 | 1.586  | KV452897.1  | 130202 | 7-scf00166  | 7  |
| AX-158043465 | 8 | 1.586  | KV452897.1  | 132614 | 7-scf00166  | 7  |
| AX-158043471 | 8 | 1.586  | KV452897.1  | 136119 | 7-scf00166  | 7  |
| AX-158043480 | 8 | 1.586  | KV452897.1  | 148476 | 7-scf00166  | 7  |
| AX-157822194 | 8 | 1.586  | KV452897.1  | 150058 | 7-scf00166  | 7  |

|              |   |       |            |        |            |   |
|--------------|---|-------|------------|--------|------------|---|
| AX-158043483 | 8 | 1.586 | KV452897.1 | 152809 | 7-scf00166 | 7 |
| AX-158043484 | 8 | 1.586 | KV452897.1 | 155934 | 7-scf00166 | 7 |
| AX-158043485 | 8 | 1.586 | KV452897.1 | 158073 | 7-scf00166 | 7 |
| AX-158043486 | 8 | 1.586 | KV452897.1 | 158484 | 7-scf00166 | 7 |
| AX-157727296 | 8 | 1.586 | KV452897.1 | 160011 | 7-scf00166 | 7 |
| AX-158043488 | 8 | 1.586 | KV452897.1 | 160237 | 7-scf00166 | 7 |
| AX-158043502 | 8 | 1.586 | KV452897.1 | 171920 | 7-scf00166 | 7 |
| AX-158043503 | 8 | 1.586 | KV452897.1 | 173251 | 7-scf00166 | 7 |
| AX-158043570 | 8 | 1.586 | KV452897.1 | 211743 | 7-scf00166 | 7 |
| AX-157748473 | 8 | 1.586 | KV452897.1 | 219393 | 7-scf00166 | 7 |
| AX-157775481 | 8 | 1.586 | KV452897.1 | 234418 | 7-scf00166 | 7 |
| AX-158043608 | 8 | 1.586 | KV452897.1 | 247737 | 7-scf00166 | 7 |
| AX-158043616 | 8 | 1.586 | KV452897.1 | 259039 | 7-scf00166 | 7 |
| AX-157683042 | 8 | 1.586 | KV452896.1 | 119906 | 7-scf00167 | 7 |
| AX-158043489 | 8 | 1.593 | KV452897.1 | 160622 | 7-scf00166 | 7 |
| AX-158043491 | 8 | 1.602 | KV452897.1 | 162133 | 7-scf00166 | 7 |
| AX-158043599 | 8 | 1.602 | KV452897.1 | 241645 | 7-scf00166 | 7 |
| AX-158043407 | 8 | 1.604 | KV452897.1 | 59279  | 7-scf00166 | 7 |
| AX-158043467 | 8 | 1.604 | KV452897.1 | 134615 | 7-scf00166 | 7 |
| AX-157822196 | 8 | 1.604 | KV452897.1 | 163209 | 7-scf00166 | 7 |
| AX-158043512 | 8 | 1.604 | KV452897.1 | 177876 | 7-scf00166 | 7 |
| AX-158043550 | 8 | 1.604 | KV452897.1 | 203816 | 7-scf00166 | 7 |
| AX-157822195 | 8 | 1.612 | KV452897.1 | 159599 | 7-scf00166 | 7 |
| AX-158043501 | 8 | 1.612 | KV452897.1 | 171356 | 7-scf00166 | 7 |
| AX-157822197 | 8 | 1.612 | KV452897.1 | 172502 | 7-scf00166 | 7 |
| AX-158043522 | 8 | 1.612 | KV452897.1 | 189377 | 7-scf00166 | 7 |
| AX-158043530 | 8 | 1.612 | KV452897.1 | 193690 | 7-scf00166 | 7 |
| AX-158043536 | 8 | 1.612 | KV452897.1 | 198211 | 7-scf00166 | 7 |
| AX-158043572 | 8 | 1.612 | KV452897.1 | 213623 | 7-scf00166 | 7 |
| AX-157822204 | 8 | 1.612 | KV452897.1 | 236369 | 7-scf00166 | 7 |
| AX-158043505 | 8 | 1.621 | KV452897.1 | 173687 | 7-scf00166 | 7 |
| AX-158043510 | 8 | 1.632 | KV452897.1 | 177278 | 7-scf00166 | 7 |
| AX-158043514 | 8 | 1.642 | KV452897.1 | 178903 | 7-scf00166 | 7 |
| AX-158043674 | 8 | 1.642 | KV452897.1 | 323629 | 7-scf00166 | 7 |
| AX-157683031 | 8 | 1.642 | KV452896.1 | 91728  | 7-scf00167 | 7 |
| AX-158043525 | 8 | 1.654 | KV452897.1 | 190438 | 7-scf00166 | 7 |
| AX-158043544 | 8 | 1.659 | KV452897.1 | 200642 | 7-scf00166 | 7 |
| AX-158043620 | 8 | 1.659 | KV452897.1 | 262087 | 7-scf00166 | 7 |
| AX-157822253 | 8 | 1.659 | KV452897.1 | 349271 | 7-scf00166 | 7 |
| AX-158043308 | 8 | 1.673 | KV452900.1 | 342420 | 7-scf00165 | 7 |
| AX-158043558 | 8 | 1.673 | KV452897.1 | 205477 | 7-scf00166 | 7 |
| AX-158043437 | 8 | 1.687 | KV452897.1 | 103041 | 7-scf00166 | 7 |
| AX-158043494 | 8 | 1.687 | KV452897.1 | 164201 | 7-scf00166 | 7 |
| AX-158043499 | 8 | 1.687 | KV452897.1 | 170357 | 7-scf00166 | 7 |
| AX-158043559 | 8 | 1.687 | KV452897.1 | 206371 | 7-scf00166 | 7 |
| AX-157741655 | 8 | 1.687 | KV452897.1 | 268269 | 7-scf00166 | 7 |
| AX-158043412 | 8 | 1.695 | KV452897.1 | 63665  | 7-scf00166 | 7 |
| AX-158043426 | 8 | 1.695 | KV452897.1 | 85425  | 7-scf00166 | 7 |
| AX-158043427 | 8 | 1.695 | KV452897.1 | 86333  | 7-scf00166 | 7 |
| AX-158043433 | 8 | 1.695 | KV452897.1 | 95418  | 7-scf00166 | 7 |
| AX-158043470 | 8 | 1.695 | KV452897.1 | 135464 | 7-scf00166 | 7 |

|              |   |       |            |        |            |   |
|--------------|---|-------|------------|--------|------------|---|
| AX-158043482 | 8 | 1.695 | KV452897.1 | 151151 | 7-scf00166 | 7 |
| AX-158043551 | 8 | 1.695 | KV452897.1 | 204185 | 7-scf00166 | 7 |
| AX-158043560 | 8 | 1.695 | KV452897.1 | 206652 | 7-scf00166 | 7 |
| AX-158043567 | 8 | 1.695 | KV452897.1 | 208519 | 7-scf00166 | 7 |
| AX-158043569 | 8 | 1.695 | KV452897.1 | 211167 | 7-scf00166 | 7 |
| AX-157822201 | 8 | 1.695 | KV452897.1 | 223570 | 7-scf00166 | 7 |
| AX-158043579 | 8 | 1.695 | KV452897.1 | 225265 | 7-scf00166 | 7 |
| AX-158043591 | 8 | 1.695 | KV452897.1 | 239096 | 7-scf00166 | 7 |
| AX-157822205 | 8 | 1.695 | KV452897.1 | 239511 | 7-scf00166 | 7 |
| AX-158043596 | 8 | 1.695 | KV452897.1 | 241295 | 7-scf00166 | 7 |
| AX-158043602 | 8 | 1.695 | KV452897.1 | 242564 | 7-scf00166 | 7 |
| AX-158043603 | 8 | 1.695 | KV452897.1 | 244427 | 7-scf00166 | 7 |
| AX-158043604 | 8 | 1.695 | KV452897.1 | 245260 | 7-scf00166 | 7 |
| AX-157720548 | 8 | 1.695 | KV452897.1 | 253964 | 7-scf00166 | 7 |
| AX-158043613 | 8 | 1.695 | KV452897.1 | 255021 | 7-scf00166 | 7 |
| AX-157822206 | 8 | 1.695 | KV452897.1 | 255437 | 7-scf00166 | 7 |
| AX-157735415 | 8 | 1.695 | KV452897.1 | 259160 | 7-scf00166 | 7 |
| AX-157822207 | 8 | 1.695 | KV452897.1 | 260750 | 7-scf00166 | 7 |
| AX-157745769 | 8 | 1.695 | KV452897.1 | 261116 | 7-scf00166 | 7 |
| AX-158043618 | 8 | 1.695 | KV452897.1 | 261673 | 7-scf00166 | 7 |
| AX-157822211 | 8 | 1.695 | KV452897.1 | 266139 | 7-scf00166 | 7 |
| AX-158043627 | 8 | 1.695 | KV452897.1 | 266642 | 7-scf00166 | 7 |
| AX-157822215 | 8 | 1.715 | KV452897.1 | 272345 | 7-scf00166 | 7 |
| AX-158043157 | 8 | 1.734 | KV452900.1 | 59352  | 7-scf00165 | 7 |
| AX-158391717 | 8 | 1.734 | KV452900.1 | 330247 | 7-scf00165 | 7 |
| AX-158043333 | 8 | 1.734 | KV452900.1 | 383440 | 7-scf00165 | 7 |
| AX-158043440 | 8 | 1.734 | KV452897.1 | 104440 | 7-scf00166 | 7 |
| AX-158043496 | 8 | 1.734 | KV452897.1 | 166910 | 7-scf00166 | 7 |
| AX-158043516 | 8 | 1.734 | KV452897.1 | 181147 | 7-scf00166 | 7 |
| AX-158043563 | 8 | 1.734 | KV452897.1 | 207352 | 7-scf00166 | 7 |
| AX-158043634 | 8 | 1.734 | KV452897.1 | 273469 | 7-scf00166 | 7 |
| AX-158043636 | 8 | 1.734 | KV452897.1 | 278907 | 7-scf00166 | 7 |
| AX-157822244 | 8 | 1.734 | KV452897.1 | 317120 | 7-scf00166 | 7 |
| AX-158043323 | 8 | 1.804 | KV452900.1 | 363173 | 7-scf00165 | 7 |
| AX-158043378 | 8 | 1.804 | KV452900.1 | 480200 | 7-scf00165 | 7 |
| AX-158043388 | 8 | 1.804 | KV452897.1 | 3695   | 7-scf00166 | 7 |
| AX-158043405 | 8 | 1.804 | KV452897.1 | 45227  | 7-scf00166 | 7 |
| AX-158043476 | 8 | 1.804 | KV452897.1 | 142937 | 7-scf00166 | 7 |
| AX-158043487 | 8 | 1.804 | KV452897.1 | 158953 | 7-scf00166 | 7 |
| AX-158043490 | 8 | 1.804 | KV452897.1 | 161539 | 7-scf00166 | 7 |
| AX-158043506 | 8 | 1.804 | KV452897.1 | 174898 | 7-scf00166 | 7 |
| AX-158043509 | 8 | 1.804 | KV452897.1 | 176049 | 7-scf00166 | 7 |
| AX-157822198 | 8 | 1.804 | KV452897.1 | 183471 | 7-scf00166 | 7 |
| AX-158043529 | 8 | 1.804 | KV452897.1 | 192796 | 7-scf00166 | 7 |
| AX-157822200 | 8 | 1.804 | KV452897.1 | 194625 | 7-scf00166 | 7 |
| AX-158043543 | 8 | 1.804 | KV452897.1 | 200303 | 7-scf00166 | 7 |
| AX-158043564 | 8 | 1.804 | KV452897.1 | 207757 | 7-scf00166 | 7 |
| AX-157717081 | 8 | 1.804 | KV452897.1 | 255687 | 7-scf00166 | 7 |
| AX-157717737 | 8 | 1.804 | KV452897.1 | 259860 | 7-scf00166 | 7 |
| AX-158043628 | 8 | 1.804 | KV452897.1 | 268897 | 7-scf00166 | 7 |
| AX-157822213 | 8 | 1.804 | KV452897.1 | 269918 | 7-scf00166 | 7 |

|              |   |       |             |        |            |    |
|--------------|---|-------|-------------|--------|------------|----|
| AX-157822214 | 8 | 1.804 | KV452897.1  | 271188 | 7-scf00166 | 7  |
| AX-158043635 | 8 | 1.804 | KV452897.1  | 274205 | 7-scf00166 | 7  |
| AX-157822217 | 8 | 1.804 | KV452897.1  | 274292 | 7-scf00166 | 7  |
| AX-157822219 | 8 | 1.804 | KV452897.1  | 277405 | 7-scf00166 | 7  |
| AX-157822220 | 8 | 1.804 | KV452897.1  | 279295 | 7-scf00166 | 7  |
| AX-157822221 | 8 | 1.804 | KV452897.1  | 279447 | 7-scf00166 | 7  |
| AX-158043643 | 8 | 1.804 | KV452897.1  | 284322 | 7-scf00166 | 7  |
| AX-157822224 | 8 | 1.804 | KV452897.1  | 285931 | 7-scf00166 | 7  |
| AX-158043647 | 8 | 1.804 | KV452897.1  | 286566 | 7-scf00166 | 7  |
| AX-158043648 | 8 | 1.804 | KV452897.1  | 287226 | 7-scf00166 | 7  |
| AX-157822227 | 8 | 1.804 | KV452897.1  | 288659 | 7-scf00166 | 7  |
| AX-158043652 | 8 | 1.804 | KV452897.1  | 291769 | 7-scf00166 | 7  |
| AX-157717326 | 8 | 1.804 | KV452897.1  | 296017 | 7-scf00166 | 7  |
| AX-157822232 | 8 | 1.804 | KV452897.1  | 296713 | 7-scf00166 | 7  |
| AX-158043654 | 8 | 1.804 | KV452897.1  | 296814 | 7-scf00166 | 7  |
| AX-158043655 | 8 | 1.804 | KV452897.1  | 297878 | 7-scf00166 | 7  |
| AX-157822233 | 8 | 1.804 | KV452897.1  | 298272 | 7-scf00166 | 7  |
| AX-158043656 | 8 | 1.804 | KV452897.1  | 298573 | 7-scf00166 | 7  |
| AX-157747344 | 8 | 1.804 | KV452897.1  | 302802 | 7-scf00166 | 7  |
| AX-158043663 | 8 | 1.804 | KV452897.1  | 306336 | 7-scf00166 | 7  |
| AX-157822235 | 8 | 1.804 | KV452897.1  | 307410 | 7-scf00166 | 7  |
| AX-157822236 | 8 | 1.804 | KV452897.1  | 308666 | 7-scf00166 | 7  |
| AX-157748949 | 8 | 1.804 | KV452897.1  | 311432 | 7-scf00166 | 7  |
| AX-157822238 | 8 | 1.804 | KV452897.1  | 312070 | 7-scf00166 | 7  |
| AX-157716551 | 8 | 1.804 | KV452897.1  | 312465 | 7-scf00166 | 7  |
| AX-157822240 | 8 | 1.804 | KV452897.1  | 313209 | 7-scf00166 | 7  |
| AX-157822241 | 8 | 1.804 | KV452897.1  | 313708 | 7-scf00166 | 7  |
| AX-157822242 | 8 | 1.804 | KV452897.1  | 314393 | 7-scf00166 | 7  |
| AX-158043677 | 8 | 1.804 | KV452897.1  | 328432 | 7-scf00166 | 7  |
| AX-157822247 | 8 | 1.804 | KV452897.1  | 329321 | 7-scf00166 | 7  |
| AX-157822248 | 8 | 1.804 | KV452897.1  | 333992 | 7-scf00166 | 7  |
| AX-158043678 | 8 | 1.804 | KV452897.1  | 334148 | 7-scf00166 | 7  |
| AX-158043685 | 8 | 1.804 | KV452897.1  | 337707 | 7-scf00166 | 7  |
| AX-158043689 | 8 | 1.804 | KV452897.1  | 340557 | 7-scf00166 | 7  |
| AX-157822250 | 8 | 1.804 | KV452897.1  | 343657 | 7-scf00166 | 7  |
| AX-158043692 | 8 | 1.804 | KV452897.1  | 344288 | 7-scf00166 | 7  |
| AX-157772835 | 8 | 1.804 | KV452897.1  | 346089 | 7-scf00166 | 7  |
| AX-157822251 | 8 | 1.804 | KV452897.1  | 347146 | 7-scf00166 | 7  |
| AX-158043697 | 8 | 1.804 | KV452897.1  | 347649 | 7-scf00166 | 7  |
| AX-157822252 | 8 | 1.804 | KV452897.1  | 348804 | 7-scf00166 | 7  |
| AX-157683025 | 8 | 1.804 | KV452896.1  | 72234  | 7-scf00167 | 7  |
| AX-157683044 | 8 | 1.804 | KV452896.1  | 124799 | 7-scf00167 | 7  |
| AX-157683046 | 8 | 1.804 | KV452896.1  | 128964 | 7-scf00167 | 7  |
| AX-157683047 | 8 | 1.804 | KV452896.1  | 129538 | 7-scf00167 | 7  |
| AX-157683049 | 8 | 1.804 | KV452896.1  | 134839 | 7-scf00167 | 7  |
| AX-157683050 | 8 | 1.804 | KV452896.1  | 135291 | 7-scf00167 | 7  |
| AX-157683051 | 8 | 1.804 | KV452896.1  | 135622 | 7-scf00167 | 7  |
| AX-157689403 | 8 | 1.804 | 3ML01029529 | 230    | scf05152_1 | UN |
| AX-158043706 | 8 | 1.813 | KV452897.1  | 363425 | 7-scf00166 | 7  |
| AX-158043137 | 8 | 1.864 | KV452900.1  | 6254   | 7-scf00165 | 7  |
| AX-158043138 | 8 | 1.914 | KV452900.1  | 7032   | 7-scf00165 | 7  |

|              |   |       |            |        |            |   |
|--------------|---|-------|------------|--------|------------|---|
| AX-158043139 | 8 | 1.914 | KV452900.1 | 7415   | 7-scf00165 | 7 |
| AX-158043155 | 8 | 1.914 | KV452900.1 | 42630  | 7-scf00165 | 7 |
| AX-158043185 | 8 | 1.914 | KV452900.1 | 104102 | 7-scf00165 | 7 |
| AX-158043186 | 8 | 1.914 | KV452900.1 | 105159 | 7-scf00165 | 7 |
| AX-157822181 | 8 | 1.914 | KV452900.1 | 147090 | 7-scf00165 | 7 |
| AX-157770914 | 8 | 1.914 | KV452900.1 | 239552 | 7-scf00165 | 7 |
| AX-158043255 | 8 | 1.914 | KV452900.1 | 242398 | 7-scf00165 | 7 |
| AX-158383939 | 8 | 1.914 | KV452900.1 | 262333 | 7-scf00165 | 7 |
| AX-158043267 | 8 | 1.914 | KV452900.1 | 270068 | 7-scf00165 | 7 |
| AX-158043272 | 8 | 1.914 | KV452900.1 | 278680 | 7-scf00165 | 7 |
| AX-158043280 | 8 | 1.914 | KV452900.1 | 298431 | 7-scf00165 | 7 |
| AX-157822187 | 8 | 1.914 | KV452900.1 | 312967 | 7-scf00165 | 7 |
| AX-157742022 | 8 | 1.914 | KV452900.1 | 321704 | 7-scf00165 | 7 |
| AX-158043296 | 8 | 1.914 | KV452900.1 | 322153 | 7-scf00165 | 7 |
| AX-158043300 | 8 | 1.914 | KV452900.1 | 326672 | 7-scf00165 | 7 |
| AX-158043303 | 8 | 1.914 | KV452900.1 | 328448 | 7-scf00165 | 7 |
| AX-158043304 | 8 | 1.914 | KV452900.1 | 329720 | 7-scf00165 | 7 |
| AX-158383940 | 8 | 1.914 | KV452900.1 | 349742 | 7-scf00165 | 7 |
| AX-158043318 | 8 | 1.914 | KV452900.1 | 358848 | 7-scf00165 | 7 |
| AX-158043321 | 8 | 1.914 | KV452900.1 | 361364 | 7-scf00165 | 7 |
| AX-158043322 | 8 | 1.914 | KV452900.1 | 362143 | 7-scf00165 | 7 |
| AX-158043337 | 8 | 1.914 | KV452900.1 | 405043 | 7-scf00165 | 7 |
| AX-158408575 | 8 | 1.914 | KV452900.1 | 410042 | 7-scf00165 | 7 |
| AX-158043342 | 8 | 1.914 | KV452900.1 | 417545 | 7-scf00165 | 7 |
| AX-158043350 | 8 | 1.914 | KV452900.1 | 429434 | 7-scf00165 | 7 |
| AX-158043351 | 8 | 1.914 | KV452900.1 | 435287 | 7-scf00165 | 7 |
| AX-158043352 | 8 | 1.914 | KV452900.1 | 435886 | 7-scf00165 | 7 |
| AX-158043355 | 8 | 1.914 | KV452900.1 | 437270 | 7-scf00165 | 7 |
| AX-158043356 | 8 | 1.914 | KV452900.1 | 438074 | 7-scf00165 | 7 |
| AX-157700037 | 8 | 1.914 | KV452900.1 | 439576 | 7-scf00165 | 7 |
| AX-158043360 | 8 | 1.914 | KV452900.1 | 446122 | 7-scf00165 | 7 |
| AX-158043363 | 8 | 1.914 | KV452900.1 | 452257 | 7-scf00165 | 7 |
| AX-158043367 | 8 | 1.914 | KV452900.1 | 455596 | 7-scf00165 | 7 |
| AX-158408579 | 8 | 1.914 | KV452900.1 | 476336 | 7-scf00165 | 7 |
| AX-158043493 | 8 | 1.914 | KV452897.1 | 163895 | 7-scf00166 | 7 |
| AX-158043495 | 8 | 1.914 | KV452897.1 | 165974 | 7-scf00166 | 7 |
| AX-158043534 | 8 | 1.914 | KV452897.1 | 194870 | 7-scf00166 | 7 |
| AX-158043565 | 8 | 1.914 | KV452897.1 | 208243 | 7-scf00166 | 7 |
| AX-158043594 | 8 | 1.914 | KV452897.1 | 240117 | 7-scf00166 | 7 |
| AX-158043612 | 8 | 1.914 | KV452897.1 | 253190 | 7-scf00166 | 7 |
| AX-157822223 | 8 | 1.914 | KV452897.1 | 284123 | 7-scf00166 | 7 |
| AX-157822229 | 8 | 1.914 | KV452897.1 | 290219 | 7-scf00166 | 7 |
| AX-157717305 | 8 | 1.914 | KV452897.1 | 318997 | 7-scf00166 | 7 |
| AX-158043703 | 8 | 1.914 | KV452897.1 | 353761 | 7-scf00166 | 7 |
| AX-157683022 | 8 | 1.914 | KV452896.1 | 60719  | 7-scf00167 | 7 |
| AX-157683028 | 8 | 1.914 | KV452896.1 | 89829  | 7-scf00167 | 7 |
| AX-157683040 | 8 | 1.914 | KV452896.1 | 115880 | 7-scf00167 | 7 |
| AX-157683053 | 8 | 1.914 | KV452896.1 | 142520 | 7-scf00167 | 7 |
| AX-157683054 | 8 | 1.914 | KV452896.1 | 142740 | 7-scf00167 | 7 |
| AX-158416245 | 8 | 1.914 | KV452896.1 | 153895 | 7-scf00167 | 7 |
| AX-157683094 | 8 | 1.914 | KV452899.1 | 4509   | 7-scf00170 | 7 |

|              |   |       |             |        |            |    |
|--------------|---|-------|-------------|--------|------------|----|
| AX-157683095 | 8 | 1.914 | KV452899.1  | 5146   | 7-scf00170 | 7  |
| AX-157683100 | 8 | 1.914 | KV452899.1  | 9873   | 7-scf00170 | 7  |
| AX-157680645 | 8 | 1.914 | KV452899.1  | 28347  | 7-scf00170 | 7  |
| AX-157695790 | 8 | 1.914 | FI899466.1  | 293    | 7-scf00170 | UN |
| AX-157687629 | 8 | 1.914 | 3ML01025073 | 9530   | scf00953_1 | UN |
| AX-158416227 | 8 | 2.049 | KV452900.1  | 65078  | 7-scf00165 | 7  |
| AX-158043259 | 8 | 2.461 | KV452900.1  | 247910 | 7-scf00165 | 7  |
| AX-157683055 | 8 | 2.461 | KV452896.1  | 143896 | 7-scf00167 | 7  |
| AX-158043717 | 8 | 2.461 | KV452901.1  | 23840  | 7-scf00168 | 7  |
| AX-158043720 | 8 | 2.461 | KV452901.1  | 30423  | 7-scf00168 | 7  |
| AX-158043724 | 8 | 2.461 | KV452901.1  | 40812  | 7-scf00168 | 7  |
| AX-158408596 | 8 | 2.461 | KV452901.1  | 49660  | 7-scf00168 | 7  |
| AX-158043732 | 8 | 2.461 | KV452901.1  | 56083  | 7-scf00168 | 7  |
| AX-157713805 | 8 | 2.461 | KV452901.1  | 80379  | 7-scf00168 | 7  |
| AX-158043749 | 8 | 2.461 | KV452901.1  | 83889  | 7-scf00168 | 7  |
| AX-158043752 | 8 | 2.461 | KV452901.1  | 87681  | 7-scf00168 | 7  |
| AX-157688899 | 8 | 2.461 | 3ML01027402 | 550    | scf03008_1 | UN |
| AX-158043754 | 8 | 2.549 | KV452901.1  | 88518  | 7-scf00168 | 7  |
| AX-158043776 | 8 | 2.569 | KV452901.1  | 100309 | 7-scf00168 | 7  |
| AX-158043721 | 8 | 2.618 | KV452901.1  | 30689  | 7-scf00168 | 7  |
| AX-158043751 | 8 | 2.618 | KV452901.1  | 86794  | 7-scf00168 | 7  |
| AX-158043777 | 8 | 2.618 | KV452901.1  | 101157 | 7-scf00168 | 7  |
| AX-158043780 | 8 | 2.618 | KV452901.1  | 102784 | 7-scf00168 | 7  |
| AX-158043789 | 8 | 2.618 | KV452901.1  | 112652 | 7-scf00168 | 7  |
| AX-158043791 | 8 | 2.618 | KV452901.1  | 113318 | 7-scf00168 | 7  |
| AX-158043797 | 8 | 2.647 | KV452901.1  | 118224 | 7-scf00168 | 7  |
| AX-158043799 | 8 | 2.697 | KV452901.1  | 118835 | 7-scf00168 | 7  |
| AX-158043726 | 8 | 2.742 | KV452901.1  | 46373  | 7-scf00168 | 7  |
| AX-158043728 | 8 | 2.742 | KV452901.1  | 46874  | 7-scf00168 | 7  |
| AX-158043731 | 8 | 2.742 | KV452901.1  | 49855  | 7-scf00168 | 7  |
| AX-157822254 | 8 | 2.742 | KV452901.1  | 119006 | 7-scf00168 | 7  |
| AX-158043872 | 8 | 2.742 | KV452901.1  | 187299 | 7-scf00168 | 7  |
| AX-157683066 | 8 | 2.742 | KV452898.1  | 1868   | 7-scf00169 | 7  |
| AX-158043800 | 8 | 2.788 | KV452901.1  | 119667 | 7-scf00168 | 7  |
| AX-158043815 | 8 | 2.788 | KV452901.1  | 129092 | 7-scf00168 | 7  |
| AX-158043818 | 8 | 2.788 | KV452901.1  | 130200 | 7-scf00168 | 7  |
| AX-157720903 | 8 | 2.788 | KV452901.1  | 189147 | 7-scf00168 | 7  |
| AX-158043878 | 8 | 2.788 | KV452901.1  | 193711 | 7-scf00168 | 7  |
| AX-158043888 | 8 | 2.788 | KV452901.1  | 205727 | 7-scf00168 | 7  |
| AX-157701529 | 8 | 2.826 | KV452901.1  | 130568 | 7-scf00168 | 7  |
| AX-158043765 | 8 | 2.841 | KV452901.1  | 94856  | 7-scf00168 | 7  |
| AX-158043821 | 8 | 2.841 | KV452901.1  | 134176 | 7-scf00168 | 7  |
| AX-158391724 | 8 | 2.841 | KV452901.1  | 138424 | 7-scf00168 | 7  |
| AX-157683074 | 8 | 2.841 | KV452898.1  | 25056  | 7-scf00169 | 7  |
| AX-158043826 | 8 | 2.88  | KV452901.1  | 138869 | 7-scf00168 | 7  |
| AX-158043737 | 8 | 2.898 | KV452901.1  | 68439  | 7-scf00168 | 7  |
| AX-158408597 | 8 | 2.898 | KV452901.1  | 115831 | 7-scf00168 | 7  |
| AX-158043834 | 8 | 2.898 | KV452901.1  | 143896 | 7-scf00168 | 7  |
| AX-158379838 | 8 | 2.898 | KV452901.1  | 144781 | 7-scf00168 | 7  |
| AX-158043836 | 8 | 2.898 | KV452901.1  | 144977 | 7-scf00168 | 7  |
| AX-158043759 | 8 | 2.899 | KV452901.1  | 90885  | 7-scf00168 | 7  |

|              |   |       |            |        |            |   |
|--------------|---|-------|------------|--------|------------|---|
| AX-158043841 | 8 | 2.899 | KV452901.1 | 149173 | 7-scf00168 | 7 |
| AX-157683084 | 8 | 2.899 | KV452898.1 | 43738  | 7-scf00169 | 7 |
| AX-157683085 | 8 | 2.899 | KV452898.1 | 45716  | 7-scf00169 | 7 |
| AX-158043771 | 8 | 2.9   | KV452901.1 | 97576  | 7-scf00168 | 7 |
| AX-158043781 | 8 | 2.9   | KV452901.1 | 103750 | 7-scf00168 | 7 |
| AX-158043785 | 8 | 2.9   | KV452901.1 | 106941 | 7-scf00168 | 7 |
| AX-158383951 | 8 | 2.9   | KV452901.1 | 136701 | 7-scf00168 | 7 |
| AX-157746685 | 8 | 2.9   | KV452901.1 | 149939 | 7-scf00168 | 7 |
| AX-158043844 | 8 | 2.9   | KV452901.1 | 154810 | 7-scf00168 | 7 |
| AX-157822255 | 8 | 3.33  | KV452901.1 | 156749 | 7-scf00168 | 7 |
| AX-157694755 | 8 | 3.331 | KV452900.1 | 49811  | 7-scf00165 | 7 |
| AX-158043168 | 8 | 3.331 | KV452900.1 | 75402  | 7-scf00165 | 7 |
| AX-158043846 | 8 | 3.331 | KV452901.1 | 157810 | 7-scf00168 | 7 |
| AX-157751579 | 8 | 3.331 | KV452901.1 | 158298 | 7-scf00168 | 7 |
| AX-157822258 | 8 | 3.331 | KV452901.1 | 163822 | 7-scf00168 | 7 |
| AX-158043866 | 8 | 3.331 | KV452901.1 | 181572 | 7-scf00168 | 7 |
| AX-158043847 | 8 | 3.332 | KV452901.1 | 162996 | 7-scf00168 | 7 |
| AX-158043743 | 8 | 3.333 | KV452901.1 | 79573  | 7-scf00168 | 7 |
| AX-157693520 | 8 | 3.333 | KV452901.1 | 115271 | 7-scf00168 | 7 |
| AX-158043795 | 8 | 3.333 | KV452901.1 | 115782 | 7-scf00168 | 7 |
| AX-158043796 | 8 | 3.333 | KV452901.1 | 117340 | 7-scf00168 | 7 |
| AX-158043829 | 8 | 3.333 | KV452901.1 | 141354 | 7-scf00168 | 7 |
| AX-158043853 | 8 | 3.333 | KV452901.1 | 168365 | 7-scf00168 | 7 |
| AX-157772597 | 8 | 3.333 | KV452901.1 | 170977 | 7-scf00168 | 7 |
| AX-158043757 | 8 | 3.334 | KV452901.1 | 89951  | 7-scf00168 | 7 |
| AX-158043763 | 8 | 3.334 | KV452901.1 | 93146  | 7-scf00168 | 7 |
| AX-158043764 | 8 | 3.334 | KV452901.1 | 93917  | 7-scf00168 | 7 |
| AX-158043768 | 8 | 3.334 | KV452901.1 | 95729  | 7-scf00168 | 7 |
| AX-158043770 | 8 | 3.334 | KV452901.1 | 96982  | 7-scf00168 | 7 |
| AX-158043793 | 8 | 3.334 | KV452901.1 | 114325 | 7-scf00168 | 7 |
| AX-158043819 | 8 | 3.334 | KV452901.1 | 131290 | 7-scf00168 | 7 |
| AX-158043824 | 8 | 3.334 | KV452901.1 | 137195 | 7-scf00168 | 7 |
| AX-158043845 | 8 | 3.334 | KV452901.1 | 155902 | 7-scf00168 | 7 |
| AX-158043848 | 8 | 3.334 | KV452901.1 | 165209 | 7-scf00168 | 7 |
| AX-158043859 | 8 | 3.334 | KV452901.1 | 174107 | 7-scf00168 | 7 |
| AX-158043861 | 8 | 3.334 | KV452901.1 | 174829 | 7-scf00168 | 7 |
| AX-157747428 | 8 | 3.334 | KV452901.1 | 182302 | 7-scf00168 | 7 |
| AX-158043868 | 8 | 3.334 | KV452901.1 | 184300 | 7-scf00168 | 7 |
| AX-158043870 | 8 | 3.334 | KV452901.1 | 185441 | 7-scf00168 | 7 |
| AX-157822261 | 8 | 3.334 | KV452901.1 | 189733 | 7-scf00168 | 7 |
| AX-158383953 | 8 | 3.334 | KV452901.1 | 191832 | 7-scf00168 | 7 |
| AX-157822263 | 8 | 3.334 | KV452901.1 | 191888 | 7-scf00168 | 7 |
| AX-158043876 | 8 | 3.334 | KV452901.1 | 192022 | 7-scf00168 | 7 |
| AX-158043877 | 8 | 3.334 | KV452901.1 | 193042 | 7-scf00168 | 7 |
| AX-157753239 | 8 | 3.334 | KV452901.1 | 194281 | 7-scf00168 | 7 |
| AX-158043882 | 8 | 3.334 | KV452901.1 | 198256 | 7-scf00168 | 7 |
| AX-158043886 | 8 | 3.661 | KV452901.1 | 204601 | 7-scf00168 | 7 |
| AX-158043891 | 8 | 3.661 | KV452901.1 | 207072 | 7-scf00168 | 7 |
| AX-157724768 | 8 | 3.662 | KV452901.1 | 205359 | 7-scf00168 | 7 |
| AX-158043889 | 8 | 3.662 | KV452901.1 | 205948 | 7-scf00168 | 7 |
| AX-158043895 | 8 | 3.662 | KV452901.1 | 210365 | 7-scf00168 | 7 |

|              |   |       |            |        |            |   |
|--------------|---|-------|------------|--------|------------|---|
| AX-158043897 | 8 | 3.662 | KV452901.1 | 210868 | 7-scf00168 | 7 |
| AX-158043899 | 8 | 3.662 | KV452901.1 | 213737 | 7-scf00168 | 7 |
| AX-157822257 | 8 | 3.989 | KV452901.1 | 159935 | 7-scf00168 | 7 |
| AX-157865407 | 8 | 3.989 | KV452901.1 | 202301 | 7-scf00168 | 7 |
| AX-158043902 | 8 | 3.989 | KV452901.1 | 217614 | 7-scf00168 | 7 |
| AX-158043905 | 8 | 3.989 | KV452901.1 | 217992 | 7-scf00168 | 7 |
| AX-157725275 | 8 | 3.989 | KV452901.1 | 218197 | 7-scf00168 | 7 |
| AX-158043906 | 8 | 3.989 | KV452901.1 | 218856 | 7-scf00168 | 7 |
| AX-157725670 | 8 | 3.989 | KV452901.1 | 219952 | 7-scf00168 | 7 |
| AX-158043907 | 8 | 3.989 | KV452901.1 | 222243 | 7-scf00168 | 7 |
| AX-157822264 | 8 | 3.989 | KV452901.1 | 242148 | 7-scf00168 | 7 |
| AX-158043908 | 8 | 4.21  | KV452901.1 | 223217 | 7-scf00168 | 7 |
| AX-158043913 | 8 | 4.318 | KV452901.1 | 228570 | 7-scf00168 | 7 |
| AX-158043914 | 8 | 4.418 | KV452901.1 | 229189 | 7-scf00168 | 7 |
| AX-157822265 | 8 | 4.429 | KV452901.1 | 243618 | 7-scf00168 | 7 |
| AX-158043923 | 8 | 4.559 | KV452901.1 | 245941 | 7-scf00168 | 7 |
| AX-158043925 | 8 | 4.559 | KV452901.1 | 249514 | 7-scf00168 | 7 |
| AX-158043926 | 8 | 4.559 | KV452901.1 | 251496 | 7-scf00168 | 7 |
| AX-158043927 | 8 | 4.559 | KV452901.1 | 251883 | 7-scf00168 | 7 |
| AX-157822267 | 8 | 4.559 | KV452901.1 | 255604 | 7-scf00168 | 7 |
| AX-158043930 | 8 | 4.559 | KV452901.1 | 256056 | 7-scf00168 | 7 |
| AX-158043940 | 8 | 4.821 | KV452901.1 | 269332 | 7-scf00168 | 7 |
| AX-158043928 | 8 | 4.952 | KV452901.1 | 253949 | 7-scf00168 | 7 |
| AX-158043942 | 8 | 4.952 | KV452901.1 | 271768 | 7-scf00168 | 7 |
| AX-158043952 | 8 | 4.952 | KV452901.1 | 281241 | 7-scf00168 | 7 |
| AX-158043943 | 8 | 5.083 | KV452901.1 | 272478 | 7-scf00168 | 7 |
| AX-158043944 | 8 | 5.083 | KV452901.1 | 272972 | 7-scf00168 | 7 |
| AX-157741784 | 8 | 5.247 | KV452901.1 | 276353 | 7-scf00168 | 7 |
| AX-158043947 | 8 | 5.247 | KV452901.1 | 277157 | 7-scf00168 | 7 |
| AX-158043954 | 8 | 5.41  | KV452901.1 | 282145 | 7-scf00168 | 7 |
| AX-158043955 | 8 | 5.41  | KV452901.1 | 283135 | 7-scf00168 | 7 |
| AX-158043948 | 8 | 5.411 | KV452901.1 | 277842 | 7-scf00168 | 7 |
| AX-158391726 | 8 | 5.411 | KV452901.1 | 278540 | 7-scf00168 | 7 |
| AX-157775080 | 8 | 5.411 | KV452901.1 | 285511 | 7-scf00168 | 7 |
| AX-158043965 | 8 | 5.411 | KV452901.1 | 294666 | 7-scf00168 | 7 |
| AX-157745853 | 8 | 5.411 | KV452901.1 | 296647 | 7-scf00168 | 7 |
| AX-158043967 | 8 | 5.411 | KV452901.1 | 297902 | 7-scf00168 | 7 |
| AX-157697728 | 8 | 5.411 | KV452901.1 | 301769 | 7-scf00168 | 7 |
| AX-158043971 | 8 | 5.411 | KV452901.1 | 303685 | 7-scf00168 | 7 |
| AX-158043972 | 8 | 5.411 | KV452901.1 | 304088 | 7-scf00168 | 7 |
| AX-157751053 | 8 | 5.411 | KV452901.1 | 309901 | 7-scf00168 | 7 |
| AX-157822270 | 8 | 5.411 | KV452901.1 | 312493 | 7-scf00168 | 7 |
| AX-158043986 | 8 | 5.411 | KV452901.1 | 331225 | 7-scf00168 | 7 |
| AX-158043978 | 8 | 5.59  | KV452901.1 | 314986 | 7-scf00168 | 7 |
| AX-158043979 | 8 | 5.689 | KV452901.1 | 315357 | 7-scf00168 | 7 |
| AX-158043982 | 8 | 5.689 | KV452901.1 | 316933 | 7-scf00168 | 7 |
| AX-157717023 | 8 | 5.689 | KV452901.1 | 323484 | 7-scf00168 | 7 |
| AX-158043985 | 8 | 5.772 | KV452901.1 | 324415 | 7-scf00168 | 7 |
| AX-157752226 | 8 | 5.957 | KV452901.1 | 329214 | 7-scf00168 | 7 |
| AX-158043989 | 8 | 6.066 | KV452901.1 | 334104 | 7-scf00168 | 7 |
| AX-158043992 | 8 | 6.066 | KV452901.1 | 334773 | 7-scf00168 | 7 |



|              |   |       |            |        |            |   |
|--------------|---|-------|------------|--------|------------|---|
| AX-157721878 | 8 | 6.066 | KV452901.1 | 335261 | 7-scf00168 | 7 |
| AX-158043996 | 8 | 6.066 | KV452901.1 | 336079 | 7-scf00168 | 7 |
| AX-158043997 | 8 | 6.066 | KV452901.1 | 336371 | 7-scf00168 | 7 |
| AX-158043998 | 8 | 6.066 | KV452901.1 | 337393 | 7-scf00168 | 7 |
| AX-157754747 | 8 | 6.123 | KV452901.1 | 338335 | 7-scf00168 | 7 |
| AX-158044001 | 8 | 6.285 | KV452901.1 | 340374 | 7-scf00168 | 7 |
| AX-158044005 | 8 | 6.449 | KV452901.1 | 347170 | 7-scf00168 | 7 |
| AX-158044007 | 8 | 6.449 | KV452901.1 | 348021 | 7-scf00168 | 7 |
| AX-158044008 | 8 | 6.449 | KV452901.1 | 348503 | 7-scf00168 | 7 |
| AX-158044012 | 8 | 6.613 | KV452901.1 | 354001 | 7-scf00168 | 7 |
| AX-158044013 | 8 | 6.613 | KV452901.1 | 354979 | 7-scf00168 | 7 |
| AX-158044015 | 8 | 6.613 | KV452901.1 | 355755 | 7-scf00168 | 7 |
| AX-158044016 | 8 | 6.613 | KV452901.1 | 356650 | 7-scf00168 | 7 |
| AX-158044017 | 8 | 6.613 | KV452901.1 | 358222 | 7-scf00168 | 7 |
| AX-158044018 | 8 | 6.613 | KV452901.1 | 359027 | 7-scf00168 | 7 |
| AX-158044031 | 8 | 6.613 | KV452901.1 | 369198 | 7-scf00168 | 7 |
| AX-158044033 | 8 | 6.613 | KV452901.1 | 371483 | 7-scf00168 | 7 |
| AX-158044019 | 8 | 6.904 | KV452901.1 | 360814 | 7-scf00168 | 7 |
| AX-158044022 | 8 | 6.904 | KV452901.1 | 361830 | 7-scf00168 | 7 |
| AX-158044027 | 8 | 6.904 | KV452901.1 | 365670 | 7-scf00168 | 7 |
| AX-158044029 | 8 | 6.904 | KV452901.1 | 366328 | 7-scf00168 | 7 |
| AX-158044032 | 8 | 6.904 | KV452901.1 | 370325 | 7-scf00168 | 7 |
| AX-158044035 | 8 | 6.904 | KV452901.1 | 372974 | 7-scf00168 | 7 |
| AX-158044041 | 8 | 6.904 | KV452901.1 | 377583 | 7-scf00168 | 7 |
| AX-158044042 | 8 | 6.904 | KV452901.1 | 378820 | 7-scf00168 | 7 |
| AX-157756372 | 8 | 6.904 | KV452901.1 | 404762 | 7-scf00168 | 7 |
| AX-158044043 | 8 | 7.049 | KV452901.1 | 380618 | 7-scf00168 | 7 |
| AX-158044045 | 8 | 7.049 | KV452901.1 | 381362 | 7-scf00168 | 7 |
| AX-157743955 | 8 | 7.049 | KV452901.1 | 383799 | 7-scf00168 | 7 |
| AX-158044052 | 8 | 7.049 | KV452901.1 | 386437 | 7-scf00168 | 7 |
| AX-158044053 | 8 | 7.049 | KV452901.1 | 387342 | 7-scf00168 | 7 |
| AX-158044056 | 8 | 7.093 | KV452901.1 | 389066 | 7-scf00168 | 7 |
| AX-158044075 | 8 | 7.093 | KV452901.1 | 407061 | 7-scf00168 | 7 |
| AX-158044057 | 8 | 7.143 | KV452901.1 | 390648 | 7-scf00168 | 7 |
| AX-158044059 | 8 | 7.162 | KV452901.1 | 391672 | 7-scf00168 | 7 |
| AX-158044060 | 8 | 7.19  | KV452901.1 | 392456 | 7-scf00168 | 7 |
| AX-158044092 | 8 | 7.19  | KV452901.1 | 422634 | 7-scf00168 | 7 |
| AX-158044220 | 8 | 7.19  | KV452901.1 | 560031 | 7-scf00168 | 7 |
| AX-158044064 | 8 | 7.231 | KV452901.1 | 397181 | 7-scf00168 | 7 |
| AX-158044068 | 8 | 7.347 | KV452901.1 | 399967 | 7-scf00168 | 7 |
| AX-158044072 | 8 | 7.454 | KV452901.1 | 404528 | 7-scf00168 | 7 |
| AX-157725012 | 8 | 7.595 | KV452901.1 | 408090 | 7-scf00168 | 7 |
| AX-158044078 | 8 | 7.596 | KV452901.1 | 411539 | 7-scf00168 | 7 |
| AX-158044083 | 8 | 7.652 | KV452901.1 | 416545 | 7-scf00168 | 7 |
| AX-158044086 | 8 | 7.67  | KV452901.1 | 419590 | 7-scf00168 | 7 |
| AX-158044087 | 8 | 7.706 | KV452901.1 | 420241 | 7-scf00168 | 7 |
| AX-158044088 | 8 | 7.706 | KV452901.1 | 420852 | 7-scf00168 | 7 |
| AX-158044089 | 8 | 7.706 | KV452901.1 | 421469 | 7-scf00168 | 7 |
| AX-158044090 | 8 | 7.706 | KV452901.1 | 422070 | 7-scf00168 | 7 |
| AX-157719861 | 8 | 7.828 | KV452901.1 | 434985 | 7-scf00168 | 7 |
| AX-158044110 | 8 | 7.924 | KV452901.1 | 443479 | 7-scf00168 | 7 |

|              |   |       |            |        |            |   |
|--------------|---|-------|------------|--------|------------|---|
| AX-158044112 | 8 | 7.924 | KV452901.1 | 444693 | 7-scf00168 | 7 |
| AX-158044108 | 8 | 8.034 | KV452901.1 | 442903 | 7-scf00168 | 7 |
| AX-157885114 | 8 | 8.034 | KV452901.1 | 445428 | 7-scf00168 | 7 |
| AX-158044115 | 8 | 8.034 | KV452901.1 | 447555 | 7-scf00168 | 7 |
| AX-158044120 | 8 | 8.034 | KV452901.1 | 449631 | 7-scf00168 | 7 |
| AX-158044124 | 8 | 8.034 | KV452901.1 | 459604 | 7-scf00168 | 7 |
| AX-158044128 | 8 | 8.034 | KV452901.1 | 462923 | 7-scf00168 | 7 |
| AX-158044130 | 8 | 8.034 | KV452901.1 | 463349 | 7-scf00168 | 7 |
| AX-158044134 | 8 | 8.034 | KV452901.1 | 464599 | 7-scf00168 | 7 |
| AX-158044135 | 8 | 8.034 | KV452901.1 | 464965 | 7-scf00168 | 7 |
| AX-158044137 | 8 | 8.034 | KV452901.1 | 466200 | 7-scf00168 | 7 |
| AX-158044140 | 8 | 8.034 | KV452901.1 | 467061 | 7-scf00168 | 7 |
| AX-158408604 | 8 | 8.034 | KV452901.1 | 486755 | 7-scf00168 | 7 |
| AX-158044156 | 8 | 8.034 | KV452901.1 | 491185 | 7-scf00168 | 7 |
| AX-158044218 | 8 | 8.034 | KV452901.1 | 557619 | 7-scf00168 | 7 |
| AX-158044238 | 8 | 8.034 | KV452901.1 | 579617 | 7-scf00168 | 7 |
| AX-158044143 | 8 | 8.042 | KV452901.1 | 473092 | 7-scf00168 | 7 |
| AX-158044146 | 8 | 8.055 | KV452901.1 | 478843 | 7-scf00168 | 7 |
| AX-158044223 | 8 | 8.055 | KV452901.1 | 569518 | 7-scf00168 | 7 |
| AX-158044147 | 8 | 8.063 | KV452901.1 | 479389 | 7-scf00168 | 7 |
| AX-158044148 | 8 | 8.071 | KV452901.1 | 480070 | 7-scf00168 | 7 |
| AX-158044149 | 8 | 8.087 | KV452901.1 | 482203 | 7-scf00168 | 7 |
| AX-158044150 | 8 | 8.105 | KV452901.1 | 485736 | 7-scf00168 | 7 |
| AX-158044153 | 8 | 8.121 | KV452901.1 | 489837 | 7-scf00168 | 7 |
| AX-158044161 | 8 | 8.135 | KV452901.1 | 494741 | 7-scf00168 | 7 |
| AX-158044176 | 8 | 8.135 | KV452901.1 | 517176 | 7-scf00168 | 7 |
| AX-158044096 | 8 | 8.143 | KV452901.1 | 428938 | 7-scf00168 | 7 |
| AX-158044111 | 8 | 8.143 | KV452901.1 | 444160 | 7-scf00168 | 7 |
| AX-158044138 | 8 | 8.143 | KV452901.1 | 466446 | 7-scf00168 | 7 |
| AX-158044142 | 8 | 8.143 | KV452901.1 | 472316 | 7-scf00168 | 7 |
| AX-158044163 | 8 | 8.143 | KV452901.1 | 495953 | 7-scf00168 | 7 |
| AX-158044164 | 8 | 8.143 | KV452901.1 | 496726 | 7-scf00168 | 7 |
| AX-158044166 | 8 | 8.143 | KV452901.1 | 501844 | 7-scf00168 | 7 |
| AX-158044169 | 8 | 8.143 | KV452901.1 | 508879 | 7-scf00168 | 7 |
| AX-158044170 | 8 | 8.143 | KV452901.1 | 509405 | 7-scf00168 | 7 |
| AX-158044171 | 8 | 8.143 | KV452901.1 | 514501 | 7-scf00168 | 7 |
| AX-158044172 | 8 | 8.143 | KV452901.1 | 515035 | 7-scf00168 | 7 |
| AX-158044180 | 8 | 8.143 | KV452901.1 | 520886 | 7-scf00168 | 7 |
| AX-158383957 | 8 | 8.143 | KV452901.1 | 520980 | 7-scf00168 | 7 |
| AX-158044182 | 8 | 8.143 | KV452901.1 | 525640 | 7-scf00168 | 7 |
| AX-158044183 | 8 | 8.143 | KV452901.1 | 526311 | 7-scf00168 | 7 |
| AX-158044184 | 8 | 8.143 | KV452901.1 | 526851 | 7-scf00168 | 7 |
| AX-158044185 | 8 | 8.143 | KV452901.1 | 526904 | 7-scf00168 | 7 |
| AX-158044186 | 8 | 8.143 | KV452901.1 | 527736 | 7-scf00168 | 7 |
| AX-158044196 | 8 | 8.143 | KV452901.1 | 534312 | 7-scf00168 | 7 |
| AX-158044198 | 8 | 8.143 | KV452901.1 | 535401 | 7-scf00168 | 7 |
| AX-158044214 | 8 | 8.143 | KV452901.1 | 549639 | 7-scf00168 | 7 |
| AX-158044216 | 8 | 8.143 | KV452901.1 | 552958 | 7-scf00168 | 7 |
| AX-158044217 | 8 | 8.143 | KV452901.1 | 556034 | 7-scf00168 | 7 |
| AX-157885118 | 8 | 8.143 | KV452901.1 | 559003 | 7-scf00168 | 7 |
| AX-158044226 | 8 | 8.143 | KV452901.1 | 572143 | 7-scf00168 | 7 |

|              |   |       |             |        |            |    |
|--------------|---|-------|-------------|--------|------------|----|
| AX-158044229 | 8 | 8.143 | KV452901.1  | 573566 | 7-scf00168 | 7  |
| AX-157822274 | 8 | 8.143 | KV452901.1  | 576271 | 7-scf00168 | 7  |
| AX-158408608 | 8 | 8.143 | KV452901.1  | 584230 | 7-scf00168 | 7  |
| AX-158044263 | 8 | 8.143 | KV452901.1  | 602463 | 7-scf00168 | 7  |
| AX-158044266 | 8 | 8.143 | KV452901.1  | 603835 | 7-scf00168 | 7  |
| AX-157745786 | 8 | 8.143 | KV452901.1  | 609793 | 7-scf00168 | 7  |
| AX-157706120 | 8 | 8.143 | 3ML01031651 | 123    | scf07268_1 | UN |
| AX-158044249 | 8 | 8.2   | KV452901.1  | 586319 | 7-scf00168 | 7  |
| AX-158044178 | 8 | 8.252 | KV452901.1  | 518482 | 7-scf00168 | 7  |
| AX-157757677 | 8 | 8.252 | KV452901.1  | 553569 | 7-scf00168 | 7  |
| AX-158044246 | 8 | 8.252 | KV452901.1  | 585371 | 7-scf00168 | 7  |
| AX-158379842 | 8 | 8.252 | KV452901.1  | 588338 | 7-scf00168 | 7  |
| AX-157723590 | 8 | 8.252 | KV452901.1  | 590431 | 7-scf00168 | 7  |
| AX-158044255 | 8 | 8.252 | KV452901.1  | 594318 | 7-scf00168 | 7  |
| AX-157708444 | 8 | 8.252 | KV452901.1  | 907287 | 7-scf00168 | 7  |
| AX-157756617 | 8 | 8.361 | KV452901.1  | 603198 | 7-scf00168 | 7  |
| AX-158408609 | 8 | 8.361 | KV452901.1  | 604047 | 7-scf00168 | 7  |
| AX-158408610 | 8 | 8.361 | KV452901.1  | 604148 | 7-scf00168 | 7  |
| AX-158044267 | 8 | 8.361 | KV452901.1  | 605695 | 7-scf00168 | 7  |
| AX-158044330 | 8 | 8.361 | KV452901.1  | 655234 | 7-scf00168 | 7  |
| AX-158044271 | 8 | 8.447 | KV452901.1  | 608216 | 7-scf00168 | 7  |
| AX-158044304 | 8 | 8.447 | KV452901.1  | 631686 | 7-scf00168 | 7  |
| AX-158044278 | 8 | 8.526 | KV452901.1  | 614689 | 7-scf00168 | 7  |
| AX-158044272 | 8 | 8.588 | KV452901.1  | 610653 | 7-scf00168 | 7  |
| AX-158044282 | 8 | 8.588 | KV452901.1  | 616012 | 7-scf00168 | 7  |
| AX-158044285 | 8 | 8.641 | KV452901.1  | 617093 | 7-scf00168 | 7  |
| AX-158044274 | 8 | 8.658 | KV452901.1  | 611865 | 7-scf00168 | 7  |
| AX-158044297 | 8 | 8.658 | KV452901.1  | 623390 | 7-scf00168 | 7  |
| AX-158044301 | 8 | 8.658 | KV452901.1  | 627646 | 7-scf00168 | 7  |
| AX-158044303 | 8 | 8.658 | KV452901.1  | 629747 | 7-scf00168 | 7  |
| AX-158044302 | 8 | 8.689 | KV452901.1  | 629226 | 7-scf00168 | 7  |
| AX-157719195 | 8 | 8.689 | KV452901.1  | 642980 | 7-scf00168 | 7  |
| AX-158044331 | 8 | 8.689 | KV452901.1  | 656249 | 7-scf00168 | 7  |
| AX-158044347 | 8 | 9.016 | KV452901.1  | 669721 | 7-scf00168 | 7  |
| AX-158044355 | 8 | 9.016 | KV452901.1  | 678262 | 7-scf00168 | 7  |
| AX-158044356 | 8 | 9.017 | KV452901.1  | 679745 | 7-scf00168 | 7  |
| AX-158044359 | 8 | 9.017 | KV452901.1  | 681003 | 7-scf00168 | 7  |
| AX-158044376 | 8 | 9.017 | KV452901.1  | 699966 | 7-scf00168 | 7  |
| AX-158044377 | 8 | 9.017 | KV452901.1  | 701303 | 7-scf00168 | 7  |
| AX-158416259 | 8 | 9.017 | KV452901.1  | 702075 | 7-scf00168 | 7  |
| AX-158391731 | 8 | 9.017 | KV452901.1  | 722866 | 7-scf00168 | 7  |
| AX-158044448 | 8 | 9.017 | KV452901.1  | 795169 | 7-scf00168 | 7  |
| AX-158044386 | 8 | 9.056 | KV452901.1  | 708215 | 7-scf00168 | 7  |
| AX-158044387 | 8 | 9.084 | KV452901.1  | 711625 | 7-scf00168 | 7  |
| AX-158044404 | 8 | 9.084 | KV452901.1  | 737002 | 7-scf00168 | 7  |
| AX-158044348 | 8 | 9.098 | KV452901.1  | 670701 | 7-scf00168 | 7  |
| AX-157771537 | 8 | 9.098 | KV452901.1  | 676981 | 7-scf00168 | 7  |
| AX-158044360 | 8 | 9.098 | KV452901.1  | 685831 | 7-scf00168 | 7  |
| AX-158044365 | 8 | 9.098 | KV452901.1  | 692652 | 7-scf00168 | 7  |
| AX-158044412 | 8 | 9.098 | KV452901.1  | 749515 | 7-scf00168 | 7  |
| AX-158044426 | 8 | 9.098 | KV452901.1  | 774569 | 7-scf00168 | 7  |

|              |   |       |            |         |            |   |
|--------------|---|-------|------------|---------|------------|---|
| AX-158044298 | 8 | 9.126 | KV452901.1 | 624689  | 7-scf00168 | 7 |
| AX-158044307 | 8 | 9.126 | KV452901.1 | 636553  | 7-scf00168 | 7 |
| AX-157771348 | 8 | 9.126 | KV452901.1 | 643427  | 7-scf00168 | 7 |
| AX-158044362 | 8 | 9.126 | KV452901.1 | 689377  | 7-scf00168 | 7 |
| AX-158044413 | 8 | 9.126 | KV452901.1 | 752140  | 7-scf00168 | 7 |
| AX-158044415 | 8 | 9.126 | KV452901.1 | 753453  | 7-scf00168 | 7 |
| AX-158044420 | 8 | 9.126 | KV452901.1 | 757670  | 7-scf00168 | 7 |
| AX-158044436 | 8 | 9.126 | KV452901.1 | 781303  | 7-scf00168 | 7 |
| AX-158044440 | 8 | 9.126 | KV452901.1 | 786350  | 7-scf00168 | 7 |
| AX-158044442 | 8 | 9.126 | KV452901.1 | 787600  | 7-scf00168 | 7 |
| AX-157725139 | 8 | 9.126 | KV452901.1 | 788229  | 7-scf00168 | 7 |
| AX-158044443 | 8 | 9.126 | KV452901.1 | 788690  | 7-scf00168 | 7 |
| AX-158044454 | 8 | 9.126 | KV452901.1 | 801680  | 7-scf00168 | 7 |
| AX-158044455 | 8 | 9.126 | KV452901.1 | 803027  | 7-scf00168 | 7 |
| AX-157708750 | 8 | 9.126 | KV452901.1 | 812207  | 7-scf00168 | 7 |
| AX-158044465 | 8 | 9.126 | KV452901.1 | 813186  | 7-scf00168 | 7 |
| AX-158383961 | 8 | 9.126 | KV452901.1 | 814621  | 7-scf00168 | 7 |
| AX-158044556 | 8 | 9.126 | KV452901.1 | 918548  | 7-scf00168 | 7 |
| AX-158416269 | 8 | 9.126 | KV452901.1 | 1402940 | 7-scf00168 | 7 |
| AX-158044479 | 8 | 9.235 | KV452901.1 | 832881  | 7-scf00168 | 7 |
| AX-158044480 | 8 | 9.235 | KV452901.1 | 833276  | 7-scf00168 | 7 |
| AX-158044483 | 8 | 9.235 | KV452901.1 | 835037  | 7-scf00168 | 7 |
| AX-158044525 | 8 | 9.235 | KV452901.1 | 877008  | 7-scf00168 | 7 |
| AX-158044322 | 8 | 9.345 | KV452901.1 | 651234  | 7-scf00168 | 7 |
| AX-158044370 | 8 | 9.345 | KV452901.1 | 697146  | 7-scf00168 | 7 |
| AX-157758027 | 8 | 9.345 | KV452901.1 | 747679  | 7-scf00168 | 7 |
| AX-158408614 | 8 | 9.345 | KV452901.1 | 803744  | 7-scf00168 | 7 |
| AX-158044489 | 8 | 9.345 | KV452901.1 | 846575  | 7-scf00168 | 7 |
| AX-158044502 | 8 | 9.345 | KV452901.1 | 854356  | 7-scf00168 | 7 |
| AX-158044504 | 8 | 9.345 | KV452901.1 | 857224  | 7-scf00168 | 7 |
| AX-158044505 | 8 | 9.345 | KV452901.1 | 858984  | 7-scf00168 | 7 |
| AX-158044508 | 8 | 9.345 | KV452901.1 | 862936  | 7-scf00168 | 7 |
| AX-158044510 | 8 | 9.345 | KV452901.1 | 864198  | 7-scf00168 | 7 |
| AX-158044518 | 8 | 9.345 | KV452901.1 | 872714  | 7-scf00168 | 7 |
| AX-158044519 | 8 | 9.345 | KV452901.1 | 873678  | 7-scf00168 | 7 |
| AX-158391735 | 8 | 9.345 | KV452901.1 | 873828  | 7-scf00168 | 7 |
| AX-158044520 | 8 | 9.345 | KV452901.1 | 874789  | 7-scf00168 | 7 |
| AX-158044523 | 8 | 9.345 | KV452901.1 | 876492  | 7-scf00168 | 7 |
| AX-158044527 | 8 | 9.345 | KV452901.1 | 882301  | 7-scf00168 | 7 |
| AX-158044770 | 8 | 9.345 | KV452901.1 | 1226798 | 7-scf00168 | 7 |
| AX-158044529 | 8 | 9.49  | KV452901.1 | 887789  | 7-scf00168 | 7 |
| AX-158044530 | 8 | 9.49  | KV452901.1 | 891028  | 7-scf00168 | 7 |
| AX-158044531 | 8 | 9.49  | KV452901.1 | 892048  | 7-scf00168 | 7 |
| AX-158044492 | 8 | 9.781 | KV452901.1 | 849909  | 7-scf00168 | 7 |
| AX-158044537 | 8 | 9.781 | KV452901.1 | 899912  | 7-scf00168 | 7 |
| AX-158044540 | 8 | 9.781 | KV452901.1 | 906865  | 7-scf00168 | 7 |
| AX-158044547 | 8 | 9.781 | KV452901.1 | 912159  | 7-scf00168 | 7 |
| AX-158044550 | 8 | 9.781 | KV452901.1 | 915882  | 7-scf00168 | 7 |
| AX-158044552 | 8 | 9.781 | KV452901.1 | 918071  | 7-scf00168 | 7 |
| AX-158044554 | 8 | 9.781 | KV452901.1 | 918296  | 7-scf00168 | 7 |
| AX-158044568 | 8 | 9.781 | KV452901.1 | 936143  | 7-scf00168 | 7 |

|              |   |       |            |         |            |   |
|--------------|---|-------|------------|---------|------------|---|
| AX-158044573 | 8 | 9.781 | KV452901.1 | 941516  | 7-scf00168 | 7 |
| AX-158044574 | 8 | 9.781 | KV452901.1 | 942681  | 7-scf00168 | 7 |
| AX-158044577 | 8 | 9.781 | KV452901.1 | 947492  | 7-scf00168 | 7 |
| AX-158044578 | 8 | 9.781 | KV452901.1 | 948320  | 7-scf00168 | 7 |
| AX-158044583 | 8 | 9.781 | KV452901.1 | 957874  | 7-scf00168 | 7 |
| AX-158044585 | 8 | 9.781 | KV452901.1 | 963755  | 7-scf00168 | 7 |
| AX-158044586 | 8 | 9.781 | KV452901.1 | 964872  | 7-scf00168 | 7 |
| AX-158044587 | 8 | 9.781 | KV452901.1 | 965445  | 7-scf00168 | 7 |
| AX-158044588 | 8 | 9.781 | KV452901.1 | 966814  | 7-scf00168 | 7 |
| AX-158044589 | 8 | 9.781 | KV452901.1 | 968950  | 7-scf00168 | 7 |
| AX-158044597 | 8 | 9.781 | KV452901.1 | 984224  | 7-scf00168 | 7 |
| AX-158044603 | 8 | 9.781 | KV452901.1 | 1011425 | 7-scf00168 | 7 |
| AX-158044627 | 8 | 9.781 | KV452901.1 | 1048272 | 7-scf00168 | 7 |
| AX-158044628 | 8 | 9.781 | KV452901.1 | 1049112 | 7-scf00168 | 7 |
| AX-158044635 | 8 | 9.781 | KV452901.1 | 1059115 | 7-scf00168 | 7 |
| AX-158044637 | 8 | 9.781 | KV452901.1 | 1065805 | 7-scf00168 | 7 |
| AX-158044656 | 8 | 9.781 | KV452901.1 | 1098859 | 7-scf00168 | 7 |
| AX-158044657 | 8 | 9.781 | KV452901.1 | 1099679 | 7-scf00168 | 7 |
| AX-158044873 | 8 | 9.781 | KV452901.1 | 1339736 | 7-scf00168 | 7 |
| AX-158044947 | 8 | 9.781 | KV452901.1 | 1427585 | 7-scf00168 | 7 |
| AX-158044288 | 8 | 9.81  | KV452901.1 | 618902  | 7-scf00168 | 7 |
| AX-158044373 | 8 | 9.81  | KV452901.1 | 699004  | 7-scf00168 | 7 |
| AX-158044494 | 8 | 9.81  | KV452901.1 | 850112  | 7-scf00168 | 7 |
| AX-158044592 | 8 | 9.849 | KV452901.1 | 977474  | 7-scf00168 | 7 |
| AX-158044595 | 8 | 9.857 | KV452901.1 | 979100  | 7-scf00168 | 7 |
| AX-158044310 | 8 | 9.869 | KV452901.1 | 639812  | 7-scf00168 | 7 |
| AX-158044326 | 8 | 9.869 | KV452901.1 | 652819  | 7-scf00168 | 7 |
| AX-158044596 | 8 | 9.869 | KV452901.1 | 981969  | 7-scf00168 | 7 |
| AX-158044590 | 8 | 9.88  | KV452901.1 | 974729  | 7-scf00168 | 7 |
| AX-158044591 | 8 | 9.88  | KV452901.1 | 974965  | 7-scf00168 | 7 |
| AX-158044600 | 8 | 9.88  | KV452901.1 | 1005699 | 7-scf00168 | 7 |
| AX-157822281 | 8 | 9.88  | KV452901.1 | 1062379 | 7-scf00168 | 7 |
| AX-158044487 | 8 | 9.891 | KV452901.1 | 842603  | 7-scf00168 | 7 |
| AX-158044535 | 8 | 9.891 | KV452901.1 | 899186  | 7-scf00168 | 7 |
| AX-158044608 | 8 | 9.891 | KV452901.1 | 1019225 | 7-scf00168 | 7 |
| AX-158044619 | 8 | 9.891 | KV452901.1 | 1034968 | 7-scf00168 | 7 |
| AX-158408624 | 8 | 9.891 | KV452901.1 | 1038002 | 7-scf00168 | 7 |
| AX-158416260 | 8 | 9.891 | KV452901.1 | 1038582 | 7-scf00168 | 7 |
| AX-158044621 | 8 | 9.891 | KV452901.1 | 1039627 | 7-scf00168 | 7 |
| AX-158044626 | 8 | 9.891 | KV452901.1 | 1046857 | 7-scf00168 | 7 |
| AX-158408627 | 8 | 9.891 | KV452901.1 | 1052187 | 7-scf00168 | 7 |
| AX-158408628 | 8 | 9.891 | KV452901.1 | 1052357 | 7-scf00168 | 7 |
| AX-158408629 | 8 | 9.891 | KV452901.1 | 1052721 | 7-scf00168 | 7 |
| AX-158044631 | 8 | 9.891 | KV452901.1 | 1053344 | 7-scf00168 | 7 |
| AX-157738864 | 8 | 9.891 | KV452901.1 | 1054450 | 7-scf00168 | 7 |
| AX-158044632 | 8 | 9.891 | KV452901.1 | 1055000 | 7-scf00168 | 7 |
| AX-157822279 | 8 | 9.891 | KV452901.1 | 1057670 | 7-scf00168 | 7 |
| AX-157822280 | 8 | 9.891 | KV452901.1 | 1058242 | 7-scf00168 | 7 |
| AX-157719113 | 8 | 9.891 | KV452901.1 | 1059673 | 7-scf00168 | 7 |
| AX-158044674 | 8 | 9.891 | KV452901.1 | 1124718 | 7-scf00168 | 7 |
| AX-158044690 | 8 | 9.891 | KV452901.1 | 1140898 | 7-scf00168 | 7 |

|              |   |        |            |         |                |    |
|--------------|---|--------|------------|---------|----------------|----|
| AX-158044838 | 8 | 9.891  | KV452901.1 | 1300416 | 7-scf00168     | 7  |
| AX-158044851 | 8 | 9.891  | KV452901.1 | 1315423 | 7-scf00168     | 7  |
| AX-158044320 | 8 | 9.936  | KV452901.1 | 650695  | 7-scf00168     | 7  |
| AX-157713321 | 8 | 9.936  | KV452901.1 | 1073385 | 7-scf00168     | 7  |
| AX-158408619 | 8 | 9.967  | KV452901.1 | 954351  | 7-scf00168     | 7  |
| AX-158408621 | 8 | 9.967  | KV452901.1 | 954594  | 7-scf00168     | 7  |
| AX-158044623 | 8 | 9.967  | KV452901.1 | 1040904 | 7-scf00168     | 7  |
| AX-158044643 | 8 | 9.967  | KV452901.1 | 1075346 | 7-scf00168     | 7  |
| AX-158044647 | 8 | 10     | KV452901.1 | 1084431 | 7-scf00168     | 7  |
| AX-158044648 | 8 | 10     | KV452901.1 | 1085493 | 7-scf00168     | 7  |
| AX-158044650 | 8 | 10     | KV452901.1 | 1087588 | 7-scf00168     | 7  |
| AX-158044651 | 8 | 10     | KV452901.1 | 1089978 | 7-scf00168     | 7  |
| AX-158044659 | 8 | 10     | KV452901.1 | 1101496 | 7-scf00168     | 7  |
| AX-158044660 | 8 | 10     | KV452901.1 | 1103947 | 7-scf00168     | 7  |
| AX-158044661 | 8 | 10     | KV452901.1 | 1104894 | 7-scf00168     | 7  |
| AX-158044662 | 8 | 10     | KV452901.1 | 1105745 | 7-scf00168     | 7  |
| AX-157694369 | 8 | 10.034 | FI896872.1 | 558     | FORI212 lctalt | UN |
| AX-158044663 | 8 | 10.218 | KV452901.1 | 1108769 | 7-scf00168     | 7  |
| AX-158044664 | 8 | 10.218 | KV452901.1 | 1113569 | 7-scf00168     | 7  |
| AX-158044667 | 8 | 10.218 | KV452901.1 | 1117177 | 7-scf00168     | 7  |
| AX-158044668 | 8 | 10.218 | KV452901.1 | 1118704 | 7-scf00168     | 7  |
| AX-158044671 | 8 | 10.218 | KV452901.1 | 1120875 | 7-scf00168     | 7  |
| AX-158044680 | 8 | 10.218 | KV452901.1 | 1131008 | 7-scf00168     | 7  |
| AX-158379844 | 8 | 10.218 | KV452901.1 | 1132158 | 7-scf00168     | 7  |
| AX-158044684 | 8 | 10.218 | KV452901.1 | 1135690 | 7-scf00168     | 7  |
| AX-158044685 | 8 | 10.218 | KV452901.1 | 1137213 | 7-scf00168     | 7  |
| AX-158044687 | 8 | 10.218 | KV452901.1 | 1138068 | 7-scf00168     | 7  |
| AX-158044689 | 8 | 10.218 | KV452901.1 | 1139978 | 7-scf00168     | 7  |
| AX-158044699 | 8 | 10.218 | KV452901.1 | 1157083 | 7-scf00168     | 7  |
| AX-158044700 | 8 | 10.218 | KV452901.1 | 1158233 | 7-scf00168     | 7  |
| AX-158044701 | 8 | 10.218 | KV452901.1 | 1158591 | 7-scf00168     | 7  |
| AX-158044702 | 8 | 10.218 | KV452901.1 | 1164546 | 7-scf00168     | 7  |
| AX-158044703 | 8 | 10.218 | KV452901.1 | 1165795 | 7-scf00168     | 7  |
| AX-158044705 | 8 | 10.218 | KV452901.1 | 1167112 | 7-scf00168     | 7  |
| AX-158044712 | 8 | 10.218 | KV452901.1 | 1173249 | 7-scf00168     | 7  |
| AX-158044716 | 8 | 10.218 | KV452901.1 | 1176426 | 7-scf00168     | 7  |
| AX-158044719 | 8 | 10.218 | KV452901.1 | 1179092 | 7-scf00168     | 7  |
| AX-158044722 | 8 | 10.218 | KV452901.1 | 1182568 | 7-scf00168     | 7  |
| AX-157770631 | 8 | 10.218 | KV452901.1 | 1185337 | 7-scf00168     | 7  |
| AX-158044731 | 8 | 10.218 | KV452901.1 | 1189564 | 7-scf00168     | 7  |
| AX-157756111 | 8 | 10.218 | KV452901.1 | 1201707 | 7-scf00168     | 7  |
| AX-158044741 | 8 | 10.218 | KV452901.1 | 1202940 | 7-scf00168     | 7  |
| AX-158044742 | 8 | 10.218 | KV452901.1 | 1203875 | 7-scf00168     | 7  |
| AX-158044751 | 8 | 10.218 | KV452901.1 | 1211597 | 7-scf00168     | 7  |
| AX-158044759 | 8 | 10.218 | KV452901.1 | 1217718 | 7-scf00168     | 7  |
| AX-158045014 | 8 | 10.218 | KV452901.1 | 1505171 | 7-scf00168     | 7  |
| AX-158045137 | 8 | 10.218 | KV452901.1 | 1633827 | 7-scf00168     | 7  |
| AX-158044747 | 8 | 10.253 | KV452901.1 | 1207872 | 7-scf00168     | 7  |
| AX-158044639 | 8 | 10.328 | KV452901.1 | 1068947 | 7-scf00168     | 7  |
| AX-158044697 | 8 | 10.328 | KV452901.1 | 1156233 | 7-scf00168     | 7  |
| AX-158044725 | 8 | 10.328 | KV452901.1 | 1186117 | 7-scf00168     | 7  |

|              |   |        |            |         |                |    |
|--------------|---|--------|------------|---------|----------------|----|
| AX-158406376 | 8 | 10.328 | KV452901.1 | 1193778 | 7-scf00168     | 7  |
| AX-158044738 | 8 | 10.328 | KV452901.1 | 1199833 | 7-scf00168     | 7  |
| AX-158044745 | 8 | 10.328 | KV452901.1 | 1207385 | 7-scf00168     | 7  |
| AX-157757087 | 8 | 10.328 | KV452901.1 | 1207948 | 7-scf00168     | 7  |
| AX-158044748 | 8 | 10.328 | KV452901.1 | 1208437 | 7-scf00168     | 7  |
| AX-158044752 | 8 | 10.328 | KV452901.1 | 1212051 | 7-scf00168     | 7  |
| AX-158044754 | 8 | 10.328 | KV452901.1 | 1214517 | 7-scf00168     | 7  |
| AX-158044755 | 8 | 10.328 | KV452901.1 | 1215381 | 7-scf00168     | 7  |
| AX-158044764 | 8 | 10.328 | KV452901.1 | 1219276 | 7-scf00168     | 7  |
| AX-158044765 | 8 | 10.328 | KV452901.1 | 1220930 | 7-scf00168     | 7  |
| AX-158044766 | 8 | 10.328 | KV452901.1 | 1222779 | 7-scf00168     | 7  |
| AX-157885120 | 8 | 10.328 | KV452901.1 | 1229639 | 7-scf00168     | 7  |
| AX-158408634 | 8 | 10.328 | KV452901.1 | 1230862 | 7-scf00168     | 7  |
| AX-158044780 | 8 | 10.328 | KV452901.1 | 1234771 | 7-scf00168     | 7  |
| AX-157876567 | 8 | 10.328 | KV452901.1 | 1235489 | 7-scf00168     | 7  |
| AX-158044781 | 8 | 10.328 | KV452901.1 | 1236529 | 7-scf00168     | 7  |
| AX-158044783 | 8 | 10.328 | KV452901.1 | 1238202 | 7-scf00168     | 7  |
| AX-158044785 | 8 | 10.328 | KV452901.1 | 1239028 | 7-scf00168     | 7  |
| AX-158044786 | 8 | 10.328 | KV452901.1 | 1241473 | 7-scf00168     | 7  |
| AX-158044787 | 8 | 10.328 | KV452901.1 | 1242183 | 7-scf00168     | 7  |
| AX-158044789 | 8 | 10.328 | KV452901.1 | 1244824 | 7-scf00168     | 7  |
| AX-157865412 | 8 | 10.328 | KV452901.1 | 1253157 | 7-scf00168     | 7  |
| AX-158044798 | 8 | 10.328 | KV452901.1 | 1254351 | 7-scf00168     | 7  |
| AX-158044804 | 8 | 10.328 | KV452901.1 | 1262340 | 7-scf00168     | 7  |
| AX-158044810 | 8 | 10.328 | KV452901.1 | 1269977 | 7-scf00168     | 7  |
| AX-158044811 | 8 | 10.328 | KV452901.1 | 1270345 | 7-scf00168     | 7  |
| AX-158044814 | 8 | 10.328 | KV452901.1 | 1271829 | 7-scf00168     | 7  |
| AX-158044815 | 8 | 10.328 | KV452901.1 | 1273577 | 7-scf00168     | 7  |
| AX-158044817 | 8 | 10.328 | KV452901.1 | 1278624 | 7-scf00168     | 7  |
| AX-158044818 | 8 | 10.328 | KV452901.1 | 1280469 | 7-scf00168     | 7  |
| AX-158044819 | 8 | 10.328 | KV452901.1 | 1281046 | 7-scf00168     | 7  |
| AX-158044822 | 8 | 10.328 | KV452901.1 | 1286761 | 7-scf00168     | 7  |
| AX-158044825 | 8 | 10.328 | KV452901.1 | 1290011 | 7-scf00168     | 7  |
| AX-158044828 | 8 | 10.328 | KV452901.1 | 1291670 | 7-scf00168     | 7  |
| AX-158044833 | 8 | 10.328 | KV452901.1 | 1295893 | 7-scf00168     | 7  |
| AX-158044925 | 8 | 10.328 | KV452901.1 | 1400957 | 7-scf00168     | 7  |
| AX-158416271 | 8 | 10.328 | KV452901.1 | 1419158 | 7-scf00168     | 7  |
| AX-158044998 | 8 | 10.328 | KV452901.1 | 1484318 | 7-scf00168     | 7  |
| AX-157696215 | 8 | 10.328 | FI870892.1 | 130     | IORI212 lctalu | UN |
| AX-158044834 | 8 | 10.342 | KV452901.1 | 1297738 | 7-scf00168     | 7  |
| AX-158044101 | 8 | 10.355 | KV452901.1 | 435848  | 7-scf00168     | 7  |
| AX-157772796 | 8 | 10.355 | KV452901.1 | 497553  | 7-scf00168     | 7  |
| AX-158044311 | 8 | 10.355 | KV452901.1 | 640927  | 7-scf00168     | 7  |
| AX-158044641 | 8 | 10.355 | KV452901.1 | 1071815 | 7-scf00168     | 7  |
| AX-158044768 | 8 | 10.355 | KV452901.1 | 1223294 | 7-scf00168     | 7  |
| AX-158044839 | 8 | 10.355 | KV452901.1 | 1303568 | 7-scf00168     | 7  |
| AX-158044735 | 8 | 10.375 | KV452901.1 | 1193899 | 7-scf00168     | 7  |
| AX-158408632 | 8 | 10.375 | KV452901.1 | 1224037 | 7-scf00168     | 7  |
| AX-158044844 | 8 | 10.375 | KV452901.1 | 1309094 | 7-scf00168     | 7  |
| AX-158044870 | 8 | 10.375 | KV452901.1 | 1337911 | 7-scf00168     | 7  |
| AX-158044888 | 8 | 10.375 | KV452901.1 | 1360326 | 7-scf00168     | 7  |

|              |   |        |            |         |            |   |
|--------------|---|--------|------------|---------|------------|---|
| AX-158383968 | 8 | 10.375 | KV452901.1 | 1361192 | 7-scf00168 | 7 |
| AX-157822292 | 8 | 10.375 | KV452901.1 | 1365844 | 7-scf00168 | 7 |
| AX-157865414 | 8 | 10.375 | KV452901.1 | 1372014 | 7-scf00168 | 7 |
| AX-158044918 | 8 | 10.375 | KV452901.1 | 1391167 | 7-scf00168 | 7 |
| AX-158044847 | 8 | 10.397 | KV452901.1 | 1310959 | 7-scf00168 | 7 |
| AX-158044849 | 8 | 10.419 | KV452901.1 | 1311762 | 7-scf00168 | 7 |
| AX-157856432 | 8 | 10.437 | KV452901.1 | 1316744 | 7-scf00168 | 7 |
| AX-158044772 | 8 | 10.511 | KV452901.1 | 1230199 | 7-scf00168 | 7 |
| AX-158044797 | 8 | 10.511 | KV452901.1 | 1253567 | 7-scf00168 | 7 |
| AX-158044855 | 8 | 10.511 | KV452901.1 | 1319138 | 7-scf00168 | 7 |
| AX-158044857 | 8 | 10.546 | KV452901.1 | 1321217 | 7-scf00168 | 7 |
| AX-157822282 | 8 | 10.655 | KV452901.1 | 1066552 | 7-scf00168 | 7 |
| AX-158044638 | 8 | 10.655 | KV452901.1 | 1066998 | 7-scf00168 | 7 |
| AX-158044642 | 8 | 10.655 | KV452901.1 | 1072307 | 7-scf00168 | 7 |
| AX-158044653 | 8 | 10.655 | KV452901.1 | 1091275 | 7-scf00168 | 7 |
| AX-158044775 | 8 | 10.655 | KV452901.1 | 1232301 | 7-scf00168 | 7 |
| AX-158044831 | 8 | 10.655 | KV452901.1 | 1295031 | 7-scf00168 | 7 |
| AX-158044858 | 8 | 10.655 | KV452901.1 | 1324304 | 7-scf00168 | 7 |
| AX-157822288 | 8 | 10.655 | KV452901.1 | 1325137 | 7-scf00168 | 7 |
| AX-158044859 | 8 | 10.678 | KV452901.1 | 1325594 | 7-scf00168 | 7 |
| AX-157822289 | 8 | 10.72  | KV452901.1 | 1326862 | 7-scf00168 | 7 |
| AX-158044863 | 8 | 10.782 | KV452901.1 | 1329663 | 7-scf00168 | 7 |
| AX-158044866 | 8 | 10.851 | KV452901.1 | 1331532 | 7-scf00168 | 7 |
| AX-158044872 | 8 | 10.874 | KV452901.1 | 1339188 | 7-scf00168 | 7 |
| AX-158044876 | 8 | 10.874 | KV452901.1 | 1344201 | 7-scf00168 | 7 |
| AX-158044877 | 8 | 10.874 | KV452901.1 | 1345745 | 7-scf00168 | 7 |
| AX-158044878 | 8 | 10.874 | KV452901.1 | 1346172 | 7-scf00168 | 7 |
| AX-158044879 | 8 | 10.874 | KV452901.1 | 1347328 | 7-scf00168 | 7 |
| AX-158044880 | 8 | 10.874 | KV452901.1 | 1348443 | 7-scf00168 | 7 |
| AX-158044885 | 8 | 10.874 | KV452901.1 | 1356401 | 7-scf00168 | 7 |
| AX-157822291 | 8 | 10.874 | KV452901.1 | 1356484 | 7-scf00168 | 7 |
| AX-158044889 | 8 | 10.874 | KV452901.1 | 1365431 | 7-scf00168 | 7 |
| AX-157822293 | 8 | 10.874 | KV452901.1 | 1366207 | 7-scf00168 | 7 |
| AX-158044896 | 8 | 10.874 | KV452901.1 | 1371176 | 7-scf00168 | 7 |
| AX-158044897 | 8 | 10.874 | KV452901.1 | 1371780 | 7-scf00168 | 7 |
| AX-158044898 | 8 | 10.874 | KV452901.1 | 1372289 | 7-scf00168 | 7 |
| AX-158044899 | 8 | 10.874 | KV452901.1 | 1373947 | 7-scf00168 | 7 |
| AX-158044905 | 8 | 10.874 | KV452901.1 | 1378734 | 7-scf00168 | 7 |
| AX-157822294 | 8 | 10.874 | KV452901.1 | 1382769 | 7-scf00168 | 7 |
| AX-158044934 | 8 | 10.874 | KV452901.1 | 1414406 | 7-scf00168 | 7 |
| AX-158044938 | 8 | 10.874 | KV452901.1 | 1416135 | 7-scf00168 | 7 |
| AX-157713833 | 8 | 10.912 | KV452901.1 | 1384759 | 7-scf00168 | 7 |
| AX-158044926 | 8 | 10.97  | KV452901.1 | 1401350 | 7-scf00168 | 7 |
| AX-158044935 | 8 | 10.977 | KV452901.1 | 1415410 | 7-scf00168 | 7 |
| AX-158044842 | 8 | 10.983 | KV452901.1 | 1304211 | 7-scf00168 | 7 |
| AX-157770868 | 8 | 10.983 | KV452901.1 | 1339008 | 7-scf00168 | 7 |
| AX-158044922 | 8 | 10.983 | KV452901.1 | 1398331 | 7-scf00168 | 7 |
| AX-158044939 | 8 | 10.983 | KV452901.1 | 1417127 | 7-scf00168 | 7 |
| AX-158408637 | 8 | 10.983 | KV452901.1 | 1419075 | 7-scf00168 | 7 |
| AX-157822296 | 8 | 10.983 | KV452901.1 | 1419401 | 7-scf00168 | 7 |
| AX-158044942 | 8 | 10.983 | KV452901.1 | 1421574 | 7-scf00168 | 7 |



|              |   |        |            |         |            |   |
|--------------|---|--------|------------|---------|------------|---|
| AX-157735345 | 8 | 10.983 | KV452901.1 | 1421776 | 7-scf00168 | 7 |
| AX-158044946 | 8 | 10.983 | KV452901.1 | 1425255 | 7-scf00168 | 7 |
| AX-157822297 | 8 | 10.983 | KV452901.1 | 1431998 | 7-scf00168 | 7 |
| AX-158044950 | 8 | 10.983 | KV452901.1 | 1432241 | 7-scf00168 | 7 |
| AX-157865416 | 8 | 10.983 | KV452901.1 | 1432870 | 7-scf00168 | 7 |
| AX-158044951 | 8 | 10.983 | KV452901.1 | 1434879 | 7-scf00168 | 7 |
| AX-158044952 | 8 | 10.983 | KV452901.1 | 1438599 | 7-scf00168 | 7 |
| AX-158044955 | 8 | 10.983 | KV452901.1 | 1439298 | 7-scf00168 | 7 |
| AX-158044908 | 8 | 11.147 | KV452901.1 | 1379762 | 7-scf00168 | 7 |
| AX-158044961 | 8 | 11.147 | KV452901.1 | 1444547 | 7-scf00168 | 7 |
| AX-158044962 | 8 | 11.147 | KV452901.1 | 1446074 | 7-scf00168 | 7 |
| AX-157718913 | 8 | 11.147 | KV452901.1 | 1448328 | 7-scf00168 | 7 |
| AX-158044969 | 8 | 11.147 | KV452901.1 | 1454693 | 7-scf00168 | 7 |
| AX-158044972 | 8 | 11.147 | KV452901.1 | 1455873 | 7-scf00168 | 7 |
| AX-158044973 | 8 | 11.147 | KV452901.1 | 1457618 | 7-scf00168 | 7 |
| AX-158044471 | 8 | 11.311 | KV452901.1 | 822254  | 7-scf00168 | 7 |
| AX-158044843 | 8 | 11.311 | KV452901.1 | 1307680 | 7-scf00168 | 7 |
| AX-158044971 | 8 | 11.311 | KV452901.1 | 1455146 | 7-scf00168 | 7 |
| AX-158044975 | 8 | 11.311 | KV452901.1 | 1460205 | 7-scf00168 | 7 |
| AX-158044976 | 8 | 11.311 | KV452901.1 | 1460286 | 7-scf00168 | 7 |
| AX-158044981 | 8 | 11.311 | KV452901.1 | 1467895 | 7-scf00168 | 7 |
| AX-158044982 | 8 | 11.311 | KV452901.1 | 1468304 | 7-scf00168 | 7 |
| AX-158044983 | 8 | 11.311 | KV452901.1 | 1468904 | 7-scf00168 | 7 |
| AX-158044984 | 8 | 11.311 | KV452901.1 | 1469263 | 7-scf00168 | 7 |
| AX-158044987 | 8 | 11.311 | KV452901.1 | 1469749 | 7-scf00168 | 7 |
| AX-158045834 | 8 | 11.311 | KV452902.1 | 637205  | 7-scf00171 | 7 |
| AX-158045931 | 8 | 11.311 | KV452902.1 | 742984  | 7-scf00171 | 7 |
| AX-157870560 | 8 | 11.311 | KV452904.1 | 81447   | 7-scf00172 | 7 |
| AX-158046591 | 8 | 11.311 | KV452904.1 | 95942   | 7-scf00172 | 7 |
| AX-157822410 | 8 | 11.311 | KV452904.1 | 101394  | 7-scf00172 | 7 |
| AX-158046600 | 8 | 11.311 | KV452904.1 | 103571  | 7-scf00172 | 7 |
| AX-158046616 | 8 | 11.311 | KV452904.1 | 122244  | 7-scf00172 | 7 |
| AX-158046642 | 8 | 11.311 | KV452904.1 | 173592  | 7-scf00172 | 7 |
| AX-158046643 | 8 | 11.311 | KV452904.1 | 179602  | 7-scf00172 | 7 |
| AX-158046644 | 8 | 11.311 | KV452904.1 | 185671  | 7-scf00172 | 7 |
| AX-158046647 | 8 | 11.311 | KV452904.1 | 188961  | 7-scf00172 | 7 |
| AX-158046648 | 8 | 11.311 | KV452904.1 | 189770  | 7-scf00172 | 7 |
| AX-158046661 | 8 | 11.311 | KV452904.1 | 199819  | 7-scf00172 | 7 |
| AX-158046733 | 8 | 11.311 | KV452904.1 | 262662  | 7-scf00172 | 7 |
| AX-158058682 | 8 | 11.311 | KV452903.1 | 131752  | 7-scf00173 | 7 |
| AX-158044453 | 8 | 11.496 | KV452901.1 | 800243  | 7-scf00168 | 7 |
| AX-158044625 | 8 | 11.496 | KV452901.1 | 1042826 | 7-scf00168 | 7 |
| AX-158044669 | 8 | 11.496 | KV452901.1 | 1119313 | 7-scf00168 | 7 |
| AX-158044882 | 8 | 11.496 | KV452901.1 | 1352171 | 7-scf00168 | 7 |
| AX-158044977 | 8 | 11.496 | KV452901.1 | 1463700 | 7-scf00168 | 7 |
| AX-158044999 | 8 | 11.496 | KV452901.1 | 1484446 | 7-scf00168 | 7 |
| AX-158045006 | 8 | 11.496 | KV452901.1 | 1495514 | 7-scf00168 | 7 |
| AX-158045008 | 8 | 11.496 | KV452901.1 | 1498569 | 7-scf00168 | 7 |
| AX-158045009 | 8 | 11.496 | KV452901.1 | 1499297 | 7-scf00168 | 7 |
| AX-158045012 | 8 | 11.496 | KV452901.1 | 1503137 | 7-scf00168 | 7 |
| AX-158044893 | 8 | 11.53  | KV452901.1 | 1368203 | 7-scf00168 | 7 |

|              |   |        |            |         |            |   |
|--------------|---|--------|------------|---------|------------|---|
| AX-157822298 | 8 | 11.53  | KV452901.1 | 1436131 | 7-scf00168 | 7 |
| AX-158044979 | 8 | 11.53  | KV452901.1 | 1467199 | 7-scf00168 | 7 |
| AX-158045013 | 8 | 11.53  | KV452901.1 | 1504644 | 7-scf00168 | 7 |
| AX-157769504 | 8 | 11.575 | KV452901.1 | 1506558 | 7-scf00168 | 7 |
| AX-158045017 | 8 | 11.685 | KV452901.1 | 1510153 | 7-scf00168 | 7 |
| AX-158045019 | 8 | 11.685 | KV452901.1 | 1512065 | 7-scf00168 | 7 |
| AX-158045021 | 8 | 11.835 | KV452901.1 | 1513024 | 7-scf00168 | 7 |
| AX-158044988 | 8 | 11.836 | KV452901.1 | 1470352 | 7-scf00168 | 7 |
| AX-158045023 | 8 | 11.836 | KV452901.1 | 1516471 | 7-scf00168 | 7 |
| AX-157822300 | 8 | 11.836 | KV452901.1 | 1516810 | 7-scf00168 | 7 |
| AX-158045025 | 8 | 11.847 | KV452901.1 | 1517714 | 7-scf00168 | 7 |
| AX-158045026 | 8 | 11.87  | KV452901.1 | 1518105 | 7-scf00168 | 7 |
| AX-158045030 | 8 | 11.871 | KV452901.1 | 1520105 | 7-scf00168 | 7 |
| AX-157733610 | 8 | 12.009 | KV452901.1 | 1524258 | 7-scf00168 | 7 |
| AX-158045027 | 8 | 12.146 | KV452901.1 | 1518948 | 7-scf00168 | 7 |
| AX-158045037 | 8 | 12.146 | KV452901.1 | 1524066 | 7-scf00168 | 7 |
| AX-158045039 | 8 | 12.146 | KV452901.1 | 1524400 | 7-scf00168 | 7 |
| AX-157822302 | 8 | 12.147 | KV452901.1 | 1524882 | 7-scf00168 | 7 |
| AX-158045041 | 8 | 12.184 | KV452901.1 | 1527840 | 7-scf00168 | 7 |
| AX-158045047 | 8 | 12.294 | KV452901.1 | 1531108 | 7-scf00168 | 7 |
| AX-157759266 | 8 | 12.294 | KV452901.1 | 1532189 | 7-scf00168 | 7 |
| AX-158045049 | 8 | 12.294 | KV452901.1 | 1533371 | 7-scf00168 | 7 |
| AX-158045054 | 8 | 12.403 | KV452901.1 | 1535415 | 7-scf00168 | 7 |
| AX-158045057 | 8 | 12.403 | KV452901.1 | 1536370 | 7-scf00168 | 7 |
| AX-158045059 | 8 | 12.403 | KV452901.1 | 1537423 | 7-scf00168 | 7 |
| AX-158045048 | 8 | 12.622 | KV452901.1 | 1532661 | 7-scf00168 | 7 |
| AX-158045064 | 8 | 12.622 | KV452901.1 | 1542828 | 7-scf00168 | 7 |
| AX-158045065 | 8 | 12.622 | KV452901.1 | 1544207 | 7-scf00168 | 7 |
| AX-158045071 | 8 | 12.622 | KV452901.1 | 1548072 | 7-scf00168 | 7 |
| AX-158045074 | 8 | 12.622 | KV452901.1 | 1549055 | 7-scf00168 | 7 |
| AX-158045078 | 8 | 12.622 | KV452901.1 | 1552908 | 7-scf00168 | 7 |
| AX-158045079 | 8 | 12.622 | KV452901.1 | 1557369 | 7-scf00168 | 7 |
| AX-157822304 | 8 | 12.622 | KV452901.1 | 1563129 | 7-scf00168 | 7 |
| AX-158045087 | 8 | 12.622 | KV452901.1 | 1568800 | 7-scf00168 | 7 |
| AX-158045088 | 8 | 12.622 | KV452901.1 | 1569191 | 7-scf00168 | 7 |
| AX-158045091 | 8 | 12.622 | KV452901.1 | 1569782 | 7-scf00168 | 7 |
| AX-157746699 | 8 | 12.622 | KV452901.1 | 1571165 | 7-scf00168 | 7 |
| AX-158045094 | 8 | 12.622 | KV452901.1 | 1572071 | 7-scf00168 | 7 |
| AX-158045097 | 8 | 12.622 | KV452901.1 | 1573128 | 7-scf00168 | 7 |
| AX-158045098 | 8 | 12.622 | KV452901.1 | 1576530 | 7-scf00168 | 7 |
| AX-158045045 | 8 | 12.84  | KV452901.1 | 1529002 | 7-scf00168 | 7 |
| AX-158045070 | 8 | 12.84  | KV452901.1 | 1547765 | 7-scf00168 | 7 |
| AX-158045075 | 8 | 12.84  | KV452901.1 | 1550061 | 7-scf00168 | 7 |
| AX-158045104 | 8 | 12.84  | KV452901.1 | 1585724 | 7-scf00168 | 7 |
| AX-158045106 | 8 | 12.84  | KV452901.1 | 1589279 | 7-scf00168 | 7 |
| AX-158045107 | 8 | 12.84  | KV452901.1 | 1590158 | 7-scf00168 | 7 |
| AX-158045110 | 8 | 12.84  | KV452901.1 | 1592544 | 7-scf00168 | 7 |
| AX-158045116 | 8 | 12.84  | KV452901.1 | 1596079 | 7-scf00168 | 7 |
| AX-158045117 | 8 | 12.84  | KV452901.1 | 1596887 | 7-scf00168 | 7 |
| AX-158379846 | 8 | 12.84  | KV452901.1 | 1605413 | 7-scf00168 | 7 |
| AX-158045120 | 8 | 12.84  | KV452901.1 | 1616291 | 7-scf00168 | 7 |

|              |   |        |            |         |            |   |
|--------------|---|--------|------------|---------|------------|---|
| AX-158045121 | 8 | 12.84  | KV452901.1 | 1616620 | 7-scf00168 | 7 |
| AX-158045123 | 8 | 12.84  | KV452901.1 | 1617167 | 7-scf00168 | 7 |
| AX-158044672 | 8 | 12.949 | KV452901.1 | 1121376 | 7-scf00168 | 7 |
| AX-158045034 | 8 | 12.949 | KV452901.1 | 1522232 | 7-scf00168 | 7 |
| AX-158045062 | 8 | 12.949 | KV452901.1 | 1541647 | 7-scf00168 | 7 |
| AX-158045093 | 8 | 12.949 | KV452901.1 | 1569990 | 7-scf00168 | 7 |
| AX-158045124 | 8 | 12.949 | KV452901.1 | 1620039 | 7-scf00168 | 7 |
| AX-158045126 | 8 | 12.949 | KV452901.1 | 1620692 | 7-scf00168 | 7 |
| AX-157725678 | 8 | 12.949 | KV452901.1 | 1621476 | 7-scf00168 | 7 |
| AX-157865419 | 8 | 12.949 | KV452901.1 | 1624292 | 7-scf00168 | 7 |
| AX-158045129 | 8 | 12.949 | KV452901.1 | 1625101 | 7-scf00168 | 7 |
| AX-158045133 | 8 | 12.949 | KV452901.1 | 1628925 | 7-scf00168 | 7 |
| AX-158045134 | 8 | 12.949 | KV452901.1 | 1630536 | 7-scf00168 | 7 |
| AX-158045136 | 8 | 12.949 | KV452901.1 | 1631571 | 7-scf00168 | 7 |
| AX-158045138 | 8 | 12.949 | KV452901.1 | 1638491 | 7-scf00168 | 7 |
| AX-158045139 | 8 | 12.949 | KV452901.1 | 1639249 | 7-scf00168 | 7 |
| AX-158045141 | 8 | 12.949 | KV452901.1 | 1640213 | 7-scf00168 | 7 |
| AX-158045142 | 8 | 12.949 | KV452901.1 | 1640798 | 7-scf00168 | 7 |
| AX-158045145 | 8 | 12.949 | KV452901.1 | 1641924 | 7-scf00168 | 7 |
| AX-158045146 | 8 | 12.949 | KV452901.1 | 1642892 | 7-scf00168 | 7 |
| AX-158045149 | 8 | 12.949 | KV452901.1 | 1645001 | 7-scf00168 | 7 |
| AX-158046564 | 8 | 12.949 | KV452904.1 | 61824   | 7-scf00172 | 7 |
| AX-158045061 | 8 | 13.058 | KV452901.1 | 1540230 | 7-scf00168 | 7 |
| AX-157822305 | 8 | 13.058 | KV452901.1 | 1570234 | 7-scf00168 | 7 |
| AX-157744204 | 8 | 13.058 | KV452901.1 | 1646030 | 7-scf00168 | 7 |
| AX-157822309 | 8 | 13.058 | KV452901.1 | 1650213 | 7-scf00168 | 7 |
| AX-158045154 | 8 | 13.058 | KV452901.1 | 1651233 | 7-scf00168 | 7 |
| AX-158045156 | 8 | 13.058 | KV452901.1 | 1652722 | 7-scf00168 | 7 |
| AX-158045157 | 8 | 13.058 | KV452901.1 | 1654766 | 7-scf00168 | 7 |
| AX-158045159 | 8 | 13.058 | KV452901.1 | 1656253 | 7-scf00168 | 7 |
| AX-158045164 | 8 | 13.058 | KV452901.1 | 1658650 | 7-scf00168 | 7 |
| AX-158045165 | 8 | 13.058 | KV452901.1 | 1659036 | 7-scf00168 | 7 |
| AX-158045166 | 8 | 13.058 | KV452901.1 | 1659439 | 7-scf00168 | 7 |
| AX-158045179 | 8 | 13.058 | KV452901.1 | 1670935 | 7-scf00168 | 7 |
| AX-157713182 | 8 | 13.058 | KV452901.1 | 1680019 | 7-scf00168 | 7 |
| AX-158045184 | 8 | 13.058 | KV452901.1 | 1685994 | 7-scf00168 | 7 |
| AX-158045185 | 8 | 13.058 | KV452901.1 | 1686503 | 7-scf00168 | 7 |
| AX-157822311 | 8 | 13.058 | KV452901.1 | 1687691 | 7-scf00168 | 7 |
| AX-157714338 | 8 | 13.058 | KV452901.1 | 1688355 | 7-scf00168 | 7 |
| AX-158045202 | 8 | 13.386 | KV452901.1 | 1712212 | 7-scf00168 | 7 |
| AX-158045204 | 8 | 13.386 | KV452901.1 | 1715541 | 7-scf00168 | 7 |
| AX-158045208 | 8 | 13.386 | KV452901.1 | 1718149 | 7-scf00168 | 7 |
| AX-158045209 | 8 | 13.386 | KV452901.1 | 1718542 | 7-scf00168 | 7 |
| AX-158045210 | 8 | 13.388 | KV452901.1 | 1719272 | 7-scf00168 | 7 |
| AX-158045212 | 8 | 13.388 | KV452901.1 | 1719677 | 7-scf00168 | 7 |
| AX-158045214 | 8 | 13.398 | KV452901.1 | 1721663 | 7-scf00168 | 7 |
| AX-158045538 | 8 | 15.067 | KV452902.1 | 363416  | 7-scf00171 | 7 |
| AX-158406390 | 8 | 15.922 | KV452902.1 | 366678  | 7-scf00171 | 7 |
| AX-158045554 | 8 | 16.242 | KV452902.1 | 378091  | 7-scf00171 | 7 |
| AX-158045630 | 8 | 16.516 | KV452902.1 | 436146  | 7-scf00171 | 7 |
| AX-158045285 | 8 | 16.788 | KV452902.1 | 133870  | 7-scf00171 | 7 |

|              |   |        |            |         |            |    |
|--------------|---|--------|------------|---------|------------|----|
| AX-158045640 | 8 | 16.788 | KV452902.1 | 444754  | 7-scf00171 | 7  |
| AX-158046348 | 8 | 16.788 | KV452902.1 | 1240224 | 7-scf00171 | 7  |
| AX-158045668 | 8 | 17.06  | KV452902.1 | 462482  | 7-scf00171 | 7  |
| AX-158045244 | 8 | 17.328 | KV452902.1 | 71084   | 7-scf00171 | 7  |
| AX-158045700 | 8 | 17.328 | KV452902.1 | 499757  | 7-scf00171 | 7  |
| AX-158045811 | 8 | 17.328 | KV452902.1 | 615297  | 7-scf00171 | 7  |
| AX-158045954 | 8 | 17.328 | KV452902.1 | 765809  | 7-scf00171 | 7  |
| AX-158046017 | 8 | 17.328 | KV452902.1 | 843110  | 7-scf00171 | 7  |
| AX-158391762 | 8 | 17.328 | KV452902.1 | 1234243 | 7-scf00171 | 7  |
| AX-157681857 | 8 | 17.459 |            | 167     | scf11651   | UN |
| AX-158045783 | 8 | 17.599 | KV452902.1 | 589143  | 7-scf00171 | 7  |
| AX-158045804 | 8 | 17.731 | KV452902.1 | 609358  | 7-scf00171 | 7  |
| AX-158045466 | 8 | 17.867 | KV452902.1 | 293051  | 7-scf00171 | 7  |
| AX-158045528 | 8 | 17.867 | KV452902.1 | 352748  | 7-scf00171 | 7  |
| AX-158045565 | 8 | 17.867 | KV452902.1 | 390711  | 7-scf00171 | 7  |
| AX-158045626 | 8 | 17.867 | KV452902.1 | 433446  | 7-scf00171 | 7  |
| AX-157822331 | 8 | 17.867 | KV452902.1 | 469209  | 7-scf00171 | 7  |
| AX-158045702 | 8 | 17.867 | KV452902.1 | 500246  | 7-scf00171 | 7  |
| AX-158045816 | 8 | 17.867 | KV452902.1 | 624923  | 7-scf00171 | 7  |
| AX-158045826 | 8 | 17.867 | KV452902.1 | 633623  | 7-scf00171 | 7  |
| AX-158045893 | 8 | 17.867 | KV452902.1 | 704335  | 7-scf00171 | 7  |
| AX-158045961 | 8 | 17.867 | KV452902.1 | 775941  | 7-scf00171 | 7  |
| AX-157822351 | 8 | 17.867 | KV452902.1 | 778410  | 7-scf00171 | 7  |
| AX-157755830 | 8 | 17.867 | KV452902.1 | 803720  | 7-scf00171 | 7  |
| AX-158045987 | 8 | 17.867 | KV452902.1 | 804496  | 7-scf00171 | 7  |
| AX-158046110 | 8 | 17.867 | KV452902.1 | 964154  | 7-scf00171 | 7  |
| AX-158046181 | 8 | 17.867 | KV452902.1 | 1051127 | 7-scf00171 | 7  |
| AX-157757832 | 8 | 17.867 | KV452902.1 | 1105893 | 7-scf00171 | 7  |
| AX-158046308 | 8 | 17.867 | KV452902.1 | 1200977 | 7-scf00171 | 7  |
| AX-158046501 | 8 | 17.867 | KV452902.1 | 1382004 | 7-scf00171 | 7  |
| AX-158046560 | 8 | 17.867 | KV452904.1 | 50510   | 7-scf00172 | 7  |
| AX-158046725 | 8 | 17.867 | KV452904.1 | 254235  | 7-scf00172 | 7  |
| AX-157856864 | 8 | 17.867 | KV452903.1 | 45935   | 7-scf00173 | 7  |
| AX-158058632 | 8 | 17.867 | KV452903.1 | 84753   | 7-scf00173 | 7  |
| AX-158058655 | 8 | 17.867 | KV452903.1 | 111607  | 7-scf00173 | 7  |
| AX-158058656 | 8 | 17.867 | KV452903.1 | 112766  | 7-scf00173 | 7  |
| AX-158058709 | 8 | 17.867 | KV452903.1 | 150090  | 7-scf00173 | 7  |
| AX-158058712 | 8 | 17.867 | KV452903.1 | 152603  | 7-scf00173 | 7  |
| AX-158058716 | 8 | 17.867 | KV452903.1 | 159487  | 7-scf00173 | 7  |
| AX-157711864 | 8 | 17.867 | KV452939.1 | 35182   | 7-scf00645 | 7  |
| AX-157704338 | 8 | 17.867 | KV452939.1 | 72159   | 7-scf00645 | 7  |
| AX-157758538 | 8 | 17.87  | KV452902.1 | 654589  | 7-scf00171 | 7  |
| AX-157885124 | 8 | 17.871 | KV452902.1 | 673304  | 7-scf00171 | 7  |
| AX-158045682 | 8 | 17.874 | KV452902.1 | 474127  | 7-scf00171 | 7  |
| AX-158045904 | 8 | 17.874 | KV452902.1 | 716072  | 7-scf00171 | 7  |
| AX-158045914 | 8 | 17.874 | KV452902.1 | 722570  | 7-scf00171 | 7  |
| AX-158045917 | 8 | 17.902 | KV452902.1 | 726236  | 7-scf00171 | 7  |
| AX-158058615 | 8 | 17.902 | KV452903.1 | 66341   | 7-scf00173 | 7  |
| AX-158058650 | 8 | 17.902 | KV452903.1 | 107262  | 7-scf00173 | 7  |
| AX-157865427 | 8 | 17.923 | KV452902.1 | 313266  | 7-scf00171 | 7  |
| AX-157739124 | 8 | 17.923 | KV452902.1 | 564845  | 7-scf00171 | 7  |

|              |   |        |            |        |            |   |
|--------------|---|--------|------------|--------|------------|---|
| AX-158406412 | 8 | 17.923 | KV452902.1 | 732542 | 7-scf00171 | 7 |
| AX-158046622 | 8 | 17.923 | KV452904.1 | 139645 | 7-scf00172 | 7 |
| AX-158045930 | 8 | 17.985 | KV452902.1 | 742746 | 7-scf00171 | 7 |
| AX-158045940 | 8 | 18.048 | KV452902.1 | 750303 | 7-scf00171 | 7 |
| AX-158045245 | 8 | 18.106 | KV452902.1 | 72589  | 7-scf00171 | 7 |
| AX-158045248 | 8 | 18.106 | KV452902.1 | 74464  | 7-scf00171 | 7 |
| AX-158408652 | 8 | 18.106 | KV452902.1 | 82358  | 7-scf00171 | 7 |
| AX-158045260 | 8 | 18.106 | KV452902.1 | 105160 | 7-scf00171 | 7 |
| AX-158045262 | 8 | 18.106 | KV452902.1 | 106247 | 7-scf00171 | 7 |
| AX-158045291 | 8 | 18.106 | KV452902.1 | 144335 | 7-scf00171 | 7 |
| AX-157709248 | 8 | 18.106 | KV452902.1 | 145867 | 7-scf00171 | 7 |
| AX-158045295 | 8 | 18.106 | KV452902.1 | 146578 | 7-scf00171 | 7 |
| AX-158045351 | 8 | 18.106 | KV452902.1 | 193033 | 7-scf00171 | 7 |
| AX-158045364 | 8 | 18.106 | KV452902.1 | 205580 | 7-scf00171 | 7 |
| AX-158045368 | 8 | 18.106 | KV452902.1 | 206918 | 7-scf00171 | 7 |
| AX-158045369 | 8 | 18.106 | KV452902.1 | 207451 | 7-scf00171 | 7 |
| AX-157739398 | 8 | 18.106 | KV452902.1 | 219044 | 7-scf00171 | 7 |
| AX-158045390 | 8 | 18.106 | KV452902.1 | 221509 | 7-scf00171 | 7 |
| AX-158045398 | 8 | 18.106 | KV452902.1 | 225860 | 7-scf00171 | 7 |
| AX-158045403 | 8 | 18.106 | KV452902.1 | 230011 | 7-scf00171 | 7 |
| AX-158045412 | 8 | 18.106 | KV452902.1 | 236014 | 7-scf00171 | 7 |
| AX-158045414 | 8 | 18.106 | KV452902.1 | 238496 | 7-scf00171 | 7 |
| AX-158045415 | 8 | 18.106 | KV452902.1 | 240462 | 7-scf00171 | 7 |
| AX-158045423 | 8 | 18.106 | KV452902.1 | 253261 | 7-scf00171 | 7 |
| AX-157775038 | 8 | 18.106 | KV452902.1 | 253593 | 7-scf00171 | 7 |
| AX-157822324 | 8 | 18.106 | KV452902.1 | 256171 | 7-scf00171 | 7 |
| AX-158045431 | 8 | 18.106 | KV452902.1 | 259308 | 7-scf00171 | 7 |
| AX-158045440 | 8 | 18.106 | KV452902.1 | 265132 | 7-scf00171 | 7 |
| AX-158045446 | 8 | 18.106 | KV452902.1 | 270054 | 7-scf00171 | 7 |
| AX-158045460 | 8 | 18.106 | KV452902.1 | 285856 | 7-scf00171 | 7 |
| AX-158045463 | 8 | 18.106 | KV452902.1 | 292798 | 7-scf00171 | 7 |
| AX-158045480 | 8 | 18.106 | KV452902.1 | 306220 | 7-scf00171 | 7 |
| AX-158045490 | 8 | 18.106 | KV452902.1 | 312233 | 7-scf00171 | 7 |
| AX-157745617 | 8 | 18.106 | KV452902.1 | 319841 | 7-scf00171 | 7 |
| AX-158045503 | 8 | 18.106 | KV452902.1 | 324738 | 7-scf00171 | 7 |
| AX-158045522 | 8 | 18.106 | KV452902.1 | 346700 | 7-scf00171 | 7 |
| AX-158045523 | 8 | 18.106 | KV452902.1 | 347903 | 7-scf00171 | 7 |
| AX-157708516 | 8 | 18.106 | KV452902.1 | 356796 | 7-scf00171 | 7 |
| AX-158045531 | 8 | 18.106 | KV452902.1 | 357123 | 7-scf00171 | 7 |
| AX-158045564 | 8 | 18.106 | KV452902.1 | 389763 | 7-scf00171 | 7 |
| AX-158045575 | 8 | 18.106 | KV452902.1 | 398280 | 7-scf00171 | 7 |
| AX-158045599 | 8 | 18.106 | KV452902.1 | 415720 | 7-scf00171 | 7 |
| AX-158045606 | 8 | 18.106 | KV452902.1 | 420222 | 7-scf00171 | 7 |
| AX-158045654 | 8 | 18.106 | KV452902.1 | 452651 | 7-scf00171 | 7 |
| AX-158045658 | 8 | 18.106 | KV452902.1 | 454234 | 7-scf00171 | 7 |
| AX-158045674 | 8 | 18.106 | KV452902.1 | 467086 | 7-scf00171 | 7 |
| AX-158045679 | 8 | 18.106 | KV452902.1 | 472215 | 7-scf00171 | 7 |
| AX-158045685 | 8 | 18.106 | KV452902.1 | 476546 | 7-scf00171 | 7 |
| AX-157749016 | 8 | 18.106 | KV452902.1 | 487229 | 7-scf00171 | 7 |
| AX-158045746 | 8 | 18.106 | KV452902.1 | 539026 | 7-scf00171 | 7 |
| AX-158045775 | 8 | 18.106 | KV452902.1 | 577217 | 7-scf00171 | 7 |

|              |   |        |            |         |            |   |
|--------------|---|--------|------------|---------|------------|---|
| AX-158045776 | 8 | 18.106 | KV452902.1 | 580003  | 7-scf00171 | 7 |
| AX-158045779 | 8 | 18.106 | KV452902.1 | 583189  | 7-scf00171 | 7 |
| AX-157757205 | 8 | 18.106 | KV452902.1 | 618416  | 7-scf00171 | 7 |
| AX-158045815 | 8 | 18.106 | KV452902.1 | 623855  | 7-scf00171 | 7 |
| AX-158045819 | 8 | 18.106 | KV452902.1 | 625962  | 7-scf00171 | 7 |
| AX-158045831 | 8 | 18.106 | KV452902.1 | 635715  | 7-scf00171 | 7 |
| AX-158045837 | 8 | 18.106 | KV452902.1 | 641268  | 7-scf00171 | 7 |
| AX-158045844 | 8 | 18.106 | KV452902.1 | 651716  | 7-scf00171 | 7 |
| AX-158045860 | 8 | 18.106 | KV452902.1 | 667728  | 7-scf00171 | 7 |
| AX-158045868 | 8 | 18.106 | KV452902.1 | 679198  | 7-scf00171 | 7 |
| AX-158045870 | 8 | 18.106 | KV452902.1 | 685873  | 7-scf00171 | 7 |
| AX-158045874 | 8 | 18.106 | KV452902.1 | 688782  | 7-scf00171 | 7 |
| AX-158045880 | 8 | 18.106 | KV452902.1 | 692872  | 7-scf00171 | 7 |
| AX-158045887 | 8 | 18.106 | KV452902.1 | 698855  | 7-scf00171 | 7 |
| AX-158045902 | 8 | 18.106 | KV452902.1 | 714705  | 7-scf00171 | 7 |
| AX-158422366 | 8 | 18.106 | KV452902.1 | 732164  | 7-scf00171 | 7 |
| AX-158045928 | 8 | 18.106 | KV452902.1 | 740363  | 7-scf00171 | 7 |
| AX-158045933 | 8 | 18.106 | KV452902.1 | 745238  | 7-scf00171 | 7 |
| AX-158045934 | 8 | 18.106 | KV452902.1 | 745488  | 7-scf00171 | 7 |
| AX-158045935 | 8 | 18.106 | KV452902.1 | 748284  | 7-scf00171 | 7 |
| AX-158045947 | 8 | 18.106 | KV452902.1 | 759923  | 7-scf00171 | 7 |
| AX-158045956 | 8 | 18.106 | KV452902.1 | 768499  | 7-scf00171 | 7 |
| AX-158045960 | 8 | 18.106 | KV452902.1 | 775054  | 7-scf00171 | 7 |
| AX-158045962 | 8 | 18.106 | KV452902.1 | 776675  | 7-scf00171 | 7 |
| AX-157822353 | 8 | 18.106 | KV452902.1 | 800454  | 7-scf00171 | 7 |
| AX-158045992 | 8 | 18.106 | KV452902.1 | 811270  | 7-scf00171 | 7 |
| AX-158045998 | 8 | 18.106 | KV452902.1 | 815567  | 7-scf00171 | 7 |
| AX-158046002 | 8 | 18.106 | KV452902.1 | 821156  | 7-scf00171 | 7 |
| AX-158379852 | 8 | 18.106 | KV452902.1 | 847148  | 7-scf00171 | 7 |
| AX-158046069 | 8 | 18.106 | KV452902.1 | 913154  | 7-scf00171 | 7 |
| AX-158046071 | 8 | 18.106 | KV452902.1 | 914918  | 7-scf00171 | 7 |
| AX-157822363 | 8 | 18.106 | KV452902.1 | 927498  | 7-scf00171 | 7 |
| AX-158046084 | 8 | 18.106 | KV452902.1 | 940953  | 7-scf00171 | 7 |
| AX-158046089 | 8 | 18.106 | KV452902.1 | 945742  | 7-scf00171 | 7 |
| AX-158046112 | 8 | 18.106 | KV452902.1 | 970667  | 7-scf00171 | 7 |
| AX-158046114 | 8 | 18.106 | KV452902.1 | 973111  | 7-scf00171 | 7 |
| AX-158046154 | 8 | 18.106 | KV452902.1 | 1026724 | 7-scf00171 | 7 |
| AX-158046158 | 8 | 18.106 | KV452902.1 | 1029079 | 7-scf00171 | 7 |
| AX-157758174 | 8 | 18.106 | KV452902.1 | 1042319 | 7-scf00171 | 7 |
| AX-158046212 | 8 | 18.106 | KV452902.1 | 1104657 | 7-scf00171 | 7 |
| AX-158046227 | 8 | 18.106 | KV452902.1 | 1122398 | 7-scf00171 | 7 |
| AX-158046276 | 8 | 18.106 | KV452902.1 | 1169597 | 7-scf00171 | 7 |
| AX-158046305 | 8 | 18.106 | KV452902.1 | 1196582 | 7-scf00171 | 7 |
| AX-158046306 | 8 | 18.106 | KV452902.1 | 1198316 | 7-scf00171 | 7 |
| AX-158046327 | 8 | 18.106 | KV452902.1 | 1227701 | 7-scf00171 | 7 |
| AX-158046358 | 8 | 18.106 | KV452902.1 | 1244168 | 7-scf00171 | 7 |
| AX-158046359 | 8 | 18.106 | KV452902.1 | 1244560 | 7-scf00171 | 7 |
| AX-158046397 | 8 | 18.106 | KV452902.1 | 1277933 | 7-scf00171 | 7 |
| AX-158046409 | 8 | 18.106 | KV452902.1 | 1287079 | 7-scf00171 | 7 |
| AX-157753874 | 8 | 18.106 | KV452902.1 | 1300493 | 7-scf00171 | 7 |
| AX-158046426 | 8 | 18.106 | KV452902.1 | 1309662 | 7-scf00171 | 7 |

|              |   |        |            |         |            |   |
|--------------|---|--------|------------|---------|------------|---|
| AX-158046454 | 8 | 18.106 | KV452902.1 | 1340515 | 7-scf00171 | 7 |
| AX-158046476 | 8 | 18.106 | KV452902.1 | 1354696 | 7-scf00171 | 7 |
| AX-158046494 | 8 | 18.106 | KV452902.1 | 1376343 | 7-scf00171 | 7 |
| AX-158046502 | 8 | 18.106 | KV452902.1 | 1382589 | 7-scf00171 | 7 |
| AX-158046526 | 8 | 18.106 | KV452904.1 | 3682    | 7-scf00172 | 7 |
| AX-158046528 | 8 | 18.106 | KV452904.1 | 5096    | 7-scf00172 | 7 |
| AX-158046544 | 8 | 18.106 | KV452904.1 | 29680   | 7-scf00172 | 7 |
| AX-158046545 | 8 | 18.106 | KV452904.1 | 31836   | 7-scf00172 | 7 |
| AX-158046563 | 8 | 18.106 | KV452904.1 | 59327   | 7-scf00172 | 7 |
| AX-158046565 | 8 | 18.106 | KV452904.1 | 63659   | 7-scf00172 | 7 |
| AX-157870559 | 8 | 18.106 | KV452904.1 | 69665   | 7-scf00172 | 7 |
| AX-158046651 | 8 | 18.106 | KV452904.1 | 192749  | 7-scf00172 | 7 |
| AX-158046714 | 8 | 18.106 | KV452904.1 | 241015  | 7-scf00172 | 7 |
| AX-158058545 | 8 | 18.106 | KV452903.1 | 4621    | 7-scf00173 | 7 |
| AX-158058552 | 8 | 18.106 | KV452903.1 | 13164   | 7-scf00173 | 7 |
| AX-158058589 | 8 | 18.106 | KV452903.1 | 34008   | 7-scf00173 | 7 |
| AX-157709071 | 8 | 18.106 | KV452903.1 | 34305   | 7-scf00173 | 7 |
| AX-158058594 | 8 | 18.106 | KV452903.1 | 41432   | 7-scf00173 | 7 |
| AX-158058614 | 8 | 18.106 | KV452903.1 | 64295   | 7-scf00173 | 7 |
| AX-158058617 | 8 | 18.106 | KV452903.1 | 67004   | 7-scf00173 | 7 |
| AX-158058621 | 8 | 18.106 | KV452903.1 | 69537   | 7-scf00173 | 7 |
| AX-158058631 | 8 | 18.106 | KV452903.1 | 84369   | 7-scf00173 | 7 |
| AX-157775493 | 8 | 18.106 | KV452903.1 | 91458   | 7-scf00173 | 7 |
| AX-158058646 | 8 | 18.106 | KV452903.1 | 104897  | 7-scf00173 | 7 |
| AX-158058692 | 8 | 18.106 | KV452903.1 | 138787  | 7-scf00173 | 7 |
| AX-158058694 | 8 | 18.106 | KV452903.1 | 139949  | 7-scf00173 | 7 |
| AX-158046096 | 8 | 18.229 | KV452902.1 | 949791  | 7-scf00171 | 7 |
| AX-157741998 | 8 | 18.229 | KV452902.1 | 1000440 | 7-scf00171 | 7 |
| AX-158046144 | 8 | 18.229 | KV452902.1 | 1006702 | 7-scf00171 | 7 |
| AX-158046190 | 8 | 18.229 | KV452902.1 | 1070097 | 7-scf00171 | 7 |
| AX-158046201 | 8 | 18.278 | KV452902.1 | 1081410 | 7-scf00171 | 7 |
| AX-158045201 | 8 | 18.352 | KV452901.1 | 1711628 | 7-scf00168 | 7 |
| AX-158045224 | 8 | 18.352 | KV452902.1 | 27437   | 7-scf00171 | 7 |
| AX-158045225 | 8 | 18.352 | KV452902.1 | 32467   | 7-scf00171 | 7 |
| AX-158045226 | 8 | 18.352 | KV452902.1 | 37009   | 7-scf00171 | 7 |
| AX-158045227 | 8 | 18.352 | KV452902.1 | 38711   | 7-scf00171 | 7 |
| AX-158045228 | 8 | 18.352 | KV452902.1 | 45144   | 7-scf00171 | 7 |
| AX-157822315 | 8 | 18.352 | KV452902.1 | 53257   | 7-scf00171 | 7 |
| AX-158045238 | 8 | 18.352 | KV452902.1 | 62794   | 7-scf00171 | 7 |
| AX-158045239 | 8 | 18.352 | KV452902.1 | 67138   | 7-scf00171 | 7 |
| AX-158045240 | 8 | 18.352 | KV452902.1 | 67201   | 7-scf00171 | 7 |
| AX-158045241 | 8 | 18.352 | KV452902.1 | 68281   | 7-scf00171 | 7 |
| AX-157822316 | 8 | 18.352 | KV452902.1 | 68476   | 7-scf00171 | 7 |
| AX-158045246 | 8 | 18.352 | KV452902.1 | 73307   | 7-scf00171 | 7 |
| AX-158045251 | 8 | 18.352 | KV452902.1 | 77604   | 7-scf00171 | 7 |
| AX-158045256 | 8 | 18.352 | KV452902.1 | 101097  | 7-scf00171 | 7 |
| AX-158045263 | 8 | 18.352 | KV452902.1 | 111201  | 7-scf00171 | 7 |
| AX-158391746 | 8 | 18.352 | KV452902.1 | 115864  | 7-scf00171 | 7 |
| AX-158045265 | 8 | 18.352 | KV452902.1 | 116635  | 7-scf00171 | 7 |
| AX-158045267 | 8 | 18.352 | KV452902.1 | 121180  | 7-scf00171 | 7 |
| AX-158045273 | 8 | 18.352 | KV452902.1 | 122593  | 7-scf00171 | 7 |

|              |   |        |            |        |            |   |
|--------------|---|--------|------------|--------|------------|---|
| AX-158045280 | 8 | 18.352 | KV452902.1 | 129578 | 7-scf00171 | 7 |
| AX-158045284 | 8 | 18.352 | KV452902.1 | 132748 | 7-scf00171 | 7 |
| AX-157822318 | 8 | 18.352 | KV452902.1 | 132872 | 7-scf00171 | 7 |
| AX-158391747 | 8 | 18.352 | KV452902.1 | 133258 | 7-scf00171 | 7 |
| AX-158045287 | 8 | 18.352 | KV452902.1 | 135287 | 7-scf00171 | 7 |
| AX-158045289 | 8 | 18.352 | KV452902.1 | 143719 | 7-scf00171 | 7 |
| AX-158045292 | 8 | 18.352 | KV452902.1 | 144738 | 7-scf00171 | 7 |
| AX-158045299 | 8 | 18.352 | KV452902.1 | 151801 | 7-scf00171 | 7 |
| AX-158045308 | 8 | 18.352 | KV452902.1 | 156283 | 7-scf00171 | 7 |
| AX-158045311 | 8 | 18.352 | KV452902.1 | 159486 | 7-scf00171 | 7 |
| AX-158045313 | 8 | 18.352 | KV452902.1 | 159659 | 7-scf00171 | 7 |
| AX-158045314 | 8 | 18.352 | KV452902.1 | 162457 | 7-scf00171 | 7 |
| AX-157822319 | 8 | 18.352 | KV452902.1 | 163208 | 7-scf00171 | 7 |
| AX-158045315 | 8 | 18.352 | KV452902.1 | 163286 | 7-scf00171 | 7 |
| AX-158045321 | 8 | 18.352 | KV452902.1 | 168378 | 7-scf00171 | 7 |
| AX-158045327 | 8 | 18.352 | KV452902.1 | 170983 | 7-scf00171 | 7 |
| AX-158045333 | 8 | 18.352 | KV452902.1 | 174575 | 7-scf00171 | 7 |
| AX-158045334 | 8 | 18.352 | KV452902.1 | 175353 | 7-scf00171 | 7 |
| AX-158045337 | 8 | 18.352 | KV452902.1 | 176585 | 7-scf00171 | 7 |
| AX-157822321 | 8 | 18.352 | KV452902.1 | 178075 | 7-scf00171 | 7 |
| AX-157822322 | 8 | 18.352 | KV452902.1 | 178510 | 7-scf00171 | 7 |
| AX-158045342 | 8 | 18.352 | KV452902.1 | 185262 | 7-scf00171 | 7 |
| AX-158045343 | 8 | 18.352 | KV452902.1 | 187993 | 7-scf00171 | 7 |
| AX-158045344 | 8 | 18.352 | KV452902.1 | 188792 | 7-scf00171 | 7 |
| AX-158045346 | 8 | 18.352 | KV452902.1 | 189299 | 7-scf00171 | 7 |
| AX-158045349 | 8 | 18.352 | KV452902.1 | 191060 | 7-scf00171 | 7 |
| AX-158045350 | 8 | 18.352 | KV452902.1 | 192052 | 7-scf00171 | 7 |
| AX-158045353 | 8 | 18.352 | KV452902.1 | 194132 | 7-scf00171 | 7 |
| AX-158045354 | 8 | 18.352 | KV452902.1 | 194539 | 7-scf00171 | 7 |
| AX-158045358 | 8 | 18.352 | KV452902.1 | 201224 | 7-scf00171 | 7 |
| AX-158045362 | 8 | 18.352 | KV452902.1 | 203208 | 7-scf00171 | 7 |
| AX-157822323 | 8 | 18.352 | KV452902.1 | 205484 | 7-scf00171 | 7 |
| AX-158045365 | 8 | 18.352 | KV452902.1 | 206224 | 7-scf00171 | 7 |
| AX-158045371 | 8 | 18.352 | KV452902.1 | 207995 | 7-scf00171 | 7 |
| AX-158045373 | 8 | 18.352 | KV452902.1 | 209406 | 7-scf00171 | 7 |
| AX-158045376 | 8 | 18.352 | KV452902.1 | 210996 | 7-scf00171 | 7 |
| AX-158045380 | 8 | 18.352 | KV452902.1 | 213541 | 7-scf00171 | 7 |
| AX-158045389 | 8 | 18.352 | KV452902.1 | 220726 | 7-scf00171 | 7 |
| AX-158045399 | 8 | 18.352 | KV452902.1 | 227869 | 7-scf00171 | 7 |
| AX-158045406 | 8 | 18.352 | KV452902.1 | 232096 | 7-scf00171 | 7 |
| AX-158045407 | 8 | 18.352 | KV452902.1 | 232470 | 7-scf00171 | 7 |
| AX-158045408 | 8 | 18.352 | KV452902.1 | 232919 | 7-scf00171 | 7 |
| AX-158045411 | 8 | 18.352 | KV452902.1 | 234871 | 7-scf00171 | 7 |
| AX-158391748 | 8 | 18.352 | KV452902.1 | 235950 | 7-scf00171 | 7 |
| AX-158045413 | 8 | 18.352 | KV452902.1 | 237640 | 7-scf00171 | 7 |
| AX-157709932 | 8 | 18.352 | KV452902.1 | 240294 | 7-scf00171 | 7 |
| AX-158045416 | 8 | 18.352 | KV452902.1 | 245142 | 7-scf00171 | 7 |
| AX-158391749 | 8 | 18.352 | KV452902.1 | 247139 | 7-scf00171 | 7 |
| AX-158045417 | 8 | 18.352 | KV452902.1 | 247680 | 7-scf00171 | 7 |
| AX-158045420 | 8 | 18.352 | KV452902.1 | 249781 | 7-scf00171 | 7 |
| AX-158045426 | 8 | 18.352 | KV452902.1 | 254432 | 7-scf00171 | 7 |



|              |   |        |            |        |            |   |
|--------------|---|--------|------------|--------|------------|---|
| AX-158045428 | 8 | 18.352 | KV452902.1 | 258707 | 7-scf00171 | 7 |
| AX-158045433 | 8 | 18.352 | KV452902.1 | 259819 | 7-scf00171 | 7 |
| AX-158045436 | 8 | 18.352 | KV452902.1 | 260766 | 7-scf00171 | 7 |
| AX-157870552 | 8 | 18.352 | KV452902.1 | 261520 | 7-scf00171 | 7 |
| AX-158045442 | 8 | 18.352 | KV452902.1 | 267596 | 7-scf00171 | 7 |
| AX-158045447 | 8 | 18.352 | KV452902.1 | 271592 | 7-scf00171 | 7 |
| AX-158045452 | 8 | 18.352 | KV452902.1 | 276734 | 7-scf00171 | 7 |
| AX-158045456 | 8 | 18.352 | KV452902.1 | 277682 | 7-scf00171 | 7 |
| AX-158045459 | 8 | 18.352 | KV452902.1 | 284687 | 7-scf00171 | 7 |
| AX-157822325 | 8 | 18.352 | KV452902.1 | 285711 | 7-scf00171 | 7 |
| AX-158045462 | 8 | 18.352 | KV452902.1 | 289497 | 7-scf00171 | 7 |
| AX-158045468 | 8 | 18.352 | KV452902.1 | 294509 | 7-scf00171 | 7 |
| AX-158045469 | 8 | 18.352 | KV452902.1 | 294932 | 7-scf00171 | 7 |
| AX-158045476 | 8 | 18.352 | KV452902.1 | 301371 | 7-scf00171 | 7 |
| AX-158045477 | 8 | 18.352 | KV452902.1 | 304055 | 7-scf00171 | 7 |
| AX-158045485 | 8 | 18.352 | KV452902.1 | 309497 | 7-scf00171 | 7 |
| AX-158045486 | 8 | 18.352 | KV452902.1 | 309800 | 7-scf00171 | 7 |
| AX-158045488 | 8 | 18.352 | KV452902.1 | 311944 | 7-scf00171 | 7 |
| AX-158045491 | 8 | 18.352 | KV452902.1 | 312587 | 7-scf00171 | 7 |
| AX-158045494 | 8 | 18.352 | KV452902.1 | 314134 | 7-scf00171 | 7 |
| AX-157822326 | 8 | 18.352 | KV452902.1 | 317820 | 7-scf00171 | 7 |
| AX-157822328 | 8 | 18.352 | KV452902.1 | 324907 | 7-scf00171 | 7 |
| AX-158045507 | 8 | 18.352 | KV452902.1 | 327506 | 7-scf00171 | 7 |
| AX-158045508 | 8 | 18.352 | KV452902.1 | 332589 | 7-scf00171 | 7 |
| AX-158045509 | 8 | 18.352 | KV452902.1 | 333261 | 7-scf00171 | 7 |
| AX-158045510 | 8 | 18.352 | KV452902.1 | 333530 | 7-scf00171 | 7 |
| AX-158045511 | 8 | 18.352 | KV452902.1 | 333934 | 7-scf00171 | 7 |
| AX-158045514 | 8 | 18.352 | KV452902.1 | 334854 | 7-scf00171 | 7 |
| AX-158045519 | 8 | 18.352 | KV452902.1 | 341694 | 7-scf00171 | 7 |
| AX-158045530 | 8 | 18.352 | KV452902.1 | 355413 | 7-scf00171 | 7 |
| AX-158045532 | 8 | 18.352 | KV452902.1 | 357558 | 7-scf00171 | 7 |
| AX-158045533 | 8 | 18.352 | KV452902.1 | 357994 | 7-scf00171 | 7 |
| AX-158045534 | 8 | 18.352 | KV452902.1 | 359145 | 7-scf00171 | 7 |
| AX-158045539 | 8 | 18.352 | KV452902.1 | 363781 | 7-scf00171 | 7 |
| AX-158045540 | 8 | 18.352 | KV452902.1 | 364261 | 7-scf00171 | 7 |
| AX-158045542 | 8 | 18.352 | KV452902.1 | 367484 | 7-scf00171 | 7 |
| AX-158045545 | 8 | 18.352 | KV452902.1 | 369695 | 7-scf00171 | 7 |
| AX-158045550 | 8 | 18.352 | KV452902.1 | 373745 | 7-scf00171 | 7 |
| AX-158045552 | 8 | 18.352 | KV452902.1 | 376692 | 7-scf00171 | 7 |
| AX-158045556 | 8 | 18.352 | KV452902.1 | 379752 | 7-scf00171 | 7 |
| AX-158045559 | 8 | 18.352 | KV452902.1 | 383045 | 7-scf00171 | 7 |
| AX-158045568 | 8 | 18.352 | KV452902.1 | 392960 | 7-scf00171 | 7 |
| AX-158045570 | 8 | 18.352 | KV452902.1 | 396064 | 7-scf00171 | 7 |
| AX-158045572 | 8 | 18.352 | KV452902.1 | 397450 | 7-scf00171 | 7 |
| AX-158045582 | 8 | 18.352 | KV452902.1 | 403837 | 7-scf00171 | 7 |
| AX-158045584 | 8 | 18.352 | KV452902.1 | 406372 | 7-scf00171 | 7 |
| AX-158045588 | 8 | 18.352 | KV452902.1 | 406564 | 7-scf00171 | 7 |
| AX-158045590 | 8 | 18.352 | KV452902.1 | 410469 | 7-scf00171 | 7 |
| AX-158045593 | 8 | 18.352 | KV452902.1 | 412091 | 7-scf00171 | 7 |
| AX-158045594 | 8 | 18.352 | KV452902.1 | 412755 | 7-scf00171 | 7 |
| AX-158045601 | 8 | 18.352 | KV452902.1 | 417554 | 7-scf00171 | 7 |

|              |   |        |            |        |            |   |
|--------------|---|--------|------------|--------|------------|---|
| AX-158045604 | 8 | 18.352 | KV452902.1 | 418932 | 7-scf00171 | 7 |
| AX-158045607 | 8 | 18.352 | KV452902.1 | 420954 | 7-scf00171 | 7 |
| AX-158045615 | 8 | 18.352 | KV452902.1 | 426455 | 7-scf00171 | 7 |
| AX-158045619 | 8 | 18.352 | KV452902.1 | 428183 | 7-scf00171 | 7 |
| AX-157743965 | 8 | 18.352 | KV452902.1 | 429029 | 7-scf00171 | 7 |
| AX-158045622 | 8 | 18.352 | KV452902.1 | 429542 | 7-scf00171 | 7 |
| AX-158045624 | 8 | 18.352 | KV452902.1 | 431603 | 7-scf00171 | 7 |
| AX-158045625 | 8 | 18.352 | KV452902.1 | 432670 | 7-scf00171 | 7 |
| AX-158045627 | 8 | 18.352 | KV452902.1 | 433875 | 7-scf00171 | 7 |
| AX-158045628 | 8 | 18.352 | KV452902.1 | 434713 | 7-scf00171 | 7 |
| AX-158045632 | 8 | 18.352 | KV452902.1 | 437081 | 7-scf00171 | 7 |
| AX-158045635 | 8 | 18.352 | KV452902.1 | 438697 | 7-scf00171 | 7 |
| AX-158045637 | 8 | 18.352 | KV452902.1 | 439807 | 7-scf00171 | 7 |
| AX-158391751 | 8 | 18.352 | KV452902.1 | 440860 | 7-scf00171 | 7 |
| AX-158045643 | 8 | 18.352 | KV452902.1 | 445719 | 7-scf00171 | 7 |
| AX-158045644 | 8 | 18.352 | KV452902.1 | 448028 | 7-scf00171 | 7 |
| AX-158045651 | 8 | 18.352 | KV452902.1 | 451120 | 7-scf00171 | 7 |
| AX-158045665 | 8 | 18.352 | KV452902.1 | 458993 | 7-scf00171 | 7 |
| AX-158045666 | 8 | 18.352 | KV452902.1 | 459980 | 7-scf00171 | 7 |
| AX-158045667 | 8 | 18.352 | KV452902.1 | 460539 | 7-scf00171 | 7 |
| AX-158045670 | 8 | 18.352 | KV452902.1 | 462893 | 7-scf00171 | 7 |
| AX-158045672 | 8 | 18.352 | KV452902.1 | 465143 | 7-scf00171 | 7 |
| AX-158045676 | 8 | 18.352 | KV452902.1 | 467806 | 7-scf00171 | 7 |
| AX-158045678 | 8 | 18.352 | KV452902.1 | 470163 | 7-scf00171 | 7 |
| AX-157746597 | 8 | 18.352 | KV452902.1 | 481152 | 7-scf00171 | 7 |
| AX-158045688 | 8 | 18.352 | KV452902.1 | 489249 | 7-scf00171 | 7 |
| AX-158045689 | 8 | 18.352 | KV452902.1 | 490283 | 7-scf00171 | 7 |
| AX-158045694 | 8 | 18.352 | KV452902.1 | 494082 | 7-scf00171 | 7 |
| AX-158045699 | 8 | 18.352 | KV452902.1 | 497193 | 7-scf00171 | 7 |
| AX-158045704 | 8 | 18.352 | KV452902.1 | 502628 | 7-scf00171 | 7 |
| AX-158045707 | 8 | 18.352 | KV452902.1 | 503529 | 7-scf00171 | 7 |
| AX-158045714 | 8 | 18.352 | KV452902.1 | 510695 | 7-scf00171 | 7 |
| AX-158045715 | 8 | 18.352 | KV452902.1 | 512603 | 7-scf00171 | 7 |
| AX-158045717 | 8 | 18.352 | KV452902.1 | 515206 | 7-scf00171 | 7 |
| AX-158391752 | 8 | 18.352 | KV452902.1 | 516247 | 7-scf00171 | 7 |
| AX-158045723 | 8 | 18.352 | KV452902.1 | 520976 | 7-scf00171 | 7 |
| AX-158045729 | 8 | 18.352 | KV452902.1 | 526773 | 7-scf00171 | 7 |
| AX-158045730 | 8 | 18.352 | KV452902.1 | 527181 | 7-scf00171 | 7 |
| AX-158045732 | 8 | 18.352 | KV452902.1 | 528082 | 7-scf00171 | 7 |
| AX-158045737 | 8 | 18.352 | KV452902.1 | 530465 | 7-scf00171 | 7 |
| AX-158045740 | 8 | 18.352 | KV452902.1 | 534895 | 7-scf00171 | 7 |
| AX-158045741 | 8 | 18.352 | KV452902.1 | 535662 | 7-scf00171 | 7 |
| AX-158045744 | 8 | 18.352 | KV452902.1 | 537767 | 7-scf00171 | 7 |
| AX-158045748 | 8 | 18.352 | KV452902.1 | 541701 | 7-scf00171 | 7 |
| AX-158045750 | 8 | 18.352 | KV452902.1 | 546732 | 7-scf00171 | 7 |
| AX-158045752 | 8 | 18.352 | KV452902.1 | 549935 | 7-scf00171 | 7 |
| AX-158045753 | 8 | 18.352 | KV452902.1 | 552509 | 7-scf00171 | 7 |
| AX-158045754 | 8 | 18.352 | KV452902.1 | 552891 | 7-scf00171 | 7 |
| AX-158045756 | 8 | 18.352 | KV452902.1 | 558109 | 7-scf00171 | 7 |
| AX-157822334 | 8 | 18.352 | KV452902.1 | 558269 | 7-scf00171 | 7 |
| AX-158045757 | 8 | 18.352 | KV452902.1 | 559100 | 7-scf00171 | 7 |

|              |   |        |            |        |            |   |
|--------------|---|--------|------------|--------|------------|---|
| AX-158045758 | 8 | 18.352 | KV452902.1 | 560101 | 7-scf00171 | 7 |
| AX-157822335 | 8 | 18.352 | KV452902.1 | 564554 | 7-scf00171 | 7 |
| AX-158045765 | 8 | 18.352 | KV452902.1 | 568294 | 7-scf00171 | 7 |
| AX-158045767 | 8 | 18.352 | KV452902.1 | 569349 | 7-scf00171 | 7 |
| AX-158045772 | 8 | 18.352 | KV452902.1 | 570937 | 7-scf00171 | 7 |
| AX-158045778 | 8 | 18.352 | KV452902.1 | 582200 | 7-scf00171 | 7 |
| AX-158045781 | 8 | 18.352 | KV452902.1 | 584160 | 7-scf00171 | 7 |
| AX-158045785 | 8 | 18.352 | KV452902.1 | 589564 | 7-scf00171 | 7 |
| AX-158045787 | 8 | 18.352 | KV452902.1 | 590891 | 7-scf00171 | 7 |
| AX-158045797 | 8 | 18.352 | KV452902.1 | 602802 | 7-scf00171 | 7 |
| AX-158045798 | 8 | 18.352 | KV452902.1 | 604851 | 7-scf00171 | 7 |
| AX-157856433 | 8 | 18.352 | KV452902.1 | 610749 | 7-scf00171 | 7 |
| AX-158045813 | 8 | 18.352 | KV452902.1 | 616596 | 7-scf00171 | 7 |
| AX-158045824 | 8 | 18.352 | KV452902.1 | 632978 | 7-scf00171 | 7 |
| AX-158045828 | 8 | 18.352 | KV452902.1 | 634663 | 7-scf00171 | 7 |
| AX-158045833 | 8 | 18.352 | KV452902.1 | 636534 | 7-scf00171 | 7 |
| AX-158045836 | 8 | 18.352 | KV452902.1 | 639720 | 7-scf00171 | 7 |
| AX-157856434 | 8 | 18.352 | KV452902.1 | 642337 | 7-scf00171 | 7 |
| AX-158045838 | 8 | 18.352 | KV452902.1 | 642975 | 7-scf00171 | 7 |
| AX-158045839 | 8 | 18.352 | KV452902.1 | 645078 | 7-scf00171 | 7 |
| AX-158045840 | 8 | 18.352 | KV452902.1 | 646889 | 7-scf00171 | 7 |
| AX-158045842 | 8 | 18.352 | KV452902.1 | 650145 | 7-scf00171 | 7 |
| AX-158045843 | 8 | 18.352 | KV452902.1 | 651091 | 7-scf00171 | 7 |
| AX-158045847 | 8 | 18.352 | KV452902.1 | 654369 | 7-scf00171 | 7 |
| AX-158045850 | 8 | 18.352 | KV452902.1 | 656268 | 7-scf00171 | 7 |
| AX-158045851 | 8 | 18.352 | KV452902.1 | 656881 | 7-scf00171 | 7 |
| AX-158045854 | 8 | 18.352 | KV452902.1 | 661323 | 7-scf00171 | 7 |
| AX-158045856 | 8 | 18.352 | KV452902.1 | 662450 | 7-scf00171 | 7 |
| AX-158045858 | 8 | 18.352 | KV452902.1 | 665686 | 7-scf00171 | 7 |
| AX-158045862 | 8 | 18.352 | KV452902.1 | 671501 | 7-scf00171 | 7 |
| AX-158045863 | 8 | 18.352 | KV452902.1 | 673055 | 7-scf00171 | 7 |
| AX-158045864 | 8 | 18.352 | KV452902.1 | 673621 | 7-scf00171 | 7 |
| AX-157753586 | 8 | 18.352 | KV452902.1 | 686219 | 7-scf00171 | 7 |
| AX-158045872 | 8 | 18.352 | KV452902.1 | 686902 | 7-scf00171 | 7 |
| AX-158045882 | 8 | 18.352 | KV452902.1 | 694131 | 7-scf00171 | 7 |
| AX-158045883 | 8 | 18.352 | KV452902.1 | 694493 | 7-scf00171 | 7 |
| AX-158045885 | 8 | 18.352 | KV452902.1 | 695313 | 7-scf00171 | 7 |
| AX-158045886 | 8 | 18.352 | KV452902.1 | 697582 | 7-scf00171 | 7 |
| AX-158045888 | 8 | 18.352 | KV452902.1 | 699678 | 7-scf00171 | 7 |
| AX-158045890 | 8 | 18.352 | KV452902.1 | 701279 | 7-scf00171 | 7 |
| AX-158045892 | 8 | 18.352 | KV452902.1 | 702456 | 7-scf00171 | 7 |
| AX-158045897 | 8 | 18.352 | KV452902.1 | 710116 | 7-scf00171 | 7 |
| AX-158045907 | 8 | 18.352 | KV452902.1 | 719018 | 7-scf00171 | 7 |
| AX-158045910 | 8 | 18.352 | KV452902.1 | 719919 | 7-scf00171 | 7 |
| AX-158045916 | 8 | 18.352 | KV452902.1 | 725500 | 7-scf00171 | 7 |
| AX-157822336 | 8 | 18.352 | KV452902.1 | 726601 | 7-scf00171 | 7 |
| AX-157744380 | 8 | 18.352 | KV452902.1 | 727087 | 7-scf00171 | 7 |
| AX-158045919 | 8 | 18.352 | KV452902.1 | 728932 | 7-scf00171 | 7 |
| AX-158045920 | 8 | 18.352 | KV452902.1 | 728995 | 7-scf00171 | 7 |
| AX-158045922 | 8 | 18.352 | KV452902.1 | 730336 | 7-scf00171 | 7 |
| AX-158045924 | 8 | 18.352 | KV452902.1 | 734611 | 7-scf00171 | 7 |

|              |   |        |            |        |            |   |
|--------------|---|--------|------------|--------|------------|---|
| AX-158045929 | 8 | 18.352 | KV452902.1 | 742028 | 7-scf00171 | 7 |
| AX-157822338 | 8 | 18.352 | KV452902.1 | 742266 | 7-scf00171 | 7 |
| AX-158045932 | 8 | 18.352 | KV452902.1 | 744278 | 7-scf00171 | 7 |
| AX-157822340 | 8 | 18.352 | KV452902.1 | 746160 | 7-scf00171 | 7 |
| AX-157822341 | 8 | 18.352 | KV452902.1 | 750775 | 7-scf00171 | 7 |
| AX-158045942 | 8 | 18.352 | KV452902.1 | 752420 | 7-scf00171 | 7 |
| AX-157863086 | 8 | 18.352 | KV452902.1 | 755731 | 7-scf00171 | 7 |
| AX-157822344 | 8 | 18.352 | KV452902.1 | 758117 | 7-scf00171 | 7 |
| AX-158045946 | 8 | 18.352 | KV452902.1 | 759204 | 7-scf00171 | 7 |
| AX-158045952 | 8 | 18.352 | KV452902.1 | 765060 | 7-scf00171 | 7 |
| AX-157822345 | 8 | 18.352 | KV452902.1 | 766026 | 7-scf00171 | 7 |
| AX-157822347 | 8 | 18.352 | KV452902.1 | 767863 | 7-scf00171 | 7 |
| AX-158045955 | 8 | 18.352 | KV452902.1 | 768142 | 7-scf00171 | 7 |
| AX-157822350 | 8 | 18.352 | KV452902.1 | 777850 | 7-scf00171 | 7 |
| AX-158045965 | 8 | 18.352 | KV452902.1 | 779627 | 7-scf00171 | 7 |
| AX-157822352 | 8 | 18.352 | KV452902.1 | 781003 | 7-scf00171 | 7 |
| AX-158045968 | 8 | 18.352 | KV452902.1 | 784540 | 7-scf00171 | 7 |
| AX-158045970 | 8 | 18.352 | KV452902.1 | 786066 | 7-scf00171 | 7 |
| AX-158045973 | 8 | 18.352 | KV452902.1 | 793096 | 7-scf00171 | 7 |
| AX-157755589 | 8 | 18.352 | KV452902.1 | 793536 | 7-scf00171 | 7 |
| AX-158045974 | 8 | 18.352 | KV452902.1 | 793837 | 7-scf00171 | 7 |
| AX-158045975 | 8 | 18.352 | KV452902.1 | 794276 | 7-scf00171 | 7 |
| AX-158045976 | 8 | 18.352 | KV452902.1 | 795357 | 7-scf00171 | 7 |
| AX-158045985 | 8 | 18.352 | KV452902.1 | 802402 | 7-scf00171 | 7 |
| AX-158045989 | 8 | 18.352 | KV452902.1 | 806209 | 7-scf00171 | 7 |
| AX-158045990 | 8 | 18.352 | KV452902.1 | 808807 | 7-scf00171 | 7 |
| AX-158045996 | 8 | 18.352 | KV452902.1 | 812975 | 7-scf00171 | 7 |
| AX-158045997 | 8 | 18.352 | KV452902.1 | 814430 | 7-scf00171 | 7 |
| AX-158046005 | 8 | 18.352 | KV452902.1 | 825922 | 7-scf00171 | 7 |
| AX-158046009 | 8 | 18.352 | KV452902.1 | 834200 | 7-scf00171 | 7 |
| AX-157742602 | 8 | 18.352 | KV452902.1 | 834802 | 7-scf00171 | 7 |
| AX-158046014 | 8 | 18.352 | KV452902.1 | 838253 | 7-scf00171 | 7 |
| AX-158046016 | 8 | 18.352 | KV452902.1 | 842425 | 7-scf00171 | 7 |
| AX-158046020 | 8 | 18.352 | KV452902.1 | 847297 | 7-scf00171 | 7 |
| AX-158046027 | 8 | 18.352 | KV452902.1 | 850450 | 7-scf00171 | 7 |
| AX-158046028 | 8 | 18.352 | KV452902.1 | 850739 | 7-scf00171 | 7 |
| AX-158046032 | 8 | 18.352 | KV452902.1 | 852296 | 7-scf00171 | 7 |
| AX-158046039 | 8 | 18.352 | KV452902.1 | 857876 | 7-scf00171 | 7 |
| AX-158046041 | 8 | 18.352 | KV452902.1 | 860048 | 7-scf00171 | 7 |
| AX-157822358 | 8 | 18.352 | KV452902.1 | 863329 | 7-scf00171 | 7 |
| AX-158046046 | 8 | 18.352 | KV452902.1 | 867954 | 7-scf00171 | 7 |
| AX-157822359 | 8 | 18.352 | KV452902.1 | 869307 | 7-scf00171 | 7 |
| AX-158046048 | 8 | 18.352 | KV452902.1 | 869347 | 7-scf00171 | 7 |
| AX-158046052 | 8 | 18.352 | KV452902.1 | 871560 | 7-scf00171 | 7 |
| AX-158046055 | 8 | 18.352 | KV452902.1 | 876927 | 7-scf00171 | 7 |
| AX-158046056 | 8 | 18.352 | KV452902.1 | 877720 | 7-scf00171 | 7 |
| AX-158046060 | 8 | 18.352 | KV452902.1 | 882576 | 7-scf00171 | 7 |
| AX-158046064 | 8 | 18.352 | KV452902.1 | 906383 | 7-scf00171 | 7 |
| AX-158046066 | 8 | 18.352 | KV452902.1 | 908949 | 7-scf00171 | 7 |
| AX-158046067 | 8 | 18.352 | KV452902.1 | 909674 | 7-scf00171 | 7 |
| AX-158046068 | 8 | 18.352 | KV452902.1 | 910868 | 7-scf00171 | 7 |

|              |   |        |            |         |            |   |
|--------------|---|--------|------------|---------|------------|---|
| AX-157822364 | 8 | 18.352 | KV452902.1 | 929821  | 7-scf00171 | 7 |
| AX-158046072 | 8 | 18.352 | KV452902.1 | 931953  | 7-scf00171 | 7 |
| AX-158046073 | 8 | 18.352 | KV452902.1 | 932191  | 7-scf00171 | 7 |
| AX-158046074 | 8 | 18.352 | KV452902.1 | 934731  | 7-scf00171 | 7 |
| AX-158046075 | 8 | 18.352 | KV452902.1 | 936564  | 7-scf00171 | 7 |
| AX-158046082 | 8 | 18.352 | KV452902.1 | 939758  | 7-scf00171 | 7 |
| AX-158046083 | 8 | 18.352 | KV452902.1 | 939926  | 7-scf00171 | 7 |
| AX-158046085 | 8 | 18.352 | KV452902.1 | 942187  | 7-scf00171 | 7 |
| AX-158046086 | 8 | 18.352 | KV452902.1 | 943292  | 7-scf00171 | 7 |
| AX-157724852 | 8 | 18.352 | KV452902.1 | 947889  | 7-scf00171 | 7 |
| AX-158046094 | 8 | 18.352 | KV452902.1 | 948388  | 7-scf00171 | 7 |
| AX-158379853 | 8 | 18.352 | KV452902.1 | 948976  | 7-scf00171 | 7 |
| AX-158046095 | 8 | 18.352 | KV452902.1 | 949066  | 7-scf00171 | 7 |
| AX-158046102 | 8 | 18.352 | KV452902.1 | 957725  | 7-scf00171 | 7 |
| AX-158046103 | 8 | 18.352 | KV452902.1 | 959346  | 7-scf00171 | 7 |
| AX-158046104 | 8 | 18.352 | KV452902.1 | 960113  | 7-scf00171 | 7 |
| AX-158046106 | 8 | 18.352 | KV452902.1 | 961603  | 7-scf00171 | 7 |
| AX-158046107 | 8 | 18.352 | KV452902.1 | 962320  | 7-scf00171 | 7 |
| AX-158046111 | 8 | 18.352 | KV452902.1 | 968713  | 7-scf00171 | 7 |
| AX-158046113 | 8 | 18.352 | KV452902.1 | 971256  | 7-scf00171 | 7 |
| AX-158046118 | 8 | 18.352 | KV452902.1 | 981655  | 7-scf00171 | 7 |
| AX-157822366 | 8 | 18.352 | KV452902.1 | 984150  | 7-scf00171 | 7 |
| AX-158046120 | 8 | 18.352 | KV452902.1 | 984833  | 7-scf00171 | 7 |
| AX-158046124 | 8 | 18.352 | KV452902.1 | 986214  | 7-scf00171 | 7 |
| AX-158046125 | 8 | 18.352 | KV452902.1 | 987626  | 7-scf00171 | 7 |
| AX-158046129 | 8 | 18.352 | KV452902.1 | 995066  | 7-scf00171 | 7 |
| AX-158046135 | 8 | 18.352 | KV452902.1 | 1000378 | 7-scf00171 | 7 |
| AX-158046137 | 8 | 18.352 | KV452902.1 | 1001875 | 7-scf00171 | 7 |
| AX-158046138 | 8 | 18.352 | KV452902.1 | 1004291 | 7-scf00171 | 7 |
| AX-158046139 | 8 | 18.352 | KV452902.1 | 1004830 | 7-scf00171 | 7 |
| AX-157744533 | 8 | 18.352 | KV452902.1 | 1007179 | 7-scf00171 | 7 |
| AX-157856436 | 8 | 18.352 | KV452902.1 | 1018736 | 7-scf00171 | 7 |
| AX-158046149 | 8 | 18.352 | KV452902.1 | 1019123 | 7-scf00171 | 7 |
| AX-158046150 | 8 | 18.352 | KV452902.1 | 1019810 | 7-scf00171 | 7 |
| AX-157856437 | 8 | 18.352 | KV452902.1 | 1024363 | 7-scf00171 | 7 |
| AX-158046152 | 8 | 18.352 | KV452902.1 | 1025986 | 7-scf00171 | 7 |
| AX-158046155 | 8 | 18.352 | KV452902.1 | 1027198 | 7-scf00171 | 7 |
| AX-158046163 | 8 | 18.352 | KV452902.1 | 1031506 | 7-scf00171 | 7 |
| AX-158046165 | 8 | 18.352 | KV452902.1 | 1035400 | 7-scf00171 | 7 |
| AX-158046166 | 8 | 18.352 | KV452902.1 | 1036310 | 7-scf00171 | 7 |
| AX-158046168 | 8 | 18.352 | KV452902.1 | 1041833 | 7-scf00171 | 7 |
| AX-158046169 | 8 | 18.352 | KV452902.1 | 1042212 | 7-scf00171 | 7 |
| AX-158046171 | 8 | 18.352 | KV452902.1 | 1044724 | 7-scf00171 | 7 |
| AX-158046175 | 8 | 18.352 | KV452902.1 | 1047744 | 7-scf00171 | 7 |
| AX-158046180 | 8 | 18.352 | KV452902.1 | 1049668 | 7-scf00171 | 7 |
| AX-158046184 | 8 | 18.352 | KV452902.1 | 1053473 | 7-scf00171 | 7 |
| AX-158046188 | 8 | 18.352 | KV452902.1 | 1064266 | 7-scf00171 | 7 |
| AX-158391759 | 8 | 18.352 | KV452902.1 | 1067218 | 7-scf00171 | 7 |
| AX-157822372 | 8 | 18.352 | KV452902.1 | 1071273 | 7-scf00171 | 7 |
| AX-158046192 | 8 | 18.352 | KV452902.1 | 1073689 | 7-scf00171 | 7 |
| AX-158046199 | 8 | 18.352 | KV452902.1 | 1079270 | 7-scf00171 | 7 |

|              |   |        |            |         |            |   |
|--------------|---|--------|------------|---------|------------|---|
| AX-157822374 | 8 | 18.352 | KV452902.1 | 1086023 | 7-scf00171 | 7 |
| AX-158046205 | 8 | 18.352 | KV452902.1 | 1088163 | 7-scf00171 | 7 |
| AX-158391760 | 8 | 18.352 | KV452902.1 | 1088604 | 7-scf00171 | 7 |
| AX-158046207 | 8 | 18.352 | KV452902.1 | 1095941 | 7-scf00171 | 7 |
| AX-158408668 | 8 | 18.352 | KV452902.1 | 1100221 | 7-scf00171 | 7 |
| AX-157721655 | 8 | 18.352 | KV452902.1 | 1103983 | 7-scf00171 | 7 |
| AX-158046213 | 8 | 18.352 | KV452902.1 | 1107561 | 7-scf00171 | 7 |
| AX-158046216 | 8 | 18.352 | KV452902.1 | 1108856 | 7-scf00171 | 7 |
| AX-158046217 | 8 | 18.352 | KV452902.1 | 1110332 | 7-scf00171 | 7 |
| AX-158046218 | 8 | 18.352 | KV452902.1 | 1112278 | 7-scf00171 | 7 |
| AX-158046220 | 8 | 18.352 | KV452902.1 | 1115148 | 7-scf00171 | 7 |
| AX-158046223 | 8 | 18.352 | KV452902.1 | 1117812 | 7-scf00171 | 7 |
| AX-158046228 | 8 | 18.352 | KV452902.1 | 1124556 | 7-scf00171 | 7 |
| AX-158046230 | 8 | 18.352 | KV452902.1 | 1125594 | 7-scf00171 | 7 |
| AX-157822376 | 8 | 18.352 | KV452902.1 | 1127651 | 7-scf00171 | 7 |
| AX-158046232 | 8 | 18.352 | KV452902.1 | 1131205 | 7-scf00171 | 7 |
| AX-157856438 | 8 | 18.352 | KV452902.1 | 1132481 | 7-scf00171 | 7 |
| AX-158046236 | 8 | 18.352 | KV452902.1 | 1133507 | 7-scf00171 | 7 |
| AX-158046237 | 8 | 18.352 | KV452902.1 | 1134200 | 7-scf00171 | 7 |
| AX-158416277 | 8 | 18.352 | KV452902.1 | 1138446 | 7-scf00171 | 7 |
| AX-158046239 | 8 | 18.352 | KV452902.1 | 1139404 | 7-scf00171 | 7 |
| AX-158046240 | 8 | 18.352 | KV452902.1 | 1139844 | 7-scf00171 | 7 |
| AX-158046241 | 8 | 18.352 | KV452902.1 | 1140356 | 7-scf00171 | 7 |
| AX-158046244 | 8 | 18.352 | KV452902.1 | 1145365 | 7-scf00171 | 7 |
| AX-158046245 | 8 | 18.352 | KV452902.1 | 1145818 | 7-scf00171 | 7 |
| AX-158046246 | 8 | 18.352 | KV452902.1 | 1147076 | 7-scf00171 | 7 |
| AX-158046247 | 8 | 18.352 | KV452902.1 | 1147425 | 7-scf00171 | 7 |
| AX-157856439 | 8 | 18.352 | KV452902.1 | 1147928 | 7-scf00171 | 7 |
| AX-158046248 | 8 | 18.352 | KV452902.1 | 1148178 | 7-scf00171 | 7 |
| AX-157822378 | 8 | 18.352 | KV452902.1 | 1149039 | 7-scf00171 | 7 |
| AX-158046249 | 8 | 18.352 | KV452902.1 | 1150264 | 7-scf00171 | 7 |
| AX-158046251 | 8 | 18.352 | KV452902.1 | 1150690 | 7-scf00171 | 7 |
| AX-158046258 | 8 | 18.352 | KV452902.1 | 1154784 | 7-scf00171 | 7 |
| AX-157822381 | 8 | 18.352 | KV452902.1 | 1156686 | 7-scf00171 | 7 |
| AX-158046264 | 8 | 18.352 | KV452902.1 | 1161747 | 7-scf00171 | 7 |
| AX-158046266 | 8 | 18.352 | KV452902.1 | 1162352 | 7-scf00171 | 7 |
| AX-158046267 | 8 | 18.352 | KV452902.1 | 1162828 | 7-scf00171 | 7 |
| AX-158046268 | 8 | 18.352 | KV452902.1 | 1165523 | 7-scf00171 | 7 |
| AX-158046275 | 8 | 18.352 | KV452902.1 | 1168848 | 7-scf00171 | 7 |
| AX-158046277 | 8 | 18.352 | KV452902.1 | 1170489 | 7-scf00171 | 7 |
| AX-158046291 | 8 | 18.352 | KV452902.1 | 1186147 | 7-scf00171 | 7 |
| AX-158046292 | 8 | 18.352 | KV452902.1 | 1186691 | 7-scf00171 | 7 |
| AX-158046293 | 8 | 18.352 | KV452902.1 | 1187833 | 7-scf00171 | 7 |
| AX-158046296 | 8 | 18.352 | KV452902.1 | 1188209 | 7-scf00171 | 7 |
| AX-158046300 | 8 | 18.352 | KV452902.1 | 1192606 | 7-scf00171 | 7 |
| AX-158046301 | 8 | 18.352 | KV452902.1 | 1193473 | 7-scf00171 | 7 |
| AX-158046302 | 8 | 18.352 | KV452902.1 | 1194305 | 7-scf00171 | 7 |
| AX-158046304 | 8 | 18.352 | KV452902.1 | 1195324 | 7-scf00171 | 7 |
| AX-158046307 | 8 | 18.352 | KV452902.1 | 1199246 | 7-scf00171 | 7 |
| AX-158046309 | 8 | 18.352 | KV452902.1 | 1201837 | 7-scf00171 | 7 |
| AX-158046310 | 8 | 18.352 | KV452902.1 | 1203730 | 7-scf00171 | 7 |

|              |   |        |            |         |            |   |
|--------------|---|--------|------------|---------|------------|---|
| AX-158046316 | 8 | 18.352 | KV452902.1 | 1213439 | 7-scf00171 | 7 |
| AX-158046317 | 8 | 18.352 | KV452902.1 | 1213928 | 7-scf00171 | 7 |
| AX-158046320 | 8 | 18.352 | KV452902.1 | 1220478 | 7-scf00171 | 7 |
| AX-158046321 | 8 | 18.352 | KV452902.1 | 1220858 | 7-scf00171 | 7 |
| AX-158046323 | 8 | 18.352 | KV452902.1 | 1223319 | 7-scf00171 | 7 |
| AX-158046325 | 8 | 18.352 | KV452902.1 | 1225024 | 7-scf00171 | 7 |
| AX-158046330 | 8 | 18.352 | KV452902.1 | 1229301 | 7-scf00171 | 7 |
| AX-158046337 | 8 | 18.352 | KV452902.1 | 1233462 | 7-scf00171 | 7 |
| AX-158046339 | 8 | 18.352 | KV452902.1 | 1235303 | 7-scf00171 | 7 |
| AX-158046346 | 8 | 18.352 | KV452902.1 | 1239440 | 7-scf00171 | 7 |
| AX-158046347 | 8 | 18.352 | KV452902.1 | 1239850 | 7-scf00171 | 7 |
| AX-158046351 | 8 | 18.352 | KV452902.1 | 1242323 | 7-scf00171 | 7 |
| AX-158046352 | 8 | 18.352 | KV452902.1 | 1242725 | 7-scf00171 | 7 |
| AX-158046354 | 8 | 18.352 | KV452902.1 | 1243133 | 7-scf00171 | 7 |
| AX-158046356 | 8 | 18.352 | KV452902.1 | 1243808 | 7-scf00171 | 7 |
| AX-158046362 | 8 | 18.352 | KV452902.1 | 1246720 | 7-scf00171 | 7 |
| AX-158046363 | 8 | 18.352 | KV452902.1 | 1247271 | 7-scf00171 | 7 |
| AX-158046367 | 8 | 18.352 | KV452902.1 | 1248603 | 7-scf00171 | 7 |
| AX-158046369 | 8 | 18.352 | KV452902.1 | 1252334 | 7-scf00171 | 7 |
| AX-158046372 | 8 | 18.352 | KV452902.1 | 1253433 | 7-scf00171 | 7 |
| AX-158046373 | 8 | 18.352 | KV452902.1 | 1254767 | 7-scf00171 | 7 |
| AX-157822385 | 8 | 18.352 | KV452902.1 | 1255431 | 7-scf00171 | 7 |
| AX-158046379 | 8 | 18.352 | KV452902.1 | 1258121 | 7-scf00171 | 7 |
| AX-158046380 | 8 | 18.352 | KV452902.1 | 1259931 | 7-scf00171 | 7 |
| AX-158046384 | 8 | 18.352 | KV452902.1 | 1264076 | 7-scf00171 | 7 |
| AX-158046386 | 8 | 18.352 | KV452902.1 | 1268160 | 7-scf00171 | 7 |
| AX-158046389 | 8 | 18.352 | KV452902.1 | 1269208 | 7-scf00171 | 7 |
| AX-158046391 | 8 | 18.352 | KV452902.1 | 1273848 | 7-scf00171 | 7 |
| AX-158046392 | 8 | 18.352 | KV452902.1 | 1274095 | 7-scf00171 | 7 |
| AX-158046393 | 8 | 18.352 | KV452902.1 | 1275983 | 7-scf00171 | 7 |
| AX-158046395 | 8 | 18.352 | KV452902.1 | 1276263 | 7-scf00171 | 7 |
| AX-158046396 | 8 | 18.352 | KV452902.1 | 1277286 | 7-scf00171 | 7 |
| AX-157856442 | 8 | 18.352 | KV452902.1 | 1283483 | 7-scf00171 | 7 |
| AX-157721026 | 8 | 18.352 | KV452902.1 | 1283867 | 7-scf00171 | 7 |
| AX-158046406 | 8 | 18.352 | KV452902.1 | 1286332 | 7-scf00171 | 7 |
| AX-158046407 | 8 | 18.352 | KV452902.1 | 1286702 | 7-scf00171 | 7 |
| AX-158046410 | 8 | 18.352 | KV452902.1 | 1288074 | 7-scf00171 | 7 |
| AX-158046413 | 8 | 18.352 | KV452902.1 | 1290766 | 7-scf00171 | 7 |
| AX-158046414 | 8 | 18.352 | KV452902.1 | 1291103 | 7-scf00171 | 7 |
| AX-158046417 | 8 | 18.352 | KV452902.1 | 1294126 | 7-scf00171 | 7 |
| AX-158046418 | 8 | 18.352 | KV452902.1 | 1294377 | 7-scf00171 | 7 |
| AX-158046419 | 8 | 18.352 | KV452902.1 | 1295924 | 7-scf00171 | 7 |
| AX-158046420 | 8 | 18.352 | KV452902.1 | 1296238 | 7-scf00171 | 7 |
| AX-158046421 | 8 | 18.352 | KV452902.1 | 1297831 | 7-scf00171 | 7 |
| AX-157822390 | 8 | 18.352 | KV452902.1 | 1308739 | 7-scf00171 | 7 |
| AX-157822392 | 8 | 18.352 | KV452902.1 | 1312050 | 7-scf00171 | 7 |
| AX-158046430 | 8 | 18.352 | KV452902.1 | 1315087 | 7-scf00171 | 7 |
| AX-158046431 | 8 | 18.352 | KV452902.1 | 1316337 | 7-scf00171 | 7 |
| AX-158046432 | 8 | 18.352 | KV452902.1 | 1319350 | 7-scf00171 | 7 |
| AX-158046436 | 8 | 18.352 | KV452902.1 | 1323215 | 7-scf00171 | 7 |
| AX-158046439 | 8 | 18.352 | KV452902.1 | 1326412 | 7-scf00171 | 7 |

|              |   |        |            |         |            |   |
|--------------|---|--------|------------|---------|------------|---|
| AX-158046440 | 8 | 18.352 | KV452902.1 | 1327574 | 7-scf00171 | 7 |
| AX-157773044 | 8 | 18.352 | KV452902.1 | 1329947 | 7-scf00171 | 7 |
| AX-158046441 | 8 | 18.352 | KV452902.1 | 1333296 | 7-scf00171 | 7 |
| AX-158046442 | 8 | 18.352 | KV452902.1 | 1333715 | 7-scf00171 | 7 |
| AX-157722389 | 8 | 18.352 | KV452902.1 | 1333775 | 7-scf00171 | 7 |
| AX-158046444 | 8 | 18.352 | KV452902.1 | 1334474 | 7-scf00171 | 7 |
| AX-158046448 | 8 | 18.352 | KV452902.1 | 1338612 | 7-scf00171 | 7 |
| AX-158046452 | 8 | 18.352 | KV452902.1 | 1339148 | 7-scf00171 | 7 |
| AX-158046453 | 8 | 18.352 | KV452902.1 | 1339717 | 7-scf00171 | 7 |
| AX-158046465 | 8 | 18.352 | KV452902.1 | 1347055 | 7-scf00171 | 7 |
| AX-158046467 | 8 | 18.352 | KV452902.1 | 1347767 | 7-scf00171 | 7 |
| AX-158046468 | 8 | 18.352 | KV452902.1 | 1349899 | 7-scf00171 | 7 |
| AX-158046469 | 8 | 18.352 | KV452902.1 | 1350726 | 7-scf00171 | 7 |
| AX-158046471 | 8 | 18.352 | KV452902.1 | 1351079 | 7-scf00171 | 7 |
| AX-158046475 | 8 | 18.352 | KV452902.1 | 1354139 | 7-scf00171 | 7 |
| AX-158046478 | 8 | 18.352 | KV452902.1 | 1356239 | 7-scf00171 | 7 |
| AX-158046479 | 8 | 18.352 | KV452902.1 | 1357374 | 7-scf00171 | 7 |
| AX-158046480 | 8 | 18.352 | KV452902.1 | 1358097 | 7-scf00171 | 7 |
| AX-158046481 | 8 | 18.352 | KV452902.1 | 1358957 | 7-scf00171 | 7 |
| AX-157822397 | 8 | 18.352 | KV452902.1 | 1361694 | 7-scf00171 | 7 |
| AX-158046484 | 8 | 18.352 | KV452902.1 | 1362691 | 7-scf00171 | 7 |
| AX-158046487 | 8 | 18.352 | KV452902.1 | 1366385 | 7-scf00171 | 7 |
| AX-158046488 | 8 | 18.352 | KV452902.1 | 1367052 | 7-scf00171 | 7 |
| AX-158408673 | 8 | 18.352 | KV452902.1 | 1369428 | 7-scf00171 | 7 |
| AX-157822403 | 8 | 18.352 | KV452902.1 | 1375430 | 7-scf00171 | 7 |
| AX-158046495 | 8 | 18.352 | KV452902.1 | 1376994 | 7-scf00171 | 7 |
| AX-158046496 | 8 | 18.352 | KV452902.1 | 1377857 | 7-scf00171 | 7 |
| AX-158046497 | 8 | 18.352 | KV452902.1 | 1378801 | 7-scf00171 | 7 |
| AX-158046500 | 8 | 18.352 | KV452902.1 | 1381160 | 7-scf00171 | 7 |
| AX-158046505 | 8 | 18.352 | KV452902.1 | 1387884 | 7-scf00171 | 7 |
| AX-158391763 | 8 | 18.352 | KV452902.1 | 1396857 | 7-scf00171 | 7 |
| AX-158046509 | 8 | 18.352 | KV452902.1 | 1397155 | 7-scf00171 | 7 |
| AX-158046510 | 8 | 18.352 | KV452902.1 | 1398888 | 7-scf00171 | 7 |
| AX-158046513 | 8 | 18.352 | KV452902.1 | 1399377 | 7-scf00171 | 7 |
| AX-158046514 | 8 | 18.352 | KV452902.1 | 1400746 | 7-scf00171 | 7 |
| AX-158046518 | 8 | 18.352 | KV452902.1 | 1403132 | 7-scf00171 | 7 |
| AX-158391764 | 8 | 18.352 | KV452904.1 | 1309    | 7-scf00172 | 7 |
| AX-158046523 | 8 | 18.352 | KV452904.1 | 2406    | 7-scf00172 | 7 |
| AX-157822404 | 8 | 18.352 | KV452904.1 | 2793    | 7-scf00172 | 7 |
| AX-158046525 | 8 | 18.352 | KV452904.1 | 3223    | 7-scf00172 | 7 |
| AX-158046530 | 8 | 18.352 | KV452904.1 | 7708    | 7-scf00172 | 7 |
| AX-158046532 | 8 | 18.352 | KV452904.1 | 9338    | 7-scf00172 | 7 |
| AX-158046534 | 8 | 18.352 | KV452904.1 | 10658   | 7-scf00172 | 7 |
| AX-158046537 | 8 | 18.352 | KV452904.1 | 17926   | 7-scf00172 | 7 |
| AX-158058548 | 8 | 18.352 | KV452903.1 | 7952    | 7-scf00173 | 7 |
| AX-158058549 | 8 | 18.352 | KV452903.1 | 8573    | 7-scf00173 | 7 |
| AX-158391882 | 8 | 18.352 | KV452903.1 | 10942   | 7-scf00173 | 7 |
| AX-158058553 | 8 | 18.352 | KV452903.1 | 13621   | 7-scf00173 | 7 |
| AX-158058557 | 8 | 18.352 | KV452903.1 | 14985   | 7-scf00173 | 7 |
| AX-158058561 | 8 | 18.352 | KV452903.1 | 18085   | 7-scf00173 | 7 |
| AX-158058562 | 8 | 18.352 | KV452903.1 | 19987   | 7-scf00173 | 7 |



|              |   |        |            |        |            |   |
|--------------|---|--------|------------|--------|------------|---|
| AX-158058564 | 8 | 18.352 | KV452903.1 | 20708  | 7-scf00173 | 7 |
| AX-158058565 | 8 | 18.352 | KV452903.1 | 21236  | 7-scf00173 | 7 |
| AX-158058566 | 8 | 18.352 | KV452903.1 | 21692  | 7-scf00173 | 7 |
| AX-158058568 | 8 | 18.352 | KV452903.1 | 22345  | 7-scf00173 | 7 |
| AX-158058569 | 8 | 18.352 | KV452903.1 | 22540  | 7-scf00173 | 7 |
| AX-158058572 | 8 | 18.352 | KV452903.1 | 24139  | 7-scf00173 | 7 |
| AX-158058573 | 8 | 18.352 | KV452903.1 | 24811  | 7-scf00173 | 7 |
| AX-158058575 | 8 | 18.352 | KV452903.1 | 28664  | 7-scf00173 | 7 |
| AX-158058577 | 8 | 18.352 | KV452903.1 | 28968  | 7-scf00173 | 7 |
| AX-158058580 | 8 | 18.352 | KV452903.1 | 29276  | 7-scf00173 | 7 |
| AX-158058581 | 8 | 18.352 | KV452903.1 | 29969  | 7-scf00173 | 7 |
| AX-158058582 | 8 | 18.352 | KV452903.1 | 30569  | 7-scf00173 | 7 |
| AX-158391883 | 8 | 18.352 | KV452903.1 | 30828  | 7-scf00173 | 7 |
| AX-158058586 | 8 | 18.352 | KV452903.1 | 32317  | 7-scf00173 | 7 |
| AX-158058587 | 8 | 18.352 | KV452903.1 | 32899  | 7-scf00173 | 7 |
| AX-158058588 | 8 | 18.352 | KV452903.1 | 33657  | 7-scf00173 | 7 |
| AX-158058590 | 8 | 18.352 | KV452903.1 | 35888  | 7-scf00173 | 7 |
| AX-158058593 | 8 | 18.352 | KV452903.1 | 38091  | 7-scf00173 | 7 |
| AX-157823259 | 8 | 18.352 | KV452903.1 | 38648  | 7-scf00173 | 7 |
| AX-158058595 | 8 | 18.352 | KV452903.1 | 44655  | 7-scf00173 | 7 |
| AX-158058596 | 8 | 18.352 | KV452903.1 | 46439  | 7-scf00173 | 7 |
| AX-158058600 | 8 | 18.352 | KV452903.1 | 51057  | 7-scf00173 | 7 |
| AX-157870678 | 8 | 18.352 | KV452903.1 | 52564  | 7-scf00173 | 7 |
| AX-158058602 | 8 | 18.352 | KV452903.1 | 53324  | 7-scf00173 | 7 |
| AX-158058604 | 8 | 18.352 | KV452903.1 | 55129  | 7-scf00173 | 7 |
| AX-158058606 | 8 | 18.352 | KV452903.1 | 55837  | 7-scf00173 | 7 |
| AX-158058609 | 8 | 18.352 | KV452903.1 | 57227  | 7-scf00173 | 7 |
| AX-158058610 | 8 | 18.352 | KV452903.1 | 59132  | 7-scf00173 | 7 |
| AX-158058612 | 8 | 18.352 | KV452903.1 | 60441  | 7-scf00173 | 7 |
| AX-158058613 | 8 | 18.352 | KV452903.1 | 60777  | 7-scf00173 | 7 |
| AX-157870679 | 8 | 18.352 | KV452903.1 | 62891  | 7-scf00173 | 7 |
| AX-158058616 | 8 | 18.352 | KV452903.1 | 66695  | 7-scf00173 | 7 |
| AX-158058618 | 8 | 18.352 | KV452903.1 | 67472  | 7-scf00173 | 7 |
| AX-158058619 | 8 | 18.352 | KV452903.1 | 67749  | 7-scf00173 | 7 |
| AX-158058620 | 8 | 18.352 | KV452903.1 | 68062  | 7-scf00173 | 7 |
| AX-157870680 | 8 | 18.352 | KV452903.1 | 71666  | 7-scf00173 | 7 |
| AX-158058622 | 8 | 18.352 | KV452903.1 | 72039  | 7-scf00173 | 7 |
| AX-158058623 | 8 | 18.352 | KV452903.1 | 74655  | 7-scf00173 | 7 |
| AX-158058625 | 8 | 18.352 | KV452903.1 | 77377  | 7-scf00173 | 7 |
| AX-158058626 | 8 | 18.352 | KV452903.1 | 78460  | 7-scf00173 | 7 |
| AX-158058627 | 8 | 18.352 | KV452903.1 | 80116  | 7-scf00173 | 7 |
| AX-158058628 | 8 | 18.352 | KV452903.1 | 81437  | 7-scf00173 | 7 |
| AX-158058638 | 8 | 18.352 | KV452903.1 | 93981  | 7-scf00173 | 7 |
| AX-158058643 | 8 | 18.352 | KV452903.1 | 98331  | 7-scf00173 | 7 |
| AX-157823266 | 8 | 18.352 | KV452903.1 | 106056 | 7-scf00173 | 7 |
| AX-157823267 | 8 | 18.352 | KV452903.1 | 106332 | 7-scf00173 | 7 |
| AX-158058649 | 8 | 18.352 | KV452903.1 | 106967 | 7-scf00173 | 7 |
| AX-158058659 | 8 | 18.352 | KV452903.1 | 116341 | 7-scf00173 | 7 |
| AX-158058660 | 8 | 18.352 | KV452903.1 | 117107 | 7-scf00173 | 7 |
| AX-158058663 | 8 | 18.352 | KV452903.1 | 118589 | 7-scf00173 | 7 |
| AX-158058664 | 8 | 18.352 | KV452903.1 | 119025 | 7-scf00173 | 7 |

|              |   |        |             |        |               |    |
|--------------|---|--------|-------------|--------|---------------|----|
| AX-158058671 | 8 | 18.352 | KV452903.1  | 123429 | 7-scf00173    | 7  |
| AX-158058673 | 8 | 18.352 | KV452903.1  | 124401 | 7-scf00173    | 7  |
| AX-158058674 | 8 | 18.352 | KV452903.1  | 125200 | 7-scf00173    | 7  |
| AX-158058678 | 8 | 18.352 | KV452903.1  | 128119 | 7-scf00173    | 7  |
| AX-158058679 | 8 | 18.352 | KV452903.1  | 128610 | 7-scf00173    | 7  |
| AX-158058681 | 8 | 18.352 | KV452903.1  | 130131 | 7-scf00173    | 7  |
| AX-158058685 | 8 | 18.352 | KV452903.1  | 133511 | 7-scf00173    | 7  |
| AX-158058686 | 8 | 18.352 | KV452903.1  | 134214 | 7-scf00173    | 7  |
| AX-157823269 | 8 | 18.352 | KV452903.1  | 136527 | 7-scf00173    | 7  |
| AX-158058697 | 8 | 18.352 | KV452903.1  | 142267 | 7-scf00173    | 7  |
| AX-158058702 | 8 | 18.352 | KV452903.1  | 146008 | 7-scf00173    | 7  |
| AX-158391886 | 8 | 18.352 | KV452903.1  | 148853 | 7-scf00173    | 7  |
| AX-158058713 | 8 | 18.352 | KV452903.1  | 153165 | 7-scf00173    | 7  |
| AX-158058714 | 8 | 18.352 | KV452903.1  | 154136 | 7-scf00173    | 7  |
| AX-158058715 | 8 | 18.352 | KV452903.1  | 155284 | 7-scf00173    | 7  |
| AX-158058723 | 8 | 18.352 | KV452903.1  | 161945 | 7-scf00173    | 7  |
| AX-158058730 | 8 | 18.352 | KV452903.1  | 165869 | 7-scf00173    | 7  |
| AX-157704321 | 8 | 18.352 | KV452939.1  | 1505   | 7-scf00645    | 7  |
| AX-157704322 | 8 | 18.352 | KV452939.1  | 1543   | 7-scf00645    | 7  |
| AX-157704326 | 8 | 18.352 | KV452939.1  | 3603   | 7-scf00645    | 7  |
| AX-157704325 | 8 | 18.352 | KV452939.1  | 28529  | 7-scf00645    | 7  |
| AX-157695395 | 8 | 18.352 | FI870575.1  | 41     | ORI212 lctalu | UN |
| AX-157688997 | 8 | 18.352 | 3ML01027772 | 433    | scf03380_1    | UN |
| AX-157707055 | 8 | 18.352 | 3ML01033411 | 357    | scf09060_1    | UN |
| AX-157823270 | 8 | 18.846 | KV452903.1  | 146760 | 7-scf00173    | 7  |
| AX-158058703 | 8 | 19.533 | KV452903.1  | 146821 | 7-scf00173    | 7  |
| AX-158058721 | 8 | 20.034 | KV452903.1  | 161450 | 7-scf00173    | 7  |
| AX-158058725 | 8 | 20.583 | KV452903.1  | 162465 | 7-scf00173    | 7  |
| AX-158058726 | 8 | 21.012 | KV452903.1  | 163238 | 7-scf00173    | 7  |
| AX-158058728 | 8 | 21.441 | KV452903.1  | 164570 | 7-scf00173    | 7  |
| AX-158046521 | 8 | 21.872 | KV452904.1  | 1183   | 7-scf00172    | 7  |
| AX-158046522 | 8 | 22.314 | KV452904.1  | 1602   | 7-scf00172    | 7  |
| AX-158046539 | 8 | 22.78  | KV452904.1  | 19841  | 7-scf00172    | 7  |
| AX-158391765 | 8 | 23.291 | KV452904.1  | 24464  | 7-scf00172    | 7  |
| AX-158046570 | 8 | 23.817 | KV452904.1  | 65680  | 7-scf00172    | 7  |
| AX-157700313 | 8 | 24.318 | KV452902.1  | 76687  | 7-scf00171    | 7  |
| AX-158045277 | 8 | 24.318 | KV452902.1  | 124902 | 7-scf00171    | 7  |
| AX-158045324 | 8 | 24.318 | KV452902.1  | 169602 | 7-scf00171    | 7  |
| AX-158045385 | 8 | 24.318 | KV452902.1  | 216809 | 7-scf00171    | 7  |
| AX-158045500 | 8 | 24.318 | KV452902.1  | 323128 | 7-scf00171    | 7  |
| AX-158045553 | 8 | 24.318 | KV452902.1  | 377230 | 7-scf00171    | 7  |
| AX-158045576 | 8 | 24.318 | KV452902.1  | 400402 | 7-scf00171    | 7  |
| AX-158045653 | 8 | 24.318 | KV452902.1  | 451982 | 7-scf00171    | 7  |
| AX-158045708 | 8 | 24.318 | KV452902.1  | 504996 | 7-scf00171    | 7  |
| AX-158045709 | 8 | 24.318 | KV452902.1  | 505486 | 7-scf00171    | 7  |
| AX-158045751 | 8 | 24.318 | KV452902.1  | 549462 | 7-scf00171    | 7  |
| AX-157751346 | 8 | 24.318 | KV452902.1  | 560983 | 7-scf00171    | 7  |
| AX-158045794 | 8 | 24.318 | KV452902.1  | 601184 | 7-scf00171    | 7  |
| AX-158045806 | 8 | 24.318 | KV452902.1  | 610031 | 7-scf00171    | 7  |
| AX-158045823 | 8 | 24.318 | KV452902.1  | 632864 | 7-scf00171    | 7  |
| AX-158045827 | 8 | 24.318 | KV452902.1  | 633960 | 7-scf00171    | 7  |

|              |   |        |            |         |            |   |
|--------------|---|--------|------------|---------|------------|---|
| AX-158045857 | 8 | 24.318 | KV452902.1 | 663719  | 7-scf00171 | 7 |
| AX-158406409 | 8 | 24.318 | KV452902.1 | 731867  | 7-scf00171 | 7 |
| AX-158045926 | 8 | 24.318 | KV452902.1 | 737613  | 7-scf00171 | 7 |
| AX-157724830 | 8 | 24.318 | KV452902.1 | 747960  | 7-scf00171 | 7 |
| AX-158045943 | 8 | 24.318 | KV452902.1 | 754012  | 7-scf00171 | 7 |
| AX-158045945 | 8 | 24.318 | KV452902.1 | 758726  | 7-scf00171 | 7 |
| AX-158045972 | 8 | 24.318 | KV452902.1 | 789392  | 7-scf00171 | 7 |
| AX-158046011 | 8 | 24.318 | KV452902.1 | 836686  | 7-scf00171 | 7 |
| AX-157744600 | 8 | 24.318 | KV452902.1 | 840494  | 7-scf00171 | 7 |
| AX-158046053 | 8 | 24.318 | KV452902.1 | 872067  | 7-scf00171 | 7 |
| AX-158046063 | 8 | 24.318 | KV452902.1 | 904399  | 7-scf00171 | 7 |
| AX-157694371 | 8 | 24.318 | KV452902.1 | 952597  | 7-scf00171 | 7 |
| AX-157822365 | 8 | 24.318 | KV452902.1 | 961858  | 7-scf00171 | 7 |
| AX-158046134 | 8 | 24.318 | KV452902.1 | 999910  | 7-scf00171 | 7 |
| AX-158046189 | 8 | 24.318 | KV452902.1 | 1065613 | 7-scf00171 | 7 |
| AX-157745699 | 8 | 24.318 | KV452902.1 | 1135958 | 7-scf00171 | 7 |
| AX-157822379 | 8 | 24.318 | KV452902.1 | 1151844 | 7-scf00171 | 7 |
| AX-158046257 | 8 | 24.318 | KV452902.1 | 1154071 | 7-scf00171 | 7 |
| AX-157870557 | 8 | 24.318 | KV452902.1 | 1155098 | 7-scf00171 | 7 |
| AX-158416278 | 8 | 24.318 | KV452902.1 | 1200393 | 7-scf00171 | 7 |
| AX-158046387 | 8 | 24.318 | KV452902.1 | 1268609 | 7-scf00171 | 7 |
| AX-158046411 | 8 | 24.318 | KV452902.1 | 1289662 | 7-scf00171 | 7 |
| AX-158416285 | 8 | 24.318 | KV452902.1 | 1294936 | 7-scf00171 | 7 |
| AX-158046424 | 8 | 24.318 | KV452902.1 | 1299183 | 7-scf00171 | 7 |
| AX-157822394 | 8 | 24.318 | KV452902.1 | 1313909 | 7-scf00171 | 7 |
| AX-158046483 | 8 | 24.318 | KV452902.1 | 1360908 | 7-scf00171 | 7 |
| AX-158046541 | 8 | 24.318 | KV452904.1 | 23440   | 7-scf00172 | 7 |
| AX-158046559 | 8 | 24.318 | KV452904.1 | 47927   | 7-scf00172 | 7 |
| AX-157856444 | 8 | 24.318 | KV452904.1 | 67424   | 7-scf00172 | 7 |
| AX-158046579 | 8 | 24.318 | KV452904.1 | 73180   | 7-scf00172 | 7 |
| AX-157822407 | 8 | 24.318 | KV452904.1 | 73464   | 7-scf00172 | 7 |
| AX-157822408 | 8 | 24.318 | KV452904.1 | 73841   | 7-scf00172 | 7 |
| AX-158046584 | 8 | 24.318 | KV452904.1 | 86042   | 7-scf00172 | 7 |
| AX-158046588 | 8 | 24.318 | KV452904.1 | 90208   | 7-scf00172 | 7 |
| AX-158046596 | 8 | 24.318 | KV452904.1 | 97872   | 7-scf00172 | 7 |
| AX-158046597 | 8 | 24.318 | KV452904.1 | 98161   | 7-scf00172 | 7 |
| AX-157885133 | 8 | 24.318 | KV452904.1 | 121505  | 7-scf00172 | 7 |
| AX-158046615 | 8 | 24.318 | KV452904.1 | 121902  | 7-scf00172 | 7 |
| AX-158046620 | 8 | 24.318 | KV452904.1 | 134969  | 7-scf00172 | 7 |
| AX-158046623 | 8 | 24.318 | KV452904.1 | 140516  | 7-scf00172 | 7 |
| AX-158046626 | 8 | 24.318 | KV452904.1 | 144127  | 7-scf00172 | 7 |
| AX-158046627 | 8 | 24.318 | KV452904.1 | 144798  | 7-scf00172 | 7 |
| AX-158046630 | 8 | 24.318 | KV452904.1 | 147537  | 7-scf00172 | 7 |
| AX-158046639 | 8 | 24.318 | KV452904.1 | 165466  | 7-scf00172 | 7 |
| AX-158046640 | 8 | 24.318 | KV452904.1 | 168146  | 7-scf00172 | 7 |
| AX-158046641 | 8 | 24.318 | KV452904.1 | 168897  | 7-scf00172 | 7 |
| AX-157822414 | 8 | 24.318 | KV452904.1 | 175617  | 7-scf00172 | 7 |
| AX-158046652 | 8 | 24.318 | KV452904.1 | 193173  | 7-scf00172 | 7 |
| AX-158046658 | 8 | 24.318 | KV452904.1 | 198285  | 7-scf00172 | 7 |
| AX-158046664 | 8 | 24.318 | KV452904.1 | 202115  | 7-scf00172 | 7 |
| AX-158046667 | 8 | 24.318 | KV452904.1 | 204762  | 7-scf00172 | 7 |

|              |   |        |            |        |            |   |
|--------------|---|--------|------------|--------|------------|---|
| AX-158046673 | 8 | 24.318 | KV452904.1 | 210316 | 7-scf00172 | 7 |
| AX-158046675 | 8 | 24.318 | KV452904.1 | 211579 | 7-scf00172 | 7 |
| AX-157722265 | 8 | 24.318 | KV452904.1 | 211784 | 7-scf00172 | 7 |
| AX-158046676 | 8 | 24.318 | KV452904.1 | 211918 | 7-scf00172 | 7 |
| AX-157870561 | 8 | 24.318 | KV452904.1 | 214686 | 7-scf00172 | 7 |
| AX-157822415 | 8 | 24.318 | KV452904.1 | 215199 | 7-scf00172 | 7 |
| AX-157773622 | 8 | 24.318 | KV452904.1 | 215334 | 7-scf00172 | 7 |
| AX-158046680 | 8 | 24.318 | KV452904.1 | 216384 | 7-scf00172 | 7 |
| AX-157822418 | 8 | 24.318 | KV452904.1 | 220190 | 7-scf00172 | 7 |
| AX-157722156 | 8 | 24.318 | KV452904.1 | 223726 | 7-scf00172 | 7 |
| AX-158046690 | 8 | 24.318 | KV452904.1 | 226511 | 7-scf00172 | 7 |
| AX-158046699 | 8 | 24.318 | KV452904.1 | 228009 | 7-scf00172 | 7 |
| AX-157751139 | 8 | 24.318 | KV452904.1 | 230615 | 7-scf00172 | 7 |
| AX-158046702 | 8 | 24.318 | KV452904.1 | 230971 | 7-scf00172 | 7 |
| AX-158046708 | 8 | 24.318 | KV452904.1 | 236392 | 7-scf00172 | 7 |
| AX-158046712 | 8 | 24.318 | KV452904.1 | 239640 | 7-scf00172 | 7 |
| AX-158046718 | 8 | 24.318 | KV452904.1 | 245008 | 7-scf00172 | 7 |
| AX-158379860 | 8 | 24.318 | KV452904.1 | 257976 | 7-scf00172 | 7 |
| AX-158046738 | 8 | 24.318 | KV452904.1 | 266983 | 7-scf00172 | 7 |
| AX-158046743 | 8 | 24.318 | KV452904.1 | 274469 | 7-scf00172 | 7 |
| AX-158046796 | 8 | 24.318 | KV452904.1 | 337352 | 7-scf00172 | 7 |
| AX-158046858 | 8 | 24.318 | KV452904.1 | 382008 | 7-scf00172 | 7 |
| AX-158058560 | 8 | 24.318 | KV452903.1 | 17693  | 7-scf00173 | 7 |
| AX-158058624 | 8 | 24.318 | KV452903.1 | 75674  | 7-scf00173 | 7 |
| AX-157823261 | 8 | 24.318 | KV452903.1 | 81638  | 7-scf00173 | 7 |
| AX-157714556 | 8 | 24.318 | KV452903.1 | 83744  | 7-scf00173 | 7 |
| AX-158058707 | 8 | 24.318 | KV452903.1 | 148972 | 7-scf00173 | 7 |
| AX-157704335 | 8 | 24.318 | KV452939.1 | 65392  | 7-scf00645 | 7 |
| AX-158046745 | 8 | 24.427 | KV452904.1 | 276132 | 7-scf00172 | 7 |
| AX-157708925 | 8 | 24.427 | KV452904.1 | 277673 | 7-scf00172 | 7 |
| AX-158046747 | 8 | 24.427 | KV452904.1 | 279963 | 7-scf00172 | 7 |
| AX-158046752 | 8 | 24.427 | KV452904.1 | 282128 | 7-scf00172 | 7 |
| AX-157722591 | 8 | 24.427 | KV452904.1 | 285366 | 7-scf00172 | 7 |
| AX-158046754 | 8 | 24.427 | KV452904.1 | 286175 | 7-scf00172 | 7 |
| AX-158391767 | 8 | 24.427 | KV452904.1 | 288207 | 7-scf00172 | 7 |
| AX-158046757 | 8 | 24.427 | KV452904.1 | 291034 | 7-scf00172 | 7 |
| AX-158046762 | 8 | 24.427 | KV452904.1 | 298736 | 7-scf00172 | 7 |
| AX-158046766 | 8 | 24.427 | KV452904.1 | 301047 | 7-scf00172 | 7 |
| AX-158046767 | 8 | 24.427 | KV452904.1 | 301629 | 7-scf00172 | 7 |
| AX-158046756 | 8 | 24.536 | KV452904.1 | 290236 | 7-scf00172 | 7 |
| AX-158046771 | 8 | 24.536 | KV452904.1 | 306514 | 7-scf00172 | 7 |
| AX-158046772 | 8 | 24.536 | KV452904.1 | 307100 | 7-scf00172 | 7 |
| AX-158391768 | 8 | 24.536 | KV452904.1 | 307200 | 7-scf00172 | 7 |
| AX-158046774 | 8 | 24.582 | KV452904.1 | 307586 | 7-scf00172 | 7 |
| AX-158046782 | 8 | 24.646 | KV452904.1 | 316128 | 7-scf00172 | 7 |
| AX-158046784 | 8 | 24.646 | KV452904.1 | 317403 | 7-scf00172 | 7 |
| AX-158391769 | 8 | 24.646 | KV452904.1 | 318638 | 7-scf00172 | 7 |
| AX-158046790 | 8 | 24.646 | KV452904.1 | 322719 | 7-scf00172 | 7 |
| AX-157741166 | 8 | 24.687 | KV452904.1 | 324487 | 7-scf00172 | 7 |
| AX-158046791 | 8 | 24.687 | KV452904.1 | 325786 | 7-scf00172 | 7 |
| AX-158045395 | 8 | 24.755 | KV452902.1 | 224682 | 7-scf00171 | 7 |

|              |   |        |            |         |            |   |
|--------------|---|--------|------------|---------|------------|---|
| AX-158045484 | 8 | 24.755 | KV452902.1 | 307713  | 7-scf00171 | 7 |
| AX-158045529 | 8 | 24.755 | KV452902.1 | 354738  | 7-scf00171 | 7 |
| AX-158045546 | 8 | 24.755 | KV452902.1 | 370639  | 7-scf00171 | 7 |
| AX-158045567 | 8 | 24.755 | KV452902.1 | 391862  | 7-scf00171 | 7 |
| AX-158045577 | 8 | 24.755 | KV452902.1 | 401670  | 7-scf00171 | 7 |
| AX-158045600 | 8 | 24.755 | KV452902.1 | 416461  | 7-scf00171 | 7 |
| AX-158045703 | 8 | 24.755 | KV452902.1 | 501632  | 7-scf00171 | 7 |
| AX-158045727 | 8 | 24.755 | KV452902.1 | 523063  | 7-scf00171 | 7 |
| AX-158408660 | 8 | 24.755 | KV452902.1 | 731684  | 7-scf00171 | 7 |
| AX-157720730 | 8 | 24.755 | KV452902.1 | 824657  | 7-scf00171 | 7 |
| AX-158046080 | 8 | 24.755 | KV452902.1 | 939175  | 7-scf00171 | 7 |
| AX-158379854 | 8 | 24.755 | KV452902.1 | 1024893 | 7-scf00171 | 7 |
| AX-158046210 | 8 | 24.755 | KV452902.1 | 1101369 | 7-scf00171 | 7 |
| AX-158046262 | 8 | 24.755 | KV452902.1 | 1159781 | 7-scf00171 | 7 |
| AX-158379858 | 8 | 24.755 | KV452902.1 | 1188879 | 7-scf00171 | 7 |
| AX-158046342 | 8 | 24.755 | KV452902.1 | 1236755 | 7-scf00171 | 7 |
| AX-158046561 | 8 | 24.755 | KV452904.1 | 54145   | 7-scf00172 | 7 |
| AX-158046587 | 8 | 24.755 | KV452904.1 | 87994   | 7-scf00172 | 7 |
| AX-158046628 | 8 | 24.755 | KV452904.1 | 145531  | 7-scf00172 | 7 |
| AX-157822419 | 8 | 24.755 | KV452904.1 | 220579  | 7-scf00172 | 7 |
| AX-158046787 | 8 | 24.755 | KV452904.1 | 321141  | 7-scf00172 | 7 |
| AX-158046788 | 8 | 24.755 | KV452904.1 | 321633  | 7-scf00172 | 7 |
| AX-158046789 | 8 | 24.755 | KV452904.1 | 322265  | 7-scf00172 | 7 |
| AX-158046801 | 8 | 24.755 | KV452904.1 | 339379  | 7-scf00172 | 7 |
| AX-158046807 | 8 | 24.755 | KV452904.1 | 344056  | 7-scf00172 | 7 |
| AX-158046809 | 8 | 24.755 | KV452904.1 | 346693  | 7-scf00172 | 7 |
| AX-158046810 | 8 | 24.755 | KV452904.1 | 348425  | 7-scf00172 | 7 |
| AX-158046812 | 8 | 24.755 | KV452904.1 | 349051  | 7-scf00172 | 7 |
| AX-158046813 | 8 | 24.755 | KV452904.1 | 349992  | 7-scf00172 | 7 |
| AX-157885135 | 8 | 24.755 | KV452904.1 | 352843  | 7-scf00172 | 7 |
| AX-158046818 | 8 | 24.755 | KV452904.1 | 353400  | 7-scf00172 | 7 |
| AX-158422369 | 8 | 24.755 | KV452904.1 | 354650  | 7-scf00172 | 7 |
| AX-158046824 | 8 | 24.755 | KV452904.1 | 356825  | 7-scf00172 | 7 |
| AX-158046826 | 8 | 24.755 | KV452904.1 | 358573  | 7-scf00172 | 7 |
| AX-158046828 | 8 | 24.755 | KV452904.1 | 359850  | 7-scf00172 | 7 |
| AX-158046831 | 8 | 24.755 | KV452904.1 | 360390  | 7-scf00172 | 7 |
| AX-158046835 | 8 | 24.755 | KV452904.1 | 364735  | 7-scf00172 | 7 |
| AX-158046836 | 8 | 24.755 | KV452904.1 | 364875  | 7-scf00172 | 7 |
| AX-158046838 | 8 | 24.755 | KV452904.1 | 365798  | 7-scf00172 | 7 |
| AX-158046840 | 8 | 24.755 | KV452904.1 | 369005  | 7-scf00172 | 7 |
| AX-158046842 | 8 | 24.755 | KV452904.1 | 369745  | 7-scf00172 | 7 |
| AX-158046843 | 8 | 24.755 | KV452904.1 | 370228  | 7-scf00172 | 7 |
| AX-158046846 | 8 | 24.755 | KV452904.1 | 372207  | 7-scf00172 | 7 |
| AX-158046848 | 8 | 24.755 | KV452904.1 | 373821  | 7-scf00172 | 7 |
| AX-157708327 | 8 | 24.755 | KV452904.1 | 376327  | 7-scf00172 | 7 |
| AX-158046850 | 8 | 24.755 | KV452904.1 | 376662  | 7-scf00172 | 7 |
| AX-158046854 | 8 | 24.755 | KV452904.1 | 379279  | 7-scf00172 | 7 |
| AX-158046857 | 8 | 24.755 | KV452904.1 | 381114  | 7-scf00172 | 7 |
| AX-158046859 | 8 | 24.755 | KV452904.1 | 383048  | 7-scf00172 | 7 |
| AX-158046870 | 8 | 24.755 | KV452904.1 | 392382  | 7-scf00172 | 7 |
| AX-158046872 | 8 | 24.755 | KV452904.1 | 394234  | 7-scf00172 | 7 |

|              |   |        |            |         |            |   |
|--------------|---|--------|------------|---------|------------|---|
| AX-158046873 | 8 | 24.755 | KV452904.1 | 398496  | 7-scf00172 | 7 |
| AX-157772170 | 8 | 24.755 | KV452904.1 | 400565  | 7-scf00172 | 7 |
| AX-158046880 | 8 | 24.755 | KV452904.1 | 405163  | 7-scf00172 | 7 |
| AX-158046881 | 8 | 24.755 | KV452904.1 | 406329  | 7-scf00172 | 7 |
| AX-157870564 | 8 | 24.755 | KV452904.1 | 412876  | 7-scf00172 | 7 |
| AX-158046909 | 8 | 24.755 | KV452904.1 | 434684  | 7-scf00172 | 7 |
| AX-158046915 | 8 | 24.755 | KV452904.1 | 437483  | 7-scf00172 | 7 |
| AX-158058599 | 8 | 24.755 | KV452903.1 | 50693   | 7-scf00173 | 7 |
| AX-158058658 | 8 | 24.755 | KV452903.1 | 114565  | 7-scf00173 | 7 |
| AX-157823271 | 8 | 24.755 | KV452903.1 | 155572  | 7-scf00173 | 7 |
| AX-158058718 | 8 | 24.755 | KV452903.1 | 160287  | 7-scf00173 | 7 |
| AX-158058719 | 8 | 24.755 | KV452903.1 | 161035  | 7-scf00173 | 7 |
| AX-158046877 | 8 | 24.817 | KV452904.1 | 403688  | 7-scf00172 | 7 |
| AX-157750378 | 8 | 24.973 | KV452904.1 | 415030  | 7-scf00172 | 7 |
| AX-158046893 | 8 | 24.973 | KV452904.1 | 416626  | 7-scf00172 | 7 |
| AX-157822423 | 8 | 24.973 | KV452904.1 | 417423  | 7-scf00172 | 7 |
| AX-158046896 | 8 | 24.973 | KV452904.1 | 420245  | 7-scf00172 | 7 |
| AX-158046898 | 8 | 24.973 | KV452904.1 | 422192  | 7-scf00172 | 7 |
| AX-158046899 | 8 | 24.973 | KV452904.1 | 423230  | 7-scf00172 | 7 |
| AX-158046900 | 8 | 24.973 | KV452904.1 | 425130  | 7-scf00172 | 7 |
| AX-157757818 | 8 | 24.973 | KV452904.1 | 428536  | 7-scf00172 | 7 |
| AX-158046904 | 8 | 24.973 | KV452904.1 | 430674  | 7-scf00172 | 7 |
| AX-158046906 | 8 | 24.973 | KV452904.1 | 434050  | 7-scf00172 | 7 |
| AX-158046910 | 8 | 24.973 | KV452904.1 | 434967  | 7-scf00172 | 7 |
| AX-158046913 | 8 | 24.973 | KV452904.1 | 435939  | 7-scf00172 | 7 |
| AX-158045215 | 8 | 25.083 | KV452902.1 | 10512   | 7-scf00171 | 7 |
| AX-158045610 | 8 | 25.083 | KV452902.1 | 423595  | 7-scf00171 | 7 |
| AX-158045616 | 8 | 25.083 | KV452902.1 | 426954  | 7-scf00171 | 7 |
| AX-158045647 | 8 | 25.083 | KV452902.1 | 449030  | 7-scf00171 | 7 |
| AX-158045747 | 8 | 25.083 | KV452902.1 | 540308  | 7-scf00171 | 7 |
| AX-158046019 | 8 | 25.083 | KV452902.1 | 846835  | 7-scf00171 | 7 |
| AX-158046161 | 8 | 25.083 | KV452902.1 | 1029746 | 7-scf00171 | 7 |
| AX-158046329 | 8 | 25.083 | KV452902.1 | 1228411 | 7-scf00171 | 7 |
| AX-158046443 | 8 | 25.083 | KV452902.1 | 1334254 | 7-scf00171 | 7 |
| AX-157822395 | 8 | 25.083 | KV452902.1 | 1347343 | 7-scf00171 | 7 |
| AX-157865436 | 8 | 25.083 | KV452904.1 | 93926   | 7-scf00172 | 7 |
| AX-158046704 | 8 | 25.083 | KV452904.1 | 231389  | 7-scf00172 | 7 |
| AX-158046792 | 8 | 25.083 | KV452904.1 | 326446  | 7-scf00172 | 7 |
| AX-158046803 | 8 | 25.083 | KV452904.1 | 339941  | 7-scf00172 | 7 |
| AX-158046883 | 8 | 25.083 | KV452904.1 | 406805  | 7-scf00172 | 7 |
| AX-158046902 | 8 | 25.083 | KV452904.1 | 425676  | 7-scf00172 | 7 |
| AX-158046903 | 8 | 25.083 | KV452904.1 | 430418  | 7-scf00172 | 7 |
| AX-158046916 | 8 | 25.083 | KV452904.1 | 438489  | 7-scf00172 | 7 |
| AX-158046917 | 8 | 25.083 | KV452904.1 | 438797  | 7-scf00172 | 7 |
| AX-157822426 | 8 | 25.083 | KV452904.1 | 440255  | 7-scf00172 | 7 |
| AX-158046920 | 8 | 25.083 | KV452904.1 | 441637  | 7-scf00172 | 7 |
| AX-158046921 | 8 | 25.083 | KV452904.1 | 442946  | 7-scf00172 | 7 |
| AX-157876585 | 8 | 25.083 | KV452904.1 | 445982  | 7-scf00172 | 7 |
| AX-157822427 | 8 | 25.083 | KV452904.1 | 451165  | 7-scf00172 | 7 |
| AX-157754023 | 8 | 25.083 | KV452904.1 | 452169  | 7-scf00172 | 7 |
| AX-158046936 | 8 | 25.083 | KV452904.1 | 467836  | 7-scf00172 | 7 |

|              |   |        |             |        |            |    |
|--------------|---|--------|-------------|--------|------------|----|
| AX-158046942 | 8 | 25.083 | KV452904.1  | 475169 | 7-scf00172 | 7  |
| AX-158046943 | 8 | 25.083 | KV452904.1  | 476372 | 7-scf00172 | 7  |
| AX-158046993 | 8 | 25.083 | KV452904.1  | 515150 | 7-scf00172 | 7  |
| AX-158047041 | 8 | 25.083 | KV452904.1  | 563554 | 7-scf00172 | 7  |
| AX-157688299 | 8 | 25.083 | 3ML01025879 | 452    | scf01488_1 | UN |
| AX-157681529 | 8 | 25.083 | 3ML01026466 | 889    | scf02062_1 | UN |
| AX-158046922 | 8 | 25.301 | KV452904.1  | 445164 | 7-scf00172 | 7  |
| AX-158046937 | 8 | 25.301 | KV452904.1  | 469183 | 7-scf00172 | 7  |
| AX-158046945 | 8 | 25.301 | KV452904.1  | 476892 | 7-scf00172 | 7  |
| AX-158408679 | 8 | 25.301 | KV452904.1  | 478503 | 7-scf00172 | 7  |
| AX-158046953 | 8 | 25.301 | KV452904.1  | 480983 | 7-scf00172 | 7  |
| AX-158046955 | 8 | 25.301 | KV452904.1  | 481261 | 7-scf00172 | 7  |
| AX-158046958 | 8 | 25.301 | KV452904.1  | 482200 | 7-scf00172 | 7  |
| AX-158046959 | 8 | 25.301 | KV452904.1  | 482598 | 7-scf00172 | 7  |
| AX-157719712 | 8 | 25.301 | KV452904.1  | 485500 | 7-scf00172 | 7  |
| AX-158046964 | 8 | 25.301 | KV452904.1  | 486453 | 7-scf00172 | 7  |
| AX-158046939 | 8 | 25.41  | KV452904.1  | 473336 | 7-scf00172 | 7  |
| AX-158046952 | 8 | 25.41  | KV452904.1  | 480085 | 7-scf00172 | 7  |
| AX-157885139 | 8 | 25.41  | KV452904.1  | 490666 | 7-scf00172 | 7  |
| AX-157748219 | 8 | 25.41  | KV452904.1  | 492144 | 7-scf00172 | 7  |
| AX-158046969 | 8 | 25.41  | KV452904.1  | 492393 | 7-scf00172 | 7  |
| AX-158046971 | 8 | 25.41  | KV452904.1  | 493589 | 7-scf00172 | 7  |
| AX-158046973 | 8 | 25.41  | KV452904.1  | 497464 | 7-scf00172 | 7  |
| AX-158046975 | 8 | 25.41  | KV452904.1  | 497831 | 7-scf00172 | 7  |
| AX-157751556 | 8 | 25.41  | KV452904.1  | 498374 | 7-scf00172 | 7  |
| AX-158046976 | 8 | 25.41  | KV452904.1  | 499568 | 7-scf00172 | 7  |
| AX-158046977 | 8 | 25.41  | KV452904.1  | 500569 | 7-scf00172 | 7  |
| AX-158046980 | 8 | 25.41  | KV452904.1  | 502396 | 7-scf00172 | 7  |
| AX-158046983 | 8 | 25.41  | KV452904.1  | 503394 | 7-scf00172 | 7  |
| AX-158046986 | 8 | 25.41  | KV452904.1  | 503679 | 7-scf00172 | 7  |
| AX-157773045 | 8 | 25.41  | KV452904.1  | 504852 | 7-scf00172 | 7  |
| AX-158046991 | 8 | 25.41  | KV452904.1  | 511389 | 7-scf00172 | 7  |
| AX-157856446 | 8 | 25.41  | KV452904.1  | 520132 | 7-scf00172 | 7  |
| AX-158046996 | 8 | 25.41  | KV452904.1  | 521089 | 7-scf00172 | 7  |
| AX-158047002 | 8 | 25.41  | KV452904.1  | 525877 | 7-scf00172 | 7  |
| AX-158047006 | 8 | 25.41  | KV452904.1  | 527727 | 7-scf00172 | 7  |
| AX-158047008 | 8 | 25.41  | KV452904.1  | 529284 | 7-scf00172 | 7  |
| AX-158047009 | 8 | 25.41  | KV452904.1  | 530574 | 7-scf00172 | 7  |
| AX-158047017 | 8 | 25.41  | KV452904.1  | 539587 | 7-scf00172 | 7  |
| AX-157822435 | 8 | 25.41  | KV452904.1  | 540495 | 7-scf00172 | 7  |
| AX-158047019 | 8 | 25.41  | KV452904.1  | 542120 | 7-scf00172 | 7  |
| AX-158047026 | 8 | 25.41  | KV452904.1  | 554965 | 7-scf00172 | 7  |
| AX-157721944 | 8 | 25.412 | KV452904.1  | 541760 | 7-scf00172 | 7  |
| AX-157698536 | 8 | 25.802 | KV452904.1  | 543933 | 7-scf00172 | 7  |
| AX-158408680 | 8 | 25.802 | KV452904.1  | 544419 | 7-scf00172 | 7  |
| AX-158047022 | 8 | 25.802 | KV452904.1  | 548544 | 7-scf00172 | 7  |
| AX-158047020 | 8 | 25.803 | KV452904.1  | 544017 | 7-scf00172 | 7  |
| AX-157750458 | 8 | 25.915 | KV452904.1  | 547944 | 7-scf00172 | 7  |
| AX-157822436 | 8 | 26.042 | KV452904.1  | 554176 | 7-scf00172 | 7  |
| AX-158047048 | 8 | 26.165 | KV452904.1  | 571469 | 7-scf00172 | 7  |
| AX-158047049 | 8 | 26.167 | KV452904.1  | 572042 | 7-scf00172 | 7  |

|              |   |        |             |        |            |    |
|--------------|---|--------|-------------|--------|------------|----|
| AX-158047050 | 8 | 26.167 | KV452904.1  | 572905 | 7-scf00172 | 7  |
| AX-158047053 | 8 | 26.167 | KV452904.1  | 576139 | 7-scf00172 | 7  |
| AX-158047056 | 8 | 26.167 | KV452904.1  | 579937 | 7-scf00172 | 7  |
| AX-157753867 | 8 | 26.176 | KV452904.1  | 573686 | 7-scf00172 | 7  |
| AX-158047055 | 8 | 26.186 | KV452904.1  | 579405 | 7-scf00172 | 7  |
| AX-158047059 | 8 | 26.186 | KV452904.1  | 581598 | 7-scf00172 | 7  |
| AX-158047063 | 8 | 26.394 | KV452904.1  | 583582 | 7-scf00172 | 7  |
| AX-158047064 | 8 | 26.394 | KV452904.1  | 585389 | 7-scf00172 | 7  |
| AX-158047065 | 8 | 26.501 | KV452904.1  | 586673 | 7-scf00172 | 7  |
| AX-158047068 | 8 | 26.613 | KV452904.1  | 592857 | 7-scf00172 | 7  |
| AX-158047069 | 8 | 26.613 | KV452904.1  | 593599 | 7-scf00172 | 7  |
| AX-157774679 | 8 | 26.613 | KV452904.1  | 594862 | 7-scf00172 | 7  |
| AX-158047070 | 8 | 26.613 | KV452904.1  | 595046 | 7-scf00172 | 7  |
| AX-158047072 | 8 | 26.613 | KV452904.1  | 597856 | 7-scf00172 | 7  |
| AX-158047077 | 8 | 26.613 | KV452904.1  | 600074 | 7-scf00172 | 7  |
| AX-157856448 | 8 | 26.613 | KV452904.1  | 600446 | 7-scf00172 | 7  |
| AX-158047078 | 8 | 26.613 | KV452904.1  | 604503 | 7-scf00172 | 7  |
| AX-157856449 | 8 | 26.613 | KV452904.1  | 605154 | 7-scf00172 | 7  |
| AX-158047080 | 8 | 26.613 | KV452904.1  | 605982 | 7-scf00172 | 7  |
| AX-158047081 | 8 | 26.613 | KV452904.1  | 606417 | 7-scf00172 | 7  |
| AX-157822440 | 8 | 26.613 | KV452904.1  | 607104 | 7-scf00172 | 7  |
| AX-157822441 | 8 | 26.613 | KV452904.1  | 607815 | 7-scf00172 | 7  |
| AX-157717930 | 8 | 26.613 | KV452904.1  | 608213 | 7-scf00172 | 7  |
| AX-158047084 | 8 | 26.613 | KV452904.1  | 610269 | 7-scf00172 | 7  |
| AX-158047086 | 8 | 26.613 | KV452904.1  | 618886 | 7-scf00172 | 7  |
| AX-157822439 | 8 | 26.831 | KV452904.1  | 604707 | 7-scf00172 | 7  |
| AX-158047091 | 8 | 26.831 | KV452904.1  | 622097 | 7-scf00172 | 7  |
| AX-158047095 | 8 | 26.831 | KV452904.1  | 623548 | 7-scf00172 | 7  |
| AX-158047099 | 8 | 26.831 | KV452904.1  | 627657 | 7-scf00172 | 7  |
| AX-157720174 | 8 | 26.831 | KV452904.1  | 630191 | 7-scf00172 | 7  |
| AX-158047103 | 8 | 26.831 | KV452904.1  | 631930 | 7-scf00172 | 7  |
| AX-158047147 | 8 | 26.831 | KV452904.1  | 679916 | 7-scf00172 | 7  |
| AX-158047104 | 8 | 26.941 | KV452904.1  | 632641 | 7-scf00172 | 7  |
| AX-158047106 | 8 | 26.941 | KV452904.1  | 633091 | 7-scf00172 | 7  |
| AX-158047107 | 8 | 26.941 | KV452904.1  | 635810 | 7-scf00172 | 7  |
| AX-158047108 | 8 | 27.05  | KV452904.1  | 636674 | 7-scf00172 | 7  |
| AX-157822442 | 8 | 27.159 | KV452904.1  | 611202 | 7-scf00172 | 7  |
| AX-158047110 | 8 | 27.159 | KV452904.1  | 637663 | 7-scf00172 | 7  |
| AX-158047111 | 8 | 27.159 | KV452904.1  | 638312 | 7-scf00172 | 7  |
| AX-157757520 | 8 | 27.194 | KV452904.1  | 643588 | 7-scf00172 | 7  |
| AX-158047117 | 8 | 27.269 | KV452904.1  | 649047 | 7-scf00172 | 7  |
| AX-158047118 | 8 | 27.269 | KV452904.1  | 649357 | 7-scf00172 | 7  |
| AX-157870570 | 8 | 27.269 | KV452904.1  | 651148 | 7-scf00172 | 7  |
| AX-157716290 | 8 | 27.269 | KV452904.1  | 685107 | 7-scf00172 | 7  |
| AX-157706925 | 8 | 27.269 | 3ML01033167 | 485    | scf08807_1 | UN |
| AX-158047124 | 8 | 27.378 | KV452904.1  | 655757 | 7-scf00172 | 7  |
| AX-158047125 | 8 | 27.438 | KV452904.1  | 657162 | 7-scf00172 | 7  |
| AX-158047023 | 8 | 27.487 | KV452904.1  | 550103 | 7-scf00172 | 7  |
| AX-158047126 | 8 | 27.487 | KV452904.1  | 657490 | 7-scf00172 | 7  |
| AX-158047128 | 8 | 27.487 | KV452904.1  | 658021 | 7-scf00172 | 7  |
| AX-157876588 | 8 | 27.487 | KV452904.1  | 660564 | 7-scf00172 | 7  |



|              |   |        |             |        |            |    |
|--------------|---|--------|-------------|--------|------------|----|
| AX-158047131 | 8 | 27.487 | KV452904.1  | 661755 | 7-scf00172 | 7  |
| AX-158047137 | 8 | 27.487 | KV452904.1  | 669750 | 7-scf00172 | 7  |
| AX-158047253 | 8 | 27.487 | KV452904.1  | 765072 | 7-scf00172 | 7  |
| AX-157706438 | 8 | 27.487 | 3ML01032242 | 450    | scf07857_1 | UN |
| AX-158047140 | 8 | 27.596 | KV452904.1  | 670992 | 7-scf00172 | 7  |
| AX-158047141 | 8 | 27.596 | KV452904.1  | 672473 | 7-scf00172 | 7  |
| AX-157758952 | 8 | 27.596 | KV452904.1  | 676931 | 7-scf00172 | 7  |
| AX-158047149 | 8 | 27.596 | KV452904.1  | 681108 | 7-scf00172 | 7  |
| AX-158047148 | 8 | 27.597 | KV452904.1  | 680409 | 7-scf00172 | 7  |
| AX-158047151 | 8 | 27.604 | KV452904.1  | 681565 | 7-scf00172 | 7  |
| AX-158047154 | 8 | 27.608 | KV452904.1  | 681959 | 7-scf00172 | 7  |
| AX-157822445 | 8 | 27.959 | KV452904.1  | 671549 | 7-scf00172 | 7  |
| AX-158047157 | 8 | 27.959 | KV452904.1  | 688723 | 7-scf00172 | 7  |
| AX-158047158 | 8 | 27.959 | KV452904.1  | 689302 | 7-scf00172 | 7  |
| AX-158047163 | 8 | 27.959 | KV452904.1  | 695397 | 7-scf00172 | 7  |
| AX-157876592 | 8 | 27.959 | KV452904.1  | 704973 | 7-scf00172 | 7  |
| AX-158047167 | 8 | 28.141 | KV452904.1  | 700301 | 7-scf00172 | 7  |
| AX-158047166 | 8 | 28.143 | KV452904.1  | 699803 | 7-scf00172 | 7  |
| AX-158047171 | 8 | 28.143 | KV452904.1  | 705194 | 7-scf00172 | 7  |
| AX-158047172 | 8 | 28.143 | KV452904.1  | 705498 | 7-scf00172 | 7  |
| AX-158047173 | 8 | 28.143 | KV452904.1  | 707494 | 7-scf00172 | 7  |
| AX-158047176 | 8 | 28.143 | KV452904.1  | 708305 | 7-scf00172 | 7  |
| AX-158047161 | 8 | 28.145 | KV452904.1  | 692655 | 7-scf00172 | 7  |
| AX-158047178 | 8 | 28.145 | KV452904.1  | 710081 | 7-scf00172 | 7  |
| AX-157756958 | 8 | 28.145 | KV452904.1  | 711122 | 7-scf00172 | 7  |
| AX-158047182 | 8 | 28.581 | KV452904.1  | 712735 | 7-scf00172 | 7  |
| AX-158047187 | 8 | 28.581 | KV452904.1  | 716172 | 7-scf00172 | 7  |
| AX-158047189 | 8 | 28.581 | KV452904.1  | 718733 | 7-scf00172 | 7  |
| AX-158047190 | 8 | 28.581 | KV452904.1  | 719601 | 7-scf00172 | 7  |
| AX-158047192 | 8 | 28.581 | KV452904.1  | 720599 | 7-scf00172 | 7  |
| AX-158047197 | 8 | 28.675 | KV452904.1  | 724157 | 7-scf00172 | 7  |
| AX-158047202 | 8 | 28.908 | KV452904.1  | 727378 | 7-scf00172 | 7  |
| AX-158047203 | 8 | 28.908 | KV452904.1  | 729738 | 7-scf00172 | 7  |
| AX-157822449 | 8 | 28.908 | KV452904.1  | 735506 | 7-scf00172 | 7  |
| AX-158047213 | 8 | 28.908 | KV452904.1  | 739040 | 7-scf00172 | 7  |
| AX-158047218 | 8 | 28.908 | KV452904.1  | 740223 | 7-scf00172 | 7  |
| AX-158047221 | 8 | 28.908 | KV452904.1  | 742861 | 7-scf00172 | 7  |
| AX-157740908 | 8 | 28.908 | KV452904.1  | 745886 | 7-scf00172 | 7  |
| AX-157746393 | 8 | 28.908 | KV452904.1  | 746647 | 7-scf00172 | 7  |
| AX-157876596 | 8 | 28.908 | KV452904.1  | 747870 | 7-scf00172 | 7  |
| AX-158047231 | 8 | 28.908 | KV452904.1  | 751203 | 7-scf00172 | 7  |
| AX-158047272 | 8 | 28.908 | KV452904.1  | 776992 | 7-scf00172 | 7  |
| AX-158047306 | 8 | 28.908 | KV452904.1  | 806254 | 7-scf00172 | 7  |
| AX-158047227 | 8 | 28.926 | KV452904.1  | 748131 | 7-scf00172 | 7  |
| AX-158047224 | 8 | 28.946 | KV452904.1  | 745778 | 7-scf00172 | 7  |
| AX-158047228 | 8 | 28.946 | KV452904.1  | 748986 | 7-scf00172 | 7  |
| AX-157717578 | 8 | 28.946 | KV452904.1  | 781606 | 7-scf00172 | 7  |
| AX-157822455 | 8 | 28.959 | KV452904.1  | 760336 | 7-scf00172 | 7  |
| AX-158047263 | 8 | 28.976 | KV452904.1  | 770629 | 7-scf00172 | 7  |
| AX-158047266 | 8 | 28.997 | KV452904.1  | 773778 | 7-scf00172 | 7  |
| AX-158047246 | 8 | 29.004 | KV452904.1  | 761765 | 7-scf00172 | 7  |

|              |   |        |            |        |            |   |
|--------------|---|--------|------------|--------|------------|---|
| AX-157822456 | 8 | 29.004 | KV452904.1 | 776829 | 7-scf00172 | 7 |
| AX-158047273 | 8 | 29.004 | KV452904.1 | 778084 | 7-scf00172 | 7 |
| AX-157771295 | 8 | 29.004 | KV452904.1 | 861424 | 7-scf00172 | 7 |
| AX-157745920 | 8 | 29.004 | KV452904.1 | 862538 | 7-scf00172 | 7 |
| AX-157822448 | 8 | 29.018 | KV452904.1 | 734041 | 7-scf00172 | 7 |
| AX-158047219 | 8 | 29.018 | KV452904.1 | 741957 | 7-scf00172 | 7 |
| AX-158047220 | 8 | 29.018 | KV452904.1 | 742634 | 7-scf00172 | 7 |
| AX-158047222 | 8 | 29.018 | KV452904.1 | 743901 | 7-scf00172 | 7 |
| AX-157885143 | 8 | 29.018 | KV452904.1 | 745100 | 7-scf00172 | 7 |
| AX-157755664 | 8 | 29.018 | KV452904.1 | 751666 | 7-scf00172 | 7 |
| AX-158047234 | 8 | 29.018 | KV452904.1 | 751762 | 7-scf00172 | 7 |
| AX-158047265 | 8 | 29.018 | KV452904.1 | 772818 | 7-scf00172 | 7 |
| AX-158047268 | 8 | 29.018 | KV452904.1 | 775167 | 7-scf00172 | 7 |
| AX-157885145 | 8 | 29.018 | KV452904.1 | 778329 | 7-scf00172 | 7 |
| AX-157746160 | 8 | 29.018 | KV452904.1 | 785310 | 7-scf00172 | 7 |
| AX-158047286 | 8 | 29.018 | KV452904.1 | 792140 | 7-scf00172 | 7 |
| AX-158047293 | 8 | 29.018 | KV452904.1 | 798338 | 7-scf00172 | 7 |
| AX-158047297 | 8 | 29.018 | KV452904.1 | 799702 | 7-scf00172 | 7 |
| AX-158047304 | 8 | 29.018 | KV452904.1 | 804919 | 7-scf00172 | 7 |
| AX-158047309 | 8 | 29.018 | KV452904.1 | 809160 | 7-scf00172 | 7 |
| AX-158047324 | 8 | 29.018 | KV452904.1 | 823982 | 7-scf00172 | 7 |
| AX-158047312 | 8 | 29.036 | KV452904.1 | 811229 | 7-scf00172 | 7 |
| AX-158047194 | 8 | 29.07  | KV452904.1 | 721965 | 7-scf00172 | 7 |
| AX-158047200 | 8 | 29.07  | KV452904.1 | 726478 | 7-scf00172 | 7 |
| AX-158047216 | 8 | 29.07  | KV452904.1 | 739542 | 7-scf00172 | 7 |
| AX-158047233 | 8 | 29.07  | KV452904.1 | 751455 | 7-scf00172 | 7 |
| AX-158047250 | 8 | 29.07  | KV452904.1 | 764082 | 7-scf00172 | 7 |
| AX-158047315 | 8 | 29.07  | KV452904.1 | 813391 | 7-scf00172 | 7 |
| AX-157695822 | 8 | 29.102 | KV452904.1 | 816598 | 7-scf00172 | 7 |
| AX-158047321 | 8 | 29.127 | KV452904.1 | 819011 | 7-scf00172 | 7 |
| AX-157822461 | 8 | 29.127 | KV452904.1 | 822456 | 7-scf00172 | 7 |
| AX-157822462 | 8 | 29.127 | KV452904.1 | 825190 | 7-scf00172 | 7 |
| AX-157822464 | 8 | 29.236 | KV452904.1 | 833521 | 7-scf00172 | 7 |
| AX-158047332 | 8 | 29.236 | KV452904.1 | 835092 | 7-scf00172 | 7 |
| AX-158047346 | 8 | 29.236 | KV452904.1 | 855188 | 7-scf00172 | 7 |
| AX-157738921 | 8 | 29.272 | KV452904.1 | 790339 | 7-scf00172 | 7 |
| AX-158047348 | 8 | 29.272 | KV452904.1 | 856376 | 7-scf00172 | 7 |
| AX-157717248 | 8 | 29.272 | KV452904.1 | 870049 | 7-scf00172 | 7 |
| AX-157752264 | 8 | 29.272 | KV452904.1 | 873580 | 7-scf00172 | 7 |
| AX-158047369 | 8 | 29.311 | KV452904.1 | 884442 | 7-scf00172 | 7 |
| AX-158047372 | 8 | 29.345 | KV452904.1 | 885491 | 7-scf00172 | 7 |
| AX-158047373 | 8 | 29.345 | KV452904.1 | 886974 | 7-scf00172 | 7 |
| AX-158047374 | 8 | 29.345 | KV452904.1 | 889121 | 7-scf00172 | 7 |
| AX-158047382 | 8 | 29.345 | KV452904.1 | 905145 | 7-scf00172 | 7 |
| AX-158047209 | 8 | 29.374 | KV452904.1 | 736429 | 7-scf00172 | 7 |
| AX-158047359 | 8 | 29.374 | KV452904.1 | 867977 | 7-scf00172 | 7 |
| AX-158047381 | 8 | 29.374 | KV452904.1 | 903570 | 7-scf00172 | 7 |
| AX-157822472 | 8 | 29.374 | KV452904.1 | 908209 | 7-scf00172 | 7 |
| AX-157822473 | 8 | 29.454 | KV452904.1 | 908623 | 7-scf00172 | 7 |
| AX-158047387 | 8 | 29.454 | KV452904.1 | 910472 | 7-scf00172 | 7 |
| AX-158047389 | 8 | 29.454 | KV452904.1 | 911147 | 7-scf00172 | 7 |

|              |   |        |            |         |            |   |
|--------------|---|--------|------------|---------|------------|---|
| AX-157822474 | 8 | 29.454 | KV452904.1 | 911803  | 7-scf00172 | 7 |
| AX-158047390 | 8 | 29.454 | KV452904.1 | 912991  | 7-scf00172 | 7 |
| AX-157822475 | 8 | 29.454 | KV452904.1 | 913121  | 7-scf00172 | 7 |
| AX-158047393 | 8 | 29.454 | KV452904.1 | 915079  | 7-scf00172 | 7 |
| AX-158047398 | 8 | 29.454 | KV452904.1 | 916622  | 7-scf00172 | 7 |
| AX-158047401 | 8 | 29.454 | KV452904.1 | 920796  | 7-scf00172 | 7 |
| AX-158047402 | 8 | 29.454 | KV452904.1 | 921282  | 7-scf00172 | 7 |
| AX-158047406 | 8 | 29.454 | KV452904.1 | 927102  | 7-scf00172 | 7 |
| AX-157822484 | 8 | 29.454 | KV452904.1 | 929928  | 7-scf00172 | 7 |
| AX-157822477 | 8 | 29.455 | KV452904.1 | 913723  | 7-scf00172 | 7 |
| AX-157758805 | 8 | 29.455 | KV452904.1 | 918514  | 7-scf00172 | 7 |
| AX-158047399 | 8 | 29.455 | KV452904.1 | 918747  | 7-scf00172 | 7 |
| AX-158047404 | 8 | 29.455 | KV452904.1 | 924936  | 7-scf00172 | 7 |
| AX-157727515 | 8 | 29.455 | KV452904.1 | 928554  | 7-scf00172 | 7 |
| AX-157822483 | 8 | 29.455 | KV452904.1 | 928648  | 7-scf00172 | 7 |
| AX-157750285 | 8 | 29.601 | KV452904.1 | 770260  | 7-scf00172 | 7 |
| AX-158047294 | 8 | 29.601 | KV452904.1 | 798691  | 7-scf00172 | 7 |
| AX-158047311 | 8 | 29.601 | KV452904.1 | 809533  | 7-scf00172 | 7 |
| AX-158047335 | 8 | 29.601 | KV452904.1 | 838758  | 7-scf00172 | 7 |
| AX-158047384 | 8 | 29.601 | KV452904.1 | 905522  | 7-scf00172 | 7 |
| AX-158047394 | 8 | 29.601 | KV452904.1 | 915500  | 7-scf00172 | 7 |
| AX-157822486 | 8 | 29.601 | KV452904.1 | 932942  | 7-scf00172 | 7 |
| AX-158047409 | 8 | 29.601 | KV452904.1 | 933980  | 7-scf00172 | 7 |
| AX-158047410 | 8 | 29.725 | KV452904.1 | 936751  | 7-scf00172 | 7 |
| AX-158047412 | 8 | 29.887 | KV452904.1 | 940777  | 7-scf00172 | 7 |
| AX-158047413 | 8 | 29.887 | KV452904.1 | 941274  | 7-scf00172 | 7 |
| AX-158047442 | 8 | 29.887 | KV452904.1 | 971048  | 7-scf00172 | 7 |
| AX-158047469 | 8 | 29.887 | KV452904.1 | 991226  | 7-scf00172 | 7 |
| AX-158047417 | 8 | 29.888 | KV452904.1 | 944201  | 7-scf00172 | 7 |
| AX-158047426 | 8 | 29.888 | KV452904.1 | 950689  | 7-scf00172 | 7 |
| AX-158047498 | 8 | 29.888 | KV452904.1 | 1016713 | 7-scf00172 | 7 |
| AX-158047536 | 8 | 29.888 | KV452904.1 | 1054740 | 7-scf00172 | 7 |
| AX-158047427 | 8 | 29.89  | KV452904.1 | 952114  | 7-scf00172 | 7 |
| AX-158047429 | 8 | 29.891 | KV452904.1 | 955536  | 7-scf00172 | 7 |
| AX-158047431 | 8 | 29.892 | KV452904.1 | 957445  | 7-scf00172 | 7 |
| AX-158047433 | 8 | 29.892 | KV452904.1 | 960729  | 7-scf00172 | 7 |
| AX-158047434 | 8 | 29.892 | KV452904.1 | 961109  | 7-scf00172 | 7 |
| AX-157822465 | 8 | 30.001 | KV452904.1 | 842259  | 7-scf00172 | 7 |
| AX-158047441 | 8 | 30.001 | KV452904.1 | 969292  | 7-scf00172 | 7 |
| AX-158047444 | 8 | 30.001 | KV452904.1 | 971414  | 7-scf00172 | 7 |
| AX-158047445 | 8 | 30.001 | KV452904.1 | 971780  | 7-scf00172 | 7 |
| AX-158047446 | 8 | 30.001 | KV452904.1 | 972960  | 7-scf00172 | 7 |
| AX-157758360 | 8 | 30.001 | KV452904.1 | 974501  | 7-scf00172 | 7 |
| AX-158047450 | 8 | 30.001 | KV452904.1 | 976011  | 7-scf00172 | 7 |
| AX-158047452 | 8 | 30.001 | KV452904.1 | 976811  | 7-scf00172 | 7 |
| AX-157757215 | 8 | 30.001 | KV452904.1 | 996435  | 7-scf00172 | 7 |
| AX-158047456 | 8 | 30.056 | KV452904.1 | 979374  | 7-scf00172 | 7 |
| AX-158047326 | 8 | 30.11  | KV452904.1 | 825710  | 7-scf00172 | 7 |
| AX-157822468 | 8 | 30.11  | KV452904.1 | 866963  | 7-scf00172 | 7 |
| AX-158047362 | 8 | 30.11  | KV452904.1 | 878078  | 7-scf00172 | 7 |
| AX-158047411 | 8 | 30.11  | KV452904.1 | 937574  | 7-scf00172 | 7 |

|              |   |        |            |         |            |   |
|--------------|---|--------|------------|---------|------------|---|
| AX-158047428 | 8 | 30.11  | KV452904.1 | 952525  | 7-scf00172 | 7 |
| AX-158047455 | 8 | 30.11  | KV452904.1 | 978249  | 7-scf00172 | 7 |
| AX-158047459 | 8 | 30.11  | KV452904.1 | 983606  | 7-scf00172 | 7 |
| AX-158047461 | 8 | 30.11  | KV452904.1 | 984573  | 7-scf00172 | 7 |
| AX-158047462 | 8 | 30.11  | KV452904.1 | 985704  | 7-scf00172 | 7 |
| AX-158047464 | 8 | 30.11  | KV452904.1 | 987424  | 7-scf00172 | 7 |
| AX-158047466 | 8 | 30.11  | KV452904.1 | 989211  | 7-scf00172 | 7 |
| AX-157822491 | 8 | 30.11  | KV452904.1 | 989786  | 7-scf00172 | 7 |
| AX-158047468 | 8 | 30.11  | KV452904.1 | 990217  | 7-scf00172 | 7 |
| AX-158047471 | 8 | 30.11  | KV452904.1 | 991939  | 7-scf00172 | 7 |
| AX-158047473 | 8 | 30.11  | KV452904.1 | 992547  | 7-scf00172 | 7 |
| AX-158047475 | 8 | 30.11  | KV452904.1 | 993755  | 7-scf00172 | 7 |
| AX-157822492 | 8 | 30.11  | KV452904.1 | 996596  | 7-scf00172 | 7 |
| AX-158047478 | 8 | 30.11  | KV452904.1 | 997528  | 7-scf00172 | 7 |
| AX-158047480 | 8 | 30.11  | KV452904.1 | 998564  | 7-scf00172 | 7 |
| AX-158047484 | 8 | 30.11  | KV452904.1 | 1000307 | 7-scf00172 | 7 |
| AX-158047496 | 8 | 30.11  | KV452904.1 | 1016639 | 7-scf00172 | 7 |
| AX-158047499 | 8 | 30.11  | KV452904.1 | 1017795 | 7-scf00172 | 7 |
| AX-158047482 | 8 | 30.117 | KV452904.1 | 999897  | 7-scf00172 | 7 |
| AX-157774246 | 8 | 30.651 | KV452904.1 | 1018352 | 7-scf00172 | 7 |
| AX-157822493 | 8 | 30.656 | KV452904.1 | 1014018 | 7-scf00172 | 7 |
| AX-158047500 | 8 | 30.656 | KV452904.1 | 1020706 | 7-scf00172 | 7 |
| AX-158047503 | 8 | 30.656 | KV452904.1 | 1023994 | 7-scf00172 | 7 |
| AX-158047505 | 8 | 30.657 | KV452904.1 | 1026271 | 7-scf00172 | 7 |
| AX-158047506 | 8 | 30.676 | KV452904.1 | 1027516 | 7-scf00172 | 7 |
| AX-158047507 | 8 | 31.112 | KV452904.1 | 1028474 | 7-scf00172 | 7 |
| AX-158047516 | 8 | 31.274 | KV452904.1 | 1038141 | 7-scf00172 | 7 |
| AX-158047523 | 8 | 31.274 | KV452904.1 | 1042549 | 7-scf00172 | 7 |
| AX-157757378 | 8 | 31.64  | KV452904.1 | 1043617 | 7-scf00172 | 7 |
| AX-158047525 | 8 | 31.64  | KV452904.1 | 1044478 | 7-scf00172 | 7 |
| AX-158047528 | 8 | 31.641 | KV452904.1 | 1045828 | 7-scf00172 | 7 |
| AX-157822495 | 8 | 31.658 | KV452904.1 | 1052212 | 7-scf00172 | 7 |
| AX-158408701 | 8 | 32.244 | KV452904.1 | 1054367 | 7-scf00172 | 7 |
| AX-158047552 | 8 | 32.244 | KV452904.1 | 1073765 | 7-scf00172 | 7 |
| AX-158047535 | 8 | 32.297 | KV452904.1 | 1052045 | 7-scf00172 | 7 |
| AX-158047540 | 8 | 32.297 | KV452904.1 | 1060849 | 7-scf00172 | 7 |
| AX-157698778 | 8 | 32.297 | KV452904.1 | 1061899 | 7-scf00172 | 7 |
| AX-158047541 | 8 | 32.297 | KV452904.1 | 1062424 | 7-scf00172 | 7 |
| AX-157822496 | 8 | 32.297 | KV452904.1 | 1064210 | 7-scf00172 | 7 |
| AX-158047544 | 8 | 32.297 | KV452904.1 | 1067019 | 7-scf00172 | 7 |
| AX-158047548 | 8 | 32.297 | KV452904.1 | 1070739 | 7-scf00172 | 7 |
| AX-158047549 | 8 | 32.297 | KV452904.1 | 1070982 | 7-scf00172 | 7 |
| AX-157747332 | 8 | 32.297 | KV452904.1 | 1072048 | 7-scf00172 | 7 |
| AX-158047550 | 8 | 32.297 | KV452904.1 | 1072189 | 7-scf00172 | 7 |
| AX-158047554 | 8 | 32.297 | KV452904.1 | 1074926 | 7-scf00172 | 7 |
| AX-158047555 | 8 | 32.297 | KV452904.1 | 1075227 | 7-scf00172 | 7 |
| AX-158406433 | 8 | 32.297 | KV452904.1 | 1079259 | 7-scf00172 | 7 |
| AX-158047556 | 8 | 32.297 | KV452904.1 | 1081878 | 7-scf00172 | 7 |
| AX-158408703 | 8 | 32.297 | KV452904.1 | 1082056 | 7-scf00172 | 7 |
| AX-158047557 | 8 | 32.297 | KV452904.1 | 1082233 | 7-scf00172 | 7 |
| AX-158047558 | 8 | 32.297 | KV452904.1 | 1082894 | 7-scf00172 | 7 |

|              |   |        |            |         |            |   |
|--------------|---|--------|------------|---------|------------|---|
| AX-158047579 | 8 | 32.297 | KV452904.1 | 1118323 | 7-scf00172 | 7 |
| AX-158047560 | 8 | 32.406 | KV452904.1 | 1084680 | 7-scf00172 | 7 |
| AX-157719457 | 8 | 32.406 | KV452904.1 | 1086583 | 7-scf00172 | 7 |
| AX-158047561 | 8 | 32.406 | KV452904.1 | 1086938 | 7-scf00172 | 7 |
| AX-157822501 | 8 | 32.406 | KV452904.1 | 1090126 | 7-scf00172 | 7 |
| AX-158047563 | 8 | 32.406 | KV452904.1 | 1090439 | 7-scf00172 | 7 |
| AX-157822502 | 8 | 32.406 | KV452904.1 | 1092396 | 7-scf00172 | 7 |
| AX-157822503 | 8 | 32.733 | KV452904.1 | 1108871 | 7-scf00172 | 7 |
| AX-158047571 | 8 | 32.734 | KV452904.1 | 1112463 | 7-scf00172 | 7 |
| AX-158047573 | 8 | 32.734 | KV452904.1 | 1115070 | 7-scf00172 | 7 |
| AX-157724138 | 8 | 32.734 | KV452904.1 | 1115283 | 7-scf00172 | 7 |
| AX-158047574 | 8 | 33.096 | KV452904.1 | 1115492 | 7-scf00172 | 7 |
| AX-157751756 | 8 | 33.274 | KV452904.1 | 1116352 | 7-scf00172 | 7 |
| AX-158047575 | 8 | 33.278 | KV452904.1 | 1116742 | 7-scf00172 | 7 |
| AX-158047586 | 8 | 33.278 | KV452904.1 | 1125865 | 7-scf00172 | 7 |
| AX-158047578 | 8 | 33.281 | KV452904.1 | 1117876 | 7-scf00172 | 7 |
| AX-157822504 | 8 | 33.285 | KV452904.1 | 1119631 | 7-scf00172 | 7 |
| AX-158047582 | 8 | 33.451 | KV452904.1 | 1121973 | 7-scf00172 | 7 |
| AX-158047585 | 8 | 33.827 | KV452904.1 | 1123866 | 7-scf00172 | 7 |
| AX-158047590 | 8 | 33.827 | KV452904.1 | 1129924 | 7-scf00172 | 7 |
| AX-158047592 | 8 | 33.829 | KV452904.1 | 1132010 | 7-scf00172 | 7 |
| AX-158047597 | 8 | 33.931 | KV452904.1 | 1134895 | 7-scf00172 | 7 |
| AX-157822500 | 8 | 34.046 | KV452904.1 | 1089649 | 7-scf00172 | 7 |
| AX-157786075 | 8 | 34.046 | KV452904.1 | 1092791 | 7-scf00172 | 7 |
| AX-158047594 | 8 | 34.046 | KV452904.1 | 1132792 | 7-scf00172 | 7 |
| AX-158047598 | 8 | 34.046 | KV452904.1 | 1136413 | 7-scf00172 | 7 |
| AX-158047600 | 8 | 34.046 | KV452904.1 | 1141700 | 7-scf00172 | 7 |
| AX-158047601 | 8 | 34.046 | KV452904.1 | 1142113 | 7-scf00172 | 7 |
| AX-158047608 | 8 | 34.046 | KV452904.1 | 1148662 | 7-scf00172 | 7 |
| AX-158047609 | 8 | 34.046 | KV452904.1 | 1149775 | 7-scf00172 | 7 |
| AX-158047619 | 8 | 34.641 | KV452904.1 | 1156651 | 7-scf00172 | 7 |
| AX-158047622 | 8 | 34.641 | KV452904.1 | 1158009 | 7-scf00172 | 7 |
| AX-157822508 | 8 | 34.856 | KV452904.1 | 1163085 | 7-scf00172 | 7 |
| AX-158047640 | 8 | 34.856 | KV452904.1 | 1181226 | 7-scf00172 | 7 |
| AX-158047645 | 8 | 34.856 | KV452904.1 | 1190704 | 7-scf00172 | 7 |
| AX-158047656 | 8 | 34.856 | KV452904.1 | 1203623 | 7-scf00172 | 7 |
| AX-158047690 | 8 | 34.856 | KV452904.1 | 1236783 | 7-scf00172 | 7 |
| AX-158047631 | 8 | 34.9   | KV452904.1 | 1169445 | 7-scf00172 | 7 |
| AX-158047633 | 8 | 34.96  | KV452904.1 | 1171627 | 7-scf00172 | 7 |
| AX-158047634 | 8 | 34.96  | KV452904.1 | 1172293 | 7-scf00172 | 7 |
| AX-158047637 | 8 | 35.249 | KV452904.1 | 1175080 | 7-scf00172 | 7 |
| AX-157720776 | 8 | 35.249 | KV452904.1 | 1187505 | 7-scf00172 | 7 |
| AX-158047646 | 8 | 35.249 | KV452904.1 | 1191124 | 7-scf00172 | 7 |
| AX-157762869 | 8 | 35.249 | KV452904.1 | 1192506 | 7-scf00172 | 7 |
| AX-158047650 | 8 | 35.358 | KV452904.1 | 1196951 | 7-scf00172 | 7 |
| AX-157745790 | 8 | 35.358 | KV452904.1 | 1199609 | 7-scf00172 | 7 |
| AX-158047655 | 8 | 35.358 | KV452904.1 | 1201855 | 7-scf00172 | 7 |
| AX-158047657 | 8 | 35.358 | KV452904.1 | 1204790 | 7-scf00172 | 7 |
| AX-157771327 | 8 | 35.358 | KV452904.1 | 1205453 | 7-scf00172 | 7 |
| AX-158047659 | 8 | 35.358 | KV452904.1 | 1207759 | 7-scf00172 | 7 |
| AX-158047643 | 8 | 35.468 | KV452904.1 | 1189604 | 7-scf00172 | 7 |

|              |   |        |             |         |            |    |
|--------------|---|--------|-------------|---------|------------|----|
| AX-157713816 | 8 | 35.468 | KV452904.1  | 1194507 | 7-scf00172 | 7  |
| AX-158047653 | 8 | 35.468 | KV452904.1  | 1200341 | 7-scf00172 | 7  |
| AX-157746565 | 8 | 35.468 | KV452904.1  | 1203719 | 7-scf00172 | 7  |
| AX-158047658 | 8 | 35.468 | KV452904.1  | 1205224 | 7-scf00172 | 7  |
| AX-158047663 | 8 | 35.468 | KV452904.1  | 1210957 | 7-scf00172 | 7  |
| AX-158047664 | 8 | 35.468 | KV452904.1  | 1211179 | 7-scf00172 | 7  |
| AX-158047665 | 8 | 35.468 | KV452904.1  | 1212726 | 7-scf00172 | 7  |
| AX-158047667 | 8 | 35.468 | KV452904.1  | 1215005 | 7-scf00172 | 7  |
| AX-158047669 | 8 | 35.468 | KV452904.1  | 1217097 | 7-scf00172 | 7  |
| AX-158047670 | 8 | 35.468 | KV452904.1  | 1217876 | 7-scf00172 | 7  |
| AX-158047672 | 8 | 35.468 | KV452904.1  | 1220077 | 7-scf00172 | 7  |
| AX-157822512 | 8 | 35.468 | KV452904.1  | 1222901 | 7-scf00172 | 7  |
| AX-158047675 | 8 | 35.468 | KV452904.1  | 1223358 | 7-scf00172 | 7  |
| AX-158047677 | 8 | 35.468 | KV452904.1  | 1225068 | 7-scf00172 | 7  |
| AX-158047678 | 8 | 35.468 | KV452904.1  | 1225687 | 7-scf00172 | 7  |
| AX-158047679 | 8 | 35.468 | KV452904.1  | 1226018 | 7-scf00172 | 7  |
| AX-157709962 | 8 | 35.468 | KV452904.1  | 1226595 | 7-scf00172 | 7  |
| AX-158047685 | 8 | 35.468 | KV452904.1  | 1231865 | 7-scf00172 | 7  |
| AX-158047687 | 8 | 35.468 | KV452904.1  | 1233618 | 7-scf00172 | 7  |
| AX-157743867 | 8 | 35.468 | KV452904.1  | 1403306 | 7-scf00172 | 7  |
| AX-157822528 | 8 | 35.468 | KV452904.1  | 1447779 | 7-scf00172 | 7  |
| AX-158047692 | 8 | 35.633 | KV452904.1  | 1242963 | 7-scf00172 | 7  |
| AX-158408710 | 8 | 35.796 | KV452904.1  | 1252692 | 7-scf00172 | 7  |
| AX-158047698 | 8 | 35.796 | KV452904.1  | 1252860 | 7-scf00172 | 7  |
| AX-158047703 | 8 | 35.796 | KV452904.1  | 1258067 | 7-scf00172 | 7  |
| AX-158047705 | 8 | 35.796 | KV452904.1  | 1258621 | 7-scf00172 | 7  |
| AX-157713498 | 8 | 35.905 | KV452904.1  | 1254488 | 7-scf00172 | 7  |
| AX-158047707 | 8 | 35.905 | KV452904.1  | 1262235 | 7-scf00172 | 7  |
| AX-158047708 | 8 | 35.905 | KV452904.1  | 1262695 | 7-scf00172 | 7  |
| AX-158047710 | 8 | 35.905 | KV452904.1  | 1263371 | 7-scf00172 | 7  |
| AX-158047715 | 8 | 35.905 | KV452904.1  | 1265812 | 7-scf00172 | 7  |
| AX-157705056 | 8 | 35.905 | 3ML01028446 | 440     | scf04053_1 | UN |
| AX-158047718 | 8 | 35.906 | KV452904.1  | 1267124 | 7-scf00172 | 7  |
| AX-158408711 | 8 | 36.229 | KV452904.1  | 1261472 | 7-scf00172 | 7  |
| AX-158047714 | 8 | 36.229 | KV452904.1  | 1265243 | 7-scf00172 | 7  |
| AX-158047719 | 8 | 36.229 | KV452904.1  | 1267762 | 7-scf00172 | 7  |
| AX-158047720 | 8 | 36.229 | KV452904.1  | 1268336 | 7-scf00172 | 7  |
| AX-157757252 | 8 | 36.229 | KV452904.1  | 1269147 | 7-scf00172 | 7  |
| AX-158047722 | 8 | 36.234 | KV452904.1  | 1271789 | 7-scf00172 | 7  |
| AX-158408714 | 8 | 36.234 | KV452904.1  | 1272005 | 7-scf00172 | 7  |
| AX-157742712 | 8 | 36.243 | KV452904.1  | 1272446 | 7-scf00172 | 7  |
| AX-157753309 | 8 | 36.596 | KV452904.1  | 1284590 | 7-scf00172 | 7  |
| AX-157876614 | 8 | 36.597 | KV452904.1  | 1288066 | 7-scf00172 | 7  |
| AX-158047736 | 8 | 36.597 | KV452904.1  | 1293393 | 7-scf00172 | 7  |
| AX-158047738 | 8 | 36.597 | KV452904.1  | 1293738 | 7-scf00172 | 7  |
| AX-157747391 | 8 | 36.68  | KV452904.1  | 1302305 | 7-scf00172 | 7  |
| AX-158047742 | 8 | 36.68  | KV452904.1  | 1302416 | 7-scf00172 | 7  |
| AX-157822517 | 8 | 36.68  | KV452904.1  | 1304507 | 7-scf00172 | 7  |
| AX-158047747 | 8 | 36.705 | KV452904.1  | 1306863 | 7-scf00172 | 7  |
| AX-157756701 | 8 | 36.78  | KV452904.1  | 1307942 | 7-scf00172 | 7  |
| AX-158047752 | 8 | 36.802 | KV452904.1  | 1309741 | 7-scf00172 | 7  |

|              |   |        |            |         |            |   |
|--------------|---|--------|------------|---------|------------|---|
| AX-158047754 | 8 | 36.831 | KV452904.1 | 1311504 | 7-scf00172 | 7 |
| AX-158047749 | 8 | 36.861 | KV452904.1 | 1307154 | 7-scf00172 | 7 |
| AX-158047755 | 8 | 36.861 | KV452904.1 | 1312332 | 7-scf00172 | 7 |
| AX-158047757 | 8 | 36.861 | KV452904.1 | 1314027 | 7-scf00172 | 7 |
| AX-158047758 | 8 | 36.889 | KV452904.1 | 1315282 | 7-scf00172 | 7 |
| AX-158047759 | 8 | 36.889 | KV452904.1 | 1318765 | 7-scf00172 | 7 |
| AX-158047761 | 8 | 37.035 | KV452904.1 | 1322993 | 7-scf00172 | 7 |
| AX-158047764 | 8 | 37.035 | KV452904.1 | 1327237 | 7-scf00172 | 7 |
| AX-158047765 | 8 | 37.035 | KV452904.1 | 1327884 | 7-scf00172 | 7 |
| AX-158047771 | 8 | 37.035 | KV452904.1 | 1335578 | 7-scf00172 | 7 |
| AX-158047774 | 8 | 37.035 | KV452904.1 | 1336079 | 7-scf00172 | 7 |
| AX-158047783 | 8 | 37.035 | KV452904.1 | 1338980 | 7-scf00172 | 7 |
| AX-157721760 | 8 | 37.035 | KV452904.1 | 1341782 | 7-scf00172 | 7 |
| AX-158047789 | 8 | 37.035 | KV452904.1 | 1349208 | 7-scf00172 | 7 |
| AX-158047797 | 8 | 37.226 | KV452904.1 | 1355221 | 7-scf00172 | 7 |
| AX-158047798 | 8 | 37.327 | KV452904.1 | 1355275 | 7-scf00172 | 7 |
| AX-158047799 | 8 | 37.327 | KV452904.1 | 1358668 | 7-scf00172 | 7 |
| AX-158047801 | 8 | 37.327 | KV452904.1 | 1359349 | 7-scf00172 | 7 |
| AX-158047802 | 8 | 37.327 | KV452904.1 | 1360676 | 7-scf00172 | 7 |
| AX-158047810 | 8 | 37.545 | KV452904.1 | 1366095 | 7-scf00172 | 7 |
| AX-158391776 | 8 | 37.545 | KV452904.1 | 1366993 | 7-scf00172 | 7 |
| AX-158047812 | 8 | 37.545 | KV452904.1 | 1368823 | 7-scf00172 | 7 |
| AX-158047815 | 8 | 37.545 | KV452904.1 | 1370899 | 7-scf00172 | 7 |
| AX-158047822 | 8 | 37.545 | KV452904.1 | 1380719 | 7-scf00172 | 7 |
| AX-157726936 | 8 | 37.545 | KV452904.1 | 1381748 | 7-scf00172 | 7 |
| AX-158047825 | 8 | 37.545 | KV452904.1 | 1388168 | 7-scf00172 | 7 |
| AX-158047828 | 8 | 37.545 | KV452904.1 | 1394593 | 7-scf00172 | 7 |
| AX-158047829 | 8 | 37.654 | KV452904.1 | 1396214 | 7-scf00172 | 7 |
| AX-158047831 | 8 | 37.654 | KV452904.1 | 1397008 | 7-scf00172 | 7 |
| AX-158047833 | 8 | 37.669 | KV452904.1 | 1399045 | 7-scf00172 | 7 |
| AX-158047846 | 8 | 37.669 | KV452904.1 | 1412564 | 7-scf00172 | 7 |
| AX-158047848 | 8 | 37.669 | KV452904.1 | 1413566 | 7-scf00172 | 7 |
| AX-158047850 | 8 | 37.669 | KV452904.1 | 1416068 | 7-scf00172 | 7 |
| AX-158047834 | 8 | 37.695 | KV452904.1 | 1399638 | 7-scf00172 | 7 |
| AX-157720188 | 8 | 37.718 | KV452904.1 | 1400521 | 7-scf00172 | 7 |
| AX-158047849 | 8 | 37.718 | KV452904.1 | 1414930 | 7-scf00172 | 7 |
| AX-158047837 | 8 | 37.738 | KV452904.1 | 1401921 | 7-scf00172 | 7 |
| AX-158047841 | 8 | 37.738 | KV452904.1 | 1403034 | 7-scf00172 | 7 |
| AX-157822523 | 8 | 37.764 | KV452904.1 | 1412955 | 7-scf00172 | 7 |
| AX-158047847 | 8 | 37.764 | KV452904.1 | 1412995 | 7-scf00172 | 7 |
| AX-158047853 | 8 | 37.764 | KV452904.1 | 1419082 | 7-scf00172 | 7 |
| AX-158047866 | 8 | 37.764 | KV452904.1 | 1433470 | 7-scf00172 | 7 |
| AX-158048740 | 8 | 37.764 | KV452904.1 | 2864819 | 7-scf00172 | 7 |
| AX-158048762 | 8 | 37.764 | KV452904.1 | 2898836 | 7-scf00172 | 7 |
| AX-158048835 | 8 | 37.764 | KV452904.1 | 3011897 | 7-scf00172 | 7 |
| AX-158047796 | 8 | 37.982 | KV452904.1 | 1354228 | 7-scf00172 | 7 |
| AX-158047817 | 8 | 37.982 | KV452904.1 | 1372589 | 7-scf00172 | 7 |
| AX-158047819 | 8 | 37.982 | KV452904.1 | 1377993 | 7-scf00172 | 7 |
| AX-157703868 | 8 | 37.982 | KV452904.1 | 1415697 | 7-scf00172 | 7 |
| AX-158047854 | 8 | 37.982 | KV452904.1 | 1420770 | 7-scf00172 | 7 |
| AX-157856459 | 8 | 37.982 | KV452904.1 | 1431594 | 7-scf00172 | 7 |

|              |   |        |            |         |            |   |
|--------------|---|--------|------------|---------|------------|---|
| AX-158047865 | 8 | 37.982 | KV452904.1 | 1433052 | 7-scf00172 | 7 |
| AX-158047871 | 8 | 37.982 | KV452904.1 | 1441404 | 7-scf00172 | 7 |
| AX-158047875 | 8 | 37.982 | KV452904.1 | 1445503 | 7-scf00172 | 7 |
| AX-158047876 | 8 | 37.982 | KV452904.1 | 1445828 | 7-scf00172 | 7 |
| AX-158047878 | 8 | 37.982 | KV452904.1 | 1448802 | 7-scf00172 | 7 |
| AX-157822529 | 8 | 37.982 | KV452904.1 | 1453615 | 7-scf00172 | 7 |
| AX-158047886 | 8 | 37.982 | KV452904.1 | 1455107 | 7-scf00172 | 7 |
| AX-158047889 | 8 | 37.982 | KV452904.1 | 1457058 | 7-scf00172 | 7 |
| AX-157721803 | 8 | 37.982 | KV452904.1 | 1457174 | 7-scf00172 | 7 |
| AX-158047891 | 8 | 37.982 | KV452904.1 | 1457465 | 7-scf00172 | 7 |
| AX-158047892 | 8 | 37.982 | KV452904.1 | 1459516 | 7-scf00172 | 7 |
| AX-157756712 | 8 | 37.982 | KV452904.1 | 1459759 | 7-scf00172 | 7 |
| AX-158047895 | 8 | 37.982 | KV452904.1 | 1461963 | 7-scf00172 | 7 |
| AX-158047897 | 8 | 37.982 | KV452904.1 | 1463461 | 7-scf00172 | 7 |
| AX-158047900 | 8 | 37.982 | KV452904.1 | 1471813 | 7-scf00172 | 7 |
| AX-158047901 | 8 | 37.982 | KV452904.1 | 1473419 | 7-scf00172 | 7 |
| AX-158047919 | 8 | 37.982 | KV452904.1 | 1489882 | 7-scf00172 | 7 |
| AX-158047925 | 8 | 37.982 | KV452904.1 | 1493130 | 7-scf00172 | 7 |
| AX-158047937 | 8 | 37.982 | KV452904.1 | 1502265 | 7-scf00172 | 7 |
| AX-158047963 | 8 | 37.982 | KV452904.1 | 1527515 | 7-scf00172 | 7 |
| AX-158047975 | 8 | 37.982 | KV452904.1 | 1536712 | 7-scf00172 | 7 |
| AX-158047984 | 8 | 37.982 | KV452904.1 | 1542413 | 7-scf00172 | 7 |
| AX-157876618 | 8 | 37.982 | KV452904.1 | 1548086 | 7-scf00172 | 7 |
| AX-158048002 | 8 | 37.982 | KV452904.1 | 1578257 | 7-scf00172 | 7 |
| AX-157822544 | 8 | 37.982 | KV452904.1 | 1646029 | 7-scf00172 | 7 |
| AX-158048058 | 8 | 37.982 | KV452904.1 | 1657682 | 7-scf00172 | 7 |
| AX-158048097 | 8 | 37.982 | KV452904.1 | 1744352 | 7-scf00172 | 7 |
| AX-158048104 | 8 | 37.982 | KV452904.1 | 1770109 | 7-scf00172 | 7 |
| AX-158048144 | 8 | 37.982 | KV452904.1 | 1835720 | 7-scf00172 | 7 |
| AX-158048156 | 8 | 37.982 | KV452904.1 | 1847529 | 7-scf00172 | 7 |
| AX-158048172 | 8 | 37.982 | KV452904.1 | 1868188 | 7-scf00172 | 7 |
| AX-158048176 | 8 | 37.982 | KV452904.1 | 1870863 | 7-scf00172 | 7 |
| AX-158048177 | 8 | 37.982 | KV452904.1 | 1871651 | 7-scf00172 | 7 |
| AX-157822550 | 8 | 37.982 | KV452904.1 | 1897263 | 7-scf00172 | 7 |
| AX-158048222 | 8 | 37.982 | KV452904.1 | 1960444 | 7-scf00172 | 7 |
| AX-158048278 | 8 | 37.982 | KV452904.1 | 2133669 | 7-scf00172 | 7 |
| AX-158048318 | 8 | 37.982 | KV452904.1 | 2215895 | 7-scf00172 | 7 |
| AX-158048357 | 8 | 37.982 | KV452904.1 | 2277068 | 7-scf00172 | 7 |
| AX-158048451 | 8 | 37.982 | KV452904.1 | 2519932 | 7-scf00172 | 7 |
| AX-157753050 | 8 | 37.982 | KV452904.1 | 3376939 | 7-scf00172 | 7 |
| AX-158049194 | 8 | 37.982 | KV452904.1 | 3420011 | 7-scf00172 | 7 |
| AX-158049201 | 8 | 37.982 | KV452904.1 | 3429828 | 7-scf00172 | 7 |
| AX-158049202 | 8 | 37.982 | KV452904.1 | 3431052 | 7-scf00172 | 7 |
| AX-158049209 | 8 | 37.982 | KV452904.1 | 3439393 | 7-scf00172 | 7 |
| AX-158049214 | 8 | 37.982 | KV452904.1 | 3441150 | 7-scf00172 | 7 |
| AX-158049219 | 8 | 37.982 | KV452904.1 | 3443259 | 7-scf00172 | 7 |
| AX-158049226 | 8 | 37.982 | KV452904.1 | 3448786 | 7-scf00172 | 7 |
| AX-158049227 | 8 | 37.982 | KV452904.1 | 3450774 | 7-scf00172 | 7 |
| AX-158049240 | 8 | 37.982 | KV452904.1 | 3462920 | 7-scf00172 | 7 |
| AX-158049245 | 8 | 37.982 | KV452904.1 | 3468356 | 7-scf00172 | 7 |
| AX-158049274 | 8 | 37.982 | KV452904.1 | 3491107 | 7-scf00172 | 7 |



|              |   |        |            |         |            |   |
|--------------|---|--------|------------|---------|------------|---|
| AX-158049680 | 8 | 37.982 | KV452904.1 | 3796155 | 7-scf00172 | 7 |
| AX-157870587 | 8 | 37.982 | KV452904.1 | 3808676 | 7-scf00172 | 7 |
| AX-158049708 | 8 | 37.982 | KV452904.1 | 3827896 | 7-scf00172 | 7 |
| AX-158049721 | 8 | 37.982 | KV452904.1 | 3836932 | 7-scf00172 | 7 |
| AX-158049731 | 8 | 37.982 | KV452904.1 | 3842907 | 7-scf00172 | 7 |
| AX-158049755 | 8 | 37.982 | KV452904.1 | 3873990 | 7-scf00172 | 7 |
| AX-157740494 | 8 | 38.309 | KV452904.1 | 1477762 | 7-scf00172 | 7 |
| AX-158047914 | 8 | 38.309 | KV452904.1 | 1486253 | 7-scf00172 | 7 |
| AX-158047915 | 8 | 38.309 | KV452904.1 | 1487186 | 7-scf00172 | 7 |
| AX-158047916 | 8 | 38.309 | KV452904.1 | 1487545 | 7-scf00172 | 7 |
| AX-158047917 | 8 | 38.309 | KV452904.1 | 1488782 | 7-scf00172 | 7 |
| AX-158047921 | 8 | 38.309 | KV452904.1 | 1491166 | 7-scf00172 | 7 |
| AX-157856460 | 8 | 38.309 | KV452904.1 | 1492472 | 7-scf00172 | 7 |
| AX-158047926 | 8 | 38.309 | KV452904.1 | 1494411 | 7-scf00172 | 7 |
| AX-158047928 | 8 | 38.309 | KV452904.1 | 1494994 | 7-scf00172 | 7 |
| AX-158047931 | 8 | 38.309 | KV452904.1 | 1497419 | 7-scf00172 | 7 |
| AX-158047934 | 8 | 38.309 | KV452904.1 | 1499735 | 7-scf00172 | 7 |
| AX-158047936 | 8 | 38.309 | KV452904.1 | 1501794 | 7-scf00172 | 7 |
| AX-158047940 | 8 | 38.309 | KV452904.1 | 1504634 | 7-scf00172 | 7 |
| AX-158047943 | 8 | 38.309 | KV452904.1 | 1506446 | 7-scf00172 | 7 |
| AX-158047947 | 8 | 38.309 | KV452904.1 | 1509109 | 7-scf00172 | 7 |
| AX-158047952 | 8 | 38.309 | KV452904.1 | 1516083 | 7-scf00172 | 7 |
| AX-158047967 | 8 | 38.419 | KV452904.1 | 1531861 | 7-scf00172 | 7 |
| AX-158047968 | 8 | 38.419 | KV452904.1 | 1532264 | 7-scf00172 | 7 |
| AX-157722075 | 8 | 38.419 | KV452904.1 | 1808782 | 7-scf00172 | 7 |
| AX-158048141 | 8 | 38.419 | KV452904.1 | 1832558 | 7-scf00172 | 7 |
| AX-158048189 | 8 | 38.419 | KV452904.1 | 1904225 | 7-scf00172 | 7 |
| AX-158048309 | 8 | 38.419 | KV452904.1 | 2194011 | 7-scf00172 | 7 |
| AX-158047980 | 8 | 38.439 | KV452904.1 | 1540209 | 7-scf00172 | 7 |
| AX-158048039 | 8 | 38.439 | KV452904.1 | 1620299 | 7-scf00172 | 7 |
| AX-158048183 | 8 | 38.439 | KV452904.1 | 1894542 | 7-scf00172 | 7 |
| AX-157822551 | 8 | 38.439 | KV452904.1 | 1897397 | 7-scf00172 | 7 |
| AX-158048340 | 8 | 38.439 | KV452904.1 | 2253159 | 7-scf00172 | 7 |
| AX-158047988 | 8 | 38.448 | KV452904.1 | 1551573 | 7-scf00172 | 7 |
| AX-157876619 | 8 | 38.474 | KV452904.1 | 1560801 | 7-scf00172 | 7 |
| AX-157714063 | 8 | 38.501 | KV452904.1 | 1570840 | 7-scf00172 | 7 |
| AX-158048151 | 8 | 38.501 | KV452904.1 | 1845096 | 7-scf00172 | 7 |
| AX-158048293 | 8 | 38.501 | KV452904.1 | 2165330 | 7-scf00172 | 7 |
| AX-158047941 | 8 | 38.528 | KV452904.1 | 1505245 | 7-scf00172 | 7 |
| AX-158047999 | 8 | 38.528 | KV452904.1 | 1574263 | 7-scf00172 | 7 |
| AX-158048001 | 8 | 38.528 | KV452904.1 | 1577244 | 7-scf00172 | 7 |
| AX-158048009 | 8 | 38.528 | KV452904.1 | 1581761 | 7-scf00172 | 7 |
| AX-157716012 | 8 | 38.528 | KV452904.1 | 1582278 | 7-scf00172 | 7 |
| AX-158048012 | 8 | 38.528 | KV452904.1 | 1583263 | 7-scf00172 | 7 |
| AX-158048013 | 8 | 38.528 | KV452904.1 | 1583668 | 7-scf00172 | 7 |
| AX-158048016 | 8 | 38.528 | KV452904.1 | 1586585 | 7-scf00172 | 7 |
| AX-157822539 | 8 | 38.528 | KV452904.1 | 1588250 | 7-scf00172 | 7 |
| AX-157822540 | 8 | 38.528 | KV452904.1 | 1588819 | 7-scf00172 | 7 |
| AX-158048020 | 8 | 38.528 | KV452904.1 | 1593630 | 7-scf00172 | 7 |
| AX-158048021 | 8 | 38.528 | KV452904.1 | 1597202 | 7-scf00172 | 7 |
| AX-158048028 | 8 | 38.528 | KV452904.1 | 1606637 | 7-scf00172 | 7 |

|              |   |        |            |         |            |   |
|--------------|---|--------|------------|---------|------------|---|
| AX-158048033 | 8 | 38.528 | KV452904.1 | 1614517 | 7-scf00172 | 7 |
| AX-158048034 | 8 | 38.528 | KV452904.1 | 1614756 | 7-scf00172 | 7 |
| AX-158408725 | 8 | 38.528 | KV452904.1 | 1620724 | 7-scf00172 | 7 |
| AX-157718406 | 8 | 38.528 | KV452904.1 | 1626890 | 7-scf00172 | 7 |
| AX-158048047 | 8 | 38.528 | KV452904.1 | 1636240 | 7-scf00172 | 7 |
| AX-158048048 | 8 | 38.528 | KV452904.1 | 1637034 | 7-scf00172 | 7 |
| AX-158379866 | 8 | 38.528 | KV452904.1 | 1652362 | 7-scf00172 | 7 |
| AX-158048057 | 8 | 38.528 | KV452904.1 | 1657052 | 7-scf00172 | 7 |
| AX-158048059 | 8 | 38.528 | KV452904.1 | 1658155 | 7-scf00172 | 7 |
| AX-158048165 | 8 | 38.528 | KV452904.1 | 1859956 | 7-scf00172 | 7 |
| AX-158048319 | 8 | 38.528 | KV452904.1 | 2217271 | 7-scf00172 | 7 |
| AX-158048794 | 8 | 38.528 | KV452904.1 | 2943334 | 7-scf00172 | 7 |
| AX-158048049 | 8 | 38.584 | KV452904.1 | 1641133 | 7-scf00172 | 7 |
| AX-158047873 | 8 | 38.637 | KV452904.1 | 1442736 | 7-scf00172 | 7 |
| AX-158047888 | 8 | 38.637 | KV452904.1 | 1456538 | 7-scf00172 | 7 |
| AX-158047910 | 8 | 38.637 | KV452904.1 | 1483378 | 7-scf00172 | 7 |
| AX-158047913 | 8 | 38.637 | KV452904.1 | 1484327 | 7-scf00172 | 7 |
| AX-158047929 | 8 | 38.637 | KV452904.1 | 1495999 | 7-scf00172 | 7 |
| AX-158047969 | 8 | 38.637 | KV452904.1 | 1533698 | 7-scf00172 | 7 |
| AX-157822536 | 8 | 38.637 | KV452904.1 | 1546296 | 7-scf00172 | 7 |
| AX-158408722 | 8 | 38.637 | KV452904.1 | 1554177 | 7-scf00172 | 7 |
| AX-158047993 | 8 | 38.637 | KV452904.1 | 1567312 | 7-scf00172 | 7 |
| AX-157718916 | 8 | 38.637 | KV452904.1 | 1586023 | 7-scf00172 | 7 |
| AX-158048037 | 8 | 38.637 | KV452904.1 | 1619060 | 7-scf00172 | 7 |
| AX-158408727 | 8 | 38.637 | KV452904.1 | 1621556 | 7-scf00172 | 7 |
| AX-158048080 | 8 | 38.637 | KV452904.1 | 1699133 | 7-scf00172 | 7 |
| AX-158048081 | 8 | 38.637 | KV452904.1 | 1700677 | 7-scf00172 | 7 |
| AX-158048082 | 8 | 38.637 | KV452904.1 | 1704122 | 7-scf00172 | 7 |
| AX-158048088 | 8 | 38.637 | KV452904.1 | 1723031 | 7-scf00172 | 7 |
| AX-158048092 | 8 | 38.637 | KV452904.1 | 1731920 | 7-scf00172 | 7 |
| AX-158048094 | 8 | 38.637 | KV452904.1 | 1741359 | 7-scf00172 | 7 |
| AX-158048095 | 8 | 38.637 | KV452904.1 | 1742368 | 7-scf00172 | 7 |
| AX-158048096 | 8 | 38.637 | KV452904.1 | 1743459 | 7-scf00172 | 7 |
| AX-158048108 | 8 | 38.637 | KV452904.1 | 1774896 | 7-scf00172 | 7 |
| AX-158048115 | 8 | 38.637 | KV452904.1 | 1788546 | 7-scf00172 | 7 |
| AX-158048124 | 8 | 38.637 | KV452904.1 | 1803901 | 7-scf00172 | 7 |
| AX-158048128 | 8 | 38.637 | KV452904.1 | 1810215 | 7-scf00172 | 7 |
| AX-158048132 | 8 | 38.637 | KV452904.1 | 1813841 | 7-scf00172 | 7 |
| AX-158048133 | 8 | 38.637 | KV452904.1 | 1815845 | 7-scf00172 | 7 |
| AX-158048142 | 8 | 38.637 | KV452904.1 | 1834464 | 7-scf00172 | 7 |
| AX-158048147 | 8 | 38.637 | KV452904.1 | 1837940 | 7-scf00172 | 7 |
| AX-158048155 | 8 | 38.637 | KV452904.1 | 1846623 | 7-scf00172 | 7 |
| AX-158048158 | 8 | 38.637 | KV452904.1 | 1849014 | 7-scf00172 | 7 |
| AX-158048163 | 8 | 38.637 | KV452904.1 | 1855792 | 7-scf00172 | 7 |
| AX-157822547 | 8 | 38.637 | KV452904.1 | 1856147 | 7-scf00172 | 7 |
| AX-158048191 | 8 | 38.637 | KV452904.1 | 1905252 | 7-scf00172 | 7 |
| AX-158048194 | 8 | 38.637 | KV452904.1 | 1910029 | 7-scf00172 | 7 |
| AX-158048199 | 8 | 38.637 | KV452904.1 | 1923412 | 7-scf00172 | 7 |
| AX-158048201 | 8 | 38.637 | KV452904.1 | 1923881 | 7-scf00172 | 7 |
| AX-158048207 | 8 | 38.637 | KV452904.1 | 1931585 | 7-scf00172 | 7 |
| AX-158048215 | 8 | 38.637 | KV452904.1 | 1946799 | 7-scf00172 | 7 |

|              |   |        |            |         |            |   |
|--------------|---|--------|------------|---------|------------|---|
| AX-157749384 | 8 | 38.637 | KV452904.1 | 1950510 | 7-scf00172 | 7 |
| AX-157822552 | 8 | 38.637 | KV452904.1 | 1988830 | 7-scf00172 | 7 |
| AX-158048239 | 8 | 38.637 | KV452904.1 | 1991039 | 7-scf00172 | 7 |
| AX-158048241 | 8 | 38.637 | KV452904.1 | 1993029 | 7-scf00172 | 7 |
| AX-158048244 | 8 | 38.637 | KV452904.1 | 1996559 | 7-scf00172 | 7 |
| AX-158048248 | 8 | 38.637 | KV452904.1 | 1998300 | 7-scf00172 | 7 |
| AX-158416304 | 8 | 38.637 | KV452904.1 | 1998523 | 7-scf00172 | 7 |
| AX-158048253 | 8 | 38.637 | KV452904.1 | 2011458 | 7-scf00172 | 7 |
| AX-158048334 | 8 | 38.637 | KV452904.1 | 2243188 | 7-scf00172 | 7 |
| AX-158048343 | 8 | 38.637 | KV452904.1 | 2265996 | 7-scf00172 | 7 |
| AX-158048344 | 8 | 38.637 | KV452904.1 | 2270139 | 7-scf00172 | 7 |
| AX-158048364 | 8 | 38.637 | KV452904.1 | 2295625 | 7-scf00172 | 7 |
| AX-158048365 | 8 | 38.637 | KV452904.1 | 2296153 | 7-scf00172 | 7 |
| AX-158048376 | 8 | 38.637 | KV452904.1 | 2310149 | 7-scf00172 | 7 |
| AX-158048378 | 8 | 38.637 | KV452904.1 | 2311445 | 7-scf00172 | 7 |
| AX-158048384 | 8 | 38.637 | KV452904.1 | 2318789 | 7-scf00172 | 7 |
| AX-158048405 | 8 | 38.637 | KV452904.1 | 2364496 | 7-scf00172 | 7 |
| AX-158048432 | 8 | 38.637 | KV452904.1 | 2469844 | 7-scf00172 | 7 |
| AX-158048480 | 8 | 38.637 | KV452904.1 | 2546303 | 7-scf00172 | 7 |
| AX-158048527 | 8 | 38.637 | KV452904.1 | 2601569 | 7-scf00172 | 7 |
| AX-158048543 | 8 | 38.637 | KV452904.1 | 2625659 | 7-scf00172 | 7 |
| AX-158048814 | 8 | 38.637 | KV452904.1 | 2978595 | 7-scf00172 | 7 |
| AX-157876645 | 8 | 38.637 | KV452904.1 | 3092980 | 7-scf00172 | 7 |
| AX-158048901 | 8 | 38.637 | KV452904.1 | 3101981 | 7-scf00172 | 7 |
| AX-158047887 | 8 | 38.746 | KV452904.1 | 1455322 | 7-scf00172 | 7 |
| AX-158047893 | 8 | 38.746 | KV452904.1 | 1460125 | 7-scf00172 | 7 |
| AX-158047894 | 8 | 38.746 | KV452904.1 | 1460958 | 7-scf00172 | 7 |
| AX-158047898 | 8 | 38.746 | KV452904.1 | 1468367 | 7-scf00172 | 7 |
| AX-158047986 | 8 | 38.746 | KV452904.1 | 1547276 | 7-scf00172 | 7 |
| AX-158048113 | 8 | 38.746 | KV452904.1 | 1778997 | 7-scf00172 | 7 |
| AX-158048117 | 8 | 38.746 | KV452904.1 | 1793403 | 7-scf00172 | 7 |
| AX-158048122 | 8 | 38.746 | KV452904.1 | 1799809 | 7-scf00172 | 7 |
| AX-158048166 | 8 | 38.746 | KV452904.1 | 1863333 | 7-scf00172 | 7 |
| AX-158048167 | 8 | 38.746 | KV452904.1 | 1864310 | 7-scf00172 | 7 |
| AX-158048169 | 8 | 38.746 | KV452904.1 | 1865264 | 7-scf00172 | 7 |
| AX-158048173 | 8 | 38.746 | KV452904.1 | 1868531 | 7-scf00172 | 7 |
| AX-158048174 | 8 | 38.746 | KV452904.1 | 1870126 | 7-scf00172 | 7 |
| AX-157822549 | 8 | 38.746 | KV452904.1 | 1894857 | 7-scf00172 | 7 |
| AX-158048186 | 8 | 38.746 | KV452904.1 | 1898284 | 7-scf00172 | 7 |
| AX-158048233 | 8 | 38.746 | KV452904.1 | 1982904 | 7-scf00172 | 7 |
| AX-158048250 | 8 | 38.746 | KV452904.1 | 2007484 | 7-scf00172 | 7 |
| AX-158048251 | 8 | 38.746 | KV452904.1 | 2010760 | 7-scf00172 | 7 |
| AX-158048257 | 8 | 38.746 | KV452904.1 | 2015244 | 7-scf00172 | 7 |
| AX-158048263 | 8 | 38.746 | KV452904.1 | 2024679 | 7-scf00172 | 7 |
| AX-157876628 | 8 | 38.746 | KV452904.1 | 2030979 | 7-scf00172 | 7 |
| AX-158408734 | 8 | 38.746 | KV452904.1 | 2095325 | 7-scf00172 | 7 |
| AX-158048270 | 8 | 38.746 | KV452904.1 | 2109037 | 7-scf00172 | 7 |
| AX-158048272 | 8 | 38.746 | KV452904.1 | 2115807 | 7-scf00172 | 7 |
| AX-158048273 | 8 | 38.746 | KV452904.1 | 2116720 | 7-scf00172 | 7 |
| AX-158048275 | 8 | 38.746 | KV452904.1 | 2118065 | 7-scf00172 | 7 |
| AX-158048276 | 8 | 38.746 | KV452904.1 | 2118767 | 7-scf00172 | 7 |

|              |   |        |            |         |            |   |
|--------------|---|--------|------------|---------|------------|---|
| AX-158048279 | 8 | 38.746 | KV452904.1 | 2134701 | 7-scf00172 | 7 |
| AX-158048281 | 8 | 38.746 | KV452904.1 | 2137026 | 7-scf00172 | 7 |
| AX-157885156 | 8 | 38.746 | KV452904.1 | 2139040 | 7-scf00172 | 7 |
| AX-158048282 | 8 | 38.746 | KV452904.1 | 2139417 | 7-scf00172 | 7 |
| AX-158048289 | 8 | 38.746 | KV452904.1 | 2155845 | 7-scf00172 | 7 |
| AX-158048290 | 8 | 38.746 | KV452904.1 | 2157522 | 7-scf00172 | 7 |
| AX-158048291 | 8 | 38.746 | KV452904.1 | 2158735 | 7-scf00172 | 7 |
| AX-158048294 | 8 | 38.746 | KV452904.1 | 2166260 | 7-scf00172 | 7 |
| AX-158048295 | 8 | 38.746 | KV452904.1 | 2174819 | 7-scf00172 | 7 |
| AX-158048300 | 8 | 38.746 | KV452904.1 | 2181151 | 7-scf00172 | 7 |
| AX-158048311 | 8 | 38.746 | KV452904.1 | 2195640 | 7-scf00172 | 7 |
| AX-158048354 | 8 | 38.746 | KV452904.1 | 2275724 | 7-scf00172 | 7 |
| AX-158048371 | 8 | 38.746 | KV452904.1 | 2299944 | 7-scf00172 | 7 |
| AX-158048374 | 8 | 38.746 | KV452904.1 | 2303713 | 7-scf00172 | 7 |
| AX-157693604 | 8 | 38.746 | KV452904.1 | 2304781 | 7-scf00172 | 7 |
| AX-158048379 | 8 | 38.746 | KV452904.1 | 2312932 | 7-scf00172 | 7 |
| AX-158048403 | 8 | 38.746 | KV452904.1 | 2357832 | 7-scf00172 | 7 |
| AX-158048423 | 8 | 38.746 | KV452904.1 | 2447434 | 7-scf00172 | 7 |
| AX-158384013 | 8 | 38.746 | KV452904.1 | 2454767 | 7-scf00172 | 7 |
| AX-158048426 | 8 | 38.746 | KV452904.1 | 2454935 | 7-scf00172 | 7 |
| AX-157876631 | 8 | 38.746 | KV452904.1 | 2457599 | 7-scf00172 | 7 |
| AX-157876632 | 8 | 38.746 | KV452904.1 | 2460722 | 7-scf00172 | 7 |
| AX-158048428 | 8 | 38.746 | KV452904.1 | 2464821 | 7-scf00172 | 7 |
| AX-157876634 | 8 | 38.746 | KV452904.1 | 2502975 | 7-scf00172 | 7 |
| AX-158048442 | 8 | 38.746 | KV452904.1 | 2504362 | 7-scf00172 | 7 |
| AX-157725575 | 8 | 38.746 | KV452904.1 | 2519427 | 7-scf00172 | 7 |
| AX-158048466 | 8 | 38.746 | KV452904.1 | 2536226 | 7-scf00172 | 7 |
| AX-157822557 | 8 | 38.746 | KV452904.1 | 2550065 | 7-scf00172 | 7 |
| AX-157822560 | 8 | 38.746 | KV452904.1 | 2594474 | 7-scf00172 | 7 |
| AX-158048915 | 8 | 38.746 | KV452904.1 | 3120941 | 7-scf00172 | 7 |
| AX-158048444 | 8 | 38.755 | KV452904.1 | 2511665 | 7-scf00172 | 7 |
| AX-157752155 | 8 | 38.764 | KV452904.1 | 1837409 | 7-scf00172 | 7 |
| AX-158048235 | 8 | 38.764 | KV452904.1 | 1986053 | 7-scf00172 | 7 |
| AX-158048450 | 8 | 38.764 | KV452904.1 | 2519297 | 7-scf00172 | 7 |
| AX-157856499 | 8 | 38.764 | KV452904.1 | 2520215 | 7-scf00172 | 7 |
| AX-158048453 | 8 | 38.764 | KV452904.1 | 2520520 | 7-scf00172 | 7 |
| AX-158408742 | 8 | 38.764 | KV452904.1 | 2523584 | 7-scf00172 | 7 |
| AX-157856500 | 8 | 38.764 | KV452904.1 | 2527491 | 7-scf00172 | 7 |
| AX-157856501 | 8 | 38.764 | KV452904.1 | 2527781 | 7-scf00172 | 7 |
| AX-158408743 | 8 | 38.764 | KV452904.1 | 2528838 | 7-scf00172 | 7 |
| AX-158048459 | 8 | 38.764 | KV452904.1 | 2532393 | 7-scf00172 | 7 |
| AX-158048464 | 8 | 38.764 | KV452904.1 | 2535424 | 7-scf00172 | 7 |
| AX-158048470 | 8 | 38.764 | KV452904.1 | 2540167 | 7-scf00172 | 7 |
| AX-158048471 | 8 | 38.764 | KV452904.1 | 2541333 | 7-scf00172 | 7 |
| AX-158048472 | 8 | 38.764 | KV452904.1 | 2542114 | 7-scf00172 | 7 |
| AX-158048474 | 8 | 38.764 | KV452904.1 | 2543037 | 7-scf00172 | 7 |
| AX-158048475 | 8 | 38.764 | KV452904.1 | 2543605 | 7-scf00172 | 7 |
| AX-158047960 | 8 | 38.77  | KV452904.1 | 1524819 | 7-scf00172 | 7 |
| AX-158048145 | 8 | 38.77  | KV452904.1 | 1836126 | 7-scf00172 | 7 |
| AX-157720595 | 8 | 38.77  | KV452904.1 | 1912654 | 7-scf00172 | 7 |
| AX-158048206 | 8 | 38.77  | KV452904.1 | 1931179 | 7-scf00172 | 7 |

|              |   |        |            |         |            |   |
|--------------|---|--------|------------|---------|------------|---|
| AX-158048210 | 8 | 38.77  | KV452904.1 | 1934827 | 7-scf00172 | 7 |
| AX-158048228 | 8 | 38.77  | KV452904.1 | 1964356 | 7-scf00172 | 7 |
| AX-158048237 | 8 | 38.77  | KV452904.1 | 1986812 | 7-scf00172 | 7 |
| AX-158048288 | 8 | 38.77  | KV452904.1 | 2149155 | 7-scf00172 | 7 |
| AX-158048430 | 8 | 38.77  | KV452904.1 | 2469096 | 7-scf00172 | 7 |
| AX-158048443 | 8 | 38.77  | KV452904.1 | 2505130 | 7-scf00172 | 7 |
| AX-157753781 | 8 | 38.77  | KV452904.1 | 2534173 | 7-scf00172 | 7 |
| AX-158048818 | 8 | 38.77  | KV452904.1 | 2985502 | 7-scf00172 | 7 |
| AX-158048476 | 8 | 38.777 | KV452904.1 | 2544062 | 7-scf00172 | 7 |
| AX-158048477 | 8 | 38.792 | KV452904.1 | 2544768 | 7-scf00172 | 7 |
| AX-158047997 | 8 | 38.805 | KV452904.1 | 1569526 | 7-scf00172 | 7 |
| AX-158047998 | 8 | 38.805 | KV452904.1 | 1570883 | 7-scf00172 | 7 |
| AX-158048482 | 8 | 38.805 | KV452904.1 | 2552865 | 7-scf00172 | 7 |
| AX-158048483 | 8 | 38.805 | KV452904.1 | 2553861 | 7-scf00172 | 7 |
| AX-158048485 | 8 | 38.805 | KV452904.1 | 2555707 | 7-scf00172 | 7 |
| AX-158048488 | 8 | 38.805 | KV452904.1 | 2557141 | 7-scf00172 | 7 |
| AX-158048487 | 8 | 38.814 | KV452904.1 | 2556636 | 7-scf00172 | 7 |
| AX-158048493 | 8 | 38.821 | KV452904.1 | 2571010 | 7-scf00172 | 7 |
| AX-158048496 | 8 | 38.83  | KV452904.1 | 2573986 | 7-scf00172 | 7 |
| AX-157822548 | 8 | 38.855 | KV452904.1 | 1869151 | 7-scf00172 | 7 |
| AX-158048498 | 8 | 38.855 | KV452904.1 | 2577218 | 7-scf00172 | 7 |
| AX-158048499 | 8 | 38.855 | KV452904.1 | 2578420 | 7-scf00172 | 7 |
| AX-157885158 | 8 | 38.855 | KV452904.1 | 2578530 | 7-scf00172 | 7 |
| AX-158048548 | 8 | 38.855 | KV452904.1 | 2630773 | 7-scf00172 | 7 |
| AX-157822577 | 8 | 38.855 | KV452904.1 | 3165708 | 7-scf00172 | 7 |
| AX-158048571 | 8 | 38.863 | KV452904.1 | 2667976 | 7-scf00172 | 7 |
| AX-157726126 | 8 | 38.89  | KV452904.1 | 1478292 | 7-scf00172 | 7 |
| AX-158047942 | 8 | 38.89  | KV452904.1 | 1505859 | 7-scf00172 | 7 |
| AX-157876617 | 8 | 38.89  | KV452904.1 | 1509844 | 7-scf00172 | 7 |
| AX-158047959 | 8 | 38.89  | KV452904.1 | 1522921 | 7-scf00172 | 7 |
| AX-157822537 | 8 | 38.89  | KV452904.1 | 1559592 | 7-scf00172 | 7 |
| AX-158047990 | 8 | 38.89  | KV452904.1 | 1567057 | 7-scf00172 | 7 |
| AX-158048119 | 8 | 38.89  | KV452904.1 | 1798596 | 7-scf00172 | 7 |
| AX-158048286 | 8 | 38.89  | KV452904.1 | 2148051 | 7-scf00172 | 7 |
| AX-158048409 | 8 | 38.89  | KV452904.1 | 2378822 | 7-scf00172 | 7 |
| AX-158048414 | 8 | 38.89  | KV452904.1 | 2422894 | 7-scf00172 | 7 |
| AX-158048489 | 8 | 38.89  | KV452904.1 | 2557589 | 7-scf00172 | 7 |
| AX-158048528 | 8 | 38.89  | KV452904.1 | 2601910 | 7-scf00172 | 7 |
| AX-157755674 | 8 | 38.89  | KV452904.1 | 2669294 | 7-scf00172 | 7 |
| AX-158408745 | 8 | 38.89  | KV452904.1 | 2674019 | 7-scf00172 | 7 |
| AX-158048575 | 8 | 38.89  | KV452904.1 | 2675716 | 7-scf00172 | 7 |
| AX-157856504 | 8 | 38.89  | KV452904.1 | 2680194 | 7-scf00172 | 7 |
| AX-157856506 | 8 | 38.89  | KV452904.1 | 2680413 | 7-scf00172 | 7 |
| AX-157856507 | 8 | 38.89  | KV452904.1 | 2680449 | 7-scf00172 | 7 |
| AX-157856509 | 8 | 38.89  | KV452904.1 | 2684467 | 7-scf00172 | 7 |
| AX-157856510 | 8 | 38.89  | KV452904.1 | 2685633 | 7-scf00172 | 7 |
| AX-157856512 | 8 | 38.89  | KV452904.1 | 2686237 | 7-scf00172 | 7 |
| AX-157856513 | 8 | 38.89  | KV452904.1 | 2686346 | 7-scf00172 | 7 |
| AX-157856517 | 8 | 38.89  | KV452904.1 | 2687999 | 7-scf00172 | 7 |
| AX-158048582 | 8 | 38.89  | KV452904.1 | 2689514 | 7-scf00172 | 7 |
| AX-157856519 | 8 | 38.89  | KV452904.1 | 2701251 | 7-scf00172 | 7 |

|              |   |        |            |         |            |   |
|--------------|---|--------|------------|---------|------------|---|
| AX-158048596 | 8 | 38.89  | KV452904.1 | 2702098 | 7-scf00172 | 7 |
| AX-158048602 | 8 | 38.89  | KV452904.1 | 2706049 | 7-scf00172 | 7 |
| AX-158048606 | 8 | 38.89  | KV452904.1 | 2711874 | 7-scf00172 | 7 |
| AX-158048608 | 8 | 38.89  | KV452904.1 | 2712409 | 7-scf00172 | 7 |
| AX-158048615 | 8 | 38.89  | KV452904.1 | 2712699 | 7-scf00172 | 7 |
| AX-158048663 | 8 | 38.89  | KV452904.1 | 2759183 | 7-scf00172 | 7 |
| AX-158048664 | 8 | 38.89  | KV452904.1 | 2761659 | 7-scf00172 | 7 |
| AX-157700346 | 8 | 38.89  | KV452904.1 | 2840923 | 7-scf00172 | 7 |
| AX-157885162 | 8 | 38.89  | KV452904.1 | 2872959 | 7-scf00172 | 7 |
| AX-157856505 | 8 | 38.918 | KV452904.1 | 2680290 | 7-scf00172 | 7 |
| AX-157856508 | 8 | 38.951 | KV452904.1 | 2684379 | 7-scf00172 | 7 |
| AX-157856511 | 8 | 38.99  | KV452904.1 | 2685722 | 7-scf00172 | 7 |
| AX-158048581 | 8 | 39.034 | KV452904.1 | 2688589 | 7-scf00172 | 7 |
| AX-158047957 | 8 | 39.074 | KV452904.1 | 1522554 | 7-scf00172 | 7 |
| AX-158047961 | 8 | 39.074 | KV452904.1 | 1525404 | 7-scf00172 | 7 |
| AX-158048086 | 8 | 39.074 | KV452904.1 | 1718291 | 7-scf00172 | 7 |
| AX-158048353 | 8 | 39.074 | KV452904.1 | 2274831 | 7-scf00172 | 7 |
| AX-158048509 | 8 | 39.074 | KV452904.1 | 2587337 | 7-scf00172 | 7 |
| AX-158048552 | 8 | 39.074 | KV452904.1 | 2637253 | 7-scf00172 | 7 |
| AX-158048580 | 8 | 39.074 | KV452904.1 | 2687816 | 7-scf00172 | 7 |
| AX-158048584 | 8 | 39.074 | KV452904.1 | 2690151 | 7-scf00172 | 7 |
| AX-157856518 | 8 | 39.074 | KV452904.1 | 2696432 | 7-scf00172 | 7 |
| AX-158048592 | 8 | 39.074 | KV452904.1 | 2697323 | 7-scf00172 | 7 |
| AX-157856520 | 8 | 39.074 | KV452904.1 | 2701288 | 7-scf00172 | 7 |
| AX-158048601 | 8 | 39.074 | KV452904.1 | 2705562 | 7-scf00172 | 7 |
| AX-157856521 | 8 | 39.074 | KV452904.1 | 2707683 | 7-scf00172 | 7 |
| AX-158048604 | 8 | 39.074 | KV452904.1 | 2708140 | 7-scf00172 | 7 |
| AX-158048641 | 8 | 39.074 | KV452904.1 | 2729184 | 7-scf00172 | 7 |
| AX-158048651 | 8 | 39.074 | KV452904.1 | 2743418 | 7-scf00172 | 7 |
| AX-158048653 | 8 | 39.074 | KV452904.1 | 2744211 | 7-scf00172 | 7 |
| AX-157822563 | 8 | 39.074 | KV452904.1 | 2745769 | 7-scf00172 | 7 |
| AX-158048659 | 8 | 39.074 | KV452904.1 | 2747475 | 7-scf00172 | 7 |
| AX-158048660 | 8 | 39.074 | KV452904.1 | 2751375 | 7-scf00172 | 7 |
| AX-157876639 | 8 | 39.074 | KV452904.1 | 2761236 | 7-scf00172 | 7 |
| AX-158048666 | 8 | 39.074 | KV452904.1 | 2770825 | 7-scf00172 | 7 |
| AX-158048669 | 8 | 39.074 | KV452904.1 | 2771922 | 7-scf00172 | 7 |
| AX-158048673 | 8 | 39.074 | KV452904.1 | 2774271 | 7-scf00172 | 7 |
| AX-158391784 | 8 | 39.074 | KV452904.1 | 2778258 | 7-scf00172 | 7 |
| AX-158048681 | 8 | 39.074 | KV452904.1 | 2783985 | 7-scf00172 | 7 |
| AX-158048684 | 8 | 39.074 | KV452904.1 | 2786347 | 7-scf00172 | 7 |
| AX-158048685 | 8 | 39.074 | KV452904.1 | 2788808 | 7-scf00172 | 7 |
| AX-158048691 | 8 | 39.074 | KV452904.1 | 2797807 | 7-scf00172 | 7 |
| AX-158048696 | 8 | 39.074 | KV452904.1 | 2804442 | 7-scf00172 | 7 |
| AX-158048700 | 8 | 39.074 | KV452904.1 | 2806302 | 7-scf00172 | 7 |
| AX-158048720 | 8 | 39.074 | KV452904.1 | 2833674 | 7-scf00172 | 7 |
| AX-158048723 | 8 | 39.074 | KV452904.1 | 2836531 | 7-scf00172 | 7 |
| AX-158048731 | 8 | 39.074 | KV452904.1 | 2853542 | 7-scf00172 | 7 |
| AX-158048739 | 8 | 39.074 | KV452904.1 | 2863351 | 7-scf00172 | 7 |
| AX-158049255 | 8 | 39.074 | KV452904.1 | 3475355 | 7-scf00172 | 7 |
| AX-158049265 | 8 | 39.074 | KV452904.1 | 3484326 | 7-scf00172 | 7 |
| AX-158049284 | 8 | 39.074 | KV452904.1 | 3496222 | 7-scf00172 | 7 |

|              |   |        |            |         |            |    |
|--------------|---|--------|------------|---------|------------|----|
| AX-158049378 | 8 | 39.074 | KV452904.1 | 3553210 | 7-scf00172 | 7  |
| AX-158049407 | 8 | 39.074 | KV452904.1 | 3567175 | 7-scf00172 | 7  |
| AX-158049445 | 8 | 39.074 | KV452904.1 | 3591230 | 7-scf00172 | 7  |
| AX-157774316 | 8 | 39.074 | KV452904.1 | 3643158 | 7-scf00172 | 7  |
| AX-157685811 | 8 | 39.074 | KV453374.1 | 19575   | scf00644   | UN |
| AX-158048744 | 8 | 39.09  | KV452904.1 | 2870807 | 7-scf00172 | 7  |
| AX-158048748 | 8 | 39.09  | KV452904.1 | 2872371 | 7-scf00172 | 7  |
| AX-158048851 | 8 | 39.09  | KV452904.1 | 3030814 | 7-scf00172 | 7  |
| AX-157712171 | 8 | 39.124 | KV452904.1 | 2890238 | 7-scf00172 | 7  |
| AX-158048756 | 8 | 39.156 | KV452904.1 | 2892347 | 7-scf00172 | 7  |
| AX-158048202 | 8 | 39.183 | KV452904.1 | 1924566 | 7-scf00172 | 7  |
| AX-158048479 | 8 | 39.183 | KV452904.1 | 2545559 | 7-scf00172 | 7  |
| AX-158048678 | 8 | 39.183 | KV452904.1 | 2781791 | 7-scf00172 | 7  |
| AX-158048680 | 8 | 39.183 | KV452904.1 | 2783477 | 7-scf00172 | 7  |
| AX-158048701 | 8 | 39.183 | KV452904.1 | 2806937 | 7-scf00172 | 7  |
| AX-158048702 | 8 | 39.183 | KV452904.1 | 2807625 | 7-scf00172 | 7  |
| AX-158048730 | 8 | 39.183 | KV452904.1 | 2850868 | 7-scf00172 | 7  |
| AX-158048745 | 8 | 39.183 | KV452904.1 | 2871164 | 7-scf00172 | 7  |
| AX-158048746 | 8 | 39.183 | KV452904.1 | 2871698 | 7-scf00172 | 7  |
| AX-158048759 | 8 | 39.183 | KV452904.1 | 2895398 | 7-scf00172 | 7  |
| AX-158408753 | 8 | 39.183 | KV452904.1 | 2908726 | 7-scf00172 | 7  |
| AX-158048772 | 8 | 39.183 | KV452904.1 | 2909025 | 7-scf00172 | 7  |
| AX-157822569 | 8 | 39.183 | KV452904.1 | 2918135 | 7-scf00172 | 7  |
| AX-158048780 | 8 | 39.183 | KV452904.1 | 2923041 | 7-scf00172 | 7  |
| AX-158048782 | 8 | 39.183 | KV452904.1 | 2923398 | 7-scf00172 | 7  |
| AX-158048785 | 8 | 39.183 | KV452904.1 | 2927422 | 7-scf00172 | 7  |
| AX-157856526 | 8 | 39.183 | KV452904.1 | 2927627 | 7-scf00172 | 7  |
| AX-157822570 | 8 | 39.183 | KV452904.1 | 2955321 | 7-scf00172 | 7  |
| AX-158048799 | 8 | 39.183 | KV452904.1 | 2955942 | 7-scf00172 | 7  |
| AX-158048827 | 8 | 39.183 | KV452904.1 | 3002673 | 7-scf00172 | 7  |
| AX-158048775 | 8 | 39.204 | KV452904.1 | 2918020 | 7-scf00172 | 7  |
| AX-158408754 | 8 | 39.204 | KV452904.1 | 2962000 | 7-scf00172 | 7  |
| AX-158048801 | 8 | 39.204 | KV452904.1 | 2965924 | 7-scf00172 | 7  |
| AX-158048857 | 8 | 39.204 | KV452904.1 | 3035006 | 7-scf00172 | 7  |
| AX-158048875 | 8 | 39.204 | KV452904.1 | 3055223 | 7-scf00172 | 7  |
| AX-158048807 | 8 | 39.217 | KV452904.1 | 2971123 | 7-scf00172 | 7  |
| AX-158048810 | 8 | 39.217 | KV452904.1 | 2971499 | 7-scf00172 | 7  |
| AX-158048899 | 8 | 39.217 | KV452904.1 | 3097117 | 7-scf00172 | 7  |
| AX-158048668 | 8 | 39.23  | KV452904.1 | 2771228 | 7-scf00172 | 7  |
| AX-158048675 | 8 | 39.23  | KV452904.1 | 2775935 | 7-scf00172 | 7  |
| AX-158048706 | 8 | 39.23  | KV452904.1 | 2810410 | 7-scf00172 | 7  |
| AX-158048734 | 8 | 39.23  | KV452904.1 | 2859114 | 7-scf00172 | 7  |
| AX-158048754 | 8 | 39.23  | KV452904.1 | 2889958 | 7-scf00172 | 7  |
| AX-158048788 | 8 | 39.23  | KV452904.1 | 2935292 | 7-scf00172 | 7  |
| AX-157822571 | 8 | 39.23  | KV452904.1 | 2965479 | 7-scf00172 | 7  |
| AX-158048812 | 8 | 39.23  | KV452904.1 | 2973746 | 7-scf00172 | 7  |
| AX-158048822 | 8 | 39.23  | KV452904.1 | 3000359 | 7-scf00172 | 7  |
| AX-158048832 | 8 | 39.23  | KV452904.1 | 3009776 | 7-scf00172 | 7  |
| AX-158048852 | 8 | 39.23  | KV452904.1 | 3031367 | 7-scf00172 | 7  |
| AX-158384023 | 8 | 39.23  | KV452904.1 | 3038212 | 7-scf00172 | 7  |
| AX-158048820 | 8 | 39.245 | KV452904.1 | 2997722 | 7-scf00172 | 7  |

|              |   |        |            |         |            |   |
|--------------|---|--------|------------|---------|------------|---|
| AX-158048824 | 8 | 39.268 | KV452904.1 | 3001466 | 7-scf00172 | 7 |
| AX-158047995 | 8 | 39.293 | KV452904.1 | 1567787 | 7-scf00172 | 7 |
| AX-158048045 | 8 | 39.293 | KV452904.1 | 1632995 | 7-scf00172 | 7 |
| AX-157856463 | 8 | 39.293 | KV452904.1 | 1640202 | 7-scf00172 | 7 |
| AX-158048830 | 8 | 39.293 | KV452904.1 | 3006091 | 7-scf00172 | 7 |
| AX-158048831 | 8 | 39.293 | KV452904.1 | 3007553 | 7-scf00172 | 7 |
| AX-158048842 | 8 | 39.293 | KV452904.1 | 3021441 | 7-scf00172 | 7 |
| AX-158048843 | 8 | 39.293 | KV452904.1 | 3022097 | 7-scf00172 | 7 |
| AX-158048846 | 8 | 39.293 | KV452904.1 | 3026418 | 7-scf00172 | 7 |
| AX-158048849 | 8 | 39.293 | KV452904.1 | 3029634 | 7-scf00172 | 7 |
| AX-158048853 | 8 | 39.293 | KV452904.1 | 3031952 | 7-scf00172 | 7 |
| AX-158048854 | 8 | 39.293 | KV452904.1 | 3033601 | 7-scf00172 | 7 |
| AX-158048864 | 8 | 39.293 | KV452904.1 | 3040159 | 7-scf00172 | 7 |
| AX-158048865 | 8 | 39.293 | KV452904.1 | 3041271 | 7-scf00172 | 7 |
| AX-158048866 | 8 | 39.293 | KV452904.1 | 3043393 | 7-scf00172 | 7 |
| AX-158048867 | 8 | 39.293 | KV452904.1 | 3046668 | 7-scf00172 | 7 |
| AX-158048870 | 8 | 39.293 | KV452904.1 | 3049593 | 7-scf00172 | 7 |
| AX-158048872 | 8 | 39.293 | KV452904.1 | 3051804 | 7-scf00172 | 7 |
| AX-158048874 | 8 | 39.293 | KV452904.1 | 3054049 | 7-scf00172 | 7 |
| AX-158048882 | 8 | 39.293 | KV452904.1 | 3071823 | 7-scf00172 | 7 |
| AX-158048892 | 8 | 39.293 | KV452904.1 | 3090217 | 7-scf00172 | 7 |
| AX-158048895 | 8 | 39.293 | KV452904.1 | 3092341 | 7-scf00172 | 7 |
| AX-158048900 | 8 | 39.293 | KV452904.1 | 3099439 | 7-scf00172 | 7 |
| AX-158048906 | 8 | 39.293 | KV452904.1 | 3106148 | 7-scf00172 | 7 |
| AX-158048908 | 8 | 39.293 | KV452904.1 | 3107343 | 7-scf00172 | 7 |
| AX-158048891 | 8 | 39.345 | KV452904.1 | 3089576 | 7-scf00172 | 7 |
| AX-157716271 | 8 | 39.345 | KV452904.1 | 3126641 | 7-scf00172 | 7 |
| AX-158048922 | 8 | 39.402 | KV452904.1 | 3130815 | 7-scf00172 | 7 |
| AX-158048923 | 8 | 39.402 | KV452904.1 | 3132781 | 7-scf00172 | 7 |
| AX-158047768 | 8 | 39.62  | KV452904.1 | 1330164 | 7-scf00172 | 7 |
| AX-158048316 | 8 | 39.62  | KV452904.1 | 2209253 | 7-scf00172 | 7 |
| AX-158048446 | 8 | 39.62  | KV452904.1 | 2513533 | 7-scf00172 | 7 |
| AX-158048484 | 8 | 39.62  | KV452904.1 | 2555015 | 7-scf00172 | 7 |
| AX-158048510 | 8 | 39.62  | KV452904.1 | 2588574 | 7-scf00172 | 7 |
| AX-158048600 | 8 | 39.62  | KV452904.1 | 2703691 | 7-scf00172 | 7 |
| AX-158048638 | 8 | 39.62  | KV452904.1 | 2725830 | 7-scf00172 | 7 |
| AX-158408746 | 8 | 39.62  | KV452904.1 | 2730746 | 7-scf00172 | 7 |
| AX-157885163 | 8 | 39.62  | KV452904.1 | 3002083 | 7-scf00172 | 7 |
| AX-158048937 | 8 | 39.62  | KV452904.1 | 3145919 | 7-scf00172 | 7 |
| AX-157745683 | 8 | 39.62  | KV452904.1 | 3148201 | 7-scf00172 | 7 |
| AX-158048938 | 8 | 39.62  | KV452904.1 | 3150070 | 7-scf00172 | 7 |
| AX-157822573 | 8 | 39.62  | KV452904.1 | 3153912 | 7-scf00172 | 7 |
| AX-158048941 | 8 | 39.62  | KV452904.1 | 3156197 | 7-scf00172 | 7 |
| AX-157822576 | 8 | 39.62  | KV452904.1 | 3158936 | 7-scf00172 | 7 |
| AX-158408762 | 8 | 39.62  | KV452904.1 | 3162492 | 7-scf00172 | 7 |
| AX-158048946 | 8 | 39.62  | KV452904.1 | 3162809 | 7-scf00172 | 7 |
| AX-158048948 | 8 | 39.62  | KV452904.1 | 3163320 | 7-scf00172 | 7 |
| AX-158048949 | 8 | 39.62  | KV452904.1 | 3164016 | 7-scf00172 | 7 |
| AX-158048951 | 8 | 39.62  | KV452904.1 | 3165658 | 7-scf00172 | 7 |
| AX-157766022 | 8 | 39.62  | KV452904.1 | 3626541 | 7-scf00172 | 7 |
| AX-158049482 | 8 | 39.62  | KV452904.1 | 3634707 | 7-scf00172 | 7 |



|              |   |        |            |         |            |   |
|--------------|---|--------|------------|---------|------------|---|
| AX-158049499 | 8 | 39.62  | KV452904.1 | 3650048 | 7-scf00172 | 7 |
| AX-158049722 | 8 | 39.62  | KV452904.1 | 3837908 | 7-scf00172 | 7 |
| AX-158408763 | 8 | 39.78  | KV452904.1 | 3163511 | 7-scf00172 | 7 |
| AX-158047970 | 8 | 39.948 | KV452904.1 | 1534273 | 7-scf00172 | 7 |
| AX-158048103 | 8 | 39.948 | KV452904.1 | 1768225 | 7-scf00172 | 7 |
| AX-158048116 | 8 | 39.948 | KV452904.1 | 1792124 | 7-scf00172 | 7 |
| AX-157716337 | 8 | 39.948 | KV452904.1 | 3170671 | 7-scf00172 | 7 |
| AX-158048956 | 8 | 39.948 | KV452904.1 | 3170879 | 7-scf00172 | 7 |
| AX-158048958 | 8 | 39.948 | KV452904.1 | 3172524 | 7-scf00172 | 7 |
| AX-158048981 | 8 | 39.948 | KV452904.1 | 3196797 | 7-scf00172 | 7 |
| AX-158048962 | 8 | 39.989 | KV452904.1 | 3184667 | 7-scf00172 | 7 |
| AX-158048968 | 8 | 40.035 | KV452904.1 | 3189946 | 7-scf00172 | 7 |
| AX-158048959 | 8 | 40.072 | KV452904.1 | 3173293 | 7-scf00172 | 7 |
| AX-158048963 | 8 | 40.072 | KV452904.1 | 3184984 | 7-scf00172 | 7 |
| AX-157822578 | 8 | 40.072 | KV452904.1 | 3190367 | 7-scf00172 | 7 |
| AX-158048969 | 8 | 40.072 | KV452904.1 | 3190501 | 7-scf00172 | 7 |
| AX-158048971 | 8 | 40.072 | KV452904.1 | 3191326 | 7-scf00172 | 7 |
| AX-158049069 | 8 | 40.072 | KV452904.1 | 3294682 | 7-scf00172 | 7 |
| AX-158048979 | 8 | 40.073 | KV452904.1 | 3194112 | 7-scf00172 | 7 |
| AX-158048984 | 8 | 40.439 | KV452904.1 | 3200165 | 7-scf00172 | 7 |
| AX-158048982 | 8 | 40.44  | KV452904.1 | 3199332 | 7-scf00172 | 7 |
| AX-158048988 | 8 | 40.44  | KV452904.1 | 3204713 | 7-scf00172 | 7 |
| AX-158379868 | 8 | 40.44  | KV452904.1 | 3207876 | 7-scf00172 | 7 |
| AX-157739062 | 8 | 40.44  | KV452904.1 | 3208347 | 7-scf00172 | 7 |
| AX-158049001 | 8 | 40.44  | KV452904.1 | 3214940 | 7-scf00172 | 7 |
| AX-157856535 | 8 | 40.44  | KV452904.1 | 3247896 | 7-scf00172 | 7 |
| AX-158049003 | 8 | 40.925 | KV452904.1 | 3219674 | 7-scf00172 | 7 |
| AX-158049032 | 8 | 40.925 | KV452904.1 | 3250511 | 7-scf00172 | 7 |
| AX-158049034 | 8 | 40.925 | KV452904.1 | 3254189 | 7-scf00172 | 7 |
| AX-158048935 | 8 | 40.932 | KV452904.1 | 3140047 | 7-scf00172 | 7 |
| AX-157876646 | 8 | 40.932 | KV452904.1 | 3220444 | 7-scf00172 | 7 |
| AX-158049016 | 8 | 40.932 | KV452904.1 | 3228425 | 7-scf00172 | 7 |
| AX-157822579 | 8 | 40.932 | KV452904.1 | 3236645 | 7-scf00172 | 7 |
| AX-158049023 | 8 | 40.932 | KV452904.1 | 3237492 | 7-scf00172 | 7 |
| AX-158049025 | 8 | 40.932 | KV452904.1 | 3240049 | 7-scf00172 | 7 |
| AX-158049026 | 8 | 40.932 | KV452904.1 | 3240819 | 7-scf00172 | 7 |
| AX-158049028 | 8 | 40.932 | KV452904.1 | 3245441 | 7-scf00172 | 7 |
| AX-158049037 | 8 | 40.932 | KV452904.1 | 3257423 | 7-scf00172 | 7 |
| AX-158049038 | 8 | 40.932 | KV452904.1 | 3263067 | 7-scf00172 | 7 |
| AX-158049041 | 8 | 40.932 | KV452904.1 | 3267710 | 7-scf00172 | 7 |
| AX-158049042 | 8 | 40.932 | KV452904.1 | 3267819 | 7-scf00172 | 7 |
| AX-158049046 | 8 | 40.932 | KV452904.1 | 3270567 | 7-scf00172 | 7 |
| AX-158408766 | 8 | 40.932 | KV452904.1 | 3270975 | 7-scf00172 | 7 |
| AX-158049048 | 8 | 40.932 | KV452904.1 | 3271197 | 7-scf00172 | 7 |
| AX-158049049 | 8 | 40.932 | KV452904.1 | 3272447 | 7-scf00172 | 7 |
| AX-158049050 | 8 | 40.932 | KV452904.1 | 3273592 | 7-scf00172 | 7 |
| AX-158049052 | 8 | 40.932 | KV452904.1 | 3275423 | 7-scf00172 | 7 |
| AX-158049054 | 8 | 40.932 | KV452904.1 | 3276890 | 7-scf00172 | 7 |
| AX-158379869 | 8 | 40.932 | KV452904.1 | 3286533 | 7-scf00172 | 7 |
| AX-158049079 | 8 | 40.932 | KV452904.1 | 3306999 | 7-scf00172 | 7 |
| AX-158049088 | 8 | 40.932 | KV452904.1 | 3314648 | 7-scf00172 | 7 |

|              |   |        |            |         |            |   |
|--------------|---|--------|------------|---------|------------|---|
| AX-157822584 | 8 | 40.932 | KV452904.1 | 3352005 | 7-scf00172 | 7 |
| AX-157715416 | 8 | 40.932 | KV452904.1 | 3383767 | 7-scf00172 | 7 |
| AX-158049149 | 8 | 40.932 | KV452904.1 | 3383853 | 7-scf00172 | 7 |
| AX-158049348 | 8 | 40.932 | KV452904.1 | 3536052 | 7-scf00172 | 7 |
| AX-158049402 | 8 | 40.932 | KV452904.1 | 3564470 | 7-scf00172 | 7 |
| AX-158049460 | 8 | 40.932 | KV452904.1 | 3604405 | 7-scf00172 | 7 |
| AX-158049601 | 8 | 40.932 | KV452904.1 | 3730287 | 7-scf00172 | 7 |
| AX-158049602 | 8 | 40.932 | KV452904.1 | 3731631 | 7-scf00172 | 7 |
| AX-158049608 | 8 | 40.932 | KV452904.1 | 3734703 | 7-scf00172 | 7 |
| AX-158049609 | 8 | 40.932 | KV452904.1 | 3736212 | 7-scf00172 | 7 |
| AX-158049617 | 8 | 40.932 | KV452904.1 | 3742729 | 7-scf00172 | 7 |
| AX-158049618 | 8 | 40.932 | KV452904.1 | 3743422 | 7-scf00172 | 7 |
| AX-158049620 | 8 | 40.932 | KV452904.1 | 3745628 | 7-scf00172 | 7 |
| AX-158049624 | 8 | 40.932 | KV452904.1 | 3750246 | 7-scf00172 | 7 |
| AX-158049626 | 8 | 40.932 | KV452904.1 | 3750487 | 7-scf00172 | 7 |
| AX-158049627 | 8 | 40.932 | KV452904.1 | 3755669 | 7-scf00172 | 7 |
| AX-157822610 | 8 | 40.932 | KV452904.1 | 3756431 | 7-scf00172 | 7 |
| AX-157822611 | 8 | 40.932 | KV452904.1 | 3756880 | 7-scf00172 | 7 |
| AX-158049059 | 8 | 40.935 | KV452904.1 | 3282114 | 7-scf00172 | 7 |
| AX-158049062 | 8 | 40.94  | KV452904.1 | 3286492 | 7-scf00172 | 7 |
| AX-158049065 | 8 | 40.944 | KV452904.1 | 3288149 | 7-scf00172 | 7 |
| AX-158049130 | 8 | 40.944 | KV452904.1 | 3366904 | 7-scf00172 | 7 |
| AX-158049066 | 8 | 40.952 | KV452904.1 | 3291808 | 7-scf00172 | 7 |
| AX-158384027 | 8 | 40.966 | KV452904.1 | 3302035 | 7-scf00172 | 7 |
| AX-158049092 | 8 | 40.994 | KV452904.1 | 3324973 | 7-scf00172 | 7 |
| AX-158049083 | 8 | 41.027 | KV452904.1 | 3309610 | 7-scf00172 | 7 |
| AX-157724661 | 8 | 41.027 | KV452904.1 | 3317800 | 7-scf00172 | 7 |
| AX-158049094 | 8 | 41.027 | KV452904.1 | 3325767 | 7-scf00172 | 7 |
| AX-157822582 | 8 | 41.041 | KV452904.1 | 3334852 | 7-scf00172 | 7 |
| AX-158048751 | 8 | 41.15  | KV452904.1 | 2875248 | 7-scf00172 | 7 |
| AX-158048876 | 8 | 41.15  | KV452904.1 | 3056157 | 7-scf00172 | 7 |
| AX-158049002 | 8 | 41.15  | KV452904.1 | 3217260 | 7-scf00172 | 7 |
| AX-158049012 | 8 | 41.15  | KV452904.1 | 3225280 | 7-scf00172 | 7 |
| AX-157753393 | 8 | 41.15  | KV452904.1 | 3311978 | 7-scf00172 | 7 |
| AX-158049095 | 8 | 41.15  | KV452904.1 | 3330161 | 7-scf00172 | 7 |
| AX-157717657 | 8 | 41.15  | KV452904.1 | 3332773 | 7-scf00172 | 7 |
| AX-158049097 | 8 | 41.15  | KV452904.1 | 3335984 | 7-scf00172 | 7 |
| AX-158049098 | 8 | 41.15  | KV452904.1 | 3336873 | 7-scf00172 | 7 |
| AX-158049103 | 8 | 41.15  | KV452904.1 | 3339628 | 7-scf00172 | 7 |
| AX-158049104 | 8 | 41.15  | KV452904.1 | 3342111 | 7-scf00172 | 7 |
| AX-158049105 | 8 | 41.15  | KV452904.1 | 3343090 | 7-scf00172 | 7 |
| AX-158049107 | 8 | 41.15  | KV452904.1 | 3345029 | 7-scf00172 | 7 |
| AX-158049109 | 8 | 41.15  | KV452904.1 | 3345685 | 7-scf00172 | 7 |
| AX-158049112 | 8 | 41.15  | KV452904.1 | 3347713 | 7-scf00172 | 7 |
| AX-158049113 | 8 | 41.15  | KV452904.1 | 3348374 | 7-scf00172 | 7 |
| AX-158049114 | 8 | 41.15  | KV452904.1 | 3349182 | 7-scf00172 | 7 |
| AX-158049116 | 8 | 41.15  | KV452904.1 | 3350325 | 7-scf00172 | 7 |
| AX-158049118 | 8 | 41.15  | KV452904.1 | 3351118 | 7-scf00172 | 7 |
| AX-158049119 | 8 | 41.15  | KV452904.1 | 3353491 | 7-scf00172 | 7 |
| AX-158049120 | 8 | 41.15  | KV452904.1 | 3355123 | 7-scf00172 | 7 |
| AX-158049121 | 8 | 41.15  | KV452904.1 | 3356648 | 7-scf00172 | 7 |

|              |   |       |            |         |            |   |
|--------------|---|-------|------------|---------|------------|---|
| AX-158049123 | 8 | 41.15 | KV452904.1 | 3357231 | 7-scf00172 | 7 |
| AX-158384028 | 8 | 41.15 | KV452904.1 | 3357290 | 7-scf00172 | 7 |
| AX-158049126 | 8 | 41.15 | KV452904.1 | 3360088 | 7-scf00172 | 7 |
| AX-158049127 | 8 | 41.15 | KV452904.1 | 3360443 | 7-scf00172 | 7 |
| AX-158049128 | 8 | 41.15 | KV452904.1 | 3362524 | 7-scf00172 | 7 |
| AX-157725457 | 8 | 41.15 | KV452904.1 | 3363749 | 7-scf00172 | 7 |
| AX-157822585 | 8 | 41.15 | KV452904.1 | 3364184 | 7-scf00172 | 7 |
| AX-158049131 | 8 | 41.15 | KV452904.1 | 3367644 | 7-scf00172 | 7 |
| AX-157822586 | 8 | 41.15 | KV452904.1 | 3368126 | 7-scf00172 | 7 |
| AX-157757671 | 8 | 41.15 | KV452904.1 | 3370021 | 7-scf00172 | 7 |
| AX-158049134 | 8 | 41.15 | KV452904.1 | 3370738 | 7-scf00172 | 7 |
| AX-157719302 | 8 | 41.15 | KV452904.1 | 3371539 | 7-scf00172 | 7 |
| AX-158049135 | 8 | 41.15 | KV452904.1 | 3372134 | 7-scf00172 | 7 |
| AX-157822587 | 8 | 41.15 | KV452904.1 | 3372379 | 7-scf00172 | 7 |
| AX-158049137 | 8 | 41.15 | KV452904.1 | 3372713 | 7-scf00172 | 7 |
| AX-158049138 | 8 | 41.15 | KV452904.1 | 3373284 | 7-scf00172 | 7 |
| AX-158049139 | 8 | 41.15 | KV452904.1 | 3374083 | 7-scf00172 | 7 |
| AX-158049140 | 8 | 41.15 | KV452904.1 | 3374523 | 7-scf00172 | 7 |
| AX-158049141 | 8 | 41.15 | KV452904.1 | 3375488 | 7-scf00172 | 7 |
| AX-158049142 | 8 | 41.15 | KV452904.1 | 3375899 | 7-scf00172 | 7 |
| AX-158049143 | 8 | 41.15 | KV452904.1 | 3378013 | 7-scf00172 | 7 |
| AX-158049145 | 8 | 41.15 | KV452904.1 | 3381419 | 7-scf00172 | 7 |
| AX-158049146 | 8 | 41.15 | KV452904.1 | 3381947 | 7-scf00172 | 7 |
| AX-158049147 | 8 | 41.15 | KV452904.1 | 3382602 | 7-scf00172 | 7 |
| AX-158049150 | 8 | 41.15 | KV452904.1 | 3384549 | 7-scf00172 | 7 |
| AX-158049152 | 8 | 41.15 | KV452904.1 | 3386737 | 7-scf00172 | 7 |
| AX-158049153 | 8 | 41.15 | KV452904.1 | 3386952 | 7-scf00172 | 7 |
| AX-158049154 | 8 | 41.15 | KV452904.1 | 3387982 | 7-scf00172 | 7 |
| AX-158049155 | 8 | 41.15 | KV452904.1 | 3389075 | 7-scf00172 | 7 |
| AX-158049156 | 8 | 41.15 | KV452904.1 | 3389287 | 7-scf00172 | 7 |
| AX-158049157 | 8 | 41.15 | KV452904.1 | 3392410 | 7-scf00172 | 7 |
| AX-158049158 | 8 | 41.15 | KV452904.1 | 3393308 | 7-scf00172 | 7 |
| AX-158049159 | 8 | 41.15 | KV452904.1 | 3396380 | 7-scf00172 | 7 |
| AX-158049160 | 8 | 41.15 | KV452904.1 | 3397138 | 7-scf00172 | 7 |
| AX-158408769 | 8 | 41.15 | KV452904.1 | 3397345 | 7-scf00172 | 7 |
| AX-158049161 | 8 | 41.15 | KV452904.1 | 3399223 | 7-scf00172 | 7 |
| AX-158049162 | 8 | 41.15 | KV452904.1 | 3399718 | 7-scf00172 | 7 |
| AX-158049165 | 8 | 41.15 | KV452904.1 | 3401161 | 7-scf00172 | 7 |
| AX-158049166 | 8 | 41.15 | KV452904.1 | 3401841 | 7-scf00172 | 7 |
| AX-158049169 | 8 | 41.15 | KV452904.1 | 3402367 | 7-scf00172 | 7 |
| AX-158049170 | 8 | 41.15 | KV452904.1 | 3402561 | 7-scf00172 | 7 |
| AX-158049171 | 8 | 41.15 | KV452904.1 | 3403264 | 7-scf00172 | 7 |
| AX-158049173 | 8 | 41.15 | KV452904.1 | 3403782 | 7-scf00172 | 7 |
| AX-158049174 | 8 | 41.15 | KV452904.1 | 3403976 | 7-scf00172 | 7 |
| AX-158049175 | 8 | 41.15 | KV452904.1 | 3405254 | 7-scf00172 | 7 |
| AX-158049177 | 8 | 41.15 | KV452904.1 | 3406036 | 7-scf00172 | 7 |
| AX-158049179 | 8 | 41.15 | KV452904.1 | 3407066 | 7-scf00172 | 7 |
| AX-158049181 | 8 | 41.15 | KV452904.1 | 3407979 | 7-scf00172 | 7 |
| AX-158049184 | 8 | 41.15 | KV452904.1 | 3412846 | 7-scf00172 | 7 |
| AX-158049186 | 8 | 41.15 | KV452904.1 | 3414130 | 7-scf00172 | 7 |
| AX-158049188 | 8 | 41.15 | KV452904.1 | 3415841 | 7-scf00172 | 7 |

|              |   |       |            |         |            |   |
|--------------|---|-------|------------|---------|------------|---|
| AX-158049189 | 8 | 41.15 | KV452904.1 | 3416300 | 7-scf00172 | 7 |
| AX-158049190 | 8 | 41.15 | KV452904.1 | 3416860 | 7-scf00172 | 7 |
| AX-158049192 | 8 | 41.15 | KV452904.1 | 3417726 | 7-scf00172 | 7 |
| AX-158049193 | 8 | 41.15 | KV452904.1 | 3418287 | 7-scf00172 | 7 |
| AX-158049195 | 8 | 41.15 | KV452904.1 | 3423020 | 7-scf00172 | 7 |
| AX-158049196 | 8 | 41.15 | KV452904.1 | 3423953 | 7-scf00172 | 7 |
| AX-158049197 | 8 | 41.15 | KV452904.1 | 3424937 | 7-scf00172 | 7 |
| AX-158049200 | 8 | 41.15 | KV452904.1 | 3427269 | 7-scf00172 | 7 |
| AX-158049205 | 8 | 41.15 | KV452904.1 | 3436593 | 7-scf00172 | 7 |
| AX-158049208 | 8 | 41.15 | KV452904.1 | 3437791 | 7-scf00172 | 7 |
| AX-158384029 | 8 | 41.15 | KV452904.1 | 3438195 | 7-scf00172 | 7 |
| AX-158049210 | 8 | 41.15 | KV452904.1 | 3439843 | 7-scf00172 | 7 |
| AX-158049215 | 8 | 41.15 | KV452904.1 | 3441958 | 7-scf00172 | 7 |
| AX-158049216 | 8 | 41.15 | KV452904.1 | 3442609 | 7-scf00172 | 7 |
| AX-158049218 | 8 | 41.15 | KV452904.1 | 3443135 | 7-scf00172 | 7 |
| AX-158049222 | 8 | 41.15 | KV452904.1 | 3445576 | 7-scf00172 | 7 |
| AX-158049225 | 8 | 41.15 | KV452904.1 | 3447967 | 7-scf00172 | 7 |
| AX-158049229 | 8 | 41.15 | KV452904.1 | 3451367 | 7-scf00172 | 7 |
| AX-157718273 | 8 | 41.15 | KV452904.1 | 3458460 | 7-scf00172 | 7 |
| AX-158049232 | 8 | 41.15 | KV452904.1 | 3458910 | 7-scf00172 | 7 |
| AX-158049235 | 8 | 41.15 | KV452904.1 | 3459889 | 7-scf00172 | 7 |
| AX-158049238 | 8 | 41.15 | KV452904.1 | 3462072 | 7-scf00172 | 7 |
| AX-158049244 | 8 | 41.15 | KV452904.1 | 3467819 | 7-scf00172 | 7 |
| AX-158049247 | 8 | 41.15 | KV452904.1 | 3468969 | 7-scf00172 | 7 |
| AX-158049251 | 8 | 41.15 | KV452904.1 | 3473259 | 7-scf00172 | 7 |
| AX-158049301 | 8 | 41.15 | KV452904.1 | 3505734 | 7-scf00172 | 7 |
| AX-158049305 | 8 | 41.15 | KV452904.1 | 3509606 | 7-scf00172 | 7 |
| AX-158049312 | 8 | 41.15 | KV452904.1 | 3513173 | 7-scf00172 | 7 |
| AX-158049313 | 8 | 41.15 | KV452904.1 | 3513781 | 7-scf00172 | 7 |
| AX-158049322 | 8 | 41.15 | KV452904.1 | 3516502 | 7-scf00172 | 7 |
| AX-158049324 | 8 | 41.15 | KV452904.1 | 3517849 | 7-scf00172 | 7 |
| AX-158049325 | 8 | 41.15 | KV452904.1 | 3518356 | 7-scf00172 | 7 |
| AX-158049326 | 8 | 41.15 | KV452904.1 | 3519945 | 7-scf00172 | 7 |
| AX-158379870 | 8 | 41.15 | KV452904.1 | 3520318 | 7-scf00172 | 7 |
| AX-158049330 | 8 | 41.15 | KV452904.1 | 3522608 | 7-scf00172 | 7 |
| AX-158049333 | 8 | 41.15 | KV452904.1 | 3524544 | 7-scf00172 | 7 |
| AX-157856537 | 8 | 41.15 | KV452904.1 | 3524798 | 7-scf00172 | 7 |
| AX-158049338 | 8 | 41.15 | KV452904.1 | 3527838 | 7-scf00172 | 7 |
| AX-158049339 | 8 | 41.15 | KV452904.1 | 3528413 | 7-scf00172 | 7 |
| AX-158049340 | 8 | 41.15 | KV452904.1 | 3528960 | 7-scf00172 | 7 |
| AX-158049341 | 8 | 41.15 | KV452904.1 | 3529968 | 7-scf00172 | 7 |
| AX-158049342 | 8 | 41.15 | KV452904.1 | 3531281 | 7-scf00172 | 7 |
| AX-158049345 | 8 | 41.15 | KV452904.1 | 3532876 | 7-scf00172 | 7 |
| AX-158049347 | 8 | 41.15 | KV452904.1 | 3535616 | 7-scf00172 | 7 |
| AX-158049352 | 8 | 41.15 | KV452904.1 | 3538195 | 7-scf00172 | 7 |
| AX-158049355 | 8 | 41.15 | KV452904.1 | 3539265 | 7-scf00172 | 7 |
| AX-158049357 | 8 | 41.15 | KV452904.1 | 3539582 | 7-scf00172 | 7 |
| AX-158049358 | 8 | 41.15 | KV452904.1 | 3539939 | 7-scf00172 | 7 |
| AX-158049359 | 8 | 41.15 | KV452904.1 | 3540243 | 7-scf00172 | 7 |
| AX-158049360 | 8 | 41.15 | KV452904.1 | 3540558 | 7-scf00172 | 7 |
| AX-158049362 | 8 | 41.15 | KV452904.1 | 3541222 | 7-scf00172 | 7 |

|              |   |        |            |         |            |   |
|--------------|---|--------|------------|---------|------------|---|
| AX-157822591 | 8 | 41.15  | KV452904.1 | 3542221 | 7-scf00172 | 7 |
| AX-158049363 | 8 | 41.15  | KV452904.1 | 3543591 | 7-scf00172 | 7 |
| AX-158049365 | 8 | 41.15  | KV452904.1 | 3544036 | 7-scf00172 | 7 |
| AX-158049366 | 8 | 41.15  | KV452904.1 | 3544966 | 7-scf00172 | 7 |
| AX-158049368 | 8 | 41.15  | KV452904.1 | 3545893 | 7-scf00172 | 7 |
| AX-158049370 | 8 | 41.15  | KV452904.1 | 3547276 | 7-scf00172 | 7 |
| AX-158049371 | 8 | 41.15  | KV452904.1 | 3548571 | 7-scf00172 | 7 |
| AX-158049374 | 8 | 41.15  | KV452904.1 | 3550821 | 7-scf00172 | 7 |
| AX-158049376 | 8 | 41.15  | KV452904.1 | 3551453 | 7-scf00172 | 7 |
| AX-158049379 | 8 | 41.15  | KV452904.1 | 3553945 | 7-scf00172 | 7 |
| AX-158049381 | 8 | 41.15  | KV452904.1 | 3555019 | 7-scf00172 | 7 |
| AX-158049382 | 8 | 41.15  | KV452904.1 | 3555498 | 7-scf00172 | 7 |
| AX-158049383 | 8 | 41.15  | KV452904.1 | 3556302 | 7-scf00172 | 7 |
| AX-158049385 | 8 | 41.15  | KV452904.1 | 3557289 | 7-scf00172 | 7 |
| AX-158049393 | 8 | 41.15  | KV452904.1 | 3560392 | 7-scf00172 | 7 |
| AX-158049394 | 8 | 41.15  | KV452904.1 | 3560602 | 7-scf00172 | 7 |
| AX-158049395 | 8 | 41.15  | KV452904.1 | 3561060 | 7-scf00172 | 7 |
| AX-158049397 | 8 | 41.15  | KV452904.1 | 3562386 | 7-scf00172 | 7 |
| AX-158049399 | 8 | 41.15  | KV452904.1 | 3562602 | 7-scf00172 | 7 |
| AX-158049404 | 8 | 41.15  | KV452904.1 | 3565472 | 7-scf00172 | 7 |
| AX-158049412 | 8 | 41.15  | KV452904.1 | 3571427 | 7-scf00172 | 7 |
| AX-158049413 | 8 | 41.15  | KV452904.1 | 3571780 | 7-scf00172 | 7 |
| AX-158049415 | 8 | 41.15  | KV452904.1 | 3573063 | 7-scf00172 | 7 |
| AX-158049418 | 8 | 41.15  | KV452904.1 | 3575292 | 7-scf00172 | 7 |
| AX-158049420 | 8 | 41.15  | KV452904.1 | 3576078 | 7-scf00172 | 7 |
| AX-157822596 | 8 | 41.15  | KV452904.1 | 3612030 | 7-scf00172 | 7 |
| AX-157822599 | 8 | 41.15  | KV452904.1 | 3617877 | 7-scf00172 | 7 |
| AX-158049501 | 8 | 41.15  | KV452904.1 | 3650519 | 7-scf00172 | 7 |
| AX-158049867 | 8 | 41.15  | KV452904.1 | 3989314 | 7-scf00172 | 7 |
| AX-158049298 | 8 | 41.151 | KV452904.1 | 3503171 | 7-scf00172 | 7 |
| AX-158049361 | 8 | 41.151 | KV452904.1 | 3541070 | 7-scf00172 | 7 |
| AX-158049367 | 8 | 41.151 | KV452904.1 | 3545212 | 7-scf00172 | 7 |
| AX-158049372 | 8 | 41.151 | KV452904.1 | 3549665 | 7-scf00172 | 7 |
| AX-158049373 | 8 | 41.151 | KV452904.1 | 3550381 | 7-scf00172 | 7 |
| AX-158049375 | 8 | 41.151 | KV452904.1 | 3551183 | 7-scf00172 | 7 |
| AX-158049377 | 8 | 41.151 | KV452904.1 | 3552318 | 7-scf00172 | 7 |
| AX-158049391 | 8 | 41.151 | KV452904.1 | 3559935 | 7-scf00172 | 7 |
| AX-158049400 | 8 | 41.151 | KV452904.1 | 3564109 | 7-scf00172 | 7 |
| AX-158049071 | 8 | 41.477 | KV452904.1 | 3298759 | 7-scf00172 | 7 |
| AX-157822588 | 8 | 41.477 | KV452904.1 | 3374345 | 7-scf00172 | 7 |
| AX-157741057 | 8 | 41.477 | KV452904.1 | 3375122 | 7-scf00172 | 7 |
| AX-158049178 | 8 | 41.477 | KV452904.1 | 3406561 | 7-scf00172 | 7 |
| AX-158049185 | 8 | 41.477 | KV452904.1 | 3413518 | 7-scf00172 | 7 |
| AX-158049203 | 8 | 41.477 | KV452904.1 | 3432057 | 7-scf00172 | 7 |
| AX-157749335 | 8 | 41.477 | KV452904.1 | 3444891 | 7-scf00172 | 7 |
| AX-157694888 | 8 | 41.477 | KV452904.1 | 3462471 | 7-scf00172 | 7 |
| AX-158049248 | 8 | 41.477 | KV452904.1 | 3471382 | 7-scf00172 | 7 |
| AX-158049252 | 8 | 41.477 | KV452904.1 | 3474365 | 7-scf00172 | 7 |
| AX-158049254 | 8 | 41.477 | KV452904.1 | 3474637 | 7-scf00172 | 7 |
| AX-158049260 | 8 | 41.477 | KV452904.1 | 3480671 | 7-scf00172 | 7 |
| AX-158049261 | 8 | 41.477 | KV452904.1 | 3482759 | 7-scf00172 | 7 |

|              |   |        |            |         |            |   |
|--------------|---|--------|------------|---------|------------|---|
| AX-158049262 | 8 | 41.477 | KV452904.1 | 3483202 | 7-scf00172 | 7 |
| AX-158049266 | 8 | 41.477 | KV452904.1 | 3487486 | 7-scf00172 | 7 |
| AX-158049269 | 8 | 41.477 | KV452904.1 | 3488568 | 7-scf00172 | 7 |
| AX-158049272 | 8 | 41.477 | KV452904.1 | 3488975 | 7-scf00172 | 7 |
| AX-158049276 | 8 | 41.477 | KV452904.1 | 3491498 | 7-scf00172 | 7 |
| AX-158049279 | 8 | 41.477 | KV452904.1 | 3493497 | 7-scf00172 | 7 |
| AX-158049283 | 8 | 41.477 | KV452904.1 | 3495370 | 7-scf00172 | 7 |
| AX-157856536 | 8 | 41.477 | KV452904.1 | 3497152 | 7-scf00172 | 7 |
| AX-158049288 | 8 | 41.477 | KV452904.1 | 3497365 | 7-scf00172 | 7 |
| AX-158049293 | 8 | 41.477 | KV452904.1 | 3500313 | 7-scf00172 | 7 |
| AX-158049299 | 8 | 41.477 | KV452904.1 | 3503892 | 7-scf00172 | 7 |
| AX-158049300 | 8 | 41.477 | KV452904.1 | 3504475 | 7-scf00172 | 7 |
| AX-158049304 | 8 | 41.477 | KV452904.1 | 3509065 | 7-scf00172 | 7 |
| AX-157876649 | 8 | 41.477 | KV452904.1 | 3509150 | 7-scf00172 | 7 |
| AX-158049306 | 8 | 41.477 | KV452904.1 | 3510411 | 7-scf00172 | 7 |
| AX-157741300 | 8 | 41.477 | KV452904.1 | 3511448 | 7-scf00172 | 7 |
| AX-158049309 | 8 | 41.477 | KV452904.1 | 3512103 | 7-scf00172 | 7 |
| AX-158049315 | 8 | 41.477 | KV452904.1 | 3514261 | 7-scf00172 | 7 |
| AX-158049335 | 8 | 41.477 | KV452904.1 | 3526206 | 7-scf00172 | 7 |
| AX-158049351 | 8 | 41.477 | KV452904.1 | 3537717 | 7-scf00172 | 7 |
| AX-158049369 | 8 | 41.477 | KV452904.1 | 3546636 | 7-scf00172 | 7 |
| AX-158049387 | 8 | 41.477 | KV452904.1 | 3558117 | 7-scf00172 | 7 |
| AX-158049406 | 8 | 41.477 | KV452904.1 | 3566767 | 7-scf00172 | 7 |
| AX-158049410 | 8 | 41.477 | KV452904.1 | 3568944 | 7-scf00172 | 7 |
| AX-158049411 | 8 | 41.477 | KV452904.1 | 3571151 | 7-scf00172 | 7 |
| AX-158049421 | 8 | 41.477 | KV452904.1 | 3577263 | 7-scf00172 | 7 |
| AX-158049425 | 8 | 41.477 | KV452904.1 | 3577764 | 7-scf00172 | 7 |
| AX-158049428 | 8 | 41.477 | KV452904.1 | 3578368 | 7-scf00172 | 7 |
| AX-158049429 | 8 | 41.477 | KV452904.1 | 3579223 | 7-scf00172 | 7 |
| AX-157716813 | 8 | 41.477 | KV452904.1 | 3581721 | 7-scf00172 | 7 |
| AX-158049433 | 8 | 41.477 | KV452904.1 | 3582452 | 7-scf00172 | 7 |
| AX-158049438 | 8 | 41.477 | KV452904.1 | 3585883 | 7-scf00172 | 7 |
| AX-157822593 | 8 | 41.477 | KV452904.1 | 3587123 | 7-scf00172 | 7 |
| AX-158049441 | 8 | 41.477 | KV452904.1 | 3589053 | 7-scf00172 | 7 |
| AX-158049443 | 8 | 41.477 | KV452904.1 | 3590045 | 7-scf00172 | 7 |
| AX-157717379 | 8 | 41.477 | KV452904.1 | 3592422 | 7-scf00172 | 7 |
| AX-158049446 | 8 | 41.477 | KV452904.1 | 3594757 | 7-scf00172 | 7 |
| AX-157822594 | 8 | 41.477 | KV452904.1 | 3595008 | 7-scf00172 | 7 |
| AX-158049448 | 8 | 41.477 | KV452904.1 | 3597127 | 7-scf00172 | 7 |
| AX-158049475 | 8 | 41.477 | KV452904.1 | 3625469 | 7-scf00172 | 7 |
| AX-158049476 | 8 | 41.477 | KV452904.1 | 3625556 | 7-scf00172 | 7 |
| AX-157822601 | 8 | 41.477 | KV452904.1 | 3626751 | 7-scf00172 | 7 |
| AX-158049479 | 8 | 41.477 | KV452904.1 | 3628432 | 7-scf00172 | 7 |
| AX-158049480 | 8 | 41.477 | KV452904.1 | 3630778 | 7-scf00172 | 7 |
| AX-158049483 | 8 | 41.477 | KV452904.1 | 3635855 | 7-scf00172 | 7 |
| AX-158049484 | 8 | 41.477 | KV452904.1 | 3636719 | 7-scf00172 | 7 |
| AX-158049487 | 8 | 41.477 | KV452904.1 | 3640025 | 7-scf00172 | 7 |
| AX-158049489 | 8 | 41.477 | KV452904.1 | 3640869 | 7-scf00172 | 7 |
| AX-158049491 | 8 | 41.477 | KV452904.1 | 3642119 | 7-scf00172 | 7 |
| AX-158049492 | 8 | 41.477 | KV452904.1 | 3642608 | 7-scf00172 | 7 |
| AX-158049496 | 8 | 41.477 | KV452904.1 | 3647978 | 7-scf00172 | 7 |

|              |   |        |            |         |            |   |
|--------------|---|--------|------------|---------|------------|---|
| AX-158049497 | 8 | 41.477 | KV452904.1 | 3649325 | 7-scf00172 | 7 |
| AX-157856540 | 8 | 41.477 | KV452904.1 | 3649568 | 7-scf00172 | 7 |
| AX-158049498 | 8 | 41.477 | KV452904.1 | 3649821 | 7-scf00172 | 7 |
| AX-158049500 | 8 | 41.477 | KV452904.1 | 3650267 | 7-scf00172 | 7 |
| AX-158049503 | 8 | 41.477 | KV452904.1 | 3651489 | 7-scf00172 | 7 |
| AX-158049504 | 8 | 41.477 | KV452904.1 | 3652229 | 7-scf00172 | 7 |
| AX-158049505 | 8 | 41.477 | KV452904.1 | 3652886 | 7-scf00172 | 7 |
| AX-158049506 | 8 | 41.477 | KV452904.1 | 3653897 | 7-scf00172 | 7 |
| AX-158049507 | 8 | 41.477 | KV452904.1 | 3655083 | 7-scf00172 | 7 |
| AX-158049509 | 8 | 41.477 | KV452904.1 | 3655496 | 7-scf00172 | 7 |
| AX-157740855 | 8 | 41.477 | KV452904.1 | 3658010 | 7-scf00172 | 7 |
| AX-157856541 | 8 | 41.477 | KV452904.1 | 3660362 | 7-scf00172 | 7 |
| AX-157822602 | 8 | 41.477 | KV452904.1 | 3661342 | 7-scf00172 | 7 |
| AX-158049514 | 8 | 41.477 | KV452904.1 | 3661395 | 7-scf00172 | 7 |
| AX-157822603 | 8 | 41.477 | KV452904.1 | 3661662 | 7-scf00172 | 7 |
| AX-158049515 | 8 | 41.477 | KV452904.1 | 3661797 | 7-scf00172 | 7 |
| AX-158049516 | 8 | 41.477 | KV452904.1 | 3663385 | 7-scf00172 | 7 |
| AX-158048939 | 8 | 41.478 | KV452904.1 | 3152698 | 7-scf00172 | 7 |
| AX-157758840 | 8 | 41.478 | KV452904.1 | 3156850 | 7-scf00172 | 7 |
| AX-157714186 | 8 | 41.478 | KV452904.1 | 3157524 | 7-scf00172 | 7 |
| AX-157856533 | 8 | 41.478 | KV452904.1 | 3174834 | 7-scf00172 | 7 |
| AX-158049005 | 8 | 41.478 | KV452904.1 | 3220195 | 7-scf00172 | 7 |
| AX-158049091 | 8 | 41.478 | KV452904.1 | 3324621 | 7-scf00172 | 7 |
| AX-157870584 | 8 | 41.478 | KV452904.1 | 3578996 | 7-scf00172 | 7 |
| AX-158049437 | 8 | 41.478 | KV452904.1 | 3585119 | 7-scf00172 | 7 |
| AX-158049439 | 8 | 41.478 | KV452904.1 | 3586697 | 7-scf00172 | 7 |
| AX-158049444 | 8 | 41.478 | KV452904.1 | 3590738 | 7-scf00172 | 7 |
| AX-158049449 | 8 | 41.478 | KV452904.1 | 3597778 | 7-scf00172 | 7 |
| AX-158049450 | 8 | 41.478 | KV452904.1 | 3598615 | 7-scf00172 | 7 |
| AX-158049451 | 8 | 41.478 | KV452904.1 | 3599131 | 7-scf00172 | 7 |
| AX-158049453 | 8 | 41.478 | KV452904.1 | 3602358 | 7-scf00172 | 7 |
| AX-158049454 | 8 | 41.478 | KV452904.1 | 3603370 | 7-scf00172 | 7 |
| AX-158049457 | 8 | 41.478 | KV452904.1 | 3603896 | 7-scf00172 | 7 |
| AX-158049459 | 8 | 41.478 | KV452904.1 | 3604125 | 7-scf00172 | 7 |
| AX-157707818 | 8 | 41.478 | KV452904.1 | 3605174 | 7-scf00172 | 7 |
| AX-158049461 | 8 | 41.478 | KV452904.1 | 3605411 | 7-scf00172 | 7 |
| AX-158049463 | 8 | 41.478 | KV452904.1 | 3605838 | 7-scf00172 | 7 |
| AX-158049464 | 8 | 41.478 | KV452904.1 | 3606051 | 7-scf00172 | 7 |
| AX-158049465 | 8 | 41.478 | KV452904.1 | 3607004 | 7-scf00172 | 7 |
| AX-157708913 | 8 | 41.478 | KV452904.1 | 3607553 | 7-scf00172 | 7 |
| AX-158049468 | 8 | 41.478 | KV452904.1 | 3608057 | 7-scf00172 | 7 |
| AX-157772602 | 8 | 41.478 | KV452904.1 | 3608207 | 7-scf00172 | 7 |
| AX-158049471 | 8 | 41.478 | KV452904.1 | 3608770 | 7-scf00172 | 7 |
| AX-158049472 | 8 | 41.478 | KV452904.1 | 3609703 | 7-scf00172 | 7 |
| AX-157822595 | 8 | 41.478 | KV452904.1 | 3610086 | 7-scf00172 | 7 |
| AX-157822597 | 8 | 41.478 | KV452904.1 | 3612415 | 7-scf00172 | 7 |
| AX-157746248 | 8 | 41.478 | KV452904.1 | 3613206 | 7-scf00172 | 7 |
| AX-157822598 | 8 | 41.478 | KV452904.1 | 3613942 | 7-scf00172 | 7 |
| AX-158049473 | 8 | 41.478 | KV452904.1 | 3618548 | 7-scf00172 | 7 |
| AX-157757552 | 8 | 41.478 | KV452904.1 | 3619130 | 7-scf00172 | 7 |
| AX-158049474 | 8 | 41.478 | KV452904.1 | 3620003 | 7-scf00172 | 7 |

|              |   |        |            |         |            |   |
|--------------|---|--------|------------|---------|------------|---|
| AX-157748874 | 8 | 41.478 | KV452904.1 | 3621645 | 7-scf00172 | 7 |
| AX-157739524 | 8 | 41.478 | KV452904.1 | 3625231 | 7-scf00172 | 7 |
| AX-158049493 | 8 | 41.478 | KV452904.1 | 3644056 | 7-scf00172 | 7 |
| AX-157756046 | 8 | 41.478 | KV452904.1 | 3645172 | 7-scf00172 | 7 |
| AX-158049494 | 8 | 41.478 | KV452904.1 | 3646083 | 7-scf00172 | 7 |
| AX-158049502 | 8 | 41.478 | KV452904.1 | 3651070 | 7-scf00172 | 7 |
| AX-158049511 | 8 | 41.478 | KV452904.1 | 3658575 | 7-scf00172 | 7 |
| AX-158049513 | 8 | 41.478 | KV452904.1 | 3659589 | 7-scf00172 | 7 |
| AX-157822605 | 8 | 41.478 | KV452904.1 | 3664267 | 7-scf00172 | 7 |
| AX-157822606 | 8 | 41.478 | KV452904.1 | 3664810 | 7-scf00172 | 7 |
| AX-158049517 | 8 | 41.478 | KV452904.1 | 3666543 | 7-scf00172 | 7 |
| AX-158049521 | 8 | 41.478 | KV452904.1 | 3668593 | 7-scf00172 | 7 |
| AX-158049523 | 8 | 41.478 | KV452904.1 | 3669192 | 7-scf00172 | 7 |
| AX-158049526 | 8 | 41.478 | KV452904.1 | 3670306 | 7-scf00172 | 7 |
| AX-158049527 | 8 | 41.478 | KV452904.1 | 3671600 | 7-scf00172 | 7 |
| AX-157739611 | 8 | 41.478 | KV452904.1 | 3671958 | 7-scf00172 | 7 |
| AX-158049528 | 8 | 41.478 | KV452904.1 | 3672369 | 7-scf00172 | 7 |
| AX-158049529 | 8 | 41.478 | KV452904.1 | 3672722 | 7-scf00172 | 7 |
| AX-158049530 | 8 | 41.478 | KV452904.1 | 3673195 | 7-scf00172 | 7 |
| AX-158049531 | 8 | 41.478 | KV452904.1 | 3674790 | 7-scf00172 | 7 |
| AX-158049534 | 8 | 41.478 | KV452904.1 | 3677493 | 7-scf00172 | 7 |
| AX-158049536 | 8 | 41.478 | KV452904.1 | 3684766 | 7-scf00172 | 7 |
| AX-158049537 | 8 | 41.478 | KV452904.1 | 3686858 | 7-scf00172 | 7 |
| AX-158049538 | 8 | 41.478 | KV452904.1 | 3687113 | 7-scf00172 | 7 |
| AX-158049539 | 8 | 41.478 | KV452904.1 | 3687497 | 7-scf00172 | 7 |
| AX-158049542 | 8 | 41.478 | KV452904.1 | 3687972 | 7-scf00172 | 7 |
| AX-158049544 | 8 | 41.478 | KV452904.1 | 3688355 | 7-scf00172 | 7 |
| AX-158049545 | 8 | 41.478 | KV452904.1 | 3688695 | 7-scf00172 | 7 |
| AX-158049547 | 8 | 41.478 | KV452904.1 | 3689701 | 7-scf00172 | 7 |
| AX-158049548 | 8 | 41.478 | KV452904.1 | 3690036 | 7-scf00172 | 7 |
| AX-158049550 | 8 | 41.478 | KV452904.1 | 3690645 | 7-scf00172 | 7 |
| AX-158049551 | 8 | 41.478 | KV452904.1 | 3692117 | 7-scf00172 | 7 |
| AX-158049553 | 8 | 41.478 | KV452904.1 | 3693074 | 7-scf00172 | 7 |
| AX-158049554 | 8 | 41.478 | KV452904.1 | 3693789 | 7-scf00172 | 7 |
| AX-158049556 | 8 | 41.478 | KV452904.1 | 3694105 | 7-scf00172 | 7 |
| AX-158049557 | 8 | 41.478 | KV452904.1 | 3694792 | 7-scf00172 | 7 |
| AX-158049559 | 8 | 41.478 | KV452904.1 | 3696751 | 7-scf00172 | 7 |
| AX-158049560 | 8 | 41.478 | KV452904.1 | 3697438 | 7-scf00172 | 7 |
| AX-158049562 | 8 | 41.478 | KV452904.1 | 3697650 | 7-scf00172 | 7 |
| AX-158049565 | 8 | 41.478 | KV452904.1 | 3698447 | 7-scf00172 | 7 |
| AX-158049567 | 8 | 41.478 | KV452904.1 | 3698694 | 7-scf00172 | 7 |
| AX-158049568 | 8 | 41.478 | KV452904.1 | 3699588 | 7-scf00172 | 7 |
| AX-158049575 | 8 | 41.478 | KV452904.1 | 3705721 | 7-scf00172 | 7 |
| AX-158049576 | 8 | 41.478 | KV452904.1 | 3706464 | 7-scf00172 | 7 |
| AX-158049578 | 8 | 41.478 | KV452904.1 | 3707845 | 7-scf00172 | 7 |
| AX-158049580 | 8 | 41.478 | KV452904.1 | 3708230 | 7-scf00172 | 7 |
| AX-158049581 | 8 | 41.478 | KV452904.1 | 3709512 | 7-scf00172 | 7 |
| AX-158049582 | 8 | 41.478 | KV452904.1 | 3710678 | 7-scf00172 | 7 |
| AX-158049583 | 8 | 41.478 | KV452904.1 | 3711133 | 7-scf00172 | 7 |
| AX-158049584 | 8 | 41.478 | KV452904.1 | 3712003 | 7-scf00172 | 7 |
| AX-157723114 | 8 | 41.478 | KV452904.1 | 3714903 | 7-scf00172 | 7 |



|              |   |        |            |         |            |   |
|--------------|---|--------|------------|---------|------------|---|
| AX-157755193 | 8 | 41.478 | KV452904.1 | 3717605 | 7-scf00172 | 7 |
| AX-158049585 | 8 | 41.478 | KV452904.1 | 3718399 | 7-scf00172 | 7 |
| AX-158049586 | 8 | 41.478 | KV452904.1 | 3721538 | 7-scf00172 | 7 |
| AX-158049587 | 8 | 41.478 | KV452904.1 | 3723338 | 7-scf00172 | 7 |
| AX-158049590 | 8 | 41.478 | KV452904.1 | 3725226 | 7-scf00172 | 7 |
| AX-158049592 | 8 | 41.478 | KV452904.1 | 3726606 | 7-scf00172 | 7 |
| AX-158049594 | 8 | 41.478 | KV452904.1 | 3726878 | 7-scf00172 | 7 |
| AX-158049596 | 8 | 41.478 | KV452904.1 | 3727504 | 7-scf00172 | 7 |
| AX-158049598 | 8 | 41.478 | KV452904.1 | 3729725 | 7-scf00172 | 7 |
| AX-158049599 | 8 | 41.478 | KV452904.1 | 3729965 | 7-scf00172 | 7 |
| AX-158049603 | 8 | 41.478 | KV452904.1 | 3732676 | 7-scf00172 | 7 |
| AX-158049605 | 8 | 41.478 | KV452904.1 | 3732802 | 7-scf00172 | 7 |
| AX-158049606 | 8 | 41.478 | KV452904.1 | 3733253 | 7-scf00172 | 7 |
| AX-158049611 | 8 | 41.478 | KV452904.1 | 3739209 | 7-scf00172 | 7 |
| AX-157822607 | 8 | 41.478 | KV452904.1 | 3740465 | 7-scf00172 | 7 |
| AX-158049614 | 8 | 41.478 | KV452904.1 | 3741948 | 7-scf00172 | 7 |
| AX-158049615 | 8 | 41.478 | KV452904.1 | 3742305 | 7-scf00172 | 7 |
| AX-158049619 | 8 | 41.478 | KV452904.1 | 3744388 | 7-scf00172 | 7 |
| AX-157870586 | 8 | 41.478 | KV452904.1 | 3746603 | 7-scf00172 | 7 |
| AX-157822609 | 8 | 41.478 | KV452904.1 | 3747314 | 7-scf00172 | 7 |
| AX-158049629 | 8 | 41.478 | KV452904.1 | 3756361 | 7-scf00172 | 7 |
| AX-158049631 | 8 | 41.478 | KV452904.1 | 3760213 | 7-scf00172 | 7 |
| AX-158047983 | 8 | 41.587 | KV452904.1 | 1541642 | 7-scf00172 | 7 |
| AX-158049649 | 8 | 41.587 | KV452904.1 | 3773810 | 7-scf00172 | 7 |
| AX-158049651 | 8 | 41.587 | KV452904.1 | 3774357 | 7-scf00172 | 7 |
| AX-158049654 | 8 | 41.587 | KV452904.1 | 3775554 | 7-scf00172 | 7 |
| AX-157822617 | 8 | 41.587 | KV452904.1 | 3775951 | 7-scf00172 | 7 |
| AX-158379871 | 8 | 41.587 | KV452904.1 | 3776227 | 7-scf00172 | 7 |
| AX-158049656 | 8 | 41.587 | KV452904.1 | 3776539 | 7-scf00172 | 7 |
| AX-157822618 | 8 | 41.587 | KV452904.1 | 3777527 | 7-scf00172 | 7 |
| AX-158049659 | 8 | 41.587 | KV452904.1 | 3782220 | 7-scf00172 | 7 |
| AX-158049660 | 8 | 41.587 | KV452904.1 | 3782682 | 7-scf00172 | 7 |
| AX-158049664 | 8 | 41.587 | KV452904.1 | 3784663 | 7-scf00172 | 7 |
| AX-158049666 | 8 | 41.587 | KV452904.1 | 3785120 | 7-scf00172 | 7 |
| AX-158049668 | 8 | 41.587 | KV452904.1 | 3787152 | 7-scf00172 | 7 |
| AX-158049671 | 8 | 41.587 | KV452904.1 | 3787947 | 7-scf00172 | 7 |
| AX-158049672 | 8 | 41.587 | KV452904.1 | 3788838 | 7-scf00172 | 7 |
| AX-158049673 | 8 | 41.587 | KV452904.1 | 3790114 | 7-scf00172 | 7 |
| AX-158049674 | 8 | 41.587 | KV452904.1 | 3790445 | 7-scf00172 | 7 |
| AX-158049675 | 8 | 41.587 | KV452904.1 | 3791114 | 7-scf00172 | 7 |
| AX-158049676 | 8 | 41.587 | KV452904.1 | 3791351 | 7-scf00172 | 7 |
| AX-158049679 | 8 | 41.587 | KV452904.1 | 3793694 | 7-scf00172 | 7 |
| AX-157885170 | 8 | 41.587 | KV452904.1 | 3797493 | 7-scf00172 | 7 |
| AX-158049683 | 8 | 41.587 | KV452904.1 | 3798738 | 7-scf00172 | 7 |
| AX-158049684 | 8 | 41.587 | KV452904.1 | 3801090 | 7-scf00172 | 7 |
| AX-158049687 | 8 | 41.587 | KV452904.1 | 3804093 | 7-scf00172 | 7 |
| AX-158049688 | 8 | 41.587 | KV452904.1 | 3804469 | 7-scf00172 | 7 |
| AX-158049692 | 8 | 41.587 | KV452904.1 | 3805576 | 7-scf00172 | 7 |
| AX-157822619 | 8 | 41.587 | KV452904.1 | 3805944 | 7-scf00172 | 7 |
| AX-158049693 | 8 | 41.587 | KV452904.1 | 3806353 | 7-scf00172 | 7 |
| AX-158049694 | 8 | 41.587 | KV452904.1 | 3806951 | 7-scf00172 | 7 |

|              |   |        |            |         |            |   |
|--------------|---|--------|------------|---------|------------|---|
| AX-158049697 | 8 | 41.587 | KV452904.1 | 3809003 | 7-scf00172 | 7 |
| AX-158406459 | 8 | 41.587 | KV452904.1 | 3813310 | 7-scf00172 | 7 |
| AX-158049699 | 8 | 41.587 | KV452904.1 | 3816521 | 7-scf00172 | 7 |
| AX-157786172 | 8 | 41.587 | KV452904.1 | 3816890 | 7-scf00172 | 7 |
| AX-157856543 | 8 | 41.587 | KV452904.1 | 3820179 | 7-scf00172 | 7 |
| AX-158049703 | 8 | 41.587 | KV452904.1 | 3822882 | 7-scf00172 | 7 |
| AX-157822620 | 8 | 41.587 | KV452904.1 | 3824089 | 7-scf00172 | 7 |
| AX-158049705 | 8 | 41.587 | KV452904.1 | 3824599 | 7-scf00172 | 7 |
| AX-158049706 | 8 | 41.587 | KV452904.1 | 3825191 | 7-scf00172 | 7 |
| AX-158049716 | 8 | 41.587 | KV452904.1 | 3833374 | 7-scf00172 | 7 |
| AX-158049717 | 8 | 41.587 | KV452904.1 | 3833890 | 7-scf00172 | 7 |
| AX-157822621 | 8 | 41.587 | KV452904.1 | 3835327 | 7-scf00172 | 7 |
| AX-157822622 | 8 | 41.587 | KV452904.1 | 3835391 | 7-scf00172 | 7 |
| AX-158049724 | 8 | 41.587 | KV452904.1 | 3838633 | 7-scf00172 | 7 |
| AX-158049726 | 8 | 41.587 | KV452904.1 | 3841227 | 7-scf00172 | 7 |
| AX-158049728 | 8 | 41.587 | KV452904.1 | 3841996 | 7-scf00172 | 7 |
| AX-157822623 | 8 | 41.587 | KV452904.1 | 3844118 | 7-scf00172 | 7 |
| AX-158049732 | 8 | 41.587 | KV452904.1 | 3844435 | 7-scf00172 | 7 |
| AX-158049733 | 8 | 41.587 | KV452904.1 | 3845922 | 7-scf00172 | 7 |
| AX-158049743 | 8 | 41.587 | KV452904.1 | 3858230 | 7-scf00172 | 7 |
| AX-157876653 | 8 | 41.587 | KV452904.1 | 3862687 | 7-scf00172 | 7 |
| AX-158049748 | 8 | 41.587 | KV452904.1 | 3862943 | 7-scf00172 | 7 |
| AX-158049751 | 8 | 41.587 | KV452904.1 | 3868319 | 7-scf00172 | 7 |
| AX-158049752 | 8 | 41.587 | KV452904.1 | 3870629 | 7-scf00172 | 7 |
| AX-158049754 | 8 | 41.587 | KV452904.1 | 3871533 | 7-scf00172 | 7 |
| AX-158049764 | 8 | 41.587 | KV452904.1 | 3881035 | 7-scf00172 | 7 |
| AX-158049765 | 8 | 41.587 | KV452904.1 | 3882254 | 7-scf00172 | 7 |
| AX-158049766 | 8 | 41.587 | KV452904.1 | 3882801 | 7-scf00172 | 7 |
| AX-158049767 | 8 | 41.587 | KV452904.1 | 3884079 | 7-scf00172 | 7 |
| AX-158049770 | 8 | 41.587 | KV452904.1 | 3885783 | 7-scf00172 | 7 |
| AX-157822626 | 8 | 41.587 | KV452904.1 | 3886960 | 7-scf00172 | 7 |
| AX-157822627 | 8 | 41.587 | KV452904.1 | 3887115 | 7-scf00172 | 7 |
| AX-157865474 | 8 | 41.587 | KV452904.1 | 3943556 | 7-scf00172 | 7 |
| AX-158049823 | 8 | 41.587 | KV452904.1 | 3944064 | 7-scf00172 | 7 |
| AX-158049805 | 8 | 41.605 | KV452904.1 | 3923351 | 7-scf00172 | 7 |
| AX-158049817 | 8 | 41.605 | KV452904.1 | 3931820 | 7-scf00172 | 7 |
| AX-158049812 | 8 | 41.638 | KV452904.1 | 3927634 | 7-scf00172 | 7 |
| AX-158049806 | 8 | 41.696 | KV452904.1 | 3924042 | 7-scf00172 | 7 |
| AX-158049813 | 8 | 41.696 | KV452904.1 | 3928303 | 7-scf00172 | 7 |
| AX-158049819 | 8 | 41.696 | KV452904.1 | 3933983 | 7-scf00172 | 7 |
| AX-157752276 | 8 | 41.696 | KV452904.1 | 3947508 | 7-scf00172 | 7 |
| AX-158379872 | 8 | 41.696 | KV452904.1 | 3947801 | 7-scf00172 | 7 |
| AX-158049826 | 8 | 41.696 | KV452904.1 | 3950504 | 7-scf00172 | 7 |
| AX-158049830 | 8 | 41.696 | KV452904.1 | 3954968 | 7-scf00172 | 7 |
| AX-158049831 | 8 | 41.696 | KV452904.1 | 3956320 | 7-scf00172 | 7 |
| AX-158049834 | 8 | 41.696 | KV452904.1 | 3958463 | 7-scf00172 | 7 |
| AX-158049837 | 8 | 41.696 | KV452904.1 | 3959590 | 7-scf00172 | 7 |
| AX-157856545 | 8 | 41.696 | KV452904.1 | 3960141 | 7-scf00172 | 7 |
| AX-158049860 | 8 | 41.696 | KV452904.1 | 3976405 | 7-scf00172 | 7 |
| AX-158049689 | 8 | 41.835 | KV452904.1 | 3805134 | 7-scf00172 | 7 |
| AX-158049825 | 8 | 41.835 | KV452904.1 | 3949147 | 7-scf00172 | 7 |

|              |   |        |            |         |              |    |
|--------------|---|--------|------------|---------|--------------|----|
| AX-158049833 | 8 | 41.835 | KV452904.1 | 3958205 | 7-scf00172   | 7  |
| AX-158049835 | 8 | 41.835 | KV452904.1 | 3958907 | 7-scf00172   | 7  |
| AX-158049838 | 8 | 41.835 | KV452904.1 | 3961986 | 7-scf00172   | 7  |
| AX-158049842 | 8 | 41.835 | KV452904.1 | 3963075 | 7-scf00172   | 7  |
| AX-158049844 | 8 | 41.835 | KV452904.1 | 3964536 | 7-scf00172   | 7  |
| AX-158049850 | 8 | 41.835 | KV452904.1 | 3968180 | 7-scf00172   | 7  |
| AX-158049853 | 8 | 41.835 | KV452904.1 | 3970651 | 7-scf00172   | 7  |
| AX-158049843 | 8 | 41.877 | KV452904.1 | 3963656 | 7-scf00172   | 7  |
| AX-158049856 | 8 | 42.02  | KV452904.1 | 3972659 | 7-scf00172   | 7  |
| AX-158049859 | 8 | 42.021 | KV452904.1 | 3974014 | 7-scf00172   | 7  |
| AX-157822630 | 8 | 42.183 | KV452904.1 | 3982598 | 7-scf00172   | 7  |
| AX-158049866 | 8 | 42.183 | KV452904.1 | 3982946 | 7-scf00172   | 7  |
| AX-157822631 | 8 | 42.183 | KV452904.1 | 3983733 | 7-scf00172   | 7  |
| AX-157774582 | 8 | 42.183 | KV452904.1 | 3984836 | 7-scf00172   | 7  |
| AX-158049871 | 8 | 42.345 | KV452904.1 | 3996785 | 7-scf00172   | 7  |
| AX-158049873 | 8 | 42.345 | KV452904.1 | 4003261 | 7-scf00172   | 7  |
| AX-158049874 | 8 | 42.35  | KV452904.1 | 4004876 | 7-scf00172   | 7  |
| AX-158049878 | 8 | 42.39  | KV452904.1 | 4008542 | 7-scf00172   | 7  |
| AX-158049809 | 8 | 42.489 | KV452904.1 | 3926208 | 7-scf00172   | 7  |
| AX-158049858 | 8 | 42.489 | KV452904.1 | 3973498 | 7-scf00172   | 7  |
| AX-157757075 | 8 | 42.489 | KV452904.1 | 4008804 | 7-scf00172   | 7  |
| AX-158049879 | 8 | 42.489 | KV452904.1 | 4009703 | 7-scf00172   | 7  |
| AX-157756599 | 8 | 42.489 | KV452904.1 | 4015327 | 7-scf00172   | 7  |
| AX-157885172 | 8 | 42.489 | KV452904.1 | 4015416 | 7-scf00172   | 7  |
| AX-158049888 | 8 | 42.489 | KV452904.1 | 4020207 | 7-scf00172   | 7  |
| AX-158049899 | 8 | 42.489 | KV452904.1 | 4032836 | 7-scf00172   | 7  |
| AX-157822644 | 8 | 42.489 | KV452904.1 | 4179437 | 7-scf00172   | 7  |
| AX-157822645 | 8 | 42.489 | KV452904.1 | 4193601 | 7-scf00172   | 7  |
| AX-157693098 | 8 | 42.489 |            | 2771    | 232752_g10_i | UN |
| AX-158049886 | 8 | 42.737 | KV452904.1 | 4018455 | 7-scf00172   | 7  |
| AX-158049890 | 8 | 42.738 | KV452904.1 | 4023619 | 7-scf00172   | 7  |
| AX-158049892 | 8 | 42.738 | KV452904.1 | 4024025 | 7-scf00172   | 7  |
| AX-158049905 | 8 | 43.316 | KV452904.1 | 4038197 | 7-scf00172   | 7  |
| AX-158049910 | 8 | 43.316 | KV452904.1 | 4041915 | 7-scf00172   | 7  |
| AX-158049916 | 8 | 43.367 | KV452904.1 | 4048346 | 7-scf00172   | 7  |
| AX-158049921 | 8 | 43.445 | KV452904.1 | 4052967 | 7-scf00172   | 7  |
| AX-157756013 | 8 | 43.445 | KV452904.1 | 4058052 | 7-scf00172   | 7  |
| AX-158049926 | 8 | 43.445 | KV452904.1 | 4058770 | 7-scf00172   | 7  |
| AX-157717433 | 8 | 43.445 | KV452904.1 | 4061740 | 7-scf00172   | 7  |
| AX-157822634 | 8 | 43.445 | KV452904.1 | 4061813 | 7-scf00172   | 7  |
| AX-157822635 | 8 | 43.445 | KV452904.1 | 4062725 | 7-scf00172   | 7  |
| AX-158049930 | 8 | 43.445 | KV452904.1 | 4067549 | 7-scf00172   | 7  |
| AX-158049933 | 8 | 43.445 | KV452904.1 | 4071439 | 7-scf00172   | 7  |
| AX-158049936 | 8 | 43.445 | KV452904.1 | 4073121 | 7-scf00172   | 7  |
| AX-158049937 | 8 | 43.445 | KV452904.1 | 4073734 | 7-scf00172   | 7  |
| AX-158049940 | 8 | 43.445 | KV452904.1 | 4074256 | 7-scf00172   | 7  |
| AX-158049942 | 8 | 43.445 | KV452904.1 | 4075013 | 7-scf00172   | 7  |
| AX-158049944 | 8 | 43.445 | KV452904.1 | 4075929 | 7-scf00172   | 7  |
| AX-158049946 | 8 | 43.445 | KV452904.1 | 4078241 | 7-scf00172   | 7  |
| AX-158049950 | 8 | 43.445 | KV452904.1 | 4081562 | 7-scf00172   | 7  |
| AX-157714022 | 8 | 43.445 | KV452904.1 | 4082691 | 7-scf00172   | 7  |

|              |   |        |            |         |            |   |
|--------------|---|--------|------------|---------|------------|---|
| AX-158049954 | 8 | 43.445 | KV452904.1 | 4087705 | 7-scf00172 | 7 |
| AX-158049955 | 8 | 43.445 | KV452904.1 | 4091745 | 7-scf00172 | 7 |
| AX-157747840 | 8 | 43.445 | KV452904.1 | 4091877 | 7-scf00172 | 7 |
| AX-158049956 | 8 | 43.445 | KV452904.1 | 4094800 | 7-scf00172 | 7 |
| AX-157822638 | 8 | 43.445 | KV452904.1 | 4112610 | 7-scf00172 | 7 |
| AX-158049945 | 8 | 43.446 | KV452904.1 | 4077588 | 7-scf00172 | 7 |
| AX-158049961 | 8 | 43.446 | KV452904.1 | 4099703 | 7-scf00172 | 7 |
| AX-158049962 | 8 | 43.446 | KV452904.1 | 4100671 | 7-scf00172 | 7 |
| AX-157822637 | 8 | 43.609 | KV452904.1 | 4106407 | 7-scf00172 | 7 |
| AX-158049967 | 8 | 43.609 | KV452904.1 | 4107527 | 7-scf00172 | 7 |
| AX-158049969 | 8 | 43.691 | KV452904.1 | 4113407 | 7-scf00172 | 7 |
| AX-158049971 | 8 | 43.773 | KV452904.1 | 4115926 | 7-scf00172 | 7 |
| AX-158049818 | 8 | 43.909 | KV452904.1 | 3933378 | 7-scf00172 | 7 |
| AX-158049848 | 8 | 43.909 | KV452904.1 | 3966919 | 7-scf00172 | 7 |
| AX-157822629 | 8 | 43.909 | KV452904.1 | 3982528 | 7-scf00172 | 7 |
| AX-157822632 | 8 | 43.909 | KV452904.1 | 4000724 | 7-scf00172 | 7 |
| AX-158049876 | 8 | 43.909 | KV452904.1 | 4005517 | 7-scf00172 | 7 |
| AX-158049917 | 8 | 43.909 | KV452904.1 | 4050358 | 7-scf00172 | 7 |
| AX-158049918 | 8 | 43.909 | KV452904.1 | 4051147 | 7-scf00172 | 7 |
| AX-158049928 | 8 | 43.909 | KV452904.1 | 4063422 | 7-scf00172 | 7 |
| AX-158049993 | 8 | 43.909 | KV452904.1 | 4149247 | 7-scf00172 | 7 |
| AX-158050008 | 8 | 43.909 | KV452904.1 | 4158607 | 7-scf00172 | 7 |
| AX-158050015 | 8 | 43.909 | KV452904.1 | 4164695 | 7-scf00172 | 7 |
| AX-158050019 | 8 | 43.909 | KV452904.1 | 4167662 | 7-scf00172 | 7 |
| AX-158049997 | 8 | 44.079 | KV452904.1 | 4154192 | 7-scf00172 | 7 |
| AX-158049998 | 8 | 44.083 | KV452904.1 | 4154622 | 7-scf00172 | 7 |
| AX-157865476 | 8 | 44.086 | KV452904.1 | 4150177 | 7-scf00172 | 7 |
| AX-158050005 | 8 | 44.086 | KV452904.1 | 4157652 | 7-scf00172 | 7 |
| AX-158050006 | 8 | 44.297 | KV452904.1 | 4158339 | 7-scf00172 | 7 |
| AX-158050009 | 8 | 44.541 | KV452904.1 | 4159976 | 7-scf00172 | 7 |
| AX-158050010 | 8 | 44.541 | KV452904.1 | 4160715 | 7-scf00172 | 7 |
| AX-157885171 | 8 | 44.976 | KV452904.1 | 3928057 | 7-scf00172 | 7 |
| AX-158049814 | 8 | 44.976 | KV452904.1 | 3928805 | 7-scf00172 | 7 |
| AX-158049884 | 8 | 44.976 | KV452904.1 | 4015819 | 7-scf00172 | 7 |
| AX-158049931 | 8 | 44.976 | KV452904.1 | 4067990 | 7-scf00172 | 7 |
| AX-158049951 | 8 | 44.976 | KV452904.1 | 4083469 | 7-scf00172 | 7 |
| AX-158049974 | 8 | 44.976 | KV452904.1 | 4123871 | 7-scf00172 | 7 |
| AX-158049994 | 8 | 44.976 | KV452904.1 | 4151011 | 7-scf00172 | 7 |
| AX-158050014 | 8 | 44.976 | KV452904.1 | 4163382 | 7-scf00172 | 7 |
| AX-157717715 | 8 | 44.976 | KV452904.1 | 4165382 | 7-scf00172 | 7 |
| AX-158050017 | 8 | 44.976 | KV452904.1 | 4167028 | 7-scf00172 | 7 |
| AX-158050020 | 8 | 44.976 | KV452904.1 | 4169006 | 7-scf00172 | 7 |
| AX-158050021 | 8 | 44.976 | KV452904.1 | 4169811 | 7-scf00172 | 7 |
| AX-158050023 | 8 | 44.976 | KV452904.1 | 4170557 | 7-scf00172 | 7 |
| AX-158050026 | 8 | 44.976 | KV452904.1 | 4172149 | 7-scf00172 | 7 |
| AX-158050027 | 8 | 44.976 | KV452904.1 | 4172915 | 7-scf00172 | 7 |
| AX-158050029 | 8 | 44.976 | KV452904.1 | 4175218 | 7-scf00172 | 7 |
| AX-157822643 | 8 | 44.976 | KV452904.1 | 4177136 | 7-scf00172 | 7 |
| AX-158050031 | 8 | 44.976 | KV452904.1 | 4177374 | 7-scf00172 | 7 |
| AX-158050032 | 8 | 44.976 | KV452904.1 | 4181232 | 7-scf00172 | 7 |
| AX-158050037 | 8 | 44.976 | KV452904.1 | 4186413 | 7-scf00172 | 7 |

|              |   |        |            |          |            |   |
|--------------|---|--------|------------|----------|------------|---|
| AX-158050038 | 8 | 44.976 | KV452904.1 | 4186784  | 7-scf00172 | 7 |
| AX-157775372 | 8 | 44.976 | KV452904.1 | 4187072  | 7-scf00172 | 7 |
| AX-157773847 | 8 | 44.976 | KV452904.1 | 4187920  | 7-scf00172 | 7 |
| AX-158050041 | 8 | 44.976 | KV452904.1 | 4191120  | 7-scf00172 | 7 |
| AX-158050042 | 8 | 44.976 | KV452904.1 | 4192619  | 7-scf00172 | 7 |
| AX-157822648 | 8 | 44.976 | KV452904.1 | 4196385  | 7-scf00172 | 7 |
| AX-158050045 | 8 | 44.976 | KV452904.1 | 4197090  | 7-scf00172 | 7 |
| AX-158050055 | 8 | 44.976 | KV452904.1 | 4210746  | 7-scf00172 | 7 |
| AX-158049972 | 8 | 44.98  | KV452904.1 | 4118004  | 7-scf00172 | 7 |
| AX-158050046 | 8 | 44.98  | KV452904.1 | 4197562  | 7-scf00172 | 7 |
| AX-158422384 | 8 | 45.173 | KV452904.1 | 4205906  | 7-scf00172 | 7 |
| AX-157714359 | 8 | 45.517 | KV452904.1 | 4106158  | 7-scf00172 | 7 |
| AX-158050054 | 8 | 45.517 | KV452904.1 | 4210080  | 7-scf00172 | 7 |
| AX-157822646 | 8 | 45.528 | KV452904.1 | 4193661  | 7-scf00172 | 7 |
| AX-157822647 | 8 | 45.528 | KV452904.1 | 4195432  | 7-scf00172 | 7 |
| AX-158050056 | 8 | 45.528 | KV452904.1 | 4211544  | 7-scf00172 | 7 |
| AX-158050057 | 8 | 45.539 | KV452904.1 | 4213646  | 7-scf00172 | 7 |
| AX-158050058 | 8 | 45.763 | KV452904.1 | 4214924  | 7-scf00172 | 7 |
| AX-158050064 | 8 | 45.828 | KV452904.1 | 4218173  | 7-scf00172 | 7 |
| AX-158050065 | 8 | 46.07  | KV452904.1 | 4221638  | 7-scf00172 | 7 |
| AX-158050067 | 8 | 46.07  | KV452904.1 | 4223661  | 7-scf00172 | 7 |
| AX-158050070 | 8 | 46.07  | KV452904.1 | 4227948  | 7-scf00172 | 7 |
| AX-158050071 | 8 | 46.07  | KV452904.1 | 4229333  | 7-scf00172 | 7 |
| AX-158050076 | 8 | 46.07  | KV452904.1 | 4231706  | 7-scf00172 | 7 |
| AX-158050078 | 8 | 46.07  | KV452904.1 | 4232396  | 7-scf00172 | 7 |
| AX-158050080 | 8 | 46.07  | KV452904.1 | 4233680  | 7-scf00172 | 7 |
| AX-158050083 | 8 | 46.343 | KV452904.1 | 4237127  | 7-scf00172 | 7 |
| AX-157822650 | 8 | 46.343 | KV452904.1 | 4242048  | 7-scf00172 | 7 |
| AX-157856547 | 8 | 46.343 | KV452904.1 | 4243706  | 7-scf00172 | 7 |
| AX-157822651 | 8 | 46.343 | KV452904.1 | 4244586  | 7-scf00172 | 7 |
| AX-158050100 | 8 | 46.343 | KV452904.1 | 4250461  | 7-scf00172 | 7 |
| AX-158050103 | 8 | 46.343 | KV452904.1 | 4253700  | 7-scf00172 | 7 |
| AX-158050105 | 8 | 46.343 | KV452904.1 | 4254446  | 7-scf00172 | 7 |
| AX-158050117 | 8 | 46.343 | KV452904.1 | 4274721  | 7-scf00172 | 7 |
| AX-158050151 | 8 | 46.343 | KV452904.1 | 4304715  | 7-scf00172 | 7 |
| AX-158050166 | 8 | 46.343 | KV452904.1 | 4311174  | 7-scf00172 | 7 |
| AX-158050174 | 8 | 46.343 | KV452904.1 | 4320950  | 7-scf00172 | 7 |
| AX-158050181 | 8 | 46.343 | KV452904.1 | 4331552  | 7-scf00172 | 7 |
| AX-158050203 | 8 | 46.343 | KV452904.1 | 4370881  | 7-scf00172 | 7 |
| AX-158050272 | 8 | 46.343 | KV452904.1 | 4442235  | 7-scf00172 | 7 |
| AX-157822695 | 8 | 46.343 | KV452904.1 | 4811216  | 7-scf00172 | 7 |
| AX-157822698 | 8 | 46.343 | KV452904.1 | 4872072  | 7-scf00172 | 7 |
| AX-158050612 | 8 | 46.343 | KV452904.1 | 4940488  | 7-scf00172 | 7 |
| AX-157870595 | 8 | 46.343 | KV452904.1 | 4954529  | 7-scf00172 | 7 |
| AX-158050682 | 8 | 46.343 | KV452904.1 | 5040174  | 7-scf00172 | 7 |
| AX-157714322 | 8 | 46.343 | KV452904.1 | 5933414  | 7-scf00172 | 7 |
| AX-158051750 | 8 | 46.343 | KV452904.1 | 6472959  | 7-scf00172 | 7 |
| AX-158378973 | 8 | 46.343 | KV452904.1 | 16887170 | 7-scf00172 | 7 |
| AX-158050099 | 8 | 46.401 | KV452904.1 | 4249091  | 7-scf00172 | 7 |
| AX-157822653 | 8 | 46.401 | KV452904.1 | 4253807  | 7-scf00172 | 7 |
| AX-158050108 | 8 | 46.401 | KV452904.1 | 4263543  | 7-scf00172 | 7 |

|              |   |        |            |         |            |   |
|--------------|---|--------|------------|---------|------------|---|
| AX-157726458 | 8 | 46.48  | KV452904.1 | 4266149 | 7-scf00172 | 7 |
| AX-158050112 | 8 | 46.595 | KV452904.1 | 4270198 | 7-scf00172 | 7 |
| AX-158050118 | 8 | 46.617 | KV452904.1 | 4275591 | 7-scf00172 | 7 |
| AX-158050119 | 8 | 46.617 | KV452904.1 | 4276377 | 7-scf00172 | 7 |
| AX-157822654 | 8 | 46.617 | KV452904.1 | 4277535 | 7-scf00172 | 7 |
| AX-158050121 | 8 | 46.617 | KV452904.1 | 4277657 | 7-scf00172 | 7 |
| AX-158050123 | 8 | 46.617 | KV452904.1 | 4278059 | 7-scf00172 | 7 |
| AX-158050128 | 8 | 46.617 | KV452904.1 | 4282993 | 7-scf00172 | 7 |
| AX-158050130 | 8 | 46.617 | KV452904.1 | 4283146 | 7-scf00172 | 7 |
| AX-158050136 | 8 | 46.617 | KV452904.1 | 4286286 | 7-scf00172 | 7 |
| AX-158050140 | 8 | 46.617 | KV452904.1 | 4290684 | 7-scf00172 | 7 |
| AX-158050132 | 8 | 46.636 | KV452904.1 | 4283533 | 7-scf00172 | 7 |
| AX-158050133 | 8 | 46.666 | KV452904.1 | 4284325 | 7-scf00172 | 7 |
| AX-158050095 | 8 | 46.697 | KV452904.1 | 4246622 | 7-scf00172 | 7 |
| AX-158050139 | 8 | 46.697 | KV452904.1 | 4288777 | 7-scf00172 | 7 |
| AX-158050124 | 8 | 46.726 | KV452904.1 | 4279695 | 7-scf00172 | 7 |
| AX-158050144 | 8 | 46.726 | KV452904.1 | 4296853 | 7-scf00172 | 7 |
| AX-157765928 | 8 | 46.726 | KV452904.1 | 4299149 | 7-scf00172 | 7 |
| AX-158050149 | 8 | 46.726 | KV452904.1 | 4301997 | 7-scf00172 | 7 |
| AX-158050155 | 8 | 46.726 | KV452904.1 | 4307217 | 7-scf00172 | 7 |
| AX-157822656 | 8 | 46.726 | KV452904.1 | 4307617 | 7-scf00172 | 7 |
| AX-158050157 | 8 | 46.726 | KV452904.1 | 4308351 | 7-scf00172 | 7 |
| AX-158050158 | 8 | 46.726 | KV452904.1 | 4308868 | 7-scf00172 | 7 |
| AX-158050167 | 8 | 46.726 | KV452904.1 | 4311481 | 7-scf00172 | 7 |
| AX-158050170 | 8 | 46.726 | KV452904.1 | 4314192 | 7-scf00172 | 7 |
| AX-158050182 | 8 | 46.726 | KV452904.1 | 4332767 | 7-scf00172 | 7 |
| AX-157822668 | 8 | 46.726 | KV452904.1 | 4384353 | 7-scf00172 | 7 |
| AX-158050301 | 8 | 46.726 | KV452904.1 | 4474462 | 7-scf00172 | 7 |
| AX-157885175 | 8 | 46.78  | KV452904.1 | 4247143 | 7-scf00172 | 7 |
| AX-157822663 | 8 | 46.78  | KV452904.1 | 4333175 | 7-scf00172 | 7 |
| AX-158050090 | 8 | 46.835 | KV452904.1 | 4243246 | 7-scf00172 | 7 |
| AX-158050150 | 8 | 46.835 | KV452904.1 | 4302801 | 7-scf00172 | 7 |
| AX-158050188 | 8 | 46.835 | KV452904.1 | 4341276 | 7-scf00172 | 7 |
| AX-157822667 | 8 | 46.835 | KV452904.1 | 4352603 | 7-scf00172 | 7 |
| AX-157717262 | 8 | 46.835 | KV452904.1 | 4353793 | 7-scf00172 | 7 |
| AX-158050195 | 8 | 46.835 | KV452904.1 | 4356003 | 7-scf00172 | 7 |
| AX-158050202 | 8 | 46.835 | KV452904.1 | 4369631 | 7-scf00172 | 7 |
| AX-158050209 | 8 | 46.835 | KV452904.1 | 4375327 | 7-scf00172 | 7 |
| AX-158050213 | 8 | 46.835 | KV452904.1 | 4376621 | 7-scf00172 | 7 |
| AX-158050214 | 8 | 46.835 | KV452904.1 | 4377663 | 7-scf00172 | 7 |
| AX-158050216 | 8 | 46.835 | KV452904.1 | 4378567 | 7-scf00172 | 7 |
| AX-158050218 | 8 | 46.835 | KV452904.1 | 4379403 | 7-scf00172 | 7 |
| AX-158050220 | 8 | 46.835 | KV452904.1 | 4379750 | 7-scf00172 | 7 |
| AX-158050223 | 8 | 46.835 | KV452904.1 | 4380911 | 7-scf00172 | 7 |
| AX-158408792 | 8 | 46.835 | KV452904.1 | 4385039 | 7-scf00172 | 7 |
| AX-157757848 | 8 | 46.835 | KV452904.1 | 4390128 | 7-scf00172 | 7 |
| AX-158050265 | 8 | 46.835 | KV452904.1 | 4432015 | 7-scf00172 | 7 |
| AX-158050266 | 8 | 46.835 | KV452904.1 | 4432947 | 7-scf00172 | 7 |
| AX-158050267 | 8 | 46.835 | KV452904.1 | 4434014 | 7-scf00172 | 7 |
| AX-158050268 | 8 | 46.835 | KV452904.1 | 4434405 | 7-scf00172 | 7 |
| AX-157822673 | 8 | 46.835 | KV452904.1 | 4435406 | 7-scf00172 | 7 |

|              |   |        |            |         |            |   |
|--------------|---|--------|------------|---------|------------|---|
| AX-157716481 | 8 | 46.835 | KV452904.1 | 4440166 | 7-scf00172 | 7 |
| AX-158050270 | 8 | 46.835 | KV452904.1 | 4441314 | 7-scf00172 | 7 |
| AX-158050273 | 8 | 46.835 | KV452904.1 | 4444294 | 7-scf00172 | 7 |
| AX-158050274 | 8 | 46.835 | KV452904.1 | 4444999 | 7-scf00172 | 7 |
| AX-158050275 | 8 | 46.835 | KV452904.1 | 4445810 | 7-scf00172 | 7 |
| AX-158050278 | 8 | 46.835 | KV452904.1 | 4447497 | 7-scf00172 | 7 |
| AX-158050279 | 8 | 46.835 | KV452904.1 | 4450374 | 7-scf00172 | 7 |
| AX-158050280 | 8 | 46.835 | KV452904.1 | 4451139 | 7-scf00172 | 7 |
| AX-157716157 | 8 | 46.835 | KV452904.1 | 4458359 | 7-scf00172 | 7 |
| AX-158050290 | 8 | 46.835 | KV452904.1 | 4463066 | 7-scf00172 | 7 |
| AX-157725181 | 8 | 46.835 | KV452904.1 | 4463180 | 7-scf00172 | 7 |
| AX-158050292 | 8 | 46.835 | KV452904.1 | 4463362 | 7-scf00172 | 7 |
| AX-157739968 | 8 | 46.835 | KV452904.1 | 4468297 | 7-scf00172 | 7 |
| AX-158050302 | 8 | 46.835 | KV452904.1 | 4475196 | 7-scf00172 | 7 |
| AX-158050303 | 8 | 46.835 | KV452904.1 | 4481537 | 7-scf00172 | 7 |
| AX-157876667 | 8 | 46.835 | KV452904.1 | 4481796 | 7-scf00172 | 7 |
| AX-158050305 | 8 | 46.835 | KV452904.1 | 4487302 | 7-scf00172 | 7 |
| AX-157748378 | 8 | 46.835 | KV452904.1 | 4541382 | 7-scf00172 | 7 |
| AX-158050357 | 8 | 46.835 | KV452904.1 | 4578779 | 7-scf00172 | 7 |
| AX-158050364 | 8 | 46.835 | KV452904.1 | 4582862 | 7-scf00172 | 7 |
| AX-158050483 | 8 | 46.835 | KV452904.1 | 4722421 | 7-scf00172 | 7 |
| AX-158050485 | 8 | 46.835 | KV452904.1 | 4722899 | 7-scf00172 | 7 |
| AX-158050310 | 8 | 46.888 | KV452904.1 | 4505619 | 7-scf00172 | 7 |
| AX-158050143 | 8 | 46.944 | KV452904.1 | 4295537 | 7-scf00172 | 7 |
| AX-157740061 | 8 | 46.944 | KV452904.1 | 4318604 | 7-scf00172 | 7 |
| AX-158050176 | 8 | 46.944 | KV452904.1 | 4324224 | 7-scf00172 | 7 |
| AX-157822664 | 8 | 46.944 | KV452904.1 | 4333307 | 7-scf00172 | 7 |
| AX-157822665 | 8 | 46.944 | KV452904.1 | 4339069 | 7-scf00172 | 7 |
| AX-158050186 | 8 | 46.944 | KV452904.1 | 4339184 | 7-scf00172 | 7 |
| AX-158050187 | 8 | 46.944 | KV452904.1 | 4339896 | 7-scf00172 | 7 |
| AX-158050193 | 8 | 46.944 | KV452904.1 | 4352992 | 7-scf00172 | 7 |
| AX-158050197 | 8 | 46.944 | KV452904.1 | 4356835 | 7-scf00172 | 7 |
| AX-158050198 | 8 | 46.944 | KV452904.1 | 4357960 | 7-scf00172 | 7 |
| AX-158050201 | 8 | 46.944 | KV452904.1 | 4369414 | 7-scf00172 | 7 |
| AX-158050204 | 8 | 46.944 | KV452904.1 | 4371296 | 7-scf00172 | 7 |
| AX-158050207 | 8 | 46.944 | KV452904.1 | 4373275 | 7-scf00172 | 7 |
| AX-158050208 | 8 | 46.944 | KV452904.1 | 4373785 | 7-scf00172 | 7 |
| AX-157746304 | 8 | 46.944 | KV452904.1 | 4429827 | 7-scf00172 | 7 |
| AX-158050287 | 8 | 46.944 | KV452904.1 | 4458851 | 7-scf00172 | 7 |
| AX-158050298 | 8 | 46.944 | KV452904.1 | 4470480 | 7-scf00172 | 7 |
| AX-158050311 | 8 | 46.944 | KV452904.1 | 4506287 | 7-scf00172 | 7 |
| AX-157724872 | 8 | 46.944 | KV452904.1 | 4510387 | 7-scf00172 | 7 |
| AX-158050315 | 8 | 46.944 | KV452904.1 | 4519093 | 7-scf00172 | 7 |
| AX-157876669 | 8 | 46.944 | KV452904.1 | 4521171 | 7-scf00172 | 7 |
| AX-158050322 | 8 | 46.944 | KV452904.1 | 4532478 | 7-scf00172 | 7 |
| AX-158050326 | 8 | 46.944 | KV452904.1 | 4536386 | 7-scf00172 | 7 |
| AX-157822683 | 8 | 46.944 | KV452904.1 | 4537883 | 7-scf00172 | 7 |
| AX-157696176 | 8 | 46.944 | KV452904.1 | 4546022 | 7-scf00172 | 7 |
| AX-158050338 | 8 | 46.944 | KV452904.1 | 4562436 | 7-scf00172 | 7 |
| AX-158050346 | 8 | 46.944 | KV452904.1 | 4570279 | 7-scf00172 | 7 |
| AX-158050349 | 8 | 46.944 | KV452904.1 | 4574056 | 7-scf00172 | 7 |

|              |   |        |            |         |            |   |
|--------------|---|--------|------------|---------|------------|---|
| AX-158050353 | 8 | 46.944 | KV452904.1 | 4575773 | 7-scf00172 | 7 |
| AX-158050378 | 8 | 46.944 | KV452904.1 | 4598341 | 7-scf00172 | 7 |
| AX-158050380 | 8 | 46.944 | KV452904.1 | 4601312 | 7-scf00172 | 7 |
| AX-158050392 | 8 | 46.944 | KV452904.1 | 4619636 | 7-scf00172 | 7 |
| AX-158050415 | 8 | 46.944 | KV452904.1 | 4641763 | 7-scf00172 | 7 |
| AX-158050445 | 8 | 46.944 | KV452904.1 | 4673144 | 7-scf00172 | 7 |
| AX-158050184 | 8 | 47.054 | KV452904.1 | 4337170 | 7-scf00172 | 7 |
| AX-158050189 | 8 | 47.054 | KV452904.1 | 4343447 | 7-scf00172 | 7 |
| AX-157822679 | 8 | 47.054 | KV452904.1 | 4508707 | 7-scf00172 | 7 |
| AX-158050313 | 8 | 47.054 | KV452904.1 | 4509656 | 7-scf00172 | 7 |
| AX-158050316 | 8 | 47.054 | KV452904.1 | 4520807 | 7-scf00172 | 7 |
| AX-158050356 | 8 | 47.054 | KV452904.1 | 4578201 | 7-scf00172 | 7 |
| AX-157723532 | 8 | 47.054 | KV452904.1 | 4579845 | 7-scf00172 | 7 |
| AX-158050361 | 8 | 47.054 | KV452904.1 | 4580632 | 7-scf00172 | 7 |
| AX-158050381 | 8 | 47.054 | KV452904.1 | 4603278 | 7-scf00172 | 7 |
| AX-158050366 | 8 | 47.063 | KV452904.1 | 4583274 | 7-scf00172 | 7 |
| AX-158050367 | 8 | 47.072 | KV452904.1 | 4584149 | 7-scf00172 | 7 |
| AX-158050370 | 8 | 47.081 | KV452904.1 | 4586946 | 7-scf00172 | 7 |
| AX-158050375 | 8 | 47.1   | KV452904.1 | 4595531 | 7-scf00172 | 7 |
| AX-158050376 | 8 | 47.118 | KV452904.1 | 4596266 | 7-scf00172 | 7 |
| AX-158050383 | 8 | 47.14  | KV452904.1 | 4608297 | 7-scf00172 | 7 |
| AX-157724913 | 8 | 47.163 | KV452904.1 | 4610288 | 7-scf00172 | 7 |
| AX-158050384 | 8 | 47.163 | KV452904.1 | 4610876 | 7-scf00172 | 7 |
| AX-158050393 | 8 | 47.163 | KV452904.1 | 4619922 | 7-scf00172 | 7 |
| AX-158050430 | 8 | 47.163 | KV452904.1 | 4659258 | 7-scf00172 | 7 |
| AX-158050543 | 8 | 47.163 | KV452904.1 | 4784800 | 7-scf00172 | 7 |
| AX-158050403 | 8 | 47.19  | KV452904.1 | 4624981 | 7-scf00172 | 7 |
| AX-158050406 | 8 | 47.286 | KV452904.1 | 4629133 | 7-scf00172 | 7 |
| AX-158050409 | 8 | 47.381 | KV452904.1 | 4633123 | 7-scf00172 | 7 |
| AX-158050412 | 8 | 47.382 | KV452904.1 | 4635630 | 7-scf00172 | 7 |
| AX-158378719 | 8 | 47.383 | KV452904.1 | 4638206 | 7-scf00172 | 7 |
| AX-158050423 | 8 | 47.514 | KV452904.1 | 4648301 | 7-scf00172 | 7 |
| AX-158050421 | 8 | 47.68  | KV452904.1 | 4647395 | 7-scf00172 | 7 |
| AX-158050422 | 8 | 47.68  | KV452904.1 | 4647607 | 7-scf00172 | 7 |
| AX-157745985 | 8 | 47.68  | KV452904.1 | 4650279 | 7-scf00172 | 7 |
| AX-158050426 | 8 | 47.68  | KV452904.1 | 4654870 | 7-scf00172 | 7 |
| AX-158050436 | 8 | 47.736 | KV452904.1 | 4664444 | 7-scf00172 | 7 |
| AX-158050443 | 8 | 47.775 | KV452904.1 | 4671754 | 7-scf00172 | 7 |
| AX-158050447 | 8 | 47.805 | KV452904.1 | 4677511 | 7-scf00172 | 7 |
| AX-158050190 | 8 | 47.99  | KV452904.1 | 4347585 | 7-scf00172 | 7 |
| AX-158050439 | 8 | 47.99  | KV452904.1 | 4667273 | 7-scf00172 | 7 |
| AX-158050441 | 8 | 47.99  | KV452904.1 | 4670428 | 7-scf00172 | 7 |
| AX-158050450 | 8 | 47.99  | KV452904.1 | 4679248 | 7-scf00172 | 7 |
| AX-157699565 | 8 | 47.99  | KV452904.1 | 4681185 | 7-scf00172 | 7 |
| AX-158050457 | 8 | 47.99  | KV452904.1 | 4689637 | 7-scf00172 | 7 |
| AX-158050459 | 8 | 47.99  | KV452904.1 | 4690344 | 7-scf00172 | 7 |
| AX-158050463 | 8 | 47.99  | KV452904.1 | 4693745 | 7-scf00172 | 7 |
| AX-158050469 | 8 | 47.99  | KV452904.1 | 4700764 | 7-scf00172 | 7 |
| AX-158050470 | 8 | 47.99  | KV452904.1 | 4701745 | 7-scf00172 | 7 |
| AX-158050473 | 8 | 47.99  | KV452904.1 | 4705999 | 7-scf00172 | 7 |
| AX-158050453 | 8 | 48.147 | KV452904.1 | 4681479 | 7-scf00172 | 7 |



|              |   |        |            |         |            |   |
|--------------|---|--------|------------|---------|------------|---|
| AX-158050475 | 8 | 48.147 | KV452904.1 | 4708732 | 7-scf00172 | 7 |
| AX-158050489 | 8 | 48.147 | KV452904.1 | 4729732 | 7-scf00172 | 7 |
| AX-158050492 | 8 | 48.147 | KV452904.1 | 4730602 | 7-scf00172 | 7 |
| AX-158050498 | 8 | 48.147 | KV452904.1 | 4735988 | 7-scf00172 | 7 |
| AX-158050501 | 8 | 48.147 | KV452904.1 | 4737594 | 7-scf00172 | 7 |
| AX-158050507 | 8 | 48.257 | KV452904.1 | 4746531 | 7-scf00172 | 7 |
| AX-158050511 | 8 | 48.257 | KV452904.1 | 4748179 | 7-scf00172 | 7 |
| AX-157754909 | 8 | 48.257 | KV452904.1 | 4748678 | 7-scf00172 | 7 |
| AX-158050516 | 8 | 48.366 | KV452904.1 | 4753953 | 7-scf00172 | 7 |
| AX-158378721 | 8 | 48.366 | KV452904.1 | 4758551 | 7-scf00172 | 7 |
| AX-158050519 | 8 | 48.366 | KV452904.1 | 4758690 | 7-scf00172 | 7 |
| AX-158050532 | 8 | 48.366 | KV452904.1 | 4772376 | 7-scf00172 | 7 |
| AX-158050113 | 8 | 48.374 | KV452904.1 | 4270714 | 7-scf00172 | 7 |
| AX-158050160 | 8 | 48.374 | KV452904.1 | 4309280 | 7-scf00172 | 7 |
| AX-157822682 | 8 | 48.374 | KV452904.1 | 4531737 | 7-scf00172 | 7 |
| AX-158050323 | 8 | 48.374 | KV452904.1 | 4534989 | 7-scf00172 | 7 |
| AX-158050505 | 8 | 48.374 | KV452904.1 | 4745705 | 7-scf00172 | 7 |
| AX-158050518 | 8 | 48.374 | KV452904.1 | 4758126 | 7-scf00172 | 7 |
| AX-158050525 | 8 | 48.374 | KV452904.1 | 4764017 | 7-scf00172 | 7 |
| AX-158050531 | 8 | 48.381 | KV452904.1 | 4770593 | 7-scf00172 | 7 |
| AX-158050536 | 8 | 48.381 | KV452904.1 | 4778790 | 7-scf00172 | 7 |
| AX-158050528 | 8 | 48.389 | KV452904.1 | 4769799 | 7-scf00172 | 7 |
| AX-157822689 | 8 | 48.389 | KV452904.1 | 4776464 | 7-scf00172 | 7 |
| AX-158050540 | 8 | 48.402 | KV452904.1 | 4783312 | 7-scf00172 | 7 |
| AX-158050523 | 8 | 48.415 | KV452904.1 | 4762485 | 7-scf00172 | 7 |
| AX-158050524 | 8 | 48.415 | KV452904.1 | 4763275 | 7-scf00172 | 7 |
| AX-158050539 | 8 | 48.415 | KV452904.1 | 4782792 | 7-scf00172 | 7 |
| AX-158050542 | 8 | 48.415 | KV452904.1 | 4784206 | 7-scf00172 | 7 |
| AX-158050550 | 8 | 48.423 | KV452904.1 | 4790789 | 7-scf00172 | 7 |
| AX-158050551 | 8 | 48.428 | KV452904.1 | 4791995 | 7-scf00172 | 7 |
| AX-158050552 | 8 | 48.44  | KV452904.1 | 4793133 | 7-scf00172 | 7 |
| AX-157822691 | 8 | 48.445 | KV452904.1 | 4793230 | 7-scf00172 | 7 |
| AX-158050553 | 8 | 48.475 | KV452904.1 | 4795510 | 7-scf00172 | 7 |
| AX-157752472 | 8 | 48.475 | KV452904.1 | 4798454 | 7-scf00172 | 7 |
| AX-157745321 | 8 | 48.475 | KV452904.1 | 4801414 | 7-scf00172 | 7 |
| AX-157746219 | 8 | 48.475 | KV452904.1 | 4804433 | 7-scf00172 | 7 |
| AX-158050561 | 8 | 48.584 | KV452904.1 | 4812782 | 7-scf00172 | 7 |
| AX-158050562 | 8 | 48.584 | KV452904.1 | 4816453 | 7-scf00172 | 7 |
| AX-158050563 | 8 | 48.584 | KV452904.1 | 4818287 | 7-scf00172 | 7 |
| AX-158050252 | 8 | 48.803 | KV452904.1 | 4423345 | 7-scf00172 | 7 |
| AX-158050253 | 8 | 48.803 | KV452904.1 | 4424250 | 7-scf00172 | 7 |
| AX-158050254 | 8 | 48.803 | KV452904.1 | 4425338 | 7-scf00172 | 7 |
| AX-158050255 | 8 | 48.803 | KV452904.1 | 4426611 | 7-scf00172 | 7 |
| AX-157856548 | 8 | 48.803 | KV452904.1 | 4536901 | 7-scf00172 | 7 |
| AX-158050390 | 8 | 48.803 | KV452904.1 | 4619117 | 7-scf00172 | 7 |
| AX-158050395 | 8 | 48.803 | KV452904.1 | 4620166 | 7-scf00172 | 7 |
| AX-158050509 | 8 | 48.803 | KV452904.1 | 4747025 | 7-scf00172 | 7 |
| AX-157756470 | 8 | 48.803 | KV452904.1 | 4755530 | 7-scf00172 | 7 |
| AX-157748304 | 8 | 48.803 | KV452904.1 | 4855903 | 7-scf00172 | 7 |
| AX-158050577 | 8 | 48.803 | KV452904.1 | 4865571 | 7-scf00172 | 7 |
| AX-158050579 | 8 | 48.803 | KV452904.1 | 4865868 | 7-scf00172 | 7 |

|              |   |        |            |         |            |   |
|--------------|---|--------|------------|---------|------------|---|
| AX-158050582 | 8 | 48.803 | KV452904.1 | 4868295 | 7-scf00172 | 7 |
| AX-158050584 | 8 | 48.803 | KV452904.1 | 4869719 | 7-scf00172 | 7 |
| AX-158050586 | 8 | 48.803 | KV452904.1 | 4878305 | 7-scf00172 | 7 |
| AX-158050587 | 8 | 48.803 | KV452904.1 | 4880696 | 7-scf00172 | 7 |
| AX-158050588 | 8 | 48.803 | KV452904.1 | 4881780 | 7-scf00172 | 7 |
| AX-158050590 | 8 | 48.803 | KV452904.1 | 4885519 | 7-scf00172 | 7 |
| AX-157856553 | 8 | 48.803 | KV452904.1 | 4886036 | 7-scf00172 | 7 |
| AX-158050591 | 8 | 48.803 | KV452904.1 | 4886350 | 7-scf00172 | 7 |
| AX-157786256 | 8 | 48.803 | KV452904.1 | 4888014 | 7-scf00172 | 7 |
| AX-158050592 | 8 | 48.803 | KV452904.1 | 4889996 | 7-scf00172 | 7 |
| AX-157822699 | 8 | 48.803 | KV452904.1 | 4890898 | 7-scf00172 | 7 |
| AX-158408804 | 8 | 48.803 | KV452904.1 | 4893043 | 7-scf00172 | 7 |
| AX-157856554 | 8 | 48.803 | KV452904.1 | 4893988 | 7-scf00172 | 7 |
| AX-158050593 | 8 | 48.803 | KV452904.1 | 4896727 | 7-scf00172 | 7 |
| AX-157749432 | 8 | 48.803 | KV452904.1 | 4897142 | 7-scf00172 | 7 |
| AX-158050599 | 8 | 48.803 | KV452904.1 | 4908024 | 7-scf00172 | 7 |
| AX-158378724 | 8 | 48.803 | KV452904.1 | 4910012 | 7-scf00172 | 7 |
| AX-158050602 | 8 | 48.803 | KV452904.1 | 4919560 | 7-scf00172 | 7 |
| AX-158050603 | 8 | 48.803 | KV452904.1 | 4919764 | 7-scf00172 | 7 |
| AX-157744962 | 8 | 48.803 | KV452904.1 | 4925548 | 7-scf00172 | 7 |
| AX-157822704 | 8 | 48.803 | KV452904.1 | 4973560 | 7-scf00172 | 7 |
| AX-158050649 | 8 | 48.803 | KV452904.1 | 4984265 | 7-scf00172 | 7 |
| AX-158050608 | 8 | 49.021 | KV452904.1 | 4931686 | 7-scf00172 | 7 |
| AX-158050615 | 8 | 49.021 | KV452904.1 | 4944502 | 7-scf00172 | 7 |
| AX-158050618 | 8 | 49.021 | KV452904.1 | 4949743 | 7-scf00172 | 7 |
| AX-158050622 | 8 | 49.021 | KV452904.1 | 4952630 | 7-scf00172 | 7 |
| AX-157822702 | 8 | 49.021 | KV452904.1 | 4953863 | 7-scf00172 | 7 |
| AX-158050625 | 8 | 49.11  | KV452904.1 | 4959845 | 7-scf00172 | 7 |
| AX-158378726 | 8 | 49.168 | KV452904.1 | 4961542 | 7-scf00172 | 7 |
| AX-157752152 | 8 | 49.24  | KV452904.1 | 4961709 | 7-scf00172 | 7 |
| AX-158050630 | 8 | 49.24  | KV452904.1 | 4965566 | 7-scf00172 | 7 |
| AX-158050640 | 8 | 49.24  | KV452904.1 | 4975714 | 7-scf00172 | 7 |
| AX-158050641 | 8 | 49.349 | KV452904.1 | 4976472 | 7-scf00172 | 7 |
| AX-158050643 | 8 | 49.349 | KV452904.1 | 4979036 | 7-scf00172 | 7 |
| AX-158050644 | 8 | 49.458 | KV452904.1 | 4979858 | 7-scf00172 | 7 |
| AX-157822703 | 8 | 49.568 | KV452904.1 | 4962164 | 7-scf00172 | 7 |
| AX-158050654 | 8 | 49.568 | KV452904.1 | 4994524 | 7-scf00172 | 7 |
| AX-157856556 | 8 | 49.568 | KV452904.1 | 4995125 | 7-scf00172 | 7 |
| AX-157773966 | 8 | 49.568 | KV452904.1 | 4996297 | 7-scf00172 | 7 |
| AX-157822706 | 8 | 49.568 | KV452904.1 | 4996366 | 7-scf00172 | 7 |
| AX-157856557 | 8 | 49.568 | KV452904.1 | 4997320 | 7-scf00172 | 7 |
| AX-158050656 | 8 | 49.568 | KV452904.1 | 4997928 | 7-scf00172 | 7 |
| AX-158050657 | 8 | 49.568 | KV452904.1 | 4999005 | 7-scf00172 | 7 |
| AX-157712966 | 8 | 49.568 | KV452904.1 | 5003210 | 7-scf00172 | 7 |
| AX-158050659 | 8 | 49.568 | KV452904.1 | 5003501 | 7-scf00172 | 7 |
| AX-157741136 | 8 | 49.568 | KV452904.1 | 5005947 | 7-scf00172 | 7 |
| AX-158050661 | 8 | 49.568 | KV452904.1 | 5006699 | 7-scf00172 | 7 |
| AX-158050666 | 8 | 49.568 | KV452904.1 | 5012619 | 7-scf00172 | 7 |
| AX-158050667 | 8 | 49.568 | KV452904.1 | 5014172 | 7-scf00172 | 7 |
| AX-158050669 | 8 | 49.568 | KV452904.1 | 5015246 | 7-scf00172 | 7 |
| AX-158050670 | 8 | 49.568 | KV452904.1 | 5017908 | 7-scf00172 | 7 |

|              |   |        |            |          |            |   |
|--------------|---|--------|------------|----------|------------|---|
| AX-158050671 | 8 | 49.568 | KV452904.1 | 5018703  | 7-scf00172 | 7 |
| AX-158050672 | 8 | 49.568 | KV452904.1 | 5021338  | 7-scf00172 | 7 |
| AX-158050674 | 8 | 49.568 | KV452904.1 | 5023280  | 7-scf00172 | 7 |
| AX-158050677 | 8 | 49.568 | KV452904.1 | 5029210  | 7-scf00172 | 7 |
| AX-158050678 | 8 | 49.568 | KV452904.1 | 5031520  | 7-scf00172 | 7 |
| AX-157822711 | 8 | 49.568 | KV452904.1 | 5033300  | 7-scf00172 | 7 |
| AX-157822712 | 8 | 49.568 | KV452904.1 | 5035339  | 7-scf00172 | 7 |
| AX-158050683 | 8 | 49.568 | KV452904.1 | 5040634  | 7-scf00172 | 7 |
| AX-158050684 | 8 | 49.568 | KV452904.1 | 5041876  | 7-scf00172 | 7 |
| AX-157822713 | 8 | 49.568 | KV452904.1 | 5044774  | 7-scf00172 | 7 |
| AX-158050688 | 8 | 49.568 | KV452904.1 | 5054921  | 7-scf00172 | 7 |
| AX-158050690 | 8 | 49.568 | KV452904.1 | 5059733  | 7-scf00172 | 7 |
| AX-158050706 | 8 | 49.568 | KV452904.1 | 5084338  | 7-scf00172 | 7 |
| AX-157822716 | 8 | 49.568 | KV452904.1 | 5106745  | 7-scf00172 | 7 |
| AX-158051384 | 8 | 49.568 | KV452904.1 | 6012076  | 7-scf00172 | 7 |
| AX-158050645 | 8 | 49.634 | KV452904.1 | 4980295  | 7-scf00172 | 7 |
| AX-158050686 | 8 | 49.634 | KV452904.1 | 5047821  | 7-scf00172 | 7 |
| AX-158050687 | 8 | 49.677 | KV452904.1 | 5050041  | 7-scf00172 | 7 |
| AX-158050769 | 8 | 49.677 | KV452904.1 | 5155011  | 7-scf00172 | 7 |
| AX-158050662 | 8 | 49.786 | KV452904.1 | 5007414  | 7-scf00172 | 7 |
| AX-158050663 | 8 | 49.786 | KV452904.1 | 5007755  | 7-scf00172 | 7 |
| AX-157710314 | 8 | 49.786 | KV452904.1 | 5046943  | 7-scf00172 | 7 |
| AX-158378733 | 8 | 49.786 | KV452904.1 | 5056258  | 7-scf00172 | 7 |
| AX-158050689 | 8 | 49.786 | KV452904.1 | 5056593  | 7-scf00172 | 7 |
| AX-158050692 | 8 | 49.786 | KV452904.1 | 5063082  | 7-scf00172 | 7 |
| AX-158050694 | 8 | 49.786 | KV452904.1 | 5071090  | 7-scf00172 | 7 |
| AX-157822715 | 8 | 49.786 | KV452904.1 | 5072334  | 7-scf00172 | 7 |
| AX-158050698 | 8 | 49.786 | KV452904.1 | 5073686  | 7-scf00172 | 7 |
| AX-157724618 | 8 | 49.786 | KV452904.1 | 5081490  | 7-scf00172 | 7 |
| AX-158050704 | 8 | 49.786 | KV452904.1 | 5082242  | 7-scf00172 | 7 |
| AX-158050705 | 8 | 49.786 | KV452904.1 | 5082852  | 7-scf00172 | 7 |
| AX-158050708 | 8 | 49.786 | KV452904.1 | 5085239  | 7-scf00172 | 7 |
| AX-158050721 | 8 | 49.786 | KV452904.1 | 5091233  | 7-scf00172 | 7 |
| AX-158050741 | 8 | 49.786 | KV452904.1 | 5127709  | 7-scf00172 | 7 |
| AX-158051206 | 8 | 49.786 | KV452904.1 | 5701735  | 7-scf00172 | 7 |
| AX-158051451 | 8 | 49.786 | KV452904.1 | 6085269  | 7-scf00172 | 7 |
| AX-158378776 | 8 | 49.786 | KV452904.1 | 6669450  | 7-scf00172 | 7 |
| AX-158053754 | 8 | 49.786 | KV452904.1 | 9332075  | 7-scf00172 | 7 |
| AX-158056661 | 8 | 49.786 | KV452904.1 | 12917251 | 7-scf00172 | 7 |
| AX-158058077 | 8 | 49.786 | KV452904.1 | 16100343 | 7-scf00172 | 7 |
| AX-158058320 | 8 | 49.786 | KV452904.1 | 16603874 | 7-scf00172 | 7 |
| AX-158058363 | 8 | 49.786 | KV452904.1 | 16688262 | 7-scf00172 | 7 |
| AX-158050734 | 8 | 50.005 | KV452904.1 | 5118723  | 7-scf00172 | 7 |
| AX-158050738 | 8 | 50.005 | KV452904.1 | 5122145  | 7-scf00172 | 7 |
| AX-158050740 | 8 | 50.005 | KV452904.1 | 5124508  | 7-scf00172 | 7 |
| AX-157856558 | 8 | 50.005 | KV452904.1 | 5125308  | 7-scf00172 | 7 |
| AX-158050742 | 8 | 50.114 | KV452904.1 | 5128186  | 7-scf00172 | 7 |
| AX-158050744 | 8 | 50.114 | KV452904.1 | 5130207  | 7-scf00172 | 7 |
| AX-158050746 | 8 | 50.114 | KV452904.1 | 5132216  | 7-scf00172 | 7 |
| AX-158050747 | 8 | 50.114 | KV452904.1 | 5132747  | 7-scf00172 | 7 |
| AX-157709795 | 8 | 50.114 | KV452904.1 | 5133061  | 7-scf00172 | 7 |

|              |   |        |            |         |            |   |
|--------------|---|--------|------------|---------|------------|---|
| AX-158050752 | 8 | 50.114 | KV452904.1 | 5136744 | 7-scf00172 | 7 |
| AX-158050755 | 8 | 50.114 | KV452904.1 | 5140061 | 7-scf00172 | 7 |
| AX-158050761 | 8 | 50.114 | KV452904.1 | 5144059 | 7-scf00172 | 7 |
| AX-158050763 | 8 | 50.114 | KV452904.1 | 5144510 | 7-scf00172 | 7 |
| AX-158050764 | 8 | 50.114 | KV452904.1 | 5145170 | 7-scf00172 | 7 |
| AX-158050766 | 8 | 50.114 | KV452904.1 | 5146817 | 7-scf00172 | 7 |
| AX-157773523 | 8 | 50.114 | KV452904.1 | 5148616 | 7-scf00172 | 7 |
| AX-157774660 | 8 | 50.114 | KV452904.1 | 5151008 | 7-scf00172 | 7 |
| AX-158378735 | 8 | 50.115 | KV452904.1 | 5150863 | 7-scf00172 | 7 |
| AX-158050795 | 8 | 50.546 | KV452904.1 | 5177349 | 7-scf00172 | 7 |
| AX-158050796 | 8 | 50.549 | KV452904.1 | 5177974 | 7-scf00172 | 7 |
| AX-158050799 | 8 | 50.551 | KV452904.1 | 5181089 | 7-scf00172 | 7 |
| AX-157822719 | 8 | 50.551 | KV452904.1 | 5182044 | 7-scf00172 | 7 |
| AX-158050801 | 8 | 50.551 | KV452904.1 | 5186360 | 7-scf00172 | 7 |
| AX-157856559 | 8 | 50.551 | KV452904.1 | 5191925 | 7-scf00172 | 7 |
| AX-158050809 | 8 | 50.551 | KV452904.1 | 5204765 | 7-scf00172 | 7 |
| AX-158050810 | 8 | 50.551 | KV452904.1 | 5206199 | 7-scf00172 | 7 |
| AX-158050812 | 8 | 50.551 | KV452904.1 | 5206626 | 7-scf00172 | 7 |
| AX-158050813 | 8 | 50.551 | KV452904.1 | 5207733 | 7-scf00172 | 7 |
| AX-158050814 | 8 | 50.551 | KV452904.1 | 5208552 | 7-scf00172 | 7 |
| AX-158050815 | 8 | 50.551 | KV452904.1 | 5209552 | 7-scf00172 | 7 |
| AX-158050817 | 8 | 50.551 | KV452904.1 | 5210317 | 7-scf00172 | 7 |
| AX-158050818 | 8 | 50.551 | KV452904.1 | 5213498 | 7-scf00172 | 7 |
| AX-158050819 | 8 | 50.551 | KV452904.1 | 5214092 | 7-scf00172 | 7 |
| AX-157724720 | 8 | 50.624 | KV452904.1 | 5224722 | 7-scf00172 | 7 |
| AX-158051485 | 8 | 50.624 | KV452904.1 | 6128136 | 7-scf00172 | 7 |
| AX-158051486 | 8 | 50.624 | KV452904.1 | 6129767 | 7-scf00172 | 7 |
| AX-157744723 | 8 | 50.66  | KV452904.1 | 5176546 | 7-scf00172 | 7 |
| AX-158050828 | 8 | 50.66  | KV452904.1 | 5231470 | 7-scf00172 | 7 |
| AX-158050830 | 8 | 50.66  | KV452904.1 | 5232028 | 7-scf00172 | 7 |
| AX-158050834 | 8 | 50.66  | KV452904.1 | 5233471 | 7-scf00172 | 7 |
| AX-157822721 | 8 | 50.66  | KV452904.1 | 5234204 | 7-scf00172 | 7 |
| AX-158050838 | 8 | 50.66  | KV452904.1 | 5236695 | 7-scf00172 | 7 |
| AX-158050840 | 8 | 50.66  | KV452904.1 | 5237497 | 7-scf00172 | 7 |
| AX-158422393 | 8 | 50.66  | KV452904.1 | 5243718 | 7-scf00172 | 7 |
| AX-158050629 | 8 | 50.769 | KV452904.1 | 4963436 | 7-scf00172 | 7 |
| AX-158050803 | 8 | 50.769 | KV452904.1 | 5187635 | 7-scf00172 | 7 |
| AX-158050853 | 8 | 50.769 | KV452904.1 | 5248457 | 7-scf00172 | 7 |
| AX-158050859 | 8 | 50.769 | KV452904.1 | 5257568 | 7-scf00172 | 7 |
| AX-158050863 | 8 | 50.769 | KV452904.1 | 5260820 | 7-scf00172 | 7 |
| AX-158050865 | 8 | 50.769 | KV452904.1 | 5263352 | 7-scf00172 | 7 |
| AX-158050870 | 8 | 50.769 | KV452904.1 | 5272817 | 7-scf00172 | 7 |
| AX-158378741 | 8 | 50.769 | KV452904.1 | 5275478 | 7-scf00172 | 7 |
| AX-158050872 | 8 | 50.769 | KV452904.1 | 5275874 | 7-scf00172 | 7 |
| AX-158050873 | 8 | 50.769 | KV452904.1 | 5276239 | 7-scf00172 | 7 |
| AX-158050874 | 8 | 50.769 | KV452904.1 | 5277690 | 7-scf00172 | 7 |
| AX-158050877 | 8 | 50.769 | KV452904.1 | 5280705 | 7-scf00172 | 7 |
| AX-158050880 | 8 | 50.769 | KV452904.1 | 5283273 | 7-scf00172 | 7 |
| AX-158050890 | 8 | 50.769 | KV452904.1 | 5293545 | 7-scf00172 | 7 |
| AX-158050954 | 8 | 50.769 | KV452904.1 | 5384571 | 7-scf00172 | 7 |
| AX-158051028 | 8 | 50.769 | KV452904.1 | 5498283 | 7-scf00172 | 7 |

|              |   |        |            |         |                |    |
|--------------|---|--------|------------|---------|----------------|----|
| AX-157700198 | 8 | 50.769 | FI871784.1 | 494     | IORI212 Ictalu | UN |
| AX-158050878 | 8 | 50.771 | KV452904.1 | 5281464 | 7-scf00172     | 7  |
| AX-158051108 | 8 | 50.771 | KV452904.1 | 5573391 | 7-scf00172     | 7  |
| AX-158051111 | 8 | 50.771 | KV452904.1 | 5574461 | 7-scf00172     | 7  |
| AX-158050822 | 8 | 50.774 | KV452904.1 | 5224356 | 7-scf00172     | 7  |
| AX-158050881 | 8 | 50.774 | KV452904.1 | 5284097 | 7-scf00172     | 7  |
| AX-158050888 | 8 | 50.819 | KV452904.1 | 5293303 | 7-scf00172     | 7  |
| AX-157822723 | 8 | 50.879 | KV452904.1 | 5309478 | 7-scf00172     | 7  |
| AX-158050893 | 8 | 50.879 | KV452904.1 | 5311761 | 7-scf00172     | 7  |
| AX-158050904 | 8 | 50.879 | KV452904.1 | 5321570 | 7-scf00172     | 7  |
| AX-158050907 | 8 | 50.902 | KV452904.1 | 5323492 | 7-scf00172     | 7  |
| AX-158384048 | 8 | 50.928 | KV452904.1 | 5330246 | 7-scf00172     | 7  |
| AX-157856560 | 8 | 50.955 | KV452904.1 | 5337131 | 7-scf00172     | 7  |
| AX-158050919 | 8 | 50.988 | KV452904.1 | 5341250 | 7-scf00172     | 7  |
| AX-157726389 | 8 | 50.988 | KV452904.1 | 5350468 | 7-scf00172     | 7  |
| AX-158050930 | 8 | 50.988 | KV452904.1 | 5351558 | 7-scf00172     | 7  |
| AX-158050944 | 8 | 50.988 | KV452904.1 | 5366865 | 7-scf00172     | 7  |
| AX-158050991 | 8 | 50.988 | KV452904.1 | 5433250 | 7-scf00172     | 7  |
| AX-157856564 | 8 | 50.988 | KV452904.1 | 5433939 | 7-scf00172     | 7  |
| AX-157856565 | 8 | 50.988 | KV452904.1 | 5436146 | 7-scf00172     | 7  |
| AX-158050993 | 8 | 50.988 | KV452904.1 | 5437090 | 7-scf00172     | 7  |
| AX-157856566 | 8 | 50.988 | KV452904.1 | 5437752 | 7-scf00172     | 7  |
| AX-158050996 | 8 | 50.988 | KV452904.1 | 5438467 | 7-scf00172     | 7  |
| AX-157856567 | 8 | 50.988 | KV452904.1 | 5438786 | 7-scf00172     | 7  |
| AX-157870600 | 8 | 50.988 | KV452904.1 | 5439235 | 7-scf00172     | 7  |
| AX-157822736 | 8 | 50.988 | KV452904.1 | 5444417 | 7-scf00172     | 7  |
| AX-158050997 | 8 | 50.988 | KV452904.1 | 5448577 | 7-scf00172     | 7  |
| AX-158051001 | 8 | 50.988 | KV452904.1 | 5452293 | 7-scf00172     | 7  |
| AX-158051011 | 8 | 50.988 | KV452904.1 | 5462169 | 7-scf00172     | 7  |
| AX-158051096 | 8 | 50.988 | KV452904.1 | 5560416 | 7-scf00172     | 7  |
| AX-158051117 | 8 | 50.988 | KV452904.1 | 5579305 | 7-scf00172     | 7  |
| AX-158051261 | 8 | 50.988 | KV452904.1 | 5824903 | 7-scf00172     | 7  |
| AX-158051264 | 8 | 50.988 | KV452904.1 | 5828684 | 7-scf00172     | 7  |
| AX-158051269 | 8 | 50.988 | KV452904.1 | 5830284 | 7-scf00172     | 7  |
| AX-158051307 | 8 | 50.988 | KV452904.1 | 5888224 | 7-scf00172     | 7  |
| AX-158051308 | 8 | 50.988 | KV452904.1 | 5889705 | 7-scf00172     | 7  |
| AX-158051313 | 8 | 50.988 | KV452904.1 | 5891992 | 7-scf00172     | 7  |
| AX-158051315 | 8 | 50.988 | KV452904.1 | 5892810 | 7-scf00172     | 7  |
| AX-157822782 | 8 | 50.988 | KV452904.1 | 5916945 | 7-scf00172     | 7  |
| AX-158051331 | 8 | 50.988 | KV452904.1 | 5918407 | 7-scf00172     | 7  |
| AX-157822789 | 8 | 50.988 | KV452904.1 | 5967596 | 7-scf00172     | 7  |
| AX-157822732 | 8 | 51.097 | KV452904.1 | 5401553 | 7-scf00172     | 7  |
| AX-157822733 | 8 | 51.099 | KV452904.1 | 5403986 | 7-scf00172     | 7  |
| AX-157822735 | 8 | 51.099 | KV452904.1 | 5405492 | 7-scf00172     | 7  |
| AX-158050970 | 8 | 51.099 | KV452904.1 | 5409517 | 7-scf00172     | 7  |
| AX-158050972 | 8 | 51.099 | KV452904.1 | 5409886 | 7-scf00172     | 7  |
| AX-158050987 | 8 | 51.099 | KV452904.1 | 5431217 | 7-scf00172     | 7  |
| AX-157856562 | 8 | 51.099 | KV452904.1 | 5431931 | 7-scf00172     | 7  |
| AX-157856563 | 8 | 51.099 | KV452904.1 | 5432781 | 7-scf00172     | 7  |
| AX-158051092 | 8 | 51.099 | KV452904.1 | 5558283 | 7-scf00172     | 7  |
| AX-158051095 | 8 | 51.099 | KV452904.1 | 5559420 | 7-scf00172     | 7  |

|              |   |        |            |         |            |   |
|--------------|---|--------|------------|---------|------------|---|
| AX-157822751 | 8 | 51.099 | KV452904.1 | 5560708 | 7-scf00172 | 7 |
| AX-157885191 | 8 | 51.099 | KV452904.1 | 5567124 | 7-scf00172 | 7 |
| AX-158051114 | 8 | 51.099 | KV452904.1 | 5578364 | 7-scf00172 | 7 |
| AX-158051268 | 8 | 51.099 | KV452904.1 | 5829699 | 7-scf00172 | 7 |
| AX-158051326 | 8 | 51.099 | KV452904.1 | 5914338 | 7-scf00172 | 7 |
| AX-157716423 | 8 | 51.099 | KV452904.1 | 5949181 | 7-scf00172 | 7 |
| AX-157822786 | 8 | 51.099 | KV452904.1 | 5949570 | 7-scf00172 | 7 |
| AX-158051352 | 8 | 51.099 | KV452904.1 | 5963021 | 7-scf00172 | 7 |
| AX-158050968 | 8 | 51.101 | KV452904.1 | 5404589 | 7-scf00172 | 7 |
| AX-158051402 | 8 | 51.101 | KV452904.1 | 6038267 | 7-scf00172 | 7 |
| AX-157746106 | 8 | 51.103 | KV452904.1 | 5456542 | 7-scf00172 | 7 |
| AX-158408820 | 8 | 51.103 | KV452904.1 | 5471519 | 7-scf00172 | 7 |
| AX-158050756 | 8 | 51.104 | KV452904.1 | 5141047 | 7-scf00172 | 7 |
| AX-158050849 | 8 | 51.104 | KV452904.1 | 5245583 | 7-scf00172 | 7 |
| AX-158050850 | 8 | 51.104 | KV452904.1 | 5246053 | 7-scf00172 | 7 |
| AX-157722207 | 8 | 51.104 | KV452904.1 | 5331880 | 7-scf00172 | 7 |
| AX-158050914 | 8 | 51.104 | KV452904.1 | 5333520 | 7-scf00172 | 7 |
| AX-158051016 | 8 | 51.104 | KV452904.1 | 5478595 | 7-scf00172 | 7 |
| AX-158051035 | 8 | 51.104 | KV452904.1 | 5506128 | 7-scf00172 | 7 |
| AX-158051038 | 8 | 51.104 | KV452904.1 | 5509829 | 7-scf00172 | 7 |
| AX-158051041 | 8 | 51.104 | KV452904.1 | 5511492 | 7-scf00172 | 7 |
| AX-158051050 | 8 | 51.104 | KV452904.1 | 5520058 | 7-scf00172 | 7 |
| AX-158051091 | 8 | 51.104 | KV452904.1 | 5557563 | 7-scf00172 | 7 |
| AX-157715518 | 8 | 51.104 | KV452904.1 | 5782527 | 7-scf00172 | 7 |
| AX-157822770 | 8 | 51.104 | KV452904.1 | 5784213 | 7-scf00172 | 7 |
| AX-158051359 | 8 | 51.104 | KV452904.1 | 5979052 | 7-scf00172 | 7 |
| AX-158051392 | 8 | 51.104 | KV452904.1 | 6021391 | 7-scf00172 | 7 |
| AX-158051734 | 8 | 51.104 | KV452904.1 | 6430859 | 7-scf00172 | 7 |
| AX-157822746 | 8 | 51.124 | KV452904.1 | 5521847 | 7-scf00172 | 7 |
| AX-158051054 | 8 | 51.227 | KV452904.1 | 5527276 | 7-scf00172 | 7 |
| AX-158051123 | 8 | 51.28  | KV452904.1 | 5582516 | 7-scf00172 | 7 |
| AX-158051197 | 8 | 51.28  | KV452904.1 | 5686039 | 7-scf00172 | 7 |
| AX-158408825 | 8 | 51.33  | KV452904.1 | 5653469 | 7-scf00172 | 7 |
| AX-157822764 | 8 | 51.394 | KV452904.1 | 5682430 | 7-scf00172 | 7 |
| AX-157822765 | 8 | 51.455 | KV452904.1 | 5692194 | 7-scf00172 | 7 |
| AX-158051202 | 8 | 51.498 | KV452904.1 | 5692679 | 7-scf00172 | 7 |
| AX-158051204 | 8 | 51.541 | KV452904.1 | 5700359 | 7-scf00172 | 7 |
| AX-158050912 | 8 | 51.589 | KV452904.1 | 5329383 | 7-scf00172 | 7 |
| AX-157856576 | 8 | 51.589 | KV452904.1 | 5718880 | 7-scf00172 | 7 |
| AX-158050953 | 8 | 51.642 | KV452904.1 | 5376149 | 7-scf00172 | 7 |
| AX-158051145 | 8 | 51.642 | KV452904.1 | 5613463 | 7-scf00172 | 7 |
| AX-158051210 | 8 | 51.642 | KV452904.1 | 5723381 | 7-scf00172 | 7 |
| AX-158051218 | 8 | 51.642 | KV452904.1 | 5735479 | 7-scf00172 | 7 |
| AX-157822772 | 8 | 51.642 | KV452904.1 | 5792669 | 7-scf00172 | 7 |
| AX-158051316 | 8 | 51.642 | KV452904.1 | 5896456 | 7-scf00172 | 7 |
| AX-158051219 | 8 | 51.643 | KV452904.1 | 5735953 | 7-scf00172 | 7 |
| AX-158051299 | 8 | 51.643 | KV452904.1 | 5874469 | 7-scf00172 | 7 |
| AX-158051350 | 8 | 51.643 | KV452904.1 | 5960422 | 7-scf00172 | 7 |
| AX-158051531 | 8 | 51.643 | KV452904.1 | 6173182 | 7-scf00172 | 7 |
| AX-158053594 | 8 | 51.643 | KV452904.1 | 9131890 | 7-scf00172 | 7 |
| AX-158051163 | 8 | 51.644 | KV452904.1 | 5658969 | 7-scf00172 | 7 |

|              |   |        |            |         |            |   |
|--------------|---|--------|------------|---------|------------|---|
| AX-158051181 | 8 | 51.644 | KV452904.1 | 5673715 | 7-scf00172 | 7 |
| AX-157822762 | 8 | 51.644 | KV452904.1 | 5680988 | 7-scf00172 | 7 |
| AX-158422396 | 8 | 51.644 | KV452904.1 | 5694680 | 7-scf00172 | 7 |
| AX-157856574 | 8 | 51.644 | KV452904.1 | 5700483 | 7-scf00172 | 7 |
| AX-157822766 | 8 | 51.644 | KV452904.1 | 5712912 | 7-scf00172 | 7 |
| AX-158408849 | 8 | 51.644 | KV452904.1 | 5715560 | 7-scf00172 | 7 |
| AX-158051211 | 8 | 51.644 | KV452904.1 | 5725420 | 7-scf00172 | 7 |
| AX-158051222 | 8 | 51.644 | KV452904.1 | 5740425 | 7-scf00172 | 7 |
| AX-157710775 | 8 | 51.644 | KV452904.1 | 5745610 | 7-scf00172 | 7 |
| AX-157856578 | 8 | 51.644 | KV452904.1 | 5755784 | 7-scf00172 | 7 |
| AX-158051227 | 8 | 51.644 | KV452904.1 | 5756324 | 7-scf00172 | 7 |
| AX-158051231 | 8 | 51.644 | KV452904.1 | 5758480 | 7-scf00172 | 7 |
| AX-158051233 | 8 | 51.644 | KV452904.1 | 5760037 | 7-scf00172 | 7 |
| AX-158051476 | 8 | 51.644 | KV452904.1 | 6117776 | 7-scf00172 | 7 |
| AX-158051483 | 8 | 51.644 | KV452904.1 | 6124856 | 7-scf00172 | 7 |
| AX-158050743 | 8 | 51.645 | KV452904.1 | 5129511 | 7-scf00172 | 7 |
| AX-158050973 | 8 | 51.645 | KV452904.1 | 5411346 | 7-scf00172 | 7 |
| AX-158050981 | 8 | 51.645 | KV452904.1 | 5426486 | 7-scf00172 | 7 |
| AX-157856569 | 8 | 51.645 | KV452904.1 | 5469742 | 7-scf00172 | 7 |
| AX-158408827 | 8 | 51.645 | KV452904.1 | 5654187 | 7-scf00172 | 7 |
| AX-157822761 | 8 | 51.645 | KV452904.1 | 5664392 | 7-scf00172 | 7 |
| AX-158408831 | 8 | 51.645 | KV452904.1 | 5694963 | 7-scf00172 | 7 |
| AX-157856577 | 8 | 51.645 | KV452904.1 | 5722876 | 7-scf00172 | 7 |
| AX-157856579 | 8 | 51.645 | KV452904.1 | 5763834 | 7-scf00172 | 7 |
| AX-157822767 | 8 | 51.645 | KV452904.1 | 5769284 | 7-scf00172 | 7 |
| AX-157745368 | 8 | 51.645 | KV452904.1 | 5784680 | 7-scf00172 | 7 |
| AX-157822771 | 8 | 51.645 | KV452904.1 | 5786417 | 7-scf00172 | 7 |
| AX-157694961 | 8 | 51.645 | KV452904.1 | 5787945 | 7-scf00172 | 7 |
| AX-158051239 | 8 | 51.645 | KV452904.1 | 5788468 | 7-scf00172 | 7 |
| AX-158406502 | 8 | 51.645 | KV452904.1 | 5789875 | 7-scf00172 | 7 |
| AX-158378756 | 8 | 51.645 | KV452904.1 | 5792246 | 7-scf00172 | 7 |
| AX-157757235 | 8 | 51.645 | KV452904.1 | 5798672 | 7-scf00172 | 7 |
| AX-158051256 | 8 | 51.645 | KV452904.1 | 5816144 | 7-scf00172 | 7 |
| AX-157885192 | 8 | 51.645 | KV452904.1 | 5820955 | 7-scf00172 | 7 |
| AX-158051259 | 8 | 51.645 | KV452904.1 | 5821245 | 7-scf00172 | 7 |
| AX-158051263 | 8 | 51.645 | KV452904.1 | 5827106 | 7-scf00172 | 7 |
| AX-158051266 | 8 | 51.645 | KV452904.1 | 5829049 | 7-scf00172 | 7 |
| AX-158051272 | 8 | 51.645 | KV452904.1 | 5830764 | 7-scf00172 | 7 |
| AX-158051273 | 8 | 51.645 | KV452904.1 | 5833041 | 7-scf00172 | 7 |
| AX-157822773 | 8 | 51.645 | KV452904.1 | 5836209 | 7-scf00172 | 7 |
| AX-158051286 | 8 | 51.645 | KV452904.1 | 5845547 | 7-scf00172 | 7 |
| AX-157822774 | 8 | 51.645 | KV452904.1 | 5848135 | 7-scf00172 | 7 |
| AX-158051288 | 8 | 51.645 | KV452904.1 | 5850492 | 7-scf00172 | 7 |
| AX-158378759 | 8 | 51.645 | KV452904.1 | 5850576 | 7-scf00172 | 7 |
| AX-158051301 | 8 | 51.645 | KV452904.1 | 5879660 | 7-scf00172 | 7 |
| AX-158051302 | 8 | 51.645 | KV452904.1 | 5881211 | 7-scf00172 | 7 |
| AX-157822776 | 8 | 51.645 | KV452904.1 | 5883888 | 7-scf00172 | 7 |
| AX-158051304 | 8 | 51.645 | KV452904.1 | 5884421 | 7-scf00172 | 7 |
| AX-158051330 | 8 | 51.645 | KV452904.1 | 5916519 | 7-scf00172 | 7 |
| AX-157885194 | 8 | 51.645 | KV452904.1 | 5985929 | 7-scf00172 | 7 |
| AX-157822792 | 8 | 51.645 | KV452904.1 | 6010448 | 7-scf00172 | 7 |

|              |   |        |            |          |            |   |
|--------------|---|--------|------------|----------|------------|---|
| AX-158051389 | 8 | 51.645 | KV452904.1 | 6020092  | 7-scf00172 | 7 |
| AX-158051422 | 8 | 51.645 | KV452904.1 | 6061759  | 7-scf00172 | 7 |
| AX-158051442 | 8 | 51.645 | KV452904.1 | 6077558  | 7-scf00172 | 7 |
| AX-158051573 | 8 | 51.645 | KV452904.1 | 6232414  | 7-scf00172 | 7 |
| AX-158051642 | 8 | 51.645 | KV452904.1 | 6324188  | 7-scf00172 | 7 |
| AX-158051647 | 8 | 51.645 | KV452904.1 | 6341733  | 7-scf00172 | 7 |
| AX-157856589 | 8 | 51.645 | KV452904.1 | 6505091  | 7-scf00172 | 7 |
| AX-158051852 | 8 | 51.645 | KV452904.1 | 6659078  | 7-scf00172 | 7 |
| AX-158051853 | 8 | 51.645 | KV452904.1 | 6660460  | 7-scf00172 | 7 |
| AX-158051854 | 8 | 51.645 | KV452904.1 | 6661317  | 7-scf00172 | 7 |
| AX-158051859 | 8 | 51.645 | KV452904.1 | 6666762  | 7-scf00172 | 7 |
| AX-158051918 | 8 | 51.645 | KV452904.1 | 6794219  | 7-scf00172 | 7 |
| AX-158052000 | 8 | 51.645 | KV452904.1 | 6903455  | 7-scf00172 | 7 |
| AX-158052074 | 8 | 51.645 | KV452904.1 | 7027169  | 7-scf00172 | 7 |
| AX-158052624 | 8 | 51.645 | KV452904.1 | 7719752  | 7-scf00172 | 7 |
| AX-158057000 | 8 | 51.645 | KV452904.1 | 13649388 | 7-scf00172 | 7 |
| AX-158057262 | 8 | 51.645 | KV452904.1 | 14383670 | 7-scf00172 | 7 |
| AX-157744634 | 8 | 51.645 | KV452904.1 | 16628461 | 7-scf00172 | 7 |
| AX-158409099 | 8 | 51.645 | KV452904.1 | 16772118 | 7-scf00172 | 7 |
| AX-158050736 | 8 | 51.646 | KV452904.1 | 5120117  | 7-scf00172 | 7 |
| AX-158050969 | 8 | 51.646 | KV452904.1 | 5406123  | 7-scf00172 | 7 |
| AX-158051177 | 8 | 51.646 | KV452904.1 | 5672614  | 7-scf00172 | 7 |
| AX-158051333 | 8 | 51.646 | KV452904.1 | 5923152  | 7-scf00172 | 7 |
| AX-158051334 | 8 | 51.646 | KV452904.1 | 5924403  | 7-scf00172 | 7 |
| AX-158051336 | 8 | 51.646 | KV452904.1 | 5925223  | 7-scf00172 | 7 |
| AX-157822785 | 8 | 51.646 | KV452904.1 | 5948712  | 7-scf00172 | 7 |
| AX-158051699 | 8 | 51.646 | KV452904.1 | 6395124  | 7-scf00172 | 7 |
| AX-157713728 | 8 | 51.646 | KV452904.1 | 16325178 | 7-scf00172 | 7 |
| AX-157822787 | 8 | 51.714 | KV452904.1 | 5958083  | 7-scf00172 | 7 |
| AX-157822788 | 8 | 51.766 | KV452904.1 | 5959139  | 7-scf00172 | 7 |
| AX-158051351 | 8 | 51.862 | KV452904.1 | 5960737  | 7-scf00172 | 7 |
| AX-158051364 | 8 | 51.862 | KV452904.1 | 5983505  | 7-scf00172 | 7 |
| AX-157743686 | 8 | 51.862 | KV452904.1 | 6022653  | 7-scf00172 | 7 |
| AX-158051243 | 8 | 51.973 | KV452904.1 | 5800405  | 7-scf00172 | 7 |
| AX-157876699 | 8 | 51.973 | KV452904.1 | 5965123  | 7-scf00172 | 7 |
| AX-158378763 | 8 | 51.973 | KV452904.1 | 5971380  | 7-scf00172 | 7 |
| AX-157742352 | 8 | 51.973 | KV452904.1 | 7181707  | 7-scf00172 | 7 |
| AX-157856643 | 8 | 51.973 | KV452904.1 | 7505107  | 7-scf00172 | 7 |
| AX-158050114 | 8 | 52.082 | KV452904.1 | 4272460  | 7-scf00172 | 7 |
| AX-158050989 | 8 | 52.082 | KV452904.1 | 5432633  | 7-scf00172 | 7 |
| AX-158051236 | 8 | 52.082 | KV452904.1 | 5772652  | 7-scf00172 | 7 |
| AX-157740108 | 8 | 52.082 | KV452904.1 | 5957846  | 7-scf00172 | 7 |
| AX-158051354 | 8 | 52.082 | KV452904.1 | 5970331  | 7-scf00172 | 7 |
| AX-157822790 | 8 | 52.082 | KV452904.1 | 5977066  | 7-scf00172 | 7 |
| AX-158051362 | 8 | 52.082 | KV452904.1 | 5982585  | 7-scf00172 | 7 |
| AX-157744917 | 8 | 52.082 | KV452904.1 | 5991690  | 7-scf00172 | 7 |
| AX-158051366 | 8 | 52.082 | KV452904.1 | 5992081  | 7-scf00172 | 7 |
| AX-158051371 | 8 | 52.082 | KV452904.1 | 5996028  | 7-scf00172 | 7 |
| AX-158051373 | 8 | 52.082 | KV452904.1 | 5997369  | 7-scf00172 | 7 |
| AX-158051374 | 8 | 52.082 | KV452904.1 | 5997633  | 7-scf00172 | 7 |
| AX-158051376 | 8 | 52.082 | KV452904.1 | 5999883  | 7-scf00172 | 7 |



|              |   |        |            |         |            |   |
|--------------|---|--------|------------|---------|------------|---|
| AX-158051379 | 8 | 52.082 | KV452904.1 | 6001714 | 7-scf00172 | 7 |
| AX-158051380 | 8 | 52.082 | KV452904.1 | 6002572 | 7-scf00172 | 7 |
| AX-158050851 | 8 | 52.191 | KV452904.1 | 5246615 | 7-scf00172 | 7 |
| AX-157751668 | 8 | 52.191 | KV452904.1 | 5246993 | 7-scf00172 | 7 |
| AX-158050852 | 8 | 52.191 | KV452904.1 | 5248220 | 7-scf00172 | 7 |
| AX-157755601 | 8 | 52.191 | KV452904.1 | 5248381 | 7-scf00172 | 7 |
| AX-157715186 | 8 | 52.191 | KV452904.1 | 5249773 | 7-scf00172 | 7 |
| AX-158408817 | 8 | 52.191 | KV452904.1 | 5253250 | 7-scf00172 | 7 |
| AX-158050860 | 8 | 52.191 | KV452904.1 | 5258582 | 7-scf00172 | 7 |
| AX-157822725 | 8 | 52.191 | KV452904.1 | 5323084 | 7-scf00172 | 7 |
| AX-157822726 | 8 | 52.191 | KV452904.1 | 5323881 | 7-scf00172 | 7 |
| AX-158050910 | 8 | 52.191 | KV452904.1 | 5326388 | 7-scf00172 | 7 |
| AX-158378744 | 8 | 52.191 | KV452904.1 | 5326935 | 7-scf00172 | 7 |
| AX-157822727 | 8 | 52.191 | KV452904.1 | 5329344 | 7-scf00172 | 7 |
| AX-158050913 | 8 | 52.191 | KV452904.1 | 5330101 | 7-scf00172 | 7 |
| AX-158050977 | 8 | 52.191 | KV452904.1 | 5418491 | 7-scf00172 | 7 |
| AX-158050995 | 8 | 52.191 | KV452904.1 | 5437445 | 7-scf00172 | 7 |
| AX-158051053 | 8 | 52.191 | KV452904.1 | 5526257 | 7-scf00172 | 7 |
| AX-158051121 | 8 | 52.191 | KV452904.1 | 5581451 | 7-scf00172 | 7 |
| AX-158051164 | 8 | 52.191 | KV452904.1 | 5659792 | 7-scf00172 | 7 |
| AX-158051165 | 8 | 52.191 | KV452904.1 | 5660663 | 7-scf00172 | 7 |
| AX-158051171 | 8 | 52.191 | KV452904.1 | 5665279 | 7-scf00172 | 7 |
| AX-158051184 | 8 | 52.191 | KV452904.1 | 5675788 | 7-scf00172 | 7 |
| AX-158051185 | 8 | 52.191 | KV452904.1 | 5676656 | 7-scf00172 | 7 |
| AX-158051194 | 8 | 52.191 | KV452904.1 | 5683742 | 7-scf00172 | 7 |
| AX-158051199 | 8 | 52.191 | KV452904.1 | 5690195 | 7-scf00172 | 7 |
| AX-157856575 | 8 | 52.191 | KV452904.1 | 5700679 | 7-scf00172 | 7 |
| AX-157745205 | 8 | 52.191 | KV452904.1 | 5774169 | 7-scf00172 | 7 |
| AX-157770994 | 8 | 52.191 | KV452904.1 | 5775261 | 7-scf00172 | 7 |
| AX-157822779 | 8 | 52.191 | KV452904.1 | 5902341 | 7-scf00172 | 7 |
| AX-157750801 | 8 | 52.191 | KV452904.1 | 5946149 | 7-scf00172 | 7 |
| AX-157725593 | 8 | 52.191 | KV452904.1 | 5952106 | 7-scf00172 | 7 |
| AX-158051381 | 8 | 52.191 | KV452904.1 | 6005813 | 7-scf00172 | 7 |
| AX-158051382 | 8 | 52.191 | KV452904.1 | 6010937 | 7-scf00172 | 7 |
| AX-158051385 | 8 | 52.191 | KV452904.1 | 6012614 | 7-scf00172 | 7 |
| AX-158051388 | 8 | 52.191 | KV452904.1 | 6018553 | 7-scf00172 | 7 |
| AX-158051395 | 8 | 52.191 | KV452904.1 | 6025549 | 7-scf00172 | 7 |
| AX-157712244 | 8 | 52.191 | KV452904.1 | 6026132 | 7-scf00172 | 7 |
| AX-157712245 | 8 | 52.191 | KV452904.1 | 6026174 | 7-scf00172 | 7 |
| AX-158051396 | 8 | 52.191 | KV452904.1 | 6026452 | 7-scf00172 | 7 |
| AX-158051397 | 8 | 52.191 | KV452904.1 | 6026653 | 7-scf00172 | 7 |
| AX-157739896 | 8 | 52.191 | KV452904.1 | 6031892 | 7-scf00172 | 7 |
| AX-158422406 | 8 | 52.191 | KV452904.1 | 6036033 | 7-scf00172 | 7 |
| AX-158051409 | 8 | 52.191 | KV452904.1 | 6048808 | 7-scf00172 | 7 |
| AX-158051410 | 8 | 52.191 | KV452904.1 | 6051787 | 7-scf00172 | 7 |
| AX-157822795 | 8 | 52.191 | KV452904.1 | 6052110 | 7-scf00172 | 7 |
| AX-158051411 | 8 | 52.191 | KV452904.1 | 6052343 | 7-scf00172 | 7 |
| AX-158051413 | 8 | 52.191 | KV452904.1 | 6052486 | 7-scf00172 | 7 |
| AX-157747146 | 8 | 52.191 | KV452904.1 | 6054797 | 7-scf00172 | 7 |
| AX-158051417 | 8 | 52.191 | KV452904.1 | 6057973 | 7-scf00172 | 7 |
| AX-158051419 | 8 | 52.191 | KV452904.1 | 6060013 | 7-scf00172 | 7 |

|              |   |        |            |          |            |   |
|--------------|---|--------|------------|----------|------------|---|
| AX-157772404 | 8 | 52.191 | KV452904.1 | 6063118  | 7-scf00172 | 7 |
| AX-158051425 | 8 | 52.191 | KV452904.1 | 6063218  | 7-scf00172 | 7 |
| AX-158051447 | 8 | 52.191 | KV452904.1 | 6081109  | 7-scf00172 | 7 |
| AX-158051453 | 8 | 52.191 | KV452904.1 | 6089387  | 7-scf00172 | 7 |
| AX-157822799 | 8 | 52.191 | KV452904.1 | 6115358  | 7-scf00172 | 7 |
| AX-158051478 | 8 | 52.191 | KV452904.1 | 6119086  | 7-scf00172 | 7 |
| AX-158051484 | 8 | 52.191 | KV452904.1 | 6124941  | 7-scf00172 | 7 |
| AX-158051709 | 8 | 52.191 | KV452904.1 | 6413956  | 7-scf00172 | 7 |
| AX-158051896 | 8 | 52.191 | KV452904.1 | 6746938  | 7-scf00172 | 7 |
| AX-158051989 | 8 | 52.191 | KV452904.1 | 6881502  | 7-scf00172 | 7 |
| AX-158058146 | 8 | 52.191 | KV452904.1 | 16258300 | 7-scf00172 | 7 |
| AX-158051429 | 8 | 52.209 | KV452904.1 | 6064713  | 7-scf00172 | 7 |
| AX-158058336 | 8 | 52.209 | KV452904.1 | 16631373 | 7-scf00172 | 7 |
| AX-158051433 | 8 | 52.254 | KV452904.1 | 6070964  | 7-scf00172 | 7 |
| AX-158051468 | 8 | 52.3   | KV452904.1 | 6103814  | 7-scf00172 | 7 |
| AX-158051469 | 8 | 52.3   | KV452904.1 | 6105208  | 7-scf00172 | 7 |
| AX-157822797 | 8 | 52.344 | KV452904.1 | 6111497  | 7-scf00172 | 7 |
| AX-158051009 | 8 | 52.41  | KV452904.1 | 5459693  | 7-scf00172 | 7 |
| AX-158051249 | 8 | 52.41  | KV452904.1 | 5809431  | 7-scf00172 | 7 |
| AX-157885193 | 8 | 52.41  | KV452904.1 | 5979491  | 7-scf00172 | 7 |
| AX-158051404 | 8 | 52.41  | KV452904.1 | 6043843  | 7-scf00172 | 7 |
| AX-158051443 | 8 | 52.41  | KV452904.1 | 6078681  | 7-scf00172 | 7 |
| AX-157822796 | 8 | 52.41  | KV452904.1 | 6079026  | 7-scf00172 | 7 |
| AX-158051512 | 8 | 52.41  | KV452904.1 | 6151231  | 7-scf00172 | 7 |
| AX-158051520 | 8 | 52.41  | KV452904.1 | 6161666  | 7-scf00172 | 7 |
| AX-158051521 | 8 | 52.41  | KV452904.1 | 6162895  | 7-scf00172 | 7 |
| AX-158051524 | 8 | 52.41  | KV452904.1 | 6166999  | 7-scf00172 | 7 |
| AX-158051525 | 8 | 52.41  | KV452904.1 | 6167847  | 7-scf00172 | 7 |
| AX-158051536 | 8 | 52.41  | KV452904.1 | 6188751  | 7-scf00172 | 7 |
| AX-157753574 | 8 | 52.41  | KV452904.1 | 6190027  | 7-scf00172 | 7 |
| AX-158051539 | 8 | 52.41  | KV452904.1 | 6192432  | 7-scf00172 | 7 |
| AX-158051540 | 8 | 52.41  | KV452904.1 | 6193019  | 7-scf00172 | 7 |
| AX-158051545 | 8 | 52.41  | KV452904.1 | 6196230  | 7-scf00172 | 7 |
| AX-158391801 | 8 | 52.41  | KV452904.1 | 6197476  | 7-scf00172 | 7 |
| AX-158051546 | 8 | 52.41  | KV452904.1 | 6197792  | 7-scf00172 | 7 |
| AX-158051547 | 8 | 52.41  | KV452904.1 | 6198467  | 7-scf00172 | 7 |
| AX-158051548 | 8 | 52.41  | KV452904.1 | 6199575  | 7-scf00172 | 7 |
| AX-157749862 | 8 | 52.41  | KV452904.1 | 6201809  | 7-scf00172 | 7 |
| AX-158051552 | 8 | 52.41  | KV452904.1 | 6206169  | 7-scf00172 | 7 |
| AX-158051555 | 8 | 52.41  | KV452904.1 | 6207734  | 7-scf00172 | 7 |
| AX-158051557 | 8 | 52.41  | KV452904.1 | 6208156  | 7-scf00172 | 7 |
| AX-157751935 | 8 | 52.41  | KV452904.1 | 6208541  | 7-scf00172 | 7 |
| AX-158051558 | 8 | 52.41  | KV452904.1 | 6208948  | 7-scf00172 | 7 |
| AX-158051561 | 8 | 52.41  | KV452904.1 | 6209703  | 7-scf00172 | 7 |
| AX-158051565 | 8 | 52.41  | KV452904.1 | 6213631  | 7-scf00172 | 7 |
| AX-158051566 | 8 | 52.41  | KV452904.1 | 6217069  | 7-scf00172 | 7 |
| AX-158051588 | 8 | 52.41  | KV452904.1 | 6243810  | 7-scf00172 | 7 |
| AX-158051591 | 8 | 52.41  | KV452904.1 | 6245582  | 7-scf00172 | 7 |
| AX-158051593 | 8 | 52.41  | KV452904.1 | 6246102  | 7-scf00172 | 7 |
| AX-158051596 | 8 | 52.41  | KV452904.1 | 6247689  | 7-scf00172 | 7 |
| AX-158051597 | 8 | 52.41  | KV452904.1 | 6248418  | 7-scf00172 | 7 |

|              |   |       |            |         |            |   |
|--------------|---|-------|------------|---------|------------|---|
| AX-158051604 | 8 | 52.41 | KV452904.1 | 6266739 | 7-scf00172 | 7 |
| AX-158051605 | 8 | 52.41 | KV452904.1 | 6267841 | 7-scf00172 | 7 |
| AX-157822804 | 8 | 52.41 | KV452904.1 | 6269512 | 7-scf00172 | 7 |
| AX-158051607 | 8 | 52.41 | KV452904.1 | 6275123 | 7-scf00172 | 7 |
| AX-157703191 | 8 | 52.41 | KV452904.1 | 6278371 | 7-scf00172 | 7 |
| AX-158051608 | 8 | 52.41 | KV452904.1 | 6279788 | 7-scf00172 | 7 |
| AX-157856582 | 8 | 52.41 | KV452904.1 | 6280203 | 7-scf00172 | 7 |
| AX-157856583 | 8 | 52.41 | KV452904.1 | 6280914 | 7-scf00172 | 7 |
| AX-157822805 | 8 | 52.41 | KV452904.1 | 6281760 | 7-scf00172 | 7 |
| AX-157822806 | 8 | 52.41 | KV452904.1 | 6283599 | 7-scf00172 | 7 |
| AX-157822807 | 8 | 52.41 | KV452904.1 | 6288574 | 7-scf00172 | 7 |
| AX-158051612 | 8 | 52.41 | KV452904.1 | 6292190 | 7-scf00172 | 7 |
| AX-158051614 | 8 | 52.41 | KV452904.1 | 6295112 | 7-scf00172 | 7 |
| AX-158051615 | 8 | 52.41 | KV452904.1 | 6295452 | 7-scf00172 | 7 |
| AX-158051616 | 8 | 52.41 | KV452904.1 | 6297884 | 7-scf00172 | 7 |
| AX-158051628 | 8 | 52.41 | KV452904.1 | 6311475 | 7-scf00172 | 7 |
| AX-158051630 | 8 | 52.41 | KV452904.1 | 6311743 | 7-scf00172 | 7 |
| AX-158051634 | 8 | 52.41 | KV452904.1 | 6315391 | 7-scf00172 | 7 |
| AX-158051637 | 8 | 52.41 | KV452904.1 | 6321351 | 7-scf00172 | 7 |
| AX-157709748 | 8 | 52.41 | KV452904.1 | 6324583 | 7-scf00172 | 7 |
| AX-158408861 | 8 | 52.41 | KV452904.1 | 6325483 | 7-scf00172 | 7 |
| AX-158051644 | 8 | 52.41 | KV452904.1 | 6333456 | 7-scf00172 | 7 |
| AX-158051645 | 8 | 52.41 | KV452904.1 | 6339825 | 7-scf00172 | 7 |
| AX-158408862 | 8 | 52.41 | KV452904.1 | 6340066 | 7-scf00172 | 7 |
| AX-158408863 | 8 | 52.41 | KV452904.1 | 6340111 | 7-scf00172 | 7 |
| AX-158408864 | 8 | 52.41 | KV452904.1 | 6340301 | 7-scf00172 | 7 |
| AX-158408865 | 8 | 52.41 | KV452904.1 | 6340336 | 7-scf00172 | 7 |
| AX-158051646 | 8 | 52.41 | KV452904.1 | 6341024 | 7-scf00172 | 7 |
| AX-158051649 | 8 | 52.41 | KV452904.1 | 6342397 | 7-scf00172 | 7 |
| AX-158051653 | 8 | 52.41 | KV452904.1 | 6347670 | 7-scf00172 | 7 |
| AX-158051656 | 8 | 52.41 | KV452904.1 | 6349277 | 7-scf00172 | 7 |
| AX-158051658 | 8 | 52.41 | KV452904.1 | 6357977 | 7-scf00172 | 7 |
| AX-158051660 | 8 | 52.41 | KV452904.1 | 6359794 | 7-scf00172 | 7 |
| AX-158051666 | 8 | 52.41 | KV452904.1 | 6364641 | 7-scf00172 | 7 |
| AX-158051667 | 8 | 52.41 | KV452904.1 | 6365122 | 7-scf00172 | 7 |
| AX-158051670 | 8 | 52.41 | KV452904.1 | 6366564 | 7-scf00172 | 7 |
| AX-158051672 | 8 | 52.41 | KV452904.1 | 6367100 | 7-scf00172 | 7 |
| AX-158051673 | 8 | 52.41 | KV452904.1 | 6367379 | 7-scf00172 | 7 |
| AX-158051676 | 8 | 52.41 | KV452904.1 | 6368861 | 7-scf00172 | 7 |
| AX-158051677 | 8 | 52.41 | KV452904.1 | 6370215 | 7-scf00172 | 7 |
| AX-157856586 | 8 | 52.41 | KV452904.1 | 6371571 | 7-scf00172 | 7 |
| AX-158051680 | 8 | 52.41 | KV452904.1 | 6371778 | 7-scf00172 | 7 |
| AX-158051681 | 8 | 52.41 | KV452904.1 | 6373499 | 7-scf00172 | 7 |
| AX-158051683 | 8 | 52.41 | KV452904.1 | 6375264 | 7-scf00172 | 7 |
| AX-158051685 | 8 | 52.41 | KV452904.1 | 6377306 | 7-scf00172 | 7 |
| AX-158051686 | 8 | 52.41 | KV452904.1 | 6377920 | 7-scf00172 | 7 |
| AX-157822812 | 8 | 52.41 | KV452904.1 | 6384927 | 7-scf00172 | 7 |
| AX-158051693 | 8 | 52.41 | KV452904.1 | 6386825 | 7-scf00172 | 7 |
| AX-158051698 | 8 | 52.41 | KV452904.1 | 6393369 | 7-scf00172 | 7 |
| AX-158051703 | 8 | 52.41 | KV452904.1 | 6400933 | 7-scf00172 | 7 |
| AX-157715383 | 8 | 52.41 | KV452904.1 | 6409695 | 7-scf00172 | 7 |

|              |   |       |            |         |            |   |
|--------------|---|-------|------------|---------|------------|---|
| AX-158051737 | 8 | 52.41 | KV452904.1 | 6437396 | 7-scf00172 | 7 |
| AX-158051742 | 8 | 52.41 | KV452904.1 | 6459670 | 7-scf00172 | 7 |
| AX-158051745 | 8 | 52.41 | KV452904.1 | 6460755 | 7-scf00172 | 7 |
| AX-158051746 | 8 | 52.41 | KV452904.1 | 6461370 | 7-scf00172 | 7 |
| AX-158051749 | 8 | 52.41 | KV452904.1 | 6471064 | 7-scf00172 | 7 |
| AX-157758613 | 8 | 52.41 | KV452904.1 | 6477068 | 7-scf00172 | 7 |
| AX-158051751 | 8 | 52.41 | KV452904.1 | 6485674 | 7-scf00172 | 7 |
| AX-158051753 | 8 | 52.41 | KV452904.1 | 6486669 | 7-scf00172 | 7 |
| AX-158051756 | 8 | 52.41 | KV452904.1 | 6488397 | 7-scf00172 | 7 |
| AX-158408869 | 8 | 52.41 | KV452904.1 | 6511254 | 7-scf00172 | 7 |
| AX-157856590 | 8 | 52.41 | KV452904.1 | 6511743 | 7-scf00172 | 7 |
| AX-158408871 | 8 | 52.41 | KV452904.1 | 6512270 | 7-scf00172 | 7 |
| AX-158051761 | 8 | 52.41 | KV452904.1 | 6519514 | 7-scf00172 | 7 |
| AX-158051762 | 8 | 52.41 | KV452904.1 | 6528838 | 7-scf00172 | 7 |
| AX-158051768 | 8 | 52.41 | KV452904.1 | 6536661 | 7-scf00172 | 7 |
| AX-158051769 | 8 | 52.41 | KV452904.1 | 6537949 | 7-scf00172 | 7 |
| AX-158051771 | 8 | 52.41 | KV452904.1 | 6540350 | 7-scf00172 | 7 |
| AX-158051775 | 8 | 52.41 | KV452904.1 | 6541454 | 7-scf00172 | 7 |
| AX-158051787 | 8 | 52.41 | KV452904.1 | 6549126 | 7-scf00172 | 7 |
| AX-158051788 | 8 | 52.41 | KV452904.1 | 6551849 | 7-scf00172 | 7 |
| AX-158051790 | 8 | 52.41 | KV452904.1 | 6552850 | 7-scf00172 | 7 |
| AX-158051791 | 8 | 52.41 | KV452904.1 | 6555385 | 7-scf00172 | 7 |
| AX-158051792 | 8 | 52.41 | KV452904.1 | 6561894 | 7-scf00172 | 7 |
| AX-158051793 | 8 | 52.41 | KV452904.1 | 6564658 | 7-scf00172 | 7 |
| AX-158051797 | 8 | 52.41 | KV452904.1 | 6568775 | 7-scf00172 | 7 |
| AX-158051799 | 8 | 52.41 | KV452904.1 | 6569706 | 7-scf00172 | 7 |
| AX-158051800 | 8 | 52.41 | KV452904.1 | 6570392 | 7-scf00172 | 7 |
| AX-158378774 | 8 | 52.41 | KV452904.1 | 6575243 | 7-scf00172 | 7 |
| AX-158051807 | 8 | 52.41 | KV452904.1 | 6576304 | 7-scf00172 | 7 |
| AX-158051812 | 8 | 52.41 | KV452904.1 | 6583746 | 7-scf00172 | 7 |
| AX-158051815 | 8 | 52.41 | KV452904.1 | 6584251 | 7-scf00172 | 7 |
| AX-158051820 | 8 | 52.41 | KV452904.1 | 6589874 | 7-scf00172 | 7 |
| AX-158051822 | 8 | 52.41 | KV452904.1 | 6593446 | 7-scf00172 | 7 |
| AX-158051823 | 8 | 52.41 | KV452904.1 | 6594243 | 7-scf00172 | 7 |
| AX-158051833 | 8 | 52.41 | KV452904.1 | 6620095 | 7-scf00172 | 7 |
| AX-157822824 | 8 | 52.41 | KV452904.1 | 6621468 | 7-scf00172 | 7 |
| AX-158051844 | 8 | 52.41 | KV452904.1 | 6644173 | 7-scf00172 | 7 |
| AX-158051851 | 8 | 52.41 | KV452904.1 | 6658683 | 7-scf00172 | 7 |
| AX-158051855 | 8 | 52.41 | KV452904.1 | 6663920 | 7-scf00172 | 7 |
| AX-157754047 | 8 | 52.41 | KV452904.1 | 6680143 | 7-scf00172 | 7 |
| AX-157703678 | 8 | 52.41 | KV452904.1 | 6684194 | 7-scf00172 | 7 |
| AX-158051871 | 8 | 52.41 | KV452904.1 | 6705963 | 7-scf00172 | 7 |
| AX-158384055 | 8 | 52.41 | KV452904.1 | 6719695 | 7-scf00172 | 7 |
| AX-158051886 | 8 | 52.41 | KV452904.1 | 6733259 | 7-scf00172 | 7 |
| AX-158051900 | 8 | 52.41 | KV452904.1 | 6752739 | 7-scf00172 | 7 |
| AX-158051904 | 8 | 52.41 | KV452904.1 | 6770816 | 7-scf00172 | 7 |
| AX-158408873 | 8 | 52.41 | KV452904.1 | 6779222 | 7-scf00172 | 7 |
| AX-157703457 | 8 | 52.41 | KV452904.1 | 6779686 | 7-scf00172 | 7 |
| AX-158051908 | 8 | 52.41 | KV452904.1 | 6780302 | 7-scf00172 | 7 |
| AX-158051910 | 8 | 52.41 | KV452904.1 | 6784597 | 7-scf00172 | 7 |
| AX-158051912 | 8 | 52.41 | KV452904.1 | 6787133 | 7-scf00172 | 7 |

|              |   |       |            |         |            |   |
|--------------|---|-------|------------|---------|------------|---|
| AX-158051917 | 8 | 52.41 | KV452904.1 | 6793488 | 7-scf00172 | 7 |
| AX-157726299 | 8 | 52.41 | KV452904.1 | 6795391 | 7-scf00172 | 7 |
| AX-158051921 | 8 | 52.41 | KV452904.1 | 6803766 | 7-scf00172 | 7 |
| AX-158051926 | 8 | 52.41 | KV452904.1 | 6813473 | 7-scf00172 | 7 |
| AX-158051927 | 8 | 52.41 | KV452904.1 | 6813834 | 7-scf00172 | 7 |
| AX-158051931 | 8 | 52.41 | KV452904.1 | 6816007 | 7-scf00172 | 7 |
| AX-158051935 | 8 | 52.41 | KV452904.1 | 6818716 | 7-scf00172 | 7 |
| AX-158051936 | 8 | 52.41 | KV452904.1 | 6819190 | 7-scf00172 | 7 |
| AX-157726386 | 8 | 52.41 | KV452904.1 | 6819948 | 7-scf00172 | 7 |
| AX-158051940 | 8 | 52.41 | KV452904.1 | 6823629 | 7-scf00172 | 7 |
| AX-158051947 | 8 | 52.41 | KV452904.1 | 6827951 | 7-scf00172 | 7 |
| AX-158051949 | 8 | 52.41 | KV452904.1 | 6829505 | 7-scf00172 | 7 |
| AX-158051951 | 8 | 52.41 | KV452904.1 | 6830093 | 7-scf00172 | 7 |
| AX-158051955 | 8 | 52.41 | KV452904.1 | 6831257 | 7-scf00172 | 7 |
| AX-157747412 | 8 | 52.41 | KV452904.1 | 6832141 | 7-scf00172 | 7 |
| AX-158051957 | 8 | 52.41 | KV452904.1 | 6837452 | 7-scf00172 | 7 |
| AX-158051958 | 8 | 52.41 | KV452904.1 | 6839043 | 7-scf00172 | 7 |
| AX-158051961 | 8 | 52.41 | KV452904.1 | 6843665 | 7-scf00172 | 7 |
| AX-158051966 | 8 | 52.41 | KV452904.1 | 6850604 | 7-scf00172 | 7 |
| AX-158378780 | 8 | 52.41 | KV452904.1 | 6863675 | 7-scf00172 | 7 |
| AX-157724821 | 8 | 52.41 | KV452904.1 | 6871362 | 7-scf00172 | 7 |
| AX-158051984 | 8 | 52.41 | KV452904.1 | 6874192 | 7-scf00172 | 7 |
| AX-157856594 | 8 | 52.41 | KV452904.1 | 6891286 | 7-scf00172 | 7 |
| AX-158051995 | 8 | 52.41 | KV452904.1 | 6893319 | 7-scf00172 | 7 |
| AX-158051998 | 8 | 52.41 | KV452904.1 | 6896748 | 7-scf00172 | 7 |
| AX-158408878 | 8 | 52.41 | KV452904.1 | 6898222 | 7-scf00172 | 7 |
| AX-158408880 | 8 | 52.41 | KV452904.1 | 6900567 | 7-scf00172 | 7 |
| AX-158052012 | 8 | 52.41 | KV452904.1 | 6920593 | 7-scf00172 | 7 |
| AX-158052013 | 8 | 52.41 | KV452904.1 | 6930331 | 7-scf00172 | 7 |
| AX-158052018 | 8 | 52.41 | KV452904.1 | 6936122 | 7-scf00172 | 7 |
| AX-158052021 | 8 | 52.41 | KV452904.1 | 6939833 | 7-scf00172 | 7 |
| AX-158052029 | 8 | 52.41 | KV452904.1 | 6947972 | 7-scf00172 | 7 |
| AX-158052034 | 8 | 52.41 | KV452904.1 | 6952821 | 7-scf00172 | 7 |
| AX-157710624 | 8 | 52.41 | KV452904.1 | 6954174 | 7-scf00172 | 7 |
| AX-158052044 | 8 | 52.41 | KV452904.1 | 6969288 | 7-scf00172 | 7 |
| AX-158052048 | 8 | 52.41 | KV452904.1 | 6977398 | 7-scf00172 | 7 |
| AX-158052050 | 8 | 52.41 | KV452904.1 | 6978604 | 7-scf00172 | 7 |
| AX-157822836 | 8 | 52.41 | KV452904.1 | 7013230 | 7-scf00172 | 7 |
| AX-157822840 | 8 | 52.41 | KV452904.1 | 7017730 | 7-scf00172 | 7 |
| AX-158052072 | 8 | 52.41 | KV452904.1 | 7019793 | 7-scf00172 | 7 |
| AX-158052078 | 8 | 52.41 | KV452904.1 | 7034943 | 7-scf00172 | 7 |
| AX-158052080 | 8 | 52.41 | KV452904.1 | 7038161 | 7-scf00172 | 7 |
| AX-158052083 | 8 | 52.41 | KV452904.1 | 7041422 | 7-scf00172 | 7 |
| AX-158052087 | 8 | 52.41 | KV452904.1 | 7044223 | 7-scf00172 | 7 |
| AX-158052088 | 8 | 52.41 | KV452904.1 | 7045494 | 7-scf00172 | 7 |
| AX-157876719 | 8 | 52.41 | KV452904.1 | 7060145 | 7-scf00172 | 7 |
| AX-158052109 | 8 | 52.41 | KV452904.1 | 7065392 | 7-scf00172 | 7 |
| AX-158052113 | 8 | 52.41 | KV452904.1 | 7070270 | 7-scf00172 | 7 |
| AX-157714856 | 8 | 52.41 | KV452904.1 | 7084261 | 7-scf00172 | 7 |
| AX-157865504 | 8 | 52.41 | KV452904.1 | 7086756 | 7-scf00172 | 7 |
| AX-158384059 | 8 | 52.41 | KV452904.1 | 7087832 | 7-scf00172 | 7 |

|              |   |        |            |         |            |   |
|--------------|---|--------|------------|---------|------------|---|
| AX-157865506 | 8 | 52.41  | KV452904.1 | 7101552 | 7-scf00172 | 7 |
| AX-157748296 | 8 | 52.41  | KV452904.1 | 7109846 | 7-scf00172 | 7 |
| AX-158052188 | 8 | 52.41  | KV452904.1 | 7184389 | 7-scf00172 | 7 |
| AX-158052215 | 8 | 52.41  | KV452904.1 | 7232419 | 7-scf00172 | 7 |
| AX-158052230 | 8 | 52.41  | KV452904.1 | 7250795 | 7-scf00172 | 7 |
| AX-157697155 | 8 | 52.41  | KV452904.1 | 7255293 | 7-scf00172 | 7 |
| AX-158052275 | 8 | 52.41  | KV452904.1 | 7330416 | 7-scf00172 | 7 |
| AX-158052281 | 8 | 52.41  | KV452904.1 | 7333820 | 7-scf00172 | 7 |
| AX-157712800 | 8 | 52.41  | KV452904.1 | 7414201 | 7-scf00172 | 7 |
| AX-158052362 | 8 | 52.41  | KV452904.1 | 7414506 | 7-scf00172 | 7 |
| AX-157786544 | 8 | 52.41  | KV452904.1 | 7418737 | 7-scf00172 | 7 |
| AX-158052364 | 8 | 52.41  | KV452904.1 | 7419986 | 7-scf00172 | 7 |
| AX-158052491 | 8 | 52.41  | KV452904.1 | 7556431 | 7-scf00172 | 7 |
| AX-158052495 | 8 | 52.41  | KV452904.1 | 7561422 | 7-scf00172 | 7 |
| AX-158052589 | 8 | 52.41  | KV452904.1 | 7661010 | 7-scf00172 | 7 |
| AX-158052597 | 8 | 52.41  | KV452904.1 | 7666660 | 7-scf00172 | 7 |
| AX-158384064 | 8 | 52.41  | KV452904.1 | 7672920 | 7-scf00172 | 7 |
| AX-158052630 | 8 | 52.41  | KV452904.1 | 7729275 | 7-scf00172 | 7 |
| AX-158052019 | 8 | 52.464 | KV452904.1 | 6938878 | 7-scf00172 | 7 |
| AX-157712286 | 8 | 52.519 | KV452904.1 | 5832711 | 7-scf00172 | 7 |
| AX-158051470 | 8 | 52.519 | KV452904.1 | 6106878 | 7-scf00172 | 7 |
| AX-158051537 | 8 | 52.519 | KV452904.1 | 6189550 | 7-scf00172 | 7 |
| AX-158051691 | 8 | 52.519 | KV452904.1 | 6383573 | 7-scf00172 | 7 |
| AX-157822815 | 8 | 52.519 | KV452904.1 | 6398149 | 7-scf00172 | 7 |
| AX-158051705 | 8 | 52.519 | KV452904.1 | 6401940 | 7-scf00172 | 7 |
| AX-157758784 | 8 | 52.519 | KV452904.1 | 6410999 | 7-scf00172 | 7 |
| AX-158051708 | 8 | 52.519 | KV452904.1 | 6413048 | 7-scf00172 | 7 |
| AX-158051897 | 8 | 52.519 | KV452904.1 | 6748861 | 7-scf00172 | 7 |
| AX-157758982 | 8 | 52.519 | KV452904.1 | 6750304 | 7-scf00172 | 7 |
| AX-158051907 | 8 | 52.519 | KV452904.1 | 6777760 | 7-scf00172 | 7 |
| AX-158051915 | 8 | 52.519 | KV452904.1 | 6787948 | 7-scf00172 | 7 |
| AX-158051923 | 8 | 52.519 | KV452904.1 | 6808674 | 7-scf00172 | 7 |
| AX-158051924 | 8 | 52.519 | KV452904.1 | 6811675 | 7-scf00172 | 7 |
| AX-158051933 | 8 | 52.519 | KV452904.1 | 6817166 | 7-scf00172 | 7 |
| AX-158051934 | 8 | 52.519 | KV452904.1 | 6817616 | 7-scf00172 | 7 |
| AX-158051937 | 8 | 52.519 | KV452904.1 | 6821195 | 7-scf00172 | 7 |
| AX-158051943 | 8 | 52.519 | KV452904.1 | 6824583 | 7-scf00172 | 7 |
| AX-157856591 | 8 | 52.519 | KV452904.1 | 6829541 | 7-scf00172 | 7 |
| AX-157822829 | 8 | 52.519 | KV452904.1 | 6837221 | 7-scf00172 | 7 |
| AX-158051960 | 8 | 52.519 | KV452904.1 | 6841437 | 7-scf00172 | 7 |
| AX-158051962 | 8 | 52.519 | KV452904.1 | 6844201 | 7-scf00172 | 7 |
| AX-157749005 | 8 | 52.519 | KV452904.1 | 6848460 | 7-scf00172 | 7 |
| AX-158051965 | 8 | 52.519 | KV452904.1 | 6849485 | 7-scf00172 | 7 |
| AX-158051969 | 8 | 52.519 | KV452904.1 | 6854923 | 7-scf00172 | 7 |
| AX-158051979 | 8 | 52.519 | KV452904.1 | 6867584 | 7-scf00172 | 7 |
| AX-158051981 | 8 | 52.519 | KV452904.1 | 6867855 | 7-scf00172 | 7 |
| AX-157856593 | 8 | 52.519 | KV452904.1 | 6868957 | 7-scf00172 | 7 |
| AX-158051999 | 8 | 52.519 | KV452904.1 | 6899758 | 7-scf00172 | 7 |
| AX-157822831 | 8 | 52.519 | KV452904.1 | 6904532 | 7-scf00172 | 7 |
| AX-158408881 | 8 | 52.519 | KV452904.1 | 6907243 | 7-scf00172 | 7 |
| AX-158408887 | 8 | 52.519 | KV452904.1 | 6908948 | 7-scf00172 | 7 |

|              |   |        |            |         |            |   |
|--------------|---|--------|------------|---------|------------|---|
| AX-158052006 | 8 | 52.519 | KV452904.1 | 6912841 | 7-scf00172 | 7 |
| AX-158052009 | 8 | 52.519 | KV452904.1 | 6917342 | 7-scf00172 | 7 |
| AX-157856597 | 8 | 52.519 | KV452904.1 | 6920408 | 7-scf00172 | 7 |
| AX-157856598 | 8 | 52.519 | KV452904.1 | 6921101 | 7-scf00172 | 7 |
| AX-157695753 | 8 | 52.519 | KV452904.1 | 6931170 | 7-scf00172 | 7 |
| AX-158052014 | 8 | 52.519 | KV452904.1 | 6931424 | 7-scf00172 | 7 |
| AX-158052015 | 8 | 52.519 | KV452904.1 | 6933075 | 7-scf00172 | 7 |
| AX-158052024 | 8 | 52.519 | KV452904.1 | 6942639 | 7-scf00172 | 7 |
| AX-158052025 | 8 | 52.519 | KV452904.1 | 6943143 | 7-scf00172 | 7 |
| AX-158052026 | 8 | 52.519 | KV452904.1 | 6945007 | 7-scf00172 | 7 |
| AX-158052032 | 8 | 52.519 | KV452904.1 | 6950952 | 7-scf00172 | 7 |
| AX-158052035 | 8 | 52.519 | KV452904.1 | 6955242 | 7-scf00172 | 7 |
| AX-158052051 | 8 | 52.519 | KV452904.1 | 6979218 | 7-scf00172 | 7 |
| AX-158052052 | 8 | 52.519 | KV452904.1 | 6979884 | 7-scf00172 | 7 |
| AX-158052053 | 8 | 52.519 | KV452904.1 | 6980101 | 7-scf00172 | 7 |
| AX-158052056 | 8 | 52.519 | KV452904.1 | 6984832 | 7-scf00172 | 7 |
| AX-157786398 | 8 | 52.519 | KV452904.1 | 6992629 | 7-scf00172 | 7 |
| AX-157743274 | 8 | 52.519 | KV452904.1 | 6993652 | 7-scf00172 | 7 |
| AX-158378781 | 8 | 52.519 | KV452904.1 | 6998225 | 7-scf00172 | 7 |
| AX-157822833 | 8 | 52.519 | KV452904.1 | 6998788 | 7-scf00172 | 7 |
| AX-157786401 | 8 | 52.519 | KV452904.1 | 7000496 | 7-scf00172 | 7 |
| AX-157856599 | 8 | 52.519 | KV452904.1 | 7009545 | 7-scf00172 | 7 |
| AX-158052069 | 8 | 52.519 | KV452904.1 | 7012265 | 7-scf00172 | 7 |
| AX-157822837 | 8 | 52.519 | KV452904.1 | 7013479 | 7-scf00172 | 7 |
| AX-158052071 | 8 | 52.519 | KV452904.1 | 7014924 | 7-scf00172 | 7 |
| AX-157822843 | 8 | 52.519 | KV452904.1 | 7028123 | 7-scf00172 | 7 |
| AX-157773924 | 8 | 52.519 | KV452904.1 | 7037539 | 7-scf00172 | 7 |
| AX-157746287 | 8 | 52.519 | KV452904.1 | 7041616 | 7-scf00172 | 7 |
| AX-158052084 | 8 | 52.519 | KV452904.1 | 7042671 | 7-scf00172 | 7 |
| AX-157822845 | 8 | 52.519 | KV452904.1 | 7050193 | 7-scf00172 | 7 |
| AX-157822846 | 8 | 52.519 | KV452904.1 | 7051617 | 7-scf00172 | 7 |
| AX-158052092 | 8 | 52.519 | KV452904.1 | 7051768 | 7-scf00172 | 7 |
| AX-157876718 | 8 | 52.519 | KV452904.1 | 7051904 | 7-scf00172 | 7 |
| AX-158052093 | 8 | 52.519 | KV452904.1 | 7052326 | 7-scf00172 | 7 |
| AX-158052097 | 8 | 52.519 | KV452904.1 | 7055571 | 7-scf00172 | 7 |
| AX-158052110 | 8 | 52.519 | KV452904.1 | 7066296 | 7-scf00172 | 7 |
| AX-157856601 | 8 | 52.519 | KV452904.1 | 7069529 | 7-scf00172 | 7 |
| AX-158052114 | 8 | 52.519 | KV452904.1 | 7070626 | 7-scf00172 | 7 |
| AX-158416368 | 8 | 52.519 | KV452904.1 | 7071715 | 7-scf00172 | 7 |
| AX-158052115 | 8 | 52.519 | KV452904.1 | 7072333 | 7-scf00172 | 7 |
| AX-158052116 | 8 | 52.519 | KV452904.1 | 7072731 | 7-scf00172 | 7 |
| AX-158052118 | 8 | 52.519 | KV452904.1 | 7073895 | 7-scf00172 | 7 |
| AX-158052119 | 8 | 52.519 | KV452904.1 | 7074683 | 7-scf00172 | 7 |
| AX-158052121 | 8 | 52.519 | KV452904.1 | 7077913 | 7-scf00172 | 7 |
| AX-158052124 | 8 | 52.519 | KV452904.1 | 7084908 | 7-scf00172 | 7 |
| AX-158052127 | 8 | 52.519 | KV452904.1 | 7087677 | 7-scf00172 | 7 |
| AX-158052135 | 8 | 52.519 | KV452904.1 | 7104209 | 7-scf00172 | 7 |
| AX-158052136 | 8 | 52.519 | KV452904.1 | 7104534 | 7-scf00172 | 7 |
| AX-158052140 | 8 | 52.519 | KV452904.1 | 7107088 | 7-scf00172 | 7 |
| AX-158052141 | 8 | 52.519 | KV452904.1 | 7108492 | 7-scf00172 | 7 |
| AX-158052149 | 8 | 52.519 | KV452904.1 | 7127101 | 7-scf00172 | 7 |

|              |   |        |             |         |            |    |
|--------------|---|--------|-------------|---------|------------|----|
| AX-158408893 | 8 | 52.519 | KV452904.1  | 7129926 | 7-scf00172 | 7  |
| AX-158052153 | 8 | 52.519 | KV452904.1  | 7132867 | 7-scf00172 | 7  |
| AX-158052154 | 8 | 52.519 | KV452904.1  | 7133114 | 7-scf00172 | 7  |
| AX-158052157 | 8 | 52.519 | KV452904.1  | 7133969 | 7-scf00172 | 7  |
| AX-157744373 | 8 | 52.519 | KV452904.1  | 7134155 | 7-scf00172 | 7  |
| AX-158052158 | 8 | 52.519 | KV452904.1  | 7134562 | 7-scf00172 | 7  |
| AX-158052180 | 8 | 52.519 | KV452904.1  | 7165322 | 7-scf00172 | 7  |
| AX-158052184 | 8 | 52.519 | KV452904.1  | 7168224 | 7-scf00172 | 7  |
| AX-157865508 | 8 | 52.519 | KV452904.1  | 7176941 | 7-scf00172 | 7  |
| AX-157822848 | 8 | 52.519 | KV452904.1  | 7181454 | 7-scf00172 | 7  |
| AX-158052189 | 8 | 52.519 | KV452904.1  | 7185527 | 7-scf00172 | 7  |
| AX-158052204 | 8 | 52.519 | KV452904.1  | 7227380 | 7-scf00172 | 7  |
| AX-158052220 | 8 | 52.519 | KV452904.1  | 7239988 | 7-scf00172 | 7  |
| AX-158052225 | 8 | 52.519 | KV452904.1  | 7244759 | 7-scf00172 | 7  |
| AX-158052272 | 8 | 52.519 | KV452904.1  | 7326431 | 7-scf00172 | 7  |
| AX-157856619 | 8 | 52.519 | KV452904.1  | 7434472 | 7-scf00172 | 7  |
| AX-158052385 | 8 | 52.519 | KV452904.1  | 7442490 | 7-scf00172 | 7  |
| AX-157786549 | 8 | 52.519 | KV452904.1  | 7448046 | 7-scf00172 | 7  |
| AX-158052399 | 8 | 52.519 | KV452904.1  | 7465483 | 7-scf00172 | 7  |
| AX-158052412 | 8 | 52.519 | KV452904.1  | 7479355 | 7-scf00172 | 7  |
| AX-158052526 | 8 | 52.519 | KV452904.1  | 7587408 | 7-scf00172 | 7  |
| AX-158052528 | 8 | 52.519 | KV452904.1  | 7589030 | 7-scf00172 | 7  |
| AX-157856666 | 8 | 52.519 | KV452904.1  | 7589891 | 7-scf00172 | 7  |
| AX-158052531 | 8 | 52.519 | KV452904.1  | 7591054 | 7-scf00172 | 7  |
| AX-158052533 | 8 | 52.519 | KV452904.1  | 7591338 | 7-scf00172 | 7  |
| AX-158052540 | 8 | 52.519 | KV452904.1  | 7597944 | 7-scf00172 | 7  |
| AX-157856667 | 8 | 52.519 | KV452904.1  | 7602892 | 7-scf00172 | 7  |
| AX-157786563 | 8 | 52.519 | KV452904.1  | 7608060 | 7-scf00172 | 7  |
| AX-158052555 | 8 | 52.519 | KV452904.1  | 7608827 | 7-scf00172 | 7  |
| AX-158052556 | 8 | 52.519 | KV452904.1  | 7609216 | 7-scf00172 | 7  |
| AX-157822867 | 8 | 52.519 | KV452904.1  | 7615539 | 7-scf00172 | 7  |
| AX-158052633 | 8 | 52.519 | KV452904.1  | 7733873 | 7-scf00172 | 7  |
| AX-158052642 | 8 | 52.519 | KV452904.1  | 7739546 | 7-scf00172 | 7  |
| AX-158052648 | 8 | 52.519 | KV452904.1  | 7743780 | 7-scf00172 | 7  |
| AX-157856677 | 8 | 52.519 | KV452904.1  | 7752980 | 7-scf00172 | 7  |
| AX-158054010 | 8 | 52.519 | KV452904.1  | 9735536 | 7-scf00172 | 7  |
| AX-157706195 | 8 | 52.519 | 3ML01031800 | 556     | scf07421_1 | UN |
| AX-157706196 | 8 | 52.519 | 3ML01031800 | 630     | scf07421_1 | UN |
| AX-158052258 | 8 | 52.548 | KV452904.1  | 7292347 | 7-scf00172 | 7  |
| AX-158391811 | 8 | 52.628 | KV452904.1  | 7310209 | 7-scf00172 | 7  |
| AX-158052271 | 8 | 52.684 | KV452904.1  | 7325003 | 7-scf00172 | 7  |
| AX-157822856 | 8 | 52.685 | KV452904.1  | 7326670 | 7-scf00172 | 7  |
| AX-158051972 | 8 | 52.686 | KV452904.1  | 6857950 | 7-scf00172 | 7  |
| AX-158408877 | 8 | 52.686 | KV452904.1  | 6859252 | 7-scf00172 | 7  |
| AX-158051973 | 8 | 52.686 | KV452904.1  | 6859860 | 7-scf00172 | 7  |
| AX-158051977 | 8 | 52.686 | KV452904.1  | 6861941 | 7-scf00172 | 7  |
| AX-158052020 | 8 | 52.686 | KV452904.1  | 6939309 | 7-scf00172 | 7  |
| AX-158052100 | 8 | 52.686 | KV452904.1  | 7057534 | 7-scf00172 | 7  |
| AX-158052235 | 8 | 52.686 | KV452904.1  | 7254618 | 7-scf00172 | 7  |
| AX-158052278 | 8 | 52.686 | KV452904.1  | 7333288 | 7-scf00172 | 7  |
| AX-157856610 | 8 | 52.686 | KV452904.1  | 7379410 | 7-scf00172 | 7  |



|              |   |        |            |         |            |   |
|--------------|---|--------|------------|---------|------------|---|
| AX-158052390 | 8 | 52.686 | KV452904.1 | 7457667 | 7-scf00172 | 7 |
| AX-157856649 | 8 | 52.686 | KV452904.1 | 7520482 | 7-scf00172 | 7 |
| AX-158052466 | 8 | 52.686 | KV452904.1 | 7529469 | 7-scf00172 | 7 |
| AX-157856651 | 8 | 52.686 | KV452904.1 | 7530850 | 7-scf00172 | 7 |
| AX-158052467 | 8 | 52.686 | KV452904.1 | 7532418 | 7-scf00172 | 7 |
| AX-158052469 | 8 | 52.686 | KV452904.1 | 7533918 | 7-scf00172 | 7 |
| AX-157856655 | 8 | 52.686 | KV452904.1 | 7534693 | 7-scf00172 | 7 |
| AX-158052473 | 8 | 52.686 | KV452904.1 | 7537788 | 7-scf00172 | 7 |
| AX-157856659 | 8 | 52.686 | KV452904.1 | 7542450 | 7-scf00172 | 7 |
| AX-158052478 | 8 | 52.686 | KV452904.1 | 7543176 | 7-scf00172 | 7 |
| AX-157856660 | 8 | 52.686 | KV452904.1 | 7543805 | 7-scf00172 | 7 |
| AX-158052480 | 8 | 52.686 | KV452904.1 | 7543974 | 7-scf00172 | 7 |
| AX-158052482 | 8 | 52.686 | KV452904.1 | 7546561 | 7-scf00172 | 7 |
| AX-158052486 | 8 | 52.686 | KV452904.1 | 7552523 | 7-scf00172 | 7 |
| AX-157856663 | 8 | 52.686 | KV452904.1 | 7553483 | 7-scf00172 | 7 |
| AX-158052494 | 8 | 52.686 | KV452904.1 | 7560319 | 7-scf00172 | 7 |
| AX-157870615 | 8 | 52.686 | KV452904.1 | 7562323 | 7-scf00172 | 7 |
| AX-158052499 | 8 | 52.686 | KV452904.1 | 7564048 | 7-scf00172 | 7 |
| AX-157786559 | 8 | 52.686 | KV452904.1 | 7568077 | 7-scf00172 | 7 |
| AX-158052674 | 8 | 52.686 | KV452904.1 | 7767002 | 7-scf00172 | 7 |
| AX-158378787 | 8 | 52.688 | KV452904.1 | 7325171 | 7-scf00172 | 7 |
| AX-158052286 | 8 | 52.688 | KV452904.1 | 7334941 | 7-scf00172 | 7 |
| AX-157856607 | 8 | 52.688 | KV452904.1 | 7365103 | 7-scf00172 | 7 |
| AX-158052289 | 8 | 52.689 | KV452904.1 | 7335851 | 7-scf00172 | 7 |
| AX-158052291 | 8 | 52.69  | KV452904.1 | 7339283 | 7-scf00172 | 7 |
| AX-158052293 | 8 | 52.691 | KV452904.1 | 7339757 | 7-scf00172 | 7 |
| AX-158378790 | 8 | 52.693 | KV452904.1 | 7347400 | 7-scf00172 | 7 |
| AX-158052308 | 8 | 52.694 | KV452904.1 | 7354286 | 7-scf00172 | 7 |
| AX-158052310 | 8 | 52.696 | KV452904.1 | 7355742 | 7-scf00172 | 7 |
| AX-158052313 | 8 | 52.698 | KV452904.1 | 7359980 | 7-scf00172 | 7 |
| AX-158052319 | 8 | 52.699 | KV452904.1 | 7362294 | 7-scf00172 | 7 |
| AX-158052320 | 8 | 52.7   | KV452904.1 | 7362825 | 7-scf00172 | 7 |
| AX-158052321 | 8 | 52.701 | KV452904.1 | 7364526 | 7-scf00172 | 7 |
| AX-158051975 | 8 | 52.703 | KV452904.1 | 6860150 | 7-scf00172 | 7 |
| AX-158051978 | 8 | 52.703 | KV452904.1 | 6863900 | 7-scf00172 | 7 |
| AX-157742302 | 8 | 52.703 | KV452904.1 | 7213930 | 7-scf00172 | 7 |
| AX-158052229 | 8 | 52.703 | KV452904.1 | 7250348 | 7-scf00172 | 7 |
| AX-157856606 | 8 | 52.703 | KV452904.1 | 7364752 | 7-scf00172 | 7 |
| AX-157727340 | 8 | 52.703 | KV452904.1 | 7434422 | 7-scf00172 | 7 |
| AX-158052406 | 8 | 52.703 | KV452904.1 | 7474565 | 7-scf00172 | 7 |
| AX-158052408 | 8 | 52.703 | KV452904.1 | 7476847 | 7-scf00172 | 7 |
| AX-158052439 | 8 | 52.703 | KV452904.1 | 7499792 | 7-scf00172 | 7 |
| AX-157856657 | 8 | 52.703 | KV452904.1 | 7535864 | 7-scf00172 | 7 |
| AX-158052558 | 8 | 52.703 | KV452904.1 | 7611396 | 7-scf00172 | 7 |
| AX-158053046 | 8 | 52.703 | KV452904.1 | 8232923 | 7-scf00172 | 7 |
| AX-157885202 | 8 | 52.705 | KV452904.1 | 7369396 | 7-scf00172 | 7 |
| AX-158052327 | 8 | 52.71  | KV452904.1 | 7369445 | 7-scf00172 | 7 |
| AX-157822858 | 8 | 52.712 | KV452904.1 | 7372678 | 7-scf00172 | 7 |
| AX-158408897 | 8 | 52.718 | KV452904.1 | 7365325 | 7-scf00172 | 7 |
| AX-157856609 | 8 | 52.718 | KV452904.1 | 7378588 | 7-scf00172 | 7 |
| AX-158052508 | 8 | 52.718 | KV452904.1 | 7575300 | 7-scf00172 | 7 |

|              |   |        |            |          |            |   |
|--------------|---|--------|------------|----------|------------|---|
| AX-157856611 | 8 | 52.719 | KV452904.1 | 7379623  | 7-scf00172 | 7 |
| AX-157856627 | 8 | 52.719 | KV452904.1 | 7453618  | 7-scf00172 | 7 |
| AX-158052608 | 8 | 52.719 | KV452904.1 | 7679837  | 7-scf00172 | 7 |
| AX-157856676 | 8 | 52.719 | KV452904.1 | 7746915  | 7-scf00172 | 7 |
| AX-157822859 | 8 | 52.721 | KV452904.1 | 7382434  | 7-scf00172 | 7 |
| AX-157856615 | 8 | 52.722 | KV452904.1 | 7412010  | 7-scf00172 | 7 |
| AX-157856617 | 8 | 52.723 | KV452904.1 | 7423312  | 7-scf00172 | 7 |
| AX-157856634 | 8 | 52.723 | KV452904.1 | 7470156  | 7-scf00172 | 7 |
| AX-157856672 | 8 | 52.723 | KV452904.1 | 7678989  | 7-scf00172 | 7 |
| AX-158052370 | 8 | 52.725 | KV452904.1 | 7426701  | 7-scf00172 | 7 |
| AX-158056798 | 8 | 52.725 | KV452904.1 | 13183943 | 7-scf00172 | 7 |
| AX-158052378 | 8 | 52.726 | KV452904.1 | 7433483  | 7-scf00172 | 7 |
| AX-158052379 | 8 | 52.728 | KV452904.1 | 7435632  | 7-scf00172 | 7 |
| AX-157856621 | 8 | 52.729 | KV452904.1 | 7440375  | 7-scf00172 | 7 |
| AX-158052331 | 8 | 52.731 | KV452904.1 | 7372379  | 7-scf00172 | 7 |
| AX-158052384 | 8 | 52.731 | KV452904.1 | 7440673  | 7-scf00172 | 7 |
| AX-158052400 | 8 | 52.731 | KV452904.1 | 7466237  | 7-scf00172 | 7 |
| AX-157856662 | 8 | 52.731 | KV452904.1 | 7547287  | 7-scf00172 | 7 |
| AX-157768450 | 8 | 52.731 | KV452904.1 | 7575931  | 7-scf00172 | 7 |
| AX-158052577 | 8 | 52.731 | KV452904.1 | 7638039  | 7-scf00172 | 7 |
| AX-158052617 | 8 | 52.731 | KV452904.1 | 7693044  | 7-scf00172 | 7 |
| AX-157856622 | 8 | 52.732 | KV452904.1 | 7441689  | 7-scf00172 | 7 |
| AX-157856623 | 8 | 52.734 | KV452904.1 | 7442193  | 7-scf00172 | 7 |
| AX-157786547 | 8 | 52.735 | KV452904.1 | 7446329  | 7-scf00172 | 7 |
| AX-158052232 | 8 | 52.737 | KV452904.1 | 7253238  | 7-scf00172 | 7 |
| AX-157786555 | 8 | 52.737 | KV452904.1 | 7453792  | 7-scf00172 | 7 |
| AX-158052471 | 8 | 52.737 | KV452904.1 | 7536033  | 7-scf00172 | 7 |
| AX-157822877 | 8 | 52.737 | KV452904.1 | 7770518  | 7-scf00172 | 7 |
| AX-158052128 | 8 | 52.738 | KV452904.1 | 7089533  | 7-scf00172 | 7 |
| AX-158052343 | 8 | 52.738 | KV452904.1 | 7386417  | 7-scf00172 | 7 |
| AX-158052356 | 8 | 52.738 | KV452904.1 | 7397721  | 7-scf00172 | 7 |
| AX-157726107 | 8 | 52.738 | KV452904.1 | 7413097  | 7-scf00172 | 7 |
| AX-158052365 | 8 | 52.738 | KV452904.1 | 7422570  | 7-scf00172 | 7 |
| AX-158052367 | 8 | 52.738 | KV452904.1 | 7425776  | 7-scf00172 | 7 |
| AX-158052368 | 8 | 52.738 | KV452904.1 | 7426155  | 7-scf00172 | 7 |
| AX-158052380 | 8 | 52.738 | KV452904.1 | 7436569  | 7-scf00172 | 7 |
| AX-158052382 | 8 | 52.738 | KV452904.1 | 7436957  | 7-scf00172 | 7 |
| AX-157856628 | 8 | 52.738 | KV452904.1 | 7456120  | 7-scf00172 | 7 |
| AX-158052416 | 8 | 52.738 | KV452904.1 | 7480511  | 7-scf00172 | 7 |
| AX-158052441 | 8 | 52.738 | KV452904.1 | 7502120  | 7-scf00172 | 7 |
| AX-157863097 | 8 | 52.738 | KV452904.1 | 7529146  | 7-scf00172 | 7 |
| AX-157822868 | 8 | 52.738 | KV452904.1 | 7623492  | 7-scf00172 | 7 |
| AX-157876741 | 8 | 52.74  | KV452904.1 | 7457927  | 7-scf00172 | 7 |
| AX-157856629 | 8 | 52.741 | KV452904.1 | 7458963  | 7-scf00172 | 7 |
| AX-158052233 | 8 | 52.743 | KV452904.1 | 7253653  | 7-scf00172 | 7 |
| AX-158052391 | 8 | 52.743 | KV452904.1 | 7459898  | 7-scf00172 | 7 |
| AX-158052393 | 8 | 52.745 | KV452904.1 | 7461247  | 7-scf00172 | 7 |
| AX-158052396 | 8 | 52.746 | KV452904.1 | 7463169  | 7-scf00172 | 7 |
| AX-158052574 | 8 | 52.746 | KV452904.1 | 7637111  | 7-scf00172 | 7 |
| AX-157885205 | 8 | 52.748 | KV452904.1 | 7465298  | 7-scf00172 | 7 |
| AX-158053488 | 8 | 52.748 | KV452904.1 | 8986028  | 7-scf00172 | 7 |

|              |   |        |            |         |            |   |
|--------------|---|--------|------------|---------|------------|---|
| AX-158052401 | 8 | 52.749 | KV452904.1 | 7466703 | 7-scf00172 | 7 |
| AX-157856633 | 8 | 52.751 | KV452904.1 | 7468490 | 7-scf00172 | 7 |
| AX-158052410 | 8 | 52.752 | KV452904.1 | 7479131 | 7-scf00172 | 7 |
| AX-158052426 | 8 | 52.753 | KV452904.1 | 7487235 | 7-scf00172 | 7 |
| AX-158051994 | 8 | 52.754 | KV452904.1 | 6892444 | 7-scf00172 | 7 |
| AX-158051997 | 8 | 52.754 | KV452904.1 | 6894384 | 7-scf00172 | 7 |
| AX-157742646 | 8 | 52.754 | KV452904.1 | 6934775 | 7-scf00172 | 7 |
| AX-158052045 | 8 | 52.754 | KV452904.1 | 6970005 | 7-scf00172 | 7 |
| AX-157822852 | 8 | 52.754 | KV452904.1 | 7236327 | 7-scf00172 | 7 |
| AX-158052231 | 8 | 52.754 | KV452904.1 | 7252992 | 7-scf00172 | 7 |
| AX-158052359 | 8 | 52.754 | KV452904.1 | 7399219 | 7-scf00172 | 7 |
| AX-158052422 | 8 | 52.754 | KV452904.1 | 7483095 | 7-scf00172 | 7 |
| AX-158052424 | 8 | 52.754 | KV452904.1 | 7485016 | 7-scf00172 | 7 |
| AX-158052425 | 8 | 52.754 | KV452904.1 | 7486716 | 7-scf00172 | 7 |
| AX-157856640 | 8 | 52.754 | KV452904.1 | 7494916 | 7-scf00172 | 7 |
| AX-158052442 | 8 | 52.754 | KV452904.1 | 7502506 | 7-scf00172 | 7 |
| AX-158052501 | 8 | 52.754 | KV452904.1 | 7565160 | 7-scf00172 | 7 |
| AX-158052572 | 8 | 52.754 | KV452904.1 | 7635962 | 7-scf00172 | 7 |
| AX-157693468 | 8 | 52.755 | KV452904.1 | 7528243 | 7-scf00172 | 7 |
| AX-157856652 | 8 | 52.756 | KV452904.1 | 7533034 | 7-scf00172 | 7 |
| AX-157856654 | 8 | 52.758 | KV452904.1 | 7534621 | 7-scf00172 | 7 |
| AX-157856658 | 8 | 52.759 | KV452904.1 | 7538046 | 7-scf00172 | 7 |
| AX-158052465 | 8 | 52.76  | KV452904.1 | 7528545 | 7-scf00172 | 7 |
| AX-157856661 | 8 | 52.76  | KV452904.1 | 7546786 | 7-scf00172 | 7 |
| AX-158052484 | 8 | 52.761 | KV452904.1 | 7550544 | 7-scf00172 | 7 |
| AX-158052493 | 8 | 52.802 | KV452904.1 | 7559479 | 7-scf00172 | 7 |
| AX-157870617 | 8 | 52.804 | KV452904.1 | 7573282 | 7-scf00172 | 7 |
| AX-157856665 | 8 | 52.845 | KV452904.1 | 7578058 | 7-scf00172 | 7 |
| AX-157756479 | 8 | 52.846 | KV452904.1 | 7424480 | 7-scf00172 | 7 |
| AX-157822864 | 8 | 52.846 | KV452904.1 | 7445428 | 7-scf00172 | 7 |
| AX-158052510 | 8 | 52.846 | KV452904.1 | 7578495 | 7-scf00172 | 7 |
| AX-158052517 | 8 | 52.846 | KV452904.1 | 7582294 | 7-scf00172 | 7 |
| AX-158052016 | 8 | 52.847 | KV452904.1 | 6934286 | 7-scf00172 | 7 |
| AX-158052017 | 8 | 52.847 | KV452904.1 | 6935326 | 7-scf00172 | 7 |
| AX-158052028 | 8 | 52.847 | KV452904.1 | 6946730 | 7-scf00172 | 7 |
| AX-158052302 | 8 | 52.847 | KV452904.1 | 7347449 | 7-scf00172 | 7 |
| AX-158052369 | 8 | 52.847 | KV452904.1 | 7426407 | 7-scf00172 | 7 |
| AX-158052483 | 8 | 52.847 | KV452904.1 | 7548280 | 7-scf00172 | 7 |
| AX-158052515 | 8 | 52.847 | KV452904.1 | 7581877 | 7-scf00172 | 7 |
| AX-158052518 | 8 | 52.847 | KV452904.1 | 7584040 | 7-scf00172 | 7 |
| AX-158052524 | 8 | 52.847 | KV452904.1 | 7586855 | 7-scf00172 | 7 |
| AX-157709468 | 8 | 52.847 | KV452904.1 | 7590177 | 7-scf00172 | 7 |
| AX-158052530 | 8 | 52.847 | KV452904.1 | 7590535 | 7-scf00172 | 7 |
| AX-158052532 | 8 | 52.847 | KV452904.1 | 7591094 | 7-scf00172 | 7 |
| AX-158052536 | 8 | 52.847 | KV452904.1 | 7594331 | 7-scf00172 | 7 |
| AX-158052537 | 8 | 52.847 | KV452904.1 | 7596057 | 7-scf00172 | 7 |
| AX-158052538 | 8 | 52.847 | KV452904.1 | 7597586 | 7-scf00172 | 7 |
| AX-158052542 | 8 | 52.847 | KV452904.1 | 7598610 | 7-scf00172 | 7 |
| AX-158052543 | 8 | 52.847 | KV452904.1 | 7599862 | 7-scf00172 | 7 |
| AX-158052546 | 8 | 52.847 | KV452904.1 | 7602059 | 7-scf00172 | 7 |
| AX-158052551 | 8 | 52.847 | KV452904.1 | 7604081 | 7-scf00172 | 7 |

|              |   |        |            |         |            |   |
|--------------|---|--------|------------|---------|------------|---|
| AX-158052559 | 8 | 52.847 | KV452904.1 | 7614369 | 7-scf00172 | 7 |
| AX-158052560 | 8 | 52.847 | KV452904.1 | 7617476 | 7-scf00172 | 7 |
| AX-158052565 | 8 | 52.847 | KV452904.1 | 7625027 | 7-scf00172 | 7 |
| AX-158052567 | 8 | 52.847 | KV452904.1 | 7630849 | 7-scf00172 | 7 |
| AX-158052568 | 8 | 52.847 | KV452904.1 | 7633272 | 7-scf00172 | 7 |
| AX-158378793 | 8 | 52.847 | KV452904.1 | 7634581 | 7-scf00172 | 7 |
| AX-158052569 | 8 | 52.847 | KV452904.1 | 7635140 | 7-scf00172 | 7 |
| AX-158052571 | 8 | 52.847 | KV452904.1 | 7635530 | 7-scf00172 | 7 |
| AX-158052573 | 8 | 52.847 | KV452904.1 | 7636769 | 7-scf00172 | 7 |
| AX-158052576 | 8 | 52.847 | KV452904.1 | 7637486 | 7-scf00172 | 7 |
| AX-157744571 | 8 | 52.847 | KV452904.1 | 7650327 | 7-scf00172 | 7 |
| AX-157856668 | 8 | 52.847 | KV452904.1 | 7653914 | 7-scf00172 | 7 |
| AX-158052585 | 8 | 52.847 | KV452904.1 | 7654666 | 7-scf00172 | 7 |
| AX-158406522 | 8 | 52.847 | KV452904.1 | 7658697 | 7-scf00172 | 7 |
| AX-158052588 | 8 | 52.847 | KV452904.1 | 7659622 | 7-scf00172 | 7 |
| AX-158052592 | 8 | 52.847 | KV452904.1 | 7663141 | 7-scf00172 | 7 |
| AX-158052600 | 8 | 52.847 | KV452904.1 | 7667981 | 7-scf00172 | 7 |
| AX-158052601 | 8 | 52.847 | KV452904.1 | 7668660 | 7-scf00172 | 7 |
| AX-158052602 | 8 | 52.847 | KV452904.1 | 7669916 | 7-scf00172 | 7 |
| AX-158052610 | 8 | 52.847 | KV452904.1 | 7680715 | 7-scf00172 | 7 |
| AX-158378794 | 8 | 52.847 | KV452904.1 | 7683821 | 7-scf00172 | 7 |
| AX-158378795 | 8 | 52.847 | KV452904.1 | 7684947 | 7-scf00172 | 7 |
| AX-158378796 | 8 | 52.847 | KV452904.1 | 7693504 | 7-scf00172 | 7 |
| AX-158052618 | 8 | 52.847 | KV452904.1 | 7694641 | 7-scf00172 | 7 |
| AX-158052623 | 8 | 52.847 | KV452904.1 | 7717778 | 7-scf00172 | 7 |
| AX-158052644 | 8 | 52.847 | KV452904.1 | 7741197 | 7-scf00172 | 7 |
| AX-158052649 | 8 | 52.847 | KV452904.1 | 7744131 | 7-scf00172 | 7 |
| AX-157856675 | 8 | 52.847 | KV452904.1 | 7745307 | 7-scf00172 | 7 |
| AX-158052653 | 8 | 52.847 | KV452904.1 | 7747457 | 7-scf00172 | 7 |
| AX-158052660 | 8 | 52.847 | KV452904.1 | 7752517 | 7-scf00172 | 7 |
| AX-158052662 | 8 | 52.847 | KV452904.1 | 7753565 | 7-scf00172 | 7 |
| AX-158052663 | 8 | 52.847 | KV452904.1 | 7754129 | 7-scf00172 | 7 |
| AX-158052667 | 8 | 52.847 | KV452904.1 | 7760935 | 7-scf00172 | 7 |
| AX-158052676 | 8 | 52.847 | KV452904.1 | 7771371 | 7-scf00172 | 7 |
| AX-157870620 | 8 | 52.847 | KV452904.1 | 7774488 | 7-scf00172 | 7 |
| AX-158052921 | 8 | 52.847 | KV452904.1 | 8108387 | 7-scf00172 | 7 |
| AX-158053223 | 8 | 52.847 | KV452904.1 | 8523018 | 7-scf00172 | 7 |
| AX-158052683 | 8 | 52.911 | KV452904.1 | 7776473 | 7-scf00172 | 7 |
| AX-157856752 | 8 | 52.911 | KV452904.1 | 8527925 | 7-scf00172 | 7 |
| AX-157856614 | 8 | 53.012 | KV452904.1 | 7410411 | 7-scf00172 | 7 |
| AX-158052713 | 8 | 53.012 | KV452904.1 | 7815507 | 7-scf00172 | 7 |
| AX-157870621 | 8 | 53.012 | KV452904.1 | 7831867 | 7-scf00172 | 7 |
| AX-158408907 | 8 | 53.012 | KV452904.1 | 7832607 | 7-scf00172 | 7 |
| AX-158052723 | 8 | 53.012 | KV452904.1 | 7833348 | 7-scf00172 | 7 |
| AX-158052724 | 8 | 53.012 | KV452904.1 | 7834955 | 7-scf00172 | 7 |
| AX-158052727 | 8 | 53.012 | KV452904.1 | 7836270 | 7-scf00172 | 7 |
| AX-157748578 | 8 | 53.012 | KV452904.1 | 7836603 | 7-scf00172 | 7 |
| AX-158052838 | 8 | 53.012 | KV452904.1 | 7981147 | 7-scf00172 | 7 |
| AX-157856710 | 8 | 53.012 | KV452904.1 | 8142535 | 7-scf00172 | 7 |
| AX-158053062 | 8 | 53.012 | KV452904.1 | 8247003 | 7-scf00172 | 7 |
| AX-157822926 | 8 | 53.012 | KV452904.1 | 8892517 | 7-scf00172 | 7 |

|              |   |        |            |         |            |   |
|--------------|---|--------|------------|---------|------------|---|
| AX-158053429 | 8 | 53.012 | KV452904.1 | 8907089 | 7-scf00172 | 7 |
| AX-158050681 | 8 | 53.175 | KV452904.1 | 5037299 | 7-scf00172 | 7 |
| AX-158050841 | 8 | 53.175 | KV452904.1 | 5238881 | 7-scf00172 | 7 |
| AX-158050908 | 8 | 53.175 | KV452904.1 | 5324349 | 7-scf00172 | 7 |
| AX-158384049 | 8 | 53.175 | KV452904.1 | 5333199 | 7-scf00172 | 7 |
| AX-157865496 | 8 | 53.175 | KV452904.1 | 5342395 | 7-scf00172 | 7 |
| AX-158051043 | 8 | 53.175 | KV452904.1 | 5513920 | 7-scf00172 | 7 |
| AX-158051298 | 8 | 53.175 | KV452904.1 | 5874158 | 7-scf00172 | 7 |
| AX-158051319 | 8 | 53.175 | KV452904.1 | 5906977 | 7-scf00172 | 7 |
| AX-158051327 | 8 | 53.175 | KV452904.1 | 5914732 | 7-scf00172 | 7 |
| AX-158051400 | 8 | 53.175 | KV452904.1 | 6036683 | 7-scf00172 | 7 |
| AX-158051424 | 8 | 53.175 | KV452904.1 | 6062837 | 7-scf00172 | 7 |
| AX-158051839 | 8 | 53.175 | KV452904.1 | 6634349 | 7-scf00172 | 7 |
| AX-158051841 | 8 | 53.175 | KV452904.1 | 6635677 | 7-scf00172 | 7 |
| AX-158416351 | 8 | 53.175 | KV452904.1 | 6754854 | 7-scf00172 | 7 |
| AX-158052037 | 8 | 53.175 | KV452904.1 | 6959993 | 7-scf00172 | 7 |
| AX-157786400 | 8 | 53.175 | KV452904.1 | 6994384 | 7-scf00172 | 7 |
| AX-157747004 | 8 | 53.175 | KV452904.1 | 7357367 | 7-scf00172 | 7 |
| AX-158052580 | 8 | 53.175 | KV452904.1 | 7640127 | 7-scf00172 | 7 |
| AX-158052591 | 8 | 53.175 | KV452904.1 | 7661454 | 7-scf00172 | 7 |
| AX-157856682 | 8 | 53.175 | KV452904.1 | 7790324 | 7-scf00172 | 7 |
| AX-158052693 | 8 | 53.175 | KV452904.1 | 7793209 | 7-scf00172 | 7 |
| AX-157822881 | 8 | 53.175 | KV452904.1 | 7822674 | 7-scf00172 | 7 |
| AX-157885214 | 8 | 53.175 | KV452904.1 | 7845333 | 7-scf00172 | 7 |
| AX-158378799 | 8 | 53.175 | KV452904.1 | 7848786 | 7-scf00172 | 7 |
| AX-158052736 | 8 | 53.175 | KV452904.1 | 7849560 | 7-scf00172 | 7 |
| AX-158052737 | 8 | 53.175 | KV452904.1 | 7850210 | 7-scf00172 | 7 |
| AX-158052738 | 8 | 53.175 | KV452904.1 | 7851253 | 7-scf00172 | 7 |
| AX-158052744 | 8 | 53.175 | KV452904.1 | 7877068 | 7-scf00172 | 7 |
| AX-158052745 | 8 | 53.175 | KV452904.1 | 7884831 | 7-scf00172 | 7 |
| AX-158052747 | 8 | 53.175 | KV452904.1 | 7887486 | 7-scf00172 | 7 |
| AX-157856686 | 8 | 53.175 | KV452904.1 | 7895412 | 7-scf00172 | 7 |
| AX-158052754 | 8 | 53.175 | KV452904.1 | 7899611 | 7-scf00172 | 7 |
| AX-157856687 | 8 | 53.175 | KV452904.1 | 7899924 | 7-scf00172 | 7 |
| AX-157856688 | 8 | 53.175 | KV452904.1 | 7903246 | 7-scf00172 | 7 |
| AX-158052769 | 8 | 53.175 | KV452904.1 | 7917257 | 7-scf00172 | 7 |
| AX-158052771 | 8 | 53.175 | KV452904.1 | 7919359 | 7-scf00172 | 7 |
| AX-157856691 | 8 | 53.175 | KV452904.1 | 7920513 | 7-scf00172 | 7 |
| AX-157856692 | 8 | 53.175 | KV452904.1 | 7921255 | 7-scf00172 | 7 |
| AX-158391817 | 8 | 53.175 | KV452904.1 | 7922284 | 7-scf00172 | 7 |
| AX-158052786 | 8 | 53.175 | KV452904.1 | 7933379 | 7-scf00172 | 7 |
| AX-158052789 | 8 | 53.175 | KV452904.1 | 7936342 | 7-scf00172 | 7 |
| AX-158052795 | 8 | 53.175 | KV452904.1 | 7941061 | 7-scf00172 | 7 |
| AX-158052802 | 8 | 53.175 | KV452904.1 | 7949730 | 7-scf00172 | 7 |
| AX-158052885 | 8 | 53.175 | KV452904.1 | 8037578 | 7-scf00172 | 7 |
| AX-157715570 | 8 | 53.175 | KV452904.1 | 8067439 | 7-scf00172 | 7 |
| AX-158052927 | 8 | 53.175 | KV452904.1 | 8114467 | 7-scf00172 | 7 |
| AX-157822901 | 8 | 53.175 | KV452904.1 | 8261231 | 7-scf00172 | 7 |
| AX-157822908 | 8 | 53.175 | KV452904.1 | 8288508 | 7-scf00172 | 7 |
| AX-158053134 | 8 | 53.175 | KV452904.1 | 8352717 | 7-scf00172 | 7 |
| AX-158053240 | 8 | 53.175 | KV452904.1 | 8567438 | 7-scf00172 | 7 |

|              |   |        |            |         |            |   |
|--------------|---|--------|------------|---------|------------|---|
| AX-158053241 | 8 | 53.175 | KV452904.1 | 8567759 | 7-scf00172 | 7 |
| AX-158053393 | 8 | 53.175 | KV452904.1 | 8810152 | 7-scf00172 | 7 |
| AX-157756976 | 8 | 53.175 | KV452904.1 | 8939676 | 7-scf00172 | 7 |
| AX-158053495 | 8 | 53.175 | KV452904.1 | 8998110 | 7-scf00172 | 7 |
| AX-157876779 | 8 | 53.175 | KV452904.1 | 9211860 | 7-scf00172 | 7 |
| AX-157856778 | 8 | 53.175 | KV452904.1 | 9231369 | 7-scf00172 | 7 |
| AX-158053690 | 8 | 53.175 | KV452904.1 | 9246302 | 7-scf00172 | 7 |
| AX-158053691 | 8 | 53.175 | KV452904.1 | 9248461 | 7-scf00172 | 7 |
| AX-157856779 | 8 | 53.175 | KV452904.1 | 9252548 | 7-scf00172 | 7 |
| AX-158053747 | 8 | 53.175 | KV452904.1 | 9321832 | 7-scf00172 | 7 |
| AX-158053785 | 8 | 53.175 | KV452904.1 | 9388672 | 7-scf00172 | 7 |
| AX-158053794 | 8 | 53.175 | KV452904.1 | 9408019 | 7-scf00172 | 7 |
| AX-157766779 | 8 | 53.175 | KV452904.1 | 9557118 | 7-scf00172 | 7 |
| AX-158408951 | 8 | 53.175 | KV452904.1 | 9560519 | 7-scf00172 | 7 |
| AX-158053866 | 8 | 53.175 | KV452904.1 | 9563797 | 7-scf00172 | 7 |
| AX-158053873 | 8 | 53.175 | KV452904.1 | 9569055 | 7-scf00172 | 7 |
| AX-158053875 | 8 | 53.175 | KV452904.1 | 9571947 | 7-scf00172 | 7 |
| AX-158053880 | 8 | 53.175 | KV452904.1 | 9573527 | 7-scf00172 | 7 |
| AX-158053945 | 8 | 53.175 | KV452904.1 | 9628340 | 7-scf00172 | 7 |
| AX-158053947 | 8 | 53.175 | KV452904.1 | 9629435 | 7-scf00172 | 7 |
| AX-158053955 | 8 | 53.175 | KV452904.1 | 9640740 | 7-scf00172 | 7 |
| AX-157863105 | 8 | 53.175 | KV452904.1 | 9652866 | 7-scf00172 | 7 |
| AX-158391832 | 8 | 53.175 | KV452904.1 | 9704076 | 7-scf00172 | 7 |
| AX-158053985 | 8 | 53.175 | KV452904.1 | 9705669 | 7-scf00172 | 7 |
| AX-158391833 | 8 | 53.175 | KV452904.1 | 9706684 | 7-scf00172 | 7 |
| AX-158053986 | 8 | 53.175 | KV452904.1 | 9708851 | 7-scf00172 | 7 |
| AX-158053989 | 8 | 53.175 | KV452904.1 | 9711863 | 7-scf00172 | 7 |
| AX-158053996 | 8 | 53.175 | KV452904.1 | 9722360 | 7-scf00172 | 7 |
| AX-158053999 | 8 | 53.175 | KV452904.1 | 9725521 | 7-scf00172 | 7 |
| AX-157870630 | 8 | 53.175 | KV452904.1 | 9725853 | 7-scf00172 | 7 |
| AX-157870631 | 8 | 53.175 | KV452904.1 | 9726561 | 7-scf00172 | 7 |
| AX-157870634 | 8 | 53.175 | KV452904.1 | 9731320 | 7-scf00172 | 7 |
| AX-157870635 | 8 | 53.175 | KV452904.1 | 9732973 | 7-scf00172 | 7 |
| AX-158054006 | 8 | 53.175 | KV452904.1 | 9733241 | 7-scf00172 | 7 |
| AX-158054012 | 8 | 53.175 | KV452904.1 | 9736551 | 7-scf00172 | 7 |
| AX-158054015 | 8 | 53.175 | KV452904.1 | 9737953 | 7-scf00172 | 7 |
| AX-157870638 | 8 | 53.175 | KV452904.1 | 9738735 | 7-scf00172 | 7 |
| AX-157870640 | 8 | 53.175 | KV452904.1 | 9741328 | 7-scf00172 | 7 |
| AX-158054018 | 8 | 53.175 | KV452904.1 | 9744449 | 7-scf00172 | 7 |
| AX-158054021 | 8 | 53.175 | KV452904.1 | 9746884 | 7-scf00172 | 7 |
| AX-158391835 | 8 | 53.175 | KV452904.1 | 9748666 | 7-scf00172 | 7 |
| AX-158391836 | 8 | 53.175 | KV452904.1 | 9750574 | 7-scf00172 | 7 |
| AX-158054027 | 8 | 53.175 | KV452904.1 | 9755815 | 7-scf00172 | 7 |
| AX-158391837 | 8 | 53.175 | KV452904.1 | 9757126 | 7-scf00172 | 7 |
| AX-158391838 | 8 | 53.175 | KV452904.1 | 9759363 | 7-scf00172 | 7 |
| AX-157870641 | 8 | 53.175 | KV452904.1 | 9759440 | 7-scf00172 | 7 |
| AX-158054036 | 8 | 53.175 | KV452904.1 | 9761563 | 7-scf00172 | 7 |
| AX-157870644 | 8 | 53.175 | KV452904.1 | 9763165 | 7-scf00172 | 7 |
| AX-157822951 | 8 | 53.175 | KV452904.1 | 9765020 | 7-scf00172 | 7 |
| AX-157822952 | 8 | 53.175 | KV452904.1 | 9765670 | 7-scf00172 | 7 |
| AX-157870645 | 8 | 53.175 | KV452904.1 | 9773183 | 7-scf00172 | 7 |

|              |   |        |            |          |            |   |
|--------------|---|--------|------------|----------|------------|---|
| AX-157870647 | 8 | 53.175 | KV452904.1 | 9774538  | 7-scf00172 | 7 |
| AX-157870648 | 8 | 53.175 | KV452904.1 | 9776113  | 7-scf00172 | 7 |
| AX-157870649 | 8 | 53.175 | KV452904.1 | 9781688  | 7-scf00172 | 7 |
| AX-158054043 | 8 | 53.175 | KV452904.1 | 9782177  | 7-scf00172 | 7 |
| AX-157870650 | 8 | 53.175 | KV452904.1 | 9782934  | 7-scf00172 | 7 |
| AX-157870651 | 8 | 53.175 | KV452904.1 | 9783213  | 7-scf00172 | 7 |
| AX-157870652 | 8 | 53.175 | KV452904.1 | 9784257  | 7-scf00172 | 7 |
| AX-157870653 | 8 | 53.175 | KV452904.1 | 9785708  | 7-scf00172 | 7 |
| AX-157870655 | 8 | 53.175 | KV452904.1 | 9790560  | 7-scf00172 | 7 |
| AX-157822954 | 8 | 53.175 | KV452904.1 | 9790761  | 7-scf00172 | 7 |
| AX-157870656 | 8 | 53.175 | KV452904.1 | 9792589  | 7-scf00172 | 7 |
| AX-157870657 | 8 | 53.175 | KV452904.1 | 9823874  | 7-scf00172 | 7 |
| AX-157694310 | 8 | 53.175 | KV452904.1 | 9824458  | 7-scf00172 | 7 |
| AX-158391839 | 8 | 53.175 | KV452904.1 | 9831434  | 7-scf00172 | 7 |
| AX-158391840 | 8 | 53.175 | KV452904.1 | 9838414  | 7-scf00172 | 7 |
| AX-158055099 | 8 | 53.175 | KV452904.1 | 10899577 | 7-scf00172 | 7 |
| AX-158055100 | 8 | 53.175 | KV452904.1 | 10900005 | 7-scf00172 | 7 |
| AX-158055102 | 8 | 53.175 | KV452904.1 | 10901017 | 7-scf00172 | 7 |
| AX-157876801 | 8 | 53.175 | KV452904.1 | 11048453 | 7-scf00172 | 7 |
| AX-157885231 | 8 | 53.175 | KV452904.1 | 11067719 | 7-scf00172 | 7 |
| AX-158055364 | 8 | 53.175 | KV452904.1 | 11197308 | 7-scf00172 | 7 |
| AX-158055667 | 8 | 53.175 | KV452904.1 | 11555775 | 7-scf00172 | 7 |
| AX-158055838 | 8 | 53.175 | KV452904.1 | 11694732 | 7-scf00172 | 7 |
| AX-158055850 | 8 | 53.175 | KV452904.1 | 11731357 | 7-scf00172 | 7 |
| AX-157714928 | 8 | 53.175 | KV452904.1 | 11775681 | 7-scf00172 | 7 |
| AX-158055980 | 8 | 53.175 | KV452904.1 | 11968946 | 7-scf00172 | 7 |
| AX-157876820 | 8 | 53.175 | KV452904.1 | 11982696 | 7-scf00172 | 7 |
| AX-158055998 | 8 | 53.175 | KV452904.1 | 11991724 | 7-scf00172 | 7 |
| AX-158056160 | 8 | 53.175 | KV452904.1 | 12156339 | 7-scf00172 | 7 |
| AX-158056170 | 8 | 53.175 | KV452904.1 | 12173040 | 7-scf00172 | 7 |
| AX-158056319 | 8 | 53.175 | KV452904.1 | 12350773 | 7-scf00172 | 7 |
| AX-158056334 | 8 | 53.175 | KV452904.1 | 12365610 | 7-scf00172 | 7 |
| AX-158056340 | 8 | 53.175 | KV452904.1 | 12377949 | 7-scf00172 | 7 |
| AX-158056398 | 8 | 53.175 | KV452904.1 | 12459357 | 7-scf00172 | 7 |
| AX-158056401 | 8 | 53.175 | KV452904.1 | 12460907 | 7-scf00172 | 7 |
| AX-157715988 | 8 | 53.175 | KV452904.1 | 12556968 | 7-scf00172 | 7 |
| AX-158056476 | 8 | 53.175 | KV452904.1 | 12618335 | 7-scf00172 | 7 |
| AX-158056488 | 8 | 53.175 | KV452904.1 | 12636148 | 7-scf00172 | 7 |
| AX-158056501 | 8 | 53.175 | KV452904.1 | 12655183 | 7-scf00172 | 7 |
| AX-158056568 | 8 | 53.175 | KV452904.1 | 12796975 | 7-scf00172 | 7 |
| AX-158056575 | 8 | 53.175 | KV452904.1 | 12809001 | 7-scf00172 | 7 |
| AX-157823121 | 8 | 53.175 | KV452904.1 | 12867540 | 7-scf00172 | 7 |
| AX-157717787 | 8 | 53.175 | KV452904.1 | 13084404 | 7-scf00172 | 7 |
| AX-158056806 | 8 | 53.175 | KV452904.1 | 13193561 | 7-scf00172 | 7 |
| AX-158056901 | 8 | 53.175 | KV452904.1 | 13368863 | 7-scf00172 | 7 |
| AX-158057029 | 8 | 53.175 | KV452904.1 | 13715164 | 7-scf00172 | 7 |
| AX-158057500 | 8 | 53.175 | KV452904.1 | 15026371 | 7-scf00172 | 7 |
| AX-158057705 | 8 | 53.175 | KV452904.1 | 15376174 | 7-scf00172 | 7 |
| AX-158057980 | 8 | 53.175 | KV452904.1 | 15924302 | 7-scf00172 | 7 |
| AX-157727888 | 8 | 53.175 | KV452904.1 | 16083417 | 7-scf00172 | 7 |
| AX-158378964 | 8 | 53.175 | KV452904.1 | 16330132 | 7-scf00172 | 7 |

|              |   |        |            |          |            |   |
|--------------|---|--------|------------|----------|------------|---|
| AX-158058184 | 8 | 53.175 | KV452904.1 | 16359932 | 7-scf00172 | 7 |
| AX-157870675 | 8 | 53.175 | KV452904.1 | 16687645 | 7-scf00172 | 7 |
| AX-158058476 | 8 | 53.175 | KV452904.1 | 16882924 | 7-scf00172 | 7 |
| AX-158058790 | 8 | 53.175 | KV452906.1 | 69978    | 7-scf00174 | 7 |
| AX-158058795 | 8 | 53.175 | KV452906.1 | 76338    | 7-scf00174 | 7 |
| AX-158058796 | 8 | 53.175 | KV452906.1 | 77018    | 7-scf00174 | 7 |
| AX-158058898 | 8 | 53.175 | KV452905.1 | 27363    | 7-scf00175 | 7 |
| AX-158058901 | 8 | 53.175 | KV452905.1 | 35567    | 7-scf00175 | 7 |
| AX-158052807 | 8 | 53.187 | KV452904.1 | 7957615  | 7-scf00172 | 7 |
| AX-157856699 | 8 | 53.203 | KV452904.1 | 7965437  | 7-scf00172 | 7 |
| AX-158052819 | 8 | 53.218 | KV452904.1 | 7965508  | 7-scf00172 | 7 |
| AX-157822889 | 8 | 53.218 | KV452904.1 | 7983119  | 7-scf00172 | 7 |
| AX-158052820 | 8 | 53.251 | KV452904.1 | 7966784  | 7-scf00172 | 7 |
| AX-158050985 | 8 | 53.284 | KV452904.1 | 5428629  | 7-scf00172 | 7 |
| AX-158051864 | 8 | 53.284 | KV452904.1 | 6691766  | 7-scf00172 | 7 |
| AX-158052219 | 8 | 53.284 | KV452904.1 | 7236810  | 7-scf00172 | 7 |
| AX-157856604 | 8 | 53.284 | KV452904.1 | 7319195  | 7-scf00172 | 7 |
| AX-158052294 | 8 | 53.284 | KV452904.1 | 7342542  | 7-scf00172 | 7 |
| AX-158052303 | 8 | 53.284 | KV452904.1 | 7348850  | 7-scf00172 | 7 |
| AX-158052309 | 8 | 53.284 | KV452904.1 | 7355300  | 7-scf00172 | 7 |
| AX-158052311 | 8 | 53.284 | KV452904.1 | 7357708  | 7-scf00172 | 7 |
| AX-158408898 | 8 | 53.284 | KV452904.1 | 7365377  | 7-scf00172 | 7 |
| AX-158052332 | 8 | 53.284 | KV452904.1 | 7373587  | 7-scf00172 | 7 |
| AX-158052333 | 8 | 53.284 | KV452904.1 | 7376636  | 7-scf00172 | 7 |
| AX-158052334 | 8 | 53.284 | KV452904.1 | 7377013  | 7-scf00172 | 7 |
| AX-158052339 | 8 | 53.284 | KV452904.1 | 7383236  | 7-scf00172 | 7 |
| AX-157856613 | 8 | 53.284 | KV452904.1 | 7391863  | 7-scf00172 | 7 |
| AX-158052353 | 8 | 53.284 | KV452904.1 | 7396823  | 7-scf00172 | 7 |
| AX-157746233 | 8 | 53.284 | KV452904.1 | 7398261  | 7-scf00172 | 7 |
| AX-157786552 | 8 | 53.284 | KV452904.1 | 7449436  | 7-scf00172 | 7 |
| AX-158052403 | 8 | 53.284 | KV452904.1 | 7469443  | 7-scf00172 | 7 |
| AX-157856642 | 8 | 53.284 | KV452904.1 | 7497862  | 7-scf00172 | 7 |
| AX-158052475 | 8 | 53.284 | KV452904.1 | 7539829  | 7-scf00172 | 7 |
| AX-158052487 | 8 | 53.284 | KV452904.1 | 7554494  | 7-scf00172 | 7 |
| AX-158052496 | 8 | 53.284 | KV452904.1 | 7561736  | 7-scf00172 | 7 |
| AX-158052500 | 8 | 53.284 | KV452904.1 | 7564118  | 7-scf00172 | 7 |
| AX-157856664 | 8 | 53.284 | KV452904.1 | 7565940  | 7-scf00172 | 7 |
| AX-158052504 | 8 | 53.284 | KV452904.1 | 7566144  | 7-scf00172 | 7 |
| AX-158052507 | 8 | 53.284 | KV452904.1 | 7571487  | 7-scf00172 | 7 |
| AX-158052511 | 8 | 53.284 | KV452904.1 | 7579971  | 7-scf00172 | 7 |
| AX-157856669 | 8 | 53.284 | KV452904.1 | 7657310  | 7-scf00172 | 7 |
| AX-158408904 | 8 | 53.284 | KV452904.1 | 7676083  | 7-scf00172 | 7 |
| AX-158052605 | 8 | 53.284 | KV452904.1 | 7676682  | 7-scf00172 | 7 |
| AX-157856674 | 8 | 53.284 | KV452904.1 | 7688132  | 7-scf00172 | 7 |
| AX-158052619 | 8 | 53.284 | KV452904.1 | 7695347  | 7-scf00172 | 7 |
| AX-158052655 | 8 | 53.284 | KV452904.1 | 7748505  | 7-scf00172 | 7 |
| AX-157822874 | 8 | 53.284 | KV452904.1 | 7749754  | 7-scf00172 | 7 |
| AX-158052665 | 8 | 53.284 | KV452904.1 | 7756876  | 7-scf00172 | 7 |
| AX-158052694 | 8 | 53.284 | KV452904.1 | 7794829  | 7-scf00172 | 7 |
| AX-158052697 | 8 | 53.284 | KV452904.1 | 7803768  | 7-scf00172 | 7 |
| AX-158052698 | 8 | 53.284 | KV452904.1 | 7805400  | 7-scf00172 | 7 |



|              |   |        |            |         |            |   |
|--------------|---|--------|------------|---------|------------|---|
| AX-158421334 | 8 | 53.284 | KV452904.1 | 7807884 | 7-scf00172 | 7 |
| AX-158052700 | 8 | 53.284 | KV452904.1 | 7808189 | 7-scf00172 | 7 |
| AX-158052703 | 8 | 53.284 | KV452904.1 | 7809323 | 7-scf00172 | 7 |
| AX-158052709 | 8 | 53.284 | KV452904.1 | 7812764 | 7-scf00172 | 7 |
| AX-158052712 | 8 | 53.284 | KV452904.1 | 7814498 | 7-scf00172 | 7 |
| AX-157856685 | 8 | 53.284 | KV452904.1 | 7815192 | 7-scf00172 | 7 |
| AX-158052716 | 8 | 53.284 | KV452904.1 | 7816676 | 7-scf00172 | 7 |
| AX-158052720 | 8 | 53.284 | KV452904.1 | 7818785 | 7-scf00172 | 7 |
| AX-158391816 | 8 | 53.284 | KV452904.1 | 7823434 | 7-scf00172 | 7 |
| AX-157822882 | 8 | 53.284 | KV452904.1 | 7834128 | 7-scf00172 | 7 |
| AX-157870622 | 8 | 53.284 | KV452904.1 | 7835255 | 7-scf00172 | 7 |
| AX-158052729 | 8 | 53.284 | KV452904.1 | 7839161 | 7-scf00172 | 7 |
| AX-158052731 | 8 | 53.284 | KV452904.1 | 7843358 | 7-scf00172 | 7 |
| AX-158052755 | 8 | 53.284 | KV452904.1 | 7904687 | 7-scf00172 | 7 |
| AX-157856689 | 8 | 53.284 | KV452904.1 | 7904999 | 7-scf00172 | 7 |
| AX-157856690 | 8 | 53.284 | KV452904.1 | 7910205 | 7-scf00172 | 7 |
| AX-158052764 | 8 | 53.284 | KV452904.1 | 7915183 | 7-scf00172 | 7 |
| AX-158052768 | 8 | 53.284 | KV452904.1 | 7916891 | 7-scf00172 | 7 |
| AX-157747621 | 8 | 53.284 | KV452904.1 | 7917092 | 7-scf00172 | 7 |
| AX-158052773 | 8 | 53.284 | KV452904.1 | 7921416 | 7-scf00172 | 7 |
| AX-157856693 | 8 | 53.284 | KV452904.1 | 7923099 | 7-scf00172 | 7 |
| AX-158052777 | 8 | 53.284 | KV452904.1 | 7923169 | 7-scf00172 | 7 |
| AX-158052778 | 8 | 53.284 | KV452904.1 | 7923535 | 7-scf00172 | 7 |
| AX-158052779 | 8 | 53.284 | KV452904.1 | 7924142 | 7-scf00172 | 7 |
| AX-157856694 | 8 | 53.284 | KV452904.1 | 7927539 | 7-scf00172 | 7 |
| AX-157856698 | 8 | 53.284 | KV452904.1 | 7957890 | 7-scf00172 | 7 |
| AX-158052812 | 8 | 53.284 | KV452904.1 | 7961098 | 7-scf00172 | 7 |
| AX-158052816 | 8 | 53.284 | KV452904.1 | 7964464 | 7-scf00172 | 7 |
| AX-157822888 | 8 | 53.284 | KV452904.1 | 7967771 | 7-scf00172 | 7 |
| AX-158052822 | 8 | 53.284 | KV452904.1 | 7968762 | 7-scf00172 | 7 |
| AX-158378802 | 8 | 53.284 | KV452904.1 | 7971038 | 7-scf00172 | 7 |
| AX-157856700 | 8 | 53.284 | KV452904.1 | 7975020 | 7-scf00172 | 7 |
| AX-158052832 | 8 | 53.284 | KV452904.1 | 7976828 | 7-scf00172 | 7 |
| AX-158052833 | 8 | 53.284 | KV452904.1 | 7977726 | 7-scf00172 | 7 |
| AX-158052835 | 8 | 53.284 | KV452904.1 | 7978157 | 7-scf00172 | 7 |
| AX-158052837 | 8 | 53.284 | KV452904.1 | 7979449 | 7-scf00172 | 7 |
| AX-157716728 | 8 | 53.284 | KV452904.1 | 7980363 | 7-scf00172 | 7 |
| AX-157757441 | 8 | 53.284 | KV452904.1 | 7981817 | 7-scf00172 | 7 |
| AX-157856701 | 8 | 53.284 | KV452904.1 | 7983881 | 7-scf00172 | 7 |
| AX-157822890 | 8 | 53.284 | KV452904.1 | 7984075 | 7-scf00172 | 7 |
| AX-158052841 | 8 | 53.284 | KV452904.1 | 7984177 | 7-scf00172 | 7 |
| AX-158391818 | 8 | 53.284 | KV452904.1 | 7987249 | 7-scf00172 | 7 |
| AX-158052844 | 8 | 53.284 | KV452904.1 | 7987875 | 7-scf00172 | 7 |
| AX-157856702 | 8 | 53.284 | KV452904.1 | 7989160 | 7-scf00172 | 7 |
| AX-158052849 | 8 | 53.284 | KV452904.1 | 7990869 | 7-scf00172 | 7 |
| AX-158052852 | 8 | 53.284 | KV452904.1 | 7992748 | 7-scf00172 | 7 |
| AX-157885216 | 8 | 53.284 | KV452904.1 | 7992995 | 7-scf00172 | 7 |
| AX-157856703 | 8 | 53.284 | KV452904.1 | 7994440 | 7-scf00172 | 7 |
| AX-158052855 | 8 | 53.284 | KV452904.1 | 7994502 | 7-scf00172 | 7 |
| AX-157856704 | 8 | 53.284 | KV452904.1 | 7995214 | 7-scf00172 | 7 |
| AX-158052856 | 8 | 53.284 | KV452904.1 | 7999574 | 7-scf00172 | 7 |

|              |   |        |            |         |            |   |
|--------------|---|--------|------------|---------|------------|---|
| AX-157822891 | 8 | 53.284 | KV452904.1 | 8000036 | 7-scf00172 | 7 |
| AX-158052858 | 8 | 53.284 | KV452904.1 | 8005733 | 7-scf00172 | 7 |
| AX-157822892 | 8 | 53.284 | KV452904.1 | 8005856 | 7-scf00172 | 7 |
| AX-158052859 | 8 | 53.284 | KV452904.1 | 8006622 | 7-scf00172 | 7 |
| AX-157856706 | 8 | 53.284 | KV452904.1 | 8010534 | 7-scf00172 | 7 |
| AX-158052862 | 8 | 53.284 | KV452904.1 | 8011315 | 7-scf00172 | 7 |
| AX-158052863 | 8 | 53.284 | KV452904.1 | 8011787 | 7-scf00172 | 7 |
| AX-158052865 | 8 | 53.284 | KV452904.1 | 8014161 | 7-scf00172 | 7 |
| AX-158052869 | 8 | 53.284 | KV452904.1 | 8020004 | 7-scf00172 | 7 |
| AX-157856707 | 8 | 53.284 | KV452904.1 | 8021116 | 7-scf00172 | 7 |
| AX-158052870 | 8 | 53.284 | KV452904.1 | 8022049 | 7-scf00172 | 7 |
| AX-158052873 | 8 | 53.284 | KV452904.1 | 8022867 | 7-scf00172 | 7 |
| AX-158052876 | 8 | 53.284 | KV452904.1 | 8023577 | 7-scf00172 | 7 |
| AX-158052877 | 8 | 53.284 | KV452904.1 | 8024740 | 7-scf00172 | 7 |
| AX-158052881 | 8 | 53.284 | KV452904.1 | 8027433 | 7-scf00172 | 7 |
| AX-158052882 | 8 | 53.284 | KV452904.1 | 8027935 | 7-scf00172 | 7 |
| AX-158052887 | 8 | 53.284 | KV452904.1 | 8046555 | 7-scf00172 | 7 |
| AX-158052890 | 8 | 53.284 | KV452904.1 | 8049463 | 7-scf00172 | 7 |
| AX-158052893 | 8 | 53.284 | KV452904.1 | 8053405 | 7-scf00172 | 7 |
| AX-157865520 | 8 | 53.284 | KV452904.1 | 8053809 | 7-scf00172 | 7 |
| AX-157716983 | 8 | 53.284 | KV452904.1 | 8056170 | 7-scf00172 | 7 |
| AX-158052895 | 8 | 53.284 | KV452904.1 | 8059528 | 7-scf00172 | 7 |
| AX-157822893 | 8 | 53.284 | KV452904.1 | 8071865 | 7-scf00172 | 7 |
| AX-158052900 | 8 | 53.284 | KV452904.1 | 8072509 | 7-scf00172 | 7 |
| AX-158378806 | 8 | 53.284 | KV452904.1 | 8086563 | 7-scf00172 | 7 |
| AX-158052906 | 8 | 53.284 | KV452904.1 | 8089802 | 7-scf00172 | 7 |
| AX-158408914 | 8 | 53.284 | KV452904.1 | 8093884 | 7-scf00172 | 7 |
| AX-158052912 | 8 | 53.284 | KV452904.1 | 8101493 | 7-scf00172 | 7 |
| AX-157885217 | 8 | 53.284 | KV452904.1 | 8101538 | 7-scf00172 | 7 |
| AX-158052925 | 8 | 53.284 | KV452904.1 | 8112801 | 7-scf00172 | 7 |
| AX-158052931 | 8 | 53.284 | KV452904.1 | 8120576 | 7-scf00172 | 7 |
| AX-158052935 | 8 | 53.284 | KV452904.1 | 8125171 | 7-scf00172 | 7 |
| AX-158052938 | 8 | 53.284 | KV452904.1 | 8127770 | 7-scf00172 | 7 |
| AX-158052940 | 8 | 53.284 | KV452904.1 | 8133681 | 7-scf00172 | 7 |
| AX-158052945 | 8 | 53.284 | KV452904.1 | 8136159 | 7-scf00172 | 7 |
| AX-158378809 | 8 | 53.284 | KV452904.1 | 8136806 | 7-scf00172 | 7 |
| AX-158052946 | 8 | 53.284 | KV452904.1 | 8136877 | 7-scf00172 | 7 |
| AX-157856708 | 8 | 53.284 | KV452904.1 | 8137266 | 7-scf00172 | 7 |
| AX-158052948 | 8 | 53.284 | KV452904.1 | 8137522 | 7-scf00172 | 7 |
| AX-158052949 | 8 | 53.284 | KV452904.1 | 8138864 | 7-scf00172 | 7 |
| AX-158052951 | 8 | 53.284 | KV452904.1 | 8139659 | 7-scf00172 | 7 |
| AX-157856709 | 8 | 53.284 | KV452904.1 | 8140651 | 7-scf00172 | 7 |
| AX-158052954 | 8 | 53.284 | KV452904.1 | 8141280 | 7-scf00172 | 7 |
| AX-157856711 | 8 | 53.284 | KV452904.1 | 8143456 | 7-scf00172 | 7 |
| AX-157870625 | 8 | 53.284 | KV452904.1 | 8143902 | 7-scf00172 | 7 |
| AX-158052958 | 8 | 53.284 | KV452904.1 | 8145859 | 7-scf00172 | 7 |
| AX-158052963 | 8 | 53.284 | KV452904.1 | 8149246 | 7-scf00172 | 7 |
| AX-158052964 | 8 | 53.284 | KV452904.1 | 8150283 | 7-scf00172 | 7 |
| AX-157856712 | 8 | 53.284 | KV452904.1 | 8150820 | 7-scf00172 | 7 |
| AX-158052965 | 8 | 53.284 | KV452904.1 | 8151040 | 7-scf00172 | 7 |
| AX-158052967 | 8 | 53.284 | KV452904.1 | 8151547 | 7-scf00172 | 7 |

|              |   |        |            |         |            |   |
|--------------|---|--------|------------|---------|------------|---|
| AX-158052968 | 8 | 53.284 | KV452904.1 | 8152002 | 7-scf00172 | 7 |
| AX-158052970 | 8 | 53.284 | KV452904.1 | 8153368 | 7-scf00172 | 7 |
| AX-158052972 | 8 | 53.284 | KV452904.1 | 8155813 | 7-scf00172 | 7 |
| AX-158052974 | 8 | 53.284 | KV452904.1 | 8156084 | 7-scf00172 | 7 |
| AX-158052975 | 8 | 53.284 | KV452904.1 | 8157397 | 7-scf00172 | 7 |
| AX-157726893 | 8 | 53.284 | KV452904.1 | 8158196 | 7-scf00172 | 7 |
| AX-158052978 | 8 | 53.284 | KV452904.1 | 8159510 | 7-scf00172 | 7 |
| AX-158052984 | 8 | 53.284 | KV452904.1 | 8162385 | 7-scf00172 | 7 |
| AX-158052985 | 8 | 53.284 | KV452904.1 | 8162573 | 7-scf00172 | 7 |
| AX-157856714 | 8 | 53.284 | KV452904.1 | 8170450 | 7-scf00172 | 7 |
| AX-158052993 | 8 | 53.284 | KV452904.1 | 8171595 | 7-scf00172 | 7 |
| AX-158052995 | 8 | 53.284 | KV452904.1 | 8172711 | 7-scf00172 | 7 |
| AX-158052997 | 8 | 53.284 | KV452904.1 | 8175404 | 7-scf00172 | 7 |
| AX-158052999 | 8 | 53.284 | KV452904.1 | 8175940 | 7-scf00172 | 7 |
| AX-157856715 | 8 | 53.284 | KV452904.1 | 8177877 | 7-scf00172 | 7 |
| AX-158053000 | 8 | 53.284 | KV452904.1 | 8178897 | 7-scf00172 | 7 |
| AX-158391822 | 8 | 53.284 | KV452904.1 | 8179065 | 7-scf00172 | 7 |
| AX-157856716 | 8 | 53.284 | KV452904.1 | 8184801 | 7-scf00172 | 7 |
| AX-157885220 | 8 | 53.284 | KV452904.1 | 8188653 | 7-scf00172 | 7 |
| AX-158053008 | 8 | 53.284 | KV452904.1 | 8189095 | 7-scf00172 | 7 |
| AX-157856717 | 8 | 53.284 | KV452904.1 | 8192483 | 7-scf00172 | 7 |
| AX-158053012 | 8 | 53.284 | KV452904.1 | 8194344 | 7-scf00172 | 7 |
| AX-157856719 | 8 | 53.284 | KV452904.1 | 8195673 | 7-scf00172 | 7 |
| AX-158053017 | 8 | 53.284 | KV452904.1 | 8199398 | 7-scf00172 | 7 |
| AX-157856720 | 8 | 53.284 | KV452904.1 | 8204545 | 7-scf00172 | 7 |
| AX-157856721 | 8 | 53.284 | KV452904.1 | 8205149 | 7-scf00172 | 7 |
| AX-157856722 | 8 | 53.284 | KV452904.1 | 8209819 | 7-scf00172 | 7 |
| AX-157856723 | 8 | 53.284 | KV452904.1 | 8210434 | 7-scf00172 | 7 |
| AX-157771741 | 8 | 53.284 | KV452904.1 | 8214496 | 7-scf00172 | 7 |
| AX-157822896 | 8 | 53.284 | KV452904.1 | 8214550 | 7-scf00172 | 7 |
| AX-157822897 | 8 | 53.284 | KV452904.1 | 8216125 | 7-scf00172 | 7 |
| AX-158053033 | 8 | 53.284 | KV452904.1 | 8217177 | 7-scf00172 | 7 |
| AX-158053036 | 8 | 53.284 | KV452904.1 | 8223884 | 7-scf00172 | 7 |
| AX-158053037 | 8 | 53.284 | KV452904.1 | 8225794 | 7-scf00172 | 7 |
| AX-158053039 | 8 | 53.284 | KV452904.1 | 8227599 | 7-scf00172 | 7 |
| AX-158053042 | 8 | 53.284 | KV452904.1 | 8229895 | 7-scf00172 | 7 |
| AX-158053045 | 8 | 53.284 | KV452904.1 | 8232061 | 7-scf00172 | 7 |
| AX-158053047 | 8 | 53.284 | KV452904.1 | 8234091 | 7-scf00172 | 7 |
| AX-157856724 | 8 | 53.284 | KV452904.1 | 8234174 | 7-scf00172 | 7 |
| AX-157698351 | 8 | 53.284 | KV452904.1 | 8234570 | 7-scf00172 | 7 |
| AX-157822899 | 8 | 53.284 | KV452904.1 | 8237537 | 7-scf00172 | 7 |
| AX-158053050 | 8 | 53.284 | KV452904.1 | 8237622 | 7-scf00172 | 7 |
| AX-158053056 | 8 | 53.284 | KV452904.1 | 8243727 | 7-scf00172 | 7 |
| AX-158053057 | 8 | 53.284 | KV452904.1 | 8244305 | 7-scf00172 | 7 |
| AX-158053060 | 8 | 53.284 | KV452904.1 | 8245070 | 7-scf00172 | 7 |
| AX-157856725 | 8 | 53.284 | KV452904.1 | 8246643 | 7-scf00172 | 7 |
| AX-158053070 | 8 | 53.284 | KV452904.1 | 8254420 | 7-scf00172 | 7 |
| AX-158053092 | 8 | 53.284 | KV452904.1 | 8291567 | 7-scf00172 | 7 |
| AX-158053094 | 8 | 53.284 | KV452904.1 | 8300688 | 7-scf00172 | 7 |
| AX-158053109 | 8 | 53.284 | KV452904.1 | 8317455 | 7-scf00172 | 7 |
| AX-158053133 | 8 | 53.284 | KV452904.1 | 8349859 | 7-scf00172 | 7 |

|              |   |        |             |          |            |    |
|--------------|---|--------|-------------|----------|------------|----|
| AX-158053242 | 8 | 53.284 | KV452904.1  | 8572069  | 7-scf00172 | 7  |
| AX-158053289 | 8 | 53.284 | KV452904.1  | 8630724  | 7-scf00172 | 7  |
| AX-158053292 | 8 | 53.284 | KV452904.1  | 8632216  | 7-scf00172 | 7  |
| AX-158378816 | 8 | 53.284 | KV452904.1  | 8653216  | 7-scf00172 | 7  |
| AX-158053312 | 8 | 53.284 | KV452904.1  | 8667985  | 7-scf00172 | 7  |
| AX-158053505 | 8 | 53.284 | KV452904.1  | 9008817  | 7-scf00172 | 7  |
| AX-158053560 | 8 | 53.284 | KV452904.1  | 9088720  | 7-scf00172 | 7  |
| AX-158053633 | 8 | 53.284 | KV452904.1  | 9172145  | 7-scf00172 | 7  |
| AX-158058419 | 8 | 53.284 | KV452904.1  | 16771455 | 7-scf00172 | 7  |
| AX-157688453 | 8 | 53.284 | 3ML01026197 | 1810     | scf01794_1 | UN |
| AX-157706124 | 8 | 53.284 | 3ML01031654 | 356      | scf07272_1 | UN |
| AX-158053066 | 8 | 53.327 | KV452904.1  | 8250019  | 7-scf00172 | 7  |
| AX-158053067 | 8 | 53.352 | KV452904.1  | 8251774  | 7-scf00172 | 7  |
| AX-158053069 | 8 | 53.378 | KV452904.1  | 8253199  | 7-scf00172 | 7  |
| AX-158408905 | 8 | 53.394 | KV452904.1  | 7808063  | 7-scf00172 | 7  |
| AX-157856684 | 8 | 53.394 | KV452904.1  | 7812405  | 7-scf00172 | 7  |
| AX-158052719 | 8 | 53.394 | KV452904.1  | 7818312  | 7-scf00172 | 7  |
| AX-158052722 | 8 | 53.394 | KV452904.1  | 7832926  | 7-scf00172 | 7  |
| AX-158052732 | 8 | 53.394 | KV452904.1  | 7844102  | 7-scf00172 | 7  |
| AX-158052734 | 8 | 53.394 | KV452904.1  | 7845725  | 7-scf00172 | 7  |
| AX-158052781 | 8 | 53.394 | KV452904.1  | 7928118  | 7-scf00172 | 7  |
| AX-157822885 | 8 | 53.394 | KV452904.1  | 7928321  | 7-scf00172 | 7  |
| AX-158052787 | 8 | 53.394 | KV452904.1  | 7934999  | 7-scf00172 | 7  |
| AX-158052788 | 8 | 53.394 | KV452904.1  | 7935822  | 7-scf00172 | 7  |
| AX-157743720 | 8 | 53.394 | KV452904.1  | 7938846  | 7-scf00172 | 7  |
| AX-158052792 | 8 | 53.394 | KV452904.1  | 7939732  | 7-scf00172 | 7  |
| AX-158052796 | 8 | 53.394 | KV452904.1  | 7941354  | 7-scf00172 | 7  |
| AX-157856695 | 8 | 53.394 | KV452904.1  | 7941943  | 7-scf00172 | 7  |
| AX-157856696 | 8 | 53.394 | KV452904.1  | 7943959  | 7-scf00172 | 7  |
| AX-157822886 | 8 | 53.394 | KV452904.1  | 7944623  | 7-scf00172 | 7  |
| AX-157822887 | 8 | 53.394 | KV452904.1  | 7945127  | 7-scf00172 | 7  |
| AX-158052799 | 8 | 53.394 | KV452904.1  | 7947580  | 7-scf00172 | 7  |
| AX-158052800 | 8 | 53.394 | KV452904.1  | 7947996  | 7-scf00172 | 7  |
| AX-158052801 | 8 | 53.394 | KV452904.1  | 7948448  | 7-scf00172 | 7  |
| AX-157856697 | 8 | 53.394 | KV452904.1  | 7948801  | 7-scf00172 | 7  |
| AX-158052803 | 8 | 53.394 | KV452904.1  | 7953144  | 7-scf00172 | 7  |
| AX-158052817 | 8 | 53.394 | KV452904.1  | 7964945  | 7-scf00172 | 7  |
| AX-158052821 | 8 | 53.394 | KV452904.1  | 7967848  | 7-scf00172 | 7  |
| AX-158052825 | 8 | 53.394 | KV452904.1  | 7970752  | 7-scf00172 | 7  |
| AX-158052831 | 8 | 53.394 | KV452904.1  | 7975819  | 7-scf00172 | 7  |
| AX-158052867 | 8 | 53.394 | KV452904.1  | 8018362  | 7-scf00172 | 7  |
| AX-158052879 | 8 | 53.394 | KV452904.1  | 8026910  | 7-scf00172 | 7  |
| AX-157701169 | 8 | 53.394 | KV452904.1  | 8035987  | 7-scf00172 | 7  |
| AX-157715629 | 8 | 53.394 | KV452904.1  | 8038566  | 7-scf00172 | 7  |
| AX-158052888 | 8 | 53.394 | KV452904.1  | 8047256  | 7-scf00172 | 7  |
| AX-158052889 | 8 | 53.394 | KV452904.1  | 8047936  | 7-scf00172 | 7  |
| AX-157699436 | 8 | 53.394 | KV452904.1  | 8048295  | 7-scf00172 | 7  |
| AX-158052898 | 8 | 53.394 | KV452904.1  | 8062157  | 7-scf00172 | 7  |
| AX-158052904 | 8 | 53.394 | KV452904.1  | 8086606  | 7-scf00172 | 7  |
| AX-158052907 | 8 | 53.394 | KV452904.1  | 8094896  | 7-scf00172 | 7  |
| AX-158052917 | 8 | 53.394 | KV452904.1  | 8105096  | 7-scf00172 | 7  |

|              |   |        |            |         |            |   |
|--------------|---|--------|------------|---------|------------|---|
| AX-158052957 | 8 | 53.394 | KV452904.1 | 8145095 | 7-scf00172 | 7 |
| AX-158052982 | 8 | 53.394 | KV452904.1 | 8161610 | 7-scf00172 | 7 |
| AX-158053009 | 8 | 53.394 | KV452904.1 | 8190246 | 7-scf00172 | 7 |
| AX-157885221 | 8 | 53.394 | KV452904.1 | 8190804 | 7-scf00172 | 7 |
| AX-158053027 | 8 | 53.394 | KV452904.1 | 8209117 | 7-scf00172 | 7 |
| AX-157745969 | 8 | 53.394 | KV452904.1 | 8211885 | 7-scf00172 | 7 |
| AX-158053061 | 8 | 53.394 | KV452904.1 | 8246391 | 7-scf00172 | 7 |
| AX-157750097 | 8 | 53.394 | KV452904.1 | 8250830 | 7-scf00172 | 7 |
| AX-157717387 | 8 | 53.394 | KV452904.1 | 8259322 | 7-scf00172 | 7 |
| AX-158053075 | 8 | 53.394 | KV452904.1 | 8264437 | 7-scf00172 | 7 |
| AX-157745255 | 8 | 53.394 | KV452904.1 | 8269104 | 7-scf00172 | 7 |
| AX-157822903 | 8 | 53.394 | KV452904.1 | 8269474 | 7-scf00172 | 7 |
| AX-158053077 | 8 | 53.394 | KV452904.1 | 8269726 | 7-scf00172 | 7 |
| AX-158053078 | 8 | 53.394 | KV452904.1 | 8270697 | 7-scf00172 | 7 |
| AX-158053081 | 8 | 53.394 | KV452904.1 | 8272194 | 7-scf00172 | 7 |
| AX-158053082 | 8 | 53.394 | KV452904.1 | 8272903 | 7-scf00172 | 7 |
| AX-158053083 | 8 | 53.394 | KV452904.1 | 8273340 | 7-scf00172 | 7 |
| AX-157716646 | 8 | 53.394 | KV452904.1 | 8274875 | 7-scf00172 | 7 |
| AX-158053084 | 8 | 53.394 | KV452904.1 | 8275701 | 7-scf00172 | 7 |
| AX-157739324 | 8 | 53.394 | KV452904.1 | 8277103 | 7-scf00172 | 7 |
| AX-158053087 | 8 | 53.394 | KV452904.1 | 8279487 | 7-scf00172 | 7 |
| AX-157822904 | 8 | 53.394 | KV452904.1 | 8280064 | 7-scf00172 | 7 |
| AX-158053088 | 8 | 53.394 | KV452904.1 | 8282109 | 7-scf00172 | 7 |
| AX-158053089 | 8 | 53.394 | KV452904.1 | 8286411 | 7-scf00172 | 7 |
| AX-158053091 | 8 | 53.394 | KV452904.1 | 8288256 | 7-scf00172 | 7 |
| AX-157822909 | 8 | 53.394 | KV452904.1 | 8288863 | 7-scf00172 | 7 |
| AX-157856727 | 8 | 53.394 | KV452904.1 | 8291457 | 7-scf00172 | 7 |
| AX-157822910 | 8 | 53.394 | KV452904.1 | 8293134 | 7-scf00172 | 7 |
| AX-158053095 | 8 | 53.394 | KV452904.1 | 8302563 | 7-scf00172 | 7 |
| AX-158053099 | 8 | 53.394 | KV452904.1 | 8304921 | 7-scf00172 | 7 |
| AX-158053103 | 8 | 53.394 | KV452904.1 | 8307273 | 7-scf00172 | 7 |
| AX-157856731 | 8 | 53.394 | KV452904.1 | 8327362 | 7-scf00172 | 7 |
| AX-158053124 | 8 | 53.394 | KV452904.1 | 8334609 | 7-scf00172 | 7 |
| AX-157703900 | 8 | 53.394 | KV452904.1 | 8338606 | 7-scf00172 | 7 |
| AX-158053126 | 8 | 53.394 | KV452904.1 | 8339552 | 7-scf00172 | 7 |
| AX-158053127 | 8 | 53.394 | KV452904.1 | 8340126 | 7-scf00172 | 7 |
| AX-157856732 | 8 | 53.394 | KV452904.1 | 8342548 | 7-scf00172 | 7 |
| AX-158053130 | 8 | 53.394 | KV452904.1 | 8343811 | 7-scf00172 | 7 |
| AX-158053136 | 8 | 53.394 | KV452904.1 | 8354969 | 7-scf00172 | 7 |
| AX-157856734 | 8 | 53.394 | KV452904.1 | 8355863 | 7-scf00172 | 7 |
| AX-157822913 | 8 | 53.394 | KV452904.1 | 8356124 | 7-scf00172 | 7 |
| AX-157822914 | 8 | 53.394 | KV452904.1 | 8356379 | 7-scf00172 | 7 |
| AX-158053137 | 8 | 53.394 | KV452904.1 | 8356978 | 7-scf00172 | 7 |
| AX-158053139 | 8 | 53.394 | KV452904.1 | 8359491 | 7-scf00172 | 7 |
| AX-157822916 | 8 | 53.394 | KV452904.1 | 8369168 | 7-scf00172 | 7 |
| AX-157856735 | 8 | 53.394 | KV452904.1 | 8378693 | 7-scf00172 | 7 |
| AX-158391823 | 8 | 53.394 | KV452904.1 | 8381879 | 7-scf00172 | 7 |
| AX-157822918 | 8 | 53.394 | KV452904.1 | 8395901 | 7-scf00172 | 7 |
| AX-158053157 | 8 | 53.394 | KV452904.1 | 8397928 | 7-scf00172 | 7 |
| AX-158053158 | 8 | 53.394 | KV452904.1 | 8398392 | 7-scf00172 | 7 |
| AX-158053160 | 8 | 53.394 | KV452904.1 | 8398720 | 7-scf00172 | 7 |

|              |   |        |            |         |            |   |
|--------------|---|--------|------------|---------|------------|---|
| AX-158053162 | 8 | 53.394 | KV452904.1 | 8404679 | 7-scf00172 | 7 |
| AX-158053163 | 8 | 53.394 | KV452904.1 | 8405057 | 7-scf00172 | 7 |
| AX-157856737 | 8 | 53.394 | KV452904.1 | 8405501 | 7-scf00172 | 7 |
| AX-158053164 | 8 | 53.394 | KV452904.1 | 8406468 | 7-scf00172 | 7 |
| AX-157856738 | 8 | 53.394 | KV452904.1 | 8414251 | 7-scf00172 | 7 |
| AX-157856739 | 8 | 53.394 | KV452904.1 | 8414490 | 7-scf00172 | 7 |
| AX-158053170 | 8 | 53.394 | KV452904.1 | 8418234 | 7-scf00172 | 7 |
| AX-158053174 | 8 | 53.394 | KV452904.1 | 8437468 | 7-scf00172 | 7 |
| AX-158053175 | 8 | 53.394 | KV452904.1 | 8438087 | 7-scf00172 | 7 |
| AX-158053176 | 8 | 53.394 | KV452904.1 | 8441394 | 7-scf00172 | 7 |
| AX-158053177 | 8 | 53.394 | KV452904.1 | 8442529 | 7-scf00172 | 7 |
| AX-157856741 | 8 | 53.394 | KV452904.1 | 8443463 | 7-scf00172 | 7 |
| AX-158378814 | 8 | 53.394 | KV452904.1 | 8443920 | 7-scf00172 | 7 |
| AX-157856742 | 8 | 53.394 | KV452904.1 | 8444156 | 7-scf00172 | 7 |
| AX-158053185 | 8 | 53.394 | KV452904.1 | 8448909 | 7-scf00172 | 7 |
| AX-158053188 | 8 | 53.394 | KV452904.1 | 8460143 | 7-scf00172 | 7 |
| AX-158053189 | 8 | 53.394 | KV452904.1 | 8460531 | 7-scf00172 | 7 |
| AX-158053192 | 8 | 53.394 | KV452904.1 | 8467511 | 7-scf00172 | 7 |
| AX-158053196 | 8 | 53.394 | KV452904.1 | 8471867 | 7-scf00172 | 7 |
| AX-157856745 | 8 | 53.394 | KV452904.1 | 8475951 | 7-scf00172 | 7 |
| AX-158053199 | 8 | 53.394 | KV452904.1 | 8476717 | 7-scf00172 | 7 |
| AX-158408920 | 8 | 53.394 | KV452904.1 | 8480926 | 7-scf00172 | 7 |
| AX-158408921 | 8 | 53.394 | KV452904.1 | 8481043 | 7-scf00172 | 7 |
| AX-158408922 | 8 | 53.394 | KV452904.1 | 8481143 | 7-scf00172 | 7 |
| AX-158408924 | 8 | 53.394 | KV452904.1 | 8482313 | 7-scf00172 | 7 |
| AX-157856746 | 8 | 53.394 | KV452904.1 | 8483410 | 7-scf00172 | 7 |
| AX-158053202 | 8 | 53.394 | KV452904.1 | 8485875 | 7-scf00172 | 7 |
| AX-157856747 | 8 | 53.394 | KV452904.1 | 8487372 | 7-scf00172 | 7 |
| AX-158053204 | 8 | 53.394 | KV452904.1 | 8494918 | 7-scf00172 | 7 |
| AX-157856748 | 8 | 53.394 | KV452904.1 | 8497107 | 7-scf00172 | 7 |
| AX-158053206 | 8 | 53.394 | KV452904.1 | 8497849 | 7-scf00172 | 7 |
| AX-157822920 | 8 | 53.394 | KV452904.1 | 8499133 | 7-scf00172 | 7 |
| AX-158053210 | 8 | 53.394 | KV452904.1 | 8501986 | 7-scf00172 | 7 |
| AX-158053211 | 8 | 53.394 | KV452904.1 | 8505167 | 7-scf00172 | 7 |
| AX-158053214 | 8 | 53.394 | KV452904.1 | 8507006 | 7-scf00172 | 7 |
| AX-157856749 | 8 | 53.394 | KV452904.1 | 8509517 | 7-scf00172 | 7 |
| AX-158053218 | 8 | 53.394 | KV452904.1 | 8510915 | 7-scf00172 | 7 |
| AX-157856750 | 8 | 53.394 | KV452904.1 | 8512535 | 7-scf00172 | 7 |
| AX-157696823 | 8 | 53.394 | KV452904.1 | 8514301 | 7-scf00172 | 7 |
| AX-158053219 | 8 | 53.394 | KV452904.1 | 8516313 | 7-scf00172 | 7 |
| AX-157856751 | 8 | 53.394 | KV452904.1 | 8516536 | 7-scf00172 | 7 |
| AX-158053221 | 8 | 53.394 | KV452904.1 | 8520304 | 7-scf00172 | 7 |
| AX-158053222 | 8 | 53.394 | KV452904.1 | 8521075 | 7-scf00172 | 7 |
| AX-158053225 | 8 | 53.394 | KV452904.1 | 8528747 | 7-scf00172 | 7 |
| AX-157865526 | 8 | 53.394 | KV452904.1 | 8541476 | 7-scf00172 | 7 |
| AX-158053231 | 8 | 53.394 | KV452904.1 | 8544533 | 7-scf00172 | 7 |
| AX-158053232 | 8 | 53.394 | KV452904.1 | 8545831 | 7-scf00172 | 7 |
| AX-157712531 | 8 | 53.394 | KV452904.1 | 8548993 | 7-scf00172 | 7 |
| AX-158053233 | 8 | 53.394 | KV452904.1 | 8549900 | 7-scf00172 | 7 |
| AX-158053235 | 8 | 53.394 | KV452904.1 | 8555366 | 7-scf00172 | 7 |
| AX-158053237 | 8 | 53.394 | KV452904.1 | 8562426 | 7-scf00172 | 7 |

|              |   |        |            |         |            |   |
|--------------|---|--------|------------|---------|------------|---|
| AX-158053238 | 8 | 53.394 | KV452904.1 | 8564400 | 7-scf00172 | 7 |
| AX-158053239 | 8 | 53.394 | KV452904.1 | 8566159 | 7-scf00172 | 7 |
| AX-158416376 | 8 | 53.394 | KV452904.1 | 8566950 | 7-scf00172 | 7 |
| AX-157870627 | 8 | 53.394 | KV452904.1 | 8568124 | 7-scf00172 | 7 |
| AX-158053245 | 8 | 53.394 | KV452904.1 | 8578351 | 7-scf00172 | 7 |
| AX-158053247 | 8 | 53.394 | KV452904.1 | 8579334 | 7-scf00172 | 7 |
| AX-157856754 | 8 | 53.394 | KV452904.1 | 8579763 | 7-scf00172 | 7 |
| AX-157856755 | 8 | 53.394 | KV452904.1 | 8582581 | 7-scf00172 | 7 |
| AX-158053250 | 8 | 53.394 | KV452904.1 | 8585937 | 7-scf00172 | 7 |
| AX-158053252 | 8 | 53.394 | KV452904.1 | 8588066 | 7-scf00172 | 7 |
| AX-158053254 | 8 | 53.394 | KV452904.1 | 8590064 | 7-scf00172 | 7 |
| AX-158053255 | 8 | 53.394 | KV452904.1 | 8594454 | 7-scf00172 | 7 |
| AX-158053263 | 8 | 53.394 | KV452904.1 | 8601196 | 7-scf00172 | 7 |
| AX-158408928 | 8 | 53.394 | KV452904.1 | 8602554 | 7-scf00172 | 7 |
| AX-158416377 | 8 | 53.394 | KV452904.1 | 8603166 | 7-scf00172 | 7 |
| AX-157856756 | 8 | 53.394 | KV452904.1 | 8605433 | 7-scf00172 | 7 |
| AX-158053270 | 8 | 53.394 | KV452904.1 | 8613078 | 7-scf00172 | 7 |
| AX-158053272 | 8 | 53.394 | KV452904.1 | 8614962 | 7-scf00172 | 7 |
| AX-158408929 | 8 | 53.394 | KV452904.1 | 8615952 | 7-scf00172 | 7 |
| AX-158053273 | 8 | 53.394 | KV452904.1 | 8618093 | 7-scf00172 | 7 |
| AX-158053275 | 8 | 53.394 | KV452904.1 | 8618778 | 7-scf00172 | 7 |
| AX-158053278 | 8 | 53.394 | KV452904.1 | 8621842 | 7-scf00172 | 7 |
| AX-157856757 | 8 | 53.394 | KV452904.1 | 8621897 | 7-scf00172 | 7 |
| AX-158053279 | 8 | 53.394 | KV452904.1 | 8623273 | 7-scf00172 | 7 |
| AX-158053285 | 8 | 53.394 | KV452904.1 | 8626856 | 7-scf00172 | 7 |
| AX-158053286 | 8 | 53.394 | KV452904.1 | 8628655 | 7-scf00172 | 7 |
| AX-158053291 | 8 | 53.394 | KV452904.1 | 8631520 | 7-scf00172 | 7 |
| AX-158053294 | 8 | 53.394 | KV452904.1 | 8635354 | 7-scf00172 | 7 |
| AX-158053297 | 8 | 53.394 | KV452904.1 | 8637638 | 7-scf00172 | 7 |
| AX-157856759 | 8 | 53.394 | KV452904.1 | 8643120 | 7-scf00172 | 7 |
| AX-158053302 | 8 | 53.394 | KV452904.1 | 8644642 | 7-scf00172 | 7 |
| AX-157856760 | 8 | 53.394 | KV452904.1 | 8644748 | 7-scf00172 | 7 |
| AX-158053303 | 8 | 53.394 | KV452904.1 | 8647597 | 7-scf00172 | 7 |
| AX-157856762 | 8 | 53.394 | KV452904.1 | 8650499 | 7-scf00172 | 7 |
| AX-157856763 | 8 | 53.394 | KV452904.1 | 8650649 | 7-scf00172 | 7 |
| AX-158053305 | 8 | 53.394 | KV452904.1 | 8650853 | 7-scf00172 | 7 |
| AX-158053311 | 8 | 53.394 | KV452904.1 | 8663484 | 7-scf00172 | 7 |
| AX-158053313 | 8 | 53.394 | KV452904.1 | 8669147 | 7-scf00172 | 7 |
| AX-158053319 | 8 | 53.394 | KV452904.1 | 8673350 | 7-scf00172 | 7 |
| AX-157856764 | 8 | 53.394 | KV452904.1 | 8673969 | 7-scf00172 | 7 |
| AX-157885222 | 8 | 53.394 | KV452904.1 | 8674240 | 7-scf00172 | 7 |
| AX-158053320 | 8 | 53.394 | KV452904.1 | 8675089 | 7-scf00172 | 7 |
| AX-158053322 | 8 | 53.394 | KV452904.1 | 8676888 | 7-scf00172 | 7 |
| AX-158053324 | 8 | 53.394 | KV452904.1 | 8679476 | 7-scf00172 | 7 |
| AX-158053325 | 8 | 53.394 | KV452904.1 | 8683818 | 7-scf00172 | 7 |
| AX-158053326 | 8 | 53.394 | KV452904.1 | 8684894 | 7-scf00172 | 7 |
| AX-157856766 | 8 | 53.394 | KV452904.1 | 8685589 | 7-scf00172 | 7 |
| AX-158053327 | 8 | 53.394 | KV452904.1 | 8686532 | 7-scf00172 | 7 |
| AX-157856767 | 8 | 53.394 | KV452904.1 | 8686683 | 7-scf00172 | 7 |
| AX-157856769 | 8 | 53.394 | KV452904.1 | 8688729 | 7-scf00172 | 7 |
| AX-158053329 | 8 | 53.394 | KV452904.1 | 8689226 | 7-scf00172 | 7 |

|              |   |        |            |         |            |   |
|--------------|---|--------|------------|---------|------------|---|
| AX-157700183 | 8 | 53.394 | KV452904.1 | 8692214 | 7-scf00172 | 7 |
| AX-157856770 | 8 | 53.394 | KV452904.1 | 8692966 | 7-scf00172 | 7 |
| AX-158053332 | 8 | 53.394 | KV452904.1 | 8693132 | 7-scf00172 | 7 |
| AX-158053333 | 8 | 53.394 | KV452904.1 | 8694755 | 7-scf00172 | 7 |
| AX-157822921 | 8 | 53.394 | KV452904.1 | 8695223 | 7-scf00172 | 7 |
| AX-158053335 | 8 | 53.394 | KV452904.1 | 8696839 | 7-scf00172 | 7 |
| AX-158053339 | 8 | 53.394 | KV452904.1 | 8707273 | 7-scf00172 | 7 |
| AX-157822922 | 8 | 53.394 | KV452904.1 | 8716266 | 7-scf00172 | 7 |
| AX-158053345 | 8 | 53.394 | KV452904.1 | 8717297 | 7-scf00172 | 7 |
| AX-158053349 | 8 | 53.394 | KV452904.1 | 8726113 | 7-scf00172 | 7 |
| AX-157856771 | 8 | 53.394 | KV452904.1 | 8726381 | 7-scf00172 | 7 |
| AX-158053350 | 8 | 53.394 | KV452904.1 | 8727075 | 7-scf00172 | 7 |
| AX-157856772 | 8 | 53.394 | KV452904.1 | 8732569 | 7-scf00172 | 7 |
| AX-157702648 | 8 | 53.394 | KV452904.1 | 8736167 | 7-scf00172 | 7 |
| AX-158053355 | 8 | 53.394 | KV452904.1 | 8738665 | 7-scf00172 | 7 |
| AX-158053356 | 8 | 53.394 | KV452904.1 | 8740276 | 7-scf00172 | 7 |
| AX-158053358 | 8 | 53.394 | KV452904.1 | 8752232 | 7-scf00172 | 7 |
| AX-158053360 | 8 | 53.394 | KV452904.1 | 8754452 | 7-scf00172 | 7 |
| AX-158053368 | 8 | 53.394 | KV452904.1 | 8773176 | 7-scf00172 | 7 |
| AX-157856773 | 8 | 53.394 | KV452904.1 | 8777071 | 7-scf00172 | 7 |
| AX-158053370 | 8 | 53.394 | KV452904.1 | 8777529 | 7-scf00172 | 7 |
| AX-158053373 | 8 | 53.394 | KV452904.1 | 8781179 | 7-scf00172 | 7 |
| AX-158053374 | 8 | 53.394 | KV452904.1 | 8782323 | 7-scf00172 | 7 |
| AX-158053375 | 8 | 53.394 | KV452904.1 | 8783272 | 7-scf00172 | 7 |
| AX-158053377 | 8 | 53.394 | KV452904.1 | 8783953 | 7-scf00172 | 7 |
| AX-158053379 | 8 | 53.394 | KV452904.1 | 8786838 | 7-scf00172 | 7 |
| AX-158053381 | 8 | 53.394 | KV452904.1 | 8792927 | 7-scf00172 | 7 |
| AX-158408934 | 8 | 53.394 | KV452904.1 | 8793729 | 7-scf00172 | 7 |
| AX-157885223 | 8 | 53.394 | KV452904.1 | 8796749 | 7-scf00172 | 7 |
| AX-158053386 | 8 | 53.394 | KV452904.1 | 8799177 | 7-scf00172 | 7 |
| AX-158053388 | 8 | 53.394 | KV452904.1 | 8801842 | 7-scf00172 | 7 |
| AX-158053389 | 8 | 53.394 | KV452904.1 | 8802219 | 7-scf00172 | 7 |
| AX-158053390 | 8 | 53.394 | KV452904.1 | 8803323 | 7-scf00172 | 7 |
| AX-157856775 | 8 | 53.394 | KV452904.1 | 8811061 | 7-scf00172 | 7 |
| AX-157707650 | 8 | 53.394 | KV452904.1 | 8824442 | 7-scf00172 | 7 |
| AX-157707651 | 8 | 53.394 | KV452904.1 | 8824560 | 7-scf00172 | 7 |
| AX-158053400 | 8 | 53.394 | KV452904.1 | 8825387 | 7-scf00172 | 7 |
| AX-158053401 | 8 | 53.394 | KV452904.1 | 8827103 | 7-scf00172 | 7 |
| AX-158053402 | 8 | 53.394 | KV452904.1 | 8829638 | 7-scf00172 | 7 |
| AX-158053403 | 8 | 53.394 | KV452904.1 | 8829966 | 7-scf00172 | 7 |
| AX-158053404 | 8 | 53.394 | KV452904.1 | 8831672 | 7-scf00172 | 7 |
| AX-158053406 | 8 | 53.394 | KV452904.1 | 8835665 | 7-scf00172 | 7 |
| AX-158053407 | 8 | 53.394 | KV452904.1 | 8836881 | 7-scf00172 | 7 |
| AX-158053408 | 8 | 53.394 | KV452904.1 | 8844011 | 7-scf00172 | 7 |
| AX-157822924 | 8 | 53.394 | KV452904.1 | 8855398 | 7-scf00172 | 7 |
| AX-158408935 | 8 | 53.394 | KV452904.1 | 8856597 | 7-scf00172 | 7 |
| AX-158053415 | 8 | 53.394 | KV452904.1 | 8861702 | 7-scf00172 | 7 |
| AX-157822925 | 8 | 53.394 | KV452904.1 | 8865214 | 7-scf00172 | 7 |
| AX-157786702 | 8 | 53.394 | KV452904.1 | 8876929 | 7-scf00172 | 7 |
| AX-157726161 | 8 | 53.394 | KV452904.1 | 8885872 | 7-scf00172 | 7 |
| AX-158053418 | 8 | 53.394 | KV452904.1 | 8892419 | 7-scf00172 | 7 |



|              |   |        |            |         |            |   |
|--------------|---|--------|------------|---------|------------|---|
| AX-158053420 | 8 | 53.394 | KV452904.1 | 8895236 | 7-scf00172 | 7 |
| AX-158053421 | 8 | 53.394 | KV452904.1 | 8895921 | 7-scf00172 | 7 |
| AX-158053423 | 8 | 53.394 | KV452904.1 | 8899107 | 7-scf00172 | 7 |
| AX-158378819 | 8 | 53.394 | KV452904.1 | 8903605 | 7-scf00172 | 7 |
| AX-158053424 | 8 | 53.394 | KV452904.1 | 8903950 | 7-scf00172 | 7 |
| AX-158053426 | 8 | 53.394 | KV452904.1 | 8904130 | 7-scf00172 | 7 |
| AX-157822927 | 8 | 53.394 | KV452904.1 | 8905205 | 7-scf00172 | 7 |
| AX-157693190 | 8 | 53.394 | KV452904.1 | 8906631 | 7-scf00172 | 7 |
| AX-158378820 | 8 | 53.394 | KV452904.1 | 8907194 | 7-scf00172 | 7 |
| AX-158053430 | 8 | 53.394 | KV452904.1 | 8907829 | 7-scf00172 | 7 |
| AX-158053432 | 8 | 53.394 | KV452904.1 | 8908610 | 7-scf00172 | 7 |
| AX-158053433 | 8 | 53.394 | KV452904.1 | 8909956 | 7-scf00172 | 7 |
| AX-158053434 | 8 | 53.394 | KV452904.1 | 8910762 | 7-scf00172 | 7 |
| AX-158053436 | 8 | 53.394 | KV452904.1 | 8914353 | 7-scf00172 | 7 |
| AX-158053440 | 8 | 53.394 | KV452904.1 | 8916872 | 7-scf00172 | 7 |
| AX-158053447 | 8 | 53.394 | KV452904.1 | 8926650 | 7-scf00172 | 7 |
| AX-158053448 | 8 | 53.394 | KV452904.1 | 8930114 | 7-scf00172 | 7 |
| AX-158053450 | 8 | 53.394 | KV452904.1 | 8931123 | 7-scf00172 | 7 |
| AX-158053454 | 8 | 53.394 | KV452904.1 | 8942063 | 7-scf00172 | 7 |
| AX-158053455 | 8 | 53.394 | KV452904.1 | 8943813 | 7-scf00172 | 7 |
| AX-158053459 | 8 | 53.394 | KV452904.1 | 8951155 | 7-scf00172 | 7 |
| AX-158053460 | 8 | 53.394 | KV452904.1 | 8952256 | 7-scf00172 | 7 |
| AX-158053461 | 8 | 53.394 | KV452904.1 | 8955535 | 7-scf00172 | 7 |
| AX-158053462 | 8 | 53.394 | KV452904.1 | 8956983 | 7-scf00172 | 7 |
| AX-158053466 | 8 | 53.394 | KV452904.1 | 8965651 | 7-scf00172 | 7 |
| AX-157822928 | 8 | 53.394 | KV452904.1 | 8966656 | 7-scf00172 | 7 |
| AX-158053469 | 8 | 53.394 | KV452904.1 | 8968163 | 7-scf00172 | 7 |
| AX-157786705 | 8 | 53.394 | KV452904.1 | 8968982 | 7-scf00172 | 7 |
| AX-157856777 | 8 | 53.394 | KV452904.1 | 8970498 | 7-scf00172 | 7 |
| AX-158053473 | 8 | 53.394 | KV452904.1 | 8976347 | 7-scf00172 | 7 |
| AX-158053474 | 8 | 53.394 | KV452904.1 | 8978875 | 7-scf00172 | 7 |
| AX-158053477 | 8 | 53.394 | KV452904.1 | 8979822 | 7-scf00172 | 7 |
| AX-158053479 | 8 | 53.394 | KV452904.1 | 8980421 | 7-scf00172 | 7 |
| AX-158053482 | 8 | 53.394 | KV452904.1 | 8982880 | 7-scf00172 | 7 |
| AX-158053487 | 8 | 53.394 | KV452904.1 | 8985050 | 7-scf00172 | 7 |
| AX-158053489 | 8 | 53.394 | KV452904.1 | 8992449 | 7-scf00172 | 7 |
| AX-158053490 | 8 | 53.394 | KV452904.1 | 8993178 | 7-scf00172 | 7 |
| AX-158053491 | 8 | 53.394 | KV452904.1 | 8994216 | 7-scf00172 | 7 |
| AX-157786706 | 8 | 53.394 | KV452904.1 | 8994391 | 7-scf00172 | 7 |
| AX-158053494 | 8 | 53.394 | KV452904.1 | 8997679 | 7-scf00172 | 7 |
| AX-158053497 | 8 | 53.394 | KV452904.1 | 8998555 | 7-scf00172 | 7 |
| AX-158053498 | 8 | 53.394 | KV452904.1 | 8999795 | 7-scf00172 | 7 |
| AX-158053499 | 8 | 53.394 | KV452904.1 | 9000595 | 7-scf00172 | 7 |
| AX-158053500 | 8 | 53.394 | KV452904.1 | 9001994 | 7-scf00172 | 7 |
| AX-158053501 | 8 | 53.394 | KV452904.1 | 9004386 | 7-scf00172 | 7 |
| AX-157822931 | 8 | 53.394 | KV452904.1 | 9007484 | 7-scf00172 | 7 |
| AX-157822933 | 8 | 53.394 | KV452904.1 | 9009999 | 7-scf00172 | 7 |
| AX-158053507 | 8 | 53.394 | KV452904.1 | 9012762 | 7-scf00172 | 7 |
| AX-158053509 | 8 | 53.394 | KV452904.1 | 9014423 | 7-scf00172 | 7 |
| AX-157744856 | 8 | 53.394 | KV452904.1 | 9030538 | 7-scf00172 | 7 |
| AX-158053517 | 8 | 53.394 | KV452904.1 | 9038103 | 7-scf00172 | 7 |

|              |   |        |            |          |            |    |
|--------------|---|--------|------------|----------|------------|----|
| AX-158053524 | 8 | 53.394 | KV452904.1 | 9046730  | 7-scf00172 | 7  |
| AX-158053529 | 8 | 53.394 | KV452904.1 | 9048597  | 7-scf00172 | 7  |
| AX-157718418 | 8 | 53.394 | KV452904.1 | 9059234  | 7-scf00172 | 7  |
| AX-158053537 | 8 | 53.394 | KV452904.1 | 9059867  | 7-scf00172 | 7  |
| AX-157757749 | 8 | 53.394 | KV452904.1 | 9072397  | 7-scf00172 | 7  |
| AX-158053549 | 8 | 53.394 | KV452904.1 | 9075349  | 7-scf00172 | 7  |
| AX-157822938 | 8 | 53.394 | KV452904.1 | 9078245  | 7-scf00172 | 7  |
| AX-158053555 | 8 | 53.394 | KV452904.1 | 9080164  | 7-scf00172 | 7  |
| AX-158053556 | 8 | 53.394 | KV452904.1 | 9080523  | 7-scf00172 | 7  |
| AX-158053616 | 8 | 53.394 | KV452904.1 | 9153494  | 7-scf00172 | 7  |
| AX-158058230 | 8 | 53.394 | KV452904.1 | 16493230 | 7-scf00172 | 7  |
| AX-157689917 | 8 | 53.394 |            | 352      | scf12933   | UN |
| AX-158053513 | 8 | 53.395 | KV452904.1 | 9023721  | 7-scf00172 | 7  |
| AX-157876777 | 8 | 53.396 | KV452904.1 | 9037840  | 7-scf00172 | 7  |
| AX-157822937 | 8 | 53.483 | KV452904.1 | 9057481  | 7-scf00172 | 7  |
| AX-157714527 | 8 | 53.539 | KV452904.1 | 9100193  | 7-scf00172 | 7  |
| AX-157745463 | 8 | 53.539 | KV452904.1 | 9103249  | 7-scf00172 | 7  |
| AX-158053565 | 8 | 53.539 | KV452904.1 | 9103617  | 7-scf00172 | 7  |
| AX-158053568 | 8 | 53.685 | KV452904.1 | 9104789  | 7-scf00172 | 7  |
| AX-158053570 | 8 | 53.685 | KV452904.1 | 9105562  | 7-scf00172 | 7  |
| AX-158053578 | 8 | 53.685 | KV452904.1 | 9116729  | 7-scf00172 | 7  |
| AX-158378826 | 8 | 53.685 | KV452904.1 | 9117978  | 7-scf00172 | 7  |
| AX-158378827 | 8 | 53.685 | KV452904.1 | 9140761  | 7-scf00172 | 7  |
| AX-158053589 | 8 | 53.789 | KV452904.1 | 9127556  | 7-scf00172 | 7  |
| AX-158057921 | 8 | 53.789 | KV452904.1 | 15820740 | 7-scf00172 | 7  |
| AX-157823193 | 8 | 53.789 | KV452904.1 | 15835973 | 7-scf00172 | 7  |
| AX-158058499 | 8 | 53.789 | KV452904.1 | 16928165 | 7-scf00172 | 7  |
| AX-158058954 | 8 | 53.789 | KV452905.1 | 141557   | 7-scf00175 | 7  |
| AX-158051042 | 8 | 53.831 | KV452904.1 | 5512914  | 7-scf00172 | 7  |
| AX-158051663 | 8 | 53.831 | KV452904.1 | 6361258  | 7-scf00172 | 7  |
| AX-158051701 | 8 | 53.831 | KV452904.1 | 6395547  | 7-scf00172 | 7  |
| AX-158051720 | 8 | 53.831 | KV452904.1 | 6420441  | 7-scf00172 | 7  |
| AX-158408882 | 8 | 53.831 | KV452904.1 | 6907326  | 7-scf00172 | 7  |
| AX-158052705 | 8 | 53.831 | KV452904.1 | 7809760  | 7-scf00172 | 7  |
| AX-158052707 | 8 | 53.831 | KV452904.1 | 7810456  | 7-scf00172 | 7  |
| AX-158052892 | 8 | 53.831 | KV452904.1 | 8051106  | 7-scf00172 | 7  |
| AX-158053413 | 8 | 53.831 | KV452904.1 | 8859113  | 7-scf00172 | 7  |
| AX-158053493 | 8 | 53.831 | KV452904.1 | 8996124  | 7-scf00172 | 7  |
| AX-158378828 | 8 | 53.831 | KV452904.1 | 9158010  | 7-scf00172 | 7  |
| AX-158053622 | 8 | 53.831 | KV452904.1 | 9161462  | 7-scf00172 | 7  |
| AX-158053625 | 8 | 53.831 | KV452904.1 | 9163077  | 7-scf00172 | 7  |
| AX-158053629 | 8 | 53.831 | KV452904.1 | 9168048  | 7-scf00172 | 7  |
| AX-158053630 | 8 | 53.831 | KV452904.1 | 9169038  | 7-scf00172 | 7  |
| AX-158053632 | 8 | 53.831 | KV452904.1 | 9169293  | 7-scf00172 | 7  |
| AX-158053637 | 8 | 53.831 | KV452904.1 | 9177620  | 7-scf00172 | 7  |
| AX-158053638 | 8 | 53.831 | KV452904.1 | 9178179  | 7-scf00172 | 7  |
| AX-158053639 | 8 | 53.831 | KV452904.1 | 9178897  | 7-scf00172 | 7  |
| AX-158053680 | 8 | 53.831 | KV452904.1 | 9232156  | 7-scf00172 | 7  |
| AX-158053705 | 8 | 53.831 | KV452904.1 | 9264885  | 7-scf00172 | 7  |
| AX-158053740 | 8 | 53.831 | KV452904.1 | 9315215  | 7-scf00172 | 7  |
| AX-158053760 | 8 | 53.831 | KV452904.1 | 9339673  | 7-scf00172 | 7  |

|              |   |        |            |          |            |   |
|--------------|---|--------|------------|----------|------------|---|
| AX-158053861 | 8 | 53.831 | KV452904.1 | 9543231  | 7-scf00172 | 7 |
| AX-158054024 | 8 | 53.831 | KV452904.1 | 9750319  | 7-scf00172 | 7 |
| AX-158055561 | 8 | 53.831 | KV452904.1 | 11431210 | 7-scf00172 | 7 |
| AX-158055643 | 8 | 53.831 | KV452904.1 | 11512822 | 7-scf00172 | 7 |
| AX-158055721 | 8 | 53.831 | KV452904.1 | 11604526 | 7-scf00172 | 7 |
| AX-158055723 | 8 | 53.831 | KV452904.1 | 11604814 | 7-scf00172 | 7 |
| AX-158055782 | 8 | 53.831 | KV452904.1 | 11653202 | 7-scf00172 | 7 |
| AX-158056427 | 8 | 53.831 | KV452904.1 | 12515486 | 7-scf00172 | 7 |
| AX-158056484 | 8 | 53.831 | KV452904.1 | 12631156 | 7-scf00172 | 7 |
| AX-158057349 | 8 | 53.831 | KV452904.1 | 14633385 | 7-scf00172 | 7 |
| AX-158057402 | 8 | 53.831 | KV452904.1 | 14865290 | 7-scf00172 | 7 |
| AX-158058078 | 8 | 53.831 | KV452904.1 | 16101815 | 7-scf00172 | 7 |
| AX-158058108 | 8 | 53.831 | KV452904.1 | 16156699 | 7-scf00172 | 7 |
| AX-158058194 | 8 | 53.831 | KV452904.1 | 16421962 | 7-scf00172 | 7 |
| AX-158058337 | 8 | 53.831 | KV452904.1 | 16633728 | 7-scf00172 | 7 |
| AX-158053644 | 8 | 53.884 | KV452904.1 | 9188591  | 7-scf00172 | 7 |
| AX-158053648 | 8 | 53.941 | KV452904.1 | 9191626  | 7-scf00172 | 7 |
| AX-157823240 | 8 | 53.941 | KV452904.1 | 16769536 | 7-scf00172 | 7 |
| AX-158053652 | 8 | 53.996 | KV452904.1 | 9199327  | 7-scf00172 | 7 |
| AX-158053662 | 8 | 54.05  | KV452904.1 | 9208646  | 7-scf00172 | 7 |
| AX-158053664 | 8 | 54.05  | KV452904.1 | 9210242  | 7-scf00172 | 7 |
| AX-158053669 | 8 | 54.05  | KV452904.1 | 9222966  | 7-scf00172 | 7 |
| AX-158053683 | 8 | 54.114 | KV452904.1 | 9237420  | 7-scf00172 | 7 |
| AX-158050750 | 8 | 54.159 | KV452904.1 | 5135587  | 7-scf00172 | 7 |
| AX-158050792 | 8 | 54.159 | KV452904.1 | 5173357  | 7-scf00172 | 7 |
| AX-158050848 | 8 | 54.159 | KV452904.1 | 5245237  | 7-scf00172 | 7 |
| AX-158378740 | 8 | 54.159 | KV452904.1 | 5273751  | 7-scf00172 | 7 |
| AX-157822728 | 8 | 54.159 | KV452904.1 | 5329676  | 7-scf00172 | 7 |
| AX-158384047 | 8 | 54.159 | KV452904.1 | 5329877  | 7-scf00172 | 7 |
| AX-157865495 | 8 | 54.159 | KV452904.1 | 5342083  | 7-scf00172 | 7 |
| AX-158050928 | 8 | 54.159 | KV452904.1 | 5349513  | 7-scf00172 | 7 |
| AX-158051170 | 8 | 54.159 | KV452904.1 | 5664938  | 7-scf00172 | 7 |
| AX-158051196 | 8 | 54.159 | KV452904.1 | 5684412  | 7-scf00172 | 7 |
| AX-158051285 | 8 | 54.159 | KV452904.1 | 5841650  | 7-scf00172 | 7 |
| AX-157822780 | 8 | 54.159 | KV452904.1 | 5902632  | 7-scf00172 | 7 |
| AX-158051415 | 8 | 54.159 | KV452904.1 | 6056383  | 7-scf00172 | 7 |
| AX-158051428 | 8 | 54.159 | KV452904.1 | 6064248  | 7-scf00172 | 7 |
| AX-158378769 | 8 | 54.159 | KV452904.1 | 6396375  | 7-scf00172 | 7 |
| AX-157726638 | 8 | 54.159 | KV452904.1 | 6646025  | 7-scf00172 | 7 |
| AX-158051862 | 8 | 54.159 | KV452904.1 | 6679710  | 7-scf00172 | 7 |
| AX-158051885 | 8 | 54.159 | KV452904.1 | 6730855  | 7-scf00172 | 7 |
| AX-158051887 | 8 | 54.159 | KV452904.1 | 6741127  | 7-scf00172 | 7 |
| AX-158408879 | 8 | 54.159 | KV452904.1 | 6898582  | 7-scf00172 | 7 |
| AX-158052061 | 8 | 54.159 | KV452904.1 | 6991648  | 7-scf00172 | 7 |
| AX-157822834 | 8 | 54.159 | KV452904.1 | 7009769  | 7-scf00172 | 7 |
| AX-157822835 | 8 | 54.159 | KV452904.1 | 7011518  | 7-scf00172 | 7 |
| AX-158052176 | 8 | 54.159 | KV452904.1 | 7154675  | 7-scf00172 | 7 |
| AX-158052459 | 8 | 54.159 | KV452904.1 | 7518291  | 7-scf00172 | 7 |
| AX-158052552 | 8 | 54.159 | KV452904.1 | 7606141  | 7-scf00172 | 7 |
| AX-158052582 | 8 | 54.159 | KV452904.1 | 7643984  | 7-scf00172 | 7 |
| AX-157822873 | 8 | 54.159 | KV452904.1 | 7713685  | 7-scf00172 | 7 |

|              |   |        |            |         |            |   |
|--------------|---|--------|------------|---------|------------|---|
| AX-158053615 | 8 | 54.159 | KV452904.1 | 9152344 | 7-scf00172 | 7 |
| AX-158053634 | 8 | 54.159 | KV452904.1 | 9175231 | 7-scf00172 | 7 |
| AX-157822943 | 8 | 54.159 | KV452904.1 | 9222560 | 7-scf00172 | 7 |
| AX-158053684 | 8 | 54.159 | KV452904.1 | 9238139 | 7-scf00172 | 7 |
| AX-158053685 | 8 | 54.159 | KV452904.1 | 9242151 | 7-scf00172 | 7 |
| AX-158053686 | 8 | 54.159 | KV452904.1 | 9243606 | 7-scf00172 | 7 |
| AX-158053688 | 8 | 54.159 | KV452904.1 | 9244079 | 7-scf00172 | 7 |
| AX-158053695 | 8 | 54.159 | KV452904.1 | 9255130 | 7-scf00172 | 7 |
| AX-158053697 | 8 | 54.159 | KV452904.1 | 9255772 | 7-scf00172 | 7 |
| AX-158053699 | 8 | 54.159 | KV452904.1 | 9256633 | 7-scf00172 | 7 |
| AX-158053700 | 8 | 54.159 | KV452904.1 | 9258705 | 7-scf00172 | 7 |
| AX-158053703 | 8 | 54.159 | KV452904.1 | 9262317 | 7-scf00172 | 7 |
| AX-158053704 | 8 | 54.159 | KV452904.1 | 9262935 | 7-scf00172 | 7 |
| AX-158053709 | 8 | 54.159 | KV452904.1 | 9274610 | 7-scf00172 | 7 |
| AX-158378830 | 8 | 54.159 | KV452904.1 | 9292447 | 7-scf00172 | 7 |
| AX-158053720 | 8 | 54.159 | KV452904.1 | 9294354 | 7-scf00172 | 7 |
| AX-158053721 | 8 | 54.159 | KV452904.1 | 9295856 | 7-scf00172 | 7 |
| AX-158053724 | 8 | 54.159 | KV452904.1 | 9297508 | 7-scf00172 | 7 |
| AX-158053725 | 8 | 54.159 | KV452904.1 | 9298314 | 7-scf00172 | 7 |
| AX-158053726 | 8 | 54.159 | KV452904.1 | 9300211 | 7-scf00172 | 7 |
| AX-158053728 | 8 | 54.159 | KV452904.1 | 9302028 | 7-scf00172 | 7 |
| AX-158053732 | 8 | 54.159 | KV452904.1 | 9305359 | 7-scf00172 | 7 |
| AX-158053735 | 8 | 54.159 | KV452904.1 | 9307507 | 7-scf00172 | 7 |
| AX-158053736 | 8 | 54.159 | KV452904.1 | 9309554 | 7-scf00172 | 7 |
| AX-158053741 | 8 | 54.159 | KV452904.1 | 9315751 | 7-scf00172 | 7 |
| AX-158053743 | 8 | 54.159 | KV452904.1 | 9317201 | 7-scf00172 | 7 |
| AX-158053746 | 8 | 54.159 | KV452904.1 | 9321246 | 7-scf00172 | 7 |
| AX-158053750 | 8 | 54.159 | KV452904.1 | 9324553 | 7-scf00172 | 7 |
| AX-157721273 | 8 | 54.159 | KV452904.1 | 9334615 | 7-scf00172 | 7 |
| AX-158053764 | 8 | 54.159 | KV452904.1 | 9346935 | 7-scf00172 | 7 |
| AX-158053767 | 8 | 54.159 | KV452904.1 | 9350595 | 7-scf00172 | 7 |
| AX-157726385 | 8 | 54.159 | KV452904.1 | 9353254 | 7-scf00172 | 7 |
| AX-158053771 | 8 | 54.159 | KV452904.1 | 9363371 | 7-scf00172 | 7 |
| AX-158053781 | 8 | 54.159 | KV452904.1 | 9384253 | 7-scf00172 | 7 |
| AX-158053783 | 8 | 54.159 | KV452904.1 | 9385984 | 7-scf00172 | 7 |
| AX-158053790 | 8 | 54.159 | KV452904.1 | 9394466 | 7-scf00172 | 7 |
| AX-158053791 | 8 | 54.159 | KV452904.1 | 9397410 | 7-scf00172 | 7 |
| AX-158053792 | 8 | 54.159 | KV452904.1 | 9399064 | 7-scf00172 | 7 |
| AX-157754606 | 8 | 54.159 | KV452904.1 | 9399660 | 7-scf00172 | 7 |
| AX-158053797 | 8 | 54.159 | KV452904.1 | 9413412 | 7-scf00172 | 7 |
| AX-157856780 | 8 | 54.159 | KV452904.1 | 9437820 | 7-scf00172 | 7 |
| AX-158053808 | 8 | 54.159 | KV452904.1 | 9450764 | 7-scf00172 | 7 |
| AX-158053817 | 8 | 54.159 | KV452904.1 | 9460605 | 7-scf00172 | 7 |
| AX-158053824 | 8 | 54.159 | KV452904.1 | 9473188 | 7-scf00172 | 7 |
| AX-158053825 | 8 | 54.159 | KV452904.1 | 9475664 | 7-scf00172 | 7 |
| AX-158053827 | 8 | 54.159 | KV452904.1 | 9477628 | 7-scf00172 | 7 |
| AX-158053832 | 8 | 54.159 | KV452904.1 | 9482119 | 7-scf00172 | 7 |
| AX-158053835 | 8 | 54.159 | KV452904.1 | 9494747 | 7-scf00172 | 7 |
| AX-158053836 | 8 | 54.159 | KV452904.1 | 9495311 | 7-scf00172 | 7 |
| AX-158053838 | 8 | 54.159 | KV452904.1 | 9498013 | 7-scf00172 | 7 |
| AX-158053839 | 8 | 54.159 | KV452904.1 | 9498462 | 7-scf00172 | 7 |

|              |   |        |            |         |            |   |
|--------------|---|--------|------------|---------|------------|---|
| AX-158053847 | 8 | 54.159 | KV452904.1 | 9514037 | 7-scf00172 | 7 |
| AX-158053857 | 8 | 54.159 | KV452904.1 | 9534308 | 7-scf00172 | 7 |
| AX-158053863 | 8 | 54.159 | KV452904.1 | 9550576 | 7-scf00172 | 7 |
| AX-158053865 | 8 | 54.159 | KV452904.1 | 9555739 | 7-scf00172 | 7 |
| AX-157822949 | 8 | 54.159 | KV452904.1 | 9562310 | 7-scf00172 | 7 |
| AX-158053879 | 8 | 54.159 | KV452904.1 | 9573128 | 7-scf00172 | 7 |
| AX-158053881 | 8 | 54.159 | KV452904.1 | 9573815 | 7-scf00172 | 7 |
| AX-158053889 | 8 | 54.159 | KV452904.1 | 9579333 | 7-scf00172 | 7 |
| AX-158053891 | 8 | 54.159 | KV452904.1 | 9579715 | 7-scf00172 | 7 |
| AX-158053895 | 8 | 54.159 | KV452904.1 | 9581154 | 7-scf00172 | 7 |
| AX-158053896 | 8 | 54.159 | KV452904.1 | 9581373 | 7-scf00172 | 7 |
| AX-158053904 | 8 | 54.159 | KV452904.1 | 9589394 | 7-scf00172 | 7 |
| AX-158053907 | 8 | 54.159 | KV452904.1 | 9590307 | 7-scf00172 | 7 |
| AX-157822950 | 8 | 54.159 | KV452904.1 | 9592927 | 7-scf00172 | 7 |
| AX-158053921 | 8 | 54.159 | KV452904.1 | 9607816 | 7-scf00172 | 7 |
| AX-158053928 | 8 | 54.159 | KV452904.1 | 9612935 | 7-scf00172 | 7 |
| AX-158053953 | 8 | 54.159 | KV452904.1 | 9636746 | 7-scf00172 | 7 |
| AX-158053962 | 8 | 54.159 | KV452904.1 | 9654083 | 7-scf00172 | 7 |
| AX-158053973 | 8 | 54.159 | KV452904.1 | 9681447 | 7-scf00172 | 7 |
| AX-158053974 | 8 | 54.159 | KV452904.1 | 9686314 | 7-scf00172 | 7 |
| AX-158053978 | 8 | 54.159 | KV452904.1 | 9691744 | 7-scf00172 | 7 |
| AX-158053990 | 8 | 54.159 | KV452904.1 | 9713708 | 7-scf00172 | 7 |
| AX-158053993 | 8 | 54.159 | KV452904.1 | 9721480 | 7-scf00172 | 7 |
| AX-158053994 | 8 | 54.159 | KV452904.1 | 9721954 | 7-scf00172 | 7 |
| AX-158053998 | 8 | 54.159 | KV452904.1 | 9723777 | 7-scf00172 | 7 |
| AX-157723165 | 8 | 54.159 | KV452904.1 | 9724906 | 7-scf00172 | 7 |
| AX-158054000 | 8 | 54.159 | KV452904.1 | 9727190 | 7-scf00172 | 7 |
| AX-158054002 | 8 | 54.159 | KV452904.1 | 9727670 | 7-scf00172 | 7 |
| AX-158054004 | 8 | 54.159 | KV452904.1 | 9731892 | 7-scf00172 | 7 |
| AX-158054007 | 8 | 54.159 | KV452904.1 | 9733878 | 7-scf00172 | 7 |
| AX-157870636 | 8 | 54.159 | KV452904.1 | 9736270 | 7-scf00172 | 7 |
| AX-158054016 | 8 | 54.159 | KV452904.1 | 9742869 | 7-scf00172 | 7 |
| AX-158054017 | 8 | 54.159 | KV452904.1 | 9743685 | 7-scf00172 | 7 |
| AX-158054025 | 8 | 54.159 | KV452904.1 | 9751322 | 7-scf00172 | 7 |
| AX-158054030 | 8 | 54.159 | KV452904.1 | 9757200 | 7-scf00172 | 7 |
| AX-158054037 | 8 | 54.159 | KV452904.1 | 9762654 | 7-scf00172 | 7 |
| AX-158054040 | 8 | 54.159 | KV452904.1 | 9767655 | 7-scf00172 | 7 |
| AX-157822953 | 8 | 54.159 | KV452904.1 | 9784578 | 7-scf00172 | 7 |
| AX-157870654 | 8 | 54.159 | KV452904.1 | 9786727 | 7-scf00172 | 7 |
| AX-157729826 | 8 | 54.159 | KV452904.1 | 9791253 | 7-scf00172 | 7 |
| AX-158054048 | 8 | 54.159 | KV452904.1 | 9795460 | 7-scf00172 | 7 |
| AX-158054049 | 8 | 54.159 | KV452904.1 | 9796428 | 7-scf00172 | 7 |
| AX-158054050 | 8 | 54.159 | KV452904.1 | 9797308 | 7-scf00172 | 7 |
| AX-158054051 | 8 | 54.159 | KV452904.1 | 9803338 | 7-scf00172 | 7 |
| AX-157822955 | 8 | 54.159 | KV452904.1 | 9821196 | 7-scf00172 | 7 |
| AX-158054052 | 8 | 54.159 | KV452904.1 | 9826082 | 7-scf00172 | 7 |
| AX-158054054 | 8 | 54.159 | KV452904.1 | 9832081 | 7-scf00172 | 7 |
| AX-157822956 | 8 | 54.159 | KV452904.1 | 9832877 | 7-scf00172 | 7 |
| AX-157822957 | 8 | 54.159 | KV452904.1 | 9833184 | 7-scf00172 | 7 |
| AX-158054055 | 8 | 54.159 | KV452904.1 | 9833553 | 7-scf00172 | 7 |
| AX-158054056 | 8 | 54.159 | KV452904.1 | 9835604 | 7-scf00172 | 7 |

|              |   |        |            |          |            |   |
|--------------|---|--------|------------|----------|------------|---|
| AX-158054058 | 8 | 54.159 | KV452904.1 | 9839680  | 7-scf00172 | 7 |
| AX-158054059 | 8 | 54.159 | KV452904.1 | 9840143  | 7-scf00172 | 7 |
| AX-158391841 | 8 | 54.159 | KV452904.1 | 9840595  | 7-scf00172 | 7 |
| AX-158054061 | 8 | 54.159 | KV452904.1 | 9842891  | 7-scf00172 | 7 |
| AX-158054062 | 8 | 54.159 | KV452904.1 | 9843116  | 7-scf00172 | 7 |
| AX-157870658 | 8 | 54.159 | KV452904.1 | 9843876  | 7-scf00172 | 7 |
| AX-158054063 | 8 | 54.159 | KV452904.1 | 9844240  | 7-scf00172 | 7 |
| AX-158054067 | 8 | 54.159 | KV452904.1 | 9845929  | 7-scf00172 | 7 |
| AX-158054069 | 8 | 54.159 | KV452904.1 | 9849788  | 7-scf00172 | 7 |
| AX-158054071 | 8 | 54.159 | KV452904.1 | 9851422  | 7-scf00172 | 7 |
| AX-158054073 | 8 | 54.159 | KV452904.1 | 9852231  | 7-scf00172 | 7 |
| AX-158054074 | 8 | 54.159 | KV452904.1 | 9853076  | 7-scf00172 | 7 |
| AX-158054075 | 8 | 54.159 | KV452904.1 | 9853613  | 7-scf00172 | 7 |
| AX-158054077 | 8 | 54.159 | KV452904.1 | 9855087  | 7-scf00172 | 7 |
| AX-158054080 | 8 | 54.159 | KV452904.1 | 9856614  | 7-scf00172 | 7 |
| AX-158391842 | 8 | 54.159 | KV452904.1 | 9856972  | 7-scf00172 | 7 |
| AX-158054081 | 8 | 54.159 | KV452904.1 | 9857328  | 7-scf00172 | 7 |
| AX-158054082 | 8 | 54.159 | KV452904.1 | 9857858  | 7-scf00172 | 7 |
| AX-158054084 | 8 | 54.159 | KV452904.1 | 9858410  | 7-scf00172 | 7 |
| AX-158054087 | 8 | 54.159 | KV452904.1 | 9862187  | 7-scf00172 | 7 |
| AX-158054089 | 8 | 54.159 | KV452904.1 | 9862914  | 7-scf00172 | 7 |
| AX-158054092 | 8 | 54.159 | KV452904.1 | 9865326  | 7-scf00172 | 7 |
| AX-158054093 | 8 | 54.159 | KV452904.1 | 9866185  | 7-scf00172 | 7 |
| AX-158054094 | 8 | 54.159 | KV452904.1 | 9866553  | 7-scf00172 | 7 |
| AX-158054095 | 8 | 54.159 | KV452904.1 | 9867583  | 7-scf00172 | 7 |
| AX-158054097 | 8 | 54.159 | KV452904.1 | 9867974  | 7-scf00172 | 7 |
| AX-158054098 | 8 | 54.159 | KV452904.1 | 9868753  | 7-scf00172 | 7 |
| AX-158054101 | 8 | 54.159 | KV452904.1 | 9869242  | 7-scf00172 | 7 |
| AX-157822959 | 8 | 54.159 | KV452904.1 | 9869580  | 7-scf00172 | 7 |
| AX-158054103 | 8 | 54.159 | KV452904.1 | 9870737  | 7-scf00172 | 7 |
| AX-158054105 | 8 | 54.159 | KV452904.1 | 9871330  | 7-scf00172 | 7 |
| AX-158054106 | 8 | 54.159 | KV452904.1 | 9872279  | 7-scf00172 | 7 |
| AX-158054107 | 8 | 54.159 | KV452904.1 | 9873310  | 7-scf00172 | 7 |
| AX-158054108 | 8 | 54.159 | KV452904.1 | 9873906  | 7-scf00172 | 7 |
| AX-157822960 | 8 | 54.159 | KV452904.1 | 9874282  | 7-scf00172 | 7 |
| AX-158054109 | 8 | 54.159 | KV452904.1 | 9874905  | 7-scf00172 | 7 |
| AX-158054111 | 8 | 54.159 | KV452904.1 | 9877706  | 7-scf00172 | 7 |
| AX-157822961 | 8 | 54.159 | KV452904.1 | 9877970  | 7-scf00172 | 7 |
| AX-158054112 | 8 | 54.159 | KV452904.1 | 9878381  | 7-scf00172 | 7 |
| AX-158054115 | 8 | 54.159 | KV452904.1 | 9879403  | 7-scf00172 | 7 |
| AX-158054116 | 8 | 54.159 | KV452904.1 | 9879689  | 7-scf00172 | 7 |
| AX-158054118 | 8 | 54.159 | KV452904.1 | 9880298  | 7-scf00172 | 7 |
| AX-158054122 | 8 | 54.159 | KV452904.1 | 9880935  | 7-scf00172 | 7 |
| AX-158056228 | 8 | 54.159 | KV452904.1 | 12226976 | 7-scf00172 | 7 |
| AX-158378916 | 8 | 54.159 | KV452904.1 | 12237477 | 7-scf00172 | 7 |
| AX-157725729 | 8 | 54.159 | KV452904.1 | 13203097 | 7-scf00172 | 7 |
| AX-157752241 | 8 | 54.159 | KV452904.1 | 13215700 | 7-scf00172 | 7 |
| AX-158056914 | 8 | 54.159 | KV452904.1 | 13431871 | 7-scf00172 | 7 |
| AX-158056961 | 8 | 54.159 | KV452904.1 | 13543286 | 7-scf00172 | 7 |
| AX-158057576 | 8 | 54.159 | KV452904.1 | 15132619 | 7-scf00172 | 7 |
| AX-158057581 | 8 | 54.159 | KV452904.1 | 15140685 | 7-scf00172 | 7 |

|              |   |        |            |          |            |   |
|--------------|---|--------|------------|----------|------------|---|
| AX-158057714 | 8 | 54.159 | KV452904.1 | 15382009 | 7-scf00172 | 7 |
| AX-157823199 | 8 | 54.159 | KV452904.1 | 15888483 | 7-scf00172 | 7 |
| AX-158057989 | 8 | 54.159 | KV452904.1 | 15955124 | 7-scf00172 | 7 |
| AX-158058147 | 8 | 54.159 | KV452904.1 | 16259439 | 7-scf00172 | 7 |
| AX-158058150 | 8 | 54.159 | KV452904.1 | 16270364 | 7-scf00172 | 7 |
| AX-158058155 | 8 | 54.159 | KV452904.1 | 16281382 | 7-scf00172 | 7 |
| AX-158058164 | 8 | 54.159 | KV452904.1 | 16300170 | 7-scf00172 | 7 |
| AX-157713365 | 8 | 54.159 | KV452904.1 | 16422784 | 7-scf00172 | 7 |
| AX-157823216 | 8 | 54.159 | KV452904.1 | 16427576 | 7-scf00172 | 7 |
| AX-158058205 | 8 | 54.159 | KV452904.1 | 16462236 | 7-scf00172 | 7 |
| AX-158058256 | 8 | 54.159 | KV452904.1 | 16517660 | 7-scf00172 | 7 |
| AX-158058282 | 8 | 54.159 | KV452904.1 | 16554750 | 7-scf00172 | 7 |
| AX-158058292 | 8 | 54.159 | KV452904.1 | 16569228 | 7-scf00172 | 7 |
| AX-158058296 | 8 | 54.159 | KV452904.1 | 16575818 | 7-scf00172 | 7 |
| AX-158058304 | 8 | 54.159 | KV452904.1 | 16592248 | 7-scf00172 | 7 |
| AX-158058308 | 8 | 54.159 | KV452904.1 | 16594395 | 7-scf00172 | 7 |
| AX-158058310 | 8 | 54.159 | KV452904.1 | 16594735 | 7-scf00172 | 7 |
| AX-158058315 | 8 | 54.159 | KV452904.1 | 16597177 | 7-scf00172 | 7 |
| AX-158058362 | 8 | 54.159 | KV452904.1 | 16686885 | 7-scf00172 | 7 |
| AX-157699010 | 8 | 54.159 | KV452904.1 | 16694219 | 7-scf00172 | 7 |
| AX-158058366 | 8 | 54.159 | KV452904.1 | 16697535 | 7-scf00172 | 7 |
| AX-157823244 | 8 | 54.159 | KV452904.1 | 16804815 | 7-scf00172 | 7 |
| AX-157823245 | 8 | 54.159 | KV452904.1 | 16804989 | 7-scf00172 | 7 |
| AX-158391880 | 8 | 54.159 | KV452904.1 | 16874697 | 7-scf00172 | 7 |
| AX-158058478 | 8 | 54.159 | KV452904.1 | 16891627 | 7-scf00172 | 7 |
| AX-158058480 | 8 | 54.159 | KV452904.1 | 16893161 | 7-scf00172 | 7 |
| AX-157856853 | 8 | 54.159 | KV452904.1 | 16893613 | 7-scf00172 | 7 |
| AX-158058481 | 8 | 54.159 | KV452904.1 | 16894626 | 7-scf00172 | 7 |
| AX-158384118 | 8 | 54.159 | KV452904.1 | 16895053 | 7-scf00172 | 7 |
| AX-158058482 | 8 | 54.159 | KV452904.1 | 16895439 | 7-scf00172 | 7 |
| AX-157823254 | 8 | 54.159 | KV452904.1 | 16896143 | 7-scf00172 | 7 |
| AX-158058486 | 8 | 54.159 | KV452904.1 | 16896490 | 7-scf00172 | 7 |
| AX-157823255 | 8 | 54.159 | KV452904.1 | 16896693 | 7-scf00172 | 7 |
| AX-157856854 | 8 | 54.159 | KV452904.1 | 16897042 | 7-scf00172 | 7 |
| AX-158058487 | 8 | 54.159 | KV452904.1 | 16898420 | 7-scf00172 | 7 |
| AX-157856855 | 8 | 54.159 | KV452904.1 | 16899154 | 7-scf00172 | 7 |
| AX-158378974 | 8 | 54.159 | KV452904.1 | 16905058 | 7-scf00172 | 7 |
| AX-158058492 | 8 | 54.159 | KV452904.1 | 16905659 | 7-scf00172 | 7 |
| AX-157694841 | 8 | 54.159 | KV452904.1 | 16911313 | 7-scf00172 | 7 |
| AX-157856857 | 8 | 54.159 | KV452904.1 | 16912859 | 7-scf00172 | 7 |
| AX-158058513 | 8 | 54.159 | KV452904.1 | 16962100 | 7-scf00172 | 7 |
| AX-158058516 | 8 | 54.159 | KV452904.1 | 16965277 | 7-scf00172 | 7 |
| AX-158058521 | 8 | 54.159 | KV452904.1 | 16968494 | 7-scf00172 | 7 |
| AX-158058522 | 8 | 54.159 | KV452904.1 | 16970970 | 7-scf00172 | 7 |
| AX-158058524 | 8 | 54.159 | KV452904.1 | 16971224 | 7-scf00172 | 7 |
| AX-157856861 | 8 | 54.159 | KV452904.1 | 16976122 | 7-scf00172 | 7 |
| AX-158058531 | 8 | 54.159 | KV452904.1 | 16976759 | 7-scf00172 | 7 |
| AX-158058533 | 8 | 54.159 | KV452904.1 | 16984522 | 7-scf00172 | 7 |
| AX-158058537 | 8 | 54.159 | KV452904.1 | 16990432 | 7-scf00172 | 7 |
| AX-158058539 | 8 | 54.159 | KV452904.1 | 16991330 | 7-scf00172 | 7 |
| AX-158058737 | 8 | 54.159 | KV452906.1 | 2479     | 7-scf00174 | 7 |

|              |   |        |            |        |            |   |
|--------------|---|--------|------------|--------|------------|---|
| AX-158058739 | 8 | 54.159 | KV452906.1 | 4386   | 7-scf00174 | 7 |
| AX-158058741 | 8 | 54.159 | KV452906.1 | 4434   | 7-scf00174 | 7 |
| AX-157823273 | 8 | 54.159 | KV452906.1 | 8417   | 7-scf00174 | 7 |
| AX-158058743 | 8 | 54.159 | KV452906.1 | 9653   | 7-scf00174 | 7 |
| AX-158058745 | 8 | 54.159 | KV452906.1 | 10137  | 7-scf00174 | 7 |
| AX-157823274 | 8 | 54.159 | KV452906.1 | 10689  | 7-scf00174 | 7 |
| AX-158058747 | 8 | 54.159 | KV452906.1 | 10981  | 7-scf00174 | 7 |
| AX-157757062 | 8 | 54.159 | KV452906.1 | 11339  | 7-scf00174 | 7 |
| AX-158058748 | 8 | 54.159 | KV452906.1 | 13401  | 7-scf00174 | 7 |
| AX-157823275 | 8 | 54.159 | KV452906.1 | 16069  | 7-scf00174 | 7 |
| AX-157823276 | 8 | 54.159 | KV452906.1 | 16625  | 7-scf00174 | 7 |
| AX-158058749 | 8 | 54.159 | KV452906.1 | 16771  | 7-scf00174 | 7 |
| AX-157823277 | 8 | 54.159 | KV452906.1 | 16864  | 7-scf00174 | 7 |
| AX-158058750 | 8 | 54.159 | KV452906.1 | 17396  | 7-scf00174 | 7 |
| AX-157823278 | 8 | 54.159 | KV452906.1 | 19033  | 7-scf00174 | 7 |
| AX-158058751 | 8 | 54.159 | KV452906.1 | 19323  | 7-scf00174 | 7 |
| AX-157870682 | 8 | 54.159 | KV452906.1 | 20131  | 7-scf00174 | 7 |
| AX-158058752 | 8 | 54.159 | KV452906.1 | 21181  | 7-scf00174 | 7 |
| AX-158058755 | 8 | 54.159 | KV452906.1 | 22757  | 7-scf00174 | 7 |
| AX-158058758 | 8 | 54.159 | KV452906.1 | 29677  | 7-scf00174 | 7 |
| AX-157823280 | 8 | 54.159 | KV452906.1 | 30789  | 7-scf00174 | 7 |
| AX-158058759 | 8 | 54.159 | KV452906.1 | 31701  | 7-scf00174 | 7 |
| AX-158058761 | 8 | 54.159 | KV452906.1 | 32950  | 7-scf00174 | 7 |
| AX-158058762 | 8 | 54.159 | KV452906.1 | 36043  | 7-scf00174 | 7 |
| AX-158058763 | 8 | 54.159 | KV452906.1 | 36820  | 7-scf00174 | 7 |
| AX-157823282 | 8 | 54.159 | KV452906.1 | 38152  | 7-scf00174 | 7 |
| AX-157823283 | 8 | 54.159 | KV452906.1 | 40186  | 7-scf00174 | 7 |
| AX-158058765 | 8 | 54.159 | KV452906.1 | 41161  | 7-scf00174 | 7 |
| AX-158058768 | 8 | 54.159 | KV452906.1 | 44094  | 7-scf00174 | 7 |
| AX-158058770 | 8 | 54.159 | KV452906.1 | 45874  | 7-scf00174 | 7 |
| AX-157823284 | 8 | 54.159 | KV452906.1 | 51411  | 7-scf00174 | 7 |
| AX-158058773 | 8 | 54.159 | KV452906.1 | 52224  | 7-scf00174 | 7 |
| AX-158058774 | 8 | 54.159 | KV452906.1 | 54535  | 7-scf00174 | 7 |
| AX-158058775 | 8 | 54.159 | KV452906.1 | 56472  | 7-scf00174 | 7 |
| AX-158058776 | 8 | 54.159 | KV452906.1 | 58080  | 7-scf00174 | 7 |
| AX-158058777 | 8 | 54.159 | KV452906.1 | 58821  | 7-scf00174 | 7 |
| AX-158058778 | 8 | 54.159 | KV452906.1 | 59943  | 7-scf00174 | 7 |
| AX-158058785 | 8 | 54.159 | KV452906.1 | 67573  | 7-scf00174 | 7 |
| AX-158058786 | 8 | 54.159 | KV452906.1 | 67639  | 7-scf00174 | 7 |
| AX-157856866 | 8 | 54.159 | KV452906.1 | 68497  | 7-scf00174 | 7 |
| AX-158058788 | 8 | 54.159 | KV452906.1 | 69054  | 7-scf00174 | 7 |
| AX-157823285 | 8 | 54.159 | KV452906.1 | 69283  | 7-scf00174 | 7 |
| AX-157856867 | 8 | 54.159 | KV452906.1 | 70535  | 7-scf00174 | 7 |
| AX-157823286 | 8 | 54.159 | KV452906.1 | 71821  | 7-scf00174 | 7 |
| AX-158058797 | 8 | 54.159 | KV452906.1 | 82328  | 7-scf00174 | 7 |
| AX-158058798 | 8 | 54.159 | KV452906.1 | 83602  | 7-scf00174 | 7 |
| AX-158058830 | 8 | 54.159 | KV452906.1 | 107188 | 7-scf00174 | 7 |
| AX-158058832 | 8 | 54.159 | KV452906.1 | 110349 | 7-scf00174 | 7 |
| AX-158058848 | 8 | 54.159 | KV452906.1 | 125776 | 7-scf00174 | 7 |
| AX-158058864 | 8 | 54.159 | KV452906.1 | 145301 | 7-scf00174 | 7 |
| AX-158058878 | 8 | 54.159 | KV452906.1 | 160496 | 7-scf00174 | 7 |



|              |   |        |            |        |            |   |
|--------------|---|--------|------------|--------|------------|---|
| AX-158058879 | 8 | 54.159 | KV452906.1 | 162285 | 7-scf00174 | 7 |
| AX-157823296 | 8 | 54.159 | KV452905.1 | 2015   | 7-scf00175 | 7 |
| AX-158058892 | 8 | 54.159 | KV452905.1 | 9532   | 7-scf00175 | 7 |
| AX-157823300 | 8 | 54.159 | KV452905.1 | 14936  | 7-scf00175 | 7 |
| AX-158058893 | 8 | 54.159 | KV452905.1 | 17019  | 7-scf00175 | 7 |
| AX-158058896 | 8 | 54.159 | KV452905.1 | 22409  | 7-scf00175 | 7 |
| AX-158058900 | 8 | 54.159 | KV452905.1 | 35150  | 7-scf00175 | 7 |
| AX-158058904 | 8 | 54.159 | KV452905.1 | 48982  | 7-scf00175 | 7 |
| AX-157744895 | 8 | 54.159 | KV452905.1 | 58546  | 7-scf00175 | 7 |
| AX-157856871 | 8 | 54.159 | KV452905.1 | 66645  | 7-scf00175 | 7 |
| AX-158058914 | 8 | 54.159 | KV452905.1 | 67971  | 7-scf00175 | 7 |
| AX-158058917 | 8 | 54.159 | KV452905.1 | 68994  | 7-scf00175 | 7 |
| AX-157856872 | 8 | 54.159 | KV452905.1 | 70075  | 7-scf00175 | 7 |
| AX-158058921 | 8 | 54.159 | KV452905.1 | 71825  | 7-scf00175 | 7 |
| AX-158058925 | 8 | 54.159 | KV452905.1 | 77493  | 7-scf00175 | 7 |
| AX-157856874 | 8 | 54.159 | KV452905.1 | 78814  | 7-scf00175 | 7 |
| AX-157856875 | 8 | 54.159 | KV452905.1 | 81979  | 7-scf00175 | 7 |
| AX-158409106 | 8 | 54.159 | KV452905.1 | 88813  | 7-scf00175 | 7 |
| AX-157710759 | 8 | 54.159 | KV452905.1 | 90266  | 7-scf00175 | 7 |
| AX-158058933 | 8 | 54.159 | KV452905.1 | 92825  | 7-scf00175 | 7 |
| AX-157856876 | 8 | 54.159 | KV452905.1 | 94264  | 7-scf00175 | 7 |
| AX-158058936 | 8 | 54.159 | KV452905.1 | 99630  | 7-scf00175 | 7 |
| AX-157823303 | 8 | 54.159 | KV452905.1 | 107834 | 7-scf00175 | 7 |
| AX-158058940 | 8 | 54.159 | KV452905.1 | 108251 | 7-scf00175 | 7 |
| AX-158058944 | 8 | 54.159 | KV452905.1 | 120392 | 7-scf00175 | 7 |
| AX-157823304 | 8 | 54.159 | KV452905.1 | 136559 | 7-scf00175 | 7 |
| AX-157787206 | 8 | 54.159 | KV452905.1 | 138326 | 7-scf00175 | 7 |
| AX-157711015 | 8 | 54.159 | KV452905.1 | 138618 | 7-scf00175 | 7 |
| AX-157823305 | 8 | 54.159 | KV452905.1 | 143810 | 7-scf00175 | 7 |
| AX-158058955 | 8 | 54.159 | KV452905.1 | 146044 | 7-scf00175 | 7 |
| AX-158058956 | 8 | 54.159 | KV452905.1 | 146572 | 7-scf00175 | 7 |
| AX-158058958 | 8 | 54.159 | KV452905.1 | 151319 | 7-scf00175 | 7 |
| AX-158406630 | 8 | 54.159 | KV452905.1 | 152565 | 7-scf00175 | 7 |
| AX-158409114 | 8 | 54.159 | KV452905.1 | 156494 | 7-scf00175 | 7 |
| AX-158409115 | 8 | 54.159 | KV452905.1 | 156653 | 7-scf00175 | 7 |
| AX-158058959 | 8 | 54.159 | KV452905.1 | 157613 | 7-scf00175 | 7 |
| AX-158409117 | 8 | 54.159 | KV452905.1 | 157974 | 7-scf00175 | 7 |
| AX-158058967 | 8 | 54.159 | KV452905.1 | 165298 | 7-scf00175 | 7 |
| AX-158058968 | 8 | 54.159 | KV452905.1 | 165824 | 7-scf00175 | 7 |
| AX-158058971 | 8 | 54.159 | KV452905.1 | 168007 | 7-scf00175 | 7 |
| AX-157823306 | 8 | 54.159 | KV452905.1 | 168165 | 7-scf00175 | 7 |
| AX-158058973 | 8 | 54.159 | KV452905.1 | 170234 | 7-scf00175 | 7 |
| AX-157823307 | 8 | 54.159 | KV452905.1 | 171518 | 7-scf00175 | 7 |
| AX-157856878 | 8 | 54.159 | KV452905.1 | 174074 | 7-scf00175 | 7 |
| AX-158058979 | 8 | 54.159 | KV452905.1 | 179458 | 7-scf00175 | 7 |
| AX-158058980 | 8 | 54.159 | KV452905.1 | 180054 | 7-scf00175 | 7 |
| AX-158058981 | 8 | 54.159 | KV452905.1 | 181132 | 7-scf00175 | 7 |
| AX-158058984 | 8 | 54.159 | KV452905.1 | 186466 | 7-scf00175 | 7 |
| AX-158058985 | 8 | 54.159 | KV452905.1 | 189291 | 7-scf00175 | 7 |
| AX-158058987 | 8 | 54.159 | KV452905.1 | 190505 | 7-scf00175 | 7 |
| AX-158058988 | 8 | 54.159 | KV452905.1 | 190982 | 7-scf00175 | 7 |

|              |   |        |             |          |            |    |
|--------------|---|--------|-------------|----------|------------|----|
| AX-158058989 | 8 | 54.159 | KV452905.1  | 191571   | 7-scf00175 | 7  |
| AX-158058990 | 8 | 54.159 | KV452905.1  | 192400   | 7-scf00175 | 7  |
| AX-158058992 | 8 | 54.159 | KV452905.1  | 193208   | 7-scf00175 | 7  |
| AX-158058993 | 8 | 54.159 | KV452905.1  | 193935   | 7-scf00175 | 7  |
| AX-158058996 | 8 | 54.159 | KV452905.1  | 194601   | 7-scf00175 | 7  |
| AX-158058997 | 8 | 54.159 | KV452905.1  | 195390   | 7-scf00175 | 7  |
| AX-157823308 | 8 | 54.159 | KV452905.1  | 196403   | 7-scf00175 | 7  |
| AX-157706727 | 8 | 54.159 | 3ML01032807 | 449      | scf08437_1 | UN |
| AX-158052177 | 8 | 54.162 | KV452904.1  | 7156921  | 7-scf00172 | 7  |
| AX-157725540 | 8 | 54.162 | KV452904.1  | 8284493  | 7-scf00172 | 7  |
| AX-158053437 | 8 | 54.162 | KV452904.1  | 8915810  | 7-scf00172 | 7  |
| AX-158053829 | 8 | 54.162 | KV452904.1  | 9480799  | 7-scf00172 | 7  |
| AX-158053940 | 8 | 54.162 | KV452904.1  | 9623718  | 7-scf00172 | 7  |
| AX-158053979 | 8 | 54.162 | KV452904.1  | 9694041  | 7-scf00172 | 7  |
| AX-158054121 | 8 | 54.162 | KV452904.1  | 9880499  | 7-scf00172 | 7  |
| AX-158056101 | 8 | 54.162 | KV452904.1  | 12105378 | 7-scf00172 | 7  |
| AX-157741281 | 8 | 54.162 | KV452904.1  | 12115185 | 7-scf00172 | 7  |
| AX-158056133 | 8 | 54.162 | KV452904.1  | 12139625 | 7-scf00172 | 7  |
| AX-158056769 | 8 | 54.162 | KV452904.1  | 13095891 | 7-scf00172 | 7  |
| AX-157722981 | 8 | 54.162 | KV452904.1  | 13210117 | 7-scf00172 | 7  |
| AX-157707981 | 8 | 54.162 | KV452904.1  | 13219958 | 7-scf00172 | 7  |
| AX-158056960 | 8 | 54.162 | KV452904.1  | 13542859 | 7-scf00172 | 7  |
| AX-158056978 | 8 | 54.162 | KV452904.1  | 13593060 | 7-scf00172 | 7  |
| AX-157823217 | 8 | 54.162 | KV452904.1  | 16450094 | 7-scf00172 | 7  |
| AX-158058368 | 8 | 54.162 | KV452904.1  | 16704795 | 7-scf00172 | 7  |
| AX-158058441 | 8 | 54.162 | KV452904.1  | 16816596 | 7-scf00172 | 7  |
| AX-158058474 | 8 | 54.162 | KV452904.1  | 16881951 | 7-scf00172 | 7  |
| AX-158058850 | 8 | 54.162 | KV452906.1  | 127257   | 7-scf00174 | 7  |
| AX-158054665 | 8 | 56.209 | KV452904.1  | 10519035 | 7-scf00172 | 7  |
| AX-158055326 | 8 | 56.209 | KV452904.1  | 11130550 | 7-scf00172 | 7  |
| AX-158055352 | 8 | 56.209 | KV452904.1  | 11176691 | 7-scf00172 | 7  |
| AX-157823040 | 8 | 56.209 | KV452904.1  | 11227912 | 7-scf00172 | 7  |
| AX-158055390 | 8 | 56.209 | KV452904.1  | 11233373 | 7-scf00172 | 7  |
| AX-158055393 | 8 | 56.209 | KV452904.1  | 11237862 | 7-scf00172 | 7  |
| AX-158055394 | 8 | 56.209 | KV452904.1  | 11238919 | 7-scf00172 | 7  |
| AX-157876806 | 8 | 56.209 | KV452904.1  | 11243387 | 7-scf00172 | 7  |
| AX-158055402 | 8 | 56.209 | KV452904.1  | 11259703 | 7-scf00172 | 7  |
| AX-157823046 | 8 | 56.209 | KV452904.1  | 11364812 | 7-scf00172 | 7  |
| AX-158055675 | 8 | 56.209 | KV452904.1  | 11563653 | 7-scf00172 | 7  |
| AX-158055680 | 8 | 56.209 | KV452904.1  | 11564680 | 7-scf00172 | 7  |
| AX-158055828 | 8 | 56.209 | KV452904.1  | 11687567 | 7-scf00172 | 7  |
| AX-157698952 | 8 | 56.209 | KV452904.1  | 11696132 | 7-scf00172 | 7  |
| AX-158055969 | 8 | 56.209 | KV452904.1  | 11954729 | 7-scf00172 | 7  |
| AX-157823072 | 8 | 56.209 | KV452904.1  | 12005974 | 7-scf00172 | 7  |
| AX-158056044 | 8 | 56.209 | KV452904.1  | 12051378 | 7-scf00172 | 7  |
| AX-158378913 | 8 | 56.209 | KV452904.1  | 12192137 | 7-scf00172 | 7  |
| AX-157823084 | 8 | 56.209 | KV452904.1  | 12198677 | 7-scf00172 | 7  |
| AX-157822987 | 8 | 56.345 | KV452904.1  | 10203769 | 7-scf00172 | 7  |
| AX-158378877 | 8 | 56.345 | KV452904.1  | 11009118 | 7-scf00172 | 7  |
| AX-157885234 | 8 | 56.345 | KV452904.1  | 11159770 | 7-scf00172 | 7  |
| AX-157773086 | 8 | 56.345 | KV452904.1  | 11163699 | 7-scf00172 | 7  |

|              |   |        |            |          |            |   |
|--------------|---|--------|------------|----------|------------|---|
| AX-158055347 | 8 | 56.345 | KV452904.1 | 11164441 | 7-scf00172 | 7 |
| AX-158055354 | 8 | 56.345 | KV452904.1 | 11178071 | 7-scf00172 | 7 |
| AX-158055362 | 8 | 56.345 | KV452904.1 | 11191951 | 7-scf00172 | 7 |
| AX-158055363 | 8 | 56.345 | KV452904.1 | 11195899 | 7-scf00172 | 7 |
| AX-157823036 | 8 | 56.345 | KV452904.1 | 11206589 | 7-scf00172 | 7 |
| AX-158055374 | 8 | 56.345 | KV452904.1 | 11207074 | 7-scf00172 | 7 |
| AX-158055378 | 8 | 56.345 | KV452904.1 | 11216208 | 7-scf00172 | 7 |
| AX-158055384 | 8 | 56.345 | KV452904.1 | 11223400 | 7-scf00172 | 7 |
| AX-158055387 | 8 | 56.345 | KV452904.1 | 11226165 | 7-scf00172 | 7 |
| AX-158055388 | 8 | 56.345 | KV452904.1 | 11226523 | 7-scf00172 | 7 |
| AX-158055392 | 8 | 56.345 | KV452904.1 | 11236578 | 7-scf00172 | 7 |
| AX-158055396 | 8 | 56.345 | KV452904.1 | 11247338 | 7-scf00172 | 7 |
| AX-158055425 | 8 | 56.345 | KV452904.1 | 11289703 | 7-scf00172 | 7 |
| AX-158055439 | 8 | 56.345 | KV452904.1 | 11300581 | 7-scf00172 | 7 |
| AX-158055465 | 8 | 56.345 | KV452904.1 | 11335530 | 7-scf00172 | 7 |
| AX-158384095 | 8 | 56.345 | KV452904.1 | 11345109 | 7-scf00172 | 7 |
| AX-158378885 | 8 | 56.345 | KV452904.1 | 11345738 | 7-scf00172 | 7 |
| AX-158055487 | 8 | 56.345 | KV452904.1 | 11354006 | 7-scf00172 | 7 |
| AX-158055489 | 8 | 56.345 | KV452904.1 | 11356717 | 7-scf00172 | 7 |
| AX-158055493 | 8 | 56.345 | KV452904.1 | 11360119 | 7-scf00172 | 7 |
| AX-158055494 | 8 | 56.345 | KV452904.1 | 11360277 | 7-scf00172 | 7 |
| AX-158055500 | 8 | 56.345 | KV452904.1 | 11363840 | 7-scf00172 | 7 |
| AX-157823047 | 8 | 56.345 | KV452904.1 | 11365356 | 7-scf00172 | 7 |
| AX-158055502 | 8 | 56.345 | KV452904.1 | 11366195 | 7-scf00172 | 7 |
| AX-158055503 | 8 | 56.345 | KV452904.1 | 11366468 | 7-scf00172 | 7 |
| AX-158055512 | 8 | 56.345 | KV452904.1 | 11380193 | 7-scf00172 | 7 |
| AX-158055523 | 8 | 56.345 | KV452904.1 | 11394525 | 7-scf00172 | 7 |
| AX-158055526 | 8 | 56.345 | KV452904.1 | 11397440 | 7-scf00172 | 7 |
| AX-158055528 | 8 | 56.345 | KV452904.1 | 11399296 | 7-scf00172 | 7 |
| AX-158055529 | 8 | 56.345 | KV452904.1 | 11401311 | 7-scf00172 | 7 |
| AX-158055533 | 8 | 56.345 | KV452904.1 | 11402949 | 7-scf00172 | 7 |
| AX-157709167 | 8 | 56.345 | KV452904.1 | 11404472 | 7-scf00172 | 7 |
| AX-158055536 | 8 | 56.345 | KV452904.1 | 11405373 | 7-scf00172 | 7 |
| AX-158055537 | 8 | 56.345 | KV452904.1 | 11405850 | 7-scf00172 | 7 |
| AX-157856791 | 8 | 56.345 | KV452904.1 | 11406787 | 7-scf00172 | 7 |
| AX-157750263 | 8 | 56.345 | KV452904.1 | 11410344 | 7-scf00172 | 7 |
| AX-158055545 | 8 | 56.345 | KV452904.1 | 11417169 | 7-scf00172 | 7 |
| AX-158055547 | 8 | 56.345 | KV452904.1 | 11417586 | 7-scf00172 | 7 |
| AX-158055552 | 8 | 56.345 | KV452904.1 | 11421854 | 7-scf00172 | 7 |
| AX-157742895 | 8 | 56.345 | KV452904.1 | 11429173 | 7-scf00172 | 7 |
| AX-158378891 | 8 | 56.345 | KV452904.1 | 11443993 | 7-scf00172 | 7 |
| AX-157743719 | 8 | 56.345 | KV452904.1 | 11449822 | 7-scf00172 | 7 |
| AX-158055586 | 8 | 56.345 | KV452904.1 | 11453198 | 7-scf00172 | 7 |
| AX-157786814 | 8 | 56.345 | KV452904.1 | 11453421 | 7-scf00172 | 7 |
| AX-158055587 | 8 | 56.345 | KV452904.1 | 11453611 | 7-scf00172 | 7 |
| AX-158055588 | 8 | 56.345 | KV452904.1 | 11456132 | 7-scf00172 | 7 |
| AX-158055590 | 8 | 56.345 | KV452904.1 | 11458290 | 7-scf00172 | 7 |
| AX-158055591 | 8 | 56.345 | KV452904.1 | 11459442 | 7-scf00172 | 7 |
| AX-158055594 | 8 | 56.345 | KV452904.1 | 11460589 | 7-scf00172 | 7 |
| AX-158378893 | 8 | 56.345 | KV452904.1 | 11463259 | 7-scf00172 | 7 |
| AX-158055601 | 8 | 56.345 | KV452904.1 | 11475705 | 7-scf00172 | 7 |

|              |   |        |            |          |            |   |
|--------------|---|--------|------------|----------|------------|---|
| AX-157757960 | 8 | 56.345 | KV452904.1 | 11481471 | 7-scf00172 | 7 |
| AX-158055609 | 8 | 56.345 | KV452904.1 | 11483813 | 7-scf00172 | 7 |
| AX-157721240 | 8 | 56.345 | KV452904.1 | 11494458 | 7-scf00172 | 7 |
| AX-158055623 | 8 | 56.345 | KV452904.1 | 11497693 | 7-scf00172 | 7 |
| AX-158055627 | 8 | 56.345 | KV452904.1 | 11499222 | 7-scf00172 | 7 |
| AX-158055650 | 8 | 56.345 | KV452904.1 | 11534017 | 7-scf00172 | 7 |
| AX-158055656 | 8 | 56.345 | KV452904.1 | 11539347 | 7-scf00172 | 7 |
| AX-158055657 | 8 | 56.345 | KV452904.1 | 11540578 | 7-scf00172 | 7 |
| AX-157717594 | 8 | 56.345 | KV452904.1 | 11541665 | 7-scf00172 | 7 |
| AX-158055659 | 8 | 56.345 | KV452904.1 | 11544042 | 7-scf00172 | 7 |
| AX-158055661 | 8 | 56.345 | KV452904.1 | 11547447 | 7-scf00172 | 7 |
| AX-158055666 | 8 | 56.345 | KV452904.1 | 11555611 | 7-scf00172 | 7 |
| AX-158055674 | 8 | 56.345 | KV452904.1 | 11562436 | 7-scf00172 | 7 |
| AX-158409009 | 8 | 56.345 | KV452904.1 | 11565035 | 7-scf00172 | 7 |
| AX-158055690 | 8 | 56.345 | KV452904.1 | 11572117 | 7-scf00172 | 7 |
| AX-158055694 | 8 | 56.345 | KV452904.1 | 11574614 | 7-scf00172 | 7 |
| AX-158055695 | 8 | 56.345 | KV452904.1 | 11576054 | 7-scf00172 | 7 |
| AX-158055706 | 8 | 56.345 | KV452904.1 | 11586162 | 7-scf00172 | 7 |
| AX-158055710 | 8 | 56.345 | KV452904.1 | 11589439 | 7-scf00172 | 7 |
| AX-157885246 | 8 | 56.345 | KV452904.1 | 11601593 | 7-scf00172 | 7 |
| AX-158055720 | 8 | 56.345 | KV452904.1 | 11603792 | 7-scf00172 | 7 |
| AX-158055738 | 8 | 56.345 | KV452904.1 | 11618136 | 7-scf00172 | 7 |
| AX-158055739 | 8 | 56.345 | KV452904.1 | 11618194 | 7-scf00172 | 7 |
| AX-158055741 | 8 | 56.345 | KV452904.1 | 11618762 | 7-scf00172 | 7 |
| AX-157754051 | 8 | 56.345 | KV452904.1 | 11619400 | 7-scf00172 | 7 |
| AX-158055743 | 8 | 56.345 | KV452904.1 | 11621302 | 7-scf00172 | 7 |
| AX-158055750 | 8 | 56.345 | KV452904.1 | 11623096 | 7-scf00172 | 7 |
| AX-158055753 | 8 | 56.345 | KV452904.1 | 11625482 | 7-scf00172 | 7 |
| AX-158055754 | 8 | 56.345 | KV452904.1 | 11628061 | 7-scf00172 | 7 |
| AX-158055755 | 8 | 56.345 | KV452904.1 | 11628502 | 7-scf00172 | 7 |
| AX-158055759 | 8 | 56.345 | KV452904.1 | 11634168 | 7-scf00172 | 7 |
| AX-158055760 | 8 | 56.345 | KV452904.1 | 11634554 | 7-scf00172 | 7 |
| AX-158055765 | 8 | 56.345 | KV452904.1 | 11640271 | 7-scf00172 | 7 |
| AX-158055781 | 8 | 56.345 | KV452904.1 | 11652338 | 7-scf00172 | 7 |
| AX-158055786 | 8 | 56.345 | KV452904.1 | 11654739 | 7-scf00172 | 7 |
| AX-158055787 | 8 | 56.345 | KV452904.1 | 11655824 | 7-scf00172 | 7 |
| AX-158055790 | 8 | 56.345 | KV452904.1 | 11656634 | 7-scf00172 | 7 |
| AX-158055791 | 8 | 56.345 | KV452904.1 | 11657794 | 7-scf00172 | 7 |
| AX-158055792 | 8 | 56.345 | KV452904.1 | 11658159 | 7-scf00172 | 7 |
| AX-158055793 | 8 | 56.345 | KV452904.1 | 11658523 | 7-scf00172 | 7 |
| AX-157740041 | 8 | 56.345 | KV452904.1 | 11661746 | 7-scf00172 | 7 |
| AX-158055800 | 8 | 56.345 | KV452904.1 | 11663239 | 7-scf00172 | 7 |
| AX-158055803 | 8 | 56.345 | KV452904.1 | 11666117 | 7-scf00172 | 7 |
| AX-158055804 | 8 | 56.345 | KV452904.1 | 11666485 | 7-scf00172 | 7 |
| AX-157745854 | 8 | 56.345 | KV452904.1 | 11669436 | 7-scf00172 | 7 |
| AX-158055807 | 8 | 56.345 | KV452904.1 | 11670462 | 7-scf00172 | 7 |
| AX-158055809 | 8 | 56.345 | KV452904.1 | 11672024 | 7-scf00172 | 7 |
| AX-157823053 | 8 | 56.345 | KV452904.1 | 11706861 | 7-scf00172 | 7 |
| AX-158378899 | 8 | 56.345 | KV452904.1 | 11715276 | 7-scf00172 | 7 |
| AX-158055846 | 8 | 56.345 | KV452904.1 | 11718208 | 7-scf00172 | 7 |
| AX-158055847 | 8 | 56.345 | KV452904.1 | 11720131 | 7-scf00172 | 7 |

|              |   |        |            |          |                |    |
|--------------|---|--------|------------|----------|----------------|----|
| AX-158055849 | 8 | 56.345 | KV452904.1 | 11722796 | 7-scf00172     | 7  |
| AX-157823056 | 8 | 56.345 | KV452904.1 | 11751904 | 7-scf00172     | 7  |
| AX-158056004 | 8 | 56.345 | KV452904.1 | 11997048 | 7-scf00172     | 7  |
| AX-157715806 | 8 | 56.345 | KV452904.1 | 12012366 | 7-scf00172     | 7  |
| AX-158378907 | 8 | 56.345 | KV452904.1 | 12054478 | 7-scf00172     | 7  |
| AX-158056073 | 8 | 56.345 | KV452904.1 | 12085767 | 7-scf00172     | 7  |
| AX-158056088 | 8 | 56.345 | KV452904.1 | 12095641 | 7-scf00172     | 7  |
| AX-158409031 | 8 | 56.345 | KV452904.1 | 12102761 | 7-scf00172     | 7  |
| AX-158056218 | 8 | 56.345 | KV452904.1 | 12207136 | 7-scf00172     | 7  |
| AX-157710482 | 8 | 56.345 | KV452904.1 | 12213055 | 7-scf00172     | 7  |
| AX-158058945 | 8 | 56.345 | KV452905.1 | 123313   | 7-scf00175     | 7  |
| AX-158058949 | 8 | 56.345 | KV452905.1 | 129279   | 7-scf00175     | 7  |
| AX-157698971 | 8 | 56.345 | FI899041.1 | 803      | 4ORI212 lctalt | UN |
| AX-158384097 | 8 | 56.455 | KV452904.1 | 11360222 | 7-scf00172     | 7  |
| AX-158055549 | 8 | 56.455 | KV452904.1 | 11419763 | 7-scf00172     | 7  |
| AX-158055814 | 8 | 56.455 | KV452904.1 | 11675769 | 7-scf00172     | 7  |
| AX-157739114 | 8 | 56.455 | KV452904.1 | 11676868 | 7-scf00172     | 7  |
| AX-158055816 | 8 | 56.455 | KV452904.1 | 11677705 | 7-scf00172     | 7  |
| AX-158055826 | 8 | 56.455 | KV452904.1 | 11685936 | 7-scf00172     | 7  |
| AX-158055832 | 8 | 56.455 | KV452904.1 | 11689474 | 7-scf00172     | 7  |
| AX-158055833 | 8 | 56.455 | KV452904.1 | 11690400 | 7-scf00172     | 7  |
| AX-158055835 | 8 | 56.455 | KV452904.1 | 11691792 | 7-scf00172     | 7  |
| AX-158055839 | 8 | 56.455 | KV452904.1 | 11698847 | 7-scf00172     | 7  |
| AX-158055840 | 8 | 56.455 | KV452904.1 | 11700569 | 7-scf00172     | 7  |
| AX-158055841 | 8 | 56.455 | KV452904.1 | 11701659 | 7-scf00172     | 7  |
| AX-158378898 | 8 | 56.455 | KV452904.1 | 11704985 | 7-scf00172     | 7  |
| AX-158055855 | 8 | 56.455 | KV452904.1 | 11742829 | 7-scf00172     | 7  |
| AX-157724904 | 8 | 56.455 | KV452904.1 | 11748729 | 7-scf00172     | 7  |
| AX-157723947 | 8 | 56.455 | KV452904.1 | 11749923 | 7-scf00172     | 7  |
| AX-158055867 | 8 | 56.455 | KV452904.1 | 11770485 | 7-scf00172     | 7  |
| AX-158055870 | 8 | 56.455 | KV452904.1 | 11774998 | 7-scf00172     | 7  |
| AX-158055872 | 8 | 56.455 | KV452904.1 | 11778205 | 7-scf00172     | 7  |
| AX-157823096 | 8 | 56.455 | KV452904.1 | 12359408 | 7-scf00172     | 7  |
| AX-158054449 | 8 | 56.564 | KV452904.1 | 10294873 | 7-scf00172     | 7  |
| AX-158054769 | 8 | 56.564 | KV452904.1 | 10595830 | 7-scf00172     | 7  |
| AX-158054914 | 8 | 56.564 | KV452904.1 | 10724628 | 7-scf00172     | 7  |
| AX-158055089 | 8 | 56.564 | KV452904.1 | 10891612 | 7-scf00172     | 7  |
| AX-158391856 | 8 | 56.564 | KV452904.1 | 11039191 | 7-scf00172     | 7  |
| AX-158055260 | 8 | 56.564 | KV452904.1 | 11049178 | 7-scf00172     | 7  |
| AX-158055261 | 8 | 56.564 | KV452904.1 | 11051903 | 7-scf00172     | 7  |
| AX-158055272 | 8 | 56.564 | KV452904.1 | 11065630 | 7-scf00172     | 7  |
| AX-158055283 | 8 | 56.564 | KV452904.1 | 11083768 | 7-scf00172     | 7  |
| AX-158055284 | 8 | 56.564 | KV452904.1 | 11085368 | 7-scf00172     | 7  |
| AX-158055295 | 8 | 56.564 | KV452904.1 | 11095380 | 7-scf00172     | 7  |
| AX-158391857 | 8 | 56.564 | KV452904.1 | 11098587 | 7-scf00172     | 7  |
| AX-158055304 | 8 | 56.564 | KV452904.1 | 11102856 | 7-scf00172     | 7  |
| AX-157753768 | 8 | 56.564 | KV452904.1 | 11103486 | 7-scf00172     | 7  |
| AX-158055372 | 8 | 56.564 | KV452904.1 | 11205603 | 7-scf00172     | 7  |
| AX-157823039 | 8 | 56.564 | KV452904.1 | 11212607 | 7-scf00172     | 7  |
| AX-158055612 | 8 | 56.564 | KV452904.1 | 11486990 | 7-scf00172     | 7  |
| AX-158055683 | 8 | 56.564 | KV452904.1 | 11567456 | 7-scf00172     | 7  |

|              |   |        |            |          |            |   |
|--------------|---|--------|------------|----------|------------|---|
| AX-158055684 | 8 | 56.564 | KV452904.1 | 11567925 | 7-scf00172 | 7 |
| AX-158055922 | 8 | 56.564 | KV452904.1 | 11853874 | 7-scf00172 | 7 |
| AX-158055924 | 8 | 56.564 | KV452904.1 | 11887778 | 7-scf00172 | 7 |
| AX-158055926 | 8 | 56.564 | KV452904.1 | 11891472 | 7-scf00172 | 7 |
| AX-158055937 | 8 | 56.564 | KV452904.1 | 11912943 | 7-scf00172 | 7 |
| AX-157740062 | 8 | 56.564 | KV452904.1 | 11920098 | 7-scf00172 | 7 |
| AX-157823070 | 8 | 56.564 | KV452904.1 | 11933845 | 7-scf00172 | 7 |
| AX-157823071 | 8 | 56.564 | KV452904.1 | 11934144 | 7-scf00172 | 7 |
| AX-158055958 | 8 | 56.564 | KV452904.1 | 11944937 | 7-scf00172 | 7 |
| AX-158055961 | 8 | 56.564 | KV452904.1 | 11946372 | 7-scf00172 | 7 |
| AX-158056149 | 8 | 56.564 | KV452904.1 | 12150311 | 7-scf00172 | 7 |
| AX-158056226 | 8 | 56.564 | KV452904.1 | 12224288 | 7-scf00172 | 7 |
| AX-157822740 | 8 | 56.673 | KV452904.1 | 5485610  | 7-scf00172 | 7 |
| AX-158051073 | 8 | 56.673 | KV452904.1 | 5547870  | 7-scf00172 | 7 |
| AX-158051276 | 8 | 56.673 | KV452904.1 | 5834370  | 7-scf00172 | 7 |
| AX-158391800 | 8 | 56.673 | KV452904.1 | 5882209  | 7-scf00172 | 7 |
| AX-157822793 | 8 | 56.673 | KV452904.1 | 6014952  | 7-scf00172 | 7 |
| AX-158051477 | 8 | 56.673 | KV452904.1 | 6118153  | 7-scf00172 | 7 |
| AX-158051480 | 8 | 56.673 | KV452904.1 | 6120997  | 7-scf00172 | 7 |
| AX-158051481 | 8 | 56.673 | KV452904.1 | 6124059  | 7-scf00172 | 7 |
| AX-158051585 | 8 | 56.673 | KV452904.1 | 6238974  | 7-scf00172 | 7 |
| AX-158051586 | 8 | 56.673 | KV452904.1 | 6242560  | 7-scf00172 | 7 |
| AX-158051661 | 8 | 56.673 | KV452904.1 | 6360512  | 7-scf00172 | 7 |
| AX-158051674 | 8 | 56.673 | KV452904.1 | 6368486  | 7-scf00172 | 7 |
| AX-158051682 | 8 | 56.673 | KV452904.1 | 6374568  | 7-scf00172 | 7 |
| AX-158051730 | 8 | 56.673 | KV452904.1 | 6429189  | 7-scf00172 | 7 |
| AX-157822821 | 8 | 56.673 | KV452904.1 | 6431206  | 7-scf00172 | 7 |
| AX-158051930 | 8 | 56.673 | KV452904.1 | 6814206  | 7-scf00172 | 7 |
| AX-158052193 | 8 | 56.673 | KV452904.1 | 7192969  | 7-scf00172 | 7 |
| AX-157751486 | 8 | 56.673 | KV452904.1 | 7195828  | 7-scf00172 | 7 |
| AX-158052203 | 8 | 56.673 | KV452904.1 | 7224921  | 7-scf00172 | 7 |
| AX-158052207 | 8 | 56.673 | KV452904.1 | 7228953  | 7-scf00172 | 7 |
| AX-158052209 | 8 | 56.673 | KV452904.1 | 7229398  | 7-scf00172 | 7 |
| AX-158052210 | 8 | 56.673 | KV452904.1 | 7229568  | 7-scf00172 | 7 |
| AX-158052323 | 8 | 56.673 | KV452904.1 | 7365208  | 7-scf00172 | 7 |
| AX-158408899 | 8 | 56.673 | KV452904.1 | 7365520  | 7-scf00172 | 7 |
| AX-157822880 | 8 | 56.673 | KV452904.1 | 7795876  | 7-scf00172 | 7 |
| AX-158052902 | 8 | 56.673 | KV452904.1 | 8085413  | 7-scf00172 | 7 |
| AX-158052942 | 8 | 56.673 | KV452904.1 | 8134721  | 7-scf00172 | 7 |
| AX-158053765 | 8 | 56.673 | KV452904.1 | 9347374  | 7-scf00172 | 7 |
| AX-158055668 | 8 | 56.673 | KV452904.1 | 11556313 | 7-scf00172 | 7 |
| AX-158055702 | 8 | 56.673 | KV452904.1 | 11582554 | 7-scf00172 | 7 |
| AX-158055798 | 8 | 56.673 | KV452904.1 | 11660738 | 7-scf00172 | 7 |
| AX-158055801 | 8 | 56.673 | KV452904.1 | 11665608 | 7-scf00172 | 7 |
| AX-158055871 | 8 | 56.673 | KV452904.1 | 11777935 | 7-scf00172 | 7 |
| AX-158055970 | 8 | 56.673 | KV452904.1 | 11956879 | 7-scf00172 | 7 |
| AX-158055973 | 8 | 56.673 | KV452904.1 | 11960092 | 7-scf00172 | 7 |
| AX-158055979 | 8 | 56.673 | KV452904.1 | 11967297 | 7-scf00172 | 7 |
| AX-158055984 | 8 | 56.673 | KV452904.1 | 11977119 | 7-scf00172 | 7 |
| AX-157856806 | 8 | 56.673 | KV452904.1 | 11994945 | 7-scf00172 | 7 |
| AX-158056002 | 8 | 56.673 | KV452904.1 | 11995457 | 7-scf00172 | 7 |

|              |   |        |            |          |            |   |
|--------------|---|--------|------------|----------|------------|---|
| AX-158056003 | 8 | 56.673 | KV452904.1 | 11996236 | 7-scf00172 | 7 |
| AX-158056009 | 8 | 56.673 | KV452904.1 | 12002766 | 7-scf00172 | 7 |
| AX-158056018 | 8 | 56.673 | KV452904.1 | 12006789 | 7-scf00172 | 7 |
| AX-158056019 | 8 | 56.673 | KV452904.1 | 12007555 | 7-scf00172 | 7 |
| AX-158056023 | 8 | 56.673 | KV452904.1 | 12010172 | 7-scf00172 | 7 |
| AX-158378905 | 8 | 56.673 | KV452904.1 | 12012313 | 7-scf00172 | 7 |
| AX-158056040 | 8 | 56.673 | KV452904.1 | 12048732 | 7-scf00172 | 7 |
| AX-158056042 | 8 | 56.673 | KV452904.1 | 12050287 | 7-scf00172 | 7 |
| AX-158378908 | 8 | 56.673 | KV452904.1 | 12058969 | 7-scf00172 | 7 |
| AX-158056052 | 8 | 56.673 | KV452904.1 | 12062916 | 7-scf00172 | 7 |
| AX-158409023 | 8 | 56.673 | KV452904.1 | 12066441 | 7-scf00172 | 7 |
| AX-158409024 | 8 | 56.673 | KV452904.1 | 12066666 | 7-scf00172 | 7 |
| AX-158409025 | 8 | 56.673 | KV452904.1 | 12066914 | 7-scf00172 | 7 |
| AX-158409026 | 8 | 56.673 | KV452904.1 | 12067428 | 7-scf00172 | 7 |
| AX-158056060 | 8 | 56.673 | KV452904.1 | 12075146 | 7-scf00172 | 7 |
| AX-158056070 | 8 | 56.673 | KV452904.1 | 12083474 | 7-scf00172 | 7 |
| AX-158056096 | 8 | 56.673 | KV452904.1 | 12099386 | 7-scf00172 | 7 |
| AX-157823076 | 8 | 56.673 | KV452904.1 | 12103566 | 7-scf00172 | 7 |
| AX-158056105 | 8 | 56.673 | KV452904.1 | 12111307 | 7-scf00172 | 7 |
| AX-157713285 | 8 | 56.673 | KV452904.1 | 12120731 | 7-scf00172 | 7 |
| AX-158056115 | 8 | 56.673 | KV452904.1 | 12129408 | 7-scf00172 | 7 |
| AX-158056118 | 8 | 56.673 | KV452904.1 | 12130235 | 7-scf00172 | 7 |
| AX-157744939 | 8 | 56.673 | KV452904.1 | 12130813 | 7-scf00172 | 7 |
| AX-158056121 | 8 | 56.673 | KV452904.1 | 12130917 | 7-scf00172 | 7 |
| AX-158056124 | 8 | 56.673 | KV452904.1 | 12133641 | 7-scf00172 | 7 |
| AX-158056125 | 8 | 56.673 | KV452904.1 | 12135415 | 7-scf00172 | 7 |
| AX-158056132 | 8 | 56.673 | KV452904.1 | 12138081 | 7-scf00172 | 7 |
| AX-158378910 | 8 | 56.673 | KV452904.1 | 12153307 | 7-scf00172 | 7 |
| AX-158378911 | 8 | 56.673 | KV452904.1 | 12166076 | 7-scf00172 | 7 |
| AX-158056259 | 8 | 56.673 | KV452904.1 | 12267879 | 7-scf00172 | 7 |
| AX-158056322 | 8 | 56.673 | KV452904.1 | 12355425 | 7-scf00172 | 7 |
| AX-158056323 | 8 | 56.673 | KV452904.1 | 12356312 | 7-scf00172 | 7 |
| AX-157823097 | 8 | 56.673 | KV452904.1 | 12359518 | 7-scf00172 | 7 |
| AX-158056328 | 8 | 56.673 | KV452904.1 | 12359603 | 7-scf00172 | 7 |
| AX-157745423 | 8 | 56.673 | KV452904.1 | 12498292 | 7-scf00172 | 7 |
| AX-158056497 | 8 | 56.673 | KV452904.1 | 12644910 | 7-scf00172 | 7 |
| AX-158056549 | 8 | 56.673 | KV452904.1 | 12739615 | 7-scf00172 | 7 |
| AX-158056585 | 8 | 56.673 | KV452904.1 | 12829578 | 7-scf00172 | 7 |
| AX-158409052 | 8 | 56.673 | KV452904.1 | 12830748 | 7-scf00172 | 7 |
| AX-158056885 | 8 | 56.673 | KV452904.1 | 13342837 | 7-scf00172 | 7 |
| AX-158056932 | 8 | 56.673 | KV452904.1 | 13467929 | 7-scf00172 | 7 |
| AX-158056951 | 8 | 56.673 | KV452904.1 | 13520946 | 7-scf00172 | 7 |
| AX-158057419 | 8 | 56.673 | KV452904.1 | 14906123 | 7-scf00172 | 7 |
| AX-158378944 | 8 | 56.673 | KV452904.1 | 15095105 | 7-scf00172 | 7 |
| AX-158057618 | 8 | 56.673 | KV452904.1 | 15203182 | 7-scf00172 | 7 |
| AX-158057662 | 8 | 56.673 | KV452904.1 | 15277541 | 7-scf00172 | 7 |
| AX-157749193 | 8 | 56.673 | KV452904.1 | 15340803 | 7-scf00172 | 7 |
| AX-158058038 | 8 | 56.673 | KV452904.1 | 16037256 | 7-scf00172 | 7 |
| AX-158058048 | 8 | 56.673 | KV452904.1 | 16050323 | 7-scf00172 | 7 |
| AX-158058101 | 8 | 56.673 | KV452904.1 | 16146242 | 7-scf00172 | 7 |
| AX-158058281 | 8 | 56.673 | KV452904.1 | 16552918 | 7-scf00172 | 7 |

|              |   |        |            |          |            |   |
|--------------|---|--------|------------|----------|------------|---|
| AX-158056193 | 8 | 56.677 | KV452904.1 | 12186086 | 7-scf00172 | 7 |
| AX-157823081 | 8 | 56.714 | KV452904.1 | 12187825 | 7-scf00172 | 7 |
| AX-158378912 | 8 | 56.758 | KV452904.1 | 12188874 | 7-scf00172 | 7 |
| AX-158056216 | 8 | 56.782 | KV452904.1 | 12201768 | 7-scf00172 | 7 |
| AX-158056219 | 8 | 56.782 | KV452904.1 | 12207673 | 7-scf00172 | 7 |
| AX-157725819 | 8 | 56.892 | KV452904.1 | 12204485 | 7-scf00172 | 7 |
| AX-158056225 | 8 | 56.892 | KV452904.1 | 12219137 | 7-scf00172 | 7 |
| AX-158056227 | 8 | 56.892 | KV452904.1 | 12224856 | 7-scf00172 | 7 |
| AX-157720857 | 8 | 56.892 | KV452904.1 | 12225874 | 7-scf00172 | 7 |
| AX-158056235 | 8 | 56.892 | KV452904.1 | 12236378 | 7-scf00172 | 7 |
| AX-157752164 | 8 | 56.892 | KV452904.1 | 12242415 | 7-scf00172 | 7 |
| AX-158056240 | 8 | 56.892 | KV452904.1 | 12242998 | 7-scf00172 | 7 |
| AX-158056243 | 8 | 56.892 | KV452904.1 | 12244407 | 7-scf00172 | 7 |
| AX-158056244 | 8 | 56.892 | KV452904.1 | 12245938 | 7-scf00172 | 7 |
| AX-158409038 | 8 | 56.892 | KV452904.1 | 12246139 | 7-scf00172 | 7 |
| AX-158056245 | 8 | 56.892 | KV452904.1 | 12248601 | 7-scf00172 | 7 |
| AX-158056246 | 8 | 56.892 | KV452904.1 | 12249309 | 7-scf00172 | 7 |
| AX-157743819 | 8 | 56.892 | KV452904.1 | 12251573 | 7-scf00172 | 7 |
| AX-157745181 | 8 | 56.892 | KV452904.1 | 12253480 | 7-scf00172 | 7 |
| AX-158056249 | 8 | 56.892 | KV452904.1 | 12258939 | 7-scf00172 | 7 |
| AX-158056251 | 8 | 56.892 | KV452904.1 | 12260369 | 7-scf00172 | 7 |
| AX-158056253 | 8 | 56.892 | KV452904.1 | 12260882 | 7-scf00172 | 7 |
| AX-158056255 | 8 | 56.892 | KV452904.1 | 12262805 | 7-scf00172 | 7 |
| AX-158056256 | 8 | 56.892 | KV452904.1 | 12263253 | 7-scf00172 | 7 |
| AX-157752447 | 8 | 56.892 | KV452904.1 | 12264201 | 7-scf00172 | 7 |
| AX-157823088 | 8 | 56.892 | KV452904.1 | 12265663 | 7-scf00172 | 7 |
| AX-158056278 | 8 | 56.892 | KV452904.1 | 12296208 | 7-scf00172 | 7 |
| AX-158056309 | 8 | 56.892 | KV452904.1 | 12343639 | 7-scf00172 | 7 |
| AX-158056395 | 8 | 56.892 | KV452904.1 | 12447431 | 7-scf00172 | 7 |
| AX-157823108 | 8 | 56.892 | KV452904.1 | 12506906 | 7-scf00172 | 7 |
| AX-158056423 | 8 | 56.892 | KV452904.1 | 12511758 | 7-scf00172 | 7 |
| AX-158056434 | 8 | 56.892 | KV452904.1 | 12525705 | 7-scf00172 | 7 |
| AX-158056448 | 8 | 56.892 | KV452904.1 | 12565357 | 7-scf00172 | 7 |
| AX-158056489 | 8 | 56.892 | KV452904.1 | 12639684 | 7-scf00172 | 7 |
| AX-157751753 | 8 | 57.001 | KV452904.1 | 6441906  | 7-scf00172 | 7 |
| AX-158052262 | 8 | 57.001 | KV452904.1 | 7299474  | 7-scf00172 | 7 |
| AX-157758581 | 8 | 57.001 | KV452904.1 | 9213045  | 7-scf00172 | 7 |
| AX-158053801 | 8 | 57.001 | KV452904.1 | 9438099  | 7-scf00172 | 7 |
| AX-158053818 | 8 | 57.001 | KV452904.1 | 9462485  | 7-scf00172 | 7 |
| AX-158408946 | 8 | 57.001 | KV452904.1 | 9509547  | 7-scf00172 | 7 |
| AX-158054401 | 8 | 57.001 | KV452904.1 | 10259746 | 7-scf00172 | 7 |
| AX-158054418 | 8 | 57.001 | KV452904.1 | 10275263 | 7-scf00172 | 7 |
| AX-158055182 | 8 | 57.001 | KV452904.1 | 10969070 | 7-scf00172 | 7 |
| AX-158055224 | 8 | 57.001 | KV452904.1 | 11013199 | 7-scf00172 | 7 |
| AX-158378879 | 8 | 57.001 | KV452904.1 | 11022010 | 7-scf00172 | 7 |
| AX-157755940 | 8 | 57.001 | KV452904.1 | 11121469 | 7-scf00172 | 7 |
| AX-158055350 | 8 | 57.001 | KV452904.1 | 11171817 | 7-scf00172 | 7 |
| AX-158055411 | 8 | 57.001 | KV452904.1 | 11270236 | 7-scf00172 | 7 |
| AX-158055440 | 8 | 57.001 | KV452904.1 | 11301545 | 7-scf00172 | 7 |
| AX-158055444 | 8 | 57.001 | KV452904.1 | 11309245 | 7-scf00172 | 7 |
| AX-158055480 | 8 | 57.001 | KV452904.1 | 11348156 | 7-scf00172 | 7 |



|              |   |        |            |          |            |   |
|--------------|---|--------|------------|----------|------------|---|
| AX-158055516 | 8 | 57.001 | KV452904.1 | 11383774 | 7-scf00172 | 7 |
| AX-158055560 | 8 | 57.001 | KV452904.1 | 11429617 | 7-scf00172 | 7 |
| AX-157856799 | 8 | 57.001 | KV452904.1 | 11497128 | 7-scf00172 | 7 |
| AX-158055663 | 8 | 57.001 | KV452904.1 | 11551350 | 7-scf00172 | 7 |
| AX-158055756 | 8 | 57.001 | KV452904.1 | 11629932 | 7-scf00172 | 7 |
| AX-158055770 | 8 | 57.001 | KV452904.1 | 11642519 | 7-scf00172 | 7 |
| AX-158055775 | 8 | 57.001 | KV452904.1 | 11646634 | 7-scf00172 | 7 |
| AX-158055784 | 8 | 57.001 | KV452904.1 | 11654103 | 7-scf00172 | 7 |
| AX-158055821 | 8 | 57.001 | KV452904.1 | 11681032 | 7-scf00172 | 7 |
| AX-157717032 | 8 | 57.001 | KV452904.1 | 11732878 | 7-scf00172 | 7 |
| AX-158056025 | 8 | 57.001 | KV452904.1 | 12011551 | 7-scf00172 | 7 |
| AX-158378909 | 8 | 57.001 | KV452904.1 | 12110581 | 7-scf00172 | 7 |
| AX-158056155 | 8 | 57.001 | KV452904.1 | 12153501 | 7-scf00172 | 7 |
| AX-158056234 | 8 | 57.001 | KV452904.1 | 12234797 | 7-scf00172 | 7 |
| AX-157725676 | 8 | 57.001 | KV452904.1 | 12277169 | 7-scf00172 | 7 |
| AX-157865536 | 8 | 57.001 | KV452904.1 | 12279276 | 7-scf00172 | 7 |
| AX-158056275 | 8 | 57.001 | KV452904.1 | 12284640 | 7-scf00172 | 7 |
| AX-158056277 | 8 | 57.001 | KV452904.1 | 12286886 | 7-scf00172 | 7 |
| AX-158056279 | 8 | 57.001 | KV452904.1 | 12296925 | 7-scf00172 | 7 |
| AX-158056285 | 8 | 57.001 | KV452904.1 | 12303357 | 7-scf00172 | 7 |
| AX-158056286 | 8 | 57.001 | KV452904.1 | 12304714 | 7-scf00172 | 7 |
| AX-158056290 | 8 | 57.001 | KV452904.1 | 12311793 | 7-scf00172 | 7 |
| AX-158056293 | 8 | 57.001 | KV452904.1 | 12317447 | 7-scf00172 | 7 |
| AX-158056294 | 8 | 57.001 | KV452904.1 | 12317935 | 7-scf00172 | 7 |
| AX-158056300 | 8 | 57.001 | KV452904.1 | 12321050 | 7-scf00172 | 7 |
| AX-158056305 | 8 | 57.001 | KV452904.1 | 12325986 | 7-scf00172 | 7 |
| AX-157823093 | 8 | 57.001 | KV452904.1 | 12330697 | 7-scf00172 | 7 |
| AX-157747019 | 8 | 57.001 | KV452904.1 | 12330842 | 7-scf00172 | 7 |
| AX-157759083 | 8 | 57.001 | KV452904.1 | 12331821 | 7-scf00172 | 7 |
| AX-158056306 | 8 | 57.001 | KV452904.1 | 12333008 | 7-scf00172 | 7 |
| AX-157714912 | 8 | 57.001 | KV452904.1 | 12343939 | 7-scf00172 | 7 |
| AX-158056311 | 8 | 57.001 | KV452904.1 | 12345201 | 7-scf00172 | 7 |
| AX-158056312 | 8 | 57.001 | KV452904.1 | 12346637 | 7-scf00172 | 7 |
| AX-158056325 | 8 | 57.001 | KV452904.1 | 12357332 | 7-scf00172 | 7 |
| AX-158056330 | 8 | 57.001 | KV452904.1 | 12360832 | 7-scf00172 | 7 |
| AX-158056332 | 8 | 57.001 | KV452904.1 | 12363024 | 7-scf00172 | 7 |
| AX-158056333 | 8 | 57.001 | KV452904.1 | 12364131 | 7-scf00172 | 7 |
| AX-158056335 | 8 | 57.001 | KV452904.1 | 12370417 | 7-scf00172 | 7 |
| AX-158056341 | 8 | 57.001 | KV452904.1 | 12380024 | 7-scf00172 | 7 |
| AX-157741199 | 8 | 57.001 | KV452904.1 | 12391740 | 7-scf00172 | 7 |
| AX-158378919 | 8 | 57.001 | KV452904.1 | 12392866 | 7-scf00172 | 7 |
| AX-158378920 | 8 | 57.001 | KV452904.1 | 12392990 | 7-scf00172 | 7 |
| AX-158056344 | 8 | 57.001 | KV452904.1 | 12393143 | 7-scf00172 | 7 |
| AX-158056345 | 8 | 57.001 | KV452904.1 | 12393690 | 7-scf00172 | 7 |
| AX-158056347 | 8 | 57.001 | KV452904.1 | 12396652 | 7-scf00172 | 7 |
| AX-157823100 | 8 | 57.001 | KV452904.1 | 12396874 | 7-scf00172 | 7 |
| AX-158056351 | 8 | 57.001 | KV452904.1 | 12398352 | 7-scf00172 | 7 |
| AX-158056355 | 8 | 57.001 | KV452904.1 | 12404780 | 7-scf00172 | 7 |
| AX-158056356 | 8 | 57.001 | KV452904.1 | 12405770 | 7-scf00172 | 7 |
| AX-158056358 | 8 | 57.001 | KV452904.1 | 12406324 | 7-scf00172 | 7 |
| AX-158056359 | 8 | 57.001 | KV452904.1 | 12409410 | 7-scf00172 | 7 |

|              |   |        |            |          |            |   |
|--------------|---|--------|------------|----------|------------|---|
| AX-157823102 | 8 | 57.001 | KV452904.1 | 12410336 | 7-scf00172 | 7 |
| AX-158056363 | 8 | 57.001 | KV452904.1 | 12411619 | 7-scf00172 | 7 |
| AX-158056364 | 8 | 57.001 | KV452904.1 | 12412199 | 7-scf00172 | 7 |
| AX-158056365 | 8 | 57.001 | KV452904.1 | 12412784 | 7-scf00172 | 7 |
| AX-157823103 | 8 | 57.001 | KV452904.1 | 12415185 | 7-scf00172 | 7 |
| AX-157823104 | 8 | 57.001 | KV452904.1 | 12416317 | 7-scf00172 | 7 |
| AX-158056369 | 8 | 57.001 | KV452904.1 | 12417470 | 7-scf00172 | 7 |
| AX-158056371 | 8 | 57.001 | KV452904.1 | 12418078 | 7-scf00172 | 7 |
| AX-158056373 | 8 | 57.001 | KV452904.1 | 12419065 | 7-scf00172 | 7 |
| AX-158056374 | 8 | 57.001 | KV452904.1 | 12420618 | 7-scf00172 | 7 |
| AX-158056376 | 8 | 57.001 | KV452904.1 | 12423051 | 7-scf00172 | 7 |
| AX-157714576 | 8 | 57.001 | KV452904.1 | 12430473 | 7-scf00172 | 7 |
| AX-158056387 | 8 | 57.001 | KV452904.1 | 12439926 | 7-scf00172 | 7 |
| AX-158056388 | 8 | 57.001 | KV452904.1 | 12440442 | 7-scf00172 | 7 |
| AX-158056389 | 8 | 57.001 | KV452904.1 | 12441201 | 7-scf00172 | 7 |
| AX-158056392 | 8 | 57.001 | KV452904.1 | 12444728 | 7-scf00172 | 7 |
| AX-158056393 | 8 | 57.001 | KV452904.1 | 12445504 | 7-scf00172 | 7 |
| AX-157823106 | 8 | 57.001 | KV452904.1 | 12446108 | 7-scf00172 | 7 |
| AX-158056396 | 8 | 57.001 | KV452904.1 | 12451211 | 7-scf00172 | 7 |
| AX-158056399 | 8 | 57.001 | KV452904.1 | 12460025 | 7-scf00172 | 7 |
| AX-158056404 | 8 | 57.001 | KV452904.1 | 12471970 | 7-scf00172 | 7 |
| AX-157823107 | 8 | 57.001 | KV452904.1 | 12472171 | 7-scf00172 | 7 |
| AX-158056409 | 8 | 57.001 | KV452904.1 | 12480753 | 7-scf00172 | 7 |
| AX-158056410 | 8 | 57.001 | KV452904.1 | 12481831 | 7-scf00172 | 7 |
| AX-158056411 | 8 | 57.001 | KV452904.1 | 12484019 | 7-scf00172 | 7 |
| AX-158056412 | 8 | 57.001 | KV452904.1 | 12489683 | 7-scf00172 | 7 |
| AX-158056413 | 8 | 57.001 | KV452904.1 | 12499492 | 7-scf00172 | 7 |
| AX-158056414 | 8 | 57.001 | KV452904.1 | 12500439 | 7-scf00172 | 7 |
| AX-158056417 | 8 | 57.001 | KV452904.1 | 12503832 | 7-scf00172 | 7 |
| AX-158056418 | 8 | 57.001 | KV452904.1 | 12507640 | 7-scf00172 | 7 |
| AX-158056420 | 8 | 57.001 | KV452904.1 | 12508214 | 7-scf00172 | 7 |
| AX-158056421 | 8 | 57.001 | KV452904.1 | 12509913 | 7-scf00172 | 7 |
| AX-158056425 | 8 | 57.001 | KV452904.1 | 12514241 | 7-scf00172 | 7 |
| AX-158056428 | 8 | 57.001 | KV452904.1 | 12517233 | 7-scf00172 | 7 |
| AX-158056436 | 8 | 57.001 | KV452904.1 | 12527725 | 7-scf00172 | 7 |
| AX-158056440 | 8 | 57.001 | KV452904.1 | 12530935 | 7-scf00172 | 7 |
| AX-157744635 | 8 | 57.001 | KV452904.1 | 12544196 | 7-scf00172 | 7 |
| AX-158056449 | 8 | 57.001 | KV452904.1 | 12566689 | 7-scf00172 | 7 |
| AX-158056465 | 8 | 57.001 | KV452904.1 | 12600275 | 7-scf00172 | 7 |
| AX-158056472 | 8 | 57.001 | KV452904.1 | 12614307 | 7-scf00172 | 7 |
| AX-158056475 | 8 | 57.001 | KV452904.1 | 12617822 | 7-scf00172 | 7 |
| AX-158056482 | 8 | 57.001 | KV452904.1 | 12629684 | 7-scf00172 | 7 |
| AX-158056487 | 8 | 57.001 | KV452904.1 | 12633330 | 7-scf00172 | 7 |
| AX-158056506 | 8 | 57.001 | KV452904.1 | 12659030 | 7-scf00172 | 7 |
| AX-158056509 | 8 | 57.001 | KV452904.1 | 12663388 | 7-scf00172 | 7 |
| AX-158056514 | 8 | 57.001 | KV452904.1 | 12673783 | 7-scf00172 | 7 |
| AX-158056515 | 8 | 57.001 | KV452904.1 | 12675056 | 7-scf00172 | 7 |
| AX-158056522 | 8 | 57.001 | KV452904.1 | 12700398 | 7-scf00172 | 7 |
| AX-158056526 | 8 | 57.001 | KV452904.1 | 12712802 | 7-scf00172 | 7 |
| AX-157753559 | 8 | 57.001 | KV452904.1 | 12745096 | 7-scf00172 | 7 |
| AX-157744523 | 8 | 57.001 | KV452904.1 | 12774830 | 7-scf00172 | 7 |

|              |   |        |            |          |            |   |
|--------------|---|--------|------------|----------|------------|---|
| AX-158056554 | 8 | 57.001 | KV452904.1 | 12775444 | 7-scf00172 | 7 |
| AX-158056573 | 8 | 57.001 | KV452904.1 | 12805429 | 7-scf00172 | 7 |
| AX-158056577 | 8 | 57.001 | KV452904.1 | 12818161 | 7-scf00172 | 7 |
| AX-158384105 | 8 | 57.001 | KV452904.1 | 12826454 | 7-scf00172 | 7 |
| AX-157823127 | 8 | 57.001 | KV452904.1 | 12909760 | 7-scf00172 | 7 |
| AX-158056703 | 8 | 57.001 | KV452904.1 | 12969034 | 7-scf00172 | 7 |
| AX-158056712 | 8 | 57.001 | KV452904.1 | 12987603 | 7-scf00172 | 7 |
| AX-158056736 | 8 | 57.001 | KV452904.1 | 13020395 | 7-scf00172 | 7 |
| AX-157876858 | 8 | 57.001 | KV452904.1 | 13093248 | 7-scf00172 | 7 |
| AX-158056779 | 8 | 57.001 | KV452904.1 | 13155793 | 7-scf00172 | 7 |
| AX-158056790 | 8 | 57.001 | KV452904.1 | 13178491 | 7-scf00172 | 7 |
| AX-158056794 | 8 | 57.001 | KV452904.1 | 13181872 | 7-scf00172 | 7 |
| AX-157876861 | 8 | 57.001 | KV452904.1 | 13198545 | 7-scf00172 | 7 |
| AX-158056812 | 8 | 57.001 | KV452904.1 | 13199638 | 7-scf00172 | 7 |
| AX-157823140 | 8 | 57.001 | KV452904.1 | 13427607 | 7-scf00172 | 7 |
| AX-158056917 | 8 | 57.001 | KV452904.1 | 13439477 | 7-scf00172 | 7 |
| AX-157752519 | 8 | 57.001 | KV452904.1 | 13535996 | 7-scf00172 | 7 |
| AX-157865542 | 8 | 57.001 | KV452904.1 | 13634724 | 7-scf00172 | 7 |
| AX-157823147 | 8 | 57.001 | KV452904.1 | 13654749 | 7-scf00172 | 7 |
| AX-158057024 | 8 | 57.001 | KV452904.1 | 13700584 | 7-scf00172 | 7 |
| AX-157726665 | 8 | 57.001 | KV452904.1 | 13701554 | 7-scf00172 | 7 |
| AX-158057367 | 8 | 57.001 | KV452904.1 | 14711068 | 7-scf00172 | 7 |
| AX-158057380 | 8 | 57.001 | KV452904.1 | 14759695 | 7-scf00172 | 7 |
| AX-158409069 | 8 | 57.001 | KV452904.1 | 14957400 | 7-scf00172 | 7 |
| AX-158057464 | 8 | 57.001 | KV452904.1 | 14967553 | 7-scf00172 | 7 |
| AX-158057487 | 8 | 57.001 | KV452904.1 | 14998811 | 7-scf00172 | 7 |
| AX-158057540 | 8 | 57.001 | KV452904.1 | 15086931 | 7-scf00172 | 7 |
| AX-157865546 | 8 | 57.001 | KV452904.1 | 15098495 | 7-scf00172 | 7 |
| AX-158057566 | 8 | 57.001 | KV452904.1 | 15119779 | 7-scf00172 | 7 |
| AX-158057604 | 8 | 57.001 | KV452904.1 | 15169398 | 7-scf00172 | 7 |
| AX-158057630 | 8 | 57.001 | KV452904.1 | 15220077 | 7-scf00172 | 7 |
| AX-158057646 | 8 | 57.001 | KV452904.1 | 15255685 | 7-scf00172 | 7 |
| AX-158057818 | 8 | 57.001 | KV452904.1 | 15634730 | 7-scf00172 | 7 |
| AX-157733840 | 8 | 57.001 | KV452904.1 | 15761190 | 7-scf00172 | 7 |
| AX-157741269 | 8 | 57.001 | KV452904.1 | 15767202 | 7-scf00172 | 7 |
| AX-157823200 | 8 | 57.001 | KV452904.1 | 15895923 | 7-scf00172 | 7 |
| AX-158057984 | 8 | 57.001 | KV452904.1 | 15937233 | 7-scf00172 | 7 |
| AX-157703239 | 8 | 57.001 | KV452904.1 | 16160429 | 7-scf00172 | 7 |
| AX-158058251 | 8 | 57.001 | KV452904.1 | 16509621 | 7-scf00172 | 7 |
| AX-158058262 | 8 | 57.001 | KV452904.1 | 16525900 | 7-scf00172 | 7 |
| AX-158058301 | 8 | 57.001 | KV452904.1 | 16588160 | 7-scf00172 | 7 |
| AX-158053739 | 8 | 57.039 | KV452904.1 | 9314565  | 7-scf00172 | 7 |
| AX-158055210 | 8 | 57.039 | KV452904.1 | 11002086 | 7-scf00172 | 7 |
| AX-158056026 | 8 | 57.039 | KV452904.1 | 12012979 | 7-scf00172 | 7 |
| AX-158056375 | 8 | 57.039 | KV452904.1 | 12422817 | 7-scf00172 | 7 |
| AX-158056457 | 8 | 57.039 | KV452904.1 | 12588542 | 7-scf00172 | 7 |
| AX-158056499 | 8 | 57.039 | KV452904.1 | 12649832 | 7-scf00172 | 7 |
| AX-158056524 | 8 | 57.039 | KV452904.1 | 12700859 | 7-scf00172 | 7 |
| AX-158056122 | 8 | 57.056 | KV452904.1 | 12131262 | 7-scf00172 | 7 |
| AX-158056222 | 8 | 57.056 | KV452904.1 | 12212414 | 7-scf00172 | 7 |
| AX-158056433 | 8 | 57.056 | KV452904.1 | 12520052 | 7-scf00172 | 7 |

|              |   |        |             |          |            |    |
|--------------|---|--------|-------------|----------|------------|----|
| AX-158056437 | 8 | 57.056 | KV452904.1  | 12530420 | 7-scf00172 | 7  |
| AX-158056438 | 8 | 57.056 | KV452904.1  | 12530650 | 7-scf00172 | 7  |
| AX-158056516 | 8 | 57.056 | KV452904.1  | 12680300 | 7-scf00172 | 7  |
| AX-158051577 | 8 | 57.11  | KV452904.1  | 6234283  | 7-scf00172 | 7  |
| AX-157757683 | 8 | 57.11  | KV452904.1  | 6563201  | 7-scf00172 | 7  |
| AX-157745666 | 8 | 57.11  | KV452904.1  | 8967868  | 7-scf00172 | 7  |
| AX-158053533 | 8 | 57.11  | KV452904.1  | 9052905  | 7-scf00172 | 7  |
| AX-158053706 | 8 | 57.11  | KV452904.1  | 9265728  | 7-scf00172 | 7  |
| AX-158053828 | 8 | 57.11  | KV452904.1  | 9480304  | 7-scf00172 | 7  |
| AX-158053833 | 8 | 57.11  | KV452904.1  | 9493302  | 7-scf00172 | 7  |
| AX-158056014 | 8 | 57.11  | KV452904.1  | 12004569 | 7-scf00172 | 7  |
| AX-158056171 | 8 | 57.11  | KV452904.1  | 12173679 | 7-scf00172 | 7  |
| AX-158056460 | 8 | 57.11  | KV452904.1  | 12593743 | 7-scf00172 | 7  |
| AX-158056480 | 8 | 57.11  | KV452904.1  | 12623781 | 7-scf00172 | 7  |
| AX-158056490 | 8 | 57.11  | KV452904.1  | 12641345 | 7-scf00172 | 7  |
| AX-158056494 | 8 | 57.11  | KV452904.1  | 12642753 | 7-scf00172 | 7  |
| AX-157715037 | 8 | 57.11  | KV452904.1  | 12693721 | 7-scf00172 | 7  |
| AX-158056518 | 8 | 57.11  | KV452904.1  | 12693907 | 7-scf00172 | 7  |
| AX-158056519 | 8 | 57.11  | KV452904.1  | 12695284 | 7-scf00172 | 7  |
| AX-158056521 | 8 | 57.11  | KV452904.1  | 12698377 | 7-scf00172 | 7  |
| AX-158056531 | 8 | 57.11  | KV452904.1  | 12717789 | 7-scf00172 | 7  |
| AX-158056535 | 8 | 57.11  | KV452904.1  | 12724541 | 7-scf00172 | 7  |
| AX-158056537 | 8 | 57.11  | KV452904.1  | 12725223 | 7-scf00172 | 7  |
| AX-158056547 | 8 | 57.11  | KV452904.1  | 12738335 | 7-scf00172 | 7  |
| AX-158056552 | 8 | 57.11  | KV452904.1  | 12760519 | 7-scf00172 | 7  |
| AX-158056557 | 8 | 57.11  | KV452904.1  | 12779855 | 7-scf00172 | 7  |
| AX-158056584 | 8 | 57.11  | KV452904.1  | 12828935 | 7-scf00172 | 7  |
| AX-158056591 | 8 | 57.11  | KV452904.1  | 12837117 | 7-scf00172 | 7  |
| AX-157747640 | 8 | 57.11  | KV452904.1  | 12855459 | 7-scf00172 | 7  |
| AX-158378924 | 8 | 57.11  | KV452904.1  | 12855779 | 7-scf00172 | 7  |
| AX-157746066 | 8 | 57.11  | KV452904.1  | 12857686 | 7-scf00172 | 7  |
| AX-158056606 | 8 | 57.11  | KV452904.1  | 12860544 | 7-scf00172 | 7  |
| AX-158056682 | 8 | 57.11  | KV452904.1  | 12951401 | 7-scf00172 | 7  |
| AX-158057661 | 8 | 57.11  | KV452904.1  | 15275374 | 7-scf00172 | 7  |
| AX-158057986 | 8 | 57.11  | KV452904.1  | 15947678 | 7-scf00172 | 7  |
| AX-157704686 | 8 | 57.11  | 3ML01027089 | 1234     | scf02692_1 | UN |
| AX-158052280 | 8 | 57.195 | KV452904.1  | 7333540  | 7-scf00172 | 7  |
| AX-158052673 | 8 | 57.195 | KV452904.1  | 7764795  | 7-scf00172 | 7  |
| AX-158052692 | 8 | 57.195 | KV452904.1  | 7787681  | 7-scf00172 | 7  |
| AX-158052827 | 8 | 57.195 | KV452904.1  | 7971505  | 7-scf00172 | 7  |
| AX-158053032 | 8 | 57.195 | KV452904.1  | 8216196  | 7-scf00172 | 7  |
| AX-157822944 | 8 | 57.195 | KV452904.1  | 9246194  | 7-scf00172 | 7  |
| AX-158378888 | 8 | 57.195 | KV452904.1  | 11420001 | 7-scf00172 | 7  |
| AX-158055812 | 8 | 57.195 | KV452904.1  | 11673291 | 7-scf00172 | 7  |
| AX-158056336 | 8 | 57.195 | KV452904.1  | 12371175 | 7-scf00172 | 7  |
| AX-157741408 | 8 | 57.195 | KV452904.1  | 12858783 | 7-scf00172 | 7  |
| AX-157823124 | 8 | 57.274 | KV452904.1  | 12872242 | 7-scf00172 | 7  |
| AX-157747035 | 8 | 57.274 | KV452904.1  | 12873865 | 7-scf00172 | 7  |
| AX-158056615 | 8 | 57.274 | KV452904.1  | 12875590 | 7-scf00172 | 7  |
| AX-158056616 | 8 | 57.274 | KV452904.1  | 12877255 | 7-scf00172 | 7  |
| AX-158056619 | 8 | 57.274 | KV452904.1  | 12877957 | 7-scf00172 | 7  |

|              |   |        |            |          |            |   |
|--------------|---|--------|------------|----------|------------|---|
| AX-158056629 | 8 | 57.274 | KV452904.1 | 12885304 | 7-scf00172 | 7 |
| AX-158056636 | 8 | 57.274 | KV452904.1 | 12892968 | 7-scf00172 | 7 |
| AX-158056637 | 8 | 57.274 | KV452904.1 | 12893828 | 7-scf00172 | 7 |
| AX-158409053 | 8 | 57.274 | KV452904.1 | 12895224 | 7-scf00172 | 7 |
| AX-158056662 | 8 | 57.274 | KV452904.1 | 12919886 | 7-scf00172 | 7 |
| AX-157823133 | 8 | 57.274 | KV452904.1 | 12935773 | 7-scf00172 | 7 |
| AX-158056630 | 8 | 57.309 | KV452904.1 | 12886074 | 7-scf00172 | 7 |
| AX-158056639 | 8 | 57.357 | KV452904.1 | 12895120 | 7-scf00172 | 7 |
| AX-158056641 | 8 | 57.399 | KV452904.1 | 12901324 | 7-scf00172 | 7 |
| AX-158058277 | 8 | 57.399 | KV452904.1 | 16544489 | 7-scf00172 | 7 |
| AX-157709796 | 8 | 57.438 | KV452904.1 | 5133003  | 7-scf00172 | 7 |
| AX-158056657 | 8 | 57.438 | KV452904.1 | 12914392 | 7-scf00172 | 7 |
| AX-158056668 | 8 | 57.438 | KV452904.1 | 12930192 | 7-scf00172 | 7 |
| AX-158056669 | 8 | 57.438 | KV452904.1 | 12930894 | 7-scf00172 | 7 |
| AX-158056671 | 8 | 57.438 | KV452904.1 | 12933533 | 7-scf00172 | 7 |
| AX-158056674 | 8 | 57.438 | KV452904.1 | 12935416 | 7-scf00172 | 7 |
| AX-158384108 | 8 | 57.438 | KV452904.1 | 13146180 | 7-scf00172 | 7 |
| AX-157876683 | 8 | 57.547 | KV452904.1 | 5284947  | 7-scf00172 | 7 |
| AX-158051019 | 8 | 57.547 | KV452904.1 | 5489124  | 7-scf00172 | 7 |
| AX-158051020 | 8 | 57.547 | KV452904.1 | 5490067  | 7-scf00172 | 7 |
| AX-158051056 | 8 | 57.547 | KV452904.1 | 5528682  | 7-scf00172 | 7 |
| AX-157822838 | 8 | 57.547 | KV452904.1 | 7013951  | 7-scf00172 | 7 |
| AX-158052186 | 8 | 57.547 | KV452904.1 | 7176293  | 7-scf00172 | 7 |
| AX-157822850 | 8 | 57.547 | KV452904.1 | 7216404  | 7-scf00172 | 7 |
| AX-158052563 | 8 | 57.547 | KV452904.1 | 7620214  | 7-scf00172 | 7 |
| AX-158053405 | 8 | 57.547 | KV452904.1 | 8832531  | 7-scf00172 | 7 |
| AX-157856776 | 8 | 57.547 | KV452904.1 | 8837505  | 7-scf00172 | 7 |
| AX-157822930 | 8 | 57.547 | KV452904.1 | 8988371  | 7-scf00172 | 7 |
| AX-158053538 | 8 | 57.547 | KV452904.1 | 9060276  | 7-scf00172 | 7 |
| AX-158053623 | 8 | 57.547 | KV452904.1 | 9162224  | 7-scf00172 | 7 |
| AX-158053626 | 8 | 57.547 | KV452904.1 | 9163478  | 7-scf00172 | 7 |
| AX-157749015 | 8 | 57.547 | KV452904.1 | 9282907  | 7-scf00172 | 7 |
| AX-158053770 | 8 | 57.547 | KV452904.1 | 9355063  | 7-scf00172 | 7 |
| AX-158053776 | 8 | 57.547 | KV452904.1 | 9375955  | 7-scf00172 | 7 |
| AX-158053793 | 8 | 57.547 | KV452904.1 | 9405782  | 7-scf00172 | 7 |
| AX-158053799 | 8 | 57.547 | KV452904.1 | 9420733  | 7-scf00172 | 7 |
| AX-158053805 | 8 | 57.547 | KV452904.1 | 9444404  | 7-scf00172 | 7 |
| AX-158053852 | 8 | 57.547 | KV452904.1 | 9523765  | 7-scf00172 | 7 |
| AX-158054352 | 8 | 57.547 | KV452904.1 | 10209458 | 7-scf00172 | 7 |
| AX-158054925 | 8 | 57.547 | KV452904.1 | 10748722 | 7-scf00172 | 7 |
| AX-158055355 | 8 | 57.547 | KV452904.1 | 11179833 | 7-scf00172 | 7 |
| AX-158055376 | 8 | 57.547 | KV452904.1 | 11213912 | 7-scf00172 | 7 |
| AX-157727276 | 8 | 57.547 | KV452904.1 | 11278674 | 7-scf00172 | 7 |
| AX-158055449 | 8 | 57.547 | KV452904.1 | 11314664 | 7-scf00172 | 7 |
| AX-158055562 | 8 | 57.547 | KV452904.1 | 11431516 | 7-scf00172 | 7 |
| AX-158055567 | 8 | 57.547 | KV452904.1 | 11436383 | 7-scf00172 | 7 |
| AX-157708953 | 8 | 57.547 | KV452904.1 | 11464493 | 7-scf00172 | 7 |
| AX-158055797 | 8 | 57.547 | KV452904.1 | 11659965 | 7-scf00172 | 7 |
| AX-157716226 | 8 | 57.547 | KV452904.1 | 11705069 | 7-scf00172 | 7 |
| AX-158055971 | 8 | 57.547 | KV452904.1 | 11958821 | 7-scf00172 | 7 |
| AX-158056064 | 8 | 57.547 | KV452904.1 | 12079276 | 7-scf00172 | 7 |

|              |   |        |            |          |            |   |
|--------------|---|--------|------------|----------|------------|---|
| AX-158056176 | 8 | 57.547 | KV452904.1 | 12176741 | 7-scf00172 | 7 |
| AX-157694385 | 8 | 57.547 | KV452904.1 | 12252752 | 7-scf00172 | 7 |
| AX-157754918 | 8 | 57.547 | KV452904.1 | 12456757 | 7-scf00172 | 7 |
| AX-158378921 | 8 | 57.547 | KV452904.1 | 12480603 | 7-scf00172 | 7 |
| AX-158056481 | 8 | 57.547 | KV452904.1 | 12626384 | 7-scf00172 | 7 |
| AX-158056534 | 8 | 57.547 | KV452904.1 | 12720801 | 7-scf00172 | 7 |
| AX-158056550 | 8 | 57.547 | KV452904.1 | 12754143 | 7-scf00172 | 7 |
| AX-158056631 | 8 | 57.547 | KV452904.1 | 12888165 | 7-scf00172 | 7 |
| AX-157823129 | 8 | 57.547 | KV452904.1 | 12912926 | 7-scf00172 | 7 |
| AX-158056663 | 8 | 57.547 | KV452904.1 | 12923508 | 7-scf00172 | 7 |
| AX-157823131 | 8 | 57.547 | KV452904.1 | 12924574 | 7-scf00172 | 7 |
| AX-158056670 | 8 | 57.547 | KV452904.1 | 12932117 | 7-scf00172 | 7 |
| AX-158056676 | 8 | 57.547 | KV452904.1 | 12939696 | 7-scf00172 | 7 |
| AX-158056685 | 8 | 57.547 | KV452904.1 | 12953478 | 7-scf00172 | 7 |
| AX-157740787 | 8 | 57.547 | KV452904.1 | 12954437 | 7-scf00172 | 7 |
| AX-158056686 | 8 | 57.547 | KV452904.1 | 12956923 | 7-scf00172 | 7 |
| AX-158056687 | 8 | 57.547 | KV452904.1 | 12957673 | 7-scf00172 | 7 |
| AX-158056693 | 8 | 57.547 | KV452904.1 | 12960795 | 7-scf00172 | 7 |
| AX-157823136 | 8 | 57.547 | KV452904.1 | 12962004 | 7-scf00172 | 7 |
| AX-158056696 | 8 | 57.547 | KV452904.1 | 12962137 | 7-scf00172 | 7 |
| AX-158056698 | 8 | 57.547 | KV452904.1 | 12965873 | 7-scf00172 | 7 |
| AX-158056699 | 8 | 57.547 | KV452904.1 | 12966612 | 7-scf00172 | 7 |
| AX-158056702 | 8 | 57.547 | KV452904.1 | 12967979 | 7-scf00172 | 7 |
| AX-158056708 | 8 | 57.547 | KV452904.1 | 12981512 | 7-scf00172 | 7 |
| AX-158056709 | 8 | 57.547 | KV452904.1 | 12982513 | 7-scf00172 | 7 |
| AX-158056710 | 8 | 57.547 | KV452904.1 | 12982981 | 7-scf00172 | 7 |
| AX-158056713 | 8 | 57.547 | KV452904.1 | 12993004 | 7-scf00172 | 7 |
| AX-158056716 | 8 | 57.547 | KV452904.1 | 12997521 | 7-scf00172 | 7 |
| AX-158056718 | 8 | 57.547 | KV452904.1 | 12998301 | 7-scf00172 | 7 |
| AX-158056719 | 8 | 57.547 | KV452904.1 | 12999101 | 7-scf00172 | 7 |
| AX-158056720 | 8 | 57.547 | KV452904.1 | 13000181 | 7-scf00172 | 7 |
| AX-158056722 | 8 | 57.547 | KV452904.1 | 13001116 | 7-scf00172 | 7 |
| AX-158056723 | 8 | 57.547 | KV452904.1 | 13001844 | 7-scf00172 | 7 |
| AX-158056724 | 8 | 57.547 | KV452904.1 | 13002290 | 7-scf00172 | 7 |
| AX-158056725 | 8 | 57.547 | KV452904.1 | 13003287 | 7-scf00172 | 7 |
| AX-158056727 | 8 | 57.547 | KV452904.1 | 13005653 | 7-scf00172 | 7 |
| AX-158378929 | 8 | 57.547 | KV452904.1 | 13005952 | 7-scf00172 | 7 |
| AX-158056729 | 8 | 57.547 | KV452904.1 | 13008056 | 7-scf00172 | 7 |
| AX-157721957 | 8 | 57.547 | KV452904.1 | 13013898 | 7-scf00172 | 7 |
| AX-158056734 | 8 | 57.547 | KV452904.1 | 13018752 | 7-scf00172 | 7 |
| AX-158056735 | 8 | 57.547 | KV452904.1 | 13019130 | 7-scf00172 | 7 |
| AX-158056746 | 8 | 57.547 | KV452904.1 | 13037922 | 7-scf00172 | 7 |
| AX-157856819 | 8 | 57.547 | KV452904.1 | 13043130 | 7-scf00172 | 7 |
| AX-158056751 | 8 | 57.547 | KV452904.1 | 13049024 | 7-scf00172 | 7 |
| AX-157856821 | 8 | 57.547 | KV452904.1 | 13071081 | 7-scf00172 | 7 |
| AX-158056756 | 8 | 57.547 | KV452904.1 | 13073539 | 7-scf00172 | 7 |
| AX-158056760 | 8 | 57.547 | KV452904.1 | 13080592 | 7-scf00172 | 7 |
| AX-158056762 | 8 | 57.547 | KV452904.1 | 13085804 | 7-scf00172 | 7 |
| AX-158056764 | 8 | 57.547 | KV452904.1 | 13089624 | 7-scf00172 | 7 |
| AX-157856822 | 8 | 57.547 | KV452904.1 | 13090325 | 7-scf00172 | 7 |
| AX-158056765 | 8 | 57.547 | KV452904.1 | 13090509 | 7-scf00172 | 7 |

|              |   |        |            |          |            |   |
|--------------|---|--------|------------|----------|------------|---|
| AX-157856824 | 8 | 57.547 | KV452904.1 | 13092657 | 7-scf00172 | 7 |
| AX-157856825 | 8 | 57.547 | KV452904.1 | 13093314 | 7-scf00172 | 7 |
| AX-157856826 | 8 | 57.547 | KV452904.1 | 13093738 | 7-scf00172 | 7 |
| AX-157856827 | 8 | 57.547 | KV452904.1 | 13093817 | 7-scf00172 | 7 |
| AX-158056773 | 8 | 57.547 | KV452904.1 | 13144904 | 7-scf00172 | 7 |
| AX-157772788 | 8 | 57.547 | KV452904.1 | 13145476 | 7-scf00172 | 7 |
| AX-158056774 | 8 | 57.547 | KV452904.1 | 13146562 | 7-scf00172 | 7 |
| AX-158056809 | 8 | 57.547 | KV452904.1 | 13194031 | 7-scf00172 | 7 |
| AX-158056814 | 8 | 57.547 | KV452904.1 | 13201937 | 7-scf00172 | 7 |
| AX-158056819 | 8 | 57.547 | KV452904.1 | 13207351 | 7-scf00172 | 7 |
| AX-158056827 | 8 | 57.547 | KV452904.1 | 13223119 | 7-scf00172 | 7 |
| AX-158056848 | 8 | 57.547 | KV452904.1 | 13255981 | 7-scf00172 | 7 |
| AX-158056849 | 8 | 57.547 | KV452904.1 | 13257270 | 7-scf00172 | 7 |
| AX-158056853 | 8 | 57.547 | KV452904.1 | 13261158 | 7-scf00172 | 7 |
| AX-157856835 | 8 | 57.547 | KV452904.1 | 13262267 | 7-scf00172 | 7 |
| AX-158056857 | 8 | 57.547 | KV452904.1 | 13268296 | 7-scf00172 | 7 |
| AX-158056873 | 8 | 57.547 | KV452904.1 | 13319438 | 7-scf00172 | 7 |
| AX-158056874 | 8 | 57.547 | KV452904.1 | 13324192 | 7-scf00172 | 7 |
| AX-158056877 | 8 | 57.547 | KV452904.1 | 13331306 | 7-scf00172 | 7 |
| AX-158056880 | 8 | 57.547 | KV452904.1 | 13338294 | 7-scf00172 | 7 |
| AX-158056882 | 8 | 57.547 | KV452904.1 | 13339780 | 7-scf00172 | 7 |
| AX-158056888 | 8 | 57.547 | KV452904.1 | 13347733 | 7-scf00172 | 7 |
| AX-158056889 | 8 | 57.547 | KV452904.1 | 13348320 | 7-scf00172 | 7 |
| AX-158056907 | 8 | 57.547 | KV452904.1 | 13411334 | 7-scf00172 | 7 |
| AX-158056910 | 8 | 57.547 | KV452904.1 | 13416050 | 7-scf00172 | 7 |
| AX-157762762 | 8 | 57.547 | KV452904.1 | 13428790 | 7-scf00172 | 7 |
| AX-158056915 | 8 | 57.547 | KV452904.1 | 13436105 | 7-scf00172 | 7 |
| AX-158056934 | 8 | 57.547 | KV452904.1 | 13468937 | 7-scf00172 | 7 |
| AX-158056938 | 8 | 57.547 | KV452904.1 | 13480704 | 7-scf00172 | 7 |
| AX-157885260 | 8 | 57.547 | KV452904.1 | 13488172 | 7-scf00172 | 7 |
| AX-157876864 | 8 | 57.547 | KV452904.1 | 13507468 | 7-scf00172 | 7 |
| AX-158056946 | 8 | 57.547 | KV452904.1 | 13514006 | 7-scf00172 | 7 |
| AX-158056947 | 8 | 57.547 | KV452904.1 | 13514861 | 7-scf00172 | 7 |
| AX-158056953 | 8 | 57.547 | KV452904.1 | 13523156 | 7-scf00172 | 7 |
| AX-158056959 | 8 | 57.547 | KV452904.1 | 13538449 | 7-scf00172 | 7 |
| AX-158056962 | 8 | 57.547 | KV452904.1 | 13549352 | 7-scf00172 | 7 |
| AX-158056963 | 8 | 57.547 | KV452904.1 | 13552006 | 7-scf00172 | 7 |
| AX-158056967 | 8 | 57.547 | KV452904.1 | 13558209 | 7-scf00172 | 7 |
| AX-158056968 | 8 | 57.547 | KV452904.1 | 13560473 | 7-scf00172 | 7 |
| AX-158056969 | 8 | 57.547 | KV452904.1 | 13563688 | 7-scf00172 | 7 |
| AX-158056971 | 8 | 57.547 | KV452904.1 | 13564798 | 7-scf00172 | 7 |
| AX-158056972 | 8 | 57.547 | KV452904.1 | 13565031 | 7-scf00172 | 7 |
| AX-157865541 | 8 | 57.547 | KV452904.1 | 13584207 | 7-scf00172 | 7 |
| AX-158378938 | 8 | 57.547 | KV452904.1 | 13586708 | 7-scf00172 | 7 |
| AX-157823146 | 8 | 57.547 | KV452904.1 | 13588205 | 7-scf00172 | 7 |
| AX-158056977 | 8 | 57.547 | KV452904.1 | 13592512 | 7-scf00172 | 7 |
| AX-158056980 | 8 | 57.547 | KV452904.1 | 13605494 | 7-scf00172 | 7 |
| AX-158057001 | 8 | 57.547 | KV452904.1 | 13649630 | 7-scf00172 | 7 |
| AX-158057003 | 8 | 57.547 | KV452904.1 | 13650873 | 7-scf00172 | 7 |
| AX-158057006 | 8 | 57.547 | KV452904.1 | 13670374 | 7-scf00172 | 7 |
| AX-158057012 | 8 | 57.547 | KV452904.1 | 13677594 | 7-scf00172 | 7 |

|              |   |        |            |          |            |   |
|--------------|---|--------|------------|----------|------------|---|
| AX-158057016 | 8 | 57.547 | KV452904.1 | 13687069 | 7-scf00172 | 7 |
| AX-158057022 | 8 | 57.547 | KV452904.1 | 13698995 | 7-scf00172 | 7 |
| AX-158057031 | 8 | 57.547 | KV452904.1 | 13717503 | 7-scf00172 | 7 |
| AX-158057062 | 8 | 57.547 | KV452904.1 | 13818253 | 7-scf00172 | 7 |
| AX-158057063 | 8 | 57.547 | KV452904.1 | 13818794 | 7-scf00172 | 7 |
| AX-158057069 | 8 | 57.547 | KV452904.1 | 13839914 | 7-scf00172 | 7 |
| AX-158057078 | 8 | 57.547 | KV452904.1 | 13852376 | 7-scf00172 | 7 |
| AX-158057079 | 8 | 57.547 | KV452904.1 | 13853950 | 7-scf00172 | 7 |
| AX-158057088 | 8 | 57.547 | KV452904.1 | 13879709 | 7-scf00172 | 7 |
| AX-158057089 | 8 | 57.547 | KV452904.1 | 13889156 | 7-scf00172 | 7 |
| AX-158057094 | 8 | 57.547 | KV452904.1 | 13906899 | 7-scf00172 | 7 |
| AX-158057098 | 8 | 57.547 | KV452904.1 | 13909501 | 7-scf00172 | 7 |
| AX-158057103 | 8 | 57.547 | KV452904.1 | 13934470 | 7-scf00172 | 7 |
| AX-158057110 | 8 | 57.547 | KV452904.1 | 13961431 | 7-scf00172 | 7 |
| AX-158057112 | 8 | 57.547 | KV452904.1 | 13967865 | 7-scf00172 | 7 |
| AX-158057115 | 8 | 57.547 | KV452904.1 | 13970573 | 7-scf00172 | 7 |
| AX-158057118 | 8 | 57.547 | KV452904.1 | 13972573 | 7-scf00172 | 7 |
| AX-158057125 | 8 | 57.547 | KV452904.1 | 13984127 | 7-scf00172 | 7 |
| AX-158057134 | 8 | 57.547 | KV452904.1 | 14001762 | 7-scf00172 | 7 |
| AX-158057140 | 8 | 57.547 | KV452904.1 | 14022417 | 7-scf00172 | 7 |
| AX-158057143 | 8 | 57.547 | KV452904.1 | 14027519 | 7-scf00172 | 7 |
| AX-158057144 | 8 | 57.547 | KV452904.1 | 14028186 | 7-scf00172 | 7 |
| AX-158057145 | 8 | 57.547 | KV452904.1 | 14029948 | 7-scf00172 | 7 |
| AX-158057149 | 8 | 57.547 | KV452904.1 | 14046235 | 7-scf00172 | 7 |
| AX-158057156 | 8 | 57.547 | KV452904.1 | 14069225 | 7-scf00172 | 7 |
| AX-158057163 | 8 | 57.547 | KV452904.1 | 14085881 | 7-scf00172 | 7 |
| AX-158057168 | 8 | 57.547 | KV452904.1 | 14096646 | 7-scf00172 | 7 |
| AX-158057171 | 8 | 57.547 | KV452904.1 | 14099328 | 7-scf00172 | 7 |
| AX-158057195 | 8 | 57.547 | KV452904.1 | 14169968 | 7-scf00172 | 7 |
| AX-158057197 | 8 | 57.547 | KV452904.1 | 14173420 | 7-scf00172 | 7 |
| AX-158057201 | 8 | 57.547 | KV452904.1 | 14179109 | 7-scf00172 | 7 |
| AX-158057214 | 8 | 57.547 | KV452904.1 | 14223677 | 7-scf00172 | 7 |
| AX-158057222 | 8 | 57.547 | KV452904.1 | 14242807 | 7-scf00172 | 7 |
| AX-158057225 | 8 | 57.547 | KV452904.1 | 14244421 | 7-scf00172 | 7 |
| AX-158057237 | 8 | 57.547 | KV452904.1 | 14299057 | 7-scf00172 | 7 |
| AX-158057241 | 8 | 57.547 | KV452904.1 | 14305499 | 7-scf00172 | 7 |
| AX-158057244 | 8 | 57.547 | KV452904.1 | 14317621 | 7-scf00172 | 7 |
| AX-158057247 | 8 | 57.547 | KV452904.1 | 14332248 | 7-scf00172 | 7 |
| AX-158057248 | 8 | 57.547 | KV452904.1 | 14336348 | 7-scf00172 | 7 |
| AX-158057282 | 8 | 57.547 | KV452904.1 | 14435003 | 7-scf00172 | 7 |
| AX-158057286 | 8 | 57.547 | KV452904.1 | 14450533 | 7-scf00172 | 7 |
| AX-158057288 | 8 | 57.547 | KV452904.1 | 14457472 | 7-scf00172 | 7 |
| AX-158057296 | 8 | 57.547 | KV452904.1 | 14480942 | 7-scf00172 | 7 |
| AX-158057316 | 8 | 57.547 | KV452904.1 | 14534877 | 7-scf00172 | 7 |
| AX-158057317 | 8 | 57.547 | KV452904.1 | 14535110 | 7-scf00172 | 7 |
| AX-158057337 | 8 | 57.547 | KV452904.1 | 14599855 | 7-scf00172 | 7 |
| AX-158057359 | 8 | 57.547 | KV452904.1 | 14678640 | 7-scf00172 | 7 |
| AX-158057368 | 8 | 57.547 | KV452904.1 | 14716911 | 7-scf00172 | 7 |
| AX-158057369 | 8 | 57.547 | KV452904.1 | 14718075 | 7-scf00172 | 7 |
| AX-158057378 | 8 | 57.547 | KV452904.1 | 14754963 | 7-scf00172 | 7 |
| AX-158057383 | 8 | 57.547 | KV452904.1 | 14762787 | 7-scf00172 | 7 |



|              |   |        |            |          |            |   |
|--------------|---|--------|------------|----------|------------|---|
| AX-158057386 | 8 | 57.547 | KV452904.1 | 14774350 | 7-scf00172 | 7 |
| AX-158057404 | 8 | 57.547 | KV452904.1 | 14865706 | 7-scf00172 | 7 |
| AX-158057412 | 8 | 57.547 | KV452904.1 | 14891194 | 7-scf00172 | 7 |
| AX-158057429 | 8 | 57.547 | KV452904.1 | 14918052 | 7-scf00172 | 7 |
| AX-158057432 | 8 | 57.547 | KV452904.1 | 14919991 | 7-scf00172 | 7 |
| AX-158057436 | 8 | 57.547 | KV452904.1 | 14923842 | 7-scf00172 | 7 |
| AX-158057443 | 8 | 57.547 | KV452904.1 | 14929248 | 7-scf00172 | 7 |
| AX-157773593 | 8 | 57.547 | KV452904.1 | 14933060 | 7-scf00172 | 7 |
| AX-158057450 | 8 | 57.547 | KV452904.1 | 14953404 | 7-scf00172 | 7 |
| AX-158057469 | 8 | 57.547 | KV452904.1 | 14973020 | 7-scf00172 | 7 |
| AX-158057470 | 8 | 57.547 | KV452904.1 | 14974447 | 7-scf00172 | 7 |
| AX-158057479 | 8 | 57.547 | KV452904.1 | 14992181 | 7-scf00172 | 7 |
| AX-158057480 | 8 | 57.547 | KV452904.1 | 14992535 | 7-scf00172 | 7 |
| AX-158384113 | 8 | 57.547 | KV452904.1 | 14992612 | 7-scf00172 | 7 |
| AX-157775705 | 8 | 57.547 | KV452904.1 | 15001088 | 7-scf00172 | 7 |
| AX-158057501 | 8 | 57.547 | KV452904.1 | 15027803 | 7-scf00172 | 7 |
| AX-158057515 | 8 | 57.547 | KV452904.1 | 15048368 | 7-scf00172 | 7 |
| AX-158057518 | 8 | 57.547 | KV452904.1 | 15053361 | 7-scf00172 | 7 |
| AX-158057524 | 8 | 57.547 | KV452904.1 | 15056626 | 7-scf00172 | 7 |
| AX-158057531 | 8 | 57.547 | KV452904.1 | 15074923 | 7-scf00172 | 7 |
| AX-158057563 | 8 | 57.547 | KV452904.1 | 15111915 | 7-scf00172 | 7 |
| AX-158378945 | 8 | 57.547 | KV452904.1 | 15144714 | 7-scf00172 | 7 |
| AX-158057588 | 8 | 57.547 | KV452904.1 | 15147507 | 7-scf00172 | 7 |
| AX-158057729 | 8 | 57.547 | KV452904.1 | 15404463 | 7-scf00172 | 7 |
| AX-158057896 | 8 | 57.547 | KV452904.1 | 15763962 | 7-scf00172 | 7 |
| AX-157870673 | 8 | 57.547 | KV452904.1 | 15769652 | 7-scf00172 | 7 |
| AX-158057900 | 8 | 57.547 | KV452904.1 | 15773902 | 7-scf00172 | 7 |
| AX-158409081 | 8 | 57.547 | KV452904.1 | 15775788 | 7-scf00172 | 7 |
| AX-158409082 | 8 | 57.547 | KV452904.1 | 15775900 | 7-scf00172 | 7 |
| AX-157745788 | 8 | 57.547 | KV452904.1 | 15796165 | 7-scf00172 | 7 |
| AX-158057935 | 8 | 57.547 | KV452904.1 | 15851866 | 7-scf00172 | 7 |
| AX-158057950 | 8 | 57.547 | KV452904.1 | 15868063 | 7-scf00172 | 7 |
| AX-158057951 | 8 | 57.547 | KV452904.1 | 15870530 | 7-scf00172 | 7 |
| AX-157823198 | 8 | 57.547 | KV452904.1 | 15883695 | 7-scf00172 | 7 |
| AX-158057992 | 8 | 57.547 | KV452904.1 | 15963876 | 7-scf00172 | 7 |
| AX-157856845 | 8 | 57.547 | KV452904.1 | 16006904 | 7-scf00172 | 7 |
| AX-158058067 | 8 | 57.547 | KV452904.1 | 16081878 | 7-scf00172 | 7 |
| AX-158058072 | 8 | 57.547 | KV452904.1 | 16085447 | 7-scf00172 | 7 |
| AX-158058105 | 8 | 57.547 | KV452904.1 | 16148379 | 7-scf00172 | 7 |
| AX-158058132 | 8 | 57.547 | KV452904.1 | 16227489 | 7-scf00172 | 7 |
| AX-158058211 | 8 | 57.547 | KV452904.1 | 16468245 | 7-scf00172 | 7 |
| AX-158378965 | 8 | 57.547 | KV452904.1 | 16469565 | 7-scf00172 | 7 |
| AX-158058246 | 8 | 57.547 | KV452904.1 | 16504297 | 7-scf00172 | 7 |
| AX-158058265 | 8 | 57.547 | KV452904.1 | 16531265 | 7-scf00172 | 7 |
| AX-157823222 | 8 | 57.547 | KV452904.1 | 16540479 | 7-scf00172 | 7 |
| AX-157823224 | 8 | 57.547 | KV452904.1 | 16556940 | 7-scf00172 | 7 |
| AX-158058294 | 8 | 57.547 | KV452904.1 | 16572353 | 7-scf00172 | 7 |
| AX-157856847 | 8 | 57.547 | KV452904.1 | 16577519 | 7-scf00172 | 7 |
| AX-158058385 | 8 | 57.547 | KV452904.1 | 16733242 | 7-scf00172 | 7 |
| AX-158058388 | 8 | 57.547 | KV452904.1 | 16737619 | 7-scf00172 | 7 |
| AX-158058391 | 8 | 57.547 | KV452904.1 | 16744373 | 7-scf00172 | 7 |

|              |   |        |             |          |            |    |
|--------------|---|--------|-------------|----------|------------|----|
| AX-158058424 | 8 | 57.547 | KV452904.1  | 16781458 | 7-scf00172 | 7  |
| AX-157823241 | 8 | 57.547 | KV452904.1  | 16785948 | 7-scf00172 | 7  |
| AX-158058906 | 8 | 57.547 | KV452905.1  | 50164    | 7-scf00175 | 7  |
| AX-157706520 | 8 | 57.547 | 3ML01032370 | 128      | scf07988_1 | UN |
| AX-158057495 | 8 | 57.609 | KV452904.1  | 15018023 | 7-scf00172 | 7  |
| AX-158391798 | 8 | 57.656 | KV452904.1  | 5110285  | 7-scf00172 | 7  |
| AX-157822741 | 8 | 57.656 | KV452904.1  | 5490606  | 7-scf00172 | 7  |
| AX-158051214 | 8 | 57.656 | KV452904.1  | 5731285  | 7-scf00172 | 7  |
| AX-158051337 | 8 | 57.656 | KV452904.1  | 5925719  | 7-scf00172 | 7  |
| AX-158051391 | 8 | 57.656 | KV452904.1  | 6021152  | 7-scf00172 | 7  |
| AX-158051418 | 8 | 57.656 | KV452904.1  | 6058870  | 7-scf00172 | 7  |
| AX-158052455 | 8 | 57.656 | KV452904.1  | 7510369  | 7-scf00172 | 7  |
| AX-158378812 | 8 | 57.656 | KV452904.1  | 8261484  | 7-scf00172 | 7  |
| AX-157725565 | 8 | 57.656 | KV452904.1  | 8364323  | 7-scf00172 | 7  |
| AX-157754347 | 8 | 57.656 | KV452904.1  | 8860470  | 7-scf00172 | 7  |
| AX-158053416 | 8 | 57.656 | KV452904.1  | 8866037  | 7-scf00172 | 7  |
| AX-158053640 | 8 | 57.656 | KV452904.1  | 9179614  | 7-scf00172 | 7  |
| AX-158053712 | 8 | 57.656 | KV452904.1  | 9279769  | 7-scf00172 | 7  |
| AX-158053768 | 8 | 57.656 | KV452904.1  | 9351245  | 7-scf00172 | 7  |
| AX-158053897 | 8 | 57.656 | KV452904.1  | 9581725  | 7-scf00172 | 7  |
| AX-158055194 | 8 | 57.656 | KV452904.1  | 10984223 | 7-scf00172 | 7  |
| AX-158055651 | 8 | 57.656 | KV452904.1  | 11535233 | 7-scf00172 | 7  |
| AX-158055701 | 8 | 57.656 | KV452904.1  | 11580019 | 7-scf00172 | 7  |
| AX-158055734 | 8 | 57.656 | KV452904.1  | 11614531 | 7-scf00172 | 7  |
| AX-157717027 | 8 | 57.656 | KV452904.1  | 11721802 | 7-scf00172 | 7  |
| AX-158055966 | 8 | 57.656 | KV452904.1  | 11950201 | 7-scf00172 | 7  |
| AX-158056075 | 8 | 57.656 | KV452904.1  | 12086498 | 7-scf00172 | 7  |
| AX-157823086 | 8 | 57.656 | KV452904.1  | 12216927 | 7-scf00172 | 7  |
| AX-158056324 | 8 | 57.656 | KV452904.1  | 12356896 | 7-scf00172 | 7  |
| AX-158056360 | 8 | 57.656 | KV452904.1  | 12410587 | 7-scf00172 | 7  |
| AX-158056447 | 8 | 57.656 | KV452904.1  | 12551649 | 7-scf00172 | 7  |
| AX-158056485 | 8 | 57.656 | KV452904.1  | 12632567 | 7-scf00172 | 7  |
| AX-158056565 | 8 | 57.656 | KV452904.1  | 12794695 | 7-scf00172 | 7  |
| AX-158056677 | 8 | 57.656 | KV452904.1  | 12942069 | 7-scf00172 | 7  |
| AX-157740156 | 8 | 57.656 | KV452904.1  | 12946870 | 7-scf00172 | 7  |
| AX-158056684 | 8 | 57.656 | KV452904.1  | 12952244 | 7-scf00172 | 7  |
| AX-157885256 | 8 | 57.656 | KV452904.1  | 12952854 | 7-scf00172 | 7  |
| AX-157856815 | 8 | 57.656 | KV452904.1  | 12958990 | 7-scf00172 | 7  |
| AX-158378937 | 8 | 57.656 | KV452904.1  | 13408833 | 7-scf00172 | 7  |
| AX-158056937 | 8 | 57.656 | KV452904.1  | 13480119 | 7-scf00172 | 7  |
| AX-158056995 | 8 | 57.656 | KV452904.1  | 13640620 | 7-scf00172 | 7  |
| AX-158056996 | 8 | 57.656 | KV452904.1  | 13640885 | 7-scf00172 | 7  |
| AX-158057071 | 8 | 57.656 | KV452904.1  | 13843592 | 7-scf00172 | 7  |
| AX-158057085 | 8 | 57.656 | KV452904.1  | 13874745 | 7-scf00172 | 7  |
| AX-158057091 | 8 | 57.656 | KV452904.1  | 13891234 | 7-scf00172 | 7  |
| AX-158057102 | 8 | 57.656 | KV452904.1  | 13930995 | 7-scf00172 | 7  |
| AX-158057265 | 8 | 57.656 | KV452904.1  | 14387291 | 7-scf00172 | 7  |
| AX-158057433 | 8 | 57.656 | KV452904.1  | 14923570 | 7-scf00172 | 7  |
| AX-158057473 | 8 | 57.656 | KV452904.1  | 14976840 | 7-scf00172 | 7  |
| AX-158057474 | 8 | 57.656 | KV452904.1  | 14978237 | 7-scf00172 | 7  |
| AX-158057511 | 8 | 57.656 | KV452904.1  | 15044597 | 7-scf00172 | 7  |

|              |   |        |            |          |            |   |
|--------------|---|--------|------------|----------|------------|---|
| AX-158378943 | 8 | 57.656 | KV452904.1 | 15053491 | 7-scf00172 | 7 |
| AX-158057519 | 8 | 57.656 | KV452904.1 | 15053746 | 7-scf00172 | 7 |
| AX-158057529 | 8 | 57.656 | KV452904.1 | 15072666 | 7-scf00172 | 7 |
| AX-158057533 | 8 | 57.656 | KV452904.1 | 15076871 | 7-scf00172 | 7 |
| AX-158057535 | 8 | 57.656 | KV452904.1 | 15080277 | 7-scf00172 | 7 |
| AX-158057536 | 8 | 57.656 | KV452904.1 | 15080649 | 7-scf00172 | 7 |
| AX-158057569 | 8 | 57.656 | KV452904.1 | 15126070 | 7-scf00172 | 7 |
| AX-158057570 | 8 | 57.656 | KV452904.1 | 15127577 | 7-scf00172 | 7 |
| AX-158057572 | 8 | 57.656 | KV452904.1 | 15129027 | 7-scf00172 | 7 |
| AX-158057575 | 8 | 57.656 | KV452904.1 | 15131999 | 7-scf00172 | 7 |
| AX-157865548 | 8 | 57.656 | KV452904.1 | 15149471 | 7-scf00172 | 7 |
| AX-157743909 | 8 | 57.656 | KV452904.1 | 15170636 | 7-scf00172 | 7 |
| AX-158057612 | 8 | 57.656 | KV452904.1 | 15185716 | 7-scf00172 | 7 |
| AX-157700443 | 8 | 57.656 | KV452904.1 | 15187778 | 7-scf00172 | 7 |
| AX-158057615 | 8 | 57.656 | KV452904.1 | 15196742 | 7-scf00172 | 7 |
| AX-158057619 | 8 | 57.656 | KV452904.1 | 15207758 | 7-scf00172 | 7 |
| AX-157823157 | 8 | 57.656 | KV452904.1 | 15211650 | 7-scf00172 | 7 |
| AX-157823158 | 8 | 57.656 | KV452904.1 | 15213476 | 7-scf00172 | 7 |
| AX-158057622 | 8 | 57.656 | KV452904.1 | 15213668 | 7-scf00172 | 7 |
| AX-157715035 | 8 | 57.656 | KV452904.1 | 15214991 | 7-scf00172 | 7 |
| AX-158057625 | 8 | 57.656 | KV452904.1 | 15216514 | 7-scf00172 | 7 |
| AX-158057627 | 8 | 57.656 | KV452904.1 | 15217039 | 7-scf00172 | 7 |
| AX-158057628 | 8 | 57.656 | KV452904.1 | 15217585 | 7-scf00172 | 7 |
| AX-158057636 | 8 | 57.656 | KV452904.1 | 15225181 | 7-scf00172 | 7 |
| AX-158057637 | 8 | 57.656 | KV452904.1 | 15225558 | 7-scf00172 | 7 |
| AX-158057641 | 8 | 57.656 | KV452904.1 | 15233485 | 7-scf00172 | 7 |
| AX-158057645 | 8 | 57.656 | KV452904.1 | 15255245 | 7-scf00172 | 7 |
| AX-157823161 | 8 | 57.656 | KV452904.1 | 15262803 | 7-scf00172 | 7 |
| AX-158057653 | 8 | 57.656 | KV452904.1 | 15262853 | 7-scf00172 | 7 |
| AX-158057655 | 8 | 57.656 | KV452904.1 | 15263706 | 7-scf00172 | 7 |
| AX-157823164 | 8 | 57.656 | KV452904.1 | 15266993 | 7-scf00172 | 7 |
| AX-157823166 | 8 | 57.656 | KV452904.1 | 15270904 | 7-scf00172 | 7 |
| AX-158057658 | 8 | 57.656 | KV452904.1 | 15273441 | 7-scf00172 | 7 |
| AX-157823167 | 8 | 57.656 | KV452904.1 | 15275266 | 7-scf00172 | 7 |
| AX-157823168 | 8 | 57.656 | KV452904.1 | 15276825 | 7-scf00172 | 7 |
| AX-157774861 | 8 | 57.656 | KV452904.1 | 15277709 | 7-scf00172 | 7 |
| AX-158378946 | 8 | 57.656 | KV452904.1 | 15279030 | 7-scf00172 | 7 |
| AX-157720142 | 8 | 57.656 | KV452904.1 | 15279257 | 7-scf00172 | 7 |
| AX-157823169 | 8 | 57.656 | KV452904.1 | 15280827 | 7-scf00172 | 7 |
| AX-157823170 | 8 | 57.656 | KV452904.1 | 15281669 | 7-scf00172 | 7 |
| AX-158057665 | 8 | 57.656 | KV452904.1 | 15289589 | 7-scf00172 | 7 |
| AX-157758480 | 8 | 57.656 | KV452904.1 | 15291906 | 7-scf00172 | 7 |
| AX-157823175 | 8 | 57.656 | KV452904.1 | 15291954 | 7-scf00172 | 7 |
| AX-158057674 | 8 | 57.656 | KV452904.1 | 15329246 | 7-scf00172 | 7 |
| AX-158057678 | 8 | 57.656 | KV452904.1 | 15334421 | 7-scf00172 | 7 |
| AX-158057713 | 8 | 57.656 | KV452904.1 | 15381377 | 7-scf00172 | 7 |
| AX-158057715 | 8 | 57.656 | KV452904.1 | 15383548 | 7-scf00172 | 7 |
| AX-158057717 | 8 | 57.656 | KV452904.1 | 15385502 | 7-scf00172 | 7 |
| AX-158057726 | 8 | 57.656 | KV452904.1 | 15397781 | 7-scf00172 | 7 |
| AX-158057727 | 8 | 57.656 | KV452904.1 | 15403899 | 7-scf00172 | 7 |
| AX-158378950 | 8 | 57.656 | KV452904.1 | 15418475 | 7-scf00172 | 7 |

|              |   |        |            |          |               |    |
|--------------|---|--------|------------|----------|---------------|----|
| AX-158057735 | 8 | 57.656 | KV452904.1 | 15429276 | 7-scf00172    | 7  |
| AX-158057743 | 8 | 57.656 | KV452904.1 | 15448244 | 7-scf00172    | 7  |
| AX-158057747 | 8 | 57.656 | KV452904.1 | 15456014 | 7-scf00172    | 7  |
| AX-157823178 | 8 | 57.656 | KV452904.1 | 15475783 | 7-scf00172    | 7  |
| AX-158057755 | 8 | 57.656 | KV452904.1 | 15478633 | 7-scf00172    | 7  |
| AX-158057758 | 8 | 57.656 | KV452904.1 | 15494198 | 7-scf00172    | 7  |
| AX-158057768 | 8 | 57.656 | KV452904.1 | 15524033 | 7-scf00172    | 7  |
| AX-158057774 | 8 | 57.656 | KV452904.1 | 15538210 | 7-scf00172    | 7  |
| AX-158057775 | 8 | 57.656 | KV452904.1 | 15539558 | 7-scf00172    | 7  |
| AX-157856843 | 8 | 57.656 | KV452904.1 | 15867372 | 7-scf00172    | 7  |
| AX-158057959 | 8 | 57.656 | KV452904.1 | 15892634 | 7-scf00172    | 7  |
| AX-158057960 | 8 | 57.656 | KV452904.1 | 15892911 | 7-scf00172    | 7  |
| AX-158057961 | 8 | 57.656 | KV452904.1 | 15893271 | 7-scf00172    | 7  |
| AX-158057990 | 8 | 57.656 | KV452904.1 | 15963368 | 7-scf00172    | 7  |
| AX-158409084 | 8 | 57.656 | KV452904.1 | 15991917 | 7-scf00172    | 7  |
| AX-157823208 | 8 | 57.656 | KV452904.1 | 16023107 | 7-scf00172    | 7  |
| AX-158058039 | 8 | 57.656 | KV452904.1 | 16041604 | 7-scf00172    | 7  |
| AX-158058074 | 8 | 57.656 | KV452904.1 | 16086626 | 7-scf00172    | 7  |
| AX-158058094 | 8 | 57.656 | KV452904.1 | 16132748 | 7-scf00172    | 7  |
| AX-158058099 | 8 | 57.656 | KV452904.1 | 16145162 | 7-scf00172    | 7  |
| AX-158058392 | 8 | 57.656 | KV452904.1 | 16745401 | 7-scf00172    | 7  |
| AX-157757076 | 8 | 57.675 | KV452904.1 | 15636728 | 7-scf00172    | 7  |
| AX-157823181 | 8 | 57.691 | KV452904.1 | 15633255 | 7-scf00172    | 7  |
| AX-157823182 | 8 | 57.691 | KV452904.1 | 15633316 | 7-scf00172    | 7  |
| AX-158406600 | 8 | 57.691 | KV452904.1 | 15635699 | 7-scf00172    | 7  |
| AX-158057819 | 8 | 57.691 | KV452904.1 | 15637476 | 7-scf00172    | 7  |
| AX-158057821 | 8 | 57.691 | KV452904.1 | 15638494 | 7-scf00172    | 7  |
| AX-157740417 | 8 | 57.691 | KV452904.1 | 15639036 | 7-scf00172    | 7  |
| AX-158057832 | 8 | 57.691 | KV452904.1 | 15658599 | 7-scf00172    | 7  |
| AX-158057866 | 8 | 57.691 | KV452904.1 | 15709793 | 7-scf00172    | 7  |
| AX-158057873 | 8 | 57.691 | KV452904.1 | 15729080 | 7-scf00172    | 7  |
| AX-158057888 | 8 | 57.691 | KV452904.1 | 15753795 | 7-scf00172    | 7  |
| AX-158057751 | 8 | 57.696 | KV452904.1 | 15462063 | 7-scf00172    | 7  |
| AX-158057770 | 8 | 57.696 | KV452904.1 | 15527213 | 7-scf00172    | 7  |
| AX-157753747 | 8 | 57.696 | KV452904.1 | 15585571 | 7-scf00172    | 7  |
| AX-158057846 | 8 | 57.696 | KV452904.1 | 15675085 | 7-scf00172    | 7  |
| AX-158378959 | 8 | 57.696 | KV452904.1 | 15927533 | 7-scf00172    | 7  |
| AX-157823177 | 8 | 57.71  | KV452904.1 | 15355886 | 7-scf00172    | 7  |
| AX-158057685 | 8 | 57.71  | KV452904.1 | 15363799 | 7-scf00172    | 7  |
| AX-158057691 | 8 | 57.71  | KV452904.1 | 15366320 | 7-scf00172    | 7  |
| AX-157876876 | 8 | 57.71  | KV452904.1 | 15367238 | 7-scf00172    | 7  |
| AX-158057692 | 8 | 57.71  | KV452904.1 | 15367291 | 7-scf00172    | 7  |
| AX-157823180 | 8 | 57.71  | KV452904.1 | 15536563 | 7-scf00172    | 7  |
| AX-158057859 | 8 | 57.71  | KV452904.1 | 15683036 | 7-scf00172    | 7  |
| AX-158416427 | 8 | 57.71  | KV452904.1 | 15695108 | 7-scf00172    | 7  |
| AX-158057901 | 8 | 57.71  | KV452904.1 | 15774561 | 7-scf00172    | 7  |
| AX-158057932 | 8 | 57.71  | KV452904.1 | 15845454 | 7-scf00172    | 7  |
| AX-158057933 | 8 | 57.71  | KV452904.1 | 15851485 | 7-scf00172    | 7  |
| AX-157694668 | 8 | 57.71  | FI875676.1 | 678      | ORI212 Ictalu | UN |
| AX-158057867 | 8 | 57.725 | KV452904.1 | 15712370 | 7-scf00172    | 7  |
| AX-158057869 | 8 | 57.739 | KV452904.1 | 15712591 | 7-scf00172    | 7  |

|              |   |        |            |          |            |   |
|--------------|---|--------|------------|----------|------------|---|
| AX-158057877 | 8 | 57.752 | KV452904.1 | 15731365 | 7-scf00172 | 7 |
| AX-158058036 | 8 | 57.752 | KV452904.1 | 16023290 | 7-scf00172 | 7 |
| AX-158051048 | 8 | 57.765 | KV452904.1 | 5519167  | 7-scf00172 | 7 |
| AX-157856637 | 8 | 57.765 | KV452904.1 | 7487618  | 7-scf00172 | 7 |
| AX-157822865 | 8 | 57.765 | KV452904.1 | 7523443  | 7-scf00172 | 7 |
| AX-158053822 | 8 | 57.765 | KV452904.1 | 9468317  | 7-scf00172 | 7 |
| AX-158055763 | 8 | 57.765 | KV452904.1 | 11635436 | 7-scf00172 | 7 |
| AX-158056337 | 8 | 57.765 | KV452904.1 | 12371770 | 7-scf00172 | 7 |
| AX-158056467 | 8 | 57.765 | KV452904.1 | 12606701 | 7-scf00172 | 7 |
| AX-158056507 | 8 | 57.765 | KV452904.1 | 12662353 | 7-scf00172 | 7 |
| AX-157823113 | 8 | 57.765 | KV452904.1 | 12709796 | 7-scf00172 | 7 |
| AX-158056579 | 8 | 57.765 | KV452904.1 | 12821049 | 7-scf00172 | 7 |
| AX-158378932 | 8 | 57.765 | KV452904.1 | 13105537 | 7-scf00172 | 7 |
| AX-158056856 | 8 | 57.765 | KV452904.1 | 13267171 | 7-scf00172 | 7 |
| AX-158378935 | 8 | 57.765 | KV452904.1 | 13267288 | 7-scf00172 | 7 |
| AX-158056974 | 8 | 57.765 | KV452904.1 | 13580039 | 7-scf00172 | 7 |
| AX-158056975 | 8 | 57.765 | KV452904.1 | 13589546 | 7-scf00172 | 7 |
| AX-158056979 | 8 | 57.765 | KV452904.1 | 13597419 | 7-scf00172 | 7 |
| AX-158057255 | 8 | 57.765 | KV452904.1 | 14353334 | 7-scf00172 | 7 |
| AX-158057292 | 8 | 57.765 | KV452904.1 | 14472517 | 7-scf00172 | 7 |
| AX-158378940 | 8 | 57.765 | KV452904.1 | 14890833 | 7-scf00172 | 7 |
| AX-158057452 | 8 | 57.765 | KV452904.1 | 14954218 | 7-scf00172 | 7 |
| AX-158057453 | 8 | 57.765 | KV452904.1 | 14957717 | 7-scf00172 | 7 |
| AX-158057498 | 8 | 57.765 | KV452904.1 | 15019924 | 7-scf00172 | 7 |
| AX-158057506 | 8 | 57.765 | KV452904.1 | 15039912 | 7-scf00172 | 7 |
| AX-158057545 | 8 | 57.765 | KV452904.1 | 15091928 | 7-scf00172 | 7 |
| AX-158057602 | 8 | 57.765 | KV452904.1 | 15166283 | 7-scf00172 | 7 |
| AX-158057624 | 8 | 57.765 | KV452904.1 | 15214266 | 7-scf00172 | 7 |
| AX-158057657 | 8 | 57.765 | KV452904.1 | 15266456 | 7-scf00172 | 7 |
| AX-158378947 | 8 | 57.765 | KV452904.1 | 15284274 | 7-scf00172 | 7 |
| AX-157720664 | 8 | 57.765 | KV452904.1 | 15284625 | 7-scf00172 | 7 |
| AX-158378948 | 8 | 57.765 | KV452904.1 | 15285332 | 7-scf00172 | 7 |
| AX-157749562 | 8 | 57.765 | KV452904.1 | 15436278 | 7-scf00172 | 7 |
| AX-158403624 | 8 | 57.765 | KV452904.1 | 15545047 | 7-scf00172 | 7 |
| AX-158057798 | 8 | 57.765 | KV452904.1 | 15593910 | 7-scf00172 | 7 |
| AX-158057799 | 8 | 57.765 | KV452904.1 | 15597138 | 7-scf00172 | 7 |
| AX-158057801 | 8 | 57.765 | KV452904.1 | 15599412 | 7-scf00172 | 7 |
| AX-158057839 | 8 | 57.765 | KV452904.1 | 15671778 | 7-scf00172 | 7 |
| AX-158057842 | 8 | 57.765 | KV452904.1 | 15673107 | 7-scf00172 | 7 |
| AX-158057843 | 8 | 57.765 | KV452904.1 | 15673979 | 7-scf00172 | 7 |
| AX-157715396 | 8 | 57.765 | KV452904.1 | 15698184 | 7-scf00172 | 7 |
| AX-157746052 | 8 | 57.765 | KV452904.1 | 15732224 | 7-scf00172 | 7 |
| AX-158057879 | 8 | 57.765 | KV452904.1 | 15739000 | 7-scf00172 | 7 |
| AX-158057915 | 8 | 57.765 | KV452904.1 | 15811188 | 7-scf00172 | 7 |
| AX-157876878 | 8 | 57.765 | KV452904.1 | 15812114 | 7-scf00172 | 7 |
| AX-158057916 | 8 | 57.765 | KV452904.1 | 15814920 | 7-scf00172 | 7 |
| AX-158057917 | 8 | 57.765 | KV452904.1 | 15815485 | 7-scf00172 | 7 |
| AX-158057918 | 8 | 57.765 | KV452904.1 | 15815799 | 7-scf00172 | 7 |
| AX-158057920 | 8 | 57.765 | KV452904.1 | 15817433 | 7-scf00172 | 7 |
| AX-158378954 | 8 | 57.765 | KV452904.1 | 15834233 | 7-scf00172 | 7 |
| AX-157823195 | 8 | 57.765 | KV452904.1 | 15848060 | 7-scf00172 | 7 |

|              |   |        |            |          |            |   |
|--------------|---|--------|------------|----------|------------|---|
| AX-157823196 | 8 | 57.765 | KV452904.1 | 15851173 | 7-scf00172 | 7 |
| AX-158057936 | 8 | 57.765 | KV452904.1 | 15854000 | 7-scf00172 | 7 |
| AX-158378957 | 8 | 57.765 | KV452904.1 | 15868180 | 7-scf00172 | 7 |
| AX-158057954 | 8 | 57.765 | KV452904.1 | 15885607 | 7-scf00172 | 7 |
| AX-158057957 | 8 | 57.765 | KV452904.1 | 15887569 | 7-scf00172 | 7 |
| AX-158057962 | 8 | 57.765 | KV452904.1 | 15893767 | 7-scf00172 | 7 |
| AX-158057963 | 8 | 57.765 | KV452904.1 | 15894009 | 7-scf00172 | 7 |
| AX-158057964 | 8 | 57.765 | KV452904.1 | 15894837 | 7-scf00172 | 7 |
| AX-158057976 | 8 | 57.765 | KV452904.1 | 15914985 | 7-scf00172 | 7 |
| AX-157823201 | 8 | 57.765 | KV452904.1 | 15915971 | 7-scf00172 | 7 |
| AX-158057978 | 8 | 57.765 | KV452904.1 | 15916439 | 7-scf00172 | 7 |
| AX-157715830 | 8 | 57.765 | KV452904.1 | 15918318 | 7-scf00172 | 7 |
| AX-157748860 | 8 | 57.765 | KV452904.1 | 15918700 | 7-scf00172 | 7 |
| AX-158378958 | 8 | 57.765 | KV452904.1 | 15918994 | 7-scf00172 | 7 |
| AX-157823203 | 8 | 57.765 | KV452904.1 | 15920495 | 7-scf00172 | 7 |
| AX-158057982 | 8 | 57.765 | KV452904.1 | 15926911 | 7-scf00172 | 7 |
| AX-157741235 | 8 | 57.765 | KV452904.1 | 15927327 | 7-scf00172 | 7 |
| AX-157823204 | 8 | 57.765 | KV452904.1 | 15928054 | 7-scf00172 | 7 |
| AX-157823205 | 8 | 57.765 | KV452904.1 | 15930619 | 7-scf00172 | 7 |
| AX-157775936 | 8 | 57.765 | KV452904.1 | 15940288 | 7-scf00172 | 7 |
| AX-158378960 | 8 | 57.765 | KV452904.1 | 15940627 | 7-scf00172 | 7 |
| AX-158057995 | 8 | 57.765 | KV452904.1 | 15964736 | 7-scf00172 | 7 |
| AX-158057996 | 8 | 57.765 | KV452904.1 | 15968004 | 7-scf00172 | 7 |
| AX-158057998 | 8 | 57.765 | KV452904.1 | 15976672 | 7-scf00172 | 7 |
| AX-158058007 | 8 | 57.765 | KV452904.1 | 15992867 | 7-scf00172 | 7 |
| AX-158058011 | 8 | 57.765 | KV452904.1 | 16001101 | 7-scf00172 | 7 |
| AX-158058013 | 8 | 57.765 | KV452904.1 | 16001926 | 7-scf00172 | 7 |
| AX-158058014 | 8 | 57.765 | KV452904.1 | 16002123 | 7-scf00172 | 7 |
| AX-157749636 | 8 | 57.765 | KV452904.1 | 16005057 | 7-scf00172 | 7 |
| AX-158378961 | 8 | 57.765 | KV452904.1 | 16006710 | 7-scf00172 | 7 |
| AX-158058019 | 8 | 57.765 | KV452904.1 | 16010938 | 7-scf00172 | 7 |
| AX-158058023 | 8 | 57.765 | KV452904.1 | 16015820 | 7-scf00172 | 7 |
| AX-158058034 | 8 | 57.765 | KV452904.1 | 16021637 | 7-scf00172 | 7 |
| AX-157856846 | 8 | 57.765 | KV452904.1 | 16023905 | 7-scf00172 | 7 |
| AX-158409085 | 8 | 57.765 | KV452904.1 | 16039393 | 7-scf00172 | 7 |
| AX-158058042 | 8 | 57.765 | KV452904.1 | 16045999 | 7-scf00172 | 7 |
| AX-158058043 | 8 | 57.765 | KV452904.1 | 16046904 | 7-scf00172 | 7 |
| AX-158058045 | 8 | 57.765 | KV452904.1 | 16047751 | 7-scf00172 | 7 |
| AX-158058046 | 8 | 57.765 | KV452904.1 | 16049894 | 7-scf00172 | 7 |
| AX-158058049 | 8 | 57.765 | KV452904.1 | 16051359 | 7-scf00172 | 7 |
| AX-157749331 | 8 | 57.765 | KV452904.1 | 16053508 | 7-scf00172 | 7 |
| AX-158058052 | 8 | 57.765 | KV452904.1 | 16053927 | 7-scf00172 | 7 |
| AX-158058060 | 8 | 57.765 | KV452904.1 | 16074438 | 7-scf00172 | 7 |
| AX-158058062 | 8 | 57.765 | KV452904.1 | 16075036 | 7-scf00172 | 7 |
| AX-158058063 | 8 | 57.765 | KV452904.1 | 16075984 | 7-scf00172 | 7 |
| AX-157751298 | 8 | 57.765 | KV452904.1 | 16076446 | 7-scf00172 | 7 |
| AX-158058064 | 8 | 57.765 | KV452904.1 | 16076942 | 7-scf00172 | 7 |
| AX-158058069 | 8 | 57.765 | KV452904.1 | 16085151 | 7-scf00172 | 7 |
| AX-158058075 | 8 | 57.765 | KV452904.1 | 16097604 | 7-scf00172 | 7 |
| AX-158058096 | 8 | 57.765 | KV452904.1 | 16140483 | 7-scf00172 | 7 |
| AX-157727790 | 8 | 57.765 | KV452904.1 | 16193516 | 7-scf00172 | 7 |

|              |   |        |             |          |            |    |
|--------------|---|--------|-------------|----------|------------|----|
| AX-157823214 | 8 | 57.765 | KV452904.1  | 16346061 | 7-scf00172 | 7  |
| AX-158058187 | 8 | 57.765 | KV452904.1  | 16379255 | 7-scf00172 | 7  |
| AX-158058191 | 8 | 57.765 | KV452904.1  | 16387925 | 7-scf00172 | 7  |
| AX-158053666 | 8 | 57.984 | KV452904.1  | 9211493  | 7-scf00172 | 7  |
| AX-158408950 | 8 | 57.984 | KV452904.1  | 9560283  | 7-scf00172 | 7  |
| AX-158058080 | 8 | 57.984 | KV452904.1  | 16105249 | 7-scf00172 | 7  |
| AX-158058081 | 8 | 57.984 | KV452904.1  | 16105690 | 7-scf00172 | 7  |
| AX-157713160 | 8 | 57.984 | KV452904.1  | 16106854 | 7-scf00172 | 7  |
| AX-158058084 | 8 | 57.984 | KV452904.1  | 16111071 | 7-scf00172 | 7  |
| AX-157823212 | 8 | 57.984 | KV452904.1  | 16119685 | 7-scf00172 | 7  |
| AX-157823213 | 8 | 57.984 | KV452904.1  | 16119735 | 7-scf00172 | 7  |
| AX-158058087 | 8 | 57.984 | KV452904.1  | 16120010 | 7-scf00172 | 7  |
| AX-158058109 | 8 | 57.984 | KV452904.1  | 16166212 | 7-scf00172 | 7  |
| AX-158058111 | 8 | 57.984 | KV452904.1  | 16167208 | 7-scf00172 | 7  |
| AX-158058113 | 8 | 57.984 | KV452904.1  | 16169887 | 7-scf00172 | 7  |
| AX-158058124 | 8 | 57.984 | KV452904.1  | 16192177 | 7-scf00172 | 7  |
| AX-158058125 | 8 | 57.984 | KV452904.1  | 16200144 | 7-scf00172 | 7  |
| AX-158058272 | 8 | 57.984 | KV452904.1  | 16540723 | 7-scf00172 | 7  |
| AX-158058276 | 8 | 57.984 | KV452904.1  | 16543823 | 7-scf00172 | 7  |
| AX-158378977 | 8 | 57.984 | KV452904.1  | 16981939 | 7-scf00172 | 7  |
| AX-158058812 | 8 | 57.984 | KV452906.1  | 98696    | 7-scf00174 | 7  |
| AX-157823290 | 8 | 57.984 | KV452906.1  | 130731   | 7-scf00174 | 7  |
| AX-158056903 | 8 | 57.992 | KV452904.1  | 13378078 | 7-scf00172 | 7  |
| AX-158057547 | 8 | 57.992 | KV452904.1  | 15092271 | 7-scf00172 | 7  |
| AX-158058089 | 8 | 57.992 | KV452904.1  | 16120488 | 7-scf00172 | 7  |
| AX-158058107 | 8 | 57.992 | KV452904.1  | 16153482 | 7-scf00172 | 7  |
| AX-158058112 | 8 | 57.992 | KV452904.1  | 16168127 | 7-scf00172 | 7  |
| AX-158058126 | 8 | 57.992 | KV452904.1  | 16213406 | 7-scf00172 | 7  |
| AX-158058127 | 8 | 57.992 | KV452904.1  | 16213873 | 7-scf00172 | 7  |
| AX-158058129 | 8 | 57.992 | KV452904.1  | 16217650 | 7-scf00172 | 7  |
| AX-158058145 | 8 | 57.992 | KV452904.1  | 16243969 | 7-scf00172 | 7  |
| AX-158058203 | 8 | 57.992 | KV452904.1  | 16458693 | 7-scf00172 | 7  |
| AX-157775260 | 8 | 57.992 | KV452904.1  | 17002165 | 7-scf00172 | 7  |
| AX-158058938 | 8 | 57.992 | KV452905.1  | 105761   | 7-scf00175 | 7  |
| AX-157681117 | 8 | 57.992 | 3ML01029284 | 898      | scf04905_1 | UN |
| AX-158053583 | 8 | 58     | KV452904.1  | 9121997  | 7-scf00172 | 7  |
| AX-158053804 | 8 | 58     | KV452904.1  | 9443020  | 7-scf00172 | 7  |
| AX-158053842 | 8 | 58     | KV452904.1  | 9499899  | 7-scf00172 | 7  |
| AX-158053849 | 8 | 58     | KV452904.1  | 9516392  | 7-scf00172 | 7  |
| AX-158053988 | 8 | 58     | KV452904.1  | 9711478  | 7-scf00172 | 7  |
| AX-158053991 | 8 | 58     | KV452904.1  | 9717173  | 7-scf00172 | 7  |
| AX-157823118 | 8 | 58     | KV452904.1  | 12772095 | 7-scf00172 | 7  |
| AX-158378963 | 8 | 58     | KV452904.1  | 16217977 | 7-scf00172 | 7  |
| AX-158058134 | 8 | 58     | KV452904.1  | 16234937 | 7-scf00172 | 7  |
| AX-158058136 | 8 | 58     | KV452904.1  | 16236369 | 7-scf00172 | 7  |
| AX-158058300 | 8 | 58     | KV452904.1  | 16586894 | 7-scf00172 | 7  |
| AX-158058923 | 8 | 58     | KV452905.1  | 74526    | 7-scf00175 | 7  |
| AX-158057999 | 8 | 58.014 | KV452904.1  | 15981892 | 7-scf00172 | 7  |
| AX-158058037 | 8 | 58.014 | KV452904.1  | 16025692 | 7-scf00172 | 7  |
| AX-157823209 | 8 | 58.014 | KV452904.1  | 16026010 | 7-scf00172 | 7  |
| AX-158058152 | 8 | 58.014 | KV452904.1  | 16271118 | 7-scf00172 | 7  |

|              |   |        |            |          |            |   |
|--------------|---|--------|------------|----------|------------|---|
| AX-158058154 | 8 | 58.025 | KV452904.1 | 16279015 | 7-scf00172 | 7 |
| AX-158058163 | 8 | 58.036 | KV452904.1 | 16298956 | 7-scf00172 | 7 |
| AX-158053723 | 8 | 58.044 | KV452904.1 | 9297108  | 7-scf00172 | 7 |
| AX-158053727 | 8 | 58.044 | KV452904.1 | 9300568  | 7-scf00172 | 7 |
| AX-158053734 | 8 | 58.044 | KV452904.1 | 9307336  | 7-scf00172 | 7 |
| AX-158058160 | 8 | 58.044 | KV452904.1 | 16288967 | 7-scf00172 | 7 |
| AX-158409088 | 8 | 58.044 | KV452904.1 | 16299044 | 7-scf00172 | 7 |
| AX-158058167 | 8 | 58.044 | KV452904.1 | 16306231 | 7-scf00172 | 7 |
| AX-158058170 | 8 | 58.044 | KV452904.1 | 16314816 | 7-scf00172 | 7 |
| AX-158058158 | 8 | 58.057 | KV452904.1 | 16288008 | 7-scf00172 | 7 |
| AX-158058171 | 8 | 58.057 | KV452904.1 | 16316950 | 7-scf00172 | 7 |
| AX-158058179 | 8 | 58.062 | KV452904.1 | 16336312 | 7-scf00172 | 7 |
| AX-158051088 | 8 | 58.067 | KV452904.1 | 5554225  | 7-scf00172 | 7 |
| AX-158051237 | 8 | 58.067 | KV452904.1 | 5775606  | 7-scf00172 | 7 |
| AX-158052064 | 8 | 58.067 | KV452904.1 | 7004174  | 7-scf00172 | 7 |
| AX-158058180 | 8 | 58.067 | KV452904.1 | 16337502 | 7-scf00172 | 7 |
| AX-158058190 | 8 | 58.072 | KV452904.1 | 16386048 | 7-scf00172 | 7 |
| AX-157713842 | 8 | 58.082 | KV452904.1 | 16427709 | 7-scf00172 | 7 |
| AX-157856635 | 8 | 58.093 | KV452904.1 | 7481915  | 7-scf00172 | 7 |
| AX-158052782 | 8 | 58.093 | KV452904.1 | 7928748  | 7-scf00172 | 7 |
| AX-158052884 | 8 | 58.093 | KV452904.1 | 8029407  | 7-scf00172 | 7 |
| AX-158052886 | 8 | 58.093 | KV452904.1 | 8042264  | 7-scf00172 | 7 |
| AX-157856726 | 8 | 58.093 | KV452904.1 | 8264979  | 7-scf00172 | 7 |
| AX-157856730 | 8 | 58.093 | KV452904.1 | 8317548  | 7-scf00172 | 7 |
| AX-157822912 | 8 | 58.093 | KV452904.1 | 8323802  | 7-scf00172 | 7 |
| AX-158053122 | 8 | 58.093 | KV452904.1 | 8328899  | 7-scf00172 | 7 |
| AX-158053128 | 8 | 58.093 | KV452904.1 | 8341704  | 7-scf00172 | 7 |
| AX-158053140 | 8 | 58.093 | KV452904.1 | 8359980  | 7-scf00172 | 7 |
| AX-157822915 | 8 | 58.093 | KV452904.1 | 8364831  | 7-scf00172 | 7 |
| AX-157822917 | 8 | 58.093 | KV452904.1 | 8370462  | 7-scf00172 | 7 |
| AX-158053143 | 8 | 58.093 | KV452904.1 | 8370756  | 7-scf00172 | 7 |
| AX-158053147 | 8 | 58.093 | KV452904.1 | 8380343  | 7-scf00172 | 7 |
| AX-158053154 | 8 | 58.093 | KV452904.1 | 8391398  | 7-scf00172 | 7 |
| AX-157856736 | 8 | 58.093 | KV452904.1 | 8398995  | 7-scf00172 | 7 |
| AX-158053165 | 8 | 58.093 | KV452904.1 | 8408681  | 7-scf00172 | 7 |
| AX-158053166 | 8 | 58.093 | KV452904.1 | 8413609  | 7-scf00172 | 7 |
| AX-158053172 | 8 | 58.093 | KV452904.1 | 8420880  | 7-scf00172 | 7 |
| AX-157856740 | 8 | 58.093 | KV452904.1 | 8423213  | 7-scf00172 | 7 |
| AX-157695728 | 8 | 58.093 | KV452904.1 | 8424442  | 7-scf00172 | 7 |
| AX-157856743 | 8 | 58.093 | KV452904.1 | 8444286  | 7-scf00172 | 7 |
| AX-158053184 | 8 | 58.093 | KV452904.1 | 8448327  | 7-scf00172 | 7 |
| AX-157708893 | 8 | 58.093 | KV452904.1 | 8486856  | 7-scf00172 | 7 |
| AX-158053205 | 8 | 58.093 | KV452904.1 | 8497217  | 7-scf00172 | 7 |
| AX-158391824 | 8 | 58.093 | KV452904.1 | 8502577  | 7-scf00172 | 7 |
| AX-158053216 | 8 | 58.093 | KV452904.1 | 8508795  | 7-scf00172 | 7 |
| AX-158053220 | 8 | 58.093 | KV452904.1 | 8517842  | 7-scf00172 | 7 |
| AX-158053228 | 8 | 58.093 | KV452904.1 | 8529988  | 7-scf00172 | 7 |
| AX-158408927 | 8 | 58.093 | KV452904.1 | 8549531  | 7-scf00172 | 7 |
| AX-158053236 | 8 | 58.093 | KV452904.1 | 8558522  | 7-scf00172 | 7 |
| AX-158053248 | 8 | 58.093 | KV452904.1 | 8584963  | 7-scf00172 | 7 |
| AX-158053260 | 8 | 58.093 | KV452904.1 | 8598202  | 7-scf00172 | 7 |



|              |   |        |            |          |            |    |
|--------------|---|--------|------------|----------|------------|----|
| AX-158053268 | 8 | 58.093 | KV452904.1 | 8607538  | 7-scf00172 | 7  |
| AX-158053269 | 8 | 58.093 | KV452904.1 | 8609739  | 7-scf00172 | 7  |
| AX-158053282 | 8 | 58.093 | KV452904.1 | 8624103  | 7-scf00172 | 7  |
| AX-158053299 | 8 | 58.093 | KV452904.1 | 8640595  | 7-scf00172 | 7  |
| AX-157856761 | 8 | 58.093 | KV452904.1 | 8645001  | 7-scf00172 | 7  |
| AX-158053309 | 8 | 58.093 | KV452904.1 | 8659451  | 7-scf00172 | 7  |
| AX-158053323 | 8 | 58.093 | KV452904.1 | 8678443  | 7-scf00172 | 7  |
| AX-157856768 | 8 | 58.093 | KV452904.1 | 8687064  | 7-scf00172 | 7  |
| AX-158053337 | 8 | 58.093 | KV452904.1 | 8698673  | 7-scf00172 | 7  |
| AX-158053348 | 8 | 58.093 | KV452904.1 | 8720691  | 7-scf00172 | 7  |
| AX-157721895 | 8 | 58.093 | KV452904.1 | 8755398  | 7-scf00172 | 7  |
| AX-158053366 | 8 | 58.093 | KV452904.1 | 8761661  | 7-scf00172 | 7  |
| AX-158053380 | 8 | 58.093 | KV452904.1 | 8787457  | 7-scf00172 | 7  |
| AX-158053382 | 8 | 58.093 | KV452904.1 | 8795490  | 7-scf00172 | 7  |
| AX-158053392 | 8 | 58.093 | KV452904.1 | 8805319  | 7-scf00172 | 7  |
| AX-158053398 | 8 | 58.093 | KV452904.1 | 8817270  | 7-scf00172 | 7  |
| AX-157863103 | 8 | 58.093 | KV452904.1 | 8875528  | 7-scf00172 | 7  |
| AX-158053457 | 8 | 58.093 | KV452904.1 | 8944187  | 7-scf00172 | 7  |
| AX-158053463 | 8 | 58.093 | KV452904.1 | 8957721  | 7-scf00172 | 7  |
| AX-157822932 | 8 | 58.093 | KV452904.1 | 9009695  | 7-scf00172 | 7  |
| AX-158058210 | 8 | 58.093 | KV452904.1 | 16467079 | 7-scf00172 | 7  |
| AX-158058218 | 8 | 58.093 | KV452904.1 | 16473500 | 7-scf00172 | 7  |
| AX-158058222 | 8 | 58.093 | KV452904.1 | 16483006 | 7-scf00172 | 7  |
| AX-158058223 | 8 | 58.093 | KV452904.1 | 16485827 | 7-scf00172 | 7  |
| AX-158058226 | 8 | 58.093 | KV452904.1 | 16489544 | 7-scf00172 | 7  |
| AX-158058234 | 8 | 58.093 | KV452904.1 | 16499371 | 7-scf00172 | 7  |
| AX-158058241 | 8 | 58.093 | KV452904.1 | 16499672 | 7-scf00172 | 7  |
| AX-157823218 | 8 | 58.093 | KV452904.1 | 16500206 | 7-scf00172 | 7  |
| AX-158058244 | 8 | 58.093 | KV452904.1 | 16503033 | 7-scf00172 | 7  |
| AX-157695932 | 8 | 58.093 | FI894221.1 | 305      | 7-scf00172 | UN |
| AX-158051069 | 8 | 58.202 | KV452904.1 | 5544350  | 7-scf00172 | 7  |
| AX-158053353 | 8 | 58.202 | KV452904.1 | 8734463  | 7-scf00172 | 7  |
| AX-157822923 | 8 | 58.202 | KV452904.1 | 8769828  | 7-scf00172 | 7  |
| AX-158053582 | 8 | 58.202 | KV452904.1 | 9121063  | 7-scf00172 | 7  |
| AX-158053587 | 8 | 58.202 | KV452904.1 | 9125206  | 7-scf00172 | 7  |
| AX-158053598 | 8 | 58.202 | KV452904.1 | 9137876  | 7-scf00172 | 7  |
| AX-158053603 | 8 | 58.202 | KV452904.1 | 9139710  | 7-scf00172 | 7  |
| AX-158053667 | 8 | 58.202 | KV452904.1 | 9217972  | 7-scf00172 | 7  |
| AX-158053722 | 8 | 58.202 | KV452904.1 | 9296250  | 7-scf00172 | 7  |
| AX-158053758 | 8 | 58.202 | KV452904.1 | 9337884  | 7-scf00172 | 7  |
| AX-158053769 | 8 | 58.202 | KV452904.1 | 9352106  | 7-scf00172 | 7  |
| AX-158053773 | 8 | 58.202 | KV452904.1 | 9373902  | 7-scf00172 | 7  |
| AX-158055645 | 8 | 58.202 | KV452904.1 | 11514873 | 7-scf00172 | 7  |
| AX-158056203 | 8 | 58.202 | KV452904.1 | 12193435 | 7-scf00172 | 7  |
| AX-157823101 | 8 | 58.202 | KV452904.1 | 12400060 | 7-scf00172 | 7  |
| AX-158056468 | 8 | 58.202 | KV452904.1 | 12608384 | 7-scf00172 | 7  |
| AX-158058093 | 8 | 58.202 | KV452904.1 | 16131169 | 7-scf00172 | 7  |
| AX-158058229 | 8 | 58.202 | KV452904.1 | 16492725 | 7-scf00172 | 7  |
| AX-158058233 | 8 | 58.202 | KV452904.1 | 16497135 | 7-scf00172 | 7  |
| AX-158058268 | 8 | 58.202 | KV452904.1 | 16538015 | 7-scf00172 | 7  |
| AX-158058293 | 8 | 58.202 | KV452904.1 | 16572035 | 7-scf00172 | 7  |

|              |   |        |             |          |            |    |
|--------------|---|--------|-------------|----------|------------|----|
| AX-157823225 | 8 | 58.202 | KV452904.1  | 16579678 | 7-scf00172 | 7  |
| AX-158058299 | 8 | 58.202 | KV452904.1  | 16585339 | 7-scf00172 | 7  |
| AX-157738673 | 8 | 58.202 | KV452904.1  | 16586003 | 7-scf00172 | 7  |
| AX-158058307 | 8 | 58.202 | KV452904.1  | 16592536 | 7-scf00172 | 7  |
| AX-158058313 | 8 | 58.202 | KV452904.1  | 16596035 | 7-scf00172 | 7  |
| AX-158058324 | 8 | 58.202 | KV452904.1  | 16615639 | 7-scf00172 | 7  |
| AX-157713269 | 8 | 58.202 | KV452904.1  | 16620085 | 7-scf00172 | 7  |
| AX-158058332 | 8 | 58.202 | KV452904.1  | 16625867 | 7-scf00172 | 7  |
| AX-157823227 | 8 | 58.202 | KV452904.1  | 16626647 | 7-scf00172 | 7  |
| AX-157747319 | 8 | 58.202 | KV452904.1  | 16676548 | 7-scf00172 | 7  |
| AX-158058436 | 8 | 58.202 | KV452904.1  | 16806617 | 7-scf00172 | 7  |
| AX-158058483 | 8 | 58.202 | KV452904.1  | 16895528 | 7-scf00172 | 7  |
| AX-158058491 | 8 | 58.202 | KV452904.1  | 16904887 | 7-scf00172 | 7  |
| AX-158058495 | 8 | 58.202 | KV452904.1  | 16913500 | 7-scf00172 | 7  |
| AX-157856858 | 8 | 58.202 | KV452904.1  | 16918177 | 7-scf00172 | 7  |
| AX-158378975 | 8 | 58.202 | KV452904.1  | 16940201 | 7-scf00172 | 7  |
| AX-158058505 | 8 | 58.202 | KV452904.1  | 16950256 | 7-scf00172 | 7  |
| AX-158058514 | 8 | 58.202 | KV452904.1  | 16963171 | 7-scf00172 | 7  |
| AX-157856859 | 8 | 58.202 | KV452904.1  | 16964347 | 7-scf00172 | 7  |
| AX-158058530 | 8 | 58.202 | KV452904.1  | 16974958 | 7-scf00172 | 7  |
| AX-158058535 | 8 | 58.202 | KV452904.1  | 16985081 | 7-scf00172 | 7  |
| AX-157856862 | 8 | 58.202 | KV452904.1  | 16990207 | 7-scf00172 | 7  |
| AX-158058882 | 8 | 58.202 | KV452906.1  | 163573   | 7-scf00174 | 7  |
| AX-157823299 | 8 | 58.202 | KV452905.1  | 14139    | 7-scf00175 | 7  |
| AX-158058897 | 8 | 58.202 | KV452905.1  | 22678    | 7-scf00175 | 7  |
| AX-158058928 | 8 | 58.202 | KV452905.1  | 82982    | 7-scf00175 | 7  |
| AX-158058934 | 8 | 58.202 | KV452905.1  | 96903    | 7-scf00175 | 7  |
| AX-158058942 | 8 | 58.202 | KV452905.1  | 108963   | 7-scf00175 | 7  |
| AX-158058946 | 8 | 58.202 | KV452905.1  | 125137   | 7-scf00175 | 7  |
| AX-158409110 | 8 | 58.202 | KV452905.1  | 152274   | 7-scf00175 | 7  |
| AX-158058972 | 8 | 58.202 | KV452905.1  | 169571   | 7-scf00175 | 7  |
| AX-158058975 | 8 | 58.202 | KV452905.1  | 172491   | 7-scf00175 | 7  |
| AX-158058976 | 8 | 58.202 | KV452905.1  | 173259   | 7-scf00175 | 7  |
| AX-158058983 | 8 | 58.202 | KV452905.1  | 183224   | 7-scf00175 | 7  |
| AX-158058994 | 8 | 58.202 | KV452905.1  | 194427   | 7-scf00175 | 7  |
| AX-157689264 | 8 | 58.202 | 3ML01028892 | 845      | scf04507_1 | UN |
| AX-158058373 | 8 | 58.203 | KV452904.1  | 16713688 | 7-scf00172 | 7  |
| AX-158058465 | 8 | 58.204 | KV452904.1  | 16862107 | 7-scf00172 | 7  |
| AX-158058490 | 8 | 58.204 | KV452904.1  | 16901969 | 7-scf00172 | 7  |
| AX-158058891 | 8 | 58.204 | KV452905.1  | 6435     | 7-scf00175 | 7  |
| AX-158053668 | 8 | 58.205 | KV452904.1  | 9219365  | 7-scf00172 | 7  |
| AX-158053757 | 8 | 58.205 | KV452904.1  | 9336335  | 7-scf00172 | 7  |
| AX-158053775 | 8 | 58.205 | KV452904.1  | 9375519  | 7-scf00172 | 7  |
| AX-158053908 | 8 | 58.205 | KV452904.1  | 9593348  | 7-scf00172 | 7  |
| AX-158053929 | 8 | 58.205 | KV452904.1  | 9614364  | 7-scf00172 | 7  |
| AX-158053932 | 8 | 58.205 | KV452904.1  | 9615277  | 7-scf00172 | 7  |
| AX-158056905 | 8 | 58.205 | KV452904.1  | 13401133 | 7-scf00172 | 7  |
| AX-158056948 | 8 | 58.205 | KV452904.1  | 13518011 | 7-scf00172 | 7  |
| AX-158057045 | 8 | 58.205 | KV452904.1  | 13740128 | 7-scf00172 | 7  |
| AX-158057958 | 8 | 58.205 | KV452904.1  | 15890812 | 7-scf00172 | 7  |
| AX-158057994 | 8 | 58.205 | KV452904.1  | 15964233 | 7-scf00172 | 7  |

|              |   |        |            |          |            |   |
|--------------|---|--------|------------|----------|------------|---|
| AX-158058082 | 8 | 58.205 | KV452904.1 | 16106002 | 7-scf00172 | 7 |
| AX-158058189 | 8 | 58.205 | KV452904.1 | 16384861 | 7-scf00172 | 7 |
| AX-158058339 | 8 | 58.205 | KV452904.1 | 16638274 | 7-scf00172 | 7 |
| AX-157718774 | 8 | 58.205 | KV452904.1 | 16795171 | 7-scf00172 | 7 |
| AX-157742084 | 8 | 58.205 | KV452904.1 | 16831095 | 7-scf00172 | 7 |
| AX-158058451 | 8 | 58.205 | KV452904.1 | 16834661 | 7-scf00172 | 7 |
| AX-158058543 | 8 | 58.205 | KV452904.1 | 16996012 | 7-scf00172 | 7 |
| AX-158058764 | 8 | 58.205 | KV452906.1 | 38984    | 7-scf00174 | 7 |
| AX-157823287 | 8 | 58.205 | KV452906.1 | 90362    | 7-scf00174 | 7 |
| AX-158058802 | 8 | 58.205 | KV452906.1 | 92700    | 7-scf00174 | 7 |
| AX-158058841 | 8 | 58.205 | KV452906.1 | 120533   | 7-scf00174 | 7 |
| AX-158058853 | 8 | 58.205 | KV452906.1 | 133411   | 7-scf00174 | 7 |
| AX-158058855 | 8 | 58.205 | KV452906.1 | 134416   | 7-scf00174 | 7 |
| AX-157823291 | 8 | 58.205 | KV452906.1 | 138260   | 7-scf00174 | 7 |
| AX-157823293 | 8 | 58.205 | KV452906.1 | 139889   | 7-scf00174 | 7 |
| AX-158058866 | 8 | 58.205 | KV452906.1 | 145736   | 7-scf00174 | 7 |
| AX-157823295 | 8 | 58.205 | KV452906.1 | 159477   | 7-scf00174 | 7 |
| AX-158058895 | 8 | 58.207 | KV452905.1 | 21802    | 7-scf00175 | 7 |
| AX-158058907 | 8 | 58.223 | KV452905.1 | 56857    | 7-scf00175 | 7 |
| AX-158058918 | 8 | 58.232 | KV452905.1 | 70500    | 7-scf00175 | 7 |
| AX-157856873 | 8 | 58.253 | KV452905.1 | 71745    | 7-scf00175 | 7 |
| AX-158058926 | 8 | 58.262 | KV452905.1 | 79966    | 7-scf00175 | 7 |
| AX-157748807 | 8 | 58.265 | KV452905.1 | 80698    | 7-scf00175 | 7 |
| AX-158050979 | 8 | 58.31  | KV452904.1 | 5421856  | 7-scf00172 | 7 |
| AX-158050980 | 8 | 58.31  | KV452904.1 | 5422765  | 7-scf00172 | 7 |
| AX-158053800 | 8 | 58.31  | KV452904.1 | 9437410  | 7-scf00172 | 7 |
| AX-158053923 | 8 | 58.31  | KV452904.1 | 9608607  | 7-scf00172 | 7 |
| AX-158056558 | 8 | 58.31  | KV452904.1 | 12783452 | 7-scf00172 | 7 |
| AX-158056571 | 8 | 58.31  | KV452904.1 | 12800949 | 7-scf00172 | 7 |
| AX-158056836 | 8 | 58.31  | KV452904.1 | 13243300 | 7-scf00172 | 7 |
| AX-158056875 | 8 | 58.31  | KV452904.1 | 13326342 | 7-scf00172 | 7 |
| AX-158056881 | 8 | 58.31  | KV452904.1 | 13338826 | 7-scf00172 | 7 |
| AX-158056883 | 8 | 58.31  | KV452904.1 | 13341080 | 7-scf00172 | 7 |
| AX-158056884 | 8 | 58.31  | KV452904.1 | 13341869 | 7-scf00172 | 7 |
| AX-158056918 | 8 | 58.31  | KV452904.1 | 13442240 | 7-scf00172 | 7 |
| AX-158056924 | 8 | 58.31  | KV452904.1 | 13447976 | 7-scf00172 | 7 |
| AX-158057004 | 8 | 58.31  | KV452904.1 | 13653292 | 7-scf00172 | 7 |
| AX-158057026 | 8 | 58.31  | KV452904.1 | 13707050 | 7-scf00172 | 7 |
| AX-158057028 | 8 | 58.31  | KV452904.1 | 13709748 | 7-scf00172 | 7 |
| AX-158057347 | 8 | 58.31  | KV452904.1 | 14627968 | 7-scf00172 | 7 |
| AX-158057361 | 8 | 58.31  | KV452904.1 | 14685093 | 7-scf00172 | 7 |
| AX-158057362 | 8 | 58.31  | KV452904.1 | 14694393 | 7-scf00172 | 7 |
| AX-158057366 | 8 | 58.31  | KV452904.1 | 14709101 | 7-scf00172 | 7 |
| AX-158057377 | 8 | 58.31  | KV452904.1 | 14753856 | 7-scf00172 | 7 |
| AX-157718548 | 8 | 58.31  | KV452904.1 | 14884879 | 7-scf00172 | 7 |
| AX-158057482 | 8 | 58.31  | KV452904.1 | 14993624 | 7-scf00172 | 7 |
| AX-158057522 | 8 | 58.31  | KV452904.1 | 15055404 | 7-scf00172 | 7 |
| AX-158058053 | 8 | 58.31  | KV452904.1 | 16054601 | 7-scf00172 | 7 |
| AX-158058086 | 8 | 58.31  | KV452904.1 | 16111434 | 7-scf00172 | 7 |
| AX-158058381 | 8 | 58.31  | KV452904.1 | 16724799 | 7-scf00172 | 7 |
| AX-158058885 | 8 | 58.31  | KV452906.1 | 167392   | 7-scf00174 | 7 |

|              |   |        |            |          |            |   |
|--------------|---|--------|------------|----------|------------|---|
| AX-158058887 | 8 | 58.31  | KV452906.1 | 167848   | 7-scf00174 | 7 |
| AX-158409116 | 8 | 58.31  | KV452905.1 | 156749   | 7-scf00175 | 7 |
| AX-157856880 | 8 | 58.311 | KV452905.1 | 189890   | 7-scf00175 | 7 |
| AX-158378803 | 8 | 58.312 | KV452904.1 | 8006827  | 7-scf00172 | 7 |
| AX-158053038 | 8 | 58.312 | KV452904.1 | 8226249  | 7-scf00172 | 7 |
| AX-158053049 | 8 | 58.312 | KV452904.1 | 8237137  | 7-scf00172 | 7 |
| AX-158053841 | 8 | 58.312 | KV452904.1 | 9499407  | 7-scf00172 | 7 |
| AX-158053844 | 8 | 58.312 | KV452904.1 | 9503294  | 7-scf00172 | 7 |
| AX-158053864 | 8 | 58.312 | KV452904.1 | 9553446  | 7-scf00172 | 7 |
| AX-158053883 | 8 | 58.312 | KV452904.1 | 9574869  | 7-scf00172 | 7 |
| AX-158053913 | 8 | 58.312 | KV452904.1 | 9600045  | 7-scf00172 | 7 |
| AX-158053919 | 8 | 58.312 | KV452904.1 | 9606922  | 7-scf00172 | 7 |
| AX-158053924 | 8 | 58.312 | KV452904.1 | 9609729  | 7-scf00172 | 7 |
| AX-158053927 | 8 | 58.312 | KV452904.1 | 9612033  | 7-scf00172 | 7 |
| AX-158053981 | 8 | 58.312 | KV452904.1 | 9700247  | 7-scf00172 | 7 |
| AX-158053987 | 8 | 58.312 | KV452904.1 | 9709891  | 7-scf00172 | 7 |
| AX-158054033 | 8 | 58.312 | KV452904.1 | 9758390  | 7-scf00172 | 7 |
| AX-158054044 | 8 | 58.312 | KV452904.1 | 9787598  | 7-scf00172 | 7 |
| AX-158054045 | 8 | 58.312 | KV452904.1 | 9791027  | 7-scf00172 | 7 |
| AX-158054065 | 8 | 58.312 | KV452904.1 | 9845201  | 7-scf00172 | 7 |
| AX-158054066 | 8 | 58.312 | KV452904.1 | 9845470  | 7-scf00172 | 7 |
| AX-157822958 | 8 | 58.312 | KV452904.1 | 9847131  | 7-scf00172 | 7 |
| AX-158054070 | 8 | 58.312 | KV452904.1 | 9850480  | 7-scf00172 | 7 |
| AX-158054079 | 8 | 58.312 | KV452904.1 | 9855904  | 7-scf00172 | 7 |
| AX-158054085 | 8 | 58.312 | KV452904.1 | 9859160  | 7-scf00172 | 7 |
| AX-158054086 | 8 | 58.312 | KV452904.1 | 9861605  | 7-scf00172 | 7 |
| AX-158054090 | 8 | 58.312 | KV452904.1 | 9864901  | 7-scf00172 | 7 |
| AX-158055508 | 8 | 58.312 | KV452904.1 | 11375281 | 7-scf00172 | 7 |
| AX-157715870 | 8 | 58.312 | KV452904.1 | 13572652 | 7-scf00172 | 7 |
| AX-158058010 | 8 | 58.312 | KV452904.1 | 15994565 | 7-scf00172 | 7 |
| AX-157823211 | 8 | 58.312 | KV452904.1 | 16107497 | 7-scf00172 | 7 |
| AX-158058312 | 8 | 58.312 | KV452904.1 | 16595134 | 7-scf00172 | 7 |
| AX-158058314 | 8 | 58.312 | KV452904.1 | 16596846 | 7-scf00172 | 7 |
| AX-158058432 | 8 | 58.312 | KV452904.1 | 16804680 | 7-scf00172 | 7 |
| AX-157823246 | 8 | 58.312 | KV452904.1 | 16806022 | 7-scf00172 | 7 |
| AX-157823247 | 8 | 58.312 | KV452904.1 | 16806097 | 7-scf00172 | 7 |
| AX-158058488 | 8 | 58.312 | KV452904.1 | 16900920 | 7-scf00172 | 7 |
| AX-158058496 | 8 | 58.312 | KV452904.1 | 16918811 | 7-scf00172 | 7 |
| AX-158058497 | 8 | 58.312 | KV452904.1 | 16922603 | 7-scf00172 | 7 |
| AX-158058733 | 8 | 58.312 | KV452906.1 | 1305     | 7-scf00174 | 7 |
| AX-158058734 | 8 | 58.312 | KV452906.1 | 1511     | 7-scf00174 | 7 |
| AX-158058742 | 8 | 58.312 | KV452906.1 | 4874     | 7-scf00174 | 7 |
| AX-157823272 | 8 | 58.312 | KV452906.1 | 8216     | 7-scf00174 | 7 |
| AX-158058756 | 8 | 58.312 | KV452906.1 | 23707    | 7-scf00174 | 7 |
| AX-158058757 | 8 | 58.312 | KV452906.1 | 24056    | 7-scf00174 | 7 |
| AX-157823281 | 8 | 58.312 | KV452906.1 | 32574    | 7-scf00174 | 7 |
| AX-158058766 | 8 | 58.312 | KV452906.1 | 43288    | 7-scf00174 | 7 |
| AX-158058772 | 8 | 58.312 | KV452906.1 | 48594    | 7-scf00174 | 7 |
| AX-158058780 | 8 | 58.312 | KV452906.1 | 62806    | 7-scf00174 | 7 |
| AX-158058781 | 8 | 58.312 | KV452906.1 | 63602    | 7-scf00174 | 7 |
| AX-158058782 | 8 | 58.312 | KV452906.1 | 64452    | 7-scf00174 | 7 |

|              |   |        |             |          |            |    |
|--------------|---|--------|-------------|----------|------------|----|
| AX-158058784 | 8 | 58.312 | KV452906.1  | 65283    | 7-scf00174 | 7  |
| AX-158058792 | 8 | 58.312 | KV452906.1  | 72385    | 7-scf00174 | 7  |
| AX-158058799 | 8 | 58.312 | KV452906.1  | 89499    | 7-scf00174 | 7  |
| AX-158058803 | 8 | 58.312 | KV452906.1  | 93599    | 7-scf00174 | 7  |
| AX-158058805 | 8 | 58.312 | KV452906.1  | 94173    | 7-scf00174 | 7  |
| AX-158058807 | 8 | 58.312 | KV452906.1  | 95632    | 7-scf00174 | 7  |
| AX-158058808 | 8 | 58.312 | KV452906.1  | 95862    | 7-scf00174 | 7  |
| AX-158058809 | 8 | 58.312 | KV452906.1  | 96881    | 7-scf00174 | 7  |
| AX-158058813 | 8 | 58.312 | KV452906.1  | 98974    | 7-scf00174 | 7  |
| AX-158058818 | 8 | 58.312 | KV452906.1  | 100214   | 7-scf00174 | 7  |
| AX-158058820 | 8 | 58.312 | KV452906.1  | 100737   | 7-scf00174 | 7  |
| AX-158058822 | 8 | 58.312 | KV452906.1  | 101619   | 7-scf00174 | 7  |
| AX-158058824 | 8 | 58.312 | KV452906.1  | 102839   | 7-scf00174 | 7  |
| AX-158058826 | 8 | 58.312 | KV452906.1  | 105217   | 7-scf00174 | 7  |
| AX-158058827 | 8 | 58.312 | KV452906.1  | 105863   | 7-scf00174 | 7  |
| AX-158058829 | 8 | 58.312 | KV452906.1  | 106917   | 7-scf00174 | 7  |
| AX-158058831 | 8 | 58.312 | KV452906.1  | 108777   | 7-scf00174 | 7  |
| AX-158058833 | 8 | 58.312 | KV452906.1  | 111460   | 7-scf00174 | 7  |
| AX-158058834 | 8 | 58.312 | KV452906.1  | 112044   | 7-scf00174 | 7  |
| AX-157823288 | 8 | 58.312 | KV452906.1  | 113177   | 7-scf00174 | 7  |
| AX-157856868 | 8 | 58.312 | KV452906.1  | 114392   | 7-scf00174 | 7  |
| AX-158058836 | 8 | 58.312 | KV452906.1  | 114532   | 7-scf00174 | 7  |
| AX-158058837 | 8 | 58.312 | KV452906.1  | 115142   | 7-scf00174 | 7  |
| AX-158058838 | 8 | 58.312 | KV452906.1  | 116029   | 7-scf00174 | 7  |
| AX-157856869 | 8 | 58.312 | KV452906.1  | 117446   | 7-scf00174 | 7  |
| AX-158058839 | 8 | 58.312 | KV452906.1  | 117647   | 7-scf00174 | 7  |
| AX-158058840 | 8 | 58.312 | KV452906.1  | 118016   | 7-scf00174 | 7  |
| AX-158058842 | 8 | 58.312 | KV452906.1  | 121033   | 7-scf00174 | 7  |
| AX-158058844 | 8 | 58.312 | KV452906.1  | 122819   | 7-scf00174 | 7  |
| AX-158058845 | 8 | 58.312 | KV452906.1  | 123213   | 7-scf00174 | 7  |
| AX-158058849 | 8 | 58.312 | KV452906.1  | 126129   | 7-scf00174 | 7  |
| AX-158058851 | 8 | 58.312 | KV452906.1  | 130499   | 7-scf00174 | 7  |
| AX-158058854 | 8 | 58.312 | KV452906.1  | 134126   | 7-scf00174 | 7  |
| AX-158058859 | 8 | 58.312 | KV452906.1  | 139203   | 7-scf00174 | 7  |
| AX-158058861 | 8 | 58.312 | KV452906.1  | 143954   | 7-scf00174 | 7  |
| AX-158058863 | 8 | 58.312 | KV452906.1  | 144574   | 7-scf00174 | 7  |
| AX-158058869 | 8 | 58.312 | KV452906.1  | 150674   | 7-scf00174 | 7  |
| AX-158058870 | 8 | 58.312 | KV452906.1  | 151245   | 7-scf00174 | 7  |
| AX-157856870 | 8 | 58.312 | KV452906.1  | 156136   | 7-scf00174 | 7  |
| AX-158058876 | 8 | 58.312 | KV452906.1  | 159432   | 7-scf00174 | 7  |
| AX-158058894 | 8 | 58.312 | KV452905.1  | 21501    | 7-scf00175 | 7  |
| AX-158058905 | 8 | 58.312 | KV452905.1  | 49606    | 7-scf00175 | 7  |
| AX-158058943 | 8 | 58.312 | KV452905.1  | 115418   | 7-scf00175 | 7  |
| AX-157757929 | 8 | 58.312 | KV452905.1  | 116800   | 7-scf00175 | 7  |
| AX-158058950 | 8 | 58.312 | KV452905.1  | 130096   | 7-scf00175 | 7  |
| AX-158058982 | 8 | 58.312 | KV452905.1  | 182170   | 7-scf00175 | 7  |
| AX-157680465 | 8 | 58.312 | 3ML01026705 | 1375     | scf02305_1 | UN |
| AX-157706772 | 8 | 58.312 | 3ML01032888 | 190      | scf08519_1 | UN |
| AX-158054565 | 8 | 60.387 | KV452904.1  | 10422969 | 7-scf00172 | 7  |
| AX-157749125 | 8 | 60.387 | KV452904.1  | 10797408 | 7-scf00172 | 7  |
| AX-158055225 | 8 | 60.387 | KV452904.1  | 11013591 | 7-scf00172 | 7  |

|              |   |        |            |          |            |   |
|--------------|---|--------|------------|----------|------------|---|
| AX-158055232 | 8 | 60.387 | KV452904.1 | 11017056 | 7-scf00172 | 7 |
| AX-158391854 | 8 | 60.387 | KV452904.1 | 11024460 | 7-scf00172 | 7 |
| AX-158055241 | 8 | 60.387 | KV452904.1 | 11024953 | 7-scf00172 | 7 |
| AX-158055248 | 8 | 60.387 | KV452904.1 | 11036569 | 7-scf00172 | 7 |
| AX-158055282 | 8 | 60.387 | KV452904.1 | 11081161 | 7-scf00172 | 7 |
| AX-158055291 | 8 | 60.387 | KV452904.1 | 11091663 | 7-scf00172 | 7 |
| AX-158055293 | 8 | 60.387 | KV452904.1 | 11093073 | 7-scf00172 | 7 |
| AX-158055298 | 8 | 60.387 | KV452904.1 | 11099639 | 7-scf00172 | 7 |
| AX-158055300 | 8 | 60.387 | KV452904.1 | 11100502 | 7-scf00172 | 7 |
| AX-158055302 | 8 | 60.387 | KV452904.1 | 11101898 | 7-scf00172 | 7 |
| AX-158055307 | 8 | 60.387 | KV452904.1 | 11106424 | 7-scf00172 | 7 |
| AX-158055311 | 8 | 60.387 | KV452904.1 | 11111967 | 7-scf00172 | 7 |
| AX-157758139 | 8 | 60.387 | KV452904.1 | 11117128 | 7-scf00172 | 7 |
| AX-158055318 | 8 | 60.387 | KV452904.1 | 11118476 | 7-scf00172 | 7 |
| AX-158055319 | 8 | 60.387 | KV452904.1 | 11119674 | 7-scf00172 | 7 |
| AX-158055321 | 8 | 60.387 | KV452904.1 | 11127523 | 7-scf00172 | 7 |
| AX-158055322 | 8 | 60.387 | KV452904.1 | 11128363 | 7-scf00172 | 7 |
| AX-158055324 | 8 | 60.387 | KV452904.1 | 11129151 | 7-scf00172 | 7 |
| AX-158055328 | 8 | 60.387 | KV452904.1 | 11132420 | 7-scf00172 | 7 |
| AX-157743047 | 8 | 60.387 | KV452904.1 | 11141607 | 7-scf00172 | 7 |
| AX-157724445 | 8 | 60.387 | KV452904.1 | 11146966 | 7-scf00172 | 7 |
| AX-158055333 | 8 | 60.387 | KV452904.1 | 11148578 | 7-scf00172 | 7 |
| AX-158055334 | 8 | 60.387 | KV452904.1 | 11148815 | 7-scf00172 | 7 |
| AX-158055336 | 8 | 60.387 | KV452904.1 | 11150028 | 7-scf00172 | 7 |
| AX-158055341 | 8 | 60.387 | KV452904.1 | 11155329 | 7-scf00172 | 7 |
| AX-158055343 | 8 | 60.387 | KV452904.1 | 11156616 | 7-scf00172 | 7 |
| AX-158055345 | 8 | 60.387 | KV452904.1 | 11162650 | 7-scf00172 | 7 |
| AX-158055349 | 8 | 60.387 | KV452904.1 | 11171100 | 7-scf00172 | 7 |
| AX-158055379 | 8 | 60.387 | KV452904.1 | 11217217 | 7-scf00172 | 7 |
| AX-158055450 | 8 | 60.387 | KV452904.1 | 11317427 | 7-scf00172 | 7 |
| AX-158055469 | 8 | 60.387 | KV452904.1 | 11339801 | 7-scf00172 | 7 |
| AX-158055472 | 8 | 60.387 | KV452904.1 | 11344315 | 7-scf00172 | 7 |
| AX-158055473 | 8 | 60.387 | KV452904.1 | 11345638 | 7-scf00172 | 7 |
| AX-158055505 | 8 | 60.387 | KV452904.1 | 11367081 | 7-scf00172 | 7 |
| AX-158055532 | 8 | 60.387 | KV452904.1 | 11402305 | 7-scf00172 | 7 |
| AX-158055578 | 8 | 60.387 | KV452904.1 | 11447915 | 7-scf00172 | 7 |
| AX-158055606 | 8 | 60.387 | KV452904.1 | 11480711 | 7-scf00172 | 7 |
| AX-158055160 | 8 | 60.551 | KV452904.1 | 10957537 | 7-scf00172 | 7 |
| AX-158055171 | 8 | 60.551 | KV452904.1 | 10961835 | 7-scf00172 | 7 |
| AX-158055181 | 8 | 60.551 | KV452904.1 | 10967118 | 7-scf00172 | 7 |
| AX-158055201 | 8 | 60.551 | KV452904.1 | 10992873 | 7-scf00172 | 7 |
| AX-158055205 | 8 | 60.551 | KV452904.1 | 10999585 | 7-scf00172 | 7 |
| AX-158055223 | 8 | 60.551 | KV452904.1 | 11010912 | 7-scf00172 | 7 |
| AX-158055330 | 8 | 60.551 | KV452904.1 | 11134861 | 7-scf00172 | 7 |
| AX-158055566 | 8 | 60.551 | KV452904.1 | 11435825 | 7-scf00172 | 7 |
| AX-158055646 | 8 | 60.551 | KV452904.1 | 11524394 | 7-scf00172 | 7 |
| AX-158055150 | 8 | 60.635 | KV452904.1 | 10949621 | 7-scf00172 | 7 |
| AX-158055023 | 8 | 60.715 | KV452904.1 | 10828394 | 7-scf00172 | 7 |
| AX-158055026 | 8 | 60.715 | KV452904.1 | 10829290 | 7-scf00172 | 7 |
| AX-158055027 | 8 | 60.715 | KV452904.1 | 10829768 | 7-scf00172 | 7 |
| AX-158055041 | 8 | 60.715 | KV452904.1 | 10843355 | 7-scf00172 | 7 |

|              |   |        |            |          |            |   |
|--------------|---|--------|------------|----------|------------|---|
| AX-158055052 | 8 | 60.715 | KV452904.1 | 10861506 | 7-scf00172 | 7 |
| AX-158055053 | 8 | 60.715 | KV452904.1 | 10862469 | 7-scf00172 | 7 |
| AX-158055070 | 8 | 60.715 | KV452904.1 | 10873661 | 7-scf00172 | 7 |
| AX-158055075 | 8 | 60.715 | KV452904.1 | 10881660 | 7-scf00172 | 7 |
| AX-158055081 | 8 | 60.715 | KV452904.1 | 10887452 | 7-scf00172 | 7 |
| AX-158055085 | 8 | 60.715 | KV452904.1 | 10889488 | 7-scf00172 | 7 |
| AX-158055088 | 8 | 60.715 | KV452904.1 | 10890668 | 7-scf00172 | 7 |
| AX-158055096 | 8 | 60.715 | KV452904.1 | 10895555 | 7-scf00172 | 7 |
| AX-158055098 | 8 | 60.715 | KV452904.1 | 10896625 | 7-scf00172 | 7 |
| AX-158391851 | 8 | 60.715 | KV452904.1 | 10924131 | 7-scf00172 | 7 |
| AX-158055136 | 8 | 60.715 | KV452904.1 | 10936178 | 7-scf00172 | 7 |
| AX-158055138 | 8 | 60.715 | KV452904.1 | 10937021 | 7-scf00172 | 7 |
| AX-158055236 | 8 | 60.715 | KV452904.1 | 11017796 | 7-scf00172 | 7 |
| AX-158055249 | 8 | 60.715 | KV452904.1 | 11037231 | 7-scf00172 | 7 |
| AX-158055024 | 8 | 60.739 | KV452904.1 | 10828877 | 7-scf00172 | 7 |
| AX-158055014 | 8 | 60.763 | KV452904.1 | 10824066 | 7-scf00172 | 7 |
| AX-157823011 | 8 | 60.782 | KV452904.1 | 10676240 | 7-scf00172 | 7 |
| AX-158054987 | 8 | 60.782 | KV452904.1 | 10795715 | 7-scf00172 | 7 |
| AX-158054990 | 8 | 60.782 | KV452904.1 | 10797143 | 7-scf00172 | 7 |
| AX-158055000 | 8 | 60.782 | KV452904.1 | 10812259 | 7-scf00172 | 7 |
| AX-158391848 | 8 | 60.803 | KV452904.1 | 10808852 | 7-scf00172 | 7 |
| AX-157707626 | 8 | 60.825 | KV452904.1 | 10130144 | 7-scf00172 | 7 |
| AX-158054357 | 8 | 60.825 | KV452904.1 | 10214712 | 7-scf00172 | 7 |
| AX-158054366 | 8 | 60.825 | KV452904.1 | 10223213 | 7-scf00172 | 7 |
| AX-158054400 | 8 | 60.825 | KV452904.1 | 10258558 | 7-scf00172 | 7 |
| AX-158054529 | 8 | 60.825 | KV452904.1 | 10389500 | 7-scf00172 | 7 |
| AX-158054532 | 8 | 60.825 | KV452904.1 | 10391834 | 7-scf00172 | 7 |
| AX-158054586 | 8 | 60.825 | KV452904.1 | 10446959 | 7-scf00172 | 7 |
| AX-158054630 | 8 | 60.825 | KV452904.1 | 10488824 | 7-scf00172 | 7 |
| AX-157822993 | 8 | 60.825 | KV452904.1 | 10489327 | 7-scf00172 | 7 |
| AX-158054631 | 8 | 60.825 | KV452904.1 | 10489541 | 7-scf00172 | 7 |
| AX-158054698 | 8 | 60.825 | KV452904.1 | 10550413 | 7-scf00172 | 7 |
| AX-158054700 | 8 | 60.825 | KV452904.1 | 10550625 | 7-scf00172 | 7 |
| AX-158054714 | 8 | 60.825 | KV452904.1 | 10567139 | 7-scf00172 | 7 |
| AX-158054743 | 8 | 60.825 | KV452904.1 | 10578840 | 7-scf00172 | 7 |
| AX-158054775 | 8 | 60.825 | KV452904.1 | 10603653 | 7-scf00172 | 7 |
| AX-158054794 | 8 | 60.825 | KV452904.1 | 10620916 | 7-scf00172 | 7 |
| AX-158054795 | 8 | 60.825 | KV452904.1 | 10622582 | 7-scf00172 | 7 |
| AX-158054803 | 8 | 60.825 | KV452904.1 | 10629787 | 7-scf00172 | 7 |
| AX-158378870 | 8 | 60.825 | KV452904.1 | 10637016 | 7-scf00172 | 7 |
| AX-158054819 | 8 | 60.825 | KV452904.1 | 10645074 | 7-scf00172 | 7 |
| AX-158054823 | 8 | 60.825 | KV452904.1 | 10646840 | 7-scf00172 | 7 |
| AX-158054824 | 8 | 60.825 | KV452904.1 | 10648547 | 7-scf00172 | 7 |
| AX-158054827 | 8 | 60.825 | KV452904.1 | 10652373 | 7-scf00172 | 7 |
| AX-158054833 | 8 | 60.825 | KV452904.1 | 10655212 | 7-scf00172 | 7 |
| AX-157823010 | 8 | 60.825 | KV452904.1 | 10659343 | 7-scf00172 | 7 |
| AX-158054843 | 8 | 60.825 | KV452904.1 | 10660732 | 7-scf00172 | 7 |
| AX-158054852 | 8 | 60.825 | KV452904.1 | 10673273 | 7-scf00172 | 7 |
| AX-158054861 | 8 | 60.825 | KV452904.1 | 10678631 | 7-scf00172 | 7 |
| AX-158054868 | 8 | 60.825 | KV452904.1 | 10682226 | 7-scf00172 | 7 |
| AX-157823013 | 8 | 60.825 | KV452904.1 | 10683791 | 7-scf00172 | 7 |

|              |   |        |            |          |            |   |
|--------------|---|--------|------------|----------|------------|---|
| AX-158054881 | 8 | 60.825 | KV452904.1 | 10689129 | 7-scf00172 | 7 |
| AX-158054884 | 8 | 60.825 | KV452904.1 | 10692111 | 7-scf00172 | 7 |
| AX-158054887 | 8 | 60.825 | KV452904.1 | 10692676 | 7-scf00172 | 7 |
| AX-158384086 | 8 | 60.825 | KV452904.1 | 10693298 | 7-scf00172 | 7 |
| AX-158054889 | 8 | 60.825 | KV452904.1 | 10695440 | 7-scf00172 | 7 |
| AX-158054894 | 8 | 60.825 | KV452904.1 | 10698779 | 7-scf00172 | 7 |
| AX-158054896 | 8 | 60.825 | KV452904.1 | 10699577 | 7-scf00172 | 7 |
| AX-157722443 | 8 | 60.825 | KV452904.1 | 10700114 | 7-scf00172 | 7 |
| AX-158054901 | 8 | 60.825 | KV452904.1 | 10702299 | 7-scf00172 | 7 |
| AX-157865531 | 8 | 60.825 | KV452904.1 | 10713712 | 7-scf00172 | 7 |
| AX-158054911 | 8 | 60.825 | KV452904.1 | 10720554 | 7-scf00172 | 7 |
| AX-158054912 | 8 | 60.825 | KV452904.1 | 10721158 | 7-scf00172 | 7 |
| AX-158054921 | 8 | 60.825 | KV452904.1 | 10744005 | 7-scf00172 | 7 |
| AX-158054923 | 8 | 60.825 | KV452904.1 | 10745385 | 7-scf00172 | 7 |
| AX-158054931 | 8 | 60.825 | KV452904.1 | 10756283 | 7-scf00172 | 7 |
| AX-158054935 | 8 | 60.825 | KV452904.1 | 10759194 | 7-scf00172 | 7 |
| AX-157856786 | 8 | 60.825 | KV452904.1 | 10760264 | 7-scf00172 | 7 |
| AX-158054936 | 8 | 60.825 | KV452904.1 | 10760744 | 7-scf00172 | 7 |
| AX-158054937 | 8 | 60.825 | KV452904.1 | 10762378 | 7-scf00172 | 7 |
| AX-158054942 | 8 | 60.825 | KV452904.1 | 10767026 | 7-scf00172 | 7 |
| AX-158054944 | 8 | 60.825 | KV452904.1 | 10769556 | 7-scf00172 | 7 |
| AX-157727107 | 8 | 60.825 | KV452904.1 | 10770443 | 7-scf00172 | 7 |
| AX-158054946 | 8 | 60.825 | KV452904.1 | 10771095 | 7-scf00172 | 7 |
| AX-158054948 | 8 | 60.825 | KV452904.1 | 10771737 | 7-scf00172 | 7 |
| AX-158054962 | 8 | 60.825 | KV452904.1 | 10779747 | 7-scf00172 | 7 |
| AX-158054966 | 8 | 60.825 | KV452904.1 | 10782327 | 7-scf00172 | 7 |
| AX-158054970 | 8 | 60.825 | KV452904.1 | 10786506 | 7-scf00172 | 7 |
| AX-158054971 | 8 | 60.825 | KV452904.1 | 10786596 | 7-scf00172 | 7 |
| AX-158054977 | 8 | 60.825 | KV452904.1 | 10788300 | 7-scf00172 | 7 |
| AX-157823017 | 8 | 60.825 | KV452904.1 | 10788614 | 7-scf00172 | 7 |
| AX-158054979 | 8 | 60.825 | KV452904.1 | 10789073 | 7-scf00172 | 7 |
| AX-158054981 | 8 | 60.825 | KV452904.1 | 10789944 | 7-scf00172 | 7 |
| AX-157722415 | 8 | 60.825 | KV452904.1 | 10790149 | 7-scf00172 | 7 |
| AX-158055012 | 8 | 60.825 | KV452904.1 | 10822375 | 7-scf00172 | 7 |
| AX-158055076 | 8 | 60.825 | KV452904.1 | 10882261 | 7-scf00172 | 7 |
| AX-158055077 | 8 | 60.825 | KV452904.1 | 10882771 | 7-scf00172 | 7 |
| AX-158055078 | 8 | 60.825 | KV452904.1 | 10885343 | 7-scf00172 | 7 |
| AX-158055080 | 8 | 60.825 | KV452904.1 | 10886560 | 7-scf00172 | 7 |
| AX-158055082 | 8 | 60.825 | KV452904.1 | 10888232 | 7-scf00172 | 7 |
| AX-158055090 | 8 | 60.825 | KV452904.1 | 10892076 | 7-scf00172 | 7 |
| AX-158055092 | 8 | 60.825 | KV452904.1 | 10893311 | 7-scf00172 | 7 |
| AX-158055097 | 8 | 60.825 | KV452904.1 | 10896208 | 7-scf00172 | 7 |
| AX-158055101 | 8 | 60.825 | KV452904.1 | 10900556 | 7-scf00172 | 7 |
| AX-158055103 | 8 | 60.825 | KV452904.1 | 10903333 | 7-scf00172 | 7 |
| AX-158055104 | 8 | 60.825 | KV452904.1 | 10904080 | 7-scf00172 | 7 |
| AX-158055105 | 8 | 60.825 | KV452904.1 | 10905082 | 7-scf00172 | 7 |
| AX-158055113 | 8 | 60.825 | KV452904.1 | 10914485 | 7-scf00172 | 7 |
| AX-158055118 | 8 | 60.825 | KV452904.1 | 10916452 | 7-scf00172 | 7 |
| AX-158055120 | 8 | 60.825 | KV452904.1 | 10917430 | 7-scf00172 | 7 |
| AX-158055128 | 8 | 60.825 | KV452904.1 | 10926457 | 7-scf00172 | 7 |
| AX-158055133 | 8 | 60.825 | KV452904.1 | 10928147 | 7-scf00172 | 7 |



|              |   |        |            |          |                |    |
|--------------|---|--------|------------|----------|----------------|----|
| AX-158055134 | 8 | 60.825 | KV452904.1 | 10929352 | 7-scf00172     | 7  |
| AX-157719826 | 8 | 60.825 | KV452904.1 | 10929877 | 7-scf00172     | 7  |
| AX-158055141 | 8 | 60.825 | KV452904.1 | 10941222 | 7-scf00172     | 7  |
| AX-158055153 | 8 | 60.825 | KV452904.1 | 10951202 | 7-scf00172     | 7  |
| AX-158055156 | 8 | 60.825 | KV452904.1 | 10953549 | 7-scf00172     | 7  |
| AX-157823026 | 8 | 60.825 | KV452904.1 | 10954496 | 7-scf00172     | 7  |
| AX-157823027 | 8 | 60.825 | KV452904.1 | 10955054 | 7-scf00172     | 7  |
| AX-158055159 | 8 | 60.825 | KV452904.1 | 10956350 | 7-scf00172     | 7  |
| AX-158055162 | 8 | 60.825 | KV452904.1 | 10957767 | 7-scf00172     | 7  |
| AX-158055169 | 8 | 60.825 | KV452904.1 | 10960537 | 7-scf00172     | 7  |
| AX-158055170 | 8 | 60.825 | KV452904.1 | 10961479 | 7-scf00172     | 7  |
| AX-158055175 | 8 | 60.825 | KV452904.1 | 10963820 | 7-scf00172     | 7  |
| AX-158055177 | 8 | 60.825 | KV452904.1 | 10964634 | 7-scf00172     | 7  |
| AX-158055180 | 8 | 60.825 | KV452904.1 | 10966702 | 7-scf00172     | 7  |
| AX-158055184 | 8 | 60.825 | KV452904.1 | 10976027 | 7-scf00172     | 7  |
| AX-157745555 | 8 | 60.825 | KV452904.1 | 10982461 | 7-scf00172     | 7  |
| AX-158055196 | 8 | 60.825 | KV452904.1 | 10988999 | 7-scf00172     | 7  |
| AX-158055200 | 8 | 60.825 | KV452904.1 | 10991368 | 7-scf00172     | 7  |
| AX-158055203 | 8 | 60.825 | KV452904.1 | 10994006 | 7-scf00172     | 7  |
| AX-158055204 | 8 | 60.825 | KV452904.1 | 10998783 | 7-scf00172     | 7  |
| AX-158055207 | 8 | 60.825 | KV452904.1 | 11000733 | 7-scf00172     | 7  |
| AX-158055209 | 8 | 60.825 | KV452904.1 | 11001213 | 7-scf00172     | 7  |
| AX-157758414 | 8 | 60.825 | KV452904.1 | 11002545 | 7-scf00172     | 7  |
| AX-158055215 | 8 | 60.825 | KV452904.1 | 11005203 | 7-scf00172     | 7  |
| AX-158055217 | 8 | 60.825 | KV452904.1 | 11007617 | 7-scf00172     | 7  |
| AX-158055220 | 8 | 60.825 | KV452904.1 | 11008576 | 7-scf00172     | 7  |
| AX-158055228 | 8 | 60.825 | KV452904.1 | 11014218 | 7-scf00172     | 7  |
| AX-158055238 | 8 | 60.825 | KV452904.1 | 11018740 | 7-scf00172     | 7  |
| AX-158055240 | 8 | 60.825 | KV452904.1 | 11023457 | 7-scf00172     | 7  |
| AX-158055246 | 8 | 60.825 | KV452904.1 | 11030520 | 7-scf00172     | 7  |
| AX-158055541 | 8 | 60.825 | KV452904.1 | 11413168 | 7-scf00172     | 7  |
| AX-157748092 | 8 | 60.825 | KV452904.1 | 11797946 | 7-scf00172     | 7  |
| AX-158055965 | 8 | 60.825 | KV452904.1 | 11948800 | 7-scf00172     | 7  |
| AX-158056189 | 8 | 60.825 | KV452904.1 | 12183164 | 7-scf00172     | 7  |
| AX-157823095 | 8 | 60.825 | KV452904.1 | 12358933 | 7-scf00172     | 7  |
| AX-157703512 | 8 | 60.825 | DX098808.1 | 386      | IORI212 Ictalu | UN |
| AX-158054787 | 8 | 60.839 | KV452904.1 | 10615576 | 7-scf00172     | 7  |
| AX-158054804 | 8 | 60.839 | KV452904.1 | 10630820 | 7-scf00172     | 7  |
| AX-158054801 | 8 | 60.851 | KV452904.1 | 10627109 | 7-scf00172     | 7  |
| AX-158054799 | 8 | 60.854 | KV452904.1 | 10626293 | 7-scf00172     | 7  |
| AX-158054790 | 8 | 60.866 | KV452904.1 | 10616589 | 7-scf00172     | 7  |
| AX-158054752 | 8 | 60.891 | KV452904.1 | 10582647 | 7-scf00172     | 7  |
| AX-158054750 | 8 | 60.913 | KV452904.1 | 10581617 | 7-scf00172     | 7  |
| AX-158054558 | 8 | 60.923 | KV452904.1 | 10416003 | 7-scf00172     | 7  |
| AX-158054628 | 8 | 60.923 | KV452904.1 | 10487358 | 7-scf00172     | 7  |
| AX-158054739 | 8 | 60.923 | KV452904.1 | 10576942 | 7-scf00172     | 7  |
| AX-158055083 | 8 | 60.923 | KV452904.1 | 10888683 | 7-scf00172     | 7  |
| AX-158055106 | 8 | 60.923 | KV452904.1 | 10905669 | 7-scf00172     | 7  |
| AX-158055126 | 8 | 60.923 | KV452904.1 | 10921964 | 7-scf00172     | 7  |
| AX-158055213 | 8 | 60.923 | KV452904.1 | 11004703 | 7-scf00172     | 7  |
| AX-158055230 | 8 | 60.923 | KV452904.1 | 11014806 | 7-scf00172     | 7  |

|              |   |        |            |          |            |   |
|--------------|---|--------|------------|----------|------------|---|
| AX-158055239 | 8 | 60.923 | KV452904.1 | 11020171 | 7-scf00172 | 7 |
| AX-158055243 | 8 | 60.923 | KV452904.1 | 11025700 | 7-scf00172 | 7 |
| AX-158055251 | 8 | 60.923 | KV452904.1 | 11039262 | 7-scf00172 | 7 |
| AX-158055592 | 8 | 60.923 | KV452904.1 | 11459730 | 7-scf00172 | 7 |
| AX-158054440 | 8 | 60.932 | KV452904.1 | 10287909 | 7-scf00172 | 7 |
| AX-157723489 | 8 | 60.932 | KV452904.1 | 10441893 | 7-scf00172 | 7 |
| AX-158378867 | 8 | 60.932 | KV452904.1 | 10544929 | 7-scf00172 | 7 |
| AX-157744543 | 8 | 60.932 | KV452904.1 | 10545126 | 7-scf00172 | 7 |
| AX-158054720 | 8 | 60.932 | KV452904.1 | 10569503 | 7-scf00172 | 7 |
| AX-158054722 | 8 | 60.932 | KV452904.1 | 10569989 | 7-scf00172 | 7 |
| AX-158054734 | 8 | 60.932 | KV452904.1 | 10576474 | 7-scf00172 | 7 |
| AX-157823005 | 8 | 60.932 | KV452904.1 | 10617418 | 7-scf00172 | 7 |
| AX-157823006 | 8 | 60.932 | KV452904.1 | 10629444 | 7-scf00172 | 7 |
| AX-157823007 | 8 | 60.932 | KV452904.1 | 10630623 | 7-scf00172 | 7 |
| AX-158054891 | 8 | 60.932 | KV452904.1 | 10698136 | 7-scf00172 | 7 |
| AX-158054909 | 8 | 60.932 | KV452904.1 | 10718477 | 7-scf00172 | 7 |
| AX-158054910 | 8 | 60.932 | KV452904.1 | 10718754 | 7-scf00172 | 7 |
| AX-158054922 | 8 | 60.932 | KV452904.1 | 10744687 | 7-scf00172 | 7 |
| AX-158054926 | 8 | 60.932 | KV452904.1 | 10751794 | 7-scf00172 | 7 |
| AX-158378874 | 8 | 60.932 | KV452904.1 | 10829179 | 7-scf00172 | 7 |
| AX-158055071 | 8 | 60.932 | KV452904.1 | 10877481 | 7-scf00172 | 7 |
| AX-158055314 | 8 | 60.932 | KV452904.1 | 11113972 | 7-scf00172 | 7 |
| AX-158055327 | 8 | 60.932 | KV452904.1 | 11131646 | 7-scf00172 | 7 |
| AX-158055335 | 8 | 60.932 | KV452904.1 | 11149431 | 7-scf00172 | 7 |
| AX-158055344 | 8 | 60.932 | KV452904.1 | 11157814 | 7-scf00172 | 7 |
| AX-158055383 | 8 | 60.932 | KV452904.1 | 11222328 | 7-scf00172 | 7 |
| AX-158055409 | 8 | 60.932 | KV452904.1 | 11266867 | 7-scf00172 | 7 |
| AX-158054611 | 8 | 60.933 | KV452904.1 | 10469091 | 7-scf00172 | 7 |
| AX-157786770 | 8 | 60.933 | KV452904.1 | 10541473 | 7-scf00172 | 7 |
| AX-158054712 | 8 | 60.933 | KV452904.1 | 10566078 | 7-scf00172 | 7 |
| AX-157823033 | 8 | 60.933 | KV452904.1 | 11198768 | 7-scf00172 | 7 |
| AX-158054457 | 8 | 60.934 | KV452904.1 | 10307438 | 7-scf00172 | 7 |
| AX-158054473 | 8 | 60.934 | KV452904.1 | 10323468 | 7-scf00172 | 7 |
| AX-158054507 | 8 | 60.934 | KV452904.1 | 10364454 | 7-scf00172 | 7 |
| AX-158054514 | 8 | 60.934 | KV452904.1 | 10376454 | 7-scf00172 | 7 |
| AX-158054521 | 8 | 60.934 | KV452904.1 | 10383613 | 7-scf00172 | 7 |
| AX-158054537 | 8 | 60.934 | KV452904.1 | 10401719 | 7-scf00172 | 7 |
| AX-158391843 | 8 | 60.934 | KV452904.1 | 10402954 | 7-scf00172 | 7 |
| AX-158054539 | 8 | 60.934 | KV452904.1 | 10403379 | 7-scf00172 | 7 |
| AX-158054542 | 8 | 60.934 | KV452904.1 | 10405010 | 7-scf00172 | 7 |
| AX-158054543 | 8 | 60.934 | KV452904.1 | 10405472 | 7-scf00172 | 7 |
| AX-158054547 | 8 | 60.934 | KV452904.1 | 10406578 | 7-scf00172 | 7 |
| AX-158054550 | 8 | 60.934 | KV452904.1 | 10407769 | 7-scf00172 | 7 |
| AX-158054554 | 8 | 60.934 | KV452904.1 | 10411760 | 7-scf00172 | 7 |
| AX-158054555 | 8 | 60.934 | KV452904.1 | 10412491 | 7-scf00172 | 7 |
| AX-158054556 | 8 | 60.934 | KV452904.1 | 10415111 | 7-scf00172 | 7 |
| AX-158054557 | 8 | 60.934 | KV452904.1 | 10415529 | 7-scf00172 | 7 |
| AX-158054560 | 8 | 60.934 | KV452904.1 | 10417291 | 7-scf00172 | 7 |
| AX-158054561 | 8 | 60.934 | KV452904.1 | 10418065 | 7-scf00172 | 7 |
| AX-158378860 | 8 | 60.934 | KV452904.1 | 10418679 | 7-scf00172 | 7 |
| AX-158054562 | 8 | 60.934 | KV452904.1 | 10418790 | 7-scf00172 | 7 |

|              |   |        |            |          |            |   |
|--------------|---|--------|------------|----------|------------|---|
| AX-158054563 | 8 | 60.934 | KV452904.1 | 10419421 | 7-scf00172 | 7 |
| AX-158054564 | 8 | 60.934 | KV452904.1 | 10420897 | 7-scf00172 | 7 |
| AX-158054566 | 8 | 60.934 | KV452904.1 | 10423132 | 7-scf00172 | 7 |
| AX-158054568 | 8 | 60.934 | KV452904.1 | 10425530 | 7-scf00172 | 7 |
| AX-158054569 | 8 | 60.934 | KV452904.1 | 10426212 | 7-scf00172 | 7 |
| AX-158054571 | 8 | 60.934 | KV452904.1 | 10428654 | 7-scf00172 | 7 |
| AX-158054573 | 8 | 60.934 | KV452904.1 | 10429595 | 7-scf00172 | 7 |
| AX-158054574 | 8 | 60.934 | KV452904.1 | 10430264 | 7-scf00172 | 7 |
| AX-158054575 | 8 | 60.934 | KV452904.1 | 10432199 | 7-scf00172 | 7 |
| AX-158054577 | 8 | 60.934 | KV452904.1 | 10433203 | 7-scf00172 | 7 |
| AX-158054578 | 8 | 60.934 | KV452904.1 | 10435734 | 7-scf00172 | 7 |
| AX-158054580 | 8 | 60.934 | KV452904.1 | 10436271 | 7-scf00172 | 7 |
| AX-157690853 | 8 | 60.934 | KV452904.1 | 10444745 | 7-scf00172 | 7 |
| AX-158054587 | 8 | 60.934 | KV452904.1 | 10449103 | 7-scf00172 | 7 |
| AX-158054590 | 8 | 60.934 | KV452904.1 | 10450567 | 7-scf00172 | 7 |
| AX-158054594 | 8 | 60.934 | KV452904.1 | 10454630 | 7-scf00172 | 7 |
| AX-158054595 | 8 | 60.934 | KV452904.1 | 10457447 | 7-scf00172 | 7 |
| AX-158054597 | 8 | 60.934 | KV452904.1 | 10459266 | 7-scf00172 | 7 |
| AX-158054599 | 8 | 60.934 | KV452904.1 | 10459631 | 7-scf00172 | 7 |
| AX-158054600 | 8 | 60.934 | KV452904.1 | 10460600 | 7-scf00172 | 7 |
| AX-158054602 | 8 | 60.934 | KV452904.1 | 10461744 | 7-scf00172 | 7 |
| AX-158054603 | 8 | 60.934 | KV452904.1 | 10462120 | 7-scf00172 | 7 |
| AX-158054604 | 8 | 60.934 | KV452904.1 | 10464194 | 7-scf00172 | 7 |
| AX-158054613 | 8 | 60.934 | KV452904.1 | 10470502 | 7-scf00172 | 7 |
| AX-158054614 | 8 | 60.934 | KV452904.1 | 10470715 | 7-scf00172 | 7 |
| AX-158054615 | 8 | 60.934 | KV452904.1 | 10471882 | 7-scf00172 | 7 |
| AX-158054616 | 8 | 60.934 | KV452904.1 | 10473871 | 7-scf00172 | 7 |
| AX-158054618 | 8 | 60.934 | KV452904.1 | 10474351 | 7-scf00172 | 7 |
| AX-158054620 | 8 | 60.934 | KV452904.1 | 10478599 | 7-scf00172 | 7 |
| AX-158054622 | 8 | 60.934 | KV452904.1 | 10480111 | 7-scf00172 | 7 |
| AX-158054623 | 8 | 60.934 | KV452904.1 | 10480845 | 7-scf00172 | 7 |
| AX-158054625 | 8 | 60.934 | KV452904.1 | 10482839 | 7-scf00172 | 7 |
| AX-158054639 | 8 | 60.934 | KV452904.1 | 10492351 | 7-scf00172 | 7 |
| AX-158054641 | 8 | 60.934 | KV452904.1 | 10493106 | 7-scf00172 | 7 |
| AX-158054642 | 8 | 60.934 | KV452904.1 | 10493333 | 7-scf00172 | 7 |
| AX-158054644 | 8 | 60.934 | KV452904.1 | 10493829 | 7-scf00172 | 7 |
| AX-158054645 | 8 | 60.934 | KV452904.1 | 10494618 | 7-scf00172 | 7 |
| AX-158408977 | 8 | 60.934 | KV452904.1 | 10494689 | 7-scf00172 | 7 |
| AX-157696523 | 8 | 60.934 | KV452904.1 | 10495233 | 7-scf00172 | 7 |
| AX-158054646 | 8 | 60.934 | KV452904.1 | 10496176 | 7-scf00172 | 7 |
| AX-157711200 | 8 | 60.934 | KV452904.1 | 10509369 | 7-scf00172 | 7 |
| AX-158054656 | 8 | 60.934 | KV452904.1 | 10511598 | 7-scf00172 | 7 |
| AX-158054658 | 8 | 60.934 | KV452904.1 | 10513418 | 7-scf00172 | 7 |
| AX-158054676 | 8 | 60.934 | KV452904.1 | 10527559 | 7-scf00172 | 7 |
| AX-158054679 | 8 | 60.934 | KV452904.1 | 10528241 | 7-scf00172 | 7 |
| AX-157870659 | 8 | 60.934 | KV452904.1 | 10531932 | 7-scf00172 | 7 |
| AX-158054683 | 8 | 60.934 | KV452904.1 | 10532624 | 7-scf00172 | 7 |
| AX-158054684 | 8 | 60.934 | KV452904.1 | 10532871 | 7-scf00172 | 7 |
| AX-158054687 | 8 | 60.934 | KV452904.1 | 10533423 | 7-scf00172 | 7 |
| AX-158054689 | 8 | 60.934 | KV452904.1 | 10533823 | 7-scf00172 | 7 |
| AX-158408982 | 8 | 60.934 | KV452904.1 | 10534711 | 7-scf00172 | 7 |

|              |   |        |            |          |            |   |
|--------------|---|--------|------------|----------|------------|---|
| AX-158054690 | 8 | 60.934 | KV452904.1 | 10536526 | 7-scf00172 | 7 |
| AX-157822994 | 8 | 60.934 | KV452904.1 | 10537135 | 7-scf00172 | 7 |
| AX-158054692 | 8 | 60.934 | KV452904.1 | 10539629 | 7-scf00172 | 7 |
| AX-158054693 | 8 | 60.934 | KV452904.1 | 10541034 | 7-scf00172 | 7 |
| AX-158378866 | 8 | 60.934 | KV452904.1 | 10541208 | 7-scf00172 | 7 |
| AX-157822995 | 8 | 60.934 | KV452904.1 | 10543124 | 7-scf00172 | 7 |
| AX-157822996 | 8 | 60.934 | KV452904.1 | 10544159 | 7-scf00172 | 7 |
| AX-158054696 | 8 | 60.934 | KV452904.1 | 10546039 | 7-scf00172 | 7 |
| AX-158408983 | 8 | 60.934 | KV452904.1 | 10554375 | 7-scf00172 | 7 |
| AX-158054716 | 8 | 60.934 | KV452904.1 | 10568364 | 7-scf00172 | 7 |
| AX-158054718 | 8 | 60.934 | KV452904.1 | 10568946 | 7-scf00172 | 7 |
| AX-158054721 | 8 | 60.934 | KV452904.1 | 10569742 | 7-scf00172 | 7 |
| AX-158054723 | 8 | 60.934 | KV452904.1 | 10570421 | 7-scf00172 | 7 |
| AX-158054726 | 8 | 60.934 | KV452904.1 | 10571344 | 7-scf00172 | 7 |
| AX-158054727 | 8 | 60.934 | KV452904.1 | 10573209 | 7-scf00172 | 7 |
| AX-157823000 | 8 | 60.934 | KV452904.1 | 10573293 | 7-scf00172 | 7 |
| AX-158054730 | 8 | 60.934 | KV452904.1 | 10575039 | 7-scf00172 | 7 |
| AX-158054731 | 8 | 60.934 | KV452904.1 | 10575571 | 7-scf00172 | 7 |
| AX-158054732 | 8 | 60.934 | KV452904.1 | 10575983 | 7-scf00172 | 7 |
| AX-158054736 | 8 | 60.934 | KV452904.1 | 10576700 | 7-scf00172 | 7 |
| AX-158054746 | 8 | 60.934 | KV452904.1 | 10580017 | 7-scf00172 | 7 |
| AX-158054749 | 8 | 60.934 | KV452904.1 | 10580357 | 7-scf00172 | 7 |
| AX-158054753 | 8 | 60.934 | KV452904.1 | 10583980 | 7-scf00172 | 7 |
| AX-158054754 | 8 | 60.934 | KV452904.1 | 10584234 | 7-scf00172 | 7 |
| AX-158054755 | 8 | 60.934 | KV452904.1 | 10585177 | 7-scf00172 | 7 |
| AX-158054757 | 8 | 60.934 | KV452904.1 | 10585557 | 7-scf00172 | 7 |
| AX-158054760 | 8 | 60.934 | KV452904.1 | 10586881 | 7-scf00172 | 7 |
| AX-158054761 | 8 | 60.934 | KV452904.1 | 10587739 | 7-scf00172 | 7 |
| AX-158054764 | 8 | 60.934 | KV452904.1 | 10589813 | 7-scf00172 | 7 |
| AX-158054766 | 8 | 60.934 | KV452904.1 | 10590940 | 7-scf00172 | 7 |
| AX-158054767 | 8 | 60.934 | KV452904.1 | 10592198 | 7-scf00172 | 7 |
| AX-158054768 | 8 | 60.934 | KV452904.1 | 10594530 | 7-scf00172 | 7 |
| AX-157715772 | 8 | 60.934 | KV452904.1 | 10600148 | 7-scf00172 | 7 |
| AX-158054770 | 8 | 60.934 | KV452904.1 | 10600568 | 7-scf00172 | 7 |
| AX-158054772 | 8 | 60.934 | KV452904.1 | 10602324 | 7-scf00172 | 7 |
| AX-157745767 | 8 | 60.934 | KV452904.1 | 10602502 | 7-scf00172 | 7 |
| AX-158054776 | 8 | 60.934 | KV452904.1 | 10603898 | 7-scf00172 | 7 |
| AX-158054777 | 8 | 60.934 | KV452904.1 | 10604272 | 7-scf00172 | 7 |
| AX-158054781 | 8 | 60.934 | KV452904.1 | 10608581 | 7-scf00172 | 7 |
| AX-158054783 | 8 | 60.934 | KV452904.1 | 10609585 | 7-scf00172 | 7 |
| AX-158054784 | 8 | 60.934 | KV452904.1 | 10610224 | 7-scf00172 | 7 |
| AX-157823002 | 8 | 60.934 | KV452904.1 | 10611261 | 7-scf00172 | 7 |
| AX-157823003 | 8 | 60.934 | KV452904.1 | 10615069 | 7-scf00172 | 7 |
| AX-157823004 | 8 | 60.934 | KV452904.1 | 10615915 | 7-scf00172 | 7 |
| AX-158054788 | 8 | 60.934 | KV452904.1 | 10615992 | 7-scf00172 | 7 |
| AX-158054792 | 8 | 60.934 | KV452904.1 | 10619872 | 7-scf00172 | 7 |
| AX-158054796 | 8 | 60.934 | KV452904.1 | 10623171 | 7-scf00172 | 7 |
| AX-158054798 | 8 | 60.934 | KV452904.1 | 10625791 | 7-scf00172 | 7 |
| AX-158054807 | 8 | 60.934 | KV452904.1 | 10631754 | 7-scf00172 | 7 |
| AX-157823008 | 8 | 60.934 | KV452904.1 | 10631896 | 7-scf00172 | 7 |
| AX-157823009 | 8 | 60.934 | KV452904.1 | 10632822 | 7-scf00172 | 7 |

|              |   |        |            |          |            |   |
|--------------|---|--------|------------|----------|------------|---|
| AX-158054808 | 8 | 60.934 | KV452904.1 | 10634346 | 7-scf00172 | 7 |
| AX-158054810 | 8 | 60.934 | KV452904.1 | 10634786 | 7-scf00172 | 7 |
| AX-158054812 | 8 | 60.934 | KV452904.1 | 10635497 | 7-scf00172 | 7 |
| AX-158054814 | 8 | 60.934 | KV452904.1 | 10636264 | 7-scf00172 | 7 |
| AX-158391846 | 8 | 60.934 | KV452904.1 | 10636743 | 7-scf00172 | 7 |
| AX-158054815 | 8 | 60.934 | KV452904.1 | 10638276 | 7-scf00172 | 7 |
| AX-158054816 | 8 | 60.934 | KV452904.1 | 10642013 | 7-scf00172 | 7 |
| AX-158054818 | 8 | 60.934 | KV452904.1 | 10643570 | 7-scf00172 | 7 |
| AX-158054821 | 8 | 60.934 | KV452904.1 | 10645727 | 7-scf00172 | 7 |
| AX-158054822 | 8 | 60.934 | KV452904.1 | 10646374 | 7-scf00172 | 7 |
| AX-157747390 | 8 | 60.934 | KV452904.1 | 10649200 | 7-scf00172 | 7 |
| AX-158054828 | 8 | 60.934 | KV452904.1 | 10652929 | 7-scf00172 | 7 |
| AX-158054829 | 8 | 60.934 | KV452904.1 | 10653555 | 7-scf00172 | 7 |
| AX-158054831 | 8 | 60.934 | KV452904.1 | 10654215 | 7-scf00172 | 7 |
| AX-158054832 | 8 | 60.934 | KV452904.1 | 10654977 | 7-scf00172 | 7 |
| AX-158054835 | 8 | 60.934 | KV452904.1 | 10656607 | 7-scf00172 | 7 |
| AX-158054836 | 8 | 60.934 | KV452904.1 | 10657945 | 7-scf00172 | 7 |
| AX-158054837 | 8 | 60.934 | KV452904.1 | 10658149 | 7-scf00172 | 7 |
| AX-158054839 | 8 | 60.934 | KV452904.1 | 10659600 | 7-scf00172 | 7 |
| AX-158054840 | 8 | 60.934 | KV452904.1 | 10660088 | 7-scf00172 | 7 |
| AX-158054842 | 8 | 60.934 | KV452904.1 | 10660390 | 7-scf00172 | 7 |
| AX-158054845 | 8 | 60.934 | KV452904.1 | 10661709 | 7-scf00172 | 7 |
| AX-157693769 | 8 | 60.934 | KV452904.1 | 10661899 | 7-scf00172 | 7 |
| AX-158054847 | 8 | 60.934 | KV452904.1 | 10663842 | 7-scf00172 | 7 |
| AX-158054849 | 8 | 60.934 | KV452904.1 | 10665957 | 7-scf00172 | 7 |
| AX-158054850 | 8 | 60.934 | KV452904.1 | 10666432 | 7-scf00172 | 7 |
| AX-158054851 | 8 | 60.934 | KV452904.1 | 10666853 | 7-scf00172 | 7 |
| AX-157753728 | 8 | 60.934 | KV452904.1 | 10673733 | 7-scf00172 | 7 |
| AX-158054853 | 8 | 60.934 | KV452904.1 | 10674130 | 7-scf00172 | 7 |
| AX-158054855 | 8 | 60.934 | KV452904.1 | 10675448 | 7-scf00172 | 7 |
| AX-158054857 | 8 | 60.934 | KV452904.1 | 10676018 | 7-scf00172 | 7 |
| AX-158054858 | 8 | 60.934 | KV452904.1 | 10677227 | 7-scf00172 | 7 |
| AX-158054860 | 8 | 60.934 | KV452904.1 | 10678177 | 7-scf00172 | 7 |
| AX-158054865 | 8 | 60.934 | KV452904.1 | 10680035 | 7-scf00172 | 7 |
| AX-158054867 | 8 | 60.934 | KV452904.1 | 10682010 | 7-scf00172 | 7 |
| AX-157823012 | 8 | 60.934 | KV452904.1 | 10683452 | 7-scf00172 | 7 |
| AX-158054869 | 8 | 60.934 | KV452904.1 | 10683657 | 7-scf00172 | 7 |
| AX-158054870 | 8 | 60.934 | KV452904.1 | 10684011 | 7-scf00172 | 7 |
| AX-158054871 | 8 | 60.934 | KV452904.1 | 10684623 | 7-scf00172 | 7 |
| AX-158054873 | 8 | 60.934 | KV452904.1 | 10685211 | 7-scf00172 | 7 |
| AX-158054874 | 8 | 60.934 | KV452904.1 | 10686150 | 7-scf00172 | 7 |
| AX-158054877 | 8 | 60.934 | KV452904.1 | 10686603 | 7-scf00172 | 7 |
| AX-158054879 | 8 | 60.934 | KV452904.1 | 10688216 | 7-scf00172 | 7 |
| AX-158054888 | 8 | 60.934 | KV452904.1 | 10693369 | 7-scf00172 | 7 |
| AX-158054895 | 8 | 60.934 | KV452904.1 | 10699283 | 7-scf00172 | 7 |
| AX-158054897 | 8 | 60.934 | KV452904.1 | 10700375 | 7-scf00172 | 7 |
| AX-158054899 | 8 | 60.934 | KV452904.1 | 10700706 | 7-scf00172 | 7 |
| AX-158408990 | 8 | 60.934 | KV452904.1 | 10702402 | 7-scf00172 | 7 |
| AX-158054902 | 8 | 60.934 | KV452904.1 | 10704167 | 7-scf00172 | 7 |
| AX-158054903 | 8 | 60.934 | KV452904.1 | 10704696 | 7-scf00172 | 7 |
| AX-158054904 | 8 | 60.934 | KV452904.1 | 10707463 | 7-scf00172 | 7 |

|              |   |        |            |          |            |   |
|--------------|---|--------|------------|----------|------------|---|
| AX-158054905 | 8 | 60.934 | KV452904.1 | 10709168 | 7-scf00172 | 7 |
| AX-157823014 | 8 | 60.934 | KV452904.1 | 10709702 | 7-scf00172 | 7 |
| AX-158054907 | 8 | 60.934 | KV452904.1 | 10713072 | 7-scf00172 | 7 |
| AX-158054908 | 8 | 60.934 | KV452904.1 | 10717890 | 7-scf00172 | 7 |
| AX-158054919 | 8 | 60.934 | KV452904.1 | 10737859 | 7-scf00172 | 7 |
| AX-158054924 | 8 | 60.934 | KV452904.1 | 10745785 | 7-scf00172 | 7 |
| AX-158054933 | 8 | 60.934 | KV452904.1 | 10758292 | 7-scf00172 | 7 |
| AX-158054939 | 8 | 60.934 | KV452904.1 | 10766345 | 7-scf00172 | 7 |
| AX-158054940 | 8 | 60.934 | KV452904.1 | 10766802 | 7-scf00172 | 7 |
| AX-158054943 | 8 | 60.934 | KV452904.1 | 10769045 | 7-scf00172 | 7 |
| AX-158054947 | 8 | 60.934 | KV452904.1 | 10771444 | 7-scf00172 | 7 |
| AX-158054949 | 8 | 60.934 | KV452904.1 | 10772180 | 7-scf00172 | 7 |
| AX-158054954 | 8 | 60.934 | KV452904.1 | 10776630 | 7-scf00172 | 7 |
| AX-158054957 | 8 | 60.934 | KV452904.1 | 10776936 | 7-scf00172 | 7 |
| AX-158054958 | 8 | 60.934 | KV452904.1 | 10777263 | 7-scf00172 | 7 |
| AX-158054959 | 8 | 60.934 | KV452904.1 | 10777613 | 7-scf00172 | 7 |
| AX-158054960 | 8 | 60.934 | KV452904.1 | 10778499 | 7-scf00172 | 7 |
| AX-158054961 | 8 | 60.934 | KV452904.1 | 10778991 | 7-scf00172 | 7 |
| AX-158054963 | 8 | 60.934 | KV452904.1 | 10780102 | 7-scf00172 | 7 |
| AX-158054967 | 8 | 60.934 | KV452904.1 | 10784117 | 7-scf00172 | 7 |
| AX-158054968 | 8 | 60.934 | KV452904.1 | 10784401 | 7-scf00172 | 7 |
| AX-158054972 | 8 | 60.934 | KV452904.1 | 10786891 | 7-scf00172 | 7 |
| AX-158054973 | 8 | 60.934 | KV452904.1 | 10787160 | 7-scf00172 | 7 |
| AX-158054974 | 8 | 60.934 | KV452904.1 | 10787271 | 7-scf00172 | 7 |
| AX-158054975 | 8 | 60.934 | KV452904.1 | 10787528 | 7-scf00172 | 7 |
| AX-158054980 | 8 | 60.934 | KV452904.1 | 10789446 | 7-scf00172 | 7 |
| AX-158054982 | 8 | 60.934 | KV452904.1 | 10793176 | 7-scf00172 | 7 |
| AX-158054985 | 8 | 60.934 | KV452904.1 | 10794824 | 7-scf00172 | 7 |
| AX-157823019 | 8 | 60.934 | KV452904.1 | 10799212 | 7-scf00172 | 7 |
| AX-157823020 | 8 | 60.934 | KV452904.1 | 10799701 | 7-scf00172 | 7 |
| AX-158054992 | 8 | 60.934 | KV452904.1 | 10799969 | 7-scf00172 | 7 |
| AX-157823022 | 8 | 60.934 | KV452904.1 | 10800847 | 7-scf00172 | 7 |
| AX-158378872 | 8 | 60.934 | KV452904.1 | 10800906 | 7-scf00172 | 7 |
| AX-158054993 | 8 | 60.934 | KV452904.1 | 10801218 | 7-scf00172 | 7 |
| AX-158054994 | 8 | 60.934 | KV452904.1 | 10802643 | 7-scf00172 | 7 |
| AX-158054995 | 8 | 60.934 | KV452904.1 | 10803015 | 7-scf00172 | 7 |
| AX-158054996 | 8 | 60.934 | KV452904.1 | 10804308 | 7-scf00172 | 7 |
| AX-158054997 | 8 | 60.934 | KV452904.1 | 10807223 | 7-scf00172 | 7 |
| AX-158054998 | 8 | 60.934 | KV452904.1 | 10810982 | 7-scf00172 | 7 |
| AX-158054999 | 8 | 60.934 | KV452904.1 | 10811773 | 7-scf00172 | 7 |
| AX-158055001 | 8 | 60.934 | KV452904.1 | 10813608 | 7-scf00172 | 7 |
| AX-158055003 | 8 | 60.934 | KV452904.1 | 10814173 | 7-scf00172 | 7 |
| AX-158055004 | 8 | 60.934 | KV452904.1 | 10814532 | 7-scf00172 | 7 |
| AX-158055005 | 8 | 60.934 | KV452904.1 | 10815226 | 7-scf00172 | 7 |
| AX-158055007 | 8 | 60.934 | KV452904.1 | 10816140 | 7-scf00172 | 7 |
| AX-158055008 | 8 | 60.934 | KV452904.1 | 10820715 | 7-scf00172 | 7 |
| AX-158055010 | 8 | 60.934 | KV452904.1 | 10821363 | 7-scf00172 | 7 |
| AX-158055011 | 8 | 60.934 | KV452904.1 | 10822028 | 7-scf00172 | 7 |
| AX-158055016 | 8 | 60.934 | KV452904.1 | 10824754 | 7-scf00172 | 7 |
| AX-158055019 | 8 | 60.934 | KV452904.1 | 10825852 | 7-scf00172 | 7 |
| AX-158055020 | 8 | 60.934 | KV452904.1 | 10827469 | 7-scf00172 | 7 |

|              |   |        |             |          |            |    |
|--------------|---|--------|-------------|----------|------------|----|
| AX-158055030 | 8 | 60.934 | KV452904.1  | 10831967 | 7-scf00172 | 7  |
| AX-158055031 | 8 | 60.934 | KV452904.1  | 10832540 | 7-scf00172 | 7  |
| AX-158055034 | 8 | 60.934 | KV452904.1  | 10834476 | 7-scf00172 | 7  |
| AX-158055035 | 8 | 60.934 | KV452904.1  | 10835621 | 7-scf00172 | 7  |
| AX-158055037 | 8 | 60.934 | KV452904.1  | 10836052 | 7-scf00172 | 7  |
| AX-158055038 | 8 | 60.934 | KV452904.1  | 10836590 | 7-scf00172 | 7  |
| AX-158055042 | 8 | 60.934 | KV452904.1  | 10843973 | 7-scf00172 | 7  |
| AX-158055044 | 8 | 60.934 | KV452904.1  | 10845545 | 7-scf00172 | 7  |
| AX-158055048 | 8 | 60.934 | KV452904.1  | 10855746 | 7-scf00172 | 7  |
| AX-158391849 | 8 | 60.934 | KV452904.1  | 10856787 | 7-scf00172 | 7  |
| AX-158055049 | 8 | 60.934 | KV452904.1  | 10859563 | 7-scf00172 | 7  |
| AX-158055050 | 8 | 60.934 | KV452904.1  | 10860178 | 7-scf00172 | 7  |
| AX-158391850 | 8 | 60.934 | KV452904.1  | 10861581 | 7-scf00172 | 7  |
| AX-158055057 | 8 | 60.934 | KV452904.1  | 10864340 | 7-scf00172 | 7  |
| AX-158055059 | 8 | 60.934 | KV452904.1  | 10865183 | 7-scf00172 | 7  |
| AX-158055060 | 8 | 60.934 | KV452904.1  | 10866058 | 7-scf00172 | 7  |
| AX-158055061 | 8 | 60.934 | KV452904.1  | 10866465 | 7-scf00172 | 7  |
| AX-158055063 | 8 | 60.934 | KV452904.1  | 10867223 | 7-scf00172 | 7  |
| AX-158055064 | 8 | 60.934 | KV452904.1  | 10867482 | 7-scf00172 | 7  |
| AX-158055065 | 8 | 60.934 | KV452904.1  | 10871132 | 7-scf00172 | 7  |
| AX-158055066 | 8 | 60.934 | KV452904.1  | 10871522 | 7-scf00172 | 7  |
| AX-158055067 | 8 | 60.934 | KV452904.1  | 10872025 | 7-scf00172 | 7  |
| AX-158055069 | 8 | 60.934 | KV452904.1  | 10872386 | 7-scf00172 | 7  |
| AX-158378875 | 8 | 60.934 | KV452904.1  | 10875988 | 7-scf00172 | 7  |
| AX-157823023 | 8 | 60.934 | KV452904.1  | 10877808 | 7-scf00172 | 7  |
| AX-158055072 | 8 | 60.934 | KV452904.1  | 10879414 | 7-scf00172 | 7  |
| AX-158408992 | 8 | 60.934 | KV452904.1  | 10891252 | 7-scf00172 | 7  |
| AX-158408993 | 8 | 60.934 | KV452904.1  | 10898774 | 7-scf00172 | 7  |
| AX-158055108 | 8 | 60.934 | KV452904.1  | 10906355 | 7-scf00172 | 7  |
| AX-158055112 | 8 | 60.934 | KV452904.1  | 10909121 | 7-scf00172 | 7  |
| AX-158055131 | 8 | 60.934 | KV452904.1  | 10927526 | 7-scf00172 | 7  |
| AX-158055140 | 8 | 60.934 | KV452904.1  | 10940143 | 7-scf00172 | 7  |
| AX-158055148 | 8 | 60.934 | KV452904.1  | 10945521 | 7-scf00172 | 7  |
| AX-158055151 | 8 | 60.934 | KV452904.1  | 10950493 | 7-scf00172 | 7  |
| AX-158055190 | 8 | 60.934 | KV452904.1  | 10981591 | 7-scf00172 | 7  |
| AX-158055198 | 8 | 60.934 | KV452904.1  | 10990792 | 7-scf00172 | 7  |
| AX-158055216 | 8 | 60.934 | KV452904.1  | 11006823 | 7-scf00172 | 7  |
| AX-158378878 | 8 | 60.934 | KV452904.1  | 11011751 | 7-scf00172 | 7  |
| AX-158055247 | 8 | 60.934 | KV452904.1  | 11031903 | 7-scf00172 | 7  |
| AX-158055252 | 8 | 60.934 | KV452904.1  | 11039660 | 7-scf00172 | 7  |
| AX-157885235 | 8 | 60.934 | KV452904.1  | 11204751 | 7-scf00172 | 7  |
| AX-158055457 | 8 | 60.934 | KV452904.1  | 11325382 | 7-scf00172 | 7  |
| AX-158055460 | 8 | 60.934 | KV452904.1  | 11329242 | 7-scf00172 | 7  |
| AX-158055462 | 8 | 60.934 | KV452904.1  | 11331416 | 7-scf00172 | 7  |
| AX-158055470 | 8 | 60.934 | KV452904.1  | 11340260 | 7-scf00172 | 7  |
| AX-158055559 | 8 | 60.934 | KV452904.1  | 11426085 | 7-scf00172 | 7  |
| AX-158055574 | 8 | 60.934 | KV452904.1  | 11443917 | 7-scf00172 | 7  |
| AX-158055633 | 8 | 60.934 | KV452904.1  | 11501323 | 7-scf00172 | 7  |
| AX-158055810 | 8 | 60.934 | KV452904.1  | 11672880 | 7-scf00172 | 7  |
| AX-158055933 | 8 | 60.934 | KV452904.1  | 11906000 | 7-scf00172 | 7  |
| AX-157706315 | 8 | 60.934 | 3ML01032031 | 478      | scf07648_1 | UN |

|              |   |        |            |          |            |   |
|--------------|---|--------|------------|----------|------------|---|
| AX-158054553 | 8 | 61.027 | KV452904.1 | 10411445 | 7-scf00172 | 7 |
| AX-158054548 | 8 | 61.152 | KV452904.1 | 10407144 | 7-scf00172 | 7 |
| AX-158054342 | 8 | 61.153 | KV452904.1 | 10192327 | 7-scf00172 | 7 |
| AX-158054343 | 8 | 61.153 | KV452904.1 | 10193315 | 7-scf00172 | 7 |
| AX-158384080 | 8 | 61.153 | KV452904.1 | 10196007 | 7-scf00172 | 7 |
| AX-157822986 | 8 | 61.153 | KV452904.1 | 10202721 | 7-scf00172 | 7 |
| AX-158054350 | 8 | 61.153 | KV452904.1 | 10204688 | 7-scf00172 | 7 |
| AX-158054355 | 8 | 61.153 | KV452904.1 | 10214139 | 7-scf00172 | 7 |
| AX-158054359 | 8 | 61.153 | KV452904.1 | 10215672 | 7-scf00172 | 7 |
| AX-158054362 | 8 | 61.153 | KV452904.1 | 10217736 | 7-scf00172 | 7 |
| AX-158054363 | 8 | 61.153 | KV452904.1 | 10220737 | 7-scf00172 | 7 |
| AX-158054370 | 8 | 61.153 | KV452904.1 | 10229909 | 7-scf00172 | 7 |
| AX-157709399 | 8 | 61.153 | KV452904.1 | 10232083 | 7-scf00172 | 7 |
| AX-158408968 | 8 | 61.153 | KV452904.1 | 10234477 | 7-scf00172 | 7 |
| AX-158054379 | 8 | 61.153 | KV452904.1 | 10240541 | 7-scf00172 | 7 |
| AX-158054381 | 8 | 61.153 | KV452904.1 | 10241907 | 7-scf00172 | 7 |
| AX-158054384 | 8 | 61.153 | KV452904.1 | 10244043 | 7-scf00172 | 7 |
| AX-158054386 | 8 | 61.153 | KV452904.1 | 10245150 | 7-scf00172 | 7 |
| AX-158054390 | 8 | 61.153 | KV452904.1 | 10248599 | 7-scf00172 | 7 |
| AX-158054394 | 8 | 61.153 | KV452904.1 | 10251787 | 7-scf00172 | 7 |
| AX-158378855 | 8 | 61.153 | KV452904.1 | 10253441 | 7-scf00172 | 7 |
| AX-158054396 | 8 | 61.153 | KV452904.1 | 10253778 | 7-scf00172 | 7 |
| AX-158054397 | 8 | 61.153 | KV452904.1 | 10255251 | 7-scf00172 | 7 |
| AX-158408970 | 8 | 61.153 | KV452904.1 | 10256052 | 7-scf00172 | 7 |
| AX-158054398 | 8 | 61.153 | KV452904.1 | 10256353 | 7-scf00172 | 7 |
| AX-158054399 | 8 | 61.153 | KV452904.1 | 10257184 | 7-scf00172 | 7 |
| AX-158408972 | 8 | 61.153 | KV452904.1 | 10258350 | 7-scf00172 | 7 |
| AX-158054402 | 8 | 61.153 | KV452904.1 | 10260639 | 7-scf00172 | 7 |
| AX-158054405 | 8 | 61.153 | KV452904.1 | 10265382 | 7-scf00172 | 7 |
| AX-158054406 | 8 | 61.153 | KV452904.1 | 10267053 | 7-scf00172 | 7 |
| AX-158054407 | 8 | 61.153 | KV452904.1 | 10267801 | 7-scf00172 | 7 |
| AX-158054409 | 8 | 61.153 | KV452904.1 | 10268747 | 7-scf00172 | 7 |
| AX-158054410 | 8 | 61.153 | KV452904.1 | 10269343 | 7-scf00172 | 7 |
| AX-158054411 | 8 | 61.153 | KV452904.1 | 10271592 | 7-scf00172 | 7 |
| AX-158054417 | 8 | 61.153 | KV452904.1 | 10274470 | 7-scf00172 | 7 |
| AX-158054425 | 8 | 61.153 | KV452904.1 | 10280018 | 7-scf00172 | 7 |
| AX-158054427 | 8 | 61.153 | KV452904.1 | 10280621 | 7-scf00172 | 7 |
| AX-158054429 | 8 | 61.153 | KV452904.1 | 10281734 | 7-scf00172 | 7 |
| AX-158054432 | 8 | 61.153 | KV452904.1 | 10282180 | 7-scf00172 | 7 |
| AX-158054441 | 8 | 61.153 | KV452904.1 | 10288528 | 7-scf00172 | 7 |
| AX-158054443 | 8 | 61.153 | KV452904.1 | 10289103 | 7-scf00172 | 7 |
| AX-158054444 | 8 | 61.153 | KV452904.1 | 10289959 | 7-scf00172 | 7 |
| AX-158054445 | 8 | 61.153 | KV452904.1 | 10290786 | 7-scf00172 | 7 |
| AX-158054448 | 8 | 61.153 | KV452904.1 | 10294662 | 7-scf00172 | 7 |
| AX-158054451 | 8 | 61.153 | KV452904.1 | 10299039 | 7-scf00172 | 7 |
| AX-158054453 | 8 | 61.153 | KV452904.1 | 10302313 | 7-scf00172 | 7 |
| AX-157750289 | 8 | 61.153 | KV452904.1 | 10302991 | 7-scf00172 | 7 |
| AX-158054455 | 8 | 61.153 | KV452904.1 | 10303995 | 7-scf00172 | 7 |
| AX-158054456 | 8 | 61.153 | KV452904.1 | 10305754 | 7-scf00172 | 7 |
| AX-158054458 | 8 | 61.153 | KV452904.1 | 10309075 | 7-scf00172 | 7 |
| AX-158054461 | 8 | 61.153 | KV452904.1 | 10311787 | 7-scf00172 | 7 |



|              |   |        |            |          |            |   |
|--------------|---|--------|------------|----------|------------|---|
| AX-158054463 | 8 | 61.153 | KV452904.1 | 10312544 | 7-scf00172 | 7 |
| AX-158054466 | 8 | 61.153 | KV452904.1 | 10314602 | 7-scf00172 | 7 |
| AX-157757696 | 8 | 61.153 | KV452904.1 | 10316488 | 7-scf00172 | 7 |
| AX-158054467 | 8 | 61.153 | KV452904.1 | 10317456 | 7-scf00172 | 7 |
| AX-158054469 | 8 | 61.153 | KV452904.1 | 10320166 | 7-scf00172 | 7 |
| AX-158378857 | 8 | 61.153 | KV452904.1 | 10320669 | 7-scf00172 | 7 |
| AX-157702731 | 8 | 61.153 | KV452904.1 | 10320892 | 7-scf00172 | 7 |
| AX-158054472 | 8 | 61.153 | KV452904.1 | 10322084 | 7-scf00172 | 7 |
| AX-158054475 | 8 | 61.153 | KV452904.1 | 10325777 | 7-scf00172 | 7 |
| AX-158054476 | 8 | 61.153 | KV452904.1 | 10326924 | 7-scf00172 | 7 |
| AX-158054477 | 8 | 61.153 | KV452904.1 | 10328014 | 7-scf00172 | 7 |
| AX-158054479 | 8 | 61.153 | KV452904.1 | 10329552 | 7-scf00172 | 7 |
| AX-158054480 | 8 | 61.153 | KV452904.1 | 10330080 | 7-scf00172 | 7 |
| AX-158054481 | 8 | 61.153 | KV452904.1 | 10331565 | 7-scf00172 | 7 |
| AX-158054484 | 8 | 61.153 | KV452904.1 | 10334834 | 7-scf00172 | 7 |
| AX-158378858 | 8 | 61.153 | KV452904.1 | 10335212 | 7-scf00172 | 7 |
| AX-158054486 | 8 | 61.153 | KV452904.1 | 10335273 | 7-scf00172 | 7 |
| AX-158378859 | 8 | 61.153 | KV452904.1 | 10337653 | 7-scf00172 | 7 |
| AX-158054487 | 8 | 61.153 | KV452904.1 | 10339368 | 7-scf00172 | 7 |
| AX-158054489 | 8 | 61.153 | KV452904.1 | 10339788 | 7-scf00172 | 7 |
| AX-158054492 | 8 | 61.153 | KV452904.1 | 10346919 | 7-scf00172 | 7 |
| AX-158054493 | 8 | 61.153 | KV452904.1 | 10347480 | 7-scf00172 | 7 |
| AX-158054494 | 8 | 61.153 | KV452904.1 | 10349630 | 7-scf00172 | 7 |
| AX-158054495 | 8 | 61.153 | KV452904.1 | 10350164 | 7-scf00172 | 7 |
| AX-158054496 | 8 | 61.153 | KV452904.1 | 10354560 | 7-scf00172 | 7 |
| AX-158054498 | 8 | 61.153 | KV452904.1 | 10355392 | 7-scf00172 | 7 |
| AX-158054499 | 8 | 61.153 | KV452904.1 | 10356464 | 7-scf00172 | 7 |
| AX-158054500 | 8 | 61.153 | KV452904.1 | 10357327 | 7-scf00172 | 7 |
| AX-158054501 | 8 | 61.153 | KV452904.1 | 10357864 | 7-scf00172 | 7 |
| AX-158054502 | 8 | 61.153 | KV452904.1 | 10358821 | 7-scf00172 | 7 |
| AX-158054503 | 8 | 61.153 | KV452904.1 | 10359673 | 7-scf00172 | 7 |
| AX-158054504 | 8 | 61.153 | KV452904.1 | 10360029 | 7-scf00172 | 7 |
| AX-157822992 | 8 | 61.153 | KV452904.1 | 10360080 | 7-scf00172 | 7 |
| AX-158054505 | 8 | 61.153 | KV452904.1 | 10361445 | 7-scf00172 | 7 |
| AX-158054506 | 8 | 61.153 | KV452904.1 | 10362536 | 7-scf00172 | 7 |
| AX-158054508 | 8 | 61.153 | KV452904.1 | 10369845 | 7-scf00172 | 7 |
| AX-158054510 | 8 | 61.153 | KV452904.1 | 10373926 | 7-scf00172 | 7 |
| AX-158054511 | 8 | 61.153 | KV452904.1 | 10374847 | 7-scf00172 | 7 |
| AX-158054513 | 8 | 61.153 | KV452904.1 | 10376178 | 7-scf00172 | 7 |
| AX-158054515 | 8 | 61.153 | KV452904.1 | 10376753 | 7-scf00172 | 7 |
| AX-158054516 | 8 | 61.153 | KV452904.1 | 10376893 | 7-scf00172 | 7 |
| AX-158054518 | 8 | 61.153 | KV452904.1 | 10380370 | 7-scf00172 | 7 |
| AX-158054519 | 8 | 61.153 | KV452904.1 | 10381007 | 7-scf00172 | 7 |
| AX-158054520 | 8 | 61.153 | KV452904.1 | 10382515 | 7-scf00172 | 7 |
| AX-158054522 | 8 | 61.153 | KV452904.1 | 10384293 | 7-scf00172 | 7 |
| AX-158054524 | 8 | 61.153 | KV452904.1 | 10386226 | 7-scf00172 | 7 |
| AX-158054525 | 8 | 61.153 | KV452904.1 | 10386754 | 7-scf00172 | 7 |
| AX-158054526 | 8 | 61.153 | KV452904.1 | 10387936 | 7-scf00172 | 7 |
| AX-158054528 | 8 | 61.153 | KV452904.1 | 10388449 | 7-scf00172 | 7 |
| AX-158054530 | 8 | 61.153 | KV452904.1 | 10390494 | 7-scf00172 | 7 |
| AX-158054531 | 8 | 61.153 | KV452904.1 | 10391211 | 7-scf00172 | 7 |

|              |   |        |            |          |            |   |
|--------------|---|--------|------------|----------|------------|---|
| AX-158054534 | 8 | 61.153 | KV452904.1 | 10392693 | 7-scf00172 | 7 |
| AX-158054535 | 8 | 61.153 | KV452904.1 | 10393425 | 7-scf00172 | 7 |
| AX-158054582 | 8 | 61.153 | KV452904.1 | 10437501 | 7-scf00172 | 7 |
| AX-158054619 | 8 | 61.153 | KV452904.1 | 10475939 | 7-scf00172 | 7 |
| AX-158054632 | 8 | 61.153 | KV452904.1 | 10490335 | 7-scf00172 | 7 |
| AX-158054636 | 8 | 61.153 | KV452904.1 | 10491652 | 7-scf00172 | 7 |
| AX-158054671 | 8 | 61.153 | KV452904.1 | 10523311 | 7-scf00172 | 7 |
| AX-158054680 | 8 | 61.153 | KV452904.1 | 10529553 | 7-scf00172 | 7 |
| AX-158054697 | 8 | 61.153 | KV452904.1 | 10548068 | 7-scf00172 | 7 |
| AX-158055040 | 8 | 61.153 | KV452904.1 | 10841750 | 7-scf00172 | 7 |
| AX-158055086 | 8 | 61.153 | KV452904.1 | 10890292 | 7-scf00172 | 7 |
| AX-158055091 | 8 | 61.153 | KV452904.1 | 10892659 | 7-scf00172 | 7 |
| AX-158055146 | 8 | 61.153 | KV452904.1 | 10943564 | 7-scf00172 | 7 |
| AX-157823024 | 8 | 61.153 | KV452904.1 | 10948221 | 7-scf00172 | 7 |
| AX-158055174 | 8 | 61.153 | KV452904.1 | 10962791 | 7-scf00172 | 7 |
| AX-158055206 | 8 | 61.153 | KV452904.1 | 10999950 | 7-scf00172 | 7 |
| AX-158055219 | 8 | 61.153 | KV452904.1 | 11008169 | 7-scf00172 | 7 |
| AX-158054369 | 8 | 61.186 | KV452904.1 | 10229459 | 7-scf00172 | 7 |
| AX-157885229 | 8 | 61.227 | KV452904.1 | 10229267 | 7-scf00172 | 7 |
| AX-158054345 | 8 | 61.271 | KV452904.1 | 10196548 | 7-scf00172 | 7 |
| AX-158054374 | 8 | 61.271 | KV452904.1 | 10233398 | 7-scf00172 | 7 |
| AX-158054344 | 8 | 61.316 | KV452904.1 | 10194637 | 7-scf00172 | 7 |
| AX-157822984 | 8 | 61.397 | KV452904.1 | 10189841 | 7-scf00172 | 7 |
| AX-158053655 | 8 | 61.428 | KV452904.1 | 9201918  | 7-scf00172 | 7 |
| AX-158054317 | 8 | 61.428 | KV452904.1 | 10168054 | 7-scf00172 | 7 |
| AX-158054337 | 8 | 61.428 | KV452904.1 | 10183905 | 7-scf00172 | 7 |
| AX-158055558 | 8 | 61.428 | KV452904.1 | 11423821 | 7-scf00172 | 7 |
| AX-157823098 | 8 | 61.428 | KV452904.1 | 12376247 | 7-scf00172 | 7 |
| AX-157719107 | 8 | 61.428 | KV452908.1 | 47460    | 7-scf00176 | 7 |
| AX-158059131 | 8 | 61.428 | KV452908.1 | 190185   | 7-scf00176 | 7 |
| AX-158054315 | 8 | 61.48  | KV452904.1 | 10166470 | 7-scf00172 | 7 |
| AX-158054319 | 8 | 61.48  | KV452904.1 | 10169345 | 7-scf00172 | 7 |
| AX-158378853 | 8 | 61.48  | KV452904.1 | 10171145 | 7-scf00172 | 7 |
| AX-158054321 | 8 | 61.48  | KV452904.1 | 10171389 | 7-scf00172 | 7 |
| AX-158054322 | 8 | 61.48  | KV452904.1 | 10174537 | 7-scf00172 | 7 |
| AX-158054328 | 8 | 61.48  | KV452904.1 | 10177868 | 7-scf00172 | 7 |
| AX-157724711 | 8 | 61.48  | KV452904.1 | 10178269 | 7-scf00172 | 7 |
| AX-158054329 | 8 | 61.48  | KV452904.1 | 10179551 | 7-scf00172 | 7 |
| AX-158054335 | 8 | 61.48  | KV452904.1 | 10183171 | 7-scf00172 | 7 |
| AX-158054336 | 8 | 61.48  | KV452904.1 | 10183643 | 7-scf00172 | 7 |
| AX-158054306 | 8 | 61.699 | KV452904.1 | 10154878 | 7-scf00172 | 7 |
| AX-158054308 | 8 | 61.699 | KV452904.1 | 10157575 | 7-scf00172 | 7 |
| AX-158378851 | 8 | 61.699 | KV452904.1 | 10157772 | 7-scf00172 | 7 |
| AX-158054312 | 8 | 61.699 | KV452904.1 | 10161860 | 7-scf00172 | 7 |
| AX-157822983 | 8 | 61.699 | KV452904.1 | 10163494 | 7-scf00172 | 7 |
| AX-158054435 | 8 | 61.699 | KV452904.1 | 10283311 | 7-scf00172 | 7 |
| AX-158054252 | 8 | 61.808 | KV452904.1 | 10102518 | 7-scf00172 | 7 |
| AX-157746670 | 8 | 61.808 | KV452904.1 | 10102812 | 7-scf00172 | 7 |
| AX-158054259 | 8 | 61.808 | KV452904.1 | 10106300 | 7-scf00172 | 7 |
| AX-158054262 | 8 | 61.808 | KV452904.1 | 10111080 | 7-scf00172 | 7 |
| AX-158054263 | 8 | 61.808 | KV452904.1 | 10111535 | 7-scf00172 | 7 |

|              |   |        |            |          |            |   |
|--------------|---|--------|------------|----------|------------|---|
| AX-158054275 | 8 | 61.808 | KV452904.1 | 10122474 | 7-scf00172 | 7 |
| AX-158054278 | 8 | 61.808 | KV452904.1 | 10127446 | 7-scf00172 | 7 |
| AX-158054279 | 8 | 61.808 | KV452904.1 | 10128625 | 7-scf00172 | 7 |
| AX-158054284 | 8 | 61.808 | KV452904.1 | 10135624 | 7-scf00172 | 7 |
| AX-158054286 | 8 | 61.808 | KV452904.1 | 10136118 | 7-scf00172 | 7 |
| AX-158054290 | 8 | 61.808 | KV452904.1 | 10137468 | 7-scf00172 | 7 |
| AX-157822981 | 8 | 61.808 | KV452904.1 | 10142638 | 7-scf00172 | 7 |
| AX-157740024 | 8 | 61.808 | KV452904.1 | 10147710 | 7-scf00172 | 7 |
| AX-157876789 | 8 | 61.808 | KV452904.1 | 10149283 | 7-scf00172 | 7 |
| AX-158054297 | 8 | 61.808 | KV452904.1 | 10149361 | 7-scf00172 | 7 |
| AX-157822982 | 8 | 61.808 | KV452904.1 | 10151381 | 7-scf00172 | 7 |
| AX-158054301 | 8 | 61.808 | KV452904.1 | 10151752 | 7-scf00172 | 7 |
| AX-158054303 | 8 | 61.808 | KV452904.1 | 10152267 | 7-scf00172 | 7 |
| AX-158054316 | 8 | 61.808 | KV452904.1 | 10166861 | 7-scf00172 | 7 |
| AX-158055452 | 8 | 61.808 | KV452904.1 | 11319018 | 7-scf00172 | 7 |
| AX-157744808 | 8 | 61.809 | KV452904.1 | 10086969 | 7-scf00172 | 7 |
| AX-158054251 | 8 | 61.809 | KV452904.1 | 10100018 | 7-scf00172 | 7 |
| AX-157745063 | 8 | 61.809 | KV452904.1 | 10101547 | 7-scf00172 | 7 |
| AX-158054235 | 8 | 61.973 | KV452904.1 | 10078474 | 7-scf00172 | 7 |
| AX-158054237 | 8 | 61.973 | KV452904.1 | 10079149 | 7-scf00172 | 7 |
| AX-158054239 | 8 | 61.973 | KV452904.1 | 10083160 | 7-scf00172 | 7 |
| AX-158054240 | 8 | 61.973 | KV452904.1 | 10085663 | 7-scf00172 | 7 |
| AX-158054300 | 8 | 61.973 | KV452904.1 | 10150872 | 7-scf00172 | 7 |
| AX-158054234 | 8 | 61.974 | KV452904.1 | 10076933 | 7-scf00172 | 7 |
| AX-157822977 | 8 | 62.298 | KV452904.1 | 10073606 | 7-scf00172 | 7 |
| AX-157772131 | 8 | 62.307 | KV452904.1 | 10070783 | 7-scf00172 | 7 |
| AX-158054228 | 8 | 62.443 | KV452904.1 | 10068118 | 7-scf00172 | 7 |
| AX-158378843 | 8 | 63.012 | KV452904.1 | 10018647 | 7-scf00172 | 7 |
| AX-157750640 | 8 | 63.012 | KV452904.1 | 10018770 | 7-scf00172 | 7 |
| AX-157822968 | 8 | 63.012 | KV452904.1 | 10020492 | 7-scf00172 | 7 |
| AX-158054194 | 8 | 63.012 | KV452904.1 | 10020925 | 7-scf00172 | 7 |
| AX-157775742 | 8 | 63.149 | KV452904.1 | 9997818  | 7-scf00172 | 7 |
| AX-158054177 | 8 | 63.149 | KV452904.1 | 10001195 | 7-scf00172 | 7 |
| AX-158054182 | 8 | 63.149 | KV452904.1 | 10008873 | 7-scf00172 | 7 |
| AX-158054186 | 8 | 63.149 | KV452904.1 | 10013451 | 7-scf00172 | 7 |
| AX-158378842 | 8 | 63.149 | KV452904.1 | 10015016 | 7-scf00172 | 7 |
| AX-158054189 | 8 | 63.149 | KV452904.1 | 10015596 | 7-scf00172 | 7 |
| AX-158054199 | 8 | 63.149 | KV452904.1 | 10026975 | 7-scf00172 | 7 |
| AX-158059990 | 8 | 63.149 | KV452910.1 | 161803   | 7-scf00178 | 7 |
| AX-158054156 | 8 | 63.558 | KV452904.1 | 9981228  | 7-scf00172 | 7 |
| AX-158378838 | 8 | 63.558 | KV452904.1 | 9981730  | 7-scf00172 | 7 |
| AX-158054158 | 8 | 63.558 | KV452904.1 | 9982623  | 7-scf00172 | 7 |
| AX-158054161 | 8 | 63.558 | KV452904.1 | 9984120  | 7-scf00172 | 7 |
| AX-158378840 | 8 | 63.558 | KV452904.1 | 9984649  | 7-scf00172 | 7 |
| AX-158054164 | 8 | 63.558 | KV452904.1 | 9986284  | 7-scf00172 | 7 |
| AX-158054167 | 8 | 63.558 | KV452904.1 | 9989555  | 7-scf00172 | 7 |
| AX-158054148 | 8 | 63.581 | KV452904.1 | 9970057  | 7-scf00172 | 7 |
| AX-158054147 | 8 | 63.603 | KV452904.1 | 9969307  | 7-scf00172 | 7 |
| AX-158054179 | 8 | 63.603 | KV452904.1 | 10004406 | 7-scf00172 | 7 |
| AX-158054146 | 8 | 63.626 | KV452904.1 | 9968174  | 7-scf00172 | 7 |
| AX-158054145 | 8 | 63.648 | KV452904.1 | 9967664  | 7-scf00172 | 7 |

|              |   |        |            |          |            |   |
|--------------|---|--------|------------|----------|------------|---|
| AX-157713868 | 8 | 63.667 | KV452904.1 | 9961572  | 7-scf00172 | 7 |
| AX-158378836 | 8 | 63.667 | KV452904.1 | 9963414  | 7-scf00172 | 7 |
| AX-157822964 | 8 | 63.667 | KV452904.1 | 9963646  | 7-scf00172 | 7 |
| AX-157822965 | 8 | 63.667 | KV452904.1 | 9964004  | 7-scf00172 | 7 |
| AX-158054141 | 8 | 63.667 | KV452904.1 | 9964780  | 7-scf00172 | 7 |
| AX-158378837 | 8 | 63.667 | KV452904.1 | 9964955  | 7-scf00172 | 7 |
| AX-158054142 | 8 | 63.667 | KV452904.1 | 9965943  | 7-scf00172 | 7 |
| AX-157716288 | 8 | 63.667 | KV452904.1 | 9966057  | 7-scf00172 | 7 |
| AX-158054165 | 8 | 63.667 | KV452904.1 | 9986858  | 7-scf00172 | 7 |
| AX-158054135 | 8 | 63.683 | KV452904.1 | 9958308  | 7-scf00172 | 7 |
| AX-157685745 | 8 | 63.711 | KV452907.1 | 83432    | 7-scf00637 | 7 |
| AX-158059758 | 8 | 63.746 | KV452909.1 | 426237   | 7-scf00177 | 7 |
| AX-158059759 | 8 | 63.746 | KV452909.1 | 426668   | 7-scf00177 | 7 |
| AX-157823377 | 8 | 63.746 | KV452910.1 | 20195    | 7-scf00178 | 7 |
| AX-158059783 | 8 | 63.746 | KV452910.1 | 20414    | 7-scf00178 | 7 |
| AX-158059788 | 8 | 63.746 | KV452910.1 | 23655    | 7-scf00178 | 7 |
| AX-157685747 | 8 | 63.746 | KV452907.1 | 84810    | 7-scf00637 | 7 |
| AX-158054140 | 8 | 63.777 | KV452904.1 | 9963345  | 7-scf00172 | 7 |
| AX-158054162 | 8 | 63.777 | KV452904.1 | 9985164  | 7-scf00172 | 7 |
| AX-158054185 | 8 | 63.777 | KV452904.1 | 10012606 | 7-scf00172 | 7 |
| AX-158054204 | 8 | 63.777 | KV452904.1 | 10034367 | 7-scf00172 | 7 |
| AX-158054231 | 8 | 63.777 | KV452904.1 | 10070448 | 7-scf00172 | 7 |
| AX-158054233 | 8 | 63.777 | KV452904.1 | 10075721 | 7-scf00172 | 7 |
| AX-158054304 | 8 | 63.777 | KV452904.1 | 10154498 | 7-scf00172 | 7 |
| AX-157696100 | 8 | 63.777 | KV452904.1 | 11247135 | 7-scf00172 | 7 |
| AX-158059004 | 8 | 63.777 | KV452908.1 | 55512    | 7-scf00176 | 7 |
| AX-157856881 | 8 | 63.777 | KV452908.1 | 56905    | 7-scf00176 | 7 |
| AX-157743292 | 8 | 63.777 | KV452908.1 | 71158    | 7-scf00176 | 7 |
| AX-158059019 | 8 | 63.777 | KV452908.1 | 73089    | 7-scf00176 | 7 |
| AX-158059021 | 8 | 63.777 | KV452908.1 | 76247    | 7-scf00176 | 7 |
| AX-158059027 | 8 | 63.777 | KV452908.1 | 78300    | 7-scf00176 | 7 |
| AX-158059028 | 8 | 63.777 | KV452908.1 | 79317    | 7-scf00176 | 7 |
| AX-158059029 | 8 | 63.777 | KV452908.1 | 81055    | 7-scf00176 | 7 |
| AX-158059030 | 8 | 63.777 | KV452908.1 | 81472    | 7-scf00176 | 7 |
| AX-158059031 | 8 | 63.777 | KV452908.1 | 81899    | 7-scf00176 | 7 |
| AX-158059033 | 8 | 63.777 | KV452908.1 | 83178    | 7-scf00176 | 7 |
| AX-158059037 | 8 | 63.777 | KV452908.1 | 84984    | 7-scf00176 | 7 |
| AX-158059039 | 8 | 63.777 | KV452908.1 | 85560    | 7-scf00176 | 7 |
| AX-157856882 | 8 | 63.777 | KV452908.1 | 86793    | 7-scf00176 | 7 |
| AX-158059043 | 8 | 63.777 | KV452908.1 | 87713    | 7-scf00176 | 7 |
| AX-158059045 | 8 | 63.777 | KV452908.1 | 89784    | 7-scf00176 | 7 |
| AX-158059049 | 8 | 63.777 | KV452908.1 | 92200    | 7-scf00176 | 7 |
| AX-157856883 | 8 | 63.777 | KV452908.1 | 93574    | 7-scf00176 | 7 |
| AX-158059050 | 8 | 63.777 | KV452908.1 | 93812    | 7-scf00176 | 7 |
| AX-158059053 | 8 | 63.777 | KV452908.1 | 94855    | 7-scf00176 | 7 |
| AX-158059054 | 8 | 63.777 | KV452908.1 | 95563    | 7-scf00176 | 7 |
| AX-158059055 | 8 | 63.777 | KV452908.1 | 95944    | 7-scf00176 | 7 |
| AX-158059056 | 8 | 63.777 | KV452908.1 | 97280    | 7-scf00176 | 7 |
| AX-158059058 | 8 | 63.777 | KV452908.1 | 100837   | 7-scf00176 | 7 |
| AX-157823311 | 8 | 63.777 | KV452908.1 | 106146   | 7-scf00176 | 7 |
| AX-158059064 | 8 | 63.777 | KV452908.1 | 106791   | 7-scf00176 | 7 |

|              |   |        |            |          |            |   |
|--------------|---|--------|------------|----------|------------|---|
| AX-158059065 | 8 | 63.777 | KV452908.1 | 108336   | 7-scf00176 | 7 |
| AX-158059066 | 8 | 63.777 | KV452908.1 | 108638   | 7-scf00176 | 7 |
| AX-158059069 | 8 | 63.777 | KV452908.1 | 113239   | 7-scf00176 | 7 |
| AX-158059072 | 8 | 63.777 | KV452908.1 | 116527   | 7-scf00176 | 7 |
| AX-158059075 | 8 | 63.777 | KV452908.1 | 116588   | 7-scf00176 | 7 |
| AX-158059077 | 8 | 63.777 | KV452908.1 | 119880   | 7-scf00176 | 7 |
| AX-157823312 | 8 | 63.777 | KV452908.1 | 120458   | 7-scf00176 | 7 |
| AX-158059080 | 8 | 63.777 | KV452908.1 | 121692   | 7-scf00176 | 7 |
| AX-158059081 | 8 | 63.777 | KV452908.1 | 122735   | 7-scf00176 | 7 |
| AX-158059084 | 8 | 63.777 | KV452908.1 | 127073   | 7-scf00176 | 7 |
| AX-158059088 | 8 | 63.777 | KV452908.1 | 134156   | 7-scf00176 | 7 |
| AX-158059089 | 8 | 63.777 | KV452908.1 | 135359   | 7-scf00176 | 7 |
| AX-158059090 | 8 | 63.777 | KV452908.1 | 139643   | 7-scf00176 | 7 |
| AX-158059094 | 8 | 63.777 | KV452908.1 | 144742   | 7-scf00176 | 7 |
| AX-158059098 | 8 | 63.777 | KV452908.1 | 148295   | 7-scf00176 | 7 |
| AX-157823313 | 8 | 63.777 | KV452908.1 | 151788   | 7-scf00176 | 7 |
| AX-158059101 | 8 | 63.777 | KV452908.1 | 154010   | 7-scf00176 | 7 |
| AX-158059104 | 8 | 63.777 | KV452908.1 | 155498   | 7-scf00176 | 7 |
| AX-158059112 | 8 | 63.777 | KV452908.1 | 166129   | 7-scf00176 | 7 |
| AX-158059125 | 8 | 63.777 | KV452908.1 | 186846   | 7-scf00176 | 7 |
| AX-158059141 | 8 | 63.777 | KV452908.1 | 197065   | 7-scf00176 | 7 |
| AX-158059145 | 8 | 63.777 | KV452908.1 | 198622   | 7-scf00176 | 7 |
| AX-158059149 | 8 | 63.777 | KV452908.1 | 204292   | 7-scf00176 | 7 |
| AX-158059162 | 8 | 63.777 | KV452908.1 | 222937   | 7-scf00176 | 7 |
| AX-157823323 | 8 | 63.777 | KV452908.1 | 229725   | 7-scf00176 | 7 |
| AX-158391889 | 8 | 63.777 | KV452908.1 | 270400   | 7-scf00176 | 7 |
| AX-158059208 | 8 | 63.777 | KV452908.1 | 283466   | 7-scf00176 | 7 |
| AX-158059315 | 8 | 63.777 | KV452909.1 | 33644    | 7-scf00177 | 7 |
| AX-157823344 | 8 | 63.777 | KV452909.1 | 44563    | 7-scf00177 | 7 |
| AX-157716622 | 8 | 63.777 | KV452909.1 | 62839    | 7-scf00177 | 7 |
| AX-158059687 | 8 | 63.777 | KV452909.1 | 351571   | 7-scf00177 | 7 |
| AX-158059781 | 8 | 63.777 | KV452910.1 | 13530    | 7-scf00178 | 7 |
| AX-158059923 | 8 | 63.777 | KV452910.1 | 97815    | 7-scf00178 | 7 |
| AX-157685746 | 8 | 63.777 | KV452907.1 | 83911    | 7-scf00637 | 7 |
| AX-158054169 | 8 | 63.886 | KV452904.1 | 9990279  | 7-scf00172 | 7 |
| AX-158054192 | 8 | 63.886 | KV452904.1 | 10020036 | 7-scf00172 | 7 |
| AX-158054230 | 8 | 63.886 | KV452904.1 | 10068565 | 7-scf00172 | 7 |
| AX-158054232 | 8 | 63.886 | KV452904.1 | 10072378 | 7-scf00172 | 7 |
| AX-157822979 | 8 | 63.886 | KV452904.1 | 10101202 | 7-scf00172 | 7 |
| AX-158054267 | 8 | 63.886 | KV452904.1 | 10115886 | 7-scf00172 | 7 |
| AX-157856784 | 8 | 63.886 | KV452904.1 | 10178420 | 7-scf00172 | 7 |
| AX-158059118 | 8 | 63.886 | KV452908.1 | 179120   | 7-scf00176 | 7 |
| AX-158059120 | 8 | 63.886 | KV452908.1 | 180182   | 7-scf00176 | 7 |
| AX-158059121 | 8 | 63.886 | KV452908.1 | 183916   | 7-scf00176 | 7 |
| AX-157823317 | 8 | 63.886 | KV452908.1 | 186006   | 7-scf00176 | 7 |
| AX-158059124 | 8 | 63.886 | KV452908.1 | 186155   | 7-scf00176 | 7 |
| AX-157823318 | 8 | 63.886 | KV452908.1 | 186945   | 7-scf00176 | 7 |
| AX-158059130 | 8 | 63.886 | KV452908.1 | 189109   | 7-scf00176 | 7 |
| AX-158059138 | 8 | 63.886 | KV452908.1 | 195931   | 7-scf00176 | 7 |
| AX-158059140 | 8 | 63.886 | KV452908.1 | 196518   | 7-scf00176 | 7 |
| AX-158059147 | 8 | 63.886 | KV452908.1 | 201230   | 7-scf00176 | 7 |

|              |   |        |             |         |            |    |
|--------------|---|--------|-------------|---------|------------|----|
| AX-157720163 | 8 | 63.886 | KV452908.1  | 208649  | 7-scf00176 | 7  |
| AX-158059153 | 8 | 63.886 | KV452908.1  | 210043  | 7-scf00176 | 7  |
| AX-157743260 | 8 | 63.886 | KV452908.1  | 212429  | 7-scf00176 | 7  |
| AX-157823321 | 8 | 63.886 | KV452908.1  | 212841  | 7-scf00176 | 7  |
| AX-157756174 | 8 | 63.886 | KV452908.1  | 215186  | 7-scf00176 | 7  |
| AX-158059154 | 8 | 63.886 | KV452908.1  | 215229  | 7-scf00176 | 7  |
| AX-158059168 | 8 | 63.886 | KV452908.1  | 235519  | 7-scf00176 | 7  |
| AX-158059171 | 8 | 63.886 | KV452908.1  | 242522  | 7-scf00176 | 7  |
| AX-158059175 | 8 | 63.886 | KV452908.1  | 245525  | 7-scf00176 | 7  |
| AX-158059177 | 8 | 63.886 | KV452908.1  | 250782  | 7-scf00176 | 7  |
| AX-158059180 | 8 | 63.886 | KV452908.1  | 254598  | 7-scf00176 | 7  |
| AX-158059185 | 8 | 63.886 | KV452908.1  | 262849  | 7-scf00176 | 7  |
| AX-158059189 | 8 | 63.886 | KV452908.1  | 267341  | 7-scf00176 | 7  |
| AX-158059190 | 8 | 63.886 | KV452908.1  | 268165  | 7-scf00176 | 7  |
| AX-158059192 | 8 | 63.886 | KV452908.1  | 268729  | 7-scf00176 | 7  |
| AX-158059193 | 8 | 63.886 | KV452908.1  | 269738  | 7-scf00176 | 7  |
| AX-158059194 | 8 | 63.886 | KV452908.1  | 270345  | 7-scf00176 | 7  |
| AX-158059195 | 8 | 63.886 | KV452908.1  | 270926  | 7-scf00176 | 7  |
| AX-157823327 | 8 | 63.886 | KV452908.1  | 276611  | 7-scf00176 | 7  |
| AX-158059199 | 8 | 63.886 | KV452908.1  | 277659  | 7-scf00176 | 7  |
| AX-158059201 | 8 | 63.886 | KV452908.1  | 279022  | 7-scf00176 | 7  |
| AX-158059202 | 8 | 63.886 | KV452908.1  | 279813  | 7-scf00176 | 7  |
| AX-158059210 | 8 | 63.886 | KV452908.1  | 284106  | 7-scf00176 | 7  |
| AX-158059213 | 8 | 63.886 | KV452908.1  | 286588  | 7-scf00176 | 7  |
| AX-158059214 | 8 | 63.886 | KV452908.1  | 287204  | 7-scf00176 | 7  |
| AX-158059217 | 8 | 63.886 | KV452908.1  | 290153  | 7-scf00176 | 7  |
| AX-157823328 | 8 | 63.886 | KV452908.1  | 291506  | 7-scf00176 | 7  |
| AX-157747462 | 8 | 63.886 | KV452908.1  | 294739  | 7-scf00176 | 7  |
| AX-157717005 | 8 | 63.886 | KV452908.1  | 296584  | 7-scf00176 | 7  |
| AX-158059225 | 8 | 63.886 | KV452908.1  | 303101  | 7-scf00176 | 7  |
| AX-158059226 | 8 | 63.886 | KV452908.1  | 303142  | 7-scf00176 | 7  |
| AX-157708357 | 8 | 63.886 | KV452908.1  | 304387  | 7-scf00176 | 7  |
| AX-158059233 | 8 | 63.886 | KV452908.1  | 313161  | 7-scf00176 | 7  |
| AX-157743167 | 8 | 63.886 | KV452908.1  | 319704  | 7-scf00176 | 7  |
| AX-158059246 | 8 | 63.886 | KV452908.1  | 334001  | 7-scf00176 | 7  |
| AX-158059247 | 8 | 63.886 | KV452908.1  | 336714  | 7-scf00176 | 7  |
| AX-158059250 | 8 | 63.886 | KV452908.1  | 342012  | 7-scf00176 | 7  |
| AX-158059255 | 8 | 63.886 | KV452908.1  | 363955  | 7-scf00176 | 7  |
| AX-158059265 | 8 | 63.886 | KV452908.1  | 376188  | 7-scf00176 | 7  |
| AX-158059276 | 8 | 63.886 | KV452908.1  | 398127  | 7-scf00176 | 7  |
| AX-158059279 | 8 | 63.886 | KV452908.1  | 404128  | 7-scf00176 | 7  |
| AX-158059284 | 8 | 63.886 | KV452908.1  | 405969  | 7-scf00176 | 7  |
| AX-158059304 | 8 | 63.886 | KV452909.1  | 24370   | 7-scf00177 | 7  |
| AX-158059340 | 8 | 63.886 | KV452909.1  | 67703   | 7-scf00177 | 7  |
| AX-158060028 | 8 | 63.886 | KV452910.1  | 217476  | 7-scf00178 | 7  |
| AX-157680006 | 8 | 63.886 | KV452911.1  | 1554    | 7-scf02392 | 7  |
| AX-157689037 | 8 | 63.886 | 3ML01027899 | 799     | scf03507_1 | UN |
| AX-157823345 | 8 | 63.994 | KV452909.1  | 44836   | 7-scf00177 | 7  |
| AX-158054173 | 8 | 64.104 | KV452904.1  | 9994256 | 7-scf00172 | 7  |
| AX-157717028 | 8 | 64.104 | KV452908.1  | 101020  | 7-scf00176 | 7  |
| AX-158059105 | 8 | 64.104 | KV452908.1  | 155969  | 7-scf00176 | 7  |

|              |   |        |            |        |            |   |
|--------------|---|--------|------------|--------|------------|---|
| AX-158059242 | 8 | 64.104 | KV452908.1 | 326458 | 7-scf00176 | 7 |
| AX-158059311 | 8 | 64.104 | KV452909.1 | 32625  | 7-scf00177 | 7 |
| AX-158059331 | 8 | 64.104 | KV452909.1 | 59083  | 7-scf00177 | 7 |
| AX-158059348 | 8 | 64.104 | KV452909.1 | 74169  | 7-scf00177 | 7 |
| AX-158059352 | 8 | 64.104 | KV452909.1 | 77129  | 7-scf00177 | 7 |
| AX-158059355 | 8 | 64.104 | KV452909.1 | 77590  | 7-scf00177 | 7 |
| AX-158059359 | 8 | 64.104 | KV452909.1 | 79397  | 7-scf00177 | 7 |
| AX-158059368 | 8 | 64.104 | KV452909.1 | 87549  | 7-scf00177 | 7 |
| AX-157885314 | 8 | 64.104 | KV452909.1 | 89151  | 7-scf00177 | 7 |
| AX-158059371 | 8 | 64.104 | KV452909.1 | 91947  | 7-scf00177 | 7 |
| AX-158059372 | 8 | 64.104 | KV452909.1 | 96097  | 7-scf00177 | 7 |
| AX-158059378 | 8 | 64.104 | KV452909.1 | 99637  | 7-scf00177 | 7 |
| AX-158059380 | 8 | 64.104 | KV452909.1 | 102857 | 7-scf00177 | 7 |
| AX-158059381 | 8 | 64.104 | KV452909.1 | 105737 | 7-scf00177 | 7 |
| AX-158059405 | 8 | 64.104 | KV452909.1 | 118165 | 7-scf00177 | 7 |
| AX-158059406 | 8 | 64.104 | KV452909.1 | 119131 | 7-scf00177 | 7 |
| AX-158059409 | 8 | 64.104 | KV452909.1 | 124900 | 7-scf00177 | 7 |
| AX-158059411 | 8 | 64.104 | KV452909.1 | 125534 | 7-scf00177 | 7 |
| AX-158059412 | 8 | 64.104 | KV452909.1 | 126079 | 7-scf00177 | 7 |
| AX-158059416 | 8 | 64.104 | KV452909.1 | 128489 | 7-scf00177 | 7 |
| AX-157755620 | 8 | 64.104 | KV452909.1 | 133725 | 7-scf00177 | 7 |
| AX-158059419 | 8 | 64.104 | KV452909.1 | 133968 | 7-scf00177 | 7 |
| AX-158059420 | 8 | 64.104 | KV452909.1 | 134320 | 7-scf00177 | 7 |
| AX-158059421 | 8 | 64.104 | KV452909.1 | 135391 | 7-scf00177 | 7 |
| AX-157876911 | 8 | 64.104 | KV452909.1 | 142228 | 7-scf00177 | 7 |
| AX-157722300 | 8 | 64.104 | KV452909.1 | 145495 | 7-scf00177 | 7 |
| AX-158059427 | 8 | 64.104 | KV452909.1 | 145639 | 7-scf00177 | 7 |
| AX-158059430 | 8 | 64.104 | KV452909.1 | 147860 | 7-scf00177 | 7 |
| AX-158059432 | 8 | 64.104 | KV452909.1 | 151180 | 7-scf00177 | 7 |
| AX-158059434 | 8 | 64.104 | KV452909.1 | 152931 | 7-scf00177 | 7 |
| AX-158059435 | 8 | 64.104 | KV452909.1 | 153803 | 7-scf00177 | 7 |
| AX-158059463 | 8 | 64.104 | KV452909.1 | 160225 | 7-scf00177 | 7 |
| AX-158059465 | 8 | 64.104 | KV452909.1 | 162595 | 7-scf00177 | 7 |
| AX-158059467 | 8 | 64.104 | KV452909.1 | 164468 | 7-scf00177 | 7 |
| AX-158059471 | 8 | 64.104 | KV452909.1 | 166771 | 7-scf00177 | 7 |
| AX-157823349 | 8 | 64.104 | KV452909.1 | 167924 | 7-scf00177 | 7 |
| AX-157823350 | 8 | 64.104 | KV452909.1 | 168505 | 7-scf00177 | 7 |
| AX-158059477 | 8 | 64.104 | KV452909.1 | 170249 | 7-scf00177 | 7 |
| AX-157823351 | 8 | 64.104 | KV452909.1 | 173217 | 7-scf00177 | 7 |
| AX-158059486 | 8 | 64.104 | KV452909.1 | 175906 | 7-scf00177 | 7 |
| AX-157823355 | 8 | 64.104 | KV452909.1 | 180644 | 7-scf00177 | 7 |
| AX-158059530 | 8 | 64.104 | KV452909.1 | 200861 | 7-scf00177 | 7 |
| AX-158059537 | 8 | 64.104 | KV452909.1 | 212638 | 7-scf00177 | 7 |
| AX-158059545 | 8 | 64.104 | KV452909.1 | 214925 | 7-scf00177 | 7 |
| AX-158059546 | 8 | 64.104 | KV452909.1 | 216652 | 7-scf00177 | 7 |
| AX-158059547 | 8 | 64.104 | KV452909.1 | 217281 | 7-scf00177 | 7 |
| AX-158059548 | 8 | 64.104 | KV452909.1 | 217502 | 7-scf00177 | 7 |
| AX-158059549 | 8 | 64.104 | KV452909.1 | 218541 | 7-scf00177 | 7 |
| AX-158059550 | 8 | 64.104 | KV452909.1 | 218777 | 7-scf00177 | 7 |
| AX-158059551 | 8 | 64.104 | KV452909.1 | 219066 | 7-scf00177 | 7 |
| AX-158059552 | 8 | 64.104 | KV452909.1 | 219287 | 7-scf00177 | 7 |

|              |   |        |             |         |            |    |
|--------------|---|--------|-------------|---------|------------|----|
| AX-158059555 | 8 | 64.104 | KV452909.1  | 222393  | 7-scf00177 | 7  |
| AX-158059556 | 8 | 64.104 | KV452909.1  | 223674  | 7-scf00177 | 7  |
| AX-158059557 | 8 | 64.104 | KV452909.1  | 224194  | 7-scf00177 | 7  |
| AX-158059560 | 8 | 64.104 | KV452909.1  | 225877  | 7-scf00177 | 7  |
| AX-158059563 | 8 | 64.104 | KV452909.1  | 227869  | 7-scf00177 | 7  |
| AX-158059565 | 8 | 64.104 | KV452909.1  | 228670  | 7-scf00177 | 7  |
| AX-158059566 | 8 | 64.104 | KV452909.1  | 229062  | 7-scf00177 | 7  |
| AX-158059567 | 8 | 64.104 | KV452909.1  | 230745  | 7-scf00177 | 7  |
| AX-158059568 | 8 | 64.104 | KV452909.1  | 231212  | 7-scf00177 | 7  |
| AX-158059569 | 8 | 64.104 | KV452909.1  | 232458  | 7-scf00177 | 7  |
| AX-157697679 | 8 | 64.104 | KV452909.1  | 234783  | 7-scf00177 | 7  |
| AX-158059573 | 8 | 64.104 | KV452909.1  | 241310  | 7-scf00177 | 7  |
| AX-158059579 | 8 | 64.104 | KV452909.1  | 245896  | 7-scf00177 | 7  |
| AX-157723452 | 8 | 64.104 | KV452909.1  | 246560  | 7-scf00177 | 7  |
| AX-158059580 | 8 | 64.104 | KV452909.1  | 247624  | 7-scf00177 | 7  |
| AX-158059583 | 8 | 64.104 | KV452909.1  | 250634  | 7-scf00177 | 7  |
| AX-158059585 | 8 | 64.104 | KV452909.1  | 251629  | 7-scf00177 | 7  |
| AX-158059587 | 8 | 64.104 | KV452909.1  | 254543  | 7-scf00177 | 7  |
| AX-158059618 | 8 | 64.104 | KV452909.1  | 267965  | 7-scf00177 | 7  |
| AX-158059620 | 8 | 64.104 | KV452909.1  | 272305  | 7-scf00177 | 7  |
| AX-158059621 | 8 | 64.104 | KV452909.1  | 275492  | 7-scf00177 | 7  |
| AX-158059626 | 8 | 64.104 | KV452909.1  | 281976  | 7-scf00177 | 7  |
| AX-158059633 | 8 | 64.104 | KV452909.1  | 286000  | 7-scf00177 | 7  |
| AX-158059636 | 8 | 64.104 | KV452909.1  | 288202  | 7-scf00177 | 7  |
| AX-158059637 | 8 | 64.104 | KV452909.1  | 288815  | 7-scf00177 | 7  |
| AX-157695256 | 8 | 64.104 | KV452909.1  | 293332  | 7-scf00177 | 7  |
| AX-158059650 | 8 | 64.104 | KV452909.1  | 302570  | 7-scf00177 | 7  |
| AX-158059666 | 8 | 64.104 | KV452909.1  | 315421  | 7-scf00177 | 7  |
| AX-157715750 | 8 | 64.104 | KV452909.1  | 375972  | 7-scf00177 | 7  |
| AX-158059764 | 8 | 64.104 | KV452909.1  | 431742  | 7-scf00177 | 7  |
| AX-158059765 | 8 | 64.104 | KV452909.1  | 433077  | 7-scf00177 | 7  |
| AX-157823374 | 8 | 64.104 | KV452909.1  | 434327  | 7-scf00177 | 7  |
| AX-158059780 | 8 | 64.104 | KV452910.1  | 12996   | 7-scf00178 | 7  |
| AX-158059871 | 8 | 64.104 | KV452910.1  | 56367   | 7-scf00178 | 7  |
| AX-158059879 | 8 | 64.104 | KV452910.1  | 60933   | 7-scf00178 | 7  |
| AX-158059880 | 8 | 64.104 | KV452910.1  | 61349   | 7-scf00178 | 7  |
| AX-158059934 | 8 | 64.104 | KV452910.1  | 115372  | 7-scf00178 | 7  |
| AX-158060024 | 8 | 64.104 | KV452910.1  | 209641  | 7-scf00178 | 7  |
| AX-157823398 | 8 | 64.104 | KV452910.1  | 227568  | 7-scf00178 | 7  |
| AX-157823399 | 8 | 64.104 | KV452910.1  | 227814  | 7-scf00178 | 7  |
| AX-158060044 | 8 | 64.104 | KV452910.1  | 240249  | 7-scf00178 | 7  |
| AX-158060057 | 8 | 64.104 | KV452912.1  | 14065   | 7-scf00179 | 7  |
| AX-157752309 | 8 | 64.104 | KV452912.1  | 57617   | 7-scf00179 | 7  |
| AX-157774334 | 8 | 64.104 | KV452912.1  | 89737   | 7-scf00179 | 7  |
| AX-157682195 | 8 | 64.104 | KV452907.1  | 13696   | 7-scf00637 | 7  |
| AX-157685732 | 8 | 64.104 | KV452907.1  | 14029   | 7-scf00637 | 7  |
| AX-157682265 | 8 | 64.104 | 3ML01026812 | 459     | scf02414_1 | UN |
| AX-158059630 | 8 | 64.155 | KV452909.1  | 283647  | 7-scf00177 | 7  |
| AX-158059647 | 8 | 64.181 | KV452909.1  | 300748  | 7-scf00177 | 7  |
| AX-157767384 | 8 | 64.214 | KV452904.1  | 9962673 | 7-scf00172 | 7  |
| AX-158059057 | 8 | 64.214 | KV452908.1  | 97780   | 7-scf00176 | 7  |



|              |   |        |            |        |            |   |
|--------------|---|--------|------------|--------|------------|---|
| AX-158059136 | 8 | 64.214 | KV452908.1 | 195474 | 7-scf00176 | 7 |
| AX-158059181 | 8 | 64.214 | KV452908.1 | 259131 | 7-scf00176 | 7 |
| AX-157823326 | 8 | 64.214 | KV452908.1 | 271701 | 7-scf00176 | 7 |
| AX-158059229 | 8 | 64.214 | KV452908.1 | 305246 | 7-scf00176 | 7 |
| AX-158059237 | 8 | 64.214 | KV452908.1 | 321390 | 7-scf00176 | 7 |
| AX-158059240 | 8 | 64.214 | KV452908.1 | 324842 | 7-scf00176 | 7 |
| AX-158059245 | 8 | 64.214 | KV452908.1 | 326929 | 7-scf00176 | 7 |
| AX-158059249 | 8 | 64.214 | KV452908.1 | 339386 | 7-scf00176 | 7 |
| AX-157823346 | 8 | 64.214 | KV452909.1 | 52241  | 7-scf00177 | 7 |
| AX-158059336 | 8 | 64.214 | KV452909.1 | 60969  | 7-scf00177 | 7 |
| AX-158059338 | 8 | 64.214 | KV452909.1 | 65109  | 7-scf00177 | 7 |
| AX-158059339 | 8 | 64.214 | KV452909.1 | 66908  | 7-scf00177 | 7 |
| AX-158059366 | 8 | 64.214 | KV452909.1 | 83676  | 7-scf00177 | 7 |
| AX-158059383 | 8 | 64.214 | KV452909.1 | 108717 | 7-scf00177 | 7 |
| AX-158059390 | 8 | 64.214 | KV452909.1 | 111639 | 7-scf00177 | 7 |
| AX-158059404 | 8 | 64.214 | KV452909.1 | 117406 | 7-scf00177 | 7 |
| AX-157876909 | 8 | 64.214 | KV452909.1 | 122294 | 7-scf00177 | 7 |
| AX-158059414 | 8 | 64.214 | KV452909.1 | 126894 | 7-scf00177 | 7 |
| AX-158059422 | 8 | 64.214 | KV452909.1 | 138466 | 7-scf00177 | 7 |
| AX-158059437 | 8 | 64.214 | KV452909.1 | 155839 | 7-scf00177 | 7 |
| AX-158059469 | 8 | 64.214 | KV452909.1 | 165506 | 7-scf00177 | 7 |
| AX-158059489 | 8 | 64.214 | KV452909.1 | 178233 | 7-scf00177 | 7 |
| AX-157823357 | 8 | 64.214 | KV452909.1 | 205416 | 7-scf00177 | 7 |
| AX-158059553 | 8 | 64.214 | KV452909.1 | 219728 | 7-scf00177 | 7 |
| AX-158059562 | 8 | 64.214 | KV452909.1 | 227635 | 7-scf00177 | 7 |
| AX-158059582 | 8 | 64.214 | KV452909.1 | 249820 | 7-scf00177 | 7 |
| AX-158059622 | 8 | 64.214 | KV452909.1 | 277639 | 7-scf00177 | 7 |
| AX-158059641 | 8 | 64.214 | KV452909.1 | 291956 | 7-scf00177 | 7 |
| AX-157721371 | 8 | 64.214 | KV452909.1 | 292742 | 7-scf00177 | 7 |
| AX-158059674 | 8 | 64.214 | KV452909.1 | 322329 | 7-scf00177 | 7 |
| AX-158059675 | 8 | 64.214 | KV452909.1 | 322605 | 7-scf00177 | 7 |
| AX-158059677 | 8 | 64.214 | KV452909.1 | 324522 | 7-scf00177 | 7 |
| AX-157865556 | 8 | 64.214 | KV452909.1 | 326080 | 7-scf00177 | 7 |
| AX-158059679 | 8 | 64.214 | KV452909.1 | 327062 | 7-scf00177 | 7 |
| AX-158059680 | 8 | 64.214 | KV452909.1 | 330361 | 7-scf00177 | 7 |
| AX-158059681 | 8 | 64.214 | KV452909.1 | 330813 | 7-scf00177 | 7 |
| AX-158059682 | 8 | 64.214 | KV452909.1 | 331325 | 7-scf00177 | 7 |
| AX-157823361 | 8 | 64.214 | KV452909.1 | 331609 | 7-scf00177 | 7 |
| AX-158059683 | 8 | 64.214 | KV452909.1 | 336812 | 7-scf00177 | 7 |
| AX-157771433 | 8 | 64.214 | KV452909.1 | 341180 | 7-scf00177 | 7 |
| AX-158059685 | 8 | 64.214 | KV452909.1 | 344903 | 7-scf00177 | 7 |
| AX-157716687 | 8 | 64.214 | KV452909.1 | 358200 | 7-scf00177 | 7 |
| AX-157823366 | 8 | 64.214 | KV452909.1 | 358465 | 7-scf00177 | 7 |
| AX-158059696 | 8 | 64.214 | KV452909.1 | 359571 | 7-scf00177 | 7 |
| AX-158059697 | 8 | 64.214 | KV452909.1 | 359949 | 7-scf00177 | 7 |
| AX-158059698 | 8 | 64.214 | KV452909.1 | 360428 | 7-scf00177 | 7 |
| AX-157823368 | 8 | 64.214 | KV452909.1 | 361447 | 7-scf00177 | 7 |
| AX-158059699 | 8 | 64.214 | KV452909.1 | 364468 | 7-scf00177 | 7 |
| AX-158059707 | 8 | 64.214 | KV452909.1 | 367864 | 7-scf00177 | 7 |
| AX-158059708 | 8 | 64.214 | KV452909.1 | 369328 | 7-scf00177 | 7 |
| AX-157823370 | 8 | 64.214 | KV452909.1 | 389151 | 7-scf00177 | 7 |

|              |   |        |            |        |            |   |
|--------------|---|--------|------------|--------|------------|---|
| AX-158059715 | 8 | 64.214 | KV452909.1 | 389534 | 7-scf00177 | 7 |
| AX-157823371 | 8 | 64.214 | KV452909.1 | 391088 | 7-scf00177 | 7 |
| AX-158059717 | 8 | 64.214 | KV452909.1 | 394460 | 7-scf00177 | 7 |
| AX-158059721 | 8 | 64.214 | KV452909.1 | 397436 | 7-scf00177 | 7 |
| AX-158059740 | 8 | 64.214 | KV452909.1 | 402442 | 7-scf00177 | 7 |
| AX-158059741 | 8 | 64.214 | KV452909.1 | 403423 | 7-scf00177 | 7 |
| AX-158059744 | 8 | 64.214 | KV452909.1 | 406396 | 7-scf00177 | 7 |
| AX-158059747 | 8 | 64.214 | KV452909.1 | 410365 | 7-scf00177 | 7 |
| AX-158059749 | 8 | 64.214 | KV452909.1 | 415720 | 7-scf00177 | 7 |
| AX-158059762 | 8 | 64.214 | KV452909.1 | 428834 | 7-scf00177 | 7 |
| AX-158059772 | 8 | 64.214 | KV452909.1 | 442509 | 7-scf00177 | 7 |
| AX-158059776 | 8 | 64.214 | KV452910.1 | 3146   | 7-scf00178 | 7 |
| AX-157694734 | 8 | 64.214 | KV452910.1 | 9696   | 7-scf00178 | 7 |
| AX-158059787 | 8 | 64.214 | KV452910.1 | 22668  | 7-scf00178 | 7 |
| AX-158059790 | 8 | 64.214 | KV452910.1 | 29369  | 7-scf00178 | 7 |
| AX-158059792 | 8 | 64.214 | KV452910.1 | 30115  | 7-scf00178 | 7 |
| AX-158059794 | 8 | 64.214 | KV452910.1 | 31026  | 7-scf00178 | 7 |
| AX-157709614 | 8 | 64.214 | KV452910.1 | 31559  | 7-scf00178 | 7 |
| AX-157709615 | 8 | 64.214 | KV452910.1 | 31603  | 7-scf00178 | 7 |
| AX-157723005 | 8 | 64.214 | KV452910.1 | 31959  | 7-scf00178 | 7 |
| AX-158059798 | 8 | 64.214 | KV452910.1 | 31995  | 7-scf00178 | 7 |
| AX-158059808 | 8 | 64.214 | KV452910.1 | 34056  | 7-scf00178 | 7 |
| AX-158059812 | 8 | 64.214 | KV452910.1 | 34967  | 7-scf00178 | 7 |
| AX-158059813 | 8 | 64.214 | KV452910.1 | 35528  | 7-scf00178 | 7 |
| AX-158059814 | 8 | 64.214 | KV452910.1 | 36049  | 7-scf00178 | 7 |
| AX-158059815 | 8 | 64.214 | KV452910.1 | 36564  | 7-scf00178 | 7 |
| AX-158059816 | 8 | 64.214 | KV452910.1 | 36781  | 7-scf00178 | 7 |
| AX-158059821 | 8 | 64.214 | KV452910.1 | 39375  | 7-scf00178 | 7 |
| AX-157823378 | 8 | 64.214 | KV452910.1 | 39916  | 7-scf00178 | 7 |
| AX-158059838 | 8 | 64.214 | KV452910.1 | 40539  | 7-scf00178 | 7 |
| AX-158059840 | 8 | 64.214 | KV452910.1 | 41255  | 7-scf00178 | 7 |
| AX-158059841 | 8 | 64.214 | KV452910.1 | 41905  | 7-scf00178 | 7 |
| AX-158059842 | 8 | 64.214 | KV452910.1 | 42922  | 7-scf00178 | 7 |
| AX-158059843 | 8 | 64.214 | KV452910.1 | 44083  | 7-scf00178 | 7 |
| AX-158059844 | 8 | 64.214 | KV452910.1 | 45601  | 7-scf00178 | 7 |
| AX-158059847 | 8 | 64.214 | KV452910.1 | 48106  | 7-scf00178 | 7 |
| AX-157885321 | 8 | 64.214 | KV452910.1 | 49065  | 7-scf00178 | 7 |
| AX-158059855 | 8 | 64.214 | KV452910.1 | 49640  | 7-scf00178 | 7 |
| AX-158059878 | 8 | 64.214 | KV452910.1 | 60535  | 7-scf00178 | 7 |
| AX-157722703 | 8 | 64.214 | KV452910.1 | 63796  | 7-scf00178 | 7 |
| AX-158059883 | 8 | 64.214 | KV452910.1 | 64068  | 7-scf00178 | 7 |
| AX-157823379 | 8 | 64.214 | KV452910.1 | 75826  | 7-scf00178 | 7 |
| AX-158059889 | 8 | 64.214 | KV452910.1 | 77941  | 7-scf00178 | 7 |
| AX-157823380 | 8 | 64.214 | KV452910.1 | 79797  | 7-scf00178 | 7 |
| AX-158059893 | 8 | 64.214 | KV452910.1 | 81739  | 7-scf00178 | 7 |
| AX-158059894 | 8 | 64.214 | KV452910.1 | 82839  | 7-scf00178 | 7 |
| AX-158059895 | 8 | 64.214 | KV452910.1 | 83423  | 7-scf00178 | 7 |
| AX-158059896 | 8 | 64.214 | KV452910.1 | 83723  | 7-scf00178 | 7 |
| AX-158059897 | 8 | 64.214 | KV452910.1 | 84469  | 7-scf00178 | 7 |
| AX-158059901 | 8 | 64.214 | KV452910.1 | 85398  | 7-scf00178 | 7 |
| AX-158059902 | 8 | 64.214 | KV452910.1 | 88073  | 7-scf00178 | 7 |

|              |   |        |             |        |                |    |
|--------------|---|--------|-------------|--------|----------------|----|
| AX-157724863 | 8 | 64.214 | KV452910.1  | 91756  | 7-scf00178     | 7  |
| AX-157770866 | 8 | 64.214 | KV452910.1  | 93448  | 7-scf00178     | 7  |
| AX-158059924 | 8 | 64.214 | KV452910.1  | 98485  | 7-scf00178     | 7  |
| AX-158059925 | 8 | 64.214 | KV452910.1  | 99496  | 7-scf00178     | 7  |
| AX-158059926 | 8 | 64.214 | KV452910.1  | 100268 | 7-scf00178     | 7  |
| AX-158059928 | 8 | 64.214 | KV452910.1  | 101357 | 7-scf00178     | 7  |
| AX-158059933 | 8 | 64.214 | KV452910.1  | 114652 | 7-scf00178     | 7  |
| AX-157823384 | 8 | 64.214 | KV452910.1  | 120367 | 7-scf00178     | 7  |
| AX-158059944 | 8 | 64.214 | KV452910.1  | 132010 | 7-scf00178     | 7  |
| AX-158059946 | 8 | 64.214 | KV452910.1  | 133065 | 7-scf00178     | 7  |
| AX-158059947 | 8 | 64.214 | KV452910.1  | 133643 | 7-scf00178     | 7  |
| AX-158059951 | 8 | 64.214 | KV452910.1  | 134337 | 7-scf00178     | 7  |
| AX-158059952 | 8 | 64.214 | KV452910.1  | 134995 | 7-scf00178     | 7  |
| AX-157823386 | 8 | 64.214 | KV452910.1  | 135115 | 7-scf00178     | 7  |
| AX-158059953 | 8 | 64.214 | KV452910.1  | 135623 | 7-scf00178     | 7  |
| AX-158059964 | 8 | 64.214 | KV452910.1  | 138225 | 7-scf00178     | 7  |
| AX-158059967 | 8 | 64.214 | KV452910.1  | 142166 | 7-scf00178     | 7  |
| AX-158059969 | 8 | 64.214 | KV452910.1  | 145596 | 7-scf00178     | 7  |
| AX-158059970 | 8 | 64.214 | KV452910.1  | 145884 | 7-scf00178     | 7  |
| AX-158059972 | 8 | 64.214 | KV452910.1  | 147339 | 7-scf00178     | 7  |
| AX-158059974 | 8 | 64.214 | KV452910.1  | 148900 | 7-scf00178     | 7  |
| AX-158059975 | 8 | 64.214 | KV452910.1  | 150672 | 7-scf00178     | 7  |
| AX-158059977 | 8 | 64.214 | KV452910.1  | 151339 | 7-scf00178     | 7  |
| AX-158059981 | 8 | 64.214 | KV452910.1  | 152947 | 7-scf00178     | 7  |
| AX-158059983 | 8 | 64.214 | KV452910.1  | 154217 | 7-scf00178     | 7  |
| AX-158059987 | 8 | 64.214 | KV452910.1  | 155115 | 7-scf00178     | 7  |
| AX-158059997 | 8 | 64.214 | KV452910.1  | 168694 | 7-scf00178     | 7  |
| AX-157870687 | 8 | 64.214 | KV452910.1  | 172100 | 7-scf00178     | 7  |
| AX-158060002 | 8 | 64.214 | KV452910.1  | 172775 | 7-scf00178     | 7  |
| AX-157885325 | 8 | 64.214 | KV452910.1  | 177365 | 7-scf00178     | 7  |
| AX-158384129 | 8 | 64.214 | KV452910.1  | 183525 | 7-scf00178     | 7  |
| AX-158060010 | 8 | 64.214 | KV452910.1  | 186337 | 7-scf00178     | 7  |
| AX-158378980 | 8 | 64.214 | KV452910.1  | 186856 | 7-scf00178     | 7  |
| AX-158060013 | 8 | 64.214 | KV452910.1  | 188352 | 7-scf00178     | 7  |
| AX-157738371 | 8 | 64.214 | KV452910.1  | 196100 | 7-scf00178     | 7  |
| AX-158060017 | 8 | 64.214 | KV452910.1  | 198177 | 7-scf00178     | 7  |
| AX-157823390 | 8 | 64.214 | KV452910.1  | 199085 | 7-scf00178     | 7  |
| AX-158060020 | 8 | 64.214 | KV452910.1  | 200812 | 7-scf00178     | 7  |
| AX-157823392 | 8 | 64.214 | KV452910.1  | 201382 | 7-scf00178     | 7  |
| AX-157823393 | 8 | 64.214 | KV452910.1  | 202590 | 7-scf00178     | 7  |
| AX-157823394 | 8 | 64.214 | KV452910.1  | 204491 | 7-scf00178     | 7  |
| AX-157823395 | 8 | 64.214 | KV452910.1  | 204655 | 7-scf00178     | 7  |
| AX-158060022 | 8 | 64.214 | KV452910.1  | 205362 | 7-scf00178     | 7  |
| AX-158060034 | 8 | 64.214 | KV452910.1  | 225115 | 7-scf00178     | 7  |
| AX-157823401 | 8 | 64.214 | KV452910.1  | 232974 | 7-scf00178     | 7  |
| AX-158060222 | 8 | 64.214 | KV452912.1  | 176697 | 7-scf00179     | 7  |
| AX-157701810 | 8 | 64.214 | DX087921.1  | 291    | IORI212 lctalt | UN |
| AX-157695692 | 8 | 64.214 | FI878116.1  | 290    | IORI212 lctalu | UN |
| AX-157688450 | 8 | 64.214 | 3ML01026190 | 1581   | scf01787_1     | UN |
| AX-158060023 | 8 | 64.278 | KV452910.1  | 206433 | 7-scf00178     | 7  |
| AX-158060025 | 8 | 64.305 | KV452910.1  | 212434 | 7-scf00178     | 7  |

|              |   |        |            |        |            |   |
|--------------|---|--------|------------|--------|------------|---|
| AX-158060035 | 8 | 64.323 | KV452910.1 | 229501 | 7-scf00178 | 7 |
| AX-158060038 | 8 | 64.34  | KV452910.1 | 239817 | 7-scf00178 | 7 |
| AX-158060039 | 8 | 64.359 | KV452910.1 | 240043 | 7-scf00178 | 7 |
| AX-158060046 | 8 | 64.382 | KV452910.1 | 246488 | 7-scf00178 | 7 |
| AX-158060049 | 8 | 64.399 | KV452910.1 | 247735 | 7-scf00178 | 7 |
| AX-158060050 | 8 | 64.416 | KV452910.1 | 247802 | 7-scf00178 | 7 |
| AX-158059363 | 8 | 64.432 | KV452909.1 | 82717  | 7-scf00177 | 7 |
| AX-158059376 | 8 | 64.432 | KV452909.1 | 98862  | 7-scf00177 | 7 |
| AX-158059379 | 8 | 64.432 | KV452909.1 | 101443 | 7-scf00177 | 7 |
| AX-158059388 | 8 | 64.432 | KV452909.1 | 110951 | 7-scf00177 | 7 |
| AX-158059559 | 8 | 64.432 | KV452909.1 | 225171 | 7-scf00177 | 7 |
| AX-158059591 | 8 | 64.432 | KV452909.1 | 258000 | 7-scf00177 | 7 |
| AX-158059592 | 8 | 64.432 | KV452909.1 | 258412 | 7-scf00177 | 7 |
| AX-158059594 | 8 | 64.432 | KV452909.1 | 259611 | 7-scf00177 | 7 |
| AX-158059595 | 8 | 64.432 | KV452909.1 | 260438 | 7-scf00177 | 7 |
| AX-158059597 | 8 | 64.432 | KV452909.1 | 260739 | 7-scf00177 | 7 |
| AX-158059603 | 8 | 64.432 | KV452909.1 | 261907 | 7-scf00177 | 7 |
| AX-158059613 | 8 | 64.432 | KV452909.1 | 264103 | 7-scf00177 | 7 |
| AX-158059614 | 8 | 64.432 | KV452909.1 | 264701 | 7-scf00177 | 7 |
| AX-158059616 | 8 | 64.432 | KV452909.1 | 266668 | 7-scf00177 | 7 |
| AX-158059617 | 8 | 64.432 | KV452909.1 | 267566 | 7-scf00177 | 7 |
| AX-158059619 | 8 | 64.432 | KV452909.1 | 271542 | 7-scf00177 | 7 |
| AX-158059631 | 8 | 64.432 | KV452909.1 | 283920 | 7-scf00177 | 7 |
| AX-158059684 | 8 | 64.432 | KV452909.1 | 342398 | 7-scf00177 | 7 |
| AX-158059748 | 8 | 64.432 | KV452909.1 | 413792 | 7-scf00177 | 7 |
| AX-158059876 | 8 | 64.432 | KV452910.1 | 59720  | 7-scf00178 | 7 |
| AX-157823385 | 8 | 64.432 | KV452910.1 | 134241 | 7-scf00178 | 7 |
| AX-158059965 | 8 | 64.432 | KV452910.1 | 139695 | 7-scf00178 | 7 |
| AX-158059995 | 8 | 64.432 | KV452910.1 | 167847 | 7-scf00178 | 7 |
| AX-158059996 | 8 | 64.432 | KV452910.1 | 168146 | 7-scf00178 | 7 |
| AX-158059998 | 8 | 64.432 | KV452910.1 | 169871 | 7-scf00178 | 7 |
| AX-158059999 | 8 | 64.432 | KV452910.1 | 171141 | 7-scf00178 | 7 |
| AX-158060004 | 8 | 64.432 | KV452910.1 | 173509 | 7-scf00178 | 7 |
| AX-158060005 | 8 | 64.432 | KV452910.1 | 179764 | 7-scf00178 | 7 |
| AX-157823391 | 8 | 64.432 | KV452910.1 | 199519 | 7-scf00178 | 7 |
| AX-158060021 | 8 | 64.432 | KV452910.1 | 201176 | 7-scf00178 | 7 |
| AX-158060032 | 8 | 64.432 | KV452910.1 | 222286 | 7-scf00178 | 7 |
| AX-158060052 | 8 | 64.432 | KV452912.1 | 1553   | 7-scf00179 | 7 |
| AX-157755032 | 8 | 64.432 | KV452912.1 | 5950   | 7-scf00179 | 7 |
| AX-158060056 | 8 | 64.432 | KV452912.1 | 12090  | 7-scf00179 | 7 |
| AX-158060065 | 8 | 64.432 | KV452912.1 | 24998  | 7-scf00179 | 7 |
| AX-158060067 | 8 | 64.432 | KV452912.1 | 25757  | 7-scf00179 | 7 |
| AX-158060068 | 8 | 64.432 | KV452912.1 | 27400  | 7-scf00179 | 7 |
| AX-158060069 | 8 | 64.432 | KV452912.1 | 29607  | 7-scf00179 | 7 |
| AX-158060070 | 8 | 64.432 | KV452912.1 | 30309  | 7-scf00179 | 7 |
| AX-158060071 | 8 | 64.432 | KV452912.1 | 30996  | 7-scf00179 | 7 |
| AX-158060072 | 8 | 64.432 | KV452912.1 | 31567  | 7-scf00179 | 7 |
| AX-157823403 | 8 | 64.432 | KV452912.1 | 37661  | 7-scf00179 | 7 |
| AX-158060075 | 8 | 64.432 | KV452912.1 | 40244  | 7-scf00179 | 7 |
| AX-158060089 | 8 | 64.432 | KV452912.1 | 57067  | 7-scf00179 | 7 |
| AX-158060112 | 8 | 64.432 | KV452912.1 | 82656  | 7-scf00179 | 7 |

|              |   |        |            |        |            |   |
|--------------|---|--------|------------|--------|------------|---|
| AX-158060076 | 8 | 64.505 | KV452912.1 | 40805  | 7-scf00179 | 7 |
| AX-158059280 | 8 | 64.541 | KV452908.1 | 405441 | 7-scf00176 | 7 |
| AX-158059283 | 8 | 64.541 | KV452908.1 | 405562 | 7-scf00176 | 7 |
| AX-157773013 | 8 | 64.541 | KV452909.1 | 375765 | 7-scf00177 | 7 |
| AX-157720800 | 8 | 64.541 | KV452909.1 | 385865 | 7-scf00177 | 7 |
| AX-158059739 | 8 | 64.541 | KV452909.1 | 401383 | 7-scf00177 | 7 |
| AX-158059791 | 8 | 64.541 | KV452910.1 | 29897  | 7-scf00178 | 7 |
| AX-158059872 | 8 | 64.541 | KV452910.1 | 57211  | 7-scf00178 | 7 |
| AX-158059874 | 8 | 64.541 | KV452910.1 | 57870  | 7-scf00178 | 7 |
| AX-157823381 | 8 | 64.541 | KV452910.1 | 81357  | 7-scf00178 | 7 |
| AX-158059982 | 8 | 64.541 | KV452910.1 | 153421 | 7-scf00178 | 7 |
| AX-157724066 | 8 | 64.541 | KV452910.1 | 159903 | 7-scf00178 | 7 |
| AX-158059989 | 8 | 64.541 | KV452910.1 | 160194 | 7-scf00178 | 7 |
| AX-158060012 | 8 | 64.541 | KV452910.1 | 187815 | 7-scf00178 | 7 |
| AX-158060074 | 8 | 64.541 | KV452912.1 | 39243  | 7-scf00179 | 7 |
| AX-157823404 | 8 | 64.541 | KV452912.1 | 42546  | 7-scf00179 | 7 |
| AX-157740160 | 8 | 64.541 | KV452912.1 | 43355  | 7-scf00179 | 7 |
| AX-157719403 | 8 | 64.541 | KV452912.1 | 43904  | 7-scf00179 | 7 |
| AX-158060078 | 8 | 64.541 | KV452912.1 | 44436  | 7-scf00179 | 7 |
| AX-158060080 | 8 | 64.541 | KV452912.1 | 45796  | 7-scf00179 | 7 |
| AX-158060091 | 8 | 64.541 | KV452912.1 | 57452  | 7-scf00179 | 7 |
| AX-158060093 | 8 | 64.541 | KV452912.1 | 59077  | 7-scf00179 | 7 |
| AX-158060095 | 8 | 64.541 | KV452912.1 | 59510  | 7-scf00179 | 7 |
| AX-157823407 | 8 | 64.541 | KV452912.1 | 59648  | 7-scf00179 | 7 |
| AX-158060099 | 8 | 64.541 | KV452912.1 | 59695  | 7-scf00179 | 7 |
| AX-158060100 | 8 | 64.541 | KV452912.1 | 60290  | 7-scf00179 | 7 |
| AX-157823408 | 8 | 64.541 | KV452912.1 | 61123  | 7-scf00179 | 7 |
| AX-157823409 | 8 | 64.541 | KV452912.1 | 61468  | 7-scf00179 | 7 |
| AX-157823410 | 8 | 64.541 | KV452912.1 | 68924  | 7-scf00179 | 7 |
| AX-157747408 | 8 | 64.541 | KV452912.1 | 69546  | 7-scf00179 | 7 |
| AX-157773156 | 8 | 64.541 | KV452912.1 | 73170  | 7-scf00179 | 7 |
| AX-157716623 | 8 | 64.541 | KV452912.1 | 77763  | 7-scf00179 | 7 |
| AX-158060111 | 8 | 64.541 | KV452912.1 | 78312  | 7-scf00179 | 7 |
| AX-158060116 | 8 | 64.541 | KV452912.1 | 88100  | 7-scf00179 | 7 |
| AX-158060123 | 8 | 64.541 | KV452912.1 | 92820  | 7-scf00179 | 7 |
| AX-158384130 | 8 | 64.541 | KV452912.1 | 102663 | 7-scf00179 | 7 |
| AX-158060101 | 8 | 64.651 | KV452912.1 | 60576  | 7-scf00179 | 7 |
| AX-158060113 | 8 | 64.651 | KV452912.1 | 84570  | 7-scf00179 | 7 |
| AX-157744772 | 8 | 64.651 | KV452912.1 | 85835  | 7-scf00179 | 7 |
| AX-157730491 | 8 | 64.651 | KV452912.1 | 86718  | 7-scf00179 | 7 |
| AX-158060117 | 8 | 64.651 | KV452912.1 | 88756  | 7-scf00179 | 7 |
| AX-158060118 | 8 | 64.651 | KV452912.1 | 89978  | 7-scf00179 | 7 |
| AX-158060119 | 8 | 64.651 | KV452912.1 | 90262  | 7-scf00179 | 7 |
| AX-158060007 | 8 | 64.869 | KV452910.1 | 181394 | 7-scf00178 | 7 |
| AX-158060008 | 8 | 64.869 | KV452910.1 | 183370 | 7-scf00178 | 7 |
| AX-158060137 | 8 | 64.869 | KV452912.1 | 107587 | 7-scf00179 | 7 |
| AX-158060151 | 8 | 64.869 | KV452912.1 | 110078 | 7-scf00179 | 7 |
| AX-158060153 | 8 | 64.869 | KV452912.1 | 110650 | 7-scf00179 | 7 |
| AX-157773265 | 8 | 64.869 | KV452912.1 | 114134 | 7-scf00179 | 7 |
| AX-158060168 | 8 | 64.978 | KV452912.1 | 118371 | 7-scf00179 | 7 |
| AX-158060169 | 8 | 64.978 | KV452912.1 | 120066 | 7-scf00179 | 7 |

|              |   |        |             |        |            |    |
|--------------|---|--------|-------------|--------|------------|----|
| AX-158060174 | 8 | 64.978 | KV452912.1  | 123982 | 7-scf00179 | 7  |
| AX-158060175 | 8 | 64.978 | KV452912.1  | 128258 | 7-scf00179 | 7  |
| AX-158060176 | 8 | 64.978 | KV452912.1  | 128503 | 7-scf00179 | 7  |
| AX-157711987 | 8 | 64.978 | 3ML01030807 | 672    | scf06411_1 | UN |
| AX-157823420 | 8 | 65.032 | KV452912.1  | 132407 | 7-scf00179 | 7  |
| AX-158060180 | 8 | 65.088 | KV452912.1  | 134498 | 7-scf00179 | 7  |
| AX-158060185 | 8 | 65.088 | KV452912.1  | 135792 | 7-scf00179 | 7  |
| AX-157823421 | 8 | 65.088 | KV452912.1  | 136476 | 7-scf00179 | 7  |
| AX-158060026 | 8 | 65.306 | KV452910.1  | 214158 | 7-scf00178 | 7  |
| AX-158060027 | 8 | 65.306 | KV452910.1  | 214890 | 7-scf00178 | 7  |
| AX-158060086 | 8 | 65.306 | KV452912.1  | 54981  | 7-scf00179 | 7  |
| AX-158060124 | 8 | 65.306 | KV452912.1  | 93422  | 7-scf00179 | 7  |
| AX-157823416 | 8 | 65.306 | KV452912.1  | 94132  | 7-scf00179 | 7  |
| AX-158060127 | 8 | 65.306 | KV452912.1  | 97085  | 7-scf00179 | 7  |
| AX-158060133 | 8 | 65.306 | KV452912.1  | 106108 | 7-scf00179 | 7  |
| AX-158060186 | 8 | 65.306 | KV452912.1  | 137461 | 7-scf00179 | 7  |
| AX-158060188 | 8 | 65.306 | KV452912.1  | 141208 | 7-scf00179 | 7  |
| AX-158060189 | 8 | 65.306 | KV452912.1  | 142616 | 7-scf00179 | 7  |
| AX-158060193 | 8 | 65.306 | KV452912.1  | 144442 | 7-scf00179 | 7  |
| AX-158060195 | 8 | 65.306 | KV452912.1  | 145628 | 7-scf00179 | 7  |
| AX-158060200 | 8 | 65.306 | KV452912.1  | 148921 | 7-scf00179 | 7  |
| AX-158060201 | 8 | 65.306 | KV452912.1  | 151049 | 7-scf00179 | 7  |
| AX-158060202 | 8 | 65.306 | KV452912.1  | 151295 | 7-scf00179 | 7  |
| AX-158060205 | 8 | 65.306 | KV452912.1  | 153514 | 7-scf00179 | 7  |
| AX-158060206 | 8 | 65.306 | KV452912.1  | 154365 | 7-scf00179 | 7  |
| AX-158060208 | 8 | 65.306 | KV452912.1  | 158030 | 7-scf00179 | 7  |
| AX-158060209 | 8 | 65.306 | KV452912.1  | 158327 | 7-scf00179 | 7  |
| AX-158060210 | 8 | 65.306 | KV452912.1  | 158666 | 7-scf00179 | 7  |
| AX-157865558 | 8 | 65.306 | KV452912.1  | 159079 | 7-scf00179 | 7  |
| AX-158060211 | 8 | 65.306 | KV452912.1  | 159911 | 7-scf00179 | 7  |
| AX-158060212 | 8 | 65.306 | KV452912.1  | 160901 | 7-scf00179 | 7  |
| AX-158060214 | 8 | 65.306 | KV452912.1  | 163391 | 7-scf00179 | 7  |
| AX-157750854 | 8 | 65.306 | KV452912.1  | 169384 | 7-scf00179 | 7  |
| AX-158060216 | 8 | 65.306 | KV452912.1  | 170183 | 7-scf00179 | 7  |
| AX-158060217 | 8 | 65.306 | KV452912.1  | 170535 | 7-scf00179 | 7  |
| AX-158060218 | 8 | 65.337 | KV452912.1  | 171291 | 7-scf00179 | 7  |
| AX-158060219 | 8 | 65.344 | KV452912.1  | 173518 | 7-scf00179 | 7  |
| AX-158059761 | 8 | 65.375 | KV452909.1  | 427804 | 7-scf00177 | 7  |
| AX-157681967 | 8 | 65.375 | KV452907.1  | 12060  | 7-scf00637 | 7  |
| AX-158060225 | 8 | 65.415 | KV452912.1  | 180736 | 7-scf00179 | 7  |
| AX-158060226 | 8 | 65.455 | KV452912.1  | 186936 | 7-scf00179 | 7  |
| AX-157700094 | 8 | 65.49  | KV452912.1  | 168543 | 7-scf00179 | 7  |
| AX-158060230 | 8 | 65.49  | KV452912.1  | 190886 | 7-scf00179 | 7  |
| AX-157823423 | 8 | 65.49  | KV452912.1  | 217412 | 7-scf00179 | 7  |
| AX-158060250 | 8 | 65.49  | KV452912.1  | 217780 | 7-scf00179 | 7  |
| AX-157823425 | 8 | 65.49  | KV452912.1  | 234611 | 7-scf00179 | 7  |
| AX-158060227 | 8 | 65.525 | KV452912.1  | 187643 | 7-scf00179 | 7  |
| AX-158060231 | 8 | 65.525 | KV452912.1  | 191660 | 7-scf00179 | 7  |
| AX-158060235 | 8 | 65.525 | KV452912.1  | 195437 | 7-scf00179 | 7  |
| AX-157856890 | 8 | 65.525 | KV452912.1  | 196371 | 7-scf00179 | 7  |
| AX-158060237 | 8 | 65.525 | KV452912.1  | 196884 | 7-scf00179 | 7  |

|              |   |        |            |        |                |    |
|--------------|---|--------|------------|--------|----------------|----|
| AX-158060239 | 8 | 65.525 | KV452912.1 | 200344 | 7-scf00179     | 7  |
| AX-158060240 | 8 | 65.525 | KV452912.1 | 201834 | 7-scf00179     | 7  |
| AX-158060241 | 8 | 65.525 | KV452912.1 | 204258 | 7-scf00179     | 7  |
| AX-158060254 | 8 | 65.525 | KV452912.1 | 222504 | 7-scf00179     | 7  |
| AX-158060243 | 8 | 65.576 | KV452912.1 | 205771 | 7-scf00179     | 7  |
| AX-158060245 | 8 | 65.634 | KV452912.1 | 209078 | 7-scf00179     | 7  |
| AX-158060246 | 8 | 65.634 | KV452912.1 | 212197 | 7-scf00179     | 7  |
| AX-158060249 | 8 | 65.634 | KV452912.1 | 216361 | 7-scf00179     | 7  |
| AX-158060253 | 8 | 65.634 | KV452912.1 | 221149 | 7-scf00179     | 7  |
| AX-158060255 | 8 | 65.634 | KV452912.1 | 223071 | 7-scf00179     | 7  |
| AX-158060258 | 8 | 65.634 | KV452912.1 | 224066 | 7-scf00179     | 7  |
| AX-157772340 | 8 | 65.634 | KV452912.1 | 227897 | 7-scf00179     | 7  |
| AX-158060261 | 8 | 65.634 | KV452912.1 | 228798 | 7-scf00179     | 7  |
| AX-158060263 | 8 | 65.634 | KV452912.1 | 229729 | 7-scf00179     | 7  |
| AX-158060266 | 8 | 65.634 | KV452912.1 | 231405 | 7-scf00179     | 7  |
| AX-158060270 | 8 | 65.634 | KV452912.1 | 235823 | 7-scf00179     | 7  |
| AX-157699040 | 8 | 65.634 | FI893492.1 | 782    | 4ORI212 lctalt | UN |
| AX-158060279 | 8 | 65.852 | KV452912.1 | 246072 | 7-scf00179     | 7  |
| AX-157823426 | 8 | 65.852 | KV452912.1 | 249376 | 7-scf00179     | 7  |
| AX-158060282 | 8 | 65.852 | KV452912.1 | 249517 | 7-scf00179     | 7  |
| AX-158060283 | 8 | 65.852 | KV452912.1 | 249914 | 7-scf00179     | 7  |
| AX-157753090 | 8 | 65.852 | KV452912.1 | 255772 | 7-scf00179     | 7  |
| AX-158060229 | 8 | 65.928 | KV452912.1 | 190039 | 7-scf00179     | 7  |
| AX-158060288 | 8 | 65.928 | KV452912.1 | 256647 | 7-scf00179     | 7  |
| AX-158060301 | 8 | 65.928 | KV452912.1 | 263314 | 7-scf00179     | 7  |
| AX-158060319 | 8 | 65.928 | KV452912.1 | 278559 | 7-scf00179     | 7  |
| AX-157725645 | 8 | 65.962 | KV452912.1 | 259031 | 7-scf00179     | 7  |
| AX-158060291 | 8 | 65.962 | KV452912.1 | 259424 | 7-scf00179     | 7  |
| AX-158060293 | 8 | 66.001 | KV452912.1 | 260446 | 7-scf00179     | 7  |
| AX-158060234 | 8 | 66.039 | KV452912.1 | 194232 | 7-scf00179     | 7  |
| AX-157727517 | 8 | 66.039 | KV452912.1 | 260858 | 7-scf00179     | 7  |
| AX-158060295 | 8 | 66.071 | KV452912.1 | 261140 | 7-scf00179     | 7  |
| AX-158060297 | 8 | 66.071 | KV452912.1 | 262484 | 7-scf00179     | 7  |
| AX-158060298 | 8 | 66.071 | KV452912.1 | 262767 | 7-scf00179     | 7  |
| AX-158060304 | 8 | 66.071 | KV452912.1 | 266205 | 7-scf00179     | 7  |
| AX-158060305 | 8 | 66.076 | KV452912.1 | 266854 | 7-scf00179     | 7  |
| AX-158060306 | 8 | 66.081 | KV452912.1 | 267454 | 7-scf00179     | 7  |
| AX-158060309 | 8 | 66.2   | KV452912.1 | 270659 | 7-scf00179     | 7  |
| AX-157751820 | 8 | 66.2   | KV452912.1 | 271221 | 7-scf00179     | 7  |
| AX-158060307 | 8 | 66.202 | KV452912.1 | 269154 | 7-scf00179     | 7  |
| AX-158060315 | 8 | 66.202 | KV452912.1 | 276082 | 7-scf00179     | 7  |
| AX-158060320 | 8 | 66.202 | KV452912.1 | 279723 | 7-scf00179     | 7  |
| AX-157885328 | 8 | 66.204 | KV452912.1 | 277742 | 7-scf00179     | 7  |
| AX-158060317 | 8 | 66.271 | KV452912.1 | 277869 | 7-scf00179     | 7  |
| AX-158060322 | 8 | 66.374 | KV452912.1 | 280854 | 7-scf00179     | 7  |
| AX-157823427 | 8 | 66.374 | KV452912.1 | 281119 | 7-scf00179     | 7  |
| AX-158060325 | 8 | 66.551 | KV452912.1 | 285211 | 7-scf00179     | 7  |
| AX-157771458 | 8 | 66.727 | KV452912.1 | 288633 | 7-scf00179     | 7  |
| AX-158060327 | 8 | 66.727 | KV452912.1 | 293857 | 7-scf00179     | 7  |
| AX-158060328 | 8 | 66.727 | KV452912.1 | 294088 | 7-scf00179     | 7  |
| AX-158060332 | 8 | 66.821 | KV452912.1 | 297510 | 7-scf00179     | 7  |

|              |   |        |            |        |            |   |
|--------------|---|--------|------------|--------|------------|---|
| AX-158060334 | 8 | 66.946 | KV452912.1 | 299300 | 7-scf00179 | 7 |
| AX-157746894 | 8 | 66.946 | KV452912.1 | 300139 | 7-scf00179 | 7 |
| AX-158060335 | 8 | 66.946 | KV452912.1 | 301046 | 7-scf00179 | 7 |
| AX-157745646 | 8 | 66.946 | KV452912.1 | 304797 | 7-scf00179 | 7 |
| AX-157753648 | 8 | 66.946 | KV452912.1 | 307400 | 7-scf00179 | 7 |
| AX-157865559 | 8 | 66.946 | KV452912.1 | 333525 | 7-scf00179 | 7 |
| AX-157823428 | 8 | 67.309 | KV452912.1 | 310410 | 7-scf00179 | 7 |
| AX-158060350 | 8 | 67.309 | KV452912.1 | 323821 | 7-scf00179 | 7 |
| AX-158060326 | 8 | 67.31  | KV452912.1 | 286757 | 7-scf00179 | 7 |
| AX-158060342 | 8 | 67.31  | KV452912.1 | 315136 | 7-scf00179 | 7 |
| AX-157720198 | 8 | 67.31  | KV452912.1 | 317298 | 7-scf00179 | 7 |
| AX-158060345 | 8 | 67.31  | KV452912.1 | 317639 | 7-scf00179 | 7 |
| AX-158060348 | 8 | 67.31  | KV452912.1 | 319903 | 7-scf00179 | 7 |
| AX-157823429 | 8 | 67.492 | KV452912.1 | 324484 | 7-scf00179 | 7 |
| AX-158060351 | 8 | 67.492 | KV452912.1 | 325915 | 7-scf00179 | 7 |
| AX-158060349 | 8 | 67.601 | KV452912.1 | 322960 | 7-scf00179 | 7 |
| AX-158060353 | 8 | 67.601 | KV452912.1 | 327540 | 7-scf00179 | 7 |
| AX-158060355 | 8 | 67.601 | KV452912.1 | 328472 | 7-scf00179 | 7 |
| AX-158060356 | 8 | 67.601 | KV452912.1 | 330866 | 7-scf00179 | 7 |
| AX-158060357 | 8 | 67.601 | KV452912.1 | 334225 | 7-scf00179 | 7 |
| AX-157750253 | 8 | 67.693 | KV452912.1 | 336644 | 7-scf00179 | 7 |
| AX-157823431 | 8 | 67.82  | KV452912.1 | 334350 | 7-scf00179 | 7 |
| AX-157715372 | 8 | 67.82  | KV452912.1 | 337011 | 7-scf00179 | 7 |
| AX-158060358 | 8 | 67.82  | KV452912.1 | 341637 | 7-scf00179 | 7 |
| AX-158060359 | 8 | 67.82  | KV452912.1 | 341830 | 7-scf00179 | 7 |
| AX-158060360 | 8 | 67.82  | KV452912.1 | 342665 | 7-scf00179 | 7 |
| AX-157740579 | 8 | 67.82  | KV452912.1 | 344164 | 7-scf00179 | 7 |
| AX-158060361 | 8 | 67.82  | KV452912.1 | 344623 | 7-scf00179 | 7 |
| AX-158060362 | 8 | 67.82  | KV452912.1 | 345863 | 7-scf00179 | 7 |
| AX-158060367 | 8 | 67.82  | KV452912.1 | 349124 | 7-scf00179 | 7 |
| AX-158062271 | 8 | 67.82  | KV452917.1 | 183926 | 7-scf00182 | 7 |
| AX-157726152 | 8 | 68.038 | KV452912.1 | 351793 | 7-scf00179 | 7 |
| AX-157743812 | 8 | 68.038 | KV452912.1 | 353733 | 7-scf00179 | 7 |
| AX-158060371 | 8 | 68.038 | KV452912.1 | 356131 | 7-scf00179 | 7 |
| AX-158060374 | 8 | 68.038 | KV452912.1 | 362703 | 7-scf00179 | 7 |
| AX-158060376 | 8 | 68.038 | KV452912.1 | 363047 | 7-scf00179 | 7 |
| AX-157740341 | 8 | 68.038 | KV452912.1 | 363717 | 7-scf00179 | 7 |
| AX-157823433 | 8 | 68.038 | KV452912.1 | 366678 | 7-scf00179 | 7 |
| AX-158060383 | 8 | 68.038 | KV452912.1 | 366994 | 7-scf00179 | 7 |
| AX-157727582 | 8 | 68.098 | KV452912.1 | 357677 | 7-scf00179 | 7 |
| AX-157774306 | 8 | 68.098 | KV452912.1 | 370671 | 7-scf00179 | 7 |
| AX-157745576 | 8 | 68.098 | KV452912.1 | 374131 | 7-scf00179 | 7 |
| AX-157823434 | 8 | 68.098 | KV452912.1 | 393903 | 7-scf00179 | 7 |
| AX-158060373 | 8 | 68.147 | KV452912.1 | 361510 | 7-scf00179 | 7 |
| AX-158060395 | 8 | 68.147 | KV452912.1 | 387445 | 7-scf00179 | 7 |
| AX-157823435 | 8 | 68.147 | KV452912.1 | 396660 | 7-scf00179 | 7 |
| AX-158060399 | 8 | 68.147 | KV452912.1 | 396961 | 7-scf00179 | 7 |
| AX-157739488 | 8 | 68.147 | KV452912.1 | 399319 | 7-scf00179 | 7 |
| AX-158060401 | 8 | 68.147 | KV452912.1 | 402801 | 7-scf00179 | 7 |
| AX-157746729 | 8 | 68.147 | KV452912.1 | 403323 | 7-scf00179 | 7 |
| AX-158060424 | 8 | 68.147 | KV452912.1 | 405145 | 7-scf00179 | 7 |



|              |   |        |            |        |            |   |
|--------------|---|--------|------------|--------|------------|---|
| AX-157750662 | 8 | 68.208 | KV452912.1 | 408219 | 7-scf00179 | 7 |
| AX-158060427 | 8 | 68.256 | KV452912.1 | 412153 | 7-scf00179 | 7 |
| AX-157823436 | 8 | 68.256 | KV452912.1 | 412513 | 7-scf00179 | 7 |
| AX-158060429 | 8 | 68.256 | KV452912.1 | 416199 | 7-scf00179 | 7 |
| AX-158060601 | 8 | 68.256 | KV452918.1 | 50156  | 7-scf00181 | 7 |
| AX-157823537 | 8 | 68.256 | KV452914.1 | 192265 | 7-scf00183 | 7 |
| AX-158060430 | 8 | 68.318 | KV452912.1 | 416734 | 7-scf00179 | 7 |
| AX-158060128 | 8 | 68.366 | KV452912.1 | 98115  | 7-scf00179 | 7 |
| AX-158060386 | 8 | 68.366 | KV452912.1 | 370885 | 7-scf00179 | 7 |
| AX-157876931 | 8 | 68.366 | KV452912.1 | 385454 | 7-scf00179 | 7 |
| AX-158060426 | 8 | 68.366 | KV452912.1 | 407339 | 7-scf00179 | 7 |
| AX-157746828 | 8 | 68.366 | KV452912.1 | 411742 | 7-scf00179 | 7 |
| AX-158060435 | 8 | 68.366 | KV452912.1 | 422034 | 7-scf00179 | 7 |
| AX-158060436 | 8 | 68.366 | KV452912.1 | 423046 | 7-scf00179 | 7 |
| AX-158060437 | 8 | 68.366 | KV452912.1 | 424265 | 7-scf00179 | 7 |
| AX-158060441 | 8 | 68.366 | KV452912.1 | 427378 | 7-scf00179 | 7 |
| AX-158060444 | 8 | 68.366 | KV452912.1 | 429448 | 7-scf00179 | 7 |
| AX-158060446 | 8 | 68.366 | KV452912.1 | 430556 | 7-scf00179 | 7 |
| AX-158060447 | 8 | 68.366 | KV452912.1 | 431369 | 7-scf00179 | 7 |
| AX-158060449 | 8 | 68.366 | KV452912.1 | 432222 | 7-scf00179 | 7 |
| AX-158060453 | 8 | 68.366 | KV452912.1 | 437042 | 7-scf00179 | 7 |
| AX-158060454 | 8 | 68.366 | KV452912.1 | 437617 | 7-scf00179 | 7 |
| AX-158060463 | 8 | 68.366 | KV452915.1 | 25163  | 7-scf00180 | 7 |
| AX-158060464 | 8 | 68.366 | KV452915.1 | 27384  | 7-scf00180 | 7 |
| AX-158060466 | 8 | 68.366 | KV452915.1 | 31262  | 7-scf00180 | 7 |
| AX-158060470 | 8 | 68.366 | KV452915.1 | 34164  | 7-scf00180 | 7 |
| AX-158060472 | 8 | 68.366 | KV452915.1 | 34936  | 7-scf00180 | 7 |
| AX-158060478 | 8 | 68.366 | KV452915.1 | 38768  | 7-scf00180 | 7 |
| AX-158060479 | 8 | 68.366 | KV452915.1 | 39657  | 7-scf00180 | 7 |
| AX-158060481 | 8 | 68.366 | KV452915.1 | 40602  | 7-scf00180 | 7 |
| AX-158060482 | 8 | 68.366 | KV452915.1 | 40888  | 7-scf00180 | 7 |
| AX-158060484 | 8 | 68.366 | KV452915.1 | 41735  | 7-scf00180 | 7 |
| AX-158060489 | 8 | 68.366 | KV452915.1 | 43904  | 7-scf00180 | 7 |
| AX-157748462 | 8 | 68.366 | KV452915.1 | 45099  | 7-scf00180 | 7 |
| AX-158060491 | 8 | 68.366 | KV452915.1 | 46629  | 7-scf00180 | 7 |
| AX-158060492 | 8 | 68.366 | KV452915.1 | 47945  | 7-scf00180 | 7 |
| AX-158060493 | 8 | 68.366 | KV452915.1 | 51102  | 7-scf00180 | 7 |
| AX-158060498 | 8 | 68.366 | KV452915.1 | 56326  | 7-scf00180 | 7 |
| AX-158060499 | 8 | 68.366 | KV452915.1 | 59203  | 7-scf00180 | 7 |
| AX-157823441 | 8 | 68.366 | KV452915.1 | 64913  | 7-scf00180 | 7 |
| AX-158060506 | 8 | 68.366 | KV452915.1 | 66156  | 7-scf00180 | 7 |
| AX-158060508 | 8 | 68.366 | KV452915.1 | 67300  | 7-scf00180 | 7 |
| AX-158060509 | 8 | 68.366 | KV452915.1 | 68600  | 7-scf00180 | 7 |
| AX-158060510 | 8 | 68.366 | KV452915.1 | 70222  | 7-scf00180 | 7 |
| AX-158060512 | 8 | 68.366 | KV452915.1 | 70795  | 7-scf00180 | 7 |
| AX-158060513 | 8 | 68.366 | KV452915.1 | 71183  | 7-scf00180 | 7 |
| AX-158060516 | 8 | 68.366 | KV452915.1 | 73277  | 7-scf00180 | 7 |
| AX-157823442 | 8 | 68.366 | KV452915.1 | 74206  | 7-scf00180 | 7 |
| AX-158060521 | 8 | 68.366 | KV452915.1 | 75937  | 7-scf00180 | 7 |
| AX-158060522 | 8 | 68.366 | KV452915.1 | 76495  | 7-scf00180 | 7 |
| AX-158060524 | 8 | 68.366 | KV452915.1 | 77737  | 7-scf00180 | 7 |

|              |   |        |            |        |            |   |
|--------------|---|--------|------------|--------|------------|---|
| AX-158060527 | 8 | 68.366 | KV452915.1 | 80865  | 7-scf00180 | 7 |
| AX-158060528 | 8 | 68.366 | KV452915.1 | 81886  | 7-scf00180 | 7 |
| AX-158060533 | 8 | 68.366 | KV452915.1 | 88437  | 7-scf00180 | 7 |
| AX-158060535 | 8 | 68.366 | KV452915.1 | 90202  | 7-scf00180 | 7 |
| AX-158060536 | 8 | 68.366 | KV452915.1 | 90856  | 7-scf00180 | 7 |
| AX-157885333 | 8 | 68.366 | KV452915.1 | 91897  | 7-scf00180 | 7 |
| AX-158060539 | 8 | 68.366 | KV452915.1 | 92194  | 7-scf00180 | 7 |
| AX-158060541 | 8 | 68.366 | KV452915.1 | 95432  | 7-scf00180 | 7 |
| AX-158060542 | 8 | 68.366 | KV452915.1 | 95759  | 7-scf00180 | 7 |
| AX-158060543 | 8 | 68.366 | KV452915.1 | 96121  | 7-scf00180 | 7 |
| AX-157823445 | 8 | 68.366 | KV452915.1 | 96789  | 7-scf00180 | 7 |
| AX-158060545 | 8 | 68.366 | KV452915.1 | 97409  | 7-scf00180 | 7 |
| AX-158060549 | 8 | 68.366 | KV452915.1 | 99481  | 7-scf00180 | 7 |
| AX-158060553 | 8 | 68.366 | KV452915.1 | 101649 | 7-scf00180 | 7 |
| AX-158060554 | 8 | 68.366 | KV452915.1 | 102026 | 7-scf00180 | 7 |
| AX-158379878 | 8 | 68.366 | KV452915.1 | 104860 | 7-scf00180 | 7 |
| AX-157772352 | 8 | 68.366 | KV452915.1 | 107323 | 7-scf00180 | 7 |
| AX-158060560 | 8 | 68.366 | KV452915.1 | 108144 | 7-scf00180 | 7 |
| AX-158060594 | 8 | 68.366 | KV452918.1 | 43461  | 7-scf00181 | 7 |
| AX-157823446 | 8 | 68.366 | KV452918.1 | 43615  | 7-scf00181 | 7 |
| AX-158060596 | 8 | 68.366 | KV452918.1 | 44633  | 7-scf00181 | 7 |
| AX-158060599 | 8 | 68.366 | KV452918.1 | 47701  | 7-scf00181 | 7 |
| AX-157823448 | 8 | 68.366 | KV452918.1 | 48763  | 7-scf00181 | 7 |
| AX-157714427 | 8 | 68.366 | KV452918.1 | 51686  | 7-scf00181 | 7 |
| AX-158060602 | 8 | 68.366 | KV452918.1 | 52480  | 7-scf00181 | 7 |
| AX-158060603 | 8 | 68.366 | KV452918.1 | 52696  | 7-scf00181 | 7 |
| AX-158060605 | 8 | 68.366 | KV452918.1 | 56678  | 7-scf00181 | 7 |
| AX-158060607 | 8 | 68.366 | KV452918.1 | 57851  | 7-scf00181 | 7 |
| AX-158060608 | 8 | 68.366 | KV452918.1 | 59203  | 7-scf00181 | 7 |
| AX-158060609 | 8 | 68.366 | KV452918.1 | 60397  | 7-scf00181 | 7 |
| AX-157722308 | 8 | 68.366 | KV452918.1 | 64131  | 7-scf00181 | 7 |
| AX-158060614 | 8 | 68.366 | KV452918.1 | 67010  | 7-scf00181 | 7 |
| AX-157870690 | 8 | 68.366 | KV452918.1 | 73926  | 7-scf00181 | 7 |
| AX-157876935 | 8 | 68.366 | KV452918.1 | 79141  | 7-scf00181 | 7 |
| AX-158060624 | 8 | 68.366 | KV452918.1 | 79625  | 7-scf00181 | 7 |
| AX-157752383 | 8 | 68.366 | KV452918.1 | 80707  | 7-scf00181 | 7 |
| AX-158060627 | 8 | 68.366 | KV452918.1 | 83991  | 7-scf00181 | 7 |
| AX-157742018 | 8 | 68.366 | KV452918.1 | 85090  | 7-scf00181 | 7 |
| AX-158060629 | 8 | 68.366 | KV452918.1 | 87750  | 7-scf00181 | 7 |
| AX-157720344 | 8 | 68.366 | KV452918.1 | 87971  | 7-scf00181 | 7 |
| AX-157823454 | 8 | 68.366 | KV452918.1 | 91379  | 7-scf00181 | 7 |
| AX-157856898 | 8 | 68.366 | KV452918.1 | 99453  | 7-scf00181 | 7 |
| AX-157748087 | 8 | 68.366 | KV452918.1 | 101064 | 7-scf00181 | 7 |
| AX-157756015 | 8 | 68.366 | KV452917.1 | 35437  | 7-scf00182 | 7 |
| AX-158062205 | 8 | 68.366 | KV452917.1 | 35995  | 7-scf00182 | 7 |
| AX-158062207 | 8 | 68.366 | KV452917.1 | 39076  | 7-scf00182 | 7 |
| AX-158062214 | 8 | 68.366 | KV452917.1 | 51238  | 7-scf00182 | 7 |
| AX-157745287 | 8 | 68.366 | KV452917.1 | 52178  | 7-scf00182 | 7 |
| AX-157823527 | 8 | 68.366 | KV452917.1 | 55304  | 7-scf00182 | 7 |
| AX-157722154 | 8 | 68.366 | KV452917.1 | 62336  | 7-scf00182 | 7 |
| AX-158062218 | 8 | 68.366 | KV452917.1 | 62976  | 7-scf00182 | 7 |

|              |   |        |             |        |            |    |
|--------------|---|--------|-------------|--------|------------|----|
| AX-158062231 | 8 | 68.366 | KV452917.1  | 122845 | 7-scf00182 | 7  |
| AX-158062253 | 8 | 68.366 | KV452917.1  | 159088 | 7-scf00182 | 7  |
| AX-158062254 | 8 | 68.366 | KV452917.1  | 159884 | 7-scf00182 | 7  |
| AX-158062265 | 8 | 68.366 | KV452917.1  | 176575 | 7-scf00182 | 7  |
| AX-158062267 | 8 | 68.366 | KV452917.1  | 177503 | 7-scf00182 | 7  |
| AX-157727815 | 8 | 68.366 | KV452914.1  | 32881  | 7-scf00183 | 7  |
| AX-157739201 | 8 | 68.366 | KV452914.1  | 36981  | 7-scf00183 | 7  |
| AX-158062292 | 8 | 68.366 | KV452914.1  | 102975 | 7-scf00183 | 7  |
| AX-158062298 | 8 | 68.366 | KV452914.1  | 119285 | 7-scf00183 | 7  |
| AX-158062315 | 8 | 68.366 | KV452914.1  | 166634 | 7-scf00183 | 7  |
| AX-158062316 | 8 | 68.366 | KV452914.1  | 167139 | 7-scf00183 | 7  |
| AX-158062319 | 8 | 68.366 | KV452914.1  | 168965 | 7-scf00183 | 7  |
| AX-157752270 | 8 | 68.366 | KV452914.1  | 186841 | 7-scf00183 | 7  |
| AX-158062328 | 8 | 68.366 | KV452914.1  | 189024 | 7-scf00183 | 7  |
| AX-158062331 | 8 | 68.366 | KV452914.1  | 193158 | 7-scf00183 | 7  |
| AX-158062332 | 8 | 68.366 | KV452914.1  | 193968 | 7-scf00183 | 7  |
| AX-158062333 | 8 | 68.366 | KV452914.1  | 196341 | 7-scf00183 | 7  |
| AX-157823539 | 8 | 68.366 | KV452914.1  | 202194 | 7-scf00183 | 7  |
| AX-157823540 | 8 | 68.366 | KV452914.1  | 205548 | 7-scf00183 | 7  |
| AX-157742458 | 8 | 68.366 | KV452914.1  | 205594 | 7-scf00183 | 7  |
| AX-158062338 | 8 | 68.366 | KV452914.1  | 206423 | 7-scf00183 | 7  |
| AX-157744422 | 8 | 68.366 | KV452914.1  | 207062 | 7-scf00183 | 7  |
| AX-157823541 | 8 | 68.366 | KV452914.1  | 207408 | 7-scf00183 | 7  |
| AX-157823543 | 8 | 68.366 | KV452914.1  | 214012 | 7-scf00183 | 7  |
| AX-157823544 | 8 | 68.366 | KV452914.1  | 215072 | 7-scf00183 | 7  |
| AX-158062343 | 8 | 68.366 | KV452914.1  | 238072 | 7-scf00183 | 7  |
| AX-157700606 | 8 | 68.366 | KV452914.1  | 299911 | 7-scf00183 | 7  |
| AX-157686113 | 8 | 68.366 | KV452940.1  | 11499  | 7-scf00671 | 7  |
| AX-157686127 | 8 | 68.366 | KV452940.1  | 60622  | 7-scf00671 | 7  |
| AX-157680009 | 8 | 68.366 | KV452916.1  | 593    | 7-scf07116 | 7  |
| AX-157681698 | 8 | 68.366 | KV453374.1  | 34055  | scf00644   | UN |
| AX-157685821 | 8 | 68.366 | KV453374.1  | 70956  | scf00644   | UN |
| AX-157687693 | 8 | 68.366 | 3ML01025113 | 3596   | scf00974_1 | UN |
| AX-158060452 | 8 | 68.475 | KV452912.1  | 436855 | 7-scf00179 | 7  |
| AX-158060630 | 8 | 68.475 | KV452918.1  | 94127  | 7-scf00181 | 7  |
| AX-158060632 | 8 | 68.475 | KV452918.1  | 96179  | 7-scf00181 | 7  |
| AX-158062289 | 8 | 68.475 | KV452914.1  | 102280 | 7-scf00183 | 7  |
| AX-157686112 | 8 | 68.475 | KV452940.1  | 5531   | 7-scf00671 | 7  |
| AX-157685820 | 8 | 68.475 | KV453374.1  | 69679  | scf00644   | UN |
| AX-158060548 | 8 | 68.575 | KV452915.1  | 98236  | 7-scf00180 | 7  |
| AX-158060634 | 8 | 68.575 | KV452918.1  | 98481  | 7-scf00181 | 7  |
| AX-157823455 | 8 | 68.575 | KV452918.1  | 110797 | 7-scf00181 | 7  |
| AX-158060649 | 8 | 68.575 | KV452918.1  | 121140 | 7-scf00181 | 7  |
| AX-157823461 | 8 | 68.575 | KV452918.1  | 129532 | 7-scf00181 | 7  |
| AX-158060641 | 8 | 68.584 | KV452918.1  | 111738 | 7-scf00181 | 7  |
| AX-157823457 | 8 | 68.693 | KV452918.1  | 113148 | 7-scf00181 | 7  |
| AX-158416444 | 8 | 68.693 | KV452918.1  | 113762 | 7-scf00181 | 7  |
| AX-158060643 | 8 | 68.693 | KV452918.1  | 114979 | 7-scf00181 | 7  |
| AX-157739425 | 8 | 68.693 | KV452918.1  | 115658 | 7-scf00181 | 7  |
| AX-158060648 | 8 | 68.693 | KV452918.1  | 118196 | 7-scf00181 | 7  |
| AX-157823460 | 8 | 68.693 | KV452918.1  | 122080 | 7-scf00181 | 7  |

|              |   |        |            |        |            |   |
|--------------|---|--------|------------|--------|------------|---|
| AX-157747685 | 8 | 68.693 | KV452918.1 | 122249 | 7-scf00181 | 7 |
| AX-158060650 | 8 | 68.693 | KV452918.1 | 122772 | 7-scf00181 | 7 |
| AX-158060651 | 8 | 68.693 | KV452918.1 | 123143 | 7-scf00181 | 7 |
| AX-158060653 | 8 | 68.693 | KV452918.1 | 125512 | 7-scf00181 | 7 |
| AX-157745715 | 8 | 68.693 | KV452918.1 | 126171 | 7-scf00181 | 7 |
| AX-157823462 | 8 | 68.693 | KV452918.1 | 129598 | 7-scf00181 | 7 |
| AX-158060655 | 8 | 68.693 | KV452918.1 | 132692 | 7-scf00181 | 7 |
| AX-158060660 | 8 | 68.693 | KV452918.1 | 142051 | 7-scf00181 | 7 |
| AX-158060656 | 8 | 68.802 | KV452918.1 | 137689 | 7-scf00181 | 7 |
| AX-157758832 | 8 | 68.802 | KV452918.1 | 139345 | 7-scf00181 | 7 |
| AX-158060659 | 8 | 68.802 | KV452918.1 | 139734 | 7-scf00181 | 7 |
| AX-157823463 | 8 | 68.802 | KV452918.1 | 148629 | 7-scf00181 | 7 |
| AX-158060669 | 8 | 68.802 | KV452918.1 | 155219 | 7-scf00181 | 7 |
| AX-158060745 | 8 | 68.802 | KV452918.1 | 216731 | 7-scf00181 | 7 |
| AX-158060672 | 8 | 68.937 | KV452918.1 | 156383 | 7-scf00181 | 7 |
| AX-158060683 | 8 | 69.087 | KV452918.1 | 168746 | 7-scf00181 | 7 |
| AX-158060693 | 8 | 69.087 | KV452918.1 | 172786 | 7-scf00181 | 7 |
| AX-158060694 | 8 | 69.164 | KV452918.1 | 173708 | 7-scf00181 | 7 |
| AX-158060695 | 8 | 69.269 | KV452918.1 | 175003 | 7-scf00181 | 7 |
| AX-157823459 | 8 | 69.371 | KV452918.1 | 120448 | 7-scf00181 | 7 |
| AX-158060698 | 8 | 69.371 | KV452918.1 | 176481 | 7-scf00181 | 7 |
| AX-158060701 | 8 | 69.371 | KV452918.1 | 179152 | 7-scf00181 | 7 |
| AX-158060709 | 8 | 69.371 | KV452918.1 | 182589 | 7-scf00181 | 7 |
| AX-158060713 | 8 | 69.371 | KV452918.1 | 186514 | 7-scf00181 | 7 |
| AX-158060714 | 8 | 69.371 | KV452918.1 | 187083 | 7-scf00181 | 7 |
| AX-158060716 | 8 | 69.371 | KV452918.1 | 188845 | 7-scf00181 | 7 |
| AX-158060720 | 8 | 69.371 | KV452918.1 | 194476 | 7-scf00181 | 7 |
| AX-158060721 | 8 | 69.371 | KV452918.1 | 196239 | 7-scf00181 | 7 |
| AX-158060725 | 8 | 69.371 | KV452918.1 | 197664 | 7-scf00181 | 7 |
| AX-158060732 | 8 | 69.428 | KV452918.1 | 203976 | 7-scf00181 | 7 |
| AX-158060685 | 8 | 69.882 | KV452918.1 | 170015 | 7-scf00181 | 7 |
| AX-158060690 | 8 | 69.882 | KV452918.1 | 171902 | 7-scf00181 | 7 |
| AX-158060735 | 8 | 69.882 | KV452918.1 | 205745 | 7-scf00181 | 7 |
| AX-158060736 | 8 | 69.882 | KV452918.1 | 206373 | 7-scf00181 | 7 |
| AX-158060750 | 8 | 69.882 | KV452918.1 | 221100 | 7-scf00181 | 7 |
| AX-158060758 | 8 | 69.882 | KV452918.1 | 227899 | 7-scf00181 | 7 |
| AX-157705584 | 8 | 69.882 | KV452918.1 | 238353 | 7-scf00181 | 7 |
| AX-158060768 | 8 | 69.882 | KV452918.1 | 242559 | 7-scf00181 | 7 |
| AX-158060739 | 8 | 70.044 | KV452918.1 | 209864 | 7-scf00181 | 7 |
| AX-158060751 | 8 | 70.203 | KV452918.1 | 222019 | 7-scf00181 | 7 |
| AX-158060755 | 8 | 70.209 | KV452918.1 | 225355 | 7-scf00181 | 7 |
| AX-158060756 | 8 | 70.213 | KV452918.1 | 226139 | 7-scf00181 | 7 |
| AX-157865562 | 8 | 70.219 | KV452918.1 | 234351 | 7-scf00181 | 7 |
| AX-158060761 | 8 | 70.219 | KV452918.1 | 235134 | 7-scf00181 | 7 |
| AX-158060764 | 8 | 70.226 | KV452918.1 | 237112 | 7-scf00181 | 7 |
| AX-158060765 | 8 | 70.226 | KV452918.1 | 240944 | 7-scf00181 | 7 |
| AX-158060770 | 8 | 70.226 | KV452918.1 | 243384 | 7-scf00181 | 7 |
| AX-157756181 | 8 | 70.228 | KV452918.1 | 161419 | 7-scf00181 | 7 |
| AX-158060772 | 8 | 70.228 | KV452918.1 | 246013 | 7-scf00181 | 7 |
| AX-158060778 | 8 | 70.636 | KV452918.1 | 253474 | 7-scf00181 | 7 |
| AX-158060775 | 8 | 70.773 | KV452918.1 | 251935 | 7-scf00181 | 7 |

|              |   |        |            |        |            |   |
|--------------|---|--------|------------|--------|------------|---|
| AX-158060779 | 8 | 70.773 | KV452918.1 | 254828 | 7-scf00181 | 7 |
| AX-158060781 | 8 | 70.773 | KV452918.1 | 255890 | 7-scf00181 | 7 |
| AX-158060783 | 8 | 70.773 | KV452918.1 | 256290 | 7-scf00181 | 7 |
| AX-158060784 | 8 | 70.773 | KV452918.1 | 257740 | 7-scf00181 | 7 |
| AX-158060789 | 8 | 70.773 | KV452918.1 | 263915 | 7-scf00181 | 7 |
| AX-158060791 | 8 | 70.773 | KV452918.1 | 266671 | 7-scf00181 | 7 |
| AX-158060793 | 8 | 70.773 | KV452918.1 | 267843 | 7-scf00181 | 7 |
| AX-158060795 | 8 | 70.773 | KV452918.1 | 268362 | 7-scf00181 | 7 |
| AX-158060796 | 8 | 70.773 | KV452918.1 | 269200 | 7-scf00181 | 7 |
| AX-158060798 | 8 | 70.773 | KV452918.1 | 269530 | 7-scf00181 | 7 |
| AX-158060799 | 8 | 70.773 | KV452918.1 | 271795 | 7-scf00181 | 7 |
| AX-157703124 | 8 | 70.773 | KV452918.1 | 272491 | 7-scf00181 | 7 |
| AX-158060800 | 8 | 70.773 | KV452918.1 | 275139 | 7-scf00181 | 7 |
| AX-157885334 | 8 | 70.773 | KV452918.1 | 275925 | 7-scf00181 | 7 |
| AX-157752954 | 8 | 70.773 | KV452918.1 | 281625 | 7-scf00181 | 7 |
| AX-157718039 | 8 | 70.773 | KV452918.1 | 287156 | 7-scf00181 | 7 |
| AX-158060826 | 8 | 70.773 | KV452918.1 | 296351 | 7-scf00181 | 7 |
| AX-157823465 | 8 | 70.883 | KV452918.1 | 284628 | 7-scf00181 | 7 |
| AX-158060812 | 8 | 70.992 | KV452918.1 | 288136 | 7-scf00181 | 7 |
| AX-158060813 | 8 | 70.992 | KV452918.1 | 288769 | 7-scf00181 | 7 |
| AX-157870692 | 8 | 71.098 | KV452918.1 | 292321 | 7-scf00181 | 7 |
| AX-158060825 | 8 | 71.21  | KV452918.1 | 295954 | 7-scf00181 | 7 |
| AX-158060827 | 8 | 71.21  | KV452918.1 | 297010 | 7-scf00181 | 7 |
| AX-158060828 | 8 | 71.21  | KV452918.1 | 297250 | 7-scf00181 | 7 |
| AX-158060833 | 8 | 71.539 | KV452918.1 | 301949 | 7-scf00181 | 7 |
| AX-158060834 | 8 | 71.54  | KV452918.1 | 302363 | 7-scf00181 | 7 |
| AX-158060835 | 8 | 71.54  | KV452918.1 | 303062 | 7-scf00181 | 7 |
| AX-158060836 | 8 | 71.54  | KV452918.1 | 304422 | 7-scf00181 | 7 |
| AX-157743409 | 8 | 71.617 | KV452918.1 | 317541 | 7-scf00181 | 7 |
| AX-158060840 | 8 | 71.757 | KV452918.1 | 319103 | 7-scf00181 | 7 |
| AX-158060841 | 8 | 71.757 | KV452918.1 | 321363 | 7-scf00181 | 7 |
| AX-157756401 | 8 | 71.757 | KV452918.1 | 323400 | 7-scf00181 | 7 |
| AX-158060845 | 8 | 71.757 | KV452918.1 | 326711 | 7-scf00181 | 7 |
| AX-158060846 | 8 | 71.757 | KV452918.1 | 328726 | 7-scf00181 | 7 |
| AX-158060848 | 8 | 71.757 | KV452918.1 | 330302 | 7-scf00181 | 7 |
| AX-158060854 | 8 | 72.191 | KV452918.1 | 334482 | 7-scf00181 | 7 |
| AX-158060860 | 8 | 72.194 | KV452918.1 | 342521 | 7-scf00181 | 7 |
| AX-158060862 | 8 | 72.194 | KV452918.1 | 345031 | 7-scf00181 | 7 |
| AX-158060863 | 8 | 72.194 | KV452918.1 | 345484 | 7-scf00181 | 7 |
| AX-158060871 | 8 | 72.329 | KV452918.1 | 351308 | 7-scf00181 | 7 |
| AX-158060872 | 8 | 72.329 | KV452918.1 | 352817 | 7-scf00181 | 7 |
| AX-158060875 | 8 | 72.329 | KV452918.1 | 353585 | 7-scf00181 | 7 |
| AX-158060876 | 8 | 72.329 | KV452918.1 | 354902 | 7-scf00181 | 7 |
| AX-158060878 | 8 | 72.329 | KV452918.1 | 357275 | 7-scf00181 | 7 |
| AX-158060879 | 8 | 72.329 | KV452918.1 | 358033 | 7-scf00181 | 7 |
| AX-158060881 | 8 | 72.329 | KV452918.1 | 359063 | 7-scf00181 | 7 |
| AX-158060883 | 8 | 72.329 | KV452918.1 | 362287 | 7-scf00181 | 7 |
| AX-158060885 | 8 | 72.765 | KV452918.1 | 369738 | 7-scf00181 | 7 |
| AX-157721143 | 8 | 72.773 | KV452918.1 | 355530 | 7-scf00181 | 7 |
| AX-158060886 | 8 | 72.773 | KV452918.1 | 370160 | 7-scf00181 | 7 |
| AX-158060890 | 8 | 72.773 | KV452918.1 | 375080 | 7-scf00181 | 7 |

|              |   |        |            |        |            |   |
|--------------|---|--------|------------|--------|------------|---|
| AX-158060891 | 8 | 72.773 | KV452918.1 | 376736 | 7-scf00181 | 7 |
| AX-158060892 | 8 | 72.934 | KV452918.1 | 378982 | 7-scf00181 | 7 |
| AX-158060893 | 8 | 73.02  | KV452918.1 | 379395 | 7-scf00181 | 7 |
| AX-158060899 | 8 | 73.095 | KV452918.1 | 387563 | 7-scf00181 | 7 |
| AX-157754252 | 8 | 73.095 | KV452918.1 | 390220 | 7-scf00181 | 7 |
| AX-158060904 | 8 | 73.095 | KV452918.1 | 396438 | 7-scf00181 | 7 |
| AX-158060923 | 8 | 73.095 | KV452918.1 | 412981 | 7-scf00181 | 7 |
| AX-158060938 | 8 | 73.095 | KV452918.1 | 428603 | 7-scf00181 | 7 |
| AX-158060944 | 8 | 73.095 | KV452918.1 | 435111 | 7-scf00181 | 7 |
| AX-158060901 | 8 | 73.416 | KV452918.1 | 393249 | 7-scf00181 | 7 |
| AX-158060903 | 8 | 73.416 | KV452918.1 | 395822 | 7-scf00181 | 7 |
| AX-158060908 | 8 | 73.416 | KV452918.1 | 399051 | 7-scf00181 | 7 |
| AX-157856899 | 8 | 73.577 | KV452918.1 | 402638 | 7-scf00181 | 7 |
| AX-158060912 | 8 | 73.578 | KV452918.1 | 403706 | 7-scf00181 | 7 |
| AX-158060913 | 8 | 73.578 | KV452918.1 | 404217 | 7-scf00181 | 7 |
| AX-158060915 | 8 | 73.696 | KV452918.1 | 404842 | 7-scf00181 | 7 |
| AX-158060918 | 8 | 73.795 | KV452918.1 | 407522 | 7-scf00181 | 7 |
| AX-158060921 | 8 | 73.898 | KV452918.1 | 410773 | 7-scf00181 | 7 |
| AX-158060925 | 8 | 73.898 | KV452918.1 | 415483 | 7-scf00181 | 7 |
| AX-158060930 | 8 | 73.898 | KV452918.1 | 423897 | 7-scf00181 | 7 |
| AX-158060934 | 8 | 73.898 | KV452918.1 | 425792 | 7-scf00181 | 7 |
| AX-158060910 | 8 | 73.899 | KV452918.1 | 402510 | 7-scf00181 | 7 |
| AX-158060928 | 8 | 73.899 | KV452918.1 | 418807 | 7-scf00181 | 7 |
| AX-158409137 | 8 | 73.899 | KV452918.1 | 426716 | 7-scf00181 | 7 |
| AX-158060939 | 8 | 73.899 | KV452918.1 | 431060 | 7-scf00181 | 7 |
| AX-157726159 | 8 | 73.899 | KV452918.1 | 431509 | 7-scf00181 | 7 |
| AX-158060940 | 8 | 73.899 | KV452918.1 | 432559 | 7-scf00181 | 7 |
| AX-158060942 | 8 | 73.899 | KV452918.1 | 433461 | 7-scf00181 | 7 |
| AX-158060948 | 8 | 73.899 | KV452918.1 | 438398 | 7-scf00181 | 7 |
| AX-158060949 | 8 | 73.899 | KV452918.1 | 439494 | 7-scf00181 | 7 |
| AX-158060952 | 8 | 73.899 | KV452918.1 | 442640 | 7-scf00181 | 7 |
| AX-157856900 | 8 | 73.899 | KV452918.1 | 442715 | 7-scf00181 | 7 |
| AX-158060954 | 8 | 73.899 | KV452918.1 | 444217 | 7-scf00181 | 7 |
| AX-158060956 | 8 | 73.899 | KV452918.1 | 445129 | 7-scf00181 | 7 |
| AX-158060959 | 8 | 73.899 | KV452918.1 | 446600 | 7-scf00181 | 7 |
| AX-158384147 | 8 | 73.899 | KV452918.1 | 447340 | 7-scf00181 | 7 |
| AX-158060964 | 8 | 73.899 | KV452918.1 | 450394 | 7-scf00181 | 7 |
| AX-158060965 | 8 | 73.899 | KV452918.1 | 451724 | 7-scf00181 | 7 |
| AX-158060967 | 8 | 73.899 | KV452918.1 | 453007 | 7-scf00181 | 7 |
| AX-158060968 | 8 | 73.899 | KV452918.1 | 455165 | 7-scf00181 | 7 |
| AX-158060984 | 8 | 73.899 | KV452918.1 | 466793 | 7-scf00181 | 7 |
| AX-158422432 | 8 | 73.901 | KV452918.1 | 456112 | 7-scf00181 | 7 |
| AX-158060971 | 8 | 73.907 | KV452918.1 | 456482 | 7-scf00181 | 7 |
| AX-158409143 | 8 | 73.907 | KV452918.1 | 468748 | 7-scf00181 | 7 |
| AX-158060982 | 8 | 73.911 | KV452918.1 | 464103 | 7-scf00181 | 7 |
| AX-158060931 | 8 | 74.112 | KV452918.1 | 424321 | 7-scf00181 | 7 |
| AX-158060936 | 8 | 74.112 | KV452918.1 | 427358 | 7-scf00181 | 7 |
| AX-158409141 | 8 | 74.112 | KV452918.1 | 458386 | 7-scf00181 | 7 |
| AX-158060981 | 8 | 74.112 | KV452918.1 | 463419 | 7-scf00181 | 7 |
| AX-157742543 | 8 | 74.112 | KV452918.1 | 465100 | 7-scf00181 | 7 |
| AX-158060983 | 8 | 74.112 | KV452918.1 | 466405 | 7-scf00181 | 7 |

|              |   |        |            |        |            |   |
|--------------|---|--------|------------|--------|------------|---|
| AX-158060986 | 8 | 74.112 | KV452918.1 | 469322 | 7-scf00181 | 7 |
| AX-158060990 | 8 | 74.525 | KV452918.1 | 473340 | 7-scf00181 | 7 |
| AX-158060994 | 8 | 74.533 | KV452918.1 | 477833 | 7-scf00181 | 7 |
| AX-158060999 | 8 | 74.533 | KV452918.1 | 482834 | 7-scf00181 | 7 |
| AX-158061003 | 8 | 74.542 | KV452918.1 | 485262 | 7-scf00181 | 7 |
| AX-158061012 | 8 | 74.542 | KV452918.1 | 495639 | 7-scf00181 | 7 |
| AX-158061014 | 8 | 74.542 | KV452918.1 | 497011 | 7-scf00181 | 7 |
| AX-157856901 | 8 | 74.543 | KV452918.1 | 480276 | 7-scf00181 | 7 |
| AX-158061015 | 8 | 74.543 | KV452918.1 | 497732 | 7-scf00181 | 7 |
| AX-158061016 | 8 | 74.543 | KV452918.1 | 500040 | 7-scf00181 | 7 |
| AX-158061019 | 8 | 74.543 | KV452918.1 | 500984 | 7-scf00181 | 7 |
| AX-157715063 | 8 | 74.543 | KV452918.1 | 503556 | 7-scf00181 | 7 |
| AX-158061025 | 8 | 74.543 | KV452918.1 | 507827 | 7-scf00181 | 7 |
| AX-157745403 | 8 | 74.543 | KV452918.1 | 509872 | 7-scf00181 | 7 |
| AX-157856902 | 8 | 74.543 | KV452918.1 | 512977 | 7-scf00181 | 7 |
| AX-157823471 | 8 | 74.543 | KV452918.1 | 518831 | 7-scf00181 | 7 |
| AX-157751852 | 8 | 74.86  | KV452918.1 | 514232 | 7-scf00181 | 7 |
| AX-158061029 | 8 | 74.861 | KV452918.1 | 517719 | 7-scf00181 | 7 |
| AX-158061031 | 8 | 74.865 | KV452918.1 | 519661 | 7-scf00181 | 7 |
| AX-158061033 | 8 | 74.867 | KV452918.1 | 519928 | 7-scf00181 | 7 |
| AX-158061035 | 8 | 74.868 | KV452918.1 | 522049 | 7-scf00181 | 7 |
| AX-158061028 | 8 | 74.869 | KV452918.1 | 516117 | 7-scf00181 | 7 |
| AX-158061030 | 8 | 74.869 | KV452918.1 | 517868 | 7-scf00181 | 7 |
| AX-157713659 | 8 | 74.869 | KV452918.1 | 524811 | 7-scf00181 | 7 |
| AX-158061023 | 8 | 74.87  | KV452918.1 | 505992 | 7-scf00181 | 7 |
| AX-157823473 | 8 | 74.87  | KV452918.1 | 526838 | 7-scf00181 | 7 |
| AX-158061044 | 8 | 74.87  | KV452918.1 | 530704 | 7-scf00181 | 7 |
| AX-157756857 | 8 | 74.871 | KV452918.1 | 475405 | 7-scf00181 | 7 |
| AX-157756143 | 8 | 74.871 | KV452918.1 | 527313 | 7-scf00181 | 7 |
| AX-157870693 | 8 | 74.871 | KV452918.1 | 527403 | 7-scf00181 | 7 |
| AX-158061053 | 8 | 75.256 | KV452918.1 | 534396 | 7-scf00181 | 7 |
| AX-158061056 | 8 | 75.669 | KV452918.1 | 537252 | 7-scf00181 | 7 |
| AX-158061059 | 8 | 75.669 | KV452918.1 | 538374 | 7-scf00181 | 7 |
| AX-158061063 | 8 | 75.669 | KV452918.1 | 543036 | 7-scf00181 | 7 |
| AX-158061065 | 8 | 75.669 | KV452918.1 | 544598 | 7-scf00181 | 7 |
| AX-158061066 | 8 | 75.669 | KV452918.1 | 546790 | 7-scf00181 | 7 |
| AX-157717324 | 8 | 75.669 | KV452918.1 | 549004 | 7-scf00181 | 7 |
| AX-157823474 | 8 | 75.669 | KV452918.1 | 550551 | 7-scf00181 | 7 |
| AX-158061077 | 8 | 75.669 | KV452918.1 | 560723 | 7-scf00181 | 7 |
| AX-157823478 | 8 | 75.669 | KV452918.1 | 561878 | 7-scf00181 | 7 |
| AX-158061080 | 8 | 75.669 | KV452918.1 | 563770 | 7-scf00181 | 7 |
| AX-158061081 | 8 | 75.669 | KV452918.1 | 564779 | 7-scf00181 | 7 |
| AX-158061082 | 8 | 75.669 | KV452918.1 | 565395 | 7-scf00181 | 7 |
| AX-157720283 | 8 | 75.669 | KV452918.1 | 565684 | 7-scf00181 | 7 |
| AX-158061083 | 8 | 75.669 | KV452918.1 | 566433 | 7-scf00181 | 7 |
| AX-158061135 | 8 | 75.669 | KV452918.1 | 623359 | 7-scf00181 | 7 |
| AX-158061086 | 8 | 75.83  | KV452918.1 | 568336 | 7-scf00181 | 7 |
| AX-157870694 | 8 | 75.83  | KV452918.1 | 570003 | 7-scf00181 | 7 |
| AX-158061092 | 8 | 75.83  | KV452918.1 | 578574 | 7-scf00181 | 7 |
| AX-157751140 | 8 | 75.83  | KV452918.1 | 579972 | 7-scf00181 | 7 |
| AX-157865573 | 8 | 75.83  | KV452918.1 | 586077 | 7-scf00181 | 7 |

|              |   |        |            |        |            |   |
|--------------|---|--------|------------|--------|------------|---|
| AX-157823479 | 8 | 75.83  | KV452918.1 | 595142 | 7-scf00181 | 7 |
| AX-157738705 | 8 | 75.83  | KV452918.1 | 596547 | 7-scf00181 | 7 |
| AX-158061104 | 8 | 75.83  | KV452918.1 | 597188 | 7-scf00181 | 7 |
| AX-158061105 | 8 | 75.83  | KV452918.1 | 598920 | 7-scf00181 | 7 |
| AX-158061110 | 8 | 75.991 | KV452918.1 | 608265 | 7-scf00181 | 7 |
| AX-158061057 | 8 | 76.152 | KV452918.1 | 537809 | 7-scf00181 | 7 |
| AX-157752251 | 8 | 76.152 | KV452918.1 | 551462 | 7-scf00181 | 7 |
| AX-158061079 | 8 | 76.152 | KV452918.1 | 563470 | 7-scf00181 | 7 |
| AX-158061095 | 8 | 76.152 | KV452918.1 | 581251 | 7-scf00181 | 7 |
| AX-158061115 | 8 | 76.152 | KV452918.1 | 612013 | 7-scf00181 | 7 |
| AX-158061117 | 8 | 76.152 | KV452918.1 | 614260 | 7-scf00181 | 7 |
| AX-158061118 | 8 | 76.152 | KV452918.1 | 614524 | 7-scf00181 | 7 |
| AX-158061119 | 8 | 76.152 | KV452918.1 | 615214 | 7-scf00181 | 7 |
| AX-158061120 | 8 | 76.152 | KV452918.1 | 615737 | 7-scf00181 | 7 |
| AX-158061121 | 8 | 76.152 | KV452918.1 | 617245 | 7-scf00181 | 7 |
| AX-158061123 | 8 | 76.152 | KV452918.1 | 617433 | 7-scf00181 | 7 |
| AX-158061134 | 8 | 76.152 | KV452918.1 | 623220 | 7-scf00181 | 7 |
| AX-158061140 | 8 | 76.152 | KV452918.1 | 627999 | 7-scf00181 | 7 |
| AX-158061143 | 8 | 76.152 | KV452918.1 | 631215 | 7-scf00181 | 7 |
| AX-158061152 | 8 | 76.473 | KV452918.1 | 636539 | 7-scf00181 | 7 |
| AX-158061153 | 8 | 76.473 | KV452918.1 | 638134 | 7-scf00181 | 7 |
| AX-157721657 | 8 | 76.473 | KV452918.1 | 638862 | 7-scf00181 | 7 |
| AX-158061157 | 8 | 76.473 | KV452918.1 | 640256 | 7-scf00181 | 7 |
| AX-157774927 | 8 | 76.473 | KV452918.1 | 643208 | 7-scf00181 | 7 |
| AX-158061167 | 8 | 76.473 | KV452918.1 | 647203 | 7-scf00181 | 7 |
| AX-158061172 | 8 | 76.473 | KV452918.1 | 652993 | 7-scf00181 | 7 |
| AX-158061177 | 8 | 76.473 | KV452918.1 | 654662 | 7-scf00181 | 7 |
| AX-157756327 | 8 | 76.473 | KV452918.1 | 659225 | 7-scf00181 | 7 |
| AX-158061170 | 8 | 76.583 | KV452918.1 | 650765 | 7-scf00181 | 7 |
| AX-158061171 | 8 | 76.583 | KV452918.1 | 651616 | 7-scf00181 | 7 |
| AX-158061175 | 8 | 76.583 | KV452918.1 | 654260 | 7-scf00181 | 7 |
| AX-158061182 | 8 | 76.801 | KV452918.1 | 658164 | 7-scf00181 | 7 |
| AX-158061183 | 8 | 76.801 | KV452918.1 | 658727 | 7-scf00181 | 7 |
| AX-157714927 | 8 | 76.852 | KV452918.1 | 661825 | 7-scf00181 | 7 |
| AX-158061188 | 8 | 77.02  | KV452918.1 | 662420 | 7-scf00181 | 7 |
| AX-158061190 | 8 | 77.02  | KV452918.1 | 663232 | 7-scf00181 | 7 |
| AX-158061191 | 8 | 77.02  | KV452918.1 | 663917 | 7-scf00181 | 7 |
| AX-158061193 | 8 | 77.02  | KV452918.1 | 664080 | 7-scf00181 | 7 |
| AX-158061195 | 8 | 77.02  | KV452918.1 | 664817 | 7-scf00181 | 7 |
| AX-158061196 | 8 | 77.02  | KV452918.1 | 665496 | 7-scf00181 | 7 |
| AX-158061199 | 8 | 77.02  | KV452918.1 | 666809 | 7-scf00181 | 7 |
| AX-158061231 | 8 | 77.02  | KV452918.1 | 701291 | 7-scf00181 | 7 |
| AX-158061213 | 8 | 77.129 | KV452918.1 | 680134 | 7-scf00181 | 7 |
| AX-158061217 | 8 | 77.175 | KV452918.1 | 685175 | 7-scf00181 | 7 |
| AX-157718148 | 8 | 77.253 | KV452918.1 | 686846 | 7-scf00181 | 7 |
| AX-158061094 | 8 | 77.331 | KV452918.1 | 580042 | 7-scf00181 | 7 |
| AX-158061116 | 8 | 77.331 | KV452918.1 | 613870 | 7-scf00181 | 7 |
| AX-158061127 | 8 | 77.331 | KV452918.1 | 618758 | 7-scf00181 | 7 |
| AX-158061141 | 8 | 77.331 | KV452918.1 | 630023 | 7-scf00181 | 7 |
| AX-157856904 | 8 | 77.331 | KV452918.1 | 685955 | 7-scf00181 | 7 |
| AX-158061220 | 8 | 77.331 | KV452918.1 | 687557 | 7-scf00181 | 7 |



|              |   |        |            |        |            |   |
|--------------|---|--------|------------|--------|------------|---|
| AX-158061225 | 8 | 77.331 | KV452918.1 | 695727 | 7-scf00181 | 7 |
| AX-157714091 | 8 | 77.366 | KV452918.1 | 691950 | 7-scf00181 | 7 |
| AX-158406655 | 8 | 77.4   | KV452918.1 | 692879 | 7-scf00181 | 7 |
| AX-158061227 | 8 | 77.4   | KV452918.1 | 695979 | 7-scf00181 | 7 |
| AX-158061233 | 8 | 77.4   | KV452918.1 | 701757 | 7-scf00181 | 7 |
| AX-158061237 | 8 | 77.471 | KV452918.1 | 705366 | 7-scf00181 | 7 |
| AX-158061238 | 8 | 77.472 | KV452918.1 | 707764 | 7-scf00181 | 7 |
| AX-158061239 | 8 | 77.781 | KV452918.1 | 709412 | 7-scf00181 | 7 |
| AX-158061241 | 8 | 77.781 | KV452918.1 | 709752 | 7-scf00181 | 7 |
| AX-158061242 | 8 | 77.796 | KV452918.1 | 710600 | 7-scf00181 | 7 |
| AX-158061245 | 8 | 77.796 | KV452918.1 | 713069 | 7-scf00181 | 7 |
| AX-158061248 | 8 | 77.796 | KV452918.1 | 713454 | 7-scf00181 | 7 |
| AX-158061249 | 8 | 77.796 | KV452918.1 | 714139 | 7-scf00181 | 7 |
| AX-158061250 | 8 | 78.01  | KV452918.1 | 716607 | 7-scf00181 | 7 |
| AX-158061251 | 8 | 78.224 | KV452918.1 | 717629 | 7-scf00181 | 7 |
| AX-158061253 | 8 | 78.224 | KV452918.1 | 718942 | 7-scf00181 | 7 |
| AX-157856905 | 8 | 78.262 | KV452918.1 | 721826 | 7-scf00181 | 7 |
| AX-158061318 | 8 | 78.262 | KV452918.1 | 783634 | 7-scf00181 | 7 |
| AX-158061256 | 8 | 78.292 | KV452918.1 | 723065 | 7-scf00181 | 7 |
| AX-157721345 | 8 | 78.333 | KV452918.1 | 724955 | 7-scf00181 | 7 |
| AX-158061257 | 8 | 78.333 | KV452918.1 | 725355 | 7-scf00181 | 7 |
| AX-158061259 | 8 | 78.333 | KV452918.1 | 726147 | 7-scf00181 | 7 |
| AX-157823480 | 8 | 78.333 | KV452918.1 | 728148 | 7-scf00181 | 7 |
| AX-157710798 | 8 | 78.333 | KV452918.1 | 734430 | 7-scf00181 | 7 |
| AX-157713799 | 8 | 78.333 | KV452918.1 | 734900 | 7-scf00181 | 7 |
| AX-158061265 | 8 | 78.333 | KV452918.1 | 735538 | 7-scf00181 | 7 |
| AX-158061266 | 8 | 78.333 | KV452918.1 | 736397 | 7-scf00181 | 7 |
| AX-157823481 | 8 | 78.333 | KV452918.1 | 739217 | 7-scf00181 | 7 |
| AX-158061272 | 8 | 78.333 | KV452918.1 | 742998 | 7-scf00181 | 7 |
| AX-158061274 | 8 | 78.333 | KV452918.1 | 744332 | 7-scf00181 | 7 |
| AX-158061276 | 8 | 78.333 | KV452918.1 | 745428 | 7-scf00181 | 7 |
| AX-158061277 | 8 | 78.333 | KV452918.1 | 745854 | 7-scf00181 | 7 |
| AX-158061288 | 8 | 78.333 | KV452918.1 | 756175 | 7-scf00181 | 7 |
| AX-158061292 | 8 | 78.333 | KV452918.1 | 758622 | 7-scf00181 | 7 |
| AX-158061338 | 8 | 78.333 | KV452918.1 | 799060 | 7-scf00181 | 7 |
| AX-158061387 | 8 | 78.333 | KV452918.1 | 850520 | 7-scf00181 | 7 |
| AX-158061396 | 8 | 78.333 | KV452918.1 | 861036 | 7-scf00181 | 7 |
| AX-158061278 | 8 | 78.554 | KV452918.1 | 746229 | 7-scf00181 | 7 |
| AX-158061280 | 8 | 78.554 | KV452918.1 | 748382 | 7-scf00181 | 7 |
| AX-158061285 | 8 | 78.582 | KV452918.1 | 753925 | 7-scf00181 | 7 |
| AX-157775216 | 8 | 78.594 | KV452918.1 | 755382 | 7-scf00181 | 7 |
| AX-158061286 | 8 | 78.607 | KV452918.1 | 755791 | 7-scf00181 | 7 |
| AX-158061327 | 8 | 78.607 | KV452918.1 | 788215 | 7-scf00181 | 7 |
| AX-158061330 | 8 | 78.607 | KV452918.1 | 789139 | 7-scf00181 | 7 |
| AX-157823482 | 8 | 78.607 | KV452918.1 | 807214 | 7-scf00181 | 7 |
| AX-158061380 | 8 | 78.607 | KV452918.1 | 840766 | 7-scf00181 | 7 |
| AX-158061480 | 8 | 78.607 | KV452918.1 | 953078 | 7-scf00181 | 7 |
| AX-158391897 | 8 | 78.607 | KV452918.1 | 994310 | 7-scf00181 | 7 |
| AX-158061289 | 8 | 78.634 | KV452918.1 | 756754 | 7-scf00181 | 7 |
| AX-157721426 | 8 | 78.661 | KV452918.1 | 761856 | 7-scf00181 | 7 |
| AX-157724900 | 8 | 78.661 | KV452918.1 | 764258 | 7-scf00181 | 7 |

|              |   |        |            |        |            |   |
|--------------|---|--------|------------|--------|------------|---|
| AX-158061297 | 8 | 78.661 | KV452918.1 | 765395 | 7-scf00181 | 7 |
| AX-158061299 | 8 | 78.661 | KV452918.1 | 765918 | 7-scf00181 | 7 |
| AX-158061300 | 8 | 78.661 | KV452918.1 | 766390 | 7-scf00181 | 7 |
| AX-158061345 | 8 | 78.661 | KV452918.1 | 809140 | 7-scf00181 | 7 |
| AX-158061303 | 8 | 78.721 | KV452918.1 | 767251 | 7-scf00181 | 7 |
| AX-158061308 | 8 | 78.77  | KV452918.1 | 772061 | 7-scf00181 | 7 |
| AX-158061126 | 8 | 78.88  | KV452918.1 | 618138 | 7-scf00181 | 7 |
| AX-157720760 | 8 | 78.88  | KV452918.1 | 733545 | 7-scf00181 | 7 |
| AX-158061306 | 8 | 78.88  | KV452918.1 | 769557 | 7-scf00181 | 7 |
| AX-158061311 | 8 | 78.88  | KV452918.1 | 777417 | 7-scf00181 | 7 |
| AX-158061322 | 8 | 78.88  | KV452918.1 | 785563 | 7-scf00181 | 7 |
| AX-158061324 | 8 | 78.88  | KV452918.1 | 786406 | 7-scf00181 | 7 |
| AX-157747302 | 8 | 78.88  | KV452918.1 | 787168 | 7-scf00181 | 7 |
| AX-158061325 | 8 | 78.88  | KV452918.1 | 787211 | 7-scf00181 | 7 |
| AX-158061328 | 8 | 78.88  | KV452918.1 | 788739 | 7-scf00181 | 7 |
| AX-158061332 | 8 | 78.88  | KV452918.1 | 789921 | 7-scf00181 | 7 |
| AX-158061333 | 8 | 78.88  | KV452918.1 | 790304 | 7-scf00181 | 7 |
| AX-158061335 | 8 | 78.88  | KV452918.1 | 792378 | 7-scf00181 | 7 |
| AX-158061340 | 8 | 78.88  | KV452918.1 | 799664 | 7-scf00181 | 7 |
| AX-158061342 | 8 | 78.88  | KV452918.1 | 801156 | 7-scf00181 | 7 |
| AX-157726611 | 8 | 78.88  | KV452918.1 | 801320 | 7-scf00181 | 7 |
| AX-157725974 | 8 | 78.88  | KV452918.1 | 804277 | 7-scf00181 | 7 |
| AX-158061343 | 8 | 78.88  | KV452918.1 | 806929 | 7-scf00181 | 7 |
| AX-158061348 | 8 | 78.88  | KV452918.1 | 811611 | 7-scf00181 | 7 |
| AX-158061349 | 8 | 78.88  | KV452918.1 | 812428 | 7-scf00181 | 7 |
| AX-158061350 | 8 | 78.88  | KV452918.1 | 813272 | 7-scf00181 | 7 |
| AX-158061353 | 8 | 78.88  | KV452918.1 | 816924 | 7-scf00181 | 7 |
| AX-157823485 | 8 | 78.88  | KV452918.1 | 818953 | 7-scf00181 | 7 |
| AX-158061354 | 8 | 78.88  | KV452918.1 | 820874 | 7-scf00181 | 7 |
| AX-157752036 | 8 | 78.88  | KV452918.1 | 822012 | 7-scf00181 | 7 |
| AX-158061356 | 8 | 78.88  | KV452918.1 | 822868 | 7-scf00181 | 7 |
| AX-158061367 | 8 | 78.88  | KV452918.1 | 825813 | 7-scf00181 | 7 |
| AX-157823487 | 8 | 78.88  | KV452918.1 | 829410 | 7-scf00181 | 7 |
| AX-157750943 | 8 | 78.88  | KV452918.1 | 830259 | 7-scf00181 | 7 |
| AX-158061374 | 8 | 78.88  | KV452918.1 | 831161 | 7-scf00181 | 7 |
| AX-158061375 | 8 | 78.88  | KV452918.1 | 831731 | 7-scf00181 | 7 |
| AX-158061377 | 8 | 78.88  | KV452918.1 | 833426 | 7-scf00181 | 7 |
| AX-158061378 | 8 | 78.88  | KV452918.1 | 838615 | 7-scf00181 | 7 |
| AX-158061379 | 8 | 78.88  | KV452918.1 | 839311 | 7-scf00181 | 7 |
| AX-158061381 | 8 | 78.88  | KV452918.1 | 842263 | 7-scf00181 | 7 |
| AX-158061383 | 8 | 78.88  | KV452918.1 | 844650 | 7-scf00181 | 7 |
| AX-158061389 | 8 | 78.88  | KV452918.1 | 850997 | 7-scf00181 | 7 |
| AX-158409153 | 8 | 78.88  | KV452918.1 | 956795 | 7-scf00181 | 7 |
| AX-158061384 | 8 | 78.903 | KV452918.1 | 846968 | 7-scf00181 | 7 |
| AX-158061334 | 8 | 78.945 | KV452918.1 | 790996 | 7-scf00181 | 7 |
| AX-158061344 | 8 | 78.945 | KV452918.1 | 808802 | 7-scf00181 | 7 |
| AX-158061346 | 8 | 78.945 | KV452918.1 | 809457 | 7-scf00181 | 7 |
| AX-158061393 | 8 | 78.945 | KV452918.1 | 855379 | 7-scf00181 | 7 |
| AX-157870696 | 8 | 78.945 | KV452918.1 | 907798 | 7-scf00181 | 7 |
| AX-158061399 | 8 | 78.989 | KV452918.1 | 862546 | 7-scf00181 | 7 |
| AX-158061400 | 8 | 78.989 | KV452918.1 | 863587 | 7-scf00181 | 7 |

|              |   |        |            |         |            |   |
|--------------|---|--------|------------|---------|------------|---|
| AX-158061408 | 8 | 78.989 | KV452918.1 | 872747  | 7-scf00181 | 7 |
| AX-158061411 | 8 | 78.989 | KV452918.1 | 873566  | 7-scf00181 | 7 |
| AX-158061413 | 8 | 78.989 | KV452918.1 | 878603  | 7-scf00181 | 7 |
| AX-158061449 | 8 | 78.989 | KV452918.1 | 920025  | 7-scf00181 | 7 |
| AX-158061691 | 8 | 78.989 | KV452918.1 | 1188705 | 7-scf00181 | 7 |
| AX-158061719 | 8 | 78.989 | KV452918.1 | 1227786 | 7-scf00181 | 7 |
| AX-157876954 | 8 | 78.989 | KV452918.1 | 1236490 | 7-scf00181 | 7 |
| AX-158061753 | 8 | 78.989 | KV452918.1 | 1258806 | 7-scf00181 | 7 |
| AX-157772959 | 8 | 78.989 | KV452918.1 | 1265901 | 7-scf00181 | 7 |
| AX-158061412 | 8 | 79.098 | KV452918.1 | 874991  | 7-scf00181 | 7 |
| AX-158061414 | 8 | 79.098 | KV452918.1 | 878960  | 7-scf00181 | 7 |
| AX-158061418 | 8 | 79.098 | KV452918.1 | 882135  | 7-scf00181 | 7 |
| AX-158061419 | 8 | 79.098 | KV452918.1 | 885886  | 7-scf00181 | 7 |
| AX-158061420 | 8 | 79.098 | KV452918.1 | 890588  | 7-scf00181 | 7 |
| AX-158061421 | 8 | 79.098 | KV452918.1 | 891554  | 7-scf00181 | 7 |
| AX-158061422 | 8 | 79.098 | KV452918.1 | 891928  | 7-scf00181 | 7 |
| AX-158061427 | 8 | 79.176 | KV452918.1 | 897101  | 7-scf00181 | 7 |
| AX-158061293 | 8 | 79.207 | KV452918.1 | 759568  | 7-scf00181 | 7 |
| AX-157713925 | 8 | 79.207 | KV452918.1 | 824684  | 7-scf00181 | 7 |
| AX-158061417 | 8 | 79.207 | KV452918.1 | 880642  | 7-scf00181 | 7 |
| AX-158061430 | 8 | 79.207 | KV452918.1 | 899180  | 7-scf00181 | 7 |
| AX-158061432 | 8 | 79.207 | KV452918.1 | 901829  | 7-scf00181 | 7 |
| AX-157823489 | 8 | 79.207 | KV452918.1 | 903028  | 7-scf00181 | 7 |
| AX-158061435 | 8 | 79.262 | KV452918.1 | 905673  | 7-scf00181 | 7 |
| AX-158061361 | 8 | 79.316 | KV452918.1 | 823969  | 7-scf00181 | 7 |
| AX-158061440 | 8 | 79.316 | KV452918.1 | 908631  | 7-scf00181 | 7 |
| AX-158061442 | 8 | 79.316 | KV452918.1 | 909541  | 7-scf00181 | 7 |
| AX-158061445 | 8 | 79.48  | KV452918.1 | 915297  | 7-scf00181 | 7 |
| AX-158061446 | 8 | 79.48  | KV452918.1 | 915933  | 7-scf00181 | 7 |
| AX-157774403 | 8 | 79.48  | KV452918.1 | 916562  | 7-scf00181 | 7 |
| AX-157823490 | 8 | 79.48  | KV452918.1 | 918299  | 7-scf00181 | 7 |
| AX-158061450 | 8 | 79.48  | KV452918.1 | 920951  | 7-scf00181 | 7 |
| AX-158409151 | 8 | 79.543 | KV452918.1 | 923161  | 7-scf00181 | 7 |
| AX-158061456 | 8 | 79.588 | KV452918.1 | 928075  | 7-scf00181 | 7 |
| AX-157823491 | 8 | 79.644 | KV452918.1 | 929639  | 7-scf00181 | 7 |
| AX-157722803 | 8 | 79.644 | KV452918.1 | 930586  | 7-scf00181 | 7 |
| AX-158061458 | 8 | 79.644 | KV452918.1 | 931903  | 7-scf00181 | 7 |
| AX-158061460 | 8 | 79.644 | KV452918.1 | 933496  | 7-scf00181 | 7 |
| AX-158061463 | 8 | 79.644 | KV452918.1 | 936896  | 7-scf00181 | 7 |
| AX-158061466 | 8 | 79.644 | KV452918.1 | 941578  | 7-scf00181 | 7 |
| AX-158061471 | 8 | 79.644 | KV452918.1 | 946280  | 7-scf00181 | 7 |
| AX-158061472 | 8 | 79.644 | KV452918.1 | 947465  | 7-scf00181 | 7 |
| AX-158061474 | 8 | 79.644 | KV452918.1 | 948186  | 7-scf00181 | 7 |
| AX-158061477 | 8 | 79.644 | KV452918.1 | 951965  | 7-scf00181 | 7 |
| AX-158061475 | 8 | 79.753 | KV452918.1 | 951583  | 7-scf00181 | 7 |
| AX-158061479 | 8 | 79.753 | KV452918.1 | 952392  | 7-scf00181 | 7 |
| AX-157750934 | 8 | 79.753 | KV452918.1 | 955627  | 7-scf00181 | 7 |
| AX-158061484 | 8 | 79.753 | KV452918.1 | 959482  | 7-scf00181 | 7 |
| AX-157716041 | 8 | 79.753 | KV452918.1 | 961361  | 7-scf00181 | 7 |
| AX-158061492 | 8 | 79.805 | KV452918.1 | 968369  | 7-scf00181 | 7 |
| AX-158061503 | 8 | 79.805 | KV452918.1 | 980436  | 7-scf00181 | 7 |

|              |   |        |            |         |            |   |
|--------------|---|--------|------------|---------|------------|---|
| AX-158061495 | 8 | 79.863 | KV452918.1 | 971644  | 7-scf00181 | 7 |
| AX-158061496 | 8 | 79.863 | KV452918.1 | 972290  | 7-scf00181 | 7 |
| AX-158061497 | 8 | 79.863 | KV452918.1 | 974163  | 7-scf00181 | 7 |
| AX-158061498 | 8 | 79.863 | KV452918.1 | 975491  | 7-scf00181 | 7 |
| AX-158061502 | 8 | 80.017 | KV452918.1 | 978706  | 7-scf00181 | 7 |
| AX-158061506 | 8 | 80.19  | KV452918.1 | 981890  | 7-scf00181 | 7 |
| AX-158061516 | 8 | 80.191 | KV452918.1 | 987531  | 7-scf00181 | 7 |
| AX-158061525 | 8 | 80.191 | KV452918.1 | 999481  | 7-scf00181 | 7 |
| AX-158061531 | 8 | 80.224 | KV452918.1 | 1006685 | 7-scf00181 | 7 |
| AX-158061533 | 8 | 80.26  | KV452918.1 | 1009408 | 7-scf00181 | 7 |
| AX-158061469 | 8 | 80.3   | KV452918.1 | 945515  | 7-scf00181 | 7 |
| AX-157823493 | 8 | 80.3   | KV452918.1 | 950482  | 7-scf00181 | 7 |
| AX-158061535 | 8 | 80.3   | KV452918.1 | 1011075 | 7-scf00181 | 7 |
| AX-158061536 | 8 | 80.3   | KV452918.1 | 1011877 | 7-scf00181 | 7 |
| AX-157823495 | 8 | 80.3   | KV452918.1 | 1013705 | 7-scf00181 | 7 |
| AX-158061537 | 8 | 80.3   | KV452918.1 | 1015714 | 7-scf00181 | 7 |
| AX-158061540 | 8 | 80.628 | KV452918.1 | 1020998 | 7-scf00181 | 7 |
| AX-157746357 | 8 | 80.956 | KV452918.1 | 1019670 | 7-scf00181 | 7 |
| AX-158061558 | 8 | 80.956 | KV452918.1 | 1035762 | 7-scf00181 | 7 |
| AX-158061562 | 8 | 80.957 | KV452918.1 | 1038333 | 7-scf00181 | 7 |
| AX-158061566 | 8 | 80.957 | KV452918.1 | 1042042 | 7-scf00181 | 7 |
| AX-158061567 | 8 | 80.957 | KV452918.1 | 1043504 | 7-scf00181 | 7 |
| AX-158061570 | 8 | 80.957 | KV452918.1 | 1045686 | 7-scf00181 | 7 |
| AX-158061576 | 8 | 80.991 | KV452918.1 | 1052526 | 7-scf00181 | 7 |
| AX-158061585 | 8 | 81.021 | KV452918.1 | 1064459 | 7-scf00181 | 7 |
| AX-157823483 | 8 | 81.033 | KV452918.1 | 807520  | 7-scf00181 | 7 |
| AX-158061559 | 8 | 81.033 | KV452918.1 | 1036679 | 7-scf00181 | 7 |
| AX-158061587 | 8 | 81.033 | KV452918.1 | 1065701 | 7-scf00181 | 7 |
| AX-158061584 | 8 | 81.066 | KV452918.1 | 1062730 | 7-scf00181 | 7 |
| AX-158061589 | 8 | 81.066 | KV452918.1 | 1068020 | 7-scf00181 | 7 |
| AX-157726606 | 8 | 81.066 | KV452918.1 | 1076528 | 7-scf00181 | 7 |
| AX-158061593 | 8 | 81.066 | KV452918.1 | 1077289 | 7-scf00181 | 7 |
| AX-157699135 | 8 | 81.066 | KV452918.1 | 1077726 | 7-scf00181 | 7 |
| AX-158061595 | 8 | 81.067 | KV452918.1 | 1080062 | 7-scf00181 | 7 |
| AX-157823498 | 8 | 81.068 | KV452918.1 | 1080905 | 7-scf00181 | 7 |
| AX-158409155 | 8 | 81.228 | KV452918.1 | 1057970 | 7-scf00181 | 7 |
| AX-158061591 | 8 | 81.228 | KV452918.1 | 1073028 | 7-scf00181 | 7 |
| AX-157748934 | 8 | 81.228 | KV452918.1 | 1081633 | 7-scf00181 | 7 |
| AX-158061597 | 8 | 81.228 | KV452918.1 | 1082870 | 7-scf00181 | 7 |
| AX-158061602 | 8 | 81.229 | KV452918.1 | 1095260 | 7-scf00181 | 7 |
| AX-158061608 | 8 | 81.556 | KV452918.1 | 1099195 | 7-scf00181 | 7 |
| AX-158061600 | 8 | 81.557 | KV452918.1 | 1089544 | 7-scf00181 | 7 |
| AX-158061609 | 8 | 81.557 | KV452918.1 | 1100561 | 7-scf00181 | 7 |
| AX-158061617 | 8 | 81.557 | KV452918.1 | 1108681 | 7-scf00181 | 7 |
| AX-158061618 | 8 | 81.557 | KV452918.1 | 1109187 | 7-scf00181 | 7 |
| AX-158061622 | 8 | 81.557 | KV452918.1 | 1110221 | 7-scf00181 | 7 |
| AX-157714736 | 8 | 81.557 | KV452918.1 | 1111055 | 7-scf00181 | 7 |
| AX-158061627 | 8 | 81.665 | KV452918.1 | 1116500 | 7-scf00181 | 7 |
| AX-158061599 | 8 | 81.722 | KV452918.1 | 1087002 | 7-scf00181 | 7 |
| AX-158061610 | 8 | 81.722 | KV452918.1 | 1101771 | 7-scf00181 | 7 |
| AX-158061620 | 8 | 81.722 | KV452918.1 | 1109713 | 7-scf00181 | 7 |

|              |   |        |            |         |            |   |
|--------------|---|--------|------------|---------|------------|---|
| AX-158061626 | 8 | 81.722 | KV452918.1 | 1114170 | 7-scf00181 | 7 |
| AX-158061628 | 8 | 81.722 | KV452918.1 | 1118014 | 7-scf00181 | 7 |
| AX-158061630 | 8 | 81.722 | KV452918.1 | 1119128 | 7-scf00181 | 7 |
| AX-158061633 | 8 | 81.722 | KV452918.1 | 1124426 | 7-scf00181 | 7 |
| AX-158061634 | 8 | 81.722 | KV452918.1 | 1125188 | 7-scf00181 | 7 |
| AX-158061635 | 8 | 81.722 | KV452918.1 | 1127496 | 7-scf00181 | 7 |
| AX-158061638 | 8 | 81.722 | KV452918.1 | 1129104 | 7-scf00181 | 7 |
| AX-158061639 | 8 | 81.722 | KV452918.1 | 1130500 | 7-scf00181 | 7 |
| AX-158061641 | 8 | 81.722 | KV452918.1 | 1131337 | 7-scf00181 | 7 |
| AX-158061642 | 8 | 81.722 | KV452918.1 | 1132929 | 7-scf00181 | 7 |
| AX-158061645 | 8 | 81.722 | KV452918.1 | 1136970 | 7-scf00181 | 7 |
| AX-157885340 | 8 | 81.722 | KV452918.1 | 1144621 | 7-scf00181 | 7 |
| AX-158061651 | 8 | 81.831 | KV452918.1 | 1147916 | 7-scf00181 | 7 |
| AX-158061653 | 8 | 81.831 | KV452918.1 | 1148371 | 7-scf00181 | 7 |
| AX-158061657 | 8 | 81.831 | KV452918.1 | 1152464 | 7-scf00181 | 7 |
| AX-157743565 | 8 | 81.831 | KV452918.1 | 1153844 | 7-scf00181 | 7 |
| AX-157750379 | 8 | 81.831 | KV452918.1 | 1155170 | 7-scf00181 | 7 |
| AX-158061662 | 8 | 81.831 | KV452918.1 | 1160767 | 7-scf00181 | 7 |
| AX-158061665 | 8 | 81.831 | KV452918.1 | 1162801 | 7-scf00181 | 7 |
| AX-158061666 | 8 | 81.831 | KV452918.1 | 1163388 | 7-scf00181 | 7 |
| AX-158061668 | 8 | 81.831 | KV452918.1 | 1166737 | 7-scf00181 | 7 |
| AX-158061672 | 8 | 81.831 | KV452918.1 | 1173979 | 7-scf00181 | 7 |
| AX-158061673 | 8 | 81.831 | KV452918.1 | 1174837 | 7-scf00181 | 7 |
| AX-158061675 | 8 | 81.831 | KV452918.1 | 1175286 | 7-scf00181 | 7 |
| AX-158384162 | 8 | 81.831 | KV452918.1 | 1176365 | 7-scf00181 | 7 |
| AX-158406658 | 8 | 81.831 | KV452918.1 | 1184433 | 7-scf00181 | 7 |
| AX-158061678 | 8 | 82.063 | KV452918.1 | 1179401 | 7-scf00181 | 7 |
| AX-157752403 | 8 | 82.111 | KV452918.1 | 1182131 | 7-scf00181 | 7 |
| AX-158061679 | 8 | 82.163 | KV452918.1 | 1182584 | 7-scf00181 | 7 |
| AX-158061681 | 8 | 82.226 | KV452918.1 | 1183348 | 7-scf00181 | 7 |
| AX-158061683 | 8 | 82.227 | KV452918.1 | 1186050 | 7-scf00181 | 7 |
| AX-158061685 | 8 | 82.288 | KV452918.1 | 1186462 | 7-scf00181 | 7 |
| AX-158061694 | 8 | 82.706 | KV452918.1 | 1193139 | 7-scf00181 | 7 |
| AX-158061695 | 8 | 82.706 | KV452918.1 | 1194361 | 7-scf00181 | 7 |
| AX-157724468 | 8 | 82.706 | KV452918.1 | 1196893 | 7-scf00181 | 7 |
| AX-158061702 | 8 | 82.706 | KV452918.1 | 1202512 | 7-scf00181 | 7 |
| AX-158061718 | 8 | 82.706 | KV452918.1 | 1227332 | 7-scf00181 | 7 |
| AX-158061737 | 8 | 82.706 | KV452918.1 | 1244714 | 7-scf00181 | 7 |
| AX-158061704 | 8 | 82.712 | KV452918.1 | 1204040 | 7-scf00181 | 7 |
| AX-157823500 | 8 | 82.717 | KV452918.1 | 1204611 | 7-scf00181 | 7 |
| AX-157775199 | 8 | 82.723 | KV452918.1 | 1205960 | 7-scf00181 | 7 |
| AX-158061709 | 8 | 82.731 | KV452918.1 | 1207476 | 7-scf00181 | 7 |
| AX-158061713 | 8 | 82.731 | KV452918.1 | 1214529 | 7-scf00181 | 7 |
| AX-158061712 | 8 | 82.741 | KV452918.1 | 1212369 | 7-scf00181 | 7 |
| AX-158061715 | 8 | 82.755 | KV452918.1 | 1215259 | 7-scf00181 | 7 |
| AX-157749890 | 8 | 82.771 | KV452918.1 | 1219368 | 7-scf00181 | 7 |
| AX-158061716 | 8 | 82.782 | KV452918.1 | 1223315 | 7-scf00181 | 7 |
| AX-158061717 | 8 | 82.791 | KV452918.1 | 1223900 | 7-scf00181 | 7 |
| AX-157742772 | 8 | 82.803 | KV452918.1 | 1233178 | 7-scf00181 | 7 |
| AX-158061708 | 8 | 82.815 | KV452918.1 | 1206889 | 7-scf00181 | 7 |
| AX-158061724 | 8 | 82.815 | KV452918.1 | 1232777 | 7-scf00181 | 7 |

|              |   |        |            |         |            |   |
|--------------|---|--------|------------|---------|------------|---|
| AX-158061732 | 8 | 82.815 | KV452918.1 | 1240718 | 7-scf00181 | 7 |
| AX-158061733 | 8 | 82.815 | KV452918.1 | 1242672 | 7-scf00181 | 7 |
| AX-158061734 | 8 | 82.815 | KV452918.1 | 1243495 | 7-scf00181 | 7 |
| AX-157718534 | 8 | 82.815 | KV452918.1 | 1247054 | 7-scf00181 | 7 |
| AX-158061739 | 8 | 82.815 | KV452918.1 | 1247610 | 7-scf00181 | 7 |
| AX-158061740 | 8 | 82.815 | KV452918.1 | 1248183 | 7-scf00181 | 7 |
| AX-158061742 | 8 | 82.815 | KV452918.1 | 1248776 | 7-scf00181 | 7 |
| AX-158061743 | 8 | 82.815 | KV452918.1 | 1250960 | 7-scf00181 | 7 |
| AX-158061745 | 8 | 82.815 | KV452918.1 | 1251582 | 7-scf00181 | 7 |
| AX-158061746 | 8 | 82.815 | KV452918.1 | 1252299 | 7-scf00181 | 7 |
| AX-158061748 | 8 | 82.857 | KV452918.1 | 1254419 | 7-scf00181 | 7 |
| AX-158061749 | 8 | 82.889 | KV452918.1 | 1255494 | 7-scf00181 | 7 |
| AX-158061750 | 8 | 82.924 | KV452918.1 | 1256609 | 7-scf00181 | 7 |
| AX-158061757 | 8 | 82.924 | KV452918.1 | 1261248 | 7-scf00181 | 7 |
| AX-158061762 | 8 | 83.174 | KV452918.1 | 1270289 | 7-scf00181 | 7 |
| AX-158061763 | 8 | 83.174 | KV452918.1 | 1271012 | 7-scf00181 | 7 |
| AX-158061768 | 8 | 83.174 | KV452918.1 | 1276448 | 7-scf00181 | 7 |
| AX-158061772 | 8 | 83.18  | KV452918.1 | 1280488 | 7-scf00181 | 7 |
| AX-158061774 | 8 | 83.184 | KV452918.1 | 1280949 | 7-scf00181 | 7 |
| AX-158061776 | 8 | 83.408 | KV452918.1 | 1282034 | 7-scf00181 | 7 |
| AX-158061780 | 8 | 83.635 | KV452918.1 | 1285722 | 7-scf00181 | 7 |
| AX-157757939 | 8 | 83.635 | KV452918.1 | 1288963 | 7-scf00181 | 7 |
| AX-158061781 | 8 | 83.639 | KV452918.1 | 1286736 | 7-scf00181 | 7 |
| AX-158061784 | 8 | 83.642 | KV452918.1 | 1288484 | 7-scf00181 | 7 |
| AX-158061793 | 8 | 83.692 | KV452918.1 | 1296086 | 7-scf00181 | 7 |
| AX-158061794 | 8 | 83.799 | KV452918.1 | 1296848 | 7-scf00181 | 7 |
| AX-158061798 | 8 | 83.799 | KV452918.1 | 1299658 | 7-scf00181 | 7 |
| AX-157757817 | 8 | 83.799 | KV452918.1 | 1304560 | 7-scf00181 | 7 |
| AX-157876955 | 8 | 83.799 | KV452918.1 | 1305689 | 7-scf00181 | 7 |
| AX-158061805 | 8 | 83.799 | KV452918.1 | 1306288 | 7-scf00181 | 7 |
| AX-158061813 | 8 | 83.799 | KV452918.1 | 1308441 | 7-scf00181 | 7 |
| AX-158061816 | 8 | 83.799 | KV452918.1 | 1310272 | 7-scf00181 | 7 |
| AX-158061817 | 8 | 83.799 | KV452918.1 | 1310382 | 7-scf00181 | 7 |
| AX-158061829 | 8 | 84.017 | KV452918.1 | 1316900 | 7-scf00181 | 7 |
| AX-158061830 | 8 | 84.017 | KV452918.1 | 1317774 | 7-scf00181 | 7 |
| AX-158061833 | 8 | 84.017 | KV452918.1 | 1318832 | 7-scf00181 | 7 |
| AX-158061836 | 8 | 84.017 | KV452918.1 | 1321268 | 7-scf00181 | 7 |
| AX-157726621 | 8 | 84.017 | KV452918.1 | 1322091 | 7-scf00181 | 7 |
| AX-158061840 | 8 | 84.017 | KV452918.1 | 1324293 | 7-scf00181 | 7 |
| AX-158061789 | 8 | 84.196 | KV452918.1 | 1292752 | 7-scf00181 | 7 |
| AX-158061838 | 8 | 84.196 | KV452918.1 | 1323194 | 7-scf00181 | 7 |
| AX-158061843 | 8 | 84.399 | KV452918.1 | 1325766 | 7-scf00181 | 7 |
| AX-158061847 | 8 | 84.4   | KV452918.1 | 1330193 | 7-scf00181 | 7 |
| AX-158061849 | 8 | 84.4   | KV452918.1 | 1332020 | 7-scf00181 | 7 |
| AX-158061852 | 8 | 84.781 | KV452918.1 | 1335267 | 7-scf00181 | 7 |
| AX-158409162 | 8 | 84.781 | KV452918.1 | 1348090 | 7-scf00181 | 7 |
| AX-158061853 | 8 | 84.783 | KV452918.1 | 1335963 | 7-scf00181 | 7 |
| AX-158061854 | 8 | 84.783 | KV452918.1 | 1336901 | 7-scf00181 | 7 |
| AX-158061855 | 8 | 84.783 | KV452918.1 | 1340577 | 7-scf00181 | 7 |
| AX-158061878 | 8 | 84.783 | KV452918.1 | 1366967 | 7-scf00181 | 7 |
| AX-158061856 | 8 | 84.848 | KV452918.1 | 1341539 | 7-scf00181 | 7 |

|              |   |        |            |         |            |   |
|--------------|---|--------|------------|---------|------------|---|
| AX-158061858 | 8 | 84.935 | KV452918.1 | 1343166 | 7-scf00181 | 7 |
| AX-158061862 | 8 | 85.002 | KV452918.1 | 1346611 | 7-scf00181 | 7 |
| AX-158061863 | 8 | 85.002 | KV452918.1 | 1346947 | 7-scf00181 | 7 |
| AX-157710779 | 8 | 85.002 | KV452918.1 | 1347590 | 7-scf00181 | 7 |
| AX-157876960 | 8 | 85.002 | KV452918.1 | 1349926 | 7-scf00181 | 7 |
| AX-157702417 | 8 | 85.002 | KV452918.1 | 1351502 | 7-scf00181 | 7 |
| AX-158061869 | 8 | 85.002 | KV452918.1 | 1355631 | 7-scf00181 | 7 |
| AX-158061871 | 8 | 85.112 | KV452918.1 | 1356135 | 7-scf00181 | 7 |
| AX-158061875 | 8 | 85.195 | KV452918.1 | 1361461 | 7-scf00181 | 7 |
| AX-158061876 | 8 | 85.292 | KV452918.1 | 1364131 | 7-scf00181 | 7 |
| AX-158061877 | 8 | 85.398 | KV452918.1 | 1365078 | 7-scf00181 | 7 |
| AX-157773942 | 8 | 85.513 | KV452918.1 | 1366335 | 7-scf00181 | 7 |
| AX-158061879 | 8 | 85.7   | KV452918.1 | 1368362 | 7-scf00181 | 7 |
| AX-158061883 | 8 | 85.705 | KV452918.1 | 1372558 | 7-scf00181 | 7 |
| AX-158061887 | 8 | 85.705 | KV452918.1 | 1376066 | 7-scf00181 | 7 |
| AX-158061890 | 8 | 85.705 | KV452918.1 | 1379489 | 7-scf00181 | 7 |
| AX-158061891 | 8 | 85.706 | KV452918.1 | 1380856 | 7-scf00181 | 7 |
| AX-158061893 | 8 | 85.987 | KV452918.1 | 1386280 | 7-scf00181 | 7 |
| AX-158061895 | 8 | 85.987 | KV452918.1 | 1388149 | 7-scf00181 | 7 |
| AX-158061896 | 8 | 85.987 | KV452918.1 | 1389507 | 7-scf00181 | 7 |
| AX-158061899 | 8 | 86.115 | KV452918.1 | 1390660 | 7-scf00181 | 7 |
| AX-158061902 | 8 | 86.115 | KV452918.1 | 1392890 | 7-scf00181 | 7 |
| AX-158061904 | 8 | 86.116 | KV452918.1 | 1393306 | 7-scf00181 | 7 |
| AX-158062035 | 8 | 86.116 | KV452918.1 | 1515186 | 7-scf00181 | 7 |
| AX-158061908 | 8 | 86.12  | KV452918.1 | 1397762 | 7-scf00181 | 7 |
| AX-158061913 | 8 | 86.351 | KV452918.1 | 1404136 | 7-scf00181 | 7 |
| AX-158061917 | 8 | 86.593 | KV452918.1 | 1414288 | 7-scf00181 | 7 |
| AX-158061922 | 8 | 86.593 | KV452918.1 | 1418855 | 7-scf00181 | 7 |
| AX-158061910 | 8 | 86.752 | KV452918.1 | 1400004 | 7-scf00181 | 7 |
| AX-157714616 | 8 | 86.752 | KV452918.1 | 1401736 | 7-scf00181 | 7 |
| AX-158061920 | 8 | 86.752 | KV452918.1 | 1418088 | 7-scf00181 | 7 |
| AX-158061928 | 8 | 86.752 | KV452918.1 | 1423758 | 7-scf00181 | 7 |
| AX-158061930 | 8 | 86.752 | KV452918.1 | 1426242 | 7-scf00181 | 7 |
| AX-158061933 | 8 | 86.752 | KV452918.1 | 1428066 | 7-scf00181 | 7 |
| AX-158061936 | 8 | 86.752 | KV452918.1 | 1431441 | 7-scf00181 | 7 |
| AX-158061938 | 8 | 86.752 | KV452918.1 | 1434148 | 7-scf00181 | 7 |
| AX-158061939 | 8 | 86.752 | KV452918.1 | 1434543 | 7-scf00181 | 7 |
| AX-158061941 | 8 | 86.752 | KV452918.1 | 1435359 | 7-scf00181 | 7 |
| AX-158061942 | 8 | 86.752 | KV452918.1 | 1436439 | 7-scf00181 | 7 |
| AX-158061944 | 8 | 86.752 | KV452918.1 | 1436871 | 7-scf00181 | 7 |
| AX-158062084 | 8 | 86.752 | KV452918.1 | 1570172 | 7-scf00181 | 7 |
| AX-158062094 | 8 | 86.752 | KV452918.1 | 1576515 | 7-scf00181 | 7 |
| AX-158061947 | 8 | 86.862 | KV452918.1 | 1439183 | 7-scf00181 | 7 |
| AX-158061949 | 8 | 86.862 | KV452918.1 | 1443151 | 7-scf00181 | 7 |
| AX-158061950 | 8 | 86.862 | KV452918.1 | 1444235 | 7-scf00181 | 7 |
| AX-158061957 | 8 | 86.862 | KV452918.1 | 1448122 | 7-scf00181 | 7 |
| AX-157823504 | 8 | 87.08  | KV452918.1 | 1442088 | 7-scf00181 | 7 |
| AX-157772720 | 8 | 87.08  | KV452918.1 | 1455334 | 7-scf00181 | 7 |
| AX-158061966 | 8 | 87.08  | KV452918.1 | 1463206 | 7-scf00181 | 7 |
| AX-158061974 | 8 | 87.08  | KV452918.1 | 1467178 | 7-scf00181 | 7 |
| AX-158061983 | 8 | 87.08  | KV452918.1 | 1473255 | 7-scf00181 | 7 |

|              |   |        |            |         |            |   |
|--------------|---|--------|------------|---------|------------|---|
| AX-158061989 | 8 | 87.08  | KV452918.1 | 1482727 | 7-scf00181 | 7 |
| AX-158061992 | 8 | 87.08  | KV452918.1 | 1484566 | 7-scf00181 | 7 |
| AX-158061995 | 8 | 87.08  | KV452918.1 | 1487383 | 7-scf00181 | 7 |
| AX-158062003 | 8 | 87.08  | KV452918.1 | 1491609 | 7-scf00181 | 7 |
| AX-158061924 | 8 | 87.298 | KV452918.1 | 1420895 | 7-scf00181 | 7 |
| AX-158061990 | 8 | 87.298 | KV452918.1 | 1483275 | 7-scf00181 | 7 |
| AX-158061998 | 8 | 87.298 | KV452918.1 | 1488439 | 7-scf00181 | 7 |
| AX-158062007 | 8 | 87.298 | KV452918.1 | 1493685 | 7-scf00181 | 7 |
| AX-158062011 | 8 | 87.298 | KV452918.1 | 1495338 | 7-scf00181 | 7 |
| AX-158062012 | 8 | 87.298 | KV452918.1 | 1495643 | 7-scf00181 | 7 |
| AX-158062016 | 8 | 87.298 | KV452918.1 | 1499620 | 7-scf00181 | 7 |
| AX-158062021 | 8 | 87.298 | KV452918.1 | 1502170 | 7-scf00181 | 7 |
| AX-158062023 | 8 | 87.298 | KV452918.1 | 1502651 | 7-scf00181 | 7 |
| AX-158062024 | 8 | 87.298 | KV452918.1 | 1503727 | 7-scf00181 | 7 |
| AX-158062025 | 8 | 87.298 | KV452918.1 | 1504097 | 7-scf00181 | 7 |
| AX-158062027 | 8 | 87.298 | KV452918.1 | 1505825 | 7-scf00181 | 7 |
| AX-158062029 | 8 | 87.298 | KV452918.1 | 1506682 | 7-scf00181 | 7 |
| AX-158062031 | 8 | 87.298 | KV452918.1 | 1506940 | 7-scf00181 | 7 |
| AX-158062034 | 8 | 87.298 | KV452918.1 | 1513933 | 7-scf00181 | 7 |
| AX-158062039 | 8 | 87.298 | KV452918.1 | 1520918 | 7-scf00181 | 7 |
| AX-157752800 | 8 | 87.298 | KV452918.1 | 1522632 | 7-scf00181 | 7 |
| AX-158062043 | 8 | 87.298 | KV452918.1 | 1524857 | 7-scf00181 | 7 |
| AX-158062045 | 8 | 87.298 | KV452918.1 | 1526875 | 7-scf00181 | 7 |
| AX-158062050 | 8 | 87.369 | KV452918.1 | 1529208 | 7-scf00181 | 7 |
| AX-158062051 | 8 | 87.407 | KV452918.1 | 1530153 | 7-scf00181 | 7 |
| AX-158062054 | 8 | 87.407 | KV452918.1 | 1534996 | 7-scf00181 | 7 |
| AX-158062055 | 8 | 87.407 | KV452918.1 | 1535448 | 7-scf00181 | 7 |
| AX-157741140 | 8 | 87.407 | KV452918.1 | 1536867 | 7-scf00181 | 7 |
| AX-158062058 | 8 | 87.407 | KV452918.1 | 1539629 | 7-scf00181 | 7 |
| AX-158062060 | 8 | 87.407 | KV452918.1 | 1540265 | 7-scf00181 | 7 |
| AX-158062062 | 8 | 87.407 | KV452918.1 | 1542031 | 7-scf00181 | 7 |
| AX-158062067 | 8 | 87.407 | KV452918.1 | 1548204 | 7-scf00181 | 7 |
| AX-158062156 | 8 | 87.407 | KV452918.1 | 1675054 | 7-scf00181 | 7 |
| AX-158062069 | 8 | 87.517 | KV452918.1 | 1551180 | 7-scf00181 | 7 |
| AX-158062071 | 8 | 87.517 | KV452918.1 | 1554431 | 7-scf00181 | 7 |
| AX-157823506 | 8 | 87.543 | KV452918.1 | 1556848 | 7-scf00181 | 7 |
| AX-157717322 | 8 | 87.569 | KV452918.1 | 1557627 | 7-scf00181 | 7 |
| AX-158062074 | 8 | 87.597 | KV452918.1 | 1559121 | 7-scf00181 | 7 |
| AX-157714307 | 8 | 87.626 | KV452918.1 | 1562614 | 7-scf00181 | 7 |
| AX-158062076 | 8 | 87.689 | KV452918.1 | 1563253 | 7-scf00181 | 7 |
| AX-158061935 | 8 | 87.735 | KV452918.1 | 1431054 | 7-scf00181 | 7 |
| AX-158062072 | 8 | 87.735 | KV452918.1 | 1555945 | 7-scf00181 | 7 |
| AX-157823509 | 8 | 87.735 | KV452918.1 | 1563982 | 7-scf00181 | 7 |
| AX-158062077 | 8 | 87.735 | KV452918.1 | 1564092 | 7-scf00181 | 7 |
| AX-157823510 | 8 | 87.735 | KV452918.1 | 1565629 | 7-scf00181 | 7 |
| AX-158062080 | 8 | 87.735 | KV452918.1 | 1566437 | 7-scf00181 | 7 |
| AX-157823511 | 8 | 87.735 | KV452918.1 | 1566776 | 7-scf00181 | 7 |
| AX-158062082 | 8 | 87.735 | KV452918.1 | 1567535 | 7-scf00181 | 7 |
| AX-157823512 | 8 | 87.735 | KV452918.1 | 1572129 | 7-scf00181 | 7 |
| AX-157823513 | 8 | 87.735 | KV452918.1 | 1572182 | 7-scf00181 | 7 |
| AX-158062087 | 8 | 87.735 | KV452918.1 | 1573093 | 7-scf00181 | 7 |



|              |   |        |             |         |                |    |
|--------------|---|--------|-------------|---------|----------------|----|
| AX-158062088 | 8 | 87.735 | KV452918.1  | 1574472 | 7-scf00181     | 7  |
| AX-158062091 | 8 | 87.735 | KV452918.1  | 1574999 | 7-scf00181     | 7  |
| AX-158062092 | 8 | 87.735 | KV452918.1  | 1575837 | 7-scf00181     | 7  |
| AX-157775747 | 8 | 87.735 | KV452918.1  | 1704719 | 7-scf00181     | 7  |
| AX-158409165 | 8 | 87.838 | KV452918.1  | 1578835 | 7-scf00181     | 7  |
| AX-158061960 | 8 | 87.954 | KV452918.1  | 1456229 | 7-scf00181     | 7  |
| AX-158061993 | 8 | 87.954 | KV452918.1  | 1485676 | 7-scf00181     | 7  |
| AX-157876961 | 8 | 87.954 | KV452918.1  | 1513638 | 7-scf00181     | 7  |
| AX-158062036 | 8 | 87.954 | KV452918.1  | 1515862 | 7-scf00181     | 7  |
| AX-157865579 | 8 | 87.954 | KV452918.1  | 1579071 | 7-scf00181     | 7  |
| AX-158062102 | 8 | 87.954 | KV452918.1  | 1584237 | 7-scf00181     | 7  |
| AX-158062103 | 8 | 87.954 | KV452918.1  | 1585488 | 7-scf00181     | 7  |
| AX-158062107 | 8 | 87.954 | KV452918.1  | 1587484 | 7-scf00181     | 7  |
| AX-157823514 | 8 | 87.954 | KV452918.1  | 1589315 | 7-scf00181     | 7  |
| AX-158062130 | 8 | 87.954 | KV452918.1  | 1619474 | 7-scf00181     | 7  |
| AX-157694762 | 8 | 87.954 | FI868210.1  | 93      | IORI212 lctalu | UN |
| AX-157823515 | 8 | 87.955 | KV452918.1  | 1589412 | 7-scf00181     | 7  |
| AX-158062111 | 8 | 88.099 | KV452918.1  | 1592110 | 7-scf00181     | 7  |
| AX-158062115 | 8 | 88.099 | KV452918.1  | 1598581 | 7-scf00181     | 7  |
| AX-158062117 | 8 | 88.1   | KV452918.1  | 1599255 | 7-scf00181     | 7  |
| AX-157749854 | 8 | 88.25  | KV452918.1  | 1613523 | 7-scf00181     | 7  |
| AX-158062126 | 8 | 88.389 | KV452918.1  | 1615769 | 7-scf00181     | 7  |
| AX-158062135 | 8 | 88.391 | KV452918.1  | 1630287 | 7-scf00181     | 7  |
| AX-158062141 | 8 | 88.391 | KV452918.1  | 1657303 | 7-scf00181     | 7  |
| AX-157740946 | 8 | 88.391 | KV452918.1  | 1658809 | 7-scf00181     | 7  |
| AX-158062147 | 8 | 88.391 | KV452918.1  | 1661714 | 7-scf00181     | 7  |
| AX-158062149 | 8 | 88.391 | KV452918.1  | 1668609 | 7-scf00181     | 7  |
| AX-157744821 | 8 | 88.391 | KV452918.1  | 1670215 | 7-scf00181     | 7  |
| AX-158062162 | 8 | 88.421 | KV452918.1  | 1685119 | 7-scf00181     | 7  |
| AX-158062119 | 8 | 88.436 | KV452918.1  | 1600651 | 7-scf00181     | 7  |
| AX-158062153 | 8 | 88.436 | KV452918.1  | 1671918 | 7-scf00181     | 7  |
| AX-158062170 | 8 | 88.436 | KV452918.1  | 1688509 | 7-scf00181     | 7  |
| AX-157683134 | 8 | 88.436 | KV452918.1  | 1720690 | 7-scf00181     | 7  |
| AX-157743181 | 8 | 88.436 | KV452922.1  | 43903   | 7-scf00185     | 7  |
| AX-157682056 | 8 | 88.436 | KV452920.1  | 589     | 7-scf01201     | 7  |
| AX-157688066 | 8 | 88.436 | KV452920.1  | 2922    | 7-scf01201     | 7  |
| AX-157689322 | 8 | 88.436 | 3ML01029134 | 496     | scf04754_1     | UN |
| AX-158062178 | 8 | 88.437 | KV452918.1  | 1691094 | 7-scf00181     | 7  |
| AX-158062183 | 8 | 88.451 | KV452918.1  | 1693111 | 7-scf00181     | 7  |
| AX-157755239 | 8 | 88.457 | KV452918.1  | 1693352 | 7-scf00181     | 7  |
| AX-158062194 | 8 | 88.462 | KV452918.1  | 1701054 | 7-scf00181     | 7  |
| AX-158062188 | 8 | 88.469 | KV452918.1  | 1696939 | 7-scf00181     | 7  |
| AX-157683124 | 8 | 88.469 | KV452918.1  | 1713158 | 7-scf00181     | 7  |
| AX-157683125 | 8 | 88.473 | KV452918.1  | 1713485 | 7-scf00181     | 7  |
| AX-157683129 | 8 | 88.489 | KV452918.1  | 1716260 | 7-scf00181     | 7  |
| AX-157748836 | 8 | 88.489 | KV452922.1  | 32050   | 7-scf00185     | 7  |
| AX-158061962 | 8 | 88.5   | KV452918.1  | 1456832 | 7-scf00181     | 7  |
| AX-158062165 | 8 | 88.5   | KV452918.1  | 1685939 | 7-scf00181     | 7  |
| AX-158062169 | 8 | 88.5   | KV452918.1  | 1686859 | 7-scf00181     | 7  |
| AX-158062176 | 8 | 88.5   | KV452918.1  | 1690215 | 7-scf00181     | 7  |
| AX-158062181 | 8 | 88.5   | KV452918.1  | 1693028 | 7-scf00181     | 7  |

|              |   |        |             |         |            |    |
|--------------|---|--------|-------------|---------|------------|----|
| AX-158062186 | 8 | 88.5   | KV452918.1  | 1696157 | 7-scf00181 | 7  |
| AX-157683122 | 8 | 88.5   | KV452918.1  | 1711729 | 7-scf00181 | 7  |
| AX-157683127 | 8 | 88.5   | KV452918.1  | 1714825 | 7-scf00181 | 7  |
| AX-157683137 | 8 | 88.5   | KV452918.1  | 1732697 | 7-scf00181 | 7  |
| AX-158062387 | 8 | 88.5   | KV452922.1  | 17468   | 7-scf00185 | 7  |
| AX-158062390 | 8 | 88.5   | KV452922.1  | 19770   | 7-scf00185 | 7  |
| AX-157823546 | 8 | 88.5   | KV452922.1  | 22357   | 7-scf00185 | 7  |
| AX-157742951 | 8 | 88.5   | KV452922.1  | 22560   | 7-scf00185 | 7  |
| AX-158062400 | 8 | 88.5   | KV452922.1  | 27805   | 7-scf00185 | 7  |
| AX-158062408 | 8 | 88.5   | KV452922.1  | 34008   | 7-scf00185 | 7  |
| AX-158062409 | 8 | 88.5   | KV452922.1  | 37287   | 7-scf00185 | 7  |
| AX-158062412 | 8 | 88.5   | KV452922.1  | 41454   | 7-scf00185 | 7  |
| AX-158062413 | 8 | 88.5   | KV452922.1  | 43555   | 7-scf00185 | 7  |
| AX-158409185 | 8 | 88.5   | KV452922.1  | 43816   | 7-scf00185 | 7  |
| AX-158409186 | 8 | 88.5   | KV452922.1  | 44106   | 7-scf00185 | 7  |
| AX-158062418 | 8 | 88.5   | KV452922.1  | 51506   | 7-scf00185 | 7  |
| AX-157688505 | 8 | 88.5   | 3ML01026336 | 881     | scf01931_1 | UN |
| AX-157688700 | 8 | 88.5   | 3ML01026797 | 330     | scf02399_1 | UN |
| AX-157688979 | 8 | 88.5   | 3ML01027710 | 445     | scf03316_1 | UN |
| AX-157680382 | 8 | 88.5   | 3ML01029134 | 275     | scf04754_1 | UN |
| AX-158062189 | 8 | 88.557 | KV452918.1  | 1698938 | 7-scf00181 | 7  |
| AX-158062395 | 8 | 88.557 | KV452922.1  | 23313   | 7-scf00185 | 7  |
| AX-158062419 | 8 | 88.557 | KV452922.1  | 52130   | 7-scf00185 | 7  |
| AX-158062402 | 8 | 88.664 | KV452922.1  | 28299   | 7-scf00185 | 7  |
| AX-158062422 | 8 | 88.664 | KV452922.1  | 53074   | 7-scf00185 | 7  |
| AX-158062425 | 8 | 88.664 | KV452922.1  | 55020   | 7-scf00185 | 7  |
| AX-157823522 | 8 | 88.828 | KV452918.1  | 1682074 | 7-scf00181 | 7  |
| AX-158062179 | 8 | 88.828 | KV452918.1  | 1692806 | 7-scf00181 | 7  |
| AX-157683131 | 8 | 88.828 | KV452918.1  | 1717476 | 7-scf00181 | 7  |
| AX-157683132 | 8 | 88.828 | KV452918.1  | 1718945 | 7-scf00181 | 7  |
| AX-158062392 | 8 | 88.828 | KV452922.1  | 20947   | 7-scf00185 | 7  |
| AX-158062396 | 8 | 88.828 | KV452922.1  | 25036   | 7-scf00185 | 7  |
| AX-158062399 | 8 | 88.828 | KV452922.1  | 26004   | 7-scf00185 | 7  |
| AX-157865583 | 8 | 88.828 | KV452922.1  | 31551   | 7-scf00185 | 7  |
| AX-157772557 | 8 | 88.828 | KV452922.1  | 35410   | 7-scf00185 | 7  |
| AX-158062411 | 8 | 88.828 | KV452922.1  | 38361   | 7-scf00185 | 7  |
| AX-158062424 | 8 | 88.828 | KV452922.1  | 54800   | 7-scf00185 | 7  |
| AX-158062426 | 8 | 88.828 | KV452922.1  | 58533   | 7-scf00185 | 7  |
| AX-158062429 | 8 | 88.828 | KV452922.1  | 59640   | 7-scf00185 | 7  |
| AX-157823548 | 8 | 88.828 | KV452922.1  | 61622   | 7-scf00185 | 7  |
| AX-157823549 | 8 | 88.828 | KV452922.1  | 65034   | 7-scf00185 | 7  |
| AX-158062435 | 8 | 88.828 | KV452922.1  | 67417   | 7-scf00185 | 7  |
| AX-158062438 | 8 | 88.828 | KV452922.1  | 69503   | 7-scf00185 | 7  |
| AX-158062440 | 8 | 88.828 | KV452922.1  | 70307   | 7-scf00185 | 7  |
| AX-158062443 | 8 | 88.828 | KV452922.1  | 72102   | 7-scf00185 | 7  |
| AX-158062446 | 8 | 88.828 | KV452922.1  | 74210   | 7-scf00185 | 7  |
| AX-158062447 | 8 | 88.828 | KV452922.1  | 78326   | 7-scf00185 | 7  |
| AX-158062452 | 8 | 88.828 | KV452922.1  | 80503   | 7-scf00185 | 7  |
| AX-157823550 | 8 | 88.828 | KV452922.1  | 80905   | 7-scf00185 | 7  |
| AX-158062453 | 8 | 88.828 | KV452922.1  | 81127   | 7-scf00185 | 7  |
| AX-158062455 | 8 | 88.828 | KV452922.1  | 82054   | 7-scf00185 | 7  |

|              |   |        |             |        |            |    |
|--------------|---|--------|-------------|--------|------------|----|
| AX-158062465 | 8 | 88.828 | KV452922.1  | 85604  | 7-scf00185 | 7  |
| AX-158062469 | 8 | 88.828 | KV452922.1  | 90195  | 7-scf00185 | 7  |
| AX-158062473 | 8 | 88.828 | KV452922.1  | 91745  | 7-scf00185 | 7  |
| AX-158062502 | 8 | 88.828 | KV452922.1  | 108768 | 7-scf00185 | 7  |
| AX-157885354 | 8 | 88.828 | KV452922.1  | 118299 | 7-scf00185 | 7  |
| AX-158062512 | 8 | 88.828 | KV452922.1  | 122090 | 7-scf00185 | 7  |
| AX-157706452 | 8 | 88.828 | 3ML01032264 | 427    | scf07879_1 | UN |
| AX-158062463 | 8 | 89.047 | KV452922.1  | 85000  | 7-scf00185 | 7  |
| AX-158062468 | 8 | 89.047 | KV452922.1  | 88123  | 7-scf00185 | 7  |
| AX-158062483 | 8 | 89.047 | KV452922.1  | 96186  | 7-scf00185 | 7  |
| AX-158062484 | 8 | 89.047 | KV452922.1  | 97061  | 7-scf00185 | 7  |
| AX-158062486 | 8 | 89.047 | KV452922.1  | 97939  | 7-scf00185 | 7  |
| AX-158062490 | 8 | 89.047 | KV452922.1  | 99724  | 7-scf00185 | 7  |
| AX-158062491 | 8 | 89.047 | KV452922.1  | 100007 | 7-scf00185 | 7  |
| AX-158062493 | 8 | 89.047 | KV452922.1  | 100641 | 7-scf00185 | 7  |
| AX-158062496 | 8 | 89.047 | KV452922.1  | 101895 | 7-scf00185 | 7  |
| AX-157823552 | 8 | 89.047 | KV452922.1  | 102222 | 7-scf00185 | 7  |
| AX-157823553 | 8 | 89.047 | KV452922.1  | 102349 | 7-scf00185 | 7  |
| AX-158062497 | 8 | 89.047 | KV452922.1  | 102423 | 7-scf00185 | 7  |
| AX-158062476 | 8 | 89.156 | KV452922.1  | 94274  | 7-scf00185 | 7  |
| AX-158062488 | 8 | 89.156 | KV452922.1  | 99201  | 7-scf00185 | 7  |
| AX-158062501 | 8 | 89.156 | KV452922.1  | 105877 | 7-scf00185 | 7  |
| AX-157757484 | 8 | 89.156 | KV452922.1  | 107975 | 7-scf00185 | 7  |
| AX-158062504 | 8 | 89.156 | KV452922.1  | 110041 | 7-scf00185 | 7  |
| AX-158062508 | 8 | 89.156 | KV452922.1  | 117922 | 7-scf00185 | 7  |
| AX-158062511 | 8 | 89.156 | KV452922.1  | 120731 | 7-scf00185 | 7  |
| AX-157709389 | 8 | 89.156 | KV452922.1  | 121435 | 7-scf00185 | 7  |
| AX-158062513 | 8 | 89.156 | KV452922.1  | 123010 | 7-scf00185 | 7  |
| AX-157863141 | 8 | 89.156 | KV452922.1  | 123110 | 7-scf00185 | 7  |
| AX-158062515 | 8 | 89.158 | KV452922.1  | 126075 | 7-scf00185 | 7  |
| AX-158062520 | 8 | 89.593 | KV452922.1  | 130791 | 7-scf00185 | 7  |
| AX-158062521 | 8 | 89.593 | KV452922.1  | 131112 | 7-scf00185 | 7  |
| AX-157750286 | 8 | 89.593 | KV452922.1  | 132101 | 7-scf00185 | 7  |
| AX-158062523 | 8 | 89.593 | KV452922.1  | 132331 | 7-scf00185 | 7  |
| AX-158062526 | 8 | 89.655 | KV452922.1  | 135168 | 7-scf00185 | 7  |
| AX-158062531 | 8 | 89.702 | KV452922.1  | 142554 | 7-scf00185 | 7  |
| AX-158062538 | 8 | 89.702 | KV452922.1  | 146434 | 7-scf00185 | 7  |
| AX-158062539 | 8 | 89.702 | KV452922.1  | 148569 | 7-scf00185 | 7  |
| AX-158062543 | 8 | 89.703 | KV452922.1  | 149545 | 7-scf00185 | 7  |
| AX-158062547 | 8 | 89.782 | KV452922.1  | 151203 | 7-scf00185 | 7  |
| AX-157771270 | 8 | 89.86  | KV452922.1  | 146732 | 7-scf00185 | 7  |
| AX-158062549 | 8 | 89.86  | KV452922.1  | 156621 | 7-scf00185 | 7  |
| AX-158062552 | 8 | 89.86  | KV452922.1  | 158681 | 7-scf00185 | 7  |
| AX-158062563 | 8 | 89.86  | KV452922.1  | 170818 | 7-scf00185 | 7  |
| AX-158062555 | 8 | 89.957 | KV452922.1  | 161205 | 7-scf00185 | 7  |
| AX-158062557 | 8 | 90.052 | KV452922.1  | 162223 | 7-scf00185 | 7  |
| AX-158062560 | 8 | 90.053 | KV452922.1  | 166729 | 7-scf00185 | 7  |
| AX-158062569 | 8 | 90.053 | KV452922.1  | 177038 | 7-scf00185 | 7  |
| AX-158062573 | 8 | 90.492 | KV452922.1  | 179937 | 7-scf00185 | 7  |
| AX-158062590 | 8 | 90.493 | KV452922.1  | 193375 | 7-scf00185 | 7  |
| AX-158062576 | 8 | 90.589 | KV452922.1  | 183299 | 7-scf00185 | 7  |

|              |   |        |             |        |            |    |
|--------------|---|--------|-------------|--------|------------|----|
| AX-158062591 | 8 | 90.589 | KV452922.1  | 193737 | 7-scf00185 | 7  |
| AX-158062593 | 8 | 90.589 | KV452922.1  | 197074 | 7-scf00185 | 7  |
| AX-158062594 | 8 | 90.589 | KV452922.1  | 197997 | 7-scf00185 | 7  |
| AX-158062596 | 8 | 90.589 | KV452922.1  | 201174 | 7-scf00185 | 7  |
| AX-158062600 | 8 | 90.589 | KV452922.1  | 204134 | 7-scf00185 | 7  |
| AX-158062604 | 8 | 90.589 | KV452922.1  | 208601 | 7-scf00185 | 7  |
| AX-158062605 | 8 | 90.589 | KV452922.1  | 209334 | 7-scf00185 | 7  |
| AX-157758248 | 8 | 90.589 | KV452922.1  | 210882 | 7-scf00185 | 7  |
| AX-157742569 | 8 | 90.589 | KV452922.1  | 212398 | 7-scf00185 | 7  |
| AX-158062613 | 8 | 90.589 | KV452922.1  | 224536 | 7-scf00185 | 7  |
| AX-158384176 | 8 | 90.589 | KV452922.1  | 235158 | 7-scf00185 | 7  |
| AX-158062624 | 8 | 90.589 | KV452922.1  | 236711 | 7-scf00185 | 7  |
| AX-157724564 | 8 | 90.589 | KV452922.1  | 314995 | 7-scf00185 | 7  |
| AX-158062710 | 8 | 90.589 | KV452922.1  | 324461 | 7-scf00185 | 7  |
| AX-158062754 | 8 | 90.589 | KV452922.1  | 364634 | 7-scf00185 | 7  |
| AX-158062612 | 8 | 90.788 | KV452922.1  | 223613 | 7-scf00185 | 7  |
| AX-158062559 | 8 | 90.83  | KV452922.1  | 165929 | 7-scf00185 | 7  |
| AX-158062607 | 8 | 90.83  | KV452922.1  | 215498 | 7-scf00185 | 7  |
| AX-158062608 | 8 | 90.83  | KV452922.1  | 219860 | 7-scf00185 | 7  |
| AX-158062614 | 8 | 90.83  | KV452922.1  | 225674 | 7-scf00185 | 7  |
| AX-158062616 | 8 | 90.83  | KV452922.1  | 228310 | 7-scf00185 | 7  |
| AX-158062617 | 8 | 90.83  | KV452922.1  | 229297 | 7-scf00185 | 7  |
| AX-158062621 | 8 | 90.83  | KV452922.1  | 233911 | 7-scf00185 | 7  |
| AX-158062626 | 8 | 90.83  | KV452922.1  | 239317 | 7-scf00185 | 7  |
| AX-158062627 | 8 | 90.83  | KV452922.1  | 240169 | 7-scf00185 | 7  |
| AX-158062629 | 8 | 90.83  | KV452922.1  | 240517 | 7-scf00185 | 7  |
| AX-158062631 | 8 | 90.83  | KV452922.1  | 242970 | 7-scf00185 | 7  |
| AX-157823557 | 8 | 90.83  | KV452922.1  | 246569 | 7-scf00185 | 7  |
| AX-158062620 | 8 | 91.047 | KV452922.1  | 233468 | 7-scf00185 | 7  |
| AX-158062636 | 8 | 91.047 | KV452922.1  | 247813 | 7-scf00185 | 7  |
| AX-157744972 | 8 | 91.047 | KV452922.1  | 248456 | 7-scf00185 | 7  |
| AX-158062638 | 8 | 91.047 | KV452922.1  | 249842 | 7-scf00185 | 7  |
| AX-158062639 | 8 | 91.047 | KV452922.1  | 250204 | 7-scf00185 | 7  |
| AX-158062643 | 8 | 91.047 | KV452922.1  | 253904 | 7-scf00185 | 7  |
| AX-158062646 | 8 | 91.047 | KV452922.1  | 255626 | 7-scf00185 | 7  |
| AX-158062649 | 8 | 91.05  | KV452922.1  | 256357 | 7-scf00185 | 7  |
| AX-158062651 | 8 | 91.05  | KV452922.1  | 258105 | 7-scf00185 | 7  |
| AX-158062652 | 8 | 91.05  | KV452922.1  | 259081 | 7-scf00185 | 7  |
| AX-158062657 | 8 | 91.05  | KV452922.1  | 263732 | 7-scf00185 | 7  |
| AX-157707289 | 8 | 91.05  | 3ML01033917 | 162    | scf09586_1 | UN |
| AX-158062611 | 8 | 91.376 | KV452922.1  | 222779 | 7-scf00185 | 7  |
| AX-158391905 | 8 | 91.376 | KV452922.1  | 248742 | 7-scf00185 | 7  |
| AX-157741462 | 8 | 91.376 | KV452922.1  | 265176 | 7-scf00185 | 7  |
| AX-158062661 | 8 | 91.376 | KV452922.1  | 268826 | 7-scf00185 | 7  |
| AX-158062667 | 8 | 91.376 | KV452922.1  | 270909 | 7-scf00185 | 7  |
| AX-158062668 | 8 | 91.376 | KV452922.1  | 273568 | 7-scf00185 | 7  |
| AX-158062673 | 8 | 91.376 | KV452922.1  | 276979 | 7-scf00185 | 7  |
| AX-158062675 | 8 | 91.376 | KV452922.1  | 277812 | 7-scf00185 | 7  |
| AX-158062677 | 8 | 91.376 | KV452922.1  | 279547 | 7-scf00185 | 7  |
| AX-158062678 | 8 | 91.376 | KV452922.1  | 281193 | 7-scf00185 | 7  |
| AX-158062681 | 8 | 91.708 | KV452922.1  | 286998 | 7-scf00185 | 7  |

|              |   |        |            |        |            |   |
|--------------|---|--------|------------|--------|------------|---|
| AX-158062685 | 8 | 92.031 | KV452922.1 | 289325 | 7-scf00185 | 7 |
| AX-158062645 | 8 | 92.032 | KV452922.1 | 254634 | 7-scf00185 | 7 |
| AX-158062686 | 8 | 92.032 | KV452922.1 | 290224 | 7-scf00185 | 7 |
| AX-158062687 | 8 | 92.032 | KV452922.1 | 292006 | 7-scf00185 | 7 |
| AX-158062689 | 8 | 92.032 | KV452922.1 | 295316 | 7-scf00185 | 7 |
| AX-158062691 | 8 | 92.032 | KV452922.1 | 297785 | 7-scf00185 | 7 |
| AX-158062692 | 8 | 92.032 | KV452922.1 | 298659 | 7-scf00185 | 7 |
| AX-158062693 | 8 | 92.032 | KV452922.1 | 299538 | 7-scf00185 | 7 |
| AX-157724820 | 8 | 92.032 | KV452922.1 | 303228 | 7-scf00185 | 7 |
| AX-158062696 | 8 | 92.032 | KV452922.1 | 304465 | 7-scf00185 | 7 |
| AX-158062698 | 8 | 92.032 | KV452922.1 | 305750 | 7-scf00185 | 7 |
| AX-158062701 | 8 | 92.032 | KV452922.1 | 310564 | 7-scf00185 | 7 |
| AX-158062703 | 8 | 92.032 | KV452922.1 | 312770 | 7-scf00185 | 7 |
| AX-157754685 | 8 | 92.251 | KV452922.1 | 320138 | 7-scf00185 | 7 |
| AX-157885357 | 8 | 92.36  | KV452922.1 | 330389 | 7-scf00185 | 7 |
| AX-158062716 | 8 | 92.36  | KV452922.1 | 331336 | 7-scf00185 | 7 |
| AX-158062717 | 8 | 92.36  | KV452922.1 | 331726 | 7-scf00185 | 7 |
| AX-158062721 | 8 | 92.36  | KV452922.1 | 333477 | 7-scf00185 | 7 |
| AX-158062725 | 8 | 92.429 | KV452922.1 | 335028 | 7-scf00185 | 7 |
| AX-158062727 | 8 | 92.469 | KV452922.1 | 336723 | 7-scf00185 | 7 |
| AX-158062729 | 8 | 92.469 | KV452922.1 | 337292 | 7-scf00185 | 7 |
| AX-158062730 | 8 | 92.469 | KV452922.1 | 337744 | 7-scf00185 | 7 |
| AX-157885358 | 8 | 92.579 | KV452922.1 | 346039 | 7-scf00185 | 7 |
| AX-158062739 | 8 | 92.579 | KV452922.1 | 346906 | 7-scf00185 | 7 |
| AX-158062748 | 8 | 92.689 | KV452922.1 | 357142 | 7-scf00185 | 7 |
| AX-158062750 | 8 | 92.689 | KV452922.1 | 360080 | 7-scf00185 | 7 |
| AX-158062751 | 8 | 92.689 | KV452922.1 | 361314 | 7-scf00185 | 7 |
| AX-157856913 | 8 | 92.69  | KV452922.1 | 357425 | 7-scf00185 | 7 |
| AX-158062749 | 8 | 92.69  | KV452922.1 | 359154 | 7-scf00185 | 7 |
| AX-158062752 | 8 | 92.69  | KV452922.1 | 363002 | 7-scf00185 | 7 |
| AX-158409192 | 8 | 93.33  | KV452922.1 | 370698 | 7-scf00185 | 7 |
| AX-158062759 | 8 | 93.331 | KV452922.1 | 377635 | 7-scf00185 | 7 |
| AX-157702349 | 8 | 93.331 | KV452922.1 | 377743 | 7-scf00185 | 7 |
| AX-158062768 | 8 | 93.427 | KV452922.1 | 388874 | 7-scf00185 | 7 |
| AX-158062772 | 8 | 93.437 | KV452922.1 | 392647 | 7-scf00185 | 7 |
| AX-158062753 | 8 | 93.446 | KV452922.1 | 364214 | 7-scf00185 | 7 |
| AX-158062773 | 8 | 93.446 | KV452922.1 | 393409 | 7-scf00185 | 7 |
| AX-158384179 | 8 | 93.454 | KV452922.1 | 394256 | 7-scf00185 | 7 |
| AX-158062774 | 8 | 93.454 | KV452922.1 | 394292 | 7-scf00185 | 7 |
| AX-158062776 | 8 | 93.454 | KV452922.1 | 396303 | 7-scf00185 | 7 |
| AX-158062778 | 8 | 93.454 | KV452922.1 | 397195 | 7-scf00185 | 7 |
| AX-158062779 | 8 | 93.454 | KV452922.1 | 397675 | 7-scf00185 | 7 |
| AX-158062782 | 8 | 93.454 | KV452922.1 | 398695 | 7-scf00185 | 7 |
| AX-158062785 | 8 | 93.479 | KV452922.1 | 400742 | 7-scf00185 | 7 |
| AX-158062828 | 8 | 93.479 | KV452922.1 | 443609 | 7-scf00185 | 7 |
| AX-158062832 | 8 | 93.479 | KV452922.1 | 447254 | 7-scf00185 | 7 |
| AX-158062833 | 8 | 93.479 | KV452922.1 | 448045 | 7-scf00185 | 7 |
| AX-158062941 | 8 | 93.479 | KV452922.1 | 532443 | 7-scf00185 | 7 |
| AX-158409193 | 8 | 93.5   | KV452922.1 | 410671 | 7-scf00185 | 7 |
| AX-157696904 | 8 | 93.563 | KV452922.1 | 377239 | 7-scf00185 | 7 |
| AX-158062766 | 8 | 93.563 | KV452922.1 | 386430 | 7-scf00185 | 7 |

|              |   |        |            |        |            |   |
|--------------|---|--------|------------|--------|------------|---|
| AX-158062790 | 8 | 93.563 | KV452922.1 | 411120 | 7-scf00185 | 7 |
| AX-158062791 | 8 | 93.563 | KV452922.1 | 411178 | 7-scf00185 | 7 |
| AX-158062792 | 8 | 93.563 | KV452922.1 | 411703 | 7-scf00185 | 7 |
| AX-158062793 | 8 | 93.563 | KV452922.1 | 414850 | 7-scf00185 | 7 |
| AX-158062796 | 8 | 93.563 | KV452922.1 | 417366 | 7-scf00185 | 7 |
| AX-158062797 | 8 | 93.563 | KV452922.1 | 423860 | 7-scf00185 | 7 |
| AX-158062804 | 8 | 93.563 | KV452922.1 | 426701 | 7-scf00185 | 7 |
| AX-158062805 | 8 | 93.563 | KV452922.1 | 427175 | 7-scf00185 | 7 |
| AX-158062811 | 8 | 93.563 | KV452922.1 | 432797 | 7-scf00185 | 7 |
| AX-158062812 | 8 | 93.563 | KV452922.1 | 433307 | 7-scf00185 | 7 |
| AX-158391908 | 8 | 93.563 | KV452922.1 | 434593 | 7-scf00185 | 7 |
| AX-158062816 | 8 | 93.563 | KV452922.1 | 434737 | 7-scf00185 | 7 |
| AX-158062819 | 8 | 93.563 | KV452922.1 | 435602 | 7-scf00185 | 7 |
| AX-158062822 | 8 | 93.563 | KV452922.1 | 437619 | 7-scf00185 | 7 |
| AX-158062823 | 8 | 93.563 | KV452922.1 | 438633 | 7-scf00185 | 7 |
| AX-158062826 | 8 | 93.563 | KV452922.1 | 441525 | 7-scf00185 | 7 |
| AX-158062827 | 8 | 93.563 | KV452922.1 | 442084 | 7-scf00185 | 7 |
| AX-157823559 | 8 | 93.563 | KV452922.1 | 444507 | 7-scf00185 | 7 |
| AX-157823560 | 8 | 93.563 | KV452922.1 | 444911 | 7-scf00185 | 7 |
| AX-158062836 | 8 | 93.563 | KV452922.1 | 451669 | 7-scf00185 | 7 |
| AX-158062839 | 8 | 93.563 | KV452922.1 | 454287 | 7-scf00185 | 7 |
| AX-158062841 | 8 | 93.563 | KV452922.1 | 454552 | 7-scf00185 | 7 |
| AX-158062843 | 8 | 93.563 | KV452922.1 | 457647 | 7-scf00185 | 7 |
| AX-157823562 | 8 | 93.563 | KV452922.1 | 458710 | 7-scf00185 | 7 |
| AX-158409197 | 8 | 93.563 | KV452922.1 | 458959 | 7-scf00185 | 7 |
| AX-158416459 | 8 | 93.563 | KV452922.1 | 458996 | 7-scf00185 | 7 |
| AX-158062847 | 8 | 93.563 | KV452922.1 | 462286 | 7-scf00185 | 7 |
| AX-158062857 | 8 | 93.563 | KV452922.1 | 465995 | 7-scf00185 | 7 |
| AX-158062860 | 8 | 93.563 | KV452922.1 | 466849 | 7-scf00185 | 7 |
| AX-158062862 | 8 | 93.563 | KV452922.1 | 468482 | 7-scf00185 | 7 |
| AX-158062866 | 8 | 93.563 | KV452922.1 | 470235 | 7-scf00185 | 7 |
| AX-157755836 | 8 | 93.563 | KV452922.1 | 475098 | 7-scf00185 | 7 |
| AX-158062892 | 8 | 93.563 | KV452922.1 | 500618 | 7-scf00185 | 7 |
| AX-158062894 | 8 | 93.563 | KV452922.1 | 501751 | 7-scf00185 | 7 |
| AX-158062907 | 8 | 93.563 | KV452922.1 | 507962 | 7-scf00185 | 7 |
| AX-158409201 | 8 | 93.563 | KV452922.1 | 528292 | 7-scf00185 | 7 |
| AX-158409202 | 8 | 93.563 | KV452922.1 | 528673 | 7-scf00185 | 7 |
| AX-158062865 | 8 | 93.672 | KV452922.1 | 469329 | 7-scf00185 | 7 |
| AX-158062867 | 8 | 93.672 | KV452922.1 | 470980 | 7-scf00185 | 7 |
| AX-158062872 | 8 | 93.672 | KV452922.1 | 478291 | 7-scf00185 | 7 |
| AX-158062873 | 8 | 93.672 | KV452922.1 | 478857 | 7-scf00185 | 7 |
| AX-158062875 | 8 | 93.672 | KV452922.1 | 479311 | 7-scf00185 | 7 |
| AX-157725107 | 8 | 93.672 | KV452922.1 | 480773 | 7-scf00185 | 7 |
| AX-158062912 | 8 | 93.672 | KV452922.1 | 512728 | 7-scf00185 | 7 |
| AX-158062824 | 8 | 93.691 | KV452922.1 | 439244 | 7-scf00185 | 7 |
| AX-157823561 | 8 | 93.691 | KV452922.1 | 449014 | 7-scf00185 | 7 |
| AX-158062849 | 8 | 93.691 | KV452922.1 | 464824 | 7-scf00185 | 7 |
| AX-158062851 | 8 | 93.691 | KV452922.1 | 465426 | 7-scf00185 | 7 |
| AX-158062879 | 8 | 93.691 | KV452922.1 | 484085 | 7-scf00185 | 7 |
| AX-158062964 | 8 | 93.691 | KV452922.1 | 556226 | 7-scf00185 | 7 |
| AX-158062884 | 8 | 93.714 | KV452922.1 | 489275 | 7-scf00185 | 7 |

|              |   |        |             |        |            |    |
|--------------|---|--------|-------------|--------|------------|----|
| AX-158062789 | 8 | 93.732 | KV452922.1  | 408928 | 7-scf00185 | 7  |
| AX-157738998 | 8 | 93.732 | KV452922.1  | 417837 | 7-scf00185 | 7  |
| AX-157705882 | 8 | 93.732 | 3ML01031153 | 515    | scf06760_1 | UN |
| AX-158062886 | 8 | 93.754 | KV452922.1  | 494413 | 7-scf00185 | 7  |
| AX-158062761 | 8 | 93.782 | KV452922.1  | 382778 | 7-scf00185 | 7  |
| AX-157885360 | 8 | 93.782 | KV452922.1  | 475936 | 7-scf00185 | 7  |
| AX-158062888 | 8 | 93.782 | KV452922.1  | 495060 | 7-scf00185 | 7  |
| AX-158062896 | 8 | 93.829 | KV452922.1  | 502390 | 7-scf00185 | 7  |
| AX-158062902 | 8 | 93.891 | KV452922.1  | 504410 | 7-scf00185 | 7  |
| AX-157885361 | 8 | 93.891 | KV452922.1  | 505377 | 7-scf00185 | 7  |
| AX-158062909 | 8 | 93.891 | KV452922.1  | 510798 | 7-scf00185 | 7  |
| AX-158062918 | 8 | 93.891 | KV452922.1  | 515820 | 7-scf00185 | 7  |
| AX-158062921 | 8 | 93.891 | KV452922.1  | 518050 | 7-scf00185 | 7  |
| AX-158062923 | 8 | 93.891 | KV452922.1  | 518618 | 7-scf00185 | 7  |
| AX-158062924 | 8 | 93.891 | KV452922.1  | 518866 | 7-scf00185 | 7  |
| AX-158062925 | 8 | 93.952 | KV452922.1  | 519300 | 7-scf00185 | 7  |
| AX-158062926 | 8 | 93.981 | KV452922.1  | 520375 | 7-scf00185 | 7  |
| AX-158062934 | 8 | 94     | KV452922.1  | 526314 | 7-scf00185 | 7  |
| AX-158062935 | 8 | 94     | KV452922.1  | 526832 | 7-scf00185 | 7  |
| AX-158406663 | 8 | 94     | KV452922.1  | 528636 | 7-scf00185 | 7  |
| AX-158062939 | 8 | 94     | KV452922.1  | 531816 | 7-scf00185 | 7  |
| AX-158409203 | 8 | 94.004 | KV452922.1  | 528759 | 7-scf00185 | 7  |
| AX-158062944 | 8 | 94.137 | KV452922.1  | 536742 | 7-scf00185 | 7  |
| AX-158062945 | 8 | 94.137 | KV452922.1  | 538023 | 7-scf00185 | 7  |
| AX-158062947 | 8 | 94.137 | KV452922.1  | 538375 | 7-scf00185 | 7  |
| AX-158062950 | 8 | 94.137 | KV452922.1  | 539403 | 7-scf00185 | 7  |
| AX-157771154 | 8 | 94.137 | KV452922.1  | 540743 | 7-scf00185 | 7  |
| AX-158062955 | 8 | 94.137 | KV452922.1  | 546367 | 7-scf00185 | 7  |
| AX-158062961 | 8 | 94.241 | KV452922.1  | 554070 | 7-scf00185 | 7  |
| AX-158062970 | 8 | 94.332 | KV452922.1  | 562369 | 7-scf00185 | 7  |
| AX-158062972 | 8 | 94.332 | KV452922.1  | 562798 | 7-scf00185 | 7  |
| AX-158062976 | 8 | 94.332 | KV452922.1  | 565906 | 7-scf00185 | 7  |
| AX-157719102 | 8 | 94.332 | KV452922.1  | 567074 | 7-scf00185 | 7  |
| AX-158062977 | 8 | 94.527 | KV452922.1  | 567643 | 7-scf00185 | 7  |
| AX-157726490 | 8 | 94.527 | KV452922.1  | 570602 | 7-scf00185 | 7  |
| AX-157740646 | 8 | 94.952 | KV452922.1  | 575151 | 7-scf00185 | 7  |
| AX-158062985 | 8 | 94.952 | KV452922.1  | 579304 | 7-scf00185 | 7  |
| AX-158062986 | 8 | 95.094 | KV452922.1  | 579702 | 7-scf00185 | 7  |
| AX-158062988 | 8 | 95.094 | KV452922.1  | 580159 | 7-scf00185 | 7  |
| AX-158062993 | 8 | 95.094 | KV452922.1  | 582252 | 7-scf00185 | 7  |
| AX-158062999 | 8 | 95.094 | KV452922.1  | 586192 | 7-scf00185 | 7  |
| AX-157754078 | 8 | 95.313 | KV452922.1  | 587113 | 7-scf00185 | 7  |
| AX-158063000 | 8 | 95.531 | KV452922.1  | 587516 | 7-scf00185 | 7  |
| AX-158063002 | 8 | 95.531 | KV452922.1  | 589278 | 7-scf00185 | 7  |
| AX-158063004 | 8 | 95.531 | KV452922.1  | 591974 | 7-scf00185 | 7  |
| AX-157823563 | 8 | 95.531 | KV452922.1  | 593566 | 7-scf00185 | 7  |
| AX-157823564 | 8 | 95.616 | KV452922.1  | 595310 | 7-scf00185 | 7  |
| AX-157823565 | 8 | 95.75  | KV452922.1  | 595723 | 7-scf00185 | 7  |
| AX-157823566 | 8 | 95.75  | KV452922.1  | 596634 | 7-scf00185 | 7  |
| AX-157823567 | 8 | 95.75  | KV452922.1  | 597531 | 7-scf00185 | 7  |
| AX-158063009 | 8 | 95.75  | KV452922.1  | 600640 | 7-scf00185 | 7  |

|              |   |        |             |        |            |    |
|--------------|---|--------|-------------|--------|------------|----|
| AX-158063010 | 8 | 95.75  | KV452922.1  | 603708 | 7-scf00185 | 7  |
| AX-157823568 | 8 | 95.75  | KV452922.1  | 605103 | 7-scf00185 | 7  |
| AX-158063013 | 8 | 95.75  | KV452922.1  | 607557 | 7-scf00185 | 7  |
| AX-158063017 | 8 | 95.75  | KV452922.1  | 609878 | 7-scf00185 | 7  |
| AX-158063021 | 8 | 95.75  | KV452922.1  | 610521 | 7-scf00185 | 7  |
| AX-157823570 | 8 | 95.75  | KV452922.1  | 610787 | 7-scf00185 | 7  |
| AX-158063028 | 8 | 95.75  | KV452922.1  | 615657 | 7-scf00185 | 7  |
| AX-158063034 | 8 | 95.75  | KV452922.1  | 617341 | 7-scf00185 | 7  |
| AX-158063023 | 8 | 95.968 | KV452922.1  | 611454 | 7-scf00185 | 7  |
| AX-158063025 | 8 | 95.968 | KV452922.1  | 612099 | 7-scf00185 | 7  |
| AX-158063026 | 8 | 95.968 | KV452922.1  | 612514 | 7-scf00185 | 7  |
| AX-158063029 | 8 | 95.968 | KV452922.1  | 616113 | 7-scf00185 | 7  |
| AX-158063030 | 8 | 95.968 | KV452922.1  | 616435 | 7-scf00185 | 7  |
| AX-157715692 | 8 | 95.968 | KV452922.1  | 617079 | 7-scf00185 | 7  |
| AX-158063035 | 8 | 95.968 | KV452922.1  | 617905 | 7-scf00185 | 7  |
| AX-157734334 | 8 | 95.968 | KV452922.1  | 620646 | 7-scf00185 | 7  |
| AX-158063037 | 8 | 95.968 | KV452922.1  | 623107 | 7-scf00185 | 7  |
| AX-158063045 | 8 | 95.968 | KV452922.1  | 630372 | 7-scf00185 | 7  |
| AX-158406664 | 8 | 95.968 | KV452922.1  | 633662 | 7-scf00185 | 7  |
| AX-158062957 | 8 | 96.077 | KV452922.1  | 549094 | 7-scf00185 | 7  |
| AX-157743430 | 8 | 96.077 | KV452922.1  | 636612 | 7-scf00185 | 7  |
| AX-158063053 | 8 | 96.077 | KV452922.1  | 642041 | 7-scf00185 | 7  |
| AX-158063054 | 8 | 96.077 | KV452922.1  | 642419 | 7-scf00185 | 7  |
| AX-158063056 | 8 | 96.077 | KV452922.1  | 642841 | 7-scf00185 | 7  |
| AX-158063090 | 8 | 96.077 | KV452922.1  | 725063 | 7-scf00185 | 7  |
| AX-158063063 | 8 | 96.403 | KV452922.1  | 669278 | 7-scf00185 | 7  |
| AX-158063068 | 8 | 96.403 | KV452922.1  | 679301 | 7-scf00185 | 7  |
| AX-158063065 | 8 | 96.404 | KV452922.1  | 673580 | 7-scf00185 | 7  |
| AX-157885366 | 8 | 96.405 | KV452922.1  | 673839 | 7-scf00185 | 7  |
| AX-157823575 | 8 | 96.405 | KV452922.1  | 676921 | 7-scf00185 | 7  |
| AX-157823576 | 8 | 96.405 | KV452922.1  | 677832 | 7-scf00185 | 7  |
| AX-158063066 | 8 | 96.514 | KV452922.1  | 678105 | 7-scf00185 | 7  |
| AX-157823577 | 8 | 96.514 | KV452922.1  | 678351 | 7-scf00185 | 7  |
| AX-157716445 | 8 | 96.514 | KV452922.1  | 686517 | 7-scf00185 | 7  |
| AX-158063073 | 8 | 96.557 | KV452922.1  | 692860 | 7-scf00185 | 7  |
| AX-157823579 | 8 | 96.593 | KV452922.1  | 702029 | 7-scf00185 | 7  |
| AX-158063080 | 8 | 96.623 | KV452922.1  | 709659 | 7-scf00185 | 7  |
| AX-157823581 | 8 | 96.623 | KV452922.1  | 709718 | 7-scf00185 | 7  |
| AX-158063083 | 8 | 96.664 | KV452922.1  | 711339 | 7-scf00185 | 7  |
| AX-158063057 | 8 | 96.694 | KV452922.1  | 645702 | 7-scf00185 | 7  |
| AX-157774875 | 8 | 96.694 | KV452922.1  | 714704 | 7-scf00185 | 7  |
| AX-158063086 | 8 | 96.694 | KV452922.1  | 715928 | 7-scf00185 | 7  |
| AX-158063081 | 8 | 96.733 | KV452922.1  | 710770 | 7-scf00185 | 7  |
| AX-158063089 | 8 | 96.733 | KV452922.1  | 718852 | 7-scf00185 | 7  |
| AX-157748649 | 8 | 96.733 | KV452922.1  | 724835 | 7-scf00185 | 7  |
| AX-157689218 | 8 | 96.733 | 3ML01028680 | 619    | scf04291_1 | UN |
| AX-157681825 | 8 | 96.733 | 3ML01028680 | 675    | scf04291_1 | UN |
| AX-158063069 | 8 | 97.06  | KV452922.1  | 683505 | 7-scf00185 | 7  |
| AX-158063100 | 8 | 97.06  | KV452922.1  | 733153 | 7-scf00185 | 7  |
| AX-158063101 | 8 | 97.06  | KV452922.1  | 735214 | 7-scf00185 | 7  |
| AX-157823580 | 8 | 97.17  | KV452922.1  | 706431 | 7-scf00185 | 7  |



|              |   |        |            |        |            |   |
|--------------|---|--------|------------|--------|------------|---|
| AX-158063094 | 8 | 97.17  | KV452922.1 | 729905 | 7-scf00185 | 7 |
| AX-158063102 | 8 | 97.17  | KV452922.1 | 737981 | 7-scf00185 | 7 |
| AX-157710674 | 8 | 97.17  | KV452922.1 | 739070 | 7-scf00185 | 7 |
| AX-158063105 | 8 | 97.17  | KV452922.1 | 739582 | 7-scf00185 | 7 |
| AX-158063106 | 8 | 97.17  | KV452922.1 | 740767 | 7-scf00185 | 7 |
| AX-157885367 | 8 | 97.177 | KV452922.1 | 741862 | 7-scf00185 | 7 |
| AX-157823587 | 8 | 97.488 | KV452922.1 | 748994 | 7-scf00185 | 7 |
| AX-158063154 | 8 | 97.488 | KV452922.1 | 809393 | 7-scf00185 | 7 |
| AX-158063112 | 8 | 97.716 | KV452922.1 | 750186 | 7-scf00185 | 7 |
| AX-158063114 | 8 | 97.76  | KV452922.1 | 752099 | 7-scf00185 | 7 |
| AX-158063115 | 8 | 97.826 | KV452922.1 | 753938 | 7-scf00185 | 7 |
| AX-157747250 | 8 | 97.826 | KV452922.1 | 754653 | 7-scf00185 | 7 |
| AX-157876979 | 8 | 97.883 | KV452922.1 | 755982 | 7-scf00185 | 7 |
| AX-158063108 | 8 | 97.935 | KV452922.1 | 743788 | 7-scf00185 | 7 |
| AX-158063117 | 8 | 97.935 | KV452922.1 | 756322 | 7-scf00185 | 7 |
| AX-158384186 | 8 | 97.935 | KV452922.1 | 759386 | 7-scf00185 | 7 |
| AX-157754837 | 8 | 97.935 | KV452922.1 | 767836 | 7-scf00185 | 7 |
| AX-158063119 | 8 | 97.935 | KV452922.1 | 767920 | 7-scf00185 | 7 |
| AX-158063121 | 8 | 97.935 | KV452922.1 | 770103 | 7-scf00185 | 7 |
| AX-158063123 | 8 | 97.935 | KV452922.1 | 771356 | 7-scf00185 | 7 |
| AX-157740117 | 8 | 97.935 | KV452922.1 | 772468 | 7-scf00185 | 7 |
| AX-158063124 | 8 | 97.935 | KV452922.1 | 775347 | 7-scf00185 | 7 |
| AX-158063127 | 8 | 97.935 | KV452922.1 | 779253 | 7-scf00185 | 7 |
| AX-158063129 | 8 | 97.935 | KV452922.1 | 782248 | 7-scf00185 | 7 |
| AX-158063132 | 8 | 97.935 | KV452922.1 | 783879 | 7-scf00185 | 7 |
| AX-157772471 | 8 | 97.935 | KV452922.1 | 784284 | 7-scf00185 | 7 |
| AX-158063133 | 8 | 97.935 | KV452922.1 | 784541 | 7-scf00185 | 7 |
| AX-158063135 | 8 | 97.935 | KV452922.1 | 789166 | 7-scf00185 | 7 |
| AX-158063142 | 8 | 98.206 | KV452922.1 | 795496 | 7-scf00185 | 7 |
| AX-158063144 | 8 | 98.301 | KV452922.1 | 796211 | 7-scf00185 | 7 |
| AX-158063146 | 8 | 98.331 | KV452922.1 | 799276 | 7-scf00185 | 7 |
| AX-158063147 | 8 | 98.482 | KV452922.1 | 800650 | 7-scf00185 | 7 |
| AX-157724759 | 8 | 98.592 | KV452922.1 | 803748 | 7-scf00185 | 7 |
| AX-157750890 | 8 | 98.592 | KV452922.1 | 806377 | 7-scf00185 | 7 |
| AX-158063151 | 8 | 98.668 | KV452922.1 | 807521 | 7-scf00185 | 7 |
| AX-158384188 | 8 | 98.738 | KV452922.1 | 808048 | 7-scf00185 | 7 |
| AX-158063159 | 8 | 98.738 | KV452922.1 | 814843 | 7-scf00185 | 7 |
| AX-157823588 | 8 | 98.738 | KV452922.1 | 815023 | 7-scf00185 | 7 |
| AX-157725912 | 8 | 99.029 | KV452922.1 | 815176 | 7-scf00185 | 7 |
| AX-158063161 | 8 | 99.029 | KV452922.1 | 816458 | 7-scf00185 | 7 |
| AX-157756187 | 8 | 99.029 | KV452922.1 | 817949 | 7-scf00185 | 7 |
| AX-157823589 | 8 | 99.029 | KV452922.1 | 820252 | 7-scf00185 | 7 |
| AX-158063169 | 8 | 99.029 | KV452922.1 | 821638 | 7-scf00185 | 7 |
| AX-158063174 | 8 | 99.029 | KV452922.1 | 827932 | 7-scf00185 | 7 |
| AX-158063177 | 8 | 99.193 | KV452922.1 | 832429 | 7-scf00185 | 7 |
| AX-158063175 | 8 | 99.357 | KV452922.1 | 828475 | 7-scf00185 | 7 |
| AX-158063179 | 8 | 99.357 | KV452922.1 | 833115 | 7-scf00185 | 7 |
| AX-157738906 | 8 | 99.357 | KV452922.1 | 839045 | 7-scf00185 | 7 |
| AX-158063189 | 8 | 99.357 | KV452922.1 | 839979 | 7-scf00185 | 7 |
| AX-158063194 | 8 | 99.357 | KV452922.1 | 844060 | 7-scf00185 | 7 |
| AX-158063195 | 8 | 99.357 | KV452922.1 | 845618 | 7-scf00185 | 7 |

|              |   |         |             |        |            |    |
|--------------|---|---------|-------------|--------|------------|----|
| AX-158063197 | 8 | 99.357  | KV452922.1  | 848439 | 7-scf00185 | 7  |
| AX-158063200 | 8 | 99.357  | KV452922.1  | 851129 | 7-scf00185 | 7  |
| AX-158063204 | 8 | 99.576  | KV452922.1  | 854879 | 7-scf00185 | 7  |
| AX-157741373 | 8 | 99.576  | KV452922.1  | 855534 | 7-scf00185 | 7  |
| AX-158063209 | 8 | 99.576  | KV452922.1  | 858203 | 7-scf00185 | 7  |
| AX-158063212 | 8 | 99.576  | KV452922.1  | 861722 | 7-scf00185 | 7  |
| AX-157754155 | 8 | 99.576  | KV452922.1  | 862442 | 7-scf00185 | 7  |
| AX-158063213 | 8 | 99.576  | KV452922.1  | 863605 | 7-scf00185 | 7  |
| AX-158063214 | 8 | 99.965  | KV452922.1  | 864940 | 7-scf00185 | 7  |
| AX-158063184 | 8 | 99.966  | KV452922.1  | 836939 | 7-scf00185 | 7  |
| AX-158063219 | 8 | 99.966  | KV452922.1  | 870236 | 7-scf00185 | 7  |
| AX-158063245 | 8 | 99.966  | KV452922.1  | 900988 | 7-scf00185 | 7  |
| AX-158063226 | 8 | 99.969  | KV452922.1  | 874813 | 7-scf00185 | 7  |
| AX-158063230 | 8 | 99.969  | KV452922.1  | 879175 | 7-scf00185 | 7  |
| AX-157689705 | 8 | 99.969  | 3ML01031502 | 312    | scf07117_1 | UN |
| AX-158063236 | 8 | 100.066 | KV452922.1  | 889999 | 7-scf00185 | 7  |
| AX-158063237 | 8 | 100.156 | KV452922.1  | 890491 | 7-scf00185 | 7  |
| AX-158063227 | 8 | 100.177 | KV452922.1  | 875123 | 7-scf00185 | 7  |
| AX-158063239 | 8 | 100.177 | KV452922.1  | 891911 | 7-scf00185 | 7  |
| AX-158063242 | 8 | 100.231 | KV452922.1  | 899586 | 7-scf00185 | 7  |
| AX-158063243 | 8 | 100.231 | KV452922.1  | 900040 | 7-scf00185 | 7  |
| AX-158063246 | 8 | 100.231 | KV452922.1  | 902437 | 7-scf00185 | 7  |
| AX-157723162 | 8 | 100.231 | KV452922.1  | 903069 | 7-scf00185 | 7  |
| AX-158063229 | 8 | 100.34  | KV452922.1  | 875853 | 7-scf00185 | 7  |
| AX-158063248 | 8 | 100.34  | KV452922.1  | 903536 | 7-scf00185 | 7  |
| AX-158063251 | 8 | 100.34  | KV452922.1  | 904812 | 7-scf00185 | 7  |
| AX-158063252 | 8 | 100.34  | KV452922.1  | 906316 | 7-scf00185 | 7  |
| AX-158063254 | 8 | 100.34  | KV452922.1  | 909410 | 7-scf00185 | 7  |
| AX-158063260 | 8 | 100.421 | KV452922.1  | 911927 | 7-scf00185 | 7  |
| AX-158063266 | 8 | 100.494 | KV452922.1  | 916737 | 7-scf00185 | 7  |
| AX-158063259 | 8 | 100.558 | KV452922.1  | 911512 | 7-scf00185 | 7  |
| AX-158063262 | 8 | 100.558 | KV452922.1  | 914533 | 7-scf00185 | 7  |
| AX-158063265 | 8 | 100.558 | KV452922.1  | 915198 | 7-scf00185 | 7  |
| AX-158063267 | 8 | 100.558 | KV452922.1  | 918855 | 7-scf00185 | 7  |
| AX-158063268 | 8 | 100.558 | KV452922.1  | 919173 | 7-scf00185 | 7  |
| AX-158063272 | 8 | 100.558 | KV452922.1  | 920615 | 7-scf00185 | 7  |
| AX-158063275 | 8 | 100.558 | KV452922.1  | 922194 | 7-scf00185 | 7  |
| AX-158063277 | 8 | 100.558 | KV452922.1  | 922772 | 7-scf00185 | 7  |
| AX-158063278 | 8 | 100.558 | KV452922.1  | 923193 | 7-scf00185 | 7  |
| AX-158063279 | 8 | 100.558 | KV452922.1  | 923602 | 7-scf00185 | 7  |
| AX-158063280 | 8 | 100.558 | KV452922.1  | 924765 | 7-scf00185 | 7  |
| AX-158063282 | 8 | 100.558 | KV452922.1  | 925798 | 7-scf00185 | 7  |
| AX-157688350 | 8 | 100.558 | 3ML01025996 | 1455   | scf01595_1 | UN |
| AX-158063283 | 8 | 100.566 | KV452922.1  | 926158 | 7-scf00185 | 7  |
| AX-158063287 | 8 | 100.688 | KV452922.1  | 929873 | 7-scf00185 | 7  |
| AX-158063296 | 8 | 100.82  | KV452922.1  | 936091 | 7-scf00185 | 7  |
| AX-158063297 | 8 | 100.82  | KV452922.1  | 937243 | 7-scf00185 | 7  |
| AX-157726421 | 8 | 100.82  | KV452922.1  | 937401 | 7-scf00185 | 7  |
| AX-158063298 | 8 | 100.82  | KV452922.1  | 938961 | 7-scf00185 | 7  |
| AX-157885372 | 8 | 100.82  | KV452922.1  | 939438 | 7-scf00185 | 7  |
| AX-158063299 | 8 | 100.952 | KV452922.1  | 943646 | 7-scf00185 | 7  |

|              |   |         |            |        |            |   |
|--------------|---|---------|------------|--------|------------|---|
| AX-158063302 | 8 | 101.084 | KV452922.1 | 946335 | 7-scf00185 | 7 |
| AX-158409209 | 8 | 101.215 | KV452922.1 | 947970 | 7-scf00185 | 7 |
| AX-158063305 | 8 | 101.215 | KV452922.1 | 949025 | 7-scf00185 | 7 |
| AX-157775337 | 8 | 101.215 | KV452922.1 | 949230 | 7-scf00185 | 7 |
| AX-158063307 | 8 | 101.215 | KV452922.1 | 949505 | 7-scf00185 | 7 |
| AX-158063310 | 8 | 101.215 | KV452923.1 | 2199   | 7-scf00188 | 7 |
| AX-158063311 | 8 | 101.27  | KV452923.1 | 2554   | 7-scf00188 | 7 |
| AX-158063313 | 8 | 101.324 | KV452923.1 | 2972   | 7-scf00188 | 7 |
| AX-157823591 | 8 | 101.324 | KV452923.1 | 3987   | 7-scf00188 | 7 |
| AX-158063317 | 8 | 101.326 | KV452923.1 | 10426  | 7-scf00188 | 7 |
| AX-158063320 | 8 | 101.422 | KV452923.1 | 14220  | 7-scf00188 | 7 |
| AX-157823592 | 8 | 101.531 | KV452923.1 | 16109  | 7-scf00188 | 7 |
| AX-158063327 | 8 | 101.737 | KV452923.1 | 24136  | 7-scf00188 | 7 |
| AX-158063332 | 8 | 101.833 | KV452923.1 | 26794  | 7-scf00188 | 7 |
| AX-157739362 | 8 | 101.865 | KV452923.1 | 29537  | 7-scf00188 | 7 |
| AX-158063333 | 8 | 101.867 | KV452923.1 | 29963  | 7-scf00188 | 7 |
| AX-158063337 | 8 | 101.869 | KV452923.1 | 33624  | 7-scf00188 | 7 |
| AX-158063340 | 8 | 101.872 | KV452923.1 | 36529  | 7-scf00188 | 7 |
| AX-157823594 | 8 | 101.872 | KV452923.1 | 37289  | 7-scf00188 | 7 |
| AX-158063343 | 8 | 101.872 | KV452923.1 | 40568  | 7-scf00188 | 7 |
| AX-158063344 | 8 | 102.017 | KV452923.1 | 43314  | 7-scf00188 | 7 |
| AX-158063346 | 8 | 102.017 | KV452923.1 | 44715  | 7-scf00188 | 7 |
| AX-158063351 | 8 | 102.017 | KV452923.1 | 51046  | 7-scf00188 | 7 |
| AX-157721091 | 8 | 102.017 | KV452923.1 | 54392  | 7-scf00188 | 7 |
| AX-158063359 | 8 | 102.065 | KV452923.1 | 57507  | 7-scf00188 | 7 |
| AX-158063365 | 8 | 102.116 | KV452923.1 | 59973  | 7-scf00188 | 7 |
| AX-158063366 | 8 | 102.163 | KV452923.1 | 60944  | 7-scf00188 | 7 |
| AX-158063370 | 8 | 102.309 | KV452923.1 | 65751  | 7-scf00188 | 7 |
| AX-158063371 | 8 | 102.309 | KV452923.1 | 66258  | 7-scf00188 | 7 |
| AX-158063384 | 8 | 102.309 | KV452923.1 | 76610  | 7-scf00188 | 7 |
| AX-158063506 | 8 | 102.309 | KV452923.1 | 223026 | 7-scf00188 | 7 |
| AX-158063647 | 8 | 102.309 | KV452925.1 | 88206  | 7-scf00189 | 7 |
| AX-157774669 | 8 | 102.309 | KV452925.1 | 90483  | 7-scf00189 | 7 |
| AX-158063376 | 8 | 102.336 | KV452923.1 | 69277  | 7-scf00188 | 7 |
| AX-158063380 | 8 | 102.378 | KV452923.1 | 71182  | 7-scf00188 | 7 |
| AX-157823598 | 8 | 102.378 | KV452923.1 | 80924  | 7-scf00188 | 7 |
| AX-158063388 | 8 | 102.378 | KV452923.1 | 82460  | 7-scf00188 | 7 |
| AX-158063395 | 8 | 102.378 | KV452923.1 | 96643  | 7-scf00188 | 7 |
| AX-158063400 | 8 | 102.378 | KV452923.1 | 107724 | 7-scf00188 | 7 |
| AX-158063368 | 8 | 102.418 | KV452923.1 | 65315  | 7-scf00188 | 7 |
| AX-158063393 | 8 | 102.418 | KV452923.1 | 95091  | 7-scf00188 | 7 |
| AX-158063396 | 8 | 102.418 | KV452923.1 | 97278  | 7-scf00188 | 7 |
| AX-157823599 | 8 | 102.418 | KV452923.1 | 102553 | 7-scf00188 | 7 |
| AX-157823600 | 8 | 102.418 | KV452923.1 | 105031 | 7-scf00188 | 7 |
| AX-157740971 | 8 | 102.418 | KV452923.1 | 107228 | 7-scf00188 | 7 |
| AX-157713495 | 8 | 102.418 | KV452923.1 | 113156 | 7-scf00188 | 7 |
| AX-157823601 | 8 | 102.418 | KV452923.1 | 114996 | 7-scf00188 | 7 |
| AX-158063403 | 8 | 102.418 | KV452923.1 | 117573 | 7-scf00188 | 7 |
| AX-158063406 | 8 | 103.032 | KV452923.1 | 118491 | 7-scf00188 | 7 |
| AX-158063416 | 8 | 103.184 | KV452923.1 | 128515 | 7-scf00188 | 7 |
| AX-158063417 | 8 | 103.184 | KV452923.1 | 130986 | 7-scf00188 | 7 |

|              |   |         |            |        |            |   |
|--------------|---|---------|------------|--------|------------|---|
| AX-158063419 | 8 | 103.184 | KV452923.1 | 134955 | 7-scf00188 | 7 |
| AX-157823602 | 8 | 103.184 | KV452923.1 | 136569 | 7-scf00188 | 7 |
| AX-158063422 | 8 | 103.184 | KV452923.1 | 138436 | 7-scf00188 | 7 |
| AX-158063423 | 8 | 103.184 | KV452923.1 | 140490 | 7-scf00188 | 7 |
| AX-158063424 | 8 | 103.184 | KV452923.1 | 141399 | 7-scf00188 | 7 |
| AX-158063425 | 8 | 103.184 | KV452923.1 | 142923 | 7-scf00188 | 7 |
| AX-158063426 | 8 | 103.313 | KV452923.1 | 143400 | 7-scf00188 | 7 |
| AX-158063427 | 8 | 103.474 | KV452923.1 | 146993 | 7-scf00188 | 7 |
| AX-158063432 | 8 | 103.474 | KV452923.1 | 151339 | 7-scf00188 | 7 |
| AX-158063441 | 8 | 103.474 | KV452923.1 | 157824 | 7-scf00188 | 7 |
| AX-158063444 | 8 | 103.474 | KV452923.1 | 159969 | 7-scf00188 | 7 |
| AX-158063447 | 8 | 103.92  | KV452923.1 | 163695 | 7-scf00188 | 7 |
| AX-158063449 | 8 | 103.949 | KV452923.1 | 164459 | 7-scf00188 | 7 |
| AX-158063453 | 8 | 103.95  | KV452923.1 | 166947 | 7-scf00188 | 7 |
| AX-158063457 | 8 | 103.95  | KV452923.1 | 170096 | 7-scf00188 | 7 |
| AX-158063462 | 8 | 103.95  | KV452923.1 | 175429 | 7-scf00188 | 7 |
| AX-157885375 | 8 | 104.059 | KV452923.1 | 102283 | 7-scf00188 | 7 |
| AX-158063458 | 8 | 104.059 | KV452923.1 | 172449 | 7-scf00188 | 7 |
| AX-158063461 | 8 | 104.059 | KV452923.1 | 174770 | 7-scf00188 | 7 |
| AX-158063463 | 8 | 104.059 | KV452923.1 | 176237 | 7-scf00188 | 7 |
| AX-158063465 | 8 | 104.059 | KV452923.1 | 177113 | 7-scf00188 | 7 |
| AX-158063466 | 8 | 104.059 | KV452923.1 | 179483 | 7-scf00188 | 7 |
| AX-158063468 | 8 | 104.059 | KV452923.1 | 180805 | 7-scf00188 | 7 |
| AX-157823608 | 8 | 104.059 | KV452923.1 | 181135 | 7-scf00188 | 7 |
| AX-158063471 | 8 | 104.059 | KV452923.1 | 182254 | 7-scf00188 | 7 |
| AX-158063473 | 8 | 104.059 | KV452923.1 | 184372 | 7-scf00188 | 7 |
| AX-158063474 | 8 | 104.059 | KV452923.1 | 184940 | 7-scf00188 | 7 |
| AX-158063475 | 8 | 104.059 | KV452923.1 | 186954 | 7-scf00188 | 7 |
| AX-158063480 | 8 | 104.059 | KV452923.1 | 191554 | 7-scf00188 | 7 |
| AX-157876982 | 8 | 104.171 | KV452923.1 | 192182 | 7-scf00188 | 7 |
| AX-157823606 | 8 | 104.278 | KV452923.1 | 177003 | 7-scf00188 | 7 |
| AX-158063482 | 8 | 104.278 | KV452923.1 | 194772 | 7-scf00188 | 7 |
| AX-158063483 | 8 | 104.278 | KV452923.1 | 196312 | 7-scf00188 | 7 |
| AX-157823609 | 8 | 104.278 | KV452923.1 | 199731 | 7-scf00188 | 7 |
| AX-158063488 | 8 | 104.278 | KV452923.1 | 200450 | 7-scf00188 | 7 |
| AX-158063489 | 8 | 104.278 | KV452923.1 | 201788 | 7-scf00188 | 7 |
| AX-158063492 | 8 | 104.278 | KV452923.1 | 206790 | 7-scf00188 | 7 |
| AX-158063494 | 8 | 104.278 | KV452923.1 | 207811 | 7-scf00188 | 7 |
| AX-158063495 | 8 | 104.278 | KV452923.1 | 210987 | 7-scf00188 | 7 |
| AX-158063503 | 8 | 104.278 | KV452923.1 | 217382 | 7-scf00188 | 7 |
| AX-158063485 | 8 | 104.714 | KV452923.1 | 196950 | 7-scf00188 | 7 |
| AX-158063501 | 8 | 104.714 | KV452923.1 | 215687 | 7-scf00188 | 7 |
| AX-158063510 | 8 | 104.714 | KV452923.1 | 227330 | 7-scf00188 | 7 |
| AX-158063512 | 8 | 104.714 | KV452923.1 | 228153 | 7-scf00188 | 7 |
| AX-157739739 | 8 | 104.714 | KV452923.1 | 229443 | 7-scf00188 | 7 |
| AX-157752091 | 8 | 104.714 | KV452923.1 | 230433 | 7-scf00188 | 7 |
| AX-158063529 | 8 | 104.714 | KV452923.1 | 236826 | 7-scf00188 | 7 |
| AX-158063516 | 8 | 104.729 | KV452923.1 | 229823 | 7-scf00188 | 7 |
| AX-158063523 | 8 | 104.729 | KV452923.1 | 235354 | 7-scf00188 | 7 |
| AX-157742290 | 8 | 104.729 | KV452923.1 | 244556 | 7-scf00188 | 7 |
| AX-158063567 | 8 | 104.729 | KV452923.1 | 260495 | 7-scf00188 | 7 |

|              |   |         |            |        |            |   |
|--------------|---|---------|------------|--------|------------|---|
| AX-158063524 | 8 | 104.739 | KV452923.1 | 235628 | 7-scf00188 | 7 |
| AX-158063525 | 8 | 104.758 | KV452923.1 | 236142 | 7-scf00188 | 7 |
| AX-158063533 | 8 | 104.784 | KV452923.1 | 238116 | 7-scf00188 | 7 |
| AX-157724730 | 8 | 104.824 | KV452923.1 | 241045 | 7-scf00188 | 7 |
| AX-158063541 | 8 | 104.824 | KV452923.1 | 243696 | 7-scf00188 | 7 |
| AX-158063542 | 8 | 104.824 | KV452923.1 | 245643 | 7-scf00188 | 7 |
| AX-158063544 | 8 | 104.933 | KV452923.1 | 245992 | 7-scf00188 | 7 |
| AX-158063553 | 8 | 104.976 | KV452923.1 | 252110 | 7-scf00188 | 7 |
| AX-158063555 | 8 | 105.001 | KV452923.1 | 253073 | 7-scf00188 | 7 |
| AX-158063572 | 8 | 105.001 | KV452923.1 | 262214 | 7-scf00188 | 7 |
| AX-158063520 | 8 | 105.042 | KV452923.1 | 232963 | 7-scf00188 | 7 |
| AX-158063557 | 8 | 105.042 | KV452923.1 | 253293 | 7-scf00188 | 7 |
| AX-158063560 | 8 | 105.042 | KV452923.1 | 255566 | 7-scf00188 | 7 |
| AX-157772792 | 8 | 105.042 | KV452923.1 | 258115 | 7-scf00188 | 7 |
| AX-158063564 | 8 | 105.042 | KV452923.1 | 259562 | 7-scf00188 | 7 |
| AX-158063566 | 8 | 105.042 | KV452923.1 | 260403 | 7-scf00188 | 7 |
| AX-158063570 | 8 | 105.042 | KV452923.1 | 261469 | 7-scf00188 | 7 |
| AX-157823611 | 8 | 105.042 | KV452923.1 | 261982 | 7-scf00188 | 7 |
| AX-157876985 | 8 | 105.042 | KV452923.1 | 266004 | 7-scf00188 | 7 |
| AX-158063582 | 8 | 105.163 | KV452923.1 | 269243 | 7-scf00188 | 7 |
| AX-158063586 | 8 | 105.267 | KV452923.1 | 271252 | 7-scf00188 | 7 |
| AX-158063587 | 8 | 105.37  | KV452923.1 | 272570 | 7-scf00188 | 7 |
| AX-158063591 | 8 | 105.37  | KV452923.1 | 273952 | 7-scf00188 | 7 |
| AX-157726599 | 8 | 105.37  | KV452923.1 | 275591 | 7-scf00188 | 7 |
| AX-158063592 | 8 | 105.37  | KV452923.1 | 276399 | 7-scf00188 | 7 |
| AX-157726483 | 8 | 105.37  | KV452923.1 | 277397 | 7-scf00188 | 7 |
| AX-158063594 | 8 | 105.37  | KV452923.1 | 278532 | 7-scf00188 | 7 |
| AX-157746645 | 8 | 105.37  | KV452923.1 | 279438 | 7-scf00188 | 7 |
| AX-157772347 | 8 | 105.37  | KV452923.1 | 281893 | 7-scf00188 | 7 |
| AX-157823613 | 8 | 105.588 | KV452923.1 | 284643 | 7-scf00188 | 7 |
| AX-158379881 | 8 | 105.588 | KV452923.1 | 285520 | 7-scf00188 | 7 |
| AX-158063611 | 8 | 105.588 | KV452923.1 | 296554 | 7-scf00188 | 7 |
| AX-158063616 | 8 | 105.591 | KV452923.1 | 298033 | 7-scf00188 | 7 |
| AX-158063910 | 8 | 105.591 | KV452927.1 | 217784 | 7-scf00190 | 7 |
| AX-158063978 | 8 | 105.591 | KV452927.1 | 276021 | 7-scf00190 | 7 |
| AX-158063620 | 8 | 105.609 | KV452923.1 | 302889 | 7-scf00188 | 7 |
| AX-158063867 | 8 | 105.609 | KV452927.1 | 167598 | 7-scf00190 | 7 |
| AX-158063671 | 8 | 105.631 | KV452925.1 | 128878 | 7-scf00189 | 7 |
| AX-157710943 | 8 | 105.64  | KV452923.1 | 242103 | 7-scf00188 | 7 |
| AX-157876984 | 8 | 105.64  | KV452923.1 | 255070 | 7-scf00188 | 7 |
| AX-158063569 | 8 | 105.64  | KV452923.1 | 260940 | 7-scf00188 | 7 |
| AX-157885379 | 8 | 105.64  | KV452925.1 | 128976 | 7-scf00189 | 7 |
| AX-158063676 | 8 | 105.64  | KV452925.1 | 131544 | 7-scf00189 | 7 |
| AX-157823623 | 8 | 105.653 | KV452925.1 | 130595 | 7-scf00189 | 7 |
| AX-157823625 | 8 | 105.677 | KV452925.1 | 132709 | 7-scf00189 | 7 |
| AX-158063604 | 8 | 105.698 | KV452923.1 | 287529 | 7-scf00188 | 7 |
| AX-158063606 | 8 | 105.698 | KV452923.1 | 290150 | 7-scf00188 | 7 |
| AX-158063608 | 8 | 105.698 | KV452923.1 | 292555 | 7-scf00188 | 7 |
| AX-158063625 | 8 | 105.698 | KV452923.1 | 309330 | 7-scf00188 | 7 |
| AX-158063626 | 8 | 105.698 | KV452923.1 | 311815 | 7-scf00188 | 7 |
| AX-158063641 | 8 | 105.698 | KV452925.1 | 28181  | 7-scf00189 | 7 |

|              |   |         |             |        |                |    |
|--------------|---|---------|-------------|--------|----------------|----|
| AX-157772248 | 8 | 105.698 | KV452925.1  | 32888  | 7-scf00189     | 7  |
| AX-158063673 | 8 | 105.698 | KV452925.1  | 129515 | 7-scf00189     | 7  |
| AX-157823622 | 8 | 105.698 | KV452925.1  | 130414 | 7-scf00189     | 7  |
| AX-158063677 | 8 | 105.698 | KV452925.1  | 134050 | 7-scf00189     | 7  |
| AX-158063681 | 8 | 105.698 | KV452925.1  | 137946 | 7-scf00189     | 7  |
| AX-158063684 | 8 | 105.698 | KV452925.1  | 141081 | 7-scf00189     | 7  |
| AX-158063962 | 8 | 105.698 | KV452927.1  | 266816 | 7-scf00190     | 7  |
| AX-158064012 | 8 | 105.916 | KV452927.1  | 304537 | 7-scf00190     | 7  |
| AX-158391913 | 8 | 105.916 | KV452927.1  | 306607 | 7-scf00190     | 7  |
| AX-158064016 | 8 | 105.916 | KV452927.1  | 309231 | 7-scf00190     | 7  |
| AX-157713820 | 8 | 105.916 | KV452927.1  | 310517 | 7-scf00190     | 7  |
| AX-158064020 | 8 | 105.916 | KV452927.1  | 313404 | 7-scf00190     | 7  |
| AX-157823621 | 8 | 106.025 | KV452925.1  | 129613 | 7-scf00189     | 7  |
| AX-158063691 | 8 | 106.025 | KV452925.1  | 151535 | 7-scf00189     | 7  |
| AX-158063813 | 8 | 106.025 | KV452927.1  | 117749 | 7-scf00190     | 7  |
| AX-158063940 | 8 | 106.025 | KV452927.1  | 239176 | 7-scf00190     | 7  |
| AX-158063950 | 8 | 106.025 | KV452927.1  | 250733 | 7-scf00190     | 7  |
| AX-158063952 | 8 | 106.025 | KV452927.1  | 253818 | 7-scf00190     | 7  |
| AX-158063953 | 8 | 106.025 | KV452927.1  | 257577 | 7-scf00190     | 7  |
| AX-158063956 | 8 | 106.025 | KV452927.1  | 261682 | 7-scf00190     | 7  |
| AX-158063957 | 8 | 106.025 | KV452927.1  | 262896 | 7-scf00190     | 7  |
| AX-158063961 | 8 | 106.025 | KV452927.1  | 265983 | 7-scf00190     | 7  |
| AX-158063965 | 8 | 106.025 | KV452927.1  | 268409 | 7-scf00190     | 7  |
| AX-158063968 | 8 | 106.025 | KV452927.1  | 270571 | 7-scf00190     | 7  |
| AX-158063969 | 8 | 106.025 | KV452927.1  | 271636 | 7-scf00190     | 7  |
| AX-158063971 | 8 | 106.025 | KV452927.1  | 272856 | 7-scf00190     | 7  |
| AX-158063972 | 8 | 106.025 | KV452927.1  | 273552 | 7-scf00190     | 7  |
| AX-158063974 | 8 | 106.025 | KV452927.1  | 274124 | 7-scf00190     | 7  |
| AX-158063975 | 8 | 106.025 | KV452927.1  | 274636 | 7-scf00190     | 7  |
| AX-157823642 | 8 | 106.025 | KV452927.1  | 278334 | 7-scf00190     | 7  |
| AX-158063985 | 8 | 106.025 | KV452927.1  | 281715 | 7-scf00190     | 7  |
| AX-158063989 | 8 | 106.025 | KV452927.1  | 283184 | 7-scf00190     | 7  |
| AX-157763419 | 8 | 106.025 | KV452927.1  | 286404 | 7-scf00190     | 7  |
| AX-158063993 | 8 | 106.025 | KV452927.1  | 286480 | 7-scf00190     | 7  |
| AX-158409235 | 8 | 106.025 | KV452927.1  | 290587 | 7-scf00190     | 7  |
| AX-158063999 | 8 | 106.025 | KV452927.1  | 292329 | 7-scf00190     | 7  |
| AX-158064000 | 8 | 106.025 | KV452927.1  | 293916 | 7-scf00190     | 7  |
| AX-158064006 | 8 | 106.025 | KV452927.1  | 299434 | 7-scf00190     | 7  |
| AX-158064009 | 8 | 106.025 | KV452927.1  | 301407 | 7-scf00190     | 7  |
| AX-158064011 | 8 | 106.025 | KV452927.1  | 303817 | 7-scf00190     | 7  |
| AX-157724143 | 8 | 106.025 | KV452927.1  | 305329 | 7-scf00190     | 7  |
| AX-157706851 | 8 | 106.025 | 3ML01033037 | 221    | scf08674_1     | UN |
| AX-157823630 | 8 | 106.029 | KV452925.1  | 161819 | 7-scf00189     | 7  |
| AX-157701072 | 8 | 106.029 | FI863577.1  | 559    | IORI212 lctalu | UN |
| AX-157885384 | 8 | 106.175 | KV452927.1  | 227713 | 7-scf00190     | 7  |
| AX-158063859 | 8 | 106.421 | KV452927.1  | 162789 | 7-scf00190     | 7  |
| AX-158063861 | 8 | 106.421 | KV452927.1  | 163539 | 7-scf00190     | 7  |
| AX-157751995 | 8 | 106.421 | KV452927.1  | 164254 | 7-scf00190     | 7  |
| AX-158063862 | 8 | 106.421 | KV452927.1  | 164937 | 7-scf00190     | 7  |
| AX-157771078 | 8 | 106.421 | KV452927.1  | 165778 | 7-scf00190     | 7  |
| AX-158063863 | 8 | 106.421 | KV452927.1  | 166350 | 7-scf00190     | 7  |

|              |   |         |             |        |            |    |
|--------------|---|---------|-------------|--------|------------|----|
| AX-158063875 | 8 | 106.421 | KV452927.1  | 191982 | 7-scf00190 | 7  |
| AX-158063882 | 8 | 106.421 | KV452927.1  | 196134 | 7-scf00190 | 7  |
| AX-158063885 | 8 | 106.421 | KV452927.1  | 197686 | 7-scf00190 | 7  |
| AX-158063888 | 8 | 106.421 | KV452927.1  | 199837 | 7-scf00190 | 7  |
| AX-158063890 | 8 | 106.421 | KV452927.1  | 200923 | 7-scf00190 | 7  |
| AX-158063894 | 8 | 106.421 | KV452927.1  | 204689 | 7-scf00190 | 7  |
| AX-158409229 | 8 | 106.421 | KV452927.1  | 206365 | 7-scf00190 | 7  |
| AX-158063906 | 8 | 106.421 | KV452927.1  | 215749 | 7-scf00190 | 7  |
| AX-158063589 | 8 | 106.496 | KV452923.1  | 273174 | 7-scf00188 | 7  |
| AX-158063644 | 8 | 106.496 | KV452925.1  | 85752  | 7-scf00189 | 7  |
| AX-157753401 | 8 | 106.496 | KV452925.1  | 92755  | 7-scf00189 | 7  |
| AX-157856921 | 8 | 106.496 | KV452925.1  | 155796 | 7-scf00189 | 7  |
| AX-158063735 | 8 | 106.496 | KV452927.1  | 53905  | 7-scf00190 | 7  |
| AX-158063754 | 8 | 106.496 | KV452927.1  | 65049  | 7-scf00190 | 7  |
| AX-157885381 | 8 | 106.496 | KV452927.1  | 117581 | 7-scf00190 | 7  |
| AX-158063831 | 8 | 106.496 | KV452927.1  | 135370 | 7-scf00190 | 7  |
| AX-158063858 | 8 | 106.496 | KV452927.1  | 162642 | 7-scf00190 | 7  |
| AX-158063864 | 8 | 106.496 | KV452927.1  | 167014 | 7-scf00190 | 7  |
| AX-157885382 | 8 | 106.496 | KV452927.1  | 167719 | 7-scf00190 | 7  |
| AX-158384197 | 8 | 106.496 | KV452927.1  | 201048 | 7-scf00190 | 7  |
| AX-158406674 | 8 | 106.496 | KV452927.1  | 206317 | 7-scf00190 | 7  |
| AX-158063899 | 8 | 106.496 | KV452927.1  | 208756 | 7-scf00190 | 7  |
| AX-158063919 | 8 | 106.496 | KV452927.1  | 222253 | 7-scf00190 | 7  |
| AX-158063924 | 8 | 106.496 | KV452927.1  | 225361 | 7-scf00190 | 7  |
| AX-158063941 | 8 | 106.496 | KV452927.1  | 240860 | 7-scf00190 | 7  |
| AX-158063942 | 8 | 106.496 | KV452927.1  | 241214 | 7-scf00190 | 7  |
| AX-158063995 | 8 | 106.496 | KV452927.1  | 287192 | 7-scf00190 | 7  |
| AX-157758824 | 8 | 106.496 | KV452927.1  | 294305 | 7-scf00190 | 7  |
| AX-157823644 | 8 | 106.496 | KV452927.1  | 296078 | 7-scf00190 | 7  |
| AX-157698177 | 8 | 106.496 | KV452924.1  | 6961   | 7-scf00879 | 7  |
| AX-157688951 | 8 | 106.496 | 3ML01027582 | 746    | scf03188_1 | UN |
| AX-158063833 | 8 | 106.572 | KV452927.1  | 140844 | 7-scf00190 | 7  |
| AX-157713553 | 8 | 106.572 | KV452927.1  | 141671 | 7-scf00190 | 7  |
| AX-158063834 | 8 | 106.572 | KV452927.1  | 143372 | 7-scf00190 | 7  |
| AX-158063836 | 8 | 106.572 | KV452927.1  | 143520 | 7-scf00190 | 7  |
| AX-157856922 | 8 | 106.572 | KV452927.1  | 149442 | 7-scf00190 | 7  |
| AX-157856923 | 8 | 106.572 | KV452927.1  | 150077 | 7-scf00190 | 7  |
| AX-158063841 | 8 | 106.572 | KV452927.1  | 150474 | 7-scf00190 | 7  |
| AX-158063843 | 8 | 106.572 | KV452927.1  | 150585 | 7-scf00190 | 7  |
| AX-158063844 | 8 | 106.572 | KV452927.1  | 151431 | 7-scf00190 | 7  |
| AX-158063845 | 8 | 106.572 | KV452927.1  | 152284 | 7-scf00190 | 7  |
| AX-158063849 | 8 | 106.572 | KV452927.1  | 154707 | 7-scf00190 | 7  |
| AX-158063853 | 8 | 106.572 | KV452927.1  | 158194 | 7-scf00190 | 7  |
| AX-158063855 | 8 | 106.572 | KV452927.1  | 158820 | 7-scf00190 | 7  |
| AX-157876988 | 8 | 106.572 | KV452927.1  | 160765 | 7-scf00190 | 7  |
| AX-158063816 | 8 | 106.607 | KV452927.1  | 124095 | 7-scf00190 | 7  |
| AX-157714172 | 8 | 106.607 | KV452927.1  | 128833 | 7-scf00190 | 7  |
| AX-158063823 | 8 | 106.648 | KV452927.1  | 127147 | 7-scf00190 | 7  |
| AX-158063824 | 8 | 106.648 | KV452927.1  | 128047 | 7-scf00190 | 7  |
| AX-158063827 | 8 | 106.648 | KV452927.1  | 132213 | 7-scf00190 | 7  |
| AX-158063829 | 8 | 106.648 | KV452927.1  | 133013 | 7-scf00190 | 7  |

|              |   |         |             |        |            |    |
|--------------|---|---------|-------------|--------|------------|----|
| AX-158065347 | 8 | 106.648 | KV452937.1  | 538115 | 7-scf00194 | 7  |
| AX-157823634 | 8 | 106.681 | KV452927.1  | 70223  | 7-scf00190 | 7  |
| AX-157725003 | 8 | 106.681 | KV452927.1  | 72009  | 7-scf00190 | 7  |
| AX-158063778 | 8 | 106.681 | KV452927.1  | 84809  | 7-scf00190 | 7  |
| AX-158063779 | 8 | 106.681 | KV452927.1  | 86480  | 7-scf00190 | 7  |
| AX-158063780 | 8 | 106.681 | KV452927.1  | 87481  | 7-scf00190 | 7  |
| AX-158063781 | 8 | 106.681 | KV452927.1  | 88461  | 7-scf00190 | 7  |
| AX-158063782 | 8 | 106.681 | KV452927.1  | 88527  | 7-scf00190 | 7  |
| AX-157721919 | 8 | 106.681 | KV452927.1  | 90259  | 7-scf00190 | 7  |
| AX-158063790 | 8 | 106.681 | KV452927.1  | 91902  | 7-scf00190 | 7  |
| AX-158063792 | 8 | 106.681 | KV452927.1  | 92153  | 7-scf00190 | 7  |
| AX-157823637 | 8 | 106.681 | KV452927.1  | 93285  | 7-scf00190 | 7  |
| AX-157823640 | 8 | 106.681 | KV452927.1  | 96199  | 7-scf00190 | 7  |
| AX-158063800 | 8 | 106.681 | KV452927.1  | 99124  | 7-scf00190 | 7  |
| AX-158063803 | 8 | 106.681 | KV452927.1  | 101525 | 7-scf00190 | 7  |
| AX-158409226 | 8 | 106.681 | KV452927.1  | 103584 | 7-scf00190 | 7  |
| AX-158063807 | 8 | 106.681 | KV452927.1  | 111159 | 7-scf00190 | 7  |
| AX-158063811 | 8 | 106.681 | KV452927.1  | 116694 | 7-scf00190 | 7  |
| AX-158063776 | 8 | 106.697 | KV452927.1  | 82784  | 7-scf00190 | 7  |
| AX-158063784 | 8 | 106.697 | KV452927.1  | 89493  | 7-scf00190 | 7  |
| AX-158063881 | 8 | 106.697 | KV452927.1  | 195587 | 7-scf00190 | 7  |
| AX-157865592 | 8 | 106.943 | KV452927.1  | 74735  | 7-scf00190 | 7  |
| AX-158063763 | 8 | 106.943 | KV452927.1  | 76636  | 7-scf00190 | 7  |
| AX-157738506 | 8 | 107.321 | KV452927.1  | 72830  | 7-scf00190 | 7  |
| AX-157738819 | 8 | 107.325 | KV452927.1  | 70123  | 7-scf00190 | 7  |
| AX-158063734 | 8 | 107.337 | KV452927.1  | 53133  | 7-scf00190 | 7  |
| AX-158063742 | 8 | 107.337 | KV452927.1  | 58975  | 7-scf00190 | 7  |
| AX-158063746 | 8 | 107.337 | KV452927.1  | 60831  | 7-scf00190 | 7  |
| AX-158063748 | 8 | 107.337 | KV452927.1  | 60963  | 7-scf00190 | 7  |
| AX-157870702 | 8 | 107.556 | KV452927.1  | 37992  | 7-scf00190 | 7  |
| AX-158063718 | 8 | 107.556 | KV452927.1  | 38582  | 7-scf00190 | 7  |
| AX-158063719 | 8 | 107.556 | KV452927.1  | 38851  | 7-scf00190 | 7  |
| AX-158063722 | 8 | 107.556 | KV452927.1  | 41591  | 7-scf00190 | 7  |
| AX-158063724 | 8 | 107.556 | KV452927.1  | 42064  | 7-scf00190 | 7  |
| AX-158063725 | 8 | 107.556 | KV452927.1  | 42240  | 7-scf00190 | 7  |
| AX-158063727 | 8 | 107.556 | KV452927.1  | 44378  | 7-scf00190 | 7  |
| AX-158063729 | 8 | 107.556 | KV452927.1  | 45770  | 7-scf00190 | 7  |
| AX-158409222 | 8 | 107.556 | KV452927.1  | 46538  | 7-scf00190 | 7  |
| AX-158063731 | 8 | 107.556 | KV452927.1  | 48364  | 7-scf00190 | 7  |
| AX-158064492 | 8 | 107.556 | KV452932.1  | 403437 | 7-scf00192 | 7  |
| AX-157688583 | 8 | 107.556 | 3ML01026502 | 278    | scf02099_1 | UN |
| AX-157709849 | 8 | 107.883 | KV452927.1  | 350438 | 7-scf00190 | 7  |
| AX-158064821 | 8 | 107.883 | KV452927.1  | 382830 | 7-scf00190 | 7  |
| AX-157885394 | 8 | 107.883 | KV452927.1  | 407939 | 7-scf00190 | 7  |
| AX-158064829 | 8 | 107.883 | KV452927.1  | 408054 | 7-scf00190 | 7  |
| AX-158064841 | 8 | 107.883 | KV452927.1  | 424391 | 7-scf00190 | 7  |
| AX-157823656 | 8 | 107.883 | KV452931.1  | 97134  | 7-scf00191 | 7  |
| AX-157823658 | 8 | 107.883 | KV452931.1  | 112269 | 7-scf00191 | 7  |
| AX-157823659 | 8 | 107.883 | KV452931.1  | 130063 | 7-scf00191 | 7  |
| AX-158064064 | 8 | 107.883 | KV452931.1  | 131532 | 7-scf00191 | 7  |
| AX-157772106 | 8 | 107.883 | KV452931.1  | 133362 | 7-scf00191 | 7  |



|              |   |         |            |        |            |   |
|--------------|---|---------|------------|--------|------------|---|
| AX-157823662 | 8 | 107.883 | KV452931.1 | 133488 | 7-scf00191 | 7 |
| AX-158064068 | 8 | 107.883 | KV452931.1 | 135827 | 7-scf00191 | 7 |
| AX-157722826 | 8 | 107.883 | KV452931.1 | 139487 | 7-scf00191 | 7 |
| AX-158064074 | 8 | 107.883 | KV452931.1 | 141458 | 7-scf00191 | 7 |
| AX-158064075 | 8 | 107.883 | KV452931.1 | 143310 | 7-scf00191 | 7 |
| AX-158064079 | 8 | 107.883 | KV452931.1 | 146712 | 7-scf00191 | 7 |
| AX-158064080 | 8 | 107.883 | KV452931.1 | 150026 | 7-scf00191 | 7 |
| AX-158064082 | 8 | 107.883 | KV452931.1 | 153270 | 7-scf00191 | 7 |
| AX-157870704 | 8 | 107.883 | KV452931.1 | 154156 | 7-scf00191 | 7 |
| AX-158064097 | 8 | 107.883 | KV452931.1 | 172475 | 7-scf00191 | 7 |
| AX-158064100 | 8 | 107.883 | KV452931.1 | 174377 | 7-scf00191 | 7 |
| AX-158064104 | 8 | 107.883 | KV452931.1 | 181310 | 7-scf00191 | 7 |
| AX-158064106 | 8 | 107.883 | KV452931.1 | 181747 | 7-scf00191 | 7 |
| AX-158064111 | 8 | 107.883 | KV452931.1 | 183635 | 7-scf00191 | 7 |
| AX-158064116 | 8 | 107.883 | KV452931.1 | 185923 | 7-scf00191 | 7 |
| AX-157720387 | 8 | 107.883 | KV452931.1 | 188414 | 7-scf00191 | 7 |
| AX-158063771 | 8 | 107.972 | KV452927.1 | 79045  | 7-scf00190 | 7 |
| AX-158064101 | 8 | 107.972 | KV452931.1 | 177633 | 7-scf00191 | 7 |
| AX-158064115 | 8 | 107.972 | KV452931.1 | 185364 | 7-scf00191 | 7 |
| AX-157823663 | 8 | 107.996 | KV452931.1 | 142948 | 7-scf00191 | 7 |
| AX-157755376 | 8 | 107.996 | KV452931.1 | 187435 | 7-scf00191 | 7 |
| AX-158064118 | 8 | 108.023 | KV452931.1 | 187817 | 7-scf00191 | 7 |
| AX-158064119 | 8 | 108.102 | KV452931.1 | 189330 | 7-scf00191 | 7 |
| AX-158064127 | 8 | 108.211 | KV452931.1 | 200052 | 7-scf00191 | 7 |
| AX-158064129 | 8 | 108.211 | KV452931.1 | 200261 | 7-scf00191 | 7 |
| AX-157885389 | 8 | 108.211 | KV452931.1 | 201743 | 7-scf00191 | 7 |
| AX-158064130 | 8 | 108.211 | KV452931.1 | 202289 | 7-scf00191 | 7 |
| AX-158064132 | 8 | 108.211 | KV452931.1 | 202590 | 7-scf00191 | 7 |
| AX-158064140 | 8 | 108.211 | KV452931.1 | 215879 | 7-scf00191 | 7 |
| AX-157774571 | 8 | 108.211 | KV452931.1 | 225231 | 7-scf00191 | 7 |
| AX-157746297 | 8 | 108.211 | KV452931.1 | 229493 | 7-scf00191 | 7 |
| AX-158064148 | 8 | 108.211 | KV452931.1 | 232914 | 7-scf00191 | 7 |
| AX-158064150 | 8 | 108.211 | KV452931.1 | 233717 | 7-scf00191 | 7 |
| AX-158064151 | 8 | 108.211 | KV452931.1 | 236490 | 7-scf00191 | 7 |
| AX-158064153 | 8 | 108.211 | KV452931.1 | 238057 | 7-scf00191 | 7 |
| AX-158064205 | 8 | 108.211 | KV452931.1 | 284232 | 7-scf00191 | 7 |
| AX-158064216 | 8 | 108.211 | KV452931.1 | 292145 | 7-scf00191 | 7 |
| AX-157739408 | 8 | 108.429 | KV452931.1 | 240373 | 7-scf00191 | 7 |
| AX-158064156 | 8 | 108.429 | KV452931.1 | 241287 | 7-scf00191 | 7 |
| AX-158064160 | 8 | 108.429 | KV452931.1 | 243099 | 7-scf00191 | 7 |
| AX-158064169 | 8 | 108.429 | KV452931.1 | 255224 | 7-scf00191 | 7 |
| AX-158064171 | 8 | 108.429 | KV452931.1 | 258932 | 7-scf00191 | 7 |
| AX-158064174 | 8 | 108.429 | KV452931.1 | 259666 | 7-scf00191 | 7 |
| AX-158064178 | 8 | 108.429 | KV452931.1 | 261737 | 7-scf00191 | 7 |
| AX-158064184 | 8 | 108.429 | KV452931.1 | 265083 | 7-scf00191 | 7 |
| AX-158064185 | 8 | 108.429 | KV452931.1 | 265334 | 7-scf00191 | 7 |
| AX-158064186 | 8 | 108.429 | KV452931.1 | 267059 | 7-scf00191 | 7 |
| AX-158064187 | 8 | 108.429 | KV452931.1 | 269460 | 7-scf00191 | 7 |
| AX-158064189 | 8 | 108.429 | KV452931.1 | 270035 | 7-scf00191 | 7 |
| AX-158064190 | 8 | 108.429 | KV452931.1 | 271769 | 7-scf00191 | 7 |
| AX-158064192 | 8 | 108.429 | KV452931.1 | 272349 | 7-scf00191 | 7 |

|              |   |         |            |        |            |   |
|--------------|---|---------|------------|--------|------------|---|
| AX-158064195 | 8 | 108.429 | KV452931.1 | 275738 | 7-scf00191 | 7 |
| AX-158064208 | 8 | 108.429 | KV452931.1 | 286124 | 7-scf00191 | 7 |
| AX-158064209 | 8 | 108.429 | KV452931.1 | 288033 | 7-scf00191 | 7 |
| AX-158064213 | 8 | 108.429 | KV452931.1 | 290095 | 7-scf00191 | 7 |
| AX-158064219 | 8 | 108.429 | KV452931.1 | 292682 | 7-scf00191 | 7 |
| AX-157744671 | 8 | 108.429 | KV452931.1 | 293147 | 7-scf00191 | 7 |
| AX-158064222 | 8 | 108.429 | KV452931.1 | 294599 | 7-scf00191 | 7 |
| AX-158064226 | 8 | 108.429 | KV452931.1 | 298065 | 7-scf00191 | 7 |
| AX-158064228 | 8 | 108.429 | KV452931.1 | 300019 | 7-scf00191 | 7 |
| AX-158064231 | 8 | 108.429 | KV452931.1 | 301507 | 7-scf00191 | 7 |
| AX-158064233 | 8 | 108.429 | KV452931.1 | 301923 | 7-scf00191 | 7 |
| AX-158064236 | 8 | 108.429 | KV452931.1 | 306137 | 7-scf00191 | 7 |
| AX-158064249 | 8 | 108.429 | KV452931.1 | 319950 | 7-scf00191 | 7 |
| AX-158064252 | 8 | 108.429 | KV452931.1 | 322359 | 7-scf00191 | 7 |
| AX-158064259 | 8 | 108.429 | KV452932.1 | 175    | 7-scf00192 | 7 |
| AX-158064261 | 8 | 108.429 | KV452932.1 | 2152   | 7-scf00192 | 7 |
| AX-158064268 | 8 | 108.429 | KV452932.1 | 15372  | 7-scf00192 | 7 |
| AX-158064281 | 8 | 108.429 | KV452932.1 | 28300  | 7-scf00192 | 7 |
| AX-158064305 | 8 | 108.429 | KV452932.1 | 56556  | 7-scf00192 | 7 |
| AX-158064310 | 8 | 108.429 | KV452932.1 | 60984  | 7-scf00192 | 7 |
| AX-158064311 | 8 | 108.429 | KV452932.1 | 61671  | 7-scf00192 | 7 |
| AX-158064313 | 8 | 108.429 | KV452932.1 | 62089  | 7-scf00192 | 7 |
| AX-158064352 | 8 | 108.429 | KV452932.1 | 99989  | 7-scf00192 | 7 |
| AX-158064371 | 8 | 108.429 | KV452932.1 | 118951 | 7-scf00192 | 7 |
| AX-158064378 | 8 | 108.429 | KV452932.1 | 134269 | 7-scf00192 | 7 |
| AX-158409258 | 8 | 108.465 | KV452927.1 | 337653 | 7-scf00190 | 7 |
| AX-158063721 | 8 | 109.194 | KV452927.1 | 39939  | 7-scf00190 | 7 |
| AX-158064809 | 8 | 109.194 | KV452927.1 | 352575 | 7-scf00190 | 7 |
| AX-158409259 | 8 | 109.194 | KV452927.1 | 354176 | 7-scf00190 | 7 |
| AX-158064810 | 8 | 109.194 | KV452927.1 | 354397 | 7-scf00190 | 7 |
| AX-158064812 | 8 | 109.194 | KV452927.1 | 364957 | 7-scf00190 | 7 |
| AX-158064813 | 8 | 109.194 | KV452927.1 | 365435 | 7-scf00190 | 7 |
| AX-157823688 | 8 | 109.194 | KV452927.1 | 421617 | 7-scf00190 | 7 |
| AX-158064842 | 8 | 109.194 | KV452927.1 | 424691 | 7-scf00190 | 7 |
| AX-157870706 | 8 | 109.194 | KV452927.1 | 426784 | 7-scf00190 | 7 |
| AX-158064845 | 8 | 109.194 | KV452927.1 | 429573 | 7-scf00190 | 7 |
| AX-157722105 | 8 | 109.194 | KV452927.1 | 430169 | 7-scf00190 | 7 |
| AX-158064846 | 8 | 109.194 | KV452927.1 | 430284 | 7-scf00190 | 7 |
| AX-158064851 | 8 | 109.194 | KV452927.1 | 436497 | 7-scf00190 | 7 |
| AX-157823690 | 8 | 109.194 | KV452927.1 | 440468 | 7-scf00190 | 7 |
| AX-158064855 | 8 | 109.194 | KV452927.1 | 442444 | 7-scf00190 | 7 |
| AX-158064857 | 8 | 109.194 | KV452927.1 | 444942 | 7-scf00190 | 7 |
| AX-158064875 | 8 | 109.194 | KV452927.1 | 460507 | 7-scf00190 | 7 |
| AX-158064877 | 8 | 109.194 | KV452927.1 | 462245 | 7-scf00190 | 7 |
| AX-158064879 | 8 | 109.194 | KV452927.1 | 463766 | 7-scf00190 | 7 |
| AX-158064880 | 8 | 109.194 | KV452927.1 | 464468 | 7-scf00190 | 7 |
| AX-158064883 | 8 | 109.194 | KV452927.1 | 467502 | 7-scf00190 | 7 |
| AX-158064885 | 8 | 109.194 | KV452927.1 | 468491 | 7-scf00190 | 7 |
| AX-158064886 | 8 | 109.194 | KV452927.1 | 469683 | 7-scf00190 | 7 |
| AX-158064888 | 8 | 109.194 | KV452927.1 | 470601 | 7-scf00190 | 7 |
| AX-157823693 | 8 | 109.194 | KV452927.1 | 472844 | 7-scf00190 | 7 |

|              |   |         |            |        |            |    |
|--------------|---|---------|------------|--------|------------|----|
| AX-158064052 | 8 | 109.194 | KV452931.1 | 96235  | 7-scf00191 | 7  |
| AX-157823655 | 8 | 109.194 | KV452931.1 | 96686  | 7-scf00191 | 7  |
| AX-158064071 | 8 | 109.194 | KV452931.1 | 136895 | 7-scf00191 | 7  |
| AX-157686528 | 8 | 109.194 | KV453403.1 | 1457   | scf00700   | UN |
| AX-157700660 | 8 | 109.242 | KV452926.1 | 1033   | 7-scf01147 | 7  |
| AX-157772151 | 8 | 110.059 | KV452931.1 | 285221 | 7-scf00191 | 7  |
| AX-158064267 | 8 | 110.059 | KV452932.1 | 12331  | 7-scf00192 | 7  |
| AX-158064274 | 8 | 110.059 | KV452932.1 | 23036  | 7-scf00192 | 7  |
| AX-157823668 | 8 | 110.059 | KV452932.1 | 23750  | 7-scf00192 | 7  |
| AX-158064282 | 8 | 110.059 | KV452932.1 | 29249  | 7-scf00192 | 7  |
| AX-158064399 | 8 | 110.059 | KV452932.1 | 159094 | 7-scf00192 | 7  |
| AX-158064037 | 8 | 110.148 | KV452931.1 | 74673  | 7-scf00191 | 7  |
| AX-157697182 | 8 | 110.148 | KV452931.1 | 79389  | 7-scf00191 | 7  |
| AX-158064284 | 8 | 110.148 | KV452932.1 | 29611  | 7-scf00192 | 7  |
| AX-157765932 | 8 | 110.274 | KV452932.1 | 50452  | 7-scf00192 | 7  |
| AX-158063751 | 8 | 110.288 | KV452927.1 | 64083  | 7-scf00190 | 7  |
| AX-157752174 | 8 | 110.288 | KV452931.1 | 130978 | 7-scf00191 | 7  |
| AX-158064300 | 8 | 110.288 | KV452932.1 | 49708  | 7-scf00192 | 7  |
| AX-158064303 | 8 | 110.288 | KV452932.1 | 52094  | 7-scf00192 | 7  |
| AX-158064306 | 8 | 110.288 | KV452932.1 | 56946  | 7-scf00192 | 7  |
| AX-158064307 | 8 | 110.288 | KV452932.1 | 57899  | 7-scf00192 | 7  |
| AX-158064309 | 8 | 110.288 | KV452932.1 | 60194  | 7-scf00192 | 7  |
| AX-158064315 | 8 | 110.288 | KV452932.1 | 63023  | 7-scf00192 | 7  |
| AX-158064317 | 8 | 110.288 | KV452932.1 | 64356  | 7-scf00192 | 7  |
| AX-158064320 | 8 | 110.288 | KV452932.1 | 67580  | 7-scf00192 | 7  |
| AX-158064322 | 8 | 110.288 | KV452932.1 | 69476  | 7-scf00192 | 7  |
| AX-158064324 | 8 | 110.288 | KV452932.1 | 72276  | 7-scf00192 | 7  |
| AX-158064330 | 8 | 110.288 | KV452932.1 | 80282  | 7-scf00192 | 7  |
| AX-158064331 | 8 | 110.288 | KV452932.1 | 80912  | 7-scf00192 | 7  |
| AX-158064332 | 8 | 110.288 | KV452932.1 | 81796  | 7-scf00192 | 7  |
| AX-158064334 | 8 | 110.288 | KV452932.1 | 84601  | 7-scf00192 | 7  |
| AX-158064335 | 8 | 110.288 | KV452932.1 | 85099  | 7-scf00192 | 7  |
| AX-158064339 | 8 | 110.288 | KV452932.1 | 88341  | 7-scf00192 | 7  |
| AX-158064344 | 8 | 110.288 | KV452932.1 | 95062  | 7-scf00192 | 7  |
| AX-158064346 | 8 | 110.288 | KV452932.1 | 97714  | 7-scf00192 | 7  |
| AX-158064348 | 8 | 110.288 | KV452932.1 | 98220  | 7-scf00192 | 7  |
| AX-158064349 | 8 | 110.288 | KV452932.1 | 98563  | 7-scf00192 | 7  |
| AX-158064350 | 8 | 110.288 | KV452932.1 | 98988  | 7-scf00192 | 7  |
| AX-158064355 | 8 | 110.288 | KV452932.1 | 102378 | 7-scf00192 | 7  |
| AX-158064357 | 8 | 110.288 | KV452932.1 | 104309 | 7-scf00192 | 7  |
| AX-158064358 | 8 | 110.288 | KV452932.1 | 106744 | 7-scf00192 | 7  |
| AX-158064360 | 8 | 110.288 | KV452932.1 | 109407 | 7-scf00192 | 7  |
| AX-158064362 | 8 | 110.288 | KV452932.1 | 110163 | 7-scf00192 | 7  |
| AX-158064363 | 8 | 110.288 | KV452932.1 | 111494 | 7-scf00192 | 7  |
| AX-158064367 | 8 | 110.288 | KV452932.1 | 115565 | 7-scf00192 | 7  |
| AX-158064372 | 8 | 110.288 | KV452932.1 | 120363 | 7-scf00192 | 7  |
| AX-157823670 | 8 | 110.288 | KV452932.1 | 121549 | 7-scf00192 | 7  |
| AX-158064374 | 8 | 110.288 | KV452932.1 | 125468 | 7-scf00192 | 7  |
| AX-157741695 | 8 | 110.288 | KV452932.1 | 133529 | 7-scf00192 | 7  |
| AX-158064380 | 8 | 110.288 | KV452932.1 | 136280 | 7-scf00192 | 7  |
| AX-157823675 | 8 | 110.288 | KV452932.1 | 159330 | 7-scf00192 | 7  |

|              |   |         |            |        |            |   |
|--------------|---|---------|------------|--------|------------|---|
| AX-158064473 | 8 | 110.288 | KV452932.1 | 358602 | 7-scf00192 | 7 |
| AX-158065517 | 8 | 110.288 | KV452937.1 | 741670 | 7-scf00194 | 7 |
| AX-158064385 | 8 | 110.376 | KV452932.1 | 144486 | 7-scf00192 | 7 |
| AX-158064387 | 8 | 110.419 | KV452932.1 | 147404 | 7-scf00192 | 7 |
| AX-158064280 | 8 | 110.508 | KV452932.1 | 27317  | 7-scf00192 | 7 |
| AX-157823669 | 8 | 110.508 | KV452932.1 | 64833  | 7-scf00192 | 7 |
| AX-158064343 | 8 | 110.508 | KV452932.1 | 94370  | 7-scf00192 | 7 |
| AX-158064389 | 8 | 110.508 | KV452932.1 | 148530 | 7-scf00192 | 7 |
| AX-158064391 | 8 | 110.508 | KV452932.1 | 150440 | 7-scf00192 | 7 |
| AX-158064392 | 8 | 110.508 | KV452932.1 | 152306 | 7-scf00192 | 7 |
| AX-158064395 | 8 | 110.508 | KV452932.1 | 155345 | 7-scf00192 | 7 |
| AX-158064398 | 8 | 110.508 | KV452932.1 | 157834 | 7-scf00192 | 7 |
| AX-157823673 | 8 | 110.508 | KV452932.1 | 158546 | 7-scf00192 | 7 |
| AX-157823676 | 8 | 110.508 | KV452932.1 | 159378 | 7-scf00192 | 7 |
| AX-158064404 | 8 | 110.508 | KV452932.1 | 168154 | 7-scf00192 | 7 |
| AX-158064406 | 8 | 110.508 | KV452932.1 | 174545 | 7-scf00192 | 7 |
| AX-157720918 | 8 | 110.727 | KV452932.1 | 13571  | 7-scf00192 | 7 |
| AX-158064361 | 8 | 110.727 | KV452932.1 | 109799 | 7-scf00192 | 7 |
| AX-158064411 | 8 | 110.727 | KV452932.1 | 184468 | 7-scf00192 | 7 |
| AX-158064413 | 8 | 110.727 | KV452932.1 | 187521 | 7-scf00192 | 7 |
| AX-158064414 | 8 | 110.727 | KV452932.1 | 188024 | 7-scf00192 | 7 |
| AX-157740807 | 8 | 110.727 | KV452932.1 | 188066 | 7-scf00192 | 7 |
| AX-157865594 | 8 | 110.727 | KV452932.1 | 190897 | 7-scf00192 | 7 |
| AX-158064416 | 8 | 110.727 | KV452932.1 | 192718 | 7-scf00192 | 7 |
| AX-158064417 | 8 | 110.727 | KV452932.1 | 192963 | 7-scf00192 | 7 |
| AX-158064419 | 8 | 110.727 | KV452932.1 | 195123 | 7-scf00192 | 7 |
| AX-158064420 | 8 | 110.727 | KV452932.1 | 195585 | 7-scf00192 | 7 |
| AX-158064421 | 8 | 110.727 | KV452932.1 | 196077 | 7-scf00192 | 7 |
| AX-158064425 | 8 | 110.727 | KV452932.1 | 199486 | 7-scf00192 | 7 |
| AX-158064426 | 8 | 110.727 | KV452932.1 | 200829 | 7-scf00192 | 7 |
| AX-158064428 | 8 | 110.727 | KV452932.1 | 201638 | 7-scf00192 | 7 |
| AX-158064429 | 8 | 110.727 | KV452932.1 | 202795 | 7-scf00192 | 7 |
| AX-157823681 | 8 | 110.727 | KV452932.1 | 205694 | 7-scf00192 | 7 |
| AX-158064455 | 8 | 110.727 | KV452932.1 | 336900 | 7-scf00192 | 7 |
| AX-158064460 | 8 | 110.727 | KV452932.1 | 340692 | 7-scf00192 | 7 |
| AX-158064461 | 8 | 110.727 | KV452932.1 | 342885 | 7-scf00192 | 7 |
| AX-158064466 | 8 | 110.727 | KV452932.1 | 346149 | 7-scf00192 | 7 |
| AX-157770635 | 8 | 110.727 | KV452932.1 | 351125 | 7-scf00192 | 7 |
| AX-158064472 | 8 | 110.727 | KV452932.1 | 351278 | 7-scf00192 | 7 |
| AX-158064481 | 8 | 110.727 | KV452932.1 | 377733 | 7-scf00192 | 7 |
| AX-157722116 | 8 | 110.727 | KV452932.1 | 389630 | 7-scf00192 | 7 |
| AX-158064488 | 8 | 110.727 | KV452932.1 | 398204 | 7-scf00192 | 7 |
| AX-158064493 | 8 | 110.727 | KV452932.1 | 405671 | 7-scf00192 | 7 |
| AX-158064494 | 8 | 110.727 | KV452932.1 | 406111 | 7-scf00192 | 7 |
| AX-158064495 | 8 | 110.727 | KV452932.1 | 406453 | 7-scf00192 | 7 |
| AX-158064504 | 8 | 110.727 | KV452932.1 | 417570 | 7-scf00192 | 7 |
| AX-158064519 | 8 | 110.727 | KV452932.1 | 425074 | 7-scf00192 | 7 |
| AX-158064520 | 8 | 110.727 | KV452932.1 | 425386 | 7-scf00192 | 7 |
| AX-157683143 | 8 | 110.727 | KV452935.1 | 8755   | 7-scf00196 | 7 |
| AX-158378021 | 8 | 110.727 | KV452929.1 | 78421  | 7-scf00642 | 7 |
| AX-158065859 | 8 | 110.727 | KV452938.1 | 109747 | 7-scf01140 | 7 |

|              |   |         |             |        |            |    |
|--------------|---|---------|-------------|--------|------------|----|
| AX-158421394 | 8 | 110.727 | 3ML01025192 | 6729   | scf01015_1 | UN |
| AX-157754168 | 8 | 110.89  | KV452932.1  | 180220 | 7-scf00192 | 7  |
| AX-158064424 | 8 | 110.89  | KV452932.1  | 197344 | 7-scf00192 | 7  |
| AX-158064468 | 8 | 110.89  | KV452932.1  | 347251 | 7-scf00192 | 7  |
| AX-158064500 | 8 | 110.89  | KV452932.1  | 413547 | 7-scf00192 | 7  |
| AX-158064501 | 8 | 110.89  | KV452932.1  | 413844 | 7-scf00192 | 7  |
| AX-158064508 | 8 | 110.89  | KV452932.1  | 419392 | 7-scf00192 | 7  |
| AX-158064516 | 8 | 110.89  | KV452932.1  | 422325 | 7-scf00192 | 7  |
| AX-158064521 | 8 | 110.89  | KV452932.1  | 425918 | 7-scf00192 | 7  |
| AX-158064522 | 8 | 110.89  | KV452932.1  | 427670 | 7-scf00192 | 7  |
| AX-158064523 | 8 | 110.89  | KV452932.1  | 427910 | 7-scf00192 | 7  |
| AX-158064524 | 8 | 110.89  | KV452932.1  | 428401 | 7-scf00192 | 7  |
| AX-158064530 | 8 | 110.89  | KV452932.1  | 434139 | 7-scf00192 | 7  |
| AX-158064531 | 8 | 110.89  | KV452932.1  | 435194 | 7-scf00192 | 7  |
| AX-158064625 | 8 | 110.89  | KV452932.1  | 531027 | 7-scf00192 | 7  |
| AX-158064655 | 8 | 110.89  | KV452932.1  | 564202 | 7-scf00192 | 7  |
| AX-157722540 | 8 | 110.89  | KV452932.1  | 722858 | 7-scf00192 | 7  |
| AX-158064774 | 8 | 110.89  | KV452932.1  | 729350 | 7-scf00192 | 7  |
| AX-157727406 | 8 | 110.89  | KV452937.1  | 157313 | 7-scf00194 | 7  |
| AX-158065174 | 8 | 110.89  | KV452937.1  | 378048 | 7-scf00194 | 7  |
| AX-157823720 | 8 | 110.89  | KV452937.1  | 379365 | 7-scf00194 | 7  |
| AX-158065454 | 8 | 110.89  | KV452937.1  | 675070 | 7-scf00194 | 7  |
| AX-158065457 | 8 | 110.89  | KV452937.1  | 679255 | 7-scf00194 | 7  |
| AX-158065459 | 8 | 110.89  | KV452937.1  | 680173 | 7-scf00194 | 7  |
| AX-158065470 | 8 | 110.89  | KV452937.1  | 687950 | 7-scf00194 | 7  |
| AX-158065589 | 8 | 110.89  | KV452938.1  | 631471 | 7-scf01140 | 7  |
| AX-157705900 | 8 | 110.89  | 3ML01031199 | 617    | scf06805_1 | UN |
| AX-158064141 | 8 | 111.054 | KV452931.1  | 217605 | 7-scf00191 | 7  |
| AX-158064142 | 8 | 111.054 | KV452931.1  | 218751 | 7-scf00191 | 7  |
| AX-158064490 | 8 | 111.054 | KV452932.1  | 401534 | 7-scf00192 | 7  |
| AX-158064503 | 8 | 111.054 | KV452932.1  | 414121 | 7-scf00192 | 7  |
| AX-158064526 | 8 | 111.054 | KV452932.1  | 431387 | 7-scf00192 | 7  |
| AX-158064535 | 8 | 111.054 | KV452932.1  | 438317 | 7-scf00192 | 7  |
| AX-158064537 | 8 | 111.054 | KV452932.1  | 438678 | 7-scf00192 | 7  |
| AX-158064552 | 8 | 111.054 | KV452932.1  | 452049 | 7-scf00192 | 7  |
| AX-158064558 | 8 | 111.054 | KV452932.1  | 456032 | 7-scf00192 | 7  |
| AX-158064568 | 8 | 111.054 | KV452932.1  | 461609 | 7-scf00192 | 7  |
| AX-157856926 | 8 | 111.054 | KV452932.1  | 462166 | 7-scf00192 | 7  |
| AX-158064572 | 8 | 111.054 | KV452932.1  | 470973 | 7-scf00192 | 7  |
| AX-158064578 | 8 | 111.054 | KV452932.1  | 482899 | 7-scf00192 | 7  |
| AX-158064582 | 8 | 111.054 | KV452932.1  | 485563 | 7-scf00192 | 7  |
| AX-158064589 | 8 | 111.054 | KV452932.1  | 493777 | 7-scf00192 | 7  |
| AX-158064591 | 8 | 111.054 | KV452932.1  | 494064 | 7-scf00192 | 7  |
| AX-158064592 | 8 | 111.054 | KV452932.1  | 495357 | 7-scf00192 | 7  |
| AX-158064594 | 8 | 111.054 | KV452932.1  | 497722 | 7-scf00192 | 7  |
| AX-158064595 | 8 | 111.054 | KV452932.1  | 498643 | 7-scf00192 | 7  |
| AX-158064601 | 8 | 111.054 | KV452932.1  | 502912 | 7-scf00192 | 7  |
| AX-158064605 | 8 | 111.054 | KV452932.1  | 508716 | 7-scf00192 | 7  |
| AX-158064616 | 8 | 111.054 | KV452932.1  | 523121 | 7-scf00192 | 7  |
| AX-158064618 | 8 | 111.054 | KV452932.1  | 526820 | 7-scf00192 | 7  |
| AX-158064622 | 8 | 111.054 | KV452932.1  | 530451 | 7-scf00192 | 7  |

|              |   |         |             |        |            |    |
|--------------|---|---------|-------------|--------|------------|----|
| AX-158064623 | 8 | 111.054 | KV452932.1  | 530961 | 7-scf00192 | 7  |
| AX-158064628 | 8 | 111.054 | KV452932.1  | 532144 | 7-scf00192 | 7  |
| AX-158064637 | 8 | 111.054 | KV452932.1  | 540308 | 7-scf00192 | 7  |
| AX-158064639 | 8 | 111.054 | KV452932.1  | 544824 | 7-scf00192 | 7  |
| AX-158064642 | 8 | 111.054 | KV452932.1  | 549127 | 7-scf00192 | 7  |
| AX-158064646 | 8 | 111.054 | KV452932.1  | 550720 | 7-scf00192 | 7  |
| AX-158064647 | 8 | 111.054 | KV452932.1  | 555137 | 7-scf00192 | 7  |
| AX-158064649 | 8 | 111.054 | KV452932.1  | 555870 | 7-scf00192 | 7  |
| AX-158064650 | 8 | 111.054 | KV452932.1  | 557623 | 7-scf00192 | 7  |
| AX-158064652 | 8 | 111.054 | KV452932.1  | 559956 | 7-scf00192 | 7  |
| AX-158064663 | 8 | 111.054 | KV452932.1  | 577075 | 7-scf00192 | 7  |
| AX-157738501 | 8 | 111.054 | KV452932.1  | 577652 | 7-scf00192 | 7  |
| AX-158064666 | 8 | 111.054 | KV452932.1  | 579586 | 7-scf00192 | 7  |
| AX-158391916 | 8 | 111.054 | KV452932.1  | 600183 | 7-scf00192 | 7  |
| AX-158064674 | 8 | 111.054 | KV452932.1  | 602200 | 7-scf00192 | 7  |
| AX-158064688 | 8 | 111.054 | KV452932.1  | 611187 | 7-scf00192 | 7  |
| AX-158064704 | 8 | 111.054 | KV452932.1  | 629819 | 7-scf00192 | 7  |
| AX-158064723 | 8 | 111.054 | KV452932.1  | 649417 | 7-scf00192 | 7  |
| AX-158064749 | 8 | 111.054 | KV452932.1  | 684613 | 7-scf00192 | 7  |
| AX-158064768 | 8 | 111.054 | KV452932.1  | 720466 | 7-scf00192 | 7  |
| AX-158064769 | 8 | 111.054 | KV452932.1  | 722095 | 7-scf00192 | 7  |
| AX-158064771 | 8 | 111.054 | KV452932.1  | 725568 | 7-scf00192 | 7  |
| AX-158064785 | 8 | 111.054 | KV452932.1  | 736725 | 7-scf00192 | 7  |
| AX-158064800 | 8 | 111.054 | KV452932.1  | 744080 | 7-scf00192 | 7  |
| AX-157715706 | 8 | 111.054 | KV452937.1  | 221593 | 7-scf00194 | 7  |
| AX-158065138 | 8 | 111.054 | KV452937.1  | 301583 | 7-scf00194 | 7  |
| AX-158065248 | 8 | 111.054 | KV452937.1  | 438872 | 7-scf00194 | 7  |
| AX-157823724 | 8 | 111.054 | KV452937.1  | 443242 | 7-scf00194 | 7  |
| AX-158065262 | 8 | 111.054 | KV452937.1  | 446696 | 7-scf00194 | 7  |
| AX-158065364 | 8 | 111.054 | KV452937.1  | 562013 | 7-scf00194 | 7  |
| AX-158065471 | 8 | 111.054 | KV452937.1  | 688261 | 7-scf00194 | 7  |
| AX-158065514 | 8 | 111.054 | KV452937.1  | 739359 | 7-scf00194 | 7  |
| AX-158065830 | 8 | 111.054 | KV452938.1  | 184878 | 7-scf01140 | 7  |
| AX-158065703 | 8 | 111.054 | KV452938.1  | 396144 | 7-scf01140 | 7  |
| AX-158065679 | 8 | 111.054 | KV452938.1  | 445799 | 7-scf01140 | 7  |
| AX-158065675 | 8 | 111.054 | KV452938.1  | 454787 | 7-scf01140 | 7  |
| AX-158065674 | 8 | 111.054 | KV452938.1  | 455490 | 7-scf01140 | 7  |
| AX-158065673 | 8 | 111.054 | KV452938.1  | 456176 | 7-scf01140 | 7  |
| AX-158065660 | 8 | 111.054 | KV452938.1  | 475806 | 7-scf01140 | 7  |
| AX-158065658 | 8 | 111.054 | KV452938.1  | 478233 | 7-scf01140 | 7  |
| AX-158065655 | 8 | 111.054 | KV452938.1  | 493882 | 7-scf01140 | 7  |
| AX-158065652 | 8 | 111.054 | KV452938.1  | 506347 | 7-scf01140 | 7  |
| AX-157823752 | 8 | 111.054 | KV452938.1  | 513599 | 7-scf01140 | 7  |
| AX-157823751 | 8 | 111.054 | KV452938.1  | 518596 | 7-scf01140 | 7  |
| AX-158065639 | 8 | 111.054 | KV452938.1  | 535747 | 7-scf01140 | 7  |
| AX-157725465 | 8 | 111.054 | KV452938.1  | 550767 | 7-scf01140 | 7  |
| AX-158065620 | 8 | 111.054 | KV452938.1  | 560487 | 7-scf01140 | 7  |
| AX-158065596 | 8 | 111.054 | KV452938.1  | 613047 | 7-scf01140 | 7  |
| AX-158065595 | 8 | 111.054 | KV452938.1  | 615032 | 7-scf01140 | 7  |
| AX-157687622 | 8 | 111.054 | 3ML01025068 | 2718   | scf00949_1 | UN |
| AX-158391915 | 8 | 111.09  | KV452932.1  | 570497 | 7-scf00192 | 7  |

|              |   |         |            |        |            |   |
|--------------|---|---------|------------|--------|------------|---|
| AX-158064662 | 8 | 111.127 | KV452932.1 | 575030 | 7-scf00192 | 7 |
| AX-158064546 | 8 | 111.163 | KV452932.1 | 447808 | 7-scf00192 | 7 |
| AX-158064567 | 8 | 111.163 | KV452932.1 | 461220 | 7-scf00192 | 7 |
| AX-158064604 | 8 | 111.163 | KV452932.1 | 507700 | 7-scf00192 | 7 |
| AX-158064653 | 8 | 111.163 | KV452932.1 | 560398 | 7-scf00192 | 7 |
| AX-158064664 | 8 | 111.163 | KV452932.1 | 578318 | 7-scf00192 | 7 |
| AX-158064672 | 8 | 111.163 | KV452932.1 | 600389 | 7-scf00192 | 7 |
| AX-158064677 | 8 | 111.163 | KV452932.1 | 604544 | 7-scf00192 | 7 |
| AX-158064679 | 8 | 111.163 | KV452932.1 | 605560 | 7-scf00192 | 7 |
| AX-157775574 | 8 | 111.163 | KV452932.1 | 608056 | 7-scf00192 | 7 |
| AX-158064682 | 8 | 111.163 | KV452932.1 | 608282 | 7-scf00192 | 7 |
| AX-158064683 | 8 | 111.163 | KV452932.1 | 608868 | 7-scf00192 | 7 |
| AX-158064693 | 8 | 111.163 | KV452932.1 | 618049 | 7-scf00192 | 7 |
| AX-158064696 | 8 | 111.163 | KV452932.1 | 620316 | 7-scf00192 | 7 |
| AX-157762259 | 8 | 111.163 | KV452932.1 | 621767 | 7-scf00192 | 7 |
| AX-157720584 | 8 | 111.163 | KV452932.1 | 629036 | 7-scf00192 | 7 |
| AX-157823685 | 8 | 111.163 | KV452932.1 | 631745 | 7-scf00192 | 7 |
| AX-157747370 | 8 | 111.163 | KV452932.1 | 633212 | 7-scf00192 | 7 |
| AX-158064724 | 8 | 111.163 | KV452932.1 | 650755 | 7-scf00192 | 7 |
| AX-158064733 | 8 | 111.163 | KV452932.1 | 658858 | 7-scf00192 | 7 |
| AX-158064736 | 8 | 111.163 | KV452932.1 | 663152 | 7-scf00192 | 7 |
| AX-158064740 | 8 | 111.163 | KV452932.1 | 670684 | 7-scf00192 | 7 |
| AX-158064743 | 8 | 111.163 | KV452932.1 | 672632 | 7-scf00192 | 7 |
| AX-158064744 | 8 | 111.163 | KV452932.1 | 673203 | 7-scf00192 | 7 |
| AX-158064746 | 8 | 111.163 | KV452932.1 | 675989 | 7-scf00192 | 7 |
| AX-158064748 | 8 | 111.163 | KV452932.1 | 683820 | 7-scf00192 | 7 |
| AX-158064758 | 8 | 111.163 | KV452932.1 | 708287 | 7-scf00192 | 7 |
| AX-158064761 | 8 | 111.163 | KV452932.1 | 712406 | 7-scf00192 | 7 |
| AX-158064764 | 8 | 111.163 | KV452932.1 | 715732 | 7-scf00192 | 7 |
| AX-158409257 | 8 | 111.163 | KV452932.1 | 717107 | 7-scf00192 | 7 |
| AX-158064766 | 8 | 111.163 | KV452932.1 | 717703 | 7-scf00192 | 7 |
| AX-158384208 | 8 | 111.163 | KV452932.1 | 729710 | 7-scf00192 | 7 |
| AX-158064777 | 8 | 111.163 | KV452932.1 | 731605 | 7-scf00192 | 7 |
| AX-158064778 | 8 | 111.163 | KV452932.1 | 732861 | 7-scf00192 | 7 |
| AX-158064780 | 8 | 111.163 | KV452932.1 | 733933 | 7-scf00192 | 7 |
| AX-158064788 | 8 | 111.163 | KV452932.1 | 737375 | 7-scf00192 | 7 |
| AX-158064791 | 8 | 111.163 | KV452932.1 | 739335 | 7-scf00192 | 7 |
| AX-158064794 | 8 | 111.163 | KV452932.1 | 740811 | 7-scf00192 | 7 |
| AX-157823701 | 8 | 111.163 | KV452937.1 | 38011  | 7-scf00194 | 7 |
| AX-158064953 | 8 | 111.163 | KV452937.1 | 58395  | 7-scf00194 | 7 |
| AX-158065049 | 8 | 111.163 | KV452937.1 | 165552 | 7-scf00194 | 7 |
| AX-158065082 | 8 | 111.163 | KV452937.1 | 231968 | 7-scf00194 | 7 |
| AX-158065092 | 8 | 111.163 | KV452937.1 | 238479 | 7-scf00194 | 7 |
| AX-158065143 | 8 | 111.163 | KV452937.1 | 310963 | 7-scf00194 | 7 |
| AX-158065172 | 8 | 111.163 | KV452937.1 | 375483 | 7-scf00194 | 7 |
| AX-158065187 | 8 | 111.163 | KV452937.1 | 393200 | 7-scf00194 | 7 |
| AX-158065385 | 8 | 111.163 | KV452937.1 | 576123 | 7-scf00194 | 7 |
| AX-158065465 | 8 | 111.163 | KV452937.1 | 684680 | 7-scf00194 | 7 |
| AX-158065469 | 8 | 111.163 | KV452937.1 | 687283 | 7-scf00194 | 7 |
| AX-158065472 | 8 | 111.163 | KV452937.1 | 689608 | 7-scf00194 | 7 |
| AX-158065480 | 8 | 111.163 | KV452937.1 | 699004 | 7-scf00194 | 7 |

|              |   |         |            |        |            |   |
|--------------|---|---------|------------|--------|------------|---|
| AX-158065482 | 8 | 111.163 | KV452937.1 | 700122 | 7-scf00194 | 7 |
| AX-158065867 | 8 | 111.163 | KV452938.1 | 81361  | 7-scf01140 | 7 |
| AX-158065768 | 8 | 111.163 | KV452938.1 | 289701 | 7-scf01140 | 7 |
| AX-158065766 | 8 | 111.163 | KV452938.1 | 290643 | 7-scf01140 | 7 |
| AX-158065765 | 8 | 111.163 | KV452938.1 | 291199 | 7-scf01140 | 7 |
| AX-158065758 | 8 | 111.163 | KV452938.1 | 305311 | 7-scf01140 | 7 |
| AX-158065757 | 8 | 111.163 | KV452938.1 | 313073 | 7-scf01140 | 7 |
| AX-157755337 | 8 | 111.163 | KV452938.1 | 313793 | 7-scf01140 | 7 |
| AX-158065756 | 8 | 111.163 | KV452938.1 | 317281 | 7-scf01140 | 7 |
| AX-158409278 | 8 | 111.163 | KV452938.1 | 328093 | 7-scf01140 | 7 |
| AX-158065748 | 8 | 111.163 | KV452938.1 | 333472 | 7-scf01140 | 7 |
| AX-158065746 | 8 | 111.163 | KV452938.1 | 334851 | 7-scf01140 | 7 |
| AX-158065694 | 8 | 111.163 | KV452938.1 | 404120 | 7-scf01140 | 7 |
| AX-157823753 | 8 | 111.163 | KV452938.1 | 417414 | 7-scf01140 | 7 |
| AX-157885403 | 8 | 111.163 | KV452938.1 | 420915 | 7-scf01140 | 7 |
| AX-158065685 | 8 | 111.163 | KV452938.1 | 423143 | 7-scf01140 | 7 |
| AX-157885401 | 8 | 111.163 | KV452938.1 | 424954 | 7-scf01140 | 7 |
| AX-158065684 | 8 | 111.163 | KV452938.1 | 425228 | 7-scf01140 | 7 |
| AX-158065676 | 8 | 111.163 | KV452938.1 | 452327 | 7-scf01140 | 7 |
| AX-158065667 | 8 | 111.163 | KV452938.1 | 466132 | 7-scf01140 | 7 |
| AX-158065664 | 8 | 111.163 | KV452938.1 | 470063 | 7-scf01140 | 7 |
| AX-158065663 | 8 | 111.163 | KV452938.1 | 471742 | 7-scf01140 | 7 |
| AX-157709737 | 8 | 111.163 | KV452938.1 | 505447 | 7-scf01140 | 7 |
| AX-158065635 | 8 | 111.163 | KV452938.1 | 537739 | 7-scf01140 | 7 |
| AX-158065633 | 8 | 111.163 | KV452938.1 | 544464 | 7-scf01140 | 7 |
| AX-158064796 | 8 | 111.207 | KV452932.1 | 741201 | 7-scf00192 | 7 |
| AX-158064798 | 8 | 111.251 | KV452932.1 | 742056 | 7-scf00192 | 7 |
| AX-157751332 | 8 | 111.273 | KV452931.1 | 245014 | 7-scf00191 | 7 |
| AX-158064200 | 8 | 111.273 | KV452931.1 | 278716 | 7-scf00191 | 7 |
| AX-157823671 | 8 | 111.273 | KV452932.1 | 125547 | 7-scf00192 | 7 |
| AX-158064532 | 8 | 111.273 | KV452932.1 | 437588 | 7-scf00192 | 7 |
| AX-158064540 | 8 | 111.273 | KV452932.1 | 442611 | 7-scf00192 | 7 |
| AX-158064549 | 8 | 111.273 | KV452932.1 | 448824 | 7-scf00192 | 7 |
| AX-158064556 | 8 | 111.273 | KV452932.1 | 455489 | 7-scf00192 | 7 |
| AX-158064606 | 8 | 111.273 | KV452932.1 | 509477 | 7-scf00192 | 7 |
| AX-158064630 | 8 | 111.273 | KV452932.1 | 536758 | 7-scf00192 | 7 |
| AX-158064668 | 8 | 111.273 | KV452932.1 | 583403 | 7-scf00192 | 7 |
| AX-157823686 | 8 | 111.273 | KV452932.1 | 634408 | 7-scf00192 | 7 |
| AX-158064727 | 8 | 111.273 | KV452932.1 | 652084 | 7-scf00192 | 7 |
| AX-158409254 | 8 | 111.273 | KV452932.1 | 652582 | 7-scf00192 | 7 |
| AX-158064759 | 8 | 111.273 | KV452932.1 | 710222 | 7-scf00192 | 7 |
| AX-158064781 | 8 | 111.273 | KV452932.1 | 734514 | 7-scf00192 | 7 |
| AX-158064782 | 8 | 111.273 | KV452932.1 | 735055 | 7-scf00192 | 7 |
| AX-158064789 | 8 | 111.273 | KV452932.1 | 738566 | 7-scf00192 | 7 |
| AX-157823699 | 8 | 111.273 | KV452937.1 | 20340  | 7-scf00194 | 7 |
| AX-157767702 | 8 | 111.273 | KV452937.1 | 20775  | 7-scf00194 | 7 |
| AX-158064923 | 8 | 111.273 | KV452937.1 | 31964  | 7-scf00194 | 7 |
| AX-158064928 | 8 | 111.273 | KV452937.1 | 35901  | 7-scf00194 | 7 |
| AX-158064929 | 8 | 111.273 | KV452937.1 | 36489  | 7-scf00194 | 7 |
| AX-157746970 | 8 | 111.273 | KV452937.1 | 38204  | 7-scf00194 | 7 |
| AX-158064932 | 8 | 111.273 | KV452937.1 | 39103  | 7-scf00194 | 7 |



|              |   |         |            |        |            |   |
|--------------|---|---------|------------|--------|------------|---|
| AX-158064935 | 8 | 111.273 | KV452937.1 | 44495  | 7-scf00194 | 7 |
| AX-158064937 | 8 | 111.273 | KV452937.1 | 45007  | 7-scf00194 | 7 |
| AX-158064939 | 8 | 111.273 | KV452937.1 | 46297  | 7-scf00194 | 7 |
| AX-158064944 | 8 | 111.273 | KV452937.1 | 49623  | 7-scf00194 | 7 |
| AX-158064946 | 8 | 111.273 | KV452937.1 | 51428  | 7-scf00194 | 7 |
| AX-158064947 | 8 | 111.273 | KV452937.1 | 52473  | 7-scf00194 | 7 |
| AX-158064949 | 8 | 111.273 | KV452937.1 | 53043  | 7-scf00194 | 7 |
| AX-157740937 | 8 | 111.273 | KV452937.1 | 53518  | 7-scf00194 | 7 |
| AX-158064950 | 8 | 111.273 | KV452937.1 | 56453  | 7-scf00194 | 7 |
| AX-158064954 | 8 | 111.273 | KV452937.1 | 59141  | 7-scf00194 | 7 |
| AX-158064955 | 8 | 111.273 | KV452937.1 | 59427  | 7-scf00194 | 7 |
| AX-158064958 | 8 | 111.273 | KV452937.1 | 61769  | 7-scf00194 | 7 |
| AX-157758664 | 8 | 111.273 | KV452937.1 | 80219  | 7-scf00194 | 7 |
| AX-158064968 | 8 | 111.273 | KV452937.1 | 80313  | 7-scf00194 | 7 |
| AX-158064970 | 8 | 111.273 | KV452937.1 | 82368  | 7-scf00194 | 7 |
| AX-157870707 | 8 | 111.273 | KV452937.1 | 84541  | 7-scf00194 | 7 |
| AX-158064973 | 8 | 111.273 | KV452937.1 | 85031  | 7-scf00194 | 7 |
| AX-158064975 | 8 | 111.273 | KV452937.1 | 85385  | 7-scf00194 | 7 |
| AX-158064977 | 8 | 111.273 | KV452937.1 | 86464  | 7-scf00194 | 7 |
| AX-158064979 | 8 | 111.273 | KV452937.1 | 87927  | 7-scf00194 | 7 |
| AX-158064980 | 8 | 111.273 | KV452937.1 | 89192  | 7-scf00194 | 7 |
| AX-157748221 | 8 | 111.273 | KV452937.1 | 90376  | 7-scf00194 | 7 |
| AX-158409265 | 8 | 111.273 | KV452937.1 | 92936  | 7-scf00194 | 7 |
| AX-158064981 | 8 | 111.273 | KV452937.1 | 93648  | 7-scf00194 | 7 |
| AX-157823706 | 8 | 111.273 | KV452937.1 | 94130  | 7-scf00194 | 7 |
| AX-158064982 | 8 | 111.273 | KV452937.1 | 94303  | 7-scf00194 | 7 |
| AX-158064985 | 8 | 111.273 | KV452937.1 | 96244  | 7-scf00194 | 7 |
| AX-158064990 | 8 | 111.273 | KV452937.1 | 97970  | 7-scf00194 | 7 |
| AX-157740444 | 8 | 111.273 | KV452937.1 | 98568  | 7-scf00194 | 7 |
| AX-158064993 | 8 | 111.273 | KV452937.1 | 100157 | 7-scf00194 | 7 |
| AX-158064994 | 8 | 111.273 | KV452937.1 | 101200 | 7-scf00194 | 7 |
| AX-158064996 | 8 | 111.273 | KV452937.1 | 102263 | 7-scf00194 | 7 |
| AX-158064999 | 8 | 111.273 | KV452937.1 | 103733 | 7-scf00194 | 7 |
| AX-158065002 | 8 | 111.273 | KV452937.1 | 106324 | 7-scf00194 | 7 |
| AX-158065004 | 8 | 111.273 | KV452937.1 | 109027 | 7-scf00194 | 7 |
| AX-158065008 | 8 | 111.273 | KV452937.1 | 110525 | 7-scf00194 | 7 |
| AX-158065011 | 8 | 111.273 | KV452937.1 | 112320 | 7-scf00194 | 7 |
| AX-157856929 | 8 | 111.273 | KV452937.1 | 112982 | 7-scf00194 | 7 |
| AX-158065013 | 8 | 111.273 | KV452937.1 | 113839 | 7-scf00194 | 7 |
| AX-158065014 | 8 | 111.273 | KV452937.1 | 114003 | 7-scf00194 | 7 |
| AX-158065016 | 8 | 111.273 | KV452937.1 | 114723 | 7-scf00194 | 7 |
| AX-158065017 | 8 | 111.273 | KV452937.1 | 115750 | 7-scf00194 | 7 |
| AX-158065018 | 8 | 111.273 | KV452937.1 | 116686 | 7-scf00194 | 7 |
| AX-158065021 | 8 | 111.273 | KV452937.1 | 122788 | 7-scf00194 | 7 |
| AX-158065022 | 8 | 111.273 | KV452937.1 | 123157 | 7-scf00194 | 7 |
| AX-157823707 | 8 | 111.273 | KV452937.1 | 123938 | 7-scf00194 | 7 |
| AX-157764201 | 8 | 111.273 | KV452937.1 | 125181 | 7-scf00194 | 7 |
| AX-158065023 | 8 | 111.273 | KV452937.1 | 126892 | 7-scf00194 | 7 |
| AX-157877011 | 8 | 111.273 | KV452937.1 | 132064 | 7-scf00194 | 7 |
| AX-158065026 | 8 | 111.273 | KV452937.1 | 132342 | 7-scf00194 | 7 |
| AX-158065031 | 8 | 111.273 | KV452937.1 | 134819 | 7-scf00194 | 7 |

|              |   |         |            |        |            |   |
|--------------|---|---------|------------|--------|------------|---|
| AX-158065034 | 8 | 111.273 | KV452937.1 | 136145 | 7-scf00194 | 7 |
| AX-158065035 | 8 | 111.273 | KV452937.1 | 136997 | 7-scf00194 | 7 |
| AX-158065037 | 8 | 111.273 | KV452937.1 | 137391 | 7-scf00194 | 7 |
| AX-158065038 | 8 | 111.273 | KV452937.1 | 141318 | 7-scf00194 | 7 |
| AX-158065041 | 8 | 111.273 | KV452937.1 | 151036 | 7-scf00194 | 7 |
| AX-158065044 | 8 | 111.273 | KV452937.1 | 156673 | 7-scf00194 | 7 |
| AX-157856930 | 8 | 111.273 | KV452937.1 | 158148 | 7-scf00194 | 7 |
| AX-157741550 | 8 | 111.273 | KV452937.1 | 160506 | 7-scf00194 | 7 |
| AX-158065048 | 8 | 111.273 | KV452937.1 | 163195 | 7-scf00194 | 7 |
| AX-158065051 | 8 | 111.273 | KV452937.1 | 169343 | 7-scf00194 | 7 |
| AX-158065060 | 8 | 111.273 | KV452937.1 | 187555 | 7-scf00194 | 7 |
| AX-157756632 | 8 | 111.273 | KV452937.1 | 188961 | 7-scf00194 | 7 |
| AX-158065067 | 8 | 111.273 | KV452937.1 | 213299 | 7-scf00194 | 7 |
| AX-158065069 | 8 | 111.273 | KV452937.1 | 213570 | 7-scf00194 | 7 |
| AX-158065081 | 8 | 111.273 | KV452937.1 | 229909 | 7-scf00194 | 7 |
| AX-158065084 | 8 | 111.273 | KV452937.1 | 232756 | 7-scf00194 | 7 |
| AX-158065088 | 8 | 111.273 | KV452937.1 | 236948 | 7-scf00194 | 7 |
| AX-158065090 | 8 | 111.273 | KV452937.1 | 237654 | 7-scf00194 | 7 |
| AX-158065095 | 8 | 111.273 | KV452937.1 | 239684 | 7-scf00194 | 7 |
| AX-158065096 | 8 | 111.273 | KV452937.1 | 240036 | 7-scf00194 | 7 |
| AX-158065101 | 8 | 111.273 | KV452937.1 | 245109 | 7-scf00194 | 7 |
| AX-158065102 | 8 | 111.273 | KV452937.1 | 246487 | 7-scf00194 | 7 |
| AX-158065109 | 8 | 111.273 | KV452937.1 | 249914 | 7-scf00194 | 7 |
| AX-157823712 | 8 | 111.273 | KV452937.1 | 251627 | 7-scf00194 | 7 |
| AX-158065113 | 8 | 111.273 | KV452937.1 | 257913 | 7-scf00194 | 7 |
| AX-158065115 | 8 | 111.273 | KV452937.1 | 259556 | 7-scf00194 | 7 |
| AX-158065122 | 8 | 111.273 | KV452937.1 | 276021 | 7-scf00194 | 7 |
| AX-157823713 | 8 | 111.273 | KV452937.1 | 276515 | 7-scf00194 | 7 |
| AX-158065125 | 8 | 111.273 | KV452937.1 | 279525 | 7-scf00194 | 7 |
| AX-158065128 | 8 | 111.273 | KV452937.1 | 283028 | 7-scf00194 | 7 |
| AX-158065129 | 8 | 111.273 | KV452937.1 | 285560 | 7-scf00194 | 7 |
| AX-158065131 | 8 | 111.273 | KV452937.1 | 286482 | 7-scf00194 | 7 |
| AX-158065135 | 8 | 111.273 | KV452937.1 | 292965 | 7-scf00194 | 7 |
| AX-158065136 | 8 | 111.273 | KV452937.1 | 298007 | 7-scf00194 | 7 |
| AX-158065137 | 8 | 111.273 | KV452937.1 | 300350 | 7-scf00194 | 7 |
| AX-158065139 | 8 | 111.273 | KV452937.1 | 303748 | 7-scf00194 | 7 |
| AX-158065140 | 8 | 111.273 | KV452937.1 | 304376 | 7-scf00194 | 7 |
| AX-158065141 | 8 | 111.273 | KV452937.1 | 309970 | 7-scf00194 | 7 |
| AX-158065142 | 8 | 111.273 | KV452937.1 | 310389 | 7-scf00194 | 7 |
| AX-158065146 | 8 | 111.273 | KV452937.1 | 315454 | 7-scf00194 | 7 |
| AX-157823716 | 8 | 111.273 | KV452937.1 | 318449 | 7-scf00194 | 7 |
| AX-158065149 | 8 | 111.273 | KV452937.1 | 324559 | 7-scf00194 | 7 |
| AX-157856932 | 8 | 111.273 | KV452937.1 | 331307 | 7-scf00194 | 7 |
| AX-158065152 | 8 | 111.273 | KV452937.1 | 332661 | 7-scf00194 | 7 |
| AX-158065154 | 8 | 111.273 | KV452937.1 | 334311 | 7-scf00194 | 7 |
| AX-158065155 | 8 | 111.273 | KV452937.1 | 335393 | 7-scf00194 | 7 |
| AX-158065157 | 8 | 111.273 | KV452937.1 | 337154 | 7-scf00194 | 7 |
| AX-157856933 | 8 | 111.273 | KV452937.1 | 341115 | 7-scf00194 | 7 |
| AX-158065160 | 8 | 111.273 | KV452937.1 | 346841 | 7-scf00194 | 7 |
| AX-157823718 | 8 | 111.273 | KV452937.1 | 348144 | 7-scf00194 | 7 |
| AX-158065165 | 8 | 111.273 | KV452937.1 | 354310 | 7-scf00194 | 7 |

|              |   |         |            |        |            |   |
|--------------|---|---------|------------|--------|------------|---|
| AX-158065166 | 8 | 111.273 | KV452937.1 | 354950 | 7-scf00194 | 7 |
| AX-158065167 | 8 | 111.273 | KV452937.1 | 359234 | 7-scf00194 | 7 |
| AX-158065170 | 8 | 111.273 | KV452937.1 | 367135 | 7-scf00194 | 7 |
| AX-158065173 | 8 | 111.273 | KV452937.1 | 376798 | 7-scf00194 | 7 |
| AX-158065176 | 8 | 111.273 | KV452937.1 | 382042 | 7-scf00194 | 7 |
| AX-158065178 | 8 | 111.273 | KV452937.1 | 382673 | 7-scf00194 | 7 |
| AX-157745531 | 8 | 111.273 | KV452937.1 | 383524 | 7-scf00194 | 7 |
| AX-158065179 | 8 | 111.273 | KV452937.1 | 384370 | 7-scf00194 | 7 |
| AX-158065182 | 8 | 111.273 | KV452937.1 | 385948 | 7-scf00194 | 7 |
| AX-158065183 | 8 | 111.273 | KV452937.1 | 386838 | 7-scf00194 | 7 |
| AX-158065184 | 8 | 111.273 | KV452937.1 | 390603 | 7-scf00194 | 7 |
| AX-157885396 | 8 | 111.273 | KV452937.1 | 396153 | 7-scf00194 | 7 |
| AX-158065209 | 8 | 111.273 | KV452937.1 | 408917 | 7-scf00194 | 7 |
| AX-158065210 | 8 | 111.273 | KV452937.1 | 409067 | 7-scf00194 | 7 |
| AX-157743933 | 8 | 111.273 | KV452937.1 | 409914 | 7-scf00194 | 7 |
| AX-157823722 | 8 | 111.273 | KV452937.1 | 411270 | 7-scf00194 | 7 |
| AX-158065212 | 8 | 111.273 | KV452937.1 | 414737 | 7-scf00194 | 7 |
| AX-158065213 | 8 | 111.273 | KV452937.1 | 415002 | 7-scf00194 | 7 |
| AX-157723766 | 8 | 111.273 | KV452937.1 | 415263 | 7-scf00194 | 7 |
| AX-158065214 | 8 | 111.273 | KV452937.1 | 418407 | 7-scf00194 | 7 |
| AX-158065215 | 8 | 111.273 | KV452937.1 | 419416 | 7-scf00194 | 7 |
| AX-158065216 | 8 | 111.273 | KV452937.1 | 419841 | 7-scf00194 | 7 |
| AX-158065217 | 8 | 111.273 | KV452937.1 | 420378 | 7-scf00194 | 7 |
| AX-158065218 | 8 | 111.273 | KV452937.1 | 420838 | 7-scf00194 | 7 |
| AX-158065219 | 8 | 111.273 | KV452937.1 | 421390 | 7-scf00194 | 7 |
| AX-158065220 | 8 | 111.273 | KV452937.1 | 422387 | 7-scf00194 | 7 |
| AX-158065221 | 8 | 111.273 | KV452937.1 | 422789 | 7-scf00194 | 7 |
| AX-158065222 | 8 | 111.273 | KV452937.1 | 423440 | 7-scf00194 | 7 |
| AX-158065223 | 8 | 111.273 | KV452937.1 | 424632 | 7-scf00194 | 7 |
| AX-158065231 | 8 | 111.273 | KV452937.1 | 431778 | 7-scf00194 | 7 |
| AX-158065233 | 8 | 111.273 | KV452937.1 | 432225 | 7-scf00194 | 7 |
| AX-157700883 | 8 | 111.273 | KV452937.1 | 433121 | 7-scf00194 | 7 |
| AX-158065237 | 8 | 111.273 | KV452937.1 | 434331 | 7-scf00194 | 7 |
| AX-158065239 | 8 | 111.273 | KV452937.1 | 435136 | 7-scf00194 | 7 |
| AX-158065240 | 8 | 111.273 | KV452937.1 | 435692 | 7-scf00194 | 7 |
| AX-158065242 | 8 | 111.273 | KV452937.1 | 436633 | 7-scf00194 | 7 |
| AX-158065243 | 8 | 111.273 | KV452937.1 | 437003 | 7-scf00194 | 7 |
| AX-158065247 | 8 | 111.273 | KV452937.1 | 438365 | 7-scf00194 | 7 |
| AX-158065250 | 8 | 111.273 | KV452937.1 | 439889 | 7-scf00194 | 7 |
| AX-158065251 | 8 | 111.273 | KV452937.1 | 440479 | 7-scf00194 | 7 |
| AX-158065253 | 8 | 111.273 | KV452937.1 | 442547 | 7-scf00194 | 7 |
| AX-158065255 | 8 | 111.273 | KV452937.1 | 443929 | 7-scf00194 | 7 |
| AX-158065256 | 8 | 111.273 | KV452937.1 | 444161 | 7-scf00194 | 7 |
| AX-158065257 | 8 | 111.273 | KV452937.1 | 444571 | 7-scf00194 | 7 |
| AX-158065260 | 8 | 111.273 | KV452937.1 | 445448 | 7-scf00194 | 7 |
| AX-158065264 | 8 | 111.273 | KV452937.1 | 447043 | 7-scf00194 | 7 |
| AX-157823726 | 8 | 111.273 | KV452937.1 | 447396 | 7-scf00194 | 7 |
| AX-158065268 | 8 | 111.273 | KV452937.1 | 451210 | 7-scf00194 | 7 |
| AX-158065272 | 8 | 111.273 | KV452937.1 | 453946 | 7-scf00194 | 7 |
| AX-158065273 | 8 | 111.273 | KV452937.1 | 454878 | 7-scf00194 | 7 |
| AX-158065274 | 8 | 111.273 | KV452937.1 | 455869 | 7-scf00194 | 7 |

|              |   |         |            |        |            |   |
|--------------|---|---------|------------|--------|------------|---|
| AX-158065278 | 8 | 111.273 | KV452937.1 | 459923 | 7-scf00194 | 7 |
| AX-158065280 | 8 | 111.273 | KV452937.1 | 460482 | 7-scf00194 | 7 |
| AX-158065282 | 8 | 111.273 | KV452937.1 | 461107 | 7-scf00194 | 7 |
| AX-158065283 | 8 | 111.273 | KV452937.1 | 461953 | 7-scf00194 | 7 |
| AX-158065289 | 8 | 111.273 | KV452937.1 | 464864 | 7-scf00194 | 7 |
| AX-158391920 | 8 | 111.273 | KV452937.1 | 468636 | 7-scf00194 | 7 |
| AX-158065295 | 8 | 111.273 | KV452937.1 | 469909 | 7-scf00194 | 7 |
| AX-158065297 | 8 | 111.273 | KV452937.1 | 471073 | 7-scf00194 | 7 |
| AX-158065299 | 8 | 111.273 | KV452937.1 | 471408 | 7-scf00194 | 7 |
| AX-158065300 | 8 | 111.273 | KV452937.1 | 472078 | 7-scf00194 | 7 |
| AX-158065301 | 8 | 111.273 | KV452937.1 | 472568 | 7-scf00194 | 7 |
| AX-158065302 | 8 | 111.273 | KV452937.1 | 473999 | 7-scf00194 | 7 |
| AX-157823727 | 8 | 111.273 | KV452937.1 | 474264 | 7-scf00194 | 7 |
| AX-158065307 | 8 | 111.273 | KV452937.1 | 480455 | 7-scf00194 | 7 |
| AX-158065308 | 8 | 111.273 | KV452937.1 | 480886 | 7-scf00194 | 7 |
| AX-158065310 | 8 | 111.273 | KV452937.1 | 482265 | 7-scf00194 | 7 |
| AX-158065319 | 8 | 111.273 | KV452937.1 | 488398 | 7-scf00194 | 7 |
| AX-158065321 | 8 | 111.273 | KV452937.1 | 489502 | 7-scf00194 | 7 |
| AX-158065322 | 8 | 111.273 | KV452937.1 | 489874 | 7-scf00194 | 7 |
| AX-158065324 | 8 | 111.273 | KV452937.1 | 490716 | 7-scf00194 | 7 |
| AX-158065325 | 8 | 111.273 | KV452937.1 | 491789 | 7-scf00194 | 7 |
| AX-158065327 | 8 | 111.273 | KV452937.1 | 494301 | 7-scf00194 | 7 |
| AX-158065331 | 8 | 111.273 | KV452937.1 | 498265 | 7-scf00194 | 7 |
| AX-157856935 | 8 | 111.273 | KV452937.1 | 515505 | 7-scf00194 | 7 |
| AX-158065336 | 8 | 111.273 | KV452937.1 | 519818 | 7-scf00194 | 7 |
| AX-158065340 | 8 | 111.273 | KV452937.1 | 529327 | 7-scf00194 | 7 |
| AX-158065341 | 8 | 111.273 | KV452937.1 | 530036 | 7-scf00194 | 7 |
| AX-158422446 | 8 | 111.273 | KV452937.1 | 530281 | 7-scf00194 | 7 |
| AX-158409270 | 8 | 111.273 | KV452937.1 | 530666 | 7-scf00194 | 7 |
| AX-158065352 | 8 | 111.273 | KV452937.1 | 545588 | 7-scf00194 | 7 |
| AX-157775167 | 8 | 111.273 | KV452937.1 | 550752 | 7-scf00194 | 7 |
| AX-158065359 | 8 | 111.273 | KV452937.1 | 556470 | 7-scf00194 | 7 |
| AX-158065366 | 8 | 111.273 | KV452937.1 | 563237 | 7-scf00194 | 7 |
| AX-158065367 | 8 | 111.273 | KV452937.1 | 565773 | 7-scf00194 | 7 |
| AX-158065370 | 8 | 111.273 | KV452937.1 | 566161 | 7-scf00194 | 7 |
| AX-158065372 | 8 | 111.273 | KV452937.1 | 566620 | 7-scf00194 | 7 |
| AX-158065374 | 8 | 111.273 | KV452937.1 | 568682 | 7-scf00194 | 7 |
| AX-158065378 | 8 | 111.273 | KV452937.1 | 570355 | 7-scf00194 | 7 |
| AX-158379885 | 8 | 111.273 | KV452937.1 | 572073 | 7-scf00194 | 7 |
| AX-158065380 | 8 | 111.273 | KV452937.1 | 572666 | 7-scf00194 | 7 |
| AX-158065383 | 8 | 111.273 | KV452937.1 | 575121 | 7-scf00194 | 7 |
| AX-158065386 | 8 | 111.273 | KV452937.1 | 576792 | 7-scf00194 | 7 |
| AX-158065388 | 8 | 111.273 | KV452937.1 | 579279 | 7-scf00194 | 7 |
| AX-157719147 | 8 | 111.273 | KV452937.1 | 582150 | 7-scf00194 | 7 |
| AX-157754717 | 8 | 111.273 | KV452937.1 | 584085 | 7-scf00194 | 7 |
| AX-158065391 | 8 | 111.273 | KV452937.1 | 585401 | 7-scf00194 | 7 |
| AX-158065394 | 8 | 111.273 | KV452937.1 | 586746 | 7-scf00194 | 7 |
| AX-158065395 | 8 | 111.273 | KV452937.1 | 587255 | 7-scf00194 | 7 |
| AX-158065398 | 8 | 111.273 | KV452937.1 | 589781 | 7-scf00194 | 7 |
| AX-158065401 | 8 | 111.273 | KV452937.1 | 604771 | 7-scf00194 | 7 |
| AX-157727970 | 8 | 111.273 | KV452937.1 | 615966 | 7-scf00194 | 7 |

|              |   |         |            |        |            |   |
|--------------|---|---------|------------|--------|------------|---|
| AX-158065411 | 8 | 111.273 | KV452937.1 | 617844 | 7-scf00194 | 7 |
| AX-158065412 | 8 | 111.273 | KV452937.1 | 624336 | 7-scf00194 | 7 |
| AX-158065413 | 8 | 111.273 | KV452937.1 | 624830 | 7-scf00194 | 7 |
| AX-157713346 | 8 | 111.273 | KV452937.1 | 625788 | 7-scf00194 | 7 |
| AX-158065417 | 8 | 111.273 | KV452937.1 | 629633 | 7-scf00194 | 7 |
| AX-157823734 | 8 | 111.273 | KV452937.1 | 637499 | 7-scf00194 | 7 |
| AX-157751772 | 8 | 111.273 | KV452937.1 | 639300 | 7-scf00194 | 7 |
| AX-157753182 | 8 | 111.273 | KV452937.1 | 646413 | 7-scf00194 | 7 |
| AX-158065426 | 8 | 111.273 | KV452937.1 | 654488 | 7-scf00194 | 7 |
| AX-158065428 | 8 | 111.273 | KV452937.1 | 655685 | 7-scf00194 | 7 |
| AX-158065430 | 8 | 111.273 | KV452937.1 | 658885 | 7-scf00194 | 7 |
| AX-158065432 | 8 | 111.273 | KV452937.1 | 660019 | 7-scf00194 | 7 |
| AX-158065434 | 8 | 111.273 | KV452937.1 | 661944 | 7-scf00194 | 7 |
| AX-158065438 | 8 | 111.273 | KV452937.1 | 668393 | 7-scf00194 | 7 |
| AX-158065440 | 8 | 111.273 | KV452937.1 | 669881 | 7-scf00194 | 7 |
| AX-157823739 | 8 | 111.273 | KV452937.1 | 670872 | 7-scf00194 | 7 |
| AX-158065443 | 8 | 111.273 | KV452937.1 | 671190 | 7-scf00194 | 7 |
| AX-158065446 | 8 | 111.273 | KV452937.1 | 673079 | 7-scf00194 | 7 |
| AX-158065447 | 8 | 111.273 | KV452937.1 | 673826 | 7-scf00194 | 7 |
| AX-158065453 | 8 | 111.273 | KV452937.1 | 674835 | 7-scf00194 | 7 |
| AX-158065455 | 8 | 111.273 | KV452937.1 | 677015 | 7-scf00194 | 7 |
| AX-158065456 | 8 | 111.273 | KV452937.1 | 677519 | 7-scf00194 | 7 |
| AX-158065463 | 8 | 111.273 | KV452937.1 | 682563 | 7-scf00194 | 7 |
| AX-158377982 | 8 | 111.273 | KV452929.1 | 4343   | 7-scf00642 | 7 |
| AX-157722054 | 8 | 111.273 | KV452929.1 | 7284   | 7-scf00642 | 7 |
| AX-158377983 | 8 | 111.273 | KV452929.1 | 7372   | 7-scf00642 | 7 |
| AX-158377984 | 8 | 111.273 | KV452929.1 | 9315   | 7-scf00642 | 7 |
| AX-158377985 | 8 | 111.273 | KV452929.1 | 9831   | 7-scf00642 | 7 |
| AX-158377987 | 8 | 111.273 | KV452929.1 | 10944  | 7-scf00642 | 7 |
| AX-157747207 | 8 | 111.273 | KV452929.1 | 12234  | 7-scf00642 | 7 |
| AX-158377989 | 8 | 111.273 | KV452929.1 | 16162  | 7-scf00642 | 7 |
| AX-158377990 | 8 | 111.273 | KV452929.1 | 16665  | 7-scf00642 | 7 |
| AX-158377991 | 8 | 111.273 | KV452929.1 | 17184  | 7-scf00642 | 7 |
| AX-157726251 | 8 | 111.273 | KV452929.1 | 18580  | 7-scf00642 | 7 |
| AX-158377992 | 8 | 111.273 | KV452929.1 | 19477  | 7-scf00642 | 7 |
| AX-158377993 | 8 | 111.273 | KV452929.1 | 21031  | 7-scf00642 | 7 |
| AX-158377995 | 8 | 111.273 | KV452929.1 | 26599  | 7-scf00642 | 7 |
| AX-158377996 | 8 | 111.273 | KV452929.1 | 27755  | 7-scf00642 | 7 |
| AX-158377997 | 8 | 111.273 | KV452929.1 | 32971  | 7-scf00642 | 7 |
| AX-157740812 | 8 | 111.273 | KV452929.1 | 37221  | 7-scf00642 | 7 |
| AX-158378000 | 8 | 111.273 | KV452929.1 | 41868  | 7-scf00642 | 7 |
| AX-158378001 | 8 | 111.273 | KV452929.1 | 42266  | 7-scf00642 | 7 |
| AX-157853482 | 8 | 111.273 | KV452929.1 | 42733  | 7-scf00642 | 7 |
| AX-158378002 | 8 | 111.273 | KV452929.1 | 43179  | 7-scf00642 | 7 |
| AX-158378003 | 8 | 111.273 | KV452929.1 | 47292  | 7-scf00642 | 7 |
| AX-157853483 | 8 | 111.273 | KV452929.1 | 54382  | 7-scf00642 | 7 |
| AX-157853484 | 8 | 111.273 | KV452929.1 | 56272  | 7-scf00642 | 7 |
| AX-158378004 | 8 | 111.273 | KV452929.1 | 57153  | 7-scf00642 | 7 |
| AX-158378005 | 8 | 111.273 | KV452929.1 | 57522  | 7-scf00642 | 7 |
| AX-158378006 | 8 | 111.273 | KV452929.1 | 58663  | 7-scf00642 | 7 |
| AX-158378007 | 8 | 111.273 | KV452929.1 | 59035  | 7-scf00642 | 7 |

|              |   |         |            |        |            |   |
|--------------|---|---------|------------|--------|------------|---|
| AX-158378008 | 8 | 111.273 | KV452929.1 | 60196  | 7-scf00642 | 7 |
| AX-158378009 | 8 | 111.273 | KV452929.1 | 61804  | 7-scf00642 | 7 |
| AX-158378010 | 8 | 111.273 | KV452929.1 | 62416  | 7-scf00642 | 7 |
| AX-158378011 | 8 | 111.273 | KV452929.1 | 65439  | 7-scf00642 | 7 |
| AX-158378012 | 8 | 111.273 | KV452929.1 | 68170  | 7-scf00642 | 7 |
| AX-158378013 | 8 | 111.273 | KV452929.1 | 69533  | 7-scf00642 | 7 |
| AX-158378014 | 8 | 111.273 | KV452929.1 | 71642  | 7-scf00642 | 7 |
| AX-158378015 | 8 | 111.273 | KV452929.1 | 72391  | 7-scf00642 | 7 |
| AX-158378016 | 8 | 111.273 | KV452929.1 | 73208  | 7-scf00642 | 7 |
| AX-157853485 | 8 | 111.273 | KV452929.1 | 73784  | 7-scf00642 | 7 |
| AX-158378017 | 8 | 111.273 | KV452929.1 | 75946  | 7-scf00642 | 7 |
| AX-158378018 | 8 | 111.273 | KV452929.1 | 76378  | 7-scf00642 | 7 |
| AX-158378019 | 8 | 111.273 | KV452929.1 | 76786  | 7-scf00642 | 7 |
| AX-158378020 | 8 | 111.273 | KV452929.1 | 77361  | 7-scf00642 | 7 |
| AX-158378022 | 8 | 111.273 | KV452929.1 | 86529  | 7-scf00642 | 7 |
| AX-158378023 | 8 | 111.273 | KV452929.1 | 87446  | 7-scf00642 | 7 |
| AX-158378025 | 8 | 111.273 | KV452929.1 | 88286  | 7-scf00642 | 7 |
| AX-158378026 | 8 | 111.273 | KV452929.1 | 88540  | 7-scf00642 | 7 |
| AX-158378027 | 8 | 111.273 | KV452929.1 | 88769  | 7-scf00642 | 7 |
| AX-158378029 | 8 | 111.273 | KV452929.1 | 89752  | 7-scf00642 | 7 |
| AX-157687986 | 8 | 111.273 | KV452938.1 | 1963   | 7-scf01140 | 7 |
| AX-157687987 | 8 | 111.273 | KV452938.1 | 2417   | 7-scf01140 | 7 |
| AX-157680134 | 8 | 111.273 | KV452938.1 | 2849   | 7-scf01140 | 7 |
| AX-158065902 | 8 | 111.273 | KV452938.1 | 11574  | 7-scf01140 | 7 |
| AX-158065901 | 8 | 111.273 | KV452938.1 | 14782  | 7-scf01140 | 7 |
| AX-157823771 | 8 | 111.273 | KV452938.1 | 21646  | 7-scf01140 | 7 |
| AX-158065896 | 8 | 111.273 | KV452938.1 | 24443  | 7-scf01140 | 7 |
| AX-158065887 | 8 | 111.273 | KV452938.1 | 25140  | 7-scf01140 | 7 |
| AX-158065880 | 8 | 111.273 | KV452938.1 | 43254  | 7-scf01140 | 7 |
| AX-158065879 | 8 | 111.273 | KV452938.1 | 44987  | 7-scf01140 | 7 |
| AX-158065878 | 8 | 111.273 | KV452938.1 | 45212  | 7-scf01140 | 7 |
| AX-157774514 | 8 | 111.273 | KV452938.1 | 46160  | 7-scf01140 | 7 |
| AX-158065876 | 8 | 111.273 | KV452938.1 | 49460  | 7-scf01140 | 7 |
| AX-157823768 | 8 | 111.273 | KV452938.1 | 57387  | 7-scf01140 | 7 |
| AX-157823767 | 8 | 111.273 | KV452938.1 | 62827  | 7-scf01140 | 7 |
| AX-158065874 | 8 | 111.273 | KV452938.1 | 64073  | 7-scf01140 | 7 |
| AX-158422451 | 8 | 111.273 | KV452938.1 | 84355  | 7-scf01140 | 7 |
| AX-158065863 | 8 | 111.273 | KV452938.1 | 90663  | 7-scf01140 | 7 |
| AX-158065861 | 8 | 111.273 | KV452938.1 | 98132  | 7-scf01140 | 7 |
| AX-158065856 | 8 | 111.273 | KV452938.1 | 116754 | 7-scf01140 | 7 |
| AX-158065854 | 8 | 111.273 | KV452938.1 | 119605 | 7-scf01140 | 7 |
| AX-158065852 | 8 | 111.273 | KV452938.1 | 124985 | 7-scf01140 | 7 |
| AX-158065851 | 8 | 111.273 | KV452938.1 | 126420 | 7-scf01140 | 7 |
| AX-158406684 | 8 | 111.273 | KV452938.1 | 173316 | 7-scf01140 | 7 |
| AX-158065835 | 8 | 111.273 | KV452938.1 | 177412 | 7-scf01140 | 7 |
| AX-157740629 | 8 | 111.273 | KV452938.1 | 212726 | 7-scf01140 | 7 |
| AX-157856951 | 8 | 111.273 | KV452938.1 | 222418 | 7-scf01140 | 7 |
| AX-158065787 | 8 | 111.273 | KV452938.1 | 268598 | 7-scf01140 | 7 |
| AX-157823757 | 8 | 111.273 | KV452938.1 | 282388 | 7-scf01140 | 7 |
| AX-158065783 | 8 | 111.273 | KV452938.1 | 284491 | 7-scf01140 | 7 |
| AX-158065778 | 8 | 111.273 | KV452938.1 | 286035 | 7-scf01140 | 7 |

|              |   |         |             |        |            |    |
|--------------|---|---------|-------------|--------|------------|----|
| AX-158065777 | 8 | 111.273 | KV452938.1  | 286872 | 7-scf01140 | 7  |
| AX-158065770 | 8 | 111.273 | KV452938.1  | 289098 | 7-scf01140 | 7  |
| AX-158065763 | 8 | 111.273 | KV452938.1  | 292087 | 7-scf01140 | 7  |
| AX-157714840 | 8 | 111.273 | KV452938.1  | 292683 | 7-scf01140 | 7  |
| AX-158065761 | 8 | 111.273 | KV452938.1  | 296603 | 7-scf01140 | 7  |
| AX-158065754 | 8 | 111.273 | KV452938.1  | 320577 | 7-scf01140 | 7  |
| AX-158065752 | 8 | 111.273 | KV452938.1  | 324734 | 7-scf01140 | 7  |
| AX-158065747 | 8 | 111.273 | KV452938.1  | 334279 | 7-scf01140 | 7  |
| AX-157877016 | 8 | 111.273 | KV452938.1  | 337102 | 7-scf01140 | 7  |
| AX-158065738 | 8 | 111.273 | KV452938.1  | 378937 | 7-scf01140 | 7  |
| AX-158065706 | 8 | 111.273 | KV452938.1  | 391573 | 7-scf01140 | 7  |
| AX-158065705 | 8 | 111.273 | KV452938.1  | 392405 | 7-scf01140 | 7  |
| AX-157823755 | 8 | 111.273 | KV452938.1  | 400738 | 7-scf01140 | 7  |
| AX-158065691 | 8 | 111.273 | KV452938.1  | 404967 | 7-scf01140 | 7  |
| AX-158065688 | 8 | 111.273 | KV452938.1  | 413971 | 7-scf01140 | 7  |
| AX-158065669 | 8 | 111.273 | KV452938.1  | 465469 | 7-scf01140 | 7  |
| AX-158065661 | 8 | 111.273 | KV452938.1  | 474483 | 7-scf01140 | 7  |
| AX-158065654 | 8 | 111.273 | KV452938.1  | 497110 | 7-scf01140 | 7  |
| AX-158065649 | 8 | 111.273 | KV452938.1  | 522177 | 7-scf01140 | 7  |
| AX-158065647 | 8 | 111.273 | KV452938.1  | 524942 | 7-scf01140 | 7  |
| AX-158065645 | 8 | 111.273 | KV452938.1  | 525954 | 7-scf01140 | 7  |
| AX-158065643 | 8 | 111.273 | KV452938.1  | 530129 | 7-scf01140 | 7  |
| AX-158065641 | 8 | 111.273 | KV452938.1  | 535015 | 7-scf01140 | 7  |
| AX-158065637 | 8 | 111.273 | KV452938.1  | 536205 | 7-scf01140 | 7  |
| AX-158065630 | 8 | 111.273 | KV452938.1  | 547476 | 7-scf01140 | 7  |
| AX-158065628 | 8 | 111.273 | KV452938.1  | 551143 | 7-scf01140 | 7  |
| AX-157823750 | 8 | 111.273 | KV452938.1  | 573026 | 7-scf01140 | 7  |
| AX-157856946 | 8 | 111.273 | KV452938.1  | 576482 | 7-scf01140 | 7  |
| AX-158065609 | 8 | 111.273 | KV452938.1  | 578742 | 7-scf01140 | 7  |
| AX-157823749 | 8 | 111.273 | KV452938.1  | 582684 | 7-scf01140 | 7  |
| AX-158065608 | 8 | 111.273 | KV452938.1  | 583069 | 7-scf01140 | 7  |
| AX-158065605 | 8 | 111.273 | KV452938.1  | 588169 | 7-scf01140 | 7  |
| AX-157823748 | 8 | 111.273 | KV452938.1  | 589479 | 7-scf01140 | 7  |
| AX-157823747 | 8 | 111.273 | KV452938.1  | 589977 | 7-scf01140 | 7  |
| AX-157823746 | 8 | 111.273 | KV452938.1  | 591084 | 7-scf01140 | 7  |
| AX-158065603 | 8 | 111.273 | KV452938.1  | 594167 | 7-scf01140 | 7  |
| AX-158065598 | 8 | 111.273 | KV452938.1  | 606286 | 7-scf01140 | 7  |
| AX-158065593 | 8 | 111.273 | KV452938.1  | 618245 | 7-scf01140 | 7  |
| AX-158065592 | 8 | 111.273 | KV452938.1  | 620199 | 7-scf01140 | 7  |
| AX-158065572 | 8 | 111.273 | KV452938.1  | 663649 | 7-scf01140 | 7  |
| AX-158065570 | 8 | 111.273 | KV452938.1  | 666187 | 7-scf01140 | 7  |
| AX-158065569 | 8 | 111.273 | KV452938.1  | 668934 | 7-scf01140 | 7  |
| AX-158065562 | 8 | 111.273 | KV452938.1  | 675288 | 7-scf01140 | 7  |
| AX-157753036 | 8 | 111.273 | KV452938.1  | 676731 | 7-scf01140 | 7  |
| AX-157686304 | 8 | 111.273 | KV453392.1  | 1390   | scf00684   | UN |
| AX-157680015 | 8 | 111.273 | KV453392.1  | 6327   | scf00684   | UN |
| AX-157686310 | 8 | 111.273 | KV453392.1  | 31908  | scf00684   | UN |
| AX-157687152 | 8 | 111.273 | KV453471.1  | 5796   | scf00807   | UN |
| AX-157688106 | 8 | 111.273 | 3ML01025562 | 2131   | scf01242_1 | UN |
| AX-157681042 | 8 | 111.273 | 3ML01025562 | 4266   | scf01242_1 | UN |
| AX-157681043 | 8 | 111.273 | 3ML01025562 | 4340   | scf01242_1 | UN |

|              |   |         |             |        |            |    |
|--------------|---|---------|-------------|--------|------------|----|
| AX-157688190 | 8 | 111.273 | KV453780.1  | 2115   | scf01351   | UN |
| AX-157689866 | 8 | 111.273 | 3ML01033919 | 402    | scf09588_1 | UN |
| AX-158065862 | 8 | 111.475 | KV452938.1  | 93142  | 7-scf01140 | 7  |
| AX-158064738 | 8 | 111.677 | KV452932.1  | 668205 | 7-scf00192 | 7  |
| AX-158064910 | 8 | 111.677 | KV452937.1  | 24120  | 7-scf00194 | 7  |
| AX-158065186 | 8 | 111.677 | KV452937.1  | 392820 | 7-scf00194 | 7  |
| AX-158065884 | 8 | 111.677 | KV452938.1  | 30223  | 7-scf01140 | 7  |
| AX-157856954 | 8 | 111.677 | KV452938.1  | 36626  | 7-scf01140 | 7  |
| AX-158065883 | 8 | 111.677 | KV452938.1  | 38877  | 7-scf01140 | 7  |
| AX-158065877 | 8 | 111.677 | KV452938.1  | 47329  | 7-scf01140 | 7  |
| AX-158065875 | 8 | 111.677 | KV452938.1  | 57232  | 7-scf01140 | 7  |
| AX-157823766 | 8 | 111.677 | KV452938.1  | 63854  | 7-scf01140 | 7  |
| AX-157743608 | 8 | 111.677 | KV452938.1  | 98865  | 7-scf01140 | 7  |
| AX-158065860 | 8 | 111.677 | KV452938.1  | 106056 | 7-scf01140 | 7  |
| AX-158065850 | 8 | 111.677 | KV452938.1  | 126849 | 7-scf01140 | 7  |
| AX-158065794 | 8 | 111.677 | KV452938.1  | 223023 | 7-scf01140 | 7  |
| AX-158065792 | 8 | 111.677 | KV452938.1  | 227444 | 7-scf01140 | 7  |
| AX-157823759 | 8 | 111.677 | KV452938.1  | 277984 | 7-scf01140 | 7  |
| AX-158065619 | 8 | 111.677 | KV452938.1  | 562267 | 7-scf01140 | 7  |
| AX-157856947 | 8 | 111.677 | KV452938.1  | 563176 | 7-scf01140 | 7  |
| AX-158065613 | 8 | 111.677 | KV452938.1  | 577724 | 7-scf01140 | 7  |
| AX-158065611 | 8 | 111.677 | KV452938.1  | 577797 | 7-scf01140 | 7  |
| AX-158065607 | 8 | 111.677 | KV452938.1  | 585631 | 7-scf01140 | 7  |
| AX-157823744 | 8 | 111.677 | KV452938.1  | 608936 | 7-scf01140 | 7  |
| AX-157712943 | 8 | 111.677 | KV452938.1  | 644264 | 7-scf01140 | 7  |
| AX-157856944 | 8 | 111.677 | KV452938.1  | 645127 | 7-scf01140 | 7  |
| AX-157856941 | 8 | 111.677 | KV452938.1  | 670445 | 7-scf01140 | 7  |
| AX-157856940 | 8 | 111.677 | KV452938.1  | 674546 | 7-scf01140 | 7  |
| AX-158065564 | 8 | 111.677 | KV452938.1  | 674641 | 7-scf01140 | 7  |
| AX-158065558 | 8 | 111.677 | KV452938.1  | 677854 | 7-scf01140 | 7  |
| AX-157856939 | 8 | 111.677 | KV452938.1  | 680649 | 7-scf01140 | 7  |
| AX-158065548 | 8 | 111.677 | KV452938.1  | 685978 | 7-scf01140 | 7  |
| AX-158065889 | 8 | 111.695 | KV452938.1  | 24666  | 7-scf01140 | 7  |
| AX-158065286 | 8 | 111.744 | KV452937.1  | 463069 | 7-scf00194 | 7  |
| AX-158065306 | 8 | 111.744 | KV452937.1  | 477119 | 7-scf00194 | 7  |
| AX-157701301 | 8 | 111.91  | KV453662.1  | 2323   | scf01129   | UN |
| AX-157687985 | 8 | 112.518 | KV452938.1  | 1511   | 7-scf01140 | 7  |
| AX-157865596 | 9 | 0       | KV452943.1  | 11402  | 8-scf00198 | 8  |
| AX-158065910 | 9 | 0       | KV452943.1  | 13398  | 8-scf00198 | 8  |
| AX-158065917 | 9 | 0       | KV452943.1  | 27106  | 8-scf00198 | 8  |
| AX-158065922 | 9 | 0       | KV452943.1  | 37491  | 8-scf00198 | 8  |
| AX-158065940 | 9 | 0       | KV452943.1  | 100645 | 8-scf00198 | 8  |
| AX-158065951 | 9 | 0       | KV452943.1  | 119725 | 8-scf00198 | 8  |
| AX-158065952 | 9 | 0       | KV452943.1  | 120225 | 8-scf00198 | 8  |
| AX-158065964 | 9 | 0       | KV452943.1  | 139279 | 8-scf00198 | 8  |
| AX-157823784 | 9 | 0       | KV452943.1  | 156872 | 8-scf00198 | 8  |
| AX-158379886 | 9 | 0       | KV452943.1  | 171273 | 8-scf00198 | 8  |
| AX-157823790 | 9 | 0       | KV452943.1  | 188364 | 8-scf00198 | 8  |
| AX-158065979 | 9 | 0       | KV452943.1  | 195180 | 8-scf00198 | 8  |
| AX-158065989 | 9 | 0       | KV452943.1  | 209716 | 8-scf00198 | 8  |
| AX-158069658 | 9 | 0       | KV452942.1  | 1781   | 8-scf00199 | 8  |



|              |   |       |            |        |            |    |
|--------------|---|-------|------------|--------|------------|----|
| AX-158069660 | 9 | 0     | KV452942.1 | 2096   | 8-scf00199 | 8  |
| AX-158069661 | 9 | 0     | KV452942.1 | 8215   | 8-scf00199 | 8  |
| AX-158069663 | 9 | 0     | KV452942.1 | 11154  | 8-scf00199 | 8  |
| AX-157712156 | 9 | 0     | KV452942.1 | 12206  | 8-scf00199 | 8  |
| AX-158069664 | 9 | 0     | KV452942.1 | 13168  | 8-scf00199 | 8  |
| AX-158069667 | 9 | 0     | KV452942.1 | 14150  | 8-scf00199 | 8  |
| AX-158069669 | 9 | 0     | KV452942.1 | 17600  | 8-scf00199 | 8  |
| AX-158069670 | 9 | 0     | KV452942.1 | 21558  | 8-scf00199 | 8  |
| AX-158069671 | 9 | 0     | KV452942.1 | 21949  | 8-scf00199 | 8  |
| AX-158069672 | 9 | 0     | KV452942.1 | 37419  | 8-scf00199 | 8  |
| AX-158069681 | 9 | 0     | KV452942.1 | 49713  | 8-scf00199 | 8  |
| AX-158069683 | 9 | 0     | KV452942.1 | 50034  | 8-scf00199 | 8  |
| AX-157824073 | 9 | 0     | KV452942.1 | 81796  | 8-scf00199 | 8  |
| AX-157857005 | 9 | 0     | KV452942.1 | 95864  | 8-scf00199 | 8  |
| AX-158069688 | 9 | 0     | KV452942.1 | 107954 | 8-scf00199 | 8  |
| AX-158069691 | 9 | 0     | KV452942.1 | 112608 | 8-scf00199 | 8  |
| AX-158069696 | 9 | 0     | KV452942.1 | 122525 | 8-scf00199 | 8  |
| AX-158069699 | 9 | 0     | KV452942.1 | 124563 | 8-scf00199 | 8  |
| AX-158069701 | 9 | 0     | KV452942.1 | 125630 | 8-scf00199 | 8  |
| AX-157857006 | 9 | 0     | KV452942.1 | 125701 | 8-scf00199 | 8  |
| AX-158069704 | 9 | 0     | KV452942.1 | 126522 | 8-scf00199 | 8  |
| AX-157824074 | 9 | 0     | KV452942.1 | 126697 | 8-scf00199 | 8  |
| AX-157824075 | 9 | 0     | KV452942.1 | 129689 | 8-scf00199 | 8  |
| AX-158069705 | 9 | 0     | KV452942.1 | 130407 | 8-scf00199 | 8  |
| AX-157713776 | 9 | 0     | KV452942.1 | 131245 | 8-scf00199 | 8  |
| AX-158069707 | 9 | 0     | KV452942.1 | 133086 | 8-scf00199 | 8  |
| AX-158069719 | 9 | 0     | KV452942.1 | 144188 | 8-scf00199 | 8  |
| AX-158069721 | 9 | 0     | KV452942.1 | 147642 | 8-scf00199 | 8  |
| AX-158069722 | 9 | 0     | KV452942.1 | 152316 | 8-scf00199 | 8  |
| AX-157716936 | 9 | 0     | KV452942.1 | 163806 | 8-scf00199 | 8  |
| AX-158069728 | 9 | 0     | KV452942.1 | 179812 | 8-scf00199 | 8  |
| AX-158069731 | 9 | 0     | KV452942.1 | 186813 | 8-scf00199 | 8  |
| AX-158406737 | 9 | 0     | KV452942.1 | 189100 | 8-scf00199 | 8  |
| AX-158069735 | 9 | 0     | KV452942.1 | 207614 | 8-scf00199 | 8  |
| AX-158409407 | 9 | 0     | KV452942.1 | 209183 | 8-scf00199 | 8  |
| AX-158069739 | 9 | 0     | KV452942.1 | 221334 | 8-scf00199 | 8  |
| AX-158069741 | 9 | 0     | KV452942.1 | 222489 | 8-scf00199 | 8  |
| AX-157824080 | 9 | 0     | KV452942.1 | 233513 | 8-scf00199 | 8  |
| AX-157685937 | 9 | 0     | KV452941.1 | 3810   | 8-scf00658 | 8  |
| AX-157680871 | 9 | 0     | KV452941.1 | 11372  | 8-scf00658 | 8  |
| AX-157685940 | 9 | 0     | KV452941.1 | 24907  | 8-scf00658 | 8  |
| AX-157685941 | 9 | 0     | KV452941.1 | 29712  | 8-scf00658 | 8  |
| AX-157685944 | 9 | 0     | KV452941.1 | 38472  | 8-scf00658 | 8  |
| AX-157681986 | 9 | 0     | KV452941.1 | 39699  | 8-scf00658 | 8  |
| AX-157685946 | 9 | 0     | KV452941.1 | 46806  | 8-scf00658 | 8  |
| AX-157685947 | 9 | 0     | KV452941.1 | 71988  | 8-scf00658 | 8  |
| AX-157690002 | 9 | 0     |            | 67     | scf19917   | UN |
| AX-158069723 | 9 | 0.057 | KV452942.1 | 155625 | 8-scf00199 | 8  |
| AX-158069729 | 9 | 0.109 | KV452942.1 | 183130 | 8-scf00199 | 8  |
| AX-158422474 | 9 | 0.109 | KV452942.1 | 189529 | 8-scf00199 | 8  |
| AX-158069737 | 9 | 0.109 | KV452942.1 | 216252 | 8-scf00199 | 8  |

|              |   |       |             |        |            |    |
|--------------|---|-------|-------------|--------|------------|----|
| AX-157824077 | 9 | 0.109 | KV452942.1  | 228069 | 8-scf00199 | 8  |
| AX-158069750 | 9 | 0.109 | KV452942.1  | 229822 | 8-scf00199 | 8  |
| AX-157748000 | 9 | 0.109 | KV452942.1  | 236422 | 8-scf00199 | 8  |
| AX-157713525 | 9 | 0.218 | KV452942.1  | 237388 | 8-scf00199 | 8  |
| AX-157824081 | 9 | 0.218 | KV452942.1  | 242367 | 8-scf00199 | 8  |
| AX-158069755 | 9 | 0.218 | KV452942.1  | 244188 | 8-scf00199 | 8  |
| AX-157824083 | 9 | 0.218 | KV452942.1  | 245684 | 8-scf00199 | 8  |
| AX-157744826 | 9 | 0.328 | KV452943.1  | 1818   | 8-scf00198 | 8  |
| AX-158065906 | 9 | 0.328 | KV452943.1  | 9022   | 8-scf00198 | 8  |
| AX-158065908 | 9 | 0.328 | KV452943.1  | 11930  | 8-scf00198 | 8  |
| AX-158065909 | 9 | 0.328 | KV452943.1  | 13120  | 8-scf00198 | 8  |
| AX-158065911 | 9 | 0.328 | KV452943.1  | 13975  | 8-scf00198 | 8  |
| AX-158065912 | 9 | 0.328 | KV452943.1  | 14433  | 8-scf00198 | 8  |
| AX-157823772 | 9 | 0.328 | KV452943.1  | 17005  | 8-scf00198 | 8  |
| AX-158065916 | 9 | 0.328 | KV452943.1  | 21737  | 8-scf00198 | 8  |
| AX-157865597 | 9 | 0.328 | KV452943.1  | 28611  | 8-scf00198 | 8  |
| AX-158065920 | 9 | 0.328 | KV452943.1  | 35952  | 8-scf00198 | 8  |
| AX-158065925 | 9 | 0.328 | KV452943.1  | 54999  | 8-scf00198 | 8  |
| AX-158065927 | 9 | 0.328 | KV452943.1  | 68702  | 8-scf00198 | 8  |
| AX-157754579 | 9 | 0.328 | KV452943.1  | 88898  | 8-scf00198 | 8  |
| AX-158065947 | 9 | 0.328 | KV452943.1  | 109310 | 8-scf00198 | 8  |
| AX-157742137 | 9 | 0.416 | KV452943.1  | 50640  | 8-scf00198 | 8  |
| AX-158065924 | 9 | 0.437 | KV452943.1  | 53389  | 8-scf00198 | 8  |
| AX-157755837 | 9 | 0.437 | KV452943.1  | 58373  | 8-scf00198 | 8  |
| AX-158065929 | 9 | 0.437 | KV452943.1  | 76444  | 8-scf00198 | 8  |
| AX-157719396 | 9 | 0.437 | KV452943.1  | 83753  | 8-scf00198 | 8  |
| AX-158065933 | 9 | 0.437 | KV452943.1  | 87397  | 8-scf00198 | 8  |
| AX-158065936 | 9 | 0.437 | KV452943.1  | 94327  | 8-scf00198 | 8  |
| AX-158065939 | 9 | 0.437 | KV452943.1  | 100262 | 8-scf00198 | 8  |
| AX-157823777 | 9 | 0.437 | KV452943.1  | 104180 | 8-scf00198 | 8  |
| AX-158065942 | 9 | 0.437 | KV452943.1  | 104458 | 8-scf00198 | 8  |
| AX-158065943 | 9 | 0.437 | KV452943.1  | 105484 | 8-scf00198 | 8  |
| AX-158065944 | 9 | 0.437 | KV452943.1  | 107416 | 8-scf00198 | 8  |
| AX-158065949 | 9 | 0.437 | KV452943.1  | 113749 | 8-scf00198 | 8  |
| AX-157719165 | 9 | 0.437 | KV452943.1  | 114238 | 8-scf00198 | 8  |
| AX-157757956 | 9 | 0.437 | KV452943.1  | 115620 | 8-scf00198 | 8  |
| AX-157856956 | 9 | 0.437 | KV452943.1  | 144246 | 8-scf00198 | 8  |
| AX-158065967 | 9 | 0.437 | KV452943.1  | 144770 | 8-scf00198 | 8  |
| AX-157823782 | 9 | 0.437 | KV452943.1  | 153863 | 8-scf00198 | 8  |
| AX-157856957 | 9 | 0.437 | KV452943.1  | 180664 | 8-scf00198 | 8  |
| AX-158069752 | 9 | 0.437 | KV452942.1  | 233917 | 8-scf00199 | 8  |
| AX-157689307 | 9 | 0.437 | 3ML01029049 | 776    | scf04667_1 | UN |
| AX-157755937 | 9 | 0.655 | KV452943.1  | 78470  | 8-scf00198 | 8  |
| AX-158065931 | 9 | 0.655 | KV452943.1  | 85086  | 8-scf00198 | 8  |
| AX-157823778 | 9 | 0.655 | KV452943.1  | 116326 | 8-scf00198 | 8  |
| AX-158065954 | 9 | 0.655 | KV452943.1  | 121975 | 8-scf00198 | 8  |
| AX-158065956 | 9 | 0.655 | KV452943.1  | 124580 | 8-scf00198 | 8  |
| AX-158065958 | 9 | 0.655 | KV452943.1  | 125972 | 8-scf00198 | 8  |
| AX-158065960 | 9 | 0.655 | KV452943.1  | 130396 | 8-scf00198 | 8  |
| AX-157713705 | 9 | 0.655 | KV452943.1  | 132698 | 8-scf00198 | 8  |
| AX-157823779 | 9 | 0.655 | KV452943.1  | 135378 | 8-scf00198 | 8  |

|              |   |       |            |        |            |   |
|--------------|---|-------|------------|--------|------------|---|
| AX-158065963 | 9 | 0.655 | KV452943.1 | 138588 | 8-scf00198 | 8 |
| AX-158065966 | 9 | 0.655 | KV452943.1 | 143628 | 8-scf00198 | 8 |
| AX-157823781 | 9 | 0.655 | KV452943.1 | 150703 | 8-scf00198 | 8 |
| AX-158065972 | 9 | 0.655 | KV452943.1 | 163647 | 8-scf00198 | 8 |
| AX-157823786 | 9 | 0.655 | KV452943.1 | 163871 | 8-scf00198 | 8 |
| AX-157823787 | 9 | 0.655 | KV452943.1 | 167200 | 8-scf00198 | 8 |
| AX-158065973 | 9 | 0.655 | KV452943.1 | 167940 | 8-scf00198 | 8 |
| AX-157823788 | 9 | 0.655 | KV452943.1 | 169458 | 8-scf00198 | 8 |
| AX-158422453 | 9 | 0.655 | KV452943.1 | 170030 | 8-scf00198 | 8 |
| AX-158065974 | 9 | 0.655 | KV452943.1 | 171972 | 8-scf00198 | 8 |
| AX-158065981 | 9 | 0.655 | KV452943.1 | 196589 | 8-scf00198 | 8 |
| AX-158065983 | 9 | 0.655 | KV452943.1 | 197232 | 8-scf00198 | 8 |
| AX-158065991 | 9 | 0.655 | KV452943.1 | 213215 | 8-scf00198 | 8 |
| AX-157714686 | 9 | 0.655 | KV452943.1 | 243799 | 8-scf00198 | 8 |
| AX-158066205 | 9 | 0.655 | KV452943.1 | 445640 | 8-scf00198 | 8 |
| AX-158069744 | 9 | 0.655 | KV452942.1 | 224161 | 8-scf00199 | 8 |
| AX-157717425 | 9 | 0.696 | KV452943.1 | 200635 | 8-scf00198 | 8 |
| AX-157870710 | 9 | 0.765 | KV452943.1 | 204696 | 8-scf00198 | 8 |
| AX-157750451 | 9 | 0.874 | KV452943.1 | 214923 | 8-scf00198 | 8 |
| AX-158066014 | 9 | 0.874 | KV452943.1 | 223096 | 8-scf00198 | 8 |
| AX-158066024 | 9 | 0.874 | KV452943.1 | 239385 | 8-scf00198 | 8 |
| AX-158066028 | 9 | 0.874 | KV452943.1 | 240024 | 8-scf00198 | 8 |
| AX-158065996 | 9 | 0.902 | KV452943.1 | 217589 | 8-scf00198 | 8 |
| AX-158065982 | 9 | 0.983 | KV452943.1 | 196906 | 8-scf00198 | 8 |
| AX-157823791 | 9 | 0.983 | KV452943.1 | 203825 | 8-scf00198 | 8 |
| AX-158066012 | 9 | 0.983 | KV452943.1 | 221418 | 8-scf00198 | 8 |
| AX-157823792 | 9 | 0.983 | KV452943.1 | 225816 | 8-scf00198 | 8 |
| AX-158066017 | 9 | 0.983 | KV452943.1 | 225984 | 8-scf00198 | 8 |
| AX-158066019 | 9 | 0.983 | KV452943.1 | 229773 | 8-scf00198 | 8 |
| AX-158066021 | 9 | 0.983 | KV452943.1 | 230249 | 8-scf00198 | 8 |
| AX-157885409 | 9 | 0.983 | KV452943.1 | 231782 | 8-scf00198 | 8 |
| AX-158066022 | 9 | 0.983 | KV452943.1 | 237247 | 8-scf00198 | 8 |
| AX-158066023 | 9 | 0.983 | KV452943.1 | 237851 | 8-scf00198 | 8 |
| AX-158066029 | 9 | 0.983 | KV452943.1 | 240433 | 8-scf00198 | 8 |
| AX-157719971 | 9 | 0.983 | KV452943.1 | 244315 | 8-scf00198 | 8 |
| AX-158066036 | 9 | 0.983 | KV452943.1 | 257066 | 8-scf00198 | 8 |
| AX-157823795 | 9 | 0.983 | KV452943.1 | 259667 | 8-scf00198 | 8 |
| AX-158409293 | 9 | 0.983 | KV452943.1 | 260114 | 8-scf00198 | 8 |
| AX-158409295 | 9 | 0.983 | KV452943.1 | 260822 | 8-scf00198 | 8 |
| AX-158066041 | 9 | 0.983 | KV452943.1 | 262018 | 8-scf00198 | 8 |
| AX-158066043 | 9 | 0.983 | KV452943.1 | 268462 | 8-scf00198 | 8 |
| AX-158066047 | 9 | 0.983 | KV452943.1 | 270958 | 8-scf00198 | 8 |
| AX-157773306 | 9 | 0.984 | KV452943.1 | 264587 | 8-scf00198 | 8 |
| AX-158066048 | 9 | 1.029 | KV452943.1 | 271297 | 8-scf00198 | 8 |
| AX-158066051 | 9 | 1.146 | KV452943.1 | 273038 | 8-scf00198 | 8 |
| AX-158066038 | 9 | 1.311 | KV452943.1 | 258632 | 8-scf00198 | 8 |
| AX-158066057 | 9 | 1.311 | KV452943.1 | 276275 | 8-scf00198 | 8 |
| AX-158066060 | 9 | 1.311 | KV452943.1 | 280241 | 8-scf00198 | 8 |
| AX-158066061 | 9 | 1.311 | KV452943.1 | 280775 | 8-scf00198 | 8 |
| AX-158066062 | 9 | 1.311 | KV452943.1 | 281127 | 8-scf00198 | 8 |
| AX-158066031 | 9 | 1.42  | KV452943.1 | 242899 | 8-scf00198 | 8 |

|              |   |       |            |        |            |   |
|--------------|---|-------|------------|--------|------------|---|
| AX-158406687 | 9 | 1.42  | KV452943.1 | 244867 | 8-scf00198 | 8 |
| AX-158066065 | 9 | 1.42  | KV452943.1 | 282833 | 8-scf00198 | 8 |
| AX-158066072 | 9 | 1.42  | KV452943.1 | 291621 | 8-scf00198 | 8 |
| AX-157823797 | 9 | 1.42  | KV452943.1 | 297975 | 8-scf00198 | 8 |
| AX-158066080 | 9 | 1.42  | KV452943.1 | 299236 | 8-scf00198 | 8 |
| AX-158066095 | 9 | 1.42  | KV452943.1 | 308529 | 8-scf00198 | 8 |
| AX-158391921 | 9 | 1.42  | KV452943.1 | 337971 | 8-scf00198 | 8 |
| AX-158066075 | 9 | 1.421 | KV452943.1 | 295492 | 8-scf00198 | 8 |
| AX-157716183 | 9 | 1.421 | KV452943.1 | 299758 | 8-scf00198 | 8 |
| AX-158066077 | 9 | 1.444 | KV452943.1 | 296228 | 8-scf00198 | 8 |
| AX-158066085 | 9 | 1.444 | KV452943.1 | 303896 | 8-scf00198 | 8 |
| AX-158066090 | 9 | 1.444 | KV452943.1 | 306844 | 8-scf00198 | 8 |
| AX-158066099 | 9 | 1.444 | KV452943.1 | 311612 | 8-scf00198 | 8 |
| AX-158066100 | 9 | 1.444 | KV452943.1 | 312918 | 8-scf00198 | 8 |
| AX-157823800 | 9 | 1.444 | KV452943.1 | 323046 | 8-scf00198 | 8 |
| AX-158066120 | 9 | 1.444 | KV452943.1 | 339926 | 8-scf00198 | 8 |
| AX-157823806 | 9 | 1.444 | KV452943.1 | 362881 | 8-scf00198 | 8 |
| AX-158066280 | 9 | 1.444 | KV452943.1 | 533836 | 8-scf00198 | 8 |
| AX-158066283 | 9 | 1.444 | KV452943.1 | 536072 | 8-scf00198 | 8 |
| AX-157754708 | 9 | 1.467 | KV452943.1 | 305647 | 8-scf00198 | 8 |
| AX-157856958 | 9 | 1.479 | KV452943.1 | 292097 | 8-scf00198 | 8 |
| AX-158066102 | 9 | 1.479 | KV452943.1 | 313570 | 8-scf00198 | 8 |
| AX-158066103 | 9 | 1.502 | KV452943.1 | 314943 | 8-scf00198 | 8 |
| AX-157823798 | 9 | 1.521 | KV452943.1 | 318285 | 8-scf00198 | 8 |
| AX-158066107 | 9 | 1.539 | KV452943.1 | 319036 | 8-scf00198 | 8 |
| AX-158379887 | 9 | 1.556 | KV452943.1 | 324241 | 8-scf00198 | 8 |
| AX-158066111 | 9 | 1.556 | KV452943.1 | 327649 | 8-scf00198 | 8 |
| AX-158066114 | 9 | 1.556 | KV452943.1 | 328619 | 8-scf00198 | 8 |
| AX-158066116 | 9 | 1.556 | KV452943.1 | 331870 | 8-scf00198 | 8 |
| AX-158066117 | 9 | 1.556 | KV452943.1 | 335070 | 8-scf00198 | 8 |
| AX-158066124 | 9 | 1.829 | KV452943.1 | 351365 | 8-scf00198 | 8 |
| AX-158066125 | 9 | 1.83  | KV452943.1 | 354286 | 8-scf00198 | 8 |
| AX-157823805 | 9 | 1.83  | KV452943.1 | 362483 | 8-scf00198 | 8 |
| AX-158066132 | 9 | 1.83  | KV452943.1 | 369571 | 8-scf00198 | 8 |
| AX-158066135 | 9 | 1.83  | KV452943.1 | 374037 | 8-scf00198 | 8 |
| AX-158066136 | 9 | 1.83  | KV452943.1 | 375162 | 8-scf00198 | 8 |
| AX-158066138 | 9 | 1.83  | KV452943.1 | 377799 | 8-scf00198 | 8 |
| AX-158384220 | 9 | 1.83  | KV452943.1 | 379327 | 8-scf00198 | 8 |
| AX-158066142 | 9 | 1.884 | KV452943.1 | 383783 | 8-scf00198 | 8 |
| AX-157724823 | 9 | 2.275 | KV452943.1 | 386329 | 8-scf00198 | 8 |
| AX-158066146 | 9 | 2.275 | KV452943.1 | 388207 | 8-scf00198 | 8 |
| AX-158066150 | 9 | 2.514 | KV452943.1 | 391354 | 8-scf00198 | 8 |
| AX-157773359 | 9 | 2.514 | KV452943.1 | 392266 | 8-scf00198 | 8 |
| AX-158066153 | 9 | 2.514 | KV452943.1 | 395011 | 8-scf00198 | 8 |
| AX-158066155 | 9 | 2.514 | KV452943.1 | 397519 | 8-scf00198 | 8 |
| AX-158066156 | 9 | 2.514 | KV452943.1 | 400895 | 8-scf00198 | 8 |
| AX-158066159 | 9 | 2.514 | KV452943.1 | 402052 | 8-scf00198 | 8 |
| AX-158066162 | 9 | 2.514 | KV452943.1 | 404237 | 8-scf00198 | 8 |
| AX-158379888 | 9 | 2.514 | KV452943.1 | 405935 | 8-scf00198 | 8 |
| AX-158066166 | 9 | 2.514 | KV452943.1 | 407046 | 8-scf00198 | 8 |
| AX-158066170 | 9 | 2.514 | KV452943.1 | 409947 | 8-scf00198 | 8 |

|              |   |       |             |        |            |    |
|--------------|---|-------|-------------|--------|------------|----|
| AX-158066173 | 9 | 2.514 | KV452943.1  | 411119 | 8-scf00198 | 8  |
| AX-158066179 | 9 | 2.514 | KV452943.1  | 415975 | 8-scf00198 | 8  |
| AX-158384221 | 9 | 2.514 | KV452943.1  | 416557 | 8-scf00198 | 8  |
| AX-158066182 | 9 | 2.514 | KV452943.1  | 417379 | 8-scf00198 | 8  |
| AX-158066183 | 9 | 2.514 | KV452943.1  | 418570 | 8-scf00198 | 8  |
| AX-158066185 | 9 | 2.514 | KV452943.1  | 419599 | 8-scf00198 | 8  |
| AX-157856959 | 9 | 2.514 | KV452943.1  | 422747 | 8-scf00198 | 8  |
| AX-158066188 | 9 | 2.514 | KV452943.1  | 424632 | 8-scf00198 | 8  |
| AX-158066189 | 9 | 2.514 | KV452943.1  | 427189 | 8-scf00198 | 8  |
| AX-158066191 | 9 | 2.514 | KV452943.1  | 428342 | 8-scf00198 | 8  |
| AX-158066192 | 9 | 2.514 | KV452943.1  | 428739 | 8-scf00198 | 8  |
| AX-158066199 | 9 | 2.514 | KV452943.1  | 439454 | 8-scf00198 | 8  |
| AX-158066200 | 9 | 2.514 | KV452943.1  | 440030 | 8-scf00198 | 8  |
| AX-158066201 | 9 | 2.514 | KV452943.1  | 442385 | 8-scf00198 | 8  |
| AX-158066204 | 9 | 2.514 | KV452943.1  | 444958 | 8-scf00198 | 8  |
| AX-158066210 | 9 | 2.514 | KV452943.1  | 449865 | 8-scf00198 | 8  |
| AX-158066212 | 9 | 2.514 | KV452943.1  | 451221 | 8-scf00198 | 8  |
| AX-158066215 | 9 | 2.514 | KV452943.1  | 453343 | 8-scf00198 | 8  |
| AX-158066225 | 9 | 2.514 | KV452943.1  | 466624 | 8-scf00198 | 8  |
| AX-158066226 | 9 | 2.514 | KV452943.1  | 467187 | 8-scf00198 | 8  |
| AX-158066228 | 9 | 2.514 | KV452943.1  | 468096 | 8-scf00198 | 8  |
| AX-157721725 | 9 | 2.514 | KV452943.1  | 471010 | 8-scf00198 | 8  |
| AX-158066233 | 9 | 2.514 | KV452943.1  | 474153 | 8-scf00198 | 8  |
| AX-157823810 | 9 | 2.514 | KV452943.1  | 478945 | 8-scf00198 | 8  |
| AX-158066235 | 9 | 2.514 | KV452943.1  | 478982 | 8-scf00198 | 8  |
| AX-158066236 | 9 | 2.514 | KV452943.1  | 480095 | 8-scf00198 | 8  |
| AX-158066239 | 9 | 2.514 | KV452943.1  | 483111 | 8-scf00198 | 8  |
| AX-158066246 | 9 | 2.514 | KV452943.1  | 495931 | 8-scf00198 | 8  |
| AX-158066255 | 9 | 2.514 | KV452943.1  | 502716 | 8-scf00198 | 8  |
| AX-158066241 | 9 | 2.733 | KV452943.1  | 490440 | 8-scf00198 | 8  |
| AX-158066242 | 9 | 2.733 | KV452943.1  | 490972 | 8-scf00198 | 8  |
| AX-158066243 | 9 | 2.733 | KV452943.1  | 491362 | 8-scf00198 | 8  |
| AX-158066249 | 9 | 2.733 | KV452943.1  | 498236 | 8-scf00198 | 8  |
| AX-157885411 | 9 | 2.733 | KV452943.1  | 501715 | 8-scf00198 | 8  |
| AX-157705017 | 9 | 2.733 | 3ML01028293 | 1003   | scf03898_1 | UN |
| AX-158066254 | 9 | 2.784 | KV452943.1  | 501936 | 8-scf00198 | 8  |
| AX-157736308 | 9 | 2.842 | KV452943.1  | 393638 | 8-scf00198 | 8  |
| AX-158066174 | 9 | 2.842 | KV452943.1  | 413226 | 8-scf00198 | 8  |
| AX-158066229 | 9 | 2.842 | KV452943.1  | 468636 | 8-scf00198 | 8  |
| AX-158066231 | 9 | 2.842 | KV452943.1  | 469097 | 8-scf00198 | 8  |
| AX-158066257 | 9 | 2.842 | KV452943.1  | 503517 | 8-scf00198 | 8  |
| AX-158066264 | 9 | 2.842 | KV452943.1  | 510218 | 8-scf00198 | 8  |
| AX-157823812 | 9 | 2.842 | KV452943.1  | 512076 | 8-scf00198 | 8  |
| AX-158066269 | 9 | 2.842 | KV452943.1  | 514748 | 8-scf00198 | 8  |
| AX-158066271 | 9 | 2.842 | KV452943.1  | 517086 | 8-scf00198 | 8  |
| AX-157723352 | 9 | 2.842 | KV452943.1  | 519007 | 8-scf00198 | 8  |
| AX-157823816 | 9 | 3.06  | KV452943.1  | 522596 | 8-scf00198 | 8  |
| AX-158066273 | 9 | 3.06  | KV452943.1  | 526139 | 8-scf00198 | 8  |
| AX-157774929 | 9 | 3.06  | KV452943.1  | 529677 | 8-scf00198 | 8  |
| AX-157723222 | 9 | 3.351 | KV452943.1  | 530421 | 8-scf00198 | 8  |
| AX-158066277 | 9 | 3.351 | KV452943.1  | 531632 | 8-scf00198 | 8  |

|              |   |       |            |        |            |   |
|--------------|---|-------|------------|--------|------------|---|
| AX-158066278 | 9 | 3.351 | KV452943.1 | 532426 | 8-scf00198 | 8 |
| AX-157723876 | 9 | 3.351 | KV452943.1 | 534330 | 8-scf00198 | 8 |
| AX-158066289 | 9 | 3.497 | KV452943.1 | 540317 | 8-scf00198 | 8 |
| AX-158066293 | 9 | 3.497 | KV452943.1 | 542183 | 8-scf00198 | 8 |
| AX-158066296 | 9 | 3.497 | KV452943.1 | 544960 | 8-scf00198 | 8 |
| AX-158066298 | 9 | 3.497 | KV452943.1 | 546046 | 8-scf00198 | 8 |
| AX-158066302 | 9 | 3.603 | KV452943.1 | 551330 | 8-scf00198 | 8 |
| AX-158391923 | 9 | 3.716 | KV452943.1 | 555077 | 8-scf00198 | 8 |
| AX-158066310 | 9 | 3.716 | KV452943.1 | 557226 | 8-scf00198 | 8 |
| AX-158066311 | 9 | 3.716 | KV452943.1 | 561744 | 8-scf00198 | 8 |
| AX-157885412 | 9 | 3.716 | KV452943.1 | 563606 | 8-scf00198 | 8 |
| AX-158066312 | 9 | 3.716 | KV452943.1 | 564276 | 8-scf00198 | 8 |
| AX-158066314 | 9 | 3.716 | KV452943.1 | 565045 | 8-scf00198 | 8 |
| AX-158066315 | 9 | 3.717 | KV452943.1 | 565655 | 8-scf00198 | 8 |
| AX-158066294 | 9 | 4.042 | KV452943.1 | 543993 | 8-scf00198 | 8 |
| AX-158066317 | 9 | 4.042 | KV452943.1 | 566813 | 8-scf00198 | 8 |
| AX-158066331 | 9 | 4.042 | KV452943.1 | 579216 | 8-scf00198 | 8 |
| AX-158066353 | 9 | 4.042 | KV452943.1 | 596705 | 8-scf00198 | 8 |
| AX-158066355 | 9 | 4.042 | KV452943.1 | 597228 | 8-scf00198 | 8 |
| AX-158066318 | 9 | 4.043 | KV452943.1 | 567799 | 8-scf00198 | 8 |
| AX-158066323 | 9 | 4.043 | KV452943.1 | 572584 | 8-scf00198 | 8 |
| AX-158066324 | 9 | 4.043 | KV452943.1 | 573345 | 8-scf00198 | 8 |
| AX-158066326 | 9 | 4.043 | KV452943.1 | 574695 | 8-scf00198 | 8 |
| AX-158066334 | 9 | 4.043 | KV452943.1 | 580443 | 8-scf00198 | 8 |
| AX-158066337 | 9 | 4.208 | KV452943.1 | 582453 | 8-scf00198 | 8 |
| AX-158066339 | 9 | 4.371 | KV452943.1 | 584941 | 8-scf00198 | 8 |
| AX-158066341 | 9 | 4.371 | KV452943.1 | 588689 | 8-scf00198 | 8 |
| AX-158066342 | 9 | 4.371 | KV452943.1 | 589093 | 8-scf00198 | 8 |
| AX-157710078 | 9 | 4.508 | KV452943.1 | 590494 | 8-scf00198 | 8 |
| AX-158066345 | 9 | 4.516 | KV452943.1 | 591107 | 8-scf00198 | 8 |
| AX-158066299 | 9 | 4.548 | KV452943.1 | 546303 | 8-scf00198 | 8 |
| AX-157750695 | 9 | 4.548 | KV452943.1 | 593720 | 8-scf00198 | 8 |
| AX-158066436 | 9 | 4.548 | KV452943.1 | 672492 | 8-scf00198 | 8 |
| AX-158066356 | 9 | 4.596 | KV452943.1 | 597675 | 8-scf00198 | 8 |
| AX-158066358 | 9 | 4.615 | KV452943.1 | 599174 | 8-scf00198 | 8 |
| AX-158066359 | 9 | 4.645 | KV452943.1 | 599442 | 8-scf00198 | 8 |
| AX-158066301 | 9 | 4.781 | KV452943.1 | 547108 | 8-scf00198 | 8 |
| AX-158066363 | 9 | 4.781 | KV452943.1 | 602946 | 8-scf00198 | 8 |
| AX-157856961 | 9 | 4.781 | KV452943.1 | 603828 | 8-scf00198 | 8 |
| AX-157856962 | 9 | 4.781 | KV452943.1 | 609446 | 8-scf00198 | 8 |
| AX-158066370 | 9 | 4.781 | KV452943.1 | 611567 | 8-scf00198 | 8 |
| AX-158066372 | 9 | 4.781 | KV452943.1 | 613092 | 8-scf00198 | 8 |
| AX-158066376 | 9 | 4.918 | KV452943.1 | 616697 | 8-scf00198 | 8 |
| AX-158066378 | 9 | 4.918 | KV452943.1 | 617604 | 8-scf00198 | 8 |
| AX-158066379 | 9 | 4.918 | KV452943.1 | 618357 | 8-scf00198 | 8 |
| AX-158066394 | 9 | 5.027 | KV452943.1 | 629888 | 8-scf00198 | 8 |
| AX-157742374 | 9 | 5.027 | KV452943.1 | 640007 | 8-scf00198 | 8 |
| AX-158066405 | 9 | 5.027 | KV452943.1 | 641136 | 8-scf00198 | 8 |
| AX-158384222 | 9 | 5.027 | KV452943.1 | 644328 | 8-scf00198 | 8 |
| AX-158379889 | 9 | 5.027 | KV452943.1 | 645174 | 8-scf00198 | 8 |
| AX-158066414 | 9 | 5.027 | KV452943.1 | 649275 | 8-scf00198 | 8 |

|              |   |       |            |        |            |   |
|--------------|---|-------|------------|--------|------------|---|
| AX-158066418 | 9 | 5.027 | KV452943.1 | 657139 | 8-scf00198 | 8 |
| AX-158066421 | 9 | 5.353 | KV452943.1 | 660631 | 8-scf00198 | 8 |
| AX-158066423 | 9 | 5.353 | KV452943.1 | 661541 | 8-scf00198 | 8 |
| AX-158066427 | 9 | 5.353 | KV452943.1 | 664181 | 8-scf00198 | 8 |
| AX-157755994 | 9 | 5.353 | KV452943.1 | 667811 | 8-scf00198 | 8 |
| AX-158066431 | 9 | 5.353 | KV452943.1 | 669646 | 8-scf00198 | 8 |
| AX-158066424 | 9 | 5.354 | KV452943.1 | 662138 | 8-scf00198 | 8 |
| AX-158066426 | 9 | 5.354 | KV452943.1 | 663587 | 8-scf00198 | 8 |
| AX-158066433 | 9 | 5.354 | KV452943.1 | 670401 | 8-scf00198 | 8 |
| AX-157856964 | 9 | 5.354 | KV452943.1 | 671318 | 8-scf00198 | 8 |
| AX-158066435 | 9 | 5.354 | KV452943.1 | 671538 | 8-scf00198 | 8 |
| AX-158066439 | 9 | 5.354 | KV452943.1 | 673097 | 8-scf00198 | 8 |
| AX-158066440 | 9 | 5.354 | KV452943.1 | 674096 | 8-scf00198 | 8 |
| AX-158066441 | 9 | 5.354 | KV452943.1 | 674446 | 8-scf00198 | 8 |
| AX-157741012 | 9 | 5.354 | KV452943.1 | 676098 | 8-scf00198 | 8 |
| AX-158066443 | 9 | 5.354 | KV452943.1 | 676704 | 8-scf00198 | 8 |
| AX-158066445 | 9 | 5.354 | KV452943.1 | 678853 | 8-scf00198 | 8 |
| AX-158066454 | 9 | 5.354 | KV452943.1 | 691194 | 8-scf00198 | 8 |
| AX-158066476 | 9 | 5.354 | KV452943.1 | 722649 | 8-scf00198 | 8 |
| AX-157719080 | 9 | 5.354 | KV452943.1 | 823375 | 8-scf00198 | 8 |
| AX-157856965 | 9 | 5.383 | KV452943.1 | 679929 | 8-scf00198 | 8 |
| AX-158066447 | 9 | 5.397 | KV452943.1 | 680935 | 8-scf00198 | 8 |
| AX-157856963 | 9 | 5.464 | KV452943.1 | 655732 | 8-scf00198 | 8 |
| AX-158066420 | 9 | 5.464 | KV452943.1 | 659659 | 8-scf00198 | 8 |
| AX-158066450 | 9 | 5.464 | KV452943.1 | 683753 | 8-scf00198 | 8 |
| AX-158066453 | 9 | 5.464 | KV452943.1 | 690714 | 8-scf00198 | 8 |
| AX-158384223 | 9 | 5.464 | KV452943.1 | 693768 | 8-scf00198 | 8 |
| AX-158066488 | 9 | 5.464 | KV452943.1 | 742584 | 8-scf00198 | 8 |
| AX-157885416 | 9 | 5.464 | KV452943.1 | 742860 | 8-scf00198 | 8 |
| AX-158066458 | 9 | 5.484 | KV452943.1 | 695109 | 8-scf00198 | 8 |
| AX-157720241 | 9 | 6.01  | KV452943.1 | 704230 | 8-scf00198 | 8 |
| AX-157774236 | 9 | 6.01  | KV452943.1 | 705907 | 8-scf00198 | 8 |
| AX-157722212 | 9 | 6.01  | KV452943.1 | 707001 | 8-scf00198 | 8 |
| AX-157771604 | 9 | 6.01  | KV452943.1 | 707734 | 8-scf00198 | 8 |
| AX-157720869 | 9 | 6.01  | KV452943.1 | 708601 | 8-scf00198 | 8 |
| AX-158066465 | 9 | 6.01  | KV452943.1 | 709710 | 8-scf00198 | 8 |
| AX-158066466 | 9 | 6.01  | KV452943.1 | 710789 | 8-scf00198 | 8 |
| AX-158066469 | 9 | 6.01  | KV452943.1 | 713799 | 8-scf00198 | 8 |
| AX-158066472 | 9 | 6.01  | KV452943.1 | 718246 | 8-scf00198 | 8 |
| AX-158066473 | 9 | 6.01  | KV452943.1 | 720085 | 8-scf00198 | 8 |
| AX-158066475 | 9 | 6.01  | KV452943.1 | 721951 | 8-scf00198 | 8 |
| AX-158066478 | 9 | 6.01  | KV452943.1 | 723485 | 8-scf00198 | 8 |
| AX-158066480 | 9 | 6.01  | KV452943.1 | 724898 | 8-scf00198 | 8 |
| AX-158066483 | 9 | 6.01  | KV452943.1 | 727408 | 8-scf00198 | 8 |
| AX-157823823 | 9 | 6.01  | KV452943.1 | 818324 | 8-scf00198 | 8 |
| AX-158066482 | 9 | 6.03  | KV452943.1 | 727021 | 8-scf00198 | 8 |
| AX-158066490 | 9 | 6.054 | KV452943.1 | 744891 | 8-scf00198 | 8 |
| AX-158379890 | 9 | 6.077 | KV452943.1 | 734102 | 8-scf00198 | 8 |
| AX-158066491 | 9 | 6.077 | KV452943.1 | 746499 | 8-scf00198 | 8 |
| AX-158066495 | 9 | 6.119 | KV452943.1 | 748921 | 8-scf00198 | 8 |
| AX-158066498 | 9 | 6.119 | KV452943.1 | 749949 | 8-scf00198 | 8 |

|              |   |       |            |        |            |   |
|--------------|---|-------|------------|--------|------------|---|
| AX-158066505 | 9 | 6.119 | KV452943.1 | 762114 | 8-scf00198 | 8 |
| AX-158066507 | 9 | 6.119 | KV452943.1 | 763314 | 8-scf00198 | 8 |
| AX-158066494 | 9 | 6.338 | KV452943.1 | 748514 | 8-scf00198 | 8 |
| AX-158066497 | 9 | 6.338 | KV452943.1 | 749477 | 8-scf00198 | 8 |
| AX-158066510 | 9 | 6.338 | KV452943.1 | 767600 | 8-scf00198 | 8 |
| AX-158066511 | 9 | 6.338 | KV452943.1 | 768390 | 8-scf00198 | 8 |
| AX-158066512 | 9 | 6.338 | KV452943.1 | 769455 | 8-scf00198 | 8 |
| AX-158066515 | 9 | 6.338 | KV452943.1 | 771525 | 8-scf00198 | 8 |
| AX-158066520 | 9 | 6.338 | KV452943.1 | 775745 | 8-scf00198 | 8 |
| AX-157744278 | 9 | 6.338 | KV452943.1 | 779708 | 8-scf00198 | 8 |
| AX-158066526 | 9 | 6.338 | KV452943.1 | 785325 | 8-scf00198 | 8 |
| AX-157823818 | 9 | 6.338 | KV452943.1 | 786311 | 8-scf00198 | 8 |
| AX-158066516 | 9 | 6.37  | KV452943.1 | 772062 | 8-scf00198 | 8 |
| AX-158066531 | 9 | 6.37  | KV452943.1 | 789056 | 8-scf00198 | 8 |
| AX-158066554 | 9 | 6.37  | KV452943.1 | 831915 | 8-scf00198 | 8 |
| AX-158066534 | 9 | 6.403 | KV452943.1 | 790669 | 8-scf00198 | 8 |
| AX-158066537 | 9 | 6.447 | KV452943.1 | 804823 | 8-scf00198 | 8 |
| AX-158384224 | 9 | 6.447 | KV452943.1 | 805242 | 8-scf00198 | 8 |
| AX-158066538 | 9 | 6.447 | KV452943.1 | 808958 | 8-scf00198 | 8 |
| AX-158066543 | 9 | 6.447 | KV452943.1 | 814138 | 8-scf00198 | 8 |
| AX-157823820 | 9 | 6.447 | KV452943.1 | 816209 | 8-scf00198 | 8 |
| AX-157747687 | 9 | 6.447 | KV452943.1 | 817065 | 8-scf00198 | 8 |
| AX-157823821 | 9 | 6.447 | KV452943.1 | 817537 | 8-scf00198 | 8 |
| AX-157757160 | 9 | 6.447 | KV452943.1 | 818117 | 8-scf00198 | 8 |
| AX-158066544 | 9 | 6.447 | KV452943.1 | 818726 | 8-scf00198 | 8 |
| AX-158066545 | 9 | 6.447 | KV452943.1 | 820930 | 8-scf00198 | 8 |
| AX-158066547 | 9 | 6.447 | KV452943.1 | 823182 | 8-scf00198 | 8 |
| AX-158066548 | 9 | 6.447 | KV452943.1 | 823898 | 8-scf00198 | 8 |
| AX-158066479 | 9 | 6.665 | KV452943.1 | 724446 | 8-scf00198 | 8 |
| AX-157738930 | 9 | 6.665 | KV452943.1 | 773149 | 8-scf00198 | 8 |
| AX-158066529 | 9 | 6.665 | KV452943.1 | 786822 | 8-scf00198 | 8 |
| AX-158066555 | 9 | 6.665 | KV452943.1 | 833537 | 8-scf00198 | 8 |
| AX-158066556 | 9 | 6.665 | KV452943.1 | 834441 | 8-scf00198 | 8 |
| AX-158066557 | 9 | 6.665 | KV452943.1 | 835305 | 8-scf00198 | 8 |
| AX-157823825 | 9 | 6.665 | KV452943.1 | 835395 | 8-scf00198 | 8 |
| AX-158409300 | 9 | 6.665 | KV452943.1 | 841843 | 8-scf00198 | 8 |
| AX-158066562 | 9 | 6.665 | KV452943.1 | 845692 | 8-scf00198 | 8 |
| AX-158066568 | 9 | 6.665 | KV452943.1 | 847163 | 8-scf00198 | 8 |
| AX-157727828 | 9 | 6.665 | KV452943.1 | 847695 | 8-scf00198 | 8 |
| AX-158066570 | 9 | 6.665 | KV452943.1 | 848176 | 8-scf00198 | 8 |
| AX-158066571 | 9 | 6.665 | KV452943.1 | 848956 | 8-scf00198 | 8 |
| AX-158066576 | 9 | 6.665 | KV452943.1 | 852683 | 8-scf00198 | 8 |
| AX-158066577 | 9 | 6.665 | KV452943.1 | 853170 | 8-scf00198 | 8 |
| AX-158066578 | 9 | 6.84  | KV452943.1 | 854667 | 8-scf00198 | 8 |
| AX-157823826 | 9 | 6.841 | KV452943.1 | 856432 | 8-scf00198 | 8 |
| AX-158066500 | 9 | 7.19  | KV452943.1 | 754861 | 8-scf00198 | 8 |
| AX-158066583 | 9 | 7.19  | KV452943.1 | 859653 | 8-scf00198 | 8 |
| AX-158066588 | 9 | 7.19  | KV452943.1 | 864830 | 8-scf00198 | 8 |
| AX-158066591 | 9 | 7.19  | KV452943.1 | 869146 | 8-scf00198 | 8 |
| AX-158066592 | 9 | 7.19  | KV452943.1 | 870174 | 8-scf00198 | 8 |
| AX-158066594 | 9 | 7.19  | KV452943.1 | 871125 | 8-scf00198 | 8 |



|              |   |       |            |        |            |   |
|--------------|---|-------|------------|--------|------------|---|
| AX-157771103 | 9 | 7.255 | KV452943.1 | 872179 | 8-scf00198 | 8 |
| AX-158066598 | 9 | 7.321 | KV452943.1 | 873814 | 8-scf00198 | 8 |
| AX-158066599 | 9 | 7.321 | KV452943.1 | 874436 | 8-scf00198 | 8 |
| AX-158066601 | 9 | 7.321 | KV452943.1 | 874934 | 8-scf00198 | 8 |
| AX-157823828 | 9 | 7.485 | KV452943.1 | 878465 | 8-scf00198 | 8 |
| AX-158066605 | 9 | 7.648 | KV452943.1 | 879169 | 8-scf00198 | 8 |
| AX-157823832 | 9 | 7.648 | KV452943.1 | 894508 | 8-scf00198 | 8 |
| AX-157723960 | 9 | 7.649 | KV452943.1 | 878423 | 8-scf00198 | 8 |
| AX-157823829 | 9 | 7.649 | KV452943.1 | 881239 | 8-scf00198 | 8 |
| AX-157722573 | 9 | 7.706 | KV452943.1 | 883265 | 8-scf00198 | 8 |
| AX-158066609 | 9 | 7.758 | KV452943.1 | 884842 | 8-scf00198 | 8 |
| AX-157885420 | 9 | 7.758 | KV452943.1 | 885175 | 8-scf00198 | 8 |
| AX-158066612 | 9 | 7.758 | KV452943.1 | 887780 | 8-scf00198 | 8 |
| AX-158066620 | 9 | 7.758 | KV452943.1 | 890941 | 8-scf00198 | 8 |
| AX-158066628 | 9 | 7.758 | KV452943.1 | 896552 | 8-scf00198 | 8 |
| AX-158066629 | 9 | 7.758 | KV452943.1 | 897179 | 8-scf00198 | 8 |
| AX-158066630 | 9 | 7.758 | KV452943.1 | 899084 | 8-scf00198 | 8 |
| AX-157885421 | 9 | 7.758 | KV452943.1 | 920625 | 8-scf00198 | 8 |
| AX-157738945 | 9 | 7.977 | KV452943.1 | 907741 | 8-scf00198 | 8 |
| AX-158391926 | 9 | 7.977 | KV452943.1 | 910986 | 8-scf00198 | 8 |
| AX-158066638 | 9 | 7.977 | KV452943.1 | 917476 | 8-scf00198 | 8 |
| AX-158066632 | 9 | 7.978 | KV452943.1 | 901271 | 8-scf00198 | 8 |
| AX-158066634 | 9 | 7.978 | KV452943.1 | 904079 | 8-scf00198 | 8 |
| AX-157823834 | 9 | 7.978 | KV452943.1 | 918145 | 8-scf00198 | 8 |
| AX-158066639 | 9 | 7.978 | KV452943.1 | 918555 | 8-scf00198 | 8 |
| AX-157717738 | 9 | 8.139 | KV452943.1 | 915751 | 8-scf00198 | 8 |
| AX-158066641 | 9 | 8.139 | KV452943.1 | 921687 | 8-scf00198 | 8 |
| AX-157823830 | 9 | 8.304 | KV452943.1 | 882717 | 8-scf00198 | 8 |
| AX-158066642 | 9 | 8.304 | KV452943.1 | 926161 | 8-scf00198 | 8 |
| AX-158066646 | 9 | 8.304 | KV452943.1 | 930191 | 8-scf00198 | 8 |
| AX-158066649 | 9 | 8.304 | KV452943.1 | 931466 | 8-scf00198 | 8 |
| AX-157865600 | 9 | 8.304 | KV452943.1 | 981397 | 8-scf00198 | 8 |
| AX-158066658 | 9 | 8.741 | KV452943.1 | 940362 | 8-scf00198 | 8 |
| AX-157877031 | 9 | 8.741 | KV452943.1 | 942064 | 8-scf00198 | 8 |
| AX-158066659 | 9 | 8.741 | KV452943.1 | 942819 | 8-scf00198 | 8 |
| AX-158066661 | 9 | 8.876 | KV452943.1 | 944472 | 8-scf00198 | 8 |
| AX-158066662 | 9 | 8.96  | KV452943.1 | 947004 | 8-scf00198 | 8 |
| AX-158066665 | 9 | 8.96  | KV452943.1 | 950703 | 8-scf00198 | 8 |
| AX-158066666 | 9 | 8.96  | KV452943.1 | 951711 | 8-scf00198 | 8 |
| AX-158066667 | 9 | 8.977 | KV452943.1 | 953206 | 8-scf00198 | 8 |
| AX-158066669 | 9 | 8.99  | KV452943.1 | 954695 | 8-scf00198 | 8 |
| AX-158066683 | 9 | 8.99  | KV452943.1 | 971592 | 8-scf00198 | 8 |
| AX-158066673 | 9 | 9.01  | KV452943.1 | 958213 | 8-scf00198 | 8 |
| AX-158066674 | 9 | 9.013 | KV452943.1 | 958834 | 8-scf00198 | 8 |
| AX-158066675 | 9 | 9.042 | KV452943.1 | 962696 | 8-scf00198 | 8 |
| AX-158066676 | 9 | 9.07  | KV452943.1 | 963125 | 8-scf00198 | 8 |
| AX-158066677 | 9 | 9.07  | KV452943.1 | 963573 | 8-scf00198 | 8 |
| AX-158066678 | 9 | 9.107 | KV452943.1 | 966047 | 8-scf00198 | 8 |
| AX-158066682 | 9 | 9.127 | KV452943.1 | 971005 | 8-scf00198 | 8 |
| AX-158066681 | 9 | 9.148 | KV452943.1 | 970406 | 8-scf00198 | 8 |
| AX-158066685 | 9 | 9.148 | KV452943.1 | 972815 | 8-scf00198 | 8 |

|              |   |        |            |         |            |   |
|--------------|---|--------|------------|---------|------------|---|
| AX-157723090 | 9 | 9.148  | KV452943.1 | 1003353 | 8-scf00198 | 8 |
| AX-158066686 | 9 | 9.179  | KV452943.1 | 973154  | 8-scf00198 | 8 |
| AX-158066689 | 9 | 9.179  | KV452943.1 | 975052  | 8-scf00198 | 8 |
| AX-158066690 | 9 | 9.179  | KV452943.1 | 975129  | 8-scf00198 | 8 |
| AX-158066693 | 9 | 9.179  | KV452943.1 | 976537  | 8-scf00198 | 8 |
| AX-158066697 | 9 | 9.179  | KV452943.1 | 978439  | 8-scf00198 | 8 |
| AX-158066700 | 9 | 9.179  | KV452943.1 | 980321  | 8-scf00198 | 8 |
| AX-158066702 | 9 | 9.179  | KV452943.1 | 983065  | 8-scf00198 | 8 |
| AX-158066705 | 9 | 9.22   | KV452943.1 | 984401  | 8-scf00198 | 8 |
| AX-157757337 | 9 | 9.26   | KV452943.1 | 984989  | 8-scf00198 | 8 |
| AX-158066699 | 9 | 9.288  | KV452943.1 | 979491  | 8-scf00198 | 8 |
| AX-158066706 | 9 | 9.288  | KV452943.1 | 985618  | 8-scf00198 | 8 |
| AX-158066709 | 9 | 9.288  | KV452943.1 | 988180  | 8-scf00198 | 8 |
| AX-158066713 | 9 | 9.288  | KV452943.1 | 989214  | 8-scf00198 | 8 |
| AX-157823836 | 9 | 9.288  | KV452943.1 | 993655  | 8-scf00198 | 8 |
| AX-158066717 | 9 | 9.288  | KV452943.1 | 997487  | 8-scf00198 | 8 |
| AX-158066718 | 9 | 9.288  | KV452943.1 | 998052  | 8-scf00198 | 8 |
| AX-158066719 | 9 | 9.288  | KV452943.1 | 998506  | 8-scf00198 | 8 |
| AX-158066720 | 9 | 9.288  | KV452943.1 | 999143  | 8-scf00198 | 8 |
| AX-158066721 | 9 | 9.288  | KV452943.1 | 1000840 | 8-scf00198 | 8 |
| AX-158066726 | 9 | 9.288  | KV452943.1 | 1005605 | 8-scf00198 | 8 |
| AX-158066724 | 9 | 9.42   | KV452943.1 | 1004448 | 8-scf00198 | 8 |
| AX-158066725 | 9 | 9.552  | KV452943.1 | 1005086 | 8-scf00198 | 8 |
| AX-158066727 | 9 | 9.712  | KV452943.1 | 1006367 | 8-scf00198 | 8 |
| AX-158066728 | 9 | 9.714  | KV452943.1 | 1008507 | 8-scf00198 | 8 |
| AX-158066735 | 9 | 9.736  | KV452943.1 | 1019545 | 8-scf00198 | 8 |
| AX-158066739 | 9 | 9.736  | KV452943.1 | 1026309 | 8-scf00198 | 8 |
| AX-158066729 | 9 | 9.737  | KV452943.1 | 1009535 | 8-scf00198 | 8 |
| AX-158066740 | 9 | 9.737  | KV452943.1 | 1026747 | 8-scf00198 | 8 |
| AX-158066741 | 9 | 9.737  | KV452943.1 | 1028504 | 8-scf00198 | 8 |
| AX-158066749 | 9 | 9.737  | KV452943.1 | 1037963 | 8-scf00198 | 8 |
| AX-158066742 | 9 | 9.944  | KV452943.1 | 1029439 | 8-scf00198 | 8 |
| AX-158066746 | 9 | 9.944  | KV452943.1 | 1030351 | 8-scf00198 | 8 |
| AX-158066748 | 9 | 9.944  | KV452943.1 | 1031327 | 8-scf00198 | 8 |
| AX-158066760 | 9 | 9.944  | KV452943.1 | 1047854 | 8-scf00198 | 8 |
| AX-157724563 | 9 | 10.001 | KV452943.1 | 1036990 | 8-scf00198 | 8 |
| AX-158066787 | 9 | 10.001 | KV452943.1 | 1103612 | 8-scf00198 | 8 |
| AX-157708457 | 9 | 10.054 | KV452943.1 | 1010199 | 8-scf00198 | 8 |
| AX-158066752 | 9 | 10.054 | KV452943.1 | 1039361 | 8-scf00198 | 8 |
| AX-158066755 | 9 | 10.094 | KV452943.1 | 1043979 | 8-scf00198 | 8 |
| AX-158066765 | 9 | 10.094 | KV452943.1 | 1066337 | 8-scf00198 | 8 |
| AX-158066756 | 9 | 10.125 | KV452943.1 | 1044385 | 8-scf00198 | 8 |
| AX-158066759 | 9 | 10.153 | KV452943.1 | 1046782 | 8-scf00198 | 8 |
| AX-157823839 | 9 | 10.197 | KV452943.1 | 1049169 | 8-scf00198 | 8 |
| AX-158066762 | 9 | 10.236 | KV452943.1 | 1063070 | 8-scf00198 | 8 |
| AX-157753390 | 9 | 10.271 | KV452943.1 | 1018242 | 8-scf00198 | 8 |
| AX-158066764 | 9 | 10.271 | KV452943.1 | 1065178 | 8-scf00198 | 8 |
| AX-158066768 | 9 | 10.271 | KV452943.1 | 1067440 | 8-scf00198 | 8 |
| AX-158066770 | 9 | 10.273 | KV452943.1 | 1067766 | 8-scf00198 | 8 |
| AX-157823841 | 9 | 10.273 | KV452943.1 | 1070136 | 8-scf00198 | 8 |
| AX-158066771 | 9 | 10.273 | KV452943.1 | 1071395 | 8-scf00198 | 8 |

|              |   |        |             |         |            |    |
|--------------|---|--------|-------------|---------|------------|----|
| AX-157823842 | 9 | 10.273 | KV452943.1  | 1071812 | 8-scf00198 | 8  |
| AX-158421058 | 9 | 10.273 | 3ML01026061 | 452     | scf01659_1 | UN |
| AX-158066779 | 9 | 10.609 | KV452943.1  | 1089331 | 8-scf00198 | 8  |
| AX-157705487 | 9 | 10.609 | 3ML01029931 | 258     | scf05553_1 | UN |
| AX-158066785 | 9 | 10.621 | KV452943.1  | 1097573 | 8-scf00198 | 8  |
| AX-158066783 | 9 | 11.116 | KV452943.1  | 1092176 | 8-scf00198 | 8  |
| AX-157823845 | 9 | 11.116 | KV452943.1  | 1127571 | 8-scf00198 | 8  |
| AX-158066816 | 9 | 11.116 | KV452943.1  | 1138826 | 8-scf00198 | 8  |
| AX-158066822 | 9 | 11.116 | KV452943.1  | 1141240 | 8-scf00198 | 8  |
| AX-158066823 | 9 | 11.116 | KV452943.1  | 1141920 | 8-scf00198 | 8  |
| AX-158066825 | 9 | 11.116 | KV452943.1  | 1142975 | 8-scf00198 | 8  |
| AX-157725422 | 9 | 11.116 | KV452943.1  | 1145213 | 8-scf00198 | 8  |
| AX-158066855 | 9 | 11.116 | KV452943.1  | 1176340 | 8-scf00198 | 8  |
| AX-158066826 | 9 | 11.166 | KV452943.1  | 1146440 | 8-scf00198 | 8  |
| AX-157758623 | 9 | 11.207 | KV452943.1  | 1148042 | 8-scf00198 | 8  |
| AX-158066828 | 9 | 11.256 | KV452943.1  | 1148445 | 8-scf00198 | 8  |
| AX-158066829 | 9 | 11.256 | KV452943.1  | 1150473 | 8-scf00198 | 8  |
| AX-158066837 | 9 | 11.256 | KV452943.1  | 1157578 | 8-scf00198 | 8  |
| AX-158066838 | 9 | 11.256 | KV452943.1  | 1159592 | 8-scf00198 | 8  |
| AX-157722120 | 9 | 11.256 | KV452943.1  | 1163706 | 8-scf00198 | 8  |
| AX-158066848 | 9 | 11.256 | KV452943.1  | 1168063 | 8-scf00198 | 8  |
| AX-158066843 | 9 | 11.349 | KV452943.1  | 1165650 | 8-scf00198 | 8  |
| AX-158066831 | 9 | 11.475 | KV452943.1  | 1151487 | 8-scf00198 | 8  |
| AX-158379893 | 9 | 11.475 | KV452943.1  | 1152194 | 8-scf00198 | 8  |
| AX-158066834 | 9 | 11.475 | KV452943.1  | 1155160 | 8-scf00198 | 8  |
| AX-158066842 | 9 | 11.475 | KV452943.1  | 1162959 | 8-scf00198 | 8  |
| AX-158066846 | 9 | 11.475 | KV452943.1  | 1167687 | 8-scf00198 | 8  |
| AX-158066851 | 9 | 11.475 | KV452943.1  | 1170729 | 8-scf00198 | 8  |
| AX-158066852 | 9 | 11.475 | KV452943.1  | 1172497 | 8-scf00198 | 8  |
| AX-157856968 | 9 | 11.475 | KV452943.1  | 1173133 | 8-scf00198 | 8  |
| AX-157823848 | 9 | 11.475 | KV452943.1  | 1174233 | 8-scf00198 | 8  |
| AX-158066854 | 9 | 11.475 | KV452943.1  | 1175905 | 8-scf00198 | 8  |
| AX-158066856 | 9 | 11.475 | KV452943.1  | 1176805 | 8-scf00198 | 8  |
| AX-158066857 | 9 | 11.475 | KV452943.1  | 1178019 | 8-scf00198 | 8  |
| AX-158066860 | 9 | 11.475 | KV452943.1  | 1179249 | 8-scf00198 | 8  |
| AX-158066866 | 9 | 11.475 | KV452943.1  | 1185201 | 8-scf00198 | 8  |
| AX-158066878 | 9 | 11.475 | KV452943.1  | 1196193 | 8-scf00198 | 8  |
| AX-158066886 | 9 | 11.475 | KV452943.1  | 1201379 | 8-scf00198 | 8  |
| AX-158066869 | 9 | 11.584 | KV452943.1  | 1189006 | 8-scf00198 | 8  |
| AX-158066873 | 9 | 11.584 | KV452943.1  | 1191207 | 8-scf00198 | 8  |
| AX-158066874 | 9 | 11.584 | KV452943.1  | 1193186 | 8-scf00198 | 8  |
| AX-158066877 | 9 | 11.584 | KV452943.1  | 1194328 | 8-scf00198 | 8  |
| AX-158066883 | 9 | 11.584 | KV452943.1  | 1198048 | 8-scf00198 | 8  |
| AX-157743817 | 9 | 11.584 | KV452943.1  | 1198657 | 8-scf00198 | 8  |
| AX-157823851 | 9 | 11.584 | KV452943.1  | 1200647 | 8-scf00198 | 8  |
| AX-158066889 | 9 | 11.584 | KV452943.1  | 1203009 | 8-scf00198 | 8  |
| AX-157745894 | 9 | 11.584 | KV452943.1  | 1258168 | 8-scf00198 | 8  |
| AX-158066891 | 9 | 11.748 | KV452943.1  | 1205432 | 8-scf00198 | 8  |
| AX-157708343 | 9 | 11.748 | KV452943.1  | 1207750 | 8-scf00198 | 8  |
| AX-158066894 | 9 | 11.822 | KV452943.1  | 1209954 | 8-scf00198 | 8  |
| AX-158066898 | 9 | 11.911 | KV452943.1  | 1213184 | 8-scf00198 | 8  |

|              |   |        |            |         |            |   |
|--------------|---|--------|------------|---------|------------|---|
| AX-157717082 | 9 | 11.912 | KV452943.1 | 1211964 | 8-scf00198 | 8 |
| AX-158066897 | 9 | 11.912 | KV452943.1 | 1212040 | 8-scf00198 | 8 |
| AX-158066899 | 9 | 11.912 | KV452943.1 | 1215316 | 8-scf00198 | 8 |
| AX-158066901 | 9 | 11.912 | KV452943.1 | 1215508 | 8-scf00198 | 8 |
| AX-158066902 | 9 | 11.912 | KV452943.1 | 1218007 | 8-scf00198 | 8 |
| AX-158066904 | 9 | 11.912 | KV452943.1 | 1219279 | 8-scf00198 | 8 |
| AX-158066908 | 9 | 11.912 | KV452943.1 | 1221026 | 8-scf00198 | 8 |
| AX-158066909 | 9 | 11.912 | KV452943.1 | 1221578 | 8-scf00198 | 8 |
| AX-157823853 | 9 | 11.912 | KV452943.1 | 1227046 | 8-scf00198 | 8 |
| AX-157749555 | 9 | 11.912 | KV452943.1 | 1227408 | 8-scf00198 | 8 |
| AX-157702999 | 9 | 11.912 | KV452943.1 | 1227562 | 8-scf00198 | 8 |
| AX-158066915 | 9 | 11.912 | KV452943.1 | 1228590 | 8-scf00198 | 8 |
| AX-158066924 | 9 | 11.912 | KV452943.1 | 1243235 | 8-scf00198 | 8 |
| AX-157717857 | 9 | 12.178 | KV452943.1 | 1240260 | 8-scf00198 | 8 |
| AX-158066922 | 9 | 12.28  | KV452943.1 | 1242473 | 8-scf00198 | 8 |
| AX-157739837 | 9 | 12.458 | KV452943.1 | 1242336 | 8-scf00198 | 8 |
| AX-158066925 | 9 | 12.458 | KV452943.1 | 1246628 | 8-scf00198 | 8 |
| AX-158066927 | 9 | 12.458 | KV452943.1 | 1248186 | 8-scf00198 | 8 |
| AX-158066928 | 9 | 12.458 | KV452943.1 | 1252458 | 8-scf00198 | 8 |
| AX-158066929 | 9 | 12.458 | KV452943.1 | 1253601 | 8-scf00198 | 8 |
| AX-157750001 | 9 | 12.458 | KV452943.1 | 1254136 | 8-scf00198 | 8 |
| AX-158066932 | 9 | 12.458 | KV452943.1 | 1255130 | 8-scf00198 | 8 |
| AX-158066935 | 9 | 12.458 | KV452943.1 | 1256468 | 8-scf00198 | 8 |
| AX-157752298 | 9 | 12.458 | KV452943.1 | 1256682 | 8-scf00198 | 8 |
| AX-158066936 | 9 | 12.458 | KV452943.1 | 1258798 | 8-scf00198 | 8 |
| AX-158066940 | 9 | 12.458 | KV452943.1 | 1259962 | 8-scf00198 | 8 |
| AX-157714178 | 9 | 12.458 | KV452943.1 | 1261630 | 8-scf00198 | 8 |
| AX-158066943 | 9 | 12.458 | KV452943.1 | 1263035 | 8-scf00198 | 8 |
| AX-158066947 | 9 | 12.779 | KV452943.1 | 1267289 | 8-scf00198 | 8 |
| AX-157721409 | 9 | 13.099 | KV452943.1 | 1281259 | 8-scf00198 | 8 |
| AX-158066953 | 9 | 13.378 | KV452943.1 | 1282562 | 8-scf00198 | 8 |
| AX-158066954 | 9 | 13.381 | KV452943.1 | 1284074 | 8-scf00198 | 8 |
| AX-158066957 | 9 | 13.386 | KV452943.1 | 1285367 | 8-scf00198 | 8 |
| AX-158066960 | 9 | 13.569 | KV452943.1 | 1287927 | 8-scf00198 | 8 |
| AX-158066963 | 9 | 13.569 | KV452943.1 | 1288240 | 8-scf00198 | 8 |
| AX-158066975 | 9 | 13.569 | KV452943.1 | 1306117 | 8-scf00198 | 8 |
| AX-158066965 | 9 | 13.57  | KV452943.1 | 1294671 | 8-scf00198 | 8 |
| AX-158066971 | 9 | 13.88  | KV452943.1 | 1300833 | 8-scf00198 | 8 |
| AX-157865603 | 9 | 13.88  | KV452943.1 | 1301257 | 8-scf00198 | 8 |
| AX-158066974 | 9 | 13.903 | KV452943.1 | 1303239 | 8-scf00198 | 8 |
| AX-157755424 | 9 | 13.922 | KV452943.1 | 1305042 | 8-scf00198 | 8 |
| AX-158066978 | 9 | 13.943 | KV452943.1 | 1308813 | 8-scf00198 | 8 |
| AX-158066994 | 9 | 13.943 | KV452943.1 | 1327119 | 8-scf00198 | 8 |
| AX-158066982 | 9 | 13.968 | KV452943.1 | 1313440 | 8-scf00198 | 8 |
| AX-158066985 | 9 | 13.989 | KV452943.1 | 1317248 | 8-scf00198 | 8 |
| AX-158391927 | 9 | 13.99  | KV452943.1 | 1286554 | 8-scf00198 | 8 |
| AX-158066987 | 9 | 13.99  | KV452943.1 | 1318554 | 8-scf00198 | 8 |
| AX-158066992 | 9 | 13.99  | KV452943.1 | 1323778 | 8-scf00198 | 8 |
| AX-158067000 | 9 | 13.99  | KV452943.1 | 1335135 | 8-scf00198 | 8 |
| AX-158066977 | 9 | 13.991 | KV452943.1 | 1307741 | 8-scf00198 | 8 |
| AX-158066991 | 9 | 13.991 | KV452943.1 | 1322724 | 8-scf00198 | 8 |

|              |   |        |            |         |            |   |
|--------------|---|--------|------------|---------|------------|---|
| AX-158066993 | 9 | 13.992 | KV452943.1 | 1324708 | 8-scf00198 | 8 |
| AX-158066998 | 9 | 14.283 | KV452943.1 | 1330109 | 8-scf00198 | 8 |
| AX-158067036 | 9 | 14.283 | KV452943.1 | 1385653 | 8-scf00198 | 8 |
| AX-158067001 | 9 | 14.419 | KV452943.1 | 1336779 | 8-scf00198 | 8 |
| AX-158067002 | 9 | 14.419 | KV452943.1 | 1339823 | 8-scf00198 | 8 |
| AX-158066990 | 9 | 14.427 | KV452943.1 | 1321686 | 8-scf00198 | 8 |
| AX-158067004 | 9 | 14.427 | KV452943.1 | 1342826 | 8-scf00198 | 8 |
| AX-157823859 | 9 | 14.427 | KV452943.1 | 1344244 | 8-scf00198 | 8 |
| AX-158067006 | 9 | 14.427 | KV452943.1 | 1347336 | 8-scf00198 | 8 |
| AX-157748144 | 9 | 14.427 | KV452943.1 | 1348388 | 8-scf00198 | 8 |
| AX-157823860 | 9 | 14.427 | KV452943.1 | 1349016 | 8-scf00198 | 8 |
| AX-157747725 | 9 | 14.427 | KV452943.1 | 1395150 | 8-scf00198 | 8 |
| AX-157823871 | 9 | 14.427 | KV452943.1 | 1414418 | 8-scf00198 | 8 |
| AX-157823872 | 9 | 14.427 | KV452943.1 | 1419267 | 8-scf00198 | 8 |
| AX-158067067 | 9 | 14.427 | KV452943.1 | 1425452 | 8-scf00198 | 8 |
| AX-158067077 | 9 | 14.427 | KV452943.1 | 1443475 | 8-scf00198 | 8 |
| AX-158067094 | 9 | 14.427 | KV452943.1 | 1453282 | 8-scf00198 | 8 |
| AX-158067007 | 9 | 14.572 | KV452943.1 | 1350947 | 8-scf00198 | 8 |
| AX-158067009 | 9 | 14.645 | KV452943.1 | 1352540 | 8-scf00198 | 8 |
| AX-158067011 | 9 | 14.755 | KV452943.1 | 1355007 | 8-scf00198 | 8 |
| AX-158067012 | 9 | 14.864 | KV452943.1 | 1359421 | 8-scf00198 | 8 |
| AX-157823861 | 9 | 14.973 | KV452943.1 | 1362398 | 8-scf00198 | 8 |
| AX-158067013 | 9 | 15.083 | KV452943.1 | 1363984 | 8-scf00198 | 8 |
| AX-158067015 | 9 | 15.083 | KV452943.1 | 1368682 | 8-scf00198 | 8 |
| AX-158067071 | 9 | 15.083 | KV452943.1 | 1436379 | 8-scf00198 | 8 |
| AX-158067020 | 9 | 15.131 | KV452943.1 | 1370472 | 8-scf00198 | 8 |
| AX-157745506 | 9 | 15.192 | KV452943.1 | 1364737 | 8-scf00198 | 8 |
| AX-157690914 | 9 | 15.192 | KV452943.1 | 1374627 | 8-scf00198 | 8 |
| AX-158067023 | 9 | 15.192 | KV452943.1 | 1375354 | 8-scf00198 | 8 |
| AX-158067025 | 9 | 15.192 | KV452943.1 | 1377208 | 8-scf00198 | 8 |
| AX-157823862 | 9 | 15.192 | KV452943.1 | 1378121 | 8-scf00198 | 8 |
| AX-158067026 | 9 | 15.192 | KV452943.1 | 1378281 | 8-scf00198 | 8 |
| AX-157823863 | 9 | 15.192 | KV452943.1 | 1378801 | 8-scf00198 | 8 |
| AX-158067029 | 9 | 15.192 | KV452943.1 | 1380177 | 8-scf00198 | 8 |
| AX-158067031 | 9 | 15.192 | KV452943.1 | 1380959 | 8-scf00198 | 8 |
| AX-157738926 | 9 | 15.192 | KV452943.1 | 1381305 | 8-scf00198 | 8 |
| AX-157823864 | 9 | 15.192 | KV452943.1 | 1382688 | 8-scf00198 | 8 |
| AX-157823865 | 9 | 15.192 | KV452943.1 | 1382825 | 8-scf00198 | 8 |
| AX-157823867 | 9 | 15.192 | KV452943.1 | 1384716 | 8-scf00198 | 8 |
| AX-158067034 | 9 | 15.192 | KV452943.1 | 1385054 | 8-scf00198 | 8 |
| AX-158067037 | 9 | 15.192 | KV452943.1 | 1387096 | 8-scf00198 | 8 |
| AX-157823868 | 9 | 15.192 | KV452943.1 | 1387893 | 8-scf00198 | 8 |
| AX-157750535 | 9 | 15.192 | KV452943.1 | 1388085 | 8-scf00198 | 8 |
| AX-157863152 | 9 | 15.192 | KV452943.1 | 1401346 | 8-scf00198 | 8 |
| AX-157823870 | 9 | 15.41  | KV452943.1 | 1398078 | 8-scf00198 | 8 |
| AX-158067038 | 9 | 15.41  | KV452943.1 | 1399506 | 8-scf00198 | 8 |
| AX-157775370 | 9 | 15.41  | KV452943.1 | 1400156 | 8-scf00198 | 8 |
| AX-158067041 | 9 | 15.41  | KV452943.1 | 1402718 | 8-scf00198 | 8 |
| AX-158409308 | 9 | 15.41  | KV452943.1 | 1403180 | 8-scf00198 | 8 |
| AX-158067046 | 9 | 15.41  | KV452943.1 | 1403623 | 8-scf00198 | 8 |
| AX-157739239 | 9 | 15.41  | KV452943.1 | 1404276 | 8-scf00198 | 8 |

|              |   |        |            |         |            |   |
|--------------|---|--------|------------|---------|------------|---|
| AX-158067055 | 9 | 15.41  | KV452943.1 | 1411766 | 8-scf00198 | 8 |
| AX-158067049 | 9 | 15.52  | KV452943.1 | 1406926 | 8-scf00198 | 8 |
| AX-158067051 | 9 | 15.52  | KV452943.1 | 1407592 | 8-scf00198 | 8 |
| AX-158067054 | 9 | 15.52  | KV452943.1 | 1409067 | 8-scf00198 | 8 |
| AX-157877035 | 9 | 15.52  | KV452943.1 | 1410054 | 8-scf00198 | 8 |
| AX-158379895 | 9 | 15.52  | KV452943.1 | 1410652 | 8-scf00198 | 8 |
| AX-158067058 | 9 | 15.52  | KV452943.1 | 1416263 | 8-scf00198 | 8 |
| AX-158067060 | 9 | 15.52  | KV452943.1 | 1418730 | 8-scf00198 | 8 |
| AX-158384227 | 9 | 15.52  | KV452943.1 | 1418921 | 8-scf00198 | 8 |
| AX-158067061 | 9 | 15.52  | KV452943.1 | 1419154 | 8-scf00198 | 8 |
| AX-157823873 | 9 | 15.52  | KV452943.1 | 1421364 | 8-scf00198 | 8 |
| AX-158067064 | 9 | 15.52  | KV452943.1 | 1422931 | 8-scf00198 | 8 |
| AX-157823874 | 9 | 15.52  | KV452943.1 | 1424700 | 8-scf00198 | 8 |
| AX-158067079 | 9 | 15.52  | KV452943.1 | 1445266 | 8-scf00198 | 8 |
| AX-158067069 | 9 | 15.548 | KV452943.1 | 1429918 | 8-scf00198 | 8 |
| AX-158067070 | 9 | 15.589 | KV452943.1 | 1434234 | 8-scf00198 | 8 |
| AX-157823875 | 9 | 15.629 | KV452943.1 | 1436606 | 8-scf00198 | 8 |
| AX-158067073 | 9 | 15.629 | KV452943.1 | 1440416 | 8-scf00198 | 8 |
| AX-158067075 | 9 | 15.629 | KV452943.1 | 1440967 | 8-scf00198 | 8 |
| AX-158067078 | 9 | 15.738 | KV452943.1 | 1444116 | 8-scf00198 | 8 |
| AX-157823876 | 9 | 15.793 | KV452943.1 | 1445976 | 8-scf00198 | 8 |
| AX-157745814 | 9 | 15.847 | KV452943.1 | 1446245 | 8-scf00198 | 8 |
| AX-158067085 | 9 | 15.847 | KV452943.1 | 1446925 | 8-scf00198 | 8 |
| AX-158067086 | 9 | 15.847 | KV452943.1 | 1448251 | 8-scf00198 | 8 |
| AX-158067089 | 9 | 15.847 | KV452943.1 | 1450501 | 8-scf00198 | 8 |
| AX-158067091 | 9 | 15.847 | KV452943.1 | 1451522 | 8-scf00198 | 8 |
| AX-158403469 | 9 | 15.847 | KV452943.1 | 1455407 | 8-scf00198 | 8 |
| AX-158067081 | 9 | 15.848 | KV452943.1 | 1445472 | 8-scf00198 | 8 |
| AX-158067096 | 9 | 15.848 | KV452943.1 | 1459569 | 8-scf00198 | 8 |
| AX-158067098 | 9 | 15.993 | KV452943.1 | 1459921 | 8-scf00198 | 8 |
| AX-158067101 | 9 | 15.994 | KV452943.1 | 1460928 | 8-scf00198 | 8 |
| AX-158067104 | 9 | 16.284 | KV452943.1 | 1462774 | 8-scf00198 | 8 |
| AX-158067105 | 9 | 16.284 | KV452943.1 | 1464754 | 8-scf00198 | 8 |
| AX-158067106 | 9 | 16.284 | KV452943.1 | 1467178 | 8-scf00198 | 8 |
| AX-158067108 | 9 | 16.284 | KV452943.1 | 1473452 | 8-scf00198 | 8 |
| AX-158067109 | 9 | 16.284 | KV452943.1 | 1473732 | 8-scf00198 | 8 |
| AX-157823879 | 9 | 16.284 | KV452943.1 | 1475502 | 8-scf00198 | 8 |
| AX-158067111 | 9 | 16.284 | KV452943.1 | 1475974 | 8-scf00198 | 8 |
| AX-158067116 | 9 | 16.284 | KV452943.1 | 1477426 | 8-scf00198 | 8 |
| AX-158067117 | 9 | 16.284 | KV452943.1 | 1478031 | 8-scf00198 | 8 |
| AX-158067100 | 9 | 16.285 | KV452943.1 | 1460071 | 8-scf00198 | 8 |
| AX-158067115 | 9 | 16.285 | KV452943.1 | 1477294 | 8-scf00198 | 8 |
| AX-158067118 | 9 | 16.285 | KV452943.1 | 1478972 | 8-scf00198 | 8 |
| AX-157823881 | 9 | 16.285 | KV452943.1 | 1485535 | 8-scf00198 | 8 |
| AX-158067129 | 9 | 16.285 | KV452943.1 | 1493160 | 8-scf00198 | 8 |
| AX-158067126 | 9 | 16.612 | KV452943.1 | 1492494 | 8-scf00198 | 8 |
| AX-158067130 | 9 | 16.612 | KV452943.1 | 1494471 | 8-scf00198 | 8 |
| AX-158067131 | 9 | 16.612 | KV452943.1 | 1495668 | 8-scf00198 | 8 |
| AX-158067132 | 9 | 16.612 | KV452943.1 | 1496721 | 8-scf00198 | 8 |
| AX-157823883 | 9 | 16.612 | KV452943.1 | 1497539 | 8-scf00198 | 8 |
| AX-158067135 | 9 | 16.612 | KV452943.1 | 1500281 | 8-scf00198 | 8 |

|              |   |        |            |         |            |   |
|--------------|---|--------|------------|---------|------------|---|
| AX-158067137 | 9 | 16.612 | KV452943.1 | 1502603 | 8-scf00198 | 8 |
| AX-158067140 | 9 | 16.612 | KV452943.1 | 1504147 | 8-scf00198 | 8 |
| AX-158067142 | 9 | 16.612 | KV452943.1 | 1504683 | 8-scf00198 | 8 |
| AX-158067144 | 9 | 16.612 | KV452943.1 | 1508345 | 8-scf00198 | 8 |
| AX-158067146 | 9 | 16.612 | KV452943.1 | 1510347 | 8-scf00198 | 8 |
| AX-158067176 | 9 | 16.612 | KV452943.1 | 1550789 | 8-scf00198 | 8 |
| AX-157746528 | 9 | 16.612 | KV452943.1 | 1559219 | 8-scf00198 | 8 |
| AX-157823885 | 9 | 16.83  | KV452943.1 | 1512020 | 8-scf00198 | 8 |
| AX-157751545 | 9 | 16.83  | KV452943.1 | 1512729 | 8-scf00198 | 8 |
| AX-157823886 | 9 | 16.83  | KV452943.1 | 1512787 | 8-scf00198 | 8 |
| AX-158067147 | 9 | 16.83  | KV452943.1 | 1513263 | 8-scf00198 | 8 |
| AX-158067148 | 9 | 16.83  | KV452943.1 | 1515115 | 8-scf00198 | 8 |
| AX-157743858 | 9 | 16.83  | KV452943.1 | 1515878 | 8-scf00198 | 8 |
| AX-158067150 | 9 | 16.83  | KV452943.1 | 1517618 | 8-scf00198 | 8 |
| AX-158067151 | 9 | 16.83  | KV452943.1 | 1518891 | 8-scf00198 | 8 |
| AX-158067153 | 9 | 16.83  | KV452943.1 | 1519149 | 8-scf00198 | 8 |
| AX-158067156 | 9 | 16.83  | KV452943.1 | 1520096 | 8-scf00198 | 8 |
| AX-158067158 | 9 | 16.83  | KV452943.1 | 1520828 | 8-scf00198 | 8 |
| AX-158067167 | 9 | 16.83  | KV452943.1 | 1533713 | 8-scf00198 | 8 |
| AX-158067175 | 9 | 16.83  | KV452943.1 | 1543492 | 8-scf00198 | 8 |
| AX-157823907 | 9 | 16.83  | KV452943.1 | 1653608 | 8-scf00198 | 8 |
| AX-158379896 | 9 | 16.847 | KV452943.1 | 1521627 | 8-scf00198 | 8 |
| AX-157713486 | 9 | 16.847 | KV452943.1 | 1525968 | 8-scf00198 | 8 |
| AX-158067198 | 9 | 16.847 | KV452943.1 | 1582940 | 8-scf00198 | 8 |
| AX-158067160 | 9 | 16.878 | KV452943.1 | 1522317 | 8-scf00198 | 8 |
| AX-158067165 | 9 | 16.924 | KV452943.1 | 1532685 | 8-scf00198 | 8 |
| AX-157823892 | 9 | 16.929 | KV452943.1 | 1532971 | 8-scf00198 | 8 |
| AX-158067168 | 9 | 16.934 | KV452943.1 | 1534521 | 8-scf00198 | 8 |
| AX-157743766 | 9 | 16.94  | KV452943.1 | 1522871 | 8-scf00198 | 8 |
| AX-157870714 | 9 | 16.94  | KV452943.1 | 1535948 | 8-scf00198 | 8 |
| AX-157745575 | 9 | 16.94  | KV452943.1 | 1538457 | 8-scf00198 | 8 |
| AX-158067170 | 9 | 16.94  | KV452943.1 | 1540838 | 8-scf00198 | 8 |
| AX-158067171 | 9 | 16.94  | KV452943.1 | 1541192 | 8-scf00198 | 8 |
| AX-157823894 | 9 | 16.94  | KV452943.1 | 1544473 | 8-scf00198 | 8 |
| AX-158067178 | 9 | 16.94  | KV452943.1 | 1552796 | 8-scf00198 | 8 |
| AX-158067181 | 9 | 16.94  | KV452943.1 | 1553762 | 8-scf00198 | 8 |
| AX-158067184 | 9 | 16.94  | KV452943.1 | 1556851 | 8-scf00198 | 8 |
| AX-157823895 | 9 | 16.94  | KV452943.1 | 1558338 | 8-scf00198 | 8 |
| AX-157863153 | 9 | 16.94  | KV452943.1 | 1560064 | 8-scf00198 | 8 |
| AX-157823896 | 9 | 16.94  | KV452943.1 | 1563941 | 8-scf00198 | 8 |
| AX-158067188 | 9 | 16.976 | KV452943.1 | 1566009 | 8-scf00198 | 8 |
| AX-158067189 | 9 | 17.011 | KV452943.1 | 1567862 | 8-scf00198 | 8 |
| AX-158067191 | 9 | 17.049 | KV452943.1 | 1569211 | 8-scf00198 | 8 |
| AX-158067192 | 9 | 17.049 | KV452943.1 | 1570007 | 8-scf00198 | 8 |
| AX-158067193 | 9 | 17.049 | KV452943.1 | 1571965 | 8-scf00198 | 8 |
| AX-158384230 | 9 | 17.049 | KV452943.1 | 1572382 | 8-scf00198 | 8 |
| AX-158067235 | 9 | 17.049 | KV452943.1 | 1619624 | 8-scf00198 | 8 |
| AX-157885426 | 9 | 17.049 | KV452943.1 | 1623768 | 8-scf00198 | 8 |
| AX-158067238 | 9 | 17.049 | KV452943.1 | 1624664 | 8-scf00198 | 8 |
| AX-158067249 | 9 | 17.049 | KV452943.1 | 1634451 | 8-scf00198 | 8 |
| AX-158067255 | 9 | 17.049 | KV452943.1 | 1642089 | 8-scf00198 | 8 |

|              |   |        |            |         |            |   |
|--------------|---|--------|------------|---------|------------|---|
| AX-157877041 | 9 | 17.049 | KV452943.1 | 1644670 | 8-scf00198 | 8 |
| AX-157823897 | 9 | 17.158 | KV452943.1 | 1577004 | 8-scf00198 | 8 |
| AX-157823899 | 9 | 17.158 | KV452943.1 | 1579296 | 8-scf00198 | 8 |
| AX-157716939 | 9 | 17.158 | KV452943.1 | 1586962 | 8-scf00198 | 8 |
| AX-158067203 | 9 | 17.158 | KV452943.1 | 1587859 | 8-scf00198 | 8 |
| AX-157743825 | 9 | 17.158 | KV452943.1 | 1588893 | 8-scf00198 | 8 |
| AX-158067206 | 9 | 17.158 | KV452943.1 | 1590944 | 8-scf00198 | 8 |
| AX-158067207 | 9 | 17.158 | KV452943.1 | 1592770 | 8-scf00198 | 8 |
| AX-158067209 | 9 | 17.158 | KV452943.1 | 1593018 | 8-scf00198 | 8 |
| AX-158067213 | 9 | 17.158 | KV452943.1 | 1594970 | 8-scf00198 | 8 |
| AX-158067218 | 9 | 17.158 | KV452943.1 | 1599466 | 8-scf00198 | 8 |
| AX-158067220 | 9 | 17.158 | KV452943.1 | 1600197 | 8-scf00198 | 8 |
| AX-158067223 | 9 | 17.158 | KV452943.1 | 1601035 | 8-scf00198 | 8 |
| AX-158067224 | 9 | 17.158 | KV452943.1 | 1601484 | 8-scf00198 | 8 |
| AX-157823900 | 9 | 17.158 | KV452943.1 | 1602491 | 8-scf00198 | 8 |
| AX-158067227 | 9 | 17.158 | KV452943.1 | 1603269 | 8-scf00198 | 8 |
| AX-158067229 | 9 | 17.158 | KV452943.1 | 1604361 | 8-scf00198 | 8 |
| AX-157775639 | 9 | 17.158 | KV452943.1 | 1605021 | 8-scf00198 | 8 |
| AX-158067231 | 9 | 17.158 | KV452943.1 | 1608700 | 8-scf00198 | 8 |
| AX-157716233 | 9 | 17.158 | KV452943.1 | 1611477 | 8-scf00198 | 8 |
| AX-158067240 | 9 | 17.158 | KV452943.1 | 1624916 | 8-scf00198 | 8 |
| AX-157870715 | 9 | 17.158 | KV452943.1 | 1626382 | 8-scf00198 | 8 |
| AX-158067253 | 9 | 17.158 | KV452943.1 | 1640873 | 8-scf00198 | 8 |
| AX-157823906 | 9 | 17.158 | KV452943.1 | 1641643 | 8-scf00198 | 8 |
| AX-158067264 | 9 | 17.158 | KV452943.1 | 1645817 | 8-scf00198 | 8 |
| AX-157702009 | 9 | 17.158 | KV452943.1 | 1649027 | 8-scf00198 | 8 |
| AX-158067234 | 9 | 17.303 | KV452943.1 | 1619152 | 8-scf00198 | 8 |
| AX-157877039 | 9 | 17.34  | KV452943.1 | 1620433 | 8-scf00198 | 8 |
| AX-158067242 | 9 | 17.34  | KV452943.1 | 1626594 | 8-scf00198 | 8 |
| AX-157823890 | 9 | 17.365 | KV452943.1 | 1524597 | 8-scf00198 | 8 |
| AX-157748476 | 9 | 17.365 | KV452943.1 | 1546445 | 8-scf00198 | 8 |
| AX-158067243 | 9 | 17.365 | KV452943.1 | 1627723 | 8-scf00198 | 8 |
| AX-158067245 | 9 | 17.365 | KV452943.1 | 1629869 | 8-scf00198 | 8 |
| AX-157747656 | 9 | 17.376 | KV452943.1 | 1632823 | 8-scf00198 | 8 |
| AX-158067393 | 9 | 17.376 | KV452943.1 | 1755406 | 8-scf00198 | 8 |
| AX-157726096 | 9 | 17.394 | KV452943.1 | 1634010 | 8-scf00198 | 8 |
| AX-158067252 | 9 | 17.436 | KV452943.1 | 1636542 | 8-scf00198 | 8 |
| AX-157745237 | 9 | 17.459 | KV452943.1 | 1637272 | 8-scf00198 | 8 |
| AX-157823905 | 9 | 17.486 | KV452943.1 | 1639427 | 8-scf00198 | 8 |
| AX-158067258 | 9 | 17.486 | KV452943.1 | 1643669 | 8-scf00198 | 8 |
| AX-158067280 | 9 | 17.486 | KV452943.1 | 1653648 | 8-scf00198 | 8 |
| AX-158067261 | 9 | 17.543 | KV452943.1 | 1645261 | 8-scf00198 | 8 |
| AX-157823888 | 9 | 17.595 | KV452943.1 | 1520482 | 8-scf00198 | 8 |
| AX-158067212 | 9 | 17.595 | KV452943.1 | 1594273 | 8-scf00198 | 8 |
| AX-158067237 | 9 | 17.595 | KV452943.1 | 1621487 | 8-scf00198 | 8 |
| AX-157823904 | 9 | 17.595 | KV452943.1 | 1632097 | 8-scf00198 | 8 |
| AX-157721557 | 9 | 17.595 | KV452943.1 | 1639110 | 8-scf00198 | 8 |
| AX-157751203 | 9 | 17.595 | KV452943.1 | 1646451 | 8-scf00198 | 8 |
| AX-158067268 | 9 | 17.595 | KV452943.1 | 1647504 | 8-scf00198 | 8 |
| AX-158067275 | 9 | 17.595 | KV452943.1 | 1651196 | 8-scf00198 | 8 |
| AX-158067276 | 9 | 17.595 | KV452943.1 | 1651670 | 8-scf00198 | 8 |



|              |   |        |            |         |            |   |
|--------------|---|--------|------------|---------|------------|---|
| AX-157752784 | 9 | 17.595 | KV452943.1 | 1651867 | 8-scf00198 | 8 |
| AX-158067281 | 9 | 17.595 | KV452943.1 | 1656996 | 8-scf00198 | 8 |
| AX-157696489 | 9 | 17.595 | KV452943.1 | 1657416 | 8-scf00198 | 8 |
| AX-158067282 | 9 | 17.595 | KV452943.1 | 1658203 | 8-scf00198 | 8 |
| AX-158067284 | 9 | 17.595 | KV452943.1 | 1659097 | 8-scf00198 | 8 |
| AX-158406703 | 9 | 17.595 | KV452943.1 | 1661739 | 8-scf00198 | 8 |
| AX-157823909 | 9 | 17.595 | KV452943.1 | 1663280 | 8-scf00198 | 8 |
| AX-158067289 | 9 | 17.595 | KV452943.1 | 1666165 | 8-scf00198 | 8 |
| AX-158067290 | 9 | 17.595 | KV452943.1 | 1666936 | 8-scf00198 | 8 |
| AX-158067292 | 9 | 17.595 | KV452943.1 | 1669162 | 8-scf00198 | 8 |
| AX-158067293 | 9 | 17.595 | KV452943.1 | 1669590 | 8-scf00198 | 8 |
| AX-157757694 | 9 | 17.595 | KV452943.1 | 1671504 | 8-scf00198 | 8 |
| AX-158067298 | 9 | 17.595 | KV452943.1 | 1674218 | 8-scf00198 | 8 |
| AX-158067304 | 9 | 17.595 | KV452943.1 | 1681254 | 8-scf00198 | 8 |
| AX-158067299 | 9 | 17.733 | KV452943.1 | 1674679 | 8-scf00198 | 8 |
| AX-158384231 | 9 | 17.813 | KV452943.1 | 1638610 | 8-scf00198 | 8 |
| AX-157752220 | 9 | 17.813 | KV452943.1 | 1676683 | 8-scf00198 | 8 |
| AX-158067301 | 9 | 17.813 | KV452943.1 | 1678095 | 8-scf00198 | 8 |
| AX-158067303 | 9 | 17.813 | KV452943.1 | 1680780 | 8-scf00198 | 8 |
| AX-158067307 | 9 | 17.813 | KV452943.1 | 1682251 | 8-scf00198 | 8 |
| AX-157823912 | 9 | 17.813 | KV452943.1 | 1682933 | 8-scf00198 | 8 |
| AX-158067314 | 9 | 17.813 | KV452943.1 | 1686731 | 8-scf00198 | 8 |
| AX-157716224 | 9 | 17.813 | KV452943.1 | 1709095 | 8-scf00198 | 8 |
| AX-157744700 | 9 | 17.813 | KV452943.1 | 1715330 | 8-scf00198 | 8 |
| AX-158067351 | 9 | 17.813 | KV452943.1 | 1720729 | 8-scf00198 | 8 |
| AX-158067402 | 9 | 17.813 | KV452943.1 | 1766308 | 8-scf00198 | 8 |
| AX-158067310 | 9 | 17.926 | KV452943.1 | 1684839 | 8-scf00198 | 8 |
| AX-158067323 | 9 | 18.032 | KV452943.1 | 1690969 | 8-scf00198 | 8 |
| AX-158067326 | 9 | 18.032 | KV452943.1 | 1691767 | 8-scf00198 | 8 |
| AX-158067327 | 9 | 18.032 | KV452943.1 | 1692421 | 8-scf00198 | 8 |
| AX-158067329 | 9 | 18.032 | KV452943.1 | 1692828 | 8-scf00198 | 8 |
| AX-157723382 | 9 | 18.032 | KV452943.1 | 1693322 | 8-scf00198 | 8 |
| AX-157823913 | 9 | 18.032 | KV452943.1 | 1697028 | 8-scf00198 | 8 |
| AX-158067332 | 9 | 18.032 | KV452943.1 | 1699281 | 8-scf00198 | 8 |
| AX-158067333 | 9 | 18.032 | KV452943.1 | 1704943 | 8-scf00198 | 8 |
| AX-158067335 | 9 | 18.032 | KV452943.1 | 1705787 | 8-scf00198 | 8 |
| AX-158067337 | 9 | 18.032 | KV452943.1 | 1706914 | 8-scf00198 | 8 |
| AX-158067340 | 9 | 18.056 | KV452943.1 | 1710008 | 8-scf00198 | 8 |
| AX-158067341 | 9 | 18.081 | KV452943.1 | 1710780 | 8-scf00198 | 8 |
| AX-157885427 | 9 | 18.11  | KV452943.1 | 1712159 | 8-scf00198 | 8 |
| AX-158067357 | 9 | 18.11  | KV452943.1 | 1724280 | 8-scf00198 | 8 |
| AX-158067318 | 9 | 18.124 | KV452943.1 | 1689645 | 8-scf00198 | 8 |
| AX-158067324 | 9 | 18.124 | KV452943.1 | 1691448 | 8-scf00198 | 8 |
| AX-158067330 | 9 | 18.124 | KV452943.1 | 1693470 | 8-scf00198 | 8 |
| AX-157775399 | 9 | 18.124 | KV452943.1 | 1713374 | 8-scf00198 | 8 |
| AX-158379897 | 9 | 18.141 | KV452943.1 | 1716226 | 8-scf00198 | 8 |
| AX-158067352 | 9 | 18.25  | KV452943.1 | 1721418 | 8-scf00198 | 8 |
| AX-158067356 | 9 | 18.25  | KV452943.1 | 1723898 | 8-scf00198 | 8 |
| AX-158067358 | 9 | 18.25  | KV452943.1 | 1728270 | 8-scf00198 | 8 |
| AX-158067359 | 9 | 18.25  | KV452943.1 | 1728731 | 8-scf00198 | 8 |
| AX-158067361 | 9 | 18.25  | KV452943.1 | 1730078 | 8-scf00198 | 8 |

|              |   |        |            |         |            |   |
|--------------|---|--------|------------|---------|------------|---|
| AX-158067347 | 9 | 18.251 | KV452943.1 | 1719142 | 8-scf00198 | 8 |
| AX-158067362 | 9 | 18.251 | KV452943.1 | 1730337 | 8-scf00198 | 8 |
| AX-158067371 | 9 | 18.578 | KV452943.1 | 1736787 | 8-scf00198 | 8 |
| AX-157758778 | 9 | 18.578 | KV452943.1 | 1739238 | 8-scf00198 | 8 |
| AX-158067377 | 9 | 18.578 | KV452943.1 | 1741720 | 8-scf00198 | 8 |
| AX-158067378 | 9 | 18.578 | KV452943.1 | 1742144 | 8-scf00198 | 8 |
| AX-158067379 | 9 | 18.578 | KV452943.1 | 1743202 | 8-scf00198 | 8 |
| AX-158067380 | 9 | 18.578 | KV452943.1 | 1743892 | 8-scf00198 | 8 |
| AX-158067381 | 9 | 18.796 | KV452943.1 | 1747419 | 8-scf00198 | 8 |
| AX-158067383 | 9 | 18.796 | KV452943.1 | 1748166 | 8-scf00198 | 8 |
| AX-158067386 | 9 | 18.796 | KV452943.1 | 1751195 | 8-scf00198 | 8 |
| AX-158067388 | 9 | 18.796 | KV452943.1 | 1751639 | 8-scf00198 | 8 |
| AX-157877043 | 9 | 18.796 | KV452943.1 | 1751706 | 8-scf00198 | 8 |
| AX-158067392 | 9 | 18.796 | KV452943.1 | 1753760 | 8-scf00198 | 8 |
| AX-158067384 | 9 | 18.821 | KV452943.1 | 1748557 | 8-scf00198 | 8 |
| AX-157719890 | 9 | 18.821 | KV452943.1 | 1759069 | 8-scf00198 | 8 |
| AX-158067394 | 9 | 18.905 | KV452943.1 | 1757887 | 8-scf00198 | 8 |
| AX-158067397 | 9 | 18.905 | KV452943.1 | 1760569 | 8-scf00198 | 8 |
| AX-158406707 | 9 | 18.905 | KV452943.1 | 1761410 | 8-scf00198 | 8 |
| AX-158409321 | 9 | 18.905 | KV452943.1 | 1762746 | 8-scf00198 | 8 |
| AX-158391929 | 9 | 18.913 | KV452943.1 | 1769303 | 8-scf00198 | 8 |
| AX-158067428 | 9 | 18.913 | KV452943.1 | 1786928 | 8-scf00198 | 8 |
| AX-158067408 | 9 | 19.187 | KV452943.1 | 1770222 | 8-scf00198 | 8 |
| AX-158067409 | 9 | 19.187 | KV452943.1 | 1772343 | 8-scf00198 | 8 |
| AX-158067414 | 9 | 19.189 | KV452943.1 | 1774783 | 8-scf00198 | 8 |
| AX-158067439 | 9 | 19.189 | KV452943.1 | 1796307 | 8-scf00198 | 8 |
| AX-158067425 | 9 | 19.399 | KV452943.1 | 1783150 | 8-scf00198 | 8 |
| AX-158067433 | 9 | 19.399 | KV452943.1 | 1790718 | 8-scf00198 | 8 |
| AX-158067436 | 9 | 19.399 | KV452943.1 | 1794290 | 8-scf00198 | 8 |
| AX-158067431 | 9 | 19.611 | KV452943.1 | 1789955 | 8-scf00198 | 8 |
| AX-157751800 | 9 | 19.611 | KV452943.1 | 1801246 | 8-scf00198 | 8 |
| AX-158067442 | 9 | 20.003 | KV452943.1 | 1802998 | 8-scf00198 | 8 |
| AX-158067447 | 9 | 20.003 | KV452943.1 | 1809135 | 8-scf00198 | 8 |
| AX-158067450 | 9 | 20.003 | KV452943.1 | 1811127 | 8-scf00198 | 8 |
| AX-158067453 | 9 | 20.003 | KV452943.1 | 1813255 | 8-scf00198 | 8 |
| AX-158067454 | 9 | 20.003 | KV452943.1 | 1814257 | 8-scf00198 | 8 |
| AX-158067456 | 9 | 20.003 | KV452943.1 | 1815204 | 8-scf00198 | 8 |
| AX-158067457 | 9 | 20.003 | KV452943.1 | 1816246 | 8-scf00198 | 8 |
| AX-158067459 | 9 | 20.003 | KV452943.1 | 1816419 | 8-scf00198 | 8 |
| AX-158067460 | 9 | 20.003 | KV452943.1 | 1817317 | 8-scf00198 | 8 |
| AX-158067465 | 9 | 20.003 | KV452943.1 | 1819705 | 8-scf00198 | 8 |
| AX-158067463 | 9 | 20.004 | KV452943.1 | 1819504 | 8-scf00198 | 8 |
| AX-158067467 | 9 | 20.004 | KV452943.1 | 1822064 | 8-scf00198 | 8 |
| AX-158067468 | 9 | 20.004 | KV452943.1 | 1823307 | 8-scf00198 | 8 |
| AX-158067470 | 9 | 20.331 | KV452943.1 | 1826272 | 8-scf00198 | 8 |
| AX-158067471 | 9 | 20.331 | KV452943.1 | 1826996 | 8-scf00198 | 8 |
| AX-158067473 | 9 | 20.331 | KV452943.1 | 1828949 | 8-scf00198 | 8 |
| AX-157770935 | 9 | 20.331 | KV452943.1 | 1829455 | 8-scf00198 | 8 |
| AX-158067474 | 9 | 20.331 | KV452943.1 | 1829539 | 8-scf00198 | 8 |
| AX-158067476 | 9 | 20.385 | KV452943.1 | 1829782 | 8-scf00198 | 8 |
| AX-158067478 | 9 | 20.385 | KV452943.1 | 1832558 | 8-scf00198 | 8 |

|              |   |        |            |         |            |   |
|--------------|---|--------|------------|---------|------------|---|
| AX-158067477 | 9 | 20.44  | KV452943.1 | 1830071 | 8-scf00198 | 8 |
| AX-158067480 | 9 | 20.549 | KV452943.1 | 1836403 | 8-scf00198 | 8 |
| AX-158067483 | 9 | 20.658 | KV452943.1 | 1839564 | 8-scf00198 | 8 |
| AX-158067486 | 9 | 20.986 | KV452943.1 | 1843985 | 8-scf00198 | 8 |
| AX-157723494 | 9 | 21.205 | KV452943.1 | 1845049 | 8-scf00198 | 8 |
| AX-157823918 | 9 | 21.205 | KV452943.1 | 1846907 | 8-scf00198 | 8 |
| AX-158067488 | 9 | 21.205 | KV452943.1 | 1847952 | 8-scf00198 | 8 |
| AX-157823919 | 9 | 21.205 | KV452943.1 | 1848978 | 8-scf00198 | 8 |
| AX-157823920 | 9 | 21.205 | KV452943.1 | 1849333 | 8-scf00198 | 8 |
| AX-157823921 | 9 | 21.205 | KV452943.1 | 1851871 | 8-scf00198 | 8 |
| AX-158067491 | 9 | 21.314 | KV452943.1 | 1853449 | 8-scf00198 | 8 |
| AX-158067492 | 9 | 21.314 | KV452943.1 | 1853782 | 8-scf00198 | 8 |
| AX-157753234 | 9 | 21.314 | KV452943.1 | 1856185 | 8-scf00198 | 8 |
| AX-157823923 | 9 | 21.314 | KV452943.1 | 1857096 | 8-scf00198 | 8 |
| AX-157823924 | 9 | 21.314 | KV452943.1 | 1857516 | 8-scf00198 | 8 |
| AX-157742935 | 9 | 21.314 | KV452943.1 | 1882523 | 8-scf00198 | 8 |
| AX-158067497 | 9 | 21.408 | KV452943.1 | 1859821 | 8-scf00198 | 8 |
| AX-158067501 | 9 | 21.532 | KV452943.1 | 1863994 | 8-scf00198 | 8 |
| AX-157823925 | 9 | 21.532 | KV452943.1 | 1864266 | 8-scf00198 | 8 |
| AX-158067502 | 9 | 21.532 | KV452943.1 | 1867959 | 8-scf00198 | 8 |
| AX-158067506 | 9 | 21.532 | KV452943.1 | 1872657 | 8-scf00198 | 8 |
| AX-157717194 | 9 | 21.532 | KV452943.1 | 1876852 | 8-scf00198 | 8 |
| AX-158067511 | 9 | 21.532 | KV452943.1 | 1879203 | 8-scf00198 | 8 |
| AX-158067512 | 9 | 21.532 | KV452943.1 | 1880839 | 8-scf00198 | 8 |
| AX-158067514 | 9 | 21.532 | KV452943.1 | 1881255 | 8-scf00198 | 8 |
| AX-158067516 | 9 | 21.532 | KV452943.1 | 1883312 | 8-scf00198 | 8 |
| AX-157772276 | 9 | 21.532 | KV452943.1 | 1897512 | 8-scf00198 | 8 |
| AX-158067517 | 9 | 21.612 | KV452943.1 | 1886355 | 8-scf00198 | 8 |
| AX-157745158 | 9 | 21.685 | KV452943.1 | 1853564 | 8-scf00198 | 8 |
| AX-158409323 | 9 | 21.685 | KV452943.1 | 1878069 | 8-scf00198 | 8 |
| AX-157823928 | 9 | 21.685 | KV452943.1 | 1888354 | 8-scf00198 | 8 |
| AX-157716321 | 9 | 21.685 | KV452943.1 | 1888594 | 8-scf00198 | 8 |
| AX-157823929 | 9 | 21.685 | KV452943.1 | 1888955 | 8-scf00198 | 8 |
| AX-158067522 | 9 | 21.725 | KV452943.1 | 1890913 | 8-scf00198 | 8 |
| AX-158067524 | 9 | 21.765 | KV452943.1 | 1892611 | 8-scf00198 | 8 |
| AX-157823930 | 9 | 21.765 | KV452943.1 | 1893172 | 8-scf00198 | 8 |
| AX-158067537 | 9 | 21.765 | KV452943.1 | 1906486 | 8-scf00198 | 8 |
| AX-157742201 | 9 | 21.804 | KV452943.1 | 1894393 | 8-scf00198 | 8 |
| AX-158067525 | 9 | 21.838 | KV452943.1 | 1895067 | 8-scf00198 | 8 |
| AX-158067526 | 9 | 21.838 | KV452943.1 | 1895690 | 8-scf00198 | 8 |
| AX-157747322 | 9 | 21.838 | KV452943.1 | 1896374 | 8-scf00198 | 8 |
| AX-157865606 | 9 | 21.838 | KV452943.1 | 1897389 | 8-scf00198 | 8 |
| AX-158067529 | 9 | 21.991 | KV452943.1 | 1902457 | 8-scf00198 | 8 |
| AX-158067531 | 9 | 21.991 | KV452943.1 | 1903262 | 8-scf00198 | 8 |
| AX-158067533 | 9 | 21.991 | KV452943.1 | 1904445 | 8-scf00198 | 8 |
| AX-158067536 | 9 | 21.991 | KV452943.1 | 1906008 | 8-scf00198 | 8 |
| AX-158067538 | 9 | 21.991 | KV452943.1 | 1907045 | 8-scf00198 | 8 |
| AX-157823931 | 9 | 21.991 | KV452943.1 | 1913344 | 8-scf00198 | 8 |
| AX-158067546 | 9 | 22.144 | KV452943.1 | 1917792 | 8-scf00198 | 8 |
| AX-158067547 | 9 | 22.144 | KV452943.1 | 1919294 | 8-scf00198 | 8 |
| AX-158067540 | 9 | 22.297 | KV452943.1 | 1908785 | 8-scf00198 | 8 |

|              |   |        |            |         |            |   |
|--------------|---|--------|------------|---------|------------|---|
| AX-158067543 | 9 | 22.297 | KV452943.1 | 1915189 | 8-scf00198 | 8 |
| AX-158067550 | 9 | 22.297 | KV452943.1 | 1922496 | 8-scf00198 | 8 |
| AX-158067551 | 9 | 22.297 | KV452943.1 | 1923037 | 8-scf00198 | 8 |
| AX-158067553 | 9 | 22.297 | KV452943.1 | 1923512 | 8-scf00198 | 8 |
| AX-158067572 | 9 | 22.297 | KV452943.1 | 1938289 | 8-scf00198 | 8 |
| AX-158067556 | 9 | 22.326 | KV452943.1 | 1925934 | 8-scf00198 | 8 |
| AX-157719623 | 9 | 22.354 | KV452943.1 | 1927572 | 8-scf00198 | 8 |
| AX-158067564 | 9 | 22.378 | KV452943.1 | 1929598 | 8-scf00198 | 8 |
| AX-158067566 | 9 | 22.407 | KV452943.1 | 1931303 | 8-scf00198 | 8 |
| AX-158067567 | 9 | 22.407 | KV452943.1 | 1932292 | 8-scf00198 | 8 |
| AX-157741144 | 9 | 22.407 | KV452943.1 | 1933268 | 8-scf00198 | 8 |
| AX-158067569 | 9 | 22.407 | KV452943.1 | 1937901 | 8-scf00198 | 8 |
| AX-158067575 | 9 | 22.714 | KV452943.1 | 1938723 | 8-scf00198 | 8 |
| AX-158067591 | 9 | 22.714 | KV452943.1 | 1954887 | 8-scf00198 | 8 |
| AX-158384233 | 9 | 22.714 | KV452943.1 | 1956396 | 8-scf00198 | 8 |
| AX-158067631 | 9 | 22.714 | KV452943.1 | 1995936 | 8-scf00198 | 8 |
| AX-157709158 | 9 | 22.715 | KV452943.1 | 1939850 | 8-scf00198 | 8 |
| AX-158067580 | 9 | 22.715 | KV452943.1 | 1941220 | 8-scf00198 | 8 |
| AX-158067581 | 9 | 22.715 | KV452943.1 | 1941740 | 8-scf00198 | 8 |
| AX-158067583 | 9 | 22.715 | KV452943.1 | 1942486 | 8-scf00198 | 8 |
| AX-158067586 | 9 | 22.785 | KV452943.1 | 1944688 | 8-scf00198 | 8 |
| AX-158067590 | 9 | 22.785 | KV452943.1 | 1946427 | 8-scf00198 | 8 |
| AX-158067596 | 9 | 22.785 | KV452943.1 | 1962389 | 8-scf00198 | 8 |
| AX-158067604 | 9 | 22.785 | KV452943.1 | 1968710 | 8-scf00198 | 8 |
| AX-157724024 | 9 | 22.795 | KV452943.1 | 1945179 | 8-scf00198 | 8 |
| AX-158067587 | 9 | 22.86  | KV452943.1 | 1945567 | 8-scf00198 | 8 |
| AX-158067595 | 9 | 23.142 | KV452943.1 | 1958304 | 8-scf00198 | 8 |
| AX-157720505 | 9 | 23.237 | KV452943.1 | 1964076 | 8-scf00198 | 8 |
| AX-158067602 | 9 | 23.283 | KV452943.1 | 1968199 | 8-scf00198 | 8 |
| AX-158067605 | 9 | 23.283 | KV452943.1 | 1969277 | 8-scf00198 | 8 |
| AX-158067608 | 9 | 23.283 | KV452943.1 | 1972861 | 8-scf00198 | 8 |
| AX-158067609 | 9 | 23.425 | KV452943.1 | 1974445 | 8-scf00198 | 8 |
| AX-158067619 | 9 | 23.565 | KV452943.1 | 1986005 | 8-scf00198 | 8 |
| AX-158067624 | 9 | 23.565 | KV452943.1 | 1988699 | 8-scf00198 | 8 |
| AX-158067629 | 9 | 23.565 | KV452943.1 | 1995098 | 8-scf00198 | 8 |
| AX-158067632 | 9 | 23.565 | KV452943.1 | 1996506 | 8-scf00198 | 8 |
| AX-158067634 | 9 | 23.566 | KV452943.1 | 1997935 | 8-scf00198 | 8 |
| AX-158067616 | 9 | 23.747 | KV452943.1 | 1981476 | 8-scf00198 | 8 |
| AX-158067638 | 9 | 23.747 | KV452943.1 | 1999705 | 8-scf00198 | 8 |
| AX-158409328 | 9 | 23.925 | KV452943.1 | 2002068 | 8-scf00198 | 8 |
| AX-158409329 | 9 | 24.005 | KV452943.1 | 2002126 | 8-scf00198 | 8 |
| AX-158067645 | 9 | 24.005 | KV452943.1 | 2005512 | 8-scf00198 | 8 |
| AX-158067647 | 9 | 24.106 | KV452943.1 | 2006664 | 8-scf00198 | 8 |
| AX-158379898 | 9 | 24.106 | KV452943.1 | 2007856 | 8-scf00198 | 8 |
| AX-158067650 | 9 | 24.106 | KV452943.1 | 2008166 | 8-scf00198 | 8 |
| AX-158067653 | 9 | 24.106 | KV452943.1 | 2010321 | 8-scf00198 | 8 |
| AX-158067654 | 9 | 24.106 | KV452943.1 | 2015583 | 8-scf00198 | 8 |
| AX-158067657 | 9 | 24.165 | KV452943.1 | 2021135 | 8-scf00198 | 8 |
| AX-158067658 | 9 | 24.213 | KV452943.1 | 2030126 | 8-scf00198 | 8 |
| AX-158067648 | 9 | 24.264 | KV452943.1 | 2007410 | 8-scf00198 | 8 |
| AX-158067660 | 9 | 24.264 | KV452943.1 | 2036044 | 8-scf00198 | 8 |

|              |   |        |            |         |            |   |
|--------------|---|--------|------------|---------|------------|---|
| AX-158067679 | 9 | 24.264 | KV452943.1 | 2055387 | 8-scf00198 | 8 |
| AX-157823938 | 9 | 24.578 | KV452943.1 | 2041251 | 8-scf00198 | 8 |
| AX-158067674 | 9 | 24.578 | KV452943.1 | 2048820 | 8-scf00198 | 8 |
| AX-157716347 | 9 | 24.579 | KV452943.1 | 2004578 | 8-scf00198 | 8 |
| AX-158067656 | 9 | 24.579 | KV452943.1 | 2018653 | 8-scf00198 | 8 |
| AX-158067663 | 9 | 24.579 | KV452943.1 | 2036647 | 8-scf00198 | 8 |
| AX-157823937 | 9 | 24.579 | KV452943.1 | 2038635 | 8-scf00198 | 8 |
| AX-157748808 | 9 | 24.579 | KV452943.1 | 2040838 | 8-scf00198 | 8 |
| AX-157752047 | 9 | 24.579 | KV452943.1 | 2041413 | 8-scf00198 | 8 |
| AX-158067668 | 9 | 24.579 | KV452943.1 | 2044036 | 8-scf00198 | 8 |
| AX-158067669 | 9 | 24.579 | KV452943.1 | 2045530 | 8-scf00198 | 8 |
| AX-157856975 | 9 | 24.579 | KV452943.1 | 2048052 | 8-scf00198 | 8 |
| AX-157823939 | 9 | 24.579 | KV452943.1 | 2050749 | 8-scf00198 | 8 |
| AX-158067675 | 9 | 24.579 | KV452943.1 | 2051012 | 8-scf00198 | 8 |
| AX-158067676 | 9 | 24.579 | KV452943.1 | 2051432 | 8-scf00198 | 8 |
| AX-158067677 | 9 | 24.579 | KV452943.1 | 2054130 | 8-scf00198 | 8 |
| AX-157741203 | 9 | 24.579 | KV452943.1 | 2064815 | 8-scf00198 | 8 |
| AX-157757656 | 9 | 24.579 | KV452943.1 | 2065321 | 8-scf00198 | 8 |
| AX-158067690 | 9 | 24.579 | KV452943.1 | 2065928 | 8-scf00198 | 8 |
| AX-158067692 | 9 | 24.579 | KV452943.1 | 2066817 | 8-scf00198 | 8 |
| AX-158067693 | 9 | 24.579 | KV452943.1 | 2067501 | 8-scf00198 | 8 |
| AX-158384235 | 9 | 24.579 | KV452943.1 | 2069603 | 8-scf00198 | 8 |
| AX-158067699 | 9 | 24.579 | KV452943.1 | 2072904 | 8-scf00198 | 8 |
| AX-157877046 | 9 | 24.579 | KV452943.1 | 2073782 | 8-scf00198 | 8 |
| AX-158067701 | 9 | 24.579 | KV452943.1 | 2074505 | 8-scf00198 | 8 |
| AX-157713325 | 9 | 24.579 | KV452943.1 | 2075380 | 8-scf00198 | 8 |
| AX-158067682 | 9 | 24.68  | KV452943.1 | 2058637 | 8-scf00198 | 8 |
| AX-158067694 | 9 | 24.68  | KV452943.1 | 2068124 | 8-scf00198 | 8 |
| AX-158067704 | 9 | 24.68  | KV452943.1 | 2076366 | 8-scf00198 | 8 |
| AX-158067724 | 9 | 24.68  | KV452943.1 | 2092249 | 8-scf00198 | 8 |
| AX-158067710 | 9 | 24.79  | KV452943.1 | 2077989 | 8-scf00198 | 8 |
| AX-158067712 | 9 | 24.792 | KV452943.1 | 2078480 | 8-scf00198 | 8 |
| AX-157699664 | 9 | 24.793 | KV452943.1 | 2051981 | 8-scf00198 | 8 |
| AX-158067714 | 9 | 24.793 | KV452943.1 | 2081189 | 8-scf00198 | 8 |
| AX-158067715 | 9 | 24.795 | KV452943.1 | 2081614 | 8-scf00198 | 8 |
| AX-157721628 | 9 | 25.212 | KV452943.1 | 2082761 | 8-scf00198 | 8 |
| AX-158067716 | 9 | 25.212 | KV452943.1 | 2083793 | 8-scf00198 | 8 |
| AX-158067722 | 9 | 25.212 | KV452943.1 | 2090913 | 8-scf00198 | 8 |
| AX-158067718 | 9 | 25.3   | KV452943.1 | 2088193 | 8-scf00198 | 8 |
| AX-158067725 | 9 | 25.682 | KV452943.1 | 2095888 | 8-scf00198 | 8 |
| AX-158067732 | 9 | 25.687 | KV452943.1 | 2103427 | 8-scf00198 | 8 |
| AX-158067729 | 9 | 25.762 | KV452943.1 | 2100684 | 8-scf00198 | 8 |
| AX-157696832 | 9 | 25.762 | KV452943.1 | 2105666 | 8-scf00198 | 8 |
| AX-158067740 | 9 | 25.845 | KV452943.1 | 2110095 | 8-scf00198 | 8 |
| AX-158416522 | 9 | 25.846 | KV452943.1 | 2100793 | 8-scf00198 | 8 |
| AX-158067741 | 9 | 25.846 | KV452943.1 | 2110649 | 8-scf00198 | 8 |
| AX-157823940 | 9 | 25.846 | KV452943.1 | 2116669 | 8-scf00198 | 8 |
| AX-158067744 | 9 | 26.051 | KV452943.1 | 2115084 | 8-scf00198 | 8 |
| AX-158067747 | 9 | 26.051 | KV452943.1 | 2130183 | 8-scf00198 | 8 |
| AX-158409338 | 9 | 26.051 | KV452943.1 | 2136800 | 8-scf00198 | 8 |
| AX-157823945 | 9 | 26.206 | KV452943.1 | 2131920 | 8-scf00198 | 8 |

|              |   |        |            |         |            |   |
|--------------|---|--------|------------|---------|------------|---|
| AX-158067755 | 9 | 26.206 | KV452943.1 | 2152132 | 8-scf00198 | 8 |
| AX-157823946 | 9 | 26.276 | KV452943.1 | 2134659 | 8-scf00198 | 8 |
| AX-157856978 | 9 | 26.635 | KV452943.1 | 2141852 | 8-scf00198 | 8 |
| AX-158067749 | 9 | 26.636 | KV452943.1 | 2142119 | 8-scf00198 | 8 |
| AX-157773449 | 9 | 26.636 | KV452943.1 | 2142579 | 8-scf00198 | 8 |
| AX-158067750 | 9 | 26.636 | KV452943.1 | 2144503 | 8-scf00198 | 8 |
| AX-158067746 | 9 | 26.637 | KV452943.1 | 2128375 | 8-scf00198 | 8 |
| AX-157823949 | 9 | 26.637 | KV452943.1 | 2153329 | 8-scf00198 | 8 |
| AX-158067757 | 9 | 26.637 | KV452943.1 | 2155268 | 8-scf00198 | 8 |
| AX-158067763 | 9 | 26.637 | KV452943.1 | 2159566 | 8-scf00198 | 8 |
| AX-158067765 | 9 | 26.637 | KV452943.1 | 2160191 | 8-scf00198 | 8 |
| AX-157750134 | 9 | 26.637 | KV452943.1 | 2166088 | 8-scf00198 | 8 |
| AX-158067778 | 9 | 26.637 | KV452943.1 | 2173670 | 8-scf00198 | 8 |
| AX-158067779 | 9 | 26.637 | KV452943.1 | 2174584 | 8-scf00198 | 8 |
| AX-158067782 | 9 | 26.637 | KV452943.1 | 2176625 | 8-scf00198 | 8 |
| AX-158067787 | 9 | 26.637 | KV452943.1 | 2178878 | 8-scf00198 | 8 |
| AX-158067802 | 9 | 26.637 | KV452943.1 | 2192755 | 8-scf00198 | 8 |
| AX-157823951 | 9 | 26.637 | KV452943.1 | 2206032 | 8-scf00198 | 8 |
| AX-157719641 | 9 | 26.796 | KV452943.1 | 2168797 | 8-scf00198 | 8 |
| AX-158067772 | 9 | 26.796 | KV452943.1 | 2170266 | 8-scf00198 | 8 |
| AX-157863154 | 9 | 26.796 | KV452943.1 | 2223609 | 8-scf00198 | 8 |
| AX-158067775 | 9 | 26.797 | KV452943.1 | 2172174 | 8-scf00198 | 8 |
| AX-158067789 | 9 | 26.797 | KV452943.1 | 2179341 | 8-scf00198 | 8 |
| AX-158067790 | 9 | 26.797 | KV452943.1 | 2180049 | 8-scf00198 | 8 |
| AX-158067818 | 9 | 26.797 | KV452943.1 | 2209462 | 8-scf00198 | 8 |
| AX-158067828 | 9 | 26.797 | KV452943.1 | 2217609 | 8-scf00198 | 8 |
| AX-158384237 | 9 | 26.798 | KV452943.1 | 2183100 | 8-scf00198 | 8 |
| AX-157757300 | 9 | 26.798 | KV452943.1 | 2186143 | 8-scf00198 | 8 |
| AX-158067796 | 9 | 26.921 | KV452943.1 | 2186437 | 8-scf00198 | 8 |
| AX-158067803 | 9 | 27.017 | KV452943.1 | 2194329 | 8-scf00198 | 8 |
| AX-157716894 | 9 | 27.11  | KV452943.1 | 2206572 | 8-scf00198 | 8 |
| AX-158067820 | 9 | 27.11  | KV452943.1 | 2210487 | 8-scf00198 | 8 |
| AX-157823952 | 9 | 27.111 | KV452943.1 | 2206097 | 8-scf00198 | 8 |
| AX-158067823 | 9 | 27.111 | KV452943.1 | 2211899 | 8-scf00198 | 8 |
| AX-157720196 | 9 | 27.111 | KV452943.1 | 2214183 | 8-scf00198 | 8 |
| AX-157877048 | 9 | 27.427 | KV452943.1 | 2215260 | 8-scf00198 | 8 |
| AX-158067839 | 9 | 27.427 | KV452943.1 | 2227054 | 8-scf00198 | 8 |
| AX-157774096 | 9 | 27.427 | KV452943.1 | 2253359 | 8-scf00198 | 8 |
| AX-158067877 | 9 | 27.427 | KV452943.1 | 2270580 | 8-scf00198 | 8 |
| AX-158067827 | 9 | 27.586 | KV452943.1 | 2214978 | 8-scf00198 | 8 |
| AX-157774489 | 9 | 27.586 | KV452943.1 | 2216491 | 8-scf00198 | 8 |
| AX-158067859 | 9 | 27.586 | KV452943.1 | 2247568 | 8-scf00198 | 8 |
| AX-157718587 | 9 | 27.586 | KV452943.1 | 2256870 | 8-scf00198 | 8 |
| AX-158067829 | 9 | 27.651 | KV452943.1 | 2218809 | 8-scf00198 | 8 |
| AX-158067813 | 9 | 27.699 | KV452943.1 | 2202544 | 8-scf00198 | 8 |
| AX-158067830 | 9 | 27.699 | KV452943.1 | 2219506 | 8-scf00198 | 8 |
| AX-158067833 | 9 | 27.744 | KV452943.1 | 2222998 | 8-scf00198 | 8 |
| AX-158067836 | 9 | 27.744 | KV452943.1 | 2223183 | 8-scf00198 | 8 |
| AX-158067837 | 9 | 27.826 | KV452943.1 | 2226329 | 8-scf00198 | 8 |
| AX-158067771 | 9 | 27.901 | KV452943.1 | 2168331 | 8-scf00198 | 8 |
| AX-157742111 | 9 | 27.901 | KV452943.1 | 2186932 | 8-scf00198 | 8 |

|              |   |        |            |         |            |   |
|--------------|---|--------|------------|---------|------------|---|
| AX-158067840 | 9 | 27.901 | KV452943.1 | 2229379 | 8-scf00198 | 8 |
| AX-158067843 | 9 | 27.901 | KV452943.1 | 2231583 | 8-scf00198 | 8 |
| AX-158067846 | 9 | 27.901 | KV452943.1 | 2234505 | 8-scf00198 | 8 |
| AX-158067847 | 9 | 27.901 | KV452943.1 | 2236430 | 8-scf00198 | 8 |
| AX-158067849 | 9 | 28.059 | KV452943.1 | 2238524 | 8-scf00198 | 8 |
| AX-158067851 | 9 | 28.059 | KV452943.1 | 2238981 | 8-scf00198 | 8 |
| AX-158067853 | 9 | 28.059 | KV452943.1 | 2239356 | 8-scf00198 | 8 |
| AX-158067855 | 9 | 28.059 | KV452943.1 | 2240904 | 8-scf00198 | 8 |
| AX-157823953 | 9 | 28.059 | KV452943.1 | 2245371 | 8-scf00198 | 8 |
| AX-158067867 | 9 | 28.059 | KV452943.1 | 2263543 | 8-scf00198 | 8 |
| AX-158067892 | 9 | 28.059 | KV452943.1 | 2282359 | 8-scf00198 | 8 |
| AX-158067979 | 9 | 28.059 | KV452943.1 | 2361851 | 8-scf00198 | 8 |
| AX-158067856 | 9 | 28.144 | KV452943.1 | 2241475 | 8-scf00198 | 8 |
| AX-158067860 | 9 | 28.217 | KV452943.1 | 2252742 | 8-scf00198 | 8 |
| AX-157747161 | 9 | 28.217 | KV452943.1 | 2256023 | 8-scf00198 | 8 |
| AX-158067863 | 9 | 28.217 | KV452943.1 | 2261169 | 8-scf00198 | 8 |
| AX-158067864 | 9 | 28.217 | KV452943.1 | 2261862 | 8-scf00198 | 8 |
| AX-158067870 | 9 | 28.217 | KV452943.1 | 2267030 | 8-scf00198 | 8 |
| AX-158067874 | 9 | 28.217 | KV452943.1 | 2269041 | 8-scf00198 | 8 |
| AX-158067881 | 9 | 28.217 | KV452943.1 | 2274911 | 8-scf00198 | 8 |
| AX-157823956 | 9 | 28.217 | KV452943.1 | 2283811 | 8-scf00198 | 8 |
| AX-158067906 | 9 | 28.217 | KV452943.1 | 2299513 | 8-scf00198 | 8 |
| AX-158067882 | 9 | 28.368 | KV452943.1 | 2277640 | 8-scf00198 | 8 |
| AX-158067878 | 9 | 28.533 | KV452943.1 | 2271583 | 8-scf00198 | 8 |
| AX-157755619 | 9 | 28.533 | KV452943.1 | 2277044 | 8-scf00198 | 8 |
| AX-158067889 | 9 | 28.533 | KV452943.1 | 2281771 | 8-scf00198 | 8 |
| AX-158067890 | 9 | 28.533 | KV452943.1 | 2282043 | 8-scf00198 | 8 |
| AX-157725706 | 9 | 28.533 | KV452943.1 | 2285070 | 8-scf00198 | 8 |
| AX-158067893 | 9 | 28.533 | KV452943.1 | 2287814 | 8-scf00198 | 8 |
| AX-158422462 | 9 | 28.533 | KV452943.1 | 2322272 | 8-scf00198 | 8 |
| AX-157823957 | 9 | 28.849 | KV452943.1 | 2290936 | 8-scf00198 | 8 |
| AX-158067900 | 9 | 28.849 | KV452943.1 | 2292473 | 8-scf00198 | 8 |
| AX-158067909 | 9 | 28.849 | KV452943.1 | 2300832 | 8-scf00198 | 8 |
| AX-158067903 | 9 | 28.917 | KV452943.1 | 2296214 | 8-scf00198 | 8 |
| AX-158067904 | 9 | 28.98  | KV452943.1 | 2297187 | 8-scf00198 | 8 |
| AX-157739566 | 9 | 29.036 | KV452943.1 | 2304169 | 8-scf00198 | 8 |
| AX-157823958 | 9 | 29.1   | KV452943.1 | 2304498 | 8-scf00198 | 8 |
| AX-158067873 | 9 | 29.165 | KV452943.1 | 2268490 | 8-scf00198 | 8 |
| AX-158067876 | 9 | 29.165 | KV452943.1 | 2270086 | 8-scf00198 | 8 |
| AX-157752253 | 9 | 29.165 | KV452943.1 | 2279906 | 8-scf00198 | 8 |
| AX-157775558 | 9 | 29.165 | KV452943.1 | 2298102 | 8-scf00198 | 8 |
| AX-158067912 | 9 | 29.165 | KV452943.1 | 2306454 | 8-scf00198 | 8 |
| AX-158067918 | 9 | 29.165 | KV452943.1 | 2309209 | 8-scf00198 | 8 |
| AX-158067922 | 9 | 29.165 | KV452943.1 | 2312854 | 8-scf00198 | 8 |
| AX-158067923 | 9 | 29.165 | KV452943.1 | 2313647 | 8-scf00198 | 8 |
| AX-158067928 | 9 | 29.165 | KV452943.1 | 2316731 | 8-scf00198 | 8 |
| AX-158067929 | 9 | 29.165 | KV452943.1 | 2317499 | 8-scf00198 | 8 |
| AX-158067932 | 9 | 29.165 | KV452943.1 | 2318054 | 8-scf00198 | 8 |
| AX-157823961 | 9 | 29.165 | KV452943.1 | 2321777 | 8-scf00198 | 8 |
| AX-158067938 | 9 | 29.165 | KV452943.1 | 2330219 | 8-scf00198 | 8 |
| AX-157712168 | 9 | 29.165 | KV452943.1 | 2331089 | 8-scf00198 | 8 |

|              |   |        |            |         |            |   |
|--------------|---|--------|------------|---------|------------|---|
| AX-158067945 | 9 | 29.165 | KV452943.1 | 2333556 | 8-scf00198 | 8 |
| AX-158067947 | 9 | 29.165 | KV452943.1 | 2336001 | 8-scf00198 | 8 |
| AX-158067948 | 9 | 29.165 | KV452943.1 | 2336434 | 8-scf00198 | 8 |
| AX-157823968 | 9 | 29.165 | KV452943.1 | 2376742 | 8-scf00198 | 8 |
| AX-158068003 | 9 | 29.165 | KV452943.1 | 2381452 | 8-scf00198 | 8 |
| AX-158067950 | 9 | 29.216 | KV452943.1 | 2336805 | 8-scf00198 | 8 |
| AX-157823964 | 9 | 29.27  | KV452943.1 | 2342980 | 8-scf00198 | 8 |
| AX-158067961 | 9 | 29.323 | KV452943.1 | 2344962 | 8-scf00198 | 8 |
| AX-157823965 | 9 | 29.323 | KV452943.1 | 2345884 | 8-scf00198 | 8 |
| AX-157758615 | 9 | 29.323 | KV452943.1 | 2346659 | 8-scf00198 | 8 |
| AX-158067967 | 9 | 29.345 | KV452943.1 | 2349898 | 8-scf00198 | 8 |
| AX-157754172 | 9 | 29.367 | KV452943.1 | 2351803 | 8-scf00198 | 8 |
| AX-158067954 | 9 | 29.385 | KV452943.1 | 2339853 | 8-scf00198 | 8 |
| AX-158067972 | 9 | 29.385 | KV452943.1 | 2356270 | 8-scf00198 | 8 |
| AX-158067997 | 9 | 29.385 | KV452943.1 | 2377878 | 8-scf00198 | 8 |
| AX-158067973 | 9 | 29.402 | KV452943.1 | 2357533 | 8-scf00198 | 8 |
| AX-158409350 | 9 | 29.418 | KV452943.1 | 2358494 | 8-scf00198 | 8 |
| AX-158067975 | 9 | 29.719 | KV452943.1 | 2360232 | 8-scf00198 | 8 |
| AX-158067976 | 9 | 29.719 | KV452943.1 | 2360766 | 8-scf00198 | 8 |
| AX-158067984 | 9 | 29.955 | KV452943.1 | 2366567 | 8-scf00198 | 8 |
| AX-158067985 | 9 | 29.955 | KV452943.1 | 2367023 | 8-scf00198 | 8 |
| AX-158379901 | 9 | 29.955 | KV452943.1 | 2368132 | 8-scf00198 | 8 |
| AX-158067987 | 9 | 30.01  | KV452943.1 | 2368731 | 8-scf00198 | 8 |
| AX-158067988 | 9 | 30.064 | KV452943.1 | 2369264 | 8-scf00198 | 8 |
| AX-158067978 | 9 | 30.113 | KV452943.1 | 2361486 | 8-scf00198 | 8 |
| AX-158067993 | 9 | 30.113 | KV452943.1 | 2373954 | 8-scf00198 | 8 |
| AX-157823967 | 9 | 30.113 | KV452943.1 | 2376259 | 8-scf00198 | 8 |
| AX-157714516 | 9 | 30.113 | KV452943.1 | 2378341 | 8-scf00198 | 8 |
| AX-157823969 | 9 | 30.113 | KV452943.1 | 2378602 | 8-scf00198 | 8 |
| AX-158068000 | 9 | 30.113 | KV452943.1 | 2379519 | 8-scf00198 | 8 |
| AX-158068001 | 9 | 30.113 | KV452943.1 | 2380492 | 8-scf00198 | 8 |
| AX-158068009 | 9 | 30.113 | KV452943.1 | 2385482 | 8-scf00198 | 8 |
| AX-158068010 | 9 | 30.271 | KV452943.1 | 2385796 | 8-scf00198 | 8 |
| AX-157856980 | 9 | 30.429 | KV452943.1 | 2390294 | 8-scf00198 | 8 |
| AX-157823971 | 9 | 30.429 | KV452943.1 | 2390708 | 8-scf00198 | 8 |
| AX-158068013 | 9 | 30.429 | KV452943.1 | 2392678 | 8-scf00198 | 8 |
| AX-158068016 | 9 | 30.429 | KV452943.1 | 2399561 | 8-scf00198 | 8 |
| AX-158068018 | 9 | 30.429 | KV452943.1 | 2402876 | 8-scf00198 | 8 |
| AX-158068019 | 9 | 30.429 | KV452943.1 | 2404594 | 8-scf00198 | 8 |
| AX-158068020 | 9 | 30.429 | KV452943.1 | 2406223 | 8-scf00198 | 8 |
| AX-157770145 | 9 | 30.429 | KV452943.1 | 2406780 | 8-scf00198 | 8 |
| AX-157787587 | 9 | 30.429 | KV452943.1 | 2407708 | 8-scf00198 | 8 |
| AX-158068023 | 9 | 30.429 | KV452943.1 | 2414498 | 8-scf00198 | 8 |
| AX-157823974 | 9 | 30.429 | KV452943.1 | 2419366 | 8-scf00198 | 8 |
| AX-158068028 | 9 | 30.429 | KV452943.1 | 2422424 | 8-scf00198 | 8 |
| AX-158068046 | 9 | 30.429 | KV452943.1 | 2440963 | 8-scf00198 | 8 |
| AX-158068021 | 9 | 30.502 | KV452943.1 | 2408130 | 8-scf00198 | 8 |
| AX-158068015 | 9 | 30.587 | KV452943.1 | 2398469 | 8-scf00198 | 8 |
| AX-157772409 | 9 | 30.587 | KV452943.1 | 2410651 | 8-scf00198 | 8 |
| AX-157758899 | 9 | 30.587 | KV452943.1 | 2416837 | 8-scf00198 | 8 |
| AX-158068026 | 9 | 30.587 | KV452943.1 | 2417996 | 8-scf00198 | 8 |



|              |   |        |            |         |            |   |
|--------------|---|--------|------------|---------|------------|---|
| AX-157823973 | 9 | 30.587 | KV452943.1 | 2418713 | 8-scf00198 | 8 |
| AX-158068027 | 9 | 30.587 | KV452943.1 | 2418915 | 8-scf00198 | 8 |
| AX-158068029 | 9 | 30.587 | KV452943.1 | 2423153 | 8-scf00198 | 8 |
| AX-158068030 | 9 | 30.587 | KV452943.1 | 2423660 | 8-scf00198 | 8 |
| AX-158068031 | 9 | 30.587 | KV452943.1 | 2424488 | 8-scf00198 | 8 |
| AX-158068032 | 9 | 30.587 | KV452943.1 | 2424981 | 8-scf00198 | 8 |
| AX-158068033 | 9 | 30.587 | KV452943.1 | 2426330 | 8-scf00198 | 8 |
| AX-158068035 | 9 | 30.587 | KV452943.1 | 2428253 | 8-scf00198 | 8 |
| AX-157823975 | 9 | 30.587 | KV452943.1 | 2428417 | 8-scf00198 | 8 |
| AX-157823976 | 9 | 30.587 | KV452943.1 | 2430542 | 8-scf00198 | 8 |
| AX-158068036 | 9 | 30.587 | KV452943.1 | 2431477 | 8-scf00198 | 8 |
| AX-157745448 | 9 | 30.587 | KV452943.1 | 2438520 | 8-scf00198 | 8 |
| AX-158068049 | 9 | 30.587 | KV452943.1 | 2443315 | 8-scf00198 | 8 |
| AX-157719055 | 9 | 30.587 | KV452943.1 | 2444377 | 8-scf00198 | 8 |
| AX-158068067 | 9 | 30.587 | KV452943.1 | 2461472 | 8-scf00198 | 8 |
| AX-158068112 | 9 | 30.587 | KV452943.1 | 2504794 | 8-scf00198 | 8 |
| AX-157727238 | 9 | 30.595 | KV452943.1 | 2430628 | 8-scf00198 | 8 |
| AX-158068047 | 9 | 30.6   | KV452943.1 | 2441917 | 8-scf00198 | 8 |
| AX-158068051 | 9 | 30.603 | KV452943.1 | 2444066 | 8-scf00198 | 8 |
| AX-157823977 | 9 | 31.046 | KV452943.1 | 2445832 | 8-scf00198 | 8 |
| AX-158068055 | 9 | 31.046 | KV452943.1 | 2446937 | 8-scf00198 | 8 |
| AX-157823978 | 9 | 31.046 | KV452943.1 | 2454068 | 8-scf00198 | 8 |
| AX-158068061 | 9 | 31.046 | KV452943.1 | 2454136 | 8-scf00198 | 8 |
| AX-157823979 | 9 | 31.046 | KV452943.1 | 2454207 | 8-scf00198 | 8 |
| AX-158068064 | 9 | 31.046 | KV452943.1 | 2458556 | 8-scf00198 | 8 |
| AX-158068065 | 9 | 31.046 | KV452943.1 | 2459399 | 8-scf00198 | 8 |
| AX-158068069 | 9 | 31.046 | KV452943.1 | 2461690 | 8-scf00198 | 8 |
| AX-158068071 | 9 | 31.046 | KV452943.1 | 2466959 | 8-scf00198 | 8 |
| AX-158068073 | 9 | 31.046 | KV452943.1 | 2468032 | 8-scf00198 | 8 |
| AX-158068083 | 9 | 31.047 | KV452943.1 | 2475646 | 8-scf00198 | 8 |
| AX-158068095 | 9 | 31.047 | KV452943.1 | 2487551 | 8-scf00198 | 8 |
| AX-157722271 | 9 | 31.048 | KV452943.1 | 2482113 | 8-scf00198 | 8 |
| AX-158068092 | 9 | 31.442 | KV452943.1 | 2485579 | 8-scf00198 | 8 |
| AX-158068094 | 9 | 31.449 | KV452943.1 | 2486138 | 8-scf00198 | 8 |
| AX-158068097 | 9 | 31.587 | KV452943.1 | 2492791 | 8-scf00198 | 8 |
| AX-157823982 | 9 | 31.72  | KV452943.1 | 2493479 | 8-scf00198 | 8 |
| AX-158068098 | 9 | 32.117 | KV452943.1 | 2494080 | 8-scf00198 | 8 |
| AX-157823983 | 9 | 32.117 | KV452943.1 | 2496067 | 8-scf00198 | 8 |
| AX-158068101 | 9 | 32.117 | KV452943.1 | 2496821 | 8-scf00198 | 8 |
| AX-158068102 | 9 | 32.117 | KV452943.1 | 2497688 | 8-scf00198 | 8 |
| AX-158068104 | 9 | 32.117 | KV452943.1 | 2498446 | 8-scf00198 | 8 |
| AX-158068105 | 9 | 32.117 | KV452943.1 | 2500669 | 8-scf00198 | 8 |
| AX-158068106 | 9 | 32.117 | KV452943.1 | 2501193 | 8-scf00198 | 8 |
| AX-157758353 | 9 | 32.117 | KV452943.1 | 2503255 | 8-scf00198 | 8 |
| AX-158068111 | 9 | 32.117 | KV452943.1 | 2504341 | 8-scf00198 | 8 |
| AX-157877052 | 9 | 32.117 | KV452943.1 | 2505853 | 8-scf00198 | 8 |
| AX-158068115 | 9 | 32.117 | KV452943.1 | 2506611 | 8-scf00198 | 8 |
| AX-158068118 | 9 | 32.117 | KV452943.1 | 2509230 | 8-scf00198 | 8 |
| AX-158068119 | 9 | 32.117 | KV452943.1 | 2509772 | 8-scf00198 | 8 |
| AX-158384241 | 9 | 32.117 | KV452943.1 | 2511116 | 8-scf00198 | 8 |
| AX-158068120 | 9 | 32.117 | KV452943.1 | 2511924 | 8-scf00198 | 8 |

|              |   |        |            |         |            |   |
|--------------|---|--------|------------|---------|------------|---|
| AX-158068121 | 9 | 32.117 | KV452943.1 | 2512455 | 8-scf00198 | 8 |
| AX-158068127 | 9 | 32.117 | KV452943.1 | 2514780 | 8-scf00198 | 8 |
| AX-158068123 | 9 | 32.298 | KV452943.1 | 2513477 | 8-scf00198 | 8 |
| AX-158068124 | 9 | 32.298 | KV452943.1 | 2514001 | 8-scf00198 | 8 |
| AX-158068129 | 9 | 32.298 | KV452943.1 | 2515282 | 8-scf00198 | 8 |
| AX-158068130 | 9 | 32.298 | KV452943.1 | 2515927 | 8-scf00198 | 8 |
| AX-157885433 | 9 | 32.298 | KV452943.1 | 2516334 | 8-scf00198 | 8 |
| AX-158068131 | 9 | 32.298 | KV452943.1 | 2516576 | 8-scf00198 | 8 |
| AX-158068134 | 9 | 32.298 | KV452943.1 | 2517964 | 8-scf00198 | 8 |
| AX-158068149 | 9 | 32.813 | KV452943.1 | 2530357 | 8-scf00198 | 8 |
| AX-157696538 | 9 | 32.813 | KV452943.1 | 2532785 | 8-scf00198 | 8 |
| AX-158068153 | 9 | 32.813 | KV452943.1 | 2533740 | 8-scf00198 | 8 |
| AX-158068154 | 9 | 32.813 | KV452943.1 | 2534163 | 8-scf00198 | 8 |
| AX-158068160 | 9 | 32.813 | KV452943.1 | 2537521 | 8-scf00198 | 8 |
| AX-158068158 | 9 | 32.845 | KV452943.1 | 2536108 | 8-scf00198 | 8 |
| AX-158068162 | 9 | 32.906 | KV452943.1 | 2539682 | 8-scf00198 | 8 |
| AX-158068164 | 9 | 32.909 | KV452943.1 | 2542725 | 8-scf00198 | 8 |
| AX-158068166 | 9 | 33.101 | KV452943.1 | 2543162 | 8-scf00198 | 8 |
| AX-158068167 | 9 | 33.101 | KV452943.1 | 2543541 | 8-scf00198 | 8 |
| AX-158068168 | 9 | 33.102 | KV452943.1 | 2544376 | 8-scf00198 | 8 |
| AX-158068176 | 9 | 33.342 | KV452943.1 | 2559126 | 8-scf00198 | 8 |
| AX-158068178 | 9 | 33.367 | KV452943.1 | 2559752 | 8-scf00198 | 8 |
| AX-158068190 | 9 | 34.082 | KV452943.1 | 2569298 | 8-scf00198 | 8 |
| AX-158068193 | 9 | 34.107 | KV452943.1 | 2573209 | 8-scf00198 | 8 |
| AX-158068195 | 9 | 34.107 | KV452943.1 | 2573856 | 8-scf00198 | 8 |
| AX-158068196 | 9 | 34.107 | KV452943.1 | 2575103 | 8-scf00198 | 8 |
| AX-158068202 | 9 | 34.107 | KV452943.1 | 2576683 | 8-scf00198 | 8 |
| AX-158068204 | 9 | 34.107 | KV452943.1 | 2577995 | 8-scf00198 | 8 |
| AX-158068207 | 9 | 34.107 | KV452943.1 | 2579984 | 8-scf00198 | 8 |
| AX-158068210 | 9 | 34.107 | KV452943.1 | 2581341 | 8-scf00198 | 8 |
| AX-158068211 | 9 | 34.107 | KV452943.1 | 2581762 | 8-scf00198 | 8 |
| AX-157823984 | 9 | 34.192 | KV452943.1 | 2571618 | 8-scf00198 | 8 |
| AX-158068219 | 9 | 34.192 | KV452943.1 | 2586938 | 8-scf00198 | 8 |
| AX-158068281 | 9 | 34.192 | KV452943.1 | 2628807 | 8-scf00198 | 8 |
| AX-158068220 | 9 | 34.26  | KV452943.1 | 2587390 | 8-scf00198 | 8 |
| AX-158068222 | 9 | 34.26  | KV452943.1 | 2588073 | 8-scf00198 | 8 |
| AX-158068224 | 9 | 34.26  | KV452943.1 | 2588560 | 8-scf00198 | 8 |
| AX-158068225 | 9 | 34.26  | KV452943.1 | 2589748 | 8-scf00198 | 8 |
| AX-158068227 | 9 | 34.26  | KV452943.1 | 2590570 | 8-scf00198 | 8 |
| AX-158422466 | 9 | 34.26  | KV452943.1 | 2637885 | 8-scf00198 | 8 |
| AX-158068234 | 9 | 34.302 | KV452943.1 | 2595450 | 8-scf00198 | 8 |
| AX-158068255 | 9 | 34.302 | KV452943.1 | 2609570 | 8-scf00198 | 8 |
| AX-158068239 | 9 | 34.331 | KV452943.1 | 2597659 | 8-scf00198 | 8 |
| AX-158068243 | 9 | 34.368 | KV452943.1 | 2599342 | 8-scf00198 | 8 |
| AX-158068233 | 9 | 34.413 | KV452943.1 | 2594239 | 8-scf00198 | 8 |
| AX-158384244 | 9 | 34.413 | KV452943.1 | 2602543 | 8-scf00198 | 8 |
| AX-158068260 | 9 | 34.719 | KV452943.1 | 2612900 | 8-scf00198 | 8 |
| AX-158068262 | 9 | 34.719 | KV452943.1 | 2613953 | 8-scf00198 | 8 |
| AX-158068265 | 9 | 34.719 | KV452943.1 | 2615062 | 8-scf00198 | 8 |
| AX-158068267 | 9 | 34.719 | KV452943.1 | 2615917 | 8-scf00198 | 8 |
| AX-158068269 | 9 | 34.719 | KV452943.1 | 2616757 | 8-scf00198 | 8 |

|              |   |        |            |         |            |   |
|--------------|---|--------|------------|---------|------------|---|
| AX-158068272 | 9 | 34.719 | KV452943.1 | 2621199 | 8-scf00198 | 8 |
| AX-158068257 | 9 | 34.72  | KV452943.1 | 2610822 | 8-scf00198 | 8 |
| AX-158068274 | 9 | 34.72  | KV452943.1 | 2621949 | 8-scf00198 | 8 |
| AX-158068135 | 9 | 35.023 | KV452943.1 | 2518758 | 8-scf00198 | 8 |
| AX-158068182 | 9 | 35.023 | KV452943.1 | 2562207 | 8-scf00198 | 8 |
| AX-158068277 | 9 | 35.023 | KV452943.1 | 2623892 | 8-scf00198 | 8 |
| AX-158068285 | 9 | 35.023 | KV452943.1 | 2633349 | 8-scf00198 | 8 |
| AX-158068393 | 9 | 35.023 | KV452943.1 | 2705498 | 8-scf00198 | 8 |
| AX-158068482 | 9 | 35.023 | KV452943.1 | 2790580 | 8-scf00198 | 8 |
| AX-158068244 | 9 | 35.024 | KV452943.1 | 2600444 | 8-scf00198 | 8 |
| AX-158068271 | 9 | 35.024 | KV452943.1 | 2620696 | 8-scf00198 | 8 |
| AX-158068289 | 9 | 35.024 | KV452943.1 | 2635600 | 8-scf00198 | 8 |
| AX-158068294 | 9 | 35.024 | KV452943.1 | 2638845 | 8-scf00198 | 8 |
| AX-158068295 | 9 | 35.024 | KV452943.1 | 2639862 | 8-scf00198 | 8 |
| AX-158068299 | 9 | 35.024 | KV452943.1 | 2645453 | 8-scf00198 | 8 |
| AX-158068305 | 9 | 35.024 | KV452943.1 | 2649225 | 8-scf00198 | 8 |
| AX-158068313 | 9 | 35.024 | KV452943.1 | 2653933 | 8-scf00198 | 8 |
| AX-158068317 | 9 | 35.024 | KV452943.1 | 2655298 | 8-scf00198 | 8 |
| AX-158068350 | 9 | 35.024 | KV452943.1 | 2679241 | 8-scf00198 | 8 |
| AX-158068357 | 9 | 35.024 | KV452943.1 | 2684057 | 8-scf00198 | 8 |
| AX-158068329 | 9 | 35.308 | KV452943.1 | 2666691 | 8-scf00198 | 8 |
| AX-158068330 | 9 | 35.308 | KV452943.1 | 2667338 | 8-scf00198 | 8 |
| AX-158068336 | 9 | 35.308 | KV452943.1 | 2671772 | 8-scf00198 | 8 |
| AX-158068338 | 9 | 35.308 | KV452943.1 | 2672388 | 8-scf00198 | 8 |
| AX-158068321 | 9 | 35.329 | KV452943.1 | 2656992 | 8-scf00198 | 8 |
| AX-158068344 | 9 | 35.329 | KV452943.1 | 2677173 | 8-scf00198 | 8 |
| AX-158068396 | 9 | 35.329 | KV452943.1 | 2708253 | 8-scf00198 | 8 |
| AX-158068203 | 9 | 35.351 | KV452943.1 | 2577716 | 8-scf00198 | 8 |
| AX-158068214 | 9 | 35.351 | KV452943.1 | 2583367 | 8-scf00198 | 8 |
| AX-158068217 | 9 | 35.351 | KV452943.1 | 2586082 | 8-scf00198 | 8 |
| AX-158068284 | 9 | 35.351 | KV452943.1 | 2632420 | 8-scf00198 | 8 |
| AX-158068309 | 9 | 35.351 | KV452943.1 | 2651114 | 8-scf00198 | 8 |
| AX-158068310 | 9 | 35.351 | KV452943.1 | 2651519 | 8-scf00198 | 8 |
| AX-158068346 | 9 | 35.351 | KV452943.1 | 2677560 | 8-scf00198 | 8 |
| AX-158068349 | 9 | 35.351 | KV452943.1 | 2678351 | 8-scf00198 | 8 |
| AX-158068353 | 9 | 35.351 | KV452943.1 | 2680890 | 8-scf00198 | 8 |
| AX-158068383 | 9 | 35.351 | KV452943.1 | 2699189 | 8-scf00198 | 8 |
| AX-158068390 | 9 | 35.351 | KV452943.1 | 2704220 | 8-scf00198 | 8 |
| AX-158068415 | 9 | 35.351 | KV452943.1 | 2724244 | 8-scf00198 | 8 |
| AX-158068431 | 9 | 35.351 | KV452943.1 | 2730870 | 8-scf00198 | 8 |
| AX-158068436 | 9 | 35.351 | KV452943.1 | 2734696 | 8-scf00198 | 8 |
| AX-158068442 | 9 | 35.351 | KV452943.1 | 2741848 | 8-scf00198 | 8 |
| AX-158068446 | 9 | 35.351 | KV452943.1 | 2744066 | 8-scf00198 | 8 |
| AX-158068493 | 9 | 35.351 | KV452943.1 | 2808707 | 8-scf00198 | 8 |
| AX-158068495 | 9 | 35.351 | KV452943.1 | 2809035 | 8-scf00198 | 8 |
| AX-158068278 | 9 | 35.635 | KV452943.1 | 2625206 | 8-scf00198 | 8 |
| AX-158068363 | 9 | 35.635 | KV452943.1 | 2688774 | 8-scf00198 | 8 |
| AX-158068364 | 9 | 35.635 | KV452943.1 | 2689833 | 8-scf00198 | 8 |
| AX-158068369 | 9 | 35.635 | KV452943.1 | 2692644 | 8-scf00198 | 8 |
| AX-158068448 | 9 | 35.635 | KV452943.1 | 2746358 | 8-scf00198 | 8 |
| AX-158068377 | 9 | 35.788 | KV452943.1 | 2697465 | 8-scf00198 | 8 |

|              |   |        |            |         |            |   |
|--------------|---|--------|------------|---------|------------|---|
| AX-158068378 | 9 | 35.788 | KV452943.1 | 2697959 | 8-scf00198 | 8 |
| AX-158068434 | 9 | 35.788 | KV452943.1 | 2732674 | 8-scf00198 | 8 |
| AX-157721030 | 9 | 35.788 | KV452943.1 | 2732752 | 8-scf00198 | 8 |
| AX-158068381 | 9 | 35.789 | KV452943.1 | 2698798 | 8-scf00198 | 8 |
| AX-158068385 | 9 | 35.789 | KV452943.1 | 2699912 | 8-scf00198 | 8 |
| AX-158068392 | 9 | 35.789 | KV452943.1 | 2704712 | 8-scf00198 | 8 |
| AX-158068414 | 9 | 36.093 | KV452943.1 | 2723421 | 8-scf00198 | 8 |
| AX-158068427 | 9 | 36.093 | KV452943.1 | 2729412 | 8-scf00198 | 8 |
| AX-157823990 | 9 | 36.093 | KV452943.1 | 2731153 | 8-scf00198 | 8 |
| AX-157823991 | 9 | 36.093 | KV452943.1 | 2731533 | 8-scf00198 | 8 |
| AX-158068433 | 9 | 36.093 | KV452943.1 | 2732039 | 8-scf00198 | 8 |
| AX-158068435 | 9 | 36.093 | KV452943.1 | 2733029 | 8-scf00198 | 8 |
| AX-157732331 | 9 | 36.093 | KV452943.1 | 2738615 | 8-scf00198 | 8 |
| AX-158068470 | 9 | 36.093 | KV452943.1 | 2769561 | 8-scf00198 | 8 |
| AX-157748362 | 9 | 36.093 | KV452943.1 | 2777224 | 8-scf00198 | 8 |
| AX-157787607 | 9 | 36.093 | KV452943.1 | 2925524 | 8-scf00198 | 8 |
| AX-157823985 | 9 | 36.173 | KV452943.1 | 2677345 | 8-scf00198 | 8 |
| AX-158068449 | 9 | 36.173 | KV452943.1 | 2746922 | 8-scf00198 | 8 |
| AX-158068455 | 9 | 36.246 | KV452943.1 | 2753383 | 8-scf00198 | 8 |
| AX-158068458 | 9 | 36.246 | KV452943.1 | 2757219 | 8-scf00198 | 8 |
| AX-158068463 | 9 | 36.246 | KV452943.1 | 2763364 | 8-scf00198 | 8 |
| AX-158068467 | 9 | 36.246 | KV452943.1 | 2765205 | 8-scf00198 | 8 |
| AX-158068471 | 9 | 36.246 | KV452943.1 | 2771468 | 8-scf00198 | 8 |
| AX-158068544 | 9 | 36.246 | KV452943.1 | 2862306 | 8-scf00198 | 8 |
| AX-158068079 | 9 | 36.45  | KV452943.1 | 2471219 | 8-scf00198 | 8 |
| AX-157823992 | 9 | 36.45  | KV452943.1 | 2751607 | 8-scf00198 | 8 |
| AX-157739643 | 9 | 36.45  | KV452943.1 | 2752739 | 8-scf00198 | 8 |
| AX-158068468 | 9 | 36.45  | KV452943.1 | 2765948 | 8-scf00198 | 8 |
| AX-158068473 | 9 | 36.45  | KV452943.1 | 2773108 | 8-scf00198 | 8 |
| AX-157823993 | 9 | 36.45  | KV452943.1 | 2781293 | 8-scf00198 | 8 |
| AX-158068477 | 9 | 36.45  | KV452943.1 | 2782443 | 8-scf00198 | 8 |
| AX-158068479 | 9 | 36.45  | KV452943.1 | 2787501 | 8-scf00198 | 8 |
| AX-158068480 | 9 | 36.45  | KV452943.1 | 2787954 | 8-scf00198 | 8 |
| AX-157743798 | 9 | 36.45  | KV452943.1 | 2788777 | 8-scf00198 | 8 |
| AX-158068481 | 9 | 36.45  | KV452943.1 | 2789554 | 8-scf00198 | 8 |
| AX-158068487 | 9 | 36.45  | KV452943.1 | 2797747 | 8-scf00198 | 8 |
| AX-158068501 | 9 | 36.45  | KV452943.1 | 2815155 | 8-scf00198 | 8 |
| AX-158068490 | 9 | 36.452 | KV452943.1 | 2801860 | 8-scf00198 | 8 |
| AX-158068496 | 9 | 36.858 | KV452943.1 | 2810387 | 8-scf00198 | 8 |
| AX-158068506 | 9 | 36.858 | KV452943.1 | 2818342 | 8-scf00198 | 8 |
| AX-157719323 | 9 | 36.858 | KV452943.1 | 2827165 | 8-scf00198 | 8 |
| AX-158068517 | 9 | 36.858 | KV452943.1 | 2831837 | 8-scf00198 | 8 |
| AX-158068519 | 9 | 36.858 | KV452943.1 | 2832285 | 8-scf00198 | 8 |
| AX-158068520 | 9 | 36.858 | KV452943.1 | 2833108 | 8-scf00198 | 8 |
| AX-158068521 | 9 | 36.858 | KV452943.1 | 2834582 | 8-scf00198 | 8 |
| AX-158068522 | 9 | 36.858 | KV452943.1 | 2837976 | 8-scf00198 | 8 |
| AX-157722593 | 9 | 36.858 | KV452943.1 | 2838145 | 8-scf00198 | 8 |
| AX-157752549 | 9 | 36.858 | KV452943.1 | 2840287 | 8-scf00198 | 8 |
| AX-158068536 | 9 | 36.858 | KV452943.1 | 2852120 | 8-scf00198 | 8 |
| AX-157714969 | 9 | 36.858 | KV452943.1 | 2871074 | 8-scf00198 | 8 |
| AX-158068526 | 9 | 37.014 | KV452943.1 | 2841101 | 8-scf00198 | 8 |

|              |   |        |            |         |            |   |
|--------------|---|--------|------------|---------|------------|---|
| AX-158068533 | 9 | 37.164 | KV452943.1 | 2849471 | 8-scf00198 | 8 |
| AX-158068535 | 9 | 37.164 | KV452943.1 | 2850221 | 8-scf00198 | 8 |
| AX-157725549 | 9 | 37.164 | KV452943.1 | 2853584 | 8-scf00198 | 8 |
| AX-158068539 | 9 | 37.164 | KV452943.1 | 2854070 | 8-scf00198 | 8 |
| AX-157750132 | 9 | 37.164 | KV452943.1 | 2862910 | 8-scf00198 | 8 |
| AX-158068547 | 9 | 37.164 | KV452943.1 | 2866175 | 8-scf00198 | 8 |
| AX-157752791 | 9 | 37.164 | KV452943.1 | 2866735 | 8-scf00198 | 8 |
| AX-158068550 | 9 | 37.164 | KV452943.1 | 2869765 | 8-scf00198 | 8 |
| AX-157823998 | 9 | 37.241 | KV452943.1 | 2870696 | 8-scf00198 | 8 |
| AX-158068514 | 9 | 37.316 | KV452943.1 | 2829068 | 8-scf00198 | 8 |
| AX-158068527 | 9 | 37.316 | KV452943.1 | 2842423 | 8-scf00198 | 8 |
| AX-158068530 | 9 | 37.316 | KV452943.1 | 2847095 | 8-scf00198 | 8 |
| AX-158068532 | 9 | 37.316 | KV452943.1 | 2848999 | 8-scf00198 | 8 |
| AX-157824001 | 9 | 37.316 | KV452943.1 | 2878074 | 8-scf00198 | 8 |
| AX-157885438 | 9 | 37.316 | KV452943.1 | 2880019 | 8-scf00198 | 8 |
| AX-157824002 | 9 | 37.316 | KV452943.1 | 2880870 | 8-scf00198 | 8 |
| AX-158068555 | 9 | 37.316 | KV452943.1 | 2882935 | 8-scf00198 | 8 |
| AX-158068556 | 9 | 37.316 | KV452943.1 | 2884611 | 8-scf00198 | 8 |
| AX-158068655 | 9 | 37.316 | KV452943.1 | 2971576 | 8-scf00198 | 8 |
| AX-157824005 | 9 | 37.469 | KV452943.1 | 2891304 | 8-scf00198 | 8 |
| AX-158068562 | 9 | 37.469 | KV452943.1 | 2893912 | 8-scf00198 | 8 |
| AX-158068551 | 9 | 37.492 | KV452943.1 | 2876347 | 8-scf00198 | 8 |
| AX-158068560 | 9 | 37.492 | KV452943.1 | 2892445 | 8-scf00198 | 8 |
| AX-158068564 | 9 | 37.492 | KV452943.1 | 2896771 | 8-scf00198 | 8 |
| AX-158068606 | 9 | 37.492 | KV452943.1 | 2937255 | 8-scf00198 | 8 |
| AX-158068617 | 9 | 37.492 | KV452943.1 | 2943648 | 8-scf00198 | 8 |
| AX-157716858 | 9 | 37.56  | KV452943.1 | 2903464 | 8-scf00198 | 8 |
| AX-157824006 | 9 | 37.622 | KV452943.1 | 2906131 | 8-scf00198 | 8 |
| AX-158068574 | 9 | 37.622 | KV452943.1 | 2909579 | 8-scf00198 | 8 |
| AX-158068576 | 9 | 37.622 | KV452943.1 | 2911450 | 8-scf00198 | 8 |
| AX-158422467 | 9 | 37.622 | KV452943.1 | 2914099 | 8-scf00198 | 8 |
| AX-158068583 | 9 | 37.622 | KV452943.1 | 2917365 | 8-scf00198 | 8 |
| AX-158068585 | 9 | 37.623 | KV452943.1 | 2917870 | 8-scf00198 | 8 |
| AX-158068588 | 9 | 37.928 | KV452943.1 | 2919651 | 8-scf00198 | 8 |
| AX-158068590 | 9 | 37.928 | KV452943.1 | 2922127 | 8-scf00198 | 8 |
| AX-158068641 | 9 | 37.928 | KV452943.1 | 2961897 | 8-scf00198 | 8 |
| AX-158068597 | 9 | 38.235 | KV452943.1 | 2931899 | 8-scf00198 | 8 |
| AX-158068600 | 9 | 38.235 | KV452943.1 | 2933841 | 8-scf00198 | 8 |
| AX-157856984 | 9 | 38.388 | KV452943.1 | 2936557 | 8-scf00198 | 8 |
| AX-158068611 | 9 | 38.389 | KV452943.1 | 2940488 | 8-scf00198 | 8 |
| AX-158068620 | 9 | 38.694 | KV452943.1 | 2946299 | 8-scf00198 | 8 |
| AX-158068623 | 9 | 38.694 | KV452943.1 | 2948987 | 8-scf00198 | 8 |
| AX-158068624 | 9 | 38.694 | KV452943.1 | 2949423 | 8-scf00198 | 8 |
| AX-158068627 | 9 | 38.754 | KV452943.1 | 2951379 | 8-scf00198 | 8 |
| AX-158068618 | 9 | 38.806 | KV452943.1 | 2944573 | 8-scf00198 | 8 |
| AX-157877062 | 9 | 38.806 | KV452943.1 | 2959078 | 8-scf00198 | 8 |
| AX-158068637 | 9 | 38.867 | KV452943.1 | 2959713 | 8-scf00198 | 8 |
| AX-158068639 | 9 | 38.867 | KV452943.1 | 2961370 | 8-scf00198 | 8 |
| AX-158068638 | 9 | 38.936 | KV452943.1 | 2960789 | 8-scf00198 | 8 |
| AX-157724342 | 9 | 38.936 | KV452943.1 | 2976471 | 8-scf00198 | 8 |
| AX-158068546 | 9 | 39     | KV452943.1 | 2865595 | 8-scf00198 | 8 |

|              |   |        |            |         |            |   |
|--------------|---|--------|------------|---------|------------|---|
| AX-158068552 | 9 | 39     | KV452943.1 | 2877415 | 8-scf00198 | 8 |
| AX-158068579 | 9 | 39     | KV452943.1 | 2913623 | 8-scf00198 | 8 |
| AX-158068644 | 9 | 39     | KV452943.1 | 2965288 | 8-scf00198 | 8 |
| AX-158068646 | 9 | 39.012 | KV452943.1 | 2967346 | 8-scf00198 | 8 |
| AX-158068658 | 9 | 39.012 | KV452943.1 | 2973750 | 8-scf00198 | 8 |
| AX-158068647 | 9 | 39.015 | KV452943.1 | 2967824 | 8-scf00198 | 8 |
| AX-158068653 | 9 | 39.199 | KV452943.1 | 2970521 | 8-scf00198 | 8 |
| AX-158068656 | 9 | 39.199 | KV452943.1 | 2972150 | 8-scf00198 | 8 |
| AX-158068662 | 9 | 39.199 | KV452943.1 | 2979241 | 8-scf00198 | 8 |
| AX-158068661 | 9 | 39.405 | KV452943.1 | 2977990 | 8-scf00198 | 8 |
| AX-158068671 | 9 | 39.612 | KV452943.1 | 2996959 | 8-scf00198 | 8 |
| AX-158068673 | 9 | 39.612 | KV452943.1 | 2998969 | 8-scf00198 | 8 |
| AX-158068676 | 9 | 39.612 | KV452943.1 | 3003525 | 8-scf00198 | 8 |
| AX-158068677 | 9 | 39.612 | KV452943.1 | 3004470 | 8-scf00198 | 8 |
| AX-158068680 | 9 | 39.612 | KV452943.1 | 3004966 | 8-scf00198 | 8 |
| AX-158068681 | 9 | 39.612 | KV452943.1 | 3006023 | 8-scf00198 | 8 |
| AX-158068684 | 9 | 39.765 | KV452943.1 | 3012062 | 8-scf00198 | 8 |
| AX-158068686 | 9 | 39.765 | KV452943.1 | 3013477 | 8-scf00198 | 8 |
| AX-158068689 | 9 | 39.765 | KV452943.1 | 3016619 | 8-scf00198 | 8 |
| AX-158068692 | 9 | 39.765 | KV452943.1 | 3018256 | 8-scf00198 | 8 |
| AX-158068695 | 9 | 39.765 | KV452943.1 | 3019451 | 8-scf00198 | 8 |
| AX-157824011 | 9 | 39.942 | KV452943.1 | 3007563 | 8-scf00198 | 8 |
| AX-157824013 | 9 | 39.942 | KV452943.1 | 3039599 | 8-scf00198 | 8 |
| AX-157770846 | 9 | 39.942 | KV452943.1 | 3058243 | 8-scf00198 | 8 |
| AX-158068729 | 9 | 39.942 | KV452943.1 | 3061731 | 8-scf00198 | 8 |
| AX-157753327 | 9 | 39.942 | KV452943.1 | 3104672 | 8-scf00198 | 8 |
| AX-158421240 | 9 | 40.07  | KV452943.1 | 3022427 | 8-scf00198 | 8 |
| AX-158391940 | 9 | 40.07  | KV452943.1 | 3049997 | 8-scf00198 | 8 |
| AX-158068719 | 9 | 40.07  | KV452943.1 | 3052816 | 8-scf00198 | 8 |
| AX-158068721 | 9 | 40.07  | KV452943.1 | 3054086 | 8-scf00198 | 8 |
| AX-158068722 | 9 | 40.07  | KV452943.1 | 3054529 | 8-scf00198 | 8 |
| AX-158068725 | 9 | 40.07  | KV452943.1 | 3056728 | 8-scf00198 | 8 |
| AX-158068728 | 9 | 40.376 | KV452943.1 | 3060009 | 8-scf00198 | 8 |
| AX-157824014 | 9 | 40.376 | KV452943.1 | 3060048 | 8-scf00198 | 8 |
| AX-158068731 | 9 | 40.529 | KV452943.1 | 3066639 | 8-scf00198 | 8 |
| AX-158068740 | 9 | 40.529 | KV452943.1 | 3075383 | 8-scf00198 | 8 |
| AX-157758424 | 9 | 40.529 | KV452943.1 | 3082671 | 8-scf00198 | 8 |
| AX-157757333 | 9 | 40.529 | KV452943.1 | 3089016 | 8-scf00198 | 8 |
| AX-158068756 | 9 | 40.529 | KV452943.1 | 3093066 | 8-scf00198 | 8 |
| AX-158068759 | 9 | 40.529 | KV452943.1 | 3094570 | 8-scf00198 | 8 |
| AX-158068762 | 9 | 40.529 | KV452943.1 | 3097212 | 8-scf00198 | 8 |
| AX-158068811 | 9 | 40.529 | KV452943.1 | 3149237 | 8-scf00198 | 8 |
| AX-158068814 | 9 | 40.529 | KV452943.1 | 3149898 | 8-scf00198 | 8 |
| AX-157725167 | 9 | 40.529 | KV452943.1 | 3153388 | 8-scf00198 | 8 |
| AX-158068672 | 9 | 40.682 | KV452943.1 | 2998289 | 8-scf00198 | 8 |
| AX-158068707 | 9 | 40.682 | KV452943.1 | 3034144 | 8-scf00198 | 8 |
| AX-158068710 | 9 | 40.682 | KV452943.1 | 3037487 | 8-scf00198 | 8 |
| AX-158068716 | 9 | 40.682 | KV452943.1 | 3046422 | 8-scf00198 | 8 |
| AX-157877063 | 9 | 40.682 | KV452943.1 | 3046708 | 8-scf00198 | 8 |
| AX-157877064 | 9 | 40.682 | KV452943.1 | 3057494 | 8-scf00198 | 8 |
| AX-157824020 | 9 | 40.682 | KV452943.1 | 3104338 | 8-scf00198 | 8 |

|              |   |        |            |         |            |   |
|--------------|---|--------|------------|---------|------------|---|
| AX-158068770 | 9 | 40.682 | KV452943.1 | 3109444 | 8-scf00198 | 8 |
| AX-157824021 | 9 | 40.682 | KV452943.1 | 3112211 | 8-scf00198 | 8 |
| AX-158068775 | 9 | 40.682 | KV452943.1 | 3113055 | 8-scf00198 | 8 |
| AX-158068779 | 9 | 40.682 | KV452943.1 | 3116936 | 8-scf00198 | 8 |
| AX-158068788 | 9 | 40.682 | KV452943.1 | 3127971 | 8-scf00198 | 8 |
| AX-158068790 | 9 | 40.682 | KV452943.1 | 3128504 | 8-scf00198 | 8 |
| AX-158068666 | 9 | 40.834 | KV452943.1 | 2986817 | 8-scf00198 | 8 |
| AX-158068701 | 9 | 40.834 | KV452943.1 | 3024579 | 8-scf00198 | 8 |
| AX-158068734 | 9 | 40.834 | KV452943.1 | 3068946 | 8-scf00198 | 8 |
| AX-158068736 | 9 | 40.834 | KV452943.1 | 3070678 | 8-scf00198 | 8 |
| AX-157824016 | 9 | 40.834 | KV452943.1 | 3072417 | 8-scf00198 | 8 |
| AX-157824017 | 9 | 40.834 | KV452943.1 | 3077617 | 8-scf00198 | 8 |
| AX-158068743 | 9 | 40.834 | KV452943.1 | 3078045 | 8-scf00198 | 8 |
| AX-157708898 | 9 | 40.834 | KV452943.1 | 3081028 | 8-scf00198 | 8 |
| AX-158068745 | 9 | 40.834 | KV452943.1 | 3083983 | 8-scf00198 | 8 |
| AX-158068784 | 9 | 40.834 | KV452943.1 | 3123886 | 8-scf00198 | 8 |
| AX-158068791 | 9 | 40.834 | KV452943.1 | 3130792 | 8-scf00198 | 8 |
| AX-158068793 | 9 | 40.834 | KV452943.1 | 3131505 | 8-scf00198 | 8 |
| AX-158068796 | 9 | 40.834 | KV452943.1 | 3133301 | 8-scf00198 | 8 |
| AX-158068799 | 9 | 40.834 | KV452943.1 | 3135672 | 8-scf00198 | 8 |
| AX-158068803 | 9 | 40.834 | KV452943.1 | 3137562 | 8-scf00198 | 8 |
| AX-158068805 | 9 | 40.834 | KV452943.1 | 3138792 | 8-scf00198 | 8 |
| AX-157745272 | 9 | 40.834 | KV452943.1 | 3140723 | 8-scf00198 | 8 |
| AX-158068806 | 9 | 40.834 | KV452943.1 | 3142253 | 8-scf00198 | 8 |
| AX-157747665 | 9 | 40.834 | KV452943.1 | 3149103 | 8-scf00198 | 8 |
| AX-158068813 | 9 | 40.834 | KV452943.1 | 3149489 | 8-scf00198 | 8 |
| AX-158068815 | 9 | 40.834 | KV452943.1 | 3150229 | 8-scf00198 | 8 |
| AX-158068816 | 9 | 40.834 | KV452943.1 | 3151460 | 8-scf00198 | 8 |
| AX-158068819 | 9 | 40.834 | KV452943.1 | 3155108 | 8-scf00198 | 8 |
| AX-158379906 | 9 | 40.834 | KV452943.1 | 3157743 | 8-scf00198 | 8 |
| AX-158068851 | 9 | 40.834 | KV452943.1 | 3191218 | 8-scf00198 | 8 |
| AX-158068886 | 9 | 40.834 | KV452943.1 | 3238283 | 8-scf00198 | 8 |
| AX-158068966 | 9 | 40.834 | KV452943.1 | 3310541 | 8-scf00198 | 8 |
| AX-157856988 | 9 | 41.038 | KV452943.1 | 3176368 | 8-scf00198 | 8 |
| AX-158068836 | 9 | 41.038 | KV452943.1 | 3179343 | 8-scf00198 | 8 |
| AX-158068839 | 9 | 41.038 | KV452943.1 | 3181524 | 8-scf00198 | 8 |
| AX-158068841 | 9 | 41.038 | KV452943.1 | 3182280 | 8-scf00198 | 8 |
| AX-158068842 | 9 | 41.038 | KV452943.1 | 3182514 | 8-scf00198 | 8 |
| AX-158068845 | 9 | 41.038 | KV452943.1 | 3183923 | 8-scf00198 | 8 |
| AX-157824026 | 9 | 41.038 | KV452943.1 | 3184259 | 8-scf00198 | 8 |
| AX-158068846 | 9 | 41.038 | KV452943.1 | 3185210 | 8-scf00198 | 8 |
| AX-158068852 | 9 | 41.038 | KV452943.1 | 3193228 | 8-scf00198 | 8 |
| AX-158379907 | 9 | 41.038 | KV452943.1 | 3258347 | 8-scf00198 | 8 |
| AX-158068977 | 9 | 41.038 | KV452943.1 | 3318106 | 8-scf00198 | 8 |
| AX-157824028 | 9 | 41.186 | KV452943.1 | 3192479 | 8-scf00198 | 8 |
| AX-157742203 | 9 | 41.446 | KV452943.1 | 3130908 | 8-scf00198 | 8 |
| AX-158068792 | 9 | 41.446 | KV452943.1 | 3131322 | 8-scf00198 | 8 |
| AX-158068855 | 9 | 41.446 | KV452943.1 | 3200488 | 8-scf00198 | 8 |
| AX-158068857 | 9 | 41.446 | KV452943.1 | 3202603 | 8-scf00198 | 8 |
| AX-158068863 | 9 | 41.446 | KV452943.1 | 3211379 | 8-scf00198 | 8 |
| AX-157724722 | 9 | 41.446 | KV452943.1 | 3213846 | 8-scf00198 | 8 |

|              |   |        |            |         |            |   |
|--------------|---|--------|------------|---------|------------|---|
| AX-158068870 | 9 | 41.446 | KV452943.1 | 3216234 | 8-scf00198 | 8 |
| AX-158068874 | 9 | 41.446 | KV452943.1 | 3218591 | 8-scf00198 | 8 |
| AX-158068915 | 9 | 41.446 | KV452943.1 | 3264018 | 8-scf00198 | 8 |
| AX-158068927 | 9 | 41.446 | KV452943.1 | 3275435 | 8-scf00198 | 8 |
| AX-157722820 | 9 | 41.493 | KV452943.1 | 3219455 | 8-scf00198 | 8 |
| AX-158068882 | 9 | 42.058 | KV452943.1 | 3235135 | 8-scf00198 | 8 |
| AX-158068885 | 9 | 42.058 | KV452943.1 | 3237153 | 8-scf00198 | 8 |
| AX-158068917 | 9 | 42.058 | KV452943.1 | 3264988 | 8-scf00198 | 8 |
| AX-158068827 | 9 | 42.059 | KV452943.1 | 3167329 | 8-scf00198 | 8 |
| AX-157824029 | 9 | 42.059 | KV452943.1 | 3192529 | 8-scf00198 | 8 |
| AX-158068891 | 9 | 42.059 | KV452943.1 | 3244640 | 8-scf00198 | 8 |
| AX-157710855 | 9 | 42.059 | KV452943.1 | 3245796 | 8-scf00198 | 8 |
| AX-158068893 | 9 | 42.059 | KV452943.1 | 3246579 | 8-scf00198 | 8 |
| AX-158068898 | 9 | 42.059 | KV452943.1 | 3255944 | 8-scf00198 | 8 |
| AX-158068899 | 9 | 42.059 | KV452943.1 | 3256418 | 8-scf00198 | 8 |
| AX-158068901 | 9 | 42.059 | KV452943.1 | 3257388 | 8-scf00198 | 8 |
| AX-158068911 | 9 | 42.059 | KV452943.1 | 3262376 | 8-scf00198 | 8 |
| AX-157739396 | 9 | 42.059 | KV452943.1 | 3262541 | 8-scf00198 | 8 |
| AX-158068914 | 9 | 42.059 | KV452943.1 | 3263298 | 8-scf00198 | 8 |
| AX-157719495 | 9 | 42.059 | KV452943.1 | 3264448 | 8-scf00198 | 8 |
| AX-157741589 | 9 | 42.059 | KV452943.1 | 3265167 | 8-scf00198 | 8 |
| AX-158068923 | 9 | 42.059 | KV452943.1 | 3270328 | 8-scf00198 | 8 |
| AX-158068935 | 9 | 42.059 | KV452943.1 | 3280569 | 8-scf00198 | 8 |
| AX-158068936 | 9 | 42.059 | KV452943.1 | 3282327 | 8-scf00198 | 8 |
| AX-158068949 | 9 | 42.059 | KV452943.1 | 3299747 | 8-scf00198 | 8 |
| AX-158068954 | 9 | 42.059 | KV452943.1 | 3301783 | 8-scf00198 | 8 |
| AX-158068894 | 9 | 42.114 | KV452943.1 | 3249996 | 8-scf00198 | 8 |
| AX-157722635 | 9 | 42.114 | KV452943.1 | 3278692 | 8-scf00198 | 8 |
| AX-158068944 | 9 | 42.159 | KV452943.1 | 3287968 | 8-scf00198 | 8 |
| AX-158068946 | 9 | 42.211 | KV452943.1 | 3289965 | 8-scf00198 | 8 |
| AX-158068947 | 9 | 42.211 | KV452943.1 | 3290808 | 8-scf00198 | 8 |
| AX-157750308 | 9 | 42.279 | KV452943.1 | 3208541 | 8-scf00198 | 8 |
| AX-158068948 | 9 | 42.279 | KV452943.1 | 3293448 | 8-scf00198 | 8 |
| AX-157885440 | 9 | 42.279 | KV452943.1 | 3296154 | 8-scf00198 | 8 |
| AX-158068950 | 9 | 42.364 | KV452943.1 | 3300334 | 8-scf00198 | 8 |
| AX-158068956 | 9 | 42.364 | KV452943.1 | 3304995 | 8-scf00198 | 8 |
| AX-158409369 | 9 | 42.364 | KV452943.1 | 3305206 | 8-scf00198 | 8 |
| AX-158068957 | 9 | 42.364 | KV452943.1 | 3305245 | 8-scf00198 | 8 |
| AX-158068963 | 9 | 42.366 | KV452943.1 | 3307504 | 8-scf00198 | 8 |
| AX-158068967 | 9 | 42.368 | KV452943.1 | 3311358 | 8-scf00198 | 8 |
| AX-158068972 | 9 | 42.744 | KV452943.1 | 3315074 | 8-scf00198 | 8 |
| AX-158068973 | 9 | 42.747 | KV452943.1 | 3315597 | 8-scf00198 | 8 |
| AX-158068975 | 9 | 42.748 | KV452943.1 | 3316166 | 8-scf00198 | 8 |
| AX-158068976 | 9 | 42.945 | KV452943.1 | 3316859 | 8-scf00198 | 8 |
| AX-158069024 | 9 | 42.945 | KV452943.1 | 3346675 | 8-scf00198 | 8 |
| AX-158069096 | 9 | 42.945 | KV452943.1 | 3423353 | 8-scf00198 | 8 |
| AX-158068982 | 9 | 43.129 | KV452943.1 | 3322256 | 8-scf00198 | 8 |
| AX-158068986 | 9 | 43.129 | KV452943.1 | 3324334 | 8-scf00198 | 8 |
| AX-157749385 | 9 | 43.129 | KV452943.1 | 3324752 | 8-scf00198 | 8 |
| AX-158068988 | 9 | 43.129 | KV452943.1 | 3325184 | 8-scf00198 | 8 |
| AX-158068992 | 9 | 43.129 | KV452943.1 | 3328086 | 8-scf00198 | 8 |



|              |   |        |            |         |            |   |
|--------------|---|--------|------------|---------|------------|---|
| AX-158069029 | 9 | 43.129 | KV452943.1 | 3350304 | 8-scf00198 | 8 |
| AX-157856991 | 9 | 43.129 | KV452943.1 | 3389454 | 8-scf00198 | 8 |
| AX-157727636 | 9 | 43.129 | KV452943.1 | 3392090 | 8-scf00198 | 8 |
| AX-158069078 | 9 | 43.129 | KV452943.1 | 3401866 | 8-scf00198 | 8 |
| AX-158069097 | 9 | 43.129 | KV452943.1 | 3423850 | 8-scf00198 | 8 |
| AX-158069124 | 9 | 43.129 | KV452943.1 | 3447085 | 8-scf00198 | 8 |
| AX-158069139 | 9 | 43.129 | KV452943.1 | 3456483 | 8-scf00198 | 8 |
| AX-158069005 | 9 | 43.13  | KV452943.1 | 3336984 | 8-scf00198 | 8 |
| AX-158069026 | 9 | 43.13  | KV452943.1 | 3347962 | 8-scf00198 | 8 |
| AX-158069010 | 9 | 43.131 | KV452943.1 | 3339498 | 8-scf00198 | 8 |
| AX-158069063 | 9 | 43.131 | KV452943.1 | 3381138 | 8-scf00198 | 8 |
| AX-158069013 | 9 | 43.132 | KV452943.1 | 3340630 | 8-scf00198 | 8 |
| AX-158069015 | 9 | 43.132 | KV452943.1 | 3341015 | 8-scf00198 | 8 |
| AX-158069017 | 9 | 43.132 | KV452943.1 | 3341933 | 8-scf00198 | 8 |
| AX-158069027 | 9 | 43.132 | KV452943.1 | 3348410 | 8-scf00198 | 8 |
| AX-158069022 | 9 | 43.134 | KV452943.1 | 3344863 | 8-scf00198 | 8 |
| AX-158069034 | 9 | 43.135 | KV452943.1 | 3355540 | 8-scf00198 | 8 |
| AX-158069044 | 9 | 43.135 | KV452943.1 | 3366606 | 8-scf00198 | 8 |
| AX-158069037 | 9 | 43.136 | KV452943.1 | 3357973 | 8-scf00198 | 8 |
| AX-158069040 | 9 | 43.137 | KV452943.1 | 3359874 | 8-scf00198 | 8 |
| AX-158069045 | 9 | 43.138 | KV452943.1 | 3367105 | 8-scf00198 | 8 |
| AX-158069003 | 9 | 43.139 | KV452943.1 | 3336628 | 8-scf00198 | 8 |
| AX-158069046 | 9 | 43.139 | KV452943.1 | 3367681 | 8-scf00198 | 8 |
| AX-158069054 | 9 | 43.14  | KV452943.1 | 3374236 | 8-scf00198 | 8 |
| AX-158069055 | 9 | 43.2   | KV452943.1 | 3374466 | 8-scf00198 | 8 |
| AX-158069057 | 9 | 43.397 | KV452943.1 | 3376394 | 8-scf00198 | 8 |
| AX-158069061 | 9 | 43.587 | KV452943.1 | 3378954 | 8-scf00198 | 8 |
| AX-158069064 | 9 | 43.587 | KV452943.1 | 3382695 | 8-scf00198 | 8 |
| AX-158069065 | 9 | 43.587 | KV452943.1 | 3383126 | 8-scf00198 | 8 |
| AX-158069066 | 9 | 43.587 | KV452943.1 | 3383762 | 8-scf00198 | 8 |
| AX-158069094 | 9 | 43.587 | KV452943.1 | 3421932 | 8-scf00198 | 8 |
| AX-158069125 | 9 | 43.587 | KV452943.1 | 3447934 | 8-scf00198 | 8 |
| AX-158069062 | 9 | 43.588 | KV452943.1 | 3380203 | 8-scf00198 | 8 |
| AX-158069067 | 9 | 43.588 | KV452943.1 | 3384990 | 8-scf00198 | 8 |
| AX-158069074 | 9 | 43.588 | KV452943.1 | 3394302 | 8-scf00198 | 8 |
| AX-158069068 | 9 | 43.606 | KV452943.1 | 3386115 | 8-scf00198 | 8 |
| AX-158069070 | 9 | 43.625 | KV452943.1 | 3387581 | 8-scf00198 | 8 |
| AX-157744179 | 9 | 43.646 | KV452943.1 | 3388298 | 8-scf00198 | 8 |
| AX-158069079 | 9 | 43.665 | KV452943.1 | 3407566 | 8-scf00198 | 8 |
| AX-158069081 | 9 | 43.691 | KV452943.1 | 3409930 | 8-scf00198 | 8 |
| AX-158069083 | 9 | 43.71  | KV452943.1 | 3411043 | 8-scf00198 | 8 |
| AX-157723739 | 9 | 43.741 | KV452943.1 | 3411759 | 8-scf00198 | 8 |
| AX-158069087 | 9 | 43.741 | KV452943.1 | 3413554 | 8-scf00198 | 8 |
| AX-158391942 | 9 | 43.741 | KV452943.1 | 3413623 | 8-scf00198 | 8 |
| AX-158069092 | 9 | 43.741 | KV452943.1 | 3421430 | 8-scf00198 | 8 |
| AX-158069095 | 9 | 43.743 | KV452943.1 | 3422400 | 8-scf00198 | 8 |
| AX-158069163 | 9 | 44.507 | KV452943.1 | 3476834 | 8-scf00198 | 8 |
| AX-158069164 | 9 | 44.543 | KV452943.1 | 3477761 | 8-scf00198 | 8 |
| AX-158069165 | 9 | 44.569 | KV452943.1 | 3478240 | 8-scf00198 | 8 |
| AX-158080253 | 9 | 44.569 | KV452943.1 | 4098322 | 8-scf00198 | 8 |
| AX-158070939 | 9 | 44.569 | KV452945.1 | 2806100 | 8-scf00200 | 8 |

|              |   |        |            |         |            |   |
|--------------|---|--------|------------|---------|------------|---|
| AX-158071515 | 9 | 44.569 | KV452945.1 | 3836434 | 8-scf00200 | 8 |
| AX-158069176 | 9 | 44.604 | KV452943.1 | 3487548 | 8-scf00198 | 8 |
| AX-158069173 | 9 | 44.616 | KV452943.1 | 3485607 | 8-scf00198 | 8 |
| AX-157742723 | 9 | 44.616 | KV452943.1 | 3488090 | 8-scf00198 | 8 |
| AX-158069183 | 9 | 44.616 | KV452943.1 | 3497842 | 8-scf00198 | 8 |
| AX-158069230 | 9 | 44.616 | KV452943.1 | 3539834 | 8-scf00198 | 8 |
| AX-158416533 | 9 | 44.66  | KV452943.1 | 3488811 | 8-scf00198 | 8 |
| AX-157775149 | 9 | 44.66  | KV452943.1 | 3496719 | 8-scf00198 | 8 |
| AX-158069182 | 9 | 44.66  | KV452943.1 | 3497218 | 8-scf00198 | 8 |
| AX-158069185 | 9 | 44.66  | KV452943.1 | 3498978 | 8-scf00198 | 8 |
| AX-158069188 | 9 | 44.66  | KV452943.1 | 3500891 | 8-scf00198 | 8 |
| AX-158069192 | 9 | 44.66  | KV452943.1 | 3506571 | 8-scf00198 | 8 |
| AX-158069232 | 9 | 45.12  | KV452943.1 | 3542526 | 8-scf00198 | 8 |
| AX-158069235 | 9 | 45.274 | KV452943.1 | 3546663 | 8-scf00198 | 8 |
| AX-158069236 | 9 | 45.274 | KV452943.1 | 3547218 | 8-scf00198 | 8 |
| AX-158069239 | 9 | 45.274 | KV452943.1 | 3549409 | 8-scf00198 | 8 |
| AX-157748620 | 9 | 45.274 | KV452943.1 | 3549991 | 8-scf00198 | 8 |
| AX-158069241 | 9 | 45.274 | KV452943.1 | 3552356 | 8-scf00198 | 8 |
| AX-157856997 | 9 | 45.274 | KV452943.1 | 3554102 | 8-scf00198 | 8 |
| AX-158069246 | 9 | 45.274 | KV452943.1 | 3556090 | 8-scf00198 | 8 |
| AX-158069252 | 9 | 45.274 | KV452943.1 | 3562951 | 8-scf00198 | 8 |
| AX-158069258 | 9 | 45.274 | KV452943.1 | 3573579 | 8-scf00198 | 8 |
| AX-158069266 | 9 | 45.274 | KV452943.1 | 3585968 | 8-scf00198 | 8 |
| AX-158069270 | 9 | 45.274 | KV452943.1 | 3592199 | 8-scf00198 | 8 |
| AX-157757303 | 9 | 45.274 | KV452943.1 | 3594313 | 8-scf00198 | 8 |
| AX-158069273 | 9 | 45.274 | KV452943.1 | 3597803 | 8-scf00198 | 8 |
| AX-158069276 | 9 | 45.274 | KV452943.1 | 3600055 | 8-scf00198 | 8 |
| AX-158069281 | 9 | 45.274 | KV452943.1 | 3604452 | 8-scf00198 | 8 |
| AX-158069453 | 9 | 45.274 | KV452943.1 | 3821068 | 8-scf00198 | 8 |
| AX-158069500 | 9 | 45.274 | KV452943.1 | 3880756 | 8-scf00198 | 8 |
| AX-158080380 | 9 | 45.274 | KV452943.1 | 4310516 | 8-scf00198 | 8 |
| AX-158080391 | 9 | 45.274 | KV452943.1 | 4329076 | 8-scf00198 | 8 |
| AX-158069808 | 9 | 45.274 | KV452945.1 | 181112  | 8-scf00200 | 8 |
| AX-158409415 | 9 | 45.274 | KV452945.1 | 388774  | 8-scf00200 | 8 |
| AX-158069939 | 9 | 45.274 | KV452945.1 | 688640  | 8-scf00200 | 8 |
| AX-158070814 | 9 | 45.274 | KV452945.1 | 2621175 | 8-scf00200 | 8 |
| AX-157824188 | 9 | 45.274 | KV452945.1 | 2923223 | 8-scf00200 | 8 |
| AX-158069237 | 9 | 45.293 | KV452943.1 | 3548903 | 8-scf00198 | 8 |
| AX-157824036 | 9 | 45.293 | KV452943.1 | 3592259 | 8-scf00198 | 8 |
| AX-157856998 | 9 | 45.293 | KV452943.1 | 3598296 | 8-scf00198 | 8 |
| AX-157856999 | 9 | 45.293 | KV452943.1 | 3598698 | 8-scf00198 | 8 |
| AX-158069285 | 9 | 45.293 | KV452943.1 | 3608992 | 8-scf00198 | 8 |
| AX-157857000 | 9 | 45.293 | KV452943.1 | 3609124 | 8-scf00198 | 8 |
| AX-158069287 | 9 | 45.293 | KV452943.1 | 3611678 | 8-scf00198 | 8 |
| AX-158069288 | 9 | 45.293 | KV452943.1 | 3613731 | 8-scf00198 | 8 |
| AX-157824037 | 9 | 45.426 | KV452943.1 | 3623679 | 8-scf00198 | 8 |
| AX-158069307 | 9 | 45.58  | KV452943.1 | 3631575 | 8-scf00198 | 8 |
| AX-158069311 | 9 | 45.58  | KV452943.1 | 3635349 | 8-scf00198 | 8 |
| AX-158069323 | 9 | 45.58  | KV452943.1 | 3648979 | 8-scf00198 | 8 |
| AX-158384260 | 9 | 45.58  | KV452943.1 | 3686663 | 8-scf00198 | 8 |
| AX-158409377 | 9 | 45.58  | KV452943.1 | 3689089 | 8-scf00198 | 8 |

|              |   |        |             |         |            |    |
|--------------|---|--------|-------------|---------|------------|----|
| AX-158069462 | 9 | 45.58  | KV452943.1  | 3827992 | 8-scf00198 | 8  |
| AX-158069316 | 9 | 45.732 | KV452943.1  | 3640326 | 8-scf00198 | 8  |
| AX-158069319 | 9 | 45.732 | KV452943.1  | 3642585 | 8-scf00198 | 8  |
| AX-158069320 | 9 | 45.732 | KV452943.1  | 3643110 | 8-scf00198 | 8  |
| AX-158069321 | 9 | 45.732 | KV452943.1  | 3648108 | 8-scf00198 | 8  |
| AX-158069331 | 9 | 45.732 | KV452943.1  | 3653692 | 8-scf00198 | 8  |
| AX-158069356 | 9 | 45.732 | KV452943.1  | 3681922 | 8-scf00198 | 8  |
| AX-157870722 | 9 | 45.733 | KV452943.1  | 3655801 | 8-scf00198 | 8  |
| AX-158069357 | 9 | 45.874 | KV452943.1  | 3683091 | 8-scf00198 | 8  |
| AX-158069324 | 9 | 46.038 | KV452943.1  | 3649507 | 8-scf00198 | 8  |
| AX-158069360 | 9 | 46.038 | KV452943.1  | 3686608 | 8-scf00198 | 8  |
| AX-158416535 | 9 | 46.038 | KV452943.1  | 3688689 | 8-scf00198 | 8  |
| AX-158069367 | 9 | 46.038 | KV452943.1  | 3695068 | 8-scf00198 | 8  |
| AX-158069381 | 9 | 46.038 | KV452943.1  | 3710072 | 8-scf00198 | 8  |
| AX-157824046 | 9 | 46.038 | KV452943.1  | 3735456 | 8-scf00198 | 8  |
| AX-158069395 | 9 | 46.038 | KV452943.1  | 3743949 | 8-scf00198 | 8  |
| AX-158069400 | 9 | 46.038 | KV452943.1  | 3746288 | 8-scf00198 | 8  |
| AX-158069410 | 9 | 46.038 | KV452943.1  | 3757509 | 8-scf00198 | 8  |
| AX-158069412 | 9 | 46.038 | KV452943.1  | 3758094 | 8-scf00198 | 8  |
| AX-158069413 | 9 | 46.038 | KV452943.1  | 3760064 | 8-scf00198 | 8  |
| AX-158069460 | 9 | 46.038 | KV452943.1  | 3826022 | 8-scf00198 | 8  |
| AX-158069466 | 9 | 46.038 | KV452943.1  | 3829311 | 8-scf00198 | 8  |
| AX-157713196 | 9 | 46.038 | KV452943.1  | 3849613 | 8-scf00198 | 8  |
| AX-158069507 | 9 | 46.038 | KV452943.1  | 3890645 | 8-scf00198 | 8  |
| AX-158069519 | 9 | 46.038 | KV452943.1  | 3902188 | 8-scf00198 | 8  |
| AX-158069894 | 9 | 46.038 | KV452945.1  | 565338  | 8-scf00200 | 8  |
| AX-158070647 | 9 | 46.038 | KV452945.1  | 2263174 | 8-scf00200 | 8  |
| AX-158070672 | 9 | 46.038 | KV452945.1  | 2364962 | 8-scf00200 | 8  |
| AX-158070771 | 9 | 46.038 | KV452945.1  | 2543185 | 8-scf00200 | 8  |
| AX-158071239 | 9 | 46.038 | KV452945.1  | 3322312 | 8-scf00200 | 8  |
| AX-157705672 | 9 | 46.038 | 3ML01030574 | 317     | scf06174_1 | UN |
| AX-157705673 | 9 | 46.038 | 3ML01030574 | 608     | scf06174_1 | UN |
| AX-158069415 | 9 | 46.054 | KV452943.1  | 3760919 | 8-scf00198 | 8  |
| AX-158069488 | 9 | 46.124 | KV452943.1  | 3863610 | 8-scf00198 | 8  |
| AX-158069489 | 9 | 46.124 | KV452943.1  | 3864148 | 8-scf00198 | 8  |
| AX-158069633 | 9 | 46.124 | KV452943.1  | 3993114 | 8-scf00198 | 8  |
| AX-157824130 | 9 | 46.124 | KV452945.1  | 1227856 | 8-scf00200 | 8  |
| AX-158071621 | 9 | 46.124 | KV452945.1  | 4028922 | 8-scf00200 | 8  |
| AX-157705836 | 9 | 46.124 | 3ML01031014 | 393     | scf06617_1 | UN |
| AX-158069310 | 9 | 46.191 | KV452943.1  | 3634045 | 8-scf00198 | 8  |
| AX-158069330 | 9 | 46.191 | KV452943.1  | 3652079 | 8-scf00198 | 8  |
| AX-158069344 | 9 | 46.191 | KV452943.1  | 3664661 | 8-scf00198 | 8  |
| AX-158069361 | 9 | 46.191 | KV452943.1  | 3691138 | 8-scf00198 | 8  |
| AX-158069364 | 9 | 46.191 | KV452943.1  | 3692914 | 8-scf00198 | 8  |
| AX-157714751 | 9 | 46.191 | KV452943.1  | 3695459 | 8-scf00198 | 8  |
| AX-158069369 | 9 | 46.191 | KV452943.1  | 3695828 | 8-scf00198 | 8  |
| AX-157747602 | 9 | 46.191 | KV452943.1  | 3740227 | 8-scf00198 | 8  |
| AX-158069394 | 9 | 46.191 | KV452943.1  | 3740908 | 8-scf00198 | 8  |
| AX-157824049 | 9 | 46.191 | KV452943.1  | 3749927 | 8-scf00198 | 8  |
| AX-158069418 | 9 | 46.191 | KV452943.1  | 3762943 | 8-scf00198 | 8  |
| AX-158069419 | 9 | 46.191 | KV452943.1  | 3764480 | 8-scf00198 | 8  |

|              |   |        |            |         |            |   |
|--------------|---|--------|------------|---------|------------|---|
| AX-158069443 | 9 | 46.191 | KV452943.1 | 3798768 | 8-scf00198 | 8 |
| AX-158069444 | 9 | 46.191 | KV452943.1 | 3800145 | 8-scf00198 | 8 |
| AX-158069449 | 9 | 46.191 | KV452943.1 | 3815029 | 8-scf00198 | 8 |
| AX-158069452 | 9 | 46.191 | KV452943.1 | 3818984 | 8-scf00198 | 8 |
| AX-158069458 | 9 | 46.191 | KV452943.1 | 3825449 | 8-scf00198 | 8 |
| AX-158069461 | 9 | 46.191 | KV452943.1 | 3826797 | 8-scf00198 | 8 |
| AX-158069463 | 9 | 46.191 | KV452943.1 | 3828242 | 8-scf00198 | 8 |
| AX-158069468 | 9 | 46.191 | KV452943.1 | 3830765 | 8-scf00198 | 8 |
| AX-157740941 | 9 | 46.191 | KV452943.1 | 3830895 | 8-scf00198 | 8 |
| AX-158069477 | 9 | 46.191 | KV452943.1 | 3837413 | 8-scf00198 | 8 |
| AX-157824061 | 9 | 46.191 | KV452943.1 | 3862229 | 8-scf00198 | 8 |
| AX-158069491 | 9 | 46.191 | KV452943.1 | 3866515 | 8-scf00198 | 8 |
| AX-158069499 | 9 | 46.191 | KV452943.1 | 3880259 | 8-scf00198 | 8 |
| AX-158069518 | 9 | 46.191 | KV452943.1 | 3900644 | 8-scf00198 | 8 |
| AX-158069525 | 9 | 46.191 | KV452943.1 | 3908346 | 8-scf00198 | 8 |
| AX-158069527 | 9 | 46.191 | KV452943.1 | 3908803 | 8-scf00198 | 8 |
| AX-157695876 | 9 | 46.191 | KV452943.1 | 3914961 | 8-scf00198 | 8 |
| AX-158069533 | 9 | 46.191 | KV452943.1 | 3914997 | 8-scf00198 | 8 |
| AX-158069535 | 9 | 46.191 | KV452943.1 | 3920119 | 8-scf00198 | 8 |
| AX-158069539 | 9 | 46.191 | KV452943.1 | 3926956 | 8-scf00198 | 8 |
| AX-158069540 | 9 | 46.191 | KV452943.1 | 3927328 | 8-scf00198 | 8 |
| AX-158069542 | 9 | 46.191 | KV452943.1 | 3929632 | 8-scf00198 | 8 |
| AX-158069545 | 9 | 46.191 | KV452943.1 | 3931704 | 8-scf00198 | 8 |
| AX-158069555 | 9 | 46.191 | KV452943.1 | 3944205 | 8-scf00198 | 8 |
| AX-158069557 | 9 | 46.191 | KV452943.1 | 3953204 | 8-scf00198 | 8 |
| AX-158069558 | 9 | 46.191 | KV452943.1 | 3954497 | 8-scf00198 | 8 |
| AX-158070198 | 9 | 46.191 | KV452945.1 | 1327302 | 8-scf00200 | 8 |
| AX-158070333 | 9 | 46.191 | KV452945.1 | 1522201 | 8-scf00200 | 8 |
| AX-157758317 | 9 | 46.191 | KV452945.1 | 1577685 | 8-scf00200 | 8 |
| AX-158070551 | 9 | 46.191 | KV452945.1 | 2032219 | 8-scf00200 | 8 |
| AX-158070565 | 9 | 46.191 | KV452945.1 | 2075990 | 8-scf00200 | 8 |
| AX-158070567 | 9 | 46.191 | KV452945.1 | 2076976 | 8-scf00200 | 8 |
| AX-158070571 | 9 | 46.191 | KV452945.1 | 2079289 | 8-scf00200 | 8 |
| AX-158070573 | 9 | 46.191 | KV452945.1 | 2081178 | 8-scf00200 | 8 |
| AX-158409457 | 9 | 46.191 | KV452945.1 | 2081333 | 8-scf00200 | 8 |
| AX-158070574 | 9 | 46.191 | KV452945.1 | 2083037 | 8-scf00200 | 8 |
| AX-158070576 | 9 | 46.191 | KV452945.1 | 2083719 | 8-scf00200 | 8 |
| AX-158070577 | 9 | 46.191 | KV452945.1 | 2085349 | 8-scf00200 | 8 |
| AX-158070730 | 9 | 46.191 | KV452945.1 | 2469461 | 8-scf00200 | 8 |
| AX-157824179 | 9 | 46.191 | KV452945.1 | 2479257 | 8-scf00200 | 8 |
| AX-158070743 | 9 | 46.191 | KV452945.1 | 2483591 | 8-scf00200 | 8 |
| AX-158071228 | 9 | 46.191 | KV452945.1 | 3297341 | 8-scf00200 | 8 |
| AX-158071286 | 9 | 46.191 | KV452945.1 | 3392317 | 8-scf00200 | 8 |
| AX-158071294 | 9 | 46.191 | KV452945.1 | 3412561 | 8-scf00200 | 8 |
| AX-158071308 | 9 | 46.191 | KV452945.1 | 3429635 | 8-scf00200 | 8 |
| AX-158071346 | 9 | 46.191 | KV452945.1 | 3535083 | 8-scf00200 | 8 |
| AX-158071363 | 9 | 46.191 | KV452945.1 | 3569389 | 8-scf00200 | 8 |
| AX-158071503 | 9 | 46.191 | KV452945.1 | 3817485 | 8-scf00200 | 8 |
| AX-158071504 | 9 | 46.191 | KV452945.1 | 3819721 | 8-scf00200 | 8 |
| AX-157824201 | 9 | 46.191 | KV452945.1 | 3885439 | 8-scf00200 | 8 |
| AX-158071739 | 9 | 46.191 | KV452945.1 | 4143986 | 8-scf00200 | 8 |

|              |   |        |             |         |            |    |
|--------------|---|--------|-------------|---------|------------|----|
| AX-158071957 | 9 | 46.191 | KV452945.1  | 4452881 | 8-scf00200 | 8  |
| AX-158072580 | 9 | 46.191 | KV452945.1  | 5184689 | 8-scf00200 | 8  |
| AX-158075138 | 9 | 46.191 | KV452945.1  | 8918237 | 8-scf00200 | 8  |
| AX-157705890 | 9 | 46.191 | 3ML01031177 | 503     | scf06783_1 | UN |
| AX-158069244 | 9 | 46.343 | KV452943.1  | 3554755 | 8-scf00198 | 8  |
| AX-158069353 | 9 | 46.343 | KV452943.1  | 3677117 | 8-scf00198 | 8  |
| AX-158069492 | 9 | 46.343 | KV452943.1  | 3868467 | 8-scf00198 | 8  |
| AX-158069496 | 9 | 46.343 | KV452943.1  | 3876372 | 8-scf00198 | 8  |
| AX-158069502 | 9 | 46.343 | KV452943.1  | 3886382 | 8-scf00198 | 8  |
| AX-158069510 | 9 | 46.343 | KV452943.1  | 3893330 | 8-scf00198 | 8  |
| AX-158069520 | 9 | 46.343 | KV452943.1  | 3903833 | 8-scf00198 | 8  |
| AX-157708058 | 9 | 46.343 | KV452943.1  | 3922538 | 8-scf00198 | 8  |
| AX-158069541 | 9 | 46.343 | KV452943.1  | 3928093 | 8-scf00198 | 8  |
| AX-157824066 | 9 | 46.343 | KV452943.1  | 3972768 | 8-scf00198 | 8  |
| AX-158069617 | 9 | 46.343 | KV452943.1  | 3972853 | 8-scf00198 | 8  |
| AX-158069619 | 9 | 46.343 | KV452943.1  | 3976961 | 8-scf00198 | 8  |
| AX-157755900 | 9 | 46.343 | KV452943.1  | 3977459 | 8-scf00198 | 8  |
| AX-157720492 | 9 | 46.343 | KV452943.1  | 3978808 | 8-scf00198 | 8  |
| AX-158069624 | 9 | 46.343 | KV452943.1  | 3981753 | 8-scf00198 | 8  |
| AX-157824069 | 9 | 46.343 | KV452943.1  | 3998870 | 8-scf00198 | 8  |
| AX-158069641 | 9 | 46.343 | KV452943.1  | 4001205 | 8-scf00198 | 8  |
| AX-157857004 | 9 | 46.343 | KV452943.1  | 4005435 | 8-scf00198 | 8  |
| AX-158069643 | 9 | 46.343 | KV452943.1  | 4007622 | 8-scf00198 | 8  |
| AX-158069648 | 9 | 46.343 | KV452943.1  | 4019261 | 8-scf00198 | 8  |
| AX-158069650 | 9 | 46.343 | KV452943.1  | 4019847 | 8-scf00198 | 8  |
| AX-158069651 | 9 | 46.343 | KV452943.1  | 4022246 | 8-scf00198 | 8  |
| AX-158069652 | 9 | 46.343 | KV452943.1  | 4023022 | 8-scf00198 | 8  |
| AX-158069654 | 9 | 46.343 | KV452943.1  | 4023333 | 8-scf00198 | 8  |
| AX-157824910 | 9 | 46.343 | KV452943.1  | 4043849 | 8-scf00198 | 8  |
| AX-158080226 | 9 | 46.343 | KV452943.1  | 4051765 | 8-scf00198 | 8  |
| AX-157824911 | 9 | 46.343 | KV452943.1  | 4052122 | 8-scf00198 | 8  |
| AX-158080233 | 9 | 46.343 | KV452943.1  | 4063322 | 8-scf00198 | 8  |
| AX-158080239 | 9 | 46.343 | KV452943.1  | 4074924 | 8-scf00198 | 8  |
| AX-157824916 | 9 | 46.343 | KV452943.1  | 4107641 | 8-scf00198 | 8  |
| AX-157824919 | 9 | 46.343 | KV452943.1  | 4192912 | 8-scf00198 | 8  |
| AX-158080327 | 9 | 46.343 | KV452943.1  | 4229681 | 8-scf00198 | 8  |
| AX-157870835 | 9 | 46.343 | KV452943.1  | 4233953 | 8-scf00198 | 8  |
| AX-158080329 | 9 | 46.343 | KV452943.1  | 4241279 | 8-scf00198 | 8  |
| AX-158080331 | 9 | 46.343 | KV452943.1  | 4242526 | 8-scf00198 | 8  |
| AX-157750730 | 9 | 46.343 | KV452943.1  | 4245021 | 8-scf00198 | 8  |
| AX-158080333 | 9 | 46.343 | KV452943.1  | 4247076 | 8-scf00198 | 8  |
| AX-157743386 | 9 | 46.343 | KV452943.1  | 4247286 | 8-scf00198 | 8  |
| AX-157824924 | 9 | 46.343 | KV452943.1  | 4263837 | 8-scf00198 | 8  |
| AX-157824926 | 9 | 46.343 | KV452943.1  | 4268888 | 8-scf00198 | 8  |
| AX-157824927 | 9 | 46.343 | KV452943.1  | 4269454 | 8-scf00198 | 8  |
| AX-158080346 | 9 | 46.343 | KV452943.1  | 4269751 | 8-scf00198 | 8  |
| AX-158080347 | 9 | 46.343 | KV452943.1  | 4269963 | 8-scf00198 | 8  |
| AX-157748484 | 9 | 46.343 | KV452943.1  | 4270734 | 8-scf00198 | 8  |
| AX-158080348 | 9 | 46.343 | KV452943.1  | 4270976 | 8-scf00198 | 8  |
| AX-158080351 | 9 | 46.343 | KV452943.1  | 4272442 | 8-scf00198 | 8  |
| AX-158080424 | 9 | 46.343 | KV452943.1  | 4383306 | 8-scf00198 | 8  |

|              |   |        |             |         |            |    |
|--------------|---|--------|-------------|---------|------------|----|
| AX-158080431 | 9 | 46.343 | KV452943.1  | 4388294 | 8-scf00198 | 8  |
| AX-158080436 | 9 | 46.343 | KV452943.1  | 4394528 | 8-scf00198 | 8  |
| AX-158080466 | 9 | 46.343 | KV452943.1  | 4442209 | 8-scf00198 | 8  |
| AX-158080472 | 9 | 46.343 | KV452943.1  | 4450906 | 8-scf00198 | 8  |
| AX-158069843 | 9 | 46.343 | KV452945.1  | 375385  | 8-scf00200 | 8  |
| AX-157746939 | 9 | 46.343 | KV452945.1  | 579587  | 8-scf00200 | 8  |
| AX-158069904 | 9 | 46.343 | KV452945.1  | 586456  | 8-scf00200 | 8  |
| AX-158069931 | 9 | 46.343 | KV452945.1  | 666445  | 8-scf00200 | 8  |
| AX-158069932 | 9 | 46.343 | KV452945.1  | 673088  | 8-scf00200 | 8  |
| AX-158069933 | 9 | 46.343 | KV452945.1  | 682382  | 8-scf00200 | 8  |
| AX-158069940 | 9 | 46.343 | KV452945.1  | 693412  | 8-scf00200 | 8  |
| AX-158069958 | 9 | 46.343 | KV452945.1  | 779397  | 8-scf00200 | 8  |
| AX-158069988 | 9 | 46.343 | KV452945.1  | 919241  | 8-scf00200 | 8  |
| AX-158069989 | 9 | 46.343 | KV452945.1  | 920122  | 8-scf00200 | 8  |
| AX-158070375 | 9 | 46.343 | KV452945.1  | 1591952 | 8-scf00200 | 8  |
| AX-158070601 | 9 | 46.343 | KV452945.1  | 2124378 | 8-scf00200 | 8  |
| AX-158070727 | 9 | 46.343 | KV452945.1  | 2464488 | 8-scf00200 | 8  |
| AX-157727490 | 9 | 46.343 | KV452945.1  | 2556991 | 8-scf00200 | 8  |
| AX-158070936 | 9 | 46.343 | KV452945.1  | 2804825 | 8-scf00200 | 8  |
| AX-158071076 | 9 | 46.343 | KV452945.1  | 3023420 | 8-scf00200 | 8  |
| AX-158071220 | 9 | 46.343 | KV452945.1  | 3278101 | 8-scf00200 | 8  |
| AX-158409487 | 9 | 46.343 | KV452945.1  | 3307691 | 8-scf00200 | 8  |
| AX-158071609 | 9 | 46.343 | KV452945.1  | 4022448 | 8-scf00200 | 8  |
| AX-157824235 | 9 | 46.343 | KV452945.1  | 4284650 | 8-scf00200 | 8  |
| AX-157707321 | 9 | 46.343 | 3ML01034008 | 411     | scf09678_1 | UN |
| AX-157885549 | 9 | 46.404 | KV452943.1  | 4262995 | 8-scf00198 | 8  |
| AX-157824925 | 9 | 46.447 | KV452943.1  | 4264229 | 8-scf00198 | 8  |
| AX-158070713 | 9 | 46.447 | KV452945.1  | 2438108 | 8-scf00200 | 8  |
| AX-158071241 | 9 | 46.447 | KV452945.1  | 3323818 | 8-scf00200 | 8  |
| AX-158069638 | 9 | 46.496 | KV452943.1  | 3996857 | 8-scf00198 | 8  |
| AX-158080366 | 9 | 46.496 | KV452943.1  | 4291662 | 8-scf00198 | 8  |
| AX-158080367 | 9 | 46.496 | KV452943.1  | 4292247 | 8-scf00198 | 8  |
| AX-158080369 | 9 | 46.496 | KV452943.1  | 4292722 | 8-scf00198 | 8  |
| AX-157885551 | 9 | 46.496 | KV452943.1  | 4296396 | 8-scf00198 | 8  |
| AX-158080373 | 9 | 46.496 | KV452943.1  | 4297183 | 8-scf00198 | 8  |
| AX-158080377 | 9 | 46.496 | KV452943.1  | 4306743 | 8-scf00198 | 8  |
| AX-158080378 | 9 | 46.496 | KV452943.1  | 4309583 | 8-scf00198 | 8  |
| AX-158080395 | 9 | 46.496 | KV452943.1  | 4334667 | 8-scf00198 | 8  |
| AX-157775669 | 9 | 46.496 | KV452943.1  | 4341603 | 8-scf00198 | 8  |
| AX-158080404 | 9 | 46.496 | KV452943.1  | 4351285 | 8-scf00198 | 8  |
| AX-158080428 | 9 | 46.496 | KV452943.1  | 4385778 | 8-scf00198 | 8  |
| AX-158080434 | 9 | 46.496 | KV452943.1  | 4391151 | 8-scf00198 | 8  |
| AX-158080435 | 9 | 46.496 | KV452943.1  | 4391758 | 8-scf00198 | 8  |
| AX-158080439 | 9 | 46.496 | KV452943.1  | 4399130 | 8-scf00198 | 8  |
| AX-157857117 | 9 | 46.496 | KV452943.1  | 4405060 | 8-scf00198 | 8  |
| AX-157885554 | 9 | 46.496 | KV452943.1  | 4428503 | 8-scf00198 | 8  |
| AX-158080460 | 9 | 46.496 | KV452943.1  | 4437572 | 8-scf00198 | 8  |
| AX-158080462 | 9 | 46.496 | KV452943.1  | 4438607 | 8-scf00198 | 8  |
| AX-157857118 | 9 | 46.496 | KV452943.1  | 4443822 | 8-scf00198 | 8  |
| AX-158080467 | 9 | 46.496 | KV452943.1  | 4444208 | 8-scf00198 | 8  |
| AX-157885556 | 9 | 46.496 | KV452943.1  | 4446831 | 8-scf00198 | 8  |

|              |   |        |            |         |            |   |
|--------------|---|--------|------------|---------|------------|---|
| AX-157885557 | 9 | 46.496 | KV452943.1 | 4446974 | 8-scf00198 | 8 |
| AX-158392053 | 9 | 46.496 | KV452943.1 | 4450686 | 8-scf00198 | 8 |
| AX-158080476 | 9 | 46.496 | KV452943.1 | 4453198 | 8-scf00198 | 8 |
| AX-157885560 | 9 | 46.496 | KV452943.1 | 4471462 | 8-scf00198 | 8 |
| AX-157885561 | 9 | 46.496 | KV452943.1 | 4472676 | 8-scf00198 | 8 |
| AX-158080485 | 9 | 46.496 | KV452943.1 | 4474206 | 8-scf00198 | 8 |
| AX-157720272 | 9 | 46.496 | KV452943.1 | 4503547 | 8-scf00198 | 8 |
| AX-157877116 | 9 | 46.496 | KV452943.1 | 4507201 | 8-scf00198 | 8 |
| AX-158080513 | 9 | 46.496 | KV452943.1 | 4528789 | 8-scf00198 | 8 |
| AX-158080523 | 9 | 46.496 | KV452943.1 | 4552505 | 8-scf00198 | 8 |
| AX-158409718 | 9 | 46.496 | KV452943.1 | 4588397 | 8-scf00198 | 8 |
| AX-157824936 | 9 | 46.496 | KV452943.1 | 4600296 | 8-scf00198 | 8 |
| AX-158080540 | 9 | 46.496 | KV452943.1 | 4601635 | 8-scf00198 | 8 |
| AX-158080543 | 9 | 46.496 | KV452943.1 | 4611854 | 8-scf00198 | 8 |
| AX-158080546 | 9 | 46.496 | KV452943.1 | 4620877 | 8-scf00198 | 8 |
| AX-157753388 | 9 | 46.496 | KV452943.1 | 4636633 | 8-scf00198 | 8 |
| AX-158080555 | 9 | 46.496 | KV452943.1 | 4647440 | 8-scf00198 | 8 |
| AX-158080558 | 9 | 46.496 | KV452943.1 | 4648643 | 8-scf00198 | 8 |
| AX-158080560 | 9 | 46.496 | KV452943.1 | 4648960 | 8-scf00198 | 8 |
| AX-158080566 | 9 | 46.496 | KV452943.1 | 4669648 | 8-scf00198 | 8 |
| AX-157885564 | 9 | 46.496 | KV452943.1 | 4680683 | 8-scf00198 | 8 |
| AX-158080569 | 9 | 46.496 | KV452943.1 | 4681827 | 8-scf00198 | 8 |
| AX-158080577 | 9 | 46.496 | KV452943.1 | 4726839 | 8-scf00198 | 8 |
| AX-158080579 | 9 | 46.496 | KV452943.1 | 4730036 | 8-scf00198 | 8 |
| AX-158080583 | 9 | 46.496 | KV452943.1 | 4742668 | 8-scf00198 | 8 |
| AX-158080586 | 9 | 46.496 | KV452943.1 | 4748706 | 8-scf00198 | 8 |
| AX-158080590 | 9 | 46.496 | KV452943.1 | 4755104 | 8-scf00198 | 8 |
| AX-158080593 | 9 | 46.496 | KV452943.1 | 4757285 | 8-scf00198 | 8 |
| AX-157857119 | 9 | 46.496 | KV452943.1 | 5037832 | 8-scf00198 | 8 |
| AX-157703676 | 9 | 46.496 | KV452943.1 | 5096732 | 8-scf00198 | 8 |
| AX-158080748 | 9 | 46.496 | KV452943.1 | 5258300 | 8-scf00198 | 8 |
| AX-158080749 | 9 | 46.496 | KV452943.1 | 5259094 | 8-scf00198 | 8 |
| AX-158080754 | 9 | 46.496 | KV452943.1 | 5267897 | 8-scf00198 | 8 |
| AX-158080756 | 9 | 46.496 | KV452943.1 | 5271459 | 8-scf00198 | 8 |
| AX-158080758 | 9 | 46.496 | KV452943.1 | 5272578 | 8-scf00198 | 8 |
| AX-158080759 | 9 | 46.496 | KV452943.1 | 5274470 | 8-scf00198 | 8 |
| AX-158080763 | 9 | 46.496 | KV452943.1 | 5296566 | 8-scf00198 | 8 |
| AX-158080765 | 9 | 46.496 | KV452943.1 | 5299633 | 8-scf00198 | 8 |
| AX-158080769 | 9 | 46.496 | KV452943.1 | 5309024 | 8-scf00198 | 8 |
| AX-158080776 | 9 | 46.496 | KV452943.1 | 5343310 | 8-scf00198 | 8 |
| AX-158080778 | 9 | 46.496 | KV452943.1 | 5354953 | 8-scf00198 | 8 |
| AX-158080782 | 9 | 46.496 | KV452943.1 | 5371773 | 8-scf00198 | 8 |
| AX-158080790 | 9 | 46.496 | KV452943.1 | 5409576 | 8-scf00198 | 8 |
| AX-158080793 | 9 | 46.496 | KV452943.1 | 5443818 | 8-scf00198 | 8 |
| AX-158080794 | 9 | 46.496 | KV452943.1 | 5445500 | 8-scf00198 | 8 |
| AX-158080796 | 9 | 46.496 | KV452943.1 | 5452350 | 8-scf00198 | 8 |
| AX-157824941 | 9 | 46.496 | KV452943.1 | 5476544 | 8-scf00198 | 8 |
| AX-158080815 | 9 | 46.496 | KV452943.1 | 5508016 | 8-scf00198 | 8 |
| AX-158080817 | 9 | 46.496 | KV452943.1 | 5515453 | 8-scf00198 | 8 |
| AX-158080818 | 9 | 46.496 | KV452943.1 | 5515805 | 8-scf00198 | 8 |
| AX-158080824 | 9 | 46.496 | KV452943.1 | 5534635 | 8-scf00198 | 8 |

|              |   |        |            |         |            |    |
|--------------|---|--------|------------|---------|------------|----|
| AX-157824943 | 9 | 46.496 | KV452943.1 | 5540501 | 8-scf00198 | 8  |
| AX-158080878 | 9 | 46.496 | KV452943.1 | 5673846 | 8-scf00198 | 8  |
| AX-157824947 | 9 | 46.496 | KV452943.1 | 5747209 | 8-scf00198 | 8  |
| AX-158080891 | 9 | 46.496 | KV452943.1 | 5785343 | 8-scf00198 | 8  |
| AX-158080893 | 9 | 46.496 | KV452943.1 | 5791849 | 8-scf00198 | 8  |
| AX-158080908 | 9 | 46.496 | KV452943.1 | 5825043 | 8-scf00198 | 8  |
| AX-157824951 | 9 | 46.496 | KV452943.1 | 5914834 | 8-scf00198 | 8  |
| AX-158080956 | 9 | 46.496 | KV452943.1 | 6023675 | 8-scf00198 | 8  |
| AX-157824084 | 9 | 46.496 | KV452945.1 | 12013   | 8-scf00200 | 8  |
| AX-158069815 | 9 | 46.496 | KV452945.1 | 234274  | 8-scf00200 | 8  |
| AX-158069816 | 9 | 46.496 | KV452945.1 | 235587  | 8-scf00200 | 8  |
| AX-158069818 | 9 | 46.496 | KV452945.1 | 255175  | 8-scf00200 | 8  |
| AX-158069880 | 9 | 46.496 | KV452945.1 | 519503  | 8-scf00200 | 8  |
| AX-158069897 | 9 | 46.496 | KV452945.1 | 566699  | 8-scf00200 | 8  |
| AX-157824109 | 9 | 46.496 | KV452945.1 | 954747  | 8-scf00200 | 8  |
| AX-157885468 | 9 | 46.496 | KV452945.1 | 1274579 | 8-scf00200 | 8  |
| AX-157824134 | 9 | 46.496 | KV452945.1 | 1276323 | 8-scf00200 | 8  |
| AX-157824135 | 9 | 46.496 | KV452945.1 | 1276391 | 8-scf00200 | 8  |
| AX-158409430 | 9 | 46.496 | KV452945.1 | 1289689 | 8-scf00200 | 8  |
| AX-157723253 | 9 | 46.496 | KV452945.1 | 1573120 | 8-scf00200 | 8  |
| AX-158070378 | 9 | 46.496 | KV452945.1 | 1615983 | 8-scf00200 | 8  |
| AX-158070383 | 9 | 46.496 | KV452945.1 | 1629404 | 8-scf00200 | 8  |
| AX-158070669 | 9 | 46.496 | KV452945.1 | 2356933 | 8-scf00200 | 8  |
| AX-158070695 | 9 | 46.496 | KV452945.1 | 2419899 | 8-scf00200 | 8  |
| AX-158070697 | 9 | 46.496 | KV452945.1 | 2421124 | 8-scf00200 | 8  |
| AX-158070699 | 9 | 46.496 | KV452945.1 | 2427096 | 8-scf00200 | 8  |
| AX-158070700 | 9 | 46.496 | KV452945.1 | 2427860 | 8-scf00200 | 8  |
| AX-157775475 | 9 | 46.496 | KV452945.1 | 2514355 | 8-scf00200 | 8  |
| AX-158070838 | 9 | 46.496 | KV452945.1 | 2670318 | 8-scf00200 | 8  |
| AX-158070902 | 9 | 46.496 | KV452945.1 | 2770737 | 8-scf00200 | 8  |
| AX-158071051 | 9 | 46.496 | KV452945.1 | 2973983 | 8-scf00200 | 8  |
| AX-158071061 | 9 | 46.496 | KV452945.1 | 2994258 | 8-scf00200 | 8  |
| AX-158071062 | 9 | 46.496 | KV452945.1 | 2995308 | 8-scf00200 | 8  |
| AX-158071131 | 9 | 46.496 | KV452945.1 | 3138459 | 8-scf00200 | 8  |
| AX-158071134 | 9 | 46.496 | KV452945.1 | 3141571 | 8-scf00200 | 8  |
| AX-157726418 | 9 | 46.496 | KV452945.1 | 3763528 | 8-scf00200 | 8  |
| AX-157885492 | 9 | 46.496 | KV452945.1 | 3796629 | 8-scf00200 | 8  |
| AX-158071485 | 9 | 46.496 | KV452945.1 | 3797044 | 8-scf00200 | 8  |
| AX-158071516 | 9 | 46.496 | KV452945.1 | 3837019 | 8-scf00200 | 8  |
| AX-158072249 | 9 | 46.496 | KV452945.1 | 4733206 | 8-scf00200 | 8  |
| AX-158073339 | 9 | 46.496 | KV452945.1 | 6137296 | 8-scf00200 | 8  |
| AX-158391993 | 9 | 46.496 | KV452945.1 | 7379354 | 8-scf00200 | 8  |
| AX-158073990 | 9 | 46.496 | KV452945.1 | 7406358 | 8-scf00200 | 8  |
| AX-158074020 | 9 | 46.496 | KV452945.1 | 7449966 | 8-scf00200 | 8  |
| AX-158074021 | 9 | 46.496 | KV452945.1 | 7451360 | 8-scf00200 | 8  |
| AX-157685328 | 9 | 46.496 | KV452944.1 | 107927  | 8-scf00609 | 8  |
| AX-157685334 | 9 | 46.496 | KV452944.1 | 138950  | 8-scf00609 | 8  |
| AX-157685338 | 9 | 46.496 | KV452944.1 | 152747  | 8-scf00609 | 8  |
| AX-157685339 | 9 | 46.496 | KV452944.1 | 154573  | 8-scf00609 | 8  |
| AX-157680997 | 9 | 46.496 | KV453506.1 | 7215    | scf00858   | UN |
| AX-157824942 | 9 | 46.566 | KV452943.1 | 5540139 | 8-scf00198 | 8  |



|              |   |        |            |         |            |   |
|--------------|---|--------|------------|---------|------------|---|
| AX-158080896 | 9 | 46.566 | KV452943.1 | 5794224 | 8-scf00198 | 8 |
| AX-158069621 | 9 | 46.649 | KV452943.1 | 3978098 | 8-scf00198 | 8 |
| AX-157697132 | 9 | 46.649 | KV452943.1 | 3984139 | 8-scf00198 | 8 |
| AX-158069635 | 9 | 46.649 | KV452943.1 | 3995807 | 8-scf00198 | 8 |
| AX-158069637 | 9 | 46.649 | KV452943.1 | 3996224 | 8-scf00198 | 8 |
| AX-158080235 | 9 | 46.649 | KV452943.1 | 4066955 | 8-scf00198 | 8 |
| AX-158080338 | 9 | 46.649 | KV452943.1 | 4255813 | 8-scf00198 | 8 |
| AX-158080418 | 9 | 46.649 | KV452943.1 | 4370374 | 8-scf00198 | 8 |
| AX-158409712 | 9 | 46.649 | KV452943.1 | 4392185 | 8-scf00198 | 8 |
| AX-158080657 | 9 | 46.649 | KV452943.1 | 4951307 | 8-scf00198 | 8 |
| AX-158080727 | 9 | 46.649 | KV452943.1 | 5194110 | 8-scf00198 | 8 |
| AX-157870840 | 9 | 46.649 | KV452943.1 | 5312450 | 8-scf00198 | 8 |
| AX-157788466 | 9 | 46.649 | KV452943.1 | 5540952 | 8-scf00198 | 8 |
| AX-158080834 | 9 | 46.649 | KV452943.1 | 5543514 | 8-scf00198 | 8 |
| AX-158080858 | 9 | 46.649 | KV452943.1 | 5607665 | 8-scf00198 | 8 |
| AX-157762494 | 9 | 46.649 | KV452943.1 | 5639668 | 8-scf00198 | 8 |
| AX-158080872 | 9 | 46.649 | KV452943.1 | 5649408 | 8-scf00198 | 8 |
| AX-157767351 | 9 | 46.649 | KV452943.1 | 5661406 | 8-scf00198 | 8 |
| AX-157788477 | 9 | 46.649 | KV452943.1 | 5676489 | 8-scf00198 | 8 |
| AX-157788479 | 9 | 46.649 | KV452943.1 | 5682197 | 8-scf00198 | 8 |
| AX-158409732 | 9 | 46.649 | KV452943.1 | 5703960 | 8-scf00198 | 8 |
| AX-158409736 | 9 | 46.649 | KV452943.1 | 5705933 | 8-scf00198 | 8 |
| AX-157824948 | 9 | 46.649 | KV452943.1 | 5747608 | 8-scf00198 | 8 |
| AX-158080895 | 9 | 46.649 | KV452943.1 | 5792938 | 8-scf00198 | 8 |
| AX-158080898 | 9 | 46.649 | KV452943.1 | 5801380 | 8-scf00198 | 8 |
| AX-158080903 | 9 | 46.649 | KV452943.1 | 5815312 | 8-scf00198 | 8 |
| AX-158080909 | 9 | 46.649 | KV452943.1 | 5826418 | 8-scf00198 | 8 |
| AX-157824952 | 9 | 46.649 | KV452943.1 | 5932310 | 8-scf00198 | 8 |
| AX-158080938 | 9 | 46.649 | KV452943.1 | 5936291 | 8-scf00198 | 8 |
| AX-158080939 | 9 | 46.649 | KV452943.1 | 5937955 | 8-scf00198 | 8 |
| AX-157694471 | 9 | 46.649 | KV452943.1 | 5994554 | 8-scf00198 | 8 |
| AX-158069785 | 9 | 46.649 | KV452945.1 | 85409   | 8-scf00200 | 8 |
| AX-158069799 | 9 | 46.649 | KV452945.1 | 134921  | 8-scf00200 | 8 |
| AX-158069844 | 9 | 46.649 | KV452945.1 | 397332  | 8-scf00200 | 8 |
| AX-157824089 | 9 | 46.649 | KV452945.1 | 401083  | 8-scf00200 | 8 |
| AX-158069846 | 9 | 46.649 | KV452945.1 | 401770  | 8-scf00200 | 8 |
| AX-157824091 | 9 | 46.649 | KV452945.1 | 452987  | 8-scf00200 | 8 |
| AX-158069873 | 9 | 46.649 | KV452945.1 | 489953  | 8-scf00200 | 8 |
| AX-158069887 | 9 | 46.649 | KV452945.1 | 544609  | 8-scf00200 | 8 |
| AX-158069895 | 9 | 46.649 | KV452945.1 | 566482  | 8-scf00200 | 8 |
| AX-157824094 | 9 | 46.649 | KV452945.1 | 576431  | 8-scf00200 | 8 |
| AX-158069907 | 9 | 46.649 | KV452945.1 | 594420  | 8-scf00200 | 8 |
| AX-158069909 | 9 | 46.649 | KV452945.1 | 600038  | 8-scf00200 | 8 |
| AX-158069910 | 9 | 46.649 | KV452945.1 | 602366  | 8-scf00200 | 8 |
| AX-158069912 | 9 | 46.649 | KV452945.1 | 610249  | 8-scf00200 | 8 |
| AX-158069926 | 9 | 46.649 | KV452945.1 | 652389  | 8-scf00200 | 8 |
| AX-158069937 | 9 | 46.649 | KV452945.1 | 685740  | 8-scf00200 | 8 |
| AX-158391949 | 9 | 46.649 | KV452945.1 | 687071  | 8-scf00200 | 8 |
| AX-158069945 | 9 | 46.649 | KV452945.1 | 726124  | 8-scf00200 | 8 |
| AX-157824097 | 9 | 46.649 | KV452945.1 | 745993  | 8-scf00200 | 8 |
| AX-157824098 | 9 | 46.649 | KV452945.1 | 748366  | 8-scf00200 | 8 |

|              |   |        |            |         |            |   |
|--------------|---|--------|------------|---------|------------|---|
| AX-158069953 | 9 | 46.649 | KV452945.1 | 766227  | 8-scf00200 | 8 |
| AX-157787710 | 9 | 46.649 | KV452945.1 | 781807  | 8-scf00200 | 8 |
| AX-157824101 | 9 | 46.649 | KV452945.1 | 796735  | 8-scf00200 | 8 |
| AX-157824102 | 9 | 46.649 | KV452945.1 | 801271  | 8-scf00200 | 8 |
| AX-158070122 | 9 | 46.649 | KV452945.1 | 1180406 | 8-scf00200 | 8 |
| AX-158070616 | 9 | 46.649 | KV452945.1 | 2165225 | 8-scf00200 | 8 |
| AX-157717562 | 9 | 46.649 | KV452945.1 | 2368437 | 8-scf00200 | 8 |
| AX-158070702 | 9 | 46.649 | KV452945.1 | 2428366 | 8-scf00200 | 8 |
| AX-158409470 | 9 | 46.649 | KV452945.1 | 2665005 | 8-scf00200 | 8 |
| AX-158071324 | 9 | 46.649 | KV452945.1 | 3475969 | 8-scf00200 | 8 |
| AX-158071710 | 9 | 46.649 | KV452945.1 | 4114863 | 8-scf00200 | 8 |
| AX-158071711 | 9 | 46.649 | KV452945.1 | 4115769 | 8-scf00200 | 8 |
| AX-157751997 | 9 | 46.649 | KV452945.1 | 4301847 | 8-scf00200 | 8 |
| AX-158416562 | 9 | 46.649 | KV452945.1 | 4331306 | 8-scf00200 | 8 |
| AX-157824242 | 9 | 46.649 | KV452945.1 | 4377194 | 8-scf00200 | 8 |
| AX-158071982 | 9 | 46.649 | KV452945.1 | 4471151 | 8-scf00200 | 8 |
| AX-158071983 | 9 | 46.649 | KV452945.1 | 4471594 | 8-scf00200 | 8 |
| AX-158072128 | 9 | 46.649 | KV452945.1 | 4606700 | 8-scf00200 | 8 |
| AX-157746904 | 9 | 46.649 | KV452945.1 | 5677456 | 8-scf00200 | 8 |
| AX-157685337 | 9 | 46.649 | KV452944.1 | 148768  | 8-scf00609 | 8 |
| AX-158069282 | 9 | 46.802 | KV452943.1 | 3604867 | 8-scf00198 | 8 |
| AX-158069295 | 9 | 46.802 | KV452943.1 | 3619115 | 8-scf00198 | 8 |
| AX-158069304 | 9 | 46.802 | KV452943.1 | 3625790 | 8-scf00198 | 8 |
| AX-158384259 | 9 | 46.802 | KV452943.1 | 3650289 | 8-scf00198 | 8 |
| AX-158069345 | 9 | 46.802 | KV452943.1 | 3669792 | 8-scf00198 | 8 |
| AX-157824040 | 9 | 46.802 | KV452943.1 | 3693456 | 8-scf00198 | 8 |
| AX-158069382 | 9 | 46.802 | KV452943.1 | 3719753 | 8-scf00198 | 8 |
| AX-157824048 | 9 | 46.802 | KV452943.1 | 3738357 | 8-scf00198 | 8 |
| AX-158069401 | 9 | 46.802 | KV452943.1 | 3746802 | 8-scf00198 | 8 |
| AX-158069445 | 9 | 46.802 | KV452943.1 | 3803829 | 8-scf00198 | 8 |
| AX-158069480 | 9 | 46.802 | KV452943.1 | 3844533 | 8-scf00198 | 8 |
| AX-158069482 | 9 | 46.802 | KV452943.1 | 3845173 | 8-scf00198 | 8 |
| AX-158069484 | 9 | 46.802 | KV452943.1 | 3846766 | 8-scf00198 | 8 |
| AX-157824059 | 9 | 46.802 | KV452943.1 | 3860418 | 8-scf00198 | 8 |
| AX-158069503 | 9 | 46.802 | KV452943.1 | 3888392 | 8-scf00198 | 8 |
| AX-158069512 | 9 | 46.802 | KV452943.1 | 3893732 | 8-scf00198 | 8 |
| AX-158069608 | 9 | 46.802 | KV452943.1 | 3963653 | 8-scf00198 | 8 |
| AX-158069631 | 9 | 46.802 | KV452943.1 | 3991730 | 8-scf00198 | 8 |
| AX-158069644 | 9 | 46.802 | KV452943.1 | 4009063 | 8-scf00198 | 8 |
| AX-158080220 | 9 | 46.802 | KV452943.1 | 4046967 | 8-scf00198 | 8 |
| AX-158080225 | 9 | 46.802 | KV452943.1 | 4050369 | 8-scf00198 | 8 |
| AX-158080228 | 9 | 46.802 | KV452943.1 | 4058278 | 8-scf00198 | 8 |
| AX-158080237 | 9 | 46.802 | KV452943.1 | 4070634 | 8-scf00198 | 8 |
| AX-158080249 | 9 | 46.802 | KV452943.1 | 4087499 | 8-scf00198 | 8 |
| AX-157824914 | 9 | 46.802 | KV452943.1 | 4096257 | 8-scf00198 | 8 |
| AX-158080264 | 9 | 46.802 | KV452943.1 | 4106472 | 8-scf00198 | 8 |
| AX-158080393 | 9 | 46.802 | KV452943.1 | 4333110 | 8-scf00198 | 8 |
| AX-158080396 | 9 | 46.802 | KV452943.1 | 4336931 | 8-scf00198 | 8 |
| AX-158080408 | 9 | 46.802 | KV452943.1 | 4360085 | 8-scf00198 | 8 |
| AX-158080413 | 9 | 46.802 | KV452943.1 | 4366459 | 8-scf00198 | 8 |
| AX-158080438 | 9 | 46.802 | KV452943.1 | 4396359 | 8-scf00198 | 8 |

|              |   |        |            |         |            |   |
|--------------|---|--------|------------|---------|------------|---|
| AX-158080453 | 9 | 46.802 | KV452943.1 | 4421588 | 8-scf00198 | 8 |
| AX-158080454 | 9 | 46.802 | KV452943.1 | 4422137 | 8-scf00198 | 8 |
| AX-158080470 | 9 | 46.802 | KV452943.1 | 4446155 | 8-scf00198 | 8 |
| AX-158080473 | 9 | 46.802 | KV452943.1 | 4451332 | 8-scf00198 | 8 |
| AX-158080478 | 9 | 46.802 | KV452943.1 | 4458915 | 8-scf00198 | 8 |
| AX-158080487 | 9 | 46.802 | KV452943.1 | 4478229 | 8-scf00198 | 8 |
| AX-158080537 | 9 | 46.802 | KV452943.1 | 4591865 | 8-scf00198 | 8 |
| AX-158080545 | 9 | 46.802 | KV452943.1 | 4616456 | 8-scf00198 | 8 |
| AX-158080785 | 9 | 46.802 | KV452943.1 | 5375162 | 8-scf00198 | 8 |
| AX-157709525 | 9 | 46.802 | KV452943.1 | 5795161 | 8-scf00198 | 8 |
| AX-158080911 | 9 | 46.802 | KV452943.1 | 5834043 | 8-scf00198 | 8 |
| AX-158080931 | 9 | 46.802 | KV452943.1 | 5887423 | 8-scf00198 | 8 |
| AX-158080934 | 9 | 46.802 | KV452943.1 | 5912862 | 8-scf00198 | 8 |
| AX-158080952 | 9 | 46.802 | KV452943.1 | 6005117 | 8-scf00198 | 8 |
| AX-158069770 | 9 | 46.802 | KV452945.1 | 6314    | 8-scf00200 | 8 |
| AX-158069777 | 9 | 46.802 | KV452945.1 | 50944   | 8-scf00200 | 8 |
| AX-158069784 | 9 | 46.802 | KV452945.1 | 72986   | 8-scf00200 | 8 |
| AX-158069870 | 9 | 46.802 | KV452945.1 | 487513  | 8-scf00200 | 8 |
| AX-158069884 | 9 | 46.802 | KV452945.1 | 540243  | 8-scf00200 | 8 |
| AX-158069892 | 9 | 46.802 | KV452945.1 | 561240  | 8-scf00200 | 8 |
| AX-158069901 | 9 | 46.802 | KV452945.1 | 582076  | 8-scf00200 | 8 |
| AX-158069911 | 9 | 46.802 | KV452945.1 | 607715  | 8-scf00200 | 8 |
| AX-158069916 | 9 | 46.802 | KV452945.1 | 616573  | 8-scf00200 | 8 |
| AX-158069917 | 9 | 46.802 | KV452945.1 | 621369  | 8-scf00200 | 8 |
| AX-158069918 | 9 | 46.802 | KV452945.1 | 621907  | 8-scf00200 | 8 |
| AX-158069965 | 9 | 46.802 | KV452945.1 | 819623  | 8-scf00200 | 8 |
| AX-158069994 | 9 | 46.802 | KV452945.1 | 936139  | 8-scf00200 | 8 |
| AX-157714535 | 9 | 46.802 | KV452945.1 | 959511  | 8-scf00200 | 8 |
| AX-157824110 | 9 | 46.802 | KV452945.1 | 963914  | 8-scf00200 | 8 |
| AX-157741273 | 9 | 46.802 | KV452945.1 | 966308  | 8-scf00200 | 8 |
| AX-157824112 | 9 | 46.802 | KV452945.1 | 991739  | 8-scf00200 | 8 |
| AX-158070011 | 9 | 46.802 | KV452945.1 | 1003186 | 8-scf00200 | 8 |
| AX-158070016 | 9 | 46.802 | KV452945.1 | 1010377 | 8-scf00200 | 8 |
| AX-158070017 | 9 | 46.802 | KV452945.1 | 1012824 | 8-scf00200 | 8 |
| AX-158070019 | 9 | 46.802 | KV452945.1 | 1015629 | 8-scf00200 | 8 |
| AX-157824115 | 9 | 46.802 | KV452945.1 | 1027089 | 8-scf00200 | 8 |
| AX-158391950 | 9 | 46.802 | KV452945.1 | 1042925 | 8-scf00200 | 8 |
| AX-158070031 | 9 | 46.802 | KV452945.1 | 1044026 | 8-scf00200 | 8 |
| AX-158070034 | 9 | 46.802 | KV452945.1 | 1046456 | 8-scf00200 | 8 |
| AX-158070035 | 9 | 46.802 | KV452945.1 | 1048735 | 8-scf00200 | 8 |
| AX-158070050 | 9 | 46.802 | KV452945.1 | 1062394 | 8-scf00200 | 8 |
| AX-158070053 | 9 | 46.802 | KV452945.1 | 1066895 | 8-scf00200 | 8 |
| AX-157731197 | 9 | 46.802 | KV452945.1 | 1067397 | 8-scf00200 | 8 |
| AX-157824119 | 9 | 46.802 | KV452945.1 | 1068368 | 8-scf00200 | 8 |
| AX-158070055 | 9 | 46.802 | KV452945.1 | 1069593 | 8-scf00200 | 8 |
| AX-158070056 | 9 | 46.802 | KV452945.1 | 1071678 | 8-scf00200 | 8 |
| AX-158070058 | 9 | 46.802 | KV452945.1 | 1073042 | 8-scf00200 | 8 |
| AX-157724965 | 9 | 46.802 | KV452945.1 | 1073485 | 8-scf00200 | 8 |
| AX-157824121 | 9 | 46.802 | KV452945.1 | 1080856 | 8-scf00200 | 8 |
| AX-158070072 | 9 | 46.802 | KV452945.1 | 1094653 | 8-scf00200 | 8 |
| AX-158070078 | 9 | 46.802 | KV452945.1 | 1111258 | 8-scf00200 | 8 |

|              |   |        |            |         |            |   |
|--------------|---|--------|------------|---------|------------|---|
| AX-158070085 | 9 | 46.802 | KV452945.1 | 1125378 | 8-scf00200 | 8 |
| AX-158384270 | 9 | 46.802 | KV452945.1 | 1133473 | 8-scf00200 | 8 |
| AX-158070102 | 9 | 46.802 | KV452945.1 | 1143844 | 8-scf00200 | 8 |
| AX-158070107 | 9 | 46.802 | KV452945.1 | 1156149 | 8-scf00200 | 8 |
| AX-157745451 | 9 | 46.802 | KV452945.1 | 1160556 | 8-scf00200 | 8 |
| AX-158070116 | 9 | 46.802 | KV452945.1 | 1175311 | 8-scf00200 | 8 |
| AX-158070123 | 9 | 46.802 | KV452945.1 | 1185277 | 8-scf00200 | 8 |
| AX-158070127 | 9 | 46.802 | KV452945.1 | 1189328 | 8-scf00200 | 8 |
| AX-158070137 | 9 | 46.802 | KV452945.1 | 1211619 | 8-scf00200 | 8 |
| AX-157727080 | 9 | 46.802 | KV452945.1 | 1217118 | 8-scf00200 | 8 |
| AX-158070144 | 9 | 46.802 | KV452945.1 | 1218243 | 8-scf00200 | 8 |
| AX-158070146 | 9 | 46.802 | KV452945.1 | 1218643 | 8-scf00200 | 8 |
| AX-158070148 | 9 | 46.802 | KV452945.1 | 1221410 | 8-scf00200 | 8 |
| AX-158070151 | 9 | 46.802 | KV452945.1 | 1224948 | 8-scf00200 | 8 |
| AX-158070152 | 9 | 46.802 | KV452945.1 | 1228129 | 8-scf00200 | 8 |
| AX-157824131 | 9 | 46.802 | KV452945.1 | 1229079 | 8-scf00200 | 8 |
| AX-157885465 | 9 | 46.802 | KV452945.1 | 1229457 | 8-scf00200 | 8 |
| AX-157824132 | 9 | 46.802 | KV452945.1 | 1232576 | 8-scf00200 | 8 |
| AX-158070156 | 9 | 46.802 | KV452945.1 | 1243695 | 8-scf00200 | 8 |
| AX-158070157 | 9 | 46.802 | KV452945.1 | 1246591 | 8-scf00200 | 8 |
| AX-157885466 | 9 | 46.802 | KV452945.1 | 1252621 | 8-scf00200 | 8 |
| AX-157857011 | 9 | 46.802 | KV452945.1 | 1252700 | 8-scf00200 | 8 |
| AX-157885467 | 9 | 46.802 | KV452945.1 | 1266653 | 8-scf00200 | 8 |
| AX-158070192 | 9 | 46.802 | KV452945.1 | 1300074 | 8-scf00200 | 8 |
| AX-158070194 | 9 | 46.802 | KV452945.1 | 1300426 | 8-scf00200 | 8 |
| AX-158070196 | 9 | 46.802 | KV452945.1 | 1305099 | 8-scf00200 | 8 |
| AX-157824141 | 9 | 46.802 | KV452945.1 | 1312141 | 8-scf00200 | 8 |
| AX-157694105 | 9 | 46.802 | KV452945.1 | 1316604 | 8-scf00200 | 8 |
| AX-157857012 | 9 | 46.802 | KV452945.1 | 1326421 | 8-scf00200 | 8 |
| AX-157857013 | 9 | 46.802 | KV452945.1 | 1328662 | 8-scf00200 | 8 |
| AX-157824144 | 9 | 46.802 | KV452945.1 | 1335040 | 8-scf00200 | 8 |
| AX-157824145 | 9 | 46.802 | KV452945.1 | 1336304 | 8-scf00200 | 8 |
| AX-157824147 | 9 | 46.802 | KV452945.1 | 1362751 | 8-scf00200 | 8 |
| AX-158409434 | 9 | 46.802 | KV452945.1 | 1377947 | 8-scf00200 | 8 |
| AX-158070231 | 9 | 46.802 | KV452945.1 | 1378207 | 8-scf00200 | 8 |
| AX-157885473 | 9 | 46.802 | KV452945.1 | 1382705 | 8-scf00200 | 8 |
| AX-157885474 | 9 | 46.802 | KV452945.1 | 1385135 | 8-scf00200 | 8 |
| AX-158409438 | 9 | 46.802 | KV452945.1 | 1388910 | 8-scf00200 | 8 |
| AX-158070241 | 9 | 46.802 | KV452945.1 | 1395899 | 8-scf00200 | 8 |
| AX-158070248 | 9 | 46.802 | KV452945.1 | 1403649 | 8-scf00200 | 8 |
| AX-158070249 | 9 | 46.802 | KV452945.1 | 1404250 | 8-scf00200 | 8 |
| AX-157885477 | 9 | 46.802 | KV452945.1 | 1410402 | 8-scf00200 | 8 |
| AX-158070254 | 9 | 46.802 | KV452945.1 | 1412259 | 8-scf00200 | 8 |
| AX-158070255 | 9 | 46.802 | KV452945.1 | 1417930 | 8-scf00200 | 8 |
| AX-158070257 | 9 | 46.802 | KV452945.1 | 1420341 | 8-scf00200 | 8 |
| AX-157857016 | 9 | 46.802 | KV452945.1 | 1420566 | 8-scf00200 | 8 |
| AX-158409443 | 9 | 46.802 | KV452945.1 | 1424829 | 8-scf00200 | 8 |
| AX-158070259 | 9 | 46.802 | KV452945.1 | 1426530 | 8-scf00200 | 8 |
| AX-158070261 | 9 | 46.802 | KV452945.1 | 1427336 | 8-scf00200 | 8 |
| AX-158070269 | 9 | 46.802 | KV452945.1 | 1434423 | 8-scf00200 | 8 |
| AX-158070273 | 9 | 46.802 | KV452945.1 | 1439521 | 8-scf00200 | 8 |

|              |   |        |            |         |            |   |
|--------------|---|--------|------------|---------|------------|---|
| AX-158070274 | 9 | 46.802 | KV452945.1 | 1441059 | 8-scf00200 | 8 |
| AX-158070276 | 9 | 46.802 | KV452945.1 | 1443203 | 8-scf00200 | 8 |
| AX-158070282 | 9 | 46.802 | KV452945.1 | 1448158 | 8-scf00200 | 8 |
| AX-158070312 | 9 | 46.802 | KV452945.1 | 1471873 | 8-scf00200 | 8 |
| AX-158070317 | 9 | 46.802 | KV452945.1 | 1476134 | 8-scf00200 | 8 |
| AX-157824151 | 9 | 46.802 | KV452945.1 | 1486147 | 8-scf00200 | 8 |
| AX-157753493 | 9 | 46.802 | KV452945.1 | 1487140 | 8-scf00200 | 8 |
| AX-158070322 | 9 | 46.802 | KV452945.1 | 1488194 | 8-scf00200 | 8 |
| AX-158409447 | 9 | 46.802 | KV452945.1 | 1499888 | 8-scf00200 | 8 |
| AX-158070328 | 9 | 46.802 | KV452945.1 | 1515235 | 8-scf00200 | 8 |
| AX-158070341 | 9 | 46.802 | KV452945.1 | 1529730 | 8-scf00200 | 8 |
| AX-158070342 | 9 | 46.802 | KV452945.1 | 1530640 | 8-scf00200 | 8 |
| AX-157824157 | 9 | 46.802 | KV452945.1 | 1548646 | 8-scf00200 | 8 |
| AX-158070351 | 9 | 46.802 | KV452945.1 | 1554406 | 8-scf00200 | 8 |
| AX-158070352 | 9 | 46.802 | KV452945.1 | 1555335 | 8-scf00200 | 8 |
| AX-158070355 | 9 | 46.802 | KV452945.1 | 1562715 | 8-scf00200 | 8 |
| AX-158070358 | 9 | 46.802 | KV452945.1 | 1565518 | 8-scf00200 | 8 |
| AX-158070359 | 9 | 46.802 | KV452945.1 | 1568144 | 8-scf00200 | 8 |
| AX-158070362 | 9 | 46.802 | KV452945.1 | 1571573 | 8-scf00200 | 8 |
| AX-157824158 | 9 | 46.802 | KV452945.1 | 1571799 | 8-scf00200 | 8 |
| AX-158070365 | 9 | 46.802 | KV452945.1 | 1577133 | 8-scf00200 | 8 |
| AX-158070370 | 9 | 46.802 | KV452945.1 | 1582195 | 8-scf00200 | 8 |
| AX-158070372 | 9 | 46.802 | KV452945.1 | 1586163 | 8-scf00200 | 8 |
| AX-158070380 | 9 | 46.802 | KV452945.1 | 1625946 | 8-scf00200 | 8 |
| AX-158070381 | 9 | 46.802 | KV452945.1 | 1627032 | 8-scf00200 | 8 |
| AX-158070382 | 9 | 46.802 | KV452945.1 | 1627534 | 8-scf00200 | 8 |
| AX-158070384 | 9 | 46.802 | KV452945.1 | 1630819 | 8-scf00200 | 8 |
| AX-158070388 | 9 | 46.802 | KV452945.1 | 1637705 | 8-scf00200 | 8 |
| AX-158070390 | 9 | 46.802 | KV452945.1 | 1640915 | 8-scf00200 | 8 |
| AX-158070392 | 9 | 46.802 | KV452945.1 | 1645466 | 8-scf00200 | 8 |
| AX-158070396 | 9 | 46.802 | KV452945.1 | 1650951 | 8-scf00200 | 8 |
| AX-158070399 | 9 | 46.802 | KV452945.1 | 1658937 | 8-scf00200 | 8 |
| AX-157865625 | 9 | 46.802 | KV452945.1 | 1676564 | 8-scf00200 | 8 |
| AX-158070409 | 9 | 46.802 | KV452945.1 | 1684218 | 8-scf00200 | 8 |
| AX-158070413 | 9 | 46.802 | KV452945.1 | 1690862 | 8-scf00200 | 8 |
| AX-158070421 | 9 | 46.802 | KV452945.1 | 1696238 | 8-scf00200 | 8 |
| AX-158070422 | 9 | 46.802 | KV452945.1 | 1701051 | 8-scf00200 | 8 |
| AX-158070424 | 9 | 46.802 | KV452945.1 | 1701432 | 8-scf00200 | 8 |
| AX-157753514 | 9 | 46.802 | KV452945.1 | 1703334 | 8-scf00200 | 8 |
| AX-158070427 | 9 | 46.802 | KV452945.1 | 1707352 | 8-scf00200 | 8 |
| AX-158070439 | 9 | 46.802 | KV452945.1 | 1729391 | 8-scf00200 | 8 |
| AX-158422482 | 9 | 46.802 | KV452945.1 | 1735252 | 8-scf00200 | 8 |
| AX-158070446 | 9 | 46.802 | KV452945.1 | 1740077 | 8-scf00200 | 8 |
| AX-158070448 | 9 | 46.802 | KV452945.1 | 1741170 | 8-scf00200 | 8 |
| AX-158070449 | 9 | 46.802 | KV452945.1 | 1741616 | 8-scf00200 | 8 |
| AX-158070450 | 9 | 46.802 | KV452945.1 | 1744770 | 8-scf00200 | 8 |
| AX-158384275 | 9 | 46.802 | KV452945.1 | 1764830 | 8-scf00200 | 8 |
| AX-158070463 | 9 | 46.802 | KV452945.1 | 1771789 | 8-scf00200 | 8 |
| AX-158070466 | 9 | 46.802 | KV452945.1 | 1786590 | 8-scf00200 | 8 |
| AX-158070475 | 9 | 46.802 | KV452945.1 | 1828228 | 8-scf00200 | 8 |
| AX-158070480 | 9 | 46.802 | KV452945.1 | 1840122 | 8-scf00200 | 8 |

|              |   |        |            |         |            |   |
|--------------|---|--------|------------|---------|------------|---|
| AX-158070482 | 9 | 46.802 | KV452945.1 | 1842118 | 8-scf00200 | 8 |
| AX-158070483 | 9 | 46.802 | KV452945.1 | 1844390 | 8-scf00200 | 8 |
| AX-158070489 | 9 | 46.802 | KV452945.1 | 1893318 | 8-scf00200 | 8 |
| AX-158070491 | 9 | 46.802 | KV452945.1 | 1898189 | 8-scf00200 | 8 |
| AX-158070494 | 9 | 46.802 | KV452945.1 | 1899984 | 8-scf00200 | 8 |
| AX-158070497 | 9 | 46.802 | KV452945.1 | 1901328 | 8-scf00200 | 8 |
| AX-158070543 | 9 | 46.802 | KV452945.1 | 2019658 | 8-scf00200 | 8 |
| AX-158070548 | 9 | 46.802 | KV452945.1 | 2028492 | 8-scf00200 | 8 |
| AX-158070555 | 9 | 46.802 | KV452945.1 | 2038270 | 8-scf00200 | 8 |
| AX-158070556 | 9 | 46.802 | KV452945.1 | 2040882 | 8-scf00200 | 8 |
| AX-158070558 | 9 | 46.802 | KV452945.1 | 2041420 | 8-scf00200 | 8 |
| AX-158070560 | 9 | 46.802 | KV452945.1 | 2048640 | 8-scf00200 | 8 |
| AX-158070563 | 9 | 46.802 | KV452945.1 | 2051354 | 8-scf00200 | 8 |
| AX-157824167 | 9 | 46.802 | KV452945.1 | 2058682 | 8-scf00200 | 8 |
| AX-157824169 | 9 | 46.802 | KV452945.1 | 2063971 | 8-scf00200 | 8 |
| AX-158070570 | 9 | 46.802 | KV452945.1 | 2077774 | 8-scf00200 | 8 |
| AX-158070593 | 9 | 46.802 | KV452945.1 | 2119538 | 8-scf00200 | 8 |
| AX-158070596 | 9 | 46.802 | KV452945.1 | 2123792 | 8-scf00200 | 8 |
| AX-158070599 | 9 | 46.802 | KV452945.1 | 2124059 | 8-scf00200 | 8 |
| AX-158070602 | 9 | 46.802 | KV452945.1 | 2126628 | 8-scf00200 | 8 |
| AX-158070604 | 9 | 46.802 | KV452945.1 | 2130096 | 8-scf00200 | 8 |
| AX-158070606 | 9 | 46.802 | KV452945.1 | 2140125 | 8-scf00200 | 8 |
| AX-158070608 | 9 | 46.802 | KV452945.1 | 2143239 | 8-scf00200 | 8 |
| AX-158070609 | 9 | 46.802 | KV452945.1 | 2143898 | 8-scf00200 | 8 |
| AX-158070611 | 9 | 46.802 | KV452945.1 | 2144332 | 8-scf00200 | 8 |
| AX-158070620 | 9 | 46.802 | KV452945.1 | 2174702 | 8-scf00200 | 8 |
| AX-158070621 | 9 | 46.802 | KV452945.1 | 2176499 | 8-scf00200 | 8 |
| AX-158070623 | 9 | 46.802 | KV452945.1 | 2177081 | 8-scf00200 | 8 |
| AX-158070624 | 9 | 46.802 | KV452945.1 | 2179234 | 8-scf00200 | 8 |
| AX-158070629 | 9 | 46.802 | KV452945.1 | 2198166 | 8-scf00200 | 8 |
| AX-158070631 | 9 | 46.802 | KV452945.1 | 2200389 | 8-scf00200 | 8 |
| AX-158070632 | 9 | 46.802 | KV452945.1 | 2201263 | 8-scf00200 | 8 |
| AX-158070634 | 9 | 46.802 | KV452945.1 | 2208547 | 8-scf00200 | 8 |
| AX-158070635 | 9 | 46.802 | KV452945.1 | 2215601 | 8-scf00200 | 8 |
| AX-158070637 | 9 | 46.802 | KV452945.1 | 2231352 | 8-scf00200 | 8 |
| AX-158070640 | 9 | 46.802 | KV452945.1 | 2243042 | 8-scf00200 | 8 |
| AX-158070641 | 9 | 46.802 | KV452945.1 | 2255180 | 8-scf00200 | 8 |
| AX-158070643 | 9 | 46.802 | KV452945.1 | 2255735 | 8-scf00200 | 8 |
| AX-158070644 | 9 | 46.802 | KV452945.1 | 2256832 | 8-scf00200 | 8 |
| AX-158070645 | 9 | 46.802 | KV452945.1 | 2260346 | 8-scf00200 | 8 |
| AX-158070648 | 9 | 46.802 | KV452945.1 | 2265744 | 8-scf00200 | 8 |
| AX-157824172 | 9 | 46.802 | KV452945.1 | 2288457 | 8-scf00200 | 8 |
| AX-158070652 | 9 | 46.802 | KV452945.1 | 2306577 | 8-scf00200 | 8 |
| AX-158070656 | 9 | 46.802 | KV452945.1 | 2314066 | 8-scf00200 | 8 |
| AX-158070661 | 9 | 46.802 | KV452945.1 | 2327929 | 8-scf00200 | 8 |
| AX-158070683 | 9 | 46.802 | KV452945.1 | 2380209 | 8-scf00200 | 8 |
| AX-158070690 | 9 | 46.802 | KV452945.1 | 2389301 | 8-scf00200 | 8 |
| AX-157824175 | 9 | 46.802 | KV452945.1 | 2425505 | 8-scf00200 | 8 |
| AX-158070704 | 9 | 46.802 | KV452945.1 | 2430791 | 8-scf00200 | 8 |
| AX-158070706 | 9 | 46.802 | KV452945.1 | 2432890 | 8-scf00200 | 8 |
| AX-158070709 | 9 | 46.802 | KV452945.1 | 2435136 | 8-scf00200 | 8 |

|              |   |        |            |         |            |   |
|--------------|---|--------|------------|---------|------------|---|
| AX-158070712 | 9 | 46.802 | KV452945.1 | 2437049 | 8-scf00200 | 8 |
| AX-158070715 | 9 | 46.802 | KV452945.1 | 2442477 | 8-scf00200 | 8 |
| AX-157824176 | 9 | 46.802 | KV452945.1 | 2442734 | 8-scf00200 | 8 |
| AX-158070717 | 9 | 46.802 | KV452945.1 | 2443755 | 8-scf00200 | 8 |
| AX-158070718 | 9 | 46.802 | KV452945.1 | 2444960 | 8-scf00200 | 8 |
| AX-158070719 | 9 | 46.802 | KV452945.1 | 2446705 | 8-scf00200 | 8 |
| AX-157718021 | 9 | 46.802 | KV452945.1 | 2448059 | 8-scf00200 | 8 |
| AX-157824177 | 9 | 46.802 | KV452945.1 | 2450078 | 8-scf00200 | 8 |
| AX-157824178 | 9 | 46.802 | KV452945.1 | 2450211 | 8-scf00200 | 8 |
| AX-157757246 | 9 | 46.802 | KV452945.1 | 2450693 | 8-scf00200 | 8 |
| AX-158070723 | 9 | 46.802 | KV452945.1 | 2452830 | 8-scf00200 | 8 |
| AX-158070728 | 9 | 46.802 | KV452945.1 | 2465173 | 8-scf00200 | 8 |
| AX-158070729 | 9 | 46.802 | KV452945.1 | 2465482 | 8-scf00200 | 8 |
| AX-158070738 | 9 | 46.802 | KV452945.1 | 2477512 | 8-scf00200 | 8 |
| AX-158070739 | 9 | 46.802 | KV452945.1 | 2477766 | 8-scf00200 | 8 |
| AX-158070740 | 9 | 46.802 | KV452945.1 | 2480902 | 8-scf00200 | 8 |
| AX-157865628 | 9 | 46.802 | KV452945.1 | 2494567 | 8-scf00200 | 8 |
| AX-158070745 | 9 | 46.802 | KV452945.1 | 2494788 | 8-scf00200 | 8 |
| AX-158070751 | 9 | 46.802 | KV452945.1 | 2498970 | 8-scf00200 | 8 |
| AX-158070752 | 9 | 46.802 | KV452945.1 | 2499902 | 8-scf00200 | 8 |
| AX-158070756 | 9 | 46.802 | KV452945.1 | 2513136 | 8-scf00200 | 8 |
| AX-158070758 | 9 | 46.802 | KV452945.1 | 2514020 | 8-scf00200 | 8 |
| AX-157824180 | 9 | 46.802 | KV452945.1 | 2519738 | 8-scf00200 | 8 |
| AX-157857021 | 9 | 46.802 | KV452945.1 | 2520906 | 8-scf00200 | 8 |
| AX-158070760 | 9 | 46.802 | KV452945.1 | 2521540 | 8-scf00200 | 8 |
| AX-158070765 | 9 | 46.802 | KV452945.1 | 2528814 | 8-scf00200 | 8 |
| AX-158070767 | 9 | 46.802 | KV452945.1 | 2531971 | 8-scf00200 | 8 |
| AX-158070774 | 9 | 46.802 | KV452945.1 | 2546066 | 8-scf00200 | 8 |
| AX-158070780 | 9 | 46.802 | KV452945.1 | 2555688 | 8-scf00200 | 8 |
| AX-158070800 | 9 | 46.802 | KV452945.1 | 2589028 | 8-scf00200 | 8 |
| AX-158409462 | 9 | 46.802 | KV452945.1 | 2589981 | 8-scf00200 | 8 |
| AX-158070803 | 9 | 46.802 | KV452945.1 | 2601035 | 8-scf00200 | 8 |
| AX-158070805 | 9 | 46.802 | KV452945.1 | 2603162 | 8-scf00200 | 8 |
| AX-158070806 | 9 | 46.802 | KV452945.1 | 2603581 | 8-scf00200 | 8 |
| AX-158070807 | 9 | 46.802 | KV452945.1 | 2609666 | 8-scf00200 | 8 |
| AX-158070809 | 9 | 46.802 | KV452945.1 | 2611700 | 8-scf00200 | 8 |
| AX-158409464 | 9 | 46.802 | KV452945.1 | 2641235 | 8-scf00200 | 8 |
| AX-158070820 | 9 | 46.802 | KV452945.1 | 2642332 | 8-scf00200 | 8 |
| AX-158070821 | 9 | 46.802 | KV452945.1 | 2644048 | 8-scf00200 | 8 |
| AX-158384280 | 9 | 46.802 | KV452945.1 | 2644998 | 8-scf00200 | 8 |
| AX-158070824 | 9 | 46.802 | KV452945.1 | 2648807 | 8-scf00200 | 8 |
| AX-158384281 | 9 | 46.802 | KV452945.1 | 2649856 | 8-scf00200 | 8 |
| AX-158422485 | 9 | 46.802 | KV452945.1 | 2650851 | 8-scf00200 | 8 |
| AX-158070827 | 9 | 46.802 | KV452945.1 | 2654084 | 8-scf00200 | 8 |
| AX-158070833 | 9 | 46.802 | KV452945.1 | 2666584 | 8-scf00200 | 8 |
| AX-157824184 | 9 | 46.802 | KV452945.1 | 2666987 | 8-scf00200 | 8 |
| AX-158070836 | 9 | 46.802 | KV452945.1 | 2668474 | 8-scf00200 | 8 |
| AX-158070837 | 9 | 46.802 | KV452945.1 | 2668855 | 8-scf00200 | 8 |
| AX-158070842 | 9 | 46.802 | KV452945.1 | 2676006 | 8-scf00200 | 8 |
| AX-158070845 | 9 | 46.802 | KV452945.1 | 2678480 | 8-scf00200 | 8 |
| AX-158070847 | 9 | 46.802 | KV452945.1 | 2682148 | 8-scf00200 | 8 |

|              |   |        |            |         |            |   |
|--------------|---|--------|------------|---------|------------|---|
| AX-158070851 | 9 | 46.802 | KV452945.1 | 2694310 | 8-scf00200 | 8 |
| AX-158070852 | 9 | 46.802 | KV452945.1 | 2698364 | 8-scf00200 | 8 |
| AX-158070855 | 9 | 46.802 | KV452945.1 | 2706305 | 8-scf00200 | 8 |
| AX-158070856 | 9 | 46.802 | KV452945.1 | 2713216 | 8-scf00200 | 8 |
| AX-158070858 | 9 | 46.802 | KV452945.1 | 2715195 | 8-scf00200 | 8 |
| AX-158070859 | 9 | 46.802 | KV452945.1 | 2717245 | 8-scf00200 | 8 |
| AX-158070861 | 9 | 46.802 | KV452945.1 | 2719512 | 8-scf00200 | 8 |
| AX-158070866 | 9 | 46.802 | KV452945.1 | 2723618 | 8-scf00200 | 8 |
| AX-158070867 | 9 | 46.802 | KV452945.1 | 2724622 | 8-scf00200 | 8 |
| AX-158070869 | 9 | 46.802 | KV452945.1 | 2727799 | 8-scf00200 | 8 |
| AX-158070873 | 9 | 46.802 | KV452945.1 | 2733946 | 8-scf00200 | 8 |
| AX-157724959 | 9 | 46.802 | KV452945.1 | 2734557 | 8-scf00200 | 8 |
| AX-158070874 | 9 | 46.802 | KV452945.1 | 2735251 | 8-scf00200 | 8 |
| AX-158070882 | 9 | 46.802 | KV452945.1 | 2745210 | 8-scf00200 | 8 |
| AX-158070896 | 9 | 46.802 | KV452945.1 | 2767821 | 8-scf00200 | 8 |
| AX-157774615 | 9 | 46.802 | KV452945.1 | 2768059 | 8-scf00200 | 8 |
| AX-158070899 | 9 | 46.802 | KV452945.1 | 2768144 | 8-scf00200 | 8 |
| AX-158070900 | 9 | 46.802 | KV452945.1 | 2768559 | 8-scf00200 | 8 |
| AX-158070901 | 9 | 46.802 | KV452945.1 | 2770212 | 8-scf00200 | 8 |
| AX-158070910 | 9 | 46.802 | KV452945.1 | 2778916 | 8-scf00200 | 8 |
| AX-158070911 | 9 | 46.802 | KV452945.1 | 2779162 | 8-scf00200 | 8 |
| AX-158070916 | 9 | 46.802 | KV452945.1 | 2782921 | 8-scf00200 | 8 |
| AX-158070918 | 9 | 46.802 | KV452945.1 | 2783170 | 8-scf00200 | 8 |
| AX-158070930 | 9 | 46.802 | KV452945.1 | 2801349 | 8-scf00200 | 8 |
| AX-158070934 | 9 | 46.802 | KV452945.1 | 2804674 | 8-scf00200 | 8 |
| AX-158070978 | 9 | 46.802 | KV452945.1 | 2857709 | 8-scf00200 | 8 |
| AX-158070997 | 9 | 46.802 | KV452945.1 | 2884978 | 8-scf00200 | 8 |
| AX-158070999 | 9 | 46.802 | KV452945.1 | 2887297 | 8-scf00200 | 8 |
| AX-158071001 | 9 | 46.802 | KV452945.1 | 2889278 | 8-scf00200 | 8 |
| AX-158071005 | 9 | 46.802 | KV452945.1 | 2894889 | 8-scf00200 | 8 |
| AX-158071006 | 9 | 46.802 | KV452945.1 | 2897682 | 8-scf00200 | 8 |
| AX-158071011 | 9 | 46.802 | KV452945.1 | 2908713 | 8-scf00200 | 8 |
| AX-158071013 | 9 | 46.802 | KV452945.1 | 2910169 | 8-scf00200 | 8 |
| AX-158071014 | 9 | 46.802 | KV452945.1 | 2912572 | 8-scf00200 | 8 |
| AX-158071016 | 9 | 46.802 | KV452945.1 | 2916939 | 8-scf00200 | 8 |
| AX-158071020 | 9 | 46.802 | KV452945.1 | 2919168 | 8-scf00200 | 8 |
| AX-158071023 | 9 | 46.802 | KV452945.1 | 2920401 | 8-scf00200 | 8 |
| AX-158071024 | 9 | 46.802 | KV452945.1 | 2920680 | 8-scf00200 | 8 |
| AX-158071029 | 9 | 46.802 | KV452945.1 | 2933331 | 8-scf00200 | 8 |
| AX-158071033 | 9 | 46.802 | KV452945.1 | 2935396 | 8-scf00200 | 8 |
| AX-158071040 | 9 | 46.802 | KV452945.1 | 2955146 | 8-scf00200 | 8 |
| AX-158071045 | 9 | 46.802 | KV452945.1 | 2962711 | 8-scf00200 | 8 |
| AX-158071048 | 9 | 46.802 | KV452945.1 | 2967337 | 8-scf00200 | 8 |
| AX-158071065 | 9 | 46.802 | KV452945.1 | 2998425 | 8-scf00200 | 8 |
| AX-158071068 | 9 | 46.802 | KV452945.1 | 3010479 | 8-scf00200 | 8 |
| AX-158071069 | 9 | 46.802 | KV452945.1 | 3017148 | 8-scf00200 | 8 |
| AX-158071070 | 9 | 46.802 | KV452945.1 | 3018067 | 8-scf00200 | 8 |
| AX-158071072 | 9 | 46.802 | KV452945.1 | 3018462 | 8-scf00200 | 8 |
| AX-158071074 | 9 | 46.802 | KV452945.1 | 3021425 | 8-scf00200 | 8 |
| AX-158071079 | 9 | 46.802 | KV452945.1 | 3040381 | 8-scf00200 | 8 |
| AX-158071081 | 9 | 46.802 | KV452945.1 | 3043310 | 8-scf00200 | 8 |



|              |   |        |            |         |            |   |
|--------------|---|--------|------------|---------|------------|---|
| AX-158071082 | 9 | 46.802 | KV452945.1 | 3046600 | 8-scf00200 | 8 |
| AX-158071087 | 9 | 46.802 | KV452945.1 | 3059684 | 8-scf00200 | 8 |
| AX-158071090 | 9 | 46.802 | KV452945.1 | 3062239 | 8-scf00200 | 8 |
| AX-158071112 | 9 | 46.802 | KV452945.1 | 3100542 | 8-scf00200 | 8 |
| AX-158071114 | 9 | 46.802 | KV452945.1 | 3105573 | 8-scf00200 | 8 |
| AX-158071117 | 9 | 46.802 | KV452945.1 | 3108643 | 8-scf00200 | 8 |
| AX-158071119 | 9 | 46.802 | KV452945.1 | 3110294 | 8-scf00200 | 8 |
| AX-158071121 | 9 | 46.802 | KV452945.1 | 3110898 | 8-scf00200 | 8 |
| AX-158071122 | 9 | 46.802 | KV452945.1 | 3111600 | 8-scf00200 | 8 |
| AX-158071123 | 9 | 46.802 | KV452945.1 | 3112919 | 8-scf00200 | 8 |
| AX-158071124 | 9 | 46.802 | KV452945.1 | 3113391 | 8-scf00200 | 8 |
| AX-158071126 | 9 | 46.802 | KV452945.1 | 3121177 | 8-scf00200 | 8 |
| AX-158071130 | 9 | 46.802 | KV452945.1 | 3131597 | 8-scf00200 | 8 |
| AX-158071161 | 9 | 46.802 | KV452945.1 | 3182261 | 8-scf00200 | 8 |
| AX-157773709 | 9 | 46.802 | KV452945.1 | 3197764 | 8-scf00200 | 8 |
| AX-158071172 | 9 | 46.802 | KV452945.1 | 3200476 | 8-scf00200 | 8 |
| AX-158071210 | 9 | 46.802 | KV452945.1 | 3256836 | 8-scf00200 | 8 |
| AX-158071211 | 9 | 46.802 | KV452945.1 | 3259084 | 8-scf00200 | 8 |
| AX-158071218 | 9 | 46.802 | KV452945.1 | 3277411 | 8-scf00200 | 8 |
| AX-158071219 | 9 | 46.802 | KV452945.1 | 3277846 | 8-scf00200 | 8 |
| AX-158071227 | 9 | 46.802 | KV452945.1 | 3290503 | 8-scf00200 | 8 |
| AX-158071233 | 9 | 46.802 | KV452945.1 | 3310117 | 8-scf00200 | 8 |
| AX-158071253 | 9 | 46.802 | KV452945.1 | 3337465 | 8-scf00200 | 8 |
| AX-158071260 | 9 | 46.802 | KV452945.1 | 3340125 | 8-scf00200 | 8 |
| AX-158071262 | 9 | 46.802 | KV452945.1 | 3346148 | 8-scf00200 | 8 |
| AX-158071269 | 9 | 46.802 | KV452945.1 | 3352103 | 8-scf00200 | 8 |
| AX-158071272 | 9 | 46.802 | KV452945.1 | 3353134 | 8-scf00200 | 8 |
| AX-158071273 | 9 | 46.802 | KV452945.1 | 3354628 | 8-scf00200 | 8 |
| AX-158071278 | 9 | 46.802 | KV452945.1 | 3365470 | 8-scf00200 | 8 |
| AX-158071279 | 9 | 46.802 | KV452945.1 | 3366802 | 8-scf00200 | 8 |
| AX-158071282 | 9 | 46.802 | KV452945.1 | 3385204 | 8-scf00200 | 8 |
| AX-158071283 | 9 | 46.802 | KV452945.1 | 3388189 | 8-scf00200 | 8 |
| AX-158071284 | 9 | 46.802 | KV452945.1 | 3389617 | 8-scf00200 | 8 |
| AX-157824190 | 9 | 46.802 | KV452945.1 | 3391145 | 8-scf00200 | 8 |
| AX-158071289 | 9 | 46.802 | KV452945.1 | 3404866 | 8-scf00200 | 8 |
| AX-158071290 | 9 | 46.802 | KV452945.1 | 3406316 | 8-scf00200 | 8 |
| AX-158071295 | 9 | 46.802 | KV452945.1 | 3417927 | 8-scf00200 | 8 |
| AX-158071299 | 9 | 46.802 | KV452945.1 | 3419956 | 8-scf00200 | 8 |
| AX-158071302 | 9 | 46.802 | KV452945.1 | 3422297 | 8-scf00200 | 8 |
| AX-157754470 | 9 | 46.802 | KV452945.1 | 3433265 | 8-scf00200 | 8 |
| AX-158071311 | 9 | 46.802 | KV452945.1 | 3437057 | 8-scf00200 | 8 |
| AX-158071318 | 9 | 46.802 | KV452945.1 | 3462698 | 8-scf00200 | 8 |
| AX-158071319 | 9 | 46.802 | KV452945.1 | 3467397 | 8-scf00200 | 8 |
| AX-158071327 | 9 | 46.802 | KV452945.1 | 3489937 | 8-scf00200 | 8 |
| AX-158071336 | 9 | 46.802 | KV452945.1 | 3517298 | 8-scf00200 | 8 |
| AX-158071355 | 9 | 46.802 | KV452945.1 | 3550121 | 8-scf00200 | 8 |
| AX-158071364 | 9 | 46.802 | KV452945.1 | 3572532 | 8-scf00200 | 8 |
| AX-158071366 | 9 | 46.802 | KV452945.1 | 3573911 | 8-scf00200 | 8 |
| AX-158071453 | 9 | 46.802 | KV452945.1 | 3747278 | 8-scf00200 | 8 |
| AX-158071462 | 9 | 46.802 | KV452945.1 | 3753248 | 8-scf00200 | 8 |
| AX-157754474 | 9 | 46.802 | KV452945.1 | 3763151 | 8-scf00200 | 8 |

|              |   |        |            |         |            |   |
|--------------|---|--------|------------|---------|------------|---|
| AX-158071471 | 9 | 46.802 | KV452945.1 | 3764144 | 8-scf00200 | 8 |
| AX-158071492 | 9 | 46.802 | KV452945.1 | 3804016 | 8-scf00200 | 8 |
| AX-158071496 | 9 | 46.802 | KV452945.1 | 3805000 | 8-scf00200 | 8 |
| AX-158071498 | 9 | 46.802 | KV452945.1 | 3810063 | 8-scf00200 | 8 |
| AX-158071499 | 9 | 46.802 | KV452945.1 | 3810789 | 8-scf00200 | 8 |
| AX-157877074 | 9 | 46.802 | KV452945.1 | 3877215 | 8-scf00200 | 8 |
| AX-157885493 | 9 | 46.802 | KV452945.1 | 3898431 | 8-scf00200 | 8 |
| AX-158071595 | 9 | 46.802 | KV452945.1 | 4008689 | 8-scf00200 | 8 |
| AX-158071597 | 9 | 46.802 | KV452945.1 | 4009149 | 8-scf00200 | 8 |
| AX-158071598 | 9 | 46.802 | KV452945.1 | 4011699 | 8-scf00200 | 8 |
| AX-158071613 | 9 | 46.802 | KV452945.1 | 4025392 | 8-scf00200 | 8 |
| AX-158071625 | 9 | 46.802 | KV452945.1 | 4032178 | 8-scf00200 | 8 |
| AX-158071631 | 9 | 46.802 | KV452945.1 | 4038231 | 8-scf00200 | 8 |
| AX-158384296 | 9 | 46.802 | KV452945.1 | 4050140 | 8-scf00200 | 8 |
| AX-158071637 | 9 | 46.802 | KV452945.1 | 4050248 | 8-scf00200 | 8 |
| AX-158071648 | 9 | 46.802 | KV452945.1 | 4057422 | 8-scf00200 | 8 |
| AX-158071681 | 9 | 46.802 | KV452945.1 | 4090831 | 8-scf00200 | 8 |
| AX-158071682 | 9 | 46.802 | KV452945.1 | 4092490 | 8-scf00200 | 8 |
| AX-158071683 | 9 | 46.802 | KV452945.1 | 4093391 | 8-scf00200 | 8 |
| AX-158071685 | 9 | 46.802 | KV452945.1 | 4094062 | 8-scf00200 | 8 |
| AX-158071687 | 9 | 46.802 | KV452945.1 | 4095082 | 8-scf00200 | 8 |
| AX-158071703 | 9 | 46.802 | KV452945.1 | 4111438 | 8-scf00200 | 8 |
| AX-158071706 | 9 | 46.802 | KV452945.1 | 4113809 | 8-scf00200 | 8 |
| AX-158071708 | 9 | 46.802 | KV452945.1 | 4114177 | 8-scf00200 | 8 |
| AX-158071735 | 9 | 46.802 | KV452945.1 | 4138120 | 8-scf00200 | 8 |
| AX-158071737 | 9 | 46.802 | KV452945.1 | 4138339 | 8-scf00200 | 8 |
| AX-158409503 | 9 | 46.802 | KV452945.1 | 4145765 | 8-scf00200 | 8 |
| AX-157824219 | 9 | 46.802 | KV452945.1 | 4147309 | 8-scf00200 | 8 |
| AX-158071745 | 9 | 46.802 | KV452945.1 | 4152459 | 8-scf00200 | 8 |
| AX-157750530 | 9 | 46.802 | KV452945.1 | 4158742 | 8-scf00200 | 8 |
| AX-158071753 | 9 | 46.802 | KV452945.1 | 4159526 | 8-scf00200 | 8 |
| AX-158071771 | 9 | 46.802 | KV452945.1 | 4198388 | 8-scf00200 | 8 |
| AX-158384298 | 9 | 46.802 | KV452945.1 | 4213478 | 8-scf00200 | 8 |
| AX-158071787 | 9 | 46.802 | KV452945.1 | 4216948 | 8-scf00200 | 8 |
| AX-157824229 | 9 | 46.802 | KV452945.1 | 4242290 | 8-scf00200 | 8 |
| AX-158071810 | 9 | 46.802 | KV452945.1 | 4250959 | 8-scf00200 | 8 |
| AX-158071811 | 9 | 46.802 | KV452945.1 | 4251974 | 8-scf00200 | 8 |
| AX-158071814 | 9 | 46.802 | KV452945.1 | 4256636 | 8-scf00200 | 8 |
| AX-158071817 | 9 | 46.802 | KV452945.1 | 4260957 | 8-scf00200 | 8 |
| AX-158071823 | 9 | 46.802 | KV452945.1 | 4269872 | 8-scf00200 | 8 |
| AX-158071834 | 9 | 46.802 | KV452945.1 | 4301422 | 8-scf00200 | 8 |
| AX-158071871 | 9 | 46.802 | KV452945.1 | 4343225 | 8-scf00200 | 8 |
| AX-158071945 | 9 | 46.802 | KV452945.1 | 4442384 | 8-scf00200 | 8 |
| AX-158071952 | 9 | 46.802 | KV452945.1 | 4451558 | 8-scf00200 | 8 |
| AX-158071980 | 9 | 46.802 | KV452945.1 | 4470418 | 8-scf00200 | 8 |
| AX-158072002 | 9 | 46.802 | KV452945.1 | 4488187 | 8-scf00200 | 8 |
| AX-158072042 | 9 | 46.802 | KV452945.1 | 4523859 | 8-scf00200 | 8 |
| AX-158072071 | 9 | 46.802 | KV452945.1 | 4550518 | 8-scf00200 | 8 |
| AX-158072105 | 9 | 46.802 | KV452945.1 | 4577746 | 8-scf00200 | 8 |
| AX-158072195 | 9 | 46.802 | KV452945.1 | 4681560 | 8-scf00200 | 8 |
| AX-157735630 | 9 | 46.802 | KV452945.1 | 4818580 | 8-scf00200 | 8 |

|              |   |        |             |          |                 |    |
|--------------|---|--------|-------------|----------|-----------------|----|
| AX-158072326 | 9 | 46.802 | KV452945.1  | 4830061  | 8-scf00200      | 8  |
| AX-157824301 | 9 | 46.802 | KV452945.1  | 4943304  | 8-scf00200      | 8  |
| AX-157824305 | 9 | 46.802 | KV452945.1  | 5011234  | 8-scf00200      | 8  |
| AX-157742585 | 9 | 46.802 | KV452945.1  | 5352095  | 8-scf00200      | 8  |
| AX-158072789 | 9 | 46.802 | KV452945.1  | 5465105  | 8-scf00200      | 8  |
| AX-157754830 | 9 | 46.802 | KV452945.1  | 5499960  | 8-scf00200      | 8  |
| AX-158072920 | 9 | 46.802 | KV452945.1  | 5640499  | 8-scf00200      | 8  |
| AX-158073212 | 9 | 46.802 | KV452945.1  | 6015066  | 8-scf00200      | 8  |
| AX-157716436 | 9 | 46.802 | KV452945.1  | 6064596  | 8-scf00200      | 8  |
| AX-158073285 | 9 | 46.802 | KV452945.1  | 6092044  | 8-scf00200      | 8  |
| AX-158073289 | 9 | 46.802 | KV452945.1  | 6096091  | 8-scf00200      | 8  |
| AX-158073673 | 9 | 46.802 | KV452945.1  | 6546952  | 8-scf00200      | 8  |
| AX-158409553 | 9 | 46.802 | KV452945.1  | 7054124  | 8-scf00200      | 8  |
| AX-158074018 | 9 | 46.802 | KV452945.1  | 7446209  | 8-scf00200      | 8  |
| AX-158074177 | 9 | 46.802 | KV452945.1  | 7918887  | 8-scf00200      | 8  |
| AX-157714714 | 9 | 46.802 | KV452945.1  | 8158501  | 8-scf00200      | 8  |
| AX-158074531 | 9 | 46.802 | KV452945.1  | 8250593  | 8-scf00200      | 8  |
| AX-158074592 | 9 | 46.802 | KV452945.1  | 8302443  | 8-scf00200      | 8  |
| AX-157756122 | 9 | 46.802 | KV452945.1  | 8467972  | 8-scf00200      | 8  |
| AX-158074867 | 9 | 46.802 | KV452945.1  | 8576803  | 8-scf00200      | 8  |
| AX-157702105 | 9 | 46.802 | KV452945.1  | 8593870  | 8-scf00200      | 8  |
| AX-158075129 | 9 | 46.802 | KV452945.1  | 8902812  | 8-scf00200      | 8  |
| AX-158075143 | 9 | 46.802 | KV452945.1  | 8926419  | 8-scf00200      | 8  |
| AX-157824511 | 9 | 46.802 | KV452945.1  | 8984828  | 8-scf00200      | 8  |
| AX-158075277 | 9 | 46.802 | KV452945.1  | 9082909  | 8-scf00200      | 8  |
| AX-157863179 | 9 | 46.802 | KV452945.1  | 9090685  | 8-scf00200      | 8  |
| AX-158075551 | 9 | 46.802 | KV452945.1  | 9364994  | 8-scf00200      | 8  |
| AX-158076061 | 9 | 46.802 | KV452945.1  | 9941134  | 8-scf00200      | 8  |
| AX-158076139 | 9 | 46.802 | KV452945.1  | 10014250 | 8-scf00200      | 8  |
| AX-158076218 | 9 | 46.802 | KV452945.1  | 10105827 | 8-scf00200      | 8  |
| AX-158076523 | 9 | 46.802 | KV452945.1  | 10440543 | 8-scf00200      | 8  |
| AX-158077304 | 9 | 46.802 | KV452945.1  | 11257480 | 8-scf00200      | 8  |
| AX-158077805 | 9 | 46.802 | KV452945.1  | 11697809 | 8-scf00200      | 8  |
| AX-158077840 | 9 | 46.802 | KV452945.1  | 11728292 | 8-scf00200      | 8  |
| AX-158077860 | 9 | 46.802 | KV452945.1  | 11749815 | 8-scf00200      | 8  |
| AX-157685321 | 9 | 46.802 | KV452944.1  | 31774    | 8-scf00609      | 8  |
| AX-157701986 | 9 | 46.802 | DX089063.1  | 154      | -IORI212 lctalt | UN |
| AX-157704927 | 9 | 46.802 | 3ML01028397 | 779      | scf04004_1      | UN |
| AX-157705773 | 9 | 46.802 | 3ML01030838 | 416      | scf06442_1      | UN |
| AX-158070320 | 9 | 46.824 | KV452945.1  | 1483079  | 8-scf00200      | 8  |
| AX-158069253 | 9 | 46.955 | KV452943.1  | 3566772  | 8-scf00198      | 8  |
| AX-158416554 | 9 | 46.955 | KV452945.1  | 2841723  | 8-scf00200      | 8  |
| AX-158071523 | 9 | 46.955 | KV452945.1  | 3860302  | 8-scf00200      | 8  |
| AX-158071526 | 9 | 46.955 | KV452945.1  | 3862823  | 8-scf00200      | 8  |
| AX-158071527 | 9 | 46.955 | KV452945.1  | 3864764  | 8-scf00200      | 8  |
| AX-158071530 | 9 | 46.955 | KV452945.1  | 3866673  | 8-scf00200      | 8  |
| AX-157824202 | 9 | 46.955 | KV452945.1  | 3896231  | 8-scf00200      | 8  |
| AX-158071574 | 9 | 46.955 | KV452945.1  | 3978762  | 8-scf00200      | 8  |
| AX-158071614 | 9 | 46.955 | KV452945.1  | 4026433  | 8-scf00200      | 8  |
| AX-158071616 | 9 | 46.955 | KV452945.1  | 4026617  | 8-scf00200      | 8  |
| AX-158071619 | 9 | 46.955 | KV452945.1  | 4027468  | 8-scf00200      | 8  |

|              |   |        |            |         |            |   |
|--------------|---|--------|------------|---------|------------|---|
| AX-158409498 | 9 | 46.955 | KV452945.1 | 4029812 | 8-scf00200 | 8 |
| AX-158409499 | 9 | 46.955 | KV452945.1 | 4029863 | 8-scf00200 | 8 |
| AX-158071623 | 9 | 46.955 | KV452945.1 | 4030145 | 8-scf00200 | 8 |
| AX-158071630 | 9 | 46.955 | KV452945.1 | 4035596 | 8-scf00200 | 8 |
| AX-158071636 | 9 | 46.955 | KV452945.1 | 4048963 | 8-scf00200 | 8 |
| AX-158071649 | 9 | 46.955 | KV452945.1 | 4058086 | 8-scf00200 | 8 |
| AX-158071667 | 9 | 46.955 | KV452945.1 | 4070455 | 8-scf00200 | 8 |
| AX-157824214 | 9 | 46.955 | KV452945.1 | 4072284 | 8-scf00200 | 8 |
| AX-158071690 | 9 | 46.955 | KV452945.1 | 4095767 | 8-scf00200 | 8 |
| AX-158071691 | 9 | 46.955 | KV452945.1 | 4096513 | 8-scf00200 | 8 |
| AX-158071702 | 9 | 46.955 | KV452945.1 | 4110713 | 8-scf00200 | 8 |
| AX-158071714 | 9 | 46.978 | KV452945.1 | 4116276 | 8-scf00200 | 8 |
| AX-157712307 | 9 | 46.978 | KV452945.1 | 7638974 | 8-scf00200 | 8 |
| AX-158070128 | 9 | 47.109 | KV452945.1 | 1189958 | 8-scf00200 | 8 |
| AX-157824173 | 9 | 47.109 | KV452945.1 | 2292851 | 8-scf00200 | 8 |
| AX-158071693 | 9 | 47.109 | KV452945.1 | 4099140 | 8-scf00200 | 8 |
| AX-158071716 | 9 | 47.109 | KV452945.1 | 4119832 | 8-scf00200 | 8 |
| AX-158071720 | 9 | 47.109 | KV452945.1 | 4123792 | 8-scf00200 | 8 |
| AX-158071726 | 9 | 47.109 | KV452945.1 | 4126389 | 8-scf00200 | 8 |
| AX-157824216 | 9 | 47.109 | KV452945.1 | 4126699 | 8-scf00200 | 8 |
| AX-158071729 | 9 | 47.109 | KV452945.1 | 4127437 | 8-scf00200 | 8 |
| AX-158071731 | 9 | 47.109 | KV452945.1 | 4127791 | 8-scf00200 | 8 |
| AX-158071734 | 9 | 47.109 | KV452945.1 | 4129113 | 8-scf00200 | 8 |
| AX-157824218 | 9 | 47.109 | KV452945.1 | 4133130 | 8-scf00200 | 8 |
| AX-158071743 | 9 | 47.109 | KV452945.1 | 4147268 | 8-scf00200 | 8 |
| AX-157857042 | 9 | 47.109 | KV452945.1 | 4149011 | 8-scf00200 | 8 |
| AX-158071746 | 9 | 47.109 | KV452945.1 | 4154714 | 8-scf00200 | 8 |
| AX-158071754 | 9 | 47.109 | KV452945.1 | 4159796 | 8-scf00200 | 8 |
| AX-157824221 | 9 | 47.109 | KV452945.1 | 4169679 | 8-scf00200 | 8 |
| AX-158071781 | 9 | 47.109 | KV452945.1 | 4213629 | 8-scf00200 | 8 |
| AX-158071791 | 9 | 47.109 | KV452945.1 | 4220342 | 8-scf00200 | 8 |
| AX-158071793 | 9 | 47.109 | KV452945.1 | 4222267 | 8-scf00200 | 8 |
| AX-158071794 | 9 | 47.109 | KV452945.1 | 4224550 | 8-scf00200 | 8 |
| AX-158071796 | 9 | 47.109 | KV452945.1 | 4225869 | 8-scf00200 | 8 |
| AX-157754729 | 9 | 47.109 | KV452945.1 | 4227229 | 8-scf00200 | 8 |
| AX-157715205 | 9 | 47.109 | KV452945.1 | 4232388 | 8-scf00200 | 8 |
| AX-158071801 | 9 | 47.109 | KV452945.1 | 4235476 | 8-scf00200 | 8 |
| AX-158071804 | 9 | 47.109 | KV452945.1 | 4240162 | 8-scf00200 | 8 |
| AX-157824228 | 9 | 47.109 | KV452945.1 | 4240329 | 8-scf00200 | 8 |
| AX-158071805 | 9 | 47.109 | KV452945.1 | 4243177 | 8-scf00200 | 8 |
| AX-158071807 | 9 | 47.109 | KV452945.1 | 4243424 | 8-scf00200 | 8 |
| AX-157824230 | 9 | 47.109 | KV452945.1 | 4247207 | 8-scf00200 | 8 |
| AX-158071808 | 9 | 47.109 | KV452945.1 | 4249811 | 8-scf00200 | 8 |
| AX-158071822 | 9 | 47.109 | KV452945.1 | 4267729 | 8-scf00200 | 8 |
| AX-158409506 | 9 | 47.109 | KV452945.1 | 4358285 | 8-scf00200 | 8 |
| AX-158071892 | 9 | 47.109 | KV452945.1 | 4390822 | 8-scf00200 | 8 |
| AX-158071898 | 9 | 47.109 | KV452945.1 | 4399333 | 8-scf00200 | 8 |
| AX-158071937 | 9 | 47.109 | KV452945.1 | 4436496 | 8-scf00200 | 8 |
| AX-158071960 | 9 | 47.109 | KV452945.1 | 4457907 | 8-scf00200 | 8 |
| AX-158072050 | 9 | 47.109 | KV452945.1 | 4534379 | 8-scf00200 | 8 |
| AX-158072094 | 9 | 47.109 | KV452945.1 | 4570096 | 8-scf00200 | 8 |

|              |   |        |            |         |            |   |
|--------------|---|--------|------------|---------|------------|---|
| AX-158072095 | 9 | 47.109 | KV452945.1 | 4570891 | 8-scf00200 | 8 |
| AX-158070391 | 9 | 47.263 | KV452945.1 | 1644066 | 8-scf00200 | 8 |
| AX-158070512 | 9 | 47.263 | KV452945.1 | 1937230 | 8-scf00200 | 8 |
| AX-157857019 | 9 | 47.263 | KV452945.1 | 1950835 | 8-scf00200 | 8 |
| AX-158070517 | 9 | 47.263 | KV452945.1 | 1957421 | 8-scf00200 | 8 |
| AX-158070521 | 9 | 47.263 | KV452945.1 | 1964991 | 8-scf00200 | 8 |
| AX-158070528 | 9 | 47.263 | KV452945.1 | 1981328 | 8-scf00200 | 8 |
| AX-157824166 | 9 | 47.263 | KV452945.1 | 2023692 | 8-scf00200 | 8 |
| AX-158070844 | 9 | 47.263 | KV452945.1 | 2676714 | 8-scf00200 | 8 |
| AX-158071092 | 9 | 47.263 | KV452945.1 | 3070940 | 8-scf00200 | 8 |
| AX-158071450 | 9 | 47.263 | KV452945.1 | 3746332 | 8-scf00200 | 8 |
| AX-158071457 | 9 | 47.263 | KV452945.1 | 3749626 | 8-scf00200 | 8 |
| AX-158071529 | 9 | 47.263 | KV452945.1 | 3865206 | 8-scf00200 | 8 |
| AX-158071534 | 9 | 47.263 | KV452945.1 | 3872221 | 8-scf00200 | 8 |
| AX-157755967 | 9 | 47.263 | KV452945.1 | 4040139 | 8-scf00200 | 8 |
| AX-158071675 | 9 | 47.263 | KV452945.1 | 4073709 | 8-scf00200 | 8 |
| AX-157824217 | 9 | 47.263 | KV452945.1 | 4132638 | 8-scf00200 | 8 |
| AX-157824222 | 9 | 47.263 | KV452945.1 | 4172160 | 8-scf00200 | 8 |
| AX-157824223 | 9 | 47.263 | KV452945.1 | 4185547 | 8-scf00200 | 8 |
| AX-157775842 | 9 | 47.263 | KV452945.1 | 4189886 | 8-scf00200 | 8 |
| AX-158071769 | 9 | 47.263 | KV452945.1 | 4196420 | 8-scf00200 | 8 |
| AX-157824227 | 9 | 47.263 | KV452945.1 | 4237691 | 8-scf00200 | 8 |
| AX-158071824 | 9 | 47.263 | KV452945.1 | 4270805 | 8-scf00200 | 8 |
| AX-158071845 | 9 | 47.263 | KV452945.1 | 4323635 | 8-scf00200 | 8 |
| AX-158071852 | 9 | 47.263 | KV452945.1 | 4329535 | 8-scf00200 | 8 |
| AX-158071853 | 9 | 47.263 | KV452945.1 | 4330452 | 8-scf00200 | 8 |
| AX-158071865 | 9 | 47.263 | KV452945.1 | 4337510 | 8-scf00200 | 8 |
| AX-158071868 | 9 | 47.263 | KV452945.1 | 4342170 | 8-scf00200 | 8 |
| AX-157824238 | 9 | 47.263 | KV452945.1 | 4356559 | 8-scf00200 | 8 |
| AX-158071878 | 9 | 47.263 | KV452945.1 | 4357908 | 8-scf00200 | 8 |
| AX-157713188 | 9 | 47.263 | KV452945.1 | 4368585 | 8-scf00200 | 8 |
| AX-158384303 | 9 | 47.263 | KV452945.1 | 4488748 | 8-scf00200 | 8 |
| AX-158072087 | 9 | 47.263 | KV452945.1 | 4561008 | 8-scf00200 | 8 |
| AX-158072116 | 9 | 47.263 | KV452945.1 | 4596759 | 8-scf00200 | 8 |
| AX-158072122 | 9 | 47.263 | KV452945.1 | 4600164 | 8-scf00200 | 8 |
| AX-157824266 | 9 | 47.263 | KV452945.1 | 4638798 | 8-scf00200 | 8 |
| AX-158072160 | 9 | 47.263 | KV452945.1 | 4639043 | 8-scf00200 | 8 |
| AX-157824273 | 9 | 47.263 | KV452945.1 | 4685464 | 8-scf00200 | 8 |
| AX-158072205 | 9 | 47.263 | KV452945.1 | 4686893 | 8-scf00200 | 8 |
| AX-158072266 | 9 | 47.263 | KV452945.1 | 4756995 | 8-scf00200 | 8 |
| AX-158072280 | 9 | 47.263 | KV452945.1 | 4767572 | 8-scf00200 | 8 |
| AX-158072285 | 9 | 47.263 | KV452945.1 | 4770242 | 8-scf00200 | 8 |
| AX-158072321 | 9 | 47.263 | KV452945.1 | 4827871 | 8-scf00200 | 8 |
| AX-158072354 | 9 | 47.263 | KV452945.1 | 4855459 | 8-scf00200 | 8 |
| AX-158072391 | 9 | 47.263 | KV452945.1 | 4888577 | 8-scf00200 | 8 |
| AX-158072424 | 9 | 47.263 | KV452945.1 | 4942082 | 8-scf00200 | 8 |
| AX-158072482 | 9 | 47.263 | KV452945.1 | 4993270 | 8-scf00200 | 8 |
| AX-158391972 | 9 | 47.263 | KV452945.1 | 5121492 | 8-scf00200 | 8 |
| AX-158391973 | 9 | 47.263 | KV452945.1 | 5136223 | 8-scf00200 | 8 |
| AX-158072686 | 9 | 47.263 | KV452945.1 | 5344326 | 8-scf00200 | 8 |
| AX-157870744 | 9 | 47.263 | KV452945.1 | 5361462 | 8-scf00200 | 8 |

|              |   |        |            |          |            |   |
|--------------|---|--------|------------|----------|------------|---|
| AX-158072953 | 9 | 47.263 | KV452945.1 | 5691953  | 8-scf00200 | 8 |
| AX-158072954 | 9 | 47.263 | KV452945.1 | 5692161  | 8-scf00200 | 8 |
| AX-158073088 | 9 | 47.263 | KV452945.1 | 5854066  | 8-scf00200 | 8 |
| AX-158073135 | 9 | 47.263 | KV452945.1 | 5932589  | 8-scf00200 | 8 |
| AX-158073202 | 9 | 47.263 | KV452945.1 | 6006077  | 8-scf00200 | 8 |
| AX-157771653 | 9 | 47.263 | KV452945.1 | 6011594  | 8-scf00200 | 8 |
| AX-158073211 | 9 | 47.263 | KV452945.1 | 6013857  | 8-scf00200 | 8 |
| AX-158073234 | 9 | 47.263 | KV452945.1 | 6035499  | 8-scf00200 | 8 |
| AX-158073478 | 9 | 47.263 | KV452945.1 | 6258219  | 8-scf00200 | 8 |
| AX-158073486 | 9 | 47.263 | KV452945.1 | 6268003  | 8-scf00200 | 8 |
| AX-158073765 | 9 | 47.263 | KV452945.1 | 6811676  | 8-scf00200 | 8 |
| AX-158073797 | 9 | 47.263 | KV452945.1 | 6899048  | 8-scf00200 | 8 |
| AX-158073800 | 9 | 47.263 | KV452945.1 | 6904966  | 8-scf00200 | 8 |
| AX-157877092 | 9 | 47.263 | KV452945.1 | 7592214  | 8-scf00200 | 8 |
| AX-158074090 | 9 | 47.263 | KV452945.1 | 7782328  | 8-scf00200 | 8 |
| AX-158074373 | 9 | 47.263 | KV452945.1 | 8092487  | 8-scf00200 | 8 |
| AX-157824447 | 9 | 47.263 | KV452945.1 | 8123535  | 8-scf00200 | 8 |
| AX-158074407 | 9 | 47.263 | KV452945.1 | 8137622  | 8-scf00200 | 8 |
| AX-158384331 | 9 | 47.263 | KV452945.1 | 8168000  | 8-scf00200 | 8 |
| AX-158074568 | 9 | 47.263 | KV452945.1 | 8279503  | 8-scf00200 | 8 |
| AX-158074637 | 9 | 47.263 | KV452945.1 | 8347761  | 8-scf00200 | 8 |
| AX-157885509 | 9 | 47.263 | KV452945.1 | 8347850  | 8-scf00200 | 8 |
| AX-157857066 | 9 | 47.263 | KV452945.1 | 8348857  | 8-scf00200 | 8 |
| AX-158074648 | 9 | 47.263 | KV452945.1 | 8363737  | 8-scf00200 | 8 |
| AX-158074653 | 9 | 47.263 | KV452945.1 | 8368763  | 8-scf00200 | 8 |
| AX-158074675 | 9 | 47.263 | KV452945.1 | 8385820  | 8-scf00200 | 8 |
| AX-157824490 | 9 | 47.263 | KV452945.1 | 8830167  | 8-scf00200 | 8 |
| AX-158075247 | 9 | 47.263 | KV452945.1 | 9047985  | 8-scf00200 | 8 |
| AX-157885517 | 9 | 47.263 | KV452945.1 | 9208578  | 8-scf00200 | 8 |
| AX-158075395 | 9 | 47.263 | KV452945.1 | 9211658  | 8-scf00200 | 8 |
| AX-158075683 | 9 | 47.263 | KV452945.1 | 9476048  | 8-scf00200 | 8 |
| AX-158075795 | 9 | 47.263 | KV452945.1 | 9627220  | 8-scf00200 | 8 |
| AX-157824592 | 9 | 47.263 | KV452945.1 | 9632510  | 8-scf00200 | 8 |
| AX-157824633 | 9 | 47.263 | KV452945.1 | 10159479 | 8-scf00200 | 8 |
| AX-158076343 | 9 | 47.263 | KV452945.1 | 10228549 | 8-scf00200 | 8 |
| AX-158076385 | 9 | 47.263 | KV452945.1 | 10274047 | 8-scf00200 | 8 |
| AX-158076444 | 9 | 47.263 | KV452945.1 | 10348527 | 8-scf00200 | 8 |
| AX-158076445 | 9 | 47.263 | KV452945.1 | 10349068 | 8-scf00200 | 8 |
| AX-158076461 | 9 | 47.263 | KV452945.1 | 10368514 | 8-scf00200 | 8 |
| AX-158076787 | 9 | 47.263 | KV452945.1 | 10663187 | 8-scf00200 | 8 |
| AX-157877101 | 9 | 47.263 | KV452945.1 | 11704316 | 8-scf00200 | 8 |
| AX-158077899 | 9 | 47.263 | KV452945.1 | 11773256 | 8-scf00200 | 8 |
| AX-158080234 | 9 | 47.345 | KV452943.1 | 4064754  | 8-scf00198 | 8 |
| AX-158080375 | 9 | 47.345 | KV452943.1 | 4300219  | 8-scf00198 | 8 |
| AX-158080498 | 9 | 47.345 | KV452943.1 | 4497628  | 8-scf00198 | 8 |
| AX-157885562 | 9 | 47.345 | KV452943.1 | 4504985  | 8-scf00198 | 8 |
| AX-158080511 | 9 | 47.345 | KV452943.1 | 4517243  | 8-scf00198 | 8 |
| AX-158080512 | 9 | 47.345 | KV452943.1 | 4520574  | 8-scf00198 | 8 |
| AX-158080522 | 9 | 47.345 | KV452943.1 | 4550513  | 8-scf00198 | 8 |
| AX-157824944 | 9 | 47.345 | KV452943.1 | 5586351  | 8-scf00198 | 8 |
| AX-158080860 | 9 | 47.345 | KV452943.1 | 5607929  | 8-scf00198 | 8 |

|              |   |        |            |         |            |   |
|--------------|---|--------|------------|---------|------------|---|
| AX-158080868 | 9 | 47.345 | KV452943.1 | 5631516 | 8-scf00198 | 8 |
| AX-158069781 | 9 | 47.345 | KV452945.1 | 67636   | 8-scf00200 | 8 |
| AX-158069942 | 9 | 47.345 | KV452945.1 | 695408  | 8-scf00200 | 8 |
| AX-158071748 | 9 | 47.345 | KV452945.1 | 4156483 | 8-scf00200 | 8 |
| AX-158071755 | 9 | 47.345 | KV452945.1 | 4163195 | 8-scf00200 | 8 |
| AX-158071788 | 9 | 47.345 | KV452945.1 | 4217743 | 8-scf00200 | 8 |
| AX-158071844 | 9 | 47.345 | KV452945.1 | 4322455 | 8-scf00200 | 8 |
| AX-158071872 | 9 | 47.345 | KV452945.1 | 4345303 | 8-scf00200 | 8 |
| AX-157708301 | 9 | 47.345 | KV452945.1 | 4370444 | 8-scf00200 | 8 |
| AX-158072062 | 9 | 47.345 | KV452945.1 | 4543406 | 8-scf00200 | 8 |
| AX-158070684 | 9 | 47.417 | KV452945.1 | 2381053 | 8-scf00200 | 8 |
| AX-158070984 | 9 | 47.417 | KV452945.1 | 2870287 | 8-scf00200 | 8 |
| AX-158071267 | 9 | 47.417 | KV452945.1 | 3349323 | 8-scf00200 | 8 |
| AX-157824244 | 9 | 47.417 | KV452945.1 | 4389903 | 8-scf00200 | 8 |
| AX-157824245 | 9 | 47.417 | KV452945.1 | 4390553 | 8-scf00200 | 8 |
| AX-158071893 | 9 | 47.417 | KV452945.1 | 4392045 | 8-scf00200 | 8 |
| AX-158071907 | 9 | 47.417 | KV452945.1 | 4407155 | 8-scf00200 | 8 |
| AX-158071908 | 9 | 47.49  | KV452945.1 | 4408993 | 8-scf00200 | 8 |
| AX-158080231 | 9 | 47.57  | KV452943.1 | 4061622 | 8-scf00198 | 8 |
| AX-158080852 | 9 | 47.57  | KV452943.1 | 5579507 | 8-scf00198 | 8 |
| AX-157788480 | 9 | 47.57  | KV452943.1 | 5684789 | 8-scf00198 | 8 |
| AX-158080915 | 9 | 47.57  | KV452943.1 | 5838126 | 8-scf00198 | 8 |
| AX-158080926 | 9 | 47.57  | KV452943.1 | 5865071 | 8-scf00198 | 8 |
| AX-157824950 | 9 | 47.57  | KV452943.1 | 5906008 | 8-scf00198 | 8 |
| AX-157824953 | 9 | 47.57  | KV452943.1 | 5941260 | 8-scf00198 | 8 |
| AX-157723368 | 9 | 47.57  | KV452943.1 | 5985631 | 8-scf00198 | 8 |
| AX-158080955 | 9 | 47.57  | KV452943.1 | 6020973 | 8-scf00198 | 8 |
| AX-158080957 | 9 | 47.57  | KV452943.1 | 6025796 | 8-scf00198 | 8 |
| AX-157824085 | 9 | 47.57  | KV452945.1 | 45498   | 8-scf00200 | 8 |
| AX-158422478 | 9 | 47.57  | KV452945.1 | 92994   | 8-scf00200 | 8 |
| AX-158069803 | 9 | 47.57  | KV452945.1 | 149875  | 8-scf00200 | 8 |
| AX-157824086 | 9 | 47.57  | KV452945.1 | 382222  | 8-scf00200 | 8 |
| AX-157824087 | 9 | 47.57  | KV452945.1 | 383823  | 8-scf00200 | 8 |
| AX-158069991 | 9 | 47.57  | KV452945.1 | 921182  | 8-scf00200 | 8 |
| AX-157857009 | 9 | 47.57  | KV452945.1 | 925373  | 8-scf00200 | 8 |
| AX-157857010 | 9 | 47.57  | KV452945.1 | 993209  | 8-scf00200 | 8 |
| AX-157824117 | 9 | 47.57  | KV452945.1 | 1048575 | 8-scf00200 | 8 |
| AX-157824118 | 9 | 47.57  | KV452945.1 | 1054814 | 8-scf00200 | 8 |
| AX-158070167 | 9 | 47.57  | KV452945.1 | 1265578 | 8-scf00200 | 8 |
| AX-158409429 | 9 | 47.57  | KV452945.1 | 1289568 | 8-scf00200 | 8 |
| AX-157824143 | 9 | 47.57  | KV452945.1 | 1317284 | 8-scf00200 | 8 |
| AX-157701987 | 9 | 47.57  | KV452945.1 | 1332579 | 8-scf00200 | 8 |
| AX-158070211 | 9 | 47.57  | KV452945.1 | 1351099 | 8-scf00200 | 8 |
| AX-158070216 | 9 | 47.57  | KV452945.1 | 1355473 | 8-scf00200 | 8 |
| AX-158070227 | 9 | 47.57  | KV452945.1 | 1365975 | 8-scf00200 | 8 |
| AX-157824149 | 9 | 47.57  | KV452945.1 | 1383875 | 8-scf00200 | 8 |
| AX-157885475 | 9 | 47.57  | KV452945.1 | 1399522 | 8-scf00200 | 8 |
| AX-158391952 | 9 | 47.57  | KV452945.1 | 1412358 | 8-scf00200 | 8 |
| AX-158070263 | 9 | 47.57  | KV452945.1 | 1428822 | 8-scf00200 | 8 |
| AX-158070278 | 9 | 47.57  | KV452945.1 | 1444867 | 8-scf00200 | 8 |
| AX-158070296 | 9 | 47.57  | KV452945.1 | 1466066 | 8-scf00200 | 8 |

|              |   |        |            |          |            |    |
|--------------|---|--------|------------|----------|------------|----|
| AX-158070324 | 9 | 47.57  | KV452945.1 | 1489982  | 8-scf00200 | 8  |
| AX-157824153 | 9 | 47.57  | KV452945.1 | 1504867  | 8-scf00200 | 8  |
| AX-158070327 | 9 | 47.57  | KV452945.1 | 1510480  | 8-scf00200 | 8  |
| AX-157824156 | 9 | 47.57  | KV452945.1 | 1536681  | 8-scf00200 | 8  |
| AX-158070356 | 9 | 47.57  | KV452945.1 | 1563143  | 8-scf00200 | 8  |
| AX-158070373 | 9 | 47.57  | KV452945.1 | 1587223  | 8-scf00200 | 8  |
| AX-157709094 | 9 | 47.57  | KV452945.1 | 1671062  | 8-scf00200 | 8  |
| AX-158070503 | 9 | 47.57  | KV452945.1 | 1925514  | 8-scf00200 | 8  |
| AX-158071181 | 9 | 47.57  | KV452945.1 | 3208810  | 8-scf00200 | 8  |
| AX-158071465 | 9 | 47.57  | KV452945.1 | 3755226  | 8-scf00200 | 8  |
| AX-157738682 | 9 | 47.57  | KV452945.1 | 4307707  | 8-scf00200 | 8  |
| AX-158071911 | 9 | 47.57  | KV452945.1 | 4412306  | 8-scf00200 | 8  |
| AX-158071914 | 9 | 47.57  | KV452945.1 | 4414690  | 8-scf00200 | 8  |
| AX-158071916 | 9 | 47.57  | KV452945.1 | 4415267  | 8-scf00200 | 8  |
| AX-158071927 | 9 | 47.57  | KV452945.1 | 4424497  | 8-scf00200 | 8  |
| AX-157824249 | 9 | 47.57  | KV452945.1 | 4429658  | 8-scf00200 | 8  |
| AX-158071939 | 9 | 47.57  | KV452945.1 | 4437014  | 8-scf00200 | 8  |
| AX-158071948 | 9 | 47.57  | KV452945.1 | 4448099  | 8-scf00200 | 8  |
| AX-157824254 | 9 | 47.57  | KV452945.1 | 4451060  | 8-scf00200 | 8  |
| AX-158072041 | 9 | 47.57  | KV452945.1 | 4523365  | 8-scf00200 | 8  |
| AX-158072112 | 9 | 47.57  | KV452945.1 | 4588639  | 8-scf00200 | 8  |
| AX-158072157 | 9 | 47.57  | KV452945.1 | 4634029  | 8-scf00200 | 8  |
| AX-158391969 | 9 | 47.57  | KV452945.1 | 5006270  | 8-scf00200 | 8  |
| AX-157750366 | 9 | 47.57  | KV452945.1 | 5323506  | 8-scf00200 | 8  |
| AX-158072688 | 9 | 47.57  | KV452945.1 | 5347413  | 8-scf00200 | 8  |
| AX-158072915 | 9 | 47.57  | KV452945.1 | 5632357  | 8-scf00200 | 8  |
| AX-158073664 | 9 | 47.57  | KV452945.1 | 6532668  | 8-scf00200 | 8  |
| AX-158073834 | 9 | 47.57  | KV452945.1 | 7009179  | 8-scf00200 | 8  |
| AX-158074536 | 9 | 47.57  | KV452945.1 | 8252784  | 8-scf00200 | 8  |
| AX-158074619 | 9 | 47.57  | KV452945.1 | 8327734  | 8-scf00200 | 8  |
| AX-158074631 | 9 | 47.57  | KV452945.1 | 8335090  | 8-scf00200 | 8  |
| AX-158409576 | 9 | 47.57  | KV452945.1 | 8451954  | 8-scf00200 | 8  |
| AX-157824484 | 9 | 47.57  | KV452945.1 | 8707138  | 8-scf00200 | 8  |
| AX-157824509 | 9 | 47.57  | KV452945.1 | 8979804  | 8-scf00200 | 8  |
| AX-158075281 | 9 | 47.57  | KV452945.1 | 9093723  | 8-scf00200 | 8  |
| AX-158075470 | 9 | 47.57  | KV452945.1 | 9294610  | 8-scf00200 | 8  |
| AX-158077194 | 9 | 47.57  | KV452945.1 | 11137244 | 8-scf00200 | 8  |
| AX-158077312 | 9 | 47.57  | KV452945.1 | 11262706 | 8-scf00200 | 8  |
| AX-157682183 | 9 | 47.57  | KV452944.1 | 63386    | 8-scf00609 | 8  |
| AX-157685325 | 9 | 47.57  | KV452944.1 | 67773    | 8-scf00609 | 8  |
| AX-158420706 | 9 | 47.57  | KV452944.1 | 98859    | 8-scf00609 | 8  |
| AX-158420707 | 9 | 47.57  | KV452944.1 | 99020    | 8-scf00609 | 8  |
| AX-158413833 | 9 | 47.57  | KV452944.1 | 103259   | 8-scf00609 | 8  |
| AX-157680410 | 9 | 47.57  | KV452944.1 | 135864   | 8-scf00609 | 8  |
| AX-158420964 | 9 | 47.57  | KV453506.1 | 5902     | scf00858   | UN |
| AX-158424066 | 9 | 47.57  | KV453506.1 | 6710     | scf00858   | UN |
| AX-158071966 | 9 | 47.571 | KV452945.1 | 4461126  | 8-scf00200 | 8  |
| AX-158071972 | 9 | 47.571 | KV452945.1 | 4464791  | 8-scf00200 | 8  |
| AX-158071974 | 9 | 47.571 | KV452945.1 | 4466783  | 8-scf00200 | 8  |
| AX-158071870 | 9 | 47.572 | KV452945.1 | 4342730  | 8-scf00200 | 8  |
| AX-157824246 | 9 | 47.572 | KV452945.1 | 4397250  | 8-scf00200 | 8  |



|              |   |        |            |         |            |   |
|--------------|---|--------|------------|---------|------------|---|
| AX-158071925 | 9 | 47.572 | KV452945.1 | 4423189 | 8-scf00200 | 8 |
| AX-158071954 | 9 | 47.572 | KV452945.1 | 4451987 | 8-scf00200 | 8 |
| AX-158071977 | 9 | 47.572 | KV452945.1 | 4470054 | 8-scf00200 | 8 |
| AX-157775074 | 9 | 47.572 | KV452945.1 | 4475755 | 8-scf00200 | 8 |
| AX-158071990 | 9 | 47.572 | KV452945.1 | 4476283 | 8-scf00200 | 8 |
| AX-158071997 | 9 | 47.572 | KV452945.1 | 4483766 | 8-scf00200 | 8 |
| AX-158071998 | 9 | 47.572 | KV452945.1 | 4484323 | 8-scf00200 | 8 |
| AX-158071999 | 9 | 47.572 | KV452945.1 | 4486468 | 8-scf00200 | 8 |
| AX-158072005 | 9 | 47.572 | KV452945.1 | 4491960 | 8-scf00200 | 8 |
| AX-158072010 | 9 | 47.572 | KV452945.1 | 4492754 | 8-scf00200 | 8 |
| AX-158072014 | 9 | 47.572 | KV452945.1 | 4499146 | 8-scf00200 | 8 |
| AX-158072019 | 9 | 47.572 | KV452945.1 | 4501205 | 8-scf00200 | 8 |
| AX-157713011 | 9 | 47.572 | KV452945.1 | 4502215 | 8-scf00200 | 8 |
| AX-158072022 | 9 | 47.572 | KV452945.1 | 4504644 | 8-scf00200 | 8 |
| AX-158072025 | 9 | 47.572 | KV452945.1 | 4507145 | 8-scf00200 | 8 |
| AX-158072035 | 9 | 47.572 | KV452945.1 | 4517956 | 8-scf00200 | 8 |
| AX-158072060 | 9 | 47.572 | KV452945.1 | 4543091 | 8-scf00200 | 8 |
| AX-158072065 | 9 | 47.572 | KV452945.1 | 4546142 | 8-scf00200 | 8 |
| AX-158072086 | 9 | 47.572 | KV452945.1 | 4560833 | 8-scf00200 | 8 |
| AX-158072099 | 9 | 47.572 | KV452945.1 | 4573041 | 8-scf00200 | 8 |
| AX-158072108 | 9 | 47.572 | KV452945.1 | 4583521 | 8-scf00200 | 8 |
| AX-157877075 | 9 | 47.572 | KV452945.1 | 4587030 | 8-scf00200 | 8 |
| AX-158072117 | 9 | 47.572 | KV452945.1 | 4598436 | 8-scf00200 | 8 |
| AX-158072131 | 9 | 47.572 | KV452945.1 | 4611492 | 8-scf00200 | 8 |
| AX-158072188 | 9 | 47.572 | KV452945.1 | 4672705 | 8-scf00200 | 8 |
| AX-157824280 | 9 | 47.572 | KV452945.1 | 4741339 | 8-scf00200 | 8 |
| AX-157735176 | 9 | 47.573 | KV452945.1 | 4430244 | 8-scf00200 | 8 |
| AX-157824250 | 9 | 47.573 | KV452945.1 | 4432732 | 8-scf00200 | 8 |
| AX-158071963 | 9 | 47.573 | KV452945.1 | 4459674 | 8-scf00200 | 8 |
| AX-157824259 | 9 | 47.573 | KV452945.1 | 4518421 | 8-scf00200 | 8 |
| AX-157719767 | 9 | 47.573 | KV452945.1 | 4519683 | 8-scf00200 | 8 |
| AX-158072045 | 9 | 47.573 | KV452945.1 | 4526414 | 8-scf00200 | 8 |
| AX-158072047 | 9 | 47.573 | KV452945.1 | 4528485 | 8-scf00200 | 8 |
| AX-157721876 | 9 | 47.573 | KV452945.1 | 4531725 | 8-scf00200 | 8 |
| AX-158072049 | 9 | 47.573 | KV452945.1 | 4533824 | 8-scf00200 | 8 |
| AX-158409509 | 9 | 47.573 | KV452945.1 | 4545523 | 8-scf00200 | 8 |
| AX-157865643 | 9 | 47.573 | KV452945.1 | 4546727 | 8-scf00200 | 8 |
| AX-158072078 | 9 | 47.573 | KV452945.1 | 4553026 | 8-scf00200 | 8 |
| AX-158072089 | 9 | 47.573 | KV452945.1 | 4562892 | 8-scf00200 | 8 |
| AX-158072168 | 9 | 47.573 | KV452945.1 | 4653046 | 8-scf00200 | 8 |
| AX-158072173 | 9 | 47.573 | KV452945.1 | 4658249 | 8-scf00200 | 8 |
| AX-157870752 | 9 | 47.573 | KV452945.1 | 5829015 | 8-scf00200 | 8 |
| AX-158074518 | 9 | 47.573 | KV452945.1 | 8241917 | 8-scf00200 | 8 |
| AX-158075347 | 9 | 47.573 | KV452945.1 | 9161383 | 8-scf00200 | 8 |
| AX-157824054 | 9 | 47.862 | KV452943.1 | 3776782 | 8-scf00198 | 8 |
| AX-158069530 | 9 | 47.862 | KV452943.1 | 3910437 | 8-scf00198 | 8 |
| AX-158069546 | 9 | 47.862 | KV452943.1 | 3933343 | 8-scf00198 | 8 |
| AX-158069656 | 9 | 47.862 | KV452943.1 | 4024995 | 8-scf00198 | 8 |
| AX-158080528 | 9 | 47.862 | KV452943.1 | 4562380 | 8-scf00198 | 8 |
| AX-158080529 | 9 | 47.862 | KV452943.1 | 4568130 | 8-scf00198 | 8 |
| AX-158080531 | 9 | 47.862 | KV452943.1 | 4575252 | 8-scf00198 | 8 |

|              |   |        |            |         |            |   |
|--------------|---|--------|------------|---------|------------|---|
| AX-158080532 | 9 | 47.862 | KV452943.1 | 4578701 | 8-scf00198 | 8 |
| AX-158080534 | 9 | 47.862 | KV452943.1 | 4582357 | 8-scf00198 | 8 |
| AX-157824937 | 9 | 47.862 | KV452943.1 | 4604990 | 8-scf00198 | 8 |
| AX-158080544 | 9 | 47.862 | KV452943.1 | 4613196 | 8-scf00198 | 8 |
| AX-158080548 | 9 | 47.862 | KV452943.1 | 4623682 | 8-scf00198 | 8 |
| AX-158080550 | 9 | 47.862 | KV452943.1 | 4625175 | 8-scf00198 | 8 |
| AX-158080554 | 9 | 47.862 | KV452943.1 | 4634742 | 8-scf00198 | 8 |
| AX-158080573 | 9 | 47.862 | KV452943.1 | 4711076 | 8-scf00198 | 8 |
| AX-158080585 | 9 | 47.862 | KV452943.1 | 4748142 | 8-scf00198 | 8 |
| AX-158080599 | 9 | 47.862 | KV452943.1 | 4781674 | 8-scf00198 | 8 |
| AX-158409723 | 9 | 47.862 | KV452943.1 | 4870915 | 8-scf00198 | 8 |
| AX-158080642 | 9 | 47.862 | KV452943.1 | 4929041 | 8-scf00198 | 8 |
| AX-158080644 | 9 | 47.862 | KV452943.1 | 4930115 | 8-scf00198 | 8 |
| AX-158080647 | 9 | 47.862 | KV452943.1 | 4931457 | 8-scf00198 | 8 |
| AX-158080950 | 9 | 47.862 | KV452943.1 | 5997942 | 8-scf00198 | 8 |
| AX-158080953 | 9 | 47.862 | KV452943.1 | 6011556 | 8-scf00198 | 8 |
| AX-158069786 | 9 | 47.862 | KV452945.1 | 88646   | 8-scf00200 | 8 |
| AX-158069795 | 9 | 47.862 | KV452945.1 | 121826  | 8-scf00200 | 8 |
| AX-158069801 | 9 | 47.862 | KV452945.1 | 141228  | 8-scf00200 | 8 |
| AX-158069804 | 9 | 47.862 | KV452945.1 | 156763  | 8-scf00200 | 8 |
| AX-158069839 | 9 | 47.862 | KV452945.1 | 337803  | 8-scf00200 | 8 |
| AX-158069850 | 9 | 47.862 | KV452945.1 | 428756  | 8-scf00200 | 8 |
| AX-158069853 | 9 | 47.862 | KV452945.1 | 431169  | 8-scf00200 | 8 |
| AX-157824090 | 9 | 47.862 | KV452945.1 | 452549  | 8-scf00200 | 8 |
| AX-158069875 | 9 | 47.862 | KV452945.1 | 490704  | 8-scf00200 | 8 |
| AX-158069876 | 9 | 47.862 | KV452945.1 | 502756  | 8-scf00200 | 8 |
| AX-158069882 | 9 | 47.862 | KV452945.1 | 522159  | 8-scf00200 | 8 |
| AX-157704265 | 9 | 47.862 | KV452945.1 | 549482  | 8-scf00200 | 8 |
| AX-158069906 | 9 | 47.862 | KV452945.1 | 586839  | 8-scf00200 | 8 |
| AX-158070004 | 9 | 47.862 | KV452945.1 | 990861  | 8-scf00200 | 8 |
| AX-158070132 | 9 | 47.862 | KV452945.1 | 1205987 | 8-scf00200 | 8 |
| AX-158070133 | 9 | 47.862 | KV452945.1 | 1206940 | 8-scf00200 | 8 |
| AX-158070376 | 9 | 47.862 | KV452945.1 | 1602664 | 8-scf00200 | 8 |
| AX-157885481 | 9 | 47.862 | KV452945.1 | 1609855 | 8-scf00200 | 8 |
| AX-157824159 | 9 | 47.862 | KV452945.1 | 1658429 | 8-scf00200 | 8 |
| AX-158384274 | 9 | 47.862 | KV452945.1 | 1684988 | 8-scf00200 | 8 |
| AX-158070415 | 9 | 47.862 | KV452945.1 | 1691312 | 8-scf00200 | 8 |
| AX-158070434 | 9 | 47.862 | KV452945.1 | 1718215 | 8-scf00200 | 8 |
| AX-157824168 | 9 | 47.862 | KV452945.1 | 2062929 | 8-scf00200 | 8 |
| AX-157824170 | 9 | 47.862 | KV452945.1 | 2065718 | 8-scf00200 | 8 |
| AX-158070579 | 9 | 47.862 | KV452945.1 | 2086828 | 8-scf00200 | 8 |
| AX-158070626 | 9 | 47.862 | KV452945.1 | 2180937 | 8-scf00200 | 8 |
| AX-158071133 | 9 | 47.862 | KV452945.1 | 3139358 | 8-scf00200 | 8 |
| AX-158071146 | 9 | 47.862 | KV452945.1 | 3169595 | 8-scf00200 | 8 |
| AX-158071147 | 9 | 47.862 | KV452945.1 | 3170092 | 8-scf00200 | 8 |
| AX-158071357 | 9 | 47.862 | KV452945.1 | 3552850 | 8-scf00200 | 8 |
| AX-158384294 | 9 | 47.862 | KV452945.1 | 3980257 | 8-scf00200 | 8 |
| AX-158071639 | 9 | 47.862 | KV452945.1 | 4051155 | 8-scf00200 | 8 |
| AX-158071650 | 9 | 47.862 | KV452945.1 | 4059152 | 8-scf00200 | 8 |
| AX-158071919 | 9 | 47.862 | KV452945.1 | 4416127 | 8-scf00200 | 8 |
| AX-157824252 | 9 | 47.862 | KV452945.1 | 4439239 | 8-scf00200 | 8 |

|              |   |        |            |         |            |   |
|--------------|---|--------|------------|---------|------------|---|
| AX-158071942 | 9 | 47.862 | KV452945.1 | 4439954 | 8-scf00200 | 8 |
| AX-158071943 | 9 | 47.862 | KV452945.1 | 4441646 | 8-scf00200 | 8 |
| AX-158071991 | 9 | 47.862 | KV452945.1 | 4476560 | 8-scf00200 | 8 |
| AX-158072055 | 9 | 47.862 | KV452945.1 | 4536780 | 8-scf00200 | 8 |
| AX-158072069 | 9 | 47.862 | KV452945.1 | 4547857 | 8-scf00200 | 8 |
| AX-158072082 | 9 | 47.862 | KV452945.1 | 4556457 | 8-scf00200 | 8 |
| AX-158072093 | 9 | 47.862 | KV452945.1 | 4566513 | 8-scf00200 | 8 |
| AX-158072096 | 9 | 47.862 | KV452945.1 | 4571620 | 8-scf00200 | 8 |
| AX-158072100 | 9 | 47.862 | KV452945.1 | 4574082 | 8-scf00200 | 8 |
| AX-158072104 | 9 | 47.862 | KV452945.1 | 4576267 | 8-scf00200 | 8 |
| AX-158072107 | 9 | 47.862 | KV452945.1 | 4582560 | 8-scf00200 | 8 |
| AX-157710372 | 9 | 47.862 | KV452945.1 | 4585154 | 8-scf00200 | 8 |
| AX-158072110 | 9 | 47.862 | KV452945.1 | 4587492 | 8-scf00200 | 8 |
| AX-158072127 | 9 | 47.862 | KV452945.1 | 4604257 | 8-scf00200 | 8 |
| AX-158072132 | 9 | 47.862 | KV452945.1 | 4612171 | 8-scf00200 | 8 |
| AX-158072133 | 9 | 47.862 | KV452945.1 | 4612776 | 8-scf00200 | 8 |
| AX-158072146 | 9 | 47.862 | KV452945.1 | 4622396 | 8-scf00200 | 8 |
| AX-158391964 | 9 | 47.862 | KV452945.1 | 4625325 | 8-scf00200 | 8 |
| AX-157824262 | 9 | 47.862 | KV452945.1 | 4633967 | 8-scf00200 | 8 |
| AX-158072159 | 9 | 47.862 | KV452945.1 | 4635122 | 8-scf00200 | 8 |
| AX-157824264 | 9 | 47.862 | KV452945.1 | 4635608 | 8-scf00200 | 8 |
| AX-157824265 | 9 | 47.862 | KV452945.1 | 4638280 | 8-scf00200 | 8 |
| AX-157824267 | 9 | 47.862 | KV452945.1 | 4639987 | 8-scf00200 | 8 |
| AX-158072163 | 9 | 47.862 | KV452945.1 | 4642980 | 8-scf00200 | 8 |
| AX-158391966 | 9 | 47.862 | KV452945.1 | 4656520 | 8-scf00200 | 8 |
| AX-158072174 | 9 | 47.862 | KV452945.1 | 4658688 | 8-scf00200 | 8 |
| AX-158072176 | 9 | 47.862 | KV452945.1 | 4660271 | 8-scf00200 | 8 |
| AX-158391967 | 9 | 47.862 | KV452945.1 | 4662595 | 8-scf00200 | 8 |
| AX-158072186 | 9 | 47.862 | KV452945.1 | 4671159 | 8-scf00200 | 8 |
| AX-158072192 | 9 | 47.862 | KV452945.1 | 4674120 | 8-scf00200 | 8 |
| AX-157723757 | 9 | 47.862 | KV452945.1 | 4681780 | 8-scf00200 | 8 |
| AX-158072197 | 9 | 47.862 | KV452945.1 | 4684020 | 8-scf00200 | 8 |
| AX-158072201 | 9 | 47.862 | KV452945.1 | 4685071 | 8-scf00200 | 8 |
| AX-158072203 | 9 | 47.862 | KV452945.1 | 4686181 | 8-scf00200 | 8 |
| AX-158072234 | 9 | 47.862 | KV452945.1 | 4718578 | 8-scf00200 | 8 |
| AX-158072246 | 9 | 47.862 | KV452945.1 | 4728468 | 8-scf00200 | 8 |
| AX-158072248 | 9 | 47.862 | KV452945.1 | 4731161 | 8-scf00200 | 8 |
| AX-157702300 | 9 | 47.862 | KV452945.1 | 4734297 | 8-scf00200 | 8 |
| AX-158072277 | 9 | 47.862 | KV452945.1 | 4763186 | 8-scf00200 | 8 |
| AX-158072291 | 9 | 47.862 | KV452945.1 | 4778264 | 8-scf00200 | 8 |
| AX-158072318 | 9 | 47.862 | KV452945.1 | 4826145 | 8-scf00200 | 8 |
| AX-158072331 | 9 | 47.862 | KV452945.1 | 4833237 | 8-scf00200 | 8 |
| AX-158072332 | 9 | 47.862 | KV452945.1 | 4833506 | 8-scf00200 | 8 |
| AX-158072408 | 9 | 47.862 | KV452945.1 | 4910628 | 8-scf00200 | 8 |
| AX-157824302 | 9 | 47.862 | KV452945.1 | 4944983 | 8-scf00200 | 8 |
| AX-158072453 | 9 | 47.862 | KV452945.1 | 4967491 | 8-scf00200 | 8 |
| AX-158072502 | 9 | 47.862 | KV452945.1 | 5020592 | 8-scf00200 | 8 |
| AX-158072598 | 9 | 47.862 | KV452945.1 | 5214229 | 8-scf00200 | 8 |
| AX-157857053 | 9 | 47.862 | KV452945.1 | 5219231 | 8-scf00200 | 8 |
| AX-158072669 | 9 | 47.862 | KV452945.1 | 5313720 | 8-scf00200 | 8 |
| AX-158072706 | 9 | 47.862 | KV452945.1 | 5382022 | 8-scf00200 | 8 |

|              |   |        |             |         |            |    |
|--------------|---|--------|-------------|---------|------------|----|
| AX-158072714 | 9 | 47.862 | KV452945.1  | 5386525 | 8-scf00200 | 8  |
| AX-158072756 | 9 | 47.862 | KV452945.1  | 5431497 | 8-scf00200 | 8  |
| AX-158072804 | 9 | 47.862 | KV452945.1  | 5497790 | 8-scf00200 | 8  |
| AX-157757654 | 9 | 47.862 | KV452945.1  | 5514769 | 8-scf00200 | 8  |
| AX-158072824 | 9 | 47.862 | KV452945.1  | 5515403 | 8-scf00200 | 8  |
| AX-158072832 | 9 | 47.862 | KV452945.1  | 5522696 | 8-scf00200 | 8  |
| AX-158072916 | 9 | 47.862 | KV452945.1  | 5632986 | 8-scf00200 | 8  |
| AX-157824341 | 9 | 47.862 | KV452945.1  | 5648934 | 8-scf00200 | 8  |
| AX-157824347 | 9 | 47.862 | KV452945.1  | 5710260 | 8-scf00200 | 8  |
| AX-158073025 | 9 | 47.862 | KV452945.1  | 5780318 | 8-scf00200 | 8  |
| AX-158073040 | 9 | 47.862 | KV452945.1  | 5797120 | 8-scf00200 | 8  |
| AX-158073043 | 9 | 47.862 | KV452945.1  | 5799914 | 8-scf00200 | 8  |
| AX-158073052 | 9 | 47.862 | KV452945.1  | 5806866 | 8-scf00200 | 8  |
| AX-158073057 | 9 | 47.862 | KV452945.1  | 5817542 | 8-scf00200 | 8  |
| AX-157685323 | 9 | 47.862 | KV452944.1  | 36493   | 8-scf00609 | 8  |
| AX-157685333 | 9 | 47.862 | KV452944.1  | 131017  | 8-scf00609 | 8  |
| AX-157705892 | 9 | 47.862 | 3ML01031227 | 428     | scf06833_1 | UN |
| AX-158072261 | 9 | 48.151 | KV452945.1  | 4744259 | 8-scf00200 | 8  |
| AX-158072272 | 9 | 48.151 | KV452945.1  | 4762061 | 8-scf00200 | 8  |
| AX-158072274 | 9 | 48.151 | KV452945.1  | 4762314 | 8-scf00200 | 8  |
| AX-157775302 | 9 | 48.151 | KV452945.1  | 4764688 | 8-scf00200 | 8  |
| AX-157717767 | 9 | 48.151 | KV452945.1  | 4766172 | 8-scf00200 | 8  |
| AX-158072284 | 9 | 48.151 | KV452945.1  | 4769544 | 8-scf00200 | 8  |
| AX-157713250 | 9 | 48.151 | KV452945.1  | 4771091 | 8-scf00200 | 8  |
| AX-158072287 | 9 | 48.151 | KV452945.1  | 4774823 | 8-scf00200 | 8  |
| AX-158072251 | 9 | 48.239 | KV452945.1  | 4733783 | 8-scf00200 | 8  |
| AX-158072289 | 9 | 48.239 | KV452945.1  | 4775277 | 8-scf00200 | 8  |
| AX-158072011 | 9 | 48.337 | KV452945.1  | 4493105 | 8-scf00200 | 8  |
| AX-158072290 | 9 | 48.337 | KV452945.1  | 4776532 | 8-scf00200 | 8  |
| AX-157746524 | 9 | 48.44  | KV452945.1  | 4522074 | 8-scf00200 | 8  |
| AX-158072297 | 9 | 48.44  | KV452945.1  | 4786772 | 8-scf00200 | 8  |
| AX-157824287 | 9 | 48.44  | KV452945.1  | 4790993 | 8-scf00200 | 8  |
| AX-157824288 | 9 | 48.44  | KV452945.1  | 4791389 | 8-scf00200 | 8  |
| AX-157824289 | 9 | 48.44  | KV452945.1  | 4791652 | 8-scf00200 | 8  |
| AX-158072305 | 9 | 48.44  | KV452945.1  | 4804067 | 8-scf00200 | 8  |
| AX-158072847 | 9 | 48.44  | KV452945.1  | 5536636 | 8-scf00200 | 8  |
| AX-157824286 | 9 | 48.729 | KV452945.1  | 4789226 | 8-scf00200 | 8  |
| AX-158072303 | 9 | 48.729 | KV452945.1  | 4802316 | 8-scf00200 | 8  |
| AX-158072304 | 9 | 48.729 | KV452945.1  | 4803516 | 8-scf00200 | 8  |
| AX-158072327 | 9 | 49.018 | KV452945.1  | 4831559 | 8-scf00200 | 8  |
| AX-158072687 | 9 | 49.018 | KV452945.1  | 5345594 | 8-scf00200 | 8  |
| AX-158072724 | 9 | 49.018 | KV452945.1  | 5394451 | 8-scf00200 | 8  |
| AX-158072879 | 9 | 49.018 | KV452945.1  | 5598481 | 8-scf00200 | 8  |
| AX-158073033 | 9 | 49.018 | KV452945.1  | 5791237 | 8-scf00200 | 8  |
| AX-158072336 | 9 | 49.019 | KV452945.1  | 4839592 | 8-scf00200 | 8  |
| AX-158072342 | 9 | 49.019 | KV452945.1  | 4847021 | 8-scf00200 | 8  |
| AX-157824296 | 9 | 49.019 | KV452945.1  | 4853376 | 8-scf00200 | 8  |
| AX-158072347 | 9 | 49.019 | KV452945.1  | 4853679 | 8-scf00200 | 8  |
| AX-158072352 | 9 | 49.019 | KV452945.1  | 4855130 | 8-scf00200 | 8  |
| AX-158072924 | 9 | 49.019 | KV452945.1  | 5645549 | 8-scf00200 | 8  |
| AX-158073031 | 9 | 49.019 | KV452945.1  | 5789678 | 8-scf00200 | 8  |

|              |   |        |            |         |            |   |
|--------------|---|--------|------------|---------|------------|---|
| AX-158072361 | 9 | 49.02  | KV452945.1 | 4858951 | 8-scf00200 | 8 |
| AX-158072362 | 9 | 49.02  | KV452945.1 | 4859550 | 8-scf00200 | 8 |
| AX-157824297 | 9 | 49.021 | KV452945.1 | 4860607 | 8-scf00200 | 8 |
| AX-158070906 | 9 | 49.022 | KV452945.1 | 2776434 | 8-scf00200 | 8 |
| AX-158070915 | 9 | 49.022 | KV452945.1 | 2782061 | 8-scf00200 | 8 |
| AX-158071053 | 9 | 49.022 | KV452945.1 | 2978369 | 8-scf00200 | 8 |
| AX-158072217 | 9 | 49.022 | KV452945.1 | 4695160 | 8-scf00200 | 8 |
| AX-158072300 | 9 | 49.022 | KV452945.1 | 4791885 | 8-scf00200 | 8 |
| AX-158072367 | 9 | 49.022 | KV452945.1 | 4862881 | 8-scf00200 | 8 |
| AX-158072370 | 9 | 49.022 | KV452945.1 | 4864280 | 8-scf00200 | 8 |
| AX-158072371 | 9 | 49.022 | KV452945.1 | 4866272 | 8-scf00200 | 8 |
| AX-158072374 | 9 | 49.022 | KV452945.1 | 4868941 | 8-scf00200 | 8 |
| AX-158072397 | 9 | 49.022 | KV452945.1 | 4890463 | 8-scf00200 | 8 |
| AX-157870743 | 9 | 49.022 | KV452945.1 | 4891842 | 8-scf00200 | 8 |
| AX-158072404 | 9 | 49.022 | KV452945.1 | 4906393 | 8-scf00200 | 8 |
| AX-158072411 | 9 | 49.022 | KV452945.1 | 4920152 | 8-scf00200 | 8 |
| AX-158072425 | 9 | 49.022 | KV452945.1 | 4942499 | 8-scf00200 | 8 |
| AX-158072427 | 9 | 49.022 | KV452945.1 | 4942999 | 8-scf00200 | 8 |
| AX-158072434 | 9 | 49.022 | KV452945.1 | 4947698 | 8-scf00200 | 8 |
| AX-157824303 | 9 | 49.022 | KV452945.1 | 4950887 | 8-scf00200 | 8 |
| AX-157741765 | 9 | 49.022 | KV452945.1 | 4955791 | 8-scf00200 | 8 |
| AX-158072455 | 9 | 49.022 | KV452945.1 | 4968059 | 8-scf00200 | 8 |
| AX-158072530 | 9 | 49.022 | KV452945.1 | 5078554 | 8-scf00200 | 8 |
| AX-158072545 | 9 | 49.022 | KV452945.1 | 5105122 | 8-scf00200 | 8 |
| AX-158072577 | 9 | 49.022 | KV452945.1 | 5174037 | 8-scf00200 | 8 |
| AX-158072582 | 9 | 49.022 | KV452945.1 | 5186268 | 8-scf00200 | 8 |
| AX-158072587 | 9 | 49.022 | KV452945.1 | 5192465 | 8-scf00200 | 8 |
| AX-158072589 | 9 | 49.022 | KV452945.1 | 5195807 | 8-scf00200 | 8 |
| AX-158072594 | 9 | 49.022 | KV452945.1 | 5206217 | 8-scf00200 | 8 |
| AX-158072606 | 9 | 49.022 | KV452945.1 | 5235450 | 8-scf00200 | 8 |
| AX-158072652 | 9 | 49.022 | KV452945.1 | 5296314 | 8-scf00200 | 8 |
| AX-158072658 | 9 | 49.022 | KV452945.1 | 5297141 | 8-scf00200 | 8 |
| AX-158072673 | 9 | 49.022 | KV452945.1 | 5316026 | 8-scf00200 | 8 |
| AX-158072682 | 9 | 49.022 | KV452945.1 | 5325466 | 8-scf00200 | 8 |
| AX-158072693 | 9 | 49.022 | KV452945.1 | 5351641 | 8-scf00200 | 8 |
| AX-158072705 | 9 | 49.022 | KV452945.1 | 5381635 | 8-scf00200 | 8 |
| AX-158072711 | 9 | 49.022 | KV452945.1 | 5383712 | 8-scf00200 | 8 |
| AX-158072767 | 9 | 49.022 | KV452945.1 | 5444947 | 8-scf00200 | 8 |
| AX-158072807 | 9 | 49.022 | KV452945.1 | 5502202 | 8-scf00200 | 8 |
| AX-158072846 | 9 | 49.022 | KV452945.1 | 5536080 | 8-scf00200 | 8 |
| AX-158072853 | 9 | 49.022 | KV452945.1 | 5543537 | 8-scf00200 | 8 |
| AX-158072872 | 9 | 49.022 | KV452945.1 | 5592080 | 8-scf00200 | 8 |
| AX-158072883 | 9 | 49.022 | KV452945.1 | 5601560 | 8-scf00200 | 8 |
| AX-158072887 | 9 | 49.022 | KV452945.1 | 5605085 | 8-scf00200 | 8 |
| AX-158384315 | 9 | 49.022 | KV452945.1 | 5619752 | 8-scf00200 | 8 |
| AX-158072950 | 9 | 49.022 | KV452945.1 | 5686555 | 8-scf00200 | 8 |
| AX-158409535 | 9 | 49.022 | KV452945.1 | 5700143 | 8-scf00200 | 8 |
| AX-158072964 | 9 | 49.022 | KV452945.1 | 5710009 | 8-scf00200 | 8 |
| AX-158073001 | 9 | 49.022 | KV452945.1 | 5748862 | 8-scf00200 | 8 |
| AX-157824354 | 9 | 49.022 | KV452945.1 | 5765241 | 8-scf00200 | 8 |
| AX-158391980 | 9 | 49.022 | KV452945.1 | 5773768 | 8-scf00200 | 8 |

|              |   |        |            |         |            |   |
|--------------|---|--------|------------|---------|------------|---|
| AX-158073020 | 9 | 49.022 | KV452945.1 | 5774922 | 8-scf00200 | 8 |
| AX-158073021 | 9 | 49.022 | KV452945.1 | 5775758 | 8-scf00200 | 8 |
| AX-158073024 | 9 | 49.022 | KV452945.1 | 5778599 | 8-scf00200 | 8 |
| AX-158073984 | 9 | 49.022 | KV452945.1 | 7403630 | 8-scf00200 | 8 |
| AX-158072449 | 9 | 49.232 | KV452945.1 | 4963449 | 8-scf00200 | 8 |
| AX-158072339 | 9 | 49.311 | KV452945.1 | 4842730 | 8-scf00200 | 8 |
| AX-158072450 | 9 | 49.311 | KV452945.1 | 4964535 | 8-scf00200 | 8 |
| AX-158072456 | 9 | 49.311 | KV452945.1 | 4969013 | 8-scf00200 | 8 |
| AX-158072532 | 9 | 49.311 | KV452945.1 | 5079168 | 8-scf00200 | 8 |
| AX-158072484 | 9 | 49.324 | KV452945.1 | 4996800 | 8-scf00200 | 8 |
| AX-158072489 | 9 | 50.216 | KV452945.1 | 5000731 | 8-scf00200 | 8 |
| AX-158072364 | 9 | 50.24  | KV452945.1 | 4861171 | 8-scf00200 | 8 |
| AX-158072498 | 9 | 50.24  | KV452945.1 | 5014542 | 8-scf00200 | 8 |
| AX-158072917 | 9 | 50.24  | KV452945.1 | 5637326 | 8-scf00200 | 8 |
| AX-158071928 | 9 | 50.262 | KV452945.1 | 4425529 | 8-scf00200 | 8 |
| AX-158072537 | 9 | 50.262 | KV452945.1 | 5087707 | 8-scf00200 | 8 |
| AX-158072541 | 9 | 50.284 | KV452945.1 | 5100253 | 8-scf00200 | 8 |
| AX-158072578 | 9 | 50.312 | KV452945.1 | 5181521 | 8-scf00200 | 8 |
| AX-158072581 | 9 | 50.338 | KV452945.1 | 5184933 | 8-scf00200 | 8 |
| AX-158072599 | 9 | 50.359 | KV452945.1 | 5214355 | 8-scf00200 | 8 |
| AX-158072614 | 9 | 50.369 | KV452945.1 | 5244277 | 8-scf00200 | 8 |
| AX-158072668 | 9 | 50.393 | KV452945.1 | 5313155 | 8-scf00200 | 8 |
| AX-158072597 | 9 | 50.415 | KV452945.1 | 5213449 | 8-scf00200 | 8 |
| AX-158072677 | 9 | 50.415 | KV452945.1 | 5317732 | 8-scf00200 | 8 |
| AX-158072827 | 9 | 50.415 | KV452945.1 | 5517601 | 8-scf00200 | 8 |
| AX-158072902 | 9 | 50.415 | KV452945.1 | 5617988 | 8-scf00200 | 8 |
| AX-158072684 | 9 | 50.436 | KV452945.1 | 5344097 | 8-scf00200 | 8 |
| AX-158072694 | 9 | 50.455 | KV452945.1 | 5352861 | 8-scf00200 | 8 |
| AX-158070013 | 9 | 50.475 | KV452945.1 | 1008568 | 8-scf00200 | 8 |
| AX-158072350 | 9 | 50.475 | KV452945.1 | 4854496 | 8-scf00200 | 8 |
| AX-158072695 | 9 | 50.475 | KV452945.1 | 5355546 | 8-scf00200 | 8 |
| AX-158072696 | 9 | 50.475 | KV452945.1 | 5355928 | 8-scf00200 | 8 |
| AX-158072700 | 9 | 50.475 | KV452945.1 | 5376753 | 8-scf00200 | 8 |
| AX-158074414 | 9 | 50.475 | KV452945.1 | 8140046 | 8-scf00200 | 8 |
| AX-158072238 | 9 | 50.476 | KV452945.1 | 4720182 | 8-scf00200 | 8 |
| AX-158072253 | 9 | 50.476 | KV452945.1 | 4735693 | 8-scf00200 | 8 |
| AX-158072341 | 9 | 50.476 | KV452945.1 | 4845904 | 8-scf00200 | 8 |
| AX-158072359 | 9 | 50.476 | KV452945.1 | 4858318 | 8-scf00200 | 8 |
| AX-158072377 | 9 | 50.476 | KV452945.1 | 4869994 | 8-scf00200 | 8 |
| AX-157717503 | 9 | 50.476 | KV452945.1 | 4909177 | 8-scf00200 | 8 |
| AX-157774426 | 9 | 50.476 | KV452945.1 | 4930446 | 8-scf00200 | 8 |
| AX-158072472 | 9 | 50.476 | KV452945.1 | 4982291 | 8-scf00200 | 8 |
| AX-158072474 | 9 | 50.476 | KV452945.1 | 4983823 | 8-scf00200 | 8 |
| AX-157877078 | 9 | 50.476 | KV452945.1 | 5070320 | 8-scf00200 | 8 |
| AX-158072521 | 9 | 50.476 | KV452945.1 | 5070551 | 8-scf00200 | 8 |
| AX-157726735 | 9 | 50.476 | KV452945.1 | 5094810 | 8-scf00200 | 8 |
| AX-158072547 | 9 | 50.476 | KV452945.1 | 5108965 | 8-scf00200 | 8 |
| AX-157774199 | 9 | 50.476 | KV452945.1 | 5109991 | 8-scf00200 | 8 |
| AX-158072579 | 9 | 50.476 | KV452945.1 | 5183635 | 8-scf00200 | 8 |
| AX-158072600 | 9 | 50.476 | KV452945.1 | 5215671 | 8-scf00200 | 8 |
| AX-158072629 | 9 | 50.476 | KV452945.1 | 5262088 | 8-scf00200 | 8 |

|              |   |        |            |         |            |   |
|--------------|---|--------|------------|---------|------------|---|
| AX-158072644 | 9 | 50.476 | KV452945.1 | 5279938 | 8-scf00200 | 8 |
| AX-158072683 | 9 | 50.476 | KV452945.1 | 5335773 | 8-scf00200 | 8 |
| AX-158072698 | 9 | 50.476 | KV452945.1 | 5358074 | 8-scf00200 | 8 |
| AX-157718795 | 9 | 50.476 | KV452945.1 | 5367638 | 8-scf00200 | 8 |
| AX-158072702 | 9 | 50.476 | KV452945.1 | 5377663 | 8-scf00200 | 8 |
| AX-158072704 | 9 | 50.476 | KV452945.1 | 5378056 | 8-scf00200 | 8 |
| AX-158072709 | 9 | 50.476 | KV452945.1 | 5383126 | 8-scf00200 | 8 |
| AX-157865649 | 9 | 50.476 | KV452945.1 | 5386240 | 8-scf00200 | 8 |
| AX-157824318 | 9 | 50.476 | KV452945.1 | 5391406 | 8-scf00200 | 8 |
| AX-158072723 | 9 | 50.476 | KV452945.1 | 5393676 | 8-scf00200 | 8 |
| AX-158072726 | 9 | 50.476 | KV452945.1 | 5396056 | 8-scf00200 | 8 |
| AX-157713159 | 9 | 50.476 | KV452945.1 | 5396347 | 8-scf00200 | 8 |
| AX-158072727 | 9 | 50.476 | KV452945.1 | 5397221 | 8-scf00200 | 8 |
| AX-157824319 | 9 | 50.476 | KV452945.1 | 5399766 | 8-scf00200 | 8 |
| AX-157746275 | 9 | 50.476 | KV452945.1 | 5400799 | 8-scf00200 | 8 |
| AX-158072729 | 9 | 50.476 | KV452945.1 | 5401439 | 8-scf00200 | 8 |
| AX-157824320 | 9 | 50.476 | KV452945.1 | 5402087 | 8-scf00200 | 8 |
| AX-158072740 | 9 | 50.476 | KV452945.1 | 5410964 | 8-scf00200 | 8 |
| AX-158072744 | 9 | 50.476 | KV452945.1 | 5415098 | 8-scf00200 | 8 |
| AX-158072745 | 9 | 50.476 | KV452945.1 | 5416086 | 8-scf00200 | 8 |
| AX-157743688 | 9 | 50.476 | KV452945.1 | 5419334 | 8-scf00200 | 8 |
| AX-157877081 | 9 | 50.476 | KV452945.1 | 5424591 | 8-scf00200 | 8 |
| AX-158072753 | 9 | 50.476 | KV452945.1 | 5425540 | 8-scf00200 | 8 |
| AX-158072757 | 9 | 50.476 | KV452945.1 | 5432214 | 8-scf00200 | 8 |
| AX-158072769 | 9 | 50.476 | KV452945.1 | 5450708 | 8-scf00200 | 8 |
| AX-158072773 | 9 | 50.476 | KV452945.1 | 5452384 | 8-scf00200 | 8 |
| AX-157824323 | 9 | 50.476 | KV452945.1 | 5453453 | 8-scf00200 | 8 |
| AX-158072785 | 9 | 50.476 | KV452945.1 | 5461482 | 8-scf00200 | 8 |
| AX-158072787 | 9 | 50.476 | KV452945.1 | 5463027 | 8-scf00200 | 8 |
| AX-158072790 | 9 | 50.476 | KV452945.1 | 5468569 | 8-scf00200 | 8 |
| AX-158072815 | 9 | 50.476 | KV452945.1 | 5509962 | 8-scf00200 | 8 |
| AX-157824331 | 9 | 50.476 | KV452945.1 | 5546894 | 8-scf00200 | 8 |
| AX-158072864 | 9 | 50.476 | KV452945.1 | 5572047 | 8-scf00200 | 8 |
| AX-157711602 | 9 | 50.476 | KV452945.1 | 5643181 | 8-scf00200 | 8 |
| AX-157744595 | 9 | 50.476 | KV452945.1 | 5663779 | 8-scf00200 | 8 |
| AX-157824343 | 9 | 50.476 | KV452945.1 | 5665721 | 8-scf00200 | 8 |
| AX-158072939 | 9 | 50.476 | KV452945.1 | 5668311 | 8-scf00200 | 8 |
| AX-157824346 | 9 | 50.476 | KV452945.1 | 5700446 | 8-scf00200 | 8 |
| AX-158072989 | 9 | 50.476 | KV452945.1 | 5731205 | 8-scf00200 | 8 |
| AX-157824351 | 9 | 50.476 | KV452945.1 | 5743772 | 8-scf00200 | 8 |
| AX-158072996 | 9 | 50.476 | KV452945.1 | 5744153 | 8-scf00200 | 8 |
| AX-158073005 | 9 | 50.476 | KV452945.1 | 5752307 | 8-scf00200 | 8 |
| AX-158073009 | 9 | 50.476 | KV452945.1 | 5758115 | 8-scf00200 | 8 |
| AX-158073012 | 9 | 50.476 | KV452945.1 | 5763661 | 8-scf00200 | 8 |
| AX-158073023 | 9 | 50.476 | KV452945.1 | 5777260 | 8-scf00200 | 8 |
| AX-158073653 | 9 | 50.476 | KV452945.1 | 6519858 | 8-scf00200 | 8 |
| AX-158073659 | 9 | 50.476 | KV452945.1 | 6527391 | 8-scf00200 | 8 |
| AX-158073662 | 9 | 50.476 | KV452945.1 | 6532463 | 8-scf00200 | 8 |
| AX-158073674 | 9 | 50.476 | KV452945.1 | 6548132 | 8-scf00200 | 8 |
| AX-158073675 | 9 | 50.476 | KV452945.1 | 6551779 | 8-scf00200 | 8 |
| AX-158073677 | 9 | 50.476 | KV452945.1 | 6554426 | 8-scf00200 | 8 |

|              |   |        |            |          |            |   |
|--------------|---|--------|------------|----------|------------|---|
| AX-158069959 | 9 | 50.765 | KV452945.1 | 781193   | 8-scf00200 | 8 |
| AX-158070251 | 9 | 50.765 | KV452945.1 | 1404800  | 8-scf00200 | 8 |
| AX-158070534 | 9 | 50.765 | KV452945.1 | 1993466  | 8-scf00200 | 8 |
| AX-158072101 | 9 | 50.765 | KV452945.1 | 4575590  | 8-scf00200 | 8 |
| AX-158072106 | 9 | 50.765 | KV452945.1 | 4578595  | 8-scf00200 | 8 |
| AX-158072114 | 9 | 50.765 | KV452945.1 | 4592708  | 8-scf00200 | 8 |
| AX-158072486 | 9 | 50.765 | KV452945.1 | 4998118  | 8-scf00200 | 8 |
| AX-158072800 | 9 | 50.765 | KV452945.1 | 5484696  | 8-scf00200 | 8 |
| AX-158072810 | 9 | 50.765 | KV452945.1 | 5505699  | 8-scf00200 | 8 |
| AX-157757913 | 9 | 50.765 | KV452945.1 | 5591785  | 8-scf00200 | 8 |
| AX-157718118 | 9 | 50.765 | KV452945.1 | 5834114  | 8-scf00200 | 8 |
| AX-158073217 | 9 | 50.765 | KV452945.1 | 6018458  | 8-scf00200 | 8 |
| AX-158074354 | 9 | 50.765 | KV452945.1 | 8074115  | 8-scf00200 | 8 |
| AX-158075117 | 9 | 50.765 | KV452945.1 | 8894633  | 8-scf00200 | 8 |
| AX-158076720 | 9 | 50.765 | KV452945.1 | 10620830 | 8-scf00200 | 8 |
| AX-157824684 | 9 | 50.765 | KV452945.1 | 10900133 | 8-scf00200 | 8 |
| AX-157824685 | 9 | 50.765 | KV452945.1 | 10901682 | 8-scf00200 | 8 |
| AX-158077230 | 9 | 50.765 | KV452945.1 | 11175904 | 8-scf00200 | 8 |
| AX-158077392 | 9 | 50.765 | KV452945.1 | 11329507 | 8-scf00200 | 8 |
| AX-158072286 | 9 | 50.82  | KV452945.1 | 4771731  | 8-scf00200 | 8 |
| AX-158072831 | 9 | 50.82  | KV452945.1 | 5520921  | 8-scf00200 | 8 |
| AX-157824350 | 9 | 50.82  | KV452945.1 | 5736955  | 8-scf00200 | 8 |
| AX-157787958 | 9 | 50.82  | KV452945.1 | 5738014  | 8-scf00200 | 8 |
| AX-157824326 | 9 | 50.869 | KV452945.1 | 5521845  | 8-scf00200 | 8 |
| AX-158072840 | 9 | 51.038 | KV452945.1 | 5534088  | 8-scf00200 | 8 |
| AX-157824332 | 9 | 51.055 | KV452945.1 | 5560534  | 8-scf00200 | 8 |
| AX-158409526 | 9 | 51.055 | KV452945.1 | 5569923  | 8-scf00200 | 8 |
| AX-157717790 | 9 | 51.073 | KV452945.1 | 5572911  | 8-scf00200 | 8 |
| AX-157824336 | 9 | 51.083 | KV452945.1 | 5585460  | 8-scf00200 | 8 |
| AX-158409466 | 9 | 51.092 | KV452945.1 | 2651084  | 8-scf00200 | 8 |
| AX-157717060 | 9 | 51.092 | KV452945.1 | 4674810  | 8-scf00200 | 8 |
| AX-158072271 | 9 | 51.092 | KV452945.1 | 4760812  | 8-scf00200 | 8 |
| AX-157725932 | 9 | 51.092 | KV452945.1 | 5309751  | 8-scf00200 | 8 |
| AX-158409529 | 9 | 51.092 | KV452945.1 | 5593030  | 8-scf00200 | 8 |
| AX-158072874 | 9 | 51.092 | KV452945.1 | 5593241  | 8-scf00200 | 8 |
| AX-157824338 | 9 | 51.092 | KV452945.1 | 5593543  | 8-scf00200 | 8 |
| AX-158077819 | 9 | 51.092 | KV452945.1 | 11706873 | 8-scf00200 | 8 |
| AX-158078408 | 9 | 51.092 | KV452945.1 | 12213430 | 8-scf00200 | 8 |
| AX-158072901 | 9 | 51.097 | KV452945.1 | 5616776  | 8-scf00200 | 8 |
| AX-158072904 | 9 | 51.103 | KV452945.1 | 5619346  | 8-scf00200 | 8 |
| AX-157721343 | 9 | 51.107 | KV452945.1 | 5436485  | 8-scf00200 | 8 |
| AX-158072763 | 9 | 51.107 | KV452945.1 | 5440597  | 8-scf00200 | 8 |
| AX-158072835 | 9 | 51.107 | KV452945.1 | 5528104  | 8-scf00200 | 8 |
| AX-158072905 | 9 | 51.107 | KV452945.1 | 5622377  | 8-scf00200 | 8 |
| AX-157824344 | 9 | 51.107 | KV452945.1 | 5684981  | 8-scf00200 | 8 |
| AX-158072949 | 9 | 51.107 | KV452945.1 | 5685479  | 8-scf00200 | 8 |
| AX-158072921 | 9 | 51.111 | KV452945.1 | 5641655  | 8-scf00200 | 8 |
| AX-158072931 | 9 | 51.115 | KV452945.1 | 5657373  | 8-scf00200 | 8 |
| AX-158072933 | 9 | 51.115 | KV452945.1 | 5657833  | 8-scf00200 | 8 |
| AX-158072934 | 9 | 51.115 | KV452945.1 | 5658472  | 8-scf00200 | 8 |
| AX-157716150 | 9 | 51.119 | KV452945.1 | 5690997  | 8-scf00200 | 8 |



|              |   |        |            |         |            |   |
|--------------|---|--------|------------|---------|------------|---|
| AX-158072977 | 9 | 51.615 | KV452945.1 | 5720286 | 8-scf00200 | 8 |
| AX-157824348 | 9 | 51.619 | KV452945.1 | 5722189 | 8-scf00200 | 8 |
| AX-158073029 | 9 | 51.619 | KV452945.1 | 5787563 | 8-scf00200 | 8 |
| AX-157824349 | 9 | 51.622 | KV452945.1 | 5734156 | 8-scf00200 | 8 |
| AX-158072992 | 9 | 51.626 | KV452945.1 | 5739719 | 8-scf00200 | 8 |
| AX-157721950 | 9 | 51.63  | KV452945.1 | 5742560 | 8-scf00200 | 8 |
| AX-158072994 | 9 | 51.633 | KV452945.1 | 5742657 | 8-scf00200 | 8 |
| AX-158073002 | 9 | 51.636 | KV452945.1 | 5749403 | 8-scf00200 | 8 |
| AX-158073006 | 9 | 51.636 | KV452945.1 | 5753360 | 8-scf00200 | 8 |
| AX-158073007 | 9 | 51.637 | KV452945.1 | 5754728 | 8-scf00200 | 8 |
| AX-158073036 | 9 | 51.64  | KV452945.1 | 5793246 | 8-scf00200 | 8 |
| AX-158073038 | 9 | 51.64  | KV452945.1 | 5794155 | 8-scf00200 | 8 |
| AX-158073048 | 9 | 51.64  | KV452945.1 | 5805159 | 8-scf00200 | 8 |
| AX-158073039 | 9 | 51.643 | KV452945.1 | 5795208 | 8-scf00200 | 8 |
| AX-158073051 | 9 | 51.701 | KV452945.1 | 5805783 | 8-scf00200 | 8 |
| AX-157717348 | 9 | 52.427 | KV452945.1 | 5807773 | 8-scf00200 | 8 |
| AX-158073060 | 9 | 52.496 | KV452945.1 | 5821158 | 8-scf00200 | 8 |
| AX-157824356 | 9 | 52.571 | KV452945.1 | 5823015 | 8-scf00200 | 8 |
| AX-158406803 | 9 | 52.573 | KV452945.1 | 5823871 | 8-scf00200 | 8 |
| AX-157746804 | 9 | 52.573 | KV452945.1 | 5829649 | 8-scf00200 | 8 |
| AX-158073070 | 9 | 52.573 | KV452945.1 | 5831884 | 8-scf00200 | 8 |
| AX-158073072 | 9 | 52.573 | KV452945.1 | 5833035 | 8-scf00200 | 8 |
| AX-158073073 | 9 | 52.573 | KV452945.1 | 5834386 | 8-scf00200 | 8 |
| AX-158073074 | 9 | 52.573 | KV452945.1 | 5836531 | 8-scf00200 | 8 |
| AX-158073089 | 9 | 52.573 | KV452945.1 | 5859980 | 8-scf00200 | 8 |
| AX-157824358 | 9 | 52.573 | KV452945.1 | 5862831 | 8-scf00200 | 8 |
| AX-157747512 | 9 | 52.573 | KV452945.1 | 5864678 | 8-scf00200 | 8 |
| AX-158073096 | 9 | 52.573 | KV452945.1 | 5864850 | 8-scf00200 | 8 |
| AX-157824359 | 9 | 52.573 | KV452945.1 | 5865756 | 8-scf00200 | 8 |
| AX-158073097 | 9 | 52.573 | KV452945.1 | 5875255 | 8-scf00200 | 8 |
| AX-158073098 | 9 | 52.573 | KV452945.1 | 5877881 | 8-scf00200 | 8 |
| AX-158073099 | 9 | 52.573 | KV452945.1 | 5878893 | 8-scf00200 | 8 |
| AX-157721101 | 9 | 52.573 | KV452945.1 | 5895994 | 8-scf00200 | 8 |
| AX-158073107 | 9 | 52.573 | KV452945.1 | 5897820 | 8-scf00200 | 8 |
| AX-158073108 | 9 | 52.573 | KV452945.1 | 5899445 | 8-scf00200 | 8 |
| AX-158073110 | 9 | 52.573 | KV452945.1 | 5903670 | 8-scf00200 | 8 |
| AX-158073111 | 9 | 52.573 | KV452945.1 | 5906556 | 8-scf00200 | 8 |
| AX-158073113 | 9 | 52.573 | KV452945.1 | 5907115 | 8-scf00200 | 8 |
| AX-158073115 | 9 | 52.573 | KV452945.1 | 5907814 | 8-scf00200 | 8 |
| AX-158073117 | 9 | 52.573 | KV452945.1 | 5908673 | 8-scf00200 | 8 |
| AX-157714290 | 9 | 52.573 | KV452945.1 | 5910259 | 8-scf00200 | 8 |
| AX-157824363 | 9 | 52.573 | KV452945.1 | 5914554 | 8-scf00200 | 8 |
| AX-157740586 | 9 | 52.573 | KV452945.1 | 5916338 | 8-scf00200 | 8 |
| AX-158073120 | 9 | 52.573 | KV452945.1 | 5919544 | 8-scf00200 | 8 |
| AX-158073124 | 9 | 52.573 | KV452945.1 | 5921207 | 8-scf00200 | 8 |
| AX-157824367 | 9 | 52.573 | KV452945.1 | 5924873 | 8-scf00200 | 8 |
| AX-158073129 | 9 | 52.573 | KV452945.1 | 5929262 | 8-scf00200 | 8 |
| AX-158073137 | 9 | 52.573 | KV452945.1 | 5935617 | 8-scf00200 | 8 |
| AX-158073138 | 9 | 52.573 | KV452945.1 | 5935975 | 8-scf00200 | 8 |
| AX-158073142 | 9 | 52.573 | KV452945.1 | 5942071 | 8-scf00200 | 8 |
| AX-158073146 | 9 | 52.573 | KV452945.1 | 5950781 | 8-scf00200 | 8 |

|              |   |        |             |          |            |    |
|--------------|---|--------|-------------|----------|------------|----|
| AX-158073149 | 9 | 52.573 | KV452945.1  | 5957391  | 8-scf00200 | 8  |
| AX-158073188 | 9 | 52.573 | KV452945.1  | 5986150  | 8-scf00200 | 8  |
| AX-158073193 | 9 | 52.573 | KV452945.1  | 5994784  | 8-scf00200 | 8  |
| AX-157824373 | 9 | 52.573 | KV452945.1  | 6010659  | 8-scf00200 | 8  |
| AX-158073243 | 9 | 52.573 | KV452945.1  | 6042467  | 8-scf00200 | 8  |
| AX-158073257 | 9 | 52.573 | KV452945.1  | 6064044  | 8-scf00200 | 8  |
| AX-158077646 | 9 | 52.573 | KV452945.1  | 11570911 | 8-scf00200 | 8  |
| AX-158073159 | 9 | 52.739 | KV452945.1  | 5962982  | 8-scf00200 | 8  |
| AX-158073164 | 9 | 52.847 | KV452945.1  | 5971709  | 8-scf00200 | 8  |
| AX-157717161 | 9 | 52.901 | KV452945.1  | 4795144  | 8-scf00200 | 8  |
| AX-158072395 | 9 | 52.901 | KV452945.1  | 4890123  | 8-scf00200 | 8  |
| AX-158072627 | 9 | 52.901 | KV452945.1  | 5254578  | 8-scf00200 | 8  |
| AX-158072956 | 9 | 52.901 | KV452945.1  | 5693279  | 8-scf00200 | 8  |
| AX-158072983 | 9 | 52.901 | KV452945.1  | 5724081  | 8-scf00200 | 8  |
| AX-158073180 | 9 | 52.901 | KV452945.1  | 5983065  | 8-scf00200 | 8  |
| AX-158073184 | 9 | 52.901 | KV452945.1  | 5984753  | 8-scf00200 | 8  |
| AX-158073194 | 9 | 52.901 | KV452945.1  | 5998650  | 8-scf00200 | 8  |
| AX-157714520 | 9 | 52.901 | KV452945.1  | 5999069  | 8-scf00200 | 8  |
| AX-157824372 | 9 | 52.901 | KV452945.1  | 6000275  | 8-scf00200 | 8  |
| AX-158073205 | 9 | 52.901 | KV452945.1  | 6009354  | 8-scf00200 | 8  |
| AX-158073222 | 9 | 52.901 | KV452945.1  | 6022740  | 8-scf00200 | 8  |
| AX-158073228 | 9 | 52.901 | KV452945.1  | 6029187  | 8-scf00200 | 8  |
| AX-158073232 | 9 | 52.901 | KV452945.1  | 6033273  | 8-scf00200 | 8  |
| AX-158073237 | 9 | 52.901 | KV452945.1  | 6037461  | 8-scf00200 | 8  |
| AX-157824375 | 9 | 52.901 | KV452945.1  | 6039988  | 8-scf00200 | 8  |
| AX-158073241 | 9 | 52.901 | KV452945.1  | 6042157  | 8-scf00200 | 8  |
| AX-158073244 | 9 | 52.901 | KV452945.1  | 6046365  | 8-scf00200 | 8  |
| AX-158073246 | 9 | 52.901 | KV452945.1  | 6047258  | 8-scf00200 | 8  |
| AX-158073247 | 9 | 52.901 | KV452945.1  | 6049150  | 8-scf00200 | 8  |
| AX-158073250 | 9 | 52.901 | KV452945.1  | 6050847  | 8-scf00200 | 8  |
| AX-158073254 | 9 | 52.901 | KV452945.1  | 6062679  | 8-scf00200 | 8  |
| AX-158073260 | 9 | 52.901 | KV452945.1  | 6067319  | 8-scf00200 | 8  |
| AX-158073261 | 9 | 52.901 | KV452945.1  | 6067915  | 8-scf00200 | 8  |
| AX-158073331 | 9 | 52.901 | KV452945.1  | 6130756  | 8-scf00200 | 8  |
| AX-158073350 | 9 | 52.901 | KV452945.1  | 6153545  | 8-scf00200 | 8  |
| AX-158073352 | 9 | 52.901 | KV452945.1  | 6154988  | 8-scf00200 | 8  |
| AX-158073506 | 9 | 52.901 | KV452945.1  | 6286327  | 8-scf00200 | 8  |
| AX-157704715 | 9 | 52.901 | 3ML01027138 | 483      | scf02741_1 | UN |
| AX-158073292 | 9 | 53.011 | KV452945.1  | 6098933  | 8-scf00200 | 8  |
| AX-158073295 | 9 | 53.106 | KV452945.1  | 6101012  | 8-scf00200 | 8  |
| AX-158073297 | 9 | 53.116 | KV452945.1  | 6102328  | 8-scf00200 | 8  |
| AX-158073231 | 9 | 53.12  | KV452945.1  | 6030778  | 8-scf00200 | 8  |
| AX-158073298 | 9 | 53.12  | KV452945.1  | 6104816  | 8-scf00200 | 8  |
| AX-158073301 | 9 | 53.12  | KV452945.1  | 6106953  | 8-scf00200 | 8  |
| AX-158073302 | 9 | 53.12  | KV452945.1  | 6107391  | 8-scf00200 | 8  |
| AX-158073305 | 9 | 53.12  | KV452945.1  | 6109482  | 8-scf00200 | 8  |
| AX-158073306 | 9 | 53.12  | KV452945.1  | 6111059  | 8-scf00200 | 8  |
| AX-158073313 | 9 | 53.12  | KV452945.1  | 6119090  | 8-scf00200 | 8  |
| AX-158073315 | 9 | 53.12  | KV452945.1  | 6120057  | 8-scf00200 | 8  |
| AX-158073317 | 9 | 53.12  | KV452945.1  | 6122204  | 8-scf00200 | 8  |
| AX-158073319 | 9 | 53.12  | KV452945.1  | 6122395  | 8-scf00200 | 8  |

|              |   |        |            |         |            |   |
|--------------|---|--------|------------|---------|------------|---|
| AX-158073322 | 9 | 53.12  | KV452945.1 | 6124564 | 8-scf00200 | 8 |
| AX-158409545 | 9 | 53.12  | KV452945.1 | 6126214 | 8-scf00200 | 8 |
| AX-158073333 | 9 | 53.12  | KV452945.1 | 6132940 | 8-scf00200 | 8 |
| AX-157770990 | 9 | 53.12  | KV452945.1 | 6134459 | 8-scf00200 | 8 |
| AX-158073337 | 9 | 53.12  | KV452945.1 | 6135311 | 8-scf00200 | 8 |
| AX-158073341 | 9 | 53.12  | KV452945.1 | 6138438 | 8-scf00200 | 8 |
| AX-158073346 | 9 | 53.12  | KV452945.1 | 6146691 | 8-scf00200 | 8 |
| AX-157824377 | 9 | 53.12  | KV452945.1 | 6147559 | 8-scf00200 | 8 |
| AX-158073347 | 9 | 53.12  | KV452945.1 | 6147769 | 8-scf00200 | 8 |
| AX-158073349 | 9 | 53.12  | KV452945.1 | 6152151 | 8-scf00200 | 8 |
| AX-157749133 | 9 | 53.12  | KV452945.1 | 6154401 | 8-scf00200 | 8 |
| AX-158073356 | 9 | 53.12  | KV452945.1 | 6157033 | 8-scf00200 | 8 |
| AX-158073472 | 9 | 53.12  | KV452945.1 | 6255952 | 8-scf00200 | 8 |
| AX-158073536 | 9 | 53.12  | KV452945.1 | 6326088 | 8-scf00200 | 8 |
| AX-157824387 | 9 | 53.12  | KV452945.1 | 6331726 | 8-scf00200 | 8 |
| AX-158073544 | 9 | 53.12  | KV452945.1 | 6333290 | 8-scf00200 | 8 |
| AX-158073545 | 9 | 53.12  | KV452945.1 | 6334290 | 8-scf00200 | 8 |
| AX-158073600 | 9 | 53.12  | KV452945.1 | 6428819 | 8-scf00200 | 8 |
| AX-158074425 | 9 | 53.12  | KV452945.1 | 8147714 | 8-scf00200 | 8 |
| AX-158074702 | 9 | 53.12  | KV452945.1 | 8411698 | 8-scf00200 | 8 |
| AX-158074725 | 9 | 53.12  | KV452945.1 | 8426513 | 8-scf00200 | 8 |
| AX-158075108 | 9 | 53.12  | KV452945.1 | 8889995 | 8-scf00200 | 8 |
| AX-158075264 | 9 | 53.12  | KV452945.1 | 9063107 | 8-scf00200 | 8 |
| AX-158073353 | 9 | 53.229 | KV452945.1 | 6155471 | 8-scf00200 | 8 |
| AX-158073374 | 9 | 53.229 | KV452945.1 | 6171926 | 8-scf00200 | 8 |
| AX-158073375 | 9 | 53.229 | KV452945.1 | 6172912 | 8-scf00200 | 8 |
| AX-158073377 | 9 | 53.229 | KV452945.1 | 6174495 | 8-scf00200 | 8 |
| AX-158073379 | 9 | 53.229 | KV452945.1 | 6179237 | 8-scf00200 | 8 |
| AX-158073387 | 9 | 53.229 | KV452945.1 | 6187193 | 8-scf00200 | 8 |
| AX-158073391 | 9 | 53.229 | KV452945.1 | 6188773 | 8-scf00200 | 8 |
| AX-157714389 | 9 | 53.229 | KV452945.1 | 6190328 | 8-scf00200 | 8 |
| AX-158073393 | 9 | 53.229 | KV452945.1 | 6193089 | 8-scf00200 | 8 |
| AX-158073421 | 9 | 53.229 | KV452945.1 | 6224053 | 8-scf00200 | 8 |
| AX-158384323 | 9 | 53.229 | KV452945.1 | 6226278 | 8-scf00200 | 8 |
| AX-158073425 | 9 | 53.229 | KV452945.1 | 6227648 | 8-scf00200 | 8 |
| AX-158073466 | 9 | 53.229 | KV452945.1 | 6253566 | 8-scf00200 | 8 |
| AX-158073473 | 9 | 53.229 | KV452945.1 | 6256121 | 8-scf00200 | 8 |
| AX-158073487 | 9 | 53.229 | KV452945.1 | 6272642 | 8-scf00200 | 8 |
| AX-158073489 | 9 | 53.229 | KV452945.1 | 6275929 | 8-scf00200 | 8 |
| AX-158073495 | 9 | 53.229 | KV452945.1 | 6279325 | 8-scf00200 | 8 |
| AX-158073503 | 9 | 53.229 | KV452945.1 | 6284857 | 8-scf00200 | 8 |
| AX-157824386 | 9 | 53.229 | KV452945.1 | 6293018 | 8-scf00200 | 8 |
| AX-158073511 | 9 | 53.229 | KV452945.1 | 6293334 | 8-scf00200 | 8 |
| AX-158073514 | 9 | 53.229 | KV452945.1 | 6295376 | 8-scf00200 | 8 |
| AX-158073520 | 9 | 53.229 | KV452945.1 | 6305070 | 8-scf00200 | 8 |
| AX-158073521 | 9 | 53.229 | KV452945.1 | 6305736 | 8-scf00200 | 8 |
| AX-158073522 | 9 | 53.229 | KV452945.1 | 6309371 | 8-scf00200 | 8 |
| AX-158073523 | 9 | 53.229 | KV452945.1 | 6311921 | 8-scf00200 | 8 |
| AX-158073528 | 9 | 53.229 | KV452945.1 | 6318399 | 8-scf00200 | 8 |
| AX-158073532 | 9 | 53.229 | KV452945.1 | 6323839 | 8-scf00200 | 8 |
| AX-158073533 | 9 | 53.229 | KV452945.1 | 6324517 | 8-scf00200 | 8 |

|              |   |        |            |          |            |   |
|--------------|---|--------|------------|----------|------------|---|
| AX-158073551 | 9 | 53.229 | KV452945.1 | 6346340  | 8-scf00200 | 8 |
| AX-158073553 | 9 | 53.229 | KV452945.1 | 6351258  | 8-scf00200 | 8 |
| AX-158073556 | 9 | 53.229 | KV452945.1 | 6357913  | 8-scf00200 | 8 |
| AX-158073562 | 9 | 53.229 | KV452945.1 | 6362480  | 8-scf00200 | 8 |
| AX-158073563 | 9 | 53.229 | KV452945.1 | 6366511  | 8-scf00200 | 8 |
| AX-158073564 | 9 | 53.229 | KV452945.1 | 6368068  | 8-scf00200 | 8 |
| AX-158073565 | 9 | 53.229 | KV452945.1 | 6369112  | 8-scf00200 | 8 |
| AX-158073567 | 9 | 53.229 | KV452945.1 | 6370087  | 8-scf00200 | 8 |
| AX-158073569 | 9 | 53.229 | KV452945.1 | 6371144  | 8-scf00200 | 8 |
| AX-158073578 | 9 | 53.229 | KV452945.1 | 6387083  | 8-scf00200 | 8 |
| AX-158073586 | 9 | 53.229 | KV452945.1 | 6397841  | 8-scf00200 | 8 |
| AX-158073590 | 9 | 53.229 | KV452945.1 | 6406868  | 8-scf00200 | 8 |
| AX-158073614 | 9 | 53.229 | KV452945.1 | 6449117  | 8-scf00200 | 8 |
| AX-158073780 | 9 | 53.229 | KV452945.1 | 6840862  | 8-scf00200 | 8 |
| AX-158073785 | 9 | 53.229 | KV452945.1 | 6852473  | 8-scf00200 | 8 |
| AX-158073790 | 9 | 53.229 | KV452945.1 | 6880561  | 8-scf00200 | 8 |
| AX-158073872 | 9 | 53.229 | KV452945.1 | 7117606  | 8-scf00200 | 8 |
| AX-158073884 | 9 | 53.229 | KV452945.1 | 7163588  | 8-scf00200 | 8 |
| AX-158422495 | 9 | 53.229 | KV452945.1 | 7164745  | 8-scf00200 | 8 |
| AX-158073885 | 9 | 53.229 | KV452945.1 | 7166921  | 8-scf00200 | 8 |
| AX-158073974 | 9 | 53.229 | KV452945.1 | 7387002  | 8-scf00200 | 8 |
| AX-158074043 | 9 | 53.229 | KV452945.1 | 7531187  | 8-scf00200 | 8 |
| AX-158074052 | 9 | 53.229 | KV452945.1 | 7546169  | 8-scf00200 | 8 |
| AX-158074053 | 9 | 53.229 | KV452945.1 | 7554861  | 8-scf00200 | 8 |
| AX-158074369 | 9 | 53.229 | KV452945.1 | 8086398  | 8-scf00200 | 8 |
| AX-158074640 | 9 | 53.229 | KV452945.1 | 8353423  | 8-scf00200 | 8 |
| AX-158074650 | 9 | 53.229 | KV452945.1 | 8366244  | 8-scf00200 | 8 |
| AX-158074654 | 9 | 53.229 | KV452945.1 | 8369859  | 8-scf00200 | 8 |
| AX-158074657 | 9 | 53.229 | KV452945.1 | 8370535  | 8-scf00200 | 8 |
| AX-157824470 | 9 | 53.229 | KV452945.1 | 8374413  | 8-scf00200 | 8 |
| AX-157824471 | 9 | 53.229 | KV452945.1 | 8374454  | 8-scf00200 | 8 |
| AX-158074743 | 9 | 53.229 | KV452945.1 | 8445071  | 8-scf00200 | 8 |
| AX-158074779 | 9 | 53.229 | KV452945.1 | 8488194  | 8-scf00200 | 8 |
| AX-158074902 | 9 | 53.229 | KV452945.1 | 8650511  | 8-scf00200 | 8 |
| AX-158074909 | 9 | 53.229 | KV452945.1 | 8657267  | 8-scf00200 | 8 |
| AX-158075073 | 9 | 53.229 | KV452945.1 | 8852650  | 8-scf00200 | 8 |
| AX-158406846 | 9 | 53.229 | KV452945.1 | 8987631  | 8-scf00200 | 8 |
| AX-158075240 | 9 | 53.229 | KV452945.1 | 9043159  | 8-scf00200 | 8 |
| AX-158075678 | 9 | 53.229 | KV452945.1 | 9472807  | 8-scf00200 | 8 |
| AX-158077997 | 9 | 53.229 | KV452945.1 | 11867891 | 8-scf00200 | 8 |
| AX-158080838 | 9 | 53.338 | KV452943.1 | 5547830  | 8-scf00198 | 8 |
| AX-158070014 | 9 | 53.338 | KV452945.1 | 1009055  | 8-scf00200 | 8 |
| AX-158070197 | 9 | 53.338 | KV452945.1 | 1322648  | 8-scf00200 | 8 |
| AX-158409439 | 9 | 53.338 | KV452945.1 | 1388946  | 8-scf00200 | 8 |
| AX-158409445 | 9 | 53.338 | KV452945.1 | 1438407  | 8-scf00200 | 8 |
| AX-158070281 | 9 | 53.338 | KV452945.1 | 1446935  | 8-scf00200 | 8 |
| AX-157713974 | 9 | 53.338 | KV452945.1 | 1549449  | 8-scf00200 | 8 |
| AX-157824161 | 9 | 53.338 | KV452945.1 | 1659792  | 8-scf00200 | 8 |
| AX-158070802 | 9 | 53.338 | KV452945.1 | 2590512  | 8-scf00200 | 8 |
| AX-158070810 | 9 | 53.338 | KV452945.1 | 2612962  | 8-scf00200 | 8 |
| AX-158070920 | 9 | 53.338 | KV452945.1 | 2783474  | 8-scf00200 | 8 |

|              |   |        |            |         |            |   |
|--------------|---|--------|------------|---------|------------|---|
| AX-158071031 | 9 | 53.338 | KV452945.1 | 2933729 | 8-scf00200 | 8 |
| AX-158071036 | 9 | 53.338 | KV452945.1 | 2940984 | 8-scf00200 | 8 |
| AX-158071038 | 9 | 53.338 | KV452945.1 | 2943241 | 8-scf00200 | 8 |
| AX-158071043 | 9 | 53.338 | KV452945.1 | 2960026 | 8-scf00200 | 8 |
| AX-158071046 | 9 | 53.338 | KV452945.1 | 2965376 | 8-scf00200 | 8 |
| AX-158071080 | 9 | 53.338 | KV452945.1 | 3041724 | 8-scf00200 | 8 |
| AX-158071156 | 9 | 53.338 | KV452945.1 | 3179080 | 8-scf00200 | 8 |
| AX-158071159 | 9 | 53.338 | KV452945.1 | 3181205 | 8-scf00200 | 8 |
| AX-158071163 | 9 | 53.338 | KV452945.1 | 3183937 | 8-scf00200 | 8 |
| AX-157710839 | 9 | 53.338 | KV452945.1 | 3295871 | 8-scf00200 | 8 |
| AX-158071229 | 9 | 53.338 | KV452945.1 | 3299480 | 8-scf00200 | 8 |
| AX-157824191 | 9 | 53.338 | KV452945.1 | 3452957 | 8-scf00200 | 8 |
| AX-158071349 | 9 | 53.338 | KV452945.1 | 3540485 | 8-scf00200 | 8 |
| AX-158071384 | 9 | 53.338 | KV452945.1 | 3620033 | 8-scf00200 | 8 |
| AX-157707947 | 9 | 53.338 | KV452945.1 | 3812889 | 8-scf00200 | 8 |
| AX-158071512 | 9 | 53.338 | KV452945.1 | 3828263 | 8-scf00200 | 8 |
| AX-157824205 | 9 | 53.338 | KV452945.1 | 3921888 | 8-scf00200 | 8 |
| AX-158071565 | 9 | 53.338 | KV452945.1 | 3962962 | 8-scf00200 | 8 |
| AX-158071658 | 9 | 53.338 | KV452945.1 | 4067499 | 8-scf00200 | 8 |
| AX-158071696 | 9 | 53.338 | KV452945.1 | 4105103 | 8-scf00200 | 8 |
| AX-158071780 | 9 | 53.338 | KV452945.1 | 4209739 | 8-scf00200 | 8 |
| AX-158416560 | 9 | 53.338 | KV452945.1 | 4211994 | 8-scf00200 | 8 |
| AX-157824234 | 9 | 53.338 | KV452945.1 | 4277416 | 8-scf00200 | 8 |
| AX-158071894 | 9 | 53.338 | KV452945.1 | 4393118 | 8-scf00200 | 8 |
| AX-158071917 | 9 | 53.338 | KV452945.1 | 4415636 | 8-scf00200 | 8 |
| AX-158071924 | 9 | 53.338 | KV452945.1 | 4422854 | 8-scf00200 | 8 |
| AX-158071951 | 9 | 53.338 | KV452945.1 | 4451469 | 8-scf00200 | 8 |
| AX-158071970 | 9 | 53.338 | KV452945.1 | 4462873 | 8-scf00200 | 8 |
| AX-158072029 | 9 | 53.338 | KV452945.1 | 4510071 | 8-scf00200 | 8 |
| AX-158072072 | 9 | 53.338 | KV452945.1 | 4550862 | 8-scf00200 | 8 |
| AX-158072098 | 9 | 53.338 | KV452945.1 | 4572484 | 8-scf00200 | 8 |
| AX-158072149 | 9 | 53.338 | KV452945.1 | 4628557 | 8-scf00200 | 8 |
| AX-158072240 | 9 | 53.338 | KV452945.1 | 4721530 | 8-scf00200 | 8 |
| AX-157717040 | 9 | 53.338 | KV452945.1 | 4763820 | 8-scf00200 | 8 |
| AX-157744069 | 9 | 53.338 | KV452945.1 | 4797548 | 8-scf00200 | 8 |
| AX-158072346 | 9 | 53.338 | KV452945.1 | 4852703 | 8-scf00200 | 8 |
| AX-158072416 | 9 | 53.338 | KV452945.1 | 4928704 | 8-scf00200 | 8 |
| AX-158072418 | 9 | 53.338 | KV452945.1 | 4929665 | 8-scf00200 | 8 |
| AX-158416570 | 9 | 53.338 | KV452945.1 | 4959336 | 8-scf00200 | 8 |
| AX-158072459 | 9 | 53.338 | KV452945.1 | 4972363 | 8-scf00200 | 8 |
| AX-158072478 | 9 | 53.338 | KV452945.1 | 4987845 | 8-scf00200 | 8 |
| AX-158072492 | 9 | 53.338 | KV452945.1 | 5008569 | 8-scf00200 | 8 |
| AX-158072515 | 9 | 53.338 | KV452945.1 | 5051833 | 8-scf00200 | 8 |
| AX-158072535 | 9 | 53.338 | KV452945.1 | 5080973 | 8-scf00200 | 8 |
| AX-158384308 | 9 | 53.338 | KV452945.1 | 5102779 | 8-scf00200 | 8 |
| AX-158072575 | 9 | 53.338 | KV452945.1 | 5165443 | 8-scf00200 | 8 |
| AX-158072586 | 9 | 53.338 | KV452945.1 | 5190139 | 8-scf00200 | 8 |
| AX-157824307 | 9 | 53.338 | KV452945.1 | 5200540 | 8-scf00200 | 8 |
| AX-158072602 | 9 | 53.338 | KV452945.1 | 5225792 | 8-scf00200 | 8 |
| AX-158072701 | 9 | 53.338 | KV452945.1 | 5376866 | 8-scf00200 | 8 |
| AX-158072928 | 9 | 53.338 | KV452945.1 | 5648031 | 8-scf00200 | 8 |

|              |   |        |            |         |            |   |
|--------------|---|--------|------------|---------|------------|---|
| AX-158072930 | 9 | 53.338 | KV452945.1 | 5649192 | 8-scf00200 | 8 |
| AX-158073026 | 9 | 53.338 | KV452945.1 | 5783234 | 8-scf00200 | 8 |
| AX-158073062 | 9 | 53.338 | KV452945.1 | 5821278 | 8-scf00200 | 8 |
| AX-158073080 | 9 | 53.338 | KV452945.1 | 5842346 | 8-scf00200 | 8 |
| AX-158073123 | 9 | 53.338 | KV452945.1 | 5920731 | 8-scf00200 | 8 |
| AX-157754573 | 9 | 53.338 | KV452945.1 | 5981612 | 8-scf00200 | 8 |
| AX-158073189 | 9 | 53.338 | KV452945.1 | 5988718 | 8-scf00200 | 8 |
| AX-158073220 | 9 | 53.338 | KV452945.1 | 6021768 | 8-scf00200 | 8 |
| AX-158073224 | 9 | 53.338 | KV452945.1 | 6025076 | 8-scf00200 | 8 |
| AX-157824374 | 9 | 53.338 | KV452945.1 | 6029711 | 8-scf00200 | 8 |
| AX-157746019 | 9 | 53.338 | KV452945.1 | 6070543 | 8-scf00200 | 8 |
| AX-158073286 | 9 | 53.338 | KV452945.1 | 6095265 | 8-scf00200 | 8 |
| AX-158073307 | 9 | 53.338 | KV452945.1 | 6112828 | 8-scf00200 | 8 |
| AX-158073330 | 9 | 53.338 | KV452945.1 | 6129490 | 8-scf00200 | 8 |
| AX-157824379 | 9 | 53.338 | KV452945.1 | 6194255 | 8-scf00200 | 8 |
| AX-158073410 | 9 | 53.338 | KV452945.1 | 6209346 | 8-scf00200 | 8 |
| AX-158073509 | 9 | 53.338 | KV452945.1 | 6291910 | 8-scf00200 | 8 |
| AX-158409550 | 9 | 53.338 | KV452945.1 | 6327802 | 8-scf00200 | 8 |
| AX-158073581 | 9 | 53.338 | KV452945.1 | 6390430 | 8-scf00200 | 8 |
| AX-157722791 | 9 | 53.338 | KV452945.1 | 6392254 | 8-scf00200 | 8 |
| AX-158073592 | 9 | 53.338 | KV452945.1 | 6411253 | 8-scf00200 | 8 |
| AX-158073594 | 9 | 53.338 | KV452945.1 | 6414389 | 8-scf00200 | 8 |
| AX-158073602 | 9 | 53.338 | KV452945.1 | 6432322 | 8-scf00200 | 8 |
| AX-158073630 | 9 | 53.338 | KV452945.1 | 6476797 | 8-scf00200 | 8 |
| AX-158073632 | 9 | 53.338 | KV452945.1 | 6482119 | 8-scf00200 | 8 |
| AX-158073642 | 9 | 53.338 | KV452945.1 | 6503712 | 8-scf00200 | 8 |
| AX-158073643 | 9 | 53.338 | KV452945.1 | 6505307 | 8-scf00200 | 8 |
| AX-158073647 | 9 | 53.338 | KV452945.1 | 6514849 | 8-scf00200 | 8 |
| AX-158073648 | 9 | 53.338 | KV452945.1 | 6515689 | 8-scf00200 | 8 |
| AX-158073656 | 9 | 53.338 | KV452945.1 | 6526174 | 8-scf00200 | 8 |
| AX-158073667 | 9 | 53.338 | KV452945.1 | 6537686 | 8-scf00200 | 8 |
| AX-158073669 | 9 | 53.338 | KV452945.1 | 6542591 | 8-scf00200 | 8 |
| AX-158073672 | 9 | 53.338 | KV452945.1 | 6545491 | 8-scf00200 | 8 |
| AX-158073679 | 9 | 53.338 | KV452945.1 | 6559524 | 8-scf00200 | 8 |
| AX-158073688 | 9 | 53.338 | KV452945.1 | 6578290 | 8-scf00200 | 8 |
| AX-158073708 | 9 | 53.338 | KV452945.1 | 6637507 | 8-scf00200 | 8 |
| AX-158073718 | 9 | 53.338 | KV452945.1 | 6653405 | 8-scf00200 | 8 |
| AX-158073772 | 9 | 53.338 | KV452945.1 | 6816812 | 8-scf00200 | 8 |
| AX-158073774 | 9 | 53.338 | KV452945.1 | 6818220 | 8-scf00200 | 8 |
| AX-158073775 | 9 | 53.338 | KV452945.1 | 6820754 | 8-scf00200 | 8 |
| AX-158073777 | 9 | 53.338 | KV452945.1 | 6832614 | 8-scf00200 | 8 |
| AX-158073778 | 9 | 53.338 | KV452945.1 | 6836930 | 8-scf00200 | 8 |
| AX-158073784 | 9 | 53.338 | KV452945.1 | 6851489 | 8-scf00200 | 8 |
| AX-158073787 | 9 | 53.338 | KV452945.1 | 6859444 | 8-scf00200 | 8 |
| AX-158073788 | 9 | 53.338 | KV452945.1 | 6861629 | 8-scf00200 | 8 |
| AX-158073792 | 9 | 53.338 | KV452945.1 | 6887744 | 8-scf00200 | 8 |
| AX-158073822 | 9 | 53.338 | KV452945.1 | 6980992 | 8-scf00200 | 8 |
| AX-158073851 | 9 | 53.338 | KV452945.1 | 7049497 | 8-scf00200 | 8 |
| AX-158073857 | 9 | 53.338 | KV452945.1 | 7060224 | 8-scf00200 | 8 |
| AX-158073870 | 9 | 53.338 | KV452945.1 | 7115838 | 8-scf00200 | 8 |
| AX-158073882 | 9 | 53.338 | KV452945.1 | 7159820 | 8-scf00200 | 8 |

|              |   |        |            |         |            |   |
|--------------|---|--------|------------|---------|------------|---|
| AX-158073889 | 9 | 53.338 | KV452945.1 | 7172183 | 8-scf00200 | 8 |
| AX-158073891 | 9 | 53.338 | KV452945.1 | 7173994 | 8-scf00200 | 8 |
| AX-157788029 | 9 | 53.338 | KV452945.1 | 7415120 | 8-scf00200 | 8 |
| AX-157788032 | 9 | 53.338 | KV452945.1 | 7415449 | 8-scf00200 | 8 |
| AX-158391995 | 9 | 53.338 | KV452945.1 | 7449860 | 8-scf00200 | 8 |
| AX-158074028 | 9 | 53.338 | KV452945.1 | 7458014 | 8-scf00200 | 8 |
| AX-158409561 | 9 | 53.338 | KV452945.1 | 7505186 | 8-scf00200 | 8 |
| AX-158074045 | 9 | 53.338 | KV452945.1 | 7541290 | 8-scf00200 | 8 |
| AX-158074049 | 9 | 53.338 | KV452945.1 | 7542430 | 8-scf00200 | 8 |
| AX-158074054 | 9 | 53.338 | KV452945.1 | 7555363 | 8-scf00200 | 8 |
| AX-158074070 | 9 | 53.338 | KV452945.1 | 7636115 | 8-scf00200 | 8 |
| AX-158074254 | 9 | 53.338 | KV452945.1 | 7992215 | 8-scf00200 | 8 |
| AX-158074270 | 9 | 53.338 | KV452945.1 | 8002347 | 8-scf00200 | 8 |
| AX-157870785 | 9 | 53.338 | KV452945.1 | 8005634 | 8-scf00200 | 8 |
| AX-158074288 | 9 | 53.338 | KV452945.1 | 8011648 | 8-scf00200 | 8 |
| AX-157756948 | 9 | 53.338 | KV452945.1 | 8113489 | 8-scf00200 | 8 |
| AX-158074526 | 9 | 53.338 | KV452945.1 | 8249397 | 8-scf00200 | 8 |
| AX-158074596 | 9 | 53.338 | KV452945.1 | 8307061 | 8-scf00200 | 8 |
| AX-158074598 | 9 | 53.338 | KV452945.1 | 8307493 | 8-scf00200 | 8 |
| AX-158074607 | 9 | 53.338 | KV452945.1 | 8312694 | 8-scf00200 | 8 |
| AX-158074609 | 9 | 53.338 | KV452945.1 | 8315007 | 8-scf00200 | 8 |
| AX-158074611 | 9 | 53.338 | KV452945.1 | 8317282 | 8-scf00200 | 8 |
| AX-158074614 | 9 | 53.338 | KV452945.1 | 8319497 | 8-scf00200 | 8 |
| AX-158074617 | 9 | 53.338 | KV452945.1 | 8323951 | 8-scf00200 | 8 |
| AX-158074641 | 9 | 53.338 | KV452945.1 | 8356394 | 8-scf00200 | 8 |
| AX-158074652 | 9 | 53.338 | KV452945.1 | 8366464 | 8-scf00200 | 8 |
| AX-158074659 | 9 | 53.338 | KV452945.1 | 8372961 | 8-scf00200 | 8 |
| AX-158074664 | 9 | 53.338 | KV452945.1 | 8374830 | 8-scf00200 | 8 |
| AX-158074705 | 9 | 53.338 | KV452945.1 | 8415965 | 8-scf00200 | 8 |
| AX-158074706 | 9 | 53.338 | KV452945.1 | 8416177 | 8-scf00200 | 8 |
| AX-158074727 | 9 | 53.338 | KV452945.1 | 8429462 | 8-scf00200 | 8 |
| AX-158074733 | 9 | 53.338 | KV452945.1 | 8433968 | 8-scf00200 | 8 |
| AX-158074736 | 9 | 53.338 | KV452945.1 | 8436959 | 8-scf00200 | 8 |
| AX-158074744 | 9 | 53.338 | KV452945.1 | 8445739 | 8-scf00200 | 8 |
| AX-158074791 | 9 | 53.338 | KV452945.1 | 8498981 | 8-scf00200 | 8 |
| AX-158074797 | 9 | 53.338 | KV452945.1 | 8506833 | 8-scf00200 | 8 |
| AX-158074827 | 9 | 53.338 | KV452945.1 | 8529563 | 8-scf00200 | 8 |
| AX-157824473 | 9 | 53.338 | KV452945.1 | 8555984 | 8-scf00200 | 8 |
| AX-157824480 | 9 | 53.338 | KV452945.1 | 8629106 | 8-scf00200 | 8 |
| AX-158074914 | 9 | 53.338 | KV452945.1 | 8661439 | 8-scf00200 | 8 |
| AX-157824482 | 9 | 53.338 | KV452945.1 | 8695195 | 8-scf00200 | 8 |
| AX-158392024 | 9 | 53.338 | KV452945.1 | 8706870 | 8-scf00200 | 8 |
| AX-158075085 | 9 | 53.338 | KV452945.1 | 8866310 | 8-scf00200 | 8 |
| AX-158075086 | 9 | 53.338 | KV452945.1 | 8866714 | 8-scf00200 | 8 |
| AX-158075113 | 9 | 53.338 | KV452945.1 | 8891817 | 8-scf00200 | 8 |
| AX-158075159 | 9 | 53.338 | KV452945.1 | 8948346 | 8-scf00200 | 8 |
| AX-158075165 | 9 | 53.338 | KV452945.1 | 8958775 | 8-scf00200 | 8 |
| AX-158075168 | 9 | 53.338 | KV452945.1 | 8960854 | 8-scf00200 | 8 |
| AX-157824507 | 9 | 53.338 | KV452945.1 | 8962714 | 8-scf00200 | 8 |
| AX-158075176 | 9 | 53.338 | KV452945.1 | 8965605 | 8-scf00200 | 8 |
| AX-158075182 | 9 | 53.338 | KV452945.1 | 8972820 | 8-scf00200 | 8 |

|              |   |        |             |          |            |    |
|--------------|---|--------|-------------|----------|------------|----|
| AX-158075188 | 9 | 53.338 | KV452945.1  | 8974971  | 8-scf00200 | 8  |
| AX-158075189 | 9 | 53.338 | KV452945.1  | 8975967  | 8-scf00200 | 8  |
| AX-157824508 | 9 | 53.338 | KV452945.1  | 8978787  | 8-scf00200 | 8  |
| AX-157824510 | 9 | 53.338 | KV452945.1  | 8979859  | 8-scf00200 | 8  |
| AX-158075275 | 9 | 53.338 | KV452945.1  | 9080115  | 8-scf00200 | 8  |
| AX-158075279 | 9 | 53.338 | KV452945.1  | 9084764  | 8-scf00200 | 8  |
| AX-157865656 | 9 | 53.338 | KV452945.1  | 9102663  | 8-scf00200 | 8  |
| AX-158075402 | 9 | 53.338 | KV452945.1  | 9217597  | 8-scf00200 | 8  |
| AX-157824564 | 9 | 53.338 | KV452945.1  | 9280614  | 8-scf00200 | 8  |
| AX-158075547 | 9 | 53.338 | KV452945.1  | 9355811  | 8-scf00200 | 8  |
| AX-158075656 | 9 | 53.338 | KV452945.1  | 9456888  | 8-scf00200 | 8  |
| AX-158076059 | 9 | 53.338 | KV452945.1  | 9938971  | 8-scf00200 | 8  |
| AX-158076128 | 9 | 53.338 | KV452945.1  | 9996542  | 8-scf00200 | 8  |
| AX-157824629 | 9 | 53.338 | KV452945.1  | 10006855 | 8-scf00200 | 8  |
| AX-158076260 | 9 | 53.338 | KV452945.1  | 10134691 | 8-scf00200 | 8  |
| AX-158076280 | 9 | 53.338 | KV452945.1  | 10161629 | 8-scf00200 | 8  |
| AX-158076297 | 9 | 53.338 | KV452945.1  | 10175441 | 8-scf00200 | 8  |
| AX-158076553 | 9 | 53.338 | KV452945.1  | 10464753 | 8-scf00200 | 8  |
| AX-158076582 | 9 | 53.338 | KV452945.1  | 10497799 | 8-scf00200 | 8  |
| AX-158076629 | 9 | 53.338 | KV452945.1  | 10532483 | 8-scf00200 | 8  |
| AX-157738331 | 9 | 53.338 | KV452945.1  | 10537208 | 8-scf00200 | 8  |
| AX-158076636 | 9 | 53.338 | KV452945.1  | 10537539 | 8-scf00200 | 8  |
| AX-158076857 | 9 | 53.338 | KV452945.1  | 10714062 | 8-scf00200 | 8  |
| AX-158077279 | 9 | 53.338 | KV452945.1  | 11232371 | 8-scf00200 | 8  |
| AX-158077289 | 9 | 53.338 | KV452945.1  | 11247541 | 8-scf00200 | 8  |
| AX-158077326 | 9 | 53.338 | KV452945.1  | 11272086 | 8-scf00200 | 8  |
| AX-158077400 | 9 | 53.338 | KV452945.1  | 11334226 | 8-scf00200 | 8  |
| AX-158077586 | 9 | 53.338 | KV452945.1  | 11524537 | 8-scf00200 | 8  |
| AX-157824745 | 9 | 53.338 | KV452945.1  | 11568223 | 8-scf00200 | 8  |
| AX-158077649 | 9 | 53.338 | KV452945.1  | 11572691 | 8-scf00200 | 8  |
| AX-158077846 | 9 | 53.338 | KV452945.1  | 11733862 | 8-scf00200 | 8  |
| AX-157824906 | 9 | 53.338 | KV452945.1  | 14273247 | 8-scf00200 | 8  |
| AX-157704922 | 9 | 53.338 | 3ML01028012 | 665      | scf03618_1 | UN |
| AX-157706074 | 9 | 53.338 | 3ML01031545 | 394      | scf07162_1 | UN |
| AX-158073930 | 9 | 53.369 | KV452945.1  | 7244406  | 8-scf00200 | 8  |
| AX-158072731 | 9 | 53.394 | KV452945.1  | 5403326  | 8-scf00200 | 8  |
| AX-158073899 | 9 | 53.394 | KV452945.1  | 7201659  | 8-scf00200 | 8  |
| AX-158073911 | 9 | 53.394 | KV452945.1  | 7217763  | 8-scf00200 | 8  |
| AX-158073954 | 9 | 53.394 | KV452945.1  | 7299585  | 8-scf00200 | 8  |
| AX-157714553 | 9 | 53.394 | KV452945.1  | 7311546  | 8-scf00200 | 8  |
| AX-158074355 | 9 | 53.394 | KV452945.1  | 8074496  | 8-scf00200 | 8  |
| AX-157824460 | 9 | 53.394 | KV452945.1  | 8165059  | 8-scf00200 | 8  |
| AX-158074441 | 9 | 53.394 | KV452945.1  | 8172110  | 8-scf00200 | 8  |
| AX-158074740 | 9 | 53.394 | KV452945.1  | 8441948  | 8-scf00200 | 8  |
| AX-158074751 | 9 | 53.394 | KV452945.1  | 8453031  | 8-scf00200 | 8  |
| AX-158074754 | 9 | 53.394 | KV452945.1  | 8456855  | 8-scf00200 | 8  |
| AX-158074755 | 9 | 53.394 | KV452945.1  | 8457332  | 8-scf00200 | 8  |
| AX-158074756 | 9 | 53.394 | KV452945.1  | 8458437  | 8-scf00200 | 8  |
| AX-158073170 | 9 | 53.412 | KV452945.1  | 5973381  | 8-scf00200 | 8  |
| AX-158073518 | 9 | 53.412 | KV452945.1  | 6304298  | 8-scf00200 | 8  |
| AX-158073525 | 9 | 53.412 | KV452945.1  | 6314143  | 8-scf00200 | 8  |



|              |   |        |            |         |            |   |
|--------------|---|--------|------------|---------|------------|---|
| AX-158073977 | 9 | 53.412 | KV452945.1 | 7394184 | 8-scf00200 | 8 |
| AX-158073982 | 9 | 53.412 | KV452945.1 | 7403052 | 8-scf00200 | 8 |
| AX-158073986 | 9 | 53.412 | KV452945.1 | 7404426 | 8-scf00200 | 8 |
| AX-157824420 | 9 | 53.412 | KV452945.1 | 7563348 | 8-scf00200 | 8 |
| AX-158074057 | 9 | 53.412 | KV452945.1 | 7574187 | 8-scf00200 | 8 |
| AX-158074058 | 9 | 53.412 | KV452945.1 | 7577665 | 8-scf00200 | 8 |
| AX-158074060 | 9 | 53.412 | KV452945.1 | 7586022 | 8-scf00200 | 8 |
| AX-157824422 | 9 | 53.412 | KV452945.1 | 7592785 | 8-scf00200 | 8 |
| AX-157716978 | 9 | 53.412 | KV452945.1 | 7593403 | 8-scf00200 | 8 |
| AX-158073994 | 9 | 53.423 | KV452945.1 | 7409045 | 8-scf00200 | 8 |
| AX-158409558 | 9 | 53.436 | KV452945.1 | 7445472 | 8-scf00200 | 8 |
| AX-158070444 | 9 | 53.447 | KV452945.1 | 1736569 | 8-scf00200 | 8 |
| AX-158070502 | 9 | 53.447 | KV452945.1 | 1912079 | 8-scf00200 | 8 |
| AX-158070617 | 9 | 53.447 | KV452945.1 | 2167186 | 8-scf00200 | 8 |
| AX-158070618 | 9 | 53.447 | KV452945.1 | 2169896 | 8-scf00200 | 8 |
| AX-158071057 | 9 | 53.447 | KV452945.1 | 2980747 | 8-scf00200 | 8 |
| AX-158071313 | 9 | 53.447 | KV452945.1 | 3440663 | 8-scf00200 | 8 |
| AX-158071383 | 9 | 53.447 | KV452945.1 | 3612123 | 8-scf00200 | 8 |
| AX-157744884 | 9 | 53.447 | KV452945.1 | 3625837 | 8-scf00200 | 8 |
| AX-158071391 | 9 | 53.447 | KV452945.1 | 3632273 | 8-scf00200 | 8 |
| AX-158071392 | 9 | 53.447 | KV452945.1 | 3632561 | 8-scf00200 | 8 |
| AX-157824203 | 9 | 53.447 | KV452945.1 | 3900952 | 8-scf00200 | 8 |
| AX-157824257 | 9 | 53.447 | KV452945.1 | 4501486 | 8-scf00200 | 8 |
| AX-157824258 | 9 | 53.447 | KV452945.1 | 4502845 | 8-scf00200 | 8 |
| AX-158072033 | 9 | 53.447 | KV452945.1 | 4516904 | 8-scf00200 | 8 |
| AX-157870739 | 9 | 53.447 | KV452945.1 | 4682125 | 8-scf00200 | 8 |
| AX-157824274 | 9 | 53.447 | KV452945.1 | 4688477 | 8-scf00200 | 8 |
| AX-158072207 | 9 | 53.447 | KV452945.1 | 4689886 | 8-scf00200 | 8 |
| AX-157824275 | 9 | 53.447 | KV452945.1 | 4698608 | 8-scf00200 | 8 |
| AX-158073118 | 9 | 53.447 | KV452945.1 | 5915218 | 8-scf00200 | 8 |
| AX-158073197 | 9 | 53.447 | KV452945.1 | 6002519 | 8-scf00200 | 8 |
| AX-158073199 | 9 | 53.447 | KV452945.1 | 6004600 | 8-scf00200 | 8 |
| AX-157877091 | 9 | 53.447 | KV452945.1 | 6025031 | 8-scf00200 | 8 |
| AX-158073253 | 9 | 53.447 | KV452945.1 | 6057786 | 8-scf00200 | 8 |
| AX-158073258 | 9 | 53.447 | KV452945.1 | 6067027 | 8-scf00200 | 8 |
| AX-157713628 | 9 | 53.447 | KV452945.1 | 6207744 | 8-scf00200 | 8 |
| AX-158073475 | 9 | 53.447 | KV452945.1 | 6256872 | 8-scf00200 | 8 |
| AX-158073492 | 9 | 53.447 | KV452945.1 | 6278518 | 8-scf00200 | 8 |
| AX-158409556 | 9 | 53.447 | KV452945.1 | 7393756 | 8-scf00200 | 8 |
| AX-158409557 | 9 | 53.447 | KV452945.1 | 7393821 | 8-scf00200 | 8 |
| AX-158391994 | 9 | 53.447 | KV452945.1 | 7439511 | 8-scf00200 | 8 |
| AX-158409559 | 9 | 53.447 | KV452945.1 | 7452135 | 8-scf00200 | 8 |
| AX-158074033 | 9 | 53.447 | KV452945.1 | 7461442 | 8-scf00200 | 8 |
| AX-158409560 | 9 | 53.447 | KV452945.1 | 7472389 | 8-scf00200 | 8 |
| AX-157824417 | 9 | 53.447 | KV452945.1 | 7493467 | 8-scf00200 | 8 |
| AX-158074111 | 9 | 53.447 | KV452945.1 | 7826967 | 8-scf00200 | 8 |
| AX-157753004 | 9 | 53.447 | KV452945.1 | 7848532 | 8-scf00200 | 8 |
| AX-158074139 | 9 | 53.447 | KV452945.1 | 7851593 | 8-scf00200 | 8 |
| AX-158074140 | 9 | 53.447 | KV452945.1 | 7852092 | 8-scf00200 | 8 |
| AX-157748485 | 9 | 53.447 | KV452945.1 | 7959191 | 8-scf00200 | 8 |
| AX-158074469 | 9 | 53.447 | KV452945.1 | 8201718 | 8-scf00200 | 8 |

|              |   |        |            |          |            |   |
|--------------|---|--------|------------|----------|------------|---|
| AX-158074470 | 9 | 53.447 | KV452945.1 | 8202314  | 8-scf00200 | 8 |
| AX-157771449 | 9 | 53.447 | KV452945.1 | 8221115  | 8-scf00200 | 8 |
| AX-158074500 | 9 | 53.447 | KV452945.1 | 8222854  | 8-scf00200 | 8 |
| AX-158384333 | 9 | 53.447 | KV452945.1 | 8232040  | 8-scf00200 | 8 |
| AX-158074517 | 9 | 53.447 | KV452945.1 | 8241540  | 8-scf00200 | 8 |
| AX-158074550 | 9 | 53.447 | KV452945.1 | 8263076  | 8-scf00200 | 8 |
| AX-158074559 | 9 | 53.447 | KV452945.1 | 8267657  | 8-scf00200 | 8 |
| AX-157715459 | 9 | 53.447 | KV452945.1 | 8326922  | 8-scf00200 | 8 |
| AX-158074814 | 9 | 53.447 | KV452945.1 | 8516893  | 8-scf00200 | 8 |
| AX-157824487 | 9 | 53.447 | KV452945.1 | 8726106  | 8-scf00200 | 8 |
| AX-158075410 | 9 | 53.447 | KV452945.1 | 9229914  | 8-scf00200 | 8 |
| AX-158076593 | 9 | 53.447 | KV452945.1 | 10508119 | 8-scf00200 | 8 |
| AX-157824668 | 9 | 53.447 | KV452945.1 | 10557122 | 8-scf00200 | 8 |
| AX-158076783 | 9 | 53.447 | KV452945.1 | 10662450 | 8-scf00200 | 8 |
| AX-158077519 | 9 | 53.447 | KV452945.1 | 11455705 | 8-scf00200 | 8 |
| AX-157824742 | 9 | 53.447 | KV452945.1 | 11525159 | 8-scf00200 | 8 |
| AX-158074219 | 9 | 53.448 | KV452945.1 | 7959675  | 8-scf00200 | 8 |
| AX-157824439 | 9 | 53.448 | KV452945.1 | 7960678  | 8-scf00200 | 8 |
| AX-157824440 | 9 | 53.448 | KV452945.1 | 7961404  | 8-scf00200 | 8 |
| AX-157715050 | 9 | 53.448 | KV452945.1 | 7974709  | 8-scf00200 | 8 |
| AX-158074266 | 9 | 53.448 | KV452945.1 | 8000243  | 8-scf00200 | 8 |
| AX-158074267 | 9 | 53.448 | KV452945.1 | 8000842  | 8-scf00200 | 8 |
| AX-158074273 | 9 | 53.448 | KV452945.1 | 8002699  | 8-scf00200 | 8 |
| AX-158074277 | 9 | 53.448 | KV452945.1 | 8007120  | 8-scf00200 | 8 |
| AX-158074391 | 9 | 53.451 | KV452945.1 | 8116816  | 8-scf00200 | 8 |
| AX-157824450 | 9 | 53.453 | KV452945.1 | 8128345  | 8-scf00200 | 8 |
| AX-158073574 | 9 | 53.455 | KV452945.1 | 6377961  | 8-scf00200 | 8 |
| AX-158073597 | 9 | 53.455 | KV452945.1 | 6423024  | 8-scf00200 | 8 |
| AX-158073598 | 9 | 53.455 | KV452945.1 | 6423664  | 8-scf00200 | 8 |
| AX-158074422 | 9 | 53.455 | KV452945.1 | 8144210  | 8-scf00200 | 8 |
| AX-158074594 | 9 | 53.455 | KV452945.1 | 8302835  | 8-scf00200 | 8 |
| AX-158074813 | 9 | 53.455 | KV452945.1 | 8516383  | 8-scf00200 | 8 |
| AX-158406831 | 9 | 53.455 | KV452945.1 | 8572964  | 8-scf00200 | 8 |
| AX-158075158 | 9 | 53.455 | KV452945.1 | 8947420  | 8-scf00200 | 8 |
| AX-158075174 | 9 | 53.455 | KV452945.1 | 8964509  | 8-scf00200 | 8 |
| AX-158075179 | 9 | 53.455 | KV452945.1 | 8966001  | 8-scf00200 | 8 |
| AX-158074436 | 9 | 53.457 | KV452945.1 | 8166504  | 8-scf00200 | 8 |
| AX-158074450 | 9 | 53.459 | KV452945.1 | 8186794  | 8-scf00200 | 8 |
| AX-158072135 | 9 | 53.462 | KV452945.1 | 4613199  | 8-scf00200 | 8 |
| AX-157824269 | 9 | 53.462 | KV452945.1 | 4643308  | 8-scf00200 | 8 |
| AX-158391965 | 9 | 53.462 | KV452945.1 | 4650099  | 8-scf00200 | 8 |
| AX-157824270 | 9 | 53.462 | KV452945.1 | 4650548  | 8-scf00200 | 8 |
| AX-157824292 | 9 | 53.462 | KV452945.1 | 4819598  | 8-scf00200 | 8 |
| AX-157824293 | 9 | 53.462 | KV452945.1 | 4820064  | 8-scf00200 | 8 |
| AX-157824294 | 9 | 53.462 | KV452945.1 | 4820593  | 8-scf00200 | 8 |
| AX-158072533 | 9 | 53.462 | KV452945.1 | 5079754  | 8-scf00200 | 8 |
| AX-158072554 | 9 | 53.462 | KV452945.1 | 5119910  | 8-scf00200 | 8 |
| AX-158072680 | 9 | 53.462 | KV452945.1 | 5322073  | 8-scf00200 | 8 |
| AX-158072716 | 9 | 53.462 | KV452945.1 | 5387602  | 8-scf00200 | 8 |
| AX-158072792 | 9 | 53.462 | KV452945.1 | 5469575  | 8-scf00200 | 8 |
| AX-157723099 | 9 | 53.462 | KV452945.1 | 5472157  | 8-scf00200 | 8 |

|              |   |        |            |         |            |   |
|--------------|---|--------|------------|---------|------------|---|
| AX-158072885 | 9 | 53.462 | KV452945.1 | 5603418 | 8-scf00200 | 8 |
| AX-158072889 | 9 | 53.462 | KV452945.1 | 5607764 | 8-scf00200 | 8 |
| AX-158072891 | 9 | 53.462 | KV452945.1 | 5608210 | 8-scf00200 | 8 |
| AX-158072892 | 9 | 53.462 | KV452945.1 | 5608866 | 8-scf00200 | 8 |
| AX-158073049 | 9 | 53.462 | KV452945.1 | 5805570 | 8-scf00200 | 8 |
| AX-158073056 | 9 | 53.462 | KV452945.1 | 5812830 | 8-scf00200 | 8 |
| AX-157824369 | 9 | 53.462 | KV452945.1 | 5944528 | 8-scf00200 | 8 |
| AX-158074402 | 9 | 53.462 | KV452945.1 | 8129996 | 8-scf00200 | 8 |
| AX-157824462 | 9 | 53.462 | KV452945.1 | 8189561 | 8-scf00200 | 8 |
| AX-158074471 | 9 | 53.464 | KV452945.1 | 8202852 | 8-scf00200 | 8 |
| AX-157824444 | 9 | 53.467 | KV452945.1 | 8084612 | 8-scf00200 | 8 |
| AX-158074466 | 9 | 53.467 | KV452945.1 | 8198923 | 8-scf00200 | 8 |
| AX-158074477 | 9 | 53.467 | KV452945.1 | 8205915 | 8-scf00200 | 8 |
| AX-158074487 | 9 | 53.467 | KV452945.1 | 8212238 | 8-scf00200 | 8 |
| AX-158074493 | 9 | 53.467 | KV452945.1 | 8217397 | 8-scf00200 | 8 |
| AX-157824465 | 9 | 53.467 | KV452945.1 | 8223653 | 8-scf00200 | 8 |
| AX-158074510 | 9 | 53.467 | KV452945.1 | 8228191 | 8-scf00200 | 8 |
| AX-158074515 | 9 | 53.467 | KV452945.1 | 8232636 | 8-scf00200 | 8 |
| AX-158409570 | 9 | 53.467 | KV452945.1 | 8236739 | 8-scf00200 | 8 |
| AX-157824466 | 9 | 53.467 | KV452945.1 | 8241067 | 8-scf00200 | 8 |
| AX-158074628 | 9 | 53.467 | KV452945.1 | 8332941 | 8-scf00200 | 8 |
| AX-158074730 | 9 | 53.467 | KV452945.1 | 8431776 | 8-scf00200 | 8 |
| AX-158074694 | 9 | 53.468 | KV452945.1 | 8404555 | 8-scf00200 | 8 |
| AX-158074760 | 9 | 53.523 | KV452945.1 | 8465105 | 8-scf00200 | 8 |
| AX-158074784 | 9 | 53.523 | KV452945.1 | 8492953 | 8-scf00200 | 8 |
| AX-157824512 | 9 | 53.523 | KV452945.1 | 8988600 | 8-scf00200 | 8 |
| AX-158075199 | 9 | 53.523 | KV452945.1 | 8994642 | 8-scf00200 | 8 |
| AX-157824513 | 9 | 53.523 | KV452945.1 | 8995231 | 8-scf00200 | 8 |
| AX-158075348 | 9 | 53.523 | KV452945.1 | 9162213 | 8-scf00200 | 8 |
| AX-158073383 | 9 | 53.579 | KV452945.1 | 6182499 | 8-scf00200 | 8 |
| AX-158073897 | 9 | 53.579 | KV452945.1 | 7184738 | 8-scf00200 | 8 |
| AX-158073905 | 9 | 53.579 | KV452945.1 | 7212878 | 8-scf00200 | 8 |
| AX-158073909 | 9 | 53.579 | KV452945.1 | 7217067 | 8-scf00200 | 8 |
| AX-157714637 | 9 | 53.579 | KV452945.1 | 8244414 | 8-scf00200 | 8 |
| AX-157741148 | 9 | 53.579 | KV452945.1 | 8248658 | 8-scf00200 | 8 |
| AX-158074524 | 9 | 53.579 | KV452945.1 | 8249051 | 8-scf00200 | 8 |
| AX-158074528 | 9 | 53.579 | KV452945.1 | 8249988 | 8-scf00200 | 8 |
| AX-157824469 | 9 | 53.579 | KV452945.1 | 8270584 | 8-scf00200 | 8 |
| AX-158074717 | 9 | 53.579 | KV452945.1 | 8423890 | 8-scf00200 | 8 |
| AX-158074775 | 9 | 53.579 | KV452945.1 | 8482047 | 8-scf00200 | 8 |
| AX-158074789 | 9 | 53.579 | KV452945.1 | 8496913 | 8-scf00200 | 8 |
| AX-158074803 | 9 | 53.579 | KV452945.1 | 8508843 | 8-scf00200 | 8 |
| AX-158074846 | 9 | 53.579 | KV452945.1 | 8562015 | 8-scf00200 | 8 |
| AX-158075366 | 9 | 53.579 | KV452945.1 | 9177379 | 8-scf00200 | 8 |
| AX-158073810 | 9 | 53.718 | KV452945.1 | 6941283 | 8-scf00200 | 8 |
| AX-158073813 | 9 | 53.718 | KV452945.1 | 6948461 | 8-scf00200 | 8 |
| AX-158073815 | 9 | 53.718 | KV452945.1 | 6959688 | 8-scf00200 | 8 |
| AX-158074890 | 9 | 53.718 | KV452945.1 | 8614285 | 8-scf00200 | 8 |
| AX-158074892 | 9 | 53.718 | KV452945.1 | 8614700 | 8-scf00200 | 8 |
| AX-158074896 | 9 | 53.718 | KV452945.1 | 8636617 | 8-scf00200 | 8 |
| AX-158074899 | 9 | 53.718 | KV452945.1 | 8648811 | 8-scf00200 | 8 |

|              |   |        |            |          |            |   |
|--------------|---|--------|------------|----------|------------|---|
| AX-158074931 | 9 | 53.718 | KV452945.1 | 8684621  | 8-scf00200 | 8 |
| AX-157824485 | 9 | 53.718 | KV452945.1 | 8711305  | 8-scf00200 | 8 |
| AX-158075213 | 9 | 53.718 | KV452945.1 | 9007310  | 8-scf00200 | 8 |
| AX-158075241 | 9 | 53.718 | KV452945.1 | 9045720  | 8-scf00200 | 8 |
| AX-158075244 | 9 | 53.718 | KV452945.1 | 9047060  | 8-scf00200 | 8 |
| AX-158072500 | 9 | 53.719 | KV452945.1 | 5015365  | 8-scf00200 | 8 |
| AX-158072583 | 9 | 53.719 | KV452945.1 | 5187107  | 8-scf00200 | 8 |
| AX-158072690 | 9 | 53.719 | KV452945.1 | 5348238  | 8-scf00200 | 8 |
| AX-158072962 | 9 | 53.719 | KV452945.1 | 5709578  | 8-scf00200 | 8 |
| AX-157824360 | 9 | 53.719 | KV452945.1 | 5865976  | 8-scf00200 | 8 |
| AX-158074886 | 9 | 53.719 | KV452945.1 | 8603506  | 8-scf00200 | 8 |
| AX-158075092 | 9 | 53.719 | KV452945.1 | 8872851  | 8-scf00200 | 8 |
| AX-158075093 | 9 | 53.719 | KV452945.1 | 8873921  | 8-scf00200 | 8 |
| AX-158075273 | 9 | 53.988 | KV452945.1 | 9079657  | 8-scf00200 | 8 |
| AX-158075276 | 9 | 53.988 | KV452945.1 | 9081475  | 8-scf00200 | 8 |
| AX-158075302 | 9 | 53.992 | KV452945.1 | 9115881  | 8-scf00200 | 8 |
| AX-158075307 | 9 | 53.996 | KV452945.1 | 9116970  | 8-scf00200 | 8 |
| AX-158384340 | 9 | 53.996 | KV452945.1 | 9138321  | 8-scf00200 | 8 |
| AX-158077595 | 9 | 53.996 | KV452945.1 | 11532499 | 8-scf00200 | 8 |
| AX-157824552 | 9 | 53.999 | KV452945.1 | 9123970  | 8-scf00200 | 8 |
| AX-157824558 | 9 | 54.544 | KV452945.1 | 9189905  | 8-scf00200 | 8 |
| AX-158075442 | 9 | 54.726 | KV452945.1 | 9261305  | 8-scf00200 | 8 |
| AX-158075443 | 9 | 54.989 | KV452945.1 | 9262130  | 8-scf00200 | 8 |
| AX-157752939 | 9 | 54.989 | KV452945.1 | 9473686  | 8-scf00200 | 8 |
| AX-157824385 | 9 | 55.089 | KV452945.1 | 6217111  | 8-scf00200 | 8 |
| AX-158409549 | 9 | 55.089 | KV452945.1 | 6327656  | 8-scf00200 | 8 |
| AX-158074522 | 9 | 55.089 | KV452945.1 | 8246787  | 8-scf00200 | 8 |
| AX-157716908 | 9 | 55.089 | KV452945.1 | 8699163  | 8-scf00200 | 8 |
| AX-158075006 | 9 | 55.089 | KV452945.1 | 8783651  | 8-scf00200 | 8 |
| AX-158075104 | 9 | 55.089 | KV452945.1 | 8882489  | 8-scf00200 | 8 |
| AX-158075445 | 9 | 55.089 | KV452945.1 | 9264442  | 8-scf00200 | 8 |
| AX-157824565 | 9 | 55.089 | KV452945.1 | 9283665  | 8-scf00200 | 8 |
| AX-157745590 | 9 | 55.089 | KV452945.1 | 9286796  | 8-scf00200 | 8 |
| AX-158075464 | 9 | 55.089 | KV452945.1 | 9291572  | 8-scf00200 | 8 |
| AX-158075659 | 9 | 55.089 | KV452945.1 | 9458494  | 8-scf00200 | 8 |
| AX-157724178 | 9 | 55.089 | KV452945.1 | 9926024  | 8-scf00200 | 8 |
| AX-158076177 | 9 | 55.089 | KV452945.1 | 10062591 | 8-scf00200 | 8 |
| AX-158076244 | 9 | 55.089 | KV452945.1 | 10125990 | 8-scf00200 | 8 |
| AX-158076323 | 9 | 55.089 | KV452945.1 | 10202884 | 8-scf00200 | 8 |
| AX-157716256 | 9 | 55.089 | KV452945.1 | 10697782 | 8-scf00200 | 8 |
| AX-158409639 | 9 | 55.089 | KV452945.1 | 10703767 | 8-scf00200 | 8 |
| AX-157714433 | 9 | 55.089 | KV452945.1 | 11032794 | 8-scf00200 | 8 |
| AX-158077633 | 9 | 55.089 | KV452945.1 | 11563513 | 8-scf00200 | 8 |
| AX-158077928 | 9 | 55.089 | KV452945.1 | 11802877 | 8-scf00200 | 8 |
| AX-158078065 | 9 | 55.089 | KV452945.1 | 11920323 | 8-scf00200 | 8 |
| AX-158078325 | 9 | 55.089 | KV452945.1 | 12152788 | 8-scf00200 | 8 |
| AX-158079586 | 9 | 55.089 | KV452945.1 | 13645069 | 8-scf00200 | 8 |
| AX-158081614 | 9 | 55.089 | KV452947.1 | 103874   | 8-scf00203 | 8 |
| AX-158081716 | 9 | 55.089 | KV452947.1 | 187467   | 8-scf00203 | 8 |
| AX-158075500 | 9 | 55.139 | KV452945.1 | 9318564  | 8-scf00200 | 8 |
| AX-157772034 | 9 | 55.198 | KV452945.1 | 9319792  | 8-scf00200 | 8 |

|              |   |        |            |          |            |   |
|--------------|---|--------|------------|----------|------------|---|
| AX-158075503 | 9 | 55.198 | KV452945.1 | 9322464  | 8-scf00200 | 8 |
| AX-158075504 | 9 | 55.239 | KV452945.1 | 9322933  | 8-scf00200 | 8 |
| AX-158075513 | 9 | 55.282 | KV452945.1 | 9328746  | 8-scf00200 | 8 |
| AX-158075537 | 9 | 55.307 | KV452945.1 | 9345615  | 8-scf00200 | 8 |
| AX-158075563 | 9 | 55.325 | KV452945.1 | 9379803  | 8-scf00200 | 8 |
| AX-158075580 | 9 | 55.325 | KV452945.1 | 9393278  | 8-scf00200 | 8 |
| AX-157717114 | 9 | 55.325 | KV452945.1 | 9422264  | 8-scf00200 | 8 |
| AX-157824578 | 9 | 55.325 | KV452945.1 | 9422522  | 8-scf00200 | 8 |
| AX-157824581 | 9 | 55.325 | KV452945.1 | 9433693  | 8-scf00200 | 8 |
| AX-157824576 | 9 | 55.349 | KV452945.1 | 9395769  | 8-scf00200 | 8 |
| AX-158075587 | 9 | 55.361 | KV452945.1 | 9397748  | 8-scf00200 | 8 |
| AX-157824555 | 9 | 55.417 | KV452945.1 | 9172914  | 8-scf00200 | 8 |
| AX-157757157 | 9 | 55.417 | KV452945.1 | 9347378  | 8-scf00200 | 8 |
| AX-158075549 | 9 | 55.417 | KV452945.1 | 9360180  | 8-scf00200 | 8 |
| AX-158075552 | 9 | 55.417 | KV452945.1 | 9367228  | 8-scf00200 | 8 |
| AX-158075560 | 9 | 55.417 | KV452945.1 | 9375891  | 8-scf00200 | 8 |
| AX-158075566 | 9 | 55.417 | KV452945.1 | 9382052  | 8-scf00200 | 8 |
| AX-158075568 | 9 | 55.417 | KV452945.1 | 9383642  | 8-scf00200 | 8 |
| AX-158075599 | 9 | 55.417 | KV452945.1 | 9403985  | 8-scf00200 | 8 |
| AX-158075600 | 9 | 55.417 | KV452945.1 | 9404236  | 8-scf00200 | 8 |
| AX-158075601 | 9 | 55.417 | KV452945.1 | 9404673  | 8-scf00200 | 8 |
| AX-158075603 | 9 | 55.417 | KV452945.1 | 9405179  | 8-scf00200 | 8 |
| AX-158075604 | 9 | 55.417 | KV452945.1 | 9405528  | 8-scf00200 | 8 |
| AX-158075609 | 9 | 55.417 | KV452945.1 | 9408806  | 8-scf00200 | 8 |
| AX-158075617 | 9 | 55.417 | KV452945.1 | 9413160  | 8-scf00200 | 8 |
| AX-158075619 | 9 | 55.417 | KV452945.1 | 9413586  | 8-scf00200 | 8 |
| AX-158075634 | 9 | 55.417 | KV452945.1 | 9429305  | 8-scf00200 | 8 |
| AX-158075644 | 9 | 55.417 | KV452945.1 | 9443431  | 8-scf00200 | 8 |
| AX-158075653 | 9 | 55.417 | KV452945.1 | 9453763  | 8-scf00200 | 8 |
| AX-158075657 | 9 | 55.417 | KV452945.1 | 9457440  | 8-scf00200 | 8 |
| AX-158075669 | 9 | 55.417 | KV452945.1 | 9463763  | 8-scf00200 | 8 |
| AX-158075685 | 9 | 55.417 | KV452945.1 | 9476936  | 8-scf00200 | 8 |
| AX-158075686 | 9 | 55.417 | KV452945.1 | 9478211  | 8-scf00200 | 8 |
| AX-158075694 | 9 | 55.417 | KV452945.1 | 9481335  | 8-scf00200 | 8 |
| AX-158075870 | 9 | 55.417 | KV452945.1 | 9714826  | 8-scf00200 | 8 |
| AX-158078116 | 9 | 55.417 | KV452945.1 | 11960556 | 8-scf00200 | 8 |
| AX-158075716 | 9 | 55.51  | KV452945.1 | 9519149  | 8-scf00200 | 8 |
| AX-158075718 | 9 | 55.575 | KV452945.1 | 9519419  | 8-scf00200 | 8 |
| AX-158075570 | 9 | 55.635 | KV452945.1 | 9384158  | 8-scf00200 | 8 |
| AX-158075583 | 9 | 55.635 | KV452945.1 | 9393524  | 8-scf00200 | 8 |
| AX-158075610 | 9 | 55.635 | KV452945.1 | 9410042  | 8-scf00200 | 8 |
| AX-158075714 | 9 | 55.635 | KV452945.1 | 9518778  | 8-scf00200 | 8 |
| AX-158075723 | 9 | 55.635 | KV452945.1 | 9524685  | 8-scf00200 | 8 |
| AX-158075727 | 9 | 55.635 | KV452945.1 | 9529496  | 8-scf00200 | 8 |
| AX-157824585 | 9 | 55.635 | KV452945.1 | 9530074  | 8-scf00200 | 8 |
| AX-157857072 | 9 | 55.635 | KV452945.1 | 9530144  | 8-scf00200 | 8 |
| AX-158075728 | 9 | 55.635 | KV452945.1 | 9532696  | 8-scf00200 | 8 |
| AX-158075731 | 9 | 55.635 | KV452945.1 | 9534688  | 8-scf00200 | 8 |
| AX-158075732 | 9 | 55.635 | KV452945.1 | 9535150  | 8-scf00200 | 8 |
| AX-158075741 | 9 | 55.635 | KV452945.1 | 9542476  | 8-scf00200 | 8 |
| AX-158075744 | 9 | 55.635 | KV452945.1 | 9543422  | 8-scf00200 | 8 |

|              |   |        |            |         |            |   |
|--------------|---|--------|------------|---------|------------|---|
| AX-158075754 | 9 | 55.635 | KV452945.1 | 9545475 | 8-scf00200 | 8 |
| AX-158075756 | 9 | 55.635 | KV452945.1 | 9550452 | 8-scf00200 | 8 |
| AX-158075759 | 9 | 55.635 | KV452945.1 | 9554363 | 8-scf00200 | 8 |
| AX-157824586 | 9 | 55.635 | KV452945.1 | 9557195 | 8-scf00200 | 8 |
| AX-158075761 | 9 | 55.635 | KV452945.1 | 9558962 | 8-scf00200 | 8 |
| AX-158075763 | 9 | 55.635 | KV452945.1 | 9559690 | 8-scf00200 | 8 |
| AX-158075778 | 9 | 55.635 | KV452945.1 | 9591883 | 8-scf00200 | 8 |
| AX-157824587 | 9 | 55.635 | KV452945.1 | 9592692 | 8-scf00200 | 8 |
| AX-157824588 | 9 | 55.635 | KV452945.1 | 9593036 | 8-scf00200 | 8 |
| AX-158075779 | 9 | 55.635 | KV452945.1 | 9596704 | 8-scf00200 | 8 |
| AX-157824589 | 9 | 55.635 | KV452945.1 | 9597044 | 8-scf00200 | 8 |
| AX-158075780 | 9 | 55.635 | KV452945.1 | 9597594 | 8-scf00200 | 8 |
| AX-158075786 | 9 | 55.635 | KV452945.1 | 9605200 | 8-scf00200 | 8 |
| AX-157824590 | 9 | 55.635 | KV452945.1 | 9610405 | 8-scf00200 | 8 |
| AX-157857073 | 9 | 55.635 | KV452945.1 | 9615441 | 8-scf00200 | 8 |
| AX-157885520 | 9 | 55.635 | KV452945.1 | 9617738 | 8-scf00200 | 8 |
| AX-158075790 | 9 | 55.635 | KV452945.1 | 9619919 | 8-scf00200 | 8 |
| AX-158075793 | 9 | 55.635 | KV452945.1 | 9622211 | 8-scf00200 | 8 |
| AX-158075794 | 9 | 55.635 | KV452945.1 | 9625627 | 8-scf00200 | 8 |
| AX-158075798 | 9 | 55.635 | KV452945.1 | 9632161 | 8-scf00200 | 8 |
| AX-158075800 | 9 | 55.635 | KV452945.1 | 9636282 | 8-scf00200 | 8 |
| AX-157743710 | 9 | 55.635 | KV452945.1 | 9638720 | 8-scf00200 | 8 |
| AX-158075802 | 9 | 55.635 | KV452945.1 | 9638828 | 8-scf00200 | 8 |
| AX-157824594 | 9 | 55.635 | KV452945.1 | 9646389 | 8-scf00200 | 8 |
| AX-157824596 | 9 | 55.635 | KV452945.1 | 9655127 | 8-scf00200 | 8 |
| AX-158075810 | 9 | 55.635 | KV452945.1 | 9661673 | 8-scf00200 | 8 |
| AX-158075811 | 9 | 55.635 | KV452945.1 | 9662014 | 8-scf00200 | 8 |
| AX-157824597 | 9 | 55.635 | KV452945.1 | 9664725 | 8-scf00200 | 8 |
| AX-158075816 | 9 | 55.635 | KV452945.1 | 9665266 | 8-scf00200 | 8 |
| AX-158075818 | 9 | 55.635 | KV452945.1 | 9666039 | 8-scf00200 | 8 |
| AX-158075819 | 9 | 55.635 | KV452945.1 | 9667148 | 8-scf00200 | 8 |
| AX-158075826 | 9 | 55.635 | KV452945.1 | 9676585 | 8-scf00200 | 8 |
| AX-157824598 | 9 | 55.635 | KV452945.1 | 9680174 | 8-scf00200 | 8 |
| AX-158409609 | 9 | 55.635 | KV452945.1 | 9681393 | 8-scf00200 | 8 |
| AX-158075832 | 9 | 55.635 | KV452945.1 | 9681612 | 8-scf00200 | 8 |
| AX-158075837 | 9 | 55.635 | KV452945.1 | 9687865 | 8-scf00200 | 8 |
| AX-158075839 | 9 | 55.635 | KV452945.1 | 9690608 | 8-scf00200 | 8 |
| AX-158075844 | 9 | 55.635 | KV452945.1 | 9691955 | 8-scf00200 | 8 |
| AX-158075846 | 9 | 55.635 | KV452945.1 | 9693575 | 8-scf00200 | 8 |
| AX-158075848 | 9 | 55.635 | KV452945.1 | 9696790 | 8-scf00200 | 8 |
| AX-158075852 | 9 | 55.635 | KV452945.1 | 9698638 | 8-scf00200 | 8 |
| AX-158075854 | 9 | 55.635 | KV452945.1 | 9699663 | 8-scf00200 | 8 |
| AX-158075855 | 9 | 55.635 | KV452945.1 | 9701091 | 8-scf00200 | 8 |
| AX-158075880 | 9 | 55.635 | KV452945.1 | 9729685 | 8-scf00200 | 8 |
| AX-158075919 | 9 | 55.635 | KV452945.1 | 9776531 | 8-scf00200 | 8 |
| AX-158075925 | 9 | 55.635 | KV452945.1 | 9779716 | 8-scf00200 | 8 |
| AX-158075945 | 9 | 55.635 | KV452945.1 | 9797899 | 8-scf00200 | 8 |
| AX-158075954 | 9 | 55.635 | KV452945.1 | 9805724 | 8-scf00200 | 8 |
| AX-158075965 | 9 | 55.635 | KV452945.1 | 9817067 | 8-scf00200 | 8 |
| AX-158075966 | 9 | 55.635 | KV452945.1 | 9817905 | 8-scf00200 | 8 |
| AX-158075969 | 9 | 55.635 | KV452945.1 | 9818808 | 8-scf00200 | 8 |

|              |   |        |            |         |            |   |
|--------------|---|--------|------------|---------|------------|---|
| AX-158075971 | 9 | 55.635 | KV452945.1 | 9820026 | 8-scf00200 | 8 |
| AX-158075973 | 9 | 55.635 | KV452945.1 | 9827122 | 8-scf00200 | 8 |
| AX-158075974 | 9 | 55.635 | KV452945.1 | 9828737 | 8-scf00200 | 8 |
| AX-157717865 | 9 | 55.635 | KV452945.1 | 9830729 | 8-scf00200 | 8 |
| AX-158075978 | 9 | 55.635 | KV452945.1 | 9833012 | 8-scf00200 | 8 |
| AX-157740534 | 9 | 55.635 | KV452945.1 | 9833677 | 8-scf00200 | 8 |
| AX-158075980 | 9 | 55.635 | KV452945.1 | 9834960 | 8-scf00200 | 8 |
| AX-158075981 | 9 | 55.635 | KV452945.1 | 9836191 | 8-scf00200 | 8 |
| AX-158075983 | 9 | 55.635 | KV452945.1 | 9837250 | 8-scf00200 | 8 |
| AX-158075984 | 9 | 55.635 | KV452945.1 | 9837703 | 8-scf00200 | 8 |
| AX-157824613 | 9 | 55.635 | KV452945.1 | 9840361 | 8-scf00200 | 8 |
| AX-158075985 | 9 | 55.635 | KV452945.1 | 9841740 | 8-scf00200 | 8 |
| AX-158075987 | 9 | 55.635 | KV452945.1 | 9842234 | 8-scf00200 | 8 |
| AX-158075989 | 9 | 55.635 | KV452945.1 | 9843097 | 8-scf00200 | 8 |
| AX-158075990 | 9 | 55.635 | KV452945.1 | 9843328 | 8-scf00200 | 8 |
| AX-158075991 | 9 | 55.635 | KV452945.1 | 9845836 | 8-scf00200 | 8 |
| AX-158075993 | 9 | 55.635 | KV452945.1 | 9849581 | 8-scf00200 | 8 |
| AX-158076001 | 9 | 55.635 | KV452945.1 | 9853795 | 8-scf00200 | 8 |
| AX-158076002 | 9 | 55.635 | KV452945.1 | 9855153 | 8-scf00200 | 8 |
| AX-158076005 | 9 | 55.635 | KV452945.1 | 9856692 | 8-scf00200 | 8 |
| AX-158076007 | 9 | 55.635 | KV452945.1 | 9857176 | 8-scf00200 | 8 |
| AX-158076008 | 9 | 55.635 | KV452945.1 | 9859844 | 8-scf00200 | 8 |
| AX-158076009 | 9 | 55.635 | KV452945.1 | 9861150 | 8-scf00200 | 8 |
| AX-158076011 | 9 | 55.635 | KV452945.1 | 9863416 | 8-scf00200 | 8 |
| AX-158076013 | 9 | 55.635 | KV452945.1 | 9864847 | 8-scf00200 | 8 |
| AX-158076016 | 9 | 55.635 | KV452945.1 | 9865648 | 8-scf00200 | 8 |
| AX-158076021 | 9 | 55.635 | KV452945.1 | 9868921 | 8-scf00200 | 8 |
| AX-158076023 | 9 | 55.635 | KV452945.1 | 9871569 | 8-scf00200 | 8 |
| AX-158076027 | 9 | 55.635 | KV452945.1 | 9874797 | 8-scf00200 | 8 |
| AX-158076029 | 9 | 55.635 | KV452945.1 | 9876116 | 8-scf00200 | 8 |
| AX-157824615 | 9 | 55.635 | KV452945.1 | 9876550 | 8-scf00200 | 8 |
| AX-158076030 | 9 | 55.635 | KV452945.1 | 9877176 | 8-scf00200 | 8 |
| AX-158076031 | 9 | 55.635 | KV452945.1 | 9880156 | 8-scf00200 | 8 |
| AX-158406860 | 9 | 55.635 | KV452945.1 | 9884662 | 8-scf00200 | 8 |
| AX-157857075 | 9 | 55.635 | KV452945.1 | 9888793 | 8-scf00200 | 8 |
| AX-158076034 | 9 | 55.635 | KV452945.1 | 9891085 | 8-scf00200 | 8 |
| AX-158076035 | 9 | 55.635 | KV452945.1 | 9892248 | 8-scf00200 | 8 |
| AX-157824617 | 9 | 55.635 | KV452945.1 | 9893578 | 8-scf00200 | 8 |
| AX-157885523 | 9 | 55.635 | KV452945.1 | 9898263 | 8-scf00200 | 8 |
| AX-158076036 | 9 | 55.635 | KV452945.1 | 9901195 | 8-scf00200 | 8 |
| AX-158076039 | 9 | 55.635 | KV452945.1 | 9903847 | 8-scf00200 | 8 |
| AX-158076042 | 9 | 55.635 | KV452945.1 | 9912052 | 8-scf00200 | 8 |
| AX-157857076 | 9 | 55.635 | KV452945.1 | 9912108 | 8-scf00200 | 8 |
| AX-157824620 | 9 | 55.635 | KV452945.1 | 9918781 | 8-scf00200 | 8 |
| AX-157824622 | 9 | 55.635 | KV452945.1 | 9919642 | 8-scf00200 | 8 |
| AX-158076047 | 9 | 55.635 | KV452945.1 | 9922357 | 8-scf00200 | 8 |
| AX-158076048 | 9 | 55.635 | KV452945.1 | 9924200 | 8-scf00200 | 8 |
| AX-157824623 | 9 | 55.635 | KV452945.1 | 9930060 | 8-scf00200 | 8 |
| AX-157824624 | 9 | 55.635 | KV452945.1 | 9931518 | 8-scf00200 | 8 |
| AX-158076052 | 9 | 55.635 | KV452945.1 | 9934058 | 8-scf00200 | 8 |
| AX-158076057 | 9 | 55.635 | KV452945.1 | 9937016 | 8-scf00200 | 8 |

|              |   |        |            |          |            |   |
|--------------|---|--------|------------|----------|------------|---|
| AX-158076065 | 9 | 55.635 | KV452945.1 | 9949065  | 8-scf00200 | 8 |
| AX-158076068 | 9 | 55.635 | KV452945.1 | 9950709  | 8-scf00200 | 8 |
| AX-158076069 | 9 | 55.635 | KV452945.1 | 9951001  | 8-scf00200 | 8 |
| AX-158076070 | 9 | 55.635 | KV452945.1 | 9951752  | 8-scf00200 | 8 |
| AX-158076071 | 9 | 55.635 | KV452945.1 | 9953354  | 8-scf00200 | 8 |
| AX-158076072 | 9 | 55.635 | KV452945.1 | 9953789  | 8-scf00200 | 8 |
| AX-158076073 | 9 | 55.635 | KV452945.1 | 9955437  | 8-scf00200 | 8 |
| AX-158076074 | 9 | 55.635 | KV452945.1 | 9955909  | 8-scf00200 | 8 |
| AX-158076075 | 9 | 55.635 | KV452945.1 | 9956272  | 8-scf00200 | 8 |
| AX-158076076 | 9 | 55.635 | KV452945.1 | 9956522  | 8-scf00200 | 8 |
| AX-158076077 | 9 | 55.635 | KV452945.1 | 9956916  | 8-scf00200 | 8 |
| AX-158076078 | 9 | 55.635 | KV452945.1 | 9957282  | 8-scf00200 | 8 |
| AX-158076079 | 9 | 55.635 | KV452945.1 | 9958370  | 8-scf00200 | 8 |
| AX-158076081 | 9 | 55.635 | KV452945.1 | 9959229  | 8-scf00200 | 8 |
| AX-157885524 | 9 | 55.635 | KV452945.1 | 9959309  | 8-scf00200 | 8 |
| AX-158076082 | 9 | 55.635 | KV452945.1 | 9960302  | 8-scf00200 | 8 |
| AX-158076086 | 9 | 55.635 | KV452945.1 | 9963250  | 8-scf00200 | 8 |
| AX-158076093 | 9 | 55.635 | KV452945.1 | 9968391  | 8-scf00200 | 8 |
| AX-158076094 | 9 | 55.635 | KV452945.1 | 9968917  | 8-scf00200 | 8 |
| AX-158076097 | 9 | 55.635 | KV452945.1 | 9970344  | 8-scf00200 | 8 |
| AX-158076098 | 9 | 55.635 | KV452945.1 | 9971693  | 8-scf00200 | 8 |
| AX-158076100 | 9 | 55.635 | KV452945.1 | 9972281  | 8-scf00200 | 8 |
| AX-158076101 | 9 | 55.635 | KV452945.1 | 9973750  | 8-scf00200 | 8 |
| AX-158076104 | 9 | 55.635 | KV452945.1 | 9975564  | 8-scf00200 | 8 |
| AX-158076107 | 9 | 55.635 | KV452945.1 | 9977689  | 8-scf00200 | 8 |
| AX-158076109 | 9 | 55.635 | KV452945.1 | 9978409  | 8-scf00200 | 8 |
| AX-158076110 | 9 | 55.635 | KV452945.1 | 9979953  | 8-scf00200 | 8 |
| AX-158076112 | 9 | 55.635 | KV452945.1 | 9980232  | 8-scf00200 | 8 |
| AX-158076122 | 9 | 55.635 | KV452945.1 | 9990252  | 8-scf00200 | 8 |
| AX-158076125 | 9 | 55.635 | KV452945.1 | 9992380  | 8-scf00200 | 8 |
| AX-158076129 | 9 | 55.635 | KV452945.1 | 9997130  | 8-scf00200 | 8 |
| AX-158076221 | 9 | 55.635 | KV452945.1 | 10107277 | 8-scf00200 | 8 |
| AX-157824644 | 9 | 55.635 | KV452945.1 | 10203763 | 8-scf00200 | 8 |
| AX-157824645 | 9 | 55.635 | KV452945.1 | 10206714 | 8-scf00200 | 8 |
| AX-158076347 | 9 | 55.635 | KV452945.1 | 10232932 | 8-scf00200 | 8 |
| AX-158076450 | 9 | 55.635 | KV452945.1 | 10353061 | 8-scf00200 | 8 |
| AX-158076479 | 9 | 55.635 | KV452945.1 | 10382789 | 8-scf00200 | 8 |
| AX-158416607 | 9 | 55.635 | KV452945.1 | 10382905 | 8-scf00200 | 8 |
| AX-158076603 | 9 | 55.635 | KV452945.1 | 10516277 | 8-scf00200 | 8 |
| AX-158076632 | 9 | 55.635 | KV452945.1 | 10534167 | 8-scf00200 | 8 |
| AX-158076639 | 9 | 55.635 | KV452945.1 | 10538193 | 8-scf00200 | 8 |
| AX-158076700 | 9 | 55.635 | KV452945.1 | 10608462 | 8-scf00200 | 8 |
| AX-158076705 | 9 | 55.635 | KV452945.1 | 10610374 | 8-scf00200 | 8 |
| AX-158076706 | 9 | 55.635 | KV452945.1 | 10612879 | 8-scf00200 | 8 |
| AX-157824671 | 9 | 55.635 | KV452945.1 | 10614265 | 8-scf00200 | 8 |
| AX-157824672 | 9 | 55.635 | KV452945.1 | 10614543 | 8-scf00200 | 8 |
| AX-158076709 | 9 | 55.635 | KV452945.1 | 10615430 | 8-scf00200 | 8 |
| AX-158076714 | 9 | 55.635 | KV452945.1 | 10618458 | 8-scf00200 | 8 |
| AX-158076917 | 9 | 55.635 | KV452945.1 | 10776043 | 8-scf00200 | 8 |
| AX-158076998 | 9 | 55.635 | KV452945.1 | 10874128 | 8-scf00200 | 8 |
| AX-157722813 | 9 | 55.635 | KV452945.1 | 11082299 | 8-scf00200 | 8 |



|              |   |        |            |          |            |   |
|--------------|---|--------|------------|----------|------------|---|
| AX-158077149 | 9 | 55.635 | KV452945.1 | 11083299 | 8-scf00200 | 8 |
| AX-158077345 | 9 | 55.635 | KV452945.1 | 11285363 | 8-scf00200 | 8 |
| AX-158077853 | 9 | 55.635 | KV452945.1 | 11746018 | 8-scf00200 | 8 |
| AX-158076114 | 9 | 55.636 | KV452945.1 | 9986718  | 8-scf00200 | 8 |
| AX-158076117 | 9 | 55.636 | KV452945.1 | 9988447  | 8-scf00200 | 8 |
| AX-158076120 | 9 | 55.811 | KV452945.1 | 9989411  | 8-scf00200 | 8 |
| AX-158075508 | 9 | 55.963 | KV452945.1 | 9324021  | 8-scf00200 | 8 |
| AX-158075764 | 9 | 55.963 | KV452945.1 | 9562887  | 8-scf00200 | 8 |
| AX-157824591 | 9 | 55.963 | KV452945.1 | 9610536  | 8-scf00200 | 8 |
| AX-158075838 | 9 | 55.963 | KV452945.1 | 9690500  | 8-scf00200 | 8 |
| AX-158076136 | 9 | 55.963 | KV452945.1 | 10010415 | 8-scf00200 | 8 |
| AX-157885525 | 9 | 55.963 | KV452945.1 | 10010603 | 8-scf00200 | 8 |
| AX-158076138 | 9 | 55.963 | KV452945.1 | 10010824 | 8-scf00200 | 8 |
| AX-158076141 | 9 | 55.963 | KV452945.1 | 10017139 | 8-scf00200 | 8 |
| AX-158076144 | 9 | 55.963 | KV452945.1 | 10029153 | 8-scf00200 | 8 |
| AX-157877096 | 9 | 55.963 | KV452945.1 | 10029587 | 8-scf00200 | 8 |
| AX-158076146 | 9 | 55.963 | KV452945.1 | 10030042 | 8-scf00200 | 8 |
| AX-158076149 | 9 | 55.963 | KV452945.1 | 10032912 | 8-scf00200 | 8 |
| AX-158076154 | 9 | 55.963 | KV452945.1 | 10037158 | 8-scf00200 | 8 |
| AX-158076156 | 9 | 55.963 | KV452945.1 | 10041346 | 8-scf00200 | 8 |
| AX-158076161 | 9 | 55.963 | KV452945.1 | 10044525 | 8-scf00200 | 8 |
| AX-158076162 | 9 | 55.963 | KV452945.1 | 10045566 | 8-scf00200 | 8 |
| AX-158076164 | 9 | 55.963 | KV452945.1 | 10052734 | 8-scf00200 | 8 |
| AX-158076165 | 9 | 55.963 | KV452945.1 | 10054257 | 8-scf00200 | 8 |
| AX-158076172 | 9 | 55.963 | KV452945.1 | 10059873 | 8-scf00200 | 8 |
| AX-158076174 | 9 | 55.963 | KV452945.1 | 10061542 | 8-scf00200 | 8 |
| AX-157766551 | 9 | 55.963 | KV452945.1 | 10066074 | 8-scf00200 | 8 |
| AX-158076185 | 9 | 55.963 | KV452945.1 | 10068818 | 8-scf00200 | 8 |
| AX-158076186 | 9 | 55.963 | KV452945.1 | 10070723 | 8-scf00200 | 8 |
| AX-157715697 | 9 | 55.963 | KV452945.1 | 10074687 | 8-scf00200 | 8 |
| AX-158076189 | 9 | 55.963 | KV452945.1 | 10077150 | 8-scf00200 | 8 |
| AX-158076194 | 9 | 55.963 | KV452945.1 | 10084517 | 8-scf00200 | 8 |
| AX-157824636 | 9 | 55.963 | KV452945.1 | 10170422 | 8-scf00200 | 8 |
| AX-157824638 | 9 | 55.963 | KV452945.1 | 10176874 | 8-scf00200 | 8 |
| AX-158076300 | 9 | 55.963 | KV452945.1 | 10176979 | 8-scf00200 | 8 |
| AX-158076304 | 9 | 55.963 | KV452945.1 | 10182043 | 8-scf00200 | 8 |
| AX-158392032 | 9 | 55.963 | KV452945.1 | 10187000 | 8-scf00200 | 8 |
| AX-158076315 | 9 | 55.963 | KV452945.1 | 10195590 | 8-scf00200 | 8 |
| AX-158076386 | 9 | 55.963 | KV452945.1 | 10274696 | 8-scf00200 | 8 |
| AX-158076460 | 9 | 55.963 | KV452945.1 | 10367881 | 8-scf00200 | 8 |
| AX-158076828 | 9 | 55.963 | KV452945.1 | 10688264 | 8-scf00200 | 8 |
| AX-157724437 | 9 | 55.963 | KV452945.1 | 11173477 | 8-scf00200 | 8 |
| AX-158077325 | 9 | 55.963 | KV452945.1 | 11270554 | 8-scf00200 | 8 |
| AX-158409675 | 9 | 55.963 | KV452945.1 | 12403028 | 8-scf00200 | 8 |
| AX-158078978 | 9 | 55.963 | KV452945.1 | 12955376 | 8-scf00200 | 8 |
| AX-158079564 | 9 | 55.963 | KV452945.1 | 13620163 | 8-scf00200 | 8 |
| AX-157772373 | 9 | 55.963 | KV452945.1 | 13818778 | 8-scf00200 | 8 |
| AX-157741393 | 9 | 55.963 | KV452947.1 | 221751   | 8-scf00203 | 8 |
| AX-157824625 | 9 | 56.072 | KV452945.1 | 9932936  | 8-scf00200 | 8 |
| AX-157824627 | 9 | 56.072 | KV452945.1 | 9979544  | 8-scf00200 | 8 |
| AX-158076157 | 9 | 56.072 | KV452945.1 | 10041798 | 8-scf00200 | 8 |

|              |   |        |            |          |            |   |
|--------------|---|--------|------------|----------|------------|---|
| AX-158076169 | 9 | 56.072 | KV452945.1 | 10056921 | 8-scf00200 | 8 |
| AX-158076203 | 9 | 56.072 | KV452945.1 | 10090294 | 8-scf00200 | 8 |
| AX-158076206 | 9 | 56.072 | KV452945.1 | 10096009 | 8-scf00200 | 8 |
| AX-158076208 | 9 | 56.072 | KV452945.1 | 10098138 | 8-scf00200 | 8 |
| AX-158076212 | 9 | 56.072 | KV452945.1 | 10102198 | 8-scf00200 | 8 |
| AX-158076217 | 9 | 56.072 | KV452945.1 | 10105247 | 8-scf00200 | 8 |
| AX-157824631 | 9 | 56.072 | KV452945.1 | 10107808 | 8-scf00200 | 8 |
| AX-158076224 | 9 | 56.072 | KV452945.1 | 10109603 | 8-scf00200 | 8 |
| AX-158076227 | 9 | 56.072 | KV452945.1 | 10110238 | 8-scf00200 | 8 |
| AX-158076229 | 9 | 56.072 | KV452945.1 | 10111967 | 8-scf00200 | 8 |
| AX-158076234 | 9 | 56.072 | KV452945.1 | 10118340 | 8-scf00200 | 8 |
| AX-158076235 | 9 | 56.072 | KV452945.1 | 10119021 | 8-scf00200 | 8 |
| AX-158076237 | 9 | 56.072 | KV452945.1 | 10119801 | 8-scf00200 | 8 |
| AX-158076238 | 9 | 56.072 | KV452945.1 | 10120894 | 8-scf00200 | 8 |
| AX-158076243 | 9 | 56.072 | KV452945.1 | 10124571 | 8-scf00200 | 8 |
| AX-158076252 | 9 | 56.072 | KV452945.1 | 10130445 | 8-scf00200 | 8 |
| AX-158076253 | 9 | 56.072 | KV452945.1 | 10130657 | 8-scf00200 | 8 |
| AX-158076287 | 9 | 56.072 | KV452945.1 | 10168043 | 8-scf00200 | 8 |
| AX-158409625 | 9 | 56.072 | KV452945.1 | 10193722 | 8-scf00200 | 8 |
| AX-157744630 | 9 | 56.072 | KV452945.1 | 10199586 | 8-scf00200 | 8 |
| AX-158076365 | 9 | 56.072 | KV452945.1 | 10252048 | 8-scf00200 | 8 |
| AX-158076715 | 9 | 56.072 | KV452945.1 | 10618931 | 8-scf00200 | 8 |
| AX-157739856 | 9 | 56.072 | KV452945.1 | 10673546 | 8-scf00200 | 8 |
| AX-158076932 | 9 | 56.072 | KV452945.1 | 10804023 | 8-scf00200 | 8 |
| AX-157857085 | 9 | 56.072 | KV452945.1 | 11005034 | 8-scf00200 | 8 |
| AX-158077269 | 9 | 56.072 | KV452945.1 | 11218778 | 8-scf00200 | 8 |
| AX-158076259 | 9 | 56.073 | KV452945.1 | 10133474 | 8-scf00200 | 8 |
| AX-157773415 | 9 | 56.073 | KV452945.1 | 10136937 | 8-scf00200 | 8 |
| AX-157744376 | 9 | 56.346 | KV452945.1 | 10210547 | 8-scf00200 | 8 |
| AX-158076334 | 9 | 56.346 | KV452945.1 | 10220465 | 8-scf00200 | 8 |
| AX-158076336 | 9 | 56.346 | KV452945.1 | 10220680 | 8-scf00200 | 8 |
| AX-158076711 | 9 | 56.346 | KV452945.1 | 10617344 | 8-scf00200 | 8 |
| AX-157824651 | 9 | 56.472 | KV452945.1 | 10232691 | 8-scf00200 | 8 |
| AX-158076405 | 9 | 56.472 | KV452945.1 | 10296372 | 8-scf00200 | 8 |
| AX-158076352 | 9 | 56.619 | KV452945.1 | 10240740 | 8-scf00200 | 8 |
| AX-158076361 | 9 | 56.619 | KV452945.1 | 10250750 | 8-scf00200 | 8 |
| AX-158076370 | 9 | 56.619 | KV452945.1 | 10259517 | 8-scf00200 | 8 |
| AX-158076381 | 9 | 56.619 | KV452945.1 | 10266161 | 8-scf00200 | 8 |
| AX-158076406 | 9 | 56.619 | KV452945.1 | 10301322 | 8-scf00200 | 8 |
| AX-158076408 | 9 | 56.619 | KV452945.1 | 10301853 | 8-scf00200 | 8 |
| AX-158076429 | 9 | 56.619 | KV452945.1 | 10329020 | 8-scf00200 | 8 |
| AX-158076939 | 9 | 56.619 | KV452945.1 | 10807003 | 8-scf00200 | 8 |
| AX-158076387 | 9 | 56.714 | KV452945.1 | 10280127 | 8-scf00200 | 8 |
| AX-158076414 | 9 | 56.714 | KV452945.1 | 10304972 | 8-scf00200 | 8 |
| AX-158076436 | 9 | 56.714 | KV452945.1 | 10338253 | 8-scf00200 | 8 |
| AX-157755452 | 9 | 56.728 | KV452945.1 | 1321951  | 8-scf00200 | 8 |
| AX-157824200 | 9 | 56.728 | KV452945.1 | 3748771  | 8-scf00200 | 8 |
| AX-158072793 | 9 | 56.728 | KV452945.1 | 5477702  | 8-scf00200 | 8 |
| AX-158075676 | 9 | 56.728 | KV452945.1 | 9471596  | 8-scf00200 | 8 |
| AX-158076196 | 9 | 56.728 | KV452945.1 | 10085493 | 8-scf00200 | 8 |
| AX-158076442 | 9 | 56.728 | KV452945.1 | 10347838 | 8-scf00200 | 8 |

|              |   |        |            |          |            |   |
|--------------|---|--------|------------|----------|------------|---|
| AX-158076443 | 9 | 56.728 | KV452945.1 | 10348037 | 8-scf00200 | 8 |
| AX-158076448 | 9 | 56.728 | KV452945.1 | 10351663 | 8-scf00200 | 8 |
| AX-157865667 | 9 | 56.728 | KV452945.1 | 10359184 | 8-scf00200 | 8 |
| AX-157865668 | 9 | 56.728 | KV452945.1 | 10362753 | 8-scf00200 | 8 |
| AX-158076458 | 9 | 56.728 | KV452945.1 | 10366522 | 8-scf00200 | 8 |
| AX-157755581 | 9 | 56.728 | KV452945.1 | 10366628 | 8-scf00200 | 8 |
| AX-157865670 | 9 | 56.728 | KV452945.1 | 10369535 | 8-scf00200 | 8 |
| AX-158409630 | 9 | 56.728 | KV452945.1 | 10371459 | 8-scf00200 | 8 |
| AX-158076464 | 9 | 56.728 | KV452945.1 | 10372193 | 8-scf00200 | 8 |
| AX-158076467 | 9 | 56.728 | KV452945.1 | 10373248 | 8-scf00200 | 8 |
| AX-157724810 | 9 | 56.728 | KV452945.1 | 10376213 | 8-scf00200 | 8 |
| AX-158076469 | 9 | 56.728 | KV452945.1 | 10376443 | 8-scf00200 | 8 |
| AX-158076470 | 9 | 56.728 | KV452945.1 | 10376923 | 8-scf00200 | 8 |
| AX-158076473 | 9 | 56.728 | KV452945.1 | 10378080 | 8-scf00200 | 8 |
| AX-158076474 | 9 | 56.728 | KV452945.1 | 10380252 | 8-scf00200 | 8 |
| AX-158076475 | 9 | 56.728 | KV452945.1 | 10380695 | 8-scf00200 | 8 |
| AX-158076476 | 9 | 56.728 | KV452945.1 | 10381192 | 8-scf00200 | 8 |
| AX-157717707 | 9 | 56.728 | KV452945.1 | 10383826 | 8-scf00200 | 8 |
| AX-158076596 | 9 | 56.728 | KV452945.1 | 10510238 | 8-scf00200 | 8 |
| AX-158076710 | 9 | 56.728 | KV452945.1 | 10615833 | 8-scf00200 | 8 |
| AX-157756045 | 9 | 56.728 | KV452945.1 | 10919189 | 8-scf00200 | 8 |
| AX-158077157 | 9 | 56.728 | KV452945.1 | 11091230 | 8-scf00200 | 8 |
| AX-158076505 | 9 | 56.781 | KV452945.1 | 10415598 | 8-scf00200 | 8 |
| AX-158076506 | 9 | 56.801 | KV452945.1 | 10416016 | 8-scf00200 | 8 |
| AX-158076437 | 9 | 56.821 | KV452945.1 | 10339737 | 8-scf00200 | 8 |
| AX-158076522 | 9 | 56.821 | KV452945.1 | 10440128 | 8-scf00200 | 8 |
| AX-158076529 | 9 | 56.821 | KV452945.1 | 10442271 | 8-scf00200 | 8 |
| AX-158076534 | 9 | 56.821 | KV452945.1 | 10447122 | 8-scf00200 | 8 |
| AX-157713315 | 9 | 56.821 | KV452945.1 | 10447375 | 8-scf00200 | 8 |
| AX-158075646 | 9 | 56.837 | KV452945.1 | 9446824  | 8-scf00200 | 8 |
| AX-158075705 | 9 | 56.837 | KV452945.1 | 9495054  | 8-scf00200 | 8 |
| AX-157824616 | 9 | 56.837 | KV452945.1 | 9891781  | 8-scf00200 | 8 |
| AX-158076043 | 9 | 56.837 | KV452945.1 | 9912929  | 8-scf00200 | 8 |
| AX-158076202 | 9 | 56.837 | KV452945.1 | 10088914 | 8-scf00200 | 8 |
| AX-158076246 | 9 | 56.837 | KV452945.1 | 10126358 | 8-scf00200 | 8 |
| AX-158076358 | 9 | 56.837 | KV452945.1 | 10246236 | 8-scf00200 | 8 |
| AX-158076371 | 9 | 56.837 | KV452945.1 | 10259935 | 8-scf00200 | 8 |
| AX-158076454 | 9 | 56.837 | KV452945.1 | 10357086 | 8-scf00200 | 8 |
| AX-157754367 | 9 | 56.837 | KV452945.1 | 10418901 | 8-scf00200 | 8 |
| AX-158076521 | 9 | 56.837 | KV452945.1 | 10438012 | 8-scf00200 | 8 |
| AX-158076531 | 9 | 56.837 | KV452945.1 | 10444995 | 8-scf00200 | 8 |
| AX-158076546 | 9 | 56.837 | KV452945.1 | 10458212 | 8-scf00200 | 8 |
| AX-157727731 | 9 | 56.837 | KV452945.1 | 10460478 | 8-scf00200 | 8 |
| AX-158076567 | 9 | 56.837 | KV452945.1 | 10479720 | 8-scf00200 | 8 |
| AX-158076568 | 9 | 56.837 | KV452945.1 | 10480526 | 8-scf00200 | 8 |
| AX-157715493 | 9 | 56.837 | KV452945.1 | 10488843 | 8-scf00200 | 8 |
| AX-158076579 | 9 | 56.837 | KV452945.1 | 10495935 | 8-scf00200 | 8 |
| AX-158076583 | 9 | 56.837 | KV452945.1 | 10500810 | 8-scf00200 | 8 |
| AX-158076585 | 9 | 56.837 | KV452945.1 | 10501100 | 8-scf00200 | 8 |
| AX-158076594 | 9 | 56.837 | KV452945.1 | 10509751 | 8-scf00200 | 8 |
| AX-158076599 | 9 | 56.837 | KV452945.1 | 10512165 | 8-scf00200 | 8 |

|              |   |        |             |          |            |    |
|--------------|---|--------|-------------|----------|------------|----|
| AX-158076602 | 9 | 56.837 | KV452945.1  | 10514483 | 8-scf00200 | 8  |
| AX-158076605 | 9 | 56.837 | KV452945.1  | 10517553 | 8-scf00200 | 8  |
| AX-158076606 | 9 | 56.837 | KV452945.1  | 10519003 | 8-scf00200 | 8  |
| AX-158076608 | 9 | 56.837 | KV452945.1  | 10519476 | 8-scf00200 | 8  |
| AX-157740778 | 9 | 56.837 | KV452945.1  | 10519522 | 8-scf00200 | 8  |
| AX-158076609 | 9 | 56.837 | KV452945.1  | 10519992 | 8-scf00200 | 8  |
| AX-158076610 | 9 | 56.837 | KV452945.1  | 10520338 | 8-scf00200 | 8  |
| AX-158076615 | 9 | 56.837 | KV452945.1  | 10522168 | 8-scf00200 | 8  |
| AX-158076618 | 9 | 56.837 | KV452945.1  | 10523486 | 8-scf00200 | 8  |
| AX-157824664 | 9 | 56.837 | KV452945.1  | 10530134 | 8-scf00200 | 8  |
| AX-158076657 | 9 | 56.837 | KV452945.1  | 10561787 | 8-scf00200 | 8  |
| AX-158076660 | 9 | 56.837 | KV452945.1  | 10563009 | 8-scf00200 | 8  |
| AX-158076675 | 9 | 56.837 | KV452945.1  | 10572750 | 8-scf00200 | 8  |
| AX-158409633 | 9 | 56.837 | KV452945.1  | 10576232 | 8-scf00200 | 8  |
| AX-158076698 | 9 | 56.837 | KV452945.1  | 10607680 | 8-scf00200 | 8  |
| AX-157717984 | 9 | 56.837 | KV452945.1  | 10607802 | 8-scf00200 | 8  |
| AX-158076776 | 9 | 56.837 | KV452945.1  | 10660502 | 8-scf00200 | 8  |
| AX-158076803 | 9 | 56.837 | KV452945.1  | 10669121 | 8-scf00200 | 8  |
| AX-157693263 | 9 | 56.837 | KV452945.1  | 10670873 | 8-scf00200 | 8  |
| AX-158076810 | 9 | 56.837 | KV452945.1  | 10671381 | 8-scf00200 | 8  |
| AX-158076811 | 9 | 56.837 | KV452945.1  | 10672076 | 8-scf00200 | 8  |
| AX-158076818 | 9 | 56.837 | KV452945.1  | 10676619 | 8-scf00200 | 8  |
| AX-158076819 | 9 | 56.837 | KV452945.1  | 10677159 | 8-scf00200 | 8  |
| AX-158076824 | 9 | 56.837 | KV452945.1  | 10682488 | 8-scf00200 | 8  |
| AX-157718233 | 9 | 56.837 | KV452945.1  | 10744833 | 8-scf00200 | 8  |
| AX-158409643 | 9 | 56.837 | KV452945.1  | 10764485 | 8-scf00200 | 8  |
| AX-158076931 | 9 | 56.837 | KV452945.1  | 10801824 | 8-scf00200 | 8  |
| AX-157757438 | 9 | 56.837 | KV452945.1  | 10803199 | 8-scf00200 | 8  |
| AX-158076989 | 9 | 56.837 | KV452945.1  | 10853459 | 8-scf00200 | 8  |
| AX-157771335 | 9 | 56.837 | KV452945.1  | 10854116 | 8-scf00200 | 8  |
| AX-158076990 | 9 | 56.837 | KV452945.1  | 10854731 | 8-scf00200 | 8  |
| AX-158076991 | 9 | 56.837 | KV452945.1  | 10855342 | 8-scf00200 | 8  |
| AX-158076999 | 9 | 56.837 | KV452945.1  | 10878510 | 8-scf00200 | 8  |
| AX-158077018 | 9 | 56.837 | KV452945.1  | 10910300 | 8-scf00200 | 8  |
| AX-158077095 | 9 | 56.837 | KV452945.1  | 11042748 | 8-scf00200 | 8  |
| AX-158077110 | 9 | 56.837 | KV452945.1  | 11052101 | 8-scf00200 | 8  |
| AX-158077151 | 9 | 56.837 | KV452945.1  | 11084769 | 8-scf00200 | 8  |
| AX-158077163 | 9 | 56.837 | KV452945.1  | 11093491 | 8-scf00200 | 8  |
| AX-157824694 | 9 | 56.837 | KV452945.1  | 11133506 | 8-scf00200 | 8  |
| AX-158077213 | 9 | 56.837 | KV452945.1  | 11161234 | 8-scf00200 | 8  |
| AX-158077257 | 9 | 56.837 | KV452945.1  | 11193592 | 8-scf00200 | 8  |
| AX-158077275 | 9 | 56.837 | KV452945.1  | 11227592 | 8-scf00200 | 8  |
| AX-158077348 | 9 | 56.837 | KV452945.1  | 11286601 | 8-scf00200 | 8  |
| AX-157824722 | 9 | 56.837 | KV452945.1  | 11388107 | 8-scf00200 | 8  |
| AX-157711978 | 9 | 56.837 | 3ML01030292 | 157      | scf05887_1 | UN |
| AX-158076995 | 9 | 56.857 | KV452945.1  | 10864655 | 8-scf00200 | 8  |
| AX-157824683 | 9 | 56.864 | KV452945.1  | 10899468 | 8-scf00200 | 8  |
| AX-158077010 | 9 | 56.871 | KV452945.1  | 10900249 | 8-scf00200 | 8  |
| AX-158076232 | 9 | 56.89  | KV452945.1  | 10113847 | 8-scf00200 | 8  |
| AX-158076338 | 9 | 56.89  | KV452945.1  | 10227249 | 8-scf00200 | 8  |
| AX-157824659 | 9 | 56.89  | KV452945.1  | 10463208 | 8-scf00200 | 8  |

|              |   |        |            |          |                |    |
|--------------|---|--------|------------|----------|----------------|----|
| AX-157713372 | 9 | 56.89  | KV452945.1 | 10540377 | 8-scf00200     | 8  |
| AX-157824669 | 9 | 56.89  | KV452945.1 | 10571374 | 8-scf00200     | 8  |
| AX-158076838 | 9 | 56.89  | KV452945.1 | 10694398 | 8-scf00200     | 8  |
| AX-158076839 | 9 | 56.89  | KV452945.1 | 10695150 | 8-scf00200     | 8  |
| AX-158077028 | 9 | 56.89  | KV452945.1 | 10937473 | 8-scf00200     | 8  |
| AX-158077035 | 9 | 56.89  | KV452945.1 | 10943077 | 8-scf00200     | 8  |
| AX-158077046 | 9 | 56.89  | KV452945.1 | 10950420 | 8-scf00200     | 8  |
| AX-158077087 | 9 | 56.89  | KV452945.1 | 11024803 | 8-scf00200     | 8  |
| AX-158077311 | 9 | 56.89  | KV452945.1 | 11262221 | 8-scf00200     | 8  |
| AX-158077324 | 9 | 56.89  | KV452945.1 | 11269989 | 8-scf00200     | 8  |
| AX-158077336 | 9 | 56.89  | KV452945.1 | 11274403 | 8-scf00200     | 8  |
| AX-157700321 | 9 | 56.917 | FI872584.1 | 214      | IORI212 lctalu | UN |
| AX-158077054 | 9 | 56.922 | KV452945.1 | 10963387 | 8-scf00200     | 8  |
| AX-158076064 | 9 | 56.947 | KV452945.1 | 9948787  | 8-scf00200     | 8  |
| AX-157746925 | 9 | 56.947 | KV452945.1 | 10697261 | 8-scf00200     | 8  |
| AX-158076846 | 9 | 56.947 | KV452945.1 | 10705880 | 8-scf00200     | 8  |
| AX-158077058 | 9 | 56.947 | KV452945.1 | 10971680 | 8-scf00200     | 8  |
| AX-158077059 | 9 | 56.947 | KV452945.1 | 10972255 | 8-scf00200     | 8  |
| AX-158077063 | 9 | 56.947 | KV452945.1 | 10976552 | 8-scf00200     | 8  |
| AX-157857084 | 9 | 56.947 | KV452945.1 | 10977002 | 8-scf00200     | 8  |
| AX-158077068 | 9 | 56.947 | KV452945.1 | 10988269 | 8-scf00200     | 8  |
| AX-158077070 | 9 | 56.947 | KV452945.1 | 10988627 | 8-scf00200     | 8  |
| AX-158077071 | 9 | 56.947 | KV452945.1 | 10990601 | 8-scf00200     | 8  |
| AX-158077075 | 9 | 56.947 | KV452945.1 | 11005973 | 8-scf00200     | 8  |
| AX-158077096 | 9 | 56.947 | KV452945.1 | 11043178 | 8-scf00200     | 8  |
| AX-158077123 | 9 | 56.947 | KV452945.1 | 11058099 | 8-scf00200     | 8  |
| AX-158077133 | 9 | 56.947 | KV452945.1 | 11063035 | 8-scf00200     | 8  |
| AX-158077135 | 9 | 56.947 | KV452945.1 | 11065940 | 8-scf00200     | 8  |
| AX-158077138 | 9 | 56.947 | KV452945.1 | 11066834 | 8-scf00200     | 8  |
| AX-158078215 | 9 | 56.947 | KV452945.1 | 12036219 | 8-scf00200     | 8  |
| AX-158078359 | 9 | 56.947 | KV452945.1 | 12180332 | 8-scf00200     | 8  |
| AX-158078442 | 9 | 56.947 | KV452945.1 | 12236108 | 8-scf00200     | 8  |
| AX-158078852 | 9 | 56.947 | KV452945.1 | 12771563 | 8-scf00200     | 8  |
| AX-157727025 | 9 | 56.947 | KV452945.1 | 12861314 | 8-scf00200     | 8  |
| AX-158078981 | 9 | 56.947 | KV452945.1 | 12969199 | 8-scf00200     | 8  |
| AX-158079078 | 9 | 56.947 | KV452945.1 | 13095038 | 8-scf00200     | 8  |
| AX-158079445 | 9 | 56.947 | KV452945.1 | 13506491 | 8-scf00200     | 8  |
| AX-158079471 | 9 | 56.947 | KV452945.1 | 13525316 | 8-scf00200     | 8  |
| AX-158079724 | 9 | 56.947 | KV452945.1 | 13782595 | 8-scf00200     | 8  |
| AX-158079908 | 9 | 56.947 | KV452945.1 | 13953337 | 8-scf00200     | 8  |
| AX-157709163 | 9 | 56.947 | KV452945.1 | 14267408 | 8-scf00200     | 8  |
| AX-158081773 | 9 | 56.947 | KV452947.1 | 252564   | 8-scf00203     | 8  |
| AX-158077079 | 9 | 57.056 | KV452945.1 | 11008188 | 8-scf00200     | 8  |
| AX-158077099 | 9 | 57.056 | KV452945.1 | 11044517 | 8-scf00200     | 8  |
| AX-158077101 | 9 | 57.056 | KV452945.1 | 11045057 | 8-scf00200     | 8  |
| AX-158077105 | 9 | 57.056 | KV452945.1 | 11048900 | 8-scf00200     | 8  |
| AX-157824692 | 9 | 57.056 | KV452945.1 | 11050266 | 8-scf00200     | 8  |
| AX-158075586 | 9 | 57.165 | KV452945.1 | 9396577  | 8-scf00200     | 8  |
| AX-158075665 | 9 | 57.165 | KV452945.1 | 9460706  | 8-scf00200     | 8  |
| AX-157720598 | 9 | 57.165 | KV452945.1 | 10374423 | 8-scf00200     | 8  |
| AX-158076482 | 9 | 57.165 | KV452945.1 | 10387555 | 8-scf00200     | 8  |

|              |   |        |            |          |                |    |
|--------------|---|--------|------------|----------|----------------|----|
| AX-158076538 | 9 | 57.165 | KV452945.1 | 10450929 | 8-scf00200     | 8  |
| AX-158077017 | 9 | 57.165 | KV452945.1 | 10909600 | 8-scf00200     | 8  |
| AX-158077076 | 9 | 57.165 | KV452945.1 | 11006428 | 8-scf00200     | 8  |
| AX-158077077 | 9 | 57.165 | KV452945.1 | 11007621 | 8-scf00200     | 8  |
| AX-157824688 | 9 | 57.165 | KV452945.1 | 11010693 | 8-scf00200     | 8  |
| AX-158077108 | 9 | 57.165 | KV452945.1 | 11049915 | 8-scf00200     | 8  |
| AX-158077109 | 9 | 57.165 | KV452945.1 | 11051595 | 8-scf00200     | 8  |
| AX-158077136 | 9 | 57.165 | KV452945.1 | 11066254 | 8-scf00200     | 8  |
| AX-158077139 | 9 | 57.165 | KV452945.1 | 11067330 | 8-scf00200     | 8  |
| AX-158077150 | 9 | 57.165 | KV452945.1 | 11084072 | 8-scf00200     | 8  |
| AX-158077166 | 9 | 57.165 | KV452945.1 | 11096581 | 8-scf00200     | 8  |
| AX-158077168 | 9 | 57.165 | KV452945.1 | 11098829 | 8-scf00200     | 8  |
| AX-157753875 | 9 | 57.165 | KV452945.1 | 11100503 | 8-scf00200     | 8  |
| AX-158077171 | 9 | 57.165 | KV452945.1 | 11104270 | 8-scf00200     | 8  |
| AX-158077172 | 9 | 57.165 | KV452945.1 | 11104787 | 8-scf00200     | 8  |
| AX-158077173 | 9 | 57.165 | KV452945.1 | 11105462 | 8-scf00200     | 8  |
| AX-158077174 | 9 | 57.165 | KV452945.1 | 11105729 | 8-scf00200     | 8  |
| AX-157755316 | 9 | 57.165 | KV452945.1 | 11116884 | 8-scf00200     | 8  |
| AX-158077182 | 9 | 57.165 | KV452945.1 | 11119446 | 8-scf00200     | 8  |
| AX-158077186 | 9 | 57.165 | KV452945.1 | 11123633 | 8-scf00200     | 8  |
| AX-158077192 | 9 | 57.165 | KV452945.1 | 11136132 | 8-scf00200     | 8  |
| AX-158077201 | 9 | 57.165 | KV452945.1 | 11149531 | 8-scf00200     | 8  |
| AX-158077203 | 9 | 57.165 | KV452945.1 | 11150100 | 8-scf00200     | 8  |
| AX-158077205 | 9 | 57.165 | KV452945.1 | 11152403 | 8-scf00200     | 8  |
| AX-158077211 | 9 | 57.165 | KV452945.1 | 11159159 | 8-scf00200     | 8  |
| AX-158077214 | 9 | 57.165 | KV452945.1 | 11161610 | 8-scf00200     | 8  |
| AX-158077216 | 9 | 57.165 | KV452945.1 | 11166376 | 8-scf00200     | 8  |
| AX-158077219 | 9 | 57.165 | KV452945.1 | 11168967 | 8-scf00200     | 8  |
| AX-157723040 | 9 | 57.165 | KV452945.1 | 11169917 | 8-scf00200     | 8  |
| AX-157717591 | 9 | 57.165 | KV452945.1 | 11171874 | 8-scf00200     | 8  |
| AX-158077225 | 9 | 57.165 | KV452945.1 | 11172191 | 8-scf00200     | 8  |
| AX-158077228 | 9 | 57.165 | KV452945.1 | 11173683 | 8-scf00200     | 8  |
| AX-157824701 | 9 | 57.165 | KV452945.1 | 11186525 | 8-scf00200     | 8  |
| AX-158077245 | 9 | 57.165 | KV452945.1 | 11187329 | 8-scf00200     | 8  |
| AX-158077248 | 9 | 57.165 | KV452945.1 | 11187857 | 8-scf00200     | 8  |
| AX-158077251 | 9 | 57.165 | KV452945.1 | 11188752 | 8-scf00200     | 8  |
| AX-158077252 | 9 | 57.165 | KV452945.1 | 11189829 | 8-scf00200     | 8  |
| AX-158077253 | 9 | 57.165 | KV452945.1 | 11190743 | 8-scf00200     | 8  |
| AX-158077256 | 9 | 57.165 | KV452945.1 | 11192775 | 8-scf00200     | 8  |
| AX-157772497 | 9 | 57.165 | KV452945.1 | 11275145 | 8-scf00200     | 8  |
| AX-158077408 | 9 | 57.165 | KV452945.1 | 11341786 | 8-scf00200     | 8  |
| AX-158077481 | 9 | 57.165 | KV452945.1 | 11431421 | 8-scf00200     | 8  |
| AX-158077648 | 9 | 57.165 | KV452945.1 | 11571276 | 8-scf00200     | 8  |
| AX-157699414 | 9 | 57.165 | FI886989.1 | 63       | IORI212 lctalt | UN |
| AX-158077267 | 9 | 57.226 | KV452945.1 | 11216807 | 8-scf00200     | 8  |
| AX-158077268 | 9 | 57.226 | KV452945.1 | 11217190 | 8-scf00200     | 8  |
| AX-158076353 | 9 | 57.278 | KV452945.1 | 10241417 | 8-scf00200     | 8  |
| AX-158076368 | 9 | 57.278 | KV452945.1 | 10258816 | 8-scf00200     | 8  |
| AX-158077178 | 9 | 57.278 | KV452945.1 | 11108545 | 8-scf00200     | 8  |
| AX-157746866 | 9 | 57.278 | KV452945.1 | 11125128 | 8-scf00200     | 8  |
| AX-158077215 | 9 | 57.278 | KV452945.1 | 11162891 | 8-scf00200     | 8  |

|              |   |        |            |          |            |   |
|--------------|---|--------|------------|----------|------------|---|
| AX-157824697 | 9 | 57.278 | KV452945.1 | 11177019 | 8-scf00200 | 8 |
| AX-158077234 | 9 | 57.278 | KV452945.1 | 11180028 | 8-scf00200 | 8 |
| AX-158077236 | 9 | 57.278 | KV452945.1 | 11180438 | 8-scf00200 | 8 |
| AX-158077239 | 9 | 57.278 | KV452945.1 | 11182490 | 8-scf00200 | 8 |
| AX-157824698 | 9 | 57.278 | KV452945.1 | 11182880 | 8-scf00200 | 8 |
| AX-157824700 | 9 | 57.278 | KV452945.1 | 11186300 | 8-scf00200 | 8 |
| AX-157741502 | 9 | 57.278 | KV452945.1 | 11222238 | 8-scf00200 | 8 |
| AX-157748287 | 9 | 57.278 | KV452945.1 | 11223477 | 8-scf00200 | 8 |
| AX-158077373 | 9 | 57.278 | KV452945.1 | 11303448 | 8-scf00200 | 8 |
| AX-158077383 | 9 | 57.278 | KV452945.1 | 11311193 | 8-scf00200 | 8 |
| AX-158077384 | 9 | 57.278 | KV452945.1 | 11312299 | 8-scf00200 | 8 |
| AX-158077088 | 9 | 57.334 | KV452945.1 | 11031215 | 8-scf00200 | 8 |
| AX-157824704 | 9 | 57.334 | KV452945.1 | 11241114 | 8-scf00200 | 8 |
| AX-158077285 | 9 | 57.334 | KV452945.1 | 11241710 | 8-scf00200 | 8 |
| AX-158072399 | 9 | 57.384 | KV452945.1 | 4895599  | 8-scf00200 | 8 |
| AX-156395134 | 9 | 57.384 | KV452945.1 | 11273714 | 8-scf00200 | 8 |
| AX-158077337 | 9 | 57.384 | KV452945.1 | 11275754 | 8-scf00200 | 8 |
| AX-157743623 | 9 | 57.384 | KV452945.1 | 11279040 | 8-scf00200 | 8 |
| AX-158077339 | 9 | 57.384 | KV452945.1 | 11281336 | 8-scf00200 | 8 |
| AX-158077344 | 9 | 57.384 | KV452945.1 | 11284699 | 8-scf00200 | 8 |
| AX-158077347 | 9 | 57.384 | KV452945.1 | 11286103 | 8-scf00200 | 8 |
| AX-158077350 | 9 | 57.384 | KV452945.1 | 11287296 | 8-scf00200 | 8 |
| AX-158077352 | 9 | 57.384 | KV452945.1 | 11288599 | 8-scf00200 | 8 |
| AX-158077367 | 9 | 57.384 | KV452945.1 | 11301348 | 8-scf00200 | 8 |
| AX-158077375 | 9 | 57.384 | KV452945.1 | 11304736 | 8-scf00200 | 8 |
| AX-158077377 | 9 | 57.384 | KV452945.1 | 11306237 | 8-scf00200 | 8 |
| AX-158077380 | 9 | 57.384 | KV452945.1 | 11310200 | 8-scf00200 | 8 |
| AX-158077382 | 9 | 57.384 | KV452945.1 | 11310719 | 8-scf00200 | 8 |
| AX-157824708 | 9 | 57.384 | KV452945.1 | 11321470 | 8-scf00200 | 8 |
| AX-158077386 | 9 | 57.384 | KV452945.1 | 11321608 | 8-scf00200 | 8 |
| AX-158077387 | 9 | 57.384 | KV452945.1 | 11322737 | 8-scf00200 | 8 |
| AX-158077389 | 9 | 57.384 | KV452945.1 | 11323759 | 8-scf00200 | 8 |
| AX-158077393 | 9 | 57.384 | KV452945.1 | 11330062 | 8-scf00200 | 8 |
| AX-158077394 | 9 | 57.384 | KV452945.1 | 11330572 | 8-scf00200 | 8 |
| AX-157713175 | 9 | 57.384 | KV452945.1 | 11339160 | 8-scf00200 | 8 |
| AX-158077407 | 9 | 57.384 | KV452945.1 | 11341290 | 8-scf00200 | 8 |
| AX-157824737 | 9 | 57.384 | KV452945.1 | 11507523 | 8-scf00200 | 8 |
| AX-158077734 | 9 | 57.384 | KV452945.1 | 11647728 | 8-scf00200 | 8 |
| AX-158077780 | 9 | 57.384 | KV452945.1 | 11680151 | 8-scf00200 | 8 |
| AX-158077832 | 9 | 57.384 | KV452945.1 | 11721781 | 8-scf00200 | 8 |
| AX-158077419 | 9 | 57.439 | KV452945.1 | 11353864 | 8-scf00200 | 8 |
| AX-157788273 | 9 | 57.493 | KV452945.1 | 11364092 | 8-scf00200 | 8 |
| AX-158077434 | 9 | 57.493 | KV452945.1 | 11375395 | 8-scf00200 | 8 |
| AX-158077435 | 9 | 57.493 | KV452945.1 | 11375643 | 8-scf00200 | 8 |
| AX-157824719 | 9 | 57.493 | KV452945.1 | 11383377 | 8-scf00200 | 8 |
| AX-157824716 | 9 | 57.602 | KV452945.1 | 11371583 | 8-scf00200 | 8 |
| AX-157824717 | 9 | 57.602 | KV452945.1 | 11380016 | 8-scf00200 | 8 |
| AX-158077436 | 9 | 57.602 | KV452945.1 | 11381018 | 8-scf00200 | 8 |
| AX-158077438 | 9 | 57.602 | KV452945.1 | 11383030 | 8-scf00200 | 8 |
| AX-157824721 | 9 | 57.602 | KV452945.1 | 11385347 | 8-scf00200 | 8 |
| AX-158077443 | 9 | 57.602 | KV452945.1 | 11387316 | 8-scf00200 | 8 |

|              |   |        |            |          |            |   |
|--------------|---|--------|------------|----------|------------|---|
| AX-158409653 | 9 | 57.602 | KV452945.1 | 11394148 | 8-scf00200 | 8 |
| AX-158077449 | 9 | 57.602 | KV452945.1 | 11395709 | 8-scf00200 | 8 |
| AX-158077450 | 9 | 57.602 | KV452945.1 | 11395807 | 8-scf00200 | 8 |
| AX-157750284 | 9 | 57.602 | KV452945.1 | 11643644 | 8-scf00200 | 8 |
| AX-158077462 | 9 | 57.711 | KV452945.1 | 11415125 | 8-scf00200 | 8 |
| AX-158077463 | 9 | 57.711 | KV452945.1 | 11416728 | 8-scf00200 | 8 |
| AX-158077465 | 9 | 57.711 | KV452945.1 | 11421503 | 8-scf00200 | 8 |
| AX-157824728 | 9 | 57.711 | KV452945.1 | 11424087 | 8-scf00200 | 8 |
| AX-158077471 | 9 | 57.711 | KV452945.1 | 11424773 | 8-scf00200 | 8 |
| AX-158077472 | 9 | 57.711 | KV452945.1 | 11426342 | 8-scf00200 | 8 |
| AX-158077477 | 9 | 57.772 | KV452945.1 | 11429947 | 8-scf00200 | 8 |
| AX-158077497 | 9 | 57.821 | KV452945.1 | 11441354 | 8-scf00200 | 8 |
| AX-158077522 | 9 | 57.918 | KV452945.1 | 11457866 | 8-scf00200 | 8 |
| AX-158077523 | 9 | 57.918 | KV452945.1 | 11458519 | 8-scf00200 | 8 |
| AX-157824732 | 9 | 57.918 | KV452945.1 | 11458722 | 8-scf00200 | 8 |
| AX-158077582 | 9 | 57.918 | KV452945.1 | 11521386 | 8-scf00200 | 8 |
| AX-158077605 | 9 | 57.918 | KV452945.1 | 11537778 | 8-scf00200 | 8 |
| AX-158077530 | 9 | 57.976 | KV452945.1 | 11461983 | 8-scf00200 | 8 |
| AX-158077501 | 9 | 57.996 | KV452945.1 | 11444139 | 8-scf00200 | 8 |
| AX-158077525 | 9 | 57.996 | KV452945.1 | 11459530 | 8-scf00200 | 8 |
| AX-158077533 | 9 | 57.996 | KV452945.1 | 11467128 | 8-scf00200 | 8 |
| AX-158077538 | 9 | 57.996 | KV452945.1 | 11476634 | 8-scf00200 | 8 |
| AX-158077608 | 9 | 57.996 | KV452945.1 | 11540863 | 8-scf00200 | 8 |
| AX-158077716 | 9 | 57.996 | KV452945.1 | 11628737 | 8-scf00200 | 8 |
| AX-158077718 | 9 | 57.996 | KV452945.1 | 11629177 | 8-scf00200 | 8 |
| AX-158077237 | 9 | 58.039 | KV452945.1 | 11180789 | 8-scf00200 | 8 |
| AX-158077500 | 9 | 58.039 | KV452945.1 | 11443066 | 8-scf00200 | 8 |
| AX-158077516 | 9 | 58.039 | KV452945.1 | 11453460 | 8-scf00200 | 8 |
| AX-158077520 | 9 | 58.039 | KV452945.1 | 11456669 | 8-scf00200 | 8 |
| AX-158077526 | 9 | 58.039 | KV452945.1 | 11460579 | 8-scf00200 | 8 |
| AX-158077539 | 9 | 58.039 | KV452945.1 | 11477093 | 8-scf00200 | 8 |
| AX-157747217 | 9 | 58.039 | KV452945.1 | 11477348 | 8-scf00200 | 8 |
| AX-158077541 | 9 | 58.039 | KV452945.1 | 11477614 | 8-scf00200 | 8 |
| AX-158077544 | 9 | 58.039 | KV452945.1 | 11479920 | 8-scf00200 | 8 |
| AX-157865687 | 9 | 58.039 | KV452945.1 | 11480320 | 8-scf00200 | 8 |
| AX-158077546 | 9 | 58.039 | KV452945.1 | 11483440 | 8-scf00200 | 8 |
| AX-157824735 | 9 | 58.039 | KV452945.1 | 11486763 | 8-scf00200 | 8 |
| AX-158077550 | 9 | 58.039 | KV452945.1 | 11487666 | 8-scf00200 | 8 |
| AX-158077552 | 9 | 58.039 | KV452945.1 | 11488435 | 8-scf00200 | 8 |
| AX-158077558 | 9 | 58.039 | KV452945.1 | 11493443 | 8-scf00200 | 8 |
| AX-157717932 | 9 | 58.039 | KV452945.1 | 11498045 | 8-scf00200 | 8 |
| AX-158077565 | 9 | 58.039 | KV452945.1 | 11501815 | 8-scf00200 | 8 |
| AX-157715422 | 9 | 58.039 | KV452945.1 | 11504556 | 8-scf00200 | 8 |
| AX-158077572 | 9 | 58.039 | KV452945.1 | 11511190 | 8-scf00200 | 8 |
| AX-157771736 | 9 | 58.039 | KV452945.1 | 11512202 | 8-scf00200 | 8 |
| AX-157824738 | 9 | 58.039 | KV452945.1 | 11513841 | 8-scf00200 | 8 |
| AX-158077576 | 9 | 58.039 | KV452945.1 | 11516171 | 8-scf00200 | 8 |
| AX-158077577 | 9 | 58.039 | KV452945.1 | 11517217 | 8-scf00200 | 8 |
| AX-158077578 | 9 | 58.039 | KV452945.1 | 11518713 | 8-scf00200 | 8 |
| AX-158077580 | 9 | 58.039 | KV452945.1 | 11519341 | 8-scf00200 | 8 |
| AX-157885531 | 9 | 58.039 | KV452945.1 | 11521080 | 8-scf00200 | 8 |



|              |   |        |            |          |            |   |
|--------------|---|--------|------------|----------|------------|---|
| AX-157824741 | 9 | 58.039 | KV452945.1 | 11522106 | 8-scf00200 | 8 |
| AX-158077583 | 9 | 58.039 | KV452945.1 | 11522424 | 8-scf00200 | 8 |
| AX-158077588 | 9 | 58.039 | KV452945.1 | 11526743 | 8-scf00200 | 8 |
| AX-158077594 | 9 | 58.039 | KV452945.1 | 11531736 | 8-scf00200 | 8 |
| AX-158077598 | 9 | 58.039 | KV452945.1 | 11535537 | 8-scf00200 | 8 |
| AX-158077610 | 9 | 58.039 | KV452945.1 | 11541436 | 8-scf00200 | 8 |
| AX-158409661 | 9 | 58.039 | KV452945.1 | 11542399 | 8-scf00200 | 8 |
| AX-158077629 | 9 | 58.039 | KV452945.1 | 11560774 | 8-scf00200 | 8 |
| AX-158077631 | 9 | 58.039 | KV452945.1 | 11562770 | 8-scf00200 | 8 |
| AX-158077666 | 9 | 58.039 | KV452945.1 | 11589077 | 8-scf00200 | 8 |
| AX-158077667 | 9 | 58.039 | KV452945.1 | 11589412 | 8-scf00200 | 8 |
| AX-158077669 | 9 | 58.039 | KV452945.1 | 11590115 | 8-scf00200 | 8 |
| AX-158077671 | 9 | 58.039 | KV452945.1 | 11591694 | 8-scf00200 | 8 |
| AX-158077674 | 9 | 58.039 | KV452945.1 | 11594873 | 8-scf00200 | 8 |
| AX-158077677 | 9 | 58.039 | KV452945.1 | 11595978 | 8-scf00200 | 8 |
| AX-158077680 | 9 | 58.039 | KV452945.1 | 11600738 | 8-scf00200 | 8 |
| AX-157824754 | 9 | 58.039 | KV452945.1 | 11617954 | 8-scf00200 | 8 |
| AX-158077719 | 9 | 58.039 | KV452945.1 | 11629865 | 8-scf00200 | 8 |
| AX-158077722 | 9 | 58.039 | KV452945.1 | 11631018 | 8-scf00200 | 8 |
| AX-158078127 | 9 | 58.039 | KV452945.1 | 11967998 | 8-scf00200 | 8 |
| AX-158078519 | 9 | 58.039 | KV452945.1 | 12299594 | 8-scf00200 | 8 |
| AX-158078704 | 9 | 58.039 | KV452945.1 | 12513301 | 8-scf00200 | 8 |
| AX-158077606 | 9 | 58.161 | KV452945.1 | 11538447 | 8-scf00200 | 8 |
| AX-158077616 | 9 | 58.258 | KV452945.1 | 11546096 | 8-scf00200 | 8 |
| AX-157824744 | 9 | 58.258 | KV452945.1 | 11551821 | 8-scf00200 | 8 |
| AX-158077618 | 9 | 58.258 | KV452945.1 | 11552818 | 8-scf00200 | 8 |
| AX-157718309 | 9 | 58.258 | KV452945.1 | 11553110 | 8-scf00200 | 8 |
| AX-158077622 | 9 | 58.258 | KV452945.1 | 11555950 | 8-scf00200 | 8 |
| AX-158077623 | 9 | 58.258 | KV452945.1 | 11556456 | 8-scf00200 | 8 |
| AX-158077624 | 9 | 58.258 | KV452945.1 | 11556770 | 8-scf00200 | 8 |
| AX-158077626 | 9 | 58.258 | KV452945.1 | 11558930 | 8-scf00200 | 8 |
| AX-158406889 | 9 | 58.258 | KV452945.1 | 11568275 | 8-scf00200 | 8 |
| AX-158077659 | 9 | 58.258 | KV452945.1 | 11582098 | 8-scf00200 | 8 |
| AX-157824747 | 9 | 58.258 | KV452945.1 | 11586293 | 8-scf00200 | 8 |
| AX-157824748 | 9 | 58.258 | KV452945.1 | 11586634 | 8-scf00200 | 8 |
| AX-158077663 | 9 | 58.258 | KV452945.1 | 11588575 | 8-scf00200 | 8 |
| AX-158077670 | 9 | 58.258 | KV452945.1 | 11590752 | 8-scf00200 | 8 |
| AX-158077672 | 9 | 58.258 | KV452945.1 | 11593654 | 8-scf00200 | 8 |
| AX-158077675 | 9 | 58.258 | KV452945.1 | 11595143 | 8-scf00200 | 8 |
| AX-158077679 | 9 | 58.258 | KV452945.1 | 11599025 | 8-scf00200 | 8 |
| AX-158077683 | 9 | 58.258 | KV452945.1 | 11604390 | 8-scf00200 | 8 |
| AX-157824751 | 9 | 58.258 | KV452945.1 | 11604952 | 8-scf00200 | 8 |
| AX-157724531 | 9 | 58.258 | KV452945.1 | 11608205 | 8-scf00200 | 8 |
| AX-158077686 | 9 | 58.258 | KV452945.1 | 11609522 | 8-scf00200 | 8 |
| AX-157774411 | 9 | 58.258 | KV452945.1 | 11612941 | 8-scf00200 | 8 |
| AX-158077691 | 9 | 58.258 | KV452945.1 | 11615130 | 8-scf00200 | 8 |
| AX-158077696 | 9 | 58.258 | KV452945.1 | 11617374 | 8-scf00200 | 8 |
| AX-158077697 | 9 | 58.258 | KV452945.1 | 11618532 | 8-scf00200 | 8 |
| AX-158077700 | 9 | 58.258 | KV452945.1 | 11620109 | 8-scf00200 | 8 |
| AX-158077703 | 9 | 58.258 | KV452945.1 | 11621787 | 8-scf00200 | 8 |
| AX-158077708 | 9 | 58.258 | KV452945.1 | 11623631 | 8-scf00200 | 8 |

|              |   |        |            |          |            |   |
|--------------|---|--------|------------|----------|------------|---|
| AX-158077714 | 9 | 58.258 | KV452945.1 | 11627221 | 8-scf00200 | 8 |
| AX-158077723 | 9 | 58.258 | KV452945.1 | 11631423 | 8-scf00200 | 8 |
| AX-158416612 | 9 | 58.258 | KV452945.1 | 11633421 | 8-scf00200 | 8 |
| AX-158077728 | 9 | 58.258 | KV452945.1 | 11636631 | 8-scf00200 | 8 |
| AX-158077732 | 9 | 58.258 | KV452945.1 | 11640271 | 8-scf00200 | 8 |
| AX-158077739 | 9 | 58.258 | KV452945.1 | 11654680 | 8-scf00200 | 8 |
| AX-158077981 | 9 | 58.258 | KV452945.1 | 11856936 | 8-scf00200 | 8 |
| AX-157824774 | 9 | 58.258 | KV452945.1 | 12017494 | 8-scf00200 | 8 |
| AX-158077426 | 9 | 58.367 | KV452945.1 | 11366342 | 8-scf00200 | 8 |
| AX-158077639 | 9 | 58.367 | KV452945.1 | 11565615 | 8-scf00200 | 8 |
| AX-158077657 | 9 | 58.367 | KV452945.1 | 11580805 | 8-scf00200 | 8 |
| AX-158077705 | 9 | 58.367 | KV452945.1 | 11622003 | 8-scf00200 | 8 |
| AX-157824757 | 9 | 58.367 | KV452945.1 | 11640131 | 8-scf00200 | 8 |
| AX-158077733 | 9 | 58.367 | KV452945.1 | 11641953 | 8-scf00200 | 8 |
| AX-158422512 | 9 | 58.367 | KV452945.1 | 11643212 | 8-scf00200 | 8 |
| AX-157824758 | 9 | 58.367 | KV452945.1 | 11646437 | 8-scf00200 | 8 |
| AX-158077735 | 9 | 58.367 | KV452945.1 | 11648806 | 8-scf00200 | 8 |
| AX-157824760 | 9 | 58.367 | KV452945.1 | 11654289 | 8-scf00200 | 8 |
| AX-158077740 | 9 | 58.367 | KV452945.1 | 11655634 | 8-scf00200 | 8 |
| AX-157750037 | 9 | 58.367 | KV452945.1 | 11657004 | 8-scf00200 | 8 |
| AX-158077742 | 9 | 58.367 | KV452945.1 | 11657472 | 8-scf00200 | 8 |
| AX-158077743 | 9 | 58.367 | KV452945.1 | 11657920 | 8-scf00200 | 8 |
| AX-158077744 | 9 | 58.367 | KV452945.1 | 11658649 | 8-scf00200 | 8 |
| AX-158077745 | 9 | 58.367 | KV452945.1 | 11658885 | 8-scf00200 | 8 |
| AX-158077748 | 9 | 58.367 | KV452945.1 | 11659433 | 8-scf00200 | 8 |
| AX-158077749 | 9 | 58.367 | KV452945.1 | 11660705 | 8-scf00200 | 8 |
| AX-158077753 | 9 | 58.367 | KV452945.1 | 11664438 | 8-scf00200 | 8 |
| AX-158077757 | 9 | 58.367 | KV452945.1 | 11667475 | 8-scf00200 | 8 |
| AX-158077772 | 9 | 58.367 | KV452945.1 | 11676736 | 8-scf00200 | 8 |
| AX-158077774 | 9 | 58.367 | KV452945.1 | 11677424 | 8-scf00200 | 8 |
| AX-158077777 | 9 | 58.367 | KV452945.1 | 11678421 | 8-scf00200 | 8 |
| AX-158077782 | 9 | 58.367 | KV452945.1 | 11681614 | 8-scf00200 | 8 |
| AX-158077835 | 9 | 58.367 | KV452945.1 | 11723754 | 8-scf00200 | 8 |
| AX-158077984 | 9 | 58.367 | KV452945.1 | 11860000 | 8-scf00200 | 8 |
| AX-158078025 | 9 | 58.367 | KV452945.1 | 11893923 | 8-scf00200 | 8 |
| AX-157709891 | 9 | 58.367 | KV452945.1 | 11923902 | 8-scf00200 | 8 |
| AX-158078130 | 9 | 58.367 | KV452945.1 | 11973666 | 8-scf00200 | 8 |
| AX-158078156 | 9 | 58.367 | KV452945.1 | 11986970 | 8-scf00200 | 8 |
| AX-158078180 | 9 | 58.367 | KV452945.1 | 12005202 | 8-scf00200 | 8 |
| AX-157824779 | 9 | 58.367 | KV452945.1 | 12042712 | 8-scf00200 | 8 |
| AX-158078230 | 9 | 58.367 | KV452945.1 | 12051188 | 8-scf00200 | 8 |
| AX-158078232 | 9 | 58.367 | KV452945.1 | 12054620 | 8-scf00200 | 8 |
| AX-158078298 | 9 | 58.367 | KV452945.1 | 12118166 | 8-scf00200 | 8 |
| AX-158078423 | 9 | 58.367 | KV452945.1 | 12219038 | 8-scf00200 | 8 |
| AX-158078570 | 9 | 58.367 | KV452945.1 | 12345815 | 8-scf00200 | 8 |
| AX-157714034 | 9 | 58.367 | KV452945.1 | 12475248 | 8-scf00200 | 8 |
| AX-158079261 | 9 | 58.367 | KV452945.1 | 13335712 | 8-scf00200 | 8 |
| AX-158077651 | 9 | 58.585 | KV452945.1 | 11574153 | 8-scf00200 | 8 |
| AX-158077736 | 9 | 58.585 | KV452945.1 | 11652038 | 8-scf00200 | 8 |
| AX-158077806 | 9 | 58.585 | KV452945.1 | 11698266 | 8-scf00200 | 8 |
| AX-158077814 | 9 | 58.585 | KV452945.1 | 11701795 | 8-scf00200 | 8 |

|              |   |        |            |          |            |   |
|--------------|---|--------|------------|----------|------------|---|
| AX-158077821 | 9 | 58.585 | KV452945.1 | 11711896 | 8-scf00200 | 8 |
| AX-158077823 | 9 | 58.585 | KV452945.1 | 11712324 | 8-scf00200 | 8 |
| AX-158077825 | 9 | 58.585 | KV452945.1 | 11712746 | 8-scf00200 | 8 |
| AX-158077841 | 9 | 58.585 | KV452945.1 | 11730390 | 8-scf00200 | 8 |
| AX-158077865 | 9 | 58.585 | KV452945.1 | 11752665 | 8-scf00200 | 8 |
| AX-158077868 | 9 | 58.585 | KV452945.1 | 11753286 | 8-scf00200 | 8 |
| AX-158077875 | 9 | 58.585 | KV452945.1 | 11757992 | 8-scf00200 | 8 |
| AX-158077883 | 9 | 58.585 | KV452945.1 | 11765513 | 8-scf00200 | 8 |
| AX-157718050 | 9 | 58.585 | KV452945.1 | 11765637 | 8-scf00200 | 8 |
| AX-158077889 | 9 | 58.585 | KV452945.1 | 11768149 | 8-scf00200 | 8 |
| AX-158077890 | 9 | 58.585 | KV452945.1 | 11768642 | 8-scf00200 | 8 |
| AX-158077891 | 9 | 58.585 | KV452945.1 | 11769008 | 8-scf00200 | 8 |
| AX-158077893 | 9 | 58.585 | KV452945.1 | 11769627 | 8-scf00200 | 8 |
| AX-158077896 | 9 | 58.585 | KV452945.1 | 11772854 | 8-scf00200 | 8 |
| AX-158077906 | 9 | 58.585 | KV452945.1 | 11779567 | 8-scf00200 | 8 |
| AX-157712934 | 9 | 58.585 | KV452945.1 | 11800131 | 8-scf00200 | 8 |
| AX-158078088 | 9 | 58.585 | KV452945.1 | 11936914 | 8-scf00200 | 8 |
| AX-158078813 | 9 | 58.585 | KV452945.1 | 12687640 | 8-scf00200 | 8 |
| AX-157824764 | 9 | 58.642 | KV452945.1 | 11786708 | 8-scf00200 | 8 |
| AX-157746224 | 9 | 58.695 | KV452945.1 | 11787140 | 8-scf00200 | 8 |
| AX-157824765 | 9 | 58.695 | KV452945.1 | 11790902 | 8-scf00200 | 8 |
| AX-158077918 | 9 | 58.695 | KV452945.1 | 11793751 | 8-scf00200 | 8 |
| AX-158077827 | 9 | 58.769 | KV452945.1 | 11714805 | 8-scf00200 | 8 |
| AX-158077922 | 9 | 58.769 | KV452945.1 | 11798062 | 8-scf00200 | 8 |
| AX-158077955 | 9 | 58.769 | KV452945.1 | 11837629 | 8-scf00200 | 8 |
| AX-158077962 | 9 | 58.769 | KV452945.1 | 11843880 | 8-scf00200 | 8 |
| AX-158078244 | 9 | 58.769 | KV452945.1 | 12063090 | 8-scf00200 | 8 |
| AX-158078300 | 9 | 58.769 | KV452945.1 | 12118921 | 8-scf00200 | 8 |
| AX-158078303 | 9 | 58.769 | KV452945.1 | 12120413 | 8-scf00200 | 8 |
| AX-157750467 | 9 | 58.769 | KV452945.1 | 13311198 | 8-scf00200 | 8 |
| AX-157747476 | 9 | 58.769 | KV452945.1 | 13437149 | 8-scf00200 | 8 |
| AX-158077851 | 9 | 58.785 | KV452945.1 | 11744573 | 8-scf00200 | 8 |
| AX-158077909 | 9 | 58.785 | KV452945.1 | 11782523 | 8-scf00200 | 8 |
| AX-158077924 | 9 | 58.785 | KV452945.1 | 11799599 | 8-scf00200 | 8 |
| AX-157824767 | 9 | 58.785 | KV452945.1 | 11805711 | 8-scf00200 | 8 |
| AX-157755685 | 9 | 58.796 | KV452945.1 | 11807134 | 8-scf00200 | 8 |
| AX-158077936 | 9 | 58.799 | KV452945.1 | 11815640 | 8-scf00200 | 8 |
| AX-158077937 | 9 | 58.804 | KV452945.1 | 11818062 | 8-scf00200 | 8 |
| AX-158077940 | 9 | 58.804 | KV452945.1 | 11820547 | 8-scf00200 | 8 |
| AX-157824714 | 9 | 58.913 | KV452945.1 | 11355686 | 8-scf00200 | 8 |
| AX-158077871 | 9 | 58.913 | KV452945.1 | 11755116 | 8-scf00200 | 8 |
| AX-158077872 | 9 | 58.913 | KV452945.1 | 11755552 | 8-scf00200 | 8 |
| AX-158077885 | 9 | 58.913 | KV452945.1 | 11767332 | 8-scf00200 | 8 |
| AX-157885533 | 9 | 58.913 | KV452945.1 | 11793937 | 8-scf00200 | 8 |
| AX-157824766 | 9 | 58.913 | KV452945.1 | 11794963 | 8-scf00200 | 8 |
| AX-158077919 | 9 | 58.913 | KV452945.1 | 11795328 | 8-scf00200 | 8 |
| AX-157824768 | 9 | 58.913 | KV452945.1 | 11817078 | 8-scf00200 | 8 |
| AX-158077943 | 9 | 58.913 | KV452945.1 | 11824013 | 8-scf00200 | 8 |
| AX-158077946 | 9 | 58.913 | KV452945.1 | 11825470 | 8-scf00200 | 8 |
| AX-158077947 | 9 | 58.913 | KV452945.1 | 11826431 | 8-scf00200 | 8 |
| AX-157717418 | 9 | 58.913 | KV452945.1 | 11830276 | 8-scf00200 | 8 |

|              |   |        |            |          |            |   |
|--------------|---|--------|------------|----------|------------|---|
| AX-157857089 | 9 | 58.913 | KV452945.1 | 11832273 | 8-scf00200 | 8 |
| AX-158077952 | 9 | 58.913 | KV452945.1 | 11832923 | 8-scf00200 | 8 |
| AX-158077954 | 9 | 58.913 | KV452945.1 | 11834805 | 8-scf00200 | 8 |
| AX-158077957 | 9 | 58.913 | KV452945.1 | 11838145 | 8-scf00200 | 8 |
| AX-158077964 | 9 | 58.913 | KV452945.1 | 11844540 | 8-scf00200 | 8 |
| AX-158077983 | 9 | 59.071 | KV452945.1 | 11857822 | 8-scf00200 | 8 |
| AX-158077738 | 9 | 59.132 | KV452945.1 | 11653724 | 8-scf00200 | 8 |
| AX-158077837 | 9 | 59.132 | KV452945.1 | 11725131 | 8-scf00200 | 8 |
| AX-158078003 | 9 | 59.132 | KV452945.1 | 11877743 | 8-scf00200 | 8 |
| AX-158078004 | 9 | 59.132 | KV452945.1 | 11878317 | 8-scf00200 | 8 |
| AX-158078005 | 9 | 59.132 | KV452945.1 | 11879389 | 8-scf00200 | 8 |
| AX-158078006 | 9 | 59.132 | KV452945.1 | 11880157 | 8-scf00200 | 8 |
| AX-158078014 | 9 | 59.132 | KV452945.1 | 11886485 | 8-scf00200 | 8 |
| AX-158078019 | 9 | 59.132 | KV452945.1 | 11890721 | 8-scf00200 | 8 |
| AX-158078027 | 9 | 59.132 | KV452945.1 | 11894468 | 8-scf00200 | 8 |
| AX-158078031 | 9 | 59.132 | KV452945.1 | 11895214 | 8-scf00200 | 8 |
| AX-158078044 | 9 | 59.132 | KV452945.1 | 11900381 | 8-scf00200 | 8 |
| AX-158078046 | 9 | 59.132 | KV452945.1 | 11901231 | 8-scf00200 | 8 |
| AX-158078047 | 9 | 59.132 | KV452945.1 | 11905466 | 8-scf00200 | 8 |
| AX-158078048 | 9 | 59.132 | KV452945.1 | 11906015 | 8-scf00200 | 8 |
| AX-158078052 | 9 | 59.132 | KV452945.1 | 11907810 | 8-scf00200 | 8 |
| AX-158078054 | 9 | 59.132 | KV452945.1 | 11908326 | 8-scf00200 | 8 |
| AX-158078060 | 9 | 59.132 | KV452945.1 | 11915564 | 8-scf00200 | 8 |
| AX-158078064 | 9 | 59.132 | KV452945.1 | 11919789 | 8-scf00200 | 8 |
| AX-158078074 | 9 | 59.132 | KV452945.1 | 11925160 | 8-scf00200 | 8 |
| AX-158078082 | 9 | 59.132 | KV452945.1 | 11929266 | 8-scf00200 | 8 |
| AX-158078085 | 9 | 59.132 | KV452945.1 | 11932679 | 8-scf00200 | 8 |
| AX-158078086 | 9 | 59.132 | KV452945.1 | 11934200 | 8-scf00200 | 8 |
| AX-158078087 | 9 | 59.132 | KV452945.1 | 11935732 | 8-scf00200 | 8 |
| AX-158078090 | 9 | 59.132 | KV452945.1 | 11942947 | 8-scf00200 | 8 |
| AX-158392041 | 9 | 59.132 | KV452945.1 | 11945424 | 8-scf00200 | 8 |
| AX-158078100 | 9 | 59.132 | KV452945.1 | 11948836 | 8-scf00200 | 8 |
| AX-157697834 | 9 | 59.132 | KV452945.1 | 11948954 | 8-scf00200 | 8 |
| AX-158078101 | 9 | 59.132 | KV452945.1 | 11949086 | 8-scf00200 | 8 |
| AX-158078104 | 9 | 59.132 | KV452945.1 | 11951986 | 8-scf00200 | 8 |
| AX-158078141 | 9 | 59.132 | KV452945.1 | 11978850 | 8-scf00200 | 8 |
| AX-158078177 | 9 | 59.132 | KV452945.1 | 12003210 | 8-scf00200 | 8 |
| AX-157824775 | 9 | 59.132 | KV452945.1 | 12019840 | 8-scf00200 | 8 |
| AX-158078262 | 9 | 59.132 | KV452945.1 | 12089725 | 8-scf00200 | 8 |
| AX-158078272 | 9 | 59.132 | KV452945.1 | 12101819 | 8-scf00200 | 8 |
| AX-158078366 | 9 | 59.132 | KV452945.1 | 12184655 | 8-scf00200 | 8 |
| AX-158078391 | 9 | 59.132 | KV452945.1 | 12207247 | 8-scf00200 | 8 |
| AX-158078480 | 9 | 59.132 | KV452945.1 | 12269580 | 8-scf00200 | 8 |
| AX-157824788 | 9 | 59.132 | KV452945.1 | 12333265 | 8-scf00200 | 8 |
| AX-158078682 | 9 | 59.132 | KV452945.1 | 12458765 | 8-scf00200 | 8 |
| AX-158078729 | 9 | 59.132 | KV452945.1 | 12564268 | 8-scf00200 | 8 |
| AX-158078791 | 9 | 59.132 | KV452945.1 | 12649495 | 8-scf00200 | 8 |
| AX-157747472 | 9 | 59.132 | KV452945.1 | 12682223 | 8-scf00200 | 8 |
| AX-158078825 | 9 | 59.132 | KV452945.1 | 12712645 | 8-scf00200 | 8 |
| AX-157758004 | 9 | 59.132 | KV452945.1 | 12790310 | 8-scf00200 | 8 |
| AX-158078998 | 9 | 59.132 | KV452945.1 | 12984552 | 8-scf00200 | 8 |

|              |   |        |            |          |            |   |
|--------------|---|--------|------------|----------|------------|---|
| AX-158079025 | 9 | 59.132 | KV452945.1 | 13032795 | 8-scf00200 | 8 |
| AX-158079036 | 9 | 59.132 | KV452945.1 | 13044169 | 8-scf00200 | 8 |
| AX-158079042 | 9 | 59.132 | KV452945.1 | 13052928 | 8-scf00200 | 8 |
| AX-158079113 | 9 | 59.132 | KV452945.1 | 13171929 | 8-scf00200 | 8 |
| AX-158079115 | 9 | 59.132 | KV452945.1 | 13172426 | 8-scf00200 | 8 |
| AX-158409689 | 9 | 59.132 | KV452945.1 | 13185010 | 8-scf00200 | 8 |
| AX-158079176 | 9 | 59.132 | KV452945.1 | 13238791 | 8-scf00200 | 8 |
| AX-158079177 | 9 | 59.132 | KV452945.1 | 13239343 | 8-scf00200 | 8 |
| AX-158409692 | 9 | 59.132 | KV452945.1 | 13367950 | 8-scf00200 | 8 |
| AX-158079787 | 9 | 59.132 | KV452945.1 | 13834428 | 8-scf00200 | 8 |
| AX-158078112 | 9 | 59.241 | KV452945.1 | 11957602 | 8-scf00200 | 8 |
| AX-158078119 | 9 | 59.241 | KV452945.1 | 11962449 | 8-scf00200 | 8 |
| AX-158078120 | 9 | 59.241 | KV452945.1 | 11964080 | 8-scf00200 | 8 |
| AX-158078122 | 9 | 59.241 | KV452945.1 | 11965014 | 8-scf00200 | 8 |
| AX-158078123 | 9 | 59.241 | KV452945.1 | 11965679 | 8-scf00200 | 8 |
| AX-157824772 | 9 | 59.241 | KV452945.1 | 11974736 | 8-scf00200 | 8 |
| AX-158078133 | 9 | 59.241 | KV452945.1 | 11975577 | 8-scf00200 | 8 |
| AX-158078136 | 9 | 59.241 | KV452945.1 | 11976725 | 8-scf00200 | 8 |
| AX-158078142 | 9 | 59.241 | KV452945.1 | 11979304 | 8-scf00200 | 8 |
| AX-158078170 | 9 | 59.241 | KV452945.1 | 11995347 | 8-scf00200 | 8 |
| AX-158078381 | 9 | 59.241 | KV452945.1 | 12202616 | 8-scf00200 | 8 |
| AX-158078383 | 9 | 59.241 | KV452945.1 | 12203310 | 8-scf00200 | 8 |
| AX-158078385 | 9 | 59.241 | KV452945.1 | 12204785 | 8-scf00200 | 8 |
| AX-158078745 | 9 | 59.241 | KV452945.1 | 12576823 | 8-scf00200 | 8 |
| AX-158079145 | 9 | 59.241 | KV452945.1 | 13217113 | 8-scf00200 | 8 |
| AX-158079152 | 9 | 59.241 | KV452945.1 | 13220024 | 8-scf00200 | 8 |
| AX-158079214 | 9 | 59.241 | KV452945.1 | 13274197 | 8-scf00200 | 8 |
| AX-158384365 | 9 | 59.249 | KV452945.1 | 11981476 | 8-scf00200 | 8 |
| AX-157824780 | 9 | 59.249 | KV452945.1 | 12045072 | 8-scf00200 | 8 |
| AX-158079568 | 9 | 59.249 | KV452945.1 | 13622015 | 8-scf00200 | 8 |
| AX-158081995 | 9 | 59.249 | KV452947.1 | 488195   | 8-scf00203 | 8 |
| AX-158078150 | 9 | 59.269 | KV452945.1 | 11983119 | 8-scf00200 | 8 |
| AX-158078172 | 9 | 59.283 | KV452945.1 | 11997590 | 8-scf00200 | 8 |
| AX-158078189 | 9 | 59.283 | KV452945.1 | 12012242 | 8-scf00200 | 8 |
| AX-158078227 | 9 | 59.283 | KV452945.1 | 12050204 | 8-scf00200 | 8 |
| AX-158078188 | 9 | 59.383 | KV452945.1 | 12010867 | 8-scf00200 | 8 |
| AX-158392042 | 9 | 59.39  | KV452945.1 | 12012091 | 8-scf00200 | 8 |
| AX-158077950 | 9 | 59.459 | KV452945.1 | 11828318 | 8-scf00200 | 8 |
| AX-157824771 | 9 | 59.459 | KV452945.1 | 11890329 | 8-scf00200 | 8 |
| AX-158078126 | 9 | 59.459 | KV452945.1 | 11966722 | 8-scf00200 | 8 |
| AX-158078182 | 9 | 59.459 | KV452945.1 | 12006196 | 8-scf00200 | 8 |
| AX-158078187 | 9 | 59.459 | KV452945.1 | 12010504 | 8-scf00200 | 8 |
| AX-157824778 | 9 | 59.459 | KV452945.1 | 12033466 | 8-scf00200 | 8 |
| AX-158078209 | 9 | 59.459 | KV452945.1 | 12034195 | 8-scf00200 | 8 |
| AX-157714920 | 9 | 59.459 | KV452945.1 | 12047470 | 8-scf00200 | 8 |
| AX-158078222 | 9 | 59.459 | KV452945.1 | 12047971 | 8-scf00200 | 8 |
| AX-158078234 | 9 | 59.459 | KV452945.1 | 12056033 | 8-scf00200 | 8 |
| AX-158078235 | 9 | 59.459 | KV452945.1 | 12056350 | 8-scf00200 | 8 |
| AX-158078237 | 9 | 59.459 | KV452945.1 | 12056582 | 8-scf00200 | 8 |
| AX-158078239 | 9 | 59.459 | KV452945.1 | 12057104 | 8-scf00200 | 8 |
| AX-158078243 | 9 | 59.459 | KV452945.1 | 12062024 | 8-scf00200 | 8 |

|              |   |        |            |          |            |   |
|--------------|---|--------|------------|----------|------------|---|
| AX-157750565 | 9 | 59.459 | KV452945.1 | 12076284 | 8-scf00200 | 8 |
| AX-158078259 | 9 | 59.459 | KV452945.1 | 12088309 | 8-scf00200 | 8 |
| AX-158078261 | 9 | 59.459 | KV452945.1 | 12088662 | 8-scf00200 | 8 |
| AX-157720916 | 9 | 59.459 | KV452945.1 | 12093538 | 8-scf00200 | 8 |
| AX-158078269 | 9 | 59.459 | KV452945.1 | 12098155 | 8-scf00200 | 8 |
| AX-158078274 | 9 | 59.459 | KV452945.1 | 12102648 | 8-scf00200 | 8 |
| AX-158078276 | 9 | 59.459 | KV452945.1 | 12105085 | 8-scf00200 | 8 |
| AX-158078281 | 9 | 59.459 | KV452945.1 | 12108402 | 8-scf00200 | 8 |
| AX-158078291 | 9 | 59.459 | KV452945.1 | 12114756 | 8-scf00200 | 8 |
| AX-158078292 | 9 | 59.459 | KV452945.1 | 12115337 | 8-scf00200 | 8 |
| AX-158078294 | 9 | 59.459 | KV452945.1 | 12115435 | 8-scf00200 | 8 |
| AX-158078317 | 9 | 59.459 | KV452945.1 | 12138879 | 8-scf00200 | 8 |
| AX-157824786 | 9 | 59.459 | KV452945.1 | 12174571 | 8-scf00200 | 8 |
| AX-158078602 | 9 | 59.459 | KV452945.1 | 12368913 | 8-scf00200 | 8 |
| AX-157774672 | 9 | 59.459 | KV452945.1 | 12410150 | 8-scf00200 | 8 |
| AX-158078663 | 9 | 59.459 | KV452945.1 | 12439048 | 8-scf00200 | 8 |
| AX-158078664 | 9 | 59.459 | KV452945.1 | 12439650 | 8-scf00200 | 8 |
| AX-158078686 | 9 | 59.459 | KV452945.1 | 12463239 | 8-scf00200 | 8 |
| AX-158078728 | 9 | 59.459 | KV452945.1 | 12561633 | 8-scf00200 | 8 |
| AX-157754763 | 9 | 59.459 | KV452945.1 | 13240642 | 8-scf00200 | 8 |
| AX-157773970 | 9 | 59.459 | KV452945.1 | 14313204 | 8-scf00200 | 8 |
| AX-157714194 | 9 | 59.678 | KV452945.1 | 11975261 | 8-scf00200 | 8 |
| AX-158078171 | 9 | 59.678 | KV452945.1 | 11996184 | 8-scf00200 | 8 |
| AX-158078311 | 9 | 59.678 | KV452945.1 | 12131277 | 8-scf00200 | 8 |
| AX-158078319 | 9 | 59.678 | KV452945.1 | 12140566 | 8-scf00200 | 8 |
| AX-158078334 | 9 | 59.678 | KV452945.1 | 12157604 | 8-scf00200 | 8 |
| AX-158078346 | 9 | 59.678 | KV452945.1 | 12168293 | 8-scf00200 | 8 |
| AX-158078355 | 9 | 59.678 | KV452945.1 | 12178451 | 8-scf00200 | 8 |
| AX-158078370 | 9 | 59.678 | KV452945.1 | 12187852 | 8-scf00200 | 8 |
| AX-157774668 | 9 | 59.678 | KV452945.1 | 12188531 | 8-scf00200 | 8 |
| AX-158078378 | 9 | 59.678 | KV452945.1 | 12197782 | 8-scf00200 | 8 |
| AX-157726647 | 9 | 59.678 | KV452945.1 | 12200203 | 8-scf00200 | 8 |
| AX-158078380 | 9 | 59.678 | KV452945.1 | 12201522 | 8-scf00200 | 8 |
| AX-158078384 | 9 | 59.678 | KV452945.1 | 12204081 | 8-scf00200 | 8 |
| AX-158078388 | 9 | 59.678 | KV452945.1 | 12206088 | 8-scf00200 | 8 |
| AX-158078397 | 9 | 59.678 | KV452945.1 | 12209750 | 8-scf00200 | 8 |
| AX-158078420 | 9 | 59.678 | KV452945.1 | 12218185 | 8-scf00200 | 8 |
| AX-158078427 | 9 | 59.678 | KV452945.1 | 12219788 | 8-scf00200 | 8 |
| AX-158078428 | 9 | 59.678 | KV452945.1 | 12220524 | 8-scf00200 | 8 |
| AX-158078432 | 9 | 59.678 | KV452945.1 | 12222763 | 8-scf00200 | 8 |
| AX-158078435 | 9 | 59.678 | KV452945.1 | 12228585 | 8-scf00200 | 8 |
| AX-157773577 | 9 | 59.678 | KV452945.1 | 12242735 | 8-scf00200 | 8 |
| AX-158078457 | 9 | 59.678 | KV452945.1 | 12248304 | 8-scf00200 | 8 |
| AX-157857094 | 9 | 59.678 | KV452945.1 | 12252314 | 8-scf00200 | 8 |
| AX-158078468 | 9 | 59.678 | KV452945.1 | 12259083 | 8-scf00200 | 8 |
| AX-158078542 | 9 | 59.678 | KV452945.1 | 12321119 | 8-scf00200 | 8 |
| AX-158078651 | 9 | 59.678 | KV452945.1 | 12422336 | 8-scf00200 | 8 |
| AX-158078750 | 9 | 59.678 | KV452945.1 | 12590222 | 8-scf00200 | 8 |
| AX-158078857 | 9 | 59.678 | KV452945.1 | 12781078 | 8-scf00200 | 8 |
| AX-158079101 | 9 | 59.678 | KV452945.1 | 13141276 | 8-scf00200 | 8 |
| AX-158079110 | 9 | 59.678 | KV452945.1 | 13170645 | 8-scf00200 | 8 |

|              |   |        |             |          |            |    |
|--------------|---|--------|-------------|----------|------------|----|
| AX-158079191 | 9 | 59.678 | KV452945.1  | 13250236 | 8-scf00200 | 8  |
| AX-158079193 | 9 | 59.678 | KV452945.1  | 13250459 | 8-scf00200 | 8  |
| AX-158079219 | 9 | 59.678 | KV452945.1  | 13281887 | 8-scf00200 | 8  |
| AX-158079319 | 9 | 59.678 | KV452945.1  | 13391072 | 8-scf00200 | 8  |
| AX-157712174 | 9 | 59.678 | KV452945.1  | 13444464 | 8-scf00200 | 8  |
| AX-158079499 | 9 | 59.678 | KV452945.1  | 13552687 | 8-scf00200 | 8  |
| AX-157752871 | 9 | 59.678 | KV452945.1  | 13581564 | 8-scf00200 | 8  |
| AX-158079948 | 9 | 59.678 | KV452945.1  | 13978949 | 8-scf00200 | 8  |
| AX-158079955 | 9 | 59.678 | KV452945.1  | 13990405 | 8-scf00200 | 8  |
| AX-158079982 | 9 | 59.678 | KV452945.1  | 14016900 | 8-scf00200 | 8  |
| AX-158080106 | 9 | 59.678 | KV452945.1  | 14188840 | 8-scf00200 | 8  |
| AX-158081106 | 9 | 59.678 | KV452946.1  | 148003   | 8-scf00202 | 8  |
| AX-158082979 | 9 | 59.678 | KV452947.1  | 2321001  | 8-scf00203 | 8  |
| AX-157705344 | 9 | 59.678 | 3ML01029447 | 522      | scf05070_1 | UN |
| AX-157707384 | 9 | 59.678 | 3ML01034160 | 39       | scf09831_1 | UN |
| AX-158077925 | 9 | 59.787 | KV452945.1  | 11800907 | 8-scf00200 | 8  |
| AX-158078001 | 9 | 59.787 | KV452945.1  | 11876152 | 8-scf00200 | 8  |
| AX-158078096 | 9 | 59.787 | KV452945.1  | 11946036 | 8-scf00200 | 8  |
| AX-158078110 | 9 | 59.787 | KV452945.1  | 11956893 | 8-scf00200 | 8  |
| AX-158078168 | 9 | 59.787 | KV452945.1  | 11994629 | 8-scf00200 | 8  |
| AX-158078211 | 9 | 59.787 | KV452945.1  | 12035096 | 8-scf00200 | 8  |
| AX-158078400 | 9 | 59.787 | KV452945.1  | 12211410 | 8-scf00200 | 8  |
| AX-158078401 | 9 | 59.787 | KV452945.1  | 12211913 | 8-scf00200 | 8  |
| AX-158078452 | 9 | 59.787 | KV452945.1  | 12244754 | 8-scf00200 | 8  |
| AX-158078470 | 9 | 59.787 | KV452945.1  | 12260657 | 8-scf00200 | 8  |
| AX-158078481 | 9 | 59.787 | KV452945.1  | 12270725 | 8-scf00200 | 8  |
| AX-158078485 | 9 | 59.787 | KV452945.1  | 12273779 | 8-scf00200 | 8  |
| AX-158078491 | 9 | 59.787 | KV452945.1  | 12277108 | 8-scf00200 | 8  |
| AX-157723117 | 9 | 59.787 | KV452945.1  | 12278733 | 8-scf00200 | 8  |
| AX-158078494 | 9 | 59.787 | KV452945.1  | 12282205 | 8-scf00200 | 8  |
| AX-158078497 | 9 | 59.787 | KV452945.1  | 12283646 | 8-scf00200 | 8  |
| AX-158078501 | 9 | 59.787 | KV452945.1  | 12287643 | 8-scf00200 | 8  |
| AX-158078507 | 9 | 59.787 | KV452945.1  | 12289139 | 8-scf00200 | 8  |
| AX-158078518 | 9 | 59.787 | KV452945.1  | 12297079 | 8-scf00200 | 8  |
| AX-158078529 | 9 | 59.787 | KV452945.1  | 12306249 | 8-scf00200 | 8  |
| AX-158078531 | 9 | 59.787 | KV452945.1  | 12306523 | 8-scf00200 | 8  |
| AX-158078555 | 9 | 59.787 | KV452945.1  | 12328696 | 8-scf00200 | 8  |
| AX-158078557 | 9 | 59.787 | KV452945.1  | 12330798 | 8-scf00200 | 8  |
| AX-158078560 | 9 | 59.787 | KV452945.1  | 12334232 | 8-scf00200 | 8  |
| AX-158078563 | 9 | 59.787 | KV452945.1  | 12335599 | 8-scf00200 | 8  |
| AX-158078592 | 9 | 59.787 | KV452945.1  | 12362251 | 8-scf00200 | 8  |
| AX-158078594 | 9 | 59.787 | KV452945.1  | 12364640 | 8-scf00200 | 8  |
| AX-158078596 | 9 | 59.787 | KV452945.1  | 12365044 | 8-scf00200 | 8  |
| AX-158078627 | 9 | 59.787 | KV452945.1  | 12400259 | 8-scf00200 | 8  |
| AX-158078649 | 9 | 59.787 | KV452945.1  | 12419806 | 8-scf00200 | 8  |
| AX-158078670 | 9 | 59.787 | KV452945.1  | 12447077 | 8-scf00200 | 8  |
| AX-158078688 | 9 | 59.787 | KV452945.1  | 12472981 | 8-scf00200 | 8  |
| AX-158078715 | 9 | 59.787 | KV452945.1  | 12532645 | 8-scf00200 | 8  |
| AX-158078716 | 9 | 59.787 | KV452945.1  | 12540060 | 8-scf00200 | 8  |
| AX-158078721 | 9 | 59.787 | KV452945.1  | 12550674 | 8-scf00200 | 8  |
| AX-158078724 | 9 | 59.787 | KV452945.1  | 12554295 | 8-scf00200 | 8  |

|              |   |        |             |          |            |    |
|--------------|---|--------|-------------|----------|------------|----|
| AX-158406932 | 9 | 59.787 | KV452945.1  | 12562681 | 8-scf00200 | 8  |
| AX-158078731 | 9 | 59.787 | KV452945.1  | 12565308 | 8-scf00200 | 8  |
| AX-157824794 | 9 | 59.787 | KV452945.1  | 12575235 | 8-scf00200 | 8  |
| AX-158078746 | 9 | 59.787 | KV452945.1  | 12580117 | 8-scf00200 | 8  |
| AX-158078756 | 9 | 59.787 | KV452945.1  | 12605520 | 8-scf00200 | 8  |
| AX-158078993 | 9 | 59.787 | KV452945.1  | 12980608 | 8-scf00200 | 8  |
| AX-158079033 | 9 | 59.787 | KV452945.1  | 13043044 | 8-scf00200 | 8  |
| AX-158079144 | 9 | 59.787 | KV452945.1  | 13216384 | 8-scf00200 | 8  |
| AX-158079148 | 9 | 59.787 | KV452945.1  | 13218669 | 8-scf00200 | 8  |
| AX-158079161 | 9 | 59.787 | KV452945.1  | 13223825 | 8-scf00200 | 8  |
| AX-157758163 | 9 | 59.787 | KV452945.1  | 13319021 | 8-scf00200 | 8  |
| AX-157707211 | 9 | 59.787 | 3ML01033751 | 204      | scf09415_1 | UN |
| AX-157824795 | 9 | 59.811 | KV452945.1  | 12583394 | 8-scf00200 | 8  |
| AX-158078964 | 9 | 59.811 | KV452945.1  | 12922767 | 8-scf00200 | 8  |
| AX-158078462 | 9 | 59.825 | KV452945.1  | 12251987 | 8-scf00200 | 8  |
| AX-158078752 | 9 | 59.825 | KV452945.1  | 12596324 | 8-scf00200 | 8  |
| AX-158079360 | 9 | 59.825 | KV452945.1  | 13441334 | 8-scf00200 | 8  |
| AX-158079373 | 9 | 59.825 | KV452945.1  | 13457974 | 8-scf00200 | 8  |
| AX-158078777 | 9 | 59.85  | KV452945.1  | 12640371 | 8-scf00200 | 8  |
| AX-158078779 | 9 | 59.874 | KV452945.1  | 12641208 | 8-scf00200 | 8  |
| AX-158077688 | 9 | 59.896 | KV452945.1  | 11610740 | 8-scf00200 | 8  |
| AX-158077693 | 9 | 59.896 | KV452945.1  | 11615643 | 8-scf00200 | 8  |
| AX-158077701 | 9 | 59.896 | KV452945.1  | 11620437 | 8-scf00200 | 8  |
| AX-158077858 | 9 | 59.896 | KV452945.1  | 11747566 | 8-scf00200 | 8  |
| AX-157877102 | 9 | 59.896 | KV452945.1  | 11748690 | 8-scf00200 | 8  |
| AX-158077933 | 9 | 59.896 | KV452945.1  | 11810075 | 8-scf00200 | 8  |
| AX-158077951 | 9 | 59.896 | KV452945.1  | 11829152 | 8-scf00200 | 8  |
| AX-158077973 | 9 | 59.896 | KV452945.1  | 11851699 | 8-scf00200 | 8  |
| AX-157857091 | 9 | 59.896 | KV452945.1  | 11975721 | 8-scf00200 | 8  |
| AX-158078158 | 9 | 59.896 | KV452945.1  | 11987712 | 8-scf00200 | 8  |
| AX-158078175 | 9 | 59.896 | KV452945.1  | 12001424 | 8-scf00200 | 8  |
| AX-158078258 | 9 | 59.896 | KV452945.1  | 12084400 | 8-scf00200 | 8  |
| AX-157720616 | 9 | 59.896 | KV452945.1  | 12113160 | 8-scf00200 | 8  |
| AX-157748982 | 9 | 59.896 | KV452945.1  | 12161143 | 8-scf00200 | 8  |
| AX-158078367 | 9 | 59.896 | KV452945.1  | 12185592 | 8-scf00200 | 8  |
| AX-158078369 | 9 | 59.896 | KV452945.1  | 12186180 | 8-scf00200 | 8  |
| AX-158078506 | 9 | 59.896 | KV452945.1  | 12288476 | 8-scf00200 | 8  |
| AX-158078509 | 9 | 59.896 | KV452945.1  | 12289834 | 8-scf00200 | 8  |
| AX-158078510 | 9 | 59.896 | KV452945.1  | 12290512 | 8-scf00200 | 8  |
| AX-158078528 | 9 | 59.896 | KV452945.1  | 12306175 | 8-scf00200 | 8  |
| AX-158078589 | 9 | 59.896 | KV452945.1  | 12356865 | 8-scf00200 | 8  |
| AX-157749034 | 9 | 59.896 | KV452945.1  | 12411951 | 8-scf00200 | 8  |
| AX-158078647 | 9 | 59.896 | KV452945.1  | 12419401 | 8-scf00200 | 8  |
| AX-158078675 | 9 | 59.896 | KV452945.1  | 12450461 | 8-scf00200 | 8  |
| AX-158078693 | 9 | 59.896 | KV452945.1  | 12485036 | 8-scf00200 | 8  |
| AX-158078695 | 9 | 59.896 | KV452945.1  | 12498154 | 8-scf00200 | 8  |
| AX-158078717 | 9 | 59.896 | KV452945.1  | 12541305 | 8-scf00200 | 8  |
| AX-158078747 | 9 | 59.896 | KV452945.1  | 12583950 | 8-scf00200 | 8  |
| AX-158078749 | 9 | 59.896 | KV452945.1  | 12587979 | 8-scf00200 | 8  |
| AX-158078760 | 9 | 59.896 | KV452945.1  | 12615415 | 8-scf00200 | 8  |
| AX-157725829 | 9 | 59.896 | KV452945.1  | 12615791 | 8-scf00200 | 8  |



|              |   |        |            |          |            |   |
|--------------|---|--------|------------|----------|------------|---|
| AX-158078776 | 9 | 59.896 | KV452945.1 | 12640014 | 8-scf00200 | 8 |
| AX-158078780 | 9 | 59.896 | KV452945.1 | 12641775 | 8-scf00200 | 8 |
| AX-158078781 | 9 | 59.896 | KV452945.1 | 12642702 | 8-scf00200 | 8 |
| AX-158078788 | 9 | 59.896 | KV452945.1 | 12644828 | 8-scf00200 | 8 |
| AX-158078795 | 9 | 59.896 | KV452945.1 | 12654188 | 8-scf00200 | 8 |
| AX-158078796 | 9 | 59.896 | KV452945.1 | 12654772 | 8-scf00200 | 8 |
| AX-158078799 | 9 | 59.896 | KV452945.1 | 12662650 | 8-scf00200 | 8 |
| AX-158078801 | 9 | 59.896 | KV452945.1 | 12664827 | 8-scf00200 | 8 |
| AX-158078804 | 9 | 59.896 | KV452945.1 | 12674520 | 8-scf00200 | 8 |
| AX-158078805 | 9 | 59.896 | KV452945.1 | 12674738 | 8-scf00200 | 8 |
| AX-158078812 | 9 | 59.896 | KV452945.1 | 12685645 | 8-scf00200 | 8 |
| AX-158078821 | 9 | 59.896 | KV452945.1 | 12702590 | 8-scf00200 | 8 |
| AX-158078827 | 9 | 59.896 | KV452945.1 | 12714667 | 8-scf00200 | 8 |
| AX-158078831 | 9 | 59.896 | KV452945.1 | 12732886 | 8-scf00200 | 8 |
| AX-158078832 | 9 | 59.896 | KV452945.1 | 12733888 | 8-scf00200 | 8 |
| AX-157824798 | 9 | 59.896 | KV452945.1 | 12734192 | 8-scf00200 | 8 |
| AX-157747577 | 9 | 59.896 | KV452945.1 | 12750437 | 8-scf00200 | 8 |
| AX-157824800 | 9 | 59.896 | KV452945.1 | 12753293 | 8-scf00200 | 8 |
| AX-157824801 | 9 | 59.896 | KV452945.1 | 12754787 | 8-scf00200 | 8 |
| AX-157824802 | 9 | 59.896 | KV452945.1 | 12763939 | 8-scf00200 | 8 |
| AX-158078847 | 9 | 59.896 | KV452945.1 | 12765035 | 8-scf00200 | 8 |
| AX-157727916 | 9 | 59.896 | KV452945.1 | 12768071 | 8-scf00200 | 8 |
| AX-158078850 | 9 | 59.896 | KV452945.1 | 12770735 | 8-scf00200 | 8 |
| AX-158078860 | 9 | 59.896 | KV452945.1 | 12784265 | 8-scf00200 | 8 |
| AX-158078862 | 9 | 59.896 | KV452945.1 | 12792184 | 8-scf00200 | 8 |
| AX-158078863 | 9 | 59.896 | KV452945.1 | 12793439 | 8-scf00200 | 8 |
| AX-158078896 | 9 | 59.896 | KV452945.1 | 12807918 | 8-scf00200 | 8 |
| AX-158078901 | 9 | 59.896 | KV452945.1 | 12815173 | 8-scf00200 | 8 |
| AX-158078902 | 9 | 59.896 | KV452945.1 | 12816148 | 8-scf00200 | 8 |
| AX-158078905 | 9 | 59.896 | KV452945.1 | 12821418 | 8-scf00200 | 8 |
| AX-158078907 | 9 | 59.896 | KV452945.1 | 12834974 | 8-scf00200 | 8 |
| AX-158078909 | 9 | 59.896 | KV452945.1 | 12837446 | 8-scf00200 | 8 |
| AX-158078910 | 9 | 59.896 | KV452945.1 | 12838024 | 8-scf00200 | 8 |
| AX-158078911 | 9 | 59.896 | KV452945.1 | 12839138 | 8-scf00200 | 8 |
| AX-158078932 | 9 | 59.896 | KV452945.1 | 12881121 | 8-scf00200 | 8 |
| AX-158078944 | 9 | 59.896 | KV452945.1 | 12893987 | 8-scf00200 | 8 |
| AX-158078952 | 9 | 59.896 | KV452945.1 | 12907127 | 8-scf00200 | 8 |
| AX-158078983 | 9 | 59.896 | KV452945.1 | 12974886 | 8-scf00200 | 8 |
| AX-158078986 | 9 | 59.896 | KV452945.1 | 12976798 | 8-scf00200 | 8 |
| AX-158078990 | 9 | 59.896 | KV452945.1 | 12979988 | 8-scf00200 | 8 |
| AX-158079005 | 9 | 59.896 | KV452945.1 | 12990240 | 8-scf00200 | 8 |
| AX-158079011 | 9 | 59.896 | KV452945.1 | 12997692 | 8-scf00200 | 8 |
| AX-158079014 | 9 | 59.896 | KV452945.1 | 13001995 | 8-scf00200 | 8 |
| AX-158079016 | 9 | 59.896 | KV452945.1 | 13006441 | 8-scf00200 | 8 |
| AX-158079017 | 9 | 59.896 | KV452945.1 | 13011876 | 8-scf00200 | 8 |
| AX-158079028 | 9 | 59.896 | KV452945.1 | 13034137 | 8-scf00200 | 8 |
| AX-158079055 | 9 | 59.896 | KV452945.1 | 13066803 | 8-scf00200 | 8 |
| AX-158079061 | 9 | 59.896 | KV452945.1 | 13072668 | 8-scf00200 | 8 |
| AX-158079067 | 9 | 59.896 | KV452945.1 | 13086365 | 8-scf00200 | 8 |
| AX-157749979 | 9 | 59.896 | KV452945.1 | 13087116 | 8-scf00200 | 8 |
| AX-158079071 | 9 | 59.896 | KV452945.1 | 13089797 | 8-scf00200 | 8 |

|              |   |        |            |          |            |   |
|--------------|---|--------|------------|----------|------------|---|
| AX-158079083 | 9 | 59.896 | KV452945.1 | 13105547 | 8-scf00200 | 8 |
| AX-158079112 | 9 | 59.896 | KV452945.1 | 13171088 | 8-scf00200 | 8 |
| AX-158079116 | 9 | 59.896 | KV452945.1 | 13172898 | 8-scf00200 | 8 |
| AX-158079118 | 9 | 59.896 | KV452945.1 | 13173482 | 8-scf00200 | 8 |
| AX-158079124 | 9 | 59.896 | KV452945.1 | 13186440 | 8-scf00200 | 8 |
| AX-158079129 | 9 | 59.896 | KV452945.1 | 13194442 | 8-scf00200 | 8 |
| AX-158079147 | 9 | 59.896 | KV452945.1 | 13217740 | 8-scf00200 | 8 |
| AX-158079154 | 9 | 59.896 | KV452945.1 | 13221566 | 8-scf00200 | 8 |
| AX-158079157 | 9 | 59.896 | KV452945.1 | 13222092 | 8-scf00200 | 8 |
| AX-158079158 | 9 | 59.896 | KV452945.1 | 13223152 | 8-scf00200 | 8 |
| AX-158079160 | 9 | 59.896 | KV452945.1 | 13223397 | 8-scf00200 | 8 |
| AX-158079163 | 9 | 59.896 | KV452945.1 | 13224686 | 8-scf00200 | 8 |
| AX-158079164 | 9 | 59.896 | KV452945.1 | 13226443 | 8-scf00200 | 8 |
| AX-158079166 | 9 | 59.896 | KV452945.1 | 13228584 | 8-scf00200 | 8 |
| AX-157824815 | 9 | 59.896 | KV452945.1 | 13247549 | 8-scf00200 | 8 |
| AX-157865699 | 9 | 59.896 | KV452945.1 | 13249140 | 8-scf00200 | 8 |
| AX-157824818 | 9 | 59.896 | KV452945.1 | 13260457 | 8-scf00200 | 8 |
| AX-157824819 | 9 | 59.896 | KV452945.1 | 13260945 | 8-scf00200 | 8 |
| AX-158079209 | 9 | 59.896 | KV452945.1 | 13267557 | 8-scf00200 | 8 |
| AX-158079210 | 9 | 59.896 | KV452945.1 | 13269407 | 8-scf00200 | 8 |
| AX-158079241 | 9 | 59.896 | KV452945.1 | 13304057 | 8-scf00200 | 8 |
| AX-158079244 | 9 | 59.896 | KV452945.1 | 13305676 | 8-scf00200 | 8 |
| AX-157710951 | 9 | 59.896 | KV452945.1 | 13305857 | 8-scf00200 | 8 |
| AX-157746567 | 9 | 59.896 | KV452945.1 | 13307513 | 8-scf00200 | 8 |
| AX-158079246 | 9 | 59.896 | KV452945.1 | 13312280 | 8-scf00200 | 8 |
| AX-158079248 | 9 | 59.896 | KV452945.1 | 13320443 | 8-scf00200 | 8 |
| AX-158079275 | 9 | 59.896 | KV452945.1 | 13345505 | 8-scf00200 | 8 |
| AX-158079298 | 9 | 59.896 | KV452945.1 | 13374022 | 8-scf00200 | 8 |
| AX-158079411 | 9 | 59.896 | KV452945.1 | 13481652 | 8-scf00200 | 8 |
| AX-158079456 | 9 | 59.896 | KV452945.1 | 13513700 | 8-scf00200 | 8 |
| AX-158079673 | 9 | 59.896 | KV452945.1 | 13725902 | 8-scf00200 | 8 |
| AX-157824961 | 9 | 59.896 | KV452946.1 | 148793   | 8-scf00202 | 8 |
| AX-158416642 | 9 | 59.896 | KV452946.1 | 215319   | 8-scf00202 | 8 |
| AX-158384397 | 9 | 59.896 | KV452946.1 | 216354   | 8-scf00202 | 8 |
| AX-158081252 | 9 | 59.896 | KV452946.1 | 271428   | 8-scf00202 | 8 |
| AX-158081399 | 9 | 59.896 | KV452946.1 | 425136   | 8-scf00202 | 8 |
| AX-157885577 | 9 | 59.896 | KV452947.1 | 2324723  | 8-scf00203 | 8 |
| AX-158082990 | 9 | 59.896 | KV452947.1 | 2335319  | 8-scf00203 | 8 |
| AX-158082994 | 9 | 59.896 | KV452947.1 | 2338752  | 8-scf00203 | 8 |
| AX-158083000 | 9 | 59.896 | KV452947.1 | 2344483  | 8-scf00203 | 8 |
| AX-158392076 | 9 | 59.896 | KV452947.1 | 2347831  | 8-scf00203 | 8 |
| AX-158083008 | 9 | 59.896 | KV452947.1 | 2359109  | 8-scf00203 | 8 |
| AX-158083009 | 9 | 59.896 | KV452947.1 | 2360111  | 8-scf00203 | 8 |
| AX-158078302 | 9 | 59.909 | KV452945.1 | 12119857 | 8-scf00200 | 8 |
| AX-158078308 | 9 | 59.909 | KV452945.1 | 12126034 | 8-scf00200 | 8 |
| AX-158078482 | 9 | 59.909 | KV452945.1 | 12272865 | 8-scf00200 | 8 |
| AX-158078730 | 9 | 59.909 | KV452945.1 | 12564498 | 8-scf00200 | 8 |
| AX-158078733 | 9 | 59.909 | KV452945.1 | 12566179 | 8-scf00200 | 8 |
| AX-158078734 | 9 | 59.909 | KV452945.1 | 12567197 | 8-scf00200 | 8 |
| AX-158078736 | 9 | 59.909 | KV452945.1 | 12569515 | 8-scf00200 | 8 |
| AX-158384381 | 9 | 59.909 | KV452945.1 | 12597147 | 8-scf00200 | 8 |

|              |   |        |            |          |            |   |
|--------------|---|--------|------------|----------|------------|---|
| AX-158079173 | 9 | 59.909 | KV452945.1 | 13236726 | 8-scf00200 | 8 |
| AX-158392048 | 9 | 59.909 | KV452945.1 | 13262299 | 8-scf00200 | 8 |
| AX-158079267 | 9 | 59.909 | KV452945.1 | 13340367 | 8-scf00200 | 8 |
| AX-158079314 | 9 | 59.909 | KV452945.1 | 13387928 | 8-scf00200 | 8 |
| AX-158079331 | 9 | 59.909 | KV452945.1 | 13404349 | 8-scf00200 | 8 |
| AX-158079386 | 9 | 59.909 | KV452945.1 | 13464960 | 8-scf00200 | 8 |
| AX-158079549 | 9 | 59.909 | KV452945.1 | 13612922 | 8-scf00200 | 8 |
| AX-158079670 | 9 | 59.909 | KV452945.1 | 13722390 | 8-scf00200 | 8 |
| AX-158079686 | 9 | 59.909 | KV452945.1 | 13740060 | 8-scf00200 | 8 |
| AX-157824848 | 9 | 59.909 | KV452945.1 | 13740287 | 8-scf00200 | 8 |
| AX-158079868 | 9 | 59.909 | KV452945.1 | 13918111 | 8-scf00200 | 8 |
| AX-158077970 | 9 | 59.936 | KV452945.1 | 11849458 | 8-scf00200 | 8 |
| AX-158078263 | 9 | 59.936 | KV452945.1 | 12091362 | 8-scf00200 | 8 |
| AX-158078908 | 9 | 59.936 | KV452945.1 | 12837039 | 8-scf00200 | 8 |
| AX-158079197 | 9 | 59.936 | KV452945.1 | 13260242 | 8-scf00200 | 8 |
| AX-158079269 | 9 | 59.936 | KV452945.1 | 13342299 | 8-scf00200 | 8 |
| AX-158079270 | 9 | 59.936 | KV452945.1 | 13343502 | 8-scf00200 | 8 |
| AX-158079277 | 9 | 59.936 | KV452945.1 | 13353230 | 8-scf00200 | 8 |
| AX-158079272 | 9 | 59.959 | KV452945.1 | 13343922 | 8-scf00200 | 8 |
| AX-158078865 | 9 | 59.979 | KV452945.1 | 12799351 | 8-scf00200 | 8 |
| AX-158078965 | 9 | 59.979 | KV452945.1 | 12924136 | 8-scf00200 | 8 |
| AX-158384382 | 9 | 59.979 | KV452945.1 | 12937137 | 8-scf00200 | 8 |
| AX-158079000 | 9 | 59.979 | KV452945.1 | 12985264 | 8-scf00200 | 8 |
| AX-158079020 | 9 | 59.979 | KV452945.1 | 13014348 | 8-scf00200 | 8 |
| AX-158079279 | 9 | 59.979 | KV452945.1 | 13357099 | 8-scf00200 | 8 |
| AX-158079287 | 9 | 60.005 | KV452945.1 | 13367731 | 8-scf00200 | 8 |
| AX-158079289 | 9 | 60.005 | KV452945.1 | 13368662 | 8-scf00200 | 8 |
| AX-158079293 | 9 | 60.005 | KV452945.1 | 13371365 | 8-scf00200 | 8 |
| AX-158079545 | 9 | 60.005 | KV452945.1 | 13611136 | 8-scf00200 | 8 |
| AX-158080112 | 9 | 60.005 | KV452945.1 | 14194717 | 8-scf00200 | 8 |
| AX-158079303 | 9 | 60.119 | KV452945.1 | 13381032 | 8-scf00200 | 8 |
| AX-158076719 | 9 | 60.169 | KV452945.1 | 10620383 | 8-scf00200 | 8 |
| AX-158077958 | 9 | 60.169 | KV452945.1 | 11839393 | 8-scf00200 | 8 |
| AX-158078830 | 9 | 60.169 | KV452945.1 | 12718045 | 8-scf00200 | 8 |
| AX-158079325 | 9 | 60.169 | KV452945.1 | 13399567 | 8-scf00200 | 8 |
| AX-158079327 | 9 | 60.169 | KV452945.1 | 13401239 | 8-scf00200 | 8 |
| AX-158079329 | 9 | 60.169 | KV452945.1 | 13403348 | 8-scf00200 | 8 |
| AX-158078489 | 9 | 60.333 | KV452945.1 | 12276425 | 8-scf00200 | 8 |
| AX-158078492 | 9 | 60.333 | KV452945.1 | 12277693 | 8-scf00200 | 8 |
| AX-158078493 | 9 | 60.333 | KV452945.1 | 12278252 | 8-scf00200 | 8 |
| AX-158078601 | 9 | 60.333 | KV452945.1 | 12367511 | 8-scf00200 | 8 |
| AX-158416622 | 9 | 60.333 | KV452945.1 | 12662033 | 8-scf00200 | 8 |
| AX-157715970 | 9 | 60.333 | KV452945.1 | 12823520 | 8-scf00200 | 8 |
| AX-158079257 | 9 | 60.333 | KV452945.1 | 13332737 | 8-scf00200 | 8 |
| AX-157747777 | 9 | 60.333 | KV452945.1 | 13415100 | 8-scf00200 | 8 |
| AX-157824825 | 9 | 60.333 | KV452945.1 | 13424708 | 8-scf00200 | 8 |
| AX-158079351 | 9 | 60.333 | KV452945.1 | 13425368 | 8-scf00200 | 8 |
| AX-157723753 | 9 | 60.333 | KV452945.1 | 13426474 | 8-scf00200 | 8 |
| AX-158079355 | 9 | 60.333 | KV452945.1 | 13428991 | 8-scf00200 | 8 |
| AX-158079357 | 9 | 60.333 | KV452945.1 | 13432244 | 8-scf00200 | 8 |
| AX-157824826 | 9 | 60.333 | KV452945.1 | 13433453 | 8-scf00200 | 8 |

|              |   |        |            |          |                |    |
|--------------|---|--------|------------|----------|----------------|----|
| AX-157824827 | 9 | 60.333 | KV452945.1 | 13436971 | 8-scf00200     | 8  |
| AX-157865704 | 9 | 60.333 | KV452945.1 | 13437356 | 8-scf00200     | 8  |
| AX-157713569 | 9 | 60.333 | KV452945.1 | 13445380 | 8-scf00200     | 8  |
| AX-157824829 | 9 | 60.333 | KV452945.1 | 13449133 | 8-scf00200     | 8  |
| AX-158079366 | 9 | 60.333 | KV452945.1 | 13452577 | 8-scf00200     | 8  |
| AX-158079370 | 9 | 60.333 | KV452945.1 | 13455183 | 8-scf00200     | 8  |
| AX-158079372 | 9 | 60.333 | KV452945.1 | 13456060 | 8-scf00200     | 8  |
| AX-157824831 | 9 | 60.333 | KV452945.1 | 13458763 | 8-scf00200     | 8  |
| AX-158079382 | 9 | 60.333 | KV452945.1 | 13461775 | 8-scf00200     | 8  |
| AX-158079391 | 9 | 60.333 | KV452945.1 | 13469698 | 8-scf00200     | 8  |
| AX-158079403 | 9 | 60.333 | KV452945.1 | 13477178 | 8-scf00200     | 8  |
| AX-158081922 | 9 | 60.333 | KV452947.1 | 425815   | 8-scf00203     | 8  |
| AX-158079400 | 9 | 60.424 | KV452945.1 | 13475127 | 8-scf00200     | 8  |
| AX-158079408 | 9 | 60.424 | KV452945.1 | 13480882 | 8-scf00200     | 8  |
| AX-158079401 | 9 | 60.515 | KV452945.1 | 13476582 | 8-scf00200     | 8  |
| AX-158079405 | 9 | 60.515 | KV452945.1 | 13479520 | 8-scf00200     | 8  |
| AX-158079415 | 9 | 60.52  | KV452945.1 | 13484407 | 8-scf00200     | 8  |
| AX-158079418 | 9 | 60.809 | KV452945.1 | 13486430 | 8-scf00200     | 8  |
| AX-158079419 | 9 | 60.809 | KV452945.1 | 13488052 | 8-scf00200     | 8  |
| AX-158079421 | 9 | 60.809 | KV452945.1 | 13490742 | 8-scf00200     | 8  |
| AX-158079433 | 9 | 60.982 | KV452945.1 | 13502266 | 8-scf00200     | 8  |
| AX-158081973 | 9 | 60.982 | KV452947.1 | 463946   | 8-scf00203     | 8  |
| AX-158079435 | 9 | 60.989 | KV452945.1 | 13503449 | 8-scf00200     | 8  |
| AX-158079436 | 9 | 60.989 | KV452945.1 | 13503834 | 8-scf00200     | 8  |
| AX-157824832 | 9 | 60.989 | KV452945.1 | 13504197 | 8-scf00200     | 8  |
| AX-158079440 | 9 | 60.989 | KV452945.1 | 13504809 | 8-scf00200     | 8  |
| AX-157824833 | 9 | 60.989 | KV452945.1 | 13505610 | 8-scf00200     | 8  |
| AX-158079443 | 9 | 60.989 | KV452945.1 | 13505827 | 8-scf00200     | 8  |
| AX-158079452 | 9 | 60.989 | KV452945.1 | 13510186 | 8-scf00200     | 8  |
| AX-158079453 | 9 | 60.989 | KV452945.1 | 13511242 | 8-scf00200     | 8  |
| AX-158079455 | 9 | 60.989 | KV452945.1 | 13512631 | 8-scf00200     | 8  |
| AX-158409695 | 9 | 60.989 | KV452945.1 | 13527740 | 8-scf00200     | 8  |
| AX-157749348 | 9 | 60.989 | KV452945.1 | 13532883 | 8-scf00200     | 8  |
| AX-158079498 | 9 | 60.989 | KV452945.1 | 13550532 | 8-scf00200     | 8  |
| AX-157701165 | 9 | 61.189 | KV452945.1 | 13514369 | 8-scf00200     | 8  |
| AX-158079469 | 9 | 61.189 | KV452945.1 | 13522317 | 8-scf00200     | 8  |
| AX-158079472 | 9 | 61.189 | KV452945.1 | 13527776 | 8-scf00200     | 8  |
| AX-158079473 | 9 | 61.189 | KV452945.1 | 13527928 | 8-scf00200     | 8  |
| AX-158079475 | 9 | 61.189 | KV452945.1 | 13529085 | 8-scf00200     | 8  |
| AX-157824836 | 9 | 61.189 | KV452945.1 | 13542666 | 8-scf00200     | 8  |
| AX-158079491 | 9 | 61.189 | KV452945.1 | 13544948 | 8-scf00200     | 8  |
| AX-158079496 | 9 | 61.189 | KV452945.1 | 13549856 | 8-scf00200     | 8  |
| AX-158079504 | 9 | 61.189 | KV452945.1 | 13559159 | 8-scf00200     | 8  |
| AX-157739320 | 9 | 61.189 | KV452945.1 | 13564638 | 8-scf00200     | 8  |
| AX-158079508 | 9 | 61.189 | KV452945.1 | 13565862 | 8-scf00200     | 8  |
| AX-158079873 | 9 | 61.189 | KV452945.1 | 13920512 | 8-scf00200     | 8  |
| AX-157711128 | 9 | 61.189 | FI875537.1 | 84       | IORI212 lctalu | UN |
| AX-157824837 | 9 | 61.226 | KV452945.1 | 13569090 | 8-scf00200     | 8  |
| AX-157885536 | 9 | 61.642 | KV452945.1 | 12013574 | 8-scf00200     | 8  |
| AX-158078197 | 9 | 61.642 | KV452945.1 | 12021545 | 8-scf00200     | 8  |
| AX-158078206 | 9 | 61.642 | KV452945.1 | 12032199 | 8-scf00200     | 8  |

|              |   |        |            |          |            |   |
|--------------|---|--------|------------|----------|------------|---|
| AX-158078306 | 9 | 61.642 | KV452945.1 | 12125523 | 8-scf00200 | 8 |
| AX-158079512 | 9 | 61.642 | KV452945.1 | 13572469 | 8-scf00200 | 8 |
| AX-158079513 | 9 | 61.642 | KV452945.1 | 13573041 | 8-scf00200 | 8 |
| AX-158079394 | 9 | 61.644 | KV452945.1 | 13470981 | 8-scf00200 | 8 |
| AX-158079517 | 9 | 61.644 | KV452945.1 | 13579453 | 8-scf00200 | 8 |
| AX-158079518 | 9 | 61.644 | KV452945.1 | 13579544 | 8-scf00200 | 8 |
| AX-158079522 | 9 | 61.644 | KV452945.1 | 13583515 | 8-scf00200 | 8 |
| AX-157824838 | 9 | 61.644 | KV452945.1 | 13589619 | 8-scf00200 | 8 |
| AX-158079526 | 9 | 61.644 | KV452945.1 | 13592774 | 8-scf00200 | 8 |
| AX-158079528 | 9 | 61.644 | KV452945.1 | 13595549 | 8-scf00200 | 8 |
| AX-158079530 | 9 | 61.644 | KV452945.1 | 13597741 | 8-scf00200 | 8 |
| AX-158409698 | 9 | 61.644 | KV452945.1 | 13598037 | 8-scf00200 | 8 |
| AX-158079531 | 9 | 61.644 | KV452945.1 | 13598106 | 8-scf00200 | 8 |
| AX-158079532 | 9 | 61.644 | KV452945.1 | 13598993 | 8-scf00200 | 8 |
| AX-158079537 | 9 | 61.644 | KV452945.1 | 13603097 | 8-scf00200 | 8 |
| AX-158079543 | 9 | 61.644 | KV452945.1 | 13607661 | 8-scf00200 | 8 |
| AX-158079736 | 9 | 61.644 | KV452945.1 | 13791468 | 8-scf00200 | 8 |
| AX-158079539 | 9 | 62.095 | KV452945.1 | 13604310 | 8-scf00200 | 8 |
| AX-158079552 | 9 | 62.095 | KV452945.1 | 13614912 | 8-scf00200 | 8 |
| AX-158079554 | 9 | 62.095 | KV452945.1 | 13615529 | 8-scf00200 | 8 |
| AX-158079570 | 9 | 62.095 | KV452945.1 | 13622427 | 8-scf00200 | 8 |
| AX-158079575 | 9 | 62.095 | KV452945.1 | 13631886 | 8-scf00200 | 8 |
| AX-158081217 | 9 | 62.095 | KV452946.1 | 244505   | 8-scf00202 | 8 |
| AX-158079574 | 9 | 62.453 | KV452945.1 | 13628066 | 8-scf00200 | 8 |
| AX-158079576 | 9 | 62.535 | KV452945.1 | 13634595 | 8-scf00200 | 8 |
| AX-158079578 | 9 | 62.535 | KV452945.1 | 13637420 | 8-scf00200 | 8 |
| AX-157722568 | 9 | 62.536 | KV452945.1 | 13628864 | 8-scf00200 | 8 |
| AX-157824845 | 9 | 62.536 | KV452945.1 | 13638646 | 8-scf00200 | 8 |
| AX-158079579 | 9 | 62.536 | KV452945.1 | 13638730 | 8-scf00200 | 8 |
| AX-158079587 | 9 | 62.671 | KV452945.1 | 13646472 | 8-scf00200 | 8 |
| AX-157745416 | 9 | 62.671 | KV452945.1 | 13670373 | 8-scf00200 | 8 |
| AX-157741858 | 9 | 62.671 | KV452945.1 | 13743331 | 8-scf00200 | 8 |
| AX-158079741 | 9 | 62.671 | KV452945.1 | 13798818 | 8-scf00200 | 8 |
| AX-158079745 | 9 | 62.671 | KV452945.1 | 13804375 | 8-scf00200 | 8 |
| AX-158079589 | 9 | 63.034 | KV452945.1 | 13648784 | 8-scf00200 | 8 |
| AX-158079585 | 9 | 63.067 | KV452945.1 | 13644155 | 8-scf00200 | 8 |
| AX-158079590 | 9 | 63.067 | KV452945.1 | 13650145 | 8-scf00200 | 8 |
| AX-158079596 | 9 | 63.067 | KV452945.1 | 13663695 | 8-scf00200 | 8 |
| AX-158079600 | 9 | 63.067 | KV452945.1 | 13666620 | 8-scf00200 | 8 |
| AX-158079603 | 9 | 63.067 | KV452945.1 | 13668027 | 8-scf00200 | 8 |
| AX-158079608 | 9 | 63.067 | KV452945.1 | 13669449 | 8-scf00200 | 8 |
| AX-158079609 | 9 | 63.067 | KV452945.1 | 13670216 | 8-scf00200 | 8 |
| AX-158079615 | 9 | 63.067 | KV452945.1 | 13677311 | 8-scf00200 | 8 |
| AX-158079617 | 9 | 63.067 | KV452945.1 | 13678167 | 8-scf00200 | 8 |
| AX-158079621 | 9 | 63.067 | KV452945.1 | 13680065 | 8-scf00200 | 8 |
| AX-158079680 | 9 | 63.067 | KV452945.1 | 13732245 | 8-scf00200 | 8 |
| AX-158079694 | 9 | 63.067 | KV452945.1 | 13758431 | 8-scf00200 | 8 |
| AX-158079627 | 9 | 63.393 | KV452945.1 | 13690023 | 8-scf00200 | 8 |
| AX-158079630 | 9 | 63.393 | KV452945.1 | 13690533 | 8-scf00200 | 8 |
| AX-158078434 | 9 | 63.394 | KV452945.1 | 12226748 | 8-scf00200 | 8 |
| AX-158079632 | 9 | 63.394 | KV452945.1 | 13691015 | 8-scf00200 | 8 |

|              |   |        |            |          |            |   |
|--------------|---|--------|------------|----------|------------|---|
| AX-158079634 | 9 | 63.394 | KV452945.1 | 13695932 | 8-scf00200 | 8 |
| AX-158079639 | 9 | 63.394 | KV452945.1 | 13700168 | 8-scf00200 | 8 |
| AX-158079648 | 9 | 63.394 | KV452945.1 | 13714209 | 8-scf00200 | 8 |
| AX-158079650 | 9 | 63.394 | KV452945.1 | 13715134 | 8-scf00200 | 8 |
| AX-158079652 | 9 | 63.394 | KV452945.1 | 13716421 | 8-scf00200 | 8 |
| AX-158079654 | 9 | 63.394 | KV452945.1 | 13716808 | 8-scf00200 | 8 |
| AX-158079655 | 9 | 63.394 | KV452945.1 | 13717277 | 8-scf00200 | 8 |
| AX-158079658 | 9 | 63.394 | KV452945.1 | 13717844 | 8-scf00200 | 8 |
| AX-158079663 | 9 | 63.394 | KV452945.1 | 13719272 | 8-scf00200 | 8 |
| AX-158079664 | 9 | 63.394 | KV452945.1 | 13719517 | 8-scf00200 | 8 |
| AX-158079665 | 9 | 63.394 | KV452945.1 | 13719757 | 8-scf00200 | 8 |
| AX-158079669 | 9 | 63.394 | KV452945.1 | 13721207 | 8-scf00200 | 8 |
| AX-157857104 | 9 | 63.394 | KV452945.1 | 13722825 | 8-scf00200 | 8 |
| AX-158079675 | 9 | 63.394 | KV452945.1 | 13727136 | 8-scf00200 | 8 |
| AX-158079677 | 9 | 63.394 | KV452945.1 | 13730510 | 8-scf00200 | 8 |
| AX-158079678 | 9 | 63.394 | KV452945.1 | 13730897 | 8-scf00200 | 8 |
| AX-158079679 | 9 | 63.394 | KV452945.1 | 13731996 | 8-scf00200 | 8 |
| AX-157744953 | 9 | 63.394 | KV452945.1 | 13741425 | 8-scf00200 | 8 |
| AX-157824849 | 9 | 63.394 | KV452945.1 | 13741690 | 8-scf00200 | 8 |
| AX-157824855 | 9 | 63.394 | KV452945.1 | 13756465 | 8-scf00200 | 8 |
| AX-158079691 | 9 | 63.394 | KV452945.1 | 13756619 | 8-scf00200 | 8 |
| AX-157743949 | 9 | 63.394 | KV452945.1 | 13759411 | 8-scf00200 | 8 |
| AX-158079734 | 9 | 63.394 | KV452945.1 | 13790144 | 8-scf00200 | 8 |
| AX-158079778 | 9 | 63.394 | KV452945.1 | 13830854 | 8-scf00200 | 8 |
| AX-158079783 | 9 | 63.394 | KV452945.1 | 13831770 | 8-scf00200 | 8 |
| AX-157714059 | 9 | 63.405 | KV452945.1 | 13750805 | 8-scf00200 | 8 |
| AX-157824852 | 9 | 63.428 | KV452945.1 | 13752293 | 8-scf00200 | 8 |
| AX-157824853 | 9 | 63.445 | KV452945.1 | 13754132 | 8-scf00200 | 8 |
| AX-158080012 | 9 | 63.445 | KV452945.1 | 14054440 | 8-scf00200 | 8 |
| AX-158080013 | 9 | 63.445 | KV452945.1 | 14055541 | 8-scf00200 | 8 |
| AX-158079692 | 9 | 63.468 | KV452945.1 | 13757139 | 8-scf00200 | 8 |
| AX-157824861 | 9 | 63.468 | KV452945.1 | 13817071 | 8-scf00200 | 8 |
| AX-158078098 | 9 | 63.503 | KV452945.1 | 11946479 | 8-scf00200 | 8 |
| AX-158078146 | 9 | 63.503 | KV452945.1 | 11980671 | 8-scf00200 | 8 |
| AX-158078183 | 9 | 63.503 | KV452945.1 | 12008770 | 8-scf00200 | 8 |
| AX-158078223 | 9 | 63.503 | KV452945.1 | 12048348 | 8-scf00200 | 8 |
| AX-158079602 | 9 | 63.503 | KV452945.1 | 13667811 | 8-scf00200 | 8 |
| AX-158079637 | 9 | 63.503 | KV452945.1 | 13698528 | 8-scf00200 | 8 |
| AX-158079661 | 9 | 63.503 | KV452945.1 | 13718909 | 8-scf00200 | 8 |
| AX-158079676 | 9 | 63.503 | KV452945.1 | 13729437 | 8-scf00200 | 8 |
| AX-158079707 | 9 | 63.503 | KV452945.1 | 13771310 | 8-scf00200 | 8 |
| AX-158079708 | 9 | 63.503 | KV452945.1 | 13771747 | 8-scf00200 | 8 |
| AX-158079711 | 9 | 63.503 | KV452945.1 | 13772123 | 8-scf00200 | 8 |
| AX-158079712 | 9 | 63.503 | KV452945.1 | 13772596 | 8-scf00200 | 8 |
| AX-158079714 | 9 | 63.503 | KV452945.1 | 13774759 | 8-scf00200 | 8 |
| AX-158079715 | 9 | 63.503 | KV452945.1 | 13775820 | 8-scf00200 | 8 |
| AX-158079718 | 9 | 63.503 | KV452945.1 | 13779009 | 8-scf00200 | 8 |
| AX-158079719 | 9 | 63.503 | KV452945.1 | 13779588 | 8-scf00200 | 8 |
| AX-157824859 | 9 | 63.503 | KV452945.1 | 13780255 | 8-scf00200 | 8 |
| AX-158079735 | 9 | 63.503 | KV452945.1 | 13790950 | 8-scf00200 | 8 |
| AX-158079738 | 9 | 63.503 | KV452945.1 | 13794397 | 8-scf00200 | 8 |

|              |   |        |            |          |            |   |
|--------------|---|--------|------------|----------|------------|---|
| AX-158079743 | 9 | 63.503 | KV452945.1 | 13803831 | 8-scf00200 | 8 |
| AX-158079746 | 9 | 63.503 | KV452945.1 | 13804826 | 8-scf00200 | 8 |
| AX-157824860 | 9 | 63.503 | KV452945.1 | 13809676 | 8-scf00200 | 8 |
| AX-158079754 | 9 | 63.503 | KV452945.1 | 13813730 | 8-scf00200 | 8 |
| AX-158079755 | 9 | 63.503 | KV452945.1 | 13814695 | 8-scf00200 | 8 |
| AX-157740173 | 9 | 63.503 | KV452945.1 | 13816303 | 8-scf00200 | 8 |
| AX-158079757 | 9 | 63.503 | KV452945.1 | 13816919 | 8-scf00200 | 8 |
| AX-158079770 | 9 | 63.503 | KV452945.1 | 13824767 | 8-scf00200 | 8 |
| AX-158079817 | 9 | 63.503 | KV452945.1 | 13871703 | 8-scf00200 | 8 |
| AX-158082184 | 9 | 63.503 | KV452947.1 | 750872   | 8-scf00203 | 8 |
| AX-157824813 | 9 | 63.612 | KV452945.1 | 13133111 | 8-scf00200 | 8 |
| AX-158079470 | 9 | 63.612 | KV452945.1 | 13523736 | 8-scf00200 | 8 |
| AX-158079649 | 9 | 63.612 | KV452945.1 | 13714513 | 8-scf00200 | 8 |
| AX-158079776 | 9 | 63.612 | KV452945.1 | 13827983 | 8-scf00200 | 8 |
| AX-158079791 | 9 | 63.612 | KV452945.1 | 13837507 | 8-scf00200 | 8 |
| AX-158079792 | 9 | 63.612 | KV452945.1 | 13838708 | 8-scf00200 | 8 |
| AX-157753041 | 9 | 63.612 | KV452945.1 | 13840338 | 8-scf00200 | 8 |
| AX-158079795 | 9 | 63.612 | KV452945.1 | 13844485 | 8-scf00200 | 8 |
| AX-157752933 | 9 | 63.612 | KV452945.1 | 13855451 | 8-scf00200 | 8 |
| AX-158079801 | 9 | 63.612 | KV452945.1 | 13860569 | 8-scf00200 | 8 |
| AX-158079806 | 9 | 63.612 | KV452945.1 | 13861867 | 8-scf00200 | 8 |
| AX-158079808 | 9 | 63.612 | KV452945.1 | 13865614 | 8-scf00200 | 8 |
| AX-158079814 | 9 | 63.612 | KV452945.1 | 13869191 | 8-scf00200 | 8 |
| AX-157824869 | 9 | 63.612 | KV452945.1 | 13874117 | 8-scf00200 | 8 |
| AX-158422518 | 9 | 63.612 | KV452945.1 | 13874639 | 8-scf00200 | 8 |
| AX-157824870 | 9 | 63.612 | KV452945.1 | 13882108 | 8-scf00200 | 8 |
| AX-158079823 | 9 | 63.612 | KV452945.1 | 13882689 | 8-scf00200 | 8 |
| AX-158079824 | 9 | 63.612 | KV452945.1 | 13883724 | 8-scf00200 | 8 |
| AX-158079825 | 9 | 63.612 | KV452945.1 | 13885277 | 8-scf00200 | 8 |
| AX-158079826 | 9 | 63.612 | KV452945.1 | 13889442 | 8-scf00200 | 8 |
| AX-158079827 | 9 | 63.612 | KV452945.1 | 13891470 | 8-scf00200 | 8 |
| AX-157774359 | 9 | 63.612 | KV452945.1 | 13897055 | 8-scf00200 | 8 |
| AX-157758551 | 9 | 63.612 | KV452945.1 | 13897948 | 8-scf00200 | 8 |
| AX-158079833 | 9 | 63.612 | KV452945.1 | 13897994 | 8-scf00200 | 8 |
| AX-157772576 | 9 | 63.612 | KV452945.1 | 13898314 | 8-scf00200 | 8 |
| AX-158079836 | 9 | 63.612 | KV452945.1 | 13900760 | 8-scf00200 | 8 |
| AX-158079842 | 9 | 63.612 | KV452945.1 | 13904295 | 8-scf00200 | 8 |
| AX-158079844 | 9 | 63.612 | KV452945.1 | 13907128 | 8-scf00200 | 8 |
| AX-158079849 | 9 | 63.612 | KV452945.1 | 13908660 | 8-scf00200 | 8 |
| AX-158079851 | 9 | 63.612 | KV452945.1 | 13909740 | 8-scf00200 | 8 |
| AX-158079852 | 9 | 63.612 | KV452945.1 | 13909896 | 8-scf00200 | 8 |
| AX-158079855 | 9 | 63.612 | KV452945.1 | 13910766 | 8-scf00200 | 8 |
| AX-158079858 | 9 | 63.612 | KV452945.1 | 13911635 | 8-scf00200 | 8 |
| AX-158079860 | 9 | 63.612 | KV452945.1 | 13912680 | 8-scf00200 | 8 |
| AX-158079865 | 9 | 63.612 | KV452945.1 | 13915236 | 8-scf00200 | 8 |
| AX-158079871 | 9 | 63.612 | KV452945.1 | 13918922 | 8-scf00200 | 8 |
| AX-158079874 | 9 | 63.612 | KV452945.1 | 13920672 | 8-scf00200 | 8 |
| AX-158079875 | 9 | 63.612 | KV452945.1 | 13921137 | 8-scf00200 | 8 |
| AX-158079877 | 9 | 63.612 | KV452945.1 | 13921962 | 8-scf00200 | 8 |
| AX-158079878 | 9 | 63.612 | KV452945.1 | 13923109 | 8-scf00200 | 8 |
| AX-158079881 | 9 | 63.612 | KV452945.1 | 13925534 | 8-scf00200 | 8 |

|              |   |        |            |          |            |   |
|--------------|---|--------|------------|----------|------------|---|
| AX-158079890 | 9 | 63.612 | KV452945.1 | 13935455 | 8-scf00200 | 8 |
| AX-158079891 | 9 | 63.612 | KV452945.1 | 13936538 | 8-scf00200 | 8 |
| AX-158079905 | 9 | 63.612 | KV452945.1 | 13952405 | 8-scf00200 | 8 |
| AX-158079911 | 9 | 63.612 | KV452945.1 | 13956357 | 8-scf00200 | 8 |
| AX-158079913 | 9 | 63.612 | KV452945.1 | 13957185 | 8-scf00200 | 8 |
| AX-158079916 | 9 | 63.612 | KV452945.1 | 13959372 | 8-scf00200 | 8 |
| AX-158079918 | 9 | 63.612 | KV452945.1 | 13960039 | 8-scf00200 | 8 |
| AX-158079919 | 9 | 63.612 | KV452945.1 | 13960509 | 8-scf00200 | 8 |
| AX-158079921 | 9 | 63.612 | KV452945.1 | 13960756 | 8-scf00200 | 8 |
| AX-158079922 | 9 | 63.612 | KV452945.1 | 13961104 | 8-scf00200 | 8 |
| AX-158079927 | 9 | 63.612 | KV452945.1 | 13965997 | 8-scf00200 | 8 |
| AX-158079928 | 9 | 63.612 | KV452945.1 | 13968427 | 8-scf00200 | 8 |
| AX-158079931 | 9 | 63.612 | KV452945.1 | 13970726 | 8-scf00200 | 8 |
| AX-158079932 | 9 | 63.612 | KV452945.1 | 13971651 | 8-scf00200 | 8 |
| AX-158079933 | 9 | 63.612 | KV452945.1 | 13972027 | 8-scf00200 | 8 |
| AX-158079934 | 9 | 63.612 | KV452945.1 | 13973678 | 8-scf00200 | 8 |
| AX-158080019 | 9 | 63.612 | KV452945.1 | 14063799 | 8-scf00200 | 8 |
| AX-157824882 | 9 | 63.612 | KV452945.1 | 14064742 | 8-scf00200 | 8 |
| AX-158080165 | 9 | 63.612 | KV452945.1 | 14251463 | 8-scf00200 | 8 |
| AX-158081003 | 9 | 63.612 | KV452946.1 | 64084    | 8-scf00202 | 8 |
| AX-157885571 | 9 | 63.612 | KV452946.1 | 325589   | 8-scf00202 | 8 |
| AX-158081743 | 9 | 63.612 | KV452947.1 | 213442   | 8-scf00203 | 8 |
| AX-158079225 | 9 | 63.831 | KV452945.1 | 13292463 | 8-scf00200 | 8 |
| AX-158079463 | 9 | 63.831 | KV452945.1 | 13516149 | 8-scf00200 | 8 |
| AX-157824871 | 9 | 63.831 | KV452945.1 | 13892675 | 8-scf00200 | 8 |
| AX-158079856 | 9 | 63.831 | KV452945.1 | 13911252 | 8-scf00200 | 8 |
| AX-158079936 | 9 | 63.831 | KV452945.1 | 13974113 | 8-scf00200 | 8 |
| AX-158079943 | 9 | 63.831 | KV452945.1 | 13977152 | 8-scf00200 | 8 |
| AX-158079960 | 9 | 63.831 | KV452945.1 | 13994089 | 8-scf00200 | 8 |
| AX-158079961 | 9 | 63.831 | KV452945.1 | 13994535 | 8-scf00200 | 8 |
| AX-158079971 | 9 | 63.831 | KV452945.1 | 14000868 | 8-scf00200 | 8 |
| AX-157714011 | 9 | 63.831 | KV452945.1 | 14011322 | 8-scf00200 | 8 |
| AX-158079987 | 9 | 63.831 | KV452945.1 | 14018247 | 8-scf00200 | 8 |
| AX-157824884 | 9 | 63.831 | KV452945.1 | 14079829 | 8-scf00200 | 8 |
| AX-158080033 | 9 | 63.831 | KV452945.1 | 14088828 | 8-scf00200 | 8 |
| AX-158080068 | 9 | 63.831 | KV452945.1 | 14155291 | 8-scf00200 | 8 |
| AX-158080085 | 9 | 63.831 | KV452945.1 | 14171568 | 8-scf00200 | 8 |
| AX-158080182 | 9 | 63.831 | KV452945.1 | 14278335 | 8-scf00200 | 8 |
| AX-157824876 | 9 | 63.94  | KV452945.1 | 14021762 | 8-scf00200 | 8 |
| AX-158079990 | 9 | 63.94  | KV452945.1 | 14023066 | 8-scf00200 | 8 |
| AX-158079991 | 9 | 63.94  | KV452945.1 | 14025142 | 8-scf00200 | 8 |
| AX-157824879 | 9 | 63.94  | KV452945.1 | 14041893 | 8-scf00200 | 8 |
| AX-158080015 | 9 | 63.993 | KV452945.1 | 14057054 | 8-scf00200 | 8 |
| AX-158072194 | 9 | 64.049 | KV452945.1 | 4675342  | 8-scf00200 | 8 |
| AX-158073957 | 9 | 64.049 | KV452945.1 | 7322990  | 8-scf00200 | 8 |
| AX-158073958 | 9 | 64.049 | KV452945.1 | 7328330  | 8-scf00200 | 8 |
| AX-158073960 | 9 | 64.049 | KV452945.1 | 7331950  | 8-scf00200 | 8 |
| AX-157725166 | 9 | 64.049 | KV452945.1 | 8298829  | 8-scf00200 | 8 |
| AX-158076022 | 9 | 64.049 | KV452945.1 | 9870886  | 8-scf00200 | 8 |
| AX-158076439 | 9 | 64.049 | KV452945.1 | 10342528 | 8-scf00200 | 8 |
| AX-158076558 | 9 | 64.049 | KV452945.1 | 10470578 | 8-scf00200 | 8 |



|              |   |        |            |          |            |   |
|--------------|---|--------|------------|----------|------------|---|
| AX-158077880 | 9 | 64.049 | KV452945.1 | 11761363 | 8-scf00200 | 8 |
| AX-158078767 | 9 | 64.049 | KV452945.1 | 12632354 | 8-scf00200 | 8 |
| AX-158078770 | 9 | 64.049 | KV452945.1 | 12634766 | 8-scf00200 | 8 |
| AX-158078789 | 9 | 64.049 | KV452945.1 | 12647458 | 8-scf00200 | 8 |
| AX-158079051 | 9 | 64.049 | KV452945.1 | 13060922 | 8-scf00200 | 8 |
| AX-158079053 | 9 | 64.049 | KV452945.1 | 13065906 | 8-scf00200 | 8 |
| AX-158079058 | 9 | 64.049 | KV452945.1 | 13068589 | 8-scf00200 | 8 |
| AX-158079262 | 9 | 64.049 | KV452945.1 | 13336339 | 8-scf00200 | 8 |
| AX-158080021 | 9 | 64.049 | KV452945.1 | 14071291 | 8-scf00200 | 8 |
| AX-158080024 | 9 | 64.049 | KV452945.1 | 14079127 | 8-scf00200 | 8 |
| AX-157824885 | 9 | 64.049 | KV452945.1 | 14079927 | 8-scf00200 | 8 |
| AX-158080025 | 9 | 64.049 | KV452945.1 | 14080585 | 8-scf00200 | 8 |
| AX-158080027 | 9 | 64.049 | KV452945.1 | 14081524 | 8-scf00200 | 8 |
| AX-158080028 | 9 | 64.049 | KV452945.1 | 14082965 | 8-scf00200 | 8 |
| AX-158080032 | 9 | 64.049 | KV452945.1 | 14087977 | 8-scf00200 | 8 |
| AX-158080035 | 9 | 64.049 | KV452945.1 | 14089197 | 8-scf00200 | 8 |
| AX-158080065 | 9 | 64.049 | KV452945.1 | 14150091 | 8-scf00200 | 8 |
| AX-158082970 | 9 | 64.049 | KV452947.1 | 2301120  | 8-scf00203 | 8 |
| AX-158080037 | 9 | 64.09  | KV452945.1 | 14091932 | 8-scf00200 | 8 |
| AX-158080041 | 9 | 64.104 | KV452945.1 | 14105675 | 8-scf00200 | 8 |
| AX-158079591 | 9 | 64.158 | KV452945.1 | 13650346 | 8-scf00200 | 8 |
| AX-158079993 | 9 | 64.158 | KV452945.1 | 14025978 | 8-scf00200 | 8 |
| AX-157824886 | 9 | 64.158 | KV452945.1 | 14093071 | 8-scf00200 | 8 |
| AX-158080043 | 9 | 64.158 | KV452945.1 | 14110010 | 8-scf00200 | 8 |
| AX-158409707 | 9 | 64.158 | KV452945.1 | 14116762 | 8-scf00200 | 8 |
| AX-158080047 | 9 | 64.158 | KV452945.1 | 14116814 | 8-scf00200 | 8 |
| AX-158080048 | 9 | 64.158 | KV452945.1 | 14117642 | 8-scf00200 | 8 |
| AX-157824887 | 9 | 64.158 | KV452945.1 | 14117727 | 8-scf00200 | 8 |
| AX-158080049 | 9 | 64.158 | KV452945.1 | 14119931 | 8-scf00200 | 8 |
| AX-157709688 | 9 | 64.158 | KV452945.1 | 14134170 | 8-scf00200 | 8 |
| AX-158080057 | 9 | 64.158 | KV452945.1 | 14139955 | 8-scf00200 | 8 |
| AX-157824891 | 9 | 64.158 | KV452945.1 | 14141302 | 8-scf00200 | 8 |
| AX-158080062 | 9 | 64.158 | KV452945.1 | 14147329 | 8-scf00200 | 8 |
| AX-158080066 | 9 | 64.158 | KV452945.1 | 14152458 | 8-scf00200 | 8 |
| AX-157824892 | 9 | 64.158 | KV452945.1 | 14158088 | 8-scf00200 | 8 |
| AX-157824893 | 9 | 64.158 | KV452945.1 | 14158270 | 8-scf00200 | 8 |
| AX-157857107 | 9 | 64.158 | KV452945.1 | 14163742 | 8-scf00200 | 8 |
| AX-157824894 | 9 | 64.158 | KV452945.1 | 14163783 | 8-scf00200 | 8 |
| AX-158080128 | 9 | 64.158 | KV452945.1 | 14212988 | 8-scf00200 | 8 |
| AX-158379914 | 9 | 64.158 | KV452947.1 | 265260   | 8-scf00203 | 8 |
| AX-158081784 | 9 | 64.158 | KV452947.1 | 265591   | 8-scf00203 | 8 |
| AX-158081794 | 9 | 64.158 | KV452947.1 | 279186   | 8-scf00203 | 8 |
| AX-158081930 | 9 | 64.158 | KV452947.1 | 431590   | 8-scf00203 | 8 |
| AX-158081933 | 9 | 64.158 | KV452947.1 | 434344   | 8-scf00203 | 8 |
| AX-157885545 | 9 | 64.204 | KV452945.1 | 14162775 | 8-scf00200 | 8 |
| AX-158080080 | 9 | 64.28  | KV452945.1 | 14166410 | 8-scf00200 | 8 |
| AX-158070822 | 9 | 64.377 | KV452945.1 | 2646113  | 8-scf00200 | 8 |
| AX-157710085 | 9 | 64.377 | KV452945.1 | 8290713  | 8-scf00200 | 8 |
| AX-158075766 | 9 | 64.377 | KV452945.1 | 9569888  | 8-scf00200 | 8 |
| AX-157723214 | 9 | 64.377 | KV452945.1 | 10481334 | 8-scf00200 | 8 |
| AX-158076587 | 9 | 64.377 | KV452945.1 | 10502429 | 8-scf00200 | 8 |

|              |   |        |            |          |            |   |
|--------------|---|--------|------------|----------|------------|---|
| AX-158076600 | 9 | 64.377 | KV452945.1 | 10512350 | 8-scf00200 | 8 |
| AX-158076869 | 9 | 64.377 | KV452945.1 | 10724716 | 8-scf00200 | 8 |
| AX-158076997 | 9 | 64.377 | KV452945.1 | 10873214 | 8-scf00200 | 8 |
| AX-158078818 | 9 | 64.377 | KV452945.1 | 12696198 | 8-scf00200 | 8 |
| AX-158079023 | 9 | 64.377 | KV452945.1 | 13026365 | 8-scf00200 | 8 |
| AX-158079029 | 9 | 64.377 | KV452945.1 | 13034696 | 8-scf00200 | 8 |
| AX-158079034 | 9 | 64.377 | KV452945.1 | 13043604 | 8-scf00200 | 8 |
| AX-158079056 | 9 | 64.377 | KV452945.1 | 13067612 | 8-scf00200 | 8 |
| AX-157720880 | 9 | 64.377 | KV452945.1 | 13113704 | 8-scf00200 | 8 |
| AX-158079598 | 9 | 64.377 | KV452945.1 | 13665924 | 8-scf00200 | 8 |
| AX-157824857 | 9 | 64.377 | KV452945.1 | 13776614 | 8-scf00200 | 8 |
| AX-157824858 | 9 | 64.377 | KV452945.1 | 13777392 | 8-scf00200 | 8 |
| AX-158079760 | 9 | 64.377 | KV452945.1 | 13818850 | 8-scf00200 | 8 |
| AX-158079789 | 9 | 64.377 | KV452945.1 | 13835641 | 8-scf00200 | 8 |
| AX-158079819 | 9 | 64.377 | KV452945.1 | 13872147 | 8-scf00200 | 8 |
| AX-157824868 | 9 | 64.377 | KV452945.1 | 13873364 | 8-scf00200 | 8 |
| AX-158409703 | 9 | 64.377 | KV452945.1 | 13929498 | 8-scf00200 | 8 |
| AX-158080081 | 9 | 64.377 | KV452945.1 | 14169692 | 8-scf00200 | 8 |
| AX-157824895 | 9 | 64.377 | KV452945.1 | 14170215 | 8-scf00200 | 8 |
| AX-157824896 | 9 | 64.377 | KV452945.1 | 14170325 | 8-scf00200 | 8 |
| AX-158080083 | 9 | 64.377 | KV452945.1 | 14170905 | 8-scf00200 | 8 |
| AX-158080095 | 9 | 64.377 | KV452945.1 | 14176505 | 8-scf00200 | 8 |
| AX-158080098 | 9 | 64.377 | KV452945.1 | 14178026 | 8-scf00200 | 8 |
| AX-158080101 | 9 | 64.377 | KV452945.1 | 14180889 | 8-scf00200 | 8 |
| AX-158080108 | 9 | 64.377 | KV452945.1 | 14191700 | 8-scf00200 | 8 |
| AX-158080115 | 9 | 64.377 | KV452945.1 | 14197189 | 8-scf00200 | 8 |
| AX-158080121 | 9 | 64.377 | KV452945.1 | 14205739 | 8-scf00200 | 8 |
| AX-158080127 | 9 | 64.377 | KV452945.1 | 14212782 | 8-scf00200 | 8 |
| AX-157773246 | 9 | 64.377 | KV452945.1 | 14214134 | 8-scf00200 | 8 |
| AX-158080200 | 9 | 64.377 | KV452945.1 | 14313080 | 8-scf00200 | 8 |
| AX-158081075 | 9 | 64.377 | KV452946.1 | 131846   | 8-scf00202 | 8 |
| AX-158081115 | 9 | 64.377 | KV452946.1 | 157739   | 8-scf00202 | 8 |
| AX-158081186 | 9 | 64.377 | KV452946.1 | 221967   | 8-scf00202 | 8 |
| AX-158081195 | 9 | 64.377 | KV452946.1 | 226227   | 8-scf00202 | 8 |
| AX-158081387 | 9 | 64.377 | KV452946.1 | 414223   | 8-scf00202 | 8 |
| AX-158409761 | 9 | 64.377 | KV452947.1 | 271961   | 8-scf00203 | 8 |
| AX-158081825 | 9 | 64.377 | KV452947.1 | 324506   | 8-scf00203 | 8 |
| AX-158082183 | 9 | 64.377 | KV452947.1 | 749716   | 8-scf00203 | 8 |
| AX-158082209 | 9 | 64.377 | KV452947.1 | 773567   | 8-scf00203 | 8 |
| AX-158080129 | 9 | 64.702 | KV452945.1 | 14216808 | 8-scf00200 | 8 |
| AX-157824901 | 9 | 64.703 | KV452945.1 | 14220295 | 8-scf00200 | 8 |
| AX-157740497 | 9 | 64.704 | KV452945.1 | 13860521 | 8-scf00200 | 8 |
| AX-158079805 | 9 | 64.704 | KV452945.1 | 13861093 | 8-scf00200 | 8 |
| AX-158080135 | 9 | 64.704 | KV452945.1 | 14224093 | 8-scf00200 | 8 |
| AX-158080136 | 9 | 64.704 | KV452945.1 | 14224876 | 8-scf00200 | 8 |
| AX-157722802 | 9 | 64.704 | KV452945.1 | 14242106 | 8-scf00200 | 8 |
| AX-158080151 | 9 | 64.704 | KV452945.1 | 14246208 | 8-scf00200 | 8 |
| AX-158080172 | 9 | 64.704 | KV452945.1 | 14257654 | 8-scf00200 | 8 |
| AX-158080174 | 9 | 64.704 | KV452945.1 | 14259340 | 8-scf00200 | 8 |
| AX-157720289 | 9 | 64.704 | KV452945.1 | 14260770 | 8-scf00200 | 8 |
| AX-158080178 | 9 | 64.704 | KV452945.1 | 14261588 | 8-scf00200 | 8 |

|              |   |        |            |          |            |   |
|--------------|---|--------|------------|----------|------------|---|
| AX-158080183 | 9 | 64.704 | KV452945.1 | 14280911 | 8-scf00200 | 8 |
| AX-158080184 | 9 | 64.704 | KV452945.1 | 14285052 | 8-scf00200 | 8 |
| AX-158080186 | 9 | 64.704 | KV452945.1 | 14294262 | 8-scf00200 | 8 |
| AX-158080188 | 9 | 64.704 | KV452945.1 | 14296528 | 8-scf00200 | 8 |
| AX-158080194 | 9 | 64.704 | KV452945.1 | 14301785 | 8-scf00200 | 8 |
| AX-158080197 | 9 | 64.704 | KV452945.1 | 14305706 | 8-scf00200 | 8 |
| AX-158080198 | 9 | 64.704 | KV452945.1 | 14306610 | 8-scf00200 | 8 |
| AX-158080201 | 9 | 64.704 | KV452945.1 | 14314571 | 8-scf00200 | 8 |
| AX-158080203 | 9 | 64.704 | KV452945.1 | 14315983 | 8-scf00200 | 8 |
| AX-157756973 | 9 | 64.704 | KV452945.1 | 14316652 | 8-scf00200 | 8 |
| AX-158080204 | 9 | 64.704 | KV452945.1 | 14317479 | 8-scf00200 | 8 |
| AX-158080206 | 9 | 64.704 | KV452945.1 | 14318898 | 8-scf00200 | 8 |
| AX-158080207 | 9 | 64.704 | KV452945.1 | 14319384 | 8-scf00200 | 8 |
| AX-158080212 | 9 | 64.704 | KV452945.1 | 14330249 | 8-scf00200 | 8 |
| AX-158080213 | 9 | 64.704 | KV452945.1 | 14330847 | 8-scf00200 | 8 |
| AX-157857109 | 9 | 64.704 | KV452945.1 | 14331104 | 8-scf00200 | 8 |
| AX-158080214 | 9 | 64.704 | KV452945.1 | 14331872 | 8-scf00200 | 8 |
| AX-158080215 | 9 | 64.704 | KV452945.1 | 14333407 | 8-scf00200 | 8 |
| AX-157857110 | 9 | 64.704 | KV452945.1 | 14333564 | 8-scf00200 | 8 |
| AX-158080975 | 9 | 64.704 | KV452946.1 | 22922    | 8-scf00202 | 8 |
| AX-158409746 | 9 | 64.704 | KV452946.1 | 36099    | 8-scf00202 | 8 |
| AX-157770654 | 9 | 64.704 | KV452946.1 | 39578    | 8-scf00202 | 8 |
| AX-158080981 | 9 | 64.704 | KV452946.1 | 39730    | 8-scf00202 | 8 |
| AX-158080997 | 9 | 64.704 | KV452946.1 | 53891    | 8-scf00202 | 8 |
| AX-158081002 | 9 | 64.704 | KV452946.1 | 60882    | 8-scf00202 | 8 |
| AX-157774405 | 9 | 64.704 | KV452946.1 | 65224    | 8-scf00202 | 8 |
| AX-158081005 | 9 | 64.704 | KV452946.1 | 65488    | 8-scf00202 | 8 |
| AX-157748170 | 9 | 64.704 | KV452946.1 | 66296    | 8-scf00202 | 8 |
| AX-157857121 | 9 | 64.704 | KV452946.1 | 67372    | 8-scf00202 | 8 |
| AX-157824959 | 9 | 64.704 | KV452946.1 | 73245    | 8-scf00202 | 8 |
| AX-158081018 | 9 | 64.704 | KV452946.1 | 82800    | 8-scf00202 | 8 |
| AX-158081021 | 9 | 64.704 | KV452946.1 | 86988    | 8-scf00202 | 8 |
| AX-158081022 | 9 | 64.704 | KV452946.1 | 87736    | 8-scf00202 | 8 |
| AX-158081036 | 9 | 64.704 | KV452946.1 | 98083    | 8-scf00202 | 8 |
| AX-158081038 | 9 | 64.704 | KV452946.1 | 98536    | 8-scf00202 | 8 |
| AX-157857123 | 9 | 64.704 | KV452946.1 | 100381   | 8-scf00202 | 8 |
| AX-158081044 | 9 | 64.704 | KV452946.1 | 103370   | 8-scf00202 | 8 |
| AX-157723746 | 9 | 64.704 | KV452946.1 | 107476   | 8-scf00202 | 8 |
| AX-158081057 | 9 | 64.704 | KV452946.1 | 108980   | 8-scf00202 | 8 |
| AX-158081061 | 9 | 64.704 | KV452946.1 | 111381   | 8-scf00202 | 8 |
| AX-158081062 | 9 | 64.704 | KV452946.1 | 112041   | 8-scf00202 | 8 |
| AX-158081069 | 9 | 64.704 | KV452946.1 | 123556   | 8-scf00202 | 8 |
| AX-158081070 | 9 | 64.704 | KV452946.1 | 123998   | 8-scf00202 | 8 |
| AX-158081076 | 9 | 64.704 | KV452946.1 | 132676   | 8-scf00202 | 8 |
| AX-157857125 | 9 | 64.704 | KV452946.1 | 192180   | 8-scf00202 | 8 |
| AX-158081167 | 9 | 64.704 | KV452946.1 | 204350   | 8-scf00202 | 8 |
| AX-158416641 | 9 | 64.704 | KV452946.1 | 207939   | 8-scf00202 | 8 |
| AX-158081174 | 9 | 64.704 | KV452946.1 | 211395   | 8-scf00202 | 8 |
| AX-158081179 | 9 | 64.704 | KV452946.1 | 217567   | 8-scf00202 | 8 |
| AX-158081183 | 9 | 64.704 | KV452946.1 | 220391   | 8-scf00202 | 8 |
| AX-158081198 | 9 | 64.704 | KV452946.1 | 228638   | 8-scf00202 | 8 |

|              |   |        |            |          |            |   |
|--------------|---|--------|------------|----------|------------|---|
| AX-158081220 | 9 | 64.704 | KV452946.1 | 245726   | 8-scf00202 | 8 |
| AX-158081229 | 9 | 64.704 | KV452946.1 | 255508   | 8-scf00202 | 8 |
| AX-158081231 | 9 | 64.704 | KV452946.1 | 256254   | 8-scf00202 | 8 |
| AX-158081233 | 9 | 64.704 | KV452946.1 | 256989   | 8-scf00202 | 8 |
| AX-158081240 | 9 | 64.704 | KV452946.1 | 264174   | 8-scf00202 | 8 |
| AX-158081268 | 9 | 64.704 | KV452946.1 | 281963   | 8-scf00202 | 8 |
| AX-158081277 | 9 | 64.704 | KV452946.1 | 294052   | 8-scf00202 | 8 |
| AX-158081300 | 9 | 64.704 | KV452946.1 | 321127   | 8-scf00202 | 8 |
| AX-158081302 | 9 | 64.704 | KV452946.1 | 327914   | 8-scf00202 | 8 |
| AX-158081304 | 9 | 64.704 | KV452946.1 | 328701   | 8-scf00202 | 8 |
| AX-158081308 | 9 | 64.704 | KV452946.1 | 330615   | 8-scf00202 | 8 |
| AX-157824965 | 9 | 64.704 | KV452946.1 | 342859   | 8-scf00202 | 8 |
| AX-157747030 | 9 | 64.704 | KV452946.1 | 345993   | 8-scf00202 | 8 |
| AX-158081350 | 9 | 64.704 | KV452946.1 | 370044   | 8-scf00202 | 8 |
| AX-157877117 | 9 | 64.704 | KV452946.1 | 379698   | 8-scf00202 | 8 |
| AX-158081370 | 9 | 64.704 | KV452946.1 | 387008   | 8-scf00202 | 8 |
| AX-157824973 | 9 | 64.704 | KV452946.1 | 387971   | 8-scf00202 | 8 |
| AX-158081375 | 9 | 64.704 | KV452946.1 | 400056   | 8-scf00202 | 8 |
| AX-158081377 | 9 | 64.704 | KV452946.1 | 401838   | 8-scf00202 | 8 |
| AX-158081401 | 9 | 64.704 | KV452946.1 | 428995   | 8-scf00202 | 8 |
| AX-157824993 | 9 | 64.704 | KV452947.1 | 65488    | 8-scf00203 | 8 |
| AX-158081595 | 9 | 64.704 | KV452947.1 | 87977    | 8-scf00203 | 8 |
| AX-158081651 | 9 | 64.704 | KV452947.1 | 126882   | 8-scf00203 | 8 |
| AX-158081690 | 9 | 64.704 | KV452947.1 | 161565   | 8-scf00203 | 8 |
| AX-158081707 | 9 | 64.704 | KV452947.1 | 180211   | 8-scf00203 | 8 |
| AX-158081713 | 9 | 64.704 | KV452947.1 | 183951   | 8-scf00203 | 8 |
| AX-157704213 | 9 | 64.923 | KV452947.1 | 296756   | 8-scf00203 | 8 |
| AX-157687826 | 9 | 64.923 | KV452960.1 | 955      | 8-scf01052 | 8 |
| AX-157704212 | 9 | 64.923 | KV452960.1 | 2258     | 8-scf01052 | 8 |
| AX-158078253 | 9 | 65.142 | KV452945.1 | 12072291 | 8-scf00200 | 8 |
| AX-158079092 | 9 | 65.142 | KV452945.1 | 13120880 | 8-scf00200 | 8 |
| AX-158079721 | 9 | 65.142 | KV452945.1 | 13780906 | 8-scf00200 | 8 |
| AX-157741587 | 9 | 65.142 | KV452945.1 | 13849140 | 8-scf00200 | 8 |
| AX-158080117 | 9 | 65.142 | KV452945.1 | 14202245 | 8-scf00200 | 8 |
| AX-158080122 | 9 | 65.142 | KV452945.1 | 14207028 | 8-scf00200 | 8 |
| AX-158080132 | 9 | 65.142 | KV452945.1 | 14221262 | 8-scf00200 | 8 |
| AX-158080143 | 9 | 65.142 | KV452945.1 | 14241463 | 8-scf00200 | 8 |
| AX-157824907 | 9 | 65.142 | KV452945.1 | 14287802 | 8-scf00200 | 8 |
| AX-158080189 | 9 | 65.142 | KV452945.1 | 14297017 | 8-scf00200 | 8 |
| AX-158080191 | 9 | 65.142 | KV452945.1 | 14297662 | 8-scf00200 | 8 |
| AX-158080192 | 9 | 65.142 | KV452945.1 | 14297890 | 8-scf00200 | 8 |
| AX-157824908 | 9 | 65.142 | KV452945.1 | 14304442 | 8-scf00200 | 8 |
| AX-157824909 | 9 | 65.142 | KV452945.1 | 14315664 | 8-scf00200 | 8 |
| AX-158080209 | 9 | 65.142 | KV452945.1 | 14320408 | 8-scf00200 | 8 |
| AX-158080960 | 9 | 65.142 | KV452946.1 | 9823     | 8-scf00202 | 8 |
| AX-158080962 | 9 | 65.142 | KV452946.1 | 10719    | 8-scf00202 | 8 |
| AX-158080963 | 9 | 65.142 | KV452946.1 | 10910    | 8-scf00202 | 8 |
| AX-158409745 | 9 | 65.142 | KV452946.1 | 15352    | 8-scf00202 | 8 |
| AX-158080976 | 9 | 65.142 | KV452946.1 | 28590    | 8-scf00202 | 8 |
| AX-158080978 | 9 | 65.142 | KV452946.1 | 32396    | 8-scf00202 | 8 |
| AX-157824955 | 9 | 65.142 | KV452946.1 | 34718    | 8-scf00202 | 8 |

|              |   |        |            |        |            |   |
|--------------|---|--------|------------|--------|------------|---|
| AX-158080980 | 9 | 65.142 | KV452946.1 | 36203  | 8-scf00202 | 8 |
| AX-158080983 | 9 | 65.142 | KV452946.1 | 43168  | 8-scf00202 | 8 |
| AX-158080989 | 9 | 65.142 | KV452946.1 | 48744  | 8-scf00202 | 8 |
| AX-158080991 | 9 | 65.142 | KV452946.1 | 49543  | 8-scf00202 | 8 |
| AX-158080998 | 9 | 65.142 | KV452946.1 | 57250  | 8-scf00202 | 8 |
| AX-157713012 | 9 | 65.142 | KV452946.1 | 60430  | 8-scf00202 | 8 |
| AX-157824957 | 9 | 65.142 | KV452946.1 | 64391  | 8-scf00202 | 8 |
| AX-157824958 | 9 | 65.142 | KV452946.1 | 64907  | 8-scf00202 | 8 |
| AX-158081008 | 9 | 65.142 | KV452946.1 | 71718  | 8-scf00202 | 8 |
| AX-157857122 | 9 | 65.142 | KV452946.1 | 87513  | 8-scf00202 | 8 |
| AX-157865716 | 9 | 65.142 | KV452946.1 | 88013  | 8-scf00202 | 8 |
| AX-158081023 | 9 | 65.142 | KV452946.1 | 88539  | 8-scf00202 | 8 |
| AX-158081025 | 9 | 65.142 | KV452946.1 | 89353  | 8-scf00202 | 8 |
| AX-158081027 | 9 | 65.142 | KV452946.1 | 92920  | 8-scf00202 | 8 |
| AX-158081031 | 9 | 65.142 | KV452946.1 | 95598  | 8-scf00202 | 8 |
| AX-158081032 | 9 | 65.142 | KV452946.1 | 96232  | 8-scf00202 | 8 |
| AX-158081046 | 9 | 65.142 | KV452946.1 | 105113 | 8-scf00202 | 8 |
| AX-158081049 | 9 | 65.142 | KV452946.1 | 106493 | 8-scf00202 | 8 |
| AX-158081054 | 9 | 65.142 | KV452946.1 | 107866 | 8-scf00202 | 8 |
| AX-158081055 | 9 | 65.142 | KV452946.1 | 108699 | 8-scf00202 | 8 |
| AX-158081058 | 9 | 65.142 | KV452946.1 | 109198 | 8-scf00202 | 8 |
| AX-157717862 | 9 | 65.142 | KV452946.1 | 113687 | 8-scf00202 | 8 |
| AX-158081064 | 9 | 65.142 | KV452946.1 | 115902 | 8-scf00202 | 8 |
| AX-158081065 | 9 | 65.142 | KV452946.1 | 118638 | 8-scf00202 | 8 |
| AX-158081066 | 9 | 65.142 | KV452946.1 | 119180 | 8-scf00202 | 8 |
| AX-158081067 | 9 | 65.142 | KV452946.1 | 119938 | 8-scf00202 | 8 |
| AX-158081068 | 9 | 65.142 | KV452946.1 | 123220 | 8-scf00202 | 8 |
| AX-158081072 | 9 | 65.142 | KV452946.1 | 128957 | 8-scf00202 | 8 |
| AX-158081073 | 9 | 65.142 | KV452946.1 | 129986 | 8-scf00202 | 8 |
| AX-158081079 | 9 | 65.142 | KV452946.1 | 133886 | 8-scf00202 | 8 |
| AX-158081081 | 9 | 65.142 | KV452946.1 | 134242 | 8-scf00202 | 8 |
| AX-158081082 | 9 | 65.142 | KV452946.1 | 134800 | 8-scf00202 | 8 |
| AX-158081084 | 9 | 65.142 | KV452946.1 | 136146 | 8-scf00202 | 8 |
| AX-158081086 | 9 | 65.142 | KV452946.1 | 136736 | 8-scf00202 | 8 |
| AX-158081087 | 9 | 65.142 | KV452946.1 | 137327 | 8-scf00202 | 8 |
| AX-158081088 | 9 | 65.142 | KV452946.1 | 137768 | 8-scf00202 | 8 |
| AX-158081097 | 9 | 65.142 | KV452946.1 | 141104 | 8-scf00202 | 8 |
| AX-158081098 | 9 | 65.142 | KV452946.1 | 141870 | 8-scf00202 | 8 |
| AX-158081108 | 9 | 65.142 | KV452946.1 | 149094 | 8-scf00202 | 8 |
| AX-158081110 | 9 | 65.142 | KV452946.1 | 150316 | 8-scf00202 | 8 |
| AX-157757169 | 9 | 65.142 | KV452946.1 | 153846 | 8-scf00202 | 8 |
| AX-158081117 | 9 | 65.142 | KV452946.1 | 158824 | 8-scf00202 | 8 |
| AX-158081119 | 9 | 65.142 | KV452946.1 | 160169 | 8-scf00202 | 8 |
| AX-157743935 | 9 | 65.142 | KV452946.1 | 162366 | 8-scf00202 | 8 |
| AX-158081124 | 9 | 65.142 | KV452946.1 | 162573 | 8-scf00202 | 8 |
| AX-158081126 | 9 | 65.142 | KV452946.1 | 165765 | 8-scf00202 | 8 |
| AX-158081130 | 9 | 65.142 | KV452946.1 | 171682 | 8-scf00202 | 8 |
| AX-158081131 | 9 | 65.142 | KV452946.1 | 172407 | 8-scf00202 | 8 |
| AX-158081133 | 9 | 65.142 | KV452946.1 | 173103 | 8-scf00202 | 8 |
| AX-158384396 | 9 | 65.142 | KV452946.1 | 173152 | 8-scf00202 | 8 |
| AX-158081135 | 9 | 65.142 | KV452946.1 | 173850 | 8-scf00202 | 8 |

|              |   |        |            |        |            |   |
|--------------|---|--------|------------|--------|------------|---|
| AX-158081136 | 9 | 65.142 | KV452946.1 | 174331 | 8-scf00202 | 8 |
| AX-158081138 | 9 | 65.142 | KV452946.1 | 175189 | 8-scf00202 | 8 |
| AX-158081140 | 9 | 65.142 | KV452946.1 | 175560 | 8-scf00202 | 8 |
| AX-158081142 | 9 | 65.142 | KV452946.1 | 176070 | 8-scf00202 | 8 |
| AX-158081146 | 9 | 65.142 | KV452946.1 | 184475 | 8-scf00202 | 8 |
| AX-158081149 | 9 | 65.142 | KV452946.1 | 186107 | 8-scf00202 | 8 |
| AX-158081150 | 9 | 65.142 | KV452946.1 | 186977 | 8-scf00202 | 8 |
| AX-157824963 | 9 | 65.142 | KV452946.1 | 191166 | 8-scf00202 | 8 |
| AX-158081152 | 9 | 65.142 | KV452946.1 | 191269 | 8-scf00202 | 8 |
| AX-158081153 | 9 | 65.142 | KV452946.1 | 193111 | 8-scf00202 | 8 |
| AX-158081155 | 9 | 65.142 | KV452946.1 | 194537 | 8-scf00202 | 8 |
| AX-158081158 | 9 | 65.142 | KV452946.1 | 194991 | 8-scf00202 | 8 |
| AX-158081159 | 9 | 65.142 | KV452946.1 | 199228 | 8-scf00202 | 8 |
| AX-158081161 | 9 | 65.142 | KV452946.1 | 199723 | 8-scf00202 | 8 |
| AX-158081163 | 9 | 65.142 | KV452946.1 | 202511 | 8-scf00202 | 8 |
| AX-158081164 | 9 | 65.142 | KV452946.1 | 203040 | 8-scf00202 | 8 |
| AX-158081172 | 9 | 65.142 | KV452946.1 | 206786 | 8-scf00202 | 8 |
| AX-158081175 | 9 | 65.142 | KV452946.1 | 212119 | 8-scf00202 | 8 |
| AX-158081177 | 9 | 65.142 | KV452946.1 | 216862 | 8-scf00202 | 8 |
| AX-158081181 | 9 | 65.142 | KV452946.1 | 219705 | 8-scf00202 | 8 |
| AX-158081184 | 9 | 65.142 | KV452946.1 | 220859 | 8-scf00202 | 8 |
| AX-158081188 | 9 | 65.142 | KV452946.1 | 222955 | 8-scf00202 | 8 |
| AX-158081189 | 9 | 65.142 | KV452946.1 | 223853 | 8-scf00202 | 8 |
| AX-158081203 | 9 | 65.142 | KV452946.1 | 231110 | 8-scf00202 | 8 |
| AX-158081207 | 9 | 65.142 | KV452946.1 | 232206 | 8-scf00202 | 8 |
| AX-158081208 | 9 | 65.142 | KV452946.1 | 233017 | 8-scf00202 | 8 |
| AX-158081213 | 9 | 65.142 | KV452946.1 | 241241 | 8-scf00202 | 8 |
| AX-158081221 | 9 | 65.142 | KV452946.1 | 246582 | 8-scf00202 | 8 |
| AX-158081236 | 9 | 65.142 | KV452946.1 | 258391 | 8-scf00202 | 8 |
| AX-158081239 | 9 | 65.142 | KV452946.1 | 262179 | 8-scf00202 | 8 |
| AX-157885570 | 9 | 65.142 | KV452946.1 | 262641 | 8-scf00202 | 8 |
| AX-158081241 | 9 | 65.142 | KV452946.1 | 264332 | 8-scf00202 | 8 |
| AX-158081244 | 9 | 65.142 | KV452946.1 | 265486 | 8-scf00202 | 8 |
| AX-158081246 | 9 | 65.142 | KV452946.1 | 266168 | 8-scf00202 | 8 |
| AX-158081257 | 9 | 65.142 | KV452946.1 | 274463 | 8-scf00202 | 8 |
| AX-158081258 | 9 | 65.142 | KV452946.1 | 274945 | 8-scf00202 | 8 |
| AX-158081259 | 9 | 65.142 | KV452946.1 | 275547 | 8-scf00202 | 8 |
| AX-158081260 | 9 | 65.142 | KV452946.1 | 276011 | 8-scf00202 | 8 |
| AX-158081262 | 9 | 65.142 | KV452946.1 | 276470 | 8-scf00202 | 8 |
| AX-158081264 | 9 | 65.142 | KV452946.1 | 276736 | 8-scf00202 | 8 |
| AX-158081265 | 9 | 65.142 | KV452946.1 | 280827 | 8-scf00202 | 8 |
| AX-158081267 | 9 | 65.142 | KV452946.1 | 281690 | 8-scf00202 | 8 |
| AX-158081270 | 9 | 65.142 | KV452946.1 | 283097 | 8-scf00202 | 8 |
| AX-157709927 | 9 | 65.142 | KV452946.1 | 286039 | 8-scf00202 | 8 |
| AX-158081276 | 9 | 65.142 | KV452946.1 | 292430 | 8-scf00202 | 8 |
| AX-158081278 | 9 | 65.142 | KV452946.1 | 297570 | 8-scf00202 | 8 |
| AX-157738622 | 9 | 65.142 | KV452946.1 | 302138 | 8-scf00202 | 8 |
| AX-158081281 | 9 | 65.142 | KV452946.1 | 302509 | 8-scf00202 | 8 |
| AX-158081287 | 9 | 65.142 | KV452946.1 | 310498 | 8-scf00202 | 8 |
| AX-158081289 | 9 | 65.142 | KV452946.1 | 311343 | 8-scf00202 | 8 |
| AX-158081290 | 9 | 65.142 | KV452946.1 | 312949 | 8-scf00202 | 8 |

|              |   |        |            |          |            |   |
|--------------|---|--------|------------|----------|------------|---|
| AX-158081292 | 9 | 65.142 | KV452946.1 | 314342   | 8-scf00202 | 8 |
| AX-157738335 | 9 | 65.142 | KV452946.1 | 314905   | 8-scf00202 | 8 |
| AX-158081307 | 9 | 65.142 | KV452946.1 | 330129   | 8-scf00202 | 8 |
| AX-157865718 | 9 | 65.142 | KV452946.1 | 340937   | 8-scf00202 | 8 |
| AX-158081315 | 9 | 65.142 | KV452946.1 | 344175   | 8-scf00202 | 8 |
| AX-158081318 | 9 | 65.142 | KV452946.1 | 349494   | 8-scf00202 | 8 |
| AX-157720639 | 9 | 65.142 | KV452946.1 | 350028   | 8-scf00202 | 8 |
| AX-158081321 | 9 | 65.142 | KV452946.1 | 352088   | 8-scf00202 | 8 |
| AX-158081326 | 9 | 65.142 | KV452946.1 | 354052   | 8-scf00202 | 8 |
| AX-158081342 | 9 | 65.142 | KV452946.1 | 364979   | 8-scf00202 | 8 |
| AX-157885572 | 9 | 65.142 | KV452946.1 | 366476   | 8-scf00202 | 8 |
| AX-158081355 | 9 | 65.142 | KV452946.1 | 373658   | 8-scf00202 | 8 |
| AX-158081361 | 9 | 65.142 | KV452946.1 | 380962   | 8-scf00202 | 8 |
| AX-157824972 | 9 | 65.142 | KV452946.1 | 386285   | 8-scf00202 | 8 |
| AX-157745779 | 9 | 65.142 | KV452946.1 | 393894   | 8-scf00202 | 8 |
| AX-158081380 | 9 | 65.142 | KV452946.1 | 408521   | 8-scf00202 | 8 |
| AX-157824980 | 9 | 65.142 | KV452946.1 | 409866   | 8-scf00202 | 8 |
| AX-158081405 | 9 | 65.142 | KV452946.1 | 432019   | 8-scf00202 | 8 |
| AX-158081476 | 9 | 65.142 | KV452946.1 | 491388   | 8-scf00202 | 8 |
| AX-158081578 | 9 | 65.142 | KV452947.1 | 65904    | 8-scf00203 | 8 |
| AX-158081599 | 9 | 65.142 | KV452947.1 | 91752    | 8-scf00203 | 8 |
| AX-158081632 | 9 | 65.142 | KV452947.1 | 115426   | 8-scf00203 | 8 |
| AX-158081635 | 9 | 65.142 | KV452947.1 | 116030   | 8-scf00203 | 8 |
| AX-158081637 | 9 | 65.142 | KV452947.1 | 117731   | 8-scf00203 | 8 |
| AX-157747132 | 9 | 65.142 | KV452947.1 | 143381   | 8-scf00203 | 8 |
| AX-158081732 | 9 | 65.142 | KV452947.1 | 201917   | 8-scf00203 | 8 |
| AX-157824978 | 9 | 65.36  | KV452946.1 | 406365   | 8-scf00202 | 8 |
| AX-158081382 | 9 | 65.36  | KV452946.1 | 409252   | 8-scf00202 | 8 |
| AX-157746587 | 9 | 65.36  | KV452946.1 | 410984   | 8-scf00202 | 8 |
| AX-158081386 | 9 | 65.36  | KV452946.1 | 413341   | 8-scf00202 | 8 |
| AX-157824982 | 9 | 65.36  | KV452946.1 | 415075   | 8-scf00202 | 8 |
| AX-157742886 | 9 | 65.36  | KV452946.1 | 417724   | 8-scf00202 | 8 |
| AX-158081389 | 9 | 65.36  | KV452946.1 | 417761   | 8-scf00202 | 8 |
| AX-158081393 | 9 | 65.36  | KV452946.1 | 420893   | 8-scf00202 | 8 |
| AX-158081394 | 9 | 65.36  | KV452946.1 | 421633   | 8-scf00202 | 8 |
| AX-158081397 | 9 | 65.36  | KV452946.1 | 424807   | 8-scf00202 | 8 |
| AX-157865720 | 9 | 65.36  | KV452946.1 | 433387   | 8-scf00202 | 8 |
| AX-158081406 | 9 | 65.36  | KV452946.1 | 434447   | 8-scf00202 | 8 |
| AX-158081412 | 9 | 65.36  | KV452946.1 | 436289   | 8-scf00202 | 8 |
| AX-158078029 | 9 | 65.469 | KV452945.1 | 11895004 | 8-scf00200 | 8 |
| AX-157870828 | 9 | 65.469 | KV452945.1 | 12055738 | 8-scf00200 | 8 |
| AX-158078496 | 9 | 65.469 | KV452945.1 | 12282850 | 8-scf00200 | 8 |
| AX-158078540 | 9 | 65.469 | KV452945.1 | 12320739 | 8-scf00200 | 8 |
| AX-158078631 | 9 | 65.469 | KV452945.1 | 12401703 | 8-scf00200 | 8 |
| AX-158078840 | 9 | 65.469 | KV452945.1 | 12744832 | 8-scf00200 | 8 |
| AX-158079143 | 9 | 65.469 | KV452945.1 | 13213612 | 8-scf00200 | 8 |
| AX-158079229 | 9 | 65.469 | KV452945.1 | 13294822 | 8-scf00200 | 8 |
| AX-158079231 | 9 | 65.469 | KV452945.1 | 13297362 | 8-scf00200 | 8 |
| AX-158079232 | 9 | 65.469 | KV452945.1 | 13297555 | 8-scf00200 | 8 |
| AX-158079234 | 9 | 65.469 | KV452945.1 | 13298049 | 8-scf00200 | 8 |
| AX-158079235 | 9 | 65.469 | KV452945.1 | 13301184 | 8-scf00200 | 8 |

|              |   |        |            |          |            |   |
|--------------|---|--------|------------|----------|------------|---|
| AX-158079237 | 9 | 65.469 | KV452945.1 | 13301901 | 8-scf00200 | 8 |
| AX-158079278 | 9 | 65.469 | KV452945.1 | 13356403 | 8-scf00200 | 8 |
| AX-158079389 | 9 | 65.469 | KV452945.1 | 13468204 | 8-scf00200 | 8 |
| AX-158079519 | 9 | 65.469 | KV452945.1 | 13580844 | 8-scf00200 | 8 |
| AX-158080042 | 9 | 65.469 | KV452945.1 | 14109286 | 8-scf00200 | 8 |
| AX-158080969 | 9 | 65.469 | KV452946.1 | 16670    | 8-scf00202 | 8 |
| AX-158081113 | 9 | 65.469 | KV452946.1 | 152591   | 8-scf00202 | 8 |
| AX-158081279 | 9 | 65.469 | KV452946.1 | 297860   | 8-scf00202 | 8 |
| AX-158081347 | 9 | 65.469 | KV452946.1 | 367422   | 8-scf00202 | 8 |
| AX-158081357 | 9 | 65.469 | KV452946.1 | 375453   | 8-scf00202 | 8 |
| AX-157694605 | 9 | 65.469 | KV452946.1 | 400818   | 8-scf00202 | 8 |
| AX-158081417 | 9 | 65.469 | KV452946.1 | 439123   | 8-scf00202 | 8 |
| AX-158081419 | 9 | 65.469 | KV452946.1 | 440839   | 8-scf00202 | 8 |
| AX-158081420 | 9 | 65.469 | KV452946.1 | 441680   | 8-scf00202 | 8 |
| AX-157746156 | 9 | 65.469 | KV452946.1 | 443886   | 8-scf00202 | 8 |
| AX-158081422 | 9 | 65.469 | KV452946.1 | 444026   | 8-scf00202 | 8 |
| AX-158081424 | 9 | 65.469 | KV452946.1 | 444654   | 8-scf00202 | 8 |
| AX-157739495 | 9 | 65.469 | KV452946.1 | 445684   | 8-scf00202 | 8 |
| AX-158081426 | 9 | 65.469 | KV452946.1 | 447110   | 8-scf00202 | 8 |
| AX-158081429 | 9 | 65.469 | KV452946.1 | 451129   | 8-scf00202 | 8 |
| AX-157715109 | 9 | 65.469 | KV452946.1 | 452239   | 8-scf00202 | 8 |
| AX-157708349 | 9 | 65.469 | KV452946.1 | 452731   | 8-scf00202 | 8 |
| AX-158081432 | 9 | 65.469 | KV452946.1 | 453863   | 8-scf00202 | 8 |
| AX-157824985 | 9 | 65.469 | KV452946.1 | 454541   | 8-scf00202 | 8 |
| AX-158081435 | 9 | 65.469 | KV452946.1 | 457605   | 8-scf00202 | 8 |
| AX-158081436 | 9 | 65.469 | KV452946.1 | 457983   | 8-scf00202 | 8 |
| AX-158081438 | 9 | 65.469 | KV452946.1 | 459623   | 8-scf00202 | 8 |
| AX-158081440 | 9 | 65.469 | KV452946.1 | 462095   | 8-scf00202 | 8 |
| AX-158081443 | 9 | 65.469 | KV452946.1 | 465708   | 8-scf00202 | 8 |
| AX-158081446 | 9 | 65.469 | KV452946.1 | 467768   | 8-scf00202 | 8 |
| AX-158081447 | 9 | 65.469 | KV452946.1 | 469659   | 8-scf00202 | 8 |
| AX-157857128 | 9 | 65.469 | KV452946.1 | 469835   | 8-scf00202 | 8 |
| AX-158081449 | 9 | 65.469 | KV452946.1 | 471727   | 8-scf00202 | 8 |
| AX-157713634 | 9 | 65.469 | KV452946.1 | 473304   | 8-scf00202 | 8 |
| AX-157857129 | 9 | 65.469 | KV452946.1 | 474689   | 8-scf00202 | 8 |
| AX-158081453 | 9 | 65.469 | KV452946.1 | 475261   | 8-scf00202 | 8 |
| AX-158081454 | 9 | 65.469 | KV452946.1 | 476481   | 8-scf00202 | 8 |
| AX-158081456 | 9 | 65.469 | KV452946.1 | 479151   | 8-scf00202 | 8 |
| AX-158081463 | 9 | 65.469 | KV452946.1 | 482236   | 8-scf00202 | 8 |
| AX-158081464 | 9 | 65.469 | KV452946.1 | 482949   | 8-scf00202 | 8 |
| AX-158081466 | 9 | 65.469 | KV452946.1 | 483294   | 8-scf00202 | 8 |
| AX-158081467 | 9 | 65.469 | KV452946.1 | 483880   | 8-scf00202 | 8 |
| AX-158081468 | 9 | 65.469 | KV452946.1 | 485500   | 8-scf00202 | 8 |
| AX-158081469 | 9 | 65.469 | KV452946.1 | 486330   | 8-scf00202 | 8 |
| AX-158081470 | 9 | 65.469 | KV452946.1 | 487439   | 8-scf00202 | 8 |
| AX-158081471 | 9 | 65.469 | KV452946.1 | 487979   | 8-scf00202 | 8 |
| AX-158081472 | 9 | 65.469 | KV452946.1 | 489894   | 8-scf00202 | 8 |
| AX-158081474 | 9 | 65.469 | KV452946.1 | 490831   | 8-scf00202 | 8 |
| AX-158081475 | 9 | 65.469 | KV452946.1 | 491253   | 8-scf00202 | 8 |
| AX-158081477 | 9 | 65.469 | KV452946.1 | 492387   | 8-scf00202 | 8 |
| AX-158081478 | 9 | 65.469 | KV452946.1 | 493058   | 8-scf00202 | 8 |



|              |   |        |            |        |            |   |
|--------------|---|--------|------------|--------|------------|---|
| AX-158081479 | 9 | 65.469 | KV452946.1 | 493497 | 8-scf00202 | 8 |
| AX-158081486 | 9 | 65.469 | KV452946.1 | 496666 | 8-scf00202 | 8 |
| AX-157719567 | 9 | 65.469 | KV452946.1 | 498913 | 8-scf00202 | 8 |
| AX-158081489 | 9 | 65.469 | KV452946.1 | 500451 | 8-scf00202 | 8 |
| AX-158081490 | 9 | 65.469 | KV452946.1 | 500845 | 8-scf00202 | 8 |
| AX-158081493 | 9 | 65.469 | KV452946.1 | 501060 | 8-scf00202 | 8 |
| AX-158081495 | 9 | 65.469 | KV452947.1 | 316    | 8-scf00203 | 8 |
| AX-158081496 | 9 | 65.469 | KV452947.1 | 709    | 8-scf00203 | 8 |
| AX-158081498 | 9 | 65.469 | KV452947.1 | 1133   | 8-scf00203 | 8 |
| AX-158379912 | 9 | 65.469 | KV452947.1 | 2074   | 8-scf00203 | 8 |
| AX-158081506 | 9 | 65.469 | KV452947.1 | 2713   | 8-scf00203 | 8 |
| AX-158081508 | 9 | 65.469 | KV452947.1 | 4331   | 8-scf00203 | 8 |
| AX-158081511 | 9 | 65.469 | KV452947.1 | 6982   | 8-scf00203 | 8 |
| AX-157824987 | 9 | 65.469 | KV452947.1 | 8815   | 8-scf00203 | 8 |
| AX-158081512 | 9 | 65.469 | KV452947.1 | 9119   | 8-scf00203 | 8 |
| AX-158081514 | 9 | 65.469 | KV452947.1 | 9497   | 8-scf00203 | 8 |
| AX-158081515 | 9 | 65.469 | KV452947.1 | 10999  | 8-scf00203 | 8 |
| AX-157773672 | 9 | 65.469 | KV452947.1 | 11780  | 8-scf00203 | 8 |
| AX-158081516 | 9 | 65.469 | KV452947.1 | 12563  | 8-scf00203 | 8 |
| AX-158081518 | 9 | 65.469 | KV452947.1 | 12716  | 8-scf00203 | 8 |
| AX-158081521 | 9 | 65.469 | KV452947.1 | 14318  | 8-scf00203 | 8 |
| AX-158081525 | 9 | 65.469 | KV452947.1 | 16138  | 8-scf00203 | 8 |
| AX-158081527 | 9 | 65.469 | KV452947.1 | 16929  | 8-scf00203 | 8 |
| AX-158081531 | 9 | 65.469 | KV452947.1 | 19652  | 8-scf00203 | 8 |
| AX-158081533 | 9 | 65.469 | KV452947.1 | 20896  | 8-scf00203 | 8 |
| AX-158081534 | 9 | 65.469 | KV452947.1 | 21286  | 8-scf00203 | 8 |
| AX-158081535 | 9 | 65.469 | KV452947.1 | 23275  | 8-scf00203 | 8 |
| AX-158081538 | 9 | 65.469 | KV452947.1 | 25229  | 8-scf00203 | 8 |
| AX-158081539 | 9 | 65.469 | KV452947.1 | 25610  | 8-scf00203 | 8 |
| AX-158081541 | 9 | 65.469 | KV452947.1 | 25972  | 8-scf00203 | 8 |
| AX-158081543 | 9 | 65.469 | KV452947.1 | 27662  | 8-scf00203 | 8 |
| AX-158081546 | 9 | 65.469 | KV452947.1 | 31973  | 8-scf00203 | 8 |
| AX-158081548 | 9 | 65.469 | KV452947.1 | 33107  | 8-scf00203 | 8 |
| AX-158081549 | 9 | 65.469 | KV452947.1 | 33402  | 8-scf00203 | 8 |
| AX-158081550 | 9 | 65.469 | KV452947.1 | 34917  | 8-scf00203 | 8 |
| AX-158081553 | 9 | 65.469 | KV452947.1 | 35857  | 8-scf00203 | 8 |
| AX-158081556 | 9 | 65.469 | KV452947.1 | 37887  | 8-scf00203 | 8 |
| AX-158081558 | 9 | 65.469 | KV452947.1 | 38221  | 8-scf00203 | 8 |
| AX-158081559 | 9 | 65.469 | KV452947.1 | 39419  | 8-scf00203 | 8 |
| AX-158081560 | 9 | 65.469 | KV452947.1 | 40432  | 8-scf00203 | 8 |
| AX-157745021 | 9 | 65.469 | KV452947.1 | 42058  | 8-scf00203 | 8 |
| AX-157824988 | 9 | 65.469 | KV452947.1 | 43873  | 8-scf00203 | 8 |
| AX-157824989 | 9 | 65.469 | KV452947.1 | 45585  | 8-scf00203 | 8 |
| AX-157824990 | 9 | 65.469 | KV452947.1 | 45709  | 8-scf00203 | 8 |
| AX-158081561 | 9 | 65.469 | KV452947.1 | 46281  | 8-scf00203 | 8 |
| AX-157824992 | 9 | 65.469 | KV452947.1 | 49485  | 8-scf00203 | 8 |
| AX-157755245 | 9 | 65.469 | KV452947.1 | 51394  | 8-scf00203 | 8 |
| AX-158081563 | 9 | 65.469 | KV452947.1 | 53280  | 8-scf00203 | 8 |
| AX-158081564 | 9 | 65.469 | KV452947.1 | 53511  | 8-scf00203 | 8 |
| AX-158081565 | 9 | 65.469 | KV452947.1 | 56004  | 8-scf00203 | 8 |
| AX-158081579 | 9 | 65.469 | KV452947.1 | 67609  | 8-scf00203 | 8 |

|              |   |        |             |          |            |    |
|--------------|---|--------|-------------|----------|------------|----|
| AX-158081580 | 9 | 65.469 | KV452947.1  | 68148    | 8-scf00203 | 8  |
| AX-158081584 | 9 | 65.469 | KV452947.1  | 73820    | 8-scf00203 | 8  |
| AX-158081585 | 9 | 65.469 | KV452947.1  | 76092    | 8-scf00203 | 8  |
| AX-158081587 | 9 | 65.469 | KV452947.1  | 78246    | 8-scf00203 | 8  |
| AX-158081588 | 9 | 65.469 | KV452947.1  | 78675    | 8-scf00203 | 8  |
| AX-158081603 | 9 | 65.469 | KV452947.1  | 93667    | 8-scf00203 | 8  |
| AX-158081604 | 9 | 65.469 | KV452947.1  | 95164    | 8-scf00203 | 8  |
| AX-158081606 | 9 | 65.469 | KV452947.1  | 96433    | 8-scf00203 | 8  |
| AX-158081617 | 9 | 65.469 | KV452947.1  | 105973   | 8-scf00203 | 8  |
| AX-158081684 | 9 | 65.469 | KV452947.1  | 151950   | 8-scf00203 | 8  |
| AX-158081698 | 9 | 65.469 | KV452947.1  | 170725   | 8-scf00203 | 8  |
| AX-158081765 | 9 | 65.469 | KV452947.1  | 243657   | 8-scf00203 | 8  |
| AX-158384407 | 9 | 65.469 | KV452947.1  | 261948   | 8-scf00203 | 8  |
| AX-158082158 | 9 | 65.469 | KV452947.1  | 704686   | 8-scf00203 | 8  |
| AX-157722493 | 9 | 65.469 | KV452947.1  | 968175   | 8-scf00203 | 8  |
| AX-158082322 | 9 | 65.469 | KV452947.1  | 985448   | 8-scf00203 | 8  |
| AX-158082354 | 9 | 65.469 | KV452947.1  | 1030576  | 8-scf00203 | 8  |
| AX-158082364 | 9 | 65.469 | KV452947.1  | 1044491  | 8-scf00203 | 8  |
| AX-158082388 | 9 | 65.469 | KV452947.1  | 1075421  | 8-scf00203 | 8  |
| AX-158082483 | 9 | 65.469 | KV452947.1  | 1190777  | 8-scf00203 | 8  |
| AX-158082611 | 9 | 65.469 | KV452947.1  | 1458176  | 8-scf00203 | 8  |
| AX-158082614 | 9 | 65.469 | KV452947.1  | 1466038  | 8-scf00203 | 8  |
| AX-158082645 | 9 | 65.469 | KV452947.1  | 1517084  | 8-scf00203 | 8  |
| AX-158082710 | 9 | 65.469 | KV452947.1  | 1655693  | 8-scf00203 | 8  |
| AX-158082719 | 9 | 65.469 | KV452947.1  | 1672484  | 8-scf00203 | 8  |
| AX-158082743 | 9 | 65.469 | KV452947.1  | 1756220  | 8-scf00203 | 8  |
| AX-158082781 | 9 | 65.469 | KV452947.1  | 1896066  | 8-scf00203 | 8  |
| AX-158082812 | 9 | 65.469 | KV452947.1  | 1995989  | 8-scf00203 | 8  |
| AX-158082819 | 9 | 65.469 | KV452947.1  | 2014440  | 8-scf00203 | 8  |
| AX-158082835 | 9 | 65.469 | KV452947.1  | 2058485  | 8-scf00203 | 8  |
| AX-158082852 | 9 | 65.469 | KV452947.1  | 2127860  | 8-scf00203 | 8  |
| AX-157857166 | 9 | 65.469 | KV452947.1  | 2314202  | 8-scf00203 | 8  |
| AX-158083147 | 9 | 65.469 | KV452947.1  | 2573404  | 8-scf00203 | 8  |
| AX-158083160 | 9 | 65.469 | KV452947.1  | 2599619  | 8-scf00203 | 8  |
| AX-158083194 | 9 | 65.469 | KV452947.1  | 2653296  | 8-scf00203 | 8  |
| AX-158083195 | 9 | 65.469 | KV452947.1  | 2655700  | 8-scf00203 | 8  |
| AX-157739927 | 9 | 65.469 | KV452947.1  | 2803084  | 8-scf00203 | 8  |
| AX-157705478 | 9 | 65.469 | 3ML01029903 | 544      | scf05525_1 | UN |
| AX-157706578 | 9 | 65.469 | 3ML01032505 | 465      | scf08126_1 | UN |
| AX-158409752 | 9 | 65.508 | KV452947.1  | 55309    | 8-scf00203 | 8  |
| AX-157724199 | 9 | 65.538 | KV452947.1  | 56808    | 8-scf00203 | 8  |
| AX-158081573 | 9 | 65.538 | KV452947.1  | 62156    | 8-scf00203 | 8  |
| AX-158081576 | 9 | 65.538 | KV452947.1  | 64822    | 8-scf00203 | 8  |
| AX-158081567 | 9 | 65.546 | KV452947.1  | 57844    | 8-scf00203 | 8  |
| AX-158081568 | 9 | 65.546 | KV452947.1  | 58213    | 8-scf00203 | 8  |
| AX-158081570 | 9 | 65.546 | KV452947.1  | 59824    | 8-scf00203 | 8  |
| AX-158081571 | 9 | 65.553 | KV452947.1  | 60598    | 8-scf00203 | 8  |
| AX-158081572 | 9 | 65.559 | KV452947.1  | 61005    | 8-scf00203 | 8  |
| AX-158081575 | 9 | 65.569 | KV452947.1  | 63993    | 8-scf00203 | 8  |
| AX-158078015 | 9 | 65.579 | KV452945.1  | 11886703 | 8-scf00200 | 8  |
| AX-158078220 | 9 | 65.579 | KV452945.1  | 12042029 | 8-scf00200 | 8  |

|              |   |        |            |          |            |   |
|--------------|---|--------|------------|----------|------------|---|
| AX-158080170 | 9 | 65.579 | KV452945.1 | 14256437 | 8-scf00200 | 8 |
| AX-158080185 | 9 | 65.579 | KV452945.1 | 14290231 | 8-scf00200 | 8 |
| AX-158081026 | 9 | 65.579 | KV452946.1 | 90615    | 8-scf00202 | 8 |
| AX-158081215 | 9 | 65.579 | KV452946.1 | 243486   | 8-scf00202 | 8 |
| AX-158081251 | 9 | 65.579 | KV452946.1 | 270927   | 8-scf00202 | 8 |
| AX-158081256 | 9 | 65.579 | KV452946.1 | 273349   | 8-scf00202 | 8 |
| AX-157824977 | 9 | 65.579 | KV452946.1 | 405978   | 8-scf00202 | 8 |
| AX-158081408 | 9 | 65.579 | KV452946.1 | 435438   | 8-scf00202 | 8 |
| AX-158081425 | 9 | 65.579 | KV452946.1 | 445641   | 8-scf00202 | 8 |
| AX-158081427 | 9 | 65.579 | KV452946.1 | 447422   | 8-scf00202 | 8 |
| AX-157824984 | 9 | 65.579 | KV452946.1 | 447719   | 8-scf00202 | 8 |
| AX-158081487 | 9 | 65.579 | KV452946.1 | 497272   | 8-scf00202 | 8 |
| AX-157720302 | 9 | 65.579 | KV452947.1 | 224      | 8-scf00203 | 8 |
| AX-158081555 | 9 | 65.579 | KV452947.1 | 36113    | 8-scf00203 | 8 |
| AX-158081577 | 9 | 65.579 | KV452947.1 | 65225    | 8-scf00203 | 8 |
| AX-158081586 | 9 | 65.579 | KV452947.1 | 77736    | 8-scf00203 | 8 |
| AX-158081591 | 9 | 65.579 | KV452947.1 | 83601    | 8-scf00203 | 8 |
| AX-158081592 | 9 | 65.579 | KV452947.1 | 84961    | 8-scf00203 | 8 |
| AX-158081598 | 9 | 65.579 | KV452947.1 | 91203    | 8-scf00203 | 8 |
| AX-158081607 | 9 | 65.579 | KV452947.1 | 97191    | 8-scf00203 | 8 |
| AX-158081608 | 9 | 65.579 | KV452947.1 | 97636    | 8-scf00203 | 8 |
| AX-158081609 | 9 | 65.579 | KV452947.1 | 100284   | 8-scf00203 | 8 |
| AX-158081610 | 9 | 65.579 | KV452947.1 | 100882   | 8-scf00203 | 8 |
| AX-158081701 | 9 | 65.579 | KV452947.1 | 175634   | 8-scf00203 | 8 |
| AX-158409753 | 9 | 65.579 | KV452947.1 | 175680   | 8-scf00203 | 8 |
| AX-158081728 | 9 | 65.579 | KV452947.1 | 199580   | 8-scf00203 | 8 |
| AX-158081601 | 9 | 65.63  | KV452947.1 | 92107    | 8-scf00203 | 8 |
| AX-158081620 | 9 | 65.688 | KV452947.1 | 106957   | 8-scf00203 | 8 |
| AX-158081621 | 9 | 65.715 | KV452947.1 | 108105   | 8-scf00203 | 8 |
| AX-158081649 | 9 | 65.715 | KV452947.1 | 125351   | 8-scf00203 | 8 |
| AX-158081678 | 9 | 65.715 | KV452947.1 | 143986   | 8-scf00203 | 8 |
| AX-158081624 | 9 | 65.797 | KV452947.1 | 113126   | 8-scf00203 | 8 |
| AX-158081626 | 9 | 65.797 | KV452947.1 | 113726   | 8-scf00203 | 8 |
| AX-158081662 | 9 | 65.797 | KV452947.1 | 133315   | 8-scf00203 | 8 |
| AX-158081704 | 9 | 65.875 | KV452947.1 | 177214   | 8-scf00203 | 8 |
| AX-158081741 | 9 | 65.907 | KV452947.1 | 210702   | 8-scf00203 | 8 |
| AX-158081745 | 9 | 65.907 | KV452947.1 | 215591   | 8-scf00203 | 8 |
| AX-158081740 | 9 | 65.982 | KV452947.1 | 209786   | 8-scf00203 | 8 |
| AX-157824996 | 9 | 65.982 | KV452947.1 | 223215   | 8-scf00203 | 8 |
| AX-157824997 | 9 | 66.016 | KV452947.1 | 223453   | 8-scf00203 | 8 |
| AX-157824998 | 9 | 66.016 | KV452947.1 | 223835   | 8-scf00203 | 8 |
| AX-158081750 | 9 | 66.016 | KV452947.1 | 225279   | 8-scf00203 | 8 |
| AX-158081752 | 9 | 66.016 | KV452947.1 | 225875   | 8-scf00203 | 8 |
| AX-158081753 | 9 | 66.026 | KV452947.1 | 227935   | 8-scf00203 | 8 |
| AX-157755052 | 9 | 66.03  | KV452947.1 | 231730   | 8-scf00203 | 8 |
| AX-157774348 | 9 | 66.03  | KV452947.1 | 238395   | 8-scf00203 | 8 |
| AX-158081744 | 9 | 66.04  | KV452947.1 | 214668   | 8-scf00203 | 8 |
| AX-158081756 | 9 | 66.04  | KV452947.1 | 233940   | 8-scf00203 | 8 |
| AX-158081759 | 9 | 66.04  | KV452947.1 | 237081   | 8-scf00203 | 8 |
| AX-158081762 | 9 | 66.19  | KV452947.1 | 239282   | 8-scf00203 | 8 |
| AX-158081766 | 9 | 66.404 | KV452947.1 | 244253   | 8-scf00203 | 8 |

|              |   |        |            |         |            |   |
|--------------|---|--------|------------|---------|------------|---|
| AX-158081787 | 9 | 66.565 | KV452947.1 | 271287  | 8-scf00203 | 8 |
| AX-158416646 | 9 | 66.565 | KV452947.1 | 272506  | 8-scf00203 | 8 |
| AX-158081790 | 9 | 66.565 | KV452947.1 | 273979  | 8-scf00203 | 8 |
| AX-158081793 | 9 | 66.565 | KV452947.1 | 276894  | 8-scf00203 | 8 |
| AX-158081795 | 9 | 66.565 | KV452947.1 | 280731  | 8-scf00203 | 8 |
| AX-158081797 | 9 | 66.565 | KV452947.1 | 281642  | 8-scf00203 | 8 |
| AX-158081798 | 9 | 66.565 | KV452947.1 | 282904  | 8-scf00203 | 8 |
| AX-157719341 | 9 | 66.565 | KV452947.1 | 322171  | 8-scf00203 | 8 |
| AX-157877119 | 9 | 66.74  | KV452947.1 | 250941  | 8-scf00203 | 8 |
| AX-157857132 | 9 | 66.74  | KV452947.1 | 304067  | 8-scf00203 | 8 |
| AX-158081910 | 9 | 66.74  | KV452947.1 | 414009  | 8-scf00203 | 8 |
| AX-158081938 | 9 | 66.74  | KV452947.1 | 437584  | 8-scf00203 | 8 |
| AX-158081810 | 9 | 66.893 | KV452947.1 | 305793  | 8-scf00203 | 8 |
| AX-158081834 | 9 | 66.893 | KV452947.1 | 328384  | 8-scf00203 | 8 |
| AX-158081854 | 9 | 66.893 | KV452947.1 | 347062  | 8-scf00203 | 8 |
| AX-158081865 | 9 | 66.893 | KV452947.1 | 356922  | 8-scf00203 | 8 |
| AX-158081893 | 9 | 66.893 | KV452947.1 | 383715  | 8-scf00203 | 8 |
| AX-158081873 | 9 | 67.038 | KV452947.1 | 365207  | 8-scf00203 | 8 |
| AX-158081903 | 9 | 67.038 | KV452947.1 | 396309  | 8-scf00203 | 8 |
| AX-158081911 | 9 | 67.038 | KV452947.1 | 414783  | 8-scf00203 | 8 |
| AX-158081929 | 9 | 67.329 | KV452947.1 | 431036  | 8-scf00203 | 8 |
| AX-158081936 | 9 | 67.33  | KV452947.1 | 436917  | 8-scf00203 | 8 |
| AX-158081942 | 9 | 67.33  | KV452947.1 | 439359  | 8-scf00203 | 8 |
| AX-158081944 | 9 | 67.33  | KV452947.1 | 441996  | 8-scf00203 | 8 |
| AX-158081945 | 9 | 67.374 | KV452947.1 | 442533  | 8-scf00203 | 8 |
| AX-158409766 | 9 | 67.399 | KV452947.1 | 444310  | 8-scf00203 | 8 |
| AX-158081951 | 9 | 67.439 | KV452947.1 | 446357  | 8-scf00203 | 8 |
| AX-158081954 | 9 | 67.439 | KV452947.1 | 447344  | 8-scf00203 | 8 |
| AX-157725160 | 9 | 67.439 | KV452947.1 | 449277  | 8-scf00203 | 8 |
| AX-158081964 | 9 | 67.439 | KV452947.1 | 456594  | 8-scf00203 | 8 |
| AX-158081977 | 9 | 67.439 | KV452947.1 | 469630  | 8-scf00203 | 8 |
| AX-158081979 | 9 | 67.439 | KV452947.1 | 470374  | 8-scf00203 | 8 |
| AX-158082098 | 9 | 67.64  | KV452947.1 | 585623  | 8-scf00203 | 8 |
| AX-157857142 | 9 | 67.674 | KV452947.1 | 700961  | 8-scf00203 | 8 |
| AX-158082165 | 9 | 67.674 | KV452947.1 | 716240  | 8-scf00203 | 8 |
| AX-158082193 | 9 | 67.674 | KV452947.1 | 761833  | 8-scf00203 | 8 |
| AX-157748711 | 9 | 67.674 | KV452947.1 | 827836  | 8-scf00203 | 8 |
| AX-157716068 | 9 | 67.674 | KV452947.1 | 830857  | 8-scf00203 | 8 |
| AX-158082774 | 9 | 67.674 | KV452947.1 | 1871097 | 8-scf00203 | 8 |
| AX-158082797 | 9 | 67.674 | KV452947.1 | 1947182 | 8-scf00203 | 8 |
| AX-158082860 | 9 | 67.674 | KV452947.1 | 2144158 | 8-scf00203 | 8 |
| AX-158082861 | 9 | 67.674 | KV452947.1 | 2144531 | 8-scf00203 | 8 |
| AX-158082891 | 9 | 67.674 | KV452947.1 | 2182633 | 8-scf00203 | 8 |
| AX-158083037 | 9 | 67.674 | KV452947.1 | 2392831 | 8-scf00203 | 8 |
| AX-158083038 | 9 | 67.674 | KV452947.1 | 2392911 | 8-scf00203 | 8 |
| AX-158083117 | 9 | 67.674 | KV452947.1 | 2521602 | 8-scf00203 | 8 |
| AX-158083179 | 9 | 67.674 | KV452947.1 | 2628378 | 8-scf00203 | 8 |
| AX-157712994 | 9 | 67.674 | KV452947.1 | 2660998 | 8-scf00203 | 8 |
| AX-157825024 | 9 | 67.876 | KV452947.1 | 612654  | 8-scf00203 | 8 |
| AX-158082206 | 9 | 67.876 | KV452947.1 | 769579  | 8-scf00203 | 8 |
| AX-157748453 | 9 | 67.876 | KV452947.1 | 822946  | 8-scf00203 | 8 |

|              |   |        |            |         |            |   |
|--------------|---|--------|------------|---------|------------|---|
| AX-157718950 | 9 | 67.876 | KV452947.1 | 832518  | 8-scf00203 | 8 |
| AX-157825033 | 9 | 67.876 | KV452947.1 | 833050  | 8-scf00203 | 8 |
| AX-157715610 | 9 | 67.876 | KV452947.1 | 834347  | 8-scf00203 | 8 |
| AX-158082767 | 9 | 67.876 | KV452947.1 | 1829346 | 8-scf00203 | 8 |
| AX-158082771 | 9 | 67.876 | KV452947.1 | 1848970 | 8-scf00203 | 8 |
| AX-158082780 | 9 | 67.876 | KV452947.1 | 1882046 | 8-scf00203 | 8 |
| AX-158082783 | 9 | 67.876 | KV452947.1 | 1898160 | 8-scf00203 | 8 |
| AX-158082790 | 9 | 67.876 | KV452947.1 | 1926142 | 8-scf00203 | 8 |
| AX-158082792 | 9 | 67.876 | KV452947.1 | 1929063 | 8-scf00203 | 8 |
| AX-158082794 | 9 | 67.876 | KV452947.1 | 1932397 | 8-scf00203 | 8 |
| AX-158082795 | 9 | 67.876 | KV452947.1 | 1934786 | 8-scf00203 | 8 |
| AX-158082798 | 9 | 67.876 | KV452947.1 | 1948932 | 8-scf00203 | 8 |
| AX-158082847 | 9 | 67.876 | KV452947.1 | 2099842 | 8-scf00203 | 8 |
| AX-158082849 | 9 | 67.876 | KV452947.1 | 2111486 | 8-scf00203 | 8 |
| AX-158082850 | 9 | 67.876 | KV452947.1 | 2112417 | 8-scf00203 | 8 |
| AX-158082851 | 9 | 67.876 | KV452947.1 | 2119530 | 8-scf00203 | 8 |
| AX-158082854 | 9 | 67.876 | KV452947.1 | 2129453 | 8-scf00203 | 8 |
| AX-158082876 | 9 | 67.876 | KV452947.1 | 2164451 | 8-scf00203 | 8 |
| AX-158082902 | 9 | 67.876 | KV452947.1 | 2196303 | 8-scf00203 | 8 |
| AX-158082912 | 9 | 67.876 | KV452947.1 | 2211424 | 8-scf00203 | 8 |
| AX-158082917 | 9 | 67.876 | KV452947.1 | 2216578 | 8-scf00203 | 8 |
| AX-158082939 | 9 | 67.876 | KV452947.1 | 2244296 | 8-scf00203 | 8 |
| AX-158082958 | 9 | 67.876 | KV452947.1 | 2276391 | 8-scf00203 | 8 |
| AX-158083052 | 9 | 67.876 | KV452947.1 | 2409143 | 8-scf00203 | 8 |
| AX-158083077 | 9 | 67.876 | KV452947.1 | 2451174 | 8-scf00203 | 8 |
| AX-158083079 | 9 | 67.876 | KV452947.1 | 2452977 | 8-scf00203 | 8 |
| AX-158083080 | 9 | 67.876 | KV452947.1 | 2453350 | 8-scf00203 | 8 |
| AX-158083083 | 9 | 67.876 | KV452947.1 | 2459627 | 8-scf00203 | 8 |
| AX-158083084 | 9 | 67.876 | KV452947.1 | 2461215 | 8-scf00203 | 8 |
| AX-158083086 | 9 | 67.876 | KV452947.1 | 2463087 | 8-scf00203 | 8 |
| AX-158083088 | 9 | 67.876 | KV452947.1 | 2466828 | 8-scf00203 | 8 |
| AX-158083090 | 9 | 67.876 | KV452947.1 | 2468289 | 8-scf00203 | 8 |
| AX-158083091 | 9 | 67.876 | KV452947.1 | 2469503 | 8-scf00203 | 8 |
| AX-157757139 | 9 | 67.876 | KV452947.1 | 2487386 | 8-scf00203 | 8 |
| AX-158392079 | 9 | 67.876 | KV452947.1 | 2496673 | 8-scf00203 | 8 |
| AX-158083173 | 9 | 67.876 | KV452947.1 | 2623060 | 8-scf00203 | 8 |
| AX-157825059 | 9 | 67.876 | KV452947.1 | 2628534 | 8-scf00203 | 8 |
| AX-158083188 | 9 | 67.876 | KV452947.1 | 2642449 | 8-scf00203 | 8 |
| AX-157825066 | 9 | 67.876 | KV452947.1 | 2699911 | 8-scf00203 | 8 |
| AX-158083232 | 9 | 67.876 | KV452947.1 | 2721924 | 8-scf00203 | 8 |
| AX-158083259 | 9 | 67.876 | KV452947.1 | 2769376 | 8-scf00203 | 8 |
| AX-158082109 | 9 | 67.985 | KV452947.1 | 607007  | 8-scf00203 | 8 |
| AX-158083096 | 9 | 67.985 | KV452947.1 | 2478873 | 8-scf00203 | 8 |
| AX-157885578 | 9 | 67.985 | KV452947.1 | 2529896 | 8-scf00203 | 8 |
| AX-158083126 | 9 | 67.985 | KV452947.1 | 2540699 | 8-scf00203 | 8 |
| AX-158083143 | 9 | 68.094 | KV452947.1 | 2569592 | 8-scf00203 | 8 |
| AX-158083151 | 9 | 68.094 | KV452947.1 | 2578580 | 8-scf00203 | 8 |
| AX-158083216 | 9 | 68.204 | KV452947.1 | 2690354 | 8-scf00203 | 8 |
| AX-158083225 | 9 | 68.255 | KV452947.1 | 2703444 | 8-scf00203 | 8 |
| AX-158082951 | 9 | 68.37  | KV452947.1 | 2267669 | 8-scf00203 | 8 |
| AX-158083229 | 9 | 68.37  | KV452947.1 | 2717112 | 8-scf00203 | 8 |

|              |   |        |            |         |            |   |
|--------------|---|--------|------------|---------|------------|---|
| AX-158083235 | 9 | 68.423 | KV452947.1 | 2729045 | 8-scf00203 | 8 |
| AX-158083261 | 9 | 68.45  | KV452947.1 | 2772580 | 8-scf00203 | 8 |
| AX-158083262 | 9 | 68.477 | KV452947.1 | 2773905 | 8-scf00203 | 8 |
| AX-157825078 | 9 | 68.504 | KV452947.1 | 2775301 | 8-scf00203 | 8 |
| AX-158083270 | 9 | 68.532 | KV452947.1 | 2785835 | 8-scf00203 | 8 |
| AX-158083276 | 9 | 68.532 | KV452947.1 | 2794356 | 8-scf00203 | 8 |
| AX-158083278 | 9 | 68.696 | KV452947.1 | 2796342 | 8-scf00203 | 8 |
| AX-158083099 | 9 | 68.778 | KV452947.1 | 2484178 | 8-scf00203 | 8 |
| AX-158083288 | 9 | 68.778 | KV452947.1 | 2808701 | 8-scf00203 | 8 |
| AX-158083299 | 9 | 68.778 | KV452947.1 | 2822138 | 8-scf00203 | 8 |
| AX-158083291 | 9 | 68.86  | KV452947.1 | 2811190 | 8-scf00203 | 8 |
| AX-158409804 | 9 | 68.934 | KV452947.1 | 2833797 | 8-scf00203 | 8 |
| AX-158083312 | 9 | 68.969 | KV452947.1 | 2840102 | 8-scf00203 | 8 |
| AX-158083315 | 9 | 68.969 | KV452947.1 | 2843080 | 8-scf00203 | 8 |
| AX-158083318 | 9 | 68.969 | KV452947.1 | 2847124 | 8-scf00203 | 8 |
| AX-158083321 | 9 | 68.969 | KV452947.1 | 2850013 | 8-scf00203 | 8 |
| AX-158083322 | 9 | 68.969 | KV452947.1 | 2851578 | 8-scf00203 | 8 |
| AX-158083320 | 9 | 68.97  | KV452947.1 | 2848998 | 8-scf00203 | 8 |
| AX-158083328 | 9 | 69.133 | KV452947.1 | 2863953 | 8-scf00203 | 8 |
| AX-158083329 | 9 | 69.177 | KV452947.1 | 2864171 | 8-scf00203 | 8 |
| AX-158083339 | 9 | 69.228 | KV452947.1 | 2878713 | 8-scf00203 | 8 |
| AX-158083343 | 9 | 69.297 | KV452947.1 | 2883217 | 8-scf00203 | 8 |
| AX-158083344 | 9 | 69.297 | KV452947.1 | 2883568 | 8-scf00203 | 8 |
| AX-157753641 | 9 | 69.297 | KV452947.1 | 2885341 | 8-scf00203 | 8 |
| AX-158083350 | 9 | 69.297 | KV452947.1 | 2890945 | 8-scf00203 | 8 |
| AX-158083352 | 9 | 69.297 | KV452947.1 | 2895014 | 8-scf00203 | 8 |
| AX-158083353 | 9 | 69.297 | KV452947.1 | 2895287 | 8-scf00203 | 8 |
| AX-158083354 | 9 | 69.297 | KV452947.1 | 2895749 | 8-scf00203 | 8 |
| AX-158083355 | 9 | 69.297 | KV452947.1 | 2896342 | 8-scf00203 | 8 |
| AX-158083361 | 9 | 69.297 | KV452947.1 | 2905976 | 8-scf00203 | 8 |
| AX-158083379 | 9 | 69.297 | KV452947.1 | 2931266 | 8-scf00203 | 8 |
| AX-158083362 | 9 | 69.358 | KV452947.1 | 2907450 | 8-scf00203 | 8 |
| AX-157715572 | 9 | 69.405 | KV452947.1 | 2907860 | 8-scf00203 | 8 |
| AX-158083364 | 9 | 69.443 | KV452947.1 | 2909221 | 8-scf00203 | 8 |
| AX-158083369 | 9 | 69.443 | KV452947.1 | 2917982 | 8-scf00203 | 8 |
| AX-158083331 | 9 | 69.492 | KV452947.1 | 2865556 | 8-scf00203 | 8 |
| AX-158083371 | 9 | 69.492 | KV452947.1 | 2919014 | 8-scf00203 | 8 |
| AX-158083380 | 9 | 69.492 | KV452947.1 | 2938156 | 8-scf00203 | 8 |
| AX-158392081 | 9 | 69.634 | KV452947.1 | 2930096 | 8-scf00203 | 8 |
| AX-158083373 | 9 | 69.734 | KV452947.1 | 2924502 | 8-scf00203 | 8 |
| AX-158083375 | 9 | 69.734 | KV452947.1 | 2927141 | 8-scf00203 | 8 |
| AX-158083383 | 9 | 69.734 | KV452947.1 | 2943896 | 8-scf00203 | 8 |
| AX-158083384 | 9 | 69.734 | KV452947.1 | 2944251 | 8-scf00203 | 8 |
| AX-158083385 | 9 | 69.734 | KV452947.1 | 2945624 | 8-scf00203 | 8 |
| AX-158083389 | 9 | 69.734 | KV452947.1 | 2949201 | 8-scf00203 | 8 |
| AX-158083390 | 9 | 69.734 | KV452947.1 | 2949818 | 8-scf00203 | 8 |
| AX-158083391 | 9 | 69.734 | KV452947.1 | 2950634 | 8-scf00203 | 8 |
| AX-158083392 | 9 | 69.734 | KV452947.1 | 2951722 | 8-scf00203 | 8 |
| AX-158083394 | 9 | 69.734 | KV452947.1 | 2953223 | 8-scf00203 | 8 |
| AX-158083397 | 9 | 69.734 | KV452947.1 | 2961466 | 8-scf00203 | 8 |
| AX-158083400 | 9 | 69.734 | KV452947.1 | 2963998 | 8-scf00203 | 8 |

|              |   |        |            |         |            |   |
|--------------|---|--------|------------|---------|------------|---|
| AX-158083402 | 9 | 69.734 | KV452947.1 | 2965730 | 8-scf00203 | 8 |
| AX-158083403 | 9 | 69.734 | KV452947.1 | 2966441 | 8-scf00203 | 8 |
| AX-158083489 | 9 | 69.734 | KV452947.1 | 3088700 | 8-scf00203 | 8 |
| AX-157723627 | 9 | 69.843 | KV452947.1 | 2908312 | 8-scf00203 | 8 |
| AX-158083406 | 9 | 69.843 | KV452947.1 | 2967900 | 8-scf00203 | 8 |
| AX-158083410 | 9 | 69.843 | KV452947.1 | 2971243 | 8-scf00203 | 8 |
| AX-158083414 | 9 | 69.843 | KV452947.1 | 2975306 | 8-scf00203 | 8 |
| AX-158083415 | 9 | 69.843 | KV452947.1 | 2975748 | 8-scf00203 | 8 |
| AX-158083416 | 9 | 69.843 | KV452947.1 | 2976976 | 8-scf00203 | 8 |
| AX-158083418 | 9 | 69.843 | KV452947.1 | 2981023 | 8-scf00203 | 8 |
| AX-158083419 | 9 | 69.843 | KV452947.1 | 2981726 | 8-scf00203 | 8 |
| AX-158083420 | 9 | 69.843 | KV452947.1 | 2982263 | 8-scf00203 | 8 |
| AX-158083425 | 9 | 69.843 | KV452947.1 | 2987751 | 8-scf00203 | 8 |
| AX-158083427 | 9 | 69.843 | KV452947.1 | 2992510 | 8-scf00203 | 8 |
| AX-158083428 | 9 | 69.843 | KV452947.1 | 2993026 | 8-scf00203 | 8 |
| AX-158083429 | 9 | 69.843 | KV452947.1 | 2994228 | 8-scf00203 | 8 |
| AX-158083430 | 9 | 69.843 | KV452947.1 | 2995894 | 8-scf00203 | 8 |
| AX-158083444 | 9 | 69.843 | KV452947.1 | 3018319 | 8-scf00203 | 8 |
| AX-157863208 | 9 | 69.843 | KV452947.1 | 3155572 | 8-scf00203 | 8 |
| AX-158083577 | 9 | 69.843 | KV452947.1 | 3230839 | 8-scf00203 | 8 |
| AX-158083613 | 9 | 69.843 | KV452947.1 | 3289472 | 8-scf00203 | 8 |
| AX-158083615 | 9 | 69.843 | KV452947.1 | 3291722 | 8-scf00203 | 8 |
| AX-158083435 | 9 | 69.953 | KV452947.1 | 3002377 | 8-scf00203 | 8 |
| AX-157825081 | 9 | 69.953 | KV452947.1 | 3007273 | 8-scf00203 | 8 |
| AX-158083323 | 9 | 70.062 | KV452947.1 | 2852355 | 8-scf00203 | 8 |
| AX-158083401 | 9 | 70.062 | KV452947.1 | 2964557 | 8-scf00203 | 8 |
| AX-158083413 | 9 | 70.062 | KV452947.1 | 2974433 | 8-scf00203 | 8 |
| AX-158083423 | 9 | 70.062 | KV452947.1 | 2985341 | 8-scf00203 | 8 |
| AX-158083426 | 9 | 70.062 | KV452947.1 | 2990110 | 8-scf00203 | 8 |
| AX-157825082 | 9 | 70.062 | KV452947.1 | 3008721 | 8-scf00203 | 8 |
| AX-158083441 | 9 | 70.062 | KV452947.1 | 3015143 | 8-scf00203 | 8 |
| AX-158083442 | 9 | 70.062 | KV452947.1 | 3015539 | 8-scf00203 | 8 |
| AX-158083446 | 9 | 70.062 | KV452947.1 | 3022381 | 8-scf00203 | 8 |
| AX-158083448 | 9 | 70.062 | KV452947.1 | 3024744 | 8-scf00203 | 8 |
| AX-158083450 | 9 | 70.062 | KV452947.1 | 3026815 | 8-scf00203 | 8 |
| AX-158083451 | 9 | 70.062 | KV452947.1 | 3027201 | 8-scf00203 | 8 |
| AX-157750118 | 9 | 70.062 | KV452947.1 | 3027308 | 8-scf00203 | 8 |
| AX-158083452 | 9 | 70.062 | KV452947.1 | 3031403 | 8-scf00203 | 8 |
| AX-158083453 | 9 | 70.062 | KV452947.1 | 3037216 | 8-scf00203 | 8 |
| AX-158083454 | 9 | 70.062 | KV452947.1 | 3037445 | 8-scf00203 | 8 |
| AX-158083456 | 9 | 70.062 | KV452947.1 | 3040702 | 8-scf00203 | 8 |
| AX-157748863 | 9 | 70.062 | KV452947.1 | 3043810 | 8-scf00203 | 8 |
| AX-158083460 | 9 | 70.062 | KV452947.1 | 3048305 | 8-scf00203 | 8 |
| AX-158083462 | 9 | 70.062 | KV452947.1 | 3052177 | 8-scf00203 | 8 |
| AX-158083467 | 9 | 70.062 | KV452947.1 | 3058556 | 8-scf00203 | 8 |
| AX-158083469 | 9 | 70.062 | KV452947.1 | 3059422 | 8-scf00203 | 8 |
| AX-158083470 | 9 | 70.062 | KV452947.1 | 3060562 | 8-scf00203 | 8 |
| AX-158083471 | 9 | 70.062 | KV452947.1 | 3061422 | 8-scf00203 | 8 |
| AX-158083475 | 9 | 70.062 | KV452947.1 | 3066496 | 8-scf00203 | 8 |
| AX-158083477 | 9 | 70.062 | KV452947.1 | 3067668 | 8-scf00203 | 8 |
| AX-158083478 | 9 | 70.062 | KV452947.1 | 3069936 | 8-scf00203 | 8 |

|              |   |        |             |         |            |    |
|--------------|---|--------|-------------|---------|------------|----|
| AX-158083479 | 9 | 70.062 | KV452947.1  | 3071069 | 8-scf00203 | 8  |
| AX-158083482 | 9 | 70.062 | KV452947.1  | 3073351 | 8-scf00203 | 8  |
| AX-157825086 | 9 | 70.062 | KV452947.1  | 3082045 | 8-scf00203 | 8  |
| AX-158409808 | 9 | 70.062 | KV452947.1  | 3085511 | 8-scf00203 | 8  |
| AX-158083488 | 9 | 70.062 | KV452947.1  | 3086805 | 8-scf00203 | 8  |
| AX-158083492 | 9 | 70.062 | KV452947.1  | 3094568 | 8-scf00203 | 8  |
| AX-157825087 | 9 | 70.062 | KV452947.1  | 3096066 | 8-scf00203 | 8  |
| AX-158083493 | 9 | 70.062 | KV452947.1  | 3099625 | 8-scf00203 | 8  |
| AX-157885583 | 9 | 70.062 | KV452947.1  | 3102324 | 8-scf00203 | 8  |
| AX-158083496 | 9 | 70.062 | KV452947.1  | 3103911 | 8-scf00203 | 8  |
| AX-158083497 | 9 | 70.062 | KV452947.1  | 3104376 | 8-scf00203 | 8  |
| AX-158083499 | 9 | 70.062 | KV452947.1  | 3105272 | 8-scf00203 | 8  |
| AX-158083500 | 9 | 70.062 | KV452947.1  | 3107746 | 8-scf00203 | 8  |
| AX-157710008 | 9 | 70.062 | KV452947.1  | 3108033 | 8-scf00203 | 8  |
| AX-158083503 | 9 | 70.062 | KV452947.1  | 3111308 | 8-scf00203 | 8  |
| AX-158083504 | 9 | 70.062 | KV452947.1  | 3117355 | 8-scf00203 | 8  |
| AX-158083507 | 9 | 70.062 | KV452947.1  | 3118269 | 8-scf00203 | 8  |
| AX-158083511 | 9 | 70.062 | KV452947.1  | 3121786 | 8-scf00203 | 8  |
| AX-158083512 | 9 | 70.062 | KV452947.1  | 3124006 | 8-scf00203 | 8  |
| AX-158083513 | 9 | 70.062 | KV452947.1  | 3126379 | 8-scf00203 | 8  |
| AX-158083517 | 9 | 70.062 | KV452947.1  | 3130946 | 8-scf00203 | 8  |
| AX-158083522 | 9 | 70.062 | KV452947.1  | 3139089 | 8-scf00203 | 8  |
| AX-157825090 | 9 | 70.062 | KV452947.1  | 3147832 | 8-scf00203 | 8  |
| AX-158083525 | 9 | 70.062 | KV452947.1  | 3150551 | 8-scf00203 | 8  |
| AX-158083526 | 9 | 70.062 | KV452947.1  | 3151108 | 8-scf00203 | 8  |
| AX-158083527 | 9 | 70.062 | KV452947.1  | 3152689 | 8-scf00203 | 8  |
| AX-158083528 | 9 | 70.062 | KV452947.1  | 3153420 | 8-scf00203 | 8  |
| AX-158083539 | 9 | 70.062 | KV452947.1  | 3168446 | 8-scf00203 | 8  |
| AX-158083546 | 9 | 70.062 | KV452947.1  | 3177171 | 8-scf00203 | 8  |
| AX-158083551 | 9 | 70.062 | KV452947.1  | 3189029 | 8-scf00203 | 8  |
| AX-158083566 | 9 | 70.062 | KV452947.1  | 3211028 | 8-scf00203 | 8  |
| AX-158083579 | 9 | 70.062 | KV452947.1  | 3234134 | 8-scf00203 | 8  |
| AX-158083586 | 9 | 70.062 | KV452947.1  | 3243841 | 8-scf00203 | 8  |
| AX-158083596 | 9 | 70.062 | KV452947.1  | 3262657 | 8-scf00203 | 8  |
| AX-158384427 | 9 | 70.062 | KV452947.1  | 3279143 | 8-scf00203 | 8  |
| AX-158083605 | 9 | 70.062 | KV452947.1  | 3279789 | 8-scf00203 | 8  |
| AX-158083619 | 9 | 70.062 | KV452947.1  | 3300066 | 8-scf00203 | 8  |
| AX-158083653 | 9 | 70.062 | KV452947.1  | 3362381 | 8-scf00203 | 8  |
| AX-157715487 | 9 | 70.062 | KV452947.1  | 3374187 | 8-scf00203 | 8  |
| AX-158083693 | 9 | 70.062 | KV452947.1  | 3413812 | 8-scf00203 | 8  |
| AX-158083697 | 9 | 70.062 | KV452947.1  | 3417747 | 8-scf00203 | 8  |
| AX-157706378 | 9 | 70.062 | 3ML01032150 | 81      | scf07764_1 | UN |
| AX-157707463 | 9 | 70.062 | 3ML01034329 | 98      | scf10002_1 | UN |
| AX-158083365 | 9 | 70.079 | KV452947.1  | 2913138 | 8-scf00203 | 8  |
| AX-158083367 | 9 | 70.079 | KV452947.1  | 2916124 | 8-scf00203 | 8  |
| AX-158384426 | 9 | 70.079 | KV452947.1  | 3075897 | 8-scf00203 | 8  |
| AX-158083487 | 9 | 70.079 | KV452947.1  | 3081075 | 8-scf00203 | 8  |
| AX-158083530 | 9 | 70.079 | KV452947.1  | 3155978 | 8-scf00203 | 8  |
| AX-158083540 | 9 | 70.079 | KV452947.1  | 3168936 | 8-scf00203 | 8  |
| AX-158083585 | 9 | 70.079 | KV452947.1  | 3243066 | 8-scf00203 | 8  |
| AX-158083538 | 9 | 70.091 | KV452947.1  | 3168087 | 8-scf00203 | 8  |



|              |   |        |             |         |            |    |
|--------------|---|--------|-------------|---------|------------|----|
| AX-158083543 | 9 | 70.106 | KV452947.1  | 3173420 | 8-scf00203 | 8  |
| AX-157697766 | 9 | 70.124 | KV452947.1  | 3021029 | 8-scf00203 | 8  |
| AX-158083545 | 9 | 70.124 | KV452947.1  | 3174807 | 8-scf00203 | 8  |
| AX-158083562 | 9 | 70.124 | KV452947.1  | 3207671 | 8-scf00203 | 8  |
| AX-158083547 | 9 | 70.129 | KV452947.1  | 3178941 | 8-scf00203 | 8  |
| AX-157771186 | 9 | 70.14  | KV452947.1  | 3103088 | 8-scf00203 | 8  |
| AX-158083548 | 9 | 70.14  | KV452947.1  | 3181541 | 8-scf00203 | 8  |
| AX-158083437 | 9 | 70.155 | KV452947.1  | 3009835 | 8-scf00203 | 8  |
| AX-157825093 | 9 | 70.155 | KV452947.1  | 3193876 | 8-scf00203 | 8  |
| AX-158409809 | 9 | 70.155 | KV452947.1  | 3204157 | 8-scf00203 | 8  |
| AX-158083625 | 9 | 70.155 | KV452947.1  | 3305705 | 8-scf00203 | 8  |
| AX-158083643 | 9 | 70.155 | KV452947.1  | 3338357 | 8-scf00203 | 8  |
| AX-158083744 | 9 | 70.155 | KV452947.1  | 3503153 | 8-scf00203 | 8  |
| AX-158083775 | 9 | 70.155 | KV452947.1  | 3548140 | 8-scf00203 | 8  |
| AX-157743230 | 9 | 70.171 | KV452947.1  | 3107234 | 8-scf00203 | 8  |
| AX-157714333 | 9 | 70.171 | KV452947.1  | 3141056 | 8-scf00203 | 8  |
| AX-158083561 | 9 | 70.171 | KV452947.1  | 3207058 | 8-scf00203 | 8  |
| AX-158083569 | 9 | 70.171 | KV452947.1  | 3214014 | 8-scf00203 | 8  |
| AX-158083570 | 9 | 70.171 | KV452947.1  | 3214778 | 8-scf00203 | 8  |
| AX-158409813 | 9 | 70.171 | KV452947.1  | 3221592 | 8-scf00203 | 8  |
| AX-158083582 | 9 | 70.171 | KV452947.1  | 3236583 | 8-scf00203 | 8  |
| AX-158083583 | 9 | 70.171 | KV452947.1  | 3238129 | 8-scf00203 | 8  |
| AX-158083588 | 9 | 70.171 | KV452947.1  | 3247562 | 8-scf00203 | 8  |
| AX-158083589 | 9 | 70.171 | KV452947.1  | 3248757 | 8-scf00203 | 8  |
| AX-158083593 | 9 | 70.171 | KV452947.1  | 3259366 | 8-scf00203 | 8  |
| AX-157724906 | 9 | 70.171 | KV452947.1  | 3261156 | 8-scf00203 | 8  |
| AX-157825095 | 9 | 70.171 | KV452947.1  | 3265973 | 8-scf00203 | 8  |
| AX-158083603 | 9 | 70.171 | KV452947.1  | 3275027 | 8-scf00203 | 8  |
| AX-158083604 | 9 | 70.171 | KV452947.1  | 3278316 | 8-scf00203 | 8  |
| AX-158083606 | 9 | 70.171 | KV452947.1  | 3281029 | 8-scf00203 | 8  |
| AX-158083607 | 9 | 70.171 | KV452947.1  | 3282296 | 8-scf00203 | 8  |
| AX-158083612 | 9 | 70.171 | KV452947.1  | 3288658 | 8-scf00203 | 8  |
| AX-158083614 | 9 | 70.171 | KV452947.1  | 3290267 | 8-scf00203 | 8  |
| AX-158083627 | 9 | 70.171 | KV452947.1  | 3312700 | 8-scf00203 | 8  |
| AX-158083642 | 9 | 70.171 | KV452947.1  | 3336807 | 8-scf00203 | 8  |
| AX-157751392 | 9 | 70.171 | KV452947.1  | 3512283 | 8-scf00203 | 8  |
| AX-158083808 | 9 | 70.171 | KV452947.1  | 3602982 | 8-scf00203 | 8  |
| AX-157707013 | 9 | 70.171 | 3ML01033336 | 257     | scf08982_1 | UN |
| AX-158083608 | 9 | 70.28  | KV452947.1  | 3283575 | 8-scf00203 | 8  |
| AX-158083620 | 9 | 70.28  | KV452947.1  | 3300936 | 8-scf00203 | 8  |
| AX-158083622 | 9 | 70.28  | KV452947.1  | 3302195 | 8-scf00203 | 8  |
| AX-158083623 | 9 | 70.28  | KV452947.1  | 3303979 | 8-scf00203 | 8  |
| AX-158083624 | 9 | 70.28  | KV452947.1  | 3304822 | 8-scf00203 | 8  |
| AX-158083626 | 9 | 70.28  | KV452947.1  | 3306281 | 8-scf00203 | 8  |
| AX-157825098 | 9 | 70.28  | KV452947.1  | 3308666 | 8-scf00203 | 8  |
| AX-158083628 | 9 | 70.28  | KV452947.1  | 3315301 | 8-scf00203 | 8  |
| AX-158083629 | 9 | 70.28  | KV452947.1  | 3315824 | 8-scf00203 | 8  |
| AX-158083630 | 9 | 70.28  | KV452947.1  | 3316318 | 8-scf00203 | 8  |
| AX-157825100 | 9 | 70.28  | KV452947.1  | 3319145 | 8-scf00203 | 8  |
| AX-158083631 | 9 | 70.28  | KV452947.1  | 3324717 | 8-scf00203 | 8  |
| AX-157716057 | 9 | 70.28  | KV452947.1  | 3326416 | 8-scf00203 | 8  |

|              |   |        |            |         |            |   |
|--------------|---|--------|------------|---------|------------|---|
| AX-158083634 | 9 | 70.28  | KV452947.1 | 3327340 | 8-scf00203 | 8 |
| AX-158083635 | 9 | 70.28  | KV452947.1 | 3328049 | 8-scf00203 | 8 |
| AX-157825101 | 9 | 70.28  | KV452947.1 | 3330178 | 8-scf00203 | 8 |
| AX-157825102 | 9 | 70.28  | KV452947.1 | 3330310 | 8-scf00203 | 8 |
| AX-157825104 | 9 | 70.28  | KV452947.1 | 3333836 | 8-scf00203 | 8 |
| AX-158083649 | 9 | 70.28  | KV452947.1 | 3344775 | 8-scf00203 | 8 |
| AX-158083650 | 9 | 70.28  | KV452947.1 | 3345355 | 8-scf00203 | 8 |
| AX-158083651 | 9 | 70.28  | KV452947.1 | 3348859 | 8-scf00203 | 8 |
| AX-157825107 | 9 | 70.28  | KV452947.1 | 3352354 | 8-scf00203 | 8 |
| AX-157746537 | 9 | 70.28  | KV452947.1 | 3352501 | 8-scf00203 | 8 |
| AX-157825108 | 9 | 70.28  | KV452947.1 | 3352730 | 8-scf00203 | 8 |
| AX-157825109 | 9 | 70.28  | KV452947.1 | 3356666 | 8-scf00203 | 8 |
| AX-158083655 | 9 | 70.28  | KV452947.1 | 3365604 | 8-scf00203 | 8 |
| AX-158083656 | 9 | 70.28  | KV452947.1 | 3365940 | 8-scf00203 | 8 |
| AX-158083658 | 9 | 70.28  | KV452947.1 | 3369592 | 8-scf00203 | 8 |
| AX-158083659 | 9 | 70.28  | KV452947.1 | 3370644 | 8-scf00203 | 8 |
| AX-157825110 | 9 | 70.28  | KV452947.1 | 3370887 | 8-scf00203 | 8 |
| AX-158083660 | 9 | 70.28  | KV452947.1 | 3371210 | 8-scf00203 | 8 |
| AX-158083661 | 9 | 70.28  | KV452947.1 | 3371568 | 8-scf00203 | 8 |
| AX-158083663 | 9 | 70.28  | KV452947.1 | 3372431 | 8-scf00203 | 8 |
| AX-158083665 | 9 | 70.28  | KV452947.1 | 3373794 | 8-scf00203 | 8 |
| AX-158083667 | 9 | 70.28  | KV452947.1 | 3377150 | 8-scf00203 | 8 |
| AX-158083679 | 9 | 70.28  | KV452947.1 | 3399927 | 8-scf00203 | 8 |
| AX-158083687 | 9 | 70.28  | KV452947.1 | 3409266 | 8-scf00203 | 8 |
| AX-158083688 | 9 | 70.28  | KV452947.1 | 3409328 | 8-scf00203 | 8 |
| AX-158083690 | 9 | 70.28  | KV452947.1 | 3412071 | 8-scf00203 | 8 |
| AX-158083691 | 9 | 70.28  | KV452947.1 | 3412572 | 8-scf00203 | 8 |
| AX-158384428 | 9 | 70.28  | KV452947.1 | 3417479 | 8-scf00203 | 8 |
| AX-158384429 | 9 | 70.28  | KV452947.1 | 3421275 | 8-scf00203 | 8 |
| AX-158083703 | 9 | 70.28  | KV452947.1 | 3425826 | 8-scf00203 | 8 |
| AX-158083709 | 9 | 70.28  | KV452947.1 | 3435317 | 8-scf00203 | 8 |
| AX-158083724 | 9 | 70.28  | KV452947.1 | 3459166 | 8-scf00203 | 8 |
| AX-157825112 | 9 | 70.389 | KV452947.1 | 3386044 | 8-scf00203 | 8 |
| AX-157770651 | 9 | 70.389 | KV452947.1 | 3413853 | 8-scf00203 | 8 |
| AX-158083694 | 9 | 70.389 | KV452947.1 | 3414149 | 8-scf00203 | 8 |
| AX-158083700 | 9 | 70.389 | KV452947.1 | 3422484 | 8-scf00203 | 8 |
| AX-158083702 | 9 | 70.389 | KV452947.1 | 3423993 | 8-scf00203 | 8 |
| AX-158083713 | 9 | 70.389 | KV452947.1 | 3441420 | 8-scf00203 | 8 |
| AX-157865740 | 9 | 70.389 | KV452947.1 | 3444492 | 8-scf00203 | 8 |
| AX-158083714 | 9 | 70.389 | KV452947.1 | 3445560 | 8-scf00203 | 8 |
| AX-158083715 | 9 | 70.389 | KV452947.1 | 3445846 | 8-scf00203 | 8 |
| AX-158083459 | 9 | 70.427 | KV452947.1 | 3042901 | 8-scf00203 | 8 |
| AX-158083480 | 9 | 70.427 | KV452947.1 | 3071559 | 8-scf00203 | 8 |
| AX-158083523 | 9 | 70.427 | KV452947.1 | 3144129 | 8-scf00203 | 8 |
| AX-158083529 | 9 | 70.427 | KV452947.1 | 3154464 | 8-scf00203 | 8 |
| AX-157825114 | 9 | 70.427 | KV452947.1 | 3445452 | 8-scf00203 | 8 |
| AX-158083718 | 9 | 70.427 | KV452947.1 | 3447302 | 8-scf00203 | 8 |
| AX-158083738 | 9 | 70.427 | KV452947.1 | 3498228 | 8-scf00203 | 8 |
| AX-158083669 | 9 | 70.468 | KV452947.1 | 3386605 | 8-scf00203 | 8 |
| AX-158083692 | 9 | 70.468 | KV452947.1 | 3413016 | 8-scf00203 | 8 |
| AX-158083704 | 9 | 70.468 | KV452947.1 | 3427116 | 8-scf00203 | 8 |

|              |   |        |            |         |            |   |
|--------------|---|--------|------------|---------|------------|---|
| AX-158083720 | 9 | 70.468 | KV452947.1 | 3452439 | 8-scf00203 | 8 |
| AX-158083722 | 9 | 70.501 | KV452947.1 | 3454461 | 8-scf00203 | 8 |
| AX-158083723 | 9 | 70.513 | KV452947.1 | 3455222 | 8-scf00203 | 8 |
| AX-158083726 | 9 | 70.523 | KV452947.1 | 3460731 | 8-scf00203 | 8 |
| AX-158083729 | 9 | 70.597 | KV452947.1 | 3463778 | 8-scf00203 | 8 |
| AX-158083730 | 9 | 70.612 | KV452947.1 | 3464045 | 8-scf00203 | 8 |
| AX-158083731 | 9 | 70.612 | KV452947.1 | 3465497 | 8-scf00203 | 8 |
| AX-158083732 | 9 | 70.612 | KV452947.1 | 3491920 | 8-scf00203 | 8 |
| AX-158083733 | 9 | 70.683 | KV452947.1 | 3492385 | 8-scf00203 | 8 |
| AX-158083395 | 9 | 70.717 | KV452947.1 | 2954853 | 8-scf00203 | 8 |
| AX-158083734 | 9 | 70.717 | KV452947.1 | 3492679 | 8-scf00203 | 8 |
| AX-158083739 | 9 | 70.717 | KV452947.1 | 3499181 | 8-scf00203 | 8 |
| AX-158083740 | 9 | 70.717 | KV452947.1 | 3499603 | 8-scf00203 | 8 |
| AX-158392085 | 9 | 70.827 | KV452947.1 | 3501961 | 8-scf00203 | 8 |
| AX-158083743 | 9 | 70.827 | KV452947.1 | 3502153 | 8-scf00203 | 8 |
| AX-158416688 | 9 | 70.827 | KV452947.1 | 3505008 | 8-scf00203 | 8 |
| AX-157708474 | 9 | 70.827 | KV452947.1 | 3510531 | 8-scf00203 | 8 |
| AX-157825116 | 9 | 70.827 | KV452947.1 | 3512585 | 8-scf00203 | 8 |
| AX-158083748 | 9 | 70.995 | KV452947.1 | 3515308 | 8-scf00203 | 8 |
| AX-157721629 | 9 | 71.045 | KV452947.1 | 3514695 | 8-scf00203 | 8 |
| AX-158083752 | 9 | 71.045 | KV452947.1 | 3519971 | 8-scf00203 | 8 |
| AX-158083753 | 9 | 71.045 | KV452947.1 | 3520824 | 8-scf00203 | 8 |
| AX-158083755 | 9 | 71.045 | KV452947.1 | 3522913 | 8-scf00203 | 8 |
| AX-158407062 | 9 | 71.045 | KV452947.1 | 3523511 | 8-scf00203 | 8 |
| AX-158407063 | 9 | 71.045 | KV452947.1 | 3523553 | 8-scf00203 | 8 |
| AX-158083757 | 9 | 71.045 | KV452947.1 | 3528065 | 8-scf00203 | 8 |
| AX-157748208 | 9 | 71.045 | KV452947.1 | 3528731 | 8-scf00203 | 8 |
| AX-157825119 | 9 | 71.045 | KV452947.1 | 3531427 | 8-scf00203 | 8 |
| AX-157756538 | 9 | 71.045 | KV452947.1 | 3531635 | 8-scf00203 | 8 |
| AX-157825120 | 9 | 71.045 | KV452947.1 | 3531812 | 8-scf00203 | 8 |
| AX-158083760 | 9 | 71.045 | KV452947.1 | 3533084 | 8-scf00203 | 8 |
| AX-157742106 | 9 | 71.045 | KV452947.1 | 3533379 | 8-scf00203 | 8 |
| AX-158083761 | 9 | 71.045 | KV452947.1 | 3533526 | 8-scf00203 | 8 |
| AX-157727111 | 9 | 71.264 | KV452947.1 | 3537614 | 8-scf00203 | 8 |
| AX-157870857 | 9 | 71.264 | KV452947.1 | 3541746 | 8-scf00203 | 8 |
| AX-158083768 | 9 | 71.264 | KV452947.1 | 3542363 | 8-scf00203 | 8 |
| AX-158083769 | 9 | 71.264 | KV452947.1 | 3542669 | 8-scf00203 | 8 |
| AX-158083770 | 9 | 71.264 | KV452947.1 | 3544118 | 8-scf00203 | 8 |
| AX-158083771 | 9 | 71.264 | KV452947.1 | 3544976 | 8-scf00203 | 8 |
| AX-158083774 | 9 | 71.264 | KV452947.1 | 3547295 | 8-scf00203 | 8 |
| AX-157775416 | 9 | 71.264 | KV452947.1 | 3549597 | 8-scf00203 | 8 |
| AX-158083779 | 9 | 71.264 | KV452947.1 | 3552958 | 8-scf00203 | 8 |
| AX-158083780 | 9 | 71.264 | KV452947.1 | 3553250 | 8-scf00203 | 8 |
| AX-158083783 | 9 | 71.264 | KV452947.1 | 3554884 | 8-scf00203 | 8 |
| AX-157825121 | 9 | 71.264 | KV452947.1 | 3555636 | 8-scf00203 | 8 |
| AX-158083787 | 9 | 71.264 | KV452947.1 | 3559697 | 8-scf00203 | 8 |
| AX-158083790 | 9 | 71.264 | KV452947.1 | 3561878 | 8-scf00203 | 8 |
| AX-158083792 | 9 | 71.264 | KV452947.1 | 3564529 | 8-scf00203 | 8 |
| AX-158083793 | 9 | 71.264 | KV452947.1 | 3564913 | 8-scf00203 | 8 |
| AX-158083794 | 9 | 71.264 | KV452947.1 | 3567865 | 8-scf00203 | 8 |
| AX-158083795 | 9 | 71.264 | KV452947.1 | 3571517 | 8-scf00203 | 8 |

|              |   |        |            |         |            |   |
|--------------|---|--------|------------|---------|------------|---|
| AX-158083796 | 9 | 71.264 | KV452947.1 | 3574342 | 8-scf00203 | 8 |
| AX-158083809 | 9 | 71.264 | KV452947.1 | 3607814 | 8-scf00203 | 8 |
| AX-158083799 | 9 | 71.373 | KV452947.1 | 3583358 | 8-scf00203 | 8 |
| AX-158083800 | 9 | 71.373 | KV452947.1 | 3583787 | 8-scf00203 | 8 |
| AX-158083801 | 9 | 71.373 | KV452947.1 | 3584241 | 8-scf00203 | 8 |
| AX-158083803 | 9 | 71.482 | KV452947.1 | 3589974 | 8-scf00203 | 8 |
| AX-157825124 | 9 | 71.501 | KV452947.1 | 3591110 | 8-scf00203 | 8 |
| AX-157825125 | 9 | 71.547 | KV452947.1 | 3596704 | 8-scf00203 | 8 |
| AX-157825127 | 9 | 71.591 | KV452947.1 | 3598478 | 8-scf00203 | 8 |
| AX-158083807 | 9 | 71.591 | KV452947.1 | 3599114 | 8-scf00203 | 8 |
| AX-157774923 | 9 | 71.591 | KV452947.1 | 3599686 | 8-scf00203 | 8 |
| AX-158083784 | 9 | 71.7   | KV452947.1 | 3556905 | 8-scf00203 | 8 |
| AX-158083813 | 9 | 71.7   | KV452947.1 | 3613411 | 8-scf00203 | 8 |
| AX-158083814 | 9 | 71.7   | KV452947.1 | 3613787 | 8-scf00203 | 8 |
| AX-158083815 | 9 | 71.7   | KV452947.1 | 3614939 | 8-scf00203 | 8 |
| AX-158083817 | 9 | 71.7   | KV452947.1 | 3615937 | 8-scf00203 | 8 |
| AX-158083818 | 9 | 71.7   | KV452947.1 | 3616189 | 8-scf00203 | 8 |
| AX-158083819 | 9 | 71.7   | KV452947.1 | 3617948 | 8-scf00203 | 8 |
| AX-157825129 | 9 | 71.7   | KV452947.1 | 3618582 | 8-scf00203 | 8 |
| AX-157825130 | 9 | 71.7   | KV452947.1 | 3618723 | 8-scf00203 | 8 |
| AX-158083823 | 9 | 71.7   | KV452947.1 | 3627259 | 8-scf00203 | 8 |
| AX-158083824 | 9 | 71.7   | KV452947.1 | 3627630 | 8-scf00203 | 8 |
| AX-158083826 | 9 | 71.7   | KV452947.1 | 3630573 | 8-scf00203 | 8 |
| AX-158083827 | 9 | 71.7   | KV452947.1 | 3630812 | 8-scf00203 | 8 |
| AX-157725332 | 9 | 71.7   | KV452947.1 | 3631841 | 8-scf00203 | 8 |
| AX-158083830 | 9 | 71.7   | KV452947.1 | 3633288 | 8-scf00203 | 8 |
| AX-158083845 | 9 | 71.7   | KV452947.1 | 3654746 | 8-scf00203 | 8 |
| AX-158083831 | 9 | 71.739 | KV452947.1 | 3633928 | 8-scf00203 | 8 |
| AX-158083832 | 9 | 71.771 | KV452947.1 | 3634639 | 8-scf00203 | 8 |
| AX-158083833 | 9 | 71.771 | KV452947.1 | 3635388 | 8-scf00203 | 8 |
| AX-157738443 | 9 | 71.81  | KV452947.1 | 3620877 | 8-scf00203 | 8 |
| AX-158083835 | 9 | 71.81  | KV452947.1 | 3637275 | 8-scf00203 | 8 |
| AX-157745841 | 9 | 71.81  | KV452947.1 | 3637318 | 8-scf00203 | 8 |
| AX-158083836 | 9 | 71.81  | KV452947.1 | 3638881 | 8-scf00203 | 8 |
| AX-158083839 | 9 | 71.81  | KV452947.1 | 3644796 | 8-scf00203 | 8 |
| AX-157758468 | 9 | 71.81  | KV452947.1 | 3645087 | 8-scf00203 | 8 |
| AX-158083840 | 9 | 71.81  | KV452947.1 | 3645421 | 8-scf00203 | 8 |
| AX-158083841 | 9 | 71.81  | KV452947.1 | 3646492 | 8-scf00203 | 8 |
| AX-157714197 | 9 | 71.81  | KV452947.1 | 3658425 | 8-scf00203 | 8 |
| AX-158083857 | 9 | 71.81  | KV452947.1 | 3678996 | 8-scf00203 | 8 |
| AX-158083846 | 9 | 72.029 | KV452947.1 | 3656416 | 8-scf00203 | 8 |
| AX-158083850 | 9 | 72.029 | KV452947.1 | 3663799 | 8-scf00203 | 8 |
| AX-158083859 | 9 | 72.081 | KV452947.1 | 3680911 | 8-scf00203 | 8 |
| AX-158083874 | 9 | 72.081 | KV452947.1 | 3696507 | 8-scf00203 | 8 |
| AX-158083844 | 9 | 72.124 | KV452947.1 | 3651982 | 8-scf00203 | 8 |
| AX-158083863 | 9 | 72.124 | KV452947.1 | 3684005 | 8-scf00203 | 8 |
| AX-158083889 | 9 | 72.124 | KV452947.1 | 3726467 | 8-scf00203 | 8 |
| AX-158083935 | 9 | 72.124 | KV452947.1 | 3779349 | 8-scf00203 | 8 |
| AX-158083864 | 9 | 72.137 | KV452947.1 | 3685241 | 8-scf00203 | 8 |
| AX-158083867 | 9 | 72.137 | KV452947.1 | 3687853 | 8-scf00203 | 8 |
| AX-158083868 | 9 | 72.137 | KV452947.1 | 3689316 | 8-scf00203 | 8 |

|              |   |        |            |         |            |   |
|--------------|---|--------|------------|---------|------------|---|
| AX-158083869 | 9 | 72.137 | KV452947.1 | 3690128 | 8-scf00203 | 8 |
| AX-158083872 | 9 | 72.137 | KV452947.1 | 3695184 | 8-scf00203 | 8 |
| AX-158083873 | 9 | 72.138 | KV452947.1 | 3695827 | 8-scf00203 | 8 |
| AX-157723871 | 9 | 72.138 | KV452947.1 | 3698414 | 8-scf00203 | 8 |
| AX-158083908 | 9 | 72.138 | KV452947.1 | 3749029 | 8-scf00203 | 8 |
| AX-158083914 | 9 | 72.138 | KV452947.1 | 3756684 | 8-scf00203 | 8 |
| AX-158083875 | 9 | 72.302 | KV452947.1 | 3700513 | 8-scf00203 | 8 |
| AX-158083878 | 9 | 72.302 | KV452947.1 | 3704091 | 8-scf00203 | 8 |
| AX-158083879 | 9 | 72.302 | KV452947.1 | 3706043 | 8-scf00203 | 8 |
| AX-158083883 | 9 | 72.782 | KV452947.1 | 3713935 | 8-scf00203 | 8 |
| AX-158083884 | 9 | 72.782 | KV452947.1 | 3719255 | 8-scf00203 | 8 |
| AX-157877143 | 9 | 72.968 | KV452947.1 | 3726873 | 8-scf00203 | 8 |
| AX-157700630 | 9 | 72.973 | KV452947.1 | 3729010 | 8-scf00203 | 8 |
| AX-158083895 | 9 | 73.017 | KV452947.1 | 3733353 | 8-scf00203 | 8 |
| AX-158083898 | 9 | 73.087 | KV452947.1 | 3736368 | 8-scf00203 | 8 |
| AX-158083900 | 9 | 73.121 | KV452947.1 | 3739247 | 8-scf00203 | 8 |
| AX-158083902 | 9 | 73.121 | KV452947.1 | 3742889 | 8-scf00203 | 8 |
| AX-158083903 | 9 | 73.121 | KV452947.1 | 3743777 | 8-scf00203 | 8 |
| AX-158083904 | 9 | 73.121 | KV452947.1 | 3745722 | 8-scf00203 | 8 |
| AX-158083920 | 9 | 73.121 | KV452947.1 | 3762428 | 8-scf00203 | 8 |
| AX-158083905 | 9 | 73.122 | KV452947.1 | 3747412 | 8-scf00203 | 8 |
| AX-158083906 | 9 | 73.122 | KV452947.1 | 3748248 | 8-scf00203 | 8 |
| AX-157740714 | 9 | 73.134 | KV452947.1 | 3749208 | 8-scf00203 | 8 |
| AX-158083909 | 9 | 73.155 | KV452947.1 | 3749512 | 8-scf00203 | 8 |
| AX-157865746 | 9 | 73.181 | KV452947.1 | 3752831 | 8-scf00203 | 8 |
| AX-157710621 | 9 | 73.208 | KV452947.1 | 3758937 | 8-scf00203 | 8 |
| AX-158083916 | 9 | 73.208 | KV452947.1 | 3759343 | 8-scf00203 | 8 |
| AX-158083897 | 9 | 73.231 | KV452947.1 | 3735023 | 8-scf00203 | 8 |
| AX-158083917 | 9 | 73.231 | KV452947.1 | 3760259 | 8-scf00203 | 8 |
| AX-158083918 | 9 | 73.231 | KV452947.1 | 3760879 | 8-scf00203 | 8 |
| AX-158083919 | 9 | 73.231 | KV452947.1 | 3761575 | 8-scf00203 | 8 |
| AX-158083921 | 9 | 73.231 | KV452947.1 | 3764206 | 8-scf00203 | 8 |
| AX-158083922 | 9 | 73.231 | KV452947.1 | 3765828 | 8-scf00203 | 8 |
| AX-158083924 | 9 | 73.231 | KV452947.1 | 3766727 | 8-scf00203 | 8 |
| AX-158083926 | 9 | 73.231 | KV452947.1 | 3767570 | 8-scf00203 | 8 |
| AX-158083927 | 9 | 73.231 | KV452947.1 | 3770298 | 8-scf00203 | 8 |
| AX-158083929 | 9 | 73.231 | KV452947.1 | 3771372 | 8-scf00203 | 8 |
| AX-158083934 | 9 | 73.231 | KV452947.1 | 3776592 | 8-scf00203 | 8 |
| AX-158083957 | 9 | 73.504 | KV452947.1 | 3805789 | 8-scf00203 | 8 |
| AX-158083958 | 9 | 73.504 | KV452947.1 | 3806874 | 8-scf00203 | 8 |
| AX-158083959 | 9 | 73.504 | KV452947.1 | 3807387 | 8-scf00203 | 8 |
| AX-158083961 | 9 | 73.504 | KV452947.1 | 3808761 | 8-scf00203 | 8 |
| AX-158083968 | 9 | 73.776 | KV452947.1 | 3815519 | 8-scf00203 | 8 |
| AX-158083970 | 9 | 73.776 | KV452947.1 | 3818331 | 8-scf00203 | 8 |
| AX-158083971 | 9 | 73.776 | KV452947.1 | 3819232 | 8-scf00203 | 8 |
| AX-157727557 | 9 | 73.776 | KV452947.1 | 3820996 | 8-scf00203 | 8 |
| AX-157717683 | 9 | 73.776 | KV452947.1 | 3823919 | 8-scf00203 | 8 |
| AX-158083972 | 9 | 73.776 | KV452947.1 | 3825004 | 8-scf00203 | 8 |
| AX-158083973 | 9 | 73.776 | KV452947.1 | 3826580 | 8-scf00203 | 8 |
| AX-158083964 | 9 | 73.81  | KV452947.1 | 3813384 | 8-scf00203 | 8 |
| AX-158083974 | 9 | 73.81  | KV452947.1 | 3827138 | 8-scf00203 | 8 |

|              |   |        |            |         |            |   |
|--------------|---|--------|------------|---------|------------|---|
| AX-158083975 | 9 | 73.81  | KV452947.1 | 3828556 | 8-scf00203 | 8 |
| AX-157740610 | 9 | 73.84  | KV452947.1 | 3832681 | 8-scf00203 | 8 |
| AX-158083979 | 9 | 73.866 | KV452947.1 | 3835972 | 8-scf00203 | 8 |
| AX-158083980 | 9 | 73.886 | KV452947.1 | 3837449 | 8-scf00203 | 8 |
| AX-158083981 | 9 | 73.886 | KV452947.1 | 3837861 | 8-scf00203 | 8 |
| AX-158083982 | 9 | 73.886 | KV452947.1 | 3839736 | 8-scf00203 | 8 |
| AX-158083983 | 9 | 73.886 | KV452947.1 | 3840619 | 8-scf00203 | 8 |
| AX-158083984 | 9 | 73.886 | KV452947.1 | 3841333 | 8-scf00203 | 8 |
| AX-158083985 | 9 | 74.106 | KV452947.1 | 3842600 | 8-scf00203 | 8 |
| AX-158083989 | 9 | 74.106 | KV452947.1 | 3845626 | 8-scf00203 | 8 |
| AX-158083990 | 9 | 74.106 | KV452947.1 | 3845950 | 8-scf00203 | 8 |
| AX-158083987 | 9 | 74.324 | KV452947.1 | 3844889 | 8-scf00203 | 8 |
| AX-158083991 | 9 | 74.324 | KV452947.1 | 3847808 | 8-scf00203 | 8 |
| AX-158083992 | 9 | 74.324 | KV452947.1 | 3848384 | 8-scf00203 | 8 |
| AX-158083994 | 9 | 74.324 | KV452947.1 | 3849307 | 8-scf00203 | 8 |
| AX-158083998 | 9 | 74.324 | KV452947.1 | 3852138 | 8-scf00203 | 8 |
| AX-158083999 | 9 | 74.324 | KV452947.1 | 3852646 | 8-scf00203 | 8 |
| AX-158084001 | 9 | 74.324 | KV452947.1 | 3862675 | 8-scf00203 | 8 |
| AX-158084004 | 9 | 74.324 | KV452947.1 | 3864798 | 8-scf00203 | 8 |
| AX-158084008 | 9 | 74.324 | KV452947.1 | 3871231 | 8-scf00203 | 8 |
| AX-158084009 | 9 | 74.324 | KV452947.1 | 3871572 | 8-scf00203 | 8 |
| AX-158084012 | 9 | 74.324 | KV452947.1 | 3875083 | 8-scf00203 | 8 |
| AX-158084013 | 9 | 74.324 | KV452947.1 | 3876894 | 8-scf00203 | 8 |
| AX-158084014 | 9 | 74.324 | KV452947.1 | 3878927 | 8-scf00203 | 8 |
| AX-158084015 | 9 | 74.324 | KV452947.1 | 3879165 | 8-scf00203 | 8 |
| AX-158084016 | 9 | 74.324 | KV452947.1 | 3879743 | 8-scf00203 | 8 |
| AX-158084017 | 9 | 74.324 | KV452947.1 | 3880863 | 8-scf00203 | 8 |
| AX-158084018 | 9 | 74.324 | KV452947.1 | 3881337 | 8-scf00203 | 8 |
| AX-158084019 | 9 | 74.324 | KV452947.1 | 3882408 | 8-scf00203 | 8 |
| AX-158409824 | 9 | 74.324 | KV452947.1 | 3883736 | 8-scf00203 | 8 |
| AX-158084020 | 9 | 74.324 | KV452947.1 | 3885032 | 8-scf00203 | 8 |
| AX-158084021 | 9 | 74.324 | KV452947.1 | 3886016 | 8-scf00203 | 8 |
| AX-158084023 | 9 | 74.324 | KV452947.1 | 3887291 | 8-scf00203 | 8 |
| AX-158084024 | 9 | 74.324 | KV452947.1 | 3888625 | 8-scf00203 | 8 |
| AX-158084027 | 9 | 74.324 | KV452947.1 | 3891454 | 8-scf00203 | 8 |
| AX-158084054 | 9 | 74.324 | KV452947.1 | 3917708 | 8-scf00203 | 8 |
| AX-158084073 | 9 | 74.324 | KV452947.1 | 3936273 | 8-scf00203 | 8 |
| AX-158084026 | 9 | 74.395 | KV452947.1 | 3889721 | 8-scf00203 | 8 |
| AX-157739999 | 9 | 74.488 | KV452947.1 | 3894087 | 8-scf00203 | 8 |
| AX-158084031 | 9 | 74.502 | KV452947.1 | 3895613 | 8-scf00203 | 8 |
| AX-158409826 | 9 | 74.651 | KV452947.1 | 3896837 | 8-scf00203 | 8 |
| AX-158084035 | 9 | 74.651 | KV452947.1 | 3897581 | 8-scf00203 | 8 |
| AX-157885588 | 9 | 74.651 | KV452947.1 | 3898817 | 8-scf00203 | 8 |
| AX-158084037 | 9 | 74.651 | KV452947.1 | 3899938 | 8-scf00203 | 8 |
| AX-158084041 | 9 | 74.651 | KV452947.1 | 3904551 | 8-scf00203 | 8 |
| AX-158084045 | 9 | 74.651 | KV452947.1 | 3907537 | 8-scf00203 | 8 |
| AX-158084047 | 9 | 74.651 | KV452947.1 | 3910213 | 8-scf00203 | 8 |
| AX-158084048 | 9 | 74.651 | KV452947.1 | 3910677 | 8-scf00203 | 8 |
| AX-158084049 | 9 | 74.651 | KV452947.1 | 3911116 | 8-scf00203 | 8 |
| AX-158084050 | 9 | 74.651 | KV452947.1 | 3912617 | 8-scf00203 | 8 |
| AX-158084061 | 9 | 74.788 | KV452947.1 | 3922788 | 8-scf00203 | 8 |

|              |   |        |            |         |            |   |
|--------------|---|--------|------------|---------|------------|---|
| AX-158084062 | 9 | 74.788 | KV452947.1 | 3923480 | 8-scf00203 | 8 |
| AX-158084046 | 9 | 75.001 | KV452947.1 | 3908692 | 8-scf00203 | 8 |
| AX-158084063 | 9 | 75.001 | KV452947.1 | 3924393 | 8-scf00203 | 8 |
| AX-158084066 | 9 | 75.061 | KV452947.1 | 3926940 | 8-scf00203 | 8 |
| AX-158084068 | 9 | 75.061 | KV452947.1 | 3928766 | 8-scf00203 | 8 |
| AX-158083997 | 9 | 75.198 | KV452947.1 | 3851311 | 8-scf00203 | 8 |
| AX-158084067 | 9 | 75.198 | KV452947.1 | 3928311 | 8-scf00203 | 8 |
| AX-157726110 | 9 | 75.198 | KV452947.1 | 3929576 | 8-scf00203 | 8 |
| AX-157825137 | 9 | 75.198 | KV452947.1 | 3929873 | 8-scf00203 | 8 |
| AX-158084072 | 9 | 75.198 | KV452947.1 | 3935632 | 8-scf00203 | 8 |
| AX-158084074 | 9 | 75.198 | KV452947.1 | 3937846 | 8-scf00203 | 8 |
| AX-158084077 | 9 | 75.198 | KV452947.1 | 3940417 | 8-scf00203 | 8 |
| AX-158084079 | 9 | 75.198 | KV452947.1 | 3942210 | 8-scf00203 | 8 |
| AX-158084080 | 9 | 75.198 | KV452947.1 | 3943834 | 8-scf00203 | 8 |
| AX-158409827 | 9 | 75.198 | KV452947.1 | 3951170 | 8-scf00203 | 8 |
| AX-158409828 | 9 | 75.198 | KV452947.1 | 3951310 | 8-scf00203 | 8 |
| AX-158379927 | 9 | 75.198 | KV452947.1 | 3954010 | 8-scf00203 | 8 |
| AX-158084091 | 9 | 75.198 | KV452947.1 | 3957089 | 8-scf00203 | 8 |
| AX-158084093 | 9 | 75.198 | KV452947.1 | 3958237 | 8-scf00203 | 8 |
| AX-158084094 | 9 | 75.198 | KV452947.1 | 3960817 | 8-scf00203 | 8 |
| AX-158084097 | 9 | 75.198 | KV452947.1 | 3962876 | 8-scf00203 | 8 |
| AX-158084098 | 9 | 75.198 | KV452947.1 | 3963491 | 8-scf00203 | 8 |
| AX-157725406 | 9 | 75.198 | KV452947.1 | 3969133 | 8-scf00203 | 8 |
| AX-158084102 | 9 | 75.198 | KV452947.1 | 3969892 | 8-scf00203 | 8 |
| AX-158084103 | 9 | 75.198 | KV452947.1 | 3970484 | 8-scf00203 | 8 |
| AX-158084104 | 9 | 75.198 | KV452947.1 | 3973029 | 8-scf00203 | 8 |
| AX-158084133 | 9 | 75.198 | KV452947.1 | 4019224 | 8-scf00203 | 8 |
| AX-158084105 | 9 | 75.524 | KV452947.1 | 3973411 | 8-scf00203 | 8 |
| AX-158084006 | 9 | 75.525 | KV452947.1 | 3867186 | 8-scf00203 | 8 |
| AX-158084022 | 9 | 75.525 | KV452947.1 | 3886671 | 8-scf00203 | 8 |
| AX-158084051 | 9 | 75.525 | KV452947.1 | 3916455 | 8-scf00203 | 8 |
| AX-157719214 | 9 | 75.525 | KV452947.1 | 3975655 | 8-scf00203 | 8 |
| AX-158084108 | 9 | 75.525 | KV452947.1 | 3976993 | 8-scf00203 | 8 |
| AX-158084110 | 9 | 75.525 | KV452947.1 | 3980126 | 8-scf00203 | 8 |
| AX-158084111 | 9 | 75.525 | KV452947.1 | 3981057 | 8-scf00203 | 8 |
| AX-157727575 | 9 | 75.525 | KV452947.1 | 3982134 | 8-scf00203 | 8 |
| AX-157775137 | 9 | 75.525 | KV452947.1 | 3983499 | 8-scf00203 | 8 |
| AX-158084113 | 9 | 75.525 | KV452947.1 | 3985059 | 8-scf00203 | 8 |
| AX-158084114 | 9 | 75.525 | KV452947.1 | 3987439 | 8-scf00203 | 8 |
| AX-158084115 | 9 | 75.525 | KV452947.1 | 3992866 | 8-scf00203 | 8 |
| AX-158084119 | 9 | 75.525 | KV452947.1 | 3999902 | 8-scf00203 | 8 |
| AX-158084127 | 9 | 75.525 | KV452947.1 | 4010505 | 8-scf00203 | 8 |
| AX-158084116 | 9 | 75.527 | KV452947.1 | 3993185 | 8-scf00203 | 8 |
| AX-158084120 | 9 | 75.718 | KV452947.1 | 4000785 | 8-scf00203 | 8 |
| AX-158084122 | 9 | 75.958 | KV452947.1 | 4003688 | 8-scf00203 | 8 |
| AX-158084124 | 9 | 75.96  | KV452947.1 | 4005251 | 8-scf00203 | 8 |
| AX-158084125 | 9 | 75.961 | KV452947.1 | 4005782 | 8-scf00203 | 8 |
| AX-158084123 | 9 | 75.963 | KV452947.1 | 4004022 | 8-scf00203 | 8 |
| AX-158084129 | 9 | 75.963 | KV452947.1 | 4013990 | 8-scf00203 | 8 |
| AX-158084131 | 9 | 75.963 | KV452947.1 | 4015836 | 8-scf00203 | 8 |
| AX-157726340 | 9 | 75.963 | KV452947.1 | 4016363 | 8-scf00203 | 8 |

|              |   |        |            |         |            |   |
|--------------|---|--------|------------|---------|------------|---|
| AX-158084132 | 9 | 75.963 | KV452947.1 | 4017247 | 8-scf00203 | 8 |
| AX-158084134 | 9 | 75.987 | KV452947.1 | 4020058 | 8-scf00203 | 8 |
| AX-158084138 | 9 | 76.018 | KV452947.1 | 4022647 | 8-scf00203 | 8 |
| AX-158384436 | 9 | 76.048 | KV452947.1 | 4025425 | 8-scf00203 | 8 |
| AX-157754323 | 9 | 76.072 | KV452947.1 | 4025545 | 8-scf00203 | 8 |
| AX-158084142 | 9 | 76.072 | KV452947.1 | 4026487 | 8-scf00203 | 8 |
| AX-158084143 | 9 | 76.29  | KV452947.1 | 4031198 | 8-scf00203 | 8 |
| AX-158084144 | 9 | 76.29  | KV452947.1 | 4032538 | 8-scf00203 | 8 |
| AX-158084145 | 9 | 76.29  | KV452947.1 | 4033084 | 8-scf00203 | 8 |
| AX-157770731 | 9 | 76.29  | KV452947.1 | 4036158 | 8-scf00203 | 8 |
| AX-157740679 | 9 | 76.29  | KV452947.1 | 4051277 | 8-scf00203 | 8 |
| AX-158084152 | 9 | 76.4   | KV452947.1 | 4045183 | 8-scf00203 | 8 |
| AX-158084153 | 9 | 76.4   | KV452947.1 | 4045470 | 8-scf00203 | 8 |
| AX-158084155 | 9 | 76.4   | KV452947.1 | 4049881 | 8-scf00203 | 8 |
| AX-158084156 | 9 | 76.4   | KV452947.1 | 4050596 | 8-scf00203 | 8 |
| AX-157885590 | 9 | 76.4   | KV452947.1 | 4052284 | 8-scf00203 | 8 |
| AX-158084157 | 9 | 76.4   | KV452947.1 | 4053109 | 8-scf00203 | 8 |
| AX-157724160 | 9 | 76.727 | KV452947.1 | 4056673 | 8-scf00203 | 8 |
| AX-158084160 | 9 | 76.727 | KV452947.1 | 4057733 | 8-scf00203 | 8 |
| AX-158084162 | 9 | 76.925 | KV452947.1 | 4059270 | 8-scf00203 | 8 |
| AX-158084164 | 9 | 76.94  | KV452947.1 | 4062423 | 8-scf00203 | 8 |
| AX-158084166 | 9 | 76.97  | KV452947.1 | 4065045 | 8-scf00203 | 8 |
| AX-157738769 | 9 | 77.009 | KV452947.1 | 4065689 | 8-scf00203 | 8 |
| AX-158084167 | 9 | 77.047 | KV452947.1 | 4066741 | 8-scf00203 | 8 |
| AX-158084170 | 9 | 77.141 | KV452947.1 | 4068299 | 8-scf00203 | 8 |
| AX-158084172 | 9 | 77.166 | KV452947.1 | 4071398 | 8-scf00203 | 8 |
| AX-157739024 | 9 | 77.186 | KV452947.1 | 4074499 | 8-scf00203 | 8 |
| AX-157757088 | 9 | 77.186 | KV452947.1 | 4076243 | 8-scf00203 | 8 |
| AX-158084176 | 9 | 77.186 | KV452947.1 | 4079468 | 8-scf00203 | 8 |
| AX-158084179 | 9 | 77.186 | KV452947.1 | 4082000 | 8-scf00203 | 8 |
| AX-158084183 | 9 | 77.186 | KV452947.1 | 4087809 | 8-scf00203 | 8 |
| AX-158084187 | 9 | 77.186 | KV452947.1 | 4092650 | 8-scf00203 | 8 |
| AX-158084188 | 9 | 77.186 | KV452947.1 | 4093703 | 8-scf00203 | 8 |
| AX-158084180 | 9 | 77.248 | KV452947.1 | 4083458 | 8-scf00203 | 8 |
| AX-158084184 | 9 | 77.321 | KV452947.1 | 4089698 | 8-scf00203 | 8 |
| AX-158084165 | 9 | 77.383 | KV452947.1 | 4063555 | 8-scf00203 | 8 |
| AX-158084185 | 9 | 77.383 | KV452947.1 | 4090875 | 8-scf00203 | 8 |
| AX-158379928 | 9 | 77.383 | KV452947.1 | 4091286 | 8-scf00203 | 8 |
| AX-157721144 | 9 | 77.383 | KV452947.1 | 4091532 | 8-scf00203 | 8 |
| AX-158084189 | 9 | 77.383 | KV452947.1 | 4094472 | 8-scf00203 | 8 |
| AX-158084190 | 9 | 77.383 | KV452947.1 | 4095771 | 8-scf00203 | 8 |
| AX-158084191 | 9 | 77.383 | KV452947.1 | 4096725 | 8-scf00203 | 8 |
| AX-158084193 | 9 | 77.383 | KV452947.1 | 4102141 | 8-scf00203 | 8 |
| AX-158084194 | 9 | 77.383 | KV452947.1 | 4103943 | 8-scf00203 | 8 |
| AX-158084196 | 9 | 77.664 | KV452947.1 | 4106823 | 8-scf00203 | 8 |
| AX-158084197 | 9 | 77.664 | KV452947.1 | 4107408 | 8-scf00203 | 8 |
| AX-158084201 | 9 | 77.664 | KV452947.1 | 4115493 | 8-scf00203 | 8 |
| AX-157877148 | 9 | 77.664 | KV452947.1 | 4115547 | 8-scf00203 | 8 |
| AX-158084204 | 9 | 77.664 | KV452947.1 | 4119573 | 8-scf00203 | 8 |
| AX-158084209 | 9 | 77.664 | KV452947.1 | 4126722 | 8-scf00203 | 8 |
| AX-158084211 | 9 | 77.664 | KV452947.1 | 4128253 | 8-scf00203 | 8 |



|              |   |        |             |         |            |    |
|--------------|---|--------|-------------|---------|------------|----|
| AX-158084413 | 9 | 77.664 | KV452947.1  | 4398747 | 8-scf00203 | 8  |
| AX-158084214 | 9 | 77.805 | KV452947.1  | 4131010 | 8-scf00203 | 8  |
| AX-158084217 | 9 | 77.807 | KV452947.1  | 4133104 | 8-scf00203 | 8  |
| AX-158084218 | 9 | 77.807 | KV452947.1  | 4137968 | 8-scf00203 | 8  |
| AX-157725764 | 9 | 77.89  | KV452947.1  | 4139287 | 8-scf00203 | 8  |
| AX-158084232 | 9 | 78.075 | KV452947.1  | 4155838 | 8-scf00203 | 8  |
| AX-158084202 | 9 | 78.171 | KV452947.1  | 4115998 | 8-scf00203 | 8  |
| AX-158084208 | 9 | 78.171 | KV452947.1  | 4125532 | 8-scf00203 | 8  |
| AX-158084231 | 9 | 78.171 | KV452947.1  | 4155048 | 8-scf00203 | 8  |
| AX-158084233 | 9 | 78.171 | KV452947.1  | 4156263 | 8-scf00203 | 8  |
| AX-158084238 | 9 | 78.171 | KV452947.1  | 4166475 | 8-scf00203 | 8  |
| AX-158084237 | 9 | 78.228 | KV452947.1  | 4165241 | 8-scf00203 | 8  |
| AX-158084239 | 9 | 78.228 | KV452947.1  | 4166990 | 8-scf00203 | 8  |
| AX-158084240 | 9 | 78.228 | KV452947.1  | 4167356 | 8-scf00203 | 8  |
| AX-158084242 | 9 | 78.228 | KV452947.1  | 4168491 | 8-scf00203 | 8  |
| AX-158084243 | 9 | 78.288 | KV452947.1  | 4169311 | 8-scf00203 | 8  |
| AX-158084245 | 9 | 78.369 | KV452947.1  | 4170790 | 8-scf00203 | 8  |
| AX-158084249 | 9 | 78.369 | KV452947.1  | 4178756 | 8-scf00203 | 8  |
| AX-158084250 | 9 | 78.369 | KV452947.1  | 4180771 | 8-scf00203 | 8  |
| AX-158084252 | 9 | 78.369 | KV452947.1  | 4182321 | 8-scf00203 | 8  |
| AX-157885591 | 9 | 78.369 | KV452947.1  | 4183401 | 8-scf00203 | 8  |
| AX-158084257 | 9 | 78.369 | KV452947.1  | 4188480 | 8-scf00203 | 8  |
| AX-158084263 | 9 | 78.369 | KV452947.1  | 4202352 | 8-scf00203 | 8  |
| AX-158084280 | 9 | 78.369 | KV452947.1  | 4222116 | 8-scf00203 | 8  |
| AX-158084330 | 9 | 78.369 | KV452947.1  | 4288396 | 8-scf00203 | 8  |
| AX-158084423 | 9 | 78.369 | KV452947.1  | 4411473 | 8-scf00203 | 8  |
| AX-158084465 | 9 | 78.369 | KV452947.1  | 4464163 | 8-scf00203 | 8  |
| AX-158084515 | 9 | 78.369 | KV452947.1  | 4517424 | 8-scf00203 | 8  |
| AX-158084537 | 9 | 78.369 | KV452947.1  | 4541762 | 8-scf00203 | 8  |
| AX-158084256 | 9 | 78.4   | KV452947.1  | 4187465 | 8-scf00203 | 8  |
| AX-158084259 | 9 | 78.438 | KV452947.1  | 4190248 | 8-scf00203 | 8  |
| AX-158084260 | 9 | 78.475 | KV452947.1  | 4191397 | 8-scf00203 | 8  |
| AX-158084487 | 9 | 78.475 | KV452947.1  | 4485919 | 8-scf00203 | 8  |
| AX-158084261 | 9 | 78.51  | KV452947.1  | 4196987 | 8-scf00203 | 8  |
| AX-158084212 | 9 | 78.651 | KV452947.1  | 4129372 | 8-scf00203 | 8  |
| AX-158084213 | 9 | 78.651 | KV452947.1  | 4130496 | 8-scf00203 | 8  |
| AX-157775895 | 9 | 78.651 | KV452947.1  | 4159394 | 8-scf00203 | 8  |
| AX-157865748 | 9 | 78.651 | KV452947.1  | 4199742 | 8-scf00203 | 8  |
| AX-157707166 | 9 | 78.651 | 3ML01033643 | 444     | scf09302_1 | UN |
| AX-157825139 | 9 | 78.702 | KV452947.1  | 4203825 | 8-scf00203 | 8  |
| AX-157716334 | 9 | 78.754 | KV452947.1  | 4204747 | 8-scf00203 | 8  |
| AX-157746191 | 9 | 78.754 | KV452947.1  | 4220183 | 8-scf00203 | 8  |
| AX-158084301 | 9 | 78.754 | KV452947.1  | 4246007 | 8-scf00203 | 8  |
| AX-158084246 | 9 | 78.793 | KV452947.1  | 4171294 | 8-scf00203 | 8  |
| AX-158084265 | 9 | 78.793 | KV452947.1  | 4205285 | 8-scf00203 | 8  |
| AX-158084268 | 9 | 78.793 | KV452947.1  | 4208948 | 8-scf00203 | 8  |
| AX-158084269 | 9 | 78.793 | KV452947.1  | 4211082 | 8-scf00203 | 8  |
| AX-158084270 | 9 | 78.793 | KV452947.1  | 4212717 | 8-scf00203 | 8  |
| AX-158379930 | 9 | 78.793 | KV452947.1  | 4214601 | 8-scf00203 | 8  |
| AX-158084273 | 9 | 78.793 | KV452947.1  | 4214772 | 8-scf00203 | 8  |
| AX-158084275 | 9 | 78.793 | KV452947.1  | 4216033 | 8-scf00203 | 8  |

|              |   |        |            |         |            |   |
|--------------|---|--------|------------|---------|------------|---|
| AX-158084278 | 9 | 78.793 | KV452947.1 | 4220696 | 8-scf00203 | 8 |
| AX-158084281 | 9 | 78.793 | KV452947.1 | 4222394 | 8-scf00203 | 8 |
| AX-158084286 | 9 | 78.793 | KV452947.1 | 4227455 | 8-scf00203 | 8 |
| AX-158084287 | 9 | 78.793 | KV452947.1 | 4228797 | 8-scf00203 | 8 |
| AX-158084293 | 9 | 78.793 | KV452947.1 | 4236395 | 8-scf00203 | 8 |
| AX-158084295 | 9 | 78.793 | KV452947.1 | 4239200 | 8-scf00203 | 8 |
| AX-158084296 | 9 | 78.793 | KV452947.1 | 4240229 | 8-scf00203 | 8 |
| AX-158084298 | 9 | 78.793 | KV452947.1 | 4242104 | 8-scf00203 | 8 |
| AX-158084300 | 9 | 78.793 | KV452947.1 | 4244384 | 8-scf00203 | 8 |
| AX-158384440 | 9 | 78.793 | KV452947.1 | 4246436 | 8-scf00203 | 8 |
| AX-158084302 | 9 | 78.793 | KV452947.1 | 4247508 | 8-scf00203 | 8 |
| AX-157757907 | 9 | 78.793 | KV452947.1 | 4250076 | 8-scf00203 | 8 |
| AX-158084304 | 9 | 78.793 | KV452947.1 | 4250406 | 8-scf00203 | 8 |
| AX-158084305 | 9 | 78.793 | KV452947.1 | 4252248 | 8-scf00203 | 8 |
| AX-158084306 | 9 | 78.793 | KV452947.1 | 4253508 | 8-scf00203 | 8 |
| AX-157751904 | 9 | 78.793 | KV452947.1 | 4261517 | 8-scf00203 | 8 |
| AX-158084311 | 9 | 78.793 | KV452947.1 | 4263388 | 8-scf00203 | 8 |
| AX-158084314 | 9 | 78.793 | KV452947.1 | 4267056 | 8-scf00203 | 8 |
| AX-158084317 | 9 | 78.793 | KV452947.1 | 4276387 | 8-scf00203 | 8 |
| AX-158084447 | 9 | 78.793 | KV452947.1 | 4439435 | 8-scf00203 | 8 |
| AX-157727372 | 9 | 78.793 | KV452947.1 | 4469395 | 8-scf00203 | 8 |
| AX-158084476 | 9 | 78.793 | KV452947.1 | 4479634 | 8-scf00203 | 8 |
| AX-158084530 | 9 | 78.793 | KV452947.1 | 4534553 | 8-scf00203 | 8 |
| AX-158084545 | 9 | 78.793 | KV452947.1 | 4549904 | 8-scf00203 | 8 |
| AX-157825148 | 9 | 78.869 | KV452947.1 | 4273732 | 8-scf00203 | 8 |
| AX-158084324 | 9 | 78.934 | KV452947.1 | 4283482 | 8-scf00203 | 8 |
| AX-158084325 | 9 | 78.934 | KV452947.1 | 4283834 | 8-scf00203 | 8 |
| AX-158084328 | 9 | 78.934 | KV452947.1 | 4285684 | 8-scf00203 | 8 |
| AX-158084334 | 9 | 78.934 | KV452947.1 | 4295095 | 8-scf00203 | 8 |
| AX-158084338 | 9 | 78.934 | KV452947.1 | 4303916 | 8-scf00203 | 8 |
| AX-157720670 | 9 | 79.075 | KV452947.1 | 4299099 | 8-scf00203 | 8 |
| AX-158084335 | 9 | 79.075 | KV452947.1 | 4299704 | 8-scf00203 | 8 |
| AX-158084336 | 9 | 79.075 | KV452947.1 | 4302409 | 8-scf00203 | 8 |
| AX-158084341 | 9 | 79.075 | KV452947.1 | 4306354 | 8-scf00203 | 8 |
| AX-158084283 | 9 | 79.216 | KV452947.1 | 4224397 | 8-scf00203 | 8 |
| AX-158084307 | 9 | 79.216 | KV452947.1 | 4256853 | 8-scf00203 | 8 |
| AX-158084319 | 9 | 79.216 | KV452947.1 | 4278565 | 8-scf00203 | 8 |
| AX-158084323 | 9 | 79.216 | KV452947.1 | 4280794 | 8-scf00203 | 8 |
| AX-158384444 | 9 | 79.216 | KV452947.1 | 4311143 | 8-scf00203 | 8 |
| AX-158084349 | 9 | 79.216 | KV452947.1 | 4311987 | 8-scf00203 | 8 |
| AX-158084351 | 9 | 79.216 | KV452947.1 | 4316171 | 8-scf00203 | 8 |
| AX-157775609 | 9 | 79.216 | KV452947.1 | 4317292 | 8-scf00203 | 8 |
| AX-157865752 | 9 | 79.216 | KV452947.1 | 4350137 | 8-scf00203 | 8 |
| AX-157825153 | 9 | 79.216 | KV452947.1 | 4350773 | 8-scf00203 | 8 |
| AX-158084388 | 9 | 79.216 | KV452947.1 | 4372655 | 8-scf00203 | 8 |
| AX-158084402 | 9 | 79.216 | KV452947.1 | 4389419 | 8-scf00203 | 8 |
| AX-158084436 | 9 | 79.216 | KV452947.1 | 4425766 | 8-scf00203 | 8 |
| AX-158084355 | 9 | 79.229 | KV452947.1 | 4318653 | 8-scf00203 | 8 |
| AX-158084435 | 9 | 79.229 | KV452947.1 | 4424164 | 8-scf00203 | 8 |
| AX-158084480 | 9 | 79.229 | KV452947.1 | 4482086 | 8-scf00203 | 8 |
| AX-158084358 | 9 | 79.262 | KV452947.1 | 4321882 | 8-scf00203 | 8 |

|              |   |        |             |         |            |    |
|--------------|---|--------|-------------|---------|------------|----|
| AX-158084361 | 9 | 79.296 | KV452947.1  | 4324990 | 8-scf00203 | 8  |
| AX-158084362 | 9 | 79.296 | KV452947.1  | 4325737 | 8-scf00203 | 8  |
| AX-158084318 | 9 | 79.327 | KV452947.1  | 4277847 | 8-scf00203 | 8  |
| AX-157825149 | 9 | 79.327 | KV452947.1  | 4284088 | 8-scf00203 | 8  |
| AX-157857180 | 9 | 79.327 | KV452947.1  | 4295425 | 8-scf00203 | 8  |
| AX-158084340 | 9 | 79.327 | KV452947.1  | 4305450 | 8-scf00203 | 8  |
| AX-157717289 | 9 | 79.327 | KV452947.1  | 4348447 | 8-scf00203 | 8  |
| AX-158084379 | 9 | 79.327 | KV452947.1  | 4349168 | 8-scf00203 | 8  |
| AX-158084415 | 9 | 79.327 | KV452947.1  | 4403462 | 8-scf00203 | 8  |
| AX-158084417 | 9 | 79.327 | KV452947.1  | 4405734 | 8-scf00203 | 8  |
| AX-157743496 | 9 | 79.357 | KV452947.1  | 4328482 | 8-scf00203 | 8  |
| AX-158084386 | 9 | 79.357 | KV452947.1  | 4366583 | 8-scf00203 | 8  |
| AX-158084387 | 9 | 79.357 | KV452947.1  | 4371549 | 8-scf00203 | 8  |
| AX-158084397 | 9 | 79.357 | KV452947.1  | 4386175 | 8-scf00203 | 8  |
| AX-158084398 | 9 | 79.357 | KV452947.1  | 4386893 | 8-scf00203 | 8  |
| AX-158384446 | 9 | 79.357 | KV452947.1  | 4406065 | 8-scf00203 | 8  |
| AX-158084422 | 9 | 79.357 | KV452947.1  | 4409836 | 8-scf00203 | 8  |
| AX-158084520 | 9 | 79.357 | KV452947.1  | 4524098 | 8-scf00203 | 8  |
| AX-158084521 | 9 | 79.357 | KV452947.1  | 4524462 | 8-scf00203 | 8  |
| AX-158084541 | 9 | 79.357 | KV452947.1  | 4547178 | 8-scf00203 | 8  |
| AX-158084399 | 9 | 79.407 | KV452947.1  | 4387399 | 8-scf00203 | 8  |
| AX-157707101 | 9 | 79.416 | 3ML01033561 | 92      | scf09216_1 | UN |
| AX-158084364 | 9 | 79.459 | KV452947.1  | 4331361 | 8-scf00203 | 8  |
| AX-158084366 | 9 | 79.459 | KV452947.1  | 4332406 | 8-scf00203 | 8  |
| AX-158084368 | 9 | 79.459 | KV452947.1  | 4334369 | 8-scf00203 | 8  |
| AX-158084403 | 9 | 79.459 | KV452947.1  | 4389839 | 8-scf00203 | 8  |
| AX-158084421 | 9 | 79.459 | KV452947.1  | 4409513 | 8-scf00203 | 8  |
| AX-158084406 | 9 | 79.505 | KV452947.1  | 4392139 | 8-scf00203 | 8  |
| AX-157708585 | 9 | 79.509 | KV452947.1  | 4395660 | 8-scf00203 | 8  |
| AX-158084345 | 9 | 79.545 | KV452947.1  | 4309937 | 8-scf00203 | 8  |
| AX-158084348 | 9 | 79.545 | KV452947.1  | 4311421 | 8-scf00203 | 8  |
| AX-158084410 | 9 | 79.545 | KV452947.1  | 4396373 | 8-scf00203 | 8  |
| AX-158084367 | 9 | 79.588 | KV452947.1  | 4333478 | 8-scf00203 | 8  |
| AX-158084416 | 9 | 79.588 | KV452947.1  | 4404685 | 8-scf00203 | 8  |
| AX-158084434 | 9 | 79.588 | KV452947.1  | 4423179 | 8-scf00203 | 8  |
| AX-158084419 | 9 | 79.639 | KV452947.1  | 4407678 | 8-scf00203 | 8  |
| AX-158084427 | 9 | 79.781 | KV452947.1  | 4416439 | 8-scf00203 | 8  |
| AX-158084430 | 9 | 79.781 | KV452947.1  | 4420312 | 8-scf00203 | 8  |
| AX-158084438 | 9 | 79.781 | KV452947.1  | 4427589 | 8-scf00203 | 8  |
| AX-158084441 | 9 | 79.781 | KV452947.1  | 4430505 | 8-scf00203 | 8  |
| AX-158084442 | 9 | 79.781 | KV452947.1  | 4431064 | 8-scf00203 | 8  |
| AX-158084445 | 9 | 79.781 | KV452947.1  | 4436368 | 8-scf00203 | 8  |
| AX-158084451 | 9 | 79.859 | KV452947.1  | 4447452 | 8-scf00203 | 8  |
| AX-158084456 | 9 | 79.859 | KV452947.1  | 4450058 | 8-scf00203 | 8  |
| AX-158379932 | 9 | 79.859 | KV452947.1  | 4454793 | 8-scf00203 | 8  |
| AX-158084502 | 9 | 79.859 | KV452947.1  | 4502829 | 8-scf00203 | 8  |
| AX-158084453 | 9 | 79.922 | KV452947.1  | 4448408 | 8-scf00203 | 8  |
| AX-158084454 | 9 | 79.922 | KV452947.1  | 4449098 | 8-scf00203 | 8  |
| AX-158084455 | 9 | 79.922 | KV452947.1  | 4449660 | 8-scf00203 | 8  |
| AX-158084457 | 9 | 79.922 | KV452947.1  | 4450777 | 8-scf00203 | 8  |
| AX-158084459 | 9 | 79.922 | KV452947.1  | 4453266 | 8-scf00203 | 8  |

|              |   |        |            |         |            |   |
|--------------|---|--------|------------|---------|------------|---|
| AX-158084505 | 9 | 79.922 | KV452947.1 | 4505431 | 8-scf00203 | 8 |
| AX-158084477 | 9 | 79.966 | KV452947.1 | 4479945 | 8-scf00203 | 8 |
| AX-158084479 | 9 | 79.966 | KV452947.1 | 4480583 | 8-scf00203 | 8 |
| AX-158084481 | 9 | 79.966 | KV452947.1 | 4482375 | 8-scf00203 | 8 |
| AX-158084500 | 9 | 79.966 | KV452947.1 | 4497557 | 8-scf00203 | 8 |
| AX-158084517 | 9 | 79.966 | KV452947.1 | 4520281 | 8-scf00203 | 8 |
| AX-158084525 | 9 | 79.966 | KV452947.1 | 4527074 | 8-scf00203 | 8 |
| AX-158084482 | 9 | 80.005 | KV452947.1 | 4482571 | 8-scf00203 | 8 |
| AX-158084486 | 9 | 80.016 | KV452947.1 | 4485455 | 8-scf00203 | 8 |
| AX-158084493 | 9 | 80.063 | KV452947.1 | 4491973 | 8-scf00203 | 8 |
| AX-158084494 | 9 | 80.063 | KV452947.1 | 4492340 | 8-scf00203 | 8 |
| AX-158084497 | 9 | 80.063 | KV452947.1 | 4495945 | 8-scf00203 | 8 |
| AX-158084507 | 9 | 80.063 | KV452947.1 | 4507682 | 8-scf00203 | 8 |
| AX-158084509 | 9 | 80.063 | KV452947.1 | 4510427 | 8-scf00203 | 8 |
| AX-157825150 | 9 | 80.204 | KV452947.1 | 4312585 | 8-scf00203 | 8 |
| AX-158084350 | 9 | 80.204 | KV452947.1 | 4315777 | 8-scf00203 | 8 |
| AX-158084396 | 9 | 80.204 | KV452947.1 | 4386075 | 8-scf00203 | 8 |
| AX-158084498 | 9 | 80.204 | KV452947.1 | 4495991 | 8-scf00203 | 8 |
| AX-158084501 | 9 | 80.204 | KV452947.1 | 4499853 | 8-scf00203 | 8 |
| AX-158084518 | 9 | 80.204 | KV452947.1 | 4522764 | 8-scf00203 | 8 |
| AX-158084519 | 9 | 80.204 | KV452947.1 | 4523521 | 8-scf00203 | 8 |
| AX-158084522 | 9 | 80.204 | KV452947.1 | 4525110 | 8-scf00203 | 8 |
| AX-158084529 | 9 | 80.242 | KV452947.1 | 4532530 | 8-scf00203 | 8 |
| AX-158084276 | 9 | 80.28  | KV452947.1 | 4216295 | 8-scf00203 | 8 |
| AX-158084309 | 9 | 80.28  | KV452947.1 | 4258738 | 8-scf00203 | 8 |
| AX-158084357 | 9 | 80.28  | KV452947.1 | 4320812 | 8-scf00203 | 8 |
| AX-158084370 | 9 | 80.28  | KV452947.1 | 4337694 | 8-scf00203 | 8 |
| AX-157825152 | 9 | 80.28  | KV452947.1 | 4338355 | 8-scf00203 | 8 |
| AX-158084426 | 9 | 80.28  | KV452947.1 | 4415667 | 8-scf00203 | 8 |
| AX-158084490 | 9 | 80.28  | KV452947.1 | 4490606 | 8-scf00203 | 8 |
| AX-158084499 | 9 | 80.28  | KV452947.1 | 4496564 | 8-scf00203 | 8 |
| AX-158084506 | 9 | 80.28  | KV452947.1 | 4506336 | 8-scf00203 | 8 |
| AX-157751853 | 9 | 80.28  | KV452947.1 | 4506992 | 8-scf00203 | 8 |
| AX-158084526 | 9 | 80.28  | KV452947.1 | 4529287 | 8-scf00203 | 8 |
| AX-158084531 | 9 | 80.28  | KV452947.1 | 4534684 | 8-scf00203 | 8 |
| AX-158084532 | 9 | 80.28  | KV452947.1 | 4536560 | 8-scf00203 | 8 |
| AX-158409838 | 9 | 80.28  | KV452947.1 | 4539172 | 8-scf00203 | 8 |
| AX-158084533 | 9 | 80.311 | KV452947.1 | 4537095 | 8-scf00203 | 8 |
| AX-158084450 | 9 | 80.346 | KV452947.1 | 4444321 | 8-scf00203 | 8 |
| AX-158084536 | 9 | 80.346 | KV452947.1 | 4540582 | 8-scf00203 | 8 |
| AX-157825156 | 9 | 80.346 | KV452947.1 | 4541685 | 8-scf00203 | 8 |
| AX-158084549 | 9 | 80.346 | KV452947.1 | 4555340 | 8-scf00203 | 8 |
| AX-158084553 | 9 | 80.346 | KV452947.1 | 4563575 | 8-scf00203 | 8 |
| AX-158084550 | 9 | 80.354 | KV452947.1 | 4558325 | 8-scf00203 | 8 |
| AX-157825173 | 9 | 80.354 | KV452947.1 | 4802889 | 8-scf00203 | 8 |
| AX-158084555 | 9 | 80.531 | KV452947.1 | 4564769 | 8-scf00203 | 8 |
| AX-158084556 | 9 | 80.531 | KV452947.1 | 4565238 | 8-scf00203 | 8 |
| AX-158084571 | 9 | 80.721 | KV452947.1 | 4581151 | 8-scf00203 | 8 |
| AX-158084573 | 9 | 80.721 | KV452947.1 | 4582548 | 8-scf00203 | 8 |
| AX-158409840 | 9 | 80.784 | KV452947.1 | 4590580 | 8-scf00203 | 8 |
| AX-158084576 | 9 | 80.795 | KV452947.1 | 4589058 | 8-scf00203 | 8 |

|              |   |        |            |         |            |   |
|--------------|---|--------|------------|---------|------------|---|
| AX-158084577 | 9 | 80.795 | KV452947.1 | 4591656 | 8-scf00203 | 8 |
| AX-158392093 | 9 | 80.795 | KV452947.1 | 4641335 | 8-scf00203 | 8 |
| AX-158084644 | 9 | 80.795 | KV452947.1 | 4680958 | 8-scf00203 | 8 |
| AX-157825162 | 9 | 80.795 | KV452947.1 | 4717915 | 8-scf00203 | 8 |
| AX-157825163 | 9 | 80.795 | KV452947.1 | 4724253 | 8-scf00203 | 8 |
| AX-158084688 | 9 | 80.795 | KV452947.1 | 4774901 | 8-scf00203 | 8 |
| AX-157825182 | 9 | 80.795 | KV452947.1 | 4867257 | 8-scf00203 | 8 |
| AX-158084742 | 9 | 80.795 | KV452947.1 | 4885260 | 8-scf00203 | 8 |
| AX-158384450 | 9 | 80.795 | KV452947.1 | 4891918 | 8-scf00203 | 8 |
| AX-157857183 | 9 | 80.795 | KV452947.1 | 4906806 | 8-scf00203 | 8 |
| AX-158084769 | 9 | 80.795 | KV452947.1 | 4931603 | 8-scf00203 | 8 |
| AX-157825157 | 9 | 80.855 | KV452947.1 | 4589645 | 8-scf00203 | 8 |
| AX-158084565 | 9 | 80.911 | KV452947.1 | 4573801 | 8-scf00203 | 8 |
| AX-158084569 | 9 | 80.911 | KV452947.1 | 4577663 | 8-scf00203 | 8 |
| AX-158084578 | 9 | 80.911 | KV452947.1 | 4592597 | 8-scf00203 | 8 |
| AX-157719350 | 9 | 80.911 | KV452947.1 | 4593718 | 8-scf00203 | 8 |
| AX-158084581 | 9 | 80.911 | KV452947.1 | 4595495 | 8-scf00203 | 8 |
| AX-158084596 | 9 | 80.911 | KV452947.1 | 4612997 | 8-scf00203 | 8 |
| AX-158084633 | 9 | 80.911 | KV452947.1 | 4661621 | 8-scf00203 | 8 |
| AX-158084657 | 9 | 80.911 | KV452947.1 | 4704442 | 8-scf00203 | 8 |
| AX-158084589 | 9 | 81.052 | KV452947.1 | 4603227 | 8-scf00203 | 8 |
| AX-158084331 | 9 | 81.193 | KV452947.1 | 4288947 | 8-scf00203 | 8 |
| AX-158084561 | 9 | 81.193 | KV452947.1 | 4568485 | 8-scf00203 | 8 |
| AX-158084562 | 9 | 81.193 | KV452947.1 | 4569266 | 8-scf00203 | 8 |
| AX-158392092 | 9 | 81.193 | KV452947.1 | 4593149 | 8-scf00203 | 8 |
| AX-158084586 | 9 | 81.193 | KV452947.1 | 4600812 | 8-scf00203 | 8 |
| AX-158084597 | 9 | 81.193 | KV452947.1 | 4613609 | 8-scf00203 | 8 |
| AX-158084598 | 9 | 81.193 | KV452947.1 | 4613938 | 8-scf00203 | 8 |
| AX-158084600 | 9 | 81.193 | KV452947.1 | 4617966 | 8-scf00203 | 8 |
| AX-158084604 | 9 | 81.193 | KV452947.1 | 4624342 | 8-scf00203 | 8 |
| AX-158084610 | 9 | 81.193 | KV452947.1 | 4630584 | 8-scf00203 | 8 |
| AX-158084618 | 9 | 81.193 | KV452947.1 | 4640595 | 8-scf00203 | 8 |
| AX-157751914 | 9 | 81.193 | KV452947.1 | 4649641 | 8-scf00203 | 8 |
| AX-157772912 | 9 | 81.193 | KV452947.1 | 4658550 | 8-scf00203 | 8 |
| AX-158084664 | 9 | 81.193 | KV452947.1 | 4711691 | 8-scf00203 | 8 |
| AX-158084429 | 9 | 81.334 | KV452947.1 | 4417520 | 8-scf00203 | 8 |
| AX-158084582 | 9 | 81.334 | KV452947.1 | 4595862 | 8-scf00203 | 8 |
| AX-158084591 | 9 | 81.334 | KV452947.1 | 4605596 | 8-scf00203 | 8 |
| AX-158084608 | 9 | 81.334 | KV452947.1 | 4629577 | 8-scf00203 | 8 |
| AX-158084612 | 9 | 81.334 | KV452947.1 | 4631443 | 8-scf00203 | 8 |
| AX-157759009 | 9 | 81.334 | KV452947.1 | 4631843 | 8-scf00203 | 8 |
| AX-158084614 | 9 | 81.334 | KV452947.1 | 4635123 | 8-scf00203 | 8 |
| AX-158084615 | 9 | 81.334 | KV452947.1 | 4635499 | 8-scf00203 | 8 |
| AX-157695845 | 9 | 81.334 | KV452947.1 | 4635749 | 8-scf00203 | 8 |
| AX-158084616 | 9 | 81.334 | KV452947.1 | 4639482 | 8-scf00203 | 8 |
| AX-158084620 | 9 | 81.334 | KV452947.1 | 4642250 | 8-scf00203 | 8 |
| AX-158084621 | 9 | 81.334 | KV452947.1 | 4643199 | 8-scf00203 | 8 |
| AX-158084623 | 9 | 81.334 | KV452947.1 | 4645213 | 8-scf00203 | 8 |
| AX-157825159 | 9 | 81.334 | KV452947.1 | 4646790 | 8-scf00203 | 8 |
| AX-158084625 | 9 | 81.334 | KV452947.1 | 4649987 | 8-scf00203 | 8 |
| AX-158084626 | 9 | 81.334 | KV452947.1 | 4650718 | 8-scf00203 | 8 |

|              |   |        |            |         |            |   |
|--------------|---|--------|------------|---------|------------|---|
| AX-158084627 | 9 | 81.334 | KV452947.1 | 4651725 | 8-scf00203 | 8 |
| AX-158084628 | 9 | 81.334 | KV452947.1 | 4653411 | 8-scf00203 | 8 |
| AX-158084634 | 9 | 81.334 | KV452947.1 | 4662583 | 8-scf00203 | 8 |
| AX-158084636 | 9 | 81.334 | KV452947.1 | 4666477 | 8-scf00203 | 8 |
| AX-157745537 | 9 | 81.334 | KV452947.1 | 4667548 | 8-scf00203 | 8 |
| AX-157715498 | 9 | 81.334 | KV452947.1 | 4667755 | 8-scf00203 | 8 |
| AX-158084637 | 9 | 81.334 | KV452947.1 | 4669537 | 8-scf00203 | 8 |
| AX-157725604 | 9 | 81.334 | KV452947.1 | 4689798 | 8-scf00203 | 8 |
| AX-157744142 | 9 | 81.334 | KV452947.1 | 4751058 | 8-scf00203 | 8 |
| AX-158084679 | 9 | 81.334 | KV452947.1 | 4765514 | 8-scf00203 | 8 |
| AX-158084694 | 9 | 81.334 | KV452947.1 | 4784466 | 8-scf00203 | 8 |
| AX-158084714 | 9 | 81.334 | KV452947.1 | 4821025 | 8-scf00203 | 8 |
| AX-158084716 | 9 | 81.334 | KV452947.1 | 4826595 | 8-scf00203 | 8 |
| AX-158084717 | 9 | 81.334 | KV452947.1 | 4841299 | 8-scf00203 | 8 |
| AX-157825180 | 9 | 81.334 | KV452947.1 | 4843925 | 8-scf00203 | 8 |
| AX-158084747 | 9 | 81.334 | KV452947.1 | 4893952 | 8-scf00203 | 8 |
| AX-158084638 | 9 | 81.435 | KV452947.1 | 4670213 | 8-scf00203 | 8 |
| AX-158084646 | 9 | 81.553 | KV452947.1 | 4682583 | 8-scf00203 | 8 |
| AX-157825161 | 9 | 81.553 | KV452947.1 | 4689381 | 8-scf00203 | 8 |
| AX-158084651 | 9 | 81.553 | KV452947.1 | 4693806 | 8-scf00203 | 8 |
| AX-157715023 | 9 | 81.553 | KV452947.1 | 4697842 | 8-scf00203 | 8 |
| AX-158084656 | 9 | 81.553 | KV452947.1 | 4701792 | 8-scf00203 | 8 |
| AX-158084658 | 9 | 81.553 | KV452947.1 | 4705110 | 8-scf00203 | 8 |
| AX-158084659 | 9 | 81.553 | KV452947.1 | 4707909 | 8-scf00203 | 8 |
| AX-158084660 | 9 | 81.553 | KV452947.1 | 4708135 | 8-scf00203 | 8 |
| AX-158084661 | 9 | 81.553 | KV452947.1 | 4710436 | 8-scf00203 | 8 |
| AX-158084662 | 9 | 81.553 | KV452947.1 | 4710766 | 8-scf00203 | 8 |
| AX-158084667 | 9 | 81.553 | KV452947.1 | 4719023 | 8-scf00203 | 8 |
| AX-157716199 | 9 | 81.553 | KV452947.1 | 4723593 | 8-scf00203 | 8 |
| AX-157750183 | 9 | 81.553 | KV452947.1 | 4727322 | 8-scf00203 | 8 |
| AX-158084668 | 9 | 81.553 | KV452947.1 | 4729280 | 8-scf00203 | 8 |
| AX-158084671 | 9 | 81.553 | KV452947.1 | 4738567 | 8-scf00203 | 8 |
| AX-158084672 | 9 | 81.553 | KV452947.1 | 4739158 | 8-scf00203 | 8 |
| AX-158084675 | 9 | 81.553 | KV452947.1 | 4754996 | 8-scf00203 | 8 |
| AX-158084776 | 9 | 81.553 | KV452947.1 | 4941435 | 8-scf00203 | 8 |
| AX-158084682 | 9 | 81.651 | KV452947.1 | 4770326 | 8-scf00203 | 8 |
| AX-158084685 | 9 | 81.768 | KV452947.1 | 4773019 | 8-scf00203 | 8 |
| AX-158084689 | 9 | 81.773 | KV452947.1 | 4776421 | 8-scf00203 | 8 |
| AX-158084690 | 9 | 81.946 | KV452947.1 | 4776968 | 8-scf00203 | 8 |
| AX-158084691 | 9 | 81.946 | KV452947.1 | 4780211 | 8-scf00203 | 8 |
| AX-158084683 | 9 | 82.099 | KV452947.1 | 4772377 | 8-scf00203 | 8 |
| AX-158084692 | 9 | 82.099 | KV452947.1 | 4781065 | 8-scf00203 | 8 |
| AX-158084695 | 9 | 82.099 | KV452947.1 | 4789510 | 8-scf00203 | 8 |
| AX-158084711 | 9 | 82.099 | KV452947.1 | 4818832 | 8-scf00203 | 8 |
| AX-158084713 | 9 | 82.099 | KV452947.1 | 4820345 | 8-scf00203 | 8 |
| AX-157825184 | 9 | 82.099 | KV452947.1 | 4870983 | 8-scf00203 | 8 |
| AX-158084684 | 9 | 82.155 | KV452947.1 | 4772662 | 8-scf00203 | 8 |
| AX-157748900 | 9 | 82.155 | KV452947.1 | 4828803 | 8-scf00203 | 8 |
| AX-158084723 | 9 | 82.209 | KV452947.1 | 4853289 | 8-scf00203 | 8 |
| AX-158084725 | 9 | 82.209 | KV452947.1 | 4856003 | 8-scf00203 | 8 |
| AX-158084726 | 9 | 82.209 | KV452947.1 | 4856678 | 8-scf00203 | 8 |

|              |   |        |            |         |            |   |
|--------------|---|--------|------------|---------|------------|---|
| AX-157702518 | 9 | 82.209 | KV452947.1 | 4857197 | 8-scf00203 | 8 |
| AX-157717344 | 9 | 82.209 | KV452947.1 | 4859292 | 8-scf00203 | 8 |
| AX-158084729 | 9 | 82.209 | KV452947.1 | 4862520 | 8-scf00203 | 8 |
| AX-158084730 | 9 | 82.209 | KV452947.1 | 4863465 | 8-scf00203 | 8 |
| AX-157825183 | 9 | 82.209 | KV452947.1 | 4868229 | 8-scf00203 | 8 |
| AX-157825185 | 9 | 82.209 | KV452947.1 | 4871197 | 8-scf00203 | 8 |
| AX-158084734 | 9 | 82.209 | KV452947.1 | 4876378 | 8-scf00203 | 8 |
| AX-158084736 | 9 | 82.209 | KV452947.1 | 4878220 | 8-scf00203 | 8 |
| AX-158084737 | 9 | 82.209 | KV452947.1 | 4880222 | 8-scf00203 | 8 |
| AX-158084731 | 9 | 82.257 | KV452947.1 | 4865658 | 8-scf00203 | 8 |
| AX-158084743 | 9 | 82.257 | KV452947.1 | 4889319 | 8-scf00203 | 8 |
| AX-157757867 | 9 | 82.257 | KV452947.1 | 4905578 | 8-scf00203 | 8 |
| AX-158084744 | 9 | 82.318 | KV452947.1 | 4890081 | 8-scf00203 | 8 |
| AX-157720244 | 9 | 82.348 | KV452947.1 | 4926341 | 8-scf00203 | 8 |
| AX-158084766 | 9 | 82.376 | KV452947.1 | 4927792 | 8-scf00203 | 8 |
| AX-158084645 | 9 | 82.405 | KV452947.1 | 4681681 | 8-scf00203 | 8 |
| AX-158084768 | 9 | 82.405 | KV452947.1 | 4930722 | 8-scf00203 | 8 |
| AX-157744276 | 9 | 82.427 | KV452947.1 | 4931238 | 8-scf00203 | 8 |
| AX-158084770 | 9 | 82.461 | KV452947.1 | 4933204 | 8-scf00203 | 8 |
| AX-158084771 | 9 | 82.461 | KV452947.1 | 4934283 | 8-scf00203 | 8 |
| AX-158084775 | 9 | 82.461 | KV452947.1 | 4936306 | 8-scf00203 | 8 |
| AX-157703642 | 9 | 82.461 | KV452947.1 | 4938774 | 8-scf00203 | 8 |
| AX-157825187 | 9 | 82.461 | KV452947.1 | 4939249 | 8-scf00203 | 8 |
| AX-158084783 | 9 | 82.461 | KV452947.1 | 4955710 | 8-scf00203 | 8 |
| AX-157885599 | 9 | 82.461 | KV452947.1 | 4960859 | 8-scf00203 | 8 |
| AX-158392096 | 9 | 82.461 | KV452947.1 | 4991871 | 8-scf00203 | 8 |
| AX-157825188 | 9 | 82.498 | KV452947.1 | 4940086 | 8-scf00203 | 8 |
| AX-158084773 | 9 | 82.536 | KV452947.1 | 4934885 | 8-scf00203 | 8 |
| AX-158084778 | 9 | 82.536 | KV452947.1 | 4945503 | 8-scf00203 | 8 |
| AX-157753009 | 9 | 82.536 | KV452947.1 | 4947009 | 8-scf00203 | 8 |
| AX-158084781 | 9 | 82.536 | KV452947.1 | 4951456 | 8-scf00203 | 8 |
| AX-158084782 | 9 | 82.536 | KV452947.1 | 4953158 | 8-scf00203 | 8 |
| AX-157696612 | 9 | 82.536 | KV452947.1 | 4954952 | 8-scf00203 | 8 |
| AX-158084786 | 9 | 82.536 | KV452947.1 | 4957516 | 8-scf00203 | 8 |
| AX-158084788 | 9 | 82.536 | KV452947.1 | 4958929 | 8-scf00203 | 8 |
| AX-158084791 | 9 | 82.536 | KV452947.1 | 4961018 | 8-scf00203 | 8 |
| AX-158084792 | 9 | 82.536 | KV452947.1 | 4962360 | 8-scf00203 | 8 |
| AX-158084794 | 9 | 82.536 | KV452947.1 | 4964459 | 8-scf00203 | 8 |
| AX-158084797 | 9 | 82.536 | KV452947.1 | 4966532 | 8-scf00203 | 8 |
| AX-158084798 | 9 | 82.536 | KV452947.1 | 4967381 | 8-scf00203 | 8 |
| AX-158084799 | 9 | 82.536 | KV452947.1 | 4967975 | 8-scf00203 | 8 |
| AX-158084800 | 9 | 82.536 | KV452947.1 | 4969105 | 8-scf00203 | 8 |
| AX-158084801 | 9 | 82.536 | KV452947.1 | 4969806 | 8-scf00203 | 8 |
| AX-157857186 | 9 | 82.536 | KV452947.1 | 5046057 | 8-scf00203 | 8 |
| AX-158084869 | 9 | 82.536 | KV452947.1 | 5048363 | 8-scf00203 | 8 |
| AX-158084808 | 9 | 82.574 | KV452947.1 | 4981241 | 8-scf00203 | 8 |
| AX-158084809 | 9 | 82.668 | KV452947.1 | 4982685 | 8-scf00203 | 8 |
| AX-158084722 | 9 | 82.755 | KV452947.1 | 4852990 | 8-scf00203 | 8 |
| AX-158084745 | 9 | 82.755 | KV452947.1 | 4890753 | 8-scf00203 | 8 |
| AX-157770843 | 9 | 82.755 | KV452947.1 | 4975822 | 8-scf00203 | 8 |
| AX-158084810 | 9 | 82.755 | KV452947.1 | 4983471 | 8-scf00203 | 8 |

|              |   |        |             |         |            |    |
|--------------|---|--------|-------------|---------|------------|----|
| AX-158084811 | 9 | 82.755 | KV452947.1  | 4984204 | 8-scf00203 | 8  |
| AX-158084815 | 9 | 82.755 | KV452947.1  | 4989052 | 8-scf00203 | 8  |
| AX-158084817 | 9 | 82.755 | KV452947.1  | 4992197 | 8-scf00203 | 8  |
| AX-158084818 | 9 | 82.755 | KV452947.1  | 4992878 | 8-scf00203 | 8  |
| AX-158084820 | 9 | 82.755 | KV452947.1  | 4994719 | 8-scf00203 | 8  |
| AX-158084821 | 9 | 82.755 | KV452947.1  | 4995785 | 8-scf00203 | 8  |
| AX-158084823 | 9 | 82.755 | KV452947.1  | 4996674 | 8-scf00203 | 8  |
| AX-158084825 | 9 | 82.755 | KV452947.1  | 4998832 | 8-scf00203 | 8  |
| AX-158084829 | 9 | 82.755 | KV452947.1  | 5002069 | 8-scf00203 | 8  |
| AX-158084830 | 9 | 82.755 | KV452947.1  | 5005000 | 8-scf00203 | 8  |
| AX-158084831 | 9 | 82.755 | KV452947.1  | 5005377 | 8-scf00203 | 8  |
| AX-158409847 | 9 | 82.755 | KV452947.1  | 5007978 | 8-scf00203 | 8  |
| AX-158084841 | 9 | 82.755 | KV452947.1  | 5018509 | 8-scf00203 | 8  |
| AX-158084885 | 9 | 82.755 | KV452947.1  | 5068521 | 8-scf00203 | 8  |
| AX-157705724 | 9 | 82.755 | 3ML01030709 | 582     | scf06309_1 | UN |
| AX-158084828 | 9 | 82.761 | KV452947.1  | 5001431 | 8-scf00203 | 8  |
| AX-158084832 | 9 | 82.761 | KV452947.1  | 5010751 | 8-scf00203 | 8  |
| AX-158084857 | 9 | 82.761 | KV452947.1  | 5036166 | 8-scf00203 | 8  |
| AX-158084867 | 9 | 82.761 | KV452947.1  | 5046338 | 8-scf00203 | 8  |
| AX-158084898 | 9 | 82.761 | KV452947.1  | 5104950 | 8-scf00203 | 8  |
| AX-158085139 | 9 | 82.761 | KV452947.1  | 5442100 | 8-scf00203 | 8  |
| AX-158084834 | 9 | 82.78  | KV452947.1  | 5013245 | 8-scf00203 | 8  |
| AX-158084836 | 9 | 82.8   | KV452947.1  | 5015788 | 8-scf00203 | 8  |
| AX-158084835 | 9 | 82.818 | KV452947.1  | 5015323 | 8-scf00203 | 8  |
| AX-158084838 | 9 | 82.818 | KV452947.1  | 5016561 | 8-scf00203 | 8  |
| AX-158084853 | 9 | 82.818 | KV452947.1  | 5032368 | 8-scf00203 | 8  |
| AX-158084865 | 9 | 82.818 | KV452947.1  | 5043946 | 8-scf00203 | 8  |
| AX-158084891 | 9 | 82.818 | KV452947.1  | 5082346 | 8-scf00203 | 8  |
| AX-158085050 | 9 | 82.818 | KV452947.1  | 5327971 | 8-scf00203 | 8  |
| AX-157742146 | 9 | 82.818 | KV452947.1  | 5495455 | 8-scf00203 | 8  |
| AX-158085230 | 9 | 82.818 | KV452948.1  | 132081  | 8-scf00204 | 8  |
| AX-158084839 | 9 | 82.838 | KV452947.1  | 5017118 | 8-scf00203 | 8  |
| AX-158084739 | 9 | 82.864 | KV452947.1  | 4883833 | 8-scf00203 | 8  |
| AX-158084772 | 9 | 82.864 | KV452947.1  | 4934618 | 8-scf00203 | 8  |
| AX-157750609 | 9 | 82.864 | KV452947.1  | 4937724 | 8-scf00203 | 8  |
| AX-158084784 | 9 | 82.864 | KV452947.1  | 4956442 | 8-scf00203 | 8  |
| AX-158084806 | 9 | 82.864 | KV452947.1  | 4978122 | 8-scf00203 | 8  |
| AX-158084816 | 9 | 82.864 | KV452947.1  | 4990606 | 8-scf00203 | 8  |
| AX-158084840 | 9 | 82.864 | KV452947.1  | 5017626 | 8-scf00203 | 8  |
| AX-158384458 | 9 | 82.864 | KV452947.1  | 5018995 | 8-scf00203 | 8  |
| AX-158084845 | 9 | 82.864 | KV452947.1  | 5022962 | 8-scf00203 | 8  |
| AX-158084847 | 9 | 82.864 | KV452947.1  | 5026027 | 8-scf00203 | 8  |
| AX-158084848 | 9 | 82.864 | KV452947.1  | 5026626 | 8-scf00203 | 8  |
| AX-158084851 | 9 | 82.864 | KV452947.1  | 5030347 | 8-scf00203 | 8  |
| AX-158084852 | 9 | 82.864 | KV452947.1  | 5031192 | 8-scf00203 | 8  |
| AX-158084854 | 9 | 82.864 | KV452947.1  | 5034320 | 8-scf00203 | 8  |
| AX-158084855 | 9 | 82.864 | KV452947.1  | 5034988 | 8-scf00203 | 8  |
| AX-158084856 | 9 | 82.864 | KV452947.1  | 5035833 | 8-scf00203 | 8  |
| AX-158084858 | 9 | 82.864 | KV452947.1  | 5036743 | 8-scf00203 | 8  |
| AX-158084859 | 9 | 82.864 | KV452947.1  | 5037062 | 8-scf00203 | 8  |
| AX-158084860 | 9 | 82.864 | KV452947.1  | 5037769 | 8-scf00203 | 8  |



|              |   |        |             |         |            |    |
|--------------|---|--------|-------------|---------|------------|----|
| AX-158084861 | 9 | 82.864 | KV452947.1  | 5038780 | 8-scf00203 | 8  |
| AX-158084864 | 9 | 82.864 | KV452947.1  | 5042467 | 8-scf00203 | 8  |
| AX-158084870 | 9 | 82.864 | KV452947.1  | 5049465 | 8-scf00203 | 8  |
| AX-158084871 | 9 | 82.864 | KV452947.1  | 5050160 | 8-scf00203 | 8  |
| AX-158084872 | 9 | 82.864 | KV452947.1  | 5051355 | 8-scf00203 | 8  |
| AX-158084879 | 9 | 82.864 | KV452947.1  | 5059245 | 8-scf00203 | 8  |
| AX-158084951 | 9 | 82.864 | KV452947.1  | 5197868 | 8-scf00203 | 8  |
| AX-158084959 | 9 | 82.864 | KV452947.1  | 5209712 | 8-scf00203 | 8  |
| AX-158085051 | 9 | 82.864 | KV452947.1  | 5329511 | 8-scf00203 | 8  |
| AX-157825160 | 9 | 83.029 | KV452947.1  | 4671661 | 8-scf00203 | 8  |
| AX-157720901 | 9 | 83.029 | KV452947.1  | 5052583 | 8-scf00203 | 8  |
| AX-158084874 | 9 | 83.029 | KV452947.1  | 5053406 | 8-scf00203 | 8  |
| AX-157724962 | 9 | 83.029 | KV452947.1  | 5058577 | 8-scf00203 | 8  |
| AX-158084881 | 9 | 83.19  | KV452947.1  | 5061607 | 8-scf00203 | 8  |
| AX-158085042 | 9 | 83.19  | KV452947.1  | 5318664 | 8-scf00203 | 8  |
| AX-158085043 | 9 | 83.19  | KV452947.1  | 5321579 | 8-scf00203 | 8  |
| AX-158085063 | 9 | 83.19  | KV452947.1  | 5340270 | 8-scf00203 | 8  |
| AX-158084802 | 9 | 83.192 | KV452947.1  | 4970569 | 8-scf00203 | 8  |
| AX-158084807 | 9 | 83.192 | KV452947.1  | 4980319 | 8-scf00203 | 8  |
| AX-158084882 | 9 | 83.192 | KV452947.1  | 5062196 | 8-scf00203 | 8  |
| AX-158084890 | 9 | 83.192 | KV452947.1  | 5081227 | 8-scf00203 | 8  |
| AX-157825193 | 9 | 83.192 | KV452947.1  | 5081942 | 8-scf00203 | 8  |
| AX-157718625 | 9 | 83.192 | KV452947.1  | 5084495 | 8-scf00203 | 8  |
| AX-158084892 | 9 | 83.192 | KV452947.1  | 5085837 | 8-scf00203 | 8  |
| AX-158084894 | 9 | 83.192 | KV452947.1  | 5090121 | 8-scf00203 | 8  |
| AX-157744872 | 9 | 83.192 | KV452947.1  | 5095712 | 8-scf00203 | 8  |
| AX-158084907 | 9 | 83.192 | KV452947.1  | 5121271 | 8-scf00203 | 8  |
| AX-158085037 | 9 | 83.192 | KV452947.1  | 5311986 | 8-scf00203 | 8  |
| AX-157707476 | 9 | 83.192 | 3ML01034356 | 296     | scf10029_1 | UN |
| AX-157825196 | 9 | 83.41  | KV452947.1  | 5104740 | 8-scf00203 | 8  |
| AX-158084899 | 9 | 83.41  | KV452947.1  | 5106535 | 8-scf00203 | 8  |
| AX-157825198 | 9 | 83.41  | KV452947.1  | 5116308 | 8-scf00203 | 8  |
| AX-158084905 | 9 | 83.41  | KV452947.1  | 5119709 | 8-scf00203 | 8  |
| AX-158084676 | 9 | 83.52  | KV452947.1  | 4759071 | 8-scf00203 | 8  |
| AX-158084741 | 9 | 83.52  | KV452947.1  | 4884597 | 8-scf00203 | 8  |
| AX-158084900 | 9 | 83.52  | KV452947.1  | 5109956 | 8-scf00203 | 8  |
| AX-158084902 | 9 | 83.52  | KV452947.1  | 5111512 | 8-scf00203 | 8  |
| AX-158084904 | 9 | 83.52  | KV452947.1  | 5116904 | 8-scf00203 | 8  |
| AX-157825199 | 9 | 83.52  | KV452947.1  | 5125599 | 8-scf00203 | 8  |
| AX-158084909 | 9 | 83.52  | KV452947.1  | 5126036 | 8-scf00203 | 8  |
| AX-158084913 | 9 | 83.52  | KV452947.1  | 5131921 | 8-scf00203 | 8  |
| AX-158084914 | 9 | 83.52  | KV452947.1  | 5132173 | 8-scf00203 | 8  |
| AX-158084915 | 9 | 83.52  | KV452947.1  | 5132527 | 8-scf00203 | 8  |
| AX-158084916 | 9 | 83.52  | KV452947.1  | 5133687 | 8-scf00203 | 8  |
| AX-158084918 | 9 | 83.52  | KV452947.1  | 5135110 | 8-scf00203 | 8  |
| AX-158084923 | 9 | 83.52  | KV452947.1  | 5138448 | 8-scf00203 | 8  |
| AX-158084927 | 9 | 83.52  | KV452947.1  | 5140477 | 8-scf00203 | 8  |
| AX-158084929 | 9 | 83.52  | KV452947.1  | 5144065 | 8-scf00203 | 8  |
| AX-158084931 | 9 | 83.52  | KV452947.1  | 5161428 | 8-scf00203 | 8  |
| AX-158084933 | 9 | 83.52  | KV452947.1  | 5169383 | 8-scf00203 | 8  |
| AX-158084936 | 9 | 83.52  | KV452947.1  | 5174264 | 8-scf00203 | 8  |

|              |   |       |            |         |            |   |
|--------------|---|-------|------------|---------|------------|---|
| AX-158084937 | 9 | 83.52 | KV452947.1 | 5174795 | 8-scf00203 | 8 |
| AX-158084939 | 9 | 83.52 | KV452947.1 | 5181813 | 8-scf00203 | 8 |
| AX-158084941 | 9 | 83.52 | KV452947.1 | 5183011 | 8-scf00203 | 8 |
| AX-157739486 | 9 | 83.52 | KV452947.1 | 5188884 | 8-scf00203 | 8 |
| AX-158084942 | 9 | 83.52 | KV452947.1 | 5190977 | 8-scf00203 | 8 |
| AX-158084943 | 9 | 83.52 | KV452947.1 | 5191622 | 8-scf00203 | 8 |
| AX-158084947 | 9 | 83.52 | KV452947.1 | 5194783 | 8-scf00203 | 8 |
| AX-157825202 | 9 | 83.52 | KV452947.1 | 5195659 | 8-scf00203 | 8 |
| AX-158084948 | 9 | 83.52 | KV452947.1 | 5195725 | 8-scf00203 | 8 |
| AX-158084949 | 9 | 83.52 | KV452947.1 | 5196454 | 8-scf00203 | 8 |
| AX-158084950 | 9 | 83.52 | KV452947.1 | 5197204 | 8-scf00203 | 8 |
| AX-158379936 | 9 | 83.52 | KV452947.1 | 5198167 | 8-scf00203 | 8 |
| AX-158084953 | 9 | 83.52 | KV452947.1 | 5199936 | 8-scf00203 | 8 |
| AX-158084955 | 9 | 83.52 | KV452947.1 | 5202658 | 8-scf00203 | 8 |
| AX-157825203 | 9 | 83.52 | KV452947.1 | 5202926 | 8-scf00203 | 8 |
| AX-157721541 | 9 | 83.52 | KV452947.1 | 5205499 | 8-scf00203 | 8 |
| AX-158084957 | 9 | 83.52 | KV452947.1 | 5206840 | 8-scf00203 | 8 |
| AX-158084958 | 9 | 83.52 | KV452947.1 | 5207974 | 8-scf00203 | 8 |
| AX-157708652 | 9 | 83.52 | KV452947.1 | 5210158 | 8-scf00203 | 8 |
| AX-158084961 | 9 | 83.52 | KV452947.1 | 5212724 | 8-scf00203 | 8 |
| AX-158084962 | 9 | 83.52 | KV452947.1 | 5213477 | 8-scf00203 | 8 |
| AX-158084963 | 9 | 83.52 | KV452947.1 | 5214674 | 8-scf00203 | 8 |
| AX-158084973 | 9 | 83.52 | KV452947.1 | 5225154 | 8-scf00203 | 8 |
| AX-158084980 | 9 | 83.52 | KV452947.1 | 5228935 | 8-scf00203 | 8 |
| AX-158084982 | 9 | 83.52 | KV452947.1 | 5229784 | 8-scf00203 | 8 |
| AX-158084983 | 9 | 83.52 | KV452947.1 | 5229989 | 8-scf00203 | 8 |
| AX-158084985 | 9 | 83.52 | KV452947.1 | 5249524 | 8-scf00203 | 8 |
| AX-158084986 | 9 | 83.52 | KV452947.1 | 5250962 | 8-scf00203 | 8 |
| AX-158084988 | 9 | 83.52 | KV452947.1 | 5253816 | 8-scf00203 | 8 |
| AX-158084993 | 9 | 83.52 | KV452947.1 | 5256852 | 8-scf00203 | 8 |
| AX-157825205 | 9 | 83.52 | KV452947.1 | 5262090 | 8-scf00203 | 8 |
| AX-158084998 | 9 | 83.52 | KV452947.1 | 5262411 | 8-scf00203 | 8 |
| AX-157825206 | 9 | 83.52 | KV452947.1 | 5262906 | 8-scf00203 | 8 |
| AX-157722817 | 9 | 83.52 | KV452947.1 | 5273557 | 8-scf00203 | 8 |
| AX-158085005 | 9 | 83.52 | KV452947.1 | 5274972 | 8-scf00203 | 8 |
| AX-158085006 | 9 | 83.52 | KV452947.1 | 5276827 | 8-scf00203 | 8 |
| AX-157825208 | 9 | 83.52 | KV452947.1 | 5277164 | 8-scf00203 | 8 |
| AX-157825209 | 9 | 83.52 | KV452947.1 | 5277379 | 8-scf00203 | 8 |
| AX-157825210 | 9 | 83.52 | KV452947.1 | 5277719 | 8-scf00203 | 8 |
| AX-158085007 | 9 | 83.52 | KV452947.1 | 5278089 | 8-scf00203 | 8 |
| AX-158085008 | 9 | 83.52 | KV452947.1 | 5278507 | 8-scf00203 | 8 |
| AX-158085009 | 9 | 83.52 | KV452947.1 | 5279103 | 8-scf00203 | 8 |
| AX-158085010 | 9 | 83.52 | KV452947.1 | 5280178 | 8-scf00203 | 8 |
| AX-158085011 | 9 | 83.52 | KV452947.1 | 5280795 | 8-scf00203 | 8 |
| AX-158085012 | 9 | 83.52 | KV452947.1 | 5281610 | 8-scf00203 | 8 |
| AX-158085013 | 9 | 83.52 | KV452947.1 | 5282108 | 8-scf00203 | 8 |
| AX-158085014 | 9 | 83.52 | KV452947.1 | 5282634 | 8-scf00203 | 8 |
| AX-158085016 | 9 | 83.52 | KV452947.1 | 5283585 | 8-scf00203 | 8 |
| AX-158085017 | 9 | 83.52 | KV452947.1 | 5284943 | 8-scf00203 | 8 |
| AX-157720447 | 9 | 83.52 | KV452947.1 | 5286131 | 8-scf00203 | 8 |
| AX-157771919 | 9 | 83.52 | KV452947.1 | 5286928 | 8-scf00203 | 8 |

|              |   |       |            |         |            |   |
|--------------|---|-------|------------|---------|------------|---|
| AX-158085018 | 9 | 83.52 | KV452947.1 | 5287620 | 8-scf00203 | 8 |
| AX-158085019 | 9 | 83.52 | KV452947.1 | 5288640 | 8-scf00203 | 8 |
| AX-158085021 | 9 | 83.52 | KV452947.1 | 5289325 | 8-scf00203 | 8 |
| AX-158085027 | 9 | 83.52 | KV452947.1 | 5293736 | 8-scf00203 | 8 |
| AX-158085028 | 9 | 83.52 | KV452947.1 | 5294557 | 8-scf00203 | 8 |
| AX-158085029 | 9 | 83.52 | KV452947.1 | 5295853 | 8-scf00203 | 8 |
| AX-157825211 | 9 | 83.52 | KV452947.1 | 5296281 | 8-scf00203 | 8 |
| AX-158085032 | 9 | 83.52 | KV452947.1 | 5299727 | 8-scf00203 | 8 |
| AX-158085034 | 9 | 83.52 | KV452947.1 | 5300787 | 8-scf00203 | 8 |
| AX-158085035 | 9 | 83.52 | KV452947.1 | 5306078 | 8-scf00203 | 8 |
| AX-158085036 | 9 | 83.52 | KV452947.1 | 5310193 | 8-scf00203 | 8 |
| AX-158085041 | 9 | 83.52 | KV452947.1 | 5317586 | 8-scf00203 | 8 |
| AX-157750505 | 9 | 83.52 | KV452947.1 | 5317955 | 8-scf00203 | 8 |
| AX-158085044 | 9 | 83.52 | KV452947.1 | 5322778 | 8-scf00203 | 8 |
| AX-158085045 | 9 | 83.52 | KV452947.1 | 5323238 | 8-scf00203 | 8 |
| AX-158085048 | 9 | 83.52 | KV452947.1 | 5325596 | 8-scf00203 | 8 |
| AX-157716062 | 9 | 83.52 | KV452947.1 | 5328403 | 8-scf00203 | 8 |
| AX-158085052 | 9 | 83.52 | KV452947.1 | 5330845 | 8-scf00203 | 8 |
| AX-158085053 | 9 | 83.52 | KV452947.1 | 5331378 | 8-scf00203 | 8 |
| AX-158085054 | 9 | 83.52 | KV452947.1 | 5333505 | 8-scf00203 | 8 |
| AX-158085055 | 9 | 83.52 | KV452947.1 | 5333894 | 8-scf00203 | 8 |
| AX-157877165 | 9 | 83.52 | KV452947.1 | 5350942 | 8-scf00203 | 8 |
| AX-158085070 | 9 | 83.52 | KV452947.1 | 5352029 | 8-scf00203 | 8 |
| AX-158085071 | 9 | 83.52 | KV452947.1 | 5353140 | 8-scf00203 | 8 |
| AX-158085072 | 9 | 83.52 | KV452947.1 | 5353748 | 8-scf00203 | 8 |
| AX-158085074 | 9 | 83.52 | KV452947.1 | 5354979 | 8-scf00203 | 8 |
| AX-157713380 | 9 | 83.52 | KV452947.1 | 5363483 | 8-scf00203 | 8 |
| AX-157720485 | 9 | 83.52 | KV452947.1 | 5365737 | 8-scf00203 | 8 |
| AX-158085079 | 9 | 83.52 | KV452947.1 | 5366929 | 8-scf00203 | 8 |
| AX-158085080 | 9 | 83.52 | KV452947.1 | 5367541 | 8-scf00203 | 8 |
| AX-158085081 | 9 | 83.52 | KV452947.1 | 5369032 | 8-scf00203 | 8 |
| AX-158085082 | 9 | 83.52 | KV452947.1 | 5370631 | 8-scf00203 | 8 |
| AX-157825215 | 9 | 83.52 | KV452947.1 | 5374283 | 8-scf00203 | 8 |
| AX-157825217 | 9 | 83.52 | KV452947.1 | 5375238 | 8-scf00203 | 8 |
| AX-158085086 | 9 | 83.52 | KV452947.1 | 5376066 | 8-scf00203 | 8 |
| AX-158085090 | 9 | 83.52 | KV452947.1 | 5380979 | 8-scf00203 | 8 |
| AX-157743771 | 9 | 83.52 | KV452947.1 | 5382012 | 8-scf00203 | 8 |
| AX-158085093 | 9 | 83.52 | KV452947.1 | 5384315 | 8-scf00203 | 8 |
| AX-158085095 | 9 | 83.52 | KV452947.1 | 5390456 | 8-scf00203 | 8 |
| AX-157757136 | 9 | 83.52 | KV452947.1 | 5395025 | 8-scf00203 | 8 |
| AX-158085098 | 9 | 83.52 | KV452947.1 | 5397554 | 8-scf00203 | 8 |
| AX-158085099 | 9 | 83.52 | KV452947.1 | 5398113 | 8-scf00203 | 8 |
| AX-158085100 | 9 | 83.52 | KV452947.1 | 5399538 | 8-scf00203 | 8 |
| AX-158085101 | 9 | 83.52 | KV452947.1 | 5400797 | 8-scf00203 | 8 |
| AX-158085115 | 9 | 83.52 | KV452947.1 | 5416121 | 8-scf00203 | 8 |
| AX-158379937 | 9 | 83.52 | KV452947.1 | 5416628 | 8-scf00203 | 8 |
| AX-158085118 | 9 | 83.52 | KV452947.1 | 5418752 | 8-scf00203 | 8 |
| AX-158085119 | 9 | 83.52 | KV452947.1 | 5419510 | 8-scf00203 | 8 |
| AX-158085120 | 9 | 83.52 | KV452947.1 | 5420901 | 8-scf00203 | 8 |
| AX-158085122 | 9 | 83.52 | KV452947.1 | 5425227 | 8-scf00203 | 8 |
| AX-158085124 | 9 | 83.52 | KV452947.1 | 5426303 | 8-scf00203 | 8 |

|              |   |        |             |         |                |    |
|--------------|---|--------|-------------|---------|----------------|----|
| AX-158085125 | 9 | 83.52  | KV452947.1  | 5426897 | 8-scf00203     | 8  |
| AX-158085126 | 9 | 83.52  | KV452947.1  | 5427454 | 8-scf00203     | 8  |
| AX-157773233 | 9 | 83.52  | KV452947.1  | 5430502 | 8-scf00203     | 8  |
| AX-158085141 | 9 | 83.52  | KV452947.1  | 5445555 | 8-scf00203     | 8  |
| AX-158085142 | 9 | 83.52  | KV452947.1  | 5451478 | 8-scf00203     | 8  |
| AX-158085143 | 9 | 83.52  | KV452947.1  | 5451932 | 8-scf00203     | 8  |
| AX-158384468 | 9 | 83.52  | KV452947.1  | 5474344 | 8-scf00203     | 8  |
| AX-158085161 | 9 | 83.52  | KV452947.1  | 5501100 | 8-scf00203     | 8  |
| AX-158085167 | 9 | 83.52  | KV452947.1  | 5512829 | 8-scf00203     | 8  |
| AX-158085180 | 9 | 83.52  | KV452948.1  | 34381   | 8-scf00204     | 8  |
| AX-158085209 | 9 | 83.52  | KV452948.1  | 85545   | 8-scf00204     | 8  |
| AX-158085232 | 9 | 83.52  | KV452948.1  | 133679  | 8-scf00204     | 8  |
| AX-158085243 | 9 | 83.52  | KV452948.1  | 143039  | 8-scf00204     | 8  |
| AX-158085247 | 9 | 83.52  | KV452948.1  | 151261  | 8-scf00204     | 8  |
| AX-158085254 | 9 | 83.52  | KV452948.1  | 158976  | 8-scf00204     | 8  |
| AX-158085267 | 9 | 83.52  | KV452948.1  | 187707  | 8-scf00204     | 8  |
| AX-158085271 | 9 | 83.52  | KV452948.1  | 192602  | 8-scf00204     | 8  |
| AX-157746382 | 9 | 83.52  | KV452948.1  | 193299  | 8-scf00204     | 8  |
| AX-158085317 | 9 | 83.52  | KV452948.1  | 252868  | 8-scf00204     | 8  |
| AX-158409861 | 9 | 83.52  | KV452948.1  | 254246  | 8-scf00204     | 8  |
| AX-158085342 | 9 | 83.52  | KV452948.1  | 289957  | 8-scf00204     | 8  |
| AX-157877170 | 9 | 83.52  | KV452948.1  | 333943  | 8-scf00204     | 8  |
| AX-158085417 | 9 | 83.52  | KV452948.1  | 386935  | 8-scf00204     | 8  |
| AX-158085493 | 9 | 83.52  | KV452948.1  | 494925  | 8-scf00204     | 8  |
| AX-157702276 | 9 | 83.52  | DX090934.1  | 238     | IORI212 Ictalt | UN |
| AX-157707256 | 9 | 83.52  | 3ML01033825 | 441     | scf09491_1     | UN |
| AX-158085173 | 9 | 83.738 | KV452948.1  | 8921    | 8-scf00204     | 8  |
| AX-158085177 | 9 | 83.738 | KV452948.1  | 31811   | 8-scf00204     | 8  |
| AX-158085182 | 9 | 83.738 | KV452948.1  | 42546   | 8-scf00204     | 8  |
| AX-158085184 | 9 | 83.738 | KV452948.1  | 45142   | 8-scf00204     | 8  |
| AX-158085185 | 9 | 83.738 | KV452948.1  | 48955   | 8-scf00204     | 8  |
| AX-158085187 | 9 | 83.738 | KV452948.1  | 51247   | 8-scf00204     | 8  |
| AX-158085189 | 9 | 83.738 | KV452948.1  | 53090   | 8-scf00204     | 8  |
| AX-158085190 | 9 | 83.738 | KV452948.1  | 54277   | 8-scf00204     | 8  |
| AX-158085194 | 9 | 83.738 | KV452948.1  | 60239   | 8-scf00204     | 8  |
| AX-158085198 | 9 | 83.738 | KV452948.1  | 68865   | 8-scf00204     | 8  |
| AX-158085199 | 9 | 83.738 | KV452948.1  | 69520   | 8-scf00204     | 8  |
| AX-158085205 | 9 | 83.738 | KV452948.1  | 77952   | 8-scf00204     | 8  |
| AX-157743705 | 9 | 83.738 | KV452948.1  | 81391   | 8-scf00204     | 8  |
| AX-157755488 | 9 | 83.738 | KV452948.1  | 105853  | 8-scf00204     | 8  |
| AX-158085207 | 9 | 83.755 | KV452948.1  | 81659   | 8-scf00204     | 8  |
| AX-158085208 | 9 | 83.791 | KV452948.1  | 85111   | 8-scf00204     | 8  |
| AX-158085114 | 9 | 83.847 | KV452947.1  | 5415053 | 8-scf00203     | 8  |
| AX-158085116 | 9 | 83.847 | KV452947.1  | 5416847 | 8-scf00203     | 8  |
| AX-157885605 | 9 | 83.847 | KV452948.1  | 32823   | 8-scf00204     | 8  |
| AX-158085210 | 9 | 83.847 | KV452948.1  | 88599   | 8-scf00204     | 8  |
| AX-158085211 | 9 | 83.847 | KV452948.1  | 90694   | 8-scf00204     | 8  |
| AX-158085217 | 9 | 83.847 | KV452948.1  | 96724   | 8-scf00204     | 8  |
| AX-158085219 | 9 | 83.847 | KV452948.1  | 99203   | 8-scf00204     | 8  |
| AX-157770772 | 9 | 83.847 | KV452948.1  | 102696  | 8-scf00204     | 8  |
| AX-158085223 | 9 | 83.847 | KV452948.1  | 107311  | 8-scf00204     | 8  |

|              |   |        |            |         |            |   |
|--------------|---|--------|------------|---------|------------|---|
| AX-158085224 | 9 | 83.847 | KV452948.1 | 107860  | 8-scf00204 | 8 |
| AX-157724881 | 9 | 83.847 | KV452948.1 | 109340  | 8-scf00204 | 8 |
| AX-158085225 | 9 | 83.847 | KV452948.1 | 110504  | 8-scf00204 | 8 |
| AX-158085227 | 9 | 83.847 | KV452948.1 | 111388  | 8-scf00204 | 8 |
| AX-158085228 | 9 | 83.847 | KV452948.1 | 130476  | 8-scf00204 | 8 |
| AX-157825224 | 9 | 83.847 | KV452948.1 | 130761  | 8-scf00204 | 8 |
| AX-158085229 | 9 | 83.847 | KV452948.1 | 131284  | 8-scf00204 | 8 |
| AX-158085233 | 9 | 83.847 | KV452948.1 | 135747  | 8-scf00204 | 8 |
| AX-158085238 | 9 | 83.847 | KV452948.1 | 140361  | 8-scf00204 | 8 |
| AX-158085234 | 9 | 83.9   | KV452948.1 | 136232  | 8-scf00204 | 8 |
| AX-158085056 | 9 | 83.956 | KV452947.1 | 5336028 | 8-scf00203 | 8 |
| AX-158085215 | 9 | 83.956 | KV452948.1 | 95547   | 8-scf00204 | 8 |
| AX-158085236 | 9 | 83.956 | KV452948.1 | 138336  | 8-scf00204 | 8 |
| AX-158085239 | 9 | 83.956 | KV452948.1 | 140655  | 8-scf00204 | 8 |
| AX-158085240 | 9 | 83.956 | KV452948.1 | 141178  | 8-scf00204 | 8 |
| AX-158085241 | 9 | 83.956 | KV452948.1 | 141755  | 8-scf00204 | 8 |
| AX-158085242 | 9 | 83.956 | KV452948.1 | 142216  | 8-scf00204 | 8 |
| AX-157741715 | 9 | 83.956 | KV452948.1 | 147722  | 8-scf00204 | 8 |
| AX-158085245 | 9 | 83.956 | KV452948.1 | 148305  | 8-scf00204 | 8 |
| AX-158085246 | 9 | 83.956 | KV452948.1 | 148708  | 8-scf00204 | 8 |
| AX-158085248 | 9 | 83.956 | KV452948.1 | 151981  | 8-scf00204 | 8 |
| AX-158085250 | 9 | 83.956 | KV452948.1 | 155414  | 8-scf00204 | 8 |
| AX-158085251 | 9 | 83.956 | KV452948.1 | 155907  | 8-scf00204 | 8 |
| AX-158085253 | 9 | 83.956 | KV452948.1 | 157190  | 8-scf00204 | 8 |
| AX-157885606 | 9 | 83.956 | KV452948.1 | 167010  | 8-scf00204 | 8 |
| AX-158085257 | 9 | 83.956 | KV452948.1 | 169050  | 8-scf00204 | 8 |
| AX-157751655 | 9 | 83.956 | KV452948.1 | 169625  | 8-scf00204 | 8 |
| AX-158085258 | 9 | 83.956 | KV452948.1 | 171593  | 8-scf00204 | 8 |
| AX-158085260 | 9 | 83.956 | KV452948.1 | 174555  | 8-scf00204 | 8 |
| AX-158085261 | 9 | 83.956 | KV452948.1 | 179372  | 8-scf00204 | 8 |
| AX-158085262 | 9 | 83.956 | KV452948.1 | 179810  | 8-scf00204 | 8 |
| AX-158085270 | 9 | 83.956 | KV452948.1 | 191249  | 8-scf00204 | 8 |
| AX-157750538 | 9 | 83.956 | KV452948.1 | 195233  | 8-scf00204 | 8 |
| AX-158085065 | 9 | 83.957 | KV452947.1 | 5341920 | 8-scf00203 | 8 |
| AX-158085200 | 9 | 83.957 | KV452948.1 | 71375   | 8-scf00204 | 8 |
| AX-158085263 | 9 | 83.957 | KV452948.1 | 180386  | 8-scf00204 | 8 |
| AX-158085397 | 9 | 83.957 | KV452948.1 | 356872  | 8-scf00204 | 8 |
| AX-158085266 | 9 | 84.322 | KV452948.1 | 186880  | 8-scf00204 | 8 |
| AX-158085047 | 9 | 84.325 | KV452947.1 | 5324800 | 8-scf00203 | 8 |
| AX-158085272 | 9 | 84.325 | KV452948.1 | 192786  | 8-scf00204 | 8 |
| AX-158085274 | 9 | 84.325 | KV452948.1 | 201292  | 8-scf00204 | 8 |
| AX-158085277 | 9 | 84.49  | KV452948.1 | 204729  | 8-scf00204 | 8 |
| AX-158085283 | 9 | 84.503 | KV452948.1 | 210169  | 8-scf00204 | 8 |
| AX-158085285 | 9 | 84.503 | KV452948.1 | 212194  | 8-scf00204 | 8 |
| AX-157750343 | 9 | 84.503 | KV452948.1 | 214650  | 8-scf00204 | 8 |
| AX-158085288 | 9 | 84.503 | KV452948.1 | 215724  | 8-scf00204 | 8 |
| AX-158085289 | 9 | 84.503 | KV452948.1 | 216140  | 8-scf00204 | 8 |
| AX-158085290 | 9 | 84.503 | KV452948.1 | 216759  | 8-scf00204 | 8 |
| AX-158085291 | 9 | 84.503 | KV452948.1 | 217570  | 8-scf00204 | 8 |
| AX-157770729 | 9 | 84.503 | KV452948.1 | 219077  | 8-scf00204 | 8 |
| AX-158085294 | 9 | 84.503 | KV452948.1 | 219902  | 8-scf00204 | 8 |

|              |   |        |            |         |                |    |
|--------------|---|--------|------------|---------|----------------|----|
| AX-157720420 | 9 | 84.503 | KV452948.1 | 225598  | 8-scf00204     | 8  |
| AX-158085299 | 9 | 84.503 | KV452948.1 | 226123  | 8-scf00204     | 8  |
| AX-158085300 | 9 | 84.503 | KV452948.1 | 226280  | 8-scf00204     | 8  |
| AX-158085306 | 9 | 84.503 | KV452948.1 | 238061  | 8-scf00204     | 8  |
| AX-158085309 | 9 | 84.503 | KV452948.1 | 241084  | 8-scf00204     | 8  |
| AX-158085328 | 9 | 84.503 | KV452948.1 | 269071  | 8-scf00204     | 8  |
| AX-158384472 | 9 | 84.503 | KV452948.1 | 269663  | 8-scf00204     | 8  |
| AX-158085311 | 9 | 84.58  | KV452948.1 | 243284  | 8-scf00204     | 8  |
| AX-157825154 | 9 | 84.612 | KV452947.1 | 4355990 | 8-scf00203     | 8  |
| AX-158084443 | 9 | 84.612 | KV452947.1 | 4431584 | 8-scf00203     | 8  |
| AX-158085295 | 9 | 84.612 | KV452948.1 | 220608  | 8-scf00204     | 8  |
| AX-158085297 | 9 | 84.612 | KV452948.1 | 223186  | 8-scf00204     | 8  |
| AX-158085305 | 9 | 84.612 | KV452948.1 | 235835  | 8-scf00204     | 8  |
| AX-158085310 | 9 | 84.612 | KV452948.1 | 242165  | 8-scf00204     | 8  |
| AX-158085312 | 9 | 84.612 | KV452948.1 | 243996  | 8-scf00204     | 8  |
| AX-158085313 | 9 | 84.612 | KV452948.1 | 247326  | 8-scf00204     | 8  |
| AX-158085321 | 9 | 84.844 | KV452948.1 | 257070  | 8-scf00204     | 8  |
| AX-158085323 | 9 | 85.442 | KV452948.1 | 261814  | 8-scf00204     | 8  |
| AX-157740568 | 9 | 85.443 | KV452948.1 | 262165  | 8-scf00204     | 8  |
| AX-158085326 | 9 | 85.443 | KV452948.1 | 266418  | 8-scf00204     | 8  |
| AX-158085327 | 9 | 85.443 | KV452948.1 | 266914  | 8-scf00204     | 8  |
| AX-157775774 | 9 | 85.443 | KV452948.1 | 267471  | 8-scf00204     | 8  |
| AX-158085329 | 9 | 85.443 | KV452948.1 | 269507  | 8-scf00204     | 8  |
| AX-158085331 | 9 | 85.443 | KV452948.1 | 271606  | 8-scf00204     | 8  |
| AX-158085332 | 9 | 85.443 | KV452948.1 | 272218  | 8-scf00204     | 8  |
| AX-158085348 | 9 | 85.443 | KV452948.1 | 297944  | 8-scf00204     | 8  |
| AX-158085356 | 9 | 85.443 | KV452948.1 | 304344  | 8-scf00204     | 8  |
| AX-158085358 | 9 | 85.443 | KV452948.1 | 305332  | 8-scf00204     | 8  |
| AX-158085364 | 9 | 85.443 | KV452948.1 | 313260  | 8-scf00204     | 8  |
| AX-158085386 | 9 | 85.443 | KV452948.1 | 332759  | 8-scf00204     | 8  |
| AX-158085396 | 9 | 85.443 | KV452948.1 | 356096  | 8-scf00204     | 8  |
| AX-158085398 | 9 | 85.443 | KV452948.1 | 357801  | 8-scf00204     | 8  |
| AX-157755612 | 9 | 85.443 | KV452948.1 | 484641  | 8-scf00204     | 8  |
| AX-158085490 | 9 | 85.443 | KV452948.1 | 488040  | 8-scf00204     | 8  |
| AX-157700888 | 9 | 85.443 | FI863174.1 | 282     | IORI212 lctalu | UN |
| AX-158409860 | 9 | 85.484 | KV452948.1 | 228050  | 8-scf00204     | 8  |
| AX-158085330 | 9 | 85.484 | KV452948.1 | 270107  | 8-scf00204     | 8  |
| AX-158085333 | 9 | 85.484 | KV452948.1 | 274945  | 8-scf00204     | 8  |
| AX-158085336 | 9 | 85.52  | KV452948.1 | 282597  | 8-scf00204     | 8  |
| AX-158085339 | 9 | 85.558 | KV452948.1 | 284982  | 8-scf00204     | 8  |
| AX-157718640 | 9 | 85.597 | KV452948.1 | 260803  | 8-scf00204     | 8  |
| AX-158085347 | 9 | 85.597 | KV452948.1 | 297231  | 8-scf00204     | 8  |
| AX-158085349 | 9 | 85.597 | KV452948.1 | 298353  | 8-scf00204     | 8  |
| AX-158085352 | 9 | 85.597 | KV452948.1 | 300132  | 8-scf00204     | 8  |
| AX-158085353 | 9 | 85.597 | KV452948.1 | 301104  | 8-scf00204     | 8  |
| AX-158085354 | 9 | 85.597 | KV452948.1 | 302444  | 8-scf00204     | 8  |
| AX-157825228 | 9 | 85.597 | KV452948.1 | 305295  | 8-scf00204     | 8  |
| AX-158085362 | 9 | 85.676 | KV452948.1 | 310045  | 8-scf00204     | 8  |
| AX-157721430 | 9 | 85.73  | KV452948.1 | 310574  | 8-scf00204     | 8  |
| AX-158085363 | 9 | 85.816 | KV452948.1 | 311209  | 8-scf00204     | 8  |
| AX-158085369 | 9 | 85.816 | KV452948.1 | 319134  | 8-scf00204     | 8  |

|              |   |        |            |        |            |   |
|--------------|---|--------|------------|--------|------------|---|
| AX-158085372 | 9 | 85.816 | KV452948.1 | 321467 | 8-scf00204 | 8 |
| AX-157740838 | 9 | 85.816 | KV452948.1 | 321967 | 8-scf00204 | 8 |
| AX-158085373 | 9 | 85.816 | KV452948.1 | 322608 | 8-scf00204 | 8 |
| AX-158416713 | 9 | 85.816 | KV452948.1 | 328179 | 8-scf00204 | 8 |
| AX-158085383 | 9 | 85.816 | KV452948.1 | 330857 | 8-scf00204 | 8 |
| AX-158085385 | 9 | 85.816 | KV452948.1 | 331622 | 8-scf00204 | 8 |
| AX-158085387 | 9 | 85.816 | KV452948.1 | 336477 | 8-scf00204 | 8 |
| AX-157748322 | 9 | 86.362 | KV452948.1 | 342366 | 8-scf00204 | 8 |
| AX-158085389 | 9 | 86.362 | KV452948.1 | 344606 | 8-scf00204 | 8 |
| AX-157725157 | 9 | 86.362 | KV452948.1 | 345239 | 8-scf00204 | 8 |
| AX-157724746 | 9 | 86.362 | KV452948.1 | 352193 | 8-scf00204 | 8 |
| AX-158085392 | 9 | 86.362 | KV452948.1 | 353216 | 8-scf00204 | 8 |
| AX-158085394 | 9 | 86.362 | KV452948.1 | 354362 | 8-scf00204 | 8 |
| AX-158085395 | 9 | 86.362 | KV452948.1 | 355541 | 8-scf00204 | 8 |
| AX-158085400 | 9 | 86.471 | KV452948.1 | 359297 | 8-scf00204 | 8 |
| AX-157719772 | 9 | 86.471 | KV452948.1 | 361517 | 8-scf00204 | 8 |
| AX-158085403 | 9 | 86.58  | KV452948.1 | 365253 | 8-scf00204 | 8 |
| AX-158085404 | 9 | 86.58  | KV452948.1 | 365979 | 8-scf00204 | 8 |
| AX-158085405 | 9 | 86.58  | KV452948.1 | 366461 | 8-scf00204 | 8 |
| AX-158085406 | 9 | 86.58  | KV452948.1 | 367280 | 8-scf00204 | 8 |
| AX-158085407 | 9 | 86.58  | KV452948.1 | 367419 | 8-scf00204 | 8 |
| AX-158085409 | 9 | 86.58  | KV452948.1 | 372297 | 8-scf00204 | 8 |
| AX-157719644 | 9 | 86.689 | KV452948.1 | 372725 | 8-scf00204 | 8 |
| AX-158085410 | 9 | 86.8   | KV452948.1 | 375066 | 8-scf00204 | 8 |
| AX-158085411 | 9 | 86.908 | KV452948.1 | 377998 | 8-scf00204 | 8 |
| AX-158085412 | 9 | 86.908 | KV452948.1 | 378669 | 8-scf00204 | 8 |
| AX-158085414 | 9 | 86.908 | KV452948.1 | 382865 | 8-scf00204 | 8 |
| AX-158085413 | 9 | 86.959 | KV452948.1 | 379191 | 8-scf00204 | 8 |
| AX-158392105 | 9 | 87.017 | KV452948.1 | 384643 | 8-scf00204 | 8 |
| AX-158085416 | 9 | 87.017 | KV452948.1 | 384691 | 8-scf00204 | 8 |
| AX-158085420 | 9 | 87.017 | KV452948.1 | 390454 | 8-scf00204 | 8 |
| AX-158085422 | 9 | 87.017 | KV452948.1 | 391958 | 8-scf00204 | 8 |
| AX-157723709 | 9 | 87.1   | KV452948.1 | 397353 | 8-scf00204 | 8 |
| AX-158085424 | 9 | 87.127 | KV452948.1 | 396195 | 8-scf00204 | 8 |
| AX-157719175 | 9 | 87.127 | KV452948.1 | 400264 | 8-scf00204 | 8 |
| AX-157744716 | 9 | 87.127 | KV452948.1 | 401746 | 8-scf00204 | 8 |
| AX-158085427 | 9 | 87.127 | KV452948.1 | 406279 | 8-scf00204 | 8 |
| AX-158085428 | 9 | 87.127 | KV452948.1 | 406837 | 8-scf00204 | 8 |
| AX-158085429 | 9 | 87.127 | KV452948.1 | 409586 | 8-scf00204 | 8 |
| AX-158085430 | 9 | 87.127 | KV452948.1 | 410619 | 8-scf00204 | 8 |
| AX-158085431 | 9 | 87.127 | KV452948.1 | 411020 | 8-scf00204 | 8 |
| AX-157724896 | 9 | 87.127 | KV452948.1 | 412310 | 8-scf00204 | 8 |
| AX-158085435 | 9 | 87.345 | KV452948.1 | 415490 | 8-scf00204 | 8 |
| AX-157885608 | 9 | 87.345 | KV452948.1 | 416894 | 8-scf00204 | 8 |
| AX-158085437 | 9 | 87.345 | KV452948.1 | 417687 | 8-scf00204 | 8 |
| AX-158085440 | 9 | 87.345 | KV452948.1 | 419438 | 8-scf00204 | 8 |
| AX-158085441 | 9 | 87.454 | KV452948.1 | 420105 | 8-scf00204 | 8 |
| AX-158085442 | 9 | 87.454 | KV452948.1 | 421978 | 8-scf00204 | 8 |
| AX-158085443 | 9 | 87.454 | KV452948.1 | 422386 | 8-scf00204 | 8 |
| AX-158085445 | 9 | 87.454 | KV452948.1 | 424090 | 8-scf00204 | 8 |
| AX-158085446 | 9 | 87.454 | KV452948.1 | 425217 | 8-scf00204 | 8 |

|              |   |        |             |        |            |    |
|--------------|---|--------|-------------|--------|------------|----|
| AX-157721903 | 9 | 87.454 | KV452948.1  | 425989 | 8-scf00204 | 8  |
| AX-158085447 | 9 | 87.454 | KV452948.1  | 427412 | 8-scf00204 | 8  |
| AX-158085448 | 9 | 87.454 | KV452948.1  | 428683 | 8-scf00204 | 8  |
| AX-158085450 | 9 | 87.454 | KV452948.1  | 431532 | 8-scf00204 | 8  |
| AX-158085451 | 9 | 87.454 | KV452948.1  | 431980 | 8-scf00204 | 8  |
| AX-158085452 | 9 | 87.454 | KV452948.1  | 432090 | 8-scf00204 | 8  |
| AX-158085454 | 9 | 87.454 | KV452948.1  | 434697 | 8-scf00204 | 8  |
| AX-158085455 | 9 | 87.454 | KV452948.1  | 435410 | 8-scf00204 | 8  |
| AX-158085456 | 9 | 87.454 | KV452948.1  | 438270 | 8-scf00204 | 8  |
| AX-157726784 | 9 | 87.454 | KV452948.1  | 439032 | 8-scf00204 | 8  |
| AX-158085457 | 9 | 87.454 | KV452948.1  | 439907 | 8-scf00204 | 8  |
| AX-158085459 | 9 | 87.454 | KV452948.1  | 443457 | 8-scf00204 | 8  |
| AX-158085460 | 9 | 87.508 | KV452948.1  | 444940 | 8-scf00204 | 8  |
| AX-158085461 | 9 | 87.564 | KV452948.1  | 447810 | 8-scf00204 | 8  |
| AX-158085464 | 9 | 87.564 | KV452948.1  | 450264 | 8-scf00204 | 8  |
| AX-157885609 | 9 | 87.564 | KV452948.1  | 481275 | 8-scf00204 | 8  |
| AX-158085471 | 9 | 87.673 | KV452948.1  | 463887 | 8-scf00204 | 8  |
| AX-158392106 | 9 | 87.673 | KV452948.1  | 464457 | 8-scf00204 | 8  |
| AX-158085472 | 9 | 87.673 | KV452948.1  | 466057 | 8-scf00204 | 8  |
| AX-157772308 | 9 | 87.673 | KV452948.1  | 468134 | 8-scf00204 | 8  |
| AX-158085477 | 9 | 87.673 | KV452948.1  | 472038 | 8-scf00204 | 8  |
| AX-157825230 | 9 | 87.673 | KV452948.1  | 472242 | 8-scf00204 | 8  |
| AX-158085478 | 9 | 87.673 | KV452948.1  | 472913 | 8-scf00204 | 8  |
| AX-157704842 | 9 | 87.673 | 3ML01027608 | 338    | scf03214_1 | UN |
| AX-158085467 | 9 | 87.726 | KV452948.1  | 454248 | 8-scf00204 | 8  |
| AX-158392107 | 9 | 87.726 | KV452948.1  | 481219 | 8-scf00204 | 8  |
| AX-158085486 | 9 | 87.726 | KV452948.1  | 482713 | 8-scf00204 | 8  |
| AX-158085488 | 9 | 87.726 | KV452948.1  | 484267 | 8-scf00204 | 8  |
| AX-157749931 | 9 | 87.891 | KV452948.1  | 473446 | 8-scf00204 | 8  |
| AX-158085479 | 9 | 87.891 | KV452948.1  | 474574 | 8-scf00204 | 8  |
| AX-158085482 | 9 | 87.891 | KV452948.1  | 478421 | 8-scf00204 | 8  |
| AX-158085485 | 9 | 87.891 | KV452948.1  | 480759 | 8-scf00204 | 8  |
| AX-157692992 | 9 | 87.891 | KV452948.1  | 482932 | 8-scf00204 | 8  |
| AX-158085487 | 9 | 87.891 | KV452948.1  | 483447 | 8-scf00204 | 8  |
| AX-158085489 | 9 | 88.056 | KV452948.1  | 487024 | 8-scf00204 | 8  |
| AX-157774725 | 9 | 88.056 | KV452948.1  | 487776 | 8-scf00204 | 8  |
| AX-158085491 | 9 | 88.217 | KV452948.1  | 488650 | 8-scf00204 | 8  |
| AX-157825232 | 9 | 88.218 | KV452948.1  | 492145 | 8-scf00204 | 8  |
| AX-158085492 | 9 | 88.219 | KV452948.1  | 490505 | 8-scf00204 | 8  |
| AX-157755180 | 9 | 88.219 | KV452948.1  | 495767 | 8-scf00204 | 8  |
| AX-158085495 | 9 | 88.219 | KV452948.1  | 498717 | 8-scf00204 | 8  |
| AX-158085500 | 9 | 88.219 | KV452948.1  | 504291 | 8-scf00204 | 8  |
| AX-158085502 | 9 | 88.286 | KV452948.1  | 506767 | 8-scf00204 | 8  |
| AX-158085506 | 9 | 88.357 | KV452948.1  | 509030 | 8-scf00204 | 8  |
| AX-158085507 | 9 | 88.357 | KV452948.1  | 509301 | 8-scf00204 | 8  |
| AX-158085508 | 9 | 88.357 | KV452948.1  | 510769 | 8-scf00204 | 8  |
| AX-158085509 | 9 | 88.495 | KV452948.1  | 512168 | 8-scf00204 | 8  |
| AX-158085511 | 9 | 88.495 | KV452948.1  | 515177 | 8-scf00204 | 8  |
| AX-158085512 | 9 | 88.495 | KV452948.1  | 516666 | 8-scf00204 | 8  |
| AX-158085518 | 9 | 88.495 | KV452948.1  | 524028 | 8-scf00204 | 8  |
| AX-158085524 | 9 | 88.495 | KV452948.1  | 539366 | 8-scf00204 | 8  |



|              |   |        |            |        |            |   |
|--------------|---|--------|------------|--------|------------|---|
| AX-158085517 | 9 | 88.568 | KV452948.1 | 523375 | 8-scf00204 | 8 |
| AX-158085519 | 9 | 88.755 | KV452948.1 | 529888 | 8-scf00204 | 8 |
| AX-158085520 | 9 | 88.761 | KV452948.1 | 531546 | 8-scf00204 | 8 |
| AX-158085522 | 9 | 88.762 | KV452948.1 | 535357 | 8-scf00204 | 8 |
| AX-158085525 | 9 | 88.764 | KV452948.1 | 543912 | 8-scf00204 | 8 |
| AX-158085530 | 9 | 88.766 | KV452948.1 | 548875 | 8-scf00204 | 8 |
| AX-158085533 | 9 | 88.766 | KV452948.1 | 554155 | 8-scf00204 | 8 |
| AX-158085536 | 9 | 88.811 | KV452948.1 | 557482 | 8-scf00204 | 8 |
| AX-158085537 | 9 | 88.9   | KV452948.1 | 560834 | 8-scf00204 | 8 |
| AX-158407095 | 9 | 88.985 | KV452948.1 | 562632 | 8-scf00204 | 8 |
| AX-158085540 | 9 | 88.985 | KV452948.1 | 564866 | 8-scf00204 | 8 |
| AX-157754743 | 9 | 88.985 | KV452948.1 | 566412 | 8-scf00204 | 8 |
| AX-158085562 | 9 | 88.985 | KV452948.1 | 601254 | 8-scf00204 | 8 |
| AX-158085542 | 9 | 89.058 | KV452948.1 | 569825 | 8-scf00204 | 8 |
| AX-158085544 | 9 | 89.149 | KV452948.1 | 572619 | 8-scf00204 | 8 |
| AX-158085545 | 9 | 89.149 | KV452948.1 | 573154 | 8-scf00204 | 8 |
| AX-158085527 | 9 | 89.216 | KV452948.1 | 545937 | 8-scf00204 | 8 |
| AX-158085529 | 9 | 89.216 | KV452948.1 | 547862 | 8-scf00204 | 8 |
| AX-158384476 | 9 | 89.216 | KV452948.1 | 550550 | 8-scf00204 | 8 |
| AX-158085541 | 9 | 89.216 | KV452948.1 | 565806 | 8-scf00204 | 8 |
| AX-158085543 | 9 | 89.216 | KV452948.1 | 571825 | 8-scf00204 | 8 |
| AX-158085547 | 9 | 89.216 | KV452948.1 | 575713 | 8-scf00204 | 8 |
| AX-158085549 | 9 | 89.216 | KV452948.1 | 578220 | 8-scf00204 | 8 |
| AX-158384478 | 9 | 89.216 | KV452948.1 | 618656 | 8-scf00204 | 8 |
| AX-158085554 | 9 | 89.253 | KV452948.1 | 586432 | 8-scf00204 | 8 |
| AX-158085555 | 9 | 89.313 | KV452948.1 | 586973 | 8-scf00204 | 8 |
| AX-158085556 | 9 | 89.313 | KV452948.1 | 589840 | 8-scf00204 | 8 |
| AX-158085558 | 9 | 89.313 | KV452948.1 | 592904 | 8-scf00204 | 8 |
| AX-158085559 | 9 | 89.313 | KV452948.1 | 595291 | 8-scf00204 | 8 |
| AX-158085560 | 9 | 89.313 | KV452948.1 | 599283 | 8-scf00204 | 8 |
| AX-158085561 | 9 | 89.313 | KV452948.1 | 599790 | 8-scf00204 | 8 |
| AX-158085563 | 9 | 89.313 | KV452948.1 | 601652 | 8-scf00204 | 8 |
| AX-158085565 | 9 | 89.313 | KV452948.1 | 605553 | 8-scf00204 | 8 |
| AX-158085568 | 9 | 89.313 | KV452948.1 | 607791 | 8-scf00204 | 8 |
| AX-158085569 | 9 | 89.313 | KV452948.1 | 608672 | 8-scf00204 | 8 |
| AX-158085570 | 9 | 89.313 | KV452948.1 | 609468 | 8-scf00204 | 8 |
| AX-158085580 | 9 | 89.313 | KV452948.1 | 620451 | 8-scf00204 | 8 |
| AX-158085592 | 9 | 89.313 | KV452948.1 | 631390 | 8-scf00204 | 8 |
| AX-158085594 | 9 | 89.313 | KV452948.1 | 634080 | 8-scf00204 | 8 |
| AX-157771682 | 9 | 89.313 | KV452948.1 | 639306 | 8-scf00204 | 8 |
| AX-158085573 | 9 | 89.422 | KV452948.1 | 611914 | 8-scf00204 | 8 |
| AX-158085521 | 9 | 89.469 | KV452948.1 | 532281 | 8-scf00204 | 8 |
| AX-158085574 | 9 | 89.469 | KV452948.1 | 613960 | 8-scf00204 | 8 |
| AX-157726879 | 9 | 89.469 | KV452948.1 | 615001 | 8-scf00204 | 8 |
| AX-158085548 | 9 | 89.531 | KV452948.1 | 577734 | 8-scf00204 | 8 |
| AX-157857194 | 9 | 89.531 | KV452948.1 | 616529 | 8-scf00204 | 8 |
| AX-158085577 | 9 | 89.531 | KV452948.1 | 617887 | 8-scf00204 | 8 |
| AX-158085579 | 9 | 89.531 | KV452948.1 | 618880 | 8-scf00204 | 8 |
| AX-158085584 | 9 | 89.531 | KV452948.1 | 625361 | 8-scf00204 | 8 |
| AX-158085585 | 9 | 89.531 | KV452948.1 | 625954 | 8-scf00204 | 8 |
| AX-158085597 | 9 | 89.585 | KV452948.1 | 638042 | 8-scf00204 | 8 |

|              |   |        |             |        |            |    |
|--------------|---|--------|-------------|--------|------------|----|
| AX-158085604 | 9 | 89.585 | KV452948.1  | 643693 | 8-scf00204 | 8  |
| AX-158085598 | 9 | 89.75  | KV452948.1  | 639829 | 8-scf00204 | 8  |
| AX-158085600 | 9 | 89.75  | KV452948.1  | 640997 | 8-scf00204 | 8  |
| AX-158085603 | 9 | 89.75  | KV452948.1  | 642712 | 8-scf00204 | 8  |
| AX-158085606 | 9 | 90.137 | KV452948.1  | 649770 | 8-scf00204 | 8  |
| AX-158085591 | 9 | 90.139 | KV452948.1  | 630799 | 8-scf00204 | 8  |
| AX-158085593 | 9 | 90.139 | KV452948.1  | 631845 | 8-scf00204 | 8  |
| AX-158085607 | 9 | 90.139 | KV452948.1  | 650460 | 8-scf00204 | 8  |
| AX-158085611 | 9 | 90.246 | KV452948.1  | 657358 | 8-scf00204 | 8  |
| AX-158085630 | 9 | 90.246 | KV452948.1  | 680359 | 8-scf00204 | 8  |
| AX-158384479 | 9 | 90.25  | KV452948.1  | 659767 | 8-scf00204 | 8  |
| AX-158085613 | 9 | 90.25  | KV452948.1  | 660526 | 8-scf00204 | 8  |
| AX-158392110 | 9 | 90.515 | KV452948.1  | 666316 | 8-scf00204 | 8  |
| AX-158085618 | 9 | 90.515 | KV452948.1  | 666629 | 8-scf00204 | 8  |
| AX-157709227 | 9 | 90.515 | KV452948.1  | 677733 | 8-scf00204 | 8  |
| AX-158085615 | 9 | 90.516 | KV452948.1  | 663026 | 8-scf00204 | 8  |
| AX-158085619 | 9 | 90.516 | KV452948.1  | 667172 | 8-scf00204 | 8  |
| AX-158085621 | 9 | 90.516 | KV452948.1  | 668466 | 8-scf00204 | 8  |
| AX-158085627 | 9 | 90.516 | KV452948.1  | 678902 | 8-scf00204 | 8  |
| AX-158085628 | 9 | 90.516 | KV452948.1  | 679516 | 8-scf00204 | 8  |
| AX-158085631 | 9 | 90.517 | KV452948.1  | 681533 | 8-scf00204 | 8  |
| AX-158085632 | 9 | 90.78  | KV452948.1  | 682735 | 8-scf00204 | 8  |
| AX-158085634 | 9 | 90.78  | KV452948.1  | 684283 | 8-scf00204 | 8  |
| AX-158085637 | 9 | 91.034 | KV452948.1  | 687632 | 8-scf00204 | 8  |
| AX-158085645 | 9 | 91.042 | KV452948.1  | 695719 | 8-scf00204 | 8  |
| AX-157771688 | 9 | 91.09  | KV452948.1  | 698223 | 8-scf00204 | 8  |
| AX-158085647 | 9 | 91.128 | KV452948.1  | 698734 | 8-scf00204 | 8  |
| AX-158085648 | 9 | 91.166 | KV452948.1  | 700578 | 8-scf00204 | 8  |
| AX-158085651 | 9 | 91.218 | KV452948.1  | 703339 | 8-scf00204 | 8  |
| AX-158085635 | 9 | 91.385 | KV452948.1  | 685704 | 8-scf00204 | 8  |
| AX-158085653 | 9 | 91.385 | KV452948.1  | 705061 | 8-scf00204 | 8  |
| AX-158085657 | 9 | 91.39  | KV452948.1  | 711322 | 8-scf00204 | 8  |
| AX-158085658 | 9 | 91.39  | KV452948.1  | 712361 | 8-scf00204 | 8  |
| AX-158085659 | 9 | 91.391 | KV452948.1  | 712975 | 8-scf00204 | 8  |
| AX-158085646 | 9 | 91.609 | KV452948.1  | 696804 | 8-scf00204 | 8  |
| AX-158085660 | 9 | 91.609 | KV452948.1  | 716395 | 8-scf00204 | 8  |
| AX-158085662 | 9 | 91.609 | KV452948.1  | 718065 | 8-scf00204 | 8  |
| AX-158085663 | 9 | 91.609 | KV452948.1  | 718522 | 8-scf00204 | 8  |
| AX-158085664 | 9 | 91.609 | KV452948.1  | 719533 | 8-scf00204 | 8  |
| AX-158085665 | 9 | 91.609 | KV452948.1  | 720387 | 8-scf00204 | 8  |
| AX-158085669 | 9 | 91.609 | KV452948.1  | 722821 | 8-scf00204 | 8  |
| AX-158085682 | 9 | 91.609 | KV452948.1  | 736248 | 8-scf00204 | 8  |
| AX-158085683 | 9 | 91.609 | KV452948.1  | 737768 | 8-scf00204 | 8  |
| AX-157707334 | 9 | 91.919 | 3ML01034035 | 227    | scf09705_1 | UN |
| AX-158085677 | 9 | 91.943 | KV452948.1  | 731267 | 8-scf00204 | 8  |
| AX-158085680 | 9 | 91.943 | KV452948.1  | 735174 | 8-scf00204 | 8  |
| AX-158085685 | 9 | 91.943 | KV452948.1  | 739322 | 8-scf00204 | 8  |
| AX-158085688 | 9 | 91.943 | KV452948.1  | 741268 | 8-scf00204 | 8  |
| AX-157741151 | 9 | 91.943 | KV452948.1  | 744596 | 8-scf00204 | 8  |
| AX-158085694 | 9 | 91.943 | KV452948.1  | 753071 | 8-scf00204 | 8  |
| AX-158085711 | 9 | 91.943 | KV452948.1  | 771048 | 8-scf00204 | 8  |

|              |   |        |             |        |            |    |
|--------------|---|--------|-------------|--------|------------|----|
| AX-158085689 | 9 | 92.374 | KV452948.1  | 746689 | 8-scf00204 | 8  |
| AX-157750187 | 9 | 92.374 | KV452948.1  | 749592 | 8-scf00204 | 8  |
| AX-158085691 | 9 | 92.374 | KV452948.1  | 750450 | 8-scf00204 | 8  |
| AX-158085692 | 9 | 92.374 | KV452948.1  | 751621 | 8-scf00204 | 8  |
| AX-158085695 | 9 | 92.374 | KV452948.1  | 754176 | 8-scf00204 | 8  |
| AX-158085697 | 9 | 92.374 | KV452948.1  | 756012 | 8-scf00204 | 8  |
| AX-158085726 | 9 | 92.374 | KV452948.1  | 798725 | 8-scf00204 | 8  |
| AX-158085700 | 9 | 92.483 | KV452948.1  | 758609 | 8-scf00204 | 8  |
| AX-158085701 | 9 | 92.483 | KV452948.1  | 759167 | 8-scf00204 | 8  |
| AX-158085705 | 9 | 92.483 | KV452948.1  | 764118 | 8-scf00204 | 8  |
| AX-158085706 | 9 | 92.483 | KV452948.1  | 765816 | 8-scf00204 | 8  |
| AX-158085708 | 9 | 92.483 | KV452948.1  | 767490 | 8-scf00204 | 8  |
| AX-158085709 | 9 | 92.483 | KV452948.1  | 769821 | 8-scf00204 | 8  |
| AX-158085730 | 9 | 92.483 | KV452948.1  | 805138 | 8-scf00204 | 8  |
| AX-158085712 | 9 | 92.484 | KV452948.1  | 772662 | 8-scf00204 | 8  |
| AX-158085716 | 9 | 92.485 | KV452948.1  | 781736 | 8-scf00204 | 8  |
| AX-158085718 | 9 | 92.485 | KV452948.1  | 789718 | 8-scf00204 | 8  |
| AX-158085721 | 9 | 92.485 | KV452948.1  | 791672 | 8-scf00204 | 8  |
| AX-158085727 | 9 | 92.485 | KV452948.1  | 802174 | 8-scf00204 | 8  |
| AX-158085717 | 9 | 92.486 | KV452948.1  | 782255 | 8-scf00204 | 8  |
| AX-158085720 | 9 | 92.487 | KV452948.1  | 791287 | 8-scf00204 | 8  |
| AX-158085723 | 9 | 92.487 | KV452948.1  | 794550 | 8-scf00204 | 8  |
| AX-157757619 | 9 | 92.876 | KV452948.1  | 797997 | 8-scf00204 | 8  |
| AX-158085729 | 9 | 92.876 | KV452948.1  | 804915 | 8-scf00204 | 8  |
| AX-158085733 | 9 | 92.876 | KV452948.1  | 807117 | 8-scf00204 | 8  |
| AX-158085734 | 9 | 92.876 | KV452948.1  | 809370 | 8-scf00204 | 8  |
| AX-158085735 | 9 | 92.876 | KV452948.1  | 811290 | 8-scf00204 | 8  |
| AX-158085737 | 9 | 93.138 | KV452948.1  | 814928 | 8-scf00204 | 8  |
| AX-157885614 | 9 | 93.138 | KV452948.1  | 815019 | 8-scf00204 | 8  |
| AX-158085740 | 9 | 93.138 | KV452948.1  | 818667 | 8-scf00204 | 8  |
| AX-158085742 | 9 | 93.138 | KV452948.1  | 821592 | 8-scf00204 | 8  |
| AX-157721742 | 9 | 93.138 | KV452948.1  | 827754 | 8-scf00204 | 8  |
| AX-158085746 | 9 | 93.138 | KV452948.1  | 830798 | 8-scf00204 | 8  |
| AX-158085747 | 9 | 93.138 | KV452948.1  | 831916 | 8-scf00204 | 8  |
| AX-158085749 | 9 | 93.138 | KV452948.1  | 834809 | 8-scf00204 | 8  |
| AX-158085748 | 9 | 93.139 | KV452948.1  | 832302 | 8-scf00204 | 8  |
| AX-158085750 | 9 | 93.464 | KV452948.1  | 836482 | 8-scf00204 | 8  |
| AX-158085753 | 9 | 93.686 | KV452948.1  | 841836 | 8-scf00204 | 8  |
| AX-157724251 | 9 | 93.686 | KV452948.1  | 846350 | 8-scf00204 | 8  |
| AX-157885616 | 9 | 93.686 | KV452948.1  | 847659 | 8-scf00204 | 8  |
| AX-158085757 | 9 | 93.686 | KV452948.1  | 847922 | 8-scf00204 | 8  |
| AX-158085758 | 9 | 93.686 | KV452948.1  | 849030 | 8-scf00204 | 8  |
| AX-157739897 | 9 | 93.823 | KV452948.1  | 854963 | 8-scf00204 | 8  |
| AX-158085764 | 9 | 93.823 | KV452948.1  | 860059 | 8-scf00204 | 8  |
| AX-158085765 | 9 | 93.823 | KV452948.1  | 861261 | 8-scf00204 | 8  |
| AX-157706165 | 9 | 94.082 | 3ML01031752 | 654    | scf07372_1 | UN |
| AX-157727251 | 9 | 94.233 | KV452948.1  | 865046 | 8-scf00204 | 8  |
| AX-157722960 | 9 | 94.233 | KV452948.1  | 866207 | 8-scf00204 | 8  |
| AX-158085768 | 9 | 94.233 | KV452948.1  | 868765 | 8-scf00204 | 8  |
| AX-158085770 | 9 | 94.233 | KV452948.1  | 870455 | 8-scf00204 | 8  |
| AX-158085776 | 9 | 94.234 | KV452948.1  | 875248 | 8-scf00204 | 8  |

|              |   |        |            |         |            |   |
|--------------|---|--------|------------|---------|------------|---|
| AX-158085777 | 9 | 94.613 | KV452948.1 | 878741  | 8-scf00204 | 8 |
| AX-158085780 | 9 | 94.613 | KV452948.1 | 881865  | 8-scf00204 | 8 |
| AX-158085781 | 9 | 94.613 | KV452948.1 | 883231  | 8-scf00204 | 8 |
| AX-158085783 | 9 | 94.613 | KV452948.1 | 885804  | 8-scf00204 | 8 |
| AX-158085784 | 9 | 94.613 | KV452948.1 | 886422  | 8-scf00204 | 8 |
| AX-158085786 | 9 | 94.613 | KV452948.1 | 888567  | 8-scf00204 | 8 |
| AX-157721664 | 9 | 94.613 | KV452948.1 | 891692  | 8-scf00204 | 8 |
| AX-158085788 | 9 | 94.613 | KV452948.1 | 893835  | 8-scf00204 | 8 |
| AX-158085789 | 9 | 94.613 | KV452948.1 | 895907  | 8-scf00204 | 8 |
| AX-157825234 | 9 | 94.744 | KV452948.1 | 898884  | 8-scf00204 | 8 |
| AX-158085799 | 9 | 94.744 | KV452948.1 | 905914  | 8-scf00204 | 8 |
| AX-158085793 | 9 | 94.865 | KV452948.1 | 899549  | 8-scf00204 | 8 |
| AX-158085794 | 9 | 94.865 | KV452948.1 | 900221  | 8-scf00204 | 8 |
| AX-158085797 | 9 | 94.868 | KV452948.1 | 903091  | 8-scf00204 | 8 |
| AX-158085791 | 9 | 95.026 | KV452948.1 | 897549  | 8-scf00204 | 8 |
| AX-158085792 | 9 | 95.026 | KV452948.1 | 898540  | 8-scf00204 | 8 |
| AX-158085798 | 9 | 95.026 | KV452948.1 | 903739  | 8-scf00204 | 8 |
| AX-158085800 | 9 | 95.04  | KV452948.1 | 908682  | 8-scf00204 | 8 |
| AX-158085804 | 9 | 95.326 | KV452948.1 | 915184  | 8-scf00204 | 8 |
| AX-158085805 | 9 | 95.326 | KV452948.1 | 916942  | 8-scf00204 | 8 |
| AX-158085806 | 9 | 95.326 | KV452948.1 | 923213  | 8-scf00204 | 8 |
| AX-157771830 | 9 | 95.326 | KV452948.1 | 924687  | 8-scf00204 | 8 |
| AX-158085808 | 9 | 95.326 | KV452948.1 | 926655  | 8-scf00204 | 8 |
| AX-158085809 | 9 | 95.326 | KV452948.1 | 926917  | 8-scf00204 | 8 |
| AX-158085810 | 9 | 95.337 | KV452948.1 | 928558  | 8-scf00204 | 8 |
| AX-158085814 | 9 | 95.872 | KV452948.1 | 936668  | 8-scf00204 | 8 |
| AX-158085816 | 9 | 95.872 | KV452948.1 | 941392  | 8-scf00204 | 8 |
| AX-158085819 | 9 | 95.872 | KV452948.1 | 944197  | 8-scf00204 | 8 |
| AX-158085820 | 9 | 95.872 | KV452948.1 | 945607  | 8-scf00204 | 8 |
| AX-158085821 | 9 | 95.872 | KV452948.1 | 947201  | 8-scf00204 | 8 |
| AX-158085822 | 9 | 95.874 | KV452948.1 | 948172  | 8-scf00204 | 8 |
| AX-157825237 | 9 | 96.198 | KV452948.1 | 955832  | 8-scf00204 | 8 |
| AX-158085843 | 9 | 96.198 | KV452948.1 | 985277  | 8-scf00204 | 8 |
| AX-158085825 | 9 | 96.202 | KV452948.1 | 957856  | 8-scf00204 | 8 |
| AX-157750490 | 9 | 96.202 | KV452948.1 | 963605  | 8-scf00204 | 8 |
| AX-158085829 | 9 | 96.202 | KV452948.1 | 964699  | 8-scf00204 | 8 |
| AX-158085833 | 9 | 96.202 | KV452948.1 | 969346  | 8-scf00204 | 8 |
| AX-158085834 | 9 | 96.202 | KV452948.1 | 969981  | 8-scf00204 | 8 |
| AX-158085838 | 9 | 96.202 | KV452948.1 | 976913  | 8-scf00204 | 8 |
| AX-158085839 | 9 | 96.202 | KV452948.1 | 980804  | 8-scf00204 | 8 |
| AX-158392111 | 9 | 96.202 | KV452948.1 | 1001099 | 8-scf00204 | 8 |
| AX-158085845 | 9 | 96.448 | KV452948.1 | 987025  | 8-scf00204 | 8 |
| AX-158085841 | 9 | 96.451 | KV452948.1 | 984175  | 8-scf00204 | 8 |
| AX-158085842 | 9 | 96.451 | KV452948.1 | 984539  | 8-scf00204 | 8 |
| AX-158085846 | 9 | 96.451 | KV452948.1 | 987395  | 8-scf00204 | 8 |
| AX-158085850 | 9 | 96.942 | KV452948.1 | 991130  | 8-scf00204 | 8 |
| AX-158085853 | 9 | 97.248 | KV452948.1 | 995082  | 8-scf00204 | 8 |
| AX-158085855 | 9 | 97.248 | KV452948.1 | 1001585 | 8-scf00204 | 8 |
| AX-158085856 | 9 | 97.249 | KV452948.1 | 1003335 | 8-scf00204 | 8 |
| AX-158085858 | 9 | 97.409 | KV452948.1 | 1005112 | 8-scf00204 | 8 |
| AX-158085859 | 9 | 97.542 | KV452948.1 | 1008713 | 8-scf00204 | 8 |

|              |   |        |            |         |            |   |
|--------------|---|--------|------------|---------|------------|---|
| AX-158085857 | 9 | 97.553 | KV452948.1 | 1003729 | 8-scf00204 | 8 |
| AX-158085860 | 9 | 97.553 | KV452948.1 | 1009182 | 8-scf00204 | 8 |
| AX-158085861 | 9 | 97.553 | KV452948.1 | 1014128 | 8-scf00204 | 8 |
| AX-158085862 | 9 | 97.553 | KV452948.1 | 1014363 | 8-scf00204 | 8 |
| AX-157825238 | 9 | 97.553 | KV452948.1 | 1015558 | 8-scf00204 | 8 |
| AX-158085864 | 9 | 97.553 | KV452948.1 | 1016335 | 8-scf00204 | 8 |
| AX-158085865 | 9 | 97.553 | KV452948.1 | 1019040 | 8-scf00204 | 8 |
| AX-158085866 | 9 | 97.553 | KV452948.1 | 1020229 | 8-scf00204 | 8 |
| AX-158409871 | 9 | 97.553 | KV452948.1 | 1020613 | 8-scf00204 | 8 |
| AX-158085868 | 9 | 97.849 | KV452948.1 | 1025981 | 8-scf00204 | 8 |
| AX-158085869 | 9 | 97.849 | KV452948.1 | 1026084 | 8-scf00204 | 8 |
| AX-157825239 | 9 | 97.849 | KV452948.1 | 1027410 | 8-scf00204 | 8 |
| AX-158085870 | 9 | 97.949 | KV452948.1 | 1028709 | 8-scf00204 | 8 |
| AX-157725245 | 9 | 97.951 | KV452948.1 | 1037027 | 8-scf00204 | 8 |
| AX-158085873 | 9 | 97.951 | KV452948.1 | 1038511 | 8-scf00204 | 8 |
| AX-158085874 | 9 | 97.951 | KV452948.1 | 1039227 | 8-scf00204 | 8 |
| AX-158085875 | 9 | 97.951 | KV452948.1 | 1039767 | 8-scf00204 | 8 |
| AX-158085876 | 9 | 97.951 | KV452948.1 | 1040589 | 8-scf00204 | 8 |
| AX-158085877 | 9 | 97.951 | KV452948.1 | 1041118 | 8-scf00204 | 8 |
| AX-158085879 | 9 | 97.951 | KV452948.1 | 1042660 | 8-scf00204 | 8 |
| AX-158085880 | 9 | 97.951 | KV452948.1 | 1043329 | 8-scf00204 | 8 |
| AX-157743133 | 9 | 97.951 | KV452948.1 | 1046018 | 8-scf00204 | 8 |
| AX-158085882 | 9 | 97.951 | KV452948.1 | 1048480 | 8-scf00204 | 8 |
| AX-158085883 | 9 | 97.951 | KV452948.1 | 1049110 | 8-scf00204 | 8 |
| AX-157751082 | 9 | 98.175 | KV452948.1 | 1054480 | 8-scf00204 | 8 |
| AX-158085888 | 9 | 98.38  | KV452948.1 | 1055978 | 8-scf00204 | 8 |
| AX-158085886 | 9 | 98.382 | KV452948.1 | 1053082 | 8-scf00204 | 8 |
| AX-158392112 | 9 | 98.382 | KV452948.1 | 1057718 | 8-scf00204 | 8 |
| AX-157771339 | 9 | 98.383 | KV452948.1 | 1060892 | 8-scf00204 | 8 |
| AX-158085891 | 9 | 98.386 | KV452948.1 | 1062347 | 8-scf00204 | 8 |
| AX-158085892 | 9 | 98.389 | KV452948.1 | 1064400 | 8-scf00204 | 8 |
| AX-157727431 | 9 | 98.389 | KV452948.1 | 1065999 | 8-scf00204 | 8 |
| AX-157857197 | 9 | 98.492 | KV452948.1 | 1081711 | 8-scf00204 | 8 |
| AX-158085905 | 9 | 98.492 | KV452948.1 | 1088232 | 8-scf00204 | 8 |
| AX-158085921 | 9 | 98.492 | KV452948.1 | 1115883 | 8-scf00204 | 8 |
| AX-158085907 | 9 | 98.582 | KV452948.1 | 1092686 | 8-scf00204 | 8 |
| AX-157756527 | 9 | 99.038 | KV452948.1 | 1093193 | 8-scf00204 | 8 |
| AX-158085908 | 9 | 99.038 | KV452948.1 | 1093677 | 8-scf00204 | 8 |
| AX-158085910 | 9 | 99.085 | KV452948.1 | 1100316 | 8-scf00204 | 8 |
| AX-158085894 | 9 | 99.131 | KV452948.1 | 1067458 | 8-scf00204 | 8 |
| AX-158085912 | 9 | 99.131 | KV452948.1 | 1102138 | 8-scf00204 | 8 |
| AX-158085930 | 9 | 99.131 | KV452948.1 | 1127702 | 8-scf00204 | 8 |
| AX-158085913 | 9 | 99.209 | KV452948.1 | 1103408 | 8-scf00204 | 8 |
| AX-158085914 | 9 | 99.209 | KV452948.1 | 1104850 | 8-scf00204 | 8 |
| AX-158085915 | 9 | 99.209 | KV452948.1 | 1108629 | 8-scf00204 | 8 |
| AX-158085916 | 9 | 99.257 | KV452948.1 | 1109731 | 8-scf00204 | 8 |
| AX-158085918 | 9 | 99.259 | KV452948.1 | 1112533 | 8-scf00204 | 8 |
| AX-158085919 | 9 | 99.259 | KV452948.1 | 1114073 | 8-scf00204 | 8 |
| AX-158085922 | 9 | 99.611 | KV452948.1 | 1118083 | 8-scf00204 | 8 |
| AX-158085923 | 9 | 99.611 | KV452948.1 | 1118997 | 8-scf00204 | 8 |
| AX-158085925 | 9 | 99.611 | KV452948.1 | 1121681 | 8-scf00204 | 8 |

|              |   |         |            |         |            |   |
|--------------|---|---------|------------|---------|------------|---|
| AX-158085926 | 9 | 99.611  | KV452948.1 | 1122721 | 8-scf00204 | 8 |
| AX-158085935 | 9 | 99.611  | KV452948.1 | 1132641 | 8-scf00204 | 8 |
| AX-157739724 | 9 | 99.612  | KV452948.1 | 1124256 | 8-scf00204 | 8 |
| AX-158085931 | 9 | 99.612  | KV452948.1 | 1129096 | 8-scf00204 | 8 |
| AX-158085933 | 9 | 99.665  | KV452948.1 | 1130222 | 8-scf00204 | 8 |
| AX-158085934 | 9 | 99.986  | KV452948.1 | 1131408 | 8-scf00204 | 8 |
| AX-158085938 | 9 | 100.368 | KV452948.1 | 1135116 | 8-scf00204 | 8 |
| AX-158085960 | 9 | 100.368 | KV452948.1 | 1167952 | 8-scf00204 | 8 |
| AX-158085942 | 9 | 100.75  | KV452948.1 | 1139177 | 8-scf00204 | 8 |
| AX-158085943 | 9 | 100.751 | KV452948.1 | 1141006 | 8-scf00204 | 8 |
| AX-158085945 | 9 | 100.762 | KV452948.1 | 1142234 | 8-scf00204 | 8 |
| AX-158392113 | 9 | 100.774 | KV452948.1 | 1145733 | 8-scf00204 | 8 |
| AX-158384492 | 9 | 100.78  | KV452948.1 | 1148138 | 8-scf00204 | 8 |
| AX-158085952 | 9 | 101.186 | KV452948.1 | 1158573 | 8-scf00204 | 8 |
| AX-158085953 | 9 | 101.198 | KV452948.1 | 1159629 | 8-scf00204 | 8 |
| AX-157757638 | 9 | 101.251 | KV452948.1 | 1160925 | 8-scf00204 | 8 |
| AX-158085955 | 9 | 101.251 | KV452948.1 | 1162262 | 8-scf00204 | 8 |
| AX-158085956 | 9 | 101.455 | KV452948.1 | 1165320 | 8-scf00204 | 8 |
| AX-158085966 | 9 | 101.455 | KV452948.1 | 1177346 | 8-scf00204 | 8 |
| AX-158085967 | 9 | 101.455 | KV452948.1 | 1177701 | 8-scf00204 | 8 |
| AX-158085968 | 9 | 101.455 | KV452948.1 | 1179129 | 8-scf00204 | 8 |
| AX-158085969 | 9 | 101.455 | KV452948.1 | 1179761 | 8-scf00204 | 8 |
| AX-158085970 | 9 | 101.455 | KV452948.1 | 1181794 | 8-scf00204 | 8 |
| AX-158085979 | 9 | 101.455 | KV452948.1 | 1190349 | 8-scf00204 | 8 |
| AX-158085971 | 9 | 101.462 | KV452948.1 | 1183022 | 8-scf00204 | 8 |
| AX-158085973 | 9 | 101.462 | KV452948.1 | 1185138 | 8-scf00204 | 8 |
| AX-157738515 | 9 | 101.462 | KV452948.1 | 1189117 | 8-scf00204 | 8 |
| AX-158085990 | 9 | 101.462 | KV452948.1 | 1205361 | 8-scf00204 | 8 |
| AX-158085999 | 9 | 101.462 | KV452948.1 | 1219037 | 8-scf00204 | 8 |
| AX-158085974 | 9 | 101.48  | KV452948.1 | 1185780 | 8-scf00204 | 8 |
| AX-158085977 | 9 | 101.505 | KV452948.1 | 1188380 | 8-scf00204 | 8 |
| AX-158085984 | 9 | 101.519 | KV452948.1 | 1197941 | 8-scf00204 | 8 |
| AX-157706982 | 9 | 101.538 | KV452948.1 | 1200262 | 8-scf00204 | 8 |
| AX-157885621 | 9 | 101.57  | KV452948.1 | 1161291 | 8-scf00204 | 8 |
| AX-158085959 | 9 | 101.57  | KV452948.1 | 1167170 | 8-scf00204 | 8 |
| AX-157709878 | 9 | 101.57  | KV452948.1 | 1200689 | 8-scf00204 | 8 |
| AX-158085985 | 9 | 101.57  | KV452948.1 | 1201110 | 8-scf00204 | 8 |
| AX-158085986 | 9 | 101.57  | KV452948.1 | 1202884 | 8-scf00204 | 8 |
| AX-158085988 | 9 | 101.57  | KV452948.1 | 1204112 | 8-scf00204 | 8 |
| AX-158085989 | 9 | 101.57  | KV452948.1 | 1204765 | 8-scf00204 | 8 |
| AX-158085992 | 9 | 101.635 | KV452948.1 | 1209313 | 8-scf00204 | 8 |
| AX-158085993 | 9 | 101.662 | KV452948.1 | 1210549 | 8-scf00204 | 8 |
| AX-158392114 | 9 | 101.68  | KV452948.1 | 1210703 | 8-scf00204 | 8 |
| AX-158085994 | 9 | 101.68  | KV452948.1 | 1210959 | 8-scf00204 | 8 |
| AX-158085996 | 9 | 101.68  | KV452948.1 | 1213746 | 8-scf00204 | 8 |
| AX-157754970 | 9 | 101.68  | KV452948.1 | 1234971 | 8-scf00204 | 8 |
| AX-158086000 | 9 | 101.844 | KV452948.1 | 1220693 | 8-scf00204 | 8 |
| AX-158086002 | 9 | 101.844 | KV452948.1 | 1223371 | 8-scf00204 | 8 |
| AX-157726884 | 9 | 101.844 | KV452948.1 | 1223638 | 8-scf00204 | 8 |
| AX-158086003 | 9 | 101.844 | KV452948.1 | 1224407 | 8-scf00204 | 8 |
| AX-157743360 | 9 | 101.844 | KV452948.1 | 1270565 | 8-scf00204 | 8 |

|              |   |         |            |         |            |   |
|--------------|---|---------|------------|---------|------------|---|
| AX-158086005 | 9 | 102.007 | KV452948.1 | 1232693 | 8-scf00204 | 8 |
| AX-158086010 | 9 | 102.007 | KV452948.1 | 1236615 | 8-scf00204 | 8 |
| AX-157885623 | 9 | 102.007 | KV452948.1 | 1240318 | 8-scf00204 | 8 |
| AX-158086014 | 9 | 102.007 | KV452948.1 | 1242839 | 8-scf00204 | 8 |
| AX-158086017 | 9 | 102.007 | KV452948.1 | 1247353 | 8-scf00204 | 8 |
| AX-158086018 | 9 | 102.007 | KV452948.1 | 1250328 | 8-scf00204 | 8 |
| AX-158086020 | 9 | 102.007 | KV452948.1 | 1252231 | 8-scf00204 | 8 |
| AX-158086021 | 9 | 102.117 | KV452948.1 | 1253381 | 8-scf00204 | 8 |
| AX-158086022 | 9 | 102.117 | KV452948.1 | 1254166 | 8-scf00204 | 8 |
| AX-158086023 | 9 | 102.117 | KV452948.1 | 1255448 | 8-scf00204 | 8 |
| AX-158086024 | 9 | 102.143 | KV452948.1 | 1255970 | 8-scf00204 | 8 |
| AX-157747164 | 9 | 102.143 | KV452948.1 | 1257053 | 8-scf00204 | 8 |
| AX-158086026 | 9 | 102.162 | KV452948.1 | 1259748 | 8-scf00204 | 8 |
| AX-158086029 | 9 | 102.183 | KV452948.1 | 1262819 | 8-scf00204 | 8 |
| AX-158086030 | 9 | 102.203 | KV452948.1 | 1264008 | 8-scf00204 | 8 |
| AX-158086031 | 9 | 102.226 | KV452948.1 | 1264711 | 8-scf00204 | 8 |
| AX-158086033 | 9 | 102.226 | KV452948.1 | 1267060 | 8-scf00204 | 8 |
| AX-158086034 | 9 | 102.226 | KV452948.1 | 1267686 | 8-scf00204 | 8 |
| AX-158086035 | 9 | 102.226 | KV452948.1 | 1269412 | 8-scf00204 | 8 |
| AX-158086037 | 9 | 102.226 | KV452948.1 | 1272887 | 8-scf00204 | 8 |
| AX-158086039 | 9 | 102.226 | KV452948.1 | 1274723 | 8-scf00204 | 8 |
| AX-158086042 | 9 | 102.226 | KV452948.1 | 1278185 | 8-scf00204 | 8 |
| AX-157773294 | 9 | 102.226 | KV452948.1 | 1278400 | 8-scf00204 | 8 |
| AX-158086019 | 9 | 102.348 | KV452948.1 | 1250701 | 8-scf00204 | 8 |
| AX-158086043 | 9 | 102.348 | KV452948.1 | 1279310 | 8-scf00204 | 8 |
| AX-157719838 | 9 | 102.445 | KV452948.1 | 1281493 | 8-scf00204 | 8 |
| AX-158086047 | 9 | 102.445 | KV452948.1 | 1285101 | 8-scf00204 | 8 |
| AX-158086048 | 9 | 102.445 | KV452948.1 | 1286587 | 8-scf00204 | 8 |
| AX-157825241 | 9 | 102.445 | KV452948.1 | 1291500 | 8-scf00204 | 8 |
| AX-158086054 | 9 | 102.554 | KV452948.1 | 1297471 | 8-scf00204 | 8 |
| AX-158086055 | 9 | 102.554 | KV452948.1 | 1298076 | 8-scf00204 | 8 |
| AX-157752339 | 9 | 102.554 | KV452948.1 | 1298948 | 8-scf00204 | 8 |
| AX-158086056 | 9 | 102.663 | KV452948.1 | 1298321 | 8-scf00204 | 8 |
| AX-158086060 | 9 | 102.663 | KV452948.1 | 1311078 | 8-scf00204 | 8 |
| AX-158086045 | 9 | 102.772 | KV452948.1 | 1280331 | 8-scf00204 | 8 |
| AX-157870872 | 9 | 102.772 | KV452948.1 | 1300909 | 8-scf00204 | 8 |
| AX-158086059 | 9 | 102.772 | KV452948.1 | 1308445 | 8-scf00204 | 8 |
| AX-157825244 | 9 | 102.772 | KV452948.1 | 1315003 | 8-scf00204 | 8 |
| AX-157739157 | 9 | 102.772 | KV452948.1 | 1315179 | 8-scf00204 | 8 |
| AX-158086061 | 9 | 102.772 | KV452948.1 | 1316505 | 8-scf00204 | 8 |
| AX-157746374 | 9 | 102.772 | KV452948.1 | 1317598 | 8-scf00204 | 8 |
| AX-158086064 | 9 | 102.772 | KV452948.1 | 1320631 | 8-scf00204 | 8 |
| AX-158086065 | 9 | 102.772 | KV452948.1 | 1323774 | 8-scf00204 | 8 |
| AX-158086066 | 9 | 102.772 | KV452948.1 | 1324204 | 8-scf00204 | 8 |
| AX-158086067 | 9 | 102.772 | KV452948.1 | 1324631 | 8-scf00204 | 8 |
| AX-158086068 | 9 | 102.772 | KV452948.1 | 1327792 | 8-scf00204 | 8 |
| AX-158086072 | 9 | 102.772 | KV452948.1 | 1331676 | 8-scf00204 | 8 |
| AX-158086074 | 9 | 102.772 | KV452948.1 | 1334047 | 8-scf00204 | 8 |
| AX-158086076 | 9 | 102.772 | KV452948.1 | 1335004 | 8-scf00204 | 8 |
| AX-158086077 | 9 | 102.772 | KV452948.1 | 1340790 | 8-scf00204 | 8 |
| AX-158086078 | 9 | 102.772 | KV452948.1 | 1341940 | 8-scf00204 | 8 |

|              |   |         |             |         |            |    |
|--------------|---|---------|-------------|---------|------------|----|
| AX-158086079 | 9 | 102.772 | KV452948.1  | 1343085 | 8-scf00204 | 8  |
| AX-158086080 | 9 | 102.772 | KV452948.1  | 1343944 | 8-scf00204 | 8  |
| AX-158086082 | 9 | 102.772 | KV452948.1  | 1345596 | 8-scf00204 | 8  |
| AX-158086083 | 9 | 102.772 | KV452948.1  | 1350382 | 8-scf00204 | 8  |
| AX-157720081 | 9 | 103.002 | KV452948.1  | 1349996 | 8-scf00204 | 8  |
| AX-158086086 | 9 | 103.002 | KV452948.1  | 1353300 | 8-scf00204 | 8  |
| AX-158086085 | 9 | 103.231 | KV452948.1  | 1352954 | 8-scf00204 | 8  |
| AX-157723972 | 9 | 103.231 | KV452948.1  | 1354356 | 8-scf00204 | 8  |
| AX-158086087 | 9 | 103.231 | KV452948.1  | 1356474 | 8-scf00204 | 8  |
| AX-158086090 | 9 | 103.231 | KV452948.1  | 1358207 | 8-scf00204 | 8  |
| AX-158086091 | 9 | 103.231 | KV452948.1  | 1359645 | 8-scf00204 | 8  |
| AX-158086093 | 9 | 103.537 | KV452948.1  | 1360816 | 8-scf00204 | 8  |
| AX-158086095 | 9 | 103.537 | KV452948.1  | 1362276 | 8-scf00204 | 8  |
| AX-158086099 | 9 | 103.537 | KV452948.1  | 1365130 | 8-scf00204 | 8  |
| AX-158086101 | 9 | 103.537 | KV452948.1  | 1367302 | 8-scf00204 | 8  |
| AX-158086102 | 9 | 103.537 | KV452948.1  | 1368589 | 8-scf00204 | 8  |
| AX-158086103 | 9 | 103.537 | KV452948.1  | 1369165 | 8-scf00204 | 8  |
| AX-158086105 | 9 | 103.537 | KV452948.1  | 1369956 | 8-scf00204 | 8  |
| AX-158086106 | 9 | 103.537 | KV452948.1  | 1371623 | 8-scf00204 | 8  |
| AX-158086107 | 9 | 103.537 | KV452948.1  | 1372835 | 8-scf00204 | 8  |
| AX-158086110 | 9 | 103.537 | KV452948.1  | 1374868 | 8-scf00204 | 8  |
| AX-158086112 | 9 | 103.537 | KV452948.1  | 1377572 | 8-scf00204 | 8  |
| AX-157771572 | 9 | 103.635 | KV452948.1  | 1379189 | 8-scf00204 | 8  |
| AX-158086097 | 9 | 103.756 | KV452948.1  | 1363869 | 8-scf00204 | 8  |
| AX-157699905 | 9 | 103.756 | KV452948.1  | 1384291 | 8-scf00204 | 8  |
| AX-158086115 | 9 | 103.756 | KV452948.1  | 1385440 | 8-scf00204 | 8  |
| AX-158086116 | 9 | 103.756 | KV452948.1  | 1385563 | 8-scf00204 | 8  |
| AX-158086117 | 9 | 103.756 | KV452948.1  | 1387088 | 8-scf00204 | 8  |
| AX-158086119 | 9 | 103.756 | KV452948.1  | 1388491 | 8-scf00204 | 8  |
| AX-158086120 | 9 | 103.756 | KV452948.1  | 1389147 | 8-scf00204 | 8  |
| AX-158086121 | 9 | 103.756 | KV452948.1  | 1389626 | 8-scf00204 | 8  |
| AX-157702662 | 9 | 103.756 | KV452948.1  | 1393016 | 8-scf00204 | 8  |
| AX-158086123 | 9 | 103.756 | KV452948.1  | 1393285 | 8-scf00204 | 8  |
| AX-158384498 | 9 | 103.756 | KV452948.1  | 1393667 | 8-scf00204 | 8  |
| AX-158086124 | 9 | 103.756 | KV452948.1  | 1394158 | 8-scf00204 | 8  |
| AX-158086126 | 9 | 103.756 | KV452948.1  | 1395798 | 8-scf00204 | 8  |
| AX-158086143 | 9 | 103.756 | KV452948.1  | 1411892 | 8-scf00204 | 8  |
| AX-158086176 | 9 | 103.756 | KV452948.1  | 1444935 | 8-scf00204 | 8  |
| AX-158086125 | 9 | 103.865 | KV452948.1  | 1395282 | 8-scf00204 | 8  |
| AX-158086127 | 9 | 103.865 | KV452948.1  | 1396485 | 8-scf00204 | 8  |
| AX-158086129 | 9 | 103.865 | KV452948.1  | 1398061 | 8-scf00204 | 8  |
| AX-158086133 | 9 | 103.865 | KV452948.1  | 1401630 | 8-scf00204 | 8  |
| AX-158086135 | 9 | 103.865 | KV452948.1  | 1403695 | 8-scf00204 | 8  |
| AX-158086136 | 9 | 103.866 | KV452948.1  | 1404359 | 8-scf00204 | 8  |
| AX-158086137 | 9 | 103.867 | KV452948.1  | 1405220 | 8-scf00204 | 8  |
| AX-158086139 | 9 | 104.029 | KV452948.1  | 1408290 | 8-scf00204 | 8  |
| AX-157707478 | 9 | 104.03  | 3ML01034360 | 421     | scf10034_1 | UN |
| AX-158086141 | 9 | 104.032 | KV452948.1  | 1410026 | 8-scf00204 | 8  |
| AX-158086146 | 9 | 104.126 | KV452948.1  | 1417643 | 8-scf00204 | 8  |
| AX-158086142 | 9 | 104.188 | KV452948.1  | 1410714 | 8-scf00204 | 8  |
| AX-158086147 | 9 | 104.188 | KV452948.1  | 1418946 | 8-scf00204 | 8  |



|              |   |         |            |         |            |   |
|--------------|---|---------|------------|---------|------------|---|
| AX-158086155 | 9 | 104.258 | KV452948.1 | 1425729 | 8-scf00204 | 8 |
| AX-158086156 | 9 | 104.412 | KV452948.1 | 1426413 | 8-scf00204 | 8 |
| AX-158086157 | 9 | 104.412 | KV452948.1 | 1428835 | 8-scf00204 | 8 |
| AX-158086158 | 9 | 104.412 | KV452948.1 | 1430692 | 8-scf00204 | 8 |
| AX-158086159 | 9 | 104.412 | KV452948.1 | 1432334 | 8-scf00204 | 8 |
| AX-158086165 | 9 | 104.412 | KV452948.1 | 1436580 | 8-scf00204 | 8 |
| AX-158086166 | 9 | 104.412 | KV452948.1 | 1436941 | 8-scf00204 | 8 |
| AX-158086167 | 9 | 104.412 | KV452948.1 | 1437541 | 8-scf00204 | 8 |
| AX-158086168 | 9 | 104.412 | KV452948.1 | 1438105 | 8-scf00204 | 8 |
| AX-158086169 | 9 | 104.412 | KV452948.1 | 1440244 | 8-scf00204 | 8 |
| AX-158086171 | 9 | 104.412 | KV452948.1 | 1441388 | 8-scf00204 | 8 |
| AX-158086173 | 9 | 104.412 | KV452948.1 | 1442394 | 8-scf00204 | 8 |
| AX-158086175 | 9 | 104.412 | KV452948.1 | 1443417 | 8-scf00204 | 8 |
| AX-158086180 | 9 | 104.412 | KV452948.1 | 1449487 | 8-scf00204 | 8 |
| AX-158086181 | 9 | 104.412 | KV452948.1 | 1450111 | 8-scf00204 | 8 |
| AX-158086182 | 9 | 104.437 | KV452948.1 | 1450824 | 8-scf00204 | 8 |
| AX-158086183 | 9 | 104.522 | KV452948.1 | 1454250 | 8-scf00204 | 8 |
| AX-158086184 | 9 | 104.522 | KV452948.1 | 1455125 | 8-scf00204 | 8 |
| AX-158086185 | 9 | 104.522 | KV452948.1 | 1455574 | 8-scf00204 | 8 |
| AX-158086191 | 9 | 104.795 | KV452948.1 | 1467364 | 8-scf00204 | 8 |
| AX-158086203 | 9 | 105.069 | KV452948.1 | 1486710 | 8-scf00204 | 8 |
| AX-158086204 | 9 | 105.069 | KV452948.1 | 1487304 | 8-scf00204 | 8 |
| AX-158086208 | 9 | 105.069 | KV452948.1 | 1489392 | 8-scf00204 | 8 |
| AX-158086209 | 9 | 105.069 | KV452948.1 | 1489719 | 8-scf00204 | 8 |
| AX-158086210 | 9 | 105.069 | KV452948.1 | 1490267 | 8-scf00204 | 8 |
| AX-158086211 | 9 | 105.069 | KV452948.1 | 1491285 | 8-scf00204 | 8 |
| AX-157727106 | 9 | 105.396 | KV452948.1 | 1492534 | 8-scf00204 | 8 |
| AX-157749291 | 9 | 105.397 | KV452948.1 | 1498018 | 8-scf00204 | 8 |
| AX-158086214 | 9 | 105.397 | KV452948.1 | 1501502 | 8-scf00204 | 8 |
| AX-158086215 | 9 | 105.397 | KV452948.1 | 1502657 | 8-scf00204 | 8 |
| AX-158086216 | 9 | 105.397 | KV452948.1 | 1503199 | 8-scf00204 | 8 |
| AX-158086219 | 9 | 105.397 | KV452948.1 | 1505855 | 8-scf00204 | 8 |
| AX-157857202 | 9 | 105.561 | KV452948.1 | 1513554 | 8-scf00204 | 8 |
| AX-158086222 | 9 | 105.561 | KV452948.1 | 1514827 | 8-scf00204 | 8 |
| AX-157877183 | 9 | 105.561 | KV452948.1 | 1524808 | 8-scf00204 | 8 |
| AX-158086224 | 9 | 105.724 | KV452948.1 | 1516487 | 8-scf00204 | 8 |
| AX-158086225 | 9 | 105.724 | KV452948.1 | 1517255 | 8-scf00204 | 8 |
| AX-158086227 | 9 | 105.724 | KV452948.1 | 1520080 | 8-scf00204 | 8 |
| AX-158086230 | 9 | 105.724 | KV452948.1 | 1522602 | 8-scf00204 | 8 |
| AX-157752495 | 9 | 105.724 | KV452948.1 | 1523960 | 8-scf00204 | 8 |
| AX-158086231 | 9 | 105.724 | KV452948.1 | 1525137 | 8-scf00204 | 8 |
| AX-158086235 | 9 | 105.943 | KV452948.1 | 1528139 | 8-scf00204 | 8 |
| AX-157722337 | 9 | 106.007 | KV452948.1 | 1530965 | 8-scf00204 | 8 |
| AX-158086238 | 9 | 106.052 | KV452948.1 | 1532668 | 8-scf00204 | 8 |
| AX-158086240 | 9 | 106.073 | KV452948.1 | 1534520 | 8-scf00204 | 8 |
| AX-158086242 | 9 | 106.102 | KV452948.1 | 1536705 | 8-scf00204 | 8 |
| AX-158086243 | 9 | 106.132 | KV452948.1 | 1537113 | 8-scf00204 | 8 |
| AX-158086244 | 9 | 106.132 | KV452948.1 | 1537578 | 8-scf00204 | 8 |
| AX-158086245 | 9 | 106.161 | KV452948.1 | 1538985 | 8-scf00204 | 8 |
| AX-158086247 | 9 | 106.161 | KV452948.1 | 1540603 | 8-scf00204 | 8 |
| AX-158086254 | 9 | 106.161 | KV452948.1 | 1552239 | 8-scf00204 | 8 |

|              |   |         |            |         |            |   |
|--------------|---|---------|------------|---------|------------|---|
| AX-158086259 | 9 | 106.161 | KV452948.1 | 1556295 | 8-scf00204 | 8 |
| AX-158086255 | 9 | 106.38  | KV452948.1 | 1552374 | 8-scf00204 | 8 |
| AX-158086257 | 9 | 106.38  | KV452948.1 | 1555173 | 8-scf00204 | 8 |
| AX-158086258 | 9 | 106.38  | KV452948.1 | 1555588 | 8-scf00204 | 8 |
| AX-157774904 | 9 | 106.548 | KV452948.1 | 1556897 | 8-scf00204 | 8 |
| AX-158086261 | 9 | 106.707 | KV452948.1 | 1558182 | 8-scf00204 | 8 |
| AX-158086262 | 9 | 106.708 | KV452948.1 | 1558593 | 8-scf00204 | 8 |
| AX-158086275 | 9 | 106.708 | KV452948.1 | 1572917 | 8-scf00204 | 8 |
| AX-158086269 | 9 | 107.033 | KV452948.1 | 1568888 | 8-scf00204 | 8 |
| AX-158086273 | 9 | 107.033 | KV452948.1 | 1572004 | 8-scf00204 | 8 |
| AX-157857203 | 9 | 107.033 | KV452948.1 | 1576843 | 8-scf00204 | 8 |
| AX-158086284 | 9 | 107.033 | KV452948.1 | 1585283 | 8-scf00204 | 8 |
| AX-158086280 | 9 | 107.035 | KV452948.1 | 1577767 | 8-scf00204 | 8 |
| AX-158086281 | 9 | 107.035 | KV452948.1 | 1578495 | 8-scf00204 | 8 |
| AX-158086282 | 9 | 107.035 | KV452948.1 | 1582529 | 8-scf00204 | 8 |
| AX-158086266 | 9 | 107.036 | KV452948.1 | 1565569 | 8-scf00204 | 8 |
| AX-158086283 | 9 | 107.036 | KV452948.1 | 1584109 | 8-scf00204 | 8 |
| AX-158086285 | 9 | 107.036 | KV452948.1 | 1585782 | 8-scf00204 | 8 |
| AX-158086286 | 9 | 107.036 | KV452948.1 | 1586390 | 8-scf00204 | 8 |
| AX-157750179 | 9 | 107.036 | KV452948.1 | 1587601 | 8-scf00204 | 8 |
| AX-158086290 | 9 | 107.036 | KV452948.1 | 1601328 | 8-scf00204 | 8 |
| AX-158086312 | 9 | 107.036 | KV452948.1 | 1625285 | 8-scf00204 | 8 |
| AX-158416721 | 9 | 107.515 | KV452948.1 | 1599983 | 8-scf00204 | 8 |
| AX-157752145 | 9 | 107.677 | KV452948.1 | 1615541 | 8-scf00204 | 8 |
| AX-158086308 | 9 | 107.89  | KV452948.1 | 1621551 | 8-scf00204 | 8 |
| AX-158086316 | 9 | 107.89  | KV452948.1 | 1630449 | 8-scf00204 | 8 |
| AX-158086318 | 9 | 107.89  | KV452948.1 | 1631861 | 8-scf00204 | 8 |
| AX-158086319 | 9 | 107.89  | KV452948.1 | 1632635 | 8-scf00204 | 8 |
| AX-158086320 | 9 | 107.89  | KV452948.1 | 1633357 | 8-scf00204 | 8 |
| AX-158086321 | 9 | 107.89  | KV452948.1 | 1634803 | 8-scf00204 | 8 |
| AX-158086322 | 9 | 107.89  | KV452948.1 | 1635408 | 8-scf00204 | 8 |
| AX-158086323 | 9 | 107.89  | KV452948.1 | 1636257 | 8-scf00204 | 8 |
| AX-158086325 | 9 | 107.89  | KV452948.1 | 1639561 | 8-scf00204 | 8 |
| AX-158086327 | 9 | 107.89  | KV452948.1 | 1641105 | 8-scf00204 | 8 |
| AX-158384506 | 9 | 107.89  | KV452948.1 | 1643765 | 8-scf00204 | 8 |
| AX-158086336 | 9 | 107.89  | KV452948.1 | 1650864 | 8-scf00204 | 8 |
| AX-158086337 | 9 | 107.89  | KV452948.1 | 1651741 | 8-scf00204 | 8 |
| AX-158086362 | 9 | 107.89  | KV452948.1 | 1682793 | 8-scf00204 | 8 |
| AX-158086383 | 9 | 107.89  | KV452948.1 | 1714834 | 8-scf00204 | 8 |
| AX-158086328 | 9 | 107.975 | KV452948.1 | 1642191 | 8-scf00204 | 8 |
| AX-158086335 | 9 | 107.975 | KV452948.1 | 1649722 | 8-scf00204 | 8 |
| AX-158086333 | 9 | 108.06  | KV452948.1 | 1648766 | 8-scf00204 | 8 |
| AX-158086334 | 9 | 108.06  | KV452948.1 | 1649292 | 8-scf00204 | 8 |
| AX-158086339 | 9 | 108.06  | KV452948.1 | 1656318 | 8-scf00204 | 8 |
| AX-158086346 | 9 | 108.06  | KV452948.1 | 1662874 | 8-scf00204 | 8 |
| AX-158086344 | 9 | 108.064 | KV452948.1 | 1660609 | 8-scf00204 | 8 |
| AX-158086347 | 9 | 108.067 | KV452948.1 | 1663945 | 8-scf00204 | 8 |
| AX-158086332 | 9 | 108.07  | KV452948.1 | 1648334 | 8-scf00204 | 8 |
| AX-158086349 | 9 | 108.07  | KV452948.1 | 1665445 | 8-scf00204 | 8 |
| AX-158086350 | 9 | 108.07  | KV452948.1 | 1665986 | 8-scf00204 | 8 |
| AX-158086379 | 9 | 108.07  | KV452948.1 | 1705505 | 8-scf00204 | 8 |

|              |   |         |             |         |            |    |
|--------------|---|---------|-------------|---------|------------|----|
| AX-158086352 | 9 | 108.562 | KV452948.1  | 1668725 | 8-scf00204 | 8  |
| AX-158086355 | 9 | 108.566 | KV452948.1  | 1670113 | 8-scf00204 | 8  |
| AX-158086360 | 9 | 108.572 | KV452948.1  | 1679823 | 8-scf00204 | 8  |
| AX-157717536 | 9 | 108.86  | KV452948.1  | 1680940 | 8-scf00204 | 8  |
| AX-157705786 | 9 | 108.884 | 3ML01030879 | 428     | scf06483_1 | UN |
| AX-158086372 | 9 | 109.335 | KV452948.1  | 1693913 | 8-scf00204 | 8  |
| AX-158086374 | 9 | 109.336 | KV452948.1  | 1697867 | 8-scf00204 | 8  |
| AX-158086378 | 9 | 109.336 | KV452948.1  | 1705109 | 8-scf00204 | 8  |
| AX-158086380 | 9 | 109.745 | KV452948.1  | 1708073 | 8-scf00204 | 8  |
| AX-158086381 | 9 | 109.745 | KV452948.1  | 1709543 | 8-scf00204 | 8  |
| AX-158086385 | 9 | 109.745 | KV452948.1  | 1716715 | 8-scf00204 | 8  |
| AX-158086382 | 9 | 109.882 | KV452948.1  | 1713076 | 8-scf00204 | 8  |
| AX-158086384 | 9 | 109.882 | KV452948.1  | 1715337 | 8-scf00204 | 8  |
| AX-158086386 | 9 | 109.882 | KV452948.1  | 1716845 | 8-scf00204 | 8  |
| AX-158086402 | 9 | 109.882 | KV452948.1  | 1742243 | 8-scf00204 | 8  |
| AX-158086388 | 9 | 110.022 | KV452948.1  | 1720155 | 8-scf00204 | 8  |
| AX-158086389 | 9 | 110.022 | KV452948.1  | 1721200 | 8-scf00204 | 8  |
| AX-158086392 | 9 | 110.163 | KV452948.1  | 1725127 | 8-scf00204 | 8  |
| AX-158086393 | 9 | 110.163 | KV452948.1  | 1726095 | 8-scf00204 | 8  |
| AX-158086396 | 9 | 110.211 | KV452948.1  | 1729544 | 8-scf00204 | 8  |
| AX-157741641 | 9 | 110.257 | KV452948.1  | 1739441 | 8-scf00204 | 8  |
| AX-157696411 | 9 | 110.304 | KV452948.1  | 1740375 | 8-scf00204 | 8  |
| AX-157696410 | 9 | 110.304 | KV452948.1  | 1740629 | 8-scf00204 | 8  |
| AX-158086404 | 9 | 110.586 | KV452948.1  | 1744561 | 8-scf00204 | 8  |
| AX-158086406 | 9 | 110.586 | KV452948.1  | 1748746 | 8-scf00204 | 8  |
| AX-158086407 | 9 | 110.868 | KV452948.1  | 1750488 | 8-scf00204 | 8  |
| AX-158086408 | 9 | 110.868 | KV452948.1  | 1751638 | 8-scf00204 | 8  |
| AX-158086409 | 9 | 110.868 | KV452948.1  | 1753701 | 8-scf00204 | 8  |
| AX-158086410 | 9 | 110.868 | KV452948.1  | 1754487 | 8-scf00204 | 8  |
| AX-157775514 | 9 | 110.919 | KV452948.1  | 1757720 | 8-scf00204 | 8  |
| AX-158086413 | 9 | 110.919 | KV452948.1  | 1760464 | 8-scf00204 | 8  |
| AX-157725538 | 9 | 111.032 | KV452948.1  | 1758077 | 8-scf00204 | 8  |
| AX-157754711 | 9 | 111.196 | KV452948.1  | 1761051 | 8-scf00204 | 8  |
| AX-158086417 | 9 | 111.196 | KV452948.1  | 1764645 | 8-scf00204 | 8  |
| AX-158086418 | 9 | 111.196 | KV452948.1  | 1765252 | 8-scf00204 | 8  |
| AX-158086419 | 9 | 111.196 | KV452948.1  | 1765900 | 8-scf00204 | 8  |
| AX-157739525 | 9 | 111.196 | KV452948.1  | 1768884 | 8-scf00204 | 8  |
| AX-158086421 | 9 | 111.196 | KV452948.1  | 1772262 | 8-scf00204 | 8  |
| AX-158086422 | 9 | 111.196 | KV452948.1  | 1773461 | 8-scf00204 | 8  |
| AX-158086423 | 9 | 111.196 | KV452948.1  | 1774163 | 8-scf00204 | 8  |
| AX-158086426 | 9 | 111.197 | KV452948.1  | 1778102 | 8-scf00204 | 8  |
| AX-158086429 | 9 | 111.285 | KV452948.1  | 1782730 | 8-scf00204 | 8  |
| AX-157877185 | 9 | 111.381 | KV452948.1  | 1786528 | 8-scf00204 | 8  |
| AX-158086443 | 9 | 111.381 | KV452948.1  | 1800251 | 8-scf00204 | 8  |
| AX-158086433 | 9 | 111.51  | KV452948.1  | 1791620 | 8-scf00204 | 8  |
| AX-158086435 | 9 | 111.557 | KV452948.1  | 1793069 | 8-scf00204 | 8  |
| AX-158086437 | 9 | 111.557 | KV452948.1  | 1794634 | 8-scf00204 | 8  |
| AX-158086438 | 9 | 111.557 | KV452948.1  | 1795468 | 8-scf00204 | 8  |
| AX-158086440 | 9 | 111.67  | KV452948.1  | 1796466 | 8-scf00204 | 8  |
| AX-157721493 | 9 | 111.791 | KV452948.1  | 1803451 | 8-scf00204 | 8  |
| AX-157718458 | 9 | 111.95  | KV452948.1  | 1804010 | 8-scf00204 | 8  |

|              |   |         |            |         |            |   |
|--------------|---|---------|------------|---------|------------|---|
| AX-158086445 | 9 | 112.056 | KV452948.1 | 1804725 | 8-scf00204 | 8 |
| AX-158086449 | 9 | 112.251 | KV452948.1 | 1810273 | 8-scf00204 | 8 |
| AX-158086450 | 9 | 112.251 | KV452948.1 | 1811693 | 8-scf00204 | 8 |
| AX-158086451 | 9 | 112.251 | KV452948.1 | 1811888 | 8-scf00204 | 8 |
| AX-158086452 | 9 | 112.252 | KV452948.1 | 1813798 | 8-scf00204 | 8 |
| AX-157709393 | 9 | 112.252 | KV452948.1 | 1814409 | 8-scf00204 | 8 |
| AX-158086454 | 9 | 112.252 | KV452948.1 | 1816535 | 8-scf00204 | 8 |
| AX-157825252 | 9 | 112.526 | KV452948.1 | 1819638 | 8-scf00204 | 8 |
| AX-158086483 | 9 | 112.865 | KV452948.1 | 1844384 | 8-scf00204 | 8 |
| AX-158086446 | 9 | 113.168 | KV452948.1 | 1807898 | 8-scf00204 | 8 |
| AX-158086447 | 9 | 113.168 | KV452948.1 | 1808448 | 8-scf00204 | 8 |
| AX-158384510 | 9 | 113.168 | KV452948.1 | 1848697 | 8-scf00204 | 8 |
| AX-158086485 | 9 | 113.168 | KV452948.1 | 1849169 | 8-scf00204 | 8 |
| AX-158086486 | 9 | 113.168 | KV452948.1 | 1851620 | 8-scf00204 | 8 |
| AX-158086487 | 9 | 113.168 | KV452948.1 | 1853259 | 8-scf00204 | 8 |
| AX-158086494 | 9 | 113.168 | KV452948.1 | 1865384 | 8-scf00204 | 8 |
| AX-158086496 | 9 | 113.168 | KV452948.1 | 1867113 | 8-scf00204 | 8 |
| AX-158086497 | 9 | 113.168 | KV452948.1 | 1868457 | 8-scf00204 | 8 |
| AX-158086500 | 9 | 113.168 | KV452948.1 | 1870846 | 8-scf00204 | 8 |
| AX-158086501 | 9 | 113.168 | KV452948.1 | 1870990 | 8-scf00204 | 8 |
| AX-158086502 | 9 | 113.168 | KV452948.1 | 1871646 | 8-scf00204 | 8 |
| AX-158086503 | 9 | 113.168 | KV452948.1 | 1872139 | 8-scf00204 | 8 |
| AX-158086504 | 9 | 113.168 | KV452948.1 | 1872564 | 8-scf00204 | 8 |
| AX-158086505 | 9 | 113.168 | KV452948.1 | 1873180 | 8-scf00204 | 8 |
| AX-158086492 | 9 | 113.169 | KV452948.1 | 1862751 | 8-scf00204 | 8 |
| AX-158086506 | 9 | 113.169 | KV452948.1 | 1874411 | 8-scf00204 | 8 |
| AX-158086507 | 9 | 113.236 | KV452948.1 | 1874867 | 8-scf00204 | 8 |
| AX-158086508 | 9 | 113.332 | KV452948.1 | 1875380 | 8-scf00204 | 8 |
| AX-158086509 | 9 | 113.332 | KV452948.1 | 1875737 | 8-scf00204 | 8 |
| AX-158086510 | 9 | 113.359 | KV452948.1 | 1877323 | 8-scf00204 | 8 |
| AX-158086513 | 9 | 113.359 | KV452948.1 | 1881148 | 8-scf00204 | 8 |
| AX-157726927 | 9 | 113.359 | KV452948.1 | 1892994 | 8-scf00204 | 8 |
| AX-158086527 | 9 | 113.359 | KV452948.1 | 1899405 | 8-scf00204 | 8 |
| AX-158086514 | 9 | 113.496 | KV452948.1 | 1882475 | 8-scf00204 | 8 |
| AX-158086515 | 9 | 113.496 | KV452948.1 | 1884377 | 8-scf00204 | 8 |
| AX-158086516 | 9 | 113.496 | KV452948.1 | 1885642 | 8-scf00204 | 8 |
| AX-158086517 | 9 | 113.496 | KV452948.1 | 1886680 | 8-scf00204 | 8 |
| AX-158086518 | 9 | 113.496 | KV452948.1 | 1889196 | 8-scf00204 | 8 |
| AX-158086519 | 9 | 113.496 | KV452948.1 | 1889551 | 8-scf00204 | 8 |
| AX-158086523 | 9 | 113.496 | KV452948.1 | 1893407 | 8-scf00204 | 8 |
| AX-158086526 | 9 | 113.496 | KV452948.1 | 1895703 | 8-scf00204 | 8 |
| AX-157865761 | 9 | 113.496 | KV452948.1 | 1900995 | 8-scf00204 | 8 |
| AX-158086538 | 9 | 113.496 | KV452948.1 | 1917731 | 8-scf00204 | 8 |
| AX-158086520 | 9 | 113.605 | KV452948.1 | 1890715 | 8-scf00204 | 8 |
| AX-158086521 | 9 | 113.605 | KV452948.1 | 1892322 | 8-scf00204 | 8 |
| AX-157825255 | 9 | 113.661 | KV452948.1 | 1901585 | 8-scf00204 | 8 |
| AX-158086529 | 9 | 113.715 | KV452948.1 | 1902458 | 8-scf00204 | 8 |
| AX-158086530 | 9 | 113.715 | KV452948.1 | 1903592 | 8-scf00204 | 8 |
| AX-158086532 | 9 | 113.715 | KV452948.1 | 1905216 | 8-scf00204 | 8 |
| AX-157714815 | 9 | 113.715 | KV452948.1 | 1907327 | 8-scf00204 | 8 |
| AX-158086535 | 9 | 113.715 | KV452948.1 | 1908950 | 8-scf00204 | 8 |

|              |   |         |            |         |            |   |
|--------------|---|---------|------------|---------|------------|---|
| AX-158086536 | 9 | 113.715 | KV452948.1 | 1910772 | 8-scf00204 | 8 |
| AX-158086537 | 9 | 113.715 | KV452948.1 | 1912770 | 8-scf00204 | 8 |
| AX-157741285 | 9 | 113.715 | KV452948.1 | 1915228 | 8-scf00204 | 8 |
| AX-157825259 | 9 | 113.715 | KV452948.1 | 1921141 | 8-scf00204 | 8 |
| AX-158086541 | 9 | 113.715 | KV452948.1 | 1921814 | 8-scf00204 | 8 |
| AX-157825260 | 9 | 113.715 | KV452948.1 | 1925767 | 8-scf00204 | 8 |
| AX-158086542 | 9 | 113.715 | KV452948.1 | 1930738 | 8-scf00204 | 8 |
| AX-158086543 | 9 | 113.715 | KV452948.1 | 1931301 | 8-scf00204 | 8 |
| AX-157742678 | 9 | 113.871 | KV452948.1 | 1906512 | 8-scf00204 | 8 |
| AX-157747326 | 9 | 113.871 | KV452948.1 | 1923281 | 8-scf00204 | 8 |
| AX-157825262 | 9 | 113.871 | KV452948.1 | 1928871 | 8-scf00204 | 8 |
| AX-158086553 | 9 | 113.871 | KV452948.1 | 1951162 | 8-scf00204 | 8 |
| AX-158086554 | 9 | 113.871 | KV452948.1 | 1951912 | 8-scf00204 | 8 |
| AX-158086556 | 9 | 113.871 | KV452948.1 | 1954793 | 8-scf00204 | 8 |
| AX-158086558 | 9 | 114.185 | KV452948.1 | 1957050 | 8-scf00204 | 8 |
| AX-158086561 | 9 | 114.397 | KV452948.1 | 1961948 | 8-scf00204 | 8 |
| AX-158409881 | 9 | 114.483 | KV452948.1 | 1962060 | 8-scf00204 | 8 |
| AX-158086567 | 9 | 114.787 | KV452948.1 | 1971322 | 8-scf00204 | 8 |
| AX-158086568 | 9 | 115.027 | KV452948.1 | 1971908 | 8-scf00204 | 8 |
| AX-158086570 | 9 | 115.028 | KV452948.1 | 1974725 | 8-scf00204 | 8 |
| AX-158086571 | 9 | 115.028 | KV452948.1 | 1975411 | 8-scf00204 | 8 |
| AX-158086572 | 9 | 115.028 | KV452948.1 | 1976149 | 8-scf00204 | 8 |
| AX-158086580 | 9 | 115.028 | KV452948.1 | 1981051 | 8-scf00204 | 8 |
| AX-158086581 | 9 | 115.152 | KV452948.1 | 1981509 | 8-scf00204 | 8 |
| AX-157870873 | 9 | 115.236 | KV452948.1 | 1982409 | 8-scf00204 | 8 |
| AX-158086605 | 9 | 115.236 | KV452948.1 | 2015208 | 8-scf00204 | 8 |
| AX-158086616 | 9 | 115.236 | KV452948.1 | 2032032 | 8-scf00204 | 8 |
| AX-158086597 | 9 | 115.265 | KV452948.1 | 2006161 | 8-scf00204 | 8 |
| AX-158086599 | 9 | 115.98  | KV452948.1 | 2006902 | 8-scf00204 | 8 |
| AX-158086612 | 9 | 115.98  | KV452948.1 | 2023611 | 8-scf00204 | 8 |
| AX-158086601 | 9 | 115.99  | KV452948.1 | 2010194 | 8-scf00204 | 8 |
| AX-157712989 | 9 | 115.999 | KV452948.1 | 2011870 | 8-scf00204 | 8 |
| AX-158086609 | 9 | 116.171 | KV452948.1 | 2017956 | 8-scf00204 | 8 |
| AX-157753822 | 9 | 116.18  | KV452948.1 | 2024396 | 8-scf00204 | 8 |
| AX-158086613 | 9 | 116.186 | KV452948.1 | 2025274 | 8-scf00204 | 8 |
| AX-158086615 | 9 | 116.186 | KV452948.1 | 2031358 | 8-scf00204 | 8 |
| AX-158086630 | 9 | 116.186 | KV452948.1 | 2050829 | 8-scf00204 | 8 |
| AX-158086617 | 9 | 116.338 | KV452948.1 | 2032831 | 8-scf00204 | 8 |
| AX-158086619 | 9 | 116.341 | KV452948.1 | 2038464 | 8-scf00204 | 8 |
| AX-158086626 | 9 | 116.45  | KV452948.1 | 2046579 | 8-scf00204 | 8 |
| AX-158086627 | 9 | 116.45  | KV452948.1 | 2046927 | 8-scf00204 | 8 |
| AX-158086631 | 9 | 116.45  | KV452948.1 | 2051645 | 8-scf00204 | 8 |
| AX-158086770 | 9 | 116.45  | KV452948.1 | 2225420 | 8-scf00204 | 8 |
| AX-158086633 | 9 | 116.545 | KV452948.1 | 2057600 | 8-scf00204 | 8 |
| AX-158086720 | 9 | 116.545 | KV452948.1 | 2170808 | 8-scf00204 | 8 |
| AX-157683196 | 9 | 116.545 | KV452950.1 | 35229   | 8-scf00206 | 8 |
| AX-157758590 | 9 | 116.615 | KV452948.1 | 2059765 | 8-scf00204 | 8 |
| AX-157825267 | 9 | 116.777 | KV452948.1 | 2071539 | 8-scf00204 | 8 |
| AX-158086643 | 9 | 116.777 | KV452948.1 | 2074069 | 8-scf00204 | 8 |
| AX-158086660 | 9 | 116.777 | KV452948.1 | 2094842 | 8-scf00204 | 8 |
| AX-158086644 | 9 | 116.778 | KV452948.1 | 2074692 | 8-scf00204 | 8 |

|              |   |         |             |         |            |    |
|--------------|---|---------|-------------|---------|------------|----|
| AX-158086651 | 9 | 116.778 | KV452948.1  | 2085864 | 8-scf00204 | 8  |
| AX-158086652 | 9 | 116.778 | KV452948.1  | 2085923 | 8-scf00204 | 8  |
| AX-158086653 | 9 | 116.778 | KV452948.1  | 2086282 | 8-scf00204 | 8  |
| AX-158086654 | 9 | 116.778 | KV452948.1  | 2087303 | 8-scf00204 | 8  |
| AX-157865763 | 9 | 116.778 | KV452948.1  | 2087877 | 8-scf00204 | 8  |
| AX-158086655 | 9 | 116.778 | KV452948.1  | 2089199 | 8-scf00204 | 8  |
| AX-158086657 | 9 | 116.778 | KV452948.1  | 2093121 | 8-scf00204 | 8  |
| AX-158086658 | 9 | 116.778 | KV452948.1  | 2093569 | 8-scf00204 | 8  |
| AX-158086661 | 9 | 116.778 | KV452948.1  | 2095379 | 8-scf00204 | 8  |
| AX-157825268 | 9 | 116.778 | KV452948.1  | 2096490 | 8-scf00204 | 8  |
| AX-158086675 | 9 | 116.778 | KV452948.1  | 2111302 | 8-scf00204 | 8  |
| AX-158086666 | 9 | 116.844 | KV452948.1  | 2102485 | 8-scf00204 | 8  |
| AX-158086673 | 9 | 116.844 | KV452948.1  | 2107112 | 8-scf00204 | 8  |
| AX-158086687 | 9 | 116.844 | KV452948.1  | 2123649 | 8-scf00204 | 8  |
| AX-158384513 | 9 | 116.887 | KV452948.1  | 2034137 | 8-scf00204 | 8  |
| AX-158086668 | 9 | 116.887 | KV452948.1  | 2103146 | 8-scf00204 | 8  |
| AX-158086669 | 9 | 116.887 | KV452948.1  | 2103801 | 8-scf00204 | 8  |
| AX-158086670 | 9 | 116.887 | KV452948.1  | 2104570 | 8-scf00204 | 8  |
| AX-158086671 | 9 | 116.887 | KV452948.1  | 2106007 | 8-scf00204 | 8  |
| AX-157747394 | 9 | 116.887 | KV452948.1  | 2108919 | 8-scf00204 | 8  |
| AX-158086674 | 9 | 116.887 | KV452948.1  | 2110536 | 8-scf00204 | 8  |
| AX-158086677 | 9 | 116.887 | KV452948.1  | 2112916 | 8-scf00204 | 8  |
| AX-158086679 | 9 | 116.887 | KV452948.1  | 2114619 | 8-scf00204 | 8  |
| AX-158086680 | 9 | 116.887 | KV452948.1  | 2114741 | 8-scf00204 | 8  |
| AX-158384515 | 9 | 116.887 | KV452948.1  | 2115955 | 8-scf00204 | 8  |
| AX-158086690 | 9 | 116.887 | KV452948.1  | 2126742 | 8-scf00204 | 8  |
| AX-158086692 | 9 | 116.887 | KV452948.1  | 2133414 | 8-scf00204 | 8  |
| AX-158086696 | 9 | 116.887 | KV452948.1  | 2139309 | 8-scf00204 | 8  |
| AX-158086697 | 9 | 116.887 | KV452948.1  | 2140756 | 8-scf00204 | 8  |
| AX-158086700 | 9 | 116.887 | KV452948.1  | 2143397 | 8-scf00204 | 8  |
| AX-158086701 | 9 | 116.887 | KV452948.1  | 2144448 | 8-scf00204 | 8  |
| AX-158086702 | 9 | 116.887 | KV452948.1  | 2145275 | 8-scf00204 | 8  |
| AX-158086704 | 9 | 116.887 | KV452948.1  | 2148937 | 8-scf00204 | 8  |
| AX-158086705 | 9 | 116.887 | KV452948.1  | 2149229 | 8-scf00204 | 8  |
| AX-158086744 | 9 | 116.887 | KV452948.1  | 2186013 | 8-scf00204 | 8  |
| AX-157707026 | 9 | 116.887 | 3ML01033353 | 77      | scf09000_1 | UN |
| AX-157715251 | 9 | 117.106 | KV452948.1  | 2149970 | 8-scf00204 | 8  |
| AX-158086707 | 9 | 117.106 | KV452948.1  | 2150129 | 8-scf00204 | 8  |
| AX-157870875 | 9 | 117.106 | KV452948.1  | 2150743 | 8-scf00204 | 8  |
| AX-158086708 | 9 | 117.106 | KV452948.1  | 2153135 | 8-scf00204 | 8  |
| AX-158086709 | 9 | 117.106 | KV452948.1  | 2157680 | 8-scf00204 | 8  |
| AX-158086713 | 9 | 117.106 | KV452948.1  | 2165004 | 8-scf00204 | 8  |
| AX-158086717 | 9 | 117.106 | KV452948.1  | 2168730 | 8-scf00204 | 8  |
| AX-158086718 | 9 | 117.106 | KV452948.1  | 2169271 | 8-scf00204 | 8  |
| AX-158086721 | 9 | 117.106 | KV452948.1  | 2171166 | 8-scf00204 | 8  |
| AX-158086728 | 9 | 117.106 | KV452948.1  | 2174673 | 8-scf00204 | 8  |
| AX-157722775 | 9 | 117.106 | KV452948.1  | 2177249 | 8-scf00204 | 8  |
| AX-158086731 | 9 | 117.106 | KV452948.1  | 2177579 | 8-scf00204 | 8  |
| AX-158086732 | 9 | 117.106 | KV452948.1  | 2178265 | 8-scf00204 | 8  |
| AX-158086737 | 9 | 117.106 | KV452948.1  | 2181555 | 8-scf00204 | 8  |
| AX-158086738 | 9 | 117.106 | KV452948.1  | 2181768 | 8-scf00204 | 8  |

|              |   |         |            |         |            |   |
|--------------|---|---------|------------|---------|------------|---|
| AX-158086739 | 9 | 117.106 | KV452948.1 | 2182156 | 8-scf00204 | 8 |
| AX-158086741 | 9 | 117.106 | KV452948.1 | 2183452 | 8-scf00204 | 8 |
| AX-158086747 | 9 | 117.106 | KV452948.1 | 2191021 | 8-scf00204 | 8 |
| AX-157727284 | 9 | 117.106 | KV452948.1 | 2195126 | 8-scf00204 | 8 |
| AX-158086750 | 9 | 117.106 | KV452948.1 | 2198554 | 8-scf00204 | 8 |
| AX-158086751 | 9 | 117.106 | KV452948.1 | 2199085 | 8-scf00204 | 8 |
| AX-158086755 | 9 | 117.106 | KV452948.1 | 2202514 | 8-scf00204 | 8 |
| AX-158086757 | 9 | 117.106 | KV452948.1 | 2204042 | 8-scf00204 | 8 |
| AX-158086760 | 9 | 117.106 | KV452948.1 | 2206912 | 8-scf00204 | 8 |
| AX-158086761 | 9 | 117.106 | KV452948.1 | 2207519 | 8-scf00204 | 8 |
| AX-158086762 | 9 | 117.215 | KV452948.1 | 2209072 | 8-scf00204 | 8 |
| AX-157825271 | 9 | 117.215 | KV452948.1 | 2210023 | 8-scf00204 | 8 |
| AX-158086763 | 9 | 117.215 | KV452948.1 | 2210446 | 8-scf00204 | 8 |
| AX-157825272 | 9 | 117.215 | KV452948.1 | 2210883 | 8-scf00204 | 8 |
| AX-158086764 | 9 | 117.215 | KV452948.1 | 2212120 | 8-scf00204 | 8 |
| AX-158086766 | 9 | 117.215 | KV452948.1 | 2213281 | 8-scf00204 | 8 |
| AX-158086767 | 9 | 117.215 | KV452948.1 | 2215641 | 8-scf00204 | 8 |
| AX-158086773 | 9 | 117.215 | KV452948.1 | 2230318 | 8-scf00204 | 8 |
| AX-158086774 | 9 | 117.215 | KV452948.1 | 2230952 | 8-scf00204 | 8 |
| AX-157756642 | 9 | 117.215 | KV452948.1 | 2232014 | 8-scf00204 | 8 |
| AX-158086776 | 9 | 117.215 | KV452948.1 | 2233320 | 8-scf00204 | 8 |
| AX-157754835 | 9 | 117.215 | KV452948.1 | 2240841 | 8-scf00204 | 8 |
| AX-158384516 | 9 | 117.23  | KV452948.1 | 2233441 | 8-scf00204 | 8 |
| AX-158086780 | 9 | 117.289 | KV452948.1 | 2242049 | 8-scf00204 | 8 |
| AX-158086646 | 9 | 117.433 | KV452948.1 | 2076544 | 8-scf00204 | 8 |
| AX-158086664 | 9 | 117.433 | KV452948.1 | 2097815 | 8-scf00204 | 8 |
| AX-158086691 | 9 | 117.433 | KV452948.1 | 2128016 | 8-scf00204 | 8 |
| AX-158086781 | 9 | 117.433 | KV452948.1 | 2242539 | 8-scf00204 | 8 |
| AX-158086783 | 9 | 117.433 | KV452948.1 | 2246318 | 8-scf00204 | 8 |
| AX-158086787 | 9 | 117.433 | KV452948.1 | 2250425 | 8-scf00204 | 8 |
| AX-158086790 | 9 | 117.433 | KV452948.1 | 2252446 | 8-scf00204 | 8 |
| AX-158086792 | 9 | 117.433 | KV452948.1 | 2255513 | 8-scf00204 | 8 |
| AX-157857206 | 9 | 117.433 | KV452948.1 | 2257176 | 8-scf00204 | 8 |
| AX-157757197 | 9 | 117.433 | KV452948.1 | 2258055 | 8-scf00204 | 8 |
| AX-158086793 | 9 | 117.433 | KV452948.1 | 2259002 | 8-scf00204 | 8 |
| AX-158086798 | 9 | 117.433 | KV452948.1 | 2266292 | 8-scf00204 | 8 |
| AX-158086799 | 9 | 117.433 | KV452948.1 | 2267063 | 8-scf00204 | 8 |
| AX-158086807 | 9 | 117.433 | KV452948.1 | 2287075 | 8-scf00204 | 8 |
| AX-157719798 | 9 | 117.494 | KV452948.1 | 2267572 | 8-scf00204 | 8 |
| AX-158086806 | 9 | 117.494 | KV452948.1 | 2285693 | 8-scf00204 | 8 |
| AX-158086791 | 9 | 117.543 | KV452948.1 | 2253520 | 8-scf00204 | 8 |
| AX-158086805 | 9 | 117.543 | KV452948.1 | 2280049 | 8-scf00204 | 8 |
| AX-158392122 | 9 | 117.543 | KV452948.1 | 2282942 | 8-scf00204 | 8 |
| AX-158086811 | 9 | 117.543 | KV452948.1 | 2294682 | 8-scf00204 | 8 |
| AX-158086812 | 9 | 117.543 | KV452948.1 | 2296336 | 8-scf00204 | 8 |
| AX-158086815 | 9 | 117.543 | KV452948.1 | 2299110 | 8-scf00204 | 8 |
| AX-158086816 | 9 | 117.543 | KV452948.1 | 2300538 | 8-scf00204 | 8 |
| AX-158086817 | 9 | 117.543 | KV452948.1 | 2301925 | 8-scf00204 | 8 |
| AX-158086820 | 9 | 117.543 | KV452948.1 | 2305523 | 8-scf00204 | 8 |
| AX-158086821 | 9 | 117.543 | KV452948.1 | 2305982 | 8-scf00204 | 8 |
| AX-158086823 | 9 | 117.761 | KV452948.1 | 2309047 | 8-scf00204 | 8 |

|              |   |         |             |         |            |    |
|--------------|---|---------|-------------|---------|------------|----|
| AX-158086829 | 9 | 117.761 | KV452948.1  | 2316608 | 8-scf00204 | 8  |
| AX-157885631 | 9 | 117.761 | KV452948.1  | 2320552 | 8-scf00204 | 8  |
| AX-157683152 | 9 | 117.818 | KV452949.1  | 6032    | 8-scf00205 | 8  |
| AX-157683155 | 9 | 117.885 | KV452949.1  | 8266    | 8-scf00205 | 8  |
| AX-157681599 | 9 | 117.885 | KV452949.1  | 10024   | 8-scf00205 | 8  |
| AX-157683157 | 9 | 117.885 | KV452949.1  | 11613   | 8-scf00205 | 8  |
| AX-157683159 | 9 | 117.885 | KV452949.1  | 12379   | 8-scf00205 | 8  |
| AX-157680435 | 9 | 117.885 | KV452949.1  | 18377   | 8-scf00205 | 8  |
| AX-157683161 | 9 | 117.885 | KV452949.1  | 21481   | 8-scf00205 | 8  |
| AX-157683163 | 9 | 118.739 | KV452950.1  | 755     | 8-scf00206 | 8  |
| AX-157683167 | 9 | 118.745 | KV452950.1  | 5981    | 8-scf00206 | 8  |
| AX-157683168 | 9 | 118.746 | KV452950.1  | 7995    | 8-scf00206 | 8  |
| AX-157683171 | 9 | 118.746 | KV452950.1  | 12113   | 8-scf00206 | 8  |
| AX-157741746 | 9 | 118.746 | KV452951.1  | 31692   | 8-scf00207 | 8  |
| AX-157683172 | 9 | 118.965 | KV452950.1  | 12395   | 8-scf00206 | 8  |
| AX-158086832 | 9 | 118.966 | KV452948.1  | 2320662 | 8-scf00204 | 8  |
| AX-157683174 | 9 | 118.966 | KV452950.1  | 13162   | 8-scf00206 | 8  |
| AX-157683175 | 9 | 118.966 | KV452950.1  | 13825   | 8-scf00206 | 8  |
| AX-157680077 | 9 | 119.184 | KV452950.1  | 23074   | 8-scf00206 | 8  |
| AX-157683183 | 9 | 119.184 | KV452950.1  | 24536   | 8-scf00206 | 8  |
| AX-157683184 | 9 | 119.184 | KV452950.1  | 24820   | 8-scf00206 | 8  |
| AX-157680206 | 9 | 119.184 | KV452950.1  | 25033   | 8-scf00206 | 8  |
| AX-157683187 | 9 | 119.184 | KV452950.1  | 26376   | 8-scf00206 | 8  |
| AX-157683195 | 9 | 119.184 | KV452950.1  | 34093   | 8-scf00206 | 8  |
| AX-157683197 | 9 | 119.184 | KV452950.1  | 36094   | 8-scf00206 | 8  |
| AX-157683198 | 9 | 119.184 | KV452950.1  | 38503   | 8-scf00206 | 8  |
| AX-157683199 | 9 | 119.184 | KV452950.1  | 43074   | 8-scf00206 | 8  |
| AX-157683200 | 9 | 119.184 | KV452950.1  | 48763   | 8-scf00206 | 8  |
| AX-157683201 | 9 | 119.184 | KV452950.1  | 49251   | 8-scf00206 | 8  |
| AX-157706979 | 9 | 119.184 | 3ML01033277 | 456     | scf08918_1 | UN |
| AX-158086837 | 9 | 119.621 | KV452951.1  | 487     | 8-scf00207 | 8  |
| AX-158086842 | 9 | 119.621 | KV452951.1  | 12167   | 8-scf00207 | 8  |
| AX-158086845 | 9 | 119.621 | KV452951.1  | 15720   | 8-scf00207 | 8  |
| AX-158086847 | 9 | 119.621 | KV452951.1  | 20180   | 8-scf00207 | 8  |
| AX-157752196 | 9 | 119.621 | KV452951.1  | 21308   | 8-scf00207 | 8  |
| AX-158086851 | 9 | 119.621 | KV452951.1  | 24530   | 8-scf00207 | 8  |
| AX-158086869 | 9 | 119.621 | KV452951.1  | 50680   | 8-scf00207 | 8  |
| AX-158086871 | 9 | 119.621 | KV452951.1  | 53298   | 8-scf00207 | 8  |
| AX-157865772 | 9 | 119.621 | KV452951.1  | 111395  | 8-scf00207 | 8  |
| AX-157752776 | 9 | 119.621 | KV452952.1  | 3128    | 8-scf00208 | 8  |
| AX-158086937 | 9 | 119.621 | KV452952.1  | 12068   | 8-scf00208 | 8  |
| AX-157689773 | 9 | 119.621 | 3ML01032181 | 127     | scf07797_1 | UN |
| AX-158086852 | 9 | 119.626 | KV452951.1  | 25307   | 8-scf00207 | 8  |
| AX-158086860 | 9 | 119.643 | KV452951.1  | 40119   | 8-scf00207 | 8  |
| AX-158086861 | 9 | 119.687 | KV452951.1  | 41008   | 8-scf00207 | 8  |
| AX-157753141 | 9 | 119.73  | KV452951.1  | 1874    | 8-scf00207 | 8  |
| AX-157857207 | 9 | 119.73  | KV452951.1  | 42169   | 8-scf00207 | 8  |
| AX-158086863 | 9 | 119.73  | KV452951.1  | 43723   | 8-scf00207 | 8  |
| AX-158086867 | 9 | 119.73  | KV452951.1  | 46571   | 8-scf00207 | 8  |
| AX-157710418 | 9 | 119.73  | KV452951.1  | 50782   | 8-scf00207 | 8  |
| AX-157742974 | 9 | 119.73  | KV452951.1  | 53179   | 8-scf00207 | 8  |



|              |   |         |             |        |            |    |
|--------------|---|---------|-------------|--------|------------|----|
| AX-158086872 | 9 | 119.73  | KV452951.1  | 53788  | 8-scf00207 | 8  |
| AX-157738417 | 9 | 119.73  | KV452951.1  | 54840  | 8-scf00207 | 8  |
| AX-158086874 | 9 | 119.73  | KV452951.1  | 58322  | 8-scf00207 | 8  |
| AX-158086875 | 9 | 119.73  | KV452951.1  | 61326  | 8-scf00207 | 8  |
| AX-157724651 | 9 | 119.73  | KV452951.1  | 61436  | 8-scf00207 | 8  |
| AX-157689327 | 9 | 119.73  | 3ML01029164 | 371    | scf04784_1 | UN |
| AX-158086859 | 9 | 119.839 | KV452951.1  | 39599  | 8-scf00207 | 8  |
| AX-158086879 | 9 | 119.839 | KV452951.1  | 67282  | 8-scf00207 | 8  |
| AX-158086882 | 9 | 119.839 | KV452951.1  | 77996  | 8-scf00207 | 8  |
| AX-158086883 | 9 | 119.839 | KV452951.1  | 79107  | 8-scf00207 | 8  |
| AX-157748159 | 9 | 119.839 | KV452951.1  | 79574  | 8-scf00207 | 8  |
| AX-157825275 | 9 | 119.839 | KV452951.1  | 79776  | 8-scf00207 | 8  |
| AX-157825276 | 9 | 119.839 | KV452951.1  | 85131  | 8-scf00207 | 8  |
| AX-157825277 | 9 | 119.839 | KV452951.1  | 86501  | 8-scf00207 | 8  |
| AX-157751235 | 9 | 119.839 | KV452951.1  | 89765  | 8-scf00207 | 8  |
| AX-158086886 | 9 | 119.839 | KV452951.1  | 91754  | 8-scf00207 | 8  |
| AX-158086887 | 9 | 119.839 | KV452951.1  | 93451  | 8-scf00207 | 8  |
| AX-158086889 | 9 | 119.839 | KV452951.1  | 96696  | 8-scf00207 | 8  |
| AX-158086891 | 9 | 119.839 | KV452951.1  | 98992  | 8-scf00207 | 8  |
| AX-158086893 | 9 | 119.839 | KV452951.1  | 101125 | 8-scf00207 | 8  |
| AX-158086895 | 9 | 119.839 | KV452951.1  | 105113 | 8-scf00207 | 8  |
| AX-158086896 | 9 | 119.839 | KV452951.1  | 107761 | 8-scf00207 | 8  |
| AX-158086900 | 9 | 119.839 | KV452951.1  | 111632 | 8-scf00207 | 8  |
| AX-158086902 | 9 | 119.839 | KV452951.1  | 114267 | 8-scf00207 | 8  |
| AX-158086904 | 9 | 119.839 | KV452951.1  | 118374 | 8-scf00207 | 8  |
| AX-158086905 | 9 | 119.839 | KV452951.1  | 122242 | 8-scf00207 | 8  |
| AX-158086906 | 9 | 119.839 | KV452951.1  | 122850 | 8-scf00207 | 8  |
| AX-158086907 | 9 | 119.839 | KV452951.1  | 123328 | 8-scf00207 | 8  |
| AX-158086908 | 9 | 119.839 | KV452951.1  | 123937 | 8-scf00207 | 8  |
| AX-158086910 | 9 | 119.839 | KV452951.1  | 127927 | 8-scf00207 | 8  |
| AX-158086911 | 9 | 119.839 | KV452951.1  | 129083 | 8-scf00207 | 8  |
| AX-158086914 | 9 | 119.839 | KV452951.1  | 134911 | 8-scf00207 | 8  |
| AX-158086919 | 9 | 119.839 | KV452951.1  | 141521 | 8-scf00207 | 8  |
| AX-158086920 | 9 | 119.839 | KV452951.1  | 142222 | 8-scf00207 | 8  |
| AX-158086922 | 9 | 119.948 | KV452951.1  | 145175 | 8-scf00207 | 8  |
| AX-158086925 | 9 | 119.948 | KV452951.1  | 146576 | 8-scf00207 | 8  |
| AX-158086928 | 9 | 119.948 | KV452952.1  | 1139   | 8-scf00208 | 8  |
| AX-158416730 | 9 | 119.948 | KV452952.1  | 1218   | 8-scf00208 | 8  |
| AX-158086929 | 9 | 119.948 | KV452952.1  | 2255   | 8-scf00208 | 8  |
| AX-158086881 | 9 | 120.276 | KV452951.1  | 76212  | 8-scf00207 | 8  |
| AX-158086936 | 9 | 120.276 | KV452952.1  | 11025  | 8-scf00208 | 8  |
| AX-158086942 | 9 | 120.276 | KV452952.1  | 23619  | 8-scf00208 | 8  |
| AX-158086953 | 9 | 120.385 | KV452952.1  | 34539  | 8-scf00208 | 8  |
| AX-157683267 | 9 | 120.385 | KV452958.1  | 13168  | 8-scf00215 | 8  |
| AX-158086956 | 9 | 120.387 | KV452952.1  | 40116  | 8-scf00208 | 8  |
| AX-158086957 | 9 | 120.389 | KV452952.1  | 40992  | 8-scf00208 | 8  |
| AX-158086938 | 9 | 120.391 | KV452952.1  | 13572  | 8-scf00208 | 8  |
| AX-158086943 | 9 | 120.391 | KV452952.1  | 24254  | 8-scf00208 | 8  |
| AX-158086960 | 9 | 120.391 | KV452952.1  | 49468  | 8-scf00208 | 8  |
| AX-158086962 | 9 | 120.391 | KV452952.1  | 52450  | 8-scf00208 | 8  |
| AX-158086964 | 9 | 120.391 | KV452952.1  | 60527  | 8-scf00208 | 8  |

|              |   |         |            |        |            |   |
|--------------|---|---------|------------|--------|------------|---|
| AX-158086978 | 9 | 120.391 | KV452952.1 | 81424  | 8-scf00208 | 8 |
| AX-158086979 | 9 | 120.391 | KV452952.1 | 81859  | 8-scf00208 | 8 |
| AX-158086969 | 9 | 120.529 | KV452952.1 | 73081  | 8-scf00208 | 8 |
| AX-158086971 | 9 | 120.529 | KV452952.1 | 74858  | 8-scf00208 | 8 |
| AX-158086974 | 9 | 120.529 | KV452952.1 | 77235  | 8-scf00208 | 8 |
| AX-158086997 | 9 | 120.529 | KV452952.1 | 102484 | 8-scf00208 | 8 |
| AX-158087031 | 9 | 120.529 | KV452952.1 | 165850 | 8-scf00208 | 8 |
| AX-158087032 | 9 | 120.529 | KV452952.1 | 166372 | 8-scf00208 | 8 |
| AX-158087193 | 9 | 120.529 | KV452955.1 | 59801  | 8-scf00210 | 8 |
| AX-158087202 | 9 | 120.529 | KV452955.1 | 70226  | 8-scf00210 | 8 |
| AX-158087214 | 9 | 120.529 | KV452953.1 | 879    | 8-scf00212 | 8 |
| AX-158086986 | 9 | 120.676 | KV452952.1 | 88655  | 8-scf00208 | 8 |
| AX-158086990 | 9 | 120.676 | KV452952.1 | 92425  | 8-scf00208 | 8 |
| AX-157724783 | 9 | 120.676 | KV452952.1 | 92896  | 8-scf00208 | 8 |
| AX-158086992 | 9 | 120.723 | KV452952.1 | 94695  | 8-scf00208 | 8 |
| AX-158086993 | 9 | 120.723 | KV452952.1 | 95174  | 8-scf00208 | 8 |
| AX-157857210 | 9 | 120.773 | KV452952.1 | 72971  | 8-scf00208 | 8 |
| AX-158086989 | 9 | 120.773 | KV452952.1 | 92251  | 8-scf00208 | 8 |
| AX-157709625 | 9 | 120.773 | KV452952.1 | 93345  | 8-scf00208 | 8 |
| AX-158086994 | 9 | 120.773 | KV452952.1 | 98523  | 8-scf00208 | 8 |
| AX-157825282 | 9 | 120.773 | KV452952.1 | 130312 | 8-scf00208 | 8 |
| AX-157825283 | 9 | 120.773 | KV452952.1 | 132307 | 8-scf00208 | 8 |
| AX-158087042 | 9 | 120.773 | KV452957.1 | 4956   | 8-scf00209 | 8 |
| AX-158087043 | 9 | 120.773 | KV452957.1 | 5444   | 8-scf00209 | 8 |
| AX-158087049 | 9 | 120.773 | KV452957.1 | 18217  | 8-scf00209 | 8 |
| AX-158087052 | 9 | 120.773 | KV452957.1 | 19907  | 8-scf00209 | 8 |
| AX-158087060 | 9 | 120.773 | KV452957.1 | 29813  | 8-scf00209 | 8 |
| AX-158087064 | 9 | 120.773 | KV452957.1 | 33916  | 8-scf00209 | 8 |
| AX-158087069 | 9 | 120.773 | KV452957.1 | 38651  | 8-scf00209 | 8 |
| AX-158087070 | 9 | 120.773 | KV452957.1 | 40401  | 8-scf00209 | 8 |
| AX-158087074 | 9 | 120.773 | KV452957.1 | 47562  | 8-scf00209 | 8 |
| AX-158087075 | 9 | 120.773 | KV452957.1 | 50189  | 8-scf00209 | 8 |
| AX-158087077 | 9 | 120.773 | KV452957.1 | 52150  | 8-scf00209 | 8 |
| AX-158087078 | 9 | 120.773 | KV452957.1 | 52822  | 8-scf00209 | 8 |
| AX-158087081 | 9 | 120.773 | KV452957.1 | 55769  | 8-scf00209 | 8 |
| AX-158087083 | 9 | 120.773 | KV452957.1 | 57146  | 8-scf00209 | 8 |
| AX-158087084 | 9 | 120.773 | KV452957.1 | 59316  | 8-scf00209 | 8 |
| AX-158087085 | 9 | 120.773 | KV452957.1 | 59783  | 8-scf00209 | 8 |
| AX-158087086 | 9 | 120.773 | KV452957.1 | 61230  | 8-scf00209 | 8 |
| AX-158087087 | 9 | 120.773 | KV452957.1 | 61602  | 8-scf00209 | 8 |
| AX-158087088 | 9 | 120.773 | KV452957.1 | 61992  | 8-scf00209 | 8 |
| AX-158087089 | 9 | 120.773 | KV452957.1 | 67837  | 8-scf00209 | 8 |
| AX-158087091 | 9 | 120.773 | KV452957.1 | 69215  | 8-scf00209 | 8 |
| AX-158087097 | 9 | 120.773 | KV452957.1 | 79944  | 8-scf00209 | 8 |
| AX-158392125 | 9 | 120.773 | KV452957.1 | 90055  | 8-scf00209 | 8 |
| AX-158087110 | 9 | 120.773 | KV452957.1 | 98566  | 8-scf00209 | 8 |
| AX-158087111 | 9 | 120.773 | KV452957.1 | 99208  | 8-scf00209 | 8 |
| AX-158087113 | 9 | 120.773 | KV452957.1 | 100622 | 8-scf00209 | 8 |
| AX-158087114 | 9 | 120.773 | KV452957.1 | 101446 | 8-scf00209 | 8 |
| AX-158087117 | 9 | 120.773 | KV452957.1 | 107532 | 8-scf00209 | 8 |
| AX-158087119 | 9 | 120.773 | KV452957.1 | 109664 | 8-scf00209 | 8 |

|              |   |         |            |        |            |   |
|--------------|---|---------|------------|--------|------------|---|
| AX-158087120 | 9 | 120.773 | KV452957.1 | 110378 | 8-scf00209 | 8 |
| AX-158087121 | 9 | 120.773 | KV452957.1 | 110826 | 8-scf00209 | 8 |
| AX-158087122 | 9 | 120.773 | KV452957.1 | 114489 | 8-scf00209 | 8 |
| AX-158087124 | 9 | 120.773 | KV452957.1 | 117485 | 8-scf00209 | 8 |
| AX-158087129 | 9 | 120.773 | KV452957.1 | 120935 | 8-scf00209 | 8 |
| AX-158392128 | 9 | 120.773 | KV452957.1 | 121253 | 8-scf00209 | 8 |
| AX-158087134 | 9 | 120.773 | KV452957.1 | 130969 | 8-scf00209 | 8 |
| AX-158087137 | 9 | 120.773 | KV452957.1 | 133346 | 8-scf00209 | 8 |
| AX-158087140 | 9 | 120.773 | KV452957.1 | 141948 | 8-scf00209 | 8 |
| AX-158087141 | 9 | 120.773 | KV452957.1 | 142440 | 8-scf00209 | 8 |
| AX-158087145 | 9 | 120.773 | KV452957.1 | 148282 | 8-scf00209 | 8 |
| AX-157683309 | 9 | 120.773 | KV452957.1 | 150909 | 8-scf00209 | 8 |
| AX-157683306 | 9 | 120.773 | KV452957.1 | 152592 | 8-scf00209 | 8 |
| AX-157683303 | 9 | 120.773 | KV452957.1 | 155488 | 8-scf00209 | 8 |
| AX-157683300 | 9 | 120.773 | KV452957.1 | 160494 | 8-scf00209 | 8 |
| AX-157683299 | 9 | 120.773 | KV452957.1 | 163985 | 8-scf00209 | 8 |
| AX-157683298 | 9 | 120.773 | KV452957.1 | 164961 | 8-scf00209 | 8 |
| AX-157683297 | 9 | 120.773 | KV452957.1 | 166220 | 8-scf00209 | 8 |
| AX-157683295 | 9 | 120.773 | KV452957.1 | 169527 | 8-scf00209 | 8 |
| AX-157680647 | 9 | 120.773 | KV452957.1 | 169953 | 8-scf00209 | 8 |
| AX-157683294 | 9 | 120.773 | KV452957.1 | 173276 | 8-scf00209 | 8 |
| AX-157683293 | 9 | 120.773 | KV452957.1 | 174804 | 8-scf00209 | 8 |
| AX-157683289 | 9 | 120.773 | KV452957.1 | 181740 | 8-scf00209 | 8 |
| AX-157683287 | 9 | 120.773 | KV452957.1 | 186013 | 8-scf00209 | 8 |
| AX-157683282 | 9 | 120.773 | KV452957.1 | 193186 | 8-scf00209 | 8 |
| AX-157683280 | 9 | 120.773 | KV452957.1 | 194976 | 8-scf00209 | 8 |
| AX-157683279 | 9 | 120.773 | KV452957.1 | 195235 | 8-scf00209 | 8 |
| AX-158087151 | 9 | 120.773 | KV452955.1 | 1764   | 8-scf00210 | 8 |
| AX-158087152 | 9 | 120.773 | KV452955.1 | 9275   | 8-scf00210 | 8 |
| AX-158087184 | 9 | 120.773 | KV452955.1 | 49513  | 8-scf00210 | 8 |
| AX-158087186 | 9 | 120.773 | KV452955.1 | 51570  | 8-scf00210 | 8 |
| AX-158087187 | 9 | 120.773 | KV452955.1 | 52114  | 8-scf00210 | 8 |
| AX-158087192 | 9 | 120.773 | KV452955.1 | 59438  | 8-scf00210 | 8 |
| AX-158087194 | 9 | 120.773 | KV452955.1 | 60639  | 8-scf00210 | 8 |
| AX-158087195 | 9 | 120.773 | KV452955.1 | 61649  | 8-scf00210 | 8 |
| AX-158087196 | 9 | 120.773 | KV452955.1 | 61749  | 8-scf00210 | 8 |
| AX-158087197 | 9 | 120.773 | KV452955.1 | 62222  | 8-scf00210 | 8 |
| AX-158087200 | 9 | 120.773 | KV452955.1 | 66522  | 8-scf00210 | 8 |
| AX-158087201 | 9 | 120.773 | KV452955.1 | 69212  | 8-scf00210 | 8 |
| AX-158087204 | 9 | 120.773 | KV452955.1 | 73731  | 8-scf00210 | 8 |
| AX-158087206 | 9 | 120.773 | KV452955.1 | 75889  | 8-scf00210 | 8 |
| AX-158087208 | 9 | 120.773 | KV452955.1 | 78877  | 8-scf00210 | 8 |
| AX-158087209 | 9 | 120.773 | KV452955.1 | 79766  | 8-scf00210 | 8 |
| AX-158087211 | 9 | 120.773 | KV452955.1 | 83329  | 8-scf00210 | 8 |
| AX-157683203 | 9 | 120.773 | KV452954.1 | 1529   | 8-scf00211 | 8 |
| AX-157683206 | 9 | 120.773 | KV452954.1 | 5503   | 8-scf00211 | 8 |
| AX-157683239 | 9 | 120.773 | KV452954.1 | 59278  | 8-scf00211 | 8 |
| AX-158087243 | 9 | 120.773 | KV452953.1 | 49020  | 8-scf00212 | 8 |
| AX-158087273 | 9 | 120.773 | KV452959.1 | 4674   | 8-scf00214 | 8 |
| AX-158087274 | 9 | 120.773 | KV452959.1 | 11844  | 8-scf00214 | 8 |
| AX-158087275 | 9 | 120.773 | KV452959.1 | 12780  | 8-scf00214 | 8 |

|              |   |         |            |        |            |   |
|--------------|---|---------|------------|--------|------------|---|
| AX-158087276 | 9 | 120.773 | KV452959.1 | 16372  | 8-scf00214 | 8 |
| AX-158392130 | 9 | 120.773 | KV452959.1 | 27524  | 8-scf00214 | 8 |
| AX-158087287 | 9 | 120.773 | KV452959.1 | 34060  | 8-scf00214 | 8 |
| AX-158087290 | 9 | 120.773 | KV452959.1 | 38156  | 8-scf00214 | 8 |
| AX-158087291 | 9 | 120.773 | KV452959.1 | 39644  | 8-scf00214 | 8 |
| AX-158087293 | 9 | 120.773 | KV452959.1 | 41887  | 8-scf00214 | 8 |
| AX-158087294 | 9 | 120.773 | KV452959.1 | 42246  | 8-scf00214 | 8 |
| AX-158087295 | 9 | 120.773 | KV452959.1 | 42785  | 8-scf00214 | 8 |
| AX-158087299 | 9 | 120.773 | KV452959.1 | 45569  | 8-scf00214 | 8 |
| AX-158087300 | 9 | 120.773 | KV452959.1 | 45991  | 8-scf00214 | 8 |
| AX-158087301 | 9 | 120.773 | KV452959.1 | 46732  | 8-scf00214 | 8 |
| AX-158087303 | 9 | 120.773 | KV452959.1 | 51649  | 8-scf00214 | 8 |
| AX-158087307 | 9 | 120.773 | KV452959.1 | 59130  | 8-scf00214 | 8 |
| AX-158087308 | 9 | 120.773 | KV452959.1 | 60116  | 8-scf00214 | 8 |
| AX-158087310 | 9 | 120.773 | KV452959.1 | 61442  | 8-scf00214 | 8 |
| AX-158087311 | 9 | 120.773 | KV452959.1 | 63199  | 8-scf00214 | 8 |
| AX-158087312 | 9 | 120.773 | KV452959.1 | 63780  | 8-scf00214 | 8 |
| AX-158087317 | 9 | 120.773 | KV452959.1 | 67329  | 8-scf00214 | 8 |
| AX-158087319 | 9 | 120.773 | KV452959.1 | 68296  | 8-scf00214 | 8 |
| AX-158087320 | 9 | 120.773 | KV452959.1 | 69662  | 8-scf00214 | 8 |
| AX-158087324 | 9 | 120.773 | KV452959.1 | 73608  | 8-scf00214 | 8 |
| AX-158087325 | 9 | 120.773 | KV452959.1 | 73861  | 8-scf00214 | 8 |
| AX-158087328 | 9 | 120.773 | KV452959.1 | 74693  | 8-scf00214 | 8 |
| AX-158087330 | 9 | 120.773 | KV452959.1 | 76040  | 8-scf00214 | 8 |
| AX-158087331 | 9 | 120.773 | KV452959.1 | 76369  | 8-scf00214 | 8 |
| AX-158087332 | 9 | 120.773 | KV452959.1 | 76595  | 8-scf00214 | 8 |
| AX-158087334 | 9 | 120.773 | KV452959.1 | 78262  | 8-scf00214 | 8 |
| AX-158087336 | 9 | 120.773 | KV452959.1 | 80142  | 8-scf00214 | 8 |
| AX-158087337 | 9 | 120.773 | KV452959.1 | 80706  | 8-scf00214 | 8 |
| AX-158087339 | 9 | 120.773 | KV452959.1 | 81723  | 8-scf00214 | 8 |
| AX-158087340 | 9 | 120.773 | KV452959.1 | 82524  | 8-scf00214 | 8 |
| AX-158087343 | 9 | 120.773 | KV452959.1 | 85219  | 8-scf00214 | 8 |
| AX-158087344 | 9 | 120.773 | KV452959.1 | 86282  | 8-scf00214 | 8 |
| AX-158087347 | 9 | 120.773 | KV452959.1 | 90931  | 8-scf00214 | 8 |
| AX-158087350 | 9 | 120.773 | KV452959.1 | 94794  | 8-scf00214 | 8 |
| AX-158087351 | 9 | 120.773 | KV452959.1 | 95409  | 8-scf00214 | 8 |
| AX-158087353 | 9 | 120.773 | KV452959.1 | 96557  | 8-scf00214 | 8 |
| AX-158087354 | 9 | 120.773 | KV452959.1 | 97097  | 8-scf00214 | 8 |
| AX-158087356 | 9 | 120.773 | KV452959.1 | 99025  | 8-scf00214 | 8 |
| AX-158087359 | 9 | 120.773 | KV452959.1 | 100420 | 8-scf00214 | 8 |
| AX-158087360 | 9 | 120.773 | KV452959.1 | 101393 | 8-scf00214 | 8 |
| AX-158087364 | 9 | 120.773 | KV452959.1 | 105087 | 8-scf00214 | 8 |
| AX-158087365 | 9 | 120.773 | KV452959.1 | 105866 | 8-scf00214 | 8 |
| AX-158087366 | 9 | 120.773 | KV452959.1 | 106140 | 8-scf00214 | 8 |
| AX-158087373 | 9 | 120.773 | KV452959.1 | 115724 | 8-scf00214 | 8 |
| AX-158087374 | 9 | 120.773 | KV452959.1 | 117384 | 8-scf00214 | 8 |
| AX-158087386 | 9 | 120.773 | KV452959.1 | 136771 | 8-scf00214 | 8 |
| AX-158087388 | 9 | 120.773 | KV452959.1 | 138443 | 8-scf00214 | 8 |
| AX-158087389 | 9 | 120.773 | KV452959.1 | 139147 | 8-scf00214 | 8 |
| AX-158087392 | 9 | 120.773 | KV452959.1 | 140263 | 8-scf00214 | 8 |
| AX-158087396 | 9 | 120.773 | KV452959.1 | 144905 | 8-scf00214 | 8 |

|              |   |         |             |        |            |    |
|--------------|---|---------|-------------|--------|------------|----|
| AX-158087398 | 9 | 120.773 | KV452959.1  | 150790 | 8-scf00214 | 8  |
| AX-158087399 | 9 | 120.773 | KV452959.1  | 154250 | 8-scf00214 | 8  |
| AX-158409893 | 9 | 120.773 | KV452959.1  | 157688 | 8-scf00214 | 8  |
| AX-158087403 | 9 | 120.773 | KV452959.1  | 160057 | 8-scf00214 | 8  |
| AX-158087404 | 9 | 120.773 | KV452959.1  | 161932 | 8-scf00214 | 8  |
| AX-158087405 | 9 | 120.773 | KV452959.1  | 162409 | 8-scf00214 | 8  |
| AX-158087411 | 9 | 120.773 | KV452959.1  | 167996 | 8-scf00214 | 8  |
| AX-158087412 | 9 | 120.773 | KV452959.1  | 169217 | 8-scf00214 | 8  |
| AX-158087413 | 9 | 120.773 | KV452959.1  | 169954 | 8-scf00214 | 8  |
| AX-158087416 | 9 | 120.773 | KV452959.1  | 174914 | 8-scf00214 | 8  |
| AX-158087420 | 9 | 120.773 | KV452959.1  | 179134 | 8-scf00214 | 8  |
| AX-158087422 | 9 | 120.773 | KV452959.1  | 180395 | 8-scf00214 | 8  |
| AX-158087423 | 9 | 120.773 | KV452959.1  | 181005 | 8-scf00214 | 8  |
| AX-158087432 | 9 | 120.773 | KV452959.1  | 194038 | 8-scf00214 | 8  |
| AX-158087442 | 9 | 120.773 | KV452959.1  | 205375 | 8-scf00214 | 8  |
| AX-158087443 | 9 | 120.773 | KV452959.1  | 205734 | 8-scf00214 | 8  |
| AX-158087447 | 9 | 120.773 | KV452959.1  | 210285 | 8-scf00214 | 8  |
| AX-158087449 | 9 | 120.773 | KV452959.1  | 211906 | 8-scf00214 | 8  |
| AX-157683259 | 9 | 120.773 | KV452958.1  | 574    | 8-scf00215 | 8  |
| AX-157683262 | 9 | 120.773 | KV452958.1  | 2229   | 8-scf00215 | 8  |
| AX-157680646 | 9 | 120.773 | KV452958.1  | 5338   | 8-scf00215 | 8  |
| AX-157683263 | 9 | 120.773 | KV452958.1  | 7439   | 8-scf00215 | 8  |
| AX-157683264 | 9 | 120.773 | KV452958.1  | 8361   | 8-scf00215 | 8  |
| AX-157683266 | 9 | 120.773 | KV452958.1  | 10563  | 8-scf00215 | 8  |
| AX-157683269 | 9 | 120.773 | KV452958.1  | 15517  | 8-scf00215 | 8  |
| AX-157683271 | 9 | 120.773 | KV452958.1  | 17183  | 8-scf00215 | 8  |
| AX-157683273 | 9 | 120.773 | KV452958.1  | 19680  | 8-scf00215 | 8  |
| AX-157688055 | 9 | 120.773 | KV453696.1  | 3163   | scf01196   | UN |
| AX-157688391 | 9 | 120.773 | 3ML01026067 | 1474   | scf01665_1 | UN |
| AX-157681256 | 9 | 120.773 | 3ML01029910 | 632    | scf05532_1 | UN |
| AX-158086995 | 9 | 120.822 | KV452952.1  | 98990  | 8-scf00208 | 8  |
| AX-158086996 | 9 | 120.822 | KV452952.1  | 100495 | 8-scf00208 | 8  |
| AX-157755213 | 9 | 120.822 | KV452952.1  | 103268 | 8-scf00208 | 8  |
| AX-158087000 | 9 | 120.822 | KV452952.1  | 105099 | 8-scf00208 | 8  |
| AX-158087001 | 9 | 120.822 | KV452952.1  | 105641 | 8-scf00208 | 8  |
| AX-158087004 | 9 | 120.822 | KV452952.1  | 108521 | 8-scf00208 | 8  |
| AX-158087007 | 9 | 120.822 | KV452952.1  | 115148 | 8-scf00208 | 8  |
| AX-158087009 | 9 | 120.822 | KV452952.1  | 117273 | 8-scf00208 | 8  |
| AX-158384520 | 9 | 120.822 | KV452952.1  | 122372 | 8-scf00208 | 8  |
| AX-158087018 | 9 | 120.822 | KV452952.1  | 132226 | 8-scf00208 | 8  |
| AX-157825285 | 9 | 120.822 | KV452952.1  | 134405 | 8-scf00208 | 8  |
| AX-157721280 | 9 | 120.822 | KV452952.1  | 134511 | 8-scf00208 | 8  |
| AX-157746437 | 9 | 120.822 | KV452952.1  | 146500 | 8-scf00208 | 8  |
| AX-158087027 | 9 | 120.822 | KV452952.1  | 148338 | 8-scf00208 | 8  |
| AX-157825292 | 9 | 120.822 | KV452952.1  | 164786 | 8-scf00208 | 8  |
| AX-158087071 | 9 | 120.822 | KV452957.1  | 42513  | 8-scf00209 | 8  |
| AX-158087229 | 9 | 120.822 | KV452953.1  | 26687  | 8-scf00212 | 8  |
| AX-158087427 | 9 | 120.822 | KV452959.1  | 187554 | 8-scf00214 | 8  |
| AX-158087008 | 9 | 120.931 | KV452952.1  | 116112 | 8-scf00208 | 8  |
| AX-158087013 | 9 | 120.931 | KV452952.1  | 126195 | 8-scf00208 | 8  |
| AX-158087014 | 9 | 120.931 | KV452952.1  | 128944 | 8-scf00208 | 8  |

|              |   |         |             |        |            |    |
|--------------|---|---------|-------------|--------|------------|----|
| AX-158087016 | 9 | 120.931 | KV452952.1  | 130840 | 8-scf00208 | 8  |
| AX-157825284 | 9 | 120.931 | KV452952.1  | 132389 | 8-scf00208 | 8  |
| AX-157825287 | 9 | 120.931 | KV452952.1  | 138755 | 8-scf00208 | 8  |
| AX-158087022 | 9 | 120.931 | KV452952.1  | 139145 | 8-scf00208 | 8  |
| AX-158087023 | 9 | 120.931 | KV452952.1  | 139688 | 8-scf00208 | 8  |
| AX-158087024 | 9 | 120.931 | KV452952.1  | 141366 | 8-scf00208 | 8  |
| AX-157825291 | 9 | 120.931 | KV452952.1  | 150984 | 8-scf00208 | 8  |
| AX-158087029 | 9 | 120.931 | KV452952.1  | 165376 | 8-scf00208 | 8  |
| AX-158087033 | 9 | 120.931 | KV452952.1  | 166890 | 8-scf00208 | 8  |
| AX-158087098 | 9 | 120.931 | KV452957.1  | 81404  | 8-scf00209 | 8  |
| AX-158087224 | 9 | 120.931 | KV452953.1  | 20797  | 8-scf00212 | 8  |
| AX-157757918 | 9 | 120.931 | KV452953.1  | 75459  | 8-scf00212 | 8  |
| AX-157726588 | 9 | 121.15  | KV452957.1  | 127574 | 8-scf00209 | 8  |
| AX-157688052 | 9 | 121.15  | KV453696.1  | 491    | scf01196   | UN |
| AX-157688629 | 9 | 121.15  | 3ML01026596 | 810    | scf02194_1 | UN |
| AX-157825293 | 9 | 121.18  | KV452952.1  | 173166 | 8-scf00208 | 8  |
| AX-158087034 | 9 | 121.274 | KV452952.1  | 175881 | 8-scf00208 | 8  |
| AX-158087036 | 9 | 121.369 | KV452952.1  | 182181 | 8-scf00208 | 8  |
| AX-157857211 | 9 | 121.369 | KV452952.1  | 185139 | 8-scf00208 | 8  |
| AX-157683212 | 9 | 121.369 | KV452954.1  | 10502  | 8-scf00211 | 8  |
| AX-158087213 | 9 | 121.369 | KV452953.1  | 458    | 8-scf00212 | 8  |
| AX-158416733 | 9 | 121.369 | KV452953.1  | 3235   | 8-scf00212 | 8  |
| AX-158087217 | 9 | 121.369 | KV452953.1  | 8149   | 8-scf00212 | 8  |
| AX-158087219 | 9 | 121.369 | KV452953.1  | 9671   | 8-scf00212 | 8  |
| AX-158087220 | 9 | 121.369 | KV452953.1  | 10597  | 8-scf00212 | 8  |
| AX-158087225 | 9 | 121.369 | KV452953.1  | 21415  | 8-scf00212 | 8  |
| AX-158087227 | 9 | 121.369 | KV452953.1  | 22411  | 8-scf00212 | 8  |
| AX-158087230 | 9 | 121.369 | KV452953.1  | 27086  | 8-scf00212 | 8  |
| AX-158086999 | 9 | 121.478 | KV452952.1  | 104679 | 8-scf00208 | 8  |
| AX-157681601 | 9 | 121.478 | KV452954.1  | 42765  | 8-scf00211 | 8  |
| AX-158087235 | 9 | 121.478 | KV452953.1  | 36713  | 8-scf00212 | 8  |
| AX-158087236 | 9 | 121.478 | KV452953.1  | 37273  | 8-scf00212 | 8  |
| AX-158087238 | 9 | 121.478 | KV452953.1  | 39891  | 8-scf00212 | 8  |
| AX-158087240 | 9 | 121.478 | KV452953.1  | 43487  | 8-scf00212 | 8  |
| AX-158087241 | 9 | 121.478 | KV452953.1  | 45020  | 8-scf00212 | 8  |
| AX-158087242 | 9 | 121.478 | KV452953.1  | 48041  | 8-scf00212 | 8  |
| AX-158087261 | 9 | 121.478 | KV452953.1  | 75850  | 8-scf00212 | 8  |
| AX-158087262 | 9 | 121.478 | KV452953.1  | 76286  | 8-scf00212 | 8  |
| AX-158087263 | 9 | 121.478 | KV452953.1  | 77133  | 8-scf00212 | 8  |
| AX-157683215 | 9 | 121.501 | KV452954.1  | 15492  | 8-scf00211 | 8  |
| AX-158087050 | 9 | 121.509 | KV452957.1  | 19046  | 8-scf00209 | 8  |
| AX-158392124 | 9 | 121.509 | KV452957.1  | 29387  | 8-scf00209 | 8  |
| AX-157683216 | 9 | 121.509 | KV452954.1  | 16606  | 8-scf00211 | 8  |
| AX-158087068 | 9 | 121.513 | KV452957.1  | 37919  | 8-scf00209 | 8  |
| AX-157683207 | 9 | 121.513 | KV452954.1  | 6868   | 8-scf00211 | 8  |
| AX-157683208 | 9 | 121.513 | KV452954.1  | 7735   | 8-scf00211 | 8  |
| AX-157683217 | 9 | 121.513 | KV452954.1  | 17795  | 8-scf00211 | 8  |
| AX-157683229 | 9 | 121.513 | KV452954.1  | 45606  | 8-scf00211 | 8  |
| AX-157683231 | 9 | 121.513 | KV452954.1  | 47208  | 8-scf00211 | 8  |
| AX-158087251 | 9 | 121.513 | KV452953.1  | 59317  | 8-scf00212 | 8  |
| AX-158087253 | 9 | 121.513 | KV452953.1  | 61962  | 8-scf00212 | 8  |

|              |    |         |             |        |             |    |
|--------------|----|---------|-------------|--------|-------------|----|
| AX-158087258 | 9  | 121.513 | KV452953.1  | 68182  | 8-scf00212  | 8  |
| AX-158087259 | 9  | 121.513 | KV452953.1  | 74232  | 8-scf00212  | 8  |
| AX-158087260 | 9  | 121.513 | KV452953.1  | 74898  | 8-scf00212  | 8  |
| AX-158087264 | 9  | 121.513 | KV452953.1  | 77757  | 8-scf00212  | 8  |
| AX-158087266 | 9  | 121.513 | KV452953.1  | 78821  | 8-scf00212  | 8  |
| AX-158087267 | 9  | 121.513 | KV452953.1  | 79775  | 8-scf00212  | 8  |
| AX-158087268 | 9  | 121.513 | KV452953.1  | 82535  | 8-scf00212  | 8  |
| AX-158087270 | 9  | 121.513 | KV452953.1  | 101206 | 8-scf00212  | 8  |
| AX-158087348 | 9  | 121.513 | KV452959.1  | 91622  | 8-scf00214  | 8  |
| AX-157706540 | 9  | 121.513 | 3ML01032410 | 579    | scf08030_1  | UN |
| AX-157683225 | 9  | 121.517 | KV452954.1  | 38329  | 8-scf00211  | 8  |
| AX-158087019 | 9  | 121.52  | KV452952.1  | 136010 | 8-scf00208  | 8  |
| AX-158087026 | 9  | 121.52  | KV452952.1  | 143311 | 8-scf00208  | 8  |
| AX-158087179 | 9  | 121.52  | KV452955.1  | 39586  | 8-scf00210  | 8  |
| AX-157683218 | 9  | 121.52  | KV452954.1  | 18877  | 8-scf00211  | 8  |
| AX-157683219 | 9  | 121.52  | KV452954.1  | 23413  | 8-scf00211  | 8  |
| AX-157683222 | 9  | 121.52  | KV452954.1  | 28654  | 8-scf00211  | 8  |
| AX-157683226 | 9  | 121.52  | KV452954.1  | 38404  | 8-scf00211  | 8  |
| AX-157683227 | 9  | 121.52  | KV452954.1  | 39934  | 8-scf00211  | 8  |
| AX-157683228 | 9  | 121.52  | KV452954.1  | 43791  | 8-scf00211  | 8  |
| AX-157683232 | 9  | 121.52  | KV452954.1  | 48159  | 8-scf00211  | 8  |
| AX-158087222 | 9  | 121.52  | KV452953.1  | 18911  | 8-scf00212  | 8  |
| AX-157683230 | 9  | 121.587 | KV452954.1  | 46243  | 8-scf00211  | 8  |
| AX-157679983 | 9  | 121.587 | KV452956.1  | 2131   | 8-scf00213  | 8  |
| AX-157739098 | 9  | 121.696 | KV452957.1  | 41783  | 8-scf00209  | 8  |
| AX-158087072 | 9  | 121.702 | KV452957.1  | 43513  | 8-scf00209  | 8  |
| AX-158087314 | 9  | 121.702 | KV452959.1  | 65542  | 8-scf00214  | 8  |
| AX-157683258 | 9  | 121.702 | KV452958.1  | 400    | 8-scf00215  | 8  |
| AX-158087092 | 9  | 121.82  | KV452957.1  | 71141  | 8-scf00209  | 8  |
| AX-157683291 | 9  | 121.82  | KV452957.1  | 178293 | 8-scf00209  | 8  |
| AX-157758067 | 9  | 121.82  | KV452959.1  | 62829  | 8-scf00214  | 8  |
| AX-158087329 | 9  | 121.82  | KV452959.1  | 74914  | 8-scf00214  | 8  |
| AX-157756722 | 9  | 121.82  | KV452959.1  | 116932 | 8-scf00214  | 8  |
| AX-157683270 | 9  | 121.82  | KV452958.1  | 15912  | 8-scf00215  | 8  |
| AX-157679946 | 9  | 121.829 | KV452957.1  | 190105 | 8-scf00209  | 8  |
| AX-157683285 | 9  | 122.109 | KV452957.1  | 189626 | 8-scf00209  | 8  |
| AX-158087453 | 10 | 0       | KV453271.1  | 1005   | 26-scf00217 | 26 |
| AX-158087454 | 10 | 0       | KV453271.1  | 1092   | 26-scf00217 | 26 |
| AX-158087461 | 10 | 0       | KV453271.1  | 9510   | 26-scf00217 | 26 |
| AX-158087463 | 10 | 0       | KV453271.1  | 18508  | 26-scf00217 | 26 |
| AX-158087465 | 10 | 0       | KV453271.1  | 19384  | 26-scf00217 | 26 |
| AX-158087471 | 10 | 0       | KV453271.1  | 28008  | 26-scf00217 | 26 |
| AX-158087594 | 10 | 0       | KV453272.1  | 296    | 26-scf00218 | 26 |
| AX-158087637 | 10 | 0       | KV453272.1  | 58379  | 26-scf00218 | 26 |
| AX-158087470 | 10 | 0.126   | KV453271.1  | 27791  | 26-scf00217 | 26 |
| AX-158087472 | 10 | 0.126   | KV453271.1  | 29715  | 26-scf00217 | 26 |
| AX-158087478 | 10 | 0.126   | KV453271.1  | 35257  | 26-scf00217 | 26 |
| AX-157825300 | 10 | 0.126   | KV453271.1  | 37423  | 26-scf00217 | 26 |
| AX-158087480 | 10 | 0.126   | KV453271.1  | 37989  | 26-scf00217 | 26 |
| AX-158087481 | 10 | 0.126   | KV453271.1  | 38984  | 26-scf00217 | 26 |
| AX-158087482 | 10 | 0.126   | KV453271.1  | 39718  | 26-scf00217 | 26 |

|              |    |       |             |        |             |    |
|--------------|----|-------|-------------|--------|-------------|----|
| AX-158087483 | 10 | 0.126 | KV453271.1  | 40480  | 26-scf00217 | 26 |
| AX-158087484 | 10 | 0.126 | KV453271.1  | 40691  | 26-scf00217 | 26 |
| AX-157747767 | 10 | 0.126 | KV453271.1  | 42470  | 26-scf00217 | 26 |
| AX-158087485 | 10 | 0.126 | KV453271.1  | 43369  | 26-scf00217 | 26 |
| AX-157739020 | 10 | 0.126 | KV453272.1  | 2083   | 26-scf00218 | 26 |
| AX-158087727 | 10 | 0.126 | KV453272.1  | 235995 | 26-scf00218 | 26 |
| AX-158087494 | 10 | 0.209 | KV453271.1  | 59109  | 26-scf00217 | 26 |
| AX-157706529 | 10 | 0.209 | 3ML01032387 | 136    | scf08006_1  | UN |
| AX-158087491 | 10 | 0.268 | KV453271.1  | 55021  | 26-scf00217 | 26 |
| AX-157825302 | 10 | 0.268 | KV453271.1  | 63967  | 26-scf00217 | 26 |
| AX-158087496 | 10 | 0.268 | KV453271.1  | 65701  | 26-scf00217 | 26 |
| AX-157825304 | 10 | 0.41  | KV453271.1  | 70600  | 26-scf00217 | 26 |
| AX-157747768 | 10 | 0.551 | KV453271.1  | 77057  | 26-scf00217 | 26 |
| AX-157825308 | 10 | 0.551 | KV453271.1  | 87937  | 26-scf00217 | 26 |
| AX-158087511 | 10 | 0.551 | KV453271.1  | 93579  | 26-scf00217 | 26 |
| AX-158087512 | 10 | 0.551 | KV453271.1  | 93991  | 26-scf00217 | 26 |
| AX-158087514 | 10 | 0.551 | KV453271.1  | 97069  | 26-scf00217 | 26 |
| AX-158087544 | 10 | 0.834 | KV453271.1  | 126634 | 26-scf00217 | 26 |
| AX-157717153 | 10 | 0.834 | KV453271.1  | 127496 | 26-scf00217 | 26 |
| AX-157825312 | 10 | 0.835 | KV453271.1  | 131524 | 26-scf00217 | 26 |
| AX-158087549 | 10 | 0.835 | KV453271.1  | 133674 | 26-scf00217 | 26 |
| AX-158087551 | 10 | 0.835 | KV453271.1  | 135442 | 26-scf00217 | 26 |
| AX-158087553 | 10 | 0.835 | KV453271.1  | 137109 | 26-scf00217 | 26 |
| AX-158087557 | 10 | 0.835 | KV453271.1  | 143417 | 26-scf00217 | 26 |
| AX-158087556 | 10 | 0.836 | KV453271.1  | 141129 | 26-scf00217 | 26 |
| AX-158087561 | 10 | 1.116 | KV453271.1  | 150661 | 26-scf00217 | 26 |
| AX-158087563 | 10 | 1.116 | KV453271.1  | 153155 | 26-scf00217 | 26 |
| AX-157756274 | 10 | 1.116 | KV453271.1  | 166785 | 26-scf00217 | 26 |
| AX-158087578 | 10 | 1.116 | KV453271.1  | 169095 | 26-scf00217 | 26 |
| AX-157885640 | 10 | 1.117 | KV453271.1  | 23979  | 26-scf00217 | 26 |
| AX-158087565 | 10 | 1.117 | KV453271.1  | 154215 | 26-scf00217 | 26 |
| AX-158087570 | 10 | 1.117 | KV453271.1  | 161170 | 26-scf00217 | 26 |
| AX-158087571 | 10 | 1.117 | KV453271.1  | 162131 | 26-scf00217 | 26 |
| AX-158087572 | 10 | 1.117 | KV453271.1  | 162449 | 26-scf00217 | 26 |
| AX-157743321 | 10 | 1.117 | KV453271.1  | 163647 | 26-scf00217 | 26 |
| AX-158087573 | 10 | 1.117 | KV453271.1  | 164338 | 26-scf00217 | 26 |
| AX-157724106 | 10 | 1.117 | KV453271.1  | 164556 | 26-scf00217 | 26 |
| AX-158087576 | 10 | 1.117 | KV453271.1  | 167566 | 26-scf00217 | 26 |
| AX-158087577 | 10 | 1.117 | KV453271.1  | 167959 | 26-scf00217 | 26 |
| AX-158087579 | 10 | 1.117 | KV453271.1  | 170549 | 26-scf00217 | 26 |
| AX-158087580 | 10 | 1.117 | KV453271.1  | 171407 | 26-scf00217 | 26 |
| AX-158087581 | 10 | 1.117 | KV453271.1  | 172328 | 26-scf00217 | 26 |
| AX-158087584 | 10 | 1.117 | KV453271.1  | 177153 | 26-scf00217 | 26 |
| AX-158087589 | 10 | 1.117 | KV453271.1  | 186313 | 26-scf00217 | 26 |
| AX-158087590 | 10 | 1.117 | KV453271.1  | 187373 | 26-scf00217 | 26 |
| AX-157825314 | 10 | 1.117 | KV453271.1  | 191431 | 26-scf00217 | 26 |
| AX-158087593 | 10 | 1.117 | KV453271.1  | 192887 | 26-scf00217 | 26 |
| AX-157885642 | 10 | 1.118 | KV453271.1  | 130060 | 26-scf00217 | 26 |
| AX-157721065 | 10 | 1.118 | KV453271.1  | 160794 | 26-scf00217 | 26 |
| AX-158087569 | 10 | 1.118 | KV453271.1  | 160906 | 26-scf00217 | 26 |
| AX-158087582 | 10 | 1.118 | KV453271.1  | 175062 | 26-scf00217 | 26 |



|              |    |       |            |        |             |    |
|--------------|----|-------|------------|--------|-------------|----|
| AX-158087583 | 10 | 1.118 | KV453271.1 | 175632 | 26-scf00217 | 26 |
| AX-157774712 | 10 | 1.118 | KV453271.1 | 177102 | 26-scf00217 | 26 |
| AX-158087585 | 10 | 1.118 | KV453271.1 | 180477 | 26-scf00217 | 26 |
| AX-158087586 | 10 | 1.118 | KV453271.1 | 182121 | 26-scf00217 | 26 |
| AX-158087588 | 10 | 1.118 | KV453271.1 | 182973 | 26-scf00217 | 26 |
| AX-158087591 | 10 | 1.118 | KV453271.1 | 190893 | 26-scf00217 | 26 |
| AX-158087595 | 10 | 2.251 | KV453272.1 | 600    | 26-scf00218 | 26 |
| AX-158087598 | 10 | 2.251 | KV453272.1 | 5927   | 26-scf00218 | 26 |
| AX-158087603 | 10 | 2.251 | KV453272.1 | 10508  | 26-scf00218 | 26 |
| AX-158087604 | 10 | 2.251 | KV453272.1 | 11184  | 26-scf00218 | 26 |
| AX-158087608 | 10 | 2.535 | KV453272.1 | 16404  | 26-scf00218 | 26 |
| AX-158087614 | 10 | 2.654 | KV453272.1 | 26689  | 26-scf00218 | 26 |
| AX-158087616 | 10 | 2.761 | KV453272.1 | 30112  | 26-scf00218 | 26 |
| AX-158087623 | 10 | 2.865 | KV453272.1 | 38328  | 26-scf00218 | 26 |
| AX-158087624 | 10 | 2.96  | KV453272.1 | 38769  | 26-scf00218 | 26 |
| AX-158087627 | 10 | 2.96  | KV453272.1 | 42007  | 26-scf00218 | 26 |
| AX-158087628 | 10 | 2.962 | KV453272.1 | 44873  | 26-scf00218 | 26 |
| AX-158379939 | 10 | 2.991 | KV453272.1 | 46219  | 26-scf00218 | 26 |
| AX-158087629 | 10 | 3.018 | KV453272.1 | 46546  | 26-scf00218 | 26 |
| AX-158087630 | 10 | 3.203 | KV453272.1 | 48379  | 26-scf00218 | 26 |
| AX-158087632 | 10 | 3.206 | KV453272.1 | 51093  | 26-scf00218 | 26 |
| AX-157722103 | 10 | 3.649 | KV453272.1 | 52009  | 26-scf00218 | 26 |
| AX-158087634 | 10 | 3.698 | KV453272.1 | 53447  | 26-scf00218 | 26 |
| AX-158087640 | 10 | 3.75  | KV453272.1 | 62847  | 26-scf00218 | 26 |
| AX-158087641 | 10 | 3.75  | KV453272.1 | 63553  | 26-scf00218 | 26 |
| AX-158087642 | 10 | 3.75  | KV453272.1 | 64029  | 26-scf00218 | 26 |
| AX-157857219 | 10 | 3.955 | KV453272.1 | 65145  | 26-scf00218 | 26 |
| AX-158087643 | 10 | 3.956 | KV453272.1 | 65606  | 26-scf00218 | 26 |
| AX-157744316 | 10 | 3.956 | KV453272.1 | 66963  | 26-scf00218 | 26 |
| AX-157825317 | 10 | 3.973 | KV453272.1 | 68054  | 26-scf00218 | 26 |
| AX-157716744 | 10 | 4.298 | KV453272.1 | 74585  | 26-scf00218 | 26 |
| AX-158087645 | 10 | 4.602 | KV453272.1 | 72288  | 26-scf00218 | 26 |
| AX-158087647 | 10 | 4.602 | KV453272.1 | 83498  | 26-scf00218 | 26 |
| AX-158087651 | 10 | 4.602 | KV453272.1 | 90210  | 26-scf00218 | 26 |
| AX-157885645 | 10 | 4.603 | KV453272.1 | 83332  | 26-scf00218 | 26 |
| AX-157751455 | 10 | 4.603 | KV453272.1 | 91172  | 26-scf00218 | 26 |
| AX-158087654 | 10 | 4.603 | KV453272.1 | 92844  | 26-scf00218 | 26 |
| AX-158087652 | 10 | 4.604 | KV453272.1 | 91412  | 26-scf00218 | 26 |
| AX-158087655 | 10 | 4.605 | KV453272.1 | 94876  | 26-scf00218 | 26 |
| AX-158087660 | 10 | 5.101 | KV453272.1 | 101751 | 26-scf00218 | 26 |
| AX-158087662 | 10 | 5.14  | KV453272.1 | 107069 | 26-scf00218 | 26 |
| AX-158087657 | 10 | 5.558 | KV453272.1 | 96417  | 26-scf00218 | 26 |
| AX-158087663 | 10 | 5.558 | KV453272.1 | 107825 | 26-scf00218 | 26 |
| AX-158087665 | 10 | 5.56  | KV453272.1 | 113802 | 26-scf00218 | 26 |
| AX-158087666 | 10 | 5.563 | KV453272.1 | 114918 | 26-scf00218 | 26 |
| AX-157857220 | 10 | 5.983 | KV453272.1 | 121618 | 26-scf00218 | 26 |
| AX-157751535 | 10 | 5.985 | KV453272.1 | 122920 | 26-scf00218 | 26 |
| AX-158087683 | 10 | 7.294 | KV453272.1 | 153927 | 26-scf00218 | 26 |
| AX-158087456 | 10 | 7.552 | KV453271.1 | 3470   | 26-scf00217 | 26 |
| AX-158087460 | 10 | 7.552 | KV453271.1 | 8956   | 26-scf00217 | 26 |
| AX-158087476 | 10 | 7.552 | KV453271.1 | 32452  | 26-scf00217 | 26 |

|              |    |       |             |        |             |    |
|--------------|----|-------|-------------|--------|-------------|----|
| AX-158087493 | 10 | 7.552 | KV453271.1  | 58463  | 26-scf00217 | 26 |
| AX-158087547 | 10 | 7.552 | KV453271.1  | 129945 | 26-scf00217 | 26 |
| AX-157865777 | 10 | 7.552 | KV453271.1  | 139962 | 26-scf00217 | 26 |
| AX-158087559 | 10 | 7.552 | KV453271.1  | 145356 | 26-scf00217 | 26 |
| AX-157825316 | 10 | 7.552 | KV453272.1  | 9369   | 26-scf00218 | 26 |
| AX-158087605 | 10 | 7.552 | KV453272.1  | 13579  | 26-scf00218 | 26 |
| AX-158087609 | 10 | 7.552 | KV453272.1  | 17985  | 26-scf00218 | 26 |
| AX-158087612 | 10 | 7.552 | KV453272.1  | 22989  | 26-scf00218 | 26 |
| AX-157708988 | 10 | 7.552 | KV453272.1  | 81074  | 26-scf00218 | 26 |
| AX-158087661 | 10 | 7.552 | KV453272.1  | 104116 | 26-scf00218 | 26 |
| AX-157885646 | 10 | 7.552 | KV453272.1  | 110502 | 26-scf00218 | 26 |
| AX-158087687 | 10 | 7.552 | KV453272.1  | 160844 | 26-scf00218 | 26 |
| AX-157863214 | 10 | 7.552 | KV453272.1  | 183551 | 26-scf00218 | 26 |
| AX-158087704 | 10 | 7.552 | KV453272.1  | 185423 | 26-scf00218 | 26 |
| AX-158087707 | 10 | 7.552 | KV453272.1  | 203304 | 26-scf00218 | 26 |
| AX-158087712 | 10 | 7.552 | KV453272.1  | 209105 | 26-scf00218 | 26 |
| AX-158087751 | 10 | 7.552 | KV453272.1  | 274733 | 26-scf00218 | 26 |
| AX-158087797 | 10 | 7.552 | KV453272.1  | 342075 | 26-scf00218 | 26 |
| AX-158087816 | 10 | 7.552 | KV453272.1  | 381666 | 26-scf00218 | 26 |
| AX-157721325 | 10 | 7.552 | KV453272.1  | 382063 | 26-scf00218 | 26 |
| AX-158088069 | 10 | 7.552 | KV453278.1  | 15148  | 26-scf00221 | 26 |
| AX-158088092 | 10 | 7.552 | KV453278.1  | 50336  | 26-scf00221 | 26 |
| AX-157739562 | 10 | 7.552 | KV453280.1  | 13768  | 26-scf00225 | 26 |
| AX-157685259 | 10 | 7.552 | KV453282.1  | 152212 | 26-scf00602 | 26 |
| AX-158421020 | 10 | 7.552 | 3ML01025323 | 1816   | scf01087_1  | UN |
| AX-157710099 | 10 | 7.787 | KV453272.1  | 163464 | 26-scf00218 | 26 |
| AX-157725233 | 10 | 7.832 | KV453272.1  | 169350 | 26-scf00218 | 26 |
| AX-158087675 | 10 | 7.881 | KV453272.1  | 136444 | 26-scf00218 | 26 |
| AX-158087684 | 10 | 7.881 | KV453272.1  | 154568 | 26-scf00218 | 26 |
| AX-157825322 | 10 | 7.881 | KV453272.1  | 170669 | 26-scf00218 | 26 |
| AX-157825326 | 10 | 7.881 | KV453272.1  | 185936 | 26-scf00218 | 26 |
| AX-157865782 | 10 | 7.881 | KV453272.1  | 232122 | 26-scf00218 | 26 |
| AX-158088415 | 10 | 7.881 | KV453280.1  | 43278  | 26-scf00225 | 26 |
| AX-157741343 | 10 | 7.881 | KV453280.1  | 65027  | 26-scf00225 | 26 |
| AX-158087693 | 10 | 7.951 | KV453272.1  | 171421 | 26-scf00218 | 26 |
| AX-157825323 | 10 | 7.951 | KV453272.1  | 172598 | 26-scf00218 | 26 |
| AX-158087694 | 10 | 7.951 | KV453272.1  | 173130 | 26-scf00218 | 26 |
| AX-157825324 | 10 | 7.951 | KV453272.1  | 173488 | 26-scf00218 | 26 |
| AX-158087700 | 10 | 8.058 | KV453272.1  | 180991 | 26-scf00218 | 26 |
| AX-157825329 | 10 | 8.058 | KV453272.1  | 194174 | 26-scf00218 | 26 |
| AX-158087701 | 10 | 8.116 | KV453272.1  | 182355 | 26-scf00218 | 26 |
| AX-157752581 | 10 | 8.116 | KV453272.1  | 191810 | 26-scf00218 | 26 |
| AX-157825330 | 10 | 8.278 | KV453272.1  | 198409 | 26-scf00218 | 26 |
| AX-158087724 | 10 | 8.278 | KV453272.1  | 229768 | 26-scf00218 | 26 |
| AX-157756037 | 10 | 8.279 | KV453272.1  | 202272 | 26-scf00218 | 26 |
| AX-157825331 | 10 | 8.279 | KV453272.1  | 204161 | 26-scf00218 | 26 |
| AX-157825332 | 10 | 8.279 | KV453272.1  | 204319 | 26-scf00218 | 26 |
| AX-158087709 | 10 | 8.279 | KV453272.1  | 205308 | 26-scf00218 | 26 |
| AX-157751882 | 10 | 8.279 | KV453272.1  | 206534 | 26-scf00218 | 26 |
| AX-158087713 | 10 | 8.279 | KV453272.1  | 210778 | 26-scf00218 | 26 |
| AX-157723941 | 10 | 8.317 | KV453272.1  | 185684 | 26-scf00218 | 26 |

|              |    |        |             |        |             |    |
|--------------|----|--------|-------------|--------|-------------|----|
| AX-158087715 | 10 | 8.317  | KV453272.1  | 211742 | 26-scf00218 | 26 |
| AX-158087716 | 10 | 8.317  | KV453272.1  | 212346 | 26-scf00218 | 26 |
| AX-157825335 | 10 | 8.34   | KV453272.1  | 219460 | 26-scf00218 | 26 |
| AX-158087723 | 10 | 8.356  | KV453272.1  | 229270 | 26-scf00218 | 26 |
| AX-158087725 | 10 | 8.356  | KV453272.1  | 231458 | 26-scf00218 | 26 |
| AX-158087728 | 10 | 8.389  | KV453272.1  | 236740 | 26-scf00218 | 26 |
| AX-158087729 | 10 | 8.389  | KV453272.1  | 237277 | 26-scf00218 | 26 |
| AX-158087733 | 10 | 8.934  | KV453272.1  | 246563 | 26-scf00218 | 26 |
| AX-158087774 | 10 | 8.934  | KV453272.1  | 308718 | 26-scf00218 | 26 |
| AX-157885647 | 10 | 8.935  | KV453272.1  | 247175 | 26-scf00218 | 26 |
| AX-158087734 | 10 | 8.935  | KV453272.1  | 248163 | 26-scf00218 | 26 |
| AX-158087737 | 10 | 8.935  | KV453272.1  | 255604 | 26-scf00218 | 26 |
| AX-158087739 | 10 | 8.935  | KV453272.1  | 258774 | 26-scf00218 | 26 |
| AX-157825338 | 10 | 8.935  | KV453272.1  | 263735 | 26-scf00218 | 26 |
| AX-157721231 | 10 | 8.943  | KV453272.1  | 126869 | 26-scf00218 | 26 |
| AX-158087735 | 10 | 8.943  | KV453272.1  | 250847 | 26-scf00218 | 26 |
| AX-158087742 | 10 | 8.943  | KV453272.1  | 264432 | 26-scf00218 | 26 |
| AX-158087780 | 10 | 8.943  | KV453272.1  | 319324 | 26-scf00218 | 26 |
| AX-158087743 | 10 | 8.954  | KV453272.1  | 264996 | 26-scf00218 | 26 |
| AX-157825339 | 10 | 9.057  | KV453272.1  | 265179 | 26-scf00218 | 26 |
| AX-157721598 | 10 | 9.245  | KV453272.1  | 274267 | 26-scf00218 | 26 |
| AX-158087757 | 10 | 9.809  | KV453272.1  | 286098 | 26-scf00218 | 26 |
| AX-158087758 | 10 | 9.809  | KV453272.1  | 287217 | 26-scf00218 | 26 |
| AX-158087760 | 10 | 10.199 | KV453272.1  | 292871 | 26-scf00218 | 26 |
| AX-158087765 | 10 | 10.559 | KV453272.1  | 301041 | 26-scf00218 | 26 |
| AX-158087778 | 10 | 10.559 | KV453272.1  | 316170 | 26-scf00218 | 26 |
| AX-158088467 | 10 | 10.559 | KV453280.1  | 107231 | 26-scf00225 | 26 |
| AX-158087764 | 10 | 10.58  | KV453272.1  | 297600 | 26-scf00218 | 26 |
| AX-158087769 | 10 | 10.58  | KV453272.1  | 302887 | 26-scf00218 | 26 |
| AX-158087770 | 10 | 10.58  | KV453272.1  | 303529 | 26-scf00218 | 26 |
| AX-157750342 | 10 | 10.58  | KV453272.1  | 307571 | 26-scf00218 | 26 |
| AX-158087773 | 10 | 10.58  | KV453272.1  | 307998 | 26-scf00218 | 26 |
| AX-158087775 | 10 | 10.58  | KV453272.1  | 310466 | 26-scf00218 | 26 |
| AX-158087776 | 10 | 10.58  | KV453272.1  | 311176 | 26-scf00218 | 26 |
| AX-157706672 | 10 | 10.58  | 3ML01032717 | 506    | scf08344_1  | UN |
| AX-157750661 | 10 | 10.689 | KV453272.1  | 321001 | 26-scf00218 | 26 |
| AX-157857222 | 10 | 10.689 | KV453272.1  | 325007 | 26-scf00218 | 26 |
| AX-158087784 | 10 | 10.908 | KV453272.1  | 330685 | 26-scf00218 | 26 |
| AX-158087787 | 10 | 10.945 | KV453272.1  | 331852 | 26-scf00218 | 26 |
| AX-158087790 | 10 | 11.127 | KV453272.1  | 335138 | 26-scf00218 | 26 |
| AX-158087791 | 10 | 11.127 | KV453272.1  | 336665 | 26-scf00218 | 26 |
| AX-158087793 | 10 | 11.127 | KV453272.1  | 338504 | 26-scf00218 | 26 |
| AX-158087795 | 10 | 11.202 | KV453272.1  | 339888 | 26-scf00218 | 26 |
| AX-158087796 | 10 | 11.268 | KV453272.1  | 340992 | 26-scf00218 | 26 |
| AX-158087798 | 10 | 11.617 | KV453272.1  | 347443 | 26-scf00218 | 26 |
| AX-157709272 | 10 | 11.617 | KV453272.1  | 381318 | 26-scf00218 | 26 |
| AX-158087824 | 10 | 11.617 | KV453272.1  | 397005 | 26-scf00218 | 26 |
| AX-157747871 | 10 | 11.617 | KV453273.1  | 96598  | 26-scf00219 | 26 |
| AX-157865792 | 10 | 11.617 | KV453278.1  | 14103  | 26-scf00221 | 26 |
| AX-158087801 | 10 | 11.999 | KV453272.1  | 355472 | 26-scf00218 | 26 |
| AX-158087804 | 10 | 11.999 | KV453272.1  | 358745 | 26-scf00218 | 26 |

|              |    |        |            |        |             |    |
|--------------|----|--------|------------|--------|-------------|----|
| AX-157825344 | 10 | 11.999 | KV453272.1 | 363546 | 26-scf00218 | 26 |
| AX-158087806 | 10 | 11.999 | KV453272.1 | 366225 | 26-scf00218 | 26 |
| AX-158087810 | 10 | 11.999 | KV453272.1 | 371734 | 26-scf00218 | 26 |
| AX-158087811 | 10 | 11.999 | KV453272.1 | 372898 | 26-scf00218 | 26 |
| AX-157825345 | 10 | 11.999 | KV453272.1 | 375743 | 26-scf00218 | 26 |
| AX-158087807 | 10 | 12.002 | KV453272.1 | 366638 | 26-scf00218 | 26 |
| AX-158087812 | 10 | 12.002 | KV453272.1 | 376431 | 26-scf00218 | 26 |
| AX-158087813 | 10 | 12.007 | KV453272.1 | 377001 | 26-scf00218 | 26 |
| AX-158087817 | 10 | 12.359 | KV453272.1 | 383122 | 26-scf00218 | 26 |
| AX-158087865 | 10 | 12.359 | KV453273.1 | 38322  | 26-scf00219 | 26 |
| AX-157719365 | 10 | 12.867 | KV453272.1 | 395785 | 26-scf00218 | 26 |
| AX-158087822 | 10 | 12.902 | KV453272.1 | 395983 | 26-scf00218 | 26 |
| AX-157825347 | 10 | 12.931 | KV453272.1 | 397732 | 26-scf00218 | 26 |
| AX-157825355 | 10 | 12.931 | KV453272.1 | 431413 | 26-scf00218 | 26 |
| AX-158087874 | 10 | 12.931 | KV453273.1 | 48090  | 26-scf00219 | 26 |
| AX-158088072 | 10 | 12.931 | KV453278.1 | 21572  | 26-scf00221 | 26 |
| AX-157825348 | 10 | 12.957 | KV453272.1 | 399116 | 26-scf00218 | 26 |
| AX-158087826 | 10 | 12.957 | KV453272.1 | 403202 | 26-scf00218 | 26 |
| AX-157825343 | 10 | 12.987 | KV453272.1 | 356515 | 26-scf00218 | 26 |
| AX-158087821 | 10 | 12.987 | KV453272.1 | 390985 | 26-scf00218 | 26 |
| AX-157724213 | 10 | 12.987 | KV453272.1 | 407395 | 26-scf00218 | 26 |
| AX-158087829 | 10 | 12.987 | KV453272.1 | 409568 | 26-scf00218 | 26 |
| AX-157825351 | 10 | 12.987 | KV453272.1 | 419068 | 26-scf00218 | 26 |
| AX-157825352 | 10 | 12.987 | KV453272.1 | 419222 | 26-scf00218 | 26 |
| AX-158087833 | 10 | 12.987 | KV453272.1 | 420981 | 26-scf00218 | 26 |
| AX-158087836 | 10 | 13.198 | KV453272.1 | 424381 | 26-scf00218 | 26 |
| AX-157719453 | 10 | 13.409 | KV453272.1 | 146138 | 26-scf00218 | 26 |
| AX-158087831 | 10 | 13.409 | KV453272.1 | 418117 | 26-scf00218 | 26 |
| AX-158409898 | 10 | 13.409 | KV453272.1 | 425343 | 26-scf00218 | 26 |
| AX-158087839 | 10 | 13.409 | KV453272.1 | 427482 | 26-scf00218 | 26 |
| AX-158392137 | 10 | 13.409 | KV453272.1 | 431563 | 26-scf00218 | 26 |
| AX-158087842 | 10 | 13.409 | KV453272.1 | 432464 | 26-scf00218 | 26 |
| AX-158087843 | 10 | 13.409 | KV453272.1 | 432923 | 26-scf00218 | 26 |
| AX-158087846 | 10 | 13.409 | KV453273.1 | 3056   | 26-scf00219 | 26 |
| AX-157825356 | 10 | 13.622 | KV453273.1 | 7398   | 26-scf00219 | 26 |
| AX-157825357 | 10 | 13.622 | KV453273.1 | 7791   | 26-scf00219 | 26 |
| AX-158087850 | 10 | 13.834 | KV453273.1 | 14659  | 26-scf00219 | 26 |
| AX-158087851 | 10 | 13.869 | KV453273.1 | 15153  | 26-scf00219 | 26 |
| AX-157725744 | 10 | 13.869 | KV453273.1 | 24128  | 26-scf00219 | 26 |
| AX-158087853 | 10 | 13.917 | KV453273.1 | 16616  | 26-scf00219 | 26 |
| AX-157745519 | 10 | 13.971 | KV453273.1 | 22201  | 26-scf00219 | 26 |
| AX-158087858 | 10 | 13.972 | KV453273.1 | 31076  | 26-scf00219 | 26 |
| AX-158087860 | 10 | 13.972 | KV453273.1 | 33652  | 26-scf00219 | 26 |
| AX-158087863 | 10 | 13.972 | KV453273.1 | 37275  | 26-scf00219 | 26 |
| AX-158409901 | 10 | 13.972 | KV453273.1 | 51564  | 26-scf00219 | 26 |
| AX-157714534 | 10 | 14.081 | KV453273.1 | 13723  | 26-scf00219 | 26 |
| AX-158087854 | 10 | 14.081 | KV453273.1 | 20397  | 26-scf00219 | 26 |
| AX-157717601 | 10 | 14.081 | KV453273.1 | 21831  | 26-scf00219 | 26 |
| AX-158087869 | 10 | 14.081 | KV453273.1 | 44037  | 26-scf00219 | 26 |
| AX-158087871 | 10 | 14.081 | KV453273.1 | 44927  | 26-scf00219 | 26 |
| AX-158087873 | 10 | 14.081 | KV453273.1 | 47185  | 26-scf00219 | 26 |

|              |    |        |             |        |             |    |
|--------------|----|--------|-------------|--------|-------------|----|
| AX-158087875 | 10 | 14.081 | KV453273.1  | 48945  | 26-scf00219 | 26 |
| AX-158087876 | 10 | 14.081 | KV453273.1  | 49420  | 26-scf00219 | 26 |
| AX-158087879 | 10 | 14.081 | KV453273.1  | 51823  | 26-scf00219 | 26 |
| AX-158087880 | 10 | 14.081 | KV453273.1  | 52836  | 26-scf00219 | 26 |
| AX-158087881 | 10 | 14.081 | KV453273.1  | 53888  | 26-scf00219 | 26 |
| AX-158087882 | 10 | 14.081 | KV453273.1  | 57423  | 26-scf00219 | 26 |
| AX-158087884 | 10 | 14.081 | KV453273.1  | 58518  | 26-scf00219 | 26 |
| AX-158087885 | 10 | 14.081 | KV453273.1  | 62984  | 26-scf00219 | 26 |
| AX-158087887 | 10 | 14.081 | KV453273.1  | 64904  | 26-scf00219 | 26 |
| AX-158087888 | 10 | 14.081 | KV453273.1  | 65964  | 26-scf00219 | 26 |
| AX-158087889 | 10 | 14.081 | KV453273.1  | 67629  | 26-scf00219 | 26 |
| AX-158087890 | 10 | 14.081 | KV453273.1  | 68144  | 26-scf00219 | 26 |
| AX-158087891 | 10 | 14.081 | KV453273.1  | 69868  | 26-scf00219 | 26 |
| AX-158087893 | 10 | 14.081 | KV453273.1  | 73110  | 26-scf00219 | 26 |
| AX-158087894 | 10 | 14.081 | KV453273.1  | 75409  | 26-scf00219 | 26 |
| AX-158087895 | 10 | 14.081 | KV453273.1  | 75984  | 26-scf00219 | 26 |
| AX-158087942 | 10 | 14.081 | KV453281.1  | 37849  | 26-scf00220 | 26 |
| AX-157877215 | 10 | 14.081 | KV453278.1  | 68580  | 26-scf00221 | 26 |
| AX-158088110 | 10 | 14.081 | KV453278.1  | 77669  | 26-scf00221 | 26 |
| AX-158088534 | 10 | 14.081 | KV453280.1  | 206871 | 26-scf00225 | 26 |
| AX-157718218 | 10 | 14.081 | KV453286.1  | 632045 | 26-scf00229 | 26 |
| AX-157685232 | 10 | 14.081 | KV453282.1  | 54904  | 26-scf00602 | 26 |
| AX-157679981 | 10 | 14.081 | 3ML01026097 | 1777   | scf01696_1  | UN |
| AX-157682255 | 10 | 14.081 | 3ML01026349 | 961    | scf01944_1  | UN |
| AX-158409902 | 10 | 14.191 | KV453273.1  | 80885  | 26-scf00219 | 26 |
| AX-157720311 | 10 | 14.3   | KV453273.1  | 78487  | 26-scf00219 | 26 |
| AX-157725035 | 10 | 14.3   | KV453273.1  | 81333  | 26-scf00219 | 26 |
| AX-157857226 | 10 | 14.518 | KV453273.1  | 81919  | 26-scf00219 | 26 |
| AX-158087897 | 10 | 14.518 | KV453273.1  | 82993  | 26-scf00219 | 26 |
| AX-158087898 | 10 | 14.518 | KV453273.1  | 85660  | 26-scf00219 | 26 |
| AX-158087899 | 10 | 14.518 | KV453273.1  | 86729  | 26-scf00219 | 26 |
| AX-157825361 | 10 | 14.518 | KV453273.1  | 87894  | 26-scf00219 | 26 |
| AX-158087900 | 10 | 14.518 | KV453273.1  | 89622  | 26-scf00219 | 26 |
| AX-158087901 | 10 | 14.518 | KV453273.1  | 91466  | 26-scf00219 | 26 |
| AX-158087902 | 10 | 14.518 | KV453273.1  | 91685  | 26-scf00219 | 26 |
| AX-158087903 | 10 | 14.628 | KV453273.1  | 92459  | 26-scf00219 | 26 |
| AX-158087904 | 10 | 14.737 | KV453273.1  | 93009  | 26-scf00219 | 26 |
| AX-157825362 | 10 | 14.737 | KV453273.1  | 95096  | 26-scf00219 | 26 |
| AX-158087906 | 10 | 14.737 | KV453273.1  | 101532 | 26-scf00219 | 26 |
| AX-158087908 | 10 | 15.01  | KV453273.1  | 105154 | 26-scf00219 | 26 |
| AX-158087913 | 10 | 15.284 | KV453273.1  | 111625 | 26-scf00219 | 26 |
| AX-158087915 | 10 | 15.284 | KV453273.1  | 113023 | 26-scf00219 | 26 |
| AX-158087916 | 10 | 15.284 | KV453273.1  | 113889 | 26-scf00219 | 26 |
| AX-157683311 | 10 | 15.284 | KV453275.1  | 7727   | 26-scf00222 | 26 |
| AX-157683312 | 10 | 15.284 | KV453275.1  | 8937   | 26-scf00222 | 26 |
| AX-157683314 | 10 | 15.284 | KV453275.1  | 42969  | 26-scf00222 | 26 |
| AX-157683316 | 10 | 15.284 | KV453275.1  | 44659  | 26-scf00222 | 26 |
| AX-157680331 | 10 | 15.284 | KV453276.1  | 834    | 26-scf00226 | 26 |
| AX-157683321 | 10 | 15.284 | KV453276.1  | 1424   | 26-scf00226 | 26 |
| AX-157683322 | 10 | 15.284 | KV453276.1  | 4186   | 26-scf00226 | 26 |
| AX-157679979 | 10 | 15.502 | KV453276.1  | 6213   | 26-scf00226 | 26 |

|              |    |        |             |        |                |    |
|--------------|----|--------|-------------|--------|----------------|----|
| AX-157683323 | 10 | 15.502 | KV453276.1  | 7409   | 26-scf00226    | 26 |
| AX-157683325 | 10 | 15.502 | KV453276.1  | 9023   | 26-scf00226    | 26 |
| AX-157683326 | 10 | 15.502 | KV453276.1  | 9602   | 26-scf00226    | 26 |
| AX-157683327 | 10 | 15.507 | KV453276.1  | 11981  | 26-scf00226    | 26 |
| AX-158088060 | 10 | 15.51  | KV453278.1  | 4711   | 26-scf00221    | 26 |
| AX-158088099 | 10 | 15.51  | KV453278.1  | 66119  | 26-scf00221    | 26 |
| AX-158088068 | 10 | 15.511 | KV453278.1  | 13310  | 26-scf00221    | 26 |
| AX-157680648 | 10 | 15.511 | KV453275.1  | 1665   | 26-scf00222    | 26 |
| AX-158088073 | 10 | 15.514 | KV453278.1  | 22255  | 26-scf00221    | 26 |
| AX-158088074 | 10 | 15.517 | KV453278.1  | 22755  | 26-scf00221    | 26 |
| AX-157725709 | 10 | 15.521 | KV453278.1  | 23154  | 26-scf00221    | 26 |
| AX-157825378 | 10 | 15.772 | KV453278.1  | 30919  | 26-scf00221    | 26 |
| AX-158088081 | 10 | 15.772 | KV453278.1  | 32387  | 26-scf00221    | 26 |
| AX-157719352 | 10 | 16.048 | KV453278.1  | 36637  | 26-scf00221    | 26 |
| AX-158088091 | 10 | 16.048 | KV453278.1  | 48984  | 26-scf00221    | 26 |
| AX-158088264 | 10 | 16.157 | KV453279.1  | 63998  | 26-scf00224    | 26 |
| AX-158088266 | 10 | 16.157 | KV453279.1  | 65639  | 26-scf00224    | 26 |
| AX-158088278 | 10 | 16.157 | KV453279.1  | 80102  | 26-scf00224    | 26 |
| AX-158088285 | 10 | 16.157 | KV453279.1  | 94882  | 26-scf00224    | 26 |
| AX-158088288 | 10 | 16.157 | KV453279.1  | 96374  | 26-scf00224    | 26 |
| AX-158088295 | 10 | 16.157 | KV453279.1  | 100331 | 26-scf00224    | 26 |
| AX-158088297 | 10 | 16.157 | KV453279.1  | 101929 | 26-scf00224    | 26 |
| AX-158088317 | 10 | 16.157 | KV453279.1  | 115364 | 26-scf00224    | 26 |
| AX-158088412 | 10 | 16.157 | KV453280.1  | 36119  | 26-scf00225    | 26 |
| AX-158376956 | 10 | 16.157 | KV453285.1  | 165921 | 26-scf00595    | 26 |
| AX-158376968 | 10 | 16.157 | KV453285.1  | 182633 | 26-scf00595    | 26 |
| AX-158376971 | 10 | 16.157 | KV453285.1  | 186143 | 26-scf00595    | 26 |
| AX-157703302 | 10 | 16.157 | DX097563.1  | 74     | IORI212 Ictalu | UN |
| AX-157689280 | 10 | 16.157 | 3ML01028932 | 1013   | scf04548_1     | UN |
| AX-158088418 | 10 | 16.264 | KV453280.1  | 47139  | 26-scf00225    | 26 |
| AX-158088442 | 10 | 16.375 | KV453280.1  | 75182  | 26-scf00225    | 26 |
| AX-158088444 | 10 | 16.421 | KV453280.1  | 77514  | 26-scf00225    | 26 |
| AX-158088447 | 10 | 16.48  | KV453280.1  | 80327  | 26-scf00225    | 26 |
| AX-158392141 | 10 | 16.687 | KV453280.1  | 93484  | 26-scf00225    | 26 |
| AX-158088480 | 10 | 16.711 | KV453280.1  | 123088 | 26-scf00225    | 26 |
| AX-158088485 | 10 | 16.725 | KV453280.1  | 132422 | 26-scf00225    | 26 |
| AX-158088486 | 10 | 16.925 | KV453280.1  | 133442 | 26-scf00225    | 26 |
| AX-157742092 | 10 | 16.925 | KV453280.1  | 145705 | 26-scf00225    | 26 |
| AX-158088493 | 10 | 16.925 | KV453280.1  | 146247 | 26-scf00225    | 26 |
| AX-158088494 | 10 | 16.925 | KV453280.1  | 150985 | 26-scf00225    | 26 |
| AX-158088043 | 10 | 17.109 | KV453281.1  | 199983 | 26-scf00220    | 26 |
| AX-158088495 | 10 | 17.109 | KV453280.1  | 153046 | 26-scf00225    | 26 |
| AX-158088497 | 10 | 17.109 | KV453280.1  | 156483 | 26-scf00225    | 26 |
| AX-158088499 | 10 | 17.109 | KV453280.1  | 160541 | 26-scf00225    | 26 |
| AX-158088524 | 10 | 17.109 | KV453280.1  | 198909 | 26-scf00225    | 26 |
| AX-158088503 | 10 | 17.192 | KV453280.1  | 164067 | 26-scf00225    | 26 |
| AX-157825400 | 10 | 17.192 | KV453280.1  | 171919 | 26-scf00225    | 26 |
| AX-158088521 | 10 | 17.382 | KV453280.1  | 194673 | 26-scf00225    | 26 |
| AX-158088538 | 10 | 17.382 | KV453280.1  | 209631 | 26-scf00225    | 26 |
| AX-158087923 | 10 | 18.21  | KV453281.1  | 15382  | 26-scf00220    | 26 |
| AX-158087924 | 10 | 18.21  | KV453281.1  | 16269  | 26-scf00220    | 26 |

|              |    |        |            |        |             |    |
|--------------|----|--------|------------|--------|-------------|----|
| AX-158087926 | 10 | 18.215 | KV453281.1 | 17818  | 26-scf00220 | 26 |
| AX-158087940 | 10 | 18.215 | KV453281.1 | 36618  | 26-scf00220 | 26 |
| AX-158087944 | 10 | 18.215 | KV453281.1 | 39942  | 26-scf00220 | 26 |
| AX-157865790 | 10 | 18.215 | KV453281.1 | 200198 | 26-scf00220 | 26 |
| AX-158088050 | 10 | 18.215 | KV453281.1 | 213132 | 26-scf00220 | 26 |
| AX-157708271 | 10 | 18.257 | KV453281.1 | 19451  | 26-scf00220 | 26 |
| AX-157885652 | 10 | 18.296 | KV453281.1 | 21806  | 26-scf00220 | 26 |
| AX-158087929 | 10 | 18.347 | KV453281.1 | 22125  | 26-scf00220 | 26 |
| AX-158087934 | 10 | 18.347 | KV453281.1 | 29172  | 26-scf00220 | 26 |
| AX-158087939 | 10 | 18.347 | KV453281.1 | 34504  | 26-scf00220 | 26 |
| AX-157774873 | 10 | 18.347 | KV453281.1 | 36069  | 26-scf00220 | 26 |
| AX-158087941 | 10 | 18.347 | KV453281.1 | 37364  | 26-scf00220 | 26 |
| AX-158087963 | 10 | 18.347 | KV453281.1 | 64855  | 26-scf00220 | 26 |
| AX-158087947 | 10 | 18.351 | KV453281.1 | 41997  | 26-scf00220 | 26 |
| AX-158087937 | 10 | 18.355 | KV453281.1 | 31603  | 26-scf00220 | 26 |
| AX-158087951 | 10 | 18.355 | KV453281.1 | 45440  | 26-scf00220 | 26 |
| AX-158087958 | 10 | 18.355 | KV453281.1 | 57277  | 26-scf00220 | 26 |
| AX-158087952 | 10 | 18.576 | KV453281.1 | 48995  | 26-scf00220 | 26 |
| AX-157719498 | 10 | 18.576 | KV453281.1 | 153212 | 26-scf00220 | 26 |
| AX-157775557 | 10 | 18.576 | KV453281.1 | 173372 | 26-scf00220 | 26 |
| AX-158087960 | 10 | 18.813 | KV453281.1 | 58789  | 26-scf00220 | 26 |
| AX-158087966 | 10 | 18.813 | KV453281.1 | 70738  | 26-scf00220 | 26 |
| AX-158088000 | 10 | 18.813 | KV453281.1 | 120405 | 26-scf00220 | 26 |
| AX-157825368 | 10 | 18.868 | KV453281.1 | 150814 | 26-scf00220 | 26 |
| AX-158088032 | 10 | 18.873 | KV453281.1 | 186977 | 26-scf00220 | 26 |
| AX-158088033 | 10 | 18.968 | KV453281.1 | 187898 | 26-scf00220 | 26 |
| AX-157685252 | 10 | 18.977 | KV453282.1 | 128899 | 26-scf00602 | 26 |
| AX-158088122 | 10 | 19.229 | KV453283.1 | 7366   | 26-scf00223 | 26 |
| AX-157825384 | 10 | 19.229 | KV453283.1 | 7679   | 26-scf00223 | 26 |
| AX-158088124 | 10 | 19.229 | KV453283.1 | 10309  | 26-scf00223 | 26 |
| AX-157825385 | 10 | 19.229 | KV453283.1 | 23899  | 26-scf00223 | 26 |
| AX-158088159 | 10 | 19.229 | KV453283.1 | 53130  | 26-scf00223 | 26 |
| AX-157757413 | 10 | 19.229 | KV453283.1 | 76857  | 26-scf00223 | 26 |
| AX-158088187 | 10 | 19.229 | KV453283.1 | 109883 | 26-scf00223 | 26 |
| AX-158088188 | 10 | 19.229 | KV453283.1 | 111722 | 26-scf00223 | 26 |
| AX-158088189 | 10 | 19.229 | KV453283.1 | 112542 | 26-scf00223 | 26 |
| AX-158088190 | 10 | 19.229 | KV453283.1 | 113271 | 26-scf00223 | 26 |
| AX-158088199 | 10 | 19.229 | KV453283.1 | 122815 | 26-scf00223 | 26 |
| AX-158088200 | 10 | 19.229 | KV453283.1 | 123659 | 26-scf00223 | 26 |
| AX-158088201 | 10 | 19.229 | KV453283.1 | 124899 | 26-scf00223 | 26 |
| AX-158088202 | 10 | 19.229 | KV453283.1 | 125405 | 26-scf00223 | 26 |
| AX-157743050 | 10 | 19.229 | KV453283.1 | 127960 | 26-scf00223 | 26 |
| AX-158088206 | 10 | 19.229 | KV453283.1 | 128907 | 26-scf00223 | 26 |
| AX-158088213 | 10 | 19.229 | KV453283.1 | 133148 | 26-scf00223 | 26 |
| AX-158088215 | 10 | 19.229 | KV453283.1 | 134284 | 26-scf00223 | 26 |
| AX-158088216 | 10 | 19.229 | KV453283.1 | 135611 | 26-scf00223 | 26 |
| AX-158088220 | 10 | 19.229 | KV453283.1 | 136682 | 26-scf00223 | 26 |
| AX-158088225 | 10 | 19.229 | KV453283.1 | 143540 | 26-scf00223 | 26 |
| AX-157681022 | 10 | 19.229 | KV453284.1 | 2574   | 26-scf01012 | 26 |
| AX-158088125 | 10 | 19.499 | KV453283.1 | 10760  | 26-scf00223 | 26 |
| AX-158088134 | 10 | 19.499 | KV453283.1 | 26079  | 26-scf00223 | 26 |

|              |    |        |            |        |             |    |
|--------------|----|--------|------------|--------|-------------|----|
| AX-158088137 | 10 | 19.676 | KV453283.1 | 28363  | 26-scf00223 | 26 |
| AX-158088139 | 10 | 19.676 | KV453283.1 | 30586  | 26-scf00223 | 26 |
| AX-158088145 | 10 | 19.676 | KV453283.1 | 40161  | 26-scf00223 | 26 |
| AX-158088146 | 10 | 19.676 | KV453283.1 | 40890  | 26-scf00223 | 26 |
| AX-158088147 | 10 | 19.676 | KV453283.1 | 43407  | 26-scf00223 | 26 |
| AX-158088148 | 10 | 19.676 | KV453283.1 | 44089  | 26-scf00223 | 26 |
| AX-158088150 | 10 | 19.676 | KV453283.1 | 46254  | 26-scf00223 | 26 |
| AX-158088151 | 10 | 19.676 | KV453283.1 | 47152  | 26-scf00223 | 26 |
| AX-158088153 | 10 | 19.676 | KV453283.1 | 48167  | 26-scf00223 | 26 |
| AX-158088154 | 10 | 19.676 | KV453283.1 | 49054  | 26-scf00223 | 26 |
| AX-158088155 | 10 | 19.676 | KV453283.1 | 49493  | 26-scf00223 | 26 |
| AX-158088156 | 10 | 19.676 | KV453283.1 | 50408  | 26-scf00223 | 26 |
| AX-158088158 | 10 | 19.676 | KV453283.1 | 52464  | 26-scf00223 | 26 |
| AX-158088160 | 10 | 19.676 | KV453283.1 | 53679  | 26-scf00223 | 26 |
| AX-158088162 | 10 | 19.676 | KV453283.1 | 55658  | 26-scf00223 | 26 |
| AX-158088163 | 10 | 19.676 | KV453283.1 | 57111  | 26-scf00223 | 26 |
| AX-157773149 | 10 | 19.676 | KV453283.1 | 57712  | 26-scf00223 | 26 |
| AX-158088164 | 10 | 19.676 | KV453283.1 | 58346  | 26-scf00223 | 26 |
| AX-157825386 | 10 | 19.676 | KV453283.1 | 73617  | 26-scf00223 | 26 |
| AX-157697504 | 10 | 19.676 | KV453283.1 | 74238  | 26-scf00223 | 26 |
| AX-157755846 | 10 | 19.676 | KV453283.1 | 74865  | 26-scf00223 | 26 |
| AX-158088170 | 10 | 19.676 | KV453283.1 | 80668  | 26-scf00223 | 26 |
| AX-158088171 | 10 | 19.676 | KV453283.1 | 81578  | 26-scf00223 | 26 |
| AX-158088174 | 10 | 19.676 | KV453283.1 | 95284  | 26-scf00223 | 26 |
| AX-158088175 | 10 | 19.676 | KV453283.1 | 95849  | 26-scf00223 | 26 |
| AX-158088178 | 10 | 19.676 | KV453283.1 | 98667  | 26-scf00223 | 26 |
| AX-158088182 | 10 | 19.676 | KV453283.1 | 103064 | 26-scf00223 | 26 |
| AX-158088183 | 10 | 19.676 | KV453283.1 | 104402 | 26-scf00223 | 26 |
| AX-158088185 | 10 | 19.676 | KV453283.1 | 106545 | 26-scf00223 | 26 |
| AX-158088195 | 10 | 19.676 | KV453283.1 | 120235 | 26-scf00223 | 26 |
| AX-157711984 | 10 | 19.676 | KV453297.1 | 78     | 26-scf06349 | 26 |
| AX-158088230 | 10 | 19.853 | KV453283.1 | 149101 | 26-scf00223 | 26 |
| AX-157727353 | 10 | 19.853 | KV453279.1 | 46105  | 26-scf00224 | 26 |
| AX-158088258 | 10 | 19.853 | KV453279.1 | 55685  | 26-scf00224 | 26 |
| AX-158088259 | 10 | 19.853 | KV453279.1 | 56898  | 26-scf00224 | 26 |
| AX-158088260 | 10 | 19.853 | KV453279.1 | 57578  | 26-scf00224 | 26 |
| AX-158088267 | 10 | 19.853 | KV453279.1 | 66174  | 26-scf00224 | 26 |
| AX-158088270 | 10 | 19.853 | KV453279.1 | 70742  | 26-scf00224 | 26 |
| AX-158088274 | 10 | 19.853 | KV453279.1 | 76872  | 26-scf00224 | 26 |
| AX-158088280 | 10 | 19.853 | KV453279.1 | 83683  | 26-scf00224 | 26 |
| AX-158088289 | 10 | 19.853 | KV453279.1 | 96978  | 26-scf00224 | 26 |
| AX-158088290 | 10 | 19.853 | KV453279.1 | 97375  | 26-scf00224 | 26 |
| AX-158088292 | 10 | 19.853 | KV453279.1 | 98809  | 26-scf00224 | 26 |
| AX-158088296 | 10 | 19.853 | KV453279.1 | 101094 | 26-scf00224 | 26 |
| AX-158088300 | 10 | 19.853 | KV453279.1 | 103825 | 26-scf00224 | 26 |
| AX-158088301 | 10 | 19.853 | KV453279.1 | 104571 | 26-scf00224 | 26 |
| AX-158088315 | 10 | 19.853 | KV453279.1 | 113950 | 26-scf00224 | 26 |
| AX-157772227 | 10 | 19.853 | KV453279.1 | 142014 | 26-scf00224 | 26 |
| AX-158088348 | 10 | 19.853 | KV453279.1 | 148611 | 26-scf00224 | 26 |
| AX-158088354 | 10 | 19.853 | KV453279.1 | 152878 | 26-scf00224 | 26 |
| AX-158088370 | 10 | 19.853 | KV453279.1 | 172741 | 26-scf00224 | 26 |



|              |    |        |             |         |             |    |
|--------------|----|--------|-------------|---------|-------------|----|
| AX-158088373 | 10 | 19.853 | KV453279.1  | 175016  | 26-scf00224 | 26 |
| AX-158088377 | 10 | 19.853 | KV453279.1  | 178112  | 26-scf00224 | 26 |
| AX-157865797 | 10 | 19.853 | KV453279.1  | 203367  | 26-scf00224 | 26 |
| AX-158376871 | 10 | 19.853 | KV453285.1  | 82172   | 26-scf00595 | 26 |
| AX-158376908 | 10 | 19.853 | KV453285.1  | 118081  | 26-scf00595 | 26 |
| AX-158376944 | 10 | 19.853 | KV453285.1  | 153914  | 26-scf00595 | 26 |
| AX-158376951 | 10 | 19.853 | KV453285.1  | 160753  | 26-scf00595 | 26 |
| AX-158376952 | 10 | 19.853 | KV453285.1  | 161577  | 26-scf00595 | 26 |
| AX-158376961 | 10 | 19.853 | KV453285.1  | 174993  | 26-scf00595 | 26 |
| AX-158376965 | 10 | 19.853 | KV453285.1  | 177971  | 26-scf00595 | 26 |
| AX-158376972 | 10 | 19.853 | KV453285.1  | 187692  | 26-scf00595 | 26 |
| AX-158376978 | 10 | 19.853 | KV453285.1  | 192940  | 26-scf00595 | 26 |
| AX-158376979 | 10 | 19.853 | KV453285.1  | 193846  | 26-scf00595 | 26 |
| AX-158376980 | 10 | 19.853 | KV453285.1  | 194724  | 26-scf00595 | 26 |
| AX-158376982 | 10 | 19.853 | KV453285.1  | 195552  | 26-scf00595 | 26 |
| AX-158376986 | 10 | 19.853 | KV453285.1  | 208235  | 26-scf00595 | 26 |
| AX-158376987 | 10 | 19.853 | KV453285.1  | 210780  | 26-scf00595 | 26 |
| AX-157689278 | 10 | 19.853 | 3ML01028932 | 298     | scf04548_1  | UN |
| AX-157689279 | 10 | 19.853 | 3ML01028932 | 910     | scf04548_1  | UN |
| AX-158376839 | 10 | 20.091 | KV453285.1  | 42918   | 26-scf00595 | 26 |
| AX-158376848 | 10 | 20.091 | KV453285.1  | 54535   | 26-scf00595 | 26 |
| AX-158376864 | 10 | 20.091 | KV453285.1  | 77202   | 26-scf00595 | 26 |
| AX-158376900 | 10 | 20.151 | KV453285.1  | 109749  | 26-scf00595 | 26 |
| AX-158376947 | 10 | 20.151 | KV453285.1  | 159102  | 26-scf00595 | 26 |
| AX-158090061 | 10 | 20.48  | KV453277.1  | 2398658 | 26-scf00227 | 26 |
| AX-158090465 | 10 | 20.48  | KV453286.1  | 160134  | 26-scf00229 | 26 |
| AX-158090613 | 10 | 20.48  | KV453286.1  | 482972  | 26-scf00229 | 26 |
| AX-158090662 | 10 | 20.48  | KV453286.1  | 543158  | 26-scf00229 | 26 |
| AX-158088624 | 10 | 20.808 | KV453277.1  | 104616  | 26-scf00227 | 26 |
| AX-157750019 | 10 | 20.808 | KV453277.1  | 713835  | 26-scf00227 | 26 |
| AX-157825433 | 10 | 20.808 | KV453277.1  | 715909  | 26-scf00227 | 26 |
| AX-158090265 | 10 | 20.808 | KV453288.1  | 421890  | 26-scf00228 | 26 |
| AX-158090542 | 10 | 20.808 | KV453286.1  | 374139  | 26-scf00229 | 26 |
| AX-158090564 | 10 | 20.808 | KV453286.1  | 410530  | 26-scf00229 | 26 |
| AX-158090784 | 10 | 20.808 | KV453286.1  | 716489  | 26-scf00229 | 26 |
| AX-157719857 | 10 | 20.808 | KV453286.1  | 729460  | 26-scf00229 | 26 |
| AX-157701832 | 10 | 20.808 | KV453286.1  | 734185  | 26-scf00229 | 26 |
| AX-157877288 | 10 | 20.808 | KV453286.1  | 745578  | 26-scf00229 | 26 |
| AX-158379959 | 10 | 20.808 | KV453286.1  | 790026  | 26-scf00229 | 26 |
| AX-158090841 | 10 | 20.808 | KV453286.1  | 813825  | 26-scf00229 | 26 |
| AX-158090915 | 10 | 20.808 | KV453286.1  | 911166  | 26-scf00229 | 26 |
| AX-158090929 | 10 | 20.808 | KV453286.1  | 929578  | 26-scf00229 | 26 |
| AX-158090930 | 10 | 20.808 | KV453286.1  | 931444  | 26-scf00229 | 26 |
| AX-158090931 | 10 | 20.808 | KV453286.1  | 931823  | 26-scf00229 | 26 |
| AX-158090936 | 10 | 20.808 | KV453286.1  | 944175  | 26-scf00229 | 26 |
| AX-158090938 | 10 | 20.808 | KV453286.1  | 946273  | 26-scf00229 | 26 |
| AX-158090943 | 10 | 20.808 | KV453286.1  | 956265  | 26-scf00229 | 26 |
| AX-157683331 | 10 | 20.808 | KV453287.1  | 8608    | 26-scf00230 | 26 |
| AX-157683350 | 10 | 20.808 | KV453287.1  | 29082   | 26-scf00230 | 26 |
| AX-158410029 | 10 | 20.808 | KV453287.1  | 29851   | 26-scf00230 | 26 |
| AX-157683351 | 10 | 20.808 | KV453287.1  | 30883   | 26-scf00230 | 26 |

|              |    |        |            |         |             |    |
|--------------|----|--------|------------|---------|-------------|----|
| AX-157683352 | 10 | 20.808 | KV453287.1 | 31009   | 26-scf00230 | 26 |
| AX-157683353 | 10 | 20.808 | KV453287.1 | 32575   | 26-scf00230 | 26 |
| AX-158090115 | 10 | 20.976 | KV453288.1 | 166154  | 26-scf00228 | 26 |
| AX-158088588 | 10 | 21.135 | KV453277.1 | 39278   | 26-scf00227 | 26 |
| AX-158088608 | 10 | 21.135 | KV453277.1 | 66888   | 26-scf00227 | 26 |
| AX-157771374 | 10 | 21.135 | KV453277.1 | 633864  | 26-scf00227 | 26 |
| AX-158088857 | 10 | 21.135 | KV453277.1 | 635719  | 26-scf00227 | 26 |
| AX-158088858 | 10 | 21.135 | KV453277.1 | 636113  | 26-scf00227 | 26 |
| AX-158088917 | 10 | 21.135 | KV453277.1 | 790787  | 26-scf00227 | 26 |
| AX-158088957 | 10 | 21.135 | KV453277.1 | 848502  | 26-scf00227 | 26 |
| AX-158088988 | 10 | 21.135 | KV453277.1 | 877151  | 26-scf00227 | 26 |
| AX-157726241 | 10 | 21.135 | KV453277.1 | 890843  | 26-scf00227 | 26 |
| AX-158089822 | 10 | 21.135 | KV453277.1 | 1917781 | 26-scf00227 | 26 |
| AX-158089839 | 10 | 21.135 | KV453277.1 | 1937192 | 26-scf00227 | 26 |
| AX-158384559 | 10 | 21.135 | KV453288.1 | 8877    | 26-scf00228 | 26 |
| AX-157773708 | 10 | 21.135 | KV453288.1 | 9432    | 26-scf00228 | 26 |
| AX-158090108 | 10 | 21.135 | KV453288.1 | 154300  | 26-scf00228 | 26 |
| AX-158090120 | 10 | 21.135 | KV453288.1 | 173789  | 26-scf00228 | 26 |
| AX-158090152 | 10 | 21.135 | KV453288.1 | 259787  | 26-scf00228 | 26 |
| AX-158090153 | 10 | 21.135 | KV453288.1 | 264033  | 26-scf00228 | 26 |
| AX-158090155 | 10 | 21.135 | KV453288.1 | 272176  | 26-scf00228 | 26 |
| AX-158090156 | 10 | 21.135 | KV453288.1 | 273679  | 26-scf00228 | 26 |
| AX-158090157 | 10 | 21.135 | KV453288.1 | 273915  | 26-scf00228 | 26 |
| AX-158090158 | 10 | 21.135 | KV453288.1 | 275406  | 26-scf00228 | 26 |
| AX-158090159 | 10 | 21.135 | KV453288.1 | 276630  | 26-scf00228 | 26 |
| AX-157770649 | 10 | 21.135 | KV453288.1 | 277769  | 26-scf00228 | 26 |
| AX-158090162 | 10 | 21.135 | KV453288.1 | 277842  | 26-scf00228 | 26 |
| AX-158090163 | 10 | 21.135 | KV453288.1 | 278056  | 26-scf00228 | 26 |
| AX-158090166 | 10 | 21.135 | KV453288.1 | 286128  | 26-scf00228 | 26 |
| AX-158090169 | 10 | 21.135 | KV453288.1 | 291996  | 26-scf00228 | 26 |
| AX-157720524 | 10 | 21.135 | KV453288.1 | 294428  | 26-scf00228 | 26 |
| AX-158090176 | 10 | 21.135 | KV453288.1 | 306749  | 26-scf00228 | 26 |
| AX-158090177 | 10 | 21.135 | KV453288.1 | 307213  | 26-scf00228 | 26 |
| AX-158090178 | 10 | 21.135 | KV453288.1 | 308278  | 26-scf00228 | 26 |
| AX-158090180 | 10 | 21.135 | KV453288.1 | 310205  | 26-scf00228 | 26 |
| AX-157825470 | 10 | 21.135 | KV453288.1 | 312303  | 26-scf00228 | 26 |
| AX-158090183 | 10 | 21.135 | KV453288.1 | 313614  | 26-scf00228 | 26 |
| AX-158090186 | 10 | 21.135 | KV453288.1 | 315732  | 26-scf00228 | 26 |
| AX-157774715 | 10 | 21.135 | KV453288.1 | 316925  | 26-scf00228 | 26 |
| AX-157825471 | 10 | 21.135 | KV453288.1 | 317876  | 26-scf00228 | 26 |
| AX-158090207 | 10 | 21.135 | KV453288.1 | 338038  | 26-scf00228 | 26 |
| AX-158090209 | 10 | 21.135 | KV453288.1 | 339080  | 26-scf00228 | 26 |
| AX-157738629 | 10 | 21.135 | KV453288.1 | 343082  | 26-scf00228 | 26 |
| AX-158090259 | 10 | 21.135 | KV453288.1 | 413415  | 26-scf00228 | 26 |
| AX-158090261 | 10 | 21.135 | KV453288.1 | 415112  | 26-scf00228 | 26 |
| AX-158090264 | 10 | 21.135 | KV453288.1 | 419200  | 26-scf00228 | 26 |
| AX-158409985 | 10 | 21.135 | KV453288.1 | 438346  | 26-scf00228 | 26 |
| AX-158090628 | 10 | 21.135 | KV453286.1 | 503532  | 26-scf00229 | 26 |
| AX-158090853 | 10 | 21.135 | KV453286.1 | 828588  | 26-scf00229 | 26 |
| AX-158090863 | 10 | 21.135 | KV453286.1 | 838400  | 26-scf00229 | 26 |
| AX-158090869 | 10 | 21.135 | KV453286.1 | 845937  | 26-scf00229 | 26 |

|              |    |        |            |         |             |    |
|--------------|----|--------|------------|---------|-------------|----|
| AX-158090870 | 10 | 21.135 | KV453286.1 | 846282  | 26-scf00229 | 26 |
| AX-158090871 | 10 | 21.135 | KV453286.1 | 846826  | 26-scf00229 | 26 |
| AX-158090872 | 10 | 21.135 | KV453286.1 | 849297  | 26-scf00229 | 26 |
| AX-158090904 | 10 | 21.135 | KV453286.1 | 897921  | 26-scf00229 | 26 |
| AX-158090955 | 10 | 21.135 | KV453286.1 | 980819  | 26-scf00229 | 26 |
| AX-158090957 | 10 | 21.135 | KV453286.1 | 982181  | 26-scf00229 | 26 |
| AX-158090986 | 10 | 21.135 | KV453286.1 | 1027338 | 26-scf00229 | 26 |
| AX-158090995 | 10 | 21.135 | KV453286.1 | 1047202 | 26-scf00229 | 26 |
| AX-157747713 | 10 | 21.135 | KV453286.1 | 1095138 | 26-scf00229 | 26 |
| AX-157727289 | 10 | 21.135 | KV453286.1 | 1122083 | 26-scf00229 | 26 |
| AX-158091016 | 10 | 21.135 | KV453286.1 | 1133130 | 26-scf00229 | 26 |
| AX-157885692 | 10 | 21.135 | KV453286.1 | 1135309 | 26-scf00229 | 26 |
| AX-158091017 | 10 | 21.135 | KV453286.1 | 1135420 | 26-scf00229 | 26 |
| AX-158091018 | 10 | 21.135 | KV453286.1 | 1136774 | 26-scf00229 | 26 |
| AX-158091020 | 10 | 21.135 | KV453286.1 | 1138507 | 26-scf00229 | 26 |
| AX-157716108 | 10 | 21.135 | KV453286.1 | 1141211 | 26-scf00229 | 26 |
| AX-158091026 | 10 | 21.135 | KV453286.1 | 1151392 | 26-scf00229 | 26 |
| AX-158091029 | 10 | 21.135 | KV453286.1 | 1167625 | 26-scf00229 | 26 |
| AX-157746936 | 10 | 21.135 | KV453286.1 | 1173999 | 26-scf00229 | 26 |
| AX-158091037 | 10 | 21.135 | KV453286.1 | 1261433 | 26-scf00229 | 26 |
| AX-158410019 | 10 | 21.135 | KV453286.1 | 1278735 | 26-scf00229 | 26 |
| AX-158091038 | 10 | 21.135 | KV453286.1 | 1282510 | 26-scf00229 | 26 |
| AX-158091039 | 10 | 21.135 | KV453286.1 | 1283889 | 26-scf00229 | 26 |
| AX-158091040 | 10 | 21.135 | KV453286.1 | 1284808 | 26-scf00229 | 26 |
| AX-158091041 | 10 | 21.135 | KV453286.1 | 1287223 | 26-scf00229 | 26 |
| AX-158091043 | 10 | 21.135 | KV453286.1 | 1307165 | 26-scf00229 | 26 |
| AX-158091044 | 10 | 21.135 | KV453286.1 | 1318957 | 26-scf00229 | 26 |
| AX-158091045 | 10 | 21.135 | KV453286.1 | 1319668 | 26-scf00229 | 26 |
| AX-158091046 | 10 | 21.135 | KV453286.1 | 1320984 | 26-scf00229 | 26 |
| AX-158091048 | 10 | 21.135 | KV453286.1 | 1344496 | 26-scf00229 | 26 |
| AX-158410028 | 10 | 21.135 | KV453286.1 | 1367176 | 26-scf00229 | 26 |
| AX-158376895 | 10 | 21.135 | KV453285.1 | 105235  | 26-scf00595 | 26 |
| AX-158090170 | 10 | 21.136 | KV453288.1 | 292392  | 26-scf00228 | 26 |
| AX-157825469 | 10 | 21.136 | KV453288.1 | 297473  | 26-scf00228 | 26 |
| AX-157720219 | 10 | 21.136 | KV453288.1 | 301393  | 26-scf00228 | 26 |
| AX-158090173 | 10 | 21.136 | KV453288.1 | 301837  | 26-scf00228 | 26 |
| AX-158090174 | 10 | 21.136 | KV453288.1 | 303215  | 26-scf00228 | 26 |
| AX-158090175 | 10 | 21.136 | KV453288.1 | 304558  | 26-scf00228 | 26 |
| AX-158090246 | 10 | 21.136 | KV453288.1 | 390734  | 26-scf00228 | 26 |
| AX-158090543 | 10 | 21.136 | KV453286.1 | 375013  | 26-scf00229 | 26 |
| AX-158090631 | 10 | 21.136 | KV453286.1 | 508271  | 26-scf00229 | 26 |
| AX-158090884 | 10 | 21.136 | KV453286.1 | 872388  | 26-scf00229 | 26 |
| AX-158090933 | 10 | 21.136 | KV453286.1 | 934905  | 26-scf00229 | 26 |
| AX-158090934 | 10 | 21.136 | KV453286.1 | 935281  | 26-scf00229 | 26 |
| AX-158090947 | 10 | 21.136 | KV453286.1 | 962843  | 26-scf00229 | 26 |
| AX-158090963 | 10 | 21.136 | KV453286.1 | 993274  | 26-scf00229 | 26 |
| AX-158090964 | 10 | 21.136 | KV453286.1 | 994017  | 26-scf00229 | 26 |
| AX-158090965 | 10 | 21.136 | KV453286.1 | 995639  | 26-scf00229 | 26 |
| AX-158090966 | 10 | 21.136 | KV453286.1 | 997063  | 26-scf00229 | 26 |
| AX-158090968 | 10 | 21.136 | KV453286.1 | 999844  | 26-scf00229 | 26 |
| AX-157770886 | 10 | 21.137 | KV453288.1 | 310423  | 26-scf00228 | 26 |

|              |    |        |            |         |             |    |
|--------------|----|--------|------------|---------|-------------|----|
| AX-158090184 | 10 | 21.142 | KV453288.1 | 314350  | 26-scf00228 | 26 |
| AX-158090185 | 10 | 21.146 | KV453288.1 | 314936  | 26-scf00228 | 26 |
| AX-158090187 | 10 | 21.2   | KV453288.1 | 316556  | 26-scf00228 | 26 |
| AX-157748942 | 10 | 21.2   | KV453288.1 | 380445  | 26-scf00228 | 26 |
| AX-158090244 | 10 | 21.2   | KV453288.1 | 389973  | 26-scf00228 | 26 |
| AX-158090839 | 10 | 21.2   | KV453286.1 | 812364  | 26-scf00229 | 26 |
| AX-158090192 | 10 | 21.218 | KV453288.1 | 324089  | 26-scf00228 | 26 |
| AX-157825472 | 10 | 21.233 | KV453288.1 | 325737  | 26-scf00228 | 26 |
| AX-158088184 | 10 | 21.245 | KV453283.1 | 105251  | 26-scf00223 | 26 |
| AX-158088583 | 10 | 21.245 | KV453277.1 | 30769   | 26-scf00227 | 26 |
| AX-158088836 | 10 | 21.245 | KV453277.1 | 571264  | 26-scf00227 | 26 |
| AX-157721642 | 10 | 21.245 | KV453277.1 | 774241  | 26-scf00227 | 26 |
| AX-158089348 | 10 | 21.245 | KV453277.1 | 1299572 | 26-scf00227 | 26 |
| AX-158090200 | 10 | 21.245 | KV453288.1 | 334501  | 26-scf00228 | 26 |
| AX-158090201 | 10 | 21.245 | KV453288.1 | 335078  | 26-scf00228 | 26 |
| AX-158090202 | 10 | 21.245 | KV453288.1 | 335306  | 26-scf00228 | 26 |
| AX-158090203 | 10 | 21.245 | KV453288.1 | 336424  | 26-scf00228 | 26 |
| AX-158090206 | 10 | 21.245 | KV453288.1 | 337604  | 26-scf00228 | 26 |
| AX-158090210 | 10 | 21.245 | KV453288.1 | 342594  | 26-scf00228 | 26 |
| AX-157745407 | 10 | 21.245 | KV453288.1 | 349583  | 26-scf00228 | 26 |
| AX-158090212 | 10 | 21.245 | KV453288.1 | 349832  | 26-scf00228 | 26 |
| AX-158090218 | 10 | 21.245 | KV453288.1 | 356819  | 26-scf00228 | 26 |
| AX-157701499 | 10 | 21.245 | KV453288.1 | 360251  | 26-scf00228 | 26 |
| AX-158090220 | 10 | 21.245 | KV453288.1 | 361225  | 26-scf00228 | 26 |
| AX-158090224 | 10 | 21.245 | KV453288.1 | 364055  | 26-scf00228 | 26 |
| AX-158090225 | 10 | 21.245 | KV453288.1 | 364516  | 26-scf00228 | 26 |
| AX-158090227 | 10 | 21.245 | KV453288.1 | 365534  | 26-scf00228 | 26 |
| AX-157714538 | 10 | 21.245 | KV453288.1 | 365903  | 26-scf00228 | 26 |
| AX-158090228 | 10 | 21.245 | KV453288.1 | 367453  | 26-scf00228 | 26 |
| AX-158090229 | 10 | 21.245 | KV453288.1 | 368282  | 26-scf00228 | 26 |
| AX-158090230 | 10 | 21.245 | KV453288.1 | 368603  | 26-scf00228 | 26 |
| AX-158090231 | 10 | 21.245 | KV453288.1 | 368861  | 26-scf00228 | 26 |
| AX-158090235 | 10 | 21.245 | KV453288.1 | 377023  | 26-scf00228 | 26 |
| AX-158090238 | 10 | 21.245 | KV453288.1 | 382599  | 26-scf00228 | 26 |
| AX-158090239 | 10 | 21.245 | KV453288.1 | 383125  | 26-scf00228 | 26 |
| AX-158090240 | 10 | 21.245 | KV453288.1 | 385650  | 26-scf00228 | 26 |
| AX-158090242 | 10 | 21.245 | KV453288.1 | 388511  | 26-scf00228 | 26 |
| AX-158090277 | 10 | 21.245 | KV453288.1 | 441831  | 26-scf00228 | 26 |
| AX-158416791 | 10 | 21.245 | KV453286.1 | 17934   | 26-scf00229 | 26 |
| AX-158090534 | 10 | 21.245 | KV453286.1 | 357217  | 26-scf00229 | 26 |
| AX-158090611 | 10 | 21.245 | KV453286.1 | 480958  | 26-scf00229 | 26 |
| AX-158090633 | 10 | 21.245 | KV453286.1 | 510937  | 26-scf00229 | 26 |
| AX-157825520 | 10 | 21.245 | KV453286.1 | 516585  | 26-scf00229 | 26 |
| AX-158090643 | 10 | 21.245 | KV453286.1 | 525614  | 26-scf00229 | 26 |
| AX-158090645 | 10 | 21.245 | KV453286.1 | 526999  | 26-scf00229 | 26 |
| AX-158090646 | 10 | 21.245 | KV453286.1 | 527517  | 26-scf00229 | 26 |
| AX-158090650 | 10 | 21.245 | KV453286.1 | 532456  | 26-scf00229 | 26 |
| AX-158090651 | 10 | 21.245 | KV453286.1 | 533666  | 26-scf00229 | 26 |
| AX-158090654 | 10 | 21.245 | KV453286.1 | 536946  | 26-scf00229 | 26 |
| AX-158090669 | 10 | 21.245 | KV453286.1 | 551925  | 26-scf00229 | 26 |
| AX-158090671 | 10 | 21.245 | KV453286.1 | 553856  | 26-scf00229 | 26 |

|              |    |        |             |        |             |    |
|--------------|----|--------|-------------|--------|-------------|----|
| AX-158090672 | 10 | 21.245 | KV453286.1  | 554658 | 26-scf00229 | 26 |
| AX-158090673 | 10 | 21.245 | KV453286.1  | 555689 | 26-scf00229 | 26 |
| AX-158090674 | 10 | 21.245 | KV453286.1  | 556771 | 26-scf00229 | 26 |
| AX-158090675 | 10 | 21.245 | KV453286.1  | 558369 | 26-scf00229 | 26 |
| AX-158090676 | 10 | 21.245 | KV453286.1  | 559154 | 26-scf00229 | 26 |
| AX-158090689 | 10 | 21.245 | KV453286.1  | 568747 | 26-scf00229 | 26 |
| AX-158090694 | 10 | 21.245 | KV453286.1  | 576025 | 26-scf00229 | 26 |
| AX-158090695 | 10 | 21.245 | KV453286.1  | 576837 | 26-scf00229 | 26 |
| AX-158090697 | 10 | 21.245 | KV453286.1  | 578729 | 26-scf00229 | 26 |
| AX-158090698 | 10 | 21.245 | KV453286.1  | 579884 | 26-scf00229 | 26 |
| AX-158090703 | 10 | 21.245 | KV453286.1  | 584144 | 26-scf00229 | 26 |
| AX-157825524 | 10 | 21.245 | KV453286.1  | 584476 | 26-scf00229 | 26 |
| AX-158090704 | 10 | 21.245 | KV453286.1  | 584992 | 26-scf00229 | 26 |
| AX-157825526 | 10 | 21.245 | KV453286.1  | 588052 | 26-scf00229 | 26 |
| AX-157772402 | 10 | 21.245 | KV453286.1  | 598901 | 26-scf00229 | 26 |
| AX-157825527 | 10 | 21.245 | KV453286.1  | 603808 | 26-scf00229 | 26 |
| AX-158090713 | 10 | 21.245 | KV453286.1  | 605419 | 26-scf00229 | 26 |
| AX-158090722 | 10 | 21.245 | KV453286.1  | 618617 | 26-scf00229 | 26 |
| AX-157825529 | 10 | 21.245 | KV453286.1  | 618746 | 26-scf00229 | 26 |
| AX-157825530 | 10 | 21.245 | KV453286.1  | 619337 | 26-scf00229 | 26 |
| AX-158090723 | 10 | 21.245 | KV453286.1  | 621113 | 26-scf00229 | 26 |
| AX-158090726 | 10 | 21.245 | KV453286.1  | 625142 | 26-scf00229 | 26 |
| AX-158090728 | 10 | 21.245 | KV453286.1  | 628866 | 26-scf00229 | 26 |
| AX-158090729 | 10 | 21.245 | KV453286.1  | 631266 | 26-scf00229 | 26 |
| AX-157719686 | 10 | 21.245 | KV453286.1  | 640564 | 26-scf00229 | 26 |
| AX-158090745 | 10 | 21.245 | KV453286.1  | 655750 | 26-scf00229 | 26 |
| AX-158090748 | 10 | 21.245 | KV453286.1  | 658388 | 26-scf00229 | 26 |
| AX-157825540 | 10 | 21.245 | KV453286.1  | 662417 | 26-scf00229 | 26 |
| AX-157825541 | 10 | 21.245 | KV453286.1  | 666065 | 26-scf00229 | 26 |
| AX-157825542 | 10 | 21.245 | KV453286.1  | 668073 | 26-scf00229 | 26 |
| AX-158090752 | 10 | 21.245 | KV453286.1  | 669995 | 26-scf00229 | 26 |
| AX-157775292 | 10 | 21.245 | KV453286.1  | 673639 | 26-scf00229 | 26 |
| AX-158090755 | 10 | 21.245 | KV453286.1  | 674886 | 26-scf00229 | 26 |
| AX-158090756 | 10 | 21.245 | KV453286.1  | 676667 | 26-scf00229 | 26 |
| AX-157825545 | 10 | 21.245 | KV453286.1  | 681741 | 26-scf00229 | 26 |
| AX-157825547 | 10 | 21.245 | KV453286.1  | 688187 | 26-scf00229 | 26 |
| AX-157825548 | 10 | 21.245 | KV453286.1  | 691821 | 26-scf00229 | 26 |
| AX-158090826 | 10 | 21.245 | KV453286.1  | 786585 | 26-scf00229 | 26 |
| AX-158090898 | 10 | 21.245 | KV453286.1  | 885556 | 26-scf00229 | 26 |
| AX-157683339 | 10 | 21.245 | KV453287.1  | 17658  | 26-scf00230 | 26 |
| AX-157683340 | 10 | 21.245 | KV453287.1  | 19324  | 26-scf00230 | 26 |
| AX-158376861 | 10 | 21.245 | KV453285.1  | 73014  | 26-scf00595 | 26 |
| AX-157705997 | 10 | 21.245 | 3ML01031403 | 473    | scf07016_1  | UN |
| AX-158090241 | 10 | 21.272 | KV453288.1  | 387200 | 26-scf00228 | 26 |
| AX-157877264 | 10 | 21.294 | KV453288.1  | 397846 | 26-scf00228 | 26 |
| AX-158090252 | 10 | 21.317 | KV453288.1  | 401789 | 26-scf00228 | 26 |
| AX-158090254 | 10 | 21.337 | KV453288.1  | 405083 | 26-scf00228 | 26 |
| AX-158088659 | 10 | 21.354 | KV453277.1  | 251393 | 26-scf00227 | 26 |
| AX-158090237 | 10 | 21.354 | KV453288.1  | 379430 | 26-scf00228 | 26 |
| AX-158090255 | 10 | 21.354 | KV453288.1  | 407492 | 26-scf00228 | 26 |
| AX-158090258 | 10 | 21.354 | KV453288.1  | 412821 | 26-scf00228 | 26 |

|              |    |        |            |         |             |    |
|--------------|----|--------|------------|---------|-------------|----|
| AX-158090260 | 10 | 21.354 | KV453288.1 | 414529  | 26-scf00228 | 26 |
| AX-158090262 | 10 | 21.354 | KV453288.1 | 415493  | 26-scf00228 | 26 |
| AX-157699331 | 10 | 21.354 | KV453288.1 | 417772  | 26-scf00228 | 26 |
| AX-158407191 | 10 | 21.354 | KV453288.1 | 421094  | 26-scf00228 | 26 |
| AX-158090267 | 10 | 21.354 | KV453288.1 | 429240  | 26-scf00228 | 26 |
| AX-157744289 | 10 | 21.354 | KV453288.1 | 432074  | 26-scf00228 | 26 |
| AX-158090269 | 10 | 21.354 | KV453288.1 | 433981  | 26-scf00228 | 26 |
| AX-158090270 | 10 | 21.354 | KV453288.1 | 434412  | 26-scf00228 | 26 |
| AX-158090271 | 10 | 21.354 | KV453288.1 | 434584  | 26-scf00228 | 26 |
| AX-158090272 | 10 | 21.354 | KV453288.1 | 434903  | 26-scf00228 | 26 |
| AX-158090357 | 10 | 21.354 | KV453288.1 | 560508  | 26-scf00228 | 26 |
| AX-158090361 | 10 | 21.354 | KV453288.1 | 566700  | 26-scf00228 | 26 |
| AX-157740669 | 10 | 21.354 | KV453288.1 | 569125  | 26-scf00228 | 26 |
| AX-158090875 | 10 | 21.354 | KV453286.1 | 854051  | 26-scf00229 | 26 |
| AX-158090900 | 10 | 21.354 | KV453286.1 | 894258  | 26-scf00229 | 26 |
| AX-158091021 | 10 | 21.354 | KV453286.1 | 1138939 | 26-scf00229 | 26 |
| AX-158091127 | 10 | 21.354 | KV453290.1 | 38523   | 26-scf00232 | 26 |
| AX-157825483 | 10 | 21.39  | KV453288.1 | 435439  | 26-scf00228 | 26 |
| AX-158090273 | 10 | 21.426 | KV453288.1 | 436414  | 26-scf00228 | 26 |
| AX-158090257 | 10 | 21.463 | KV453288.1 | 410677  | 26-scf00228 | 26 |
| AX-157865802 | 10 | 21.463 | KV453288.1 | 438634  | 26-scf00228 | 26 |
| AX-158090275 | 10 | 21.463 | KV453288.1 | 440501  | 26-scf00228 | 26 |
| AX-158090280 | 10 | 21.463 | KV453288.1 | 445978  | 26-scf00228 | 26 |
| AX-157857258 | 10 | 21.463 | KV453288.1 | 448270  | 26-scf00228 | 26 |
| AX-158090284 | 10 | 21.463 | KV453288.1 | 449876  | 26-scf00228 | 26 |
| AX-158090285 | 10 | 21.463 | KV453288.1 | 450668  | 26-scf00228 | 26 |
| AX-157726345 | 10 | 21.463 | KV453288.1 | 451722  | 26-scf00228 | 26 |
| AX-158090288 | 10 | 21.463 | KV453288.1 | 454143  | 26-scf00228 | 26 |
| AX-158090295 | 10 | 21.463 | KV453288.1 | 468533  | 26-scf00228 | 26 |
| AX-157825486 | 10 | 21.463 | KV453288.1 | 474862  | 26-scf00228 | 26 |
| AX-157825488 | 10 | 21.463 | KV453288.1 | 475258  | 26-scf00228 | 26 |
| AX-158089959 | 10 | 21.79  | KV453277.1 | 2214091 | 26-scf00227 | 26 |
| AX-158090311 | 10 | 21.79  | KV453288.1 | 499007  | 26-scf00228 | 26 |
| AX-157741071 | 10 | 21.79  | KV453288.1 | 502651  | 26-scf00228 | 26 |
| AX-158379954 | 10 | 21.79  | KV453288.1 | 512108  | 26-scf00228 | 26 |
| AX-158090333 | 10 | 21.79  | KV453288.1 | 535471  | 26-scf00228 | 26 |
| AX-158090377 | 10 | 21.79  | KV453288.1 | 600913  | 26-scf00228 | 26 |
| AX-157825490 | 10 | 21.791 | KV453288.1 | 499578  | 26-scf00228 | 26 |
| AX-157825491 | 10 | 21.791 | KV453288.1 | 499974  | 26-scf00228 | 26 |
| AX-158090316 | 10 | 21.791 | KV453288.1 | 513674  | 26-scf00228 | 26 |
| AX-158090317 | 10 | 21.791 | KV453288.1 | 514223  | 26-scf00228 | 26 |
| AX-158090319 | 10 | 21.791 | KV453288.1 | 516337  | 26-scf00228 | 26 |
| AX-158090320 | 10 | 21.791 | KV453288.1 | 516959  | 26-scf00228 | 26 |
| AX-158090321 | 10 | 21.791 | KV453288.1 | 520852  | 26-scf00228 | 26 |
| AX-157825493 | 10 | 21.791 | KV453288.1 | 522157  | 26-scf00228 | 26 |
| AX-158090323 | 10 | 21.791 | KV453288.1 | 523927  | 26-scf00228 | 26 |
| AX-157825494 | 10 | 21.791 | KV453288.1 | 524188  | 26-scf00228 | 26 |
| AX-157825495 | 10 | 21.791 | KV453288.1 | 529906  | 26-scf00228 | 26 |
| AX-157825496 | 10 | 21.791 | KV453288.1 | 530165  | 26-scf00228 | 26 |
| AX-157825497 | 10 | 21.791 | KV453288.1 | 530738  | 26-scf00228 | 26 |
| AX-158090326 | 10 | 21.791 | KV453288.1 | 531777  | 26-scf00228 | 26 |

|              |    |        |            |        |             |    |
|--------------|----|--------|------------|--------|-------------|----|
| AX-158090327 | 10 | 21.791 | KV453288.1 | 532163 | 26-scf00228 | 26 |
| AX-157825498 | 10 | 21.791 | KV453288.1 | 532587 | 26-scf00228 | 26 |
| AX-158090328 | 10 | 21.791 | KV453288.1 | 533007 | 26-scf00228 | 26 |
| AX-158090329 | 10 | 21.791 | KV453288.1 | 533508 | 26-scf00228 | 26 |
| AX-158090331 | 10 | 21.791 | KV453288.1 | 534287 | 26-scf00228 | 26 |
| AX-158090332 | 10 | 21.791 | KV453288.1 | 535130 | 26-scf00228 | 26 |
| AX-158090334 | 10 | 21.791 | KV453288.1 | 536116 | 26-scf00228 | 26 |
| AX-158090335 | 10 | 21.791 | KV453288.1 | 537929 | 26-scf00228 | 26 |
| AX-158090336 | 10 | 21.791 | KV453288.1 | 538162 | 26-scf00228 | 26 |
| AX-158090338 | 10 | 21.791 | KV453288.1 | 538811 | 26-scf00228 | 26 |
| AX-158090339 | 10 | 21.791 | KV453288.1 | 540414 | 26-scf00228 | 26 |
| AX-158090340 | 10 | 21.791 | KV453288.1 | 541252 | 26-scf00228 | 26 |
| AX-158090343 | 10 | 21.791 | KV453288.1 | 542979 | 26-scf00228 | 26 |
| AX-158090344 | 10 | 21.791 | KV453288.1 | 543415 | 26-scf00228 | 26 |
| AX-158090346 | 10 | 21.791 | KV453288.1 | 545654 | 26-scf00228 | 26 |
| AX-158090351 | 10 | 21.791 | KV453288.1 | 553442 | 26-scf00228 | 26 |
| AX-158090352 | 10 | 21.791 | KV453288.1 | 553900 | 26-scf00228 | 26 |
| AX-157885683 | 10 | 21.791 | KV453288.1 | 554260 | 26-scf00228 | 26 |
| AX-158090354 | 10 | 21.791 | KV453288.1 | 556745 | 26-scf00228 | 26 |
| AX-158090355 | 10 | 21.791 | KV453288.1 | 557254 | 26-scf00228 | 26 |
| AX-157825501 | 10 | 21.791 | KV453288.1 | 564831 | 26-scf00228 | 26 |
| AX-158090360 | 10 | 21.791 | KV453288.1 | 565343 | 26-scf00228 | 26 |
| AX-158090362 | 10 | 21.791 | KV453288.1 | 574343 | 26-scf00228 | 26 |
| AX-158090363 | 10 | 21.791 | KV453288.1 | 574769 | 26-scf00228 | 26 |
| AX-158090364 | 10 | 21.791 | KV453288.1 | 575244 | 26-scf00228 | 26 |
| AX-158090365 | 10 | 21.791 | KV453288.1 | 575929 | 26-scf00228 | 26 |
| AX-157713880 | 10 | 21.791 | KV453288.1 | 577924 | 26-scf00228 | 26 |
| AX-157825502 | 10 | 21.791 | KV453288.1 | 579220 | 26-scf00228 | 26 |
| AX-157714514 | 10 | 21.9   | KV453288.1 | 543126 | 26-scf00228 | 26 |
| AX-158090347 | 10 | 21.9   | KV453288.1 | 546249 | 26-scf00228 | 26 |
| AX-158090348 | 10 | 21.9   | KV453288.1 | 547392 | 26-scf00228 | 26 |
| AX-158090368 | 10 | 21.9   | KV453288.1 | 586472 | 26-scf00228 | 26 |
| AX-158090369 | 10 | 21.9   | KV453288.1 | 586675 | 26-scf00228 | 26 |
| AX-158090370 | 10 | 21.9   | KV453288.1 | 588549 | 26-scf00228 | 26 |
| AX-158090374 | 10 | 21.9   | KV453288.1 | 599016 | 26-scf00228 | 26 |
| AX-158090376 | 10 | 21.9   | KV453288.1 | 599754 | 26-scf00228 | 26 |
| AX-157772528 | 10 | 21.9   | KV453288.1 | 600697 | 26-scf00228 | 26 |
| AX-158090380 | 10 | 21.9   | KV453288.1 | 609131 | 26-scf00228 | 26 |
| AX-157773976 | 10 | 21.9   | KV453288.1 | 638347 | 26-scf00228 | 26 |
| AX-157716790 | 10 | 22.051 | KV453288.1 | 610432 | 26-scf00228 | 26 |
| AX-158090383 | 10 | 22.201 | KV453288.1 | 613795 | 26-scf00228 | 26 |
| AX-158090387 | 10 | 22.201 | KV453288.1 | 620090 | 26-scf00228 | 26 |
| AX-158090388 | 10 | 22.201 | KV453288.1 | 620365 | 26-scf00228 | 26 |
| AX-158090394 | 10 | 22.201 | KV453288.1 | 632972 | 26-scf00228 | 26 |
| AX-157825591 | 10 | 22.201 | KV453290.1 | 1492   | 26-scf00232 | 26 |
| AX-158090396 | 10 | 22.248 | KV453288.1 | 637147 | 26-scf00228 | 26 |
| AX-158090397 | 10 | 22.298 | KV453288.1 | 637316 | 26-scf00228 | 26 |
| AX-158090398 | 10 | 22.298 | KV453288.1 | 638513 | 26-scf00228 | 26 |
| AX-157771825 | 10 | 22.299 | KV453288.1 | 638723 | 26-scf00228 | 26 |
| AX-157742377 | 10 | 22.299 | KV453288.1 | 643873 | 26-scf00228 | 26 |
| AX-158090402 | 10 | 22.51  | KV453288.1 | 646899 | 26-scf00228 | 26 |

|              |    |        |            |        |             |    |
|--------------|----|--------|------------|--------|-------------|----|
| AX-158090403 | 10 | 22.51  | KV453288.1 | 647639 | 26-scf00228 | 26 |
| AX-158090414 | 10 | 22.51  | KV453288.1 | 658944 | 26-scf00228 | 26 |
| AX-158090404 | 10 | 22.565 | KV453288.1 | 649124 | 26-scf00228 | 26 |
| AX-158090410 | 10 | 22.664 | KV453288.1 | 656111 | 26-scf00228 | 26 |
| AX-158090411 | 10 | 22.664 | KV453288.1 | 657279 | 26-scf00228 | 26 |
| AX-158090416 | 10 | 22.665 | KV453288.1 | 665619 | 26-scf00228 | 26 |
| AX-157748178 | 10 | 22.665 | KV453288.1 | 665723 | 26-scf00228 | 26 |
| AX-158090419 | 10 | 22.665 | KV453288.1 | 669687 | 26-scf00228 | 26 |
| AX-157748580 | 10 | 22.665 | KV453288.1 | 673513 | 26-scf00228 | 26 |
| AX-158090421 | 10 | 22.665 | KV453288.1 | 674020 | 26-scf00228 | 26 |
| AX-158090422 | 10 | 22.665 | KV453288.1 | 674681 | 26-scf00228 | 26 |
| AX-158090423 | 10 | 22.665 | KV453288.1 | 677934 | 26-scf00228 | 26 |
| AX-157825508 | 10 | 22.665 | KV453288.1 | 679709 | 26-scf00228 | 26 |
| AX-158090425 | 10 | 22.665 | KV453288.1 | 680704 | 26-scf00228 | 26 |
| AX-158090408 | 10 | 22.884 | KV453288.1 | 652378 | 26-scf00228 | 26 |
| AX-158090427 | 10 | 22.884 | KV453288.1 | 681408 | 26-scf00228 | 26 |
| AX-158091096 | 10 | 22.884 | KV453288.1 | 686279 | 26-scf00228 | 26 |
| AX-158091094 | 10 | 22.884 | KV453288.1 | 687261 | 26-scf00228 | 26 |
| AX-158091092 | 10 | 22.884 | KV453288.1 | 688770 | 26-scf00228 | 26 |
| AX-158410032 | 10 | 22.884 | KV453288.1 | 690831 | 26-scf00228 | 26 |
| AX-158091087 | 10 | 22.884 | KV453288.1 | 693318 | 26-scf00228 | 26 |
| AX-158091085 | 10 | 22.884 | KV453288.1 | 698237 | 26-scf00228 | 26 |
| AX-158091084 | 10 | 22.884 | KV453288.1 | 698648 | 26-scf00228 | 26 |
| AX-158091083 | 10 | 22.884 | KV453288.1 | 699390 | 26-scf00228 | 26 |
| AX-158091082 | 10 | 22.884 | KV453288.1 | 699797 | 26-scf00228 | 26 |
| AX-158091081 | 10 | 22.884 | KV453288.1 | 700465 | 26-scf00228 | 26 |
| AX-158091080 | 10 | 22.884 | KV453288.1 | 701534 | 26-scf00228 | 26 |
| AX-157717214 | 10 | 22.884 | KV453288.1 | 701727 | 26-scf00228 | 26 |
| AX-158091079 | 10 | 22.884 | KV453288.1 | 702847 | 26-scf00228 | 26 |
| AX-157771015 | 10 | 22.884 | KV453288.1 | 708997 | 26-scf00228 | 26 |
| AX-158091078 | 10 | 22.884 | KV453288.1 | 710426 | 26-scf00228 | 26 |
| AX-158091076 | 10 | 22.884 | KV453288.1 | 713398 | 26-scf00228 | 26 |
| AX-158091075 | 10 | 22.884 | KV453288.1 | 715188 | 26-scf00228 | 26 |
| AX-157825589 | 10 | 22.884 | KV453288.1 | 717543 | 26-scf00228 | 26 |
| AX-158091073 | 10 | 22.884 | KV453288.1 | 717966 | 26-scf00228 | 26 |
| AX-157825588 | 10 | 22.884 | KV453288.1 | 718474 | 26-scf00228 | 26 |
| AX-158091072 | 10 | 22.884 | KV453288.1 | 720149 | 26-scf00228 | 26 |
| AX-158091071 | 10 | 22.884 | KV453288.1 | 721122 | 26-scf00228 | 26 |
| AX-158091070 | 10 | 22.884 | KV453288.1 | 723861 | 26-scf00228 | 26 |
| AX-157825586 | 10 | 22.884 | KV453288.1 | 724916 | 26-scf00228 | 26 |
| AX-157746187 | 10 | 22.884 | KV453288.1 | 731038 | 26-scf00228 | 26 |
| AX-158091067 | 10 | 22.884 | KV453288.1 | 731891 | 26-scf00228 | 26 |
| AX-158091065 | 10 | 22.884 | KV453288.1 | 732853 | 26-scf00228 | 26 |
| AX-158091063 | 10 | 22.884 | KV453288.1 | 735204 | 26-scf00228 | 26 |
| AX-158091062 | 10 | 22.884 | KV453288.1 | 735412 | 26-scf00228 | 26 |
| AX-158091061 | 10 | 22.884 | KV453288.1 | 736740 | 26-scf00228 | 26 |
| AX-158091060 | 10 | 22.884 | KV453288.1 | 737193 | 26-scf00228 | 26 |
| AX-158091059 | 10 | 22.884 | KV453288.1 | 737881 | 26-scf00228 | 26 |
| AX-158091116 | 10 | 22.884 | KV453290.1 | 22240  | 26-scf00232 | 26 |
| AX-158091118 | 10 | 22.884 | KV453290.1 | 24520  | 26-scf00232 | 26 |
| AX-157825594 | 10 | 22.884 | KV453290.1 | 49062  | 26-scf00232 | 26 |



|              |    |        |             |        |             |    |
|--------------|----|--------|-------------|--------|-------------|----|
| AX-158091159 | 10 | 22.884 | KV453290.1  | 89487  | 26-scf00232 | 26 |
| AX-157825592 | 10 | 23.102 | KV453290.1  | 15131  | 26-scf00232 | 26 |
| AX-157744979 | 10 | 23.102 | KV453290.1  | 16878  | 26-scf00232 | 26 |
| AX-158091115 | 10 | 23.102 | KV453290.1  | 21857  | 26-scf00232 | 26 |
| AX-158091117 | 10 | 23.102 | KV453290.1  | 23762  | 26-scf00232 | 26 |
| AX-158091122 | 10 | 23.102 | KV453290.1  | 27398  | 26-scf00232 | 26 |
| AX-158091123 | 10 | 23.102 | KV453290.1  | 31738  | 26-scf00232 | 26 |
| AX-158091132 | 10 | 23.102 | KV453290.1  | 45288  | 26-scf00232 | 26 |
| AX-158091144 | 10 | 23.102 | KV453290.1  | 60721  | 26-scf00232 | 26 |
| AX-158407222 | 10 | 23.109 | KV453290.1  | 32728  | 26-scf00232 | 26 |
| AX-157725274 | 10 | 23.137 | KV453290.1  | 34007  | 26-scf00232 | 26 |
| AX-158090888 | 10 | 23.159 | KV453286.1  | 874529 | 26-scf00229 | 26 |
| AX-158091101 | 10 | 23.159 | KV453290.1  | 645    | 26-scf00232 | 26 |
| AX-158091107 | 10 | 23.159 | KV453290.1  | 7634   | 26-scf00232 | 26 |
| AX-158091119 | 10 | 23.159 | KV453290.1  | 25428  | 26-scf00232 | 26 |
| AX-158091125 | 10 | 23.159 | KV453290.1  | 37356  | 26-scf00232 | 26 |
| AX-158091148 | 10 | 23.159 | KV453290.1  | 76963  | 26-scf00232 | 26 |
| AX-158091126 | 10 | 23.176 | KV453290.1  | 37763  | 26-scf00232 | 26 |
| AX-158091152 | 10 | 23.176 | KV453290.1  | 81512  | 26-scf00232 | 26 |
| AX-157705517 | 10 | 23.176 | 3ML01030069 | 569    | scf05661_1  | UN |
| AX-158091129 | 10 | 23.211 | KV453290.1  | 43262  | 26-scf00232 | 26 |
| AX-158091130 | 10 | 23.211 | KV453290.1  | 44064  | 26-scf00232 | 26 |
| AX-158091131 | 10 | 23.211 | KV453290.1  | 44661  | 26-scf00232 | 26 |
| AX-158091133 | 10 | 23.211 | KV453290.1  | 45673  | 26-scf00232 | 26 |
| AX-158407223 | 10 | 23.211 | KV453290.1  | 48700  | 26-scf00232 | 26 |
| AX-158091137 | 10 | 23.211 | KV453290.1  | 51391  | 26-scf00232 | 26 |
| AX-157825595 | 10 | 23.211 | KV453290.1  | 52413  | 26-scf00232 | 26 |
| AX-158091138 | 10 | 23.211 | KV453290.1  | 56036  | 26-scf00232 | 26 |
| AX-157825597 | 10 | 23.211 | KV453290.1  | 57152  | 26-scf00232 | 26 |
| AX-158091140 | 10 | 23.211 | KV453290.1  | 57992  | 26-scf00232 | 26 |
| AX-158091142 | 10 | 23.211 | KV453290.1  | 60086  | 26-scf00232 | 26 |
| AX-158091143 | 10 | 23.211 | KV453290.1  | 60352  | 26-scf00232 | 26 |
| AX-157825599 | 10 | 23.211 | KV453290.1  | 66919  | 26-scf00232 | 26 |
| AX-157825601 | 10 | 23.211 | KV453290.1  | 67796  | 26-scf00232 | 26 |
| AX-158091153 | 10 | 23.211 | KV453290.1  | 82586  | 26-scf00232 | 26 |
| AX-157745315 | 10 | 23.211 | KV453290.1  | 111848 | 26-scf00232 | 26 |
| AX-158091184 | 10 | 23.211 | KV453290.1  | 128119 | 26-scf00232 | 26 |
| AX-157773270 | 10 | 23.211 | KV453290.1  | 164850 | 26-scf00232 | 26 |
| AX-157865809 | 10 | 23.211 | KV453290.1  | 186714 | 26-scf00232 | 26 |
| AX-157825598 | 10 | 23.243 | KV453290.1  | 66764  | 26-scf00232 | 26 |
| AX-157825600 | 10 | 23.243 | KV453290.1  | 66985  | 26-scf00232 | 26 |
| AX-158091146 | 10 | 23.277 | KV453290.1  | 70694  | 26-scf00232 | 26 |
| AX-158091147 | 10 | 23.302 | KV453290.1  | 72022  | 26-scf00232 | 26 |
| AX-158091149 | 10 | 23.32  | KV453290.1  | 79138  | 26-scf00232 | 26 |
| AX-158091150 | 10 | 23.32  | KV453290.1  | 79801  | 26-scf00232 | 26 |
| AX-158091151 | 10 | 23.32  | KV453290.1  | 80739  | 26-scf00232 | 26 |
| AX-157746054 | 10 | 23.32  | KV453290.1  | 82178  | 26-scf00232 | 26 |
| AX-158091155 | 10 | 23.32  | KV453290.1  | 84418  | 26-scf00232 | 26 |
| AX-158091156 | 10 | 23.391 | KV453290.1  | 87967  | 26-scf00232 | 26 |
| AX-158091158 | 10 | 23.43  | KV453290.1  | 89286  | 26-scf00232 | 26 |
| AX-158091180 | 10 | 23.43  | KV453290.1  | 119938 | 26-scf00232 | 26 |

|              |    |        |            |        |             |    |
|--------------|----|--------|------------|--------|-------------|----|
| AX-157717206 | 10 | 23.484 | KV453290.1 | 90098  | 26-scf00232 | 26 |
| AX-158091161 | 10 | 23.539 | KV453290.1 | 91699  | 26-scf00232 | 26 |
| AX-158091164 | 10 | 23.539 | KV453290.1 | 93961  | 26-scf00232 | 26 |
| AX-158091165 | 10 | 23.539 | KV453290.1 | 94305  | 26-scf00232 | 26 |
| AX-158091168 | 10 | 23.539 | KV453290.1 | 96685  | 26-scf00232 | 26 |
| AX-157744110 | 10 | 23.539 | KV453290.1 | 99605  | 26-scf00232 | 26 |
| AX-158091173 | 10 | 23.539 | KV453290.1 | 104050 | 26-scf00232 | 26 |
| AX-158091179 | 10 | 23.539 | KV453290.1 | 118998 | 26-scf00232 | 26 |
| AX-158091185 | 10 | 23.539 | KV453290.1 | 128816 | 26-scf00232 | 26 |
| AX-158091187 | 10 | 23.539 | KV453290.1 | 134688 | 26-scf00232 | 26 |
| AX-157825604 | 10 | 23.539 | KV453290.1 | 136268 | 26-scf00232 | 26 |
| AX-158091189 | 10 | 23.539 | KV453290.1 | 138080 | 26-scf00232 | 26 |
| AX-158091190 | 10 | 23.539 | KV453290.1 | 138243 | 26-scf00232 | 26 |
| AX-158091194 | 10 | 23.539 | KV453290.1 | 139876 | 26-scf00232 | 26 |
| AX-158091196 | 10 | 23.539 | KV453290.1 | 140444 | 26-scf00232 | 26 |
| AX-157825605 | 10 | 23.539 | KV453290.1 | 142045 | 26-scf00232 | 26 |
| AX-157825606 | 10 | 23.539 | KV453290.1 | 142744 | 26-scf00232 | 26 |
| AX-158091199 | 10 | 23.539 | KV453290.1 | 144200 | 26-scf00232 | 26 |
| AX-157774446 | 10 | 23.539 | KV453290.1 | 144811 | 26-scf00232 | 26 |
| AX-158091200 | 10 | 23.539 | KV453290.1 | 150382 | 26-scf00232 | 26 |
| AX-158091202 | 10 | 23.539 | KV453290.1 | 152368 | 26-scf00232 | 26 |
| AX-158091209 | 10 | 23.539 | KV453290.1 | 165625 | 26-scf00232 | 26 |
| AX-158091217 | 10 | 23.539 | KV453290.1 | 171134 | 26-scf00232 | 26 |
| AX-158091228 | 10 | 23.539 | KV453290.1 | 190123 | 26-scf00232 | 26 |
| AX-158091233 | 10 | 23.539 | KV453290.1 | 198463 | 26-scf00232 | 26 |
| AX-158091201 | 10 | 23.595 | KV453290.1 | 150979 | 26-scf00232 | 26 |
| AX-157771871 | 10 | 23.595 | KV453290.1 | 226493 | 26-scf00232 | 26 |
| AX-158091175 | 10 | 23.648 | KV453290.1 | 107944 | 26-scf00232 | 26 |
| AX-158091181 | 10 | 23.648 | KV453290.1 | 120328 | 26-scf00232 | 26 |
| AX-157825603 | 10 | 23.648 | KV453290.1 | 121413 | 26-scf00232 | 26 |
| AX-158091183 | 10 | 23.648 | KV453290.1 | 124901 | 26-scf00232 | 26 |
| AX-158091195 | 10 | 23.648 | KV453290.1 | 140210 | 26-scf00232 | 26 |
| AX-157825607 | 10 | 23.648 | KV453290.1 | 154584 | 26-scf00232 | 26 |
| AX-158091206 | 10 | 23.648 | KV453290.1 | 158057 | 26-scf00232 | 26 |
| AX-158091207 | 10 | 23.648 | KV453290.1 | 159253 | 26-scf00232 | 26 |
| AX-157743967 | 10 | 23.648 | KV453290.1 | 159680 | 26-scf00232 | 26 |
| AX-157715817 | 10 | 23.648 | KV453290.1 | 164452 | 26-scf00232 | 26 |
| AX-158091211 | 10 | 23.648 | KV453290.1 | 167671 | 26-scf00232 | 26 |
| AX-158091212 | 10 | 23.648 | KV453290.1 | 168060 | 26-scf00232 | 26 |
| AX-157770807 | 10 | 23.648 | KV453290.1 | 168714 | 26-scf00232 | 26 |
| AX-158091213 | 10 | 23.648 | KV453290.1 | 169151 | 26-scf00232 | 26 |
| AX-158091215 | 10 | 23.648 | KV453290.1 | 170492 | 26-scf00232 | 26 |
| AX-158091221 | 10 | 23.648 | KV453290.1 | 179456 | 26-scf00232 | 26 |
| AX-158091222 | 10 | 23.648 | KV453290.1 | 181680 | 26-scf00232 | 26 |
| AX-158410037 | 10 | 23.648 | KV453290.1 | 182964 | 26-scf00232 | 26 |
| AX-158091223 | 10 | 23.648 | KV453290.1 | 183698 | 26-scf00232 | 26 |
| AX-157746227 | 10 | 23.648 | KV453290.1 | 184292 | 26-scf00232 | 26 |
| AX-158091224 | 10 | 23.648 | KV453290.1 | 185573 | 26-scf00232 | 26 |
| AX-158091226 | 10 | 23.648 | KV453290.1 | 186260 | 26-scf00232 | 26 |
| AX-157825610 | 10 | 23.648 | KV453290.1 | 190932 | 26-scf00232 | 26 |
| AX-157743704 | 10 | 23.648 | KV453290.1 | 191234 | 26-scf00232 | 26 |

|              |    |        |            |        |             |    |
|--------------|----|--------|------------|--------|-------------|----|
| AX-158091229 | 10 | 23.648 | KV453290.1 | 193304 | 26-scf00232 | 26 |
| AX-158091230 | 10 | 23.648 | KV453290.1 | 194341 | 26-scf00232 | 26 |
| AX-157719944 | 10 | 23.648 | KV453290.1 | 200294 | 26-scf00232 | 26 |
| AX-158410039 | 10 | 23.648 | KV453290.1 | 212413 | 26-scf00232 | 26 |
| AX-158091248 | 10 | 23.648 | KV453290.1 | 225856 | 26-scf00232 | 26 |
| AX-158091249 | 10 | 23.648 | KV453290.1 | 227466 | 26-scf00232 | 26 |
| AX-157757307 | 10 | 23.648 | KV453290.1 | 276560 | 26-scf00232 | 26 |
| AX-158091285 | 10 | 23.648 | KV453290.1 | 290537 | 26-scf00232 | 26 |
| AX-158091298 | 10 | 23.648 | KV453290.1 | 301872 | 26-scf00232 | 26 |
| AX-158091302 | 10 | 23.648 | KV453290.1 | 307068 | 26-scf00232 | 26 |
| AX-158091318 | 10 | 23.648 | KV453290.1 | 328166 | 26-scf00232 | 26 |
| AX-158091319 | 10 | 23.648 | KV453290.1 | 329161 | 26-scf00232 | 26 |
| AX-158091420 | 10 | 23.648 | KV453290.1 | 482411 | 26-scf00232 | 26 |
| AX-157752703 | 10 | 23.648 | KV453290.1 | 549753 | 26-scf00232 | 26 |
| AX-158091477 | 10 | 23.648 | KV453290.1 | 551637 | 26-scf00232 | 26 |
| AX-158091478 | 10 | 23.648 | KV453290.1 | 553286 | 26-scf00232 | 26 |
| AX-158091494 | 10 | 23.648 | KV453290.1 | 573427 | 26-scf00232 | 26 |
| AX-158091235 | 10 | 23.683 | KV453290.1 | 199140 | 26-scf00232 | 26 |
| AX-157825611 | 10 | 23.719 | KV453290.1 | 201380 | 26-scf00232 | 26 |
| AX-158091232 | 10 | 23.757 | KV453290.1 | 197421 | 26-scf00232 | 26 |
| AX-158091238 | 10 | 23.757 | KV453290.1 | 205659 | 26-scf00232 | 26 |
| AX-158091239 | 10 | 23.757 | KV453290.1 | 206695 | 26-scf00232 | 26 |
| AX-158091240 | 10 | 23.757 | KV453290.1 | 209099 | 26-scf00232 | 26 |
| AX-157775890 | 10 | 23.757 | KV453290.1 | 209492 | 26-scf00232 | 26 |
| AX-158379961 | 10 | 23.976 | KV453290.1 | 175196 | 26-scf00232 | 26 |
| AX-158091244 | 10 | 23.976 | KV453290.1 | 218976 | 26-scf00232 | 26 |
| AX-157825613 | 10 | 23.976 | KV453290.1 | 219768 | 26-scf00232 | 26 |
| AX-157751478 | 10 | 23.976 | KV453290.1 | 221198 | 26-scf00232 | 26 |
| AX-158091245 | 10 | 23.976 | KV453290.1 | 222193 | 26-scf00232 | 26 |
| AX-157715108 | 10 | 23.976 | KV453290.1 | 223279 | 26-scf00232 | 26 |
| AX-157825617 | 10 | 23.976 | KV453290.1 | 235272 | 26-scf00232 | 26 |
| AX-158091253 | 10 | 23.976 | KV453290.1 | 235826 | 26-scf00232 | 26 |
| AX-158091254 | 10 | 23.976 | KV453290.1 | 238476 | 26-scf00232 | 26 |
| AX-157788911 | 10 | 23.976 | KV453290.1 | 239901 | 26-scf00232 | 26 |
| AX-157714362 | 10 | 23.976 | KV453290.1 | 242445 | 26-scf00232 | 26 |
| AX-157716441 | 10 | 23.976 | KV453290.1 | 245945 | 26-scf00232 | 26 |
| AX-158091256 | 10 | 23.976 | KV453290.1 | 246681 | 26-scf00232 | 26 |
| AX-158091258 | 10 | 23.976 | KV453290.1 | 248211 | 26-scf00232 | 26 |
| AX-158091259 | 10 | 23.976 | KV453290.1 | 248461 | 26-scf00232 | 26 |
| AX-157774532 | 10 | 23.976 | KV453290.1 | 251533 | 26-scf00232 | 26 |
| AX-158091260 | 10 | 23.976 | KV453290.1 | 253204 | 26-scf00232 | 26 |
| AX-158091262 | 10 | 23.976 | KV453290.1 | 255208 | 26-scf00232 | 26 |
| AX-158091265 | 10 | 23.976 | KV453290.1 | 259736 | 26-scf00232 | 26 |
| AX-158091266 | 10 | 23.976 | KV453290.1 | 259990 | 26-scf00232 | 26 |
| AX-157825619 | 10 | 23.976 | KV453290.1 | 263440 | 26-scf00232 | 26 |
| AX-158091269 | 10 | 23.976 | KV453290.1 | 264196 | 26-scf00232 | 26 |
| AX-158091270 | 10 | 23.976 | KV453290.1 | 265467 | 26-scf00232 | 26 |
| AX-157825620 | 10 | 23.976 | KV453290.1 | 267347 | 26-scf00232 | 26 |
| AX-157825621 | 10 | 23.976 | KV453290.1 | 267585 | 26-scf00232 | 26 |
| AX-158091274 | 10 | 23.976 | KV453290.1 | 270870 | 26-scf00232 | 26 |
| AX-158091282 | 10 | 23.976 | KV453290.1 | 285848 | 26-scf00232 | 26 |

|              |    |        |            |        |             |    |
|--------------|----|--------|------------|--------|-------------|----|
| AX-158091283 | 10 | 23.976 | KV453290.1 | 287851 | 26-scf00232 | 26 |
| AX-158091290 | 10 | 23.976 | KV453290.1 | 294349 | 26-scf00232 | 26 |
| AX-158091293 | 10 | 23.976 | KV453290.1 | 295785 | 26-scf00232 | 26 |
| AX-158091294 | 10 | 23.976 | KV453290.1 | 298236 | 26-scf00232 | 26 |
| AX-157825623 | 10 | 23.976 | KV453290.1 | 300202 | 26-scf00232 | 26 |
| AX-158091306 | 10 | 23.976 | KV453290.1 | 313290 | 26-scf00232 | 26 |
| AX-158091307 | 10 | 23.976 | KV453290.1 | 314795 | 26-scf00232 | 26 |
| AX-158091309 | 10 | 23.976 | KV453290.1 | 315880 | 26-scf00232 | 26 |
| AX-158091311 | 10 | 23.976 | KV453290.1 | 320688 | 26-scf00232 | 26 |
| AX-158410042 | 10 | 23.976 | KV453290.1 | 340621 | 26-scf00232 | 26 |
| AX-158091326 | 10 | 23.976 | KV453290.1 | 342907 | 26-scf00232 | 26 |
| AX-158091327 | 10 | 23.976 | KV453290.1 | 342991 | 26-scf00232 | 26 |
| AX-158091328 | 10 | 23.976 | KV453290.1 | 343624 | 26-scf00232 | 26 |
| AX-158091329 | 10 | 23.976 | KV453290.1 | 344149 | 26-scf00232 | 26 |
| AX-157771842 | 10 | 23.976 | KV453290.1 | 346450 | 26-scf00232 | 26 |
| AX-157750666 | 10 | 23.976 | KV453290.1 | 349805 | 26-scf00232 | 26 |
| AX-158091344 | 10 | 23.976 | KV453290.1 | 379680 | 26-scf00232 | 26 |
| AX-158091355 | 10 | 23.976 | KV453290.1 | 403013 | 26-scf00232 | 26 |
| AX-157721870 | 10 | 23.976 | KV453290.1 | 405997 | 26-scf00232 | 26 |
| AX-158091362 | 10 | 23.976 | KV453290.1 | 407602 | 26-scf00232 | 26 |
| AX-158091375 | 10 | 23.976 | KV453290.1 | 420019 | 26-scf00232 | 26 |
| AX-157825632 | 10 | 23.976 | KV453290.1 | 450438 | 26-scf00232 | 26 |
| AX-158091405 | 10 | 23.976 | KV453290.1 | 461797 | 26-scf00232 | 26 |
| AX-158091414 | 10 | 23.976 | KV453290.1 | 468119 | 26-scf00232 | 26 |
| AX-157751688 | 10 | 23.976 | KV453290.1 | 470065 | 26-scf00232 | 26 |
| AX-158091425 | 10 | 23.976 | KV453290.1 | 492700 | 26-scf00232 | 26 |
| AX-158091435 | 10 | 23.976 | KV453290.1 | 505689 | 26-scf00232 | 26 |
| AX-158091452 | 10 | 23.976 | KV453290.1 | 523563 | 26-scf00232 | 26 |
| AX-158091458 | 10 | 23.976 | KV453290.1 | 534401 | 26-scf00232 | 26 |
| AX-158091475 | 10 | 23.976 | KV453290.1 | 548467 | 26-scf00232 | 26 |
| AX-157825642 | 10 | 23.976 | KV453290.1 | 575417 | 26-scf00232 | 26 |
| AX-158091255 | 10 | 23.988 | KV453290.1 | 241382 | 26-scf00232 | 26 |
| AX-158091310 | 10 | 23.988 | KV453290.1 | 317292 | 26-scf00232 | 26 |
| AX-158091312 | 10 | 24.058 | KV453290.1 | 323879 | 26-scf00232 | 26 |
| AX-158091314 | 10 | 24.07  | KV453290.1 | 324835 | 26-scf00232 | 26 |
| AX-157825614 | 10 | 24.085 | KV453290.1 | 229005 | 26-scf00232 | 26 |
| AX-158091252 | 10 | 24.085 | KV453290.1 | 230463 | 26-scf00232 | 26 |
| AX-157825616 | 10 | 24.085 | KV453290.1 | 234951 | 26-scf00232 | 26 |
| AX-158091257 | 10 | 24.085 | KV453290.1 | 247702 | 26-scf00232 | 26 |
| AX-158091291 | 10 | 24.085 | KV453290.1 | 294784 | 26-scf00232 | 26 |
| AX-158091315 | 10 | 24.085 | KV453290.1 | 325436 | 26-scf00232 | 26 |
| AX-158091316 | 10 | 24.085 | KV453290.1 | 326680 | 26-scf00232 | 26 |
| AX-157877303 | 10 | 24.085 | KV453290.1 | 428837 | 26-scf00232 | 26 |
| AX-157771853 | 10 | 24.085 | KV453290.1 | 439694 | 26-scf00232 | 26 |
| AX-158091411 | 10 | 24.085 | KV453290.1 | 465497 | 26-scf00232 | 26 |
| AX-158091445 | 10 | 24.085 | KV453290.1 | 515738 | 26-scf00232 | 26 |
| AX-158091322 | 10 | 24.099 | KV453290.1 | 336225 | 26-scf00232 | 26 |
| AX-157825636 | 10 | 24.099 | KV453290.1 | 469989 | 26-scf00232 | 26 |
| AX-158091415 | 10 | 24.099 | KV453290.1 | 471208 | 26-scf00232 | 26 |
| AX-158091246 | 10 | 24.112 | KV453290.1 | 224828 | 26-scf00232 | 26 |
| AX-157723792 | 10 | 24.112 | KV453290.1 | 341576 | 26-scf00232 | 26 |

|              |    |        |            |        |             |    |
|--------------|----|--------|------------|--------|-------------|----|
| AX-157739974 | 10 | 24.125 | KV453290.1 | 361338 | 26-scf00232 | 26 |
| AX-158091342 | 10 | 24.138 | KV453290.1 | 378086 | 26-scf00232 | 26 |
| AX-157825615 | 10 | 24.155 | KV453290.1 | 229887 | 26-scf00232 | 26 |
| AX-158091332 | 10 | 24.155 | KV453290.1 | 355482 | 26-scf00232 | 26 |
| AX-158091349 | 10 | 24.155 | KV453290.1 | 386547 | 26-scf00232 | 26 |
| AX-158091391 | 10 | 24.176 | KV453290.1 | 443577 | 26-scf00232 | 26 |
| AX-158091247 | 10 | 24.194 | KV453290.1 | 225243 | 26-scf00232 | 26 |
| AX-158091272 | 10 | 24.194 | KV453290.1 | 270123 | 26-scf00232 | 26 |
| AX-158091284 | 10 | 24.194 | KV453290.1 | 290282 | 26-scf00232 | 26 |
| AX-158091287 | 10 | 24.194 | KV453290.1 | 291411 | 26-scf00232 | 26 |
| AX-158091320 | 10 | 24.194 | KV453290.1 | 333757 | 26-scf00232 | 26 |
| AX-157771115 | 10 | 24.194 | KV453290.1 | 336913 | 26-scf00232 | 26 |
| AX-157726847 | 10 | 24.194 | KV453290.1 | 385056 | 26-scf00232 | 26 |
| AX-158091396 | 10 | 24.194 | KV453290.1 | 446661 | 26-scf00232 | 26 |
| AX-158091397 | 10 | 24.194 | KV453290.1 | 447334 | 26-scf00232 | 26 |
| AX-158091398 | 10 | 24.194 | KV453290.1 | 449467 | 26-scf00232 | 26 |
| AX-157744990 | 10 | 24.194 | KV453290.1 | 454753 | 26-scf00232 | 26 |
| AX-158091400 | 10 | 24.194 | KV453290.1 | 455173 | 26-scf00232 | 26 |
| AX-158091401 | 10 | 24.194 | KV453290.1 | 455442 | 26-scf00232 | 26 |
| AX-158091402 | 10 | 24.194 | KV453290.1 | 458184 | 26-scf00232 | 26 |
| AX-157825634 | 10 | 24.194 | KV453290.1 | 458401 | 26-scf00232 | 26 |
| AX-158091403 | 10 | 24.194 | KV453290.1 | 458640 | 26-scf00232 | 26 |
| AX-158091417 | 10 | 24.194 | KV453290.1 | 472186 | 26-scf00232 | 26 |
| AX-158091418 | 10 | 24.194 | KV453290.1 | 473884 | 26-scf00232 | 26 |
| AX-158091419 | 10 | 24.194 | KV453290.1 | 481753 | 26-scf00232 | 26 |
| AX-158091422 | 10 | 24.194 | KV453290.1 | 483645 | 26-scf00232 | 26 |
| AX-158091433 | 10 | 24.194 | KV453290.1 | 503734 | 26-scf00232 | 26 |
| AX-158091446 | 10 | 24.194 | KV453290.1 | 516474 | 26-scf00232 | 26 |
| AX-158091485 | 10 | 24.194 | KV453290.1 | 561562 | 26-scf00232 | 26 |
| AX-158091488 | 10 | 24.194 | KV453290.1 | 563154 | 26-scf00232 | 26 |
| AX-158091424 | 10 | 24.241 | KV453290.1 | 489660 | 26-scf00232 | 26 |
| AX-158091331 | 10 | 24.303 | KV453290.1 | 353722 | 26-scf00232 | 26 |
| AX-158091432 | 10 | 24.303 | KV453290.1 | 503328 | 26-scf00232 | 26 |
| AX-158091438 | 10 | 24.303 | KV453290.1 | 508426 | 26-scf00232 | 26 |
| AX-158091440 | 10 | 24.303 | KV453290.1 | 509714 | 26-scf00232 | 26 |
| AX-158091441 | 10 | 24.303 | KV453290.1 | 510575 | 26-scf00232 | 26 |
| AX-158091442 | 10 | 24.303 | KV453290.1 | 511349 | 26-scf00232 | 26 |
| AX-158091448 | 10 | 24.303 | KV453290.1 | 517632 | 26-scf00232 | 26 |
| AX-157724304 | 10 | 24.303 | KV453290.1 | 520107 | 26-scf00232 | 26 |
| AX-158091454 | 10 | 24.303 | KV453290.1 | 528483 | 26-scf00232 | 26 |
| AX-158091456 | 10 | 24.303 | KV453290.1 | 529541 | 26-scf00232 | 26 |
| AX-158091457 | 10 | 24.303 | KV453290.1 | 530574 | 26-scf00232 | 26 |
| AX-158091460 | 10 | 24.303 | KV453290.1 | 535701 | 26-scf00232 | 26 |
| AX-158091461 | 10 | 24.303 | KV453290.1 | 536086 | 26-scf00232 | 26 |
| AX-158091464 | 10 | 24.303 | KV453290.1 | 537131 | 26-scf00232 | 26 |
| AX-158091465 | 10 | 24.303 | KV453290.1 | 538120 | 26-scf00232 | 26 |
| AX-157745175 | 10 | 24.303 | KV453290.1 | 539405 | 26-scf00232 | 26 |
| AX-158091467 | 10 | 24.303 | KV453290.1 | 541637 | 26-scf00232 | 26 |
| AX-158091470 | 10 | 24.303 | KV453290.1 | 544500 | 26-scf00232 | 26 |
| AX-158091471 | 10 | 24.303 | KV453290.1 | 545581 | 26-scf00232 | 26 |
| AX-158091472 | 10 | 24.303 | KV453290.1 | 545815 | 26-scf00232 | 26 |

|              |    |        |            |         |                |    |
|--------------|----|--------|------------|---------|----------------|----|
| AX-157752222 | 10 | 24.303 | KV453290.1 | 551286  | 26-scf00232    | 26 |
| AX-158091480 | 10 | 24.303 | KV453290.1 | 557481  | 26-scf00232    | 26 |
| AX-158091481 | 10 | 24.303 | KV453290.1 | 557626  | 26-scf00232    | 26 |
| AX-157825639 | 10 | 24.303 | KV453290.1 | 560830  | 26-scf00232    | 26 |
| AX-158091487 | 10 | 24.413 | KV453290.1 | 562922  | 26-scf00232    | 26 |
| AX-158091490 | 10 | 24.622 | KV453290.1 | 565041  | 26-scf00232    | 26 |
| AX-158091492 | 10 | 24.622 | KV453290.1 | 569783  | 26-scf00232    | 26 |
| AX-157825643 | 10 | 24.622 | KV453290.1 | 579184  | 26-scf00232    | 26 |
| AX-157870890 | 10 | 24.622 | KV453290.1 | 579959  | 26-scf00232    | 26 |
| AX-157773143 | 10 | 24.622 | KV453290.1 | 580170  | 26-scf00232    | 26 |
| AX-158091499 | 10 | 24.622 | KV453290.1 | 580704  | 26-scf00232    | 26 |
| AX-158091505 | 10 | 24.622 | KV453290.1 | 583649  | 26-scf00232    | 26 |
| AX-158091604 | 10 | 24.622 | KV453290.1 | 737457  | 26-scf00232    | 26 |
| AX-158091711 | 10 | 24.622 | KV453290.1 | 876184  | 26-scf00232    | 26 |
| AX-158091732 | 10 | 24.622 | KV453290.1 | 909607  | 26-scf00232    | 26 |
| AX-158092156 | 10 | 24.622 | KV453290.1 | 1535516 | 26-scf00232    | 26 |
| AX-157722738 | 10 | 24.622 | KV453290.1 | 2174899 | 26-scf00232    | 26 |
| AX-157693481 | 10 | 24.622 | FI858394.1 | 259     | IORI212 lctalu | UN |
| AX-158091489 | 10 | 24.64  | KV453290.1 | 563688  | 26-scf00232    | 26 |
| AX-157825640 | 10 | 24.64  | KV453290.1 | 566702  | 26-scf00232    | 26 |
| AX-158091498 | 10 | 24.64  | KV453290.1 | 580128  | 26-scf00232    | 26 |
| AX-158091507 | 10 | 24.64  | KV453290.1 | 585588  | 26-scf00232    | 26 |
| AX-158091510 | 10 | 24.64  | KV453290.1 | 588803  | 26-scf00232    | 26 |
| AX-158091511 | 10 | 24.64  | KV453290.1 | 589230  | 26-scf00232    | 26 |
| AX-157877305 | 10 | 24.64  | KV453290.1 | 607598  | 26-scf00232    | 26 |
| AX-158091539 | 10 | 24.64  | KV453290.1 | 627314  | 26-scf00232    | 26 |
| AX-158091512 | 10 | 24.731 | KV453290.1 | 590296  | 26-scf00232    | 26 |
| AX-158091514 | 10 | 24.82  | KV453290.1 | 591247  | 26-scf00232    | 26 |
| AX-158091517 | 10 | 24.85  | KV453290.1 | 595570  | 26-scf00232    | 26 |
| AX-158091518 | 10 | 24.85  | KV453290.1 | 596309  | 26-scf00232    | 26 |
| AX-157825644 | 10 | 24.85  | KV453290.1 | 596595  | 26-scf00232    | 26 |
| AX-157738482 | 10 | 24.85  | KV453290.1 | 600380  | 26-scf00232    | 26 |
| AX-158091528 | 10 | 24.85  | KV453290.1 | 611298  | 26-scf00232    | 26 |
| AX-158091504 | 10 | 24.875 | KV453290.1 | 583017  | 26-scf00232    | 26 |
| AX-157825645 | 10 | 24.875 | KV453290.1 | 597354  | 26-scf00232    | 26 |
| AX-157774309 | 10 | 24.875 | KV453290.1 | 602052  | 26-scf00232    | 26 |
| AX-157772261 | 10 | 24.875 | KV453290.1 | 624363  | 26-scf00232    | 26 |
| AX-158091522 | 10 | 24.913 | KV453290.1 | 602860  | 26-scf00232    | 26 |
| AX-157738296 | 10 | 24.959 | KV453290.1 | 608726  | 26-scf00232    | 26 |
| AX-157825646 | 10 | 24.959 | KV453290.1 | 615324  | 26-scf00232    | 26 |
| AX-157713860 | 10 | 24.959 | KV453290.1 | 616830  | 26-scf00232    | 26 |
| AX-158091533 | 10 | 24.959 | KV453290.1 | 620152  | 26-scf00232    | 26 |
| AX-158091534 | 10 | 24.959 | KV453290.1 | 621091  | 26-scf00232    | 26 |
| AX-158091536 | 10 | 24.959 | KV453290.1 | 624810  | 26-scf00232    | 26 |
| AX-158091540 | 10 | 24.959 | KV453290.1 | 628119  | 26-scf00232    | 26 |
| AX-158091558 | 10 | 24.959 | KV453290.1 | 654006  | 26-scf00232    | 26 |
| AX-158091526 | 10 | 25.068 | KV453290.1 | 606752  | 26-scf00232    | 26 |
| AX-158091542 | 10 | 25.068 | KV453290.1 | 629572  | 26-scf00232    | 26 |
| AX-158091546 | 10 | 25.068 | KV453290.1 | 636830  | 26-scf00232    | 26 |
| AX-158091609 | 10 | 25.068 | KV453290.1 | 743427  | 26-scf00232    | 26 |
| AX-158091537 | 10 | 25.177 | KV453290.1 | 625359  | 26-scf00232    | 26 |

|              |    |        |             |        |             |    |
|--------------|----|--------|-------------|--------|-------------|----|
| AX-158379965 | 10 | 25.177 | KV453290.1  | 633914 | 26-scf00232 | 26 |
| AX-158091547 | 10 | 25.177 | KV453290.1  | 638560 | 26-scf00232 | 26 |
| AX-158091548 | 10 | 25.177 | KV453290.1  | 639101 | 26-scf00232 | 26 |
| AX-158091549 | 10 | 25.177 | KV453290.1  | 639669 | 26-scf00232 | 26 |
| AX-158091550 | 10 | 25.177 | KV453290.1  | 640442 | 26-scf00232 | 26 |
| AX-157749215 | 10 | 25.177 | KV453290.1  | 640889 | 26-scf00232 | 26 |
| AX-157747003 | 10 | 25.177 | KV453290.1  | 643651 | 26-scf00232 | 26 |
| AX-157825649 | 10 | 25.177 | KV453290.1  | 644026 | 26-scf00232 | 26 |
| AX-158091554 | 10 | 25.177 | KV453290.1  | 649373 | 26-scf00232 | 26 |
| AX-157825652 | 10 | 25.177 | KV453290.1  | 649914 | 26-scf00232 | 26 |
| AX-158091555 | 10 | 25.177 | KV453290.1  | 649998 | 26-scf00232 | 26 |
| AX-158091556 | 10 | 25.177 | KV453290.1  | 651411 | 26-scf00232 | 26 |
| AX-158091557 | 10 | 25.177 | KV453290.1  | 652308 | 26-scf00232 | 26 |
| AX-157857269 | 10 | 25.322 | KV453290.1  | 593875 | 26-scf00232 | 26 |
| AX-157693747 | 10 | 25.322 | KV453290.1  | 653103 | 26-scf00232 | 26 |
| AX-158091564 | 10 | 25.623 | KV453290.1  | 664268 | 26-scf00232 | 26 |
| AX-158091567 | 10 | 25.627 | KV453290.1  | 668843 | 26-scf00232 | 26 |
| AX-158091559 | 10 | 25.81  | KV453290.1  | 656353 | 26-scf00232 | 26 |
| AX-158091569 | 10 | 25.81  | KV453290.1  | 672818 | 26-scf00232 | 26 |
| AX-158091570 | 10 | 25.81  | KV453290.1  | 674316 | 26-scf00232 | 26 |
| AX-158091571 | 10 | 25.81  | KV453290.1  | 675136 | 26-scf00232 | 26 |
| AX-158091572 | 10 | 25.81  | KV453290.1  | 679405 | 26-scf00232 | 26 |
| AX-158091573 | 10 | 25.85  | KV453290.1  | 681867 | 26-scf00232 | 26 |
| AX-158091576 | 10 | 25.942 | KV453290.1  | 691387 | 26-scf00232 | 26 |
| AX-158091577 | 10 | 25.942 | KV453290.1  | 692449 | 26-scf00232 | 26 |
| AX-157825656 | 10 | 25.942 | KV453290.1  | 697172 | 26-scf00232 | 26 |
| AX-158091613 | 10 | 25.942 | KV453290.1  | 747127 | 26-scf00232 | 26 |
| AX-157705950 | 10 | 25.942 | 3ML01031297 | 471    | scf06905_1  | UN |
| AX-157713995 | 10 | 25.958 | KV453290.1  | 702161 | 26-scf00232 | 26 |
| AX-158091591 | 10 | 25.958 | KV453290.1  | 717308 | 26-scf00232 | 26 |
| AX-158091610 | 10 | 25.958 | KV453290.1  | 743968 | 26-scf00232 | 26 |
| AX-158091580 | 10 | 25.962 | KV453290.1  | 700001 | 26-scf00232 | 26 |
| AX-158091582 | 10 | 25.962 | KV453290.1  | 705578 | 26-scf00232 | 26 |
| AX-158091626 | 10 | 25.962 | KV453290.1  | 763781 | 26-scf00232 | 26 |
| AX-158091628 | 10 | 25.962 | KV453290.1  | 767029 | 26-scf00232 | 26 |
| AX-158091583 | 10 | 25.976 | KV453290.1  | 708063 | 26-scf00232 | 26 |
| AX-157755029 | 10 | 25.976 | KV453290.1  | 761036 | 26-scf00232 | 26 |
| AX-158091585 | 10 | 25.992 | KV453290.1  | 712288 | 26-scf00232 | 26 |
| AX-158091586 | 10 | 26.01  | KV453290.1  | 712509 | 26-scf00232 | 26 |
| AX-158091588 | 10 | 26.023 | KV453290.1  | 714564 | 26-scf00232 | 26 |
| AX-158091589 | 10 | 26.051 | KV453290.1  | 715529 | 26-scf00232 | 26 |
| AX-157740533 | 10 | 26.051 | KV453290.1  | 715582 | 26-scf00232 | 26 |
| AX-157857270 | 10 | 26.051 | KV453290.1  | 716075 | 26-scf00232 | 26 |
| AX-158091590 | 10 | 26.051 | KV453290.1  | 716998 | 26-scf00232 | 26 |
| AX-158091592 | 10 | 26.051 | KV453290.1  | 717838 | 26-scf00232 | 26 |
| AX-158091593 | 10 | 26.051 | KV453290.1  | 718094 | 26-scf00232 | 26 |
| AX-158091595 | 10 | 26.051 | KV453290.1  | 720943 | 26-scf00232 | 26 |
| AX-157740961 | 10 | 26.051 | KV453290.1  | 722055 | 26-scf00232 | 26 |
| AX-157870891 | 10 | 26.051 | KV453290.1  | 722985 | 26-scf00232 | 26 |
| AX-158091598 | 10 | 26.051 | KV453290.1  | 726298 | 26-scf00232 | 26 |
| AX-158091600 | 10 | 26.051 | KV453290.1  | 729034 | 26-scf00232 | 26 |

|              |    |        |             |         |             |    |
|--------------|----|--------|-------------|---------|-------------|----|
| AX-158091603 | 10 | 26.051 | KV453290.1  | 736605  | 26-scf00232 | 26 |
| AX-158091606 | 10 | 26.051 | KV453290.1  | 741721  | 26-scf00232 | 26 |
| AX-158091607 | 10 | 26.051 | KV453290.1  | 742329  | 26-scf00232 | 26 |
| AX-158091611 | 10 | 26.051 | KV453290.1  | 745692  | 26-scf00232 | 26 |
| AX-158091612 | 10 | 26.051 | KV453290.1  | 746126  | 26-scf00232 | 26 |
| AX-158091614 | 10 | 26.051 | KV453290.1  | 748451  | 26-scf00232 | 26 |
| AX-158091619 | 10 | 26.051 | KV453290.1  | 753393  | 26-scf00232 | 26 |
| AX-158091621 | 10 | 26.051 | KV453290.1  | 756310  | 26-scf00232 | 26 |
| AX-158091635 | 10 | 26.051 | KV453290.1  | 779514  | 26-scf00232 | 26 |
| AX-158091890 | 10 | 26.051 | KV453290.1  | 1150236 | 26-scf00232 | 26 |
| AX-158091615 | 10 | 26.052 | KV453290.1  | 749777  | 26-scf00232 | 26 |
| AX-158091617 | 10 | 26.052 | KV453290.1  | 751556  | 26-scf00232 | 26 |
| AX-158091629 | 10 | 26.157 | KV453290.1  | 768407  | 26-scf00232 | 26 |
| AX-158091599 | 10 | 26.27  | KV453290.1  | 727937  | 26-scf00232 | 26 |
| AX-158091625 | 10 | 26.27  | KV453290.1  | 763383  | 26-scf00232 | 26 |
| AX-158091630 | 10 | 26.27  | KV453290.1  | 769044  | 26-scf00232 | 26 |
| AX-158091633 | 10 | 26.27  | KV453290.1  | 774341  | 26-scf00232 | 26 |
| AX-158091634 | 10 | 26.27  | KV453290.1  | 776251  | 26-scf00232 | 26 |
| AX-157825657 | 10 | 26.27  | KV453290.1  | 786205  | 26-scf00232 | 26 |
| AX-158091643 | 10 | 26.27  | KV453290.1  | 791673  | 26-scf00232 | 26 |
| AX-158091644 | 10 | 26.27  | KV453290.1  | 792972  | 26-scf00232 | 26 |
| AX-157825658 | 10 | 26.27  | KV453290.1  | 793734  | 26-scf00232 | 26 |
| AX-157825660 | 10 | 26.27  | KV453290.1  | 837273  | 26-scf00232 | 26 |
| AX-158092464 | 10 | 26.27  | KV453290.1  | 2030938 | 26-scf00232 | 26 |
| AX-157740335 | 10 | 26.489 | KV453290.1  | 797763  | 26-scf00232 | 26 |
| AX-158091651 | 10 | 26.489 | KV453290.1  | 798542  | 26-scf00232 | 26 |
| AX-157825659 | 10 | 26.489 | KV453290.1  | 799079  | 26-scf00232 | 26 |
| AX-158091654 | 10 | 26.489 | KV453290.1  | 801595  | 26-scf00232 | 26 |
| AX-157750519 | 10 | 26.489 | KV453290.1  | 803752  | 26-scf00232 | 26 |
| AX-157724025 | 10 | 26.489 | KV453290.1  | 806303  | 26-scf00232 | 26 |
| AX-158091657 | 10 | 26.489 | KV453290.1  | 807668  | 26-scf00232 | 26 |
| AX-158091659 | 10 | 26.489 | KV453290.1  | 814595  | 26-scf00232 | 26 |
| AX-158091677 | 10 | 26.489 | KV453290.1  | 837037  | 26-scf00232 | 26 |
| AX-158091679 | 10 | 26.489 | KV453290.1  | 838360  | 26-scf00232 | 26 |
| AX-157705949 | 10 | 26.489 | 3ML01031297 | 252     | scf06905_1  | UN |
| AX-158091658 | 10 | 26.532 | KV453290.1  | 809874  | 26-scf00232 | 26 |
| AX-158091660 | 10 | 26.563 | KV453290.1  | 816430  | 26-scf00232 | 26 |
| AX-157877310 | 10 | 26.563 | KV453290.1  | 841530  | 26-scf00232 | 26 |
| AX-158091602 | 10 | 26.598 | KV453290.1  | 735718  | 26-scf00232 | 26 |
| AX-158091638 | 10 | 26.598 | KV453290.1  | 782347  | 26-scf00232 | 26 |
| AX-158091646 | 10 | 26.598 | KV453290.1  | 793456  | 26-scf00232 | 26 |
| AX-158091665 | 10 | 26.598 | KV453290.1  | 821941  | 26-scf00232 | 26 |
| AX-158091667 | 10 | 26.598 | KV453290.1  | 824368  | 26-scf00232 | 26 |
| AX-158091675 | 10 | 26.598 | KV453290.1  | 832594  | 26-scf00232 | 26 |
| AX-158091676 | 10 | 26.598 | KV453290.1  | 833778  | 26-scf00232 | 26 |
| AX-158091678 | 10 | 26.598 | KV453290.1  | 837940  | 26-scf00232 | 26 |
| AX-158091681 | 10 | 26.598 | KV453290.1  | 840409  | 26-scf00232 | 26 |
| AX-158091685 | 10 | 26.598 | KV453290.1  | 844379  | 26-scf00232 | 26 |
| AX-158379967 | 10 | 26.598 | KV453290.1  | 845596  | 26-scf00232 | 26 |
| AX-158091688 | 10 | 26.598 | KV453290.1  | 847284  | 26-scf00232 | 26 |
| AX-158091691 | 10 | 26.598 | KV453290.1  | 849561  | 26-scf00232 | 26 |



|              |    |        |             |         |             |    |
|--------------|----|--------|-------------|---------|-------------|----|
| AX-158091693 | 10 | 26.598 | KV453290.1  | 855288  | 26-scf00232 | 26 |
| AX-158091697 | 10 | 26.598 | KV453290.1  | 858935  | 26-scf00232 | 26 |
| AX-158091698 | 10 | 26.598 | KV453290.1  | 859706  | 26-scf00232 | 26 |
| AX-158416810 | 10 | 26.598 | KV453290.1  | 864836  | 26-scf00232 | 26 |
| AX-158091724 | 10 | 26.598 | KV453290.1  | 901164  | 26-scf00232 | 26 |
| AX-158091793 | 10 | 26.598 | KV453290.1  | 991207  | 26-scf00232 | 26 |
| AX-158091805 | 10 | 26.598 | KV453290.1  | 1007517 | 26-scf00232 | 26 |
| AX-157877315 | 10 | 26.598 | KV453290.1  | 1092959 | 26-scf00232 | 26 |
| AX-158091879 | 10 | 26.598 | KV453290.1  | 1122654 | 26-scf00232 | 26 |
| AX-158091689 | 10 | 26.661 | KV453290.1  | 847750  | 26-scf00232 | 26 |
| AX-158091700 | 10 | 26.661 | KV453290.1  | 862413  | 26-scf00232 | 26 |
| AX-158091710 | 10 | 26.661 | KV453290.1  | 875023  | 26-scf00232 | 26 |
| AX-158091769 | 10 | 26.661 | KV453290.1  | 959940  | 26-scf00232 | 26 |
| AX-158091779 | 10 | 26.661 | KV453290.1  | 974453  | 26-scf00232 | 26 |
| AX-158410054 | 10 | 26.707 | KV453290.1  | 805172  | 26-scf00232 | 26 |
| AX-158091666 | 10 | 26.707 | KV453290.1  | 823352  | 26-scf00232 | 26 |
| AX-158091695 | 10 | 26.707 | KV453290.1  | 857199  | 26-scf00232 | 26 |
| AX-158091702 | 10 | 26.707 | KV453290.1  | 865734  | 26-scf00232 | 26 |
| AX-158091703 | 10 | 26.707 | KV453290.1  | 866408  | 26-scf00232 | 26 |
| AX-158091706 | 10 | 26.707 | KV453290.1  | 869721  | 26-scf00232 | 26 |
| AX-158091707 | 10 | 26.707 | KV453290.1  | 871147  | 26-scf00232 | 26 |
| AX-157773115 | 10 | 26.707 | KV453290.1  | 875319  | 26-scf00232 | 26 |
| AX-158091717 | 10 | 26.707 | KV453290.1  | 891486  | 26-scf00232 | 26 |
| AX-158379968 | 10 | 26.707 | KV453290.1  | 910512  | 26-scf00232 | 26 |
| AX-157705948 | 10 | 26.707 | 3ML01031297 | 215     | scf06905_1  | UN |
| AX-158091714 | 10 | 26.766 | KV453290.1  | 881186  | 26-scf00232 | 26 |
| AX-157749251 | 10 | 26.816 | KV453290.1  | 890748  | 26-scf00232 | 26 |
| AX-158091721 | 10 | 26.816 | KV453290.1  | 896294  | 26-scf00232 | 26 |
| AX-158091722 | 10 | 26.816 | KV453290.1  | 898342  | 26-scf00232 | 26 |
| AX-158091723 | 10 | 26.816 | KV453290.1  | 899678  | 26-scf00232 | 26 |
| AX-158091726 | 10 | 26.816 | KV453290.1  | 902817  | 26-scf00232 | 26 |
| AX-157745384 | 10 | 26.816 | KV453290.1  | 903746  | 26-scf00232 | 26 |
| AX-157825664 | 10 | 26.817 | KV453290.1  | 905287  | 26-scf00232 | 26 |
| AX-158091727 | 10 | 26.817 | KV453290.1  | 905567  | 26-scf00232 | 26 |
| AX-158091729 | 10 | 26.817 | KV453290.1  | 906602  | 26-scf00232 | 26 |
| AX-157714647 | 10 | 26.817 | KV453290.1  | 922445  | 26-scf00232 | 26 |
| AX-158091785 | 10 | 26.817 | KV453290.1  | 980578  | 26-scf00232 | 26 |
| AX-158091741 | 10 | 26.889 | KV453290.1  | 923950  | 26-scf00232 | 26 |
| AX-158091742 | 10 | 26.956 | KV453290.1  | 924711  | 26-scf00232 | 26 |
| AX-158091747 | 10 | 26.956 | KV453290.1  | 930154  | 26-scf00232 | 26 |
| AX-158091751 | 10 | 26.956 | KV453290.1  | 935153  | 26-scf00232 | 26 |
| AX-157825668 | 10 | 26.956 | KV453290.1  | 935812  | 26-scf00232 | 26 |
| AX-157746183 | 10 | 26.956 | KV453290.1  | 936408  | 26-scf00232 | 26 |
| AX-157713259 | 10 | 26.956 | KV453290.1  | 940330  | 26-scf00232 | 26 |
| AX-158091755 | 10 | 26.956 | KV453290.1  | 941466  | 26-scf00232 | 26 |
| AX-158091756 | 10 | 26.956 | KV453290.1  | 943562  | 26-scf00232 | 26 |
| AX-157745998 | 10 | 26.956 | KV453290.1  | 944089  | 26-scf00232 | 26 |
| AX-158091759 | 10 | 26.956 | KV453290.1  | 947358  | 26-scf00232 | 26 |
| AX-158410058 | 10 | 26.956 | KV453290.1  | 950185  | 26-scf00232 | 26 |
| AX-158091761 | 10 | 26.956 | KV453290.1  | 951758  | 26-scf00232 | 26 |
| AX-157825673 | 10 | 26.956 | KV453290.1  | 966725  | 26-scf00232 | 26 |

|              |    |        |             |         |             |    |
|--------------|----|--------|-------------|---------|-------------|----|
| AX-158091776 | 10 | 26.956 | KV453290.1  | 972702  | 26-scf00232 | 26 |
| AX-158092110 | 10 | 26.956 | KV453290.1  | 1460703 | 26-scf00232 | 26 |
| AX-158091770 | 10 | 27.005 | KV453290.1  | 960410  | 26-scf00232 | 26 |
| AX-158091737 | 10 | 27.049 | KV453290.1  | 916556  | 26-scf00232 | 26 |
| AX-158091772 | 10 | 27.049 | KV453290.1  | 961391  | 26-scf00232 | 26 |
| AX-158410059 | 10 | 27.097 | KV453290.1  | 965691  | 26-scf00232 | 26 |
| AX-158091777 | 10 | 27.097 | KV453290.1  | 973329  | 26-scf00232 | 26 |
| AX-158091778 | 10 | 27.097 | KV453290.1  | 974004  | 26-scf00232 | 26 |
| AX-158091787 | 10 | 27.238 | KV453290.1  | 982979  | 26-scf00232 | 26 |
| AX-158091788 | 10 | 27.238 | KV453290.1  | 983102  | 26-scf00232 | 26 |
| AX-158091789 | 10 | 27.238 | KV453290.1  | 984261  | 26-scf00232 | 26 |
| AX-158091826 | 10 | 27.238 | KV453290.1  | 1033138 | 26-scf00232 | 26 |
| AX-157825690 | 10 | 27.238 | KV453290.1  | 1177514 | 26-scf00232 | 26 |
| AX-158091791 | 10 | 27.323 | KV453290.1  | 985047  | 26-scf00232 | 26 |
| AX-157770932 | 10 | 27.323 | KV453290.1  | 1160353 | 26-scf00232 | 26 |
| AX-158091905 | 10 | 27.323 | KV453290.1  | 1178465 | 26-scf00232 | 26 |
| AX-158091945 | 10 | 27.323 | KV453290.1  | 1225152 | 26-scf00232 | 26 |
| AX-158091963 | 10 | 27.323 | KV453290.1  | 1244213 | 26-scf00232 | 26 |
| AX-157720110 | 10 | 27.323 | KV453290.1  | 1970551 | 26-scf00232 | 26 |
| AX-157756398 | 10 | 27.378 | KV453290.1  | 988543  | 26-scf00232 | 26 |
| AX-158091794 | 10 | 27.378 | KV453290.1  | 992932  | 26-scf00232 | 26 |
| AX-158091796 | 10 | 27.378 | KV453290.1  | 995356  | 26-scf00232 | 26 |
| AX-158392146 | 10 | 27.378 | KV453290.1  | 999004  | 26-scf00232 | 26 |
| AX-158091799 | 10 | 27.378 | KV453290.1  | 999843  | 26-scf00232 | 26 |
| AX-157752466 | 10 | 27.378 | KV453290.1  | 1001006 | 26-scf00232 | 26 |
| AX-158091800 | 10 | 27.378 | KV453290.1  | 1001378 | 26-scf00232 | 26 |
| AX-158091803 | 10 | 27.378 | KV453290.1  | 1004086 | 26-scf00232 | 26 |
| AX-158091804 | 10 | 27.378 | KV453290.1  | 1004769 | 26-scf00232 | 26 |
| AX-158091806 | 10 | 27.378 | KV453290.1  | 1008384 | 26-scf00232 | 26 |
| AX-158091809 | 10 | 27.378 | KV453290.1  | 1010187 | 26-scf00232 | 26 |
| AX-158091815 | 10 | 27.378 | KV453290.1  | 1016564 | 26-scf00232 | 26 |
| AX-158091816 | 10 | 27.378 | KV453290.1  | 1017782 | 26-scf00232 | 26 |
| AX-158091817 | 10 | 27.378 | KV453290.1  | 1021286 | 26-scf00232 | 26 |
| AX-158091818 | 10 | 27.378 | KV453290.1  | 1023408 | 26-scf00232 | 26 |
| AX-158091819 | 10 | 27.378 | KV453290.1  | 1024061 | 26-scf00232 | 26 |
| AX-158091820 | 10 | 27.378 | KV453290.1  | 1025103 | 26-scf00232 | 26 |
| AX-157723407 | 10 | 27.378 | KV453290.1  | 1025638 | 26-scf00232 | 26 |
| AX-158091823 | 10 | 27.378 | KV453290.1  | 1030750 | 26-scf00232 | 26 |
| AX-158091831 | 10 | 27.378 | KV453290.1  | 1038846 | 26-scf00232 | 26 |
| AX-158091912 | 10 | 27.378 | KV453290.1  | 1188444 | 26-scf00232 | 26 |
| AX-157705601 | 10 | 27.378 | 3ML01030364 | 893     | scf05960_1  | UN |
| AX-158091824 | 10 | 27.519 | KV453290.1  | 1031404 | 26-scf00232 | 26 |
| AX-158091825 | 10 | 27.519 | KV453290.1  | 1032191 | 26-scf00232 | 26 |
| AX-158091827 | 10 | 27.519 | KV453290.1  | 1033455 | 26-scf00232 | 26 |
| AX-158091829 | 10 | 27.519 | KV453290.1  | 1035699 | 26-scf00232 | 26 |
| AX-158091423 | 10 | 27.66  | KV453290.1  | 483903  | 26-scf00232 | 26 |
| AX-158091752 | 10 | 27.66  | KV453290.1  | 936996  | 26-scf00232 | 26 |
| AX-158091828 | 10 | 27.66  | KV453290.1  | 1034478 | 26-scf00232 | 26 |
| AX-158091832 | 10 | 27.66  | KV453290.1  | 1041355 | 26-scf00232 | 26 |
| AX-158091835 | 10 | 27.66  | KV453290.1  | 1049120 | 26-scf00232 | 26 |
| AX-157877314 | 10 | 27.66  | KV453290.1  | 1050345 | 26-scf00232 | 26 |

|              |    |        |            |         |             |    |
|--------------|----|--------|------------|---------|-------------|----|
| AX-158091837 | 10 | 27.66  | KV453290.1 | 1050475 | 26-scf00232 | 26 |
| AX-158091842 | 10 | 27.66  | KV453290.1 | 1059400 | 26-scf00232 | 26 |
| AX-158091844 | 10 | 27.66  | KV453290.1 | 1060689 | 26-scf00232 | 26 |
| AX-158091846 | 10 | 27.66  | KV453290.1 | 1062190 | 26-scf00232 | 26 |
| AX-157825677 | 10 | 27.66  | KV453290.1 | 1064386 | 26-scf00232 | 26 |
| AX-157741109 | 10 | 27.66  | KV453290.1 | 1065853 | 26-scf00232 | 26 |
| AX-158091850 | 10 | 27.66  | KV453290.1 | 1069784 | 26-scf00232 | 26 |
| AX-157825679 | 10 | 27.66  | KV453290.1 | 1072963 | 26-scf00232 | 26 |
| AX-158091859 | 10 | 27.66  | KV453290.1 | 1093773 | 26-scf00232 | 26 |
| AX-158091869 | 10 | 27.66  | KV453290.1 | 1109021 | 26-scf00232 | 26 |
| AX-158091915 | 10 | 27.66  | KV453290.1 | 1190654 | 26-scf00232 | 26 |
| AX-158091959 | 10 | 27.66  | KV453290.1 | 1241327 | 26-scf00232 | 26 |
| AX-158092305 | 10 | 27.66  | KV453290.1 | 1825914 | 26-scf00232 | 26 |
| AX-158092496 | 10 | 27.66  | KV453290.1 | 2081527 | 26-scf00232 | 26 |
| AX-157745833 | 10 | 27.719 | KV453290.1 | 1074034 | 26-scf00232 | 26 |
| AX-158091856 | 10 | 27.746 | KV453290.1 | 1082883 | 26-scf00232 | 26 |
| AX-158091753 | 10 | 27.801 | KV453290.1 | 939410  | 26-scf00232 | 26 |
| AX-157825671 | 10 | 27.801 | KV453290.1 | 963873  | 26-scf00232 | 26 |
| AX-158091797 | 10 | 27.801 | KV453290.1 | 998403  | 26-scf00232 | 26 |
| AX-158091864 | 10 | 27.801 | KV453290.1 | 1101219 | 26-scf00232 | 26 |
| AX-158091865 | 10 | 27.801 | KV453290.1 | 1102545 | 26-scf00232 | 26 |
| AX-158091866 | 10 | 27.801 | KV453290.1 | 1103708 | 26-scf00232 | 26 |
| AX-158091868 | 10 | 27.801 | KV453290.1 | 1105744 | 26-scf00232 | 26 |
| AX-158091870 | 10 | 27.801 | KV453290.1 | 1111196 | 26-scf00232 | 26 |
| AX-158091872 | 10 | 27.801 | KV453290.1 | 1112210 | 26-scf00232 | 26 |
| AX-158091874 | 10 | 27.801 | KV453290.1 | 1115385 | 26-scf00232 | 26 |
| AX-158403848 | 10 | 27.801 | KV453290.1 | 1118332 | 26-scf00232 | 26 |
| AX-158091875 | 10 | 27.801 | KV453290.1 | 1118995 | 26-scf00232 | 26 |
| AX-158091876 | 10 | 27.801 | KV453290.1 | 1119184 | 26-scf00232 | 26 |
| AX-158091878 | 10 | 27.801 | KV453290.1 | 1122028 | 26-scf00232 | 26 |
| AX-158091880 | 10 | 27.801 | KV453290.1 | 1123946 | 26-scf00232 | 26 |
| AX-158091882 | 10 | 27.801 | KV453290.1 | 1125334 | 26-scf00232 | 26 |
| AX-158091888 | 10 | 27.801 | KV453290.1 | 1138692 | 26-scf00232 | 26 |
| AX-157825684 | 10 | 27.801 | KV453290.1 | 1139364 | 26-scf00232 | 26 |
| AX-158091889 | 10 | 27.801 | KV453290.1 | 1141707 | 26-scf00232 | 26 |
| AX-157713006 | 10 | 27.801 | KV453290.1 | 1152683 | 26-scf00232 | 26 |
| AX-158091892 | 10 | 27.801 | KV453290.1 | 1153501 | 26-scf00232 | 26 |
| AX-158091893 | 10 | 27.801 | KV453290.1 | 1154705 | 26-scf00232 | 26 |
| AX-158091895 | 10 | 27.801 | KV453290.1 | 1155358 | 26-scf00232 | 26 |
| AX-157825687 | 10 | 27.801 | KV453290.1 | 1160976 | 26-scf00232 | 26 |
| AX-158091897 | 10 | 27.801 | KV453290.1 | 1162254 | 26-scf00232 | 26 |
| AX-158091899 | 10 | 27.801 | KV453290.1 | 1166848 | 26-scf00232 | 26 |
| AX-158091900 | 10 | 27.801 | KV453290.1 | 1169359 | 26-scf00232 | 26 |
| AX-158091902 | 10 | 27.801 | KV453290.1 | 1172592 | 26-scf00232 | 26 |
| AX-158091903 | 10 | 27.801 | KV453290.1 | 1173638 | 26-scf00232 | 26 |
| AX-158091904 | 10 | 27.801 | KV453290.1 | 1177789 | 26-scf00232 | 26 |
| AX-157825691 | 10 | 27.801 | KV453290.1 | 1178751 | 26-scf00232 | 26 |
| AX-157746450 | 10 | 27.801 | KV453290.1 | 1178839 | 26-scf00232 | 26 |
| AX-157825692 | 10 | 27.801 | KV453290.1 | 1179478 | 26-scf00232 | 26 |
| AX-158091908 | 10 | 27.801 | KV453290.1 | 1181300 | 26-scf00232 | 26 |
| AX-158091910 | 10 | 27.801 | KV453290.1 | 1187002 | 26-scf00232 | 26 |

|              |    |        |            |         |             |    |
|--------------|----|--------|------------|---------|-------------|----|
| AX-158091914 | 10 | 27.801 | KV453290.1 | 1189260 | 26-scf00232 | 26 |
| AX-158091916 | 10 | 27.801 | KV453290.1 | 1190969 | 26-scf00232 | 26 |
| AX-157857273 | 10 | 27.801 | KV453290.1 | 1191396 | 26-scf00232 | 26 |
| AX-158091918 | 10 | 27.801 | KV453290.1 | 1192923 | 26-scf00232 | 26 |
| AX-158091925 | 10 | 27.801 | KV453290.1 | 1201928 | 26-scf00232 | 26 |
| AX-158091927 | 10 | 27.801 | KV453290.1 | 1203067 | 26-scf00232 | 26 |
| AX-157753294 | 10 | 27.801 | KV453290.1 | 1226414 | 26-scf00232 | 26 |
| AX-158091949 | 10 | 27.801 | KV453290.1 | 1229136 | 26-scf00232 | 26 |
| AX-158091958 | 10 | 27.801 | KV453290.1 | 1240588 | 26-scf00232 | 26 |
| AX-157825742 | 10 | 27.801 | KV453290.1 | 1923993 | 26-scf00232 | 26 |
| AX-158092579 | 10 | 27.801 | KV453290.1 | 2203666 | 26-scf00232 | 26 |
| AX-158091873 | 10 | 27.835 | KV453290.1 | 1114982 | 26-scf00232 | 26 |
| AX-158091929 | 10 | 27.835 | KV453290.1 | 1204322 | 26-scf00232 | 26 |
| AX-158091923 | 10 | 27.91  | KV453290.1 | 1200183 | 26-scf00232 | 26 |
| AX-158091930 | 10 | 27.91  | KV453290.1 | 1204820 | 26-scf00232 | 26 |
| AX-158384572 | 10 | 27.91  | KV453290.1 | 1207167 | 26-scf00232 | 26 |
| AX-158091932 | 10 | 27.91  | KV453290.1 | 1209665 | 26-scf00232 | 26 |
| AX-158091934 | 10 | 27.91  | KV453290.1 | 1212235 | 26-scf00232 | 26 |
| AX-158091937 | 10 | 27.91  | KV453290.1 | 1216712 | 26-scf00232 | 26 |
| AX-158091938 | 10 | 27.91  | KV453290.1 | 1217081 | 26-scf00232 | 26 |
| AX-158091943 | 10 | 27.91  | KV453290.1 | 1222374 | 26-scf00232 | 26 |
| AX-158091946 | 10 | 27.91  | KV453290.1 | 1225975 | 26-scf00232 | 26 |
| AX-158091954 | 10 | 27.939 | KV453290.1 | 1235451 | 26-scf00232 | 26 |
| AX-158091961 | 10 | 27.939 | KV453290.1 | 1243084 | 26-scf00232 | 26 |
| AX-158092141 | 10 | 27.939 | KV453290.1 | 1512534 | 26-scf00232 | 26 |
| AX-158092162 | 10 | 27.939 | KV453290.1 | 1548371 | 26-scf00232 | 26 |
| AX-158092181 | 10 | 27.939 | KV453290.1 | 1624846 | 26-scf00232 | 26 |
| AX-158410070 | 10 | 27.939 | KV453290.1 | 1636291 | 26-scf00232 | 26 |
| AX-158092232 | 10 | 27.939 | KV453290.1 | 1717499 | 26-scf00232 | 26 |
| AX-157825736 | 10 | 27.939 | KV453290.1 | 1787512 | 26-scf00232 | 26 |
| AX-158091955 | 10 | 27.998 | KV453290.1 | 1237391 | 26-scf00232 | 26 |
| AX-158091957 | 10 | 28.057 | KV453290.1 | 1239953 | 26-scf00232 | 26 |
| AX-158091670 | 10 | 28.129 | KV453290.1 | 826965  | 26-scf00232 | 26 |
| AX-158091783 | 10 | 28.129 | KV453290.1 | 978942  | 26-scf00232 | 26 |
| AX-158091801 | 10 | 28.129 | KV453290.1 | 1002599 | 26-scf00232 | 26 |
| AX-157825675 | 10 | 28.129 | KV453290.1 | 1040859 | 26-scf00232 | 26 |
| AX-158091924 | 10 | 28.129 | KV453290.1 | 1201185 | 26-scf00232 | 26 |
| AX-158091933 | 10 | 28.129 | KV453290.1 | 1210933 | 26-scf00232 | 26 |
| AX-158091944 | 10 | 28.129 | KV453290.1 | 1224567 | 26-scf00232 | 26 |
| AX-158091947 | 10 | 28.129 | KV453290.1 | 1227453 | 26-scf00232 | 26 |
| AX-158091948 | 10 | 28.129 | KV453290.1 | 1228431 | 26-scf00232 | 26 |
| AX-158091950 | 10 | 28.129 | KV453290.1 | 1230481 | 26-scf00232 | 26 |
| AX-158091951 | 10 | 28.129 | KV453290.1 | 1231659 | 26-scf00232 | 26 |
| AX-158091952 | 10 | 28.129 | KV453290.1 | 1232156 | 26-scf00232 | 26 |
| AX-158091953 | 10 | 28.129 | KV453290.1 | 1232876 | 26-scf00232 | 26 |
| AX-157752102 | 10 | 28.129 | KV453290.1 | 1242282 | 26-scf00232 | 26 |
| AX-158091960 | 10 | 28.129 | KV453290.1 | 1242819 | 26-scf00232 | 26 |
| AX-158091962 | 10 | 28.129 | KV453290.1 | 1243753 | 26-scf00232 | 26 |
| AX-158091965 | 10 | 28.129 | KV453290.1 | 1245142 | 26-scf00232 | 26 |
| AX-157723238 | 10 | 28.129 | KV453290.1 | 1245191 | 26-scf00232 | 26 |
| AX-158091966 | 10 | 28.129 | KV453290.1 | 1246728 | 26-scf00232 | 26 |

|              |    |        |            |         |             |    |
|--------------|----|--------|------------|---------|-------------|----|
| AX-157825693 | 10 | 28.129 | KV453290.1 | 1251493 | 26-scf00232 | 26 |
| AX-158091967 | 10 | 28.129 | KV453290.1 | 1251745 | 26-scf00232 | 26 |
| AX-158091968 | 10 | 28.129 | KV453290.1 | 1252244 | 26-scf00232 | 26 |
| AX-158091969 | 10 | 28.129 | KV453290.1 | 1258038 | 26-scf00232 | 26 |
| AX-158091970 | 10 | 28.129 | KV453290.1 | 1258818 | 26-scf00232 | 26 |
| AX-158091974 | 10 | 28.129 | KV453290.1 | 1265740 | 26-scf00232 | 26 |
| AX-157753932 | 10 | 28.129 | KV453290.1 | 1265924 | 26-scf00232 | 26 |
| AX-158091975 | 10 | 28.129 | KV453290.1 | 1265981 | 26-scf00232 | 26 |
| AX-158091976 | 10 | 28.129 | KV453290.1 | 1266453 | 26-scf00232 | 26 |
| AX-158091977 | 10 | 28.129 | KV453290.1 | 1266956 | 26-scf00232 | 26 |
| AX-157825694 | 10 | 28.129 | KV453290.1 | 1267588 | 26-scf00232 | 26 |
| AX-157825695 | 10 | 28.129 | KV453290.1 | 1267793 | 26-scf00232 | 26 |
| AX-158091978 | 10 | 28.129 | KV453290.1 | 1268617 | 26-scf00232 | 26 |
| AX-157744738 | 10 | 28.129 | KV453290.1 | 1268906 | 26-scf00232 | 26 |
| AX-158091981 | 10 | 28.129 | KV453290.1 | 1271351 | 26-scf00232 | 26 |
| AX-158091983 | 10 | 28.129 | KV453290.1 | 1272868 | 26-scf00232 | 26 |
| AX-157825696 | 10 | 28.129 | KV453290.1 | 1279103 | 26-scf00232 | 26 |
| AX-157748116 | 10 | 28.129 | KV453290.1 | 1280828 | 26-scf00232 | 26 |
| AX-158091986 | 10 | 28.129 | KV453290.1 | 1280989 | 26-scf00232 | 26 |
| AX-158091987 | 10 | 28.129 | KV453290.1 | 1281262 | 26-scf00232 | 26 |
| AX-158091988 | 10 | 28.129 | KV453290.1 | 1281703 | 26-scf00232 | 26 |
| AX-157825697 | 10 | 28.129 | KV453290.1 | 1282061 | 26-scf00232 | 26 |
| AX-158091989 | 10 | 28.129 | KV453290.1 | 1283803 | 26-scf00232 | 26 |
| AX-157825698 | 10 | 28.129 | KV453290.1 | 1287044 | 26-scf00232 | 26 |
| AX-157825699 | 10 | 28.129 | KV453290.1 | 1287350 | 26-scf00232 | 26 |
| AX-158091992 | 10 | 28.129 | KV453290.1 | 1298491 | 26-scf00232 | 26 |
| AX-158091994 | 10 | 28.129 | KV453290.1 | 1300245 | 26-scf00232 | 26 |
| AX-158091996 | 10 | 28.129 | KV453290.1 | 1302929 | 26-scf00232 | 26 |
| AX-157825700 | 10 | 28.129 | KV453290.1 | 1304299 | 26-scf00232 | 26 |
| AX-158091999 | 10 | 28.129 | KV453290.1 | 1305674 | 26-scf00232 | 26 |
| AX-158092000 | 10 | 28.129 | KV453290.1 | 1308452 | 26-scf00232 | 26 |
| AX-157750276 | 10 | 28.129 | KV453290.1 | 1311004 | 26-scf00232 | 26 |
| AX-158092003 | 10 | 28.129 | KV453290.1 | 1313534 | 26-scf00232 | 26 |
| AX-158092005 | 10 | 28.129 | KV453290.1 | 1314718 | 26-scf00232 | 26 |
| AX-158092006 | 10 | 28.129 | KV453290.1 | 1316894 | 26-scf00232 | 26 |
| AX-158379970 | 10 | 28.129 | KV453290.1 | 1317701 | 26-scf00232 | 26 |
| AX-158092009 | 10 | 28.129 | KV453290.1 | 1321212 | 26-scf00232 | 26 |
| AX-158092010 | 10 | 28.129 | KV453290.1 | 1322029 | 26-scf00232 | 26 |
| AX-158092012 | 10 | 28.129 | KV453290.1 | 1322838 | 26-scf00232 | 26 |
| AX-158092014 | 10 | 28.129 | KV453290.1 | 1327512 | 26-scf00232 | 26 |
| AX-158092015 | 10 | 28.129 | KV453290.1 | 1327915 | 26-scf00232 | 26 |
| AX-158092016 | 10 | 28.129 | KV453290.1 | 1328876 | 26-scf00232 | 26 |
| AX-158092019 | 10 | 28.129 | KV453290.1 | 1332078 | 26-scf00232 | 26 |
| AX-158092020 | 10 | 28.129 | KV453290.1 | 1332977 | 26-scf00232 | 26 |
| AX-158092021 | 10 | 28.129 | KV453290.1 | 1333226 | 26-scf00232 | 26 |
| AX-158092022 | 10 | 28.129 | KV453290.1 | 1334378 | 26-scf00232 | 26 |
| AX-158092024 | 10 | 28.129 | KV453290.1 | 1336083 | 26-scf00232 | 26 |
| AX-158092025 | 10 | 28.129 | KV453290.1 | 1336520 | 26-scf00232 | 26 |
| AX-158092026 | 10 | 28.129 | KV453290.1 | 1342207 | 26-scf00232 | 26 |
| AX-158092027 | 10 | 28.129 | KV453290.1 | 1342744 | 26-scf00232 | 26 |
| AX-158092028 | 10 | 28.129 | KV453290.1 | 1344160 | 26-scf00232 | 26 |

|              |    |        |            |         |             |    |
|--------------|----|--------|------------|---------|-------------|----|
| AX-157885699 | 10 | 28.129 | KV453290.1 | 1345564 | 26-scf00232 | 26 |
| AX-158092031 | 10 | 28.129 | KV453290.1 | 1348159 | 26-scf00232 | 26 |
| AX-158092032 | 10 | 28.129 | KV453290.1 | 1348681 | 26-scf00232 | 26 |
| AX-158092033 | 10 | 28.129 | KV453290.1 | 1349207 | 26-scf00232 | 26 |
| AX-158092035 | 10 | 28.129 | KV453290.1 | 1349935 | 26-scf00232 | 26 |
| AX-158092038 | 10 | 28.129 | KV453290.1 | 1352006 | 26-scf00232 | 26 |
| AX-158092039 | 10 | 28.129 | KV453290.1 | 1352450 | 26-scf00232 | 26 |
| AX-158092040 | 10 | 28.129 | KV453290.1 | 1353005 | 26-scf00232 | 26 |
| AX-158092041 | 10 | 28.129 | KV453290.1 | 1354164 | 26-scf00232 | 26 |
| AX-158092042 | 10 | 28.129 | KV453290.1 | 1355007 | 26-scf00232 | 26 |
| AX-158092045 | 10 | 28.129 | KV453290.1 | 1357211 | 26-scf00232 | 26 |
| AX-158092046 | 10 | 28.129 | KV453290.1 | 1358074 | 26-scf00232 | 26 |
| AX-158092051 | 10 | 28.129 | KV453290.1 | 1364705 | 26-scf00232 | 26 |
| AX-158092052 | 10 | 28.129 | KV453290.1 | 1365773 | 26-scf00232 | 26 |
| AX-158092054 | 10 | 28.129 | KV453290.1 | 1368856 | 26-scf00232 | 26 |
| AX-158092055 | 10 | 28.129 | KV453290.1 | 1370482 | 26-scf00232 | 26 |
| AX-157726572 | 10 | 28.129 | KV453290.1 | 1372094 | 26-scf00232 | 26 |
| AX-158092057 | 10 | 28.129 | KV453290.1 | 1377633 | 26-scf00232 | 26 |
| AX-158092060 | 10 | 28.129 | KV453290.1 | 1383819 | 26-scf00232 | 26 |
| AX-158092061 | 10 | 28.129 | KV453290.1 | 1384521 | 26-scf00232 | 26 |
| AX-158092062 | 10 | 28.129 | KV453290.1 | 1385640 | 26-scf00232 | 26 |
| AX-158092066 | 10 | 28.129 | KV453290.1 | 1389507 | 26-scf00232 | 26 |
| AX-158092067 | 10 | 28.129 | KV453290.1 | 1390686 | 26-scf00232 | 26 |
| AX-158092069 | 10 | 28.129 | KV453290.1 | 1392556 | 26-scf00232 | 26 |
| AX-158092071 | 10 | 28.129 | KV453290.1 | 1398652 | 26-scf00232 | 26 |
| AX-158092072 | 10 | 28.129 | KV453290.1 | 1400010 | 26-scf00232 | 26 |
| AX-158092075 | 10 | 28.129 | KV453290.1 | 1402082 | 26-scf00232 | 26 |
| AX-158092076 | 10 | 28.129 | KV453290.1 | 1402497 | 26-scf00232 | 26 |
| AX-158410067 | 10 | 28.129 | KV453290.1 | 1403585 | 26-scf00232 | 26 |
| AX-158092079 | 10 | 28.129 | KV453290.1 | 1405372 | 26-scf00232 | 26 |
| AX-158092081 | 10 | 28.129 | KV453290.1 | 1408061 | 26-scf00232 | 26 |
| AX-158092084 | 10 | 28.129 | KV453290.1 | 1419702 | 26-scf00232 | 26 |
| AX-158092087 | 10 | 28.129 | KV453290.1 | 1426397 | 26-scf00232 | 26 |
| AX-158092090 | 10 | 28.129 | KV453290.1 | 1428208 | 26-scf00232 | 26 |
| AX-158092091 | 10 | 28.129 | KV453290.1 | 1428858 | 26-scf00232 | 26 |
| AX-157752156 | 10 | 28.129 | KV453290.1 | 1429967 | 26-scf00232 | 26 |
| AX-157771886 | 10 | 28.129 | KV453290.1 | 1434549 | 26-scf00232 | 26 |
| AX-158092095 | 10 | 28.129 | KV453290.1 | 1437290 | 26-scf00232 | 26 |
| AX-158092100 | 10 | 28.129 | KV453290.1 | 1444489 | 26-scf00232 | 26 |
| AX-158092102 | 10 | 28.129 | KV453290.1 | 1445403 | 26-scf00232 | 26 |
| AX-158092108 | 10 | 28.129 | KV453290.1 | 1459007 | 26-scf00232 | 26 |
| AX-158092109 | 10 | 28.129 | KV453290.1 | 1459422 | 26-scf00232 | 26 |
| AX-158092112 | 10 | 28.129 | KV453290.1 | 1463119 | 26-scf00232 | 26 |
| AX-158092114 | 10 | 28.129 | KV453290.1 | 1465452 | 26-scf00232 | 26 |
| AX-158092115 | 10 | 28.129 | KV453290.1 | 1466453 | 26-scf00232 | 26 |
| AX-158092119 | 10 | 28.129 | KV453290.1 | 1468508 | 26-scf00232 | 26 |
| AX-157825706 | 10 | 28.129 | KV453290.1 | 1470229 | 26-scf00232 | 26 |
| AX-158092121 | 10 | 28.129 | KV453290.1 | 1472495 | 26-scf00232 | 26 |
| AX-158092122 | 10 | 28.129 | KV453290.1 | 1473135 | 26-scf00232 | 26 |
| AX-158092124 | 10 | 28.129 | KV453290.1 | 1476288 | 26-scf00232 | 26 |
| AX-157825710 | 10 | 28.129 | KV453290.1 | 1478324 | 26-scf00232 | 26 |

|              |    |        |            |         |             |    |
|--------------|----|--------|------------|---------|-------------|----|
| AX-157825711 | 10 | 28.129 | KV453290.1 | 1481378 | 26-scf00232 | 26 |
| AX-157825714 | 10 | 28.129 | KV453290.1 | 1484189 | 26-scf00232 | 26 |
| AX-157759052 | 10 | 28.129 | KV453290.1 | 1488033 | 26-scf00232 | 26 |
| AX-158092129 | 10 | 28.129 | KV453290.1 | 1490236 | 26-scf00232 | 26 |
| AX-158092130 | 10 | 28.129 | KV453290.1 | 1491507 | 26-scf00232 | 26 |
| AX-158092131 | 10 | 28.129 | KV453290.1 | 1494536 | 26-scf00232 | 26 |
| AX-158092132 | 10 | 28.129 | KV453290.1 | 1495042 | 26-scf00232 | 26 |
| AX-158092133 | 10 | 28.129 | KV453290.1 | 1496774 | 26-scf00232 | 26 |
| AX-158092134 | 10 | 28.129 | KV453290.1 | 1497716 | 26-scf00232 | 26 |
| AX-158092135 | 10 | 28.129 | KV453290.1 | 1498092 | 26-scf00232 | 26 |
| AX-158092137 | 10 | 28.129 | KV453290.1 | 1499002 | 26-scf00232 | 26 |
| AX-157749707 | 10 | 28.129 | KV453290.1 | 1501640 | 26-scf00232 | 26 |
| AX-158092139 | 10 | 28.129 | KV453290.1 | 1508748 | 26-scf00232 | 26 |
| AX-158092143 | 10 | 28.129 | KV453290.1 | 1514366 | 26-scf00232 | 26 |
| AX-158092144 | 10 | 28.129 | KV453290.1 | 1515085 | 26-scf00232 | 26 |
| AX-158092145 | 10 | 28.129 | KV453290.1 | 1515470 | 26-scf00232 | 26 |
| AX-157825716 | 10 | 28.129 | KV453290.1 | 1515960 | 26-scf00232 | 26 |
| AX-157825717 | 10 | 28.129 | KV453290.1 | 1516731 | 26-scf00232 | 26 |
| AX-158092146 | 10 | 28.129 | KV453290.1 | 1516901 | 26-scf00232 | 26 |
| AX-157825718 | 10 | 28.129 | KV453290.1 | 1518706 | 26-scf00232 | 26 |
| AX-158092148 | 10 | 28.129 | KV453290.1 | 1523016 | 26-scf00232 | 26 |
| AX-157825720 | 10 | 28.129 | KV453290.1 | 1523645 | 26-scf00232 | 26 |
| AX-157825721 | 10 | 28.129 | KV453290.1 | 1524034 | 26-scf00232 | 26 |
| AX-157741051 | 10 | 28.129 | KV453290.1 | 1524606 | 26-scf00232 | 26 |
| AX-158092150 | 10 | 28.129 | KV453290.1 | 1527146 | 26-scf00232 | 26 |
| AX-158092151 | 10 | 28.129 | KV453290.1 | 1527396 | 26-scf00232 | 26 |
| AX-157825722 | 10 | 28.129 | KV453290.1 | 1527766 | 26-scf00232 | 26 |
| AX-157751771 | 10 | 28.129 | KV453290.1 | 1531135 | 26-scf00232 | 26 |
| AX-158092155 | 10 | 28.129 | KV453290.1 | 1534566 | 26-scf00232 | 26 |
| AX-158092159 | 10 | 28.129 | KV453290.1 | 1540799 | 26-scf00232 | 26 |
| AX-158092160 | 10 | 28.129 | KV453290.1 | 1541203 | 26-scf00232 | 26 |
| AX-158092161 | 10 | 28.129 | KV453290.1 | 1541467 | 26-scf00232 | 26 |
| AX-157825724 | 10 | 28.129 | KV453290.1 | 1542197 | 26-scf00232 | 26 |
| AX-158092163 | 10 | 28.129 | KV453290.1 | 1549959 | 26-scf00232 | 26 |
| AX-158092164 | 10 | 28.129 | KV453290.1 | 1550627 | 26-scf00232 | 26 |
| AX-157717603 | 10 | 28.129 | KV453290.1 | 1554714 | 26-scf00232 | 26 |
| AX-158092165 | 10 | 28.129 | KV453290.1 | 1557166 | 26-scf00232 | 26 |
| AX-158092167 | 10 | 28.129 | KV453290.1 | 1568349 | 26-scf00232 | 26 |
| AX-158092168 | 10 | 28.129 | KV453290.1 | 1570531 | 26-scf00232 | 26 |
| AX-158092176 | 10 | 28.129 | KV453290.1 | 1593524 | 26-scf00232 | 26 |
| AX-158092177 | 10 | 28.129 | KV453290.1 | 1593830 | 26-scf00232 | 26 |
| AX-158092179 | 10 | 28.129 | KV453290.1 | 1601487 | 26-scf00232 | 26 |
| AX-157704371 | 10 | 28.129 | KV453290.1 | 1618658 | 26-scf00232 | 26 |
| AX-158392151 | 10 | 28.129 | KV453290.1 | 1623776 | 26-scf00232 | 26 |
| AX-158092184 | 10 | 28.129 | KV453290.1 | 1628250 | 26-scf00232 | 26 |
| AX-158092185 | 10 | 28.129 | KV453290.1 | 1629579 | 26-scf00232 | 26 |
| AX-158092187 | 10 | 28.129 | KV453290.1 | 1631410 | 26-scf00232 | 26 |
| AX-158092188 | 10 | 28.129 | KV453290.1 | 1634477 | 26-scf00232 | 26 |
| AX-157825728 | 10 | 28.129 | KV453290.1 | 1635863 | 26-scf00232 | 26 |
| AX-158410072 | 10 | 28.129 | KV453290.1 | 1636747 | 26-scf00232 | 26 |
| AX-158092190 | 10 | 28.129 | KV453290.1 | 1636824 | 26-scf00232 | 26 |

|              |    |        |            |         |             |    |
|--------------|----|--------|------------|---------|-------------|----|
| AX-158092191 | 10 | 28.129 | KV453290.1 | 1637512 | 26-scf00232 | 26 |
| AX-158092194 | 10 | 28.129 | KV453290.1 | 1639328 | 26-scf00232 | 26 |
| AX-158092195 | 10 | 28.129 | KV453290.1 | 1639697 | 26-scf00232 | 26 |
| AX-158092196 | 10 | 28.129 | KV453290.1 | 1642770 | 26-scf00232 | 26 |
| AX-158092197 | 10 | 28.129 | KV453290.1 | 1643460 | 26-scf00232 | 26 |
| AX-157711330 | 10 | 28.129 | KV453290.1 | 1654407 | 26-scf00232 | 26 |
| AX-157825729 | 10 | 28.129 | KV453290.1 | 1658553 | 26-scf00232 | 26 |
| AX-157825730 | 10 | 28.129 | KV453290.1 | 1659578 | 26-scf00232 | 26 |
| AX-158092202 | 10 | 28.129 | KV453290.1 | 1661688 | 26-scf00232 | 26 |
| AX-158092203 | 10 | 28.129 | KV453290.1 | 1663740 | 26-scf00232 | 26 |
| AX-158092204 | 10 | 28.129 | KV453290.1 | 1666139 | 26-scf00232 | 26 |
| AX-158092205 | 10 | 28.129 | KV453290.1 | 1668016 | 26-scf00232 | 26 |
| AX-157745928 | 10 | 28.129 | KV453290.1 | 1672625 | 26-scf00232 | 26 |
| AX-158092210 | 10 | 28.129 | KV453290.1 | 1680248 | 26-scf00232 | 26 |
| AX-158092212 | 10 | 28.129 | KV453290.1 | 1688282 | 26-scf00232 | 26 |
| AX-158092214 | 10 | 28.129 | KV453290.1 | 1691887 | 26-scf00232 | 26 |
| AX-158092216 | 10 | 28.129 | KV453290.1 | 1693469 | 26-scf00232 | 26 |
| AX-158092217 | 10 | 28.129 | KV453290.1 | 1694701 | 26-scf00232 | 26 |
| AX-158092218 | 10 | 28.129 | KV453290.1 | 1696849 | 26-scf00232 | 26 |
| AX-158416814 | 10 | 28.129 | KV453290.1 | 1697013 | 26-scf00232 | 26 |
| AX-158092219 | 10 | 28.129 | KV453290.1 | 1699646 | 26-scf00232 | 26 |
| AX-158410076 | 10 | 28.129 | KV453290.1 | 1700849 | 26-scf00232 | 26 |
| AX-158092221 | 10 | 28.129 | KV453290.1 | 1703163 | 26-scf00232 | 26 |
| AX-158092227 | 10 | 28.129 | KV453290.1 | 1710945 | 26-scf00232 | 26 |
| AX-158092230 | 10 | 28.129 | KV453290.1 | 1715346 | 26-scf00232 | 26 |
| AX-158092231 | 10 | 28.129 | KV453290.1 | 1716552 | 26-scf00232 | 26 |
| AX-158092234 | 10 | 28.129 | KV453290.1 | 1720794 | 26-scf00232 | 26 |
| AX-158092235 | 10 | 28.129 | KV453290.1 | 1723796 | 26-scf00232 | 26 |
| AX-158092236 | 10 | 28.129 | KV453290.1 | 1725673 | 26-scf00232 | 26 |
| AX-158092238 | 10 | 28.129 | KV453290.1 | 1728305 | 26-scf00232 | 26 |
| AX-158092240 | 10 | 28.129 | KV453290.1 | 1729352 | 26-scf00232 | 26 |
| AX-157825732 | 10 | 28.129 | KV453290.1 | 1729439 | 26-scf00232 | 26 |
| AX-158410078 | 10 | 28.129 | KV453290.1 | 1731880 | 26-scf00232 | 26 |
| AX-158092242 | 10 | 28.129 | KV453290.1 | 1733585 | 26-scf00232 | 26 |
| AX-158092244 | 10 | 28.129 | KV453290.1 | 1734843 | 26-scf00232 | 26 |
| AX-158092245 | 10 | 28.129 | KV453290.1 | 1735731 | 26-scf00232 | 26 |
| AX-158092249 | 10 | 28.129 | KV453290.1 | 1749792 | 26-scf00232 | 26 |
| AX-158092250 | 10 | 28.129 | KV453290.1 | 1751447 | 26-scf00232 | 26 |
| AX-158092251 | 10 | 28.129 | KV453290.1 | 1752055 | 26-scf00232 | 26 |
| AX-157720312 | 10 | 28.129 | KV453290.1 | 1753376 | 26-scf00232 | 26 |
| AX-158092252 | 10 | 28.129 | KV453290.1 | 1755024 | 26-scf00232 | 26 |
| AX-158092254 | 10 | 28.129 | KV453290.1 | 1761688 | 26-scf00232 | 26 |
| AX-158092255 | 10 | 28.129 | KV453290.1 | 1767265 | 26-scf00232 | 26 |
| AX-158092259 | 10 | 28.129 | KV453290.1 | 1773559 | 26-scf00232 | 26 |
| AX-158092262 | 10 | 28.129 | KV453290.1 | 1775393 | 26-scf00232 | 26 |
| AX-158092263 | 10 | 28.129 | KV453290.1 | 1780655 | 26-scf00232 | 26 |
| AX-158092264 | 10 | 28.129 | KV453290.1 | 1781024 | 26-scf00232 | 26 |
| AX-158092268 | 10 | 28.129 | KV453290.1 | 1783108 | 26-scf00232 | 26 |
| AX-158092270 | 10 | 28.129 | KV453290.1 | 1785430 | 26-scf00232 | 26 |
| AX-158092271 | 10 | 28.129 | KV453290.1 | 1785904 | 26-scf00232 | 26 |
| AX-158092276 | 10 | 28.129 | KV453290.1 | 1792340 | 26-scf00232 | 26 |



|              |    |        |             |         |             |    |
|--------------|----|--------|-------------|---------|-------------|----|
| AX-158092282 | 10 | 28.129 | KV453290.1  | 1801059 | 26-scf00232 | 26 |
| AX-158092285 | 10 | 28.129 | KV453290.1  | 1805297 | 26-scf00232 | 26 |
| AX-158092286 | 10 | 28.129 | KV453290.1  | 1805978 | 26-scf00232 | 26 |
| AX-158092289 | 10 | 28.129 | KV453290.1  | 1808796 | 26-scf00232 | 26 |
| AX-157726071 | 10 | 28.129 | KV453290.1  | 1811057 | 26-scf00232 | 26 |
| AX-158092301 | 10 | 28.129 | KV453290.1  | 1821165 | 26-scf00232 | 26 |
| AX-157721985 | 10 | 28.129 | KV453290.1  | 1834139 | 26-scf00232 | 26 |
| AX-158092312 | 10 | 28.129 | KV453290.1  | 1834527 | 26-scf00232 | 26 |
| AX-158092319 | 10 | 28.129 | KV453290.1  | 1844417 | 26-scf00232 | 26 |
| AX-158092323 | 10 | 28.129 | KV453290.1  | 1846134 | 26-scf00232 | 26 |
| AX-158092348 | 10 | 28.129 | KV453290.1  | 1869521 | 26-scf00232 | 26 |
| AX-158092391 | 10 | 28.129 | KV453290.1  | 1923002 | 26-scf00232 | 26 |
| AX-158092408 | 10 | 28.129 | KV453290.1  | 1944195 | 26-scf00232 | 26 |
| AX-158092413 | 10 | 28.129 | KV453290.1  | 1950770 | 26-scf00232 | 26 |
| AX-158092416 | 10 | 28.129 | KV453290.1  | 1955638 | 26-scf00232 | 26 |
| AX-158092425 | 10 | 28.129 | KV453290.1  | 1969318 | 26-scf00232 | 26 |
| AX-158092436 | 10 | 28.129 | KV453290.1  | 1987881 | 26-scf00232 | 26 |
| AX-158092443 | 10 | 28.129 | KV453290.1  | 1994636 | 26-scf00232 | 26 |
| AX-158092446 | 10 | 28.129 | KV453290.1  | 1998998 | 26-scf00232 | 26 |
| AX-157825748 | 10 | 28.129 | KV453290.1  | 1999154 | 26-scf00232 | 26 |
| AX-158092462 | 10 | 28.129 | KV453290.1  | 2028646 | 26-scf00232 | 26 |
| AX-158092500 | 10 | 28.129 | KV453290.1  | 2084326 | 26-scf00232 | 26 |
| AX-158092505 | 10 | 28.129 | KV453290.1  | 2091169 | 26-scf00232 | 26 |
| AX-158410084 | 10 | 28.129 | KV453290.1  | 2132982 | 26-scf00232 | 26 |
| AX-158410086 | 10 | 28.129 | KV453290.1  | 2133700 | 26-scf00232 | 26 |
| AX-158092539 | 10 | 28.129 | KV453290.1  | 2143230 | 26-scf00232 | 26 |
| AX-157788997 | 10 | 28.129 | KV453290.1  | 2183242 | 26-scf00232 | 26 |
| AX-157825764 | 10 | 28.129 | KV453290.1  | 2191285 | 26-scf00232 | 26 |
| AX-158092572 | 10 | 28.129 | KV453290.1  | 2194583 | 26-scf00232 | 26 |
| AX-157825768 | 10 | 28.129 | KV453290.1  | 2196187 | 26-scf00232 | 26 |
| AX-158092582 | 10 | 28.129 | KV453290.1  | 2207456 | 26-scf00232 | 26 |
| AX-157707549 | 10 | 28.129 | 3ML01034529 | 299     | scf10206_1  | UN |
| AX-158092291 | 10 | 28.187 | KV453290.1  | 1812924 | 26-scf00232 | 26 |
| AX-158092294 | 10 | 28.347 | KV453290.1  | 1815682 | 26-scf00232 | 26 |
| AX-158092296 | 10 | 28.347 | KV453290.1  | 1817214 | 26-scf00232 | 26 |
| AX-158092297 | 10 | 28.347 | KV453290.1  | 1817826 | 26-scf00232 | 26 |
| AX-158092304 | 10 | 28.347 | KV453290.1  | 1823579 | 26-scf00232 | 26 |
| AX-158092306 | 10 | 28.347 | KV453290.1  | 1826963 | 26-scf00232 | 26 |
| AX-158092309 | 10 | 28.347 | KV453290.1  | 1829557 | 26-scf00232 | 26 |
| AX-158092313 | 10 | 28.347 | KV453290.1  | 1836024 | 26-scf00232 | 26 |
| AX-158092315 | 10 | 28.347 | KV453290.1  | 1840353 | 26-scf00232 | 26 |
| AX-158092324 | 10 | 28.347 | KV453290.1  | 1847007 | 26-scf00232 | 26 |
| AX-157714590 | 10 | 28.347 | KV453290.1  | 1849083 | 26-scf00232 | 26 |
| AX-158092331 | 10 | 28.347 | KV453290.1  | 1853894 | 26-scf00232 | 26 |
| AX-158092334 | 10 | 28.347 | KV453290.1  | 1859037 | 26-scf00232 | 26 |
| AX-158092335 | 10 | 28.347 | KV453290.1  | 1859406 | 26-scf00232 | 26 |
| AX-158092336 | 10 | 28.347 | KV453290.1  | 1859818 | 26-scf00232 | 26 |
| AX-158092337 | 10 | 28.347 | KV453290.1  | 1860329 | 26-scf00232 | 26 |
| AX-158092342 | 10 | 28.347 | KV453290.1  | 1863598 | 26-scf00232 | 26 |
| AX-157857275 | 10 | 28.347 | KV453290.1  | 1865681 | 26-scf00232 | 26 |
| AX-157857276 | 10 | 28.347 | KV453290.1  | 1867380 | 26-scf00232 | 26 |

|              |    |        |            |         |             |    |
|--------------|----|--------|------------|---------|-------------|----|
| AX-158092349 | 10 | 28.347 | KV453290.1 | 1870125 | 26-scf00232 | 26 |
| AX-158092350 | 10 | 28.347 | KV453290.1 | 1870403 | 26-scf00232 | 26 |
| AX-157825739 | 10 | 28.347 | KV453290.1 | 1872726 | 26-scf00232 | 26 |
| AX-158092355 | 10 | 28.347 | KV453290.1 | 1874004 | 26-scf00232 | 26 |
| AX-158092366 | 10 | 28.347 | KV453290.1 | 1882716 | 26-scf00232 | 26 |
| AX-157825743 | 10 | 28.347 | KV453290.1 | 1924255 | 26-scf00232 | 26 |
| AX-158092417 | 10 | 28.347 | KV453290.1 | 1956476 | 26-scf00232 | 26 |
| AX-158092460 | 10 | 28.347 | KV453290.1 | 2025178 | 26-scf00232 | 26 |
| AX-158092461 | 10 | 28.347 | KV453290.1 | 2025931 | 26-scf00232 | 26 |
| AX-158092488 | 10 | 28.347 | KV453290.1 | 2069370 | 26-scf00232 | 26 |
| AX-158092490 | 10 | 28.347 | KV453290.1 | 2075827 | 26-scf00232 | 26 |
| AX-157714140 | 10 | 28.347 | KV453290.1 | 2157327 | 26-scf00232 | 26 |
| AX-158092562 | 10 | 28.347 | KV453290.1 | 2173578 | 26-scf00232 | 26 |
| AX-158092563 | 10 | 28.347 | KV453290.1 | 2174826 | 26-scf00232 | 26 |
| AX-158091762 | 10 | 28.456 | KV453290.1 | 953020  | 26-scf00232 | 26 |
| AX-158091887 | 10 | 28.456 | KV453290.1 | 1133448 | 26-scf00232 | 26 |
| AX-157825686 | 10 | 28.456 | KV453290.1 | 1145091 | 26-scf00232 | 26 |
| AX-158091920 | 10 | 28.456 | KV453290.1 | 1194372 | 26-scf00232 | 26 |
| AX-158091922 | 10 | 28.456 | KV453290.1 | 1199288 | 26-scf00232 | 26 |
| AX-158091942 | 10 | 28.456 | KV453290.1 | 1221507 | 26-scf00232 | 26 |
| AX-158091973 | 10 | 28.456 | KV453290.1 | 1262951 | 26-scf00232 | 26 |
| AX-158092056 | 10 | 28.456 | KV453290.1 | 1377358 | 26-scf00232 | 26 |
| AX-158092070 | 10 | 28.456 | KV453290.1 | 1393350 | 26-scf00232 | 26 |
| AX-158092208 | 10 | 28.456 | KV453290.1 | 1672140 | 26-scf00232 | 26 |
| AX-158416815 | 10 | 28.456 | KV453290.1 | 1722438 | 26-scf00232 | 26 |
| AX-158092248 | 10 | 28.456 | KV453290.1 | 1738682 | 26-scf00232 | 26 |
| AX-158092277 | 10 | 28.456 | KV453290.1 | 1793327 | 26-scf00232 | 26 |
| AX-158092284 | 10 | 28.456 | KV453290.1 | 1802502 | 26-scf00232 | 26 |
| AX-158092298 | 10 | 28.456 | KV453290.1 | 1819808 | 26-scf00232 | 26 |
| AX-158092326 | 10 | 28.456 | KV453290.1 | 1849677 | 26-scf00232 | 26 |
| AX-158092332 | 10 | 28.456 | KV453290.1 | 1855941 | 26-scf00232 | 26 |
| AX-158092343 | 10 | 28.456 | KV453290.1 | 1864027 | 26-scf00232 | 26 |
| AX-158092344 | 10 | 28.456 | KV453290.1 | 1864981 | 26-scf00232 | 26 |
| AX-158092352 | 10 | 28.456 | KV453290.1 | 1872128 | 26-scf00232 | 26 |
| AX-158092353 | 10 | 28.456 | KV453290.1 | 1872676 | 26-scf00232 | 26 |
| AX-158092356 | 10 | 28.456 | KV453290.1 | 1875188 | 26-scf00232 | 26 |
| AX-158092357 | 10 | 28.456 | KV453290.1 | 1875606 | 26-scf00232 | 26 |
| AX-158092358 | 10 | 28.456 | KV453290.1 | 1876404 | 26-scf00232 | 26 |
| AX-158092359 | 10 | 28.456 | KV453290.1 | 1876830 | 26-scf00232 | 26 |
| AX-158410081 | 10 | 28.456 | KV453290.1 | 1877982 | 26-scf00232 | 26 |
| AX-158092360 | 10 | 28.456 | KV453290.1 | 1878261 | 26-scf00232 | 26 |
| AX-158092361 | 10 | 28.456 | KV453290.1 | 1879405 | 26-scf00232 | 26 |
| AX-158092364 | 10 | 28.456 | KV453290.1 | 1881121 | 26-scf00232 | 26 |
| AX-158092365 | 10 | 28.456 | KV453290.1 | 1882261 | 26-scf00232 | 26 |
| AX-157771541 | 10 | 28.456 | KV453290.1 | 1886860 | 26-scf00232 | 26 |
| AX-158092368 | 10 | 28.456 | KV453290.1 | 1887958 | 26-scf00232 | 26 |
| AX-158092372 | 10 | 28.456 | KV453290.1 | 1896871 | 26-scf00232 | 26 |
| AX-158092373 | 10 | 28.456 | KV453290.1 | 1898051 | 26-scf00232 | 26 |
| AX-157825741 | 10 | 28.456 | KV453290.1 | 1898668 | 26-scf00232 | 26 |
| AX-158092374 | 10 | 28.456 | KV453290.1 | 1898994 | 26-scf00232 | 26 |
| AX-157857277 | 10 | 28.456 | KV453290.1 | 1900457 | 26-scf00232 | 26 |

|              |    |        |            |         |             |    |
|--------------|----|--------|------------|---------|-------------|----|
| AX-158092383 | 10 | 28.456 | KV453290.1 | 1909908 | 26-scf00232 | 26 |
| AX-158092386 | 10 | 28.456 | KV453290.1 | 1911985 | 26-scf00232 | 26 |
| AX-158092387 | 10 | 28.456 | KV453290.1 | 1913348 | 26-scf00232 | 26 |
| AX-158092389 | 10 | 28.456 | KV453290.1 | 1918972 | 26-scf00232 | 26 |
| AX-157885703 | 10 | 28.456 | KV453290.1 | 1921333 | 26-scf00232 | 26 |
| AX-158092392 | 10 | 28.456 | KV453290.1 | 1923938 | 26-scf00232 | 26 |
| AX-158092394 | 10 | 28.456 | KV453290.1 | 1926033 | 26-scf00232 | 26 |
| AX-158092395 | 10 | 28.456 | KV453290.1 | 1926576 | 26-scf00232 | 26 |
| AX-157885704 | 10 | 28.456 | KV453290.1 | 1926848 | 26-scf00232 | 26 |
| AX-158092396 | 10 | 28.456 | KV453290.1 | 1927783 | 26-scf00232 | 26 |
| AX-157723562 | 10 | 28.456 | KV453290.1 | 1928631 | 26-scf00232 | 26 |
| AX-158092397 | 10 | 28.456 | KV453290.1 | 1933423 | 26-scf00232 | 26 |
| AX-158092398 | 10 | 28.456 | KV453290.1 | 1933965 | 26-scf00232 | 26 |
| AX-158092399 | 10 | 28.456 | KV453290.1 | 1938133 | 26-scf00232 | 26 |
| AX-158092401 | 10 | 28.456 | KV453290.1 | 1939372 | 26-scf00232 | 26 |
| AX-158092407 | 10 | 28.456 | KV453290.1 | 1943363 | 26-scf00232 | 26 |
| AX-158092409 | 10 | 28.456 | KV453290.1 | 1945724 | 26-scf00232 | 26 |
| AX-158092411 | 10 | 28.456 | KV453290.1 | 1949368 | 26-scf00232 | 26 |
| AX-158092412 | 10 | 28.456 | KV453290.1 | 1949749 | 26-scf00232 | 26 |
| AX-158092414 | 10 | 28.456 | KV453290.1 | 1951630 | 26-scf00232 | 26 |
| AX-158092415 | 10 | 28.456 | KV453290.1 | 1952191 | 26-scf00232 | 26 |
| AX-158092418 | 10 | 28.456 | KV453290.1 | 1959105 | 26-scf00232 | 26 |
| AX-158410082 | 10 | 28.456 | KV453290.1 | 1962732 | 26-scf00232 | 26 |
| AX-158416816 | 10 | 28.456 | KV453290.1 | 1963442 | 26-scf00232 | 26 |
| AX-158092421 | 10 | 28.456 | KV453290.1 | 1965476 | 26-scf00232 | 26 |
| AX-158092422 | 10 | 28.456 | KV453290.1 | 1966159 | 26-scf00232 | 26 |
| AX-158092426 | 10 | 28.456 | KV453290.1 | 1971451 | 26-scf00232 | 26 |
| AX-157747574 | 10 | 28.456 | KV453290.1 | 1974473 | 26-scf00232 | 26 |
| AX-158092427 | 10 | 28.456 | KV453290.1 | 1977225 | 26-scf00232 | 26 |
| AX-158092429 | 10 | 28.456 | KV453290.1 | 1978916 | 26-scf00232 | 26 |
| AX-158092431 | 10 | 28.456 | KV453290.1 | 1980988 | 26-scf00232 | 26 |
| AX-158092440 | 10 | 28.456 | KV453290.1 | 1991073 | 26-scf00232 | 26 |
| AX-158092442 | 10 | 28.456 | KV453290.1 | 1993251 | 26-scf00232 | 26 |
| AX-158092444 | 10 | 28.456 | KV453290.1 | 1995236 | 26-scf00232 | 26 |
| AX-158092451 | 10 | 28.456 | KV453290.1 | 2006567 | 26-scf00232 | 26 |
| AX-158092452 | 10 | 28.456 | KV453290.1 | 2007887 | 26-scf00232 | 26 |
| AX-158092453 | 10 | 28.456 | KV453290.1 | 2010729 | 26-scf00232 | 26 |
| AX-157716787 | 10 | 28.456 | KV453290.1 | 2014761 | 26-scf00232 | 26 |
| AX-157865817 | 10 | 28.456 | KV453290.1 | 2016599 | 26-scf00232 | 26 |
| AX-158092455 | 10 | 28.456 | KV453290.1 | 2016966 | 26-scf00232 | 26 |
| AX-158092456 | 10 | 28.456 | KV453290.1 | 2018113 | 26-scf00232 | 26 |
| AX-158092467 | 10 | 28.456 | KV453290.1 | 2034656 | 26-scf00232 | 26 |
| AX-158092469 | 10 | 28.456 | KV453290.1 | 2036815 | 26-scf00232 | 26 |
| AX-158092473 | 10 | 28.456 | KV453290.1 | 2040061 | 26-scf00232 | 26 |
| AX-158092482 | 10 | 28.456 | KV453290.1 | 2050856 | 26-scf00232 | 26 |
| AX-157825751 | 10 | 28.456 | KV453290.1 | 2054761 | 26-scf00232 | 26 |
| AX-157825752 | 10 | 28.456 | KV453290.1 | 2055099 | 26-scf00232 | 26 |
| AX-158092486 | 10 | 28.456 | KV453290.1 | 2062828 | 26-scf00232 | 26 |
| AX-157756311 | 10 | 28.456 | KV453290.1 | 2071771 | 26-scf00232 | 26 |
| AX-158092493 | 10 | 28.456 | KV453290.1 | 2078281 | 26-scf00232 | 26 |
| AX-158092495 | 10 | 28.456 | KV453290.1 | 2079101 | 26-scf00232 | 26 |

|              |    |        |            |         |             |    |
|--------------|----|--------|------------|---------|-------------|----|
| AX-158092497 | 10 | 28.456 | KV453290.1 | 2082414 | 26-scf00232 | 26 |
| AX-158092498 | 10 | 28.456 | KV453290.1 | 2083559 | 26-scf00232 | 26 |
| AX-158092499 | 10 | 28.456 | KV453290.1 | 2083771 | 26-scf00232 | 26 |
| AX-157727122 | 10 | 28.456 | KV453290.1 | 2087456 | 26-scf00232 | 26 |
| AX-158092501 | 10 | 28.456 | KV453290.1 | 2087896 | 26-scf00232 | 26 |
| AX-158092502 | 10 | 28.456 | KV453290.1 | 2089311 | 26-scf00232 | 26 |
| AX-158092503 | 10 | 28.456 | KV453290.1 | 2090353 | 26-scf00232 | 26 |
| AX-158092504 | 10 | 28.456 | KV453290.1 | 2090697 | 26-scf00232 | 26 |
| AX-158092507 | 10 | 28.456 | KV453290.1 | 2093800 | 26-scf00232 | 26 |
| AX-158092508 | 10 | 28.456 | KV453290.1 | 2094630 | 26-scf00232 | 26 |
| AX-158092510 | 10 | 28.456 | KV453290.1 | 2095693 | 26-scf00232 | 26 |
| AX-158384575 | 10 | 28.456 | KV453290.1 | 2096028 | 26-scf00232 | 26 |
| AX-158092511 | 10 | 28.456 | KV453290.1 | 2096393 | 26-scf00232 | 26 |
| AX-158092512 | 10 | 28.456 | KV453290.1 | 2097015 | 26-scf00232 | 26 |
| AX-158092513 | 10 | 28.456 | KV453290.1 | 2097492 | 26-scf00232 | 26 |
| AX-158092514 | 10 | 28.456 | KV453290.1 | 2098061 | 26-scf00232 | 26 |
| AX-158092515 | 10 | 28.456 | KV453290.1 | 2098504 | 26-scf00232 | 26 |
| AX-157740091 | 10 | 28.456 | KV453290.1 | 2099724 | 26-scf00232 | 26 |
| AX-158092518 | 10 | 28.456 | KV453290.1 | 2100242 | 26-scf00232 | 26 |
| AX-157825756 | 10 | 28.456 | KV453290.1 | 2101221 | 26-scf00232 | 26 |
| AX-158092519 | 10 | 28.456 | KV453290.1 | 2101837 | 26-scf00232 | 26 |
| AX-157825757 | 10 | 28.456 | KV453290.1 | 2103861 | 26-scf00232 | 26 |
| AX-158092524 | 10 | 28.456 | KV453290.1 | 2106150 | 26-scf00232 | 26 |
| AX-157764002 | 10 | 28.456 | KV453290.1 | 2106395 | 26-scf00232 | 26 |
| AX-157825758 | 10 | 28.456 | KV453290.1 | 2107070 | 26-scf00232 | 26 |
| AX-158379973 | 10 | 28.456 | KV453290.1 | 2108221 | 26-scf00232 | 26 |
| AX-158092529 | 10 | 28.456 | KV453290.1 | 2115323 | 26-scf00232 | 26 |
| AX-157742393 | 10 | 28.456 | KV453290.1 | 2116061 | 26-scf00232 | 26 |
| AX-158092530 | 10 | 28.456 | KV453290.1 | 2120005 | 26-scf00232 | 26 |
| AX-157825759 | 10 | 28.456 | KV453290.1 | 2123860 | 26-scf00232 | 26 |
| AX-157724424 | 10 | 28.456 | KV453290.1 | 2127261 | 26-scf00232 | 26 |
| AX-158410083 | 10 | 28.456 | KV453290.1 | 2132662 | 26-scf00232 | 26 |
| AX-158092532 | 10 | 28.456 | KV453290.1 | 2135651 | 26-scf00232 | 26 |
| AX-158092533 | 10 | 28.456 | KV453290.1 | 2138094 | 26-scf00232 | 26 |
| AX-158092534 | 10 | 28.456 | KV453290.1 | 2138475 | 26-scf00232 | 26 |
| AX-158092535 | 10 | 28.456 | KV453290.1 | 2139166 | 26-scf00232 | 26 |
| AX-158092536 | 10 | 28.456 | KV453290.1 | 2140349 | 26-scf00232 | 26 |
| AX-158092538 | 10 | 28.456 | KV453290.1 | 2142382 | 26-scf00232 | 26 |
| AX-158092543 | 10 | 28.456 | KV453290.1 | 2154980 | 26-scf00232 | 26 |
| AX-158092544 | 10 | 28.456 | KV453290.1 | 2156327 | 26-scf00232 | 26 |
| AX-158092546 | 10 | 28.456 | KV453290.1 | 2159030 | 26-scf00232 | 26 |
| AX-158092547 | 10 | 28.456 | KV453290.1 | 2159479 | 26-scf00232 | 26 |
| AX-158092548 | 10 | 28.456 | KV453290.1 | 2159826 | 26-scf00232 | 26 |
| AX-158092549 | 10 | 28.456 | KV453290.1 | 2160550 | 26-scf00232 | 26 |
| AX-158092550 | 10 | 28.456 | KV453290.1 | 2161104 | 26-scf00232 | 26 |
| AX-157739096 | 10 | 28.456 | KV453290.1 | 2163494 | 26-scf00232 | 26 |
| AX-158092556 | 10 | 28.456 | KV453290.1 | 2169364 | 26-scf00232 | 26 |
| AX-158092558 | 10 | 28.456 | KV453290.1 | 2171309 | 26-scf00232 | 26 |
| AX-158092559 | 10 | 28.456 | KV453290.1 | 2172229 | 26-scf00232 | 26 |
| AX-158092560 | 10 | 28.456 | KV453290.1 | 2172568 | 26-scf00232 | 26 |
| AX-158092561 | 10 | 28.456 | KV453290.1 | 2173184 | 26-scf00232 | 26 |

|              |    |        |             |         |             |    |
|--------------|----|--------|-------------|---------|-------------|----|
| AX-158092565 | 10 | 28.456 | KV453290.1  | 2179296 | 26-scf00232 | 26 |
| AX-157740440 | 10 | 28.456 | KV453290.1  | 2180039 | 26-scf00232 | 26 |
| AX-157825762 | 10 | 28.456 | KV453290.1  | 2181995 | 26-scf00232 | 26 |
| AX-158092568 | 10 | 28.456 | KV453290.1  | 2182140 | 26-scf00232 | 26 |
| AX-158092571 | 10 | 28.456 | KV453290.1  | 2187039 | 26-scf00232 | 26 |
| AX-157825767 | 10 | 28.456 | KV453290.1  | 2195280 | 26-scf00232 | 26 |
| AX-158092573 | 10 | 28.456 | KV453290.1  | 2196332 | 26-scf00232 | 26 |
| AX-157825769 | 10 | 28.456 | KV453290.1  | 2196601 | 26-scf00232 | 26 |
| AX-158092574 | 10 | 28.456 | KV453290.1  | 2196803 | 26-scf00232 | 26 |
| AX-157825771 | 10 | 28.456 | KV453290.1  | 2199958 | 26-scf00232 | 26 |
| AX-158384577 | 10 | 28.456 | KV453290.1  | 2200180 | 26-scf00232 | 26 |
| AX-158092575 | 10 | 28.456 | KV453290.1  | 2200249 | 26-scf00232 | 26 |
| AX-158092576 | 10 | 28.456 | KV453290.1  | 2200912 | 26-scf00232 | 26 |
| AX-158092578 | 10 | 28.456 | KV453290.1  | 2202732 | 26-scf00232 | 26 |
| AX-158384578 | 10 | 28.456 | KV453290.1  | 2206892 | 26-scf00232 | 26 |
| AX-158092583 | 10 | 28.456 | KV453290.1  | 2212270 | 26-scf00232 | 26 |
| AX-158092584 | 10 | 28.456 | KV453290.1  | 2213487 | 26-scf00232 | 26 |
| AX-158092585 | 10 | 28.456 | KV453290.1  | 2214478 | 26-scf00232 | 26 |
| AX-158092586 | 10 | 28.456 | KV453290.1  | 2215787 | 26-scf00232 | 26 |
| AX-158092589 | 10 | 28.456 | KV453290.1  | 2219622 | 26-scf00232 | 26 |
| AX-157755016 | 10 | 28.456 | KV453290.1  | 2221055 | 26-scf00232 | 26 |
| AX-158092592 | 10 | 28.456 | KV453290.1  | 2222737 | 26-scf00232 | 26 |
| AX-157749739 | 10 | 28.456 | KV453290.1  | 2223974 | 26-scf00232 | 26 |
| AX-158092594 | 10 | 28.456 | KV453290.1  | 2224652 | 26-scf00232 | 26 |
| AX-158092595 | 10 | 28.456 | KV453290.1  | 2225196 | 26-scf00232 | 26 |
| AX-158092598 | 10 | 28.456 | KV453290.1  | 2228160 | 26-scf00232 | 26 |
| AX-158092599 | 10 | 28.456 | KV453290.1  | 2229431 | 26-scf00232 | 26 |
| AX-157857279 | 10 | 28.456 | KV453290.1  | 2231230 | 26-scf00232 | 26 |
| AX-158092601 | 10 | 28.456 | KV453290.1  | 2231573 | 26-scf00232 | 26 |
| AX-158092603 | 10 | 28.456 | KV453290.1  | 2234591 | 26-scf00232 | 26 |
| AX-158092604 | 10 | 28.456 | KV453290.1  | 2234958 | 26-scf00232 | 26 |
| AX-158092605 | 10 | 28.456 | KV453290.1  | 2235389 | 26-scf00232 | 26 |
| AX-158092608 | 10 | 28.456 | KV453290.1  | 2237766 | 26-scf00232 | 26 |
| AX-158092611 | 10 | 28.456 | KV453290.1  | 2248624 | 26-scf00232 | 26 |
| AX-158092613 | 10 | 28.456 | KV453290.1  | 2250118 | 26-scf00232 | 26 |
| AX-157825776 | 10 | 28.456 | KV453290.1  | 2266778 | 26-scf00232 | 26 |
| AX-157739206 | 10 | 28.456 | KV453290.1  | 2278251 | 26-scf00232 | 26 |
| AX-158092629 | 10 | 28.456 | KV453290.1  | 2280275 | 26-scf00232 | 26 |
| AX-158092630 | 10 | 28.456 | KV453290.1  | 2280571 | 26-scf00232 | 26 |
| AX-157825779 | 10 | 28.456 | KV453290.1  | 2286875 | 26-scf00232 | 26 |
| AX-157825786 | 10 | 28.456 | KV453290.1  | 2324527 | 26-scf00232 | 26 |
| AX-158092660 | 10 | 28.456 | KV453290.1  | 2328597 | 26-scf00232 | 26 |
| AX-158092662 | 10 | 28.456 | KV453290.1  | 2331738 | 26-scf00232 | 26 |
| AX-158092676 | 10 | 28.456 | KV453290.1  | 2351768 | 26-scf00232 | 26 |
| AX-158092682 | 10 | 28.456 | KV453290.1  | 2361552 | 26-scf00232 | 26 |
| AX-157706422 | 10 | 28.456 | 3ML01032374 | 245     | scf07992_1  | UN |
| AX-157706620 | 10 | 28.456 | 3ML01032602 | 465     | scf08226_1  | UN |
| AX-158092380 | 10 | 28.565 | KV453290.1  | 1906991 | 26-scf00232 | 26 |
| AX-158092410 | 10 | 28.565 | KV453290.1  | 1948507 | 26-scf00232 | 26 |
| AX-158092609 | 10 | 28.565 | KV453290.1  | 2241229 | 26-scf00232 | 26 |
| AX-157825773 | 10 | 28.565 | KV453290.1  | 2241319 | 26-scf00232 | 26 |

|              |    |        |            |         |             |    |
|--------------|----|--------|------------|---------|-------------|----|
| AX-158092610 | 10 | 28.565 | KV453290.1 | 2247262 | 26-scf00232 | 26 |
| AX-158092612 | 10 | 28.565 | KV453290.1 | 2248914 | 26-scf00232 | 26 |
| AX-158092614 | 10 | 28.565 | KV453290.1 | 2251074 | 26-scf00232 | 26 |
| AX-158092616 | 10 | 28.565 | KV453290.1 | 2254269 | 26-scf00232 | 26 |
| AX-157870895 | 10 | 28.565 | KV453290.1 | 2259030 | 26-scf00232 | 26 |
| AX-157740844 | 10 | 28.565 | KV453290.1 | 2268860 | 26-scf00232 | 26 |
| AX-157715098 | 10 | 28.565 | KV453290.1 | 2270134 | 26-scf00232 | 26 |
| AX-158092625 | 10 | 28.565 | KV453290.1 | 2273573 | 26-scf00232 | 26 |
| AX-158092626 | 10 | 28.565 | KV453290.1 | 2274330 | 26-scf00232 | 26 |
| AX-158092627 | 10 | 28.565 | KV453290.1 | 2277889 | 26-scf00232 | 26 |
| AX-157825778 | 10 | 28.565 | KV453290.1 | 2281128 | 26-scf00232 | 26 |
| AX-157789007 | 10 | 28.565 | KV453290.1 | 2283498 | 26-scf00232 | 26 |
| AX-158092634 | 10 | 28.565 | KV453290.1 | 2286374 | 26-scf00232 | 26 |
| AX-158091833 | 10 | 28.893 | KV453290.1 | 1042397 | 26-scf00232 | 26 |
| AX-157825688 | 10 | 28.893 | KV453290.1 | 1167351 | 26-scf00232 | 26 |
| AX-158091972 | 10 | 28.893 | KV453290.1 | 1261538 | 26-scf00232 | 26 |
| AX-158092637 | 10 | 28.893 | KV453290.1 | 2290528 | 26-scf00232 | 26 |
| AX-158092640 | 10 | 28.893 | KV453290.1 | 2294494 | 26-scf00232 | 26 |
| AX-158092644 | 10 | 28.893 | KV453290.1 | 2301760 | 26-scf00232 | 26 |
| AX-158092646 | 10 | 28.893 | KV453290.1 | 2305406 | 26-scf00232 | 26 |
| AX-157716330 | 10 | 28.893 | KV453290.1 | 2305978 | 26-scf00232 | 26 |
| AX-158092647 | 10 | 28.893 | KV453290.1 | 2306571 | 26-scf00232 | 26 |
| AX-158092648 | 10 | 28.893 | KV453290.1 | 2307408 | 26-scf00232 | 26 |
| AX-157825782 | 10 | 28.893 | KV453290.1 | 2308145 | 26-scf00232 | 26 |
| AX-157825783 | 10 | 28.893 | KV453290.1 | 2308850 | 26-scf00232 | 26 |
| AX-158092649 | 10 | 28.893 | KV453290.1 | 2309114 | 26-scf00232 | 26 |
| AX-158092650 | 10 | 28.893 | KV453290.1 | 2310893 | 26-scf00232 | 26 |
| AX-158092652 | 10 | 28.893 | KV453290.1 | 2312338 | 26-scf00232 | 26 |
| AX-157885705 | 10 | 28.893 | KV453290.1 | 2314356 | 26-scf00232 | 26 |
| AX-158416820 | 10 | 28.893 | KV453290.1 | 2314821 | 26-scf00232 | 26 |
| AX-157825784 | 10 | 28.893 | KV453290.1 | 2315664 | 26-scf00232 | 26 |
| AX-157825785 | 10 | 28.893 | KV453290.1 | 2315926 | 26-scf00232 | 26 |
| AX-158092654 | 10 | 28.893 | KV453290.1 | 2318772 | 26-scf00232 | 26 |
| AX-158092656 | 10 | 28.893 | KV453290.1 | 2320063 | 26-scf00232 | 26 |
| AX-158092657 | 10 | 28.893 | KV453290.1 | 2324897 | 26-scf00232 | 26 |
| AX-158092659 | 10 | 28.893 | KV453290.1 | 2327468 | 26-scf00232 | 26 |
| AX-157825787 | 10 | 28.893 | KV453290.1 | 2333697 | 26-scf00232 | 26 |
| AX-158091860 | 10 | 29.33  | KV453290.1 | 1095112 | 26-scf00232 | 26 |
| AX-158092666 | 10 | 29.33  | KV453290.1 | 2340953 | 26-scf00232 | 26 |
| AX-158092667 | 10 | 29.33  | KV453290.1 | 2341743 | 26-scf00232 | 26 |
| AX-158092669 | 10 | 29.33  | KV453290.1 | 2342987 | 26-scf00232 | 26 |
| AX-158092670 | 10 | 29.33  | KV453290.1 | 2343337 | 26-scf00232 | 26 |
| AX-158092671 | 10 | 29.33  | KV453290.1 | 2343896 | 26-scf00232 | 26 |
| AX-158092673 | 10 | 29.33  | KV453290.1 | 2350285 | 26-scf00232 | 26 |
| AX-158407263 | 10 | 29.33  | KV453290.1 | 2353972 | 26-scf00232 | 26 |
| AX-158092680 | 10 | 29.33  | KV453290.1 | 2357415 | 26-scf00232 | 26 |
| AX-158092681 | 10 | 29.33  | KV453290.1 | 2360789 | 26-scf00232 | 26 |
| AX-157753764 | 10 | 29.33  | KV453290.1 | 2362063 | 26-scf00232 | 26 |
| AX-158092683 | 10 | 29.33  | KV453290.1 | 2363180 | 26-scf00232 | 26 |
| AX-158092686 | 10 | 29.33  | KV453290.1 | 2365832 | 26-scf00232 | 26 |
| AX-158092687 | 10 | 29.33  | KV453290.1 | 2366620 | 26-scf00232 | 26 |

|              |    |        |             |         |               |    |
|--------------|----|--------|-------------|---------|---------------|----|
| AX-158092688 | 10 | 29.33  | KV453290.1  | 2367085 | 26-scf00232   | 26 |
| AX-158092689 | 10 | 29.33  | KV453290.1  | 2368497 | 26-scf00232   | 26 |
| AX-158092690 | 10 | 29.511 | KV453290.1  | 2369820 | 26-scf00232   | 26 |
| AX-157758893 | 10 | 29.657 | KV453290.1  | 2370273 | 26-scf00232   | 26 |
| AX-158092691 | 10 | 29.657 | KV453290.1  | 2370968 | 26-scf00232   | 26 |
| AX-158092692 | 10 | 29.657 | KV453290.1  | 2373812 | 26-scf00232   | 26 |
| AX-158379974 | 10 | 29.657 | KV453290.1  | 2374838 | 26-scf00232   | 26 |
| AX-158092694 | 10 | 29.657 | KV453290.1  | 2375898 | 26-scf00232   | 26 |
| AX-158092695 | 10 | 29.657 | KV453290.1  | 2376415 | 26-scf00232   | 26 |
| AX-158092697 | 10 | 29.657 | KV453290.1  | 2380368 | 26-scf00232   | 26 |
| AX-158092698 | 10 | 29.657 | KV453290.1  | 2383136 | 26-scf00232   | 26 |
| AX-157755204 | 10 | 29.767 | KV453290.1  | 2383815 | 26-scf00232   | 26 |
| AX-157885706 | 10 | 29.767 | KV453290.1  | 2384232 | 26-scf00232   | 26 |
| AX-158092700 | 10 | 29.767 | KV453290.1  | 2385260 | 26-scf00232   | 26 |
| AX-158092701 | 10 | 29.767 | KV453290.1  | 2385697 | 26-scf00232   | 26 |
| AX-158092702 | 10 | 29.767 | KV453290.1  | 2387342 | 26-scf00232   | 26 |
| AX-158092693 | 10 | 29.985 | KV453290.1  | 2374744 | 26-scf00232   | 26 |
| AX-158092706 | 10 | 29.985 | KV453290.1  | 2394248 | 26-scf00232   | 26 |
| AX-158092707 | 10 | 29.985 | KV453290.1  | 2397105 | 26-scf00232   | 26 |
| AX-157825792 | 10 | 29.985 | KV453290.1  | 2400978 | 26-scf00232   | 26 |
| AX-158092712 | 10 | 29.985 | KV453290.1  | 2401433 | 26-scf00232   | 26 |
| AX-158092713 | 10 | 29.985 | KV453290.1  | 2402695 | 26-scf00232   | 26 |
| AX-158092714 | 10 | 29.985 | KV453290.1  | 2403295 | 26-scf00232   | 26 |
| AX-158092715 | 10 | 29.985 | KV453290.1  | 2404621 | 26-scf00232   | 26 |
| AX-158092721 | 10 | 29.985 | KV453290.1  | 2410347 | 26-scf00232   | 26 |
| AX-158092722 | 10 | 29.985 | KV453290.1  | 2412025 | 26-scf00232   | 26 |
| AX-158092736 | 10 | 29.985 | KV453290.1  | 2430473 | 26-scf00232   | 26 |
| AX-158092723 | 10 | 30.204 | KV453290.1  | 2413318 | 26-scf00232   | 26 |
| AX-158092724 | 10 | 30.204 | KV453290.1  | 2415689 | 26-scf00232   | 26 |
| AX-157757227 | 10 | 30.204 | KV453290.1  | 2417855 | 26-scf00232   | 26 |
| AX-158416821 | 10 | 30.313 | KV453290.1  | 2421290 | 26-scf00232   | 26 |
| AX-158092730 | 10 | 30.313 | KV453290.1  | 2424683 | 26-scf00232   | 26 |
| AX-158092731 | 10 | 30.313 | KV453290.1  | 2426035 | 26-scf00232   | 26 |
| AX-158092733 | 10 | 30.313 | KV453290.1  | 2427572 | 26-scf00232   | 26 |
| AX-158092737 | 10 | 30.422 | KV453290.1  | 2433240 | 26-scf00232   | 26 |
| AX-158092740 | 10 | 30.422 | KV453290.1  | 2435561 | 26-scf00232   | 26 |
| AX-158092741 | 10 | 30.422 | KV453290.1  | 2436560 | 26-scf00232   | 26 |
| AX-158092742 | 10 | 30.422 | KV453290.1  | 2437045 | 26-scf00232   | 26 |
| AX-158092745 | 10 | 30.422 | KV453290.1  | 2447062 | 26-scf00232   | 26 |
| AX-157825848 | 10 | 30.422 | KV453290.1  | 4162509 | 26-scf00232   | 26 |
| AX-157825849 | 10 | 30.422 | KV453290.1  | 4167005 | 26-scf00232   | 26 |
| AX-158093681 | 10 | 30.422 | KV453290.1  | 4171463 | 26-scf00232   | 26 |
| AX-157711469 | 10 | 30.422 | FI867937.1  | 609     | ORI212 lctalu | UN |
| AX-158092750 | 10 | 30.588 | KV453290.1  | 2455839 | 26-scf00232   | 26 |
| AX-157755502 | 10 | 30.588 | KV453290.1  | 2479836 | 26-scf00232   | 26 |
| AX-157689646 | 10 | 30.588 | 3ML01031101 | 739     | scf06707_1    | UN |
| AX-157722027 | 10 | 30.75  | KV453290.1  | 2460313 | 26-scf00232   | 26 |
| AX-158092751 | 10 | 30.75  | KV453290.1  | 2463401 | 26-scf00232   | 26 |
| AX-158092755 | 10 | 30.75  | KV453290.1  | 2465614 | 26-scf00232   | 26 |
| AX-158092756 | 10 | 30.75  | KV453290.1  | 2466346 | 26-scf00232   | 26 |
| AX-158092759 | 10 | 30.75  | KV453290.1  | 2468751 | 26-scf00232   | 26 |

|              |    |        |             |         |             |    |
|--------------|----|--------|-------------|---------|-------------|----|
| AX-158092760 | 10 | 30.783 | KV453290.1  | 2470432 | 26-scf00232 | 26 |
| AX-158092763 | 10 | 30.823 | KV453290.1  | 2472985 | 26-scf00232 | 26 |
| AX-157825793 | 10 | 30.823 | KV453290.1  | 2482602 | 26-scf00232 | 26 |
| AX-158092764 | 10 | 30.86  | KV453290.1  | 2474412 | 26-scf00232 | 26 |
| AX-158092766 | 10 | 30.86  | KV453290.1  | 2477900 | 26-scf00232 | 26 |
| AX-157716580 | 10 | 30.86  | KV453290.1  | 2478228 | 26-scf00232 | 26 |
| AX-158092767 | 10 | 30.86  | KV453290.1  | 2479109 | 26-scf00232 | 26 |
| AX-158092768 | 10 | 30.86  | KV453290.1  | 2480150 | 26-scf00232 | 26 |
| AX-158092769 | 10 | 30.86  | KV453290.1  | 2481524 | 26-scf00232 | 26 |
| AX-157789013 | 10 | 30.916 | KV453290.1  | 2483690 | 26-scf00232 | 26 |
| AX-158092753 | 10 | 30.969 | KV453290.1  | 2464442 | 26-scf00232 | 26 |
| AX-158092757 | 10 | 30.969 | KV453290.1  | 2467163 | 26-scf00232 | 26 |
| AX-157825795 | 10 | 30.969 | KV453290.1  | 2484707 | 26-scf00232 | 26 |
| AX-158092770 | 10 | 30.969 | KV453290.1  | 2485706 | 26-scf00232 | 26 |
| AX-158092771 | 10 | 30.969 | KV453290.1  | 2487230 | 26-scf00232 | 26 |
| AX-158384581 | 10 | 30.969 | KV453290.1  | 2487533 | 26-scf00232 | 26 |
| AX-158092773 | 10 | 30.969 | KV453290.1  | 2491580 | 26-scf00232 | 26 |
| AX-157825797 | 10 | 30.969 | KV453290.1  | 2491780 | 26-scf00232 | 26 |
| AX-158092774 | 10 | 30.969 | KV453290.1  | 2496998 | 26-scf00232 | 26 |
| AX-158092777 | 10 | 30.969 | KV453290.1  | 2499885 | 26-scf00232 | 26 |
| AX-158092778 | 10 | 30.969 | KV453290.1  | 2502155 | 26-scf00232 | 26 |
| AX-158092780 | 10 | 30.969 | KV453290.1  | 2502935 | 26-scf00232 | 26 |
| AX-158092772 | 10 | 31.187 | KV453290.1  | 2489961 | 26-scf00232 | 26 |
| AX-158092782 | 10 | 31.187 | KV453290.1  | 2504581 | 26-scf00232 | 26 |
| AX-157825798 | 10 | 31.187 | KV453290.1  | 2505509 | 26-scf00232 | 26 |
| AX-158092787 | 10 | 31.187 | KV453290.1  | 2510340 | 26-scf00232 | 26 |
| AX-157740015 | 10 | 31.187 | KV453290.1  | 2513588 | 26-scf00232 | 26 |
| AX-158092794 | 10 | 31.187 | KV453290.1  | 2516853 | 26-scf00232 | 26 |
| AX-158092795 | 10 | 31.187 | KV453290.1  | 2518422 | 26-scf00232 | 26 |
| AX-158092796 | 10 | 31.187 | KV453290.1  | 2518732 | 26-scf00232 | 26 |
| AX-157759054 | 10 | 31.187 | KV453290.1  | 2519601 | 26-scf00232 | 26 |
| AX-158092798 | 10 | 31.187 | KV453290.1  | 2520753 | 26-scf00232 | 26 |
| AX-158092801 | 10 | 31.187 | KV453290.1  | 2523428 | 26-scf00232 | 26 |
| AX-158092802 | 10 | 31.187 | KV453290.1  | 2524402 | 26-scf00232 | 26 |
| AX-158092803 | 10 | 31.187 | KV453290.1  | 2526767 | 26-scf00232 | 26 |
| AX-157699494 | 10 | 31.187 | KV453290.1  | 2528090 | 26-scf00232 | 26 |
| AX-158092805 | 10 | 31.187 | KV453290.1  | 2531774 | 26-scf00232 | 26 |
| AX-158093018 | 10 | 31.187 | KV453290.1  | 2820570 | 26-scf00232 | 26 |
| AX-157773890 | 10 | 31.478 | KV453290.1  | 2535029 | 26-scf00232 | 26 |
| AX-158092809 | 10 | 31.478 | KV453290.1  | 2540234 | 26-scf00232 | 26 |
| AX-157723856 | 10 | 31.624 | KV453290.1  | 2544260 | 26-scf00232 | 26 |
| AX-158092814 | 10 | 31.624 | KV453290.1  | 2550365 | 26-scf00232 | 26 |
| AX-157712064 | 10 | 31.624 | 3ML01033129 | 544     | scf08765_1  | UN |
| AX-158092823 | 10 | 31.733 | KV453290.1  | 2565946 | 26-scf00232 | 26 |
| AX-157738319 | 10 | 31.733 | KV453290.1  | 2569113 | 26-scf00232 | 26 |
| AX-158092831 | 10 | 31.753 | KV453290.1  | 2581896 | 26-scf00232 | 26 |
| AX-157825803 | 10 | 31.804 | KV453290.1  | 2584046 | 26-scf00232 | 26 |
| AX-158092832 | 10 | 31.843 | KV453290.1  | 2584152 | 26-scf00232 | 26 |
| AX-158092837 | 10 | 31.88  | KV453290.1  | 2587984 | 26-scf00232 | 26 |
| AX-157700839 | 10 | 31.952 | KV453290.1  | 2545797 | 26-scf00232 | 26 |
| AX-158092825 | 10 | 31.952 | KV453290.1  | 2568348 | 26-scf00232 | 26 |



|              |    |        |            |         |             |    |
|--------------|----|--------|------------|---------|-------------|----|
| AX-157825802 | 10 | 31.952 | KV453290.1 | 2569073 | 26-scf00232 | 26 |
| AX-158092827 | 10 | 31.952 | KV453290.1 | 2575449 | 26-scf00232 | 26 |
| AX-158092836 | 10 | 31.952 | KV453290.1 | 2587607 | 26-scf00232 | 26 |
| AX-158092838 | 10 | 31.952 | KV453290.1 | 2588506 | 26-scf00232 | 26 |
| AX-158092839 | 10 | 31.952 | KV453290.1 | 2588861 | 26-scf00232 | 26 |
| AX-157825804 | 10 | 31.952 | KV453290.1 | 2589901 | 26-scf00232 | 26 |
| AX-157825806 | 10 | 31.952 | KV453290.1 | 2590857 | 26-scf00232 | 26 |
| AX-158092842 | 10 | 31.952 | KV453290.1 | 2591440 | 26-scf00232 | 26 |
| AX-158092843 | 10 | 31.952 | KV453290.1 | 2591906 | 26-scf00232 | 26 |
| AX-158092847 | 10 | 31.952 | KV453290.1 | 2599323 | 26-scf00232 | 26 |
| AX-158092849 | 10 | 31.952 | KV453290.1 | 2600925 | 26-scf00232 | 26 |
| AX-158092850 | 10 | 31.952 | KV453290.1 | 2601634 | 26-scf00232 | 26 |
| AX-158092854 | 10 | 31.952 | KV453290.1 | 2605436 | 26-scf00232 | 26 |
| AX-158092856 | 10 | 31.952 | KV453290.1 | 2606885 | 26-scf00232 | 26 |
| AX-158092858 | 10 | 31.952 | KV453290.1 | 2608714 | 26-scf00232 | 26 |
| AX-158092859 | 10 | 31.952 | KV453290.1 | 2609323 | 26-scf00232 | 26 |
| AX-158092860 | 10 | 31.952 | KV453290.1 | 2611405 | 26-scf00232 | 26 |
| AX-158092861 | 10 | 31.952 | KV453290.1 | 2611664 | 26-scf00232 | 26 |
| AX-158092863 | 10 | 31.952 | KV453290.1 | 2612191 | 26-scf00232 | 26 |
| AX-158092865 | 10 | 31.952 | KV453290.1 | 2612899 | 26-scf00232 | 26 |
| AX-158092866 | 10 | 31.952 | KV453290.1 | 2614512 | 26-scf00232 | 26 |
| AX-158092867 | 10 | 31.952 | KV453290.1 | 2614821 | 26-scf00232 | 26 |
| AX-158092868 | 10 | 31.952 | KV453290.1 | 2616387 | 26-scf00232 | 26 |
| AX-158092870 | 10 | 31.952 | KV453290.1 | 2618960 | 26-scf00232 | 26 |
| AX-158092872 | 10 | 31.952 | KV453290.1 | 2621693 | 26-scf00232 | 26 |
| AX-158092873 | 10 | 31.952 | KV453290.1 | 2622331 | 26-scf00232 | 26 |
| AX-158092875 | 10 | 31.952 | KV453290.1 | 2623815 | 26-scf00232 | 26 |
| AX-158092876 | 10 | 31.952 | KV453290.1 | 2625528 | 26-scf00232 | 26 |
| AX-158092877 | 10 | 31.952 | KV453290.1 | 2627004 | 26-scf00232 | 26 |
| AX-158092878 | 10 | 31.952 | KV453290.1 | 2627476 | 26-scf00232 | 26 |
| AX-158092880 | 10 | 31.952 | KV453290.1 | 2629034 | 26-scf00232 | 26 |
| AX-158092881 | 10 | 31.952 | KV453290.1 | 2630284 | 26-scf00232 | 26 |
| AX-158092882 | 10 | 31.952 | KV453290.1 | 2630899 | 26-scf00232 | 26 |
| AX-158092884 | 10 | 31.952 | KV453290.1 | 2633316 | 26-scf00232 | 26 |
| AX-158092887 | 10 | 31.952 | KV453290.1 | 2635400 | 26-scf00232 | 26 |
| AX-158092888 | 10 | 31.952 | KV453290.1 | 2636102 | 26-scf00232 | 26 |
| AX-158092889 | 10 | 31.952 | KV453290.1 | 2637501 | 26-scf00232 | 26 |
| AX-158092890 | 10 | 31.952 | KV453290.1 | 2639214 | 26-scf00232 | 26 |
| AX-158092891 | 10 | 31.952 | KV453290.1 | 2639610 | 26-scf00232 | 26 |
| AX-157775887 | 10 | 31.952 | KV453290.1 | 2640970 | 26-scf00232 | 26 |
| AX-158092892 | 10 | 31.952 | KV453290.1 | 2641156 | 26-scf00232 | 26 |
| AX-157825811 | 10 | 31.952 | KV453290.1 | 2648531 | 26-scf00232 | 26 |
| AX-157825812 | 10 | 31.952 | KV453290.1 | 2650671 | 26-scf00232 | 26 |
| AX-157713036 | 10 | 31.952 | KV453290.1 | 2653454 | 26-scf00232 | 26 |
| AX-158092901 | 10 | 31.952 | KV453290.1 | 2656037 | 26-scf00232 | 26 |
| AX-157772637 | 10 | 31.952 | KV453290.1 | 2656132 | 26-scf00232 | 26 |
| AX-158092903 | 10 | 31.952 | KV453290.1 | 2658208 | 26-scf00232 | 26 |
| AX-158092904 | 10 | 31.952 | KV453290.1 | 2658442 | 26-scf00232 | 26 |
| AX-158092907 | 10 | 31.952 | KV453290.1 | 2659512 | 26-scf00232 | 26 |
| AX-158092910 | 10 | 31.952 | KV453290.1 | 2662748 | 26-scf00232 | 26 |
| AX-158092911 | 10 | 31.952 | KV453290.1 | 2664970 | 26-scf00232 | 26 |

|              |    |        |            |         |             |    |
|--------------|----|--------|------------|---------|-------------|----|
| AX-158092914 | 10 | 31.952 | KV453290.1 | 2666455 | 26-scf00232 | 26 |
| AX-158092916 | 10 | 31.952 | KV453290.1 | 2668569 | 26-scf00232 | 26 |
| AX-158092917 | 10 | 31.952 | KV453290.1 | 2669684 | 26-scf00232 | 26 |
| AX-158092918 | 10 | 31.952 | KV453290.1 | 2671093 | 26-scf00232 | 26 |
| AX-158092919 | 10 | 31.952 | KV453290.1 | 2672835 | 26-scf00232 | 26 |
| AX-157703844 | 10 | 31.952 | KV453290.1 | 2672902 | 26-scf00232 | 26 |
| AX-158092927 | 10 | 31.952 | KV453290.1 | 2682310 | 26-scf00232 | 26 |
| AX-158092928 | 10 | 31.952 | KV453290.1 | 2683007 | 26-scf00232 | 26 |
| AX-158092935 | 10 | 31.952 | KV453290.1 | 2692355 | 26-scf00232 | 26 |
| AX-158092951 | 10 | 31.952 | KV453290.1 | 2718932 | 26-scf00232 | 26 |
| AX-158092952 | 10 | 31.952 | KV453290.1 | 2719313 | 26-scf00232 | 26 |
| AX-157825815 | 10 | 31.952 | KV453290.1 | 2721836 | 26-scf00232 | 26 |
| AX-158092955 | 10 | 31.952 | KV453290.1 | 2728476 | 26-scf00232 | 26 |
| AX-158092956 | 10 | 31.952 | KV453290.1 | 2729844 | 26-scf00232 | 26 |
| AX-158092958 | 10 | 31.952 | KV453290.1 | 2734677 | 26-scf00232 | 26 |
| AX-158092959 | 10 | 31.952 | KV453290.1 | 2736077 | 26-scf00232 | 26 |
| AX-158092967 | 10 | 31.952 | KV453290.1 | 2744082 | 26-scf00232 | 26 |
| AX-158092973 | 10 | 31.952 | KV453290.1 | 2751684 | 26-scf00232 | 26 |
| AX-158092977 | 10 | 31.952 | KV453290.1 | 2754549 | 26-scf00232 | 26 |
| AX-158092982 | 10 | 31.952 | KV453290.1 | 2760219 | 26-scf00232 | 26 |
| AX-158092983 | 10 | 31.952 | KV453290.1 | 2763792 | 26-scf00232 | 26 |
| AX-158092987 | 10 | 31.952 | KV453290.1 | 2768359 | 26-scf00232 | 26 |
| AX-157825819 | 10 | 31.952 | KV453290.1 | 2796961 | 26-scf00232 | 26 |
| AX-158093005 | 10 | 31.952 | KV453290.1 | 2797985 | 26-scf00232 | 26 |
| AX-158093013 | 10 | 31.952 | KV453290.1 | 2809570 | 26-scf00232 | 26 |
| AX-158093028 | 10 | 31.952 | KV453290.1 | 2829826 | 26-scf00232 | 26 |
| AX-158093132 | 10 | 31.952 | KV453290.1 | 3034768 | 26-scf00232 | 26 |
| AX-158093295 | 10 | 31.952 | KV453290.1 | 3322938 | 26-scf00232 | 26 |
| AX-158093296 | 10 | 31.952 | KV453290.1 | 3325390 | 26-scf00232 | 26 |
| AX-158093302 | 10 | 31.952 | KV453290.1 | 3334800 | 26-scf00232 | 26 |
| AX-157789037 | 10 | 31.952 | KV453290.1 | 3448678 | 26-scf00232 | 26 |
| AX-158093413 | 10 | 31.952 | KV453290.1 | 3623019 | 26-scf00232 | 26 |
| AX-158093423 | 10 | 31.952 | KV453290.1 | 3660310 | 26-scf00232 | 26 |
| AX-158093429 | 10 | 31.952 | KV453290.1 | 3690326 | 26-scf00232 | 26 |
| AX-158093431 | 10 | 31.952 | KV453290.1 | 3693462 | 26-scf00232 | 26 |
| AX-158093433 | 10 | 31.952 | KV453290.1 | 3699541 | 26-scf00232 | 26 |
| AX-158093434 | 10 | 31.952 | KV453290.1 | 3700238 | 26-scf00232 | 26 |
| AX-158093473 | 10 | 31.952 | KV453290.1 | 3791736 | 26-scf00232 | 26 |
| AX-157857300 | 10 | 31.952 | KV453290.1 | 3871759 | 26-scf00232 | 26 |
| AX-157825856 | 10 | 31.952 | KV453290.1 | 4246207 | 26-scf00232 | 26 |
| AX-158093757 | 10 | 31.952 | KV453290.1 | 4271232 | 26-scf00232 | 26 |
| AX-157825816 | 10 | 31.983 | KV453290.1 | 2739238 | 26-scf00232 | 26 |
| AX-157714805 | 10 | 32.171 | KV453290.1 | 2587467 | 26-scf00232 | 26 |
| AX-158092864 | 10 | 32.171 | KV453290.1 | 2612583 | 26-scf00232 | 26 |
| AX-158092950 | 10 | 32.171 | KV453290.1 | 2717593 | 26-scf00232 | 26 |
| AX-158092962 | 10 | 32.171 | KV453290.1 | 2742050 | 26-scf00232 | 26 |
| AX-158092965 | 10 | 32.171 | KV453290.1 | 2743365 | 26-scf00232 | 26 |
| AX-158092970 | 10 | 32.171 | KV453290.1 | 2745603 | 26-scf00232 | 26 |
| AX-158092972 | 10 | 32.171 | KV453290.1 | 2750457 | 26-scf00232 | 26 |
| AX-158092979 | 10 | 32.171 | KV453290.1 | 2759073 | 26-scf00232 | 26 |
| AX-158092981 | 10 | 32.171 | KV453290.1 | 2759688 | 26-scf00232 | 26 |

|              |    |        |             |         |             |    |
|--------------|----|--------|-------------|---------|-------------|----|
| AX-158092986 | 10 | 32.171 | KV453290.1  | 2767156 | 26-scf00232 | 26 |
| AX-158092988 | 10 | 32.171 | KV453290.1  | 2770617 | 26-scf00232 | 26 |
| AX-158092989 | 10 | 32.171 | KV453290.1  | 2771769 | 26-scf00232 | 26 |
| AX-158092991 | 10 | 32.171 | KV453290.1  | 2776463 | 26-scf00232 | 26 |
| AX-158092993 | 10 | 32.171 | KV453290.1  | 2777510 | 26-scf00232 | 26 |
| AX-157750000 | 10 | 32.171 | KV453290.1  | 2778374 | 26-scf00232 | 26 |
| AX-158092994 | 10 | 32.171 | KV453290.1  | 2780689 | 26-scf00232 | 26 |
| AX-158092996 | 10 | 32.171 | KV453290.1  | 2783177 | 26-scf00232 | 26 |
| AX-158092998 | 10 | 32.171 | KV453290.1  | 2785780 | 26-scf00232 | 26 |
| AX-157744369 | 10 | 32.171 | KV453290.1  | 2787058 | 26-scf00232 | 26 |
| AX-157825818 | 10 | 32.171 | KV453290.1  | 2790029 | 26-scf00232 | 26 |
| AX-157748659 | 10 | 32.171 | KV453290.1  | 2790395 | 26-scf00232 | 26 |
| AX-157696048 | 10 | 32.171 | KV453290.1  | 2791841 | 26-scf00232 | 26 |
| AX-158093000 | 10 | 32.171 | KV453290.1  | 2792970 | 26-scf00232 | 26 |
| AX-158093002 | 10 | 32.171 | KV453290.1  | 2795225 | 26-scf00232 | 26 |
| AX-158379975 | 10 | 32.171 | KV453290.1  | 2796262 | 26-scf00232 | 26 |
| AX-158093004 | 10 | 32.171 | KV453290.1  | 2796585 | 26-scf00232 | 26 |
| AX-157748311 | 10 | 32.171 | KV453290.1  | 2800959 | 26-scf00232 | 26 |
| AX-158093010 | 10 | 32.171 | KV453290.1  | 2804088 | 26-scf00232 | 26 |
| AX-158384586 | 10 | 32.171 | KV453290.1  | 2813126 | 26-scf00232 | 26 |
| AX-157735616 | 10 | 32.171 | KV453290.1  | 2814830 | 26-scf00232 | 26 |
| AX-157877351 | 10 | 32.171 | KV453290.1  | 2821106 | 26-scf00232 | 26 |
| AX-158093024 | 10 | 32.171 | KV453290.1  | 2828204 | 26-scf00232 | 26 |
| AX-158093083 | 10 | 32.171 | KV453290.1  | 2937068 | 26-scf00232 | 26 |
| AX-158093196 | 10 | 32.171 | KV453290.1  | 3103303 | 26-scf00232 | 26 |
| AX-158093201 | 10 | 32.171 | KV453290.1  | 3107218 | 26-scf00232 | 26 |
| AX-158410101 | 10 | 32.171 | KV453290.1  | 3125588 | 26-scf00232 | 26 |
| AX-157877352 | 10 | 32.171 | KV453290.1  | 3326495 | 26-scf00232 | 26 |
| AX-158410105 | 10 | 32.171 | KV453290.1  | 3329323 | 26-scf00232 | 26 |
| AX-157877353 | 10 | 32.171 | KV453290.1  | 3337435 | 26-scf00232 | 26 |
| AX-158093304 | 10 | 32.171 | KV453290.1  | 3346284 | 26-scf00232 | 26 |
| AX-158410106 | 10 | 32.171 | KV453290.1  | 3355461 | 26-scf00232 | 26 |
| AX-157722666 | 10 | 32.171 | KV453290.1  | 3414537 | 26-scf00232 | 26 |
| AX-158093330 | 10 | 32.171 | KV453290.1  | 3416853 | 26-scf00232 | 26 |
| AX-158093410 | 10 | 32.171 | KV453290.1  | 3615963 | 26-scf00232 | 26 |
| AX-157707320 | 10 | 32.171 | 3ML01034007 | 410     | scf09677_1  | UN |
| AX-158092785 | 10 | 32.389 | KV453290.1  | 2507814 | 26-scf00232 | 26 |
| AX-158092792 | 10 | 32.389 | KV453290.1  | 2515822 | 26-scf00232 | 26 |
| AX-158092812 | 10 | 32.389 | KV453290.1  | 2541083 | 26-scf00232 | 26 |
| AX-158092816 | 10 | 32.389 | KV453290.1  | 2554129 | 26-scf00232 | 26 |
| AX-157825801 | 10 | 32.389 | KV453290.1  | 2566498 | 26-scf00232 | 26 |
| AX-158092826 | 10 | 32.389 | KV453290.1  | 2570783 | 26-scf00232 | 26 |
| AX-158092857 | 10 | 32.389 | KV453290.1  | 2607787 | 26-scf00232 | 26 |
| AX-158092902 | 10 | 32.389 | KV453290.1  | 2656388 | 26-scf00232 | 26 |
| AX-158092932 | 10 | 32.389 | KV453290.1  | 2687144 | 26-scf00232 | 26 |
| AX-158092936 | 10 | 32.389 | KV453290.1  | 2692555 | 26-scf00232 | 26 |
| AX-158092937 | 10 | 32.389 | KV453290.1  | 2693270 | 26-scf00232 | 26 |
| AX-158092938 | 10 | 32.389 | KV453290.1  | 2693700 | 26-scf00232 | 26 |
| AX-158092960 | 10 | 32.389 | KV453290.1  | 2740678 | 26-scf00232 | 26 |
| AX-158092968 | 10 | 32.389 | KV453290.1  | 2744337 | 26-scf00232 | 26 |
| AX-158093006 | 10 | 32.389 | KV453290.1  | 2799891 | 26-scf00232 | 26 |

|              |    |        |            |         |             |    |
|--------------|----|--------|------------|---------|-------------|----|
| AX-158093012 | 10 | 32.389 | KV453290.1 | 2807625 | 26-scf00232 | 26 |
| AX-158093016 | 10 | 32.389 | KV453290.1 | 2817685 | 26-scf00232 | 26 |
| AX-158093019 | 10 | 32.389 | KV453290.1 | 2822802 | 26-scf00232 | 26 |
| AX-158093021 | 10 | 32.389 | KV453290.1 | 2825469 | 26-scf00232 | 26 |
| AX-158093022 | 10 | 32.389 | KV453290.1 | 2826705 | 26-scf00232 | 26 |
| AX-158093025 | 10 | 32.389 | KV453290.1 | 2828700 | 26-scf00232 | 26 |
| AX-158093029 | 10 | 32.389 | KV453290.1 | 2830672 | 26-scf00232 | 26 |
| AX-158093030 | 10 | 32.389 | KV453290.1 | 2831427 | 26-scf00232 | 26 |
| AX-158093035 | 10 | 32.389 | KV453290.1 | 2845629 | 26-scf00232 | 26 |
| AX-158093038 | 10 | 32.389 | KV453290.1 | 2847443 | 26-scf00232 | 26 |
| AX-158093039 | 10 | 32.389 | KV453290.1 | 2847894 | 26-scf00232 | 26 |
| AX-158093040 | 10 | 32.389 | KV453290.1 | 2848255 | 26-scf00232 | 26 |
| AX-158093041 | 10 | 32.389 | KV453290.1 | 2850395 | 26-scf00232 | 26 |
| AX-158093046 | 10 | 32.389 | KV453290.1 | 2856757 | 26-scf00232 | 26 |
| AX-158093048 | 10 | 32.389 | KV453290.1 | 2859585 | 26-scf00232 | 26 |
| AX-158093050 | 10 | 32.389 | KV453290.1 | 2866182 | 26-scf00232 | 26 |
| AX-158093053 | 10 | 32.389 | KV453290.1 | 2867863 | 26-scf00232 | 26 |
| AX-158093054 | 10 | 32.389 | KV453290.1 | 2868116 | 26-scf00232 | 26 |
| AX-158093057 | 10 | 32.389 | KV453290.1 | 2871893 | 26-scf00232 | 26 |
| AX-158093069 | 10 | 32.389 | KV453290.1 | 2911721 | 26-scf00232 | 26 |
| AX-158093079 | 10 | 32.389 | KV453290.1 | 2929084 | 26-scf00232 | 26 |
| AX-158093080 | 10 | 32.389 | KV453290.1 | 2930454 | 26-scf00232 | 26 |
| AX-158093086 | 10 | 32.389 | KV453290.1 | 2939269 | 26-scf00232 | 26 |
| AX-158093088 | 10 | 32.389 | KV453290.1 | 2945038 | 26-scf00232 | 26 |
| AX-158416827 | 10 | 32.389 | KV453290.1 | 2946873 | 26-scf00232 | 26 |
| AX-158093091 | 10 | 32.389 | KV453290.1 | 2953263 | 26-scf00232 | 26 |
| AX-158093092 | 10 | 32.389 | KV453290.1 | 2955538 | 26-scf00232 | 26 |
| AX-158093095 | 10 | 32.389 | KV453290.1 | 2959256 | 26-scf00232 | 26 |
| AX-158093096 | 10 | 32.389 | KV453290.1 | 2960556 | 26-scf00232 | 26 |
| AX-158416828 | 10 | 32.389 | KV453290.1 | 2961407 | 26-scf00232 | 26 |
| AX-158410099 | 10 | 32.389 | KV453290.1 | 2961566 | 26-scf00232 | 26 |
| AX-158093102 | 10 | 32.389 | KV453290.1 | 2974728 | 26-scf00232 | 26 |
| AX-158093106 | 10 | 32.389 | KV453290.1 | 2978812 | 26-scf00232 | 26 |
| AX-158093107 | 10 | 32.389 | KV453290.1 | 2981105 | 26-scf00232 | 26 |
| AX-158093112 | 10 | 32.389 | KV453290.1 | 2997153 | 26-scf00232 | 26 |
| AX-158093113 | 10 | 32.389 | KV453290.1 | 2998390 | 26-scf00232 | 26 |
| AX-158093116 | 10 | 32.389 | KV453290.1 | 3003918 | 26-scf00232 | 26 |
| AX-158093117 | 10 | 32.389 | KV453290.1 | 3006594 | 26-scf00232 | 26 |
| AX-158093118 | 10 | 32.389 | KV453290.1 | 3007365 | 26-scf00232 | 26 |
| AX-158093119 | 10 | 32.389 | KV453290.1 | 3007735 | 26-scf00232 | 26 |
| AX-158093122 | 10 | 32.389 | KV453290.1 | 3010825 | 26-scf00232 | 26 |
| AX-158093128 | 10 | 32.389 | KV453290.1 | 3023781 | 26-scf00232 | 26 |
| AX-158093129 | 10 | 32.389 | KV453290.1 | 3027407 | 26-scf00232 | 26 |
| AX-158093134 | 10 | 32.389 | KV453290.1 | 3037835 | 26-scf00232 | 26 |
| AX-158093135 | 10 | 32.389 | KV453290.1 | 3038771 | 26-scf00232 | 26 |
| AX-158093136 | 10 | 32.389 | KV453290.1 | 3039296 | 26-scf00232 | 26 |
| AX-158093137 | 10 | 32.389 | KV453290.1 | 3039877 | 26-scf00232 | 26 |
| AX-158093143 | 10 | 32.389 | KV453290.1 | 3047848 | 26-scf00232 | 26 |
| AX-158093147 | 10 | 32.389 | KV453290.1 | 3050666 | 26-scf00232 | 26 |
| AX-158093148 | 10 | 32.389 | KV453290.1 | 3052416 | 26-scf00232 | 26 |
| AX-158093152 | 10 | 32.389 | KV453290.1 | 3054251 | 26-scf00232 | 26 |

|              |    |        |            |         |             |    |
|--------------|----|--------|------------|---------|-------------|----|
| AX-158093154 | 10 | 32.389 | KV453290.1 | 3057872 | 26-scf00232 | 26 |
| AX-158093156 | 10 | 32.389 | KV453290.1 | 3058621 | 26-scf00232 | 26 |
| AX-158093158 | 10 | 32.389 | KV453290.1 | 3062216 | 26-scf00232 | 26 |
| AX-158093164 | 10 | 32.389 | KV453290.1 | 3066990 | 26-scf00232 | 26 |
| AX-158093166 | 10 | 32.389 | KV453290.1 | 3071413 | 26-scf00232 | 26 |
| AX-158093168 | 10 | 32.389 | KV453290.1 | 3075071 | 26-scf00232 | 26 |
| AX-158093170 | 10 | 32.389 | KV453290.1 | 3077571 | 26-scf00232 | 26 |
| AX-157857290 | 10 | 32.389 | KV453290.1 | 3078626 | 26-scf00232 | 26 |
| AX-158093171 | 10 | 32.389 | KV453290.1 | 3078832 | 26-scf00232 | 26 |
| AX-158093174 | 10 | 32.389 | KV453290.1 | 3080997 | 26-scf00232 | 26 |
| AX-158093175 | 10 | 32.389 | KV453290.1 | 3082708 | 26-scf00232 | 26 |
| AX-158093176 | 10 | 32.389 | KV453290.1 | 3084433 | 26-scf00232 | 26 |
| AX-158093177 | 10 | 32.389 | KV453290.1 | 3085133 | 26-scf00232 | 26 |
| AX-158093179 | 10 | 32.389 | KV453290.1 | 3086969 | 26-scf00232 | 26 |
| AX-158093180 | 10 | 32.389 | KV453290.1 | 3088171 | 26-scf00232 | 26 |
| AX-158093181 | 10 | 32.389 | KV453290.1 | 3088576 | 26-scf00232 | 26 |
| AX-158093182 | 10 | 32.389 | KV453290.1 | 3089960 | 26-scf00232 | 26 |
| AX-158093183 | 10 | 32.389 | KV453290.1 | 3090655 | 26-scf00232 | 26 |
| AX-158093186 | 10 | 32.389 | KV453290.1 | 3092119 | 26-scf00232 | 26 |
| AX-158093190 | 10 | 32.389 | KV453290.1 | 3096624 | 26-scf00232 | 26 |
| AX-158093191 | 10 | 32.389 | KV453290.1 | 3097062 | 26-scf00232 | 26 |
| AX-158093194 | 10 | 32.389 | KV453290.1 | 3099060 | 26-scf00232 | 26 |
| AX-158093195 | 10 | 32.389 | KV453290.1 | 3102217 | 26-scf00232 | 26 |
| AX-158093197 | 10 | 32.389 | KV453290.1 | 3103756 | 26-scf00232 | 26 |
| AX-157857291 | 10 | 32.389 | KV453290.1 | 3103991 | 26-scf00232 | 26 |
| AX-158093198 | 10 | 32.389 | KV453290.1 | 3105809 | 26-scf00232 | 26 |
| AX-158093199 | 10 | 32.389 | KV453290.1 | 3106137 | 26-scf00232 | 26 |
| AX-158093200 | 10 | 32.389 | KV453290.1 | 3106687 | 26-scf00232 | 26 |
| AX-158093203 | 10 | 32.389 | KV453290.1 | 3109224 | 26-scf00232 | 26 |
| AX-158093204 | 10 | 32.389 | KV453290.1 | 3109694 | 26-scf00232 | 26 |
| AX-158093205 | 10 | 32.389 | KV453290.1 | 3113714 | 26-scf00232 | 26 |
| AX-158093206 | 10 | 32.389 | KV453290.1 | 3114611 | 26-scf00232 | 26 |
| AX-157857293 | 10 | 32.389 | KV453290.1 | 3115667 | 26-scf00232 | 26 |
| AX-158093207 | 10 | 32.389 | KV453290.1 | 3117089 | 26-scf00232 | 26 |
| AX-158093208 | 10 | 32.389 | KV453290.1 | 3117655 | 26-scf00232 | 26 |
| AX-158093210 | 10 | 32.389 | KV453290.1 | 3119721 | 26-scf00232 | 26 |
| AX-158093211 | 10 | 32.389 | KV453290.1 | 3121854 | 26-scf00232 | 26 |
| AX-158093213 | 10 | 32.389 | KV453290.1 | 3123931 | 26-scf00232 | 26 |
| AX-158407269 | 10 | 32.389 | KV453290.1 | 3125649 | 26-scf00232 | 26 |
| AX-158093215 | 10 | 32.389 | KV453290.1 | 3126664 | 26-scf00232 | 26 |
| AX-158093216 | 10 | 32.389 | KV453290.1 | 3131762 | 26-scf00232 | 26 |
| AX-158093224 | 10 | 32.389 | KV453290.1 | 3145611 | 26-scf00232 | 26 |
| AX-158093225 | 10 | 32.389 | KV453290.1 | 3146860 | 26-scf00232 | 26 |
| AX-158093226 | 10 | 32.389 | KV453290.1 | 3147906 | 26-scf00232 | 26 |
| AX-158093228 | 10 | 32.389 | KV453290.1 | 3149005 | 26-scf00232 | 26 |
| AX-157825827 | 10 | 32.389 | KV453290.1 | 3154926 | 26-scf00232 | 26 |
| AX-158093231 | 10 | 32.389 | KV453290.1 | 3156010 | 26-scf00232 | 26 |
| AX-158093233 | 10 | 32.389 | KV453290.1 | 3162517 | 26-scf00232 | 26 |
| AX-158093236 | 10 | 32.389 | KV453290.1 | 3165796 | 26-scf00232 | 26 |
| AX-157757539 | 10 | 32.389 | KV453290.1 | 3166381 | 26-scf00232 | 26 |
| AX-158093238 | 10 | 32.389 | KV453290.1 | 3170635 | 26-scf00232 | 26 |

|              |    |        |            |         |             |    |
|--------------|----|--------|------------|---------|-------------|----|
| AX-158410102 | 10 | 32.389 | KV453290.1 | 3185847 | 26-scf00232 | 26 |
| AX-158093248 | 10 | 32.389 | KV453290.1 | 3214000 | 26-scf00232 | 26 |
| AX-158093249 | 10 | 32.389 | KV453290.1 | 3216336 | 26-scf00232 | 26 |
| AX-158093252 | 10 | 32.389 | KV453290.1 | 3220107 | 26-scf00232 | 26 |
| AX-158093256 | 10 | 32.389 | KV453290.1 | 3227111 | 26-scf00232 | 26 |
| AX-157825828 | 10 | 32.389 | KV453290.1 | 3233078 | 26-scf00232 | 26 |
| AX-158093259 | 10 | 32.389 | KV453290.1 | 3234514 | 26-scf00232 | 26 |
| AX-158093260 | 10 | 32.389 | KV453290.1 | 3234929 | 26-scf00232 | 26 |
| AX-158093266 | 10 | 32.389 | KV453290.1 | 3245139 | 26-scf00232 | 26 |
| AX-158093268 | 10 | 32.389 | KV453290.1 | 3247746 | 26-scf00232 | 26 |
| AX-158093269 | 10 | 32.389 | KV453290.1 | 3251735 | 26-scf00232 | 26 |
| AX-158093279 | 10 | 32.389 | KV453290.1 | 3272076 | 26-scf00232 | 26 |
| AX-157757268 | 10 | 32.389 | KV453290.1 | 3272778 | 26-scf00232 | 26 |
| AX-158093280 | 10 | 32.389 | KV453290.1 | 3273840 | 26-scf00232 | 26 |
| AX-158093281 | 10 | 32.389 | KV453290.1 | 3276632 | 26-scf00232 | 26 |
| AX-158093283 | 10 | 32.389 | KV453290.1 | 3284212 | 26-scf00232 | 26 |
| AX-158093284 | 10 | 32.389 | KV453290.1 | 3288067 | 26-scf00232 | 26 |
| AX-158093288 | 10 | 32.389 | KV453290.1 | 3301831 | 26-scf00232 | 26 |
| AX-158093290 | 10 | 32.389 | KV453290.1 | 3308429 | 26-scf00232 | 26 |
| AX-158093291 | 10 | 32.389 | KV453290.1 | 3310792 | 26-scf00232 | 26 |
| AX-157723700 | 10 | 32.389 | KV453290.1 | 3324504 | 26-scf00232 | 26 |
| AX-158093299 | 10 | 32.389 | KV453290.1 | 3331854 | 26-scf00232 | 26 |
| AX-158093311 | 10 | 32.389 | KV453290.1 | 3354465 | 26-scf00232 | 26 |
| AX-158410107 | 10 | 32.389 | KV453290.1 | 3355607 | 26-scf00232 | 26 |
| AX-158093313 | 10 | 32.389 | KV453290.1 | 3358940 | 26-scf00232 | 26 |
| AX-158093314 | 10 | 32.389 | KV453290.1 | 3361409 | 26-scf00232 | 26 |
| AX-157773543 | 10 | 32.389 | KV453290.1 | 3361958 | 26-scf00232 | 26 |
| AX-158093316 | 10 | 32.389 | KV453290.1 | 3362854 | 26-scf00232 | 26 |
| AX-158093318 | 10 | 32.389 | KV453290.1 | 3366713 | 26-scf00232 | 26 |
| AX-158093319 | 10 | 32.389 | KV453290.1 | 3369366 | 26-scf00232 | 26 |
| AX-158422575 | 10 | 32.389 | KV453290.1 | 3371813 | 26-scf00232 | 26 |
| AX-157857297 | 10 | 32.389 | KV453290.1 | 3391554 | 26-scf00232 | 26 |
| AX-158093335 | 10 | 32.389 | KV453290.1 | 3423495 | 26-scf00232 | 26 |
| AX-158093338 | 10 | 32.389 | KV453290.1 | 3426387 | 26-scf00232 | 26 |
| AX-158093340 | 10 | 32.389 | KV453290.1 | 3438546 | 26-scf00232 | 26 |
| AX-158093341 | 10 | 32.389 | KV453290.1 | 3439975 | 26-scf00232 | 26 |
| AX-158093342 | 10 | 32.389 | KV453290.1 | 3443702 | 26-scf00232 | 26 |
| AX-158093344 | 10 | 32.389 | KV453290.1 | 3455041 | 26-scf00232 | 26 |
| AX-158093346 | 10 | 32.389 | KV453290.1 | 3464658 | 26-scf00232 | 26 |
| AX-158093350 | 10 | 32.389 | KV453290.1 | 3477762 | 26-scf00232 | 26 |
| AX-158093361 | 10 | 32.389 | KV453290.1 | 3491504 | 26-scf00232 | 26 |
| AX-157755405 | 10 | 32.389 | KV453290.1 | 3493836 | 26-scf00232 | 26 |
| AX-158093369 | 10 | 32.389 | KV453290.1 | 3506475 | 26-scf00232 | 26 |
| AX-157789039 | 10 | 32.389 | KV453290.1 | 3509169 | 26-scf00232 | 26 |
| AX-158093377 | 10 | 32.389 | KV453290.1 | 3522354 | 26-scf00232 | 26 |
| AX-158093378 | 10 | 32.389 | KV453290.1 | 3523470 | 26-scf00232 | 26 |
| AX-158093379 | 10 | 32.389 | KV453290.1 | 3528700 | 26-scf00232 | 26 |
| AX-158093384 | 10 | 32.389 | KV453290.1 | 3536372 | 26-scf00232 | 26 |
| AX-158410114 | 10 | 32.389 | KV453290.1 | 3537514 | 26-scf00232 | 26 |
| AX-157695650 | 10 | 32.389 | KV453290.1 | 3586991 | 26-scf00232 | 26 |
| AX-158093395 | 10 | 32.389 | KV453290.1 | 3587487 | 26-scf00232 | 26 |

|              |    |        |            |         |             |    |
|--------------|----|--------|------------|---------|-------------|----|
| AX-158093396 | 10 | 32.389 | KV453290.1 | 3591198 | 26-scf00232 | 26 |
| AX-158093397 | 10 | 32.389 | KV453290.1 | 3592292 | 26-scf00232 | 26 |
| AX-158093399 | 10 | 32.389 | KV453290.1 | 3594620 | 26-scf00232 | 26 |
| AX-158093400 | 10 | 32.389 | KV453290.1 | 3595198 | 26-scf00232 | 26 |
| AX-158093401 | 10 | 32.389 | KV453290.1 | 3598429 | 26-scf00232 | 26 |
| AX-158093405 | 10 | 32.389 | KV453290.1 | 3606467 | 26-scf00232 | 26 |
| AX-158093424 | 10 | 32.389 | KV453290.1 | 3665152 | 26-scf00232 | 26 |
| AX-158093435 | 10 | 32.389 | KV453290.1 | 3700753 | 26-scf00232 | 26 |
| AX-158093445 | 10 | 32.389 | KV453290.1 | 3731397 | 26-scf00232 | 26 |
| AX-157755347 | 10 | 32.389 | KV453290.1 | 3757970 | 26-scf00232 | 26 |
| AX-158093478 | 10 | 32.389 | KV453290.1 | 3794973 | 26-scf00232 | 26 |
| AX-158410121 | 10 | 32.389 | KV453290.1 | 3804577 | 26-scf00232 | 26 |
| AX-158410122 | 10 | 32.389 | KV453290.1 | 3804983 | 26-scf00232 | 26 |
| AX-157695551 | 10 | 32.389 | KV453290.1 | 3810365 | 26-scf00232 | 26 |
| AX-158093485 | 10 | 32.389 | KV453290.1 | 3820085 | 26-scf00232 | 26 |
| AX-158410123 | 10 | 32.389 | KV453290.1 | 3827779 | 26-scf00232 | 26 |
| AX-158093486 | 10 | 32.389 | KV453290.1 | 3833349 | 26-scf00232 | 26 |
| AX-157709472 | 10 | 32.389 | KV453290.1 | 3833796 | 26-scf00232 | 26 |
| AX-158093491 | 10 | 32.389 | KV453290.1 | 3839953 | 26-scf00232 | 26 |
| AX-158093499 | 10 | 32.389 | KV453290.1 | 3860739 | 26-scf00232 | 26 |
| AX-158093508 | 10 | 32.389 | KV453290.1 | 3885743 | 26-scf00232 | 26 |
| AX-158093514 | 10 | 32.389 | KV453290.1 | 3904913 | 26-scf00232 | 26 |
| AX-158093519 | 10 | 32.389 | KV453290.1 | 3910814 | 26-scf00232 | 26 |
| AX-158093524 | 10 | 32.389 | KV453290.1 | 3918146 | 26-scf00232 | 26 |
| AX-158093527 | 10 | 32.389 | KV453290.1 | 3925318 | 26-scf00232 | 26 |
| AX-158093542 | 10 | 32.389 | KV453290.1 | 3944328 | 26-scf00232 | 26 |
| AX-158093553 | 10 | 32.389 | KV453290.1 | 3974033 | 26-scf00232 | 26 |
| AX-158093556 | 10 | 32.389 | KV453290.1 | 3976458 | 26-scf00232 | 26 |
| AX-158093617 | 10 | 32.389 | KV453290.1 | 4074668 | 26-scf00232 | 26 |
| AX-158093688 | 10 | 32.389 | KV453290.1 | 4180911 | 26-scf00232 | 26 |
| AX-158093689 | 10 | 32.389 | KV453290.1 | 4183188 | 26-scf00232 | 26 |
| AX-158093704 | 10 | 32.389 | KV453290.1 | 4203114 | 26-scf00232 | 26 |
| AX-158093725 | 10 | 32.389 | KV453290.1 | 4228756 | 26-scf00232 | 26 |
| AX-157825857 | 10 | 32.389 | KV453290.1 | 4256434 | 26-scf00232 | 26 |
| AX-158093748 | 10 | 32.389 | KV453290.1 | 4258311 | 26-scf00232 | 26 |
| AX-157825858 | 10 | 32.389 | KV453290.1 | 4260100 | 26-scf00232 | 26 |
| AX-158093751 | 10 | 32.389 | KV453290.1 | 4263850 | 26-scf00232 | 26 |
| AX-157825859 | 10 | 32.389 | KV453290.1 | 4269235 | 26-scf00232 | 26 |
| AX-157749352 | 10 | 32.389 | KV453290.1 | 4276840 | 26-scf00232 | 26 |
| AX-158093782 | 10 | 32.389 | KV453290.1 | 4319356 | 26-scf00232 | 26 |
| AX-158093785 | 10 | 32.389 | KV453290.1 | 4322316 | 26-scf00232 | 26 |
| AX-157743689 | 10 | 32.389 | KV453290.1 | 4332497 | 26-scf00232 | 26 |
| AX-158093790 | 10 | 32.389 | KV453290.1 | 4335251 | 26-scf00232 | 26 |
| AX-157885715 | 10 | 32.389 | KV453290.1 | 4340225 | 26-scf00232 | 26 |
| AX-158093796 | 10 | 32.389 | KV453290.1 | 4345484 | 26-scf00232 | 26 |
| AX-158093857 | 10 | 32.389 | KV453290.1 | 4435013 | 26-scf00232 | 26 |
| AX-158093487 | 10 | 32.441 | KV453290.1 | 3834329 | 26-scf00232 | 26 |
| AX-158092743 | 10 | 32.498 | KV453290.1 | 2440444 | 26-scf00232 | 26 |
| AX-158092806 | 10 | 32.498 | KV453290.1 | 2535391 | 26-scf00232 | 26 |
| AX-157825808 | 10 | 32.498 | KV453290.1 | 2593500 | 26-scf00232 | 26 |
| AX-158092984 | 10 | 32.498 | KV453290.1 | 2766144 | 26-scf00232 | 26 |

|              |    |        |            |         |             |    |
|--------------|----|--------|------------|---------|-------------|----|
| AX-158092990 | 10 | 32.498 | KV453290.1 | 2772159 | 26-scf00232 | 26 |
| AX-158093032 | 10 | 32.498 | KV453290.1 | 2833568 | 26-scf00232 | 26 |
| AX-157750840 | 10 | 32.498 | KV453290.1 | 2854115 | 26-scf00232 | 26 |
| AX-158093145 | 10 | 32.498 | KV453290.1 | 3048759 | 26-scf00232 | 26 |
| AX-158093161 | 10 | 32.498 | KV453290.1 | 3064251 | 26-scf00232 | 26 |
| AX-158093184 | 10 | 32.498 | KV453290.1 | 3091338 | 26-scf00232 | 26 |
| AX-157857292 | 10 | 32.498 | KV453290.1 | 3107804 | 26-scf00232 | 26 |
| AX-158093239 | 10 | 32.498 | KV453290.1 | 3185286 | 26-scf00232 | 26 |
| AX-158093310 | 10 | 32.498 | KV453290.1 | 3353892 | 26-scf00232 | 26 |
| AX-158093312 | 10 | 32.498 | KV453290.1 | 3358634 | 26-scf00232 | 26 |
| AX-158093332 | 10 | 32.498 | KV453290.1 | 3417594 | 26-scf00232 | 26 |
| AX-158093347 | 10 | 32.498 | KV453290.1 | 3467815 | 26-scf00232 | 26 |
| AX-157727320 | 10 | 32.498 | KV453290.1 | 3542928 | 26-scf00232 | 26 |
| AX-158093386 | 10 | 32.498 | KV453290.1 | 3546322 | 26-scf00232 | 26 |
| AX-158093387 | 10 | 32.498 | KV453290.1 | 3547811 | 26-scf00232 | 26 |
| AX-158093389 | 10 | 32.498 | KV453290.1 | 3559576 | 26-scf00232 | 26 |
| AX-158410118 | 10 | 32.498 | KV453290.1 | 3562332 | 26-scf00232 | 26 |
| AX-158093391 | 10 | 32.498 | KV453290.1 | 3570331 | 26-scf00232 | 26 |
| AX-158093392 | 10 | 32.498 | KV453290.1 | 3572913 | 26-scf00232 | 26 |
| AX-158093403 | 10 | 32.498 | KV453290.1 | 3600339 | 26-scf00232 | 26 |
| AX-158093404 | 10 | 32.498 | KV453290.1 | 3603862 | 26-scf00232 | 26 |
| AX-158093409 | 10 | 32.498 | KV453290.1 | 3615177 | 26-scf00232 | 26 |
| AX-158093417 | 10 | 32.498 | KV453290.1 | 3633205 | 26-scf00232 | 26 |
| AX-158093418 | 10 | 32.498 | KV453290.1 | 3635579 | 26-scf00232 | 26 |
| AX-158093421 | 10 | 32.498 | KV453290.1 | 3648031 | 26-scf00232 | 26 |
| AX-157701685 | 10 | 32.498 | KV453290.1 | 3660241 | 26-scf00232 | 26 |
| AX-158093425 | 10 | 32.498 | KV453290.1 | 3675027 | 26-scf00232 | 26 |
| AX-158093440 | 10 | 32.498 | KV453290.1 | 3712122 | 26-scf00232 | 26 |
| AX-158093441 | 10 | 32.498 | KV453290.1 | 3713402 | 26-scf00232 | 26 |
| AX-158093444 | 10 | 32.498 | KV453290.1 | 3722234 | 26-scf00232 | 26 |
| AX-158093446 | 10 | 32.498 | KV453290.1 | 3734368 | 26-scf00232 | 26 |
| AX-158093447 | 10 | 32.498 | KV453290.1 | 3741520 | 26-scf00232 | 26 |
| AX-158416830 | 10 | 32.498 | KV453290.1 | 3747590 | 26-scf00232 | 26 |
| AX-158093456 | 10 | 32.498 | KV453290.1 | 3763690 | 26-scf00232 | 26 |
| AX-158093457 | 10 | 32.498 | KV453290.1 | 3766742 | 26-scf00232 | 26 |
| AX-158410120 | 10 | 32.498 | KV453290.1 | 3767801 | 26-scf00232 | 26 |
| AX-158093458 | 10 | 32.498 | KV453290.1 | 3770219 | 26-scf00232 | 26 |
| AX-158093459 | 10 | 32.498 | KV453290.1 | 3770973 | 26-scf00232 | 26 |
| AX-158093462 | 10 | 32.498 | KV453290.1 | 3776844 | 26-scf00232 | 26 |
| AX-158093464 | 10 | 32.498 | KV453290.1 | 3781249 | 26-scf00232 | 26 |
| AX-158093465 | 10 | 32.498 | KV453290.1 | 3783204 | 26-scf00232 | 26 |
| AX-158093466 | 10 | 32.498 | KV453290.1 | 3785422 | 26-scf00232 | 26 |
| AX-158093468 | 10 | 32.498 | KV453290.1 | 3787291 | 26-scf00232 | 26 |
| AX-158093470 | 10 | 32.498 | KV453290.1 | 3789134 | 26-scf00232 | 26 |
| AX-158093476 | 10 | 32.498 | KV453290.1 | 3793273 | 26-scf00232 | 26 |
| AX-157697250 | 10 | 32.498 | KV453290.1 | 3811913 | 26-scf00232 | 26 |
| AX-157697252 | 10 | 32.498 | KV453290.1 | 3811998 | 26-scf00232 | 26 |
| AX-158093483 | 10 | 32.498 | KV453290.1 | 3812353 | 26-scf00232 | 26 |
| AX-158410125 | 10 | 32.498 | KV453290.1 | 3836978 | 26-scf00232 | 26 |
| AX-158093489 | 10 | 32.498 | KV453290.1 | 3838502 | 26-scf00232 | 26 |
| AX-158093490 | 10 | 32.498 | KV453290.1 | 3838880 | 26-scf00232 | 26 |



|              |    |        |            |         |             |    |
|--------------|----|--------|------------|---------|-------------|----|
| AX-158093492 | 10 | 32.498 | KV453290.1 | 3841430 | 26-scf00232 | 26 |
| AX-158093493 | 10 | 32.498 | KV453290.1 | 3842014 | 26-scf00232 | 26 |
| AX-158093504 | 10 | 32.498 | KV453290.1 | 3868355 | 26-scf00232 | 26 |
| AX-157857299 | 10 | 32.498 | KV453290.1 | 3868426 | 26-scf00232 | 26 |
| AX-158093507 | 10 | 32.498 | KV453290.1 | 3879337 | 26-scf00232 | 26 |
| AX-158093509 | 10 | 32.498 | KV453290.1 | 3887176 | 26-scf00232 | 26 |
| AX-158410128 | 10 | 32.498 | KV453290.1 | 3889016 | 26-scf00232 | 26 |
| AX-158093510 | 10 | 32.498 | KV453290.1 | 3891699 | 26-scf00232 | 26 |
| AX-158093511 | 10 | 32.498 | KV453290.1 | 3892095 | 26-scf00232 | 26 |
| AX-158093512 | 10 | 32.498 | KV453290.1 | 3901417 | 26-scf00232 | 26 |
| AX-158093513 | 10 | 32.498 | KV453290.1 | 3903594 | 26-scf00232 | 26 |
| AX-157698366 | 10 | 32.498 | KV453290.1 | 3908482 | 26-scf00232 | 26 |
| AX-158093517 | 10 | 32.498 | KV453290.1 | 3909269 | 26-scf00232 | 26 |
| AX-158093520 | 10 | 32.498 | KV453290.1 | 3912036 | 26-scf00232 | 26 |
| AX-158093521 | 10 | 32.498 | KV453290.1 | 3913113 | 26-scf00232 | 26 |
| AX-157877356 | 10 | 32.498 | KV453290.1 | 3916322 | 26-scf00232 | 26 |
| AX-158093522 | 10 | 32.498 | KV453290.1 | 3917387 | 26-scf00232 | 26 |
| AX-157870899 | 10 | 32.498 | KV453290.1 | 3925057 | 26-scf00232 | 26 |
| AX-157857301 | 10 | 32.498 | KV453290.1 | 3932280 | 26-scf00232 | 26 |
| AX-158093534 | 10 | 32.498 | KV453290.1 | 3934862 | 26-scf00232 | 26 |
| AX-158093536 | 10 | 32.498 | KV453290.1 | 3935703 | 26-scf00232 | 26 |
| AX-158407283 | 10 | 32.498 | KV453290.1 | 3937864 | 26-scf00232 | 26 |
| AX-158093538 | 10 | 32.498 | KV453290.1 | 3938302 | 26-scf00232 | 26 |
| AX-158093539 | 10 | 32.498 | KV453290.1 | 3941215 | 26-scf00232 | 26 |
| AX-158093540 | 10 | 32.498 | KV453290.1 | 3942762 | 26-scf00232 | 26 |
| AX-158093541 | 10 | 32.498 | KV453290.1 | 3943210 | 26-scf00232 | 26 |
| AX-158093545 | 10 | 32.498 | KV453290.1 | 3950708 | 26-scf00232 | 26 |
| AX-157863244 | 10 | 32.498 | KV453290.1 | 3950761 | 26-scf00232 | 26 |
| AX-158093546 | 10 | 32.498 | KV453290.1 | 3953118 | 26-scf00232 | 26 |
| AX-158093547 | 10 | 32.498 | KV453290.1 | 3955839 | 26-scf00232 | 26 |
| AX-157885711 | 10 | 32.498 | KV453290.1 | 3956268 | 26-scf00232 | 26 |
| AX-157825831 | 10 | 32.498 | KV453290.1 | 3963359 | 26-scf00232 | 26 |
| AX-158093554 | 10 | 32.498 | KV453290.1 | 3974567 | 26-scf00232 | 26 |
| AX-158093555 | 10 | 32.498 | KV453290.1 | 3975338 | 26-scf00232 | 26 |
| AX-158093561 | 10 | 32.498 | KV453290.1 | 3991108 | 26-scf00232 | 26 |
| AX-158093562 | 10 | 32.498 | KV453290.1 | 3993773 | 26-scf00232 | 26 |
| AX-158093564 | 10 | 32.498 | KV453290.1 | 3995744 | 26-scf00232 | 26 |
| AX-158093565 | 10 | 32.498 | KV453290.1 | 3997617 | 26-scf00232 | 26 |
| AX-158093566 | 10 | 32.498 | KV453290.1 | 3999449 | 26-scf00232 | 26 |
| AX-158093567 | 10 | 32.498 | KV453290.1 | 3999929 | 26-scf00232 | 26 |
| AX-158392156 | 10 | 32.498 | KV453290.1 | 4004852 | 26-scf00232 | 26 |
| AX-158093581 | 10 | 32.498 | KV453290.1 | 4032079 | 26-scf00232 | 26 |
| AX-158093618 | 10 | 32.498 | KV453290.1 | 4076106 | 26-scf00232 | 26 |
| AX-158093690 | 10 | 32.498 | KV453290.1 | 4183571 | 26-scf00232 | 26 |
| AX-158093699 | 10 | 32.498 | KV453290.1 | 4197211 | 26-scf00232 | 26 |
| AX-157723610 | 10 | 32.498 | KV453290.1 | 4863552 | 26-scf00232 | 26 |
| AX-158093575 | 10 | 32.607 | KV453290.1 | 4012362 | 26-scf00232 | 26 |
| AX-158093576 | 10 | 32.607 | KV453290.1 | 4015158 | 26-scf00232 | 26 |
| AX-158093577 | 10 | 32.607 | KV453290.1 | 4022551 | 26-scf00232 | 26 |
| AX-158093579 | 10 | 32.607 | KV453290.1 | 4025628 | 26-scf00232 | 26 |
| AX-158093582 | 10 | 32.607 | KV453290.1 | 4033215 | 26-scf00232 | 26 |

|              |    |        |            |         |             |    |
|--------------|----|--------|------------|---------|-------------|----|
| AX-158093583 | 10 | 32.607 | KV453290.1 | 4034994 | 26-scf00232 | 26 |
| AX-158093585 | 10 | 32.607 | KV453290.1 | 4038558 | 26-scf00232 | 26 |
| AX-158093590 | 10 | 32.607 | KV453290.1 | 4045857 | 26-scf00232 | 26 |
| AX-158093591 | 10 | 32.607 | KV453290.1 | 4046892 | 26-scf00232 | 26 |
| AX-158093592 | 10 | 32.607 | KV453290.1 | 4047833 | 26-scf00232 | 26 |
| AX-158093593 | 10 | 32.607 | KV453290.1 | 4049323 | 26-scf00232 | 26 |
| AX-158093594 | 10 | 32.607 | KV453290.1 | 4052053 | 26-scf00232 | 26 |
| AX-158093595 | 10 | 32.607 | KV453290.1 | 4057239 | 26-scf00232 | 26 |
| AX-158093597 | 10 | 32.607 | KV453290.1 | 4058431 | 26-scf00232 | 26 |
| AX-157825832 | 10 | 32.607 | KV453290.1 | 4059176 | 26-scf00232 | 26 |
| AX-158093598 | 10 | 32.607 | KV453290.1 | 4061386 | 26-scf00232 | 26 |
| AX-158093599 | 10 | 32.607 | KV453290.1 | 4061932 | 26-scf00232 | 26 |
| AX-158093600 | 10 | 32.607 | KV453290.1 | 4062162 | 26-scf00232 | 26 |
| AX-157865821 | 10 | 32.607 | KV453290.1 | 4062967 | 26-scf00232 | 26 |
| AX-158093602 | 10 | 32.607 | KV453290.1 | 4063116 | 26-scf00232 | 26 |
| AX-158093603 | 10 | 32.607 | KV453290.1 | 4063402 | 26-scf00232 | 26 |
| AX-158093604 | 10 | 32.607 | KV453290.1 | 4063699 | 26-scf00232 | 26 |
| AX-158093605 | 10 | 32.607 | KV453290.1 | 4063904 | 26-scf00232 | 26 |
| AX-158093607 | 10 | 32.607 | KV453290.1 | 4065793 | 26-scf00232 | 26 |
| AX-158093608 | 10 | 32.607 | KV453290.1 | 4070139 | 26-scf00232 | 26 |
| AX-158093610 | 10 | 32.607 | KV453290.1 | 4071813 | 26-scf00232 | 26 |
| AX-158093611 | 10 | 32.607 | KV453290.1 | 4071874 | 26-scf00232 | 26 |
| AX-158093613 | 10 | 32.607 | KV453290.1 | 4072505 | 26-scf00232 | 26 |
| AX-158093614 | 10 | 32.607 | KV453290.1 | 4073000 | 26-scf00232 | 26 |
| AX-158093615 | 10 | 32.607 | KV453290.1 | 4073121 | 26-scf00232 | 26 |
| AX-158093616 | 10 | 32.607 | KV453290.1 | 4073984 | 26-scf00232 | 26 |
| AX-158093619 | 10 | 32.607 | KV453290.1 | 4076449 | 26-scf00232 | 26 |
| AX-158093620 | 10 | 32.607 | KV453290.1 | 4077298 | 26-scf00232 | 26 |
| AX-158093621 | 10 | 32.607 | KV453290.1 | 4077580 | 26-scf00232 | 26 |
| AX-158093622 | 10 | 32.607 | KV453290.1 | 4083315 | 26-scf00232 | 26 |
| AX-158093623 | 10 | 32.607 | KV453290.1 | 4083659 | 26-scf00232 | 26 |
| AX-157865823 | 10 | 32.607 | KV453290.1 | 4084389 | 26-scf00232 | 26 |
| AX-158093624 | 10 | 32.607 | KV453290.1 | 4084751 | 26-scf00232 | 26 |
| AX-157772396 | 10 | 32.607 | KV453290.1 | 4086234 | 26-scf00232 | 26 |
| AX-158093626 | 10 | 32.607 | KV453290.1 | 4086766 | 26-scf00232 | 26 |
| AX-158093634 | 10 | 32.607 | KV453290.1 | 4092997 | 26-scf00232 | 26 |
| AX-158093635 | 10 | 32.607 | KV453290.1 | 4093716 | 26-scf00232 | 26 |
| AX-158093636 | 10 | 32.607 | KV453290.1 | 4094117 | 26-scf00232 | 26 |
| AX-158093637 | 10 | 32.607 | KV453290.1 | 4094270 | 26-scf00232 | 26 |
| AX-157825833 | 10 | 32.607 | KV453290.1 | 4104085 | 26-scf00232 | 26 |
| AX-158093645 | 10 | 32.607 | KV453290.1 | 4113294 | 26-scf00232 | 26 |
| AX-158093649 | 10 | 32.607 | KV453290.1 | 4119180 | 26-scf00232 | 26 |
| AX-158093652 | 10 | 32.607 | KV453290.1 | 4121054 | 26-scf00232 | 26 |
| AX-158093670 | 10 | 32.607 | KV453290.1 | 4146949 | 26-scf00232 | 26 |
| AX-158093671 | 10 | 32.607 | KV453290.1 | 4147517 | 26-scf00232 | 26 |
| AX-158093625 | 10 | 32.615 | KV453290.1 | 4085830 | 26-scf00232 | 26 |
| AX-158093630 | 10 | 32.623 | KV453290.1 | 4089907 | 26-scf00232 | 26 |
| AX-158093496 | 10 | 32.63  | KV453290.1 | 3852024 | 26-scf00232 | 26 |
| AX-158093631 | 10 | 32.63  | KV453290.1 | 4092024 | 26-scf00232 | 26 |
| AX-158093632 | 10 | 32.644 | KV453290.1 | 4092298 | 26-scf00232 | 26 |
| AX-158093642 | 10 | 32.664 | KV453290.1 | 4105119 | 26-scf00232 | 26 |

|              |    |        |            |         |             |    |
|--------------|----|--------|------------|---------|-------------|----|
| AX-157825834 | 10 | 32.683 | KV453290.1 | 4107021 | 26-scf00232 | 26 |
| AX-157701619 | 10 | 32.69  | KV453290.1 | 4107708 | 26-scf00232 | 26 |
| AX-158093644 | 10 | 32.7   | KV453290.1 | 4110726 | 26-scf00232 | 26 |
| AX-158093261 | 10 | 32.716 | KV453290.1 | 3236082 | 26-scf00232 | 26 |
| AX-158093292 | 10 | 32.716 | KV453290.1 | 3314447 | 26-scf00232 | 26 |
| AX-158093293 | 10 | 32.716 | KV453290.1 | 3318159 | 26-scf00232 | 26 |
| AX-158093300 | 10 | 32.716 | KV453290.1 | 3332887 | 26-scf00232 | 26 |
| AX-157744321 | 10 | 32.716 | KV453290.1 | 4085238 | 26-scf00232 | 26 |
| AX-158093638 | 10 | 32.716 | KV453290.1 | 4096186 | 26-scf00232 | 26 |
| AX-157756022 | 10 | 32.716 | KV453290.1 | 4114612 | 26-scf00232 | 26 |
| AX-157739590 | 10 | 32.716 | KV453290.1 | 4117093 | 26-scf00232 | 26 |
| AX-158093653 | 10 | 32.716 | KV453290.1 | 4121577 | 26-scf00232 | 26 |
| AX-158093654 | 10 | 32.716 | KV453290.1 | 4122812 | 26-scf00232 | 26 |
| AX-158093657 | 10 | 32.716 | KV453290.1 | 4126390 | 26-scf00232 | 26 |
| AX-157696501 | 10 | 32.716 | KV453290.1 | 4127611 | 26-scf00232 | 26 |
| AX-157771082 | 10 | 32.716 | KV453290.1 | 4128417 | 26-scf00232 | 26 |
| AX-157825836 | 10 | 32.716 | KV453290.1 | 4129301 | 26-scf00232 | 26 |
| AX-158093659 | 10 | 32.716 | KV453290.1 | 4132968 | 26-scf00232 | 26 |
| AX-158093662 | 10 | 32.716 | KV453290.1 | 4137498 | 26-scf00232 | 26 |
| AX-158093665 | 10 | 32.716 | KV453290.1 | 4142733 | 26-scf00232 | 26 |
| AX-157825840 | 10 | 32.716 | KV453290.1 | 4143472 | 26-scf00232 | 26 |
| AX-157825841 | 10 | 32.716 | KV453290.1 | 4143531 | 26-scf00232 | 26 |
| AX-157825842 | 10 | 32.716 | KV453290.1 | 4144038 | 26-scf00232 | 26 |
| AX-158093666 | 10 | 32.716 | KV453290.1 | 4144101 | 26-scf00232 | 26 |
| AX-158093667 | 10 | 32.716 | KV453290.1 | 4145151 | 26-scf00232 | 26 |
| AX-158093668 | 10 | 32.716 | KV453290.1 | 4145741 | 26-scf00232 | 26 |
| AX-158093669 | 10 | 32.716 | KV453290.1 | 4146228 | 26-scf00232 | 26 |
| AX-158093674 | 10 | 32.716 | KV453290.1 | 4150031 | 26-scf00232 | 26 |
| AX-157825846 | 10 | 32.716 | KV453290.1 | 4154463 | 26-scf00232 | 26 |
| AX-158093677 | 10 | 32.786 | KV453290.1 | 4157997 | 26-scf00232 | 26 |
| AX-158093684 | 10 | 32.803 | KV453290.1 | 4176294 | 26-scf00232 | 26 |
| AX-158093047 | 10 | 32.872 | KV453290.1 | 2857408 | 26-scf00232 | 26 |
| AX-158093058 | 10 | 32.872 | KV453290.1 | 2872909 | 26-scf00232 | 26 |
| AX-158093276 | 10 | 32.872 | KV453290.1 | 3264912 | 26-scf00232 | 26 |
| AX-158093474 | 10 | 32.872 | KV453290.1 | 3792016 | 26-scf00232 | 26 |
| AX-158093686 | 10 | 32.872 | KV453290.1 | 4178770 | 26-scf00232 | 26 |
| AX-158093461 | 10 | 32.935 | KV453290.1 | 3775904 | 26-scf00232 | 26 |
| AX-158392158 | 10 | 32.935 | KV453290.1 | 4186545 | 26-scf00232 | 26 |
| AX-158093692 | 10 | 32.935 | KV453290.1 | 4187032 | 26-scf00232 | 26 |
| AX-157825851 | 10 | 32.935 | KV453290.1 | 4187976 | 26-scf00232 | 26 |
| AX-157877358 | 10 | 32.935 | KV453290.1 | 4191050 | 26-scf00232 | 26 |
| AX-158093695 | 10 | 32.935 | KV453290.1 | 4193535 | 26-scf00232 | 26 |
| AX-158093696 | 10 | 32.935 | KV453290.1 | 4193917 | 26-scf00232 | 26 |
| AX-158093697 | 10 | 32.935 | KV453290.1 | 4194550 | 26-scf00232 | 26 |
| AX-158093698 | 10 | 32.935 | KV453290.1 | 4195690 | 26-scf00232 | 26 |
| AX-158093701 | 10 | 32.935 | KV453290.1 | 4201069 | 26-scf00232 | 26 |
| AX-158093703 | 10 | 32.935 | KV453290.1 | 4202526 | 26-scf00232 | 26 |
| AX-158093708 | 10 | 32.935 | KV453290.1 | 4209445 | 26-scf00232 | 26 |
| AX-157825852 | 10 | 32.935 | KV453290.1 | 4210518 | 26-scf00232 | 26 |
| AX-157748341 | 10 | 32.935 | KV453290.1 | 4218493 | 26-scf00232 | 26 |
| AX-158093713 | 10 | 32.935 | KV453290.1 | 4219244 | 26-scf00232 | 26 |

|              |    |        |            |         |             |    |
|--------------|----|--------|------------|---------|-------------|----|
| AX-158093716 | 10 | 32.935 | KV453290.1 | 4220471 | 26-scf00232 | 26 |
| AX-158093717 | 10 | 32.935 | KV453290.1 | 4222002 | 26-scf00232 | 26 |
| AX-158093718 | 10 | 32.935 | KV453290.1 | 4222089 | 26-scf00232 | 26 |
| AX-158093719 | 10 | 32.935 | KV453290.1 | 4222674 | 26-scf00232 | 26 |
| AX-158093720 | 10 | 32.935 | KV453290.1 | 4224138 | 26-scf00232 | 26 |
| AX-158093721 | 10 | 32.935 | KV453290.1 | 4224355 | 26-scf00232 | 26 |
| AX-158093722 | 10 | 32.935 | KV453290.1 | 4224790 | 26-scf00232 | 26 |
| AX-158093723 | 10 | 32.935 | KV453290.1 | 4227110 | 26-scf00232 | 26 |
| AX-158093724 | 10 | 32.935 | KV453290.1 | 4227697 | 26-scf00232 | 26 |
| AX-158093732 | 10 | 32.935 | KV453290.1 | 4236124 | 26-scf00232 | 26 |
| AX-158093733 | 10 | 32.935 | KV453290.1 | 4236843 | 26-scf00232 | 26 |
| AX-158093736 | 10 | 32.935 | KV453290.1 | 4238098 | 26-scf00232 | 26 |
| AX-157865824 | 10 | 32.935 | KV453290.1 | 4239243 | 26-scf00232 | 26 |
| AX-158093737 | 10 | 32.935 | KV453290.1 | 4241489 | 26-scf00232 | 26 |
| AX-158093739 | 10 | 32.935 | KV453290.1 | 4242297 | 26-scf00232 | 26 |
| AX-158093740 | 10 | 32.935 | KV453290.1 | 4242946 | 26-scf00232 | 26 |
| AX-157825854 | 10 | 32.935 | KV453290.1 | 4244764 | 26-scf00232 | 26 |
| AX-158093741 | 10 | 32.935 | KV453290.1 | 4245058 | 26-scf00232 | 26 |
| AX-158093744 | 10 | 32.935 | KV453290.1 | 4256196 | 26-scf00232 | 26 |
| AX-158093745 | 10 | 32.935 | KV453290.1 | 4256838 | 26-scf00232 | 26 |
| AX-158093747 | 10 | 32.935 | KV453290.1 | 4257561 | 26-scf00232 | 26 |
| AX-158093749 | 10 | 33.044 | KV453290.1 | 4261539 | 26-scf00232 | 26 |
| AX-158093750 | 10 | 33.073 | KV453290.1 | 4262512 | 26-scf00232 | 26 |
| AX-158093754 | 10 | 33.073 | KV453290.1 | 4266387 | 26-scf00232 | 26 |
| AX-158093752 | 10 | 33.114 | KV453290.1 | 4264628 | 26-scf00232 | 26 |
| AX-158093693 | 10 | 33.154 | KV453290.1 | 4187616 | 26-scf00232 | 26 |
| AX-158093758 | 10 | 33.154 | KV453290.1 | 4272917 | 26-scf00232 | 26 |
| AX-158379979 | 10 | 33.154 | KV453290.1 | 4277716 | 26-scf00232 | 26 |
| AX-158093759 | 10 | 33.154 | KV453290.1 | 4279661 | 26-scf00232 | 26 |
| AX-158093760 | 10 | 33.154 | KV453290.1 | 4280257 | 26-scf00232 | 26 |
| AX-158093761 | 10 | 33.154 | KV453290.1 | 4280771 | 26-scf00232 | 26 |
| AX-157825860 | 10 | 33.154 | KV453290.1 | 4284762 | 26-scf00232 | 26 |
| AX-158093764 | 10 | 33.154 | KV453290.1 | 4287308 | 26-scf00232 | 26 |
| AX-158093766 | 10 | 33.154 | KV453290.1 | 4295752 | 26-scf00232 | 26 |
| AX-158093768 | 10 | 33.154 | KV453290.1 | 4297638 | 26-scf00232 | 26 |
| AX-157754854 | 10 | 33.154 | KV453290.1 | 4298304 | 26-scf00232 | 26 |
| AX-157710132 | 10 | 33.154 | KV453290.1 | 4299682 | 26-scf00232 | 26 |
| AX-158093770 | 10 | 33.154 | KV453290.1 | 4300761 | 26-scf00232 | 26 |
| AX-158093771 | 10 | 33.154 | KV453290.1 | 4304827 | 26-scf00232 | 26 |
| AX-158093773 | 10 | 33.154 | KV453290.1 | 4306394 | 26-scf00232 | 26 |
| AX-158093775 | 10 | 33.154 | KV453290.1 | 4310219 | 26-scf00232 | 26 |
| AX-158384601 | 10 | 33.154 | KV453290.1 | 4312065 | 26-scf00232 | 26 |
| AX-158093776 | 10 | 33.154 | KV453290.1 | 4313392 | 26-scf00232 | 26 |
| AX-158093777 | 10 | 33.154 | KV453290.1 | 4313830 | 26-scf00232 | 26 |
| AX-158093778 | 10 | 33.154 | KV453290.1 | 4314397 | 26-scf00232 | 26 |
| AX-158093779 | 10 | 33.154 | KV453290.1 | 4316416 | 26-scf00232 | 26 |
| AX-157763615 | 10 | 33.154 | KV453290.1 | 4319518 | 26-scf00232 | 26 |
| AX-158093783 | 10 | 33.154 | KV453290.1 | 4320305 | 26-scf00232 | 26 |
| AX-158093787 | 10 | 33.154 | KV453290.1 | 4324638 | 26-scf00232 | 26 |
| AX-158093809 | 10 | 33.154 | KV453290.1 | 4361154 | 26-scf00232 | 26 |
| AX-157725900 | 10 | 33.299 | KV453290.1 | 4329639 | 26-scf00232 | 26 |

|              |    |        |            |         |             |    |
|--------------|----|--------|------------|---------|-------------|----|
| AX-158384602 | 10 | 33.357 | KV453290.1 | 4337610 | 26-scf00232 | 26 |
| AX-158093807 | 10 | 33.357 | KV453290.1 | 4356915 | 26-scf00232 | 26 |
| AX-158093842 | 10 | 33.357 | KV453290.1 | 4404645 | 26-scf00232 | 26 |
| AX-157714142 | 10 | 33.479 | KV453290.1 | 4345835 | 26-scf00232 | 26 |
| AX-158093789 | 10 | 33.591 | KV453290.1 | 4333730 | 26-scf00232 | 26 |
| AX-157825861 | 10 | 33.591 | KV453290.1 | 4348942 | 26-scf00232 | 26 |
| AX-157825862 | 10 | 33.591 | KV453290.1 | 4349386 | 26-scf00232 | 26 |
| AX-158093804 | 10 | 33.591 | KV453290.1 | 4351666 | 26-scf00232 | 26 |
| AX-158093806 | 10 | 33.591 | KV453290.1 | 4353214 | 26-scf00232 | 26 |
| AX-157752514 | 10 | 33.591 | KV453290.1 | 4356134 | 26-scf00232 | 26 |
| AX-157722453 | 10 | 33.591 | KV453290.1 | 4359013 | 26-scf00232 | 26 |
| AX-158093810 | 10 | 33.591 | KV453290.1 | 4362155 | 26-scf00232 | 26 |
| AX-158093811 | 10 | 33.591 | KV453290.1 | 4363162 | 26-scf00232 | 26 |
| AX-158093812 | 10 | 33.591 | KV453290.1 | 4364287 | 26-scf00232 | 26 |
| AX-158093820 | 10 | 33.591 | KV453290.1 | 4372139 | 26-scf00232 | 26 |
| AX-158093822 | 10 | 33.591 | KV453290.1 | 4375386 | 26-scf00232 | 26 |
| AX-158093825 | 10 | 33.591 | KV453290.1 | 4376651 | 26-scf00232 | 26 |
| AX-158093829 | 10 | 33.591 | KV453290.1 | 4382447 | 26-scf00232 | 26 |
| AX-157770685 | 10 | 33.591 | KV453290.1 | 4387254 | 26-scf00232 | 26 |
| AX-158093836 | 10 | 33.591 | KV453290.1 | 4397288 | 26-scf00232 | 26 |
| AX-157741094 | 10 | 33.591 | KV453290.1 | 4397432 | 26-scf00232 | 26 |
| AX-158093838 | 10 | 33.591 | KV453290.1 | 4400555 | 26-scf00232 | 26 |
| AX-158093839 | 10 | 33.591 | KV453290.1 | 4401048 | 26-scf00232 | 26 |
| AX-157825865 | 10 | 33.591 | KV453290.1 | 4401261 | 26-scf00232 | 26 |
| AX-158093840 | 10 | 33.591 | KV453290.1 | 4403956 | 26-scf00232 | 26 |
| AX-157877364 | 10 | 33.591 | KV453290.1 | 4437463 | 26-scf00232 | 26 |
| AX-158093887 | 10 | 33.591 | KV453290.1 | 4481841 | 26-scf00232 | 26 |
| AX-158093852 | 10 | 33.7   | KV453290.1 | 4423862 | 26-scf00232 | 26 |
| AX-157750745 | 10 | 33.7   | KV453290.1 | 4427936 | 26-scf00232 | 26 |
| AX-158093853 | 10 | 33.7   | KV453290.1 | 4428681 | 26-scf00232 | 26 |
| AX-158093854 | 10 | 33.7   | KV453290.1 | 4432897 | 26-scf00232 | 26 |
| AX-158093835 | 10 | 33.74  | KV453290.1 | 4397047 | 26-scf00232 | 26 |
| AX-157748563 | 10 | 33.74  | KV453290.1 | 4435952 | 26-scf00232 | 26 |
| AX-158093866 | 10 | 33.81  | KV453290.1 | 4447069 | 26-scf00232 | 26 |
| AX-158093868 | 10 | 33.81  | KV453290.1 | 4447807 | 26-scf00232 | 26 |
| AX-158093869 | 10 | 33.81  | KV453290.1 | 4448651 | 26-scf00232 | 26 |
| AX-157825873 | 10 | 33.81  | KV453290.1 | 4452983 | 26-scf00232 | 26 |
| AX-158093872 | 10 | 33.81  | KV453290.1 | 4455764 | 26-scf00232 | 26 |
| AX-158093875 | 10 | 33.81  | KV453290.1 | 4458370 | 26-scf00232 | 26 |
| AX-158093791 | 10 | 33.84  | KV453290.1 | 4336242 | 26-scf00232 | 26 |
| AX-158093873 | 10 | 33.84  | KV453290.1 | 4456430 | 26-scf00232 | 26 |
| AX-157745586 | 10 | 33.84  | KV453290.1 | 4462575 | 26-scf00232 | 26 |
| AX-158093878 | 10 | 33.84  | KV453290.1 | 4463936 | 26-scf00232 | 26 |
| AX-158384604 | 10 | 33.84  | KV453290.1 | 4547668 | 26-scf00232 | 26 |
| AX-158422578 | 10 | 33.88  | KV453290.1 | 4467673 | 26-scf00232 | 26 |
| AX-158093865 | 10 | 33.898 | KV453290.1 | 4446574 | 26-scf00232 | 26 |
| AX-158093874 | 10 | 33.898 | KV453290.1 | 4457050 | 26-scf00232 | 26 |
| AX-157825874 | 10 | 33.898 | KV453290.1 | 4460508 | 26-scf00232 | 26 |
| AX-157825876 | 10 | 33.898 | KV453290.1 | 4467927 | 26-scf00232 | 26 |
| AX-158093903 | 10 | 33.898 | KV453290.1 | 4504461 | 26-scf00232 | 26 |
| AX-157789070 | 10 | 33.898 | KV453290.1 | 4522474 | 26-scf00232 | 26 |

|              |    |        |            |         |             |    |
|--------------|----|--------|------------|---------|-------------|----|
| AX-158093928 | 10 | 33.898 | KV453290.1 | 4525633 | 26-scf00232 | 26 |
| AX-157773484 | 10 | 33.898 | KV453290.1 | 4525867 | 26-scf00232 | 26 |
| AX-158093930 | 10 | 33.898 | KV453290.1 | 4527484 | 26-scf00232 | 26 |
| AX-158093817 | 10 | 33.919 | KV453290.1 | 4369365 | 26-scf00232 | 26 |
| AX-158093879 | 10 | 33.919 | KV453290.1 | 4465995 | 26-scf00232 | 26 |
| AX-158093881 | 10 | 33.919 | KV453290.1 | 4469499 | 26-scf00232 | 26 |
| AX-158093883 | 10 | 33.919 | KV453290.1 | 4473175 | 26-scf00232 | 26 |
| AX-158093885 | 10 | 33.919 | KV453290.1 | 4478385 | 26-scf00232 | 26 |
| AX-158093886 | 10 | 33.919 | KV453290.1 | 4479478 | 26-scf00232 | 26 |
| AX-158093888 | 10 | 33.919 | KV453290.1 | 4482895 | 26-scf00232 | 26 |
| AX-158093889 | 10 | 33.919 | KV453290.1 | 4483706 | 26-scf00232 | 26 |
| AX-157825880 | 10 | 33.919 | KV453290.1 | 4485815 | 26-scf00232 | 26 |
| AX-158093891 | 10 | 33.919 | KV453290.1 | 4487856 | 26-scf00232 | 26 |
| AX-157719309 | 10 | 33.919 | KV453290.1 | 4489269 | 26-scf00232 | 26 |
| AX-158093893 | 10 | 33.919 | KV453290.1 | 4489536 | 26-scf00232 | 26 |
| AX-158093896 | 10 | 33.919 | KV453290.1 | 4493148 | 26-scf00232 | 26 |
| AX-158093898 | 10 | 33.919 | KV453290.1 | 4498757 | 26-scf00232 | 26 |
| AX-157738348 | 10 | 33.919 | KV453290.1 | 4500458 | 26-scf00232 | 26 |
| AX-157877367 | 10 | 33.919 | KV453290.1 | 4500596 | 26-scf00232 | 26 |
| AX-158093901 | 10 | 33.919 | KV453290.1 | 4503004 | 26-scf00232 | 26 |
| AX-158093902 | 10 | 33.919 | KV453290.1 | 4503347 | 26-scf00232 | 26 |
| AX-158093904 | 10 | 33.919 | KV453290.1 | 4505507 | 26-scf00232 | 26 |
| AX-158093905 | 10 | 33.919 | KV453290.1 | 4505848 | 26-scf00232 | 26 |
| AX-158093909 | 10 | 33.919 | KV453290.1 | 4507445 | 26-scf00232 | 26 |
| AX-158093910 | 10 | 33.919 | KV453290.1 | 4508526 | 26-scf00232 | 26 |
| AX-158093911 | 10 | 33.919 | KV453290.1 | 4509295 | 26-scf00232 | 26 |
| AX-158093922 | 10 | 33.919 | KV453290.1 | 4522912 | 26-scf00232 | 26 |
| AX-158093923 | 10 | 33.919 | KV453290.1 | 4523530 | 26-scf00232 | 26 |
| AX-158093924 | 10 | 33.919 | KV453290.1 | 4523927 | 26-scf00232 | 26 |
| AX-158093925 | 10 | 33.919 | KV453290.1 | 4524173 | 26-scf00232 | 26 |
| AX-158093927 | 10 | 33.919 | KV453290.1 | 4525024 | 26-scf00232 | 26 |
| AX-158093932 | 10 | 33.919 | KV453290.1 | 4528194 | 26-scf00232 | 26 |
| AX-157722182 | 10 | 33.919 | KV453290.1 | 4529050 | 26-scf00232 | 26 |
| AX-158093934 | 10 | 33.919 | KV453290.1 | 4529211 | 26-scf00232 | 26 |
| AX-157752151 | 10 | 33.919 | KV453290.1 | 4530333 | 26-scf00232 | 26 |
| AX-158093936 | 10 | 33.919 | KV453290.1 | 4530556 | 26-scf00232 | 26 |
| AX-158093937 | 10 | 33.919 | KV453290.1 | 4531060 | 26-scf00232 | 26 |
| AX-158093938 | 10 | 33.919 | KV453290.1 | 4531517 | 26-scf00232 | 26 |
| AX-158093802 | 10 | 34.137 | KV453290.1 | 4350409 | 26-scf00232 | 26 |
| AX-158093816 | 10 | 34.137 | KV453290.1 | 4368284 | 26-scf00232 | 26 |
| AX-158093819 | 10 | 34.137 | KV453290.1 | 4371628 | 26-scf00232 | 26 |
| AX-158093828 | 10 | 34.137 | KV453290.1 | 4382252 | 26-scf00232 | 26 |
| AX-157825868 | 10 | 34.137 | KV453290.1 | 4403143 | 26-scf00232 | 26 |
| AX-157716198 | 10 | 34.137 | KV453290.1 | 4406130 | 26-scf00232 | 26 |
| AX-158093861 | 10 | 34.137 | KV453290.1 | 4439122 | 26-scf00232 | 26 |
| AX-157825879 | 10 | 34.137 | KV453290.1 | 4479853 | 26-scf00232 | 26 |
| AX-158093894 | 10 | 34.137 | KV453290.1 | 4490418 | 26-scf00232 | 26 |
| AX-158093897 | 10 | 34.137 | KV453290.1 | 4498345 | 26-scf00232 | 26 |
| AX-157825883 | 10 | 34.137 | KV453290.1 | 4531988 | 26-scf00232 | 26 |
| AX-158093942 | 10 | 34.137 | KV453290.1 | 4540962 | 26-scf00232 | 26 |
| AX-158093943 | 10 | 34.137 | KV453290.1 | 4543327 | 26-scf00232 | 26 |

|              |    |        |            |         |             |    |
|--------------|----|--------|------------|---------|-------------|----|
| AX-158093944 | 10 | 34.137 | KV453290.1 | 4543968 | 26-scf00232 | 26 |
| AX-158093947 | 10 | 34.137 | KV453290.1 | 4550255 | 26-scf00232 | 26 |
| AX-158093948 | 10 | 34.137 | KV453290.1 | 4550766 | 26-scf00232 | 26 |
| AX-157770619 | 10 | 34.137 | KV453290.1 | 4552159 | 26-scf00232 | 26 |
| AX-157825886 | 10 | 34.137 | KV453290.1 | 4553042 | 26-scf00232 | 26 |
| AX-158093949 | 10 | 34.137 | KV453290.1 | 4553110 | 26-scf00232 | 26 |
| AX-158093950 | 10 | 34.137 | KV453290.1 | 4553754 | 26-scf00232 | 26 |
| AX-157825887 | 10 | 34.137 | KV453290.1 | 4557822 | 26-scf00232 | 26 |
| AX-158093957 | 10 | 34.137 | KV453290.1 | 4563982 | 26-scf00232 | 26 |
| AX-158093958 | 10 | 34.137 | KV453290.1 | 4564063 | 26-scf00232 | 26 |
| AX-157877373 | 10 | 34.137 | KV453290.1 | 4570066 | 26-scf00232 | 26 |
| AX-158093965 | 10 | 34.137 | KV453290.1 | 4571910 | 26-scf00232 | 26 |
| AX-157743713 | 10 | 34.137 | KV453290.1 | 4572305 | 26-scf00232 | 26 |
| AX-158093966 | 10 | 34.137 | KV453290.1 | 4572899 | 26-scf00232 | 26 |
| AX-158392160 | 10 | 34.137 | KV453290.1 | 4574293 | 26-scf00232 | 26 |
| AX-158093969 | 10 | 34.137 | KV453290.1 | 4576176 | 26-scf00232 | 26 |
| AX-157825890 | 10 | 34.137 | KV453290.1 | 4576365 | 26-scf00232 | 26 |
| AX-158093971 | 10 | 34.137 | KV453290.1 | 4578113 | 26-scf00232 | 26 |
| AX-158093972 | 10 | 34.137 | KV453290.1 | 4578978 | 26-scf00232 | 26 |
| AX-158093976 | 10 | 34.137 | KV453290.1 | 4580573 | 26-scf00232 | 26 |
| AX-158093977 | 10 | 34.137 | KV453290.1 | 4581933 | 26-scf00232 | 26 |
| AX-157877376 | 10 | 34.137 | KV453290.1 | 4588374 | 26-scf00232 | 26 |
| AX-158093979 | 10 | 34.137 | KV453290.1 | 4589078 | 26-scf00232 | 26 |
| AX-158093980 | 10 | 34.137 | KV453290.1 | 4592312 | 26-scf00232 | 26 |
| AX-158093982 | 10 | 34.137 | KV453290.1 | 4593156 | 26-scf00232 | 26 |
| AX-158093984 | 10 | 34.137 | KV453290.1 | 4596277 | 26-scf00232 | 26 |
| AX-158093986 | 10 | 34.137 | KV453290.1 | 4597809 | 26-scf00232 | 26 |
| AX-158093987 | 10 | 34.137 | KV453290.1 | 4598396 | 26-scf00232 | 26 |
| AX-157857308 | 10 | 34.137 | KV453290.1 | 4599324 | 26-scf00232 | 26 |
| AX-158093988 | 10 | 34.137 | KV453290.1 | 4599386 | 26-scf00232 | 26 |
| AX-158093991 | 10 | 34.137 | KV453290.1 | 4601705 | 26-scf00232 | 26 |
| AX-158093992 | 10 | 34.137 | KV453290.1 | 4602410 | 26-scf00232 | 26 |
| AX-158093993 | 10 | 34.137 | KV453290.1 | 4603016 | 26-scf00232 | 26 |
| AX-158093994 | 10 | 34.137 | KV453290.1 | 4603866 | 26-scf00232 | 26 |
| AX-158093999 | 10 | 34.137 | KV453290.1 | 4610673 | 26-scf00232 | 26 |
| AX-158094000 | 10 | 34.137 | KV453290.1 | 4612099 | 26-scf00232 | 26 |
| AX-158094002 | 10 | 34.137 | KV453290.1 | 4614860 | 26-scf00232 | 26 |
| AX-158094003 | 10 | 34.137 | KV453290.1 | 4616839 | 26-scf00232 | 26 |
| AX-158094007 | 10 | 34.137 | KV453290.1 | 4620345 | 26-scf00232 | 26 |
| AX-158094009 | 10 | 34.137 | KV453290.1 | 4625851 | 26-scf00232 | 26 |
| AX-158094010 | 10 | 34.137 | KV453290.1 | 4626986 | 26-scf00232 | 26 |
| AX-157825892 | 10 | 34.137 | KV453290.1 | 4630688 | 26-scf00232 | 26 |
| AX-158094014 | 10 | 34.137 | KV453290.1 | 4642032 | 26-scf00232 | 26 |
| AX-158094015 | 10 | 34.137 | KV453290.1 | 4643244 | 26-scf00232 | 26 |
| AX-157825894 | 10 | 34.137 | KV453290.1 | 4643503 | 26-scf00232 | 26 |
| AX-157825896 | 10 | 34.137 | KV453290.1 | 4653310 | 26-scf00232 | 26 |
| AX-158094019 | 10 | 34.137 | KV453290.1 | 4657083 | 26-scf00232 | 26 |
| AX-158094020 | 10 | 34.137 | KV453290.1 | 4657365 | 26-scf00232 | 26 |
| AX-158094025 | 10 | 34.137 | KV453290.1 | 4663397 | 26-scf00232 | 26 |
| AX-158094028 | 10 | 34.137 | KV453290.1 | 4665745 | 26-scf00232 | 26 |
| AX-158094029 | 10 | 34.137 | KV453290.1 | 4666936 | 26-scf00232 | 26 |

|              |    |        |             |         |             |    |
|--------------|----|--------|-------------|---------|-------------|----|
| AX-158094031 | 10 | 34.137 | KV453290.1  | 4668598 | 26-scf00232 | 26 |
| AX-157825899 | 10 | 34.137 | KV453290.1  | 4668892 | 26-scf00232 | 26 |
| AX-158094033 | 10 | 34.137 | KV453290.1  | 4672361 | 26-scf00232 | 26 |
| AX-158094034 | 10 | 34.137 | KV453290.1  | 4673986 | 26-scf00232 | 26 |
| AX-158094036 | 10 | 34.137 | KV453290.1  | 4675891 | 26-scf00232 | 26 |
| AX-157744646 | 10 | 34.137 | KV453290.1  | 4676253 | 26-scf00232 | 26 |
| AX-158094040 | 10 | 34.137 | KV453290.1  | 4677585 | 26-scf00232 | 26 |
| AX-158094041 | 10 | 34.137 | KV453290.1  | 4677830 | 26-scf00232 | 26 |
| AX-158094043 | 10 | 34.137 | KV453290.1  | 4680199 | 26-scf00232 | 26 |
| AX-157825901 | 10 | 34.137 | KV453290.1  | 4682228 | 26-scf00232 | 26 |
| AX-157825902 | 10 | 34.137 | KV453290.1  | 4684775 | 26-scf00232 | 26 |
| AX-158094048 | 10 | 34.137 | KV453290.1  | 4685645 | 26-scf00232 | 26 |
| AX-158094049 | 10 | 34.137 | KV453290.1  | 4686552 | 26-scf00232 | 26 |
| AX-158094052 | 10 | 34.137 | KV453290.1  | 4689125 | 26-scf00232 | 26 |
| AX-158094092 | 10 | 34.137 | KV453290.1  | 4743567 | 26-scf00232 | 26 |
| AX-158094094 | 10 | 34.137 | KV453290.1  | 4745695 | 26-scf00232 | 26 |
| AX-158094141 | 10 | 34.137 | KV453290.1  | 4805084 | 26-scf00232 | 26 |
| AX-157705427 | 10 | 34.137 | 3ML01029755 | 833     | scf05377_1  | UN |
| AX-157714792 | 10 | 34.356 | KV453290.1  | 4692931 | 26-scf00232 | 26 |
| AX-158094058 | 10 | 34.356 | KV453290.1  | 4693251 | 26-scf00232 | 26 |
| AX-158410137 | 10 | 34.356 | KV453290.1  | 4696700 | 26-scf00232 | 26 |
| AX-157825903 | 10 | 34.356 | KV453290.1  | 4698097 | 26-scf00232 | 26 |
| AX-158094064 | 10 | 34.356 | KV453290.1  | 4699960 | 26-scf00232 | 26 |
| AX-157713836 | 10 | 34.356 | KV453290.1  | 4701221 | 26-scf00232 | 26 |
| AX-158094066 | 10 | 34.356 | KV453290.1  | 4702173 | 26-scf00232 | 26 |
| AX-158094067 | 10 | 34.356 | KV453290.1  | 4702586 | 26-scf00232 | 26 |
| AX-158094071 | 10 | 34.356 | KV453290.1  | 4708399 | 26-scf00232 | 26 |
| AX-157825907 | 10 | 34.356 | KV453290.1  | 4725291 | 26-scf00232 | 26 |
| AX-158094080 | 10 | 34.356 | KV453290.1  | 4727836 | 26-scf00232 | 26 |
| AX-158094095 | 10 | 34.356 | KV453290.1  | 4746214 | 26-scf00232 | 26 |
| AX-157752927 | 10 | 34.356 | KV453290.1  | 4748425 | 26-scf00232 | 26 |
| AX-158094078 | 10 | 34.357 | KV453290.1  | 4719594 | 26-scf00232 | 26 |
| AX-157825906 | 10 | 34.358 | KV453290.1  | 4720419 | 26-scf00232 | 26 |
| AX-158094079 | 10 | 34.36  | KV453290.1  | 4723104 | 26-scf00232 | 26 |
| AX-157763721 | 10 | 34.362 | KV453290.1  | 4723258 | 26-scf00232 | 26 |
| AX-158094087 | 10 | 34.366 | KV453290.1  | 4737383 | 26-scf00232 | 26 |
| AX-158094088 | 10 | 34.367 | KV453290.1  | 4739251 | 26-scf00232 | 26 |
| AX-158094030 | 10 | 34.369 | KV453290.1  | 4667870 | 26-scf00232 | 26 |
| AX-157695307 | 10 | 34.369 | KV453290.1  | 4739392 | 26-scf00232 | 26 |
| AX-158094063 | 10 | 34.536 | KV453290.1  | 4698695 | 26-scf00232 | 26 |
| AX-158094089 | 10 | 34.536 | KV453290.1  | 4740605 | 26-scf00232 | 26 |
| AX-157825919 | 10 | 34.536 | KV453290.1  | 4796284 | 26-scf00232 | 26 |
| AX-158094090 | 10 | 34.557 | KV453290.1  | 4741031 | 26-scf00232 | 26 |
| AX-158094076 | 10 | 34.574 | KV453290.1  | 4714156 | 26-scf00232 | 26 |
| AX-158094093 | 10 | 34.574 | KV453290.1  | 4744902 | 26-scf00232 | 26 |
| AX-157825869 | 10 | 34.683 | KV453290.1  | 4407726 | 26-scf00232 | 26 |
| AX-157825884 | 10 | 34.683 | KV453290.1  | 4532995 | 26-scf00232 | 26 |
| AX-157825895 | 10 | 34.683 | KV453290.1  | 4651506 | 26-scf00232 | 26 |
| AX-157825904 | 10 | 34.683 | KV453290.1  | 4710067 | 26-scf00232 | 26 |
| AX-158094085 | 10 | 34.683 | KV453290.1  | 4732393 | 26-scf00232 | 26 |
| AX-158094097 | 10 | 34.683 | KV453290.1  | 4750835 | 26-scf00232 | 26 |



|              |    |        |            |         |             |    |
|--------------|----|--------|------------|---------|-------------|----|
| AX-158094099 | 10 | 34.683 | KV453290.1 | 4751856 | 26-scf00232 | 26 |
| AX-158094100 | 10 | 34.683 | KV453290.1 | 4754088 | 26-scf00232 | 26 |
| AX-158094105 | 10 | 34.683 | KV453290.1 | 4759050 | 26-scf00232 | 26 |
| AX-158094106 | 10 | 34.683 | KV453290.1 | 4760050 | 26-scf00232 | 26 |
| AX-158094107 | 10 | 34.683 | KV453290.1 | 4761402 | 26-scf00232 | 26 |
| AX-157825913 | 10 | 34.683 | KV453290.1 | 4762032 | 26-scf00232 | 26 |
| AX-158094109 | 10 | 34.683 | KV453290.1 | 4763406 | 26-scf00232 | 26 |
| AX-158094111 | 10 | 34.683 | KV453290.1 | 4764465 | 26-scf00232 | 26 |
| AX-157825914 | 10 | 34.683 | KV453290.1 | 4765914 | 26-scf00232 | 26 |
| AX-158094112 | 10 | 34.683 | KV453290.1 | 4768150 | 26-scf00232 | 26 |
| AX-158094114 | 10 | 34.683 | KV453290.1 | 4769454 | 26-scf00232 | 26 |
| AX-158094115 | 10 | 34.683 | KV453290.1 | 4770064 | 26-scf00232 | 26 |
| AX-158094123 | 10 | 34.683 | KV453290.1 | 4782285 | 26-scf00232 | 26 |
| AX-157825916 | 10 | 34.683 | KV453290.1 | 4782428 | 26-scf00232 | 26 |
| AX-158094124 | 10 | 34.683 | KV453290.1 | 4786338 | 26-scf00232 | 26 |
| AX-158094126 | 10 | 34.683 | KV453290.1 | 4788102 | 26-scf00232 | 26 |
| AX-158094127 | 10 | 34.683 | KV453290.1 | 4789053 | 26-scf00232 | 26 |
| AX-158094129 | 10 | 34.683 | KV453290.1 | 4791238 | 26-scf00232 | 26 |
| AX-157745007 | 10 | 34.683 | KV453290.1 | 4791517 | 26-scf00232 | 26 |
| AX-158094133 | 10 | 34.683 | KV453290.1 | 4794719 | 26-scf00232 | 26 |
| AX-158094134 | 10 | 34.683 | KV453290.1 | 4796038 | 26-scf00232 | 26 |
| AX-157825918 | 10 | 34.683 | KV453290.1 | 4796233 | 26-scf00232 | 26 |
| AX-158094135 | 10 | 34.683 | KV453290.1 | 4796708 | 26-scf00232 | 26 |
| AX-158094137 | 10 | 34.683 | KV453290.1 | 4798639 | 26-scf00232 | 26 |
| AX-158094142 | 10 | 34.683 | KV453290.1 | 4805675 | 26-scf00232 | 26 |
| AX-158094145 | 10 | 34.683 | KV453290.1 | 4807818 | 26-scf00232 | 26 |
| AX-158094147 | 10 | 34.683 | KV453290.1 | 4809297 | 26-scf00232 | 26 |
| AX-157739314 | 10 | 34.683 | KV453290.1 | 4810675 | 26-scf00232 | 26 |
| AX-158094149 | 10 | 34.683 | KV453290.1 | 4811513 | 26-scf00232 | 26 |
| AX-158094150 | 10 | 34.683 | KV453290.1 | 4811960 | 26-scf00232 | 26 |
| AX-158094152 | 10 | 34.683 | KV453290.1 | 4816199 | 26-scf00232 | 26 |
| AX-158094154 | 10 | 34.683 | KV453290.1 | 4818200 | 26-scf00232 | 26 |
| AX-158094156 | 10 | 34.683 | KV453290.1 | 4819644 | 26-scf00232 | 26 |
| AX-158094157 | 10 | 34.683 | KV453290.1 | 4820003 | 26-scf00232 | 26 |
| AX-158094160 | 10 | 34.683 | KV453290.1 | 4822493 | 26-scf00232 | 26 |
| AX-158094164 | 10 | 34.683 | KV453290.1 | 4825041 | 26-scf00232 | 26 |
| AX-158094168 | 10 | 34.683 | KV453290.1 | 4829184 | 26-scf00232 | 26 |
| AX-158094169 | 10 | 34.683 | KV453290.1 | 4831370 | 26-scf00232 | 26 |
| AX-158094181 | 10 | 34.683 | KV453290.1 | 4846387 | 26-scf00232 | 26 |
| AX-157746238 | 10 | 34.683 | KV453290.1 | 4869998 | 26-scf00232 | 26 |
| AX-157766050 | 10 | 34.683 | KV453290.1 | 4889867 | 26-scf00232 | 26 |
| AX-158094162 | 10 | 34.724 | KV453290.1 | 4823532 | 26-scf00232 | 26 |
| AX-158094173 | 10 | 34.748 | KV453290.1 | 4834693 | 26-scf00232 | 26 |
| AX-158094074 | 10 | 34.792 | KV453290.1 | 4709615 | 26-scf00232 | 26 |
| AX-158094119 | 10 | 34.792 | KV453290.1 | 4777600 | 26-scf00232 | 26 |
| AX-158094121 | 10 | 34.792 | KV453290.1 | 4779282 | 26-scf00232 | 26 |
| AX-158094139 | 10 | 34.792 | KV453290.1 | 4801559 | 26-scf00232 | 26 |
| AX-158094140 | 10 | 34.792 | KV453290.1 | 4803696 | 26-scf00232 | 26 |
| AX-158094175 | 10 | 34.792 | KV453290.1 | 4835551 | 26-scf00232 | 26 |
| AX-158094176 | 10 | 34.792 | KV453290.1 | 4836822 | 26-scf00232 | 26 |
| AX-157715306 | 10 | 34.792 | KV453290.1 | 4839073 | 26-scf00232 | 26 |

|              |    |        |            |         |             |    |
|--------------|----|--------|------------|---------|-------------|----|
| AX-158094177 | 10 | 34.792 | KV453290.1 | 4840360 | 26-scf00232 | 26 |
| AX-158094178 | 10 | 34.792 | KV453290.1 | 4843204 | 26-scf00232 | 26 |
| AX-158094179 | 10 | 34.792 | KV453290.1 | 4844696 | 26-scf00232 | 26 |
| AX-158094188 | 10 | 34.792 | KV453290.1 | 4858324 | 26-scf00232 | 26 |
| AX-158094190 | 10 | 34.792 | KV453290.1 | 4858831 | 26-scf00232 | 26 |
| AX-158094194 | 10 | 34.792 | KV453290.1 | 4862667 | 26-scf00232 | 26 |
| AX-158094199 | 10 | 34.792 | KV453290.1 | 4868351 | 26-scf00232 | 26 |
| AX-158094201 | 10 | 34.902 | KV453290.1 | 4868962 | 26-scf00232 | 26 |
| AX-158094203 | 10 | 34.902 | KV453290.1 | 4875706 | 26-scf00232 | 26 |
| AX-158094204 | 10 | 34.902 | KV453290.1 | 4875921 | 26-scf00232 | 26 |
| AX-158094205 | 10 | 34.902 | KV453290.1 | 4876559 | 26-scf00232 | 26 |
| AX-158094207 | 10 | 34.902 | KV453290.1 | 4879030 | 26-scf00232 | 26 |
| AX-158094208 | 10 | 34.902 | KV453290.1 | 4879393 | 26-scf00232 | 26 |
| AX-158094214 | 10 | 34.902 | KV453290.1 | 4883681 | 26-scf00232 | 26 |
| AX-158094217 | 10 | 34.902 | KV453290.1 | 4885435 | 26-scf00232 | 26 |
| AX-158094236 | 10 | 34.902 | KV453290.1 | 4911487 | 26-scf00232 | 26 |
| AX-158094219 | 10 | 35.039 | KV453290.1 | 4889184 | 26-scf00232 | 26 |
| AX-158384609 | 10 | 35.039 | KV453290.1 | 4890703 | 26-scf00232 | 26 |
| AX-157825925 | 10 | 35.041 | KV453290.1 | 4892541 | 26-scf00232 | 26 |
| AX-158094222 | 10 | 35.043 | KV453290.1 | 4894672 | 26-scf00232 | 26 |
| AX-157825926 | 10 | 35.044 | KV453290.1 | 4895751 | 26-scf00232 | 26 |
| AX-158094227 | 10 | 35.157 | KV453290.1 | 4899163 | 26-scf00232 | 26 |
| AX-158094224 | 10 | 35.437 | KV453290.1 | 4896673 | 26-scf00232 | 26 |
| AX-158094229 | 10 | 35.437 | KV453290.1 | 4900178 | 26-scf00232 | 26 |
| AX-158094231 | 10 | 35.449 | KV453290.1 | 4902850 | 26-scf00232 | 26 |
| AX-157885723 | 10 | 35.449 | KV453290.1 | 4910564 | 26-scf00232 | 26 |
| AX-158094237 | 10 | 35.558 | KV453290.1 | 4914148 | 26-scf00232 | 26 |
| AX-158094238 | 10 | 35.558 | KV453290.1 | 4915007 | 26-scf00232 | 26 |
| AX-158094239 | 10 | 35.558 | KV453290.1 | 4915389 | 26-scf00232 | 26 |
| AX-158094241 | 10 | 35.776 | KV453290.1 | 4920847 | 26-scf00232 | 26 |
| AX-158094242 | 10 | 35.776 | KV453290.1 | 4923040 | 26-scf00232 | 26 |
| AX-158094246 | 10 | 35.776 | KV453290.1 | 4926043 | 26-scf00232 | 26 |
| AX-158094247 | 10 | 35.776 | KV453290.1 | 4926428 | 26-scf00232 | 26 |
| AX-158094248 | 10 | 35.776 | KV453290.1 | 4926868 | 26-scf00232 | 26 |
| AX-158094249 | 10 | 35.776 | KV453290.1 | 4927634 | 26-scf00232 | 26 |
| AX-158094250 | 10 | 35.776 | KV453290.1 | 4928884 | 26-scf00232 | 26 |
| AX-158094252 | 10 | 35.776 | KV453290.1 | 4931989 | 26-scf00232 | 26 |
| AX-157825928 | 10 | 35.776 | KV453290.1 | 4937195 | 26-scf00232 | 26 |
| AX-158094254 | 10 | 35.885 | KV453290.1 | 4933882 | 26-scf00232 | 26 |
| AX-158094256 | 10 | 35.885 | KV453290.1 | 4934766 | 26-scf00232 | 26 |
| AX-158094257 | 10 | 35.885 | KV453290.1 | 4935277 | 26-scf00232 | 26 |
| AX-158094258 | 10 | 35.885 | KV453290.1 | 4935618 | 26-scf00232 | 26 |
| AX-158094259 | 10 | 35.885 | KV453290.1 | 4935988 | 26-scf00232 | 26 |
| AX-158094260 | 10 | 35.885 | KV453290.1 | 4936777 | 26-scf00232 | 26 |
| AX-157747002 | 10 | 35.885 | KV453290.1 | 4936989 | 26-scf00232 | 26 |
| AX-158094262 | 10 | 35.885 | KV453290.1 | 4940422 | 26-scf00232 | 26 |
| AX-158094264 | 10 | 35.885 | KV453290.1 | 4943021 | 26-scf00232 | 26 |
| AX-158094270 | 10 | 35.885 | KV453290.1 | 4949457 | 26-scf00232 | 26 |
| AX-158094268 | 10 | 35.886 | KV453290.1 | 4948067 | 26-scf00232 | 26 |
| AX-158094271 | 10 | 36.213 | KV453290.1 | 4950582 | 26-scf00232 | 26 |
| AX-157825929 | 10 | 36.214 | KV453290.1 | 4953378 | 26-scf00232 | 26 |

|              |    |        |            |         |             |    |
|--------------|----|--------|------------|---------|-------------|----|
| AX-158094280 | 10 | 36.214 | KV453290.1 | 4965436 | 26-scf00232 | 26 |
| AX-158094281 | 10 | 36.214 | KV453290.1 | 4965720 | 26-scf00232 | 26 |
| AX-158094282 | 10 | 36.214 | KV453290.1 | 4965939 | 26-scf00232 | 26 |
| AX-158094283 | 10 | 36.214 | KV453290.1 | 4966359 | 26-scf00232 | 26 |
| AX-158094279 | 10 | 36.267 | KV453290.1 | 4964970 | 26-scf00232 | 26 |
| AX-158094284 | 10 | 36.267 | KV453290.1 | 4967629 | 26-scf00232 | 26 |
| AX-158094286 | 10 | 36.273 | KV453290.1 | 4969675 | 26-scf00232 | 26 |
| AX-158094233 | 10 | 36.323 | KV453290.1 | 4906286 | 26-scf00232 | 26 |
| AX-158094244 | 10 | 36.323 | KV453290.1 | 4924226 | 26-scf00232 | 26 |
| AX-158094266 | 10 | 36.323 | KV453290.1 | 4944029 | 26-scf00232 | 26 |
| AX-157825930 | 10 | 36.323 | KV453290.1 | 4970502 | 26-scf00232 | 26 |
| AX-158094287 | 10 | 36.323 | KV453290.1 | 4971767 | 26-scf00232 | 26 |
| AX-158094288 | 10 | 36.323 | KV453290.1 | 4973498 | 26-scf00232 | 26 |
| AX-158094289 | 10 | 36.323 | KV453290.1 | 4974078 | 26-scf00232 | 26 |
| AX-158094290 | 10 | 36.323 | KV453290.1 | 4975447 | 26-scf00232 | 26 |
| AX-158094291 | 10 | 36.323 | KV453290.1 | 4976267 | 26-scf00232 | 26 |
| AX-157825931 | 10 | 36.323 | KV453290.1 | 4977990 | 26-scf00232 | 26 |
| AX-158094292 | 10 | 36.323 | KV453290.1 | 4978276 | 26-scf00232 | 26 |
| AX-158094293 | 10 | 36.325 | KV453290.1 | 4984764 | 26-scf00232 | 26 |
| AX-158094298 | 10 | 36.352 | KV453290.1 | 4988171 | 26-scf00232 | 26 |
| AX-157885725 | 10 | 36.382 | KV453290.1 | 4997996 | 26-scf00232 | 26 |
| AX-158094306 | 10 | 36.417 | KV453290.1 | 5001651 | 26-scf00232 | 26 |
| AX-158094308 | 10 | 36.433 | KV453290.1 | 5003370 | 26-scf00232 | 26 |
| AX-158094309 | 10 | 36.433 | KV453290.1 | 5004124 | 26-scf00232 | 26 |
| AX-157885726 | 10 | 36.433 | KV453290.1 | 5004504 | 26-scf00232 | 26 |
| AX-158094310 | 10 | 36.433 | KV453290.1 | 5005105 | 26-scf00232 | 26 |
| AX-158094312 | 10 | 36.433 | KV453290.1 | 5006621 | 26-scf00232 | 26 |
| AX-158094318 | 10 | 36.433 | KV453290.1 | 5010457 | 26-scf00232 | 26 |
| AX-157885727 | 10 | 36.542 | KV453290.1 | 5011796 | 26-scf00232 | 26 |
| AX-158094321 | 10 | 36.542 | KV453290.1 | 5012713 | 26-scf00232 | 26 |
| AX-158094325 | 10 | 36.542 | KV453290.1 | 5019605 | 26-scf00232 | 26 |
| AX-158094326 | 10 | 36.542 | KV453290.1 | 5021854 | 26-scf00232 | 26 |
| AX-158094320 | 10 | 36.651 | KV453290.1 | 5011429 | 26-scf00232 | 26 |
| AX-158094327 | 10 | 36.651 | KV453290.1 | 5023384 | 26-scf00232 | 26 |
| AX-158094328 | 10 | 36.651 | KV453290.1 | 5024183 | 26-scf00232 | 26 |
| AX-158094329 | 10 | 36.651 | KV453290.1 | 5025389 | 26-scf00232 | 26 |
| AX-158094330 | 10 | 36.651 | KV453290.1 | 5029241 | 26-scf00232 | 26 |
| AX-158094337 | 10 | 36.651 | KV453290.1 | 5036525 | 26-scf00232 | 26 |
| AX-158094331 | 10 | 36.76  | KV453290.1 | 5031514 | 26-scf00232 | 26 |
| AX-158094334 | 10 | 36.76  | KV453290.1 | 5034829 | 26-scf00232 | 26 |
| AX-157758910 | 10 | 36.76  | KV453290.1 | 5039011 | 26-scf00232 | 26 |
| AX-158094342 | 10 | 36.76  | KV453290.1 | 5041332 | 26-scf00232 | 26 |
| AX-158094343 | 10 | 36.76  | KV453290.1 | 5042672 | 26-scf00232 | 26 |
| AX-158094347 | 10 | 36.76  | KV453290.1 | 5048172 | 26-scf00232 | 26 |
| AX-158094348 | 10 | 36.76  | KV453290.1 | 5048921 | 26-scf00232 | 26 |
| AX-157718395 | 10 | 36.76  | KV453290.1 | 5051756 | 26-scf00232 | 26 |
| AX-158094350 | 10 | 36.76  | KV453290.1 | 5055348 | 26-scf00232 | 26 |
| AX-157739698 | 10 | 36.979 | KV453290.1 | 5057849 | 26-scf00232 | 26 |
| AX-157885729 | 10 | 36.979 | KV453290.1 | 5058830 | 26-scf00232 | 26 |
| AX-158094352 | 10 | 36.979 | KV453290.1 | 5059805 | 26-scf00232 | 26 |
| AX-157741928 | 10 | 36.979 | KV453290.1 | 5068783 | 26-scf00232 | 26 |

|              |    |        |            |         |             |    |
|--------------|----|--------|------------|---------|-------------|----|
| AX-158094412 | 10 | 36.979 | KV453290.1 | 5143508 | 26-scf00232 | 26 |
| AX-157753788 | 10 | 36.979 | KV453290.1 | 5143759 | 26-scf00232 | 26 |
| AX-158095050 | 10 | 36.979 | KV453290.1 | 6063810 | 26-scf00232 | 26 |
| AX-158384623 | 10 | 36.979 | KV453290.1 | 6089495 | 26-scf00232 | 26 |
| AX-158094353 | 10 | 37.198 | KV453290.1 | 5063323 | 26-scf00232 | 26 |
| AX-158094355 | 10 | 37.198 | KV453290.1 | 5066237 | 26-scf00232 | 26 |
| AX-157721798 | 10 | 37.198 | KV453290.1 | 5067952 | 26-scf00232 | 26 |
| AX-158094356 | 10 | 37.198 | KV453290.1 | 5068164 | 26-scf00232 | 26 |
| AX-158094357 | 10 | 37.198 | KV453290.1 | 5069692 | 26-scf00232 | 26 |
| AX-158094358 | 10 | 37.198 | KV453290.1 | 5070673 | 26-scf00232 | 26 |
| AX-158094363 | 10 | 37.198 | KV453290.1 | 5074497 | 26-scf00232 | 26 |
| AX-158094370 | 10 | 37.198 | KV453290.1 | 5083148 | 26-scf00232 | 26 |
| AX-158094389 | 10 | 37.198 | KV453290.1 | 5110195 | 26-scf00232 | 26 |
| AX-158094390 | 10 | 37.198 | KV453290.1 | 5110678 | 26-scf00232 | 26 |
| AX-157727486 | 10 | 37.198 | KV453290.1 | 5115510 | 26-scf00232 | 26 |
| AX-158094365 | 10 | 37.221 | KV453290.1 | 5076387 | 26-scf00232 | 26 |
| AX-158094368 | 10 | 37.271 | KV453290.1 | 5080563 | 26-scf00232 | 26 |
| AX-157825932 | 10 | 37.307 | KV453290.1 | 5096362 | 26-scf00232 | 26 |
| AX-158094380 | 10 | 37.307 | KV453290.1 | 5098711 | 26-scf00232 | 26 |
| AX-158094381 | 10 | 37.307 | KV453290.1 | 5099720 | 26-scf00232 | 26 |
| AX-158094384 | 10 | 37.307 | KV453290.1 | 5103289 | 26-scf00232 | 26 |
| AX-157774084 | 10 | 37.307 | KV453290.1 | 5104484 | 26-scf00232 | 26 |
| AX-158094386 | 10 | 37.307 | KV453290.1 | 5105901 | 26-scf00232 | 26 |
| AX-158094397 | 10 | 37.307 | KV453290.1 | 5122648 | 26-scf00232 | 26 |
| AX-158094398 | 10 | 37.329 | KV453290.1 | 5123131 | 26-scf00232 | 26 |
| AX-158094366 | 10 | 37.35  | KV453290.1 | 5079032 | 26-scf00232 | 26 |
| AX-157877394 | 10 | 37.35  | KV453290.1 | 5084088 | 26-scf00232 | 26 |
| AX-158094400 | 10 | 37.35  | KV453290.1 | 5125418 | 26-scf00232 | 26 |
| AX-158094402 | 10 | 37.35  | KV453290.1 | 5129734 | 26-scf00232 | 26 |
| AX-157740357 | 10 | 37.35  | KV453290.1 | 5141070 | 26-scf00232 | 26 |
| AX-158094374 | 10 | 37.376 | KV453290.1 | 5093166 | 26-scf00232 | 26 |
| AX-157738043 | 10 | 37.376 | KV453290.1 | 5134318 | 26-scf00232 | 26 |
| AX-158094411 | 10 | 37.402 | KV453290.1 | 5140315 | 26-scf00232 | 26 |
| AX-158094414 | 10 | 37.416 | KV453290.1 | 5144695 | 26-scf00232 | 26 |
| AX-157825934 | 10 | 37.416 | KV453290.1 | 5145084 | 26-scf00232 | 26 |
| AX-157825935 | 10 | 37.455 | KV453290.1 | 5145873 | 26-scf00232 | 26 |
| AX-158094416 | 10 | 37.48  | KV453290.1 | 5146109 | 26-scf00232 | 26 |
| AX-158094417 | 10 | 37.503 | KV453290.1 | 5151096 | 26-scf00232 | 26 |
| AX-158094418 | 10 | 37.525 | KV453290.1 | 5152630 | 26-scf00232 | 26 |
| AX-158094420 | 10 | 37.57  | KV453290.1 | 5154641 | 26-scf00232 | 26 |
| AX-158094422 | 10 | 37.583 | KV453290.1 | 5157545 | 26-scf00232 | 26 |
| AX-157716396 | 10 | 37.583 | KV453290.1 | 5170625 | 26-scf00232 | 26 |
| AX-158094423 | 10 | 37.608 | KV453290.1 | 5157922 | 26-scf00232 | 26 |
| AX-158094377 | 10 | 37.635 | KV453290.1 | 5096698 | 26-scf00232 | 26 |
| AX-158094387 | 10 | 37.635 | KV453290.1 | 5106914 | 26-scf00232 | 26 |
| AX-158094426 | 10 | 37.635 | KV453290.1 | 5161975 | 26-scf00232 | 26 |
| AX-158094428 | 10 | 37.635 | KV453290.1 | 5165718 | 26-scf00232 | 26 |
| AX-158094429 | 10 | 37.635 | KV453290.1 | 5165942 | 26-scf00232 | 26 |
| AX-158094430 | 10 | 37.635 | KV453290.1 | 5167880 | 26-scf00232 | 26 |
| AX-158094434 | 10 | 37.635 | KV453290.1 | 5173641 | 26-scf00232 | 26 |
| AX-158094435 | 10 | 37.635 | KV453290.1 | 5174180 | 26-scf00232 | 26 |

|              |    |        |            |         |             |    |
|--------------|----|--------|------------|---------|-------------|----|
| AX-158094440 | 10 | 37.635 | KV453290.1 | 5183585 | 26-scf00232 | 26 |
| AX-158094436 | 10 | 37.694 | KV453290.1 | 5176472 | 26-scf00232 | 26 |
| AX-157865830 | 10 | 37.744 | KV453290.1 | 5179796 | 26-scf00232 | 26 |
| AX-158094438 | 10 | 37.744 | KV453290.1 | 5180701 | 26-scf00232 | 26 |
| AX-158094439 | 10 | 37.744 | KV453290.1 | 5181351 | 26-scf00232 | 26 |
| AX-158094443 | 10 | 37.744 | KV453290.1 | 5185660 | 26-scf00232 | 26 |
| AX-158094444 | 10 | 37.744 | KV453290.1 | 5185995 | 26-scf00232 | 26 |
| AX-157715593 | 10 | 37.744 | KV453290.1 | 5186682 | 26-scf00232 | 26 |
| AX-158094447 | 10 | 37.744 | KV453290.1 | 5189156 | 26-scf00232 | 26 |
| AX-157825936 | 10 | 37.744 | KV453290.1 | 5190950 | 26-scf00232 | 26 |
| AX-157713697 | 10 | 37.744 | KV453290.1 | 5192655 | 26-scf00232 | 26 |
| AX-158094450 | 10 | 37.744 | KV453290.1 | 5195138 | 26-scf00232 | 26 |
| AX-158094453 | 10 | 37.853 | KV453290.1 | 5203254 | 26-scf00232 | 26 |
| AX-157825937 | 10 | 37.853 | KV453290.1 | 5204453 | 26-scf00232 | 26 |
| AX-158094455 | 10 | 37.853 | KV453290.1 | 5206967 | 26-scf00232 | 26 |
| AX-158094458 | 10 | 37.853 | KV453290.1 | 5209204 | 26-scf00232 | 26 |
| AX-158094459 | 10 | 37.853 | KV453290.1 | 5210640 | 26-scf00232 | 26 |
| AX-158094460 | 10 | 37.853 | KV453290.1 | 5211366 | 26-scf00232 | 26 |
| AX-158094465 | 10 | 37.853 | KV453290.1 | 5215508 | 26-scf00232 | 26 |
| AX-158094467 | 10 | 37.912 | KV453290.1 | 5217030 | 26-scf00232 | 26 |
| AX-157825940 | 10 | 37.912 | KV453290.1 | 5244993 | 26-scf00232 | 26 |
| AX-158094441 | 10 | 37.962 | KV453290.1 | 5184426 | 26-scf00232 | 26 |
| AX-157885735 | 10 | 37.962 | KV453290.1 | 5215858 | 26-scf00232 | 26 |
| AX-157758555 | 10 | 37.962 | KV453290.1 | 5218071 | 26-scf00232 | 26 |
| AX-158094468 | 10 | 37.962 | KV453290.1 | 5218262 | 26-scf00232 | 26 |
| AX-158094469 | 10 | 37.962 | KV453290.1 | 5219889 | 26-scf00232 | 26 |
| AX-158094470 | 10 | 37.962 | KV453290.1 | 5221174 | 26-scf00232 | 26 |
| AX-158094471 | 10 | 37.962 | KV453290.1 | 5222906 | 26-scf00232 | 26 |
| AX-158094473 | 10 | 37.962 | KV453290.1 | 5224667 | 26-scf00232 | 26 |
| AX-157825938 | 10 | 37.962 | KV453290.1 | 5226402 | 26-scf00232 | 26 |
| AX-158094476 | 10 | 37.962 | KV453290.1 | 5227878 | 26-scf00232 | 26 |
| AX-158094477 | 10 | 37.962 | KV453290.1 | 5228095 | 26-scf00232 | 26 |
| AX-158094478 | 10 | 37.962 | KV453290.1 | 5228413 | 26-scf00232 | 26 |
| AX-158094479 | 10 | 37.962 | KV453290.1 | 5231570 | 26-scf00232 | 26 |
| AX-158094482 | 10 | 37.962 | KV453290.1 | 5235157 | 26-scf00232 | 26 |
| AX-158094483 | 10 | 37.962 | KV453290.1 | 5235939 | 26-scf00232 | 26 |
| AX-158094755 | 10 | 37.962 | KV453290.1 | 5638251 | 26-scf00232 | 26 |
| AX-158095031 | 10 | 37.962 | KV453290.1 | 6033181 | 26-scf00232 | 26 |
| AX-158094485 | 10 | 37.964 | KV453290.1 | 5236899 | 26-scf00232 | 26 |
| AX-157772343 | 10 | 37.967 | KV453290.1 | 5239592 | 26-scf00232 | 26 |
| AX-158094487 | 10 | 38.399 | KV453290.1 | 5240211 | 26-scf00232 | 26 |
| AX-158094488 | 10 | 38.399 | KV453290.1 | 5240744 | 26-scf00232 | 26 |
| AX-157825941 | 10 | 38.399 | KV453290.1 | 5245843 | 26-scf00232 | 26 |
| AX-157825942 | 10 | 38.399 | KV453290.1 | 5246877 | 26-scf00232 | 26 |
| AX-158094491 | 10 | 38.399 | KV453290.1 | 5247724 | 26-scf00232 | 26 |
| AX-157825945 | 10 | 38.399 | KV453290.1 | 5256890 | 26-scf00232 | 26 |
| AX-158094531 | 10 | 38.399 | KV453290.1 | 5317686 | 26-scf00232 | 26 |
| AX-157825984 | 10 | 38.399 | KV453290.1 | 5655803 | 26-scf00232 | 26 |
| AX-157716553 | 10 | 38.399 | KV453290.1 | 5656568 | 26-scf00232 | 26 |
| AX-158094870 | 10 | 38.399 | KV453290.1 | 5803144 | 26-scf00232 | 26 |
| AX-158094495 | 10 | 38.458 | KV453290.1 | 5255295 | 26-scf00232 | 26 |

|              |    |        |            |         |             |    |
|--------------|----|--------|------------|---------|-------------|----|
| AX-157825947 | 10 | 38.508 | KV453290.1 | 5265336 | 26-scf00232 | 26 |
| AX-158094492 | 10 | 38.617 | KV453290.1 | 5249965 | 26-scf00232 | 26 |
| AX-157825946 | 10 | 38.617 | KV453290.1 | 5257194 | 26-scf00232 | 26 |
| AX-158094502 | 10 | 38.617 | KV453290.1 | 5271122 | 26-scf00232 | 26 |
| AX-157744713 | 10 | 38.617 | KV453290.1 | 5272910 | 26-scf00232 | 26 |
| AX-157714136 | 10 | 38.617 | KV453290.1 | 5281695 | 26-scf00232 | 26 |
| AX-158094506 | 10 | 38.617 | KV453290.1 | 5282832 | 26-scf00232 | 26 |
| AX-157825948 | 10 | 38.617 | KV453290.1 | 5286775 | 26-scf00232 | 26 |
| AX-158094508 | 10 | 38.617 | KV453290.1 | 5287803 | 26-scf00232 | 26 |
| AX-158094512 | 10 | 38.617 | KV453290.1 | 5291862 | 26-scf00232 | 26 |
| AX-157714483 | 10 | 38.617 | KV453290.1 | 5293067 | 26-scf00232 | 26 |
| AX-157825949 | 10 | 38.617 | KV453290.1 | 5293422 | 26-scf00232 | 26 |
| AX-158094514 | 10 | 38.617 | KV453290.1 | 5296694 | 26-scf00232 | 26 |
| AX-158094516 | 10 | 38.617 | KV453290.1 | 5297439 | 26-scf00232 | 26 |
| AX-157825951 | 10 | 38.617 | KV453290.1 | 5298181 | 26-scf00232 | 26 |
| AX-158094517 | 10 | 38.617 | KV453290.1 | 5299412 | 26-scf00232 | 26 |
| AX-158094518 | 10 | 38.617 | KV453290.1 | 5301909 | 26-scf00232 | 26 |
| AX-158094520 | 10 | 38.617 | KV453290.1 | 5304966 | 26-scf00232 | 26 |
| AX-158094521 | 10 | 38.617 | KV453290.1 | 5306148 | 26-scf00232 | 26 |
| AX-158410148 | 10 | 38.617 | KV453290.1 | 5306767 | 26-scf00232 | 26 |
| AX-157825952 | 10 | 38.617 | KV453290.1 | 5310007 | 26-scf00232 | 26 |
| AX-158094526 | 10 | 38.617 | KV453290.1 | 5311785 | 26-scf00232 | 26 |
| AX-158392168 | 10 | 38.617 | KV453290.1 | 5317052 | 26-scf00232 | 26 |
| AX-158094535 | 10 | 38.617 | KV453290.1 | 5321963 | 26-scf00232 | 26 |
| AX-158094536 | 10 | 38.617 | KV453290.1 | 5323065 | 26-scf00232 | 26 |
| AX-158094537 | 10 | 38.617 | KV453290.1 | 5323513 | 26-scf00232 | 26 |
| AX-158094538 | 10 | 38.617 | KV453290.1 | 5325330 | 26-scf00232 | 26 |
| AX-157742737 | 10 | 38.617 | KV453290.1 | 5326036 | 26-scf00232 | 26 |
| AX-158094539 | 10 | 38.617 | KV453290.1 | 5327081 | 26-scf00232 | 26 |
| AX-158094543 | 10 | 38.617 | KV453290.1 | 5330263 | 26-scf00232 | 26 |
| AX-158379984 | 10 | 38.617 | KV453290.1 | 5331071 | 26-scf00232 | 26 |
| AX-158094544 | 10 | 38.617 | KV453290.1 | 5331387 | 26-scf00232 | 26 |
| AX-157746175 | 10 | 38.617 | KV453290.1 | 5344616 | 26-scf00232 | 26 |
| AX-157825954 | 10 | 38.617 | KV453290.1 | 5345219 | 26-scf00232 | 26 |
| AX-157825958 | 10 | 38.617 | KV453290.1 | 5351752 | 26-scf00232 | 26 |
| AX-158094553 | 10 | 38.617 | KV453290.1 | 5352823 | 26-scf00232 | 26 |
| AX-158094554 | 10 | 38.617 | KV453290.1 | 5354029 | 26-scf00232 | 26 |
| AX-157825959 | 10 | 38.617 | KV453290.1 | 5356774 | 26-scf00232 | 26 |
| AX-158094556 | 10 | 38.617 | KV453290.1 | 5356900 | 26-scf00232 | 26 |
| AX-158094557 | 10 | 38.617 | KV453290.1 | 5359312 | 26-scf00232 | 26 |
| AX-158094559 | 10 | 38.617 | KV453290.1 | 5360826 | 26-scf00232 | 26 |
| AX-158094565 | 10 | 38.617 | KV453290.1 | 5367166 | 26-scf00232 | 26 |
| AX-158094566 | 10 | 38.617 | KV453290.1 | 5367777 | 26-scf00232 | 26 |
| AX-157825961 | 10 | 38.617 | KV453290.1 | 5367983 | 26-scf00232 | 26 |
| AX-157825962 | 10 | 38.617 | KV453290.1 | 5368103 | 26-scf00232 | 26 |
| AX-157743452 | 10 | 38.617 | KV453290.1 | 5371207 | 26-scf00232 | 26 |
| AX-157825963 | 10 | 38.617 | KV453290.1 | 5371752 | 26-scf00232 | 26 |
| AX-158094567 | 10 | 38.617 | KV453290.1 | 5372614 | 26-scf00232 | 26 |
| AX-158094569 | 10 | 38.617 | KV453290.1 | 5376062 | 26-scf00232 | 26 |
| AX-158094582 | 10 | 38.617 | KV453290.1 | 5388085 | 26-scf00232 | 26 |
| AX-158094592 | 10 | 38.617 | KV453290.1 | 5399620 | 26-scf00232 | 26 |

|              |    |        |            |         |             |    |
|--------------|----|--------|------------|---------|-------------|----|
| AX-157717354 | 10 | 38.617 | KV453290.1 | 5403285 | 26-scf00232 | 26 |
| AX-157745249 | 10 | 38.617 | KV453290.1 | 5405184 | 26-scf00232 | 26 |
| AX-157771947 | 10 | 38.617 | KV453290.1 | 5405911 | 26-scf00232 | 26 |
| AX-158094595 | 10 | 38.617 | KV453290.1 | 5407010 | 26-scf00232 | 26 |
| AX-157825969 | 10 | 38.617 | KV453290.1 | 5407982 | 26-scf00232 | 26 |
| AX-158094604 | 10 | 38.617 | KV453290.1 | 5415003 | 26-scf00232 | 26 |
| AX-158094608 | 10 | 38.617 | KV453290.1 | 5422041 | 26-scf00232 | 26 |
| AX-158094609 | 10 | 38.617 | KV453290.1 | 5423416 | 26-scf00232 | 26 |
| AX-158094610 | 10 | 38.617 | KV453290.1 | 5428398 | 26-scf00232 | 26 |
| AX-158094611 | 10 | 38.617 | KV453290.1 | 5429967 | 26-scf00232 | 26 |
| AX-158094613 | 10 | 38.617 | KV453290.1 | 5437329 | 26-scf00232 | 26 |
| AX-158094616 | 10 | 38.617 | KV453290.1 | 5441443 | 26-scf00232 | 26 |
| AX-158094618 | 10 | 38.617 | KV453290.1 | 5443171 | 26-scf00232 | 26 |
| AX-158094619 | 10 | 38.617 | KV453290.1 | 5444097 | 26-scf00232 | 26 |
| AX-158094621 | 10 | 38.617 | KV453290.1 | 5445382 | 26-scf00232 | 26 |
| AX-158094623 | 10 | 38.617 | KV453290.1 | 5447525 | 26-scf00232 | 26 |
| AX-158094625 | 10 | 38.617 | KV453290.1 | 5449505 | 26-scf00232 | 26 |
| AX-158094626 | 10 | 38.617 | KV453290.1 | 5450164 | 26-scf00232 | 26 |
| AX-158094628 | 10 | 38.617 | KV453290.1 | 5451569 | 26-scf00232 | 26 |
| AX-158094630 | 10 | 38.617 | KV453290.1 | 5452533 | 26-scf00232 | 26 |
| AX-158094632 | 10 | 38.617 | KV453290.1 | 5456004 | 26-scf00232 | 26 |
| AX-158094634 | 10 | 38.617 | KV453290.1 | 5459923 | 26-scf00232 | 26 |
| AX-158094635 | 10 | 38.617 | KV453290.1 | 5460557 | 26-scf00232 | 26 |
| AX-158094636 | 10 | 38.617 | KV453290.1 | 5461227 | 26-scf00232 | 26 |
| AX-158094639 | 10 | 38.617 | KV453290.1 | 5464232 | 26-scf00232 | 26 |
| AX-158094640 | 10 | 38.617 | KV453290.1 | 5465183 | 26-scf00232 | 26 |
| AX-158094642 | 10 | 38.617 | KV453290.1 | 5466425 | 26-scf00232 | 26 |
| AX-158094643 | 10 | 38.617 | KV453290.1 | 5468290 | 26-scf00232 | 26 |
| AX-157825971 | 10 | 38.617 | KV453290.1 | 5469870 | 26-scf00232 | 26 |
| AX-158094644 | 10 | 38.617 | KV453290.1 | 5471304 | 26-scf00232 | 26 |
| AX-158094646 | 10 | 38.617 | KV453290.1 | 5472946 | 26-scf00232 | 26 |
| AX-158094648 | 10 | 38.617 | KV453290.1 | 5474421 | 26-scf00232 | 26 |
| AX-157825973 | 10 | 38.617 | KV453290.1 | 5475079 | 26-scf00232 | 26 |
| AX-157825974 | 10 | 38.617 | KV453290.1 | 5478731 | 26-scf00232 | 26 |
| AX-158094651 | 10 | 38.617 | KV453290.1 | 5479224 | 26-scf00232 | 26 |
| AX-158094653 | 10 | 38.617 | KV453290.1 | 5481811 | 26-scf00232 | 26 |
| AX-158094663 | 10 | 38.617 | KV453290.1 | 5515511 | 26-scf00232 | 26 |
| AX-158094666 | 10 | 38.617 | KV453290.1 | 5518327 | 26-scf00232 | 26 |
| AX-158094668 | 10 | 38.617 | KV453290.1 | 5521594 | 26-scf00232 | 26 |
| AX-158094671 | 10 | 38.617 | KV453290.1 | 5525827 | 26-scf00232 | 26 |
| AX-158094673 | 10 | 38.617 | KV453290.1 | 5528022 | 26-scf00232 | 26 |
| AX-158094676 | 10 | 38.617 | KV453290.1 | 5532946 | 26-scf00232 | 26 |
| AX-158094677 | 10 | 38.617 | KV453290.1 | 5534232 | 26-scf00232 | 26 |
| AX-158094679 | 10 | 38.617 | KV453290.1 | 5535828 | 26-scf00232 | 26 |
| AX-158094681 | 10 | 38.617 | KV453290.1 | 5537259 | 26-scf00232 | 26 |
| AX-158094682 | 10 | 38.617 | KV453290.1 | 5537961 | 26-scf00232 | 26 |
| AX-158094702 | 10 | 38.617 | KV453290.1 | 5569819 | 26-scf00232 | 26 |
| AX-158094713 | 10 | 38.617 | KV453290.1 | 5580825 | 26-scf00232 | 26 |
| AX-158094724 | 10 | 38.617 | KV453290.1 | 5589022 | 26-scf00232 | 26 |
| AX-158094730 | 10 | 38.617 | KV453290.1 | 5600590 | 26-scf00232 | 26 |
| AX-157825980 | 10 | 38.617 | KV453290.1 | 5611422 | 26-scf00232 | 26 |

|              |    |        |             |         |             |    |
|--------------|----|--------|-------------|---------|-------------|----|
| AX-158094735 | 10 | 38.617 | KV453290.1  | 5615692 | 26-scf00232 | 26 |
| AX-158094738 | 10 | 38.617 | KV453290.1  | 5617533 | 26-scf00232 | 26 |
| AX-157718876 | 10 | 38.617 | KV453290.1  | 5618017 | 26-scf00232 | 26 |
| AX-158094739 | 10 | 38.617 | KV453290.1  | 5618513 | 26-scf00232 | 26 |
| AX-158094740 | 10 | 38.617 | KV453290.1  | 5618890 | 26-scf00232 | 26 |
| AX-158094744 | 10 | 38.617 | KV453290.1  | 5621218 | 26-scf00232 | 26 |
| AX-158094746 | 10 | 38.617 | KV453290.1  | 5624097 | 26-scf00232 | 26 |
| AX-158094753 | 10 | 38.617 | KV453290.1  | 5631122 | 26-scf00232 | 26 |
| AX-158094799 | 10 | 38.617 | KV453290.1  | 5718261 | 26-scf00232 | 26 |
| AX-158094800 | 10 | 38.617 | KV453290.1  | 5719726 | 26-scf00232 | 26 |
| AX-158094898 | 10 | 38.617 | KV453290.1  | 5845452 | 26-scf00232 | 26 |
| AX-158094915 | 10 | 38.617 | KV453290.1  | 5863800 | 26-scf00232 | 26 |
| AX-158094923 | 10 | 38.617 | KV453290.1  | 5880704 | 26-scf00232 | 26 |
| AX-158094934 | 10 | 38.617 | KV453290.1  | 5894967 | 26-scf00232 | 26 |
| AX-157712100 | 10 | 38.617 | 3ML01034423 | 363     | scf10097_1  | UN |
| AX-157681580 | 10 | 38.617 |             | 255     | scf16973    | UN |
| AX-158094532 | 10 | 38.727 | KV453290.1  | 5318266 | 26-scf00232 | 26 |
| AX-158094588 | 10 | 38.727 | KV453290.1  | 5396229 | 26-scf00232 | 26 |
| AX-158094590 | 10 | 38.727 | KV453290.1  | 5397799 | 26-scf00232 | 26 |
| AX-158094593 | 10 | 38.727 | KV453290.1  | 5400880 | 26-scf00232 | 26 |
| AX-158094594 | 10 | 38.727 | KV453290.1  | 5402194 | 26-scf00232 | 26 |
| AX-158094596 | 10 | 38.727 | KV453290.1  | 5408801 | 26-scf00232 | 26 |
| AX-157763687 | 10 | 38.727 | KV453290.1  | 5410502 | 26-scf00232 | 26 |
| AX-158094606 | 10 | 38.727 | KV453290.1  | 5417464 | 26-scf00232 | 26 |
| AX-158094607 | 10 | 38.727 | KV453290.1  | 5419651 | 26-scf00232 | 26 |
| AX-158094612 | 10 | 38.727 | KV453290.1  | 5434561 | 26-scf00232 | 26 |
| AX-157825970 | 10 | 38.727 | KV453290.1  | 5439041 | 26-scf00232 | 26 |
| AX-158094622 | 10 | 38.727 | KV453290.1  | 5446635 | 26-scf00232 | 26 |
| AX-158410150 | 10 | 38.727 | KV453290.1  | 5447207 | 26-scf00232 | 26 |
| AX-158094629 | 10 | 38.727 | KV453290.1  | 5452171 | 26-scf00232 | 26 |
| AX-158094641 | 10 | 38.727 | KV453290.1  | 5465831 | 26-scf00232 | 26 |
| AX-157825972 | 10 | 38.727 | KV453290.1  | 5472022 | 26-scf00232 | 26 |
| AX-158094667 | 10 | 38.727 | KV453290.1  | 5520878 | 26-scf00232 | 26 |
| AX-158392170 | 10 | 38.727 | KV453290.1  | 5525780 | 26-scf00232 | 26 |
| AX-158094704 | 10 | 38.727 | KV453290.1  | 5573652 | 26-scf00232 | 26 |
| AX-158094617 | 10 | 38.728 | KV453290.1  | 5442207 | 26-scf00232 | 26 |
| AX-157742380 | 10 | 38.728 | KV453290.1  | 5467680 | 26-scf00232 | 26 |
| AX-158094650 | 10 | 38.728 | KV453290.1  | 5477981 | 26-scf00232 | 26 |
| AX-157825975 | 10 | 38.728 | KV453290.1  | 5480600 | 26-scf00232 | 26 |
| AX-158094660 | 10 | 38.728 | KV453290.1  | 5505639 | 26-scf00232 | 26 |
| AX-158094662 | 10 | 38.729 | KV453290.1  | 5514791 | 26-scf00232 | 26 |
| AX-158094669 | 10 | 38.729 | KV453290.1  | 5523122 | 26-scf00232 | 26 |
| AX-158094705 | 10 | 38.73  | KV453290.1  | 5574724 | 26-scf00232 | 26 |
| AX-158094716 | 10 | 38.73  | KV453290.1  | 5581896 | 26-scf00232 | 26 |
| AX-158094726 | 10 | 38.73  | KV453290.1  | 5594471 | 26-scf00232 | 26 |
| AX-157870905 | 10 | 38.73  | KV453290.1  | 5599827 | 26-scf00232 | 26 |
| AX-158410154 | 10 | 38.73  | KV453290.1  | 5617715 | 26-scf00232 | 26 |
| AX-157825981 | 10 | 38.73  | KV453290.1  | 5624562 | 26-scf00232 | 26 |
| AX-158384620 | 10 | 38.73  | KV453290.1  | 5642650 | 26-scf00232 | 26 |
| AX-158094812 | 10 | 38.73  | KV453290.1  | 5731943 | 26-scf00232 | 26 |
| AX-158094523 | 10 | 38.889 | KV453290.1  | 5308123 | 26-scf00232 | 26 |



|              |    |        |            |         |             |    |
|--------------|----|--------|------------|---------|-------------|----|
| AX-158094757 | 10 | 38.889 | KV453290.1 | 5641437 | 26-scf00232 | 26 |
| AX-158094760 | 10 | 38.889 | KV453290.1 | 5646615 | 26-scf00232 | 26 |
| AX-158094762 | 10 | 38.889 | KV453290.1 | 5651905 | 26-scf00232 | 26 |
| AX-158094788 | 10 | 38.889 | KV453290.1 | 5710625 | 26-scf00232 | 26 |
| AX-158094801 | 10 | 38.889 | KV453290.1 | 5720303 | 26-scf00232 | 26 |
| AX-158094802 | 10 | 38.889 | KV453290.1 | 5721358 | 26-scf00232 | 26 |
| AX-158094803 | 10 | 38.889 | KV453290.1 | 5725341 | 26-scf00232 | 26 |
| AX-158094805 | 10 | 38.889 | KV453290.1 | 5726535 | 26-scf00232 | 26 |
| AX-157885738 | 10 | 38.889 | KV453290.1 | 5727077 | 26-scf00232 | 26 |
| AX-158094806 | 10 | 38.889 | KV453290.1 | 5727229 | 26-scf00232 | 26 |
| AX-158094807 | 10 | 38.889 | KV453290.1 | 5728462 | 26-scf00232 | 26 |
| AX-158094811 | 10 | 38.889 | KV453290.1 | 5731406 | 26-scf00232 | 26 |
| AX-158094827 | 10 | 38.889 | KV453290.1 | 5747484 | 26-scf00232 | 26 |
| AX-158094828 | 10 | 38.889 | KV453290.1 | 5748547 | 26-scf00232 | 26 |
| AX-158094830 | 10 | 38.889 | KV453290.1 | 5749870 | 26-scf00232 | 26 |
| AX-158094831 | 10 | 38.889 | KV453290.1 | 5752146 | 26-scf00232 | 26 |
| AX-158094832 | 10 | 38.889 | KV453290.1 | 5752423 | 26-scf00232 | 26 |
| AX-158094833 | 10 | 38.889 | KV453290.1 | 5753544 | 26-scf00232 | 26 |
| AX-157825990 | 10 | 38.889 | KV453290.1 | 5754331 | 26-scf00232 | 26 |
| AX-157825991 | 10 | 38.889 | KV453290.1 | 5755139 | 26-scf00232 | 26 |
| AX-157825993 | 10 | 38.889 | KV453290.1 | 5757259 | 26-scf00232 | 26 |
| AX-157825995 | 10 | 38.889 | KV453290.1 | 5757917 | 26-scf00232 | 26 |
| AX-158094838 | 10 | 38.889 | KV453290.1 | 5762561 | 26-scf00232 | 26 |
| AX-157826001 | 10 | 38.889 | KV453290.1 | 5767696 | 26-scf00232 | 26 |
| AX-157742654 | 10 | 38.889 | KV453290.1 | 5771903 | 26-scf00232 | 26 |
| AX-157826003 | 10 | 38.889 | KV453290.1 | 5773484 | 26-scf00232 | 26 |
| AX-157826005 | 10 | 38.889 | KV453290.1 | 5774610 | 26-scf00232 | 26 |
| AX-158094852 | 10 | 38.889 | KV453290.1 | 5786154 | 26-scf00232 | 26 |
| AX-158094853 | 10 | 38.889 | KV453290.1 | 5786795 | 26-scf00232 | 26 |
| AX-158094862 | 10 | 38.889 | KV453290.1 | 5794250 | 26-scf00232 | 26 |
| AX-158094869 | 10 | 38.889 | KV453290.1 | 5799996 | 26-scf00232 | 26 |
| AX-158094871 | 10 | 38.889 | KV453290.1 | 5805175 | 26-scf00232 | 26 |
| AX-158094872 | 10 | 38.889 | KV453290.1 | 5805427 | 26-scf00232 | 26 |
| AX-158094886 | 10 | 38.889 | KV453290.1 | 5823877 | 26-scf00232 | 26 |
| AX-157826009 | 10 | 38.889 | KV453290.1 | 5872232 | 26-scf00232 | 26 |
| AX-158094892 | 10 | 39.019 | KV453290.1 | 5834072 | 26-scf00232 | 26 |
| AX-157825953 | 10 | 39.054 | KV453290.1 | 5322863 | 26-scf00232 | 26 |
| AX-157825955 | 10 | 39.054 | KV453290.1 | 5345553 | 26-scf00232 | 26 |
| AX-157825982 | 10 | 39.054 | KV453290.1 | 5626389 | 26-scf00232 | 26 |
| AX-158094747 | 10 | 39.054 | KV453290.1 | 5626702 | 26-scf00232 | 26 |
| AX-157885742 | 10 | 39.054 | KV453290.1 | 5843570 | 26-scf00232 | 26 |
| AX-158094900 | 10 | 39.054 | KV453290.1 | 5847894 | 26-scf00232 | 26 |
| AX-158094901 | 10 | 39.054 | KV453290.1 | 5848960 | 26-scf00232 | 26 |
| AX-157877405 | 10 | 39.054 | KV453290.1 | 5848997 | 26-scf00232 | 26 |
| AX-158094902 | 10 | 39.054 | KV453290.1 | 5851323 | 26-scf00232 | 26 |
| AX-158392173 | 10 | 39.054 | KV453290.1 | 5852859 | 26-scf00232 | 26 |
| AX-158094905 | 10 | 39.054 | KV453290.1 | 5853313 | 26-scf00232 | 26 |
| AX-158094907 | 10 | 39.054 | KV453290.1 | 5858258 | 26-scf00232 | 26 |
| AX-157702284 | 10 | 39.054 | KV453290.1 | 5859003 | 26-scf00232 | 26 |
| AX-158094911 | 10 | 39.054 | KV453290.1 | 5860249 | 26-scf00232 | 26 |
| AX-158094914 | 10 | 39.054 | KV453290.1 | 5863035 | 26-scf00232 | 26 |

|              |    |        |            |         |             |    |
|--------------|----|--------|------------|---------|-------------|----|
| AX-158094917 | 10 | 39.054 | KV453290.1 | 5867325 | 26-scf00232 | 26 |
| AX-158094918 | 10 | 39.054 | KV453290.1 | 5869245 | 26-scf00232 | 26 |
| AX-158094920 | 10 | 39.054 | KV453290.1 | 5872731 | 26-scf00232 | 26 |
| AX-158094925 | 10 | 39.054 | KV453290.1 | 5882427 | 26-scf00232 | 26 |
| AX-157752540 | 10 | 39.054 | KV453290.1 | 5882630 | 26-scf00232 | 26 |
| AX-158094929 | 10 | 39.054 | KV453290.1 | 5888697 | 26-scf00232 | 26 |
| AX-158379986 | 10 | 39.054 | KV453290.1 | 5895833 | 26-scf00232 | 26 |
| AX-158094935 | 10 | 39.054 | KV453290.1 | 5898141 | 26-scf00232 | 26 |
| AX-158094940 | 10 | 39.054 | KV453290.1 | 5906323 | 26-scf00232 | 26 |
| AX-158410157 | 10 | 39.054 | KV453290.1 | 5910072 | 26-scf00232 | 26 |
| AX-158410161 | 10 | 39.054 | KV453290.1 | 5911194 | 26-scf00232 | 26 |
| AX-157826012 | 10 | 39.054 | KV453290.1 | 5911513 | 26-scf00232 | 26 |
| AX-158094957 | 10 | 39.054 | KV453290.1 | 5922417 | 26-scf00232 | 26 |
| AX-158094988 | 10 | 39.054 | KV453290.1 | 5965281 | 26-scf00232 | 26 |
| AX-158094995 | 10 | 39.054 | KV453290.1 | 5984640 | 26-scf00232 | 26 |
| AX-158095056 | 10 | 39.054 | KV453290.1 | 6071501 | 26-scf00232 | 26 |
| AX-158094928 | 10 | 39.102 | KV453290.1 | 5887805 | 26-scf00232 | 26 |
| AX-158094943 | 10 | 39.102 | KV453290.1 | 5913843 | 26-scf00232 | 26 |
| AX-158094546 | 10 | 39.164 | KV453290.1 | 5334377 | 26-scf00232 | 26 |
| AX-158094942 | 10 | 39.164 | KV453290.1 | 5907209 | 26-scf00232 | 26 |
| AX-158094944 | 10 | 39.164 | KV453290.1 | 5915086 | 26-scf00232 | 26 |
| AX-158094945 | 10 | 39.164 | KV453290.1 | 5915307 | 26-scf00232 | 26 |
| AX-158094946 | 10 | 39.164 | KV453290.1 | 5915929 | 26-scf00232 | 26 |
| AX-158094952 | 10 | 39.164 | KV453290.1 | 5917882 | 26-scf00232 | 26 |
| AX-158094954 | 10 | 39.164 | KV453290.1 | 5920533 | 26-scf00232 | 26 |
| AX-157760052 | 10 | 39.164 | KV453290.1 | 5921711 | 26-scf00232 | 26 |
| AX-158094959 | 10 | 39.164 | KV453290.1 | 5924906 | 26-scf00232 | 26 |
| AX-157826014 | 10 | 39.164 | KV453290.1 | 5925155 | 26-scf00232 | 26 |
| AX-158094960 | 10 | 39.164 | KV453290.1 | 5926363 | 26-scf00232 | 26 |
| AX-158094964 | 10 | 39.164 | KV453290.1 | 5928035 | 26-scf00232 | 26 |
| AX-158094963 | 10 | 39.185 | KV453290.1 | 5927747 | 26-scf00232 | 26 |
| AX-157826015 | 10 | 39.208 | KV453290.1 | 5949189 | 26-scf00232 | 26 |
| AX-158094981 | 10 | 39.273 | KV453290.1 | 5951395 | 26-scf00232 | 26 |
| AX-158094982 | 10 | 39.273 | KV453290.1 | 5952605 | 26-scf00232 | 26 |
| AX-158094983 | 10 | 39.273 | KV453290.1 | 5953600 | 26-scf00232 | 26 |
| AX-157877408 | 10 | 39.273 | KV453290.1 | 5959016 | 26-scf00232 | 26 |
| AX-158094986 | 10 | 39.273 | KV453290.1 | 5961814 | 26-scf00232 | 26 |
| AX-157727072 | 10 | 39.273 | KV453290.1 | 6033481 | 26-scf00232 | 26 |
| AX-157747398 | 10 | 39.296 | KV453290.1 | 5966820 | 26-scf00232 | 26 |
| AX-158094990 | 10 | 39.315 | KV453290.1 | 5970577 | 26-scf00232 | 26 |
| AX-158094991 | 10 | 39.315 | KV453290.1 | 5971161 | 26-scf00232 | 26 |
| AX-158095000 | 10 | 39.315 | KV453290.1 | 5989805 | 26-scf00232 | 26 |
| AX-158095014 | 10 | 39.315 | KV453290.1 | 6016814 | 26-scf00232 | 26 |
| AX-157745563 | 10 | 39.337 | KV453290.1 | 5982971 | 26-scf00232 | 26 |
| AX-158094994 | 10 | 39.355 | KV453290.1 | 5983983 | 26-scf00232 | 26 |
| AX-158094992 | 10 | 39.382 | KV453290.1 | 5972600 | 26-scf00232 | 26 |
| AX-157773059 | 10 | 39.382 | KV453290.1 | 5985348 | 26-scf00232 | 26 |
| AX-157826019 | 10 | 39.382 | KV453290.1 | 5986332 | 26-scf00232 | 26 |
| AX-158094996 | 10 | 39.382 | KV453290.1 | 5986656 | 26-scf00232 | 26 |
| AX-157826020 | 10 | 39.382 | KV453290.1 | 5988404 | 26-scf00232 | 26 |
| AX-158094999 | 10 | 39.382 | KV453290.1 | 5989259 | 26-scf00232 | 26 |

|              |    |        |            |         |             |    |
|--------------|----|--------|------------|---------|-------------|----|
| AX-158095002 | 10 | 39.382 | KV453290.1 | 5991667 | 26-scf00232 | 26 |
| AX-158095003 | 10 | 39.382 | KV453290.1 | 5992482 | 26-scf00232 | 26 |
| AX-157772922 | 10 | 39.382 | KV453290.1 | 5992958 | 26-scf00232 | 26 |
| AX-158095004 | 10 | 39.382 | KV453290.1 | 5993917 | 26-scf00232 | 26 |
| AX-157725970 | 10 | 39.382 | KV453290.1 | 5996031 | 26-scf00232 | 26 |
| AX-158095005 | 10 | 39.382 | KV453290.1 | 5997498 | 26-scf00232 | 26 |
| AX-157772171 | 10 | 39.382 | KV453290.1 | 6006334 | 26-scf00232 | 26 |
| AX-157826021 | 10 | 39.382 | KV453290.1 | 6018106 | 26-scf00232 | 26 |
| AX-158095058 | 10 | 39.382 | KV453290.1 | 6072419 | 26-scf00232 | 26 |
| AX-158095064 | 10 | 39.382 | KV453290.1 | 6082001 | 26-scf00232 | 26 |
| AX-158095080 | 10 | 39.382 | KV453290.1 | 6097046 | 26-scf00232 | 26 |
| AX-157826028 | 10 | 39.382 | KV453290.1 | 6117863 | 26-scf00232 | 26 |
| AX-158095010 | 10 | 39.406 | KV453290.1 | 6006997 | 26-scf00232 | 26 |
| AX-157726067 | 10 | 39.432 | KV453290.1 | 6008784 | 26-scf00232 | 26 |
| AX-157865836 | 10 | 39.461 | KV453290.1 | 6010123 | 26-scf00232 | 26 |
| AX-158094511 | 10 | 39.491 | KV453290.1 | 5291015 | 26-scf00232 | 26 |
| AX-158094678 | 10 | 39.491 | KV453290.1 | 5534686 | 26-scf00232 | 26 |
| AX-158094759 | 10 | 39.491 | KV453290.1 | 5645995 | 26-scf00232 | 26 |
| AX-158094867 | 10 | 39.491 | KV453290.1 | 5799215 | 26-scf00232 | 26 |
| AX-158094899 | 10 | 39.491 | KV453290.1 | 5846583 | 26-scf00232 | 26 |
| AX-157721904 | 10 | 39.491 | KV453290.1 | 6012461 | 26-scf00232 | 26 |
| AX-158095012 | 10 | 39.491 | KV453290.1 | 6013143 | 26-scf00232 | 26 |
| AX-158094661 | 10 | 39.6   | KV453290.1 | 5514160 | 26-scf00232 | 26 |
| AX-158094873 | 10 | 39.6   | KV453290.1 | 5807076 | 26-scf00232 | 26 |
| AX-157747851 | 10 | 39.6   | KV453290.1 | 5816869 | 26-scf00232 | 26 |
| AX-158094887 | 10 | 39.6   | KV453290.1 | 5824098 | 26-scf00232 | 26 |
| AX-158094893 | 10 | 39.6   | KV453290.1 | 5836804 | 26-scf00232 | 26 |
| AX-158094897 | 10 | 39.6   | KV453290.1 | 5844805 | 26-scf00232 | 26 |
| AX-158094956 | 10 | 39.6   | KV453290.1 | 5921399 | 26-scf00232 | 26 |
| AX-157766973 | 10 | 39.6   | KV453290.1 | 5972361 | 26-scf00232 | 26 |
| AX-157826017 | 10 | 39.6   | KV453290.1 | 5973420 | 26-scf00232 | 26 |
| AX-157826018 | 10 | 39.6   | KV453290.1 | 5977756 | 26-scf00232 | 26 |
| AX-157724274 | 10 | 39.6   | KV453290.1 | 6015517 | 26-scf00232 | 26 |
| AX-158095015 | 10 | 39.6   | KV453290.1 | 6019222 | 26-scf00232 | 26 |
| AX-158095016 | 10 | 39.6   | KV453290.1 | 6019463 | 26-scf00232 | 26 |
| AX-158095019 | 10 | 39.6   | KV453290.1 | 6021916 | 26-scf00232 | 26 |
| AX-158095020 | 10 | 39.6   | KV453290.1 | 6022745 | 26-scf00232 | 26 |
| AX-157877411 | 10 | 39.6   | KV453290.1 | 6023218 | 26-scf00232 | 26 |
| AX-157826024 | 10 | 39.6   | KV453290.1 | 6024497 | 26-scf00232 | 26 |
| AX-158095023 | 10 | 39.6   | KV453290.1 | 6026569 | 26-scf00232 | 26 |
| AX-158095024 | 10 | 39.6   | KV453290.1 | 6027827 | 26-scf00232 | 26 |
| AX-157710412 | 10 | 39.6   | KV453290.1 | 6028266 | 26-scf00232 | 26 |
| AX-157710413 | 10 | 39.6   | KV453290.1 | 6028320 | 26-scf00232 | 26 |
| AX-158095025 | 10 | 39.6   | KV453290.1 | 6028914 | 26-scf00232 | 26 |
| AX-158095026 | 10 | 39.6   | KV453290.1 | 6029775 | 26-scf00232 | 26 |
| AX-157772050 | 10 | 39.6   | KV453290.1 | 6031221 | 26-scf00232 | 26 |
| AX-158095030 | 10 | 39.6   | KV453290.1 | 6032429 | 26-scf00232 | 26 |
| AX-158095032 | 10 | 39.6   | KV453290.1 | 6034782 | 26-scf00232 | 26 |
| AX-157723061 | 10 | 39.6   | KV453290.1 | 6037254 | 26-scf00232 | 26 |
| AX-158095033 | 10 | 39.6   | KV453290.1 | 6039442 | 26-scf00232 | 26 |
| AX-158095034 | 10 | 39.6   | KV453290.1 | 6040070 | 26-scf00232 | 26 |

|              |    |        |             |         |             |    |
|--------------|----|--------|-------------|---------|-------------|----|
| AX-158095036 | 10 | 39.6   | KV453290.1  | 6045275 | 26-scf00232 | 26 |
| AX-157826025 | 10 | 39.6   | KV453290.1  | 6051545 | 26-scf00232 | 26 |
| AX-158095040 | 10 | 39.6   | KV453290.1  | 6054869 | 26-scf00232 | 26 |
| AX-158095041 | 10 | 39.6   | KV453290.1  | 6055177 | 26-scf00232 | 26 |
| AX-157826026 | 10 | 39.6   | KV453290.1  | 6056471 | 26-scf00232 | 26 |
| AX-158095043 | 10 | 39.6   | KV453290.1  | 6057471 | 26-scf00232 | 26 |
| AX-158095044 | 10 | 39.6   | KV453290.1  | 6058061 | 26-scf00232 | 26 |
| AX-158095045 | 10 | 39.6   | KV453290.1  | 6059094 | 26-scf00232 | 26 |
| AX-158095051 | 10 | 39.6   | KV453290.1  | 6065754 | 26-scf00232 | 26 |
| AX-157746376 | 10 | 39.6   | KV453290.1  | 6068933 | 26-scf00232 | 26 |
| AX-158095054 | 10 | 39.6   | KV453290.1  | 6069677 | 26-scf00232 | 26 |
| AX-158095055 | 10 | 39.6   | KV453290.1  | 6071007 | 26-scf00232 | 26 |
| AX-158095057 | 10 | 39.6   | KV453290.1  | 6072020 | 26-scf00232 | 26 |
| AX-158095060 | 10 | 39.6   | KV453290.1  | 6074894 | 26-scf00232 | 26 |
| AX-158095061 | 10 | 39.6   | KV453290.1  | 6077583 | 26-scf00232 | 26 |
| AX-158095062 | 10 | 39.6   | KV453290.1  | 6078236 | 26-scf00232 | 26 |
| AX-158095063 | 10 | 39.6   | KV453290.1  | 6079353 | 26-scf00232 | 26 |
| AX-158095124 | 10 | 39.6   | KV453290.1  | 6141474 | 26-scf00232 | 26 |
| AX-157689823 | 10 | 39.6   | 3ML01033009 | 95      | scf08645_1  | UN |
| AX-157706928 | 10 | 39.6   | 3ML01033173 | 256     | scf08813_1  | UN |
| AX-158095066 | 10 | 39.71  | KV453290.1  | 6083896 | 26-scf00232 | 26 |
| AX-158095067 | 10 | 39.71  | KV453290.1  | 6085265 | 26-scf00232 | 26 |
| AX-158095074 | 10 | 39.819 | KV453290.1  | 6091770 | 26-scf00232 | 26 |
| AX-158095075 | 10 | 39.819 | KV453290.1  | 6092475 | 26-scf00232 | 26 |
| AX-158095076 | 10 | 39.819 | KV453290.1  | 6093343 | 26-scf00232 | 26 |
| AX-158095011 | 10 | 39.839 | KV453290.1  | 6012007 | 26-scf00232 | 26 |
| AX-158095027 | 10 | 39.839 | KV453290.1  | 6030399 | 26-scf00232 | 26 |
| AX-158095048 | 10 | 39.839 | KV453290.1  | 6061785 | 26-scf00232 | 26 |
| AX-158095065 | 10 | 39.839 | KV453290.1  | 6083056 | 26-scf00232 | 26 |
| AX-158095077 | 10 | 39.839 | KV453290.1  | 6094711 | 26-scf00232 | 26 |
| AX-158095078 | 10 | 39.86  | KV453290.1  | 6095954 | 26-scf00232 | 26 |
| AX-158095082 | 10 | 39.888 | KV453290.1  | 6100993 | 26-scf00232 | 26 |
| AX-158095083 | 10 | 39.899 | KV453290.1  | 6102041 | 26-scf00232 | 26 |
| AX-158095068 | 10 | 39.928 | KV453290.1  | 6085733 | 26-scf00232 | 26 |
| AX-158095084 | 10 | 39.928 | KV453290.1  | 6102769 | 26-scf00232 | 26 |
| AX-158095085 | 10 | 39.928 | KV453290.1  | 6105865 | 26-scf00232 | 26 |
| AX-158095087 | 10 | 39.928 | KV453290.1  | 6107924 | 26-scf00232 | 26 |
| AX-158095088 | 10 | 39.928 | KV453290.1  | 6109243 | 26-scf00232 | 26 |
| AX-158095090 | 10 | 39.928 | KV453290.1  | 6110883 | 26-scf00232 | 26 |
| AX-158095091 | 10 | 39.928 | KV453290.1  | 6112289 | 26-scf00232 | 26 |
| AX-158095092 | 10 | 39.928 | KV453290.1  | 6114017 | 26-scf00232 | 26 |
| AX-158095093 | 10 | 39.928 | KV453290.1  | 6114682 | 26-scf00232 | 26 |
| AX-158095094 | 10 | 39.928 | KV453290.1  | 6115338 | 26-scf00232 | 26 |
| AX-158095095 | 10 | 39.928 | KV453290.1  | 6116245 | 26-scf00232 | 26 |
| AX-158095097 | 10 | 39.928 | KV453290.1  | 6118876 | 26-scf00232 | 26 |
| AX-158095098 | 10 | 39.928 | KV453290.1  | 6122000 | 26-scf00232 | 26 |
| AX-158095100 | 10 | 39.928 | KV453290.1  | 6123484 | 26-scf00232 | 26 |
| AX-158095101 | 10 | 39.928 | KV453290.1  | 6124285 | 26-scf00232 | 26 |
| AX-158095102 | 10 | 39.928 | KV453290.1  | 6125013 | 26-scf00232 | 26 |
| AX-158095103 | 10 | 39.928 | KV453290.1  | 6125149 | 26-scf00232 | 26 |
| AX-157857317 | 10 | 39.928 | KV453290.1  | 6128230 | 26-scf00232 | 26 |

|              |    |        |            |         |             |    |
|--------------|----|--------|------------|---------|-------------|----|
| AX-158095108 | 10 | 39.928 | KV453290.1 | 6130032 | 26-scf00232 | 26 |
| AX-158095109 | 10 | 39.928 | KV453290.1 | 6131353 | 26-scf00232 | 26 |
| AX-157754269 | 10 | 40.219 | KV453290.1 | 6125988 | 26-scf00232 | 26 |
| AX-157756534 | 10 | 40.219 | KV453290.1 | 6128037 | 26-scf00232 | 26 |
| AX-158095110 | 10 | 40.219 | KV453290.1 | 6131620 | 26-scf00232 | 26 |
| AX-158095112 | 10 | 40.219 | KV453290.1 | 6132539 | 26-scf00232 | 26 |
| AX-158410164 | 10 | 40.219 | KV453290.1 | 6133352 | 26-scf00232 | 26 |
| AX-158095121 | 10 | 40.219 | KV453290.1 | 6138915 | 26-scf00232 | 26 |
| AX-158095113 | 10 | 40.365 | KV453290.1 | 6133872 | 26-scf00232 | 26 |
| AX-158095114 | 10 | 40.365 | KV453290.1 | 6134507 | 26-scf00232 | 26 |
| AX-158095115 | 10 | 40.365 | KV453290.1 | 6135154 | 26-scf00232 | 26 |
| AX-158095117 | 10 | 40.365 | KV453290.1 | 6136130 | 26-scf00232 | 26 |
| AX-158095118 | 10 | 40.474 | KV453290.1 | 6137358 | 26-scf00232 | 26 |
| AX-158095125 | 10 | 40.474 | KV453290.1 | 6143487 | 26-scf00232 | 26 |
| AX-158095126 | 10 | 40.474 | KV453290.1 | 6143669 | 26-scf00232 | 26 |
| AX-157826029 | 10 | 40.474 | KV453290.1 | 6146042 | 26-scf00232 | 26 |
| AX-158095129 | 10 | 40.474 | KV453290.1 | 6148343 | 26-scf00232 | 26 |
| AX-158095130 | 10 | 40.474 | KV453290.1 | 6149080 | 26-scf00232 | 26 |
| AX-158095131 | 10 | 40.474 | KV453290.1 | 6150008 | 26-scf00232 | 26 |
| AX-158095135 | 10 | 40.474 | KV453290.1 | 6153500 | 26-scf00232 | 26 |
| AX-157826030 | 10 | 40.474 | KV453290.1 | 6166969 | 26-scf00232 | 26 |
| AX-158095145 | 10 | 40.474 | KV453290.1 | 6175479 | 26-scf00232 | 26 |
| AX-158095146 | 10 | 40.474 | KV453290.1 | 6175988 | 26-scf00232 | 26 |
| AX-157826034 | 10 | 40.474 | KV453290.1 | 6199981 | 26-scf00232 | 26 |
| AX-158095176 | 10 | 40.474 | KV453290.1 | 6219484 | 26-scf00232 | 26 |
| AX-158095217 | 10 | 40.474 | KV453290.1 | 6268991 | 26-scf00232 | 26 |
| AX-158095137 | 10 | 40.693 | KV453290.1 | 6154891 | 26-scf00232 | 26 |
| AX-158095139 | 10 | 40.693 | KV453290.1 | 6165597 | 26-scf00232 | 26 |
| AX-158095141 | 10 | 40.693 | KV453290.1 | 6170766 | 26-scf00232 | 26 |
| AX-158095142 | 10 | 40.693 | KV453290.1 | 6171923 | 26-scf00232 | 26 |
| AX-158095143 | 10 | 40.693 | KV453290.1 | 6174147 | 26-scf00232 | 26 |
| AX-158095144 | 10 | 40.693 | KV453290.1 | 6174544 | 26-scf00232 | 26 |
| AX-158095147 | 10 | 40.693 | KV453290.1 | 6177854 | 26-scf00232 | 26 |
| AX-158095148 | 10 | 40.693 | KV453290.1 | 6178703 | 26-scf00232 | 26 |
| AX-157826031 | 10 | 40.693 | KV453290.1 | 6179420 | 26-scf00232 | 26 |
| AX-158095149 | 10 | 40.693 | KV453290.1 | 6179824 | 26-scf00232 | 26 |
| AX-158095150 | 10 | 40.693 | KV453290.1 | 6180344 | 26-scf00232 | 26 |
| AX-158095154 | 10 | 40.693 | KV453290.1 | 6186145 | 26-scf00232 | 26 |
| AX-158095192 | 10 | 40.693 | KV453290.1 | 6237802 | 26-scf00232 | 26 |
| AX-158095203 | 10 | 40.693 | KV453290.1 | 6245775 | 26-scf00232 | 26 |
| AX-158095152 | 10 | 40.802 | KV453290.1 | 6183307 | 26-scf00232 | 26 |
| AX-157826032 | 10 | 40.802 | KV453290.1 | 6189588 | 26-scf00232 | 26 |
| AX-158095159 | 10 | 41.072 | KV453290.1 | 6193201 | 26-scf00232 | 26 |
| AX-157826033 | 10 | 41.397 | KV453290.1 | 6195697 | 26-scf00232 | 26 |
| AX-157752096 | 10 | 41.458 | KV453290.1 | 6198495 | 26-scf00232 | 26 |
| AX-158095161 | 10 | 41.458 | KV453290.1 | 6199765 | 26-scf00232 | 26 |
| AX-158095162 | 10 | 41.458 | KV453290.1 | 6201047 | 26-scf00232 | 26 |
| AX-158095163 | 10 | 41.458 | KV453290.1 | 6205112 | 26-scf00232 | 26 |
| AX-158095164 | 10 | 41.458 | KV453290.1 | 6205571 | 26-scf00232 | 26 |
| AX-158095165 | 10 | 41.458 | KV453290.1 | 6206692 | 26-scf00232 | 26 |
| AX-158095169 | 10 | 41.458 | KV453290.1 | 6211022 | 26-scf00232 | 26 |

|              |    |        |            |         |             |    |
|--------------|----|--------|------------|---------|-------------|----|
| AX-157826035 | 10 | 41.458 | KV453290.1 | 6211739 | 26-scf00232 | 26 |
| AX-158095173 | 10 | 41.502 | KV453290.1 | 6215196 | 26-scf00232 | 26 |
| AX-158095174 | 10 | 41.525 | KV453290.1 | 6216875 | 26-scf00232 | 26 |
| AX-158095178 | 10 | 41.525 | KV453290.1 | 6220321 | 26-scf00232 | 26 |
| AX-158095179 | 10 | 41.568 | KV453290.1 | 6220716 | 26-scf00232 | 26 |
| AX-158095180 | 10 | 41.568 | KV453290.1 | 6222713 | 26-scf00232 | 26 |
| AX-158095181 | 10 | 41.568 | KV453290.1 | 6223855 | 26-scf00232 | 26 |
| AX-158095182 | 10 | 41.568 | KV453290.1 | 6224113 | 26-scf00232 | 26 |
| AX-158095183 | 10 | 41.568 | KV453290.1 | 6226886 | 26-scf00232 | 26 |
| AX-158095184 | 10 | 41.568 | KV453290.1 | 6228569 | 26-scf00232 | 26 |
| AX-158095219 | 10 | 41.568 | KV453290.1 | 6273608 | 26-scf00232 | 26 |
| AX-158095170 | 10 | 41.677 | KV453290.1 | 6212133 | 26-scf00232 | 26 |
| AX-157826037 | 10 | 41.677 | KV453290.1 | 6229258 | 26-scf00232 | 26 |
| AX-158095185 | 10 | 41.677 | KV453290.1 | 6231183 | 26-scf00232 | 26 |
| AX-157865841 | 10 | 41.677 | KV453290.1 | 6231650 | 26-scf00232 | 26 |
| AX-158095187 | 10 | 41.677 | KV453290.1 | 6234077 | 26-scf00232 | 26 |
| AX-158095188 | 10 | 41.677 | KV453290.1 | 6235135 | 26-scf00232 | 26 |
| AX-158095189 | 10 | 41.677 | KV453290.1 | 6235402 | 26-scf00232 | 26 |
| AX-158095190 | 10 | 41.677 | KV453290.1 | 6236086 | 26-scf00232 | 26 |
| AX-158095191 | 10 | 41.677 | KV453290.1 | 6237148 | 26-scf00232 | 26 |
| AX-157738760 | 10 | 41.677 | KV453290.1 | 6237404 | 26-scf00232 | 26 |
| AX-158095194 | 10 | 41.677 | KV453290.1 | 6238937 | 26-scf00232 | 26 |
| AX-158095196 | 10 | 41.677 | KV453290.1 | 6240503 | 26-scf00232 | 26 |
| AX-158095197 | 10 | 41.677 | KV453290.1 | 6241022 | 26-scf00232 | 26 |
| AX-158095198 | 10 | 41.677 | KV453290.1 | 6242172 | 26-scf00232 | 26 |
| AX-157826038 | 10 | 41.677 | KV453290.1 | 6244090 | 26-scf00232 | 26 |
| AX-158095202 | 10 | 41.677 | KV453290.1 | 6245481 | 26-scf00232 | 26 |
| AX-158095207 | 10 | 41.677 | KV453290.1 | 6253017 | 26-scf00232 | 26 |
| AX-158095212 | 10 | 41.677 | KV453290.1 | 6259915 | 26-scf00232 | 26 |
| AX-157727298 | 10 | 41.812 | KV453290.1 | 6251113 | 26-scf00232 | 26 |
| AX-158095136 | 10 | 41.883 | KV453290.1 | 6154112 | 26-scf00232 | 26 |
| AX-158095175 | 10 | 41.883 | KV453290.1 | 6218476 | 26-scf00232 | 26 |
| AX-158095211 | 10 | 41.883 | KV453290.1 | 6258973 | 26-scf00232 | 26 |
| AX-157716931 | 10 | 41.883 | KV453290.1 | 6260324 | 26-scf00232 | 26 |
| AX-157739663 | 10 | 42.084 | KV453290.1 | 6266820 | 26-scf00232 | 26 |
| AX-158095222 | 10 | 42.087 | KV453290.1 | 6276330 | 26-scf00232 | 26 |
| AX-158095223 | 10 | 42.132 | KV453290.1 | 6276946 | 26-scf00232 | 26 |
| AX-158095270 | 10 | 42.132 | KV453290.1 | 6327831 | 26-scf00232 | 26 |
| AX-157754139 | 10 | 42.132 | KV453290.1 | 6380198 | 26-scf00232 | 26 |
| AX-158095224 | 10 | 42.165 | KV453290.1 | 6278075 | 26-scf00232 | 26 |
| AX-158095214 | 10 | 42.223 | KV453290.1 | 6265227 | 26-scf00232 | 26 |
| AX-158095216 | 10 | 42.223 | KV453290.1 | 6267845 | 26-scf00232 | 26 |
| AX-158095230 | 10 | 42.223 | KV453290.1 | 6280560 | 26-scf00232 | 26 |
| AX-157754935 | 10 | 42.223 | KV453290.1 | 6282759 | 26-scf00232 | 26 |
| AX-158095232 | 10 | 42.223 | KV453290.1 | 6282813 | 26-scf00232 | 26 |
| AX-157826040 | 10 | 42.223 | KV453290.1 | 6286330 | 26-scf00232 | 26 |
| AX-157746277 | 10 | 42.223 | KV453290.1 | 6286750 | 26-scf00232 | 26 |
| AX-158095236 | 10 | 42.223 | KV453290.1 | 6289033 | 26-scf00232 | 26 |
| AX-157826041 | 10 | 42.223 | KV453290.1 | 6289068 | 26-scf00232 | 26 |
| AX-157826042 | 10 | 42.223 | KV453290.1 | 6289960 | 26-scf00232 | 26 |
| AX-158095240 | 10 | 42.223 | KV453290.1 | 6294205 | 26-scf00232 | 26 |

|              |    |        |            |         |             |    |
|--------------|----|--------|------------|---------|-------------|----|
| AX-158095241 | 10 | 42.223 | KV453290.1 | 6294451 | 26-scf00232 | 26 |
| AX-158095244 | 10 | 42.223 | KV453290.1 | 6297095 | 26-scf00232 | 26 |
| AX-158095245 | 10 | 42.223 | KV453290.1 | 6298747 | 26-scf00232 | 26 |
| AX-158095246 | 10 | 42.223 | KV453290.1 | 6299316 | 26-scf00232 | 26 |
| AX-158095248 | 10 | 42.223 | KV453290.1 | 6302607 | 26-scf00232 | 26 |
| AX-158095265 | 10 | 42.223 | KV453290.1 | 6323390 | 26-scf00232 | 26 |
| AX-157695488 | 10 | 42.223 | KV453290.1 | 6326484 | 26-scf00232 | 26 |
| AX-158095273 | 10 | 42.223 | KV453290.1 | 6334240 | 26-scf00232 | 26 |
| AX-158095301 | 10 | 42.223 | KV453290.1 | 6394860 | 26-scf00232 | 26 |
| AX-158095249 | 10 | 42.236 | KV453290.1 | 6303777 | 26-scf00232 | 26 |
| AX-157740223 | 10 | 42.25  | KV453290.1 | 6304120 | 26-scf00232 | 26 |
| AX-158095250 | 10 | 42.265 | KV453290.1 | 6307807 | 26-scf00232 | 26 |
| AX-158095252 | 10 | 42.287 | KV453290.1 | 6310580 | 26-scf00232 | 26 |
| AX-158095254 | 10 | 42.31  | KV453290.1 | 6313001 | 26-scf00232 | 26 |
| AX-158095266 | 10 | 42.333 | KV453290.1 | 6324229 | 26-scf00232 | 26 |
| AX-158095247 | 10 | 42.356 | KV453290.1 | 6300702 | 26-scf00232 | 26 |
| AX-158095268 | 10 | 42.356 | KV453290.1 | 6325575 | 26-scf00232 | 26 |
| AX-158095271 | 10 | 42.362 | KV453290.1 | 6332226 | 26-scf00232 | 26 |
| AX-157826047 | 10 | 42.362 | KV453290.1 | 6382527 | 26-scf00232 | 26 |
| AX-157826043 | 10 | 42.382 | KV453290.1 | 6298087 | 26-scf00232 | 26 |
| AX-158095274 | 10 | 42.382 | KV453290.1 | 6337091 | 26-scf00232 | 26 |
| AX-158095293 | 10 | 42.382 | KV453290.1 | 6375070 | 26-scf00232 | 26 |
| AX-158095275 | 10 | 42.4   | KV453290.1 | 6341290 | 26-scf00232 | 26 |
| AX-158095259 | 10 | 42.418 | KV453290.1 | 6317092 | 26-scf00232 | 26 |
| AX-158095260 | 10 | 42.418 | KV453290.1 | 6317895 | 26-scf00232 | 26 |
| AX-158095276 | 10 | 42.418 | KV453290.1 | 6345776 | 26-scf00232 | 26 |
| AX-158095221 | 10 | 42.442 | KV453290.1 | 6275691 | 26-scf00232 | 26 |
| AX-158095233 | 10 | 42.442 | KV453290.1 | 6283643 | 26-scf00232 | 26 |
| AX-158095235 | 10 | 42.442 | KV453290.1 | 6288018 | 26-scf00232 | 26 |
| AX-158095237 | 10 | 42.442 | KV453290.1 | 6290967 | 26-scf00232 | 26 |
| AX-158095243 | 10 | 42.442 | KV453290.1 | 6295805 | 26-scf00232 | 26 |
| AX-158379990 | 10 | 42.442 | KV453290.1 | 6296029 | 26-scf00232 | 26 |
| AX-158095255 | 10 | 42.442 | KV453290.1 | 6314010 | 26-scf00232 | 26 |
| AX-158095264 | 10 | 42.442 | KV453290.1 | 6322740 | 26-scf00232 | 26 |
| AX-158095267 | 10 | 42.442 | KV453290.1 | 6324774 | 26-scf00232 | 26 |
| AX-157857319 | 10 | 42.442 | KV453290.1 | 6354675 | 26-scf00232 | 26 |
| AX-158095280 | 10 | 42.442 | KV453290.1 | 6356681 | 26-scf00232 | 26 |
| AX-158095283 | 10 | 42.442 | KV453290.1 | 6357671 | 26-scf00232 | 26 |
| AX-158095284 | 10 | 42.442 | KV453290.1 | 6362964 | 26-scf00232 | 26 |
| AX-158095285 | 10 | 42.442 | KV453290.1 | 6363533 | 26-scf00232 | 26 |
| AX-158095286 | 10 | 42.442 | KV453290.1 | 6364949 | 26-scf00232 | 26 |
| AX-157826045 | 10 | 42.442 | KV453290.1 | 6366071 | 26-scf00232 | 26 |
| AX-157826046 | 10 | 42.442 | KV453290.1 | 6366111 | 26-scf00232 | 26 |
| AX-158095287 | 10 | 42.442 | KV453290.1 | 6366330 | 26-scf00232 | 26 |
| AX-158095288 | 10 | 42.442 | KV453290.1 | 6367027 | 26-scf00232 | 26 |
| AX-158095289 | 10 | 42.442 | KV453290.1 | 6368561 | 26-scf00232 | 26 |
| AX-157743348 | 10 | 42.442 | KV453290.1 | 6370667 | 26-scf00232 | 26 |
| AX-157745643 | 10 | 42.442 | KV453290.1 | 6371574 | 26-scf00232 | 26 |
| AX-158095292 | 10 | 42.442 | KV453290.1 | 6374762 | 26-scf00232 | 26 |
| AX-157724390 | 10 | 42.442 | KV453290.1 | 6377591 | 26-scf00232 | 26 |
| AX-157885744 | 10 | 42.442 | KV453290.1 | 6379867 | 26-scf00232 | 26 |

|              |    |        |            |         |             |    |
|--------------|----|--------|------------|---------|-------------|----|
| AX-157826048 | 10 | 42.442 | KV453290.1 | 6384869 | 26-scf00232 | 26 |
| AX-158095295 | 10 | 42.442 | KV453290.1 | 6384939 | 26-scf00232 | 26 |
| AX-157718105 | 10 | 42.442 | KV453290.1 | 6389195 | 26-scf00232 | 26 |
| AX-158095300 | 10 | 42.442 | KV453290.1 | 6393770 | 26-scf00232 | 26 |
| AX-158095297 | 10 | 42.66  | KV453290.1 | 6390460 | 26-scf00232 | 26 |
| AX-157723518 | 10 | 42.66  | KV453290.1 | 6391755 | 26-scf00232 | 26 |
| AX-158095302 | 10 | 42.66  | KV453290.1 | 6396507 | 26-scf00232 | 26 |
| AX-157826039 | 10 | 42.77  | KV453290.1 | 6268592 | 26-scf00232 | 26 |
| AX-157885745 | 10 | 42.77  | KV453290.1 | 6392123 | 26-scf00232 | 26 |
| AX-158095305 | 10 | 42.77  | KV453290.1 | 6399437 | 26-scf00232 | 26 |
| AX-158095307 | 10 | 42.77  | KV453290.1 | 6400465 | 26-scf00232 | 26 |
| AX-158095309 | 10 | 42.77  | KV453290.1 | 6403800 | 26-scf00232 | 26 |
| AX-158095315 | 10 | 42.77  | KV453290.1 | 6415758 | 26-scf00232 | 26 |
| AX-158095314 | 10 | 43.096 | KV453290.1 | 6414583 | 26-scf00232 | 26 |
| AX-157758183 | 10 | 43.096 | KV453290.1 | 6414845 | 26-scf00232 | 26 |
| AX-157720515 | 10 | 43.097 | KV453290.1 | 6417980 | 26-scf00232 | 26 |
| AX-158095319 | 10 | 43.097 | KV453290.1 | 6418379 | 26-scf00232 | 26 |
| AX-157826049 | 10 | 43.097 | KV453290.1 | 6420666 | 26-scf00232 | 26 |
| AX-158095322 | 10 | 43.097 | KV453290.1 | 6426130 | 26-scf00232 | 26 |
| AX-158095323 | 10 | 43.097 | KV453290.1 | 6428069 | 26-scf00232 | 26 |
| AX-158095324 | 10 | 43.097 | KV453290.1 | 6430884 | 26-scf00232 | 26 |
| AX-158095325 | 10 | 43.261 | KV453290.1 | 6432567 | 26-scf00232 | 26 |
| AX-158095327 | 10 | 43.261 | KV453290.1 | 6434793 | 26-scf00232 | 26 |
| AX-158095328 | 10 | 43.261 | KV453290.1 | 6435261 | 26-scf00232 | 26 |
| AX-158095330 | 10 | 43.261 | KV453290.1 | 6437331 | 26-scf00232 | 26 |
| AX-158095333 | 10 | 43.425 | KV453290.1 | 6440470 | 26-scf00232 | 26 |
| AX-158095334 | 10 | 43.425 | KV453290.1 | 6440799 | 26-scf00232 | 26 |
| AX-158095335 | 10 | 43.425 | KV453290.1 | 6441240 | 26-scf00232 | 26 |
| AX-157857320 | 10 | 43.425 | KV453290.1 | 6442828 | 26-scf00232 | 26 |
| AX-158095406 | 10 | 43.425 | KV453290.1 | 6544523 | 26-scf00232 | 26 |
| AX-157826050 | 10 | 43.475 | KV453290.1 | 6453824 | 26-scf00232 | 26 |
| AX-158095343 | 10 | 43.475 | KV453290.1 | 6454239 | 26-scf00232 | 26 |
| AX-158095345 | 10 | 43.507 | KV453290.1 | 6456011 | 26-scf00232 | 26 |
| AX-158095351 | 10 | 43.534 | KV453290.1 | 6463273 | 26-scf00232 | 26 |
| AX-157754670 | 10 | 43.534 | KV453290.1 | 6463574 | 26-scf00232 | 26 |
| AX-158095353 | 10 | 43.534 | KV453290.1 | 6465093 | 26-scf00232 | 26 |
| AX-158095355 | 10 | 43.534 | KV453290.1 | 6468447 | 26-scf00232 | 26 |
| AX-158095357 | 10 | 43.534 | KV453290.1 | 6470550 | 26-scf00232 | 26 |
| AX-158095350 | 10 | 43.561 | KV453290.1 | 6462404 | 26-scf00232 | 26 |
| AX-158095361 | 10 | 43.561 | KV453290.1 | 6476846 | 26-scf00232 | 26 |
| AX-157704257 | 10 | 43.561 | KV453290.1 | 6477549 | 26-scf00232 | 26 |
| AX-158095387 | 10 | 43.561 | KV453290.1 | 6515638 | 26-scf00232 | 26 |
| AX-158095363 | 10 | 43.584 | KV453290.1 | 6479410 | 26-scf00232 | 26 |
| AX-157870914 | 10 | 43.595 | KV453290.1 | 6452338 | 26-scf00232 | 26 |
| AX-158095344 | 10 | 43.595 | KV453290.1 | 6455372 | 26-scf00232 | 26 |
| AX-158095365 | 10 | 43.595 | KV453290.1 | 6481452 | 26-scf00232 | 26 |
| AX-158095395 | 10 | 43.595 | KV453290.1 | 6529378 | 26-scf00232 | 26 |
| AX-157826078 | 10 | 43.595 | KV453290.1 | 6759754 | 26-scf00232 | 26 |
| AX-158410182 | 10 | 43.595 | KV453290.1 | 6826328 | 26-scf00232 | 26 |
| AX-158095758 | 10 | 43.595 | KV453290.1 | 7015093 | 26-scf00232 | 26 |
| AX-158095897 | 10 | 43.595 | KV453290.1 | 7222218 | 26-scf00232 | 26 |



|              |    |        |             |         |               |    |
|--------------|----|--------|-------------|---------|---------------|----|
| AX-158095958 | 10 | 43.595 | KV453290.1  | 7294335 | 26-scf00232   | 26 |
| AX-158095372 | 10 | 43.613 | KV453290.1  | 6493123 | 26-scf00232   | 26 |
| AX-158095362 | 10 | 43.644 | KV453290.1  | 6478382 | 26-scf00232   | 26 |
| AX-158095364 | 10 | 43.644 | KV453290.1  | 6480812 | 26-scf00232   | 26 |
| AX-158095367 | 10 | 43.644 | KV453290.1  | 6488563 | 26-scf00232   | 26 |
| AX-158095369 | 10 | 43.644 | KV453290.1  | 6490458 | 26-scf00232   | 26 |
| AX-158095370 | 10 | 43.644 | KV453290.1  | 6492210 | 26-scf00232   | 26 |
| AX-158095374 | 10 | 43.644 | KV453290.1  | 6496797 | 26-scf00232   | 26 |
| AX-158095375 | 10 | 43.644 | KV453290.1  | 6497403 | 26-scf00232   | 26 |
| AX-158095378 | 10 | 43.644 | KV453290.1  | 6503017 | 26-scf00232   | 26 |
| AX-158095379 | 10 | 43.644 | KV453290.1  | 6503319 | 26-scf00232   | 26 |
| AX-158095381 | 10 | 43.644 | KV453290.1  | 6507356 | 26-scf00232   | 26 |
| AX-157711378 | 10 | 43.644 | KV453290.1  | 6507886 | 26-scf00232   | 26 |
| AX-158095382 | 10 | 43.644 | KV453290.1  | 6508916 | 26-scf00232   | 26 |
| AX-158095383 | 10 | 43.644 | KV453290.1  | 6509934 | 26-scf00232   | 26 |
| AX-157870916 | 10 | 43.644 | KV453290.1  | 6510675 | 26-scf00232   | 26 |
| AX-158095385 | 10 | 43.644 | KV453290.1  | 6514111 | 26-scf00232   | 26 |
| AX-158095388 | 10 | 43.644 | KV453290.1  | 6515948 | 26-scf00232   | 26 |
| AX-158095389 | 10 | 43.644 | KV453290.1  | 6517129 | 26-scf00232   | 26 |
| AX-158095390 | 10 | 43.644 | KV453290.1  | 6519148 | 26-scf00232   | 26 |
| AX-158095391 | 10 | 43.644 | KV453290.1  | 6524363 | 26-scf00232   | 26 |
| AX-158095392 | 10 | 43.644 | KV453290.1  | 6524616 | 26-scf00232   | 26 |
| AX-158095393 | 10 | 43.644 | KV453290.1  | 6526806 | 26-scf00232   | 26 |
| AX-158095394 | 10 | 43.644 | KV453290.1  | 6527913 | 26-scf00232   | 26 |
| AX-158095396 | 10 | 43.644 | KV453290.1  | 6531999 | 26-scf00232   | 26 |
| AX-158095397 | 10 | 43.644 | KV453290.1  | 6532433 | 26-scf00232   | 26 |
| AX-158095402 | 10 | 43.644 | KV453290.1  | 6540729 | 26-scf00232   | 26 |
| AX-158392175 | 10 | 43.644 | KV453290.1  | 6595949 | 26-scf00232   | 26 |
| AX-157694776 | 10 | 43.644 | FI873961.1  | 69      | ORI212 lctalu | UN |
| AX-157826053 | 10 | 43.746 | KV453290.1  | 6535906 | 26-scf00232   | 26 |
| AX-158095407 | 10 | 43.842 | KV453290.1  | 6545243 | 26-scf00232   | 26 |
| AX-158095409 | 10 | 44.041 | KV453290.1  | 6547160 | 26-scf00232   | 26 |
| AX-158095410 | 10 | 44.041 | KV453290.1  | 6549437 | 26-scf00232   | 26 |
| AX-158095411 | 10 | 44.041 | KV453290.1  | 6551289 | 26-scf00232   | 26 |
| AX-158095421 | 10 | 44.041 | KV453290.1  | 6561205 | 26-scf00232   | 26 |
| AX-158095438 | 10 | 44.041 | KV453290.1  | 6581531 | 26-scf00232   | 26 |
| AX-158095466 | 10 | 44.041 | KV453290.1  | 6618472 | 26-scf00232   | 26 |
| AX-158095368 | 10 | 44.159 | KV453290.1  | 6489433 | 26-scf00232   | 26 |
| AX-158095413 | 10 | 44.159 | KV453290.1  | 6553750 | 26-scf00232   | 26 |
| AX-158095483 | 10 | 44.159 | KV453290.1  | 6639304 | 26-scf00232   | 26 |
| AX-157707167 | 10 | 44.159 | 3ML01033646 | 244     | scf09305_1    | UN |
| AX-158095414 | 10 | 44.276 | KV453290.1  | 6555212 | 26-scf00232   | 26 |
| AX-158095415 | 10 | 44.281 | KV453290.1  | 6555991 | 26-scf00232   | 26 |
| AX-158095416 | 10 | 44.286 | KV453290.1  | 6556179 | 26-scf00232   | 26 |
| AX-158095419 | 10 | 44.291 | KV453290.1  | 6559785 | 26-scf00232   | 26 |
| AX-157714486 | 10 | 44.296 | KV453290.1  | 6568599 | 26-scf00232   | 26 |
| AX-158095454 | 10 | 44.296 | KV453290.1  | 6604582 | 26-scf00232   | 26 |
| AX-158095418 | 10 | 44.3   | KV453290.1  | 6558314 | 26-scf00232   | 26 |
| AX-158095420 | 10 | 44.3   | KV453290.1  | 6560631 | 26-scf00232   | 26 |
| AX-158095423 | 10 | 44.3   | KV453290.1  | 6564835 | 26-scf00232   | 26 |
| AX-158095424 | 10 | 44.3   | KV453290.1  | 6566301 | 26-scf00232   | 26 |

|              |    |        |            |         |             |    |
|--------------|----|--------|------------|---------|-------------|----|
| AX-158095427 | 10 | 44.3   | KV453290.1 | 6567817 | 26-scf00232 | 26 |
| AX-158095428 | 10 | 44.3   | KV453290.1 | 6570890 | 26-scf00232 | 26 |
| AX-158095430 | 10 | 44.3   | KV453290.1 | 6572053 | 26-scf00232 | 26 |
| AX-158095435 | 10 | 44.3   | KV453290.1 | 6578468 | 26-scf00232 | 26 |
| AX-157770883 | 10 | 44.3   | KV453290.1 | 6579109 | 26-scf00232 | 26 |
| AX-158095436 | 10 | 44.3   | KV453290.1 | 6579681 | 26-scf00232 | 26 |
| AX-158095437 | 10 | 44.3   | KV453290.1 | 6580962 | 26-scf00232 | 26 |
| AX-157857321 | 10 | 44.3   | KV453290.1 | 6583587 | 26-scf00232 | 26 |
| AX-158095440 | 10 | 44.3   | KV453290.1 | 6584340 | 26-scf00232 | 26 |
| AX-157713472 | 10 | 44.3   | KV453290.1 | 6585603 | 26-scf00232 | 26 |
| AX-158095442 | 10 | 44.3   | KV453290.1 | 6586161 | 26-scf00232 | 26 |
| AX-158095443 | 10 | 44.3   | KV453290.1 | 6586904 | 26-scf00232 | 26 |
| AX-158095447 | 10 | 44.3   | KV453290.1 | 6591605 | 26-scf00232 | 26 |
| AX-157826057 | 10 | 44.3   | KV453290.1 | 6592510 | 26-scf00232 | 26 |
| AX-158095449 | 10 | 44.3   | KV453290.1 | 6593475 | 26-scf00232 | 26 |
| AX-158095450 | 10 | 44.3   | KV453290.1 | 6593963 | 26-scf00232 | 26 |
| AX-158095451 | 10 | 44.3   | KV453290.1 | 6595424 | 26-scf00232 | 26 |
| AX-157826058 | 10 | 44.3   | KV453290.1 | 6595533 | 26-scf00232 | 26 |
| AX-157710592 | 10 | 44.3   | KV453290.1 | 6598898 | 26-scf00232 | 26 |
| AX-158095452 | 10 | 44.3   | KV453290.1 | 6599478 | 26-scf00232 | 26 |
| AX-157826059 | 10 | 44.3   | KV453290.1 | 6603935 | 26-scf00232 | 26 |
| AX-157865848 | 10 | 44.3   | KV453290.1 | 6605304 | 26-scf00232 | 26 |
| AX-158095455 | 10 | 44.3   | KV453290.1 | 6605768 | 26-scf00232 | 26 |
| AX-158095458 | 10 | 44.3   | KV453290.1 | 6608146 | 26-scf00232 | 26 |
| AX-158095459 | 10 | 44.3   | KV453290.1 | 6610645 | 26-scf00232 | 26 |
| AX-158095461 | 10 | 44.3   | KV453290.1 | 6612023 | 26-scf00232 | 26 |
| AX-158095462 | 10 | 44.3   | KV453290.1 | 6612893 | 26-scf00232 | 26 |
| AX-157826060 | 10 | 44.3   | KV453290.1 | 6613491 | 26-scf00232 | 26 |
| AX-158095463 | 10 | 44.3   | KV453290.1 | 6613822 | 26-scf00232 | 26 |
| AX-157743405 | 10 | 44.3   | KV453290.1 | 6616909 | 26-scf00232 | 26 |
| AX-158095487 | 10 | 44.3   | KV453290.1 | 6645688 | 26-scf00232 | 26 |
| AX-158095548 | 10 | 44.3   | KV453290.1 | 6712367 | 26-scf00232 | 26 |
| AX-158095549 | 10 | 44.3   | KV453290.1 | 6713581 | 26-scf00232 | 26 |
| AX-158095606 | 10 | 44.3   | KV453290.1 | 6784285 | 26-scf00232 | 26 |
| AX-158095654 | 10 | 44.3   | KV453290.1 | 6864898 | 26-scf00232 | 26 |
| AX-157722166 | 10 | 44.3   | KV453290.1 | 7019360 | 26-scf00232 | 26 |
| AX-158095883 | 10 | 44.3   | KV453290.1 | 7205498 | 26-scf00232 | 26 |
| AX-158095901 | 10 | 44.3   | KV453290.1 | 7228768 | 26-scf00232 | 26 |
| AX-157722679 | 10 | 44.464 | KV453290.1 | 6635292 | 26-scf00232 | 26 |
| AX-158095535 | 10 | 44.464 | KV453290.1 | 6696676 | 26-scf00232 | 26 |
| AX-158095482 | 10 | 44.626 | KV453290.1 | 6638524 | 26-scf00232 | 26 |
| AX-158095485 | 10 | 44.626 | KV453290.1 | 6640173 | 26-scf00232 | 26 |
| AX-158095505 | 10 | 44.626 | KV453290.1 | 6670776 | 26-scf00232 | 26 |
| AX-158095486 | 10 | 44.627 | KV453290.1 | 6644938 | 26-scf00232 | 26 |
| AX-158095492 | 10 | 44.627 | KV453290.1 | 6650451 | 26-scf00232 | 26 |
| AX-158095497 | 10 | 44.627 | KV453290.1 | 6653737 | 26-scf00232 | 26 |
| AX-157863254 | 10 | 44.627 | KV453290.1 | 6654729 | 26-scf00232 | 26 |
| AX-158379991 | 10 | 44.627 | KV453290.1 | 6659264 | 26-scf00232 | 26 |
| AX-157758092 | 10 | 44.627 | KV453290.1 | 6662836 | 26-scf00232 | 26 |
| AX-158095499 | 10 | 44.627 | KV453290.1 | 6663101 | 26-scf00232 | 26 |
| AX-157826065 | 10 | 44.627 | KV453290.1 | 6666516 | 26-scf00232 | 26 |

|              |    |        |            |         |             |    |
|--------------|----|--------|------------|---------|-------------|----|
| AX-158095506 | 10 | 44.627 | KV453290.1 | 6671470 | 26-scf00232 | 26 |
| AX-158095508 | 10 | 44.627 | KV453290.1 | 6672824 | 26-scf00232 | 26 |
| AX-158095510 | 10 | 44.627 | KV453290.1 | 6674141 | 26-scf00232 | 26 |
| AX-158095511 | 10 | 44.627 | KV453290.1 | 6675943 | 26-scf00232 | 26 |
| AX-158095512 | 10 | 44.627 | KV453290.1 | 6676937 | 26-scf00232 | 26 |
| AX-158095514 | 10 | 44.627 | KV453290.1 | 6678738 | 26-scf00232 | 26 |
| AX-158095515 | 10 | 44.627 | KV453290.1 | 6679840 | 26-scf00232 | 26 |
| AX-158095524 | 10 | 44.627 | KV453290.1 | 6688165 | 26-scf00232 | 26 |
| AX-157751507 | 10 | 44.627 | KV453290.1 | 6710885 | 26-scf00232 | 26 |
| AX-158095658 | 10 | 44.627 | KV453290.1 | 6870882 | 26-scf00232 | 26 |
| AX-158095665 | 10 | 44.627 | KV453290.1 | 6893124 | 26-scf00232 | 26 |
| AX-158410190 | 10 | 44.627 | KV453290.1 | 7069016 | 26-scf00232 | 26 |
| AX-158410191 | 10 | 44.627 | KV453290.1 | 7069390 | 26-scf00232 | 26 |
| AX-158095849 | 10 | 44.627 | KV453290.1 | 7159605 | 26-scf00232 | 26 |
| AX-157826055 | 10 | 44.736 | KV453290.1 | 6542943 | 26-scf00232 | 26 |
| AX-158095521 | 10 | 44.736 | KV453290.1 | 6684008 | 26-scf00232 | 26 |
| AX-158095523 | 10 | 44.736 | KV453290.1 | 6687750 | 26-scf00232 | 26 |
| AX-158095525 | 10 | 44.736 | KV453290.1 | 6688501 | 26-scf00232 | 26 |
| AX-158095527 | 10 | 44.736 | KV453290.1 | 6690399 | 26-scf00232 | 26 |
| AX-158095528 | 10 | 44.736 | KV453290.1 | 6691022 | 26-scf00232 | 26 |
| AX-158095529 | 10 | 44.736 | KV453290.1 | 6692190 | 26-scf00232 | 26 |
| AX-158095534 | 10 | 44.736 | KV453290.1 | 6696168 | 26-scf00232 | 26 |
| AX-158095679 | 10 | 44.736 | KV453290.1 | 6910064 | 26-scf00232 | 26 |
| AX-158095426 | 10 | 44.846 | KV453290.1 | 6567325 | 26-scf00232 | 26 |
| AX-158095518 | 10 | 44.846 | KV453290.1 | 6683027 | 26-scf00232 | 26 |
| AX-158095537 | 10 | 44.846 | KV453290.1 | 6697610 | 26-scf00232 | 26 |
| AX-158095538 | 10 | 44.846 | KV453290.1 | 6697842 | 26-scf00232 | 26 |
| AX-158095540 | 10 | 44.846 | KV453290.1 | 6701677 | 26-scf00232 | 26 |
| AX-158095543 | 10 | 44.846 | KV453290.1 | 6707313 | 26-scf00232 | 26 |
| AX-158095544 | 10 | 44.846 | KV453290.1 | 6708067 | 26-scf00232 | 26 |
| AX-158095546 | 10 | 44.846 | KV453290.1 | 6709386 | 26-scf00232 | 26 |
| AX-158095547 | 10 | 44.846 | KV453290.1 | 6711710 | 26-scf00232 | 26 |
| AX-158384634 | 10 | 44.846 | KV453290.1 | 6713212 | 26-scf00232 | 26 |
| AX-157826070 | 10 | 44.846 | KV453290.1 | 6713813 | 26-scf00232 | 26 |
| AX-158095554 | 10 | 44.846 | KV453290.1 | 6718047 | 26-scf00232 | 26 |
| AX-158095556 | 10 | 44.846 | KV453290.1 | 6719225 | 26-scf00232 | 26 |
| AX-158095559 | 10 | 44.846 | KV453290.1 | 6721960 | 26-scf00232 | 26 |
| AX-158095562 | 10 | 44.846 | KV453290.1 | 6724208 | 26-scf00232 | 26 |
| AX-158095564 | 10 | 44.846 | KV453290.1 | 6725563 | 26-scf00232 | 26 |
| AX-157753698 | 10 | 44.846 | KV453290.1 | 6728254 | 26-scf00232 | 26 |
| AX-158095565 | 10 | 44.846 | KV453290.1 | 6728904 | 26-scf00232 | 26 |
| AX-158095566 | 10 | 44.846 | KV453290.1 | 6729815 | 26-scf00232 | 26 |
| AX-158095567 | 10 | 44.846 | KV453290.1 | 6732111 | 26-scf00232 | 26 |
| AX-158095590 | 10 | 44.846 | KV453290.1 | 6759517 | 26-scf00232 | 26 |
| AX-158095671 | 10 | 44.846 | KV453290.1 | 6901311 | 26-scf00232 | 26 |
| AX-158095700 | 10 | 44.846 | KV453290.1 | 6938030 | 26-scf00232 | 26 |
| AX-158095709 | 10 | 44.846 | KV453290.1 | 6949870 | 26-scf00232 | 26 |
| AX-157826089 | 10 | 44.846 | KV453290.1 | 6950257 | 26-scf00232 | 26 |
| AX-158095720 | 10 | 44.846 | KV453290.1 | 6964201 | 26-scf00232 | 26 |
| AX-157826091 | 10 | 44.846 | KV453290.1 | 7009230 | 26-scf00232 | 26 |
| AX-158095756 | 10 | 44.846 | KV453290.1 | 7012304 | 26-scf00232 | 26 |

|              |    |        |             |         |             |    |
|--------------|----|--------|-------------|---------|-------------|----|
| AX-158095795 | 10 | 44.846 | KV453290.1  | 7062593 | 26-scf00232 | 26 |
| AX-158095855 | 10 | 44.846 | KV453290.1  | 7167895 | 26-scf00232 | 26 |
| AX-158095568 | 10 | 44.899 | KV453290.1  | 6732585 | 26-scf00232 | 26 |
| AX-158095573 | 10 | 44.955 | KV453290.1  | 6736155 | 26-scf00232 | 26 |
| AX-158095574 | 10 | 44.955 | KV453290.1  | 6738101 | 26-scf00232 | 26 |
| AX-157826072 | 10 | 44.955 | KV453290.1  | 6738749 | 26-scf00232 | 26 |
| AX-157826073 | 10 | 44.955 | KV453290.1  | 6742661 | 26-scf00232 | 26 |
| AX-157826075 | 10 | 44.955 | KV453290.1  | 6746772 | 26-scf00232 | 26 |
| AX-158095584 | 10 | 44.955 | KV453290.1  | 6752575 | 26-scf00232 | 26 |
| AX-158095586 | 10 | 44.955 | KV453290.1  | 6754064 | 26-scf00232 | 26 |
| AX-158095587 | 10 | 44.955 | KV453290.1  | 6754838 | 26-scf00232 | 26 |
| AX-158095592 | 10 | 44.955 | KV453290.1  | 6764579 | 26-scf00232 | 26 |
| AX-158095593 | 10 | 44.955 | KV453290.1  | 6765051 | 26-scf00232 | 26 |
| AX-158095595 | 10 | 44.955 | KV453290.1  | 6766029 | 26-scf00232 | 26 |
| AX-158095596 | 10 | 44.955 | KV453290.1  | 6767318 | 26-scf00232 | 26 |
| AX-158095597 | 10 | 44.955 | KV453290.1  | 6767747 | 26-scf00232 | 26 |
| AX-157826079 | 10 | 44.955 | KV453290.1  | 6771656 | 26-scf00232 | 26 |
| AX-158095605 | 10 | 44.955 | KV453290.1  | 6782591 | 26-scf00232 | 26 |
| AX-158095607 | 10 | 44.955 | KV453290.1  | 6786224 | 26-scf00232 | 26 |
| AX-158095608 | 10 | 44.955 | KV453290.1  | 6789786 | 26-scf00232 | 26 |
| AX-158095609 | 10 | 44.955 | KV453290.1  | 6790982 | 26-scf00232 | 26 |
| AX-158095610 | 10 | 44.955 | KV453290.1  | 6791452 | 26-scf00232 | 26 |
| AX-158095613 | 10 | 44.955 | KV453290.1  | 6795463 | 26-scf00232 | 26 |
| AX-158095623 | 10 | 44.955 | KV453290.1  | 6809864 | 26-scf00232 | 26 |
| AX-157826083 | 10 | 44.955 | KV453290.1  | 6813027 | 26-scf00232 | 26 |
| AX-158095630 | 10 | 44.955 | KV453290.1  | 6823580 | 26-scf00232 | 26 |
| AX-158095644 | 10 | 44.955 | KV453290.1  | 6845308 | 26-scf00232 | 26 |
| AX-158095681 | 10 | 44.955 | KV453290.1  | 6915761 | 26-scf00232 | 26 |
| AX-158095682 | 10 | 44.955 | KV453290.1  | 6919548 | 26-scf00232 | 26 |
| AX-158095733 | 10 | 44.955 | KV453290.1  | 6983859 | 26-scf00232 | 26 |
| AX-157697582 | 10 | 44.955 | KV453290.1  | 6990478 | 26-scf00232 | 26 |
| AX-158095763 | 10 | 44.955 | KV453290.1  | 7027477 | 26-scf00232 | 26 |
| AX-157826092 | 10 | 44.955 | KV453290.1  | 7028158 | 26-scf00232 | 26 |
| AX-158095773 | 10 | 44.955 | KV453290.1  | 7038006 | 26-scf00232 | 26 |
| AX-158095774 | 10 | 44.955 | KV453290.1  | 7038238 | 26-scf00232 | 26 |
| AX-158095937 | 10 | 44.955 | KV453290.1  | 7273225 | 26-scf00232 | 26 |
| AX-158095972 | 10 | 44.955 | KV453290.1  | 7308928 | 26-scf00232 | 26 |
| AX-157707487 | 10 | 44.955 | 3ML01034388 | 177     | scf10062_1  | UN |
| AX-157707488 | 10 | 44.955 | 3ML01034388 | 214     | scf10062_1  | UN |
| AX-158095377 | 10 | 45.173 | KV453290.1  | 6498267 | 26-scf00232 | 26 |
| AX-158384632 | 10 | 45.173 | KV453290.1  | 6567424 | 26-scf00232 | 26 |
| AX-158095456 | 10 | 45.173 | KV453290.1  | 6606917 | 26-scf00232 | 26 |
| AX-158095464 | 10 | 45.173 | KV453290.1  | 6614105 | 26-scf00232 | 26 |
| AX-157865849 | 10 | 45.173 | KV453290.1  | 6614257 | 26-scf00232 | 26 |
| AX-158095469 | 10 | 45.173 | KV453290.1  | 6624969 | 26-scf00232 | 26 |
| AX-158095470 | 10 | 45.173 | KV453290.1  | 6625617 | 26-scf00232 | 26 |
| AX-158095473 | 10 | 45.173 | KV453290.1  | 6629410 | 26-scf00232 | 26 |
| AX-158095494 | 10 | 45.173 | KV453290.1  | 6651935 | 26-scf00232 | 26 |
| AX-158095496 | 10 | 45.173 | KV453290.1  | 6652600 | 26-scf00232 | 26 |
| AX-158095501 | 10 | 45.173 | KV453290.1  | 6665092 | 26-scf00232 | 26 |
| AX-157826066 | 10 | 45.173 | KV453290.1  | 6666740 | 26-scf00232 | 26 |

|              |    |        |            |         |             |    |
|--------------|----|--------|------------|---------|-------------|----|
| AX-158095509 | 10 | 45.173 | KV453290.1 | 6673026 | 26-scf00232 | 26 |
| AX-158095542 | 10 | 45.173 | KV453290.1 | 6706830 | 26-scf00232 | 26 |
| AX-158095545 | 10 | 45.173 | KV453290.1 | 6708648 | 26-scf00232 | 26 |
| AX-158095555 | 10 | 45.173 | KV453290.1 | 6718250 | 26-scf00232 | 26 |
| AX-158095571 | 10 | 45.173 | KV453290.1 | 6734880 | 26-scf00232 | 26 |
| AX-157826076 | 10 | 45.173 | KV453290.1 | 6753938 | 26-scf00232 | 26 |
| AX-157826080 | 10 | 45.173 | KV453290.1 | 6772889 | 26-scf00232 | 26 |
| AX-158095617 | 10 | 45.173 | KV453290.1 | 6804891 | 26-scf00232 | 26 |
| AX-157755344 | 10 | 45.173 | KV453290.1 | 6807188 | 26-scf00232 | 26 |
| AX-158095625 | 10 | 45.173 | KV453290.1 | 6814232 | 26-scf00232 | 26 |
| AX-158095628 | 10 | 45.173 | KV453290.1 | 6818629 | 26-scf00232 | 26 |
| AX-157865853 | 10 | 45.173 | KV453290.1 | 6822356 | 26-scf00232 | 26 |
| AX-158095631 | 10 | 45.173 | KV453290.1 | 6824370 | 26-scf00232 | 26 |
| AX-158095634 | 10 | 45.173 | KV453290.1 | 6830657 | 26-scf00232 | 26 |
| AX-158095635 | 10 | 45.173 | KV453290.1 | 6836705 | 26-scf00232 | 26 |
| AX-158095637 | 10 | 45.173 | KV453290.1 | 6838116 | 26-scf00232 | 26 |
| AX-158095639 | 10 | 45.173 | KV453290.1 | 6840823 | 26-scf00232 | 26 |
| AX-158095641 | 10 | 45.173 | KV453290.1 | 6843342 | 26-scf00232 | 26 |
| AX-158095643 | 10 | 45.173 | KV453290.1 | 6844587 | 26-scf00232 | 26 |
| AX-158095650 | 10 | 45.173 | KV453290.1 | 6857391 | 26-scf00232 | 26 |
| AX-158095656 | 10 | 45.173 | KV453290.1 | 6867094 | 26-scf00232 | 26 |
| AX-157754410 | 10 | 45.173 | KV453290.1 | 6868071 | 26-scf00232 | 26 |
| AX-157826086 | 10 | 45.173 | KV453290.1 | 6870209 | 26-scf00232 | 26 |
| AX-158095660 | 10 | 45.173 | KV453290.1 | 6879718 | 26-scf00232 | 26 |
| AX-158095664 | 10 | 45.173 | KV453290.1 | 6892448 | 26-scf00232 | 26 |
| AX-158095666 | 10 | 45.173 | KV453290.1 | 6894285 | 26-scf00232 | 26 |
| AX-158095672 | 10 | 45.173 | KV453290.1 | 6903529 | 26-scf00232 | 26 |
| AX-158095677 | 10 | 45.173 | KV453290.1 | 6907588 | 26-scf00232 | 26 |
| AX-157750396 | 10 | 45.173 | KV453290.1 | 6918145 | 26-scf00232 | 26 |
| AX-157765215 | 10 | 45.173 | KV453290.1 | 6921024 | 26-scf00232 | 26 |
| AX-157826087 | 10 | 45.173 | KV453290.1 | 6922277 | 26-scf00232 | 26 |
| AX-158095684 | 10 | 45.173 | KV453290.1 | 6922319 | 26-scf00232 | 26 |
| AX-158095685 | 10 | 45.173 | KV453290.1 | 6923291 | 26-scf00232 | 26 |
| AX-157714660 | 10 | 45.173 | KV453290.1 | 6924258 | 26-scf00232 | 26 |
| AX-158095688 | 10 | 45.173 | KV453290.1 | 6925713 | 26-scf00232 | 26 |
| AX-158095689 | 10 | 45.173 | KV453290.1 | 6927739 | 26-scf00232 | 26 |
| AX-158095691 | 10 | 45.173 | KV453290.1 | 6930652 | 26-scf00232 | 26 |
| AX-158095692 | 10 | 45.173 | KV453290.1 | 6930932 | 26-scf00232 | 26 |
| AX-158095695 | 10 | 45.173 | KV453290.1 | 6934777 | 26-scf00232 | 26 |
| AX-157826088 | 10 | 45.173 | KV453290.1 | 6935965 | 26-scf00232 | 26 |
| AX-158095697 | 10 | 45.173 | KV453290.1 | 6936539 | 26-scf00232 | 26 |
| AX-158095698 | 10 | 45.173 | KV453290.1 | 6936848 | 26-scf00232 | 26 |
| AX-158095702 | 10 | 45.173 | KV453290.1 | 6938542 | 26-scf00232 | 26 |
| AX-158095705 | 10 | 45.173 | KV453290.1 | 6941711 | 26-scf00232 | 26 |
| AX-158095706 | 10 | 45.173 | KV453290.1 | 6946321 | 26-scf00232 | 26 |
| AX-157857323 | 10 | 45.173 | KV453290.1 | 6946736 | 26-scf00232 | 26 |
| AX-158095712 | 10 | 45.173 | KV453290.1 | 6956673 | 26-scf00232 | 26 |
| AX-158095713 | 10 | 45.173 | KV453290.1 | 6957199 | 26-scf00232 | 26 |
| AX-158095714 | 10 | 45.173 | KV453290.1 | 6958416 | 26-scf00232 | 26 |
| AX-158095718 | 10 | 45.173 | KV453290.1 | 6961967 | 26-scf00232 | 26 |
| AX-158095722 | 10 | 45.173 | KV453290.1 | 6967354 | 26-scf00232 | 26 |

|              |    |        |            |         |             |    |
|--------------|----|--------|------------|---------|-------------|----|
| AX-158095724 | 10 | 45.173 | KV453290.1 | 6970261 | 26-scf00232 | 26 |
| AX-158095726 | 10 | 45.173 | KV453290.1 | 6972355 | 26-scf00232 | 26 |
| AX-158095727 | 10 | 45.173 | KV453290.1 | 6972757 | 26-scf00232 | 26 |
| AX-158095728 | 10 | 45.173 | KV453290.1 | 6973378 | 26-scf00232 | 26 |
| AX-158095729 | 10 | 45.173 | KV453290.1 | 6973864 | 26-scf00232 | 26 |
| AX-157754492 | 10 | 45.173 | KV453290.1 | 6977637 | 26-scf00232 | 26 |
| AX-158095731 | 10 | 45.173 | KV453290.1 | 6980254 | 26-scf00232 | 26 |
| AX-158095732 | 10 | 45.173 | KV453290.1 | 6983277 | 26-scf00232 | 26 |
| AX-158095735 | 10 | 45.173 | KV453290.1 | 6986495 | 26-scf00232 | 26 |
| AX-158095737 | 10 | 45.173 | KV453290.1 | 6987760 | 26-scf00232 | 26 |
| AX-158095738 | 10 | 45.173 | KV453290.1 | 6988570 | 26-scf00232 | 26 |
| AX-157695629 | 10 | 45.173 | KV453290.1 | 6991489 | 26-scf00232 | 26 |
| AX-158095739 | 10 | 45.173 | KV453290.1 | 6992866 | 26-scf00232 | 26 |
| AX-158095742 | 10 | 45.173 | KV453290.1 | 6995742 | 26-scf00232 | 26 |
| AX-158095745 | 10 | 45.173 | KV453290.1 | 6997275 | 26-scf00232 | 26 |
| AX-158095746 | 10 | 45.173 | KV453290.1 | 6997582 | 26-scf00232 | 26 |
| AX-158095747 | 10 | 45.173 | KV453290.1 | 6997972 | 26-scf00232 | 26 |
| AX-157870920 | 10 | 45.173 | KV453290.1 | 6998870 | 26-scf00232 | 26 |
| AX-158095748 | 10 | 45.173 | KV453290.1 | 6999570 | 26-scf00232 | 26 |
| AX-158095749 | 10 | 45.173 | KV453290.1 | 7000927 | 26-scf00232 | 26 |
| AX-158095750 | 10 | 45.173 | KV453290.1 | 7004929 | 26-scf00232 | 26 |
| AX-158095753 | 10 | 45.173 | KV453290.1 | 7006917 | 26-scf00232 | 26 |
| AX-158095755 | 10 | 45.173 | KV453290.1 | 7011755 | 26-scf00232 | 26 |
| AX-158095760 | 10 | 45.173 | KV453290.1 | 7020574 | 26-scf00232 | 26 |
| AX-157738624 | 10 | 45.173 | KV453290.1 | 7022973 | 26-scf00232 | 26 |
| AX-158095761 | 10 | 45.173 | KV453290.1 | 7025219 | 26-scf00232 | 26 |
| AX-158095762 | 10 | 45.173 | KV453290.1 | 7027073 | 26-scf00232 | 26 |
| AX-158095764 | 10 | 45.173 | KV453290.1 | 7029055 | 26-scf00232 | 26 |
| AX-157759037 | 10 | 45.173 | KV453290.1 | 7030570 | 26-scf00232 | 26 |
| AX-158095766 | 10 | 45.173 | KV453290.1 | 7031827 | 26-scf00232 | 26 |
| AX-157826093 | 10 | 45.173 | KV453290.1 | 7032112 | 26-scf00232 | 26 |
| AX-158095768 | 10 | 45.173 | KV453290.1 | 7032981 | 26-scf00232 | 26 |
| AX-158095769 | 10 | 45.173 | KV453290.1 | 7033589 | 26-scf00232 | 26 |
| AX-158095770 | 10 | 45.173 | KV453290.1 | 7034476 | 26-scf00232 | 26 |
| AX-158095771 | 10 | 45.173 | KV453290.1 | 7035753 | 26-scf00232 | 26 |
| AX-158095772 | 10 | 45.173 | KV453290.1 | 7036907 | 26-scf00232 | 26 |
| AX-158095775 | 10 | 45.173 | KV453290.1 | 7038539 | 26-scf00232 | 26 |
| AX-158095780 | 10 | 45.173 | KV453290.1 | 7043325 | 26-scf00232 | 26 |
| AX-158095781 | 10 | 45.173 | KV453290.1 | 7044058 | 26-scf00232 | 26 |
| AX-157877425 | 10 | 45.173 | KV453290.1 | 7046188 | 26-scf00232 | 26 |
| AX-158095785 | 10 | 45.173 | KV453290.1 | 7049752 | 26-scf00232 | 26 |
| AX-158095786 | 10 | 45.173 | KV453290.1 | 7051536 | 26-scf00232 | 26 |
| AX-158095789 | 10 | 45.173 | KV453290.1 | 7052943 | 26-scf00232 | 26 |
| AX-158095790 | 10 | 45.173 | KV453290.1 | 7056514 | 26-scf00232 | 26 |
| AX-158095791 | 10 | 45.173 | KV453290.1 | 7057045 | 26-scf00232 | 26 |
| AX-157826095 | 10 | 45.173 | KV453290.1 | 7057338 | 26-scf00232 | 26 |
| AX-157826096 | 10 | 45.173 | KV453290.1 | 7057800 | 26-scf00232 | 26 |
| AX-157826097 | 10 | 45.173 | KV453290.1 | 7059123 | 26-scf00232 | 26 |
| AX-158095793 | 10 | 45.173 | KV453290.1 | 7061024 | 26-scf00232 | 26 |
| AX-158095796 | 10 | 45.173 | KV453290.1 | 7062913 | 26-scf00232 | 26 |
| AX-158095798 | 10 | 45.173 | KV453290.1 | 7064423 | 26-scf00232 | 26 |

|              |    |        |            |         |             |    |
|--------------|----|--------|------------|---------|-------------|----|
| AX-158095804 | 10 | 45.173 | KV453290.1 | 7074025 | 26-scf00232 | 26 |
| AX-158095807 | 10 | 45.173 | KV453290.1 | 7076082 | 26-scf00232 | 26 |
| AX-158095809 | 10 | 45.173 | KV453290.1 | 7079346 | 26-scf00232 | 26 |
| AX-157762856 | 10 | 45.173 | KV453290.1 | 7079996 | 26-scf00232 | 26 |
| AX-157885749 | 10 | 45.173 | KV453290.1 | 7087154 | 26-scf00232 | 26 |
| AX-158095825 | 10 | 45.173 | KV453290.1 | 7130516 | 26-scf00232 | 26 |
| AX-158095826 | 10 | 45.173 | KV453290.1 | 7132548 | 26-scf00232 | 26 |
| AX-158095827 | 10 | 45.173 | KV453290.1 | 7132900 | 26-scf00232 | 26 |
| AX-158095828 | 10 | 45.173 | KV453290.1 | 7135107 | 26-scf00232 | 26 |
| AX-157723679 | 10 | 45.173 | KV453290.1 | 7135382 | 26-scf00232 | 26 |
| AX-158095830 | 10 | 45.173 | KV453290.1 | 7138136 | 26-scf00232 | 26 |
| AX-158095832 | 10 | 45.173 | KV453290.1 | 7142121 | 26-scf00232 | 26 |
| AX-158095833 | 10 | 45.173 | KV453290.1 | 7142735 | 26-scf00232 | 26 |
| AX-158095834 | 10 | 45.173 | KV453290.1 | 7143224 | 26-scf00232 | 26 |
| AX-158095835 | 10 | 45.173 | KV453290.1 | 7144977 | 26-scf00232 | 26 |
| AX-158095837 | 10 | 45.173 | KV453290.1 | 7148211 | 26-scf00232 | 26 |
| AX-158095838 | 10 | 45.173 | KV453290.1 | 7148780 | 26-scf00232 | 26 |
| AX-158095839 | 10 | 45.173 | KV453290.1 | 7149157 | 26-scf00232 | 26 |
| AX-158095841 | 10 | 45.173 | KV453290.1 | 7150762 | 26-scf00232 | 26 |
| AX-158095844 | 10 | 45.173 | KV453290.1 | 7153842 | 26-scf00232 | 26 |
| AX-158095845 | 10 | 45.173 | KV453290.1 | 7154545 | 26-scf00232 | 26 |
| AX-157743350 | 10 | 45.173 | KV453290.1 | 7155583 | 26-scf00232 | 26 |
| AX-158095846 | 10 | 45.173 | KV453290.1 | 7156514 | 26-scf00232 | 26 |
| AX-158095848 | 10 | 45.173 | KV453290.1 | 7158941 | 26-scf00232 | 26 |
| AX-158095850 | 10 | 45.173 | KV453290.1 | 7160016 | 26-scf00232 | 26 |
| AX-158095851 | 10 | 45.173 | KV453290.1 | 7160550 | 26-scf00232 | 26 |
| AX-158095852 | 10 | 45.173 | KV453290.1 | 7160863 | 26-scf00232 | 26 |
| AX-157739302 | 10 | 45.173 | KV453290.1 | 7164613 | 26-scf00232 | 26 |
| AX-158095854 | 10 | 45.173 | KV453290.1 | 7165105 | 26-scf00232 | 26 |
| AX-158095864 | 10 | 45.173 | KV453290.1 | 7180653 | 26-scf00232 | 26 |
| AX-158095869 | 10 | 45.173 | KV453290.1 | 7188125 | 26-scf00232 | 26 |
| AX-158095870 | 10 | 45.173 | KV453290.1 | 7190129 | 26-scf00232 | 26 |
| AX-158095871 | 10 | 45.173 | KV453290.1 | 7190646 | 26-scf00232 | 26 |
| AX-157742420 | 10 | 45.173 | KV453290.1 | 7195738 | 26-scf00232 | 26 |
| AX-158095875 | 10 | 45.173 | KV453290.1 | 7195903 | 26-scf00232 | 26 |
| AX-158095876 | 10 | 45.173 | KV453290.1 | 7199766 | 26-scf00232 | 26 |
| AX-157773220 | 10 | 45.173 | KV453290.1 | 7200544 | 26-scf00232 | 26 |
| AX-158095877 | 10 | 45.173 | KV453290.1 | 7200643 | 26-scf00232 | 26 |
| AX-158095878 | 10 | 45.173 | KV453290.1 | 7201180 | 26-scf00232 | 26 |
| AX-158095879 | 10 | 45.173 | KV453290.1 | 7201847 | 26-scf00232 | 26 |
| AX-158095880 | 10 | 45.173 | KV453290.1 | 7203347 | 26-scf00232 | 26 |
| AX-158095881 | 10 | 45.173 | KV453290.1 | 7204327 | 26-scf00232 | 26 |
| AX-158095884 | 10 | 45.173 | KV453290.1 | 7207126 | 26-scf00232 | 26 |
| AX-158095887 | 10 | 45.173 | KV453290.1 | 7211344 | 26-scf00232 | 26 |
| AX-157826104 | 10 | 45.173 | KV453290.1 | 7211946 | 26-scf00232 | 26 |
| AX-157711629 | 10 | 45.173 | KV453290.1 | 7212615 | 26-scf00232 | 26 |
| AX-158095890 | 10 | 45.173 | KV453290.1 | 7217106 | 26-scf00232 | 26 |
| AX-158095892 | 10 | 45.173 | KV453290.1 | 7218576 | 26-scf00232 | 26 |
| AX-158095894 | 10 | 45.173 | KV453290.1 | 7220035 | 26-scf00232 | 26 |
| AX-158095895 | 10 | 45.173 | KV453290.1 | 7220654 | 26-scf00232 | 26 |
| AX-158095896 | 10 | 45.173 | KV453290.1 | 7221119 | 26-scf00232 | 26 |

|              |    |        |             |         |             |    |
|--------------|----|--------|-------------|---------|-------------|----|
| AX-157726708 | 10 | 45.173 | KV453290.1  | 7226937 | 26-scf00232 | 26 |
| AX-158095900 | 10 | 45.173 | KV453290.1  | 7228317 | 26-scf00232 | 26 |
| AX-158095908 | 10 | 45.173 | KV453290.1  | 7234989 | 26-scf00232 | 26 |
| AX-158095931 | 10 | 45.173 | KV453290.1  | 7263797 | 26-scf00232 | 26 |
| AX-158095932 | 10 | 45.173 | KV453290.1  | 7264568 | 26-scf00232 | 26 |
| AX-157742560 | 10 | 45.173 | KV453290.1  | 7269628 | 26-scf00232 | 26 |
| AX-158095938 | 10 | 45.173 | KV453290.1  | 7274163 | 26-scf00232 | 26 |
| AX-158095940 | 10 | 45.173 | KV453290.1  | 7276449 | 26-scf00232 | 26 |
| AX-158095941 | 10 | 45.173 | KV453290.1  | 7277086 | 26-scf00232 | 26 |
| AX-157857324 | 10 | 45.173 | KV453290.1  | 7278172 | 26-scf00232 | 26 |
| AX-158095943 | 10 | 45.173 | KV453290.1  | 7279574 | 26-scf00232 | 26 |
| AX-158095945 | 10 | 45.173 | KV453290.1  | 7281247 | 26-scf00232 | 26 |
| AX-158095946 | 10 | 45.173 | KV453290.1  | 7281955 | 26-scf00232 | 26 |
| AX-158095947 | 10 | 45.173 | KV453290.1  | 7282855 | 26-scf00232 | 26 |
| AX-158095948 | 10 | 45.173 | KV453290.1  | 7283708 | 26-scf00232 | 26 |
| AX-158095951 | 10 | 45.173 | KV453290.1  | 7285841 | 26-scf00232 | 26 |
| AX-157771252 | 10 | 45.173 | KV453290.1  | 7288077 | 26-scf00232 | 26 |
| AX-158095955 | 10 | 45.173 | KV453290.1  | 7291951 | 26-scf00232 | 26 |
| AX-158095956 | 10 | 45.173 | KV453290.1  | 7292518 | 26-scf00232 | 26 |
| AX-158095960 | 10 | 45.173 | KV453290.1  | 7296276 | 26-scf00232 | 26 |
| AX-158095965 | 10 | 45.173 | KV453290.1  | 7299712 | 26-scf00232 | 26 |
| AX-158095969 | 10 | 45.173 | KV453290.1  | 7306103 | 26-scf00232 | 26 |
| AX-158095971 | 10 | 45.173 | KV453290.1  | 7307798 | 26-scf00232 | 26 |
| AX-158379994 | 10 | 45.173 | KV453290.1  | 7336810 | 26-scf00232 | 26 |
| AX-158096029 | 10 | 45.173 | KV453290.1  | 7384398 | 26-scf00232 | 26 |
| AX-157711973 | 10 | 45.173 | 3ML01030012 | 464     | scf05634_1  | UN |
| AX-157712102 | 10 | 45.173 | 3ML01034453 | 258     | scf10128_1  | UN |
| AX-158095976 | 10 | 45.5   | KV453290.1  | 7315853 | 26-scf00232 | 26 |
| AX-158095977 | 10 | 45.501 | KV453290.1  | 7315968 | 26-scf00232 | 26 |
| AX-158095979 | 10 | 45.501 | KV453290.1  | 7321904 | 26-scf00232 | 26 |
| AX-158095982 | 10 | 45.501 | KV453290.1  | 7326586 | 26-scf00232 | 26 |
| AX-158095984 | 10 | 45.501 | KV453290.1  | 7328558 | 26-scf00232 | 26 |
| AX-158095988 | 10 | 45.501 | KV453290.1  | 7336703 | 26-scf00232 | 26 |
| AX-158095993 | 10 | 45.501 | KV453290.1  | 7340966 | 26-scf00232 | 26 |
| AX-158095999 | 10 | 45.501 | KV453290.1  | 7346064 | 26-scf00232 | 26 |
| AX-158096001 | 10 | 45.501 | KV453290.1  | 7351654 | 26-scf00232 | 26 |
| AX-158096113 | 10 | 45.501 | KV453290.1  | 7482064 | 26-scf00232 | 26 |
| AX-158096157 | 10 | 45.501 | KV453290.1  | 7534403 | 26-scf00232 | 26 |
| AX-158096184 | 10 | 45.501 | KV453290.1  | 7572167 | 26-scf00232 | 26 |
| AX-157718450 | 10 | 45.61  | KV453290.1  | 7327523 | 26-scf00232 | 26 |
| AX-158095992 | 10 | 45.61  | KV453290.1  | 7339401 | 26-scf00232 | 26 |
| AX-158095996 | 10 | 45.61  | KV453290.1  | 7343320 | 26-scf00232 | 26 |
| AX-158096006 | 10 | 45.61  | KV453290.1  | 7357167 | 26-scf00232 | 26 |
| AX-158096007 | 10 | 45.61  | KV453290.1  | 7358577 | 26-scf00232 | 26 |
| AX-158096009 | 10 | 45.61  | KV453290.1  | 7360853 | 26-scf00232 | 26 |
| AX-158096010 | 10 | 45.61  | KV453290.1  | 7363092 | 26-scf00232 | 26 |
| AX-158096011 | 10 | 45.61  | KV453290.1  | 7363376 | 26-scf00232 | 26 |
| AX-158096045 | 10 | 45.61  | KV453290.1  | 7406914 | 26-scf00232 | 26 |
| AX-158096053 | 10 | 45.61  | KV453290.1  | 7419061 | 26-scf00232 | 26 |
| AX-158096014 | 10 | 45.739 | KV453290.1  | 7367990 | 26-scf00232 | 26 |
| AX-158096033 | 10 | 45.739 | KV453290.1  | 7393607 | 26-scf00232 | 26 |



|              |    |        |            |         |             |    |
|--------------|----|--------|------------|---------|-------------|----|
| AX-158095991 | 10 | 45.828 | KV453290.1 | 7338995 | 26-scf00232 | 26 |
| AX-158096015 | 10 | 45.828 | KV453290.1 | 7369382 | 26-scf00232 | 26 |
| AX-158096021 | 10 | 45.828 | KV453290.1 | 7372940 | 26-scf00232 | 26 |
| AX-158096022 | 10 | 45.828 | KV453290.1 | 7375198 | 26-scf00232 | 26 |
| AX-158096024 | 10 | 45.828 | KV453290.1 | 7377453 | 26-scf00232 | 26 |
| AX-158096026 | 10 | 45.828 | KV453290.1 | 7380744 | 26-scf00232 | 26 |
| AX-158096035 | 10 | 45.828 | KV453290.1 | 7394916 | 26-scf00232 | 26 |
| AX-158096038 | 10 | 45.828 | KV453290.1 | 7399516 | 26-scf00232 | 26 |
| AX-157772709 | 10 | 45.828 | KV453290.1 | 7404642 | 26-scf00232 | 26 |
| AX-158096042 | 10 | 45.828 | KV453290.1 | 7405304 | 26-scf00232 | 26 |
| AX-158096044 | 10 | 45.828 | KV453290.1 | 7406276 | 26-scf00232 | 26 |
| AX-158096046 | 10 | 45.828 | KV453290.1 | 7408358 | 26-scf00232 | 26 |
| AX-158096047 | 10 | 45.828 | KV453290.1 | 7408728 | 26-scf00232 | 26 |
| AX-158096048 | 10 | 45.828 | KV453290.1 | 7409585 | 26-scf00232 | 26 |
| AX-158096049 | 10 | 45.828 | KV453290.1 | 7410140 | 26-scf00232 | 26 |
| AX-157826107 | 10 | 45.828 | KV453290.1 | 7410388 | 26-scf00232 | 26 |
| AX-157749980 | 10 | 45.828 | KV453290.1 | 7410495 | 26-scf00232 | 26 |
| AX-158096067 | 10 | 45.828 | KV453290.1 | 7434948 | 26-scf00232 | 26 |
| AX-158096069 | 10 | 45.828 | KV453290.1 | 7436668 | 26-scf00232 | 26 |
| AX-158096147 | 10 | 45.828 | KV453290.1 | 7525735 | 26-scf00232 | 26 |
| AX-157699499 | 10 | 45.868 | KV453290.1 | 7411536 | 26-scf00232 | 26 |
| AX-158096052 | 10 | 45.938 | KV453290.1 | 7413196 | 26-scf00232 | 26 |
| AX-157726701 | 10 | 46.127 | KV453290.1 | 7416975 | 26-scf00232 | 26 |
| AX-158096054 | 10 | 46.156 | KV453290.1 | 7420347 | 26-scf00232 | 26 |
| AX-158096061 | 10 | 46.156 | KV453290.1 | 7428731 | 26-scf00232 | 26 |
| AX-158096063 | 10 | 46.156 | KV453290.1 | 7430300 | 26-scf00232 | 26 |
| AX-158096064 | 10 | 46.156 | KV453290.1 | 7430792 | 26-scf00232 | 26 |
| AX-158096101 | 10 | 46.156 | KV453290.1 | 7470836 | 26-scf00232 | 26 |
| AX-158096130 | 10 | 46.156 | KV453290.1 | 7503326 | 26-scf00232 | 26 |
| AX-158096132 | 10 | 46.156 | KV453290.1 | 7507305 | 26-scf00232 | 26 |
| AX-158096136 | 10 | 46.156 | KV453290.1 | 7515970 | 26-scf00232 | 26 |
| AX-158384648 | 10 | 46.156 | KV453290.1 | 7555006 | 26-scf00232 | 26 |
| AX-157774045 | 10 | 46.374 | KV453290.1 | 7352817 | 26-scf00232 | 26 |
| AX-158096073 | 10 | 46.374 | KV453290.1 | 7439573 | 26-scf00232 | 26 |
| AX-158096075 | 10 | 46.374 | KV453290.1 | 7442064 | 26-scf00232 | 26 |
| AX-158096076 | 10 | 46.374 | KV453290.1 | 7442743 | 26-scf00232 | 26 |
| AX-158096082 | 10 | 46.374 | KV453290.1 | 7447329 | 26-scf00232 | 26 |
| AX-158096083 | 10 | 46.374 | KV453290.1 | 7448329 | 26-scf00232 | 26 |
| AX-158096084 | 10 | 46.374 | KV453290.1 | 7449796 | 26-scf00232 | 26 |
| AX-158096086 | 10 | 46.374 | KV453290.1 | 7452666 | 26-scf00232 | 26 |
| AX-158096089 | 10 | 46.374 | KV453290.1 | 7456520 | 26-scf00232 | 26 |
| AX-158096090 | 10 | 46.374 | KV453290.1 | 7457976 | 26-scf00232 | 26 |
| AX-158096092 | 10 | 46.374 | KV453290.1 | 7459393 | 26-scf00232 | 26 |
| AX-158096093 | 10 | 46.374 | KV453290.1 | 7459785 | 26-scf00232 | 26 |
| AX-157724605 | 10 | 46.374 | KV453290.1 | 7461874 | 26-scf00232 | 26 |
| AX-158096096 | 10 | 46.374 | KV453290.1 | 7465649 | 26-scf00232 | 26 |
| AX-157726433 | 10 | 46.374 | KV453290.1 | 7465899 | 26-scf00232 | 26 |
| AX-158096098 | 10 | 46.374 | KV453290.1 | 7468539 | 26-scf00232 | 26 |
| AX-157714537 | 10 | 46.374 | KV453290.1 | 7468794 | 26-scf00232 | 26 |
| AX-158096099 | 10 | 46.374 | KV453290.1 | 7469734 | 26-scf00232 | 26 |
| AX-158096103 | 10 | 46.374 | KV453290.1 | 7472353 | 26-scf00232 | 26 |

|              |    |        |            |         |             |    |
|--------------|----|--------|------------|---------|-------------|----|
| AX-158096105 | 10 | 46.374 | KV453290.1 | 7474101 | 26-scf00232 | 26 |
| AX-158096109 | 10 | 46.374 | KV453290.1 | 7476530 | 26-scf00232 | 26 |
| AX-158096111 | 10 | 46.374 | KV453290.1 | 7480573 | 26-scf00232 | 26 |
| AX-158096114 | 10 | 46.374 | KV453290.1 | 7485223 | 26-scf00232 | 26 |
| AX-158096116 | 10 | 46.374 | KV453290.1 | 7487042 | 26-scf00232 | 26 |
| AX-158096119 | 10 | 46.374 | KV453290.1 | 7491264 | 26-scf00232 | 26 |
| AX-158096121 | 10 | 46.374 | KV453290.1 | 7492826 | 26-scf00232 | 26 |
| AX-158096123 | 10 | 46.374 | KV453290.1 | 7494835 | 26-scf00232 | 26 |
| AX-158096134 | 10 | 46.374 | KV453290.1 | 7514193 | 26-scf00232 | 26 |
| AX-158096135 | 10 | 46.374 | KV453290.1 | 7514793 | 26-scf00232 | 26 |
| AX-158096140 | 10 | 46.374 | KV453290.1 | 7519097 | 26-scf00232 | 26 |
| AX-158096148 | 10 | 46.374 | KV453290.1 | 7526247 | 26-scf00232 | 26 |
| AX-158096169 | 10 | 46.374 | KV453290.1 | 7550515 | 26-scf00232 | 26 |
| AX-158096213 | 10 | 46.374 | KV453290.1 | 7604209 | 26-scf00232 | 26 |
| AX-158096125 | 10 | 46.377 | KV453290.1 | 7496566 | 26-scf00232 | 26 |
| AX-158096107 | 10 | 46.39  | KV453290.1 | 7475085 | 26-scf00232 | 26 |
| AX-158096126 | 10 | 46.39  | KV453290.1 | 7497412 | 26-scf00232 | 26 |
| AX-158096000 | 10 | 46.392 | KV453290.1 | 7348649 | 26-scf00232 | 26 |
| AX-158096127 | 10 | 46.392 | KV453290.1 | 7498407 | 26-scf00232 | 26 |
| AX-158096131 | 10 | 46.402 | KV453290.1 | 7503685 | 26-scf00232 | 26 |
| AX-158096108 | 10 | 46.409 | KV453290.1 | 7475926 | 26-scf00232 | 26 |
| AX-158096133 | 10 | 46.409 | KV453290.1 | 7509172 | 26-scf00232 | 26 |
| AX-158096138 | 10 | 46.422 | KV453290.1 | 7517314 | 26-scf00232 | 26 |
| AX-158379995 | 10 | 46.434 | KV453290.1 | 7437198 | 26-scf00232 | 26 |
| AX-158096139 | 10 | 46.434 | KV453290.1 | 7518217 | 26-scf00232 | 26 |
| AX-158410195 | 10 | 46.434 | KV453290.1 | 7544439 | 26-scf00232 | 26 |
| AX-158096205 | 10 | 46.434 | KV453290.1 | 7598147 | 26-scf00232 | 26 |
| AX-158096239 | 10 | 46.434 | KV453290.1 | 7635849 | 26-scf00232 | 26 |
| AX-158096256 | 10 | 46.434 | KV453290.1 | 7655884 | 26-scf00232 | 26 |
| AX-158384643 | 10 | 46.444 | KV453290.1 | 7340007 | 26-scf00232 | 26 |
| AX-158096039 | 10 | 46.444 | KV453290.1 | 7400853 | 26-scf00232 | 26 |
| AX-157826108 | 10 | 46.444 | KV453290.1 | 7422172 | 26-scf00232 | 26 |
| AX-158096072 | 10 | 46.444 | KV453290.1 | 7439146 | 26-scf00232 | 26 |
| AX-158096128 | 10 | 46.444 | KV453290.1 | 7499244 | 26-scf00232 | 26 |
| AX-158096151 | 10 | 46.444 | KV453290.1 | 7530015 | 26-scf00232 | 26 |
| AX-158096152 | 10 | 46.444 | KV453290.1 | 7531077 | 26-scf00232 | 26 |
| AX-158096179 | 10 | 46.444 | KV453290.1 | 7558984 | 26-scf00232 | 26 |
| AX-158096326 | 10 | 46.444 | KV453290.1 | 7735464 | 26-scf00232 | 26 |
| AX-158096161 | 10 | 46.453 | KV453290.1 | 7542322 | 26-scf00232 | 26 |
| AX-158096165 | 10 | 46.461 | KV453290.1 | 7546338 | 26-scf00232 | 26 |
| AX-158096168 | 10 | 46.47  | KV453290.1 | 7550366 | 26-scf00232 | 26 |
| AX-158096088 | 10 | 46.484 | KV453290.1 | 7455103 | 26-scf00232 | 26 |
| AX-158096100 | 10 | 46.484 | KV453290.1 | 7470206 | 26-scf00232 | 26 |
| AX-158096104 | 10 | 46.484 | KV453290.1 | 7472781 | 26-scf00232 | 26 |
| AX-158096118 | 10 | 46.484 | KV453290.1 | 7490458 | 26-scf00232 | 26 |
| AX-158096137 | 10 | 46.484 | KV453290.1 | 7516592 | 26-scf00232 | 26 |
| AX-158096141 | 10 | 46.484 | KV453290.1 | 7520341 | 26-scf00232 | 26 |
| AX-158096153 | 10 | 46.484 | KV453290.1 | 7531642 | 26-scf00232 | 26 |
| AX-158096170 | 10 | 46.484 | KV453290.1 | 7551045 | 26-scf00232 | 26 |
| AX-158096171 | 10 | 46.484 | KV453290.1 | 7552171 | 26-scf00232 | 26 |
| AX-158096174 | 10 | 46.484 | KV453290.1 | 7553904 | 26-scf00232 | 26 |

|              |    |        |            |         |             |    |
|--------------|----|--------|------------|---------|-------------|----|
| AX-158096181 | 10 | 46.484 | KV453290.1 | 7564395 | 26-scf00232 | 26 |
| AX-158096183 | 10 | 46.484 | KV453290.1 | 7571066 | 26-scf00232 | 26 |
| AX-158096185 | 10 | 46.484 | KV453290.1 | 7572887 | 26-scf00232 | 26 |
| AX-158096211 | 10 | 46.484 | KV453290.1 | 7602917 | 26-scf00232 | 26 |
| AX-158096212 | 10 | 46.484 | KV453290.1 | 7603628 | 26-scf00232 | 26 |
| AX-158096252 | 10 | 46.484 | KV453290.1 | 7652160 | 26-scf00232 | 26 |
| AX-158096257 | 10 | 46.484 | KV453290.1 | 7656426 | 26-scf00232 | 26 |
| AX-158096278 | 10 | 46.484 | KV453290.1 | 7680702 | 26-scf00232 | 26 |
| AX-158096383 | 10 | 46.484 | KV453290.1 | 7806002 | 26-scf00232 | 26 |
| AX-157826122 | 10 | 46.484 | KV453290.1 | 7815993 | 26-scf00232 | 26 |
| AX-158096012 | 10 | 46.593 | KV453290.1 | 7364986 | 26-scf00232 | 26 |
| AX-157722933 | 10 | 46.593 | KV453290.1 | 7560038 | 26-scf00232 | 26 |
| AX-158096186 | 10 | 46.593 | KV453290.1 | 7576223 | 26-scf00232 | 26 |
| AX-158096187 | 10 | 46.593 | KV453290.1 | 7577848 | 26-scf00232 | 26 |
| AX-158096188 | 10 | 46.593 | KV453290.1 | 7578589 | 26-scf00232 | 26 |
| AX-158096189 | 10 | 46.593 | KV453290.1 | 7579829 | 26-scf00232 | 26 |
| AX-158096190 | 10 | 46.593 | KV453290.1 | 7580260 | 26-scf00232 | 26 |
| AX-158096191 | 10 | 46.593 | KV453290.1 | 7581279 | 26-scf00232 | 26 |
| AX-157775189 | 10 | 46.593 | KV453290.1 | 7581718 | 26-scf00232 | 26 |
| AX-157703320 | 10 | 46.593 | KV453290.1 | 7584662 | 26-scf00232 | 26 |
| AX-158096195 | 10 | 46.593 | KV453290.1 | 7585401 | 26-scf00232 | 26 |
| AX-158096200 | 10 | 46.593 | KV453290.1 | 7593559 | 26-scf00232 | 26 |
| AX-158096202 | 10 | 46.593 | KV453290.1 | 7595362 | 26-scf00232 | 26 |
| AX-158096206 | 10 | 46.593 | KV453290.1 | 7598690 | 26-scf00232 | 26 |
| AX-158096207 | 10 | 46.593 | KV453290.1 | 7600015 | 26-scf00232 | 26 |
| AX-158096208 | 10 | 46.593 | KV453290.1 | 7600976 | 26-scf00232 | 26 |
| AX-158096209 | 10 | 46.593 | KV453290.1 | 7602006 | 26-scf00232 | 26 |
| AX-158096210 | 10 | 46.593 | KV453290.1 | 7602492 | 26-scf00232 | 26 |
| AX-158096214 | 10 | 46.593 | KV453290.1 | 7605028 | 26-scf00232 | 26 |
| AX-158096215 | 10 | 46.593 | KV453290.1 | 7605385 | 26-scf00232 | 26 |
| AX-158096216 | 10 | 46.593 | KV453290.1 | 7606461 | 26-scf00232 | 26 |
| AX-158096217 | 10 | 46.593 | KV453290.1 | 7607486 | 26-scf00232 | 26 |
| AX-158096219 | 10 | 46.593 | KV453290.1 | 7609543 | 26-scf00232 | 26 |
| AX-158096218 | 10 | 46.626 | KV453290.1 | 7608062 | 26-scf00232 | 26 |
| AX-158096251 | 10 | 46.626 | KV453290.1 | 7650062 | 26-scf00232 | 26 |
| AX-158096270 | 10 | 46.626 | KV453290.1 | 7671451 | 26-scf00232 | 26 |
| AX-158096272 | 10 | 46.626 | KV453290.1 | 7672563 | 26-scf00232 | 26 |
| AX-158096176 | 10 | 46.702 | KV453290.1 | 7555406 | 26-scf00232 | 26 |
| AX-158096182 | 10 | 46.702 | KV453290.1 | 7566564 | 26-scf00232 | 26 |
| AX-158096220 | 10 | 46.702 | KV453290.1 | 7610520 | 26-scf00232 | 26 |
| AX-158096221 | 10 | 46.702 | KV453290.1 | 7611789 | 26-scf00232 | 26 |
| AX-158096224 | 10 | 46.702 | KV453290.1 | 7617396 | 26-scf00232 | 26 |
| AX-158096227 | 10 | 46.702 | KV453290.1 | 7623726 | 26-scf00232 | 26 |
| AX-158096228 | 10 | 46.702 | KV453290.1 | 7624898 | 26-scf00232 | 26 |
| AX-158096229 | 10 | 46.702 | KV453290.1 | 7626347 | 26-scf00232 | 26 |
| AX-158096231 | 10 | 46.702 | KV453290.1 | 7629208 | 26-scf00232 | 26 |
| AX-158096233 | 10 | 46.702 | KV453290.1 | 7630499 | 26-scf00232 | 26 |
| AX-158096235 | 10 | 46.702 | KV453290.1 | 7632371 | 26-scf00232 | 26 |
| AX-158096238 | 10 | 46.702 | KV453290.1 | 7634813 | 26-scf00232 | 26 |
| AX-158096240 | 10 | 46.702 | KV453290.1 | 7637308 | 26-scf00232 | 26 |
| AX-158096242 | 10 | 46.811 | KV453290.1 | 7639702 | 26-scf00232 | 26 |

|              |    |        |            |         |             |    |
|--------------|----|--------|------------|---------|-------------|----|
| AX-158096244 | 10 | 46.811 | KV453290.1 | 7642702 | 26-scf00232 | 26 |
| AX-158096245 | 10 | 46.811 | KV453290.1 | 7643271 | 26-scf00232 | 26 |
| AX-157718676 | 10 | 46.815 | KV453290.1 | 7644420 | 26-scf00232 | 26 |
| AX-158096253 | 10 | 46.82  | KV453290.1 | 7652515 | 26-scf00232 | 26 |
| AX-158096254 | 10 | 46.825 | KV453290.1 | 7654003 | 26-scf00232 | 26 |
| AX-158096255 | 10 | 46.884 | KV453290.1 | 7654849 | 26-scf00232 | 26 |
| AX-158096230 | 10 | 46.92  | KV453290.1 | 7627707 | 26-scf00232 | 26 |
| AX-158096258 | 10 | 46.92  | KV453290.1 | 7657853 | 26-scf00232 | 26 |
| AX-157726462 | 10 | 46.92  | KV453290.1 | 7661236 | 26-scf00232 | 26 |
| AX-158096261 | 10 | 46.92  | KV453290.1 | 7663494 | 26-scf00232 | 26 |
| AX-158096262 | 10 | 46.92  | KV453290.1 | 7665765 | 26-scf00232 | 26 |
| AX-158096263 | 10 | 46.92  | KV453290.1 | 7666179 | 26-scf00232 | 26 |
| AX-158096265 | 10 | 46.92  | KV453290.1 | 7667902 | 26-scf00232 | 26 |
| AX-158096268 | 10 | 46.92  | KV453290.1 | 7669591 | 26-scf00232 | 26 |
| AX-158096271 | 10 | 46.95  | KV453290.1 | 7671825 | 26-scf00232 | 26 |
| AX-158096273 | 10 | 46.991 | KV453290.1 | 7674660 | 26-scf00232 | 26 |
| AX-158096274 | 10 | 47.03  | KV453290.1 | 7675795 | 26-scf00232 | 26 |
| AX-158096275 | 10 | 47.03  | KV453290.1 | 7676759 | 26-scf00232 | 26 |
| AX-158096277 | 10 | 47.03  | KV453290.1 | 7680175 | 26-scf00232 | 26 |
| AX-158096279 | 10 | 47.03  | KV453290.1 | 7682388 | 26-scf00232 | 26 |
| AX-158096280 | 10 | 47.03  | KV453290.1 | 7683630 | 26-scf00232 | 26 |
| AX-158096284 | 10 | 47.139 | KV453290.1 | 7687831 | 26-scf00232 | 26 |
| AX-158096286 | 10 | 47.139 | KV453290.1 | 7692471 | 26-scf00232 | 26 |
| AX-158096287 | 10 | 47.139 | KV453290.1 | 7694380 | 26-scf00232 | 26 |
| AX-158096288 | 10 | 47.139 | KV453290.1 | 7694681 | 26-scf00232 | 26 |
| AX-158096289 | 10 | 47.139 | KV453290.1 | 7695685 | 26-scf00232 | 26 |
| AX-158096290 | 10 | 47.139 | KV453290.1 | 7696703 | 26-scf00232 | 26 |
| AX-158096292 | 10 | 47.172 | KV453290.1 | 7697750 | 26-scf00232 | 26 |
| AX-158096294 | 10 | 47.187 | KV453290.1 | 7698783 | 26-scf00232 | 26 |
| AX-158096299 | 10 | 47.21  | KV453290.1 | 7702712 | 26-scf00232 | 26 |
| AX-158096298 | 10 | 47.229 | KV453290.1 | 7701468 | 26-scf00232 | 26 |
| AX-158096300 | 10 | 47.229 | KV453290.1 | 7704163 | 26-scf00232 | 26 |
| AX-158096311 | 10 | 47.229 | KV453290.1 | 7719467 | 26-scf00232 | 26 |
| AX-158096313 | 10 | 47.229 | KV453290.1 | 7720463 | 26-scf00232 | 26 |
| AX-158096337 | 10 | 47.229 | KV453290.1 | 7749651 | 26-scf00232 | 26 |
| AX-157789236 | 10 | 47.248 | KV453290.1 | 7680770 | 26-scf00232 | 26 |
| AX-158096285 | 10 | 47.248 | KV453290.1 | 7688846 | 26-scf00232 | 26 |
| AX-158096301 | 10 | 47.248 | KV453290.1 | 7704771 | 26-scf00232 | 26 |
| AX-158096307 | 10 | 47.248 | KV453290.1 | 7713117 | 26-scf00232 | 26 |
| AX-158096308 | 10 | 47.248 | KV453290.1 | 7714725 | 26-scf00232 | 26 |
| AX-157750086 | 10 | 47.248 | KV453290.1 | 7717561 | 26-scf00232 | 26 |
| AX-158096312 | 10 | 47.248 | KV453290.1 | 7720001 | 26-scf00232 | 26 |
| AX-158096314 | 10 | 47.248 | KV453290.1 | 7721429 | 26-scf00232 | 26 |
| AX-158096316 | 10 | 47.248 | KV453290.1 | 7725589 | 26-scf00232 | 26 |
| AX-158096318 | 10 | 47.248 | KV453290.1 | 7730970 | 26-scf00232 | 26 |
| AX-158096319 | 10 | 47.248 | KV453290.1 | 7732128 | 26-scf00232 | 26 |
| AX-157739858 | 10 | 47.248 | KV453290.1 | 7733180 | 26-scf00232 | 26 |
| AX-158096322 | 10 | 47.248 | KV453290.1 | 7733278 | 26-scf00232 | 26 |
| AX-158096323 | 10 | 47.248 | KV453290.1 | 7734179 | 26-scf00232 | 26 |
| AX-158096324 | 10 | 47.248 | KV453290.1 | 7734630 | 26-scf00232 | 26 |
| AX-157715227 | 10 | 47.248 | KV453290.1 | 7737386 | 26-scf00232 | 26 |

|              |    |        |             |         |             |    |
|--------------|----|--------|-------------|---------|-------------|----|
| AX-158096328 | 10 | 47.248 | KV453290.1  | 7737554 | 26-scf00232 | 26 |
| AX-158096329 | 10 | 47.248 | KV453290.1  | 7738994 | 26-scf00232 | 26 |
| AX-157717102 | 10 | 47.248 | KV453290.1  | 7743017 | 26-scf00232 | 26 |
| AX-157743440 | 10 | 47.248 | KV453290.1  | 7743835 | 26-scf00232 | 26 |
| AX-158096334 | 10 | 47.248 | KV453290.1  | 7746043 | 26-scf00232 | 26 |
| AX-158096335 | 10 | 47.248 | KV453290.1  | 7746378 | 26-scf00232 | 26 |
| AX-158096336 | 10 | 47.248 | KV453290.1  | 7746809 | 26-scf00232 | 26 |
| AX-157706442 | 10 | 47.248 | 3ML01032247 | 73      | scf07862_1  | UN |
| AX-158096345 | 10 | 47.412 | KV453290.1  | 7756545 | 26-scf00232 | 26 |
| AX-158096347 | 10 | 47.412 | KV453290.1  | 7758391 | 26-scf00232 | 26 |
| AX-158096348 | 10 | 47.575 | KV453290.1  | 7759004 | 26-scf00232 | 26 |
| AX-158096350 | 10 | 47.575 | KV453290.1  | 7763170 | 26-scf00232 | 26 |
| AX-158096352 | 10 | 47.576 | KV453290.1  | 7764883 | 26-scf00232 | 26 |
| AX-158096354 | 10 | 47.576 | KV453290.1  | 7767941 | 26-scf00232 | 26 |
| AX-158096355 | 10 | 47.576 | KV453290.1  | 7769711 | 26-scf00232 | 26 |
| AX-157826113 | 10 | 47.576 | KV453290.1  | 7772909 | 26-scf00232 | 26 |
| AX-157826114 | 10 | 47.576 | KV453290.1  | 7774686 | 26-scf00232 | 26 |
| AX-158096360 | 10 | 47.576 | KV453290.1  | 7775179 | 26-scf00232 | 26 |
| AX-158096363 | 10 | 47.576 | KV453290.1  | 7783583 | 26-scf00232 | 26 |
| AX-158096364 | 10 | 47.576 | KV453290.1  | 7784499 | 26-scf00232 | 26 |
| AX-158096365 | 10 | 47.576 | KV453290.1  | 7784947 | 26-scf00232 | 26 |
| AX-158096366 | 10 | 47.576 | KV453290.1  | 7785654 | 26-scf00232 | 26 |
| AX-158096367 | 10 | 47.576 | KV453290.1  | 7786195 | 26-scf00232 | 26 |
| AX-157826116 | 10 | 47.576 | KV453290.1  | 7786647 | 26-scf00232 | 26 |
| AX-158096369 | 10 | 47.576 | KV453290.1  | 7791316 | 26-scf00232 | 26 |
| AX-157754212 | 10 | 47.576 | KV453290.1  | 7791481 | 26-scf00232 | 26 |
| AX-158096370 | 10 | 47.576 | KV453290.1  | 7791562 | 26-scf00232 | 26 |
| AX-158096371 | 10 | 47.576 | KV453290.1  | 7793435 | 26-scf00232 | 26 |
| AX-158096372 | 10 | 47.576 | KV453290.1  | 7793772 | 26-scf00232 | 26 |
| AX-158096375 | 10 | 47.576 | KV453290.1  | 7795782 | 26-scf00232 | 26 |
| AX-158096376 | 10 | 47.576 | KV453290.1  | 7796668 | 26-scf00232 | 26 |
| AX-158096377 | 10 | 47.576 | KV453290.1  | 7797139 | 26-scf00232 | 26 |
| AX-158096378 | 10 | 47.576 | KV453290.1  | 7797733 | 26-scf00232 | 26 |
| AX-158096409 | 10 | 47.576 | KV453290.1  | 7846227 | 26-scf00232 | 26 |
| AX-158096425 | 10 | 47.576 | KV453290.1  | 7874878 | 26-scf00232 | 26 |
| AX-157826117 | 10 | 47.656 | KV453290.1  | 7798338 | 26-scf00232 | 26 |
| AX-158096296 | 10 | 47.685 | KV453290.1  | 7700145 | 26-scf00232 | 26 |
| AX-158096297 | 10 | 47.685 | KV453290.1  | 7701263 | 26-scf00232 | 26 |
| AX-158379996 | 10 | 47.685 | KV453290.1  | 7702581 | 26-scf00232 | 26 |
| AX-158096303 | 10 | 47.685 | KV453290.1  | 7705751 | 26-scf00232 | 26 |
| AX-158096331 | 10 | 47.685 | KV453290.1  | 7741201 | 26-scf00232 | 26 |
| AX-158096339 | 10 | 47.685 | KV453290.1  | 7752627 | 26-scf00232 | 26 |
| AX-158096349 | 10 | 47.685 | KV453290.1  | 7761021 | 26-scf00232 | 26 |
| AX-158096351 | 10 | 47.685 | KV453290.1  | 7764174 | 26-scf00232 | 26 |
| AX-158096358 | 10 | 47.685 | KV453290.1  | 7772043 | 26-scf00232 | 26 |
| AX-158096359 | 10 | 47.685 | KV453290.1  | 7773574 | 26-scf00232 | 26 |
| AX-157719270 | 10 | 47.685 | KV453290.1  | 7780925 | 26-scf00232 | 26 |
| AX-158096362 | 10 | 47.685 | KV453290.1  | 7782668 | 26-scf00232 | 26 |
| AX-157716424 | 10 | 47.685 | KV453290.1  | 7801826 | 26-scf00232 | 26 |
| AX-158096382 | 10 | 47.685 | KV453290.1  | 7805476 | 26-scf00232 | 26 |
| AX-157826120 | 10 | 47.685 | KV453290.1  | 7808929 | 26-scf00232 | 26 |

|              |    |        |            |         |             |    |
|--------------|----|--------|------------|---------|-------------|----|
| AX-158096386 | 10 | 47.685 | KV453290.1 | 7812265 | 26-scf00232 | 26 |
| AX-158096388 | 10 | 47.685 | KV453290.1 | 7814118 | 26-scf00232 | 26 |
| AX-158096389 | 10 | 47.685 | KV453290.1 | 7816677 | 26-scf00232 | 26 |
| AX-157826124 | 10 | 47.685 | KV453290.1 | 7821681 | 26-scf00232 | 26 |
| AX-158096395 | 10 | 47.685 | KV453290.1 | 7822609 | 26-scf00232 | 26 |
| AX-158096396 | 10 | 47.685 | KV453290.1 | 7823192 | 26-scf00232 | 26 |
| AX-157826125 | 10 | 47.685 | KV453290.1 | 7824841 | 26-scf00232 | 26 |
| AX-158096397 | 10 | 47.685 | KV453290.1 | 7825061 | 26-scf00232 | 26 |
| AX-158096398 | 10 | 47.685 | KV453290.1 | 7826049 | 26-scf00232 | 26 |
| AX-157826126 | 10 | 47.685 | KV453290.1 | 7826439 | 26-scf00232 | 26 |
| AX-157745660 | 10 | 47.685 | KV453290.1 | 7827184 | 26-scf00232 | 26 |
| AX-158096399 | 10 | 47.685 | KV453290.1 | 7827537 | 26-scf00232 | 26 |
| AX-158096401 | 10 | 47.685 | KV453290.1 | 7830582 | 26-scf00232 | 26 |
| AX-158096404 | 10 | 47.685 | KV453290.1 | 7836048 | 26-scf00232 | 26 |
| AX-157723134 | 10 | 47.685 | KV453290.1 | 7853662 | 26-scf00232 | 26 |
| AX-157720669 | 10 | 47.685 | KV453290.1 | 7880797 | 26-scf00232 | 26 |
| AX-158096494 | 10 | 47.685 | KV453290.1 | 7968164 | 26-scf00232 | 26 |
| AX-157826115 | 10 | 47.794 | KV453290.1 | 7776172 | 26-scf00232 | 26 |
| AX-158096408 | 10 | 47.794 | KV453290.1 | 7840370 | 26-scf00232 | 26 |
| AX-157775824 | 10 | 47.794 | KV453290.1 | 7842830 | 26-scf00232 | 26 |
| AX-157722599 | 10 | 47.794 | KV453290.1 | 7849366 | 26-scf00232 | 26 |
| AX-158096412 | 10 | 47.794 | KV453290.1 | 7853113 | 26-scf00232 | 26 |
| AX-158096413 | 10 | 47.794 | KV453290.1 | 7857225 | 26-scf00232 | 26 |
| AX-158096415 | 10 | 47.794 | KV453290.1 | 7858235 | 26-scf00232 | 26 |
| AX-158096418 | 10 | 47.794 | KV453290.1 | 7865464 | 26-scf00232 | 26 |
| AX-158096456 | 10 | 47.794 | KV453290.1 | 7916205 | 26-scf00232 | 26 |
| AX-158096459 | 10 | 47.794 | KV453290.1 | 7919519 | 26-scf00232 | 26 |
| AX-158096466 | 10 | 47.794 | KV453290.1 | 7927245 | 26-scf00232 | 26 |
| AX-158096522 | 10 | 47.794 | KV453290.1 | 8005807 | 26-scf00232 | 26 |
| AX-158096528 | 10 | 47.794 | KV453290.1 | 8010971 | 26-scf00232 | 26 |
| AX-158096403 | 10 | 47.848 | KV453290.1 | 7834969 | 26-scf00232 | 26 |
| AX-158096410 | 10 | 47.848 | KV453290.1 | 7847636 | 26-scf00232 | 26 |
| AX-158096417 | 10 | 47.848 | KV453290.1 | 7860549 | 26-scf00232 | 26 |
| AX-158096441 | 10 | 47.848 | KV453290.1 | 7893794 | 26-scf00232 | 26 |
| AX-157826127 | 10 | 47.903 | KV453290.1 | 7861948 | 26-scf00232 | 26 |
| AX-158096427 | 10 | 47.903 | KV453290.1 | 7879305 | 26-scf00232 | 26 |
| AX-157826129 | 10 | 47.903 | KV453290.1 | 7881081 | 26-scf00232 | 26 |
| AX-158096431 | 10 | 47.903 | KV453290.1 | 7885711 | 26-scf00232 | 26 |
| AX-157774665 | 10 | 47.903 | KV453290.1 | 7945771 | 26-scf00232 | 26 |
| AX-158096435 | 10 | 48.021 | KV453290.1 | 7889480 | 26-scf00232 | 26 |
| AX-158096407 | 10 | 48.122 | KV453290.1 | 7839804 | 26-scf00232 | 26 |
| AX-158096437 | 10 | 48.122 | KV453290.1 | 7890801 | 26-scf00232 | 26 |
| AX-158096439 | 10 | 48.122 | KV453290.1 | 7892293 | 26-scf00232 | 26 |
| AX-158096443 | 10 | 48.122 | KV453290.1 | 7895136 | 26-scf00232 | 26 |
| AX-158096445 | 10 | 48.122 | KV453290.1 | 7896953 | 26-scf00232 | 26 |
| AX-157750292 | 10 | 48.122 | KV453290.1 | 7900622 | 26-scf00232 | 26 |
| AX-158096446 | 10 | 48.122 | KV453290.1 | 7902466 | 26-scf00232 | 26 |
| AX-158096447 | 10 | 48.122 | KV453290.1 | 7905406 | 26-scf00232 | 26 |
| AX-158096450 | 10 | 48.122 | KV453290.1 | 7907166 | 26-scf00232 | 26 |
| AX-158096453 | 10 | 48.122 | KV453290.1 | 7912593 | 26-scf00232 | 26 |
| AX-158096454 | 10 | 48.122 | KV453290.1 | 7912925 | 26-scf00232 | 26 |

|              |    |        |            |         |             |    |
|--------------|----|--------|------------|---------|-------------|----|
| AX-158096457 | 10 | 48.122 | KV453290.1 | 7917253 | 26-scf00232 | 26 |
| AX-158096458 | 10 | 48.122 | KV453290.1 | 7918204 | 26-scf00232 | 26 |
| AX-158096461 | 10 | 48.122 | KV453290.1 | 7921965 | 26-scf00232 | 26 |
| AX-158096462 | 10 | 48.122 | KV453290.1 | 7922535 | 26-scf00232 | 26 |
| AX-158096464 | 10 | 48.122 | KV453290.1 | 7925110 | 26-scf00232 | 26 |
| AX-157772490 | 10 | 48.122 | KV453290.1 | 7926286 | 26-scf00232 | 26 |
| AX-158096467 | 10 | 48.122 | KV453290.1 | 7928112 | 26-scf00232 | 26 |
| AX-158096470 | 10 | 48.122 | KV453290.1 | 7932846 | 26-scf00232 | 26 |
| AX-158096471 | 10 | 48.122 | KV453290.1 | 7933768 | 26-scf00232 | 26 |
| AX-158096477 | 10 | 48.122 | KV453290.1 | 7942584 | 26-scf00232 | 26 |
| AX-158096478 | 10 | 48.122 | KV453290.1 | 7943441 | 26-scf00232 | 26 |
| AX-158096480 | 10 | 48.122 | KV453290.1 | 7944881 | 26-scf00232 | 26 |
| AX-158096481 | 10 | 48.122 | KV453290.1 | 7946095 | 26-scf00232 | 26 |
| AX-157826131 | 10 | 48.122 | KV453290.1 | 7952908 | 26-scf00232 | 26 |
| AX-158410200 | 10 | 48.122 | KV453290.1 | 7953982 | 26-scf00232 | 26 |
| AX-158096487 | 10 | 48.122 | KV453290.1 | 7955757 | 26-scf00232 | 26 |
| AX-158096488 | 10 | 48.122 | KV453290.1 | 7960202 | 26-scf00232 | 26 |
| AX-158096490 | 10 | 48.122 | KV453290.1 | 7961928 | 26-scf00232 | 26 |
| AX-158096498 | 10 | 48.122 | KV453290.1 | 7974590 | 26-scf00232 | 26 |
| AX-158096501 | 10 | 48.122 | KV453290.1 | 7977865 | 26-scf00232 | 26 |
| AX-158410201 | 10 | 48.122 | KV453290.1 | 7980956 | 26-scf00232 | 26 |
| AX-158096530 | 10 | 48.122 | KV453290.1 | 8015826 | 26-scf00232 | 26 |
| AX-158096465 | 10 | 48.154 | KV453290.1 | 7926784 | 26-scf00232 | 26 |
| AX-157885760 | 10 | 48.154 | KV453290.1 | 7958299 | 26-scf00232 | 26 |
| AX-158096512 | 10 | 48.154 | KV453290.1 | 7996094 | 26-scf00232 | 26 |
| AX-158096474 | 10 | 48.178 | KV453290.1 | 7939584 | 26-scf00232 | 26 |
| AX-157756964 | 10 | 48.178 | KV453290.1 | 7960773 | 26-scf00232 | 26 |
| AX-158096492 | 10 | 48.186 | KV453290.1 | 7966477 | 26-scf00232 | 26 |
| AX-158096432 | 10 | 48.212 | KV453290.1 | 7886085 | 26-scf00232 | 26 |
| AX-158096440 | 10 | 48.212 | KV453290.1 | 7892719 | 26-scf00232 | 26 |
| AX-158096493 | 10 | 48.212 | KV453290.1 | 7967719 | 26-scf00232 | 26 |
| AX-157826130 | 10 | 48.231 | KV453290.1 | 7882513 | 26-scf00232 | 26 |
| AX-158096442 | 10 | 48.231 | KV453290.1 | 7894594 | 26-scf00232 | 26 |
| AX-158096496 | 10 | 48.231 | KV453290.1 | 7972785 | 26-scf00232 | 26 |
| AX-158096497 | 10 | 48.231 | KV453290.1 | 7974186 | 26-scf00232 | 26 |
| AX-158096502 | 10 | 48.231 | KV453290.1 | 7982634 | 26-scf00232 | 26 |
| AX-158096504 | 10 | 48.231 | KV453290.1 | 7984681 | 26-scf00232 | 26 |
| AX-158096509 | 10 | 48.231 | KV453290.1 | 7990294 | 26-scf00232 | 26 |
| AX-158392184 | 10 | 48.231 | KV453290.1 | 7997452 | 26-scf00232 | 26 |
| AX-158096517 | 10 | 48.231 | KV453290.1 | 8000854 | 26-scf00232 | 26 |
| AX-158096519 | 10 | 48.231 | KV453290.1 | 8002889 | 26-scf00232 | 26 |
| AX-158096520 | 10 | 48.231 | KV453290.1 | 8003767 | 26-scf00232 | 26 |
| AX-158096521 | 10 | 48.231 | KV453290.1 | 8004512 | 26-scf00232 | 26 |
| AX-158096524 | 10 | 48.231 | KV453290.1 | 8006547 | 26-scf00232 | 26 |
| AX-158096527 | 10 | 48.231 | KV453290.1 | 8009652 | 26-scf00232 | 26 |
| AX-157722906 | 10 | 48.231 | KV453290.1 | 8013832 | 26-scf00232 | 26 |
| AX-158096531 | 10 | 48.269 | KV453290.1 | 8017732 | 26-scf00232 | 26 |
| AX-158096533 | 10 | 48.34  | KV453290.1 | 8021601 | 26-scf00232 | 26 |
| AX-158096534 | 10 | 48.34  | KV453290.1 | 8022833 | 26-scf00232 | 26 |
| AX-158096598 | 10 | 48.34  | KV453290.1 | 8114973 | 26-scf00232 | 26 |
| AX-158096535 | 10 | 48.559 | KV453290.1 | 8028704 | 26-scf00232 | 26 |

|              |    |        |            |         |             |    |
|--------------|----|--------|------------|---------|-------------|----|
| AX-158096536 | 10 | 48.559 | KV453290.1 | 8029273 | 26-scf00232 | 26 |
| AX-158096537 | 10 | 48.559 | KV453290.1 | 8031804 | 26-scf00232 | 26 |
| AX-158096539 | 10 | 48.559 | KV453290.1 | 8032846 | 26-scf00232 | 26 |
| AX-158096540 | 10 | 48.564 | KV453290.1 | 8037168 | 26-scf00232 | 26 |
| AX-158096541 | 10 | 48.568 | KV453290.1 | 8038603 | 26-scf00232 | 26 |
| AX-158096526 | 10 | 48.738 | KV453290.1 | 8009275 | 26-scf00232 | 26 |
| AX-158384655 | 10 | 48.738 | KV453290.1 | 8040776 | 26-scf00232 | 26 |
| AX-158096545 | 10 | 48.738 | KV453290.1 | 8046774 | 26-scf00232 | 26 |
| AX-158096546 | 10 | 48.738 | KV453290.1 | 8047744 | 26-scf00232 | 26 |
| AX-158096547 | 10 | 48.738 | KV453290.1 | 8048531 | 26-scf00232 | 26 |
| AX-157877441 | 10 | 48.738 | KV453290.1 | 8051648 | 26-scf00232 | 26 |
| AX-158096552 | 10 | 48.738 | KV453290.1 | 8054468 | 26-scf00232 | 26 |
| AX-158096554 | 10 | 48.738 | KV453290.1 | 8055568 | 26-scf00232 | 26 |
| AX-158096559 | 10 | 49.102 | KV453290.1 | 8061788 | 26-scf00232 | 26 |
| AX-157758195 | 10 | 49.103 | KV453290.1 | 8063985 | 26-scf00232 | 26 |
| AX-158096560 | 10 | 49.103 | KV453290.1 | 8065696 | 26-scf00232 | 26 |
| AX-158096550 | 10 | 49.394 | KV453290.1 | 8051310 | 26-scf00232 | 26 |
| AX-158096566 | 10 | 49.394 | KV453290.1 | 8073380 | 26-scf00232 | 26 |
| AX-158096567 | 10 | 49.43  | KV453290.1 | 8076142 | 26-scf00232 | 26 |
| AX-158096568 | 10 | 49.631 | KV453290.1 | 8076560 | 26-scf00232 | 26 |
| AX-158096563 | 10 | 49.652 | KV453290.1 | 8068757 | 26-scf00232 | 26 |
| AX-158096573 | 10 | 49.652 | KV453290.1 | 8080455 | 26-scf00232 | 26 |
| AX-158096574 | 10 | 49.652 | KV453290.1 | 8081719 | 26-scf00232 | 26 |
| AX-157877443 | 10 | 49.652 | KV453290.1 | 8081889 | 26-scf00232 | 26 |
| AX-158096556 | 10 | 49.762 | KV453290.1 | 8057118 | 26-scf00232 | 26 |
| AX-158096562 | 10 | 49.762 | KV453290.1 | 8066851 | 26-scf00232 | 26 |
| AX-158096576 | 10 | 49.762 | KV453290.1 | 8082660 | 26-scf00232 | 26 |
| AX-158096577 | 10 | 49.762 | KV453290.1 | 8083093 | 26-scf00232 | 26 |
| AX-157722179 | 10 | 49.762 | KV453290.1 | 8084780 | 26-scf00232 | 26 |
| AX-158096579 | 10 | 49.814 | KV453290.1 | 8087267 | 26-scf00232 | 26 |
| AX-158096569 | 10 | 49.871 | KV453290.1 | 8077262 | 26-scf00232 | 26 |
| AX-158096580 | 10 | 49.871 | KV453290.1 | 8088472 | 26-scf00232 | 26 |
| AX-158096581 | 10 | 49.871 | KV453290.1 | 8090340 | 26-scf00232 | 26 |
| AX-158096582 | 10 | 49.871 | KV453290.1 | 8090782 | 26-scf00232 | 26 |
| AX-158096583 | 10 | 49.871 | KV453290.1 | 8092555 | 26-scf00232 | 26 |
| AX-158096584 | 10 | 49.871 | KV453290.1 | 8092802 | 26-scf00232 | 26 |
| AX-158096585 | 10 | 49.871 | KV453290.1 | 8093447 | 26-scf00232 | 26 |
| AX-158096586 | 10 | 49.871 | KV453290.1 | 8094708 | 26-scf00232 | 26 |
| AX-157745861 | 10 | 49.871 | KV453290.1 | 8095513 | 26-scf00232 | 26 |
| AX-157723509 | 10 | 49.871 | KV453290.1 | 8102526 | 26-scf00232 | 26 |
| AX-158096591 | 10 | 49.871 | KV453290.1 | 8103242 | 26-scf00232 | 26 |
| AX-158096594 | 10 | 49.871 | KV453290.1 | 8107460 | 26-scf00232 | 26 |
| AX-157826136 | 10 | 50.304 | KV453290.1 | 8110697 | 26-scf00232 | 26 |
| AX-158096596 | 10 | 50.308 | KV453290.1 | 8112441 | 26-scf00232 | 26 |
| AX-158096600 | 10 | 50.308 | KV453290.1 | 8119137 | 26-scf00232 | 26 |
| AX-158096601 | 10 | 50.308 | KV453290.1 | 8120246 | 26-scf00232 | 26 |
| AX-158096602 | 10 | 50.308 | KV453290.1 | 8122477 | 26-scf00232 | 26 |
| AX-158096603 | 10 | 50.308 | KV453290.1 | 8123110 | 26-scf00232 | 26 |
| AX-158096604 | 10 | 50.308 | KV453290.1 | 8123577 | 26-scf00232 | 26 |
| AX-158096609 | 10 | 50.308 | KV453290.1 | 8128472 | 26-scf00232 | 26 |
| AX-158096619 | 10 | 50.308 | KV453290.1 | 8135237 | 26-scf00232 | 26 |



|              |    |        |            |         |             |    |
|--------------|----|--------|------------|---------|-------------|----|
| AX-157727207 | 10 | 50.308 | KV453290.1 | 8143900 | 26-scf00232 | 26 |
| AX-158096605 | 10 | 50.363 | KV453290.1 | 8124154 | 26-scf00232 | 26 |
| AX-158096610 | 10 | 50.363 | KV453290.1 | 8128905 | 26-scf00232 | 26 |
| AX-158096607 | 10 | 50.382 | KV453290.1 | 8126201 | 26-scf00232 | 26 |
| AX-158096608 | 10 | 50.417 | KV453290.1 | 8128090 | 26-scf00232 | 26 |
| AX-158096611 | 10 | 50.417 | KV453290.1 | 8129432 | 26-scf00232 | 26 |
| AX-158096612 | 10 | 50.417 | KV453290.1 | 8129933 | 26-scf00232 | 26 |
| AX-158096618 | 10 | 50.472 | KV453290.1 | 8134450 | 26-scf00232 | 26 |
| AX-158096620 | 10 | 50.556 | KV453290.1 | 8135948 | 26-scf00232 | 26 |
| AX-158096621 | 10 | 50.636 | KV453290.1 | 8136320 | 26-scf00232 | 26 |
| AX-158096623 | 10 | 50.636 | KV453290.1 | 8137276 | 26-scf00232 | 26 |
| AX-158096625 | 10 | 50.636 | KV453290.1 | 8138787 | 26-scf00232 | 26 |
| AX-158392186 | 10 | 50.64  | KV453290.1 | 8143505 | 26-scf00232 | 26 |
| AX-158096630 | 10 | 50.915 | KV453290.1 | 8145152 | 26-scf00232 | 26 |
| AX-158096632 | 10 | 50.915 | KV453290.1 | 8148457 | 26-scf00232 | 26 |
| AX-158096634 | 10 | 50.915 | KV453290.1 | 8150150 | 26-scf00232 | 26 |
| AX-158096635 | 10 | 50.915 | KV453290.1 | 8150510 | 26-scf00232 | 26 |
| AX-158096637 | 10 | 50.915 | KV453290.1 | 8152055 | 26-scf00232 | 26 |
| AX-158096638 | 10 | 51.02  | KV453290.1 | 8153042 | 26-scf00232 | 26 |
| AX-158096639 | 10 | 51.13  | KV453290.1 | 8153427 | 26-scf00232 | 26 |
| AX-158096641 | 10 | 51.131 | KV453290.1 | 8156152 | 26-scf00232 | 26 |
| AX-158096642 | 10 | 51.704 | KV453290.1 | 8158895 | 26-scf00232 | 26 |
| AX-158096653 | 10 | 51.704 | KV453290.1 | 8175803 | 26-scf00232 | 26 |
| AX-157775633 | 10 | 51.716 | KV453290.1 | 8160832 | 26-scf00232 | 26 |
| AX-158096644 | 10 | 51.728 | KV453290.1 | 8164377 | 26-scf00232 | 26 |
| AX-158096646 | 10 | 51.728 | KV453290.1 | 8167278 | 26-scf00232 | 26 |
| AX-158096647 | 10 | 51.73  | KV453290.1 | 8168725 | 26-scf00232 | 26 |
| AX-158096645 | 10 | 51.946 | KV453290.1 | 8166832 | 26-scf00232 | 26 |
| AX-158096649 | 10 | 51.946 | KV453290.1 | 8172806 | 26-scf00232 | 26 |
| AX-158096654 | 10 | 51.946 | KV453290.1 | 8178417 | 26-scf00232 | 26 |
| AX-158096664 | 10 | 51.946 | KV453290.1 | 8193009 | 26-scf00232 | 26 |
| AX-158410202 | 10 | 52.166 | KV453290.1 | 8187802 | 26-scf00232 | 26 |
| AX-158096663 | 10 | 52.166 | KV453290.1 | 8192711 | 26-scf00232 | 26 |
| AX-158096665 | 10 | 52.166 | KV453290.1 | 8194057 | 26-scf00232 | 26 |
| AX-158096666 | 10 | 52.203 | KV453290.1 | 8195883 | 26-scf00232 | 26 |
| AX-157740567 | 10 | 52.203 | KV453290.1 | 8226274 | 26-scf00232 | 26 |
| AX-158096668 | 10 | 52.287 | KV453290.1 | 8199293 | 26-scf00232 | 26 |
| AX-158096670 | 10 | 52.384 | KV453290.1 | 8205096 | 26-scf00232 | 26 |
| AX-158096674 | 10 | 52.384 | KV453290.1 | 8208225 | 26-scf00232 | 26 |
| AX-157726687 | 10 | 52.384 | KV453290.1 | 8208893 | 26-scf00232 | 26 |
| AX-157747131 | 10 | 52.384 | KV453290.1 | 8209944 | 26-scf00232 | 26 |
| AX-158096678 | 10 | 52.384 | KV453290.1 | 8213490 | 26-scf00232 | 26 |
| AX-158096679 | 10 | 52.384 | KV453290.1 | 8213806 | 26-scf00232 | 26 |
| AX-158096682 | 10 | 52.384 | KV453290.1 | 8216093 | 26-scf00232 | 26 |
| AX-158096681 | 10 | 52.597 | KV453290.1 | 8215656 | 26-scf00232 | 26 |
| AX-158096683 | 10 | 52.597 | KV453290.1 | 8218454 | 26-scf00232 | 26 |
| AX-158096687 | 10 | 52.597 | KV453290.1 | 8225874 | 26-scf00232 | 26 |
| AX-157885765 | 10 | 52.597 | KV453290.1 | 8458252 | 26-scf00232 | 26 |
| AX-158096688 | 10 | 52.599 | KV453290.1 | 8228404 | 26-scf00232 | 26 |
| AX-158096689 | 10 | 52.6   | KV453290.1 | 8231770 | 26-scf00232 | 26 |
| AX-158384657 | 10 | 53.198 | KV453290.1 | 8235317 | 26-scf00232 | 26 |

|              |    |        |            |         |             |    |
|--------------|----|--------|------------|---------|-------------|----|
| AX-157721646 | 10 | 53.209 | KV453290.1 | 8235868 | 26-scf00232 | 26 |
| AX-158096706 | 10 | 53.209 | KV453290.1 | 8260322 | 26-scf00232 | 26 |
| AX-158096716 | 10 | 53.209 | KV453290.1 | 8270067 | 26-scf00232 | 26 |
| AX-158096692 | 10 | 53.24  | KV453290.1 | 8241311 | 26-scf00232 | 26 |
| AX-158096696 | 10 | 53.241 | KV453290.1 | 8244793 | 26-scf00232 | 26 |
| AX-158096698 | 10 | 53.241 | KV453290.1 | 8250499 | 26-scf00232 | 26 |
| AX-158096699 | 10 | 53.277 | KV453290.1 | 8253164 | 26-scf00232 | 26 |
| AX-158096700 | 10 | 53.277 | KV453290.1 | 8254209 | 26-scf00232 | 26 |
| AX-158096701 | 10 | 53.33  | KV453290.1 | 8255111 | 26-scf00232 | 26 |
| AX-158096703 | 10 | 53.33  | KV453290.1 | 8258093 | 26-scf00232 | 26 |
| AX-158096704 | 10 | 53.478 | KV453290.1 | 8259290 | 26-scf00232 | 26 |
| AX-158096705 | 10 | 53.478 | KV453290.1 | 8259838 | 26-scf00232 | 26 |
| AX-158096710 | 10 | 53.478 | KV453290.1 | 8264300 | 26-scf00232 | 26 |
| AX-158096713 | 10 | 53.478 | KV453290.1 | 8267467 | 26-scf00232 | 26 |
| AX-158096715 | 10 | 53.588 | KV453290.1 | 8269189 | 26-scf00232 | 26 |
| AX-158096712 | 10 | 53.806 | KV453290.1 | 8266215 | 26-scf00232 | 26 |
| AX-158096720 | 10 | 53.806 | KV453290.1 | 8273940 | 26-scf00232 | 26 |
| AX-158096723 | 10 | 53.806 | KV453290.1 | 8275208 | 26-scf00232 | 26 |
| AX-157773470 | 10 | 53.806 | KV453290.1 | 8280964 | 26-scf00232 | 26 |
| AX-158096727 | 10 | 53.806 | KV453290.1 | 8283602 | 26-scf00232 | 26 |
| AX-158096728 | 10 | 53.806 | KV453290.1 | 8284702 | 26-scf00232 | 26 |
| AX-158096730 | 10 | 53.806 | KV453290.1 | 8287006 | 26-scf00232 | 26 |
| AX-158096733 | 10 | 53.806 | KV453290.1 | 8288942 | 26-scf00232 | 26 |
| AX-158096734 | 10 | 53.806 | KV453290.1 | 8289138 | 26-scf00232 | 26 |
| AX-158096731 | 10 | 54.025 | KV453290.1 | 8287828 | 26-scf00232 | 26 |
| AX-158096732 | 10 | 54.025 | KV453290.1 | 8288180 | 26-scf00232 | 26 |
| AX-158096735 | 10 | 54.025 | KV453290.1 | 8290888 | 26-scf00232 | 26 |
| AX-158096738 | 10 | 54.025 | KV453290.1 | 8292970 | 26-scf00232 | 26 |
| AX-158096739 | 10 | 54.025 | KV453290.1 | 8293332 | 26-scf00232 | 26 |
| AX-158096740 | 10 | 54.025 | KV453290.1 | 8294279 | 26-scf00232 | 26 |
| AX-158096744 | 10 | 54.025 | KV453290.1 | 8302418 | 26-scf00232 | 26 |
| AX-157747578 | 10 | 54.099 | KV453290.1 | 8300058 | 26-scf00232 | 26 |
| AX-158096749 | 10 | 54.099 | KV453290.1 | 8309844 | 26-scf00232 | 26 |
| AX-158096759 | 10 | 54.099 | KV453290.1 | 8315934 | 26-scf00232 | 26 |
| AX-158096782 | 10 | 54.099 | KV453290.1 | 8346748 | 26-scf00232 | 26 |
| AX-158096783 | 10 | 54.099 | KV453290.1 | 8347577 | 26-scf00232 | 26 |
| AX-158096736 | 10 | 54.243 | KV453290.1 | 8292036 | 26-scf00232 | 26 |
| AX-158096745 | 10 | 54.243 | KV453290.1 | 8305958 | 26-scf00232 | 26 |
| AX-158096746 | 10 | 54.243 | KV453290.1 | 8306674 | 26-scf00232 | 26 |
| AX-158096747 | 10 | 54.243 | KV453290.1 | 8308557 | 26-scf00232 | 26 |
| AX-157739756 | 10 | 54.243 | KV453290.1 | 8309032 | 26-scf00232 | 26 |
| AX-158096750 | 10 | 54.243 | KV453290.1 | 8310398 | 26-scf00232 | 26 |
| AX-158096751 | 10 | 54.243 | KV453290.1 | 8311121 | 26-scf00232 | 26 |
| AX-158096760 | 10 | 54.243 | KV453290.1 | 8317943 | 26-scf00232 | 26 |
| AX-157745053 | 10 | 54.243 | KV453290.1 | 8322157 | 26-scf00232 | 26 |
| AX-158096763 | 10 | 54.243 | KV453290.1 | 8323214 | 26-scf00232 | 26 |
| AX-158096752 | 10 | 54.309 | KV453290.1 | 8311800 | 26-scf00232 | 26 |
| AX-158096743 | 10 | 54.352 | KV453290.1 | 8301549 | 26-scf00232 | 26 |
| AX-158096755 | 10 | 54.352 | KV453290.1 | 8313186 | 26-scf00232 | 26 |
| AX-158096756 | 10 | 54.352 | KV453290.1 | 8313542 | 26-scf00232 | 26 |
| AX-158392188 | 10 | 54.352 | KV453290.1 | 8316481 | 26-scf00232 | 26 |

|              |    |        |            |         |             |    |
|--------------|----|--------|------------|---------|-------------|----|
| AX-158410207 | 10 | 54.352 | KV453290.1 | 8320399 | 26-scf00232 | 26 |
| AX-158096764 | 10 | 54.352 | KV453290.1 | 8326340 | 26-scf00232 | 26 |
| AX-158379999 | 10 | 54.352 | KV453290.1 | 8326400 | 26-scf00232 | 26 |
| AX-158096765 | 10 | 54.352 | KV453290.1 | 8327901 | 26-scf00232 | 26 |
| AX-158096767 | 10 | 54.352 | KV453290.1 | 8329012 | 26-scf00232 | 26 |
| AX-158096768 | 10 | 54.352 | KV453290.1 | 8330116 | 26-scf00232 | 26 |
| AX-158096770 | 10 | 54.352 | KV453290.1 | 8331796 | 26-scf00232 | 26 |
| AX-158096773 | 10 | 54.352 | KV453290.1 | 8334257 | 26-scf00232 | 26 |
| AX-158096774 | 10 | 54.352 | KV453290.1 | 8334752 | 26-scf00232 | 26 |
| AX-158096775 | 10 | 54.352 | KV453290.1 | 8338910 | 26-scf00232 | 26 |
| AX-158096776 | 10 | 54.352 | KV453290.1 | 8339175 | 26-scf00232 | 26 |
| AX-158096777 | 10 | 54.401 | KV453290.1 | 8341789 | 26-scf00232 | 26 |
| AX-158096778 | 10 | 54.462 | KV453290.1 | 8341911 | 26-scf00232 | 26 |
| AX-158096780 | 10 | 54.571 | KV453290.1 | 8343508 | 26-scf00232 | 26 |
| AX-158096781 | 10 | 54.571 | KV453290.1 | 8344900 | 26-scf00232 | 26 |
| AX-158096784 | 10 | 54.571 | KV453290.1 | 8349287 | 26-scf00232 | 26 |
| AX-158096785 | 10 | 54.619 | KV453290.1 | 8350368 | 26-scf00232 | 26 |
| AX-158096787 | 10 | 54.619 | KV453290.1 | 8351393 | 26-scf00232 | 26 |
| AX-158096758 | 10 | 54.65  | KV453290.1 | 8314913 | 26-scf00232 | 26 |
| AX-157755528 | 10 | 54.65  | KV453290.1 | 8352339 | 26-scf00232 | 26 |
| AX-158416872 | 10 | 54.65  | KV453290.1 | 8355004 | 26-scf00232 | 26 |
| AX-158096792 | 10 | 54.65  | KV453290.1 | 8358455 | 26-scf00232 | 26 |
| AX-158096793 | 10 | 54.68  | KV453290.1 | 8360101 | 26-scf00232 | 26 |
| AX-158096794 | 10 | 54.68  | KV453290.1 | 8361377 | 26-scf00232 | 26 |
| AX-158096796 | 10 | 54.68  | KV453290.1 | 8362649 | 26-scf00232 | 26 |
| AX-158096797 | 10 | 54.68  | KV453290.1 | 8362946 | 26-scf00232 | 26 |
| AX-158096798 | 10 | 54.68  | KV453290.1 | 8363696 | 26-scf00232 | 26 |
| AX-158096799 | 10 | 54.68  | KV453290.1 | 8364213 | 26-scf00232 | 26 |
| AX-158096800 | 10 | 54.68  | KV453290.1 | 8365108 | 26-scf00232 | 26 |
| AX-158096801 | 10 | 54.68  | KV453290.1 | 8368115 | 26-scf00232 | 26 |
| AX-157756777 | 10 | 54.68  | KV453290.1 | 8368414 | 26-scf00232 | 26 |
| AX-158096805 | 10 | 54.68  | KV453290.1 | 8370222 | 26-scf00232 | 26 |
| AX-158096808 | 10 | 54.68  | KV453290.1 | 8372592 | 26-scf00232 | 26 |
| AX-158096827 | 10 | 54.68  | KV453290.1 | 8401328 | 26-scf00232 | 26 |
| AX-158096824 | 10 | 55.335 | KV453290.1 | 8396253 | 26-scf00232 | 26 |
| AX-158096825 | 10 | 55.335 | KV453290.1 | 8398899 | 26-scf00232 | 26 |
| AX-158096829 | 10 | 55.335 | KV453290.1 | 8404470 | 26-scf00232 | 26 |
| AX-158096830 | 10 | 55.335 | KV453290.1 | 8405031 | 26-scf00232 | 26 |
| AX-158096831 | 10 | 55.335 | KV453290.1 | 8408860 | 26-scf00232 | 26 |
| AX-157885763 | 10 | 55.335 | KV453290.1 | 8409111 | 26-scf00232 | 26 |
| AX-158096832 | 10 | 55.335 | KV453290.1 | 8410771 | 26-scf00232 | 26 |
| AX-158096833 | 10 | 55.335 | KV453290.1 | 8412679 | 26-scf00232 | 26 |
| AX-158096834 | 10 | 55.335 | KV453290.1 | 8413503 | 26-scf00232 | 26 |
| AX-157826144 | 10 | 55.335 | KV453290.1 | 8426199 | 26-scf00232 | 26 |
| AX-157826145 | 10 | 55.335 | KV453290.1 | 8428524 | 26-scf00232 | 26 |
| AX-158096840 | 10 | 55.335 | KV453290.1 | 8429774 | 26-scf00232 | 26 |
| AX-158096843 | 10 | 55.335 | KV453290.1 | 8434839 | 26-scf00232 | 26 |
| AX-158096845 | 10 | 55.335 | KV453290.1 | 8436418 | 26-scf00232 | 26 |
| AX-158096847 | 10 | 55.335 | KV453290.1 | 8442848 | 26-scf00232 | 26 |
| AX-157721995 | 10 | 55.335 | KV453290.1 | 8443279 | 26-scf00232 | 26 |
| AX-158096848 | 10 | 55.335 | KV453290.1 | 8443840 | 26-scf00232 | 26 |

|              |    |        |            |         |             |    |
|--------------|----|--------|------------|---------|-------------|----|
| AX-158096849 | 10 | 55.335 | KV453290.1 | 8444877 | 26-scf00232 | 26 |
| AX-158096852 | 10 | 55.335 | KV453290.1 | 8448704 | 26-scf00232 | 26 |
| AX-158096858 | 10 | 55.335 | KV453290.1 | 8455490 | 26-scf00232 | 26 |
| AX-157743549 | 10 | 55.335 | KV453290.1 | 8456884 | 26-scf00232 | 26 |
| AX-158096863 | 10 | 55.335 | KV453290.1 | 8462955 | 26-scf00232 | 26 |
| AX-158096869 | 10 | 55.335 | KV453290.1 | 8473054 | 26-scf00232 | 26 |
| AX-158096865 | 10 | 55.521 | KV453290.1 | 8466990 | 26-scf00232 | 26 |
| AX-157826146 | 10 | 55.715 | KV453290.1 | 8472533 | 26-scf00232 | 26 |
| AX-157826147 | 10 | 55.951 | KV453290.1 | 8473311 | 26-scf00232 | 26 |
| AX-158096870 | 10 | 55.951 | KV453290.1 | 8474367 | 26-scf00232 | 26 |
| AX-158096874 | 10 | 55.951 | KV453290.1 | 8479752 | 26-scf00232 | 26 |
| AX-157877451 | 10 | 55.951 | KV453290.1 | 8480428 | 26-scf00232 | 26 |
| AX-157741208 | 10 | 55.951 | KV453290.1 | 8487007 | 26-scf00232 | 26 |
| AX-158096875 | 10 | 56.012 | KV453290.1 | 8482779 | 26-scf00232 | 26 |
| AX-158096876 | 10 | 56.057 | KV453290.1 | 8484046 | 26-scf00232 | 26 |
| AX-158096877 | 10 | 56.101 | KV453290.1 | 8485548 | 26-scf00232 | 26 |
| AX-158096879 | 10 | 56.101 | KV453290.1 | 8489042 | 26-scf00232 | 26 |
| AX-158096880 | 10 | 56.102 | KV453290.1 | 8489930 | 26-scf00232 | 26 |
| AX-158096882 | 10 | 56.102 | KV453290.1 | 8492144 | 26-scf00232 | 26 |
| AX-158096883 | 10 | 56.102 | KV453290.1 | 8492934 | 26-scf00232 | 26 |
| AX-158096886 | 10 | 56.211 | KV453290.1 | 8499001 | 26-scf00232 | 26 |
| AX-158096887 | 10 | 56.211 | KV453290.1 | 8499338 | 26-scf00232 | 26 |
| AX-158096888 | 10 | 56.211 | KV453290.1 | 8499666 | 26-scf00232 | 26 |
| AX-158096889 | 10 | 56.211 | KV453290.1 | 8500067 | 26-scf00232 | 26 |
| AX-158380000 | 10 | 56.37  | KV453290.1 | 8508028 | 26-scf00232 | 26 |
| AX-158096893 | 10 | 56.37  | KV453290.1 | 8511156 | 26-scf00232 | 26 |
| AX-157742298 | 10 | 56.37  | KV453290.1 | 8511871 | 26-scf00232 | 26 |
| AX-158096895 | 10 | 56.554 | KV453290.1 | 8513355 | 26-scf00232 | 26 |
| AX-157716516 | 10 | 56.856 | KV453290.1 | 8517561 | 26-scf00232 | 26 |
| AX-158096898 | 10 | 56.867 | KV453290.1 | 8522490 | 26-scf00232 | 26 |
| AX-157741032 | 10 | 56.867 | KV453290.1 | 8524301 | 26-scf00232 | 26 |
| AX-157826150 | 10 | 56.867 | KV453290.1 | 8525444 | 26-scf00232 | 26 |
| AX-157717406 | 10 | 56.867 | KV453290.1 | 8525940 | 26-scf00232 | 26 |
| AX-158096900 | 10 | 56.867 | KV453290.1 | 8526014 | 26-scf00232 | 26 |
| AX-158096905 | 10 | 56.867 | KV453290.1 | 8530466 | 26-scf00232 | 26 |
| AX-158096906 | 10 | 56.867 | KV453290.1 | 8530902 | 26-scf00232 | 26 |
| AX-158096907 | 10 | 56.867 | KV453290.1 | 8531255 | 26-scf00232 | 26 |
| AX-157826151 | 10 | 56.867 | KV453290.1 | 8532125 | 26-scf00232 | 26 |
| AX-158096908 | 10 | 56.867 | KV453290.1 | 8533274 | 26-scf00232 | 26 |
| AX-158096910 | 10 | 56.867 | KV453290.1 | 8533975 | 26-scf00232 | 26 |
| AX-158096916 | 10 | 56.867 | KV453290.1 | 8538940 | 26-scf00232 | 26 |
| AX-157717818 | 10 | 56.977 | KV453290.1 | 8543812 | 26-scf00232 | 26 |
| AX-157698443 | 10 | 56.977 | KV453290.1 | 8546520 | 26-scf00232 | 26 |
| AX-158096921 | 10 | 56.977 | KV453290.1 | 8546593 | 26-scf00232 | 26 |
| AX-157722804 | 10 | 56.977 | KV453290.1 | 8548419 | 26-scf00232 | 26 |
| AX-158096925 | 10 | 57.195 | KV453290.1 | 8554974 | 26-scf00232 | 26 |
| AX-158096926 | 10 | 57.195 | KV453290.1 | 8555241 | 26-scf00232 | 26 |
| AX-157743433 | 10 | 57.195 | KV453290.1 | 8556800 | 26-scf00232 | 26 |
| AX-158096929 | 10 | 57.195 | KV453290.1 | 8558164 | 26-scf00232 | 26 |
| AX-158096936 | 10 | 57.265 | KV453290.1 | 8570819 | 26-scf00232 | 26 |
| AX-158096937 | 10 | 57.342 | KV453290.1 | 8571937 | 26-scf00232 | 26 |

|              |    |        |            |         |             |    |
|--------------|----|--------|------------|---------|-------------|----|
| AX-157742917 | 10 | 57.414 | KV453290.1 | 8572313 | 26-scf00232 | 26 |
| AX-157885767 | 10 | 57.414 | KV453290.1 | 8577934 | 26-scf00232 | 26 |
| AX-158096940 | 10 | 57.414 | KV453290.1 | 8578250 | 26-scf00232 | 26 |
| AX-158096941 | 10 | 57.414 | KV453290.1 | 8578533 | 26-scf00232 | 26 |
| AX-158096942 | 10 | 57.414 | KV453290.1 | 8584766 | 26-scf00232 | 26 |
| AX-157826154 | 10 | 57.414 | KV453290.1 | 8585954 | 26-scf00232 | 26 |
| AX-158096951 | 10 | 57.414 | KV453290.1 | 8597863 | 26-scf00232 | 26 |
| AX-158096961 | 10 | 57.414 | KV453290.1 | 8623355 | 26-scf00232 | 26 |
| AX-157752384 | 10 | 57.414 | KV453290.1 | 8640769 | 26-scf00232 | 26 |
| AX-158096967 | 10 | 57.414 | KV453290.1 | 8644933 | 26-scf00232 | 26 |
| AX-158096995 | 10 | 57.414 | KV453290.1 | 8689351 | 26-scf00232 | 26 |
| AX-158096944 | 10 | 57.45  | KV453290.1 | 8587817 | 26-scf00232 | 26 |
| AX-158096945 | 10 | 57.523 | KV453290.1 | 8588528 | 26-scf00232 | 26 |
| AX-158096946 | 10 | 57.523 | KV453290.1 | 8589380 | 26-scf00232 | 26 |
| AX-158096947 | 10 | 57.632 | KV453290.1 | 8590133 | 26-scf00232 | 26 |
| AX-158096948 | 10 | 57.632 | KV453290.1 | 8592544 | 26-scf00232 | 26 |
| AX-158096950 | 10 | 57.632 | KV453290.1 | 8594658 | 26-scf00232 | 26 |
| AX-158392189 | 10 | 57.632 | KV453290.1 | 8600085 | 26-scf00232 | 26 |
| AX-158096953 | 10 | 57.632 | KV453290.1 | 8600448 | 26-scf00232 | 26 |
| AX-158096954 | 10 | 57.632 | KV453290.1 | 8601221 | 26-scf00232 | 26 |
| AX-158096955 | 10 | 57.632 | KV453290.1 | 8602899 | 26-scf00232 | 26 |
| AX-158096957 | 10 | 57.632 | KV453290.1 | 8604224 | 26-scf00232 | 26 |
| AX-157826157 | 10 | 57.632 | KV453290.1 | 8606943 | 26-scf00232 | 26 |
| AX-157826159 | 10 | 57.632 | KV453290.1 | 8609731 | 26-scf00232 | 26 |
| AX-157826160 | 10 | 57.632 | KV453290.1 | 8615177 | 26-scf00232 | 26 |
| AX-157863260 | 10 | 57.632 | KV453290.1 | 8615232 | 26-scf00232 | 26 |
| AX-158410211 | 10 | 57.662 | KV453290.1 | 8493466 | 26-scf00232 | 26 |
| AX-158380001 | 10 | 57.662 | KV453290.1 | 8619355 | 26-scf00232 | 26 |
| AX-157726403 | 10 | 57.662 | KV453290.1 | 8644322 | 26-scf00232 | 26 |
| AX-157826163 | 10 | 57.691 | KV453290.1 | 8630832 | 26-scf00232 | 26 |
| AX-157722729 | 10 | 57.712 | KV453290.1 | 8632127 | 26-scf00232 | 26 |
| AX-158096964 | 10 | 57.742 | KV453290.1 | 8632575 | 26-scf00232 | 26 |
| AX-158096965 | 10 | 57.742 | KV453290.1 | 8634379 | 26-scf00232 | 26 |
| AX-157715707 | 10 | 57.742 | KV453290.1 | 8643067 | 26-scf00232 | 26 |
| AX-157721252 | 10 | 57.742 | KV453290.1 | 8645201 | 26-scf00232 | 26 |
| AX-158096968 | 10 | 57.742 | KV453290.1 | 8645672 | 26-scf00232 | 26 |
| AX-158096943 | 10 | 57.804 | KV453290.1 | 8585318 | 26-scf00232 | 26 |
| AX-158096956 | 10 | 57.804 | KV453290.1 | 8603621 | 26-scf00232 | 26 |
| AX-158096971 | 10 | 57.804 | KV453290.1 | 8649646 | 26-scf00232 | 26 |
| AX-158097042 | 10 | 57.804 | KV453290.1 | 8758600 | 26-scf00232 | 26 |
| AX-158096934 | 10 | 57.851 | KV453290.1 | 8563823 | 26-scf00232 | 26 |
| AX-158096952 | 10 | 57.851 | KV453290.1 | 8599975 | 26-scf00232 | 26 |
| AX-158096962 | 10 | 57.851 | KV453290.1 | 8631222 | 26-scf00232 | 26 |
| AX-158096972 | 10 | 57.851 | KV453290.1 | 8653542 | 26-scf00232 | 26 |
| AX-157857331 | 10 | 57.851 | KV453290.1 | 8655144 | 26-scf00232 | 26 |
| AX-158096974 | 10 | 57.851 | KV453290.1 | 8656152 | 26-scf00232 | 26 |
| AX-157826164 | 10 | 57.851 | KV453290.1 | 8658349 | 26-scf00232 | 26 |
| AX-158096976 | 10 | 57.851 | KV453290.1 | 8660107 | 26-scf00232 | 26 |
| AX-158096977 | 10 | 57.851 | KV453290.1 | 8660551 | 26-scf00232 | 26 |
| AX-157750610 | 10 | 57.851 | KV453290.1 | 8683948 | 26-scf00232 | 26 |
| AX-158097003 | 10 | 57.851 | KV453290.1 | 8700729 | 26-scf00232 | 26 |

|              |    |        |            |         |             |    |
|--------------|----|--------|------------|---------|-------------|----|
| AX-158096981 | 10 | 57.866 | KV453290.1 | 8667211 | 26-scf00232 | 26 |
| AX-158096984 | 10 | 57.892 | KV453290.1 | 8669923 | 26-scf00232 | 26 |
| AX-158096973 | 10 | 57.96  | KV453290.1 | 8655240 | 26-scf00232 | 26 |
| AX-158096980 | 10 | 57.96  | KV453290.1 | 8665991 | 26-scf00232 | 26 |
| AX-158096985 | 10 | 57.96  | KV453290.1 | 8670939 | 26-scf00232 | 26 |
| AX-158096986 | 10 | 57.96  | KV453290.1 | 8671983 | 26-scf00232 | 26 |
| AX-158096987 | 10 | 57.96  | KV453290.1 | 8673210 | 26-scf00232 | 26 |
| AX-158392190 | 10 | 57.96  | KV453290.1 | 8674847 | 26-scf00232 | 26 |
| AX-158096988 | 10 | 57.96  | KV453290.1 | 8677047 | 26-scf00232 | 26 |
| AX-158096990 | 10 | 57.96  | KV453290.1 | 8680886 | 26-scf00232 | 26 |
| AX-158096992 | 10 | 57.96  | KV453290.1 | 8684585 | 26-scf00232 | 26 |
| AX-158096993 | 10 | 57.96  | KV453290.1 | 8685141 | 26-scf00232 | 26 |
| AX-157716814 | 10 | 57.96  | KV453290.1 | 8688334 | 26-scf00232 | 26 |
| AX-158096996 | 10 | 57.96  | KV453290.1 | 8689626 | 26-scf00232 | 26 |
| AX-158096997 | 10 | 57.96  | KV453290.1 | 8690824 | 26-scf00232 | 26 |
| AX-158096999 | 10 | 57.96  | KV453290.1 | 8693483 | 26-scf00232 | 26 |
| AX-158097002 | 10 | 57.96  | KV453290.1 | 8698216 | 26-scf00232 | 26 |
| AX-158097006 | 10 | 57.96  | KV453290.1 | 8702174 | 26-scf00232 | 26 |
| AX-157750137 | 10 | 57.96  | KV453290.1 | 8703526 | 26-scf00232 | 26 |
| AX-158097009 | 10 | 57.96  | KV453290.1 | 8706619 | 26-scf00232 | 26 |
| AX-158097010 | 10 | 57.96  | KV453290.1 | 8707912 | 26-scf00232 | 26 |
| AX-158097012 | 10 | 57.962 | KV453290.1 | 8712276 | 26-scf00232 | 26 |
| AX-158096989 | 10 | 57.963 | KV453290.1 | 8679839 | 26-scf00232 | 26 |
| AX-157715657 | 10 | 57.963 | KV453290.1 | 8712702 | 26-scf00232 | 26 |
| AX-158097013 | 10 | 57.963 | KV453290.1 | 8714787 | 26-scf00232 | 26 |
| AX-158097014 | 10 | 58.397 | KV453290.1 | 8716743 | 26-scf00232 | 26 |
| AX-158097017 | 10 | 58.397 | KV453290.1 | 8721764 | 26-scf00232 | 26 |
| AX-158097027 | 10 | 58.397 | KV453290.1 | 8738964 | 26-scf00232 | 26 |
| AX-158097020 | 10 | 58.506 | KV453290.1 | 8725541 | 26-scf00232 | 26 |
| AX-158097021 | 10 | 58.506 | KV453290.1 | 8726358 | 26-scf00232 | 26 |
| AX-158097022 | 10 | 58.506 | KV453290.1 | 8729322 | 26-scf00232 | 26 |
| AX-158097023 | 10 | 58.506 | KV453290.1 | 8729409 | 26-scf00232 | 26 |
| AX-158097025 | 10 | 58.506 | KV453290.1 | 8733317 | 26-scf00232 | 26 |
| AX-157742465 | 10 | 58.506 | KV453290.1 | 8734188 | 26-scf00232 | 26 |
| AX-158097048 | 10 | 58.506 | KV453290.1 | 8766902 | 26-scf00232 | 26 |
| AX-158097070 | 10 | 58.506 | KV453290.1 | 8796738 | 26-scf00232 | 26 |
| AX-158097030 | 10 | 58.543 | KV453290.1 | 8741638 | 26-scf00232 | 26 |
| AX-158097031 | 10 | 58.573 | KV453290.1 | 8741977 | 26-scf00232 | 26 |
| AX-158097032 | 10 | 58.616 | KV453290.1 | 8742695 | 26-scf00232 | 26 |
| AX-157755162 | 10 | 58.663 | KV453290.1 | 8746448 | 26-scf00232 | 26 |
| AX-158410212 | 10 | 58.667 | KV453290.1 | 8762001 | 26-scf00232 | 26 |
| AX-158097040 | 10 | 58.866 | KV453290.1 | 8756406 | 26-scf00232 | 26 |
| AX-158416878 | 10 | 58.866 | KV453290.1 | 8762460 | 26-scf00232 | 26 |
| AX-158097045 | 10 | 58.866 | KV453290.1 | 8762828 | 26-scf00232 | 26 |
| AX-158097049 | 10 | 59.345 | KV453290.1 | 8767858 | 26-scf00232 | 26 |
| AX-158097050 | 10 | 59.349 | KV453290.1 | 8769340 | 26-scf00232 | 26 |
| AX-158097051 | 10 | 59.353 | KV453290.1 | 8770148 | 26-scf00232 | 26 |
| AX-158097053 | 10 | 59.353 | KV453290.1 | 8772777 | 26-scf00232 | 26 |
| AX-158097056 | 10 | 59.399 | KV453290.1 | 8779234 | 26-scf00232 | 26 |
| AX-158097054 | 10 | 59.516 | KV453290.1 | 8773035 | 26-scf00232 | 26 |
| AX-158097058 | 10 | 59.516 | KV453290.1 | 8781718 | 26-scf00232 | 26 |

|              |    |        |            |         |             |    |
|--------------|----|--------|------------|---------|-------------|----|
| AX-157885769 | 10 | 59.516 | KV453290.1 | 8783754 | 26-scf00232 | 26 |
| AX-158097061 | 10 | 59.516 | KV453290.1 | 8785481 | 26-scf00232 | 26 |
| AX-158097065 | 10 | 59.516 | KV453290.1 | 8792008 | 26-scf00232 | 26 |
| AX-158097063 | 10 | 59.552 | KV453290.1 | 8789009 | 26-scf00232 | 26 |
| AX-157727287 | 10 | 59.575 | KV453290.1 | 8789906 | 26-scf00232 | 26 |
| AX-158097064 | 10 | 59.604 | KV453290.1 | 8791360 | 26-scf00232 | 26 |
| AX-158097060 | 10 | 59.645 | KV453290.1 | 8784326 | 26-scf00232 | 26 |
| AX-158380003 | 10 | 59.645 | KV453290.1 | 8791500 | 26-scf00232 | 26 |
| AX-158097066 | 10 | 59.645 | KV453290.1 | 8792540 | 26-scf00232 | 26 |
| AX-158097067 | 10 | 59.645 | KV453290.1 | 8794367 | 26-scf00232 | 26 |
| AX-158097068 | 10 | 60.063 | KV453290.1 | 8794972 | 26-scf00232 | 26 |
| AX-158097074 | 10 | 60.129 | KV453290.1 | 8801551 | 26-scf00232 | 26 |
| AX-158097075 | 10 | 60.129 | KV453290.1 | 8803113 | 26-scf00232 | 26 |
| AX-158097080 | 10 | 60.129 | KV453290.1 | 8807745 | 26-scf00232 | 26 |
| AX-158097085 | 10 | 60.468 | KV453290.1 | 8822379 | 26-scf00232 | 26 |
| AX-158097086 | 10 | 60.805 | KV453290.1 | 8824655 | 26-scf00232 | 26 |
| AX-157826168 | 10 | 60.805 | KV453290.1 | 8830980 | 26-scf00232 | 26 |
| AX-158097095 | 10 | 61.172 | KV453290.1 | 8842801 | 26-scf00232 | 26 |
| AX-157757074 | 10 | 61.2   | KV453290.1 | 8842887 | 26-scf00232 | 26 |
| AX-157740591 | 10 | 61.227 | KV453290.1 | 8843540 | 26-scf00232 | 26 |
| AX-158097100 | 10 | 61.553 | KV453290.1 | 8850156 | 26-scf00232 | 26 |
| AX-158097101 | 10 | 61.571 | KV453290.1 | 8850517 | 26-scf00232 | 26 |
| AX-158097102 | 10 | 61.571 | KV453290.1 | 8850963 | 26-scf00232 | 26 |
| AX-157826170 | 10 | 61.571 | KV453290.1 | 8851008 | 26-scf00232 | 26 |
| AX-157736776 | 10 | 61.571 | KV453290.1 | 8851969 | 26-scf00232 | 26 |
| AX-157713414 | 10 | 61.571 | KV453290.1 | 8853008 | 26-scf00232 | 26 |
| AX-157826171 | 10 | 61.571 | KV453290.1 | 8854912 | 26-scf00232 | 26 |
| AX-157826172 | 10 | 61.571 | KV453290.1 | 8855633 | 26-scf00232 | 26 |
| AX-158097104 | 10 | 61.604 | KV453290.1 | 8860189 | 26-scf00232 | 26 |
| AX-158097103 | 10 | 61.68  | KV453290.1 | 8858623 | 26-scf00232 | 26 |
| AX-158097107 | 10 | 61.68  | KV453290.1 | 8861664 | 26-scf00232 | 26 |
| AX-158097108 | 10 | 61.68  | KV453290.1 | 8862403 | 26-scf00232 | 26 |
| AX-158097109 | 10 | 61.68  | KV453290.1 | 8862759 | 26-scf00232 | 26 |
| AX-158097110 | 10 | 61.68  | KV453290.1 | 8863219 | 26-scf00232 | 26 |
| AX-158097112 | 10 | 61.68  | KV453290.1 | 8864892 | 26-scf00232 | 26 |
| AX-158097114 | 10 | 61.68  | KV453290.1 | 8870040 | 26-scf00232 | 26 |
| AX-158097121 | 10 | 61.68  | KV453290.1 | 8883131 | 26-scf00232 | 26 |
| AX-158097105 | 10 | 61.719 | KV453290.1 | 8860868 | 26-scf00232 | 26 |
| AX-158097116 | 10 | 61.719 | KV453290.1 | 8872100 | 26-scf00232 | 26 |
| AX-158097118 | 10 | 61.747 | KV453290.1 | 8876981 | 26-scf00232 | 26 |
| AX-157774893 | 10 | 61.789 | KV453290.1 | 8879775 | 26-scf00232 | 26 |
| AX-157740664 | 10 | 61.789 | KV453290.1 | 8880167 | 26-scf00232 | 26 |
| AX-158097119 | 10 | 61.789 | KV453290.1 | 8881136 | 26-scf00232 | 26 |
| AX-158097123 | 10 | 61.971 | KV453290.1 | 8886249 | 26-scf00232 | 26 |
| AX-158097126 | 10 | 61.972 | KV453290.1 | 8889189 | 26-scf00232 | 26 |
| AX-158097127 | 10 | 62.163 | KV453290.1 | 8889442 | 26-scf00232 | 26 |
| AX-157826173 | 10 | 62.336 | KV453290.1 | 8894414 | 26-scf00232 | 26 |
| AX-157708679 | 10 | 62.336 | KV453290.1 | 8894985 | 26-scf00232 | 26 |
| AX-157826174 | 10 | 62.336 | KV453290.1 | 8895416 | 26-scf00232 | 26 |
| AX-157757682 | 10 | 62.989 | KV453290.1 | 8900038 | 26-scf00232 | 26 |
| AX-157747086 | 10 | 62.989 | KV453290.1 | 8904399 | 26-scf00232 | 26 |

|              |    |        |            |         |             |    |
|--------------|----|--------|------------|---------|-------------|----|
| AX-158097133 | 10 | 63.141 | KV453290.1 | 8901766 | 26-scf00232 | 26 |
| AX-158097134 | 10 | 63.153 | KV453290.1 | 8905470 | 26-scf00232 | 26 |
| AX-158097137 | 10 | 63.34  | KV453290.1 | 8911518 | 26-scf00232 | 26 |
| AX-158097140 | 10 | 63.527 | KV453290.1 | 8915976 | 26-scf00232 | 26 |
| AX-158097141 | 10 | 63.538 | KV453290.1 | 8917828 | 26-scf00232 | 26 |
| AX-158097142 | 10 | 63.55  | KV453290.1 | 8923973 | 26-scf00232 | 26 |
| AX-157826176 | 10 | 63.798 | KV453290.1 | 8926349 | 26-scf00232 | 26 |
| AX-158097145 | 10 | 64.09  | KV453290.1 | 8929259 | 26-scf00232 | 26 |
| AX-157714783 | 10 | 64.09  | KV453290.1 | 8933499 | 26-scf00232 | 26 |
| AX-157751532 | 10 | 64.09  | KV453290.1 | 8936121 | 26-scf00232 | 26 |
| AX-157738350 | 10 | 64.09  | KV453290.1 | 8937954 | 26-scf00232 | 26 |
| AX-158097147 | 10 | 64.306 | KV453290.1 | 8945892 | 26-scf00232 | 26 |
| AX-158097148 | 10 | 64.309 | KV453290.1 | 8946707 | 26-scf00232 | 26 |
| AX-158097149 | 10 | 64.309 | KV453290.1 | 8948008 | 26-scf00232 | 26 |
| AX-158097153 | 10 | 64.738 | KV453290.1 | 8954270 | 26-scf00232 | 26 |
| AX-158097156 | 10 | 64.745 | KV453290.1 | 8960694 | 26-scf00232 | 26 |
| AX-157826179 | 10 | 64.745 | KV453290.1 | 8964014 | 26-scf00232 | 26 |
| AX-158097157 | 10 | 64.745 | KV453290.1 | 8964326 | 26-scf00232 | 26 |
| AX-157826180 | 10 | 64.745 | KV453290.1 | 8964931 | 26-scf00232 | 26 |
| AX-158097158 | 10 | 64.746 | KV453290.1 | 8967255 | 26-scf00232 | 26 |
| AX-158097161 | 10 | 64.927 | KV453290.1 | 8971180 | 26-scf00232 | 26 |
| AX-158097162 | 10 | 64.928 | KV453290.1 | 8971514 | 26-scf00232 | 26 |
| AX-158097164 | 10 | 64.929 | KV453290.1 | 8975019 | 26-scf00232 | 26 |
| AX-157713235 | 10 | 64.929 | KV453290.1 | 8975422 | 26-scf00232 | 26 |
| AX-158097166 | 10 | 64.93  | KV453290.1 | 8976051 | 26-scf00232 | 26 |
| AX-158097167 | 10 | 65.291 | KV453290.1 | 8976362 | 26-scf00232 | 26 |
| AX-158097168 | 10 | 65.291 | KV453290.1 | 8977109 | 26-scf00232 | 26 |
| AX-158097170 | 10 | 65.291 | KV453290.1 | 8984233 | 26-scf00232 | 26 |
| AX-157722721 | 10 | 65.291 | KV453290.1 | 8986866 | 26-scf00232 | 26 |
| AX-157826183 | 10 | 65.291 | KV453290.1 | 8989943 | 26-scf00232 | 26 |
| AX-157771425 | 10 | 65.35  | KV453290.1 | 8990690 | 26-scf00232 | 26 |
| AX-158097202 | 10 | 65.35  | KV453290.1 | 9042559 | 26-scf00232 | 26 |
| AX-158097179 | 10 | 65.401 | KV453290.1 | 8996798 | 26-scf00232 | 26 |
| AX-158097180 | 10 | 65.401 | KV453290.1 | 8997863 | 26-scf00232 | 26 |
| AX-158097184 | 10 | 65.619 | KV453290.1 | 9006815 | 26-scf00232 | 26 |
| AX-158097185 | 10 | 65.619 | KV453290.1 | 9007354 | 26-scf00232 | 26 |
| AX-158097190 | 10 | 65.619 | KV453290.1 | 9016404 | 26-scf00232 | 26 |
| AX-158410216 | 10 | 65.619 | KV453290.1 | 9017387 | 26-scf00232 | 26 |
| AX-158097192 | 10 | 65.619 | KV453290.1 | 9020183 | 26-scf00232 | 26 |
| AX-158097186 | 10 | 65.721 | KV453290.1 | 9008303 | 26-scf00232 | 26 |
| AX-157748448 | 10 | 65.721 | KV453290.1 | 9022336 | 26-scf00232 | 26 |
| AX-158097218 | 10 | 65.721 | KV453290.1 | 9092964 | 26-scf00232 | 26 |
| AX-157744192 | 10 | 65.838 | KV453290.1 | 9030347 | 26-scf00232 | 26 |
| AX-158384662 | 10 | 65.838 | KV453290.1 | 9032816 | 26-scf00232 | 26 |
| AX-158097197 | 10 | 65.838 | KV453290.1 | 9034863 | 26-scf00232 | 26 |
| AX-158097198 | 10 | 65.838 | KV453290.1 | 9037214 | 26-scf00232 | 26 |
| AX-157826186 | 10 | 65.864 | KV453290.1 | 9041290 | 26-scf00232 | 26 |
| AX-158097201 | 10 | 65.897 | KV453290.1 | 9042016 | 26-scf00232 | 26 |
| AX-157715842 | 10 | 65.919 | KV453290.1 | 9044610 | 26-scf00232 | 26 |
| AX-157743732 | 10 | 65.935 | KV453290.1 | 9053993 | 26-scf00232 | 26 |
| AX-158097204 | 10 | 65.947 | KV453290.1 | 9055989 | 26-scf00232 | 26 |



|              |    |        |            |         |             |    |
|--------------|----|--------|------------|---------|-------------|----|
| AX-157826191 | 10 | 65.947 | KV453290.1 | 9060971 | 26-scf00232 | 26 |
| AX-158097205 | 10 | 65.947 | KV453290.1 | 9065719 | 26-scf00232 | 26 |
| AX-158097207 | 10 | 66.166 | KV453290.1 | 9072325 | 26-scf00232 | 26 |
| AX-158097209 | 10 | 66.166 | KV453290.1 | 9074284 | 26-scf00232 | 26 |
| AX-158097230 | 10 | 66.166 | KV453290.1 | 9109299 | 26-scf00232 | 26 |
| AX-158097210 | 10 | 66.384 | KV453290.1 | 9076902 | 26-scf00232 | 26 |
| AX-157726595 | 10 | 66.384 | KV453290.1 | 9082126 | 26-scf00232 | 26 |
| AX-158097212 | 10 | 66.384 | KV453290.1 | 9082406 | 26-scf00232 | 26 |
| AX-157865872 | 10 | 66.384 | KV453290.1 | 9085402 | 26-scf00232 | 26 |
| AX-158097226 | 10 | 66.384 | KV453290.1 | 9103036 | 26-scf00232 | 26 |
| AX-157755627 | 10 | 66.384 | KV453290.1 | 9104534 | 26-scf00232 | 26 |
| AX-158097227 | 10 | 66.384 | KV453290.1 | 9105978 | 26-scf00232 | 26 |
| AX-158097228 | 10 | 66.384 | KV453290.1 | 9107583 | 26-scf00232 | 26 |
| AX-158097229 | 10 | 66.384 | KV453290.1 | 9109075 | 26-scf00232 | 26 |
| AX-157826192 | 10 | 66.384 | KV453290.1 | 9111607 | 26-scf00232 | 26 |
| AX-158097232 | 10 | 66.384 | KV453290.1 | 9113004 | 26-scf00232 | 26 |
| AX-158097236 | 10 | 66.384 | KV453290.1 | 9117392 | 26-scf00232 | 26 |
| AX-158097237 | 10 | 66.384 | KV453290.1 | 9117863 | 26-scf00232 | 26 |
| AX-158097239 | 10 | 66.384 | KV453290.1 | 9119101 | 26-scf00232 | 26 |
| AX-157826193 | 10 | 66.384 | KV453290.1 | 9120394 | 26-scf00232 | 26 |
| AX-158097241 | 10 | 66.384 | KV453290.1 | 9120655 | 26-scf00232 | 26 |
| AX-158097242 | 10 | 66.384 | KV453290.1 | 9120910 | 26-scf00232 | 26 |
| AX-157747371 | 10 | 66.384 | KV453290.1 | 9122400 | 26-scf00232 | 26 |
| AX-158097245 | 10 | 66.384 | KV453290.1 | 9124238 | 26-scf00232 | 26 |
| AX-158097247 | 10 | 66.384 | KV453290.1 | 9126635 | 26-scf00232 | 26 |
| AX-158097248 | 10 | 66.384 | KV453290.1 | 9127819 | 26-scf00232 | 26 |
| AX-158097249 | 10 | 66.384 | KV453290.1 | 9128017 | 26-scf00232 | 26 |
| AX-158097252 | 10 | 66.384 | KV453290.1 | 9130355 | 26-scf00232 | 26 |
| AX-158097253 | 10 | 66.494 | KV453290.1 | 9131265 | 26-scf00232 | 26 |
| AX-157826194 | 10 | 66.603 | KV453290.1 | 9131913 | 26-scf00232 | 26 |
| AX-158097225 | 10 | 66.822 | KV453290.1 | 9102234 | 26-scf00232 | 26 |
| AX-158097256 | 10 | 66.822 | KV453290.1 | 9133898 | 26-scf00232 | 26 |
| AX-157738324 | 10 | 66.822 | KV453290.1 | 9134360 | 26-scf00232 | 26 |
| AX-157826195 | 10 | 66.822 | KV453290.1 | 9134534 | 26-scf00232 | 26 |
| AX-158097259 | 10 | 66.822 | KV453290.1 | 9137768 | 26-scf00232 | 26 |
| AX-158097261 | 10 | 66.822 | KV453290.1 | 9139498 | 26-scf00232 | 26 |
| AX-158097260 | 10 | 66.83  | KV453290.1 | 9138339 | 26-scf00232 | 26 |
| AX-158097262 | 10 | 67.368 | KV453290.1 | 9142398 | 26-scf00232 | 26 |
| AX-157826196 | 10 | 67.368 | KV453290.1 | 9142898 | 26-scf00232 | 26 |
| AX-157826197 | 10 | 67.368 | KV453290.1 | 9143350 | 26-scf00232 | 26 |
| AX-158097263 | 10 | 67.368 | KV453290.1 | 9144382 | 26-scf00232 | 26 |
| AX-157775689 | 10 | 67.368 | KV453290.1 | 9146436 | 26-scf00232 | 26 |
| AX-158097268 | 10 | 67.368 | KV453290.1 | 9147685 | 26-scf00232 | 26 |
| AX-157773953 | 10 | 67.368 | KV453290.1 | 9149737 | 26-scf00232 | 26 |
| AX-157857336 | 10 | 67.368 | KV453290.1 | 9151434 | 26-scf00232 | 26 |
| AX-158097271 | 10 | 67.368 | KV453290.1 | 9152493 | 26-scf00232 | 26 |
| AX-158097272 | 10 | 67.477 | KV453290.1 | 9155331 | 26-scf00232 | 26 |
| AX-157826199 | 10 | 67.477 | KV453290.1 | 9155569 | 26-scf00232 | 26 |
| AX-158380005 | 10 | 67.477 | KV453290.1 | 9156674 | 26-scf00232 | 26 |
| AX-158097273 | 10 | 67.477 | KV453290.1 | 9156796 | 26-scf00232 | 26 |
| AX-158097289 | 10 | 67.477 | KV453290.1 | 9177406 | 26-scf00232 | 26 |

|              |    |        |            |         |             |    |
|--------------|----|--------|------------|---------|-------------|----|
| AX-157758107 | 10 | 67.987 | KV453290.1 | 9164992 | 26-scf00232 | 26 |
| AX-158097276 | 10 | 67.987 | KV453290.1 | 9165712 | 26-scf00232 | 26 |
| AX-157746138 | 10 | 67.987 | KV453290.1 | 9166212 | 26-scf00232 | 26 |
| AX-158097277 | 10 | 67.987 | KV453290.1 | 9167081 | 26-scf00232 | 26 |
| AX-158097283 | 10 | 67.987 | KV453290.1 | 9174093 | 26-scf00232 | 26 |
| AX-158097285 | 10 | 68.035 | KV453290.1 | 9175764 | 26-scf00232 | 26 |
| AX-158097290 | 10 | 68.114 | KV453290.1 | 9179153 | 26-scf00232 | 26 |
| AX-157709112 | 10 | 68.114 | KV453290.1 | 9183308 | 26-scf00232 | 26 |
| AX-158097286 | 10 | 68.242 | KV453290.1 | 9175982 | 26-scf00232 | 26 |
| AX-157770673 | 10 | 68.242 | KV453290.1 | 9181720 | 26-scf00232 | 26 |
| AX-158097292 | 10 | 68.242 | KV453290.1 | 9184093 | 26-scf00232 | 26 |
| AX-157826201 | 10 | 68.242 | KV453290.1 | 9185467 | 26-scf00232 | 26 |
| AX-158097294 | 10 | 68.242 | KV453290.1 | 9187666 | 26-scf00232 | 26 |
| AX-158097297 | 10 | 68.242 | KV453290.1 | 9189274 | 26-scf00232 | 26 |
| AX-158097299 | 10 | 68.242 | KV453290.1 | 9190495 | 26-scf00232 | 26 |
| AX-158097300 | 10 | 68.242 | KV453290.1 | 9190929 | 26-scf00232 | 26 |
| AX-158097301 | 10 | 68.242 | KV453290.1 | 9193064 | 26-scf00232 | 26 |
| AX-157826202 | 10 | 68.242 | KV453290.1 | 9193736 | 26-scf00232 | 26 |
| AX-158097302 | 10 | 68.242 | KV453290.1 | 9194267 | 26-scf00232 | 26 |
| AX-157826204 | 10 | 68.242 | KV453290.1 | 9223156 | 26-scf00232 | 26 |
| AX-157748755 | 10 | 68.436 | KV453290.1 | 9199585 | 26-scf00232 | 26 |
| AX-158097303 | 10 | 68.436 | KV453290.1 | 9200566 | 26-scf00232 | 26 |
| AX-158097305 | 10 | 68.743 | KV453290.1 | 9204115 | 26-scf00232 | 26 |
| AX-158410219 | 10 | 68.75  | KV453290.1 | 9211898 | 26-scf00232 | 26 |
| AX-158097309 | 10 | 68.865 | KV453290.1 | 9214942 | 26-scf00232 | 26 |
| AX-158097311 | 10 | 68.865 | KV453290.1 | 9217587 | 26-scf00232 | 26 |
| AX-158097313 | 10 | 68.865 | KV453290.1 | 9220759 | 26-scf00232 | 26 |
| AX-158097314 | 10 | 69.007 | KV453290.1 | 9221685 | 26-scf00232 | 26 |
| AX-158097315 | 10 | 69.007 | KV453290.1 | 9222439 | 26-scf00232 | 26 |
| AX-158097316 | 10 | 69.007 | KV453290.1 | 9222695 | 26-scf00232 | 26 |
| AX-158097321 | 10 | 69.007 | KV453290.1 | 9227849 | 26-scf00232 | 26 |
| AX-158097342 | 10 | 69.007 | KV453290.1 | 9272811 | 26-scf00232 | 26 |
| AX-158097354 | 10 | 69.007 | KV453290.1 | 9295856 | 26-scf00232 | 26 |
| AX-158097367 | 10 | 69.007 | KV453290.1 | 9316627 | 26-scf00232 | 26 |
| AX-157826205 | 10 | 69.034 | KV453290.1 | 9224773 | 26-scf00232 | 26 |
| AX-158097317 | 10 | 69.074 | KV453290.1 | 9225329 | 26-scf00232 | 26 |
| AX-158097318 | 10 | 69.117 | KV453290.1 | 9225845 | 26-scf00232 | 26 |
| AX-158097319 | 10 | 69.117 | KV453290.1 | 9226854 | 26-scf00232 | 26 |
| AX-157826206 | 10 | 69.117 | KV453290.1 | 9228675 | 26-scf00232 | 26 |
| AX-158097322 | 10 | 69.117 | KV453290.1 | 9229407 | 26-scf00232 | 26 |
| AX-158097325 | 10 | 69.117 | KV453290.1 | 9232414 | 26-scf00232 | 26 |
| AX-157775520 | 10 | 69.117 | KV453290.1 | 9237295 | 26-scf00232 | 26 |
| AX-157753334 | 10 | 69.117 | KV453290.1 | 9257368 | 26-scf00232 | 26 |
| AX-158097335 | 10 | 69.149 | KV453290.1 | 9257536 | 26-scf00232 | 26 |
| AX-158097336 | 10 | 69.193 | KV453290.1 | 9259581 | 26-scf00232 | 26 |
| AX-157698776 | 10 | 69.193 | KV453290.1 | 9268621 | 26-scf00232 | 26 |
| AX-157870932 | 10 | 69.226 | KV453290.1 | 9262052 | 26-scf00232 | 26 |
| AX-157870933 | 10 | 69.226 | KV453290.1 | 9262414 | 26-scf00232 | 26 |
| AX-158097341 | 10 | 69.226 | KV453290.1 | 9272202 | 26-scf00232 | 26 |
| AX-158097343 | 10 | 69.226 | KV453290.1 | 9274025 | 26-scf00232 | 26 |
| AX-158097344 | 10 | 69.335 | KV453290.1 | 9276631 | 26-scf00232 | 26 |

|              |    |        |            |         |             |    |
|--------------|----|--------|------------|---------|-------------|----|
| AX-158097345 | 10 | 69.335 | KV453290.1 | 9277455 | 26-scf00232 | 26 |
| AX-158097350 | 10 | 69.335 | KV453290.1 | 9286104 | 26-scf00232 | 26 |
| AX-157826210 | 10 | 69.335 | KV453290.1 | 9286270 | 26-scf00232 | 26 |
| AX-157716594 | 10 | 69.335 | KV453290.1 | 9293283 | 26-scf00232 | 26 |
| AX-158097355 | 10 | 69.335 | KV453290.1 | 9297557 | 26-scf00232 | 26 |
| AX-158097356 | 10 | 69.335 | KV453290.1 | 9298932 | 26-scf00232 | 26 |
| AX-158097361 | 10 | 69.335 | KV453290.1 | 9311422 | 26-scf00232 | 26 |
| AX-158097363 | 10 | 69.335 | KV453290.1 | 9313786 | 26-scf00232 | 26 |
| AX-157715573 | 10 | 69.335 | KV453290.1 | 9314119 | 26-scf00232 | 26 |
| AX-158097372 | 10 | 69.335 | KV453290.1 | 9322515 | 26-scf00232 | 26 |
| AX-157710767 | 10 | 69.335 | KV453290.1 | 9359452 | 26-scf00232 | 26 |
| AX-158097475 | 10 | 69.335 | KV453290.1 | 9473057 | 26-scf00232 | 26 |
| AX-158097366 | 10 | 69.662 | KV453290.1 | 9316228 | 26-scf00232 | 26 |
| AX-158097378 | 10 | 69.662 | KV453290.1 | 9330306 | 26-scf00232 | 26 |
| AX-158097387 | 10 | 69.662 | KV453290.1 | 9345588 | 26-scf00232 | 26 |
| AX-157739155 | 10 | 69.662 | KV453290.1 | 9391755 | 26-scf00232 | 26 |
| AX-158097379 | 10 | 69.663 | KV453290.1 | 9330514 | 26-scf00232 | 26 |
| AX-157826216 | 10 | 69.663 | KV453290.1 | 9336501 | 26-scf00232 | 26 |
| AX-158097413 | 10 | 69.663 | KV453290.1 | 9395545 | 26-scf00232 | 26 |
| AX-158097383 | 10 | 69.772 | KV453290.1 | 9340961 | 26-scf00232 | 26 |
| AX-158097384 | 10 | 69.806 | KV453290.1 | 9343728 | 26-scf00232 | 26 |
| AX-157748558 | 10 | 69.828 | KV453290.1 | 9344024 | 26-scf00232 | 26 |
| AX-157743242 | 10 | 69.857 | KV453290.1 | 9345519 | 26-scf00232 | 26 |
| AX-158097371 | 10 | 69.881 | KV453290.1 | 9318820 | 26-scf00232 | 26 |
| AX-158097385 | 10 | 69.881 | KV453290.1 | 9344688 | 26-scf00232 | 26 |
| AX-157826217 | 10 | 69.881 | KV453290.1 | 9346292 | 26-scf00232 | 26 |
| AX-157750477 | 10 | 69.881 | KV453290.1 | 9346373 | 26-scf00232 | 26 |
| AX-158097388 | 10 | 69.881 | KV453290.1 | 9347889 | 26-scf00232 | 26 |
| AX-158097389 | 10 | 69.881 | KV453290.1 | 9350003 | 26-scf00232 | 26 |
| AX-158097390 | 10 | 69.881 | KV453290.1 | 9351097 | 26-scf00232 | 26 |
| AX-158097392 | 10 | 69.881 | KV453290.1 | 9356278 | 26-scf00232 | 26 |
| AX-158097393 | 10 | 69.881 | KV453290.1 | 9357797 | 26-scf00232 | 26 |
| AX-158097396 | 10 | 69.881 | KV453290.1 | 9364939 | 26-scf00232 | 26 |
| AX-158097399 | 10 | 69.881 | KV453290.1 | 9380230 | 26-scf00232 | 26 |
| AX-158097400 | 10 | 69.881 | KV453290.1 | 9381812 | 26-scf00232 | 26 |
| AX-158097401 | 10 | 69.881 | KV453290.1 | 9382222 | 26-scf00232 | 26 |
| AX-158097405 | 10 | 69.881 | KV453290.1 | 9384537 | 26-scf00232 | 26 |
| AX-158097406 | 10 | 69.881 | KV453290.1 | 9384743 | 26-scf00232 | 26 |
| AX-158097409 | 10 | 69.881 | KV453290.1 | 9391211 | 26-scf00232 | 26 |
| AX-157826218 | 10 | 69.881 | KV453290.1 | 9391289 | 26-scf00232 | 26 |
| AX-158097421 | 10 | 69.881 | KV453290.1 | 9399901 | 26-scf00232 | 26 |
| AX-158097437 | 10 | 69.881 | KV453290.1 | 9422899 | 26-scf00232 | 26 |
| AX-157717690 | 10 | 69.881 | KV453290.1 | 9425405 | 26-scf00232 | 26 |
| AX-158097416 | 10 | 70.099 | KV453290.1 | 9397095 | 26-scf00232 | 26 |
| AX-158097418 | 10 | 70.099 | KV453290.1 | 9398226 | 26-scf00232 | 26 |
| AX-158097419 | 10 | 70.099 | KV453290.1 | 9398651 | 26-scf00232 | 26 |
| AX-158097420 | 10 | 70.099 | KV453290.1 | 9399310 | 26-scf00232 | 26 |
| AX-157724920 | 10 | 70.099 | KV453290.1 | 9402191 | 26-scf00232 | 26 |
| AX-158097425 | 10 | 70.099 | KV453290.1 | 9408714 | 26-scf00232 | 26 |
| AX-158097427 | 10 | 70.099 | KV453290.1 | 9410143 | 26-scf00232 | 26 |
| AX-158097430 | 10 | 70.099 | KV453290.1 | 9412080 | 26-scf00232 | 26 |

|              |    |        |            |         |             |    |
|--------------|----|--------|------------|---------|-------------|----|
| AX-158097432 | 10 | 70.256 | KV453290.1 | 9415843 | 26-scf00232 | 26 |
| AX-158097433 | 10 | 70.256 | KV453290.1 | 9417967 | 26-scf00232 | 26 |
| AX-158097444 | 10 | 70.72  | KV453290.1 | 9435830 | 26-scf00232 | 26 |
| AX-157727674 | 10 | 70.724 | KV453290.1 | 9432265 | 26-scf00232 | 26 |
| AX-157742571 | 10 | 70.724 | KV453290.1 | 9440436 | 26-scf00232 | 26 |
| AX-158097454 | 10 | 70.724 | KV453290.1 | 9450103 | 26-scf00232 | 26 |
| AX-158097455 | 10 | 70.724 | KV453290.1 | 9451698 | 26-scf00232 | 26 |
| AX-157753077 | 10 | 70.724 | KV453290.1 | 9457097 | 26-scf00232 | 26 |
| AX-158097461 | 10 | 70.724 | KV453290.1 | 9458311 | 26-scf00232 | 26 |
| AX-157749484 | 10 | 70.724 | KV453290.1 | 9479643 | 26-scf00232 | 26 |
| AX-158097458 | 10 | 70.76  | KV453290.1 | 9455891 | 26-scf00232 | 26 |
| AX-158097463 | 10 | 70.849 | KV453290.1 | 9460537 | 26-scf00232 | 26 |
| AX-158097464 | 10 | 70.849 | KV453290.1 | 9462417 | 26-scf00232 | 26 |
| AX-158097465 | 10 | 70.849 | KV453290.1 | 9463399 | 26-scf00232 | 26 |
| AX-158097466 | 10 | 70.849 | KV453290.1 | 9465098 | 26-scf00232 | 26 |
| AX-158097467 | 10 | 70.936 | KV453290.1 | 9465989 | 26-scf00232 | 26 |
| AX-158097460 | 10 | 70.974 | KV453290.1 | 9457169 | 26-scf00232 | 26 |
| AX-158097470 | 10 | 70.974 | KV453290.1 | 9468903 | 26-scf00232 | 26 |
| AX-157722565 | 10 | 70.974 | KV453290.1 | 9469653 | 26-scf00232 | 26 |
| AX-158097474 | 10 | 70.974 | KV453290.1 | 9471738 | 26-scf00232 | 26 |
| AX-157741150 | 10 | 70.974 | KV453290.1 | 9477563 | 26-scf00232 | 26 |
| AX-158097479 | 10 | 70.974 | KV453290.1 | 9478237 | 26-scf00232 | 26 |
| AX-158097480 | 10 | 70.974 | KV453290.1 | 9481528 | 26-scf00232 | 26 |
| AX-157746693 | 10 | 70.974 | KV453290.1 | 9483882 | 26-scf00232 | 26 |
| AX-158097482 | 10 | 70.974 | KV453290.1 | 9484335 | 26-scf00232 | 26 |
| AX-157826221 | 10 | 70.974 | KV453290.1 | 9494520 | 26-scf00232 | 26 |
| AX-158097483 | 10 | 71.083 | KV453290.1 | 9485708 | 26-scf00232 | 26 |
| AX-158097486 | 10 | 71.083 | KV453290.1 | 9489706 | 26-scf00232 | 26 |
| AX-157715554 | 10 | 71.083 | KV453290.1 | 9490452 | 26-scf00232 | 26 |
| AX-158097487 | 10 | 71.139 | KV453290.1 | 9492235 | 26-scf00232 | 26 |
| AX-158097488 | 10 | 71.192 | KV453290.1 | 9493308 | 26-scf00232 | 26 |
| AX-157751335 | 10 | 71.192 | KV453290.1 | 9508836 | 26-scf00232 | 26 |
| AX-158097489 | 10 | 71.248 | KV453290.1 | 9494792 | 26-scf00232 | 26 |
| AX-158097490 | 10 | 71.259 | KV453290.1 | 9496685 | 26-scf00232 | 26 |
| AX-158407330 | 10 | 71.302 | KV453290.1 | 9504367 | 26-scf00232 | 26 |
| AX-158410226 | 10 | 71.302 | KV453290.1 | 9504881 | 26-scf00232 | 26 |
| AX-158097493 | 10 | 71.302 | KV453290.1 | 9508177 | 26-scf00232 | 26 |
| AX-158097494 | 10 | 71.302 | KV453290.1 | 9508588 | 26-scf00232 | 26 |
| AX-158097496 | 10 | 71.302 | KV453290.1 | 9510112 | 26-scf00232 | 26 |
| AX-157702795 | 10 | 71.302 | KV453290.1 | 9512573 | 26-scf00232 | 26 |
| AX-157826222 | 10 | 71.466 | KV453290.1 | 9513887 | 26-scf00232 | 26 |
| AX-158097498 | 10 | 71.524 | KV453290.1 | 9514740 | 26-scf00232 | 26 |
| AX-157771823 | 10 | 71.524 | KV453290.1 | 9521467 | 26-scf00232 | 26 |
| AX-158097544 | 10 | 71.524 | KV453290.1 | 9589419 | 26-scf00232 | 26 |
| AX-157750301 | 10 | 71.63  | KV453290.1 | 9525376 | 26-scf00232 | 26 |
| AX-157716442 | 10 | 71.632 | KV453290.1 | 9530616 | 26-scf00232 | 26 |
| AX-158380006 | 10 | 71.713 | KV453290.1 | 9250457 | 26-scf00232 | 26 |
| AX-158097509 | 10 | 71.713 | KV453290.1 | 9542665 | 26-scf00232 | 26 |
| AX-158097506 | 10 | 71.77  | KV453290.1 | 9538082 | 26-scf00232 | 26 |
| AX-158097508 | 10 | 71.77  | KV453290.1 | 9539500 | 26-scf00232 | 26 |
| AX-158097515 | 10 | 71.77  | KV453290.1 | 9551680 | 26-scf00232 | 26 |

|              |    |        |             |         |             |    |
|--------------|----|--------|-------------|---------|-------------|----|
| AX-158097516 | 10 | 71.77  | KV453290.1  | 9552604 | 26-scf00232 | 26 |
| AX-157826227 | 10 | 71.77  | KV453290.1  | 9555523 | 26-scf00232 | 26 |
| AX-158097522 | 10 | 71.77  | KV453290.1  | 9558147 | 26-scf00232 | 26 |
| AX-157750779 | 10 | 71.911 | KV453290.1  | 9566608 | 26-scf00232 | 26 |
| AX-158097532 | 10 | 71.911 | KV453290.1  | 9575170 | 26-scf00232 | 26 |
| AX-158097534 | 10 | 71.911 | KV453290.1  | 9577438 | 26-scf00232 | 26 |
| AX-157707493 | 10 | 71.911 | 3ML01034395 | 448     | scf10069_1  | UN |
| AX-158097535 | 10 | 71.913 | KV453290.1  | 9580212 | 26-scf00232 | 26 |
| AX-158097536 | 10 | 71.913 | KV453290.1  | 9580645 | 26-scf00232 | 26 |
| AX-158097538 | 10 | 72.119 | KV453290.1  | 9583490 | 26-scf00232 | 26 |
| AX-158097542 | 10 | 72.119 | KV453290.1  | 9585839 | 26-scf00232 | 26 |
| AX-158097545 | 10 | 72.348 | KV453290.1  | 9590128 | 26-scf00232 | 26 |
| AX-158097549 | 10 | 72.351 | KV453290.1  | 9595732 | 26-scf00232 | 26 |
| AX-158097553 | 10 | 72.504 | KV453290.1  | 9600494 | 26-scf00232 | 26 |
| AX-158097555 | 10 | 72.504 | KV453290.1  | 9601106 | 26-scf00232 | 26 |
| AX-157710007 | 10 | 72.504 | KV453290.1  | 9601358 | 26-scf00232 | 26 |
| AX-158097560 | 10 | 72.504 | KV453290.1  | 9605815 | 26-scf00232 | 26 |
| AX-158097578 | 10 | 72.504 | KV453290.1  | 9633357 | 26-scf00232 | 26 |
| AX-157719524 | 10 | 72.504 | KV453290.1  | 9669329 | 26-scf00232 | 26 |
| AX-157689857 | 10 | 72.504 | 3ML01033676 | 275     | scf09337_1  | UN |
| AX-157707492 | 10 | 72.504 | 3ML01034395 | 279     | scf10069_1  | UN |
| AX-158097438 | 10 | 72.505 | KV453290.1  | 9427870 | 26-scf00232 | 26 |
| AX-157740740 | 10 | 72.505 | KV453290.1  | 9610561 | 26-scf00232 | 26 |
| AX-158097562 | 10 | 72.505 | KV453290.1  | 9611838 | 26-scf00232 | 26 |
| AX-158097563 | 10 | 72.505 | KV453290.1  | 9612277 | 26-scf00232 | 26 |
| AX-158097564 | 10 | 72.505 | KV453290.1  | 9612583 | 26-scf00232 | 26 |
| AX-157722985 | 10 | 72.505 | KV453290.1  | 9619486 | 26-scf00232 | 26 |
| AX-158097573 | 10 | 72.505 | KV453290.1  | 9629690 | 26-scf00232 | 26 |
| AX-157826229 | 10 | 72.505 | KV453290.1  | 9636718 | 26-scf00232 | 26 |
| AX-158097580 | 10 | 72.505 | KV453290.1  | 9637038 | 26-scf00232 | 26 |
| AX-158097597 | 10 | 72.505 | KV453290.1  | 9657684 | 26-scf00232 | 26 |
| AX-158097575 | 10 | 72.585 | KV453290.1  | 9630425 | 26-scf00232 | 26 |
| AX-158097579 | 10 | 72.654 | KV453290.1  | 9636453 | 26-scf00232 | 26 |
| AX-157716852 | 10 | 72.723 | KV453290.1  | 9635585 | 26-scf00232 | 26 |
| AX-158097581 | 10 | 72.723 | KV453290.1  | 9637717 | 26-scf00232 | 26 |
| AX-158380011 | 10 | 72.723 | KV453290.1  | 9652556 | 26-scf00232 | 26 |
| AX-158097594 | 10 | 72.74  | KV453290.1  | 9655154 | 26-scf00232 | 26 |
| AX-158097596 | 10 | 72.774 | KV453290.1  | 9657462 | 26-scf00232 | 26 |
| AX-157826235 | 10 | 72.795 | KV453290.1  | 9658997 | 26-scf00232 | 26 |
| AX-157826240 | 10 | 72.832 | KV453290.1  | 9683109 | 26-scf00232 | 26 |
| AX-158097608 | 10 | 72.832 | KV453290.1  | 9685413 | 26-scf00232 | 26 |
| AX-158097610 | 10 | 73.051 | KV453290.1  | 9686685 | 26-scf00232 | 26 |
| AX-158097612 | 10 | 73.051 | KV453290.1  | 9687880 | 26-scf00232 | 26 |
| AX-157877473 | 10 | 73.051 | KV453290.1  | 9695973 | 26-scf00232 | 26 |
| AX-158097615 | 10 | 73.051 | KV453290.1  | 9696611 | 26-scf00232 | 26 |
| AX-158097614 | 10 | 73.102 | KV453290.1  | 9696189 | 26-scf00232 | 26 |
| AX-157740931 | 10 | 73.186 | KV453290.1  | 9697852 | 26-scf00232 | 26 |
| AX-158097617 | 10 | 73.269 | KV453290.1  | 9698830 | 26-scf00232 | 26 |
| AX-157749801 | 10 | 73.269 | KV453290.1  | 9700115 | 26-scf00232 | 26 |
| AX-158097619 | 10 | 73.269 | KV453290.1  | 9700615 | 26-scf00232 | 26 |
| AX-158097621 | 10 | 73.269 | KV453290.1  | 9703350 | 26-scf00232 | 26 |

|              |    |        |            |         |             |    |
|--------------|----|--------|------------|---------|-------------|----|
| AX-158097624 | 10 | 73.269 | KV453290.1 | 9706728 | 26-scf00232 | 26 |
| AX-158097625 | 10 | 73.269 | KV453290.1 | 9707397 | 26-scf00232 | 26 |
| AX-157726522 | 10 | 73.269 | KV453290.1 | 9708470 | 26-scf00232 | 26 |
| AX-158097627 | 10 | 73.269 | KV453290.1 | 9710029 | 26-scf00232 | 26 |
| AX-158097630 | 10 | 73.269 | KV453290.1 | 9711204 | 26-scf00232 | 26 |
| AX-157715580 | 10 | 73.269 | KV453290.1 | 9711875 | 26-scf00232 | 26 |
| AX-158097633 | 10 | 73.269 | KV453290.1 | 9714935 | 26-scf00232 | 26 |
| AX-157877474 | 10 | 73.269 | KV453290.1 | 9718218 | 26-scf00232 | 26 |
| AX-158097636 | 10 | 73.269 | KV453290.1 | 9718505 | 26-scf00232 | 26 |
| AX-158097637 | 10 | 73.269 | KV453290.1 | 9718920 | 26-scf00232 | 26 |
| AX-157722206 | 10 | 73.269 | KV453290.1 | 9730104 | 26-scf00232 | 26 |
| AX-158097640 | 10 | 73.269 | KV453290.1 | 9730922 | 26-scf00232 | 26 |
| AX-158097642 | 10 | 73.269 | KV453290.1 | 9732627 | 26-scf00232 | 26 |
| AX-158097648 | 10 | 73.269 | KV453290.1 | 9744261 | 26-scf00232 | 26 |
| AX-158097659 | 10 | 73.269 | KV453290.1 | 9758752 | 26-scf00232 | 26 |
| AX-158097671 | 10 | 73.269 | KV453290.1 | 9786184 | 26-scf00232 | 26 |
| AX-158097755 | 10 | 73.269 | KV453290.1 | 9947068 | 26-scf00232 | 26 |
| AX-158097780 | 10 | 73.269 | KV453292.1 | 10341   | 26-scf00233 | 26 |
| AX-158097649 | 10 | 73.27  | KV453290.1 | 9744719 | 26-scf00232 | 26 |
| AX-158097638 | 10 | 73.424 | KV453290.1 | 9726148 | 26-scf00232 | 26 |
| AX-158097653 | 10 | 73.424 | KV453290.1 | 9749160 | 26-scf00232 | 26 |
| AX-158097656 | 10 | 73.424 | KV453290.1 | 9753316 | 26-scf00232 | 26 |
| AX-158097661 | 10 | 73.424 | KV453290.1 | 9761699 | 26-scf00232 | 26 |
| AX-158097665 | 10 | 73.424 | KV453290.1 | 9781384 | 26-scf00232 | 26 |
| AX-157826241 | 10 | 73.424 | KV453290.1 | 9801356 | 26-scf00232 | 26 |
| AX-158097683 | 10 | 73.424 | KV453290.1 | 9811378 | 26-scf00232 | 26 |
| AX-158097705 | 10 | 73.424 | KV453290.1 | 9851206 | 26-scf00232 | 26 |
| AX-158097660 | 10 | 73.598 | KV453290.1 | 9759363 | 26-scf00232 | 26 |
| AX-158097662 | 10 | 73.813 | KV453290.1 | 9770388 | 26-scf00232 | 26 |
| AX-158097667 | 10 | 73.813 | KV453290.1 | 9784491 | 26-scf00232 | 26 |
| AX-157744379 | 10 | 73.818 | KV453290.1 | 9793326 | 26-scf00232 | 26 |
| AX-158097677 | 10 | 73.981 | KV453290.1 | 9799644 | 26-scf00232 | 26 |
| AX-158097678 | 10 | 73.981 | KV453290.1 | 9801690 | 26-scf00232 | 26 |
| AX-157826243 | 10 | 73.981 | KV453290.1 | 9830711 | 26-scf00232 | 26 |
| AX-158097684 | 10 | 74.143 | KV453290.1 | 9812356 | 26-scf00232 | 26 |
| AX-158097688 | 10 | 74.143 | KV453290.1 | 9816245 | 26-scf00232 | 26 |
| AX-158097693 | 10 | 74.143 | KV453290.1 | 9823848 | 26-scf00232 | 26 |
| AX-158097689 | 10 | 74.144 | KV453290.1 | 9816738 | 26-scf00232 | 26 |
| AX-157720320 | 10 | 74.144 | KV453290.1 | 9817987 | 26-scf00232 | 26 |
| AX-158097691 | 10 | 74.144 | KV453290.1 | 9819397 | 26-scf00232 | 26 |
| AX-158097695 | 10 | 74.144 | KV453290.1 | 9825078 | 26-scf00232 | 26 |
| AX-158097698 | 10 | 74.144 | KV453290.1 | 9832371 | 26-scf00232 | 26 |
| AX-158097700 | 10 | 74.144 | KV453290.1 | 9834261 | 26-scf00232 | 26 |
| AX-158097701 | 10 | 74.144 | KV453290.1 | 9837145 | 26-scf00232 | 26 |
| AX-157826246 | 10 | 74.144 | KV453290.1 | 9837340 | 26-scf00232 | 26 |
| AX-158097703 | 10 | 74.144 | KV453290.1 | 9847234 | 26-scf00232 | 26 |
| AX-157713044 | 10 | 74.144 | KV453290.1 | 9848520 | 26-scf00232 | 26 |
| AX-158097704 | 10 | 74.144 | KV453290.1 | 9848919 | 26-scf00232 | 26 |
| AX-157826248 | 10 | 74.144 | KV453290.1 | 9859103 | 26-scf00232 | 26 |
| AX-157826249 | 10 | 74.211 | KV453290.1 | 9859604 | 26-scf00232 | 26 |
| AX-158097709 | 10 | 74.253 | KV453290.1 | 9858463 | 26-scf00232 | 26 |

|              |    |        |             |         |             |    |
|--------------|----|--------|-------------|---------|-------------|----|
| AX-158097711 | 10 | 74.253 | KV453290.1  | 9861058 | 26-scf00232 | 26 |
| AX-158097712 | 10 | 74.253 | KV453290.1  | 9861717 | 26-scf00232 | 26 |
| AX-157826250 | 10 | 74.253 | KV453290.1  | 9865361 | 26-scf00232 | 26 |
| AX-158097713 | 10 | 74.298 | KV453290.1  | 9866328 | 26-scf00232 | 26 |
| AX-157885778 | 10 | 74.362 | KV453290.1  | 9867208 | 26-scf00232 | 26 |
| AX-158097714 | 10 | 74.362 | KV453290.1  | 9870379 | 26-scf00232 | 26 |
| AX-158097716 | 10 | 74.362 | KV453290.1  | 9873276 | 26-scf00232 | 26 |
| AX-158097724 | 10 | 74.404 | KV453290.1  | 9896731 | 26-scf00232 | 26 |
| AX-158097732 | 10 | 74.404 | KV453290.1  | 9914495 | 26-scf00232 | 26 |
| AX-158097718 | 10 | 74.471 | KV453290.1  | 9881343 | 26-scf00232 | 26 |
| AX-157770627 | 10 | 74.471 | KV453290.1  | 9883619 | 26-scf00232 | 26 |
| AX-158097722 | 10 | 74.471 | KV453290.1  | 9895447 | 26-scf00232 | 26 |
| AX-157754261 | 10 | 74.471 | KV453290.1  | 9898037 | 26-scf00232 | 26 |
| AX-157749975 | 10 | 74.471 | KV453290.1  | 9899284 | 26-scf00232 | 26 |
| AX-158097727 | 10 | 74.471 | KV453290.1  | 9901189 | 26-scf00232 | 26 |
| AX-158097729 | 10 | 74.471 | KV453290.1  | 9904061 | 26-scf00232 | 26 |
| AX-157772383 | 10 | 74.471 | KV453290.1  | 9904899 | 26-scf00232 | 26 |
| AX-158097730 | 10 | 74.471 | KV453290.1  | 9906317 | 26-scf00232 | 26 |
| AX-157826255 | 10 | 74.471 | KV453290.1  | 9907822 | 26-scf00232 | 26 |
| AX-158097731 | 10 | 74.471 | KV453290.1  | 9908780 | 26-scf00232 | 26 |
| AX-157826256 | 10 | 74.471 | KV453290.1  | 9910832 | 26-scf00232 | 26 |
| AX-158097733 | 10 | 74.471 | KV453290.1  | 9915849 | 26-scf00232 | 26 |
| AX-158097737 | 10 | 74.471 | KV453290.1  | 9925613 | 26-scf00232 | 26 |
| AX-158097739 | 10 | 74.471 | KV453290.1  | 9927143 | 26-scf00232 | 26 |
| AX-158097741 | 10 | 74.471 | KV453290.1  | 9929819 | 26-scf00232 | 26 |
| AX-158097747 | 10 | 74.471 | KV453290.1  | 9938372 | 26-scf00232 | 26 |
| AX-158097748 | 10 | 74.471 | KV453290.1  | 9938859 | 26-scf00232 | 26 |
| AX-158097749 | 10 | 74.471 | KV453290.1  | 9941164 | 26-scf00232 | 26 |
| AX-158097750 | 10 | 74.471 | KV453290.1  | 9941668 | 26-scf00232 | 26 |
| AX-158097751 | 10 | 74.471 | KV453290.1  | 9942137 | 26-scf00232 | 26 |
| AX-158097752 | 10 | 74.471 | KV453290.1  | 9942357 | 26-scf00232 | 26 |
| AX-158097756 | 10 | 74.547 | KV453290.1  | 9947632 | 26-scf00232 | 26 |
| AX-157717378 | 10 | 74.583 | KV453290.1  | 9909807 | 26-scf00232 | 26 |
| AX-158097759 | 10 | 74.583 | KV453290.1  | 9953765 | 26-scf00232 | 26 |
| AX-158097760 | 10 | 74.583 | KV453290.1  | 9955300 | 26-scf00232 | 26 |
| AX-158097763 | 10 | 74.583 | KV453290.1  | 9958646 | 26-scf00232 | 26 |
| AX-158097644 | 10 | 74.636 | KV453290.1  | 9733697 | 26-scf00232 | 26 |
| AX-158097761 | 10 | 74.636 | KV453290.1  | 9956305 | 26-scf00232 | 26 |
| AX-158097770 | 10 | 74.682 | KV453290.1  | 9964271 | 26-scf00232 | 26 |
| AX-158097771 | 10 | 74.682 | KV453290.1  | 9964954 | 26-scf00232 | 26 |
| AX-158097772 | 10 | 74.682 | KV453290.1  | 9966290 | 26-scf00232 | 26 |
| AX-158097774 | 10 | 74.682 | KV453290.1  | 9969525 | 26-scf00232 | 26 |
| AX-158097781 | 10 | 74.682 | KV453292.1  | 11191   | 26-scf00233 | 26 |
| AX-158097786 | 10 | 74.682 | KV453292.1  | 18482   | 26-scf00233 | 26 |
| AX-157857340 | 10 | 74.682 | KV453292.1  | 18938   | 26-scf00233 | 26 |
| AX-157681574 | 10 | 74.682 | 3ML01033580 | 132     | scf09237_1  | UN |
| AX-158410237 | 10 | 74.691 | KV453292.1  | 21050   | 26-scf00233 | 26 |
| AX-158097745 | 10 | 75.225 | KV453290.1  | 9932841 | 26-scf00232 | 26 |
| AX-157708140 | 10 | 75.225 | KV453292.1  | 36361   | 26-scf00233 | 26 |
| AX-158097798 | 10 | 75.229 | KV453292.1  | 42367   | 26-scf00233 | 26 |
| AX-157826261 | 10 | 75.236 | KV453290.1  | 9946214 | 26-scf00232 | 26 |

|              |    |        |             |         |             |    |
|--------------|----|--------|-------------|---------|-------------|----|
| AX-157770806 | 10 | 75.236 | KV453292.1  | 35506   | 26-scf00233 | 26 |
| AX-158097799 | 10 | 75.236 | KV453292.1  | 42860   | 26-scf00233 | 26 |
| AX-158097801 | 10 | 75.236 | KV453292.1  | 44485   | 26-scf00233 | 26 |
| AX-158097802 | 10 | 75.236 | KV453292.1  | 45080   | 26-scf00233 | 26 |
| AX-157826264 | 10 | 75.236 | KV453292.1  | 45459   | 26-scf00233 | 26 |
| AX-157758475 | 10 | 75.236 | KV453292.1  | 52479   | 26-scf00233 | 26 |
| AX-158097804 | 10 | 75.236 | KV453292.1  | 53584   | 26-scf00233 | 26 |
| AX-157857343 | 10 | 75.236 | KV453292.1  | 53913   | 26-scf00233 | 26 |
| AX-158097806 | 10 | 75.236 | KV453292.1  | 55010   | 26-scf00233 | 26 |
| AX-158097808 | 10 | 75.236 | KV453292.1  | 59235   | 26-scf00233 | 26 |
| AX-157756519 | 10 | 75.236 | KV453292.1  | 60171   | 26-scf00233 | 26 |
| AX-157753018 | 10 | 75.236 | KV453292.1  | 60958   | 26-scf00233 | 26 |
| AX-158097817 | 10 | 75.236 | KV453292.1  | 71547   | 26-scf00233 | 26 |
| AX-157752021 | 10 | 75.236 | KV453292.1  | 86531   | 26-scf00233 | 26 |
| AX-157826267 | 10 | 75.236 | KV453292.1  | 117016  | 26-scf00233 | 26 |
| AX-157706892 | 10 | 75.236 | 3ML01033113 | 132     | scf08749_1  | UN |
| AX-157774507 | 10 | 75.455 | KV453292.1  | 70188   | 26-scf00233 | 26 |
| AX-158097818 | 10 | 75.673 | KV453292.1  | 73587   | 26-scf00233 | 26 |
| AX-158097819 | 10 | 75.673 | KV453292.1  | 74334   | 26-scf00233 | 26 |
| AX-158097823 | 10 | 75.673 | KV453292.1  | 83053   | 26-scf00233 | 26 |
| AX-158097828 | 10 | 75.673 | KV453292.1  | 88134   | 26-scf00233 | 26 |
| AX-158097834 | 10 | 75.673 | KV453292.1  | 99675   | 26-scf00233 | 26 |
| AX-157748079 | 10 | 75.673 | KV453292.1  | 101097  | 26-scf00233 | 26 |
| AX-158097837 | 10 | 75.673 | KV453292.1  | 101386  | 26-scf00233 | 26 |
| AX-158097838 | 10 | 75.673 | KV453292.1  | 103115  | 26-scf00233 | 26 |
| AX-158097839 | 10 | 75.7   | KV453292.1  | 104905  | 26-scf00233 | 26 |
| AX-157857341 | 10 | 75.718 | KV453292.1  | 24522   | 26-scf00233 | 26 |
| AX-158097821 | 10 | 75.718 | KV453292.1  | 77693   | 26-scf00233 | 26 |
| AX-158097832 | 10 | 75.718 | KV453292.1  | 90425   | 26-scf00233 | 26 |
| AX-158097836 | 10 | 75.718 | KV453292.1  | 100989  | 26-scf00233 | 26 |
| AX-158097840 | 10 | 75.718 | KV453292.1  | 107623  | 26-scf00233 | 26 |
| AX-157690006 | 10 | 75.718 |             | 70      | scf20683    | UN |
| AX-158097843 | 10 | 75.729 | KV453292.1  | 122204  | 26-scf00233 | 26 |
| AX-158097962 | 10 | 75.729 | KV453292.1  | 347250  | 26-scf00233 | 26 |
| AX-158098182 | 10 | 75.729 | KV453292.1  | 743270  | 26-scf00233 | 26 |
| AX-158098224 | 10 | 75.729 | KV453292.1  | 793714  | 26-scf00233 | 26 |
| AX-158098266 | 10 | 75.729 | KV453292.1  | 845559  | 26-scf00233 | 26 |
| AX-157857350 | 10 | 75.729 | KV453292.1  | 861900  | 26-scf00233 | 26 |
| AX-158097844 | 10 | 75.743 | KV453292.1  | 123241  | 26-scf00233 | 26 |
| AX-158097835 | 10 | 75.757 | KV453292.1  | 100329  | 26-scf00233 | 26 |
| AX-158097845 | 10 | 75.757 | KV453292.1  | 124671  | 26-scf00233 | 26 |
| AX-157826269 | 10 | 75.757 | KV453292.1  | 136089  | 26-scf00233 | 26 |
| AX-158097902 | 10 | 75.757 | KV453292.1  | 224504  | 26-scf00233 | 26 |
| AX-158097904 | 10 | 75.757 | KV453292.1  | 229895  | 26-scf00233 | 26 |
| AX-157746485 | 10 | 75.765 | KV453292.1  | 124976  | 26-scf00233 | 26 |
| AX-157826271 | 10 | 75.765 | KV453292.1  | 136970  | 26-scf00233 | 26 |
| AX-157746555 | 10 | 75.765 | KV453292.1  | 203303  | 26-scf00233 | 26 |
| AX-157826268 | 10 | 75.782 | KV453292.1  | 133043  | 26-scf00233 | 26 |
| AX-157826270 | 10 | 75.782 | KV453292.1  | 136345  | 26-scf00233 | 26 |
| AX-158097735 | 10 | 76.001 | KV453290.1  | 9918179 | 26-scf00232 | 26 |
| AX-158097775 | 10 | 76.001 | KV453290.1  | 9970964 | 26-scf00232 | 26 |



|              |    |        |             |         |             |    |
|--------------|----|--------|-------------|---------|-------------|----|
| AX-158097778 | 10 | 76.001 | KV453292.1  | 2202    | 26-scf00233 | 26 |
| AX-158097783 | 10 | 76.001 | KV453292.1  | 14238   | 26-scf00233 | 26 |
| AX-158097813 | 10 | 76.001 | KV453292.1  | 64128   | 26-scf00233 | 26 |
| AX-158097853 | 10 | 76.001 | KV453292.1  | 142191  | 26-scf00233 | 26 |
| AX-158097855 | 10 | 76.329 | KV453292.1  | 148018  | 26-scf00233 | 26 |
| AX-157740285 | 10 | 76.329 | KV453292.1  | 149476  | 26-scf00233 | 26 |
| AX-158097858 | 10 | 76.329 | KV453292.1  | 150010  | 26-scf00233 | 26 |
| AX-158097859 | 10 | 76.329 | KV453292.1  | 150376  | 26-scf00233 | 26 |
| AX-158097860 | 10 | 76.329 | KV453292.1  | 151002  | 26-scf00233 | 26 |
| AX-158097861 | 10 | 76.329 | KV453292.1  | 151743  | 26-scf00233 | 26 |
| AX-157826273 | 10 | 76.438 | KV453292.1  | 154352  | 26-scf00233 | 26 |
| AX-158097864 | 10 | 76.438 | KV453292.1  | 155492  | 26-scf00233 | 26 |
| AX-158097867 | 10 | 76.438 | KV453292.1  | 159891  | 26-scf00233 | 26 |
| AX-158097872 | 10 | 76.438 | KV453292.1  | 162937  | 26-scf00233 | 26 |
| AX-157741190 | 10 | 76.442 | KV453292.1  | 162633  | 26-scf00233 | 26 |
| AX-157826274 | 10 | 76.451 | KV453292.1  | 165182  | 26-scf00233 | 26 |
| AX-158098248 | 10 | 76.451 | KV453292.1  | 822621  | 26-scf00233 | 26 |
| AX-158098356 | 10 | 76.451 | KV453292.1  | 1057459 | 26-scf00233 | 26 |
| AX-158098668 | 10 | 76.451 | KV453292.1  | 1401780 | 26-scf00233 | 26 |
| AX-158097873 | 10 | 76.458 | KV453292.1  | 170634  | 26-scf00233 | 26 |
| AX-158097874 | 10 | 76.47  | KV453292.1  | 172009  | 26-scf00233 | 26 |
| AX-157774332 | 10 | 76.484 | KV453292.1  | 178174  | 26-scf00233 | 26 |
| AX-157826276 | 10 | 76.499 | KV453292.1  | 178947  | 26-scf00233 | 26 |
| AX-157723569 | 10 | 76.514 | KV453292.1  | 179941  | 26-scf00233 | 26 |
| AX-158097879 | 10 | 76.53  | KV453292.1  | 180493  | 26-scf00233 | 26 |
| AX-158097865 | 10 | 76.548 | KV453292.1  | 157183  | 26-scf00233 | 26 |
| AX-158097880 | 10 | 76.548 | KV453292.1  | 184487  | 26-scf00233 | 26 |
| AX-158097883 | 10 | 76.548 | KV453292.1  | 187829  | 26-scf00233 | 26 |
| AX-158097889 | 10 | 76.548 | KV453292.1  | 199192  | 26-scf00233 | 26 |
| AX-158097890 | 10 | 76.548 | KV453292.1  | 201880  | 26-scf00233 | 26 |
| AX-158097891 | 10 | 76.548 | KV453292.1  | 202977  | 26-scf00233 | 26 |
| AX-158097892 | 10 | 76.548 | KV453292.1  | 204376  | 26-scf00233 | 26 |
| AX-158098203 | 10 | 76.548 | KV453292.1  | 768343  | 26-scf00233 | 26 |
| AX-158098399 | 10 | 76.548 | KV453292.1  | 1113334 | 26-scf00233 | 26 |
| AX-158098607 | 10 | 76.548 | KV453292.1  | 1556004 | 26-scf00233 | 26 |
| AX-157717946 | 10 | 76.548 | KV453292.1  | 1572587 | 26-scf00233 | 26 |
| AX-157745413 | 10 | 76.548 | KV453292.1  | 1639986 | 26-scf00233 | 26 |
| AX-158098509 | 10 | 76.548 | KV453292.1  | 1756606 | 26-scf00233 | 26 |
| AX-158098508 | 10 | 76.548 | KV453292.1  | 1757656 | 26-scf00233 | 26 |
| AX-158098498 | 10 | 76.548 | KV453292.1  | 1785071 | 26-scf00233 | 26 |
| AX-157826397 | 10 | 76.548 | KV453292.1  | 1787994 | 26-scf00233 | 26 |
| AX-158098497 | 10 | 76.548 | KV453292.1  | 1788476 | 26-scf00233 | 26 |
| AX-158098460 | 10 | 76.548 | KV453292.1  | 1853033 | 26-scf00233 | 26 |
| AX-157826378 | 10 | 76.548 | KV453292.1  | 1897235 | 26-scf00233 | 26 |
| AX-158098427 | 10 | 76.548 | KV453292.1  | 1928940 | 26-scf00233 | 26 |
| AX-157826466 | 10 | 76.548 | KV453295.1  | 11573   | 26-scf00236 | 26 |
| AX-157680930 | 10 | 76.548 | KV453291.1  | 16892   | 26-scf00702 | 26 |
| AX-157686573 | 10 | 76.548 | KV453291.1  | 36504   | 26-scf00702 | 26 |
| AX-157686575 | 10 | 76.548 | KV453291.1  | 41307   | 26-scf00702 | 26 |
| AX-157686583 | 10 | 76.548 | KV453291.1  | 46010   | 26-scf00702 | 26 |
| AX-157689115 | 10 | 76.548 | 3ML01028225 | 382     | scf03830_1  | UN |

|              |    |        |            |         |             |    |
|--------------|----|--------|------------|---------|-------------|----|
| AX-158097895 | 10 | 76.766 | KV453292.1 | 214253  | 26-scf00233 | 26 |
| AX-158097899 | 10 | 76.766 | KV453292.1 | 219855  | 26-scf00233 | 26 |
| AX-158098107 | 10 | 76.766 | KV453292.1 | 636455  | 26-scf00233 | 26 |
| AX-158097900 | 10 | 76.822 | KV453292.1 | 220321  | 26-scf00233 | 26 |
| AX-157740066 | 10 | 76.876 | KV453292.1 | 220961  | 26-scf00233 | 26 |
| AX-158097901 | 10 | 76.876 | KV453292.1 | 221707  | 26-scf00233 | 26 |
| AX-157826282 | 10 | 76.876 | KV453292.1 | 225001  | 26-scf00233 | 26 |
| AX-158097905 | 10 | 76.925 | KV453292.1 | 232287  | 26-scf00233 | 26 |
| AX-157826284 | 10 | 76.985 | KV453292.1 | 233293  | 26-scf00233 | 26 |
| AX-158097909 | 10 | 77.026 | KV453292.1 | 239210  | 26-scf00233 | 26 |
| AX-158097911 | 10 | 77.026 | KV453292.1 | 243747  | 26-scf00233 | 26 |
| AX-158097914 | 10 | 77.026 | KV453292.1 | 248396  | 26-scf00233 | 26 |
| AX-158097916 | 10 | 77.026 | KV453292.1 | 252659  | 26-scf00233 | 26 |
| AX-158097919 | 10 | 77.026 | KV453292.1 | 258094  | 26-scf00233 | 26 |
| AX-158097931 | 10 | 77.026 | KV453292.1 | 290053  | 26-scf00233 | 26 |
| AX-158097939 | 10 | 77.026 | KV453292.1 | 306322  | 26-scf00233 | 26 |
| AX-158097952 | 10 | 77.026 | KV453292.1 | 331727  | 26-scf00233 | 26 |
| AX-157757429 | 10 | 77.026 | KV453292.1 | 691343  | 26-scf00233 | 26 |
| AX-158098176 | 10 | 77.026 | KV453292.1 | 726414  | 26-scf00233 | 26 |
| AX-158098359 | 10 | 77.026 | KV453292.1 | 1063640 | 26-scf00233 | 26 |
| AX-158098673 | 10 | 77.026 | KV453292.1 | 1396091 | 26-scf00233 | 26 |
| AX-157789324 | 10 | 77.061 | KV453292.1 | 256574  | 26-scf00233 | 26 |
| AX-157826291 | 10 | 77.094 | KV453292.1 | 265015  | 26-scf00233 | 26 |
| AX-157727040 | 10 | 77.094 | KV453292.1 | 293583  | 26-scf00233 | 26 |
| AX-157826288 | 10 | 77.203 | KV453292.1 | 259225  | 26-scf00233 | 26 |
| AX-158097923 | 10 | 77.203 | KV453292.1 | 273213  | 26-scf00233 | 26 |
| AX-158097925 | 10 | 77.203 | KV453292.1 | 274891  | 26-scf00233 | 26 |
| AX-158097927 | 10 | 77.203 | KV453292.1 | 279031  | 26-scf00233 | 26 |
| AX-157758699 | 10 | 77.203 | KV453292.1 | 280834  | 26-scf00233 | 26 |
| AX-157826293 | 10 | 77.203 | KV453292.1 | 282325  | 26-scf00233 | 26 |
| AX-157713052 | 10 | 77.203 | KV453292.1 | 282766  | 26-scf00233 | 26 |
| AX-157721478 | 10 | 77.203 | KV453292.1 | 284007  | 26-scf00233 | 26 |
| AX-158097932 | 10 | 77.203 | KV453292.1 | 290461  | 26-scf00233 | 26 |
| AX-157826294 | 10 | 77.203 | KV453292.1 | 291092  | 26-scf00233 | 26 |
| AX-158410241 | 10 | 77.203 | KV453292.1 | 295761  | 26-scf00233 | 26 |
| AX-158416889 | 10 | 77.203 | KV453292.1 | 295922  | 26-scf00233 | 26 |
| AX-157722984 | 10 | 77.203 | KV453292.1 | 299291  | 26-scf00233 | 26 |
| AX-158097935 | 10 | 77.203 | KV453292.1 | 303189  | 26-scf00233 | 26 |
| AX-158097937 | 10 | 77.203 | KV453292.1 | 304391  | 26-scf00233 | 26 |
| AX-158097938 | 10 | 77.203 | KV453292.1 | 304930  | 26-scf00233 | 26 |
| AX-157826296 | 10 | 77.203 | KV453292.1 | 307253  | 26-scf00233 | 26 |
| AX-158097945 | 10 | 77.203 | KV453292.1 | 317925  | 26-scf00233 | 26 |
| AX-157826298 | 10 | 77.203 | KV453292.1 | 319382  | 26-scf00233 | 26 |
| AX-158097946 | 10 | 77.203 | KV453292.1 | 323659  | 26-scf00233 | 26 |
| AX-158097947 | 10 | 77.203 | KV453292.1 | 325819  | 26-scf00233 | 26 |
| AX-158097949 | 10 | 77.203 | KV453292.1 | 327145  | 26-scf00233 | 26 |
| AX-158097951 | 10 | 77.203 | KV453292.1 | 330191  | 26-scf00233 | 26 |
| AX-157826299 | 10 | 77.203 | KV453292.1 | 333649  | 26-scf00233 | 26 |
| AX-157826301 | 10 | 77.203 | KV453292.1 | 337283  | 26-scf00233 | 26 |
| AX-157826302 | 10 | 77.203 | KV453292.1 | 338331  | 26-scf00233 | 26 |
| AX-157826303 | 10 | 77.203 | KV453292.1 | 338759  | 26-scf00233 | 26 |

|              |    |        |            |        |             |    |
|--------------|----|--------|------------|--------|-------------|----|
| AX-158097955 | 10 | 77.203 | KV453292.1 | 339931 | 26-scf00233 | 26 |
| AX-158097958 | 10 | 77.203 | KV453292.1 | 342993 | 26-scf00233 | 26 |
| AX-158097959 | 10 | 77.203 | KV453292.1 | 344405 | 26-scf00233 | 26 |
| AX-158097960 | 10 | 77.203 | KV453292.1 | 344726 | 26-scf00233 | 26 |
| AX-158097961 | 10 | 77.203 | KV453292.1 | 345995 | 26-scf00233 | 26 |
| AX-157826306 | 10 | 77.203 | KV453292.1 | 347078 | 26-scf00233 | 26 |
| AX-157826307 | 10 | 77.203 | KV453292.1 | 347294 | 26-scf00233 | 26 |
| AX-158097963 | 10 | 77.203 | KV453292.1 | 347416 | 26-scf00233 | 26 |
| AX-158097964 | 10 | 77.203 | KV453292.1 | 348724 | 26-scf00233 | 26 |
| AX-158097966 | 10 | 77.203 | KV453292.1 | 349683 | 26-scf00233 | 26 |
| AX-157826308 | 10 | 77.203 | KV453292.1 | 351939 | 26-scf00233 | 26 |
| AX-158097970 | 10 | 77.203 | KV453292.1 | 354214 | 26-scf00233 | 26 |
| AX-158097972 | 10 | 77.203 | KV453292.1 | 356388 | 26-scf00233 | 26 |
| AX-157718019 | 10 | 77.203 | KV453292.1 | 359788 | 26-scf00233 | 26 |
| AX-157714836 | 10 | 77.203 | KV453292.1 | 362692 | 26-scf00233 | 26 |
| AX-158097976 | 10 | 77.203 | KV453292.1 | 363351 | 26-scf00233 | 26 |
| AX-158097978 | 10 | 77.203 | KV453292.1 | 364692 | 26-scf00233 | 26 |
| AX-157715194 | 10 | 77.203 | KV453292.1 | 373160 | 26-scf00233 | 26 |
| AX-158097985 | 10 | 77.203 | KV453292.1 | 375885 | 26-scf00233 | 26 |
| AX-158097990 | 10 | 77.203 | KV453292.1 | 385112 | 26-scf00233 | 26 |
| AX-158097991 | 10 | 77.203 | KV453292.1 | 385357 | 26-scf00233 | 26 |
| AX-158097992 | 10 | 77.203 | KV453292.1 | 386516 | 26-scf00233 | 26 |
| AX-158097993 | 10 | 77.203 | KV453292.1 | 389749 | 26-scf00233 | 26 |
| AX-157857346 | 10 | 77.203 | KV453292.1 | 395745 | 26-scf00233 | 26 |
| AX-158097995 | 10 | 77.203 | KV453292.1 | 398766 | 26-scf00233 | 26 |
| AX-157826313 | 10 | 77.203 | KV453292.1 | 400303 | 26-scf00233 | 26 |
| AX-158097998 | 10 | 77.203 | KV453292.1 | 402091 | 26-scf00233 | 26 |
| AX-158097999 | 10 | 77.203 | KV453292.1 | 402876 | 26-scf00233 | 26 |
| AX-158098003 | 10 | 77.203 | KV453292.1 | 412547 | 26-scf00233 | 26 |
| AX-157826315 | 10 | 77.203 | KV453292.1 | 420561 | 26-scf00233 | 26 |
| AX-158098005 | 10 | 77.203 | KV453292.1 | 421006 | 26-scf00233 | 26 |
| AX-158407348 | 10 | 77.203 | KV453292.1 | 429348 | 26-scf00233 | 26 |
| AX-158098014 | 10 | 77.203 | KV453292.1 | 429935 | 26-scf00233 | 26 |
| AX-157727499 | 10 | 77.203 | KV453292.1 | 432648 | 26-scf00233 | 26 |
| AX-157826316 | 10 | 77.203 | KV453292.1 | 440655 | 26-scf00233 | 26 |
| AX-158098020 | 10 | 77.203 | KV453292.1 | 440885 | 26-scf00233 | 26 |
| AX-158416891 | 10 | 77.203 | KV453292.1 | 443794 | 26-scf00233 | 26 |
| AX-158098031 | 10 | 77.203 | KV453292.1 | 462628 | 26-scf00233 | 26 |
| AX-158098037 | 10 | 77.203 | KV453292.1 | 476702 | 26-scf00233 | 26 |
| AX-158098039 | 10 | 77.203 | KV453292.1 | 478354 | 26-scf00233 | 26 |
| AX-158098045 | 10 | 77.203 | KV453292.1 | 503235 | 26-scf00233 | 26 |
| AX-158098052 | 10 | 77.203 | KV453292.1 | 515992 | 26-scf00233 | 26 |
| AX-157713010 | 10 | 77.203 | KV453292.1 | 518454 | 26-scf00233 | 26 |
| AX-158098054 | 10 | 77.203 | KV453292.1 | 522173 | 26-scf00233 | 26 |
| AX-157746193 | 10 | 77.203 | KV453292.1 | 522313 | 26-scf00233 | 26 |
| AX-158098055 | 10 | 77.203 | KV453292.1 | 525402 | 26-scf00233 | 26 |
| AX-158098056 | 10 | 77.203 | KV453292.1 | 525649 | 26-scf00233 | 26 |
| AX-157744029 | 10 | 77.203 | KV453292.1 | 525754 | 26-scf00233 | 26 |
| AX-158098060 | 10 | 77.203 | KV453292.1 | 528418 | 26-scf00233 | 26 |
| AX-158098069 | 10 | 77.203 | KV453292.1 | 554366 | 26-scf00233 | 26 |
| AX-158098075 | 10 | 77.203 | KV453292.1 | 565396 | 26-scf00233 | 26 |

|              |    |        |            |         |             |    |
|--------------|----|--------|------------|---------|-------------|----|
| AX-158098078 | 10 | 77.203 | KV453292.1 | 569152  | 26-scf00233 | 26 |
| AX-158098082 | 10 | 77.203 | KV453292.1 | 571811  | 26-scf00233 | 26 |
| AX-158098083 | 10 | 77.203 | KV453292.1 | 572757  | 26-scf00233 | 26 |
| AX-158098084 | 10 | 77.203 | KV453292.1 | 573076  | 26-scf00233 | 26 |
| AX-158098093 | 10 | 77.203 | KV453292.1 | 588526  | 26-scf00233 | 26 |
| AX-158098094 | 10 | 77.203 | KV453292.1 | 590424  | 26-scf00233 | 26 |
| AX-158384671 | 10 | 77.203 | KV453292.1 | 590851  | 26-scf00233 | 26 |
| AX-158098095 | 10 | 77.203 | KV453292.1 | 593082  | 26-scf00233 | 26 |
| AX-158098096 | 10 | 77.203 | KV453292.1 | 594794  | 26-scf00233 | 26 |
| AX-158098100 | 10 | 77.203 | KV453292.1 | 610653  | 26-scf00233 | 26 |
| AX-158098101 | 10 | 77.203 | KV453292.1 | 614679  | 26-scf00233 | 26 |
| AX-158098103 | 10 | 77.203 | KV453292.1 | 619216  | 26-scf00233 | 26 |
| AX-157773807 | 10 | 77.203 | KV453292.1 | 625206  | 26-scf00233 | 26 |
| AX-157740657 | 10 | 77.203 | KV453292.1 | 645024  | 26-scf00233 | 26 |
| AX-158098118 | 10 | 77.203 | KV453292.1 | 656903  | 26-scf00233 | 26 |
| AX-158098126 | 10 | 77.203 | KV453292.1 | 667464  | 26-scf00233 | 26 |
| AX-158098127 | 10 | 77.203 | KV453292.1 | 667722  | 26-scf00233 | 26 |
| AX-158098130 | 10 | 77.203 | KV453292.1 | 670252  | 26-scf00233 | 26 |
| AX-158098137 | 10 | 77.203 | KV453292.1 | 676831  | 26-scf00233 | 26 |
| AX-158098138 | 10 | 77.203 | KV453292.1 | 677472  | 26-scf00233 | 26 |
| AX-158098141 | 10 | 77.203 | KV453292.1 | 680720  | 26-scf00233 | 26 |
| AX-158098143 | 10 | 77.203 | KV453292.1 | 681833  | 26-scf00233 | 26 |
| AX-157826328 | 10 | 77.203 | KV453292.1 | 682742  | 26-scf00233 | 26 |
| AX-158098148 | 10 | 77.203 | KV453292.1 | 686403  | 26-scf00233 | 26 |
| AX-157826335 | 10 | 77.203 | KV453292.1 | 713084  | 26-scf00233 | 26 |
| AX-158098173 | 10 | 77.203 | KV453292.1 | 721722  | 26-scf00233 | 26 |
| AX-157775808 | 10 | 77.203 | KV453292.1 | 735453  | 26-scf00233 | 26 |
| AX-158098179 | 10 | 77.203 | KV453292.1 | 736842  | 26-scf00233 | 26 |
| AX-158098191 | 10 | 77.203 | KV453292.1 | 754450  | 26-scf00233 | 26 |
| AX-158098192 | 10 | 77.203 | KV453292.1 | 755302  | 26-scf00233 | 26 |
| AX-157826339 | 10 | 77.203 | KV453292.1 | 762734  | 26-scf00233 | 26 |
| AX-158098226 | 10 | 77.203 | KV453292.1 | 799117  | 26-scf00233 | 26 |
| AX-158098227 | 10 | 77.203 | KV453292.1 | 799886  | 26-scf00233 | 26 |
| AX-157709051 | 10 | 77.203 | KV453292.1 | 821999  | 26-scf00233 | 26 |
| AX-158098252 | 10 | 77.203 | KV453292.1 | 834171  | 26-scf00233 | 26 |
| AX-158098255 | 10 | 77.203 | KV453292.1 | 837615  | 26-scf00233 | 26 |
| AX-158098256 | 10 | 77.203 | KV453292.1 | 837827  | 26-scf00233 | 26 |
| AX-158098257 | 10 | 77.203 | KV453292.1 | 838279  | 26-scf00233 | 26 |
| AX-158098268 | 10 | 77.203 | KV453292.1 | 848248  | 26-scf00233 | 26 |
| AX-158098277 | 10 | 77.203 | KV453292.1 | 864684  | 26-scf00233 | 26 |
| AX-158098410 | 10 | 77.203 | KV453292.1 | 1138652 | 26-scf00233 | 26 |
| AX-158098760 | 10 | 77.203 | KV453292.1 | 1235822 | 26-scf00233 | 26 |
| AX-157719646 | 10 | 77.203 | KV453292.1 | 1479190 | 26-scf00233 | 26 |
| AX-157826421 | 10 | 77.203 | KV453292.1 | 1516124 | 26-scf00233 | 26 |
| AX-157826385 | 10 | 77.203 | KV453292.1 | 1874354 | 26-scf00233 | 26 |
| AX-158098852 | 10 | 77.203 | KV453295.1 | 111761  | 26-scf00236 | 26 |
| AX-157686512 | 10 | 77.203 | KV453294.1 | 24712   | 26-scf00697 | 26 |
| AX-157680921 | 10 | 77.203 | KV453294.1 | 31160   | 26-scf00697 | 26 |
| AX-158098063 | 10 | 77.3   | KV453292.1 | 534222  | 26-scf00233 | 26 |
| AX-158098064 | 10 | 77.3   | KV453292.1 | 538751  | 26-scf00233 | 26 |
| AX-157826325 | 10 | 77.3   | KV453292.1 | 539680  | 26-scf00233 | 26 |

|              |    |        |             |         |             |    |
|--------------|----|--------|-------------|---------|-------------|----|
| AX-157683355 | 10 | 77.3   | KV453296.1  | 10334   | 26-scf00238 | 26 |
| AX-158098070 | 10 | 77.422 | KV453292.1  | 556348  | 26-scf00233 | 26 |
| AX-158098071 | 10 | 77.422 | KV453292.1  | 557053  | 26-scf00233 | 26 |
| AX-158098072 | 10 | 77.422 | KV453292.1  | 557771  | 26-scf00233 | 26 |
| AX-158098074 | 10 | 77.422 | KV453292.1  | 564601  | 26-scf00233 | 26 |
| AX-158098076 | 10 | 77.422 | KV453292.1  | 567066  | 26-scf00233 | 26 |
| AX-158098098 | 10 | 77.422 | KV453292.1  | 602312  | 26-scf00233 | 26 |
| AX-158098106 | 10 | 77.422 | KV453292.1  | 632635  | 26-scf00233 | 26 |
| AX-157713465 | 10 | 77.422 | KV453292.1  | 641468  | 26-scf00233 | 26 |
| AX-158098109 | 10 | 77.422 | KV453292.1  | 643209  | 26-scf00233 | 26 |
| AX-158098110 | 10 | 77.422 | KV453292.1  | 646230  | 26-scf00233 | 26 |
| AX-158098117 | 10 | 77.422 | KV453292.1  | 655272  | 26-scf00233 | 26 |
| AX-158098678 | 10 | 77.422 | KV453292.1  | 1390394 | 26-scf00233 | 26 |
| AX-157686507 | 10 | 77.422 | KV453294.1  | 4570    | 26-scf00697 | 26 |
| AX-157705085 | 10 | 77.422 | 3ML01028555 | 871     | scf04165_1  | UN |
| AX-158098119 | 10 | 77.496 | KV453292.1  | 659419  | 26-scf00233 | 26 |
| AX-158098000 | 10 | 77.531 | KV453292.1  | 407225  | 26-scf00233 | 26 |
| AX-158098001 | 10 | 77.531 | KV453292.1  | 407602  | 26-scf00233 | 26 |
| AX-158098011 | 10 | 77.531 | KV453292.1  | 426950  | 26-scf00233 | 26 |
| AX-158098012 | 10 | 77.531 | KV453292.1  | 427523  | 26-scf00233 | 26 |
| AX-158098120 | 10 | 77.531 | KV453292.1  | 660572  | 26-scf00233 | 26 |
| AX-158098121 | 10 | 77.531 | KV453292.1  | 662494  | 26-scf00233 | 26 |
| AX-157750546 | 10 | 77.531 | KV453292.1  | 662549  | 26-scf00233 | 26 |
| AX-158098122 | 10 | 77.531 | KV453292.1  | 663026  | 26-scf00233 | 26 |
| AX-158098125 | 10 | 77.531 | KV453292.1  | 665664  | 26-scf00233 | 26 |
| AX-158098128 | 10 | 77.531 | KV453292.1  | 669276  | 26-scf00233 | 26 |
| AX-158098131 | 10 | 77.531 | KV453292.1  | 671819  | 26-scf00233 | 26 |
| AX-157826332 | 10 | 77.531 | KV453292.1  | 696007  | 26-scf00233 | 26 |
| AX-158098152 | 10 | 77.531 | KV453292.1  | 697233  | 26-scf00233 | 26 |
| AX-158098155 | 10 | 77.531 | KV453292.1  | 698789  | 26-scf00233 | 26 |
| AX-158098156 | 10 | 77.531 | KV453292.1  | 699654  | 26-scf00233 | 26 |
| AX-158098158 | 10 | 77.531 | KV453292.1  | 702584  | 26-scf00233 | 26 |
| AX-158098159 | 10 | 77.531 | KV453292.1  | 703552  | 26-scf00233 | 26 |
| AX-158098161 | 10 | 77.531 | KV453292.1  | 704282  | 26-scf00233 | 26 |
| AX-157742524 | 10 | 77.531 | KV453292.1  | 711778  | 26-scf00233 | 26 |
| AX-157826338 | 10 | 77.531 | KV453292.1  | 730704  | 26-scf00233 | 26 |
| AX-158098178 | 10 | 77.531 | KV453292.1  | 734961  | 26-scf00233 | 26 |
| AX-158098180 | 10 | 77.531 | KV453292.1  | 739320  | 26-scf00233 | 26 |
| AX-158098184 | 10 | 77.531 | KV453292.1  | 744642  | 26-scf00233 | 26 |
| AX-157756312 | 10 | 77.531 | KV453292.1  | 747586  | 26-scf00233 | 26 |
| AX-158098185 | 10 | 77.531 | KV453292.1  | 748316  | 26-scf00233 | 26 |
| AX-158098193 | 10 | 77.531 | KV453292.1  | 755576  | 26-scf00233 | 26 |
| AX-158098194 | 10 | 77.531 | KV453292.1  | 755963  | 26-scf00233 | 26 |
| AX-158098195 | 10 | 77.531 | KV453292.1  | 756396  | 26-scf00233 | 26 |
| AX-158410257 | 10 | 77.531 | KV453292.1  | 761078  | 26-scf00233 | 26 |
| AX-157826340 | 10 | 77.531 | KV453292.1  | 765218  | 26-scf00233 | 26 |
| AX-157826341 | 10 | 77.531 | KV453292.1  | 765423  | 26-scf00233 | 26 |
| AX-157826342 | 10 | 77.531 | KV453292.1  | 766524  | 26-scf00233 | 26 |
| AX-158098201 | 10 | 77.531 | KV453292.1  | 767638  | 26-scf00233 | 26 |
| AX-157826343 | 10 | 77.531 | KV453292.1  | 768549  | 26-scf00233 | 26 |
| AX-157826345 | 10 | 77.531 | KV453292.1  | 773281  | 26-scf00233 | 26 |

|              |    |        |            |         |             |    |
|--------------|----|--------|------------|---------|-------------|----|
| AX-157753187 | 10 | 77.531 | KV453292.1 | 774863  | 26-scf00233 | 26 |
| AX-158098205 | 10 | 77.531 | KV453292.1 | 776033  | 26-scf00233 | 26 |
| AX-158098206 | 10 | 77.531 | KV453292.1 | 777085  | 26-scf00233 | 26 |
| AX-158098207 | 10 | 77.531 | KV453292.1 | 778044  | 26-scf00233 | 26 |
| AX-158098208 | 10 | 77.531 | KV453292.1 | 778385  | 26-scf00233 | 26 |
| AX-158098209 | 10 | 77.531 | KV453292.1 | 779203  | 26-scf00233 | 26 |
| AX-157750697 | 10 | 77.531 | KV453292.1 | 780948  | 26-scf00233 | 26 |
| AX-157756432 | 10 | 77.531 | KV453292.1 | 781603  | 26-scf00233 | 26 |
| AX-158098210 | 10 | 77.531 | KV453292.1 | 781661  | 26-scf00233 | 26 |
| AX-157738435 | 10 | 77.531 | KV453292.1 | 783100  | 26-scf00233 | 26 |
| AX-158098214 | 10 | 77.531 | KV453292.1 | 787296  | 26-scf00233 | 26 |
| AX-158098216 | 10 | 77.531 | KV453292.1 | 789773  | 26-scf00233 | 26 |
| AX-158098217 | 10 | 77.531 | KV453292.1 | 790247  | 26-scf00233 | 26 |
| AX-158098222 | 10 | 77.531 | KV453292.1 | 792567  | 26-scf00233 | 26 |
| AX-158098225 | 10 | 77.531 | KV453292.1 | 793924  | 26-scf00233 | 26 |
| AX-158098235 | 10 | 77.531 | KV453292.1 | 807642  | 26-scf00233 | 26 |
| AX-158098238 | 10 | 77.531 | KV453292.1 | 808762  | 26-scf00233 | 26 |
| AX-157826346 | 10 | 77.531 | KV453292.1 | 809275  | 26-scf00233 | 26 |
| AX-158098242 | 10 | 77.531 | KV453292.1 | 813836  | 26-scf00233 | 26 |
| AX-158098243 | 10 | 77.531 | KV453292.1 | 815479  | 26-scf00233 | 26 |
| AX-157759093 | 10 | 77.531 | KV453292.1 | 817458  | 26-scf00233 | 26 |
| AX-158098245 | 10 | 77.531 | KV453292.1 | 818445  | 26-scf00233 | 26 |
| AX-158098246 | 10 | 77.531 | KV453292.1 | 819333  | 26-scf00233 | 26 |
| AX-158098247 | 10 | 77.531 | KV453292.1 | 821012  | 26-scf00233 | 26 |
| AX-158098249 | 10 | 77.531 | KV453292.1 | 823874  | 26-scf00233 | 26 |
| AX-157719386 | 10 | 77.531 | KV453292.1 | 824423  | 26-scf00233 | 26 |
| AX-158098250 | 10 | 77.531 | KV453292.1 | 827481  | 26-scf00233 | 26 |
| AX-158098251 | 10 | 77.531 | KV453292.1 | 832166  | 26-scf00233 | 26 |
| AX-158098258 | 10 | 77.531 | KV453292.1 | 838565  | 26-scf00233 | 26 |
| AX-158098263 | 10 | 77.531 | KV453292.1 | 842340  | 26-scf00233 | 26 |
| AX-157740352 | 10 | 77.531 | KV453292.1 | 844323  | 26-scf00233 | 26 |
| AX-158098265 | 10 | 77.531 | KV453292.1 | 845089  | 26-scf00233 | 26 |
| AX-157826348 | 10 | 77.531 | KV453292.1 | 849187  | 26-scf00233 | 26 |
| AX-157717810 | 10 | 77.531 | KV453292.1 | 852272  | 26-scf00233 | 26 |
| AX-158098271 | 10 | 77.531 | KV453292.1 | 854173  | 26-scf00233 | 26 |
| AX-157714079 | 10 | 77.531 | KV453292.1 | 859233  | 26-scf00233 | 26 |
| AX-158098275 | 10 | 77.531 | KV453292.1 | 863779  | 26-scf00233 | 26 |
| AX-158098276 | 10 | 77.531 | KV453292.1 | 864398  | 26-scf00233 | 26 |
| AX-158098282 | 10 | 77.531 | KV453292.1 | 872927  | 26-scf00233 | 26 |
| AX-157885784 | 10 | 77.531 | KV453292.1 | 876333  | 26-scf00233 | 26 |
| AX-158098347 | 10 | 77.531 | KV453292.1 | 1021798 | 26-scf00233 | 26 |
| AX-157742246 | 10 | 77.531 | KV453292.1 | 1038641 | 26-scf00233 | 26 |
| AX-158098355 | 10 | 77.531 | KV453292.1 | 1056982 | 26-scf00233 | 26 |
| AX-157771942 | 10 | 77.531 | KV453292.1 | 1080686 | 26-scf00233 | 26 |
| AX-158098783 | 10 | 77.531 | KV453292.1 | 1197991 | 26-scf00233 | 26 |
| AX-158098768 | 10 | 77.531 | KV453292.1 | 1225591 | 26-scf00233 | 26 |
| AX-158098749 | 10 | 77.531 | KV453292.1 | 1261520 | 26-scf00233 | 26 |
| AX-158098717 | 10 | 77.531 | KV453292.1 | 1316493 | 26-scf00233 | 26 |
| AX-158098716 | 10 | 77.531 | KV453292.1 | 1319235 | 26-scf00233 | 26 |
| AX-158098715 | 10 | 77.531 | KV453292.1 | 1319406 | 26-scf00233 | 26 |
| AX-158098712 | 10 | 77.531 | KV453292.1 | 1328044 | 26-scf00233 | 26 |

|              |    |        |            |         |             |    |
|--------------|----|--------|------------|---------|-------------|----|
| AX-158098711 | 10 | 77.531 | KV453292.1 | 1333025 | 26-scf00233 | 26 |
| AX-157694515 | 10 | 77.531 | KV453292.1 | 1333661 | 26-scf00233 | 26 |
| AX-157716453 | 10 | 77.531 | KV453292.1 | 1341886 | 26-scf00233 | 26 |
| AX-158098702 | 10 | 77.531 | KV453292.1 | 1347328 | 26-scf00233 | 26 |
| AX-158098660 | 10 | 77.531 | KV453292.1 | 1418660 | 26-scf00233 | 26 |
| AX-158098638 | 10 | 77.531 | KV453292.1 | 1468858 | 26-scf00233 | 26 |
| AX-158098637 | 10 | 77.531 | KV453292.1 | 1469217 | 26-scf00233 | 26 |
| AX-157826431 | 10 | 77.531 | KV453292.1 | 1471898 | 26-scf00233 | 26 |
| AX-157857353 | 10 | 77.531 | KV453292.1 | 1521253 | 26-scf00233 | 26 |
| AX-158098601 | 10 | 77.531 | KV453292.1 | 1565778 | 26-scf00233 | 26 |
| AX-158098526 | 10 | 77.531 | KV453292.1 | 1727386 | 26-scf00233 | 26 |
| AX-157826386 | 10 | 77.531 | KV453292.1 | 1873585 | 26-scf00233 | 26 |
| AX-158098901 | 10 | 77.531 | KV453293.1 | 121229  | 26-scf00237 | 26 |
| AX-157686540 | 10 | 77.531 | KV453291.1 | 146     | 26-scf00702 | 26 |
| AX-157686560 | 10 | 77.531 | KV453291.1 | 25727   | 26-scf00702 | 26 |
| AX-157686571 | 10 | 77.531 | KV453291.1 | 33931   | 26-scf00702 | 26 |
| AX-157686578 | 10 | 77.531 | KV453291.1 | 42638   | 26-scf00702 | 26 |
| AX-157751937 | 10 | 77.585 | KV453292.1 | 866118  | 26-scf00233 | 26 |
| AX-158097975 | 10 | 77.64  | KV453292.1 | 360382  | 26-scf00233 | 26 |
| AX-158098279 | 10 | 77.64  | KV453292.1 | 870033  | 26-scf00233 | 26 |
| AX-158098280 | 10 | 77.64  | KV453292.1 | 870321  | 26-scf00233 | 26 |
| AX-157826351 | 10 | 77.64  | KV453292.1 | 871914  | 26-scf00233 | 26 |
| AX-158098285 | 10 | 77.64  | KV453292.1 | 874701  | 26-scf00233 | 26 |
| AX-158098286 | 10 | 77.64  | KV453292.1 | 875289  | 26-scf00233 | 26 |
| AX-157738940 | 10 | 77.64  | KV453292.1 | 895942  | 26-scf00233 | 26 |
| AX-157751875 | 10 | 77.64  | KV453292.1 | 899397  | 26-scf00233 | 26 |
| AX-158098301 | 10 | 77.64  | KV453292.1 | 920759  | 26-scf00233 | 26 |
| AX-158098307 | 10 | 77.64  | KV453292.1 | 943064  | 26-scf00233 | 26 |
| AX-158098312 | 10 | 77.64  | KV453292.1 | 949163  | 26-scf00233 | 26 |
| AX-157826356 | 10 | 77.64  | KV453292.1 | 950744  | 26-scf00233 | 26 |
| AX-158098315 | 10 | 77.64  | KV453292.1 | 951368  | 26-scf00233 | 26 |
| AX-158098325 | 10 | 77.64  | KV453292.1 | 963986  | 26-scf00233 | 26 |
| AX-158416895 | 10 | 77.64  | KV453292.1 | 982253  | 26-scf00233 | 26 |
| AX-158098334 | 10 | 77.64  | KV453292.1 | 982871  | 26-scf00233 | 26 |
| AX-157826362 | 10 | 77.64  | KV453292.1 | 984341  | 26-scf00233 | 26 |
| AX-158098335 | 10 | 77.64  | KV453292.1 | 984626  | 26-scf00233 | 26 |
| AX-158098361 | 10 | 77.64  | KV453292.1 | 1065027 | 26-scf00233 | 26 |
| AX-158098382 | 10 | 77.64  | KV453292.1 | 1086118 | 26-scf00233 | 26 |
| AX-158098421 | 10 | 77.64  | KV453292.1 | 1152663 | 26-scf00233 | 26 |
| AX-157744242 | 10 | 77.64  | KV453292.1 | 1174139 | 26-scf00233 | 26 |
| AX-157826461 | 10 | 77.64  | KV453292.1 | 1176311 | 26-scf00233 | 26 |
| AX-157826457 | 10 | 77.64  | KV453292.1 | 1201975 | 26-scf00233 | 26 |
| AX-158098701 | 10 | 77.64  | KV453292.1 | 1347954 | 26-scf00233 | 26 |
| AX-158098672 | 10 | 77.64  | KV453292.1 | 1396693 | 26-scf00233 | 26 |
| AX-157680496 | 10 | 77.64  | KV453294.1 | 249     | 26-scf00697 | 26 |
| AX-158097921 | 10 | 77.749 | KV453292.1 | 261250  | 26-scf00233 | 26 |
| AX-158098021 | 10 | 77.749 | KV453292.1 | 442985  | 26-scf00233 | 26 |
| AX-158098068 | 10 | 77.749 | KV453292.1 | 553811  | 26-scf00233 | 26 |
| AX-158098196 | 10 | 77.749 | KV453292.1 | 758089  | 26-scf00233 | 26 |
| AX-158098197 | 10 | 77.749 | KV453292.1 | 758390  | 26-scf00233 | 26 |
| AX-158098233 | 10 | 77.749 | KV453292.1 | 805674  | 26-scf00233 | 26 |

|              |    |        |            |         |             |    |
|--------------|----|--------|------------|---------|-------------|----|
| AX-158098259 | 10 | 77.749 | KV453292.1 | 839097  | 26-scf00233 | 26 |
| AX-158098314 | 10 | 77.749 | KV453292.1 | 950449  | 26-scf00233 | 26 |
| AX-158098338 | 10 | 77.749 | KV453292.1 | 991536  | 26-scf00233 | 26 |
| AX-158098354 | 10 | 77.749 | KV453292.1 | 1055554 | 26-scf00233 | 26 |
| AX-158098363 | 10 | 77.749 | KV453292.1 | 1066688 | 26-scf00233 | 26 |
| AX-158098364 | 10 | 77.749 | KV453292.1 | 1067799 | 26-scf00233 | 26 |
| AX-158098365 | 10 | 77.749 | KV453292.1 | 1071141 | 26-scf00233 | 26 |
| AX-158098368 | 10 | 77.749 | KV453292.1 | 1072502 | 26-scf00233 | 26 |
| AX-158098369 | 10 | 77.749 | KV453292.1 | 1072916 | 26-scf00233 | 26 |
| AX-158098371 | 10 | 77.749 | KV453292.1 | 1073845 | 26-scf00233 | 26 |
| AX-158098372 | 10 | 77.749 | KV453292.1 | 1074110 | 26-scf00233 | 26 |
| AX-157750802 | 10 | 77.749 | KV453292.1 | 1074693 | 26-scf00233 | 26 |
| AX-158098373 | 10 | 77.749 | KV453292.1 | 1075160 | 26-scf00233 | 26 |
| AX-158098375 | 10 | 77.749 | KV453292.1 | 1077556 | 26-scf00233 | 26 |
| AX-158098376 | 10 | 77.749 | KV453292.1 | 1078186 | 26-scf00233 | 26 |
| AX-158098377 | 10 | 77.749 | KV453292.1 | 1080278 | 26-scf00233 | 26 |
| AX-158098378 | 10 | 77.749 | KV453292.1 | 1080828 | 26-scf00233 | 26 |
| AX-158098383 | 10 | 77.749 | KV453292.1 | 1086844 | 26-scf00233 | 26 |
| AX-158098385 | 10 | 77.749 | KV453292.1 | 1089369 | 26-scf00233 | 26 |
| AX-157714082 | 10 | 77.749 | KV453292.1 | 1089787 | 26-scf00233 | 26 |
| AX-157826366 | 10 | 77.749 | KV453292.1 | 1092814 | 26-scf00233 | 26 |
| AX-158410263 | 10 | 77.749 | KV453292.1 | 1094170 | 26-scf00233 | 26 |
| AX-157826368 | 10 | 77.749 | KV453292.1 | 1098241 | 26-scf00233 | 26 |
| AX-158098394 | 10 | 77.749 | KV453292.1 | 1100858 | 26-scf00233 | 26 |
| AX-157747604 | 10 | 77.749 | KV453292.1 | 1105107 | 26-scf00233 | 26 |
| AX-158098762 | 10 | 77.749 | KV453292.1 | 1231434 | 26-scf00233 | 26 |
| AX-157826449 | 10 | 77.749 | KV453292.1 | 1242160 | 26-scf00233 | 26 |
| AX-157716296 | 10 | 77.749 | KV453292.1 | 1252911 | 26-scf00233 | 26 |
| AX-157746677 | 10 | 77.749 | KV453292.1 | 1280278 | 26-scf00233 | 26 |
| AX-158098726 | 10 | 77.749 | KV453292.1 | 1293629 | 26-scf00233 | 26 |
| AX-158098694 | 10 | 77.749 | KV453292.1 | 1356380 | 26-scf00233 | 26 |
| AX-157826439 | 10 | 77.749 | KV453292.1 | 1356995 | 26-scf00233 | 26 |
| AX-158098634 | 10 | 77.749 | KV453292.1 | 1471259 | 26-scf00233 | 26 |
| AX-158098551 | 10 | 77.749 | KV453292.1 | 1662651 | 26-scf00233 | 26 |
| AX-157748379 | 10 | 77.749 | KV453292.1 | 1903258 | 26-scf00233 | 26 |
| AX-157680385 | 10 | 77.749 | KV453294.1 | 3364    | 26-scf00697 | 26 |
| AX-157686513 | 10 | 77.749 | KV453294.1 | 25142   | 26-scf00697 | 26 |
| AX-157680097 | 10 | 77.749 | KV453294.1 | 31899   | 26-scf00697 | 26 |
| AX-157680924 | 10 | 77.749 | KV453294.1 | 36567   | 26-scf00697 | 26 |
| AX-157680480 | 10 | 77.749 | KV453294.1 | 38946   | 26-scf00697 | 26 |
| AX-157686523 | 10 | 77.749 | KV453294.1 | 47118   | 26-scf00697 | 26 |
| AX-158098398 | 10 | 77.802 | KV453292.1 | 1106113 | 26-scf00233 | 26 |
| AX-158097915 | 10 | 77.882 | KV453292.1 | 251609  | 26-scf00233 | 26 |
| AX-157747548 | 10 | 77.882 | KV453292.1 | 322633  | 26-scf00233 | 26 |
| AX-158098129 | 10 | 77.882 | KV453292.1 | 669761  | 26-scf00233 | 26 |
| AX-158407355 | 10 | 77.882 | KV453292.1 | 890132  | 26-scf00233 | 26 |
| AX-158098292 | 10 | 77.882 | KV453292.1 | 892460  | 26-scf00233 | 26 |
| AX-157826353 | 10 | 77.882 | KV453292.1 | 897828  | 26-scf00233 | 26 |
| AX-158098294 | 10 | 77.882 | KV453292.1 | 900002  | 26-scf00233 | 26 |
| AX-158098300 | 10 | 77.882 | KV453292.1 | 915766  | 26-scf00233 | 26 |
| AX-157723728 | 10 | 77.882 | KV453292.1 | 941033  | 26-scf00233 | 26 |



|              |    |        |            |         |             |    |
|--------------|----|--------|------------|---------|-------------|----|
| AX-157726041 | 10 | 77.882 | KV453292.1 | 975628  | 26-scf00233 | 26 |
| AX-158098366 | 10 | 77.882 | KV453292.1 | 1071798 | 26-scf00233 | 26 |
| AX-157727307 | 10 | 77.882 | KV453292.1 | 1106620 | 26-scf00233 | 26 |
| AX-158098675 | 10 | 77.882 | KV453292.1 | 1394217 | 26-scf00233 | 26 |
| AX-157826436 | 10 | 77.882 | KV453292.1 | 1410683 | 26-scf00233 | 26 |
| AX-158098663 | 10 | 77.882 | KV453292.1 | 1411527 | 26-scf00233 | 26 |
| AX-158098662 | 10 | 77.882 | KV453292.1 | 1412550 | 26-scf00233 | 26 |
| AX-158098656 | 10 | 77.882 | KV453292.1 | 1428239 | 26-scf00233 | 26 |
| AX-158098654 | 10 | 77.882 | KV453292.1 | 1429730 | 26-scf00233 | 26 |
| AX-157826430 | 10 | 77.882 | KV453292.1 | 1475054 | 26-scf00233 | 26 |
| AX-158098612 | 10 | 77.882 | KV453292.1 | 1539443 | 26-scf00233 | 26 |
| AX-158098483 | 10 | 77.882 | KV453292.1 | 1809911 | 26-scf00233 | 26 |
| AX-157826349 | 10 | 77.963 | KV453292.1 | 871231  | 26-scf00233 | 26 |
| AX-158098384 | 10 | 77.963 | KV453292.1 | 1088098 | 26-scf00233 | 26 |
| AX-158098420 | 10 | 77.963 | KV453292.1 | 1150342 | 26-scf00233 | 26 |
| AX-158098425 | 10 | 77.963 | KV453292.1 | 1159713 | 26-scf00233 | 26 |
| AX-157713785 | 10 | 77.963 | KV453292.1 | 1232326 | 26-scf00233 | 26 |
| AX-158098740 | 10 | 77.963 | KV453292.1 | 1275087 | 26-scf00233 | 26 |
| AX-157686506 | 10 | 77.963 | KV453294.1 | 391     | 26-scf00697 | 26 |
| AX-157698519 | 10 | 78.025 | KV453292.1 | 913939  | 26-scf00233 | 26 |
| AX-158098426 | 10 | 78.025 | KV453292.1 | 1159991 | 26-scf00233 | 26 |
| AX-158098475 | 10 | 78.025 | KV453292.1 | 1820085 | 26-scf00233 | 26 |
| AX-158098839 | 10 | 78.025 | KV453295.1 | 84873   | 26-scf00236 | 26 |
| AX-158098844 | 10 | 78.025 | KV453295.1 | 98471   | 26-scf00236 | 26 |
| AX-157686515 | 10 | 78.025 | KV453294.1 | 25657   | 26-scf00697 | 26 |
| AX-158098859 | 10 | 78.791 | KV453293.1 | 6154    | 26-scf00237 | 26 |
| AX-158097971 | 10 | 78.844 | KV453292.1 | 355238  | 26-scf00233 | 26 |
| AX-158098609 | 10 | 78.844 | KV453292.1 | 1544302 | 26-scf00233 | 26 |
| AX-158098598 | 10 | 78.844 | KV453292.1 | 1570218 | 26-scf00233 | 26 |
| AX-157826412 | 10 | 78.844 | KV453292.1 | 1573947 | 26-scf00233 | 26 |
| AX-158098587 | 10 | 78.844 | KV453292.1 | 1589482 | 26-scf00233 | 26 |
| AX-157870944 | 10 | 78.844 | KV453292.1 | 1591034 | 26-scf00233 | 26 |
| AX-158098584 | 10 | 78.844 | KV453292.1 | 1596410 | 26-scf00233 | 26 |
| AX-158098571 | 10 | 78.844 | KV453292.1 | 1612550 | 26-scf00233 | 26 |
| AX-158098559 | 10 | 78.844 | KV453292.1 | 1642586 | 26-scf00233 | 26 |
| AX-158098557 | 10 | 78.844 | KV453292.1 | 1642914 | 26-scf00233 | 26 |
| AX-158098556 | 10 | 78.844 | KV453292.1 | 1643651 | 26-scf00233 | 26 |
| AX-158098553 | 10 | 78.844 | KV453292.1 | 1655357 | 26-scf00233 | 26 |
| AX-158098549 | 10 | 78.844 | KV453292.1 | 1669608 | 26-scf00233 | 26 |
| AX-157826400 | 10 | 78.844 | KV453292.1 | 1682750 | 26-scf00233 | 26 |
| AX-158098539 | 10 | 78.844 | KV453292.1 | 1704684 | 26-scf00233 | 26 |
| AX-158098529 | 10 | 78.844 | KV453292.1 | 1721112 | 26-scf00233 | 26 |
| AX-158098523 | 10 | 78.844 | KV453292.1 | 1734801 | 26-scf00233 | 26 |
| AX-158098505 | 10 | 78.844 | KV453292.1 | 1764536 | 26-scf00233 | 26 |
| AX-157826398 | 10 | 78.844 | KV453292.1 | 1779930 | 26-scf00233 | 26 |
| AX-157865878 | 10 | 78.844 | KV453292.1 | 1786288 | 26-scf00233 | 26 |
| AX-157826396 | 10 | 78.844 | KV453292.1 | 1788948 | 26-scf00233 | 26 |
| AX-158098496 | 10 | 78.844 | KV453292.1 | 1789757 | 26-scf00233 | 26 |
| AX-158098495 | 10 | 78.844 | KV453292.1 | 1790758 | 26-scf00233 | 26 |
| AX-158098490 | 10 | 78.844 | KV453292.1 | 1796265 | 26-scf00233 | 26 |
| AX-158098489 | 10 | 78.844 | KV453292.1 | 1797358 | 26-scf00233 | 26 |

|              |    |        |            |         |             |    |
|--------------|----|--------|------------|---------|-------------|----|
| AX-158098478 | 10 | 78.844 | KV453292.1 | 1814953 | 26-scf00233 | 26 |
| AX-158098474 | 10 | 78.844 | KV453292.1 | 1820607 | 26-scf00233 | 26 |
| AX-157722553 | 10 | 78.844 | KV453292.1 | 1823725 | 26-scf00233 | 26 |
| AX-157753558 | 10 | 78.844 | KV453292.1 | 1826086 | 26-scf00233 | 26 |
| AX-158098468 | 10 | 78.844 | KV453292.1 | 1831943 | 26-scf00233 | 26 |
| AX-157720790 | 10 | 78.844 | KV453292.1 | 1832306 | 26-scf00233 | 26 |
| AX-157826394 | 10 | 78.844 | KV453292.1 | 1834006 | 26-scf00233 | 26 |
| AX-158098467 | 10 | 78.844 | KV453292.1 | 1835432 | 26-scf00233 | 26 |
| AX-157826391 | 10 | 78.844 | KV453292.1 | 1837412 | 26-scf00233 | 26 |
| AX-158098463 | 10 | 78.844 | KV453292.1 | 1840704 | 26-scf00233 | 26 |
| AX-158098462 | 10 | 78.844 | KV453292.1 | 1846028 | 26-scf00233 | 26 |
| AX-157826389 | 10 | 78.844 | KV453292.1 | 1847994 | 26-scf00233 | 26 |
| AX-158098459 | 10 | 78.844 | KV453292.1 | 1856015 | 26-scf00233 | 26 |
| AX-158098456 | 10 | 78.844 | KV453292.1 | 1863907 | 26-scf00233 | 26 |
| AX-158098454 | 10 | 78.844 | KV453292.1 | 1865746 | 26-scf00233 | 26 |
| AX-158098451 | 10 | 78.844 | KV453292.1 | 1867316 | 26-scf00233 | 26 |
| AX-158098447 | 10 | 78.844 | KV453292.1 | 1876543 | 26-scf00233 | 26 |
| AX-157826383 | 10 | 78.844 | KV453292.1 | 1882861 | 26-scf00233 | 26 |
| AX-157826381 | 10 | 78.844 | KV453292.1 | 1884749 | 26-scf00233 | 26 |
| AX-158098440 | 10 | 78.844 | KV453292.1 | 1886112 | 26-scf00233 | 26 |
| AX-158098437 | 10 | 78.844 | KV453292.1 | 1898006 | 26-scf00233 | 26 |
| AX-157826377 | 10 | 78.844 | KV453292.1 | 1900014 | 26-scf00233 | 26 |
| AX-158098434 | 10 | 78.844 | KV453292.1 | 1902960 | 26-scf00233 | 26 |
| AX-158098433 | 10 | 78.844 | KV453292.1 | 1904684 | 26-scf00233 | 26 |
| AX-158098430 | 10 | 78.844 | KV453292.1 | 1918937 | 26-scf00233 | 26 |
| AX-157826374 | 10 | 78.844 | KV453292.1 | 1932348 | 26-scf00233 | 26 |
| AX-158098804 | 10 | 78.844 | KV453295.1 | 6987    | 26-scf00236 | 26 |
| AX-158098812 | 10 | 78.844 | KV453295.1 | 28847   | 26-scf00236 | 26 |
| AX-157744137 | 10 | 78.844 | KV453295.1 | 29020   | 26-scf00236 | 26 |
| AX-158407365 | 10 | 78.844 | KV453295.1 | 43568   | 26-scf00236 | 26 |
| AX-158098815 | 10 | 78.844 | KV453295.1 | 46288   | 26-scf00236 | 26 |
| AX-158098835 | 10 | 78.844 | KV453295.1 | 79811   | 26-scf00236 | 26 |
| AX-157826472 | 10 | 78.844 | KV453295.1 | 80706   | 26-scf00236 | 26 |
| AX-158098841 | 10 | 78.844 | KV453295.1 | 87093   | 26-scf00236 | 26 |
| AX-158098860 | 10 | 78.844 | KV453293.1 | 7178    | 26-scf00237 | 26 |
| AX-158098862 | 10 | 78.844 | KV453293.1 | 7925    | 26-scf00237 | 26 |
| AX-157826476 | 10 | 78.844 | KV453293.1 | 15931   | 26-scf00237 | 26 |
| AX-157826477 | 10 | 78.844 | KV453293.1 | 17255   | 26-scf00237 | 26 |
| AX-158098866 | 10 | 78.844 | KV453293.1 | 17580   | 26-scf00237 | 26 |
| AX-157826478 | 10 | 78.844 | KV453293.1 | 36772   | 26-scf00237 | 26 |
| AX-158098877 | 10 | 78.844 | KV453293.1 | 56373   | 26-scf00237 | 26 |
| AX-158098882 | 10 | 78.844 | KV453293.1 | 81719   | 26-scf00237 | 26 |
| AX-158098885 | 10 | 78.844 | KV453293.1 | 92155   | 26-scf00237 | 26 |
| AX-158098887 | 10 | 78.844 | KV453293.1 | 93462   | 26-scf00237 | 26 |
| AX-158098892 | 10 | 78.844 | KV453293.1 | 111008  | 26-scf00237 | 26 |
| AX-158098893 | 10 | 78.844 | KV453293.1 | 113495  | 26-scf00237 | 26 |
| AX-157826480 | 10 | 78.844 | KV453293.1 | 117590  | 26-scf00237 | 26 |
| AX-158098900 | 10 | 78.844 | KV453293.1 | 121038  | 26-scf00237 | 26 |
| AX-158098902 | 10 | 78.844 | KV453293.1 | 121488  | 26-scf00237 | 26 |
| AX-157683354 | 10 | 78.844 | KV453296.1 | 2793    | 26-scf00238 | 26 |
| AX-157683357 | 10 | 78.844 | KV453296.1 | 24262   | 26-scf00238 | 26 |

|              |    |        |             |         |             |    |
|--------------|----|--------|-------------|---------|-------------|----|
| AX-157680653 | 10 | 78.844 | KV453296.1  | 27850   | 26-scf00238 | 26 |
| AX-157680278 | 10 | 78.844 | KV453296.1  | 37919   | 26-scf00238 | 26 |
| AX-157683362 | 10 | 78.844 | KV453296.1  | 42005   | 26-scf00238 | 26 |
| AX-157686541 | 10 | 78.844 | KV453291.1  | 708     | 26-scf00702 | 26 |
| AX-157686544 | 10 | 78.844 | KV453291.1  | 6447    | 26-scf00702 | 26 |
| AX-157686545 | 10 | 78.844 | KV453291.1  | 7939    | 26-scf00702 | 26 |
| AX-157680928 | 10 | 78.844 | KV453291.1  | 11428   | 26-scf00702 | 26 |
| AX-157686548 | 10 | 78.844 | KV453291.1  | 11932   | 26-scf00702 | 26 |
| AX-157686549 | 10 | 78.844 | KV453291.1  | 12306   | 26-scf00702 | 26 |
| AX-157686556 | 10 | 78.844 | KV453291.1  | 21716   | 26-scf00702 | 26 |
| AX-157708531 | 10 | 78.844 | KV453291.1  | 22599   | 26-scf00702 | 26 |
| AX-157686559 | 10 | 78.844 | KV453291.1  | 24222   | 26-scf00702 | 26 |
| AX-157686564 | 10 | 78.844 | KV453291.1  | 26453   | 26-scf00702 | 26 |
| AX-157686565 | 10 | 78.844 | KV453291.1  | 26946   | 26-scf00702 | 26 |
| AX-157686568 | 10 | 78.844 | KV453291.1  | 32236   | 26-scf00702 | 26 |
| AX-157680023 | 10 | 78.844 | KV453291.1  | 32935   | 26-scf00702 | 26 |
| AX-157686570 | 10 | 78.844 | KV453291.1  | 33414   | 26-scf00702 | 26 |
| AX-157686572 | 10 | 78.844 | KV453291.1  | 36072   | 26-scf00702 | 26 |
| AX-157689114 | 10 | 78.844 | 3ML01028225 | 264     | scf03830_1  | UN |
| AX-157709858 | 10 | 78.918 | KV453292.1  | 1783592 | 26-scf00233 | 26 |
| AX-157752413 | 10 | 78.918 | KV453295.1  | 62237   | 26-scf00236 | 26 |
| AX-158098033 | 10 | 79.063 | KV453292.1  | 463755  | 26-scf00233 | 26 |
| AX-158098043 | 10 | 79.063 | KV453292.1  | 497098  | 26-scf00233 | 26 |
| AX-158098046 | 10 | 79.063 | KV453292.1  | 503677  | 26-scf00233 | 26 |
| AX-158098288 | 10 | 79.063 | KV453292.1  | 879494  | 26-scf00233 | 26 |
| AX-158098308 | 10 | 79.063 | KV453292.1  | 945006  | 26-scf00233 | 26 |
| AX-158098732 | 10 | 79.063 | KV453292.1  | 1283688 | 26-scf00233 | 26 |
| AX-158098685 | 10 | 79.063 | KV453292.1  | 1372240 | 26-scf00233 | 26 |
| AX-157826429 | 10 | 79.063 | KV453292.1  | 1477750 | 26-scf00233 | 26 |
| AX-158098595 | 10 | 79.063 | KV453292.1  | 1575338 | 26-scf00233 | 26 |
| AX-158098594 | 10 | 79.063 | KV453292.1  | 1575758 | 26-scf00233 | 26 |
| AX-158098548 | 10 | 79.063 | KV453292.1  | 1678872 | 26-scf00233 | 26 |
| AX-158098542 | 10 | 79.063 | KV453292.1  | 1696568 | 26-scf00233 | 26 |
| AX-158098536 | 10 | 79.063 | KV453292.1  | 1708483 | 26-scf00233 | 26 |
| AX-158098532 | 10 | 79.063 | KV453292.1  | 1712637 | 26-scf00233 | 26 |
| AX-157826399 | 10 | 79.063 | KV453292.1  | 1722306 | 26-scf00233 | 26 |
| AX-158098522 | 10 | 79.063 | KV453292.1  | 1735312 | 26-scf00233 | 26 |
| AX-158098521 | 10 | 79.063 | KV453292.1  | 1737568 | 26-scf00233 | 26 |
| AX-158098520 | 10 | 79.063 | KV453292.1  | 1741580 | 26-scf00233 | 26 |
| AX-158098517 | 10 | 79.063 | KV453292.1  | 1744989 | 26-scf00233 | 26 |
| AX-158098516 | 10 | 79.063 | KV453292.1  | 1745891 | 26-scf00233 | 26 |
| AX-158098515 | 10 | 79.063 | KV453292.1  | 1746601 | 26-scf00233 | 26 |
| AX-157826384 | 10 | 79.063 | KV453292.1  | 1882262 | 26-scf00233 | 26 |
| AX-157826382 | 10 | 79.063 | KV453292.1  | 1883493 | 26-scf00233 | 26 |
| AX-158098441 | 10 | 79.063 | KV453292.1  | 1885706 | 26-scf00233 | 26 |
| AX-158098431 | 10 | 79.063 | KV453292.1  | 1917781 | 26-scf00233 | 26 |
| AX-157826470 | 10 | 79.063 | KV453295.1  | 67834   | 26-scf00236 | 26 |
| AX-158098863 | 10 | 79.063 | KV453293.1  | 8911    | 26-scf00237 | 26 |
| AX-158098873 | 10 | 79.063 | KV453293.1  | 37919   | 26-scf00237 | 26 |
| AX-158098888 | 10 | 79.063 | KV453293.1  | 95580   | 26-scf00237 | 26 |
| AX-158098891 | 10 | 79.063 | KV453293.1  | 110129  | 26-scf00237 | 26 |

|              |    |        |             |         |             |    |
|--------------|----|--------|-------------|---------|-------------|----|
| AX-158098895 | 10 | 79.063 | KV453293.1  | 114946  | 26-scf00237 | 26 |
| AX-158098896 | 10 | 79.063 | KV453293.1  | 117964  | 26-scf00237 | 26 |
| AX-158098899 | 10 | 79.063 | KV453293.1  | 120209  | 26-scf00237 | 26 |
| AX-158098903 | 10 | 79.063 | KV453293.1  | 121959  | 26-scf00237 | 26 |
| AX-157683360 | 10 | 79.063 | KV453296.1  | 40827   | 26-scf00238 | 26 |
| AX-157683363 | 10 | 79.063 | KV453296.1  | 43854   | 26-scf00238 | 26 |
| AX-157686539 | 10 | 79.063 | KV453291.1  | 97      | 26-scf00702 | 26 |
| AX-157686542 | 10 | 79.063 | KV453291.1  | 1317    | 26-scf00702 | 26 |
| AX-157680926 | 10 | 79.063 | KV453291.1  | 2194    | 26-scf00702 | 26 |
| AX-157686546 | 10 | 79.063 | KV453291.1  | 10826   | 26-scf00702 | 26 |
| AX-157686547 | 10 | 79.063 | KV453291.1  | 11510   | 26-scf00702 | 26 |
| AX-157686550 | 10 | 79.063 | KV453291.1  | 12514   | 26-scf00702 | 26 |
| AX-157686552 | 10 | 79.063 | KV453291.1  | 13126   | 26-scf00702 | 26 |
| AX-157680929 | 10 | 79.063 | KV453291.1  | 14924   | 26-scf00702 | 26 |
| AX-157686554 | 10 | 79.063 | KV453291.1  | 19456   | 26-scf00702 | 26 |
| AX-157686555 | 10 | 79.063 | KV453291.1  | 20443   | 26-scf00702 | 26 |
| AX-157686557 | 10 | 79.063 | KV453291.1  | 22394   | 26-scf00702 | 26 |
| AX-157686562 | 10 | 79.063 | KV453291.1  | 26161   | 26-scf00702 | 26 |
| AX-157686563 | 10 | 79.063 | KV453291.1  | 26388   | 26-scf00702 | 26 |
| AX-157686566 | 10 | 79.063 | KV453291.1  | 27016   | 26-scf00702 | 26 |
| AX-157686567 | 10 | 79.063 | KV453291.1  | 30779   | 26-scf00702 | 26 |
| AX-157686574 | 10 | 79.063 | KV453291.1  | 37224   | 26-scf00702 | 26 |
| AX-157686577 | 10 | 79.063 | KV453291.1  | 42349   | 26-scf00702 | 26 |
| AX-157686582 | 10 | 79.063 | KV453291.1  | 45779   | 26-scf00702 | 26 |
| AX-157707232 | 10 | 79.063 | 3ML01033776 | 304     | scf09442_1  | UN |
| AX-158098756 | 10 | 79.172 | KV453292.1  | 1253823 | 26-scf00233 | 26 |
| AX-157826420 | 10 | 79.172 | KV453292.1  | 1542984 | 26-scf00233 | 26 |
| AX-157826413 | 10 | 79.172 | KV453292.1  | 1568354 | 26-scf00233 | 26 |
| AX-158098593 | 10 | 79.172 | KV453292.1  | 1576849 | 26-scf00233 | 26 |
| AX-158098592 | 10 | 79.172 | KV453292.1  | 1577175 | 26-scf00233 | 26 |
| AX-158098591 | 10 | 79.172 | KV453292.1  | 1578993 | 26-scf00233 | 26 |
| AX-157826411 | 10 | 79.172 | KV453292.1  | 1579497 | 26-scf00233 | 26 |
| AX-158098590 | 10 | 79.172 | KV453292.1  | 1579727 | 26-scf00233 | 26 |
| AX-157713190 | 10 | 79.172 | KV453292.1  | 1595050 | 26-scf00233 | 26 |
| AX-157746180 | 10 | 79.172 | KV453292.1  | 1599780 | 26-scf00233 | 26 |
| AX-158098581 | 10 | 79.172 | KV453292.1  | 1600611 | 26-scf00233 | 26 |
| AX-158098577 | 10 | 79.172 | KV453292.1  | 1604122 | 26-scf00233 | 26 |
| AX-158098573 | 10 | 79.172 | KV453292.1  | 1608378 | 26-scf00233 | 26 |
| AX-158098569 | 10 | 79.172 | KV453292.1  | 1619623 | 26-scf00233 | 26 |
| AX-158098567 | 10 | 79.172 | KV453292.1  | 1620864 | 26-scf00233 | 26 |
| AX-158098564 | 10 | 79.172 | KV453292.1  | 1624106 | 26-scf00233 | 26 |
| AX-158098563 | 10 | 79.172 | KV453292.1  | 1626055 | 26-scf00233 | 26 |
| AX-158098558 | 10 | 79.172 | KV453292.1  | 1642661 | 26-scf00233 | 26 |
| AX-157750652 | 10 | 79.172 | KV453292.1  | 1653640 | 26-scf00233 | 26 |
| AX-157826403 | 10 | 79.172 | KV453292.1  | 1658049 | 26-scf00233 | 26 |
| AX-158098550 | 10 | 79.172 | KV453292.1  | 1667061 | 26-scf00233 | 26 |
| AX-158098443 | 10 | 79.172 | KV453292.1  | 1881863 | 26-scf00233 | 26 |
| AX-157826379 | 10 | 79.172 | KV453292.1  | 1890130 | 26-scf00233 | 26 |
| AX-157738440 | 10 | 79.172 | KV453295.1  | 913     | 26-scf00236 | 26 |
| AX-157774395 | 10 | 79.172 | KV453295.1  | 15686   | 26-scf00236 | 26 |
| AX-158098867 | 10 | 79.172 | KV453293.1  | 20026   | 26-scf00237 | 26 |

|              |    |        |            |         |             |    |
|--------------|----|--------|------------|---------|-------------|----|
| AX-158098874 | 10 | 79.172 | KV453293.1 | 44822   | 26-scf00237 | 26 |
| AX-158098876 | 10 | 79.172 | KV453293.1 | 51299   | 26-scf00237 | 26 |
| AX-158098608 | 10 | 79.284 | KV453292.1 | 1545935 | 26-scf00233 | 26 |
| AX-158097994 | 10 | 79.391 | KV453292.1 | 392593  | 26-scf00233 | 26 |
| AX-158098164 | 10 | 79.391 | KV453292.1 | 705938  | 26-scf00233 | 26 |
| AX-158098353 | 10 | 79.391 | KV453292.1 | 1055113 | 26-scf00233 | 26 |
| AX-158098747 | 10 | 79.391 | KV453292.1 | 1268566 | 26-scf00233 | 26 |
| AX-158098704 | 10 | 79.391 | KV453292.1 | 1344443 | 26-scf00233 | 26 |
| AX-158098691 | 10 | 79.391 | KV453292.1 | 1364988 | 26-scf00233 | 26 |
| AX-158098628 | 10 | 79.391 | KV453292.1 | 1501392 | 26-scf00233 | 26 |
| AX-157857354 | 10 | 79.391 | KV453292.1 | 1503545 | 26-scf00233 | 26 |
| AX-158098622 | 10 | 79.391 | KV453292.1 | 1522984 | 26-scf00233 | 26 |
| AX-158098620 | 10 | 79.391 | KV453292.1 | 1528514 | 26-scf00233 | 26 |
| AX-157775457 | 10 | 79.391 | KV453292.1 | 1531035 | 26-scf00233 | 26 |
| AX-158098618 | 10 | 79.391 | KV453292.1 | 1533851 | 26-scf00233 | 26 |
| AX-158098617 | 10 | 79.391 | KV453292.1 | 1534768 | 26-scf00233 | 26 |
| AX-158098616 | 10 | 79.391 | KV453292.1 | 1535406 | 26-scf00233 | 26 |
| AX-158098613 | 10 | 79.391 | KV453292.1 | 1538998 | 26-scf00233 | 26 |
| AX-157826419 | 10 | 79.391 | KV453292.1 | 1545686 | 26-scf00233 | 26 |
| AX-158098175 | 10 | 79.5   | KV453292.1 | 723109  | 26-scf00233 | 26 |
| AX-158098198 | 10 | 79.5   | KV453292.1 | 764663  | 26-scf00233 | 26 |
| AX-157826352 | 10 | 79.5   | KV453292.1 | 872276  | 26-scf00233 | 26 |
| AX-157885785 | 10 | 79.5   | KV453292.1 | 876513  | 26-scf00233 | 26 |
| AX-157885786 | 10 | 79.5   | KV453292.1 | 876777  | 26-scf00233 | 26 |
| AX-158098290 | 10 | 79.5   | KV453292.1 | 886641  | 26-scf00233 | 26 |
| AX-158098327 | 10 | 79.5   | KV453292.1 | 969522  | 26-scf00233 | 26 |
| AX-158098409 | 10 | 79.5   | KV453292.1 | 1138220 | 26-scf00233 | 26 |
| AX-158098422 | 10 | 79.5   | KV453292.1 | 1156076 | 26-scf00233 | 26 |
| AX-158098423 | 10 | 79.5   | KV453292.1 | 1158418 | 26-scf00233 | 26 |
| AX-158098782 | 10 | 79.5   | KV453292.1 | 1202191 | 26-scf00233 | 26 |
| AX-157826453 | 10 | 79.5   | KV453292.1 | 1213425 | 26-scf00233 | 26 |
| AX-158098772 | 10 | 79.5   | KV453292.1 | 1219969 | 26-scf00233 | 26 |
| AX-157703898 | 10 | 79.5   | KV453292.1 | 1222400 | 26-scf00233 | 26 |
| AX-158098770 | 10 | 79.5   | KV453292.1 | 1223537 | 26-scf00233 | 26 |
| AX-158098764 | 10 | 79.5   | KV453292.1 | 1230141 | 26-scf00233 | 26 |
| AX-158410270 | 10 | 79.5   | KV453292.1 | 1240204 | 26-scf00233 | 26 |
| AX-158098755 | 10 | 79.5   | KV453292.1 | 1254047 | 26-scf00233 | 26 |
| AX-157826440 | 10 | 79.5   | KV453292.1 | 1342055 | 26-scf00233 | 26 |
| AX-158098698 | 10 | 79.5   | KV453292.1 | 1349700 | 26-scf00233 | 26 |
| AX-158098697 | 10 | 79.5   | KV453292.1 | 1350972 | 26-scf00233 | 26 |
| AX-158098696 | 10 | 79.5   | KV453292.1 | 1352422 | 26-scf00233 | 26 |
| AX-157826438 | 10 | 79.5   | KV453292.1 | 1364678 | 26-scf00233 | 26 |
| AX-158098690 | 10 | 79.5   | KV453292.1 | 1365233 | 26-scf00233 | 26 |
| AX-158098687 | 10 | 79.5   | KV453292.1 | 1370696 | 26-scf00233 | 26 |
| AX-158098684 | 10 | 79.5   | KV453292.1 | 1373605 | 26-scf00233 | 26 |
| AX-158098683 | 10 | 79.5   | KV453292.1 | 1374870 | 26-scf00233 | 26 |
| AX-158098681 | 10 | 79.5   | KV453292.1 | 1382991 | 26-scf00233 | 26 |
| AX-157870947 | 10 | 79.5   | KV453292.1 | 1392244 | 26-scf00233 | 26 |
| AX-158098677 | 10 | 79.5   | KV453292.1 | 1392650 | 26-scf00233 | 26 |
| AX-158098676 | 10 | 79.5   | KV453292.1 | 1393384 | 26-scf00233 | 26 |
| AX-158098671 | 10 | 79.5   | KV453292.1 | 1398705 | 26-scf00233 | 26 |

|              |    |        |            |         |             |    |
|--------------|----|--------|------------|---------|-------------|----|
| AX-157826435 | 10 | 79.5   | KV453292.1 | 1424341 | 26-scf00233 | 26 |
| AX-158098655 | 10 | 79.5   | KV453292.1 | 1428646 | 26-scf00233 | 26 |
| AX-157751169 | 10 | 79.5   | KV453292.1 | 1430948 | 26-scf00233 | 26 |
| AX-157772043 | 10 | 79.5   | KV453292.1 | 1431539 | 26-scf00233 | 26 |
| AX-158098653 | 10 | 79.5   | KV453292.1 | 1432122 | 26-scf00233 | 26 |
| AX-158098652 | 10 | 79.5   | KV453292.1 | 1433504 | 26-scf00233 | 26 |
| AX-158098651 | 10 | 79.5   | KV453292.1 | 1434218 | 26-scf00233 | 26 |
| AX-157826434 | 10 | 79.5   | KV453292.1 | 1436255 | 26-scf00233 | 26 |
| AX-158098649 | 10 | 79.5   | KV453292.1 | 1440510 | 26-scf00233 | 26 |
| AX-158098648 | 10 | 79.5   | KV453292.1 | 1442714 | 26-scf00233 | 26 |
| AX-158098647 | 10 | 79.5   | KV453292.1 | 1445817 | 26-scf00233 | 26 |
| AX-158098644 | 10 | 79.5   | KV453292.1 | 1449453 | 26-scf00233 | 26 |
| AX-158098643 | 10 | 79.5   | KV453292.1 | 1450983 | 26-scf00233 | 26 |
| AX-158098642 | 10 | 79.5   | KV453292.1 | 1451597 | 26-scf00233 | 26 |
| AX-158098641 | 10 | 79.5   | KV453292.1 | 1456075 | 26-scf00233 | 26 |
| AX-157826390 | 10 | 79.5   | KV453292.1 | 1845292 | 26-scf00233 | 26 |
| AX-157680494 | 10 | 79.5   | KV453294.1 | 5340    | 26-scf00697 | 26 |
| AX-158098234 | 10 | 79.529 | KV453292.1 | 805826  | 26-scf00233 | 26 |
| AX-158098352 | 10 | 79.529 | KV453292.1 | 1054862 | 26-scf00233 | 26 |
| AX-157826365 | 10 | 79.529 | KV453292.1 | 1088427 | 26-scf00233 | 26 |
| AX-158098706 | 10 | 79.529 | KV453292.1 | 1340462 | 26-scf00233 | 26 |
| AX-158098890 | 10 | 79.529 | KV453293.1 | 109680  | 26-scf00237 | 26 |
| AX-158098710 | 10 | 79.556 | KV453292.1 | 1335585 | 26-scf00233 | 26 |
| AX-158098295 | 10 | 79.582 | KV453292.1 | 900423  | 26-scf00233 | 26 |
| AX-157826363 | 10 | 79.582 | KV453292.1 | 984464  | 26-scf00233 | 26 |
| AX-157826452 | 10 | 79.582 | KV453292.1 | 1215930 | 26-scf00233 | 26 |
| AX-158098728 | 10 | 79.582 | KV453292.1 | 1290755 | 26-scf00233 | 26 |
| AX-158098709 | 10 | 79.582 | KV453292.1 | 1337675 | 26-scf00233 | 26 |
| AX-157686524 | 10 | 79.582 | KV453294.1 | 48066   | 26-scf00697 | 26 |
| AX-157695808 | 10 | 79.609 | KV453292.1 | 431359  | 26-scf00233 | 26 |
| AX-157738408 | 10 | 79.609 | KV453292.1 | 1154051 | 26-scf00233 | 26 |
| AX-158098795 | 10 | 79.609 | KV453292.1 | 1182247 | 26-scf00233 | 26 |
| AX-158098791 | 10 | 79.609 | KV453292.1 | 1186964 | 26-scf00233 | 26 |
| AX-158098785 | 10 | 79.609 | KV453292.1 | 1194454 | 26-scf00233 | 26 |
| AX-158098781 | 10 | 79.609 | KV453292.1 | 1203310 | 26-scf00233 | 26 |
| AX-158098778 | 10 | 79.609 | KV453292.1 | 1206518 | 26-scf00233 | 26 |
| AX-157826456 | 10 | 79.609 | KV453292.1 | 1207157 | 26-scf00233 | 26 |
| AX-158098776 | 10 | 79.609 | KV453292.1 | 1209129 | 26-scf00233 | 26 |
| AX-158098773 | 10 | 79.609 | KV453292.1 | 1217686 | 26-scf00233 | 26 |
| AX-158098767 | 10 | 79.609 | KV453292.1 | 1227826 | 26-scf00233 | 26 |
| AX-157826447 | 10 | 79.609 | KV453292.1 | 1255235 | 26-scf00233 | 26 |
| AX-158098754 | 10 | 79.609 | KV453292.1 | 1255440 | 26-scf00233 | 26 |
| AX-158098753 | 10 | 79.609 | KV453292.1 | 1255734 | 26-scf00233 | 26 |
| AX-158098742 | 10 | 79.609 | KV453292.1 | 1272814 | 26-scf00233 | 26 |
| AX-157826445 | 10 | 79.609 | KV453292.1 | 1273947 | 26-scf00233 | 26 |
| AX-158098707 | 10 | 79.609 | KV453292.1 | 1338417 | 26-scf00233 | 26 |
| AX-158098661 | 10 | 79.609 | KV453292.1 | 1415164 | 26-scf00233 | 26 |
| AX-158098395 | 10 | 79.661 | KV453292.1 | 1101501 | 26-scf00233 | 26 |
| AX-158098786 | 10 | 79.661 | KV453292.1 | 1193390 | 26-scf00233 | 26 |
| AX-157740135 | 10 | 79.718 | KV453292.1 | 112179  | 26-scf00233 | 26 |
| AX-158097868 | 10 | 79.718 | KV453292.1 | 160240  | 26-scf00233 | 26 |

|              |    |        |            |         |                |    |
|--------------|----|--------|------------|---------|----------------|----|
| AX-158097896 | 10 | 79.718 | KV453292.1 | 215431  | 26-scf00233    | 26 |
| AX-157759076 | 10 | 79.718 | KV453292.1 | 995696  | 26-scf00233    | 26 |
| AX-157826370 | 10 | 79.718 | KV453292.1 | 1106855 | 26-scf00233    | 26 |
| AX-157826464 | 10 | 79.718 | KV453292.1 | 1170113 | 26-scf00233    | 26 |
| AX-157826463 | 10 | 79.718 | KV453292.1 | 1170792 | 26-scf00233    | 26 |
| AX-158098801 | 10 | 79.718 | KV453292.1 | 1172131 | 26-scf00233    | 26 |
| AX-157750300 | 10 | 79.718 | KV453292.1 | 1173430 | 26-scf00233    | 26 |
| AX-158410271 | 10 | 79.718 | KV453292.1 | 1179272 | 26-scf00233    | 26 |
| AX-158098794 | 10 | 79.718 | KV453292.1 | 1182508 | 26-scf00233    | 26 |
| AX-157826459 | 10 | 79.718 | KV453292.1 | 1188730 | 26-scf00233    | 26 |
| AX-158098789 | 10 | 79.718 | KV453292.1 | 1190995 | 26-scf00233    | 26 |
| AX-157699050 | 10 | 79.718 | FI889565.1 | 448     | FORI212 Ictali | UN |
| AX-157681019 | 10 | 79.718 | KV453588.1 | 212     | scf00991       | UN |
| AX-157771981 | 10 | 80.369 | KV453295.1 | 11718   | 26-scf00236    | 26 |
| AX-157752063 | 10 | 80.37  | KV453295.1 | 30378   | 26-scf00236    | 26 |
| AX-157826468 | 10 | 80.371 | KV453295.1 | 39572   | 26-scf00236    | 26 |
| AX-158098816 | 10 | 80.372 | KV453295.1 | 47029   | 26-scf00236    | 26 |
| AX-158098061 | 10 | 80.373 | KV453292.1 | 528966  | 26-scf00233    | 26 |
| AX-158098062 | 10 | 80.373 | KV453292.1 | 529382  | 26-scf00233    | 26 |
| AX-157771548 | 10 | 80.373 | KV453292.1 | 531886  | 26-scf00233    | 26 |
| AX-158098405 | 10 | 80.373 | KV453292.1 | 1125961 | 26-scf00233    | 26 |
| AX-158098589 | 10 | 80.373 | KV453292.1 | 1583099 | 26-scf00233    | 26 |
| AX-158098480 | 10 | 80.373 | KV453292.1 | 1814102 | 26-scf00233    | 26 |
| AX-158098472 | 10 | 80.373 | KV453292.1 | 1825791 | 26-scf00233    | 26 |
| AX-158098471 | 10 | 80.373 | KV453292.1 | 1828321 | 26-scf00233    | 26 |
| AX-158098470 | 10 | 80.373 | KV453292.1 | 1828888 | 26-scf00233    | 26 |
| AX-158098469 | 10 | 80.373 | KV453292.1 | 1830809 | 26-scf00233    | 26 |
| AX-157826469 | 10 | 80.373 | KV453295.1 | 44093   | 26-scf00236    | 26 |
| AX-158098817 | 10 | 80.373 | KV453295.1 | 47118   | 26-scf00236    | 26 |
| AX-158098818 | 10 | 80.373 | KV453295.1 | 49555   | 26-scf00236    | 26 |
| AX-158098819 | 10 | 80.373 | KV453295.1 | 50290   | 26-scf00236    | 26 |
| AX-158098822 | 10 | 80.373 | KV453295.1 | 52641   | 26-scf00236    | 26 |
| AX-158098823 | 10 | 80.373 | KV453295.1 | 58634   | 26-scf00236    | 26 |
| AX-158098824 | 10 | 80.373 | KV453295.1 | 61437   | 26-scf00236    | 26 |
| AX-157826471 | 10 | 80.373 | KV453295.1 | 70462   | 26-scf00236    | 26 |
| AX-158098831 | 10 | 80.373 | KV453295.1 | 73375   | 26-scf00236    | 26 |
| AX-158098832 | 10 | 80.373 | KV453295.1 | 73931   | 26-scf00236    | 26 |
| AX-158098833 | 10 | 80.373 | KV453295.1 | 77939   | 26-scf00236    | 26 |
| AX-157877491 | 10 | 80.373 | KV453295.1 | 100875  | 26-scf00236    | 26 |
| AX-158098861 | 10 | 80.373 | KV453293.1 | 7595    | 26-scf00237    | 26 |
| AX-158098881 | 10 | 80.373 | KV453293.1 | 68857   | 26-scf00237    | 26 |
| AX-157680651 | 10 | 80.373 | KV453296.1 | 8100    | 26-scf00238    | 26 |
| AX-158098477 | 10 | 80.482 | KV453292.1 | 1815635 | 26-scf00233    | 26 |
| AX-157752132 | 10 | 80.482 | KV453295.1 | 80564   | 26-scf00236    | 26 |
| AX-157746417 | 10 | 80.482 | KV453295.1 | 81918   | 26-scf00236    | 26 |
| AX-157826473 | 10 | 80.55  | KV453295.1 | 83771   | 26-scf00236    | 26 |
| AX-158098837 | 10 | 80.651 | KV453295.1 | 84041   | 26-scf00236    | 26 |
| AX-157748203 | 10 | 80.695 | KV453295.1 | 71694   | 26-scf00236    | 26 |
| AX-158098847 | 10 | 80.695 | KV453295.1 | 106460  | 26-scf00236    | 26 |
| AX-157826474 | 10 | 80.695 | KV453295.1 | 106932  | 26-scf00236    | 26 |
| AX-158098851 | 10 | 80.695 | KV453295.1 | 111218  | 26-scf00236    | 26 |

|              |    |        |            |        |             |    |
|--------------|----|--------|------------|--------|-------------|----|
| AX-157680649 | 10 | 80.695 | KV453296.1 | 5994   | 26-scf00238 | 26 |
| AX-157680652 | 10 | 80.695 | KV453296.1 | 17555  | 26-scf00238 | 26 |
| AX-157683361 | 10 | 80.721 | KV453296.1 | 41316  | 26-scf00238 | 26 |
| AX-158098907 | 11 | 0      | KV452844.1 | 3351   | 5-scf00239  | 5  |
| AX-158098909 | 11 | 0      | KV452844.1 | 8508   | 5-scf00239  | 5  |
| AX-158098911 | 11 | 0      | KV452844.1 | 10357  | 5-scf00239  | 5  |
| AX-157826483 | 11 | 0      | KV452844.1 | 23734  | 5-scf00239  | 5  |
| AX-158098918 | 11 | 0      | KV452844.1 | 29038  | 5-scf00239  | 5  |
| AX-158098919 | 11 | 0      | KV452844.1 | 29822  | 5-scf00239  | 5  |
| AX-158098920 | 11 | 0      | KV452844.1 | 29955  | 5-scf00239  | 5  |
| AX-158098922 | 11 | 0      | KV452844.1 | 32022  | 5-scf00239  | 5  |
| AX-157748696 | 11 | 0      | KV452844.1 | 38051  | 5-scf00239  | 5  |
| AX-158098923 | 11 | 0      | KV452844.1 | 38450  | 5-scf00239  | 5  |
| AX-158098925 | 11 | 0      | KV452844.1 | 39446  | 5-scf00239  | 5  |
| AX-157745046 | 11 | 0      | KV452844.1 | 59855  | 5-scf00239  | 5  |
| AX-158098929 | 11 | 0      | KV452844.1 | 60222  | 5-scf00239  | 5  |
| AX-158098930 | 11 | 0      | KV452844.1 | 60651  | 5-scf00239  | 5  |
| AX-158098931 | 11 | 0      | KV452844.1 | 61498  | 5-scf00239  | 5  |
| AX-157752648 | 11 | 0      | KV452844.1 | 62755  | 5-scf00239  | 5  |
| AX-157826484 | 11 | 0      | KV452844.1 | 63846  | 5-scf00239  | 5  |
| AX-158098934 | 11 | 0      | KV452844.1 | 64766  | 5-scf00239  | 5  |
| AX-158098935 | 11 | 0      | KV452844.1 | 65568  | 5-scf00239  | 5  |
| AX-158098937 | 11 | 0      | KV452844.1 | 68890  | 5-scf00239  | 5  |
| AX-157826485 | 11 | 0      | KV452844.1 | 69911  | 5-scf00239  | 5  |
| AX-157713297 | 11 | 0      | KV452844.1 | 70211  | 5-scf00239  | 5  |
| AX-158098939 | 11 | 0      | KV452844.1 | 72053  | 5-scf00239  | 5  |
| AX-157885798 | 11 | 0      | KV452844.1 | 73790  | 5-scf00239  | 5  |
| AX-158098941 | 11 | 0      | KV452844.1 | 75155  | 5-scf00239  | 5  |
| AX-158098942 | 11 | 0      | KV452844.1 | 76057  | 5-scf00239  | 5  |
| AX-158098943 | 11 | 0      | KV452844.1 | 77139  | 5-scf00239  | 5  |
| AX-158098944 | 11 | 0      | KV452844.1 | 79009  | 5-scf00239  | 5  |
| AX-158098947 | 11 | 0      | KV452844.1 | 85768  | 5-scf00239  | 5  |
| AX-158098948 | 11 | 0      | KV452844.1 | 86671  | 5-scf00239  | 5  |
| AX-158098949 | 11 | 0      | KV452844.1 | 87546  | 5-scf00239  | 5  |
| AX-158098951 | 11 | 0      | KV452844.1 | 89697  | 5-scf00239  | 5  |
| AX-158098953 | 11 | 0      | KV452844.1 | 93857  | 5-scf00239  | 5  |
| AX-157735229 | 11 | 0      | KV452844.1 | 100903 | 5-scf00239  | 5  |
| AX-158098965 | 11 | 0      | KV452844.1 | 128708 | 5-scf00239  | 5  |
| AX-157826488 | 11 | 0      | KV452844.1 | 130277 | 5-scf00239  | 5  |
| AX-158098966 | 11 | 0      | KV452844.1 | 130757 | 5-scf00239  | 5  |
| AX-158098967 | 11 | 0      | KV452844.1 | 131166 | 5-scf00239  | 5  |
| AX-158098968 | 11 | 0      | KV452844.1 | 131799 | 5-scf00239  | 5  |
| AX-158098970 | 11 | 0      | KV452844.1 | 133142 | 5-scf00239  | 5  |
| AX-158407369 | 11 | 0      | KV452844.1 | 133652 | 5-scf00239  | 5  |
| AX-157749161 | 11 | 0      | KV452844.1 | 137560 | 5-scf00239  | 5  |
| AX-157715387 | 11 | 0      | KV452844.1 | 159012 | 5-scf00239  | 5  |
| AX-158098980 | 11 | 0      | KV452844.1 | 159270 | 5-scf00239  | 5  |
| AX-157720577 | 11 | 0      | KV452844.1 | 159737 | 5-scf00239  | 5  |
| AX-157826492 | 11 | 0      | KV452844.1 | 160715 | 5-scf00239  | 5  |
| AX-157857358 | 11 | 0      | KV452844.1 | 164670 | 5-scf00239  | 5  |
| AX-158098984 | 11 | 0      | KV452844.1 | 171365 | 5-scf00239  | 5  |



|              |    |       |             |        |            |    |
|--------------|----|-------|-------------|--------|------------|----|
| AX-158098985 | 11 | 0     | KV452844.1  | 172934 | 5-scf00239 | 5  |
| AX-158098986 | 11 | 0     | KV452844.1  | 174173 | 5-scf00239 | 5  |
| AX-157857359 | 11 | 0     | KV452844.1  | 174503 | 5-scf00239 | 5  |
| AX-158098988 | 11 | 0     | KV452844.1  | 175877 | 5-scf00239 | 5  |
| AX-157826495 | 11 | 0     | KV452844.1  | 181753 | 5-scf00239 | 5  |
| AX-157826496 | 11 | 0     | KV452844.1  | 182483 | 5-scf00239 | 5  |
| AX-158098993 | 11 | 0     | KV452844.1  | 182709 | 5-scf00239 | 5  |
| AX-158099000 | 11 | 0     | KV452844.1  | 191867 | 5-scf00239 | 5  |
| AX-157716629 | 11 | 0     | KV452844.1  | 192118 | 5-scf00239 | 5  |
| AX-157752824 | 11 | 0     | KV452844.1  | 193873 | 5-scf00239 | 5  |
| AX-157738916 | 11 | 0     | KV452844.1  | 196650 | 5-scf00239 | 5  |
| AX-158099026 | 11 | 0     | KV452844.1  | 251883 | 5-scf00239 | 5  |
| AX-158099044 | 11 | 0     | KV452844.1  | 294960 | 5-scf00239 | 5  |
| AX-158099059 | 11 | 0     | KV452844.1  | 323340 | 5-scf00239 | 5  |
| AX-158099063 | 11 | 0     | KV452844.1  | 332960 | 5-scf00239 | 5  |
| AX-157826520 | 11 | 0     | KV452844.1  | 383411 | 5-scf00239 | 5  |
| AX-158099147 | 11 | 0     | KV452844.1  | 465899 | 5-scf00239 | 5  |
| AX-157683372 | 11 | 0     | KV452842.1  | 22760  | 5-scf00240 | 5  |
| AX-157683373 | 11 | 0     | KV452842.1  | 24715  | 5-scf00240 | 5  |
| AX-157683374 | 11 | 0     | KV452842.1  | 26432  | 5-scf00240 | 5  |
| AX-157680109 | 11 | 0     | KV452842.1  | 32805  | 5-scf00240 | 5  |
| AX-157683376 | 11 | 0     | KV452842.1  | 36695  | 5-scf00240 | 5  |
| AX-157683380 | 11 | 0     | KV452842.1  | 45684  | 5-scf00240 | 5  |
| AX-157680655 | 11 | 0     | KV452842.1  | 49267  | 5-scf00240 | 5  |
| AX-157680656 | 11 | 0     | KV452842.1  | 60569  | 5-scf00240 | 5  |
| AX-158410289 | 11 | 0     | KV452842.1  | 73114  | 5-scf00240 | 5  |
| AX-157683393 | 11 | 0     | KV452842.1  | 97405  | 5-scf00240 | 5  |
| AX-157680658 | 11 | 0     | KV452842.1  | 99706  | 5-scf00240 | 5  |
| AX-157683394 | 11 | 0     | KV452842.1  | 120178 | 5-scf00240 | 5  |
| AX-157686931 | 11 | 0     | KV452843.1  | 9390   | 5-scf00760 | 5  |
| AX-157686932 | 11 | 0     | KV452843.1  | 17315  | 5-scf00760 | 5  |
| AX-157686933 | 11 | 0     | KV452843.1  | 19600  | 5-scf00760 | 5  |
| AX-157686939 | 11 | 0     | KV452847.1  | 19098  | 5-scf00761 | 5  |
| AX-157681486 | 11 | 0     | KV452841.1  | 15718  | 5-scf00834 | 5  |
| AX-157687258 | 11 | 0     | KV452841.1  | 16199  | 5-scf00834 | 5  |
| AX-157688441 | 11 | 0     | 3ML01026175 | 829    | scf01772_1 | UN |
| AX-157681287 | 11 | 0     |             | 85     | scf20394   | UN |
| AX-157757633 | 11 | 0.08  | KV452844.1  | 207554 | 5-scf00239 | 5  |
| AX-158099013 | 11 | 0.16  | KV452844.1  | 210322 | 5-scf00239 | 5  |
| AX-158098906 | 11 | 0.219 | KV452844.1  | 2766   | 5-scf00239 | 5  |
| AX-158098928 | 11 | 0.219 | KV452844.1  | 58584  | 5-scf00239 | 5  |
| AX-157826490 | 11 | 0.219 | KV452844.1  | 156298 | 5-scf00239 | 5  |
| AX-158098979 | 11 | 0.219 | KV452844.1  | 158457 | 5-scf00239 | 5  |
| AX-157826494 | 11 | 0.219 | KV452844.1  | 167601 | 5-scf00239 | 5  |
| AX-158098994 | 11 | 0.219 | KV452844.1  | 183576 | 5-scf00239 | 5  |
| AX-158098996 | 11 | 0.219 | KV452844.1  | 186078 | 5-scf00239 | 5  |
| AX-158098998 | 11 | 0.219 | KV452844.1  | 189651 | 5-scf00239 | 5  |
| AX-158099003 | 11 | 0.219 | KV452844.1  | 196497 | 5-scf00239 | 5  |
| AX-158099007 | 11 | 0.219 | KV452844.1  | 198039 | 5-scf00239 | 5  |
| AX-158099008 | 11 | 0.219 | KV452844.1  | 199016 | 5-scf00239 | 5  |
| AX-157826498 | 11 | 0.219 | KV452844.1  | 199728 | 5-scf00239 | 5  |

|              |    |       |            |        |            |   |
|--------------|----|-------|------------|--------|------------|---|
| AX-157717799 | 11 | 0.219 | KV452844.1 | 203328 | 5-scf00239 | 5 |
| AX-158099010 | 11 | 0.219 | KV452844.1 | 203738 | 5-scf00239 | 5 |
| AX-157753052 | 11 | 0.219 | KV452844.1 | 209460 | 5-scf00239 | 5 |
| AX-158099015 | 11 | 0.219 | KV452844.1 | 214077 | 5-scf00239 | 5 |
| AX-158099017 | 11 | 0.219 | KV452844.1 | 216399 | 5-scf00239 | 5 |
| AX-157870949 | 11 | 0.219 | KV452844.1 | 218324 | 5-scf00239 | 5 |
| AX-157741127 | 11 | 0.219 | KV452844.1 | 221054 | 5-scf00239 | 5 |
| AX-158099020 | 11 | 0.219 | KV452844.1 | 221206 | 5-scf00239 | 5 |
| AX-158099021 | 11 | 0.219 | KV452844.1 | 233106 | 5-scf00239 | 5 |
| AX-158099024 | 11 | 0.219 | KV452844.1 | 240142 | 5-scf00239 | 5 |
| AX-157789497 | 11 | 0.219 | KV452844.1 | 250417 | 5-scf00239 | 5 |
| AX-158099025 | 11 | 0.219 | KV452844.1 | 251316 | 5-scf00239 | 5 |
| AX-157826503 | 11 | 0.219 | KV452844.1 | 258759 | 5-scf00239 | 5 |
| AX-157826504 | 11 | 0.219 | KV452844.1 | 265584 | 5-scf00239 | 5 |
| AX-157877498 | 11 | 0.219 | KV452844.1 | 267441 | 5-scf00239 | 5 |
| AX-158099031 | 11 | 0.219 | KV452844.1 | 268518 | 5-scf00239 | 5 |
| AX-158099033 | 11 | 0.219 | KV452844.1 | 269285 | 5-scf00239 | 5 |
| AX-158099036 | 11 | 0.219 | KV452844.1 | 278022 | 5-scf00239 | 5 |
| AX-158099038 | 11 | 0.219 | KV452844.1 | 279457 | 5-scf00239 | 5 |
| AX-158099041 | 11 | 0.219 | KV452844.1 | 289185 | 5-scf00239 | 5 |
| AX-158099042 | 11 | 0.219 | KV452844.1 | 289650 | 5-scf00239 | 5 |
| AX-158099043 | 11 | 0.219 | KV452844.1 | 290099 | 5-scf00239 | 5 |
| AX-158099047 | 11 | 0.219 | KV452844.1 | 302463 | 5-scf00239 | 5 |
| AX-158099048 | 11 | 0.219 | KV452844.1 | 304995 | 5-scf00239 | 5 |
| AX-158099049 | 11 | 0.219 | KV452844.1 | 306934 | 5-scf00239 | 5 |
| AX-158099050 | 11 | 0.219 | KV452844.1 | 307514 | 5-scf00239 | 5 |
| AX-158099051 | 11 | 0.219 | KV452844.1 | 309500 | 5-scf00239 | 5 |
| AX-157826511 | 11 | 0.219 | KV452844.1 | 313012 | 5-scf00239 | 5 |
| AX-158099055 | 11 | 0.219 | KV452844.1 | 314007 | 5-scf00239 | 5 |
| AX-157877500 | 11 | 0.219 | KV452844.1 | 314831 | 5-scf00239 | 5 |
| AX-158099056 | 11 | 0.219 | KV452844.1 | 317287 | 5-scf00239 | 5 |
| AX-157744050 | 11 | 0.219 | KV452844.1 | 318818 | 5-scf00239 | 5 |
| AX-158099058 | 11 | 0.219 | KV452844.1 | 319336 | 5-scf00239 | 5 |
| AX-157826513 | 11 | 0.219 | KV452844.1 | 327181 | 5-scf00239 | 5 |
| AX-158099060 | 11 | 0.219 | KV452844.1 | 328486 | 5-scf00239 | 5 |
| AX-158099061 | 11 | 0.219 | KV452844.1 | 330116 | 5-scf00239 | 5 |
| AX-158099064 | 11 | 0.219 | KV452844.1 | 338567 | 5-scf00239 | 5 |
| AX-158099065 | 11 | 0.219 | KV452844.1 | 339715 | 5-scf00239 | 5 |
| AX-158099067 | 11 | 0.219 | KV452844.1 | 341925 | 5-scf00239 | 5 |
| AX-158422601 | 11 | 0.219 | KV452844.1 | 362736 | 5-scf00239 | 5 |
| AX-158099079 | 11 | 0.219 | KV452844.1 | 364836 | 5-scf00239 | 5 |
| AX-158099080 | 11 | 0.219 | KV452844.1 | 365225 | 5-scf00239 | 5 |
| AX-158099082 | 11 | 0.219 | KV452844.1 | 368084 | 5-scf00239 | 5 |
| AX-158099085 | 11 | 0.219 | KV452844.1 | 372444 | 5-scf00239 | 5 |
| AX-158099088 | 11 | 0.219 | KV452844.1 | 373576 | 5-scf00239 | 5 |
| AX-158099090 | 11 | 0.219 | KV452844.1 | 375068 | 5-scf00239 | 5 |
| AX-158099091 | 11 | 0.219 | KV452844.1 | 376865 | 5-scf00239 | 5 |
| AX-157826518 | 11 | 0.219 | KV452844.1 | 377519 | 5-scf00239 | 5 |
| AX-157751522 | 11 | 0.219 | KV452844.1 | 379168 | 5-scf00239 | 5 |
| AX-158099098 | 11 | 0.219 | KV452844.1 | 391101 | 5-scf00239 | 5 |
| AX-157713354 | 11 | 0.219 | KV452844.1 | 391848 | 5-scf00239 | 5 |

|              |    |       |            |        |            |   |
|--------------|----|-------|------------|--------|------------|---|
| AX-157826521 | 11 | 0.219 | KV452844.1 | 393315 | 5-scf00239 | 5 |
| AX-157826522 | 11 | 0.219 | KV452844.1 | 393736 | 5-scf00239 | 5 |
| AX-158099099 | 11 | 0.219 | KV452844.1 | 395049 | 5-scf00239 | 5 |
| AX-157749989 | 11 | 0.219 | KV452844.1 | 399776 | 5-scf00239 | 5 |
| AX-158099109 | 11 | 0.219 | KV452844.1 | 411478 | 5-scf00239 | 5 |
| AX-158099110 | 11 | 0.219 | KV452844.1 | 413103 | 5-scf00239 | 5 |
| AX-157857360 | 11 | 0.219 | KV452844.1 | 416924 | 5-scf00239 | 5 |
| AX-157725896 | 11 | 0.219 | KV452844.1 | 418501 | 5-scf00239 | 5 |
| AX-158099114 | 11 | 0.219 | KV452844.1 | 421764 | 5-scf00239 | 5 |
| AX-158099115 | 11 | 0.219 | KV452844.1 | 424380 | 5-scf00239 | 5 |
| AX-158099116 | 11 | 0.219 | KV452844.1 | 424810 | 5-scf00239 | 5 |
| AX-158099118 | 11 | 0.219 | KV452844.1 | 429389 | 5-scf00239 | 5 |
| AX-157740014 | 11 | 0.219 | KV452844.1 | 431267 | 5-scf00239 | 5 |
| AX-158099122 | 11 | 0.219 | KV452844.1 | 432108 | 5-scf00239 | 5 |
| AX-158099123 | 11 | 0.219 | KV452844.1 | 432586 | 5-scf00239 | 5 |
| AX-157826525 | 11 | 0.219 | KV452844.1 | 434936 | 5-scf00239 | 5 |
| AX-157857361 | 11 | 0.219 | KV452844.1 | 435159 | 5-scf00239 | 5 |
| AX-158099131 | 11 | 0.219 | KV452844.1 | 444663 | 5-scf00239 | 5 |
| AX-157826526 | 11 | 0.219 | KV452844.1 | 445277 | 5-scf00239 | 5 |
| AX-158099132 | 11 | 0.219 | KV452844.1 | 446953 | 5-scf00239 | 5 |
| AX-158099134 | 11 | 0.219 | KV452844.1 | 449442 | 5-scf00239 | 5 |
| AX-158099135 | 11 | 0.219 | KV452844.1 | 450332 | 5-scf00239 | 5 |
| AX-158099136 | 11 | 0.219 | KV452844.1 | 453314 | 5-scf00239 | 5 |
| AX-157826527 | 11 | 0.219 | KV452844.1 | 454283 | 5-scf00239 | 5 |
| AX-158099138 | 11 | 0.219 | KV452844.1 | 456085 | 5-scf00239 | 5 |
| AX-158099140 | 11 | 0.219 | KV452844.1 | 458131 | 5-scf00239 | 5 |
| AX-158099141 | 11 | 0.219 | KV452844.1 | 458867 | 5-scf00239 | 5 |
| AX-158099142 | 11 | 0.219 | KV452844.1 | 459793 | 5-scf00239 | 5 |
| AX-158099146 | 11 | 0.219 | KV452844.1 | 464150 | 5-scf00239 | 5 |
| AX-158099149 | 11 | 0.219 | KV452844.1 | 471058 | 5-scf00239 | 5 |
| AX-158099152 | 11 | 0.219 | KV452844.1 | 473296 | 5-scf00239 | 5 |
| AX-158099166 | 11 | 0.219 | KV452844.1 | 490476 | 5-scf00239 | 5 |
| AX-157726224 | 11 | 0.219 | KV452844.1 | 506653 | 5-scf00239 | 5 |
| AX-158099178 | 11 | 0.219 | KV452844.1 | 512075 | 5-scf00239 | 5 |
| AX-157683368 | 11 | 0.219 | KV452842.1 | 10105  | 5-scf00240 | 5 |
| AX-157683378 | 11 | 0.219 | KV452842.1 | 38969  | 5-scf00240 | 5 |
| AX-157683390 | 11 | 0.219 | KV452842.1 | 86694  | 5-scf00240 | 5 |
| AX-157680659 | 11 | 0.219 | KV452842.1 | 119641 | 5-scf00240 | 5 |
| AX-157826550 | 11 | 0.219 | KV452846.1 | 10539  | 5-scf00242 | 5 |
| AX-157708540 | 11 | 0.219 | KV452843.1 | 4405   | 5-scf00760 | 5 |
| AX-157686935 | 11 | 0.219 | KV452847.1 | 1921   | 5-scf00761 | 5 |
| AX-157686937 | 11 | 0.219 | KV452847.1 | 13540  | 5-scf00761 | 5 |
| AX-158421214 | 11 | 0.219 | KV452847.1 | 20962  | 5-scf00761 | 5 |
| AX-157686940 | 11 | 0.219 | KV452847.1 | 23036  | 5-scf00761 | 5 |
| AX-157682038 | 11 | 0.219 | KV452841.1 | 2059   | 5-scf00834 | 5 |
| AX-158420949 | 11 | 0.219 | KV452841.1 | 6654   | 5-scf00834 | 5 |
| AX-157704346 | 11 | 0.219 | KV452883.1 | 4828   | 5-scf00950 | 5 |
| AX-158098913 | 11 | 0.328 | KV452844.1 | 12550  | 5-scf00239 | 5 |
| AX-158098955 | 11 | 0.328 | KV452844.1 | 95667  | 5-scf00239 | 5 |
| AX-157885799 | 11 | 0.328 | KV452844.1 | 167201 | 5-scf00239 | 5 |
| AX-157826519 | 11 | 0.328 | KV452844.1 | 377798 | 5-scf00239 | 5 |

|              |    |       |            |        |            |   |
|--------------|----|-------|------------|--------|------------|---|
| AX-157857363 | 11 | 0.328 | KV452844.1 | 454179 | 5-scf00239 | 5 |
| AX-158099154 | 11 | 0.328 | KV452844.1 | 477127 | 5-scf00239 | 5 |
| AX-158099158 | 11 | 0.328 | KV452844.1 | 480944 | 5-scf00239 | 5 |
| AX-158099161 | 11 | 0.328 | KV452844.1 | 484471 | 5-scf00239 | 5 |
| AX-158099164 | 11 | 0.328 | KV452844.1 | 486677 | 5-scf00239 | 5 |
| AX-158099165 | 11 | 0.328 | KV452844.1 | 489652 | 5-scf00239 | 5 |
| AX-158099167 | 11 | 0.328 | KV452844.1 | 492206 | 5-scf00239 | 5 |
| AX-158099170 | 11 | 0.328 | KV452844.1 | 499441 | 5-scf00239 | 5 |
| AX-158099171 | 11 | 0.328 | KV452844.1 | 500696 | 5-scf00239 | 5 |
| AX-157826529 | 11 | 0.328 | KV452844.1 | 502905 | 5-scf00239 | 5 |
| AX-158099172 | 11 | 0.328 | KV452844.1 | 504803 | 5-scf00239 | 5 |
| AX-158099173 | 11 | 0.328 | KV452844.1 | 505173 | 5-scf00239 | 5 |
| AX-158099174 | 11 | 0.328 | KV452844.1 | 506211 | 5-scf00239 | 5 |
| AX-157758744 | 11 | 0.328 | KV452844.1 | 507506 | 5-scf00239 | 5 |
| AX-158099175 | 11 | 0.328 | KV452844.1 | 507872 | 5-scf00239 | 5 |
| AX-158099176 | 11 | 0.328 | KV452844.1 | 509736 | 5-scf00239 | 5 |
| AX-157826530 | 11 | 0.328 | KV452844.1 | 511554 | 5-scf00239 | 5 |
| AX-158099181 | 11 | 0.328 | KV452844.1 | 516676 | 5-scf00239 | 5 |
| AX-157683395 | 11 | 0.328 | KV452842.1 | 120307 | 5-scf00240 | 5 |
| AX-158099419 | 11 | 0.328 | KV452846.1 | 11881  | 5-scf00242 | 5 |
| AX-157680960 | 11 | 0.328 | KV452843.1 | 7981   | 5-scf00760 | 5 |
| AX-157687365 | 11 | 0.328 | KV452845.1 | 10497  | 5-scf00861 | 5 |
| AX-158099412 | 11 | 0.437 | KV452846.1 | 2870   | 5-scf00242 | 5 |
| AX-158099415 | 11 | 0.437 | KV452846.1 | 4789   | 5-scf00242 | 5 |
| AX-157863267 | 11 | 0.437 | KV452846.1 | 5124   | 5-scf00242 | 5 |
| AX-158099417 | 11 | 0.437 | KV452846.1 | 10157  | 5-scf00242 | 5 |
| AX-158099418 | 11 | 0.437 | KV452846.1 | 10782  | 5-scf00242 | 5 |
| AX-158099423 | 11 | 0.437 | KV452846.1 | 16313  | 5-scf00242 | 5 |
| AX-158099426 | 11 | 0.437 | KV452846.1 | 17626  | 5-scf00242 | 5 |
| AX-158424062 | 11 | 0.437 | KV452841.1 | 9781   | 5-scf00834 | 5 |
| AX-157711867 | 11 | 0.437 | KV452883.1 | 2224   | 5-scf00950 | 5 |
| AX-157704345 | 11 | 0.437 | KV452883.1 | 4192   | 5-scf00950 | 5 |
| AX-157704344 | 11 | 0.438 | KV452883.1 | 2769   | 5-scf00950 | 5 |
| AX-158099428 | 11 | 0.764 | KV452846.1 | 29567  | 5-scf00242 | 5 |
| AX-158099430 | 11 | 0.764 | KV452846.1 | 34286  | 5-scf00242 | 5 |
| AX-157885802 | 11 | 0.764 | KV452846.1 | 57472  | 5-scf00242 | 5 |
| AX-158099434 | 11 | 0.765 | KV452846.1 | 39227  | 5-scf00242 | 5 |
| AX-158099435 | 11 | 0.765 | KV452846.1 | 40619  | 5-scf00242 | 5 |
| AX-158384685 | 11 | 0.765 | KV452846.1 | 41342  | 5-scf00242 | 5 |
| AX-158099439 | 11 | 0.765 | KV452846.1 | 45909  | 5-scf00242 | 5 |
| AX-157771562 | 11 | 1.076 | KV452846.1 | 48844  | 5-scf00242 | 5 |
| AX-158099445 | 11 | 1.104 | KV452846.1 | 51870  | 5-scf00242 | 5 |
| AX-158099201 | 11 | 1.13  | KV452848.1 | 20581  | 5-scf00241 | 5 |
| AX-158099447 | 11 | 1.13  | KV452846.1 | 52967  | 5-scf00242 | 5 |
| AX-158099450 | 11 | 1.131 | KV452846.1 | 55112  | 5-scf00242 | 5 |
| AX-157743088 | 11 | 1.131 | KV452846.1 | 55517  | 5-scf00242 | 5 |
| AX-158099226 | 11 | 1.244 | KV452848.1 | 60099  | 5-scf00241 | 5 |
| AX-158099454 | 11 | 1.244 | KV452846.1 | 63265  | 5-scf00242 | 5 |
| AX-158099186 | 11 | 1.421 | KV452848.1 | 1379   | 5-scf00241 | 5 |
| AX-158099187 | 11 | 1.421 | KV452848.1 | 3869   | 5-scf00241 | 5 |
| AX-158099192 | 11 | 1.421 | KV452848.1 | 10067  | 5-scf00241 | 5 |

|              |    |       |            |        |            |   |
|--------------|----|-------|------------|--------|------------|---|
| AX-158099193 | 11 | 1.421 | KV452848.1 | 11663  | 5-scf00241 | 5 |
| AX-158099194 | 11 | 1.421 | KV452848.1 | 12539  | 5-scf00241 | 5 |
| AX-158099196 | 11 | 1.421 | KV452848.1 | 16598  | 5-scf00241 | 5 |
| AX-158099200 | 11 | 1.421 | KV452848.1 | 19703  | 5-scf00241 | 5 |
| AX-158099207 | 11 | 1.421 | KV452848.1 | 31043  | 5-scf00241 | 5 |
| AX-158099209 | 11 | 1.421 | KV452848.1 | 33077  | 5-scf00241 | 5 |
| AX-158099214 | 11 | 1.421 | KV452848.1 | 41652  | 5-scf00241 | 5 |
| AX-157771509 | 11 | 1.421 | KV452848.1 | 43897  | 5-scf00241 | 5 |
| AX-157857366 | 11 | 1.421 | KV452848.1 | 82486  | 5-scf00241 | 5 |
| AX-158099449 | 11 | 1.421 | KV452846.1 | 54574  | 5-scf00242 | 5 |
| AX-158099456 | 11 | 1.421 | KV452846.1 | 67440  | 5-scf00242 | 5 |
| AX-157719188 | 11 | 1.421 | KV452846.1 | 70241  | 5-scf00242 | 5 |
| AX-158099458 | 11 | 1.421 | KV452846.1 | 70678  | 5-scf00242 | 5 |
| AX-157680961 | 11 | 1.421 | KV452847.1 | 24160  | 5-scf00761 | 5 |
| AX-158099185 | 11 | 1.491 | KV452848.1 | 894    | 5-scf00241 | 5 |
| AX-158099189 | 11 | 1.491 | KV452848.1 | 7077   | 5-scf00241 | 5 |
| AX-158099198 | 11 | 1.491 | KV452848.1 | 17258  | 5-scf00241 | 5 |
| AX-157757544 | 11 | 1.491 | KV452848.1 | 37557  | 5-scf00241 | 5 |
| AX-158099212 | 11 | 1.491 | KV452848.1 | 39655  | 5-scf00241 | 5 |
| AX-158099451 | 11 | 1.491 | KV452846.1 | 56038  | 5-scf00242 | 5 |
| AX-158099208 | 11 | 1.53  | KV452848.1 | 32098  | 5-scf00241 | 5 |
| AX-157693914 | 11 | 1.53  | KV452848.1 | 37277  | 5-scf00241 | 5 |
| AX-158099213 | 11 | 1.53  | KV452848.1 | 40574  | 5-scf00241 | 5 |
| AX-158099218 | 11 | 1.53  | KV452848.1 | 44614  | 5-scf00241 | 5 |
| AX-158099219 | 11 | 1.53  | KV452848.1 | 45857  | 5-scf00241 | 5 |
| AX-157752179 | 11 | 1.53  | KV452848.1 | 47015  | 5-scf00241 | 5 |
| AX-157772522 | 11 | 1.53  | KV452848.1 | 49188  | 5-scf00241 | 5 |
| AX-158099221 | 11 | 1.53  | KV452848.1 | 51212  | 5-scf00241 | 5 |
| AX-158384682 | 11 | 1.606 | KV452848.1 | 1481   | 5-scf00241 | 5 |
| AX-158099206 | 11 | 1.606 | KV452848.1 | 29140  | 5-scf00241 | 5 |
| AX-158099216 | 11 | 1.606 | KV452848.1 | 42865  | 5-scf00241 | 5 |
| AX-158099222 | 11 | 1.606 | KV452848.1 | 51933  | 5-scf00241 | 5 |
| AX-157857367 | 11 | 1.606 | KV452848.1 | 89547  | 5-scf00241 | 5 |
| AX-158099223 | 11 | 1.749 | KV452848.1 | 53875  | 5-scf00241 | 5 |
| AX-158099224 | 11 | 1.749 | KV452848.1 | 55128  | 5-scf00241 | 5 |
| AX-157750178 | 11 | 1.749 | KV452848.1 | 69127  | 5-scf00241 | 5 |
| AX-157742567 | 11 | 1.749 | KV452848.1 | 70926  | 5-scf00241 | 5 |
| AX-158380013 | 11 | 1.749 | KV452848.1 | 75714  | 5-scf00241 | 5 |
| AX-158099231 | 11 | 1.749 | KV452848.1 | 76631  | 5-scf00241 | 5 |
| AX-158099232 | 11 | 1.749 | KV452848.1 | 77366  | 5-scf00241 | 5 |
| AX-158099233 | 11 | 1.749 | KV452848.1 | 78788  | 5-scf00241 | 5 |
| AX-158099239 | 11 | 2.044 | KV452848.1 | 97484  | 5-scf00241 | 5 |
| AX-158099245 | 11 | 2.044 | KV452848.1 | 101859 | 5-scf00241 | 5 |
| AX-158099247 | 11 | 2.044 | KV452848.1 | 102816 | 5-scf00241 | 5 |
| AX-157722028 | 11 | 2.044 | KV452848.1 | 103419 | 5-scf00241 | 5 |
| AX-158099248 | 11 | 2.044 | KV452848.1 | 103948 | 5-scf00241 | 5 |
| AX-158099249 | 11 | 2.044 | KV452848.1 | 105889 | 5-scf00241 | 5 |
| AX-158099254 | 11 | 2.044 | KV452848.1 | 111899 | 5-scf00241 | 5 |
| AX-157826533 | 11 | 2.044 | KV452848.1 | 112862 | 5-scf00241 | 5 |
| AX-158099255 | 11 | 2.044 | KV452848.1 | 115443 | 5-scf00241 | 5 |
| AX-157826534 | 11 | 2.175 | KV452848.1 | 117754 | 5-scf00241 | 5 |

|              |    |       |            |        |            |   |
|--------------|----|-------|------------|--------|------------|---|
| AX-158099258 | 11 | 2.175 | KV452848.1 | 118440 | 5-scf00241 | 5 |
| AX-158099259 | 11 | 2.178 | KV452848.1 | 120062 | 5-scf00241 | 5 |
| AX-158099274 | 11 | 2.178 | KV452848.1 | 130687 | 5-scf00241 | 5 |
| AX-158099260 | 11 | 2.18  | KV452848.1 | 121718 | 5-scf00241 | 5 |
| AX-158099234 | 11 | 2.181 | KV452848.1 | 79024  | 5-scf00241 | 5 |
| AX-158099261 | 11 | 2.181 | KV452848.1 | 122343 | 5-scf00241 | 5 |
| AX-158099265 | 11 | 2.183 | KV452848.1 | 124607 | 5-scf00241 | 5 |
| AX-158099268 | 11 | 2.184 | KV452848.1 | 127081 | 5-scf00241 | 5 |
| AX-158099285 | 11 | 2.184 | KV452848.1 | 157821 | 5-scf00241 | 5 |
| AX-157826538 | 11 | 2.184 | KV452848.1 | 175885 | 5-scf00241 | 5 |
| AX-158099242 | 11 | 2.186 | KV452848.1 | 99391  | 5-scf00241 | 5 |
| AX-158099266 | 11 | 2.186 | KV452848.1 | 124992 | 5-scf00241 | 5 |
| AX-158099267 | 11 | 2.186 | KV452848.1 | 125649 | 5-scf00241 | 5 |
| AX-157721730 | 11 | 2.186 | KV452848.1 | 129413 | 5-scf00241 | 5 |
| AX-158099276 | 11 | 2.186 | KV452848.1 | 135564 | 5-scf00241 | 5 |
| AX-158099277 | 11 | 2.186 | KV452848.1 | 141267 | 5-scf00241 | 5 |
| AX-158099281 | 11 | 2.186 | KV452848.1 | 151890 | 5-scf00241 | 5 |
| AX-158099284 | 11 | 2.186 | KV452848.1 | 155959 | 5-scf00241 | 5 |
| AX-157826535 | 11 | 2.186 | KV452848.1 | 160211 | 5-scf00241 | 5 |
| AX-157758518 | 11 | 2.186 | KV452848.1 | 160984 | 5-scf00241 | 5 |
| AX-158407383 | 11 | 2.186 | KV452848.1 | 162757 | 5-scf00241 | 5 |
| AX-158099288 | 11 | 2.186 | KV452848.1 | 163953 | 5-scf00241 | 5 |
| AX-158099290 | 11 | 2.186 | KV452848.1 | 169951 | 5-scf00241 | 5 |
| AX-157826536 | 11 | 2.186 | KV452848.1 | 172618 | 5-scf00241 | 5 |
| AX-157694467 | 11 | 2.186 | KV452848.1 | 175202 | 5-scf00241 | 5 |
| AX-158099292 | 11 | 2.186 | KV452848.1 | 175392 | 5-scf00241 | 5 |
| AX-158099293 | 11 | 2.186 | KV452848.1 | 176524 | 5-scf00241 | 5 |
| AX-158099327 | 11 | 2.186 | KV452848.1 | 234002 | 5-scf00241 | 5 |
| AX-158099346 | 11 | 2.186 | KV452848.1 | 254518 | 5-scf00241 | 5 |
| AX-158099299 | 11 | 2.264 | KV452848.1 | 185204 | 5-scf00241 | 5 |
| AX-157746491 | 11 | 2.404 | KV452848.1 | 193815 | 5-scf00241 | 5 |
| AX-157744089 | 11 | 2.404 | KV452848.1 | 195052 | 5-scf00241 | 5 |
| AX-158099304 | 11 | 2.404 | KV452848.1 | 196262 | 5-scf00241 | 5 |
| AX-158099307 | 11 | 2.404 | KV452848.1 | 201513 | 5-scf00241 | 5 |
| AX-158099309 | 11 | 2.404 | KV452848.1 | 203155 | 5-scf00241 | 5 |
| AX-158099310 | 11 | 2.514 | KV452848.1 | 204871 | 5-scf00241 | 5 |
| AX-158099314 | 11 | 2.514 | KV452848.1 | 213847 | 5-scf00241 | 5 |
| AX-158099315 | 11 | 2.514 | KV452848.1 | 214279 | 5-scf00241 | 5 |
| AX-157857368 | 11 | 2.514 | KV452848.1 | 216799 | 5-scf00241 | 5 |
| AX-158099317 | 11 | 2.514 | KV452848.1 | 216917 | 5-scf00241 | 5 |
| AX-158380014 | 11 | 2.514 | KV452848.1 | 219263 | 5-scf00241 | 5 |
| AX-158099328 | 11 | 2.514 | KV452848.1 | 234393 | 5-scf00241 | 5 |
| AX-157826542 | 11 | 2.514 | KV452848.1 | 235138 | 5-scf00241 | 5 |
| AX-158099329 | 11 | 2.514 | KV452848.1 | 235270 | 5-scf00241 | 5 |
| AX-158099333 | 11 | 2.514 | KV452848.1 | 238264 | 5-scf00241 | 5 |
| AX-157826547 | 11 | 2.514 | KV452848.1 | 272419 | 5-scf00241 | 5 |
| AX-158099335 | 11 | 2.623 | KV452848.1 | 241380 | 5-scf00241 | 5 |
| AX-158099337 | 11 | 2.623 | KV452848.1 | 243044 | 5-scf00241 | 5 |
| AX-158099340 | 11 | 2.623 | KV452848.1 | 247918 | 5-scf00241 | 5 |
| AX-158099703 | 11 | 2.623 | KV452851.1 | 224297 | 5-scf00244 | 5 |
| AX-158099348 | 11 | 2.652 | KV452848.1 | 255198 | 5-scf00241 | 5 |

|              |    |       |            |        |            |   |
|--------------|----|-------|------------|--------|------------|---|
| AX-158099351 | 11 | 2.776 | KV452848.1 | 259406 | 5-scf00241 | 5 |
| AX-158099353 | 11 | 2.877 | KV452848.1 | 260091 | 5-scf00241 | 5 |
| AX-158099364 | 11 | 2.877 | KV452848.1 | 280376 | 5-scf00241 | 5 |
| AX-158099366 | 11 | 2.877 | KV452848.1 | 282212 | 5-scf00241 | 5 |
| AX-158099508 | 11 | 2.877 | KV452849.1 | 113039 | 5-scf00243 | 5 |
| AX-158099511 | 11 | 2.877 | KV452849.1 | 115862 | 5-scf00243 | 5 |
| AX-158099512 | 11 | 2.877 | KV452849.1 | 116157 | 5-scf00243 | 5 |
| AX-158099250 | 11 | 2.951 | KV452848.1 | 107404 | 5-scf00241 | 5 |
| AX-158099344 | 11 | 2.951 | KV452848.1 | 253544 | 5-scf00241 | 5 |
| AX-158099349 | 11 | 2.951 | KV452848.1 | 257100 | 5-scf00241 | 5 |
| AX-157719953 | 11 | 2.951 | KV452848.1 | 259060 | 5-scf00241 | 5 |
| AX-158099359 | 11 | 2.951 | KV452848.1 | 268303 | 5-scf00241 | 5 |
| AX-157826546 | 11 | 2.951 | KV452848.1 | 271292 | 5-scf00241 | 5 |
| AX-158099365 | 11 | 2.951 | KV452848.1 | 280672 | 5-scf00241 | 5 |
| AX-158099367 | 11 | 2.951 | KV452848.1 | 283909 | 5-scf00241 | 5 |
| AX-158099376 | 11 | 2.951 | KV452848.1 | 293345 | 5-scf00241 | 5 |
| AX-158099377 | 11 | 2.951 | KV452848.1 | 294402 | 5-scf00241 | 5 |
| AX-158099379 | 11 | 2.951 | KV452848.1 | 297947 | 5-scf00241 | 5 |
| AX-158099386 | 11 | 2.951 | KV452848.1 | 314955 | 5-scf00241 | 5 |
| AX-158099387 | 11 | 2.951 | KV452848.1 | 315480 | 5-scf00241 | 5 |
| AX-158099390 | 11 | 2.951 | KV452848.1 | 317439 | 5-scf00241 | 5 |
| AX-157727429 | 11 | 2.951 | KV452848.1 | 318035 | 5-scf00241 | 5 |
| AX-158099391 | 11 | 2.951 | KV452848.1 | 320053 | 5-scf00241 | 5 |
| AX-158099392 | 11 | 2.951 | KV452848.1 | 320325 | 5-scf00241 | 5 |
| AX-158099393 | 11 | 2.951 | KV452848.1 | 324784 | 5-scf00241 | 5 |
| AX-157724135 | 11 | 2.951 | KV452848.1 | 325775 | 5-scf00241 | 5 |
| AX-157761509 | 11 | 2.951 | KV452848.1 | 328343 | 5-scf00241 | 5 |
| AX-158099400 | 11 | 2.951 | KV452848.1 | 336145 | 5-scf00241 | 5 |
| AX-158099402 | 11 | 2.951 | KV452848.1 | 336626 | 5-scf00241 | 5 |
| AX-158099403 | 11 | 2.951 | KV452848.1 | 338519 | 5-scf00241 | 5 |
| AX-158099404 | 11 | 2.951 | KV452848.1 | 338810 | 5-scf00241 | 5 |
| AX-158099405 | 11 | 2.951 | KV452848.1 | 339554 | 5-scf00241 | 5 |
| AX-158099406 | 11 | 2.951 | KV452848.1 | 342328 | 5-scf00241 | 5 |
| AX-158099407 | 11 | 2.951 | KV452848.1 | 342614 | 5-scf00241 | 5 |
| AX-158099409 | 11 | 2.951 | KV452848.1 | 346066 | 5-scf00241 | 5 |
| AX-158099592 | 11 | 2.951 | KV452849.1 | 224769 | 5-scf00243 | 5 |
| AX-158099596 | 11 | 2.951 | KV452849.1 | 227780 | 5-scf00243 | 5 |
| AX-158099597 | 11 | 2.951 | KV452849.1 | 229942 | 5-scf00243 | 5 |
| AX-158099616 | 11 | 2.951 | KV452851.1 | 54598  | 5-scf00244 | 5 |
| AX-157885807 | 11 | 2.951 | KV452851.1 | 84028  | 5-scf00244 | 5 |
| AX-158099648 | 11 | 2.951 | KV452851.1 | 101934 | 5-scf00244 | 5 |
| AX-157826559 | 11 | 2.951 | KV452851.1 | 213396 | 5-scf00244 | 5 |
| AX-158099696 | 11 | 2.951 | KV452851.1 | 214981 | 5-scf00244 | 5 |
| AX-158099311 | 11 | 3.169 | KV452848.1 | 205136 | 5-scf00241 | 5 |
| AX-158099342 | 11 | 3.169 | KV452848.1 | 249497 | 5-scf00241 | 5 |
| AX-158099384 | 11 | 3.169 | KV452848.1 | 310719 | 5-scf00241 | 5 |
| AX-158099459 | 11 | 3.169 | KV452849.1 | 8067   | 5-scf00243 | 5 |
| AX-158099491 | 11 | 3.169 | KV452849.1 | 91839  | 5-scf00243 | 5 |
| AX-158099496 | 11 | 3.169 | KV452849.1 | 94283  | 5-scf00243 | 5 |
| AX-158099498 | 11 | 3.169 | KV452849.1 | 96204  | 5-scf00243 | 5 |
| AX-158099510 | 11 | 3.169 | KV452849.1 | 115304 | 5-scf00243 | 5 |

|              |    |       |            |        |            |   |
|--------------|----|-------|------------|--------|------------|---|
| AX-158099517 | 11 | 3.169 | KV452849.1 | 124358 | 5-scf00243 | 5 |
| AX-157739720 | 11 | 3.169 | KV452849.1 | 124578 | 5-scf00243 | 5 |
| AX-158099518 | 11 | 3.169 | KV452849.1 | 124969 | 5-scf00243 | 5 |
| AX-158099521 | 11 | 3.169 | KV452849.1 | 126757 | 5-scf00243 | 5 |
| AX-158099534 | 11 | 3.169 | KV452849.1 | 136943 | 5-scf00243 | 5 |
| AX-158099539 | 11 | 3.169 | KV452849.1 | 142292 | 5-scf00243 | 5 |
| AX-158099541 | 11 | 3.169 | KV452849.1 | 146279 | 5-scf00243 | 5 |
| AX-158099556 | 11 | 3.169 | KV452849.1 | 163271 | 5-scf00243 | 5 |
| AX-158099557 | 11 | 3.169 | KV452849.1 | 164545 | 5-scf00243 | 5 |
| AX-158099558 | 11 | 3.169 | KV452849.1 | 164760 | 5-scf00243 | 5 |
| AX-158099564 | 11 | 3.169 | KV452849.1 | 175467 | 5-scf00243 | 5 |
| AX-158099566 | 11 | 3.169 | KV452849.1 | 188046 | 5-scf00243 | 5 |
| AX-158099568 | 11 | 3.169 | KV452849.1 | 189525 | 5-scf00243 | 5 |
| AX-158099569 | 11 | 3.169 | KV452849.1 | 191373 | 5-scf00243 | 5 |
| AX-158099572 | 11 | 3.169 | KV452849.1 | 196276 | 5-scf00243 | 5 |
| AX-158099576 | 11 | 3.169 | KV452849.1 | 205324 | 5-scf00243 | 5 |
| AX-158099679 | 11 | 3.169 | KV452851.1 | 179376 | 5-scf00244 | 5 |
| AX-157716901 | 11 | 3.169 | KV452851.1 | 216457 | 5-scf00244 | 5 |
| AX-157826561 | 11 | 3.169 | KV452851.1 | 220658 | 5-scf00244 | 5 |
| AX-158099561 | 11 | 3.184 | KV452849.1 | 170847 | 5-scf00243 | 5 |
| AX-158099562 | 11 | 3.198 | KV452849.1 | 174226 | 5-scf00243 | 5 |
| AX-158099497 | 11 | 3.21  | KV452849.1 | 95474  | 5-scf00243 | 5 |
| AX-158099565 | 11 | 3.21  | KV452849.1 | 179816 | 5-scf00243 | 5 |
| AX-158099567 | 11 | 3.22  | KV452849.1 | 189344 | 5-scf00243 | 5 |
| AX-158099398 | 11 | 3.23  | KV452848.1 | 334322 | 5-scf00241 | 5 |
| AX-157826549 | 11 | 3.23  | KV452848.1 | 334757 | 5-scf00241 | 5 |
| AX-158099570 | 11 | 3.23  | KV452849.1 | 192452 | 5-scf00243 | 5 |
| AX-158099575 | 11 | 3.23  | KV452849.1 | 203586 | 5-scf00243 | 5 |
| AX-158099577 | 11 | 3.23  | KV452849.1 | 206397 | 5-scf00243 | 5 |
| AX-158099582 | 11 | 3.254 | KV452849.1 | 213397 | 5-scf00243 | 5 |
| AX-158099586 | 11 | 3.388 | KV452849.1 | 219983 | 5-scf00243 | 5 |
| AX-158099587 | 11 | 3.388 | KV452849.1 | 221368 | 5-scf00243 | 5 |
| AX-158099588 | 11 | 3.388 | KV452849.1 | 221703 | 5-scf00243 | 5 |
| AX-158099589 | 11 | 3.388 | KV452849.1 | 222267 | 5-scf00243 | 5 |
| AX-157754626 | 11 | 3.453 | KV452849.1 | 224878 | 5-scf00243 | 5 |
| AX-158099295 | 11 | 3.51  | KV452848.1 | 177882 | 5-scf00241 | 5 |
| AX-158099361 | 11 | 3.51  | KV452848.1 | 275858 | 5-scf00241 | 5 |
| AX-158099401 | 11 | 3.51  | KV452848.1 | 336455 | 5-scf00241 | 5 |
| AX-158099461 | 11 | 3.51  | KV452849.1 | 33308  | 5-scf00243 | 5 |
| AX-158099502 | 11 | 3.51  | KV452849.1 | 100156 | 5-scf00243 | 5 |
| AX-158099594 | 11 | 3.51  | KV452849.1 | 227279 | 5-scf00243 | 5 |
| AX-158099595 | 11 | 3.51  | KV452849.1 | 227529 | 5-scf00243 | 5 |
| AX-158099640 | 11 | 3.51  | KV452851.1 | 97081  | 5-scf00244 | 5 |
| AX-158099395 | 11 | 3.715 | KV452848.1 | 331740 | 5-scf00241 | 5 |
| AX-158099399 | 11 | 3.715 | KV452848.1 | 335229 | 5-scf00241 | 5 |
| AX-158099537 | 11 | 3.715 | KV452849.1 | 140991 | 5-scf00243 | 5 |
| AX-158099605 | 11 | 3.715 | KV452851.1 | 11264  | 5-scf00244 | 5 |
| AX-158099606 | 11 | 3.715 | KV452851.1 | 16558  | 5-scf00244 | 5 |
| AX-158099615 | 11 | 3.715 | KV452851.1 | 51703  | 5-scf00244 | 5 |
| AX-158099624 | 11 | 3.715 | KV452851.1 | 74426  | 5-scf00244 | 5 |
| AX-158099651 | 11 | 3.715 | KV452851.1 | 104098 | 5-scf00244 | 5 |



|              |    |       |             |        |              |    |
|--------------|----|-------|-------------|--------|--------------|----|
| AX-157680363 | 11 | 3.715 | KV452850.1  | 18847  | 5-scf00245   | 5  |
| AX-157689352 | 11 | 3.715 | 3ML01029233 | 78     | scf04854_1   | UN |
| AX-157750106 | 11 | 3.716 | KV452848.1  | 318803 | 5-scf00241   | 5  |
| AX-158099520 | 11 | 3.716 | KV452849.1  | 125895 | 5-scf00243   | 5  |
| AX-158099524 | 11 | 3.716 | KV452849.1  | 129490 | 5-scf00243   | 5  |
| AX-158099535 | 11 | 3.716 | KV452849.1  | 137521 | 5-scf00243   | 5  |
| AX-157757742 | 11 | 3.716 | KV452849.1  | 140086 | 5-scf00243   | 5  |
| AX-158099538 | 11 | 3.716 | KV452849.1  | 141375 | 5-scf00243   | 5  |
| AX-158099552 | 11 | 3.716 | KV452849.1  | 159615 | 5-scf00243   | 5  |
| AX-158099554 | 11 | 3.716 | KV452849.1  | 161065 | 5-scf00243   | 5  |
| AX-158099555 | 11 | 3.716 | KV452849.1  | 162196 | 5-scf00243   | 5  |
| AX-158099583 | 11 | 3.716 | KV452849.1  | 217375 | 5-scf00243   | 5  |
| AX-157877515 | 11 | 3.716 | KV452851.1  | 32215  | 5-scf00244   | 5  |
| AX-158099625 | 11 | 3.716 | KV452851.1  | 77399  | 5-scf00244   | 5  |
| AX-158099628 | 11 | 3.716 | KV452851.1  | 79829  | 5-scf00244   | 5  |
| AX-157753192 | 11 | 3.716 | KV452851.1  | 83296  | 5-scf00244   | 5  |
| AX-158099633 | 11 | 3.716 | KV452851.1  | 84824  | 5-scf00244   | 5  |
| AX-158099636 | 11 | 3.716 | KV452851.1  | 92862  | 5-scf00244   | 5  |
| AX-158099637 | 11 | 3.716 | KV452851.1  | 93625  | 5-scf00244   | 5  |
| AX-158099638 | 11 | 3.716 | KV452851.1  | 95836  | 5-scf00244   | 5  |
| AX-157754160 | 11 | 3.716 | KV452851.1  | 98085  | 5-scf00244   | 5  |
| AX-158099645 | 11 | 3.716 | KV452851.1  | 100747 | 5-scf00244   | 5  |
| AX-158099646 | 11 | 3.716 | KV452851.1  | 101208 | 5-scf00244   | 5  |
| AX-157826553 | 11 | 3.716 | KV452851.1  | 102644 | 5-scf00244   | 5  |
| AX-158099654 | 11 | 3.716 | KV452851.1  | 108425 | 5-scf00244   | 5  |
| AX-158099655 | 11 | 3.716 | KV452851.1  | 109694 | 5-scf00244   | 5  |
| AX-158099656 | 11 | 3.716 | KV452851.1  | 111434 | 5-scf00244   | 5  |
| AX-158099657 | 11 | 3.716 | KV452851.1  | 115207 | 5-scf00244   | 5  |
| AX-157711039 | 11 | 3.821 |             | 136    | 233359_g5_i2 | UN |
| AX-158099667 | 11 | 3.934 | KV452851.1  | 157923 | 5-scf00244   | 5  |
| AX-158099670 | 11 | 3.934 | KV452851.1  | 165245 | 5-scf00244   | 5  |
| AX-157826554 | 11 | 3.934 | KV452851.1  | 168917 | 5-scf00244   | 5  |
| AX-158099673 | 11 | 3.934 | KV452851.1  | 169066 | 5-scf00244   | 5  |
| AX-157826555 | 11 | 3.934 | KV452851.1  | 175400 | 5-scf00244   | 5  |
| AX-157739441 | 11 | 3.934 | KV452851.1  | 178783 | 5-scf00244   | 5  |
| AX-157870956 | 11 | 3.934 | KV452851.1  | 185842 | 5-scf00244   | 5  |
| AX-158099678 | 11 | 3.974 | KV452851.1  | 178855 | 5-scf00244   | 5  |
| AX-157826557 | 11 | 4.007 | KV452851.1  | 189716 | 5-scf00244   | 5  |
| AX-157742578 | 11 | 4.029 | KV452851.1  | 191704 | 5-scf00244   | 5  |
| AX-158099383 | 11 | 4.035 | KV452848.1  | 309582 | 5-scf00241   | 5  |
| AX-157748535 | 11 | 4.035 | KV452848.1  | 316898 | 5-scf00241   | 5  |
| AX-158099688 | 11 | 4.035 | KV452851.1  | 195080 | 5-scf00244   | 5  |
| AX-157877510 | 11 | 4.044 | KV452848.1  | 285779 | 5-scf00241   | 5  |
| AX-158099370 | 11 | 4.044 | KV452848.1  | 286462 | 5-scf00241   | 5  |
| AX-158099540 | 11 | 4.044 | KV452849.1  | 142814 | 5-scf00243   | 5  |
| AX-158099545 | 11 | 4.044 | KV452849.1  | 148867 | 5-scf00243   | 5  |
| AX-158099550 | 11 | 4.044 | KV452849.1  | 157634 | 5-scf00243   | 5  |
| AX-158099563 | 11 | 4.044 | KV452849.1  | 175109 | 5-scf00243   | 5  |
| AX-158099601 | 11 | 4.044 | KV452851.1  | 3726   | 5-scf00244   | 5  |
| AX-158099602 | 11 | 4.044 | KV452851.1  | 5249   | 5-scf00244   | 5  |
| AX-158099623 | 11 | 4.044 | KV452851.1  | 73840  | 5-scf00244   | 5  |

|              |    |       |             |        |            |    |
|--------------|----|-------|-------------|--------|------------|----|
| AX-158099634 | 11 | 4.044 | KV452851.1  | 90318  | 5-scf00244 | 5  |
| AX-158099652 | 11 | 4.044 | KV452851.1  | 105926 | 5-scf00244 | 5  |
| AX-158099689 | 11 | 4.044 | KV452851.1  | 197524 | 5-scf00244 | 5  |
| AX-157826558 | 11 | 4.044 | KV452851.1  | 203635 | 5-scf00244 | 5  |
| AX-158099693 | 11 | 4.044 | KV452851.1  | 207894 | 5-scf00244 | 5  |
| AX-158099694 | 11 | 4.044 | KV452851.1  | 208703 | 5-scf00244 | 5  |
| AX-157717340 | 11 | 4.153 | KV452848.1  | 339888 | 5-scf00241 | 5  |
| AX-157885809 | 11 | 4.153 | KV452851.1  | 214070 | 5-scf00244 | 5  |
| AX-158099697 | 11 | 4.153 | KV452851.1  | 217870 | 5-scf00244 | 5  |
| AX-158099698 | 11 | 4.153 | KV452851.1  | 218484 | 5-scf00244 | 5  |
| AX-158099699 | 11 | 4.153 | KV452851.1  | 219239 | 5-scf00244 | 5  |
| AX-158099668 | 11 | 4.581 | KV452851.1  | 159419 | 5-scf00244 | 5  |
| AX-157743495 | 11 | 4.581 | KV452851.1  | 193852 | 5-scf00244 | 5  |
| AX-157716829 | 11 | 4.581 | KV452851.1  | 222035 | 5-scf00244 | 5  |
| AX-158099702 | 11 | 4.581 | KV452851.1  | 222894 | 5-scf00244 | 5  |
| AX-157826564 | 11 | 4.581 | KV452851.1  | 230290 | 5-scf00244 | 5  |
| AX-158099708 | 11 | 4.581 | KV452851.1  | 234893 | 5-scf00244 | 5  |
| AX-157721380 | 11 | 4.581 | KV452851.1  | 237012 | 5-scf00244 | 5  |
| AX-158099711 | 11 | 4.581 | KV452851.1  | 238636 | 5-scf00244 | 5  |
| AX-158099713 | 11 | 4.597 | KV452851.1  | 240330 | 5-scf00244 | 5  |
| AX-158099715 | 11 | 4.597 | KV452851.1  | 241475 | 5-scf00244 | 5  |
| AX-157865888 | 11 | 4.597 | KV452851.1  | 242295 | 5-scf00244 | 5  |
| AX-157826565 | 11 | 5.136 | KV452851.1  | 246275 | 5-scf00244 | 5  |
| AX-158099717 | 11 | 5.136 | KV452851.1  | 246965 | 5-scf00244 | 5  |
| AX-157754036 | 11 | 5.136 | KV452851.1  | 247362 | 5-scf00244 | 5  |
| AX-158099719 | 11 | 5.137 | KV452851.1  | 247551 | 5-scf00244 | 5  |
| AX-158099722 | 11 | 5.137 | KV452851.1  | 249152 | 5-scf00244 | 5  |
| AX-158099723 | 11 | 5.137 | KV452851.1  | 251701 | 5-scf00244 | 5  |
| AX-157720315 | 11 | 5.137 | KV452851.1  | 252395 | 5-scf00244 | 5  |
| AX-158099736 | 11 | 5.137 | KV452851.1  | 268567 | 5-scf00244 | 5  |
| AX-158099718 | 11 | 5.218 | KV452851.1  | 247150 | 5-scf00244 | 5  |
| AX-158099725 | 11 | 5.218 | KV452851.1  | 253329 | 5-scf00244 | 5  |
| AX-157826566 | 11 | 5.295 | KV452851.1  | 255738 | 5-scf00244 | 5  |
| AX-158099730 | 11 | 5.353 | KV452851.1  | 258059 | 5-scf00244 | 5  |
| AX-158099731 | 11 | 5.353 | KV452851.1  | 258865 | 5-scf00244 | 5  |
| AX-158099733 | 11 | 5.424 | KV452851.1  | 261422 | 5-scf00244 | 5  |
| AX-157680031 | 11 | 5.47  | 3ML01029068 | 561    | scf04687_1 | UN |
| AX-158099738 | 11 | 5.573 | KV452851.1  | 270845 | 5-scf00244 | 5  |
| AX-158099742 | 11 | 5.573 | KV452852.1  | 5201   | 5-scf00246 | 5  |
| AX-158099746 | 11 | 5.573 | KV452852.1  | 17267  | 5-scf00246 | 5  |
| AX-158384687 | 11 | 5.573 | KV452852.1  | 22100  | 5-scf00246 | 5  |
| AX-158099749 | 11 | 5.573 | KV452852.1  | 23562  | 5-scf00246 | 5  |
| AX-158410313 | 11 | 5.573 | KV452852.1  | 25558  | 5-scf00246 | 5  |
| AX-158410314 | 11 | 5.573 | KV452852.1  | 25832  | 5-scf00246 | 5  |
| AX-158410315 | 11 | 5.573 | KV452852.1  | 26169  | 5-scf00246 | 5  |
| AX-158384692 | 11 | 5.573 | KV452852.1  | 143657 | 5-scf00246 | 5  |
| AX-158410316 | 11 | 5.791 | KV452852.1  | 26268  | 5-scf00246 | 5  |
| AX-158099756 | 11 | 5.791 | KV452852.1  | 29694  | 5-scf00246 | 5  |
| AX-158099757 | 11 | 5.792 | KV452852.1  | 29912  | 5-scf00246 | 5  |
| AX-158380015 | 11 | 5.792 | KV452852.1  | 31094  | 5-scf00246 | 5  |
| AX-158099763 | 11 | 5.792 | KV452852.1  | 37176  | 5-scf00246 | 5  |

|              |    |       |            |        |            |   |
|--------------|----|-------|------------|--------|------------|---|
| AX-157727314 | 11 | 5.792 | KV452852.1 | 41090  | 5-scf00246 | 5 |
| AX-158099768 | 11 | 5.869 | KV452852.1 | 44911  | 5-scf00246 | 5 |
| AX-158099769 | 11 | 5.933 | KV452852.1 | 52513  | 5-scf00246 | 5 |
| AX-158099674 | 11 | 6.01  | KV452851.1 | 171512 | 5-scf00244 | 5 |
| AX-158099750 | 11 | 6.01  | KV452852.1 | 23985  | 5-scf00246 | 5 |
| AX-158099753 | 11 | 6.01  | KV452852.1 | 27683  | 5-scf00246 | 5 |
| AX-158099770 | 11 | 6.01  | KV452852.1 | 53219  | 5-scf00246 | 5 |
| AX-158099772 | 11 | 6.01  | KV452852.1 | 57259  | 5-scf00246 | 5 |
| AX-158099773 | 11 | 6.01  | KV452852.1 | 58050  | 5-scf00246 | 5 |
| AX-157720706 | 11 | 6.01  | KV452852.1 | 59236  | 5-scf00246 | 5 |
| AX-158099774 | 11 | 6.01  | KV452852.1 | 59738  | 5-scf00246 | 5 |
| AX-158099783 | 11 | 6.228 | KV452852.1 | 76172  | 5-scf00246 | 5 |
| AX-158099784 | 11 | 6.228 | KV452852.1 | 76687  | 5-scf00246 | 5 |
| AX-158099787 | 11 | 6.228 | KV452852.1 | 79461  | 5-scf00246 | 5 |
| AX-158099788 | 11 | 6.275 | KV452852.1 | 80037  | 5-scf00246 | 5 |
| AX-158099789 | 11 | 6.342 | KV452852.1 | 81971  | 5-scf00246 | 5 |
| AX-158099792 | 11 | 6.371 | KV452852.1 | 86044  | 5-scf00246 | 5 |
| AX-158099793 | 11 | 6.447 | KV452852.1 | 94560  | 5-scf00246 | 5 |
| AX-158099794 | 11 | 6.447 | KV452852.1 | 96713  | 5-scf00246 | 5 |
| AX-158099800 | 11 | 6.632 | KV452852.1 | 104516 | 5-scf00246 | 5 |
| AX-158099801 | 11 | 6.632 | KV452852.1 | 105003 | 5-scf00246 | 5 |
| AX-158099803 | 11 | 6.632 | KV452852.1 | 107150 | 5-scf00246 | 5 |
| AX-158099806 | 11 | 6.817 | KV452852.1 | 112448 | 5-scf00246 | 5 |
| AX-158099807 | 11 | 6.817 | KV452852.1 | 113110 | 5-scf00246 | 5 |
| AX-158099808 | 11 | 6.817 | KV452852.1 | 113312 | 5-scf00246 | 5 |
| AX-158384689 | 11 | 6.987 | KV452852.1 | 116179 | 5-scf00246 | 5 |
| AX-158099798 | 11 | 6.997 | KV452852.1 | 102453 | 5-scf00246 | 5 |
| AX-158099810 | 11 | 6.997 | KV452852.1 | 117879 | 5-scf00246 | 5 |
| AX-158099811 | 11 | 6.997 | KV452852.1 | 119510 | 5-scf00246 | 5 |
| AX-158099812 | 11 | 6.997 | KV452852.1 | 120846 | 5-scf00246 | 5 |
| AX-158099813 | 11 | 6.997 | KV452852.1 | 123227 | 5-scf00246 | 5 |
| AX-158099814 | 11 | 6.997 | KV452852.1 | 124372 | 5-scf00246 | 5 |
| AX-158099839 | 11 | 6.997 | KV452852.1 | 167505 | 5-scf00246 | 5 |
| AX-158099815 | 11 | 7.299 | KV452852.1 | 129514 | 5-scf00246 | 5 |
| AX-157742453 | 11 | 7.3   | KV452852.1 | 133245 | 5-scf00246 | 5 |
| AX-158099820 | 11 | 7.3   | KV452852.1 | 137154 | 5-scf00246 | 5 |
| AX-157745477 | 11 | 7.506 | KV452852.1 | 138636 | 5-scf00246 | 5 |
| AX-158099823 | 11 | 7.512 | KV452852.1 | 144753 | 5-scf00246 | 5 |
| AX-158099825 | 11 | 7.512 | KV452852.1 | 147812 | 5-scf00246 | 5 |
| AX-158099826 | 11 | 7.512 | KV452852.1 | 148842 | 5-scf00246 | 5 |
| AX-158099827 | 11 | 7.515 | KV452852.1 | 155973 | 5-scf00246 | 5 |
| AX-158099829 | 11 | 7.868 | KV452852.1 | 157755 | 5-scf00246 | 5 |
| AX-158099830 | 11 | 7.868 | KV452852.1 | 158445 | 5-scf00246 | 5 |
| AX-158392203 | 11 | 7.868 | KV452852.1 | 159160 | 5-scf00246 | 5 |
| AX-158099831 | 11 | 7.868 | KV452852.1 | 159876 | 5-scf00246 | 5 |
| AX-158099832 | 11 | 7.868 | KV452852.1 | 162205 | 5-scf00246 | 5 |
| AX-158099834 | 11 | 7.869 | KV452852.1 | 163755 | 5-scf00246 | 5 |
| AX-158380017 | 11 | 7.869 | KV452852.1 | 165254 | 5-scf00246 | 5 |
| AX-158099837 | 11 | 7.869 | KV452852.1 | 165510 | 5-scf00246 | 5 |
| AX-158099838 | 11 | 7.872 | KV452852.1 | 166547 | 5-scf00246 | 5 |
| AX-158099845 | 11 | 8.654 | KV452852.1 | 174448 | 5-scf00246 | 5 |

|              |    |        |            |        |            |   |
|--------------|----|--------|------------|--------|------------|---|
| AX-158099863 | 11 | 8.654  | KV452852.1 | 192185 | 5-scf00246 | 5 |
| AX-158099848 | 11 | 8.657  | KV452852.1 | 177362 | 5-scf00246 | 5 |
| AX-158099849 | 11 | 8.657  | KV452852.1 | 177897 | 5-scf00246 | 5 |
| AX-158099850 | 11 | 8.765  | KV452852.1 | 178687 | 5-scf00246 | 5 |
| AX-158099855 | 11 | 8.852  | KV452852.1 | 184628 | 5-scf00246 | 5 |
| AX-158099860 | 11 | 8.854  | KV452852.1 | 190040 | 5-scf00246 | 5 |
| AX-158099861 | 11 | 8.856  | KV452852.1 | 190577 | 5-scf00246 | 5 |
| AX-157719054 | 11 | 8.972  | KV452852.1 | 191595 | 5-scf00246 | 5 |
| AX-158099864 | 11 | 9.181  | KV452852.1 | 193795 | 5-scf00246 | 5 |
| AX-158099865 | 11 | 9.293  | KV452852.1 | 194390 | 5-scf00246 | 5 |
| AX-158099870 | 11 | 9.545  | KV452852.1 | 199286 | 5-scf00246 | 5 |
| AX-158099868 | 11 | 9.546  | KV452852.1 | 198128 | 5-scf00246 | 5 |
| AX-158099871 | 11 | 9.546  | KV452852.1 | 199672 | 5-scf00246 | 5 |
| AX-157775685 | 11 | 9.546  | KV452852.1 | 201161 | 5-scf00246 | 5 |
| AX-157749811 | 11 | 9.548  | KV452852.1 | 203456 | 5-scf00246 | 5 |
| AX-158099876 | 11 | 9.91   | KV452852.1 | 206864 | 5-scf00246 | 5 |
| AX-157713783 | 11 | 9.912  | KV452852.1 | 209565 | 5-scf00246 | 5 |
| AX-158099882 | 11 | 9.912  | KV452852.1 | 214437 | 5-scf00246 | 5 |
| AX-158384696 | 11 | 10.277 | KV452852.1 | 219218 | 5-scf00246 | 5 |
| AX-158099883 | 11 | 10.277 | KV452852.1 | 220283 | 5-scf00246 | 5 |
| AX-157723343 | 11 | 10.277 | KV452852.1 | 226991 | 5-scf00246 | 5 |
| AX-158099885 | 11 | 10.604 | KV452852.1 | 222148 | 5-scf00246 | 5 |
| AX-158099886 | 11 | 10.605 | KV452852.1 | 222465 | 5-scf00246 | 5 |
| AX-157758099 | 11 | 10.605 | KV452852.1 | 225057 | 5-scf00246 | 5 |
| AX-158099888 | 11 | 10.605 | KV452852.1 | 225907 | 5-scf00246 | 5 |
| AX-158099889 | 11 | 10.605 | KV452852.1 | 232142 | 5-scf00246 | 5 |
| AX-158099890 | 11 | 10.605 | KV452852.1 | 236095 | 5-scf00246 | 5 |
| AX-158099892 | 11 | 10.605 | KV452852.1 | 238832 | 5-scf00246 | 5 |
| AX-157746274 | 11 | 10.605 | KV452852.1 | 240806 | 5-scf00246 | 5 |
| AX-158099895 | 11 | 10.605 | KV452852.1 | 241287 | 5-scf00246 | 5 |
| AX-157826571 | 11 | 10.607 | KV452852.1 | 239975 | 5-scf00246 | 5 |
| AX-158099896 | 11 | 10.607 | KV452852.1 | 241946 | 5-scf00246 | 5 |
| AX-158099900 | 11 | 10.868 | KV452852.1 | 245458 | 5-scf00246 | 5 |
| AX-158099902 | 11 | 10.973 | KV452852.1 | 246663 | 5-scf00246 | 5 |
| AX-158099907 | 11 | 10.973 | KV452852.1 | 260776 | 5-scf00246 | 5 |
| AX-157748112 | 11 | 10.973 | KV452852.1 | 262916 | 5-scf00246 | 5 |
| AX-158099909 | 11 | 10.973 | KV452852.1 | 263796 | 5-scf00246 | 5 |
| AX-158380018 | 11 | 10.973 | KV452852.1 | 268936 | 5-scf00246 | 5 |
| AX-158384697 | 11 | 11.015 | KV452852.1 | 270507 | 5-scf00246 | 5 |
| AX-157720917 | 11 | 11.056 | KV452852.1 | 262330 | 5-scf00246 | 5 |
| AX-157857374 | 11 | 11.056 | KV452852.1 | 275703 | 5-scf00246 | 5 |
| AX-158099913 | 11 | 11.149 | KV452852.1 | 276057 | 5-scf00246 | 5 |
| AX-158099915 | 11 | 11.444 | KV452852.1 | 282039 | 5-scf00246 | 5 |
| AX-158099952 | 11 | 11.444 | KV452852.1 | 343650 | 5-scf00246 | 5 |
| AX-157750125 | 11 | 11.585 | KV452852.1 | 283170 | 5-scf00246 | 5 |
| AX-158099919 | 11 | 11.585 | KV452852.1 | 287051 | 5-scf00246 | 5 |
| AX-158099920 | 11 | 11.586 | KV452852.1 | 289279 | 5-scf00246 | 5 |
| AX-158099922 | 11 | 11.587 | KV452852.1 | 290964 | 5-scf00246 | 5 |
| AX-158099924 | 11 | 11.588 | KV452852.1 | 292019 | 5-scf00246 | 5 |
| AX-158099925 | 11 | 11.589 | KV452852.1 | 293770 | 5-scf00246 | 5 |
| AX-157826573 | 11 | 11.589 | KV452852.1 | 295100 | 5-scf00246 | 5 |

|              |    |        |            |        |            |   |
|--------------|----|--------|------------|--------|------------|---|
| AX-158099918 | 11 | 11.807 | KV452852.1 | 286341 | 5-scf00246 | 5 |
| AX-157715358 | 11 | 11.807 | KV452852.1 | 296419 | 5-scf00246 | 5 |
| AX-157708815 | 11 | 11.807 | KV452852.1 | 305864 | 5-scf00246 | 5 |
| AX-157877523 | 11 | 11.807 | KV452852.1 | 310841 | 5-scf00246 | 5 |
| AX-158099932 | 11 | 11.807 | KV452852.1 | 311625 | 5-scf00246 | 5 |
| AX-158099933 | 11 | 11.807 | KV452852.1 | 312286 | 5-scf00246 | 5 |
| AX-158099934 | 11 | 11.807 | KV452852.1 | 315417 | 5-scf00246 | 5 |
| AX-158099935 | 11 | 11.807 | KV452852.1 | 316193 | 5-scf00246 | 5 |
| AX-158099936 | 11 | 11.807 | KV452852.1 | 317408 | 5-scf00246 | 5 |
| AX-157750955 | 11 | 11.807 | KV452852.1 | 321281 | 5-scf00246 | 5 |
| AX-157747852 | 11 | 11.807 | KV452852.1 | 324839 | 5-scf00246 | 5 |
| AX-157747589 | 11 | 11.807 | KV452852.1 | 327012 | 5-scf00246 | 5 |
| AX-158099943 | 11 | 11.807 | KV452852.1 | 327959 | 5-scf00246 | 5 |
| AX-157826574 | 11 | 11.807 | KV452852.1 | 329518 | 5-scf00246 | 5 |
| AX-157738680 | 11 | 11.807 | KV452852.1 | 330360 | 5-scf00246 | 5 |
| AX-158380019 | 11 | 11.807 | KV452852.1 | 331645 | 5-scf00246 | 5 |
| AX-157723507 | 11 | 11.807 | KV452852.1 | 333707 | 5-scf00246 | 5 |
| AX-157826575 | 11 | 11.807 | KV452852.1 | 334275 | 5-scf00246 | 5 |
| AX-158099945 | 11 | 11.807 | KV452852.1 | 337345 | 5-scf00246 | 5 |
| AX-157826576 | 11 | 11.807 | KV452852.1 | 337860 | 5-scf00246 | 5 |
| AX-157715238 | 11 | 11.807 | KV452852.1 | 339294 | 5-scf00246 | 5 |
| AX-158099950 | 11 | 11.807 | KV452852.1 | 341712 | 5-scf00246 | 5 |
| AX-158099951 | 11 | 11.807 | KV452852.1 | 342644 | 5-scf00246 | 5 |
| AX-158099953 | 11 | 12.025 | KV452852.1 | 348121 | 5-scf00246 | 5 |
| AX-158099954 | 11 | 12.025 | KV452852.1 | 348579 | 5-scf00246 | 5 |
| AX-158099956 | 11 | 12.081 | KV452852.1 | 351259 | 5-scf00246 | 5 |
| AX-158099957 | 11 | 12.135 | KV452852.1 | 352554 | 5-scf00246 | 5 |
| AX-157826580 | 11 | 12.135 | KV452852.1 | 359367 | 5-scf00246 | 5 |
| AX-157826581 | 11 | 12.264 | KV452852.1 | 365010 | 5-scf00246 | 5 |
| AX-158099962 | 11 | 12.86  | KV452852.1 | 372176 | 5-scf00246 | 5 |
| AX-158099961 | 11 | 12.9   | KV452852.1 | 363699 | 5-scf00246 | 5 |
| AX-158099963 | 11 | 12.9   | KV452852.1 | 372558 | 5-scf00246 | 5 |
| AX-158099967 | 11 | 12.9   | KV452852.1 | 375514 | 5-scf00246 | 5 |
| AX-158099968 | 11 | 12.9   | KV452852.1 | 379152 | 5-scf00246 | 5 |
| AX-158099969 | 11 | 13.143 | KV452852.1 | 381894 | 5-scf00246 | 5 |
| AX-157754161 | 11 | 13.143 | KV452852.1 | 382010 | 5-scf00246 | 5 |
| AX-157714475 | 11 | 13.143 | KV452852.1 | 383083 | 5-scf00246 | 5 |
| AX-158099970 | 11 | 13.588 | KV452852.1 | 387258 | 5-scf00246 | 5 |
| AX-158099971 | 11 | 13.591 | KV452852.1 | 388014 | 5-scf00246 | 5 |
| AX-158099974 | 11 | 13.594 | KV452852.1 | 390739 | 5-scf00246 | 5 |
| AX-158099975 | 11 | 13.665 | KV452852.1 | 391946 | 5-scf00246 | 5 |
| AX-158099978 | 11 | 14.025 | KV452852.1 | 401765 | 5-scf00246 | 5 |
| AX-157718075 | 11 | 14.076 | KV452852.1 | 402329 | 5-scf00246 | 5 |
| AX-158392206 | 11 | 14.076 | KV452852.1 | 405658 | 5-scf00246 | 5 |
| AX-157714610 | 11 | 14.077 | KV452852.1 | 408174 | 5-scf00246 | 5 |
| AX-157740880 | 11 | 14.077 | KV452852.1 | 408958 | 5-scf00246 | 5 |
| AX-158099984 | 11 | 14.113 | KV452852.1 | 412066 | 5-scf00246 | 5 |
| AX-157826582 | 11 | 14.213 | KV452852.1 | 416117 | 5-scf00246 | 5 |
| AX-157773904 | 11 | 14.213 | KV452852.1 | 419061 | 5-scf00246 | 5 |
| AX-157826583 | 11 | 14.213 | KV452852.1 | 419731 | 5-scf00246 | 5 |
| AX-158099987 | 11 | 14.213 | KV452852.1 | 423975 | 5-scf00246 | 5 |

|              |    |        |             |        |            |    |
|--------------|----|--------|-------------|--------|------------|----|
| AX-158099989 | 11 | 14.242 | KV452852.1  | 430604 | 5-scf00246 | 5  |
| AX-158099991 | 11 | 14.317 | KV452852.1  | 432753 | 5-scf00246 | 5  |
| AX-158099993 | 11 | 14.396 | KV452852.1  | 434766 | 5-scf00246 | 5  |
| AX-158099995 | 11 | 14.397 | KV452852.1  | 438339 | 5-scf00246 | 5  |
| AX-157826585 | 11 | 14.76  | KV452852.1  | 422062 | 5-scf00246 | 5  |
| AX-158384700 | 11 | 14.76  | KV452852.1  | 439697 | 5-scf00246 | 5  |
| AX-158099996 | 11 | 14.76  | KV452852.1  | 440726 | 5-scf00246 | 5  |
| AX-158099997 | 11 | 14.76  | KV452852.1  | 441219 | 5-scf00246 | 5  |
| AX-158099998 | 11 | 14.76  | KV452852.1  | 444798 | 5-scf00246 | 5  |
| AX-158099999 | 11 | 14.76  | KV452852.1  | 445752 | 5-scf00246 | 5  |
| AX-158100000 | 11 | 14.76  | KV452852.1  | 447888 | 5-scf00246 | 5  |
| AX-158100001 | 11 | 14.76  | KV452852.1  | 451290 | 5-scf00246 | 5  |
| AX-158100004 | 11 | 14.76  | KV452852.1  | 453560 | 5-scf00246 | 5  |
| AX-158100005 | 11 | 14.76  | KV452852.1  | 454067 | 5-scf00246 | 5  |
| AX-158100007 | 11 | 14.76  | KV452852.1  | 456553 | 5-scf00246 | 5  |
| AX-158100008 | 11 | 14.869 | KV452852.1  | 458511 | 5-scf00246 | 5  |
| AX-158100009 | 11 | 14.869 | KV452852.1  | 459109 | 5-scf00246 | 5  |
| AX-158100013 | 11 | 14.869 | KV452852.1  | 462397 | 5-scf00246 | 5  |
| AX-158100015 | 11 | 14.869 | KV452852.1  | 463811 | 5-scf00246 | 5  |
| AX-157709186 | 11 | 14.947 | KV452852.1  | 467138 | 5-scf00246 | 5  |
| AX-158100017 | 11 | 15.033 | KV452852.1  | 468087 | 5-scf00246 | 5  |
| AX-157740235 | 11 | 15.033 | KV452852.1  | 470910 | 5-scf00246 | 5  |
| AX-158392207 | 11 | 15.033 | KV452852.1  | 473625 | 5-scf00246 | 5  |
| AX-158100021 | 11 | 15.033 | KV452852.1  | 480067 | 5-scf00246 | 5  |
| AX-158100022 | 11 | 15.033 | KV452852.1  | 480460 | 5-scf00246 | 5  |
| AX-158100023 | 11 | 15.033 | KV452852.1  | 480822 | 5-scf00246 | 5  |
| AX-157689865 | 11 | 15.033 | 3ML01033918 | 252    | scf09587_1 | UN |
| AX-158100002 | 11 | 15.267 | KV452852.1  | 452598 | 5-scf00246 | 5  |
| AX-158100003 | 11 | 15.267 | KV452852.1  | 453056 | 5-scf00246 | 5  |
| AX-158100006 | 11 | 15.267 | KV452852.1  | 454898 | 5-scf00246 | 5  |
| AX-158410324 | 11 | 15.267 | KV452852.1  | 485790 | 5-scf00246 | 5  |
| AX-158100033 | 11 | 15.267 | KV452852.1  | 511666 | 5-scf00246 | 5  |
| AX-158100041 | 11 | 15.267 | KV452852.1  | 524290 | 5-scf00246 | 5  |
| AX-157722144 | 11 | 15.267 | KV452852.1  | 555350 | 5-scf00246 | 5  |
| AX-158100030 | 11 | 15.525 | KV452852.1  | 503105 | 5-scf00246 | 5  |
| AX-157740650 | 11 | 15.525 | KV452852.1  | 512028 | 5-scf00246 | 5  |
| AX-157744329 | 11 | 15.525 | KV452852.1  | 512507 | 5-scf00246 | 5  |
| AX-158100035 | 11 | 15.525 | KV452852.1  | 515493 | 5-scf00246 | 5  |
| AX-158100037 | 11 | 15.525 | KV452852.1  | 519011 | 5-scf00246 | 5  |
| AX-157877527 | 11 | 15.597 | KV452852.1  | 521117 | 5-scf00246 | 5  |
| AX-158100039 | 11 | 15.744 | KV452852.1  | 521626 | 5-scf00246 | 5  |
| AX-158100042 | 11 | 15.744 | KV452852.1  | 524653 | 5-scf00246 | 5  |
| AX-157826588 | 11 | 15.744 | KV452852.1  | 528901 | 5-scf00246 | 5  |
| AX-158100045 | 11 | 15.744 | KV452852.1  | 530868 | 5-scf00246 | 5  |
| AX-157826589 | 11 | 15.744 | KV452852.1  | 531697 | 5-scf00246 | 5  |
| AX-158100046 | 11 | 15.962 | KV452852.1  | 532130 | 5-scf00246 | 5  |
| AX-157826590 | 11 | 15.962 | KV452852.1  | 541740 | 5-scf00246 | 5  |
| AX-158100051 | 11 | 15.962 | KV452852.1  | 546560 | 5-scf00246 | 5  |
| AX-158100052 | 11 | 15.962 | KV452852.1  | 547028 | 5-scf00246 | 5  |
| AX-158100053 | 11 | 15.962 | KV452852.1  | 547141 | 5-scf00246 | 5  |
| AX-158100054 | 11 | 15.962 | KV452852.1  | 547603 | 5-scf00246 | 5  |

|              |    |        |            |        |            |   |
|--------------|----|--------|------------|--------|------------|---|
| AX-158100055 | 11 | 15.962 | KV452852.1 | 549026 | 5-scf00246 | 5 |
| AX-158100056 | 11 | 15.962 | KV452852.1 | 551507 | 5-scf00246 | 5 |
| AX-158100059 | 11 | 15.962 | KV452852.1 | 552600 | 5-scf00246 | 5 |
| AX-158100060 | 11 | 15.962 | KV452852.1 | 552928 | 5-scf00246 | 5 |
| AX-158100066 | 11 | 15.962 | KV452852.1 | 560998 | 5-scf00246 | 5 |
| AX-158100067 | 11 | 15.962 | KV452852.1 | 563596 | 5-scf00246 | 5 |
| AX-158100069 | 11 | 15.962 | KV452852.1 | 565761 | 5-scf00246 | 5 |
| AX-158100071 | 11 | 15.962 | KV452852.1 | 566703 | 5-scf00246 | 5 |
| AX-158100074 | 11 | 15.962 | KV452852.1 | 569248 | 5-scf00246 | 5 |
| AX-158100075 | 11 | 15.962 | KV452852.1 | 570087 | 5-scf00246 | 5 |
| AX-158100078 | 11 | 16.087 | KV452852.1 | 573837 | 5-scf00246 | 5 |
| AX-157751256 | 11 | 16.087 | KV452852.1 | 576395 | 5-scf00246 | 5 |
| AX-158100081 | 11 | 16.087 | KV452852.1 | 577912 | 5-scf00246 | 5 |
| AX-158100082 | 11 | 16.087 | KV452852.1 | 578161 | 5-scf00246 | 5 |
| AX-157826591 | 11 | 16.193 | KV452852.1 | 580316 | 5-scf00246 | 5 |
| AX-158100084 | 11 | 16.275 | KV452852.1 | 584238 | 5-scf00246 | 5 |
| AX-158100086 | 11 | 16.275 | KV452852.1 | 586627 | 5-scf00246 | 5 |
| AX-158100087 | 11 | 16.275 | KV452852.1 | 588583 | 5-scf00246 | 5 |
| AX-158100092 | 11 | 16.835 | KV452852.1 | 601424 | 5-scf00246 | 5 |
| AX-158100019 | 11 | 16.837 | KV452852.1 | 474542 | 5-scf00246 | 5 |
| AX-157751450 | 11 | 16.837 | KV452852.1 | 594962 | 5-scf00246 | 5 |
| AX-158100093 | 11 | 16.837 | KV452852.1 | 603042 | 5-scf00246 | 5 |
| AX-157758277 | 11 | 16.837 | KV452852.1 | 603595 | 5-scf00246 | 5 |
| AX-158100094 | 11 | 16.837 | KV452852.1 | 604419 | 5-scf00246 | 5 |
| AX-157774756 | 11 | 16.837 | KV452852.1 | 605215 | 5-scf00246 | 5 |
| AX-158380023 | 11 | 16.837 | KV452852.1 | 608710 | 5-scf00246 | 5 |
| AX-158100096 | 11 | 16.837 | KV452852.1 | 610017 | 5-scf00246 | 5 |
| AX-158100098 | 11 | 16.837 | KV452852.1 | 612399 | 5-scf00246 | 5 |
| AX-158100104 | 11 | 16.837 | KV452852.1 | 617821 | 5-scf00246 | 5 |
| AX-158100105 | 11 | 16.837 | KV452852.1 | 618655 | 5-scf00246 | 5 |
| AX-158100106 | 11 | 16.837 | KV452852.1 | 619895 | 5-scf00246 | 5 |
| AX-158100110 | 11 | 16.837 | KV452852.1 | 624181 | 5-scf00246 | 5 |
| AX-158100114 | 11 | 16.837 | KV452852.1 | 630622 | 5-scf00246 | 5 |
| AX-158100112 | 11 | 16.946 | KV452852.1 | 626907 | 5-scf00246 | 5 |
| AX-158100115 | 11 | 16.946 | KV452852.1 | 632247 | 5-scf00246 | 5 |
| AX-158100117 | 11 | 16.946 | KV452852.1 | 633666 | 5-scf00246 | 5 |
| AX-157744649 | 11 | 17.164 | KV452852.1 | 639578 | 5-scf00246 | 5 |
| AX-158100119 | 11 | 17.164 | KV452852.1 | 640828 | 5-scf00246 | 5 |
| AX-158100120 | 11 | 17.164 | KV452852.1 | 641596 | 5-scf00246 | 5 |
| AX-158100121 | 11 | 17.164 | KV452852.1 | 642535 | 5-scf00246 | 5 |
| AX-158100122 | 11 | 17.164 | KV452852.1 | 644559 | 5-scf00246 | 5 |
| AX-158100123 | 11 | 17.164 | KV452852.1 | 645567 | 5-scf00246 | 5 |
| AX-158100124 | 11 | 17.164 | KV452852.1 | 646527 | 5-scf00246 | 5 |
| AX-158100125 | 11 | 17.164 | KV452852.1 | 646948 | 5-scf00246 | 5 |
| AX-158100126 | 11 | 17.164 | KV452852.1 | 647588 | 5-scf00246 | 5 |
| AX-158100127 | 11 | 17.164 | KV452852.1 | 648184 | 5-scf00246 | 5 |
| AX-158100128 | 11 | 17.164 | KV452852.1 | 653736 | 5-scf00246 | 5 |
| AX-158410333 | 11 | 17.164 | KV452852.1 | 657591 | 5-scf00246 | 5 |
| AX-158100134 | 11 | 17.164 | KV452852.1 | 665178 | 5-scf00246 | 5 |
| AX-158100135 | 11 | 17.164 | KV452852.1 | 665961 | 5-scf00246 | 5 |
| AX-157826593 | 11 | 17.164 | KV452852.1 | 666414 | 5-scf00246 | 5 |

|              |    |        |            |        |            |   |
|--------------|----|--------|------------|--------|------------|---|
| AX-158100136 | 11 | 17.164 | KV452852.1 | 666546 | 5-scf00246 | 5 |
| AX-158100138 | 11 | 17.164 | KV452852.1 | 668151 | 5-scf00246 | 5 |
| AX-158100140 | 11 | 17.164 | KV452852.1 | 668985 | 5-scf00246 | 5 |
| AX-158100145 | 11 | 17.164 | KV452852.1 | 673849 | 5-scf00246 | 5 |
| AX-158100148 | 11 | 17.164 | KV452852.1 | 679137 | 5-scf00246 | 5 |
| AX-158100149 | 11 | 17.164 | KV452852.1 | 679643 | 5-scf00246 | 5 |
| AX-158100150 | 11 | 17.164 | KV452852.1 | 680344 | 5-scf00246 | 5 |
| AX-158100152 | 11 | 17.164 | KV452852.1 | 682517 | 5-scf00246 | 5 |
| AX-158100156 | 11 | 17.164 | KV452852.1 | 685884 | 5-scf00246 | 5 |
| AX-157721696 | 11 | 17.164 | KV452852.1 | 687025 | 5-scf00246 | 5 |
| AX-158410334 | 11 | 17.164 | KV452852.1 | 688496 | 5-scf00246 | 5 |
| AX-158100159 | 11 | 17.164 | KV452852.1 | 689122 | 5-scf00246 | 5 |
| AX-158100083 | 11 | 17.491 | KV452852.1 | 578734 | 5-scf00246 | 5 |
| AX-158100090 | 11 | 17.491 | KV452852.1 | 597904 | 5-scf00246 | 5 |
| AX-158100129 | 11 | 17.491 | KV452852.1 | 658611 | 5-scf00246 | 5 |
| AX-158100161 | 11 | 17.491 | KV452852.1 | 691901 | 5-scf00246 | 5 |
| AX-158100164 | 11 | 17.491 | KV452852.1 | 695177 | 5-scf00246 | 5 |
| AX-158100172 | 11 | 17.491 | KV452852.1 | 709039 | 5-scf00246 | 5 |
| AX-157826597 | 11 | 17.491 | KV452852.1 | 783818 | 5-scf00246 | 5 |
| AX-158100168 | 11 | 17.492 | KV452852.1 | 704010 | 5-scf00246 | 5 |
| AX-158410336 | 11 | 17.492 | KV452852.1 | 711304 | 5-scf00246 | 5 |
| AX-157725674 | 11 | 17.492 | KV452852.1 | 712052 | 5-scf00246 | 5 |
| AX-158100173 | 11 | 17.492 | KV452852.1 | 713279 | 5-scf00246 | 5 |
| AX-158100174 | 11 | 17.492 | KV452852.1 | 713797 | 5-scf00246 | 5 |
| AX-158100178 | 11 | 17.492 | KV452852.1 | 715921 | 5-scf00246 | 5 |
| AX-158100179 | 11 | 17.492 | KV452852.1 | 717654 | 5-scf00246 | 5 |
| AX-158100180 | 11 | 17.492 | KV452852.1 | 718216 | 5-scf00246 | 5 |
| AX-158100181 | 11 | 17.492 | KV452852.1 | 719088 | 5-scf00246 | 5 |
| AX-158100182 | 11 | 17.492 | KV452852.1 | 721417 | 5-scf00246 | 5 |
| AX-158100185 | 11 | 17.492 | KV452852.1 | 737901 | 5-scf00246 | 5 |
| AX-157743620 | 11 | 17.492 | KV452852.1 | 741369 | 5-scf00246 | 5 |
| AX-158100203 | 11 | 17.492 | KV452852.1 | 756390 | 5-scf00246 | 5 |
| AX-158100205 | 11 | 17.492 | KV452852.1 | 758908 | 5-scf00246 | 5 |
| AX-158100206 | 11 | 17.492 | KV452852.1 | 760165 | 5-scf00246 | 5 |
| AX-158100191 | 11 | 17.543 | KV452852.1 | 743405 | 5-scf00246 | 5 |
| AX-158100207 | 11 | 17.543 | KV452852.1 | 761134 | 5-scf00246 | 5 |
| AX-158100193 | 11 | 17.564 | KV452852.1 | 746163 | 5-scf00246 | 5 |
| AX-158100196 | 11 | 17.601 | KV452852.1 | 748329 | 5-scf00246 | 5 |
| AX-158100197 | 11 | 17.601 | KV452852.1 | 750574 | 5-scf00246 | 5 |
| AX-158100198 | 11 | 17.601 | KV452852.1 | 751488 | 5-scf00246 | 5 |
| AX-158100200 | 11 | 17.601 | KV452852.1 | 753505 | 5-scf00246 | 5 |
| AX-158100201 | 11 | 17.711 | KV452852.1 | 754248 | 5-scf00246 | 5 |
| AX-158100202 | 11 | 17.747 | KV452852.1 | 755382 | 5-scf00246 | 5 |
| AX-158100204 | 11 | 17.747 | KV452852.1 | 758172 | 5-scf00246 | 5 |
| AX-157826596 | 11 | 17.747 | KV452852.1 | 758673 | 5-scf00246 | 5 |
| AX-158100209 | 11 | 17.747 | KV452852.1 | 762176 | 5-scf00246 | 5 |
| AX-158100228 | 11 | 17.747 | KV452852.1 | 784152 | 5-scf00246 | 5 |
| AX-157826598 | 11 | 17.747 | KV452852.1 | 793024 | 5-scf00246 | 5 |
| AX-158100217 | 11 | 18.038 | KV452852.1 | 771050 | 5-scf00246 | 5 |
| AX-158100218 | 11 | 18.038 | KV452852.1 | 772616 | 5-scf00246 | 5 |
| AX-158100221 | 11 | 18.038 | KV452852.1 | 775689 | 5-scf00246 | 5 |



|              |    |        |            |        |            |   |
|--------------|----|--------|------------|--------|------------|---|
| AX-158100222 | 11 | 18.038 | KV452852.1 | 777150 | 5-scf00246 | 5 |
| AX-158100225 | 11 | 18.038 | KV452852.1 | 780047 | 5-scf00246 | 5 |
| AX-157722403 | 11 | 18.038 | KV452852.1 | 780811 | 5-scf00246 | 5 |
| AX-158100226 | 11 | 18.038 | KV452852.1 | 782079 | 5-scf00246 | 5 |
| AX-158100230 | 11 | 18.038 | KV452852.1 | 789577 | 5-scf00246 | 5 |
| AX-158100232 | 11 | 18.038 | KV452852.1 | 799620 | 5-scf00246 | 5 |
| AX-157738713 | 11 | 18.085 | KV452852.1 | 790219 | 5-scf00246 | 5 |
| AX-158100233 | 11 | 18.085 | KV452852.1 | 800514 | 5-scf00246 | 5 |
| AX-158100050 | 11 | 18.147 | KV452852.1 | 544814 | 5-scf00246 | 5 |
| AX-158100186 | 11 | 18.147 | KV452852.1 | 739595 | 5-scf00246 | 5 |
| AX-158100194 | 11 | 18.147 | KV452852.1 | 747173 | 5-scf00246 | 5 |
| AX-158100211 | 11 | 18.147 | KV452852.1 | 764311 | 5-scf00246 | 5 |
| AX-158100213 | 11 | 18.147 | KV452852.1 | 767474 | 5-scf00246 | 5 |
| AX-158100219 | 11 | 18.147 | KV452852.1 | 773332 | 5-scf00246 | 5 |
| AX-157751985 | 11 | 18.147 | KV452852.1 | 801279 | 5-scf00246 | 5 |
| AX-157713941 | 11 | 18.147 | KV452852.1 | 802517 | 5-scf00246 | 5 |
| AX-157735727 | 11 | 18.147 | KV452852.1 | 804770 | 5-scf00246 | 5 |
| AX-158100237 | 11 | 18.147 | KV452852.1 | 805066 | 5-scf00246 | 5 |
| AX-157743074 | 11 | 18.147 | KV452852.1 | 808736 | 5-scf00246 | 5 |
| AX-158100239 | 11 | 18.147 | KV452852.1 | 812322 | 5-scf00246 | 5 |
| AX-158100240 | 11 | 18.147 | KV452852.1 | 813216 | 5-scf00246 | 5 |
| AX-158100242 | 11 | 18.147 | KV452852.1 | 815682 | 5-scf00246 | 5 |
| AX-157826605 | 11 | 18.147 | KV452852.1 | 832968 | 5-scf00246 | 5 |
| AX-158100243 | 11 | 18.311 | KV452852.1 | 818758 | 5-scf00246 | 5 |
| AX-158100244 | 11 | 18.475 | KV452852.1 | 819109 | 5-scf00246 | 5 |
| AX-157826601 | 11 | 18.475 | KV452852.1 | 821200 | 5-scf00246 | 5 |
| AX-158100247 | 11 | 18.475 | KV452852.1 | 821972 | 5-scf00246 | 5 |
| AX-158100248 | 11 | 18.475 | KV452852.1 | 822677 | 5-scf00246 | 5 |
| AX-157744697 | 11 | 18.475 | KV452852.1 | 829566 | 5-scf00246 | 5 |
| AX-158100250 | 11 | 18.533 | KV452852.1 | 823796 | 5-scf00246 | 5 |
| AX-158407403 | 11 | 18.584 | KV452852.1 | 825469 | 5-scf00246 | 5 |
| AX-157826603 | 11 | 18.584 | KV452852.1 | 831760 | 5-scf00246 | 5 |
| AX-157758979 | 11 | 18.584 | KV452852.1 | 831937 | 5-scf00246 | 5 |
| AX-158100255 | 11 | 18.584 | KV452852.1 | 833013 | 5-scf00246 | 5 |
| AX-157826606 | 11 | 18.584 | KV452852.1 | 835123 | 5-scf00246 | 5 |
| AX-158100259 | 11 | 18.629 | KV452852.1 | 840098 | 5-scf00246 | 5 |
| AX-157773043 | 11 | 18.694 | KV452852.1 | 841252 | 5-scf00246 | 5 |
| AX-158100261 | 11 | 18.694 | KV452852.1 | 842149 | 5-scf00246 | 5 |
| AX-158100257 | 11 | 18.76  | KV452852.1 | 836210 | 5-scf00246 | 5 |
| AX-158100264 | 11 | 18.76  | KV452852.1 | 847279 | 5-scf00246 | 5 |
| AX-158100267 | 11 | 18.76  | KV452852.1 | 848921 | 5-scf00246 | 5 |
| AX-158100265 | 11 | 18.803 | KV452852.1 | 847809 | 5-scf00246 | 5 |
| AX-158100268 | 11 | 18.803 | KV452852.1 | 849480 | 5-scf00246 | 5 |
| AX-158100269 | 11 | 18.803 | KV452852.1 | 851097 | 5-scf00246 | 5 |
| AX-157715386 | 11 | 18.803 | KV452852.1 | 851943 | 5-scf00246 | 5 |
| AX-158100270 | 11 | 18.803 | KV452852.1 | 852129 | 5-scf00246 | 5 |
| AX-157702207 | 11 | 18.803 | KV452852.1 | 856924 | 5-scf00246 | 5 |
| AX-158100271 | 11 | 18.803 | KV452852.1 | 858489 | 5-scf00246 | 5 |
| AX-158100272 | 11 | 18.803 | KV452852.1 | 860007 | 5-scf00246 | 5 |
| AX-158100273 | 11 | 18.803 | KV452852.1 | 861705 | 5-scf00246 | 5 |
| AX-158100249 | 11 | 18.912 | KV452852.1 | 823177 | 5-scf00246 | 5 |

|              |    |        |            |        |            |   |
|--------------|----|--------|------------|--------|------------|---|
| AX-158380025 | 11 | 18.912 | KV452852.1 | 833231 | 5-scf00246 | 5 |
| AX-158100266 | 11 | 18.912 | KV452852.1 | 848539 | 5-scf00246 | 5 |
| AX-158100274 | 11 | 18.912 | KV452852.1 | 862913 | 5-scf00246 | 5 |
| AX-157857377 | 11 | 18.912 | KV452852.1 | 863867 | 5-scf00246 | 5 |
| AX-158100277 | 11 | 18.912 | KV452852.1 | 864882 | 5-scf00246 | 5 |
| AX-158100279 | 11 | 18.912 | KV452852.1 | 866521 | 5-scf00246 | 5 |
| AX-158100281 | 11 | 19.021 | KV452852.1 | 868123 | 5-scf00246 | 5 |
| AX-157741627 | 11 | 19.021 | KV452852.1 | 871363 | 5-scf00246 | 5 |
| AX-158100282 | 11 | 19.021 | KV452852.1 | 871703 | 5-scf00246 | 5 |
| AX-157754332 | 11 | 19.021 | KV452852.1 | 872015 | 5-scf00246 | 5 |
| AX-158100283 | 11 | 19.021 | KV452852.1 | 872324 | 5-scf00246 | 5 |
| AX-158100284 | 11 | 19.021 | KV452852.1 | 872860 | 5-scf00246 | 5 |
| AX-158100288 | 11 | 19.021 | KV452852.1 | 879492 | 5-scf00246 | 5 |
| AX-158100049 | 11 | 19.24  | KV452852.1 | 535709 | 5-scf00246 | 5 |
| AX-157885822 | 11 | 19.24  | KV452852.1 | 865036 | 5-scf00246 | 5 |
| AX-158100285 | 11 | 19.24  | KV452852.1 | 873698 | 5-scf00246 | 5 |
| AX-157826608 | 11 | 19.24  | KV452852.1 | 880342 | 5-scf00246 | 5 |
| AX-158100289 | 11 | 19.24  | KV452852.1 | 880609 | 5-scf00246 | 5 |
| AX-158100290 | 11 | 19.24  | KV452852.1 | 881173 | 5-scf00246 | 5 |
| AX-158100292 | 11 | 19.24  | KV452852.1 | 882774 | 5-scf00246 | 5 |
| AX-157826610 | 11 | 19.24  | KV452852.1 | 883679 | 5-scf00246 | 5 |
| AX-157826611 | 11 | 19.24  | KV452852.1 | 883725 | 5-scf00246 | 5 |
| AX-157826613 | 11 | 19.24  | KV452852.1 | 889736 | 5-scf00246 | 5 |
| AX-158100295 | 11 | 19.24  | KV452852.1 | 889951 | 5-scf00246 | 5 |
| AX-157826614 | 11 | 19.24  | KV452852.1 | 890115 | 5-scf00246 | 5 |
| AX-158100296 | 11 | 19.24  | KV452852.1 | 890873 | 5-scf00246 | 5 |
| AX-158100298 | 11 | 19.249 | KV452852.1 | 893121 | 5-scf00246 | 5 |
| AX-158100299 | 11 | 19.668 | KV452852.1 | 894287 | 5-scf00246 | 5 |
| AX-158100306 | 11 | 19.668 | KV452852.1 | 911629 | 5-scf00246 | 5 |
| AX-158100301 | 11 | 19.677 | KV452852.1 | 897764 | 5-scf00246 | 5 |
| AX-157744681 | 11 | 19.677 | KV452852.1 | 898556 | 5-scf00246 | 5 |
| AX-158100304 | 11 | 20.009 | KV452852.1 | 910360 | 5-scf00246 | 5 |
| AX-158100307 | 11 | 20.175 | KV452852.1 | 912160 | 5-scf00246 | 5 |
| AX-158100308 | 11 | 20.175 | KV452852.1 | 912686 | 5-scf00246 | 5 |
| AX-158380026 | 11 | 20.175 | KV452852.1 | 915541 | 5-scf00246 | 5 |
| AX-158100311 | 11 | 20.175 | KV452852.1 | 916471 | 5-scf00246 | 5 |
| AX-158100312 | 11 | 20.175 | KV452852.1 | 917666 | 5-scf00246 | 5 |
| AX-158100313 | 11 | 20.175 | KV452852.1 | 918636 | 5-scf00246 | 5 |
| AX-158100317 | 11 | 20.175 | KV452852.1 | 923698 | 5-scf00246 | 5 |
| AX-158100318 | 11 | 20.175 | KV452852.1 | 924700 | 5-scf00246 | 5 |
| AX-158100320 | 11 | 20.175 | KV452852.1 | 926639 | 5-scf00246 | 5 |
| AX-158100322 | 11 | 20.175 | KV452852.1 | 928613 | 5-scf00246 | 5 |
| AX-158100323 | 11 | 20.175 | KV452852.1 | 929656 | 5-scf00246 | 5 |
| AX-158100324 | 11 | 20.175 | KV452852.1 | 930118 | 5-scf00246 | 5 |
| AX-158100326 | 11 | 20.175 | KV452852.1 | 932157 | 5-scf00246 | 5 |
| AX-158100328 | 11 | 20.175 | KV452852.1 | 936030 | 5-scf00246 | 5 |
| AX-158100337 | 11 | 20.175 | KV452852.1 | 946734 | 5-scf00246 | 5 |
| AX-157751573 | 11 | 20.175 | KV452852.1 | 958227 | 5-scf00246 | 5 |
| AX-158100332 | 11 | 20.323 | KV452852.1 | 941954 | 5-scf00246 | 5 |
| AX-157877531 | 11 | 20.324 | KV452852.1 | 931255 | 5-scf00246 | 5 |
| AX-158100335 | 11 | 20.324 | KV452852.1 | 944009 | 5-scf00246 | 5 |

|              |    |        |            |         |            |   |
|--------------|----|--------|------------|---------|------------|---|
| AX-158100336 | 11 | 20.33  | KV452852.1 | 945925  | 5-scf00246 | 5 |
| AX-157773078 | 11 | 20.33  | KV452852.1 | 955944  | 5-scf00246 | 5 |
| AX-158100352 | 11 | 20.33  | KV452852.1 | 963985  | 5-scf00246 | 5 |
| AX-158100340 | 11 | 20.335 | KV452852.1 | 948466  | 5-scf00246 | 5 |
| AX-158100341 | 11 | 20.335 | KV452852.1 | 949130  | 5-scf00246 | 5 |
| AX-158100343 | 11 | 20.335 | KV452852.1 | 951957  | 5-scf00246 | 5 |
| AX-158100346 | 11 | 20.335 | KV452852.1 | 954090  | 5-scf00246 | 5 |
| AX-158100347 | 11 | 20.335 | KV452852.1 | 956603  | 5-scf00246 | 5 |
| AX-158100350 | 11 | 20.335 | KV452852.1 | 962067  | 5-scf00246 | 5 |
| AX-158100354 | 11 | 20.335 | KV452852.1 | 965955  | 5-scf00246 | 5 |
| AX-158100357 | 11 | 20.401 | KV452852.1 | 969344  | 5-scf00246 | 5 |
| AX-158100325 | 11 | 20.462 | KV452852.1 | 931435  | 5-scf00246 | 5 |
| AX-158100355 | 11 | 20.462 | KV452852.1 | 966647  | 5-scf00246 | 5 |
| AX-158100358 | 11 | 20.462 | KV452852.1 | 969896  | 5-scf00246 | 5 |
| AX-158100361 | 11 | 20.462 | KV452852.1 | 973871  | 5-scf00246 | 5 |
| AX-158100362 | 11 | 20.462 | KV452852.1 | 974400  | 5-scf00246 | 5 |
| AX-158100363 | 11 | 20.462 | KV452852.1 | 975169  | 5-scf00246 | 5 |
| AX-157744839 | 11 | 20.462 | KV452852.1 | 1007630 | 5-scf00246 | 5 |
| AX-158100370 | 11 | 21.097 | KV452852.1 | 988316  | 5-scf00246 | 5 |
| AX-158100372 | 11 | 21.097 | KV452852.1 | 996895  | 5-scf00246 | 5 |
| AX-158100373 | 11 | 21.097 | KV452852.1 | 997970  | 5-scf00246 | 5 |
| AX-158100374 | 11 | 21.097 | KV452852.1 | 998472  | 5-scf00246 | 5 |
| AX-158100376 | 11 | 21.097 | KV452852.1 | 999547  | 5-scf00246 | 5 |
| AX-158100377 | 11 | 21.097 | KV452852.1 | 1001316 | 5-scf00246 | 5 |
| AX-157877532 | 11 | 21.097 | KV452852.1 | 1004066 | 5-scf00246 | 5 |
| AX-158100380 | 11 | 21.097 | KV452852.1 | 1004573 | 5-scf00246 | 5 |
| AX-157877533 | 11 | 21.097 | KV452852.1 | 1012550 | 5-scf00246 | 5 |
| AX-158100381 | 11 | 21.098 | KV452852.1 | 1006410 | 5-scf00246 | 5 |
| AX-158100382 | 11 | 21.098 | KV452852.1 | 1007171 | 5-scf00246 | 5 |
| AX-157738379 | 11 | 21.098 | KV452852.1 | 1009564 | 5-scf00246 | 5 |
| AX-158100384 | 11 | 21.098 | KV452852.1 | 1010660 | 5-scf00246 | 5 |
| AX-158100387 | 11 | 21.282 | KV452852.1 | 1014718 | 5-scf00246 | 5 |
| AX-158100389 | 11 | 21.282 | KV452852.1 | 1019304 | 5-scf00246 | 5 |
| AX-158100390 | 11 | 21.282 | KV452852.1 | 1021119 | 5-scf00246 | 5 |
| AX-158100404 | 11 | 21.282 | KV452852.1 | 1040315 | 5-scf00246 | 5 |
| AX-157723394 | 11 | 21.365 | KV452852.1 | 978743  | 5-scf00246 | 5 |
| AX-158100392 | 11 | 21.365 | KV452852.1 | 1023086 | 5-scf00246 | 5 |
| AX-158100399 | 11 | 21.365 | KV452852.1 | 1030672 | 5-scf00246 | 5 |
| AX-158100400 | 11 | 21.365 | KV452852.1 | 1031815 | 5-scf00246 | 5 |
| AX-158100401 | 11 | 21.365 | KV452852.1 | 1033817 | 5-scf00246 | 5 |
| AX-158100409 | 11 | 21.365 | KV452852.1 | 1044691 | 5-scf00246 | 5 |
| AX-158100412 | 11 | 21.365 | KV452852.1 | 1057980 | 5-scf00246 | 5 |
| AX-158100403 | 11 | 21.377 | KV452852.1 | 1040010 | 5-scf00246 | 5 |
| AX-158100407 | 11 | 21.424 | KV452852.1 | 1042969 | 5-scf00246 | 5 |
| AX-158100408 | 11 | 21.465 | KV452852.1 | 1044403 | 5-scf00246 | 5 |
| AX-158100411 | 11 | 21.465 | KV452852.1 | 1056518 | 5-scf00246 | 5 |
| AX-158100415 | 11 | 21.643 | KV452852.1 | 1062778 | 5-scf00246 | 5 |
| AX-157826617 | 11 | 21.643 | KV452852.1 | 1064501 | 5-scf00246 | 5 |
| AX-158100422 | 11 | 21.643 | KV452852.1 | 1077592 | 5-scf00246 | 5 |
| AX-158100424 | 11 | 21.643 | KV452852.1 | 1078554 | 5-scf00246 | 5 |
| AX-158100434 | 11 | 21.643 | KV452852.1 | 1095624 | 5-scf00246 | 5 |

|              |    |        |            |         |            |   |
|--------------|----|--------|------------|---------|------------|---|
| AX-158100425 | 11 | 21.644 | KV452852.1 | 1080828 | 5-scf00246 | 5 |
| AX-158100427 | 11 | 21.644 | KV452852.1 | 1083938 | 5-scf00246 | 5 |
| AX-158100428 | 11 | 21.644 | KV452852.1 | 1088189 | 5-scf00246 | 5 |
| AX-158100431 | 11 | 21.644 | KV452852.1 | 1092537 | 5-scf00246 | 5 |
| AX-158100429 | 11 | 21.647 | KV452852.1 | 1091622 | 5-scf00246 | 5 |
| AX-157826618 | 11 | 21.652 | KV452852.1 | 1083250 | 5-scf00246 | 5 |
| AX-158100420 | 11 | 21.775 | KV452852.1 | 1076342 | 5-scf00246 | 5 |
| AX-158100432 | 11 | 21.775 | KV452852.1 | 1092995 | 5-scf00246 | 5 |
| AX-158100402 | 11 | 22.249 | KV452852.1 | 1035911 | 5-scf00246 | 5 |
| AX-158100437 | 11 | 22.249 | KV452852.1 | 1101397 | 5-scf00246 | 5 |
| AX-158100439 | 11 | 22.249 | KV452852.1 | 1106412 | 5-scf00246 | 5 |
| AX-158100440 | 11 | 22.497 | KV452852.1 | 1109976 | 5-scf00246 | 5 |
| AX-158100441 | 11 | 22.497 | KV452852.1 | 1110379 | 5-scf00246 | 5 |
| AX-157727807 | 11 | 22.497 | KV452852.1 | 1114557 | 5-scf00246 | 5 |
| AX-157857378 | 11 | 22.497 | KV452852.1 | 1119973 | 5-scf00246 | 5 |
| AX-158100443 | 11 | 22.499 | KV452852.1 | 1116815 | 5-scf00246 | 5 |
| AX-158100445 | 11 | 22.868 | KV452852.1 | 1120728 | 5-scf00246 | 5 |
| AX-158100447 | 11 | 22.869 | KV452852.1 | 1122399 | 5-scf00246 | 5 |
| AX-158100448 | 11 | 22.872 | KV452852.1 | 1126857 | 5-scf00246 | 5 |
| AX-157826620 | 11 | 22.872 | KV452852.1 | 1127306 | 5-scf00246 | 5 |
| AX-158100453 | 11 | 23.431 | KV452852.1 | 1133783 | 5-scf00246 | 5 |
| AX-158100454 | 11 | 23.431 | KV452852.1 | 1136643 | 5-scf00246 | 5 |
| AX-158100456 | 11 | 23.614 | KV452852.1 | 1139509 | 5-scf00246 | 5 |
| AX-158100481 | 11 | 23.614 | KV452852.1 | 1169533 | 5-scf00246 | 5 |
| AX-158100457 | 11 | 23.616 | KV452852.1 | 1141117 | 5-scf00246 | 5 |
| AX-158100458 | 11 | 23.616 | KV452852.1 | 1141774 | 5-scf00246 | 5 |
| AX-158100459 | 11 | 23.616 | KV452852.1 | 1142367 | 5-scf00246 | 5 |
| AX-158100460 | 11 | 23.616 | KV452852.1 | 1143234 | 5-scf00246 | 5 |
| AX-158100461 | 11 | 23.616 | KV452852.1 | 1144816 | 5-scf00246 | 5 |
| AX-157826621 | 11 | 23.616 | KV452852.1 | 1144939 | 5-scf00246 | 5 |
| AX-158100463 | 11 | 23.616 | KV452852.1 | 1146840 | 5-scf00246 | 5 |
| AX-158100464 | 11 | 23.616 | KV452852.1 | 1150993 | 5-scf00246 | 5 |
| AX-157754075 | 11 | 23.616 | KV452852.1 | 1155499 | 5-scf00246 | 5 |
| AX-158100468 | 11 | 23.616 | KV452852.1 | 1157870 | 5-scf00246 | 5 |
| AX-157826622 | 11 | 23.616 | KV452852.1 | 1158953 | 5-scf00246 | 5 |
| AX-157750430 | 11 | 23.616 | KV452852.1 | 1159695 | 5-scf00246 | 5 |
| AX-158100473 | 11 | 23.616 | KV452852.1 | 1161777 | 5-scf00246 | 5 |
| AX-158100478 | 11 | 23.616 | KV452852.1 | 1165582 | 5-scf00246 | 5 |
| AX-158407408 | 11 | 23.616 | KV452852.1 | 1186602 | 5-scf00246 | 5 |
| AX-157772655 | 11 | 23.683 | KV452852.1 | 1163098 | 5-scf00246 | 5 |
| AX-157719630 | 11 | 23.725 | KV452852.1 | 1144015 | 5-scf00246 | 5 |
| AX-158100467 | 11 | 23.725 | KV452852.1 | 1154292 | 5-scf00246 | 5 |
| AX-158100471 | 11 | 23.725 | KV452852.1 | 1159269 | 5-scf00246 | 5 |
| AX-158100476 | 11 | 23.725 | KV452852.1 | 1164905 | 5-scf00246 | 5 |
| AX-158100477 | 11 | 23.725 | KV452852.1 | 1165449 | 5-scf00246 | 5 |
| AX-158100479 | 11 | 23.725 | KV452852.1 | 1166535 | 5-scf00246 | 5 |
| AX-158100480 | 11 | 23.725 | KV452852.1 | 1166754 | 5-scf00246 | 5 |
| AX-158380029 | 11 | 23.725 | KV452852.1 | 1167131 | 5-scf00246 | 5 |
| AX-157753262 | 11 | 23.725 | KV452852.1 | 1168654 | 5-scf00246 | 5 |
| AX-158100484 | 11 | 24.083 | KV452852.1 | 1174719 | 5-scf00246 | 5 |
| AX-157857379 | 11 | 24.083 | KV452852.1 | 1177716 | 5-scf00246 | 5 |

|              |    |        |            |         |            |   |
|--------------|----|--------|------------|---------|------------|---|
| AX-158100488 | 11 | 24.083 | KV452852.1 | 1180995 | 5-scf00246 | 5 |
| AX-158100489 | 11 | 24.083 | KV452852.1 | 1182222 | 5-scf00246 | 5 |
| AX-158100490 | 11 | 24.083 | KV452852.1 | 1189023 | 5-scf00246 | 5 |
| AX-158100492 | 11 | 24.083 | KV452852.1 | 1190225 | 5-scf00246 | 5 |
| AX-158100493 | 11 | 24.26  | KV452852.1 | 1191251 | 5-scf00246 | 5 |
| AX-158100498 | 11 | 24.442 | KV452852.1 | 1200635 | 5-scf00246 | 5 |
| AX-158100501 | 11 | 24.8   | KV452852.1 | 1203332 | 5-scf00246 | 5 |
| AX-158100502 | 11 | 24.802 | KV452852.1 | 1204585 | 5-scf00246 | 5 |
| AX-158100503 | 11 | 24.802 | KV452852.1 | 1206228 | 5-scf00246 | 5 |
| AX-158100504 | 11 | 24.921 | KV452852.1 | 1206944 | 5-scf00246 | 5 |
| AX-158100506 | 11 | 24.921 | KV452852.1 | 1209805 | 5-scf00246 | 5 |
| AX-157757427 | 11 | 24.921 | KV452852.1 | 1210332 | 5-scf00246 | 5 |
| AX-158100507 | 11 | 24.921 | KV452852.1 | 1210798 | 5-scf00246 | 5 |
| AX-157718189 | 11 | 25.041 | KV452852.1 | 1215269 | 5-scf00246 | 5 |
| AX-158100511 | 11 | 25.041 | KV452852.1 | 1215724 | 5-scf00246 | 5 |
| AX-158100515 | 11 | 25.803 | KV452852.1 | 1230954 | 5-scf00246 | 5 |
| AX-158100525 | 11 | 25.803 | KV452852.1 | 1253201 | 5-scf00246 | 5 |
| AX-158100533 | 11 | 25.803 | KV452852.1 | 1260001 | 5-scf00246 | 5 |
| AX-158100518 | 11 | 25.807 | KV452852.1 | 1234611 | 5-scf00246 | 5 |
| AX-158100519 | 11 | 25.807 | KV452852.1 | 1237740 | 5-scf00246 | 5 |
| AX-158100513 | 11 | 26.025 | KV452852.1 | 1229907 | 5-scf00246 | 5 |
| AX-158100521 | 11 | 26.025 | KV452852.1 | 1242375 | 5-scf00246 | 5 |
| AX-158100522 | 11 | 26.03  | KV452852.1 | 1243812 | 5-scf00246 | 5 |
| AX-157750412 | 11 | 26.31  | KV452852.1 | 1248447 | 5-scf00246 | 5 |
| AX-158100524 | 11 | 26.494 | KV452852.1 | 1252282 | 5-scf00246 | 5 |
| AX-158100526 | 11 | 26.494 | KV452852.1 | 1253403 | 5-scf00246 | 5 |
| AX-158100527 | 11 | 26.494 | KV452852.1 | 1253942 | 5-scf00246 | 5 |
| AX-158100528 | 11 | 26.494 | KV452852.1 | 1254219 | 5-scf00246 | 5 |
| AX-158100529 | 11 | 26.494 | KV452852.1 | 1254696 | 5-scf00246 | 5 |
| AX-158100530 | 11 | 26.494 | KV452852.1 | 1254989 | 5-scf00246 | 5 |
| AX-158100531 | 11 | 26.494 | KV452852.1 | 1255396 | 5-scf00246 | 5 |
| AX-158100532 | 11 | 26.758 | KV452852.1 | 1259447 | 5-scf00246 | 5 |
| AX-158100537 | 11 | 26.955 | KV452852.1 | 1267963 | 5-scf00246 | 5 |
| AX-157826625 | 11 | 26.958 | KV452852.1 | 1268002 | 5-scf00246 | 5 |
| AX-158100538 | 11 | 26.966 | KV452852.1 | 1269851 | 5-scf00246 | 5 |
| AX-158100541 | 11 | 26.966 | KV452852.1 | 1273597 | 5-scf00246 | 5 |
| AX-158100542 | 11 | 27.122 | KV452852.1 | 1274537 | 5-scf00246 | 5 |
| AX-158100539 | 11 | 27.448 | KV452852.1 | 1270406 | 5-scf00246 | 5 |
| AX-158100543 | 11 | 27.448 | KV452852.1 | 1276240 | 5-scf00246 | 5 |
| AX-157767077 | 11 | 27.448 | KV452852.1 | 1276818 | 5-scf00246 | 5 |
| AX-158100544 | 11 | 27.448 | KV452852.1 | 1280134 | 5-scf00246 | 5 |
| AX-158100545 | 11 | 27.448 | KV452852.1 | 1283445 | 5-scf00246 | 5 |
| AX-157885825 | 11 | 27.448 | KV452852.1 | 1285361 | 5-scf00246 | 5 |
| AX-158100546 | 11 | 27.448 | KV452852.1 | 1285923 | 5-scf00246 | 5 |
| AX-157710748 | 11 | 27.448 | KV452852.1 | 1295948 | 5-scf00246 | 5 |
| AX-157826626 | 11 | 27.448 | KV452852.1 | 1302470 | 5-scf00246 | 5 |
| AX-158100549 | 11 | 27.448 | KV452852.1 | 1304524 | 5-scf00246 | 5 |
| AX-158100551 | 11 | 27.448 | KV452852.1 | 1309359 | 5-scf00246 | 5 |
| AX-157774127 | 11 | 27.448 | KV452852.1 | 1310347 | 5-scf00246 | 5 |
| AX-157826627 | 11 | 27.448 | KV452852.1 | 1310832 | 5-scf00246 | 5 |
| AX-158410351 | 11 | 27.448 | KV452852.1 | 1312648 | 5-scf00246 | 5 |

|              |    |        |            |         |            |   |
|--------------|----|--------|------------|---------|------------|---|
| AX-158100554 | 11 | 27.448 | KV452852.1 | 1315010 | 5-scf00246 | 5 |
| AX-158100557 | 11 | 27.448 | KV452852.1 | 1318619 | 5-scf00246 | 5 |
| AX-158100559 | 11 | 27.448 | KV452852.1 | 1319939 | 5-scf00246 | 5 |
| AX-157870965 | 11 | 27.448 | KV452852.1 | 1320774 | 5-scf00246 | 5 |
| AX-158100575 | 11 | 27.448 | KV452852.1 | 1354647 | 5-scf00246 | 5 |
| AX-157826628 | 11 | 27.448 | KV452852.1 | 1361640 | 5-scf00246 | 5 |
| AX-157715069 | 11 | 27.556 | KV452852.1 | 1324606 | 5-scf00246 | 5 |
| AX-158100561 | 11 | 27.609 | KV452852.1 | 1330462 | 5-scf00246 | 5 |
| AX-158100547 | 11 | 27.661 | KV452852.1 | 1292135 | 5-scf00246 | 5 |
| AX-158100553 | 11 | 27.661 | KV452852.1 | 1313447 | 5-scf00246 | 5 |
| AX-157726680 | 11 | 27.661 | KV452852.1 | 1332779 | 5-scf00246 | 5 |
| AX-158100562 | 11 | 27.661 | KV452852.1 | 1333888 | 5-scf00246 | 5 |
| AX-158100563 | 11 | 27.661 | KV452852.1 | 1334533 | 5-scf00246 | 5 |
| AX-158380030 | 11 | 27.661 | KV452852.1 | 1335097 | 5-scf00246 | 5 |
| AX-158100567 | 11 | 27.661 | KV452852.1 | 1343824 | 5-scf00246 | 5 |
| AX-158100568 | 11 | 27.763 | KV452852.1 | 1344310 | 5-scf00246 | 5 |
| AX-158100569 | 11 | 27.876 | KV452852.1 | 1347147 | 5-scf00246 | 5 |
| AX-158100571 | 11 | 27.876 | KV452852.1 | 1350664 | 5-scf00246 | 5 |
| AX-158100572 | 11 | 27.876 | KV452852.1 | 1351056 | 5-scf00246 | 5 |
| AX-158100580 | 11 | 27.879 | KV452852.1 | 1366590 | 5-scf00246 | 5 |
| AX-158100581 | 11 | 27.893 | KV452852.1 | 1367493 | 5-scf00246 | 5 |
| AX-158100586 | 11 | 28.158 | KV452852.1 | 1374986 | 5-scf00246 | 5 |
| AX-157826629 | 11 | 28.201 | KV452852.1 | 1375631 | 5-scf00246 | 5 |
| AX-158100587 | 11 | 28.295 | KV452852.1 | 1377915 | 5-scf00246 | 5 |
| AX-158100589 | 11 | 28.43  | KV452852.1 | 1385600 | 5-scf00246 | 5 |
| AX-158380031 | 11 | 28.432 | KV452852.1 | 1390025 | 5-scf00246 | 5 |
| AX-157714733 | 11 | 28.432 | KV452852.1 | 1390323 | 5-scf00246 | 5 |
| AX-158100596 | 11 | 28.513 | KV452852.1 | 1398705 | 5-scf00246 | 5 |
| AX-158100597 | 11 | 28.578 | KV452852.1 | 1403748 | 5-scf00246 | 5 |
| AX-158100599 | 11 | 28.579 | KV452852.1 | 1404902 | 5-scf00246 | 5 |
| AX-158100600 | 11 | 28.579 | KV452852.1 | 1408605 | 5-scf00246 | 5 |
| AX-157719543 | 11 | 28.868 | KV452852.1 | 1423509 | 5-scf00246 | 5 |
| AX-158100603 | 11 | 28.869 | KV452852.1 | 1424313 | 5-scf00246 | 5 |
| AX-157826631 | 11 | 28.869 | KV452852.1 | 1431507 | 5-scf00246 | 5 |
| AX-158100605 | 11 | 28.869 | KV452852.1 | 1433497 | 5-scf00246 | 5 |
| AX-158100607 | 11 | 28.87  | KV452852.1 | 1435385 | 5-scf00246 | 5 |
| AX-158100609 | 11 | 28.87  | KV452852.1 | 1438756 | 5-scf00246 | 5 |
| AX-158100610 | 11 | 28.87  | KV452852.1 | 1440101 | 5-scf00246 | 5 |
| AX-158100614 | 11 | 29.328 | KV452852.1 | 1452850 | 5-scf00246 | 5 |
| AX-157755111 | 11 | 29.328 | KV452852.1 | 1454798 | 5-scf00246 | 5 |
| AX-158100616 | 11 | 29.328 | KV452852.1 | 1460645 | 5-scf00246 | 5 |
| AX-158100617 | 11 | 29.328 | KV452852.1 | 1461022 | 5-scf00246 | 5 |
| AX-158100618 | 11 | 29.328 | KV452852.1 | 1461936 | 5-scf00246 | 5 |
| AX-158100619 | 11 | 29.328 | KV452852.1 | 1463442 | 5-scf00246 | 5 |
| AX-158100621 | 11 | 29.328 | KV452852.1 | 1466489 | 5-scf00246 | 5 |
| AX-157754880 | 11 | 29.328 | KV452852.1 | 1467790 | 5-scf00246 | 5 |
| AX-158100623 | 11 | 29.328 | KV452852.1 | 1470431 | 5-scf00246 | 5 |
| AX-158100624 | 11 | 29.328 | KV452852.1 | 1471043 | 5-scf00246 | 5 |
| AX-158100626 | 11 | 29.328 | KV452852.1 | 1473225 | 5-scf00246 | 5 |
| AX-158100627 | 11 | 29.482 | KV452852.1 | 1477707 | 5-scf00246 | 5 |
| AX-158100628 | 11 | 29.634 | KV452852.1 | 1479574 | 5-scf00246 | 5 |

|              |    |        |            |         |            |   |
|--------------|----|--------|------------|---------|------------|---|
| AX-158100632 | 11 | 29.634 | KV452852.1 | 1485684 | 5-scf00246 | 5 |
| AX-158100634 | 11 | 29.634 | KV452852.1 | 1486957 | 5-scf00246 | 5 |
| AX-158100635 | 11 | 29.634 | KV452852.1 | 1488156 | 5-scf00246 | 5 |
| AX-158100636 | 11 | 29.634 | KV452852.1 | 1489961 | 5-scf00246 | 5 |
| AX-158100637 | 11 | 29.634 | KV452852.1 | 1491236 | 5-scf00246 | 5 |
| AX-157857383 | 11 | 29.634 | KV452852.1 | 1495903 | 5-scf00246 | 5 |
| AX-158100640 | 11 | 29.634 | KV452852.1 | 1496275 | 5-scf00246 | 5 |
| AX-158100642 | 11 | 29.634 | KV452852.1 | 1498931 | 5-scf00246 | 5 |
| AX-158100643 | 11 | 29.635 | KV452852.1 | 1499595 | 5-scf00246 | 5 |
| AX-158100646 | 11 | 29.962 | KV452852.1 | 1501980 | 5-scf00246 | 5 |
| AX-158100647 | 11 | 29.962 | KV452852.1 | 1505279 | 5-scf00246 | 5 |
| AX-158100648 | 11 | 29.962 | KV452852.1 | 1505994 | 5-scf00246 | 5 |
| AX-158100650 | 11 | 29.962 | KV452852.1 | 1509279 | 5-scf00246 | 5 |
| AX-158100592 | 11 | 30.071 | KV452852.1 | 1394281 | 5-scf00246 | 5 |
| AX-158100630 | 11 | 30.071 | KV452852.1 | 1480456 | 5-scf00246 | 5 |
| AX-158392211 | 11 | 30.071 | KV452852.1 | 1507280 | 5-scf00246 | 5 |
| AX-158100649 | 11 | 30.071 | KV452852.1 | 1508376 | 5-scf00246 | 5 |
| AX-158100651 | 11 | 30.071 | KV452852.1 | 1512738 | 5-scf00246 | 5 |
| AX-157826634 | 11 | 30.071 | KV452852.1 | 1514774 | 5-scf00246 | 5 |
| AX-158100652 | 11 | 30.071 | KV452852.1 | 1514856 | 5-scf00246 | 5 |
| AX-158100653 | 11 | 30.071 | KV452852.1 | 1515369 | 5-scf00246 | 5 |
| AX-158100654 | 11 | 30.071 | KV452852.1 | 1516437 | 5-scf00246 | 5 |
| AX-157746678 | 11 | 30.071 | KV452852.1 | 1520446 | 5-scf00246 | 5 |
| AX-157713158 | 11 | 30.071 | KV452852.1 | 1523074 | 5-scf00246 | 5 |
| AX-157725776 | 11 | 30.123 | KV452852.1 | 1526380 | 5-scf00246 | 5 |
| AX-158100669 | 11 | 30.123 | KV452852.1 | 1546330 | 5-scf00246 | 5 |
| AX-157745839 | 11 | 30.17  | KV452852.1 | 1529631 | 5-scf00246 | 5 |
| AX-158100667 | 11 | 30.17  | KV452852.1 | 1543837 | 5-scf00246 | 5 |
| AX-158100658 | 11 | 30.21  | KV452852.1 | 1534406 | 5-scf00246 | 5 |
| AX-158100664 | 11 | 30.21  | KV452852.1 | 1538938 | 5-scf00246 | 5 |
| AX-158100659 | 11 | 30.239 | KV452852.1 | 1534811 | 5-scf00246 | 5 |
| AX-158100662 | 11 | 30.239 | KV452852.1 | 1536600 | 5-scf00246 | 5 |
| AX-158100655 | 11 | 30.29  | KV452852.1 | 1518768 | 5-scf00246 | 5 |
| AX-157863269 | 11 | 30.29  | KV452852.1 | 1520672 | 5-scf00246 | 5 |
| AX-158100660 | 11 | 30.29  | KV452852.1 | 1535221 | 5-scf00246 | 5 |
| AX-158100661 | 11 | 30.29  | KV452852.1 | 1535516 | 5-scf00246 | 5 |
| AX-158100663 | 11 | 30.29  | KV452852.1 | 1538088 | 5-scf00246 | 5 |
| AX-157826637 | 11 | 30.29  | KV452852.1 | 1539200 | 5-scf00246 | 5 |
| AX-158100665 | 11 | 30.293 | KV452852.1 | 1539566 | 5-scf00246 | 5 |
| AX-157745987 | 11 | 30.726 | KV452852.1 | 1551077 | 5-scf00246 | 5 |
| AX-158100671 | 11 | 30.726 | KV452852.1 | 1554373 | 5-scf00246 | 5 |
| AX-158100672 | 11 | 30.726 | KV452852.1 | 1555188 | 5-scf00246 | 5 |
| AX-157742449 | 11 | 30.726 | KV452852.1 | 1555808 | 5-scf00246 | 5 |
| AX-158100673 | 11 | 30.726 | KV452852.1 | 1556833 | 5-scf00246 | 5 |
| AX-158100675 | 11 | 30.726 | KV452852.1 | 1558380 | 5-scf00246 | 5 |
| AX-158100678 | 11 | 30.781 | KV452852.1 | 1562006 | 5-scf00246 | 5 |
| AX-158100680 | 11 | 30.836 | KV452852.1 | 1563029 | 5-scf00246 | 5 |
| AX-158100681 | 11 | 30.836 | KV452852.1 | 1564079 | 5-scf00246 | 5 |
| AX-158100685 | 11 | 30.836 | KV452852.1 | 1573256 | 5-scf00246 | 5 |
| AX-158100688 | 11 | 30.836 | KV452852.1 | 1576359 | 5-scf00246 | 5 |
| AX-158100689 | 11 | 30.836 | KV452852.1 | 1577074 | 5-scf00246 | 5 |

|              |    |        |            |         |            |   |
|--------------|----|--------|------------|---------|------------|---|
| AX-157720801 | 11 | 30.836 | KV452852.1 | 1578901 | 5-scf00246 | 5 |
| AX-157826642 | 11 | 30.836 | KV452852.1 | 1580360 | 5-scf00246 | 5 |
| AX-158100692 | 11 | 30.836 | KV452852.1 | 1581718 | 5-scf00246 | 5 |
| AX-158100693 | 11 | 30.836 | KV452852.1 | 1582186 | 5-scf00246 | 5 |
| AX-158100694 | 11 | 30.836 | KV452852.1 | 1584132 | 5-scf00246 | 5 |
| AX-157738740 | 11 | 30.836 | KV452852.1 | 1586799 | 5-scf00246 | 5 |
| AX-158100697 | 11 | 30.836 | KV452852.1 | 1590000 | 5-scf00246 | 5 |
| AX-157826643 | 11 | 30.836 | KV452852.1 | 1592251 | 5-scf00246 | 5 |
| AX-158100704 | 11 | 31.597 | KV452852.1 | 1600309 | 5-scf00246 | 5 |
| AX-157826645 | 11 | 31.6   | KV452852.1 | 1597585 | 5-scf00246 | 5 |
| AX-158100706 | 11 | 31.6   | KV452852.1 | 1601343 | 5-scf00246 | 5 |
| AX-158100707 | 11 | 31.6   | KV452852.1 | 1602615 | 5-scf00246 | 5 |
| AX-158100709 | 11 | 31.6   | KV452852.1 | 1606764 | 5-scf00246 | 5 |
| AX-158100712 | 11 | 31.6   | KV452852.1 | 1617376 | 5-scf00246 | 5 |
| AX-158100714 | 11 | 31.6   | KV452852.1 | 1619299 | 5-scf00246 | 5 |
| AX-158100717 | 11 | 31.6   | KV452852.1 | 1621143 | 5-scf00246 | 5 |
| AX-158100719 | 11 | 31.6   | KV452852.1 | 1622487 | 5-scf00246 | 5 |
| AX-158100724 | 11 | 31.6   | KV452852.1 | 1625251 | 5-scf00246 | 5 |
| AX-158100726 | 11 | 31.6   | KV452852.1 | 1627603 | 5-scf00246 | 5 |
| AX-158100728 | 11 | 31.6   | KV452852.1 | 1630580 | 5-scf00246 | 5 |
| AX-158100729 | 11 | 31.6   | KV452852.1 | 1631783 | 5-scf00246 | 5 |
| AX-157885829 | 11 | 31.6   | KV452852.1 | 1632521 | 5-scf00246 | 5 |
| AX-158100730 | 11 | 31.6   | KV452852.1 | 1633729 | 5-scf00246 | 5 |
| AX-158100737 | 11 | 31.6   | KV452852.1 | 1644125 | 5-scf00246 | 5 |
| AX-158100739 | 11 | 31.6   | KV452852.1 | 1645328 | 5-scf00246 | 5 |
| AX-158100743 | 11 | 31.6   | KV452852.1 | 1651446 | 5-scf00246 | 5 |
| AX-157751211 | 11 | 31.6   | KV452852.1 | 1685614 | 5-scf00246 | 5 |
| AX-158100770 | 11 | 31.6   | KV452852.1 | 1697871 | 5-scf00246 | 5 |
| AX-157826658 | 11 | 31.6   | KV452852.1 | 1757183 | 5-scf00246 | 5 |
| AX-158100740 | 11 | 31.628 | KV452852.1 | 1645577 | 5-scf00246 | 5 |
| AX-158100742 | 11 | 31.657 | KV452852.1 | 1649119 | 5-scf00246 | 5 |
| AX-158100747 | 11 | 31.689 | KV452852.1 | 1662213 | 5-scf00246 | 5 |
| AX-158100682 | 11 | 31.709 | KV452852.1 | 1565358 | 5-scf00246 | 5 |
| AX-158100703 | 11 | 31.709 | KV452852.1 | 1599792 | 5-scf00246 | 5 |
| AX-158380033 | 11 | 31.709 | KV452852.1 | 1607087 | 5-scf00246 | 5 |
| AX-158392212 | 11 | 31.709 | KV452852.1 | 1610899 | 5-scf00246 | 5 |
| AX-158100718 | 11 | 31.709 | KV452852.1 | 1621871 | 5-scf00246 | 5 |
| AX-158100721 | 11 | 31.709 | KV452852.1 | 1623216 | 5-scf00246 | 5 |
| AX-158100748 | 11 | 31.709 | KV452852.1 | 1664088 | 5-scf00246 | 5 |
| AX-158100749 | 11 | 31.709 | KV452852.1 | 1664351 | 5-scf00246 | 5 |
| AX-158100750 | 11 | 31.709 | KV452852.1 | 1666394 | 5-scf00246 | 5 |
| AX-157826652 | 11 | 31.709 | KV452852.1 | 1668160 | 5-scf00246 | 5 |
| AX-158100752 | 11 | 31.709 | KV452852.1 | 1669266 | 5-scf00246 | 5 |
| AX-158100754 | 11 | 31.709 | KV452852.1 | 1671563 | 5-scf00246 | 5 |
| AX-158100755 | 11 | 31.709 | KV452852.1 | 1672137 | 5-scf00246 | 5 |
| AX-157826653 | 11 | 31.709 | KV452852.1 | 1678864 | 5-scf00246 | 5 |
| AX-158100760 | 11 | 31.709 | KV452852.1 | 1680714 | 5-scf00246 | 5 |
| AX-157826654 | 11 | 31.709 | KV452852.1 | 1682498 | 5-scf00246 | 5 |
| AX-158100763 | 11 | 31.709 | KV452852.1 | 1690092 | 5-scf00246 | 5 |
| AX-157720133 | 11 | 31.709 | KV452852.1 | 1690547 | 5-scf00246 | 5 |
| AX-157752018 | 11 | 31.709 | KV452852.1 | 1693680 | 5-scf00246 | 5 |



|              |    |        |            |         |            |   |
|--------------|----|--------|------------|---------|------------|---|
| AX-158100765 | 11 | 31.709 | KV452852.1 | 1694967 | 5-scf00246 | 5 |
| AX-158100772 | 11 | 31.709 | KV452852.1 | 1698674 | 5-scf00246 | 5 |
| AX-158100773 | 11 | 31.709 | KV452852.1 | 1701832 | 5-scf00246 | 5 |
| AX-158100775 | 11 | 31.709 | KV452852.1 | 1706493 | 5-scf00246 | 5 |
| AX-157826655 | 11 | 31.709 | KV452852.1 | 1714642 | 5-scf00246 | 5 |
| AX-158100759 | 11 | 31.818 | KV452852.1 | 1680068 | 5-scf00246 | 5 |
| AX-158100767 | 11 | 31.818 | KV452852.1 | 1696476 | 5-scf00246 | 5 |
| AX-158100778 | 11 | 31.818 | KV452852.1 | 1711543 | 5-scf00246 | 5 |
| AX-157826656 | 11 | 31.818 | KV452852.1 | 1715420 | 5-scf00246 | 5 |
| AX-158100779 | 11 | 31.818 | KV452852.1 | 1716931 | 5-scf00246 | 5 |
| AX-158100780 | 11 | 31.818 | KV452852.1 | 1717655 | 5-scf00246 | 5 |
| AX-158100787 | 11 | 31.819 | KV452852.1 | 1731519 | 5-scf00246 | 5 |
| AX-157729025 | 11 | 31.82  | KV452852.1 | 1693371 | 5-scf00246 | 5 |
| AX-158100788 | 11 | 31.82  | KV452852.1 | 1731988 | 5-scf00246 | 5 |
| AX-158100789 | 11 | 31.894 | KV452852.1 | 1733870 | 5-scf00246 | 5 |
| AX-157755989 | 11 | 31.894 | KV452852.1 | 1768271 | 5-scf00246 | 5 |
| AX-157826660 | 11 | 31.894 | KV452852.1 | 1805469 | 5-scf00246 | 5 |
| AX-157826647 | 11 | 32.146 | KV452852.1 | 1616077 | 5-scf00246 | 5 |
| AX-158100716 | 11 | 32.146 | KV452852.1 | 1620881 | 5-scf00246 | 5 |
| AX-158100723 | 11 | 32.146 | KV452852.1 | 1624805 | 5-scf00246 | 5 |
| AX-157870967 | 11 | 32.146 | KV452852.1 | 1646910 | 5-scf00246 | 5 |
| AX-157774255 | 11 | 32.146 | KV452852.1 | 1652955 | 5-scf00246 | 5 |
| AX-158100764 | 11 | 32.146 | KV452852.1 | 1694500 | 5-scf00246 | 5 |
| AX-158100776 | 11 | 32.146 | KV452852.1 | 1707415 | 5-scf00246 | 5 |
| AX-158100784 | 11 | 32.146 | KV452852.1 | 1728807 | 5-scf00246 | 5 |
| AX-158100786 | 11 | 32.146 | KV452852.1 | 1730163 | 5-scf00246 | 5 |
| AX-158100794 | 11 | 32.146 | KV452852.1 | 1740276 | 5-scf00246 | 5 |
| AX-158100797 | 11 | 32.146 | KV452852.1 | 1744512 | 5-scf00246 | 5 |
| AX-158100798 | 11 | 32.146 | KV452852.1 | 1746043 | 5-scf00246 | 5 |
| AX-158100799 | 11 | 32.146 | KV452852.1 | 1748456 | 5-scf00246 | 5 |
| AX-157826657 | 11 | 32.146 | KV452852.1 | 1748855 | 5-scf00246 | 5 |
| AX-158100801 | 11 | 32.146 | KV452852.1 | 1750160 | 5-scf00246 | 5 |
| AX-158100803 | 11 | 32.146 | KV452852.1 | 1751582 | 5-scf00246 | 5 |
| AX-158100804 | 11 | 32.146 | KV452852.1 | 1752054 | 5-scf00246 | 5 |
| AX-157857385 | 11 | 32.146 | KV452852.1 | 1753232 | 5-scf00246 | 5 |
| AX-158100806 | 11 | 32.146 | KV452852.1 | 1756573 | 5-scf00246 | 5 |
| AX-158100807 | 11 | 32.146 | KV452852.1 | 1757837 | 5-scf00246 | 5 |
| AX-158100809 | 11 | 32.146 | KV452852.1 | 1761291 | 5-scf00246 | 5 |
| AX-158100814 | 11 | 32.146 | KV452852.1 | 1783189 | 5-scf00246 | 5 |
| AX-157826659 | 11 | 32.167 | KV452852.1 | 1764347 | 5-scf00246 | 5 |
| AX-157826651 | 11 | 32.179 | KV452852.1 | 1664304 | 5-scf00246 | 5 |
| AX-158100810 | 11 | 32.179 | KV452852.1 | 1767269 | 5-scf00246 | 5 |
| AX-158410355 | 11 | 32.214 | KV452852.1 | 1779627 | 5-scf00246 | 5 |
| AX-158100720 | 11 | 32.255 | KV452852.1 | 1622788 | 5-scf00246 | 5 |
| AX-158100805 | 11 | 32.255 | KV452852.1 | 1754947 | 5-scf00246 | 5 |
| AX-158100812 | 11 | 32.255 | KV452852.1 | 1781597 | 5-scf00246 | 5 |
| AX-158100819 | 11 | 32.255 | KV452852.1 | 1790556 | 5-scf00246 | 5 |
| AX-157756570 | 11 | 32.255 | KV452852.1 | 1793902 | 5-scf00246 | 5 |
| AX-158100821 | 11 | 32.255 | KV452852.1 | 1794310 | 5-scf00246 | 5 |
| AX-157716376 | 11 | 32.255 | KV452852.1 | 1797113 | 5-scf00246 | 5 |
| AX-158100823 | 11 | 32.255 | KV452852.1 | 1797981 | 5-scf00246 | 5 |

|              |    |        |            |         |            |   |
|--------------|----|--------|------------|---------|------------|---|
| AX-158100824 | 11 | 32.255 | KV452852.1 | 1798387 | 5-scf00246 | 5 |
| AX-158100713 | 11 | 32.365 | KV452852.1 | 1618783 | 5-scf00246 | 5 |
| AX-158100725 | 11 | 32.365 | KV452852.1 | 1626335 | 5-scf00246 | 5 |
| AX-158100757 | 11 | 32.365 | KV452852.1 | 1676502 | 5-scf00246 | 5 |
| AX-158100768 | 11 | 32.365 | KV452852.1 | 1696796 | 5-scf00246 | 5 |
| AX-157774803 | 11 | 32.365 | KV452852.1 | 1799670 | 5-scf00246 | 5 |
| AX-158100825 | 11 | 32.365 | KV452852.1 | 1800672 | 5-scf00246 | 5 |
| AX-158100826 | 11 | 32.604 | KV452852.1 | 1801348 | 5-scf00246 | 5 |
| AX-158100828 | 11 | 32.604 | KV452852.1 | 1802580 | 5-scf00246 | 5 |
| AX-158100829 | 11 | 32.604 | KV452852.1 | 1804194 | 5-scf00246 | 5 |
| AX-158100830 | 11 | 32.604 | KV452852.1 | 1804879 | 5-scf00246 | 5 |
| AX-158100837 | 11 | 32.951 | KV452852.1 | 1826920 | 5-scf00246 | 5 |
| AX-158100839 | 11 | 32.952 | KV452852.1 | 1829177 | 5-scf00246 | 5 |
| AX-158100841 | 11 | 32.952 | KV452852.1 | 1831854 | 5-scf00246 | 5 |
| AX-158100842 | 11 | 32.952 | KV452852.1 | 1832503 | 5-scf00246 | 5 |
| AX-158100845 | 11 | 32.952 | KV452852.1 | 1836617 | 5-scf00246 | 5 |
| AX-157771067 | 11 | 33.088 | KV452852.1 | 1841103 | 5-scf00246 | 5 |
| AX-158100853 | 11 | 33.088 | KV452852.1 | 1845037 | 5-scf00246 | 5 |
| AX-157826662 | 11 | 33.286 | KV452852.1 | 1850482 | 5-scf00246 | 5 |
| AX-158100859 | 11 | 33.443 | KV452852.1 | 1855414 | 5-scf00246 | 5 |
| AX-157754754 | 11 | 33.569 | KV452852.1 | 1857766 | 5-scf00246 | 5 |
| AX-158100874 | 11 | 33.569 | KV452852.1 | 1880469 | 5-scf00246 | 5 |
| AX-157754475 | 11 | 33.57  | KV452852.1 | 1861188 | 5-scf00246 | 5 |
| AX-157724064 | 11 | 33.57  | KV452852.1 | 1865391 | 5-scf00246 | 5 |
| AX-158100863 | 11 | 33.57  | KV452852.1 | 1865870 | 5-scf00246 | 5 |
| AX-158100855 | 11 | 33.575 | KV452852.1 | 1849658 | 5-scf00246 | 5 |
| AX-158100864 | 11 | 33.575 | KV452852.1 | 1866110 | 5-scf00246 | 5 |
| AX-158100866 | 11 | 33.575 | KV452852.1 | 1868231 | 5-scf00246 | 5 |
| AX-158100870 | 11 | 33.575 | KV452852.1 | 1874107 | 5-scf00246 | 5 |
| AX-158100891 | 11 | 33.575 | KV452852.1 | 1899190 | 5-scf00246 | 5 |
| AX-157757700 | 11 | 33.575 | KV452852.1 | 1910737 | 5-scf00246 | 5 |
| AX-158100912 | 11 | 33.575 | KV452852.1 | 1930789 | 5-scf00246 | 5 |
| AX-158100967 | 11 | 33.575 | KV452852.1 | 2013740 | 5-scf00246 | 5 |
| AX-158100871 | 11 | 33.584 | KV452852.1 | 1875908 | 5-scf00246 | 5 |
| AX-158100872 | 11 | 33.597 | KV452852.1 | 1877875 | 5-scf00246 | 5 |
| AX-158100875 | 11 | 33.61  | KV452852.1 | 1881473 | 5-scf00246 | 5 |
| AX-157826663 | 11 | 33.629 | KV452852.1 | 1884209 | 5-scf00246 | 5 |
| AX-157826664 | 11 | 33.648 | KV452852.1 | 1884359 | 5-scf00246 | 5 |
| AX-158100878 | 11 | 33.67  | KV452852.1 | 1885922 | 5-scf00246 | 5 |
| AX-158100880 | 11 | 33.68  | KV452852.1 | 1889049 | 5-scf00246 | 5 |
| AX-158100883 | 11 | 33.697 | KV452852.1 | 1892045 | 5-scf00246 | 5 |
| AX-158100887 | 11 | 33.789 | KV452852.1 | 1896964 | 5-scf00246 | 5 |
| AX-158100889 | 11 | 33.874 | KV452852.1 | 1897911 | 5-scf00246 | 5 |
| AX-158100895 | 11 | 34.007 | KV452852.1 | 1902408 | 5-scf00246 | 5 |
| AX-158100899 | 11 | 34.007 | KV452852.1 | 1906234 | 5-scf00246 | 5 |
| AX-158100900 | 11 | 34.007 | KV452852.1 | 1907345 | 5-scf00246 | 5 |
| AX-158100901 | 11 | 34.007 | KV452852.1 | 1908848 | 5-scf00246 | 5 |
| AX-157723179 | 11 | 34.007 | KV452852.1 | 1911602 | 5-scf00246 | 5 |
| AX-158100905 | 11 | 34.007 | KV452852.1 | 1918507 | 5-scf00246 | 5 |
| AX-158100907 | 11 | 34.046 | KV452852.1 | 1921547 | 5-scf00246 | 5 |
| AX-158100908 | 11 | 34.073 | KV452852.1 | 1922914 | 5-scf00246 | 5 |

|              |    |        |             |         |            |    |
|--------------|----|--------|-------------|---------|------------|----|
| AX-157706149 | 11 | 34.099 | 3ML01031715 | 682     | scf07335_1 | UN |
| AX-158100910 | 11 | 34.116 | KV452852.1  | 1927173 | 5-scf00246 | 5  |
| AX-158100911 | 11 | 34.116 | KV452852.1  | 1928168 | 5-scf00246 | 5  |
| AX-157715381 | 11 | 34.116 | KV452852.1  | 1929366 | 5-scf00246 | 5  |
| AX-158100913 | 11 | 34.116 | KV452852.1  | 1931018 | 5-scf00246 | 5  |
| AX-157826666 | 11 | 34.116 | KV452852.1  | 1931987 | 5-scf00246 | 5  |
| AX-158100914 | 11 | 34.116 | KV452852.1  | 1932670 | 5-scf00246 | 5  |
| AX-158100935 | 11 | 34.116 | KV452852.1  | 1965645 | 5-scf00246 | 5  |
| AX-158100896 | 11 | 34.226 | KV452852.1  | 1904154 | 5-scf00246 | 5  |
| AX-158100903 | 11 | 34.226 | KV452852.1  | 1910570 | 5-scf00246 | 5  |
| AX-158392213 | 11 | 34.226 | KV452852.1  | 1942148 | 5-scf00246 | 5  |
| AX-158100919 | 11 | 34.226 | KV452852.1  | 1942232 | 5-scf00246 | 5  |
| AX-158100920 | 11 | 34.226 | KV452852.1  | 1943316 | 5-scf00246 | 5  |
| AX-158100921 | 11 | 34.226 | KV452852.1  | 1946701 | 5-scf00246 | 5  |
| AX-158100926 | 11 | 34.226 | KV452852.1  | 1957436 | 5-scf00246 | 5  |
| AX-158100927 | 11 | 34.226 | KV452852.1  | 1957870 | 5-scf00246 | 5  |
| AX-158100928 | 11 | 34.226 | KV452852.1  | 1958255 | 5-scf00246 | 5  |
| AX-158100929 | 11 | 34.226 | KV452852.1  | 1958538 | 5-scf00246 | 5  |
| AX-158100930 | 11 | 34.226 | KV452852.1  | 1959878 | 5-scf00246 | 5  |
| AX-158100931 | 11 | 34.226 | KV452852.1  | 1960522 | 5-scf00246 | 5  |
| AX-158100947 | 11 | 34.226 | KV452852.1  | 1977082 | 5-scf00246 | 5  |
| AX-158100948 | 11 | 34.226 | KV452852.1  | 1977691 | 5-scf00246 | 5  |
| AX-158100949 | 11 | 34.226 | KV452852.1  | 1978307 | 5-scf00246 | 5  |
| AX-158100958 | 11 | 34.226 | KV452852.1  | 1991891 | 5-scf00246 | 5  |
| AX-158100969 | 11 | 34.226 | KV452852.1  | 2015702 | 5-scf00246 | 5  |
| AX-158100979 | 11 | 34.226 | KV452852.1  | 2029857 | 5-scf00246 | 5  |
| AX-158100982 | 11 | 34.226 | KV452852.1  | 2037675 | 5-scf00246 | 5  |
| AX-158100932 | 11 | 34.335 | KV452852.1  | 1962650 | 5-scf00246 | 5  |
| AX-158100934 | 11 | 34.335 | KV452852.1  | 1964303 | 5-scf00246 | 5  |
| AX-158100936 | 11 | 34.337 | KV452852.1  | 1967416 | 5-scf00246 | 5  |
| AX-158100915 | 11 | 34.347 | KV452852.1  | 1934852 | 5-scf00246 | 5  |
| AX-158100938 | 11 | 34.347 | KV452852.1  | 1968719 | 5-scf00246 | 5  |
| AX-158100942 | 11 | 34.347 | KV452852.1  | 1971442 | 5-scf00246 | 5  |
| AX-158100965 | 11 | 34.347 | KV452852.1  | 2010113 | 5-scf00246 | 5  |
| AX-157713895 | 11 | 34.359 | KV452852.1  | 1972568 | 5-scf00246 | 5  |
| AX-158100944 | 11 | 34.369 | KV452852.1  | 1973101 | 5-scf00246 | 5  |
| AX-158100945 | 11 | 34.379 | KV452852.1  | 1973743 | 5-scf00246 | 5  |
| AX-158100946 | 11 | 34.388 | KV452852.1  | 1975859 | 5-scf00246 | 5  |
| AX-158100955 | 11 | 34.399 | KV452852.1  | 1989034 | 5-scf00246 | 5  |
| AX-158100968 | 11 | 34.399 | KV452852.1  | 2014167 | 5-scf00246 | 5  |
| AX-158100956 | 11 | 34.418 | KV452852.1  | 1990663 | 5-scf00246 | 5  |
| AX-157754757 | 11 | 34.444 | KV452852.1  | 1938191 | 5-scf00246 | 5  |
| AX-158100957 | 11 | 34.444 | KV452852.1  | 1991500 | 5-scf00246 | 5  |
| AX-158100959 | 11 | 34.444 | KV452852.1  | 1995097 | 5-scf00246 | 5  |
| AX-158100960 | 11 | 34.444 | KV452852.1  | 1997292 | 5-scf00246 | 5  |
| AX-158100961 | 11 | 34.444 | KV452852.1  | 1997714 | 5-scf00246 | 5  |
| AX-158380034 | 11 | 34.444 | KV452852.1  | 1998782 | 5-scf00246 | 5  |
| AX-157826667 | 11 | 34.444 | KV452852.1  | 2003708 | 5-scf00246 | 5  |
| AX-157826669 | 11 | 34.444 | KV452852.1  | 2005342 | 5-scf00246 | 5  |
| AX-158100966 | 11 | 34.444 | KV452852.1  | 2011755 | 5-scf00246 | 5  |
| AX-157826671 | 11 | 34.444 | KV452852.1  | 2017304 | 5-scf00246 | 5  |

|              |    |        |            |         |            |   |
|--------------|----|--------|------------|---------|------------|---|
| AX-158100974 | 11 | 34.817 | KV452852.1 | 2022736 | 5-scf00246 | 5 |
| AX-157826673 | 11 | 34.819 | KV452852.1 | 2035271 | 5-scf00246 | 5 |
| AX-158100983 | 11 | 34.819 | KV452852.1 | 2039867 | 5-scf00246 | 5 |
| AX-158100984 | 11 | 34.944 | KV452852.1 | 2040511 | 5-scf00246 | 5 |
| AX-158100987 | 11 | 34.944 | KV452852.1 | 2043797 | 5-scf00246 | 5 |
| AX-158100990 | 11 | 34.944 | KV452852.1 | 2046072 | 5-scf00246 | 5 |
| AX-158100980 | 11 | 35.318 | KV452852.1 | 2033378 | 5-scf00246 | 5 |
| AX-158100994 | 11 | 35.318 | KV452852.1 | 2052957 | 5-scf00246 | 5 |
| AX-157870969 | 11 | 35.318 | KV452852.1 | 2057594 | 5-scf00246 | 5 |
| AX-158100996 | 11 | 35.318 | KV452852.1 | 2057947 | 5-scf00246 | 5 |
| AX-158100999 | 11 | 35.318 | KV452852.1 | 2061303 | 5-scf00246 | 5 |
| AX-158101001 | 11 | 35.318 | KV452852.1 | 2065071 | 5-scf00246 | 5 |
| AX-158101002 | 11 | 35.318 | KV452852.1 | 2066388 | 5-scf00246 | 5 |
| AX-158101004 | 11 | 35.318 | KV452852.1 | 2071385 | 5-scf00246 | 5 |
| AX-158101005 | 11 | 35.318 | KV452852.1 | 2071709 | 5-scf00246 | 5 |
| AX-158101007 | 11 | 35.318 | KV452852.1 | 2074841 | 5-scf00246 | 5 |
| AX-158101012 | 11 | 35.318 | KV452852.1 | 2082920 | 5-scf00246 | 5 |
| AX-158101034 | 11 | 35.318 | KV452852.1 | 2112780 | 5-scf00246 | 5 |
| AX-157877553 | 11 | 35.318 | KV452852.1 | 2120627 | 5-scf00246 | 5 |
| AX-158101000 | 11 | 35.428 | KV452852.1 | 2063955 | 5-scf00246 | 5 |
| AX-158101008 | 11 | 35.428 | KV452852.1 | 2078628 | 5-scf00246 | 5 |
| AX-157826676 | 11 | 35.428 | KV452852.1 | 2079149 | 5-scf00246 | 5 |
| AX-158101011 | 11 | 35.428 | KV452852.1 | 2080228 | 5-scf00246 | 5 |
| AX-158101014 | 11 | 35.428 | KV452852.1 | 2086316 | 5-scf00246 | 5 |
| AX-158101015 | 11 | 35.428 | KV452852.1 | 2087381 | 5-scf00246 | 5 |
| AX-158101016 | 11 | 35.428 | KV452852.1 | 2088690 | 5-scf00246 | 5 |
| AX-158101018 | 11 | 35.428 | KV452852.1 | 2092000 | 5-scf00246 | 5 |
| AX-157719576 | 11 | 35.428 | KV452852.1 | 2096210 | 5-scf00246 | 5 |
| AX-158101021 | 11 | 35.428 | KV452852.1 | 2096516 | 5-scf00246 | 5 |
| AX-157877552 | 11 | 35.428 | KV452852.1 | 2096576 | 5-scf00246 | 5 |
| AX-158101023 | 11 | 35.428 | KV452852.1 | 2100880 | 5-scf00246 | 5 |
| AX-157718575 | 11 | 35.428 | KV452852.1 | 2117923 | 5-scf00246 | 5 |
| AX-158384717 | 11 | 35.646 | KV452852.1 | 2097880 | 5-scf00246 | 5 |
| AX-158101022 | 11 | 35.646 | KV452852.1 | 2100265 | 5-scf00246 | 5 |
| AX-158101024 | 11 | 35.646 | KV452852.1 | 2102169 | 5-scf00246 | 5 |
| AX-158101027 | 11 | 35.646 | KV452852.1 | 2105097 | 5-scf00246 | 5 |
| AX-157771365 | 11 | 35.646 | KV452852.1 | 2105526 | 5-scf00246 | 5 |
| AX-158101030 | 11 | 35.646 | KV452852.1 | 2108742 | 5-scf00246 | 5 |
| AX-157826678 | 11 | 35.737 | KV452852.1 | 2109090 | 5-scf00246 | 5 |
| AX-158101032 | 11 | 35.849 | KV452852.1 | 2111328 | 5-scf00246 | 5 |
| AX-158101036 | 11 | 35.849 | KV452852.1 | 2114691 | 5-scf00246 | 5 |
| AX-158101035 | 11 | 35.88  | KV452852.1 | 2113487 | 5-scf00246 | 5 |
| AX-158101025 | 11 | 36.083 | KV452852.1 | 2103021 | 5-scf00246 | 5 |
| AX-158101038 | 11 | 36.083 | KV452852.1 | 2118559 | 5-scf00246 | 5 |
| AX-158101040 | 11 | 36.083 | KV452852.1 | 2121904 | 5-scf00246 | 5 |
| AX-157715299 | 11 | 36.083 | KV452852.1 | 2124354 | 5-scf00246 | 5 |
| AX-157826680 | 11 | 36.083 | KV452852.1 | 2126817 | 5-scf00246 | 5 |
| AX-157826683 | 11 | 36.417 | KV452852.1 | 2129768 | 5-scf00246 | 5 |
| AX-158101047 | 11 | 36.417 | KV452852.1 | 2129990 | 5-scf00246 | 5 |
| AX-158101049 | 11 | 36.417 | KV452852.1 | 2132602 | 5-scf00246 | 5 |
| AX-158101050 | 11 | 36.58  | KV452852.1 | 2133131 | 5-scf00246 | 5 |

|              |    |        |            |         |            |   |
|--------------|----|--------|------------|---------|------------|---|
| AX-158101053 | 11 | 36.58  | KV452852.1 | 2136012 | 5-scf00246 | 5 |
| AX-157826684 | 11 | 36.58  | KV452852.1 | 2138165 | 5-scf00246 | 5 |
| AX-158101061 | 11 | 36.58  | KV452852.1 | 2143496 | 5-scf00246 | 5 |
| AX-157826685 | 11 | 36.58  | KV452852.1 | 2147159 | 5-scf00246 | 5 |
| AX-157826686 | 11 | 36.58  | KV452852.1 | 2147307 | 5-scf00246 | 5 |
| AX-158101090 | 11 | 36.58  | KV452852.1 | 2180547 | 5-scf00246 | 5 |
| AX-158101060 | 11 | 36.583 | KV452852.1 | 2142939 | 5-scf00246 | 5 |
| AX-158101048 | 11 | 36.708 | KV452852.1 | 2131545 | 5-scf00246 | 5 |
| AX-158101056 | 11 | 36.708 | KV452852.1 | 2141721 | 5-scf00246 | 5 |
| AX-158101066 | 11 | 36.708 | KV452852.1 | 2145984 | 5-scf00246 | 5 |
| AX-158101068 | 11 | 36.708 | KV452852.1 | 2146946 | 5-scf00246 | 5 |
| AX-158101074 | 11 | 36.708 | KV452852.1 | 2151109 | 5-scf00246 | 5 |
| AX-158101071 | 11 | 36.833 | KV452852.1 | 2148875 | 5-scf00246 | 5 |
| AX-158392215 | 11 | 36.833 | KV452852.1 | 2153783 | 5-scf00246 | 5 |
| AX-158101077 | 11 | 36.957 | KV452852.1 | 2155573 | 5-scf00246 | 5 |
| AX-157736055 | 11 | 36.957 | KV452852.1 | 2156785 | 5-scf00246 | 5 |
| AX-158101093 | 11 | 36.957 | KV452852.1 | 2185348 | 5-scf00246 | 5 |
| AX-157714960 | 11 | 36.958 | KV452852.1 | 2156172 | 5-scf00246 | 5 |
| AX-158101079 | 11 | 36.958 | KV452852.1 | 2157922 | 5-scf00246 | 5 |
| AX-157826692 | 11 | 36.958 | KV452852.1 | 2173114 | 5-scf00246 | 5 |
| AX-158101085 | 11 | 36.958 | KV452852.1 | 2173336 | 5-scf00246 | 5 |
| AX-158101087 | 11 | 36.958 | KV452852.1 | 2176221 | 5-scf00246 | 5 |
| AX-158101088 | 11 | 36.958 | KV452852.1 | 2176944 | 5-scf00246 | 5 |
| AX-158101084 | 11 | 37.179 | KV452852.1 | 2170210 | 5-scf00246 | 5 |
| AX-158101092 | 11 | 37.179 | KV452852.1 | 2184681 | 5-scf00246 | 5 |
| AX-157740350 | 11 | 37.179 | KV452852.1 | 2188613 | 5-scf00246 | 5 |
| AX-158101099 | 11 | 37.39  | KV452852.1 | 2194881 | 5-scf00246 | 5 |
| AX-158101100 | 11 | 37.39  | KV452852.1 | 2195724 | 5-scf00246 | 5 |
| AX-158101091 | 11 | 37.395 | KV452852.1 | 2182879 | 5-scf00246 | 5 |
| AX-157885831 | 11 | 37.395 | KV452852.1 | 2196019 | 5-scf00246 | 5 |
| AX-158101101 | 11 | 37.395 | KV452852.1 | 2196533 | 5-scf00246 | 5 |
| AX-158101102 | 11 | 37.395 | KV452852.1 | 2197527 | 5-scf00246 | 5 |
| AX-158101104 | 11 | 37.395 | KV452852.1 | 2199162 | 5-scf00246 | 5 |
| AX-158101105 | 11 | 37.395 | KV452852.1 | 2199534 | 5-scf00246 | 5 |
| AX-158101106 | 11 | 37.395 | KV452852.1 | 2201046 | 5-scf00246 | 5 |
| AX-158101107 | 11 | 37.395 | KV452852.1 | 2202550 | 5-scf00246 | 5 |
| AX-158101108 | 11 | 37.395 | KV452852.1 | 2204391 | 5-scf00246 | 5 |
| AX-158101109 | 11 | 37.395 | KV452852.1 | 2205456 | 5-scf00246 | 5 |
| AX-158101110 | 11 | 37.395 | KV452852.1 | 2206459 | 5-scf00246 | 5 |
| AX-158101111 | 11 | 37.395 | KV452852.1 | 2208517 | 5-scf00246 | 5 |
| AX-157726513 | 11 | 37.395 | KV452852.1 | 2208572 | 5-scf00246 | 5 |
| AX-158101113 | 11 | 37.395 | KV452852.1 | 2209742 | 5-scf00246 | 5 |
| AX-158101114 | 11 | 37.395 | KV452852.1 | 2210824 | 5-scf00246 | 5 |
| AX-158101081 | 11 | 37.646 | KV452852.1 | 2161319 | 5-scf00246 | 5 |
| AX-158101118 | 11 | 37.646 | KV452852.1 | 2214837 | 5-scf00246 | 5 |
| AX-158101121 | 11 | 37.646 | KV452852.1 | 2215995 | 5-scf00246 | 5 |
| AX-158101122 | 11 | 37.646 | KV452852.1 | 2216329 | 5-scf00246 | 5 |
| AX-157727630 | 11 | 37.646 | KV452852.1 | 2216865 | 5-scf00246 | 5 |
| AX-158101124 | 11 | 37.646 | KV452852.1 | 2216969 | 5-scf00246 | 5 |
| AX-158101128 | 11 | 37.646 | KV452852.1 | 2222314 | 5-scf00246 | 5 |
| AX-158101144 | 11 | 37.646 | KV452852.1 | 2245951 | 5-scf00246 | 5 |

|              |    |        |            |         |            |   |
|--------------|----|--------|------------|---------|------------|---|
| AX-157751014 | 11 | 37.896 | KV452852.1 | 2230668 | 5-scf00246 | 5 |
| AX-158101135 | 11 | 37.896 | KV452852.1 | 2233970 | 5-scf00246 | 5 |
| AX-157870972 | 11 | 37.896 | KV452852.1 | 2234248 | 5-scf00246 | 5 |
| AX-158101168 | 11 | 37.896 | KV452852.1 | 2269744 | 5-scf00246 | 5 |
| AX-158101137 | 11 | 37.903 | KV452852.1 | 2236383 | 5-scf00246 | 5 |
| AX-157757356 | 11 | 37.908 | KV452852.1 | 2224205 | 5-scf00246 | 5 |
| AX-158101139 | 11 | 37.908 | KV452852.1 | 2240455 | 5-scf00246 | 5 |
| AX-158101145 | 11 | 38.292 | KV452852.1 | 2246597 | 5-scf00246 | 5 |
| AX-158101058 | 11 | 38.389 | KV452852.1 | 2142301 | 5-scf00246 | 5 |
| AX-157826688 | 11 | 38.389 | KV452852.1 | 2153190 | 5-scf00246 | 5 |
| AX-158101142 | 11 | 38.389 | KV452852.1 | 2244415 | 5-scf00246 | 5 |
| AX-157724136 | 11 | 38.389 | KV452852.1 | 2250537 | 5-scf00246 | 5 |
| AX-157826696 | 11 | 38.389 | KV452852.1 | 2256024 | 5-scf00246 | 5 |
| AX-158101148 | 11 | 38.398 | KV452852.1 | 2254690 | 5-scf00246 | 5 |
| AX-158101149 | 11 | 38.399 | KV452852.1 | 2255136 | 5-scf00246 | 5 |
| AX-158101150 | 11 | 38.399 | KV452852.1 | 2255420 | 5-scf00246 | 5 |
| AX-158101152 | 11 | 38.399 | KV452852.1 | 2257944 | 5-scf00246 | 5 |
| AX-158101155 | 11 | 38.399 | KV452852.1 | 2260962 | 5-scf00246 | 5 |
| AX-158101159 | 11 | 38.399 | KV452852.1 | 2265035 | 5-scf00246 | 5 |
| AX-158101160 | 11 | 38.399 | KV452852.1 | 2265453 | 5-scf00246 | 5 |
| AX-158101165 | 11 | 38.399 | KV452852.1 | 2268115 | 5-scf00246 | 5 |
| AX-158101169 | 11 | 38.399 | KV452852.1 | 2271009 | 5-scf00246 | 5 |
| AX-158101170 | 11 | 38.735 | KV452852.1 | 2274182 | 5-scf00246 | 5 |
| AX-158101172 | 11 | 39.071 | KV452852.1 | 2277774 | 5-scf00246 | 5 |
| AX-158101175 | 11 | 39.072 | KV452852.1 | 2281449 | 5-scf00246 | 5 |
| AX-158101176 | 11 | 39.073 | KV452852.1 | 2282321 | 5-scf00246 | 5 |
| AX-158101132 | 11 | 39.374 | KV452852.1 | 2227868 | 5-scf00246 | 5 |
| AX-158101136 | 11 | 39.374 | KV452852.1 | 2234860 | 5-scf00246 | 5 |
| AX-158101179 | 11 | 39.374 | KV452852.1 | 2288042 | 5-scf00246 | 5 |
| AX-157826697 | 11 | 39.374 | KV452852.1 | 2293662 | 5-scf00246 | 5 |
| AX-158101185 | 11 | 39.788 | KV452852.1 | 2301442 | 5-scf00246 | 5 |
| AX-158101186 | 11 | 39.788 | KV452852.1 | 2302639 | 5-scf00246 | 5 |
| AX-157754004 | 11 | 39.912 | KV452852.1 | 2302181 | 5-scf00246 | 5 |
| AX-158101189 | 11 | 39.912 | KV452852.1 | 2307819 | 5-scf00246 | 5 |
| AX-158101191 | 11 | 39.912 | KV452852.1 | 2312385 | 5-scf00246 | 5 |
| AX-158101192 | 11 | 39.912 | KV452852.1 | 2314236 | 5-scf00246 | 5 |
| AX-158101194 | 11 | 39.912 | KV452852.1 | 2315349 | 5-scf00246 | 5 |
| AX-158101195 | 11 | 39.912 | KV452852.1 | 2316258 | 5-scf00246 | 5 |
| AX-158101196 | 11 | 39.916 | KV452852.1 | 2316420 | 5-scf00246 | 5 |
| AX-158101198 | 11 | 40.768 | KV452852.1 | 2318583 | 5-scf00246 | 5 |
| AX-158101199 | 11 | 40.768 | KV452852.1 | 2319491 | 5-scf00246 | 5 |
| AX-158101206 | 11 | 40.826 | KV452852.1 | 2327772 | 5-scf00246 | 5 |
| AX-158101213 | 11 | 40.893 | KV452852.1 | 2336075 | 5-scf00246 | 5 |
| AX-158101214 | 11 | 40.893 | KV452852.1 | 2339355 | 5-scf00246 | 5 |
| AX-158101215 | 11 | 40.899 | KV452852.1 | 2339710 | 5-scf00246 | 5 |
| AX-157772735 | 11 | 40.933 | KV452852.1 | 2327062 | 5-scf00246 | 5 |
| AX-158101208 | 11 | 40.933 | KV452852.1 | 2329500 | 5-scf00246 | 5 |
| AX-158101209 | 11 | 40.933 | KV452852.1 | 2330075 | 5-scf00246 | 5 |
| AX-158101217 | 11 | 40.933 | KV452852.1 | 2342985 | 5-scf00246 | 5 |
| AX-158101220 | 11 | 40.933 | KV452852.1 | 2347224 | 5-scf00246 | 5 |
| AX-158101222 | 11 | 40.933 | KV452852.1 | 2350111 | 5-scf00246 | 5 |

|              |    |        |            |         |            |   |
|--------------|----|--------|------------|---------|------------|---|
| AX-158101228 | 11 | 40.933 | KV452852.1 | 2353501 | 5-scf00246 | 5 |
| AX-158101224 | 11 | 40.934 | KV452852.1 | 2350660 | 5-scf00246 | 5 |
| AX-158101231 | 11 | 41.576 | KV452852.1 | 2357941 | 5-scf00246 | 5 |
| AX-158101233 | 11 | 42.084 | KV452852.1 | 2360448 | 5-scf00246 | 5 |
| AX-157721206 | 11 | 42.084 | KV452852.1 | 2409965 | 5-scf00246 | 5 |
| AX-158101236 | 11 | 42.085 | KV452852.1 | 2362645 | 5-scf00246 | 5 |
| AX-158101237 | 11 | 42.441 | KV452852.1 | 2363910 | 5-scf00246 | 5 |
| AX-157744525 | 11 | 42.441 | KV452852.1 | 2365532 | 5-scf00246 | 5 |
| AX-158101240 | 11 | 42.441 | KV452852.1 | 2372312 | 5-scf00246 | 5 |
| AX-158101241 | 11 | 42.441 | KV452852.1 | 2372701 | 5-scf00246 | 5 |
| AX-158101243 | 11 | 42.441 | KV452852.1 | 2374449 | 5-scf00246 | 5 |
| AX-158101245 | 11 | 42.441 | KV452852.1 | 2376526 | 5-scf00246 | 5 |
| AX-157870974 | 11 | 42.441 | KV452852.1 | 2377395 | 5-scf00246 | 5 |
| AX-157739093 | 11 | 42.441 | KV452852.1 | 2380003 | 5-scf00246 | 5 |
| AX-158101247 | 11 | 42.441 | KV452852.1 | 2380141 | 5-scf00246 | 5 |
| AX-158101248 | 11 | 42.441 | KV452852.1 | 2381392 | 5-scf00246 | 5 |
| AX-158101251 | 11 | 42.441 | KV452852.1 | 2385426 | 5-scf00246 | 5 |
| AX-158101255 | 11 | 42.441 | KV452852.1 | 2390031 | 5-scf00246 | 5 |
| AX-157773114 | 11 | 42.441 | KV452852.1 | 2395786 | 5-scf00246 | 5 |
| AX-157746966 | 11 | 42.441 | KV452852.1 | 2402258 | 5-scf00246 | 5 |
| AX-157755820 | 11 | 42.441 | KV452852.1 | 2404734 | 5-scf00246 | 5 |
| AX-158101261 | 11 | 42.441 | KV452852.1 | 2407438 | 5-scf00246 | 5 |
| AX-158101265 | 11 | 42.441 | KV452852.1 | 2419283 | 5-scf00246 | 5 |
| AX-157826702 | 11 | 42.441 | KV452852.1 | 2419719 | 5-scf00246 | 5 |
| AX-158101266 | 11 | 42.441 | KV452852.1 | 2421673 | 5-scf00246 | 5 |
| AX-157857388 | 11 | 42.441 | KV452852.1 | 2422677 | 5-scf00246 | 5 |
| AX-158101268 | 11 | 42.441 | KV452852.1 | 2422813 | 5-scf00246 | 5 |
| AX-158101270 | 11 | 42.441 | KV452852.1 | 2424070 | 5-scf00246 | 5 |
| AX-157727019 | 11 | 42.441 | KV452852.1 | 2459966 | 5-scf00246 | 5 |
| AX-157748231 | 11 | 42.693 | KV452852.1 | 2366445 | 5-scf00246 | 5 |
| AX-158101238 | 11 | 42.693 | KV452852.1 | 2367866 | 5-scf00246 | 5 |
| AX-158101254 | 11 | 42.693 | KV452852.1 | 2387474 | 5-scf00246 | 5 |
| AX-158101258 | 11 | 42.693 | KV452852.1 | 2397114 | 5-scf00246 | 5 |
| AX-158101267 | 11 | 42.693 | KV452852.1 | 2422200 | 5-scf00246 | 5 |
| AX-158101273 | 11 | 42.693 | KV452852.1 | 2430027 | 5-scf00246 | 5 |
| AX-158101274 | 11 | 42.693 | KV452852.1 | 2431010 | 5-scf00246 | 5 |
| AX-157826706 | 11 | 42.693 | KV452852.1 | 2463789 | 5-scf00246 | 5 |
| AX-157739169 | 11 | 42.944 | KV452852.1 | 2440921 | 5-scf00246 | 5 |
| AX-158101283 | 11 | 42.944 | KV452852.1 | 2444000 | 5-scf00246 | 5 |
| AX-158101286 | 11 | 43.196 | KV452852.1 | 2449726 | 5-scf00246 | 5 |
| AX-157870976 | 11 | 43.196 | KV452852.1 | 2450668 | 5-scf00246 | 5 |
| AX-157717151 | 11 | 43.196 | KV452852.1 | 2450846 | 5-scf00246 | 5 |
| AX-158101288 | 11 | 43.196 | KV452852.1 | 2452079 | 5-scf00246 | 5 |
| AX-158101289 | 11 | 43.196 | KV452852.1 | 2455341 | 5-scf00246 | 5 |
| AX-158101292 | 11 | 43.196 | KV452852.1 | 2460833 | 5-scf00246 | 5 |
| AX-157727184 | 11 | 43.196 | KV452852.1 | 2462295 | 5-scf00246 | 5 |
| AX-158101293 | 11 | 43.196 | KV452852.1 | 2462865 | 5-scf00246 | 5 |
| AX-157745716 | 11 | 43.196 | KV452852.1 | 2468188 | 5-scf00246 | 5 |
| AX-157826707 | 11 | 43.196 | KV452852.1 | 2468264 | 5-scf00246 | 5 |
| AX-158101297 | 11 | 43.196 | KV452852.1 | 2468840 | 5-scf00246 | 5 |
| AX-158101302 | 11 | 43.196 | KV452852.1 | 2479749 | 5-scf00246 | 5 |

|              |    |        |            |         |            |   |
|--------------|----|--------|------------|---------|------------|---|
| AX-157826709 | 11 | 43.196 | KV452852.1 | 2502696 | 5-scf00246 | 5 |
| AX-158101271 | 11 | 43.209 | KV452852.1 | 2425256 | 5-scf00246 | 5 |
| AX-157870977 | 11 | 43.209 | KV452852.1 | 2457918 | 5-scf00246 | 5 |
| AX-158101305 | 11 | 43.209 | KV452852.1 | 2487453 | 5-scf00246 | 5 |
| AX-157714230 | 11 | 43.222 | KV452852.1 | 2489352 | 5-scf00246 | 5 |
| AX-158101307 | 11 | 43.235 | KV452852.1 | 2490560 | 5-scf00246 | 5 |
| AX-158101308 | 11 | 43.246 | KV452852.1 | 2491010 | 5-scf00246 | 5 |
| AX-158101311 | 11 | 43.463 | KV452852.1 | 2496476 | 5-scf00246 | 5 |
| AX-158101284 | 11 | 43.658 | KV452852.1 | 2445344 | 5-scf00246 | 5 |
| AX-158101304 | 11 | 43.658 | KV452852.1 | 2487205 | 5-scf00246 | 5 |
| AX-158101313 | 11 | 43.658 | KV452852.1 | 2498277 | 5-scf00246 | 5 |
| AX-158101263 | 11 | 43.767 | KV452852.1 | 2415426 | 5-scf00246 | 5 |
| AX-158101276 | 11 | 43.767 | KV452852.1 | 2433394 | 5-scf00246 | 5 |
| AX-158101316 | 11 | 43.767 | KV452852.1 | 2500587 | 5-scf00246 | 5 |
| AX-158101318 | 11 | 43.946 | KV452852.1 | 2502783 | 5-scf00246 | 5 |
| AX-158101317 | 11 | 43.951 | KV452852.1 | 2501006 | 5-scf00246 | 5 |
| AX-158101321 | 11 | 43.951 | KV452852.1 | 2504978 | 5-scf00246 | 5 |
| AX-158101322 | 11 | 43.951 | KV452852.1 | 2505361 | 5-scf00246 | 5 |
| AX-158101323 | 11 | 44.041 | KV452852.1 | 2507612 | 5-scf00246 | 5 |
| AX-158101328 | 11 | 44.244 | KV452852.1 | 2516102 | 5-scf00246 | 5 |
| AX-158101329 | 11 | 44.771 | KV452852.1 | 2519412 | 5-scf00246 | 5 |
| AX-158101330 | 11 | 44.771 | KV452852.1 | 2522076 | 5-scf00246 | 5 |
| AX-157826715 | 11 | 45.216 | KV452852.1 | 2526417 | 5-scf00246 | 5 |
| AX-157759062 | 11 | 45.217 | KV452852.1 | 2529543 | 5-scf00246 | 5 |
| AX-158101333 | 11 | 45.217 | KV452852.1 | 2533582 | 5-scf00246 | 5 |
| AX-158101335 | 11 | 45.217 | KV452852.1 | 2535859 | 5-scf00246 | 5 |
| AX-158101337 | 11 | 45.922 | KV452852.1 | 2541793 | 5-scf00246 | 5 |
| AX-158101338 | 11 | 45.948 | KV452852.1 | 2543197 | 5-scf00246 | 5 |
| AX-158101336 | 11 | 45.974 | KV452852.1 | 2541427 | 5-scf00246 | 5 |
| AX-158101342 | 11 | 45.974 | KV452852.1 | 2546857 | 5-scf00246 | 5 |
| AX-158101343 | 11 | 45.974 | KV452852.1 | 2548049 | 5-scf00246 | 5 |
| AX-158101344 | 11 | 45.974 | KV452852.1 | 2548596 | 5-scf00246 | 5 |
| AX-158101345 | 11 | 45.974 | KV452852.1 | 2549184 | 5-scf00246 | 5 |
| AX-158101347 | 11 | 46.225 | KV452852.1 | 2551128 | 5-scf00246 | 5 |
| AX-158101351 | 11 | 46.225 | KV452852.1 | 2556027 | 5-scf00246 | 5 |
| AX-158101353 | 11 | 46.225 | KV452852.1 | 2561939 | 5-scf00246 | 5 |
| AX-158101356 | 11 | 46.225 | KV452852.1 | 2565178 | 5-scf00246 | 5 |
| AX-158101354 | 11 | 46.229 | KV452852.1 | 2563690 | 5-scf00246 | 5 |
| AX-157885833 | 11 | 46.229 | KV452852.1 | 2565782 | 5-scf00246 | 5 |
| AX-158101360 | 11 | 46.229 | KV452852.1 | 2572686 | 5-scf00246 | 5 |
| AX-157826714 | 11 | 46.234 | KV452852.1 | 2524618 | 5-scf00246 | 5 |
| AX-158101332 | 11 | 46.234 | KV452852.1 | 2532685 | 5-scf00246 | 5 |
| AX-158101367 | 11 | 46.234 | KV452852.1 | 2578283 | 5-scf00246 | 5 |
| AX-158101349 | 11 | 46.238 | KV452852.1 | 2553614 | 5-scf00246 | 5 |
| AX-158101363 | 11 | 46.238 | KV452852.1 | 2574805 | 5-scf00246 | 5 |
| AX-158101368 | 11 | 46.238 | KV452852.1 | 2580746 | 5-scf00246 | 5 |
| AX-158101372 | 11 | 46.728 | KV452852.1 | 2591221 | 5-scf00246 | 5 |
| AX-158101373 | 11 | 46.728 | KV452852.1 | 2592123 | 5-scf00246 | 5 |
| AX-158101375 | 11 | 46.728 | KV452852.1 | 2595082 | 5-scf00246 | 5 |
| AX-158101377 | 11 | 46.728 | KV452852.1 | 2598768 | 5-scf00246 | 5 |
| AX-158101379 | 11 | 46.728 | KV452852.1 | 2600922 | 5-scf00246 | 5 |



|              |    |        |            |         |            |   |
|--------------|----|--------|------------|---------|------------|---|
| AX-158101380 | 11 | 46.728 | KV452852.1 | 2601594 | 5-scf00246 | 5 |
| AX-158101382 | 11 | 46.728 | KV452852.1 | 2603556 | 5-scf00246 | 5 |
| AX-158101383 | 11 | 46.728 | KV452852.1 | 2605347 | 5-scf00246 | 5 |
| AX-158101387 | 11 | 46.728 | KV452852.1 | 2612713 | 5-scf00246 | 5 |
| AX-158101384 | 11 | 46.978 | KV452852.1 | 2609272 | 5-scf00246 | 5 |
| AX-158101385 | 11 | 46.978 | KV452852.1 | 2610639 | 5-scf00246 | 5 |
| AX-158101394 | 11 | 46.982 | KV452852.1 | 2621242 | 5-scf00246 | 5 |
| AX-158101396 | 11 | 47.312 | KV452852.1 | 2624906 | 5-scf00246 | 5 |
| AX-158101401 | 11 | 47.32  | KV452852.1 | 2631128 | 5-scf00246 | 5 |
| AX-158101402 | 11 | 47.32  | KV452852.1 | 2631544 | 5-scf00246 | 5 |
| AX-158101350 | 11 | 47.986 | KV452852.1 | 2554544 | 5-scf00246 | 5 |
| AX-158101359 | 11 | 47.986 | KV452852.1 | 2570468 | 5-scf00246 | 5 |
| AX-157742432 | 11 | 47.986 | KV452852.1 | 2584500 | 5-scf00246 | 5 |
| AX-158101405 | 11 | 47.986 | KV452852.1 | 2635442 | 5-scf00246 | 5 |
| AX-158101408 | 11 | 47.986 | KV452852.1 | 2637213 | 5-scf00246 | 5 |
| AX-158101410 | 11 | 47.986 | KV452852.1 | 2639459 | 5-scf00246 | 5 |
| AX-158101411 | 11 | 47.986 | KV452852.1 | 2641232 | 5-scf00246 | 5 |
| AX-157770756 | 11 | 47.986 | KV452852.1 | 2642434 | 5-scf00246 | 5 |
| AX-158101412 | 11 | 47.986 | KV452852.1 | 2642710 | 5-scf00246 | 5 |
| AX-157758024 | 11 | 47.986 | KV452852.1 | 2643731 | 5-scf00246 | 5 |
| AX-158101414 | 11 | 47.986 | KV452852.1 | 2647517 | 5-scf00246 | 5 |
| AX-157717754 | 11 | 47.986 | KV452852.1 | 2649748 | 5-scf00246 | 5 |
| AX-158101415 | 11 | 47.986 | KV452852.1 | 2652667 | 5-scf00246 | 5 |
| AX-157826719 | 11 | 47.986 | KV452852.1 | 2653122 | 5-scf00246 | 5 |
| AX-158101419 | 11 | 47.986 | KV452852.1 | 2657478 | 5-scf00246 | 5 |
| AX-158101423 | 11 | 47.986 | KV452852.1 | 2662236 | 5-scf00246 | 5 |
| AX-158101426 | 11 | 47.986 | KV452852.1 | 2664047 | 5-scf00246 | 5 |
| AX-158101428 | 11 | 47.986 | KV452852.1 | 2665988 | 5-scf00246 | 5 |
| AX-157826720 | 11 | 47.986 | KV452852.1 | 2666127 | 5-scf00246 | 5 |
| AX-158101432 | 11 | 47.986 | KV452852.1 | 2693214 | 5-scf00246 | 5 |
| AX-158101434 | 11 | 47.986 | KV452852.1 | 2695023 | 5-scf00246 | 5 |
| AX-158101436 | 11 | 47.986 | KV452852.1 | 2696810 | 5-scf00246 | 5 |
| AX-158101438 | 11 | 47.986 | KV452852.1 | 2700115 | 5-scf00246 | 5 |
| AX-158101439 | 11 | 47.986 | KV452852.1 | 2700539 | 5-scf00246 | 5 |
| AX-158101440 | 11 | 47.986 | KV452852.1 | 2700744 | 5-scf00246 | 5 |
| AX-158101442 | 11 | 47.986 | KV452852.1 | 2702649 | 5-scf00246 | 5 |
| AX-158101443 | 11 | 47.986 | KV452852.1 | 2703291 | 5-scf00246 | 5 |
| AX-158101445 | 11 | 47.986 | KV452852.1 | 2706334 | 5-scf00246 | 5 |
| AX-158101453 | 11 | 47.986 | KV452852.1 | 2717970 | 5-scf00246 | 5 |
| AX-158101454 | 11 | 47.986 | KV452852.1 | 2719274 | 5-scf00246 | 5 |
| AX-158101615 | 11 | 47.986 | KV452852.1 | 2949255 | 5-scf00246 | 5 |
| AX-158101448 | 11 | 48.215 | KV452852.1 | 2709635 | 5-scf00246 | 5 |
| AX-158101451 | 11 | 48.215 | KV452852.1 | 2712972 | 5-scf00246 | 5 |
| AX-158101452 | 11 | 48.215 | KV452852.1 | 2714689 | 5-scf00246 | 5 |
| AX-158410370 | 11 | 48.501 | KV452852.1 | 2717260 | 5-scf00246 | 5 |
| AX-158101455 | 11 | 48.501 | KV452852.1 | 2721131 | 5-scf00246 | 5 |
| AX-158101456 | 11 | 48.688 | KV452852.1 | 2722575 | 5-scf00246 | 5 |
| AX-158101457 | 11 | 48.788 | KV452852.1 | 2723084 | 5-scf00246 | 5 |
| AX-158101463 | 11 | 48.788 | KV452852.1 | 2728132 | 5-scf00246 | 5 |
| AX-158101467 | 11 | 48.788 | KV452852.1 | 2736220 | 5-scf00246 | 5 |
| AX-157739920 | 11 | 48.788 | KV452852.1 | 2736615 | 5-scf00246 | 5 |

|              |    |        |            |         |            |   |
|--------------|----|--------|------------|---------|------------|---|
| AX-158101470 | 11 | 48.788 | KV452852.1 | 2738257 | 5-scf00246 | 5 |
| AX-158101471 | 11 | 48.788 | KV452852.1 | 2741301 | 5-scf00246 | 5 |
| AX-157755296 | 11 | 48.788 | KV452852.1 | 2745012 | 5-scf00246 | 5 |
| AX-158101474 | 11 | 48.788 | KV452852.1 | 2747494 | 5-scf00246 | 5 |
| AX-158101476 | 11 | 48.788 | KV452852.1 | 2748660 | 5-scf00246 | 5 |
| AX-158101477 | 11 | 48.788 | KV452852.1 | 2749436 | 5-scf00246 | 5 |
| AX-158101478 | 11 | 48.852 | KV452852.1 | 2750281 | 5-scf00246 | 5 |
| AX-158101492 | 11 | 48.852 | KV452852.1 | 2769359 | 5-scf00246 | 5 |
| AX-158101482 | 11 | 48.903 | KV452852.1 | 2755640 | 5-scf00246 | 5 |
| AX-158101483 | 11 | 48.903 | KV452852.1 | 2758341 | 5-scf00246 | 5 |
| AX-158101486 | 11 | 48.903 | KV452852.1 | 2760552 | 5-scf00246 | 5 |
| AX-158101488 | 11 | 48.903 | KV452852.1 | 2760983 | 5-scf00246 | 5 |
| AX-158101460 | 11 | 49.017 | KV452852.1 | 2725623 | 5-scf00246 | 5 |
| AX-158101468 | 11 | 49.017 | KV452852.1 | 2737158 | 5-scf00246 | 5 |
| AX-158101490 | 11 | 49.017 | KV452852.1 | 2763646 | 5-scf00246 | 5 |
| AX-158101491 | 11 | 49.017 | KV452852.1 | 2767041 | 5-scf00246 | 5 |
| AX-157728509 | 11 | 49.017 | KV452852.1 | 2768466 | 5-scf00246 | 5 |
| AX-157826723 | 11 | 49.017 | KV452852.1 | 2769454 | 5-scf00246 | 5 |
| AX-158101494 | 11 | 49.017 | KV452852.1 | 2770571 | 5-scf00246 | 5 |
| AX-158101495 | 11 | 49.017 | KV452852.1 | 2770943 | 5-scf00246 | 5 |
| AX-158101497 | 11 | 49.017 | KV452852.1 | 2772498 | 5-scf00246 | 5 |
| AX-158410372 | 11 | 49.017 | KV452852.1 | 2777306 | 5-scf00246 | 5 |
| AX-158101501 | 11 | 49.017 | KV452852.1 | 2777424 | 5-scf00246 | 5 |
| AX-158101507 | 11 | 49.017 | KV452852.1 | 2782437 | 5-scf00246 | 5 |
| AX-158392217 | 11 | 49.017 | KV452852.1 | 2783700 | 5-scf00246 | 5 |
| AX-158101512 | 11 | 49.017 | KV452852.1 | 2789205 | 5-scf00246 | 5 |
| AX-158101551 | 11 | 49.017 | KV452852.1 | 2857665 | 5-scf00246 | 5 |
| AX-158101516 | 11 | 49.132 | KV452852.1 | 2797748 | 5-scf00246 | 5 |
| AX-158101517 | 11 | 49.246 | KV452852.1 | 2799431 | 5-scf00246 | 5 |
| AX-158101520 | 11 | 49.246 | KV452852.1 | 2804066 | 5-scf00246 | 5 |
| AX-158101524 | 11 | 49.246 | KV452852.1 | 2807953 | 5-scf00246 | 5 |
| AX-158101525 | 11 | 49.246 | KV452852.1 | 2808839 | 5-scf00246 | 5 |
| AX-157857390 | 11 | 49.246 | KV452852.1 | 2808958 | 5-scf00246 | 5 |
| AX-158101526 | 11 | 49.246 | KV452852.1 | 2811321 | 5-scf00246 | 5 |
| AX-157773178 | 11 | 49.246 | KV452852.1 | 2819405 | 5-scf00246 | 5 |
| AX-158101531 | 11 | 49.246 | KV452852.1 | 2820435 | 5-scf00246 | 5 |
| AX-157746865 | 11 | 49.246 | KV452852.1 | 2824954 | 5-scf00246 | 5 |
| AX-157721431 | 11 | 49.246 | KV452852.1 | 2827009 | 5-scf00246 | 5 |
| AX-157744055 | 11 | 49.246 | KV452852.1 | 2834308 | 5-scf00246 | 5 |
| AX-158101542 | 11 | 49.246 | KV452852.1 | 2836750 | 5-scf00246 | 5 |
| AX-158101545 | 11 | 49.246 | KV452852.1 | 2842660 | 5-scf00246 | 5 |
| AX-158101546 | 11 | 49.246 | KV452852.1 | 2846363 | 5-scf00246 | 5 |
| AX-157826726 | 11 | 49.246 | KV452852.1 | 2848820 | 5-scf00246 | 5 |
| AX-158101549 | 11 | 49.246 | KV452852.1 | 2852054 | 5-scf00246 | 5 |
| AX-157738468 | 11 | 49.246 | KV452852.1 | 2852093 | 5-scf00246 | 5 |
| AX-157713291 | 11 | 49.246 | KV452852.1 | 2858683 | 5-scf00246 | 5 |
| AX-158101556 | 11 | 49.246 | KV452852.1 | 2868645 | 5-scf00246 | 5 |
| AX-158101569 | 11 | 49.246 | KV452852.1 | 2880220 | 5-scf00246 | 5 |
| AX-157826729 | 11 | 49.246 | KV452852.1 | 2892410 | 5-scf00246 | 5 |
| AX-158101581 | 11 | 49.246 | KV452852.1 | 2893858 | 5-scf00246 | 5 |
| AX-157716030 | 11 | 49.246 | KV452852.1 | 2967805 | 5-scf00246 | 5 |

|              |    |        |            |         |            |   |
|--------------|----|--------|------------|---------|------------|---|
| AX-158101553 | 11 | 49.253 | KV452852.1 | 2862625 | 5-scf00246 | 5 |
| AX-158101529 | 11 | 49.302 | KV452852.1 | 2816757 | 5-scf00246 | 5 |
| AX-158101561 | 11 | 49.302 | KV452852.1 | 2871613 | 5-scf00246 | 5 |
| AX-158101580 | 11 | 49.302 | KV452852.1 | 2893593 | 5-scf00246 | 5 |
| AX-158101538 | 11 | 49.361 | KV452852.1 | 2833776 | 5-scf00246 | 5 |
| AX-158101562 | 11 | 49.361 | KV452852.1 | 2872635 | 5-scf00246 | 5 |
| AX-158101566 | 11 | 49.361 | KV452852.1 | 2875995 | 5-scf00246 | 5 |
| AX-158101567 | 11 | 49.361 | KV452852.1 | 2877298 | 5-scf00246 | 5 |
| AX-157826727 | 11 | 49.361 | KV452852.1 | 2884599 | 5-scf00246 | 5 |
| AX-158101575 | 11 | 49.475 | KV452852.1 | 2887066 | 5-scf00246 | 5 |
| AX-157826728 | 11 | 49.475 | KV452852.1 | 2892372 | 5-scf00246 | 5 |
| AX-158101582 | 11 | 49.475 | KV452852.1 | 2895353 | 5-scf00246 | 5 |
| AX-158101587 | 11 | 49.475 | KV452852.1 | 2906493 | 5-scf00246 | 5 |
| AX-158101518 | 11 | 49.589 | KV452852.1 | 2802100 | 5-scf00246 | 5 |
| AX-158101523 | 11 | 49.589 | KV452852.1 | 2807244 | 5-scf00246 | 5 |
| AX-158101528 | 11 | 49.589 | KV452852.1 | 2814914 | 5-scf00246 | 5 |
| AX-157720441 | 11 | 49.589 | KV452852.1 | 2850571 | 5-scf00246 | 5 |
| AX-157717258 | 11 | 49.589 | KV452852.1 | 2866044 | 5-scf00246 | 5 |
| AX-157726134 | 11 | 49.589 | KV452852.1 | 2886596 | 5-scf00246 | 5 |
| AX-158101594 | 11 | 49.589 | KV452852.1 | 2914477 | 5-scf00246 | 5 |
| AX-157754554 | 11 | 49.589 | KV452852.1 | 2919874 | 5-scf00246 | 5 |
| AX-158101601 | 11 | 49.589 | KV452852.1 | 2929281 | 5-scf00246 | 5 |
| AX-158101603 | 11 | 49.589 | KV452852.1 | 2931088 | 5-scf00246 | 5 |
| AX-158101611 | 11 | 49.589 | KV452852.1 | 2943719 | 5-scf00246 | 5 |
| AX-158101613 | 11 | 49.589 | KV452852.1 | 2947284 | 5-scf00246 | 5 |
| AX-158101614 | 11 | 49.589 | KV452852.1 | 2948484 | 5-scf00246 | 5 |
| AX-158101609 | 11 | 49.761 | KV452852.1 | 2939886 | 5-scf00246 | 5 |
| AX-158101621 | 11 | 49.933 | KV452852.1 | 2968869 | 5-scf00246 | 5 |
| AX-157826732 | 11 | 49.933 | KV452852.1 | 2969646 | 5-scf00246 | 5 |
| AX-158101623 | 11 | 49.933 | KV452852.1 | 2970737 | 5-scf00246 | 5 |
| AX-158101625 | 11 | 49.933 | KV452852.1 | 2971434 | 5-scf00246 | 5 |
| AX-158101626 | 11 | 49.933 | KV452852.1 | 2971724 | 5-scf00246 | 5 |
| AX-158101630 | 11 | 49.933 | KV452852.1 | 2976584 | 5-scf00246 | 5 |
| AX-158101631 | 11 | 49.933 | KV452852.1 | 2983652 | 5-scf00246 | 5 |
| AX-158101632 | 11 | 49.933 | KV452852.1 | 2985445 | 5-scf00246 | 5 |
| AX-158101633 | 11 | 49.933 | KV452852.1 | 2987133 | 5-scf00246 | 5 |
| AX-158101634 | 11 | 49.933 | KV452852.1 | 2987872 | 5-scf00246 | 5 |
| AX-158101635 | 11 | 49.933 | KV452852.1 | 2988258 | 5-scf00246 | 5 |
| AX-157826738 | 11 | 49.933 | KV452852.1 | 2988879 | 5-scf00246 | 5 |
| AX-158101637 | 11 | 49.933 | KV452852.1 | 2991518 | 5-scf00246 | 5 |
| AX-158101639 | 11 | 49.933 | KV452852.1 | 2995817 | 5-scf00246 | 5 |
| AX-157716166 | 11 | 49.933 | KV452852.1 | 2998342 | 5-scf00246 | 5 |
| AX-158101640 | 11 | 49.933 | KV452852.1 | 3000336 | 5-scf00246 | 5 |
| AX-157826740 | 11 | 49.933 | KV452852.1 | 3002211 | 5-scf00246 | 5 |
| AX-158101644 | 11 | 49.933 | KV452852.1 | 3004209 | 5-scf00246 | 5 |
| AX-158101645 | 11 | 49.933 | KV452852.1 | 3005504 | 5-scf00246 | 5 |
| AX-158101650 | 11 | 49.933 | KV452852.1 | 3012235 | 5-scf00246 | 5 |
| AX-158101657 | 11 | 49.933 | KV452852.1 | 3024817 | 5-scf00246 | 5 |
| AX-158101663 | 11 | 49.933 | KV452852.1 | 3029296 | 5-scf00246 | 5 |
| AX-157826745 | 11 | 49.933 | KV452852.1 | 3038002 | 5-scf00246 | 5 |
| AX-157826747 | 11 | 49.933 | KV452852.1 | 3044071 | 5-scf00246 | 5 |

|              |    |        |            |         |            |   |
|--------------|----|--------|------------|---------|------------|---|
| AX-158101689 | 11 | 49.933 | KV452852.1 | 3079023 | 5-scf00246 | 5 |
| AX-158101698 | 11 | 49.933 | KV452852.1 | 3093316 | 5-scf00246 | 5 |
| AX-158101707 | 11 | 49.933 | KV452852.1 | 3101938 | 5-scf00246 | 5 |
| AX-158101713 | 11 | 49.933 | KV452852.1 | 3106560 | 5-scf00246 | 5 |
| AX-158101646 | 11 | 49.965 | KV452852.1 | 3006569 | 5-scf00246 | 5 |
| AX-158101505 | 11 | 50     | KV452852.1 | 2780756 | 5-scf00246 | 5 |
| AX-158101565 | 11 | 50     | KV452852.1 | 2874872 | 5-scf00246 | 5 |
| AX-158101590 | 11 | 50     | KV452852.1 | 2909211 | 5-scf00246 | 5 |
| AX-158101600 | 11 | 50     | KV452852.1 | 2926596 | 5-scf00246 | 5 |
| AX-157826735 | 11 | 50     | KV452852.1 | 2973996 | 5-scf00246 | 5 |
| AX-157754588 | 11 | 50     | KV452852.1 | 3008229 | 5-scf00246 | 5 |
| AX-157747850 | 11 | 50     | KV452852.1 | 3037803 | 5-scf00246 | 5 |
| AX-157826748 | 11 | 50     | KV452852.1 | 3066724 | 5-scf00246 | 5 |
| AX-157826744 | 11 | 50.033 | KV452852.1 | 3037870 | 5-scf00246 | 5 |
| AX-157826737 | 11 | 50.048 | KV452852.1 | 2988813 | 5-scf00246 | 5 |
| AX-157826742 | 11 | 50.048 | KV452852.1 | 3029673 | 5-scf00246 | 5 |
| AX-158101681 | 11 | 50.048 | KV452852.1 | 3065068 | 5-scf00246 | 5 |
| AX-158101683 | 11 | 50.048 | KV452852.1 | 3070802 | 5-scf00246 | 5 |
| AX-157826750 | 11 | 50.048 | KV452852.1 | 3071307 | 5-scf00246 | 5 |
| AX-158101685 | 11 | 50.048 | KV452852.1 | 3071769 | 5-scf00246 | 5 |
| AX-158101697 | 11 | 50.048 | KV452852.1 | 3091394 | 5-scf00246 | 5 |
| AX-158101702 | 11 | 50.048 | KV452852.1 | 3099170 | 5-scf00246 | 5 |
| AX-158101710 | 11 | 50.048 | KV452852.1 | 3104458 | 5-scf00246 | 5 |
| AX-158416939 | 11 | 50.048 | KV452852.1 | 3104726 | 5-scf00246 | 5 |
| AX-158101711 | 11 | 50.048 | KV452852.1 | 3105423 | 5-scf00246 | 5 |
| AX-157738749 | 11 | 50.048 | KV452852.1 | 3107430 | 5-scf00246 | 5 |
| AX-157757679 | 11 | 50.048 | KV452852.1 | 3116703 | 5-scf00246 | 5 |
| AX-158101724 | 11 | 50.048 | KV452852.1 | 3120371 | 5-scf00246 | 5 |
| AX-158101725 | 11 | 50.048 | KV452852.1 | 3120808 | 5-scf00246 | 5 |
| AX-157826753 | 11 | 50.048 | KV452852.1 | 3123010 | 5-scf00246 | 5 |
| AX-158101798 | 11 | 50.048 | KV452852.1 | 3231255 | 5-scf00246 | 5 |
| AX-158101651 | 11 | 50.162 | KV452852.1 | 3016266 | 5-scf00246 | 5 |
| AX-158101705 | 11 | 50.162 | KV452852.1 | 3100649 | 5-scf00246 | 5 |
| AX-158101709 | 11 | 50.162 | KV452852.1 | 3103730 | 5-scf00246 | 5 |
| AX-157826752 | 11 | 50.162 | KV452852.1 | 3114979 | 5-scf00246 | 5 |
| AX-158101730 | 11 | 50.162 | KV452852.1 | 3147191 | 5-scf00246 | 5 |
| AX-158101731 | 11 | 50.162 | KV452852.1 | 3147452 | 5-scf00246 | 5 |
| AX-158101732 | 11 | 50.162 | KV452852.1 | 3148055 | 5-scf00246 | 5 |
| AX-158101733 | 11 | 50.162 | KV452852.1 | 3149914 | 5-scf00246 | 5 |
| AX-158101736 | 11 | 50.162 | KV452852.1 | 3154823 | 5-scf00246 | 5 |
| AX-158101737 | 11 | 50.162 | KV452852.1 | 3157479 | 5-scf00246 | 5 |
| AX-158101740 | 11 | 50.162 | KV452852.1 | 3160930 | 5-scf00246 | 5 |
| AX-158101741 | 11 | 50.162 | KV452852.1 | 3161274 | 5-scf00246 | 5 |
| AX-158101745 | 11 | 50.162 | KV452852.1 | 3165200 | 5-scf00246 | 5 |
| AX-158101746 | 11 | 50.162 | KV452852.1 | 3165289 | 5-scf00246 | 5 |
| AX-157747570 | 11 | 50.162 | KV452852.1 | 3223678 | 5-scf00246 | 5 |
| AX-158101533 | 11 | 50.276 | KV452852.1 | 2827667 | 5-scf00246 | 5 |
| AX-157724664 | 11 | 50.276 | KV452852.1 | 2896489 | 5-scf00246 | 5 |
| AX-157723620 | 11 | 50.276 | KV452852.1 | 2915750 | 5-scf00246 | 5 |
| AX-158101604 | 11 | 50.276 | KV452852.1 | 2931932 | 5-scf00246 | 5 |
| AX-158101617 | 11 | 50.276 | KV452852.1 | 2963920 | 5-scf00246 | 5 |

|              |    |        |            |         |            |   |
|--------------|----|--------|------------|---------|------------|---|
| AX-158101622 | 11 | 50.276 | KV452852.1 | 2969492 | 5-scf00246 | 5 |
| AX-158101627 | 11 | 50.276 | KV452852.1 | 2972590 | 5-scf00246 | 5 |
| AX-158101648 | 11 | 50.276 | KV452852.1 | 3010295 | 5-scf00246 | 5 |
| AX-158101661 | 11 | 50.276 | KV452852.1 | 3027029 | 5-scf00246 | 5 |
| AX-158101687 | 11 | 50.276 | KV452852.1 | 3073169 | 5-scf00246 | 5 |
| AX-158101694 | 11 | 50.276 | KV452852.1 | 3088530 | 5-scf00246 | 5 |
| AX-158101766 | 11 | 50.276 | KV452852.1 | 3191136 | 5-scf00246 | 5 |
| AX-158101767 | 11 | 50.276 | KV452852.1 | 3193765 | 5-scf00246 | 5 |
| AX-158101772 | 11 | 50.276 | KV452852.1 | 3198851 | 5-scf00246 | 5 |
| AX-158101775 | 11 | 50.276 | KV452852.1 | 3201526 | 5-scf00246 | 5 |
| AX-158101778 | 11 | 50.276 | KV452852.1 | 3207720 | 5-scf00246 | 5 |
| AX-158101789 | 11 | 50.276 | KV452852.1 | 3219525 | 5-scf00246 | 5 |
| AX-158101790 | 11 | 50.276 | KV452852.1 | 3220000 | 5-scf00246 | 5 |
| AX-158101792 | 11 | 50.276 | KV452852.1 | 3221844 | 5-scf00246 | 5 |
| AX-157755688 | 11 | 50.276 | KV452852.1 | 3239035 | 5-scf00246 | 5 |
| AX-158101806 | 11 | 50.276 | KV452852.1 | 3242413 | 5-scf00246 | 5 |
| AX-158101809 | 11 | 50.276 | KV452852.1 | 3244867 | 5-scf00246 | 5 |
| AX-158101823 | 11 | 50.276 | KV452852.1 | 3268223 | 5-scf00246 | 5 |
| AX-158101836 | 11 | 50.276 | KV452852.1 | 3284895 | 5-scf00246 | 5 |
| AX-158102062 | 11 | 50.276 | KV452852.1 | 3609160 | 5-scf00246 | 5 |
| AX-158101808 | 11 | 50.278 | KV452852.1 | 3244452 | 5-scf00246 | 5 |
| AX-158101692 | 11 | 50.448 | KV452852.1 | 3086269 | 5-scf00246 | 5 |
| AX-158101768 | 11 | 50.448 | KV452852.1 | 3194050 | 5-scf00246 | 5 |
| AX-157724977 | 11 | 50.448 | KV452852.1 | 3222801 | 5-scf00246 | 5 |
| AX-158101803 | 11 | 50.448 | KV452852.1 | 3237641 | 5-scf00246 | 5 |
| AX-158101811 | 11 | 50.448 | KV452852.1 | 3249343 | 5-scf00246 | 5 |
| AX-158101880 | 11 | 50.448 | KV452852.1 | 3347840 | 5-scf00246 | 5 |
| AX-158101923 | 11 | 50.448 | KV452852.1 | 3396324 | 5-scf00246 | 5 |
| AX-158101947 | 11 | 50.448 | KV452852.1 | 3435872 | 5-scf00246 | 5 |
| AX-157739942 | 11 | 50.619 | KV452852.1 | 3262631 | 5-scf00246 | 5 |
| AX-158101773 | 11 | 50.62  | KV452852.1 | 3199701 | 5-scf00246 | 5 |
| AX-158101774 | 11 | 50.62  | KV452852.1 | 3200466 | 5-scf00246 | 5 |
| AX-158101820 | 11 | 50.62  | KV452852.1 | 3266611 | 5-scf00246 | 5 |
| AX-158101827 | 11 | 50.62  | KV452852.1 | 3271212 | 5-scf00246 | 5 |
| AX-158101830 | 11 | 50.62  | KV452852.1 | 3272586 | 5-scf00246 | 5 |
| AX-158101831 | 11 | 50.62  | KV452852.1 | 3273112 | 5-scf00246 | 5 |
| AX-158101837 | 11 | 50.62  | KV452852.1 | 3285380 | 5-scf00246 | 5 |
| AX-157726313 | 11 | 50.735 | KV452852.1 | 3290133 | 5-scf00246 | 5 |
| AX-158101682 | 11 | 50.849 | KV452852.1 | 3068620 | 5-scf00246 | 5 |
| AX-158101819 | 11 | 50.849 | KV452852.1 | 3265847 | 5-scf00246 | 5 |
| AX-158101839 | 11 | 50.849 | KV452852.1 | 3288340 | 5-scf00246 | 5 |
| AX-158101841 | 11 | 50.849 | KV452852.1 | 3292561 | 5-scf00246 | 5 |
| AX-158101842 | 11 | 50.849 | KV452852.1 | 3293520 | 5-scf00246 | 5 |
| AX-158101852 | 11 | 50.849 | KV452852.1 | 3306474 | 5-scf00246 | 5 |
| AX-158101853 | 11 | 50.849 | KV452852.1 | 3312174 | 5-scf00246 | 5 |
| AX-158101866 | 11 | 50.849 | KV452852.1 | 3323398 | 5-scf00246 | 5 |
| AX-158101864 | 11 | 50.963 | KV452852.1 | 3322033 | 5-scf00246 | 5 |
| AX-158101865 | 11 | 50.963 | KV452852.1 | 3322270 | 5-scf00246 | 5 |
| AX-158101867 | 11 | 50.963 | KV452852.1 | 3324044 | 5-scf00246 | 5 |
| AX-158101871 | 11 | 51.078 | KV452852.1 | 3335459 | 5-scf00246 | 5 |
| AX-158101872 | 11 | 51.078 | KV452852.1 | 3336537 | 5-scf00246 | 5 |

|              |    |        |            |         |            |   |
|--------------|----|--------|------------|---------|------------|---|
| AX-158101874 | 11 | 51.078 | KV452852.1 | 3341797 | 5-scf00246 | 5 |
| AX-158101878 | 11 | 51.078 | KV452852.1 | 3345580 | 5-scf00246 | 5 |
| AX-158101888 | 11 | 51.078 | KV452852.1 | 3354603 | 5-scf00246 | 5 |
| AX-157877572 | 11 | 51.078 | KV452852.1 | 3357086 | 5-scf00246 | 5 |
| AX-158101898 | 11 | 51.078 | KV452852.1 | 3361165 | 5-scf00246 | 5 |
| AX-158101900 | 11 | 51.078 | KV452852.1 | 3362708 | 5-scf00246 | 5 |
| AX-157826769 | 11 | 51.078 | KV452852.1 | 3416146 | 5-scf00246 | 5 |
| AX-157758886 | 11 | 51.098 | KV452852.1 | 3363385 | 5-scf00246 | 5 |
| AX-158101907 | 11 | 51.121 | KV452852.1 | 3371939 | 5-scf00246 | 5 |
| AX-157826766 | 11 | 51.144 | KV452852.1 | 3374660 | 5-scf00246 | 5 |
| AX-158101910 | 11 | 51.167 | KV452852.1 | 3376686 | 5-scf00246 | 5 |
| AX-158101857 | 11 | 51.192 | KV452852.1 | 3315405 | 5-scf00246 | 5 |
| AX-158101858 | 11 | 51.192 | KV452852.1 | 3317043 | 5-scf00246 | 5 |
| AX-158101862 | 11 | 51.192 | KV452852.1 | 3320023 | 5-scf00246 | 5 |
| AX-158101911 | 11 | 51.192 | KV452852.1 | 3378811 | 5-scf00246 | 5 |
| AX-158101894 | 11 | 51.307 | KV452852.1 | 3358815 | 5-scf00246 | 5 |
| AX-157826767 | 11 | 51.307 | KV452852.1 | 3377549 | 5-scf00246 | 5 |
| AX-158410379 | 11 | 51.307 | KV452852.1 | 3384654 | 5-scf00246 | 5 |
| AX-158410381 | 11 | 51.307 | KV452852.1 | 3387848 | 5-scf00246 | 5 |
| AX-158101920 | 11 | 51.307 | KV452852.1 | 3392590 | 5-scf00246 | 5 |
| AX-158101921 | 11 | 51.307 | KV452852.1 | 3393747 | 5-scf00246 | 5 |
| AX-158101922 | 11 | 51.307 | KV452852.1 | 3395977 | 5-scf00246 | 5 |
| AX-158101928 | 11 | 51.307 | KV452852.1 | 3410874 | 5-scf00246 | 5 |
| AX-157756121 | 11 | 51.307 | KV452852.1 | 3414715 | 5-scf00246 | 5 |
| AX-158101933 | 11 | 51.307 | KV452852.1 | 3416813 | 5-scf00246 | 5 |
| AX-158101938 | 11 | 51.307 | KV452852.1 | 3427462 | 5-scf00246 | 5 |
| AX-157758217 | 11 | 51.536 | KV452852.1 | 3382359 | 5-scf00246 | 5 |
| AX-158101913 | 11 | 51.536 | KV452852.1 | 3382820 | 5-scf00246 | 5 |
| AX-158101927 | 11 | 51.536 | KV452852.1 | 3410213 | 5-scf00246 | 5 |
| AX-158101931 | 11 | 51.536 | KV452852.1 | 3413340 | 5-scf00246 | 5 |
| AX-158101935 | 11 | 51.536 | KV452852.1 | 3424162 | 5-scf00246 | 5 |
| AX-158101936 | 11 | 51.536 | KV452852.1 | 3425484 | 5-scf00246 | 5 |
| AX-158101939 | 11 | 51.536 | KV452852.1 | 3428057 | 5-scf00246 | 5 |
| AX-158101942 | 11 | 51.536 | KV452852.1 | 3430834 | 5-scf00246 | 5 |
| AX-158101944 | 11 | 51.536 | KV452852.1 | 3432533 | 5-scf00246 | 5 |
| AX-158392229 | 11 | 51.536 | KV452852.1 | 3461442 | 5-scf00246 | 5 |
| AX-158101945 | 11 | 51.561 | KV452852.1 | 3432948 | 5-scf00246 | 5 |
| AX-158101917 | 11 | 51.589 | KV452852.1 | 3388879 | 5-scf00246 | 5 |
| AX-158101953 | 11 | 51.589 | KV452852.1 | 3444395 | 5-scf00246 | 5 |
| AX-157708669 | 11 | 51.618 | KV452852.1 | 3444768 | 5-scf00246 | 5 |
| AX-158101954 | 11 | 51.618 | KV452852.1 | 3445295 | 5-scf00246 | 5 |
| AX-158392227 | 11 | 51.65  | KV452852.1 | 3451934 | 5-scf00246 | 5 |
| AX-158101961 | 11 | 51.65  | KV452852.1 | 3453326 | 5-scf00246 | 5 |
| AX-158392228 | 11 | 51.65  | KV452852.1 | 3458300 | 5-scf00246 | 5 |
| AX-158101966 | 11 | 51.702 | KV452852.1 | 3460430 | 5-scf00246 | 5 |
| AX-158101968 | 11 | 51.712 | KV452852.1 | 3462098 | 5-scf00246 | 5 |
| AX-158101969 | 11 | 51.765 | KV452852.1 | 3462910 | 5-scf00246 | 5 |
| AX-158101970 | 11 | 51.765 | KV452852.1 | 3463904 | 5-scf00246 | 5 |
| AX-157744582 | 11 | 51.765 | KV452852.1 | 3465857 | 5-scf00246 | 5 |
| AX-158101979 | 11 | 51.88  | KV452852.1 | 3476853 | 5-scf00246 | 5 |
| AX-157758384 | 11 | 51.88  | KV452852.1 | 3496194 | 5-scf00246 | 5 |

|              |    |        |            |         |            |   |
|--------------|----|--------|------------|---------|------------|---|
| AX-158101995 | 11 | 51.88  | KV452852.1 | 3498004 | 5-scf00246 | 5 |
| AX-158101997 | 11 | 51.88  | KV452852.1 | 3500769 | 5-scf00246 | 5 |
| AX-158102044 | 11 | 51.88  | KV452852.1 | 3572252 | 5-scf00246 | 5 |
| AX-157826772 | 11 | 51.903 | KV452852.1 | 3506329 | 5-scf00246 | 5 |
| AX-157715031 | 11 | 51.994 | KV452852.1 | 3123807 | 5-scf00246 | 5 |
| AX-158101843 | 11 | 51.994 | KV452852.1 | 3294848 | 5-scf00246 | 5 |
| AX-157755286 | 11 | 51.994 | KV452852.1 | 3307637 | 5-scf00246 | 5 |
| AX-158101854 | 11 | 51.994 | KV452852.1 | 3312668 | 5-scf00246 | 5 |
| AX-157826768 | 11 | 51.994 | KV452852.1 | 3379209 | 5-scf00246 | 5 |
| AX-157857393 | 11 | 51.994 | KV452852.1 | 3409221 | 5-scf00246 | 5 |
| AX-157857394 | 11 | 51.994 | KV452852.1 | 3423284 | 5-scf00246 | 5 |
| AX-158101971 | 11 | 51.994 | KV452852.1 | 3464110 | 5-scf00246 | 5 |
| AX-157748235 | 11 | 51.994 | KV452852.1 | 3506912 | 5-scf00246 | 5 |
| AX-158102005 | 11 | 51.994 | KV452852.1 | 3513172 | 5-scf00246 | 5 |
| AX-157826773 | 11 | 51.994 | KV452852.1 | 3518581 | 5-scf00246 | 5 |
| AX-158102009 | 11 | 51.994 | KV452852.1 | 3520379 | 5-scf00246 | 5 |
| AX-158102010 | 11 | 51.994 | KV452852.1 | 3520838 | 5-scf00246 | 5 |
| AX-158102011 | 11 | 51.994 | KV452852.1 | 3521172 | 5-scf00246 | 5 |
| AX-158102013 | 11 | 51.994 | KV452852.1 | 3524099 | 5-scf00246 | 5 |
| AX-158102015 | 11 | 51.994 | KV452852.1 | 3528588 | 5-scf00246 | 5 |
| AX-158102039 | 11 | 51.994 | KV452852.1 | 3565222 | 5-scf00246 | 5 |
| AX-158102128 | 11 | 51.994 | KV452852.1 | 3703561 | 5-scf00246 | 5 |
| AX-158102348 | 11 | 51.994 | KV452852.1 | 3997554 | 5-scf00246 | 5 |
| AX-158102381 | 11 | 51.994 | KV452852.1 | 4044674 | 5-scf00246 | 5 |
| AX-158102468 | 11 | 51.994 | KV452852.1 | 4159785 | 5-scf00246 | 5 |
| AX-158102027 | 11 | 52.033 | KV452852.1 | 3550421 | 5-scf00246 | 5 |
| AX-158102029 | 11 | 52.07  | KV452852.1 | 3552993 | 5-scf00246 | 5 |
| AX-157724150 | 11 | 52.108 | KV452852.1 | 2907934 | 5-scf00246 | 5 |
| AX-158101743 | 11 | 52.108 | KV452852.1 | 3164401 | 5-scf00246 | 5 |
| AX-158101752 | 11 | 52.108 | KV452852.1 | 3171328 | 5-scf00246 | 5 |
| AX-158101760 | 11 | 52.108 | KV452852.1 | 3177185 | 5-scf00246 | 5 |
| AX-157774032 | 11 | 52.108 | KV452852.1 | 3185032 | 5-scf00246 | 5 |
| AX-157826757 | 11 | 52.108 | KV452852.1 | 3185931 | 5-scf00246 | 5 |
| AX-158101780 | 11 | 52.108 | KV452852.1 | 3209704 | 5-scf00246 | 5 |
| AX-158101782 | 11 | 52.108 | KV452852.1 | 3213043 | 5-scf00246 | 5 |
| AX-158101795 | 11 | 52.108 | KV452852.1 | 3227022 | 5-scf00246 | 5 |
| AX-157826762 | 11 | 52.108 | KV452852.1 | 3257966 | 5-scf00246 | 5 |
| AX-158101833 | 11 | 52.108 | KV452852.1 | 3274561 | 5-scf00246 | 5 |
| AX-157750448 | 11 | 52.108 | KV452852.1 | 3417066 | 5-scf00246 | 5 |
| AX-157877573 | 11 | 52.108 | KV452852.1 | 3419083 | 5-scf00246 | 5 |
| AX-158101940 | 11 | 52.108 | KV452852.1 | 3429722 | 5-scf00246 | 5 |
| AX-158101958 | 11 | 52.108 | KV452852.1 | 3450201 | 5-scf00246 | 5 |
| AX-158101960 | 11 | 52.108 | KV452852.1 | 3453074 | 5-scf00246 | 5 |
| AX-158384735 | 11 | 52.108 | KV452852.1 | 3467557 | 5-scf00246 | 5 |
| AX-158101974 | 11 | 52.108 | KV452852.1 | 3470198 | 5-scf00246 | 5 |
| AX-158101975 | 11 | 52.108 | KV452852.1 | 3474333 | 5-scf00246 | 5 |
| AX-158101992 | 11 | 52.108 | KV452852.1 | 3493746 | 5-scf00246 | 5 |
| AX-158101996 | 11 | 52.108 | KV452852.1 | 3498511 | 5-scf00246 | 5 |
| AX-157722074 | 11 | 52.108 | KV452852.1 | 3499079 | 5-scf00246 | 5 |
| AX-158102016 | 11 | 52.108 | KV452852.1 | 3532749 | 5-scf00246 | 5 |
| AX-158102022 | 11 | 52.108 | KV452852.1 | 3541838 | 5-scf00246 | 5 |

|              |    |        |            |         |            |   |
|--------------|----|--------|------------|---------|------------|---|
| AX-157826777 | 11 | 52.108 | KV452852.1 | 3542983 | 5-scf00246 | 5 |
| AX-158102024 | 11 | 52.108 | KV452852.1 | 3544905 | 5-scf00246 | 5 |
| AX-157826779 | 11 | 52.108 | KV452852.1 | 3544940 | 5-scf00246 | 5 |
| AX-157826780 | 11 | 52.108 | KV452852.1 | 3546075 | 5-scf00246 | 5 |
| AX-158102025 | 11 | 52.108 | KV452852.1 | 3546777 | 5-scf00246 | 5 |
| AX-158102028 | 11 | 52.108 | KV452852.1 | 3552548 | 5-scf00246 | 5 |
| AX-158102030 | 11 | 52.108 | KV452852.1 | 3554606 | 5-scf00246 | 5 |
| AX-158102033 | 11 | 52.108 | KV452852.1 | 3556018 | 5-scf00246 | 5 |
| AX-157857396 | 11 | 52.108 | KV452852.1 | 3556920 | 5-scf00246 | 5 |
| AX-157885839 | 11 | 52.108 | KV452852.1 | 3562028 | 5-scf00246 | 5 |
| AX-158102038 | 11 | 52.108 | KV452852.1 | 3564412 | 5-scf00246 | 5 |
| AX-158102046 | 11 | 52.108 | KV452852.1 | 3576205 | 5-scf00246 | 5 |
| AX-158102049 | 11 | 52.108 | KV452852.1 | 3581021 | 5-scf00246 | 5 |
| AX-157826782 | 11 | 52.108 | KV452852.1 | 3589968 | 5-scf00246 | 5 |
| AX-157826783 | 11 | 52.108 | KV452852.1 | 3591409 | 5-scf00246 | 5 |
| AX-157826784 | 11 | 52.108 | KV452852.1 | 3592267 | 5-scf00246 | 5 |
| AX-158102051 | 11 | 52.108 | KV452852.1 | 3592554 | 5-scf00246 | 5 |
| AX-157826785 | 11 | 52.108 | KV452852.1 | 3593169 | 5-scf00246 | 5 |
| AX-157826786 | 11 | 52.108 | KV452852.1 | 3594791 | 5-scf00246 | 5 |
| AX-158102052 | 11 | 52.108 | KV452852.1 | 3595038 | 5-scf00246 | 5 |
| AX-158102054 | 11 | 52.108 | KV452852.1 | 3599046 | 5-scf00246 | 5 |
| AX-158102055 | 11 | 52.108 | KV452852.1 | 3599464 | 5-scf00246 | 5 |
| AX-158102060 | 11 | 52.108 | KV452852.1 | 3606659 | 5-scf00246 | 5 |
| AX-158102061 | 11 | 52.108 | KV452852.1 | 3608110 | 5-scf00246 | 5 |
| AX-158102063 | 11 | 52.108 | KV452852.1 | 3614941 | 5-scf00246 | 5 |
| AX-158102064 | 11 | 52.108 | KV452852.1 | 3615805 | 5-scf00246 | 5 |
| AX-158102066 | 11 | 52.108 | KV452852.1 | 3616595 | 5-scf00246 | 5 |
| AX-158102075 | 11 | 52.108 | KV452852.1 | 3625696 | 5-scf00246 | 5 |
| AX-157753128 | 11 | 52.108 | KV452852.1 | 3626845 | 5-scf00246 | 5 |
| AX-158102078 | 11 | 52.108 | KV452852.1 | 3628521 | 5-scf00246 | 5 |
| AX-158102085 | 11 | 52.108 | KV452852.1 | 3639930 | 5-scf00246 | 5 |
| AX-158102086 | 11 | 52.108 | KV452852.1 | 3640497 | 5-scf00246 | 5 |
| AX-158102087 | 11 | 52.108 | KV452852.1 | 3642101 | 5-scf00246 | 5 |
| AX-158102088 | 11 | 52.108 | KV452852.1 | 3642883 | 5-scf00246 | 5 |
| AX-158102097 | 11 | 52.108 | KV452852.1 | 3651319 | 5-scf00246 | 5 |
| AX-157826791 | 11 | 52.108 | KV452852.1 | 3652440 | 5-scf00246 | 5 |
| AX-158102099 | 11 | 52.108 | KV452852.1 | 3657534 | 5-scf00246 | 5 |
| AX-157723077 | 11 | 52.108 | KV452852.1 | 3658812 | 5-scf00246 | 5 |
| AX-158102127 | 11 | 52.108 | KV452852.1 | 3702426 | 5-scf00246 | 5 |
| AX-157826796 | 11 | 52.108 | KV452852.1 | 3717995 | 5-scf00246 | 5 |
| AX-157826793 | 11 | 52.145 | KV452852.1 | 3666860 | 5-scf00246 | 5 |
| AX-158102031 | 11 | 52.151 | KV452852.1 | 3554927 | 5-scf00246 | 5 |
| AX-157747758 | 11 | 52.151 | KV452852.1 | 3669646 | 5-scf00246 | 5 |
| AX-158102105 | 11 | 52.18  | KV452852.1 | 3670130 | 5-scf00246 | 5 |
| AX-158101932 | 11 | 52.223 | KV452852.1 | 3416453 | 5-scf00246 | 5 |
| AX-157755525 | 11 | 52.223 | KV452852.1 | 3477892 | 5-scf00246 | 5 |
| AX-157755728 | 11 | 52.223 | KV452852.1 | 3488019 | 5-scf00246 | 5 |
| AX-158102020 | 11 | 52.223 | KV452852.1 | 3541036 | 5-scf00246 | 5 |
| AX-158102048 | 11 | 52.223 | KV452852.1 | 3577236 | 5-scf00246 | 5 |
| AX-157826789 | 11 | 52.223 | KV452852.1 | 3635911 | 5-scf00246 | 5 |
| AX-158102084 | 11 | 52.223 | KV452852.1 | 3636313 | 5-scf00246 | 5 |



|              |    |        |            |         |            |   |
|--------------|----|--------|------------|---------|------------|---|
| AX-158102090 | 11 | 52.223 | KV452852.1 | 3643721 | 5-scf00246 | 5 |
| AX-158102094 | 11 | 52.223 | KV452852.1 | 3646942 | 5-scf00246 | 5 |
| AX-157826792 | 11 | 52.223 | KV452852.1 | 3662399 | 5-scf00246 | 5 |
| AX-158102102 | 11 | 52.223 | KV452852.1 | 3667341 | 5-scf00246 | 5 |
| AX-158102109 | 11 | 52.223 | KV452852.1 | 3676441 | 5-scf00246 | 5 |
| AX-158102111 | 11 | 52.223 | KV452852.1 | 3678136 | 5-scf00246 | 5 |
| AX-158102112 | 11 | 52.223 | KV452852.1 | 3679111 | 5-scf00246 | 5 |
| AX-158102113 | 11 | 52.223 | KV452852.1 | 3679593 | 5-scf00246 | 5 |
| AX-158102114 | 11 | 52.223 | KV452852.1 | 3680053 | 5-scf00246 | 5 |
| AX-158102115 | 11 | 52.223 | KV452852.1 | 3681157 | 5-scf00246 | 5 |
| AX-158102116 | 11 | 52.223 | KV452852.1 | 3683903 | 5-scf00246 | 5 |
| AX-157751591 | 11 | 52.223 | KV452852.1 | 3684602 | 5-scf00246 | 5 |
| AX-158102117 | 11 | 52.223 | KV452852.1 | 3687234 | 5-scf00246 | 5 |
| AX-158102122 | 11 | 52.223 | KV452852.1 | 3693280 | 5-scf00246 | 5 |
| AX-158102135 | 11 | 52.223 | KV452852.1 | 3712474 | 5-scf00246 | 5 |
| AX-158102136 | 11 | 52.223 | KV452852.1 | 3713166 | 5-scf00246 | 5 |
| AX-158102151 | 11 | 52.223 | KV452852.1 | 3733432 | 5-scf00246 | 5 |
| AX-158102118 | 11 | 52.312 | KV452852.1 | 3688028 | 5-scf00246 | 5 |
| AX-158407436 | 11 | 52.312 | KV452852.1 | 3702258 | 5-scf00246 | 5 |
| AX-158102145 | 11 | 52.312 | KV452852.1 | 3723386 | 5-scf00246 | 5 |
| AX-158102137 | 11 | 52.431 | KV452852.1 | 3713690 | 5-scf00246 | 5 |
| AX-158102146 | 11 | 52.516 | KV452852.1 | 3726020 | 5-scf00246 | 5 |
| AX-158102150 | 11 | 52.516 | KV452852.1 | 3732230 | 5-scf00246 | 5 |
| AX-158102152 | 11 | 52.516 | KV452852.1 | 3734113 | 5-scf00246 | 5 |
| AX-158102153 | 11 | 52.516 | KV452852.1 | 3736748 | 5-scf00246 | 5 |
| AX-158102157 | 11 | 52.516 | KV452852.1 | 3743752 | 5-scf00246 | 5 |
| AX-158102159 | 11 | 52.516 | KV452852.1 | 3748940 | 5-scf00246 | 5 |
| AX-157826800 | 11 | 52.808 | KV452852.1 | 3749771 | 5-scf00246 | 5 |
| AX-157826802 | 11 | 52.808 | KV452852.1 | 3752390 | 5-scf00246 | 5 |
| AX-157826797 | 11 | 52.809 | KV452852.1 | 3747457 | 5-scf00246 | 5 |
| AX-158102160 | 11 | 52.809 | KV452852.1 | 3752930 | 5-scf00246 | 5 |
| AX-158102161 | 11 | 52.809 | KV452852.1 | 3753191 | 5-scf00246 | 5 |
| AX-158102163 | 11 | 52.809 | KV452852.1 | 3754034 | 5-scf00246 | 5 |
| AX-158102164 | 11 | 52.809 | KV452852.1 | 3754462 | 5-scf00246 | 5 |
| AX-157725066 | 11 | 52.809 | KV452852.1 | 3765023 | 5-scf00246 | 5 |
| AX-157826804 | 11 | 52.809 | KV452852.1 | 3779479 | 5-scf00246 | 5 |
| AX-158102192 | 11 | 52.809 | KV452852.1 | 3800124 | 5-scf00246 | 5 |
| AX-158102201 | 11 | 52.809 | KV452852.1 | 3806038 | 5-scf00246 | 5 |
| AX-158102213 | 11 | 52.809 | KV452852.1 | 3816058 | 5-scf00246 | 5 |
| AX-158102239 | 11 | 52.809 | KV452852.1 | 3844720 | 5-scf00246 | 5 |
| AX-158102310 | 11 | 52.809 | KV452852.1 | 3942971 | 5-scf00246 | 5 |
| AX-158102735 | 11 | 52.809 | KV452852.1 | 4504298 | 5-scf00246 | 5 |
| AX-158102165 | 11 | 52.839 | KV452852.1 | 3754974 | 5-scf00246 | 5 |
| AX-158102140 | 11 | 52.926 | KV452852.1 | 3717031 | 5-scf00246 | 5 |
| AX-158380045 | 11 | 52.926 | KV452852.1 | 3725244 | 5-scf00246 | 5 |
| AX-158102155 | 11 | 52.926 | KV452852.1 | 3739926 | 5-scf00246 | 5 |
| AX-157744779 | 11 | 52.926 | KV452852.1 | 3745711 | 5-scf00246 | 5 |
| AX-158102158 | 11 | 52.926 | KV452852.1 | 3747667 | 5-scf00246 | 5 |
| AX-157773737 | 11 | 52.926 | KV452852.1 | 3759152 | 5-scf00246 | 5 |
| AX-158102170 | 11 | 52.926 | KV452852.1 | 3762551 | 5-scf00246 | 5 |
| AX-157826803 | 11 | 52.926 | KV452852.1 | 3772177 | 5-scf00246 | 5 |

|              |    |        |            |         |            |   |
|--------------|----|--------|------------|---------|------------|---|
| AX-158102173 | 11 | 52.926 | KV452852.1 | 3774276 | 5-scf00246 | 5 |
| AX-158102252 | 11 | 52.926 | KV452852.1 | 3855625 | 5-scf00246 | 5 |
| AX-158102148 | 11 | 52.962 | KV452852.1 | 3730076 | 5-scf00246 | 5 |
| AX-158102180 | 11 | 52.962 | KV452852.1 | 3785433 | 5-scf00246 | 5 |
| AX-157826807 | 11 | 52.962 | KV452852.1 | 3798512 | 5-scf00246 | 5 |
| AX-158384741 | 11 | 52.962 | KV452852.1 | 3829343 | 5-scf00246 | 5 |
| AX-157885840 | 11 | 52.962 | KV452852.1 | 3851111 | 5-scf00246 | 5 |
| AX-158102182 | 11 | 53     | KV452852.1 | 3786169 | 5-scf00246 | 5 |
| AX-158102162 | 11 | 53.04  | KV452852.1 | 3753832 | 5-scf00246 | 5 |
| AX-158102183 | 11 | 53.04  | KV452852.1 | 3787406 | 5-scf00246 | 5 |
| AX-157725796 | 11 | 53.04  | KV452852.1 | 3788161 | 5-scf00246 | 5 |
| AX-158102185 | 11 | 53.04  | KV452852.1 | 3790770 | 5-scf00246 | 5 |
| AX-157826805 | 11 | 53.04  | KV452852.1 | 3793799 | 5-scf00246 | 5 |
| AX-158102187 | 11 | 53.04  | KV452852.1 | 3794637 | 5-scf00246 | 5 |
| AX-158102188 | 11 | 53.04  | KV452852.1 | 3795014 | 5-scf00246 | 5 |
| AX-157826806 | 11 | 53.04  | KV452852.1 | 3797769 | 5-scf00246 | 5 |
| AX-158102190 | 11 | 53.04  | KV452852.1 | 3798740 | 5-scf00246 | 5 |
| AX-158102191 | 11 | 53.04  | KV452852.1 | 3799469 | 5-scf00246 | 5 |
| AX-157757565 | 11 | 53.04  | KV452852.1 | 3801456 | 5-scf00246 | 5 |
| AX-158102196 | 11 | 53.04  | KV452852.1 | 3802540 | 5-scf00246 | 5 |
| AX-158102206 | 11 | 53.163 | KV452852.1 | 3811999 | 5-scf00246 | 5 |
| AX-158102181 | 11 | 53.267 | KV452852.1 | 3785926 | 5-scf00246 | 5 |
| AX-158102207 | 11 | 53.267 | KV452852.1 | 3812550 | 5-scf00246 | 5 |
| AX-158102208 | 11 | 53.267 | KV452852.1 | 3813505 | 5-scf00246 | 5 |
| AX-158102209 | 11 | 53.267 | KV452852.1 | 3813895 | 5-scf00246 | 5 |
| AX-158102210 | 11 | 53.267 | KV452852.1 | 3814269 | 5-scf00246 | 5 |
| AX-158102218 | 11 | 53.267 | KV452852.1 | 3825543 | 5-scf00246 | 5 |
| AX-158102220 | 11 | 53.267 | KV452852.1 | 3828934 | 5-scf00246 | 5 |
| AX-158102222 | 11 | 53.267 | KV452852.1 | 3832649 | 5-scf00246 | 5 |
| AX-158102225 | 11 | 53.267 | KV452852.1 | 3834179 | 5-scf00246 | 5 |
| AX-158102226 | 11 | 53.267 | KV452852.1 | 3835027 | 5-scf00246 | 5 |
| AX-158102227 | 11 | 53.267 | KV452852.1 | 3835488 | 5-scf00246 | 5 |
| AX-158102233 | 11 | 53.267 | KV452852.1 | 3838868 | 5-scf00246 | 5 |
| AX-158102234 | 11 | 53.267 | KV452852.1 | 3839360 | 5-scf00246 | 5 |
| AX-158102235 | 11 | 53.267 | KV452852.1 | 3841105 | 5-scf00246 | 5 |
| AX-158102237 | 11 | 53.267 | KV452852.1 | 3841793 | 5-scf00246 | 5 |
| AX-158102238 | 11 | 53.267 | KV452852.1 | 3843011 | 5-scf00246 | 5 |
| AX-158102240 | 11 | 53.267 | KV452852.1 | 3845283 | 5-scf00246 | 5 |
| AX-157826809 | 11 | 53.267 | KV452852.1 | 3850645 | 5-scf00246 | 5 |
| AX-158102247 | 11 | 53.267 | KV452852.1 | 3852060 | 5-scf00246 | 5 |
| AX-158102248 | 11 | 53.267 | KV452852.1 | 3853021 | 5-scf00246 | 5 |
| AX-157724918 | 11 | 53.267 | KV452852.1 | 3861987 | 5-scf00246 | 5 |
| AX-158102250 | 11 | 53.361 | KV452852.1 | 3854139 | 5-scf00246 | 5 |
| AX-158102223 | 11 | 53.381 | KV452852.1 | 3833093 | 5-scf00246 | 5 |
| AX-157717864 | 11 | 53.381 | KV452852.1 | 3860774 | 5-scf00246 | 5 |
| AX-158102256 | 11 | 53.381 | KV452852.1 | 3862292 | 5-scf00246 | 5 |
| AX-158102257 | 11 | 53.381 | KV452852.1 | 3862424 | 5-scf00246 | 5 |
| AX-157721296 | 11 | 53.381 | KV452852.1 | 3864054 | 5-scf00246 | 5 |
| AX-157826810 | 11 | 53.381 | KV452852.1 | 3864130 | 5-scf00246 | 5 |
| AX-157826811 | 11 | 53.381 | KV452852.1 | 3864409 | 5-scf00246 | 5 |
| AX-158102260 | 11 | 53.381 | KV452852.1 | 3866174 | 5-scf00246 | 5 |

|              |    |        |            |         |            |   |
|--------------|----|--------|------------|---------|------------|---|
| AX-158102262 | 11 | 53.381 | KV452852.1 | 3866686 | 5-scf00246 | 5 |
| AX-157772412 | 11 | 53.723 | KV452852.1 | 3877052 | 5-scf00246 | 5 |
| AX-157749863 | 11 | 53.723 | KV452852.1 | 3878806 | 5-scf00246 | 5 |
| AX-158102265 | 11 | 53.723 | KV452852.1 | 3880566 | 5-scf00246 | 5 |
| AX-158102266 | 11 | 53.723 | KV452852.1 | 3881156 | 5-scf00246 | 5 |
| AX-158102267 | 11 | 53.723 | KV452852.1 | 3883247 | 5-scf00246 | 5 |
| AX-158102268 | 11 | 53.723 | KV452852.1 | 3884228 | 5-scf00246 | 5 |
| AX-158102269 | 11 | 53.723 | KV452852.1 | 3884758 | 5-scf00246 | 5 |
| AX-158102270 | 11 | 53.723 | KV452852.1 | 3885312 | 5-scf00246 | 5 |
| AX-158102271 | 11 | 53.723 | KV452852.1 | 3886089 | 5-scf00246 | 5 |
| AX-158102272 | 11 | 53.723 | KV452852.1 | 3886442 | 5-scf00246 | 5 |
| AX-158102273 | 11 | 53.723 | KV452852.1 | 3888669 | 5-scf00246 | 5 |
| AX-158102278 | 11 | 53.723 | KV452852.1 | 3895344 | 5-scf00246 | 5 |
| AX-158102282 | 11 | 53.723 | KV452852.1 | 3899155 | 5-scf00246 | 5 |
| AX-157724645 | 11 | 53.723 | KV452852.1 | 3904461 | 5-scf00246 | 5 |
| AX-158102285 | 11 | 53.723 | KV452852.1 | 3906126 | 5-scf00246 | 5 |
| AX-158102286 | 11 | 53.723 | KV452852.1 | 3907033 | 5-scf00246 | 5 |
| AX-158102287 | 11 | 53.723 | KV452852.1 | 3907935 | 5-scf00246 | 5 |
| AX-158102288 | 11 | 53.723 | KV452852.1 | 3908626 | 5-scf00246 | 5 |
| AX-158102293 | 11 | 53.723 | KV452852.1 | 3918507 | 5-scf00246 | 5 |
| AX-158102316 | 11 | 53.723 | KV452852.1 | 3952861 | 5-scf00246 | 5 |
| AX-158102320 | 11 | 53.723 | KV452852.1 | 3962893 | 5-scf00246 | 5 |
| AX-158102476 | 11 | 53.723 | KV452852.1 | 4172977 | 5-scf00246 | 5 |
| AX-158102292 | 11 | 53.951 | KV452852.1 | 3918045 | 5-scf00246 | 5 |
| AX-158102296 | 11 | 53.951 | KV452852.1 | 3923397 | 5-scf00246 | 5 |
| AX-157865917 | 11 | 53.951 | KV452852.1 | 3924070 | 5-scf00246 | 5 |
| AX-158102299 | 11 | 53.951 | KV452852.1 | 3926696 | 5-scf00246 | 5 |
| AX-158102301 | 11 | 54.065 | KV452852.1 | 3933630 | 5-scf00246 | 5 |
| AX-158102303 | 11 | 54.065 | KV452852.1 | 3934985 | 5-scf00246 | 5 |
| AX-158102305 | 11 | 54.065 | KV452852.1 | 3937362 | 5-scf00246 | 5 |
| AX-158102306 | 11 | 54.065 | KV452852.1 | 3939995 | 5-scf00246 | 5 |
| AX-158102308 | 11 | 54.065 | KV452852.1 | 3941360 | 5-scf00246 | 5 |
| AX-157771608 | 11 | 54.065 | KV452852.1 | 3941837 | 5-scf00246 | 5 |
| AX-158102309 | 11 | 54.065 | KV452852.1 | 3942342 | 5-scf00246 | 5 |
| AX-157726984 | 11 | 54.065 | KV452852.1 | 3955560 | 5-scf00246 | 5 |
| AX-158102313 | 11 | 54.093 | KV452852.1 | 3949095 | 5-scf00246 | 5 |
| AX-158102281 | 11 | 54.139 | KV452852.1 | 3898419 | 5-scf00246 | 5 |
| AX-157826816 | 11 | 54.139 | KV452852.1 | 3928902 | 5-scf00246 | 5 |
| AX-157826817 | 11 | 54.139 | KV452852.1 | 3933150 | 5-scf00246 | 5 |
| AX-158102304 | 11 | 54.139 | KV452852.1 | 3936035 | 5-scf00246 | 5 |
| AX-158102314 | 11 | 54.139 | KV452852.1 | 3951839 | 5-scf00246 | 5 |
| AX-158102317 | 11 | 54.139 | KV452852.1 | 3954333 | 5-scf00246 | 5 |
| AX-158102323 | 11 | 54.139 | KV452852.1 | 3969422 | 5-scf00246 | 5 |
| AX-158102342 | 11 | 54.139 | KV452852.1 | 3990407 | 5-scf00246 | 5 |
| AX-158102386 | 11 | 54.139 | KV452852.1 | 4051080 | 5-scf00246 | 5 |
| AX-157756793 | 11 | 54.139 | KV452852.1 | 4252563 | 5-scf00246 | 5 |
| AX-158102572 | 11 | 54.139 | KV452852.1 | 4281236 | 5-scf00246 | 5 |
| AX-158102726 | 11 | 54.139 | KV452852.1 | 4488010 | 5-scf00246 | 5 |
| AX-158410407 | 11 | 54.139 | KV452852.1 | 4488104 | 5-scf00246 | 5 |
| AX-158102727 | 11 | 54.139 | KV452852.1 | 4488415 | 5-scf00246 | 5 |
| AX-157826854 | 11 | 54.139 | KV452852.1 | 4489442 | 5-scf00246 | 5 |

|              |    |        |             |         |            |    |
|--------------|----|--------|-------------|---------|------------|----|
| AX-157745812 | 11 | 54.139 | KV452852.1  | 4489502 | 5-scf00246 | 5  |
| AX-158102729 | 11 | 54.139 | KV452852.1  | 4493733 | 5-scf00246 | 5  |
| AX-158102730 | 11 | 54.139 | KV452852.1  | 4495049 | 5-scf00246 | 5  |
| AX-158102738 | 11 | 54.139 | KV452852.1  | 4510505 | 5-scf00246 | 5  |
| AX-158102770 | 11 | 54.139 | KV452852.1  | 4563448 | 5-scf00246 | 5  |
| AX-158102854 | 11 | 54.139 | KV452852.1  | 4650202 | 5-scf00246 | 5  |
| AX-158102876 | 11 | 54.139 | KV452852.1  | 4685512 | 5-scf00246 | 5  |
| AX-158410424 | 11 | 54.139 | KV452856.1  | 199500  | 5-scf00247 | 5  |
| AX-158103104 | 11 | 54.139 | KV452856.1  | 264136  | 5-scf00247 | 5  |
| AX-157725045 | 11 | 54.139 | KV452856.1  | 831199  | 5-scf00247 | 5  |
| AX-157688223 | 11 | 54.139 | 3ML01025767 | 1184    | scf01386_1 | UN |
| AX-158102322 | 11 | 54.179 | KV452852.1  | 3968573 | 5-scf00246 | 5  |
| AX-158102325 | 11 | 54.179 | KV452852.1  | 3971174 | 5-scf00246 | 5  |
| AX-158102327 | 11 | 54.179 | KV452852.1  | 3973564 | 5-scf00246 | 5  |
| AX-158102328 | 11 | 54.179 | KV452852.1  | 3973912 | 5-scf00246 | 5  |
| AX-158102330 | 11 | 54.179 | KV452852.1  | 3974798 | 5-scf00246 | 5  |
| AX-158102333 | 11 | 54.293 | KV452852.1  | 3977183 | 5-scf00246 | 5  |
| AX-158102335 | 11 | 54.293 | KV452852.1  | 3978208 | 5-scf00246 | 5  |
| AX-158102430 | 11 | 54.293 | KV452852.1  | 4114686 | 5-scf00246 | 5  |
| AX-157771379 | 11 | 54.293 | KV452852.1  | 4191533 | 5-scf00246 | 5  |
| AX-158102546 | 11 | 54.293 | KV452852.1  | 4245799 | 5-scf00246 | 5  |
| AX-158102612 | 11 | 54.293 | KV452852.1  | 4337525 | 5-scf00246 | 5  |
| AX-157717569 | 11 | 54.293 | KV452852.1  | 4450282 | 5-scf00246 | 5  |
| AX-158102724 | 11 | 54.293 | KV452852.1  | 4481730 | 5-scf00246 | 5  |
| AX-158102961 | 11 | 54.293 | KV452856.1  | 33524   | 5-scf00247 | 5  |
| AX-158103032 | 11 | 54.293 | KV452856.1  | 126079  | 5-scf00247 | 5  |
| AX-158103045 | 11 | 54.293 | KV452856.1  | 139417  | 5-scf00247 | 5  |
| AX-157688240 | 11 | 54.293 | 3ML01025795 | 917     | scf01411_1 | UN |
| AX-157739295 | 11 | 54.52  | KV452852.1  | 3921522 | 5-scf00246 | 5  |
| AX-158102321 | 11 | 54.52  | KV452852.1  | 3965799 | 5-scf00246 | 5  |
| AX-157709929 | 11 | 54.52  | KV452852.1  | 3984447 | 5-scf00246 | 5  |
| AX-158102341 | 11 | 54.52  | KV452852.1  | 3989550 | 5-scf00246 | 5  |
| AX-157740097 | 11 | 54.52  | KV452852.1  | 3991975 | 5-scf00246 | 5  |
| AX-158102343 | 11 | 54.52  | KV452852.1  | 3993406 | 5-scf00246 | 5  |
| AX-157826818 | 11 | 54.52  | KV452852.1  | 3993656 | 5-scf00246 | 5  |
| AX-157752110 | 11 | 54.52  | KV452852.1  | 4001841 | 5-scf00246 | 5  |
| AX-157774818 | 11 | 54.52  | KV452852.1  | 4005384 | 5-scf00246 | 5  |
| AX-158102349 | 11 | 54.52  | KV452852.1  | 4007746 | 5-scf00246 | 5  |
| AX-158102352 | 11 | 54.52  | KV452852.1  | 4008995 | 5-scf00246 | 5  |
| AX-158102353 | 11 | 54.52  | KV452852.1  | 4010184 | 5-scf00246 | 5  |
| AX-158102354 | 11 | 54.52  | KV452852.1  | 4010433 | 5-scf00246 | 5  |
| AX-158102356 | 11 | 54.52  | KV452852.1  | 4012687 | 5-scf00246 | 5  |
| AX-158102357 | 11 | 54.52  | KV452852.1  | 4013883 | 5-scf00246 | 5  |
| AX-157857401 | 11 | 54.52  | KV452852.1  | 4014500 | 5-scf00246 | 5  |
| AX-158102358 | 11 | 54.52  | KV452852.1  | 4014915 | 5-scf00246 | 5  |
| AX-157710399 | 11 | 54.52  | KV452852.1  | 4015071 | 5-scf00246 | 5  |
| AX-158102359 | 11 | 54.52  | KV452852.1  | 4016129 | 5-scf00246 | 5  |
| AX-158102360 | 11 | 54.521 | KV452852.1  | 4016961 | 5-scf00246 | 5  |
| AX-158102361 | 11 | 54.521 | KV452852.1  | 4017555 | 5-scf00246 | 5  |
| AX-157826820 | 11 | 54.861 | KV452852.1  | 4024527 | 5-scf00246 | 5  |
| AX-158102373 | 11 | 54.862 | KV452852.1  | 4038003 | 5-scf00246 | 5  |

|              |    |        |             |         |            |    |
|--------------|----|--------|-------------|---------|------------|----|
| AX-158102374 | 11 | 54.862 | KV452852.1  | 4040167 | 5-scf00246 | 5  |
| AX-157705060 | 11 | 54.862 | 3ML01028452 | 1129    | scf04059_1 | UN |
| AX-158102380 | 11 | 54.863 | KV452852.1  | 4043973 | 5-scf00246 | 5  |
| AX-158102428 | 11 | 55.148 | KV452852.1  | 4112253 | 5-scf00246 | 5  |
| AX-158102429 | 11 | 55.148 | KV452852.1  | 4113593 | 5-scf00246 | 5  |
| AX-158102363 | 11 | 55.432 | KV452852.1  | 4022868 | 5-scf00246 | 5  |
| AX-158102372 | 11 | 55.432 | KV452852.1  | 4037134 | 5-scf00246 | 5  |
| AX-158102375 | 11 | 55.432 | KV452852.1  | 4040921 | 5-scf00246 | 5  |
| AX-158102434 | 11 | 55.432 | KV452852.1  | 4122615 | 5-scf00246 | 5  |
| AX-158102435 | 11 | 55.432 | KV452852.1  | 4122985 | 5-scf00246 | 5  |
| AX-158102436 | 11 | 55.432 | KV452852.1  | 4123636 | 5-scf00246 | 5  |
| AX-157722517 | 11 | 55.432 | KV452852.1  | 4124165 | 5-scf00246 | 5  |
| AX-158102438 | 11 | 55.432 | KV452852.1  | 4126609 | 5-scf00246 | 5  |
| AX-158102441 | 11 | 55.432 | KV452852.1  | 4129658 | 5-scf00246 | 5  |
| AX-158102444 | 11 | 55.432 | KV452852.1  | 4131912 | 5-scf00246 | 5  |
| AX-158102445 | 11 | 55.432 | KV452852.1  | 4132717 | 5-scf00246 | 5  |
| AX-158102446 | 11 | 55.432 | KV452852.1  | 4132854 | 5-scf00246 | 5  |
| AX-157775429 | 11 | 55.432 | KV452852.1  | 4135746 | 5-scf00246 | 5  |
| AX-158102451 | 11 | 55.432 | KV452852.1  | 4139502 | 5-scf00246 | 5  |
| AX-158102452 | 11 | 55.432 | KV452852.1  | 4140396 | 5-scf00246 | 5  |
| AX-158102454 | 11 | 55.432 | KV452852.1  | 4144231 | 5-scf00246 | 5  |
| AX-158102459 | 11 | 55.432 | KV452852.1  | 4152520 | 5-scf00246 | 5  |
| AX-158102465 | 11 | 55.432 | KV452852.1  | 4158301 | 5-scf00246 | 5  |
| AX-158102475 | 11 | 55.432 | KV452852.1  | 4172660 | 5-scf00246 | 5  |
| AX-158102481 | 11 | 55.432 | KV452852.1  | 4177298 | 5-scf00246 | 5  |
| AX-158102484 | 11 | 55.432 | KV452852.1  | 4180124 | 5-scf00246 | 5  |
| AX-157739535 | 11 | 55.52  | KV452852.1  | 4166501 | 5-scf00246 | 5  |
| AX-157857402 | 11 | 55.52  | KV452852.1  | 4168208 | 5-scf00246 | 5  |
| AX-158102474 | 11 | 55.52  | KV452852.1  | 4172156 | 5-scf00246 | 5  |
| AX-158102490 | 11 | 55.52  | KV452852.1  | 4190947 | 5-scf00246 | 5  |
| AX-158384745 | 11 | 55.603 | KV452852.1  | 4142977 | 5-scf00246 | 5  |
| AX-158102456 | 11 | 55.603 | KV452852.1  | 4149799 | 5-scf00246 | 5  |
| AX-158102494 | 11 | 55.603 | KV452852.1  | 4195755 | 5-scf00246 | 5  |
| AX-158102495 | 11 | 55.603 | KV452852.1  | 4196555 | 5-scf00246 | 5  |
| AX-158102498 | 11 | 55.603 | KV452852.1  | 4198613 | 5-scf00246 | 5  |
| AX-158102501 | 11 | 55.603 | KV452852.1  | 4203432 | 5-scf00246 | 5  |
| AX-158102502 | 11 | 55.603 | KV452852.1  | 4204166 | 5-scf00246 | 5  |
| AX-158102503 | 11 | 55.603 | KV452852.1  | 4205231 | 5-scf00246 | 5  |
| AX-158103128 | 11 | 55.603 | KV452856.1  | 309608  | 5-scf00247 | 5  |
| AX-158103240 | 11 | 55.603 | KV452856.1  | 489430  | 5-scf00247 | 5  |
| AX-158102509 | 11 | 55.774 | KV452852.1  | 4209461 | 5-scf00246 | 5  |
| AX-158102510 | 11 | 55.774 | KV452852.1  | 4210608 | 5-scf00246 | 5  |
| AX-158102511 | 11 | 55.774 | KV452852.1  | 4211132 | 5-scf00246 | 5  |
| AX-158102512 | 11 | 55.779 | KV452852.1  | 4211651 | 5-scf00246 | 5  |
| AX-158102514 | 11 | 55.795 | KV452852.1  | 4213030 | 5-scf00246 | 5  |
| AX-158102522 | 11 | 55.822 | KV452852.1  | 4221161 | 5-scf00246 | 5  |
| AX-158102523 | 11 | 55.848 | KV452852.1  | 4221519 | 5-scf00246 | 5  |
| AX-157742406 | 11 | 55.896 | KV452852.1  | 3901847 | 5-scf00246 | 5  |
| AX-158384742 | 11 | 55.896 | KV452852.1  | 3906231 | 5-scf00246 | 5  |
| AX-158102368 | 11 | 55.896 | KV452852.1  | 4033724 | 5-scf00246 | 5  |
| AX-158102384 | 11 | 55.896 | KV452852.1  | 4049249 | 5-scf00246 | 5  |

|              |    |        |             |         |            |    |
|--------------|----|--------|-------------|---------|------------|----|
| AX-157774785 | 11 | 55.896 | KV452852.1  | 4145705 | 5-scf00246 | 5  |
| AX-158102455 | 11 | 55.896 | KV452852.1  | 4148675 | 5-scf00246 | 5  |
| AX-158102527 | 11 | 55.896 | KV452852.1  | 4225205 | 5-scf00246 | 5  |
| AX-158102531 | 11 | 55.896 | KV452852.1  | 4232716 | 5-scf00246 | 5  |
| AX-158102534 | 11 | 55.896 | KV452852.1  | 4234024 | 5-scf00246 | 5  |
| AX-158102535 | 11 | 55.896 | KV452852.1  | 4234466 | 5-scf00246 | 5  |
| AX-158102518 | 11 | 55.943 | KV452852.1  | 4217483 | 5-scf00246 | 5  |
| AX-158102539 | 11 | 55.943 | KV452852.1  | 4238530 | 5-scf00246 | 5  |
| AX-158102559 | 11 | 55.943 | KV452852.1  | 4267789 | 5-scf00246 | 5  |
| AX-158102566 | 11 | 55.943 | KV452852.1  | 4274891 | 5-scf00246 | 5  |
| AX-157885845 | 11 | 55.943 | KV452852.1  | 4301416 | 5-scf00246 | 5  |
| AX-158102596 | 11 | 55.943 | KV452852.1  | 4314630 | 5-scf00246 | 5  |
| AX-157826842 | 11 | 55.943 | KV452852.1  | 4325819 | 5-scf00246 | 5  |
| AX-157826845 | 11 | 55.943 | KV452852.1  | 4346761 | 5-scf00246 | 5  |
| AX-158102648 | 11 | 55.943 | KV452852.1  | 4389361 | 5-scf00246 | 5  |
| AX-158102654 | 11 | 55.943 | KV452852.1  | 4404034 | 5-scf00246 | 5  |
| AX-158102679 | 11 | 55.943 | KV452852.1  | 4426995 | 5-scf00246 | 5  |
| AX-158102910 | 11 | 55.943 | KV452852.1  | 4731334 | 5-scf00246 | 5  |
| AX-158102919 | 11 | 55.943 | KV452852.1  | 4746935 | 5-scf00246 | 5  |
| AX-157689522 | 11 | 55.943 | 3ML01030307 | 799     | scf05903_1 | UN |
| AX-158102473 | 11 | 56.02  | KV452852.1  | 4170943 | 5-scf00246 | 5  |
| AX-158102482 | 11 | 56.02  | KV452852.1  | 4179008 | 5-scf00246 | 5  |
| AX-158102508 | 11 | 56.02  | KV452852.1  | 4208725 | 5-scf00246 | 5  |
| AX-158102515 | 11 | 56.02  | KV452852.1  | 4213609 | 5-scf00246 | 5  |
| AX-158102526 | 11 | 56.02  | KV452852.1  | 4224561 | 5-scf00246 | 5  |
| AX-158102528 | 11 | 56.02  | KV452852.1  | 4228660 | 5-scf00246 | 5  |
| AX-158102529 | 11 | 56.02  | KV452852.1  | 4230811 | 5-scf00246 | 5  |
| AX-157877587 | 11 | 56.02  | KV452852.1  | 4238055 | 5-scf00246 | 5  |
| AX-158102548 | 11 | 56.02  | KV452852.1  | 4252239 | 5-scf00246 | 5  |
| AX-158102555 | 11 | 56.02  | KV452852.1  | 4264872 | 5-scf00246 | 5  |
| AX-158102561 | 11 | 56.02  | KV452852.1  | 4269864 | 5-scf00246 | 5  |
| AX-157752845 | 11 | 56.02  | KV452852.1  | 4276918 | 5-scf00246 | 5  |
| AX-158102571 | 11 | 56.02  | KV452852.1  | 4280380 | 5-scf00246 | 5  |
| AX-158102573 | 11 | 56.02  | KV452852.1  | 4281527 | 5-scf00246 | 5  |
| AX-158102577 | 11 | 56.02  | KV452852.1  | 4284511 | 5-scf00246 | 5  |
| AX-158102579 | 11 | 56.02  | KV452852.1  | 4285410 | 5-scf00246 | 5  |
| AX-158102582 | 11 | 56.02  | KV452852.1  | 4292408 | 5-scf00246 | 5  |
| AX-158102583 | 11 | 56.02  | KV452852.1  | 4293297 | 5-scf00246 | 5  |
| AX-157826839 | 11 | 56.02  | KV452852.1  | 4295819 | 5-scf00246 | 5  |
| AX-158102589 | 11 | 56.02  | KV452852.1  | 4302690 | 5-scf00246 | 5  |
| AX-157826841 | 11 | 56.02  | KV452852.1  | 4303433 | 5-scf00246 | 5  |
| AX-158102593 | 11 | 56.02  | KV452852.1  | 4306498 | 5-scf00246 | 5  |
| AX-158102600 | 11 | 56.02  | KV452852.1  | 4323026 | 5-scf00246 | 5  |
| AX-158102608 | 11 | 56.02  | KV452852.1  | 4332636 | 5-scf00246 | 5  |
| AX-158102619 | 11 | 56.02  | KV452852.1  | 4346339 | 5-scf00246 | 5  |
| AX-158102628 | 11 | 56.02  | KV452852.1  | 4360360 | 5-scf00246 | 5  |
| AX-158102700 | 11 | 56.02  | KV452852.1  | 4449171 | 5-scf00246 | 5  |
| AX-158102717 | 11 | 56.02  | KV452852.1  | 4473049 | 5-scf00246 | 5  |
| AX-158102900 | 11 | 56.02  | KV452852.1  | 4712921 | 5-scf00246 | 5  |
| AX-158103031 | 11 | 56.02  | KV452856.1  | 123308  | 5-scf00247 | 5  |
| AX-158103068 | 11 | 56.02  | KV452856.1  | 178911  | 5-scf00247 | 5  |

|              |    |        |            |         |            |   |
|--------------|----|--------|------------|---------|------------|---|
| AX-158103082 | 11 | 56.02  | KV452856.1 | 212248  | 5-scf00247 | 5 |
| AX-157744223 | 11 | 56.084 | KV452852.1 | 4300386 | 5-scf00246 | 5 |
| AX-158102591 | 11 | 56.084 | KV452852.1 | 4305558 | 5-scf00246 | 5 |
| AX-157757892 | 11 | 56.084 | KV452852.1 | 4322813 | 5-scf00246 | 5 |
| AX-158102627 | 11 | 56.084 | KV452852.1 | 4360159 | 5-scf00246 | 5 |
| AX-158102631 | 11 | 56.084 | KV452852.1 | 4366090 | 5-scf00246 | 5 |
| AX-158102641 | 11 | 56.084 | KV452852.1 | 4380276 | 5-scf00246 | 5 |
| AX-158102645 | 11 | 56.084 | KV452852.1 | 4384886 | 5-scf00246 | 5 |
| AX-157826849 | 11 | 56.084 | KV452852.1 | 4401750 | 5-scf00246 | 5 |
| AX-158102655 | 11 | 56.084 | KV452852.1 | 4405020 | 5-scf00246 | 5 |
| AX-158102656 | 11 | 56.084 | KV452852.1 | 4408217 | 5-scf00246 | 5 |
| AX-158102681 | 11 | 56.084 | KV452852.1 | 4427762 | 5-scf00246 | 5 |
| AX-158102682 | 11 | 56.084 | KV452852.1 | 4428155 | 5-scf00246 | 5 |
| AX-158102683 | 11 | 56.084 | KV452852.1 | 4429271 | 5-scf00246 | 5 |
| AX-158102923 | 11 | 56.084 | KV452852.1 | 4766158 | 5-scf00246 | 5 |
| AX-157826877 | 11 | 56.084 | KV452856.1 | 12140   | 5-scf00247 | 5 |
| AX-158102948 | 11 | 56.084 | KV452856.1 | 13318   | 5-scf00247 | 5 |
| AX-158102989 | 11 | 56.084 | KV452856.1 | 63497   | 5-scf00247 | 5 |
| AX-158103017 | 11 | 56.084 | KV452856.1 | 104367  | 5-scf00247 | 5 |
| AX-158103040 | 11 | 56.084 | KV452856.1 | 135281  | 5-scf00247 | 5 |
| AX-158102340 | 11 | 56.145 | KV452852.1 | 3989079 | 5-scf00246 | 5 |
| AX-158102364 | 11 | 56.145 | KV452852.1 | 4026741 | 5-scf00246 | 5 |
| AX-157826833 | 11 | 56.145 | KV452852.1 | 4119458 | 5-scf00246 | 5 |
| AX-158102477 | 11 | 56.145 | KV452852.1 | 4173754 | 5-scf00246 | 5 |
| AX-158102519 | 11 | 56.145 | KV452852.1 | 4218571 | 5-scf00246 | 5 |
| AX-158102543 | 11 | 56.145 | KV452852.1 | 4242082 | 5-scf00246 | 5 |
| AX-158102544 | 11 | 56.145 | KV452852.1 | 4242299 | 5-scf00246 | 5 |
| AX-158102567 | 11 | 56.145 | KV452852.1 | 4276502 | 5-scf00246 | 5 |
| AX-158102575 | 11 | 56.145 | KV452852.1 | 4282998 | 5-scf00246 | 5 |
| AX-157865925 | 11 | 56.145 | KV452852.1 | 4284869 | 5-scf00246 | 5 |
| AX-158102592 | 11 | 56.145 | KV452852.1 | 4306000 | 5-scf00246 | 5 |
| AX-158102603 | 11 | 56.145 | KV452852.1 | 4325098 | 5-scf00246 | 5 |
| AX-157826843 | 11 | 56.145 | KV452852.1 | 4330847 | 5-scf00246 | 5 |
| AX-158102611 | 11 | 56.145 | KV452852.1 | 4335976 | 5-scf00246 | 5 |
| AX-157826844 | 11 | 56.145 | KV452852.1 | 4343622 | 5-scf00246 | 5 |
| AX-158102632 | 11 | 56.145 | KV452852.1 | 4367197 | 5-scf00246 | 5 |
| AX-158102635 | 11 | 56.145 | KV452852.1 | 4370453 | 5-scf00246 | 5 |
| AX-158102636 | 11 | 56.145 | KV452852.1 | 4370772 | 5-scf00246 | 5 |
| AX-158102640 | 11 | 56.145 | KV452852.1 | 4379565 | 5-scf00246 | 5 |
| AX-158102642 | 11 | 56.145 | KV452852.1 | 4380609 | 5-scf00246 | 5 |
| AX-158102647 | 11 | 56.145 | KV452852.1 | 4386806 | 5-scf00246 | 5 |
| AX-158102653 | 11 | 56.145 | KV452852.1 | 4401612 | 5-scf00246 | 5 |
| AX-158102658 | 11 | 56.145 | KV452852.1 | 4409437 | 5-scf00246 | 5 |
| AX-158380049 | 11 | 56.145 | KV452852.1 | 4411494 | 5-scf00246 | 5 |
| AX-158102666 | 11 | 56.145 | KV452852.1 | 4415385 | 5-scf00246 | 5 |
| AX-158102668 | 11 | 56.145 | KV452852.1 | 4416622 | 5-scf00246 | 5 |
| AX-158102669 | 11 | 56.145 | KV452852.1 | 4417712 | 5-scf00246 | 5 |
| AX-158102673 | 11 | 56.145 | KV452852.1 | 4420811 | 5-scf00246 | 5 |
| AX-158102674 | 11 | 56.145 | KV452852.1 | 4422967 | 5-scf00246 | 5 |
| AX-158102676 | 11 | 56.145 | KV452852.1 | 4424857 | 5-scf00246 | 5 |
| AX-158102678 | 11 | 56.145 | KV452852.1 | 4426083 | 5-scf00246 | 5 |

|              |    |        |            |         |            |   |
|--------------|----|--------|------------|---------|------------|---|
| AX-158102685 | 11 | 56.145 | KV452852.1 | 4432597 | 5-scf00246 | 5 |
| AX-158102688 | 11 | 56.145 | KV452852.1 | 4435451 | 5-scf00246 | 5 |
| AX-158102689 | 11 | 56.145 | KV452852.1 | 4436472 | 5-scf00246 | 5 |
| AX-158102693 | 11 | 56.145 | KV452852.1 | 4439672 | 5-scf00246 | 5 |
| AX-158102698 | 11 | 56.145 | KV452852.1 | 4446526 | 5-scf00246 | 5 |
| AX-158102699 | 11 | 56.145 | KV452852.1 | 4447387 | 5-scf00246 | 5 |
| AX-158410401 | 11 | 56.145 | KV452852.1 | 4448239 | 5-scf00246 | 5 |
| AX-158422627 | 11 | 56.145 | KV452852.1 | 4448815 | 5-scf00246 | 5 |
| AX-158410403 | 11 | 56.145 | KV452852.1 | 4449037 | 5-scf00246 | 5 |
| AX-157826850 | 11 | 56.145 | KV452852.1 | 4449490 | 5-scf00246 | 5 |
| AX-158102701 | 11 | 56.145 | KV452852.1 | 4451173 | 5-scf00246 | 5 |
| AX-157826851 | 11 | 56.145 | KV452852.1 | 4453552 | 5-scf00246 | 5 |
| AX-158102706 | 11 | 56.145 | KV452852.1 | 4456927 | 5-scf00246 | 5 |
| AX-158102710 | 11 | 56.145 | KV452852.1 | 4463071 | 5-scf00246 | 5 |
| AX-157718887 | 11 | 56.145 | KV452852.1 | 4463653 | 5-scf00246 | 5 |
| AX-158102712 | 11 | 56.145 | KV452852.1 | 4464497 | 5-scf00246 | 5 |
| AX-158102714 | 11 | 56.145 | KV452852.1 | 4466772 | 5-scf00246 | 5 |
| AX-157826853 | 11 | 56.145 | KV452852.1 | 4468349 | 5-scf00246 | 5 |
| AX-158102716 | 11 | 56.145 | KV452852.1 | 4470581 | 5-scf00246 | 5 |
| AX-158102721 | 11 | 56.145 | KV452852.1 | 4478899 | 5-scf00246 | 5 |
| AX-158102722 | 11 | 56.145 | KV452852.1 | 4479714 | 5-scf00246 | 5 |
| AX-158410406 | 11 | 56.145 | KV452852.1 | 4487030 | 5-scf00246 | 5 |
| AX-158102728 | 11 | 56.145 | KV452852.1 | 4493211 | 5-scf00246 | 5 |
| AX-158102733 | 11 | 56.145 | KV452852.1 | 4498367 | 5-scf00246 | 5 |
| AX-157742930 | 11 | 56.145 | KV452852.1 | 4500586 | 5-scf00246 | 5 |
| AX-158102734 | 11 | 56.145 | KV452852.1 | 4501750 | 5-scf00246 | 5 |
| AX-158410410 | 11 | 56.145 | KV452852.1 | 4508522 | 5-scf00246 | 5 |
| AX-157826855 | 11 | 56.145 | KV452852.1 | 4514109 | 5-scf00246 | 5 |
| AX-158102739 | 11 | 56.145 | KV452852.1 | 4514614 | 5-scf00246 | 5 |
| AX-158102746 | 11 | 56.145 | KV452852.1 | 4522163 | 5-scf00246 | 5 |
| AX-158102749 | 11 | 56.145 | KV452852.1 | 4527408 | 5-scf00246 | 5 |
| AX-157826860 | 11 | 56.145 | KV452852.1 | 4528593 | 5-scf00246 | 5 |
| AX-157747894 | 11 | 56.145 | KV452852.1 | 4529820 | 5-scf00246 | 5 |
| AX-158102753 | 11 | 56.145 | KV452852.1 | 4536259 | 5-scf00246 | 5 |
| AX-158102756 | 11 | 56.145 | KV452852.1 | 4539004 | 5-scf00246 | 5 |
| AX-157826865 | 11 | 56.145 | KV452852.1 | 4539956 | 5-scf00246 | 5 |
| AX-158102757 | 11 | 56.145 | KV452852.1 | 4540239 | 5-scf00246 | 5 |
| AX-158102758 | 11 | 56.145 | KV452852.1 | 4540544 | 5-scf00246 | 5 |
| AX-158102761 | 11 | 56.145 | KV452852.1 | 4543708 | 5-scf00246 | 5 |
| AX-158102765 | 11 | 56.145 | KV452852.1 | 4548391 | 5-scf00246 | 5 |
| AX-157826867 | 11 | 56.145 | KV452852.1 | 4555698 | 5-scf00246 | 5 |
| AX-158102766 | 11 | 56.145 | KV452852.1 | 4555885 | 5-scf00246 | 5 |
| AX-158102767 | 11 | 56.145 | KV452852.1 | 4557227 | 5-scf00246 | 5 |
| AX-158102768 | 11 | 56.145 | KV452852.1 | 4557674 | 5-scf00246 | 5 |
| AX-157758141 | 11 | 56.145 | KV452852.1 | 4560596 | 5-scf00246 | 5 |
| AX-157700750 | 11 | 56.145 | KV452852.1 | 4569530 | 5-scf00246 | 5 |
| AX-158102774 | 11 | 56.145 | KV452852.1 | 4572536 | 5-scf00246 | 5 |
| AX-158102775 | 11 | 56.145 | KV452852.1 | 4572804 | 5-scf00246 | 5 |
| AX-157826868 | 11 | 56.145 | KV452852.1 | 4573081 | 5-scf00246 | 5 |
| AX-157826870 | 11 | 56.145 | KV452852.1 | 4577588 | 5-scf00246 | 5 |
| AX-158102783 | 11 | 56.145 | KV452852.1 | 4581362 | 5-scf00246 | 5 |



|              |    |        |            |         |            |   |
|--------------|----|--------|------------|---------|------------|---|
| AX-158102784 | 11 | 56.145 | KV452852.1 | 4582021 | 5-scf00246 | 5 |
| AX-158102785 | 11 | 56.145 | KV452852.1 | 4582280 | 5-scf00246 | 5 |
| AX-158102786 | 11 | 56.145 | KV452852.1 | 4583431 | 5-scf00246 | 5 |
| AX-158102787 | 11 | 56.145 | KV452852.1 | 4584538 | 5-scf00246 | 5 |
| AX-158102788 | 11 | 56.145 | KV452852.1 | 4585522 | 5-scf00246 | 5 |
| AX-158102789 | 11 | 56.145 | KV452852.1 | 4585962 | 5-scf00246 | 5 |
| AX-158102790 | 11 | 56.145 | KV452852.1 | 4586258 | 5-scf00246 | 5 |
| AX-158102791 | 11 | 56.145 | KV452852.1 | 4586768 | 5-scf00246 | 5 |
| AX-158102792 | 11 | 56.145 | KV452852.1 | 4587073 | 5-scf00246 | 5 |
| AX-158102793 | 11 | 56.145 | KV452852.1 | 4587795 | 5-scf00246 | 5 |
| AX-158102794 | 11 | 56.145 | KV452852.1 | 4588406 | 5-scf00246 | 5 |
| AX-158102796 | 11 | 56.145 | KV452852.1 | 4590546 | 5-scf00246 | 5 |
| AX-158102797 | 11 | 56.145 | KV452852.1 | 4591138 | 5-scf00246 | 5 |
| AX-158102799 | 11 | 56.145 | KV452852.1 | 4596902 | 5-scf00246 | 5 |
| AX-158102800 | 11 | 56.145 | KV452852.1 | 4597278 | 5-scf00246 | 5 |
| AX-158102802 | 11 | 56.145 | KV452852.1 | 4598334 | 5-scf00246 | 5 |
| AX-158102805 | 11 | 56.145 | KV452852.1 | 4601260 | 5-scf00246 | 5 |
| AX-158102806 | 11 | 56.145 | KV452852.1 | 4601797 | 5-scf00246 | 5 |
| AX-158102807 | 11 | 56.145 | KV452852.1 | 4604224 | 5-scf00246 | 5 |
| AX-158102809 | 11 | 56.145 | KV452852.1 | 4606475 | 5-scf00246 | 5 |
| AX-158102810 | 11 | 56.145 | KV452852.1 | 4607592 | 5-scf00246 | 5 |
| AX-158102812 | 11 | 56.145 | KV452852.1 | 4608988 | 5-scf00246 | 5 |
| AX-158102813 | 11 | 56.145 | KV452852.1 | 4609459 | 5-scf00246 | 5 |
| AX-158102816 | 11 | 56.145 | KV452852.1 | 4614783 | 5-scf00246 | 5 |
| AX-158102819 | 11 | 56.145 | KV452852.1 | 4617246 | 5-scf00246 | 5 |
| AX-158102820 | 11 | 56.145 | KV452852.1 | 4618967 | 5-scf00246 | 5 |
| AX-158102822 | 11 | 56.145 | KV452852.1 | 4620834 | 5-scf00246 | 5 |
| AX-157717868 | 11 | 56.145 | KV452852.1 | 4623513 | 5-scf00246 | 5 |
| AX-158102824 | 11 | 56.145 | KV452852.1 | 4624775 | 5-scf00246 | 5 |
| AX-158102826 | 11 | 56.145 | KV452852.1 | 4626869 | 5-scf00246 | 5 |
| AX-158102827 | 11 | 56.145 | KV452852.1 | 4627247 | 5-scf00246 | 5 |
| AX-158102829 | 11 | 56.145 | KV452852.1 | 4628201 | 5-scf00246 | 5 |
| AX-158102830 | 11 | 56.145 | KV452852.1 | 4629370 | 5-scf00246 | 5 |
| AX-158102831 | 11 | 56.145 | KV452852.1 | 4632219 | 5-scf00246 | 5 |
| AX-158102833 | 11 | 56.145 | KV452852.1 | 4632803 | 5-scf00246 | 5 |
| AX-158102834 | 11 | 56.145 | KV452852.1 | 4633061 | 5-scf00246 | 5 |
| AX-158102835 | 11 | 56.145 | KV452852.1 | 4633741 | 5-scf00246 | 5 |
| AX-158102836 | 11 | 56.145 | KV452852.1 | 4633942 | 5-scf00246 | 5 |
| AX-158102837 | 11 | 56.145 | KV452852.1 | 4634192 | 5-scf00246 | 5 |
| AX-157826872 | 11 | 56.145 | KV452852.1 | 4635277 | 5-scf00246 | 5 |
| AX-158102840 | 11 | 56.145 | KV452852.1 | 4635688 | 5-scf00246 | 5 |
| AX-158102841 | 11 | 56.145 | KV452852.1 | 4635999 | 5-scf00246 | 5 |
| AX-158102844 | 11 | 56.145 | KV452852.1 | 4639811 | 5-scf00246 | 5 |
| AX-158102845 | 11 | 56.145 | KV452852.1 | 4640464 | 5-scf00246 | 5 |
| AX-158102846 | 11 | 56.145 | KV452852.1 | 4642090 | 5-scf00246 | 5 |
| AX-158102847 | 11 | 56.145 | KV452852.1 | 4642775 | 5-scf00246 | 5 |
| AX-158102848 | 11 | 56.145 | KV452852.1 | 4643077 | 5-scf00246 | 5 |
| AX-158102850 | 11 | 56.145 | KV452852.1 | 4645687 | 5-scf00246 | 5 |
| AX-158102856 | 11 | 56.145 | KV452852.1 | 4655691 | 5-scf00246 | 5 |
| AX-158102859 | 11 | 56.145 | KV452852.1 | 4658773 | 5-scf00246 | 5 |
| AX-158102861 | 11 | 56.145 | KV452852.1 | 4659744 | 5-scf00246 | 5 |

|              |    |        |            |         |            |   |
|--------------|----|--------|------------|---------|------------|---|
| AX-158102862 | 11 | 56.145 | KV452852.1 | 4662234 | 5-scf00246 | 5 |
| AX-158102863 | 11 | 56.145 | KV452852.1 | 4663461 | 5-scf00246 | 5 |
| AX-158102864 | 11 | 56.145 | KV452852.1 | 4664555 | 5-scf00246 | 5 |
| AX-158102867 | 11 | 56.145 | KV452852.1 | 4667090 | 5-scf00246 | 5 |
| AX-158102869 | 11 | 56.145 | KV452852.1 | 4669774 | 5-scf00246 | 5 |
| AX-158102873 | 11 | 56.145 | KV452852.1 | 4674907 | 5-scf00246 | 5 |
| AX-158102875 | 11 | 56.145 | KV452852.1 | 4681083 | 5-scf00246 | 5 |
| AX-158102878 | 11 | 56.145 | KV452852.1 | 4689728 | 5-scf00246 | 5 |
| AX-158102880 | 11 | 56.145 | KV452852.1 | 4690553 | 5-scf00246 | 5 |
| AX-158102883 | 11 | 56.145 | KV452852.1 | 4693793 | 5-scf00246 | 5 |
| AX-158102884 | 11 | 56.145 | KV452852.1 | 4694230 | 5-scf00246 | 5 |
| AX-158102885 | 11 | 56.145 | KV452852.1 | 4694922 | 5-scf00246 | 5 |
| AX-158102886 | 11 | 56.145 | KV452852.1 | 4697823 | 5-scf00246 | 5 |
| AX-158102887 | 11 | 56.145 | KV452852.1 | 4698379 | 5-scf00246 | 5 |
| AX-158102888 | 11 | 56.145 | KV452852.1 | 4698699 | 5-scf00246 | 5 |
| AX-158102890 | 11 | 56.145 | KV452852.1 | 4702127 | 5-scf00246 | 5 |
| AX-158410415 | 11 | 56.145 | KV452852.1 | 4702610 | 5-scf00246 | 5 |
| AX-158102891 | 11 | 56.145 | KV452852.1 | 4703844 | 5-scf00246 | 5 |
| AX-158102892 | 11 | 56.145 | KV452852.1 | 4704626 | 5-scf00246 | 5 |
| AX-158102893 | 11 | 56.145 | KV452852.1 | 4705815 | 5-scf00246 | 5 |
| AX-158102899 | 11 | 56.145 | KV452852.1 | 4712119 | 5-scf00246 | 5 |
| AX-157749028 | 11 | 56.145 | KV452852.1 | 4718575 | 5-scf00246 | 5 |
| AX-158102904 | 11 | 56.145 | KV452852.1 | 4719288 | 5-scf00246 | 5 |
| AX-158102907 | 11 | 56.145 | KV452852.1 | 4727303 | 5-scf00246 | 5 |
| AX-158102908 | 11 | 56.145 | KV452852.1 | 4728616 | 5-scf00246 | 5 |
| AX-158102918 | 11 | 56.145 | KV452852.1 | 4746162 | 5-scf00246 | 5 |
| AX-158102924 | 11 | 56.145 | KV452852.1 | 4767295 | 5-scf00246 | 5 |
| AX-158102926 | 11 | 56.145 | KV452852.1 | 4767966 | 5-scf00246 | 5 |
| AX-158102927 | 11 | 56.145 | KV452852.1 | 4769496 | 5-scf00246 | 5 |
| AX-158102928 | 11 | 56.145 | KV452852.1 | 4771247 | 5-scf00246 | 5 |
| AX-158410420 | 11 | 56.145 | KV452852.1 | 4782943 | 5-scf00246 | 5 |
| AX-158102933 | 11 | 56.145 | KV452852.1 | 4783121 | 5-scf00246 | 5 |
| AX-158102936 | 11 | 56.145 | KV452856.1 | 1857    | 5-scf00247 | 5 |
| AX-158102940 | 11 | 56.145 | KV452856.1 | 4671    | 5-scf00247 | 5 |
| AX-158102950 | 11 | 56.145 | KV452856.1 | 16360   | 5-scf00247 | 5 |
| AX-158102954 | 11 | 56.145 | KV452856.1 | 26429   | 5-scf00247 | 5 |
| AX-157694215 | 11 | 56.145 | KV452856.1 | 29493   | 5-scf00247 | 5 |
| AX-158102957 | 11 | 56.145 | KV452856.1 | 29534   | 5-scf00247 | 5 |
| AX-158102958 | 11 | 56.145 | KV452856.1 | 31529   | 5-scf00247 | 5 |
| AX-158102959 | 11 | 56.145 | KV452856.1 | 32540   | 5-scf00247 | 5 |
| AX-158102960 | 11 | 56.145 | KV452856.1 | 32875   | 5-scf00247 | 5 |
| AX-158102966 | 11 | 56.145 | KV452856.1 | 38859   | 5-scf00247 | 5 |
| AX-157826880 | 11 | 56.145 | KV452856.1 | 73262   | 5-scf00247 | 5 |
| AX-158102997 | 11 | 56.145 | KV452856.1 | 73961   | 5-scf00247 | 5 |
| AX-158103004 | 11 | 56.145 | KV452856.1 | 86590   | 5-scf00247 | 5 |
| AX-157755745 | 11 | 56.145 | KV452856.1 | 109354  | 5-scf00247 | 5 |
| AX-158103033 | 11 | 56.145 | KV452856.1 | 126618  | 5-scf00247 | 5 |
| AX-158103034 | 11 | 56.145 | KV452856.1 | 127027  | 5-scf00247 | 5 |
| AX-158103035 | 11 | 56.145 | KV452856.1 | 127411  | 5-scf00247 | 5 |
| AX-158403445 | 11 | 56.145 | KV452856.1 | 132060  | 5-scf00247 | 5 |
| AX-158103037 | 11 | 56.145 | KV452856.1 | 132394  | 5-scf00247 | 5 |

|              |    |        |             |         |            |    |
|--------------|----|--------|-------------|---------|------------|----|
| AX-158103038 | 11 | 56.145 | KV452856.1  | 133236  | 5-scf00247 | 5  |
| AX-158103052 | 11 | 56.145 | KV452856.1  | 150071  | 5-scf00247 | 5  |
| AX-158103060 | 11 | 56.145 | KV452856.1  | 165871  | 5-scf00247 | 5  |
| AX-158103064 | 11 | 56.145 | KV452856.1  | 172782  | 5-scf00247 | 5  |
| AX-158103070 | 11 | 56.145 | KV452856.1  | 194270  | 5-scf00247 | 5  |
| AX-157688388 | 11 | 56.145 | 3ML01026059 | 2028    | scf01657_1 | UN |
| AX-158102985 | 11 | 56.197 | KV452856.1  | 59723   | 5-scf00247 | 5  |
| AX-158102488 | 11 | 56.269 | KV452852.1  | 4188121 | 5-scf00246 | 5  |
| AX-158102662 | 11 | 56.269 | KV452852.1  | 4412995 | 5-scf00246 | 5  |
| AX-158102665 | 11 | 56.269 | KV452852.1  | 4414976 | 5-scf00246 | 5  |
| AX-158102705 | 11 | 56.269 | KV452852.1  | 4455391 | 5-scf00246 | 5  |
| AX-158102798 | 11 | 56.269 | KV452852.1  | 4592717 | 5-scf00246 | 5  |
| AX-158102808 | 11 | 56.269 | KV452852.1  | 4604640 | 5-scf00246 | 5  |
| AX-158102823 | 11 | 56.269 | KV452852.1  | 4622820 | 5-scf00246 | 5  |
| AX-158102839 | 11 | 56.269 | KV452852.1  | 4634801 | 5-scf00246 | 5  |
| AX-158102852 | 11 | 56.269 | KV452852.1  | 4649513 | 5-scf00246 | 5  |
| AX-158102866 | 11 | 56.269 | KV452852.1  | 4666671 | 5-scf00246 | 5  |
| AX-158102903 | 11 | 56.269 | KV452852.1  | 4718616 | 5-scf00246 | 5  |
| AX-157826876 | 11 | 56.269 | KV452852.1  | 4766663 | 5-scf00246 | 5  |
| AX-158102979 | 11 | 56.269 | KV452856.1  | 51316   | 5-scf00247 | 5  |
| AX-158102987 | 11 | 56.269 | KV452856.1  | 61795   | 5-scf00247 | 5  |
| AX-158102993 | 11 | 56.269 | KV452856.1  | 70198   | 5-scf00247 | 5  |
| AX-157722648 | 11 | 56.269 | KV452856.1  | 76224   | 5-scf00247 | 5  |
| AX-158102999 | 11 | 56.269 | KV452856.1  | 79418   | 5-scf00247 | 5  |
| AX-157746116 | 11 | 56.269 | KV452856.1  | 79505   | 5-scf00247 | 5  |
| AX-157775918 | 11 | 56.269 | KV452856.1  | 81516   | 5-scf00247 | 5  |
| AX-158103000 | 11 | 56.269 | KV452856.1  | 81668   | 5-scf00247 | 5  |
| AX-157826882 | 11 | 56.269 | KV452856.1  | 83857   | 5-scf00247 | 5  |
| AX-158103008 | 11 | 56.269 | KV452856.1  | 91059   | 5-scf00247 | 5  |
| AX-158103009 | 11 | 56.269 | KV452856.1  | 91557   | 5-scf00247 | 5  |
| AX-158103014 | 11 | 56.269 | KV452856.1  | 99869   | 5-scf00247 | 5  |
| AX-158103015 | 11 | 56.269 | KV452856.1  | 101236  | 5-scf00247 | 5  |
| AX-158103018 | 11 | 56.269 | KV452856.1  | 105500  | 5-scf00247 | 5  |
| AX-158103019 | 11 | 56.269 | KV452856.1  | 106451  | 5-scf00247 | 5  |
| AX-158103020 | 11 | 56.269 | KV452856.1  | 107699  | 5-scf00247 | 5  |
| AX-158103022 | 11 | 56.269 | KV452856.1  | 112692  | 5-scf00247 | 5  |
| AX-158103026 | 11 | 56.269 | KV452856.1  | 118966  | 5-scf00247 | 5  |
| AX-158103028 | 11 | 56.269 | KV452856.1  | 120011  | 5-scf00247 | 5  |
| AX-158103006 | 11 | 56.393 | KV452856.1  | 87803   | 5-scf00247 | 5  |
| AX-158103051 | 11 | 56.393 | KV452856.1  | 148397  | 5-scf00247 | 5  |
| AX-158103055 | 11 | 56.393 | KV452856.1  | 156421  | 5-scf00247 | 5  |
| AX-158103056 | 11 | 56.393 | KV452856.1  | 159230  | 5-scf00247 | 5  |
| AX-158103057 | 11 | 56.393 | KV452856.1  | 159888  | 5-scf00247 | 5  |
| AX-158103058 | 11 | 56.393 | KV452856.1  | 161323  | 5-scf00247 | 5  |
| AX-157713451 | 11 | 56.393 | KV452856.1  | 163958  | 5-scf00247 | 5  |
| AX-158103063 | 11 | 56.393 | KV452856.1  | 171623  | 5-scf00247 | 5  |
| AX-158103065 | 11 | 56.518 | KV452856.1  | 173825  | 5-scf00247 | 5  |
| AX-157826883 | 11 | 56.573 | KV452856.1  | 193276  | 5-scf00247 | 5  |
| AX-158103071 | 11 | 56.766 | KV452856.1  | 196517  | 5-scf00247 | 5  |
| AX-158103073 | 11 | 56.766 | KV452856.1  | 199058  | 5-scf00247 | 5  |
| AX-158103074 | 11 | 56.766 | KV452856.1  | 204245  | 5-scf00247 | 5  |

|              |    |        |            |        |            |   |
|--------------|----|--------|------------|--------|------------|---|
| AX-158380051 | 11 | 56.766 | KV452856.1 | 208782 | 5-scf00247 | 5 |
| AX-158103080 | 11 | 56.766 | KV452856.1 | 211347 | 5-scf00247 | 5 |
| AX-158103079 | 11 | 56.888 | KV452856.1 | 209701 | 5-scf00247 | 5 |
| AX-158103086 | 11 | 57.099 | KV452856.1 | 220444 | 5-scf00247 | 5 |
| AX-158103089 | 11 | 57.099 | KV452856.1 | 224703 | 5-scf00247 | 5 |
| AX-158103091 | 11 | 57.099 | KV452856.1 | 228406 | 5-scf00247 | 5 |
| AX-158103094 | 11 | 57.099 | KV452856.1 | 238306 | 5-scf00247 | 5 |
| AX-158103101 | 11 | 57.099 | KV452856.1 | 255722 | 5-scf00247 | 5 |
| AX-158103092 | 11 | 57.26  | KV452856.1 | 235405 | 5-scf00247 | 5 |
| AX-158103095 | 11 | 57.26  | KV452856.1 | 238789 | 5-scf00247 | 5 |
| AX-158410425 | 11 | 57.26  | KV452856.1 | 243639 | 5-scf00247 | 5 |
| AX-158103099 | 11 | 57.26  | KV452856.1 | 252991 | 5-scf00247 | 5 |
| AX-158103102 | 11 | 57.26  | KV452856.1 | 259040 | 5-scf00247 | 5 |
| AX-158103105 | 11 | 57.264 | KV452856.1 | 269191 | 5-scf00247 | 5 |
| AX-158103122 | 11 | 57.388 | KV452856.1 | 298842 | 5-scf00247 | 5 |
| AX-158103123 | 11 | 57.388 | KV452856.1 | 299961 | 5-scf00247 | 5 |
| AX-157723782 | 11 | 57.492 | KV452856.1 | 314628 | 5-scf00247 | 5 |
| AX-157826893 | 11 | 57.492 | KV452856.1 | 414664 | 5-scf00247 | 5 |
| AX-157710184 | 11 | 57.637 | KV452856.1 | 204048 | 5-scf00247 | 5 |
| AX-157696686 | 11 | 57.637 | KV452856.1 | 295630 | 5-scf00247 | 5 |
| AX-158103134 | 11 | 57.637 | KV452856.1 | 317218 | 5-scf00247 | 5 |
| AX-158103137 | 11 | 57.637 | KV452856.1 | 319923 | 5-scf00247 | 5 |
| AX-158103155 | 11 | 57.637 | KV452856.1 | 341564 | 5-scf00247 | 5 |
| AX-158103156 | 11 | 57.637 | KV452856.1 | 341790 | 5-scf00247 | 5 |
| AX-158103157 | 11 | 57.637 | KV452856.1 | 343260 | 5-scf00247 | 5 |
| AX-158103160 | 11 | 57.637 | KV452856.1 | 347019 | 5-scf00247 | 5 |
| AX-158103163 | 11 | 57.637 | KV452856.1 | 350090 | 5-scf00247 | 5 |
| AX-158103165 | 11 | 57.637 | KV452856.1 | 350792 | 5-scf00247 | 5 |
| AX-158103166 | 11 | 57.637 | KV452856.1 | 351927 | 5-scf00247 | 5 |
| AX-158103167 | 11 | 57.637 | KV452856.1 | 352494 | 5-scf00247 | 5 |
| AX-157826887 | 11 | 57.637 | KV452856.1 | 357005 | 5-scf00247 | 5 |
| AX-157826888 | 11 | 57.637 | KV452856.1 | 360580 | 5-scf00247 | 5 |
| AX-158103171 | 11 | 57.637 | KV452856.1 | 361075 | 5-scf00247 | 5 |
| AX-158103174 | 11 | 57.637 | KV452856.1 | 365541 | 5-scf00247 | 5 |
| AX-157710627 | 11 | 57.637 | KV452856.1 | 368681 | 5-scf00247 | 5 |
| AX-157710626 | 11 | 57.637 | KV452856.1 | 368821 | 5-scf00247 | 5 |
| AX-158103176 | 11 | 57.637 | KV452856.1 | 369994 | 5-scf00247 | 5 |
| AX-158103178 | 11 | 57.637 | KV452856.1 | 370766 | 5-scf00247 | 5 |
| AX-158103179 | 11 | 57.637 | KV452856.1 | 373001 | 5-scf00247 | 5 |
| AX-158103197 | 11 | 57.637 | KV452856.1 | 393587 | 5-scf00247 | 5 |
| AX-157717729 | 11 | 57.637 | KV452856.1 | 401425 | 5-scf00247 | 5 |
| AX-158103199 | 11 | 57.637 | KV452856.1 | 402693 | 5-scf00247 | 5 |
| AX-157826892 | 11 | 57.637 | KV452856.1 | 410751 | 5-scf00247 | 5 |
| AX-158103203 | 11 | 57.637 | KV452856.1 | 413199 | 5-scf00247 | 5 |
| AX-157826894 | 11 | 57.637 | KV452856.1 | 415689 | 5-scf00247 | 5 |
| AX-158103209 | 11 | 57.637 | KV452856.1 | 422803 | 5-scf00247 | 5 |
| AX-158103224 | 11 | 57.637 | KV452856.1 | 457601 | 5-scf00247 | 5 |
| AX-158103227 | 11 | 57.637 | KV452856.1 | 464478 | 5-scf00247 | 5 |
| AX-157747798 | 11 | 57.637 | KV452856.1 | 465018 | 5-scf00247 | 5 |
| AX-158103230 | 11 | 57.637 | KV452856.1 | 471879 | 5-scf00247 | 5 |
| AX-158103231 | 11 | 57.637 | KV452856.1 | 472278 | 5-scf00247 | 5 |

|              |    |        |            |         |            |   |
|--------------|----|--------|------------|---------|------------|---|
| AX-158103232 | 11 | 57.637 | KV452856.1 | 473172  | 5-scf00247 | 5 |
| AX-158103233 | 11 | 57.637 | KV452856.1 | 474162  | 5-scf00247 | 5 |
| AX-158103236 | 11 | 57.637 | KV452856.1 | 478880  | 5-scf00247 | 5 |
| AX-158103237 | 11 | 57.637 | KV452856.1 | 479333  | 5-scf00247 | 5 |
| AX-158103242 | 11 | 57.637 | KV452856.1 | 491198  | 5-scf00247 | 5 |
| AX-158103244 | 11 | 57.637 | KV452856.1 | 494226  | 5-scf00247 | 5 |
| AX-158103245 | 11 | 57.637 | KV452856.1 | 494998  | 5-scf00247 | 5 |
| AX-158103246 | 11 | 57.637 | KV452856.1 | 495700  | 5-scf00247 | 5 |
| AX-158103248 | 11 | 57.637 | KV452856.1 | 497005  | 5-scf00247 | 5 |
| AX-158103259 | 11 | 57.637 | KV452856.1 | 510696  | 5-scf00247 | 5 |
| AX-158103263 | 11 | 57.637 | KV452856.1 | 517626  | 5-scf00247 | 5 |
| AX-158103264 | 11 | 57.637 | KV452856.1 | 518307  | 5-scf00247 | 5 |
| AX-157826900 | 11 | 57.637 | KV452856.1 | 526065  | 5-scf00247 | 5 |
| AX-157826905 | 11 | 57.637 | KV452856.1 | 537919  | 5-scf00247 | 5 |
| AX-157826906 | 11 | 57.637 | KV452856.1 | 539411  | 5-scf00247 | 5 |
| AX-158103294 | 11 | 57.637 | KV452856.1 | 551155  | 5-scf00247 | 5 |
| AX-157774932 | 11 | 57.637 | KV452856.1 | 564600  | 5-scf00247 | 5 |
| AX-158384762 | 11 | 57.637 | KV452856.1 | 618645  | 5-scf00247 | 5 |
| AX-158103350 | 11 | 57.637 | KV452856.1 | 640001  | 5-scf00247 | 5 |
| AX-158103362 | 11 | 57.637 | KV452856.1 | 651573  | 5-scf00247 | 5 |
| AX-158103369 | 11 | 57.637 | KV452856.1 | 660365  | 5-scf00247 | 5 |
| AX-158103374 | 11 | 57.637 | KV452856.1 | 662975  | 5-scf00247 | 5 |
| AX-158103377 | 11 | 57.637 | KV452856.1 | 667392  | 5-scf00247 | 5 |
| AX-158103378 | 11 | 57.637 | KV452856.1 | 668422  | 5-scf00247 | 5 |
| AX-158103379 | 11 | 57.637 | KV452856.1 | 670197  | 5-scf00247 | 5 |
| AX-158103381 | 11 | 57.637 | KV452856.1 | 671431  | 5-scf00247 | 5 |
| AX-158103390 | 11 | 57.637 | KV452856.1 | 679496  | 5-scf00247 | 5 |
| AX-158103394 | 11 | 57.637 | KV452856.1 | 686231  | 5-scf00247 | 5 |
| AX-158103398 | 11 | 57.637 | KV452856.1 | 689337  | 5-scf00247 | 5 |
| AX-158103410 | 11 | 57.637 | KV452856.1 | 704449  | 5-scf00247 | 5 |
| AX-157826919 | 11 | 57.637 | KV452856.1 | 705648  | 5-scf00247 | 5 |
| AX-157826925 | 11 | 57.637 | KV452856.1 | 735228  | 5-scf00247 | 5 |
| AX-158103450 | 11 | 57.637 | KV452856.1 | 773167  | 5-scf00247 | 5 |
| AX-158103451 | 11 | 57.637 | KV452856.1 | 774815  | 5-scf00247 | 5 |
| AX-158103457 | 11 | 57.637 | KV452856.1 | 792128  | 5-scf00247 | 5 |
| AX-158103461 | 11 | 57.637 | KV452856.1 | 794483  | 5-scf00247 | 5 |
| AX-158103467 | 11 | 57.637 | KV452856.1 | 803244  | 5-scf00247 | 5 |
| AX-158103474 | 11 | 57.637 | KV452856.1 | 813059  | 5-scf00247 | 5 |
| AX-158103475 | 11 | 57.637 | KV452856.1 | 813709  | 5-scf00247 | 5 |
| AX-158103504 | 11 | 57.637 | KV452856.1 | 849814  | 5-scf00247 | 5 |
| AX-158103505 | 11 | 57.637 | KV452856.1 | 850237  | 5-scf00247 | 5 |
| AX-158103509 | 11 | 57.637 | KV452856.1 | 853324  | 5-scf00247 | 5 |
| AX-158103522 | 11 | 57.637 | KV452856.1 | 875198  | 5-scf00247 | 5 |
| AX-158103533 | 11 | 57.637 | KV452856.1 | 884036  | 5-scf00247 | 5 |
| AX-158103537 | 11 | 57.637 | KV452856.1 | 889413  | 5-scf00247 | 5 |
| AX-158103543 | 11 | 57.637 | KV452856.1 | 898448  | 5-scf00247 | 5 |
| AX-158103601 | 11 | 57.637 | KV452856.1 | 989165  | 5-scf00247 | 5 |
| AX-158103615 | 11 | 57.637 | KV452856.1 | 1008686 | 5-scf00247 | 5 |
| AX-157755086 | 11 | 57.637 | KV452856.1 | 1018170 | 5-scf00247 | 5 |
| AX-158103630 | 11 | 57.637 | KV452856.1 | 1026336 | 5-scf00247 | 5 |
| AX-157774087 | 11 | 57.637 | KV452856.1 | 1034286 | 5-scf00247 | 5 |

|              |    |        |            |         |            |   |
|--------------|----|--------|------------|---------|------------|---|
| AX-158103668 | 11 | 57.637 | KV452856.1 | 1054906 | 5-scf00247 | 5 |
| AX-158103674 | 11 | 57.637 | KV452856.1 | 1062321 | 5-scf00247 | 5 |
| AX-158103675 | 11 | 57.637 | KV452856.1 | 1062803 | 5-scf00247 | 5 |
| AX-158103696 | 11 | 57.637 | KV452856.1 | 1086846 | 5-scf00247 | 5 |
| AX-158103697 | 11 | 57.637 | KV452856.1 | 1087134 | 5-scf00247 | 5 |
| AX-158103755 | 11 | 57.637 | KV452856.1 | 1161893 | 5-scf00247 | 5 |
| AX-157826980 | 11 | 57.637 | KV452856.1 | 1317944 | 5-scf00247 | 5 |
| AX-158103887 | 11 | 57.637 | KV452856.1 | 1321162 | 5-scf00247 | 5 |
| AX-158103902 | 11 | 57.637 | KV452856.1 | 1335409 | 5-scf00247 | 5 |
| AX-158103907 | 11 | 57.637 | KV452856.1 | 1340812 | 5-scf00247 | 5 |
| AX-158103909 | 11 | 57.637 | KV452856.1 | 1344113 | 5-scf00247 | 5 |
| AX-158103912 | 11 | 57.637 | KV452856.1 | 1346344 | 5-scf00247 | 5 |
| AX-158103915 | 11 | 57.637 | KV452856.1 | 1349557 | 5-scf00247 | 5 |
| AX-158103918 | 11 | 57.637 | KV452856.1 | 1354384 | 5-scf00247 | 5 |
| AX-157826988 | 11 | 57.637 | KV452856.1 | 1375615 | 5-scf00247 | 5 |
| AX-158103951 | 11 | 57.637 | KV452856.1 | 1407564 | 5-scf00247 | 5 |
| AX-158103952 | 11 | 57.637 | KV452856.1 | 1407920 | 5-scf00247 | 5 |
| AX-158103961 | 11 | 57.637 | KV452856.1 | 1422267 | 5-scf00247 | 5 |
| AX-158103963 | 11 | 57.637 | KV452856.1 | 1423137 | 5-scf00247 | 5 |
| AX-157826993 | 11 | 57.637 | KV452856.1 | 1457220 | 5-scf00247 | 5 |
| AX-158103987 | 11 | 57.637 | KV452856.1 | 1457401 | 5-scf00247 | 5 |
| AX-158103989 | 11 | 57.637 | KV452856.1 | 1460932 | 5-scf00247 | 5 |
| AX-158103990 | 11 | 57.637 | KV452856.1 | 1461564 | 5-scf00247 | 5 |
| AX-158384774 | 11 | 57.637 | KV452856.1 | 1500775 | 5-scf00247 | 5 |
| AX-157827003 | 11 | 57.637 | KV452856.1 | 1502181 | 5-scf00247 | 5 |
| AX-158104021 | 11 | 57.637 | KV452856.1 | 1506212 | 5-scf00247 | 5 |
| AX-158104023 | 11 | 57.637 | KV452856.1 | 1507485 | 5-scf00247 | 5 |
| AX-158104027 | 11 | 57.637 | KV452856.1 | 1510798 | 5-scf00247 | 5 |
| AX-158104074 | 11 | 57.637 | KV452856.1 | 1595987 | 5-scf00247 | 5 |
| AX-158103235 | 11 | 57.953 | KV452856.1 | 477533  | 5-scf00247 | 5 |
| AX-158103201 | 11 | 58.34  | KV452856.1 | 405317  | 5-scf00247 | 5 |
| AX-158103213 | 11 | 58.34  | KV452856.1 | 432968  | 5-scf00247 | 5 |
| AX-158103266 | 11 | 58.34  | KV452856.1 | 518829  | 5-scf00247 | 5 |
| AX-157683410 | 11 | 58.34  | KV452853.1 | 3263    | 5-scf00248 | 5 |
| AX-157683414 | 11 | 58.34  | KV452853.1 | 5762    | 5-scf00248 | 5 |
| AX-158103239 | 11 | 58.342 | KV452856.1 | 488050  | 5-scf00247 | 5 |
| AX-158380052 | 11 | 58.351 | KV452856.1 | 508850  | 5-scf00247 | 5 |
| AX-158103261 | 11 | 58.358 | KV452856.1 | 514691  | 5-scf00247 | 5 |
| AX-158103273 | 11 | 58.364 | KV452856.1 | 527022  | 5-scf00247 | 5 |
| AX-158103275 | 11 | 58.364 | KV452856.1 | 528104  | 5-scf00247 | 5 |
| AX-158103161 | 11 | 58.371 | KV452856.1 | 347794  | 5-scf00247 | 5 |
| AX-158103229 | 11 | 58.371 | KV452856.1 | 471196  | 5-scf00247 | 5 |
| AX-157826904 | 11 | 58.371 | KV452856.1 | 534694  | 5-scf00247 | 5 |
| AX-158103280 | 11 | 58.371 | KV452856.1 | 534984  | 5-scf00247 | 5 |
| AX-158103281 | 11 | 58.371 | KV452856.1 | 535280  | 5-scf00247 | 5 |
| AX-157747156 | 11 | 58.371 | KV452856.1 | 542177  | 5-scf00247 | 5 |
| AX-157744255 | 11 | 58.371 | KV452856.1 | 546510  | 5-scf00247 | 5 |
| AX-157826928 | 11 | 58.371 | KV452856.1 | 749962  | 5-scf00247 | 5 |
| AX-158103282 | 11 | 58.375 | KV452856.1 | 536232  | 5-scf00247 | 5 |
| AX-158103204 | 11 | 58.38  | KV452856.1 | 413707  | 5-scf00247 | 5 |
| AX-158103278 | 11 | 58.38  | KV452856.1 | 531838  | 5-scf00247 | 5 |

|              |    |        |            |         |            |   |
|--------------|----|--------|------------|---------|------------|---|
| AX-158103285 | 11 | 58.38  | KV452856.1 | 537764  | 5-scf00247 | 5 |
| AX-158103252 | 11 | 58.381 | KV452856.1 | 500197  | 5-scf00247 | 5 |
| AX-158103276 | 11 | 58.381 | KV452856.1 | 529464  | 5-scf00247 | 5 |
| AX-158103287 | 11 | 58.381 | KV452856.1 | 542882  | 5-scf00247 | 5 |
| AX-158103389 | 11 | 58.381 | KV452856.1 | 678962  | 5-scf00247 | 5 |
| AX-158103408 | 11 | 58.381 | KV452856.1 | 700897  | 5-scf00247 | 5 |
| AX-158103424 | 11 | 58.381 | KV452856.1 | 721359  | 5-scf00247 | 5 |
| AX-158103452 | 11 | 58.381 | KV452856.1 | 777849  | 5-scf00247 | 5 |
| AX-158103460 | 11 | 58.381 | KV452856.1 | 793748  | 5-scf00247 | 5 |
| AX-158103501 | 11 | 58.381 | KV452856.1 | 846604  | 5-scf00247 | 5 |
| AX-158103779 | 11 | 58.381 | KV452856.1 | 1180136 | 5-scf00247 | 5 |
| AX-158104098 | 11 | 58.381 | KV452856.1 | 1627491 | 5-scf00247 | 5 |
| AX-158104101 | 11 | 58.381 | KV452856.1 | 1635876 | 5-scf00247 | 5 |
| AX-158104107 | 11 | 58.381 | KV452856.1 | 1643803 | 5-scf00247 | 5 |
| AX-158104108 | 11 | 58.381 | KV452856.1 | 1644073 | 5-scf00247 | 5 |
| AX-158104109 | 11 | 58.381 | KV452856.1 | 1644338 | 5-scf00247 | 5 |
| AX-158104123 | 11 | 58.381 | KV452856.1 | 1661417 | 5-scf00247 | 5 |
| AX-158410464 | 11 | 58.381 | KV452856.1 | 1881893 | 5-scf00247 | 5 |
| AX-158103297 | 11 | 58.39  | KV452856.1 | 563953  | 5-scf00247 | 5 |
| AX-158103296 | 11 | 58.398 | KV452856.1 | 558874  | 5-scf00247 | 5 |
| AX-158103304 | 11 | 58.398 | KV452856.1 | 574214  | 5-scf00247 | 5 |
| AX-158103305 | 11 | 58.398 | KV452856.1 | 577522  | 5-scf00247 | 5 |
| AX-157885848 | 11 | 58.398 | KV452856.1 | 579690  | 5-scf00247 | 5 |
| AX-158103307 | 11 | 58.398 | KV452856.1 | 580159  | 5-scf00247 | 5 |
| AX-158103308 | 11 | 58.398 | KV452856.1 | 581876  | 5-scf00247 | 5 |
| AX-158103206 | 11 | 58.597 | KV452856.1 | 416457  | 5-scf00247 | 5 |
| AX-158103319 | 11 | 58.597 | KV452856.1 | 600213  | 5-scf00247 | 5 |
| AX-158103338 | 11 | 58.789 | KV452856.1 | 626282  | 5-scf00247 | 5 |
| AX-158103339 | 11 | 58.962 | KV452856.1 | 628719  | 5-scf00247 | 5 |
| AX-158103344 | 11 | 59.142 | KV452856.1 | 632372  | 5-scf00247 | 5 |
| AX-158103147 | 11 | 59.874 | KV452856.1 | 331203  | 5-scf00247 | 5 |
| AX-158103173 | 11 | 59.874 | KV452856.1 | 365001  | 5-scf00247 | 5 |
| AX-158103348 | 11 | 59.874 | KV452856.1 | 637700  | 5-scf00247 | 5 |
| AX-158103360 | 11 | 59.874 | KV452856.1 | 648217  | 5-scf00247 | 5 |
| AX-158103375 | 11 | 59.874 | KV452856.1 | 665932  | 5-scf00247 | 5 |
| AX-158103388 | 11 | 59.874 | KV452856.1 | 678205  | 5-scf00247 | 5 |
| AX-158103506 | 11 | 59.874 | KV452856.1 | 851268  | 5-scf00247 | 5 |
| AX-158103578 | 11 | 59.874 | KV452856.1 | 951872  | 5-scf00247 | 5 |
| AX-158103959 | 11 | 59.874 | KV452856.1 | 1416503 | 5-scf00247 | 5 |
| AX-158103138 | 11 | 59.881 | KV452856.1 | 320313  | 5-scf00247 | 5 |
| AX-158103177 | 11 | 59.881 | KV452856.1 | 370579  | 5-scf00247 | 5 |
| AX-157739679 | 11 | 59.881 | KV452856.1 | 638460  | 5-scf00247 | 5 |
| AX-158103354 | 11 | 59.881 | KV452856.1 | 642976  | 5-scf00247 | 5 |
| AX-158103356 | 11 | 59.881 | KV452856.1 | 644362  | 5-scf00247 | 5 |
| AX-158103370 | 11 | 59.881 | KV452856.1 | 660903  | 5-scf00247 | 5 |
| AX-158103376 | 11 | 59.881 | KV452856.1 | 666613  | 5-scf00247 | 5 |
| AX-158103384 | 11 | 59.881 | KV452856.1 | 674727  | 5-scf00247 | 5 |
| AX-158103423 | 11 | 59.881 | KV452856.1 | 719211  | 5-scf00247 | 5 |
| AX-157754397 | 11 | 59.881 | KV452856.1 | 732915  | 5-scf00247 | 5 |
| AX-158103434 | 11 | 59.881 | KV452856.1 | 736575  | 5-scf00247 | 5 |
| AX-158410428 | 11 | 61.326 | KV452856.1 | 507104  | 5-scf00247 | 5 |

|              |    |        |            |         |            |   |
|--------------|----|--------|------------|---------|------------|---|
| AX-158103437 | 11 | 61.326 | KV452856.1 | 743247  | 5-scf00247 | 5 |
| AX-158103265 | 11 | 61.349 | KV452856.1 | 518483  | 5-scf00247 | 5 |
| AX-158103352 | 11 | 61.349 | KV452856.1 | 641599  | 5-scf00247 | 5 |
| AX-158103358 | 11 | 61.349 | KV452856.1 | 645822  | 5-scf00247 | 5 |
| AX-158103436 | 11 | 61.349 | KV452856.1 | 739232  | 5-scf00247 | 5 |
| AX-157826926 | 11 | 61.349 | KV452856.1 | 739639  | 5-scf00247 | 5 |
| AX-157826927 | 11 | 61.349 | KV452856.1 | 746556  | 5-scf00247 | 5 |
| AX-158103469 | 11 | 61.349 | KV452856.1 | 806976  | 5-scf00247 | 5 |
| AX-158103487 | 11 | 61.349 | KV452856.1 | 830334  | 5-scf00247 | 5 |
| AX-157722482 | 11 | 61.349 | KV452856.1 | 875856  | 5-scf00247 | 5 |
| AX-157683412 | 11 | 61.349 | KV452853.1 | 4038    | 5-scf00248 | 5 |
| AX-157826886 | 11 | 61.353 | KV452856.1 | 350299  | 5-scf00247 | 5 |
| AX-158103441 | 11 | 61.353 | KV452856.1 | 748989  | 5-scf00247 | 5 |
| AX-158103442 | 11 | 61.357 | KV452856.1 | 752279  | 5-scf00247 | 5 |
| AX-158103438 | 11 | 61.362 | KV452856.1 | 744022  | 5-scf00247 | 5 |
| AX-157885851 | 11 | 61.362 | KV452856.1 | 758152  | 5-scf00247 | 5 |
| AX-158103444 | 11 | 61.362 | KV452856.1 | 759864  | 5-scf00247 | 5 |
| AX-158103827 | 11 | 61.362 | KV452856.1 | 1231617 | 5-scf00247 | 5 |
| AX-158103855 | 11 | 61.362 | KV452856.1 | 1272889 | 5-scf00247 | 5 |
| AX-158103395 | 11 | 61.366 | KV452856.1 | 687913  | 5-scf00247 | 5 |
| AX-157709714 | 11 | 61.366 | KV452856.1 | 688549  | 5-scf00247 | 5 |
| AX-157826931 | 11 | 61.366 | KV452856.1 | 776104  | 5-scf00247 | 5 |
| AX-158103519 | 11 | 61.366 | KV452856.1 | 869662  | 5-scf00247 | 5 |
| AX-158103311 | 11 | 61.367 | KV452856.1 | 586466  | 5-scf00247 | 5 |
| AX-157752912 | 11 | 61.367 | KV452856.1 | 698374  | 5-scf00247 | 5 |
| AX-157826932 | 11 | 61.367 | KV452856.1 | 776329  | 5-scf00247 | 5 |
| AX-157826933 | 11 | 61.367 | KV452856.1 | 778228  | 5-scf00247 | 5 |
| AX-157826934 | 11 | 61.367 | KV452856.1 | 802222  | 5-scf00247 | 5 |
| AX-158103482 | 11 | 61.367 | KV452856.1 | 824158  | 5-scf00247 | 5 |
| AX-158103494 | 11 | 61.367 | KV452856.1 | 839433  | 5-scf00247 | 5 |
| AX-158103529 | 11 | 61.367 | KV452856.1 | 880480  | 5-scf00247 | 5 |
| AX-158103656 | 11 | 61.367 | KV452856.1 | 1047422 | 5-scf00247 | 5 |
| AX-157723770 | 11 | 61.372 | KV452856.1 | 838860  | 5-scf00247 | 5 |
| AX-158103096 | 11 | 61.376 | KV452856.1 | 245243  | 5-scf00247 | 5 |
| AX-158103097 | 11 | 61.376 | KV452856.1 | 249197  | 5-scf00247 | 5 |
| AX-157826908 | 11 | 61.376 | KV452856.1 | 551097  | 5-scf00247 | 5 |
| AX-158103485 | 11 | 61.376 | KV452856.1 | 828977  | 5-scf00247 | 5 |
| AX-157826937 | 11 | 61.376 | KV452856.1 | 850454  | 5-scf00247 | 5 |
| AX-158103514 | 11 | 61.381 | KV452856.1 | 863985  | 5-scf00247 | 5 |
| AX-158103532 | 11 | 61.386 | KV452856.1 | 882265  | 5-scf00247 | 5 |
| AX-158103535 | 11 | 61.393 | KV452856.1 | 885744  | 5-scf00247 | 5 |
| AX-158410436 | 11 | 61.399 | KV452856.1 | 758604  | 5-scf00247 | 5 |
| AX-157746504 | 11 | 61.399 | KV452856.1 | 887251  | 5-scf00247 | 5 |
| AX-158103714 | 11 | 61.399 | KV452856.1 | 1109134 | 5-scf00247 | 5 |
| AX-158103783 | 11 | 61.399 | KV452856.1 | 1184517 | 5-scf00247 | 5 |
| AX-158103804 | 11 | 61.399 | KV452856.1 | 1210247 | 5-scf00247 | 5 |
| AX-158103831 | 11 | 61.399 | KV452856.1 | 1242823 | 5-scf00247 | 5 |
| AX-158103861 | 11 | 61.399 | KV452856.1 | 1280323 | 5-scf00247 | 5 |
| AX-158103879 | 11 | 61.399 | KV452856.1 | 1304752 | 5-scf00247 | 5 |
| AX-158104004 | 11 | 61.399 | KV452856.1 | 1486616 | 5-scf00247 | 5 |
| AX-158104118 | 11 | 61.399 | KV452856.1 | 1654401 | 5-scf00247 | 5 |



|              |    |        |             |         |            |    |
|--------------|----|--------|-------------|---------|------------|----|
| AX-158104121 | 11 | 61.399 | KV452856.1  | 1657362 | 5-scf00247 | 5  |
| AX-158104169 | 11 | 61.399 | KV452856.1  | 1719479 | 5-scf00247 | 5  |
| AX-157741061 | 11 | 61.399 | KV452856.1  | 1719796 | 5-scf00247 | 5  |
| AX-157827026 | 11 | 61.399 | KV452856.1  | 1760697 | 5-scf00247 | 5  |
| AX-157753673 | 11 | 61.399 | KV452856.1  | 1767373 | 5-scf00247 | 5  |
| AX-158104205 | 11 | 61.399 | KV452856.1  | 1770736 | 5-scf00247 | 5  |
| AX-158104212 | 11 | 61.399 | KV452856.1  | 1777815 | 5-scf00247 | 5  |
| AX-158104313 | 11 | 61.399 | KV452856.1  | 1945600 | 5-scf00247 | 5  |
| AX-158104333 | 11 | 61.399 | KV452856.1  | 1970509 | 5-scf00247 | 5  |
| AX-158104379 | 11 | 61.399 | KV452856.1  | 2042138 | 5-scf00247 | 5  |
| AX-158104420 | 11 | 61.399 | KV452856.1  | 2102643 | 5-scf00247 | 5  |
| AX-158104479 | 11 | 61.399 | KV452856.1  | 2183467 | 5-scf00247 | 5  |
| AX-157718146 | 11 | 61.399 | KV452856.1  | 2365450 | 5-scf00247 | 5  |
| AX-158104612 | 11 | 61.399 | KV452856.1  | 2385608 | 5-scf00247 | 5  |
| AX-158104613 | 11 | 61.399 | KV452856.1  | 2385738 | 5-scf00247 | 5  |
| AX-158104725 | 11 | 61.399 | KV452856.1  | 2541523 | 5-scf00247 | 5  |
| AX-158104790 | 11 | 61.399 | KV452856.1  | 2638181 | 5-scf00247 | 5  |
| AX-158104870 | 11 | 61.399 | KV452856.1  | 2774936 | 5-scf00247 | 5  |
| AX-158104871 | 11 | 61.399 | KV452856.1  | 2775723 | 5-scf00247 | 5  |
| AX-158104898 | 11 | 61.399 | KV452856.1  | 2832055 | 5-scf00247 | 5  |
| AX-158105216 | 11 | 61.399 | KV452863.1  | 985260  | 5-scf00249 | 5  |
| AX-158105229 | 11 | 61.399 | KV452863.1  | 1011434 | 5-scf00249 | 5  |
| AX-157827337 | 11 | 61.399 | KV452863.1  | 5191909 | 5-scf00249 | 5  |
| AX-158103447 | 11 | 61.472 | KV452856.1  | 769686  | 5-scf00247 | 5  |
| AX-157826938 | 11 | 61.472 | KV452856.1  | 891667  | 5-scf00247 | 5  |
| AX-158103568 | 11 | 61.472 | KV452856.1  | 934738  | 5-scf00247 | 5  |
| AX-158103569 | 11 | 61.472 | KV452856.1  | 936165  | 5-scf00247 | 5  |
| AX-158103570 | 11 | 61.472 | KV452856.1  | 937780  | 5-scf00247 | 5  |
| AX-158103758 | 11 | 61.472 | KV452856.1  | 1163841 | 5-scf00247 | 5  |
| AX-158103544 | 11 | 61.543 | KV452856.1  | 899998  | 5-scf00247 | 5  |
| AX-158103558 | 11 | 62.88  | KV452856.1  | 922426  | 5-scf00247 | 5  |
| AX-158103785 | 11 | 62.88  | KV452856.1  | 1185955 | 5-scf00247 | 5  |
| AX-158103560 | 11 | 62.887 | KV452856.1  | 924039  | 5-scf00247 | 5  |
| AX-158103970 | 11 | 62.887 | KV452856.1  | 1434785 | 5-scf00247 | 5  |
| AX-158103555 | 11 | 62.895 | KV452856.1  | 916787  | 5-scf00247 | 5  |
| AX-158103556 | 11 | 62.895 | KV452856.1  | 919219  | 5-scf00247 | 5  |
| AX-158103557 | 11 | 62.895 | KV452856.1  | 921979  | 5-scf00247 | 5  |
| AX-157826939 | 11 | 62.895 | KV452856.1  | 925689  | 5-scf00247 | 5  |
| AX-157826940 | 11 | 62.895 | KV452856.1  | 925864  | 5-scf00247 | 5  |
| AX-157826942 | 11 | 62.895 | KV452856.1  | 926047  | 5-scf00247 | 5  |
| AX-158410439 | 11 | 62.895 | KV452856.1  | 928773  | 5-scf00247 | 5  |
| AX-158103562 | 11 | 62.895 | KV452856.1  | 929871  | 5-scf00247 | 5  |
| AX-158103564 | 11 | 62.895 | KV452856.1  | 931746  | 5-scf00247 | 5  |
| AX-158103567 | 11 | 62.895 | KV452856.1  | 933836  | 5-scf00247 | 5  |
| AX-158104266 | 11 | 62.895 | KV452856.1  | 1854689 | 5-scf00247 | 5  |
| AX-158104867 | 11 | 62.895 | KV452856.1  | 2773330 | 5-scf00247 | 5  |
| AX-157826941 | 11 | 62.901 | KV452856.1  | 925960  | 5-scf00247 | 5  |
| AX-157857407 | 11 | 62.91  | KV452856.1  | 933742  | 5-scf00247 | 5  |
| AX-157826943 | 11 | 62.915 | KV452856.1  | 935867  | 5-scf00247 | 5  |
| AX-157704680 | 11 | 62.92  | 3ML01026998 | 691     | scf02601_1 | UN |
| AX-158103572 | 11 | 62.928 | KV452856.1  | 943375  | 5-scf00247 | 5  |

|              |    |        |            |         |            |   |
|--------------|----|--------|------------|---------|------------|---|
| AX-158103577 | 11 | 62.932 | KV452856.1 | 950780  | 5-scf00247 | 5 |
| AX-158103575 | 11 | 62.94  | KV452856.1 | 947673  | 5-scf00247 | 5 |
| AX-157826944 | 11 | 62.94  | KV452856.1 | 955456  | 5-scf00247 | 5 |
| AX-158103679 | 11 | 62.94  | KV452856.1 | 1066460 | 5-scf00247 | 5 |
| AX-158103773 | 11 | 62.94  | KV452856.1 | 1171533 | 5-scf00247 | 5 |
| AX-158103832 | 11 | 62.94  | KV452856.1 | 1243676 | 5-scf00247 | 5 |
| AX-158103262 | 11 | 62.946 | KV452856.1 | 515375  | 5-scf00247 | 5 |
| AX-158103417 | 11 | 62.946 | KV452856.1 | 710100  | 5-scf00247 | 5 |
| AX-157758341 | 11 | 62.946 | KV452856.1 | 937187  | 5-scf00247 | 5 |
| AX-158416965 | 11 | 62.946 | KV452856.1 | 956616  | 5-scf00247 | 5 |
| AX-157826990 | 11 | 62.946 | KV452856.1 | 1421204 | 5-scf00247 | 5 |
| AX-158103962 | 11 | 62.946 | KV452856.1 | 1422806 | 5-scf00247 | 5 |
| AX-158103566 | 11 | 62.949 | KV452856.1 | 933004  | 5-scf00247 | 5 |
| AX-157773485 | 11 | 62.949 | KV452856.1 | 966743  | 5-scf00247 | 5 |
| AX-157826949 | 11 | 62.949 | KV452856.1 | 1001424 | 5-scf00247 | 5 |
| AX-158103592 | 11 | 62.954 | KV452856.1 | 973446  | 5-scf00247 | 5 |
| AX-158103561 | 11 | 62.955 | KV452856.1 | 925194  | 5-scf00247 | 5 |
| AX-158103599 | 11 | 62.955 | KV452856.1 | 988087  | 5-scf00247 | 5 |
| AX-158103849 | 11 | 62.955 | KV452856.1 | 1258153 | 5-scf00247 | 5 |
| AX-158103986 | 11 | 62.955 | KV452856.1 | 1456269 | 5-scf00247 | 5 |
| AX-158416977 | 11 | 62.955 | KV452856.1 | 1504254 | 5-scf00247 | 5 |
| AX-158103606 | 11 | 62.961 | KV452856.1 | 997209  | 5-scf00247 | 5 |
| AX-158103622 | 11 | 63.052 | KV452856.1 | 1019658 | 5-scf00247 | 5 |
| AX-158103552 | 11 | 63.141 | KV452856.1 | 912579  | 5-scf00247 | 5 |
| AX-157740668 | 11 | 63.141 | KV452856.1 | 1037080 | 5-scf00247 | 5 |
| AX-158103666 | 11 | 63.141 | KV452856.1 | 1053950 | 5-scf00247 | 5 |
| AX-158103669 | 11 | 63.228 | KV452856.1 | 1055391 | 5-scf00247 | 5 |
| AX-158384768 | 11 | 63.317 | KV452856.1 | 947144  | 5-scf00247 | 5 |
| AX-158103672 | 11 | 63.317 | KV452856.1 | 1060216 | 5-scf00247 | 5 |
| AX-158103680 | 11 | 63.317 | KV452856.1 | 1067695 | 5-scf00247 | 5 |
| AX-158103686 | 11 | 63.317 | KV452856.1 | 1074052 | 5-scf00247 | 5 |
| AX-157771734 | 11 | 63.317 | KV452856.1 | 1077166 | 5-scf00247 | 5 |
| AX-157826953 | 11 | 63.317 | KV452856.1 | 1103171 | 5-scf00247 | 5 |
| AX-158103824 | 11 | 63.317 | KV452856.1 | 1229705 | 5-scf00247 | 5 |
| AX-158103914 | 11 | 63.317 | KV452856.1 | 1349146 | 5-scf00247 | 5 |
| AX-158103600 | 11 | 63.407 | KV452856.1 | 988685  | 5-scf00247 | 5 |
| AX-158103623 | 11 | 63.407 | KV452856.1 | 1020730 | 5-scf00247 | 5 |
| AX-158103627 | 11 | 63.407 | KV452856.1 | 1023581 | 5-scf00247 | 5 |
| AX-158103655 | 11 | 63.407 | KV452856.1 | 1046166 | 5-scf00247 | 5 |
| AX-157877598 | 11 | 63.407 | KV452856.1 | 1053077 | 5-scf00247 | 5 |
| AX-158103678 | 11 | 63.407 | KV452856.1 | 1065593 | 5-scf00247 | 5 |
| AX-157826954 | 11 | 63.407 | KV452856.1 | 1107998 | 5-scf00247 | 5 |
| AX-158103717 | 11 | 63.407 | KV452856.1 | 1113728 | 5-scf00247 | 5 |
| AX-158103722 | 11 | 63.407 | KV452856.1 | 1126470 | 5-scf00247 | 5 |
| AX-157726273 | 11 | 63.407 | KV452856.1 | 1136857 | 5-scf00247 | 5 |
| AX-158103736 | 11 | 63.407 | KV452856.1 | 1139782 | 5-scf00247 | 5 |
| AX-158103764 | 11 | 63.407 | KV452856.1 | 1167266 | 5-scf00247 | 5 |
| AX-158103766 | 11 | 63.407 | KV452856.1 | 1167710 | 5-scf00247 | 5 |
| AX-157885854 | 11 | 63.407 | KV452856.1 | 1200473 | 5-scf00247 | 5 |
| AX-157826968 | 11 | 63.407 | KV452856.1 | 1237735 | 5-scf00247 | 5 |
| AX-158103883 | 11 | 63.407 | KV452856.1 | 1311497 | 5-scf00247 | 5 |

|              |    |        |            |         |            |   |
|--------------|----|--------|------------|---------|------------|---|
| AX-157826984 | 11 | 63.407 | KV452856.1 | 1352292 | 5-scf00247 | 5 |
| AX-158103971 | 11 | 63.407 | KV452856.1 | 1435672 | 5-scf00247 | 5 |
| AX-158104038 | 11 | 63.407 | KV452856.1 | 1522117 | 5-scf00247 | 5 |
| AX-158104059 | 11 | 63.407 | KV452856.1 | 1574993 | 5-scf00247 | 5 |
| AX-157827008 | 11 | 63.407 | KV452856.1 | 1593099 | 5-scf00247 | 5 |
| AX-158103685 | 11 | 63.497 | KV452856.1 | 1072865 | 5-scf00247 | 5 |
| AX-158103694 | 11 | 63.607 | KV452856.1 | 1084633 | 5-scf00247 | 5 |
| AX-158103707 | 11 | 64.009 | KV452856.1 | 1102549 | 5-scf00247 | 5 |
| AX-158103708 | 11 | 64.009 | KV452856.1 | 1102919 | 5-scf00247 | 5 |
| AX-158103709 | 11 | 64.009 | KV452856.1 | 1105388 | 5-scf00247 | 5 |
| AX-157756120 | 11 | 64.009 | KV452856.1 | 1122620 | 5-scf00247 | 5 |
| AX-158103733 | 11 | 64.009 | KV452856.1 | 1136975 | 5-scf00247 | 5 |
| AX-158103784 | 11 | 64.009 | KV452856.1 | 1185433 | 5-scf00247 | 5 |
| AX-158103791 | 11 | 64.009 | KV452856.1 | 1193367 | 5-scf00247 | 5 |
| AX-158103793 | 11 | 64.009 | KV452856.1 | 1195741 | 5-scf00247 | 5 |
| AX-157826962 | 11 | 64.009 | KV452856.1 | 1206891 | 5-scf00247 | 5 |
| AX-158103813 | 11 | 64.009 | KV452856.1 | 1217375 | 5-scf00247 | 5 |
| AX-158103589 | 11 | 64.019 | KV452856.1 | 971264  | 5-scf00247 | 5 |
| AX-157753760 | 11 | 64.019 | KV452856.1 | 971703  | 5-scf00247 | 5 |
| AX-158103640 | 11 | 64.019 | KV452856.1 | 1036996 | 5-scf00247 | 5 |
| AX-158103657 | 11 | 64.019 | KV452856.1 | 1047676 | 5-scf00247 | 5 |
| AX-157757195 | 11 | 64.019 | KV452856.1 | 1056645 | 5-scf00247 | 5 |
| AX-158103699 | 11 | 64.019 | KV452856.1 | 1093629 | 5-scf00247 | 5 |
| AX-157826973 | 11 | 64.019 | KV452856.1 | 1271461 | 5-scf00247 | 5 |
| AX-158103862 | 11 | 64.048 | KV452856.1 | 1282880 | 5-scf00247 | 5 |
| AX-158103869 | 11 | 64.063 | KV452856.1 | 1292020 | 5-scf00247 | 5 |
| AX-158103870 | 11 | 64.071 | KV452856.1 | 1292417 | 5-scf00247 | 5 |
| AX-158103671 | 11 | 64.078 | KV452856.1 | 1058935 | 5-scf00247 | 5 |
| AX-158103701 | 11 | 64.078 | KV452856.1 | 1096317 | 5-scf00247 | 5 |
| AX-157826951 | 11 | 64.078 | KV452856.1 | 1096919 | 5-scf00247 | 5 |
| AX-158103705 | 11 | 64.078 | KV452856.1 | 1100561 | 5-scf00247 | 5 |
| AX-158103706 | 11 | 64.078 | KV452856.1 | 1101389 | 5-scf00247 | 5 |
| AX-157774122 | 11 | 64.078 | KV452856.1 | 1101879 | 5-scf00247 | 5 |
| AX-158103711 | 11 | 64.078 | KV452856.1 | 1106718 | 5-scf00247 | 5 |
| AX-158103712 | 11 | 64.078 | KV452856.1 | 1107626 | 5-scf00247 | 5 |
| AX-158380056 | 11 | 64.078 | KV452856.1 | 1108629 | 5-scf00247 | 5 |
| AX-157826955 | 11 | 64.078 | KV452856.1 | 1108997 | 5-scf00247 | 5 |
| AX-158103716 | 11 | 64.078 | KV452856.1 | 1113068 | 5-scf00247 | 5 |
| AX-158103719 | 11 | 64.078 | KV452856.1 | 1115305 | 5-scf00247 | 5 |
| AX-158103720 | 11 | 64.078 | KV452856.1 | 1115677 | 5-scf00247 | 5 |
| AX-157749304 | 11 | 64.078 | KV452856.1 | 1119284 | 5-scf00247 | 5 |
| AX-158103723 | 11 | 64.078 | KV452856.1 | 1128569 | 5-scf00247 | 5 |
| AX-158103734 | 11 | 64.078 | KV452856.1 | 1137512 | 5-scf00247 | 5 |
| AX-158103737 | 11 | 64.078 | KV452856.1 | 1140559 | 5-scf00247 | 5 |
| AX-158103891 | 11 | 64.078 | KV452856.1 | 1324764 | 5-scf00247 | 5 |
| AX-157826986 | 11 | 64.078 | KV452856.1 | 1363239 | 5-scf00247 | 5 |
| AX-158103926 | 11 | 64.078 | KV452856.1 | 1368864 | 5-scf00247 | 5 |
| AX-158103930 | 11 | 64.078 | KV452856.1 | 1373559 | 5-scf00247 | 5 |
| AX-157827005 | 11 | 64.078 | KV452856.1 | 1507948 | 5-scf00247 | 5 |
| AX-158103643 | 11 | 64.081 | KV452856.1 | 1040249 | 5-scf00247 | 5 |
| AX-158103872 | 11 | 64.081 | KV452856.1 | 1295608 | 5-scf00247 | 5 |

|              |    |        |            |          |            |   |
|--------------|----|--------|------------|----------|------------|---|
| AX-158103938 | 11 | 64.081 | KV452856.1 | 1392062  | 5-scf00247 | 5 |
| AX-158104070 | 11 | 64.081 | KV452856.1 | 1587234  | 5-scf00247 | 5 |
| AX-158103960 | 11 | 64.086 | KV452856.1 | 1417698  | 5-scf00247 | 5 |
| AX-157865942 | 11 | 64.094 | KV452856.1 | 1430137  | 5-scf00247 | 5 |
| AX-158104503 | 11 | 64.094 | KV452856.1 | 2212415  | 5-scf00247 | 5 |
| AX-158103972 | 11 | 64.099 | KV452856.1 | 1436525  | 5-scf00247 | 5 |
| AX-158103975 | 11 | 64.099 | KV452856.1 | 1438762  | 5-scf00247 | 5 |
| AX-158103976 | 11 | 64.099 | KV452856.1 | 1439239  | 5-scf00247 | 5 |
| AX-158103977 | 11 | 64.099 | KV452856.1 | 1439519  | 5-scf00247 | 5 |
| AX-158392244 | 11 | 64.099 | KV452856.1 | 1477543  | 5-scf00247 | 5 |
| AX-158104024 | 11 | 64.099 | KV452856.1 | 1507905  | 5-scf00247 | 5 |
| AX-157826992 | 11 | 64.104 | KV452856.1 | 1450835  | 5-scf00247 | 5 |
| AX-158103682 | 11 | 64.105 | KV452856.1 | 1069078  | 5-scf00247 | 5 |
| AX-158103713 | 11 | 64.105 | KV452856.1 | 1108477  | 5-scf00247 | 5 |
| AX-157826959 | 11 | 64.105 | KV452856.1 | 1160830  | 5-scf00247 | 5 |
| AX-158103834 | 11 | 64.105 | KV452856.1 | 1245208  | 5-scf00247 | 5 |
| AX-158103837 | 11 | 64.105 | KV452856.1 | 1247627  | 5-scf00247 | 5 |
| AX-158103884 | 11 | 64.105 | KV452856.1 | 1315512  | 5-scf00247 | 5 |
| AX-158103991 | 11 | 64.105 | KV452856.1 | 1462549  | 5-scf00247 | 5 |
| AX-158410456 | 11 | 64.107 | KV452856.1 | 1463475  | 5-scf00247 | 5 |
| AX-158103994 | 11 | 64.114 | KV452856.1 | 1476202  | 5-scf00247 | 5 |
| AX-158103382 | 11 | 64.12  | KV452856.1 | 672400   | 5-scf00247 | 5 |
| AX-158103383 | 11 | 64.12  | KV452856.1 | 673535   | 5-scf00247 | 5 |
| AX-158103385 | 11 | 64.12  | KV452856.1 | 675029   | 5-scf00247 | 5 |
| AX-158103440 | 11 | 64.12  | KV452856.1 | 746339   | 5-scf00247 | 5 |
| AX-158103796 | 11 | 64.12  | KV452856.1 | 1202041  | 5-scf00247 | 5 |
| AX-157826983 | 11 | 64.12  | KV452856.1 | 1346126  | 5-scf00247 | 5 |
| AX-157720483 | 11 | 64.12  | KV452856.1 | 1485356  | 5-scf00247 | 5 |
| AX-157773517 | 11 | 64.12  | KV452856.1 | 1488032  | 5-scf00247 | 5 |
| AX-158104005 | 11 | 64.12  | KV452856.1 | 1488497  | 5-scf00247 | 5 |
| AX-158104006 | 11 | 64.12  | KV452856.1 | 1489144  | 5-scf00247 | 5 |
| AX-158104007 | 11 | 64.12  | KV452856.1 | 1490877  | 5-scf00247 | 5 |
| AX-157827000 | 11 | 64.12  | KV452856.1 | 1498122  | 5-scf00247 | 5 |
| AX-157827001 | 11 | 64.12  | KV452856.1 | 1498652  | 5-scf00247 | 5 |
| AX-158104012 | 11 | 64.12  | KV452856.1 | 1499193  | 5-scf00247 | 5 |
| AX-158104013 | 11 | 64.12  | KV452856.1 | 1499357  | 5-scf00247 | 5 |
| AX-158104151 | 11 | 64.12  | KV452856.1 | 1691669  | 5-scf00247 | 5 |
| AX-157722421 | 11 | 64.12  | KV452856.1 | 1774483  | 5-scf00247 | 5 |
| AX-158104216 | 11 | 64.12  | KV452856.1 | 1785541  | 5-scf00247 | 5 |
| AX-158104231 | 11 | 64.12  | KV452856.1 | 1809732  | 5-scf00247 | 5 |
| AX-158104398 | 11 | 64.12  | KV452856.1 | 2072521  | 5-scf00247 | 5 |
| AX-158104404 | 11 | 64.12  | KV452856.1 | 2080214  | 5-scf00247 | 5 |
| AX-158104409 | 11 | 64.12  | KV452856.1 | 2085367  | 5-scf00247 | 5 |
| AX-158104413 | 11 | 64.12  | KV452856.1 | 2090737  | 5-scf00247 | 5 |
| AX-157711291 | 11 | 64.12  | KV452863.1 | 11001713 | 5-scf00249 | 5 |
| AX-158104015 | 11 | 64.15  | KV452856.1 | 1500740  | 5-scf00247 | 5 |
| AX-158104020 | 11 | 64.165 | KV452856.1 | 1505823  | 5-scf00247 | 5 |
| AX-158104028 | 11 | 64.198 | KV452856.1 | 1512382  | 5-scf00247 | 5 |
| AX-158104036 | 11 | 64.231 | KV452856.1 | 1520475  | 5-scf00247 | 5 |
| AX-158104041 | 11 | 64.231 | KV452856.1 | 1523592  | 5-scf00247 | 5 |
| AX-158103840 | 11 | 64.259 | KV452856.1 | 1249622  | 5-scf00247 | 5 |

|              |    |        |            |         |            |   |
|--------------|----|--------|------------|---------|------------|---|
| AX-158104045 | 11 | 64.259 | KV452856.1 | 1527388 | 5-scf00247 | 5 |
| AX-158103124 | 11 | 64.341 | KV452856.1 | 301626  | 5-scf00247 | 5 |
| AX-158103159 | 11 | 64.341 | KV452856.1 | 346600  | 5-scf00247 | 5 |
| AX-157826899 | 11 | 64.341 | KV452856.1 | 488197  | 5-scf00247 | 5 |
| AX-158103247 | 11 | 64.341 | KV452856.1 | 496544  | 5-scf00247 | 5 |
| AX-158103249 | 11 | 64.341 | KV452856.1 | 498510  | 5-scf00247 | 5 |
| AX-158103251 | 11 | 64.341 | KV452856.1 | 499612  | 5-scf00247 | 5 |
| AX-157857403 | 11 | 64.341 | KV452856.1 | 500493  | 5-scf00247 | 5 |
| AX-157826903 | 11 | 64.341 | KV452856.1 | 529563  | 5-scf00247 | 5 |
| AX-158103336 | 11 | 64.341 | KV452856.1 | 623060  | 5-scf00247 | 5 |
| AX-158103380 | 11 | 64.341 | KV452856.1 | 670550  | 5-scf00247 | 5 |
| AX-158103409 | 11 | 64.341 | KV452856.1 | 703184  | 5-scf00247 | 5 |
| AX-158103689 | 11 | 64.341 | KV452856.1 | 1081327 | 5-scf00247 | 5 |
| AX-158103757 | 11 | 64.341 | KV452856.1 | 1163543 | 5-scf00247 | 5 |
| AX-157757132 | 11 | 64.341 | KV452856.1 | 1174073 | 5-scf00247 | 5 |
| AX-158103788 | 11 | 64.341 | KV452856.1 | 1189308 | 5-scf00247 | 5 |
| AX-157826976 | 11 | 64.341 | KV452856.1 | 1291784 | 5-scf00247 | 5 |
| AX-158103985 | 11 | 64.341 | KV452856.1 | 1454241 | 5-scf00247 | 5 |
| AX-158104034 | 11 | 64.341 | KV452856.1 | 1519195 | 5-scf00247 | 5 |
| AX-158380058 | 11 | 64.341 | KV452856.1 | 1526561 | 5-scf00247 | 5 |
| AX-158104044 | 11 | 64.341 | KV452856.1 | 1526781 | 5-scf00247 | 5 |
| AX-158104053 | 11 | 64.341 | KV452856.1 | 1568074 | 5-scf00247 | 5 |
| AX-158104055 | 11 | 64.341 | KV452856.1 | 1570872 | 5-scf00247 | 5 |
| AX-158104064 | 11 | 64.341 | KV452856.1 | 1583272 | 5-scf00247 | 5 |
| AX-158104068 | 11 | 64.341 | KV452856.1 | 1585824 | 5-scf00247 | 5 |
| AX-158104071 | 11 | 64.341 | KV452856.1 | 1592595 | 5-scf00247 | 5 |
| AX-157827009 | 11 | 64.341 | KV452856.1 | 1593581 | 5-scf00247 | 5 |
| AX-158104073 | 11 | 64.341 | KV452856.1 | 1595596 | 5-scf00247 | 5 |
| AX-158104077 | 11 | 64.341 | KV452856.1 | 1599529 | 5-scf00247 | 5 |
| AX-158104079 | 11 | 64.341 | KV452856.1 | 1601084 | 5-scf00247 | 5 |
| AX-158104080 | 11 | 64.341 | KV452856.1 | 1601535 | 5-scf00247 | 5 |
| AX-158104081 | 11 | 64.341 | KV452856.1 | 1601936 | 5-scf00247 | 5 |
| AX-158104082 | 11 | 64.341 | KV452856.1 | 1603958 | 5-scf00247 | 5 |
| AX-158104083 | 11 | 64.341 | KV452856.1 | 1604820 | 5-scf00247 | 5 |
| AX-158104085 | 11 | 64.341 | KV452856.1 | 1606173 | 5-scf00247 | 5 |
| AX-157827010 | 11 | 64.341 | KV452856.1 | 1607457 | 5-scf00247 | 5 |
| AX-158104089 | 11 | 64.341 | KV452856.1 | 1613697 | 5-scf00247 | 5 |
| AX-158104090 | 11 | 64.341 | KV452856.1 | 1614878 | 5-scf00247 | 5 |
| AX-158104091 | 11 | 64.341 | KV452856.1 | 1618042 | 5-scf00247 | 5 |
| AX-157827011 | 11 | 64.341 | KV452856.1 | 1619420 | 5-scf00247 | 5 |
| AX-157827013 | 11 | 64.341 | KV452856.1 | 1628216 | 5-scf00247 | 5 |
| AX-157701568 | 11 | 64.341 | KV452856.1 | 1628822 | 5-scf00247 | 5 |
| AX-157708841 | 11 | 64.341 | KV452856.1 | 1662647 | 5-scf00247 | 5 |
| AX-158104135 | 11 | 64.341 | KV452856.1 | 1675838 | 5-scf00247 | 5 |
| AX-158104136 | 11 | 64.341 | KV452856.1 | 1678115 | 5-scf00247 | 5 |
| AX-158104139 | 11 | 64.341 | KV452856.1 | 1680032 | 5-scf00247 | 5 |
| AX-158104141 | 11 | 64.341 | KV452856.1 | 1683316 | 5-scf00247 | 5 |
| AX-158104180 | 11 | 64.341 | KV452856.1 | 1738909 | 5-scf00247 | 5 |
| AX-158104218 | 11 | 64.341 | KV452856.1 | 1789669 | 5-scf00247 | 5 |
| AX-158104239 | 11 | 64.341 | KV452856.1 | 1820286 | 5-scf00247 | 5 |
| AX-157827039 | 11 | 64.341 | KV452856.1 | 1864053 | 5-scf00247 | 5 |

|              |    |        |            |         |            |   |
|--------------|----|--------|------------|---------|------------|---|
| AX-157827058 | 11 | 64.341 | KV452856.1 | 2110356 | 5-scf00247 | 5 |
| AX-158103140 | 11 | 64.451 | KV452856.1 | 322361  | 5-scf00247 | 5 |
| AX-158103149 | 11 | 64.451 | KV452856.1 | 331492  | 5-scf00247 | 5 |
| AX-158103180 | 11 | 64.451 | KV452856.1 | 373803  | 5-scf00247 | 5 |
| AX-158103293 | 11 | 64.451 | KV452856.1 | 546923  | 5-scf00247 | 5 |
| AX-158103301 | 11 | 64.451 | KV452856.1 | 571415  | 5-scf00247 | 5 |
| AX-157773038 | 11 | 64.451 | KV452856.1 | 681610  | 5-scf00247 | 5 |
| AX-158103413 | 11 | 64.451 | KV452856.1 | 708467  | 5-scf00247 | 5 |
| AX-158103435 | 11 | 64.451 | KV452856.1 | 738997  | 5-scf00247 | 5 |
| AX-158103464 | 11 | 64.451 | KV452856.1 | 797658  | 5-scf00247 | 5 |
| AX-158103510 | 11 | 64.451 | KV452856.1 | 854444  | 5-scf00247 | 5 |
| AX-158103516 | 11 | 64.451 | KV452856.1 | 867998  | 5-scf00247 | 5 |
| AX-158103546 | 11 | 64.451 | KV452856.1 | 903686  | 5-scf00247 | 5 |
| AX-158103687 | 11 | 64.451 | KV452856.1 | 1076338 | 5-scf00247 | 5 |
| AX-158103740 | 11 | 64.451 | KV452856.1 | 1145559 | 5-scf00247 | 5 |
| AX-158103802 | 11 | 64.451 | KV452856.1 | 1209245 | 5-scf00247 | 5 |
| AX-157772246 | 11 | 64.451 | KV452856.1 | 1227919 | 5-scf00247 | 5 |
| AX-158103908 | 11 | 64.451 | KV452856.1 | 1341331 | 5-scf00247 | 5 |
| AX-158104009 | 11 | 64.451 | KV452856.1 | 1492787 | 5-scf00247 | 5 |
| AX-157694446 | 11 | 64.451 | KV452856.1 | 1613078 | 5-scf00247 | 5 |
| AX-157827012 | 11 | 64.451 | KV452856.1 | 1619965 | 5-scf00247 | 5 |
| AX-158104094 | 11 | 64.451 | KV452856.1 | 1622025 | 5-scf00247 | 5 |
| AX-158104099 | 11 | 64.451 | KV452856.1 | 1628165 | 5-scf00247 | 5 |
| AX-158104104 | 11 | 64.451 | KV452856.1 | 1640351 | 5-scf00247 | 5 |
| AX-158104111 | 11 | 64.451 | KV452856.1 | 1646593 | 5-scf00247 | 5 |
| AX-157744831 | 11 | 64.451 | KV452856.1 | 1648487 | 5-scf00247 | 5 |
| AX-158104114 | 11 | 64.451 | KV452856.1 | 1650050 | 5-scf00247 | 5 |
| AX-157771464 | 11 | 64.451 | KV452856.1 | 1651565 | 5-scf00247 | 5 |
| AX-158104116 | 11 | 64.451 | KV452856.1 | 1651909 | 5-scf00247 | 5 |
| AX-158104124 | 11 | 64.451 | KV452856.1 | 1665307 | 5-scf00247 | 5 |
| AX-158104127 | 11 | 64.451 | KV452856.1 | 1666647 | 5-scf00247 | 5 |
| AX-158104140 | 11 | 64.451 | KV452856.1 | 1681586 | 5-scf00247 | 5 |
| AX-158104154 | 11 | 64.451 | KV452856.1 | 1696076 | 5-scf00247 | 5 |
| AX-158104172 | 11 | 64.451 | KV452856.1 | 1726791 | 5-scf00247 | 5 |
| AX-158104498 | 11 | 64.451 | KV452856.1 | 2207737 | 5-scf00247 | 5 |
| AX-158104125 | 11 | 64.462 | KV452856.1 | 1665830 | 5-scf00247 | 5 |
| AX-158104131 | 11 | 64.488 | KV452856.1 | 1671631 | 5-scf00247 | 5 |
| AX-157827014 | 11 | 64.526 | KV452856.1 | 1680878 | 5-scf00247 | 5 |
| AX-158103473 | 11 | 64.561 | KV452856.1 | 811398  | 5-scf00247 | 5 |
| AX-158103681 | 11 | 64.561 | KV452856.1 | 1068701 | 5-scf00247 | 5 |
| AX-157725534 | 11 | 64.561 | KV452856.1 | 1197162 | 5-scf00247 | 5 |
| AX-157726957 | 11 | 64.561 | KV452856.1 | 1199254 | 5-scf00247 | 5 |
| AX-158103839 | 11 | 64.561 | KV452856.1 | 1249115 | 5-scf00247 | 5 |
| AX-158104087 | 11 | 64.561 | KV452856.1 | 1608699 | 5-scf00247 | 5 |
| AX-158104088 | 11 | 64.561 | KV452856.1 | 1611778 | 5-scf00247 | 5 |
| AX-157714913 | 11 | 64.561 | KV452856.1 | 1618764 | 5-scf00247 | 5 |
| AX-158104096 | 11 | 64.561 | KV452856.1 | 1625600 | 5-scf00247 | 5 |
| AX-157710408 | 11 | 64.561 | KV452856.1 | 1636744 | 5-scf00247 | 5 |
| AX-158104103 | 11 | 64.561 | KV452856.1 | 1639898 | 5-scf00247 | 5 |
| AX-157871000 | 11 | 64.561 | KV452856.1 | 1646156 | 5-scf00247 | 5 |
| AX-158104115 | 11 | 64.561 | KV452856.1 | 1651108 | 5-scf00247 | 5 |

|              |    |        |            |          |            |   |
|--------------|----|--------|------------|----------|------------|---|
| AX-157773852 | 11 | 64.561 | KV452856.1 | 1675269  | 5-scf00247 | 5 |
| AX-158104146 | 11 | 64.561 | KV452856.1 | 1688099  | 5-scf00247 | 5 |
| AX-158104147 | 11 | 64.561 | KV452856.1 | 1688569  | 5-scf00247 | 5 |
| AX-158104149 | 11 | 64.561 | KV452856.1 | 1691049  | 5-scf00247 | 5 |
| AX-157722375 | 11 | 64.561 | KV452856.1 | 1703148  | 5-scf00247 | 5 |
| AX-157717689 | 11 | 64.561 | KV452856.1 | 1706196  | 5-scf00247 | 5 |
| AX-157827016 | 11 | 64.561 | KV452856.1 | 1709342  | 5-scf00247 | 5 |
| AX-158104162 | 11 | 64.561 | KV452856.1 | 1710326  | 5-scf00247 | 5 |
| AX-158104171 | 11 | 64.561 | KV452856.1 | 1724305  | 5-scf00247 | 5 |
| AX-158104240 | 11 | 64.561 | KV452856.1 | 1820542  | 5-scf00247 | 5 |
| AX-158107388 | 11 | 64.561 | KV452863.1 | 5252598  | 5-scf00249 | 5 |
| AX-158109767 | 11 | 64.561 | KV452863.1 | 9070793  | 5-scf00249 | 5 |
| AX-158109790 | 11 | 64.561 | KV452863.1 | 9104880  | 5-scf00249 | 5 |
| AX-158109834 | 11 | 64.561 | KV452863.1 | 9170354  | 5-scf00249 | 5 |
| AX-158109839 | 11 | 64.561 | KV452863.1 | 9176143  | 5-scf00249 | 5 |
| AX-158109887 | 11 | 64.561 | KV452863.1 | 9260983  | 5-scf00249 | 5 |
| AX-158109935 | 11 | 64.561 | KV452863.1 | 9376328  | 5-scf00249 | 5 |
| AX-157709925 | 11 | 64.561 | KV452863.1 | 10094553 | 5-scf00249 | 5 |
| AX-157827805 | 11 | 64.561 | KV452863.1 | 10787837 | 5-scf00249 | 5 |
| AX-157771474 | 11 | 64.561 | KV452863.1 | 10799578 | 5-scf00249 | 5 |
| AX-158103250 | 11 | 64.671 | KV452856.1 | 499186   | 5-scf00247 | 5 |
| AX-158103583 | 11 | 64.671 | KV452856.1 | 961421   | 5-scf00247 | 5 |
| AX-157826946 | 11 | 64.671 | KV452856.1 | 964161   | 5-scf00247 | 5 |
| AX-158104054 | 11 | 64.671 | KV452856.1 | 1568625  | 5-scf00247 | 5 |
| AX-157827019 | 11 | 64.671 | KV452856.1 | 1735198  | 5-scf00247 | 5 |
| AX-158104177 | 11 | 64.671 | KV452856.1 | 1737445  | 5-scf00247 | 5 |
| AX-158104189 | 11 | 64.671 | KV452856.1 | 1752667  | 5-scf00247 | 5 |
| AX-158104190 | 11 | 64.671 | KV452856.1 | 1753116  | 5-scf00247 | 5 |
| AX-157827025 | 11 | 64.671 | KV452856.1 | 1756755  | 5-scf00247 | 5 |
| AX-158104195 | 11 | 64.671 | KV452856.1 | 1758297  | 5-scf00247 | 5 |
| AX-158104200 | 11 | 64.671 | KV452856.1 | 1760997  | 5-scf00247 | 5 |
| AX-157774686 | 11 | 64.671 | KV452856.1 | 1762597  | 5-scf00247 | 5 |
| AX-158407462 | 11 | 64.671 | KV452856.1 | 1765747  | 5-scf00247 | 5 |
| AX-158104369 | 11 | 64.671 | KV452856.1 | 2026839  | 5-scf00247 | 5 |
| AX-158104204 | 11 | 64.782 | KV452856.1 | 1768900  | 5-scf00247 | 5 |
| AX-158403493 | 11 | 64.892 | KV452856.1 | 664176   | 5-scf00247 | 5 |
| AX-158103541 | 11 | 64.892 | KV452856.1 | 894732   | 5-scf00247 | 5 |
| AX-158103565 | 11 | 64.892 | KV452856.1 | 932172   | 5-scf00247 | 5 |
| AX-158103585 | 11 | 64.892 | KV452856.1 | 962950   | 5-scf00247 | 5 |
| AX-158103593 | 11 | 64.892 | KV452856.1 | 976174   | 5-scf00247 | 5 |
| AX-158103610 | 11 | 64.892 | KV452856.1 | 999360   | 5-scf00247 | 5 |
| AX-158103619 | 11 | 64.892 | KV452856.1 | 1016485  | 5-scf00247 | 5 |
| AX-158103624 | 11 | 64.892 | KV452856.1 | 1021151  | 5-scf00247 | 5 |
| AX-158103631 | 11 | 64.892 | KV452856.1 | 1027349  | 5-scf00247 | 5 |
| AX-158103721 | 11 | 64.892 | KV452856.1 | 1123456  | 5-scf00247 | 5 |
| AX-158103732 | 11 | 64.892 | KV452856.1 | 1136640  | 5-scf00247 | 5 |
| AX-158103748 | 11 | 64.892 | KV452856.1 | 1155296  | 5-scf00247 | 5 |
| AX-157746654 | 11 | 64.892 | KV452856.1 | 1176645  | 5-scf00247 | 5 |
| AX-158103858 | 11 | 64.892 | KV452856.1 | 1274494  | 5-scf00247 | 5 |
| AX-158103867 | 11 | 64.892 | KV452856.1 | 1286605  | 5-scf00247 | 5 |
| AX-158103916 | 11 | 64.892 | KV452856.1 | 1350783  | 5-scf00247 | 5 |

|              |    |        |            |         |            |   |
|--------------|----|--------|------------|---------|------------|---|
| AX-158103974 | 11 | 64.892 | KV452856.1 | 1438643 | 5-scf00247 | 5 |
| AX-158103979 | 11 | 64.892 | KV452856.1 | 1443668 | 5-scf00247 | 5 |
| AX-158103984 | 11 | 64.892 | KV452856.1 | 1447469 | 5-scf00247 | 5 |
| AX-157717631 | 11 | 64.892 | KV452856.1 | 1450501 | 5-scf00247 | 5 |
| AX-158103999 | 11 | 64.892 | KV452856.1 | 1480687 | 5-scf00247 | 5 |
| AX-158104000 | 11 | 64.892 | KV452856.1 | 1481721 | 5-scf00247 | 5 |
| AX-157716689 | 11 | 64.892 | KV452856.1 | 1484718 | 5-scf00247 | 5 |
| AX-158104050 | 11 | 64.892 | KV452856.1 | 1559309 | 5-scf00247 | 5 |
| AX-158104051 | 11 | 64.892 | KV452856.1 | 1560255 | 5-scf00247 | 5 |
| AX-158104056 | 11 | 64.892 | KV452856.1 | 1571997 | 5-scf00247 | 5 |
| AX-158104057 | 11 | 64.892 | KV452856.1 | 1573770 | 5-scf00247 | 5 |
| AX-158104100 | 11 | 64.892 | KV452856.1 | 1634825 | 5-scf00247 | 5 |
| AX-158104112 | 11 | 64.892 | KV452856.1 | 1646833 | 5-scf00247 | 5 |
| AX-158104128 | 11 | 64.892 | KV452856.1 | 1668950 | 5-scf00247 | 5 |
| AX-158104145 | 11 | 64.892 | KV452856.1 | 1687867 | 5-scf00247 | 5 |
| AX-158104165 | 11 | 64.892 | KV452856.1 | 1713304 | 5-scf00247 | 5 |
| AX-158104188 | 11 | 64.892 | KV452856.1 | 1752454 | 5-scf00247 | 5 |
| AX-158104206 | 11 | 64.892 | KV452856.1 | 1771318 | 5-scf00247 | 5 |
| AX-158104208 | 11 | 64.892 | KV452856.1 | 1774419 | 5-scf00247 | 5 |
| AX-158104209 | 11 | 64.892 | KV452856.1 | 1775802 | 5-scf00247 | 5 |
| AX-158104210 | 11 | 64.892 | KV452856.1 | 1776357 | 5-scf00247 | 5 |
| AX-158104211 | 11 | 64.892 | KV452856.1 | 1777433 | 5-scf00247 | 5 |
| AX-157722536 | 11 | 64.892 | KV452856.1 | 1778422 | 5-scf00247 | 5 |
| AX-158104215 | 11 | 64.892 | KV452856.1 | 1784925 | 5-scf00247 | 5 |
| AX-158104222 | 11 | 64.892 | KV452856.1 | 1794721 | 5-scf00247 | 5 |
| AX-158104223 | 11 | 64.892 | KV452856.1 | 1795240 | 5-scf00247 | 5 |
| AX-157721506 | 11 | 64.892 | KV452856.1 | 1795872 | 5-scf00247 | 5 |
| AX-157885855 | 11 | 64.892 | KV452856.1 | 1798991 | 5-scf00247 | 5 |
| AX-158104224 | 11 | 64.892 | KV452856.1 | 1800638 | 5-scf00247 | 5 |
| AX-158104225 | 11 | 64.892 | KV452856.1 | 1802147 | 5-scf00247 | 5 |
| AX-158104229 | 11 | 64.892 | KV452856.1 | 1808926 | 5-scf00247 | 5 |
| AX-158104232 | 11 | 64.892 | KV452856.1 | 1810414 | 5-scf00247 | 5 |
| AX-158104233 | 11 | 64.892 | KV452856.1 | 1810577 | 5-scf00247 | 5 |
| AX-158104235 | 11 | 64.892 | KV452856.1 | 1813992 | 5-scf00247 | 5 |
| AX-158104237 | 11 | 64.892 | KV452856.1 | 1816890 | 5-scf00247 | 5 |
| AX-158104238 | 11 | 64.892 | KV452856.1 | 1817381 | 5-scf00247 | 5 |
| AX-158104251 | 11 | 64.892 | KV452856.1 | 1830376 | 5-scf00247 | 5 |
| AX-158410463 | 11 | 64.892 | KV452856.1 | 1833804 | 5-scf00247 | 5 |
| AX-158104254 | 11 | 64.892 | KV452856.1 | 1834367 | 5-scf00247 | 5 |
| AX-157827032 | 11 | 64.892 | KV452856.1 | 1834677 | 5-scf00247 | 5 |
| AX-158104256 | 11 | 64.892 | KV452856.1 | 1838196 | 5-scf00247 | 5 |
| AX-158104257 | 11 | 64.892 | KV452856.1 | 1840470 | 5-scf00247 | 5 |
| AX-158104260 | 11 | 64.892 | KV452856.1 | 1844298 | 5-scf00247 | 5 |
| AX-158104261 | 11 | 64.892 | KV452856.1 | 1848037 | 5-scf00247 | 5 |
| AX-157827037 | 11 | 64.892 | KV452856.1 | 1848335 | 5-scf00247 | 5 |
| AX-158104262 | 11 | 64.892 | KV452856.1 | 1848708 | 5-scf00247 | 5 |
| AX-158104263 | 11 | 64.892 | KV452856.1 | 1849865 | 5-scf00247 | 5 |
| AX-157718035 | 11 | 64.892 | KV452856.1 | 1857568 | 5-scf00247 | 5 |
| AX-157774600 | 11 | 64.892 | KV452856.1 | 1858797 | 5-scf00247 | 5 |
| AX-158104268 | 11 | 64.892 | KV452856.1 | 1860178 | 5-scf00247 | 5 |
| AX-158104276 | 11 | 64.892 | KV452856.1 | 1883456 | 5-scf00247 | 5 |



|              |    |        |            |          |            |   |
|--------------|----|--------|------------|----------|------------|---|
| AX-158104278 | 11 | 64.892 | KV452856.1 | 1885789  | 5-scf00247 | 5 |
| AX-158104279 | 11 | 64.892 | KV452856.1 | 1887247  | 5-scf00247 | 5 |
| AX-158104280 | 11 | 64.892 | KV452856.1 | 1888017  | 5-scf00247 | 5 |
| AX-158104282 | 11 | 64.892 | KV452856.1 | 1890046  | 5-scf00247 | 5 |
| AX-158104284 | 11 | 64.892 | KV452856.1 | 1892111  | 5-scf00247 | 5 |
| AX-157827043 | 11 | 64.892 | KV452856.1 | 1896948  | 5-scf00247 | 5 |
| AX-158104289 | 11 | 64.892 | KV452856.1 | 1901103  | 5-scf00247 | 5 |
| AX-157747719 | 11 | 64.892 | KV452856.1 | 1919092  | 5-scf00247 | 5 |
| AX-158104299 | 11 | 64.892 | KV452856.1 | 1919959  | 5-scf00247 | 5 |
| AX-158104302 | 11 | 64.892 | KV452856.1 | 1923446  | 5-scf00247 | 5 |
| AX-157827045 | 11 | 64.892 | KV452856.1 | 1926722  | 5-scf00247 | 5 |
| AX-157739068 | 11 | 64.892 | KV452856.1 | 1937459  | 5-scf00247 | 5 |
| AX-158104312 | 11 | 64.892 | KV452856.1 | 1943782  | 5-scf00247 | 5 |
| AX-158104314 | 11 | 64.892 | KV452856.1 | 1947560  | 5-scf00247 | 5 |
| AX-158104317 | 11 | 64.892 | KV452856.1 | 1949366  | 5-scf00247 | 5 |
| AX-158104327 | 11 | 64.892 | KV452856.1 | 1957495  | 5-scf00247 | 5 |
| AX-158104334 | 11 | 64.892 | KV452856.1 | 1971055  | 5-scf00247 | 5 |
| AX-158104339 | 11 | 64.892 | KV452856.1 | 1977522  | 5-scf00247 | 5 |
| AX-158104356 | 11 | 64.892 | KV452856.1 | 2009205  | 5-scf00247 | 5 |
| AX-158104357 | 11 | 64.892 | KV452856.1 | 2010002  | 5-scf00247 | 5 |
| AX-158104370 | 11 | 64.892 | KV452856.1 | 2028736  | 5-scf00247 | 5 |
| AX-158104371 | 11 | 64.892 | KV452856.1 | 2031352  | 5-scf00247 | 5 |
| AX-158104396 | 11 | 64.892 | KV452856.1 | 2071380  | 5-scf00247 | 5 |
| AX-158104467 | 11 | 64.892 | KV452856.1 | 2168565  | 5-scf00247 | 5 |
| AX-157827073 | 11 | 64.892 | KV452856.1 | 2324145  | 5-scf00247 | 5 |
| AX-158104626 | 11 | 64.892 | KV452856.1 | 2414182  | 5-scf00247 | 5 |
| AX-158104847 | 11 | 64.892 | KV452856.1 | 2731803  | 5-scf00247 | 5 |
| AX-157725297 | 11 | 64.892 | KV452863.1 | 1825321  | 5-scf00249 | 5 |
| AX-158105446 | 11 | 64.892 | KV452863.1 | 1826616  | 5-scf00249 | 5 |
| AX-158105460 | 11 | 64.892 | KV452863.1 | 1883590  | 5-scf00249 | 5 |
| AX-158107974 | 11 | 64.892 | KV452863.1 | 6059303  | 5-scf00249 | 5 |
| AX-158108041 | 11 | 64.892 | KV452863.1 | 6152210  | 5-scf00249 | 5 |
| AX-158108218 | 11 | 64.892 | KV452863.1 | 6453103  | 5-scf00249 | 5 |
| AX-158108219 | 11 | 64.892 | KV452863.1 | 6454132  | 5-scf00249 | 5 |
| AX-158108532 | 11 | 64.892 | KV452863.1 | 6966336  | 5-scf00249 | 5 |
| AX-158108607 | 11 | 64.892 | KV452863.1 | 7056126  | 5-scf00249 | 5 |
| AX-158110262 | 11 | 64.892 | KV452863.1 | 10152496 | 5-scf00249 | 5 |
| AX-158104337 | 11 | 64.921 | KV452856.1 | 1973657  | 5-scf00247 | 5 |
| AX-158104341 | 11 | 65.002 | KV452856.1 | 1980474  | 5-scf00247 | 5 |
| AX-158104345 | 11 | 65.002 | KV452856.1 | 1983888  | 5-scf00247 | 5 |
| AX-158104346 | 11 | 65.002 | KV452856.1 | 1985555  | 5-scf00247 | 5 |
| AX-158104355 | 11 | 65.002 | KV452856.1 | 2003644  | 5-scf00247 | 5 |
| AX-157827051 | 11 | 65.002 | KV452856.1 | 2003828  | 5-scf00247 | 5 |
| AX-158104359 | 11 | 65.002 | KV452856.1 | 2013952  | 5-scf00247 | 5 |
| AX-157827053 | 11 | 65.002 | KV452856.1 | 2019280  | 5-scf00247 | 5 |
| AX-158104362 | 11 | 65.002 | KV452856.1 | 2019789  | 5-scf00247 | 5 |
| AX-158104363 | 11 | 65.002 | KV452856.1 | 2020561  | 5-scf00247 | 5 |
| AX-158104365 | 11 | 65.002 | KV452856.1 | 2022056  | 5-scf00247 | 5 |
| AX-158104366 | 11 | 65.002 | KV452856.1 | 2022273  | 5-scf00247 | 5 |
| AX-158104368 | 11 | 65.002 | KV452856.1 | 2026351  | 5-scf00247 | 5 |
| AX-157748114 | 11 | 65.002 | KV452856.1 | 2029473  | 5-scf00247 | 5 |

|              |    |        |            |         |            |   |
|--------------|----|--------|------------|---------|------------|---|
| AX-158104373 | 11 | 65.002 | KV452856.1 | 2033106 | 5-scf00247 | 5 |
| AX-158104375 | 11 | 65.002 | KV452856.1 | 2034274 | 5-scf00247 | 5 |
| AX-158104380 | 11 | 65.002 | KV452856.1 | 2044371 | 5-scf00247 | 5 |
| AX-158104382 | 11 | 65.002 | KV452856.1 | 2049628 | 5-scf00247 | 5 |
| AX-158104459 | 11 | 65.002 | KV452856.1 | 2152221 | 5-scf00247 | 5 |
| AX-158103590 | 11 | 65.111 | KV452856.1 | 971806  | 5-scf00247 | 5 |
| AX-158104315 | 11 | 65.111 | KV452856.1 | 1947883 | 5-scf00247 | 5 |
| AX-158104397 | 11 | 65.111 | KV452856.1 | 2072058 | 5-scf00247 | 5 |
| AX-158104002 | 11 | 65.222 | KV452856.1 | 1483463 | 5-scf00247 | 5 |
| AX-157746104 | 11 | 65.222 | KV452856.1 | 1833405 | 5-scf00247 | 5 |
| AX-158104259 | 11 | 65.222 | KV452856.1 | 1843447 | 5-scf00247 | 5 |
| AX-157827036 | 11 | 65.222 | KV452856.1 | 1845727 | 5-scf00247 | 5 |
| AX-158104277 | 11 | 65.222 | KV452856.1 | 1884503 | 5-scf00247 | 5 |
| AX-158104321 | 11 | 65.222 | KV452856.1 | 1951550 | 5-scf00247 | 5 |
| AX-158104402 | 11 | 65.222 | KV452856.1 | 2076760 | 5-scf00247 | 5 |
| AX-157744180 | 11 | 65.222 | KV452856.1 | 2078176 | 5-scf00247 | 5 |
| AX-157827055 | 11 | 65.222 | KV452856.1 | 2093998 | 5-scf00247 | 5 |
| AX-158104417 | 11 | 65.222 | KV452856.1 | 2099309 | 5-scf00247 | 5 |
| AX-158104427 | 11 | 65.222 | KV452856.1 | 2109483 | 5-scf00247 | 5 |
| AX-157721476 | 11 | 65.222 | KV452856.1 | 2118441 | 5-scf00247 | 5 |
| AX-158104432 | 11 | 65.222 | KV452856.1 | 2118935 | 5-scf00247 | 5 |
| AX-158104440 | 11 | 65.222 | KV452856.1 | 2128293 | 5-scf00247 | 5 |
| AX-158104441 | 11 | 65.222 | KV452856.1 | 2130254 | 5-scf00247 | 5 |
| AX-158104443 | 11 | 65.222 | KV452856.1 | 2131593 | 5-scf00247 | 5 |
| AX-158104444 | 11 | 65.222 | KV452856.1 | 2132223 | 5-scf00247 | 5 |
| AX-158104446 | 11 | 65.222 | KV452856.1 | 2133346 | 5-scf00247 | 5 |
| AX-158104448 | 11 | 65.222 | KV452856.1 | 2137326 | 5-scf00247 | 5 |
| AX-157827059 | 11 | 65.222 | KV452856.1 | 2137478 | 5-scf00247 | 5 |
| AX-158104451 | 11 | 65.222 | KV452856.1 | 2139168 | 5-scf00247 | 5 |
| AX-158104453 | 11 | 65.222 | KV452856.1 | 2141764 | 5-scf00247 | 5 |
| AX-158410467 | 11 | 65.222 | KV452856.1 | 2141807 | 5-scf00247 | 5 |
| AX-158410468 | 11 | 65.222 | KV452856.1 | 2141894 | 5-scf00247 | 5 |
| AX-158104455 | 11 | 65.222 | KV452856.1 | 2145067 | 5-scf00247 | 5 |
| AX-158104457 | 11 | 65.222 | KV452856.1 | 2150102 | 5-scf00247 | 5 |
| AX-158104458 | 11 | 65.222 | KV452856.1 | 2152105 | 5-scf00247 | 5 |
| AX-158104481 | 11 | 65.222 | KV452856.1 | 2189884 | 5-scf00247 | 5 |
| AX-157755633 | 11 | 65.222 | KV452856.1 | 2192203 | 5-scf00247 | 5 |
| AX-158104486 | 11 | 65.222 | KV452856.1 | 2197145 | 5-scf00247 | 5 |
| AX-158104488 | 11 | 65.222 | KV452856.1 | 2198705 | 5-scf00247 | 5 |
| AX-158104493 | 11 | 65.222 | KV452856.1 | 2202261 | 5-scf00247 | 5 |
| AX-158104494 | 11 | 65.222 | KV452856.1 | 2203797 | 5-scf00247 | 5 |
| AX-158104495 | 11 | 65.222 | KV452856.1 | 2204864 | 5-scf00247 | 5 |
| AX-158104513 | 11 | 65.222 | KV452856.1 | 2235955 | 5-scf00247 | 5 |
| AX-158104537 | 11 | 65.222 | KV452856.1 | 2268605 | 5-scf00247 | 5 |
| AX-158104546 | 11 | 65.222 | KV452856.1 | 2275465 | 5-scf00247 | 5 |
| AX-157746653 | 11 | 65.222 | KV452856.1 | 2380000 | 5-scf00247 | 5 |
| AX-158104726 | 11 | 65.222 | KV452856.1 | 2541996 | 5-scf00247 | 5 |
| AX-158104424 | 11 | 65.234 | KV452856.1 | 2108045 | 5-scf00247 | 5 |
| AX-158104502 | 11 | 65.234 | KV452856.1 | 2211795 | 5-scf00247 | 5 |
| AX-157827027 | 11 | 65.247 | KV452856.1 | 1767909 | 5-scf00247 | 5 |
| AX-158104293 | 11 | 65.247 | KV452856.1 | 1909202 | 5-scf00247 | 5 |

|              |    |        |            |         |            |   |
|--------------|----|--------|------------|---------|------------|---|
| AX-158104328 | 11 | 65.247 | KV452856.1 | 1958845 | 5-scf00247 | 5 |
| AX-158104418 | 11 | 65.247 | KV452856.1 | 2100726 | 5-scf00247 | 5 |
| AX-158104509 | 11 | 65.247 | KV452856.1 | 2225998 | 5-scf00247 | 5 |
| AX-157693436 | 11 | 65.247 | KV452856.1 | 2325122 | 5-scf00247 | 5 |
| AX-158104512 | 11 | 65.255 | KV452856.1 | 2233527 | 5-scf00247 | 5 |
| AX-158104518 | 11 | 65.269 | KV452856.1 | 2244025 | 5-scf00247 | 5 |
| AX-158104519 | 11 | 65.269 | KV452856.1 | 2244554 | 5-scf00247 | 5 |
| AX-158104520 | 11 | 65.28  | KV452856.1 | 2245095 | 5-scf00247 | 5 |
| AX-157827038 | 11 | 65.292 | KV452856.1 | 1850213 | 5-scf00247 | 5 |
| AX-158104322 | 11 | 65.292 | KV452856.1 | 1951823 | 5-scf00247 | 5 |
| AX-158104381 | 11 | 65.292 | KV452856.1 | 2044982 | 5-scf00247 | 5 |
| AX-158104521 | 11 | 65.292 | KV452856.1 | 2245749 | 5-scf00247 | 5 |
| AX-158104527 | 11 | 65.292 | KV452856.1 | 2256994 | 5-scf00247 | 5 |
| AX-157871006 | 11 | 65.292 | KV452856.1 | 2289051 | 5-scf00247 | 5 |
| AX-158104523 | 11 | 65.311 | KV452856.1 | 2249971 | 5-scf00247 | 5 |
| AX-158104525 | 11 | 65.332 | KV452856.1 | 2252335 | 5-scf00247 | 5 |
| AX-158103608 | 11 | 65.441 | KV452856.1 | 998018  | 5-scf00247 | 5 |
| AX-158103625 | 11 | 65.441 | KV452856.1 | 1022159 | 5-scf00247 | 5 |
| AX-158103626 | 11 | 65.441 | KV452856.1 | 1022783 | 5-scf00247 | 5 |
| AX-158103767 | 11 | 65.441 | KV452856.1 | 1168183 | 5-scf00247 | 5 |
| AX-158103770 | 11 | 65.441 | KV452856.1 | 1169298 | 5-scf00247 | 5 |
| AX-158104201 | 11 | 65.441 | KV452856.1 | 1762303 | 5-scf00247 | 5 |
| AX-157827031 | 11 | 65.441 | KV452856.1 | 1832300 | 5-scf00247 | 5 |
| AX-158104497 | 11 | 65.441 | KV452856.1 | 2207094 | 5-scf00247 | 5 |
| AX-158104539 | 11 | 65.441 | KV452856.1 | 2269533 | 5-scf00247 | 5 |
| AX-158104549 | 11 | 65.481 | KV452856.1 | 2279472 | 5-scf00247 | 5 |
| AX-158104429 | 11 | 65.55  | KV452856.1 | 2115136 | 5-scf00247 | 5 |
| AX-158104435 | 11 | 65.55  | KV452856.1 | 2121286 | 5-scf00247 | 5 |
| AX-158104447 | 11 | 65.55  | KV452856.1 | 2135835 | 5-scf00247 | 5 |
| AX-158104449 | 11 | 65.55  | KV452856.1 | 2138098 | 5-scf00247 | 5 |
| AX-157739063 | 11 | 65.55  | KV452856.1 | 2152009 | 5-scf00247 | 5 |
| AX-158104510 | 11 | 65.55  | KV452856.1 | 2231393 | 5-scf00247 | 5 |
| AX-158104545 | 11 | 65.55  | KV452856.1 | 2273297 | 5-scf00247 | 5 |
| AX-157827069 | 11 | 65.55  | KV452856.1 | 2275182 | 5-scf00247 | 5 |
| AX-158104547 | 11 | 65.55  | KV452856.1 | 2277593 | 5-scf00247 | 5 |
| AX-157871005 | 11 | 65.55  | KV452856.1 | 2280647 | 5-scf00247 | 5 |
| AX-158104550 | 11 | 65.55  | KV452856.1 | 2281987 | 5-scf00247 | 5 |
| AX-158104552 | 11 | 65.55  | KV452856.1 | 2284214 | 5-scf00247 | 5 |
| AX-158104553 | 11 | 65.55  | KV452856.1 | 2284828 | 5-scf00247 | 5 |
| AX-158104557 | 11 | 65.714 | KV452856.1 | 2290234 | 5-scf00247 | 5 |
| AX-158104559 | 11 | 65.714 | KV452856.1 | 2291682 | 5-scf00247 | 5 |
| AX-158104560 | 11 | 65.714 | KV452856.1 | 2291960 | 5-scf00247 | 5 |
| AX-158104566 | 11 | 65.714 | KV452856.1 | 2301570 | 5-scf00247 | 5 |
| AX-157827072 | 11 | 65.81  | KV452856.1 | 2310680 | 5-scf00247 | 5 |
| AX-158104568 | 11 | 65.878 | KV452856.1 | 2303862 | 5-scf00247 | 5 |
| AX-157710944 | 11 | 65.878 | KV452856.1 | 2311414 | 5-scf00247 | 5 |
| AX-157752136 | 11 | 65.878 | KV452856.1 | 2335263 | 5-scf00247 | 5 |
| AX-158104586 | 11 | 65.878 | KV452856.1 | 2342169 | 5-scf00247 | 5 |
| AX-158104588 | 11 | 65.878 | KV452856.1 | 2344495 | 5-scf00247 | 5 |
| AX-158104482 | 11 | 65.987 | KV452856.1 | 2191557 | 5-scf00247 | 5 |
| AX-158104551 | 11 | 65.987 | KV452856.1 | 2283927 | 5-scf00247 | 5 |

|              |    |        |             |         |            |    |
|--------------|----|--------|-------------|---------|------------|----|
| AX-158104569 | 11 | 65.987 | KV452856.1  | 2309872 | 5-scf00247 | 5  |
| AX-158104572 | 11 | 65.987 | KV452856.1  | 2312523 | 5-scf00247 | 5  |
| AX-158104574 | 11 | 65.987 | KV452856.1  | 2319459 | 5-scf00247 | 5  |
| AX-158104581 | 11 | 65.987 | KV452856.1  | 2335854 | 5-scf00247 | 5  |
| AX-158104590 | 11 | 65.987 | KV452856.1  | 2349307 | 5-scf00247 | 5  |
| AX-158104592 | 11 | 65.987 | KV452856.1  | 2351386 | 5-scf00247 | 5  |
| AX-157827080 | 11 | 65.987 | KV452856.1  | 2355002 | 5-scf00247 | 5  |
| AX-158104593 | 11 | 65.987 | KV452856.1  | 2355132 | 5-scf00247 | 5  |
| AX-157827081 | 11 | 65.987 | KV452856.1  | 2355396 | 5-scf00247 | 5  |
| AX-158104596 | 11 | 65.987 | KV452856.1  | 2359535 | 5-scf00247 | 5  |
| AX-158104597 | 11 | 65.987 | KV452856.1  | 2360130 | 5-scf00247 | 5  |
| AX-158104599 | 11 | 65.987 | KV452856.1  | 2363597 | 5-scf00247 | 5  |
| AX-158104601 | 11 | 65.987 | KV452856.1  | 2366867 | 5-scf00247 | 5  |
| AX-158104603 | 11 | 65.987 | KV452856.1  | 2370631 | 5-scf00247 | 5  |
| AX-158104606 | 11 | 65.987 | KV452856.1  | 2377797 | 5-scf00247 | 5  |
| AX-157827083 | 11 | 65.987 | KV452856.1  | 2383663 | 5-scf00247 | 5  |
| AX-158104615 | 11 | 65.987 | KV452856.1  | 2396602 | 5-scf00247 | 5  |
| AX-158104616 | 11 | 65.987 | KV452856.1  | 2397178 | 5-scf00247 | 5  |
| AX-158104617 | 11 | 65.987 | KV452856.1  | 2401953 | 5-scf00247 | 5  |
| AX-158104618 | 11 | 65.987 | KV452856.1  | 2404445 | 5-scf00247 | 5  |
| AX-158104619 | 11 | 65.987 | KV452856.1  | 2404935 | 5-scf00247 | 5  |
| AX-157740046 | 11 | 65.987 | KV452856.1  | 2410268 | 5-scf00247 | 5  |
| AX-158104624 | 11 | 65.987 | KV452856.1  | 2411922 | 5-scf00247 | 5  |
| AX-158104627 | 11 | 65.987 | KV452856.1  | 2416014 | 5-scf00247 | 5  |
| AX-157827088 | 11 | 65.987 | KV452856.1  | 2418324 | 5-scf00247 | 5  |
| AX-158104629 | 11 | 65.987 | KV452856.1  | 2420120 | 5-scf00247 | 5  |
| AX-158104746 | 11 | 65.987 | KV452856.1  | 2569537 | 5-scf00247 | 5  |
| AX-158105564 | 11 | 65.987 | KV452863.1  | 2091819 | 5-scf00249 | 5  |
| AX-157706635 | 11 | 65.987 | 3ML01032637 | 135     | scf08261_1 | UN |
| AX-157827044 | 11 | 66.097 | KV452856.1  | 1924886 | 5-scf00247 | 5  |
| AX-158104377 | 11 | 66.097 | KV452856.1  | 2038398 | 5-scf00247 | 5  |
| AX-158104585 | 11 | 66.097 | KV452856.1  | 2341175 | 5-scf00247 | 5  |
| AX-157885861 | 11 | 66.097 | KV452856.1  | 2423272 | 5-scf00247 | 5  |
| AX-158104632 | 11 | 66.097 | KV452856.1  | 2427657 | 5-scf00247 | 5  |
| AX-158104633 | 11 | 66.097 | KV452856.1  | 2428200 | 5-scf00247 | 5  |
| AX-158104634 | 11 | 66.097 | KV452856.1  | 2428717 | 5-scf00247 | 5  |
| AX-158104635 | 11 | 66.097 | KV452856.1  | 2429542 | 5-scf00247 | 5  |
| AX-158104640 | 11 | 66.097 | KV452856.1  | 2440965 | 5-scf00247 | 5  |
| AX-158104641 | 11 | 66.097 | KV452856.1  | 2442516 | 5-scf00247 | 5  |
| AX-158104642 | 11 | 66.097 | KV452856.1  | 2443192 | 5-scf00247 | 5  |
| AX-158104643 | 11 | 66.097 | KV452856.1  | 2444024 | 5-scf00247 | 5  |
| AX-158104644 | 11 | 66.097 | KV452856.1  | 2444447 | 5-scf00247 | 5  |
| AX-157827092 | 11 | 66.097 | KV452856.1  | 2509012 | 5-scf00247 | 5  |
| AX-158104874 | 11 | 66.097 | KV452856.1  | 2780460 | 5-scf00247 | 5  |
| AX-157706629 | 11 | 66.097 | 3ML01032624 | 305     | scf08248_1 | UN |
| AX-158104649 | 11 | 66.206 | KV452856.1  | 2449027 | 5-scf00247 | 5  |
| AX-158104657 | 11 | 66.206 | KV452856.1  | 2454783 | 5-scf00247 | 5  |
| AX-158104659 | 11 | 66.206 | KV452856.1  | 2457677 | 5-scf00247 | 5  |
| AX-158392248 | 11 | 66.206 | KV452856.1  | 2458084 | 5-scf00247 | 5  |
| AX-158104662 | 11 | 66.206 | KV452856.1  | 2462285 | 5-scf00247 | 5  |
| AX-158104665 | 11 | 66.206 | KV452856.1  | 2465169 | 5-scf00247 | 5  |

|              |    |        |            |         |            |   |
|--------------|----|--------|------------|---------|------------|---|
| AX-158104667 | 11 | 66.206 | KV452856.1 | 2466517 | 5-scf00247 | 5 |
| AX-158104668 | 11 | 66.206 | KV452856.1 | 2468885 | 5-scf00247 | 5 |
| AX-158104669 | 11 | 66.206 | KV452856.1 | 2469812 | 5-scf00247 | 5 |
| AX-157827090 | 11 | 66.206 | KV452856.1 | 2470276 | 5-scf00247 | 5 |
| AX-158104674 | 11 | 66.206 | KV452856.1 | 2475505 | 5-scf00247 | 5 |
| AX-158104675 | 11 | 66.206 | KV452856.1 | 2475933 | 5-scf00247 | 5 |
| AX-158104677 | 11 | 66.206 | KV452856.1 | 2477375 | 5-scf00247 | 5 |
| AX-158104681 | 11 | 66.206 | KV452856.1 | 2480656 | 5-scf00247 | 5 |
| AX-157723450 | 11 | 66.206 | KV452856.1 | 2483747 | 5-scf00247 | 5 |
| AX-157708748 | 11 | 66.206 | KV452856.1 | 2484240 | 5-scf00247 | 5 |
| AX-158410473 | 11 | 66.206 | KV452856.1 | 2486812 | 5-scf00247 | 5 |
| AX-158104687 | 11 | 66.206 | KV452856.1 | 2488610 | 5-scf00247 | 5 |
| AX-158104688 | 11 | 66.206 | KV452856.1 | 2490100 | 5-scf00247 | 5 |
| AX-158104743 | 11 | 66.206 | KV452856.1 | 2563040 | 5-scf00247 | 5 |
| AX-157742291 | 11 | 66.206 | KV452856.1 | 2606771 | 5-scf00247 | 5 |
| AX-158103691 | 11 | 66.315 | KV452856.1 | 1082285 | 5-scf00247 | 5 |
| AX-158104252 | 11 | 66.315 | KV452856.1 | 1831626 | 5-scf00247 | 5 |
| AX-158104414 | 11 | 66.315 | KV452856.1 | 2093847 | 5-scf00247 | 5 |
| AX-157827064 | 11 | 66.315 | KV452856.1 | 2161783 | 5-scf00247 | 5 |
| AX-157827068 | 11 | 66.315 | KV452856.1 | 2248681 | 5-scf00247 | 5 |
| AX-158104694 | 11 | 66.315 | KV452856.1 | 2500582 | 5-scf00247 | 5 |
| AX-158104695 | 11 | 66.315 | KV452856.1 | 2501844 | 5-scf00247 | 5 |
| AX-158104696 | 11 | 66.315 | KV452856.1 | 2502270 | 5-scf00247 | 5 |
| AX-158104697 | 11 | 66.315 | KV452856.1 | 2503118 | 5-scf00247 | 5 |
| AX-158104698 | 11 | 66.315 | KV452856.1 | 2503743 | 5-scf00247 | 5 |
| AX-158104699 | 11 | 66.315 | KV452856.1 | 2504753 | 5-scf00247 | 5 |
| AX-158104701 | 11 | 66.315 | KV452856.1 | 2505849 | 5-scf00247 | 5 |
| AX-158104703 | 11 | 66.315 | KV452856.1 | 2507658 | 5-scf00247 | 5 |
| AX-158104705 | 11 | 66.315 | KV452856.1 | 2511597 | 5-scf00247 | 5 |
| AX-158410474 | 11 | 66.315 | KV452856.1 | 2513152 | 5-scf00247 | 5 |
| AX-157749049 | 11 | 66.315 | KV452856.1 | 2514455 | 5-scf00247 | 5 |
| AX-158410475 | 11 | 66.315 | KV452856.1 | 2514695 | 5-scf00247 | 5 |
| AX-158104706 | 11 | 66.315 | KV452856.1 | 2514786 | 5-scf00247 | 5 |
| AX-158104709 | 11 | 66.315 | KV452856.1 | 2520618 | 5-scf00247 | 5 |
| AX-158104711 | 11 | 66.315 | KV452856.1 | 2521856 | 5-scf00247 | 5 |
| AX-158104713 | 11 | 66.315 | KV452856.1 | 2523191 | 5-scf00247 | 5 |
| AX-157738770 | 11 | 66.315 | KV452856.1 | 2524494 | 5-scf00247 | 5 |
| AX-158104715 | 11 | 66.315 | KV452856.1 | 2525753 | 5-scf00247 | 5 |
| AX-158104716 | 11 | 66.315 | KV452856.1 | 2526580 | 5-scf00247 | 5 |
| AX-158104719 | 11 | 66.315 | KV452856.1 | 2528127 | 5-scf00247 | 5 |
| AX-158104721 | 11 | 66.315 | KV452856.1 | 2529734 | 5-scf00247 | 5 |
| AX-158104722 | 11 | 66.315 | KV452856.1 | 2530417 | 5-scf00247 | 5 |
| AX-158104723 | 11 | 66.315 | KV452856.1 | 2532666 | 5-scf00247 | 5 |
| AX-158104724 | 11 | 66.315 | KV452856.1 | 2535348 | 5-scf00247 | 5 |
| AX-157717766 | 11 | 66.315 | KV452856.1 | 2535923 | 5-scf00247 | 5 |
| AX-158104727 | 11 | 66.424 | KV452856.1 | 2542697 | 5-scf00247 | 5 |
| AX-158104729 | 11 | 66.424 | KV452856.1 | 2544474 | 5-scf00247 | 5 |
| AX-158104738 | 11 | 66.424 | KV452856.1 | 2554780 | 5-scf00247 | 5 |
| AX-158104739 | 11 | 66.424 | KV452856.1 | 2555231 | 5-scf00247 | 5 |
| AX-157827093 | 11 | 66.424 | KV452856.1 | 2555640 | 5-scf00247 | 5 |
| AX-158104741 | 11 | 66.424 | KV452856.1 | 2556655 | 5-scf00247 | 5 |

|              |    |        |            |         |            |   |
|--------------|----|--------|------------|---------|------------|---|
| AX-158104750 | 11 | 66.424 | KV452856.1 | 2575095 | 5-scf00247 | 5 |
| AX-158104752 | 11 | 66.424 | KV452856.1 | 2579006 | 5-scf00247 | 5 |
| AX-158104758 | 11 | 66.424 | KV452856.1 | 2585390 | 5-scf00247 | 5 |
| AX-158104759 | 11 | 66.424 | KV452856.1 | 2587912 | 5-scf00247 | 5 |
| AX-158104775 | 11 | 66.424 | KV452856.1 | 2613058 | 5-scf00247 | 5 |
| AX-157827099 | 11 | 66.424 | KV452856.1 | 2652450 | 5-scf00247 | 5 |
| AX-158104800 | 11 | 66.424 | KV452856.1 | 2653756 | 5-scf00247 | 5 |
| AX-158104817 | 11 | 66.424 | KV452856.1 | 2681350 | 5-scf00247 | 5 |
| AX-158104819 | 11 | 66.424 | KV452856.1 | 2683059 | 5-scf00247 | 5 |
| AX-158104866 | 11 | 66.424 | KV452856.1 | 2769957 | 5-scf00247 | 5 |
| AX-158104872 | 11 | 66.424 | KV452856.1 | 2777627 | 5-scf00247 | 5 |
| AX-158104882 | 11 | 66.424 | KV452856.1 | 2791939 | 5-scf00247 | 5 |
| AX-158104995 | 11 | 66.424 | KV452856.1 | 3238768 | 5-scf00247 | 5 |
| AX-158105007 | 11 | 66.424 | KV452856.1 | 3360835 | 5-scf00247 | 5 |
| AX-158105025 | 11 | 66.424 | KV452856.1 | 3599549 | 5-scf00247 | 5 |
| AX-158105032 | 11 | 66.424 | KV452856.1 | 3622688 | 5-scf00247 | 5 |
| AX-158375210 | 11 | 66.424 | KV452859.1 | 8624    | 5-scf00562 | 5 |
| AX-158375222 | 11 | 66.424 | KV452859.1 | 106588  | 5-scf00562 | 5 |
| AX-158375234 | 11 | 66.424 | KV452859.1 | 229680  | 5-scf00562 | 5 |
| AX-158375246 | 11 | 66.424 | KV452859.1 | 330856  | 5-scf00562 | 5 |
| AX-158375249 | 11 | 66.424 | KV452859.1 | 339641  | 5-scf00562 | 5 |
| AX-158375250 | 11 | 66.424 | KV452859.1 | 341048  | 5-scf00562 | 5 |
| AX-158413744 | 11 | 66.424 | KV452859.1 | 572999  | 5-scf00562 | 5 |
| AX-158375279 | 11 | 66.424 | KV452859.1 | 578740  | 5-scf00562 | 5 |
| AX-158375286 | 11 | 66.424 | KV452859.1 | 645935  | 5-scf00562 | 5 |
| AX-158375288 | 11 | 66.424 | KV452859.1 | 677288  | 5-scf00562 | 5 |
| AX-158375291 | 11 | 66.424 | KV452859.1 | 712036  | 5-scf00562 | 5 |
| AX-158375294 | 11 | 66.424 | KV452859.1 | 731200  | 5-scf00562 | 5 |
| AX-158375375 | 11 | 66.424 | KV452859.1 | 1283510 | 5-scf00562 | 5 |
| AX-158113992 | 11 | 66.424 | KV452859.1 | 1392985 | 5-scf00562 | 5 |
| AX-158114007 | 11 | 66.424 | KV452859.1 | 1521743 | 5-scf00562 | 5 |
| AX-158375581 | 11 | 66.424 | KV452862.1 | 104800  | 5-scf00568 | 5 |
| AX-158376199 | 11 | 66.424 | KV452860.1 | 172746  | 5-scf00574 | 5 |
| AX-158376202 | 11 | 66.424 | KV452860.1 | 236456  | 5-scf00574 | 5 |
| AX-158376206 | 11 | 66.424 | KV452860.1 | 274879  | 5-scf00574 | 5 |
| AX-157853300 | 11 | 66.424 | KV452860.1 | 388144  | 5-scf00574 | 5 |
| AX-157684955 | 11 | 66.424 | KV452861.1 | 40190   | 5-scf00577 | 5 |
| AX-158376267 | 11 | 66.424 | KV452855.1 | 2815    | 5-scf00580 | 5 |
| AX-157746477 | 11 | 66.424 | KV452855.1 | 299283  | 5-scf00580 | 5 |
| AX-158375512 | 11 | 66.424 | KV452854.1 | 689164  | 5-scf00631 | 5 |
| AX-158375520 | 11 | 66.424 | KV452854.1 | 763604  | 5-scf00631 | 5 |
| AX-158420403 | 11 | 66.424 | KV452854.1 | 862870  | 5-scf00631 | 5 |
| AX-158375531 | 11 | 66.424 | KV452854.1 | 896021  | 5-scf00631 | 5 |
| AX-158375536 | 11 | 66.424 | KV452854.1 | 944448  | 5-scf00631 | 5 |
| AX-158104762 | 11 | 66.463 | KV452856.1 | 2590888 | 5-scf00247 | 5 |
| AX-158104789 | 11 | 66.463 | KV452856.1 | 2635112 | 5-scf00247 | 5 |
| AX-158104846 | 11 | 66.463 | KV452856.1 | 2728078 | 5-scf00247 | 5 |
| AX-157827096 | 11 | 66.5   | KV452856.1 | 2599434 | 5-scf00247 | 5 |
| AX-158104769 | 11 | 66.533 | KV452856.1 | 2605646 | 5-scf00247 | 5 |
| AX-158104773 | 11 | 66.533 | KV452856.1 | 2611708 | 5-scf00247 | 5 |
| AX-157827098 | 11 | 66.533 | KV452856.1 | 2630903 | 5-scf00247 | 5 |

|              |    |        |            |         |            |   |
|--------------|----|--------|------------|---------|------------|---|
| AX-157698412 | 11 | 66.545 | KV452856.1 | 2645554 | 5-scf00247 | 5 |
| AX-158104795 | 11 | 66.558 | KV452856.1 | 2646326 | 5-scf00247 | 5 |
| AX-158410481 | 11 | 66.573 | KV452856.1 | 2646525 | 5-scf00247 | 5 |
| AX-158104798 | 11 | 66.599 | KV452856.1 | 2652323 | 5-scf00247 | 5 |
| AX-158104801 | 11 | 66.62  | KV452856.1 | 2654260 | 5-scf00247 | 5 |
| AX-158104808 | 11 | 66.623 | KV452856.1 | 2670909 | 5-scf00247 | 5 |
| AX-158103718 | 11 | 66.643 | KV452856.1 | 1114345 | 5-scf00247 | 5 |
| AX-158104227 | 11 | 66.643 | KV452856.1 | 1805343 | 5-scf00247 | 5 |
| AX-158104228 | 11 | 66.643 | KV452856.1 | 1807980 | 5-scf00247 | 5 |
| AX-158104249 | 11 | 66.643 | KV452856.1 | 1829093 | 5-scf00247 | 5 |
| AX-157771432 | 11 | 66.643 | KV452856.1 | 1832502 | 5-scf00247 | 5 |
| AX-157827034 | 11 | 66.643 | KV452856.1 | 1840419 | 5-scf00247 | 5 |
| AX-157827035 | 11 | 66.643 | KV452856.1 | 1843716 | 5-scf00247 | 5 |
| AX-158104265 | 11 | 66.643 | KV452856.1 | 1851866 | 5-scf00247 | 5 |
| AX-157877603 | 11 | 66.643 | KV452856.1 | 1925776 | 5-scf00247 | 5 |
| AX-158104305 | 11 | 66.643 | KV452856.1 | 1929143 | 5-scf00247 | 5 |
| AX-158104323 | 11 | 66.643 | KV452856.1 | 1952698 | 5-scf00247 | 5 |
| AX-158104343 | 11 | 66.643 | KV452856.1 | 1981764 | 5-scf00247 | 5 |
| AX-158104385 | 11 | 66.643 | KV452856.1 | 2053558 | 5-scf00247 | 5 |
| AX-158104442 | 11 | 66.643 | KV452856.1 | 2130858 | 5-scf00247 | 5 |
| AX-158104540 | 11 | 66.643 | KV452856.1 | 2270032 | 5-scf00247 | 5 |
| AX-158104594 | 11 | 66.643 | KV452856.1 | 2357125 | 5-scf00247 | 5 |
| AX-158104679 | 11 | 66.643 | KV452856.1 | 2479430 | 5-scf00247 | 5 |
| AX-158104686 | 11 | 66.643 | KV452856.1 | 2487088 | 5-scf00247 | 5 |
| AX-158104731 | 11 | 66.643 | KV452856.1 | 2547028 | 5-scf00247 | 5 |
| AX-158104754 | 11 | 66.643 | KV452856.1 | 2580570 | 5-scf00247 | 5 |
| AX-158104756 | 11 | 66.643 | KV452856.1 | 2582874 | 5-scf00247 | 5 |
| AX-158104763 | 11 | 66.643 | KV452856.1 | 2592350 | 5-scf00247 | 5 |
| AX-157863281 | 11 | 66.643 | KV452856.1 | 2594709 | 5-scf00247 | 5 |
| AX-158104766 | 11 | 66.643 | KV452856.1 | 2596330 | 5-scf00247 | 5 |
| AX-158104797 | 11 | 66.643 | KV452856.1 | 2649162 | 5-scf00247 | 5 |
| AX-158104811 | 11 | 66.643 | KV452856.1 | 2673814 | 5-scf00247 | 5 |
| AX-158104814 | 11 | 66.643 | KV452856.1 | 2678742 | 5-scf00247 | 5 |
| AX-158104815 | 11 | 66.643 | KV452856.1 | 2679630 | 5-scf00247 | 5 |
| AX-158104821 | 11 | 66.643 | KV452856.1 | 2687922 | 5-scf00247 | 5 |
| AX-158104822 | 11 | 66.643 | KV452856.1 | 2688765 | 5-scf00247 | 5 |
| AX-158104825 | 11 | 66.643 | KV452856.1 | 2692261 | 5-scf00247 | 5 |
| AX-158104830 | 11 | 66.643 | KV452856.1 | 2709761 | 5-scf00247 | 5 |
| AX-158104835 | 11 | 66.643 | KV452856.1 | 2715854 | 5-scf00247 | 5 |
| AX-158104838 | 11 | 66.643 | KV452856.1 | 2717512 | 5-scf00247 | 5 |
| AX-158104841 | 11 | 66.643 | KV452856.1 | 2719546 | 5-scf00247 | 5 |
| AX-158104842 | 11 | 66.643 | KV452856.1 | 2722322 | 5-scf00247 | 5 |
| AX-158104845 | 11 | 66.643 | KV452856.1 | 2727414 | 5-scf00247 | 5 |
| AX-158104854 | 11 | 66.643 | KV452856.1 | 2749801 | 5-scf00247 | 5 |
| AX-158104856 | 11 | 66.643 | KV452856.1 | 2752214 | 5-scf00247 | 5 |
| AX-158104858 | 11 | 66.643 | KV452856.1 | 2758855 | 5-scf00247 | 5 |
| AX-158104862 | 11 | 66.643 | KV452856.1 | 2762616 | 5-scf00247 | 5 |
| AX-158104865 | 11 | 66.643 | KV452856.1 | 2768615 | 5-scf00247 | 5 |
| AX-158104884 | 11 | 66.643 | KV452856.1 | 2802791 | 5-scf00247 | 5 |
| AX-157758513 | 11 | 66.643 | KV452863.1 | 828613  | 5-scf00249 | 5 |
| AX-158105178 | 11 | 66.643 | KV452863.1 | 852032  | 5-scf00249 | 5 |

|              |    |        |            |         |            |   |
|--------------|----|--------|------------|---------|------------|---|
| AX-158105342 | 11 | 66.643 | KV452863.1 | 1264859 | 5-scf00249 | 5 |
| AX-158105375 | 11 | 66.643 | KV452863.1 | 1459695 | 5-scf00249 | 5 |
| AX-158105524 | 11 | 66.643 | KV452863.1 | 2002132 | 5-scf00249 | 5 |
| AX-158105544 | 11 | 66.643 | KV452863.1 | 2043826 | 5-scf00249 | 5 |
| AX-158108347 | 11 | 66.643 | KV452863.1 | 6639861 | 5-scf00249 | 5 |
| AX-158108430 | 11 | 66.643 | KV452863.1 | 6772908 | 5-scf00249 | 5 |
| AX-158104881 | 11 | 66.713 | KV452856.1 | 2791191 | 5-scf00247 | 5 |
| AX-158104886 | 11 | 66.713 | KV452856.1 | 2803819 | 5-scf00247 | 5 |
| AX-157827103 | 11 | 66.806 | KV452856.1 | 2828946 | 5-scf00247 | 5 |
| AX-158104897 | 11 | 66.806 | KV452856.1 | 2830450 | 5-scf00247 | 5 |
| AX-157827078 | 11 | 66.97  | KV452856.1 | 2345172 | 5-scf00247 | 5 |
| AX-157721710 | 11 | 66.97  | KV452856.1 | 2561976 | 5-scf00247 | 5 |
| AX-158104767 | 11 | 66.97  | KV452856.1 | 2603027 | 5-scf00247 | 5 |
| AX-158104809 | 11 | 66.97  | KV452856.1 | 2671284 | 5-scf00247 | 5 |
| AX-158104810 | 11 | 66.97  | KV452856.1 | 2671885 | 5-scf00247 | 5 |
| AX-158104860 | 11 | 66.97  | KV452856.1 | 2760464 | 5-scf00247 | 5 |
| AX-158104899 | 11 | 66.97  | KV452856.1 | 2837792 | 5-scf00247 | 5 |
| AX-158104907 | 11 | 66.97  | KV452856.1 | 2862410 | 5-scf00247 | 5 |
| AX-158104908 | 11 | 66.97  | KV452856.1 | 2863770 | 5-scf00247 | 5 |
| AX-158104909 | 11 | 66.97  | KV452856.1 | 2866418 | 5-scf00247 | 5 |
| AX-158104919 | 11 | 66.97  | KV452856.1 | 2905544 | 5-scf00247 | 5 |
| AX-158104920 | 11 | 66.97  | KV452856.1 | 2906249 | 5-scf00247 | 5 |
| AX-158104922 | 11 | 66.97  | KV452856.1 | 2907469 | 5-scf00247 | 5 |
| AX-157827109 | 11 | 66.97  | KV452856.1 | 2909368 | 5-scf00247 | 5 |
| AX-158104923 | 11 | 66.97  | KV452856.1 | 2909999 | 5-scf00247 | 5 |
| AX-158104924 | 11 | 66.97  | KV452856.1 | 2916148 | 5-scf00247 | 5 |
| AX-157757895 | 11 | 66.97  | KV452856.1 | 2916837 | 5-scf00247 | 5 |
| AX-158104925 | 11 | 66.97  | KV452856.1 | 2918055 | 5-scf00247 | 5 |
| AX-158104927 | 11 | 66.97  | KV452856.1 | 2919388 | 5-scf00247 | 5 |
| AX-157827110 | 11 | 66.97  | KV452856.1 | 2919634 | 5-scf00247 | 5 |
| AX-158104933 | 11 | 66.97  | KV452856.1 | 2940038 | 5-scf00247 | 5 |
| AX-158104938 | 11 | 66.97  | KV452856.1 | 2951849 | 5-scf00247 | 5 |
| AX-158104939 | 11 | 66.97  | KV452856.1 | 2955336 | 5-scf00247 | 5 |
| AX-158104940 | 11 | 66.97  | KV452856.1 | 2960289 | 5-scf00247 | 5 |
| AX-158104948 | 11 | 66.97  | KV452856.1 | 3002280 | 5-scf00247 | 5 |
| AX-158104949 | 11 | 66.97  | KV452856.1 | 3010417 | 5-scf00247 | 5 |
| AX-158104951 | 11 | 66.97  | KV452856.1 | 3029184 | 5-scf00247 | 5 |
| AX-158104954 | 11 | 66.97  | KV452856.1 | 3040219 | 5-scf00247 | 5 |
| AX-158104961 | 11 | 66.97  | KV452856.1 | 3071296 | 5-scf00247 | 5 |
| AX-158104963 | 11 | 66.97  | KV452856.1 | 3087282 | 5-scf00247 | 5 |
| AX-158104966 | 11 | 66.97  | KV452856.1 | 3093637 | 5-scf00247 | 5 |
| AX-158104970 | 11 | 66.97  | KV452856.1 | 3108978 | 5-scf00247 | 5 |
| AX-158104971 | 11 | 66.97  | KV452856.1 | 3113118 | 5-scf00247 | 5 |
| AX-158104974 | 11 | 66.97  | KV452856.1 | 3127801 | 5-scf00247 | 5 |
| AX-158104976 | 11 | 66.97  | KV452856.1 | 3142195 | 5-scf00247 | 5 |
| AX-158104977 | 11 | 66.97  | KV452856.1 | 3143634 | 5-scf00247 | 5 |
| AX-158104979 | 11 | 66.97  | KV452856.1 | 3154419 | 5-scf00247 | 5 |
| AX-157723213 | 11 | 66.97  | KV452856.1 | 3154789 | 5-scf00247 | 5 |
| AX-158104980 | 11 | 66.97  | KV452856.1 | 3155360 | 5-scf00247 | 5 |
| AX-158104981 | 11 | 66.97  | KV452856.1 | 3157500 | 5-scf00247 | 5 |
| AX-158104987 | 11 | 66.97  | KV452856.1 | 3198119 | 5-scf00247 | 5 |



|              |    |       |            |         |            |   |
|--------------|----|-------|------------|---------|------------|---|
| AX-158104989 | 11 | 66.97 | KV452856.1 | 3204154 | 5-scf00247 | 5 |
| AX-158104990 | 11 | 66.97 | KV452856.1 | 3208897 | 5-scf00247 | 5 |
| AX-158104999 | 11 | 66.97 | KV452856.1 | 3272279 | 5-scf00247 | 5 |
| AX-158105002 | 11 | 66.97 | KV452856.1 | 3343461 | 5-scf00247 | 5 |
| AX-158105006 | 11 | 66.97 | KV452856.1 | 3358991 | 5-scf00247 | 5 |
| AX-158105009 | 11 | 66.97 | KV452856.1 | 3384335 | 5-scf00247 | 5 |
| AX-158105011 | 11 | 66.97 | KV452856.1 | 3428854 | 5-scf00247 | 5 |
| AX-158105018 | 11 | 66.97 | KV452856.1 | 3505927 | 5-scf00247 | 5 |
| AX-158105020 | 11 | 66.97 | KV452856.1 | 3533480 | 5-scf00247 | 5 |
| AX-158105021 | 11 | 66.97 | KV452856.1 | 3563109 | 5-scf00247 | 5 |
| AX-158105024 | 11 | 66.97 | KV452856.1 | 3598089 | 5-scf00247 | 5 |
| AX-158105029 | 11 | 66.97 | KV452856.1 | 3615597 | 5-scf00247 | 5 |
| AX-158105033 | 11 | 66.97 | KV452856.1 | 3630314 | 5-scf00247 | 5 |
| AX-157877609 | 11 | 66.97 | KV452863.1 | 695214  | 5-scf00249 | 5 |
| AX-158105166 | 11 | 66.97 | KV452863.1 | 759139  | 5-scf00249 | 5 |
| AX-158105167 | 11 | 66.97 | KV452863.1 | 764150  | 5-scf00249 | 5 |
| AX-158410515 | 11 | 66.97 | KV452863.1 | 827859  | 5-scf00249 | 5 |
| AX-158105173 | 11 | 66.97 | KV452863.1 | 829411  | 5-scf00249 | 5 |
| AX-158410517 | 11 | 66.97 | KV452863.1 | 840514  | 5-scf00249 | 5 |
| AX-158410518 | 11 | 66.97 | KV452863.1 | 844104  | 5-scf00249 | 5 |
| AX-158105175 | 11 | 66.97 | KV452863.1 | 848073  | 5-scf00249 | 5 |
| AX-158105177 | 11 | 66.97 | KV452863.1 | 850832  | 5-scf00249 | 5 |
| AX-158105189 | 11 | 66.97 | KV452863.1 | 925670  | 5-scf00249 | 5 |
| AX-158105191 | 11 | 66.97 | KV452863.1 | 926733  | 5-scf00249 | 5 |
| AX-158384801 | 11 | 66.97 | KV452863.1 | 928947  | 5-scf00249 | 5 |
| AX-158105196 | 11 | 66.97 | KV452863.1 | 940274  | 5-scf00249 | 5 |
| AX-158105200 | 11 | 66.97 | KV452863.1 | 949767  | 5-scf00249 | 5 |
| AX-157827124 | 11 | 66.97 | KV452863.1 | 950662  | 5-scf00249 | 5 |
| AX-158105204 | 11 | 66.97 | KV452863.1 | 955354  | 5-scf00249 | 5 |
| AX-158105205 | 11 | 66.97 | KV452863.1 | 956663  | 5-scf00249 | 5 |
| AX-157693733 | 11 | 66.97 | KV452863.1 | 973662  | 5-scf00249 | 5 |
| AX-158105211 | 11 | 66.97 | KV452863.1 | 980263  | 5-scf00249 | 5 |
| AX-157749128 | 11 | 66.97 | KV452863.1 | 982428  | 5-scf00249 | 5 |
| AX-158105213 | 11 | 66.97 | KV452863.1 | 983131  | 5-scf00249 | 5 |
| AX-158105222 | 11 | 66.97 | KV452863.1 | 994691  | 5-scf00249 | 5 |
| AX-158105223 | 11 | 66.97 | KV452863.1 | 1000597 | 5-scf00249 | 5 |
| AX-158105224 | 11 | 66.97 | KV452863.1 | 1001314 | 5-scf00249 | 5 |
| AX-157827125 | 11 | 66.97 | KV452863.1 | 1020575 | 5-scf00249 | 5 |
| AX-158105269 | 11 | 66.97 | KV452863.1 | 1073853 | 5-scf00249 | 5 |
| AX-157729051 | 11 | 66.97 | KV452863.1 | 2227028 | 5-scf00249 | 5 |
| AX-158105989 | 11 | 66.97 | KV452863.1 | 3209332 | 5-scf00249 | 5 |
| AX-158107012 | 11 | 66.97 | KV452863.1 | 4691800 | 5-scf00249 | 5 |
| AX-158108163 | 11 | 66.97 | KV452863.1 | 6354014 | 5-scf00249 | 5 |
| AX-158108195 | 11 | 66.97 | KV452863.1 | 6411651 | 5-scf00249 | 5 |
| AX-158108356 | 11 | 66.97 | KV452863.1 | 6652328 | 5-scf00249 | 5 |
| AX-158108367 | 11 | 66.97 | KV452863.1 | 6670373 | 5-scf00249 | 5 |
| AX-157827476 | 11 | 66.97 | KV452863.1 | 6769296 | 5-scf00249 | 5 |
| AX-158108439 | 11 | 66.97 | KV452863.1 | 6807454 | 5-scf00249 | 5 |
| AX-158108441 | 11 | 66.97 | KV452863.1 | 6811775 | 5-scf00249 | 5 |
| AX-158108609 | 11 | 66.97 | KV452863.1 | 7057538 | 5-scf00249 | 5 |
| AX-158113978 | 11 | 66.97 | KV452857.1 | 325959  | 5-scf00250 | 5 |

|              |    |       |            |         |            |   |
|--------------|----|-------|------------|---------|------------|---|
| AX-158375211 | 11 | 66.97 | KV452859.1 | 52286   | 5-scf00562 | 5 |
| AX-158375212 | 11 | 66.97 | KV452859.1 | 56399   | 5-scf00562 | 5 |
| AX-158375213 | 11 | 66.97 | KV452859.1 | 67814   | 5-scf00562 | 5 |
| AX-158420352 | 11 | 66.97 | KV452859.1 | 82194   | 5-scf00562 | 5 |
| AX-158375215 | 11 | 66.97 | KV452859.1 | 85455   | 5-scf00562 | 5 |
| AX-158375223 | 11 | 66.97 | KV452859.1 | 113178  | 5-scf00562 | 5 |
| AX-158375226 | 11 | 66.97 | KV452859.1 | 146573  | 5-scf00562 | 5 |
| AX-157755734 | 11 | 66.97 | KV452859.1 | 148480  | 5-scf00562 | 5 |
| AX-158420354 | 11 | 66.97 | KV452859.1 | 250753  | 5-scf00562 | 5 |
| AX-158375238 | 11 | 66.97 | KV452859.1 | 302839  | 5-scf00562 | 5 |
| AX-158375240 | 11 | 66.97 | KV452859.1 | 320907  | 5-scf00562 | 5 |
| AX-158375243 | 11 | 66.97 | KV452859.1 | 323806  | 5-scf00562 | 5 |
| AX-158375244 | 11 | 66.97 | KV452859.1 | 327114  | 5-scf00562 | 5 |
| AX-158375247 | 11 | 66.97 | KV452859.1 | 337863  | 5-scf00562 | 5 |
| AX-158375255 | 11 | 66.97 | KV452859.1 | 373420  | 5-scf00562 | 5 |
| AX-158375259 | 11 | 66.97 | KV452859.1 | 409025  | 5-scf00562 | 5 |
| AX-158375262 | 11 | 66.97 | KV452859.1 | 436717  | 5-scf00562 | 5 |
| AX-158375265 | 11 | 66.97 | KV452859.1 | 441578  | 5-scf00562 | 5 |
| AX-158375267 | 11 | 66.97 | KV452859.1 | 444035  | 5-scf00562 | 5 |
| AX-158375272 | 11 | 66.97 | KV452859.1 | 542340  | 5-scf00562 | 5 |
| AX-158375276 | 11 | 66.97 | KV452859.1 | 561663  | 5-scf00562 | 5 |
| AX-158375277 | 11 | 66.97 | KV452859.1 | 569828  | 5-scf00562 | 5 |
| AX-158375278 | 11 | 66.97 | KV452859.1 | 574902  | 5-scf00562 | 5 |
| AX-158375287 | 11 | 66.97 | KV452859.1 | 664958  | 5-scf00562 | 5 |
| AX-158375297 | 11 | 66.97 | KV452859.1 | 744168  | 5-scf00562 | 5 |
| AX-158375305 | 11 | 66.97 | KV452859.1 | 793204  | 5-scf00562 | 5 |
| AX-158375311 | 11 | 66.97 | KV452859.1 | 812515  | 5-scf00562 | 5 |
| AX-158375313 | 11 | 66.97 | KV452859.1 | 814465  | 5-scf00562 | 5 |
| AX-158375315 | 11 | 66.97 | KV452859.1 | 830279  | 5-scf00562 | 5 |
| AX-158375318 | 11 | 66.97 | KV452859.1 | 843735  | 5-scf00562 | 5 |
| AX-158420364 | 11 | 66.97 | KV452859.1 | 847134  | 5-scf00562 | 5 |
| AX-158375319 | 11 | 66.97 | KV452859.1 | 853287  | 5-scf00562 | 5 |
| AX-158375321 | 11 | 66.97 | KV452859.1 | 875330  | 5-scf00562 | 5 |
| AX-158375325 | 11 | 66.97 | KV452859.1 | 899561  | 5-scf00562 | 5 |
| AX-158375326 | 11 | 66.97 | KV452859.1 | 902256  | 5-scf00562 | 5 |
| AX-158375331 | 11 | 66.97 | KV452859.1 | 932354  | 5-scf00562 | 5 |
| AX-158375334 | 11 | 66.97 | KV452859.1 | 946437  | 5-scf00562 | 5 |
| AX-158375339 | 11 | 66.97 | KV452859.1 | 960763  | 5-scf00562 | 5 |
| AX-158375347 | 11 | 66.97 | KV452859.1 | 1031329 | 5-scf00562 | 5 |
| AX-158375351 | 11 | 66.97 | KV452859.1 | 1055462 | 5-scf00562 | 5 |
| AX-158375352 | 11 | 66.97 | KV452859.1 | 1072212 | 5-scf00562 | 5 |
| AX-158420366 | 11 | 66.97 | KV452859.1 | 1148425 | 5-scf00562 | 5 |
| AX-158375358 | 11 | 66.97 | KV452859.1 | 1156281 | 5-scf00562 | 5 |
| AX-158375360 | 11 | 66.97 | KV452859.1 | 1178390 | 5-scf00562 | 5 |
| AX-158375363 | 11 | 66.97 | KV452859.1 | 1212544 | 5-scf00562 | 5 |
| AX-158375371 | 11 | 66.97 | KV452859.1 | 1266465 | 5-scf00562 | 5 |
| AX-158375378 | 11 | 66.97 | KV452859.1 | 1331810 | 5-scf00562 | 5 |
| AX-158113996 | 11 | 66.97 | KV452859.1 | 1413117 | 5-scf00562 | 5 |
| AX-158113998 | 11 | 66.97 | KV452859.1 | 1449111 | 5-scf00562 | 5 |
| AX-158114000 | 11 | 66.97 | KV452859.1 | 1460020 | 5-scf00562 | 5 |
| AX-158114005 | 11 | 66.97 | KV452859.1 | 1491238 | 5-scf00562 | 5 |

|              |    |       |            |         |            |   |
|--------------|----|-------|------------|---------|------------|---|
| AX-158114011 | 11 | 66.97 | KV452859.1 | 1578599 | 5-scf00562 | 5 |
| AX-158114013 | 11 | 66.97 | KV452859.1 | 1602526 | 5-scf00562 | 5 |
| AX-158114014 | 11 | 66.97 | KV452859.1 | 1602965 | 5-scf00562 | 5 |
| AX-158114015 | 11 | 66.97 | KV452859.1 | 1604616 | 5-scf00562 | 5 |
| AX-158114017 | 11 | 66.97 | KV452859.1 | 1701796 | 5-scf00562 | 5 |
| AX-158114021 | 11 | 66.97 | KV452859.1 | 1716633 | 5-scf00562 | 5 |
| AX-158114027 | 11 | 66.97 | KV452859.1 | 1796953 | 5-scf00562 | 5 |
| AX-158375584 | 11 | 66.97 | KV452862.1 | 124405  | 5-scf00568 | 5 |
| AX-158375591 | 11 | 66.97 | KV452862.1 | 245398  | 5-scf00568 | 5 |
| AX-158375592 | 11 | 66.97 | KV452862.1 | 247074  | 5-scf00568 | 5 |
| AX-158375595 | 11 | 66.97 | KV452862.1 | 289587  | 5-scf00568 | 5 |
| AX-158375596 | 11 | 66.97 | KV452862.1 | 308186  | 5-scf00568 | 5 |
| AX-158375598 | 11 | 66.97 | KV452862.1 | 317011  | 5-scf00568 | 5 |
| AX-158375599 | 11 | 66.97 | KV452862.1 | 317500  | 5-scf00568 | 5 |
| AX-158375600 | 11 | 66.97 | KV452862.1 | 319140  | 5-scf00568 | 5 |
| AX-158375601 | 11 | 66.97 | KV452862.1 | 320663  | 5-scf00568 | 5 |
| AX-158375602 | 11 | 66.97 | KV452862.1 | 342271  | 5-scf00568 | 5 |
| AX-158375603 | 11 | 66.97 | KV452862.1 | 345598  | 5-scf00568 | 5 |
| AX-158375604 | 11 | 66.97 | KV452862.1 | 347828  | 5-scf00568 | 5 |
| AX-158375605 | 11 | 66.97 | KV452862.1 | 348989  | 5-scf00568 | 5 |
| AX-158375608 | 11 | 66.97 | KV452862.1 | 411579  | 5-scf00568 | 5 |
| AX-158375609 | 11 | 66.97 | KV452862.1 | 480797  | 5-scf00568 | 5 |
| AX-158375610 | 11 | 66.97 | KV452862.1 | 482010  | 5-scf00568 | 5 |
| AX-157709955 | 11 | 66.97 | KV452862.1 | 493542  | 5-scf00568 | 5 |
| AX-158375612 | 11 | 66.97 | KV452862.1 | 518696  | 5-scf00568 | 5 |
| AX-158375613 | 11 | 66.97 | KV452862.1 | 531957  | 5-scf00568 | 5 |
| AX-158375619 | 11 | 66.97 | KV452862.1 | 626390  | 5-scf00568 | 5 |
| AX-158375620 | 11 | 66.97 | KV452862.1 | 654637  | 5-scf00568 | 5 |
| AX-158376189 | 11 | 66.97 | KV452860.1 | 32719   | 5-scf00574 | 5 |
| AX-158376192 | 11 | 66.97 | KV452860.1 | 111669  | 5-scf00574 | 5 |
| AX-158376194 | 11 | 66.97 | KV452860.1 | 117747  | 5-scf00574 | 5 |
| AX-158376203 | 11 | 66.97 | KV452860.1 | 237690  | 5-scf00574 | 5 |
| AX-158376210 | 11 | 66.97 | KV452860.1 | 307404  | 5-scf00574 | 5 |
| AX-157684956 | 11 | 66.97 | KV452861.1 | 48947   | 5-scf00577 | 5 |
| AX-157684957 | 11 | 66.97 | KV452861.1 | 51948   | 5-scf00577 | 5 |
| AX-157693412 | 11 | 66.97 | KV452861.1 | 173100  | 5-scf00577 | 5 |
| AX-157684969 | 11 | 66.97 | KV452861.1 | 195620  | 5-scf00577 | 5 |
| AX-157684975 | 11 | 66.97 | KV452861.1 | 273895  | 5-scf00577 | 5 |
| AX-157684976 | 11 | 66.97 | KV452861.1 | 276601  | 5-scf00577 | 5 |
| AX-157684978 | 11 | 66.97 | KV452861.1 | 303681  | 5-scf00577 | 5 |
| AX-157684979 | 11 | 66.97 | KV452861.1 | 311018  | 5-scf00577 | 5 |
| AX-157684980 | 11 | 66.97 | KV452861.1 | 338438  | 5-scf00577 | 5 |
| AX-157684981 | 11 | 66.97 | KV452861.1 | 341109  | 5-scf00577 | 5 |
| AX-157684982 | 11 | 66.97 | KV452861.1 | 351692  | 5-scf00577 | 5 |
| AX-157684984 | 11 | 66.97 | KV452861.1 | 356702  | 5-scf00577 | 5 |
| AX-157684986 | 11 | 66.97 | KV452861.1 | 369320  | 5-scf00577 | 5 |
| AX-157684987 | 11 | 66.97 | KV452861.1 | 376156  | 5-scf00577 | 5 |
| AX-158376270 | 11 | 66.97 | KV452855.1 | 60908   | 5-scf00580 | 5 |
| AX-158376272 | 11 | 66.97 | KV452855.1 | 89337   | 5-scf00580 | 5 |
| AX-158376277 | 11 | 66.97 | KV452855.1 | 145929  | 5-scf00580 | 5 |
| AX-157717667 | 11 | 66.97 | KV452855.1 | 237296  | 5-scf00580 | 5 |

|              |    |        |             |         |            |    |
|--------------|----|--------|-------------|---------|------------|----|
| AX-157712986 | 11 | 66.97  | KV452855.1  | 270238  | 5-scf00580 | 5  |
| AX-158376284 | 11 | 66.97  | KV452855.1  | 318059  | 5-scf00580 | 5  |
| AX-158376287 | 11 | 66.97  | KV452855.1  | 341250  | 5-scf00580 | 5  |
| AX-158376290 | 11 | 66.97  | KV452855.1  | 347265  | 5-scf00580 | 5  |
| AX-157853307 | 11 | 66.97  | KV452855.1  | 348541  | 5-scf00580 | 5  |
| AX-158376291 | 11 | 66.97  | KV452855.1  | 348642  | 5-scf00580 | 5  |
| AX-158375481 | 11 | 66.97  | KV452854.1  | 121785  | 5-scf00631 | 5  |
| AX-158375488 | 11 | 66.97  | KV452854.1  | 279803  | 5-scf00631 | 5  |
| AX-158375497 | 11 | 66.97  | KV452854.1  | 422127  | 5-scf00631 | 5  |
| AX-158375501 | 11 | 66.97  | KV452854.1  | 468633  | 5-scf00631 | 5  |
| AX-158375502 | 11 | 66.97  | KV452854.1  | 507111  | 5-scf00631 | 5  |
| AX-158375507 | 11 | 66.97  | KV452854.1  | 648739  | 5-scf00631 | 5  |
| AX-158375516 | 11 | 66.97  | KV452854.1  | 726026  | 5-scf00631 | 5  |
| AX-158375517 | 11 | 66.97  | KV452854.1  | 734106  | 5-scf00631 | 5  |
| AX-158375518 | 11 | 66.97  | KV452854.1  | 736214  | 5-scf00631 | 5  |
| AX-158375543 | 11 | 66.97  | KV452854.1  | 1005143 | 5-scf00631 | 5  |
| AX-158421126 | 11 | 66.97  | KV452854.1  | 1154443 | 5-scf00631 | 5  |
| AX-157686594 | 11 | 66.97  | 3ML01024415 | 19056   | scf00704_1 | UN |
| AX-157679987 | 11 | 66.97  | KV453462.1  | 4065    | scf00793   | UN |
| AX-157687755 | 11 | 66.97  | KV453598.1  | 1066    | scf01002   | UN |
| AX-158105218 | 11 | 67.003 | KV452863.1  | 990074  | 5-scf00249 | 5  |
| AX-158105215 | 11 | 67.036 | KV452863.1  | 984977  | 5-scf00249 | 5  |
| AX-158105220 | 11 | 67.036 | KV452863.1  | 991901  | 5-scf00249 | 5  |
| AX-158105226 | 11 | 67.079 | KV452863.1  | 1002453 | 5-scf00249 | 5  |
| AX-158105228 | 11 | 67.079 | KV452863.1  | 1009606 | 5-scf00249 | 5  |
| AX-158105232 | 11 | 67.079 | KV452863.1  | 1021167 | 5-scf00249 | 5  |
| AX-158105233 | 11 | 67.079 | KV452863.1  | 1021743 | 5-scf00249 | 5  |
| AX-158105246 | 11 | 67.079 | KV452863.1  | 1036140 | 5-scf00249 | 5  |
| AX-158105251 | 11 | 67.079 | KV452863.1  | 1041698 | 5-scf00249 | 5  |
| AX-158104184 | 11 | 67.189 | KV452856.1  | 1747156 | 5-scf00247 | 5  |
| AX-158104573 | 11 | 67.189 | KV452856.1  | 2313784 | 5-scf00247 | 5  |
| AX-158104582 | 11 | 67.189 | KV452856.1  | 2336841 | 5-scf00247 | 5  |
| AX-157827085 | 11 | 67.189 | KV452856.1  | 2386892 | 5-scf00247 | 5  |
| AX-158104630 | 11 | 67.189 | KV452856.1  | 2424185 | 5-scf00247 | 5  |
| AX-157865960 | 11 | 67.189 | KV452856.1  | 2428953 | 5-scf00247 | 5  |
| AX-158105240 | 11 | 67.189 | KV452863.1  | 1030435 | 5-scf00249 | 5  |
| AX-158105241 | 11 | 67.189 | KV452863.1  | 1030522 | 5-scf00249 | 5  |
| AX-158105242 | 11 | 67.189 | KV452863.1  | 1031433 | 5-scf00249 | 5  |
| AX-158105245 | 11 | 67.189 | KV452863.1  | 1035477 | 5-scf00249 | 5  |
| AX-158105247 | 11 | 67.189 | KV452863.1  | 1037519 | 5-scf00249 | 5  |
| AX-158105253 | 11 | 67.189 | KV452863.1  | 1044923 | 5-scf00249 | 5  |
| AX-157827128 | 11 | 67.189 | KV452863.1  | 1054314 | 5-scf00249 | 5  |
| AX-158105261 | 11 | 67.189 | KV452863.1  | 1058662 | 5-scf00249 | 5  |
| AX-158105262 | 11 | 67.189 | KV452863.1  | 1059911 | 5-scf00249 | 5  |
| AX-158105267 | 11 | 67.189 | KV452863.1  | 1064796 | 5-scf00249 | 5  |
| AX-157700516 | 11 | 67.189 | KV452863.1  | 1071956 | 5-scf00249 | 5  |
| AX-158105270 | 11 | 67.189 | KV452863.1  | 1074559 | 5-scf00249 | 5  |
| AX-158105271 | 11 | 67.189 | KV452863.1  | 1077828 | 5-scf00249 | 5  |
| AX-158105275 | 11 | 67.189 | KV452863.1  | 1081982 | 5-scf00249 | 5  |
| AX-158105276 | 11 | 67.189 | KV452863.1  | 1087096 | 5-scf00249 | 5  |
| AX-158105280 | 11 | 67.189 | KV452863.1  | 1092988 | 5-scf00249 | 5  |

|              |    |        |            |         |            |   |
|--------------|----|--------|------------|---------|------------|---|
| AX-158105281 | 11 | 67.189 | KV452863.1 | 1095034 | 5-scf00249 | 5 |
| AX-157702433 | 11 | 67.189 | KV452863.1 | 1099437 | 5-scf00249 | 5 |
| AX-157827131 | 11 | 67.189 | KV452863.1 | 1102978 | 5-scf00249 | 5 |
| AX-158105288 | 11 | 67.189 | KV452863.1 | 1107089 | 5-scf00249 | 5 |
| AX-158105292 | 11 | 67.189 | KV452863.1 | 1118005 | 5-scf00249 | 5 |
| AX-158105295 | 11 | 67.189 | KV452863.1 | 1122096 | 5-scf00249 | 5 |
| AX-157827132 | 11 | 67.189 | KV452863.1 | 1122473 | 5-scf00249 | 5 |
| AX-158105302 | 11 | 67.189 | KV452863.1 | 1136272 | 5-scf00249 | 5 |
| AX-158105304 | 11 | 67.189 | KV452863.1 | 1142366 | 5-scf00249 | 5 |
| AX-158105305 | 11 | 67.189 | KV452863.1 | 1144863 | 5-scf00249 | 5 |
| AX-158105306 | 11 | 67.189 | KV452863.1 | 1145504 | 5-scf00249 | 5 |
| AX-158105309 | 11 | 67.189 | KV452863.1 | 1150863 | 5-scf00249 | 5 |
| AX-158105317 | 11 | 67.189 | KV452863.1 | 1161366 | 5-scf00249 | 5 |
| AX-157827134 | 11 | 67.189 | KV452863.1 | 1172497 | 5-scf00249 | 5 |
| AX-158105328 | 11 | 67.189 | KV452863.1 | 1183634 | 5-scf00249 | 5 |
| AX-157827136 | 11 | 67.189 | KV452863.1 | 1184692 | 5-scf00249 | 5 |
| AX-158105329 | 11 | 67.189 | KV452863.1 | 1184965 | 5-scf00249 | 5 |
| AX-158105331 | 11 | 67.189 | KV452863.1 | 1188423 | 5-scf00249 | 5 |
| AX-158105332 | 11 | 67.189 | KV452863.1 | 1188794 | 5-scf00249 | 5 |
| AX-158384809 | 11 | 67.189 | KV452863.1 | 1209240 | 5-scf00249 | 5 |
| AX-158384810 | 11 | 67.189 | KV452863.1 | 1213733 | 5-scf00249 | 5 |
| AX-158384811 | 11 | 67.189 | KV452863.1 | 1223996 | 5-scf00249 | 5 |
| AX-158105337 | 11 | 67.189 | KV452863.1 | 1235287 | 5-scf00249 | 5 |
| AX-157827137 | 11 | 67.189 | KV452863.1 | 1239108 | 5-scf00249 | 5 |
| AX-158384813 | 11 | 67.189 | KV452863.1 | 1244908 | 5-scf00249 | 5 |
| AX-158105341 | 11 | 67.189 | KV452863.1 | 1261886 | 5-scf00249 | 5 |
| AX-158410524 | 11 | 67.189 | KV452863.1 | 1273238 | 5-scf00249 | 5 |
| AX-158105347 | 11 | 67.189 | KV452863.1 | 1304527 | 5-scf00249 | 5 |
| AX-158105354 | 11 | 67.189 | KV452863.1 | 1348317 | 5-scf00249 | 5 |
| AX-158105355 | 11 | 67.189 | KV452863.1 | 1349431 | 5-scf00249 | 5 |
| AX-158105358 | 11 | 67.189 | KV452863.1 | 1361679 | 5-scf00249 | 5 |
| AX-158105364 | 11 | 67.189 | KV452863.1 | 1400869 | 5-scf00249 | 5 |
| AX-158410525 | 11 | 67.189 | KV452863.1 | 1405750 | 5-scf00249 | 5 |
| AX-158105369 | 11 | 67.189 | KV452863.1 | 1427842 | 5-scf00249 | 5 |
| AX-158105374 | 11 | 67.189 | KV452863.1 | 1441196 | 5-scf00249 | 5 |
| AX-158105380 | 11 | 67.189 | KV452863.1 | 1486244 | 5-scf00249 | 5 |
| AX-158105381 | 11 | 67.189 | KV452863.1 | 1490357 | 5-scf00249 | 5 |
| AX-158380067 | 11 | 67.189 | KV452863.1 | 1506796 | 5-scf00249 | 5 |
| AX-157827141 | 11 | 67.189 | KV452863.1 | 1573253 | 5-scf00249 | 5 |
| AX-158410529 | 11 | 67.189 | KV452863.1 | 1581174 | 5-scf00249 | 5 |
| AX-158105387 | 11 | 67.189 | KV452863.1 | 1584242 | 5-scf00249 | 5 |
| AX-157827142 | 11 | 67.189 | KV452863.1 | 1597547 | 5-scf00249 | 5 |
| AX-158105391 | 11 | 67.189 | KV452863.1 | 1613681 | 5-scf00249 | 5 |
| AX-158105392 | 11 | 67.189 | KV452863.1 | 1619037 | 5-scf00249 | 5 |
| AX-158105393 | 11 | 67.189 | KV452863.1 | 1619685 | 5-scf00249 | 5 |
| AX-158105395 | 11 | 67.189 | KV452863.1 | 1629487 | 5-scf00249 | 5 |
| AX-158105397 | 11 | 67.189 | KV452863.1 | 1635649 | 5-scf00249 | 5 |
| AX-158105398 | 11 | 67.189 | KV452863.1 | 1640384 | 5-scf00249 | 5 |
| AX-158105400 | 11 | 67.189 | KV452863.1 | 1651713 | 5-scf00249 | 5 |
| AX-158105402 | 11 | 67.189 | KV452863.1 | 1659536 | 5-scf00249 | 5 |
| AX-158105405 | 11 | 67.189 | KV452863.1 | 1667271 | 5-scf00249 | 5 |

|              |    |        |            |         |            |   |
|--------------|----|--------|------------|---------|------------|---|
| AX-158105406 | 11 | 67.189 | KV452863.1 | 1682560 | 5-scf00249 | 5 |
| AX-158105408 | 11 | 67.189 | KV452863.1 | 1694731 | 5-scf00249 | 5 |
| AX-158105417 | 11 | 67.189 | KV452863.1 | 1732128 | 5-scf00249 | 5 |
| AX-157758536 | 11 | 67.189 | KV452863.1 | 1745946 | 5-scf00249 | 5 |
| AX-158105432 | 11 | 67.189 | KV452863.1 | 1769171 | 5-scf00249 | 5 |
| AX-158105433 | 11 | 67.189 | KV452863.1 | 1777080 | 5-scf00249 | 5 |
| AX-158105435 | 11 | 67.189 | KV452863.1 | 1782072 | 5-scf00249 | 5 |
| AX-158105436 | 11 | 67.189 | KV452863.1 | 1790690 | 5-scf00249 | 5 |
| AX-158105437 | 11 | 67.189 | KV452863.1 | 1794325 | 5-scf00249 | 5 |
| AX-158105442 | 11 | 67.189 | KV452863.1 | 1820686 | 5-scf00249 | 5 |
| AX-158105443 | 11 | 67.189 | KV452863.1 | 1821406 | 5-scf00249 | 5 |
| AX-158105445 | 11 | 67.189 | KV452863.1 | 1824712 | 5-scf00249 | 5 |
| AX-158105447 | 11 | 67.189 | KV452863.1 | 1833945 | 5-scf00249 | 5 |
| AX-158105457 | 11 | 67.189 | KV452863.1 | 1871183 | 5-scf00249 | 5 |
| AX-157827150 | 11 | 67.189 | KV452863.1 | 1876565 | 5-scf00249 | 5 |
| AX-157827151 | 11 | 67.189 | KV452863.1 | 1903825 | 5-scf00249 | 5 |
| AX-158105466 | 11 | 67.189 | KV452863.1 | 1906330 | 5-scf00249 | 5 |
| AX-158105478 | 11 | 67.189 | KV452863.1 | 1925641 | 5-scf00249 | 5 |
| AX-158392255 | 11 | 67.189 | KV452863.1 | 1926258 | 5-scf00249 | 5 |
| AX-158105488 | 11 | 67.189 | KV452863.1 | 1938745 | 5-scf00249 | 5 |
| AX-158105493 | 11 | 67.189 | KV452863.1 | 1943437 | 5-scf00249 | 5 |
| AX-158105494 | 11 | 67.189 | KV452863.1 | 1943741 | 5-scf00249 | 5 |
| AX-158105495 | 11 | 67.189 | KV452863.1 | 1949778 | 5-scf00249 | 5 |
| AX-157877615 | 11 | 67.189 | KV452863.1 | 1954987 | 5-scf00249 | 5 |
| AX-158105500 | 11 | 67.189 | KV452863.1 | 1955987 | 5-scf00249 | 5 |
| AX-157827156 | 11 | 67.189 | KV452863.1 | 1969607 | 5-scf00249 | 5 |
| AX-158410544 | 11 | 67.189 | KV452863.1 | 1981051 | 5-scf00249 | 5 |
| AX-158105523 | 11 | 67.189 | KV452863.1 | 2001300 | 5-scf00249 | 5 |
| AX-158105525 | 11 | 67.189 | KV452863.1 | 2007792 | 5-scf00249 | 5 |
| AX-158105526 | 11 | 67.189 | KV452863.1 | 2010085 | 5-scf00249 | 5 |
| AX-158105528 | 11 | 67.189 | KV452863.1 | 2010777 | 5-scf00249 | 5 |
| AX-158384821 | 11 | 67.189 | KV452863.1 | 2017889 | 5-scf00249 | 5 |
| AX-158105532 | 11 | 67.189 | KV452863.1 | 2022046 | 5-scf00249 | 5 |
| AX-158105533 | 11 | 67.189 | KV452863.1 | 2024028 | 5-scf00249 | 5 |
| AX-158105534 | 11 | 67.189 | KV452863.1 | 2025537 | 5-scf00249 | 5 |
| AX-158105536 | 11 | 67.189 | KV452863.1 | 2030520 | 5-scf00249 | 5 |
| AX-158105537 | 11 | 67.189 | KV452863.1 | 2032120 | 5-scf00249 | 5 |
| AX-157877616 | 11 | 67.189 | KV452863.1 | 2033611 | 5-scf00249 | 5 |
| AX-158105538 | 11 | 67.189 | KV452863.1 | 2034094 | 5-scf00249 | 5 |
| AX-158105539 | 11 | 67.189 | KV452863.1 | 2035708 | 5-scf00249 | 5 |
| AX-158105541 | 11 | 67.189 | KV452863.1 | 2038995 | 5-scf00249 | 5 |
| AX-158105546 | 11 | 67.189 | KV452863.1 | 2050936 | 5-scf00249 | 5 |
| AX-158105550 | 11 | 67.189 | KV452863.1 | 2063801 | 5-scf00249 | 5 |
| AX-157827159 | 11 | 67.189 | KV452863.1 | 2080083 | 5-scf00249 | 5 |
| AX-157827160 | 11 | 67.189 | KV452863.1 | 2083342 | 5-scf00249 | 5 |
| AX-158105556 | 11 | 67.189 | KV452863.1 | 2085805 | 5-scf00249 | 5 |
| AX-158105557 | 11 | 67.189 | KV452863.1 | 2086019 | 5-scf00249 | 5 |
| AX-158105558 | 11 | 67.189 | KV452863.1 | 2086251 | 5-scf00249 | 5 |
| AX-158105567 | 11 | 67.189 | KV452863.1 | 2098071 | 5-scf00249 | 5 |
| AX-158105568 | 11 | 67.189 | KV452863.1 | 2098564 | 5-scf00249 | 5 |
| AX-158105569 | 11 | 67.189 | KV452863.1 | 2101245 | 5-scf00249 | 5 |

|              |    |        |            |         |            |   |
|--------------|----|--------|------------|---------|------------|---|
| AX-158105605 | 11 | 67.189 | KV452863.1 | 2269208 | 5-scf00249 | 5 |
| AX-158105615 | 11 | 67.189 | KV452863.1 | 2293042 | 5-scf00249 | 5 |
| AX-157722245 | 11 | 67.189 | KV452863.1 | 2309927 | 5-scf00249 | 5 |
| AX-158105626 | 11 | 67.189 | KV452863.1 | 2312016 | 5-scf00249 | 5 |
| AX-158105635 | 11 | 67.189 | KV452863.1 | 2330563 | 5-scf00249 | 5 |
| AX-158105647 | 11 | 67.189 | KV452863.1 | 2349455 | 5-scf00249 | 5 |
| AX-158105650 | 11 | 67.189 | KV452863.1 | 2363297 | 5-scf00249 | 5 |
| AX-157827175 | 11 | 67.189 | KV452863.1 | 2363860 | 5-scf00249 | 5 |
| AX-158105651 | 11 | 67.189 | KV452863.1 | 2364546 | 5-scf00249 | 5 |
| AX-158105655 | 11 | 67.189 | KV452863.1 | 2380141 | 5-scf00249 | 5 |
| AX-158105661 | 11 | 67.189 | KV452863.1 | 2397571 | 5-scf00249 | 5 |
| AX-158105663 | 11 | 67.189 | KV452863.1 | 2404610 | 5-scf00249 | 5 |
| AX-158105676 | 11 | 67.189 | KV452863.1 | 2437733 | 5-scf00249 | 5 |
| AX-158105679 | 11 | 67.189 | KV452863.1 | 2440954 | 5-scf00249 | 5 |
| AX-158105696 | 11 | 67.189 | KV452863.1 | 2501098 | 5-scf00249 | 5 |
| AX-158105706 | 11 | 67.189 | KV452863.1 | 2528093 | 5-scf00249 | 5 |
| AX-158105710 | 11 | 67.189 | KV452863.1 | 2541104 | 5-scf00249 | 5 |
| AX-158105711 | 11 | 67.189 | KV452863.1 | 2561072 | 5-scf00249 | 5 |
| AX-158105716 | 11 | 67.189 | KV452863.1 | 2588824 | 5-scf00249 | 5 |
| AX-158105717 | 11 | 67.189 | KV452863.1 | 2589557 | 5-scf00249 | 5 |
| AX-157749194 | 11 | 67.189 | KV452863.1 | 2640674 | 5-scf00249 | 5 |
| AX-157827182 | 11 | 67.189 | KV452863.1 | 2668004 | 5-scf00249 | 5 |
| AX-158105767 | 11 | 67.189 | KV452863.1 | 2733231 | 5-scf00249 | 5 |
| AX-158105912 | 11 | 67.189 | KV452863.1 | 3038594 | 5-scf00249 | 5 |
| AX-158106008 | 11 | 67.189 | KV452863.1 | 3243926 | 5-scf00249 | 5 |
| AX-157827212 | 11 | 67.189 | KV452863.1 | 3249654 | 5-scf00249 | 5 |
| AX-158106014 | 11 | 67.189 | KV452863.1 | 3255624 | 5-scf00249 | 5 |
| AX-158106020 | 11 | 67.189 | KV452863.1 | 3266145 | 5-scf00249 | 5 |
| AX-158106022 | 11 | 67.189 | KV452863.1 | 3270252 | 5-scf00249 | 5 |
| AX-157746128 | 11 | 67.189 | KV452863.1 | 3279229 | 5-scf00249 | 5 |
| AX-158106027 | 11 | 67.189 | KV452863.1 | 3282870 | 5-scf00249 | 5 |
| AX-157725699 | 11 | 67.189 | KV452863.1 | 3305773 | 5-scf00249 | 5 |
| AX-158106045 | 11 | 67.189 | KV452863.1 | 3317131 | 5-scf00249 | 5 |
| AX-158106046 | 11 | 67.189 | KV452863.1 | 3323122 | 5-scf00249 | 5 |
| AX-157759099 | 11 | 67.189 | KV452863.1 | 3331590 | 5-scf00249 | 5 |
| AX-158106052 | 11 | 67.189 | KV452863.1 | 3332253 | 5-scf00249 | 5 |
| AX-158106053 | 11 | 67.189 | KV452863.1 | 3334579 | 5-scf00249 | 5 |
| AX-158106054 | 11 | 67.189 | KV452863.1 | 3336756 | 5-scf00249 | 5 |
| AX-158392282 | 11 | 67.189 | KV452863.1 | 3342247 | 5-scf00249 | 5 |
| AX-157720648 | 11 | 67.189 | KV452863.1 | 3394636 | 5-scf00249 | 5 |
| AX-157741684 | 11 | 67.189 | KV452863.1 | 3413794 | 5-scf00249 | 5 |
| AX-158106103 | 11 | 67.189 | KV452863.1 | 3416453 | 5-scf00249 | 5 |
| AX-157827235 | 11 | 67.189 | KV452863.1 | 3420910 | 5-scf00249 | 5 |
| AX-157827240 | 11 | 67.189 | KV452863.1 | 3471143 | 5-scf00249 | 5 |
| AX-157717452 | 11 | 67.189 | KV452863.1 | 3471461 | 5-scf00249 | 5 |
| AX-158106122 | 11 | 67.189 | KV452863.1 | 3479877 | 5-scf00249 | 5 |
| AX-158106193 | 11 | 67.189 | KV452863.1 | 3583912 | 5-scf00249 | 5 |
| AX-158106195 | 11 | 67.189 | KV452863.1 | 3589437 | 5-scf00249 | 5 |
| AX-158106196 | 11 | 67.189 | KV452863.1 | 3590406 | 5-scf00249 | 5 |
| AX-158106281 | 11 | 67.189 | KV452863.1 | 3697092 | 5-scf00249 | 5 |
| AX-158106301 | 11 | 67.189 | KV452863.1 | 3715997 | 5-scf00249 | 5 |

|              |    |        |            |          |            |   |
|--------------|----|--------|------------|----------|------------|---|
| AX-158106357 | 11 | 67.189 | KV452863.1 | 3782413  | 5-scf00249 | 5 |
| AX-158106360 | 11 | 67.189 | KV452863.1 | 3790288  | 5-scf00249 | 5 |
| AX-157865975 | 11 | 67.189 | KV452863.1 | 3790838  | 5-scf00249 | 5 |
| AX-157865976 | 11 | 67.189 | KV452863.1 | 3792699  | 5-scf00249 | 5 |
| AX-158106364 | 11 | 67.189 | KV452863.1 | 3793272  | 5-scf00249 | 5 |
| AX-158106367 | 11 | 67.189 | KV452863.1 | 3794684  | 5-scf00249 | 5 |
| AX-158410597 | 11 | 67.189 | KV452863.1 | 3795183  | 5-scf00249 | 5 |
| AX-157772080 | 11 | 67.189 | KV452863.1 | 3824463  | 5-scf00249 | 5 |
| AX-157720591 | 11 | 67.189 | KV452863.1 | 4035601  | 5-scf00249 | 5 |
| AX-158106778 | 11 | 67.189 | KV452863.1 | 4340091  | 5-scf00249 | 5 |
| AX-158106901 | 11 | 67.189 | KV452863.1 | 4501754  | 5-scf00249 | 5 |
| AX-157747143 | 11 | 67.189 | KV452863.1 | 4523460  | 5-scf00249 | 5 |
| AX-157877627 | 11 | 67.189 | KV452863.1 | 4526557  | 5-scf00249 | 5 |
| AX-158106927 | 11 | 67.189 | KV452863.1 | 4546682  | 5-scf00249 | 5 |
| AX-158106930 | 11 | 67.189 | KV452863.1 | 4554760  | 5-scf00249 | 5 |
| AX-157745450 | 11 | 67.189 | KV452863.1 | 4559965  | 5-scf00249 | 5 |
| AX-158106931 | 11 | 67.189 | KV452863.1 | 4560004  | 5-scf00249 | 5 |
| AX-157751033 | 11 | 67.189 | KV452863.1 | 5117860  | 5-scf00249 | 5 |
| AX-158107665 | 11 | 67.189 | KV452863.1 | 5597034  | 5-scf00249 | 5 |
| AX-158107853 | 11 | 67.189 | KV452863.1 | 5875965  | 5-scf00249 | 5 |
| AX-158107910 | 11 | 67.189 | KV452863.1 | 5946575  | 5-scf00249 | 5 |
| AX-158108115 | 11 | 67.189 | KV452863.1 | 6278962  | 5-scf00249 | 5 |
| AX-158108156 | 11 | 67.189 | KV452863.1 | 6346770  | 5-scf00249 | 5 |
| AX-158108185 | 11 | 67.189 | KV452863.1 | 6401063  | 5-scf00249 | 5 |
| AX-158108235 | 11 | 67.189 | KV452863.1 | 6481573  | 5-scf00249 | 5 |
| AX-158108242 | 11 | 67.189 | KV452863.1 | 6494015  | 5-scf00249 | 5 |
| AX-158108346 | 11 | 67.189 | KV452863.1 | 6638389  | 5-scf00249 | 5 |
| AX-157877635 | 11 | 67.189 | KV452863.1 | 6819098  | 5-scf00249 | 5 |
| AX-158108519 | 11 | 67.189 | KV452863.1 | 6946507  | 5-scf00249 | 5 |
| AX-158108525 | 11 | 67.189 | KV452863.1 | 6952618  | 5-scf00249 | 5 |
| AX-158108544 | 11 | 67.189 | KV452863.1 | 6981530  | 5-scf00249 | 5 |
| AX-158108603 | 11 | 67.189 | KV452863.1 | 7046524  | 5-scf00249 | 5 |
| AX-158108796 | 11 | 67.189 | KV452863.1 | 7370998  | 5-scf00249 | 5 |
| AX-158384896 | 11 | 67.189 | KV452863.1 | 8688426  | 5-scf00249 | 5 |
| AX-158110668 | 11 | 67.189 | KV452863.1 | 10809841 | 5-scf00249 | 5 |
| AX-158410570 | 11 | 67.19  | KV452863.1 | 2776865  | 5-scf00249 | 5 |
| AX-158105787 | 11 | 67.19  | KV452863.1 | 2778264  | 5-scf00249 | 5 |
| AX-158105794 | 11 | 67.19  | KV452863.1 | 2785744  | 5-scf00249 | 5 |
| AX-158105838 | 11 | 67.191 | KV452863.1 | 2884017  | 5-scf00249 | 5 |
| AX-157827191 | 11 | 67.191 | KV452863.1 | 2973198  | 5-scf00249 | 5 |
| AX-157827192 | 11 | 67.191 | KV452863.1 | 2973731  | 5-scf00249 | 5 |
| AX-158105687 | 11 | 67.192 | KV452863.1 | 2461571  | 5-scf00249 | 5 |
| AX-158410559 | 11 | 67.192 | KV452863.1 | 2464808  | 5-scf00249 | 5 |
| AX-157827181 | 11 | 67.192 | KV452863.1 | 2608229  | 5-scf00249 | 5 |
| AX-158105841 | 11 | 67.192 | KV452863.1 | 2887813  | 5-scf00249 | 5 |
| AX-157758591 | 11 | 67.192 | KV452863.1 | 2953647  | 5-scf00249 | 5 |
| AX-157827195 | 11 | 67.192 | KV452863.1 | 2989583  | 5-scf00249 | 5 |
| AX-158105897 | 11 | 67.192 | KV452863.1 | 3014647  | 5-scf00249 | 5 |
| AX-158105908 | 11 | 67.192 | KV452863.1 | 3030937  | 5-scf00249 | 5 |
| AX-158105910 | 11 | 67.192 | KV452863.1 | 3035919  | 5-scf00249 | 5 |
| AX-158105929 | 11 | 67.192 | KV452863.1 | 3081786  | 5-scf00249 | 5 |



|              |    |        |            |         |            |   |
|--------------|----|--------|------------|---------|------------|---|
| AX-157827211 | 11 | 67.192 | KV452863.1 | 3221670 | 5-scf00249 | 5 |
| AX-157827218 | 11 | 67.192 | KV452863.1 | 3284538 | 5-scf00249 | 5 |
| AX-157724738 | 11 | 67.192 | KV452863.1 | 3284681 | 5-scf00249 | 5 |
| AX-157774960 | 11 | 67.192 | KV452863.1 | 3326502 | 5-scf00249 | 5 |
| AX-157827226 | 11 | 67.192 | KV452863.1 | 3327162 | 5-scf00249 | 5 |
| AX-158106124 | 11 | 67.192 | KV452863.1 | 3482306 | 5-scf00249 | 5 |
| AX-158106141 | 11 | 67.192 | KV452863.1 | 3506946 | 5-scf00249 | 5 |
| AX-157827249 | 11 | 67.192 | KV452863.1 | 3512332 | 5-scf00249 | 5 |
| AX-158106149 | 11 | 67.192 | KV452863.1 | 3515852 | 5-scf00249 | 5 |
| AX-158106150 | 11 | 67.192 | KV452863.1 | 3519078 | 5-scf00249 | 5 |
| AX-157827251 | 11 | 67.192 | KV452863.1 | 3519927 | 5-scf00249 | 5 |
| AX-158106152 | 11 | 67.192 | KV452863.1 | 3524718 | 5-scf00249 | 5 |
| AX-158106153 | 11 | 67.192 | KV452863.1 | 3525571 | 5-scf00249 | 5 |
| AX-158392284 | 11 | 67.192 | KV452863.1 | 3539226 | 5-scf00249 | 5 |
| AX-158106160 | 11 | 67.192 | KV452863.1 | 3541669 | 5-scf00249 | 5 |
| AX-158106162 | 11 | 67.192 | KV452863.1 | 3542773 | 5-scf00249 | 5 |
| AX-157827252 | 11 | 67.192 | KV452863.1 | 3543167 | 5-scf00249 | 5 |
| AX-158106166 | 11 | 67.192 | KV452863.1 | 3547022 | 5-scf00249 | 5 |
| AX-158106169 | 11 | 67.192 | KV452863.1 | 3549306 | 5-scf00249 | 5 |
| AX-158106175 | 11 | 67.192 | KV452863.1 | 3553363 | 5-scf00249 | 5 |
| AX-158106178 | 11 | 67.192 | KV452863.1 | 3556760 | 5-scf00249 | 5 |
| AX-158106938 | 11 | 67.192 | KV452863.1 | 4568990 | 5-scf00249 | 5 |
| AX-158410610 | 11 | 67.192 | KV452863.1 | 4711899 | 5-scf00249 | 5 |
| AX-158107059 | 11 | 67.192 | KV452863.1 | 4759666 | 5-scf00249 | 5 |
| AX-158107061 | 11 | 67.192 | KV452863.1 | 4761031 | 5-scf00249 | 5 |
| AX-158107072 | 11 | 67.192 | KV452863.1 | 4803677 | 5-scf00249 | 5 |
| AX-158107077 | 11 | 67.192 | KV452863.1 | 4814480 | 5-scf00249 | 5 |
| AX-158107106 | 11 | 67.192 | KV452863.1 | 4883824 | 5-scf00249 | 5 |
| AX-158105801 | 11 | 67.298 | KV452863.1 | 2806559 | 5-scf00249 | 5 |
| AX-158105845 | 11 | 67.298 | KV452863.1 | 2895420 | 5-scf00249 | 5 |
| AX-158105851 | 11 | 67.298 | KV452863.1 | 2901963 | 5-scf00249 | 5 |
| AX-158105858 | 11 | 67.298 | KV452863.1 | 2921326 | 5-scf00249 | 5 |
| AX-158105892 | 11 | 67.298 | KV452863.1 | 3001083 | 5-scf00249 | 5 |
| AX-158417018 | 11 | 67.298 | KV452863.1 | 3094831 | 5-scf00249 | 5 |
| AX-158105935 | 11 | 67.298 | KV452863.1 | 3099434 | 5-scf00249 | 5 |
| AX-158105962 | 11 | 67.298 | KV452863.1 | 3157591 | 5-scf00249 | 5 |
| AX-158106035 | 11 | 67.298 | KV452863.1 | 3289227 | 5-scf00249 | 5 |
| AX-158106043 | 11 | 67.298 | KV452863.1 | 3311004 | 5-scf00249 | 5 |
| AX-157827220 | 11 | 67.298 | KV452863.1 | 3311924 | 5-scf00249 | 5 |
| AX-157827222 | 11 | 67.298 | KV452863.1 | 3317036 | 5-scf00249 | 5 |
| AX-158105863 | 11 | 67.332 | KV452863.1 | 2935081 | 5-scf00249 | 5 |
| AX-157759012 | 11 | 67.332 | KV452863.1 | 3340839 | 5-scf00249 | 5 |
| AX-158105274 | 11 | 67.407 | KV452863.1 | 1079610 | 5-scf00249 | 5 |
| AX-158105291 | 11 | 67.407 | KV452863.1 | 1111766 | 5-scf00249 | 5 |
| AX-158105303 | 11 | 67.407 | KV452863.1 | 1141674 | 5-scf00249 | 5 |
| AX-158105316 | 11 | 67.407 | KV452863.1 | 1160565 | 5-scf00249 | 5 |
| AX-158105411 | 11 | 67.407 | KV452863.1 | 1710975 | 5-scf00249 | 5 |
| AX-158105451 | 11 | 67.407 | KV452863.1 | 1846499 | 5-scf00249 | 5 |
| AX-158105452 | 11 | 67.407 | KV452863.1 | 1846665 | 5-scf00249 | 5 |
| AX-158105469 | 11 | 67.407 | KV452863.1 | 1912896 | 5-scf00249 | 5 |
| AX-158105479 | 11 | 67.407 | KV452863.1 | 1926941 | 5-scf00249 | 5 |

|              |    |        |            |         |            |   |
|--------------|----|--------|------------|---------|------------|---|
| AX-157827153 | 11 | 67.407 | KV452863.1 | 1927147 | 5-scf00249 | 5 |
| AX-158105480 | 11 | 67.407 | KV452863.1 | 1928248 | 5-scf00249 | 5 |
| AX-158105482 | 11 | 67.407 | KV452863.1 | 1930169 | 5-scf00249 | 5 |
| AX-158105559 | 11 | 67.407 | KV452863.1 | 2086713 | 5-scf00249 | 5 |
| AX-158105560 | 11 | 67.407 | KV452863.1 | 2087023 | 5-scf00249 | 5 |
| AX-158105562 | 11 | 67.407 | KV452863.1 | 2088114 | 5-scf00249 | 5 |
| AX-158105581 | 11 | 67.407 | KV452863.1 | 2154436 | 5-scf00249 | 5 |
| AX-157827179 | 11 | 67.407 | KV452863.1 | 2595132 | 5-scf00249 | 5 |
| AX-158105720 | 11 | 67.407 | KV452863.1 | 2598805 | 5-scf00249 | 5 |
| AX-158105721 | 11 | 67.407 | KV452863.1 | 2600029 | 5-scf00249 | 5 |
| AX-158105727 | 11 | 67.407 | KV452863.1 | 2619158 | 5-scf00249 | 5 |
| AX-158105728 | 11 | 67.407 | KV452863.1 | 2620900 | 5-scf00249 | 5 |
| AX-158392264 | 11 | 67.407 | KV452863.1 | 2629139 | 5-scf00249 | 5 |
| AX-158105734 | 11 | 67.407 | KV452863.1 | 2640212 | 5-scf00249 | 5 |
| AX-158105735 | 11 | 67.407 | KV452863.1 | 2641104 | 5-scf00249 | 5 |
| AX-158410566 | 11 | 67.407 | KV452863.1 | 2671154 | 5-scf00249 | 5 |
| AX-158422641 | 11 | 67.407 | KV452863.1 | 2671733 | 5-scf00249 | 5 |
| AX-158105746 | 11 | 67.407 | KV452863.1 | 2672307 | 5-scf00249 | 5 |
| AX-157702825 | 11 | 67.407 | KV452863.1 | 2687302 | 5-scf00249 | 5 |
| AX-158105751 | 11 | 67.407 | KV452863.1 | 2696221 | 5-scf00249 | 5 |
| AX-158105752 | 11 | 67.407 | KV452863.1 | 2704320 | 5-scf00249 | 5 |
| AX-158105753 | 11 | 67.407 | KV452863.1 | 2707091 | 5-scf00249 | 5 |
| AX-158105754 | 11 | 67.407 | KV452863.1 | 2713113 | 5-scf00249 | 5 |
| AX-158392270 | 11 | 67.407 | KV452863.1 | 2716709 | 5-scf00249 | 5 |
| AX-158105755 | 11 | 67.407 | KV452863.1 | 2717718 | 5-scf00249 | 5 |
| AX-158105756 | 11 | 67.407 | KV452863.1 | 2719121 | 5-scf00249 | 5 |
| AX-158105760 | 11 | 67.407 | KV452863.1 | 2726335 | 5-scf00249 | 5 |
| AX-157827183 | 11 | 67.407 | KV452863.1 | 2730421 | 5-scf00249 | 5 |
| AX-158105770 | 11 | 67.407 | KV452863.1 | 2740544 | 5-scf00249 | 5 |
| AX-158105771 | 11 | 67.407 | KV452863.1 | 2742529 | 5-scf00249 | 5 |
| AX-158105773 | 11 | 67.407 | KV452863.1 | 2752231 | 5-scf00249 | 5 |
| AX-157724155 | 11 | 67.407 | KV452863.1 | 2755042 | 5-scf00249 | 5 |
| AX-157857416 | 11 | 67.407 | KV452863.1 | 2760428 | 5-scf00249 | 5 |
| AX-158422642 | 11 | 67.407 | KV452863.1 | 2761030 | 5-scf00249 | 5 |
| AX-158105776 | 11 | 67.407 | KV452863.1 | 2763280 | 5-scf00249 | 5 |
| AX-158105791 | 11 | 67.407 | KV452863.1 | 2782149 | 5-scf00249 | 5 |
| AX-158410571 | 11 | 67.407 | KV452863.1 | 2795149 | 5-scf00249 | 5 |
| AX-158105803 | 11 | 67.407 | KV452863.1 | 2813975 | 5-scf00249 | 5 |
| AX-158105805 | 11 | 67.407 | KV452863.1 | 2817838 | 5-scf00249 | 5 |
| AX-158105811 | 11 | 67.407 | KV452863.1 | 2833900 | 5-scf00249 | 5 |
| AX-158392272 | 11 | 67.407 | KV452863.1 | 2834260 | 5-scf00249 | 5 |
| AX-158105814 | 11 | 67.407 | KV452863.1 | 2836849 | 5-scf00249 | 5 |
| AX-158105815 | 11 | 67.407 | KV452863.1 | 2838130 | 5-scf00249 | 5 |
| AX-158105819 | 11 | 67.407 | KV452863.1 | 2840867 | 5-scf00249 | 5 |
| AX-158105820 | 11 | 67.407 | KV452863.1 | 2841773 | 5-scf00249 | 5 |
| AX-158105829 | 11 | 67.407 | KV452863.1 | 2862279 | 5-scf00249 | 5 |
| AX-158105833 | 11 | 67.407 | KV452863.1 | 2871677 | 5-scf00249 | 5 |
| AX-158105834 | 11 | 67.407 | KV452863.1 | 2872121 | 5-scf00249 | 5 |
| AX-158105835 | 11 | 67.407 | KV452863.1 | 2874973 | 5-scf00249 | 5 |
| AX-158105840 | 11 | 67.407 | KV452863.1 | 2886898 | 5-scf00249 | 5 |
| AX-158105844 | 11 | 67.407 | KV452863.1 | 2894222 | 5-scf00249 | 5 |

|              |    |        |            |         |            |   |
|--------------|----|--------|------------|---------|------------|---|
| AX-158105846 | 11 | 67.407 | KV452863.1 | 2896116 | 5-scf00249 | 5 |
| AX-158105848 | 11 | 67.407 | KV452863.1 | 2897216 | 5-scf00249 | 5 |
| AX-157827188 | 11 | 67.407 | KV452863.1 | 2908782 | 5-scf00249 | 5 |
| AX-158105856 | 11 | 67.407 | KV452863.1 | 2919762 | 5-scf00249 | 5 |
| AX-158105862 | 11 | 67.407 | KV452863.1 | 2932083 | 5-scf00249 | 5 |
| AX-158392274 | 11 | 67.407 | KV452863.1 | 2945348 | 5-scf00249 | 5 |
| AX-158105871 | 11 | 67.407 | KV452863.1 | 2955261 | 5-scf00249 | 5 |
| AX-157871007 | 11 | 67.407 | KV452863.1 | 2959966 | 5-scf00249 | 5 |
| AX-158105875 | 11 | 67.407 | KV452863.1 | 2963969 | 5-scf00249 | 5 |
| AX-157827189 | 11 | 67.407 | KV452863.1 | 2966295 | 5-scf00249 | 5 |
| AX-158105877 | 11 | 67.407 | KV452863.1 | 2967021 | 5-scf00249 | 5 |
| AX-157827190 | 11 | 67.407 | KV452863.1 | 2968038 | 5-scf00249 | 5 |
| AX-158105883 | 11 | 67.407 | KV452863.1 | 2978328 | 5-scf00249 | 5 |
| AX-158105884 | 11 | 67.407 | KV452863.1 | 2980456 | 5-scf00249 | 5 |
| AX-158105885 | 11 | 67.407 | KV452863.1 | 2981413 | 5-scf00249 | 5 |
| AX-157827194 | 11 | 67.407 | KV452863.1 | 2985079 | 5-scf00249 | 5 |
| AX-158105891 | 11 | 67.407 | KV452863.1 | 2989483 | 5-scf00249 | 5 |
| AX-158105893 | 11 | 67.407 | KV452863.1 | 3002346 | 5-scf00249 | 5 |
| AX-158105894 | 11 | 67.407 | KV452863.1 | 3004985 | 5-scf00249 | 5 |
| AX-158105896 | 11 | 67.407 | KV452863.1 | 3013143 | 5-scf00249 | 5 |
| AX-158105899 | 11 | 67.407 | KV452863.1 | 3017300 | 5-scf00249 | 5 |
| AX-158105900 | 11 | 67.407 | KV452863.1 | 3020086 | 5-scf00249 | 5 |
| AX-158105901 | 11 | 67.407 | KV452863.1 | 3020462 | 5-scf00249 | 5 |
| AX-157724244 | 11 | 67.407 | KV452863.1 | 3024816 | 5-scf00249 | 5 |
| AX-158105902 | 11 | 67.407 | KV452863.1 | 3025276 | 5-scf00249 | 5 |
| AX-158105903 | 11 | 67.407 | KV452863.1 | 3025645 | 5-scf00249 | 5 |
| AX-158105904 | 11 | 67.407 | KV452863.1 | 3027750 | 5-scf00249 | 5 |
| AX-158105913 | 11 | 67.407 | KV452863.1 | 3038876 | 5-scf00249 | 5 |
| AX-158105915 | 11 | 67.407 | KV452863.1 | 3044927 | 5-scf00249 | 5 |
| AX-158105920 | 11 | 67.407 | KV452863.1 | 3051255 | 5-scf00249 | 5 |
| AX-157827199 | 11 | 67.407 | KV452863.1 | 3051650 | 5-scf00249 | 5 |
| AX-158105922 | 11 | 67.407 | KV452863.1 | 3059104 | 5-scf00249 | 5 |
| AX-157827201 | 11 | 67.407 | KV452863.1 | 3075346 | 5-scf00249 | 5 |
| AX-158105927 | 11 | 67.407 | KV452863.1 | 3076882 | 5-scf00249 | 5 |
| AX-158105933 | 11 | 67.407 | KV452863.1 | 3098013 | 5-scf00249 | 5 |
| AX-158105937 | 11 | 67.407 | KV452863.1 | 3104057 | 5-scf00249 | 5 |
| AX-158105938 | 11 | 67.407 | KV452863.1 | 3104271 | 5-scf00249 | 5 |
| AX-158105939 | 11 | 67.407 | KV452863.1 | 3104662 | 5-scf00249 | 5 |
| AX-158105943 | 11 | 67.407 | KV452863.1 | 3112620 | 5-scf00249 | 5 |
| AX-158105944 | 11 | 67.407 | KV452863.1 | 3113109 | 5-scf00249 | 5 |
| AX-158105946 | 11 | 67.407 | KV452863.1 | 3123035 | 5-scf00249 | 5 |
| AX-158105949 | 11 | 67.407 | KV452863.1 | 3129022 | 5-scf00249 | 5 |
| AX-158105953 | 11 | 67.407 | KV452863.1 | 3141955 | 5-scf00249 | 5 |
| AX-158105956 | 11 | 67.407 | KV452863.1 | 3147024 | 5-scf00249 | 5 |
| AX-158105970 | 11 | 67.407 | KV452863.1 | 3172859 | 5-scf00249 | 5 |
| AX-158105984 | 11 | 67.407 | KV452863.1 | 3192346 | 5-scf00249 | 5 |
| AX-157727497 | 11 | 67.407 | KV452863.1 | 3233931 | 5-scf00249 | 5 |
| AX-158106004 | 11 | 67.407 | KV452863.1 | 3236411 | 5-scf00249 | 5 |
| AX-158106005 | 11 | 67.407 | KV452863.1 | 3238117 | 5-scf00249 | 5 |
| AX-157827214 | 11 | 67.407 | KV452863.1 | 3253300 | 5-scf00249 | 5 |
| AX-157827217 | 11 | 67.407 | KV452863.1 | 3278030 | 5-scf00249 | 5 |

|              |    |        |            |         |            |   |
|--------------|----|--------|------------|---------|------------|---|
| AX-158106029 | 11 | 67.407 | KV452863.1 | 3283589 | 5-scf00249 | 5 |
| AX-158106034 | 11 | 67.407 | KV452863.1 | 3286352 | 5-scf00249 | 5 |
| AX-157827228 | 11 | 67.407 | KV452863.1 | 3352126 | 5-scf00249 | 5 |
| AX-157744352 | 11 | 67.407 | KV452863.1 | 3385730 | 5-scf00249 | 5 |
| AX-157716140 | 11 | 67.407 | KV452863.1 | 3390761 | 5-scf00249 | 5 |
| AX-158106082 | 11 | 67.407 | KV452863.1 | 3395496 | 5-scf00249 | 5 |
| AX-158106086 | 11 | 67.407 | KV452863.1 | 3398697 | 5-scf00249 | 5 |
| AX-158106089 | 11 | 67.407 | KV452863.1 | 3400668 | 5-scf00249 | 5 |
| AX-158106091 | 11 | 67.407 | KV452863.1 | 3401291 | 5-scf00249 | 5 |
| AX-158106093 | 11 | 67.407 | KV452863.1 | 3402596 | 5-scf00249 | 5 |
| AX-158106095 | 11 | 67.407 | KV452863.1 | 3403477 | 5-scf00249 | 5 |
| AX-158410581 | 11 | 67.407 | KV452863.1 | 3403889 | 5-scf00249 | 5 |
| AX-158410582 | 11 | 67.407 | KV452863.1 | 3403989 | 5-scf00249 | 5 |
| AX-158106100 | 11 | 67.407 | KV452863.1 | 3411492 | 5-scf00249 | 5 |
| AX-158106105 | 11 | 67.407 | KV452863.1 | 3424245 | 5-scf00249 | 5 |
| AX-157827236 | 11 | 67.407 | KV452863.1 | 3434883 | 5-scf00249 | 5 |
| AX-158106108 | 11 | 67.407 | KV452863.1 | 3436068 | 5-scf00249 | 5 |
| AX-157827238 | 11 | 67.407 | KV452863.1 | 3445641 | 5-scf00249 | 5 |
| AX-158106111 | 11 | 67.407 | KV452863.1 | 3452484 | 5-scf00249 | 5 |
| AX-157738671 | 11 | 67.407 | KV452863.1 | 3461421 | 5-scf00249 | 5 |
| AX-158106115 | 11 | 67.407 | KV452863.1 | 3466998 | 5-scf00249 | 5 |
| AX-158106116 | 11 | 67.407 | KV452863.1 | 3468140 | 5-scf00249 | 5 |
| AX-157827239 | 11 | 67.407 | KV452863.1 | 3469491 | 5-scf00249 | 5 |
| AX-157871014 | 11 | 67.407 | KV452863.1 | 3470995 | 5-scf00249 | 5 |
| AX-157827241 | 11 | 67.407 | KV452863.1 | 3473542 | 5-scf00249 | 5 |
| AX-158106118 | 11 | 67.407 | KV452863.1 | 3475157 | 5-scf00249 | 5 |
| AX-158106119 | 11 | 67.407 | KV452863.1 | 3478058 | 5-scf00249 | 5 |
| AX-158106120 | 11 | 67.407 | KV452863.1 | 3478828 | 5-scf00249 | 5 |
| AX-158106121 | 11 | 67.407 | KV452863.1 | 3479335 | 5-scf00249 | 5 |
| AX-157827242 | 11 | 67.407 | KV452863.1 | 3480052 | 5-scf00249 | 5 |
| AX-158106123 | 11 | 67.407 | KV452863.1 | 3481130 | 5-scf00249 | 5 |
| AX-158106125 | 11 | 67.407 | KV452863.1 | 3482801 | 5-scf00249 | 5 |
| AX-158106126 | 11 | 67.407 | KV452863.1 | 3483445 | 5-scf00249 | 5 |
| AX-158410583 | 11 | 67.407 | KV452863.1 | 3483489 | 5-scf00249 | 5 |
| AX-158422647 | 11 | 67.407 | KV452863.1 | 3483621 | 5-scf00249 | 5 |
| AX-158410585 | 11 | 67.407 | KV452863.1 | 3483777 | 5-scf00249 | 5 |
| AX-157827243 | 11 | 67.407 | KV452863.1 | 3484235 | 5-scf00249 | 5 |
| AX-158106128 | 11 | 67.407 | KV452863.1 | 3485459 | 5-scf00249 | 5 |
| AX-158106129 | 11 | 67.407 | KV452863.1 | 3486804 | 5-scf00249 | 5 |
| AX-158106131 | 11 | 67.407 | KV452863.1 | 3490208 | 5-scf00249 | 5 |
| AX-157827244 | 11 | 67.407 | KV452863.1 | 3492800 | 5-scf00249 | 5 |
| AX-157827246 | 11 | 67.407 | KV452863.1 | 3494115 | 5-scf00249 | 5 |
| AX-158106133 | 11 | 67.407 | KV452863.1 | 3494686 | 5-scf00249 | 5 |
| AX-158106135 | 11 | 67.407 | KV452863.1 | 3497883 | 5-scf00249 | 5 |
| AX-158106136 | 11 | 67.407 | KV452863.1 | 3498374 | 5-scf00249 | 5 |
| AX-158410586 | 11 | 67.407 | KV452863.1 | 3503885 | 5-scf00249 | 5 |
| AX-158106140 | 11 | 67.407 | KV452863.1 | 3506244 | 5-scf00249 | 5 |
| AX-158106161 | 11 | 67.407 | KV452863.1 | 3542092 | 5-scf00249 | 5 |
| AX-158106168 | 11 | 67.407 | KV452863.1 | 3548999 | 5-scf00249 | 5 |
| AX-158106179 | 11 | 67.407 | KV452863.1 | 3561084 | 5-scf00249 | 5 |
| AX-158106180 | 11 | 67.407 | KV452863.1 | 3562095 | 5-scf00249 | 5 |

|              |    |        |            |         |            |   |
|--------------|----|--------|------------|---------|------------|---|
| AX-158417028 | 11 | 67.407 | KV452863.1 | 3562732 | 5-scf00249 | 5 |
| AX-158106182 | 11 | 67.407 | KV452863.1 | 3567640 | 5-scf00249 | 5 |
| AX-158106183 | 11 | 67.407 | KV452863.1 | 3568112 | 5-scf00249 | 5 |
| AX-158410589 | 11 | 67.407 | KV452863.1 | 3569292 | 5-scf00249 | 5 |
| AX-158106187 | 11 | 67.407 | KV452863.1 | 3573940 | 5-scf00249 | 5 |
| AX-158106189 | 11 | 67.407 | KV452863.1 | 3575504 | 5-scf00249 | 5 |
| AX-158106204 | 11 | 67.407 | KV452863.1 | 3598093 | 5-scf00249 | 5 |
| AX-158106205 | 11 | 67.407 | KV452863.1 | 3600101 | 5-scf00249 | 5 |
| AX-158106209 | 11 | 67.407 | KV452863.1 | 3604500 | 5-scf00249 | 5 |
| AX-158106242 | 11 | 67.407 | KV452863.1 | 3645225 | 5-scf00249 | 5 |
| AX-158106941 | 11 | 67.407 | KV452863.1 | 4579255 | 5-scf00249 | 5 |
| AX-158107074 | 11 | 67.407 | KV452863.1 | 4805237 | 5-scf00249 | 5 |
| AX-158108567 | 11 | 67.407 | KV452863.1 | 7012710 | 5-scf00249 | 5 |
| AX-158108610 | 11 | 67.407 | KV452863.1 | 7059762 | 5-scf00249 | 5 |
| AX-158108611 | 11 | 67.407 | KV452863.1 | 7060223 | 5-scf00249 | 5 |
| AX-158108612 | 11 | 67.407 | KV452863.1 | 7060696 | 5-scf00249 | 5 |
| AX-158106142 | 11 | 67.502 | KV452863.1 | 3508316 | 5-scf00249 | 5 |
| AX-158106143 | 11 | 67.553 | KV452863.1 | 3508480 | 5-scf00249 | 5 |
| AX-158104691 | 11 | 67.65  | KV452856.1 | 2493495 | 5-scf00247 | 5 |
| AX-158105730 | 11 | 67.65  | KV452863.1 | 2627308 | 5-scf00249 | 5 |
| AX-158105736 | 11 | 67.65  | KV452863.1 | 2641624 | 5-scf00249 | 5 |
| AX-158105741 | 11 | 67.65  | KV452863.1 | 2654028 | 5-scf00249 | 5 |
| AX-158105768 | 11 | 67.65  | KV452863.1 | 2735281 | 5-scf00249 | 5 |
| AX-158106154 | 11 | 67.65  | KV452863.1 | 3527388 | 5-scf00249 | 5 |
| AX-158107082 | 11 | 67.65  | KV452863.1 | 4834150 | 5-scf00249 | 5 |
| AX-158106006 | 11 | 67.675 | KV452863.1 | 3238915 | 5-scf00249 | 5 |
| AX-158106051 | 11 | 67.675 | KV452863.1 | 3331335 | 5-scf00249 | 5 |
| AX-157827257 | 11 | 67.675 | KV452863.1 | 3580203 | 5-scf00249 | 5 |
| AX-158106709 | 11 | 67.675 | KV452863.1 | 4227307 | 5-scf00249 | 5 |
| AX-158106732 | 11 | 67.675 | KV452863.1 | 4261034 | 5-scf00249 | 5 |
| AX-158108669 | 11 | 67.675 | KV452863.1 | 7136398 | 5-scf00249 | 5 |
| AX-158108741 | 11 | 67.675 | KV452863.1 | 7225600 | 5-scf00249 | 5 |
| AX-158108801 | 11 | 67.675 | KV452863.1 | 7379895 | 5-scf00249 | 5 |
| AX-158108807 | 11 | 67.675 | KV452863.1 | 7384986 | 5-scf00249 | 5 |
| AX-157757963 | 11 | 67.675 | KV452863.1 | 7417983 | 5-scf00249 | 5 |
| AX-157827258 | 11 | 67.691 | KV452863.1 | 3587410 | 5-scf00249 | 5 |
| AX-157827259 | 11 | 67.736 | KV452863.1 | 3602437 | 5-scf00249 | 5 |
| AX-158105282 | 11 | 67.846 | KV452863.1 | 1097509 | 5-scf00249 | 5 |
| AX-158106219 | 11 | 67.846 | KV452863.1 | 3614195 | 5-scf00249 | 5 |
| AX-158106222 | 11 | 67.846 | KV452863.1 | 3619785 | 5-scf00249 | 5 |
| AX-158106226 | 11 | 67.846 | KV452863.1 | 3628366 | 5-scf00249 | 5 |
| AX-158106230 | 11 | 67.846 | KV452863.1 | 3630790 | 5-scf00249 | 5 |
| AX-158104935 | 11 | 67.955 | KV452856.1 | 2943137 | 5-scf00247 | 5 |
| AX-158105198 | 11 | 67.955 | KV452863.1 | 943186  | 5-scf00249 | 5 |
| AX-158105236 | 11 | 67.955 | KV452863.1 | 1025661 | 5-scf00249 | 5 |
| AX-158410520 | 11 | 67.955 | KV452863.1 | 1030865 | 5-scf00249 | 5 |
| AX-158105496 | 11 | 67.955 | KV452863.1 | 1953519 | 5-scf00249 | 5 |
| AX-158105497 | 11 | 67.955 | KV452863.1 | 1953799 | 5-scf00249 | 5 |
| AX-158105555 | 11 | 67.955 | KV452863.1 | 2081078 | 5-scf00249 | 5 |
| AX-157827172 | 11 | 67.955 | KV452863.1 | 2292712 | 5-scf00249 | 5 |
| AX-158105617 | 11 | 67.955 | KV452863.1 | 2295095 | 5-scf00249 | 5 |

|              |    |        |            |         |            |   |
|--------------|----|--------|------------|---------|------------|---|
| AX-158105632 | 11 | 67.955 | KV452863.1 | 2322654 | 5-scf00249 | 5 |
| AX-158417014 | 11 | 67.955 | KV452863.1 | 2350798 | 5-scf00249 | 5 |
| AX-157827174 | 11 | 67.955 | KV452863.1 | 2356672 | 5-scf00249 | 5 |
| AX-157827180 | 11 | 67.955 | KV452863.1 | 2607008 | 5-scf00249 | 5 |
| AX-158105729 | 11 | 67.955 | KV452863.1 | 2624866 | 5-scf00249 | 5 |
| AX-158106084 | 11 | 67.955 | KV452863.1 | 3397015 | 5-scf00249 | 5 |
| AX-158106085 | 11 | 67.955 | KV452863.1 | 3397498 | 5-scf00249 | 5 |
| AX-158106145 | 11 | 67.955 | KV452863.1 | 3510786 | 5-scf00249 | 5 |
| AX-158106146 | 11 | 67.955 | KV452863.1 | 3511027 | 5-scf00249 | 5 |
| AX-158106159 | 11 | 67.955 | KV452863.1 | 3539888 | 5-scf00249 | 5 |
| AX-157827255 | 11 | 67.955 | KV452863.1 | 3557383 | 5-scf00249 | 5 |
| AX-158106215 | 11 | 67.955 | KV452863.1 | 3610276 | 5-scf00249 | 5 |
| AX-158106221 | 11 | 67.955 | KV452863.1 | 3617784 | 5-scf00249 | 5 |
| AX-158106229 | 11 | 67.955 | KV452863.1 | 3629955 | 5-scf00249 | 5 |
| AX-157758369 | 11 | 67.955 | KV452863.1 | 3634584 | 5-scf00249 | 5 |
| AX-158106233 | 11 | 67.955 | KV452863.1 | 3635760 | 5-scf00249 | 5 |
| AX-158106234 | 11 | 67.955 | KV452863.1 | 3636133 | 5-scf00249 | 5 |
| AX-158106235 | 11 | 67.955 | KV452863.1 | 3637775 | 5-scf00249 | 5 |
| AX-158106236 | 11 | 67.955 | KV452863.1 | 3638588 | 5-scf00249 | 5 |
| AX-158106240 | 11 | 67.955 | KV452863.1 | 3644375 | 5-scf00249 | 5 |
| AX-158384837 | 11 | 67.955 | KV452863.1 | 3644710 | 5-scf00249 | 5 |
| AX-158106241 | 11 | 67.955 | KV452863.1 | 3644751 | 5-scf00249 | 5 |
| AX-158106247 | 11 | 67.955 | KV452863.1 | 3650775 | 5-scf00249 | 5 |
| AX-158106250 | 11 | 67.955 | KV452863.1 | 3656936 | 5-scf00249 | 5 |
| AX-158106253 | 11 | 67.955 | KV452863.1 | 3662362 | 5-scf00249 | 5 |
| AX-158106268 | 11 | 67.955 | KV452863.1 | 3678615 | 5-scf00249 | 5 |
| AX-158106275 | 11 | 67.955 | KV452863.1 | 3692987 | 5-scf00249 | 5 |
| AX-158106277 | 11 | 67.955 | KV452863.1 | 3695082 | 5-scf00249 | 5 |
| AX-158106279 | 11 | 67.955 | KV452863.1 | 3695855 | 5-scf00249 | 5 |
| AX-158106283 | 11 | 67.955 | KV452863.1 | 3698062 | 5-scf00249 | 5 |
| AX-158106284 | 11 | 67.955 | KV452863.1 | 3698970 | 5-scf00249 | 5 |
| AX-158106286 | 11 | 67.955 | KV452863.1 | 3700474 | 5-scf00249 | 5 |
| AX-158407526 | 11 | 67.955 | KV452863.1 | 3702006 | 5-scf00249 | 5 |
| AX-158410596 | 11 | 67.955 | KV452863.1 | 3702929 | 5-scf00249 | 5 |
| AX-158106291 | 11 | 67.955 | KV452863.1 | 3705844 | 5-scf00249 | 5 |
| AX-158106296 | 11 | 67.955 | KV452863.1 | 3710586 | 5-scf00249 | 5 |
| AX-158106298 | 11 | 67.955 | KV452863.1 | 3713138 | 5-scf00249 | 5 |
| AX-158106299 | 11 | 67.955 | KV452863.1 | 3713898 | 5-scf00249 | 5 |
| AX-158106302 | 11 | 67.955 | KV452863.1 | 3716449 | 5-scf00249 | 5 |
| AX-158106311 | 11 | 67.955 | KV452863.1 | 3727816 | 5-scf00249 | 5 |
| AX-158106313 | 11 | 67.955 | KV452863.1 | 3728833 | 5-scf00249 | 5 |
| AX-158106316 | 11 | 67.955 | KV452863.1 | 3731003 | 5-scf00249 | 5 |
| AX-158106317 | 11 | 67.955 | KV452863.1 | 3731847 | 5-scf00249 | 5 |
| AX-158106319 | 11 | 67.955 | KV452863.1 | 3733631 | 5-scf00249 | 5 |
| AX-158106320 | 11 | 67.955 | KV452863.1 | 3734794 | 5-scf00249 | 5 |
| AX-158106321 | 11 | 67.955 | KV452863.1 | 3735406 | 5-scf00249 | 5 |
| AX-158106322 | 11 | 67.955 | KV452863.1 | 3736242 | 5-scf00249 | 5 |
| AX-158106323 | 11 | 67.955 | KV452863.1 | 3739006 | 5-scf00249 | 5 |
| AX-158106324 | 11 | 67.955 | KV452863.1 | 3739372 | 5-scf00249 | 5 |
| AX-158106326 | 11 | 67.955 | KV452863.1 | 3742281 | 5-scf00249 | 5 |
| AX-158106327 | 11 | 67.955 | KV452863.1 | 3743177 | 5-scf00249 | 5 |

|              |    |        |            |         |            |   |
|--------------|----|--------|------------|---------|------------|---|
| AX-158106328 | 11 | 67.955 | KV452863.1 | 3743728 | 5-scf00249 | 5 |
| AX-158106329 | 11 | 67.955 | KV452863.1 | 3744194 | 5-scf00249 | 5 |
| AX-158106330 | 11 | 67.955 | KV452863.1 | 3745546 | 5-scf00249 | 5 |
| AX-158106331 | 11 | 67.955 | KV452863.1 | 3746212 | 5-scf00249 | 5 |
| AX-158106332 | 11 | 67.955 | KV452863.1 | 3750106 | 5-scf00249 | 5 |
| AX-158106333 | 11 | 67.955 | KV452863.1 | 3751242 | 5-scf00249 | 5 |
| AX-158106337 | 11 | 67.955 | KV452863.1 | 3755458 | 5-scf00249 | 5 |
| AX-158106341 | 11 | 67.955 | KV452863.1 | 3761187 | 5-scf00249 | 5 |
| AX-158106343 | 11 | 67.955 | KV452863.1 | 3762839 | 5-scf00249 | 5 |
| AX-158106349 | 11 | 67.955 | KV452863.1 | 3769726 | 5-scf00249 | 5 |
| AX-158106350 | 11 | 67.955 | KV452863.1 | 3771750 | 5-scf00249 | 5 |
| AX-158106363 | 11 | 67.955 | KV452863.1 | 3792967 | 5-scf00249 | 5 |
| AX-158106373 | 11 | 67.955 | KV452863.1 | 3798977 | 5-scf00249 | 5 |
| AX-158106374 | 11 | 67.955 | KV452863.1 | 3799701 | 5-scf00249 | 5 |
| AX-158106377 | 11 | 67.955 | KV452863.1 | 3802087 | 5-scf00249 | 5 |
| AX-158106379 | 11 | 67.955 | KV452863.1 | 3803195 | 5-scf00249 | 5 |
| AX-158106388 | 11 | 67.955 | KV452863.1 | 3814055 | 5-scf00249 | 5 |
| AX-158106394 | 11 | 67.955 | KV452863.1 | 3821138 | 5-scf00249 | 5 |
| AX-158380071 | 11 | 67.955 | KV452863.1 | 3822836 | 5-scf00249 | 5 |
| AX-158106395 | 11 | 67.955 | KV452863.1 | 3823038 | 5-scf00249 | 5 |
| AX-157698621 | 11 | 67.955 | KV452863.1 | 3823538 | 5-scf00249 | 5 |
| AX-158106397 | 11 | 67.955 | KV452863.1 | 3824766 | 5-scf00249 | 5 |
| AX-158106400 | 11 | 67.955 | KV452863.1 | 3826845 | 5-scf00249 | 5 |
| AX-158106403 | 11 | 67.955 | KV452863.1 | 3830152 | 5-scf00249 | 5 |
| AX-158106412 | 11 | 67.955 | KV452863.1 | 3842930 | 5-scf00249 | 5 |
| AX-158106419 | 11 | 67.955 | KV452863.1 | 3852454 | 5-scf00249 | 5 |
| AX-158106420 | 11 | 67.955 | KV452863.1 | 3852763 | 5-scf00249 | 5 |
| AX-158106445 | 11 | 67.955 | KV452863.1 | 3878712 | 5-scf00249 | 5 |
| AX-158392288 | 11 | 67.955 | KV452863.1 | 3905744 | 5-scf00249 | 5 |
| AX-158106472 | 11 | 67.955 | KV452863.1 | 3916597 | 5-scf00249 | 5 |
| AX-158106476 | 11 | 67.955 | KV452863.1 | 3918574 | 5-scf00249 | 5 |
| AX-158106480 | 11 | 67.955 | KV452863.1 | 3923107 | 5-scf00249 | 5 |
| AX-158106501 | 11 | 67.955 | KV452863.1 | 3945572 | 5-scf00249 | 5 |
| AX-158106503 | 11 | 67.955 | KV452863.1 | 3947164 | 5-scf00249 | 5 |
| AX-158106509 | 11 | 67.955 | KV452863.1 | 3952548 | 5-scf00249 | 5 |
| AX-157827278 | 11 | 67.955 | KV452863.1 | 3976045 | 5-scf00249 | 5 |
| AX-157871019 | 11 | 67.955 | KV452863.1 | 3981269 | 5-scf00249 | 5 |
| AX-158106530 | 11 | 67.955 | KV452863.1 | 3989870 | 5-scf00249 | 5 |
| AX-158106531 | 11 | 67.955 | KV452863.1 | 3991503 | 5-scf00249 | 5 |
| AX-158106541 | 11 | 67.955 | KV452863.1 | 4000833 | 5-scf00249 | 5 |
| AX-158106542 | 11 | 67.955 | KV452863.1 | 4002457 | 5-scf00249 | 5 |
| AX-158106575 | 11 | 67.955 | KV452863.1 | 4066055 | 5-scf00249 | 5 |
| AX-157827289 | 11 | 67.955 | KV452863.1 | 4066945 | 5-scf00249 | 5 |
| AX-158106577 | 11 | 67.955 | KV452863.1 | 4067565 | 5-scf00249 | 5 |
| AX-158106581 | 11 | 67.955 | KV452863.1 | 4072077 | 5-scf00249 | 5 |
| AX-158106613 | 11 | 67.955 | KV452863.1 | 4109358 | 5-scf00249 | 5 |
| AX-158106618 | 11 | 67.955 | KV452863.1 | 4115657 | 5-scf00249 | 5 |
| AX-158106639 | 11 | 67.955 | KV452863.1 | 4148539 | 5-scf00249 | 5 |
| AX-158106654 | 11 | 67.955 | KV452863.1 | 4161822 | 5-scf00249 | 5 |
| AX-157773540 | 11 | 67.955 | KV452863.1 | 4162705 | 5-scf00249 | 5 |
| AX-158106669 | 11 | 67.955 | KV452863.1 | 4174822 | 5-scf00249 | 5 |

|              |    |        |            |         |            |   |
|--------------|----|--------|------------|---------|------------|---|
| AX-158106718 | 11 | 67.955 | KV452863.1 | 4237388 | 5-scf00249 | 5 |
| AX-157827299 | 11 | 67.955 | KV452863.1 | 4286011 | 5-scf00249 | 5 |
| AX-158106767 | 11 | 67.955 | KV452863.1 | 4330574 | 5-scf00249 | 5 |
| AX-158106770 | 11 | 67.955 | KV452863.1 | 4331777 | 5-scf00249 | 5 |
| AX-158407543 | 11 | 67.955 | KV452863.1 | 4344151 | 5-scf00249 | 5 |
| AX-158106789 | 11 | 67.955 | KV452863.1 | 4355548 | 5-scf00249 | 5 |
| AX-158106798 | 11 | 67.955 | KV452863.1 | 4370228 | 5-scf00249 | 5 |
| AX-158106811 | 11 | 67.955 | KV452863.1 | 4392741 | 5-scf00249 | 5 |
| AX-158106815 | 11 | 67.955 | KV452863.1 | 4398060 | 5-scf00249 | 5 |
| AX-158106827 | 11 | 67.955 | KV452863.1 | 4409311 | 5-scf00249 | 5 |
| AX-158106833 | 11 | 67.955 | KV452863.1 | 4414191 | 5-scf00249 | 5 |
| AX-158106834 | 11 | 67.955 | KV452863.1 | 4415030 | 5-scf00249 | 5 |
| AX-157827316 | 11 | 67.955 | KV452863.1 | 4416765 | 5-scf00249 | 5 |
| AX-158106855 | 11 | 67.955 | KV452863.1 | 4438007 | 5-scf00249 | 5 |
| AX-157827322 | 11 | 67.955 | KV452863.1 | 4438579 | 5-scf00249 | 5 |
| AX-158106856 | 11 | 67.955 | KV452863.1 | 4438840 | 5-scf00249 | 5 |
| AX-157871025 | 11 | 67.955 | KV452863.1 | 4448448 | 5-scf00249 | 5 |
| AX-158106870 | 11 | 67.955 | KV452863.1 | 4457797 | 5-scf00249 | 5 |
| AX-158106876 | 11 | 67.955 | KV452863.1 | 4463635 | 5-scf00249 | 5 |
| AX-157827326 | 11 | 67.955 | KV452863.1 | 4465593 | 5-scf00249 | 5 |
| AX-158106879 | 11 | 67.955 | KV452863.1 | 4465909 | 5-scf00249 | 5 |
| AX-158106883 | 11 | 67.955 | KV452863.1 | 4471635 | 5-scf00249 | 5 |
| AX-158106885 | 11 | 67.955 | KV452863.1 | 4481087 | 5-scf00249 | 5 |
| AX-158392295 | 11 | 67.955 | KV452863.1 | 4481213 | 5-scf00249 | 5 |
| AX-158410606 | 11 | 67.955 | KV452863.1 | 4482235 | 5-scf00249 | 5 |
| AX-158407544 | 11 | 67.955 | KV452863.1 | 4482491 | 5-scf00249 | 5 |
| AX-158106887 | 11 | 67.955 | KV452863.1 | 4485311 | 5-scf00249 | 5 |
| AX-158106893 | 11 | 67.955 | KV452863.1 | 4493716 | 5-scf00249 | 5 |
| AX-158392296 | 11 | 67.955 | KV452863.1 | 4498267 | 5-scf00249 | 5 |
| AX-157871027 | 11 | 67.955 | KV452863.1 | 4498312 | 5-scf00249 | 5 |
| AX-158106904 | 11 | 67.955 | KV452863.1 | 4503034 | 5-scf00249 | 5 |
| AX-158106907 | 11 | 67.955 | KV452863.1 | 4508002 | 5-scf00249 | 5 |
| AX-158106910 | 11 | 67.955 | KV452863.1 | 4514661 | 5-scf00249 | 5 |
| AX-158106911 | 11 | 67.955 | KV452863.1 | 4515423 | 5-scf00249 | 5 |
| AX-158106912 | 11 | 67.955 | KV452863.1 | 4518566 | 5-scf00249 | 5 |
| AX-158106919 | 11 | 67.955 | KV452863.1 | 4527559 | 5-scf00249 | 5 |
| AX-157770864 | 11 | 67.955 | KV452863.1 | 4528991 | 5-scf00249 | 5 |
| AX-158106920 | 11 | 67.955 | KV452863.1 | 4531398 | 5-scf00249 | 5 |
| AX-157871029 | 11 | 67.955 | KV452863.1 | 4538042 | 5-scf00249 | 5 |
| AX-158106922 | 11 | 67.955 | KV452863.1 | 4538469 | 5-scf00249 | 5 |
| AX-158106923 | 11 | 67.955 | KV452863.1 | 4539906 | 5-scf00249 | 5 |
| AX-158106929 | 11 | 67.955 | KV452863.1 | 4550844 | 5-scf00249 | 5 |
| AX-158106932 | 11 | 67.955 | KV452863.1 | 4560297 | 5-scf00249 | 5 |
| AX-158106935 | 11 | 67.955 | KV452863.1 | 4565575 | 5-scf00249 | 5 |
| AX-158106936 | 11 | 67.955 | KV452863.1 | 4566328 | 5-scf00249 | 5 |
| AX-158106943 | 11 | 67.955 | KV452863.1 | 4580433 | 5-scf00249 | 5 |
| AX-158106947 | 11 | 67.955 | KV452863.1 | 4586457 | 5-scf00249 | 5 |
| AX-158106948 | 11 | 67.955 | KV452863.1 | 4589467 | 5-scf00249 | 5 |
| AX-157770766 | 11 | 67.955 | KV452863.1 | 4590913 | 5-scf00249 | 5 |
| AX-158106949 | 11 | 67.955 | KV452863.1 | 4593112 | 5-scf00249 | 5 |
| AX-158106954 | 11 | 67.955 | KV452863.1 | 4601865 | 5-scf00249 | 5 |



|              |    |        |            |         |            |   |
|--------------|----|--------|------------|---------|------------|---|
| AX-158106955 | 11 | 67.955 | KV452863.1 | 4604048 | 5-scf00249 | 5 |
| AX-158106964 | 11 | 67.955 | KV452863.1 | 4613212 | 5-scf00249 | 5 |
| AX-158106966 | 11 | 67.955 | KV452863.1 | 4614137 | 5-scf00249 | 5 |
| AX-158106967 | 11 | 67.955 | KV452863.1 | 4615566 | 5-scf00249 | 5 |
| AX-158106974 | 11 | 67.955 | KV452863.1 | 4624916 | 5-scf00249 | 5 |
| AX-158106977 | 11 | 67.955 | KV452863.1 | 4627132 | 5-scf00249 | 5 |
| AX-158106978 | 11 | 67.955 | KV452863.1 | 4629094 | 5-scf00249 | 5 |
| AX-158106979 | 11 | 67.955 | KV452863.1 | 4630088 | 5-scf00249 | 5 |
| AX-158106981 | 11 | 67.955 | KV452863.1 | 4633759 | 5-scf00249 | 5 |
| AX-158106984 | 11 | 67.955 | KV452863.1 | 4646767 | 5-scf00249 | 5 |
| AX-158106988 | 11 | 67.955 | KV452863.1 | 4662160 | 5-scf00249 | 5 |
| AX-158106989 | 11 | 67.955 | KV452863.1 | 4662691 | 5-scf00249 | 5 |
| AX-158106991 | 11 | 67.955 | KV452863.1 | 4663962 | 5-scf00249 | 5 |
| AX-158106993 | 11 | 67.955 | KV452863.1 | 4666311 | 5-scf00249 | 5 |
| AX-158106997 | 11 | 67.955 | KV452863.1 | 4670974 | 5-scf00249 | 5 |
| AX-158106999 | 11 | 67.955 | KV452863.1 | 4673698 | 5-scf00249 | 5 |
| AX-158107000 | 11 | 67.955 | KV452863.1 | 4676285 | 5-scf00249 | 5 |
| AX-158107002 | 11 | 67.955 | KV452863.1 | 4679002 | 5-scf00249 | 5 |
| AX-158107004 | 11 | 67.955 | KV452863.1 | 4680857 | 5-scf00249 | 5 |
| AX-157724610 | 11 | 67.955 | KV452863.1 | 4683610 | 5-scf00249 | 5 |
| AX-158107008 | 11 | 67.955 | KV452863.1 | 4687535 | 5-scf00249 | 5 |
| AX-158107010 | 11 | 67.955 | KV452863.1 | 4689486 | 5-scf00249 | 5 |
| AX-158107015 | 11 | 67.955 | KV452863.1 | 4696899 | 5-scf00249 | 5 |
| AX-158107017 | 11 | 67.955 | KV452863.1 | 4698049 | 5-scf00249 | 5 |
| AX-158107018 | 11 | 67.955 | KV452863.1 | 4700234 | 5-scf00249 | 5 |
| AX-158107019 | 11 | 67.955 | KV452863.1 | 4702228 | 5-scf00249 | 5 |
| AX-158107021 | 11 | 67.955 | KV452863.1 | 4703017 | 5-scf00249 | 5 |
| AX-158107023 | 11 | 67.955 | KV452863.1 | 4706928 | 5-scf00249 | 5 |
| AX-158107024 | 11 | 67.955 | KV452863.1 | 4709121 | 5-scf00249 | 5 |
| AX-158107025 | 11 | 67.955 | KV452863.1 | 4712067 | 5-scf00249 | 5 |
| AX-158107026 | 11 | 67.955 | KV452863.1 | 4713335 | 5-scf00249 | 5 |
| AX-158107027 | 11 | 67.955 | KV452863.1 | 4714650 | 5-scf00249 | 5 |
| AX-158107031 | 11 | 67.955 | KV452863.1 | 4721447 | 5-scf00249 | 5 |
| AX-157745130 | 11 | 67.955 | KV452863.1 | 4722478 | 5-scf00249 | 5 |
| AX-158107032 | 11 | 67.955 | KV452863.1 | 4723071 | 5-scf00249 | 5 |
| AX-158107033 | 11 | 67.955 | KV452863.1 | 4725467 | 5-scf00249 | 5 |
| AX-158107034 | 11 | 67.955 | KV452863.1 | 4726142 | 5-scf00249 | 5 |
| AX-157702427 | 11 | 67.955 | KV452863.1 | 4726355 | 5-scf00249 | 5 |
| AX-158107035 | 11 | 67.955 | KV452863.1 | 4727831 | 5-scf00249 | 5 |
| AX-158380073 | 11 | 67.955 | KV452863.1 | 4729363 | 5-scf00249 | 5 |
| AX-158107036 | 11 | 67.955 | KV452863.1 | 4729509 | 5-scf00249 | 5 |
| AX-158107037 | 11 | 67.955 | KV452863.1 | 4730364 | 5-scf00249 | 5 |
| AX-157711123 | 11 | 67.955 | KV452863.1 | 4731255 | 5-scf00249 | 5 |
| AX-158107039 | 11 | 67.955 | KV452863.1 | 4732684 | 5-scf00249 | 5 |
| AX-158107040 | 11 | 67.955 | KV452863.1 | 4735862 | 5-scf00249 | 5 |
| AX-158107043 | 11 | 67.955 | KV452863.1 | 4740625 | 5-scf00249 | 5 |
| AX-158107044 | 11 | 67.955 | KV452863.1 | 4742043 | 5-scf00249 | 5 |
| AX-158107046 | 11 | 67.955 | KV452863.1 | 4746834 | 5-scf00249 | 5 |
| AX-158107047 | 11 | 67.955 | KV452863.1 | 4747227 | 5-scf00249 | 5 |
| AX-158107049 | 11 | 67.955 | KV452863.1 | 4748283 | 5-scf00249 | 5 |
| AX-158107050 | 11 | 67.955 | KV452863.1 | 4748871 | 5-scf00249 | 5 |

|              |    |        |            |         |            |   |
|--------------|----|--------|------------|---------|------------|---|
| AX-158107052 | 11 | 67.955 | KV452863.1 | 4751076 | 5-scf00249 | 5 |
| AX-158107053 | 11 | 67.955 | KV452863.1 | 4752732 | 5-scf00249 | 5 |
| AX-158107056 | 11 | 67.955 | KV452863.1 | 4756129 | 5-scf00249 | 5 |
| AX-158107057 | 11 | 67.955 | KV452863.1 | 4757250 | 5-scf00249 | 5 |
| AX-158107063 | 11 | 67.955 | KV452863.1 | 4769656 | 5-scf00249 | 5 |
| AX-158107066 | 11 | 67.955 | KV452863.1 | 4772935 | 5-scf00249 | 5 |
| AX-157871033 | 11 | 67.955 | KV452863.1 | 4783833 | 5-scf00249 | 5 |
| AX-158107069 | 11 | 67.955 | KV452863.1 | 4797250 | 5-scf00249 | 5 |
| AX-158392299 | 11 | 67.955 | KV452863.1 | 4814678 | 5-scf00249 | 5 |
| AX-157744920 | 11 | 67.955 | KV452863.1 | 4822656 | 5-scf00249 | 5 |
| AX-158107080 | 11 | 67.955 | KV452863.1 | 4823795 | 5-scf00249 | 5 |
| AX-158107081 | 11 | 67.955 | KV452863.1 | 4831743 | 5-scf00249 | 5 |
| AX-158410611 | 11 | 67.955 | KV452863.1 | 4834482 | 5-scf00249 | 5 |
| AX-158407547 | 11 | 67.955 | KV452863.1 | 4835799 | 5-scf00249 | 5 |
| AX-158417041 | 11 | 67.955 | KV452863.1 | 4836663 | 5-scf00249 | 5 |
| AX-158107083 | 11 | 67.955 | KV452863.1 | 4839910 | 5-scf00249 | 5 |
| AX-158107084 | 11 | 67.955 | KV452863.1 | 4844858 | 5-scf00249 | 5 |
| AX-158107085 | 11 | 67.955 | KV452863.1 | 4845227 | 5-scf00249 | 5 |
| AX-158107086 | 11 | 67.955 | KV452863.1 | 4845775 | 5-scf00249 | 5 |
| AX-158107102 | 11 | 67.955 | KV452863.1 | 4880246 | 5-scf00249 | 5 |
| AX-158107104 | 11 | 67.955 | KV452863.1 | 4882079 | 5-scf00249 | 5 |
| AX-158107107 | 11 | 67.955 | KV452863.1 | 4884382 | 5-scf00249 | 5 |
| AX-158108536 | 11 | 67.955 | KV452863.1 | 6972593 | 5-scf00249 | 5 |
| AX-158108566 | 11 | 67.955 | KV452863.1 | 7012421 | 5-scf00249 | 5 |
| AX-158108666 | 11 | 67.955 | KV452863.1 | 7132316 | 5-scf00249 | 5 |
| AX-158108675 | 11 | 67.955 | KV452863.1 | 7142401 | 5-scf00249 | 5 |
| AX-158108702 | 11 | 67.955 | KV452863.1 | 7177881 | 5-scf00249 | 5 |
| AX-157718919 | 11 | 67.955 | KV452863.1 | 7179792 | 5-scf00249 | 5 |
| AX-158108705 | 11 | 67.955 | KV452863.1 | 7179949 | 5-scf00249 | 5 |
| AX-158108712 | 11 | 67.955 | KV452863.1 | 7185513 | 5-scf00249 | 5 |
| AX-157857433 | 11 | 67.955 | KV452863.1 | 7216970 | 5-scf00249 | 5 |
| AX-158108734 | 11 | 67.955 | KV452863.1 | 7218023 | 5-scf00249 | 5 |
| AX-158108736 | 11 | 67.955 | KV452863.1 | 7219048 | 5-scf00249 | 5 |
| AX-158108753 | 11 | 67.955 | KV452863.1 | 7271751 | 5-scf00249 | 5 |
| AX-158108761 | 11 | 67.955 | KV452863.1 | 7311327 | 5-scf00249 | 5 |
| AX-158108790 | 11 | 67.955 | KV452863.1 | 7360738 | 5-scf00249 | 5 |
| AX-157827541 | 11 | 67.955 | KV452863.1 | 7360987 | 5-scf00249 | 5 |
| AX-158108791 | 11 | 67.955 | KV452863.1 | 7364204 | 5-scf00249 | 5 |
| AX-158108794 | 11 | 67.955 | KV452863.1 | 7366339 | 5-scf00249 | 5 |
| AX-158108799 | 11 | 67.955 | KV452863.1 | 7377045 | 5-scf00249 | 5 |
| AX-158108800 | 11 | 67.955 | KV452863.1 | 7377463 | 5-scf00249 | 5 |
| AX-157827545 | 11 | 67.955 | KV452863.1 | 7381645 | 5-scf00249 | 5 |
| AX-158108803 | 11 | 67.955 | KV452863.1 | 7382471 | 5-scf00249 | 5 |
| AX-158108804 | 11 | 67.955 | KV452863.1 | 7383242 | 5-scf00249 | 5 |
| AX-158108805 | 11 | 67.955 | KV452863.1 | 7383647 | 5-scf00249 | 5 |
| AX-158108828 | 11 | 67.955 | KV452863.1 | 7401956 | 5-scf00249 | 5 |
| AX-158108830 | 11 | 67.955 | KV452863.1 | 7402736 | 5-scf00249 | 5 |
| AX-158108835 | 11 | 67.955 | KV452863.1 | 7404716 | 5-scf00249 | 5 |
| AX-158108838 | 11 | 67.955 | KV452863.1 | 7409220 | 5-scf00249 | 5 |
| AX-158108848 | 11 | 67.955 | KV452863.1 | 7422621 | 5-scf00249 | 5 |
| AX-158108852 | 11 | 67.955 | KV452863.1 | 7427162 | 5-scf00249 | 5 |

|              |    |        |            |         |            |   |
|--------------|----|--------|------------|---------|------------|---|
| AX-157827552 | 11 | 67.955 | KV452863.1 | 7505191 | 5-scf00249 | 5 |
| AX-157827553 | 11 | 67.955 | KV452863.1 | 7510620 | 5-scf00249 | 5 |
| AX-158108911 | 11 | 67.955 | KV452863.1 | 7519617 | 5-scf00249 | 5 |
| AX-157827555 | 11 | 67.955 | KV452863.1 | 7527771 | 5-scf00249 | 5 |
| AX-158392351 | 11 | 67.955 | KV452863.1 | 7564830 | 5-scf00249 | 5 |
| AX-158108946 | 11 | 67.955 | KV452863.1 | 7574726 | 5-scf00249 | 5 |
| AX-158108952 | 11 | 67.955 | KV452863.1 | 7598515 | 5-scf00249 | 5 |
| AX-158108954 | 11 | 67.955 | KV452863.1 | 7603332 | 5-scf00249 | 5 |
| AX-158108957 | 11 | 67.955 | KV452863.1 | 7612565 | 5-scf00249 | 5 |
| AX-158108967 | 11 | 67.955 | KV452863.1 | 7653065 | 5-scf00249 | 5 |
| AX-158106432 | 11 | 68.064 | KV452863.1 | 3865661 | 5-scf00249 | 5 |
| AX-158106454 | 11 | 68.064 | KV452863.1 | 3892376 | 5-scf00249 | 5 |
| AX-158106462 | 11 | 68.064 | KV452863.1 | 3903912 | 5-scf00249 | 5 |
| AX-158106474 | 11 | 68.064 | KV452863.1 | 3917423 | 5-scf00249 | 5 |
| AX-157885865 | 11 | 68.283 | KV452863.1 | 1039173 | 5-scf00249 | 5 |
| AX-158105273 | 11 | 68.283 | KV452863.1 | 1078965 | 5-scf00249 | 5 |
| AX-158105296 | 11 | 68.283 | KV452863.1 | 1122937 | 5-scf00249 | 5 |
| AX-158105416 | 11 | 68.283 | KV452863.1 | 1730086 | 5-scf00249 | 5 |
| AX-158105467 | 11 | 68.283 | KV452863.1 | 1909145 | 5-scf00249 | 5 |
| AX-158105468 | 11 | 68.283 | KV452863.1 | 1910076 | 5-scf00249 | 5 |
| AX-158105498 | 11 | 68.283 | KV452863.1 | 1954186 | 5-scf00249 | 5 |
| AX-157827162 | 11 | 68.283 | KV452863.1 | 2130729 | 5-scf00249 | 5 |
| AX-157827163 | 11 | 68.283 | KV452863.1 | 2131449 | 5-scf00249 | 5 |
| AX-157865973 | 11 | 68.283 | KV452863.1 | 2257874 | 5-scf00249 | 5 |
| AX-158392257 | 11 | 68.283 | KV452863.1 | 2305688 | 5-scf00249 | 5 |
| AX-158105669 | 11 | 68.283 | KV452863.1 | 2420471 | 5-scf00249 | 5 |
| AX-158407515 | 11 | 68.283 | KV452863.1 | 2597369 | 5-scf00249 | 5 |
| AX-158105723 | 11 | 68.283 | KV452863.1 | 2601399 | 5-scf00249 | 5 |
| AX-158105954 | 11 | 68.283 | KV452863.1 | 3145683 | 5-scf00249 | 5 |
| AX-158105972 | 11 | 68.283 | KV452863.1 | 3177608 | 5-scf00249 | 5 |
| AX-158105973 | 11 | 68.283 | KV452863.1 | 3179871 | 5-scf00249 | 5 |
| AX-158105985 | 11 | 68.283 | KV452863.1 | 3194928 | 5-scf00249 | 5 |
| AX-158106055 | 11 | 68.283 | KV452863.1 | 3337629 | 5-scf00249 | 5 |
| AX-158106098 | 11 | 68.283 | KV452863.1 | 3407390 | 5-scf00249 | 5 |
| AX-157704114 | 11 | 68.283 | KV452863.1 | 3439427 | 5-scf00249 | 5 |
| AX-158106132 | 11 | 68.283 | KV452863.1 | 3491959 | 5-scf00249 | 5 |
| AX-158106137 | 11 | 68.283 | KV452863.1 | 3498941 | 5-scf00249 | 5 |
| AX-157827250 | 11 | 68.283 | KV452863.1 | 3514189 | 5-scf00249 | 5 |
| AX-158106157 | 11 | 68.283 | KV452863.1 | 3536055 | 5-scf00249 | 5 |
| AX-157827254 | 11 | 68.283 | KV452863.1 | 3556625 | 5-scf00249 | 5 |
| AX-158106210 | 11 | 68.283 | KV452863.1 | 3605578 | 5-scf00249 | 5 |
| AX-158106211 | 11 | 68.283 | KV452863.1 | 3606688 | 5-scf00249 | 5 |
| AX-158106220 | 11 | 68.283 | KV452863.1 | 3616291 | 5-scf00249 | 5 |
| AX-158106223 | 11 | 68.283 | KV452863.1 | 3625911 | 5-scf00249 | 5 |
| AX-158106225 | 11 | 68.283 | KV452863.1 | 3627724 | 5-scf00249 | 5 |
| AX-158106228 | 11 | 68.283 | KV452863.1 | 3629316 | 5-scf00249 | 5 |
| AX-157722896 | 11 | 68.283 | KV452863.1 | 3630382 | 5-scf00249 | 5 |
| AX-158410590 | 11 | 68.283 | KV452863.1 | 3632929 | 5-scf00249 | 5 |
| AX-158106232 | 11 | 68.283 | KV452863.1 | 3633468 | 5-scf00249 | 5 |
| AX-158106237 | 11 | 68.283 | KV452863.1 | 3639318 | 5-scf00249 | 5 |
| AX-158106238 | 11 | 68.283 | KV452863.1 | 3639780 | 5-scf00249 | 5 |

|              |    |        |            |         |            |   |
|--------------|----|--------|------------|---------|------------|---|
| AX-158106239 | 11 | 68.283 | KV452863.1 | 3640710 | 5-scf00249 | 5 |
| AX-158106245 | 11 | 68.283 | KV452863.1 | 3648529 | 5-scf00249 | 5 |
| AX-157703089 | 11 | 68.283 | KV452863.1 | 3648946 | 5-scf00249 | 5 |
| AX-157827263 | 11 | 68.283 | KV452863.1 | 3649702 | 5-scf00249 | 5 |
| AX-158106246 | 11 | 68.283 | KV452863.1 | 3649938 | 5-scf00249 | 5 |
| AX-158106248 | 11 | 68.283 | KV452863.1 | 3653087 | 5-scf00249 | 5 |
| AX-158106251 | 11 | 68.283 | KV452863.1 | 3658537 | 5-scf00249 | 5 |
| AX-158410594 | 11 | 68.283 | KV452863.1 | 3660241 | 5-scf00249 | 5 |
| AX-158106252 | 11 | 68.283 | KV452863.1 | 3661238 | 5-scf00249 | 5 |
| AX-158106254 | 11 | 68.283 | KV452863.1 | 3664083 | 5-scf00249 | 5 |
| AX-158106257 | 11 | 68.283 | KV452863.1 | 3666100 | 5-scf00249 | 5 |
| AX-158106259 | 11 | 68.283 | KV452863.1 | 3668248 | 5-scf00249 | 5 |
| AX-158410595 | 11 | 68.283 | KV452863.1 | 3669256 | 5-scf00249 | 5 |
| AX-158106260 | 11 | 68.283 | KV452863.1 | 3669419 | 5-scf00249 | 5 |
| AX-157827265 | 11 | 68.283 | KV452863.1 | 3670503 | 5-scf00249 | 5 |
| AX-158106262 | 11 | 68.283 | KV452863.1 | 3672303 | 5-scf00249 | 5 |
| AX-158106264 | 11 | 68.283 | KV452863.1 | 3673167 | 5-scf00249 | 5 |
| AX-158106266 | 11 | 68.283 | KV452863.1 | 3676125 | 5-scf00249 | 5 |
| AX-158106309 | 11 | 68.283 | KV452863.1 | 3726564 | 5-scf00249 | 5 |
| AX-158106315 | 11 | 68.283 | KV452863.1 | 3730195 | 5-scf00249 | 5 |
| AX-158106338 | 11 | 68.283 | KV452863.1 | 3755855 | 5-scf00249 | 5 |
| AX-158106352 | 11 | 68.283 | KV452863.1 | 3774162 | 5-scf00249 | 5 |
| AX-158106384 | 11 | 68.283 | KV452863.1 | 3810096 | 5-scf00249 | 5 |
| AX-157871016 | 11 | 68.283 | KV452863.1 | 3830427 | 5-scf00249 | 5 |
| AX-158106409 | 11 | 68.283 | KV452863.1 | 3837521 | 5-scf00249 | 5 |
| AX-158106448 | 11 | 68.283 | KV452863.1 | 3879957 | 5-scf00249 | 5 |
| AX-157827272 | 11 | 68.283 | KV452863.1 | 3880102 | 5-scf00249 | 5 |
| AX-158106451 | 11 | 68.283 | KV452863.1 | 3887396 | 5-scf00249 | 5 |
| AX-158106453 | 11 | 68.283 | KV452863.1 | 3891435 | 5-scf00249 | 5 |
| AX-157827274 | 11 | 68.283 | KV452863.1 | 3892739 | 5-scf00249 | 5 |
| AX-158106473 | 11 | 68.283 | KV452863.1 | 3916823 | 5-scf00249 | 5 |
| AX-158106478 | 11 | 68.283 | KV452863.1 | 3921651 | 5-scf00249 | 5 |
| AX-157871018 | 11 | 68.283 | KV452863.1 | 3924697 | 5-scf00249 | 5 |
| AX-158106481 | 11 | 68.283 | KV452863.1 | 3925326 | 5-scf00249 | 5 |
| AX-158106504 | 11 | 68.283 | KV452863.1 | 3949047 | 5-scf00249 | 5 |
| AX-158106505 | 11 | 68.283 | KV452863.1 | 3949489 | 5-scf00249 | 5 |
| AX-157714725 | 11 | 68.283 | KV452863.1 | 3954729 | 5-scf00249 | 5 |
| AX-157718177 | 11 | 68.283 | KV452863.1 | 3955153 | 5-scf00249 | 5 |
| AX-158106512 | 11 | 68.283 | KV452863.1 | 3956133 | 5-scf00249 | 5 |
| AX-158106517 | 11 | 68.283 | KV452863.1 | 3965700 | 5-scf00249 | 5 |
| AX-158106523 | 11 | 68.283 | KV452863.1 | 3976268 | 5-scf00249 | 5 |
| AX-158106524 | 11 | 68.283 | KV452863.1 | 3976398 | 5-scf00249 | 5 |
| AX-158106525 | 11 | 68.283 | KV452863.1 | 3977933 | 5-scf00249 | 5 |
| AX-157701743 | 11 | 68.283 | KV452863.1 | 3978853 | 5-scf00249 | 5 |
| AX-158106527 | 11 | 68.283 | KV452863.1 | 3984989 | 5-scf00249 | 5 |
| AX-158106528 | 11 | 68.283 | KV452863.1 | 3985444 | 5-scf00249 | 5 |
| AX-158106529 | 11 | 68.283 | KV452863.1 | 3989731 | 5-scf00249 | 5 |
| AX-158106533 | 11 | 68.283 | KV452863.1 | 3995472 | 5-scf00249 | 5 |
| AX-158106534 | 11 | 68.283 | KV452863.1 | 3995917 | 5-scf00249 | 5 |
| AX-158106535 | 11 | 68.283 | KV452863.1 | 3996364 | 5-scf00249 | 5 |
| AX-157752513 | 11 | 68.283 | KV452863.1 | 4000053 | 5-scf00249 | 5 |

|              |    |        |            |         |            |   |
|--------------|----|--------|------------|---------|------------|---|
| AX-158106540 | 11 | 68.283 | KV452863.1 | 4000416 | 5-scf00249 | 5 |
| AX-158106544 | 11 | 68.283 | KV452863.1 | 4007503 | 5-scf00249 | 5 |
| AX-158410602 | 11 | 68.283 | KV452863.1 | 4022344 | 5-scf00249 | 5 |
| AX-158106553 | 11 | 68.283 | KV452863.1 | 4023221 | 5-scf00249 | 5 |
| AX-157738048 | 11 | 68.283 | KV452863.1 | 4024480 | 5-scf00249 | 5 |
| AX-158106555 | 11 | 68.283 | KV452863.1 | 4026149 | 5-scf00249 | 5 |
| AX-157740493 | 11 | 68.283 | KV452863.1 | 4027399 | 5-scf00249 | 5 |
| AX-158106556 | 11 | 68.283 | KV452863.1 | 4027775 | 5-scf00249 | 5 |
| AX-158106557 | 11 | 68.283 | KV452863.1 | 4032691 | 5-scf00249 | 5 |
| AX-157748220 | 11 | 68.283 | KV452863.1 | 4046259 | 5-scf00249 | 5 |
| AX-158106569 | 11 | 68.283 | KV452863.1 | 4055961 | 5-scf00249 | 5 |
| AX-157718290 | 11 | 68.283 | KV452863.1 | 4074066 | 5-scf00249 | 5 |
| AX-158106592 | 11 | 68.283 | KV452863.1 | 4086294 | 5-scf00249 | 5 |
| AX-158106597 | 11 | 68.283 | KV452863.1 | 4090813 | 5-scf00249 | 5 |
| AX-158106599 | 11 | 68.283 | KV452863.1 | 4093487 | 5-scf00249 | 5 |
| AX-158106609 | 11 | 68.283 | KV452863.1 | 4102922 | 5-scf00249 | 5 |
| AX-158392289 | 11 | 68.283 | KV452863.1 | 4117731 | 5-scf00249 | 5 |
| AX-157885872 | 11 | 68.283 | KV452863.1 | 4141202 | 5-scf00249 | 5 |
| AX-158106635 | 11 | 68.283 | KV452863.1 | 4142768 | 5-scf00249 | 5 |
| AX-158106642 | 11 | 68.283 | KV452863.1 | 4151413 | 5-scf00249 | 5 |
| AX-158106643 | 11 | 68.283 | KV452863.1 | 4151939 | 5-scf00249 | 5 |
| AX-158106648 | 11 | 68.283 | KV452863.1 | 4156923 | 5-scf00249 | 5 |
| AX-158106649 | 11 | 68.283 | KV452863.1 | 4157843 | 5-scf00249 | 5 |
| AX-158106650 | 11 | 68.283 | KV452863.1 | 4158120 | 5-scf00249 | 5 |
| AX-158106657 | 11 | 68.283 | KV452863.1 | 4164541 | 5-scf00249 | 5 |
| AX-158106666 | 11 | 68.283 | KV452863.1 | 4170310 | 5-scf00249 | 5 |
| AX-158106667 | 11 | 68.283 | KV452863.1 | 4171090 | 5-scf00249 | 5 |
| AX-158106668 | 11 | 68.283 | KV452863.1 | 4174273 | 5-scf00249 | 5 |
| AX-158106674 | 11 | 68.283 | KV452863.1 | 4178155 | 5-scf00249 | 5 |
| AX-158106676 | 11 | 68.283 | KV452863.1 | 4178994 | 5-scf00249 | 5 |
| AX-158106677 | 11 | 68.283 | KV452863.1 | 4180342 | 5-scf00249 | 5 |
| AX-157749810 | 11 | 68.283 | KV452863.1 | 4180675 | 5-scf00249 | 5 |
| AX-158106681 | 11 | 68.283 | KV452863.1 | 4185468 | 5-scf00249 | 5 |
| AX-158106697 | 11 | 68.283 | KV452863.1 | 4204837 | 5-scf00249 | 5 |
| AX-158106698 | 11 | 68.283 | KV452863.1 | 4205714 | 5-scf00249 | 5 |
| AX-158106700 | 11 | 68.283 | KV452863.1 | 4208175 | 5-scf00249 | 5 |
| AX-158106705 | 11 | 68.283 | KV452863.1 | 4217849 | 5-scf00249 | 5 |
| AX-158106715 | 11 | 68.283 | KV452863.1 | 4234999 | 5-scf00249 | 5 |
| AX-158106719 | 11 | 68.283 | KV452863.1 | 4240279 | 5-scf00249 | 5 |
| AX-158106722 | 11 | 68.283 | KV452863.1 | 4243137 | 5-scf00249 | 5 |
| AX-158392293 | 11 | 68.283 | KV452863.1 | 4243533 | 5-scf00249 | 5 |
| AX-158106724 | 11 | 68.283 | KV452863.1 | 4250217 | 5-scf00249 | 5 |
| AX-158106725 | 11 | 68.283 | KV452863.1 | 4251486 | 5-scf00249 | 5 |
| AX-158106738 | 11 | 68.283 | KV452863.1 | 4265973 | 5-scf00249 | 5 |
| AX-158106743 | 11 | 68.283 | KV452863.1 | 4272134 | 5-scf00249 | 5 |
| AX-157716374 | 11 | 68.283 | KV452863.1 | 4278095 | 5-scf00249 | 5 |
| AX-157827298 | 11 | 68.283 | KV452863.1 | 4280319 | 5-scf00249 | 5 |
| AX-158106748 | 11 | 68.283 | KV452863.1 | 4286292 | 5-scf00249 | 5 |
| AX-158106751 | 11 | 68.283 | KV452863.1 | 4289485 | 5-scf00249 | 5 |
| AX-158106757 | 11 | 68.283 | KV452863.1 | 4309248 | 5-scf00249 | 5 |
| AX-157697259 | 11 | 68.283 | KV452863.1 | 4315546 | 5-scf00249 | 5 |

|              |    |        |            |         |            |   |
|--------------|----|--------|------------|---------|------------|---|
| AX-158106764 | 11 | 68.283 | KV452863.1 | 4326401 | 5-scf00249 | 5 |
| AX-158106766 | 11 | 68.283 | KV452863.1 | 4329410 | 5-scf00249 | 5 |
| AX-158106772 | 11 | 68.283 | KV452863.1 | 4335056 | 5-scf00249 | 5 |
| AX-158106775 | 11 | 68.283 | KV452863.1 | 4338072 | 5-scf00249 | 5 |
| AX-158106779 | 11 | 68.283 | KV452863.1 | 4340971 | 5-scf00249 | 5 |
| AX-158392294 | 11 | 68.283 | KV452863.1 | 4345225 | 5-scf00249 | 5 |
| AX-158106782 | 11 | 68.283 | KV452863.1 | 4345818 | 5-scf00249 | 5 |
| AX-157744234 | 11 | 68.283 | KV452863.1 | 4351344 | 5-scf00249 | 5 |
| AX-157827307 | 11 | 68.283 | KV452863.1 | 4363594 | 5-scf00249 | 5 |
| AX-157827308 | 11 | 68.283 | KV452863.1 | 4364765 | 5-scf00249 | 5 |
| AX-158106803 | 11 | 68.283 | KV452863.1 | 4377883 | 5-scf00249 | 5 |
| AX-158106808 | 11 | 68.283 | KV452863.1 | 4386033 | 5-scf00249 | 5 |
| AX-157827313 | 11 | 68.283 | KV452863.1 | 4393879 | 5-scf00249 | 5 |
| AX-157745114 | 11 | 68.283 | KV452863.1 | 4396182 | 5-scf00249 | 5 |
| AX-158106816 | 11 | 68.283 | KV452863.1 | 4398615 | 5-scf00249 | 5 |
| AX-158106817 | 11 | 68.283 | KV452863.1 | 4401024 | 5-scf00249 | 5 |
| AX-158106818 | 11 | 68.283 | KV452863.1 | 4401407 | 5-scf00249 | 5 |
| AX-158106819 | 11 | 68.283 | KV452863.1 | 4401738 | 5-scf00249 | 5 |
| AX-157827314 | 11 | 68.283 | KV452863.1 | 4401824 | 5-scf00249 | 5 |
| AX-158106821 | 11 | 68.283 | KV452863.1 | 4402857 | 5-scf00249 | 5 |
| AX-157827315 | 11 | 68.283 | KV452863.1 | 4403105 | 5-scf00249 | 5 |
| AX-157871024 | 11 | 68.283 | KV452863.1 | 4403397 | 5-scf00249 | 5 |
| AX-158106823 | 11 | 68.283 | KV452863.1 | 4404954 | 5-scf00249 | 5 |
| AX-158106824 | 11 | 68.283 | KV452863.1 | 4407265 | 5-scf00249 | 5 |
| AX-158106825 | 11 | 68.283 | KV452863.1 | 4407667 | 5-scf00249 | 5 |
| AX-158106826 | 11 | 68.283 | KV452863.1 | 4408557 | 5-scf00249 | 5 |
| AX-158106828 | 11 | 68.283 | KV452863.1 | 4410120 | 5-scf00249 | 5 |
| AX-158106829 | 11 | 68.283 | KV452863.1 | 4410707 | 5-scf00249 | 5 |
| AX-158106830 | 11 | 68.283 | KV452863.1 | 4411999 | 5-scf00249 | 5 |
| AX-158106831 | 11 | 68.283 | KV452863.1 | 4412628 | 5-scf00249 | 5 |
| AX-158106832 | 11 | 68.283 | KV452863.1 | 4413480 | 5-scf00249 | 5 |
| AX-158106835 | 11 | 68.283 | KV452863.1 | 4415831 | 5-scf00249 | 5 |
| AX-158106836 | 11 | 68.283 | KV452863.1 | 4416208 | 5-scf00249 | 5 |
| AX-158106837 | 11 | 68.283 | KV452863.1 | 4416717 | 5-scf00249 | 5 |
| AX-157827317 | 11 | 68.283 | KV452863.1 | 4417938 | 5-scf00249 | 5 |
| AX-158106838 | 11 | 68.283 | KV452863.1 | 4418039 | 5-scf00249 | 5 |
| AX-157827318 | 11 | 68.283 | KV452863.1 | 4418368 | 5-scf00249 | 5 |
| AX-158106839 | 11 | 68.283 | KV452863.1 | 4418550 | 5-scf00249 | 5 |
| AX-158106840 | 11 | 68.283 | KV452863.1 | 4419323 | 5-scf00249 | 5 |
| AX-158106841 | 11 | 68.283 | KV452863.1 | 4420699 | 5-scf00249 | 5 |
| AX-157827319 | 11 | 68.283 | KV452863.1 | 4421831 | 5-scf00249 | 5 |
| AX-158106842 | 11 | 68.283 | KV452863.1 | 4422275 | 5-scf00249 | 5 |
| AX-158106843 | 11 | 68.283 | KV452863.1 | 4423462 | 5-scf00249 | 5 |
| AX-158106844 | 11 | 68.283 | KV452863.1 | 4424421 | 5-scf00249 | 5 |
| AX-157885873 | 11 | 68.283 | KV452863.1 | 4426050 | 5-scf00249 | 5 |
| AX-158106846 | 11 | 68.283 | KV452863.1 | 4427668 | 5-scf00249 | 5 |
| AX-158106847 | 11 | 68.283 | KV452863.1 | 4428820 | 5-scf00249 | 5 |
| AX-158106848 | 11 | 68.283 | KV452863.1 | 4429260 | 5-scf00249 | 5 |
| AX-158106849 | 11 | 68.283 | KV452863.1 | 4429546 | 5-scf00249 | 5 |
| AX-158106854 | 11 | 68.283 | KV452863.1 | 4436114 | 5-scf00249 | 5 |
| AX-158106857 | 11 | 68.283 | KV452863.1 | 4439647 | 5-scf00249 | 5 |

|              |    |        |            |         |            |   |
|--------------|----|--------|------------|---------|------------|---|
| AX-158106858 | 11 | 68.283 | KV452863.1 | 4440634 | 5-scf00249 | 5 |
| AX-158106859 | 11 | 68.283 | KV452863.1 | 4442253 | 5-scf00249 | 5 |
| AX-158106862 | 11 | 68.283 | KV452863.1 | 4445146 | 5-scf00249 | 5 |
| AX-157827323 | 11 | 68.283 | KV452863.1 | 4445220 | 5-scf00249 | 5 |
| AX-158106864 | 11 | 68.283 | KV452863.1 | 4446017 | 5-scf00249 | 5 |
| AX-158106865 | 11 | 68.283 | KV452863.1 | 4448206 | 5-scf00249 | 5 |
| AX-157871026 | 11 | 68.283 | KV452863.1 | 4449188 | 5-scf00249 | 5 |
| AX-158106866 | 11 | 68.283 | KV452863.1 | 4451375 | 5-scf00249 | 5 |
| AX-157827324 | 11 | 68.283 | KV452863.1 | 4451781 | 5-scf00249 | 5 |
| AX-158106867 | 11 | 68.283 | KV452863.1 | 4452563 | 5-scf00249 | 5 |
| AX-158106868 | 11 | 68.283 | KV452863.1 | 4456106 | 5-scf00249 | 5 |
| AX-158106871 | 11 | 68.283 | KV452863.1 | 4458692 | 5-scf00249 | 5 |
| AX-158106872 | 11 | 68.283 | KV452863.1 | 4459322 | 5-scf00249 | 5 |
| AX-158106873 | 11 | 68.283 | KV452863.1 | 4460830 | 5-scf00249 | 5 |
| AX-158106874 | 11 | 68.283 | KV452863.1 | 4461802 | 5-scf00249 | 5 |
| AX-157827325 | 11 | 68.283 | KV452863.1 | 4462055 | 5-scf00249 | 5 |
| AX-158106878 | 11 | 68.283 | KV452863.1 | 4464193 | 5-scf00249 | 5 |
| AX-158106880 | 11 | 68.283 | KV452863.1 | 4466461 | 5-scf00249 | 5 |
| AX-158106881 | 11 | 68.283 | KV452863.1 | 4467851 | 5-scf00249 | 5 |
| AX-158106886 | 11 | 68.283 | KV452863.1 | 4481831 | 5-scf00249 | 5 |
| AX-158410607 | 11 | 68.283 | KV452863.1 | 4482574 | 5-scf00249 | 5 |
| AX-158410608 | 11 | 68.283 | KV452863.1 | 4482707 | 5-scf00249 | 5 |
| AX-158106890 | 11 | 68.283 | KV452863.1 | 4489681 | 5-scf00249 | 5 |
| AX-158106892 | 11 | 68.283 | KV452863.1 | 4493123 | 5-scf00249 | 5 |
| AX-158106894 | 11 | 68.283 | KV452863.1 | 4494175 | 5-scf00249 | 5 |
| AX-158106896 | 11 | 68.283 | KV452863.1 | 4495245 | 5-scf00249 | 5 |
| AX-158106898 | 11 | 68.283 | KV452863.1 | 4497999 | 5-scf00249 | 5 |
| AX-158106899 | 11 | 68.283 | KV452863.1 | 4500118 | 5-scf00249 | 5 |
| AX-158106908 | 11 | 68.283 | KV452863.1 | 4509938 | 5-scf00249 | 5 |
| AX-157775371 | 11 | 68.283 | KV452863.1 | 4514825 | 5-scf00249 | 5 |
| AX-158380072 | 11 | 68.283 | KV452863.1 | 4515009 | 5-scf00249 | 5 |
| AX-157745798 | 11 | 68.283 | KV452863.1 | 4524150 | 5-scf00249 | 5 |
| AX-158106916 | 11 | 68.283 | KV452863.1 | 4525407 | 5-scf00249 | 5 |
| AX-158106918 | 11 | 68.283 | KV452863.1 | 4527197 | 5-scf00249 | 5 |
| AX-158106921 | 11 | 68.283 | KV452863.1 | 4531945 | 5-scf00249 | 5 |
| AX-157827327 | 11 | 68.283 | KV452863.1 | 4542534 | 5-scf00249 | 5 |
| AX-158106925 | 11 | 68.283 | KV452863.1 | 4544303 | 5-scf00249 | 5 |
| AX-158106928 | 11 | 68.283 | KV452863.1 | 4550164 | 5-scf00249 | 5 |
| AX-158106933 | 11 | 68.283 | KV452863.1 | 4561280 | 5-scf00249 | 5 |
| AX-158106937 | 11 | 68.283 | KV452863.1 | 4567749 | 5-scf00249 | 5 |
| AX-158106940 | 11 | 68.283 | KV452863.1 | 4577337 | 5-scf00249 | 5 |
| AX-158106946 | 11 | 68.283 | KV452863.1 | 4583931 | 5-scf00249 | 5 |
| AX-158106953 | 11 | 68.283 | KV452863.1 | 4601030 | 5-scf00249 | 5 |
| AX-158106958 | 11 | 68.283 | KV452863.1 | 4609519 | 5-scf00249 | 5 |
| AX-158106960 | 11 | 68.283 | KV452863.1 | 4610934 | 5-scf00249 | 5 |
| AX-158106962 | 11 | 68.283 | KV452863.1 | 4612486 | 5-scf00249 | 5 |
| AX-158106965 | 11 | 68.283 | KV452863.1 | 4613636 | 5-scf00249 | 5 |
| AX-158106971 | 11 | 68.283 | KV452863.1 | 4622717 | 5-scf00249 | 5 |
| AX-158106975 | 11 | 68.283 | KV452863.1 | 4625947 | 5-scf00249 | 5 |
| AX-158106982 | 11 | 68.283 | KV452863.1 | 4636492 | 5-scf00249 | 5 |
| AX-157827328 | 11 | 68.283 | KV452863.1 | 4644600 | 5-scf00249 | 5 |

|              |    |        |            |         |            |   |
|--------------|----|--------|------------|---------|------------|---|
| AX-158106986 | 11 | 68.283 | KV452863.1 | 4656169 | 5-scf00249 | 5 |
| AX-158106987 | 11 | 68.283 | KV452863.1 | 4661346 | 5-scf00249 | 5 |
| AX-158106994 | 11 | 68.283 | KV452863.1 | 4666849 | 5-scf00249 | 5 |
| AX-158106995 | 11 | 68.283 | KV452863.1 | 4669699 | 5-scf00249 | 5 |
| AX-158107005 | 11 | 68.283 | KV452863.1 | 4684433 | 5-scf00249 | 5 |
| AX-158107006 | 11 | 68.283 | KV452863.1 | 4684708 | 5-scf00249 | 5 |
| AX-158107016 | 11 | 68.283 | KV452863.1 | 4697808 | 5-scf00249 | 5 |
| AX-158107020 | 11 | 68.283 | KV452863.1 | 4702612 | 5-scf00249 | 5 |
| AX-157871032 | 11 | 68.283 | KV452863.1 | 4716461 | 5-scf00249 | 5 |
| AX-158107028 | 11 | 68.283 | KV452863.1 | 4717563 | 5-scf00249 | 5 |
| AX-158107030 | 11 | 68.283 | KV452863.1 | 4721128 | 5-scf00249 | 5 |
| AX-158107038 | 11 | 68.283 | KV452863.1 | 4730801 | 5-scf00249 | 5 |
| AX-158107045 | 11 | 68.283 | KV452863.1 | 4743895 | 5-scf00249 | 5 |
| AX-158107048 | 11 | 68.283 | KV452863.1 | 4747694 | 5-scf00249 | 5 |
| AX-158107060 | 11 | 68.283 | KV452863.1 | 4760353 | 5-scf00249 | 5 |
| AX-158107064 | 11 | 68.283 | KV452863.1 | 4770558 | 5-scf00249 | 5 |
| AX-158107068 | 11 | 68.283 | KV452863.1 | 4794494 | 5-scf00249 | 5 |
| AX-158107075 | 11 | 68.283 | KV452863.1 | 4807238 | 5-scf00249 | 5 |
| AX-158107076 | 11 | 68.283 | KV452863.1 | 4808406 | 5-scf00249 | 5 |
| AX-158107079 | 11 | 68.283 | KV452863.1 | 4818372 | 5-scf00249 | 5 |
| AX-157771831 | 11 | 68.283 | KV452863.1 | 4846781 | 5-scf00249 | 5 |
| AX-158107088 | 11 | 68.283 | KV452863.1 | 4847584 | 5-scf00249 | 5 |
| AX-158107094 | 11 | 68.283 | KV452863.1 | 4868787 | 5-scf00249 | 5 |
| AX-157857419 | 11 | 68.283 | KV452863.1 | 4882501 | 5-scf00249 | 5 |
| AX-158107108 | 11 | 68.283 | KV452863.1 | 4886003 | 5-scf00249 | 5 |
| AX-158107109 | 11 | 68.283 | KV452863.1 | 4886400 | 5-scf00249 | 5 |
| AX-158107896 | 11 | 68.283 | KV452863.1 | 5928715 | 5-scf00249 | 5 |
| AX-158108050 | 11 | 68.283 | KV452863.1 | 6169529 | 5-scf00249 | 5 |
| AX-158108054 | 11 | 68.283 | KV452863.1 | 6180125 | 5-scf00249 | 5 |
| AX-158108071 | 11 | 68.283 | KV452863.1 | 6201300 | 5-scf00249 | 5 |
| AX-157827426 | 11 | 68.283 | KV452863.1 | 6381516 | 5-scf00249 | 5 |
| AX-158108174 | 11 | 68.283 | KV452863.1 | 6387744 | 5-scf00249 | 5 |
| AX-158108216 | 11 | 68.283 | KV452863.1 | 6448763 | 5-scf00249 | 5 |
| AX-158108474 | 11 | 68.283 | KV452863.1 | 6863693 | 5-scf00249 | 5 |
| AX-158108509 | 11 | 68.283 | KV452863.1 | 6923771 | 5-scf00249 | 5 |
| AX-158108586 | 11 | 68.283 | KV452863.1 | 7030434 | 5-scf00249 | 5 |
| AX-158108592 | 11 | 68.283 | KV452863.1 | 7035467 | 5-scf00249 | 5 |
| AX-158108593 | 11 | 68.283 | KV452863.1 | 7036557 | 5-scf00249 | 5 |
| AX-157827518 | 11 | 68.283 | KV452863.1 | 7136043 | 5-scf00249 | 5 |
| AX-157827521 | 11 | 68.283 | KV452863.1 | 7148085 | 5-scf00249 | 5 |
| AX-158108681 | 11 | 68.283 | KV452863.1 | 7149998 | 5-scf00249 | 5 |
| AX-158108686 | 11 | 68.283 | KV452863.1 | 7157363 | 5-scf00249 | 5 |
| AX-158108687 | 11 | 68.283 | KV452863.1 | 7157828 | 5-scf00249 | 5 |
| AX-158108703 | 11 | 68.283 | KV452863.1 | 7178262 | 5-scf00249 | 5 |
| AX-158108717 | 11 | 68.283 | KV452863.1 | 7187880 | 5-scf00249 | 5 |
| AX-158108721 | 11 | 68.283 | KV452863.1 | 7193491 | 5-scf00249 | 5 |
| AX-158108731 | 11 | 68.283 | KV452863.1 | 7212710 | 5-scf00249 | 5 |
| AX-157827524 | 11 | 68.283 | KV452863.1 | 7215979 | 5-scf00249 | 5 |
| AX-157719811 | 11 | 68.283 | KV452863.1 | 7222910 | 5-scf00249 | 5 |
| AX-158108740 | 11 | 68.283 | KV452863.1 | 7225031 | 5-scf00249 | 5 |
| AX-158108743 | 11 | 68.283 | KV452863.1 | 7230379 | 5-scf00249 | 5 |



|              |    |        |             |         |                |    |
|--------------|----|--------|-------------|---------|----------------|----|
| AX-158108744 | 11 | 68.283 | KV452863.1  | 7239670 | 5-scf00249     | 5  |
| AX-158108749 | 11 | 68.283 | KV452863.1  | 7255127 | 5-scf00249     | 5  |
| AX-158108758 | 11 | 68.283 | KV452863.1  | 7282540 | 5-scf00249     | 5  |
| AX-157827530 | 11 | 68.283 | KV452863.1  | 7315205 | 5-scf00249     | 5  |
| AX-158108764 | 11 | 68.283 | KV452863.1  | 7318986 | 5-scf00249     | 5  |
| AX-158108766 | 11 | 68.283 | KV452863.1  | 7324282 | 5-scf00249     | 5  |
| AX-158108776 | 11 | 68.283 | KV452863.1  | 7338309 | 5-scf00249     | 5  |
| AX-158108792 | 11 | 68.283 | KV452863.1  | 7364781 | 5-scf00249     | 5  |
| AX-158108793 | 11 | 68.283 | KV452863.1  | 7365586 | 5-scf00249     | 5  |
| AX-158108797 | 11 | 68.283 | KV452863.1  | 7372676 | 5-scf00249     | 5  |
| AX-158108814 | 11 | 68.283 | KV452863.1  | 7391883 | 5-scf00249     | 5  |
| AX-158108834 | 11 | 68.283 | KV452863.1  | 7404399 | 5-scf00249     | 5  |
| AX-158108841 | 11 | 68.283 | KV452863.1  | 7412747 | 5-scf00249     | 5  |
| AX-158108851 | 11 | 68.283 | KV452863.1  | 7426346 | 5-scf00249     | 5  |
| AX-157751472 | 11 | 68.283 | KV452863.1  | 7427822 | 5-scf00249     | 5  |
| AX-158108863 | 11 | 68.283 | KV452863.1  | 7446853 | 5-scf00249     | 5  |
| AX-158108864 | 11 | 68.283 | KV452863.1  | 7446990 | 5-scf00249     | 5  |
| AX-158392349 | 11 | 68.283 | KV452863.1  | 7455890 | 5-scf00249     | 5  |
| AX-158108872 | 11 | 68.283 | KV452863.1  | 7456174 | 5-scf00249     | 5  |
| AX-158108876 | 11 | 68.283 | KV452863.1  | 7461326 | 5-scf00249     | 5  |
| AX-158108895 | 11 | 68.283 | KV452863.1  | 7495668 | 5-scf00249     | 5  |
| AX-157744503 | 11 | 68.283 | KV452863.1  | 7508507 | 5-scf00249     | 5  |
| AX-158108904 | 11 | 68.283 | KV452863.1  | 7514521 | 5-scf00249     | 5  |
| AX-158108907 | 11 | 68.283 | KV452863.1  | 7516770 | 5-scf00249     | 5  |
| AX-157871057 | 11 | 68.283 | KV452863.1  | 7527296 | 5-scf00249     | 5  |
| AX-158108921 | 11 | 68.283 | KV452863.1  | 7531034 | 5-scf00249     | 5  |
| AX-158108928 | 11 | 68.283 | KV452863.1  | 7539243 | 5-scf00249     | 5  |
| AX-158108945 | 11 | 68.283 | KV452863.1  | 7567342 | 5-scf00249     | 5  |
| AX-158108948 | 11 | 68.283 | KV452863.1  | 7589198 | 5-scf00249     | 5  |
| AX-158108959 | 11 | 68.283 | KV452863.1  | 7623204 | 5-scf00249     | 5  |
| AX-157827556 | 11 | 68.283 | KV452863.1  | 7626657 | 5-scf00249     | 5  |
| AX-158108966 | 11 | 68.283 | KV452863.1  | 7652004 | 5-scf00249     | 5  |
| AX-157704042 | 11 | 68.283 | DX102034.1  | 272     | IORI212 lctalu | UN |
| AX-157705915 | 11 | 68.283 | 3ML01031218 | 265     | scf06824_1     | UN |
| AX-157877638 | 11 | 68.337 | KV452863.1  | 7191975 | 5-scf00249     | 5  |
| AX-158106289 | 11 | 68.392 | KV452863.1  | 3703635 | 5-scf00249     | 5  |
| AX-158106406 | 11 | 68.392 | KV452863.1  | 3835390 | 5-scf00249     | 5  |
| AX-158106447 | 11 | 68.392 | KV452863.1  | 3879413 | 5-scf00249     | 5  |
| AX-157827279 | 11 | 68.392 | KV452863.1  | 3980586 | 5-scf00249     | 5  |
| AX-158108389 | 11 | 68.392 | KV452863.1  | 6710320 | 5-scf00249     | 5  |
| AX-158108588 | 11 | 68.392 | KV452863.1  | 7031803 | 5-scf00249     | 5  |
| AX-158108589 | 11 | 68.392 | KV452863.1  | 7032654 | 5-scf00249     | 5  |
| AX-158108598 | 11 | 68.392 | KV452863.1  | 7038846 | 5-scf00249     | 5  |
| AX-158108626 | 11 | 68.392 | KV452863.1  | 7074440 | 5-scf00249     | 5  |
| AX-158108628 | 11 | 68.392 | KV452863.1  | 7076990 | 5-scf00249     | 5  |
| AX-158108630 | 11 | 68.392 | KV452863.1  | 7077795 | 5-scf00249     | 5  |
| AX-158108639 | 11 | 68.392 | KV452863.1  | 7085778 | 5-scf00249     | 5  |
| AX-158108674 | 11 | 68.392 | KV452863.1  | 7140809 | 5-scf00249     | 5  |
| AX-158108676 | 11 | 68.392 | KV452863.1  | 7143045 | 5-scf00249     | 5  |
| AX-158108678 | 11 | 68.392 | KV452863.1  | 7143754 | 5-scf00249     | 5  |
| AX-158108684 | 11 | 68.392 | KV452863.1  | 7156252 | 5-scf00249     | 5  |

|              |    |        |            |         |            |   |
|--------------|----|--------|------------|---------|------------|---|
| AX-158108692 | 11 | 68.392 | KV452863.1 | 7171391 | 5-scf00249 | 5 |
| AX-158108693 | 11 | 68.392 | KV452863.1 | 7171625 | 5-scf00249 | 5 |
| AX-158108695 | 11 | 68.392 | KV452863.1 | 7172839 | 5-scf00249 | 5 |
| AX-158108697 | 11 | 68.392 | KV452863.1 | 7175371 | 5-scf00249 | 5 |
| AX-158108701 | 11 | 68.392 | KV452863.1 | 7177465 | 5-scf00249 | 5 |
| AX-158108706 | 11 | 68.392 | KV452863.1 | 7180024 | 5-scf00249 | 5 |
| AX-158108720 | 11 | 68.392 | KV452863.1 | 7191747 | 5-scf00249 | 5 |
| AX-158108739 | 11 | 68.392 | KV452863.1 | 7224877 | 5-scf00249 | 5 |
| AX-158410669 | 11 | 68.412 | KV452863.1 | 7018067 | 5-scf00249 | 5 |
| AX-158105311 | 11 | 68.463 | KV452863.1 | 1154791 | 5-scf00249 | 5 |
| AX-157827224 | 11 | 68.463 | KV452863.1 | 3323509 | 5-scf00249 | 5 |
| AX-158106304 | 11 | 68.463 | KV452863.1 | 3719006 | 5-scf00249 | 5 |
| AX-158106318 | 11 | 68.463 | KV452863.1 | 3732546 | 5-scf00249 | 5 |
| AX-158106334 | 11 | 68.463 | KV452863.1 | 3752947 | 5-scf00249 | 5 |
| AX-158108012 | 11 | 68.463 | KV452863.1 | 6114958 | 5-scf00249 | 5 |
| AX-157827438 | 11 | 68.463 | KV452863.1 | 6454381 | 5-scf00249 | 5 |
| AX-157857430 | 11 | 68.463 | KV452863.1 | 6497726 | 5-scf00249 | 5 |
| AX-158108563 | 11 | 68.463 | KV452863.1 | 7010022 | 5-scf00249 | 5 |
| AX-158108571 | 11 | 68.463 | KV452863.1 | 7015306 | 5-scf00249 | 5 |
| AX-158108629 | 11 | 68.463 | KV452863.1 | 7077506 | 5-scf00249 | 5 |
| AX-158108310 | 11 | 68.501 | KV452863.1 | 6587132 | 5-scf00249 | 5 |
| AX-158108546 | 11 | 68.501 | KV452863.1 | 6984256 | 5-scf00249 | 5 |
| AX-157760930 | 11 | 68.501 | KV452863.1 | 6984471 | 5-scf00249 | 5 |
| AX-158108547 | 11 | 68.501 | KV452863.1 | 6984974 | 5-scf00249 | 5 |
| AX-158108550 | 11 | 68.501 | KV452863.1 | 6988535 | 5-scf00249 | 5 |
| AX-158108552 | 11 | 68.501 | KV452863.1 | 6990889 | 5-scf00249 | 5 |
| AX-157827507 | 11 | 68.501 | KV452863.1 | 6991093 | 5-scf00249 | 5 |
| AX-158108553 | 11 | 68.501 | KV452863.1 | 6992977 | 5-scf00249 | 5 |
| AX-158380080 | 11 | 68.501 | KV452863.1 | 6998413 | 5-scf00249 | 5 |
| AX-157857432 | 11 | 68.501 | KV452863.1 | 6998569 | 5-scf00249 | 5 |
| AX-158108557 | 11 | 68.501 | KV452863.1 | 7000860 | 5-scf00249 | 5 |
| AX-157827508 | 11 | 68.501 | KV452863.1 | 7003902 | 5-scf00249 | 5 |
| AX-158108560 | 11 | 68.501 | KV452863.1 | 7005939 | 5-scf00249 | 5 |
| AX-157827509 | 11 | 68.501 | KV452863.1 | 7007353 | 5-scf00249 | 5 |
| AX-158108574 | 11 | 68.501 | KV452863.1 | 7016678 | 5-scf00249 | 5 |
| AX-158417056 | 11 | 68.501 | KV452863.1 | 7018607 | 5-scf00249 | 5 |
| AX-158108545 | 11 | 68.587 | KV452863.1 | 6982004 | 5-scf00249 | 5 |
| AX-157827506 | 11 | 68.61  | KV452863.1 | 6974034 | 5-scf00249 | 5 |
| AX-158108537 | 11 | 68.61  | KV452863.1 | 6974069 | 5-scf00249 | 5 |
| AX-158108539 | 11 | 68.61  | KV452863.1 | 6976033 | 5-scf00249 | 5 |
| AX-158108543 | 11 | 68.61  | KV452863.1 | 6980739 | 5-scf00249 | 5 |
| AX-158108565 | 11 | 68.61  | KV452863.1 | 7012183 | 5-scf00249 | 5 |
| AX-158104656 | 11 | 68.719 | KV452856.1 | 2452905 | 5-scf00247 | 5 |
| AX-157827290 | 11 | 68.719 | KV452863.1 | 4067983 | 5-scf00249 | 5 |
| AX-158106585 | 11 | 68.719 | KV452863.1 | 4076442 | 5-scf00249 | 5 |
| AX-158108397 | 11 | 68.719 | KV452863.1 | 6723320 | 5-scf00249 | 5 |
| AX-157717412 | 11 | 68.719 | KV452863.1 | 6803900 | 5-scf00249 | 5 |
| AX-157871044 | 11 | 68.719 | KV452863.1 | 6828293 | 5-scf00249 | 5 |
| AX-158108453 | 11 | 68.719 | KV452863.1 | 6832206 | 5-scf00249 | 5 |
| AX-158108455 | 11 | 68.719 | KV452863.1 | 6833621 | 5-scf00249 | 5 |
| AX-158108456 | 11 | 68.719 | KV452863.1 | 6834279 | 5-scf00249 | 5 |

|              |    |        |            |         |            |   |
|--------------|----|--------|------------|---------|------------|---|
| AX-157827488 | 11 | 68.719 | KV452863.1 | 6835895 | 5-scf00249 | 5 |
| AX-157724623 | 11 | 68.719 | KV452863.1 | 6839485 | 5-scf00249 | 5 |
| AX-158108457 | 11 | 68.719 | KV452863.1 | 6839778 | 5-scf00249 | 5 |
| AX-158108458 | 11 | 68.719 | KV452863.1 | 6840244 | 5-scf00249 | 5 |
| AX-158108468 | 11 | 68.719 | KV452863.1 | 6857343 | 5-scf00249 | 5 |
| AX-158108475 | 11 | 68.719 | KV452863.1 | 6864263 | 5-scf00249 | 5 |
| AX-158108476 | 11 | 68.719 | KV452863.1 | 6865430 | 5-scf00249 | 5 |
| AX-158108478 | 11 | 68.719 | KV452863.1 | 6866766 | 5-scf00249 | 5 |
| AX-158108479 | 11 | 68.719 | KV452863.1 | 6867672 | 5-scf00249 | 5 |
| AX-157827491 | 11 | 68.719 | KV452863.1 | 6868688 | 5-scf00249 | 5 |
| AX-157827493 | 11 | 68.719 | KV452863.1 | 6869541 | 5-scf00249 | 5 |
| AX-157871046 | 11 | 68.719 | KV452863.1 | 6869968 | 5-scf00249 | 5 |
| AX-158108485 | 11 | 68.719 | KV452863.1 | 6880267 | 5-scf00249 | 5 |
| AX-158108487 | 11 | 68.719 | KV452863.1 | 6881658 | 5-scf00249 | 5 |
| AX-158108488 | 11 | 68.719 | KV452863.1 | 6882376 | 5-scf00249 | 5 |
| AX-158108492 | 11 | 68.719 | KV452863.1 | 6890226 | 5-scf00249 | 5 |
| AX-157775041 | 11 | 68.719 | KV452863.1 | 6899656 | 5-scf00249 | 5 |
| AX-158108494 | 11 | 68.719 | KV452863.1 | 6899766 | 5-scf00249 | 5 |
| AX-158108496 | 11 | 68.719 | KV452863.1 | 6901027 | 5-scf00249 | 5 |
| AX-157827498 | 11 | 68.719 | KV452863.1 | 6901670 | 5-scf00249 | 5 |
| AX-158108497 | 11 | 68.719 | KV452863.1 | 6905696 | 5-scf00249 | 5 |
| AX-158108499 | 11 | 68.719 | KV452863.1 | 6907808 | 5-scf00249 | 5 |
| AX-158108500 | 11 | 68.719 | KV452863.1 | 6910139 | 5-scf00249 | 5 |
| AX-158108501 | 11 | 68.719 | KV452863.1 | 6911297 | 5-scf00249 | 5 |
| AX-158108503 | 11 | 68.719 | KV452863.1 | 6916289 | 5-scf00249 | 5 |
| AX-158108504 | 11 | 68.719 | KV452863.1 | 6917043 | 5-scf00249 | 5 |
| AX-158108513 | 11 | 68.719 | KV452863.1 | 6936802 | 5-scf00249 | 5 |
| AX-158108514 | 11 | 68.719 | KV452863.1 | 6938135 | 5-scf00249 | 5 |
| AX-157827501 | 11 | 68.719 | KV452863.1 | 6944098 | 5-scf00249 | 5 |
| AX-158108518 | 11 | 68.719 | KV452863.1 | 6945713 | 5-scf00249 | 5 |
| AX-158108520 | 11 | 68.719 | KV452863.1 | 6947356 | 5-scf00249 | 5 |
| AX-158108521 | 11 | 68.719 | KV452863.1 | 6947911 | 5-scf00249 | 5 |
| AX-158108526 | 11 | 68.719 | KV452863.1 | 6955396 | 5-scf00249 | 5 |
| AX-158108530 | 11 | 68.719 | KV452863.1 | 6963632 | 5-scf00249 | 5 |
| AX-158108605 | 11 | 68.719 | KV452863.1 | 7048827 | 5-scf00249 | 5 |
| AX-157758105 | 11 | 68.786 | KV452863.1 | 6828153 | 5-scf00249 | 5 |
| AX-158107333 | 11 | 68.808 | KV452863.1 | 5168350 | 5-scf00249 | 5 |
| AX-157877634 | 11 | 68.808 | KV452863.1 | 6587821 | 5-scf00249 | 5 |
| AX-157827480 | 11 | 68.808 | KV452863.1 | 6796037 | 5-scf00249 | 5 |
| AX-157756621 | 11 | 68.876 | KV452863.1 | 6793971 | 5-scf00249 | 5 |
| AX-157725685 | 11 | 68.938 | KV452856.1 | 2620892 | 5-scf00247 | 5 |
| AX-158105234 | 11 | 68.938 | KV452863.1 | 1022575 | 5-scf00249 | 5 |
| AX-157700622 | 11 | 68.938 | KV452863.1 | 1278984 | 5-scf00249 | 5 |
| AX-158105401 | 11 | 68.938 | KV452863.1 | 1656579 | 5-scf00249 | 5 |
| AX-158105473 | 11 | 68.938 | KV452863.1 | 1919348 | 5-scf00249 | 5 |
| AX-158105481 | 11 | 68.938 | KV452863.1 | 1928533 | 5-scf00249 | 5 |
| AX-158105585 | 11 | 68.938 | KV452863.1 | 2166991 | 5-scf00249 | 5 |
| AX-158105673 | 11 | 68.938 | KV452863.1 | 2429011 | 5-scf00249 | 5 |
| AX-158105740 | 11 | 68.938 | KV452863.1 | 2652740 | 5-scf00249 | 5 |
| AX-158105878 | 11 | 68.938 | KV452863.1 | 2968875 | 5-scf00249 | 5 |
| AX-158105887 | 11 | 68.938 | KV452863.1 | 2984870 | 5-scf00249 | 5 |

|              |    |        |            |         |            |   |
|--------------|----|--------|------------|---------|------------|---|
| AX-158105890 | 11 | 68.938 | KV452863.1 | 2989033 | 5-scf00249 | 5 |
| AX-157756085 | 11 | 68.938 | KV452863.1 | 3067129 | 5-scf00249 | 5 |
| AX-158105952 | 11 | 68.938 | KV452863.1 | 3138078 | 5-scf00249 | 5 |
| AX-158106096 | 11 | 68.938 | KV452863.1 | 3405269 | 5-scf00249 | 5 |
| AX-158106099 | 11 | 68.938 | KV452863.1 | 3408277 | 5-scf00249 | 5 |
| AX-158106139 | 11 | 68.938 | KV452863.1 | 3504891 | 5-scf00249 | 5 |
| AX-158106207 | 11 | 68.938 | KV452863.1 | 3602582 | 5-scf00249 | 5 |
| AX-158106244 | 11 | 68.938 | KV452863.1 | 3646170 | 5-scf00249 | 5 |
| AX-158106255 | 11 | 68.938 | KV452863.1 | 3664496 | 5-scf00249 | 5 |
| AX-158106435 | 11 | 68.938 | KV452863.1 | 3867614 | 5-scf00249 | 5 |
| AX-158107822 | 11 | 68.938 | KV452863.1 | 5817722 | 5-scf00249 | 5 |
| AX-158107993 | 11 | 68.938 | KV452863.1 | 6085806 | 5-scf00249 | 5 |
| AX-158108026 | 11 | 68.938 | KV452863.1 | 6131977 | 5-scf00249 | 5 |
| AX-158108074 | 11 | 68.938 | KV452863.1 | 6202988 | 5-scf00249 | 5 |
| AX-158108134 | 11 | 68.938 | KV452863.1 | 6300517 | 5-scf00249 | 5 |
| AX-157715532 | 11 | 68.938 | KV452863.1 | 6308188 | 5-scf00249 | 5 |
| AX-158108142 | 11 | 68.938 | KV452863.1 | 6318220 | 5-scf00249 | 5 |
| AX-158108145 | 11 | 68.938 | KV452863.1 | 6321693 | 5-scf00249 | 5 |
| AX-158108146 | 11 | 68.938 | KV452863.1 | 6322417 | 5-scf00249 | 5 |
| AX-158108152 | 11 | 68.938 | KV452863.1 | 6343611 | 5-scf00249 | 5 |
| AX-158108154 | 11 | 68.938 | KV452863.1 | 6345696 | 5-scf00249 | 5 |
| AX-158108155 | 11 | 68.938 | KV452863.1 | 6346205 | 5-scf00249 | 5 |
| AX-158108176 | 11 | 68.938 | KV452863.1 | 6390851 | 5-scf00249 | 5 |
| AX-157827428 | 11 | 68.938 | KV452863.1 | 6391625 | 5-scf00249 | 5 |
| AX-158108177 | 11 | 68.938 | KV452863.1 | 6392708 | 5-scf00249 | 5 |
| AX-158108180 | 11 | 68.938 | KV452863.1 | 6393965 | 5-scf00249 | 5 |
| AX-158108182 | 11 | 68.938 | KV452863.1 | 6398366 | 5-scf00249 | 5 |
| AX-158108187 | 11 | 68.938 | KV452863.1 | 6403491 | 5-scf00249 | 5 |
| AX-158108188 | 11 | 68.938 | KV452863.1 | 6403799 | 5-scf00249 | 5 |
| AX-158108189 | 11 | 68.938 | KV452863.1 | 6405144 | 5-scf00249 | 5 |
| AX-158108191 | 11 | 68.938 | KV452863.1 | 6405899 | 5-scf00249 | 5 |
| AX-158410643 | 11 | 68.938 | KV452863.1 | 6408097 | 5-scf00249 | 5 |
| AX-158108193 | 11 | 68.938 | KV452863.1 | 6408517 | 5-scf00249 | 5 |
| AX-157757340 | 11 | 68.938 | KV452863.1 | 6409092 | 5-scf00249 | 5 |
| AX-158108194 | 11 | 68.938 | KV452863.1 | 6410174 | 5-scf00249 | 5 |
| AX-158108199 | 11 | 68.938 | KV452863.1 | 6418055 | 5-scf00249 | 5 |
| AX-157827431 | 11 | 68.938 | KV452863.1 | 6420900 | 5-scf00249 | 5 |
| AX-158108209 | 11 | 68.938 | KV452863.1 | 6435451 | 5-scf00249 | 5 |
| AX-158108210 | 11 | 68.938 | KV452863.1 | 6435948 | 5-scf00249 | 5 |
| AX-157743599 | 11 | 68.938 | KV452863.1 | 6440487 | 5-scf00249 | 5 |
| AX-157772063 | 11 | 68.938 | KV452863.1 | 6447234 | 5-scf00249 | 5 |
| AX-158108214 | 11 | 68.938 | KV452863.1 | 6447345 | 5-scf00249 | 5 |
| AX-158108215 | 11 | 68.938 | KV452863.1 | 6447958 | 5-scf00249 | 5 |
| AX-157827437 | 11 | 68.938 | KV452863.1 | 6449585 | 5-scf00249 | 5 |
| AX-157773324 | 11 | 68.938 | KV452863.1 | 6452293 | 5-scf00249 | 5 |
| AX-158108237 | 11 | 68.938 | KV452863.1 | 6485270 | 5-scf00249 | 5 |
| AX-158108238 | 11 | 68.938 | KV452863.1 | 6486681 | 5-scf00249 | 5 |
| AX-158108243 | 11 | 68.938 | KV452863.1 | 6497117 | 5-scf00249 | 5 |
| AX-158108256 | 11 | 68.938 | KV452863.1 | 6524305 | 5-scf00249 | 5 |
| AX-157827446 | 11 | 68.938 | KV452863.1 | 6529757 | 5-scf00249 | 5 |
| AX-158108260 | 11 | 68.938 | KV452863.1 | 6531450 | 5-scf00249 | 5 |

|              |    |        |            |         |            |   |
|--------------|----|--------|------------|---------|------------|---|
| AX-158108262 | 11 | 68.938 | KV452863.1 | 6535016 | 5-scf00249 | 5 |
| AX-158108263 | 11 | 68.938 | KV452863.1 | 6536638 | 5-scf00249 | 5 |
| AX-158108265 | 11 | 68.938 | KV452863.1 | 6537439 | 5-scf00249 | 5 |
| AX-158108266 | 11 | 68.938 | KV452863.1 | 6537789 | 5-scf00249 | 5 |
| AX-158108267 | 11 | 68.938 | KV452863.1 | 6538510 | 5-scf00249 | 5 |
| AX-158108269 | 11 | 68.938 | KV452863.1 | 6541004 | 5-scf00249 | 5 |
| AX-158108270 | 11 | 68.938 | KV452863.1 | 6542440 | 5-scf00249 | 5 |
| AX-157827447 | 11 | 68.938 | KV452863.1 | 6542700 | 5-scf00249 | 5 |
| AX-158108272 | 11 | 68.938 | KV452863.1 | 6545529 | 5-scf00249 | 5 |
| AX-157750231 | 11 | 68.938 | KV452863.1 | 6546351 | 5-scf00249 | 5 |
| AX-158108273 | 11 | 68.938 | KV452863.1 | 6547162 | 5-scf00249 | 5 |
| AX-158108274 | 11 | 68.938 | KV452863.1 | 6548936 | 5-scf00249 | 5 |
| AX-158108285 | 11 | 68.938 | KV452863.1 | 6565387 | 5-scf00249 | 5 |
| AX-158108290 | 11 | 68.938 | KV452863.1 | 6569764 | 5-scf00249 | 5 |
| AX-158108299 | 11 | 68.938 | KV452863.1 | 6579257 | 5-scf00249 | 5 |
| AX-158108306 | 11 | 68.938 | KV452863.1 | 6584272 | 5-scf00249 | 5 |
| AX-158108307 | 11 | 68.938 | KV452863.1 | 6585615 | 5-scf00249 | 5 |
| AX-158108308 | 11 | 68.938 | KV452863.1 | 6586146 | 5-scf00249 | 5 |
| AX-158108309 | 11 | 68.938 | KV452863.1 | 6586392 | 5-scf00249 | 5 |
| AX-158108311 | 11 | 68.938 | KV452863.1 | 6588910 | 5-scf00249 | 5 |
| AX-158108320 | 11 | 68.938 | KV452863.1 | 6603963 | 5-scf00249 | 5 |
| AX-158108336 | 11 | 68.938 | KV452863.1 | 6629202 | 5-scf00249 | 5 |
| AX-158108337 | 11 | 68.938 | KV452863.1 | 6630180 | 5-scf00249 | 5 |
| AX-158108342 | 11 | 68.938 | KV452863.1 | 6634657 | 5-scf00249 | 5 |
| AX-158108344 | 11 | 68.938 | KV452863.1 | 6637527 | 5-scf00249 | 5 |
| AX-158108345 | 11 | 68.938 | KV452863.1 | 6637746 | 5-scf00249 | 5 |
| AX-157752399 | 11 | 68.938 | KV452863.1 | 6638203 | 5-scf00249 | 5 |
| AX-158108348 | 11 | 68.938 | KV452863.1 | 6640126 | 5-scf00249 | 5 |
| AX-158108350 | 11 | 68.938 | KV452863.1 | 6642219 | 5-scf00249 | 5 |
| AX-158108351 | 11 | 68.938 | KV452863.1 | 6644267 | 5-scf00249 | 5 |
| AX-157827454 | 11 | 68.938 | KV452863.1 | 6648158 | 5-scf00249 | 5 |
| AX-157827456 | 11 | 68.938 | KV452863.1 | 6653596 | 5-scf00249 | 5 |
| AX-158108358 | 11 | 68.938 | KV452863.1 | 6656218 | 5-scf00249 | 5 |
| AX-157827457 | 11 | 68.938 | KV452863.1 | 6658348 | 5-scf00249 | 5 |
| AX-157827458 | 11 | 68.938 | KV452863.1 | 6659754 | 5-scf00249 | 5 |
| AX-158108360 | 11 | 68.938 | KV452863.1 | 6660916 | 5-scf00249 | 5 |
| AX-158108363 | 11 | 68.938 | KV452863.1 | 6664061 | 5-scf00249 | 5 |
| AX-157827467 | 11 | 68.938 | KV452863.1 | 6676842 | 5-scf00249 | 5 |
| AX-158108381 | 11 | 68.938 | KV452863.1 | 6703946 | 5-scf00249 | 5 |
| AX-158108382 | 11 | 68.938 | KV452863.1 | 6704202 | 5-scf00249 | 5 |
| AX-158108384 | 11 | 68.938 | KV452863.1 | 6704746 | 5-scf00249 | 5 |
| AX-158108385 | 11 | 68.938 | KV452863.1 | 6705054 | 5-scf00249 | 5 |
| AX-158108386 | 11 | 68.938 | KV452863.1 | 6706265 | 5-scf00249 | 5 |
| AX-158108391 | 11 | 68.938 | KV452863.1 | 6712693 | 5-scf00249 | 5 |
| AX-158108392 | 11 | 68.938 | KV452863.1 | 6715626 | 5-scf00249 | 5 |
| AX-158108394 | 11 | 68.938 | KV452863.1 | 6716755 | 5-scf00249 | 5 |
| AX-157827470 | 11 | 68.938 | KV452863.1 | 6718218 | 5-scf00249 | 5 |
| AX-158108406 | 11 | 68.938 | KV452863.1 | 6738633 | 5-scf00249 | 5 |
| AX-158108411 | 11 | 68.938 | KV452863.1 | 6748652 | 5-scf00249 | 5 |
| AX-158108412 | 11 | 68.938 | KV452863.1 | 6749286 | 5-scf00249 | 5 |
| AX-158108416 | 11 | 68.938 | KV452863.1 | 6754958 | 5-scf00249 | 5 |

|              |    |        |            |          |            |   |
|--------------|----|--------|------------|----------|------------|---|
| AX-158108418 | 11 | 68.938 | KV452863.1 | 6757857  | 5-scf00249 | 5 |
| AX-158108423 | 11 | 68.938 | KV452863.1 | 6767026  | 5-scf00249 | 5 |
| AX-158108424 | 11 | 68.938 | KV452863.1 | 6767871  | 5-scf00249 | 5 |
| AX-158108425 | 11 | 68.938 | KV452863.1 | 6769913  | 5-scf00249 | 5 |
| AX-158108427 | 11 | 68.938 | KV452863.1 | 6771192  | 5-scf00249 | 5 |
| AX-157717735 | 11 | 68.938 | KV452863.1 | 6778407  | 5-scf00249 | 5 |
| AX-158108432 | 11 | 68.938 | KV452863.1 | 6788246  | 5-scf00249 | 5 |
| AX-158108446 | 11 | 68.938 | KV452863.1 | 6821754  | 5-scf00249 | 5 |
| AX-158108473 | 11 | 68.938 | KV452863.1 | 6862846  | 5-scf00249 | 5 |
| AX-158108490 | 11 | 68.938 | KV452863.1 | 6886220  | 5-scf00249 | 5 |
| AX-158108511 | 11 | 68.938 | KV452863.1 | 6934188  | 5-scf00249 | 5 |
| AX-158108578 | 11 | 68.938 | KV452863.1 | 7019526  | 5-scf00249 | 5 |
| AX-158108582 | 11 | 68.938 | KV452863.1 | 7025123  | 5-scf00249 | 5 |
| AX-158108608 | 11 | 68.938 | KV452863.1 | 7057328  | 5-scf00249 | 5 |
| AX-158108651 | 11 | 68.938 | KV452863.1 | 7110573  | 5-scf00249 | 5 |
| AX-158417062 | 11 | 68.938 | KV452863.1 | 7244447  | 5-scf00249 | 5 |
| AX-157723225 | 11 | 68.938 | KV452863.1 | 7287438  | 5-scf00249 | 5 |
| AX-158110680 | 11 | 68.938 | KV452863.1 | 10818906 | 5-scf00249 | 5 |
| AX-157827427 | 11 | 68.984 | KV452863.1 | 6385649  | 5-scf00249 | 5 |
| AX-158108140 | 11 | 69.006 | KV452863.1 | 6309752  | 5-scf00249 | 5 |
| AX-158108132 | 11 | 69.047 | KV452863.1 | 6297531  | 5-scf00249 | 5 |
| AX-158108137 | 11 | 69.047 | KV452863.1 | 6303103  | 5-scf00249 | 5 |
| AX-158108138 | 11 | 69.047 | KV452863.1 | 6303846  | 5-scf00249 | 5 |
| AX-158108139 | 11 | 69.047 | KV452863.1 | 6305824  | 5-scf00249 | 5 |
| AX-157827417 | 11 | 69.047 | KV452863.1 | 6309042  | 5-scf00249 | 5 |
| AX-158108151 | 11 | 69.047 | KV452863.1 | 6340417  | 5-scf00249 | 5 |
| AX-158108130 | 11 | 69.157 | KV452863.1 | 6296008  | 5-scf00249 | 5 |
| AX-158108067 | 11 | 69.266 | KV452863.1 | 6198751  | 5-scf00249 | 5 |
| AX-158108068 | 11 | 69.266 | KV452863.1 | 6199382  | 5-scf00249 | 5 |
| AX-158108110 | 11 | 69.266 | KV452863.1 | 6275778  | 5-scf00249 | 5 |
| AX-158108111 | 11 | 69.266 | KV452863.1 | 6276512  | 5-scf00249 | 5 |
| AX-158108117 | 11 | 69.266 | KV452863.1 | 6280017  | 5-scf00249 | 5 |
| AX-158108120 | 11 | 69.266 | KV452863.1 | 6282279  | 5-scf00249 | 5 |
| AX-158108121 | 11 | 69.266 | KV452863.1 | 6283265  | 5-scf00249 | 5 |
| AX-158108123 | 11 | 69.266 | KV452863.1 | 6285183  | 5-scf00249 | 5 |
| AX-158104636 | 11 | 69.303 | KV452856.1 | 2429851  | 5-scf00247 | 5 |
| AX-158105571 | 11 | 69.303 | KV452863.1 | 2108996  | 5-scf00249 | 5 |
| AX-158105630 | 11 | 69.303 | KV452863.1 | 2320826  | 5-scf00249 | 5 |
| AX-157756892 | 11 | 69.303 | KV452863.1 | 2334339  | 5-scf00249 | 5 |
| AX-157719711 | 11 | 69.303 | KV452863.1 | 5950919  | 5-scf00249 | 5 |
| AX-158108070 | 11 | 69.303 | KV452863.1 | 6201011  | 5-scf00249 | 5 |
| AX-158108099 | 11 | 69.303 | KV452863.1 | 6254033  | 5-scf00249 | 5 |
| AX-158108101 | 11 | 69.303 | KV452863.1 | 6257197  | 5-scf00249 | 5 |
| AX-158108241 | 11 | 69.303 | KV452863.1 | 6492996  | 5-scf00249 | 5 |
| AX-158376214 | 11 | 69.303 | KV452860.1 | 428974   | 5-scf00574 | 5 |
| AX-158108100 | 11 | 69.336 | KV452863.1 | 6255202  | 5-scf00249 | 5 |
| AX-158104910 | 11 | 69.358 | KV452856.1 | 2867019  | 5-scf00247 | 5 |
| AX-158105190 | 11 | 69.358 | KV452863.1 | 926234   | 5-scf00249 | 5 |
| AX-157827129 | 11 | 69.358 | KV452863.1 | 1067744  | 5-scf00249 | 5 |
| AX-158105359 | 11 | 69.358 | KV452863.1 | 1369226  | 5-scf00249 | 5 |
| AX-158105362 | 11 | 69.358 | KV452863.1 | 1388863  | 5-scf00249 | 5 |

|              |    |        |            |         |                |    |
|--------------|----|--------|------------|---------|----------------|----|
| AX-158105426 | 11 | 69.358 | KV452863.1 | 1749619 | 5-scf00249     | 5  |
| AX-158105459 | 11 | 69.358 | KV452863.1 | 1880542 | 5-scf00249     | 5  |
| AX-158105462 | 11 | 69.358 | KV452863.1 | 1895510 | 5-scf00249     | 5  |
| AX-158105513 | 11 | 69.358 | KV452863.1 | 1975098 | 5-scf00249     | 5  |
| AX-158105548 | 11 | 69.358 | KV452863.1 | 2058720 | 5-scf00249     | 5  |
| AX-158384835 | 11 | 69.358 | KV452863.1 | 3625867 | 5-scf00249     | 5  |
| AX-158410600 | 11 | 69.358 | KV452863.1 | 4002547 | 5-scf00249     | 5  |
| AX-158107054 | 11 | 69.358 | KV452863.1 | 4753647 | 5-scf00249     | 5  |
| AX-158107338 | 11 | 69.358 | KV452863.1 | 5177195 | 5-scf00249     | 5  |
| AX-158107366 | 11 | 69.358 | KV452863.1 | 5209071 | 5-scf00249     | 5  |
| AX-158107377 | 11 | 69.358 | KV452863.1 | 5236140 | 5-scf00249     | 5  |
| AX-158107472 | 11 | 69.358 | KV452863.1 | 5357880 | 5-scf00249     | 5  |
| AX-158107543 | 11 | 69.358 | KV452863.1 | 5463528 | 5-scf00249     | 5  |
| AX-158107652 | 11 | 69.358 | KV452863.1 | 5577342 | 5-scf00249     | 5  |
| AX-157827385 | 11 | 69.358 | KV452863.1 | 5600481 | 5-scf00249     | 5  |
| AX-157827386 | 11 | 69.358 | KV452863.1 | 5602807 | 5-scf00249     | 5  |
| AX-157827387 | 11 | 69.358 | KV452863.1 | 5603304 | 5-scf00249     | 5  |
| AX-158384873 | 11 | 69.358 | KV452863.1 | 6097327 | 5-scf00249     | 5  |
| AX-158108048 | 11 | 69.358 | KV452863.1 | 6169079 | 5-scf00249     | 5  |
| AX-158108085 | 11 | 69.358 | KV452863.1 | 6221310 | 5-scf00249     | 5  |
| AX-158108245 | 11 | 69.358 | KV452863.1 | 6507134 | 5-scf00249     | 5  |
| AX-158108280 | 11 | 69.358 | KV452863.1 | 6556875 | 5-scf00249     | 5  |
| AX-158108466 | 11 | 69.358 | KV452863.1 | 6852445 | 5-scf00249     | 5  |
| AX-158108469 | 11 | 69.358 | KV452863.1 | 6858602 | 5-scf00249     | 5  |
| AX-158108747 | 11 | 69.358 | KV452863.1 | 7251199 | 5-scf00249     | 5  |
| AX-158392347 | 11 | 69.358 | KV452863.1 | 7263746 | 5-scf00249     | 5  |
| AX-157727471 | 11 | 69.358 | KV452863.1 | 7724356 | 5-scf00249     | 5  |
| AX-158109140 | 11 | 69.358 | KV452863.1 | 7942462 | 5-scf00249     | 5  |
| AX-158109251 | 11 | 69.358 | KV452863.1 | 8164329 | 5-scf00249     | 5  |
| AX-158109286 | 11 | 69.358 | KV452863.1 | 8234915 | 5-scf00249     | 5  |
| AX-157698957 | 11 | 69.358 | FI889406.1 | 586     | 4ORI212 lctalt | UN |
| AX-158103345 | 11 | 69.375 | KV452856.1 | 635598  | 5-scf00247     | 5  |
| AX-158103774 | 11 | 69.375 | KV452856.1 | 1171954 | 5-scf00247     | 5  |
| AX-158103775 | 11 | 69.375 | KV452856.1 | 1172094 | 5-scf00247     | 5  |
| AX-158105283 | 11 | 69.375 | KV452863.1 | 1098975 | 5-scf00249     | 5  |
| AX-157827133 | 11 | 69.375 | KV452863.1 | 1129782 | 5-scf00249     | 5  |
| AX-158105299 | 11 | 69.375 | KV452863.1 | 1130704 | 5-scf00249     | 5  |
| AX-158105371 | 11 | 69.375 | KV452863.1 | 1431878 | 5-scf00249     | 5  |
| AX-157757179 | 11 | 69.375 | KV452863.1 | 1627733 | 5-scf00249     | 5  |
| AX-158105474 | 11 | 69.375 | KV452863.1 | 1922221 | 5-scf00249     | 5  |
| AX-158106047 | 11 | 69.375 | KV452863.1 | 3323683 | 5-scf00249     | 5  |
| AX-158106285 | 11 | 69.375 | KV452863.1 | 3699506 | 5-scf00249     | 5  |
| AX-158106366 | 11 | 69.375 | KV452863.1 | 3794365 | 5-scf00249     | 5  |
| AX-158106429 | 11 | 69.375 | KV452863.1 | 3863432 | 5-scf00249     | 5  |
| AX-158107529 | 11 | 69.375 | KV452863.1 | 5442754 | 5-scf00249     | 5  |
| AX-158107904 | 11 | 69.375 | KV452863.1 | 5935898 | 5-scf00249     | 5  |
| AX-158108034 | 11 | 69.375 | KV452863.1 | 6141442 | 5-scf00249     | 5  |
| AX-158108035 | 11 | 69.375 | KV452863.1 | 6142589 | 5-scf00249     | 5  |
| AX-158108037 | 11 | 69.375 | KV452863.1 | 6145459 | 5-scf00249     | 5  |
| AX-158108040 | 11 | 69.375 | KV452863.1 | 6148679 | 5-scf00249     | 5  |
| AX-158108053 | 11 | 69.375 | KV452863.1 | 6178081 | 5-scf00249     | 5  |

|              |    |        |            |         |            |   |
|--------------|----|--------|------------|---------|------------|---|
| AX-157827409 | 11 | 69.375 | KV452863.1 | 6188321 | 5-scf00249 | 5 |
| AX-158108059 | 11 | 69.375 | KV452863.1 | 6189729 | 5-scf00249 | 5 |
| AX-157827411 | 11 | 69.375 | KV452863.1 | 6194037 | 5-scf00249 | 5 |
| AX-158108077 | 11 | 69.375 | KV452863.1 | 6207912 | 5-scf00249 | 5 |
| AX-158108081 | 11 | 69.375 | KV452863.1 | 6213966 | 5-scf00249 | 5 |
| AX-158108083 | 11 | 69.375 | KV452863.1 | 6215323 | 5-scf00249 | 5 |
| AX-158108090 | 11 | 69.375 | KV452863.1 | 6229519 | 5-scf00249 | 5 |
| AX-158108128 | 11 | 69.375 | KV452863.1 | 6291540 | 5-scf00249 | 5 |
| AX-158108234 | 11 | 69.375 | KV452863.1 | 6478253 | 5-scf00249 | 5 |
| AX-158108279 | 11 | 69.375 | KV452863.1 | 6556450 | 5-scf00249 | 5 |
| AX-158108283 | 11 | 69.375 | KV452863.1 | 6561308 | 5-scf00249 | 5 |
| AX-158108325 | 11 | 69.375 | KV452863.1 | 6612800 | 5-scf00249 | 5 |
| AX-158108795 | 11 | 69.375 | KV452863.1 | 7367701 | 5-scf00249 | 5 |
| AX-158108815 | 11 | 69.375 | KV452863.1 | 7392654 | 5-scf00249 | 5 |
| AX-158108031 | 11 | 69.381 | KV452863.1 | 6138570 | 5-scf00249 | 5 |
| AX-158108017 | 11 | 69.393 | KV452863.1 | 6123408 | 5-scf00249 | 5 |
| AX-158108025 | 11 | 69.393 | KV452863.1 | 6131256 | 5-scf00249 | 5 |
| AX-158108023 | 11 | 69.405 | KV452863.1 | 6129086 | 5-scf00249 | 5 |
| AX-157695220 | 11 | 69.417 | KV452863.1 | 6091168 | 5-scf00249 | 5 |
| AX-158108022 | 11 | 69.417 | KV452863.1 | 6128705 | 5-scf00249 | 5 |
| AX-158108021 | 11 | 69.438 | KV452863.1 | 6128139 | 5-scf00249 | 5 |
| AX-158108018 | 11 | 69.459 | KV452863.1 | 6124265 | 5-scf00249 | 5 |
| AX-158108007 | 11 | 69.484 | KV452863.1 | 6105530 | 5-scf00249 | 5 |
| AX-158108013 | 11 | 69.484 | KV452863.1 | 6116271 | 5-scf00249 | 5 |
| AX-158108003 | 11 | 69.532 | KV452863.1 | 6097251 | 5-scf00249 | 5 |
| AX-158108057 | 11 | 69.532 | KV452863.1 | 6185211 | 5-scf00249 | 5 |
| AX-158108001 | 11 | 69.589 | KV452863.1 | 6095841 | 5-scf00249 | 5 |
| AX-158107997 | 11 | 69.646 | KV452863.1 | 6091478 | 5-scf00249 | 5 |
| AX-158107998 | 11 | 69.646 | KV452863.1 | 6092138 | 5-scf00249 | 5 |
| AX-158107999 | 11 | 69.646 | KV452863.1 | 6092654 | 5-scf00249 | 5 |
| AX-158108667 | 11 | 69.646 | KV452863.1 | 7134873 | 5-scf00249 | 5 |
| AX-157827517 | 11 | 69.646 | KV452863.1 | 7134956 | 5-scf00249 | 5 |
| AX-158108668 | 11 | 69.646 | KV452863.1 | 7135230 | 5-scf00249 | 5 |
| AX-158107995 | 11 | 69.678 | KV452863.1 | 6087420 | 5-scf00249 | 5 |
| AX-158107955 | 11 | 69.713 | KV452863.1 | 6029447 | 5-scf00249 | 5 |
| AX-158107986 | 11 | 69.713 | KV452863.1 | 6079087 | 5-scf00249 | 5 |
| AX-158108006 | 11 | 69.713 | KV452863.1 | 6103688 | 5-scf00249 | 5 |
| AX-157885878 | 11 | 69.713 | KV452863.1 | 6148192 | 5-scf00249 | 5 |
| AX-158108207 | 11 | 69.713 | KV452863.1 | 6434712 | 5-scf00249 | 5 |
| AX-158108577 | 11 | 69.713 | KV452863.1 | 7019253 | 5-scf00249 | 5 |
| AX-158107984 | 11 | 69.758 | KV452863.1 | 6076859 | 5-scf00249 | 5 |
| AX-157724450 | 11 | 69.794 | KV452863.1 | 6059110 | 5-scf00249 | 5 |
| AX-158108093 | 11 | 69.794 | KV452863.1 | 6237437 | 5-scf00249 | 5 |
| AX-158107957 | 11 | 69.812 | KV452863.1 | 6031452 | 5-scf00249 | 5 |
| AX-157827406 | 11 | 69.812 | KV452863.1 | 6032951 | 5-scf00249 | 5 |
| AX-158107959 | 11 | 69.812 | KV452863.1 | 6033609 | 5-scf00249 | 5 |
| AX-158107960 | 11 | 69.812 | KV452863.1 | 6034332 | 5-scf00249 | 5 |
| AX-158107963 | 11 | 69.812 | KV452863.1 | 6042160 | 5-scf00249 | 5 |
| AX-158107965 | 11 | 69.812 | KV452863.1 | 6044807 | 5-scf00249 | 5 |
| AX-158107966 | 11 | 69.812 | KV452863.1 | 6045422 | 5-scf00249 | 5 |
| AX-158107968 | 11 | 69.812 | KV452863.1 | 6049189 | 5-scf00249 | 5 |



|              |    |        |            |         |            |   |
|--------------|----|--------|------------|---------|------------|---|
| AX-158107971 | 11 | 69.812 | KV452863.1 | 6054445 | 5-scf00249 | 5 |
| AX-158107972 | 11 | 69.812 | KV452863.1 | 6057544 | 5-scf00249 | 5 |
| AX-158107973 | 11 | 69.812 | KV452863.1 | 6058920 | 5-scf00249 | 5 |
| AX-158106144 | 11 | 69.867 | KV452863.1 | 3509979 | 5-scf00249 | 5 |
| AX-157742099 | 11 | 69.867 | KV452863.1 | 5926373 | 5-scf00249 | 5 |
| AX-158107956 | 11 | 69.867 | KV452863.1 | 6030812 | 5-scf00249 | 5 |
| AX-158107962 | 11 | 69.867 | KV452863.1 | 6036586 | 5-scf00249 | 5 |
| AX-157827410 | 11 | 69.867 | KV452863.1 | 6191966 | 5-scf00249 | 5 |
| AX-158108806 | 11 | 69.867 | KV452863.1 | 7384485 | 5-scf00249 | 5 |
| AX-158107771 | 11 | 69.922 | KV452863.1 | 5753961 | 5-scf00249 | 5 |
| AX-157707962 | 11 | 69.922 | KV452863.1 | 5980658 | 5-scf00249 | 5 |
| AX-158107939 | 11 | 69.922 | KV452863.1 | 6001426 | 5-scf00249 | 5 |
| AX-158107944 | 11 | 69.922 | KV452863.1 | 6009212 | 5-scf00249 | 5 |
| AX-158107949 | 11 | 69.922 | KV452863.1 | 6016273 | 5-scf00249 | 5 |
| AX-158107952 | 11 | 69.922 | KV452863.1 | 6022303 | 5-scf00249 | 5 |
| AX-158107988 | 11 | 69.922 | KV452863.1 | 6081193 | 5-scf00249 | 5 |
| AX-158108009 | 11 | 69.922 | KV452863.1 | 6108674 | 5-scf00249 | 5 |
| AX-158410628 | 11 | 70.031 | KV452863.1 | 5964456 | 5-scf00249 | 5 |
| AX-158107922 | 11 | 70.031 | KV452863.1 | 5965945 | 5-scf00249 | 5 |
| AX-158107923 | 11 | 70.031 | KV452863.1 | 5966498 | 5-scf00249 | 5 |
| AX-158107938 | 11 | 70.031 | KV452863.1 | 6000729 | 5-scf00249 | 5 |
| AX-158108556 | 11 | 70.031 | KV452863.1 | 7000798 | 5-scf00249 | 5 |
| AX-158108572 | 11 | 70.031 | KV452863.1 | 7016059 | 5-scf00249 | 5 |
| AX-158108699 | 11 | 70.031 | KV452863.1 | 7176581 | 5-scf00249 | 5 |
| AX-157718298 | 11 | 70.085 | KV452863.1 | 5948471 | 5-scf00249 | 5 |
| AX-157742327 | 11 | 70.14  | KV452863.1 | 951672  | 5-scf00249 | 5 |
| AX-158105203 | 11 | 70.14  | KV452863.1 | 952252  | 5-scf00249 | 5 |
| AX-158107813 | 11 | 70.14  | KV452863.1 | 5802942 | 5-scf00249 | 5 |
| AX-158107817 | 11 | 70.14  | KV452863.1 | 5808637 | 5-scf00249 | 5 |
| AX-157772331 | 11 | 70.14  | KV452863.1 | 5921064 | 5-scf00249 | 5 |
| AX-158107890 | 11 | 70.14  | KV452863.1 | 5921642 | 5-scf00249 | 5 |
| AX-158107895 | 11 | 70.14  | KV452863.1 | 5927667 | 5-scf00249 | 5 |
| AX-158107901 | 11 | 70.14  | KV452863.1 | 5933383 | 5-scf00249 | 5 |
| AX-157756802 | 11 | 70.14  | KV452863.1 | 5934644 | 5-scf00249 | 5 |
| AX-158107905 | 11 | 70.14  | KV452863.1 | 5936420 | 5-scf00249 | 5 |
| AX-158107908 | 11 | 70.14  | KV452863.1 | 5942250 | 5-scf00249 | 5 |
| AX-157722531 | 11 | 70.14  | KV452863.1 | 5944712 | 5-scf00249 | 5 |
| AX-158107909 | 11 | 70.14  | KV452863.1 | 5945693 | 5-scf00249 | 5 |
| AX-158107936 | 11 | 70.14  | KV452863.1 | 5998840 | 5-scf00249 | 5 |
| AX-158107821 | 11 | 70.249 | KV452863.1 | 5816297 | 5-scf00249 | 5 |
| AX-158107825 | 11 | 70.249 | KV452863.1 | 5823992 | 5-scf00249 | 5 |
| AX-158107866 | 11 | 70.249 | KV452863.1 | 5890599 | 5-scf00249 | 5 |
| AX-158107867 | 11 | 70.249 | KV452863.1 | 5891561 | 5-scf00249 | 5 |
| AX-158107869 | 11 | 70.249 | KV452863.1 | 5893793 | 5-scf00249 | 5 |
| AX-158410627 | 11 | 70.249 | KV452863.1 | 5895042 | 5-scf00249 | 5 |
| AX-158107870 | 11 | 70.249 | KV452863.1 | 5895942 | 5-scf00249 | 5 |
| AX-158107873 | 11 | 70.249 | KV452863.1 | 5898614 | 5-scf00249 | 5 |
| AX-158107874 | 11 | 70.249 | KV452863.1 | 5900056 | 5-scf00249 | 5 |
| AX-158107875 | 11 | 70.249 | KV452863.1 | 5901274 | 5-scf00249 | 5 |
| AX-158107878 | 11 | 70.249 | KV452863.1 | 5906859 | 5-scf00249 | 5 |
| AX-158107880 | 11 | 70.249 | KV452863.1 | 5908163 | 5-scf00249 | 5 |

|              |    |        |             |         |            |    |
|--------------|----|--------|-------------|---------|------------|----|
| AX-158107881 | 11 | 70.249 | KV452863.1  | 5909535 | 5-scf00249 | 5  |
| AX-158107882 | 11 | 70.249 | KV452863.1  | 5911100 | 5-scf00249 | 5  |
| AX-158107883 | 11 | 70.249 | KV452863.1  | 5911917 | 5-scf00249 | 5  |
| AX-158107884 | 11 | 70.249 | KV452863.1  | 5912629 | 5-scf00249 | 5  |
| AX-158107885 | 11 | 70.249 | KV452863.1  | 5913182 | 5-scf00249 | 5  |
| AX-157710288 | 11 | 70.249 | KV452863.1  | 5915027 | 5-scf00249 | 5  |
| AX-158107886 | 11 | 70.249 | KV452863.1  | 5915128 | 5-scf00249 | 5  |
| AX-158107911 | 11 | 70.249 | KV452863.1  | 5947458 | 5-scf00249 | 5  |
| AX-158107920 | 11 | 70.249 | KV452863.1  | 5959722 | 5-scf00249 | 5  |
| AX-158108015 | 11 | 70.249 | KV452863.1  | 6120372 | 5-scf00249 | 5  |
| AX-158107856 | 11 | 70.263 | KV452863.1  | 5880286 | 5-scf00249 | 5  |
| AX-158107850 | 11 | 70.276 | KV452863.1  | 5869319 | 5-scf00249 | 5  |
| AX-158107847 | 11 | 70.29  | KV452863.1  | 5860742 | 5-scf00249 | 5  |
| AX-158107891 | 11 | 70.29  | KV452863.1  | 5922221 | 5-scf00249 | 5  |
| AX-158107845 | 11 | 70.295 | KV452863.1  | 5859333 | 5-scf00249 | 5  |
| AX-157706779 | 11 | 70.297 | 3ML01032899 | 188     | scf08530_1 | UN |
| AX-158107843 | 11 | 70.31  | KV452863.1  | 5855908 | 5-scf00249 | 5  |
| AX-157757819 | 11 | 70.31  | KV452863.1  | 7252064 | 5-scf00249 | 5  |
| AX-158107842 | 11 | 70.318 | KV452863.1  | 5855493 | 5-scf00249 | 5  |
| AX-158107871 | 11 | 70.318 | KV452863.1  | 5897024 | 5-scf00249 | 5  |
| AX-158107916 | 11 | 70.318 | KV452863.1  | 5954935 | 5-scf00249 | 5  |
| AX-158107830 | 11 | 70.331 | KV452863.1  | 5834088 | 5-scf00249 | 5  |
| AX-157827472 | 11 | 70.331 | KV452863.1  | 6741715 | 5-scf00249 | 5  |
| AX-158107717 | 11 | 70.358 | KV452863.1  | 5676812 | 5-scf00249 | 5  |
| AX-158107799 | 11 | 70.358 | KV452863.1  | 5787152 | 5-scf00249 | 5  |
| AX-158107811 | 11 | 70.358 | KV452863.1  | 5799088 | 5-scf00249 | 5  |
| AX-158107815 | 11 | 70.358 | KV452863.1  | 5806438 | 5-scf00249 | 5  |
| AX-158107816 | 11 | 70.358 | KV452863.1  | 5807207 | 5-scf00249 | 5  |
| AX-158107818 | 11 | 70.358 | KV452863.1  | 5809401 | 5-scf00249 | 5  |
| AX-158107819 | 11 | 70.358 | KV452863.1  | 5812067 | 5-scf00249 | 5  |
| AX-158107820 | 11 | 70.358 | KV452863.1  | 5813748 | 5-scf00249 | 5  |
| AX-158107824 | 11 | 70.358 | KV452863.1  | 5822515 | 5-scf00249 | 5  |
| AX-158107835 | 11 | 70.358 | KV452863.1  | 5843065 | 5-scf00249 | 5  |
| AX-158107837 | 11 | 70.358 | KV452863.1  | 5848366 | 5-scf00249 | 5  |
| AX-158107849 | 11 | 70.358 | KV452863.1  | 5866242 | 5-scf00249 | 5  |
| AX-158107924 | 11 | 70.358 | KV452863.1  | 5967423 | 5-scf00249 | 5  |
| AX-158107659 | 11 | 70.468 | KV452863.1  | 5587984 | 5-scf00249 | 5  |
| AX-158107798 | 11 | 70.468 | KV452863.1  | 5785663 | 5-scf00249 | 5  |
| AX-158107806 | 11 | 70.468 | KV452863.1  | 5793449 | 5-scf00249 | 5  |
| AX-158107808 | 11 | 70.468 | KV452863.1  | 5794959 | 5-scf00249 | 5  |
| AX-158107767 | 11 | 70.514 | KV452863.1  | 5747977 | 5-scf00249 | 5  |
| AX-157715766 | 11 | 70.514 | KV452863.1  | 5751789 | 5-scf00249 | 5  |
| AX-158107790 | 11 | 70.514 | KV452863.1  | 5779444 | 5-scf00249 | 5  |
| AX-158107803 | 11 | 70.514 | KV452863.1  | 5790277 | 5-scf00249 | 5  |
| AX-158107906 | 11 | 70.514 | KV452863.1  | 5938788 | 5-scf00249 | 5  |
| AX-158107926 | 11 | 70.514 | KV452863.1  | 5973557 | 5-scf00249 | 5  |
| AX-158107953 | 11 | 70.514 | KV452863.1  | 6023991 | 5-scf00249 | 5  |
| AX-158105248 | 11 | 70.577 | KV452863.1  | 1037740 | 5-scf00249 | 5  |
| AX-158105278 | 11 | 70.577 | KV452863.1  | 1088579 | 5-scf00249 | 5  |
| AX-158105343 | 11 | 70.577 | KV452863.1  | 1277692 | 5-scf00249 | 5  |
| AX-158105378 | 11 | 70.577 | KV452863.1  | 1476899 | 5-scf00249 | 5  |

|              |    |        |            |         |            |   |
|--------------|----|--------|------------|---------|------------|---|
| AX-158105379 | 11 | 70.577 | KV452863.1 | 1483156 | 5-scf00249 | 5 |
| AX-158105444 | 11 | 70.577 | KV452863.1 | 1821757 | 5-scf00249 | 5 |
| AX-158105501 | 11 | 70.577 | KV452863.1 | 1956424 | 5-scf00249 | 5 |
| AX-157857413 | 11 | 70.577 | KV452863.1 | 2061157 | 5-scf00249 | 5 |
| AX-158106249 | 11 | 70.577 | KV452863.1 | 3654035 | 5-scf00249 | 5 |
| AX-157827264 | 11 | 70.577 | KV452863.1 | 3666341 | 5-scf00249 | 5 |
| AX-158106494 | 11 | 70.577 | KV452863.1 | 3937459 | 5-scf00249 | 5 |
| AX-158106500 | 11 | 70.577 | KV452863.1 | 3943917 | 5-scf00249 | 5 |
| AX-158106511 | 11 | 70.577 | KV452863.1 | 3953896 | 5-scf00249 | 5 |
| AX-158107103 | 11 | 70.577 | KV452863.1 | 4881222 | 5-scf00249 | 5 |
| AX-158107154 | 11 | 70.577 | KV452863.1 | 4965237 | 5-scf00249 | 5 |
| AX-157721228 | 11 | 70.577 | KV452863.1 | 4965901 | 5-scf00249 | 5 |
| AX-158107272 | 11 | 70.577 | KV452863.1 | 5090411 | 5-scf00249 | 5 |
| AX-157720593 | 11 | 70.577 | KV452863.1 | 5129406 | 5-scf00249 | 5 |
| AX-158107343 | 11 | 70.577 | KV452863.1 | 5183207 | 5-scf00249 | 5 |
| AX-157871035 | 11 | 70.577 | KV452863.1 | 5198281 | 5-scf00249 | 5 |
| AX-157718454 | 11 | 70.577 | KV452863.1 | 5219165 | 5-scf00249 | 5 |
| AX-158392324 | 11 | 70.577 | KV452863.1 | 5269618 | 5-scf00249 | 5 |
| AX-158107409 | 11 | 70.577 | KV452863.1 | 5279063 | 5-scf00249 | 5 |
| AX-158107448 | 11 | 70.577 | KV452863.1 | 5332261 | 5-scf00249 | 5 |
| AX-158107486 | 11 | 70.577 | KV452863.1 | 5372255 | 5-scf00249 | 5 |
| AX-158107533 | 11 | 70.577 | KV452863.1 | 5448314 | 5-scf00249 | 5 |
| AX-158107566 | 11 | 70.577 | KV452863.1 | 5487423 | 5-scf00249 | 5 |
| AX-158107587 | 11 | 70.577 | KV452863.1 | 5505961 | 5-scf00249 | 5 |
| AX-158107709 | 11 | 70.577 | KV452863.1 | 5666760 | 5-scf00249 | 5 |
| AX-158107718 | 11 | 70.577 | KV452863.1 | 5677387 | 5-scf00249 | 5 |
| AX-158107728 | 11 | 70.577 | KV452863.1 | 5693173 | 5-scf00249 | 5 |
| AX-158107764 | 11 | 70.577 | KV452863.1 | 5745681 | 5-scf00249 | 5 |
| AX-158107789 | 11 | 70.577 | KV452863.1 | 5779202 | 5-scf00249 | 5 |
| AX-158392337 | 11 | 70.577 | KV452863.1 | 5956765 | 5-scf00249 | 5 |
| AX-157827434 | 11 | 70.577 | KV452863.1 | 6442890 | 5-scf00249 | 5 |
| AX-157871038 | 11 | 70.577 | KV452863.1 | 6494983 | 5-scf00249 | 5 |
| AX-158108250 | 11 | 70.577 | KV452863.1 | 6513765 | 5-scf00249 | 5 |
| AX-158108271 | 11 | 70.577 | KV452863.1 | 6544732 | 5-scf00249 | 5 |
| AX-158410652 | 11 | 70.577 | KV452863.1 | 6561005 | 5-scf00249 | 5 |
| AX-158108330 | 11 | 70.577 | KV452863.1 | 6620165 | 5-scf00249 | 5 |
| AX-158108333 | 11 | 70.577 | KV452863.1 | 6625718 | 5-scf00249 | 5 |
| AX-158108335 | 11 | 70.577 | KV452863.1 | 6628849 | 5-scf00249 | 5 |
| AX-158108338 | 11 | 70.577 | KV452863.1 | 6631157 | 5-scf00249 | 5 |
| AX-158108339 | 11 | 70.577 | KV452863.1 | 6631869 | 5-scf00249 | 5 |
| AX-158108352 | 11 | 70.577 | KV452863.1 | 6645002 | 5-scf00249 | 5 |
| AX-158108357 | 11 | 70.577 | KV452863.1 | 6655914 | 5-scf00249 | 5 |
| AX-158108364 | 11 | 70.577 | KV452863.1 | 6665304 | 5-scf00249 | 5 |
| AX-158108447 | 11 | 70.577 | KV452863.1 | 6822601 | 5-scf00249 | 5 |
| AX-157827505 | 11 | 70.577 | KV452863.1 | 6969674 | 5-scf00249 | 5 |
| AX-158108534 | 11 | 70.577 | KV452863.1 | 6969716 | 5-scf00249 | 5 |
| AX-158108755 | 11 | 70.577 | KV452863.1 | 7273153 | 5-scf00249 | 5 |
| AX-158108757 | 11 | 70.577 | KV452863.1 | 7280026 | 5-scf00249 | 5 |
| AX-157827561 | 11 | 70.577 | KV452863.1 | 7890401 | 5-scf00249 | 5 |
| AX-158109200 | 11 | 70.577 | KV452863.1 | 8046557 | 5-scf00249 | 5 |
| AX-158384894 | 11 | 70.577 | KV452863.1 | 8288070 | 5-scf00249 | 5 |

|              |    |        |            |         |            |   |
|--------------|----|--------|------------|---------|------------|---|
| AX-158107788 | 11 | 70.611 | KV452863.1 | 5776569 | 5-scf00249 | 5 |
| AX-158107784 | 11 | 70.626 | KV452863.1 | 5772895 | 5-scf00249 | 5 |
| AX-158107783 | 11 | 70.642 | KV452863.1 | 5771327 | 5-scf00249 | 5 |
| AX-158107772 | 11 | 70.664 | KV452863.1 | 5756128 | 5-scf00249 | 5 |
| AX-158107763 | 11 | 70.686 | KV452863.1 | 5744494 | 5-scf00249 | 5 |
| AX-158107762 | 11 | 70.733 | KV452863.1 | 5743707 | 5-scf00249 | 5 |
| AX-158107761 | 11 | 70.755 | KV452863.1 | 5741673 | 5-scf00249 | 5 |
| AX-158105194 | 11 | 70.795 | KV452863.1 | 937429  | 5-scf00249 | 5 |
| AX-158105201 | 11 | 70.795 | KV452863.1 | 950709  | 5-scf00249 | 5 |
| AX-158105312 | 11 | 70.795 | KV452863.1 | 1157004 | 5-scf00249 | 5 |
| AX-157827287 | 11 | 70.795 | KV452863.1 | 4028282 | 5-scf00249 | 5 |
| AX-158107416 | 11 | 70.795 | KV452863.1 | 5289033 | 5-scf00249 | 5 |
| AX-158107583 | 11 | 70.795 | KV452863.1 | 5502770 | 5-scf00249 | 5 |
| AX-158107584 | 11 | 70.795 | KV452863.1 | 5503258 | 5-scf00249 | 5 |
| AX-158107696 | 11 | 70.795 | KV452863.1 | 5648007 | 5-scf00249 | 5 |
| AX-157857428 | 11 | 70.795 | KV452863.1 | 5682520 | 5-scf00249 | 5 |
| AX-158107722 | 11 | 70.795 | KV452863.1 | 5683565 | 5-scf00249 | 5 |
| AX-158107724 | 11 | 70.795 | KV452863.1 | 5688370 | 5-scf00249 | 5 |
| AX-158107725 | 11 | 70.795 | KV452863.1 | 5689031 | 5-scf00249 | 5 |
| AX-157753961 | 11 | 70.795 | KV452863.1 | 5699769 | 5-scf00249 | 5 |
| AX-158107735 | 11 | 70.795 | KV452863.1 | 5702613 | 5-scf00249 | 5 |
| AX-158107736 | 11 | 70.795 | KV452863.1 | 5704013 | 5-scf00249 | 5 |
| AX-158107741 | 11 | 70.795 | KV452863.1 | 5713656 | 5-scf00249 | 5 |
| AX-157827397 | 11 | 70.795 | KV452863.1 | 5720065 | 5-scf00249 | 5 |
| AX-158107745 | 11 | 70.795 | KV452863.1 | 5722591 | 5-scf00249 | 5 |
| AX-158107746 | 11 | 70.795 | KV452863.1 | 5723833 | 5-scf00249 | 5 |
| AX-158384857 | 11 | 70.795 | KV452863.1 | 5724045 | 5-scf00249 | 5 |
| AX-158107748 | 11 | 70.795 | KV452863.1 | 5725340 | 5-scf00249 | 5 |
| AX-158107749 | 11 | 70.795 | KV452863.1 | 5726304 | 5-scf00249 | 5 |
| AX-158107750 | 11 | 70.795 | KV452863.1 | 5729838 | 5-scf00249 | 5 |
| AX-158107753 | 11 | 70.795 | KV452863.1 | 5734233 | 5-scf00249 | 5 |
| AX-158107756 | 11 | 70.795 | KV452863.1 | 5737059 | 5-scf00249 | 5 |
| AX-158107773 | 11 | 70.795 | KV452863.1 | 5756530 | 5-scf00249 | 5 |
| AX-158107919 | 11 | 70.795 | KV452863.1 | 5957633 | 5-scf00249 | 5 |
| AX-158107932 | 11 | 70.795 | KV452863.1 | 5987598 | 5-scf00249 | 5 |
| AX-158107937 | 11 | 70.795 | KV452863.1 | 6000287 | 5-scf00249 | 5 |
| AX-158107958 | 11 | 70.795 | KV452863.1 | 6033020 | 5-scf00249 | 5 |
| AX-158108020 | 11 | 70.795 | KV452863.1 | 6126908 | 5-scf00249 | 5 |
| AX-158108246 | 11 | 70.795 | KV452863.1 | 6508355 | 5-scf00249 | 5 |
| AX-158108287 | 11 | 70.795 | KV452863.1 | 6567453 | 5-scf00249 | 5 |
| AX-157827448 | 11 | 70.795 | KV452863.1 | 6568099 | 5-scf00249 | 5 |
| AX-158108323 | 11 | 70.795 | KV452863.1 | 6609682 | 5-scf00249 | 5 |
| AX-158108426 | 11 | 70.795 | KV452863.1 | 6770581 | 5-scf00249 | 5 |
| AX-158108627 | 11 | 70.795 | KV452863.1 | 7076201 | 5-scf00249 | 5 |
| AX-158108991 | 11 | 70.795 | KV452863.1 | 7689339 | 5-scf00249 | 5 |
| AX-157857434 | 11 | 70.795 | KV452863.1 | 7740476 | 5-scf00249 | 5 |
| AX-158109249 | 11 | 70.795 | KV452863.1 | 8162253 | 5-scf00249 | 5 |
| AX-157753553 | 11 | 70.795 | KV452863.1 | 8228887 | 5-scf00249 | 5 |
| AX-158107427 | 11 | 70.866 | KV452863.1 | 5301332 | 5-scf00249 | 5 |
| AX-158107473 | 11 | 70.866 | KV452863.1 | 5358108 | 5-scf00249 | 5 |
| AX-157715191 | 11 | 70.866 | KV452863.1 | 5465331 | 5-scf00249 | 5 |

|              |    |        |            |         |            |   |
|--------------|----|--------|------------|---------|------------|---|
| AX-158107598 | 11 | 70.866 | KV452863.1 | 5519219 | 5-scf00249 | 5 |
| AX-158107730 | 11 | 70.866 | KV452863.1 | 5694715 | 5-scf00249 | 5 |
| AX-158107858 | 11 | 70.866 | KV452863.1 | 5883832 | 5-scf00249 | 5 |
| AX-158384815 | 11 | 70.905 | KV452863.1 | 1731737 | 5-scf00249 | 5 |
| AX-157827368 | 11 | 70.905 | KV452863.1 | 5463322 | 5-scf00249 | 5 |
| AX-158107686 | 11 | 70.905 | KV452863.1 | 5632513 | 5-scf00249 | 5 |
| AX-158107688 | 11 | 70.905 | KV452863.1 | 5636978 | 5-scf00249 | 5 |
| AX-158107695 | 11 | 70.905 | KV452863.1 | 5647724 | 5-scf00249 | 5 |
| AX-158107697 | 11 | 70.905 | KV452863.1 | 5651801 | 5-scf00249 | 5 |
| AX-158107699 | 11 | 70.905 | KV452863.1 | 5653360 | 5-scf00249 | 5 |
| AX-157827393 | 11 | 70.905 | KV452863.1 | 5658010 | 5-scf00249 | 5 |
| AX-158107702 | 11 | 70.905 | KV452863.1 | 5658292 | 5-scf00249 | 5 |
| AX-158107704 | 11 | 70.905 | KV452863.1 | 5660074 | 5-scf00249 | 5 |
| AX-158107711 | 11 | 70.905 | KV452863.1 | 5668295 | 5-scf00249 | 5 |
| AX-158107716 | 11 | 70.905 | KV452863.1 | 5672793 | 5-scf00249 | 5 |
| AX-158107721 | 11 | 70.905 | KV452863.1 | 5682826 | 5-scf00249 | 5 |
| AX-158107734 | 11 | 70.905 | KV452863.1 | 5700873 | 5-scf00249 | 5 |
| AX-158107754 | 11 | 70.905 | KV452863.1 | 5734737 | 5-scf00249 | 5 |
| AX-158108579 | 11 | 70.905 | KV452863.1 | 7020045 | 5-scf00249 | 5 |
| AX-157865981 | 11 | 71.008 | KV452863.1 | 5631499 | 5-scf00249 | 5 |
| AX-157827351 | 11 | 71.123 | KV452863.1 | 5317471 | 5-scf00249 | 5 |
| AX-158107479 | 11 | 71.123 | KV452863.1 | 5365949 | 5-scf00249 | 5 |
| AX-158107520 | 11 | 71.123 | KV452863.1 | 5429331 | 5-scf00249 | 5 |
| AX-158107534 | 11 | 71.123 | KV452863.1 | 5450005 | 5-scf00249 | 5 |
| AX-158107551 | 11 | 71.123 | KV452863.1 | 5472884 | 5-scf00249 | 5 |
| AX-158107600 | 11 | 71.123 | KV452863.1 | 5521548 | 5-scf00249 | 5 |
| AX-158107658 | 11 | 71.123 | KV452863.1 | 5587452 | 5-scf00249 | 5 |
| AX-157773272 | 11 | 71.123 | KV452863.1 | 5592336 | 5-scf00249 | 5 |
| AX-158107664 | 11 | 71.123 | KV452863.1 | 5595376 | 5-scf00249 | 5 |
| AX-157827384 | 11 | 71.123 | KV452863.1 | 5597819 | 5-scf00249 | 5 |
| AX-158107667 | 11 | 71.123 | KV452863.1 | 5599309 | 5-scf00249 | 5 |
| AX-158107668 | 11 | 71.123 | KV452863.1 | 5604284 | 5-scf00249 | 5 |
| AX-157738858 | 11 | 71.123 | KV452863.1 | 5605090 | 5-scf00249 | 5 |
| AX-157827389 | 11 | 71.123 | KV452863.1 | 5611092 | 5-scf00249 | 5 |
| AX-158107675 | 11 | 71.123 | KV452863.1 | 5613897 | 5-scf00249 | 5 |
| AX-158107678 | 11 | 71.123 | KV452863.1 | 5617182 | 5-scf00249 | 5 |
| AX-158107680 | 11 | 71.123 | KV452863.1 | 5622285 | 5-scf00249 | 5 |
| AX-157827391 | 11 | 71.123 | KV452863.1 | 5622934 | 5-scf00249 | 5 |
| AX-158107742 | 11 | 71.123 | KV452863.1 | 5717113 | 5-scf00249 | 5 |
| AX-158107744 | 11 | 71.123 | KV452863.1 | 5719300 | 5-scf00249 | 5 |
| AX-158107807 | 11 | 71.123 | KV452863.1 | 5793714 | 5-scf00249 | 5 |
| AX-158107814 | 11 | 71.123 | KV452863.1 | 5804873 | 5-scf00249 | 5 |
| AX-158107836 | 11 | 71.123 | KV452863.1 | 5847618 | 5-scf00249 | 5 |
| AX-158107864 | 11 | 71.123 | KV452863.1 | 5888506 | 5-scf00249 | 5 |
| AX-158108314 | 11 | 71.123 | KV452863.1 | 6595911 | 5-scf00249 | 5 |
| AX-158108316 | 11 | 71.123 | KV452863.1 | 6599401 | 5-scf00249 | 5 |
| AX-158108493 | 11 | 71.123 | KV452863.1 | 6894730 | 5-scf00249 | 5 |
| AX-158108495 | 11 | 71.123 | KV452863.1 | 6900202 | 5-scf00249 | 5 |
| AX-157741048 | 11 | 71.125 | KV452863.1 | 3401113 | 5-scf00249 | 5 |
| AX-158107500 | 11 | 71.125 | KV452863.1 | 5401347 | 5-scf00249 | 5 |
| AX-158107516 | 11 | 71.125 | KV452863.1 | 5425402 | 5-scf00249 | 5 |

|              |    |        |            |         |            |   |
|--------------|----|--------|------------|---------|------------|---|
| AX-158107557 | 11 | 71.125 | KV452863.1 | 5479003 | 5-scf00249 | 5 |
| AX-158107579 | 11 | 71.125 | KV452863.1 | 5499397 | 5-scf00249 | 5 |
| AX-157771864 | 11 | 71.125 | KV452863.1 | 5581359 | 5-scf00249 | 5 |
| AX-158107705 | 11 | 71.125 | KV452863.1 | 5660333 | 5-scf00249 | 5 |
| AX-158107898 | 11 | 71.125 | KV452863.1 | 5930069 | 5-scf00249 | 5 |
| AX-158108538 | 11 | 71.125 | KV452863.1 | 6975617 | 5-scf00249 | 5 |
| AX-158108694 | 11 | 71.125 | KV452863.1 | 7172561 | 5-scf00249 | 5 |
| AX-158107517 | 11 | 71.232 | KV452863.1 | 5426453 | 5-scf00249 | 5 |
| AX-158107559 | 11 | 71.232 | KV452863.1 | 5480138 | 5-scf00249 | 5 |
| AX-158107564 | 11 | 71.232 | KV452863.1 | 5485269 | 5-scf00249 | 5 |
| AX-158107565 | 11 | 71.232 | KV452863.1 | 5486241 | 5-scf00249 | 5 |
| AX-158107567 | 11 | 71.232 | KV452863.1 | 5488378 | 5-scf00249 | 5 |
| AX-158107578 | 11 | 71.232 | KV452863.1 | 5498626 | 5-scf00249 | 5 |
| AX-157827374 | 11 | 71.232 | KV452863.1 | 5500616 | 5-scf00249 | 5 |
| AX-158107581 | 11 | 71.232 | KV452863.1 | 5501620 | 5-scf00249 | 5 |
| AX-158107582 | 11 | 71.232 | KV452863.1 | 5502219 | 5-scf00249 | 5 |
| AX-157827376 | 11 | 71.232 | KV452863.1 | 5503681 | 5-scf00249 | 5 |
| AX-158107593 | 11 | 71.232 | KV452863.1 | 5512658 | 5-scf00249 | 5 |
| AX-158107595 | 11 | 71.232 | KV452863.1 | 5516322 | 5-scf00249 | 5 |
| AX-158107621 | 11 | 71.232 | KV452863.1 | 5539553 | 5-scf00249 | 5 |
| AX-158107623 | 11 | 71.232 | KV452863.1 | 5541191 | 5-scf00249 | 5 |
| AX-158107624 | 11 | 71.232 | KV452863.1 | 5541572 | 5-scf00249 | 5 |
| AX-158107627 | 11 | 71.232 | KV452863.1 | 5544375 | 5-scf00249 | 5 |
| AX-158107639 | 11 | 71.232 | KV452863.1 | 5555410 | 5-scf00249 | 5 |
| AX-158107646 | 11 | 71.232 | KV452863.1 | 5567189 | 5-scf00249 | 5 |
| AX-157827380 | 11 | 71.232 | KV452863.1 | 5567707 | 5-scf00249 | 5 |
| AX-158107651 | 11 | 71.232 | KV452863.1 | 5572686 | 5-scf00249 | 5 |
| AX-157827383 | 11 | 71.232 | KV452863.1 | 5585660 | 5-scf00249 | 5 |
| AX-157717022 | 11 | 71.232 | KV452863.1 | 5586078 | 5-scf00249 | 5 |
| AX-158107706 | 11 | 71.232 | KV452863.1 | 5660616 | 5-scf00249 | 5 |
| AX-158107550 | 11 | 71.35  | KV452863.1 | 5471927 | 5-scf00249 | 5 |
| AX-157827357 | 11 | 71.451 | KV452863.1 | 5373485 | 5-scf00249 | 5 |
| AX-158107532 | 11 | 71.451 | KV452863.1 | 5446288 | 5-scf00249 | 5 |
| AX-158107540 | 11 | 71.451 | KV452863.1 | 5460278 | 5-scf00249 | 5 |
| AX-157827369 | 11 | 71.451 | KV452863.1 | 5464099 | 5-scf00249 | 5 |
| AX-157827370 | 11 | 71.451 | KV452863.1 | 5464344 | 5-scf00249 | 5 |
| AX-158107549 | 11 | 71.451 | KV452863.1 | 5471326 | 5-scf00249 | 5 |
| AX-158107538 | 11 | 71.495 | KV452863.1 | 5452690 | 5-scf00249 | 5 |
| AX-158107931 | 11 | 71.495 | KV452863.1 | 5981993 | 5-scf00249 | 5 |
| AX-158107537 | 11 | 71.52  | KV452863.1 | 5451906 | 5-scf00249 | 5 |
| AX-158107536 | 11 | 71.542 | KV452863.1 | 5451634 | 5-scf00249 | 5 |
| AX-157716317 | 11 | 71.55  | KV452863.1 | 5446458 | 5-scf00249 | 5 |
| AX-158107511 | 11 | 71.56  | KV452863.1 | 5413304 | 5-scf00249 | 5 |
| AX-158107515 | 11 | 71.56  | KV452863.1 | 5420286 | 5-scf00249 | 5 |
| AX-158107521 | 11 | 71.56  | KV452863.1 | 5435146 | 5-scf00249 | 5 |
| AX-158107531 | 11 | 71.56  | KV452863.1 | 5444423 | 5-scf00249 | 5 |
| AX-158107541 | 11 | 71.56  | KV452863.1 | 5461969 | 5-scf00249 | 5 |
| AX-157754559 | 11 | 71.669 | KV452863.1 | 3510511 | 5-scf00249 | 5 |
| AX-157827359 | 11 | 71.669 | KV452863.1 | 5385586 | 5-scf00249 | 5 |
| AX-158107497 | 11 | 71.669 | KV452863.1 | 5389926 | 5-scf00249 | 5 |
| AX-158107503 | 11 | 71.669 | KV452863.1 | 5403132 | 5-scf00249 | 5 |

|              |    |        |            |         |            |   |
|--------------|----|--------|------------|---------|------------|---|
| AX-158107506 | 11 | 71.669 | KV452863.1 | 5406697 | 5-scf00249 | 5 |
| AX-158107507 | 11 | 71.669 | KV452863.1 | 5407140 | 5-scf00249 | 5 |
| AX-158107508 | 11 | 71.669 | KV452863.1 | 5408274 | 5-scf00249 | 5 |
| AX-158107491 | 11 | 71.67  | KV452863.1 | 5376756 | 5-scf00249 | 5 |
| AX-158107484 | 11 | 71.925 | KV452863.1 | 5371221 | 5-scf00249 | 5 |
| AX-158107452 | 11 | 71.997 | KV452863.1 | 5335851 | 5-scf00249 | 5 |
| AX-158107454 | 11 | 71.997 | KV452863.1 | 5336383 | 5-scf00249 | 5 |
| AX-157827353 | 11 | 71.997 | KV452863.1 | 5337844 | 5-scf00249 | 5 |
| AX-158107456 | 11 | 71.997 | KV452863.1 | 5338932 | 5-scf00249 | 5 |
| AX-158107457 | 11 | 71.997 | KV452863.1 | 5340724 | 5-scf00249 | 5 |
| AX-158107458 | 11 | 71.997 | KV452863.1 | 5341169 | 5-scf00249 | 5 |
| AX-158107460 | 11 | 71.997 | KV452863.1 | 5343138 | 5-scf00249 | 5 |
| AX-158107462 | 11 | 71.997 | KV452863.1 | 5345108 | 5-scf00249 | 5 |
| AX-158392328 | 11 | 71.997 | KV452863.1 | 5345699 | 5-scf00249 | 5 |
| AX-158107465 | 11 | 71.997 | KV452863.1 | 5347355 | 5-scf00249 | 5 |
| AX-158107474 | 11 | 71.997 | KV452863.1 | 5360280 | 5-scf00249 | 5 |
| AX-157827356 | 11 | 71.997 | KV452863.1 | 5364983 | 5-scf00249 | 5 |
| AX-158107478 | 11 | 71.997 | KV452863.1 | 5365475 | 5-scf00249 | 5 |
| AX-158107483 | 11 | 71.997 | KV452863.1 | 5370847 | 5-scf00249 | 5 |
| AX-158107492 | 11 | 71.997 | KV452863.1 | 5377326 | 5-scf00249 | 5 |
| AX-157827372 | 11 | 71.997 | KV452863.1 | 5489732 | 5-scf00249 | 5 |
| AX-158107703 | 11 | 71.997 | KV452863.1 | 5658981 | 5-scf00249 | 5 |
| AX-158107443 | 11 | 72.161 | KV452863.1 | 5323776 | 5-scf00249 | 5 |
| AX-158392327 | 11 | 72.161 | KV452863.1 | 5325165 | 5-scf00249 | 5 |
| AX-158107442 | 11 | 72.175 | KV452863.1 | 5321966 | 5-scf00249 | 5 |
| AX-157724326 | 11 | 72.187 | KV452863.1 | 5293276 | 5-scf00249 | 5 |
| AX-158107422 | 11 | 72.187 | KV452863.1 | 5295691 | 5-scf00249 | 5 |
| AX-158392325 | 11 | 72.187 | KV452863.1 | 5318693 | 5-scf00249 | 5 |
| AX-158107441 | 11 | 72.187 | KV452863.1 | 5320695 | 5-scf00249 | 5 |
| AX-158107444 | 11 | 72.187 | KV452863.1 | 5328732 | 5-scf00249 | 5 |
| AX-158107437 | 11 | 72.219 | KV452863.1 | 5314943 | 5-scf00249 | 5 |
| AX-158107432 | 11 | 72.25  | KV452863.1 | 5310381 | 5-scf00249 | 5 |
| AX-157827347 | 11 | 72.25  | KV452863.1 | 5314111 | 5-scf00249 | 5 |
| AX-158107490 | 11 | 72.25  | KV452863.1 | 5376356 | 5-scf00249 | 5 |
| AX-157715978 | 11 | 72.25  | KV452863.1 | 5444826 | 5-scf00249 | 5 |
| AX-158107662 | 11 | 72.25  | KV452863.1 | 5591893 | 5-scf00249 | 5 |
| AX-158107846 | 11 | 72.25  | KV452863.1 | 5860376 | 5-scf00249 | 5 |
| AX-158107431 | 11 | 72.265 | KV452863.1 | 5307831 | 5-scf00249 | 5 |
| AX-158104516 | 11 | 72.297 | KV452856.1 | 2239939 | 5-scf00247 | 5 |
| AX-158107428 | 11 | 72.297 | KV452863.1 | 5303861 | 5-scf00249 | 5 |
| AX-158107501 | 11 | 72.297 | KV452863.1 | 5401828 | 5-scf00249 | 5 |
| AX-158107528 | 11 | 72.297 | KV452863.1 | 5442411 | 5-scf00249 | 5 |
| AX-158107576 | 11 | 72.297 | KV452863.1 | 5494451 | 5-scf00249 | 5 |
| AX-158107597 | 11 | 72.297 | KV452863.1 | 5518690 | 5-scf00249 | 5 |
| AX-158107655 | 11 | 72.297 | KV452863.1 | 5581880 | 5-scf00249 | 5 |
| AX-158107712 | 11 | 72.297 | KV452863.1 | 5668919 | 5-scf00249 | 5 |
| AX-158107411 | 11 | 72.325 | KV452863.1 | 5280382 | 5-scf00249 | 5 |
| AX-158107413 | 11 | 72.325 | KV452863.1 | 5283690 | 5-scf00249 | 5 |
| AX-158107414 | 11 | 72.325 | KV452863.1 | 5284754 | 5-scf00249 | 5 |
| AX-158107415 | 11 | 72.325 | KV452863.1 | 5286925 | 5-scf00249 | 5 |
| AX-158107417 | 11 | 72.325 | KV452863.1 | 5292111 | 5-scf00249 | 5 |

|              |    |        |            |         |            |   |
|--------------|----|--------|------------|---------|------------|---|
| AX-158107419 | 11 | 72.325 | KV452863.1 | 5293795 | 5-scf00249 | 5 |
| AX-158107420 | 11 | 72.325 | KV452863.1 | 5294272 | 5-scf00249 | 5 |
| AX-158107421 | 11 | 72.325 | KV452863.1 | 5294931 | 5-scf00249 | 5 |
| AX-158107425 | 11 | 72.325 | KV452863.1 | 5299544 | 5-scf00249 | 5 |
| AX-158107426 | 11 | 72.325 | KV452863.1 | 5300542 | 5-scf00249 | 5 |
| AX-158107191 | 11 | 72.434 | KV452863.1 | 5008223 | 5-scf00249 | 5 |
| AX-158107209 | 11 | 72.434 | KV452863.1 | 5024862 | 5-scf00249 | 5 |
| AX-158107215 | 11 | 72.434 | KV452863.1 | 5031008 | 5-scf00249 | 5 |
| AX-158107239 | 11 | 72.434 | KV452863.1 | 5060035 | 5-scf00249 | 5 |
| AX-158107242 | 11 | 72.434 | KV452863.1 | 5063039 | 5-scf00249 | 5 |
| AX-158107245 | 11 | 72.434 | KV452863.1 | 5065483 | 5-scf00249 | 5 |
| AX-158107406 | 11 | 72.434 | KV452863.1 | 5273680 | 5-scf00249 | 5 |
| AX-158107407 | 11 | 72.434 | KV452863.1 | 5274282 | 5-scf00249 | 5 |
| AX-158107547 | 11 | 72.434 | KV452863.1 | 5469989 | 5-scf00249 | 5 |
| AX-158107405 | 11 | 72.49  | KV452863.1 | 5273563 | 5-scf00249 | 5 |
| AX-158107833 | 11 | 72.49  | KV452863.1 | 5840188 | 5-scf00249 | 5 |
| AX-158109132 | 11 | 72.49  | KV452863.1 | 7922871 | 5-scf00249 | 5 |
| AX-158380062 | 11 | 72.544 | KV452856.1 | 2446579 | 5-scf00247 | 5 |
| AX-158384805 | 11 | 72.544 | KV452863.1 | 1073682 | 5-scf00249 | 5 |
| AX-158106227 | 11 | 72.544 | KV452863.1 | 3628875 | 5-scf00249 | 5 |
| AX-157827338 | 11 | 72.544 | KV452863.1 | 5205883 | 5-scf00249 | 5 |
| AX-158107381 | 11 | 72.544 | KV452863.1 | 5240113 | 5-scf00249 | 5 |
| AX-158107382 | 11 | 72.544 | KV452863.1 | 5242120 | 5-scf00249 | 5 |
| AX-157827345 | 11 | 72.544 | KV452863.1 | 5292237 | 5-scf00249 | 5 |
| AX-158107740 | 11 | 72.544 | KV452863.1 | 5713356 | 5-scf00249 | 5 |
| AX-158108148 | 11 | 72.544 | KV452863.1 | 6327518 | 5-scf00249 | 5 |
| AX-158108341 | 11 | 72.544 | KV452863.1 | 6633280 | 5-scf00249 | 5 |
| AX-158410683 | 11 | 72.544 | KV452863.1 | 7818065 | 5-scf00249 | 5 |
| AX-157827588 | 11 | 72.544 | KV452863.1 | 8057445 | 5-scf00249 | 5 |
| AX-158109311 | 11 | 72.544 | KV452863.1 | 8277243 | 5-scf00249 | 5 |
| AX-157746336 | 11 | 72.544 | KV452863.1 | 8384802 | 5-scf00249 | 5 |
| AX-158109436 | 11 | 72.544 | KV452863.1 | 8470814 | 5-scf00249 | 5 |
| AX-158109451 | 11 | 72.544 | KV452863.1 | 8496360 | 5-scf00249 | 5 |
| AX-157827677 | 11 | 72.544 | KV452863.1 | 8982834 | 5-scf00249 | 5 |
| AX-158107269 | 11 | 72.652 | KV452863.1 | 5088016 | 5-scf00249 | 5 |
| AX-158107277 | 11 | 72.652 | KV452863.1 | 5095099 | 5-scf00249 | 5 |
| AX-158392318 | 11 | 72.652 | KV452863.1 | 5097449 | 5-scf00249 | 5 |
| AX-158107280 | 11 | 72.652 | KV452863.1 | 5099355 | 5-scf00249 | 5 |
| AX-158107291 | 11 | 72.652 | KV452863.1 | 5110524 | 5-scf00249 | 5 |
| AX-158107293 | 11 | 72.652 | KV452863.1 | 5111498 | 5-scf00249 | 5 |
| AX-158107298 | 11 | 72.652 | KV452863.1 | 5116225 | 5-scf00249 | 5 |
| AX-158384846 | 11 | 72.652 | KV452863.1 | 5117203 | 5-scf00249 | 5 |
| AX-158108993 | 11 | 72.695 | KV452863.1 | 7691783 | 5-scf00249 | 5 |
| AX-158107348 | 11 | 72.718 | KV452863.1 | 5189358 | 5-scf00249 | 5 |
| AX-157743431 | 11 | 72.718 | KV452863.1 | 7728320 | 5-scf00249 | 5 |
| AX-158109064 | 11 | 72.718 | KV452863.1 | 7801003 | 5-scf00249 | 5 |
| AX-158103255 | 11 | 72.762 | KV452856.1 | 504648  | 5-scf00247 | 5 |
| AX-158105199 | 11 | 72.762 | KV452863.1 | 947989  | 5-scf00249 | 5 |
| AX-157865974 | 11 | 72.762 | KV452863.1 | 3467534 | 5-scf00249 | 5 |
| AX-158107122 | 11 | 72.762 | KV452863.1 | 4914113 | 5-scf00249 | 5 |
| AX-158107156 | 11 | 72.762 | KV452863.1 | 4968025 | 5-scf00249 | 5 |



|              |    |        |            |         |            |   |
|--------------|----|--------|------------|---------|------------|---|
| AX-158107171 | 11 | 72.762 | KV452863.1 | 4982359 | 5-scf00249 | 5 |
| AX-158107175 | 11 | 72.762 | KV452863.1 | 4987206 | 5-scf00249 | 5 |
| AX-158107184 | 11 | 72.762 | KV452863.1 | 5001619 | 5-scf00249 | 5 |
| AX-158107201 | 11 | 72.762 | KV452863.1 | 5015996 | 5-scf00249 | 5 |
| AX-158107203 | 11 | 72.762 | KV452863.1 | 5020224 | 5-scf00249 | 5 |
| AX-158107205 | 11 | 72.762 | KV452863.1 | 5023082 | 5-scf00249 | 5 |
| AX-158107210 | 11 | 72.762 | KV452863.1 | 5025642 | 5-scf00249 | 5 |
| AX-158107219 | 11 | 72.762 | KV452863.1 | 5038210 | 5-scf00249 | 5 |
| AX-158107225 | 11 | 72.762 | KV452863.1 | 5044806 | 5-scf00249 | 5 |
| AX-158107251 | 11 | 72.762 | KV452863.1 | 5070450 | 5-scf00249 | 5 |
| AX-158107254 | 11 | 72.762 | KV452863.1 | 5072286 | 5-scf00249 | 5 |
| AX-158107258 | 11 | 72.762 | KV452863.1 | 5076267 | 5-scf00249 | 5 |
| AX-158107259 | 11 | 72.762 | KV452863.1 | 5076995 | 5-scf00249 | 5 |
| AX-158107266 | 11 | 72.762 | KV452863.1 | 5083318 | 5-scf00249 | 5 |
| AX-158107278 | 11 | 72.762 | KV452863.1 | 5096497 | 5-scf00249 | 5 |
| AX-158107296 | 11 | 72.762 | KV452863.1 | 5114878 | 5-scf00249 | 5 |
| AX-158107371 | 11 | 72.762 | KV452863.1 | 5221304 | 5-scf00249 | 5 |
| AX-157827341 | 11 | 72.762 | KV452863.1 | 5222058 | 5-scf00249 | 5 |
| AX-158107372 | 11 | 72.762 | KV452863.1 | 5222193 | 5-scf00249 | 5 |
| AX-158107376 | 11 | 72.762 | KV452863.1 | 5233006 | 5-scf00249 | 5 |
| AX-158107378 | 11 | 72.762 | KV452863.1 | 5236547 | 5-scf00249 | 5 |
| AX-158107384 | 11 | 72.762 | KV452863.1 | 5244121 | 5-scf00249 | 5 |
| AX-157827352 | 11 | 72.762 | KV452863.1 | 5317890 | 5-scf00249 | 5 |
| AX-158107542 | 11 | 72.762 | KV452863.1 | 5462580 | 5-scf00249 | 5 |
| AX-158107545 | 11 | 72.762 | KV452863.1 | 5467571 | 5-scf00249 | 5 |
| AX-158107592 | 11 | 72.762 | KV452863.1 | 5511069 | 5-scf00249 | 5 |
| AX-157751273 | 11 | 72.762 | KV452863.1 | 5648569 | 5-scf00249 | 5 |
| AX-158107707 | 11 | 72.762 | KV452863.1 | 5662893 | 5-scf00249 | 5 |
| AX-158108039 | 11 | 72.762 | KV452863.1 | 6147869 | 5-scf00249 | 5 |
| AX-158108042 | 11 | 72.762 | KV452863.1 | 6160663 | 5-scf00249 | 5 |
| AX-158108045 | 11 | 72.762 | KV452863.1 | 6163454 | 5-scf00249 | 5 |
| AX-158108072 | 11 | 72.762 | KV452863.1 | 6201570 | 5-scf00249 | 5 |
| AX-157827449 | 11 | 72.762 | KV452863.1 | 6572923 | 5-scf00249 | 5 |
| AX-158108332 | 11 | 72.762 | KV452863.1 | 6623804 | 5-scf00249 | 5 |
| AX-157743693 | 11 | 72.762 | KV452863.1 | 6626042 | 5-scf00249 | 5 |
| AX-158108334 | 11 | 72.762 | KV452863.1 | 6628371 | 5-scf00249 | 5 |
| AX-158108575 | 11 | 72.762 | KV452863.1 | 7016770 | 5-scf00249 | 5 |
| AX-158108987 | 11 | 72.762 | KV452863.1 | 7685356 | 5-scf00249 | 5 |
| AX-158108988 | 11 | 72.762 | KV452863.1 | 7686668 | 5-scf00249 | 5 |
| AX-158109002 | 11 | 72.762 | KV452863.1 | 7706537 | 5-scf00249 | 5 |
| AX-158109018 | 11 | 72.762 | KV452863.1 | 7726996 | 5-scf00249 | 5 |
| AX-158109019 | 11 | 72.762 | KV452863.1 | 7728748 | 5-scf00249 | 5 |
| AX-158109021 | 11 | 72.762 | KV452863.1 | 7729872 | 5-scf00249 | 5 |
| AX-158392367 | 11 | 72.762 | KV452863.1 | 7731038 | 5-scf00249 | 5 |
| AX-158109028 | 11 | 72.762 | KV452863.1 | 7737869 | 5-scf00249 | 5 |
| AX-158392370 | 11 | 72.762 | KV452863.1 | 7744417 | 5-scf00249 | 5 |
| AX-158109035 | 11 | 72.762 | KV452863.1 | 7750073 | 5-scf00249 | 5 |
| AX-158109037 | 11 | 72.762 | KV452863.1 | 7752470 | 5-scf00249 | 5 |
| AX-158392375 | 11 | 72.762 | KV452863.1 | 7760791 | 5-scf00249 | 5 |
| AX-158392376 | 11 | 72.762 | KV452863.1 | 7763423 | 5-scf00249 | 5 |
| AX-158392377 | 11 | 72.762 | KV452863.1 | 7766245 | 5-scf00249 | 5 |

|              |    |        |            |         |            |   |
|--------------|----|--------|------------|---------|------------|---|
| AX-158392379 | 11 | 72.762 | KV452863.1 | 7771626 | 5-scf00249 | 5 |
| AX-158109052 | 11 | 72.762 | KV452863.1 | 7778859 | 5-scf00249 | 5 |
| AX-157752972 | 11 | 72.762 | KV452863.1 | 7780469 | 5-scf00249 | 5 |
| AX-158109057 | 11 | 72.762 | KV452863.1 | 7786704 | 5-scf00249 | 5 |
| AX-158109061 | 11 | 72.762 | KV452863.1 | 7792691 | 5-scf00249 | 5 |
| AX-158109063 | 11 | 72.762 | KV452863.1 | 7798158 | 5-scf00249 | 5 |
| AX-158109067 | 11 | 72.762 | KV452863.1 | 7804320 | 5-scf00249 | 5 |
| AX-158109068 | 11 | 72.762 | KV452863.1 | 7805376 | 5-scf00249 | 5 |
| AX-158109076 | 11 | 72.762 | KV452863.1 | 7817689 | 5-scf00249 | 5 |
| AX-157857435 | 11 | 72.762 | KV452863.1 | 7827525 | 5-scf00249 | 5 |
| AX-158109117 | 11 | 72.762 | KV452863.1 | 7885163 | 5-scf00249 | 5 |
| AX-157744500 | 11 | 72.762 | KV452863.1 | 7907156 | 5-scf00249 | 5 |
| AX-158109127 | 11 | 72.762 | KV452863.1 | 7914791 | 5-scf00249 | 5 |
| AX-158109128 | 11 | 72.762 | KV452863.1 | 7915647 | 5-scf00249 | 5 |
| AX-157713051 | 11 | 72.762 | KV452863.1 | 7916004 | 5-scf00249 | 5 |
| AX-158109130 | 11 | 72.762 | KV452863.1 | 7917514 | 5-scf00249 | 5 |
| AX-157827566 | 11 | 72.762 | KV452863.1 | 7919361 | 5-scf00249 | 5 |
| AX-158109195 | 11 | 72.762 | KV452863.1 | 8037695 | 5-scf00249 | 5 |
| AX-157827586 | 11 | 72.762 | KV452863.1 | 8052839 | 5-scf00249 | 5 |
| AX-158109206 | 11 | 72.762 | KV452863.1 | 8064947 | 5-scf00249 | 5 |
| AX-158109217 | 11 | 72.762 | KV452863.1 | 8092108 | 5-scf00249 | 5 |
| AX-157721404 | 11 | 72.762 | KV452863.1 | 8095310 | 5-scf00249 | 5 |
| AX-158109269 | 11 | 72.762 | KV452863.1 | 8191392 | 5-scf00249 | 5 |
| AX-158109270 | 11 | 72.762 | KV452863.1 | 8194075 | 5-scf00249 | 5 |
| AX-158109277 | 11 | 72.762 | KV452863.1 | 8206458 | 5-scf00249 | 5 |
| AX-158109315 | 11 | 72.762 | KV452863.1 | 8284011 | 5-scf00249 | 5 |
| AX-158109319 | 11 | 72.762 | KV452863.1 | 8288871 | 5-scf00249 | 5 |
| AX-158109322 | 11 | 72.762 | KV452863.1 | 8290260 | 5-scf00249 | 5 |
| AX-158109323 | 11 | 72.762 | KV452863.1 | 8292109 | 5-scf00249 | 5 |
| AX-158109325 | 11 | 72.762 | KV452863.1 | 8295971 | 5-scf00249 | 5 |
| AX-158109326 | 11 | 72.762 | KV452863.1 | 8296354 | 5-scf00249 | 5 |
| AX-158109327 | 11 | 72.762 | KV452863.1 | 8296977 | 5-scf00249 | 5 |
| AX-158109336 | 11 | 72.762 | KV452863.1 | 8308405 | 5-scf00249 | 5 |
| AX-158109340 | 11 | 72.762 | KV452863.1 | 8317445 | 5-scf00249 | 5 |
| AX-158109352 | 11 | 72.762 | KV452863.1 | 8335292 | 5-scf00249 | 5 |
| AX-158109367 | 11 | 72.762 | KV452863.1 | 8354539 | 5-scf00249 | 5 |
| AX-158392495 | 11 | 72.762 | KV452863.1 | 8359512 | 5-scf00249 | 5 |
| AX-158392498 | 11 | 72.762 | KV452863.1 | 8370444 | 5-scf00249 | 5 |
| AX-158109380 | 11 | 72.762 | KV452863.1 | 8377918 | 5-scf00249 | 5 |
| AX-158109381 | 11 | 72.762 | KV452863.1 | 8378985 | 5-scf00249 | 5 |
| AX-158109385 | 11 | 72.762 | KV452863.1 | 8382598 | 5-scf00249 | 5 |
| AX-157827603 | 11 | 72.762 | KV452863.1 | 8386930 | 5-scf00249 | 5 |
| AX-158109390 | 11 | 72.762 | KV452863.1 | 8390371 | 5-scf00249 | 5 |
| AX-158109397 | 11 | 72.762 | KV452863.1 | 8401326 | 5-scf00249 | 5 |
| AX-158109401 | 11 | 72.762 | KV452863.1 | 8408634 | 5-scf00249 | 5 |
| AX-157827605 | 11 | 72.762 | KV452863.1 | 8411165 | 5-scf00249 | 5 |
| AX-158109402 | 11 | 72.762 | KV452863.1 | 8411976 | 5-scf00249 | 5 |
| AX-157757280 | 11 | 72.762 | KV452863.1 | 8415802 | 5-scf00249 | 5 |
| AX-158109403 | 11 | 72.762 | KV452863.1 | 8420616 | 5-scf00249 | 5 |
| AX-158109405 | 11 | 72.762 | KV452863.1 | 8425062 | 5-scf00249 | 5 |
| AX-158109407 | 11 | 72.762 | KV452863.1 | 8425906 | 5-scf00249 | 5 |

|              |    |        |            |         |            |   |
|--------------|----|--------|------------|---------|------------|---|
| AX-158109408 | 11 | 72.762 | KV452863.1 | 8427165 | 5-scf00249 | 5 |
| AX-158109409 | 11 | 72.762 | KV452863.1 | 8428780 | 5-scf00249 | 5 |
| AX-157827609 | 11 | 72.762 | KV452863.1 | 8429420 | 5-scf00249 | 5 |
| AX-157827610 | 11 | 72.762 | KV452863.1 | 8437617 | 5-scf00249 | 5 |
| AX-158109413 | 11 | 72.762 | KV452863.1 | 8438064 | 5-scf00249 | 5 |
| AX-158392503 | 11 | 72.762 | KV452863.1 | 8443405 | 5-scf00249 | 5 |
| AX-158109420 | 11 | 72.762 | KV452863.1 | 8444341 | 5-scf00249 | 5 |
| AX-157758814 | 11 | 72.762 | KV452863.1 | 8445019 | 5-scf00249 | 5 |
| AX-158109422 | 11 | 72.762 | KV452863.1 | 8449759 | 5-scf00249 | 5 |
| AX-158109432 | 11 | 72.762 | KV452863.1 | 8462374 | 5-scf00249 | 5 |
| AX-158109433 | 11 | 72.762 | KV452863.1 | 8462935 | 5-scf00249 | 5 |
| AX-158109434 | 11 | 72.762 | KV452863.1 | 8463753 | 5-scf00249 | 5 |
| AX-157713619 | 11 | 72.762 | KV452863.1 | 8463968 | 5-scf00249 | 5 |
| AX-157713067 | 11 | 72.762 | KV452863.1 | 8468566 | 5-scf00249 | 5 |
| AX-157827614 | 11 | 72.762 | KV452863.1 | 8468617 | 5-scf00249 | 5 |
| AX-158109438 | 11 | 72.762 | KV452863.1 | 8471883 | 5-scf00249 | 5 |
| AX-158109439 | 11 | 72.762 | KV452863.1 | 8473890 | 5-scf00249 | 5 |
| AX-158109444 | 11 | 72.762 | KV452863.1 | 8484363 | 5-scf00249 | 5 |
| AX-158109445 | 11 | 72.762 | KV452863.1 | 8484656 | 5-scf00249 | 5 |
| AX-157717495 | 11 | 72.762 | KV452863.1 | 8486603 | 5-scf00249 | 5 |
| AX-158109454 | 11 | 72.762 | KV452863.1 | 8500950 | 5-scf00249 | 5 |
| AX-158109461 | 11 | 72.762 | KV452863.1 | 8515224 | 5-scf00249 | 5 |
| AX-158109462 | 11 | 72.762 | KV452863.1 | 8515682 | 5-scf00249 | 5 |
| AX-157827618 | 11 | 72.762 | KV452863.1 | 8516354 | 5-scf00249 | 5 |
| AX-158109463 | 11 | 72.762 | KV452863.1 | 8518515 | 5-scf00249 | 5 |
| AX-158109466 | 11 | 72.762 | KV452863.1 | 8522890 | 5-scf00249 | 5 |
| AX-158109469 | 11 | 72.762 | KV452863.1 | 8527835 | 5-scf00249 | 5 |
| AX-158109472 | 11 | 72.762 | KV452863.1 | 8531374 | 5-scf00249 | 5 |
| AX-157827622 | 11 | 72.762 | KV452863.1 | 8532053 | 5-scf00249 | 5 |
| AX-158109473 | 11 | 72.762 | KV452863.1 | 8532671 | 5-scf00249 | 5 |
| AX-157871098 | 11 | 72.762 | KV452863.1 | 8534737 | 5-scf00249 | 5 |
| AX-157871099 | 11 | 72.762 | KV452863.1 | 8535102 | 5-scf00249 | 5 |
| AX-158109477 | 11 | 72.762 | KV452863.1 | 8537008 | 5-scf00249 | 5 |
| AX-158109478 | 11 | 72.762 | KV452863.1 | 8538577 | 5-scf00249 | 5 |
| AX-157827623 | 11 | 72.762 | KV452863.1 | 8539017 | 5-scf00249 | 5 |
| AX-157871100 | 11 | 72.762 | KV452863.1 | 8539775 | 5-scf00249 | 5 |
| AX-158109483 | 11 | 72.762 | KV452863.1 | 8550123 | 5-scf00249 | 5 |
| AX-158392507 | 11 | 72.762 | KV452863.1 | 8551376 | 5-scf00249 | 5 |
| AX-158109484 | 11 | 72.762 | KV452863.1 | 8551779 | 5-scf00249 | 5 |
| AX-158109485 | 11 | 72.762 | KV452863.1 | 8552604 | 5-scf00249 | 5 |
| AX-158109486 | 11 | 72.762 | KV452863.1 | 8553098 | 5-scf00249 | 5 |
| AX-158109488 | 11 | 72.762 | KV452863.1 | 8554781 | 5-scf00249 | 5 |
| AX-157827624 | 11 | 72.762 | KV452863.1 | 8555864 | 5-scf00249 | 5 |
| AX-157871102 | 11 | 72.762 | KV452863.1 | 8556258 | 5-scf00249 | 5 |
| AX-157827625 | 11 | 72.762 | KV452863.1 | 8556483 | 5-scf00249 | 5 |
| AX-157871103 | 11 | 72.762 | KV452863.1 | 8556741 | 5-scf00249 | 5 |
| AX-157827627 | 11 | 72.762 | KV452863.1 | 8557580 | 5-scf00249 | 5 |
| AX-157827628 | 11 | 72.762 | KV452863.1 | 8559336 | 5-scf00249 | 5 |
| AX-157827629 | 11 | 72.762 | KV452863.1 | 8561255 | 5-scf00249 | 5 |
| AX-158109490 | 11 | 72.762 | KV452863.1 | 8563468 | 5-scf00249 | 5 |
| AX-157871106 | 11 | 72.762 | KV452863.1 | 8565006 | 5-scf00249 | 5 |

|              |    |        |            |          |            |   |
|--------------|----|--------|------------|----------|------------|---|
| AX-157749696 | 11 | 72.762 | KV452863.1 | 8566969  | 5-scf00249 | 5 |
| AX-158109492 | 11 | 72.762 | KV452863.1 | 8569342  | 5-scf00249 | 5 |
| AX-157713347 | 11 | 72.762 | KV452863.1 | 8636372  | 5-scf00249 | 5 |
| AX-158109510 | 11 | 72.762 | KV452863.1 | 8661482  | 5-scf00249 | 5 |
| AX-157871112 | 11 | 72.762 | KV452863.1 | 8689571  | 5-scf00249 | 5 |
| AX-157871113 | 11 | 72.762 | KV452863.1 | 8693654  | 5-scf00249 | 5 |
| AX-157871114 | 11 | 72.762 | KV452863.1 | 8694049  | 5-scf00249 | 5 |
| AX-158109524 | 11 | 72.762 | KV452863.1 | 8698092  | 5-scf00249 | 5 |
| AX-158109530 | 11 | 72.762 | KV452863.1 | 8705934  | 5-scf00249 | 5 |
| AX-158109534 | 11 | 72.762 | KV452863.1 | 8711477  | 5-scf00249 | 5 |
| AX-158392525 | 11 | 72.762 | KV452863.1 | 8716641  | 5-scf00249 | 5 |
| AX-158109536 | 11 | 72.762 | KV452863.1 | 8718039  | 5-scf00249 | 5 |
| AX-157871115 | 11 | 72.762 | KV452863.1 | 8718911  | 5-scf00249 | 5 |
| AX-158109537 | 11 | 72.762 | KV452863.1 | 8719980  | 5-scf00249 | 5 |
| AX-157827635 | 11 | 72.762 | KV452863.1 | 8720023  | 5-scf00249 | 5 |
| AX-158109538 | 11 | 72.762 | KV452863.1 | 8721446  | 5-scf00249 | 5 |
| AX-158392528 | 11 | 72.762 | KV452863.1 | 8725372  | 5-scf00249 | 5 |
| AX-157827663 | 11 | 72.762 | KV452863.1 | 8915764  | 5-scf00249 | 5 |
| AX-157772676 | 11 | 72.762 | KV452863.1 | 8942986  | 5-scf00249 | 5 |
| AX-158109714 | 11 | 72.762 | KV452863.1 | 9008226  | 5-scf00249 | 5 |
| AX-158109716 | 11 | 72.762 | KV452863.1 | 9011565  | 5-scf00249 | 5 |
| AX-158109740 | 11 | 72.762 | KV452863.1 | 9040249  | 5-scf00249 | 5 |
| AX-158109769 | 11 | 72.762 | KV452863.1 | 9076628  | 5-scf00249 | 5 |
| AX-158109773 | 11 | 72.762 | KV452863.1 | 9084103  | 5-scf00249 | 5 |
| AX-158109777 | 11 | 72.762 | KV452863.1 | 9087016  | 5-scf00249 | 5 |
| AX-158392564 | 11 | 72.762 | KV452863.1 | 9092842  | 5-scf00249 | 5 |
| AX-158109784 | 11 | 72.762 | KV452863.1 | 9094907  | 5-scf00249 | 5 |
| AX-158109813 | 11 | 72.762 | KV452863.1 | 9132745  | 5-scf00249 | 5 |
| AX-158110031 | 11 | 72.762 | KV452863.1 | 9615761  | 5-scf00249 | 5 |
| AX-158110072 | 11 | 72.762 | KV452863.1 | 9791375  | 5-scf00249 | 5 |
| AX-157726544 | 11 | 72.762 | KV452863.1 | 10080711 | 5-scf00249 | 5 |
| AX-158110218 | 11 | 72.762 | KV452863.1 | 10085095 | 5-scf00249 | 5 |
| AX-158110293 | 11 | 72.762 | KV452863.1 | 10188299 | 5-scf00249 | 5 |
| AX-158422640 | 11 | 72.981 | KV452863.1 | 2188325  | 5-scf00249 | 5 |
| AX-158107198 | 11 | 72.981 | KV452863.1 | 5014048  | 5-scf00249 | 5 |
| AX-158107208 | 11 | 72.981 | KV452863.1 | 5024425  | 5-scf00249 | 5 |
| AX-158107212 | 11 | 72.981 | KV452863.1 | 5027074  | 5-scf00249 | 5 |
| AX-158107267 | 11 | 72.981 | KV452863.1 | 5084094  | 5-scf00249 | 5 |
| AX-158107274 | 11 | 72.981 | KV452863.1 | 5092713  | 5-scf00249 | 5 |
| AX-158107281 | 11 | 72.981 | KV452863.1 | 5102063  | 5-scf00249 | 5 |
| AX-158392319 | 11 | 72.981 | KV452863.1 | 5118843  | 5-scf00249 | 5 |
| AX-158107335 | 11 | 72.981 | KV452863.1 | 5172484  | 5-scf00249 | 5 |
| AX-157827342 | 11 | 72.981 | KV452863.1 | 5222115  | 5-scf00249 | 5 |
| AX-158107373 | 11 | 72.981 | KV452863.1 | 5223680  | 5-scf00249 | 5 |
| AX-158107383 | 11 | 72.981 | KV452863.1 | 5242533  | 5-scf00249 | 5 |
| AX-158107398 | 11 | 72.981 | KV452863.1 | 5265204  | 5-scf00249 | 5 |
| AX-157695324 | 11 | 72.981 | KV452863.1 | 5409002  | 5-scf00249 | 5 |
| AX-157827412 | 11 | 72.981 | KV452863.1 | 6194385  | 5-scf00249 | 5 |
| AX-158108211 | 11 | 72.981 | KV452863.1 | 6436412  | 5-scf00249 | 5 |
| AX-158108976 | 11 | 72.981 | KV452863.1 | 7665456  | 5-scf00249 | 5 |
| AX-157738719 | 11 | 72.981 | KV452863.1 | 7699245  | 5-scf00249 | 5 |

|              |    |        |            |         |            |   |
|--------------|----|--------|------------|---------|------------|---|
| AX-158109003 | 11 | 72.981 | KV452863.1 | 7707313 | 5-scf00249 | 5 |
| AX-158109004 | 11 | 72.981 | KV452863.1 | 7709571 | 5-scf00249 | 5 |
| AX-158109096 | 11 | 72.981 | KV452863.1 | 7843439 | 5-scf00249 | 5 |
| AX-157744866 | 11 | 72.981 | KV452863.1 | 8090843 | 5-scf00249 | 5 |
| AX-158109250 | 11 | 72.981 | KV452863.1 | 8163253 | 5-scf00249 | 5 |
| AX-158109254 | 11 | 72.981 | KV452863.1 | 8167482 | 5-scf00249 | 5 |
| AX-157753362 | 11 | 72.981 | KV452863.1 | 8304080 | 5-scf00249 | 5 |
| AX-158109419 | 11 | 72.981 | KV452863.1 | 8443442 | 5-scf00249 | 5 |
| AX-157857440 | 11 | 72.981 | KV452863.1 | 8452790 | 5-scf00249 | 5 |
| AX-158109429 | 11 | 72.981 | KV452863.1 | 8459943 | 5-scf00249 | 5 |
| AX-158109457 | 11 | 72.981 | KV452863.1 | 8502309 | 5-scf00249 | 5 |
| AX-157865999 | 11 | 72.981 | KV452863.1 | 8562712 | 5-scf00249 | 5 |
| AX-158109498 | 11 | 72.981 | KV452863.1 | 8592038 | 5-scf00249 | 5 |
| AX-158109499 | 11 | 72.981 | KV452863.1 | 8594166 | 5-scf00249 | 5 |
| AX-158109504 | 11 | 72.981 | KV452863.1 | 8625027 | 5-scf00249 | 5 |
| AX-157745955 | 11 | 72.981 | KV452863.1 | 8627197 | 5-scf00249 | 5 |
| AX-158109506 | 11 | 72.981 | KV452863.1 | 8632310 | 5-scf00249 | 5 |
| AX-157757779 | 11 | 72.981 | KV452863.1 | 8635748 | 5-scf00249 | 5 |
| AX-158109507 | 11 | 72.981 | KV452863.1 | 8636078 | 5-scf00249 | 5 |
| AX-158109542 | 11 | 72.981 | KV452863.1 | 8726271 | 5-scf00249 | 5 |
| AX-158109547 | 11 | 72.981 | KV452863.1 | 8733111 | 5-scf00249 | 5 |
| AX-158109549 | 11 | 72.981 | KV452863.1 | 8736393 | 5-scf00249 | 5 |
| AX-158109555 | 11 | 72.981 | KV452863.1 | 8746161 | 5-scf00249 | 5 |
| AX-157727771 | 11 | 72.981 | KV452863.1 | 8751284 | 5-scf00249 | 5 |
| AX-158109560 | 11 | 72.981 | KV452863.1 | 8763946 | 5-scf00249 | 5 |
| AX-157755985 | 11 | 72.981 | KV452863.1 | 8774497 | 5-scf00249 | 5 |
| AX-157716718 | 11 | 72.981 | KV452863.1 | 8776156 | 5-scf00249 | 5 |
| AX-158109565 | 11 | 72.981 | KV452863.1 | 8776309 | 5-scf00249 | 5 |
| AX-158109572 | 11 | 72.981 | KV452863.1 | 8790525 | 5-scf00249 | 5 |
| AX-157871120 | 11 | 72.981 | KV452863.1 | 8806878 | 5-scf00249 | 5 |
| AX-158109581 | 11 | 72.981 | KV452863.1 | 8809285 | 5-scf00249 | 5 |
| AX-158109592 | 11 | 72.981 | KV452863.1 | 8817178 | 5-scf00249 | 5 |
| AX-157871123 | 11 | 72.981 | KV452863.1 | 8821317 | 5-scf00249 | 5 |
| AX-157771403 | 11 | 72.981 | KV452863.1 | 8822592 | 5-scf00249 | 5 |
| AX-158109594 | 11 | 72.981 | KV452863.1 | 8822654 | 5-scf00249 | 5 |
| AX-157747989 | 11 | 72.981 | KV452863.1 | 8839479 | 5-scf00249 | 5 |
| AX-158109608 | 11 | 72.981 | KV452863.1 | 8844983 | 5-scf00249 | 5 |
| AX-158109631 | 11 | 72.981 | KV452863.1 | 8879645 | 5-scf00249 | 5 |
| AX-157751019 | 11 | 72.981 | KV452863.1 | 8882948 | 5-scf00249 | 5 |
| AX-157753842 | 11 | 72.981 | KV452863.1 | 8888606 | 5-scf00249 | 5 |
| AX-157758336 | 11 | 72.981 | KV452863.1 | 8901485 | 5-scf00249 | 5 |
| AX-158109643 | 11 | 72.981 | KV452863.1 | 8907498 | 5-scf00249 | 5 |
| AX-158109647 | 11 | 72.981 | KV452863.1 | 8910695 | 5-scf00249 | 5 |
| AX-158109656 | 11 | 72.981 | KV452863.1 | 8923917 | 5-scf00249 | 5 |
| AX-158109660 | 11 | 72.981 | KV452863.1 | 8929639 | 5-scf00249 | 5 |
| AX-158109670 | 11 | 72.981 | KV452863.1 | 8957713 | 5-scf00249 | 5 |
| AX-157827669 | 11 | 72.981 | KV452863.1 | 8964994 | 5-scf00249 | 5 |
| AX-158109677 | 11 | 72.981 | KV452863.1 | 8965802 | 5-scf00249 | 5 |
| AX-157827671 | 11 | 72.981 | KV452863.1 | 8967186 | 5-scf00249 | 5 |
| AX-158109680 | 11 | 72.981 | KV452863.1 | 8970794 | 5-scf00249 | 5 |
| AX-157871147 | 11 | 72.981 | KV452863.1 | 8970848 | 5-scf00249 | 5 |

|              |    |        |            |         |            |   |
|--------------|----|--------|------------|---------|------------|---|
| AX-158109681 | 11 | 72.981 | KV452863.1 | 8971967 | 5-scf00249 | 5 |
| AX-158109682 | 11 | 72.981 | KV452863.1 | 8972273 | 5-scf00249 | 5 |
| AX-158109683 | 11 | 72.981 | KV452863.1 | 8972480 | 5-scf00249 | 5 |
| AX-158109685 | 11 | 72.981 | KV452863.1 | 8974513 | 5-scf00249 | 5 |
| AX-158109686 | 11 | 72.981 | KV452863.1 | 8974778 | 5-scf00249 | 5 |
| AX-157871148 | 11 | 72.981 | KV452863.1 | 8975198 | 5-scf00249 | 5 |
| AX-157827678 | 11 | 72.981 | KV452863.1 | 8984297 | 5-scf00249 | 5 |
| AX-158109691 | 11 | 72.981 | KV452863.1 | 8985181 | 5-scf00249 | 5 |
| AX-158392555 | 11 | 72.981 | KV452863.1 | 8986207 | 5-scf00249 | 5 |
| AX-158109694 | 11 | 72.981 | KV452863.1 | 8989171 | 5-scf00249 | 5 |
| AX-158109696 | 11 | 72.981 | KV452863.1 | 8989996 | 5-scf00249 | 5 |
| AX-158109703 | 11 | 72.981 | KV452863.1 | 8996077 | 5-scf00249 | 5 |
| AX-158109704 | 11 | 72.981 | KV452863.1 | 8996952 | 5-scf00249 | 5 |
| AX-158109706 | 11 | 72.981 | KV452863.1 | 8998008 | 5-scf00249 | 5 |
| AX-158109710 | 11 | 72.981 | KV452863.1 | 9002316 | 5-scf00249 | 5 |
| AX-158109713 | 11 | 72.981 | KV452863.1 | 9007770 | 5-scf00249 | 5 |
| AX-158109719 | 11 | 72.981 | KV452863.1 | 9015826 | 5-scf00249 | 5 |
| AX-158109721 | 11 | 72.981 | KV452863.1 | 9017202 | 5-scf00249 | 5 |
| AX-158109725 | 11 | 72.981 | KV452863.1 | 9023482 | 5-scf00249 | 5 |
| AX-158109726 | 11 | 72.981 | KV452863.1 | 9023812 | 5-scf00249 | 5 |
| AX-158109734 | 11 | 72.981 | KV452863.1 | 9033630 | 5-scf00249 | 5 |
| AX-158109737 | 11 | 72.981 | KV452863.1 | 9037002 | 5-scf00249 | 5 |
| AX-158109741 | 11 | 72.981 | KV452863.1 | 9041368 | 5-scf00249 | 5 |
| AX-158109751 | 11 | 72.981 | KV452863.1 | 9050266 | 5-scf00249 | 5 |
| AX-158109752 | 11 | 72.981 | KV452863.1 | 9050619 | 5-scf00249 | 5 |
| AX-158109754 | 11 | 72.981 | KV452863.1 | 9052361 | 5-scf00249 | 5 |
| AX-158109758 | 11 | 72.981 | KV452863.1 | 9057783 | 5-scf00249 | 5 |
| AX-158109761 | 11 | 72.981 | KV452863.1 | 9062166 | 5-scf00249 | 5 |
| AX-158109772 | 11 | 72.981 | KV452863.1 | 9080690 | 5-scf00249 | 5 |
| AX-158109774 | 11 | 72.981 | KV452863.1 | 9084483 | 5-scf00249 | 5 |
| AX-158109775 | 11 | 72.981 | KV452863.1 | 9084998 | 5-scf00249 | 5 |
| AX-158109776 | 11 | 72.981 | KV452863.1 | 9085321 | 5-scf00249 | 5 |
| AX-158109781 | 11 | 72.981 | KV452863.1 | 9093237 | 5-scf00249 | 5 |
| AX-158109782 | 11 | 72.981 | KV452863.1 | 9093846 | 5-scf00249 | 5 |
| AX-158109802 | 11 | 72.981 | KV452863.1 | 9118016 | 5-scf00249 | 5 |
| AX-158109808 | 11 | 72.981 | KV452863.1 | 9122743 | 5-scf00249 | 5 |
| AX-158109811 | 11 | 72.981 | KV452863.1 | 9131147 | 5-scf00249 | 5 |
| AX-158109812 | 11 | 72.981 | KV452863.1 | 9131429 | 5-scf00249 | 5 |
| AX-158392565 | 11 | 72.981 | KV452863.1 | 9140195 | 5-scf00249 | 5 |
| AX-157742683 | 11 | 72.981 | KV452863.1 | 9141890 | 5-scf00249 | 5 |
| AX-158109816 | 11 | 72.981 | KV452863.1 | 9143333 | 5-scf00249 | 5 |
| AX-158109821 | 11 | 72.981 | KV452863.1 | 9148295 | 5-scf00249 | 5 |
| AX-158109836 | 11 | 72.981 | KV452863.1 | 9171649 | 5-scf00249 | 5 |
| AX-158109838 | 11 | 72.981 | KV452863.1 | 9175691 | 5-scf00249 | 5 |
| AX-158109843 | 11 | 72.981 | KV452863.1 | 9190426 | 5-scf00249 | 5 |
| AX-158109862 | 11 | 72.981 | KV452863.1 | 9223478 | 5-scf00249 | 5 |
| AX-158109864 | 11 | 72.981 | KV452863.1 | 9227817 | 5-scf00249 | 5 |
| AX-158109865 | 11 | 72.981 | KV452863.1 | 9229955 | 5-scf00249 | 5 |
| AX-158109872 | 11 | 72.981 | KV452863.1 | 9235592 | 5-scf00249 | 5 |
| AX-158109873 | 11 | 72.981 | KV452863.1 | 9236146 | 5-scf00249 | 5 |
| AX-158109875 | 11 | 72.981 | KV452863.1 | 9242224 | 5-scf00249 | 5 |

|              |    |        |            |         |            |   |
|--------------|----|--------|------------|---------|------------|---|
| AX-158109877 | 11 | 72.981 | KV452863.1 | 9244373 | 5-scf00249 | 5 |
| AX-158109879 | 11 | 72.981 | KV452863.1 | 9246617 | 5-scf00249 | 5 |
| AX-158109881 | 11 | 72.981 | KV452863.1 | 9249149 | 5-scf00249 | 5 |
| AX-158109884 | 11 | 72.981 | KV452863.1 | 9257310 | 5-scf00249 | 5 |
| AX-158109889 | 11 | 72.981 | KV452863.1 | 9271072 | 5-scf00249 | 5 |
| AX-158109890 | 11 | 72.981 | KV452863.1 | 9272157 | 5-scf00249 | 5 |
| AX-158392574 | 11 | 72.981 | KV452863.1 | 9274643 | 5-scf00249 | 5 |
| AX-158109891 | 11 | 72.981 | KV452863.1 | 9274796 | 5-scf00249 | 5 |
| AX-157748222 | 11 | 72.981 | KV452863.1 | 9278773 | 5-scf00249 | 5 |
| AX-158407621 | 11 | 72.981 | KV452863.1 | 9286566 | 5-scf00249 | 5 |
| AX-158109903 | 11 | 72.981 | KV452863.1 | 9299762 | 5-scf00249 | 5 |
| AX-158109904 | 11 | 72.981 | KV452863.1 | 9302929 | 5-scf00249 | 5 |
| AX-158109907 | 11 | 72.981 | KV452863.1 | 9308023 | 5-scf00249 | 5 |
| AX-158109908 | 11 | 72.981 | KV452863.1 | 9309310 | 5-scf00249 | 5 |
| AX-158109909 | 11 | 72.981 | KV452863.1 | 9309778 | 5-scf00249 | 5 |
| AX-158109910 | 11 | 72.981 | KV452863.1 | 9310320 | 5-scf00249 | 5 |
| AX-158109913 | 11 | 72.981 | KV452863.1 | 9318281 | 5-scf00249 | 5 |
| AX-158109914 | 11 | 72.981 | KV452863.1 | 9319974 | 5-scf00249 | 5 |
| AX-158109916 | 11 | 72.981 | KV452863.1 | 9323542 | 5-scf00249 | 5 |
| AX-158109918 | 11 | 72.981 | KV452863.1 | 9327337 | 5-scf00249 | 5 |
| AX-158109921 | 11 | 72.981 | KV452863.1 | 9329985 | 5-scf00249 | 5 |
| AX-158109928 | 11 | 72.981 | KV452863.1 | 9345394 | 5-scf00249 | 5 |
| AX-158109929 | 11 | 72.981 | KV452863.1 | 9348325 | 5-scf00249 | 5 |
| AX-158109943 | 11 | 72.981 | KV452863.1 | 9396956 | 5-scf00249 | 5 |
| AX-157827691 | 11 | 72.981 | KV452863.1 | 9402580 | 5-scf00249 | 5 |
| AX-158109946 | 11 | 72.981 | KV452863.1 | 9405413 | 5-scf00249 | 5 |
| AX-158109952 | 11 | 72.981 | KV452863.1 | 9409744 | 5-scf00249 | 5 |
| AX-157752803 | 11 | 72.981 | KV452863.1 | 9429072 | 5-scf00249 | 5 |
| AX-158109960 | 11 | 72.981 | KV452863.1 | 9431212 | 5-scf00249 | 5 |
| AX-158109965 | 11 | 72.981 | KV452863.1 | 9437944 | 5-scf00249 | 5 |
| AX-158109966 | 11 | 72.981 | KV452863.1 | 9438796 | 5-scf00249 | 5 |
| AX-158109967 | 11 | 72.981 | KV452863.1 | 9440937 | 5-scf00249 | 5 |
| AX-158109969 | 11 | 72.981 | KV452863.1 | 9451862 | 5-scf00249 | 5 |
| AX-158109970 | 11 | 72.981 | KV452863.1 | 9455335 | 5-scf00249 | 5 |
| AX-158109971 | 11 | 72.981 | KV452863.1 | 9455799 | 5-scf00249 | 5 |
| AX-158109972 | 11 | 72.981 | KV452863.1 | 9456324 | 5-scf00249 | 5 |
| AX-158109973 | 11 | 72.981 | KV452863.1 | 9458965 | 5-scf00249 | 5 |
| AX-158109975 | 11 | 72.981 | KV452863.1 | 9466178 | 5-scf00249 | 5 |
| AX-158109979 | 11 | 72.981 | KV452863.1 | 9474986 | 5-scf00249 | 5 |
| AX-158109981 | 11 | 72.981 | KV452863.1 | 9478279 | 5-scf00249 | 5 |
| AX-158109985 | 11 | 72.981 | KV452863.1 | 9481020 | 5-scf00249 | 5 |
| AX-158109986 | 11 | 72.981 | KV452863.1 | 9484177 | 5-scf00249 | 5 |
| AX-158109987 | 11 | 72.981 | KV452863.1 | 9487124 | 5-scf00249 | 5 |
| AX-157753424 | 11 | 72.981 | KV452863.1 | 9493258 | 5-scf00249 | 5 |
| AX-158109990 | 11 | 72.981 | KV452863.1 | 9493826 | 5-scf00249 | 5 |
| AX-158109991 | 11 | 72.981 | KV452863.1 | 9495281 | 5-scf00249 | 5 |
| AX-158109992 | 11 | 72.981 | KV452863.1 | 9497766 | 5-scf00249 | 5 |
| AX-158109993 | 11 | 72.981 | KV452863.1 | 9498765 | 5-scf00249 | 5 |
| AX-158109994 | 11 | 72.981 | KV452863.1 | 9499814 | 5-scf00249 | 5 |
| AX-158109995 | 11 | 72.981 | KV452863.1 | 9506185 | 5-scf00249 | 5 |
| AX-158109997 | 11 | 72.981 | KV452863.1 | 9517695 | 5-scf00249 | 5 |

|              |    |        |            |         |            |   |
|--------------|----|--------|------------|---------|------------|---|
| AX-158109998 | 11 | 72.981 | KV452863.1 | 9520354 | 5-scf00249 | 5 |
| AX-158109999 | 11 | 72.981 | KV452863.1 | 9530663 | 5-scf00249 | 5 |
| AX-158110000 | 11 | 72.981 | KV452863.1 | 9537508 | 5-scf00249 | 5 |
| AX-158392581 | 11 | 72.981 | KV452863.1 | 9549790 | 5-scf00249 | 5 |
| AX-158110003 | 11 | 72.981 | KV452863.1 | 9554736 | 5-scf00249 | 5 |
| AX-158110004 | 11 | 72.981 | KV452863.1 | 9555919 | 5-scf00249 | 5 |
| AX-158110006 | 11 | 72.981 | KV452863.1 | 9560238 | 5-scf00249 | 5 |
| AX-158110007 | 11 | 72.981 | KV452863.1 | 9562880 | 5-scf00249 | 5 |
| AX-158110014 | 11 | 72.981 | KV452863.1 | 9577860 | 5-scf00249 | 5 |
| AX-158110016 | 11 | 72.981 | KV452863.1 | 9580964 | 5-scf00249 | 5 |
| AX-158384908 | 11 | 72.981 | KV452863.1 | 9582098 | 5-scf00249 | 5 |
| AX-158110017 | 11 | 72.981 | KV452863.1 | 9585843 | 5-scf00249 | 5 |
| AX-158110020 | 11 | 72.981 | KV452863.1 | 9591753 | 5-scf00249 | 5 |
| AX-158110024 | 11 | 72.981 | KV452863.1 | 9597763 | 5-scf00249 | 5 |
| AX-158110025 | 11 | 72.981 | KV452863.1 | 9599097 | 5-scf00249 | 5 |
| AX-158110026 | 11 | 72.981 | KV452863.1 | 9600119 | 5-scf00249 | 5 |
| AX-158407628 | 11 | 72.981 | KV452863.1 | 9603699 | 5-scf00249 | 5 |
| AX-158110029 | 11 | 72.981 | KV452863.1 | 9607851 | 5-scf00249 | 5 |
| AX-158392586 | 11 | 72.981 | KV452863.1 | 9612718 | 5-scf00249 | 5 |
| AX-158110032 | 11 | 72.981 | KV452863.1 | 9619808 | 5-scf00249 | 5 |
| AX-158110033 | 11 | 72.981 | KV452863.1 | 9621473 | 5-scf00249 | 5 |
| AX-158110034 | 11 | 72.981 | KV452863.1 | 9630720 | 5-scf00249 | 5 |
| AX-158110037 | 11 | 72.981 | KV452863.1 | 9642326 | 5-scf00249 | 5 |
| AX-158410716 | 11 | 72.981 | KV452863.1 | 9654281 | 5-scf00249 | 5 |
| AX-158410717 | 11 | 72.981 | KV452863.1 | 9654769 | 5-scf00249 | 5 |
| AX-158110039 | 11 | 72.981 | KV452863.1 | 9658128 | 5-scf00249 | 5 |
| AX-157764032 | 11 | 72.981 | KV452863.1 | 9660577 | 5-scf00249 | 5 |
| AX-158110042 | 11 | 72.981 | KV452863.1 | 9672959 | 5-scf00249 | 5 |
| AX-158110043 | 11 | 72.981 | KV452863.1 | 9676422 | 5-scf00249 | 5 |
| AX-158110044 | 11 | 72.981 | KV452863.1 | 9678587 | 5-scf00249 | 5 |
| AX-158110052 | 11 | 72.981 | KV452863.1 | 9718412 | 5-scf00249 | 5 |
| AX-158110055 | 11 | 72.981 | KV452863.1 | 9728541 | 5-scf00249 | 5 |
| AX-158110056 | 11 | 72.981 | KV452863.1 | 9732057 | 5-scf00249 | 5 |
| AX-158110057 | 11 | 72.981 | KV452863.1 | 9737679 | 5-scf00249 | 5 |
| AX-158392592 | 11 | 72.981 | KV452863.1 | 9786701 | 5-scf00249 | 5 |
| AX-158392593 | 11 | 72.981 | KV452863.1 | 9789304 | 5-scf00249 | 5 |
| AX-158110084 | 11 | 72.981 | KV452863.1 | 9810387 | 5-scf00249 | 5 |
| AX-158110088 | 11 | 72.981 | KV452863.1 | 9826068 | 5-scf00249 | 5 |
| AX-158110089 | 11 | 72.981 | KV452863.1 | 9827149 | 5-scf00249 | 5 |
| AX-158110091 | 11 | 72.981 | KV452863.1 | 9837266 | 5-scf00249 | 5 |
| AX-158110094 | 11 | 72.981 | KV452863.1 | 9844688 | 5-scf00249 | 5 |
| AX-158110095 | 11 | 72.981 | KV452863.1 | 9845799 | 5-scf00249 | 5 |
| AX-158110096 | 11 | 72.981 | KV452863.1 | 9846693 | 5-scf00249 | 5 |
| AX-157715939 | 11 | 72.981 | KV452863.1 | 9856786 | 5-scf00249 | 5 |
| AX-158110100 | 11 | 72.981 | KV452863.1 | 9860917 | 5-scf00249 | 5 |
| AX-158110101 | 11 | 72.981 | KV452863.1 | 9868196 | 5-scf00249 | 5 |
| AX-158110102 | 11 | 72.981 | KV452863.1 | 9871745 | 5-scf00249 | 5 |
| AX-158110105 | 11 | 72.981 | KV452863.1 | 9876567 | 5-scf00249 | 5 |
| AX-158110107 | 11 | 72.981 | KV452863.1 | 9878971 | 5-scf00249 | 5 |
| AX-158110108 | 11 | 72.981 | KV452863.1 | 9879189 | 5-scf00249 | 5 |
| AX-158110109 | 11 | 72.981 | KV452863.1 | 9881290 | 5-scf00249 | 5 |



|              |    |        |            |          |            |   |
|--------------|----|--------|------------|----------|------------|---|
| AX-157871163 | 11 | 72.981 | KV452863.1 | 9886936  | 5-scf00249 | 5 |
| AX-158110110 | 11 | 72.981 | KV452863.1 | 9889277  | 5-scf00249 | 5 |
| AX-158110113 | 11 | 72.981 | KV452863.1 | 9897942  | 5-scf00249 | 5 |
| AX-158110116 | 11 | 72.981 | KV452863.1 | 9913021  | 5-scf00249 | 5 |
| AX-157871165 | 11 | 72.981 | KV452863.1 | 9918840  | 5-scf00249 | 5 |
| AX-157827704 | 11 | 72.981 | KV452863.1 | 9919222  | 5-scf00249 | 5 |
| AX-157827705 | 11 | 72.981 | KV452863.1 | 9925280  | 5-scf00249 | 5 |
| AX-158110123 | 11 | 72.981 | KV452863.1 | 9928551  | 5-scf00249 | 5 |
| AX-157752374 | 11 | 72.981 | KV452863.1 | 9929136  | 5-scf00249 | 5 |
| AX-158110135 | 11 | 72.981 | KV452863.1 | 9943132  | 5-scf00249 | 5 |
| AX-158110141 | 11 | 72.981 | KV452863.1 | 9957410  | 5-scf00249 | 5 |
| AX-158110164 | 11 | 72.981 | KV452863.1 | 9992273  | 5-scf00249 | 5 |
| AX-158110169 | 11 | 72.981 | KV452863.1 | 9997869  | 5-scf00249 | 5 |
| AX-158110178 | 11 | 72.981 | KV452863.1 | 10014785 | 5-scf00249 | 5 |
| AX-158110181 | 11 | 72.981 | KV452863.1 | 10017635 | 5-scf00249 | 5 |
| AX-158410727 | 11 | 72.981 | KV452863.1 | 10028364 | 5-scf00249 | 5 |
| AX-158110201 | 11 | 72.981 | KV452863.1 | 10056066 | 5-scf00249 | 5 |
| AX-158110224 | 11 | 72.981 | KV452863.1 | 10098572 | 5-scf00249 | 5 |
| AX-158110228 | 11 | 72.981 | KV452863.1 | 10101164 | 5-scf00249 | 5 |
| AX-158110229 | 11 | 72.981 | KV452863.1 | 10101370 | 5-scf00249 | 5 |
| AX-158110246 | 11 | 72.981 | KV452863.1 | 10123926 | 5-scf00249 | 5 |
| AX-158110292 | 11 | 72.981 | KV452863.1 | 10186448 | 5-scf00249 | 5 |
| AX-158110315 | 11 | 72.981 | KV452863.1 | 10238477 | 5-scf00249 | 5 |
| AX-157744305 | 11 | 72.981 | KV452863.1 | 10501309 | 5-scf00249 | 5 |
| AX-158110452 | 11 | 72.981 | KV452863.1 | 10502007 | 5-scf00249 | 5 |
| AX-158110092 | 11 | 73.055 | KV452863.1 | 9842976  | 5-scf00249 | 5 |
| AX-157827702 | 11 | 73.055 | KV452863.1 | 9899782  | 5-scf00249 | 5 |
| AX-157827703 | 11 | 73.055 | KV452863.1 | 9899983  | 5-scf00249 | 5 |
| AX-158392310 | 11 | 73.12  | KV452863.1 | 4994172  | 5-scf00249 | 5 |
| AX-158107257 | 11 | 73.12  | KV452863.1 | 5075290  | 5-scf00249 | 5 |
| AX-157721744 | 11 | 73.12  | KV452863.1 | 8876749  | 5-scf00249 | 5 |
| AX-158110139 | 11 | 73.12  | KV452863.1 | 9954316  | 5-scf00249 | 5 |
| AX-158110143 | 11 | 73.199 | KV452863.1 | 9959805  | 5-scf00249 | 5 |
| AX-158110145 | 11 | 73.199 | KV452863.1 | 9963268  | 5-scf00249 | 5 |
| AX-158104836 | 11 | 73.245 | KV452856.1 | 2716465  | 5-scf00247 | 5 |
| AX-157871166 | 11 | 73.245 | KV452863.1 | 9972331  | 5-scf00249 | 5 |
| AX-158110152 | 11 | 73.245 | KV452863.1 | 9972827  | 5-scf00249 | 5 |
| AX-158110162 | 11 | 73.291 | KV452863.1 | 9990923  | 5-scf00249 | 5 |
| AX-157827708 | 11 | 73.291 | KV452863.1 | 9991035  | 5-scf00249 | 5 |
| AX-157740718 | 11 | 73.291 | KV452863.1 | 10193637 | 5-scf00249 | 5 |
| AX-158104843 | 11 | 73.308 | KV452856.1 | 2723042  | 5-scf00247 | 5 |
| AX-157857412 | 11 | 73.308 | KV452856.1 | 2934481  | 5-scf00247 | 5 |
| AX-158110156 | 11 | 73.308 | KV452863.1 | 9978523  | 5-scf00249 | 5 |
| AX-158110168 | 11 | 73.308 | KV452863.1 | 9996698  | 5-scf00249 | 5 |
| AX-157827710 | 11 | 73.308 | KV452863.1 | 9998822  | 5-scf00249 | 5 |
| AX-157827711 | 11 | 73.308 | KV452863.1 | 10001159 | 5-scf00249 | 5 |
| AX-158110171 | 11 | 73.308 | KV452863.1 | 10001391 | 5-scf00249 | 5 |
| AX-158110172 | 11 | 73.308 | KV452863.1 | 10002612 | 5-scf00249 | 5 |
| AX-157827712 | 11 | 73.308 | KV452863.1 | 10010434 | 5-scf00249 | 5 |
| AX-158110179 | 11 | 73.308 | KV452863.1 | 10015873 | 5-scf00249 | 5 |
| AX-158110251 | 11 | 73.308 | KV452863.1 | 10128783 | 5-scf00249 | 5 |

|              |    |        |            |          |            |   |
|--------------|----|--------|------------|----------|------------|---|
| AX-158110372 | 11 | 73.308 | KV452863.1 | 10325803 | 5-scf00249 | 5 |
| AX-158110438 | 11 | 73.308 | KV452863.1 | 10488097 | 5-scf00249 | 5 |
| AX-158110182 | 11 | 73.362 | KV452863.1 | 10018393 | 5-scf00249 | 5 |
| AX-157827715 | 11 | 73.418 | KV452863.1 | 10020011 | 5-scf00249 | 5 |
| AX-157724864 | 11 | 73.418 | KV452863.1 | 10021712 | 5-scf00249 | 5 |
| AX-158110220 | 11 | 73.418 | KV452863.1 | 10091735 | 5-scf00249 | 5 |
| AX-157827724 | 11 | 73.418 | KV452863.1 | 10092362 | 5-scf00249 | 5 |
| AX-158110279 | 11 | 73.418 | KV452863.1 | 10175046 | 5-scf00249 | 5 |
| AX-157744608 | 11 | 73.418 | KV452863.1 | 10301373 | 5-scf00249 | 5 |
| AX-158110361 | 11 | 73.418 | KV452863.1 | 10302144 | 5-scf00249 | 5 |
| AX-158110366 | 11 | 73.418 | KV452863.1 | 10313687 | 5-scf00249 | 5 |
| AX-158110204 | 11 | 73.527 | KV452863.1 | 10060633 | 5-scf00249 | 5 |
| AX-158110206 | 11 | 73.527 | KV452863.1 | 10065318 | 5-scf00249 | 5 |
| AX-158110208 | 11 | 73.531 | KV452863.1 | 10067717 | 5-scf00249 | 5 |
| AX-157827722 | 11 | 73.545 | KV452863.1 | 10086127 | 5-scf00249 | 5 |
| AX-158110219 | 11 | 73.562 | KV452863.1 | 10087328 | 5-scf00249 | 5 |
| AX-157717295 | 11 | 73.58  | KV452863.1 | 10088265 | 5-scf00249 | 5 |
| AX-158110230 | 11 | 73.602 | KV452863.1 | 10102732 | 5-scf00249 | 5 |
| AX-158110231 | 11 | 73.618 | KV452863.1 | 10103906 | 5-scf00249 | 5 |
| AX-158110232 | 11 | 73.636 | KV452863.1 | 10107137 | 5-scf00249 | 5 |
| AX-158110235 | 11 | 73.636 | KV452863.1 | 10111714 | 5-scf00249 | 5 |
| AX-158110237 | 11 | 73.636 | KV452863.1 | 10115630 | 5-scf00249 | 5 |
| AX-158110239 | 11 | 73.636 | KV452863.1 | 10116886 | 5-scf00249 | 5 |
| AX-158110241 | 11 | 73.636 | KV452863.1 | 10117793 | 5-scf00249 | 5 |
| AX-157857444 | 11 | 73.636 | KV452863.1 | 10120988 | 5-scf00249 | 5 |
| AX-157718413 | 11 | 73.854 | KV452863.1 | 9976476  | 5-scf00249 | 5 |
| AX-158110155 | 11 | 73.854 | KV452863.1 | 9976847  | 5-scf00249 | 5 |
| AX-158110253 | 11 | 73.854 | KV452863.1 | 10135172 | 5-scf00249 | 5 |
| AX-158110255 | 11 | 73.854 | KV452863.1 | 10136256 | 5-scf00249 | 5 |
| AX-158110256 | 11 | 73.854 | KV452863.1 | 10137008 | 5-scf00249 | 5 |
| AX-157743110 | 11 | 73.854 | KV452863.1 | 10161799 | 5-scf00249 | 5 |
| AX-157827743 | 11 | 73.854 | KV452863.1 | 10227750 | 5-scf00249 | 5 |
| AX-158110177 | 11 | 73.888 | KV452863.1 | 10009558 | 5-scf00249 | 5 |
| AX-157746242 | 11 | 73.888 | KV452863.1 | 10009967 | 5-scf00249 | 5 |
| AX-157827717 | 11 | 73.888 | KV452863.1 | 10022380 | 5-scf00249 | 5 |
| AX-158110199 | 11 | 73.888 | KV452863.1 | 10054390 | 5-scf00249 | 5 |
| AX-158110271 | 11 | 73.888 | KV452863.1 | 10162891 | 5-scf00249 | 5 |
| AX-158110298 | 11 | 73.888 | KV452863.1 | 10200445 | 5-scf00249 | 5 |
| AX-157719071 | 11 | 73.888 | KV452863.1 | 10240289 | 5-scf00249 | 5 |
| AX-158380090 | 11 | 73.888 | KV452863.1 | 10249834 | 5-scf00249 | 5 |
| AX-158110374 | 11 | 73.888 | KV452863.1 | 10329348 | 5-scf00249 | 5 |
| AX-158110216 | 11 | 73.921 | KV452863.1 | 10081372 | 5-scf00249 | 5 |
| AX-158110287 | 11 | 73.921 | KV452863.1 | 10182906 | 5-scf00249 | 5 |
| AX-158107250 | 11 | 73.964 | KV452863.1 | 5069940  | 5-scf00249 | 5 |
| AX-158107276 | 11 | 73.964 | KV452863.1 | 5093762  | 5-scf00249 | 5 |
| AX-158107279 | 11 | 73.964 | KV452863.1 | 5098707  | 5-scf00249 | 5 |
| AX-158107283 | 11 | 73.964 | KV452863.1 | 5104865  | 5-scf00249 | 5 |
| AX-158107286 | 11 | 73.964 | KV452863.1 | 5107654  | 5-scf00249 | 5 |
| AX-158107292 | 11 | 73.964 | KV452863.1 | 5110896  | 5-scf00249 | 5 |
| AX-158107294 | 11 | 73.964 | KV452863.1 | 5112009  | 5-scf00249 | 5 |
| AX-158107297 | 11 | 73.964 | KV452863.1 | 5115368  | 5-scf00249 | 5 |

|              |    |        |            |          |            |   |
|--------------|----|--------|------------|----------|------------|---|
| AX-158109418 | 11 | 73.964 | KV452863.1 | 8441596  | 5-scf00249 | 5 |
| AX-157754007 | 11 | 73.964 | KV452863.1 | 8766013  | 5-scf00249 | 5 |
| AX-158109637 | 11 | 73.964 | KV452863.1 | 8888253  | 5-scf00249 | 5 |
| AX-157871146 | 11 | 73.964 | KV452863.1 | 8954455  | 5-scf00249 | 5 |
| AX-158109668 | 11 | 73.964 | KV452863.1 | 8954724  | 5-scf00249 | 5 |
| AX-158109702 | 11 | 73.964 | KV452863.1 | 8994790  | 5-scf00249 | 5 |
| AX-158110158 | 11 | 73.964 | KV452863.1 | 9984429  | 5-scf00249 | 5 |
| AX-158110159 | 11 | 73.964 | KV452863.1 | 9984660  | 5-scf00249 | 5 |
| AX-157827713 | 11 | 73.964 | KV452863.1 | 10016744 | 5-scf00249 | 5 |
| AX-157699969 | 11 | 73.964 | KV452863.1 | 10092716 | 5-scf00249 | 5 |
| AX-158110238 | 11 | 73.964 | KV452863.1 | 10116038 | 5-scf00249 | 5 |
| AX-158110244 | 11 | 73.964 | KV452863.1 | 10121513 | 5-scf00249 | 5 |
| AX-158110290 | 11 | 73.964 | KV452863.1 | 10185378 | 5-scf00249 | 5 |
| AX-158110294 | 11 | 73.964 | KV452863.1 | 10192496 | 5-scf00249 | 5 |
| AX-157715529 | 11 | 73.964 | KV452863.1 | 10193211 | 5-scf00249 | 5 |
| AX-157716842 | 11 | 73.964 | KV452863.1 | 10194261 | 5-scf00249 | 5 |
| AX-158110295 | 11 | 73.964 | KV452863.1 | 10196867 | 5-scf00249 | 5 |
| AX-157827736 | 11 | 73.964 | KV452863.1 | 10201309 | 5-scf00249 | 5 |
| AX-158110299 | 11 | 73.964 | KV452863.1 | 10205681 | 5-scf00249 | 5 |
| AX-158110303 | 11 | 73.964 | KV452863.1 | 10211664 | 5-scf00249 | 5 |
| AX-158110305 | 11 | 73.964 | KV452863.1 | 10214252 | 5-scf00249 | 5 |
| AX-157827738 | 11 | 73.964 | KV452863.1 | 10214797 | 5-scf00249 | 5 |
| AX-157827740 | 11 | 73.964 | KV452863.1 | 10224093 | 5-scf00249 | 5 |
| AX-158110311 | 11 | 73.964 | KV452863.1 | 10230090 | 5-scf00249 | 5 |
| AX-158110313 | 11 | 73.964 | KV452863.1 | 10235025 | 5-scf00249 | 5 |
| AX-157827745 | 11 | 73.964 | KV452863.1 | 10237343 | 5-scf00249 | 5 |
| AX-158110314 | 11 | 73.964 | KV452863.1 | 10238057 | 5-scf00249 | 5 |
| AX-158110321 | 11 | 73.964 | KV452863.1 | 10245881 | 5-scf00249 | 5 |
| AX-157827746 | 11 | 73.964 | KV452863.1 | 10246294 | 5-scf00249 | 5 |
| AX-158110322 | 11 | 73.964 | KV452863.1 | 10246435 | 5-scf00249 | 5 |
| AX-158110323 | 11 | 73.964 | KV452863.1 | 10248191 | 5-scf00249 | 5 |
| AX-157827749 | 11 | 73.964 | KV452863.1 | 10258758 | 5-scf00249 | 5 |
| AX-158110330 | 11 | 73.964 | KV452863.1 | 10261037 | 5-scf00249 | 5 |
| AX-158110343 | 11 | 73.964 | KV452863.1 | 10278281 | 5-scf00249 | 5 |
| AX-158110291 | 11 | 74.073 | KV452863.1 | 10185773 | 5-scf00249 | 5 |
| AX-158110331 | 11 | 74.073 | KV452863.1 | 10261985 | 5-scf00249 | 5 |
| AX-158110333 | 11 | 74.073 | KV452863.1 | 10264516 | 5-scf00249 | 5 |
| AX-158110334 | 11 | 74.073 | KV452863.1 | 10265193 | 5-scf00249 | 5 |
| AX-157827754 | 11 | 74.073 | KV452863.1 | 10280267 | 5-scf00249 | 5 |
| AX-158110345 | 11 | 74.073 | KV452863.1 | 10280776 | 5-scf00249 | 5 |
| AX-158110349 | 11 | 74.073 | KV452863.1 | 10283565 | 5-scf00249 | 5 |
| AX-158110351 | 11 | 74.073 | KV452863.1 | 10284077 | 5-scf00249 | 5 |
| AX-158110356 | 11 | 74.073 | KV452863.1 | 10294296 | 5-scf00249 | 5 |
| AX-157827755 | 11 | 74.073 | KV452863.1 | 10294763 | 5-scf00249 | 5 |
| AX-158110363 | 11 | 74.073 | KV452863.1 | 10303040 | 5-scf00249 | 5 |
| AX-157827756 | 11 | 74.073 | KV452863.1 | 10303856 | 5-scf00249 | 5 |
| AX-158110369 | 11 | 74.073 | KV452863.1 | 10317249 | 5-scf00249 | 5 |
| AX-157827760 | 11 | 74.073 | KV452863.1 | 10317766 | 5-scf00249 | 5 |
| AX-157827761 | 11 | 74.073 | KV452863.1 | 10320558 | 5-scf00249 | 5 |
| AX-158110370 | 11 | 74.073 | KV452863.1 | 10323051 | 5-scf00249 | 5 |
| AX-158110381 | 11 | 74.073 | KV452863.1 | 10347877 | 5-scf00249 | 5 |

|              |    |        |            |          |            |   |
|--------------|----|--------|------------|----------|------------|---|
| AX-158110415 | 11 | 74.073 | KV452863.1 | 10397349 | 5-scf00249 | 5 |
| AX-158110434 | 11 | 74.073 | KV452863.1 | 10485318 | 5-scf00249 | 5 |
| AX-158110340 | 11 | 74.081 | KV452863.1 | 10277543 | 5-scf00249 | 5 |
| AX-158110380 | 11 | 74.081 | KV452863.1 | 10339276 | 5-scf00249 | 5 |
| AX-158110335 | 11 | 74.09  | KV452863.1 | 10266205 | 5-scf00249 | 5 |
| AX-157827764 | 11 | 74.09  | KV452863.1 | 10340026 | 5-scf00249 | 5 |
| AX-157714560 | 11 | 74.09  | KV452863.1 | 10364881 | 5-scf00249 | 5 |
| AX-157747830 | 11 | 74.09  | KV452863.1 | 10556429 | 5-scf00249 | 5 |
| AX-157827765 | 11 | 74.108 | KV452863.1 | 10342797 | 5-scf00249 | 5 |
| AX-157696924 | 11 | 74.133 | KV452863.1 | 10349618 | 5-scf00249 | 5 |
| AX-158110397 | 11 | 74.152 | KV452863.1 | 10373871 | 5-scf00249 | 5 |
| AX-157827770 | 11 | 74.159 | KV452863.1 | 10388388 | 5-scf00249 | 5 |
| AX-157723683 | 11 | 74.182 | KV452863.1 | 9986216  | 5-scf00249 | 5 |
| AX-157773882 | 11 | 74.182 | KV452863.1 | 10201368 | 5-scf00249 | 5 |
| AX-157827751 | 11 | 74.182 | KV452863.1 | 10270214 | 5-scf00249 | 5 |
| AX-157827752 | 11 | 74.182 | KV452863.1 | 10270416 | 5-scf00249 | 5 |
| AX-158110337 | 11 | 74.182 | KV452863.1 | 10271226 | 5-scf00249 | 5 |
| AX-158110357 | 11 | 74.182 | KV452863.1 | 10295242 | 5-scf00249 | 5 |
| AX-158110376 | 11 | 74.182 | KV452863.1 | 10332937 | 5-scf00249 | 5 |
| AX-157827763 | 11 | 74.182 | KV452863.1 | 10333321 | 5-scf00249 | 5 |
| AX-158110377 | 11 | 74.182 | KV452863.1 | 10333906 | 5-scf00249 | 5 |
| AX-157745446 | 11 | 74.182 | KV452863.1 | 10389825 | 5-scf00249 | 5 |
| AX-158110407 | 11 | 74.182 | KV452863.1 | 10391170 | 5-scf00249 | 5 |
| AX-157827772 | 11 | 74.182 | KV452863.1 | 10392572 | 5-scf00249 | 5 |
| AX-158110416 | 11 | 74.182 | KV452863.1 | 10400187 | 5-scf00249 | 5 |
| AX-157748121 | 11 | 74.182 | KV452863.1 | 10401869 | 5-scf00249 | 5 |
| AX-157827775 | 11 | 74.182 | KV452863.1 | 10417403 | 5-scf00249 | 5 |
| AX-158110419 | 11 | 74.182 | KV452863.1 | 10417804 | 5-scf00249 | 5 |
| AX-157715853 | 11 | 74.182 | KV452863.1 | 10419717 | 5-scf00249 | 5 |
| AX-157827776 | 11 | 74.182 | KV452863.1 | 10435509 | 5-scf00249 | 5 |
| AX-157775545 | 11 | 74.182 | KV452863.1 | 10443462 | 5-scf00249 | 5 |
| AX-158110436 | 11 | 74.182 | KV452863.1 | 10486938 | 5-scf00249 | 5 |
| AX-157714354 | 11 | 74.182 | KV452863.1 | 10487014 | 5-scf00249 | 5 |
| AX-158110443 | 11 | 74.182 | KV452863.1 | 10492507 | 5-scf00249 | 5 |
| AX-158110444 | 11 | 74.182 | KV452863.1 | 10494365 | 5-scf00249 | 5 |
| AX-158110451 | 11 | 74.182 | KV452863.1 | 10499494 | 5-scf00249 | 5 |
| AX-158110455 | 11 | 74.182 | KV452863.1 | 10507752 | 5-scf00249 | 5 |
| AX-157827786 | 11 | 74.182 | KV452863.1 | 10513650 | 5-scf00249 | 5 |
| AX-158110467 | 11 | 74.182 | KV452863.1 | 10520038 | 5-scf00249 | 5 |
| AX-157827785 | 11 | 74.196 | KV452863.1 | 10499583 | 5-scf00249 | 5 |
| AX-158110458 | 11 | 74.212 | KV452863.1 | 10511239 | 5-scf00249 | 5 |
| AX-158110460 | 11 | 74.231 | KV452863.1 | 10512035 | 5-scf00249 | 5 |
| AX-158110461 | 11 | 74.256 | KV452863.1 | 10513100 | 5-scf00249 | 5 |
| AX-158110464 | 11 | 74.268 | KV452863.1 | 10516611 | 5-scf00249 | 5 |
| AX-158110466 | 11 | 74.291 | KV452863.1 | 10517902 | 5-scf00249 | 5 |
| AX-158110468 | 11 | 74.291 | KV452863.1 | 10520336 | 5-scf00249 | 5 |
| AX-158110824 | 11 | 74.291 | KV452863.1 | 11062901 | 5-scf00249 | 5 |
| AX-158110485 | 11 | 74.322 | KV452863.1 | 10552726 | 5-scf00249 | 5 |
| AX-158110551 | 11 | 74.322 | KV452863.1 | 10641201 | 5-scf00249 | 5 |
| AX-157877644 | 11 | 74.322 | KV452863.1 | 10664371 | 5-scf00249 | 5 |
| AX-158110487 | 11 | 74.352 | KV452863.1 | 10555210 | 5-scf00249 | 5 |

|              |    |        |            |          |            |   |
|--------------|----|--------|------------|----------|------------|---|
| AX-157718561 | 11 | 74.386 | KV452863.1 | 10557539 | 5-scf00249 | 5 |
| AX-158107295 | 11 | 74.4   | KV452863.1 | 5112819  | 5-scf00249 | 5 |
| AX-158110233 | 11 | 74.4   | KV452863.1 | 10107453 | 5-scf00249 | 5 |
| AX-158110306 | 11 | 74.4   | KV452863.1 | 10217288 | 5-scf00249 | 5 |
| AX-157827757 | 11 | 74.4   | KV452863.1 | 10305484 | 5-scf00249 | 5 |
| AX-158110365 | 11 | 74.4   | KV452863.1 | 10307246 | 5-scf00249 | 5 |
| AX-157827758 | 11 | 74.4   | KV452863.1 | 10315477 | 5-scf00249 | 5 |
| AX-158110412 | 11 | 74.4   | KV452863.1 | 10394973 | 5-scf00249 | 5 |
| AX-157717937 | 11 | 74.4   | KV452863.1 | 10457846 | 5-scf00249 | 5 |
| AX-158110429 | 11 | 74.4   | KV452863.1 | 10458152 | 5-scf00249 | 5 |
| AX-158110484 | 11 | 74.4   | KV452863.1 | 10551540 | 5-scf00249 | 5 |
| AX-157827792 | 11 | 74.4   | KV452863.1 | 10568170 | 5-scf00249 | 5 |
| AX-158110498 | 11 | 74.4   | KV452863.1 | 10573341 | 5-scf00249 | 5 |
| AX-158110499 | 11 | 74.4   | KV452863.1 | 10574972 | 5-scf00249 | 5 |
| AX-158110500 | 11 | 74.4   | KV452863.1 | 10575388 | 5-scf00249 | 5 |
| AX-158110503 | 11 | 74.4   | KV452863.1 | 10577150 | 5-scf00249 | 5 |
| AX-158110505 | 11 | 74.4   | KV452863.1 | 10581256 | 5-scf00249 | 5 |
| AX-158110507 | 11 | 74.4   | KV452863.1 | 10582903 | 5-scf00249 | 5 |
| AX-158110517 | 11 | 74.4   | KV452863.1 | 10589468 | 5-scf00249 | 5 |
| AX-158110522 | 11 | 74.4   | KV452863.1 | 10593997 | 5-scf00249 | 5 |
| AX-158110524 | 11 | 74.4   | KV452863.1 | 10598325 | 5-scf00249 | 5 |
| AX-158110525 | 11 | 74.4   | KV452863.1 | 10600128 | 5-scf00249 | 5 |
| AX-158110535 | 11 | 74.4   | KV452863.1 | 10621768 | 5-scf00249 | 5 |
| AX-158110537 | 11 | 74.4   | KV452863.1 | 10624696 | 5-scf00249 | 5 |
| AX-158110539 | 11 | 74.4   | KV452863.1 | 10626624 | 5-scf00249 | 5 |
| AX-158110542 | 11 | 74.4   | KV452863.1 | 10629643 | 5-scf00249 | 5 |
| AX-158110544 | 11 | 74.4   | KV452863.1 | 10633687 | 5-scf00249 | 5 |
| AX-158110546 | 11 | 74.4   | KV452863.1 | 10636715 | 5-scf00249 | 5 |
| AX-158110550 | 11 | 74.4   | KV452863.1 | 10640455 | 5-scf00249 | 5 |
| AX-158110570 | 11 | 74.4   | KV452863.1 | 10663260 | 5-scf00249 | 5 |
| AX-158110579 | 11 | 74.4   | KV452863.1 | 10679327 | 5-scf00249 | 5 |
| AX-158380093 | 11 | 74.4   | KV452863.1 | 10699968 | 5-scf00249 | 5 |
| AX-157827790 | 11 | 74.46  | KV452863.1 | 10557867 | 5-scf00249 | 5 |
| AX-158110552 | 11 | 74.46  | KV452863.1 | 10642423 | 5-scf00249 | 5 |
| AX-158110325 | 11 | 74.51  | KV452863.1 | 10252493 | 5-scf00249 | 5 |
| AX-158110479 | 11 | 74.51  | KV452863.1 | 10538285 | 5-scf00249 | 5 |
| AX-158110509 | 11 | 74.51  | KV452863.1 | 10583995 | 5-scf00249 | 5 |
| AX-158110510 | 11 | 74.51  | KV452863.1 | 10584649 | 5-scf00249 | 5 |
| AX-158110528 | 11 | 74.51  | KV452863.1 | 10605592 | 5-scf00249 | 5 |
| AX-158110547 | 11 | 74.51  | KV452863.1 | 10637167 | 5-scf00249 | 5 |
| AX-158110553 | 11 | 74.51  | KV452863.1 | 10644040 | 5-scf00249 | 5 |
| AX-158110567 | 11 | 74.51  | KV452863.1 | 10661051 | 5-scf00249 | 5 |
| AX-158110568 | 11 | 74.51  | KV452863.1 | 10662060 | 5-scf00249 | 5 |
| AX-158110574 | 11 | 74.51  | KV452863.1 | 10668630 | 5-scf00249 | 5 |
| AX-158110575 | 11 | 74.51  | KV452863.1 | 10669257 | 5-scf00249 | 5 |
| AX-158110632 | 11 | 74.51  | KV452863.1 | 10744981 | 5-scf00249 | 5 |
| AX-158110639 | 11 | 74.51  | KV452863.1 | 10755453 | 5-scf00249 | 5 |
| AX-157740731 | 11 | 74.51  | KV452863.1 | 10772304 | 5-scf00249 | 5 |
| AX-158110660 | 11 | 74.51  | KV452863.1 | 10794091 | 5-scf00249 | 5 |
| AX-157827806 | 11 | 74.51  | KV452863.1 | 10794342 | 5-scf00249 | 5 |
| AX-158110686 | 11 | 74.51  | KV452863.1 | 10827954 | 5-scf00249 | 5 |

|              |    |        |            |          |            |   |
|--------------|----|--------|------------|----------|------------|---|
| AX-158110689 | 11 | 74.51  | KV452863.1 | 10830334 | 5-scf00249 | 5 |
| AX-157827797 | 11 | 74.523 | KV452863.1 | 10663295 | 5-scf00249 | 5 |
| AX-158110572 | 11 | 74.551 | KV452863.1 | 10664816 | 5-scf00249 | 5 |
| AX-158110577 | 11 | 74.573 | KV452863.1 | 10675507 | 5-scf00249 | 5 |
| AX-158110593 | 11 | 74.573 | KV452863.1 | 10697366 | 5-scf00249 | 5 |
| AX-158110725 | 11 | 74.573 | KV452863.1 | 10898610 | 5-scf00249 | 5 |
| AX-158110749 | 11 | 74.573 | KV452863.1 | 10920862 | 5-scf00249 | 5 |
| AX-158110583 | 11 | 74.591 | KV452863.1 | 10683995 | 5-scf00249 | 5 |
| AX-158110435 | 11 | 74.619 | KV452863.1 | 10486095 | 5-scf00249 | 5 |
| AX-158110449 | 11 | 74.619 | KV452863.1 | 10496950 | 5-scf00249 | 5 |
| AX-158110523 | 11 | 74.619 | KV452863.1 | 10595127 | 5-scf00249 | 5 |
| AX-158110585 | 11 | 74.619 | KV452863.1 | 10684868 | 5-scf00249 | 5 |
| AX-157753903 | 11 | 74.662 | KV452863.1 | 10698461 | 5-scf00249 | 5 |
| AX-158110606 | 11 | 74.696 | KV452863.1 | 10715959 | 5-scf00249 | 5 |
| AX-158110533 | 11 | 74.7   | KV452863.1 | 10618217 | 5-scf00249 | 5 |
| AX-158110609 | 11 | 74.7   | KV452863.1 | 10719224 | 5-scf00249 | 5 |
| AX-158110694 | 11 | 74.7   | KV452863.1 | 10835648 | 5-scf00249 | 5 |
| AX-158110705 | 11 | 74.7   | KV452863.1 | 10853565 | 5-scf00249 | 5 |
| AX-158110708 | 11 | 74.7   | KV452863.1 | 10857835 | 5-scf00249 | 5 |
| AX-158110735 | 11 | 74.7   | KV452863.1 | 10906403 | 5-scf00249 | 5 |
| AX-158392602 | 11 | 74.7   | KV452863.1 | 11231102 | 5-scf00249 | 5 |
| AX-158110534 | 11 | 74.728 | KV452863.1 | 10621135 | 5-scf00249 | 5 |
| AX-157749987 | 11 | 74.728 | KV452863.1 | 10687256 | 5-scf00249 | 5 |
| AX-158110590 | 11 | 74.728 | KV452863.1 | 10690101 | 5-scf00249 | 5 |
| AX-158110608 | 11 | 74.728 | KV452863.1 | 10718446 | 5-scf00249 | 5 |
| AX-158110610 | 11 | 74.728 | KV452863.1 | 10720829 | 5-scf00249 | 5 |
| AX-158110612 | 11 | 74.728 | KV452863.1 | 10722179 | 5-scf00249 | 5 |
| AX-158110617 | 11 | 74.728 | KV452863.1 | 10727057 | 5-scf00249 | 5 |
| AX-158110618 | 11 | 74.728 | KV452863.1 | 10729165 | 5-scf00249 | 5 |
| AX-158110619 | 11 | 74.728 | KV452863.1 | 10729833 | 5-scf00249 | 5 |
| AX-158110620 | 11 | 74.728 | KV452863.1 | 10730664 | 5-scf00249 | 5 |
| AX-158110621 | 11 | 74.728 | KV452863.1 | 10731722 | 5-scf00249 | 5 |
| AX-158110624 | 11 | 74.728 | KV452863.1 | 10734417 | 5-scf00249 | 5 |
| AX-157721688 | 11 | 74.728 | KV452863.1 | 10736230 | 5-scf00249 | 5 |
| AX-158110630 | 11 | 74.728 | KV452863.1 | 10742142 | 5-scf00249 | 5 |
| AX-158110635 | 11 | 74.728 | KV452863.1 | 10750450 | 5-scf00249 | 5 |
| AX-158110637 | 11 | 74.728 | KV452863.1 | 10752777 | 5-scf00249 | 5 |
| AX-157827800 | 11 | 74.728 | KV452863.1 | 10753059 | 5-scf00249 | 5 |
| AX-158110638 | 11 | 74.728 | KV452863.1 | 10754390 | 5-scf00249 | 5 |
| AX-157827802 | 11 | 74.728 | KV452863.1 | 10756860 | 5-scf00249 | 5 |
| AX-158392600 | 11 | 74.728 | KV452863.1 | 10757205 | 5-scf00249 | 5 |
| AX-158380094 | 11 | 74.728 | KV452863.1 | 10767338 | 5-scf00249 | 5 |
| AX-158110688 | 11 | 74.728 | KV452863.1 | 10829087 | 5-scf00249 | 5 |
| AX-158110696 | 11 | 74.728 | KV452863.1 | 10837656 | 5-scf00249 | 5 |
| AX-157717306 | 11 | 74.728 | KV452863.1 | 10913860 | 5-scf00249 | 5 |
| AX-158110812 | 11 | 74.728 | KV452863.1 | 11050639 | 5-scf00249 | 5 |
| AX-158110267 | 11 | 74.946 | KV452863.1 | 10159193 | 5-scf00249 | 5 |
| AX-158110477 | 11 | 74.946 | KV452863.1 | 10537211 | 5-scf00249 | 5 |
| AX-158110514 | 11 | 74.946 | KV452863.1 | 10587809 | 5-scf00249 | 5 |
| AX-158110587 | 11 | 74.946 | KV452863.1 | 10686197 | 5-scf00249 | 5 |
| AX-157827798 | 11 | 74.946 | KV452863.1 | 10694148 | 5-scf00249 | 5 |

|              |    |        |            |          |            |   |
|--------------|----|--------|------------|----------|------------|---|
| AX-158110641 | 11 | 74.946 | KV452863.1 | 10757742 | 5-scf00249 | 5 |
| AX-158110646 | 11 | 74.946 | KV452863.1 | 10767021 | 5-scf00249 | 5 |
| AX-158410735 | 11 | 74.946 | KV452863.1 | 10771762 | 5-scf00249 | 5 |
| AX-158410736 | 11 | 74.946 | KV452863.1 | 10771822 | 5-scf00249 | 5 |
| AX-158110647 | 11 | 74.946 | KV452863.1 | 10772052 | 5-scf00249 | 5 |
| AX-157827804 | 11 | 74.946 | KV452863.1 | 10772911 | 5-scf00249 | 5 |
| AX-158110648 | 11 | 74.946 | KV452863.1 | 10775318 | 5-scf00249 | 5 |
| AX-158110650 | 11 | 74.946 | KV452863.1 | 10779209 | 5-scf00249 | 5 |
| AX-158110654 | 11 | 74.946 | KV452863.1 | 10784192 | 5-scf00249 | 5 |
| AX-157703608 | 11 | 74.946 | KV452863.1 | 10785684 | 5-scf00249 | 5 |
| AX-158110655 | 11 | 74.946 | KV452863.1 | 10786378 | 5-scf00249 | 5 |
| AX-158110659 | 11 | 74.946 | KV452863.1 | 10793502 | 5-scf00249 | 5 |
| AX-158110662 | 11 | 74.946 | KV452863.1 | 10799137 | 5-scf00249 | 5 |
| AX-158110667 | 11 | 74.946 | KV452863.1 | 10808360 | 5-scf00249 | 5 |
| AX-158110669 | 11 | 74.946 | KV452863.1 | 10810403 | 5-scf00249 | 5 |
| AX-158110670 | 11 | 74.946 | KV452863.1 | 10810884 | 5-scf00249 | 5 |
| AX-158110671 | 11 | 74.946 | KV452863.1 | 10811427 | 5-scf00249 | 5 |
| AX-158110672 | 11 | 74.946 | KV452863.1 | 10812746 | 5-scf00249 | 5 |
| AX-158110674 | 11 | 74.946 | KV452863.1 | 10815584 | 5-scf00249 | 5 |
| AX-158110676 | 11 | 74.946 | KV452863.1 | 10816636 | 5-scf00249 | 5 |
| AX-158110683 | 11 | 74.946 | KV452863.1 | 10825717 | 5-scf00249 | 5 |
| AX-158110709 | 11 | 74.946 | KV452863.1 | 10860322 | 5-scf00249 | 5 |
| AX-158110710 | 11 | 74.946 | KV452863.1 | 10860530 | 5-scf00249 | 5 |
| AX-158110711 | 11 | 74.946 | KV452863.1 | 10861968 | 5-scf00249 | 5 |
| AX-157721053 | 11 | 74.946 | KV452863.1 | 10866633 | 5-scf00249 | 5 |
| AX-158110715 | 11 | 74.946 | KV452863.1 | 10874502 | 5-scf00249 | 5 |
| AX-158110717 | 11 | 74.946 | KV452863.1 | 10879194 | 5-scf00249 | 5 |
| AX-158110722 | 11 | 74.946 | KV452863.1 | 10893704 | 5-scf00249 | 5 |
| AX-158110724 | 11 | 74.946 | KV452863.1 | 10896083 | 5-scf00249 | 5 |
| AX-157857446 | 11 | 74.946 | KV452863.1 | 10897340 | 5-scf00249 | 5 |
| AX-158110729 | 11 | 74.946 | KV452863.1 | 10902148 | 5-scf00249 | 5 |
| AX-158110730 | 11 | 74.946 | KV452863.1 | 10902860 | 5-scf00249 | 5 |
| AX-158110527 | 11 | 75.056 | KV452863.1 | 10602290 | 5-scf00249 | 5 |
| AX-157753567 | 11 | 75.056 | KV452863.1 | 10653158 | 5-scf00249 | 5 |
| AX-158110652 | 11 | 75.056 | KV452863.1 | 10780142 | 5-scf00249 | 5 |
| AX-158110731 | 11 | 75.056 | KV452863.1 | 10903460 | 5-scf00249 | 5 |
| AX-158110732 | 11 | 75.056 | KV452863.1 | 10905003 | 5-scf00249 | 5 |
| AX-158110733 | 11 | 75.056 | KV452863.1 | 10905683 | 5-scf00249 | 5 |
| AX-158110736 | 11 | 75.056 | KV452863.1 | 10906759 | 5-scf00249 | 5 |
| AX-158110738 | 11 | 75.056 | KV452863.1 | 10909998 | 5-scf00249 | 5 |
| AX-158110739 | 11 | 75.056 | KV452863.1 | 10910539 | 5-scf00249 | 5 |
| AX-158410740 | 11 | 75.056 | KV452863.1 | 10911613 | 5-scf00249 | 5 |
| AX-158110743 | 11 | 75.056 | KV452863.1 | 10916401 | 5-scf00249 | 5 |
| AX-158110748 | 11 | 75.056 | KV452863.1 | 10919787 | 5-scf00249 | 5 |
| AX-157857447 | 11 | 75.056 | KV452863.1 | 10922162 | 5-scf00249 | 5 |
| AX-158110751 | 11 | 75.056 | KV452863.1 | 10922388 | 5-scf00249 | 5 |
| AX-158110752 | 11 | 75.056 | KV452863.1 | 10924526 | 5-scf00249 | 5 |
| AX-158110760 | 11 | 75.056 | KV452863.1 | 10933055 | 5-scf00249 | 5 |
| AX-158110763 | 11 | 75.056 | KV452863.1 | 10935694 | 5-scf00249 | 5 |
| AX-158110766 | 11 | 75.056 | KV452863.1 | 10939545 | 5-scf00249 | 5 |
| AX-158417095 | 11 | 75.056 | KV452863.1 | 10940865 | 5-scf00249 | 5 |

|              |    |        |            |          |            |   |
|--------------|----|--------|------------|----------|------------|---|
| AX-158110767 | 11 | 75.056 | KV452863.1 | 10941425 | 5-scf00249 | 5 |
| AX-158110769 | 11 | 75.056 | KV452863.1 | 10943284 | 5-scf00249 | 5 |
| AX-158110770 | 11 | 75.056 | KV452863.1 | 10943863 | 5-scf00249 | 5 |
| AX-158110771 | 11 | 75.056 | KV452863.1 | 10944505 | 5-scf00249 | 5 |
| AX-158110775 | 11 | 75.056 | KV452863.1 | 10948739 | 5-scf00249 | 5 |
| AX-158110786 | 11 | 75.056 | KV452863.1 | 10959415 | 5-scf00249 | 5 |
| AX-158110787 | 11 | 75.056 | KV452863.1 | 10962001 | 5-scf00249 | 5 |
| AX-158110852 | 11 | 75.056 | KV452863.1 | 11097606 | 5-scf00249 | 5 |
| AX-157827707 | 11 | 75.165 | KV452863.1 | 9969510  | 5-scf00249 | 5 |
| AX-158110170 | 11 | 75.165 | KV452863.1 | 9998463  | 5-scf00249 | 5 |
| AX-158110174 | 11 | 75.165 | KV452863.1 | 10004348 | 5-scf00249 | 5 |
| AX-157827714 | 11 | 75.165 | KV452863.1 | 10019286 | 5-scf00249 | 5 |
| AX-158110248 | 11 | 75.165 | KV452863.1 | 10126598 | 5-scf00249 | 5 |
| AX-158110266 | 11 | 75.165 | KV452863.1 | 10156655 | 5-scf00249 | 5 |
| AX-158110272 | 11 | 75.165 | KV452863.1 | 10164425 | 5-scf00249 | 5 |
| AX-158110278 | 11 | 75.165 | KV452863.1 | 10174626 | 5-scf00249 | 5 |
| AX-158110281 | 11 | 75.165 | KV452863.1 | 10177961 | 5-scf00249 | 5 |
| AX-158110329 | 11 | 75.165 | KV452863.1 | 10258848 | 5-scf00249 | 5 |
| AX-158110360 | 11 | 75.165 | KV452863.1 | 10300500 | 5-scf00249 | 5 |
| AX-157747833 | 11 | 75.165 | KV452863.1 | 10306211 | 5-scf00249 | 5 |
| AX-157827769 | 11 | 75.165 | KV452863.1 | 10387507 | 5-scf00249 | 5 |
| AX-158110423 | 11 | 75.165 | KV452863.1 | 10436582 | 5-scf00249 | 5 |
| AX-157749509 | 11 | 75.165 | KV452863.1 | 10570056 | 5-scf00249 | 5 |
| AX-157745220 | 11 | 75.165 | KV452863.1 | 10606475 | 5-scf00249 | 5 |
| AX-158110645 | 11 | 75.165 | KV452863.1 | 10763584 | 5-scf00249 | 5 |
| AX-158110768 | 11 | 75.165 | KV452863.1 | 10941880 | 5-scf00249 | 5 |
| AX-158110772 | 11 | 75.165 | KV452863.1 | 10945126 | 5-scf00249 | 5 |
| AX-158110773 | 11 | 75.165 | KV452863.1 | 10945859 | 5-scf00249 | 5 |
| AX-158110776 | 11 | 75.165 | KV452863.1 | 10949151 | 5-scf00249 | 5 |
| AX-158110780 | 11 | 75.165 | KV452863.1 | 10952705 | 5-scf00249 | 5 |
| AX-158110781 | 11 | 75.165 | KV452863.1 | 10953854 | 5-scf00249 | 5 |
| AX-158110489 | 11 | 75.274 | KV452863.1 | 10555937 | 5-scf00249 | 5 |
| AX-157703364 | 11 | 75.274 | KV452863.1 | 11015707 | 5-scf00249 | 5 |
| AX-158110802 | 11 | 75.274 | KV452863.1 | 11038731 | 5-scf00249 | 5 |
| AX-158110804 | 11 | 75.274 | KV452863.1 | 11042815 | 5-scf00249 | 5 |
| AX-158110805 | 11 | 75.274 | KV452863.1 | 11043233 | 5-scf00249 | 5 |
| AX-158110809 | 11 | 75.274 | KV452863.1 | 11047779 | 5-scf00249 | 5 |
| AX-158110811 | 11 | 75.274 | KV452863.1 | 11049923 | 5-scf00249 | 5 |
| AX-158110813 | 11 | 75.274 | KV452863.1 | 11051193 | 5-scf00249 | 5 |
| AX-157703365 | 11 | 75.348 | KV452863.1 | 11015542 | 5-scf00249 | 5 |
| AX-158110808 | 11 | 75.383 | KV452863.1 | 11045847 | 5-scf00249 | 5 |
| AX-158110815 | 11 | 75.383 | KV452863.1 | 11053414 | 5-scf00249 | 5 |
| AX-158110816 | 11 | 75.383 | KV452863.1 | 11054577 | 5-scf00249 | 5 |
| AX-157716999 | 11 | 75.383 | KV452863.1 | 11058235 | 5-scf00249 | 5 |
| AX-158110820 | 11 | 75.383 | KV452863.1 | 11058680 | 5-scf00249 | 5 |
| AX-158110822 | 11 | 75.383 | KV452863.1 | 11061091 | 5-scf00249 | 5 |
| AX-158110823 | 11 | 75.383 | KV452863.1 | 11062536 | 5-scf00249 | 5 |
| AX-158110829 | 11 | 75.383 | KV452863.1 | 11069084 | 5-scf00249 | 5 |
| AX-158110832 | 11 | 75.383 | KV452863.1 | 11071655 | 5-scf00249 | 5 |
| AX-157827821 | 11 | 75.383 | KV452863.1 | 11074750 | 5-scf00249 | 5 |
| AX-158110835 | 11 | 75.383 | KV452863.1 | 11076074 | 5-scf00249 | 5 |



|              |    |        |             |          |            |    |
|--------------|----|--------|-------------|----------|------------|----|
| AX-157827822 | 11 | 75.383 | KV452863.1  | 11077223 | 5-scf00249 | 5  |
| AX-158110836 | 11 | 75.383 | KV452863.1  | 11077330 | 5-scf00249 | 5  |
| AX-158110838 | 11 | 75.383 | KV452863.1  | 11079357 | 5-scf00249 | 5  |
| AX-158110839 | 11 | 75.383 | KV452863.1  | 11081162 | 5-scf00249 | 5  |
| AX-157857448 | 11 | 75.383 | KV452863.1  | 11081799 | 5-scf00249 | 5  |
| AX-158110842 | 11 | 75.383 | KV452863.1  | 11084070 | 5-scf00249 | 5  |
| AX-158110843 | 11 | 75.383 | KV452863.1  | 11086280 | 5-scf00249 | 5  |
| AX-158110844 | 11 | 75.383 | KV452863.1  | 11086864 | 5-scf00249 | 5  |
| AX-157700503 | 11 | 75.383 | KV452863.1  | 11087806 | 5-scf00249 | 5  |
| AX-158110845 | 11 | 75.383 | KV452863.1  | 11088353 | 5-scf00249 | 5  |
| AX-158110846 | 11 | 75.383 | KV452863.1  | 11090827 | 5-scf00249 | 5  |
| AX-157771510 | 11 | 75.383 | KV452863.1  | 11091955 | 5-scf00249 | 5  |
| AX-158110847 | 11 | 75.383 | KV452863.1  | 11093052 | 5-scf00249 | 5  |
| AX-158110859 | 11 | 75.383 | KV452863.1  | 11106844 | 5-scf00249 | 5  |
| AX-157701357 | 11 | 75.383 | KV452863.1  | 11112160 | 5-scf00249 | 5  |
| AX-157739288 | 11 | 75.384 | KV452863.1  | 11047242 | 5-scf00249 | 5  |
| AX-158110834 | 11 | 75.384 | KV452863.1  | 11074429 | 5-scf00249 | 5  |
| AX-157827824 | 11 | 75.384 | KV452863.1  | 11093694 | 5-scf00249 | 5  |
| AX-158110849 | 11 | 75.384 | KV452863.1  | 11095241 | 5-scf00249 | 5  |
| AX-157827825 | 11 | 75.385 | KV452863.1  | 11097515 | 5-scf00249 | 5  |
| AX-158110858 | 11 | 75.547 | KV452863.1  | 11106638 | 5-scf00249 | 5  |
| AX-158110851 | 11 | 75.629 | KV452863.1  | 11096732 | 5-scf00249 | 5  |
| AX-158110863 | 11 | 75.629 | KV452863.1  | 11114815 | 5-scf00249 | 5  |
| AX-157827829 | 11 | 75.711 | KV452863.1  | 11118138 | 5-scf00249 | 5  |
| AX-158110868 | 11 | 75.711 | KV452863.1  | 11121016 | 5-scf00249 | 5  |
| AX-158110871 | 11 | 75.711 | KV452863.1  | 11124951 | 5-scf00249 | 5  |
| AX-157748633 | 11 | 75.711 | KV452863.1  | 11127684 | 5-scf00249 | 5  |
| AX-158110873 | 11 | 75.711 | KV452863.1  | 11128169 | 5-scf00249 | 5  |
| AX-158110877 | 11 | 75.711 | KV452863.1  | 11129849 | 5-scf00249 | 5  |
| AX-158110878 | 11 | 75.711 | KV452863.1  | 11133888 | 5-scf00249 | 5  |
| AX-158110879 | 11 | 75.711 | KV452863.1  | 11135311 | 5-scf00249 | 5  |
| AX-158110882 | 11 | 76.121 | KV452863.1  | 11138107 | 5-scf00249 | 5  |
| AX-157827830 | 11 | 76.258 | KV452863.1  | 11144208 | 5-scf00249 | 5  |
| AX-158110888 | 11 | 76.258 | KV452863.1  | 11145735 | 5-scf00249 | 5  |
| AX-158110889 | 11 | 76.258 | KV452863.1  | 11146146 | 5-scf00249 | 5  |
| AX-158110890 | 11 | 76.258 | KV452863.1  | 11146365 | 5-scf00249 | 5  |
| AX-157705784 | 11 | 76.285 | 3ML01030874 | 221      | scf06478_1 | UN |
| AX-158110806 | 11 | 76.322 | KV452863.1  | 11044744 | 5-scf00249 | 5  |
| AX-158110876 | 11 | 76.322 | KV452863.1  | 11129521 | 5-scf00249 | 5  |
| AX-158110891 | 11 | 76.322 | KV452863.1  | 11149074 | 5-scf00249 | 5  |
| AX-157743332 | 11 | 76.339 | KV452863.1  | 11149114 | 5-scf00249 | 5  |
| AX-158110892 | 11 | 76.356 | KV452863.1  | 11149774 | 5-scf00249 | 5  |
| AX-158110893 | 11 | 76.367 | KV452863.1  | 11150406 | 5-scf00249 | 5  |
| AX-158110898 | 11 | 76.379 | KV452863.1  | 11155205 | 5-scf00249 | 5  |
| AX-158110899 | 11 | 76.392 | KV452863.1  | 11155995 | 5-scf00249 | 5  |
| AX-158110900 | 11 | 76.42  | KV452863.1  | 11157523 | 5-scf00249 | 5  |
| AX-158110897 | 11 | 76.476 | KV452863.1  | 11154532 | 5-scf00249 | 5  |
| AX-157827831 | 11 | 76.476 | KV452863.1  | 11161502 | 5-scf00249 | 5  |
| AX-158110904 | 11 | 76.476 | KV452863.1  | 11161769 | 5-scf00249 | 5  |
| AX-158110907 | 11 | 76.476 | KV452863.1  | 11165569 | 5-scf00249 | 5  |
| AX-158110909 | 11 | 76.476 | KV452863.1  | 11167423 | 5-scf00249 | 5  |

|              |    |        |            |          |            |   |
|--------------|----|--------|------------|----------|------------|---|
| AX-158110914 | 11 | 76.476 | KV452863.1 | 11171200 | 5-scf00249 | 5 |
| AX-158110915 | 11 | 76.476 | KV452863.1 | 11173157 | 5-scf00249 | 5 |
| AX-158110921 | 11 | 76.476 | KV452863.1 | 11179469 | 5-scf00249 | 5 |
| AX-158110925 | 11 | 76.476 | KV452863.1 | 11181175 | 5-scf00249 | 5 |
| AX-158110930 | 11 | 76.476 | KV452863.1 | 11186561 | 5-scf00249 | 5 |
| AX-158110931 | 11 | 76.476 | KV452863.1 | 11188333 | 5-scf00249 | 5 |
| AX-158110933 | 11 | 76.476 | KV452863.1 | 11189486 | 5-scf00249 | 5 |
| AX-158110934 | 11 | 76.476 | KV452863.1 | 11190274 | 5-scf00249 | 5 |
| AX-158110937 | 11 | 76.476 | KV452863.1 | 11191202 | 5-scf00249 | 5 |
| AX-158110938 | 11 | 76.476 | KV452863.1 | 11191884 | 5-scf00249 | 5 |
| AX-158110939 | 11 | 76.476 | KV452863.1 | 11192234 | 5-scf00249 | 5 |
| AX-157743118 | 11 | 76.476 | KV452863.1 | 11193163 | 5-scf00249 | 5 |
| AX-158110943 | 11 | 76.476 | KV452863.1 | 11195817 | 5-scf00249 | 5 |
| AX-158110944 | 11 | 76.476 | KV452863.1 | 11196454 | 5-scf00249 | 5 |
| AX-158110966 | 11 | 76.476 | KV452863.1 | 11224899 | 5-scf00249 | 5 |
| AX-158410744 | 11 | 76.476 | KV452863.1 | 11249382 | 5-scf00249 | 5 |
| AX-158110946 | 11 | 76.513 | KV452863.1 | 11199317 | 5-scf00249 | 5 |
| AX-158110886 | 11 | 76.562 | KV452863.1 | 11144990 | 5-scf00249 | 5 |
| AX-158110896 | 11 | 76.562 | KV452863.1 | 11153996 | 5-scf00249 | 5 |
| AX-158110947 | 11 | 76.562 | KV452863.1 | 11199629 | 5-scf00249 | 5 |
| AX-158110949 | 11 | 76.586 | KV452863.1 | 11202966 | 5-scf00249 | 5 |
| AX-158110953 | 11 | 76.586 | KV452863.1 | 11208560 | 5-scf00249 | 5 |
| AX-158110971 | 11 | 76.586 | KV452863.1 | 11230266 | 5-scf00249 | 5 |
| AX-158110981 | 11 | 76.586 | KV452863.1 | 11262412 | 5-scf00249 | 5 |
| AX-158110954 | 11 | 76.614 | KV452863.1 | 11208815 | 5-scf00249 | 5 |
| AX-158110948 | 11 | 76.626 | KV452863.1 | 11201220 | 5-scf00249 | 5 |
| AX-157877647 | 11 | 76.626 | KV452863.1 | 11211412 | 5-scf00249 | 5 |
| AX-157871172 | 11 | 76.626 | KV452863.1 | 11226495 | 5-scf00249 | 5 |
| AX-158110942 | 11 | 76.645 | KV452863.1 | 11195226 | 5-scf00249 | 5 |
| AX-158110956 | 11 | 76.645 | KV452863.1 | 11212135 | 5-scf00249 | 5 |
| AX-158110963 | 11 | 76.645 | KV452863.1 | 11224048 | 5-scf00249 | 5 |
| AX-158110962 | 11 | 76.666 | KV452863.1 | 11221668 | 5-scf00249 | 5 |
| AX-157827835 | 11 | 76.666 | KV452863.1 | 11223680 | 5-scf00249 | 5 |
| AX-158110964 | 11 | 76.676 | KV452863.1 | 11224111 | 5-scf00249 | 5 |
| AX-158110922 | 11 | 76.684 | KV452863.1 | 11179894 | 5-scf00249 | 5 |
| AX-157749394 | 11 | 76.684 | KV452863.1 | 11219965 | 5-scf00249 | 5 |
| AX-158110965 | 11 | 76.684 | KV452863.1 | 11224827 | 5-scf00249 | 5 |
| AX-158110968 | 11 | 76.695 | KV452863.1 | 11227554 | 5-scf00249 | 5 |
| AX-158110969 | 11 | 76.695 | KV452863.1 | 11228573 | 5-scf00249 | 5 |
| AX-158110970 | 11 | 76.695 | KV452863.1 | 11229243 | 5-scf00249 | 5 |
| AX-158110928 | 11 | 76.754 | KV452863.1 | 11185879 | 5-scf00249 | 5 |
| AX-158110972 | 11 | 76.754 | KV452863.1 | 11237354 | 5-scf00249 | 5 |
| AX-157740457 | 11 | 76.911 | KV452863.1 | 11240719 | 5-scf00249 | 5 |
| AX-158110875 | 11 | 76.915 | KV452863.1 | 11128904 | 5-scf00249 | 5 |
| AX-158110960 | 11 | 76.915 | KV452863.1 | 11214285 | 5-scf00249 | 5 |
| AX-157752249 | 11 | 76.915 | KV452863.1 | 11243046 | 5-scf00249 | 5 |
| AX-157877648 | 11 | 76.915 | KV452863.1 | 11245806 | 5-scf00249 | 5 |
| AX-158110974 | 11 | 76.915 | KV452863.1 | 11246656 | 5-scf00249 | 5 |
| AX-157827836 | 11 | 76.915 | KV452863.1 | 11247723 | 5-scf00249 | 5 |
| AX-158110976 | 11 | 76.915 | KV452863.1 | 11251685 | 5-scf00249 | 5 |
| AX-158110979 | 11 | 76.915 | KV452863.1 | 11258969 | 5-scf00249 | 5 |

|              |    |        |            |          |            |   |
|--------------|----|--------|------------|----------|------------|---|
| AX-158110985 | 11 | 76.915 | KV452863.1 | 11273207 | 5-scf00249 | 5 |
| AX-157753889 | 11 | 76.915 | KV452863.1 | 11302498 | 5-scf00249 | 5 |
| AX-158111109 | 11 | 76.915 | KV452863.1 | 11400236 | 5-scf00249 | 5 |
| AX-158110983 | 11 | 76.995 | KV452863.1 | 11269131 | 5-scf00249 | 5 |
| AX-158110984 | 11 | 77.078 | KV452863.1 | 11270699 | 5-scf00249 | 5 |
| AX-158110989 | 11 | 77.241 | KV452863.1 | 11284497 | 5-scf00249 | 5 |
| AX-158110990 | 11 | 77.241 | KV452863.1 | 11284973 | 5-scf00249 | 5 |
| AX-158110993 | 11 | 77.241 | KV452863.1 | 11290384 | 5-scf00249 | 5 |
| AX-158110994 | 11 | 77.241 | KV452863.1 | 11291192 | 5-scf00249 | 5 |
| AX-158110996 | 11 | 77.241 | KV452863.1 | 11294199 | 5-scf00249 | 5 |
| AX-158110997 | 11 | 77.241 | KV452863.1 | 11296068 | 5-scf00249 | 5 |
| AX-158111000 | 11 | 77.241 | KV452863.1 | 11298951 | 5-scf00249 | 5 |
| AX-158111002 | 11 | 77.241 | KV452863.1 | 11303125 | 5-scf00249 | 5 |
| AX-158111012 | 11 | 77.241 | KV452863.1 | 11310106 | 5-scf00249 | 5 |
| AX-158111004 | 11 | 77.242 | KV452863.1 | 11303996 | 5-scf00249 | 5 |
| AX-158110992 | 11 | 77.243 | KV452863.1 | 11289360 | 5-scf00249 | 5 |
| AX-158111005 | 11 | 77.243 | KV452863.1 | 11305325 | 5-scf00249 | 5 |
| AX-158111006 | 11 | 77.243 | KV452863.1 | 11306271 | 5-scf00249 | 5 |
| AX-158111008 | 11 | 77.569 | KV452863.1 | 11307609 | 5-scf00249 | 5 |
| AX-158111013 | 11 | 77.569 | KV452863.1 | 11311270 | 5-scf00249 | 5 |
| AX-158111014 | 11 | 77.569 | KV452863.1 | 11312706 | 5-scf00249 | 5 |
| AX-158111015 | 11 | 77.569 | KV452863.1 | 11313968 | 5-scf00249 | 5 |
| AX-158111016 | 11 | 77.569 | KV452863.1 | 11316434 | 5-scf00249 | 5 |
| AX-158111017 | 11 | 77.569 | KV452863.1 | 11316690 | 5-scf00249 | 5 |
| AX-158111020 | 11 | 77.569 | KV452863.1 | 11322400 | 5-scf00249 | 5 |
| AX-158111024 | 11 | 77.569 | KV452863.1 | 11324871 | 5-scf00249 | 5 |
| AX-158111027 | 11 | 77.569 | KV452863.1 | 11327564 | 5-scf00249 | 5 |
| AX-158111028 | 11 | 77.569 | KV452863.1 | 11327990 | 5-scf00249 | 5 |
| AX-158111032 | 11 | 77.613 | KV452863.1 | 11330576 | 5-scf00249 | 5 |
| AX-158111007 | 11 | 77.655 | KV452863.1 | 11306728 | 5-scf00249 | 5 |
| AX-158111034 | 11 | 77.655 | KV452863.1 | 11333135 | 5-scf00249 | 5 |
| AX-158111022 | 11 | 77.678 | KV452863.1 | 11323400 | 5-scf00249 | 5 |
| AX-158111035 | 11 | 77.678 | KV452863.1 | 11334578 | 5-scf00249 | 5 |
| AX-158111037 | 11 | 77.678 | KV452863.1 | 11335388 | 5-scf00249 | 5 |
| AX-157827840 | 11 | 77.68  | KV452863.1 | 11338254 | 5-scf00249 | 5 |
| AX-158111041 | 11 | 77.682 | KV452863.1 | 11338845 | 5-scf00249 | 5 |
| AX-158111042 | 11 | 77.683 | KV452863.1 | 11340312 | 5-scf00249 | 5 |
| AX-158111043 | 11 | 77.714 | KV452863.1 | 11341477 | 5-scf00249 | 5 |
| AX-158111045 | 11 | 77.853 | KV452863.1 | 11343925 | 5-scf00249 | 5 |
| AX-157715030 | 11 | 77.969 | KV452863.1 | 11344122 | 5-scf00249 | 5 |
| AX-158111047 | 11 | 77.969 | KV452863.1 | 11346455 | 5-scf00249 | 5 |
| AX-158111048 | 11 | 77.969 | KV452863.1 | 11348603 | 5-scf00249 | 5 |
| AX-158111095 | 11 | 77.969 | KV452863.1 | 11385377 | 5-scf00249 | 5 |
| AX-158111098 | 11 | 77.969 | KV452863.1 | 11387385 | 5-scf00249 | 5 |
| AX-158111103 | 11 | 77.969 | KV452863.1 | 11393428 | 5-scf00249 | 5 |
| AX-158111029 | 11 | 78.022 | KV452863.1 | 11328323 | 5-scf00249 | 5 |
| AX-158111049 | 11 | 78.022 | KV452863.1 | 11349129 | 5-scf00249 | 5 |
| AX-158111050 | 11 | 78.069 | KV452863.1 | 11350073 | 5-scf00249 | 5 |
| AX-158111070 | 11 | 78.069 | KV452863.1 | 11365643 | 5-scf00249 | 5 |
| AX-158111023 | 11 | 78.115 | KV452863.1 | 11323930 | 5-scf00249 | 5 |
| AX-158111046 | 11 | 78.115 | KV452863.1 | 11345275 | 5-scf00249 | 5 |

|              |    |        |            |          |            |   |
|--------------|----|--------|------------|----------|------------|---|
| AX-158111052 | 11 | 78.115 | KV452863.1 | 11351835 | 5-scf00249 | 5 |
| AX-158111055 | 11 | 78.115 | KV452863.1 | 11354098 | 5-scf00249 | 5 |
| AX-157741093 | 11 | 78.115 | KV452863.1 | 11354876 | 5-scf00249 | 5 |
| AX-158111061 | 11 | 78.115 | KV452863.1 | 11357620 | 5-scf00249 | 5 |
| AX-158111062 | 11 | 78.115 | KV452863.1 | 11359461 | 5-scf00249 | 5 |
| AX-158111065 | 11 | 78.115 | KV452863.1 | 11362233 | 5-scf00249 | 5 |
| AX-158111066 | 11 | 78.115 | KV452863.1 | 11363901 | 5-scf00249 | 5 |
| AX-157866031 | 11 | 78.115 | KV452863.1 | 11367106 | 5-scf00249 | 5 |
| AX-158111074 | 11 | 78.115 | KV452863.1 | 11369629 | 5-scf00249 | 5 |
| AX-158111075 | 11 | 78.115 | KV452863.1 | 11369851 | 5-scf00249 | 5 |
| AX-157827843 | 11 | 78.125 | KV452863.1 | 11370450 | 5-scf00249 | 5 |
| AX-157708716 | 11 | 78.143 | KV452863.1 | 11366169 | 5-scf00249 | 5 |
| AX-157708717 | 11 | 78.161 | KV452863.1 | 11366207 | 5-scf00249 | 5 |
| AX-158111080 | 11 | 78.179 | KV452863.1 | 11374549 | 5-scf00249 | 5 |
| AX-158111081 | 11 | 78.194 | KV452863.1 | 11375616 | 5-scf00249 | 5 |
| AX-158111082 | 11 | 78.209 | KV452863.1 | 11376120 | 5-scf00249 | 5 |
| AX-158111085 | 11 | 78.225 | KV452863.1 | 11378051 | 5-scf00249 | 5 |
| AX-158111086 | 11 | 78.225 | KV452863.1 | 11378467 | 5-scf00249 | 5 |
| AX-158111087 | 11 | 78.225 | KV452863.1 | 11379240 | 5-scf00249 | 5 |
| AX-158111090 | 11 | 78.225 | KV452863.1 | 11380868 | 5-scf00249 | 5 |
| AX-158111093 | 11 | 78.225 | KV452863.1 | 11383902 | 5-scf00249 | 5 |
| AX-158111094 | 11 | 78.285 | KV452863.1 | 11384066 | 5-scf00249 | 5 |
| AX-158111097 | 11 | 78.302 | KV452863.1 | 11386918 | 5-scf00249 | 5 |
| AX-157749923 | 11 | 78.361 | KV452863.1 | 11387259 | 5-scf00249 | 5 |
| AX-158111100 | 11 | 78.361 | KV452863.1 | 11389995 | 5-scf00249 | 5 |
| AX-158111102 | 11 | 78.361 | KV452863.1 | 11391502 | 5-scf00249 | 5 |
| AX-158111105 | 11 | 78.361 | KV452863.1 | 11395293 | 5-scf00249 | 5 |
| AX-158111106 | 11 | 78.361 | KV452863.1 | 11396334 | 5-scf00249 | 5 |
| AX-158111108 | 11 | 78.361 | KV452863.1 | 11399572 | 5-scf00249 | 5 |
| AX-157827847 | 11 | 78.361 | KV452863.1 | 11441344 | 5-scf00249 | 5 |
| AX-158111113 | 11 | 78.497 | KV452863.1 | 11407696 | 5-scf00249 | 5 |
| AX-158111115 | 11 | 78.497 | KV452863.1 | 11410264 | 5-scf00249 | 5 |
| AX-158111116 | 11 | 78.497 | KV452863.1 | 11411838 | 5-scf00249 | 5 |
| AX-158111121 | 11 | 78.633 | KV452863.1 | 11416337 | 5-scf00249 | 5 |
| AX-158111122 | 11 | 78.633 | KV452863.1 | 11418604 | 5-scf00249 | 5 |
| AX-158111123 | 11 | 78.633 | KV452863.1 | 11421072 | 5-scf00249 | 5 |
| AX-157827844 | 11 | 78.727 | KV452863.1 | 11423871 | 5-scf00249 | 5 |
| AX-158111129 | 11 | 78.727 | KV452863.1 | 11430581 | 5-scf00249 | 5 |
| AX-158111131 | 11 | 78.727 | KV452863.1 | 11435051 | 5-scf00249 | 5 |
| AX-158111140 | 11 | 78.727 | KV452863.1 | 11450421 | 5-scf00249 | 5 |
| AX-158111104 | 11 | 78.77  | KV452863.1 | 11394504 | 5-scf00249 | 5 |
| AX-158407675 | 11 | 78.77  | KV452863.1 | 11433452 | 5-scf00249 | 5 |
| AX-158410746 | 11 | 78.77  | KV452863.1 | 11436503 | 5-scf00249 | 5 |
| AX-158410749 | 11 | 78.77  | KV452863.1 | 11436645 | 5-scf00249 | 5 |
| AX-158111133 | 11 | 78.77  | KV452863.1 | 11438740 | 5-scf00249 | 5 |
| AX-158111134 | 11 | 78.77  | KV452863.1 | 11442709 | 5-scf00249 | 5 |
| AX-158111135 | 11 | 78.77  | KV452863.1 | 11443662 | 5-scf00249 | 5 |
| AX-157827849 | 11 | 78.77  | KV452863.1 | 11447687 | 5-scf00249 | 5 |
| AX-157827850 | 11 | 78.77  | KV452863.1 | 11448394 | 5-scf00249 | 5 |
| AX-158111141 | 11 | 78.77  | KV452863.1 | 11453789 | 5-scf00249 | 5 |
| AX-158111142 | 11 | 78.77  | KV452863.1 | 11454918 | 5-scf00249 | 5 |

|              |    |        |            |          |            |   |
|--------------|----|--------|------------|----------|------------|---|
| AX-157827852 | 11 | 78.779 | KV452863.1 | 11456426 | 5-scf00249 | 5 |
| AX-158111146 | 11 | 78.779 | KV452863.1 | 11461766 | 5-scf00249 | 5 |
| AX-158111147 | 11 | 78.78  | KV452863.1 | 11462103 | 5-scf00249 | 5 |
| AX-157747323 | 11 | 79.099 | KV452863.1 | 11462868 | 5-scf00249 | 5 |
| AX-158111154 | 11 | 79.099 | KV452863.1 | 11471323 | 5-scf00249 | 5 |
| AX-158111156 | 11 | 79.099 | KV452863.1 | 11472665 | 5-scf00249 | 5 |
| AX-157723498 | 11 | 79.099 | KV452863.1 | 11472754 | 5-scf00249 | 5 |
| AX-157827855 | 11 | 79.099 | KV452863.1 | 11475420 | 5-scf00249 | 5 |
| AX-157827856 | 11 | 79.327 | KV452863.1 | 11476817 | 5-scf00249 | 5 |
| AX-158111157 | 11 | 79.327 | KV452863.1 | 11478261 | 5-scf00249 | 5 |
| AX-158111163 | 11 | 79.327 | KV452863.1 | 11483254 | 5-scf00249 | 5 |
| AX-158111159 | 11 | 79.412 | KV452863.1 | 11480140 | 5-scf00249 | 5 |
| AX-158111161 | 11 | 79.412 | KV452863.1 | 11481289 | 5-scf00249 | 5 |
| AX-158111164 | 11 | 79.446 | KV452863.1 | 11484224 | 5-scf00249 | 5 |
| AX-158111165 | 11 | 79.544 | KV452863.1 | 11488345 | 5-scf00249 | 5 |
| AX-158111169 | 11 | 79.544 | KV452863.1 | 11491293 | 5-scf00249 | 5 |
| AX-158111167 | 11 | 79.755 | KV452863.1 | 11489849 | 5-scf00249 | 5 |
| AX-158111170 | 11 | 79.755 | KV452863.1 | 11491723 | 5-scf00249 | 5 |
| AX-158111177 | 11 | 79.755 | KV452863.1 | 11497255 | 5-scf00249 | 5 |
| AX-158111178 | 11 | 79.755 | KV452863.1 | 11497679 | 5-scf00249 | 5 |
| AX-158111179 | 11 | 79.755 | KV452863.1 | 11499371 | 5-scf00249 | 5 |
| AX-157753444 | 11 | 79.755 | KV452863.1 | 11501055 | 5-scf00249 | 5 |
| AX-158111183 | 11 | 79.755 | KV452863.1 | 11503931 | 5-scf00249 | 5 |
| AX-158111184 | 11 | 79.755 | KV452863.1 | 11504341 | 5-scf00249 | 5 |
| AX-157827857 | 11 | 79.755 | KV452863.1 | 11506149 | 5-scf00249 | 5 |
| AX-158111187 | 11 | 79.755 | KV452863.1 | 11506719 | 5-scf00249 | 5 |
| AX-158111190 | 11 | 79.755 | KV452863.1 | 11509851 | 5-scf00249 | 5 |
| AX-158384931 | 11 | 79.755 | KV452863.1 | 11513135 | 5-scf00249 | 5 |
| AX-158111194 | 11 | 79.755 | KV452863.1 | 11514456 | 5-scf00249 | 5 |
| AX-158111195 | 11 | 79.755 | KV452863.1 | 11515273 | 5-scf00249 | 5 |
| AX-157871175 | 11 | 79.756 | KV452863.1 | 11339194 | 5-scf00249 | 5 |
| AX-158111118 | 11 | 79.756 | KV452863.1 | 11413356 | 5-scf00249 | 5 |
| AX-158111136 | 11 | 79.756 | KV452863.1 | 11444204 | 5-scf00249 | 5 |
| AX-158111185 | 11 | 79.756 | KV452863.1 | 11505007 | 5-scf00249 | 5 |
| AX-158111192 | 11 | 79.756 | KV452863.1 | 11512089 | 5-scf00249 | 5 |
| AX-158111196 | 11 | 79.756 | KV452863.1 | 11516790 | 5-scf00249 | 5 |
| AX-158380098 | 11 | 79.913 | KV452863.1 | 11527451 | 5-scf00249 | 5 |
| AX-158111205 | 11 | 80.083 | KV452863.1 | 11529683 | 5-scf00249 | 5 |
| AX-158111209 | 11 | 80.083 | KV452863.1 | 11532403 | 5-scf00249 | 5 |
| AX-157827858 | 11 | 80.083 | KV452863.1 | 11532525 | 5-scf00249 | 5 |
| AX-158111210 | 11 | 80.083 | KV452863.1 | 11533814 | 5-scf00249 | 5 |
| AX-158111211 | 11 | 80.083 | KV452863.1 | 11534463 | 5-scf00249 | 5 |
| AX-157716291 | 11 | 80.083 | KV452863.1 | 11537029 | 5-scf00249 | 5 |
| AX-158111215 | 11 | 80.083 | KV452863.1 | 11538126 | 5-scf00249 | 5 |
| AX-158111217 | 11 | 80.184 | KV452863.1 | 11540333 | 5-scf00249 | 5 |
| AX-158111218 | 11 | 80.221 | KV452863.1 | 11540961 | 5-scf00249 | 5 |
| AX-158111216 | 11 | 80.243 | KV452863.1 | 11539834 | 5-scf00249 | 5 |
| AX-157726021 | 11 | 80.243 | KV452863.1 | 11544381 | 5-scf00249 | 5 |
| AX-158111221 | 11 | 80.271 | KV452863.1 | 11549613 | 5-scf00249 | 5 |
| AX-158111220 | 11 | 80.302 | KV452863.1 | 11547195 | 5-scf00249 | 5 |
| AX-158111223 | 11 | 80.302 | KV452863.1 | 11551070 | 5-scf00249 | 5 |

|              |    |        |            |          |            |   |
|--------------|----|--------|------------|----------|------------|---|
| AX-158111224 | 11 | 80.302 | KV452863.1 | 11551705 | 5-scf00249 | 5 |
| AX-158111225 | 11 | 80.302 | KV452863.1 | 11552227 | 5-scf00249 | 5 |
| AX-158111226 | 11 | 80.302 | KV452863.1 | 11552949 | 5-scf00249 | 5 |
| AX-158111229 | 11 | 80.302 | KV452863.1 | 11557045 | 5-scf00249 | 5 |
| AX-158111269 | 11 | 80.302 | KV452863.1 | 11616544 | 5-scf00249 | 5 |
| AX-158111233 | 11 | 80.341 | KV452863.1 | 11559448 | 5-scf00249 | 5 |
| AX-158111234 | 11 | 80.379 | KV452863.1 | 11561280 | 5-scf00249 | 5 |
| AX-158111204 | 11 | 80.411 | KV452863.1 | 11527957 | 5-scf00249 | 5 |
| AX-158111235 | 11 | 80.411 | KV452863.1 | 11561948 | 5-scf00249 | 5 |
| AX-158111236 | 11 | 80.411 | KV452863.1 | 11563415 | 5-scf00249 | 5 |
| AX-158111237 | 11 | 80.411 | KV452863.1 | 11565790 | 5-scf00249 | 5 |
| AX-157725803 | 11 | 80.411 | KV452863.1 | 11569740 | 5-scf00249 | 5 |
| AX-158111304 | 11 | 80.411 | KV452863.1 | 11661320 | 5-scf00249 | 5 |
| AX-158111335 | 11 | 80.411 | KV452863.1 | 11698522 | 5-scf00249 | 5 |
| AX-158111240 | 11 | 80.484 | KV452863.1 | 11570204 | 5-scf00249 | 5 |
| AX-158111208 | 11 | 80.52  | KV452863.1 | 11531869 | 5-scf00249 | 5 |
| AX-158111231 | 11 | 80.52  | KV452863.1 | 11558350 | 5-scf00249 | 5 |
| AX-158111241 | 11 | 80.52  | KV452863.1 | 11571506 | 5-scf00249 | 5 |
| AX-158111242 | 11 | 80.52  | KV452863.1 | 11571913 | 5-scf00249 | 5 |
| AX-158111243 | 11 | 80.52  | KV452863.1 | 11572448 | 5-scf00249 | 5 |
| AX-158111244 | 11 | 80.52  | KV452863.1 | 11573268 | 5-scf00249 | 5 |
| AX-158111245 | 11 | 80.52  | KV452863.1 | 11574357 | 5-scf00249 | 5 |
| AX-158111249 | 11 | 80.52  | KV452863.1 | 11577357 | 5-scf00249 | 5 |
| AX-158111250 | 11 | 80.52  | KV452863.1 | 11579380 | 5-scf00249 | 5 |
| AX-158111352 | 11 | 80.52  | KV452863.1 | 11716305 | 5-scf00249 | 5 |
| AX-158111360 | 11 | 80.52  | KV452863.1 | 11726987 | 5-scf00249 | 5 |
| AX-158111365 | 11 | 80.52  | KV452863.1 | 11732257 | 5-scf00249 | 5 |
| AX-158111252 | 11 | 80.738 | KV452863.1 | 11582371 | 5-scf00249 | 5 |
| AX-158111255 | 11 | 80.738 | KV452863.1 | 11589522 | 5-scf00249 | 5 |
| AX-158111256 | 11 | 80.738 | KV452863.1 | 11590593 | 5-scf00249 | 5 |
| AX-158111257 | 11 | 80.738 | KV452863.1 | 11592354 | 5-scf00249 | 5 |
| AX-158111258 | 11 | 80.738 | KV452863.1 | 11592571 | 5-scf00249 | 5 |
| AX-158111264 | 11 | 80.738 | KV452863.1 | 11596627 | 5-scf00249 | 5 |
| AX-158111292 | 11 | 80.738 | KV452863.1 | 11644954 | 5-scf00249 | 5 |
| AX-158111347 | 11 | 80.738 | KV452863.1 | 11709723 | 5-scf00249 | 5 |
| AX-158111362 | 11 | 80.738 | KV452863.1 | 11728830 | 5-scf00249 | 5 |
| AX-158111265 | 11 | 80.767 | KV452863.1 | 11601151 | 5-scf00249 | 5 |
| AX-158111266 | 11 | 80.796 | KV452863.1 | 11602535 | 5-scf00249 | 5 |
| AX-157745899 | 11 | 80.82  | KV452863.1 | 11622294 | 5-scf00249 | 5 |
| AX-158111143 | 11 | 80.848 | KV452863.1 | 11457007 | 5-scf00249 | 5 |
| AX-157714026 | 11 | 80.848 | KV452863.1 | 11593673 | 5-scf00249 | 5 |
| AX-158111275 | 11 | 80.848 | KV452863.1 | 11624189 | 5-scf00249 | 5 |
| AX-157857451 | 11 | 80.848 | KV452863.1 | 11624605 | 5-scf00249 | 5 |
| AX-158111278 | 11 | 80.848 | KV452863.1 | 11629550 | 5-scf00249 | 5 |
| AX-158111279 | 11 | 80.848 | KV452863.1 | 11631785 | 5-scf00249 | 5 |
| AX-158111281 | 11 | 80.848 | KV452863.1 | 11633810 | 5-scf00249 | 5 |
| AX-158111283 | 11 | 80.848 | KV452863.1 | 11636083 | 5-scf00249 | 5 |
| AX-158111285 | 11 | 80.848 | KV452863.1 | 11637157 | 5-scf00249 | 5 |
| AX-157753809 | 11 | 80.848 | KV452863.1 | 11643716 | 5-scf00249 | 5 |
| AX-158111293 | 11 | 80.848 | KV452863.1 | 11645176 | 5-scf00249 | 5 |
| AX-158111294 | 11 | 80.848 | KV452863.1 | 11645540 | 5-scf00249 | 5 |

|              |    |        |            |          |            |   |
|--------------|----|--------|------------|----------|------------|---|
| AX-158111296 | 11 | 80.848 | KV452863.1 | 11646732 | 5-scf00249 | 5 |
| AX-158111297 | 11 | 80.848 | KV452863.1 | 11649010 | 5-scf00249 | 5 |
| AX-158111299 | 11 | 80.848 | KV452863.1 | 11650135 | 5-scf00249 | 5 |
| AX-158111301 | 11 | 80.848 | KV452863.1 | 11653176 | 5-scf00249 | 5 |
| AX-158111303 | 11 | 80.848 | KV452863.1 | 11655623 | 5-scf00249 | 5 |
| AX-158111308 | 11 | 80.848 | KV452863.1 | 11664895 | 5-scf00249 | 5 |
| AX-158111309 | 11 | 80.848 | KV452863.1 | 11666731 | 5-scf00249 | 5 |
| AX-158111313 | 11 | 80.848 | KV452863.1 | 11672092 | 5-scf00249 | 5 |
| AX-158111315 | 11 | 80.848 | KV452863.1 | 11672938 | 5-scf00249 | 5 |
| AX-158111319 | 11 | 80.848 | KV452863.1 | 11676751 | 5-scf00249 | 5 |
| AX-158111321 | 11 | 80.848 | KV452863.1 | 11679475 | 5-scf00249 | 5 |
| AX-158111322 | 11 | 80.848 | KV452863.1 | 11680457 | 5-scf00249 | 5 |
| AX-158111325 | 11 | 80.848 | KV452863.1 | 11685316 | 5-scf00249 | 5 |
| AX-158111327 | 11 | 80.848 | KV452863.1 | 11686956 | 5-scf00249 | 5 |
| AX-158111332 | 11 | 80.848 | KV452863.1 | 11696093 | 5-scf00249 | 5 |
| AX-158111336 | 11 | 80.848 | KV452863.1 | 11698797 | 5-scf00249 | 5 |
| AX-158384933 | 11 | 80.848 | KV452863.1 | 11699312 | 5-scf00249 | 5 |
| AX-158111338 | 11 | 80.848 | KV452863.1 | 11702707 | 5-scf00249 | 5 |
| AX-158111339 | 11 | 80.848 | KV452863.1 | 11703323 | 5-scf00249 | 5 |
| AX-158111340 | 11 | 80.848 | KV452863.1 | 11703693 | 5-scf00249 | 5 |
| AX-158111341 | 11 | 80.848 | KV452863.1 | 11704210 | 5-scf00249 | 5 |
| AX-158111344 | 11 | 80.848 | KV452863.1 | 11707345 | 5-scf00249 | 5 |
| AX-158111345 | 11 | 80.848 | KV452863.1 | 11707759 | 5-scf00249 | 5 |
| AX-158111346 | 11 | 80.848 | KV452863.1 | 11708500 | 5-scf00249 | 5 |
| AX-158111350 | 11 | 80.848 | KV452863.1 | 11714951 | 5-scf00249 | 5 |
| AX-158111353 | 11 | 80.848 | KV452863.1 | 11717064 | 5-scf00249 | 5 |
| AX-158111356 | 11 | 80.848 | KV452863.1 | 11720411 | 5-scf00249 | 5 |
| AX-158111359 | 11 | 80.848 | KV452863.1 | 11723874 | 5-scf00249 | 5 |
| AX-158111363 | 11 | 80.848 | KV452863.1 | 11729865 | 5-scf00249 | 5 |
| AX-158111364 | 11 | 80.848 | KV452863.1 | 11730336 | 5-scf00249 | 5 |
| AX-157749216 | 11 | 80.848 | KV452863.1 | 11731279 | 5-scf00249 | 5 |
| AX-158111507 | 11 | 80.848 | KV452863.1 | 11891392 | 5-scf00249 | 5 |
| AX-158111624 | 11 | 80.848 | KV452863.1 | 12068961 | 5-scf00249 | 5 |
| AX-158111771 | 11 | 80.848 | KV452863.1 | 12343101 | 5-scf00249 | 5 |
| AX-158407682 | 11 | 81.066 | KV452863.1 | 11734268 | 5-scf00249 | 5 |
| AX-158111368 | 11 | 81.066 | KV452863.1 | 11734360 | 5-scf00249 | 5 |
| AX-158111369 | 11 | 81.066 | KV452863.1 | 11736587 | 5-scf00249 | 5 |
| AX-158111376 | 11 | 81.066 | KV452863.1 | 11742485 | 5-scf00249 | 5 |
| AX-158111378 | 11 | 81.066 | KV452863.1 | 11743698 | 5-scf00249 | 5 |
| AX-157752877 | 11 | 81.066 | KV452863.1 | 11751092 | 5-scf00249 | 5 |
| AX-158111260 | 11 | 81.175 | KV452863.1 | 11594744 | 5-scf00249 | 5 |
| AX-157761872 | 11 | 81.175 | KV452863.1 | 11595397 | 5-scf00249 | 5 |
| AX-158111262 | 11 | 81.175 | KV452863.1 | 11595566 | 5-scf00249 | 5 |
| AX-157827859 | 11 | 81.175 | KV452863.1 | 11602932 | 5-scf00249 | 5 |
| AX-158111286 | 11 | 81.175 | KV452863.1 | 11637747 | 5-scf00249 | 5 |
| AX-158111305 | 11 | 81.175 | KV452863.1 | 11662086 | 5-scf00249 | 5 |
| AX-158111307 | 11 | 81.175 | KV452863.1 | 11663646 | 5-scf00249 | 5 |
| AX-158111318 | 11 | 81.175 | KV452863.1 | 11675494 | 5-scf00249 | 5 |
| AX-157752230 | 11 | 81.175 | KV452863.1 | 11681106 | 5-scf00249 | 5 |
| AX-158111324 | 11 | 81.175 | KV452863.1 | 11684330 | 5-scf00249 | 5 |
| AX-157771858 | 11 | 81.175 | KV452863.1 | 11690355 | 5-scf00249 | 5 |

|              |    |        |            |          |            |   |
|--------------|----|--------|------------|----------|------------|---|
| AX-158111366 | 11 | 81.175 | KV452863.1 | 11732543 | 5-scf00249 | 5 |
| AX-158111379 | 11 | 81.175 | KV452863.1 | 11744684 | 5-scf00249 | 5 |
| AX-158111383 | 11 | 81.175 | KV452863.1 | 11750693 | 5-scf00249 | 5 |
| AX-158111385 | 11 | 81.175 | KV452863.1 | 11753844 | 5-scf00249 | 5 |
| AX-157740453 | 11 | 81.175 | KV452863.1 | 11756150 | 5-scf00249 | 5 |
| AX-158111388 | 11 | 81.175 | KV452863.1 | 11757861 | 5-scf00249 | 5 |
| AX-158111391 | 11 | 81.175 | KV452863.1 | 11760695 | 5-scf00249 | 5 |
| AX-158111393 | 11 | 81.175 | KV452863.1 | 11761948 | 5-scf00249 | 5 |
| AX-157748877 | 11 | 81.175 | KV452863.1 | 11763015 | 5-scf00249 | 5 |
| AX-158111395 | 11 | 81.175 | KV452863.1 | 11763567 | 5-scf00249 | 5 |
| AX-157758632 | 11 | 81.175 | KV452863.1 | 11765242 | 5-scf00249 | 5 |
| AX-158111398 | 11 | 81.175 | KV452863.1 | 11766292 | 5-scf00249 | 5 |
| AX-158111401 | 11 | 81.175 | KV452863.1 | 11769535 | 5-scf00249 | 5 |
| AX-158111402 | 11 | 81.175 | KV452863.1 | 11770085 | 5-scf00249 | 5 |
| AX-158111403 | 11 | 81.175 | KV452863.1 | 11770521 | 5-scf00249 | 5 |
| AX-157827862 | 11 | 81.175 | KV452863.1 | 11772639 | 5-scf00249 | 5 |
| AX-158111404 | 11 | 81.175 | KV452863.1 | 11773394 | 5-scf00249 | 5 |
| AX-158111405 | 11 | 81.175 | KV452863.1 | 11774635 | 5-scf00249 | 5 |
| AX-158111407 | 11 | 81.175 | KV452863.1 | 11775603 | 5-scf00249 | 5 |
| AX-158384934 | 11 | 81.175 | KV452863.1 | 11776037 | 5-scf00249 | 5 |
| AX-157749292 | 11 | 81.175 | KV452863.1 | 11776708 | 5-scf00249 | 5 |
| AX-158111408 | 11 | 81.175 | KV452863.1 | 11777362 | 5-scf00249 | 5 |
| AX-158111409 | 11 | 81.175 | KV452863.1 | 11779841 | 5-scf00249 | 5 |
| AX-158111410 | 11 | 81.175 | KV452863.1 | 11780872 | 5-scf00249 | 5 |
| AX-157755374 | 11 | 81.175 | KV452863.1 | 11786475 | 5-scf00249 | 5 |
| AX-157704024 | 11 | 81.175 | KV452863.1 | 11788241 | 5-scf00249 | 5 |
| AX-158111421 | 11 | 81.175 | KV452863.1 | 11793691 | 5-scf00249 | 5 |
| AX-158111425 | 11 | 81.175 | KV452863.1 | 11801921 | 5-scf00249 | 5 |
| AX-158111426 | 11 | 81.175 | KV452863.1 | 11802618 | 5-scf00249 | 5 |
| AX-157703573 | 11 | 81.175 | KV452863.1 | 11803601 | 5-scf00249 | 5 |
| AX-158111427 | 11 | 81.175 | KV452863.1 | 11804428 | 5-scf00249 | 5 |
| AX-158111428 | 11 | 81.175 | KV452863.1 | 11804938 | 5-scf00249 | 5 |
| AX-158111431 | 11 | 81.175 | KV452863.1 | 11807042 | 5-scf00249 | 5 |
| AX-158111433 | 11 | 81.175 | KV452863.1 | 11808956 | 5-scf00249 | 5 |
| AX-158111434 | 11 | 81.175 | KV452863.1 | 11809733 | 5-scf00249 | 5 |
| AX-158111437 | 11 | 81.175 | KV452863.1 | 11812092 | 5-scf00249 | 5 |
| AX-158111440 | 11 | 81.175 | KV452863.1 | 11815170 | 5-scf00249 | 5 |
| AX-158111442 | 11 | 81.175 | KV452863.1 | 11816881 | 5-scf00249 | 5 |
| AX-158111443 | 11 | 81.175 | KV452863.1 | 11817542 | 5-scf00249 | 5 |
| AX-157721741 | 11 | 81.175 | KV452863.1 | 11818251 | 5-scf00249 | 5 |
| AX-158111444 | 11 | 81.175 | KV452863.1 | 11819070 | 5-scf00249 | 5 |
| AX-158111446 | 11 | 81.175 | KV452863.1 | 11820272 | 5-scf00249 | 5 |
| AX-158111447 | 11 | 81.175 | KV452863.1 | 11822320 | 5-scf00249 | 5 |
| AX-158111450 | 11 | 81.175 | KV452863.1 | 11824403 | 5-scf00249 | 5 |
| AX-157694216 | 11 | 81.175 | KV452863.1 | 11826740 | 5-scf00249 | 5 |
| AX-158111452 | 11 | 81.175 | KV452863.1 | 11827860 | 5-scf00249 | 5 |
| AX-158111453 | 11 | 81.175 | KV452863.1 | 11829652 | 5-scf00249 | 5 |
| AX-158111455 | 11 | 81.175 | KV452863.1 | 11831067 | 5-scf00249 | 5 |
| AX-158111456 | 11 | 81.175 | KV452863.1 | 11831877 | 5-scf00249 | 5 |
| AX-158111457 | 11 | 81.175 | KV452863.1 | 11832444 | 5-scf00249 | 5 |
| AX-158111458 | 11 | 81.175 | KV452863.1 | 11833516 | 5-scf00249 | 5 |



|              |    |        |            |          |            |   |
|--------------|----|--------|------------|----------|------------|---|
| AX-158111459 | 11 | 81.175 | KV452863.1 | 11835151 | 5-scf00249 | 5 |
| AX-158111461 | 11 | 81.175 | KV452863.1 | 11836858 | 5-scf00249 | 5 |
| AX-158111464 | 11 | 81.175 | KV452863.1 | 11839731 | 5-scf00249 | 5 |
| AX-158111465 | 11 | 81.175 | KV452863.1 | 11841200 | 5-scf00249 | 5 |
| AX-158111466 | 11 | 81.175 | KV452863.1 | 11842690 | 5-scf00249 | 5 |
| AX-158111468 | 11 | 81.175 | KV452863.1 | 11846346 | 5-scf00249 | 5 |
| AX-158111471 | 11 | 81.175 | KV452863.1 | 11849642 | 5-scf00249 | 5 |
| AX-158111472 | 11 | 81.175 | KV452863.1 | 11850820 | 5-scf00249 | 5 |
| AX-158111475 | 11 | 81.175 | KV452863.1 | 11856076 | 5-scf00249 | 5 |
| AX-158111477 | 11 | 81.175 | KV452863.1 | 11858934 | 5-scf00249 | 5 |
| AX-157718434 | 11 | 81.175 | KV452863.1 | 11860651 | 5-scf00249 | 5 |
| AX-158111481 | 11 | 81.175 | KV452863.1 | 11863428 | 5-scf00249 | 5 |
| AX-158111482 | 11 | 81.175 | KV452863.1 | 11863936 | 5-scf00249 | 5 |
| AX-158111485 | 11 | 81.175 | KV452863.1 | 11868780 | 5-scf00249 | 5 |
| AX-158111486 | 11 | 81.175 | KV452863.1 | 11869623 | 5-scf00249 | 5 |
| AX-157772073 | 11 | 81.175 | KV452863.1 | 11869685 | 5-scf00249 | 5 |
| AX-158111487 | 11 | 81.175 | KV452863.1 | 11871134 | 5-scf00249 | 5 |
| AX-157774849 | 11 | 81.175 | KV452863.1 | 11871583 | 5-scf00249 | 5 |
| AX-158111490 | 11 | 81.175 | KV452863.1 | 11873501 | 5-scf00249 | 5 |
| AX-158111491 | 11 | 81.175 | KV452863.1 | 11874051 | 5-scf00249 | 5 |
| AX-158111492 | 11 | 81.175 | KV452863.1 | 11875103 | 5-scf00249 | 5 |
| AX-158111493 | 11 | 81.175 | KV452863.1 | 11876742 | 5-scf00249 | 5 |
| AX-158392611 | 11 | 81.175 | KV452863.1 | 11877673 | 5-scf00249 | 5 |
| AX-158111498 | 11 | 81.175 | KV452863.1 | 11882048 | 5-scf00249 | 5 |
| AX-158410762 | 11 | 81.175 | KV452863.1 | 11883894 | 5-scf00249 | 5 |
| AX-158384935 | 11 | 81.175 | KV452863.1 | 11884389 | 5-scf00249 | 5 |
| AX-158111501 | 11 | 81.175 | KV452863.1 | 11886964 | 5-scf00249 | 5 |
| AX-158111505 | 11 | 81.175 | KV452863.1 | 11888973 | 5-scf00249 | 5 |
| AX-158111506 | 11 | 81.175 | KV452863.1 | 11889586 | 5-scf00249 | 5 |
| AX-158422672 | 11 | 81.175 | KV452863.1 | 11892756 | 5-scf00249 | 5 |
| AX-158111511 | 11 | 81.175 | KV452863.1 | 11897190 | 5-scf00249 | 5 |
| AX-158111512 | 11 | 81.175 | KV452863.1 | 11900003 | 5-scf00249 | 5 |
| AX-158111513 | 11 | 81.175 | KV452863.1 | 11900575 | 5-scf00249 | 5 |
| AX-157827863 | 11 | 81.175 | KV452863.1 | 11901704 | 5-scf00249 | 5 |
| AX-158111514 | 11 | 81.175 | KV452863.1 | 11901791 | 5-scf00249 | 5 |
| AX-158111518 | 11 | 81.175 | KV452863.1 | 11906974 | 5-scf00249 | 5 |
| AX-158380100 | 11 | 81.175 | KV452863.1 | 11907439 | 5-scf00249 | 5 |
| AX-158392612 | 11 | 81.175 | KV452863.1 | 11908599 | 5-scf00249 | 5 |
| AX-158111521 | 11 | 81.175 | KV452863.1 | 11917874 | 5-scf00249 | 5 |
| AX-157723118 | 11 | 81.175 | KV452863.1 | 11918276 | 5-scf00249 | 5 |
| AX-158111523 | 11 | 81.175 | KV452863.1 | 11921639 | 5-scf00249 | 5 |
| AX-158111524 | 11 | 81.175 | KV452863.1 | 11922836 | 5-scf00249 | 5 |
| AX-158111525 | 11 | 81.175 | KV452863.1 | 11923283 | 5-scf00249 | 5 |
| AX-158111526 | 11 | 81.175 | KV452863.1 | 11923653 | 5-scf00249 | 5 |
| AX-158111530 | 11 | 81.175 | KV452863.1 | 11928503 | 5-scf00249 | 5 |
| AX-158111531 | 11 | 81.175 | KV452863.1 | 11929130 | 5-scf00249 | 5 |
| AX-158111532 | 11 | 81.175 | KV452863.1 | 11929953 | 5-scf00249 | 5 |
| AX-158392613 | 11 | 81.175 | KV452863.1 | 11931019 | 5-scf00249 | 5 |
| AX-158111534 | 11 | 81.175 | KV452863.1 | 11931750 | 5-scf00249 | 5 |
| AX-158111537 | 11 | 81.175 | KV452863.1 | 11935593 | 5-scf00249 | 5 |
| AX-157827866 | 11 | 81.175 | KV452863.1 | 11942350 | 5-scf00249 | 5 |

|              |    |        |            |          |            |   |
|--------------|----|--------|------------|----------|------------|---|
| AX-158111542 | 11 | 81.175 | KV452863.1 | 11943422 | 5-scf00249 | 5 |
| AX-158111543 | 11 | 81.175 | KV452863.1 | 11944010 | 5-scf00249 | 5 |
| AX-158111545 | 11 | 81.175 | KV452863.1 | 11947797 | 5-scf00249 | 5 |
| AX-158392614 | 11 | 81.175 | KV452863.1 | 11947894 | 5-scf00249 | 5 |
| AX-158111546 | 11 | 81.175 | KV452863.1 | 11948489 | 5-scf00249 | 5 |
| AX-158111548 | 11 | 81.175 | KV452863.1 | 11953283 | 5-scf00249 | 5 |
| AX-158111550 | 11 | 81.175 | KV452863.1 | 11955115 | 5-scf00249 | 5 |
| AX-158392615 | 11 | 81.175 | KV452863.1 | 11955657 | 5-scf00249 | 5 |
| AX-158111551 | 11 | 81.175 | KV452863.1 | 11956532 | 5-scf00249 | 5 |
| AX-158111552 | 11 | 81.175 | KV452863.1 | 11957735 | 5-scf00249 | 5 |
| AX-158111556 | 11 | 81.175 | KV452863.1 | 11960527 | 5-scf00249 | 5 |
| AX-158392616 | 11 | 81.175 | KV452863.1 | 11965949 | 5-scf00249 | 5 |
| AX-158111562 | 11 | 81.175 | KV452863.1 | 11966814 | 5-scf00249 | 5 |
| AX-158111563 | 11 | 81.175 | KV452863.1 | 11967697 | 5-scf00249 | 5 |
| AX-158111565 | 11 | 81.175 | KV452863.1 | 11968819 | 5-scf00249 | 5 |
| AX-158111570 | 11 | 81.175 | KV452863.1 | 11975991 | 5-scf00249 | 5 |
| AX-158111574 | 11 | 81.175 | KV452863.1 | 11988005 | 5-scf00249 | 5 |
| AX-158111575 | 11 | 81.175 | KV452863.1 | 11990901 | 5-scf00249 | 5 |
| AX-158111576 | 11 | 81.175 | KV452863.1 | 11991617 | 5-scf00249 | 5 |
| AX-158111578 | 11 | 81.175 | KV452863.1 | 11996399 | 5-scf00249 | 5 |
| AX-158111580 | 11 | 81.175 | KV452863.1 | 11998292 | 5-scf00249 | 5 |
| AX-158111581 | 11 | 81.175 | KV452863.1 | 11998792 | 5-scf00249 | 5 |
| AX-157771465 | 11 | 81.175 | KV452863.1 | 11999417 | 5-scf00249 | 5 |
| AX-158111582 | 11 | 81.175 | KV452863.1 | 12000417 | 5-scf00249 | 5 |
| AX-158111583 | 11 | 81.175 | KV452863.1 | 12001010 | 5-scf00249 | 5 |
| AX-158111585 | 11 | 81.175 | KV452863.1 | 12002377 | 5-scf00249 | 5 |
| AX-158111586 | 11 | 81.175 | KV452863.1 | 12002925 | 5-scf00249 | 5 |
| AX-157754385 | 11 | 81.175 | KV452863.1 | 12003498 | 5-scf00249 | 5 |
| AX-158111588 | 11 | 81.175 | KV452863.1 | 12005536 | 5-scf00249 | 5 |
| AX-157790449 | 11 | 81.175 | KV452863.1 | 12006363 | 5-scf00249 | 5 |
| AX-158111590 | 11 | 81.175 | KV452863.1 | 12013390 | 5-scf00249 | 5 |
| AX-158111591 | 11 | 81.175 | KV452863.1 | 12013858 | 5-scf00249 | 5 |
| AX-158111593 | 11 | 81.175 | KV452863.1 | 12016102 | 5-scf00249 | 5 |
| AX-158111595 | 11 | 81.175 | KV452863.1 | 12018411 | 5-scf00249 | 5 |
| AX-158111596 | 11 | 81.175 | KV452863.1 | 12019608 | 5-scf00249 | 5 |
| AX-158392618 | 11 | 81.175 | KV452863.1 | 12019967 | 5-scf00249 | 5 |
| AX-158111597 | 11 | 81.175 | KV452863.1 | 12022904 | 5-scf00249 | 5 |
| AX-158111599 | 11 | 81.175 | KV452863.1 | 12025731 | 5-scf00249 | 5 |
| AX-158111600 | 11 | 81.175 | KV452863.1 | 12026951 | 5-scf00249 | 5 |
| AX-158111604 | 11 | 81.175 | KV452863.1 | 12035666 | 5-scf00249 | 5 |
| AX-158111605 | 11 | 81.175 | KV452863.1 | 12042851 | 5-scf00249 | 5 |
| AX-158111606 | 11 | 81.175 | KV452863.1 | 12044809 | 5-scf00249 | 5 |
| AX-158111607 | 11 | 81.175 | KV452863.1 | 12045452 | 5-scf00249 | 5 |
| AX-158111609 | 11 | 81.175 | KV452863.1 | 12050899 | 5-scf00249 | 5 |
| AX-158111610 | 11 | 81.175 | KV452863.1 | 12052263 | 5-scf00249 | 5 |
| AX-158111611 | 11 | 81.175 | KV452863.1 | 12052689 | 5-scf00249 | 5 |
| AX-158111612 | 11 | 81.175 | KV452863.1 | 12053533 | 5-scf00249 | 5 |
| AX-158111613 | 11 | 81.175 | KV452863.1 | 12055395 | 5-scf00249 | 5 |
| AX-158111614 | 11 | 81.175 | KV452863.1 | 12056125 | 5-scf00249 | 5 |
| AX-158111615 | 11 | 81.175 | KV452863.1 | 12056769 | 5-scf00249 | 5 |
| AX-158111616 | 11 | 81.175 | KV452863.1 | 12057585 | 5-scf00249 | 5 |

|              |    |        |            |          |            |   |
|--------------|----|--------|------------|----------|------------|---|
| AX-158111617 | 11 | 81.175 | KV452863.1 | 12060127 | 5-scf00249 | 5 |
| AX-158111618 | 11 | 81.175 | KV452863.1 | 12061196 | 5-scf00249 | 5 |
| AX-158111619 | 11 | 81.175 | KV452863.1 | 12063046 | 5-scf00249 | 5 |
| AX-158111620 | 11 | 81.175 | KV452863.1 | 12064441 | 5-scf00249 | 5 |
| AX-158111621 | 11 | 81.175 | KV452863.1 | 12065566 | 5-scf00249 | 5 |
| AX-158111622 | 11 | 81.175 | KV452863.1 | 12067148 | 5-scf00249 | 5 |
| AX-158392619 | 11 | 81.175 | KV452863.1 | 12070014 | 5-scf00249 | 5 |
| AX-158111627 | 11 | 81.175 | KV452863.1 | 12072330 | 5-scf00249 | 5 |
| AX-157827868 | 11 | 81.175 | KV452863.1 | 12076957 | 5-scf00249 | 5 |
| AX-158111628 | 11 | 81.175 | KV452863.1 | 12077181 | 5-scf00249 | 5 |
| AX-157827869 | 11 | 81.175 | KV452863.1 | 12077395 | 5-scf00249 | 5 |
| AX-158111629 | 11 | 81.175 | KV452863.1 | 12079022 | 5-scf00249 | 5 |
| AX-158111633 | 11 | 81.175 | KV452863.1 | 12089400 | 5-scf00249 | 5 |
| AX-158111634 | 11 | 81.175 | KV452863.1 | 12089934 | 5-scf00249 | 5 |
| AX-158111635 | 11 | 81.175 | KV452863.1 | 12090167 | 5-scf00249 | 5 |
| AX-158111639 | 11 | 81.175 | KV452863.1 | 12094598 | 5-scf00249 | 5 |
| AX-158111640 | 11 | 81.175 | KV452863.1 | 12095672 | 5-scf00249 | 5 |
| AX-158111641 | 11 | 81.175 | KV452863.1 | 12096573 | 5-scf00249 | 5 |
| AX-158111642 | 11 | 81.175 | KV452863.1 | 12097671 | 5-scf00249 | 5 |
| AX-158111643 | 11 | 81.175 | KV452863.1 | 12097935 | 5-scf00249 | 5 |
| AX-158111644 | 11 | 81.175 | KV452863.1 | 12098573 | 5-scf00249 | 5 |
| AX-158111648 | 11 | 81.175 | KV452863.1 | 12104635 | 5-scf00249 | 5 |
| AX-158111650 | 11 | 81.175 | KV452863.1 | 12117485 | 5-scf00249 | 5 |
| AX-157827873 | 11 | 81.175 | KV452863.1 | 12118940 | 5-scf00249 | 5 |
| AX-157752555 | 11 | 81.175 | KV452863.1 | 12119435 | 5-scf00249 | 5 |
| AX-158111652 | 11 | 81.175 | KV452863.1 | 12120589 | 5-scf00249 | 5 |
| AX-157722084 | 11 | 81.175 | KV452863.1 | 12128545 | 5-scf00249 | 5 |
| AX-157857452 | 11 | 81.175 | KV452863.1 | 12129583 | 5-scf00249 | 5 |
| AX-157827875 | 11 | 81.175 | KV452863.1 | 12131444 | 5-scf00249 | 5 |
| AX-157827879 | 11 | 81.175 | KV452863.1 | 12149937 | 5-scf00249 | 5 |
| AX-158111660 | 11 | 81.175 | KV452863.1 | 12162495 | 5-scf00249 | 5 |
| AX-158111662 | 11 | 81.175 | KV452863.1 | 12166359 | 5-scf00249 | 5 |
| AX-157827881 | 11 | 81.175 | KV452863.1 | 12167685 | 5-scf00249 | 5 |
| AX-157827882 | 11 | 81.175 | KV452863.1 | 12169827 | 5-scf00249 | 5 |
| AX-158111665 | 11 | 81.175 | KV452863.1 | 12173975 | 5-scf00249 | 5 |
| AX-158111667 | 11 | 81.175 | KV452863.1 | 12178356 | 5-scf00249 | 5 |
| AX-158111669 | 11 | 81.175 | KV452863.1 | 12183981 | 5-scf00249 | 5 |
| AX-158111673 | 11 | 81.175 | KV452863.1 | 12192250 | 5-scf00249 | 5 |
| AX-157827885 | 11 | 81.175 | KV452863.1 | 12194812 | 5-scf00249 | 5 |
| AX-158111709 | 11 | 81.175 | KV452863.1 | 12258881 | 5-scf00249 | 5 |
| AX-158111716 | 11 | 81.175 | KV452863.1 | 12266249 | 5-scf00249 | 5 |
| AX-158111717 | 11 | 81.175 | KV452863.1 | 12268036 | 5-scf00249 | 5 |
| AX-158384938 | 11 | 81.175 | KV452863.1 | 12270837 | 5-scf00249 | 5 |
| AX-157827895 | 11 | 81.175 | KV452863.1 | 12274434 | 5-scf00249 | 5 |
| AX-158111750 | 11 | 81.175 | KV452863.1 | 12312201 | 5-scf00249 | 5 |
| AX-158111752 | 11 | 81.175 | KV452863.1 | 12314922 | 5-scf00249 | 5 |
| AX-157827903 | 11 | 81.175 | KV452863.1 | 12315737 | 5-scf00249 | 5 |
| AX-158111755 | 11 | 81.175 | KV452863.1 | 12319783 | 5-scf00249 | 5 |
| AX-158111761 | 11 | 81.175 | KV452863.1 | 12331110 | 5-scf00249 | 5 |
| AX-158111764 | 11 | 81.175 | KV452863.1 | 12336069 | 5-scf00249 | 5 |
| AX-158111831 | 11 | 81.175 | KV452863.1 | 12431502 | 5-scf00249 | 5 |

|              |    |        |             |          |            |    |
|--------------|----|--------|-------------|----------|------------|----|
| AX-158111845 | 11 | 81.175 | KV452863.1  | 12451939 | 5-scf00249 | 5  |
| AX-158111930 | 11 | 81.175 | KV452863.1  | 12580361 | 5-scf00249 | 5  |
| AX-158111676 | 11 | 81.231 | KV452863.1  | 12196738 | 5-scf00249 | 5  |
| AX-158111677 | 11 | 81.236 | KV452863.1  | 12197063 | 5-scf00249 | 5  |
| AX-157706963 | 11 | 81.245 | 3ML01033675 | 295      | scf09336_1 | UN |
| AX-158111681 | 11 | 81.254 | KV452863.1  | 12202430 | 5-scf00249 | 5  |
| AX-158111557 | 11 | 81.259 | KV452863.1  | 11960912 | 5-scf00249 | 5  |
| AX-158111566 | 11 | 81.259 | KV452863.1  | 11970136 | 5-scf00249 | 5  |
| AX-158392621 | 11 | 81.259 | KV452863.1  | 12203925 | 5-scf00249 | 5  |
| AX-157827886 | 11 | 81.259 | KV452863.1  | 12204321 | 5-scf00249 | 5  |
| AX-158111685 | 11 | 81.259 | KV452863.1  | 12208414 | 5-scf00249 | 5  |
| AX-157871190 | 11 | 81.259 | KV452863.1  | 12213498 | 5-scf00249 | 5  |
| AX-158111690 | 11 | 81.259 | KV452863.1  | 12214990 | 5-scf00249 | 5  |
| AX-157871191 | 11 | 81.259 | KV452863.1  | 12215144 | 5-scf00249 | 5  |
| AX-158111691 | 11 | 81.259 | KV452863.1  | 12215409 | 5-scf00249 | 5  |
| AX-158111683 | 11 | 81.265 | KV452863.1  | 12204604 | 5-scf00249 | 5  |
| AX-158111688 | 11 | 81.265 | KV452863.1  | 12211341 | 5-scf00249 | 5  |
| AX-157871189 | 11 | 81.273 | KV452863.1  | 12207559 | 5-scf00249 | 5  |
| AX-158111268 | 11 | 81.284 | KV452863.1  | 11609922 | 5-scf00249 | 5  |
| AX-158111370 | 11 | 81.284 | KV452863.1  | 11737770 | 5-scf00249 | 5  |
| AX-158111429 | 11 | 81.284 | KV452863.1  | 11805755 | 5-scf00249 | 5  |
| AX-158111430 | 11 | 81.284 | KV452863.1  | 11806607 | 5-scf00249 | 5  |
| AX-158111432 | 11 | 81.284 | KV452863.1  | 11807480 | 5-scf00249 | 5  |
| AX-158111519 | 11 | 81.284 | KV452863.1  | 11910507 | 5-scf00249 | 5  |
| AX-158111529 | 11 | 81.284 | KV452863.1  | 11928102 | 5-scf00249 | 5  |
| AX-158111561 | 11 | 81.284 | KV452863.1  | 11964677 | 5-scf00249 | 5  |
| AX-157827887 | 11 | 81.284 | KV452863.1  | 12205907 | 5-scf00249 | 5  |
| AX-157758071 | 11 | 81.284 | KV452863.1  | 12217593 | 5-scf00249 | 5  |
| AX-158111693 | 11 | 81.284 | KV452863.1  | 12218930 | 5-scf00249 | 5  |
| AX-157716974 | 11 | 81.284 | KV452863.1  | 12220870 | 5-scf00249 | 5  |
| AX-157827889 | 11 | 81.284 | KV452863.1  | 12220983 | 5-scf00249 | 5  |
| AX-157771677 | 11 | 81.284 | KV452863.1  | 12222880 | 5-scf00249 | 5  |
| AX-157827890 | 11 | 81.284 | KV452863.1  | 12225187 | 5-scf00249 | 5  |
| AX-158111699 | 11 | 81.284 | KV452863.1  | 12228462 | 5-scf00249 | 5  |
| AX-158111700 | 11 | 81.284 | KV452863.1  | 12229753 | 5-scf00249 | 5  |
| AX-158111702 | 11 | 81.284 | KV452863.1  | 12236913 | 5-scf00249 | 5  |
| AX-157827892 | 11 | 81.284 | KV452863.1  | 12237751 | 5-scf00249 | 5  |
| AX-158410772 | 11 | 81.284 | KV452863.1  | 12240604 | 5-scf00249 | 5  |
| AX-158111704 | 11 | 81.284 | KV452863.1  | 12241012 | 5-scf00249 | 5  |
| AX-158111705 | 11 | 81.284 | KV452863.1  | 12245810 | 5-scf00249 | 5  |
| AX-158111707 | 11 | 81.284 | KV452863.1  | 12253539 | 5-scf00249 | 5  |
| AX-158111710 | 11 | 81.284 | KV452863.1  | 12260181 | 5-scf00249 | 5  |
| AX-158111712 | 11 | 81.284 | KV452863.1  | 12261581 | 5-scf00249 | 5  |
| AX-157827893 | 11 | 81.284 | KV452863.1  | 12268313 | 5-scf00249 | 5  |
| AX-157827894 | 11 | 81.284 | KV452863.1  | 12268350 | 5-scf00249 | 5  |
| AX-158111718 | 11 | 81.284 | KV452863.1  | 12268892 | 5-scf00249 | 5  |
| AX-158111719 | 11 | 81.284 | KV452863.1  | 12270038 | 5-scf00249 | 5  |
| AX-158111720 | 11 | 81.284 | KV452863.1  | 12270759 | 5-scf00249 | 5  |
| AX-158111721 | 11 | 81.284 | KV452863.1  | 12271893 | 5-scf00249 | 5  |
| AX-158111723 | 11 | 81.284 | KV452863.1  | 12280290 | 5-scf00249 | 5  |
| AX-157827899 | 11 | 81.284 | KV452863.1  | 12287770 | 5-scf00249 | 5  |

|              |    |        |             |          |            |    |
|--------------|----|--------|-------------|----------|------------|----|
| AX-158111728 | 11 | 81.284 | KV452863.1  | 12290701 | 5-scf00249 | 5  |
| AX-158111730 | 11 | 81.284 | KV452863.1  | 12293247 | 5-scf00249 | 5  |
| AX-158111732 | 11 | 81.284 | KV452863.1  | 12294470 | 5-scf00249 | 5  |
| AX-157827901 | 11 | 81.284 | KV452863.1  | 12295732 | 5-scf00249 | 5  |
| AX-158111735 | 11 | 81.284 | KV452863.1  | 12296499 | 5-scf00249 | 5  |
| AX-158111736 | 11 | 81.284 | KV452863.1  | 12297580 | 5-scf00249 | 5  |
| AX-158111738 | 11 | 81.284 | KV452863.1  | 12299196 | 5-scf00249 | 5  |
| AX-158111739 | 11 | 81.284 | KV452863.1  | 12300954 | 5-scf00249 | 5  |
| AX-158111742 | 11 | 81.284 | KV452863.1  | 12304518 | 5-scf00249 | 5  |
| AX-158111743 | 11 | 81.284 | KV452863.1  | 12304865 | 5-scf00249 | 5  |
| AX-158111744 | 11 | 81.284 | KV452863.1  | 12305241 | 5-scf00249 | 5  |
| AX-158111749 | 11 | 81.284 | KV452863.1  | 12310954 | 5-scf00249 | 5  |
| AX-157885904 | 11 | 81.284 | KV452863.1  | 12312418 | 5-scf00249 | 5  |
| AX-158111751 | 11 | 81.284 | KV452863.1  | 12312724 | 5-scf00249 | 5  |
| AX-157827904 | 11 | 81.284 | KV452863.1  | 12323034 | 5-scf00249 | 5  |
| AX-158111756 | 11 | 81.284 | KV452863.1  | 12323444 | 5-scf00249 | 5  |
| AX-158111757 | 11 | 81.284 | KV452863.1  | 12323651 | 5-scf00249 | 5  |
| AX-157749561 | 11 | 81.284 | KV452863.1  | 12327256 | 5-scf00249 | 5  |
| AX-158111810 | 11 | 81.284 | KV452863.1  | 12392820 | 5-scf00249 | 5  |
| AX-157706302 | 11 | 81.284 | 3ML01032014 | 115      | scf07631_1 | UN |
| AX-157866033 | 11 | 81.394 | KV452863.1  | 11759051 | 5-scf00249 | 5  |
| AX-158111399 | 11 | 81.394 | KV452863.1  | 11766594 | 5-scf00249 | 5  |
| AX-158111508 | 11 | 81.394 | KV452863.1  | 11891806 | 5-scf00249 | 5  |
| AX-157715949 | 11 | 81.394 | KV452863.1  | 12129926 | 5-scf00249 | 5  |
| AX-158111657 | 11 | 81.394 | KV452863.1  | 12139015 | 5-scf00249 | 5  |
| AX-158111678 | 11 | 81.394 | KV452863.1  | 12198379 | 5-scf00249 | 5  |
| AX-158111701 | 11 | 81.394 | KV452863.1  | 12232619 | 5-scf00249 | 5  |
| AX-158384937 | 11 | 81.394 | KV452863.1  | 12251315 | 5-scf00249 | 5  |
| AX-157771181 | 11 | 81.394 | KV452863.1  | 12269616 | 5-scf00249 | 5  |
| AX-157827900 | 11 | 81.394 | KV452863.1  | 12290348 | 5-scf00249 | 5  |
| AX-158111737 | 11 | 81.394 | KV452863.1  | 12298220 | 5-scf00249 | 5  |
| AX-158111747 | 11 | 81.394 | KV452863.1  | 12308016 | 5-scf00249 | 5  |
| AX-157716964 | 11 | 81.394 | KV452863.1  | 12331609 | 5-scf00249 | 5  |
| AX-158111765 | 11 | 81.394 | KV452863.1  | 12337385 | 5-scf00249 | 5  |
| AX-158111769 | 11 | 81.546 | KV452863.1  | 12341568 | 5-scf00249 | 5  |
| AX-158111778 | 11 | 81.722 | KV452863.1  | 12351853 | 5-scf00249 | 5  |
| AX-158111780 | 11 | 81.722 | KV452863.1  | 12354997 | 5-scf00249 | 5  |
| AX-158111781 | 11 | 81.722 | KV452863.1  | 12356046 | 5-scf00249 | 5  |
| AX-158111782 | 11 | 81.722 | KV452863.1  | 12359145 | 5-scf00249 | 5  |
| AX-158111785 | 11 | 81.722 | KV452863.1  | 12363411 | 5-scf00249 | 5  |
| AX-158111786 | 11 | 81.722 | KV452863.1  | 12364607 | 5-scf00249 | 5  |
| AX-158111788 | 11 | 81.75  | KV452863.1  | 12367794 | 5-scf00249 | 5  |
| AX-158111789 | 11 | 81.779 | KV452863.1  | 12369578 | 5-scf00249 | 5  |
| AX-158111795 | 11 | 81.779 | KV452863.1  | 12374552 | 5-scf00249 | 5  |
| AX-158111797 | 11 | 81.779 | KV452863.1  | 12376173 | 5-scf00249 | 5  |
| AX-158111794 | 11 | 81.811 | KV452863.1  | 12373102 | 5-scf00249 | 5  |
| AX-158111768 | 11 | 81.831 | KV452863.1  | 12340213 | 5-scf00249 | 5  |
| AX-158111784 | 11 | 81.831 | KV452863.1  | 12361418 | 5-scf00249 | 5  |
| AX-158111798 | 11 | 81.831 | KV452863.1  | 12378243 | 5-scf00249 | 5  |
| AX-158111799 | 11 | 81.831 | KV452863.1  | 12379073 | 5-scf00249 | 5  |
| AX-158111801 | 11 | 81.831 | KV452863.1  | 12381209 | 5-scf00249 | 5  |

|              |    |        |            |          |            |   |
|--------------|----|--------|------------|----------|------------|---|
| AX-157745843 | 11 | 81.831 | KV452863.1 | 12401058 | 5-scf00249 | 5 |
| AX-158111825 | 11 | 81.831 | KV452863.1 | 12423491 | 5-scf00249 | 5 |
| AX-158111849 | 11 | 81.831 | KV452863.1 | 12461932 | 5-scf00249 | 5 |
| AX-158111816 | 11 | 81.892 | KV452863.1 | 12406780 | 5-scf00249 | 5 |
| AX-158111253 | 11 | 81.94  | KV452863.1 | 11583212 | 5-scf00249 | 5 |
| AX-158111793 | 11 | 81.94  | KV452863.1 | 12372981 | 5-scf00249 | 5 |
| AX-158111803 | 11 | 81.94  | KV452863.1 | 12384550 | 5-scf00249 | 5 |
| AX-158111827 | 11 | 81.94  | KV452863.1 | 12424083 | 5-scf00249 | 5 |
| AX-158111830 | 11 | 81.94  | KV452863.1 | 12431181 | 5-scf00249 | 5 |
| AX-158111832 | 11 | 81.94  | KV452863.1 | 12432741 | 5-scf00249 | 5 |
| AX-158111833 | 11 | 81.94  | KV452863.1 | 12433549 | 5-scf00249 | 5 |
| AX-157750288 | 11 | 81.948 | KV452863.1 | 12177119 | 5-scf00249 | 5 |
| AX-158111796 | 11 | 81.948 | KV452863.1 | 12374924 | 5-scf00249 | 5 |
| AX-158111814 | 11 | 81.948 | KV452863.1 | 12402962 | 5-scf00249 | 5 |
| AX-158111835 | 11 | 81.948 | KV452863.1 | 12435633 | 5-scf00249 | 5 |
| AX-158111854 | 11 | 81.948 | KV452863.1 | 12473601 | 5-scf00249 | 5 |
| AX-158111836 | 11 | 81.955 | KV452863.1 | 12436794 | 5-scf00249 | 5 |
| AX-158111838 | 11 | 82.002 | KV452863.1 | 12439041 | 5-scf00249 | 5 |
| AX-158111449 | 11 | 82.05  | KV452863.1 | 11823629 | 5-scf00249 | 5 |
| AX-158111829 | 11 | 82.05  | KV452863.1 | 12430453 | 5-scf00249 | 5 |
| AX-158111839 | 11 | 82.05  | KV452863.1 | 12441281 | 5-scf00249 | 5 |
| AX-158111843 | 11 | 82.05  | KV452863.1 | 12450084 | 5-scf00249 | 5 |
| AX-158111846 | 11 | 82.05  | KV452863.1 | 12458167 | 5-scf00249 | 5 |
| AX-158111847 | 11 | 82.05  | KV452863.1 | 12460317 | 5-scf00249 | 5 |
| AX-158111848 | 11 | 82.05  | KV452863.1 | 12461139 | 5-scf00249 | 5 |
| AX-158111850 | 11 | 82.05  | KV452863.1 | 12463159 | 5-scf00249 | 5 |
| AX-158111852 | 11 | 82.05  | KV452863.1 | 12465825 | 5-scf00249 | 5 |
| AX-157770643 | 11 | 82.05  | KV452863.1 | 12471993 | 5-scf00249 | 5 |
| AX-158111856 | 11 | 82.05  | KV452863.1 | 12474580 | 5-scf00249 | 5 |
| AX-157750320 | 11 | 82.05  | KV452863.1 | 12475090 | 5-scf00249 | 5 |
| AX-158111857 | 11 | 82.05  | KV452863.1 | 12475879 | 5-scf00249 | 5 |
| AX-158111858 | 11 | 82.05  | KV452863.1 | 12476740 | 5-scf00249 | 5 |
| AX-158111860 | 11 | 82.05  | KV452863.1 | 12478495 | 5-scf00249 | 5 |
| AX-158111861 | 11 | 82.05  | KV452863.1 | 12479378 | 5-scf00249 | 5 |
| AX-158111862 | 11 | 82.05  | KV452863.1 | 12480014 | 5-scf00249 | 5 |
| AX-158111863 | 11 | 82.05  | KV452863.1 | 12481234 | 5-scf00249 | 5 |
| AX-158111865 | 11 | 82.05  | KV452863.1 | 12484494 | 5-scf00249 | 5 |
| AX-158111866 | 11 | 82.05  | KV452863.1 | 12485971 | 5-scf00249 | 5 |
| AX-158111462 | 11 | 82.377 | KV452863.1 | 11838419 | 5-scf00249 | 5 |
| AX-158410764 | 11 | 82.377 | KV452863.1 | 11892702 | 5-scf00249 | 5 |
| AX-158111592 | 11 | 82.377 | KV452863.1 | 12014896 | 5-scf00249 | 5 |
| AX-158111601 | 11 | 82.377 | KV452863.1 | 12030102 | 5-scf00249 | 5 |
| AX-158410769 | 11 | 82.377 | KV452863.1 | 12048938 | 5-scf00249 | 5 |
| AX-158111872 | 11 | 82.377 | KV452863.1 | 12494903 | 5-scf00249 | 5 |
| AX-158111874 | 11 | 82.377 | KV452863.1 | 12497687 | 5-scf00249 | 5 |
| AX-158111876 | 11 | 82.377 | KV452863.1 | 12499997 | 5-scf00249 | 5 |
| AX-158111877 | 11 | 82.377 | KV452863.1 | 12507444 | 5-scf00249 | 5 |
| AX-157749282 | 11 | 82.377 | KV452863.1 | 12509472 | 5-scf00249 | 5 |
| AX-158111882 | 11 | 82.377 | KV452863.1 | 12514921 | 5-scf00249 | 5 |
| AX-158111887 | 11 | 82.377 | KV452863.1 | 12522293 | 5-scf00249 | 5 |
| AX-157827911 | 11 | 82.377 | KV452863.1 | 12527977 | 5-scf00249 | 5 |

|              |    |        |            |          |            |   |
|--------------|----|--------|------------|----------|------------|---|
| AX-158111891 | 11 | 82.377 | KV452863.1 | 12528065 | 5-scf00249 | 5 |
| AX-158111892 | 11 | 82.377 | KV452863.1 | 12529652 | 5-scf00249 | 5 |
| AX-158111893 | 11 | 82.377 | KV452863.1 | 12533620 | 5-scf00249 | 5 |
| AX-158111896 | 11 | 82.377 | KV452863.1 | 12539476 | 5-scf00249 | 5 |
| AX-158111904 | 11 | 82.377 | KV452863.1 | 12547537 | 5-scf00249 | 5 |
| AX-157857453 | 11 | 82.377 | KV452863.1 | 12547768 | 5-scf00249 | 5 |
| AX-158112005 | 11 | 82.377 | KV452863.1 | 12689300 | 5-scf00249 | 5 |
| AX-158112011 | 11 | 82.377 | KV452863.1 | 12697219 | 5-scf00249 | 5 |
| AX-158112042 | 11 | 82.377 | KV452863.1 | 12730169 | 5-scf00249 | 5 |
| AX-157715871 | 11 | 82.421 | KV452863.1 | 12543661 | 5-scf00249 | 5 |
| AX-158111912 | 11 | 82.46  | KV452863.1 | 12556914 | 5-scf00249 | 5 |
| AX-158111806 | 11 | 82.486 | KV452863.1 | 12388270 | 5-scf00249 | 5 |
| AX-157827908 | 11 | 82.486 | KV452863.1 | 12451860 | 5-scf00249 | 5 |
| AX-158111878 | 11 | 82.486 | KV452863.1 | 12508281 | 5-scf00249 | 5 |
| AX-157746396 | 11 | 82.486 | KV452863.1 | 12515495 | 5-scf00249 | 5 |
| AX-158410774 | 11 | 82.486 | KV452863.1 | 12520231 | 5-scf00249 | 5 |
| AX-158111888 | 11 | 82.486 | KV452863.1 | 12524884 | 5-scf00249 | 5 |
| AX-158111890 | 11 | 82.486 | KV452863.1 | 12527013 | 5-scf00249 | 5 |
| AX-158111902 | 11 | 82.486 | KV452863.1 | 12545405 | 5-scf00249 | 5 |
| AX-157709353 | 11 | 82.486 | KV452863.1 | 12549009 | 5-scf00249 | 5 |
| AX-158111918 | 11 | 82.486 | KV452863.1 | 12561780 | 5-scf00249 | 5 |
| AX-158111920 | 11 | 82.486 | KV452863.1 | 12563062 | 5-scf00249 | 5 |
| AX-158111921 | 11 | 82.486 | KV452863.1 | 12567629 | 5-scf00249 | 5 |
| AX-158111922 | 11 | 82.486 | KV452863.1 | 12568054 | 5-scf00249 | 5 |
| AX-158111923 | 11 | 82.486 | KV452863.1 | 12569217 | 5-scf00249 | 5 |
| AX-158111925 | 11 | 82.486 | KV452863.1 | 12572013 | 5-scf00249 | 5 |
| AX-158111926 | 11 | 82.486 | KV452863.1 | 12574849 | 5-scf00249 | 5 |
| AX-158111928 | 11 | 82.486 | KV452863.1 | 12578249 | 5-scf00249 | 5 |
| AX-157827913 | 11 | 82.486 | KV452863.1 | 12585438 | 5-scf00249 | 5 |
| AX-158111934 | 11 | 82.486 | KV452863.1 | 12586333 | 5-scf00249 | 5 |
| AX-158111935 | 11 | 82.486 | KV452863.1 | 12587666 | 5-scf00249 | 5 |
| AX-158111940 | 11 | 82.486 | KV452863.1 | 12596797 | 5-scf00249 | 5 |
| AX-158111941 | 11 | 82.486 | KV452863.1 | 12597525 | 5-scf00249 | 5 |
| AX-158111942 | 11 | 82.486 | KV452863.1 | 12598155 | 5-scf00249 | 5 |
| AX-158111949 | 11 | 82.486 | KV452863.1 | 12605899 | 5-scf00249 | 5 |
| AX-157827915 | 11 | 82.486 | KV452863.1 | 12606407 | 5-scf00249 | 5 |
| AX-158410779 | 11 | 82.486 | KV452863.1 | 12609432 | 5-scf00249 | 5 |
| AX-157707612 | 11 | 82.486 | KV452863.1 | 12614450 | 5-scf00249 | 5 |
| AX-158111952 | 11 | 82.486 | KV452863.1 | 12614956 | 5-scf00249 | 5 |
| AX-158111953 | 11 | 82.486 | KV452863.1 | 12615322 | 5-scf00249 | 5 |
| AX-157857454 | 11 | 82.486 | KV452863.1 | 12616332 | 5-scf00249 | 5 |
| AX-158111956 | 11 | 82.486 | KV452863.1 | 12617060 | 5-scf00249 | 5 |
| AX-158111959 | 11 | 82.486 | KV452863.1 | 12620528 | 5-scf00249 | 5 |
| AX-158111960 | 11 | 82.486 | KV452863.1 | 12622684 | 5-scf00249 | 5 |
| AX-158111980 | 11 | 82.486 | KV452863.1 | 12648504 | 5-scf00249 | 5 |
| AX-158111991 | 11 | 82.486 | KV452863.1 | 12668389 | 5-scf00249 | 5 |
| AX-158111994 | 11 | 82.486 | KV452863.1 | 12674339 | 5-scf00249 | 5 |
| AX-158112026 | 11 | 82.486 | KV452863.1 | 12718770 | 5-scf00249 | 5 |
| AX-158112031 | 11 | 82.486 | KV452863.1 | 12722288 | 5-scf00249 | 5 |
| AX-158112032 | 11 | 82.486 | KV452863.1 | 12722873 | 5-scf00249 | 5 |
| AX-158410782 | 11 | 82.486 | KV452863.1 | 12724416 | 5-scf00249 | 5 |

|              |    |        |            |          |            |   |
|--------------|----|--------|------------|----------|------------|---|
| AX-158112053 | 11 | 82.486 | KV452863.1 | 12739076 | 5-scf00249 | 5 |
| AX-158112079 | 11 | 82.486 | KV452863.1 | 12764035 | 5-scf00249 | 5 |
| AX-158111965 | 11 | 82.5   | KV452863.1 | 12630515 | 5-scf00249 | 5 |
| AX-158111966 | 11 | 82.521 | KV452863.1 | 12633062 | 5-scf00249 | 5 |
| AX-158111943 | 11 | 82.54  | KV452863.1 | 12599656 | 5-scf00249 | 5 |
| AX-157827919 | 11 | 82.54  | KV452863.1 | 12635957 | 5-scf00249 | 5 |
| AX-158112009 | 11 | 82.54  | KV452863.1 | 12694814 | 5-scf00249 | 5 |
| AX-158111880 | 11 | 82.555 | KV452863.1 | 12511503 | 5-scf00249 | 5 |
| AX-158111898 | 11 | 82.555 | KV452863.1 | 12541348 | 5-scf00249 | 5 |
| AX-158111944 | 11 | 82.555 | KV452863.1 | 12600084 | 5-scf00249 | 5 |
| AX-158111968 | 11 | 82.555 | KV452863.1 | 12636176 | 5-scf00249 | 5 |
| AX-158112001 | 11 | 82.555 | KV452863.1 | 12686126 | 5-scf00249 | 5 |
| AX-158111911 | 11 | 82.568 | KV452863.1 | 12555937 | 5-scf00249 | 5 |
| AX-158111970 | 11 | 82.568 | KV452863.1 | 12638255 | 5-scf00249 | 5 |
| AX-158111971 | 11 | 82.581 | KV452863.1 | 12638891 | 5-scf00249 | 5 |
| AX-158111871 | 11 | 82.596 | KV452863.1 | 12493065 | 5-scf00249 | 5 |
| AX-158111879 | 11 | 82.596 | KV452863.1 | 12510499 | 5-scf00249 | 5 |
| AX-158111881 | 11 | 82.596 | KV452863.1 | 12513629 | 5-scf00249 | 5 |
| AX-158111886 | 11 | 82.596 | KV452863.1 | 12520156 | 5-scf00249 | 5 |
| AX-158111900 | 11 | 82.596 | KV452863.1 | 12543103 | 5-scf00249 | 5 |
| AX-158111915 | 11 | 82.596 | KV452863.1 | 12560209 | 5-scf00249 | 5 |
| AX-158111917 | 11 | 82.596 | KV452863.1 | 12560695 | 5-scf00249 | 5 |
| AX-158111929 | 11 | 82.596 | KV452863.1 | 12578547 | 5-scf00249 | 5 |
| AX-158111937 | 11 | 82.596 | KV452863.1 | 12593537 | 5-scf00249 | 5 |
| AX-157827914 | 11 | 82.596 | KV452863.1 | 12598644 | 5-scf00249 | 5 |
| AX-158111945 | 11 | 82.596 | KV452863.1 | 12602813 | 5-scf00249 | 5 |
| AX-158111974 | 11 | 82.596 | KV452863.1 | 12640896 | 5-scf00249 | 5 |
| AX-158111979 | 11 | 82.596 | KV452863.1 | 12648000 | 5-scf00249 | 5 |
| AX-158111982 | 11 | 82.596 | KV452863.1 | 12650804 | 5-scf00249 | 5 |
| AX-158111986 | 11 | 82.596 | KV452863.1 | 12653971 | 5-scf00249 | 5 |
| AX-158111987 | 11 | 82.596 | KV452863.1 | 12658134 | 5-scf00249 | 5 |
| AX-158111993 | 11 | 82.596 | KV452863.1 | 12672994 | 5-scf00249 | 5 |
| AX-158111996 | 11 | 82.596 | KV452863.1 | 12678960 | 5-scf00249 | 5 |
| AX-158112000 | 11 | 82.596 | KV452863.1 | 12685646 | 5-scf00249 | 5 |
| AX-158112003 | 11 | 82.596 | KV452863.1 | 12688368 | 5-scf00249 | 5 |
| AX-158112008 | 11 | 82.596 | KV452863.1 | 12693846 | 5-scf00249 | 5 |
| AX-158112013 | 11 | 82.621 | KV452863.1 | 12698329 | 5-scf00249 | 5 |
| AX-158112014 | 11 | 82.644 | KV452863.1 | 12699011 | 5-scf00249 | 5 |
| AX-158111964 | 11 | 82.668 | KV452863.1 | 12629749 | 5-scf00249 | 5 |
| AX-158112015 | 11 | 82.668 | KV452863.1 | 12699696 | 5-scf00249 | 5 |
| AX-158111745 | 11 | 82.705 | KV452863.1 | 12305690 | 5-scf00249 | 5 |
| AX-158112017 | 11 | 82.705 | KV452863.1 | 12705644 | 5-scf00249 | 5 |
| AX-158111933 | 11 | 82.736 | KV452863.1 | 12585683 | 5-scf00249 | 5 |
| AX-158112020 | 11 | 82.736 | KV452863.1 | 12710192 | 5-scf00249 | 5 |
| AX-158112022 | 11 | 82.761 | KV452863.1 | 12714151 | 5-scf00249 | 5 |
| AX-158112027 | 11 | 82.761 | KV452863.1 | 12719137 | 5-scf00249 | 5 |
| AX-158112024 | 11 | 82.787 | KV452863.1 | 12716419 | 5-scf00249 | 5 |
| AX-158112035 | 11 | 82.814 | KV452863.1 | 12725555 | 5-scf00249 | 5 |
| AX-158112036 | 11 | 82.814 | KV452863.1 | 12725893 | 5-scf00249 | 5 |
| AX-158112037 | 11 | 82.814 | KV452863.1 | 12726107 | 5-scf00249 | 5 |
| AX-158112039 | 11 | 82.814 | KV452863.1 | 12727551 | 5-scf00249 | 5 |



|              |    |        |            |          |            |   |
|--------------|----|--------|------------|----------|------------|---|
| AX-158112045 | 11 | 82.814 | KV452863.1 | 12733562 | 5-scf00249 | 5 |
| AX-158112041 | 11 | 82.839 | KV452863.1 | 12728678 | 5-scf00249 | 5 |
| AX-158112044 | 11 | 82.923 | KV452863.1 | 12732878 | 5-scf00249 | 5 |
| AX-158112047 | 11 | 82.923 | KV452863.1 | 12736354 | 5-scf00249 | 5 |
| AX-158112050 | 11 | 82.923 | KV452863.1 | 12737227 | 5-scf00249 | 5 |
| AX-157827923 | 11 | 82.923 | KV452863.1 | 12737671 | 5-scf00249 | 5 |
| AX-158112051 | 11 | 82.923 | KV452863.1 | 12738261 | 5-scf00249 | 5 |
| AX-158112054 | 11 | 82.923 | KV452863.1 | 12739335 | 5-scf00249 | 5 |
| AX-158112057 | 11 | 82.923 | KV452863.1 | 12742694 | 5-scf00249 | 5 |
| AX-158112074 | 11 | 82.923 | KV452863.1 | 12760412 | 5-scf00249 | 5 |
| AX-158112064 | 11 | 83.047 | KV452863.1 | 12752450 | 5-scf00249 | 5 |
| AX-158112067 | 11 | 83.142 | KV452863.1 | 12753857 | 5-scf00249 | 5 |
| AX-158112070 | 11 | 83.142 | KV452863.1 | 12757915 | 5-scf00249 | 5 |
| AX-158112072 | 11 | 83.142 | KV452863.1 | 12759042 | 5-scf00249 | 5 |
| AX-158112084 | 11 | 83.142 | KV452863.1 | 12772253 | 5-scf00249 | 5 |
| AX-158112085 | 11 | 83.186 | KV452863.1 | 12777156 | 5-scf00249 | 5 |
| AX-157722060 | 11 | 83.229 | KV452863.1 | 12785023 | 5-scf00249 | 5 |
| AX-158112091 | 11 | 83.273 | KV452863.1 | 12786319 | 5-scf00249 | 5 |
| AX-158112092 | 11 | 83.325 | KV452863.1 | 12786794 | 5-scf00249 | 5 |
| AX-158112094 | 11 | 83.36  | KV452863.1 | 12788882 | 5-scf00249 | 5 |
| AX-158111983 | 11 | 83.385 | KV452863.1 | 12651420 | 5-scf00249 | 5 |
| AX-158112023 | 11 | 83.385 | KV452863.1 | 12715578 | 5-scf00249 | 5 |
| AX-158112101 | 11 | 83.385 | KV452863.1 | 12798082 | 5-scf00249 | 5 |
| AX-158112116 | 11 | 83.385 | KV452863.1 | 12810764 | 5-scf00249 | 5 |
| AX-158112104 | 11 | 83.405 | KV452863.1 | 12801224 | 5-scf00249 | 5 |
| AX-158112068 | 11 | 83.426 | KV452863.1 | 12755197 | 5-scf00249 | 5 |
| AX-158112097 | 11 | 83.426 | KV452863.1 | 12795742 | 5-scf00249 | 5 |
| AX-158112105 | 11 | 83.426 | KV452863.1 | 12801784 | 5-scf00249 | 5 |
| AX-158112107 | 11 | 83.429 | KV452863.1 | 12803208 | 5-scf00249 | 5 |
| AX-158112095 | 11 | 83.439 | KV452863.1 | 12790465 | 5-scf00249 | 5 |
| AX-158112103 | 11 | 83.439 | KV452863.1 | 12801081 | 5-scf00249 | 5 |
| AX-158112108 | 11 | 83.439 | KV452863.1 | 12803630 | 5-scf00249 | 5 |
| AX-158112066 | 11 | 83.455 | KV452863.1 | 12753431 | 5-scf00249 | 5 |
| AX-158112110 | 11 | 83.455 | KV452863.1 | 12806231 | 5-scf00249 | 5 |
| AX-158112142 | 11 | 83.455 | KV452863.1 | 12833434 | 5-scf00249 | 5 |
| AX-158112096 | 11 | 83.47  | KV452863.1 | 12794203 | 5-scf00249 | 5 |
| AX-157741293 | 11 | 83.47  | KV452863.1 | 12810328 | 5-scf00249 | 5 |
| AX-158112117 | 11 | 83.47  | KV452863.1 | 12813655 | 5-scf00249 | 5 |
| AX-158112119 | 11 | 83.47  | KV452863.1 | 12815720 | 5-scf00249 | 5 |
| AX-158112120 | 11 | 83.47  | KV452863.1 | 12815876 | 5-scf00249 | 5 |
| AX-158112121 | 11 | 83.47  | KV452863.1 | 12816407 | 5-scf00249 | 5 |
| AX-158112123 | 11 | 83.47  | KV452863.1 | 12817886 | 5-scf00249 | 5 |
| AX-158112124 | 11 | 83.47  | KV452863.1 | 12819169 | 5-scf00249 | 5 |
| AX-158112128 | 11 | 83.47  | KV452863.1 | 12822436 | 5-scf00249 | 5 |
| AX-158112130 | 11 | 83.47  | KV452863.1 | 12825174 | 5-scf00249 | 5 |
| AX-158112131 | 11 | 83.47  | KV452863.1 | 12825816 | 5-scf00249 | 5 |
| AX-158112133 | 11 | 83.47  | KV452863.1 | 12826971 | 5-scf00249 | 5 |
| AX-158112135 | 11 | 83.47  | KV452863.1 | 12828506 | 5-scf00249 | 5 |
| AX-158112137 | 11 | 83.47  | KV452863.1 | 12829362 | 5-scf00249 | 5 |
| AX-158112140 | 11 | 83.47  | KV452863.1 | 12832240 | 5-scf00249 | 5 |
| AX-158112141 | 11 | 83.47  | KV452863.1 | 12832999 | 5-scf00249 | 5 |

|              |    |        |            |          |            |   |
|--------------|----|--------|------------|----------|------------|---|
| AX-158112144 | 11 | 83.47  | KV452863.1 | 12838035 | 5-scf00249 | 5 |
| AX-158112145 | 11 | 83.552 | KV452863.1 | 12840562 | 5-scf00249 | 5 |
| AX-158112147 | 11 | 83.633 | KV452863.1 | 12842844 | 5-scf00249 | 5 |
| AX-158111998 | 11 | 83.688 | KV452863.1 | 12682775 | 5-scf00249 | 5 |
| AX-158112118 | 11 | 83.688 | KV452863.1 | 12814794 | 5-scf00249 | 5 |
| AX-157771940 | 11 | 83.688 | KV452863.1 | 12820335 | 5-scf00249 | 5 |
| AX-158112139 | 11 | 83.688 | KV452863.1 | 12831825 | 5-scf00249 | 5 |
| AX-157827926 | 11 | 83.688 | KV452863.1 | 12835924 | 5-scf00249 | 5 |
| AX-158112150 | 11 | 83.688 | KV452863.1 | 12845898 | 5-scf00249 | 5 |
| AX-157714394 | 11 | 83.688 | KV452863.1 | 12846872 | 5-scf00249 | 5 |
| AX-158112152 | 11 | 83.688 | KV452863.1 | 12849862 | 5-scf00249 | 5 |
| AX-158112153 | 11 | 83.688 | KV452863.1 | 12853730 | 5-scf00249 | 5 |
| AX-158112157 | 11 | 83.688 | KV452863.1 | 12859346 | 5-scf00249 | 5 |
| AX-157751022 | 11 | 83.688 | KV452863.1 | 12860501 | 5-scf00249 | 5 |
| AX-158112159 | 11 | 83.688 | KV452863.1 | 12861135 | 5-scf00249 | 5 |
| AX-158112160 | 11 | 83.688 | KV452863.1 | 12861648 | 5-scf00249 | 5 |
| AX-158112161 | 11 | 83.688 | KV452863.1 | 12862290 | 5-scf00249 | 5 |
| AX-158112163 | 11 | 83.688 | KV452863.1 | 12865800 | 5-scf00249 | 5 |
| AX-158112164 | 11 | 83.688 | KV452863.1 | 12867094 | 5-scf00249 | 5 |
| AX-158112165 | 11 | 83.688 | KV452863.1 | 12867566 | 5-scf00249 | 5 |
| AX-158112173 | 11 | 83.688 | KV452863.1 | 12877691 | 5-scf00249 | 5 |
| AX-158112167 | 11 | 83.852 | KV452863.1 | 12869316 | 5-scf00249 | 5 |
| AX-158112171 | 11 | 83.968 | KV452863.1 | 12872580 | 5-scf00249 | 5 |
| AX-158380105 | 11 | 83.968 | KV452863.1 | 12918420 | 5-scf00249 | 5 |
| AX-157827929 | 11 | 84.098 | KV452863.1 | 12872960 | 5-scf00249 | 5 |
| AX-157717332 | 11 | 84.098 | KV452863.1 | 12876115 | 5-scf00249 | 5 |
| AX-157827931 | 11 | 84.189 | KV452863.1 | 12878171 | 5-scf00249 | 5 |
| AX-158112235 | 11 | 84.189 | KV452863.1 | 12949037 | 5-scf00249 | 5 |
| AX-157827932 | 11 | 84.263 | KV452863.1 | 12878650 | 5-scf00249 | 5 |
| AX-157827936 | 11 | 84.344 | KV452863.1 | 12881329 | 5-scf00249 | 5 |
| AX-158112176 | 11 | 84.344 | KV452863.1 | 12882501 | 5-scf00249 | 5 |
| AX-158112177 | 11 | 84.344 | KV452863.1 | 12885145 | 5-scf00249 | 5 |
| AX-158112181 | 11 | 84.344 | KV452863.1 | 12889031 | 5-scf00249 | 5 |
| AX-158112184 | 11 | 84.344 | KV452863.1 | 12890600 | 5-scf00249 | 5 |
| AX-158112185 | 11 | 84.344 | KV452863.1 | 12891956 | 5-scf00249 | 5 |
| AX-158112186 | 11 | 84.344 | KV452863.1 | 12892605 | 5-scf00249 | 5 |
| AX-157771524 | 11 | 84.344 | KV452863.1 | 12894471 | 5-scf00249 | 5 |
| AX-158112197 | 11 | 84.344 | KV452863.1 | 12903242 | 5-scf00249 | 5 |
| AX-158112191 | 11 | 84.453 | KV452863.1 | 12897967 | 5-scf00249 | 5 |
| AX-158112192 | 11 | 84.453 | KV452863.1 | 12898295 | 5-scf00249 | 5 |
| AX-158112193 | 11 | 84.453 | KV452863.1 | 12898689 | 5-scf00249 | 5 |
| AX-158112196 | 11 | 84.453 | KV452863.1 | 12902669 | 5-scf00249 | 5 |
| AX-158112201 | 11 | 84.453 | KV452863.1 | 12908769 | 5-scf00249 | 5 |
| AX-158112205 | 11 | 84.453 | KV452863.1 | 12912994 | 5-scf00249 | 5 |
| AX-158112206 | 11 | 84.453 | KV452863.1 | 12915305 | 5-scf00249 | 5 |
| AX-158112209 | 11 | 84.453 | KV452863.1 | 12921178 | 5-scf00249 | 5 |
| AX-157871195 | 11 | 84.453 | KV452863.1 | 12921713 | 5-scf00249 | 5 |
| AX-157827939 | 11 | 84.453 | KV452863.1 | 12922578 | 5-scf00249 | 5 |
| AX-157755986 | 11 | 84.453 | KV452863.1 | 12923253 | 5-scf00249 | 5 |
| AX-158112210 | 11 | 84.453 | KV452863.1 | 12924604 | 5-scf00249 | 5 |
| AX-158112211 | 11 | 84.453 | KV452863.1 | 12925256 | 5-scf00249 | 5 |

|              |    |        |             |          |            |    |
|--------------|----|--------|-------------|----------|------------|----|
| AX-158112214 | 11 | 84.453 | KV452863.1  | 12927912 | 5-scf00249 | 5  |
| AX-158112216 | 11 | 84.453 | KV452863.1  | 12929692 | 5-scf00249 | 5  |
| AX-158112224 | 11 | 84.453 | KV452863.1  | 12939747 | 5-scf00249 | 5  |
| AX-158112226 | 11 | 84.453 | KV452863.1  | 12942053 | 5-scf00249 | 5  |
| AX-158112227 | 11 | 84.453 | KV452863.1  | 12943037 | 5-scf00249 | 5  |
| AX-158112231 | 11 | 84.453 | KV452863.1  | 12945693 | 5-scf00249 | 5  |
| AX-158112228 | 11 | 84.5   | KV452863.1  | 12943700 | 5-scf00249 | 5  |
| AX-157739992 | 11 | 84.541 | KV452863.1  | 12947719 | 5-scf00249 | 5  |
| AX-157770945 | 11 | 84.753 | KV452863.1  | 12935582 | 5-scf00249 | 5  |
| AX-158112237 | 11 | 84.753 | KV452863.1  | 12950119 | 5-scf00249 | 5  |
| AX-158410784 | 11 | 84.943 | KV452863.1  | 12778057 | 5-scf00249 | 5  |
| AX-158407695 | 11 | 84.943 | KV452863.1  | 12955072 | 5-scf00249 | 5  |
| AX-157747689 | 11 | 85.421 | KV452863.1  | 12878078 | 5-scf00249 | 5  |
| AX-158112179 | 11 | 85.421 | KV452863.1  | 12886319 | 5-scf00249 | 5  |
| AX-158112217 | 11 | 85.421 | KV452863.1  | 12930757 | 5-scf00249 | 5  |
| AX-158112252 | 11 | 85.421 | KV452863.1  | 12973187 | 5-scf00249 | 5  |
| AX-157773238 | 11 | 85.421 | KV452863.1  | 12973677 | 5-scf00249 | 5  |
| AX-157827943 | 11 | 85.421 | KV452863.1  | 12984438 | 5-scf00249 | 5  |
| AX-158112262 | 11 | 85.421 | KV452863.1  | 12997421 | 5-scf00249 | 5  |
| AX-157827944 | 11 | 85.616 | KV452863.1  | 12986279 | 5-scf00249 | 5  |
| AX-158112255 | 11 | 85.66  | KV452863.1  | 12991759 | 5-scf00249 | 5  |
| AX-158112256 | 11 | 85.66  | KV452863.1  | 12992295 | 5-scf00249 | 5  |
| AX-158112257 | 11 | 85.66  | KV452863.1  | 12993287 | 5-scf00249 | 5  |
| AX-158112259 | 11 | 85.66  | KV452863.1  | 12994368 | 5-scf00249 | 5  |
| AX-158112261 | 11 | 85.721 | KV452863.1  | 12995751 | 5-scf00249 | 5  |
| AX-158112263 | 11 | 85.769 | KV452863.1  | 12998235 | 5-scf00249 | 5  |
| AX-158112265 | 11 | 85.811 | KV452863.1  | 13001303 | 5-scf00249 | 5  |
| AX-158112269 | 11 | 85.831 | KV452863.1  | 13007785 | 5-scf00249 | 5  |
| AX-158112264 | 11 | 85.854 | KV452863.1  | 12998946 | 5-scf00249 | 5  |
| AX-158112271 | 11 | 85.854 | KV452863.1  | 13013495 | 5-scf00249 | 5  |
| AX-158112272 | 11 | 85.854 | KV452863.1  | 13015611 | 5-scf00249 | 5  |
| AX-158112291 | 11 | 85.854 | KV452863.1  | 13040364 | 5-scf00249 | 5  |
| AX-158417111 | 11 | 85.863 | KV452863.1  | 13016236 | 5-scf00249 | 5  |
| AX-158410791 | 11 | 85.879 | KV452863.1  | 13016319 | 5-scf00249 | 5  |
| AX-158407700 | 11 | 85.879 | KV452863.1  | 13016379 | 5-scf00249 | 5  |
| AX-158112258 | 11 | 85.897 | KV452863.1  | 12993521 | 5-scf00249 | 5  |
| AX-158112274 | 11 | 85.897 | KV452863.1  | 13017143 | 5-scf00249 | 5  |
| AX-157714880 | 11 | 85.915 | KV452863.1  | 13019373 | 5-scf00249 | 5  |
| AX-158112295 | 11 | 85.915 | KV452863.1  | 13044691 | 5-scf00249 | 5  |
| AX-157721115 | 11 | 85.988 | KV452863.1  | 12981397 | 5-scf00249 | 5  |
| AX-158112277 | 11 | 85.988 | KV452863.1  | 13020832 | 5-scf00249 | 5  |
| AX-158112278 | 11 | 85.988 | KV452863.1  | 13021713 | 5-scf00249 | 5  |
| AX-158112281 | 11 | 85.988 | KV452863.1  | 13025172 | 5-scf00249 | 5  |
| AX-158112282 | 11 | 85.988 | KV452863.1  | 13026146 | 5-scf00249 | 5  |
| AX-158112283 | 11 | 85.988 | KV452863.1  | 13027161 | 5-scf00249 | 5  |
| AX-158112285 | 11 | 85.988 | KV452863.1  | 13029439 | 5-scf00249 | 5  |
| AX-158422679 | 11 | 85.988 | KV452863.1  | 13033866 | 5-scf00249 | 5  |
| AX-157773731 | 11 | 85.988 | KV452863.1  | 13034654 | 5-scf00249 | 5  |
| AX-158112297 | 11 | 85.988 | KV452863.1  | 13048494 | 5-scf00249 | 5  |
| AX-157707097 | 11 | 85.988 | 3ML01034135 | 325      | scf09806_1 | UN |
| AX-158112168 | 11 | 86.097 | KV452863.1  | 12870079 | 5-scf00249 | 5  |

|              |    |        |            |          |            |   |
|--------------|----|--------|------------|----------|------------|---|
| AX-158112203 | 11 | 86.097 | KV452863.1 | 12909693 | 5-scf00249 | 5 |
| AX-157827938 | 11 | 86.097 | KV452863.1 | 12914497 | 5-scf00249 | 5 |
| AX-158112245 | 11 | 86.097 | KV452863.1 | 12963772 | 5-scf00249 | 5 |
| AX-158112268 | 11 | 86.097 | KV452863.1 | 13005997 | 5-scf00249 | 5 |
| AX-158112280 | 11 | 86.097 | KV452863.1 | 13023722 | 5-scf00249 | 5 |
| AX-158112284 | 11 | 86.097 | KV452863.1 | 13028677 | 5-scf00249 | 5 |
| AX-158380106 | 11 | 86.097 | KV452863.1 | 13035963 | 5-scf00249 | 5 |
| AX-158112288 | 11 | 86.097 | KV452863.1 | 13038031 | 5-scf00249 | 5 |
| AX-158112289 | 11 | 86.097 | KV452863.1 | 13038995 | 5-scf00249 | 5 |
| AX-158112290 | 11 | 86.097 | KV452863.1 | 13039257 | 5-scf00249 | 5 |
| AX-158112296 | 11 | 86.097 | KV452863.1 | 13047137 | 5-scf00249 | 5 |
| AX-158384948 | 11 | 86.097 | KV452863.1 | 13063922 | 5-scf00249 | 5 |
| AX-157753241 | 11 | 86.097 | KV452863.1 | 13065157 | 5-scf00249 | 5 |
| AX-158112253 | 11 | 86.315 | KV452863.1 | 12987132 | 5-scf00249 | 5 |
| AX-158112300 | 11 | 86.315 | KV452863.1 | 13050527 | 5-scf00249 | 5 |
| AX-158112305 | 11 | 86.315 | KV452863.1 | 13053522 | 5-scf00249 | 5 |
| AX-158112309 | 11 | 86.315 | KV452863.1 | 13056312 | 5-scf00249 | 5 |
| AX-158112311 | 11 | 86.315 | KV452863.1 | 13059047 | 5-scf00249 | 5 |
| AX-158112312 | 11 | 86.315 | KV452863.1 | 13061396 | 5-scf00249 | 5 |
| AX-157707815 | 11 | 86.315 | KV452863.1 | 13068287 | 5-scf00249 | 5 |
| AX-157754608 | 11 | 86.315 | KV452863.1 | 13068461 | 5-scf00249 | 5 |
| AX-158112319 | 11 | 86.315 | KV452863.1 | 13075105 | 5-scf00249 | 5 |
| AX-157742222 | 11 | 86.604 | KV452863.1 | 13067563 | 5-scf00249 | 5 |
| AX-158112320 | 11 | 86.604 | KV452863.1 | 13075278 | 5-scf00249 | 5 |
| AX-158112321 | 11 | 86.604 | KV452863.1 | 13076453 | 5-scf00249 | 5 |
| AX-157725869 | 11 | 86.663 | KV452863.1 | 13080271 | 5-scf00249 | 5 |
| AX-158392624 | 11 | 86.663 | KV452863.1 | 13080447 | 5-scf00249 | 5 |
| AX-158112322 | 11 | 86.664 | KV452863.1 | 13081406 | 5-scf00249 | 5 |
| AX-158112323 | 11 | 86.935 | KV452863.1 | 13083093 | 5-scf00249 | 5 |
| AX-158112324 | 11 | 86.935 | KV452863.1 | 13086329 | 5-scf00249 | 5 |
| AX-158112326 | 11 | 86.935 | KV452863.1 | 13087869 | 5-scf00249 | 5 |
| AX-158112333 | 11 | 87.364 | KV452863.1 | 13099061 | 5-scf00249 | 5 |
| AX-158112335 | 11 | 87.493 | KV452863.1 | 13100426 | 5-scf00249 | 5 |
| AX-158112338 | 11 | 87.628 | KV452863.1 | 13105822 | 5-scf00249 | 5 |
| AX-157702970 | 11 | 87.628 | KV452863.1 | 13108728 | 5-scf00249 | 5 |
| AX-157743528 | 11 | 87.628 | KV452863.1 | 13110405 | 5-scf00249 | 5 |
| AX-158112343 | 11 | 87.628 | KV452863.1 | 13113122 | 5-scf00249 | 5 |
| AX-158112345 | 11 | 87.628 | KV452863.1 | 13114477 | 5-scf00249 | 5 |
| AX-158112347 | 11 | 87.628 | KV452863.1 | 13116239 | 5-scf00249 | 5 |
| AX-158112348 | 11 | 87.628 | KV452863.1 | 13116716 | 5-scf00249 | 5 |
| AX-158112349 | 11 | 87.628 | KV452863.1 | 13117116 | 5-scf00249 | 5 |
| AX-157753600 | 11 | 87.628 | KV452863.1 | 13119640 | 5-scf00249 | 5 |
| AX-158112355 | 11 | 87.628 | KV452863.1 | 13128724 | 5-scf00249 | 5 |
| AX-157857459 | 11 | 87.629 | KV452863.1 | 13121724 | 5-scf00249 | 5 |
| AX-158112351 | 11 | 87.629 | KV452863.1 | 13121998 | 5-scf00249 | 5 |
| AX-158112353 | 11 | 87.721 | KV452863.1 | 13126927 | 5-scf00249 | 5 |
| AX-158112359 | 11 | 87.956 | KV452863.1 | 13132147 | 5-scf00249 | 5 |
| AX-158112361 | 11 | 87.956 | KV452863.1 | 13134137 | 5-scf00249 | 5 |
| AX-158112362 | 11 | 87.956 | KV452863.1 | 13134555 | 5-scf00249 | 5 |
| AX-158112363 | 11 | 87.956 | KV452863.1 | 13134918 | 5-scf00249 | 5 |
| AX-158112364 | 11 | 87.956 | KV452863.1 | 13136111 | 5-scf00249 | 5 |

|              |    |        |             |          |            |    |
|--------------|----|--------|-------------|----------|------------|----|
| AX-158112365 | 11 | 87.956 | KV452863.1  | 13137204 | 5-scf00249 | 5  |
| AX-158112366 | 11 | 87.956 | KV452863.1  | 13138980 | 5-scf00249 | 5  |
| AX-158112368 | 11 | 87.956 | KV452863.1  | 13140780 | 5-scf00249 | 5  |
| AX-158112374 | 11 | 88.201 | KV452863.1  | 13148312 | 5-scf00249 | 5  |
| AX-157773451 | 11 | 88.201 | KV452863.1  | 13151639 | 5-scf00249 | 5  |
| AX-158112375 | 11 | 88.201 | KV452863.1  | 13151984 | 5-scf00249 | 5  |
| AX-158112376 | 11 | 88.201 | KV452863.1  | 13152641 | 5-scf00249 | 5  |
| AX-158112377 | 11 | 88.916 | KV452863.1  | 13153920 | 5-scf00249 | 5  |
| AX-158112379 | 11 | 88.966 | KV452863.1  | 13157460 | 5-scf00249 | 5  |
| AX-158112382 | 11 | 88.967 | KV452863.1  | 13160353 | 5-scf00249 | 5  |
| AX-158112384 | 11 | 89.244 | KV452863.1  | 13161359 | 5-scf00249 | 5  |
| AX-158112385 | 11 | 89.244 | KV452863.1  | 13163180 | 5-scf00249 | 5  |
| AX-158112386 | 11 | 89.244 | KV452863.1  | 13164207 | 5-scf00249 | 5  |
| AX-157746681 | 11 | 89.244 | KV452863.1  | 13164734 | 5-scf00249 | 5  |
| AX-158112393 | 11 | 89.244 | KV452863.1  | 13171218 | 5-scf00249 | 5  |
| AX-158112394 | 11 | 89.398 | KV452863.1  | 13172429 | 5-scf00249 | 5  |
| AX-158112396 | 11 | 89.398 | KV452863.1  | 13174788 | 5-scf00249 | 5  |
| AX-158112392 | 11 | 89.399 | KV452863.1  | 13170237 | 5-scf00249 | 5  |
| AX-158112398 | 11 | 89.399 | KV452863.1  | 13176745 | 5-scf00249 | 5  |
| AX-158112402 | 11 | 89.706 | KV452863.1  | 13185114 | 5-scf00249 | 5  |
| AX-158112404 | 11 | 89.706 | KV452863.1  | 13186128 | 5-scf00249 | 5  |
| AX-158112405 | 11 | 89.706 | KV452863.1  | 13186917 | 5-scf00249 | 5  |
| AX-158112408 | 11 | 89.706 | KV452863.1  | 13188231 | 5-scf00249 | 5  |
| AX-158112409 | 11 | 89.706 | KV452863.1  | 13188740 | 5-scf00249 | 5  |
| AX-158112410 | 11 | 89.706 | KV452863.1  | 13189534 | 5-scf00249 | 5  |
| AX-158112412 | 11 | 89.706 | KV452863.1  | 13192060 | 5-scf00249 | 5  |
| AX-158112413 | 11 | 89.706 | KV452863.1  | 13192861 | 5-scf00249 | 5  |
| AX-158112415 | 11 | 89.706 | KV452863.1  | 13194570 | 5-scf00249 | 5  |
| AX-158112417 | 11 | 89.706 | KV452863.1  | 13196910 | 5-scf00249 | 5  |
| AX-158112418 | 11 | 89.706 | KV452863.1  | 13198224 | 5-scf00249 | 5  |
| AX-158112419 | 11 | 89.706 | KV452863.1  | 13199436 | 5-scf00249 | 5  |
| AX-158112429 | 11 | 89.706 | KV452863.1  | 13209223 | 5-scf00249 | 5  |
| AX-157707305 | 11 | 89.706 | 3ML01033965 | 63       | scf09634_1 | UN |
| AX-158112421 | 11 | 89.735 | KV452863.1  | 13201140 | 5-scf00249 | 5  |
| AX-158112422 | 11 | 89.764 | KV452863.1  | 13202174 | 5-scf00249 | 5  |
| AX-158112423 | 11 | 89.789 | KV452863.1  | 13203534 | 5-scf00249 | 5  |
| AX-158112428 | 11 | 89.789 | KV452863.1  | 13207267 | 5-scf00249 | 5  |
| AX-158112406 | 11 | 89.816 | KV452863.1  | 13187118 | 5-scf00249 | 5  |
| AX-158112424 | 11 | 89.816 | KV452863.1  | 13204538 | 5-scf00249 | 5  |
| AX-158112426 | 11 | 89.816 | KV452863.1  | 13205379 | 5-scf00249 | 5  |
| AX-158112427 | 11 | 89.816 | KV452863.1  | 13206746 | 5-scf00249 | 5  |
| AX-157741702 | 11 | 89.816 | KV452863.1  | 13208273 | 5-scf00249 | 5  |
| AX-158112431 | 11 | 89.816 | KV452863.1  | 13213461 | 5-scf00249 | 5  |
| AX-157725726 | 11 | 89.816 | KV452863.1  | 13214912 | 5-scf00249 | 5  |
| AX-158112438 | 11 | 89.816 | KV452863.1  | 13225269 | 5-scf00249 | 5  |
| AX-158112433 | 11 | 89.995 | KV452863.1  | 13217702 | 5-scf00249 | 5  |
| AX-157757320 | 11 | 89.995 | KV452863.1  | 13223159 | 5-scf00249 | 5  |
| AX-158112437 | 11 | 89.995 | KV452863.1  | 13224485 | 5-scf00249 | 5  |
| AX-157827946 | 11 | 89.995 | KV452863.1  | 13225313 | 5-scf00249 | 5  |
| AX-158112446 | 11 | 89.995 | KV452863.1  | 13231769 | 5-scf00249 | 5  |
| AX-158112439 | 11 | 90.094 | KV452863.1  | 13228007 | 5-scf00249 | 5  |

|              |    |        |            |          |            |   |
|--------------|----|--------|------------|----------|------------|---|
| AX-157827947 | 11 | 90.094 | KV452863.1 | 13235778 | 5-scf00249 | 5 |
| AX-158112443 | 11 | 90.177 | KV452863.1 | 13230393 | 5-scf00249 | 5 |
| AX-158112444 | 11 | 90.177 | KV452863.1 | 13230667 | 5-scf00249 | 5 |
| AX-158112447 | 11 | 90.177 | KV452863.1 | 13232215 | 5-scf00249 | 5 |
| AX-157757377 | 11 | 90.177 | KV452863.1 | 13232576 | 5-scf00249 | 5 |
| AX-158112449 | 11 | 90.177 | KV452863.1 | 13233491 | 5-scf00249 | 5 |
| AX-158112450 | 11 | 90.177 | KV452863.1 | 13233725 | 5-scf00249 | 5 |
| AX-158112451 | 11 | 90.177 | KV452863.1 | 13233900 | 5-scf00249 | 5 |
| AX-158112452 | 11 | 90.177 | KV452863.1 | 13234261 | 5-scf00249 | 5 |
| AX-158112458 | 11 | 90.177 | KV452863.1 | 13237908 | 5-scf00249 | 5 |
| AX-158112461 | 11 | 90.252 | KV452863.1 | 13239624 | 5-scf00249 | 5 |
| AX-158112462 | 11 | 90.362 | KV452863.1 | 13240259 | 5-scf00249 | 5 |
| AX-158112463 | 11 | 90.362 | KV452863.1 | 13240541 | 5-scf00249 | 5 |
| AX-158112464 | 11 | 90.362 | KV452863.1 | 13244320 | 5-scf00249 | 5 |
| AX-158112465 | 11 | 90.362 | KV452863.1 | 13247571 | 5-scf00249 | 5 |
| AX-158112468 | 11 | 90.362 | KV452863.1 | 13249274 | 5-scf00249 | 5 |
| AX-158112470 | 11 | 90.425 | KV452863.1 | 13252932 | 5-scf00249 | 5 |
| AX-158112471 | 11 | 90.471 | KV452863.1 | 13253612 | 5-scf00249 | 5 |
| AX-157710290 | 11 | 90.471 | KV452863.1 | 13254362 | 5-scf00249 | 5 |
| AX-158112473 | 11 | 90.471 | KV452863.1 | 13256614 | 5-scf00249 | 5 |
| AX-158112474 | 11 | 90.692 | KV452863.1 | 13258164 | 5-scf00249 | 5 |
| AX-158112478 | 11 | 90.692 | KV452863.1 | 13271215 | 5-scf00249 | 5 |
| AX-158112480 | 11 | 90.747 | KV452863.1 | 13271875 | 5-scf00249 | 5 |
| AX-158112481 | 11 | 90.759 | KV452863.1 | 13273602 | 5-scf00249 | 5 |
| AX-158112483 | 11 | 90.799 | KV452863.1 | 13275063 | 5-scf00249 | 5 |
| AX-158112485 | 11 | 90.799 | KV452863.1 | 13277734 | 5-scf00249 | 5 |
| AX-158112486 | 11 | 90.799 | KV452863.1 | 13279263 | 5-scf00249 | 5 |
| AX-158112487 | 11 | 90.908 | KV452863.1 | 13281834 | 5-scf00249 | 5 |
| AX-158112484 | 11 | 90.956 | KV452863.1 | 13276056 | 5-scf00249 | 5 |
| AX-158112490 | 11 | 90.956 | KV452863.1 | 13283970 | 5-scf00249 | 5 |
| AX-157827948 | 11 | 90.956 | KV452863.1 | 13312236 | 5-scf00249 | 5 |
| AX-158112491 | 11 | 91.017 | KV452863.1 | 13285883 | 5-scf00249 | 5 |
| AX-157714947 | 11 | 91.017 | KV452863.1 | 13286866 | 5-scf00249 | 5 |
| AX-158112492 | 11 | 91.017 | KV452863.1 | 13287663 | 5-scf00249 | 5 |
| AX-158112493 | 11 | 91.017 | KV452863.1 | 13288257 | 5-scf00249 | 5 |
| AX-158112494 | 11 | 91.017 | KV452863.1 | 13288833 | 5-scf00249 | 5 |
| AX-158112498 | 11 | 91.017 | KV452863.1 | 13295084 | 5-scf00249 | 5 |
| AX-158112499 | 11 | 91.017 | KV452863.1 | 13296270 | 5-scf00249 | 5 |
| AX-158112501 | 11 | 91.017 | KV452863.1 | 13296848 | 5-scf00249 | 5 |
| AX-158112503 | 11 | 91.071 | KV452863.1 | 13298119 | 5-scf00249 | 5 |
| AX-157866036 | 11 | 91.127 | KV452863.1 | 13301589 | 5-scf00249 | 5 |
| AX-157716857 | 11 | 91.127 | KV452863.1 | 13303009 | 5-scf00249 | 5 |
| AX-157713530 | 11 | 91.236 | KV452863.1 | 13308296 | 5-scf00249 | 5 |
| AX-158112509 | 11 | 91.296 | KV452863.1 | 13309676 | 5-scf00249 | 5 |
| AX-158112500 | 11 | 91.345 | KV452863.1 | 13296542 | 5-scf00249 | 5 |
| AX-157827949 | 11 | 91.345 | KV452863.1 | 13316463 | 5-scf00249 | 5 |
| AX-157827950 | 11 | 91.345 | KV452863.1 | 13323531 | 5-scf00249 | 5 |
| AX-157827951 | 11 | 91.345 | KV452863.1 | 13323706 | 5-scf00249 | 5 |
| AX-158112517 | 11 | 91.345 | KV452863.1 | 13323799 | 5-scf00249 | 5 |
| AX-157745002 | 11 | 91.345 | KV452863.1 | 13325585 | 5-scf00249 | 5 |
| AX-157748972 | 11 | 91.345 | KV452863.1 | 13328779 | 5-scf00249 | 5 |

|              |    |        |            |          |            |   |
|--------------|----|--------|------------|----------|------------|---|
| AX-158112522 | 11 | 91.345 | KV452863.1 | 13329022 | 5-scf00249 | 5 |
| AX-158112533 | 11 | 91.345 | KV452863.1 | 13339031 | 5-scf00249 | 5 |
| AX-157885911 | 11 | 91.345 | KV452863.1 | 13349484 | 5-scf00249 | 5 |
| AX-158112547 | 11 | 91.345 | KV452863.1 | 13366045 | 5-scf00249 | 5 |
| AX-158112518 | 11 | 91.408 | KV452863.1 | 13325236 | 5-scf00249 | 5 |
| AX-158112525 | 11 | 91.408 | KV452863.1 | 13331070 | 5-scf00249 | 5 |
| AX-157765342 | 11 | 91.454 | KV452863.1 | 13332394 | 5-scf00249 | 5 |
| AX-158112526 | 11 | 91.454 | KV452863.1 | 13333279 | 5-scf00249 | 5 |
| AX-158112527 | 11 | 91.454 | KV452863.1 | 13333562 | 5-scf00249 | 5 |
| AX-158112528 | 11 | 91.454 | KV452863.1 | 13335210 | 5-scf00249 | 5 |
| AX-158112531 | 11 | 91.454 | KV452863.1 | 13337304 | 5-scf00249 | 5 |
| AX-158112532 | 11 | 91.454 | KV452863.1 | 13337966 | 5-scf00249 | 5 |
| AX-157871199 | 11 | 91.454 | KV452863.1 | 13338548 | 5-scf00249 | 5 |
| AX-157827952 | 11 | 91.454 | KV452863.1 | 13339479 | 5-scf00249 | 5 |
| AX-158112537 | 11 | 91.501 | KV452863.1 | 13343620 | 5-scf00249 | 5 |
| AX-158380107 | 11 | 91.564 | KV452863.1 | 13305658 | 5-scf00249 | 5 |
| AX-157827954 | 11 | 91.564 | KV452863.1 | 13355669 | 5-scf00249 | 5 |
| AX-157827955 | 11 | 91.564 | KV452863.1 | 13355911 | 5-scf00249 | 5 |
| AX-158112543 | 11 | 91.564 | KV452863.1 | 13361501 | 5-scf00249 | 5 |
| AX-158112545 | 11 | 91.564 | KV452863.1 | 13364708 | 5-scf00249 | 5 |
| AX-158112591 | 11 | 91.564 | KV452863.1 | 13435113 | 5-scf00249 | 5 |
| AX-158112550 | 11 | 91.673 | KV452863.1 | 13368493 | 5-scf00249 | 5 |
| AX-157827958 | 11 | 91.673 | KV452863.1 | 13372115 | 5-scf00249 | 5 |
| AX-157827959 | 11 | 91.673 | KV452863.1 | 13374963 | 5-scf00249 | 5 |
| AX-158112553 | 11 | 91.673 | KV452863.1 | 13378387 | 5-scf00249 | 5 |
| AX-158112555 | 11 | 91.673 | KV452863.1 | 13381974 | 5-scf00249 | 5 |
| AX-158112556 | 11 | 91.673 | KV452863.1 | 13382730 | 5-scf00249 | 5 |
| AX-158112557 | 11 | 91.673 | KV452863.1 | 13383173 | 5-scf00249 | 5 |
| AX-158112559 | 11 | 91.673 | KV452863.1 | 13384499 | 5-scf00249 | 5 |
| AX-158112560 | 11 | 91.673 | KV452863.1 | 13386071 | 5-scf00249 | 5 |
| AX-157827962 | 11 | 91.673 | KV452863.1 | 13396947 | 5-scf00249 | 5 |
| AX-158112561 | 11 | 91.706 | KV452863.1 | 13388501 | 5-scf00249 | 5 |
| AX-158112565 | 11 | 91.733 | KV452863.1 | 13393753 | 5-scf00249 | 5 |
| AX-158112566 | 11 | 91.763 | KV452863.1 | 13394259 | 5-scf00249 | 5 |
| AX-158112568 | 11 | 91.782 | KV452863.1 | 13395479 | 5-scf00249 | 5 |
| AX-157827961 | 11 | 91.782 | KV452863.1 | 13395891 | 5-scf00249 | 5 |
| AX-157857460 | 11 | 91.782 | KV452863.1 | 13396179 | 5-scf00249 | 5 |
| AX-158112570 | 11 | 91.782 | KV452863.1 | 13398575 | 5-scf00249 | 5 |
| AX-158112571 | 11 | 91.782 | KV452863.1 | 13400073 | 5-scf00249 | 5 |
| AX-158112573 | 11 | 91.86  | KV452863.1 | 13404269 | 5-scf00249 | 5 |
| AX-158392626 | 11 | 91.891 | KV452863.1 | 13408367 | 5-scf00249 | 5 |
| AX-158112575 | 11 | 92.001 | KV452863.1 | 13408840 | 5-scf00249 | 5 |
| AX-158112576 | 11 | 92.001 | KV452863.1 | 13409405 | 5-scf00249 | 5 |
| AX-158112577 | 11 | 92.001 | KV452863.1 | 13410570 | 5-scf00249 | 5 |
| AX-158112578 | 11 | 92.001 | KV452863.1 | 13411066 | 5-scf00249 | 5 |
| AX-158112544 | 11 | 92.11  | KV452863.1 | 13363952 | 5-scf00249 | 5 |
| AX-158112580 | 11 | 92.11  | KV452863.1 | 13416836 | 5-scf00249 | 5 |
| AX-158112581 | 11 | 92.11  | KV452863.1 | 13417751 | 5-scf00249 | 5 |
| AX-158112582 | 11 | 92.11  | KV452863.1 | 13418532 | 5-scf00249 | 5 |
| AX-158112583 | 11 | 92.11  | KV452863.1 | 13420985 | 5-scf00249 | 5 |
| AX-157827965 | 11 | 92.11  | KV452863.1 | 13426755 | 5-scf00249 | 5 |

|              |    |        |            |          |            |   |
|--------------|----|--------|------------|----------|------------|---|
| AX-158112585 | 11 | 92.11  | KV452863.1 | 13428366 | 5-scf00249 | 5 |
| AX-157827966 | 11 | 92.11  | KV452863.1 | 13429022 | 5-scf00249 | 5 |
| AX-158112590 | 11 | 92.11  | KV452863.1 | 13434369 | 5-scf00249 | 5 |
| AX-158112592 | 11 | 92.11  | KV452863.1 | 13435995 | 5-scf00249 | 5 |
| AX-158112594 | 11 | 92.11  | KV452863.1 | 13438001 | 5-scf00249 | 5 |
| AX-158112595 | 11 | 92.11  | KV452863.1 | 13438646 | 5-scf00249 | 5 |
| AX-158112598 | 11 | 92.11  | KV452863.1 | 13443064 | 5-scf00249 | 5 |
| AX-158112599 | 11 | 92.11  | KV452863.1 | 13444061 | 5-scf00249 | 5 |
| AX-158112601 | 11 | 92.11  | KV452863.1 | 13445328 | 5-scf00249 | 5 |
| AX-158112606 | 11 | 92.372 | KV452863.1 | 13450571 | 5-scf00249 | 5 |
| AX-158112611 | 11 | 92.372 | KV452863.1 | 13455571 | 5-scf00249 | 5 |
| AX-158112613 | 11 | 92.372 | KV452863.1 | 13457823 | 5-scf00249 | 5 |
| AX-158392627 | 11 | 92.372 | KV452863.1 | 13458301 | 5-scf00249 | 5 |
| AX-158112584 | 11 | 92.635 | KV452863.1 | 13426933 | 5-scf00249 | 5 |
| AX-158380109 | 11 | 92.635 | KV452863.1 | 13436147 | 5-scf00249 | 5 |
| AX-158112616 | 11 | 92.635 | KV452863.1 | 13459736 | 5-scf00249 | 5 |
| AX-158112617 | 11 | 92.635 | KV452863.1 | 13460565 | 5-scf00249 | 5 |
| AX-157722564 | 11 | 92.699 | KV452863.1 | 13414074 | 5-scf00249 | 5 |
| AX-158112589 | 11 | 92.699 | KV452863.1 | 13434031 | 5-scf00249 | 5 |
| AX-158112618 | 11 | 92.699 | KV452863.1 | 13461441 | 5-scf00249 | 5 |
| AX-158112619 | 11 | 92.762 | KV452863.1 | 13463480 | 5-scf00249 | 5 |
| AX-158112608 | 11 | 92.766 | KV452863.1 | 13453773 | 5-scf00249 | 5 |
| AX-158112620 | 11 | 92.766 | KV452863.1 | 13466377 | 5-scf00249 | 5 |
| AX-157827968 | 11 | 92.766 | KV452863.1 | 13468805 | 5-scf00249 | 5 |
| AX-158112622 | 11 | 92.766 | KV452863.1 | 13469242 | 5-scf00249 | 5 |
| AX-158112548 | 11 | 92.875 | KV452863.1 | 13366904 | 5-scf00249 | 5 |
| AX-158112558 | 11 | 92.875 | KV452863.1 | 13383892 | 5-scf00249 | 5 |
| AX-158112564 | 11 | 92.875 | KV452863.1 | 13393620 | 5-scf00249 | 5 |
| AX-158112604 | 11 | 92.875 | KV452863.1 | 13447385 | 5-scf00249 | 5 |
| AX-157827967 | 11 | 92.875 | KV452863.1 | 13453246 | 5-scf00249 | 5 |
| AX-157775865 | 11 | 92.875 | KV452863.1 | 13471404 | 5-scf00249 | 5 |
| AX-158112623 | 11 | 92.875 | KV452863.1 | 13476290 | 5-scf00249 | 5 |
| AX-158112624 | 11 | 92.875 | KV452863.1 | 13477210 | 5-scf00249 | 5 |
| AX-157741323 | 11 | 92.875 | KV452863.1 | 13480316 | 5-scf00249 | 5 |
| AX-158112626 | 11 | 92.875 | KV452863.1 | 13482417 | 5-scf00249 | 5 |
| AX-157827969 | 11 | 92.875 | KV452863.1 | 13483664 | 5-scf00249 | 5 |
| AX-157827970 | 11 | 92.875 | KV452863.1 | 13485910 | 5-scf00249 | 5 |
| AX-158112628 | 11 | 92.875 | KV452863.1 | 13486497 | 5-scf00249 | 5 |
| AX-158112629 | 11 | 92.875 | KV452863.1 | 13487568 | 5-scf00249 | 5 |
| AX-158112630 | 11 | 92.875 | KV452863.1 | 13489761 | 5-scf00249 | 5 |
| AX-158112631 | 11 | 92.875 | KV452863.1 | 13490029 | 5-scf00249 | 5 |
| AX-158112632 | 11 | 92.875 | KV452863.1 | 13490302 | 5-scf00249 | 5 |
| AX-158112633 | 11 | 92.875 | KV452863.1 | 13490576 | 5-scf00249 | 5 |
| AX-158112635 | 11 | 92.875 | KV452863.1 | 13491755 | 5-scf00249 | 5 |
| AX-157885913 | 11 | 92.875 | KV452863.1 | 13493692 | 5-scf00249 | 5 |
| AX-158112637 | 11 | 92.875 | KV452863.1 | 13494082 | 5-scf00249 | 5 |
| AX-158112640 | 11 | 92.875 | KV452863.1 | 13495898 | 5-scf00249 | 5 |
| AX-158112641 | 11 | 92.875 | KV452863.1 | 13498846 | 5-scf00249 | 5 |
| AX-157827972 | 11 | 92.875 | KV452863.1 | 13500099 | 5-scf00249 | 5 |
| AX-157827974 | 11 | 92.875 | KV452863.1 | 13503352 | 5-scf00249 | 5 |
| AX-158112643 | 11 | 92.875 | KV452863.1 | 13504534 | 5-scf00249 | 5 |



|              |    |        |            |          |            |   |
|--------------|----|--------|------------|----------|------------|---|
| AX-158112644 | 11 | 92.875 | KV452863.1 | 13507718 | 5-scf00249 | 5 |
| AX-157827975 | 11 | 92.875 | KV452863.1 | 13508434 | 5-scf00249 | 5 |
| AX-158112645 | 11 | 92.875 | KV452863.1 | 13509014 | 5-scf00249 | 5 |
| AX-157721107 | 11 | 92.875 | KV452863.1 | 13510174 | 5-scf00249 | 5 |
| AX-158112646 | 11 | 92.875 | KV452863.1 | 13511214 | 5-scf00249 | 5 |
| AX-157747832 | 11 | 92.875 | KV452863.1 | 13512609 | 5-scf00249 | 5 |
| AX-158112647 | 11 | 92.875 | KV452863.1 | 13512701 | 5-scf00249 | 5 |
| AX-157857461 | 11 | 92.875 | KV452863.1 | 13513148 | 5-scf00249 | 5 |
| AX-158112649 | 11 | 92.875 | KV452863.1 | 13515532 | 5-scf00249 | 5 |
| AX-158112650 | 11 | 92.875 | KV452863.1 | 13515801 | 5-scf00249 | 5 |
| AX-158112651 | 11 | 92.875 | KV452863.1 | 13517269 | 5-scf00249 | 5 |
| AX-157827977 | 11 | 92.875 | KV452863.1 | 13518056 | 5-scf00249 | 5 |
| AX-158112652 | 11 | 92.875 | KV452863.1 | 13518341 | 5-scf00249 | 5 |
| AX-158112653 | 11 | 92.875 | KV452863.1 | 13518757 | 5-scf00249 | 5 |
| AX-158112654 | 11 | 92.875 | KV452863.1 | 13519567 | 5-scf00249 | 5 |
| AX-157827978 | 11 | 92.875 | KV452863.1 | 13520017 | 5-scf00249 | 5 |
| AX-158112656 | 11 | 92.875 | KV452863.1 | 13521267 | 5-scf00249 | 5 |
| AX-158112658 | 11 | 92.875 | KV452863.1 | 13523157 | 5-scf00249 | 5 |
| AX-158112662 | 11 | 92.875 | KV452863.1 | 13527192 | 5-scf00249 | 5 |
| AX-158112663 | 11 | 92.875 | KV452863.1 | 13527734 | 5-scf00249 | 5 |
| AX-158112664 | 11 | 92.875 | KV452863.1 | 13528609 | 5-scf00249 | 5 |
| AX-158112667 | 11 | 92.875 | KV452863.1 | 13533097 | 5-scf00249 | 5 |
| AX-158112668 | 11 | 92.875 | KV452863.1 | 13536865 | 5-scf00249 | 5 |
| AX-157827980 | 11 | 92.875 | KV452863.1 | 13542200 | 5-scf00249 | 5 |
| AX-158112674 | 11 | 92.875 | KV452863.1 | 13543383 | 5-scf00249 | 5 |
| AX-158112679 | 11 | 92.875 | KV452863.1 | 13548863 | 5-scf00249 | 5 |
| AX-158112680 | 11 | 92.875 | KV452863.1 | 13549214 | 5-scf00249 | 5 |
| AX-158112671 | 11 | 92.89  | KV452863.1 | 13541278 | 5-scf00249 | 5 |
| AX-158112673 | 11 | 92.903 | KV452863.1 | 13543006 | 5-scf00249 | 5 |
| AX-157857462 | 11 | 92.994 | KV452863.1 | 13543246 | 5-scf00249 | 5 |
| AX-158112677 | 11 | 92.994 | KV452863.1 | 13547960 | 5-scf00249 | 5 |
| AX-157744968 | 11 | 93.204 | KV452863.1 | 13522149 | 5-scf00249 | 5 |
| AX-158112725 | 11 | 93.204 | KV452863.1 | 13595688 | 5-scf00249 | 5 |
| AX-158112732 | 11 | 93.859 | KV452863.1 | 13607386 | 5-scf00249 | 5 |
| AX-158112733 | 11 | 93.859 | KV452863.1 | 13611408 | 5-scf00249 | 5 |
| AX-158112736 | 11 | 93.969 | KV452863.1 | 13614246 | 5-scf00249 | 5 |
| AX-158112737 | 11 | 93.969 | KV452863.1 | 13615522 | 5-scf00249 | 5 |
| AX-158112738 | 11 | 94.017 | KV452863.1 | 13616922 | 5-scf00249 | 5 |
| AX-158380110 | 11 | 94.078 | KV452863.1 | 13621314 | 5-scf00249 | 5 |
| AX-158112741 | 11 | 94.078 | KV452863.1 | 13622948 | 5-scf00249 | 5 |
| AX-158112749 | 11 | 94.078 | KV452863.1 | 13634632 | 5-scf00249 | 5 |
| AX-158112750 | 11 | 94.078 | KV452863.1 | 13635305 | 5-scf00249 | 5 |
| AX-158112746 | 11 | 94.079 | KV452863.1 | 13631836 | 5-scf00249 | 5 |
| AX-158112747 | 11 | 94.079 | KV452863.1 | 13632798 | 5-scf00249 | 5 |
| AX-157827981 | 11 | 94.079 | KV452863.1 | 13635517 | 5-scf00249 | 5 |
| AX-157827982 | 11 | 94.079 | KV452863.1 | 13639633 | 5-scf00249 | 5 |
| AX-157774598 | 11 | 94.079 | KV452863.1 | 13639803 | 5-scf00249 | 5 |
| AX-158112753 | 11 | 94.08  | KV452863.1 | 13640910 | 5-scf00249 | 5 |
| AX-158112755 | 11 | 94.081 | KV452863.1 | 13644557 | 5-scf00249 | 5 |
| AX-157745996 | 11 | 94.402 | KV452863.1 | 13647200 | 5-scf00249 | 5 |
| AX-157827984 | 11 | 94.402 | KV452863.1 | 13649047 | 5-scf00249 | 5 |

|              |    |        |             |          |            |    |
|--------------|----|--------|-------------|----------|------------|----|
| AX-158112761 | 11 | 94.411 | KV452863.1  | 13650506 | 5-scf00249 | 5  |
| AX-158112766 | 11 | 94.411 | KV452863.1  | 13657701 | 5-scf00249 | 5  |
| AX-158112767 | 11 | 94.411 | KV452863.1  | 13658407 | 5-scf00249 | 5  |
| AX-158112768 | 11 | 94.411 | KV452863.1  | 13659048 | 5-scf00249 | 5  |
| AX-158112777 | 11 | 94.411 | KV452863.1  | 13672585 | 5-scf00249 | 5  |
| AX-157712236 | 11 | 94.451 | KV452863.1  | 13661181 | 5-scf00249 | 5  |
| AX-158392628 | 11 | 94.53  | KV452863.1  | 13662282 | 5-scf00249 | 5  |
| AX-157711067 | 11 | 94.624 | KV452863.1  | 13644668 | 5-scf00249 | 5  |
| AX-157827985 | 11 | 94.624 | KV452863.1  | 13653473 | 5-scf00249 | 5  |
| AX-157871202 | 11 | 94.624 | KV452863.1  | 13654096 | 5-scf00249 | 5  |
| AX-158112771 | 11 | 94.624 | KV452863.1  | 13665552 | 5-scf00249 | 5  |
| AX-158384952 | 11 | 94.624 | KV452863.1  | 13666030 | 5-scf00249 | 5  |
| AX-158112774 | 11 | 94.624 | KV452863.1  | 13668841 | 5-scf00249 | 5  |
| AX-158112775 | 11 | 94.624 | KV452863.1  | 13669531 | 5-scf00249 | 5  |
| AX-158112778 | 11 | 94.624 | KV452863.1  | 13673027 | 5-scf00249 | 5  |
| AX-158112779 | 11 | 94.624 | KV452863.1  | 13673243 | 5-scf00249 | 5  |
| AX-158112781 | 11 | 94.624 | KV452863.1  | 13678170 | 5-scf00249 | 5  |
| AX-157827988 | 11 | 94.624 | KV452863.1  | 13686552 | 5-scf00249 | 5  |
| AX-158112789 | 11 | 94.624 | KV452863.1  | 13687642 | 5-scf00249 | 5  |
| AX-157827989 | 11 | 94.624 | KV452863.1  | 13688778 | 5-scf00249 | 5  |
| AX-157725694 | 11 | 94.624 | KV452863.1  | 13689798 | 5-scf00249 | 5  |
| AX-157740057 | 11 | 94.624 | KV452863.1  | 13690225 | 5-scf00249 | 5  |
| AX-158112792 | 11 | 94.624 | KV452863.1  | 13695343 | 5-scf00249 | 5  |
| AX-157827991 | 11 | 94.624 | KV452863.1  | 13696891 | 5-scf00249 | 5  |
| AX-158112793 | 11 | 94.624 | KV452863.1  | 13697085 | 5-scf00249 | 5  |
| AX-158112794 | 11 | 94.624 | KV452863.1  | 13697877 | 5-scf00249 | 5  |
| AX-158410802 | 11 | 94.624 | KV452863.1  | 13700806 | 5-scf00249 | 5  |
| AX-158112796 | 11 | 94.624 | KV452863.1  | 13707844 | 5-scf00249 | 5  |
| AX-157827993 | 11 | 94.624 | KV452863.1  | 13708357 | 5-scf00249 | 5  |
| AX-157706900 | 11 | 94.624 | 3ML01033125 | 252      | scf08761_1 | UN |
| AX-158112797 | 11 | 94.677 | KV452863.1  | 13710117 | 5-scf00249 | 5  |
| AX-157708091 | 11 | 94.843 | KV452863.1  | 13712041 | 5-scf00249 | 5  |
| AX-157720623 | 11 | 94.843 | KV452863.1  | 13712810 | 5-scf00249 | 5  |
| AX-158112799 | 11 | 94.843 | KV452863.1  | 13712954 | 5-scf00249 | 5  |
| AX-158112801 | 11 | 94.843 | KV452863.1  | 13715793 | 5-scf00249 | 5  |
| AX-157741430 | 11 | 94.843 | KV452863.1  | 13722985 | 5-scf00249 | 5  |
| AX-158112805 | 11 | 94.844 | KV452863.1  | 13722758 | 5-scf00249 | 5  |
| AX-158112809 | 11 | 95.17  | KV452863.1  | 13729272 | 5-scf00249 | 5  |
| AX-158112810 | 11 | 95.17  | KV452863.1  | 13729458 | 5-scf00249 | 5  |
| AX-158112811 | 11 | 95.17  | KV452863.1  | 13730507 | 5-scf00249 | 5  |
| AX-158112814 | 11 | 95.17  | KV452863.1  | 13732343 | 5-scf00249 | 5  |
| AX-157827995 | 11 | 95.17  | KV452863.1  | 13732528 | 5-scf00249 | 5  |
| AX-158112820 | 11 | 95.17  | KV452863.1  | 13738047 | 5-scf00249 | 5  |
| AX-158112821 | 11 | 95.17  | KV452863.1  | 13738314 | 5-scf00249 | 5  |
| AX-157827998 | 11 | 95.17  | KV452863.1  | 13746035 | 5-scf00249 | 5  |
| AX-158417124 | 11 | 95.17  | KV452863.1  | 13746486 | 5-scf00249 | 5  |
| AX-158112776 | 11 | 95.28  | KV452863.1  | 13672202 | 5-scf00249 | 5  |
| AX-158112786 | 11 | 95.28  | KV452863.1  | 13682846 | 5-scf00249 | 5  |
| AX-158112823 | 11 | 95.28  | KV452863.1  | 13741026 | 5-scf00249 | 5  |
| AX-157827997 | 11 | 95.28  | KV452863.1  | 13743741 | 5-scf00249 | 5  |
| AX-157827999 | 11 | 95.28  | KV452863.1  | 13749660 | 5-scf00249 | 5  |

|              |    |        |            |          |            |   |
|--------------|----|--------|------------|----------|------------|---|
| AX-158112830 | 11 | 95.28  | KV452863.1 | 13750007 | 5-scf00249 | 5 |
| AX-158112834 | 11 | 95.28  | KV452863.1 | 13754787 | 5-scf00249 | 5 |
| AX-158112836 | 11 | 95.28  | KV452863.1 | 13756560 | 5-scf00249 | 5 |
| AX-158112837 | 11 | 95.28  | KV452863.1 | 13757416 | 5-scf00249 | 5 |
| AX-158112840 | 11 | 95.28  | KV452863.1 | 13758487 | 5-scf00249 | 5 |
| AX-158112844 | 11 | 95.28  | KV452863.1 | 13761245 | 5-scf00249 | 5 |
| AX-158112787 | 11 | 95.281 | KV452863.1 | 13685218 | 5-scf00249 | 5 |
| AX-158112819 | 11 | 95.281 | KV452863.1 | 13737830 | 5-scf00249 | 5 |
| AX-158112829 | 11 | 95.281 | KV452863.1 | 13749421 | 5-scf00249 | 5 |
| AX-158112832 | 11 | 95.281 | KV452863.1 | 13753819 | 5-scf00249 | 5 |
| AX-157828003 | 11 | 95.281 | KV452863.1 | 13761852 | 5-scf00249 | 5 |
| AX-157877670 | 11 | 95.281 | KV452863.1 | 13780983 | 5-scf00249 | 5 |
| AX-158112845 | 11 | 95.283 | KV452863.1 | 13765430 | 5-scf00249 | 5 |
| AX-158112849 | 11 | 95.424 | KV452863.1 | 13775473 | 5-scf00249 | 5 |
| AX-157741551 | 11 | 95.424 | KV452863.1 | 13775517 | 5-scf00249 | 5 |
| AX-158112850 | 11 | 95.424 | KV452863.1 | 13779148 | 5-scf00249 | 5 |
| AX-158112852 | 11 | 95.424 | KV452863.1 | 13782914 | 5-scf00249 | 5 |
| AX-157723109 | 11 | 95.424 | KV452863.1 | 13785511 | 5-scf00249 | 5 |
| AX-158112855 | 11 | 95.425 | KV452863.1 | 13788163 | 5-scf00249 | 5 |
| AX-158112856 | 11 | 95.52  | KV452863.1 | 13788997 | 5-scf00249 | 5 |
| AX-158112860 | 11 | 95.52  | KV452863.1 | 13791888 | 5-scf00249 | 5 |
| AX-158112867 | 11 | 95.52  | KV452863.1 | 13803386 | 5-scf00249 | 5 |
| AX-158112879 | 11 | 95.52  | KV452863.1 | 13818536 | 5-scf00249 | 5 |
| AX-158112854 | 11 | 95.716 | KV452863.1 | 13787103 | 5-scf00249 | 5 |
| AX-158112857 | 11 | 95.716 | KV452863.1 | 13789527 | 5-scf00249 | 5 |
| AX-158112859 | 11 | 95.716 | KV452863.1 | 13791637 | 5-scf00249 | 5 |
| AX-158112861 | 11 | 95.716 | KV452863.1 | 13792931 | 5-scf00249 | 5 |
| AX-158112866 | 11 | 95.716 | KV452863.1 | 13800751 | 5-scf00249 | 5 |
| AX-157702860 | 11 | 95.716 | KV452863.1 | 13806576 | 5-scf00249 | 5 |
| AX-158112871 | 11 | 95.717 | KV452863.1 | 13810292 | 5-scf00249 | 5 |
| AX-158112873 | 11 | 95.717 | KV452863.1 | 13811536 | 5-scf00249 | 5 |
| AX-158112875 | 11 | 95.717 | KV452863.1 | 13812826 | 5-scf00249 | 5 |
| AX-157724428 | 11 | 95.717 | KV452863.1 | 13813540 | 5-scf00249 | 5 |
| AX-157828005 | 11 | 95.717 | KV452863.1 | 13817129 | 5-scf00249 | 5 |
| AX-158112878 | 11 | 95.717 | KV452863.1 | 13817879 | 5-scf00249 | 5 |
| AX-158112880 | 11 | 95.717 | KV452863.1 | 13819384 | 5-scf00249 | 5 |
| AX-158410805 | 11 | 95.717 | KV452863.1 | 13821852 | 5-scf00249 | 5 |
| AX-158112881 | 11 | 95.935 | KV452863.1 | 13820411 | 5-scf00249 | 5 |
| AX-158112882 | 11 | 95.935 | KV452863.1 | 13823228 | 5-scf00249 | 5 |
| AX-158112884 | 11 | 95.935 | KV452863.1 | 13826659 | 5-scf00249 | 5 |
| AX-158112887 | 11 | 95.935 | KV452863.1 | 13835463 | 5-scf00249 | 5 |
| AX-158112888 | 11 | 95.935 | KV452863.1 | 13836227 | 5-scf00249 | 5 |
| AX-158112895 | 11 | 95.935 | KV452863.1 | 13847129 | 5-scf00249 | 5 |
| AX-158113073 | 11 | 95.935 | KV452863.1 | 14099952 | 5-scf00249 | 5 |
| AX-157746679 | 11 | 96.044 | KV452863.1 | 13840346 | 5-scf00249 | 5 |
| AX-158112892 | 11 | 96.044 | KV452863.1 | 13841171 | 5-scf00249 | 5 |
| AX-158112899 | 11 | 96.044 | KV452863.1 | 13854443 | 5-scf00249 | 5 |
| AX-157754166 | 11 | 96.12  | KV452863.1 | 13842797 | 5-scf00249 | 5 |
| AX-158112903 | 11 | 96.12  | KV452863.1 | 13860770 | 5-scf00249 | 5 |
| AX-158112897 | 11 | 96.194 | KV452863.1 | 13850245 | 5-scf00249 | 5 |
| AX-158112890 | 11 | 96.263 | KV452863.1 | 13839752 | 5-scf00249 | 5 |

|              |    |        |            |          |            |   |
|--------------|----|--------|------------|----------|------------|---|
| AX-158112896 | 11 | 96.263 | KV452863.1 | 13848341 | 5-scf00249 | 5 |
| AX-158112900 | 11 | 96.263 | KV452863.1 | 13858206 | 5-scf00249 | 5 |
| AX-158112901 | 11 | 96.263 | KV452863.1 | 13858742 | 5-scf00249 | 5 |
| AX-158112904 | 11 | 96.263 | KV452863.1 | 13860984 | 5-scf00249 | 5 |
| AX-158112906 | 11 | 96.263 | KV452863.1 | 13865110 | 5-scf00249 | 5 |
| AX-158112907 | 11 | 96.263 | KV452863.1 | 13866013 | 5-scf00249 | 5 |
| AX-158112908 | 11 | 96.263 | KV452863.1 | 13866713 | 5-scf00249 | 5 |
| AX-158112909 | 11 | 96.263 | KV452863.1 | 13867216 | 5-scf00249 | 5 |
| AX-157717480 | 11 | 96.263 | KV452863.1 | 13868685 | 5-scf00249 | 5 |
| AX-158112912 | 11 | 96.263 | KV452863.1 | 13871731 | 5-scf00249 | 5 |
| AX-158112913 | 11 | 96.263 | KV452863.1 | 13872019 | 5-scf00249 | 5 |
| AX-158112914 | 11 | 96.263 | KV452863.1 | 13873101 | 5-scf00249 | 5 |
| AX-157790532 | 11 | 96.263 | KV452863.1 | 13875548 | 5-scf00249 | 5 |
| AX-157885915 | 11 | 96.263 | KV452863.1 | 13879296 | 5-scf00249 | 5 |
| AX-158410806 | 11 | 96.263 | KV452863.1 | 13907971 | 5-scf00249 | 5 |
| AX-157757617 | 11 | 96.263 | KV452863.1 | 14073751 | 5-scf00249 | 5 |
| AX-158113056 | 11 | 96.263 | KV452863.1 | 14074877 | 5-scf00249 | 5 |
| AX-158112916 | 11 | 96.917 | KV452863.1 | 13880573 | 5-scf00249 | 5 |
| AX-158112919 | 11 | 96.917 | KV452863.1 | 13883722 | 5-scf00249 | 5 |
| AX-158112918 | 11 | 96.918 | KV452863.1 | 13883317 | 5-scf00249 | 5 |
| AX-158112920 | 11 | 96.918 | KV452863.1 | 13885423 | 5-scf00249 | 5 |
| AX-158112921 | 11 | 96.918 | KV452863.1 | 13887714 | 5-scf00249 | 5 |
| AX-158112924 | 11 | 96.918 | KV452863.1 | 13890218 | 5-scf00249 | 5 |
| AX-158112925 | 11 | 96.918 | KV452863.1 | 13890686 | 5-scf00249 | 5 |
| AX-157756864 | 11 | 96.918 | KV452863.1 | 13896143 | 5-scf00249 | 5 |
| AX-158112935 | 11 | 96.918 | KV452863.1 | 13903546 | 5-scf00249 | 5 |
| AX-158112928 | 11 | 96.942 | KV452863.1 | 13895282 | 5-scf00249 | 5 |
| AX-158112929 | 11 | 96.974 | KV452863.1 | 13897595 | 5-scf00249 | 5 |
| AX-158112930 | 11 | 96.997 | KV452863.1 | 13898772 | 5-scf00249 | 5 |
| AX-158112931 | 11 | 97.027 | KV452863.1 | 13899202 | 5-scf00249 | 5 |
| AX-157727895 | 11 | 97.027 | KV452863.1 | 13900335 | 5-scf00249 | 5 |
| AX-158112933 | 11 | 97.027 | KV452863.1 | 13900795 | 5-scf00249 | 5 |
| AX-158112934 | 11 | 97.027 | KV452863.1 | 13901491 | 5-scf00249 | 5 |
| AX-157774347 | 11 | 97.027 | KV452863.1 | 13902567 | 5-scf00249 | 5 |
| AX-158112939 | 11 | 97.027 | KV452863.1 | 13906887 | 5-scf00249 | 5 |
| AX-158112940 | 11 | 97.027 | KV452863.1 | 13908424 | 5-scf00249 | 5 |
| AX-158112932 | 11 | 97.028 | KV452863.1 | 13900174 | 5-scf00249 | 5 |
| AX-158112942 | 11 | 97.028 | KV452863.1 | 13910650 | 5-scf00249 | 5 |
| AX-158112946 | 11 | 97.211 | KV452863.1 | 13914171 | 5-scf00249 | 5 |
| AX-158112948 | 11 | 97.211 | KV452863.1 | 13915778 | 5-scf00249 | 5 |
| AX-158112951 | 11 | 97.294 | KV452863.1 | 13917952 | 5-scf00249 | 5 |
| AX-158112954 | 11 | 97.545 | KV452863.1 | 13923581 | 5-scf00249 | 5 |
| AX-158112956 | 11 | 97.545 | KV452863.1 | 13924141 | 5-scf00249 | 5 |
| AX-158112963 | 11 | 97.833 | KV452863.1 | 13931585 | 5-scf00249 | 5 |
| AX-158112968 | 11 | 97.833 | KV452863.1 | 13935758 | 5-scf00249 | 5 |
| AX-158112969 | 11 | 97.833 | KV452863.1 | 13936183 | 5-scf00249 | 5 |
| AX-158112958 | 11 | 97.834 | KV452863.1 | 13925667 | 5-scf00249 | 5 |
| AX-158112962 | 11 | 97.834 | KV452863.1 | 13929233 | 5-scf00249 | 5 |
| AX-158112966 | 11 | 97.834 | KV452863.1 | 13932871 | 5-scf00249 | 5 |
| AX-157739597 | 11 | 97.834 | KV452863.1 | 13995971 | 5-scf00249 | 5 |
| AX-158112993 | 11 | 97.971 | KV452863.1 | 13969330 | 5-scf00249 | 5 |

|              |    |        |            |          |            |   |
|--------------|----|--------|------------|----------|------------|---|
| AX-158113001 | 11 | 97.971 | KV452863.1 | 13979446 | 5-scf00249 | 5 |
| AX-157727813 | 11 | 98.121 | KV452863.1 | 13970007 | 5-scf00249 | 5 |
| AX-158112995 | 11 | 98.121 | KV452863.1 | 13973214 | 5-scf00249 | 5 |
| AX-158112996 | 11 | 98.121 | KV452863.1 | 13974031 | 5-scf00249 | 5 |
| AX-157828014 | 11 | 98.121 | KV452863.1 | 13976746 | 5-scf00249 | 5 |
| AX-158113000 | 11 | 98.121 | KV452863.1 | 13977603 | 5-scf00249 | 5 |
| AX-157725435 | 11 | 98.121 | KV452863.1 | 13979140 | 5-scf00249 | 5 |
| AX-157828016 | 11 | 98.121 | KV452863.1 | 13984441 | 5-scf00249 | 5 |
| AX-158113002 | 11 | 98.121 | KV452863.1 | 13987111 | 5-scf00249 | 5 |
| AX-157828017 | 11 | 98.121 | KV452863.1 | 13989529 | 5-scf00249 | 5 |
| AX-158113003 | 11 | 98.121 | KV452863.1 | 13992064 | 5-scf00249 | 5 |
| AX-157877671 | 11 | 98.121 | KV452863.1 | 13993536 | 5-scf00249 | 5 |
| AX-158113108 | 11 | 98.121 | KV452863.1 | 14163238 | 5-scf00249 | 5 |
| AX-158112964 | 11 | 98.34  | KV452863.1 | 13932036 | 5-scf00249 | 5 |
| AX-158112997 | 11 | 98.34  | KV452863.1 | 13974904 | 5-scf00249 | 5 |
| AX-157715913 | 11 | 98.34  | KV452863.1 | 14003920 | 5-scf00249 | 5 |
| AX-157828022 | 11 | 98.34  | KV452863.1 | 14003956 | 5-scf00249 | 5 |
| AX-157828023 | 11 | 98.34  | KV452863.1 | 14005364 | 5-scf00249 | 5 |
| AX-158113006 | 11 | 98.34  | KV452863.1 | 14009075 | 5-scf00249 | 5 |
| AX-157857465 | 11 | 98.34  | KV452863.1 | 14011342 | 5-scf00249 | 5 |
| AX-158113008 | 11 | 98.34  | KV452863.1 | 14013293 | 5-scf00249 | 5 |
| AX-157828025 | 11 | 98.34  | KV452863.1 | 14014705 | 5-scf00249 | 5 |
| AX-158113009 | 11 | 98.34  | KV452863.1 | 14015517 | 5-scf00249 | 5 |
| AX-158113010 | 11 | 98.34  | KV452863.1 | 14019134 | 5-scf00249 | 5 |
| AX-158113012 | 11 | 98.34  | KV452863.1 | 14022277 | 5-scf00249 | 5 |
| AX-157828027 | 11 | 98.34  | KV452863.1 | 14023428 | 5-scf00249 | 5 |
| AX-158113014 | 11 | 98.34  | KV452863.1 | 14025028 | 5-scf00249 | 5 |
| AX-158113016 | 11 | 98.34  | KV452863.1 | 14027494 | 5-scf00249 | 5 |
| AX-157742512 | 11 | 98.34  | KV452863.1 | 14031380 | 5-scf00249 | 5 |
| AX-158113020 | 11 | 98.34  | KV452863.1 | 14033950 | 5-scf00249 | 5 |
| AX-158113021 | 11 | 98.34  | KV452863.1 | 14034544 | 5-scf00249 | 5 |
| AX-158113023 | 11 | 98.34  | KV452863.1 | 14038626 | 5-scf00249 | 5 |
| AX-158113024 | 11 | 98.34  | KV452863.1 | 14039492 | 5-scf00249 | 5 |
| AX-158113029 | 11 | 98.34  | KV452863.1 | 14044354 | 5-scf00249 | 5 |
| AX-158113030 | 11 | 98.34  | KV452863.1 | 14045012 | 5-scf00249 | 5 |
| AX-158113031 | 11 | 98.34  | KV452863.1 | 14045529 | 5-scf00249 | 5 |
| AX-158113070 | 11 | 98.34  | KV452863.1 | 14096239 | 5-scf00249 | 5 |
| AX-158113084 | 11 | 98.34  | KV452863.1 | 14129168 | 5-scf00249 | 5 |
| AX-158113089 | 11 | 98.34  | KV452863.1 | 14134933 | 5-scf00249 | 5 |
| AX-157828035 | 11 | 98.34  | KV452863.1 | 14136186 | 5-scf00249 | 5 |
| AX-158113106 | 11 | 98.34  | KV452863.1 | 14161415 | 5-scf00249 | 5 |
| AX-158113034 | 11 | 98.426 | KV452863.1 | 14047767 | 5-scf00249 | 5 |
| AX-158113114 | 11 | 98.426 | KV452863.1 | 14174932 | 5-scf00249 | 5 |
| AX-157828040 | 11 | 98.426 | KV452863.1 | 14197286 | 5-scf00249 | 5 |
| AX-157719909 | 11 | 98.507 | KV452863.1 | 14054586 | 5-scf00249 | 5 |
| AX-158113039 | 11 | 98.534 | KV452863.1 | 14055061 | 5-scf00249 | 5 |
| AX-157722430 | 11 | 98.584 | KV452863.1 | 14057791 | 5-scf00249 | 5 |
| AX-158113044 | 11 | 98.613 | KV452863.1 | 14059630 | 5-scf00249 | 5 |
| AX-158112910 | 11 | 98.667 | KV452863.1 | 13867458 | 5-scf00249 | 5 |
| AX-158112944 | 11 | 98.667 | KV452863.1 | 13912382 | 5-scf00249 | 5 |
| AX-158112999 | 11 | 98.667 | KV452863.1 | 13975803 | 5-scf00249 | 5 |

|              |    |        |            |          |            |   |
|--------------|----|--------|------------|----------|------------|---|
| AX-158410808 | 11 | 98.667 | KV452863.1 | 13988640 | 5-scf00249 | 5 |
| AX-158113040 | 11 | 98.667 | KV452863.1 | 14055578 | 5-scf00249 | 5 |
| AX-158113045 | 11 | 98.667 | KV452863.1 | 14060040 | 5-scf00249 | 5 |
| AX-158113047 | 11 | 98.667 | KV452863.1 | 14061820 | 5-scf00249 | 5 |
| AX-158113048 | 11 | 98.667 | KV452863.1 | 14063279 | 5-scf00249 | 5 |
| AX-158113049 | 11 | 98.667 | KV452863.1 | 14063767 | 5-scf00249 | 5 |
| AX-158113050 | 11 | 98.667 | KV452863.1 | 14065346 | 5-scf00249 | 5 |
| AX-158113051 | 11 | 98.667 | KV452863.1 | 14066769 | 5-scf00249 | 5 |
| AX-158113053 | 11 | 98.667 | KV452863.1 | 14068330 | 5-scf00249 | 5 |
| AX-158113054 | 11 | 98.667 | KV452863.1 | 14068996 | 5-scf00249 | 5 |
| AX-157828028 | 11 | 98.667 | KV452863.1 | 14070868 | 5-scf00249 | 5 |
| AX-158113060 | 11 | 98.667 | KV452863.1 | 14086052 | 5-scf00249 | 5 |
| AX-158113064 | 11 | 98.667 | KV452863.1 | 14088156 | 5-scf00249 | 5 |
| AX-158113065 | 11 | 98.667 | KV452863.1 | 14090555 | 5-scf00249 | 5 |
| AX-158113067 | 11 | 98.667 | KV452863.1 | 14092879 | 5-scf00249 | 5 |
| AX-158113068 | 11 | 98.667 | KV452863.1 | 14093052 | 5-scf00249 | 5 |
| AX-158113076 | 11 | 98.667 | KV452863.1 | 14104064 | 5-scf00249 | 5 |
| AX-158113027 | 11 | 98.704 | KV452863.1 | 14042414 | 5-scf00249 | 5 |
| AX-158113077 | 11 | 98.704 | KV452863.1 | 14107755 | 5-scf00249 | 5 |
| AX-158113079 | 11 | 98.738 | KV452863.1 | 14112495 | 5-scf00249 | 5 |
| AX-158112938 | 11 | 98.777 | KV452863.1 | 13905787 | 5-scf00249 | 5 |
| AX-158113011 | 11 | 98.777 | KV452863.1 | 14020353 | 5-scf00249 | 5 |
| AX-158380113 | 11 | 98.777 | KV452863.1 | 14054622 | 5-scf00249 | 5 |
| AX-158113062 | 11 | 98.777 | KV452863.1 | 14086974 | 5-scf00249 | 5 |
| AX-158113069 | 11 | 98.777 | KV452863.1 | 14094585 | 5-scf00249 | 5 |
| AX-158113072 | 11 | 98.777 | KV452863.1 | 14099150 | 5-scf00249 | 5 |
| AX-157828032 | 11 | 98.777 | KV452863.1 | 14117303 | 5-scf00249 | 5 |
| AX-158113080 | 11 | 98.777 | KV452863.1 | 14121408 | 5-scf00249 | 5 |
| AX-158113081 | 11 | 98.777 | KV452863.1 | 14125025 | 5-scf00249 | 5 |
| AX-158113082 | 11 | 98.777 | KV452863.1 | 14126831 | 5-scf00249 | 5 |
| AX-158113087 | 11 | 98.777 | KV452863.1 | 14132408 | 5-scf00249 | 5 |
| AX-158113088 | 11 | 98.777 | KV452863.1 | 14133368 | 5-scf00249 | 5 |
| AX-158410809 | 11 | 98.777 | KV452863.1 | 14135794 | 5-scf00249 | 5 |
| AX-158113090 | 11 | 98.777 | KV452863.1 | 14137261 | 5-scf00249 | 5 |
| AX-158113101 | 11 | 98.777 | KV452863.1 | 14158127 | 5-scf00249 | 5 |
| AX-158113107 | 11 | 98.777 | KV452863.1 | 14162865 | 5-scf00249 | 5 |
| AX-157828037 | 11 | 98.777 | KV452863.1 | 14164059 | 5-scf00249 | 5 |
| AX-158113110 | 11 | 98.777 | KV452863.1 | 14169375 | 5-scf00249 | 5 |
| AX-158113111 | 11 | 98.777 | KV452863.1 | 14170064 | 5-scf00249 | 5 |
| AX-158113112 | 11 | 98.777 | KV452863.1 | 14171053 | 5-scf00249 | 5 |
| AX-158113113 | 11 | 98.777 | KV452863.1 | 14172174 | 5-scf00249 | 5 |
| AX-158113115 | 11 | 98.777 | KV452863.1 | 14176478 | 5-scf00249 | 5 |
| AX-158113117 | 11 | 98.777 | KV452863.1 | 14179665 | 5-scf00249 | 5 |
| AX-158113120 | 11 | 98.777 | KV452863.1 | 14184231 | 5-scf00249 | 5 |
| AX-157828039 | 11 | 98.777 | KV452863.1 | 14187987 | 5-scf00249 | 5 |
| AX-157828047 | 11 | 98.777 | KV452863.1 | 14229725 | 5-scf00249 | 5 |
| AX-157774622 | 11 | 98.777 | KV452863.1 | 14251035 | 5-scf00249 | 5 |
| AX-158113123 | 11 | 98.995 | KV452863.1 | 14192728 | 5-scf00249 | 5 |
| AX-158113125 | 11 | 98.995 | KV452863.1 | 14193848 | 5-scf00249 | 5 |
| AX-158113127 | 11 | 98.995 | KV452863.1 | 14197883 | 5-scf00249 | 5 |
| AX-158113128 | 11 | 98.995 | KV452863.1 | 14200289 | 5-scf00249 | 5 |

|              |    |        |            |          |            |   |
|--------------|----|--------|------------|----------|------------|---|
| AX-158113086 | 11 | 99.104 | KV452863.1 | 14131029 | 5-scf00249 | 5 |
| AX-158113121 | 11 | 99.104 | KV452863.1 | 14184788 | 5-scf00249 | 5 |
| AX-157828041 | 11 | 99.104 | KV452863.1 | 14201545 | 5-scf00249 | 5 |
| AX-158113129 | 11 | 99.104 | KV452863.1 | 14202845 | 5-scf00249 | 5 |
| AX-157828043 | 11 | 99.104 | KV452863.1 | 14207600 | 5-scf00249 | 5 |
| AX-158113134 | 11 | 99.104 | KV452863.1 | 14209780 | 5-scf00249 | 5 |
| AX-158113135 | 11 | 99.104 | KV452863.1 | 14210442 | 5-scf00249 | 5 |
| AX-157713492 | 11 | 99.104 | KV452863.1 | 14210851 | 5-scf00249 | 5 |
| AX-158113137 | 11 | 99.104 | KV452863.1 | 14214613 | 5-scf00249 | 5 |
| AX-157716182 | 11 | 99.104 | KV452863.1 | 14236704 | 5-scf00249 | 5 |
| AX-157707797 | 11 | 99.133 | KV452863.1 | 14216470 | 5-scf00249 | 5 |
| AX-158113139 | 11 | 99.171 | KV452863.1 | 14217035 | 5-scf00249 | 5 |
| AX-158113159 | 11 | 99.171 | KV452863.1 | 14248548 | 5-scf00249 | 5 |
| AX-158113174 | 11 | 99.171 | KV452863.1 | 14260210 | 5-scf00249 | 5 |
| AX-158113019 | 11 | 99.213 | KV452863.1 | 14033532 | 5-scf00249 | 5 |
| AX-157828046 | 11 | 99.213 | KV452863.1 | 14221064 | 5-scf00249 | 5 |
| AX-158113143 | 11 | 99.213 | KV452863.1 | 14221377 | 5-scf00249 | 5 |
| AX-158113147 | 11 | 99.213 | KV452863.1 | 14226665 | 5-scf00249 | 5 |
| AX-158113150 | 11 | 99.213 | KV452863.1 | 14230262 | 5-scf00249 | 5 |
| AX-157828048 | 11 | 99.213 | KV452863.1 | 14234986 | 5-scf00249 | 5 |
| AX-157757715 | 11 | 99.213 | KV452863.1 | 14251487 | 5-scf00249 | 5 |
| AX-157828049 | 11 | 99.268 | KV452863.1 | 14235085 | 5-scf00249 | 5 |
| AX-158113153 | 11 | 99.323 | KV452863.1 | 14237638 | 5-scf00249 | 5 |
| AX-157828050 | 11 | 99.323 | KV452863.1 | 14238129 | 5-scf00249 | 5 |
| AX-157738948 | 11 | 99.323 | KV452863.1 | 14238634 | 5-scf00249 | 5 |
| AX-158113155 | 11 | 99.323 | KV452863.1 | 14240056 | 5-scf00249 | 5 |
| AX-157828052 | 11 | 99.323 | KV452863.1 | 14241203 | 5-scf00249 | 5 |
| AX-158113162 | 11 | 99.323 | KV452863.1 | 14250991 | 5-scf00249 | 5 |
| AX-158113131 | 11 | 99.342 | KV452863.1 | 14205176 | 5-scf00249 | 5 |
| AX-158113151 | 11 | 99.342 | KV452863.1 | 14230688 | 5-scf00249 | 5 |
| AX-157722664 | 11 | 99.342 | KV452863.1 | 14241969 | 5-scf00249 | 5 |
| AX-157828054 | 11 | 99.342 | KV452863.1 | 14242852 | 5-scf00249 | 5 |
| AX-158113187 | 11 | 99.342 | KV452863.1 | 14278780 | 5-scf00249 | 5 |
| AX-157828030 | 11 | 99.376 | KV452863.1 | 14116492 | 5-scf00249 | 5 |
| AX-158113160 | 11 | 99.376 | KV452863.1 | 14249654 | 5-scf00249 | 5 |
| AX-158113165 | 11 | 99.407 | KV452863.1 | 14251676 | 5-scf00249 | 5 |
| AX-158392630 | 11 | 99.432 | KV452863.1 | 14024944 | 5-scf00249 | 5 |
| AX-158113042 | 11 | 99.432 | KV452863.1 | 14058350 | 5-scf00249 | 5 |
| AX-158113167 | 11 | 99.432 | KV452863.1 | 14253383 | 5-scf00249 | 5 |
| AX-157871207 | 11 | 99.432 | KV452863.1 | 14257925 | 5-scf00249 | 5 |
| AX-158113175 | 11 | 99.432 | KV452863.1 | 14261351 | 5-scf00249 | 5 |
| AX-158113177 | 11 | 99.432 | KV452863.1 | 14263987 | 5-scf00249 | 5 |
| AX-158113178 | 11 | 99.432 | KV452863.1 | 14264620 | 5-scf00249 | 5 |
| AX-158113176 | 11 | 99.433 | KV452863.1 | 14262755 | 5-scf00249 | 5 |
| AX-158113179 | 11 | 99.433 | KV452863.1 | 14268085 | 5-scf00249 | 5 |
| AX-158113149 | 11 | 99.573 | KV452863.1 | 14229962 | 5-scf00249 | 5 |
| AX-157828053 | 11 | 99.573 | KV452863.1 | 14242551 | 5-scf00249 | 5 |
| AX-158113184 | 11 | 99.573 | KV452863.1 | 14274260 | 5-scf00249 | 5 |
| AX-158113185 | 11 | 99.573 | KV452863.1 | 14276601 | 5-scf00249 | 5 |
| AX-158113186 | 11 | 99.573 | KV452863.1 | 14277552 | 5-scf00249 | 5 |
| AX-158113189 | 11 | 99.712 | KV452863.1 | 14281309 | 5-scf00249 | 5 |

|              |    |         |            |          |            |   |
|--------------|----|---------|------------|----------|------------|---|
| AX-157828058 | 11 | 99.937  | KV452863.1 | 14286792 | 5-scf00249 | 5 |
| AX-158113192 | 11 | 100.088 | KV452863.1 | 14287051 | 5-scf00249 | 5 |
| AX-158113193 | 11 | 100.088 | KV452863.1 | 14294633 | 5-scf00249 | 5 |
| AX-158113194 | 11 | 100.088 | KV452863.1 | 14295935 | 5-scf00249 | 5 |
| AX-158113198 | 11 | 100.088 | KV452863.1 | 14303181 | 5-scf00249 | 5 |
| AX-157828059 | 11 | 100.089 | KV452863.1 | 14289667 | 5-scf00249 | 5 |
| AX-157717668 | 11 | 100.089 | KV452863.1 | 14297842 | 5-scf00249 | 5 |
| AX-157828060 | 11 | 100.089 | KV452863.1 | 14300053 | 5-scf00249 | 5 |
| AX-157828062 | 11 | 100.089 | KV452863.1 | 14308118 | 5-scf00249 | 5 |
| AX-158113266 | 11 | 100.089 | KV452863.1 | 14407898 | 5-scf00249 | 5 |
| AX-157828074 | 11 | 100.089 | KV452863.1 | 14429295 | 5-scf00249 | 5 |
| AX-158113278 | 11 | 100.089 | KV452863.1 | 14440309 | 5-scf00249 | 5 |
| AX-158113197 | 11 | 100.2   | KV452863.1 | 14301650 | 5-scf00249 | 5 |
| AX-158113199 | 11 | 100.239 | KV452863.1 | 14303522 | 5-scf00249 | 5 |
| AX-158113211 | 11 | 100.239 | KV452863.1 | 14321968 | 5-scf00249 | 5 |
| AX-157866046 | 11 | 100.239 | KV452863.1 | 14333358 | 5-scf00249 | 5 |
| AX-157828063 | 11 | 100.307 | KV452863.1 | 14309240 | 5-scf00249 | 5 |
| AX-158113204 | 11 | 100.307 | KV452863.1 | 14309379 | 5-scf00249 | 5 |
| AX-158113207 | 11 | 100.307 | KV452863.1 | 14316726 | 5-scf00249 | 5 |
| AX-158113206 | 11 | 100.417 | KV452863.1 | 14315245 | 5-scf00249 | 5 |
| AX-158113214 | 11 | 100.442 | KV452863.1 | 14325219 | 5-scf00249 | 5 |
| AX-158113216 | 11 | 100.474 | KV452863.1 | 14327019 | 5-scf00249 | 5 |
| AX-158113218 | 11 | 100.5   | KV452863.1 | 14329539 | 5-scf00249 | 5 |
| AX-158113219 | 11 | 100.526 | KV452863.1 | 14331864 | 5-scf00249 | 5 |
| AX-157828055 | 11 | 100.582 | KV452863.1 | 14246164 | 5-scf00249 | 5 |
| AX-158113158 | 11 | 100.582 | KV452863.1 | 14248145 | 5-scf00249 | 5 |
| AX-158113220 | 11 | 100.582 | KV452863.1 | 14332227 | 5-scf00249 | 5 |
| AX-158113222 | 11 | 100.582 | KV452863.1 | 14333003 | 5-scf00249 | 5 |
| AX-158113240 | 11 | 100.582 | KV452863.1 | 14364601 | 5-scf00249 | 5 |
| AX-158113242 | 11 | 100.582 | KV452863.1 | 14369179 | 5-scf00249 | 5 |
| AX-157828070 | 11 | 100.582 | KV452863.1 | 14374608 | 5-scf00249 | 5 |
| AX-157721086 | 11 | 100.613 | KV452863.1 | 14337385 | 5-scf00249 | 5 |
| AX-157766392 | 11 | 100.635 | KV452863.1 | 14277101 | 5-scf00249 | 5 |
| AX-157709792 | 11 | 100.635 | KV452863.1 | 14287186 | 5-scf00249 | 5 |
| AX-157828064 | 11 | 100.635 | KV452863.1 | 14330183 | 5-scf00249 | 5 |
| AX-158113229 | 11 | 100.635 | KV452863.1 | 14347306 | 5-scf00249 | 5 |
| AX-157828067 | 11 | 100.635 | KV452863.1 | 14349510 | 5-scf00249 | 5 |
| AX-158113231 | 11 | 100.635 | KV452863.1 | 14352849 | 5-scf00249 | 5 |
| AX-157828068 | 11 | 100.635 | KV452863.1 | 14354609 | 5-scf00249 | 5 |
| AX-158113233 | 11 | 100.635 | KV452863.1 | 14355282 | 5-scf00249 | 5 |
| AX-158113234 | 11 | 100.635 | KV452863.1 | 14355568 | 5-scf00249 | 5 |
| AX-158113235 | 11 | 100.635 | KV452863.1 | 14356170 | 5-scf00249 | 5 |
| AX-158113236 | 11 | 100.635 | KV452863.1 | 14357509 | 5-scf00249 | 5 |
| AX-158113239 | 11 | 100.635 | KV452863.1 | 14360600 | 5-scf00249 | 5 |
| AX-157713018 | 11 | 100.635 | KV452863.1 | 14362263 | 5-scf00249 | 5 |
| AX-158113244 | 11 | 100.635 | KV452863.1 | 14369915 | 5-scf00249 | 5 |
| AX-158113245 | 11 | 100.635 | KV452863.1 | 14370329 | 5-scf00249 | 5 |
| AX-158113246 | 11 | 100.635 | KV452863.1 | 14372099 | 5-scf00249 | 5 |
| AX-158113249 | 11 | 100.744 | KV452863.1 | 14379771 | 5-scf00249 | 5 |
| AX-158113250 | 11 | 100.854 | KV452863.1 | 14383232 | 5-scf00249 | 5 |
| AX-158113251 | 11 | 100.854 | KV452863.1 | 14383946 | 5-scf00249 | 5 |



|              |    |         |            |          |            |   |
|--------------|----|---------|------------|----------|------------|---|
| AX-158380115 | 11 | 100.854 | KV452863.1 | 14384528 | 5-scf00249 | 5 |
| AX-158113254 | 11 | 100.854 | KV452863.1 | 14386609 | 5-scf00249 | 5 |
| AX-158113255 | 11 | 100.854 | KV452863.1 | 14388168 | 5-scf00249 | 5 |
| AX-158113256 | 11 | 100.854 | KV452863.1 | 14388757 | 5-scf00249 | 5 |
| AX-158113257 | 11 | 100.854 | KV452863.1 | 14390143 | 5-scf00249 | 5 |
| AX-157750111 | 11 | 100.854 | KV452863.1 | 14391175 | 5-scf00249 | 5 |
| AX-157719998 | 11 | 100.854 | KV452863.1 | 14400232 | 5-scf00249 | 5 |
| AX-158113261 | 11 | 101.017 | KV452863.1 | 14399278 | 5-scf00249 | 5 |
| AX-158113264 | 11 | 101.017 | KV452863.1 | 14404093 | 5-scf00249 | 5 |
| AX-157740419 | 11 | 101.017 | KV452863.1 | 14406538 | 5-scf00249 | 5 |
| AX-158113267 | 11 | 101.017 | KV452863.1 | 14408488 | 5-scf00249 | 5 |
| AX-158113269 | 11 | 101.017 | KV452863.1 | 14411402 | 5-scf00249 | 5 |
| AX-158113215 | 11 | 101.021 | KV452863.1 | 14326054 | 5-scf00249 | 5 |
| AX-157725198 | 11 | 101.021 | KV452863.1 | 14412269 | 5-scf00249 | 5 |
| AX-158113270 | 11 | 101.03  | KV452863.1 | 14412310 | 5-scf00249 | 5 |
| AX-158113271 | 11 | 101.036 | KV452863.1 | 14412867 | 5-scf00249 | 5 |
| AX-158113274 | 11 | 101.036 | KV452863.1 | 14423212 | 5-scf00249 | 5 |
| AX-157774366 | 11 | 101.046 | KV452863.1 | 14413547 | 5-scf00249 | 5 |
| AX-158113272 | 11 | 101.13  | KV452863.1 | 14414838 | 5-scf00249 | 5 |
| AX-158113273 | 11 | 101.182 | KV452863.1 | 14415150 | 5-scf00249 | 5 |
| AX-157720060 | 11 | 101.182 | KV452863.1 | 14419591 | 5-scf00249 | 5 |
| AX-157828071 | 11 | 101.182 | KV452863.1 | 14421986 | 5-scf00249 | 5 |
| AX-157828072 | 11 | 101.182 | KV452863.1 | 14422720 | 5-scf00249 | 5 |
| AX-158113276 | 11 | 101.54  | KV452863.1 | 14432666 | 5-scf00249 | 5 |
| AX-157748957 | 11 | 101.54  | KV452863.1 | 14438117 | 5-scf00249 | 5 |
| AX-158410811 | 11 | 101.617 | KV452863.1 | 14440237 | 5-scf00249 | 5 |
| AX-157828076 | 11 | 101.736 | KV452863.1 | 14442942 | 5-scf00249 | 5 |
| AX-158113280 | 11 | 101.736 | KV452863.1 | 14443880 | 5-scf00249 | 5 |
| AX-157756425 | 11 | 101.736 | KV452863.1 | 14447309 | 5-scf00249 | 5 |
| AX-158113284 | 11 | 101.947 | KV452863.1 | 14449663 | 5-scf00249 | 5 |
| AX-158113285 | 11 | 101.947 | KV452863.1 | 14450357 | 5-scf00249 | 5 |
| AX-158113286 | 11 | 101.947 | KV452863.1 | 14450985 | 5-scf00249 | 5 |
| AX-158113287 | 11 | 101.947 | KV452863.1 | 14451741 | 5-scf00249 | 5 |
| AX-158113290 | 11 | 101.952 | KV452863.1 | 14454904 | 5-scf00249 | 5 |
| AX-158113291 | 11 | 102.426 | KV452863.1 | 14456198 | 5-scf00249 | 5 |
| AX-158113296 | 11 | 102.426 | KV452863.1 | 14462255 | 5-scf00249 | 5 |
| AX-158384960 | 11 | 102.426 | KV452863.1 | 14465706 | 5-scf00249 | 5 |
| AX-158113301 | 11 | 102.426 | KV452863.1 | 14467365 | 5-scf00249 | 5 |
| AX-158113302 | 11 | 102.609 | KV452863.1 | 14470311 | 5-scf00249 | 5 |
| AX-158113304 | 11 | 102.634 | KV452863.1 | 14477320 | 5-scf00249 | 5 |
| AX-158113305 | 11 | 102.657 | KV452863.1 | 14479089 | 5-scf00249 | 5 |
| AX-157885922 | 11 | 103.087 | KV452863.1 | 14479403 | 5-scf00249 | 5 |
| AX-158113306 | 11 | 103.087 | KV452863.1 | 14480519 | 5-scf00249 | 5 |
| AX-157857467 | 11 | 103.339 | KV452863.1 | 14483825 | 5-scf00249 | 5 |
| AX-158113312 | 11 | 103.339 | KV452863.1 | 14490033 | 5-scf00249 | 5 |
| AX-158113314 | 11 | 103.7   | KV452863.1 | 14497763 | 5-scf00249 | 5 |
| AX-158113315 | 11 | 103.7   | KV452863.1 | 14498764 | 5-scf00249 | 5 |
| AX-158113317 | 11 | 103.7   | KV452863.1 | 14501499 | 5-scf00249 | 5 |
| AX-158113318 | 11 | 103.7   | KV452863.1 | 14502912 | 5-scf00249 | 5 |
| AX-158113319 | 11 | 103.7   | KV452863.1 | 14504279 | 5-scf00249 | 5 |
| AX-158113323 | 11 | 103.7   | KV452863.1 | 14508460 | 5-scf00249 | 5 |

|              |    |         |            |          |            |   |
|--------------|----|---------|------------|----------|------------|---|
| AX-158113321 | 11 | 103.809 | KV452863.1 | 14506080 | 5-scf00249 | 5 |
| AX-158113322 | 11 | 103.809 | KV452863.1 | 14506777 | 5-scf00249 | 5 |
| AX-158113326 | 11 | 103.867 | KV452863.1 | 14513163 | 5-scf00249 | 5 |
| AX-158113329 | 11 | 103.919 | KV452863.1 | 14521320 | 5-scf00249 | 5 |
| AX-158113331 | 11 | 104.028 | KV452863.1 | 14523258 | 5-scf00249 | 5 |
| AX-157742563 | 11 | 104.028 | KV452863.1 | 14524017 | 5-scf00249 | 5 |
| AX-158113332 | 11 | 104.028 | KV452863.1 | 14526384 | 5-scf00249 | 5 |
| AX-158113335 | 11 | 104.045 | KV452863.1 | 14534998 | 5-scf00249 | 5 |
| AX-158113336 | 11 | 104.491 | KV452863.1 | 14537889 | 5-scf00249 | 5 |
| AX-158113337 | 11 | 104.545 | KV452863.1 | 14540352 | 5-scf00249 | 5 |
| AX-158113338 | 11 | 104.636 | KV452863.1 | 14542019 | 5-scf00249 | 5 |
| AX-158113339 | 11 | 104.715 | KV452863.1 | 14543173 | 5-scf00249 | 5 |
| AX-158113340 | 11 | 104.881 | KV452863.1 | 14544334 | 5-scf00249 | 5 |
| AX-158410814 | 11 | 105.124 | KV452863.1 | 14555593 | 5-scf00249 | 5 |
| AX-158113349 | 11 | 105.869 | KV452863.1 | 14569626 | 5-scf00249 | 5 |
| AX-158113351 | 11 | 105.901 | KV452863.1 | 14571065 | 5-scf00249 | 5 |
| AX-158113358 | 11 | 105.905 | KV452863.1 | 14579078 | 5-scf00249 | 5 |
| AX-158380117 | 11 | 106.093 | KV452863.1 | 14580512 | 5-scf00249 | 5 |
| AX-158113347 | 11 | 106.512 | KV452863.1 | 14565051 | 5-scf00249 | 5 |
| AX-158113352 | 11 | 106.512 | KV452863.1 | 14572567 | 5-scf00249 | 5 |
| AX-158113353 | 11 | 106.512 | KV452863.1 | 14574063 | 5-scf00249 | 5 |
| AX-157754735 | 11 | 106.512 | KV452863.1 | 14586844 | 5-scf00249 | 5 |
| AX-158113362 | 11 | 106.512 | KV452863.1 | 14588863 | 5-scf00249 | 5 |
| AX-158113363 | 11 | 106.512 | KV452863.1 | 14589353 | 5-scf00249 | 5 |
| AX-157828081 | 11 | 106.553 | KV452863.1 | 14593580 | 5-scf00249 | 5 |
| AX-157828082 | 11 | 106.553 | KV452863.1 | 14597006 | 5-scf00249 | 5 |
| AX-157828083 | 11 | 106.553 | KV452863.1 | 14597706 | 5-scf00249 | 5 |
| AX-157745711 | 11 | 106.553 | KV452863.1 | 14599748 | 5-scf00249 | 5 |
| AX-157828084 | 11 | 106.88  | KV452863.1 | 14605628 | 5-scf00249 | 5 |
| AX-158113367 | 11 | 106.88  | KV452863.1 | 14609894 | 5-scf00249 | 5 |
| AX-158113368 | 11 | 106.88  | KV452863.1 | 14613256 | 5-scf00249 | 5 |
| AX-158113370 | 11 | 106.88  | KV452863.1 | 14615069 | 5-scf00249 | 5 |
| AX-158113381 | 11 | 106.893 | KV452863.1 | 14631140 | 5-scf00249 | 5 |
| AX-157828085 | 11 | 106.958 | KV452863.1 | 14634512 | 5-scf00249 | 5 |
| AX-158113373 | 11 | 107.022 | KV452863.1 | 14619023 | 5-scf00249 | 5 |
| AX-158113374 | 11 | 107.022 | KV452863.1 | 14620682 | 5-scf00249 | 5 |
| AX-158113378 | 11 | 107.022 | KV452863.1 | 14624201 | 5-scf00249 | 5 |
| AX-158113379 | 11 | 107.022 | KV452863.1 | 14624847 | 5-scf00249 | 5 |
| AX-157774949 | 11 | 107.022 | KV452863.1 | 14628079 | 5-scf00249 | 5 |
| AX-157753857 | 11 | 107.022 | KV452863.1 | 14629766 | 5-scf00249 | 5 |
| AX-157746355 | 11 | 107.022 | KV452863.1 | 14634090 | 5-scf00249 | 5 |
| AX-158113386 | 11 | 107.022 | KV452863.1 | 14639424 | 5-scf00249 | 5 |
| AX-157828087 | 11 | 107.022 | KV452863.1 | 14648190 | 5-scf00249 | 5 |
| AX-158113388 | 11 | 107.022 | KV452863.1 | 14650421 | 5-scf00249 | 5 |
| AX-157828088 | 11 | 107.022 | KV452863.1 | 14661641 | 5-scf00249 | 5 |
| AX-158113395 | 11 | 107.022 | KV452863.1 | 14664429 | 5-scf00249 | 5 |
| AX-158113396 | 11 | 107.022 | KV452863.1 | 14666165 | 5-scf00249 | 5 |
| AX-158113397 | 11 | 107.022 | KV452863.1 | 14666848 | 5-scf00249 | 5 |
| AX-158113400 | 11 | 107.022 | KV452863.1 | 14670445 | 5-scf00249 | 5 |
| AX-158113401 | 11 | 107.022 | KV452863.1 | 14671099 | 5-scf00249 | 5 |
| AX-158113403 | 11 | 107.022 | KV452863.1 | 14672993 | 5-scf00249 | 5 |

|              |    |         |            |          |            |   |
|--------------|----|---------|------------|----------|------------|---|
| AX-158113404 | 11 | 107.022 | KV452863.1 | 14674260 | 5-scf00249 | 5 |
| AX-157828090 | 11 | 107.022 | KV452863.1 | 14678200 | 5-scf00249 | 5 |
| AX-158113409 | 11 | 107.022 | KV452863.1 | 14681314 | 5-scf00249 | 5 |
| AX-158113410 | 11 | 107.022 | KV452863.1 | 14682202 | 5-scf00249 | 5 |
| AX-157866050 | 11 | 107.306 | KV452863.1 | 14685239 | 5-scf00249 | 5 |
| AX-158113413 | 11 | 107.306 | KV452863.1 | 14687271 | 5-scf00249 | 5 |
| AX-157871210 | 11 | 107.306 | KV452863.1 | 14689801 | 5-scf00249 | 5 |
| AX-158113415 | 11 | 107.306 | KV452863.1 | 14690675 | 5-scf00249 | 5 |
| AX-158113416 | 11 | 107.307 | KV452863.1 | 14691905 | 5-scf00249 | 5 |
| AX-158113419 | 11 | 107.307 | KV452863.1 | 14696414 | 5-scf00249 | 5 |
| AX-158113420 | 11 | 107.307 | KV452863.1 | 14699072 | 5-scf00249 | 5 |
| AX-158113424 | 11 | 107.358 | KV452863.1 | 14704753 | 5-scf00249 | 5 |
| AX-157750708 | 11 | 107.4   | KV452863.1 | 14703431 | 5-scf00249 | 5 |
| AX-158113430 | 11 | 107.4   | KV452863.1 | 14715934 | 5-scf00249 | 5 |
| AX-158113425 | 11 | 107.449 | KV452863.1 | 14705235 | 5-scf00249 | 5 |
| AX-157755552 | 11 | 107.449 | KV452863.1 | 14719542 | 5-scf00249 | 5 |
| AX-158113431 | 11 | 107.449 | KV452863.1 | 14719970 | 5-scf00249 | 5 |
| AX-158113435 | 11 | 107.449 | KV452863.1 | 14734535 | 5-scf00249 | 5 |
| AX-158113436 | 11 | 107.449 | KV452863.1 | 14735477 | 5-scf00249 | 5 |
| AX-158113399 | 11 | 107.591 | KV452863.1 | 14669561 | 5-scf00249 | 5 |
| AX-158113433 | 11 | 107.591 | KV452863.1 | 14729105 | 5-scf00249 | 5 |
| AX-157885926 | 11 | 107.591 | KV452863.1 | 14742043 | 5-scf00249 | 5 |
| AX-157828096 | 11 | 107.591 | KV452863.1 | 14742993 | 5-scf00249 | 5 |
| AX-158113444 | 11 | 107.591 | KV452863.1 | 14748655 | 5-scf00249 | 5 |
| AX-158113446 | 11 | 107.591 | KV452863.1 | 14750608 | 5-scf00249 | 5 |
| AX-158113447 | 11 | 107.591 | KV452863.1 | 14751836 | 5-scf00249 | 5 |
| AX-158410817 | 11 | 107.591 | KV452863.1 | 14751931 | 5-scf00249 | 5 |
| AX-158113448 | 11 | 107.591 | KV452863.1 | 14754758 | 5-scf00249 | 5 |
| AX-157748111 | 11 | 107.591 | KV452863.1 | 14755148 | 5-scf00249 | 5 |
| AX-157828097 | 11 | 107.591 | KV452863.1 | 14755362 | 5-scf00249 | 5 |
| AX-157828098 | 11 | 107.591 | KV452863.1 | 14756886 | 5-scf00249 | 5 |
| AX-157709107 | 11 | 107.591 | KV452863.1 | 14759662 | 5-scf00249 | 5 |
| AX-158113452 | 11 | 107.591 | KV452863.1 | 14761785 | 5-scf00249 | 5 |
| AX-158410816 | 11 | 107.592 | KV452863.1 | 14704545 | 5-scf00249 | 5 |
| AX-157871211 | 11 | 107.592 | KV452863.1 | 14732287 | 5-scf00249 | 5 |
| AX-158113453 | 11 | 107.592 | KV452863.1 | 14762253 | 5-scf00249 | 5 |
| AX-157725723 | 11 | 107.592 | KV452863.1 | 14768774 | 5-scf00249 | 5 |
| AX-158113455 | 11 | 107.875 | KV452863.1 | 14766515 | 5-scf00249 | 5 |
| AX-158113457 | 11 | 107.876 | KV452863.1 | 14773520 | 5-scf00249 | 5 |
| AX-158113392 | 11 | 108.16  | KV452863.1 | 14654129 | 5-scf00249 | 5 |
| AX-158113460 | 11 | 108.16  | KV452863.1 | 14775223 | 5-scf00249 | 5 |
| AX-158113462 | 11 | 108.16  | KV452863.1 | 14776422 | 5-scf00249 | 5 |
| AX-158113464 | 11 | 108.16  | KV452863.1 | 14780765 | 5-scf00249 | 5 |
| AX-158113467 | 11 | 108.16  | KV452863.1 | 14783008 | 5-scf00249 | 5 |
| AX-158113459 | 11 | 108.444 | KV452863.1 | 14774408 | 5-scf00249 | 5 |
| AX-157828099 | 11 | 108.444 | KV452863.1 | 14782017 | 5-scf00249 | 5 |
| AX-157828101 | 11 | 108.444 | KV452863.1 | 14784605 | 5-scf00249 | 5 |
| AX-158113475 | 11 | 108.444 | KV452863.1 | 14795180 | 5-scf00249 | 5 |
| AX-158113476 | 11 | 108.444 | KV452863.1 | 14795883 | 5-scf00249 | 5 |
| AX-158113478 | 11 | 108.444 | KV452863.1 | 14798706 | 5-scf00249 | 5 |
| AX-158113480 | 11 | 108.444 | KV452863.1 | 14799357 | 5-scf00249 | 5 |

|              |    |         |            |          |            |   |
|--------------|----|---------|------------|----------|------------|---|
| AX-158113483 | 11 | 108.444 | KV452863.1 | 14802480 | 5-scf00249 | 5 |
| AX-158113484 | 11 | 108.444 | KV452863.1 | 14803511 | 5-scf00249 | 5 |
| AX-158113486 | 11 | 108.444 | KV452863.1 | 14804874 | 5-scf00249 | 5 |
| AX-158113489 | 11 | 108.444 | KV452863.1 | 14807736 | 5-scf00249 | 5 |
| AX-158113492 | 11 | 108.444 | KV452863.1 | 14809831 | 5-scf00249 | 5 |
| AX-158113493 | 11 | 108.444 | KV452863.1 | 14810105 | 5-scf00249 | 5 |
| AX-158113497 | 11 | 108.444 | KV452863.1 | 14814330 | 5-scf00249 | 5 |
| AX-158113498 | 11 | 108.444 | KV452863.1 | 14814897 | 5-scf00249 | 5 |
| AX-158113505 | 11 | 108.587 | KV452863.1 | 14820447 | 5-scf00249 | 5 |
| AX-158113506 | 11 | 108.657 | KV452863.1 | 14821126 | 5-scf00249 | 5 |
| AX-158113477 | 11 | 108.729 | KV452863.1 | 14797424 | 5-scf00249 | 5 |
| AX-158113500 | 11 | 108.729 | KV452863.1 | 14816789 | 5-scf00249 | 5 |
| AX-158113507 | 11 | 108.729 | KV452863.1 | 14821468 | 5-scf00249 | 5 |
| AX-158113510 | 11 | 108.729 | KV452863.1 | 14824798 | 5-scf00249 | 5 |
| AX-158113511 | 11 | 108.729 | KV452863.1 | 14825828 | 5-scf00249 | 5 |
| AX-157866053 | 11 | 108.729 | KV452863.1 | 14826598 | 5-scf00249 | 5 |
| AX-158113512 | 11 | 108.729 | KV452863.1 | 14826921 | 5-scf00249 | 5 |
| AX-157757852 | 11 | 108.729 | KV452863.1 | 14827114 | 5-scf00249 | 5 |
| AX-157828104 | 11 | 108.729 | KV452863.1 | 14836087 | 5-scf00249 | 5 |
| AX-157828105 | 11 | 108.729 | KV452863.1 | 14836521 | 5-scf00249 | 5 |
| AX-158113516 | 11 | 108.732 | KV452863.1 | 14839440 | 5-scf00249 | 5 |
| AX-158113521 | 11 | 108.942 | KV452863.1 | 14848504 | 5-scf00249 | 5 |
| AX-158113524 | 11 | 109.154 | KV452863.1 | 14855978 | 5-scf00249 | 5 |
| AX-157716132 | 11 | 109.156 | KV452863.1 | 14826756 | 5-scf00249 | 5 |
| AX-157714655 | 11 | 109.156 | KV452863.1 | 14857622 | 5-scf00249 | 5 |
| AX-158113530 | 11 | 109.156 | KV452863.1 | 14862075 | 5-scf00249 | 5 |
| AX-157745110 | 11 | 109.156 | KV452863.1 | 14863643 | 5-scf00249 | 5 |
| AX-158113532 | 11 | 109.156 | KV452863.1 | 14864435 | 5-scf00249 | 5 |
| AX-158113533 | 11 | 109.156 | KV452863.1 | 14866211 | 5-scf00249 | 5 |
| AX-158113534 | 11 | 109.156 | KV452863.1 | 14867135 | 5-scf00249 | 5 |
| AX-158113535 | 11 | 109.156 | KV452863.1 | 14867632 | 5-scf00249 | 5 |
| AX-158113536 | 11 | 109.156 | KV452863.1 | 14867885 | 5-scf00249 | 5 |
| AX-157758043 | 11 | 109.298 | KV452863.1 | 14849231 | 5-scf00249 | 5 |
| AX-158113540 | 11 | 109.298 | KV452863.1 | 14877063 | 5-scf00249 | 5 |
| AX-157828109 | 11 | 109.298 | KV452863.1 | 14881111 | 5-scf00249 | 5 |
| AX-158113541 | 11 | 109.298 | KV452863.1 | 14881760 | 5-scf00249 | 5 |
| AX-157738955 | 11 | 109.298 | KV452863.1 | 14883368 | 5-scf00249 | 5 |
| AX-158113543 | 11 | 109.298 | KV452863.1 | 14885860 | 5-scf00249 | 5 |
| AX-158113519 | 11 | 109.441 | KV452863.1 | 14841904 | 5-scf00249 | 5 |
| AX-158113525 | 11 | 109.441 | KV452863.1 | 14858853 | 5-scf00249 | 5 |
| AX-158113527 | 11 | 109.441 | KV452863.1 | 14859816 | 5-scf00249 | 5 |
| AX-157828107 | 11 | 109.441 | KV452863.1 | 14873926 | 5-scf00249 | 5 |
| AX-158113542 | 11 | 109.441 | KV452863.1 | 14883464 | 5-scf00249 | 5 |
| AX-158113544 | 11 | 109.441 | KV452863.1 | 14888068 | 5-scf00249 | 5 |
| AX-158113545 | 11 | 109.441 | KV452863.1 | 14888932 | 5-scf00249 | 5 |
| AX-158113549 | 11 | 109.441 | KV452863.1 | 14895564 | 5-scf00249 | 5 |
| AX-158113551 | 11 | 109.441 | KV452863.1 | 14896369 | 5-scf00249 | 5 |
| AX-158113552 | 11 | 109.441 | KV452863.1 | 14896855 | 5-scf00249 | 5 |
| AX-158113554 | 11 | 109.441 | KV452863.1 | 14900546 | 5-scf00249 | 5 |
| AX-158113555 | 11 | 109.441 | KV452863.1 | 14901053 | 5-scf00249 | 5 |
| AX-158113556 | 11 | 109.441 | KV452863.1 | 14903183 | 5-scf00249 | 5 |

|              |    |         |            |          |            |   |
|--------------|----|---------|------------|----------|------------|---|
| AX-158113559 | 11 | 109.441 | KV452863.1 | 14906048 | 5-scf00249 | 5 |
| AX-158113560 | 11 | 109.441 | KV452863.1 | 14906645 | 5-scf00249 | 5 |
| AX-158113561 | 11 | 109.441 | KV452863.1 | 14907276 | 5-scf00249 | 5 |
| AX-158113563 | 11 | 109.441 | KV452863.1 | 14908923 | 5-scf00249 | 5 |
| AX-158113565 | 11 | 109.441 | KV452863.1 | 14911907 | 5-scf00249 | 5 |
| AX-158113567 | 11 | 109.441 | KV452863.1 | 14919234 | 5-scf00249 | 5 |
| AX-158113569 | 11 | 109.441 | KV452863.1 | 14924506 | 5-scf00249 | 5 |
| AX-157877674 | 11 | 109.441 | KV452863.1 | 14933417 | 5-scf00249 | 5 |
| AX-157828114 | 11 | 109.441 | KV452863.1 | 14993938 | 5-scf00249 | 5 |
| AX-158113568 | 11 | 109.481 | KV452863.1 | 14920350 | 5-scf00249 | 5 |
| AX-158113594 | 11 | 109.481 | KV452863.1 | 14965840 | 5-scf00249 | 5 |
| AX-158113570 | 11 | 109.52  | KV452863.1 | 14924915 | 5-scf00249 | 5 |
| AX-157771108 | 11 | 109.583 | KV452863.1 | 14925478 | 5-scf00249 | 5 |
| AX-158113571 | 11 | 109.725 | KV452863.1 | 14931441 | 5-scf00249 | 5 |
| AX-158113574 | 11 | 109.725 | KV452863.1 | 14937108 | 5-scf00249 | 5 |
| AX-158113576 | 11 | 109.725 | KV452863.1 | 14939572 | 5-scf00249 | 5 |
| AX-158113579 | 11 | 109.798 | KV452863.1 | 14947589 | 5-scf00249 | 5 |
| AX-158113578 | 11 | 109.868 | KV452863.1 | 14941929 | 5-scf00249 | 5 |
| AX-158113587 | 11 | 109.868 | KV452863.1 | 14959657 | 5-scf00249 | 5 |
| AX-158113588 | 11 | 109.868 | KV452863.1 | 14960520 | 5-scf00249 | 5 |
| AX-157708821 | 11 | 109.868 | KV452863.1 | 15019027 | 5-scf00249 | 5 |
| AX-158113582 | 11 | 110.01  | KV452863.1 | 14954183 | 5-scf00249 | 5 |
| AX-158113591 | 11 | 110.01  | KV452863.1 | 14962875 | 5-scf00249 | 5 |
| AX-158113592 | 11 | 110.01  | KV452863.1 | 14964374 | 5-scf00249 | 5 |
| AX-158113597 | 11 | 110.01  | KV452863.1 | 14970685 | 5-scf00249 | 5 |
| AX-158113600 | 11 | 110.01  | KV452863.1 | 14975462 | 5-scf00249 | 5 |
| AX-158113602 | 11 | 110.01  | KV452863.1 | 14981884 | 5-scf00249 | 5 |
| AX-158113603 | 11 | 110.01  | KV452863.1 | 14982773 | 5-scf00249 | 5 |
| AX-158113608 | 11 | 110.01  | KV452863.1 | 14996916 | 5-scf00249 | 5 |
| AX-157725343 | 11 | 110.01  | KV452863.1 | 15001060 | 5-scf00249 | 5 |
| AX-157731648 | 11 | 110.01  | KV452863.1 | 15001579 | 5-scf00249 | 5 |
| AX-158113610 | 11 | 110.01  | KV452863.1 | 15002249 | 5-scf00249 | 5 |
| AX-158113596 | 11 | 110.079 | KV452863.1 | 14970004 | 5-scf00249 | 5 |
| AX-157857471 | 11 | 110.079 | KV452863.1 | 15005320 | 5-scf00249 | 5 |
| AX-158113614 | 11 | 110.152 | KV452863.1 | 15010708 | 5-scf00249 | 5 |
| AX-157752370 | 11 | 110.157 | KV452863.1 | 15016664 | 5-scf00249 | 5 |
| AX-157885929 | 11 | 110.363 | KV452863.1 | 15031981 | 5-scf00249 | 5 |
| AX-157719516 | 11 | 110.363 | KV452863.1 | 15034506 | 5-scf00249 | 5 |
| AX-158113604 | 11 | 110.579 | KV452863.1 | 14983161 | 5-scf00249 | 5 |
| AX-158113605 | 11 | 110.579 | KV452863.1 | 14983767 | 5-scf00249 | 5 |
| AX-158113609 | 11 | 110.579 | KV452863.1 | 15000726 | 5-scf00249 | 5 |
| AX-158113613 | 11 | 110.579 | KV452863.1 | 15010454 | 5-scf00249 | 5 |
| AX-158113629 | 11 | 110.579 | KV452863.1 | 15036336 | 5-scf00249 | 5 |
| AX-158113631 | 11 | 110.579 | KV452863.1 | 15042740 | 5-scf00249 | 5 |
| AX-158113632 | 11 | 110.579 | KV452863.1 | 15044405 | 5-scf00249 | 5 |
| AX-158113645 | 11 | 110.579 | KV452863.1 | 15062107 | 5-scf00249 | 5 |
| AX-158113639 | 11 | 110.647 | KV452863.1 | 15052599 | 5-scf00249 | 5 |
| AX-158113599 | 11 | 110.722 | KV452863.1 | 14972804 | 5-scf00249 | 5 |
| AX-158113636 | 11 | 110.722 | KV452863.1 | 15048904 | 5-scf00249 | 5 |
| AX-158113637 | 11 | 110.722 | KV452863.1 | 15049670 | 5-scf00249 | 5 |
| AX-157828117 | 11 | 110.722 | KV452863.1 | 15050152 | 5-scf00249 | 5 |

|              |    |         |             |          |            |    |
|--------------|----|---------|-------------|----------|------------|----|
| AX-157863315 | 11 | 110.722 | KV452863.1  | 15053028 | 5-scf00249 | 5  |
| AX-158113642 | 11 | 110.722 | KV452863.1  | 15055705 | 5-scf00249 | 5  |
| AX-158113643 | 11 | 110.722 | KV452863.1  | 15058306 | 5-scf00249 | 5  |
| AX-157716727 | 11 | 110.722 | KV452863.1  | 15059787 | 5-scf00249 | 5  |
| AX-157717733 | 11 | 110.722 | KV452863.1  | 15061751 | 5-scf00249 | 5  |
| AX-157715310 | 11 | 110.722 | KV452863.1  | 15067089 | 5-scf00249 | 5  |
| AX-157828120 | 11 | 110.722 | KV452863.1  | 15068844 | 5-scf00249 | 5  |
| AX-158113646 | 11 | 110.722 | KV452863.1  | 15068939 | 5-scf00249 | 5  |
| AX-158113649 | 11 | 110.722 | KV452863.1  | 15071272 | 5-scf00249 | 5  |
| AX-158113650 | 11 | 110.722 | KV452863.1  | 15073282 | 5-scf00249 | 5  |
| AX-158113652 | 11 | 110.722 | KV452863.1  | 15075785 | 5-scf00249 | 5  |
| AX-158113653 | 11 | 110.722 | KV452863.1  | 15076644 | 5-scf00249 | 5  |
| AX-158113654 | 11 | 110.722 | KV452863.1  | 15076750 | 5-scf00249 | 5  |
| AX-157742781 | 11 | 110.722 | KV452863.1  | 15079540 | 5-scf00249 | 5  |
| AX-158113656 | 11 | 111.047 | KV452863.1  | 15083750 | 5-scf00249 | 5  |
| AX-158113657 | 11 | 111.047 | KV452863.1  | 15084432 | 5-scf00249 | 5  |
| AX-158113658 | 11 | 111.156 | KV452863.1  | 15084911 | 5-scf00249 | 5  |
| AX-158113660 | 11 | 111.277 | KV452863.1  | 15087917 | 5-scf00249 | 5  |
| AX-158113640 | 11 | 111.378 | KV452863.1  | 15053888 | 5-scf00249 | 5  |
| AX-158113659 | 11 | 111.378 | KV452863.1  | 15085354 | 5-scf00249 | 5  |
| AX-158392636 | 11 | 111.378 | KV452863.1  | 15085913 | 5-scf00249 | 5  |
| AX-157719831 | 11 | 111.378 | KV452863.1  | 15091900 | 5-scf00249 | 5  |
| AX-158113661 | 11 | 111.378 | KV452863.1  | 15092920 | 5-scf00249 | 5  |
| AX-158113662 | 11 | 111.378 | KV452863.1  | 15093214 | 5-scf00249 | 5  |
| AX-158113663 | 11 | 111.378 | KV452863.1  | 15094217 | 5-scf00249 | 5  |
| AX-158113665 | 11 | 111.378 | KV452863.1  | 15095180 | 5-scf00249 | 5  |
| AX-157751413 | 11 | 111.378 | KV452863.1  | 15096612 | 5-scf00249 | 5  |
| AX-158113666 | 11 | 111.542 | KV452863.1  | 15098949 | 5-scf00249 | 5  |
| AX-158113668 | 11 | 111.706 | KV452863.1  | 15103732 | 5-scf00249 | 5  |
| AX-158113670 | 11 | 111.706 | KV452863.1  | 15105674 | 5-scf00249 | 5  |
| AX-157707194 | 11 | 111.706 | 3ML01033710 | 125      | scf09372_1 | UN |
| AX-158113672 | 11 | 111.925 | KV452863.1  | 15107262 | 5-scf00249 | 5  |
| AX-158113674 | 11 | 111.925 | KV452863.1  | 15108408 | 5-scf00249 | 5  |
| AX-158113679 | 11 | 111.925 | KV452863.1  | 15116606 | 5-scf00249 | 5  |
| AX-158113681 | 11 | 111.925 | KV452863.1  | 15118100 | 5-scf00249 | 5  |
| AX-158113683 | 11 | 111.925 | KV452863.1  | 15120030 | 5-scf00249 | 5  |
| AX-158113685 | 11 | 111.925 | KV452863.1  | 15123572 | 5-scf00249 | 5  |
| AX-157857472 | 11 | 111.925 | KV452863.1  | 15132171 | 5-scf00249 | 5  |
| AX-158113689 | 11 | 112.361 | KV452863.1  | 15129763 | 5-scf00249 | 5  |
| AX-158113691 | 11 | 112.361 | KV452863.1  | 15140543 | 5-scf00249 | 5  |
| AX-158113693 | 11 | 112.361 | KV452863.1  | 15141888 | 5-scf00249 | 5  |
| AX-158113696 | 11 | 112.361 | KV452863.1  | 15145727 | 5-scf00249 | 5  |
| AX-158113697 | 11 | 112.361 | KV452863.1  | 15148533 | 5-scf00249 | 5  |
| AX-157871214 | 11 | 112.361 | KV452863.1  | 15149436 | 5-scf00249 | 5  |
| AX-158113698 | 11 | 112.361 | KV452863.1  | 15150496 | 5-scf00249 | 5  |
| AX-158113699 | 11 | 112.361 | KV452863.1  | 15150975 | 5-scf00249 | 5  |
| AX-158113700 | 11 | 112.361 | KV452863.1  | 15151538 | 5-scf00249 | 5  |
| AX-158113702 | 11 | 112.652 | KV452863.1  | 15152797 | 5-scf00249 | 5  |
| AX-157866057 | 11 | 112.653 | KV452863.1  | 15153657 | 5-scf00249 | 5  |
| AX-158113704 | 11 | 112.798 | KV452863.1  | 15154798 | 5-scf00249 | 5  |
| AX-157828121 | 11 | 112.798 | KV452863.1  | 15155189 | 5-scf00249 | 5  |

|              |    |         |             |          |            |    |
|--------------|----|---------|-------------|----------|------------|----|
| AX-158113705 | 11 | 112.798 | KV452863.1  | 15155845 | 5-scf00249 | 5  |
| AX-158113706 | 11 | 112.908 | KV452863.1  | 15158190 | 5-scf00249 | 5  |
| AX-158113707 | 11 | 112.908 | KV452863.1  | 15159646 | 5-scf00249 | 5  |
| AX-158113708 | 11 | 112.908 | KV452863.1  | 15165227 | 5-scf00249 | 5  |
| AX-157706997 | 11 | 112.908 | 3ML01033305 | 82       | scf08949_1 | UN |
| AX-158113709 | 11 | 113.216 | KV452863.1  | 15171108 | 5-scf00249 | 5  |
| AX-158113710 | 11 | 113.216 | KV452863.1  | 15171788 | 5-scf00249 | 5  |
| AX-158113713 | 11 | 113.216 | KV452863.1  | 15174336 | 5-scf00249 | 5  |
| AX-157719986 | 11 | 113.28  | KV452863.1  | 15182943 | 5-scf00249 | 5  |
| AX-158113721 | 11 | 113.828 | KV452863.1  | 15194480 | 5-scf00249 | 5  |
| AX-158113725 | 11 | 114.027 | KV452863.1  | 15201301 | 5-scf00249 | 5  |
| AX-158113728 | 11 | 114.027 | KV452863.1  | 15204402 | 5-scf00249 | 5  |
| AX-158113729 | 11 | 114.282 | KV452863.1  | 15207479 | 5-scf00249 | 5  |
| AX-158113730 | 11 | 114.327 | KV452863.1  | 15210284 | 5-scf00249 | 5  |
| AX-158113733 | 11 | 114.334 | KV452863.1  | 15216647 | 5-scf00249 | 5  |
| AX-158113734 | 11 | 114.334 | KV452863.1  | 15217325 | 5-scf00249 | 5  |
| AX-158113735 | 11 | 114.549 | KV452863.1  | 15218279 | 5-scf00249 | 5  |
| AX-158113736 | 11 | 114.549 | KV452863.1  | 15219319 | 5-scf00249 | 5  |
| AX-158113738 | 11 | 114.549 | KV452863.1  | 15220786 | 5-scf00249 | 5  |
| AX-158113739 | 11 | 114.549 | KV452863.1  | 15222465 | 5-scf00249 | 5  |
| AX-157752635 | 11 | 114.549 | KV452863.1  | 15225590 | 5-scf00249 | 5  |
| AX-158113740 | 11 | 114.549 | KV452863.1  | 15226288 | 5-scf00249 | 5  |
| AX-158113743 | 11 | 114.549 | KV452863.1  | 15229549 | 5-scf00249 | 5  |
| AX-158113744 | 11 | 114.549 | KV452863.1  | 15229904 | 5-scf00249 | 5  |
| AX-157722046 | 11 | 114.549 | KV452863.1  | 15232108 | 5-scf00249 | 5  |
| AX-158113745 | 11 | 114.549 | KV452863.1  | 15233827 | 5-scf00249 | 5  |
| AX-157726184 | 11 | 114.549 | KV452863.1  | 15236159 | 5-scf00249 | 5  |
| AX-158113746 | 11 | 114.549 | KV452863.1  | 15237822 | 5-scf00249 | 5  |
| AX-157885933 | 11 | 114.549 | KV452863.1  | 15237903 | 5-scf00249 | 5  |
| AX-158113747 | 11 | 114.549 | KV452863.1  | 15240447 | 5-scf00249 | 5  |
| AX-158113748 | 11 | 114.549 | KV452863.1  | 15240837 | 5-scf00249 | 5  |
| AX-158113755 | 11 | 114.698 | KV452863.1  | 15252993 | 5-scf00249 | 5  |
| AX-158113759 | 11 | 114.962 | KV452863.1  | 15259742 | 5-scf00249 | 5  |
| AX-158113760 | 11 | 114.966 | KV452863.1  | 15260713 | 5-scf00249 | 5  |
| AX-158113762 | 11 | 115.024 | KV452863.1  | 15264370 | 5-scf00249 | 5  |
| AX-158113763 | 11 | 115.024 | KV452863.1  | 15265404 | 5-scf00249 | 5  |
| AX-158113764 | 11 | 115.118 | KV452863.1  | 15267359 | 5-scf00249 | 5  |
| AX-158113766 | 11 | 115.314 | KV452863.1  | 15268963 | 5-scf00249 | 5  |
| AX-158113765 | 11 | 115.341 | KV452863.1  | 15267902 | 5-scf00249 | 5  |
| AX-158113769 | 11 | 115.341 | KV452863.1  | 15272256 | 5-scf00249 | 5  |
| AX-158113770 | 11 | 115.362 | KV452863.1  | 15273659 | 5-scf00249 | 5  |
| AX-158113772 | 11 | 115.397 | KV452863.1  | 15274729 | 5-scf00249 | 5  |
| AX-158113774 | 11 | 115.424 | KV452863.1  | 15276375 | 5-scf00249 | 5  |
| AX-158113775 | 11 | 115.533 | KV452863.1  | 15277594 | 5-scf00249 | 5  |
| AX-157885935 | 11 | 115.533 | KV452863.1  | 15279796 | 5-scf00249 | 5  |
| AX-158113777 | 11 | 115.533 | KV452863.1  | 15280959 | 5-scf00249 | 5  |
| AX-158113778 | 11 | 115.533 | KV452863.1  | 15283555 | 5-scf00249 | 5  |
| AX-158113779 | 11 | 115.533 | KV452863.1  | 15284328 | 5-scf00249 | 5  |
| AX-158113780 | 11 | 115.533 | KV452863.1  | 15284875 | 5-scf00249 | 5  |
| AX-158113781 | 11 | 115.533 | KV452863.1  | 15285231 | 5-scf00249 | 5  |
| AX-158410819 | 11 | 115.533 | KV452863.1  | 15286999 | 5-scf00249 | 5  |

|              |    |         |            |          |            |   |
|--------------|----|---------|------------|----------|------------|---|
| AX-158113783 | 11 | 115.533 | KV452863.1 | 15289751 | 5-scf00249 | 5 |
| AX-157738314 | 11 | 115.533 | KV452863.1 | 15290305 | 5-scf00249 | 5 |
| AX-158113784 | 11 | 115.533 | KV452863.1 | 15290798 | 5-scf00249 | 5 |
| AX-158113786 | 11 | 115.533 | KV452863.1 | 15292895 | 5-scf00249 | 5 |
| AX-158392638 | 11 | 115.533 | KV452863.1 | 15293072 | 5-scf00249 | 5 |
| AX-158410821 | 11 | 115.533 | KV452863.1 | 15294666 | 5-scf00249 | 5 |
| AX-157758050 | 11 | 115.533 | KV452863.1 | 15296416 | 5-scf00249 | 5 |
| AX-158113787 | 11 | 115.533 | KV452863.1 | 15297032 | 5-scf00249 | 5 |
| AX-157775248 | 11 | 115.533 | KV452863.1 | 15300714 | 5-scf00249 | 5 |
| AX-157885934 | 11 | 115.86  | KV452863.1 | 15260235 | 5-scf00249 | 5 |
| AX-157885936 | 11 | 115.86  | KV452863.1 | 15307060 | 5-scf00249 | 5 |
| AX-157857473 | 11 | 115.86  | KV452863.1 | 15309183 | 5-scf00249 | 5 |
| AX-157828122 | 11 | 115.86  | KV452863.1 | 15316859 | 5-scf00249 | 5 |
| AX-158113795 | 11 | 115.86  | KV452863.1 | 15317614 | 5-scf00249 | 5 |
| AX-157738953 | 11 | 115.86  | KV452863.1 | 15319033 | 5-scf00249 | 5 |
| AX-158113796 | 11 | 115.86  | KV452863.1 | 15320031 | 5-scf00249 | 5 |
| AX-158113797 | 11 | 115.86  | KV452863.1 | 15323634 | 5-scf00249 | 5 |
| AX-158113798 | 11 | 115.86  | KV452863.1 | 15326946 | 5-scf00249 | 5 |
| AX-158113800 | 11 | 115.86  | KV452863.1 | 15328422 | 5-scf00249 | 5 |
| AX-157742714 | 11 | 115.86  | KV452863.1 | 15329197 | 5-scf00249 | 5 |
| AX-158113803 | 11 | 115.86  | KV452863.1 | 15330512 | 5-scf00249 | 5 |
| AX-158113804 | 11 | 115.86  | KV452863.1 | 15330919 | 5-scf00249 | 5 |
| AX-157721912 | 11 | 115.86  | KV452863.1 | 15387680 | 5-scf00249 | 5 |
| AX-157828124 | 11 | 115.862 | KV452863.1 | 15331405 | 5-scf00249 | 5 |
| AX-158113810 | 11 | 116.543 | KV452863.1 | 15338003 | 5-scf00249 | 5 |
| AX-158113817 | 11 | 116.552 | KV452863.1 | 15353273 | 5-scf00249 | 5 |
| AX-158113806 | 11 | 116.584 | KV452863.1 | 15333658 | 5-scf00249 | 5 |
| AX-157828126 | 11 | 116.584 | KV452863.1 | 15353944 | 5-scf00249 | 5 |
| AX-158113818 | 11 | 116.584 | KV452863.1 | 15355442 | 5-scf00249 | 5 |
| AX-157773553 | 11 | 116.584 | KV452863.1 | 15361790 | 5-scf00249 | 5 |
| AX-157751282 | 11 | 116.584 | KV452863.1 | 15368765 | 5-scf00249 | 5 |
| AX-157747049 | 11 | 116.584 | KV452863.1 | 15374831 | 5-scf00249 | 5 |
| AX-157750374 | 11 | 116.6   | KV452863.1 | 15383648 | 5-scf00249 | 5 |
| AX-157828128 | 11 | 116.904 | KV452863.1 | 15394526 | 5-scf00249 | 5 |
| AX-158113833 | 11 | 117.163 | KV452863.1 | 15406264 | 5-scf00249 | 5 |
| AX-158113835 | 11 | 117.173 | KV452863.1 | 15412643 | 5-scf00249 | 5 |
| AX-157750410 | 11 | 117.173 | KV452863.1 | 15413721 | 5-scf00249 | 5 |
| AX-157771556 | 11 | 117.173 | KV452863.1 | 15417359 | 5-scf00249 | 5 |
| AX-157828130 | 11 | 117.173 | KV452863.1 | 15417920 | 5-scf00249 | 5 |
| AX-157719627 | 11 | 117.173 | KV452863.1 | 15419378 | 5-scf00249 | 5 |
| AX-158113837 | 11 | 117.173 | KV452863.1 | 15421119 | 5-scf00249 | 5 |
| AX-157716720 | 11 | 117.173 | KV452863.1 | 15422826 | 5-scf00249 | 5 |
| AX-157743191 | 11 | 117.173 | KV452863.1 | 15424325 | 5-scf00249 | 5 |
| AX-158113839 | 11 | 117.173 | KV452863.1 | 15426435 | 5-scf00249 | 5 |
| AX-158380123 | 11 | 117.173 | KV452863.1 | 15427656 | 5-scf00249 | 5 |
| AX-157719017 | 11 | 117.173 | KV452863.1 | 15430238 | 5-scf00249 | 5 |
| AX-157740237 | 11 | 117.173 | KV452863.1 | 15433082 | 5-scf00249 | 5 |
| AX-158113845 | 11 | 117.173 | KV452863.1 | 15435026 | 5-scf00249 | 5 |
| AX-158113849 | 11 | 117.173 | KV452863.1 | 15436661 | 5-scf00249 | 5 |
| AX-158113850 | 11 | 117.173 | KV452863.1 | 15436893 | 5-scf00249 | 5 |
| AX-157828133 | 11 | 117.173 | KV452863.1 | 15437477 | 5-scf00249 | 5 |



|              |    |         |             |          |            |    |
|--------------|----|---------|-------------|----------|------------|----|
| AX-158113851 | 11 | 117.173 | KV452863.1  | 15439398 | 5-scf00249 | 5  |
| AX-157714446 | 11 | 117.173 | KV452863.1  | 15440804 | 5-scf00249 | 5  |
| AX-158113853 | 11 | 117.173 | KV452863.1  | 15445650 | 5-scf00249 | 5  |
| AX-157828134 | 11 | 117.173 | KV452863.1  | 15446557 | 5-scf00249 | 5  |
| AX-158113854 | 11 | 117.173 | KV452863.1  | 15448133 | 5-scf00249 | 5  |
| AX-157828136 | 11 | 117.173 | KV452863.1  | 15450769 | 5-scf00249 | 5  |
| AX-158113855 | 11 | 117.173 | KV452863.1  | 15451306 | 5-scf00249 | 5  |
| AX-158113856 | 11 | 117.173 | KV452863.1  | 15454077 | 5-scf00249 | 5  |
| AX-158113858 | 11 | 117.173 | KV452863.1  | 15456338 | 5-scf00249 | 5  |
| AX-158113859 | 11 | 117.173 | KV452863.1  | 15458597 | 5-scf00249 | 5  |
| AX-157745536 | 11 | 117.173 | KV452863.1  | 15461093 | 5-scf00249 | 5  |
| AX-158113862 | 11 | 117.173 | KV452863.1  | 15465949 | 5-scf00249 | 5  |
| AX-157713268 | 11 | 117.173 | KV452863.1  | 15466376 | 5-scf00249 | 5  |
| AX-158113864 | 11 | 117.173 | KV452863.1  | 15470134 | 5-scf00249 | 5  |
| AX-157877683 | 11 | 117.173 | KV452863.1  | 15492857 | 5-scf00249 | 5  |
| AX-158113876 | 11 | 117.173 | KV452863.1  | 15496216 | 5-scf00249 | 5  |
| AX-157681562 | 11 | 117.173 | 3ML01031424 | 402      | scf07037_1 | UN |
| AX-158113868 | 11 | 117.27  | KV452863.1  | 15475296 | 5-scf00249 | 5  |
| AX-158113870 | 11 | 117.391 | KV452863.1  | 15476797 | 5-scf00249 | 5  |
| AX-158113871 | 11 | 117.391 | KV452863.1  | 15480031 | 5-scf00249 | 5  |
| AX-158113872 | 11 | 117.391 | KV452863.1  | 15480537 | 5-scf00249 | 5  |
| AX-157750806 | 11 | 117.391 | KV452863.1  | 15483211 | 5-scf00249 | 5  |
| AX-157828138 | 11 | 117.391 | KV452863.1  | 15488379 | 5-scf00249 | 5  |
| AX-158113873 | 11 | 117.391 | KV452863.1  | 15488975 | 5-scf00249 | 5  |
| AX-157828139 | 11 | 117.391 | KV452863.1  | 15493089 | 5-scf00249 | 5  |
| AX-158113875 | 11 | 117.391 | KV452863.1  | 15495345 | 5-scf00249 | 5  |
| AX-157751005 | 11 | 117.391 | KV452863.1  | 15495793 | 5-scf00249 | 5  |
| AX-158113881 | 11 | 117.391 | KV452863.1  | 15503072 | 5-scf00249 | 5  |
| AX-158113830 | 11 | 117.61  | KV452863.1  | 15397065 | 5-scf00249 | 5  |
| AX-158113860 | 11 | 117.61  | KV452863.1  | 15461820 | 5-scf00249 | 5  |
| AX-158113869 | 11 | 117.61  | KV452863.1  | 15476028 | 5-scf00249 | 5  |
| AX-158113880 | 11 | 117.61  | KV452863.1  | 15502408 | 5-scf00249 | 5  |
| AX-158113885 | 11 | 117.61  | KV452863.1  | 15507882 | 5-scf00249 | 5  |
| AX-158113886 | 11 | 117.61  | KV452863.1  | 15508681 | 5-scf00249 | 5  |
| AX-158113887 | 11 | 117.61  | KV452863.1  | 15509152 | 5-scf00249 | 5  |
| AX-158113890 | 11 | 117.61  | KV452863.1  | 15513699 | 5-scf00249 | 5  |
| AX-158113893 | 11 | 117.61  | KV452863.1  | 15515596 | 5-scf00249 | 5  |
| AX-158113894 | 11 | 117.61  | KV452863.1  | 15518256 | 5-scf00249 | 5  |
| AX-157689682 | 11 | 117.61  | 3ML01031315 | 484      | scf06924_1 | UN |
| AX-157689683 | 11 | 117.61  | 3ML01031315 | 656      | scf06924_1 | UN |
| AX-157681138 | 11 | 117.61  | 3ML01032461 | 419      | scf08082_1 | UN |
| AX-158113897 | 11 | 118.019 | KV452863.1  | 15525698 | 5-scf00249 | 5  |
| AX-158113899 | 11 | 118.019 | KV452863.1  | 15526380 | 5-scf00249 | 5  |
| AX-158113901 | 11 | 118.019 | KV452863.1  | 15529262 | 5-scf00249 | 5  |
| AX-157828140 | 11 | 118.019 | KV452863.1  | 15529860 | 5-scf00249 | 5  |
| AX-158113910 | 11 | 118.089 | KV452863.1  | 15539623 | 5-scf00249 | 5  |
| AX-158113913 | 11 | 118.156 | KV452863.1  | 15541610 | 5-scf00249 | 5  |
| AX-158392641 | 11 | 118.156 | KV452863.1  | 15541834 | 5-scf00249 | 5  |
| AX-158113914 | 11 | 118.483 | KV452863.1  | 15547156 | 5-scf00249 | 5  |
| AX-157857474 | 11 | 118.483 | KV452863.1  | 15553008 | 5-scf00249 | 5  |
| AX-158113918 | 11 | 118.483 | KV452863.1  | 15555626 | 5-scf00249 | 5  |

|              |    |         |             |          |            |    |
|--------------|----|---------|-------------|----------|------------|----|
| AX-158113920 | 11 | 118.483 | KV452863.1  | 15556805 | 5-scf00249 | 5  |
| AX-158113921 | 11 | 118.483 | KV452863.1  | 15557579 | 5-scf00249 | 5  |
| AX-158113922 | 11 | 118.484 | KV452863.1  | 15559940 | 5-scf00249 | 5  |
| AX-157710470 | 11 | 118.484 | KV452863.1  | 15561904 | 5-scf00249 | 5  |
| AX-158113924 | 11 | 118.567 | KV452863.1  | 15567195 | 5-scf00249 | 5  |
| AX-157775388 | 11 | 118.647 | KV452863.1  | 15570738 | 5-scf00249 | 5  |
| AX-158113925 | 11 | 118.811 | KV452863.1  | 15574254 | 5-scf00249 | 5  |
| AX-158113926 | 11 | 118.811 | KV452863.1  | 15576630 | 5-scf00249 | 5  |
| AX-158113927 | 11 | 118.811 | KV452863.1  | 15577371 | 5-scf00249 | 5  |
| AX-157719820 | 11 | 118.811 | KV452863.1  | 15579105 | 5-scf00249 | 5  |
| AX-157828131 | 11 | 118.859 | KV452863.1  | 15426814 | 5-scf00249 | 5  |
| AX-157747220 | 11 | 118.859 | KV452863.1  | 15584956 | 5-scf00249 | 5  |
| AX-158113942 | 11 | 118.859 | KV452863.1  | 15616403 | 5-scf00249 | 5  |
| AX-157683418 | 11 | 118.859 | KV452864.1  | 5296     | 5-scf00253 | 5  |
| AX-158113932 | 11 | 118.898 | KV452863.1  | 15586902 | 5-scf00249 | 5  |
| AX-158113931 | 11 | 118.932 | KV452863.1  | 15583695 | 5-scf00249 | 5  |
| AX-158113934 | 11 | 118.932 | KV452863.1  | 15587425 | 5-scf00249 | 5  |
| AX-157828144 | 11 | 118.932 | KV452863.1  | 15588670 | 5-scf00249 | 5  |
| AX-157828145 | 11 | 118.932 | KV452863.1  | 15590794 | 5-scf00249 | 5  |
| AX-157828146 | 11 | 118.932 | KV452863.1  | 15591177 | 5-scf00249 | 5  |
| AX-157775522 | 11 | 118.932 | KV452863.1  | 15591894 | 5-scf00249 | 5  |
| AX-158113936 | 11 | 118.932 | KV452863.1  | 15593658 | 5-scf00249 | 5  |
| AX-158113937 | 11 | 118.932 | KV452863.1  | 15594099 | 5-scf00249 | 5  |
| AX-157773254 | 11 | 119.052 | KV452863.1  | 15598389 | 5-scf00249 | 5  |
| AX-158113938 | 11 | 119.052 | KV452863.1  | 15602031 | 5-scf00249 | 5  |
| AX-158113940 | 11 | 119.052 | KV452863.1  | 15608429 | 5-scf00249 | 5  |
| AX-157774414 | 11 | 119.215 | KV452863.1  | 15612282 | 5-scf00249 | 5  |
| AX-158113943 | 11 | 119.989 | KV452863.1  | 15617806 | 5-scf00249 | 5  |
| AX-158113944 | 11 | 120.003 | KV452863.1  | 15618622 | 5-scf00249 | 5  |
| AX-158113946 | 11 | 120.005 | KV452863.1  | 15622053 | 5-scf00249 | 5  |
| AX-157750269 | 11 | 120.005 | KV452863.1  | 15623869 | 5-scf00249 | 5  |
| AX-158113951 | 11 | 120.138 | KV452863.1  | 15627973 | 5-scf00249 | 5  |
| AX-158113952 | 11 | 120.138 | KV452863.1  | 15628219 | 5-scf00249 | 5  |
| AX-158113953 | 11 | 120.138 | KV452863.1  | 15628577 | 5-scf00249 | 5  |
| AX-157885939 | 11 | 120.142 | KV452863.1  | 15630661 | 5-scf00249 | 5  |
| AX-157681158 | 11 | 120.679 | KV452864.1  | 19585    | 5-scf00253 | 5  |
| AX-157683420 | 11 | 120.691 | KV452864.1  | 23045    | 5-scf00253 | 5  |
| AX-158113954 | 11 | 120.695 | KV452863.1  | 15632417 | 5-scf00249 | 5  |
| AX-158113955 | 11 | 120.695 | KV452863.1  | 15632719 | 5-scf00249 | 5  |
| AX-157683421 | 11 | 120.695 | KV452864.1  | 23695    | 5-scf00253 | 5  |
| AX-157683423 | 11 | 120.695 | KV452864.1  | 29112    | 5-scf00253 | 5  |
| AX-157683425 | 11 | 120.695 | KV452864.1  | 33853    | 5-scf00253 | 5  |
| AX-157683427 | 11 | 120.695 | KV452864.1  | 39474    | 5-scf00253 | 5  |
| AX-157683424 | 11 | 120.705 | KV452864.1  | 31168    | 5-scf00253 | 5  |
| AX-157683426 | 11 | 120.913 | KV452864.1  | 38245    | 5-scf00253 | 5  |
| AX-157683431 | 11 | 121.104 | KV452864.1  | 44457    | 5-scf00253 | 5  |
| AX-157683434 | 11 | 121.115 | KV452864.1  | 47145    | 5-scf00253 | 5  |
| AX-157683436 | 11 | 121.115 | KV452864.1  | 48870    | 5-scf00253 | 5  |
| AX-157680317 | 11 | 121.744 |             | 370      | scf10628   | UN |
| AX-157689908 | 11 | 121.744 |             | 243      | scf11876   | UN |
| AX-157689706 | 11 | 121.938 | 3ML01031508 | 427      | scf07123_1 | UN |

|              |    |         |             |        |            |    |
|--------------|----|---------|-------------|--------|------------|----|
| AX-158114047 | 11 | 121.952 | KV452865.1  | 3097   | 5-scf00254 | 5  |
| AX-157747256 | 11 | 121.968 | KV452865.1  | 6877   | 5-scf00254 | 5  |
| AX-158114050 | 11 | 121.973 | KV452865.1  | 7290   | 5-scf00254 | 5  |
| AX-157688295 | 11 | 121.988 | KV452864.1  | 61728  | 5-scf00253 | 5  |
| AX-157828162 | 11 | 121.988 | KV452865.1  | 9080   | 5-scf00254 | 5  |
| AX-157725868 | 11 | 121.988 | KV452865.1  | 11524  | 5-scf00254 | 5  |
| AX-158114053 | 11 | 121.988 | KV452865.1  | 11596  | 5-scf00254 | 5  |
| AX-157828163 | 11 | 121.988 | KV452865.1  | 12486  | 5-scf00254 | 5  |
| AX-158114055 | 11 | 121.988 | KV452865.1  | 14244  | 5-scf00254 | 5  |
| AX-158114056 | 11 | 121.988 | KV452865.1  | 15135  | 5-scf00254 | 5  |
| AX-158114058 | 11 | 121.988 | KV452865.1  | 17679  | 5-scf00254 | 5  |
| AX-158114060 | 11 | 121.988 | KV452865.1  | 18473  | 5-scf00254 | 5  |
| AX-158114061 | 11 | 121.988 | KV452865.1  | 19749  | 5-scf00254 | 5  |
| AX-158114062 | 11 | 121.988 | KV452865.1  | 20184  | 5-scf00254 | 5  |
| AX-158114063 | 11 | 121.988 | KV452865.1  | 21503  | 5-scf00254 | 5  |
| AX-158114066 | 11 | 121.988 | KV452865.1  | 22974  | 5-scf00254 | 5  |
| AX-158114067 | 11 | 121.988 | KV452865.1  | 23510  | 5-scf00254 | 5  |
| AX-158114069 | 11 | 121.988 | KV452865.1  | 24590  | 5-scf00254 | 5  |
| AX-158114071 | 11 | 121.988 | KV452865.1  | 26302  | 5-scf00254 | 5  |
| AX-157689086 | 11 | 121.988 | 3ML01028127 | 724    | scf03732_1 | UN |
| AX-158114072 | 11 | 122.425 | KV452865.1  | 28035  | 5-scf00254 | 5  |
| AX-158114074 | 11 | 122.425 | KV452865.1  | 33662  | 5-scf00254 | 5  |
| AX-158114076 | 11 | 122.425 | KV452865.1  | 36344  | 5-scf00254 | 5  |
| AX-157714458 | 11 | 122.425 | KV452865.1  | 41747  | 5-scf00254 | 5  |
| AX-157740435 | 11 | 122.425 | KV452865.1  | 50431  | 5-scf00254 | 5  |
| AX-157828164 | 11 | 122.458 | KV452865.1  | 39612  | 5-scf00254 | 5  |
| AX-158114079 | 11 | 122.496 | KV452865.1  | 40653  | 5-scf00254 | 5  |
| AX-158392642 | 11 | 122.534 | KV452865.1  | 34605  | 5-scf00254 | 5  |
| AX-158114083 | 11 | 122.534 | KV452865.1  | 43296  | 5-scf00254 | 5  |
| AX-158114086 | 11 | 122.534 | KV452865.1  | 49356  | 5-scf00254 | 5  |
| AX-158114087 | 11 | 122.534 | KV452865.1  | 51604  | 5-scf00254 | 5  |
| AX-157775243 | 11 | 122.551 | KV452865.1  | 46937  | 5-scf00254 | 5  |
| AX-158114091 | 11 | 122.551 | KV452865.1  | 58919  | 5-scf00254 | 5  |
| AX-158114073 | 11 | 122.57  | KV452865.1  | 29095  | 5-scf00254 | 5  |
| AX-158114078 | 11 | 122.57  | KV452865.1  | 40031  | 5-scf00254 | 5  |
| AX-158114092 | 11 | 122.57  | KV452865.1  | 60155  | 5-scf00254 | 5  |
| AX-157752317 | 11 | 122.785 | KV452865.1  | 62775  | 5-scf00254 | 5  |
| AX-158114093 | 11 | 122.785 | KV452865.1  | 64143  | 5-scf00254 | 5  |
| AX-158114096 | 11 | 123.173 | KV452865.1  | 71615  | 5-scf00254 | 5  |
| AX-157863319 | 11 | 123.173 | KV452865.1  | 74454  | 5-scf00254 | 5  |
| AX-158114125 | 11 | 123.173 | KV452865.1  | 125761 | 5-scf00254 | 5  |
| AX-158114101 | 11 | 123.285 | KV452865.1  | 77051  | 5-scf00254 | 5  |
| AX-157708378 | 11 | 123.285 | KV452865.1  | 95739  | 5-scf00254 | 5  |
| AX-158114114 | 11 | 123.292 | KV452865.1  | 105323 | 5-scf00254 | 5  |
| AX-158114097 | 11 | 123.299 | KV452865.1  | 72278  | 5-scf00254 | 5  |
| AX-157828169 | 11 | 123.299 | KV452865.1  | 106679 | 5-scf00254 | 5  |
| AX-158114116 | 11 | 123.299 | KV452865.1  | 110539 | 5-scf00254 | 5  |
| AX-157828170 | 11 | 123.499 | KV452865.1  | 113418 | 5-scf00254 | 5  |
| AX-157871215 | 11 | 123.499 | KV452865.1  | 114069 | 5-scf00254 | 5  |
| AX-157828171 | 11 | 123.783 | KV452865.1  | 117339 | 5-scf00254 | 5  |
| AX-158114120 | 11 | 123.821 | KV452865.1  | 117929 | 5-scf00254 | 5  |

|              |    |         |             |        |            |    |
|--------------|----|---------|-------------|--------|------------|----|
| AX-157723255 | 11 | 123.914 | KV452865.1  | 68241  | 5-scf00254 | 5  |
| AX-158114113 | 11 | 123.914 | KV452865.1  | 104583 | 5-scf00254 | 5  |
| AX-157828168 | 11 | 123.914 | KV452865.1  | 104787 | 5-scf00254 | 5  |
| AX-158114115 | 11 | 123.914 | KV452865.1  | 105964 | 5-scf00254 | 5  |
| AX-158114123 | 11 | 123.914 | KV452865.1  | 122079 | 5-scf00254 | 5  |
| AX-157714533 | 11 | 123.914 | KV452865.1  | 123736 | 5-scf00254 | 5  |
| AX-158114124 | 11 | 123.914 | KV452865.1  | 124118 | 5-scf00254 | 5  |
| AX-157828172 | 11 | 123.914 | KV452865.1  | 124447 | 5-scf00254 | 5  |
| AX-157828173 | 11 | 123.914 | KV452865.1  | 125345 | 5-scf00254 | 5  |
| AX-157715936 | 11 | 123.977 | KV452865.1  | 126366 | 5-scf00254 | 5  |
| AX-158114129 | 11 | 124.044 | KV452865.1  | 129595 | 5-scf00254 | 5  |
| AX-157863320 | 11 | 124.044 | KV452865.1  | 132239 | 5-scf00254 | 5  |
| AX-157774057 | 11 | 124.175 | KV452865.1  | 133964 | 5-scf00254 | 5  |
| AX-157828175 | 11 | 124.175 | KV452865.1  | 135601 | 5-scf00254 | 5  |
| AX-157706219 | 11 | 124.175 | 3ML01031844 | 439    | scf07465_1 | UN |
| AX-157753087 | 11 | 124.192 | KV452865.1  | 69487  | 5-scf00254 | 5  |
| AX-158114136 | 11 | 124.192 | KV452865.1  | 141701 | 5-scf00254 | 5  |
| AX-158114140 | 11 | 124.215 | KV452865.1  | 145558 | 5-scf00254 | 5  |
| AX-158114144 | 11 | 124.226 | KV452865.1  | 148110 | 5-scf00254 | 5  |
| AX-158114145 | 11 | 124.249 | KV452865.1  | 148487 | 5-scf00254 | 5  |
| AX-157725228 | 11 | 124.272 | KV452865.1  | 155167 | 5-scf00254 | 5  |
| AX-158114122 | 11 | 124.277 | KV452865.1  | 120385 | 5-scf00254 | 5  |
| AX-158114131 | 11 | 124.277 | KV452865.1  | 136275 | 5-scf00254 | 5  |
| AX-158114150 | 11 | 124.277 | KV452865.1  | 156372 | 5-scf00254 | 5  |
| AX-158114138 | 11 | 124.284 | KV452865.1  | 143616 | 5-scf00254 | 5  |
| AX-158114151 | 11 | 124.284 | KV452865.1  | 156671 | 5-scf00254 | 5  |
| AX-158114152 | 11 | 124.284 | KV452865.1  | 159018 | 5-scf00254 | 5  |
| AX-157828177 | 11 | 124.284 | KV452865.1  | 160729 | 5-scf00254 | 5  |
| AX-157747902 | 11 | 124.284 | KV452865.1  | 161248 | 5-scf00254 | 5  |
| AX-157775529 | 11 | 124.651 | KV452865.1  | 164191 | 5-scf00254 | 5  |
| AX-157828178 | 11 | 124.651 | KV452865.1  | 164596 | 5-scf00254 | 5  |
| AX-158114153 | 11 | 124.651 | KV452865.1  | 164947 | 5-scf00254 | 5  |
| AX-157828179 | 11 | 124.651 | KV452865.1  | 166012 | 5-scf00254 | 5  |
| AX-158114156 | 11 | 124.651 | KV452865.1  | 172944 | 5-scf00254 | 5  |
| AX-158114158 | 11 | 124.822 | KV452865.1  | 175037 | 5-scf00254 | 5  |
| AX-158114159 | 11 | 124.826 | KV452865.1  | 175889 | 5-scf00254 | 5  |
| AX-157721795 | 11 | 124.83  | KV452865.1  | 180554 | 5-scf00254 | 5  |
| AX-158114160 | 11 | 124.83  | KV452865.1  | 181354 | 5-scf00254 | 5  |
| AX-158114161 | 11 | 124.83  | KV452865.1  | 181667 | 5-scf00254 | 5  |
| AX-158114167 | 11 | 124.83  | KV452865.1  | 197966 | 5-scf00254 | 5  |
| AX-157720451 | 11 | 124.939 | KV452865.1  | 136796 | 5-scf00254 | 5  |
| AX-158114137 | 11 | 124.939 | KV452865.1  | 142763 | 5-scf00254 | 5  |
| AX-158114154 | 11 | 124.939 | KV452865.1  | 166877 | 5-scf00254 | 5  |
| AX-158114163 | 11 | 124.939 | KV452865.1  | 184123 | 5-scf00254 | 5  |
| AX-157743060 | 11 | 124.939 | KV452865.1  | 188914 | 5-scf00254 | 5  |
| AX-157745475 | 11 | 125.158 | KV452865.1  | 189807 | 5-scf00254 | 5  |
| AX-157744947 | 11 | 125.158 | KV452865.1  | 191748 | 5-scf00254 | 5  |
| AX-157739022 | 11 | 125.158 | KV452865.1  | 193394 | 5-scf00254 | 5  |
| AX-157828181 | 11 | 125.158 | KV452865.1  | 193721 | 5-scf00254 | 5  |
| AX-158114166 | 11 | 125.322 | KV452865.1  | 197826 | 5-scf00254 | 5  |
| AX-157755604 | 11 | 125.322 | KV452865.1  | 198542 | 5-scf00254 | 5  |

|              |    |         |            |        |            |   |
|--------------|----|---------|------------|--------|------------|---|
| AX-157828182 | 11 | 125.486 | KV452865.1 | 202602 | 5-scf00254 | 5 |
| AX-158114175 | 11 | 125.486 | KV452865.1 | 206551 | 5-scf00254 | 5 |
| AX-158114176 | 11 | 125.486 | KV452865.1 | 208606 | 5-scf00254 | 5 |
| AX-158114177 | 11 | 125.515 | KV452865.1 | 212060 | 5-scf00254 | 5 |
| AX-158114174 | 11 | 125.57  | KV452865.1 | 206048 | 5-scf00254 | 5 |
| AX-158114178 | 11 | 125.57  | KV452865.1 | 214233 | 5-scf00254 | 5 |
| AX-158114179 | 11 | 125.595 | KV452865.1 | 214614 | 5-scf00254 | 5 |
| AX-158114181 | 11 | 125.595 | KV452865.1 | 215945 | 5-scf00254 | 5 |
| AX-157828183 | 11 | 125.595 | KV452865.1 | 218982 | 5-scf00254 | 5 |
| AX-158114183 | 11 | 125.595 | KV452865.1 | 220564 | 5-scf00254 | 5 |
| AX-157828184 | 11 | 125.595 | KV452865.1 | 221861 | 5-scf00254 | 5 |
| AX-158114186 | 11 | 125.813 | KV452865.1 | 222293 | 5-scf00254 | 5 |
| AX-158114188 | 11 | 126.032 | KV452865.1 | 224971 | 5-scf00254 | 5 |
| AX-157720897 | 11 | 126.032 | KV452865.1 | 228694 | 5-scf00254 | 5 |
| AX-158114189 | 11 | 126.032 | KV452865.1 | 230122 | 5-scf00254 | 5 |
| AX-158114190 | 11 | 126.032 | KV452865.1 | 230749 | 5-scf00254 | 5 |
| AX-158114191 | 11 | 126.032 | KV452865.1 | 232352 | 5-scf00254 | 5 |
| AX-158114193 | 11 | 126.032 | KV452865.1 | 234172 | 5-scf00254 | 5 |
| AX-158114194 | 11 | 126.032 | KV452865.1 | 236430 | 5-scf00254 | 5 |
| AX-158114195 | 11 | 126.032 | KV452865.1 | 237352 | 5-scf00254 | 5 |
| AX-157756392 | 11 | 126.224 | KV452865.1 | 231159 | 5-scf00254 | 5 |
| AX-158114197 | 11 | 126.224 | KV452865.1 | 241921 | 5-scf00254 | 5 |
| AX-158114199 | 11 | 126.379 | KV452865.1 | 243001 | 5-scf00254 | 5 |
| AX-157751739 | 11 | 126.451 | KV452865.1 | 248625 | 5-scf00254 | 5 |
| AX-158114202 | 11 | 126.798 | KV452865.1 | 251330 | 5-scf00254 | 5 |
| AX-158114203 | 11 | 126.798 | KV452865.1 | 252678 | 5-scf00254 | 5 |
| AX-158114204 | 11 | 126.798 | KV452865.1 | 253210 | 5-scf00254 | 5 |
| AX-158114206 | 11 | 126.799 | KV452865.1 | 255984 | 5-scf00254 | 5 |
| AX-157741145 | 11 | 126.8   | KV452865.1 | 256141 | 5-scf00254 | 5 |
| AX-157757009 | 11 | 127.12  | KV452865.1 | 262143 | 5-scf00254 | 5 |
| AX-158114210 | 11 | 127.121 | KV452865.1 | 262494 | 5-scf00254 | 5 |
| AX-158114211 | 11 | 127.125 | KV452865.1 | 263047 | 5-scf00254 | 5 |
| AX-157722131 | 11 | 127.132 | KV452865.1 | 263393 | 5-scf00254 | 5 |
| AX-158114212 | 11 | 127.344 | KV452865.1 | 263892 | 5-scf00254 | 5 |
| AX-158114216 | 11 | 127.344 | KV452865.1 | 266382 | 5-scf00254 | 5 |
| AX-158114219 | 11 | 127.404 | KV452865.1 | 268010 | 5-scf00254 | 5 |
| AX-158114198 | 11 | 127.469 | KV452865.1 | 242413 | 5-scf00254 | 5 |
| AX-158114220 | 11 | 127.469 | KV452865.1 | 268833 | 5-scf00254 | 5 |
| AX-158114225 | 11 | 127.469 | KV452865.1 | 276173 | 5-scf00254 | 5 |
| AX-158114226 | 11 | 127.469 | KV452865.1 | 277599 | 5-scf00254 | 5 |
| AX-158114227 | 11 | 127.469 | KV452865.1 | 280777 | 5-scf00254 | 5 |
| AX-158114229 | 11 | 127.469 | KV452865.1 | 283429 | 5-scf00254 | 5 |
| AX-158114236 | 11 | 127.469 | KV452865.1 | 293220 | 5-scf00254 | 5 |
| AX-158114307 | 11 | 127.469 | KV452865.1 | 393024 | 5-scf00254 | 5 |
| AX-157758503 | 11 | 127.469 | KV452865.1 | 441124 | 5-scf00254 | 5 |
| AX-157774189 | 11 | 128.181 | KV452865.1 | 291188 | 5-scf00254 | 5 |
| AX-158114232 | 11 | 128.21  | KV452865.1 | 289698 | 5-scf00254 | 5 |
| AX-158114238 | 11 | 128.21  | KV452865.1 | 294809 | 5-scf00254 | 5 |
| AX-158114241 | 11 | 128.21  | KV452865.1 | 297322 | 5-scf00254 | 5 |
| AX-158114247 | 11 | 128.21  | KV452865.1 | 301873 | 5-scf00254 | 5 |
| AX-157751510 | 11 | 128.21  | KV452865.1 | 418720 | 5-scf00254 | 5 |

|              |    |         |            |        |            |   |
|--------------|----|---------|------------|--------|------------|---|
| AX-157755545 | 11 | 128.21  | KV452865.1 | 492099 | 5-scf00254 | 5 |
| AX-158114249 | 11 | 128.228 | KV452865.1 | 302873 | 5-scf00254 | 5 |
| AX-158114250 | 11 | 128.228 | KV452865.1 | 306788 | 5-scf00254 | 5 |
| AX-158114252 | 11 | 128.441 | KV452865.1 | 308491 | 5-scf00254 | 5 |
| AX-157716867 | 11 | 128.441 | KV452865.1 | 313058 | 5-scf00254 | 5 |
| AX-158114257 | 11 | 128.441 | KV452865.1 | 317094 | 5-scf00254 | 5 |
| AX-158114258 | 11 | 128.441 | KV452865.1 | 318665 | 5-scf00254 | 5 |
| AX-157828186 | 11 | 128.555 | KV452865.1 | 313131 | 5-scf00254 | 5 |
| AX-157828187 | 11 | 128.655 | KV452865.1 | 323185 | 5-scf00254 | 5 |
| AX-158114266 | 11 | 128.655 | KV452865.1 | 323857 | 5-scf00254 | 5 |
| AX-158114268 | 11 | 128.655 | KV452865.1 | 325112 | 5-scf00254 | 5 |
| AX-157866070 | 11 | 128.655 | KV452865.1 | 325691 | 5-scf00254 | 5 |
| AX-158114269 | 11 | 128.655 | KV452865.1 | 326671 | 5-scf00254 | 5 |
| AX-158114273 | 11 | 128.711 | KV452865.1 | 329628 | 5-scf00254 | 5 |
| AX-158114254 | 11 | 128.764 | KV452865.1 | 310753 | 5-scf00254 | 5 |
| AX-158114276 | 11 | 128.764 | KV452865.1 | 333304 | 5-scf00254 | 5 |
| AX-157828188 | 11 | 128.764 | KV452865.1 | 334236 | 5-scf00254 | 5 |
| AX-158114278 | 11 | 128.764 | KV452865.1 | 335717 | 5-scf00254 | 5 |
| AX-158114279 | 11 | 128.764 | KV452865.1 | 336013 | 5-scf00254 | 5 |
| AX-158114280 | 11 | 128.764 | KV452865.1 | 337392 | 5-scf00254 | 5 |
| AX-158114282 | 11 | 128.764 | KV452865.1 | 338872 | 5-scf00254 | 5 |
| AX-157709695 | 11 | 128.764 | KV452865.1 | 339821 | 5-scf00254 | 5 |
| AX-158114287 | 11 | 128.764 | KV452865.1 | 341443 | 5-scf00254 | 5 |
| AX-157828189 | 11 | 128.822 | KV452865.1 | 339964 | 5-scf00254 | 5 |
| AX-158114288 | 11 | 128.852 | KV452865.1 | 345811 | 5-scf00254 | 5 |
| AX-158114289 | 11 | 128.874 | KV452865.1 | 346779 | 5-scf00254 | 5 |
| AX-157747061 | 11 | 128.874 | KV452865.1 | 348884 | 5-scf00254 | 5 |
| AX-158114290 | 11 | 128.874 | KV452865.1 | 348922 | 5-scf00254 | 5 |
| AX-158114291 | 11 | 128.874 | KV452865.1 | 349217 | 5-scf00254 | 5 |
| AX-158114293 | 11 | 129.138 | KV452865.1 | 360865 | 5-scf00254 | 5 |
| AX-157723973 | 11 | 129.138 | KV452865.1 | 371927 | 5-scf00254 | 5 |
| AX-158114300 | 11 | 129.285 | KV452865.1 | 375819 | 5-scf00254 | 5 |
| AX-158114298 | 11 | 129.514 | KV452865.1 | 372937 | 5-scf00254 | 5 |
| AX-158114301 | 11 | 129.514 | KV452865.1 | 376630 | 5-scf00254 | 5 |
| AX-158114306 | 11 | 129.514 | KV452865.1 | 388362 | 5-scf00254 | 5 |
| AX-158114309 | 11 | 129.53  | KV452865.1 | 402758 | 5-scf00254 | 5 |
| AX-158114313 | 11 | 129.565 | KV452865.1 | 410382 | 5-scf00254 | 5 |
| AX-157741084 | 11 | 129.602 | KV452865.1 | 417502 | 5-scf00254 | 5 |
| AX-158114322 | 11 | 129.602 | KV452865.1 | 425932 | 5-scf00254 | 5 |
| AX-158114319 | 11 | 129.639 | KV452865.1 | 424275 | 5-scf00254 | 5 |
| AX-158114321 | 11 | 129.639 | KV452865.1 | 425732 | 5-scf00254 | 5 |
| AX-158114390 | 11 | 129.639 | KV452868.1 | 34179  | 5-scf00256 | 5 |
| AX-158114327 | 11 | 129.967 | KV452865.1 | 430347 | 5-scf00254 | 5 |
| AX-158114328 | 11 | 129.967 | KV452865.1 | 430774 | 5-scf00254 | 5 |
| AX-158114308 | 11 | 129.968 | KV452865.1 | 398804 | 5-scf00254 | 5 |
| AX-158114314 | 11 | 129.968 | KV452865.1 | 415924 | 5-scf00254 | 5 |
| AX-158114329 | 11 | 129.968 | KV452865.1 | 431886 | 5-scf00254 | 5 |
| AX-158114331 | 11 | 129.968 | KV452865.1 | 433119 | 5-scf00254 | 5 |
| AX-158114333 | 11 | 129.968 | KV452865.1 | 435109 | 5-scf00254 | 5 |
| AX-158114334 | 11 | 129.968 | KV452865.1 | 435722 | 5-scf00254 | 5 |
| AX-158392644 | 11 | 129.968 | KV452865.1 | 438192 | 5-scf00254 | 5 |

|              |    |         |             |        |            |    |
|--------------|----|---------|-------------|--------|------------|----|
| AX-158114335 | 11 | 129.968 | KV452865.1  | 438270 | 5-scf00254 | 5  |
| AX-157724611 | 11 | 129.968 | KV452865.1  | 439527 | 5-scf00254 | 5  |
| AX-158114336 | 11 | 129.968 | KV452865.1  | 439591 | 5-scf00254 | 5  |
| AX-157709828 | 11 | 129.968 | KV452865.1  | 444713 | 5-scf00254 | 5  |
| AX-158114342 | 11 | 129.968 | KV452865.1  | 447090 | 5-scf00254 | 5  |
| AX-158114343 | 11 | 129.968 | KV452865.1  | 448550 | 5-scf00254 | 5  |
| AX-158114344 | 11 | 129.968 | KV452865.1  | 449319 | 5-scf00254 | 5  |
| AX-158114345 | 11 | 129.968 | KV452865.1  | 450995 | 5-scf00254 | 5  |
| AX-157757711 | 11 | 129.968 | KV452865.1  | 451339 | 5-scf00254 | 5  |
| AX-158114350 | 11 | 129.968 | KV452865.1  | 461408 | 5-scf00254 | 5  |
| AX-158114360 | 11 | 129.968 | KV452865.1  | 476569 | 5-scf00254 | 5  |
| AX-157689888 | 11 | 129.968 |             | 235    | scf10745   | UN |
| AX-158114357 | 11 | 130.131 | KV452865.1  | 472282 | 5-scf00254 | 5  |
| AX-158410842 | 11 | 130.236 | KV452865.1  | 472685 | 5-scf00254 | 5  |
| AX-158114338 | 11 | 130.295 | KV452865.1  | 441751 | 5-scf00254 | 5  |
| AX-158114358 | 11 | 130.295 | KV452865.1  | 475264 | 5-scf00254 | 5  |
| AX-158114361 | 11 | 130.295 | KV452865.1  | 482847 | 5-scf00254 | 5  |
| AX-158114363 | 11 | 130.295 | KV452865.1  | 485141 | 5-scf00254 | 5  |
| AX-158114368 | 11 | 130.295 | KV452865.1  | 491099 | 5-scf00254 | 5  |
| AX-158114369 | 11 | 130.295 | KV452865.1  | 491996 | 5-scf00254 | 5  |
| AX-157683445 | 11 | 130.295 | KV452865.1  | 500775 | 5-scf00254 | 5  |
| AX-157688611 | 11 | 130.295 | KV452866.1  | 148    | 5-scf02160 | 5  |
| AX-157680473 | 11 | 130.295 | KV452866.1  | 1006   | 5-scf02160 | 5  |
| AX-157689785 | 11 | 130.295 | KV452867.1  | 121    | 5-scf07987 | 5  |
| AX-157709736 | 11 | 130.295 | 3ML01026970 | 555    | scf02573_1 | UN |
| AX-157689945 | 11 | 130.295 |             | 234    | scf15117   | UN |
| AX-157689946 | 11 | 130.295 |             | 278    | scf15117   | UN |
| AX-157680310 | 11 | 130.405 | KV452865.1  | 503046 | 5-scf00254 | 5  |
| AX-157683439 | 11 | 130.405 | KV452865.1  | 506200 | 5-scf00254 | 5  |
| AX-158114370 | 11 | 130.405 | KV452868.1  | 5994   | 5-scf00256 | 5  |
| AX-158114372 | 11 | 130.475 | KV452868.1  | 8533   | 5-scf00256 | 5  |
| AX-158114373 | 11 | 130.514 | KV452868.1  | 11301  | 5-scf00256 | 5  |
| AX-158114374 | 11 | 130.514 | KV452868.1  | 11450  | 5-scf00256 | 5  |
| AX-157744926 | 11 | 130.514 | KV452868.1  | 18601  | 5-scf00256 | 5  |
| AX-158114379 | 11 | 130.514 | KV452868.1  | 20344  | 5-scf00256 | 5  |
| AX-158114382 | 11 | 130.514 | KV452868.1  | 23237  | 5-scf00256 | 5  |
| AX-158114387 | 11 | 130.514 | KV452868.1  | 28971  | 5-scf00256 | 5  |
| AX-158114392 | 11 | 130.891 | KV452868.1  | 38348  | 5-scf00256 | 5  |
| AX-158114395 | 11 | 131.025 | KV452868.1  | 45230  | 5-scf00256 | 5  |
| AX-157828195 | 11 | 131.028 | KV452868.1  | 45714  | 5-scf00256 | 5  |
| AX-157682152 | 11 | 131.279 | KV452865.1  | 499965 | 5-scf00254 | 5  |
| AX-158114399 | 11 | 131.279 | KV452868.1  | 54746  | 5-scf00256 | 5  |
| AX-157727492 | 11 | 131.279 | KV452868.1  | 64666  | 5-scf00256 | 5  |
| AX-158114408 | 11 | 131.279 | KV452868.1  | 65816  | 5-scf00256 | 5  |
| AX-158114409 | 11 | 131.279 | KV452868.1  | 66495  | 5-scf00256 | 5  |
| AX-158114414 | 11 | 131.279 | KV452868.1  | 73920  | 5-scf00256 | 5  |
| AX-158114439 | 11 | 131.279 | KV452868.1  | 106536 | 5-scf00256 | 5  |
| AX-158114449 | 11 | 131.279 | KV452868.1  | 117876 | 5-scf00256 | 5  |
| AX-158114470 | 11 | 131.279 | KV452868.1  | 148464 | 5-scf00256 | 5  |
| AX-158114417 | 11 | 131.394 | KV452868.1  | 82299  | 5-scf00256 | 5  |
| AX-157683447 | 11 | 131.498 | KV452865.1  | 498027 | 5-scf00254 | 5  |

|              |    |         |            |         |            |   |
|--------------|----|---------|------------|---------|------------|---|
| AX-157866072 | 11 | 131.498 | KV452868.1 | 71115   | 5-scf00256 | 5 |
| AX-157828198 | 11 | 131.498 | KV452868.1 | 86232   | 5-scf00256 | 5 |
| AX-157717812 | 11 | 131.498 | KV452868.1 | 86799   | 5-scf00256 | 5 |
| AX-157828199 | 11 | 131.498 | KV452868.1 | 90968   | 5-scf00256 | 5 |
| AX-157828200 | 11 | 131.498 | KV452868.1 | 95097   | 5-scf00256 | 5 |
| AX-158114427 | 11 | 131.498 | KV452868.1 | 99026   | 5-scf00256 | 5 |
| AX-158114429 | 11 | 131.498 | KV452868.1 | 99730   | 5-scf00256 | 5 |
| AX-158114431 | 11 | 131.498 | KV452868.1 | 100598  | 5-scf00256 | 5 |
| AX-158114441 | 11 | 131.498 | KV452868.1 | 109648  | 5-scf00256 | 5 |
| AX-158114443 | 11 | 131.498 | KV452868.1 | 110922  | 5-scf00256 | 5 |
| AX-158114444 | 11 | 131.498 | KV452868.1 | 111741  | 5-scf00256 | 5 |
| AX-157828202 | 11 | 131.498 | KV452868.1 | 116445  | 5-scf00256 | 5 |
| AX-158114451 | 11 | 131.498 | KV452868.1 | 118698  | 5-scf00256 | 5 |
| AX-158114452 | 11 | 131.498 | KV452868.1 | 119057  | 5-scf00256 | 5 |
| AX-158114453 | 11 | 131.498 | KV452868.1 | 120104  | 5-scf00256 | 5 |
| AX-158114455 | 11 | 131.498 | KV452868.1 | 121398  | 5-scf00256 | 5 |
| AX-158114457 | 11 | 131.498 | KV452868.1 | 123733  | 5-scf00256 | 5 |
| AX-157857479 | 11 | 131.498 | KV452868.1 | 140324  | 5-scf00256 | 5 |
| AX-157717146 | 11 | 131.582 | KV452868.1 | 147267  | 5-scf00256 | 5 |
| AX-157683448 | 11 | 131.582 | KV452869.1 | 345     | 5-scf00257 | 5 |
| AX-158114472 | 11 | 131.716 | KV452868.1 | 150491  | 5-scf00256 | 5 |
| AX-158114475 | 11 | 131.716 | KV452868.1 | 152857  | 5-scf00256 | 5 |
| AX-158114478 | 11 | 131.716 | KV452868.1 | 156088  | 5-scf00256 | 5 |
| AX-157745990 | 11 | 131.716 | KV452868.1 | 165832  | 5-scf00256 | 5 |
| AX-158380125 | 11 | 131.716 | KV452868.1 | 165949  | 5-scf00256 | 5 |
| AX-158114480 | 11 | 131.716 | KV452868.1 | 169658  | 5-scf00256 | 5 |
| AX-158114482 | 11 | 131.716 | KV452868.1 | 170456  | 5-scf00256 | 5 |
| AX-158114483 | 11 | 131.716 | KV452868.1 | 170972  | 5-scf00256 | 5 |
| AX-157758320 | 11 | 131.716 | KV452868.1 | 171061  | 5-scf00256 | 5 |
| AX-158114498 | 11 | 131.716 | KV452870.1 | 158096  | 5-scf00260 | 5 |
| AX-158114485 | 11 | 131.814 | KV452868.1 | 174552  | 5-scf00256 | 5 |
| AX-158114486 | 11 | 131.814 | KV452868.1 | 174972  | 5-scf00256 | 5 |
| AX-157828204 | 11 | 131.935 | KV452868.1 | 177773  | 5-scf00256 | 5 |
| AX-158114489 | 11 | 131.935 | KV452868.1 | 184621  | 5-scf00256 | 5 |
| AX-158114493 | 11 | 131.935 | KV452868.1 | 193397  | 5-scf00256 | 5 |
| AX-157683455 | 11 | 131.935 | KV452869.1 | 7334    | 5-scf00257 | 5 |
| AX-158114500 | 11 | 132.117 | KV452870.1 | 155623  | 5-scf00260 | 5 |
| AX-158114504 | 11 | 132.184 | KV452870.1 | 148701  | 5-scf00260 | 5 |
| AX-158114506 | 11 | 132.3   | KV452870.1 | 146928  | 5-scf00260 | 5 |
| AX-158105052 | 11 | 132.386 | KV452856.1 | 3694075 | 5-scf00247 | 5 |
| AX-157697614 | 11 | 132.386 | KV452868.1 | 108261  | 5-scf00256 | 5 |
| AX-157749859 | 11 | 132.386 | KV452870.1 | 71467   | 5-scf00260 | 5 |
| AX-158114538 | 11 | 132.386 | KV452870.1 | 90075   | 5-scf00260 | 5 |
| AX-157828209 | 11 | 132.386 | KV452870.1 | 118018  | 5-scf00260 | 5 |
| AX-158114511 | 11 | 132.386 | KV452870.1 | 138320  | 5-scf00260 | 5 |
| AX-158114507 | 11 | 132.386 | KV452870.1 | 145108  | 5-scf00260 | 5 |
| AX-158114419 | 11 | 132.482 | KV452868.1 | 85032   | 5-scf00256 | 5 |
| AX-157747869 | 11 | 132.482 | KV452868.1 | 106448  | 5-scf00256 | 5 |
| AX-158114468 | 11 | 132.482 | KV452868.1 | 145012  | 5-scf00256 | 5 |
| AX-157683492 | 11 | 132.482 | KV452870.1 | 8778    | 5-scf00260 | 5 |
| AX-157683485 | 11 | 132.482 | KV452870.1 | 19509   | 5-scf00260 | 5 |



|              |    |         |            |         |            |    |
|--------------|----|---------|------------|---------|------------|----|
| AX-157679969 | 11 | 132.482 | KV452870.1 | 47103   | 5-scf00260 | 5  |
| AX-157720920 | 11 | 132.482 | KV452870.1 | 73814   | 5-scf00260 | 5  |
| AX-158114547 | 11 | 132.482 | KV452870.1 | 78496   | 5-scf00260 | 5  |
| AX-158114546 | 11 | 132.482 | KV452870.1 | 79022   | 5-scf00260 | 5  |
| AX-157828211 | 11 | 132.482 | KV452870.1 | 82848   | 5-scf00260 | 5  |
| AX-158114543 | 11 | 132.482 | KV452870.1 | 83320   | 5-scf00260 | 5  |
| AX-158114540 | 11 | 132.482 | KV452870.1 | 85533   | 5-scf00260 | 5  |
| AX-158114536 | 11 | 132.482 | KV452870.1 | 93461   | 5-scf00260 | 5  |
| AX-158114534 | 11 | 132.482 | KV452870.1 | 94757   | 5-scf00260 | 5  |
| AX-158114532 | 11 | 132.482 | KV452870.1 | 96003   | 5-scf00260 | 5  |
| AX-158114526 | 11 | 132.482 | KV452870.1 | 109793  | 5-scf00260 | 5  |
| AX-157756967 | 11 | 132.482 | KV452870.1 | 110235  | 5-scf00260 | 5  |
| AX-158114525 | 11 | 132.482 | KV452870.1 | 111139  | 5-scf00260 | 5  |
| AX-158114521 | 11 | 132.482 | KV452870.1 | 118857  | 5-scf00260 | 5  |
| AX-157828208 | 11 | 132.482 | KV452870.1 | 120813  | 5-scf00260 | 5  |
| AX-157742062 | 11 | 132.482 | KV452870.1 | 123727  | 5-scf00260 | 5  |
| AX-158114520 | 11 | 132.482 | KV452870.1 | 125459  | 5-scf00260 | 5  |
| AX-158114515 | 11 | 132.482 | KV452870.1 | 132112  | 5-scf00260 | 5  |
| AX-158114513 | 11 | 132.482 | KV452870.1 | 133239  | 5-scf00260 | 5  |
| AX-158114510 | 11 | 132.482 | KV452870.1 | 139164  | 5-scf00260 | 5  |
| AX-157746400 | 11 | 132.482 | KV452870.1 | 150029  | 5-scf00260 | 5  |
| AX-158114499 | 11 | 132.482 | KV452870.1 | 156269  | 5-scf00260 | 5  |
| AX-158114589 | 11 | 132.637 | KV452872.1 | 21053   | 5-scf00262 | 5  |
| AX-157686878 | 11 | 132.637 | KV452873.1 | 26907   | 5-scf00264 | 5  |
| AX-157686885 | 11 | 133.14  | KV452873.1 | 44310   | 5-scf00264 | 5  |
| AX-157686887 | 11 | 133.14  | KV452873.1 | 45917   | 5-scf00264 | 5  |
| AX-157686888 | 11 | 133.14  | KV452873.1 | 49723   | 5-scf00264 | 5  |
| AX-157686890 | 11 | 133.14  | KV452873.1 | 54171   | 5-scf00264 | 5  |
| AX-158105043 | 11 | 133.552 | KV452856.1 | 3676556 | 5-scf00247 | 5  |
| AX-158114416 | 11 | 133.552 | KV452868.1 | 78159   | 5-scf00256 | 5  |
| AX-157683461 | 11 | 133.552 | KV452870.1 | 59570   | 5-scf00260 | 5  |
| AX-157683490 | 11 | 133.797 | KV452870.1 | 9821    | 5-scf00260 | 5  |
| AX-157683478 | 11 | 133.797 | KV452870.1 | 27427   | 5-scf00260 | 5  |
| AX-157683475 | 11 | 133.797 | KV452870.1 | 29278   | 5-scf00260 | 5  |
| AX-157683473 | 11 | 133.797 | KV452870.1 | 32442   | 5-scf00260 | 5  |
| AX-157683465 | 11 | 133.797 | KV452870.1 | 53939   | 5-scf00260 | 5  |
| AX-157680661 | 11 | 133.797 | KV452870.1 | 54398   | 5-scf00260 | 5  |
| AX-158380126 | 11 | 133.797 | KV452870.1 | 57167   | 5-scf00260 | 5  |
| AX-158114550 | 11 | 133.797 | KV452870.1 | 72868   | 5-scf00260 | 5  |
| AX-158114528 | 11 | 133.797 | KV452870.1 | 108787  | 5-scf00260 | 5  |
| AX-158114522 | 11 | 133.797 | KV452870.1 | 112621  | 5-scf00260 | 5  |
| AX-158114518 | 11 | 133.797 | KV452870.1 | 126201  | 5-scf00260 | 5  |
| AX-157689774 | 11 | 133.797 | KV453836.1 | 624     | scf07856   | UN |
| AX-157683494 | 11 | 134.07  | KV452870.1 | 6429    | 5-scf00260 | 5  |
| AX-157683505 | 11 | 134.07  | KV452871.1 | 4432    | 5-scf00261 | 5  |
| AX-157680431 | 11 | 134.07  | KV452871.1 | 5406    | 5-scf00261 | 5  |
| AX-157680124 | 11 | 134.07  | KV452871.1 | 9147    | 5-scf00261 | 5  |
| AX-157680307 | 11 | 134.07  | KV452871.1 | 17444   | 5-scf00261 | 5  |
| AX-157683509 | 11 | 134.247 | KV452871.1 | 18766   | 5-scf00261 | 5  |
| AX-158114410 | 11 | 134.344 | KV452868.1 | 66877   | 5-scf00256 | 5  |
| AX-158114567 | 11 | 134.344 | KV452872.1 | 49167   | 5-scf00262 | 5  |

|              |    |         |            |        |            |   |
|--------------|----|---------|------------|--------|------------|---|
| AX-158114566 | 11 | 134.344 | KV452872.1 | 49959  | 5-scf00262 | 5 |
| AX-157758608 | 11 | 134.344 | KV452872.1 | 63930  | 5-scf00262 | 5 |
| AX-158114554 | 11 | 134.344 | KV452872.1 | 65626  | 5-scf00262 | 5 |
| AX-158114552 | 11 | 134.344 | KV452872.1 | 69527  | 5-scf00262 | 5 |
| AX-158114569 | 11 | 134.351 | KV452872.1 | 47959  | 5-scf00262 | 5 |
| AX-158114572 | 11 | 134.479 | KV452872.1 | 41785  | 5-scf00262 | 5 |
| AX-157866076 | 11 | 134.479 | KV452872.1 | 43003  | 5-scf00262 | 5 |
| AX-157866075 | 11 | 134.479 | KV452872.1 | 44118  | 5-scf00262 | 5 |
| AX-157750553 | 11 | 134.479 | KV452872.1 | 45332  | 5-scf00262 | 5 |
| AX-157683515 | 11 | 134.479 | KV452873.1 | 17310  | 5-scf00264 | 5 |
| AX-158114761 | 11 | 134.479 | KV452878.1 | 167995 | 5-scf00266 | 5 |
| AX-157828216 | 11 | 134.617 | KV452872.1 | 21415  | 5-scf00262 | 5 |
| AX-158114586 | 11 | 134.617 | KV452872.1 | 24501  | 5-scf00262 | 5 |
| AX-158114585 | 11 | 134.617 | KV452872.1 | 25045  | 5-scf00262 | 5 |
| AX-158114584 | 11 | 134.617 | KV452872.1 | 25955  | 5-scf00262 | 5 |
| AX-158114580 | 11 | 134.617 | KV452872.1 | 31423  | 5-scf00262 | 5 |
| AX-157686879 | 11 | 134.617 | KV452873.1 | 37700  | 5-scf00264 | 5 |
| AX-158114595 | 11 | 134.753 | KV452872.1 | 10011  | 5-scf00262 | 5 |
| AX-158114590 | 11 | 134.888 | KV452872.1 | 20109  | 5-scf00262 | 5 |
| AX-157683516 | 11 | 134.888 | KV452873.1 | 16782  | 5-scf00264 | 5 |
| AX-157683513 | 11 | 134.888 | KV452873.1 | 18230  | 5-scf00264 | 5 |
| AX-158114752 | 11 | 134.888 | KV452878.1 | 154660 | 5-scf00266 | 5 |
| AX-157683519 | 11 | 134.889 | KV452873.1 | 14319  | 5-scf00264 | 5 |
| AX-157683522 | 11 | 134.891 | KV452873.1 | 7433   | 5-scf00264 | 5 |
| AX-157683521 | 11 | 134.891 | KV452873.1 | 13414  | 5-scf00264 | 5 |
| AX-158114622 | 11 | 135     | KV452875.1 | 58961  | 5-scf00263 | 5 |
| AX-157757365 | 11 | 135     | KV452875.1 | 60093  | 5-scf00263 | 5 |
| AX-158114623 | 11 | 135     | KV452875.1 | 62753  | 5-scf00263 | 5 |
| AX-158114631 | 11 | 135     | KV452875.1 | 74904  | 5-scf00263 | 5 |
| AX-158114643 | 11 | 135     | KV452875.1 | 91830  | 5-scf00263 | 5 |
| AX-158114649 | 11 | 135     | KV452875.1 | 97044  | 5-scf00263 | 5 |
| AX-158114654 | 11 | 135     | KV452875.1 | 105147 | 5-scf00263 | 5 |
| AX-157709411 | 11 | 135     | KV452873.1 | 2054   | 5-scf00264 | 5 |
| AX-157680319 | 11 | 135     | KV452876.1 | 287    | 5-scf00265 | 5 |
| AX-157683479 | 11 | 135.109 | KV452870.1 | 26868  | 5-scf00260 | 5 |
| AX-158114529 | 11 | 135.109 | KV452870.1 | 105033 | 5-scf00260 | 5 |
| AX-157828225 | 11 | 135.109 | KV452875.1 | 46814  | 5-scf00263 | 5 |
| AX-158114627 | 11 | 135.109 | KV452875.1 | 70584  | 5-scf00263 | 5 |
| AX-157683520 | 11 | 135.109 | KV452873.1 | 13917  | 5-scf00264 | 5 |
| AX-158114677 | 11 | 135.109 | KV452878.1 | 47283  | 5-scf00266 | 5 |
| AX-158114680 | 11 | 135.109 | KV452878.1 | 51037  | 5-scf00266 | 5 |
| AX-158114685 | 11 | 135.109 | KV452878.1 | 57826  | 5-scf00266 | 5 |
| AX-158114691 | 11 | 135.109 | KV452878.1 | 63021  | 5-scf00266 | 5 |
| AX-157828233 | 11 | 135.109 | KV452878.1 | 67127  | 5-scf00266 | 5 |
| AX-158114702 | 11 | 135.109 | KV452878.1 | 73301  | 5-scf00266 | 5 |
| AX-158114705 | 11 | 135.109 | KV452878.1 | 75903  | 5-scf00266 | 5 |
| AX-157828236 | 11 | 135.109 | KV452878.1 | 91856  | 5-scf00266 | 5 |
| AX-157723421 | 11 | 135.109 | KV452878.1 | 97928  | 5-scf00266 | 5 |
| AX-158114717 | 11 | 135.109 | KV452878.1 | 100363 | 5-scf00266 | 5 |
| AX-158114723 | 11 | 135.109 | KV452878.1 | 110427 | 5-scf00266 | 5 |
| AX-158114725 | 11 | 135.109 | KV452878.1 | 112868 | 5-scf00266 | 5 |

|              |    |         |             |         |            |    |
|--------------|----|---------|-------------|---------|------------|----|
| AX-158114726 | 11 | 135.109 | KV452878.1  | 113135  | 5-scf00266 | 5  |
| AX-158114727 | 11 | 135.109 | KV452878.1  | 113507  | 5-scf00266 | 5  |
| AX-158114738 | 11 | 135.109 | KV452878.1  | 126040  | 5-scf00266 | 5  |
| AX-158114745 | 11 | 135.109 | KV452878.1  | 147268  | 5-scf00266 | 5  |
| AX-157708762 | 11 | 135.109 | KV452878.1  | 148046  | 5-scf00266 | 5  |
| AX-158114755 | 11 | 135.109 | KV452878.1  | 157338  | 5-scf00266 | 5  |
| AX-158114756 | 11 | 135.109 | KV452878.1  | 160463  | 5-scf00266 | 5  |
| AX-158114758 | 11 | 135.109 | KV452878.1  | 166497  | 5-scf00266 | 5  |
| AX-158114760 | 11 | 135.109 | KV452878.1  | 167391  | 5-scf00266 | 5  |
| AX-157828239 | 11 | 135.109 | KV452878.1  | 167678  | 5-scf00266 | 5  |
| AX-158114835 | 11 | 135.109 | KV452882.1  | 254817  | 5-scf00267 | 5  |
| AX-157680666 | 11 | 135.109 | KV452879.1  | 56150   | 5-scf00268 | 5  |
| AX-157683546 | 11 | 135.109 | KV452879.1  | 59330   | 5-scf00268 | 5  |
| AX-157681357 | 11 | 135.109 | KV452879.1  | 62478   | 5-scf00268 | 5  |
| AX-157682153 | 11 | 135.109 | KV452879.1  | 66962   | 5-scf00268 | 5  |
| AX-157683557 | 11 | 135.109 | KV452880.1  | 11436   | 5-scf00269 | 5  |
| AX-157683558 | 11 | 135.109 | KV452880.1  | 13110   | 5-scf00269 | 5  |
| AX-157683564 | 11 | 135.109 | KV452880.1  | 31207   | 5-scf00269 | 5  |
| AX-157683565 | 11 | 135.109 | KV452880.1  | 32993   | 5-scf00269 | 5  |
| AX-157683567 | 11 | 135.109 | KV452880.1  | 35821   | 5-scf00269 | 5  |
| AX-157683569 | 11 | 135.109 | KV452880.1  | 38525   | 5-scf00269 | 5  |
| AX-157680675 | 11 | 135.109 | KV452881.1  | 57      | 5-scf00270 | 5  |
| AX-157705255 | 11 | 135.109 | 3ML01029227 | 245     | scf04848_1 | UN |
| AX-157687047 | 11 | 135.437 | KV452874.1  | 1706    | 5-scf00784 | 5  |
| AX-157687052 | 11 | 135.437 | KV452874.1  | 11506   | 5-scf00784 | 5  |
| AX-157689792 | 11 | 135.437 | 3ML01032510 | 169     | scf08131_1 | UN |
| AX-158114557 | 11 | 135.611 | KV452872.1  | 58611   | 5-scf00262 | 5  |
| AX-157680214 | 11 | 135.611 | KV452874.1  | 22407   | 5-scf00784 | 5  |
| AX-158105037 | 11 | 135.765 | KV452856.1  | 3665450 | 5-scf00247 | 5  |
| AX-158410492 | 11 | 135.765 | KV452856.1  | 3684081 | 5-scf00247 | 5  |
| AX-157743996 | 11 | 135.765 | KV452868.1  | 144249  | 5-scf00256 | 5  |
| AX-157683497 | 11 | 135.765 | KV452870.1  | 4040    | 5-scf00260 | 5  |
| AX-157885951 | 11 | 135.765 | KV452870.1  | 137621  | 5-scf00260 | 5  |
| AX-157683506 | 11 | 135.765 | KV452871.1  | 7121    | 5-scf00261 | 5  |
| AX-157828219 | 11 | 135.765 | KV452872.1  | 16556   | 5-scf00262 | 5  |
| AX-157828218 | 11 | 135.765 | KV452872.1  | 16702   | 5-scf00262 | 5  |
| AX-158114592 | 11 | 135.765 | KV452872.1  | 18035   | 5-scf00262 | 5  |
| AX-158114591 | 11 | 135.765 | KV452872.1  | 19626   | 5-scf00262 | 5  |
| AX-158114582 | 11 | 135.765 | KV452872.1  | 30247   | 5-scf00262 | 5  |
| AX-158114579 | 11 | 135.765 | KV452872.1  | 33742   | 5-scf00262 | 5  |
| AX-158114578 | 11 | 135.765 | KV452872.1  | 34180   | 5-scf00262 | 5  |
| AX-158114558 | 11 | 135.765 | KV452872.1  | 55123   | 5-scf00262 | 5  |
| AX-158114632 | 11 | 135.765 | KV452875.1  | 75271   | 5-scf00263 | 5  |
| AX-158114647 | 11 | 135.765 | KV452875.1  | 95096   | 5-scf00263 | 5  |
| AX-158114650 | 11 | 135.765 | KV452875.1  | 97784   | 5-scf00263 | 5  |
| AX-157710340 | 11 | 135.765 | KV452873.1  | 1435    | 5-scf00264 | 5  |
| AX-157679956 | 11 | 135.765 | KV452873.1  | 34472   | 5-scf00264 | 5  |
| AX-157686880 | 11 | 135.765 | KV452873.1  | 38521   | 5-scf00264 | 5  |
| AX-158114660 | 11 | 135.765 | KV452878.1  | 14767   | 5-scf00266 | 5  |
| AX-158114662 | 11 | 135.765 | KV452878.1  | 16679   | 5-scf00266 | 5  |
| AX-157828230 | 11 | 135.765 | KV452878.1  | 37272   | 5-scf00266 | 5  |

|              |    |         |            |        |            |   |
|--------------|----|---------|------------|--------|------------|---|
| AX-158114674 | 11 | 135.765 | KV452878.1 | 43636  | 5-scf00266 | 5 |
| AX-158114678 | 11 | 135.765 | KV452878.1 | 48971  | 5-scf00266 | 5 |
| AX-158114681 | 11 | 135.765 | KV452878.1 | 51752  | 5-scf00266 | 5 |
| AX-158114684 | 11 | 135.765 | KV452878.1 | 56419  | 5-scf00266 | 5 |
| AX-157828231 | 11 | 135.765 | KV452878.1 | 61520  | 5-scf00266 | 5 |
| AX-158114690 | 11 | 135.765 | KV452878.1 | 62198  | 5-scf00266 | 5 |
| AX-158114695 | 11 | 135.765 | KV452878.1 | 67561  | 5-scf00266 | 5 |
| AX-158114697 | 11 | 135.765 | KV452878.1 | 69649  | 5-scf00266 | 5 |
| AX-158114708 | 11 | 135.765 | KV452878.1 | 81705  | 5-scf00266 | 5 |
| AX-158114709 | 11 | 135.765 | KV452878.1 | 83093  | 5-scf00266 | 5 |
| AX-157715669 | 11 | 135.765 | KV452878.1 | 84122  | 5-scf00266 | 5 |
| AX-158114715 | 11 | 135.765 | KV452878.1 | 99413  | 5-scf00266 | 5 |
| AX-158114721 | 11 | 135.765 | KV452878.1 | 108500 | 5-scf00266 | 5 |
| AX-158114728 | 11 | 135.765 | KV452878.1 | 113981 | 5-scf00266 | 5 |
| AX-158114732 | 11 | 135.765 | KV452878.1 | 116871 | 5-scf00266 | 5 |
| AX-158114733 | 11 | 135.765 | KV452878.1 | 117106 | 5-scf00266 | 5 |
| AX-158114740 | 11 | 135.765 | KV452878.1 | 132916 | 5-scf00266 | 5 |
| AX-158114741 | 11 | 135.765 | KV452878.1 | 140688 | 5-scf00266 | 5 |
| AX-158114743 | 11 | 135.765 | KV452878.1 | 146285 | 5-scf00266 | 5 |
| AX-158114748 | 11 | 135.765 | KV452878.1 | 150458 | 5-scf00266 | 5 |
| AX-158114751 | 11 | 135.765 | KV452878.1 | 151926 | 5-scf00266 | 5 |
| AX-158114753 | 11 | 135.765 | KV452878.1 | 156602 | 5-scf00266 | 5 |
| AX-158114766 | 11 | 135.765 | KV452882.1 | 386    | 5-scf00267 | 5 |
| AX-158114767 | 11 | 135.765 | KV452882.1 | 619    | 5-scf00267 | 5 |
| AX-158114768 | 11 | 135.765 | KV452882.1 | 903    | 5-scf00267 | 5 |
| AX-158114769 | 11 | 135.765 | KV452882.1 | 1088   | 5-scf00267 | 5 |
| AX-158114771 | 11 | 135.765 | KV452882.1 | 5150   | 5-scf00267 | 5 |
| AX-158114775 | 11 | 135.765 | KV452882.1 | 12617  | 5-scf00267 | 5 |
| AX-158114778 | 11 | 135.765 | KV452882.1 | 16343  | 5-scf00267 | 5 |
| AX-158114780 | 11 | 135.765 | KV452882.1 | 23308  | 5-scf00267 | 5 |
| AX-158114781 | 11 | 135.765 | KV452882.1 | 24573  | 5-scf00267 | 5 |
| AX-158114782 | 11 | 135.765 | KV452882.1 | 24828  | 5-scf00267 | 5 |
| AX-158114785 | 11 | 135.765 | KV452882.1 | 30571  | 5-scf00267 | 5 |
| AX-158114788 | 11 | 135.765 | KV452882.1 | 34325  | 5-scf00267 | 5 |
| AX-158114790 | 11 | 135.765 | KV452882.1 | 36118  | 5-scf00267 | 5 |
| AX-157828240 | 11 | 135.765 | KV452882.1 | 39298  | 5-scf00267 | 5 |
| AX-158114791 | 11 | 135.765 | KV452882.1 | 42109  | 5-scf00267 | 5 |
| AX-158114794 | 11 | 135.765 | KV452882.1 | 56824  | 5-scf00267 | 5 |
| AX-158114795 | 11 | 135.765 | KV452882.1 | 62131  | 5-scf00267 | 5 |
| AX-157828245 | 11 | 135.765 | KV452882.1 | 68251  | 5-scf00267 | 5 |
| AX-157871226 | 11 | 135.765 | KV452882.1 | 70268  | 5-scf00267 | 5 |
| AX-157885953 | 11 | 135.765 | KV452882.1 | 83261  | 5-scf00267 | 5 |
| AX-157857485 | 11 | 135.765 | KV452882.1 | 85379  | 5-scf00267 | 5 |
| AX-158114802 | 11 | 135.765 | KV452882.1 | 109595 | 5-scf00267 | 5 |
| AX-158114803 | 11 | 135.765 | KV452882.1 | 111842 | 5-scf00267 | 5 |
| AX-158114804 | 11 | 135.765 | KV452882.1 | 115649 | 5-scf00267 | 5 |
| AX-158114805 | 11 | 135.765 | KV452882.1 | 115894 | 5-scf00267 | 5 |
| AX-158114809 | 11 | 135.765 | KV452882.1 | 131799 | 5-scf00267 | 5 |
| AX-158114810 | 11 | 135.765 | KV452882.1 | 133317 | 5-scf00267 | 5 |
| AX-158114812 | 11 | 135.765 | KV452882.1 | 143662 | 5-scf00267 | 5 |
| AX-157828250 | 11 | 135.765 | KV452882.1 | 146178 | 5-scf00267 | 5 |

|              |    |         |             |        |             |    |
|--------------|----|---------|-------------|--------|-------------|----|
| AX-157828251 | 11 | 135.765 | KV452882.1  | 146403 | 5-scf00267  | 5  |
| AX-158114814 | 11 | 135.765 | KV452882.1  | 149455 | 5-scf00267  | 5  |
| AX-158114815 | 11 | 135.765 | KV452882.1  | 151292 | 5-scf00267  | 5  |
| AX-158114818 | 11 | 135.765 | KV452882.1  | 179174 | 5-scf00267  | 5  |
| AX-158114819 | 11 | 135.765 | KV452882.1  | 184309 | 5-scf00267  | 5  |
| AX-158114821 | 11 | 135.765 | KV452882.1  | 189022 | 5-scf00267  | 5  |
| AX-158114822 | 11 | 135.765 | KV452882.1  | 189186 | 5-scf00267  | 5  |
| AX-158114825 | 11 | 135.765 | KV452882.1  | 208632 | 5-scf00267  | 5  |
| AX-158114834 | 11 | 135.765 | KV452882.1  | 251657 | 5-scf00267  | 5  |
| AX-157683529 | 11 | 135.765 | KV452879.1  | 8860   | 5-scf00268  | 5  |
| AX-157679958 | 11 | 135.765 | KV452879.1  | 9694   | 5-scf00268  | 5  |
| AX-157680664 | 11 | 135.765 | KV452879.1  | 17914  | 5-scf00268  | 5  |
| AX-157683537 | 11 | 135.765 | KV452879.1  | 24093  | 5-scf00268  | 5  |
| AX-157683541 | 11 | 135.765 | KV452879.1  | 37983  | 5-scf00268  | 5  |
| AX-157683548 | 11 | 135.765 | KV452879.1  | 63564  | 5-scf00268  | 5  |
| AX-157680669 | 11 | 135.765 | KV452879.1  | 71266  | 5-scf00268  | 5  |
| AX-157683553 | 11 | 135.765 | KV452879.1  | 71843  | 5-scf00268  | 5  |
| AX-157683554 | 11 | 135.765 | KV452879.1  | 72675  | 5-scf00268  | 5  |
| AX-157680670 | 11 | 135.765 | KV452880.1  | 10769  | 5-scf00269  | 5  |
| AX-157683560 | 11 | 135.765 | KV452880.1  | 19151  | 5-scf00269  | 5  |
| AX-157683563 | 11 | 135.765 | KV452880.1  | 28904  | 5-scf00269  | 5  |
| AX-157680674 | 11 | 135.765 | KV452880.1  | 36591  | 5-scf00269  | 5  |
| AX-157680970 | 11 | 135.765 | KV452874.1  | 4236   | 5-scf00784  | 5  |
| AX-157687051 | 11 | 135.765 | KV452874.1  | 9512   | 5-scf00784  | 5  |
| AX-157680971 | 11 | 135.765 | KV452874.1  | 20803  | 5-scf00784  | 5  |
| AX-157681052 | 11 | 135.765 | KV452877.1  | 684    | 5-scf01436  | 5  |
| AX-157681136 | 11 | 135.765 | 3ML01032129 | 107    | scf07742_1  | UN |
| AX-157689933 | 11 | 135.765 |             | 220    | scf13979    | UN |
| AX-158115174 | 12 | 0       | KV453008.1  | 89392  | 12-scf00272 | 12 |
| AX-158115175 | 12 | 0       | KV453008.1  | 90981  | 12-scf00272 | 12 |
| AX-158115197 | 12 | 0.115   | KV453008.1  | 133024 | 12-scf00272 | 12 |
| AX-158115199 | 12 | 0.115   | KV453008.1  | 133776 | 12-scf00272 | 12 |
| AX-158115201 | 12 | 0.115   | KV453008.1  | 134191 | 12-scf00272 | 12 |
| AX-158115485 | 12 | 0.115   | KV453008.1  | 665345 | 12-scf00272 | 12 |
| AX-158115202 | 12 | 0.141   | KV453008.1  | 134746 | 12-scf00272 | 12 |
| AX-158115208 | 12 | 0.141   | KV453008.1  | 140243 | 12-scf00272 | 12 |
| AX-158115333 | 12 | 0.141   | KV453008.1  | 399100 | 12-scf00272 | 12 |
| AX-158115337 | 12 | 0.141   | KV453008.1  | 410193 | 12-scf00272 | 12 |
| AX-157828343 | 12 | 0.141   | KV453008.1  | 421006 | 12-scf00272 | 12 |
| AX-158115486 | 12 | 0.141   | KV453008.1  | 666127 | 12-scf00272 | 12 |
| AX-158115179 | 12 | 0.166   | KV453008.1  | 96188  | 12-scf00272 | 12 |
| AX-157828322 | 12 | 0.166   | KV453008.1  | 103752 | 12-scf00272 | 12 |
| AX-158407784 | 12 | 0.166   | KV453008.1  | 118987 | 12-scf00272 | 12 |
| AX-158115203 | 12 | 0.166   | KV453008.1  | 136245 | 12-scf00272 | 12 |
| AX-158115204 | 12 | 0.166   | KV453008.1  | 136453 | 12-scf00272 | 12 |
| AX-157744580 | 12 | 0.166   | KV453008.1  | 136709 | 12-scf00272 | 12 |
| AX-158115206 | 12 | 0.166   | KV453008.1  | 138650 | 12-scf00272 | 12 |
| AX-157828325 | 12 | 0.166   | KV453008.1  | 142093 | 12-scf00272 | 12 |
| AX-158115209 | 12 | 0.166   | KV453008.1  | 142479 | 12-scf00272 | 12 |
| AX-158115212 | 12 | 0.166   | KV453008.1  | 144579 | 12-scf00272 | 12 |
| AX-157758537 | 12 | 0.166   | KV453008.1  | 147704 | 12-scf00272 | 12 |

|              |    |       |            |        |             |    |
|--------------|----|-------|------------|--------|-------------|----|
| AX-158115217 | 12 | 0.166 | KV453008.1 | 154855 | 12-scf00272 | 12 |
| AX-158115219 | 12 | 0.166 | KV453008.1 | 158713 | 12-scf00272 | 12 |
| AX-158115222 | 12 | 0.166 | KV453008.1 | 161978 | 12-scf00272 | 12 |
| AX-158115223 | 12 | 0.166 | KV453008.1 | 164880 | 12-scf00272 | 12 |
| AX-158115230 | 12 | 0.166 | KV453008.1 | 175781 | 12-scf00272 | 12 |
| AX-157828329 | 12 | 0.166 | KV453008.1 | 236762 | 12-scf00272 | 12 |
| AX-157828334 | 12 | 0.166 | KV453008.1 | 276977 | 12-scf00272 | 12 |
| AX-158115271 | 12 | 0.166 | KV453008.1 | 285351 | 12-scf00272 | 12 |
| AX-158115272 | 12 | 0.166 | KV453008.1 | 289340 | 12-scf00272 | 12 |
| AX-158115275 | 12 | 0.166 | KV453008.1 | 296333 | 12-scf00272 | 12 |
| AX-158115276 | 12 | 0.166 | KV453008.1 | 299630 | 12-scf00272 | 12 |
| AX-157693821 | 12 | 0.166 | KV453008.1 | 303056 | 12-scf00272 | 12 |
| AX-158115280 | 12 | 0.166 | KV453008.1 | 303867 | 12-scf00272 | 12 |
| AX-157720852 | 12 | 0.166 | KV453008.1 | 303986 | 12-scf00272 | 12 |
| AX-157709358 | 12 | 0.166 | KV453008.1 | 309281 | 12-scf00272 | 12 |
| AX-158115283 | 12 | 0.166 | KV453008.1 | 310255 | 12-scf00272 | 12 |
| AX-158115284 | 12 | 0.166 | KV453008.1 | 310743 | 12-scf00272 | 12 |
| AX-158115286 | 12 | 0.166 | KV453008.1 | 315171 | 12-scf00272 | 12 |
| AX-158115287 | 12 | 0.166 | KV453008.1 | 315860 | 12-scf00272 | 12 |
| AX-157694012 | 12 | 0.166 | KV453008.1 | 316801 | 12-scf00272 | 12 |
| AX-158115293 | 12 | 0.166 | KV453008.1 | 324957 | 12-scf00272 | 12 |
| AX-158115295 | 12 | 0.166 | KV453008.1 | 328292 | 12-scf00272 | 12 |
| AX-158115296 | 12 | 0.166 | KV453008.1 | 328969 | 12-scf00272 | 12 |
| AX-157828338 | 12 | 0.166 | KV453008.1 | 332894 | 12-scf00272 | 12 |
| AX-157741642 | 12 | 0.166 | KV453008.1 | 379439 | 12-scf00272 | 12 |
| AX-158115320 | 12 | 0.166 | KV453008.1 | 380497 | 12-scf00272 | 12 |
| AX-158115326 | 12 | 0.166 | KV453008.1 | 389112 | 12-scf00272 | 12 |
| AX-158115351 | 12 | 0.166 | KV453008.1 | 431478 | 12-scf00272 | 12 |
| AX-158115366 | 12 | 0.166 | KV453008.1 | 455176 | 12-scf00272 | 12 |
| AX-157756494 | 12 | 0.166 | KV453008.1 | 561450 | 12-scf00272 | 12 |
| AX-158115452 | 12 | 0.166 | KV453008.1 | 590063 | 12-scf00272 | 12 |
| AX-158115569 | 12 | 0.166 | KV453008.1 | 814180 | 12-scf00272 | 12 |
| AX-158115323 | 12 | 0.183 | KV453008.1 | 382294 | 12-scf00272 | 12 |
| AX-158115321 | 12 | 0.226 | KV453008.1 | 381204 | 12-scf00272 | 12 |
| AX-158115334 | 12 | 0.226 | KV453008.1 | 399826 | 12-scf00272 | 12 |
| AX-158115454 | 12 | 0.226 | KV453008.1 | 595839 | 12-scf00272 | 12 |
| AX-158115253 | 12 | 0.276 | KV453008.1 | 241273 | 12-scf00272 | 12 |
| AX-157758020 | 12 | 0.276 | KV453008.1 | 326054 | 12-scf00272 | 12 |
| AX-157828339 | 12 | 0.276 | KV453008.1 | 365083 | 12-scf00272 | 12 |
| AX-157828341 | 12 | 0.276 | KV453008.1 | 401717 | 12-scf00272 | 12 |
| AX-158115335 | 12 | 0.276 | KV453008.1 | 403314 | 12-scf00272 | 12 |
| AX-158115336 | 12 | 0.276 | KV453008.1 | 404427 | 12-scf00272 | 12 |
| AX-158115338 | 12 | 0.276 | KV453008.1 | 410906 | 12-scf00272 | 12 |
| AX-158115339 | 12 | 0.276 | KV453008.1 | 411896 | 12-scf00272 | 12 |
| AX-158115344 | 12 | 0.276 | KV453008.1 | 423107 | 12-scf00272 | 12 |
| AX-158410911 | 12 | 0.276 | KV453008.1 | 438345 | 12-scf00272 | 12 |
| AX-158115355 | 12 | 0.276 | KV453008.1 | 440969 | 12-scf00272 | 12 |
| AX-158115356 | 12 | 0.276 | KV453008.1 | 441240 | 12-scf00272 | 12 |
| AX-157828346 | 12 | 0.276 | KV453008.1 | 445127 | 12-scf00272 | 12 |
| AX-158115359 | 12 | 0.276 | KV453008.1 | 446449 | 12-scf00272 | 12 |
| AX-158115360 | 12 | 0.276 | KV453008.1 | 447098 | 12-scf00272 | 12 |

|              |    |       |            |        |             |    |
|--------------|----|-------|------------|--------|-------------|----|
| AX-157828348 | 12 | 0.276 | KV453008.1 | 471129 | 12-scf00272 | 12 |
| AX-158115362 | 12 | 0.316 | KV453008.1 | 450341 | 12-scf00272 | 12 |
| AX-157715969 | 12 | 0.342 | KV453008.1 | 279506 | 12-scf00272 | 12 |
| AX-158115373 | 12 | 0.342 | KV453008.1 | 466126 | 12-scf00272 | 12 |
| AX-158115380 | 12 | 0.385 | KV453008.1 | 482251 | 12-scf00272 | 12 |
| AX-158115381 | 12 | 0.423 | KV453008.1 | 483216 | 12-scf00272 | 12 |
| AX-157828335 | 12 | 0.494 | KV453008.1 | 331620 | 12-scf00272 | 12 |
| AX-158115304 | 12 | 0.494 | KV453008.1 | 339943 | 12-scf00272 | 12 |
| AX-158115391 | 12 | 0.494 | KV453008.1 | 501613 | 12-scf00272 | 12 |
| AX-158115393 | 12 | 0.494 | KV453008.1 | 505312 | 12-scf00272 | 12 |
| AX-158115395 | 12 | 0.494 | KV453008.1 | 512587 | 12-scf00272 | 12 |
| AX-157723919 | 12 | 0.512 | KV453008.1 | 514465 | 12-scf00272 | 12 |
| AX-158115396 | 12 | 0.527 | KV453008.1 | 515861 | 12-scf00272 | 12 |
| AX-158115399 | 12 | 0.542 | KV453008.1 | 518704 | 12-scf00272 | 12 |
| AX-158115400 | 12 | 0.561 | KV453008.1 | 519048 | 12-scf00272 | 12 |
| AX-158115403 | 12 | 0.58  | KV453008.1 | 522336 | 12-scf00272 | 12 |
| AX-158115404 | 12 | 0.58  | KV453008.1 | 522935 | 12-scf00272 | 12 |
| AX-158115406 | 12 | 0.592 | KV453008.1 | 523916 | 12-scf00272 | 12 |
| AX-157828354 | 12 | 0.592 | KV453008.1 | 556615 | 12-scf00272 | 12 |
| AX-157742229 | 12 | 0.603 | KV453008.1 | 536823 | 12-scf00272 | 12 |
| AX-157716534 | 12 | 0.603 | KV453008.1 | 716028 | 12-scf00272 | 12 |
| AX-157743959 | 12 | 0.618 | KV453008.1 | 537579 | 12-scf00272 | 12 |
| AX-158115413 | 12 | 0.641 | KV453008.1 | 542682 | 12-scf00272 | 12 |
| AX-157742818 | 12 | 0.664 | KV453008.1 | 543919 | 12-scf00272 | 12 |
| AX-157828353 | 12 | 0.682 | KV453008.1 | 543999 | 12-scf00272 | 12 |
| AX-158115434 | 12 | 0.682 | KV453008.1 | 568708 | 12-scf00272 | 12 |
| AX-158115414 | 12 | 0.699 | KV453008.1 | 545126 | 12-scf00272 | 12 |
| AX-158115424 | 12 | 0.699 | KV453008.1 | 555052 | 12-scf00272 | 12 |
| AX-158114847 | 12 | 0.713 | KV453009.1 | 14057  | 12-scf00271 | 12 |
| AX-157857491 | 12 | 0.713 | KV453009.1 | 34571  | 12-scf00271 | 12 |
| AX-158114865 | 12 | 0.713 | KV453009.1 | 55360  | 12-scf00271 | 12 |
| AX-158114872 | 12 | 0.713 | KV453009.1 | 75260  | 12-scf00271 | 12 |
| AX-158114877 | 12 | 0.713 | KV453009.1 | 83276  | 12-scf00271 | 12 |
| AX-158114880 | 12 | 0.713 | KV453009.1 | 90257  | 12-scf00271 | 12 |
| AX-158407773 | 12 | 0.713 | KV453009.1 | 97851  | 12-scf00271 | 12 |
| AX-158114887 | 12 | 0.713 | KV453009.1 | 113919 | 12-scf00271 | 12 |
| AX-158410872 | 12 | 0.713 | KV453009.1 | 123632 | 12-scf00271 | 12 |
| AX-157828257 | 12 | 0.713 | KV453009.1 | 139430 | 12-scf00271 | 12 |
| AX-157857496 | 12 | 0.713 | KV453009.1 | 145445 | 12-scf00271 | 12 |
| AX-158114902 | 12 | 0.713 | KV453009.1 | 162908 | 12-scf00271 | 12 |
| AX-158114928 | 12 | 0.713 | KV453009.1 | 246349 | 12-scf00271 | 12 |
| AX-158114930 | 12 | 0.713 | KV453009.1 | 252963 | 12-scf00271 | 12 |
| AX-158114931 | 12 | 0.713 | KV453009.1 | 260106 | 12-scf00271 | 12 |
| AX-157750303 | 12 | 0.713 | KV453009.1 | 282551 | 12-scf00271 | 12 |
| AX-157828271 | 12 | 0.713 | KV453009.1 | 291494 | 12-scf00271 | 12 |
| AX-157885958 | 12 | 0.713 | KV453009.1 | 300089 | 12-scf00271 | 12 |
| AX-158114944 | 12 | 0.713 | KV453009.1 | 318897 | 12-scf00271 | 12 |
| AX-158114949 | 12 | 0.713 | KV453009.1 | 342699 | 12-scf00271 | 12 |
| AX-158114955 | 12 | 0.713 | KV453009.1 | 383494 | 12-scf00271 | 12 |
| AX-158114960 | 12 | 0.713 | KV453009.1 | 417878 | 12-scf00271 | 12 |
| AX-158114962 | 12 | 0.713 | KV453009.1 | 426710 | 12-scf00271 | 12 |

|              |    |       |            |        |             |    |
|--------------|----|-------|------------|--------|-------------|----|
| AX-158392653 | 12 | 0.713 | KV453009.1 | 436790 | 12-scf00271 | 12 |
| AX-157720066 | 12 | 0.713 | KV453009.1 | 445092 | 12-scf00271 | 12 |
| AX-157828289 | 12 | 0.713 | KV453009.1 | 467326 | 12-scf00271 | 12 |
| AX-158114972 | 12 | 0.713 | KV453009.1 | 470370 | 12-scf00271 | 12 |
| AX-158114975 | 12 | 0.713 | KV453009.1 | 480569 | 12-scf00271 | 12 |
| AX-158114977 | 12 | 0.713 | KV453009.1 | 485243 | 12-scf00271 | 12 |
| AX-157828292 | 12 | 0.713 | KV453009.1 | 494751 | 12-scf00271 | 12 |
| AX-158114984 | 12 | 0.713 | KV453009.1 | 507515 | 12-scf00271 | 12 |
| AX-158114987 | 12 | 0.713 | KV453009.1 | 518884 | 12-scf00271 | 12 |
| AX-158114991 | 12 | 0.713 | KV453009.1 | 530829 | 12-scf00271 | 12 |
| AX-158115001 | 12 | 0.713 | KV453009.1 | 577360 | 12-scf00271 | 12 |
| AX-158392655 | 12 | 0.713 | KV453009.1 | 577702 | 12-scf00271 | 12 |
| AX-158115006 | 12 | 0.713 | KV453009.1 | 611587 | 12-scf00271 | 12 |
| AX-157828298 | 12 | 0.713 | KV453009.1 | 628567 | 12-scf00271 | 12 |
| AX-157790771 | 12 | 0.713 | KV453009.1 | 634960 | 12-scf00271 | 12 |
| AX-158115011 | 12 | 0.713 | KV453009.1 | 640860 | 12-scf00271 | 12 |
| AX-157828300 | 12 | 0.713 | KV453009.1 | 652665 | 12-scf00271 | 12 |
| AX-158115014 | 12 | 0.713 | KV453009.1 | 659387 | 12-scf00271 | 12 |
| AX-157725106 | 12 | 0.713 | KV453009.1 | 712129 | 12-scf00271 | 12 |
| AX-158115032 | 12 | 0.713 | KV453009.1 | 720895 | 12-scf00271 | 12 |
| AX-158115038 | 12 | 0.713 | KV453009.1 | 735979 | 12-scf00271 | 12 |
| AX-158115041 | 12 | 0.713 | KV453009.1 | 751062 | 12-scf00271 | 12 |
| AX-157828309 | 12 | 0.713 | KV453009.1 | 761378 | 12-scf00271 | 12 |
| AX-158115046 | 12 | 0.713 | KV453009.1 | 771102 | 12-scf00271 | 12 |
| AX-158115048 | 12 | 0.713 | KV453009.1 | 782028 | 12-scf00271 | 12 |
| AX-158115056 | 12 | 0.713 | KV453009.1 | 805116 | 12-scf00271 | 12 |
| AX-157871232 | 12 | 0.713 | KV453009.1 | 839475 | 12-scf00271 | 12 |
| AX-157857524 | 12 | 0.713 | KV453009.1 | 852950 | 12-scf00271 | 12 |
| AX-158115071 | 12 | 0.713 | KV453009.1 | 856833 | 12-scf00271 | 12 |
| AX-157857525 | 12 | 0.713 | KV453009.1 | 859309 | 12-scf00271 | 12 |
| AX-158115077 | 12 | 0.713 | KV453009.1 | 869134 | 12-scf00271 | 12 |
| AX-158115079 | 12 | 0.713 | KV453009.1 | 872031 | 12-scf00271 | 12 |
| AX-158115083 | 12 | 0.713 | KV453009.1 | 887060 | 12-scf00271 | 12 |
| AX-158115084 | 12 | 0.713 | KV453009.1 | 887569 | 12-scf00271 | 12 |
| AX-158115089 | 12 | 0.713 | KV453009.1 | 895838 | 12-scf00271 | 12 |
| AX-158115105 | 12 | 0.713 | KV453009.1 | 941967 | 12-scf00271 | 12 |
| AX-158115108 | 12 | 0.713 | KV453009.1 | 948743 | 12-scf00271 | 12 |
| AX-158115118 | 12 | 0.713 | KV453009.1 | 978009 | 12-scf00271 | 12 |
| AX-158115167 | 12 | 0.713 | KV453008.1 | 85644  | 12-scf00272 | 12 |
| AX-158115193 | 12 | 0.713 | KV453008.1 | 125690 | 12-scf00272 | 12 |
| AX-158115195 | 12 | 0.713 | KV453008.1 | 127426 | 12-scf00272 | 12 |
| AX-157885963 | 12 | 0.713 | KV453008.1 | 255109 | 12-scf00272 | 12 |
| AX-158115278 | 12 | 0.713 | KV453008.1 | 301851 | 12-scf00272 | 12 |
| AX-158115300 | 12 | 0.713 | KV453008.1 | 333002 | 12-scf00272 | 12 |
| AX-158115306 | 12 | 0.713 | KV453008.1 | 352113 | 12-scf00272 | 12 |
| AX-158115315 | 12 | 0.713 | KV453008.1 | 372503 | 12-scf00272 | 12 |
| AX-157714671 | 12 | 0.713 | KV453008.1 | 402958 | 12-scf00272 | 12 |
| AX-157770647 | 12 | 0.713 | KV453008.1 | 416186 | 12-scf00272 | 12 |
| AX-158115341 | 12 | 0.713 | KV453008.1 | 417135 | 12-scf00272 | 12 |
| AX-157828342 | 12 | 0.713 | KV453008.1 | 417342 | 12-scf00272 | 12 |
| AX-158115357 | 12 | 0.713 | KV453008.1 | 442415 | 12-scf00272 | 12 |



|              |    |       |            |        |             |    |
|--------------|----|-------|------------|--------|-------------|----|
| AX-158115378 | 12 | 0.713 | KV453008.1 | 476228 | 12-scf00272 | 12 |
| AX-158115417 | 12 | 0.713 | KV453008.1 | 550523 | 12-scf00272 | 12 |
| AX-158115419 | 12 | 0.713 | KV453008.1 | 552244 | 12-scf00272 | 12 |
| AX-158115436 | 12 | 0.713 | KV453008.1 | 571369 | 12-scf00272 | 12 |
| AX-158115439 | 12 | 0.713 | KV453008.1 | 572733 | 12-scf00272 | 12 |
| AX-158115441 | 12 | 0.713 | KV453008.1 | 577030 | 12-scf00272 | 12 |
| AX-158115442 | 12 | 0.713 | KV453008.1 | 577533 | 12-scf00272 | 12 |
| AX-158115444 | 12 | 0.713 | KV453008.1 | 578475 | 12-scf00272 | 12 |
| AX-158115445 | 12 | 0.713 | KV453008.1 | 579324 | 12-scf00272 | 12 |
| AX-158115447 | 12 | 0.713 | KV453008.1 | 581041 | 12-scf00272 | 12 |
| AX-158115448 | 12 | 0.713 | KV453008.1 | 583093 | 12-scf00272 | 12 |
| AX-157828358 | 12 | 0.713 | KV453008.1 | 584473 | 12-scf00272 | 12 |
| AX-158115450 | 12 | 0.713 | KV453008.1 | 585620 | 12-scf00272 | 12 |
| AX-158115451 | 12 | 0.713 | KV453008.1 | 589175 | 12-scf00272 | 12 |
| AX-158115455 | 12 | 0.713 | KV453008.1 | 596596 | 12-scf00272 | 12 |
| AX-158115456 | 12 | 0.713 | KV453008.1 | 597151 | 12-scf00272 | 12 |
| AX-158115459 | 12 | 0.713 | KV453008.1 | 604969 | 12-scf00272 | 12 |
| AX-158115460 | 12 | 0.713 | KV453008.1 | 608438 | 12-scf00272 | 12 |
| AX-158115461 | 12 | 0.713 | KV453008.1 | 608785 | 12-scf00272 | 12 |
| AX-157828363 | 12 | 0.713 | KV453008.1 | 609298 | 12-scf00272 | 12 |
| AX-158115477 | 12 | 0.713 | KV453008.1 | 639095 | 12-scf00272 | 12 |
| AX-157747940 | 12 | 0.713 | KV453008.1 | 640781 | 12-scf00272 | 12 |
| AX-157715647 | 12 | 0.713 | KV453008.1 | 648769 | 12-scf00272 | 12 |
| AX-158115481 | 12 | 0.713 | KV453008.1 | 660310 | 12-scf00272 | 12 |
| AX-158115482 | 12 | 0.713 | KV453008.1 | 661199 | 12-scf00272 | 12 |
| AX-158115483 | 12 | 0.713 | KV453008.1 | 661494 | 12-scf00272 | 12 |
| AX-158115484 | 12 | 0.713 | KV453008.1 | 663284 | 12-scf00272 | 12 |
| AX-158115488 | 12 | 0.713 | KV453008.1 | 667903 | 12-scf00272 | 12 |
| AX-158115489 | 12 | 0.713 | KV453008.1 | 668543 | 12-scf00272 | 12 |
| AX-158115492 | 12 | 0.713 | KV453008.1 | 675693 | 12-scf00272 | 12 |
| AX-157773473 | 12 | 0.713 | KV453008.1 | 678485 | 12-scf00272 | 12 |
| AX-158115493 | 12 | 0.713 | KV453008.1 | 680377 | 12-scf00272 | 12 |
| AX-157828372 | 12 | 0.713 | KV453008.1 | 681730 | 12-scf00272 | 12 |
| AX-158115494 | 12 | 0.713 | KV453008.1 | 682919 | 12-scf00272 | 12 |
| AX-158115495 | 12 | 0.713 | KV453008.1 | 683604 | 12-scf00272 | 12 |
| AX-158115496 | 12 | 0.713 | KV453008.1 | 685332 | 12-scf00272 | 12 |
| AX-158115497 | 12 | 0.713 | KV453008.1 | 687204 | 12-scf00272 | 12 |
| AX-157828375 | 12 | 0.713 | KV453008.1 | 687400 | 12-scf00272 | 12 |
| AX-158115498 | 12 | 0.713 | KV453008.1 | 689440 | 12-scf00272 | 12 |
| AX-158115499 | 12 | 0.713 | KV453008.1 | 691274 | 12-scf00272 | 12 |
| AX-158115501 | 12 | 0.713 | KV453008.1 | 692961 | 12-scf00272 | 12 |
| AX-157743228 | 12 | 0.713 | KV453008.1 | 694442 | 12-scf00272 | 12 |
| AX-158115503 | 12 | 0.713 | KV453008.1 | 696135 | 12-scf00272 | 12 |
| AX-158115504 | 12 | 0.713 | KV453008.1 | 697832 | 12-scf00272 | 12 |
| AX-158115505 | 12 | 0.713 | KV453008.1 | 698338 | 12-scf00272 | 12 |
| AX-158115507 | 12 | 0.713 | KV453008.1 | 699972 | 12-scf00272 | 12 |
| AX-158410926 | 12 | 0.713 | KV453008.1 | 700440 | 12-scf00272 | 12 |
| AX-158115508 | 12 | 0.713 | KV453008.1 | 700560 | 12-scf00272 | 12 |
| AX-157774952 | 12 | 0.713 | KV453008.1 | 700852 | 12-scf00272 | 12 |
| AX-158115512 | 12 | 0.713 | KV453008.1 | 712685 | 12-scf00272 | 12 |
| AX-157828376 | 12 | 0.713 | KV453008.1 | 715891 | 12-scf00272 | 12 |

|              |    |       |            |        |             |    |
|--------------|----|-------|------------|--------|-------------|----|
| AX-158115519 | 12 | 0.713 | KV453008.1 | 718558 | 12-scf00272 | 12 |
| AX-157828377 | 12 | 0.713 | KV453008.1 | 719173 | 12-scf00272 | 12 |
| AX-158115521 | 12 | 0.713 | KV453008.1 | 720554 | 12-scf00272 | 12 |
| AX-158115522 | 12 | 0.713 | KV453008.1 | 720845 | 12-scf00272 | 12 |
| AX-158115523 | 12 | 0.713 | KV453008.1 | 722091 | 12-scf00272 | 12 |
| AX-158115525 | 12 | 0.713 | KV453008.1 | 729474 | 12-scf00272 | 12 |
| AX-158115527 | 12 | 0.713 | KV453008.1 | 732334 | 12-scf00272 | 12 |
| AX-158115529 | 12 | 0.713 | KV453008.1 | 733684 | 12-scf00272 | 12 |
| AX-157828379 | 12 | 0.713 | KV453008.1 | 736932 | 12-scf00272 | 12 |
| AX-157828380 | 12 | 0.713 | KV453008.1 | 740353 | 12-scf00272 | 12 |
| AX-158115532 | 12 | 0.713 | KV453008.1 | 742785 | 12-scf00272 | 12 |
| AX-158115534 | 12 | 0.713 | KV453008.1 | 744123 | 12-scf00272 | 12 |
| AX-158115539 | 12 | 0.713 | KV453008.1 | 752352 | 12-scf00272 | 12 |
| AX-158410928 | 12 | 0.713 | KV453008.1 | 753747 | 12-scf00272 | 12 |
| AX-158115541 | 12 | 0.713 | KV453008.1 | 755204 | 12-scf00272 | 12 |
| AX-158115543 | 12 | 0.713 | KV453008.1 | 761453 | 12-scf00272 | 12 |
| AX-158115545 | 12 | 0.713 | KV453008.1 | 766677 | 12-scf00272 | 12 |
| AX-158115547 | 12 | 0.713 | KV453008.1 | 767303 | 12-scf00272 | 12 |
| AX-158115548 | 12 | 0.713 | KV453008.1 | 768165 | 12-scf00272 | 12 |
| AX-158115549 | 12 | 0.713 | KV453008.1 | 768540 | 12-scf00272 | 12 |
| AX-157828381 | 12 | 0.713 | KV453008.1 | 769016 | 12-scf00272 | 12 |
| AX-158115550 | 12 | 0.713 | KV453008.1 | 770752 | 12-scf00272 | 12 |
| AX-158115551 | 12 | 0.713 | KV453008.1 | 773332 | 12-scf00272 | 12 |
| AX-157828382 | 12 | 0.713 | KV453008.1 | 774749 | 12-scf00272 | 12 |
| AX-158115552 | 12 | 0.713 | KV453008.1 | 774858 | 12-scf00272 | 12 |
| AX-158115553 | 12 | 0.713 | KV453008.1 | 775487 | 12-scf00272 | 12 |
| AX-158115554 | 12 | 0.713 | KV453008.1 | 777014 | 12-scf00272 | 12 |
| AX-157828383 | 12 | 0.713 | KV453008.1 | 782236 | 12-scf00272 | 12 |
| AX-158115556 | 12 | 0.713 | KV453008.1 | 786054 | 12-scf00272 | 12 |
| AX-157828385 | 12 | 0.713 | KV453008.1 | 796940 | 12-scf00272 | 12 |
| AX-157828386 | 12 | 0.713 | KV453008.1 | 797285 | 12-scf00272 | 12 |
| AX-157747162 | 12 | 0.713 | KV453008.1 | 798771 | 12-scf00272 | 12 |
| AX-157828387 | 12 | 0.713 | KV453008.1 | 801490 | 12-scf00272 | 12 |
| AX-157828389 | 12 | 0.713 | KV453008.1 | 802015 | 12-scf00272 | 12 |
| AX-157828391 | 12 | 0.713 | KV453008.1 | 807585 | 12-scf00272 | 12 |
| AX-158115563 | 12 | 0.713 | KV453008.1 | 808878 | 12-scf00272 | 12 |
| AX-158115565 | 12 | 0.713 | KV453008.1 | 810477 | 12-scf00272 | 12 |
| AX-158115566 | 12 | 0.713 | KV453008.1 | 811362 | 12-scf00272 | 12 |
| AX-158115567 | 12 | 0.713 | KV453008.1 | 812859 | 12-scf00272 | 12 |
| AX-157828392 | 12 | 0.713 | KV453008.1 | 813054 | 12-scf00272 | 12 |
| AX-158115570 | 12 | 0.713 | KV453008.1 | 816278 | 12-scf00272 | 12 |
| AX-157857531 | 12 | 0.713 | KV453008.1 | 816508 | 12-scf00272 | 12 |
| AX-158115575 | 12 | 0.713 | KV453008.1 | 825438 | 12-scf00272 | 12 |
| AX-158115576 | 12 | 0.713 | KV453008.1 | 826104 | 12-scf00272 | 12 |
| AX-158115577 | 12 | 0.713 | KV453008.1 | 828889 | 12-scf00272 | 12 |
| AX-157828393 | 12 | 0.713 | KV453008.1 | 829546 | 12-scf00272 | 12 |
| AX-158115578 | 12 | 0.713 | KV453008.1 | 829604 | 12-scf00272 | 12 |
| AX-157828394 | 12 | 0.713 | KV453008.1 | 830134 | 12-scf00272 | 12 |
| AX-158115580 | 12 | 0.713 | KV453008.1 | 831369 | 12-scf00272 | 12 |
| AX-158115581 | 12 | 0.713 | KV453008.1 | 832679 | 12-scf00272 | 12 |
| AX-158115582 | 12 | 0.713 | KV453008.1 | 833187 | 12-scf00272 | 12 |

|              |    |       |            |        |             |    |
|--------------|----|-------|------------|--------|-------------|----|
| AX-158115586 | 12 | 0.713 | KV453008.1 | 838766 | 12-scf00272 | 12 |
| AX-158115587 | 12 | 0.713 | KV453008.1 | 839206 | 12-scf00272 | 12 |
| AX-158115589 | 12 | 0.713 | KV453008.1 | 840761 | 12-scf00272 | 12 |
| AX-158115590 | 12 | 0.713 | KV453008.1 | 842365 | 12-scf00272 | 12 |
| AX-158115591 | 12 | 0.713 | KV453008.1 | 845191 | 12-scf00272 | 12 |
| AX-158410929 | 12 | 0.713 | KV453008.1 | 845258 | 12-scf00272 | 12 |
| AX-158410930 | 12 | 0.713 | KV453008.1 | 845542 | 12-scf00272 | 12 |
| AX-158115592 | 12 | 0.713 | KV453008.1 | 845959 | 12-scf00272 | 12 |
| AX-158115593 | 12 | 0.713 | KV453008.1 | 847190 | 12-scf00272 | 12 |
| AX-157828397 | 12 | 0.713 | KV453008.1 | 848355 | 12-scf00272 | 12 |
| AX-157757375 | 12 | 0.713 | KV453008.1 | 848556 | 12-scf00272 | 12 |
| AX-157828398 | 12 | 0.713 | KV453008.1 | 848754 | 12-scf00272 | 12 |
| AX-157857532 | 12 | 0.713 | KV453008.1 | 852005 | 12-scf00272 | 12 |
| AX-157828399 | 12 | 0.713 | KV453008.1 | 852228 | 12-scf00272 | 12 |
| AX-158410932 | 12 | 0.713 | KV453008.1 | 853100 | 12-scf00272 | 12 |
| AX-158115595 | 12 | 0.713 | KV453008.1 | 857359 | 12-scf00272 | 12 |
| AX-158115596 | 12 | 0.713 | KV453008.1 | 861188 | 12-scf00272 | 12 |
| AX-158115597 | 12 | 0.713 | KV453008.1 | 866152 | 12-scf00272 | 12 |
| AX-158115598 | 12 | 0.713 | KV453008.1 | 870223 | 12-scf00272 | 12 |
| AX-158115599 | 12 | 0.713 | KV453008.1 | 871572 | 12-scf00272 | 12 |
| AX-158115600 | 12 | 0.713 | KV453008.1 | 873840 | 12-scf00272 | 12 |
| AX-158115602 | 12 | 0.713 | KV453008.1 | 889803 | 12-scf00272 | 12 |
| AX-158115603 | 12 | 0.713 | KV453008.1 | 896757 | 12-scf00272 | 12 |
| AX-158115604 | 12 | 0.713 | KV453008.1 | 900214 | 12-scf00272 | 12 |
| AX-157857534 | 12 | 0.713 | KV453008.1 | 903041 | 12-scf00272 | 12 |
| AX-158115605 | 12 | 0.713 | KV453008.1 | 903226 | 12-scf00272 | 12 |
| AX-157857535 | 12 | 0.713 | KV453008.1 | 903632 | 12-scf00272 | 12 |
| AX-158115606 | 12 | 0.713 | KV453008.1 | 904323 | 12-scf00272 | 12 |
| AX-157857536 | 12 | 0.713 | KV453008.1 | 905600 | 12-scf00272 | 12 |
| AX-157857537 | 12 | 0.713 | KV453008.1 | 905774 | 12-scf00272 | 12 |
| AX-157857539 | 12 | 0.713 | KV453008.1 | 906769 | 12-scf00272 | 12 |
| AX-158115608 | 12 | 0.713 | KV453008.1 | 906929 | 12-scf00272 | 12 |
| AX-158115609 | 12 | 0.713 | KV453008.1 | 907325 | 12-scf00272 | 12 |
| AX-158115611 | 12 | 0.713 | KV453008.1 | 910029 | 12-scf00272 | 12 |
| AX-158115612 | 12 | 0.713 | KV453008.1 | 910924 | 12-scf00272 | 12 |
| AX-158115613 | 12 | 0.713 | KV453008.1 | 912615 | 12-scf00272 | 12 |
| AX-158115614 | 12 | 0.713 | KV453008.1 | 913355 | 12-scf00272 | 12 |
| AX-158115615 | 12 | 0.713 | KV453008.1 | 914761 | 12-scf00272 | 12 |
| AX-158115616 | 12 | 0.713 | KV453008.1 | 915172 | 12-scf00272 | 12 |
| AX-157857540 | 12 | 0.713 | KV453008.1 | 915223 | 12-scf00272 | 12 |
| AX-158115617 | 12 | 0.713 | KV453008.1 | 915855 | 12-scf00272 | 12 |
| AX-157857541 | 12 | 0.713 | KV453008.1 | 919669 | 12-scf00272 | 12 |
| AX-158115619 | 12 | 0.713 | KV453008.1 | 919710 | 12-scf00272 | 12 |
| AX-157857542 | 12 | 0.713 | KV453008.1 | 927209 | 12-scf00272 | 12 |
| AX-158115623 | 12 | 0.713 | KV453008.1 | 933765 | 12-scf00272 | 12 |
| AX-158115627 | 12 | 0.713 | KV453008.1 | 944082 | 12-scf00272 | 12 |
| AX-158115633 | 12 | 0.713 | KV453008.1 | 950439 | 12-scf00272 | 12 |
| AX-157828405 | 12 | 0.713 | KV453008.1 | 954408 | 12-scf00272 | 12 |
| AX-158115642 | 12 | 0.713 | KV453008.1 | 972135 | 12-scf00272 | 12 |
| AX-158410939 | 12 | 0.713 | KV453008.1 | 978837 | 12-scf00272 | 12 |
| AX-158115654 | 12 | 0.713 | KV453008.1 | 986576 | 12-scf00272 | 12 |

|              |    |       |             |         |                 |    |
|--------------|----|-------|-------------|---------|-----------------|----|
| AX-158115660 | 12 | 0.713 | KV453008.1  | 1004695 | 12-scf00272     | 12 |
| AX-158115662 | 12 | 0.713 | KV453008.1  | 1013658 | 12-scf00272     | 12 |
| AX-158115663 | 12 | 0.713 | KV453008.1  | 1024183 | 12-scf00272     | 12 |
| AX-157724883 | 12 | 0.713 | KV453008.1  | 1035192 | 12-scf00272     | 12 |
| AX-158115673 | 12 | 0.713 | KV453008.1  | 1041994 | 12-scf00272     | 12 |
| AX-158115674 | 12 | 0.713 | KV453008.1  | 1044506 | 12-scf00272     | 12 |
| AX-158115676 | 12 | 0.713 | KV453008.1  | 1057344 | 12-scf00272     | 12 |
| AX-157828411 | 12 | 0.713 | KV453008.1  | 1063086 | 12-scf00272     | 12 |
| AX-158115679 | 12 | 0.713 | KV453008.1  | 1071558 | 12-scf00272     | 12 |
| AX-157828415 | 12 | 0.713 | KV453008.1  | 1078167 | 12-scf00272     | 12 |
| AX-158115681 | 12 | 0.713 | KV453008.1  | 1083888 | 12-scf00272     | 12 |
| AX-158115684 | 12 | 0.713 | KV453008.1  | 1092325 | 12-scf00272     | 12 |
| AX-158115688 | 12 | 0.713 | KV453008.1  | 1099557 | 12-scf00272     | 12 |
| AX-158115695 | 12 | 0.713 | KV453008.1  | 1113521 | 12-scf00272     | 12 |
| AX-158115704 | 12 | 0.713 | KV453008.1  | 1126810 | 12-scf00272     | 12 |
| AX-158115717 | 12 | 0.713 | KV453008.1  | 1155370 | 12-scf00272     | 12 |
| AX-158115721 | 12 | 0.713 | KV453010.1  | 6956    | 12-scf00273     | 12 |
| AX-157857559 | 12 | 0.713 | KV453010.1  | 64341   | 12-scf00273     | 12 |
| AX-157871242 | 12 | 0.713 | KV453010.1  | 80684   | 12-scf00273     | 12 |
| AX-158115734 | 12 | 0.713 | KV453010.1  | 109324  | 12-scf00273     | 12 |
| AX-157828424 | 12 | 0.713 | KV453010.1  | 118746  | 12-scf00273     | 12 |
| AX-158115739 | 12 | 0.713 | KV453010.1  | 123437  | 12-scf00273     | 12 |
| AX-158115759 | 12 | 0.713 | KV453010.1  | 211340  | 12-scf00273     | 12 |
| AX-158115766 | 12 | 0.713 | KV453010.1  | 222802  | 12-scf00273     | 12 |
| AX-157828432 | 12 | 0.713 | KV453010.1  | 264092  | 12-scf00273     | 12 |
| AX-158115796 | 12 | 0.713 | KV453010.1  | 301883  | 12-scf00273     | 12 |
| AX-158115799 | 12 | 0.713 | KV453010.1  | 303999  | 12-scf00273     | 12 |
| AX-158115803 | 12 | 0.713 | KV453010.1  | 307037  | 12-scf00273     | 12 |
| AX-157774829 | 12 | 0.713 | KV453010.1  | 309382  | 12-scf00273     | 12 |
| AX-158115833 | 12 | 0.713 | KV453010.1  | 369647  | 12-scf00273     | 12 |
| AX-158115944 | 12 | 0.713 | KV453010.1  | 498877  | 12-scf00273     | 12 |
| AX-158115952 | 12 | 0.713 | KV453010.1  | 519462  | 12-scf00273     | 12 |
| AX-157702069 | 12 | 0.713 | DX089680.1  | 226     | -HORI212 lctali | UN |
| AX-157689246 | 12 | 0.713 | 3ML01028835 | 197     | scf04449_1      | UN |
| AX-158114842 | 12 | 0.876 | KV453009.1  | 5042    | 12-scf00271     | 12 |
| AX-158410860 | 12 | 0.876 | KV453009.1  | 5271    | 12-scf00271     | 12 |
| AX-158407770 | 12 | 0.876 | KV453009.1  | 5375    | 12-scf00271     | 12 |
| AX-157857489 | 12 | 0.876 | KV453009.1  | 5491    | 12-scf00271     | 12 |
| AX-158114843 | 12 | 0.876 | KV453009.1  | 7020    | 12-scf00271     | 12 |
| AX-158410861 | 12 | 0.876 | KV453009.1  | 8054    | 12-scf00271     | 12 |
| AX-158114845 | 12 | 0.876 | KV453009.1  | 10076   | 12-scf00271     | 12 |
| AX-158114846 | 12 | 0.876 | KV453009.1  | 10504   | 12-scf00271     | 12 |
| AX-157751405 | 12 | 0.876 | KV453009.1  | 12722   | 12-scf00271     | 12 |
| AX-157828255 | 12 | 0.876 | KV453009.1  | 13324   | 12-scf00271     | 12 |
| AX-157828256 | 12 | 0.876 | KV453009.1  | 13400   | 12-scf00271     | 12 |
| AX-158114852 | 12 | 0.876 | KV453009.1  | 32129   | 12-scf00271     | 12 |
| AX-158114854 | 12 | 0.876 | KV453009.1  | 33518   | 12-scf00271     | 12 |
| AX-157857492 | 12 | 0.876 | KV453009.1  | 35668   | 12-scf00271     | 12 |
| AX-157857493 | 12 | 0.876 | KV453009.1  | 49570   | 12-scf00271     | 12 |
| AX-158114859 | 12 | 0.876 | KV453009.1  | 50232   | 12-scf00271     | 12 |
| AX-158114861 | 12 | 0.876 | KV453009.1  | 51986   | 12-scf00271     | 12 |

|              |    |       |            |        |             |    |
|--------------|----|-------|------------|--------|-------------|----|
| AX-158114862 | 12 | 0.876 | KV453009.1 | 52629  | 12-scf00271 | 12 |
| AX-158114863 | 12 | 0.876 | KV453009.1 | 52994  | 12-scf00271 | 12 |
| AX-157707828 | 12 | 0.876 | KV453009.1 | 53325  | 12-scf00271 | 12 |
| AX-158114864 | 12 | 0.876 | KV453009.1 | 54330  | 12-scf00271 | 12 |
| AX-157857494 | 12 | 0.876 | KV453009.1 | 58409  | 12-scf00271 | 12 |
| AX-158114867 | 12 | 0.876 | KV453009.1 | 58485  | 12-scf00271 | 12 |
| AX-158114868 | 12 | 0.876 | KV453009.1 | 59665  | 12-scf00271 | 12 |
| AX-158417150 | 12 | 0.876 | KV453009.1 | 70461  | 12-scf00271 | 12 |
| AX-158410864 | 12 | 0.876 | KV453009.1 | 71514  | 12-scf00271 | 12 |
| AX-158114873 | 12 | 0.876 | KV453009.1 | 76898  | 12-scf00271 | 12 |
| AX-158114874 | 12 | 0.876 | KV453009.1 | 80894  | 12-scf00271 | 12 |
| AX-158114875 | 12 | 0.876 | KV453009.1 | 81366  | 12-scf00271 | 12 |
| AX-158114876 | 12 | 0.876 | KV453009.1 | 82441  | 12-scf00271 | 12 |
| AX-158114878 | 12 | 0.876 | KV453009.1 | 84047  | 12-scf00271 | 12 |
| AX-158114879 | 12 | 0.876 | KV453009.1 | 86177  | 12-scf00271 | 12 |
| AX-157857495 | 12 | 0.876 | KV453009.1 | 88991  | 12-scf00271 | 12 |
| AX-158114881 | 12 | 0.876 | KV453009.1 | 92328  | 12-scf00271 | 12 |
| AX-158114882 | 12 | 0.876 | KV453009.1 | 95748  | 12-scf00271 | 12 |
| AX-158114883 | 12 | 0.876 | KV453009.1 | 97051  | 12-scf00271 | 12 |
| AX-158410865 | 12 | 0.876 | KV453009.1 | 97634  | 12-scf00271 | 12 |
| AX-158417152 | 12 | 0.876 | KV453009.1 | 97672  | 12-scf00271 | 12 |
| AX-158114884 | 12 | 0.876 | KV453009.1 | 101967 | 12-scf00271 | 12 |
| AX-157725894 | 12 | 0.876 | KV453009.1 | 106290 | 12-scf00271 | 12 |
| AX-158114885 | 12 | 0.876 | KV453009.1 | 108507 | 12-scf00271 | 12 |
| AX-158114886 | 12 | 0.876 | KV453009.1 | 108974 | 12-scf00271 | 12 |
| AX-158410868 | 12 | 0.876 | KV453009.1 | 112330 | 12-scf00271 | 12 |
| AX-158114888 | 12 | 0.876 | KV453009.1 | 117713 | 12-scf00271 | 12 |
| AX-158114889 | 12 | 0.876 | KV453009.1 | 120587 | 12-scf00271 | 12 |
| AX-158410870 | 12 | 0.876 | KV453009.1 | 122337 | 12-scf00271 | 12 |
| AX-158407774 | 12 | 0.876 | KV453009.1 | 122767 | 12-scf00271 | 12 |
| AX-158410873 | 12 | 0.876 | KV453009.1 | 123728 | 12-scf00271 | 12 |
| AX-158114891 | 12 | 0.876 | KV453009.1 | 130366 | 12-scf00271 | 12 |
| AX-158114894 | 12 | 0.876 | KV453009.1 | 139289 | 12-scf00271 | 12 |
| AX-157885956 | 12 | 0.876 | KV453009.1 | 142066 | 12-scf00271 | 12 |
| AX-158114895 | 12 | 0.876 | KV453009.1 | 143816 | 12-scf00271 | 12 |
| AX-158114896 | 12 | 0.876 | KV453009.1 | 144424 | 12-scf00271 | 12 |
| AX-157857497 | 12 | 0.876 | KV453009.1 | 145880 | 12-scf00271 | 12 |
| AX-158114898 | 12 | 0.876 | KV453009.1 | 153260 | 12-scf00271 | 12 |
| AX-158114899 | 12 | 0.876 | KV453009.1 | 157855 | 12-scf00271 | 12 |
| AX-158114901 | 12 | 0.876 | KV453009.1 | 159851 | 12-scf00271 | 12 |
| AX-157857499 | 12 | 0.876 | KV453009.1 | 162443 | 12-scf00271 | 12 |
| AX-157871227 | 12 | 0.876 | KV453009.1 | 165479 | 12-scf00271 | 12 |
| AX-157828258 | 12 | 0.876 | KV453009.1 | 167111 | 12-scf00271 | 12 |
| AX-158114904 | 12 | 0.876 | KV453009.1 | 178152 | 12-scf00271 | 12 |
| AX-158114905 | 12 | 0.876 | KV453009.1 | 180469 | 12-scf00271 | 12 |
| AX-157828260 | 12 | 0.876 | KV453009.1 | 189512 | 12-scf00271 | 12 |
| AX-157828261 | 12 | 0.876 | KV453009.1 | 191216 | 12-scf00271 | 12 |
| AX-158114907 | 12 | 0.876 | KV453009.1 | 195161 | 12-scf00271 | 12 |
| AX-158114909 | 12 | 0.876 | KV453009.1 | 200380 | 12-scf00271 | 12 |
| AX-157857501 | 12 | 0.876 | KV453009.1 | 201532 | 12-scf00271 | 12 |
| AX-157857504 | 12 | 0.876 | KV453009.1 | 205737 | 12-scf00271 | 12 |

|              |    |       |            |        |             |    |
|--------------|----|-------|------------|--------|-------------|----|
| AX-158114914 | 12 | 0.876 | KV453009.1 | 208415 | 12-scf00271 | 12 |
| AX-158114915 | 12 | 0.876 | KV453009.1 | 209457 | 12-scf00271 | 12 |
| AX-158114916 | 12 | 0.876 | KV453009.1 | 209862 | 12-scf00271 | 12 |
| AX-158114917 | 12 | 0.876 | KV453009.1 | 212461 | 12-scf00271 | 12 |
| AX-158114918 | 12 | 0.876 | KV453009.1 | 215418 | 12-scf00271 | 12 |
| AX-158410875 | 12 | 0.876 | KV453009.1 | 216080 | 12-scf00271 | 12 |
| AX-158114919 | 12 | 0.876 | KV453009.1 | 216655 | 12-scf00271 | 12 |
| AX-157755624 | 12 | 0.876 | KV453009.1 | 217945 | 12-scf00271 | 12 |
| AX-157857505 | 12 | 0.876 | KV453009.1 | 222131 | 12-scf00271 | 12 |
| AX-158114924 | 12 | 0.876 | KV453009.1 | 230316 | 12-scf00271 | 12 |
| AX-158114925 | 12 | 0.876 | KV453009.1 | 232845 | 12-scf00271 | 12 |
| AX-157857506 | 12 | 0.876 | KV453009.1 | 233140 | 12-scf00271 | 12 |
| AX-158114926 | 12 | 0.876 | KV453009.1 | 233635 | 12-scf00271 | 12 |
| AX-157885957 | 12 | 0.876 | KV453009.1 | 235105 | 12-scf00271 | 12 |
| AX-157828262 | 12 | 0.876 | KV453009.1 | 241840 | 12-scf00271 | 12 |
| AX-157828263 | 12 | 0.876 | KV453009.1 | 245082 | 12-scf00271 | 12 |
| AX-158114929 | 12 | 0.876 | KV453009.1 | 248469 | 12-scf00271 | 12 |
| AX-157828265 | 12 | 0.876 | KV453009.1 | 255225 | 12-scf00271 | 12 |
| AX-157828266 | 12 | 0.876 | KV453009.1 | 255304 | 12-scf00271 | 12 |
| AX-158114932 | 12 | 0.876 | KV453009.1 | 264761 | 12-scf00271 | 12 |
| AX-157828268 | 12 | 0.876 | KV453009.1 | 265847 | 12-scf00271 | 12 |
| AX-158114934 | 12 | 0.876 | KV453009.1 | 278702 | 12-scf00271 | 12 |
| AX-157828269 | 12 | 0.876 | KV453009.1 | 281750 | 12-scf00271 | 12 |
| AX-157828270 | 12 | 0.876 | KV453009.1 | 282135 | 12-scf00271 | 12 |
| AX-158114935 | 12 | 0.876 | KV453009.1 | 293402 | 12-scf00271 | 12 |
| AX-158114936 | 12 | 0.876 | KV453009.1 | 301610 | 12-scf00271 | 12 |
| AX-158114937 | 12 | 0.876 | KV453009.1 | 304484 | 12-scf00271 | 12 |
| AX-158114938 | 12 | 0.876 | KV453009.1 | 306197 | 12-scf00271 | 12 |
| AX-158417155 | 12 | 0.876 | KV453009.1 | 307521 | 12-scf00271 | 12 |
| AX-158114939 | 12 | 0.876 | KV453009.1 | 308006 | 12-scf00271 | 12 |
| AX-157857507 | 12 | 0.876 | KV453009.1 | 308461 | 12-scf00271 | 12 |
| AX-158114940 | 12 | 0.876 | KV453009.1 | 308846 | 12-scf00271 | 12 |
| AX-158114941 | 12 | 0.876 | KV453009.1 | 312003 | 12-scf00271 | 12 |
| AX-157857508 | 12 | 0.876 | KV453009.1 | 312229 | 12-scf00271 | 12 |
| AX-158114942 | 12 | 0.876 | KV453009.1 | 316918 | 12-scf00271 | 12 |
| AX-157828273 | 12 | 0.876 | KV453009.1 | 317312 | 12-scf00271 | 12 |
| AX-158114943 | 12 | 0.876 | KV453009.1 | 318141 | 12-scf00271 | 12 |
| AX-158384979 | 12 | 0.876 | KV453009.1 | 318574 | 12-scf00271 | 12 |
| AX-157828274 | 12 | 0.876 | KV453009.1 | 320556 | 12-scf00271 | 12 |
| AX-158114945 | 12 | 0.876 | KV453009.1 | 329742 | 12-scf00271 | 12 |
| AX-158114946 | 12 | 0.876 | KV453009.1 | 335603 | 12-scf00271 | 12 |
| AX-158114947 | 12 | 0.876 | KV453009.1 | 337802 | 12-scf00271 | 12 |
| AX-158114948 | 12 | 0.876 | KV453009.1 | 338467 | 12-scf00271 | 12 |
| AX-157720503 | 12 | 0.876 | KV453009.1 | 346901 | 12-scf00271 | 12 |
| AX-158407777 | 12 | 0.876 | KV453009.1 | 353083 | 12-scf00271 | 12 |
| AX-158410879 | 12 | 0.876 | KV453009.1 | 353186 | 12-scf00271 | 12 |
| AX-158410880 | 12 | 0.876 | KV453009.1 | 353250 | 12-scf00271 | 12 |
| AX-157828275 | 12 | 0.876 | KV453009.1 | 354005 | 12-scf00271 | 12 |
| AX-158407778 | 12 | 0.876 | KV453009.1 | 358531 | 12-scf00271 | 12 |
| AX-157828276 | 12 | 0.876 | KV453009.1 | 364609 | 12-scf00271 | 12 |
| AX-158114951 | 12 | 0.876 | KV453009.1 | 365298 | 12-scf00271 | 12 |

|              |    |       |            |        |             |    |
|--------------|----|-------|------------|--------|-------------|----|
| AX-158114953 | 12 | 0.876 | KV453009.1 | 374353 | 12-scf00271 | 12 |
| AX-157828278 | 12 | 0.876 | KV453009.1 | 376971 | 12-scf00271 | 12 |
| AX-158410881 | 12 | 0.876 | KV453009.1 | 377094 | 12-scf00271 | 12 |
| AX-158114954 | 12 | 0.876 | KV453009.1 | 383042 | 12-scf00271 | 12 |
| AX-157857510 | 12 | 0.876 | KV453009.1 | 398322 | 12-scf00271 | 12 |
| AX-158114956 | 12 | 0.876 | KV453009.1 | 398702 | 12-scf00271 | 12 |
| AX-157828282 | 12 | 0.876 | KV453009.1 | 400559 | 12-scf00271 | 12 |
| AX-158114957 | 12 | 0.876 | KV453009.1 | 407049 | 12-scf00271 | 12 |
| AX-157885959 | 12 | 0.876 | KV453009.1 | 410496 | 12-scf00271 | 12 |
| AX-158114958 | 12 | 0.876 | KV453009.1 | 415990 | 12-scf00271 | 12 |
| AX-158114959 | 12 | 0.876 | KV453009.1 | 416484 | 12-scf00271 | 12 |
| AX-157734398 | 12 | 0.876 | KV453009.1 | 417004 | 12-scf00271 | 12 |
| AX-158114961 | 12 | 0.876 | KV453009.1 | 425342 | 12-scf00271 | 12 |
| AX-157828284 | 12 | 0.876 | KV453009.1 | 426076 | 12-scf00271 | 12 |
| AX-157828285 | 12 | 0.876 | KV453009.1 | 427897 | 12-scf00271 | 12 |
| AX-158114963 | 12 | 0.876 | KV453009.1 | 428728 | 12-scf00271 | 12 |
| AX-157857511 | 12 | 0.876 | KV453009.1 | 433760 | 12-scf00271 | 12 |
| AX-157828286 | 12 | 0.876 | KV453009.1 | 437044 | 12-scf00271 | 12 |
| AX-158114964 | 12 | 0.876 | KV453009.1 | 438384 | 12-scf00271 | 12 |
| AX-158114965 | 12 | 0.876 | KV453009.1 | 438975 | 12-scf00271 | 12 |
| AX-158114966 | 12 | 0.876 | KV453009.1 | 439857 | 12-scf00271 | 12 |
| AX-158114967 | 12 | 0.876 | KV453009.1 | 441935 | 12-scf00271 | 12 |
| AX-157857512 | 12 | 0.876 | KV453009.1 | 443864 | 12-scf00271 | 12 |
| AX-157857513 | 12 | 0.876 | KV453009.1 | 444069 | 12-scf00271 | 12 |
| AX-158114968 | 12 | 0.876 | KV453009.1 | 451175 | 12-scf00271 | 12 |
| AX-158114969 | 12 | 0.876 | KV453009.1 | 458626 | 12-scf00271 | 12 |
| AX-157828287 | 12 | 0.876 | KV453009.1 | 459510 | 12-scf00271 | 12 |
| AX-157828288 | 12 | 0.876 | KV453009.1 | 461417 | 12-scf00271 | 12 |
| AX-157857515 | 12 | 0.876 | KV453009.1 | 463793 | 12-scf00271 | 12 |
| AX-157871229 | 12 | 0.876 | KV453009.1 | 464907 | 12-scf00271 | 12 |
| AX-158114970 | 12 | 0.876 | KV453009.1 | 468542 | 12-scf00271 | 12 |
| AX-157746731 | 12 | 0.876 | KV453009.1 | 469116 | 12-scf00271 | 12 |
| AX-158114971 | 12 | 0.876 | KV453009.1 | 469590 | 12-scf00271 | 12 |
| AX-157775767 | 12 | 0.876 | KV453009.1 | 476618 | 12-scf00271 | 12 |
| AX-158114974 | 12 | 0.876 | KV453009.1 | 480079 | 12-scf00271 | 12 |
| AX-158114976 | 12 | 0.876 | KV453009.1 | 483231 | 12-scf00271 | 12 |
| AX-158114978 | 12 | 0.876 | KV453009.1 | 487773 | 12-scf00271 | 12 |
| AX-158407781 | 12 | 0.876 | KV453009.1 | 491239 | 12-scf00271 | 12 |
| AX-158410884 | 12 | 0.876 | KV453009.1 | 491600 | 12-scf00271 | 12 |
| AX-158114980 | 12 | 0.876 | KV453009.1 | 492602 | 12-scf00271 | 12 |
| AX-157828291 | 12 | 0.876 | KV453009.1 | 492810 | 12-scf00271 | 12 |
| AX-158114981 | 12 | 0.876 | KV453009.1 | 493149 | 12-scf00271 | 12 |
| AX-158114982 | 12 | 0.876 | KV453009.1 | 494406 | 12-scf00271 | 12 |
| AX-158114983 | 12 | 0.876 | KV453009.1 | 501356 | 12-scf00271 | 12 |
| AX-157828293 | 12 | 0.876 | KV453009.1 | 502260 | 12-scf00271 | 12 |
| AX-157828294 | 12 | 0.876 | KV453009.1 | 505014 | 12-scf00271 | 12 |
| AX-158407782 | 12 | 0.876 | KV453009.1 | 509686 | 12-scf00271 | 12 |
| AX-158114985 | 12 | 0.876 | KV453009.1 | 514646 | 12-scf00271 | 12 |
| AX-158114986 | 12 | 0.876 | KV453009.1 | 517999 | 12-scf00271 | 12 |
| AX-157723769 | 12 | 0.876 | KV453009.1 | 525306 | 12-scf00271 | 12 |
| AX-158114990 | 12 | 0.876 | KV453009.1 | 529737 | 12-scf00271 | 12 |

|              |    |       |            |        |             |    |
|--------------|----|-------|------------|--------|-------------|----|
| AX-157857516 | 12 | 0.876 | KV453009.1 | 529951 | 12-scf00271 | 12 |
| AX-158114993 | 12 | 0.876 | KV453009.1 | 535098 | 12-scf00271 | 12 |
| AX-158392654 | 12 | 0.876 | KV453009.1 | 535211 | 12-scf00271 | 12 |
| AX-158114995 | 12 | 0.876 | KV453009.1 | 566468 | 12-scf00271 | 12 |
| AX-158114998 | 12 | 0.876 | KV453009.1 | 572918 | 12-scf00271 | 12 |
| AX-158115002 | 12 | 0.876 | KV453009.1 | 579349 | 12-scf00271 | 12 |
| AX-157857518 | 12 | 0.876 | KV453009.1 | 585075 | 12-scf00271 | 12 |
| AX-158115003 | 12 | 0.876 | KV453009.1 | 585928 | 12-scf00271 | 12 |
| AX-157828295 | 12 | 0.876 | KV453009.1 | 589429 | 12-scf00271 | 12 |
| AX-157871230 | 12 | 0.876 | KV453009.1 | 595903 | 12-scf00271 | 12 |
| AX-158115005 | 12 | 0.876 | KV453009.1 | 604174 | 12-scf00271 | 12 |
| AX-157857519 | 12 | 0.876 | KV453009.1 | 609257 | 12-scf00271 | 12 |
| AX-157699375 | 12 | 0.876 | KV453009.1 | 627351 | 12-scf00271 | 12 |
| AX-157828297 | 12 | 0.876 | KV453009.1 | 627877 | 12-scf00271 | 12 |
| AX-157871231 | 12 | 0.876 | KV453009.1 | 630007 | 12-scf00271 | 12 |
| AX-158115008 | 12 | 0.876 | KV453009.1 | 630920 | 12-scf00271 | 12 |
| AX-157828299 | 12 | 0.876 | KV453009.1 | 634054 | 12-scf00271 | 12 |
| AX-157857521 | 12 | 0.876 | KV453009.1 | 640624 | 12-scf00271 | 12 |
| AX-158115012 | 12 | 0.876 | KV453009.1 | 641098 | 12-scf00271 | 12 |
| AX-158410888 | 12 | 0.876 | KV453009.1 | 642721 | 12-scf00271 | 12 |
| AX-158410889 | 12 | 0.876 | KV453009.1 | 642764 | 12-scf00271 | 12 |
| AX-158115013 | 12 | 0.876 | KV453009.1 | 655963 | 12-scf00271 | 12 |
| AX-157828301 | 12 | 0.876 | KV453009.1 | 658298 | 12-scf00271 | 12 |
| AX-158115015 | 12 | 0.876 | KV453009.1 | 660095 | 12-scf00271 | 12 |
| AX-157775278 | 12 | 0.876 | KV453009.1 | 666690 | 12-scf00271 | 12 |
| AX-158115016 | 12 | 0.876 | KV453009.1 | 668181 | 12-scf00271 | 12 |
| AX-158115017 | 12 | 0.876 | KV453009.1 | 668433 | 12-scf00271 | 12 |
| AX-158115018 | 12 | 0.876 | KV453009.1 | 669472 | 12-scf00271 | 12 |
| AX-158115019 | 12 | 0.876 | KV453009.1 | 670920 | 12-scf00271 | 12 |
| AX-158115020 | 12 | 0.876 | KV453009.1 | 674163 | 12-scf00271 | 12 |
| AX-158115023 | 12 | 0.876 | KV453009.1 | 684841 | 12-scf00271 | 12 |
| AX-158115024 | 12 | 0.876 | KV453009.1 | 686189 | 12-scf00271 | 12 |
| AX-157828303 | 12 | 0.876 | KV453009.1 | 686557 | 12-scf00271 | 12 |
| AX-158115027 | 12 | 0.876 | KV453009.1 | 692562 | 12-scf00271 | 12 |
| AX-158115029 | 12 | 0.876 | KV453009.1 | 695412 | 12-scf00271 | 12 |
| AX-157750354 | 12 | 0.876 | KV453009.1 | 695887 | 12-scf00271 | 12 |
| AX-158115030 | 12 | 0.876 | KV453009.1 | 701239 | 12-scf00271 | 12 |
| AX-158115031 | 12 | 0.876 | KV453009.1 | 705440 | 12-scf00271 | 12 |
| AX-158115034 | 12 | 0.876 | KV453009.1 | 724423 | 12-scf00271 | 12 |
| AX-157828304 | 12 | 0.876 | KV453009.1 | 727540 | 12-scf00271 | 12 |
| AX-158115035 | 12 | 0.876 | KV453009.1 | 727636 | 12-scf00271 | 12 |
| AX-158115036 | 12 | 0.876 | KV453009.1 | 728393 | 12-scf00271 | 12 |
| AX-158115037 | 12 | 0.876 | KV453009.1 | 729302 | 12-scf00271 | 12 |
| AX-158410890 | 12 | 0.876 | KV453009.1 | 731572 | 12-scf00271 | 12 |
| AX-157828306 | 12 | 0.876 | KV453009.1 | 734746 | 12-scf00271 | 12 |
| AX-158115042 | 12 | 0.876 | KV453009.1 | 757993 | 12-scf00271 | 12 |
| AX-158115043 | 12 | 0.876 | KV453009.1 | 759245 | 12-scf00271 | 12 |
| AX-157828307 | 12 | 0.876 | KV453009.1 | 759721 | 12-scf00271 | 12 |
| AX-157828308 | 12 | 0.876 | KV453009.1 | 761085 | 12-scf00271 | 12 |
| AX-158115044 | 12 | 0.876 | KV453009.1 | 767114 | 12-scf00271 | 12 |
| AX-158410891 | 12 | 0.876 | KV453009.1 | 786477 | 12-scf00271 | 12 |



|              |    |       |            |         |             |    |
|--------------|----|-------|------------|---------|-------------|----|
| AX-157828310 | 12 | 0.876 | KV453009.1 | 794043  | 12-scf00271 | 12 |
| AX-158115051 | 12 | 0.876 | KV453009.1 | 795760  | 12-scf00271 | 12 |
| AX-158115052 | 12 | 0.876 | KV453009.1 | 796357  | 12-scf00271 | 12 |
| AX-157828312 | 12 | 0.876 | KV453009.1 | 798362  | 12-scf00271 | 12 |
| AX-158115053 | 12 | 0.876 | KV453009.1 | 799740  | 12-scf00271 | 12 |
| AX-158115054 | 12 | 0.876 | KV453009.1 | 801290  | 12-scf00271 | 12 |
| AX-158115055 | 12 | 0.876 | KV453009.1 | 802058  | 12-scf00271 | 12 |
| AX-157857522 | 12 | 0.876 | KV453009.1 | 803923  | 12-scf00271 | 12 |
| AX-158115058 | 12 | 0.876 | KV453009.1 | 819099  | 12-scf00271 | 12 |
| AX-158115061 | 12 | 0.876 | KV453009.1 | 827021  | 12-scf00271 | 12 |
| AX-158115063 | 12 | 0.876 | KV453009.1 | 832501  | 12-scf00271 | 12 |
| AX-157857523 | 12 | 0.876 | KV453009.1 | 834439  | 12-scf00271 | 12 |
| AX-158115064 | 12 | 0.876 | KV453009.1 | 835631  | 12-scf00271 | 12 |
| AX-157727006 | 12 | 0.876 | KV453009.1 | 845173  | 12-scf00271 | 12 |
| AX-158410894 | 12 | 0.876 | KV453009.1 | 848432  | 12-scf00271 | 12 |
| AX-158115067 | 12 | 0.876 | KV453009.1 | 851049  | 12-scf00271 | 12 |
| AX-158115069 | 12 | 0.876 | KV453009.1 | 855731  | 12-scf00271 | 12 |
| AX-158115070 | 12 | 0.876 | KV453009.1 | 856552  | 12-scf00271 | 12 |
| AX-157871233 | 12 | 0.876 | KV453009.1 | 861254  | 12-scf00271 | 12 |
| AX-158115073 | 12 | 0.876 | KV453009.1 | 861591  | 12-scf00271 | 12 |
| AX-157725662 | 12 | 0.876 | KV453009.1 | 869279  | 12-scf00271 | 12 |
| AX-158115080 | 12 | 0.876 | KV453009.1 | 872850  | 12-scf00271 | 12 |
| AX-157857526 | 12 | 0.876 | KV453009.1 | 883210  | 12-scf00271 | 12 |
| AX-158115081 | 12 | 0.876 | KV453009.1 | 883725  | 12-scf00271 | 12 |
| AX-158115088 | 12 | 0.876 | KV453009.1 | 892315  | 12-scf00271 | 12 |
| AX-157828314 | 12 | 0.876 | KV453009.1 | 892478  | 12-scf00271 | 12 |
| AX-158115093 | 12 | 0.876 | KV453009.1 | 904881  | 12-scf00271 | 12 |
| AX-158115100 | 12 | 0.876 | KV453009.1 | 921085  | 12-scf00271 | 12 |
| AX-158115103 | 12 | 0.876 | KV453009.1 | 937701  | 12-scf00271 | 12 |
| AX-158115112 | 12 | 0.876 | KV453009.1 | 959715  | 12-scf00271 | 12 |
| AX-158115114 | 12 | 0.876 | KV453009.1 | 962199  | 12-scf00271 | 12 |
| AX-157866082 | 12 | 0.876 | KV453009.1 | 969181  | 12-scf00271 | 12 |
| AX-158115116 | 12 | 0.876 | KV453009.1 | 969744  | 12-scf00271 | 12 |
| AX-158115117 | 12 | 0.876 | KV453009.1 | 974119  | 12-scf00271 | 12 |
| AX-158115123 | 12 | 0.876 | KV453009.1 | 984205  | 12-scf00271 | 12 |
| AX-157828317 | 12 | 0.876 | KV453009.1 | 993797  | 12-scf00271 | 12 |
| AX-158115129 | 12 | 0.876 | KV453009.1 | 997251  | 12-scf00271 | 12 |
| AX-157828318 | 12 | 0.876 | KV453009.1 | 1005675 | 12-scf00271 | 12 |
| AX-157828319 | 12 | 0.876 | KV453009.1 | 1011987 | 12-scf00271 | 12 |
| AX-158115132 | 12 | 0.876 | KV453009.1 | 1012223 | 12-scf00271 | 12 |
| AX-158115134 | 12 | 0.876 | KV453009.1 | 1015730 | 12-scf00271 | 12 |
| AX-158115135 | 12 | 0.876 | KV453009.1 | 1016637 | 12-scf00271 | 12 |
| AX-158115141 | 12 | 0.876 | KV453009.1 | 1049544 | 12-scf00271 | 12 |
| AX-158115142 | 12 | 0.876 | KV453009.1 | 1058627 | 12-scf00271 | 12 |
| AX-158115145 | 12 | 0.876 | KV453009.1 | 1063953 | 12-scf00271 | 12 |
| AX-158115301 | 12 | 0.876 | KV453008.1 | 333861  | 12-scf00272 | 12 |
| AX-158115308 | 12 | 0.876 | KV453008.1 | 353675  | 12-scf00272 | 12 |
| AX-158115379 | 12 | 0.876 | KV453008.1 | 481521  | 12-scf00272 | 12 |
| AX-157724676 | 12 | 0.876 | KV453008.1 | 600688  | 12-scf00272 | 12 |
| AX-158115478 | 12 | 0.876 | KV453008.1 | 644334  | 12-scf00272 | 12 |
| AX-158115490 | 12 | 0.876 | KV453008.1 | 669763  | 12-scf00272 | 12 |

|              |    |       |            |         |             |    |
|--------------|----|-------|------------|---------|-------------|----|
| AX-158115491 | 12 | 0.876 | KV453008.1 | 672570  | 12-scf00272 | 12 |
| AX-157828370 | 12 | 0.876 | KV453008.1 | 673822  | 12-scf00272 | 12 |
| AX-157828371 | 12 | 0.876 | KV453008.1 | 676130  | 12-scf00272 | 12 |
| AX-157828374 | 12 | 0.876 | KV453008.1 | 682385  | 12-scf00272 | 12 |
| AX-158115510 | 12 | 0.876 | KV453008.1 | 705046  | 12-scf00272 | 12 |
| AX-158115572 | 12 | 0.876 | KV453008.1 | 818025  | 12-scf00272 | 12 |
| AX-158115601 | 12 | 0.876 | KV453008.1 | 889287  | 12-scf00272 | 12 |
| AX-158410936 | 12 | 0.876 | KV453008.1 | 921651  | 12-scf00272 | 12 |
| AX-157828400 | 12 | 0.876 | KV453008.1 | 922330  | 12-scf00272 | 12 |
| AX-158115620 | 12 | 0.876 | KV453008.1 | 922435  | 12-scf00272 | 12 |
| AX-158115621 | 12 | 0.876 | KV453008.1 | 922807  | 12-scf00272 | 12 |
| AX-157828401 | 12 | 0.876 | KV453008.1 | 923336  | 12-scf00272 | 12 |
| AX-158410937 | 12 | 0.876 | KV453008.1 | 925455  | 12-scf00272 | 12 |
| AX-158115622 | 12 | 0.876 | KV453008.1 | 925908  | 12-scf00272 | 12 |
| AX-158410938 | 12 | 0.876 | KV453008.1 | 926454  | 12-scf00272 | 12 |
| AX-157828403 | 12 | 0.876 | KV453008.1 | 927244  | 12-scf00272 | 12 |
| AX-157857543 | 12 | 0.876 | KV453008.1 | 931973  | 12-scf00272 | 12 |
| AX-158115624 | 12 | 0.876 | KV453008.1 | 939500  | 12-scf00272 | 12 |
| AX-158115625 | 12 | 0.876 | KV453008.1 | 940618  | 12-scf00272 | 12 |
| AX-158115626 | 12 | 0.876 | KV453008.1 | 941254  | 12-scf00272 | 12 |
| AX-157857544 | 12 | 0.876 | KV453008.1 | 943381  | 12-scf00272 | 12 |
| AX-158392666 | 12 | 0.876 | KV453008.1 | 949111  | 12-scf00272 | 12 |
| AX-158115631 | 12 | 0.876 | KV453008.1 | 949393  | 12-scf00272 | 12 |
| AX-158115632 | 12 | 0.876 | KV453008.1 | 950049  | 12-scf00272 | 12 |
| AX-158115634 | 12 | 0.876 | KV453008.1 | 951467  | 12-scf00272 | 12 |
| AX-157857545 | 12 | 0.876 | KV453008.1 | 957677  | 12-scf00272 | 12 |
| AX-158115637 | 12 | 0.876 | KV453008.1 | 966322  | 12-scf00272 | 12 |
| AX-157857549 | 12 | 0.876 | KV453008.1 | 967166  | 12-scf00272 | 12 |
| AX-158115638 | 12 | 0.876 | KV453008.1 | 967804  | 12-scf00272 | 12 |
| AX-158115639 | 12 | 0.876 | KV453008.1 | 968667  | 12-scf00272 | 12 |
| AX-158115640 | 12 | 0.876 | KV453008.1 | 971072  | 12-scf00272 | 12 |
| AX-158115643 | 12 | 0.876 | KV453008.1 | 973209  | 12-scf00272 | 12 |
| AX-157857550 | 12 | 0.876 | KV453008.1 | 973337  | 12-scf00272 | 12 |
| AX-157857551 | 12 | 0.876 | KV453008.1 | 973402  | 12-scf00272 | 12 |
| AX-158115644 | 12 | 0.876 | KV453008.1 | 975600  | 12-scf00272 | 12 |
| AX-158115646 | 12 | 0.876 | KV453008.1 | 980239  | 12-scf00272 | 12 |
| AX-158115647 | 12 | 0.876 | KV453008.1 | 981806  | 12-scf00272 | 12 |
| AX-158115648 | 12 | 0.876 | KV453008.1 | 983594  | 12-scf00272 | 12 |
| AX-158115649 | 12 | 0.876 | KV453008.1 | 983871  | 12-scf00272 | 12 |
| AX-158115650 | 12 | 0.876 | KV453008.1 | 983954  | 12-scf00272 | 12 |
| AX-158115651 | 12 | 0.876 | KV453008.1 | 984283  | 12-scf00272 | 12 |
| AX-158115652 | 12 | 0.876 | KV453008.1 | 984948  | 12-scf00272 | 12 |
| AX-157857552 | 12 | 0.876 | KV453008.1 | 985545  | 12-scf00272 | 12 |
| AX-158115655 | 12 | 0.876 | KV453008.1 | 986869  | 12-scf00272 | 12 |
| AX-158115657 | 12 | 0.876 | KV453008.1 | 990821  | 12-scf00272 | 12 |
| AX-158115658 | 12 | 0.876 | KV453008.1 | 991035  | 12-scf00272 | 12 |
| AX-158115659 | 12 | 0.876 | KV453008.1 | 994167  | 12-scf00272 | 12 |
| AX-157857554 | 12 | 0.876 | KV453008.1 | 1001411 | 12-scf00272 | 12 |
| AX-157857555 | 12 | 0.876 | KV453008.1 | 1002160 | 12-scf00272 | 12 |
| AX-157857556 | 12 | 0.876 | KV453008.1 | 1006361 | 12-scf00272 | 12 |
| AX-158115661 | 12 | 0.876 | KV453008.1 | 1007496 | 12-scf00272 | 12 |

|              |    |       |            |         |             |    |
|--------------|----|-------|------------|---------|-------------|----|
| AX-158115664 | 12 | 0.876 | KV453008.1 | 1028739 | 12-scf00272 | 12 |
| AX-157753503 | 12 | 0.876 | KV453008.1 | 1029196 | 12-scf00272 | 12 |
| AX-157857557 | 12 | 0.876 | KV453008.1 | 1029335 | 12-scf00272 | 12 |
| AX-157828406 | 12 | 0.876 | KV453008.1 | 1030668 | 12-scf00272 | 12 |
| AX-157722727 | 12 | 0.876 | KV453008.1 | 1031998 | 12-scf00272 | 12 |
| AX-158115666 | 12 | 0.876 | KV453008.1 | 1034115 | 12-scf00272 | 12 |
| AX-158115668 | 12 | 0.876 | KV453008.1 | 1037572 | 12-scf00272 | 12 |
| AX-158115670 | 12 | 0.876 | KV453008.1 | 1039441 | 12-scf00272 | 12 |
| AX-158115672 | 12 | 0.876 | KV453008.1 | 1041330 | 12-scf00272 | 12 |
| AX-157828410 | 12 | 0.876 | KV453008.1 | 1057843 | 12-scf00272 | 12 |
| AX-157735777 | 12 | 0.876 | KV453008.1 | 1063005 | 12-scf00272 | 12 |
| AX-157828412 | 12 | 0.876 | KV453008.1 | 1063629 | 12-scf00272 | 12 |
| AX-157828414 | 12 | 0.876 | KV453008.1 | 1070947 | 12-scf00272 | 12 |
| AX-157828416 | 12 | 0.876 | KV453008.1 | 1089486 | 12-scf00272 | 12 |
| AX-158115683 | 12 | 0.876 | KV453008.1 | 1091357 | 12-scf00272 | 12 |
| AX-157790865 | 12 | 0.876 | KV453008.1 | 1098523 | 12-scf00272 | 12 |
| AX-157828417 | 12 | 0.876 | KV453008.1 | 1098830 | 12-scf00272 | 12 |
| AX-158115691 | 12 | 0.876 | KV453008.1 | 1107683 | 12-scf00272 | 12 |
| AX-158115693 | 12 | 0.876 | KV453008.1 | 1110349 | 12-scf00272 | 12 |
| AX-158115696 | 12 | 0.876 | KV453008.1 | 1113921 | 12-scf00272 | 12 |
| AX-158115697 | 12 | 0.876 | KV453008.1 | 1118400 | 12-scf00272 | 12 |
| AX-158115698 | 12 | 0.876 | KV453008.1 | 1119065 | 12-scf00272 | 12 |
| AX-158115699 | 12 | 0.876 | KV453008.1 | 1119315 | 12-scf00272 | 12 |
| AX-158115703 | 12 | 0.876 | KV453008.1 | 1125280 | 12-scf00272 | 12 |
| AX-158115706 | 12 | 0.876 | KV453008.1 | 1130009 | 12-scf00272 | 12 |
| AX-158384987 | 12 | 0.876 | KV453008.1 | 1131578 | 12-scf00272 | 12 |
| AX-158115708 | 12 | 0.876 | KV453008.1 | 1131985 | 12-scf00272 | 12 |
| AX-158115709 | 12 | 0.876 | KV453008.1 | 1133422 | 12-scf00272 | 12 |
| AX-158392668 | 12 | 0.876 | KV453008.1 | 1139601 | 12-scf00272 | 12 |
| AX-158115713 | 12 | 0.876 | KV453008.1 | 1142690 | 12-scf00272 | 12 |
| AX-157725918 | 12 | 0.876 | KV453008.1 | 1143594 | 12-scf00272 | 12 |
| AX-158115714 | 12 | 0.876 | KV453008.1 | 1144429 | 12-scf00272 | 12 |
| AX-158115720 | 12 | 0.876 | KV453010.1 | 5779    | 12-scf00273 | 12 |
| AX-158410940 | 12 | 0.876 | KV453010.1 | 25626   | 12-scf00273 | 12 |
| AX-158115722 | 12 | 0.876 | KV453010.1 | 26895   | 12-scf00273 | 12 |
| AX-157828419 | 12 | 0.876 | KV453010.1 | 36447   | 12-scf00273 | 12 |
| AX-158115723 | 12 | 0.876 | KV453010.1 | 40649   | 12-scf00273 | 12 |
| AX-158115724 | 12 | 0.876 | KV453010.1 | 43334   | 12-scf00273 | 12 |
| AX-158115725 | 12 | 0.876 | KV453010.1 | 43603   | 12-scf00273 | 12 |
| AX-158115726 | 12 | 0.876 | KV453010.1 | 46098   | 12-scf00273 | 12 |
| AX-158115727 | 12 | 0.876 | KV453010.1 | 53237   | 12-scf00273 | 12 |
| AX-157828420 | 12 | 0.876 | KV453010.1 | 55475   | 12-scf00273 | 12 |
| AX-158115728 | 12 | 0.876 | KV453010.1 | 75793   | 12-scf00273 | 12 |
| AX-158115729 | 12 | 0.876 | KV453010.1 | 80382   | 12-scf00273 | 12 |
| AX-158115730 | 12 | 0.876 | KV453010.1 | 81771   | 12-scf00273 | 12 |
| AX-157828423 | 12 | 0.876 | KV453010.1 | 98263   | 12-scf00273 | 12 |
| AX-158115733 | 12 | 0.876 | KV453010.1 | 105858  | 12-scf00273 | 12 |
| AX-158115735 | 12 | 0.876 | KV453010.1 | 109930  | 12-scf00273 | 12 |
| AX-158115736 | 12 | 0.876 | KV453010.1 | 114593  | 12-scf00273 | 12 |
| AX-158115737 | 12 | 0.876 | KV453010.1 | 115220  | 12-scf00273 | 12 |
| AX-158115740 | 12 | 0.876 | KV453010.1 | 125006  | 12-scf00273 | 12 |

|              |    |       |             |        |                |    |
|--------------|----|-------|-------------|--------|----------------|----|
| AX-158115741 | 12 | 0.876 | KV453010.1  | 126365 | 12-scf00273    | 12 |
| AX-158115742 | 12 | 0.876 | KV453010.1  | 128849 | 12-scf00273    | 12 |
| AX-157828425 | 12 | 0.876 | KV453010.1  | 145517 | 12-scf00273    | 12 |
| AX-158417182 | 12 | 0.876 | KV453010.1  | 161839 | 12-scf00273    | 12 |
| AX-158115754 | 12 | 0.876 | KV453010.1  | 181604 | 12-scf00273    | 12 |
| AX-158410947 | 12 | 0.876 | KV453010.1  | 198138 | 12-scf00273    | 12 |
| AX-158115756 | 12 | 0.876 | KV453010.1  | 200057 | 12-scf00273    | 12 |
| AX-158407808 | 12 | 0.876 | KV453010.1  | 210339 | 12-scf00273    | 12 |
| AX-158384989 | 12 | 0.876 | KV453010.1  | 213768 | 12-scf00273    | 12 |
| AX-158115761 | 12 | 0.876 | KV453010.1  | 215505 | 12-scf00273    | 12 |
| AX-158417186 | 12 | 0.876 | KV453010.1  | 218472 | 12-scf00273    | 12 |
| AX-158115767 | 12 | 0.876 | KV453010.1  | 232850 | 12-scf00273    | 12 |
| AX-158115771 | 12 | 0.876 | KV453010.1  | 241285 | 12-scf00273    | 12 |
| AX-157828429 | 12 | 0.876 | KV453010.1  | 247737 | 12-scf00273    | 12 |
| AX-157828431 | 12 | 0.876 | KV453010.1  | 260492 | 12-scf00273    | 12 |
| AX-158115775 | 12 | 0.876 | KV453010.1  | 262573 | 12-scf00273    | 12 |
| AX-158115776 | 12 | 0.876 | KV453010.1  | 263831 | 12-scf00273    | 12 |
| AX-158115778 | 12 | 0.876 | KV453010.1  | 268525 | 12-scf00273    | 12 |
| AX-158115779 | 12 | 0.876 | KV453010.1  | 274060 | 12-scf00273    | 12 |
| AX-158115780 | 12 | 0.876 | KV453010.1  | 274819 | 12-scf00273    | 12 |
| AX-158115784 | 12 | 0.876 | KV453010.1  | 279600 | 12-scf00273    | 12 |
| AX-158115792 | 12 | 0.876 | KV453010.1  | 291711 | 12-scf00273    | 12 |
| AX-158115836 | 12 | 0.876 | KV453010.1  | 372141 | 12-scf00273    | 12 |
| AX-158410950 | 12 | 0.876 | KV453010.1  | 384014 | 12-scf00273    | 12 |
| AX-157871244 | 12 | 0.876 | KV453010.1  | 394693 | 12-scf00273    | 12 |
| AX-158115862 | 12 | 0.876 | KV453010.1  | 404531 | 12-scf00273    | 12 |
| AX-158115875 | 12 | 0.876 | KV453010.1  | 419668 | 12-scf00273    | 12 |
| AX-158115877 | 12 | 0.876 | KV453010.1  | 422061 | 12-scf00273    | 12 |
| AX-158115912 | 12 | 0.876 | KV453010.1  | 465315 | 12-scf00273    | 12 |
| AX-158115913 | 12 | 0.876 | KV453010.1  | 465412 | 12-scf00273    | 12 |
| AX-158115917 | 12 | 0.876 | KV453010.1  | 468531 | 12-scf00273    | 12 |
| AX-158115927 | 12 | 0.876 | KV453010.1  | 479376 | 12-scf00273    | 12 |
| AX-158115932 | 12 | 0.876 | KV453010.1  | 482455 | 12-scf00273    | 12 |
| AX-158115938 | 12 | 0.876 | KV453010.1  | 487071 | 12-scf00273    | 12 |
| AX-158115955 | 12 | 0.876 | KV453010.1  | 522231 | 12-scf00273    | 12 |
| AX-157703250 | 12 | 0.876 | DX097212.1  | 350    | IORI212 lctalu | UN |
| AX-157688922 | 12 | 0.876 | 3ML01027508 | 222    | scf03114_1     | UN |
| AX-157857558 | 12 | 0.877 | KV453010.1  | 44122  | 12-scf00273    | 12 |
| AX-158410943 | 12 | 0.905 | KV453010.1  | 107887 | 12-scf00273    | 12 |
| AX-158417151 | 12 | 0.987 | KV453009.1  | 97486  | 12-scf00271    | 12 |
| AX-158114893 | 12 | 0.987 | KV453009.1  | 138825 | 12-scf00271    | 12 |
| AX-158114922 | 12 | 0.987 | KV453009.1  | 229099 | 12-scf00271    | 12 |
| AX-157828264 | 12 | 0.987 | KV453009.1  | 252573 | 12-scf00271    | 12 |
| AX-157828279 | 12 | 0.987 | KV453009.1  | 382126 | 12-scf00271    | 12 |
| AX-157857514 | 12 | 0.987 | KV453009.1  | 444648 | 12-scf00271    | 12 |
| AX-158114979 | 12 | 0.987 | KV453009.1  | 489459 | 12-scf00271    | 12 |
| AX-158384980 | 12 | 0.987 | KV453009.1  | 714748 | 12-scf00271    | 12 |
| AX-158115082 | 12 | 0.987 | KV453009.1  | 884645 | 12-scf00271    | 12 |
| AX-157857548 | 12 | 0.987 | KV453008.1  | 965061 | 12-scf00272    | 12 |
| AX-158115645 | 12 | 0.987 | KV453008.1  | 978915 | 12-scf00272    | 12 |
| AX-158410944 | 12 | 0.987 | KV453010.1  | 108302 | 12-scf00273    | 12 |

|              |    |       |            |         |             |    |
|--------------|----|-------|------------|---------|-------------|----|
| AX-158115752 | 12 | 1.041 | KV453010.1 | 177620  | 12-scf00273 | 12 |
| AX-158115758 | 12 | 1.042 | KV453010.1 | 207110  | 12-scf00273 | 12 |
| AX-158115763 | 12 | 1.042 | KV453010.1 | 217006  | 12-scf00273 | 12 |
| AX-157828427 | 12 | 1.042 | KV453010.1 | 219185  | 12-scf00273 | 12 |
| AX-158115010 | 12 | 1.043 | KV453009.1 | 639073  | 12-scf00271 | 12 |
| AX-157828302 | 12 | 1.043 | KV453009.1 | 666506  | 12-scf00271 | 12 |
| AX-158115021 | 12 | 1.043 | KV453009.1 | 674962  | 12-scf00271 | 12 |
| AX-158115022 | 12 | 1.043 | KV453009.1 | 681857  | 12-scf00271 | 12 |
| AX-158115025 | 12 | 1.043 | KV453009.1 | 686947  | 12-scf00271 | 12 |
| AX-158115026 | 12 | 1.043 | KV453009.1 | 688592  | 12-scf00271 | 12 |
| AX-158115028 | 12 | 1.043 | KV453009.1 | 694427  | 12-scf00271 | 12 |
| AX-158115047 | 12 | 1.043 | KV453009.1 | 778647  | 12-scf00271 | 12 |
| AX-158410893 | 12 | 1.043 | KV453009.1 | 848384  | 12-scf00271 | 12 |
| AX-158115068 | 12 | 1.043 | KV453009.1 | 852395  | 12-scf00271 | 12 |
| AX-157772014 | 12 | 1.043 | KV453009.1 | 857587  | 12-scf00271 | 12 |
| AX-158410896 | 12 | 1.043 | KV453009.1 | 858090  | 12-scf00271 | 12 |
| AX-158115078 | 12 | 1.043 | KV453009.1 | 871446  | 12-scf00271 | 12 |
| AX-157745622 | 12 | 1.043 | KV453009.1 | 883158  | 12-scf00271 | 12 |
| AX-158115085 | 12 | 1.043 | KV453009.1 | 887941  | 12-scf00271 | 12 |
| AX-158115086 | 12 | 1.043 | KV453009.1 | 889124  | 12-scf00271 | 12 |
| AX-158115087 | 12 | 1.043 | KV453009.1 | 889682  | 12-scf00271 | 12 |
| AX-158115412 | 12 | 1.043 | KV453008.1 | 540597  | 12-scf00272 | 12 |
| AX-158115415 | 12 | 1.043 | KV453008.1 | 546677  | 12-scf00272 | 12 |
| AX-158115416 | 12 | 1.043 | KV453008.1 | 547078  | 12-scf00272 | 12 |
| AX-158115418 | 12 | 1.043 | KV453008.1 | 551759  | 12-scf00272 | 12 |
| AX-157828356 | 12 | 1.043 | KV453008.1 | 570024  | 12-scf00272 | 12 |
| AX-158115437 | 12 | 1.043 | KV453008.1 | 571795  | 12-scf00272 | 12 |
| AX-157828357 | 12 | 1.043 | KV453008.1 | 574020  | 12-scf00272 | 12 |
| AX-158115462 | 12 | 1.043 | KV453008.1 | 611099  | 12-scf00272 | 12 |
| AX-158115463 | 12 | 1.043 | KV453008.1 | 613642  | 12-scf00272 | 12 |
| AX-158115464 | 12 | 1.043 | KV453008.1 | 615754  | 12-scf00272 | 12 |
| AX-158410919 | 12 | 1.043 | KV453008.1 | 616628  | 12-scf00272 | 12 |
| AX-157718369 | 12 | 1.043 | KV453008.1 | 622608  | 12-scf00272 | 12 |
| AX-158115468 | 12 | 1.043 | KV453008.1 | 623895  | 12-scf00272 | 12 |
| AX-158115469 | 12 | 1.043 | KV453008.1 | 624511  | 12-scf00272 | 12 |
| AX-157711119 | 12 | 1.043 | KV453008.1 | 627772  | 12-scf00272 | 12 |
| AX-157828366 | 12 | 1.043 | KV453008.1 | 639992  | 12-scf00272 | 12 |
| AX-158115665 | 12 | 1.043 | KV453008.1 | 1030043 | 12-scf00272 | 12 |
| AX-158115678 | 12 | 1.043 | KV453008.1 | 1070022 | 12-scf00272 | 12 |
| AX-158417185 | 12 | 1.043 | KV453010.1 | 193275  | 12-scf00273 | 12 |
| AX-158115762 | 12 | 1.043 | KV453010.1 | 216284  | 12-scf00273 | 12 |
| AX-158115765 | 12 | 1.043 | KV453010.1 | 219583  | 12-scf00273 | 12 |
| AX-157772786 | 12 | 1.043 | KV453010.1 | 258656  | 12-scf00273 | 12 |
| AX-158115781 | 12 | 1.043 | KV453010.1 | 275629  | 12-scf00273 | 12 |
| AX-158115783 | 12 | 1.043 | KV453010.1 | 277971  | 12-scf00273 | 12 |
| AX-158115785 | 12 | 1.043 | KV453010.1 | 281673  | 12-scf00273 | 12 |
| AX-158115786 | 12 | 1.043 | KV453010.1 | 282052  | 12-scf00273 | 12 |
| AX-157828433 | 12 | 1.043 | KV453010.1 | 282419  | 12-scf00273 | 12 |
| AX-157828434 | 12 | 1.043 | KV453010.1 | 305352  | 12-scf00273 | 12 |
| AX-158115801 | 12 | 1.043 | KV453010.1 | 305626  | 12-scf00273 | 12 |
| AX-158115804 | 12 | 1.043 | KV453010.1 | 307503  | 12-scf00273 | 12 |

|              |    |       |            |        |             |    |
|--------------|----|-------|------------|--------|-------------|----|
| AX-158115805 | 12 | 1.043 | KV453010.1 | 308647 | 12-scf00273 | 12 |
| AX-158115806 | 12 | 1.043 | KV453010.1 | 315073 | 12-scf00273 | 12 |
| AX-158115807 | 12 | 1.043 | KV453010.1 | 318278 | 12-scf00273 | 12 |
| AX-158115808 | 12 | 1.043 | KV453010.1 | 319490 | 12-scf00273 | 12 |
| AX-158115809 | 12 | 1.043 | KV453010.1 | 321661 | 12-scf00273 | 12 |
| AX-158115810 | 12 | 1.043 | KV453010.1 | 322817 | 12-scf00273 | 12 |
| AX-157828435 | 12 | 1.043 | KV453010.1 | 325399 | 12-scf00273 | 12 |
| AX-158115812 | 12 | 1.043 | KV453010.1 | 326519 | 12-scf00273 | 12 |
| AX-158115813 | 12 | 1.043 | KV453010.1 | 327690 | 12-scf00273 | 12 |
| AX-158115814 | 12 | 1.043 | KV453010.1 | 332709 | 12-scf00273 | 12 |
| AX-158115821 | 12 | 1.043 | KV453010.1 | 352755 | 12-scf00273 | 12 |
| AX-158115828 | 12 | 1.043 | KV453010.1 | 360062 | 12-scf00273 | 12 |
| AX-157757389 | 12 | 1.043 | KV453010.1 | 368357 | 12-scf00273 | 12 |
| AX-158115835 | 12 | 1.043 | KV453010.1 | 370457 | 12-scf00273 | 12 |
| AX-158115837 | 12 | 1.043 | KV453010.1 | 372819 | 12-scf00273 | 12 |
| AX-158115839 | 12 | 1.043 | KV453010.1 | 375619 | 12-scf00273 | 12 |
| AX-157748428 | 12 | 1.043 | KV453010.1 | 375744 | 12-scf00273 | 12 |
| AX-158115841 | 12 | 1.043 | KV453010.1 | 377334 | 12-scf00273 | 12 |
| AX-158115843 | 12 | 1.043 | KV453010.1 | 379161 | 12-scf00273 | 12 |
| AX-158115844 | 12 | 1.043 | KV453010.1 | 380338 | 12-scf00273 | 12 |
| AX-158410951 | 12 | 1.043 | KV453010.1 | 384078 | 12-scf00273 | 12 |
| AX-158115846 | 12 | 1.043 | KV453010.1 | 384603 | 12-scf00273 | 12 |
| AX-158115848 | 12 | 1.043 | KV453010.1 | 385408 | 12-scf00273 | 12 |
| AX-158115849 | 12 | 1.043 | KV453010.1 | 386652 | 12-scf00273 | 12 |
| AX-158115850 | 12 | 1.043 | KV453010.1 | 387898 | 12-scf00273 | 12 |
| AX-158115851 | 12 | 1.043 | KV453010.1 | 388688 | 12-scf00273 | 12 |
| AX-158115852 | 12 | 1.043 | KV453010.1 | 388997 | 12-scf00273 | 12 |
| AX-158115855 | 12 | 1.043 | KV453010.1 | 390850 | 12-scf00273 | 12 |
| AX-157866089 | 12 | 1.043 | KV453010.1 | 392467 | 12-scf00273 | 12 |
| AX-158115857 | 12 | 1.043 | KV453010.1 | 395168 | 12-scf00273 | 12 |
| AX-157828436 | 12 | 1.043 | KV453010.1 | 397333 | 12-scf00273 | 12 |
| AX-158115866 | 12 | 1.043 | KV453010.1 | 407836 | 12-scf00273 | 12 |
| AX-158115870 | 12 | 1.043 | KV453010.1 | 414128 | 12-scf00273 | 12 |
| AX-158115872 | 12 | 1.043 | KV453010.1 | 415400 | 12-scf00273 | 12 |
| AX-158115874 | 12 | 1.043 | KV453010.1 | 419107 | 12-scf00273 | 12 |
| AX-158115878 | 12 | 1.043 | KV453010.1 | 423312 | 12-scf00273 | 12 |
| AX-157866090 | 12 | 1.043 | KV453010.1 | 423456 | 12-scf00273 | 12 |
| AX-158115879 | 12 | 1.043 | KV453010.1 | 423743 | 12-scf00273 | 12 |
| AX-158115880 | 12 | 1.043 | KV453010.1 | 430808 | 12-scf00273 | 12 |
| AX-158115881 | 12 | 1.043 | KV453010.1 | 431937 | 12-scf00273 | 12 |
| AX-158115885 | 12 | 1.043 | KV453010.1 | 433929 | 12-scf00273 | 12 |
| AX-158115887 | 12 | 1.043 | KV453010.1 | 435839 | 12-scf00273 | 12 |
| AX-158115889 | 12 | 1.043 | KV453010.1 | 436982 | 12-scf00273 | 12 |
| AX-158115891 | 12 | 1.043 | KV453010.1 | 438274 | 12-scf00273 | 12 |
| AX-157742066 | 12 | 1.043 | KV453010.1 | 439217 | 12-scf00273 | 12 |
| AX-158115894 | 12 | 1.043 | KV453010.1 | 439503 | 12-scf00273 | 12 |
| AX-158115896 | 12 | 1.043 | KV453010.1 | 441332 | 12-scf00273 | 12 |
| AX-158115902 | 12 | 1.043 | KV453010.1 | 447002 | 12-scf00273 | 12 |
| AX-157722684 | 12 | 1.043 | KV453010.1 | 451040 | 12-scf00273 | 12 |
| AX-158115905 | 12 | 1.043 | KV453010.1 | 451142 | 12-scf00273 | 12 |
| AX-158115906 | 12 | 1.043 | KV453010.1 | 452212 | 12-scf00273 | 12 |

|              |    |       |            |         |             |    |
|--------------|----|-------|------------|---------|-------------|----|
| AX-158115907 | 12 | 1.043 | KV453010.1 | 452599  | 12-scf00273 | 12 |
| AX-158115915 | 12 | 1.043 | KV453010.1 | 467512  | 12-scf00273 | 12 |
| AX-158115916 | 12 | 1.043 | KV453010.1 | 468215  | 12-scf00273 | 12 |
| AX-157885968 | 12 | 1.043 | KV453010.1 | 469211  | 12-scf00273 | 12 |
| AX-158115920 | 12 | 1.043 | KV453010.1 | 472896  | 12-scf00273 | 12 |
| AX-158115921 | 12 | 1.043 | KV453010.1 | 473599  | 12-scf00273 | 12 |
| AX-158115922 | 12 | 1.043 | KV453010.1 | 475586  | 12-scf00273 | 12 |
| AX-158115924 | 12 | 1.043 | KV453010.1 | 476142  | 12-scf00273 | 12 |
| AX-158115926 | 12 | 1.043 | KV453010.1 | 478299  | 12-scf00273 | 12 |
| AX-158115928 | 12 | 1.043 | KV453010.1 | 479723  | 12-scf00273 | 12 |
| AX-158115929 | 12 | 1.043 | KV453010.1 | 480994  | 12-scf00273 | 12 |
| AX-158115930 | 12 | 1.043 | KV453010.1 | 481867  | 12-scf00273 | 12 |
| AX-158115933 | 12 | 1.043 | KV453010.1 | 482886  | 12-scf00273 | 12 |
| AX-158115934 | 12 | 1.043 | KV453010.1 | 483122  | 12-scf00273 | 12 |
| AX-158115935 | 12 | 1.043 | KV453010.1 | 483788  | 12-scf00273 | 12 |
| AX-158115936 | 12 | 1.043 | KV453010.1 | 484477  | 12-scf00273 | 12 |
| AX-158115943 | 12 | 1.043 | KV453010.1 | 496116  | 12-scf00273 | 12 |
| AX-157828439 | 12 | 1.043 | KV453010.1 | 499948  | 12-scf00273 | 12 |
| AX-158115945 | 12 | 1.043 | KV453010.1 | 507434  | 12-scf00273 | 12 |
| AX-157828442 | 12 | 1.043 | KV453010.1 | 512558  | 12-scf00273 | 12 |
| AX-157828447 | 12 | 1.043 | KV453010.1 | 518241  | 12-scf00273 | 12 |
| AX-158115962 | 12 | 1.043 | KV453010.1 | 529472  | 12-scf00273 | 12 |
| AX-157828448 | 12 | 1.043 | KV453010.1 | 530657  | 12-scf00273 | 12 |
| AX-157716784 | 12 | 1.043 | KV453010.1 | 536606  | 12-scf00273 | 12 |
| AX-158115967 | 12 | 1.043 | KV453010.1 | 542278  | 12-scf00273 | 12 |
| AX-158115972 | 12 | 1.043 | KV453010.1 | 550881  | 12-scf00273 | 12 |
| AX-158115973 | 12 | 1.043 | KV453010.1 | 551444  | 12-scf00273 | 12 |
| AX-158410955 | 12 | 1.043 | KV453010.1 | 563117  | 12-scf00273 | 12 |
| AX-158116024 | 12 | 1.043 | KV453010.1 | 621067  | 12-scf00273 | 12 |
| AX-158116498 | 12 | 1.043 | KV453010.1 | 1317539 | 12-scf00273 | 12 |
| AX-158116739 | 12 | 1.043 | KV453010.1 | 1717933 | 12-scf00273 | 12 |
| AX-157828441 | 12 | 1.099 | KV453010.1 | 506844  | 12-scf00273 | 12 |
| AX-158115965 | 12 | 1.099 | KV453010.1 | 538845  | 12-scf00273 | 12 |
| AX-158115820 | 12 | 1.207 | KV453010.1 | 351526  | 12-scf00273 | 12 |
| AX-157828451 | 12 | 1.207 | KV453010.1 | 541215  | 12-scf00273 | 12 |
| AX-158115969 | 12 | 1.207 | KV453010.1 | 546582  | 12-scf00273 | 12 |
| AX-158115970 | 12 | 1.207 | KV453010.1 | 547848  | 12-scf00273 | 12 |
| AX-158115974 | 12 | 1.207 | KV453010.1 | 552545  | 12-scf00273 | 12 |
| AX-157828453 | 12 | 1.207 | KV453010.1 | 555553  | 12-scf00273 | 12 |
| AX-157828454 | 12 | 1.207 | KV453010.1 | 555907  | 12-scf00273 | 12 |
| AX-158115977 | 12 | 1.207 | KV453010.1 | 556854  | 12-scf00273 | 12 |
| AX-158116027 | 12 | 1.207 | KV453010.1 | 623850  | 12-scf00273 | 12 |
| AX-158115985 | 12 | 1.237 | KV453010.1 | 568651  | 12-scf00273 | 12 |
| AX-158115986 | 12 | 1.306 | KV453010.1 | 569088  | 12-scf00273 | 12 |
| AX-157828455 | 12 | 1.371 | KV453010.1 | 559804  | 12-scf00273 | 12 |
| AX-158115983 | 12 | 1.371 | KV453010.1 | 566750  | 12-scf00273 | 12 |
| AX-158115990 | 12 | 1.371 | KV453010.1 | 576931  | 12-scf00273 | 12 |
| AX-158115994 | 12 | 1.371 | KV453010.1 | 580734  | 12-scf00273 | 12 |
| AX-158115998 | 12 | 1.371 | KV453010.1 | 589418  | 12-scf00273 | 12 |
| AX-157714930 | 12 | 1.371 | KV453010.1 | 591527  | 12-scf00273 | 12 |
| AX-157863331 | 12 | 1.371 | KV453010.1 | 594234  | 12-scf00273 | 12 |

|              |    |       |            |        |             |    |
|--------------|----|-------|------------|--------|-------------|----|
| AX-157753997 | 12 | 1.371 | KV453010.1 | 594291 | 12-scf00273 | 12 |
| AX-158116003 | 12 | 1.371 | KV453010.1 | 596759 | 12-scf00273 | 12 |
| AX-158116004 | 12 | 1.371 | KV453010.1 | 597537 | 12-scf00273 | 12 |
| AX-158116006 | 12 | 1.371 | KV453010.1 | 601471 | 12-scf00273 | 12 |
| AX-158116009 | 12 | 1.371 | KV453010.1 | 603805 | 12-scf00273 | 12 |
| AX-157828457 | 12 | 1.371 | KV453010.1 | 607788 | 12-scf00273 | 12 |
| AX-158116011 | 12 | 1.371 | KV453010.1 | 609911 | 12-scf00273 | 12 |
| AX-158116014 | 12 | 1.371 | KV453010.1 | 612365 | 12-scf00273 | 12 |
| AX-158116016 | 12 | 1.371 | KV453010.1 | 613964 | 12-scf00273 | 12 |
| AX-158116018 | 12 | 1.371 | KV453010.1 | 615579 | 12-scf00273 | 12 |
| AX-158116020 | 12 | 1.371 | KV453010.1 | 616673 | 12-scf00273 | 12 |
| AX-158116022 | 12 | 1.371 | KV453010.1 | 617831 | 12-scf00273 | 12 |
| AX-158116023 | 12 | 1.371 | KV453010.1 | 618211 | 12-scf00273 | 12 |
| AX-157743951 | 12 | 1.371 | KV453010.1 | 618903 | 12-scf00273 | 12 |
| AX-157775770 | 12 | 1.371 | KV453010.1 | 619578 | 12-scf00273 | 12 |
| AX-158116042 | 12 | 1.371 | KV453010.1 | 653391 | 12-scf00273 | 12 |
| AX-158116051 | 12 | 1.371 | KV453010.1 | 668575 | 12-scf00273 | 12 |
| AX-158116055 | 12 | 1.371 | KV453010.1 | 675944 | 12-scf00273 | 12 |
| AX-158410964 | 12 | 1.371 | KV453010.1 | 715687 | 12-scf00273 | 12 |
| AX-158116000 | 12 | 1.589 | KV453010.1 | 593030 | 12-scf00273 | 12 |
| AX-158116033 | 12 | 1.589 | KV453010.1 | 636292 | 12-scf00273 | 12 |
| AX-158116036 | 12 | 1.589 | KV453010.1 | 638313 | 12-scf00273 | 12 |
| AX-158116037 | 12 | 1.589 | KV453010.1 | 641713 | 12-scf00273 | 12 |
| AX-157744003 | 12 | 1.589 | KV453010.1 | 724713 | 12-scf00273 | 12 |
| AX-158115757 | 12 | 1.808 | KV453010.1 | 201140 | 12-scf00273 | 12 |
| AX-157828456 | 12 | 1.808 | KV453010.1 | 595189 | 12-scf00273 | 12 |
| AX-158116002 | 12 | 1.808 | KV453010.1 | 595590 | 12-scf00273 | 12 |
| AX-158116029 | 12 | 1.808 | KV453010.1 | 631993 | 12-scf00273 | 12 |
| AX-158116031 | 12 | 1.808 | KV453010.1 | 633849 | 12-scf00273 | 12 |
| AX-158116044 | 12 | 1.808 | KV453010.1 | 654749 | 12-scf00273 | 12 |
| AX-158116045 | 12 | 1.808 | KV453010.1 | 655418 | 12-scf00273 | 12 |
| AX-158116047 | 12 | 1.808 | KV453010.1 | 660169 | 12-scf00273 | 12 |
| AX-158116049 | 12 | 1.808 | KV453010.1 | 662027 | 12-scf00273 | 12 |
| AX-158116050 | 12 | 1.808 | KV453010.1 | 663261 | 12-scf00273 | 12 |
| AX-157724294 | 12 | 1.808 | KV453010.1 | 663770 | 12-scf00273 | 12 |
| AX-157707766 | 12 | 1.808 | KV453010.1 | 669202 | 12-scf00273 | 12 |
| AX-158116052 | 12 | 1.808 | KV453010.1 | 669915 | 12-scf00273 | 12 |
| AX-157866092 | 12 | 1.808 | KV453010.1 | 670998 | 12-scf00273 | 12 |
| AX-158116054 | 12 | 1.808 | KV453010.1 | 673178 | 12-scf00273 | 12 |
| AX-158116056 | 12 | 1.808 | KV453010.1 | 677069 | 12-scf00273 | 12 |
| AX-158116058 | 12 | 1.808 | KV453010.1 | 679094 | 12-scf00273 | 12 |
| AX-158116061 | 12 | 1.808 | KV453010.1 | 685426 | 12-scf00273 | 12 |
| AX-158116064 | 12 | 1.808 | KV453010.1 | 692340 | 12-scf00273 | 12 |
| AX-158116068 | 12 | 1.808 | KV453010.1 | 697514 | 12-scf00273 | 12 |
| AX-157726408 | 12 | 1.808 | KV453010.1 | 699904 | 12-scf00273 | 12 |
| AX-157723673 | 12 | 1.808 | KV453010.1 | 700944 | 12-scf00273 | 12 |
| AX-158116071 | 12 | 1.808 | KV453010.1 | 704688 | 12-scf00273 | 12 |
| AX-158116077 | 12 | 1.808 | KV453010.1 | 709691 | 12-scf00273 | 12 |
| AX-158116079 | 12 | 1.808 | KV453010.1 | 710767 | 12-scf00273 | 12 |
| AX-158116092 | 12 | 1.808 | KV453010.1 | 744774 | 12-scf00273 | 12 |
| AX-158116113 | 12 | 1.808 | KV453010.1 | 760940 | 12-scf00273 | 12 |



|              |    |       |            |         |             |    |
|--------------|----|-------|------------|---------|-------------|----|
| AX-158116117 | 12 | 1.808 | KV453010.1 | 765164  | 12-scf00273 | 12 |
| AX-158116125 | 12 | 1.808 | KV453010.1 | 769648  | 12-scf00273 | 12 |
| AX-158116130 | 12 | 1.808 | KV453010.1 | 774529  | 12-scf00273 | 12 |
| AX-158116225 | 12 | 1.808 | KV453010.1 | 888075  | 12-scf00273 | 12 |
| AX-158116235 | 12 | 1.808 | KV453010.1 | 899534  | 12-scf00273 | 12 |
| AX-157828477 | 12 | 1.808 | KV453010.1 | 1001708 | 12-scf00273 | 12 |
| AX-157828489 | 12 | 1.808 | KV453010.1 | 1635745 | 12-scf00273 | 12 |
| AX-158116081 | 12 | 1.951 | KV453010.1 | 718868  | 12-scf00273 | 12 |
| AX-158116085 | 12 | 2.026 | KV453010.1 | 731370  | 12-scf00273 | 12 |
| AX-158116088 | 12 | 2.026 | KV453010.1 | 735144  | 12-scf00273 | 12 |
| AX-158116090 | 12 | 2.026 | KV453010.1 | 741019  | 12-scf00273 | 12 |
| AX-158116091 | 12 | 2.026 | KV453010.1 | 742380  | 12-scf00273 | 12 |
| AX-158116093 | 12 | 2.026 | KV453010.1 | 745507  | 12-scf00273 | 12 |
| AX-158116095 | 12 | 2.026 | KV453010.1 | 746469  | 12-scf00273 | 12 |
| AX-158116100 | 12 | 2.026 | KV453010.1 | 751932  | 12-scf00273 | 12 |
| AX-158116101 | 12 | 2.026 | KV453010.1 | 752239  | 12-scf00273 | 12 |
| AX-158116104 | 12 | 2.026 | KV453010.1 | 753530  | 12-scf00273 | 12 |
| AX-158116105 | 12 | 2.026 | KV453010.1 | 753682  | 12-scf00273 | 12 |
| AX-158116108 | 12 | 2.026 | KV453010.1 | 755445  | 12-scf00273 | 12 |
| AX-158116121 | 12 | 2.026 | KV453010.1 | 768297  | 12-scf00273 | 12 |
| AX-158116204 | 12 | 2.026 | KV453010.1 | 864254  | 12-scf00273 | 12 |
| AX-157771305 | 12 | 2.026 | KV453010.1 | 943906  | 12-scf00273 | 12 |
| AX-158116282 | 12 | 2.026 | KV453010.1 | 974180  | 12-scf00273 | 12 |
| AX-158116109 | 12 | 2.076 | KV453010.1 | 756383  | 12-scf00273 | 12 |
| AX-157828461 | 12 | 2.076 | KV453010.1 | 806239  | 12-scf00273 | 12 |
| AX-158115377 | 12 | 2.136 | KV453008.1 | 473655  | 12-scf00272 | 12 |
| AX-158115995 | 12 | 2.136 | KV453010.1 | 581336  | 12-scf00273 | 12 |
| AX-158116087 | 12 | 2.136 | KV453010.1 | 734493  | 12-scf00273 | 12 |
| AX-157885972 | 12 | 2.136 | KV453010.1 | 741946  | 12-scf00273 | 12 |
| AX-158116099 | 12 | 2.136 | KV453010.1 | 750890  | 12-scf00273 | 12 |
| AX-158116102 | 12 | 2.136 | KV453010.1 | 752696  | 12-scf00273 | 12 |
| AX-158116112 | 12 | 2.136 | KV453010.1 | 759849  | 12-scf00273 | 12 |
| AX-158116114 | 12 | 2.136 | KV453010.1 | 762590  | 12-scf00273 | 12 |
| AX-158116116 | 12 | 2.136 | KV453010.1 | 764104  | 12-scf00273 | 12 |
| AX-158116118 | 12 | 2.136 | KV453010.1 | 765894  | 12-scf00273 | 12 |
| AX-157871250 | 12 | 2.136 | KV453010.1 | 767138  | 12-scf00273 | 12 |
| AX-158116124 | 12 | 2.136 | KV453010.1 | 769355  | 12-scf00273 | 12 |
| AX-158116129 | 12 | 2.136 | KV453010.1 | 773675  | 12-scf00273 | 12 |
| AX-158116131 | 12 | 2.136 | KV453010.1 | 774881  | 12-scf00273 | 12 |
| AX-158116134 | 12 | 2.136 | KV453010.1 | 778834  | 12-scf00273 | 12 |
| AX-158116138 | 12 | 2.136 | KV453010.1 | 781324  | 12-scf00273 | 12 |
| AX-158116139 | 12 | 2.136 | KV453010.1 | 781827  | 12-scf00273 | 12 |
| AX-158116142 | 12 | 2.136 | KV453010.1 | 785646  | 12-scf00273 | 12 |
| AX-158116144 | 12 | 2.136 | KV453010.1 | 787380  | 12-scf00273 | 12 |
| AX-158116145 | 12 | 2.136 | KV453010.1 | 788155  | 12-scf00273 | 12 |
| AX-158116146 | 12 | 2.136 | KV453010.1 | 788531  | 12-scf00273 | 12 |
| AX-158116147 | 12 | 2.136 | KV453010.1 | 789168  | 12-scf00273 | 12 |
| AX-158116149 | 12 | 2.136 | KV453010.1 | 790716  | 12-scf00273 | 12 |
| AX-158116150 | 12 | 2.136 | KV453010.1 | 793290  | 12-scf00273 | 12 |
| AX-158116151 | 12 | 2.136 | KV453010.1 | 793852  | 12-scf00273 | 12 |
| AX-158116152 | 12 | 2.136 | KV453010.1 | 794610  | 12-scf00273 | 12 |

|              |    |       |            |         |             |    |
|--------------|----|-------|------------|---------|-------------|----|
| AX-158116163 | 12 | 2.136 | KV453010.1 | 812682  | 12-scf00273 | 12 |
| AX-158116164 | 12 | 2.136 | KV453010.1 | 813507  | 12-scf00273 | 12 |
| AX-157699275 | 12 | 2.136 | KV453010.1 | 815162  | 12-scf00273 | 12 |
| AX-158116167 | 12 | 2.136 | KV453010.1 | 818917  | 12-scf00273 | 12 |
| AX-158116168 | 12 | 2.136 | KV453010.1 | 819420  | 12-scf00273 | 12 |
| AX-158116169 | 12 | 2.136 | KV453010.1 | 819947  | 12-scf00273 | 12 |
| AX-158116186 | 12 | 2.136 | KV453010.1 | 838670  | 12-scf00273 | 12 |
| AX-158116196 | 12 | 2.136 | KV453010.1 | 849341  | 12-scf00273 | 12 |
| AX-158116223 | 12 | 2.136 | KV453010.1 | 884412  | 12-scf00273 | 12 |
| AX-157714680 | 12 | 2.136 | KV453010.1 | 889783  | 12-scf00273 | 12 |
| AX-158116227 | 12 | 2.136 | KV453010.1 | 890339  | 12-scf00273 | 12 |
| AX-158116288 | 12 | 2.136 | KV453010.1 | 1001889 | 12-scf00273 | 12 |
| AX-158116174 | 12 | 2.354 | KV453010.1 | 824166  | 12-scf00273 | 12 |
| AX-157775547 | 12 | 2.354 | KV453010.1 | 826085  | 12-scf00273 | 12 |
| AX-157755928 | 12 | 2.354 | KV453010.1 | 834176  | 12-scf00273 | 12 |
| AX-158116185 | 12 | 2.354 | KV453010.1 | 837627  | 12-scf00273 | 12 |
| AX-158116189 | 12 | 2.354 | KV453010.1 | 843685  | 12-scf00273 | 12 |
| AX-158116193 | 12 | 2.354 | KV453010.1 | 847394  | 12-scf00273 | 12 |
| AX-158116194 | 12 | 2.354 | KV453010.1 | 848351  | 12-scf00273 | 12 |
| AX-158410969 | 12 | 2.354 | KV453010.1 | 862627  | 12-scf00273 | 12 |
| AX-158116205 | 12 | 2.354 | KV453010.1 | 866771  | 12-scf00273 | 12 |
| AX-158116218 | 12 | 2.354 | KV453010.1 | 878365  | 12-scf00273 | 12 |
| AX-158116257 | 12 | 2.354 | KV453010.1 | 921018  | 12-scf00273 | 12 |
| AX-158116263 | 12 | 2.354 | KV453010.1 | 929575  | 12-scf00273 | 12 |
| AX-158116270 | 12 | 2.354 | KV453010.1 | 945892  | 12-scf00273 | 12 |
| AX-158116277 | 12 | 2.354 | KV453010.1 | 964810  | 12-scf00273 | 12 |
| AX-158116317 | 12 | 2.354 | KV453010.1 | 1037726 | 12-scf00273 | 12 |
| AX-157772525 | 12 | 2.354 | KV453010.1 | 1082162 | 12-scf00273 | 12 |
| AX-158116395 | 12 | 2.354 | KV453010.1 | 1141868 | 12-scf00273 | 12 |
| AX-158116410 | 12 | 2.354 | KV453010.1 | 1165677 | 12-scf00273 | 12 |
| AX-158116505 | 12 | 2.354 | KV453010.1 | 1327446 | 12-scf00273 | 12 |
| AX-157877699 | 12 | 2.354 | KV453010.1 | 1509793 | 12-scf00273 | 12 |
| AX-157877700 | 12 | 2.354 | KV453010.1 | 1570772 | 12-scf00273 | 12 |
| AX-158116643 | 12 | 2.354 | KV453010.1 | 1572833 | 12-scf00273 | 12 |
| AX-157771274 | 12 | 2.354 | KV453010.1 | 1650682 | 12-scf00273 | 12 |
| AX-158116744 | 12 | 2.354 | KV453010.1 | 1728999 | 12-scf00273 | 12 |
| AX-158116831 | 12 | 2.354 | KV453010.1 | 1873589 | 12-scf00273 | 12 |
| AX-158116837 | 12 | 2.354 | KV453010.1 | 1881921 | 12-scf00273 | 12 |
| AX-158116842 | 12 | 2.354 | KV453010.1 | 1887671 | 12-scf00273 | 12 |
| AX-158116848 | 12 | 2.354 | KV453010.1 | 1893353 | 12-scf00273 | 12 |
| AX-158116852 | 12 | 2.354 | KV453010.1 | 1900977 | 12-scf00273 | 12 |
| AX-157828519 | 12 | 2.354 | KV453010.1 | 1913385 | 12-scf00273 | 12 |
| AX-157701965 | 12 | 2.417 | KV453010.1 | 868780  | 12-scf00273 | 12 |
| AX-157828476 | 12 | 2.417 | KV453010.1 | 944167  | 12-scf00273 | 12 |
| AX-158116269 | 12 | 2.417 | KV453010.1 | 944273  | 12-scf00273 | 12 |
| AX-158116384 | 12 | 2.417 | KV453010.1 | 1126403 | 12-scf00273 | 12 |
| AX-158116475 | 12 | 2.417 | KV453010.1 | 1276308 | 12-scf00273 | 12 |
| AX-158116561 | 12 | 2.417 | KV453010.1 | 1431954 | 12-scf00273 | 12 |
| AX-158422708 | 12 | 2.417 | KV453010.1 | 1556280 | 12-scf00273 | 12 |
| AX-157828511 | 12 | 2.417 | KV453010.1 | 1848691 | 12-scf00273 | 12 |
| AX-158116082 | 12 | 2.463 | KV453010.1 | 719125  | 12-scf00273 | 12 |

|              |    |       |            |         |             |    |
|--------------|----|-------|------------|---------|-------------|----|
| AX-158116159 | 12 | 2.463 | KV453010.1 | 809095  | 12-scf00273 | 12 |
| AX-158116171 | 12 | 2.463 | KV453010.1 | 821658  | 12-scf00273 | 12 |
| AX-158116178 | 12 | 2.463 | KV453010.1 | 829207  | 12-scf00273 | 12 |
| AX-158116180 | 12 | 2.463 | KV453010.1 | 831635  | 12-scf00273 | 12 |
| AX-158116191 | 12 | 2.463 | KV453010.1 | 845430  | 12-scf00273 | 12 |
| AX-158410967 | 12 | 2.463 | KV453010.1 | 860071  | 12-scf00273 | 12 |
| AX-157828465 | 12 | 2.463 | KV453010.1 | 866959  | 12-scf00273 | 12 |
| AX-158116210 | 12 | 2.463 | KV453010.1 | 872637  | 12-scf00273 | 12 |
| AX-158116211 | 12 | 2.463 | KV453010.1 | 873492  | 12-scf00273 | 12 |
| AX-158116213 | 12 | 2.463 | KV453010.1 | 874776  | 12-scf00273 | 12 |
| AX-158116214 | 12 | 2.463 | KV453010.1 | 875610  | 12-scf00273 | 12 |
| AX-158116215 | 12 | 2.463 | KV453010.1 | 876046  | 12-scf00273 | 12 |
| AX-158116216 | 12 | 2.463 | KV453010.1 | 876625  | 12-scf00273 | 12 |
| AX-158116217 | 12 | 2.463 | KV453010.1 | 877580  | 12-scf00273 | 12 |
| AX-158116221 | 12 | 2.463 | KV453010.1 | 880861  | 12-scf00273 | 12 |
| AX-158116222 | 12 | 2.463 | KV453010.1 | 881479  | 12-scf00273 | 12 |
| AX-157828468 | 12 | 2.463 | KV453010.1 | 886008  | 12-scf00273 | 12 |
| AX-158116224 | 12 | 2.463 | KV453010.1 | 887147  | 12-scf00273 | 12 |
| AX-157828469 | 12 | 2.463 | KV453010.1 | 888497  | 12-scf00273 | 12 |
| AX-158116229 | 12 | 2.463 | KV453010.1 | 892985  | 12-scf00273 | 12 |
| AX-158116231 | 12 | 2.463 | KV453010.1 | 894446  | 12-scf00273 | 12 |
| AX-158116232 | 12 | 2.463 | KV453010.1 | 894957  | 12-scf00273 | 12 |
| AX-158116233 | 12 | 2.463 | KV453010.1 | 895782  | 12-scf00273 | 12 |
| AX-158116234 | 12 | 2.463 | KV453010.1 | 896348  | 12-scf00273 | 12 |
| AX-158116246 | 12 | 2.463 | KV453010.1 | 908964  | 12-scf00273 | 12 |
| AX-158116249 | 12 | 2.463 | KV453010.1 | 911331  | 12-scf00273 | 12 |
| AX-158116250 | 12 | 2.463 | KV453010.1 | 911787  | 12-scf00273 | 12 |
| AX-158116252 | 12 | 2.463 | KV453010.1 | 913427  | 12-scf00273 | 12 |
| AX-158116253 | 12 | 2.463 | KV453010.1 | 913904  | 12-scf00273 | 12 |
| AX-157828471 | 12 | 2.463 | KV453010.1 | 921556  | 12-scf00273 | 12 |
| AX-158116258 | 12 | 2.463 | KV453010.1 | 922268  | 12-scf00273 | 12 |
| AX-157828472 | 12 | 2.463 | KV453010.1 | 923883  | 12-scf00273 | 12 |
| AX-158116260 | 12 | 2.463 | KV453010.1 | 927861  | 12-scf00273 | 12 |
| AX-157828474 | 12 | 2.463 | KV453010.1 | 933965  | 12-scf00273 | 12 |
| AX-158116264 | 12 | 2.463 | KV453010.1 | 935081  | 12-scf00273 | 12 |
| AX-157714603 | 12 | 2.463 | KV453010.1 | 942278  | 12-scf00273 | 12 |
| AX-158116268 | 12 | 2.463 | KV453010.1 | 943153  | 12-scf00273 | 12 |
| AX-158410970 | 12 | 2.463 | KV453010.1 | 954702  | 12-scf00273 | 12 |
| AX-158116274 | 12 | 2.463 | KV453010.1 | 957636  | 12-scf00273 | 12 |
| AX-158116275 | 12 | 2.463 | KV453010.1 | 958749  | 12-scf00273 | 12 |
| AX-158116281 | 12 | 2.463 | KV453010.1 | 972980  | 12-scf00273 | 12 |
| AX-158116283 | 12 | 2.463 | KV453010.1 | 976097  | 12-scf00273 | 12 |
| AX-158116289 | 12 | 2.463 | KV453010.1 | 1002647 | 12-scf00273 | 12 |
| AX-158116290 | 12 | 2.463 | KV453010.1 | 1003106 | 12-scf00273 | 12 |
| AX-158116292 | 12 | 2.463 | KV453010.1 | 1004213 | 12-scf00273 | 12 |
| AX-158116293 | 12 | 2.463 | KV453010.1 | 1007301 | 12-scf00273 | 12 |
| AX-158116294 | 12 | 2.463 | KV453010.1 | 1007510 | 12-scf00273 | 12 |
| AX-158116297 | 12 | 2.463 | KV453010.1 | 1010409 | 12-scf00273 | 12 |
| AX-158116298 | 12 | 2.463 | KV453010.1 | 1010991 | 12-scf00273 | 12 |
| AX-158116299 | 12 | 2.463 | KV453010.1 | 1011130 | 12-scf00273 | 12 |
| AX-157749602 | 12 | 2.463 | KV453010.1 | 1015304 | 12-scf00273 | 12 |

|              |    |       |            |         |             |    |
|--------------|----|-------|------------|---------|-------------|----|
| AX-158116303 | 12 | 2.463 | KV453010.1 | 1016498 | 12-scf00273 | 12 |
| AX-157758802 | 12 | 2.463 | KV453010.1 | 1018092 | 12-scf00273 | 12 |
| AX-157726964 | 12 | 2.463 | KV453010.1 | 1020083 | 12-scf00273 | 12 |
| AX-158116308 | 12 | 2.463 | KV453010.1 | 1023845 | 12-scf00273 | 12 |
| AX-158116309 | 12 | 2.463 | KV453010.1 | 1024385 | 12-scf00273 | 12 |
| AX-157857564 | 12 | 2.463 | KV453010.1 | 1043366 | 12-scf00273 | 12 |
| AX-158116327 | 12 | 2.463 | KV453010.1 | 1051852 | 12-scf00273 | 12 |
| AX-158116332 | 12 | 2.463 | KV453010.1 | 1056916 | 12-scf00273 | 12 |
| AX-158116338 | 12 | 2.463 | KV453010.1 | 1064608 | 12-scf00273 | 12 |
| AX-158116345 | 12 | 2.463 | KV453010.1 | 1070307 | 12-scf00273 | 12 |
| AX-157742348 | 12 | 2.463 | KV453010.1 | 1096134 | 12-scf00273 | 12 |
| AX-158116360 | 12 | 2.463 | KV453010.1 | 1096230 | 12-scf00273 | 12 |
| AX-158116365 | 12 | 2.463 | KV453010.1 | 1102858 | 12-scf00273 | 12 |
| AX-158116370 | 12 | 2.463 | KV453010.1 | 1108899 | 12-scf00273 | 12 |
| AX-158116422 | 12 | 2.463 | KV453010.1 | 1189870 | 12-scf00273 | 12 |
| AX-158116427 | 12 | 2.463 | KV453010.1 | 1197359 | 12-scf00273 | 12 |
| AX-158116429 | 12 | 2.463 | KV453010.1 | 1198985 | 12-scf00273 | 12 |
| AX-158116436 | 12 | 2.463 | KV453010.1 | 1204972 | 12-scf00273 | 12 |
| AX-158116459 | 12 | 2.463 | KV453010.1 | 1245283 | 12-scf00273 | 12 |
| AX-157708639 | 12 | 2.463 | KV453010.1 | 1252616 | 12-scf00273 | 12 |
| AX-158116499 | 12 | 2.463 | KV453010.1 | 1318499 | 12-scf00273 | 12 |
| AX-158116500 | 12 | 2.463 | KV453010.1 | 1321864 | 12-scf00273 | 12 |
| AX-158116568 | 12 | 2.463 | KV453010.1 | 1440389 | 12-scf00273 | 12 |
| AX-158116601 | 12 | 2.463 | KV453010.1 | 1512756 | 12-scf00273 | 12 |
| AX-158116607 | 12 | 2.463 | KV453010.1 | 1523177 | 12-scf00273 | 12 |
| AX-158116611 | 12 | 2.463 | KV453010.1 | 1531562 | 12-scf00273 | 12 |
| AX-158116616 | 12 | 2.463 | KV453010.1 | 1536147 | 12-scf00273 | 12 |
| AX-158116618 | 12 | 2.463 | KV453010.1 | 1539176 | 12-scf00273 | 12 |
| AX-158116625 | 12 | 2.463 | KV453010.1 | 1549254 | 12-scf00273 | 12 |
| AX-158116673 | 12 | 2.463 | KV453010.1 | 1620392 | 12-scf00273 | 12 |
| AX-157750427 | 12 | 2.463 | KV453010.1 | 1723157 | 12-scf00273 | 12 |
| AX-158116319 | 12 | 2.789 | KV453010.1 | 1039737 | 12-scf00273 | 12 |
| AX-158116320 | 12 | 2.79  | KV453010.1 | 1040456 | 12-scf00273 | 12 |
| AX-158116329 | 12 | 2.791 | KV453010.1 | 1053467 | 12-scf00273 | 12 |
| AX-157828480 | 12 | 2.791 | KV453010.1 | 1057518 | 12-scf00273 | 12 |
| AX-158116334 | 12 | 2.791 | KV453010.1 | 1060016 | 12-scf00273 | 12 |
| AX-158116336 | 12 | 2.791 | KV453010.1 | 1063640 | 12-scf00273 | 12 |
| AX-158116337 | 12 | 2.791 | KV453010.1 | 1063987 | 12-scf00273 | 12 |
| AX-158116339 | 12 | 2.791 | KV453010.1 | 1065769 | 12-scf00273 | 12 |
| AX-158116344 | 12 | 2.791 | KV453010.1 | 1070093 | 12-scf00273 | 12 |
| AX-157828481 | 12 | 2.791 | KV453010.1 | 1072164 | 12-scf00273 | 12 |
| AX-157757785 | 12 | 2.791 | KV453010.1 | 1072921 | 12-scf00273 | 12 |
| AX-158116347 | 12 | 2.791 | KV453010.1 | 1073110 | 12-scf00273 | 12 |
| AX-158407820 | 12 | 2.791 | KV453010.1 | 1075256 | 12-scf00273 | 12 |
| AX-158410972 | 12 | 2.791 | KV453010.1 | 1075595 | 12-scf00273 | 12 |
| AX-158116349 | 12 | 2.791 | KV453010.1 | 1076522 | 12-scf00273 | 12 |
| AX-158116350 | 12 | 2.791 | KV453010.1 | 1077080 | 12-scf00273 | 12 |
| AX-158116351 | 12 | 2.791 | KV453010.1 | 1083666 | 12-scf00273 | 12 |
| AX-157828482 | 12 | 2.791 | KV453010.1 | 1086242 | 12-scf00273 | 12 |
| AX-158116353 | 12 | 2.791 | KV453010.1 | 1087951 | 12-scf00273 | 12 |
| AX-158116354 | 12 | 2.791 | KV453010.1 | 1088083 | 12-scf00273 | 12 |

|              |    |       |            |         |             |    |
|--------------|----|-------|------------|---------|-------------|----|
| AX-158116357 | 12 | 2.791 | KV453010.1 | 1092056 | 12-scf00273 | 12 |
| AX-158116364 | 12 | 2.791 | KV453010.1 | 1099941 | 12-scf00273 | 12 |
| AX-158116413 | 12 | 2.791 | KV453010.1 | 1175791 | 12-scf00273 | 12 |
| AX-157746876 | 12 | 2.835 | KV453010.1 | 1099212 | 12-scf00273 | 12 |
| AX-157750189 | 12 | 2.875 | KV453010.1 | 1097644 | 12-scf00273 | 12 |
| AX-158116363 | 12 | 2.875 | KV453010.1 | 1099146 | 12-scf00273 | 12 |
| AX-157753545 | 12 | 2.875 | KV453010.1 | 1103912 | 12-scf00273 | 12 |
| AX-157745292 | 12 | 2.9   | KV453010.1 | 897515  | 12-scf00273 | 12 |
| AX-158116261 | 12 | 2.9   | KV453010.1 | 928148  | 12-scf00273 | 12 |
| AX-158116325 | 12 | 2.9   | KV453010.1 | 1048767 | 12-scf00273 | 12 |
| AX-158116328 | 12 | 2.9   | KV453010.1 | 1052599 | 12-scf00273 | 12 |
| AX-157828478 | 12 | 2.9   | KV453010.1 | 1055149 | 12-scf00273 | 12 |
| AX-158116333 | 12 | 2.9   | KV453010.1 | 1057281 | 12-scf00273 | 12 |
| AX-158116335 | 12 | 2.9   | KV453010.1 | 1060997 | 12-scf00273 | 12 |
| AX-158407818 | 12 | 2.9   | KV453010.1 | 1062988 | 12-scf00273 | 12 |
| AX-158116341 | 12 | 2.9   | KV453010.1 | 1067720 | 12-scf00273 | 12 |
| AX-158116342 | 12 | 2.9   | KV453010.1 | 1068131 | 12-scf00273 | 12 |
| AX-157828483 | 12 | 2.9   | KV453010.1 | 1113836 | 12-scf00273 | 12 |
| AX-158116375 | 12 | 2.9   | KV453010.1 | 1118908 | 12-scf00273 | 12 |
| AX-158116376 | 12 | 2.9   | KV453010.1 | 1119519 | 12-scf00273 | 12 |
| AX-158116378 | 12 | 2.9   | KV453010.1 | 1121158 | 12-scf00273 | 12 |
| AX-158116379 | 12 | 2.9   | KV453010.1 | 1123011 | 12-scf00273 | 12 |
| AX-158116380 | 12 | 2.9   | KV453010.1 | 1124031 | 12-scf00273 | 12 |
| AX-158116381 | 12 | 2.9   | KV453010.1 | 1124308 | 12-scf00273 | 12 |
| AX-158116382 | 12 | 2.9   | KV453010.1 | 1125106 | 12-scf00273 | 12 |
| AX-158116383 | 12 | 2.9   | KV453010.1 | 1125323 | 12-scf00273 | 12 |
| AX-157828484 | 12 | 2.9   | KV453010.1 | 1130037 | 12-scf00273 | 12 |
| AX-158116388 | 12 | 2.9   | KV453010.1 | 1132653 | 12-scf00273 | 12 |
| AX-158116390 | 12 | 2.9   | KV453010.1 | 1134042 | 12-scf00273 | 12 |
| AX-157828485 | 12 | 2.9   | KV453010.1 | 1138754 | 12-scf00273 | 12 |
| AX-158116396 | 12 | 2.9   | KV453010.1 | 1142262 | 12-scf00273 | 12 |
| AX-158410975 | 12 | 2.9   | KV453010.1 | 1147749 | 12-scf00273 | 12 |
| AX-158116398 | 12 | 2.9   | KV453010.1 | 1148953 | 12-scf00273 | 12 |
| AX-158116399 | 12 | 2.9   | KV453010.1 | 1153752 | 12-scf00273 | 12 |
| AX-158116400 | 12 | 2.9   | KV453010.1 | 1155565 | 12-scf00273 | 12 |
| AX-158116403 | 12 | 2.9   | KV453010.1 | 1158545 | 12-scf00273 | 12 |
| AX-158116405 | 12 | 2.9   | KV453010.1 | 1159672 | 12-scf00273 | 12 |
| AX-158116406 | 12 | 2.9   | KV453010.1 | 1161242 | 12-scf00273 | 12 |
| AX-158116409 | 12 | 2.9   | KV453010.1 | 1165095 | 12-scf00273 | 12 |
| AX-158116412 | 12 | 2.9   | KV453010.1 | 1171518 | 12-scf00273 | 12 |
| AX-158116416 | 12 | 2.9   | KV453010.1 | 1180484 | 12-scf00273 | 12 |
| AX-158116417 | 12 | 2.9   | KV453010.1 | 1182331 | 12-scf00273 | 12 |
| AX-158116430 | 12 | 2.9   | KV453010.1 | 1201340 | 12-scf00273 | 12 |
| AX-158116434 | 12 | 2.9   | KV453010.1 | 1203400 | 12-scf00273 | 12 |
| AX-158116463 | 12 | 2.9   | KV453010.1 | 1258286 | 12-scf00273 | 12 |
| AX-158116480 | 12 | 2.9   | KV453010.1 | 1288187 | 12-scf00273 | 12 |
| AX-157725954 | 12 | 2.9   | KV453010.1 | 1289435 | 12-scf00273 | 12 |
| AX-158116484 | 12 | 2.9   | KV453010.1 | 1294114 | 12-scf00273 | 12 |
| AX-158116501 | 12 | 2.9   | KV453010.1 | 1323541 | 12-scf00273 | 12 |
| AX-158116504 | 12 | 2.9   | KV453010.1 | 1327086 | 12-scf00273 | 12 |
| AX-158116509 | 12 | 2.9   | KV453010.1 | 1336795 | 12-scf00273 | 12 |

|              |    |       |            |         |                |    |
|--------------|----|-------|------------|---------|----------------|----|
| AX-158116519 | 12 | 2.9   | KV453010.1 | 1355914 | 12-scf00273    | 12 |
| AX-158116527 | 12 | 2.9   | KV453010.1 | 1369322 | 12-scf00273    | 12 |
| AX-158116542 | 12 | 2.9   | KV453010.1 | 1386224 | 12-scf00273    | 12 |
| AX-158116549 | 12 | 2.9   | KV453010.1 | 1397157 | 12-scf00273    | 12 |
| AX-158116563 | 12 | 2.9   | KV453010.1 | 1433528 | 12-scf00273    | 12 |
| AX-158116564 | 12 | 2.9   | KV453010.1 | 1434436 | 12-scf00273    | 12 |
| AX-158116566 | 12 | 2.9   | KV453010.1 | 1437094 | 12-scf00273    | 12 |
| AX-158116592 | 12 | 2.9   | KV453010.1 | 1497871 | 12-scf00273    | 12 |
| AX-158116633 | 12 | 2.9   | KV453010.1 | 1555235 | 12-scf00273    | 12 |
| AX-157885979 | 12 | 2.9   | KV453010.1 | 1601420 | 12-scf00273    | 12 |
| AX-158421735 | 12 | 2.9   | DX102392.1 | 548     | IORI212 lctalu | UN |
| AX-158116448 | 12 | 2.936 | KV453010.1 | 1230964 | 12-scf00273    | 12 |
| AX-157723168 | 12 | 2.955 | KV453010.1 | 1232051 | 12-scf00273    | 12 |
| AX-158410981 | 12 | 2.981 | KV453010.1 | 1239634 | 12-scf00273    | 12 |
| AX-158116280 | 12 | 3.009 | KV453010.1 | 970904  | 12-scf00273    | 12 |
| AX-158116387 | 12 | 3.009 | KV453010.1 | 1130942 | 12-scf00273    | 12 |
| AX-158116397 | 12 | 3.009 | KV453010.1 | 1142854 | 12-scf00273    | 12 |
| AX-158116411 | 12 | 3.009 | KV453010.1 | 1170682 | 12-scf00273    | 12 |
| AX-158116452 | 12 | 3.009 | KV453010.1 | 1240123 | 12-scf00273    | 12 |
| AX-158116456 | 12 | 3.009 | KV453010.1 | 1243459 | 12-scf00273    | 12 |
| AX-158116487 | 12 | 3.009 | KV453010.1 | 1302426 | 12-scf00273    | 12 |
| AX-158116490 | 12 | 3.009 | KV453010.1 | 1306925 | 12-scf00273    | 12 |
| AX-158116495 | 12 | 3.009 | KV453010.1 | 1312155 | 12-scf00273    | 12 |
| AX-157727436 | 12 | 3.009 | KV453010.1 | 1325034 | 12-scf00273    | 12 |
| AX-158116512 | 12 | 3.009 | KV453010.1 | 1342109 | 12-scf00273    | 12 |
| AX-158116526 | 12 | 3.009 | KV453010.1 | 1368156 | 12-scf00273    | 12 |
| AX-158116536 | 12 | 3.009 | KV453010.1 | 1378413 | 12-scf00273    | 12 |
| AX-158116537 | 12 | 3.009 | KV453010.1 | 1379495 | 12-scf00273    | 12 |
| AX-158116539 | 12 | 3.009 | KV453010.1 | 1381931 | 12-scf00273    | 12 |
| AX-158116541 | 12 | 3.009 | KV453010.1 | 1384308 | 12-scf00273    | 12 |
| AX-158116544 | 12 | 3.009 | KV453010.1 | 1390163 | 12-scf00273    | 12 |
| AX-158116547 | 12 | 3.009 | KV453010.1 | 1395401 | 12-scf00273    | 12 |
| AX-158116550 | 12 | 3.009 | KV453010.1 | 1399213 | 12-scf00273    | 12 |
| AX-158116560 | 12 | 3.009 | KV453010.1 | 1429174 | 12-scf00273    | 12 |
| AX-158116562 | 12 | 3.009 | KV453010.1 | 1432455 | 12-scf00273    | 12 |
| AX-158116573 | 12 | 3.009 | KV453010.1 | 1450643 | 12-scf00273    | 12 |
| AX-157773244 | 12 | 3.009 | KV453010.1 | 1452368 | 12-scf00273    | 12 |
| AX-158116576 | 12 | 3.009 | KV453010.1 | 1457264 | 12-scf00273    | 12 |
| AX-158116578 | 12 | 3.009 | KV453010.1 | 1459097 | 12-scf00273    | 12 |
| AX-158116588 | 12 | 3.009 | KV453010.1 | 1488797 | 12-scf00273    | 12 |
| AX-158116594 | 12 | 3.009 | KV453010.1 | 1501778 | 12-scf00273    | 12 |
| AX-158116595 | 12 | 3.009 | KV453010.1 | 1502781 | 12-scf00273    | 12 |
| AX-158116598 | 12 | 3.009 | KV453010.1 | 1505777 | 12-scf00273    | 12 |
| AX-158116626 | 12 | 3.009 | KV453010.1 | 1549615 | 12-scf00273    | 12 |
| AX-158116645 | 12 | 3.009 | KV453010.1 | 1574320 | 12-scf00273    | 12 |
| AX-158116596 | 12 | 3.029 | KV453010.1 | 1503975 | 12-scf00273    | 12 |
| AX-158116603 | 12 | 3.057 | KV453010.1 | 1516339 | 12-scf00273    | 12 |
| AX-158116604 | 12 | 3.083 | KV453010.1 | 1517627 | 12-scf00273    | 12 |
| AX-158116605 | 12 | 3.102 | KV453010.1 | 1519360 | 12-scf00273    | 12 |
| AX-158116622 | 12 | 3.118 | KV453010.1 | 1544743 | 12-scf00273    | 12 |
| AX-158116649 | 12 | 3.118 | KV453010.1 | 1583212 | 12-scf00273    | 12 |

|              |    |       |            |         |             |    |
|--------------|----|-------|------------|---------|-------------|----|
| AX-158116650 | 12 | 3.118 | KV453010.1 | 1585218 | 12-scf00273 | 12 |
| AX-158116670 | 12 | 3.118 | KV453010.1 | 1615689 | 12-scf00273 | 12 |
| AX-157693625 | 12 | 3.337 | KV453010.1 | 1233194 | 12-scf00273 | 12 |
| AX-158116457 | 12 | 3.337 | KV453010.1 | 1243975 | 12-scf00273 | 12 |
| AX-158116619 | 12 | 3.337 | KV453010.1 | 1540480 | 12-scf00273 | 12 |
| AX-158116628 | 12 | 3.337 | KV453010.1 | 1550463 | 12-scf00273 | 12 |
| AX-158116629 | 12 | 3.337 | KV453010.1 | 1551078 | 12-scf00273 | 12 |
| AX-158116631 | 12 | 3.337 | KV453010.1 | 1552036 | 12-scf00273 | 12 |
| AX-158116632 | 12 | 3.337 | KV453010.1 | 1552461 | 12-scf00273 | 12 |
| AX-158116647 | 12 | 3.337 | KV453010.1 | 1580182 | 12-scf00273 | 12 |
| AX-158116651 | 12 | 3.337 | KV453010.1 | 1586107 | 12-scf00273 | 12 |
| AX-158116654 | 12 | 3.337 | KV453010.1 | 1589667 | 12-scf00273 | 12 |
| AX-158116658 | 12 | 3.337 | KV453010.1 | 1598370 | 12-scf00273 | 12 |
| AX-158116659 | 12 | 3.337 | KV453010.1 | 1599127 | 12-scf00273 | 12 |
| AX-158116666 | 12 | 3.337 | KV453010.1 | 1610041 | 12-scf00273 | 12 |
| AX-158116667 | 12 | 3.337 | KV453010.1 | 1611747 | 12-scf00273 | 12 |
| AX-158116669 | 12 | 3.337 | KV453010.1 | 1613680 | 12-scf00273 | 12 |
| AX-158116676 | 12 | 3.337 | KV453010.1 | 1623234 | 12-scf00273 | 12 |
| AX-158116678 | 12 | 3.337 | KV453010.1 | 1624598 | 12-scf00273 | 12 |
| AX-158116681 | 12 | 3.337 | KV453010.1 | 1626078 | 12-scf00273 | 12 |
| AX-158116685 | 12 | 3.337 | KV453010.1 | 1632409 | 12-scf00273 | 12 |
| AX-158116686 | 12 | 3.337 | KV453010.1 | 1634023 | 12-scf00273 | 12 |
| AX-158116692 | 12 | 3.337 | KV453010.1 | 1640382 | 12-scf00273 | 12 |
| AX-158116693 | 12 | 3.337 | KV453010.1 | 1643996 | 12-scf00273 | 12 |
| AX-158116698 | 12 | 3.337 | KV453010.1 | 1655269 | 12-scf00273 | 12 |
| AX-158116699 | 12 | 3.337 | KV453010.1 | 1657127 | 12-scf00273 | 12 |
| AX-158116701 | 12 | 3.337 | KV453010.1 | 1658692 | 12-scf00273 | 12 |
| AX-158116704 | 12 | 3.337 | KV453010.1 | 1660395 | 12-scf00273 | 12 |
| AX-158116705 | 12 | 3.337 | KV453010.1 | 1661824 | 12-scf00273 | 12 |
| AX-158116706 | 12 | 3.337 | KV453010.1 | 1663510 | 12-scf00273 | 12 |
| AX-158116709 | 12 | 3.337 | KV453010.1 | 1668466 | 12-scf00273 | 12 |
| AX-158116712 | 12 | 3.337 | KV453010.1 | 1670096 | 12-scf00273 | 12 |
| AX-158116713 | 12 | 3.337 | KV453010.1 | 1672935 | 12-scf00273 | 12 |
| AX-157828490 | 12 | 3.337 | KV453010.1 | 1679429 | 12-scf00273 | 12 |
| AX-158116719 | 12 | 3.337 | KV453010.1 | 1680357 | 12-scf00273 | 12 |
| AX-157828492 | 12 | 3.337 | KV453010.1 | 1684765 | 12-scf00273 | 12 |
| AX-158116722 | 12 | 3.337 | KV453010.1 | 1684849 | 12-scf00273 | 12 |
| AX-158117008 | 12 | 3.337 | KV453010.1 | 2130400 | 12-scf00273 | 12 |
| AX-157866101 | 12 | 3.337 | KV453010.1 | 2164133 | 12-scf00273 | 12 |
| AX-158117092 | 12 | 3.337 | KV453010.1 | 2228244 | 12-scf00273 | 12 |
| AX-158116648 | 12 | 3.446 | KV453010.1 | 1580592 | 12-scf00273 | 12 |
| AX-158116726 | 12 | 3.446 | KV453010.1 | 1690759 | 12-scf00273 | 12 |
| AX-158116728 | 12 | 3.446 | KV453010.1 | 1693274 | 12-scf00273 | 12 |
| AX-157726472 | 12 | 3.446 | KV453010.1 | 1700976 | 12-scf00273 | 12 |
| AX-158116755 | 12 | 3.446 | KV453010.1 | 1758747 | 12-scf00273 | 12 |
| AX-158116804 | 12 | 3.446 | KV453010.1 | 1828333 | 12-scf00273 | 12 |
| AX-158117021 | 12 | 3.446 | KV453010.1 | 2142456 | 12-scf00273 | 12 |
| AX-158117030 | 12 | 3.446 | KV453010.1 | 2153474 | 12-scf00273 | 12 |
| AX-158117262 | 12 | 3.446 | KV453010.1 | 2467827 | 12-scf00273 | 12 |
| AX-158117291 | 12 | 3.446 | KV453010.1 | 2514006 | 12-scf00273 | 12 |
| AX-157743336 | 12 | 3.446 | KV453010.1 | 2582701 | 12-scf00273 | 12 |

|              |    |       |            |         |             |    |
|--------------|----|-------|------------|---------|-------------|----|
| AX-157828497 | 12 | 3.474 | KV453010.1 | 1704921 | 12-scf00273 | 12 |
| AX-158116735 | 12 | 3.504 | KV453010.1 | 1705223 | 12-scf00273 | 12 |
| AX-158116518 | 12 | 3.555 | KV453010.1 | 1354078 | 12-scf00273 | 12 |
| AX-157740701 | 12 | 3.555 | KV453010.1 | 1709886 | 12-scf00273 | 12 |
| AX-158116737 | 12 | 3.555 | KV453010.1 | 1711318 | 12-scf00273 | 12 |
| AX-158116738 | 12 | 3.555 | KV453010.1 | 1716577 | 12-scf00273 | 12 |
| AX-157713649 | 12 | 3.555 | KV453010.1 | 1721962 | 12-scf00273 | 12 |
| AX-157828499 | 12 | 3.555 | KV453010.1 | 1723430 | 12-scf00273 | 12 |
| AX-158116743 | 12 | 3.555 | KV453010.1 | 1724801 | 12-scf00273 | 12 |
| AX-157744245 | 12 | 3.555 | KV453010.1 | 1728539 | 12-scf00273 | 12 |
| AX-158116745 | 12 | 3.555 | KV453010.1 | 1731360 | 12-scf00273 | 12 |
| AX-158116748 | 12 | 3.555 | KV453010.1 | 1735128 | 12-scf00273 | 12 |
| AX-157753637 | 12 | 3.555 | KV453010.1 | 1747911 | 12-scf00273 | 12 |
| AX-157693042 | 12 | 3.555 | KV453010.1 | 1748555 | 12-scf00273 | 12 |
| AX-157828502 | 12 | 3.555 | KV453010.1 | 1750877 | 12-scf00273 | 12 |
| AX-157770791 | 12 | 3.555 | KV453010.1 | 1751316 | 12-scf00273 | 12 |
| AX-157743938 | 12 | 3.555 | KV453010.1 | 1753555 | 12-scf00273 | 12 |
| AX-158116752 | 12 | 3.555 | KV453010.1 | 1755278 | 12-scf00273 | 12 |
| AX-158116756 | 12 | 3.555 | KV453010.1 | 1759711 | 12-scf00273 | 12 |
| AX-158116761 | 12 | 3.555 | KV453010.1 | 1766467 | 12-scf00273 | 12 |
| AX-158116762 | 12 | 3.555 | KV453010.1 | 1766841 | 12-scf00273 | 12 |
| AX-158116763 | 12 | 3.555 | KV453010.1 | 1768363 | 12-scf00273 | 12 |
| AX-158116764 | 12 | 3.555 | KV453010.1 | 1770867 | 12-scf00273 | 12 |
| AX-158116765 | 12 | 3.555 | KV453010.1 | 1771590 | 12-scf00273 | 12 |
| AX-158116766 | 12 | 3.555 | KV453010.1 | 1772058 | 12-scf00273 | 12 |
| AX-158116772 | 12 | 3.555 | KV453010.1 | 1782454 | 12-scf00273 | 12 |
| AX-158116775 | 12 | 3.555 | KV453010.1 | 1785536 | 12-scf00273 | 12 |
| AX-158116776 | 12 | 3.555 | KV453010.1 | 1787076 | 12-scf00273 | 12 |
| AX-158116783 | 12 | 3.555 | KV453010.1 | 1799238 | 12-scf00273 | 12 |
| AX-157725522 | 12 | 3.555 | KV453010.1 | 1802836 | 12-scf00273 | 12 |
| AX-158116790 | 12 | 3.555 | KV453010.1 | 1804707 | 12-scf00273 | 12 |
| AX-158116792 | 12 | 3.555 | KV453010.1 | 1805767 | 12-scf00273 | 12 |
| AX-157740779 | 12 | 3.555 | KV453010.1 | 1810072 | 12-scf00273 | 12 |
| AX-158116796 | 12 | 3.555 | KV453010.1 | 1814082 | 12-scf00273 | 12 |
| AX-158116939 | 12 | 3.555 | KV453010.1 | 2011343 | 12-scf00273 | 12 |
| AX-157708577 | 12 | 3.664 | KV453010.1 | 1812317 | 12-scf00273 | 12 |
| AX-158116795 | 12 | 3.664 | KV453010.1 | 1813555 | 12-scf00273 | 12 |
| AX-158410974 | 12 | 3.712 | KV453010.1 | 1147289 | 12-scf00273 | 12 |
| AX-158116467 | 12 | 3.712 | KV453010.1 | 1265841 | 12-scf00273 | 12 |
| AX-158116497 | 12 | 3.712 | KV453010.1 | 1317006 | 12-scf00273 | 12 |
| AX-158116538 | 12 | 3.712 | KV453010.1 | 1380227 | 12-scf00273 | 12 |
| AX-157866096 | 12 | 3.712 | KV453010.1 | 1575778 | 12-scf00273 | 12 |
| AX-158116662 | 12 | 3.712 | KV453010.1 | 1601826 | 12-scf00273 | 12 |
| AX-158116694 | 12 | 3.712 | KV453010.1 | 1646556 | 12-scf00273 | 12 |
| AX-158116734 | 12 | 3.712 | KV453010.1 | 1703130 | 12-scf00273 | 12 |
| AX-157714397 | 12 | 3.712 | KV453010.1 | 1723770 | 12-scf00273 | 12 |
| AX-158116757 | 12 | 3.712 | KV453010.1 | 1760116 | 12-scf00273 | 12 |
| AX-158116798 | 12 | 3.712 | KV453010.1 | 1815728 | 12-scf00273 | 12 |
| AX-158410987 | 12 | 3.712 | KV453010.1 | 1832860 | 12-scf00273 | 12 |
| AX-158116803 | 12 | 3.773 | KV453010.1 | 1827842 | 12-scf00273 | 12 |
| AX-157712258 | 12 | 3.773 | KV453010.1 | 1835312 | 12-scf00273 | 12 |



|              |    |       |            |         |             |    |
|--------------|----|-------|------------|---------|-------------|----|
| AX-158116805 | 12 | 3.773 | KV453010.1 | 1840483 | 12-scf00273 | 12 |
| AX-158116808 | 12 | 3.773 | KV453010.1 | 1847270 | 12-scf00273 | 12 |
| AX-158116811 | 12 | 3.773 | KV453010.1 | 1852768 | 12-scf00273 | 12 |
| AX-157828513 | 12 | 3.773 | KV453010.1 | 1852972 | 12-scf00273 | 12 |
| AX-157716653 | 12 | 3.773 | KV453010.1 | 1854802 | 12-scf00273 | 12 |
| AX-158116813 | 12 | 3.773 | KV453010.1 | 1856770 | 12-scf00273 | 12 |
| AX-158116814 | 12 | 3.773 | KV453010.1 | 1857069 | 12-scf00273 | 12 |
| AX-158116817 | 12 | 3.773 | KV453010.1 | 1859781 | 12-scf00273 | 12 |
| AX-158116819 | 12 | 3.773 | KV453010.1 | 1860930 | 12-scf00273 | 12 |
| AX-158116832 | 12 | 3.773 | KV453010.1 | 1879691 | 12-scf00273 | 12 |
| AX-158116822 | 12 | 3.883 | KV453010.1 | 1862604 | 12-scf00273 | 12 |
| AX-158116828 | 12 | 3.883 | KV453010.1 | 1868341 | 12-scf00273 | 12 |
| AX-158116835 | 12 | 3.883 | KV453010.1 | 1880567 | 12-scf00273 | 12 |
| AX-158116840 | 12 | 3.883 | KV453010.1 | 1886293 | 12-scf00273 | 12 |
| AX-158116841 | 12 | 3.883 | KV453010.1 | 1886551 | 12-scf00273 | 12 |
| AX-158116843 | 12 | 3.883 | KV453010.1 | 1888194 | 12-scf00273 | 12 |
| AX-158116847 | 12 | 3.963 | KV453010.1 | 1892456 | 12-scf00273 | 12 |
| AX-158116865 | 12 | 3.963 | KV453010.1 | 1912981 | 12-scf00273 | 12 |
| AX-158116874 | 12 | 3.963 | KV453010.1 | 1927118 | 12-scf00273 | 12 |
| AX-158116851 | 12 | 4.047 | KV453010.1 | 1898714 | 12-scf00273 | 12 |
| AX-158116854 | 12 | 4.047 | KV453010.1 | 1902448 | 12-scf00273 | 12 |
| AX-158116858 | 12 | 4.047 | KV453010.1 | 1905325 | 12-scf00273 | 12 |
| AX-158116860 | 12 | 4.047 | KV453010.1 | 1906433 | 12-scf00273 | 12 |
| AX-157885983 | 12 | 4.047 | KV453010.1 | 1908826 | 12-scf00273 | 12 |
| AX-158116875 | 12 | 4.047 | KV453010.1 | 1927726 | 12-scf00273 | 12 |
| AX-158116877 | 12 | 4.047 | KV453010.1 | 1929194 | 12-scf00273 | 12 |
| AX-158116885 | 12 | 4.047 | KV453010.1 | 1938232 | 12-scf00273 | 12 |
| AX-157725802 | 12 | 4.047 | KV453010.1 | 2092700 | 12-scf00273 | 12 |
| AX-157866098 | 12 | 4.149 | KV453010.1 | 1932856 | 12-scf00273 | 12 |
| AX-158116881 | 12 | 4.21  | KV453010.1 | 1934032 | 12-scf00273 | 12 |
| AX-157828521 | 12 | 4.21  | KV453010.1 | 1946532 | 12-scf00273 | 12 |
| AX-158116895 | 12 | 4.21  | KV453010.1 | 1956073 | 12-scf00273 | 12 |
| AX-158116897 | 12 | 4.21  | KV453010.1 | 1958664 | 12-scf00273 | 12 |
| AX-158116909 | 12 | 4.21  | KV453010.1 | 1977003 | 12-scf00273 | 12 |
| AX-158116911 | 12 | 4.21  | KV453010.1 | 1978716 | 12-scf00273 | 12 |
| AX-158116914 | 12 | 4.21  | KV453010.1 | 1983462 | 12-scf00273 | 12 |
| AX-158116915 | 12 | 4.21  | KV453010.1 | 1983542 | 12-scf00273 | 12 |
| AX-158116918 | 12 | 4.21  | KV453010.1 | 1986111 | 12-scf00273 | 12 |
| AX-158116923 | 12 | 4.21  | KV453010.1 | 1992106 | 12-scf00273 | 12 |
| AX-158116924 | 12 | 4.21  | KV453010.1 | 1994620 | 12-scf00273 | 12 |
| AX-158116925 | 12 | 4.21  | KV453010.1 | 1995242 | 12-scf00273 | 12 |
| AX-158116930 | 12 | 4.21  | KV453010.1 | 1999783 | 12-scf00273 | 12 |
| AX-158116931 | 12 | 4.21  | KV453010.1 | 2000443 | 12-scf00273 | 12 |
| AX-158116944 | 12 | 4.21  | KV453010.1 | 2015409 | 12-scf00273 | 12 |
| AX-158116959 | 12 | 4.21  | KV453010.1 | 2045398 | 12-scf00273 | 12 |
| AX-158116946 | 12 | 4.232 | KV453010.1 | 2025620 | 12-scf00273 | 12 |
| AX-158116948 | 12 | 4.262 | KV453010.1 | 2028601 | 12-scf00273 | 12 |
| AX-158116949 | 12 | 4.292 | KV453010.1 | 2029649 | 12-scf00273 | 12 |
| AX-157871256 | 12 | 4.32  | KV453010.1 | 2031583 | 12-scf00273 | 12 |
| AX-158116968 | 12 | 4.43  | KV453010.1 | 2058643 | 12-scf00273 | 12 |
| AX-158116969 | 12 | 4.43  | KV453010.1 | 2059546 | 12-scf00273 | 12 |

|              |    |       |            |         |             |    |
|--------------|----|-------|------------|---------|-------------|----|
| AX-158116951 | 12 | 4.538 | KV453010.1 | 2032885 | 12-scf00273 | 12 |
| AX-158116966 | 12 | 4.538 | KV453010.1 | 2055367 | 12-scf00273 | 12 |
| AX-157743301 | 12 | 4.538 | KV453010.1 | 2067268 | 12-scf00273 | 12 |
| AX-158116975 | 12 | 4.538 | KV453010.1 | 2068322 | 12-scf00273 | 12 |
| AX-158116978 | 12 | 4.538 | KV453010.1 | 2073462 | 12-scf00273 | 12 |
| AX-158116981 | 12 | 4.538 | KV453010.1 | 2076631 | 12-scf00273 | 12 |
| AX-158116982 | 12 | 4.538 | KV453010.1 | 2076964 | 12-scf00273 | 12 |
| AX-158116989 | 12 | 4.538 | KV453010.1 | 2090515 | 12-scf00273 | 12 |
| AX-158117007 | 12 | 4.538 | KV453010.1 | 2128493 | 12-scf00273 | 12 |
| AX-157828530 | 12 | 4.538 | KV453010.1 | 2136090 | 12-scf00273 | 12 |
| AX-158117012 | 12 | 4.538 | KV453010.1 | 2136899 | 12-scf00273 | 12 |
| AX-158117036 | 12 | 4.538 | KV453010.1 | 2169561 | 12-scf00273 | 12 |
| AX-158117060 | 12 | 4.538 | KV453010.1 | 2192524 | 12-scf00273 | 12 |
| AX-158117075 | 12 | 4.538 | KV453010.1 | 2209390 | 12-scf00273 | 12 |
| AX-158117080 | 12 | 4.538 | KV453010.1 | 2219180 | 12-scf00273 | 12 |
| AX-158116974 | 12 | 4.552 | KV453010.1 | 2066207 | 12-scf00273 | 12 |
| AX-157721423 | 12 | 4.552 | KV453010.1 | 2142558 | 12-scf00273 | 12 |
| AX-158117024 | 12 | 4.552 | KV453010.1 | 2145397 | 12-scf00273 | 12 |
| AX-158117028 | 12 | 4.552 | KV453010.1 | 2149843 | 12-scf00273 | 12 |
| AX-157747500 | 12 | 4.552 | KV453010.1 | 2157837 | 12-scf00273 | 12 |
| AX-158117033 | 12 | 4.567 | KV453010.1 | 2160679 | 12-scf00273 | 12 |
| AX-158117034 | 12 | 4.585 | KV453010.1 | 2162367 | 12-scf00273 | 12 |
| AX-158117035 | 12 | 4.605 | KV453010.1 | 2168719 | 12-scf00273 | 12 |
| AX-158117049 | 12 | 4.624 | KV453010.1 | 2182486 | 12-scf00273 | 12 |
| AX-157828494 | 12 | 4.647 | KV453010.1 | 1690080 | 12-scf00273 | 12 |
| AX-158116825 | 12 | 4.647 | KV453010.1 | 1864477 | 12-scf00273 | 12 |
| AX-158116827 | 12 | 4.647 | KV453010.1 | 1866137 | 12-scf00273 | 12 |
| AX-158116888 | 12 | 4.647 | KV453010.1 | 1946923 | 12-scf00273 | 12 |
| AX-158116890 | 12 | 4.647 | KV453010.1 | 1948798 | 12-scf00273 | 12 |
| AX-158116913 | 12 | 4.647 | KV453010.1 | 1980594 | 12-scf00273 | 12 |
| AX-158116953 | 12 | 4.647 | KV453010.1 | 2039118 | 12-scf00273 | 12 |
| AX-158116960 | 12 | 4.647 | KV453010.1 | 2047464 | 12-scf00273 | 12 |
| AX-157877704 | 12 | 4.647 | KV453010.1 | 2083780 | 12-scf00273 | 12 |
| AX-158116984 | 12 | 4.647 | KV453010.1 | 2086671 | 12-scf00273 | 12 |
| AX-158116985 | 12 | 4.647 | KV453010.1 | 2087201 | 12-scf00273 | 12 |
| AX-158117002 | 12 | 4.647 | KV453010.1 | 2116912 | 12-scf00273 | 12 |
| AX-157885987 | 12 | 4.647 | KV453010.1 | 2135525 | 12-scf00273 | 12 |
| AX-158117038 | 12 | 4.647 | KV453010.1 | 2170419 | 12-scf00273 | 12 |
| AX-158117043 | 12 | 4.647 | KV453010.1 | 2174291 | 12-scf00273 | 12 |
| AX-158117050 | 12 | 4.647 | KV453010.1 | 2183765 | 12-scf00273 | 12 |
| AX-158117051 | 12 | 4.647 | KV453010.1 | 2184077 | 12-scf00273 | 12 |
| AX-157828534 | 12 | 4.647 | KV453010.1 | 2189788 | 12-scf00273 | 12 |
| AX-158117058 | 12 | 4.647 | KV453010.1 | 2190579 | 12-scf00273 | 12 |
| AX-158117062 | 12 | 4.647 | KV453010.1 | 2195057 | 12-scf00273 | 12 |
| AX-158117063 | 12 | 4.647 | KV453010.1 | 2195700 | 12-scf00273 | 12 |
| AX-158117064 | 12 | 4.647 | KV453010.1 | 2198441 | 12-scf00273 | 12 |
| AX-157726727 | 12 | 4.647 | KV453010.1 | 2198717 | 12-scf00273 | 12 |
| AX-158117066 | 12 | 4.647 | KV453010.1 | 2200919 | 12-scf00273 | 12 |
| AX-158117067 | 12 | 4.647 | KV453010.1 | 2201650 | 12-scf00273 | 12 |
| AX-158117068 | 12 | 4.647 | KV453010.1 | 2201912 | 12-scf00273 | 12 |
| AX-158117071 | 12 | 4.647 | KV453010.1 | 2204187 | 12-scf00273 | 12 |

|              |    |       |            |         |             |    |
|--------------|----|-------|------------|---------|-------------|----|
| AX-158117074 | 12 | 4.647 | KV453010.1 | 2207628 | 12-scf00273 | 12 |
| AX-158117076 | 12 | 4.647 | KV453010.1 | 2215210 | 12-scf00273 | 12 |
| AX-158117077 | 12 | 4.647 | KV453010.1 | 2215434 | 12-scf00273 | 12 |
| AX-157828536 | 12 | 4.647 | KV453010.1 | 2218112 | 12-scf00273 | 12 |
| AX-157744450 | 12 | 4.647 | KV453010.1 | 2234737 | 12-scf00273 | 12 |
| AX-157714821 | 12 | 4.648 | KV453010.1 | 2225905 | 12-scf00273 | 12 |
| AX-158117087 | 12 | 4.648 | KV453010.1 | 2225968 | 12-scf00273 | 12 |
| AX-158117095 | 12 | 4.648 | KV453010.1 | 2231505 | 12-scf00273 | 12 |
| AX-157828537 | 12 | 4.866 | KV453010.1 | 2233009 | 12-scf00273 | 12 |
| AX-158117101 | 12 | 4.866 | KV453010.1 | 2239662 | 12-scf00273 | 12 |
| AX-158117103 | 12 | 4.866 | KV453010.1 | 2242421 | 12-scf00273 | 12 |
| AX-157828539 | 12 | 4.866 | KV453010.1 | 2244573 | 12-scf00273 | 12 |
| AX-158117113 | 12 | 4.866 | KV453010.1 | 2251192 | 12-scf00273 | 12 |
| AX-158117114 | 12 | 4.866 | KV453010.1 | 2252021 | 12-scf00273 | 12 |
| AX-158117117 | 12 | 4.912 | KV453010.1 | 2254388 | 12-scf00273 | 12 |
| AX-158117145 | 12 | 4.912 | KV453010.1 | 2316090 | 12-scf00273 | 12 |
| AX-158117146 | 12 | 4.912 | KV453010.1 | 2318307 | 12-scf00273 | 12 |
| AX-158117119 | 12 | 4.938 | KV453010.1 | 2259873 | 12-scf00273 | 12 |
| AX-158117215 | 12 | 4.938 | KV453010.1 | 2429106 | 12-scf00273 | 12 |
| AX-158117240 | 12 | 4.938 | KV453010.1 | 2447746 | 12-scf00273 | 12 |
| AX-157771288 | 12 | 4.938 | KV453010.1 | 2452581 | 12-scf00273 | 12 |
| AX-158117248 | 12 | 4.938 | KV453010.1 | 2452856 | 12-scf00273 | 12 |
| AX-158117250 | 12 | 4.938 | KV453010.1 | 2455488 | 12-scf00273 | 12 |
| AX-158117122 | 12 | 5.006 | KV453010.1 | 2266031 | 12-scf00273 | 12 |
| AX-158117180 | 12 | 5.006 | KV453010.1 | 2377000 | 12-scf00273 | 12 |
| AX-158117098 | 12 | 5.03  | KV453010.1 | 2234276 | 12-scf00273 | 12 |
| AX-158117099 | 12 | 5.03  | KV453010.1 | 2237483 | 12-scf00273 | 12 |
| AX-158117105 | 12 | 5.03  | KV453010.1 | 2244416 | 12-scf00273 | 12 |
| AX-158410993 | 12 | 5.03  | KV453010.1 | 2271626 | 12-scf00273 | 12 |
| AX-157857566 | 12 | 5.03  | KV453010.1 | 2280166 | 12-scf00273 | 12 |
| AX-158117127 | 12 | 5.03  | KV453010.1 | 2280296 | 12-scf00273 | 12 |
| AX-157718103 | 12 | 5.03  | KV453010.1 | 2304330 | 12-scf00273 | 12 |
| AX-157828544 | 12 | 5.03  | KV453010.1 | 2324343 | 12-scf00273 | 12 |
| AX-158117149 | 12 | 5.03  | KV453010.1 | 2325531 | 12-scf00273 | 12 |
| AX-158117150 | 12 | 5.03  | KV453010.1 | 2327617 | 12-scf00273 | 12 |
| AX-158117159 | 12 | 5.03  | KV453010.1 | 2339619 | 12-scf00273 | 12 |
| AX-157716509 | 12 | 5.03  | KV453010.1 | 2352030 | 12-scf00273 | 12 |
| AX-157775132 | 12 | 5.03  | KV453010.1 | 2361388 | 12-scf00273 | 12 |
| AX-158117169 | 12 | 5.03  | KV453010.1 | 2362387 | 12-scf00273 | 12 |
| AX-158117128 | 12 | 5.108 | KV453010.1 | 2280640 | 12-scf00273 | 12 |
| AX-158116950 | 12 | 5.193 | KV453010.1 | 2030382 | 12-scf00273 | 12 |
| AX-157754530 | 12 | 5.193 | KV453010.1 | 2052631 | 12-scf00273 | 12 |
| AX-158116967 | 12 | 5.193 | KV453010.1 | 2058449 | 12-scf00273 | 12 |
| AX-158116987 | 12 | 5.193 | KV453010.1 | 2088654 | 12-scf00273 | 12 |
| AX-158116993 | 12 | 5.193 | KV453010.1 | 2095170 | 12-scf00273 | 12 |
| AX-158117070 | 12 | 5.193 | KV453010.1 | 2203682 | 12-scf00273 | 12 |
| AX-158117088 | 12 | 5.193 | KV453010.1 | 2226295 | 12-scf00273 | 12 |
| AX-158117106 | 12 | 5.193 | KV453010.1 | 2245515 | 12-scf00273 | 12 |
| AX-158117107 | 12 | 5.193 | KV453010.1 | 2246174 | 12-scf00273 | 12 |
| AX-158117129 | 12 | 5.193 | KV453010.1 | 2282557 | 12-scf00273 | 12 |
| AX-158117130 | 12 | 5.193 | KV453010.1 | 2282668 | 12-scf00273 | 12 |

|              |    |       |            |         |             |    |
|--------------|----|-------|------------|---------|-------------|----|
| AX-158117133 | 12 | 5.193 | KV453010.1 | 2285903 | 12-scf00273 | 12 |
| AX-157754496 | 12 | 5.193 | KV453010.1 | 2288293 | 12-scf00273 | 12 |
| AX-158117136 | 12 | 5.193 | KV453010.1 | 2297118 | 12-scf00273 | 12 |
| AX-158117148 | 12 | 5.193 | KV453010.1 | 2320058 | 12-scf00273 | 12 |
| AX-158117199 | 12 | 5.193 | KV453010.1 | 2396593 | 12-scf00273 | 12 |
| AX-158117244 | 12 | 5.193 | KV453010.1 | 2450681 | 12-scf00273 | 12 |
| AX-158117137 | 12 | 5.194 | KV453010.1 | 2302027 | 12-scf00273 | 12 |
| AX-158117138 | 12 | 5.212 | KV453010.1 | 2303837 | 12-scf00273 | 12 |
| AX-158116907 | 12 | 5.266 | KV453010.1 | 1972924 | 12-scf00273 | 12 |
| AX-158116999 | 12 | 5.266 | KV453010.1 | 2103965 | 12-scf00273 | 12 |
| AX-158117089 | 12 | 5.266 | KV453010.1 | 2226589 | 12-scf00273 | 12 |
| AX-158117141 | 12 | 5.266 | KV453010.1 | 2306080 | 12-scf00273 | 12 |
| AX-158117142 | 12 | 5.266 | KV453010.1 | 2308219 | 12-scf00273 | 12 |
| AX-157828542 | 12 | 5.266 | KV453010.1 | 2310827 | 12-scf00273 | 12 |
| AX-158117144 | 12 | 5.266 | KV453010.1 | 2315370 | 12-scf00273 | 12 |
| AX-158117147 | 12 | 5.266 | KV453010.1 | 2318954 | 12-scf00273 | 12 |
| AX-158117207 | 12 | 5.266 | KV453010.1 | 2409308 | 12-scf00273 | 12 |
| AX-158117097 | 12 | 5.303 | KV453010.1 | 2233358 | 12-scf00273 | 12 |
| AX-157713444 | 12 | 5.303 | KV453010.1 | 2296090 | 12-scf00273 | 12 |
| AX-157828543 | 12 | 5.303 | KV453010.1 | 2311808 | 12-scf00273 | 12 |
| AX-158117154 | 12 | 5.303 | KV453010.1 | 2330737 | 12-scf00273 | 12 |
| AX-157828546 | 12 | 5.303 | KV453010.1 | 2331453 | 12-scf00273 | 12 |
| AX-158117155 | 12 | 5.303 | KV453010.1 | 2331929 | 12-scf00273 | 12 |
| AX-157828548 | 12 | 5.303 | KV453010.1 | 2350796 | 12-scf00273 | 12 |
| AX-158117170 | 12 | 5.303 | KV453010.1 | 2362603 | 12-scf00273 | 12 |
| AX-157756868 | 12 | 5.412 | KV453010.1 | 2323263 | 12-scf00273 | 12 |
| AX-158117171 | 12 | 5.412 | KV453010.1 | 2362986 | 12-scf00273 | 12 |
| AX-158117175 | 12 | 5.412 | KV453010.1 | 2367100 | 12-scf00273 | 12 |
| AX-158117176 | 12 | 5.412 | KV453010.1 | 2368410 | 12-scf00273 | 12 |
| AX-157727886 | 12 | 5.412 | KV453010.1 | 2371028 | 12-scf00273 | 12 |
| AX-158117177 | 12 | 5.412 | KV453010.1 | 2371127 | 12-scf00273 | 12 |
| AX-157749433 | 12 | 5.412 | KV453010.1 | 2373743 | 12-scf00273 | 12 |
| AX-158117179 | 12 | 5.412 | KV453010.1 | 2375006 | 12-scf00273 | 12 |
| AX-157746719 | 12 | 5.412 | KV453010.1 | 2375591 | 12-scf00273 | 12 |
| AX-157828552 | 12 | 5.412 | KV453010.1 | 2381334 | 12-scf00273 | 12 |
| AX-158117184 | 12 | 5.412 | KV453010.1 | 2383704 | 12-scf00273 | 12 |
| AX-158117185 | 12 | 5.412 | KV453010.1 | 2384109 | 12-scf00273 | 12 |
| AX-158117187 | 12 | 5.412 | KV453010.1 | 2385311 | 12-scf00273 | 12 |
| AX-158117189 | 12 | 5.412 | KV453010.1 | 2386319 | 12-scf00273 | 12 |
| AX-157828553 | 12 | 5.412 | KV453010.1 | 2387020 | 12-scf00273 | 12 |
| AX-158117190 | 12 | 5.412 | KV453010.1 | 2387521 | 12-scf00273 | 12 |
| AX-158117192 | 12 | 5.412 | KV453010.1 | 2389477 | 12-scf00273 | 12 |
| AX-157828554 | 12 | 5.412 | KV453010.1 | 2389771 | 12-scf00273 | 12 |
| AX-157772863 | 12 | 5.412 | KV453010.1 | 2390444 | 12-scf00273 | 12 |
| AX-158117195 | 12 | 5.412 | KV453010.1 | 2392275 | 12-scf00273 | 12 |
| AX-158117221 | 12 | 5.412 | KV453010.1 | 2433056 | 12-scf00273 | 12 |
| AX-158117197 | 12 | 5.441 | KV453010.1 | 2395660 | 12-scf00273 | 12 |
| AX-157754506 | 12 | 5.521 | KV453010.1 | 2402680 | 12-scf00273 | 12 |
| AX-157828556 | 12 | 5.521 | KV453010.1 | 2406454 | 12-scf00273 | 12 |
| AX-157877707 | 12 | 5.631 | KV453010.1 | 2407540 | 12-scf00273 | 12 |
| AX-158117206 | 12 | 5.631 | KV453010.1 | 2408141 | 12-scf00273 | 12 |

|              |    |       |            |         |             |    |
|--------------|----|-------|------------|---------|-------------|----|
| AX-157828557 | 12 | 5.631 | KV453010.1 | 2409175 | 12-scf00273 | 12 |
| AX-158117208 | 12 | 5.631 | KV453010.1 | 2413201 | 12-scf00273 | 12 |
| AX-157828558 | 12 | 5.631 | KV453010.1 | 2414989 | 12-scf00273 | 12 |
| AX-158117230 | 12 | 5.631 | KV453010.1 | 2441042 | 12-scf00273 | 12 |
| AX-158117210 | 12 | 5.644 | KV453010.1 | 2416598 | 12-scf00273 | 12 |
| AX-158117216 | 12 | 5.689 | KV453010.1 | 2429458 | 12-scf00273 | 12 |
| AX-158117223 | 12 | 5.74  | KV453010.1 | 2433780 | 12-scf00273 | 12 |
| AX-158117225 | 12 | 5.74  | KV453010.1 | 2435667 | 12-scf00273 | 12 |
| AX-158117232 | 12 | 5.74  | KV453010.1 | 2442304 | 12-scf00273 | 12 |
| AX-158117233 | 12 | 5.74  | KV453010.1 | 2443720 | 12-scf00273 | 12 |
| AX-158117234 | 12 | 5.74  | KV453010.1 | 2444544 | 12-scf00273 | 12 |
| AX-158117235 | 12 | 5.741 | KV453010.1 | 2444815 | 12-scf00273 | 12 |
| AX-158117239 | 12 | 6.067 | KV453010.1 | 2446684 | 12-scf00273 | 12 |
| AX-158117245 | 12 | 6.067 | KV453010.1 | 2450968 | 12-scf00273 | 12 |
| AX-158117246 | 12 | 6.068 | KV453010.1 | 2451283 | 12-scf00273 | 12 |
| AX-158117247 | 12 | 6.068 | KV453010.1 | 2452360 | 12-scf00273 | 12 |
| AX-157755371 | 12 | 6.068 | KV453010.1 | 2453107 | 12-scf00273 | 12 |
| AX-158117253 | 12 | 6.286 | KV453010.1 | 2458878 | 12-scf00273 | 12 |
| AX-158417220 | 12 | 6.286 | KV453010.1 | 2461468 | 12-scf00273 | 12 |
| AX-158117256 | 12 | 6.286 | KV453010.1 | 2462125 | 12-scf00273 | 12 |
| AX-158117258 | 12 | 6.286 | KV453010.1 | 2465060 | 12-scf00273 | 12 |
| AX-158117260 | 12 | 6.341 | KV453010.1 | 2466570 | 12-scf00273 | 12 |
| AX-158116732 | 12 | 6.392 | KV453010.1 | 1700423 | 12-scf00273 | 12 |
| AX-158117261 | 12 | 6.45  | KV453010.1 | 2467243 | 12-scf00273 | 12 |
| AX-158117266 | 12 | 6.45  | KV453010.1 | 2475455 | 12-scf00273 | 12 |
| AX-157721701 | 12 | 6.45  | KV453010.1 | 2482451 | 12-scf00273 | 12 |
| AX-158117272 | 12 | 6.614 | KV453010.1 | 2485163 | 12-scf00273 | 12 |
| AX-158117273 | 12 | 6.665 | KV453010.1 | 2486021 | 12-scf00273 | 12 |
| AX-158117167 | 12 | 6.723 | KV453010.1 | 2359512 | 12-scf00273 | 12 |
| AX-158117173 | 12 | 6.723 | KV453010.1 | 2364026 | 12-scf00273 | 12 |
| AX-158117259 | 12 | 6.723 | KV453010.1 | 2465551 | 12-scf00273 | 12 |
| AX-158117265 | 12 | 6.723 | KV453010.1 | 2475177 | 12-scf00273 | 12 |
| AX-158117274 | 12 | 6.723 | KV453010.1 | 2487026 | 12-scf00273 | 12 |
| AX-158117276 | 12 | 6.723 | KV453010.1 | 2487956 | 12-scf00273 | 12 |
| AX-158117277 | 12 | 6.723 | KV453010.1 | 2489124 | 12-scf00273 | 12 |
| AX-157748352 | 12 | 6.723 | KV453010.1 | 2490870 | 12-scf00273 | 12 |
| AX-157747038 | 12 | 6.723 | KV453010.1 | 2491355 | 12-scf00273 | 12 |
| AX-158117278 | 12 | 6.723 | KV453010.1 | 2491866 | 12-scf00273 | 12 |
| AX-158117280 | 12 | 6.723 | KV453010.1 | 2494647 | 12-scf00273 | 12 |
| AX-157716372 | 12 | 6.723 | KV453010.1 | 2496274 | 12-scf00273 | 12 |
| AX-157758423 | 12 | 6.723 | KV453010.1 | 2497673 | 12-scf00273 | 12 |
| AX-158117286 | 12 | 6.723 | KV453010.1 | 2509704 | 12-scf00273 | 12 |
| AX-157717333 | 12 | 6.723 | KV453010.1 | 2511241 | 12-scf00273 | 12 |
| AX-158117288 | 12 | 6.723 | KV453010.1 | 2511557 | 12-scf00273 | 12 |
| AX-158117289 | 12 | 6.723 | KV453010.1 | 2512033 | 12-scf00273 | 12 |
| AX-158117292 | 12 | 6.723 | KV453010.1 | 2514367 | 12-scf00273 | 12 |
| AX-158117293 | 12 | 6.723 | KV453010.1 | 2514858 | 12-scf00273 | 12 |
| AX-157828563 | 12 | 6.723 | KV453010.1 | 2515300 | 12-scf00273 | 12 |
| AX-157828565 | 12 | 6.723 | KV453010.1 | 2519077 | 12-scf00273 | 12 |
| AX-158117308 | 12 | 6.723 | KV453010.1 | 2532531 | 12-scf00273 | 12 |
| AX-158117331 | 12 | 6.723 | KV453010.1 | 2577869 | 12-scf00273 | 12 |

|              |    |       |            |         |             |    |
|--------------|----|-------|------------|---------|-------------|----|
| AX-157721928 | 12 | 6.723 | KV453011.1 | 5135    | 12-scf00274 | 12 |
| AX-158117358 | 12 | 6.723 | KV453011.1 | 18911   | 12-scf00274 | 12 |
| AX-158117448 | 12 | 6.723 | KV453011.1 | 132815  | 12-scf00274 | 12 |
| AX-158117482 | 12 | 6.723 | KV453011.1 | 179548  | 12-scf00274 | 12 |
| AX-158117497 | 12 | 6.723 | KV453011.1 | 196819  | 12-scf00274 | 12 |
| AX-158117294 | 12 | 6.724 | KV453010.1 | 2515963 | 12-scf00273 | 12 |
| AX-157828564 | 12 | 6.823 | KV453010.1 | 2516346 | 12-scf00273 | 12 |
| AX-158117297 | 12 | 6.887 | KV453010.1 | 2521854 | 12-scf00273 | 12 |
| AX-158117299 | 12 | 6.932 | KV453010.1 | 2523869 | 12-scf00273 | 12 |
| AX-158117301 | 12 | 6.983 | KV453010.1 | 2525650 | 12-scf00273 | 12 |
| AX-158117302 | 12 | 7.051 | KV453010.1 | 2527291 | 12-scf00273 | 12 |
| AX-158117305 | 12 | 7.105 | KV453010.1 | 2530858 | 12-scf00273 | 12 |
| AX-158117306 | 12 | 7.161 | KV453010.1 | 2531191 | 12-scf00273 | 12 |
| AX-158392682 | 12 | 7.161 | KV453010.1 | 2532286 | 12-scf00273 | 12 |
| AX-157828566 | 12 | 7.181 | KV453010.1 | 2526793 | 12-scf00273 | 12 |
| AX-157828567 | 12 | 7.181 | KV453010.1 | 2535879 | 12-scf00273 | 12 |
| AX-157828570 | 12 | 7.181 | KV453010.1 | 2547787 | 12-scf00273 | 12 |
| AX-158117310 | 12 | 7.215 | KV453010.1 | 2537581 | 12-scf00273 | 12 |
| AX-158117312 | 12 | 7.247 | KV453010.1 | 2540221 | 12-scf00273 | 12 |
| AX-158117320 | 12 | 7.27  | KV453010.1 | 2549216 | 12-scf00273 | 12 |
| AX-157748937 | 12 | 7.27  | KV453011.1 | 1428    | 12-scf00274 | 12 |
| AX-158117319 | 12 | 7.326 | KV453010.1 | 2548447 | 12-scf00273 | 12 |
| AX-158117322 | 12 | 7.326 | KV453010.1 | 2552459 | 12-scf00273 | 12 |
| AX-158117324 | 12 | 7.379 | KV453010.1 | 2555965 | 12-scf00273 | 12 |
| AX-157771758 | 12 | 7.488 | KV453010.1 | 2559848 | 12-scf00273 | 12 |
| AX-158117327 | 12 | 7.488 | KV453010.1 | 2570398 | 12-scf00273 | 12 |
| AX-158411006 | 12 | 7.488 | KV453010.1 | 2571742 | 12-scf00273 | 12 |
| AX-158117329 | 12 | 7.488 | KV453010.1 | 2571983 | 12-scf00273 | 12 |
| AX-157746226 | 12 | 7.488 | KV453010.1 | 2573352 | 12-scf00273 | 12 |
| AX-158117332 | 12 | 7.488 | KV453010.1 | 2578225 | 12-scf00273 | 12 |
| AX-158117337 | 12 | 7.488 | KV453010.1 | 2580849 | 12-scf00273 | 12 |
| AX-158117343 | 12 | 7.488 | KV453010.1 | 2589250 | 12-scf00273 | 12 |
| AX-157828575 | 12 | 7.488 | KV453011.1 | 2609    | 12-scf00274 | 12 |
| AX-157771253 | 12 | 7.488 | KV453011.1 | 3915    | 12-scf00274 | 12 |
| AX-158117349 | 12 | 7.488 | KV453011.1 | 5789    | 12-scf00274 | 12 |
| AX-158117379 | 12 | 7.488 | KV453011.1 | 52183   | 12-scf00274 | 12 |
| AX-158117380 | 12 | 7.488 | KV453011.1 | 54615   | 12-scf00274 | 12 |
| AX-157828576 | 12 | 7.491 | KV453011.1 | 6912    | 12-scf00274 | 12 |
| AX-158117351 | 12 | 7.493 | KV453011.1 | 9005    | 12-scf00274 | 12 |
| AX-157828579 | 12 | 7.495 | KV453011.1 | 9461    | 12-scf00274 | 12 |
| AX-158117353 | 12 | 7.498 | KV453011.1 | 12226   | 12-scf00274 | 12 |
| AX-157740084 | 12 | 7.5   | KV453011.1 | 1787    | 12-scf00274 | 12 |
| AX-158117354 | 12 | 7.5   | KV453011.1 | 16816   | 12-scf00274 | 12 |
| AX-157746761 | 12 | 7.502 | KV453011.1 | 17949   | 12-scf00274 | 12 |
| AX-158117357 | 12 | 7.502 | KV453011.1 | 18516   | 12-scf00274 | 12 |
| AX-158117360 | 12 | 7.502 | KV453011.1 | 20908   | 12-scf00274 | 12 |
| AX-158117361 | 12 | 7.547 | KV453011.1 | 21444   | 12-scf00274 | 12 |
| AX-158117374 | 12 | 7.816 | KV453011.1 | 44103   | 12-scf00274 | 12 |
| AX-158117378 | 12 | 7.816 | KV453011.1 | 51310   | 12-scf00274 | 12 |
| AX-157828585 | 12 | 7.816 | KV453011.1 | 51603   | 12-scf00274 | 12 |
| AX-157757693 | 12 | 7.816 | KV453011.1 | 53349   | 12-scf00274 | 12 |

|              |    |       |            |         |             |    |
|--------------|----|-------|------------|---------|-------------|----|
| AX-158117381 | 12 | 7.816 | KV453011.1 | 54992   | 12-scf00274 | 12 |
| AX-157727890 | 12 | 7.816 | KV453011.1 | 55167   | 12-scf00274 | 12 |
| AX-158117383 | 12 | 7.816 | KV453011.1 | 55484   | 12-scf00274 | 12 |
| AX-158411007 | 12 | 7.816 | KV453011.1 | 56322   | 12-scf00274 | 12 |
| AX-158117388 | 12 | 7.816 | KV453011.1 | 57959   | 12-scf00274 | 12 |
| AX-157752320 | 12 | 7.816 | KV453011.1 | 59486   | 12-scf00274 | 12 |
| AX-157716452 | 12 | 7.816 | KV453011.1 | 60474   | 12-scf00274 | 12 |
| AX-158117389 | 12 | 7.816 | KV453011.1 | 61637   | 12-scf00274 | 12 |
| AX-158117390 | 12 | 7.816 | KV453011.1 | 62018   | 12-scf00274 | 12 |
| AX-158117403 | 12 | 7.816 | KV453011.1 | 77781   | 12-scf00274 | 12 |
| AX-157828586 | 12 | 7.816 | KV453011.1 | 88969   | 12-scf00274 | 12 |
| AX-157828592 | 12 | 7.816 | KV453011.1 | 114474  | 12-scf00274 | 12 |
| AX-158117395 | 12 | 7.925 | KV453011.1 | 67790   | 12-scf00274 | 12 |
| AX-158117398 | 12 | 7.925 | KV453011.1 | 69923   | 12-scf00274 | 12 |
| AX-158117400 | 12 | 7.925 | KV453011.1 | 73394   | 12-scf00274 | 12 |
| AX-158117401 | 12 | 7.959 | KV453011.1 | 76450   | 12-scf00274 | 12 |
| AX-158117402 | 12 | 7.998 | KV453011.1 | 77308   | 12-scf00274 | 12 |
| AX-158117407 | 12 | 8.035 | KV453011.1 | 82972   | 12-scf00274 | 12 |
| AX-158117408 | 12 | 8.035 | KV453011.1 | 83712   | 12-scf00274 | 12 |
| AX-158117409 | 12 | 8.035 | KV453011.1 | 88625   | 12-scf00274 | 12 |
| AX-158117410 | 12 | 8.035 | KV453011.1 | 93379   | 12-scf00274 | 12 |
| AX-158117411 | 12 | 8.035 | KV453011.1 | 94073   | 12-scf00274 | 12 |
| AX-158117415 | 12 | 8.035 | KV453011.1 | 96645   | 12-scf00274 | 12 |
| AX-158117416 | 12 | 8.035 | KV453011.1 | 97406   | 12-scf00274 | 12 |
| AX-158117417 | 12 | 8.035 | KV453011.1 | 98032   | 12-scf00274 | 12 |
| AX-157828589 | 12 | 8.035 | KV453011.1 | 99199   | 12-scf00274 | 12 |
| AX-158117419 | 12 | 8.035 | KV453011.1 | 100323  | 12-scf00274 | 12 |
| AX-158117420 | 12 | 8.035 | KV453011.1 | 101687  | 12-scf00274 | 12 |
| AX-158117421 | 12 | 8.035 | KV453011.1 | 102092  | 12-scf00274 | 12 |
| AX-158117426 | 12 | 8.035 | KV453011.1 | 109215  | 12-scf00274 | 12 |
| AX-158117427 | 12 | 8.035 | KV453011.1 | 112904  | 12-scf00274 | 12 |
| AX-158117429 | 12 | 8.035 | KV453011.1 | 114136  | 12-scf00274 | 12 |
| AX-157765957 | 12 | 8.035 | KV453011.1 | 115075  | 12-scf00274 | 12 |
| AX-158117433 | 12 | 8.18  | KV453011.1 | 117405  | 12-scf00274 | 12 |
| AX-158117568 | 12 | 8.18  | KV453011.1 | 286001  | 12-scf00274 | 12 |
| AX-158117591 | 12 | 8.18  | KV453011.1 | 317285  | 12-scf00274 | 12 |
| AX-158117650 | 12 | 8.18  | KV453011.1 | 389196  | 12-scf00274 | 12 |
| AX-158117444 | 12 | 8.472 | KV453011.1 | 128661  | 12-scf00274 | 12 |
| AX-158117446 | 12 | 8.472 | KV453011.1 | 130600  | 12-scf00274 | 12 |
| AX-158117451 | 12 | 8.472 | KV453011.1 | 139242  | 12-scf00274 | 12 |
| AX-157828596 | 12 | 8.472 | KV453011.1 | 139988  | 12-scf00274 | 12 |
| AX-158117452 | 12 | 8.472 | KV453011.1 | 141241  | 12-scf00274 | 12 |
| AX-158417229 | 12 | 8.472 | KV453011.1 | 335600  | 12-scf00274 | 12 |
| AX-158117453 | 12 | 8.532 | KV453011.1 | 141513  | 12-scf00274 | 12 |
| AX-158117483 | 12 | 8.532 | KV453011.1 | 180329  | 12-scf00274 | 12 |
| AX-158116553 | 12 | 8.581 | KV453010.1 | 1402855 | 12-scf00273 | 12 |
| AX-158116671 | 12 | 8.581 | KV453010.1 | 1616054 | 12-scf00273 | 12 |
| AX-158116715 | 12 | 8.581 | KV453010.1 | 1675126 | 12-scf00273 | 12 |
| AX-158116836 | 12 | 8.581 | KV453010.1 | 1881406 | 12-scf00273 | 12 |
| AX-158117083 | 12 | 8.581 | KV453010.1 | 2221719 | 12-scf00273 | 12 |
| AX-158117368 | 12 | 8.581 | KV453011.1 | 29855   | 12-scf00274 | 12 |

|              |    |       |            |        |             |    |
|--------------|----|-------|------------|--------|-------------|----|
| AX-158117372 | 12 | 8.581 | KV453011.1 | 36866  | 12-scf00274 | 12 |
| AX-157828582 | 12 | 8.581 | KV453011.1 | 46296  | 12-scf00274 | 12 |
| AX-157828583 | 12 | 8.581 | KV453011.1 | 46578  | 12-scf00274 | 12 |
| AX-157828584 | 12 | 8.581 | KV453011.1 | 47359  | 12-scf00274 | 12 |
| AX-158117430 | 12 | 8.581 | KV453011.1 | 114866 | 12-scf00274 | 12 |
| AX-158117457 | 12 | 8.581 | KV453011.1 | 146813 | 12-scf00274 | 12 |
| AX-158117461 | 12 | 8.581 | KV453011.1 | 151583 | 12-scf00274 | 12 |
| AX-158117463 | 12 | 8.581 | KV453011.1 | 152699 | 12-scf00274 | 12 |
| AX-157747255 | 12 | 8.581 | KV453011.1 | 153203 | 12-scf00274 | 12 |
| AX-158117464 | 12 | 8.581 | KV453011.1 | 155256 | 12-scf00274 | 12 |
| AX-158117466 | 12 | 8.581 | KV453011.1 | 162693 | 12-scf00274 | 12 |
| AX-158117467 | 12 | 8.581 | KV453011.1 | 163252 | 12-scf00274 | 12 |
| AX-158117468 | 12 | 8.581 | KV453011.1 | 164393 | 12-scf00274 | 12 |
| AX-158117471 | 12 | 8.581 | KV453011.1 | 167873 | 12-scf00274 | 12 |
| AX-158117475 | 12 | 8.581 | KV453011.1 | 174335 | 12-scf00274 | 12 |
| AX-158117476 | 12 | 8.581 | KV453011.1 | 175188 | 12-scf00274 | 12 |
| AX-158117480 | 12 | 8.581 | KV453011.1 | 176996 | 12-scf00274 | 12 |
| AX-157713696 | 12 | 8.581 | KV453011.1 | 179217 | 12-scf00274 | 12 |
| AX-158117484 | 12 | 8.581 | KV453011.1 | 181113 | 12-scf00274 | 12 |
| AX-158117486 | 12 | 8.581 | KV453011.1 | 183812 | 12-scf00274 | 12 |
| AX-158117492 | 12 | 8.581 | KV453011.1 | 191345 | 12-scf00274 | 12 |
| AX-158117493 | 12 | 8.581 | KV453011.1 | 191566 | 12-scf00274 | 12 |
| AX-158117496 | 12 | 8.581 | KV453011.1 | 193041 | 12-scf00274 | 12 |
| AX-158117498 | 12 | 8.581 | KV453011.1 | 197049 | 12-scf00274 | 12 |
| AX-158117605 | 12 | 8.581 | KV453011.1 | 330326 | 12-scf00274 | 12 |
| AX-158117730 | 12 | 8.581 | KV453011.1 | 499938 | 12-scf00274 | 12 |
| AX-158117739 | 12 | 8.581 | KV453011.1 | 508543 | 12-scf00274 | 12 |
| AX-158117422 | 12 | 8.69  | KV453011.1 | 104110 | 12-scf00274 | 12 |
| AX-158117447 | 12 | 8.69  | KV453011.1 | 131896 | 12-scf00274 | 12 |
| AX-158117500 | 12 | 8.69  | KV453011.1 | 199170 | 12-scf00274 | 12 |
| AX-158117503 | 12 | 8.69  | KV453011.1 | 202148 | 12-scf00274 | 12 |
| AX-158117505 | 12 | 8.69  | KV453011.1 | 203555 | 12-scf00274 | 12 |
| AX-158117507 | 12 | 8.69  | KV453011.1 | 207332 | 12-scf00274 | 12 |
| AX-158117508 | 12 | 8.69  | KV453011.1 | 210732 | 12-scf00274 | 12 |
| AX-157828601 | 12 | 8.69  | KV453011.1 | 212472 | 12-scf00274 | 12 |
| AX-158117510 | 12 | 8.69  | KV453011.1 | 218678 | 12-scf00274 | 12 |
| AX-158117514 | 12 | 8.69  | KV453011.1 | 223052 | 12-scf00274 | 12 |
| AX-158117515 | 12 | 8.69  | KV453011.1 | 223211 | 12-scf00274 | 12 |
| AX-158117516 | 12 | 8.69  | KV453011.1 | 223639 | 12-scf00274 | 12 |
| AX-158117571 | 12 | 8.69  | KV453011.1 | 291263 | 12-scf00274 | 12 |
| AX-158117589 | 12 | 8.69  | KV453011.1 | 314861 | 12-scf00274 | 12 |
| AX-158117604 | 12 | 8.69  | KV453011.1 | 329743 | 12-scf00274 | 12 |
| AX-158117628 | 12 | 8.69  | KV453011.1 | 358385 | 12-scf00274 | 12 |
| AX-158117637 | 12 | 8.69  | KV453011.1 | 371768 | 12-scf00274 | 12 |
| AX-158117640 | 12 | 8.69  | KV453011.1 | 374891 | 12-scf00274 | 12 |
| AX-157828620 | 12 | 8.69  | KV453011.1 | 382526 | 12-scf00274 | 12 |
| AX-157727485 | 12 | 8.757 | KV453011.1 | 220628 | 12-scf00274 | 12 |
| AX-158117517 | 12 | 8.757 | KV453011.1 | 224360 | 12-scf00274 | 12 |
| AX-158117572 | 12 | 8.757 | KV453011.1 | 291667 | 12-scf00274 | 12 |
| AX-158117576 | 12 | 8.757 | KV453011.1 | 297664 | 12-scf00274 | 12 |
| AX-157885994 | 12 | 8.757 | KV453011.1 | 317405 | 12-scf00274 | 12 |



|              |    |       |            |        |             |    |
|--------------|----|-------|------------|--------|-------------|----|
| AX-157828613 | 12 | 8.757 | KV453011.1 | 341388 | 12-scf00274 | 12 |
| AX-158117622 | 12 | 8.757 | KV453011.1 | 351583 | 12-scf00274 | 12 |
| AX-158117633 | 12 | 8.757 | KV453011.1 | 365911 | 12-scf00274 | 12 |
| AX-158117473 | 12 | 8.799 | KV453011.1 | 170875 | 12-scf00274 | 12 |
| AX-158117481 | 12 | 8.799 | KV453011.1 | 177262 | 12-scf00274 | 12 |
| AX-158117494 | 12 | 8.799 | KV453011.1 | 192034 | 12-scf00274 | 12 |
| AX-157828603 | 12 | 8.799 | KV453011.1 | 228281 | 12-scf00274 | 12 |
| AX-158117524 | 12 | 8.799 | KV453011.1 | 233783 | 12-scf00274 | 12 |
| AX-158117537 | 12 | 8.799 | KV453011.1 | 246610 | 12-scf00274 | 12 |
| AX-158117539 | 12 | 8.799 | KV453011.1 | 250960 | 12-scf00274 | 12 |
| AX-158117540 | 12 | 8.799 | KV453011.1 | 251728 | 12-scf00274 | 12 |
| AX-157758710 | 12 | 8.799 | KV453011.1 | 252046 | 12-scf00274 | 12 |
| AX-158117541 | 12 | 8.799 | KV453011.1 | 253880 | 12-scf00274 | 12 |
| AX-157828607 | 12 | 8.799 | KV453011.1 | 268933 | 12-scf00274 | 12 |
| AX-158117557 | 12 | 8.799 | KV453011.1 | 270397 | 12-scf00274 | 12 |
| AX-158117558 | 12 | 8.799 | KV453011.1 | 270687 | 12-scf00274 | 12 |
| AX-158117561 | 12 | 8.799 | KV453011.1 | 273807 | 12-scf00274 | 12 |
| AX-157748051 | 12 | 8.799 | KV453011.1 | 283522 | 12-scf00274 | 12 |
| AX-158117567 | 12 | 8.799 | KV453011.1 | 285383 | 12-scf00274 | 12 |
| AX-158117573 | 12 | 8.799 | KV453011.1 | 292332 | 12-scf00274 | 12 |
| AX-158117575 | 12 | 8.799 | KV453011.1 | 296146 | 12-scf00274 | 12 |
| AX-158117580 | 12 | 8.799 | KV453011.1 | 303663 | 12-scf00274 | 12 |
| AX-157739449 | 12 | 8.799 | KV453011.1 | 304597 | 12-scf00274 | 12 |
| AX-158117582 | 12 | 8.799 | KV453011.1 | 307117 | 12-scf00274 | 12 |
| AX-158117585 | 12 | 8.799 | KV453011.1 | 310343 | 12-scf00274 | 12 |
| AX-158117592 | 12 | 8.799 | KV453011.1 | 318591 | 12-scf00274 | 12 |
| AX-158117595 | 12 | 8.799 | KV453011.1 | 321742 | 12-scf00274 | 12 |
| AX-158117596 | 12 | 8.799 | KV453011.1 | 322284 | 12-scf00274 | 12 |
| AX-158117598 | 12 | 8.799 | KV453011.1 | 324089 | 12-scf00274 | 12 |
| AX-158117599 | 12 | 8.799 | KV453011.1 | 324797 | 12-scf00274 | 12 |
| AX-158117600 | 12 | 8.799 | KV453011.1 | 325087 | 12-scf00274 | 12 |
| AX-157717551 | 12 | 8.799 | KV453011.1 | 334755 | 12-scf00274 | 12 |
| AX-158117612 | 12 | 8.799 | KV453011.1 | 342864 | 12-scf00274 | 12 |
| AX-158117614 | 12 | 8.799 | KV453011.1 | 345130 | 12-scf00274 | 12 |
| AX-158117618 | 12 | 8.799 | KV453011.1 | 347810 | 12-scf00274 | 12 |
| AX-158117619 | 12 | 8.799 | KV453011.1 | 348343 | 12-scf00274 | 12 |
| AX-158117623 | 12 | 8.799 | KV453011.1 | 351765 | 12-scf00274 | 12 |
| AX-158117624 | 12 | 8.799 | KV453011.1 | 352308 | 12-scf00274 | 12 |
| AX-158117625 | 12 | 8.799 | KV453011.1 | 352958 | 12-scf00274 | 12 |
| AX-157828616 | 12 | 8.799 | KV453011.1 | 354412 | 12-scf00274 | 12 |
| AX-158380128 | 12 | 8.799 | KV453011.1 | 355242 | 12-scf00274 | 12 |
| AX-157790985 | 12 | 8.799 | KV453011.1 | 361321 | 12-scf00274 | 12 |
| AX-158117630 | 12 | 8.799 | KV453011.1 | 364154 | 12-scf00274 | 12 |
| AX-158117636 | 12 | 8.799 | KV453011.1 | 367756 | 12-scf00274 | 12 |
| AX-158117638 | 12 | 8.799 | KV453011.1 | 372151 | 12-scf00274 | 12 |
| AX-157755294 | 12 | 8.799 | KV453011.1 | 375208 | 12-scf00274 | 12 |
| AX-158117641 | 12 | 8.799 | KV453011.1 | 375270 | 12-scf00274 | 12 |
| AX-158117646 | 12 | 8.799 | KV453011.1 | 381671 | 12-scf00274 | 12 |
| AX-158117647 | 12 | 8.799 | KV453011.1 | 382025 | 12-scf00274 | 12 |
| AX-158117649 | 12 | 8.799 | KV453011.1 | 388010 | 12-scf00274 | 12 |
| AX-158117651 | 12 | 8.799 | KV453011.1 | 389667 | 12-scf00274 | 12 |

|              |    |       |            |        |             |    |
|--------------|----|-------|------------|--------|-------------|----|
| AX-157743874 | 12 | 8.799 | KV453011.1 | 403700 | 12-scf00274 | 12 |
| AX-157828624 | 12 | 8.799 | KV453011.1 | 421558 | 12-scf00274 | 12 |
| AX-158117655 | 12 | 8.853 | KV453011.1 | 394292 | 12-scf00274 | 12 |
| AX-158117660 | 12 | 8.909 | KV453011.1 | 397537 | 12-scf00274 | 12 |
| AX-157751018 | 12 | 8.909 | KV453011.1 | 398370 | 12-scf00274 | 12 |
| AX-158117662 | 12 | 8.909 | KV453011.1 | 404378 | 12-scf00274 | 12 |
| AX-157828623 | 12 | 8.909 | KV453011.1 | 404681 | 12-scf00274 | 12 |
| AX-158117663 | 12 | 8.909 | KV453011.1 | 404821 | 12-scf00274 | 12 |
| AX-158117670 | 12 | 8.909 | KV453011.1 | 423950 | 12-scf00274 | 12 |
| AX-158117671 | 12 | 8.909 | KV453011.1 | 424510 | 12-scf00274 | 12 |
| AX-158117674 | 12 | 8.909 | KV453011.1 | 427165 | 12-scf00274 | 12 |
| AX-158117675 | 12 | 8.909 | KV453011.1 | 428049 | 12-scf00274 | 12 |
| AX-158117679 | 12 | 8.909 | KV453011.1 | 432759 | 12-scf00274 | 12 |
| AX-158117680 | 12 | 8.909 | KV453011.1 | 433543 | 12-scf00274 | 12 |
| AX-157885995 | 12 | 8.909 | KV453011.1 | 435757 | 12-scf00274 | 12 |
| AX-158117684 | 12 | 8.909 | KV453011.1 | 438954 | 12-scf00274 | 12 |
| AX-158117685 | 12 | 8.909 | KV453011.1 | 441436 | 12-scf00274 | 12 |
| AX-158117693 | 12 | 8.909 | KV453011.1 | 449897 | 12-scf00274 | 12 |
| AX-158411013 | 12 | 8.909 | KV453011.1 | 486626 | 12-scf00274 | 12 |
| AX-157828628 | 12 | 8.909 | KV453011.1 | 490073 | 12-scf00274 | 12 |
| AX-158117753 | 12 | 8.909 | KV453011.1 | 533788 | 12-scf00274 | 12 |
| AX-158117777 | 12 | 8.909 | KV453011.1 | 562102 | 12-scf00274 | 12 |
| AX-157752302 | 12 | 8.909 | KV453011.1 | 607738 | 12-scf00274 | 12 |
| AX-158117686 | 12 | 9.071 | KV453011.1 | 442423 | 12-scf00274 | 12 |
| AX-158117715 | 12 | 9.071 | KV453011.1 | 478962 | 12-scf00274 | 12 |
| AX-157828633 | 12 | 9.071 | KV453011.1 | 556288 | 12-scf00274 | 12 |
| AX-158117823 | 12 | 9.071 | KV453011.1 | 623640 | 12-scf00274 | 12 |
| AX-158117688 | 12 | 9.128 | KV453011.1 | 444239 | 12-scf00274 | 12 |
| AX-158117689 | 12 | 9.128 | KV453011.1 | 445751 | 12-scf00274 | 12 |
| AX-158117710 | 12 | 9.128 | KV453011.1 | 474315 | 12-scf00274 | 12 |
| AX-158117717 | 12 | 9.128 | KV453011.1 | 480450 | 12-scf00274 | 12 |
| AX-157717706 | 12 | 9.128 | KV453011.1 | 492022 | 12-scf00274 | 12 |
| AX-157828626 | 12 | 9.16  | KV453011.1 | 480938 | 12-scf00274 | 12 |
| AX-158117719 | 12 | 9.214 | KV453011.1 | 483766 | 12-scf00274 | 12 |
| AX-158117721 | 12 | 9.266 | KV453011.1 | 485747 | 12-scf00274 | 12 |
| AX-158117722 | 12 | 9.345 | KV453011.1 | 485949 | 12-scf00274 | 12 |
| AX-158117526 | 12 | 9.346 | KV453011.1 | 235064 | 12-scf00274 | 12 |
| AX-157746235 | 12 | 9.346 | KV453011.1 | 240969 | 12-scf00274 | 12 |
| AX-157828612 | 12 | 9.346 | KV453011.1 | 301288 | 12-scf00274 | 12 |
| AX-158117586 | 12 | 9.346 | KV453011.1 | 312433 | 12-scf00274 | 12 |
| AX-157709424 | 12 | 9.346 | KV453011.1 | 431910 | 12-scf00274 | 12 |
| AX-157828625 | 12 | 9.346 | KV453011.1 | 474110 | 12-scf00274 | 12 |
| AX-157871265 | 12 | 9.346 | KV453011.1 | 483487 | 12-scf00274 | 12 |
| AX-158117723 | 12 | 9.346 | KV453011.1 | 486838 | 12-scf00274 | 12 |
| AX-158117726 | 12 | 9.346 | KV453011.1 | 493030 | 12-scf00274 | 12 |
| AX-158117728 | 12 | 9.346 | KV453011.1 | 496062 | 12-scf00274 | 12 |
| AX-158117729 | 12 | 9.346 | KV453011.1 | 498042 | 12-scf00274 | 12 |
| AX-157885996 | 12 | 9.346 | KV453011.1 | 499156 | 12-scf00274 | 12 |
| AX-158385001 | 12 | 9.346 | KV453011.1 | 506695 | 12-scf00274 | 12 |
| AX-157828629 | 12 | 9.346 | KV453011.1 | 507844 | 12-scf00274 | 12 |
| AX-158117746 | 12 | 9.346 | KV453011.1 | 519997 | 12-scf00274 | 12 |

|              |    |        |            |        |             |    |
|--------------|----|--------|------------|--------|-------------|----|
| AX-157709182 | 12 | 9.346  | KV453011.1 | 522992 | 12-scf00274 | 12 |
| AX-158117749 | 12 | 9.346  | KV453011.1 | 523444 | 12-scf00274 | 12 |
| AX-158117750 | 12 | 9.346  | KV453011.1 | 526048 | 12-scf00274 | 12 |
| AX-158117755 | 12 | 9.346  | KV453011.1 | 536329 | 12-scf00274 | 12 |
| AX-158117756 | 12 | 9.346  | KV453011.1 | 536718 | 12-scf00274 | 12 |
| AX-158117757 | 12 | 9.346  | KV453011.1 | 539520 | 12-scf00274 | 12 |
| AX-158117758 | 12 | 9.346  | KV453011.1 | 540026 | 12-scf00274 | 12 |
| AX-158117759 | 12 | 9.346  | KV453011.1 | 541668 | 12-scf00274 | 12 |
| AX-158117764 | 12 | 9.346  | KV453011.1 | 549066 | 12-scf00274 | 12 |
| AX-157828632 | 12 | 9.346  | KV453011.1 | 549146 | 12-scf00274 | 12 |
| AX-158117768 | 12 | 9.346  | KV453011.1 | 553672 | 12-scf00274 | 12 |
| AX-158117770 | 12 | 9.346  | KV453011.1 | 555771 | 12-scf00274 | 12 |
| AX-158117773 | 12 | 9.346  | KV453011.1 | 558393 | 12-scf00274 | 12 |
| AX-158117775 | 12 | 9.346  | KV453011.1 | 560443 | 12-scf00274 | 12 |
| AX-158117778 | 12 | 9.346  | KV453011.1 | 562880 | 12-scf00274 | 12 |
| AX-158117781 | 12 | 9.346  | KV453011.1 | 565843 | 12-scf00274 | 12 |
| AX-158117786 | 12 | 9.346  | KV453011.1 | 573899 | 12-scf00274 | 12 |
| AX-158117788 | 12 | 9.346  | KV453011.1 | 575453 | 12-scf00274 | 12 |
| AX-158117789 | 12 | 9.346  | KV453011.1 | 576016 | 12-scf00274 | 12 |
| AX-157710687 | 12 | 9.346  | KV453011.1 | 613820 | 12-scf00274 | 12 |
| AX-158117796 | 12 | 9.672  | KV453011.1 | 584629 | 12-scf00274 | 12 |
| AX-158117797 | 12 | 9.672  | KV453011.1 | 586252 | 12-scf00274 | 12 |
| AX-158117798 | 12 | 9.673  | KV453011.1 | 588241 | 12-scf00274 | 12 |
| AX-158117799 | 12 | 9.673  | KV453011.1 | 588947 | 12-scf00274 | 12 |
| AX-158117801 | 12 | 9.673  | KV453011.1 | 590430 | 12-scf00274 | 12 |
| AX-158117803 | 12 | 9.673  | KV453011.1 | 592258 | 12-scf00274 | 12 |
| AX-158117805 | 12 | 9.673  | KV453011.1 | 595186 | 12-scf00274 | 12 |
| AX-158117806 | 12 | 9.673  | KV453011.1 | 595689 | 12-scf00274 | 12 |
| AX-158117807 | 12 | 9.673  | KV453011.1 | 597256 | 12-scf00274 | 12 |
| AX-158117810 | 12 | 9.783  | KV453011.1 | 601636 | 12-scf00274 | 12 |
| AX-158117812 | 12 | 9.783  | KV453011.1 | 603307 | 12-scf00274 | 12 |
| AX-158117813 | 12 | 9.783  | KV453011.1 | 604224 | 12-scf00274 | 12 |
| AX-158117814 | 12 | 9.783  | KV453011.1 | 606021 | 12-scf00274 | 12 |
| AX-158411014 | 12 | 9.783  | KV453011.1 | 612294 | 12-scf00274 | 12 |
| AX-158117820 | 12 | 9.783  | KV453011.1 | 615824 | 12-scf00274 | 12 |
| AX-157738783 | 12 | 9.939  | KV453011.1 | 622954 | 12-scf00274 | 12 |
| AX-157828635 | 12 | 9.939  | KV453011.1 | 623799 | 12-scf00274 | 12 |
| AX-158117877 | 12 | 9.939  | KV453011.1 | 685741 | 12-scf00274 | 12 |
| AX-157828643 | 12 | 9.939  | KV453011.1 | 703699 | 12-scf00274 | 12 |
| AX-158117830 | 12 | 10.097 | KV453011.1 | 634947 | 12-scf00274 | 12 |
| AX-158117832 | 12 | 10.333 | KV453011.1 | 636605 | 12-scf00274 | 12 |
| AX-158117833 | 12 | 10.512 | KV453011.1 | 640294 | 12-scf00274 | 12 |
| AX-158117834 | 12 | 10.514 | KV453011.1 | 641543 | 12-scf00274 | 12 |
| AX-158117835 | 12 | 10.517 | KV453011.1 | 643179 | 12-scf00274 | 12 |
| AX-158380129 | 12 | 10.519 | KV453011.1 | 643275 | 12-scf00274 | 12 |
| AX-158117836 | 12 | 10.521 | KV453011.1 | 643836 | 12-scf00274 | 12 |
| AX-158117837 | 12 | 10.521 | KV453011.1 | 644016 | 12-scf00274 | 12 |
| AX-158117838 | 12 | 10.521 | KV453011.1 | 645293 | 12-scf00274 | 12 |
| AX-158117839 | 12 | 10.719 | KV453011.1 | 647120 | 12-scf00274 | 12 |
| AX-157828638 | 12 | 10.797 | KV453011.1 | 649473 | 12-scf00274 | 12 |
| AX-158117944 | 12 | 10.797 | KV453011.1 | 778519 | 12-scf00274 | 12 |

|              |    |        |            |        |             |    |
|--------------|----|--------|------------|--------|-------------|----|
| AX-158117840 | 12 | 10.877 | KV453011.1 | 647631 | 12-scf00274 | 12 |
| AX-158117844 | 12 | 10.877 | KV453011.1 | 653978 | 12-scf00274 | 12 |
| AX-158117845 | 12 | 10.877 | KV453011.1 | 655208 | 12-scf00274 | 12 |
| AX-158117846 | 12 | 10.877 | KV453011.1 | 656435 | 12-scf00274 | 12 |
| AX-158117848 | 12 | 10.877 | KV453011.1 | 658098 | 12-scf00274 | 12 |
| AX-158117849 | 12 | 10.877 | KV453011.1 | 658761 | 12-scf00274 | 12 |
| AX-158117850 | 12 | 10.877 | KV453011.1 | 659406 | 12-scf00274 | 12 |
| AX-158117851 | 12 | 10.877 | KV453011.1 | 660153 | 12-scf00274 | 12 |
| AX-158117852 | 12 | 10.877 | KV453011.1 | 660674 | 12-scf00274 | 12 |
| AX-158117855 | 12 | 10.877 | KV453011.1 | 663266 | 12-scf00274 | 12 |
| AX-158117853 | 12 | 11.041 | KV453011.1 | 661077 | 12-scf00274 | 12 |
| AX-158117854 | 12 | 11.205 | KV453011.1 | 662136 | 12-scf00274 | 12 |
| AX-157828640 | 12 | 11.205 | KV453011.1 | 668378 | 12-scf00274 | 12 |
| AX-158117864 | 12 | 11.205 | KV453011.1 | 674589 | 12-scf00274 | 12 |
| AX-158117866 | 12 | 11.205 | KV453011.1 | 675975 | 12-scf00274 | 12 |
| AX-158117867 | 12 | 11.205 | KV453011.1 | 677814 | 12-scf00274 | 12 |
| AX-157767301 | 12 | 11.205 | KV453011.1 | 678739 | 12-scf00274 | 12 |
| AX-158117869 | 12 | 11.205 | KV453011.1 | 678825 | 12-scf00274 | 12 |
| AX-158117870 | 12 | 11.205 | KV453011.1 | 680742 | 12-scf00274 | 12 |
| AX-158117871 | 12 | 11.205 | KV453011.1 | 681521 | 12-scf00274 | 12 |
| AX-158117872 | 12 | 11.205 | KV453011.1 | 682311 | 12-scf00274 | 12 |
| AX-158117873 | 12 | 11.205 | KV453011.1 | 683189 | 12-scf00274 | 12 |
| AX-158117874 | 12 | 11.205 | KV453011.1 | 683692 | 12-scf00274 | 12 |
| AX-158117876 | 12 | 11.205 | KV453011.1 | 684800 | 12-scf00274 | 12 |
| AX-158117878 | 12 | 11.205 | KV453011.1 | 686915 | 12-scf00274 | 12 |
| AX-158117880 | 12 | 11.205 | KV453011.1 | 689996 | 12-scf00274 | 12 |
| AX-158117882 | 12 | 11.205 | KV453011.1 | 692823 | 12-scf00274 | 12 |
| AX-158117883 | 12 | 11.205 | KV453011.1 | 694045 | 12-scf00274 | 12 |
| AX-157828641 | 12 | 11.205 | KV453011.1 | 702028 | 12-scf00274 | 12 |
| AX-158117889 | 12 | 11.205 | KV453011.1 | 705149 | 12-scf00274 | 12 |
| AX-157828644 | 12 | 11.205 | KV453011.1 | 706153 | 12-scf00274 | 12 |
| AX-158117958 | 12 | 11.205 | KV453011.1 | 790077 | 12-scf00274 | 12 |
| AX-158380130 | 12 | 11.329 | KV453011.1 | 704911 | 12-scf00274 | 12 |
| AX-158117892 | 12 | 11.423 | KV453011.1 | 707553 | 12-scf00274 | 12 |
| AX-158117893 | 12 | 11.423 | KV453011.1 | 708631 | 12-scf00274 | 12 |
| AX-158117896 | 12 | 11.423 | KV453011.1 | 712111 | 12-scf00274 | 12 |
| AX-157886001 | 12 | 11.423 | KV453011.1 | 721024 | 12-scf00274 | 12 |
| AX-157828645 | 12 | 11.642 | KV453011.1 | 713454 | 12-scf00274 | 12 |
| AX-158117902 | 12 | 11.642 | KV453011.1 | 726417 | 12-scf00274 | 12 |
| AX-158117903 | 12 | 11.642 | KV453011.1 | 727288 | 12-scf00274 | 12 |
| AX-158117906 | 12 | 11.642 | KV453011.1 | 735252 | 12-scf00274 | 12 |
| AX-157828647 | 12 | 11.642 | KV453011.1 | 735410 | 12-scf00274 | 12 |
| AX-157828648 | 12 | 11.642 | KV453011.1 | 736888 | 12-scf00274 | 12 |
| AX-158117914 | 12 | 11.642 | KV453011.1 | 744190 | 12-scf00274 | 12 |
| AX-157757156 | 12 | 11.642 | KV453011.1 | 753760 | 12-scf00274 | 12 |
| AX-158117919 | 12 | 11.642 | KV453011.1 | 754341 | 12-scf00274 | 12 |
| AX-158117920 | 12 | 11.642 | KV453011.1 | 755237 | 12-scf00274 | 12 |
| AX-157828652 | 12 | 11.642 | KV453011.1 | 837138 | 12-scf00274 | 12 |
| AX-157742165 | 12 | 11.751 | KV453011.1 | 761541 | 12-scf00274 | 12 |
| AX-157743894 | 12 | 11.751 | KV453011.1 | 764174 | 12-scf00274 | 12 |
| AX-158117932 | 12 | 11.751 | KV453011.1 | 768521 | 12-scf00274 | 12 |

|              |    |        |            |         |             |    |
|--------------|----|--------|------------|---------|-------------|----|
| AX-158117935 | 12 | 11.751 | KV453011.1 | 770454  | 12-scf00274 | 12 |
| AX-158117937 | 12 | 11.751 | KV453011.1 | 772847  | 12-scf00274 | 12 |
| AX-158117938 | 12 | 11.751 | KV453011.1 | 773607  | 12-scf00274 | 12 |
| AX-158117940 | 12 | 11.751 | KV453011.1 | 775123  | 12-scf00274 | 12 |
| AX-158117941 | 12 | 11.751 | KV453011.1 | 775873  | 12-scf00274 | 12 |
| AX-157727829 | 12 | 11.751 | KV453011.1 | 777321  | 12-scf00274 | 12 |
| AX-158117943 | 12 | 11.915 | KV453011.1 | 778008  | 12-scf00274 | 12 |
| AX-157866112 | 12 | 11.972 | KV453011.1 | 763851  | 12-scf00274 | 12 |
| AX-158117951 | 12 | 11.972 | KV453011.1 | 786767  | 12-scf00274 | 12 |
| AX-158117964 | 12 | 11.972 | KV453011.1 | 799752  | 12-scf00274 | 12 |
| AX-158117970 | 12 | 11.972 | KV453011.1 | 803702  | 12-scf00274 | 12 |
| AX-158117974 | 12 | 11.972 | KV453011.1 | 809532  | 12-scf00274 | 12 |
| AX-157748565 | 12 | 11.972 | KV453011.1 | 812171  | 12-scf00274 | 12 |
| AX-158117955 | 12 | 12.079 | KV453011.1 | 788637  | 12-scf00274 | 12 |
| AX-158117956 | 12 | 12.079 | KV453011.1 | 789447  | 12-scf00274 | 12 |
| AX-158117957 | 12 | 12.079 | KV453011.1 | 789901  | 12-scf00274 | 12 |
| AX-158117965 | 12 | 12.079 | KV453011.1 | 800934  | 12-scf00274 | 12 |
| AX-158117968 | 12 | 12.079 | KV453011.1 | 802920  | 12-scf00274 | 12 |
| AX-157857573 | 12 | 12.079 | KV453011.1 | 806319  | 12-scf00274 | 12 |
| AX-158117972 | 12 | 12.079 | KV453011.1 | 807425  | 12-scf00274 | 12 |
| AX-158117973 | 12 | 12.079 | KV453011.1 | 809163  | 12-scf00274 | 12 |
| AX-158117977 | 12 | 12.079 | KV453011.1 | 812539  | 12-scf00274 | 12 |
| AX-158117978 | 12 | 12.079 | KV453011.1 | 813057  | 12-scf00274 | 12 |
| AX-158117980 | 12 | 12.079 | KV453011.1 | 813780  | 12-scf00274 | 12 |
| AX-158117981 | 12 | 12.079 | KV453011.1 | 814866  | 12-scf00274 | 12 |
| AX-158117984 | 12 | 12.079 | KV453011.1 | 816524  | 12-scf00274 | 12 |
| AX-157770862 | 12 | 12.079 | KV453011.1 | 817575  | 12-scf00274 | 12 |
| AX-158117986 | 12 | 12.079 | KV453011.1 | 817673  | 12-scf00274 | 12 |
| AX-157743508 | 12 | 12.079 | KV453011.1 | 819933  | 12-scf00274 | 12 |
| AX-158117988 | 12 | 12.079 | KV453011.1 | 822724  | 12-scf00274 | 12 |
| AX-158117991 | 12 | 12.079 | KV453011.1 | 824426  | 12-scf00274 | 12 |
| AX-157714782 | 12 | 12.079 | KV453011.1 | 825092  | 12-scf00274 | 12 |
| AX-158117996 | 12 | 12.079 | KV453011.1 | 830241  | 12-scf00274 | 12 |
| AX-158118005 | 12 | 12.079 | KV453011.1 | 845065  | 12-scf00274 | 12 |
| AX-157828655 | 12 | 12.079 | KV453011.1 | 863164  | 12-scf00274 | 12 |
| AX-158118107 | 12 | 12.079 | KV453011.1 | 946924  | 12-scf00274 | 12 |
| AX-158118175 | 12 | 12.079 | KV453011.1 | 1035923 | 12-scf00274 | 12 |
| AX-158117993 | 12 | 12.188 | KV453011.1 | 826819  | 12-scf00274 | 12 |
| AX-158117997 | 12 | 12.188 | KV453011.1 | 833377  | 12-scf00274 | 12 |
| AX-158117998 | 12 | 12.188 | KV453011.1 | 835566  | 12-scf00274 | 12 |
| AX-158118004 | 12 | 12.188 | KV453011.1 | 841911  | 12-scf00274 | 12 |
| AX-157828653 | 12 | 12.188 | KV453011.1 | 844473  | 12-scf00274 | 12 |
| AX-158118006 | 12 | 12.188 | KV453011.1 | 847066  | 12-scf00274 | 12 |
| AX-158118007 | 12 | 12.188 | KV453011.1 | 847847  | 12-scf00274 | 12 |
| AX-158118008 | 12 | 12.188 | KV453011.1 | 849314  | 12-scf00274 | 12 |
| AX-158118013 | 12 | 12.188 | KV453011.1 | 853974  | 12-scf00274 | 12 |
| AX-158118014 | 12 | 12.188 | KV453011.1 | 854557  | 12-scf00274 | 12 |
| AX-158118043 | 12 | 12.188 | KV453011.1 | 885381  | 12-scf00274 | 12 |
| AX-158117923 | 12 | 12.407 | KV453011.1 | 760393  | 12-scf00274 | 12 |
| AX-158118016 | 12 | 12.407 | KV453011.1 | 856225  | 12-scf00274 | 12 |
| AX-157752780 | 12 | 12.407 | KV453011.1 | 858990  | 12-scf00274 | 12 |

|              |    |        |            |         |             |    |
|--------------|----|--------|------------|---------|-------------|----|
| AX-158118018 | 12 | 12.407 | KV453011.1 | 861263  | 12-scf00274 | 12 |
| AX-158118023 | 12 | 12.407 | KV453011.1 | 865387  | 12-scf00274 | 12 |
| AX-157828656 | 12 | 12.407 | KV453011.1 | 870206  | 12-scf00274 | 12 |
| AX-158118028 | 12 | 12.407 | KV453011.1 | 870456  | 12-scf00274 | 12 |
| AX-158118029 | 12 | 12.407 | KV453011.1 | 871529  | 12-scf00274 | 12 |
| AX-158118030 | 12 | 12.407 | KV453011.1 | 871938  | 12-scf00274 | 12 |
| AX-158118038 | 12 | 12.407 | KV453011.1 | 881816  | 12-scf00274 | 12 |
| AX-158118044 | 12 | 12.407 | KV453011.1 | 885865  | 12-scf00274 | 12 |
| AX-158118045 | 12 | 12.407 | KV453011.1 | 886857  | 12-scf00274 | 12 |
| AX-157871266 | 12 | 12.407 | KV453011.1 | 889967  | 12-scf00274 | 12 |
| AX-158118047 | 12 | 12.407 | KV453011.1 | 890695  | 12-scf00274 | 12 |
| AX-158118048 | 12 | 12.407 | KV453011.1 | 891327  | 12-scf00274 | 12 |
| AX-158118049 | 12 | 12.407 | KV453011.1 | 893987  | 12-scf00274 | 12 |
| AX-158118051 | 12 | 12.407 | KV453011.1 | 895579  | 12-scf00274 | 12 |
| AX-158118052 | 12 | 12.407 | KV453011.1 | 896095  | 12-scf00274 | 12 |
| AX-158118059 | 12 | 12.407 | KV453011.1 | 905190  | 12-scf00274 | 12 |
| AX-158118063 | 12 | 12.407 | KV453011.1 | 907251  | 12-scf00274 | 12 |
| AX-158118067 | 12 | 12.407 | KV453011.1 | 910327  | 12-scf00274 | 12 |
| AX-158118068 | 12 | 12.407 | KV453011.1 | 910597  | 12-scf00274 | 12 |
| AX-158118069 | 12 | 12.407 | KV453011.1 | 912599  | 12-scf00274 | 12 |
| AX-158118070 | 12 | 12.407 | KV453011.1 | 913679  | 12-scf00274 | 12 |
| AX-158118073 | 12 | 12.407 | KV453011.1 | 916493  | 12-scf00274 | 12 |
| AX-158118075 | 12 | 12.407 | KV453011.1 | 917859  | 12-scf00274 | 12 |
| AX-157749185 | 12 | 12.407 | KV453011.1 | 921964  | 12-scf00274 | 12 |
| AX-157828657 | 12 | 12.407 | KV453011.1 | 927627  | 12-scf00274 | 12 |
| AX-158118087 | 12 | 12.407 | KV453011.1 | 928728  | 12-scf00274 | 12 |
| AX-158118088 | 12 | 12.407 | KV453011.1 | 929611  | 12-scf00274 | 12 |
| AX-158118090 | 12 | 12.407 | KV453011.1 | 930675  | 12-scf00274 | 12 |
| AX-158118094 | 12 | 12.407 | KV453011.1 | 933344  | 12-scf00274 | 12 |
| AX-158118095 | 12 | 12.407 | KV453011.1 | 934127  | 12-scf00274 | 12 |
| AX-158118097 | 12 | 12.407 | KV453011.1 | 935448  | 12-scf00274 | 12 |
| AX-158118101 | 12 | 12.407 | KV453011.1 | 940478  | 12-scf00274 | 12 |
| AX-158118104 | 12 | 12.407 | KV453011.1 | 943259  | 12-scf00274 | 12 |
| AX-158118105 | 12 | 12.407 | KV453011.1 | 944301  | 12-scf00274 | 12 |
| AX-158118109 | 12 | 12.407 | KV453011.1 | 949117  | 12-scf00274 | 12 |
| AX-157771592 | 12 | 12.407 | KV453011.1 | 953863  | 12-scf00274 | 12 |
| AX-158118116 | 12 | 12.407 | KV453011.1 | 956596  | 12-scf00274 | 12 |
| AX-158118120 | 12 | 12.407 | KV453011.1 | 962271  | 12-scf00274 | 12 |
| AX-157754389 | 12 | 12.407 | KV453011.1 | 969590  | 12-scf00274 | 12 |
| AX-158392693 | 12 | 12.407 | KV453011.1 | 970200  | 12-scf00274 | 12 |
| AX-158118127 | 12 | 12.407 | KV453011.1 | 970238  | 12-scf00274 | 12 |
| AX-158118128 | 12 | 12.407 | KV453011.1 | 970526  | 12-scf00274 | 12 |
| AX-158118132 | 12 | 12.407 | KV453011.1 | 973502  | 12-scf00274 | 12 |
| AX-158118134 | 12 | 12.407 | KV453011.1 | 975936  | 12-scf00274 | 12 |
| AX-157828659 | 12 | 12.407 | KV453011.1 | 983383  | 12-scf00274 | 12 |
| AX-158118137 | 12 | 12.407 | KV453011.1 | 983753  | 12-scf00274 | 12 |
| AX-157857575 | 12 | 12.407 | KV453011.1 | 987156  | 12-scf00274 | 12 |
| AX-157716016 | 12 | 12.407 | KV453011.1 | 991628  | 12-scf00274 | 12 |
| AX-157828660 | 12 | 12.407 | KV453011.1 | 997154  | 12-scf00274 | 12 |
| AX-158118150 | 12 | 12.407 | KV453011.1 | 997566  | 12-scf00274 | 12 |
| AX-158118168 | 12 | 12.407 | KV453011.1 | 1025853 | 12-scf00274 | 12 |

|              |    |        |            |         |             |    |
|--------------|----|--------|------------|---------|-------------|----|
| AX-158118169 | 12 | 12.407 | KV453011.1 | 1026723 | 12-scf00274 | 12 |
| AX-158118179 | 12 | 12.407 | KV453011.1 | 1048764 | 12-scf00274 | 12 |
| AX-157741267 | 12 | 12.407 | KV453011.1 | 1058548 | 12-scf00274 | 12 |
| AX-158118198 | 12 | 12.407 | KV453011.1 | 1086074 | 12-scf00274 | 12 |
| AX-158118220 | 12 | 12.407 | KV453011.1 | 1117437 | 12-scf00274 | 12 |
| AX-158417237 | 12 | 12.407 | KV453011.1 | 1266856 | 12-scf00274 | 12 |
| AX-158118431 | 12 | 12.407 | KV453011.1 | 1446730 | 12-scf00274 | 12 |
| AX-158118123 | 12 | 12.442 | KV453011.1 | 965267  | 12-scf00274 | 12 |
| AX-158118125 | 12 | 12.476 | KV453011.1 | 967288  | 12-scf00274 | 12 |
| AX-158118033 | 12 | 12.494 | KV453011.1 | 874540  | 12-scf00274 | 12 |
| AX-158118035 | 12 | 12.494 | KV453011.1 | 879425  | 12-scf00274 | 12 |
| AX-158118039 | 12 | 12.494 | KV453011.1 | 883354  | 12-scf00274 | 12 |
| AX-158118130 | 12 | 12.494 | KV453011.1 | 972328  | 12-scf00274 | 12 |
| AX-158118042 | 12 | 12.516 | KV453011.1 | 884823  | 12-scf00274 | 12 |
| AX-158118079 | 12 | 12.516 | KV453011.1 | 919547  | 12-scf00274 | 12 |
| AX-158118131 | 12 | 12.516 | KV453011.1 | 973009  | 12-scf00274 | 12 |
| AX-158118167 | 12 | 12.516 | KV453011.1 | 1024448 | 12-scf00274 | 12 |
| AX-158118171 | 12 | 12.516 | KV453011.1 | 1030341 | 12-scf00274 | 12 |
| AX-158118394 | 12 | 12.516 | KV453011.1 | 1391204 | 12-scf00274 | 12 |
| AX-158118057 | 12 | 12.525 | KV453011.1 | 904176  | 12-scf00274 | 12 |
| AX-158118129 | 12 | 12.525 | KV453011.1 | 971358  | 12-scf00274 | 12 |
| AX-158118135 | 12 | 12.525 | KV453011.1 | 977010  | 12-scf00274 | 12 |
| AX-157715603 | 12 | 12.525 | KV453011.1 | 984092  | 12-scf00274 | 12 |
| AX-158118141 | 12 | 12.525 | KV453011.1 | 986084  | 12-scf00274 | 12 |
| AX-158118136 | 12 | 12.54  | KV453011.1 | 980250  | 12-scf00274 | 12 |
| AX-158118061 | 12 | 12.558 | KV453011.1 | 905853  | 12-scf00274 | 12 |
| AX-158118138 | 12 | 12.558 | KV453011.1 | 983973  | 12-scf00274 | 12 |
| AX-158118164 | 12 | 12.558 | KV453011.1 | 1018581 | 12-scf00274 | 12 |
| AX-158118145 | 12 | 12.576 | KV453011.1 | 990974  | 12-scf00274 | 12 |
| AX-158118158 | 12 | 12.601 | KV453011.1 | 1010893 | 12-scf00274 | 12 |
| AX-158118194 | 12 | 12.601 | KV453011.1 | 1078224 | 12-scf00274 | 12 |
| AX-158118054 | 12 | 12.625 | KV453011.1 | 897923  | 12-scf00274 | 12 |
| AX-158118155 | 12 | 12.625 | KV453011.1 | 1007056 | 12-scf00274 | 12 |
| AX-157741205 | 12 | 12.625 | KV453011.1 | 1016297 | 12-scf00274 | 12 |
| AX-158118165 | 12 | 12.625 | KV453011.1 | 1019327 | 12-scf00274 | 12 |
| AX-158118166 | 12 | 12.625 | KV453011.1 | 1020066 | 12-scf00274 | 12 |
| AX-158118173 | 12 | 12.625 | KV453011.1 | 1032072 | 12-scf00274 | 12 |
| AX-157828664 | 12 | 12.625 | KV453011.1 | 1032481 | 12-scf00274 | 12 |
| AX-158118174 | 12 | 12.625 | KV453011.1 | 1034928 | 12-scf00274 | 12 |
| AX-157828665 | 12 | 12.625 | KV453011.1 | 1036053 | 12-scf00274 | 12 |
| AX-157828667 | 12 | 12.625 | KV453011.1 | 1044038 | 12-scf00274 | 12 |
| AX-157750901 | 12 | 12.625 | KV453011.1 | 1045098 | 12-scf00274 | 12 |
| AX-158392694 | 12 | 12.625 | KV453011.1 | 1045626 | 12-scf00274 | 12 |
| AX-157772387 | 12 | 12.625 | KV453011.1 | 1046964 | 12-scf00274 | 12 |
| AX-158118218 | 12 | 12.625 | KV453011.1 | 1114646 | 12-scf00274 | 12 |
| AX-158118219 | 12 | 12.625 | KV453011.1 | 1116065 | 12-scf00274 | 12 |
| AX-158118247 | 12 | 12.625 | KV453011.1 | 1158215 | 12-scf00274 | 12 |
| AX-158118249 | 12 | 12.625 | KV453011.1 | 1159261 | 12-scf00274 | 12 |
| AX-158118335 | 12 | 12.625 | KV453011.1 | 1287565 | 12-scf00274 | 12 |
| AX-158118391 | 12 | 12.625 | KV453011.1 | 1387904 | 12-scf00274 | 12 |
| AX-158118537 | 12 | 12.625 | KV453011.1 | 1594866 | 12-scf00274 | 12 |

|              |    |        |            |         |             |    |
|--------------|----|--------|------------|---------|-------------|----|
| AX-158118559 | 12 | 12.625 | KV453011.1 | 1617124 | 12-scf00274 | 12 |
| AX-158380133 | 12 | 12.685 | KV453011.1 | 1051784 | 12-scf00274 | 12 |
| AX-157886004 | 12 | 12.685 | KV453011.1 | 1067002 | 12-scf00274 | 12 |
| AX-158118098 | 12 | 12.734 | KV453011.1 | 936522  | 12-scf00274 | 12 |
| AX-157828661 | 12 | 12.734 | KV453011.1 | 998387  | 12-scf00274 | 12 |
| AX-158118157 | 12 | 12.734 | KV453011.1 | 1008984 | 12-scf00274 | 12 |
| AX-158118180 | 12 | 12.734 | KV453011.1 | 1054314 | 12-scf00274 | 12 |
| AX-158411023 | 12 | 12.734 | KV453011.1 | 1059312 | 12-scf00274 | 12 |
| AX-157694792 | 12 | 12.734 | KV453011.1 | 1059790 | 12-scf00274 | 12 |
| AX-158411025 | 12 | 12.734 | KV453011.1 | 1061046 | 12-scf00274 | 12 |
| AX-158118184 | 12 | 12.734 | KV453011.1 | 1061099 | 12-scf00274 | 12 |
| AX-158118191 | 12 | 12.734 | KV453011.1 | 1073460 | 12-scf00274 | 12 |
| AX-158118192 | 12 | 12.734 | KV453011.1 | 1075100 | 12-scf00274 | 12 |
| AX-158118193 | 12 | 12.734 | KV453011.1 | 1075463 | 12-scf00274 | 12 |
| AX-157828669 | 12 | 12.734 | KV453011.1 | 1076321 | 12-scf00274 | 12 |
| AX-157828674 | 12 | 12.734 | KV453011.1 | 1085284 | 12-scf00274 | 12 |
| AX-158118201 | 12 | 12.734 | KV453011.1 | 1089724 | 12-scf00274 | 12 |
| AX-158118204 | 12 | 12.734 | KV453011.1 | 1091826 | 12-scf00274 | 12 |
| AX-158118210 | 12 | 12.734 | KV453011.1 | 1095812 | 12-scf00274 | 12 |
| AX-157723298 | 12 | 12.734 | KV453011.1 | 1095861 | 12-scf00274 | 12 |
| AX-157828675 | 12 | 12.734 | KV453011.1 | 1111230 | 12-scf00274 | 12 |
| AX-158118221 | 12 | 12.734 | KV453011.1 | 1119019 | 12-scf00274 | 12 |
| AX-158118222 | 12 | 12.734 | KV453011.1 | 1119670 | 12-scf00274 | 12 |
| AX-158118223 | 12 | 12.734 | KV453011.1 | 1119886 | 12-scf00274 | 12 |
| AX-158118241 | 12 | 12.734 | KV453011.1 | 1151109 | 12-scf00274 | 12 |
| AX-158118242 | 12 | 12.734 | KV453011.1 | 1151493 | 12-scf00274 | 12 |
| AX-158118252 | 12 | 12.734 | KV453011.1 | 1164585 | 12-scf00274 | 12 |
| AX-157698512 | 12 | 12.734 | KV453011.1 | 1214969 | 12-scf00274 | 12 |
| AX-157828689 | 12 | 12.734 | KV453011.1 | 1217732 | 12-scf00274 | 12 |
| AX-158118290 | 12 | 12.734 | KV453011.1 | 1234433 | 12-scf00274 | 12 |
| AX-158118298 | 12 | 12.734 | KV453011.1 | 1249174 | 12-scf00274 | 12 |
| AX-158118303 | 12 | 12.734 | KV453011.1 | 1256582 | 12-scf00274 | 12 |
| AX-157866117 | 12 | 12.734 | KV453011.1 | 1274990 | 12-scf00274 | 12 |
| AX-158118343 | 12 | 12.734 | KV453011.1 | 1301349 | 12-scf00274 | 12 |
| AX-158118387 | 12 | 12.734 | KV453011.1 | 1379430 | 12-scf00274 | 12 |
| AX-158118407 | 12 | 12.734 | KV453011.1 | 1414288 | 12-scf00274 | 12 |
| AX-158118196 | 12 | 12.741 | KV453011.1 | 1081208 | 12-scf00274 | 12 |
| AX-158118021 | 12 | 12.843 | KV453011.1 | 862853  | 12-scf00274 | 12 |
| AX-158118034 | 12 | 12.843 | KV453011.1 | 876930  | 12-scf00274 | 12 |
| AX-158118064 | 12 | 12.843 | KV453011.1 | 908040  | 12-scf00274 | 12 |
| AX-158118108 | 12 | 12.843 | KV453011.1 | 947500  | 12-scf00274 | 12 |
| AX-157750850 | 12 | 12.843 | KV453011.1 | 996003  | 12-scf00274 | 12 |
| AX-158118189 | 12 | 12.843 | KV453011.1 | 1068931 | 12-scf00274 | 12 |
| AX-157828672 | 12 | 12.843 | KV453011.1 | 1082618 | 12-scf00274 | 12 |
| AX-158118197 | 12 | 12.843 | KV453011.1 | 1083421 | 12-scf00274 | 12 |
| AX-157746034 | 12 | 12.843 | KV453011.1 | 1083841 | 12-scf00274 | 12 |
| AX-158118206 | 12 | 12.843 | KV453011.1 | 1093200 | 12-scf00274 | 12 |
| AX-158118207 | 12 | 12.843 | KV453011.1 | 1093782 | 12-scf00274 | 12 |
| AX-158118209 | 12 | 12.843 | KV453011.1 | 1095307 | 12-scf00274 | 12 |
| AX-158118211 | 12 | 12.843 | KV453011.1 | 1097234 | 12-scf00274 | 12 |
| AX-158118212 | 12 | 12.843 | KV453011.1 | 1100047 | 12-scf00274 | 12 |



|              |    |        |            |         |             |    |
|--------------|----|--------|------------|---------|-------------|----|
| AX-158118213 | 12 | 12.843 | KV453011.1 | 1101109 | 12-scf00274 | 12 |
| AX-157696856 | 12 | 12.843 | KV453011.1 | 1109927 | 12-scf00274 | 12 |
| AX-157727908 | 12 | 12.843 | KV453011.1 | 1115268 | 12-scf00274 | 12 |
| AX-158118224 | 12 | 12.843 | KV453011.1 | 1122196 | 12-scf00274 | 12 |
| AX-158118226 | 12 | 12.843 | KV453011.1 | 1125645 | 12-scf00274 | 12 |
| AX-158118228 | 12 | 12.843 | KV453011.1 | 1126709 | 12-scf00274 | 12 |
| AX-158118229 | 12 | 12.843 | KV453011.1 | 1127305 | 12-scf00274 | 12 |
| AX-158118231 | 12 | 12.843 | KV453011.1 | 1128452 | 12-scf00274 | 12 |
| AX-157715281 | 12 | 12.843 | KV453011.1 | 1129120 | 12-scf00274 | 12 |
| AX-157746057 | 12 | 12.843 | KV453011.1 | 1130324 | 12-scf00274 | 12 |
| AX-158118232 | 12 | 12.843 | KV453011.1 | 1130508 | 12-scf00274 | 12 |
| AX-158118233 | 12 | 12.843 | KV453011.1 | 1130950 | 12-scf00274 | 12 |
| AX-158118234 | 12 | 12.843 | KV453011.1 | 1132396 | 12-scf00274 | 12 |
| AX-157727641 | 12 | 12.843 | KV453011.1 | 1142367 | 12-scf00274 | 12 |
| AX-157727910 | 12 | 12.843 | KV453011.1 | 1144047 | 12-scf00274 | 12 |
| AX-158118237 | 12 | 12.843 | KV453011.1 | 1144402 | 12-scf00274 | 12 |
| AX-158118239 | 12 | 12.843 | KV453011.1 | 1148919 | 12-scf00274 | 12 |
| AX-158118240 | 12 | 12.843 | KV453011.1 | 1150613 | 12-scf00274 | 12 |
| AX-157693372 | 12 | 12.843 | KV453011.1 | 1153497 | 12-scf00274 | 12 |
| AX-157775183 | 12 | 12.843 | KV453011.1 | 1155909 | 12-scf00274 | 12 |
| AX-158118246 | 12 | 12.843 | KV453011.1 | 1157353 | 12-scf00274 | 12 |
| AX-157828683 | 12 | 12.843 | KV453011.1 | 1161977 | 12-scf00274 | 12 |
| AX-157886005 | 12 | 12.843 | KV453011.1 | 1164234 | 12-scf00274 | 12 |
| AX-158118254 | 12 | 12.843 | KV453011.1 | 1165979 | 12-scf00274 | 12 |
| AX-158118256 | 12 | 12.843 | KV453011.1 | 1167130 | 12-scf00274 | 12 |
| AX-158118257 | 12 | 12.843 | KV453011.1 | 1170925 | 12-scf00274 | 12 |
| AX-157828684 | 12 | 12.843 | KV453011.1 | 1178057 | 12-scf00274 | 12 |
| AX-157759045 | 12 | 12.843 | KV453011.1 | 1179442 | 12-scf00274 | 12 |
| AX-158118263 | 12 | 12.843 | KV453011.1 | 1187070 | 12-scf00274 | 12 |
| AX-157772977 | 12 | 12.843 | KV453011.1 | 1234713 | 12-scf00274 | 12 |
| AX-158118307 | 12 | 12.843 | KV453011.1 | 1258331 | 12-scf00274 | 12 |
| AX-158118312 | 12 | 12.843 | KV453011.1 | 1263136 | 12-scf00274 | 12 |
| AX-158118315 | 12 | 12.843 | KV453011.1 | 1270841 | 12-scf00274 | 12 |
| AX-158118316 | 12 | 12.843 | KV453011.1 | 1271131 | 12-scf00274 | 12 |
| AX-158118323 | 12 | 12.843 | KV453011.1 | 1277502 | 12-scf00274 | 12 |
| AX-158118327 | 12 | 12.843 | KV453011.1 | 1281179 | 12-scf00274 | 12 |
| AX-158118340 | 12 | 12.843 | KV453011.1 | 1297376 | 12-scf00274 | 12 |
| AX-158118349 | 12 | 12.843 | KV453011.1 | 1307945 | 12-scf00274 | 12 |
| AX-158118350 | 12 | 12.843 | KV453011.1 | 1309189 | 12-scf00274 | 12 |
| AX-158118355 | 12 | 12.843 | KV453011.1 | 1312069 | 12-scf00274 | 12 |
| AX-158118374 | 12 | 12.843 | KV453011.1 | 1336963 | 12-scf00274 | 12 |
| AX-157715901 | 12 | 12.843 | KV453011.1 | 1355010 | 12-scf00274 | 12 |
| AX-158118383 | 12 | 12.843 | KV453011.1 | 1357313 | 12-scf00274 | 12 |
| AX-158118261 | 12 | 12.911 | KV453011.1 | 1181784 | 12-scf00274 | 12 |
| AX-157828676 | 12 | 12.953 | KV453011.1 | 1129642 | 12-scf00274 | 12 |
| AX-157828681 | 12 | 12.953 | KV453011.1 | 1148334 | 12-scf00274 | 12 |
| AX-158118262 | 12 | 12.953 | KV453011.1 | 1184715 | 12-scf00274 | 12 |
| AX-158118266 | 12 | 12.953 | KV453011.1 | 1193006 | 12-scf00274 | 12 |
| AX-158118269 | 12 | 12.953 | KV453011.1 | 1195274 | 12-scf00274 | 12 |
| AX-158380134 | 12 | 12.953 | KV453011.1 | 1197093 | 12-scf00274 | 12 |
| AX-157771262 | 12 | 12.953 | KV453011.1 | 1197157 | 12-scf00274 | 12 |

|              |    |        |            |         |             |    |
|--------------|----|--------|------------|---------|-------------|----|
| AX-158118271 | 12 | 12.953 | KV453011.1 | 1197688 | 12-scf00274 | 12 |
| AX-158118272 | 12 | 12.953 | KV453011.1 | 1197950 | 12-scf00274 | 12 |
| AX-158118275 | 12 | 12.953 | KV453011.1 | 1202817 | 12-scf00274 | 12 |
| AX-157828686 | 12 | 12.953 | KV453011.1 | 1203969 | 12-scf00274 | 12 |
| AX-158118278 | 12 | 12.953 | KV453011.1 | 1207504 | 12-scf00274 | 12 |
| AX-158118286 | 12 | 12.953 | KV453011.1 | 1224086 | 12-scf00274 | 12 |
| AX-158118293 | 12 | 12.953 | KV453011.1 | 1238554 | 12-scf00274 | 12 |
| AX-158118294 | 12 | 12.953 | KV453011.1 | 1239313 | 12-scf00274 | 12 |
| AX-158118300 | 12 | 12.953 | KV453011.1 | 1252833 | 12-scf00274 | 12 |
| AX-158118301 | 12 | 12.953 | KV453011.1 | 1254459 | 12-scf00274 | 12 |
| AX-158118306 | 12 | 12.953 | KV453011.1 | 1257940 | 12-scf00274 | 12 |
| AX-158118309 | 12 | 12.953 | KV453011.1 | 1259247 | 12-scf00274 | 12 |
| AX-157722376 | 12 | 12.953 | KV453011.1 | 1260388 | 12-scf00274 | 12 |
| AX-158118352 | 12 | 12.953 | KV453011.1 | 1310076 | 12-scf00274 | 12 |
| AX-158118190 | 12 | 13.062 | KV453011.1 | 1069427 | 12-scf00274 | 12 |
| AX-158118265 | 12 | 13.062 | KV453011.1 | 1191732 | 12-scf00274 | 12 |
| AX-158118276 | 12 | 13.062 | KV453011.1 | 1203162 | 12-scf00274 | 12 |
| AX-158118284 | 12 | 13.062 | KV453011.1 | 1217303 | 12-scf00274 | 12 |
| AX-158118299 | 12 | 13.062 | KV453011.1 | 1251962 | 12-scf00274 | 12 |
| AX-158118326 | 12 | 13.062 | KV453011.1 | 1280245 | 12-scf00274 | 12 |
| AX-158118336 | 12 | 13.062 | KV453011.1 | 1292630 | 12-scf00274 | 12 |
| AX-158118341 | 12 | 13.062 | KV453011.1 | 1298774 | 12-scf00274 | 12 |
| AX-158118344 | 12 | 13.062 | KV453011.1 | 1302034 | 12-scf00274 | 12 |
| AX-158118347 | 12 | 13.062 | KV453011.1 | 1306157 | 12-scf00274 | 12 |
| AX-158118351 | 12 | 13.062 | KV453011.1 | 1309564 | 12-scf00274 | 12 |
| AX-158118353 | 12 | 13.062 | KV453011.1 | 1310609 | 12-scf00274 | 12 |
| AX-158118359 | 12 | 13.062 | KV453011.1 | 1313951 | 12-scf00274 | 12 |
| AX-158118361 | 12 | 13.062 | KV453011.1 | 1316252 | 12-scf00274 | 12 |
| AX-157828692 | 12 | 13.062 | KV453011.1 | 1318647 | 12-scf00274 | 12 |
| AX-158118365 | 12 | 13.062 | KV453011.1 | 1323083 | 12-scf00274 | 12 |
| AX-158118373 | 12 | 13.062 | KV453011.1 | 1336153 | 12-scf00274 | 12 |
| AX-158118377 | 12 | 13.062 | KV453011.1 | 1347021 | 12-scf00274 | 12 |
| AX-157828700 | 12 | 13.062 | KV453011.1 | 1349899 | 12-scf00274 | 12 |
| AX-158118381 | 12 | 13.062 | KV453011.1 | 1353507 | 12-scf00274 | 12 |
| AX-157742105 | 12 | 13.062 | KV453011.1 | 1353618 | 12-scf00274 | 12 |
| AX-158411036 | 12 | 13.062 | KV453011.1 | 1355710 | 12-scf00274 | 12 |
| AX-158118384 | 12 | 13.062 | KV453011.1 | 1358291 | 12-scf00274 | 12 |
| AX-157828702 | 12 | 13.194 | KV453011.1 | 1364477 | 12-scf00274 | 12 |
| AX-157828703 | 12 | 13.303 | KV453011.1 | 1372667 | 12-scf00274 | 12 |
| AX-158118388 | 12 | 13.303 | KV453011.1 | 1380630 | 12-scf00274 | 12 |
| AX-158118392 | 12 | 13.389 | KV453011.1 | 1389240 | 12-scf00274 | 12 |
| AX-158118396 | 12 | 13.389 | KV453011.1 | 1392077 | 12-scf00274 | 12 |
| AX-158118398 | 12 | 13.389 | KV453011.1 | 1398563 | 12-scf00274 | 12 |
| AX-158118399 | 12 | 13.389 | KV453011.1 | 1399139 | 12-scf00274 | 12 |
| AX-158118401 | 12 | 13.389 | KV453011.1 | 1400694 | 12-scf00274 | 12 |
| AX-158118402 | 12 | 13.389 | KV453011.1 | 1401680 | 12-scf00274 | 12 |
| AX-156753626 | 12 | 13.389 | KV453011.1 | 1402689 | 12-scf00274 | 12 |
| AX-158118610 | 12 | 13.389 | KV453011.1 | 1673731 | 12-scf00274 | 12 |
| AX-157708931 | 12 | 13.499 | KV453011.1 | 1138764 | 12-scf00274 | 12 |
| AX-157871273 | 12 | 13.499 | KV453011.1 | 1375465 | 12-scf00274 | 12 |
| AX-158118403 | 12 | 13.499 | KV453011.1 | 1405148 | 12-scf00274 | 12 |

|              |    |        |            |         |             |    |
|--------------|----|--------|------------|---------|-------------|----|
| AX-158118404 | 12 | 13.499 | KV453011.1 | 1405615 | 12-scf00274 | 12 |
| AX-158118409 | 12 | 13.499 | KV453011.1 | 1415614 | 12-scf00274 | 12 |
| AX-158118411 | 12 | 13.499 | KV453011.1 | 1416881 | 12-scf00274 | 12 |
| AX-157696074 | 12 | 13.499 | KV453011.1 | 1417079 | 12-scf00274 | 12 |
| AX-158118412 | 12 | 13.499 | KV453011.1 | 1419051 | 12-scf00274 | 12 |
| AX-158118413 | 12 | 13.499 | KV453011.1 | 1419466 | 12-scf00274 | 12 |
| AX-158118414 | 12 | 13.499 | KV453011.1 | 1419839 | 12-scf00274 | 12 |
| AX-158118415 | 12 | 13.499 | KV453011.1 | 1420223 | 12-scf00274 | 12 |
| AX-158118418 | 12 | 13.499 | KV453011.1 | 1427120 | 12-scf00274 | 12 |
| AX-158118419 | 12 | 13.499 | KV453011.1 | 1431246 | 12-scf00274 | 12 |
| AX-158118421 | 12 | 13.499 | KV453011.1 | 1433311 | 12-scf00274 | 12 |
| AX-158118425 | 12 | 13.499 | KV453011.1 | 1437924 | 12-scf00274 | 12 |
| AX-158380135 | 12 | 13.499 | KV453011.1 | 1446629 | 12-scf00274 | 12 |
| AX-158118446 | 12 | 13.499 | KV453011.1 | 1468679 | 12-scf00274 | 12 |
| AX-158118553 | 12 | 13.499 | KV453011.1 | 1611171 | 12-scf00274 | 12 |
| AX-158118556 | 12 | 13.499 | KV453011.1 | 1614768 | 12-scf00274 | 12 |
| AX-158120350 | 12 | 13.499 | KV453011.1 | 4993135 | 12-scf00274 | 12 |
| AX-157771480 | 12 | 13.561 | KV453011.1 | 1465531 | 12-scf00274 | 12 |
| AX-157745230 | 12 | 13.608 | KV453011.1 | 1227744 | 12-scf00274 | 12 |
| AX-157700222 | 12 | 13.608 | KV453011.1 | 1390349 | 12-scf00274 | 12 |
| AX-158417239 | 12 | 13.608 | KV453011.1 | 1391901 | 12-scf00274 | 12 |
| AX-158118397 | 12 | 13.608 | KV453011.1 | 1395649 | 12-scf00274 | 12 |
| AX-158118400 | 12 | 13.608 | KV453011.1 | 1399708 | 12-scf00274 | 12 |
| AX-158118441 | 12 | 13.608 | KV453011.1 | 1464298 | 12-scf00274 | 12 |
| AX-158118442 | 12 | 13.608 | KV453011.1 | 1466284 | 12-scf00274 | 12 |
| AX-158118443 | 12 | 13.608 | KV453011.1 | 1466976 | 12-scf00274 | 12 |
| AX-158118444 | 12 | 13.608 | KV453011.1 | 1467580 | 12-scf00274 | 12 |
| AX-158118449 | 12 | 13.608 | KV453011.1 | 1470228 | 12-scf00274 | 12 |
| AX-158118450 | 12 | 13.608 | KV453011.1 | 1474091 | 12-scf00274 | 12 |
| AX-158118453 | 12 | 13.608 | KV453011.1 | 1479280 | 12-scf00274 | 12 |
| AX-158118454 | 12 | 13.608 | KV453011.1 | 1480501 | 12-scf00274 | 12 |
| AX-158118455 | 12 | 13.608 | KV453011.1 | 1480949 | 12-scf00274 | 12 |
| AX-158118458 | 12 | 13.608 | KV453011.1 | 1487414 | 12-scf00274 | 12 |
| AX-158118460 | 12 | 13.608 | KV453011.1 | 1489385 | 12-scf00274 | 12 |
| AX-158118462 | 12 | 13.608 | KV453011.1 | 1491911 | 12-scf00274 | 12 |
| AX-158118463 | 12 | 13.608 | KV453011.1 | 1492793 | 12-scf00274 | 12 |
| AX-158118465 | 12 | 13.608 | KV453011.1 | 1493818 | 12-scf00274 | 12 |
| AX-158118470 | 12 | 13.608 | KV453011.1 | 1500910 | 12-scf00274 | 12 |
| AX-158118471 | 12 | 13.608 | KV453011.1 | 1501391 | 12-scf00274 | 12 |
| AX-158118475 | 12 | 13.608 | KV453011.1 | 1504759 | 12-scf00274 | 12 |
| AX-158118476 | 12 | 13.608 | KV453011.1 | 1505136 | 12-scf00274 | 12 |
| AX-158118479 | 12 | 13.608 | KV453011.1 | 1507586 | 12-scf00274 | 12 |
| AX-158118480 | 12 | 13.608 | KV453011.1 | 1508219 | 12-scf00274 | 12 |
| AX-158118481 | 12 | 13.608 | KV453011.1 | 1509332 | 12-scf00274 | 12 |
| AX-157828704 | 12 | 13.608 | KV453011.1 | 1510699 | 12-scf00274 | 12 |
| AX-158118484 | 12 | 13.608 | KV453011.1 | 1512478 | 12-scf00274 | 12 |
| AX-158118485 | 12 | 13.608 | KV453011.1 | 1513281 | 12-scf00274 | 12 |
| AX-158118486 | 12 | 13.608 | KV453011.1 | 1514217 | 12-scf00274 | 12 |
| AX-158118487 | 12 | 13.608 | KV453011.1 | 1514958 | 12-scf00274 | 12 |
| AX-158118491 | 12 | 13.608 | KV453011.1 | 1522180 | 12-scf00274 | 12 |
| AX-157708250 | 12 | 13.608 | KV453011.1 | 1523194 | 12-scf00274 | 12 |

|              |    |        |            |         |             |    |
|--------------|----|--------|------------|---------|-------------|----|
| AX-158118495 | 12 | 13.608 | KV453011.1 | 1526864 | 12-scf00274 | 12 |
| AX-157708007 | 12 | 13.608 | KV453011.1 | 1527314 | 12-scf00274 | 12 |
| AX-158118496 | 12 | 13.608 | KV453011.1 | 1529223 | 12-scf00274 | 12 |
| AX-158118499 | 12 | 13.608 | KV453011.1 | 1536138 | 12-scf00274 | 12 |
| AX-158118502 | 12 | 13.608 | KV453011.1 | 1539049 | 12-scf00274 | 12 |
| AX-158118503 | 12 | 13.608 | KV453011.1 | 1539816 | 12-scf00274 | 12 |
| AX-158118504 | 12 | 13.608 | KV453011.1 | 1540132 | 12-scf00274 | 12 |
| AX-157717885 | 12 | 13.608 | KV453011.1 | 1542065 | 12-scf00274 | 12 |
| AX-158118507 | 12 | 13.608 | KV453011.1 | 1545776 | 12-scf00274 | 12 |
| AX-157741110 | 12 | 13.608 | KV453011.1 | 1547461 | 12-scf00274 | 12 |
| AX-158118509 | 12 | 13.608 | KV453011.1 | 1549915 | 12-scf00274 | 12 |
| AX-158118510 | 12 | 13.608 | KV453011.1 | 1550668 | 12-scf00274 | 12 |
| AX-158118512 | 12 | 13.608 | KV453011.1 | 1552760 | 12-scf00274 | 12 |
| AX-157828708 | 12 | 13.608 | KV453011.1 | 1555195 | 12-scf00274 | 12 |
| AX-157828710 | 12 | 13.608 | KV453011.1 | 1557260 | 12-scf00274 | 12 |
| AX-158118514 | 12 | 13.608 | KV453011.1 | 1557518 | 12-scf00274 | 12 |
| AX-157828711 | 12 | 13.608 | KV453011.1 | 1558915 | 12-scf00274 | 12 |
| AX-158118515 | 12 | 13.608 | KV453011.1 | 1560173 | 12-scf00274 | 12 |
| AX-158118516 | 12 | 13.608 | KV453011.1 | 1561388 | 12-scf00274 | 12 |
| AX-157828712 | 12 | 13.608 | KV453011.1 | 1562101 | 12-scf00274 | 12 |
| AX-157828714 | 12 | 13.608 | KV453011.1 | 1563045 | 12-scf00274 | 12 |
| AX-158118518 | 12 | 13.608 | KV453011.1 | 1564035 | 12-scf00274 | 12 |
| AX-157740220 | 12 | 13.608 | KV453011.1 | 1564679 | 12-scf00274 | 12 |
| AX-157746758 | 12 | 13.608 | KV453011.1 | 1565562 | 12-scf00274 | 12 |
| AX-158118520 | 12 | 13.608 | KV453011.1 | 1566796 | 12-scf00274 | 12 |
| AX-157877726 | 12 | 13.608 | KV453011.1 | 1567878 | 12-scf00274 | 12 |
| AX-158118522 | 12 | 13.608 | KV453011.1 | 1569740 | 12-scf00274 | 12 |
| AX-158118523 | 12 | 13.608 | KV453011.1 | 1570739 | 12-scf00274 | 12 |
| AX-158118531 | 12 | 13.608 | KV453011.1 | 1585061 | 12-scf00274 | 12 |
| AX-157773561 | 12 | 13.608 | KV453011.1 | 1591565 | 12-scf00274 | 12 |
| AX-158118535 | 12 | 13.608 | KV453011.1 | 1593086 | 12-scf00274 | 12 |
| AX-158118536 | 12 | 13.608 | KV453011.1 | 1594374 | 12-scf00274 | 12 |
| AX-158118539 | 12 | 13.608 | KV453011.1 | 1595578 | 12-scf00274 | 12 |
| AX-158118541 | 12 | 13.608 | KV453011.1 | 1599008 | 12-scf00274 | 12 |
| AX-158118544 | 12 | 13.608 | KV453011.1 | 1601677 | 12-scf00274 | 12 |
| AX-158118546 | 12 | 13.608 | KV453011.1 | 1602629 | 12-scf00274 | 12 |
| AX-158118547 | 12 | 13.608 | KV453011.1 | 1604551 | 12-scf00274 | 12 |
| AX-157828721 | 12 | 13.608 | KV453011.1 | 1606110 | 12-scf00274 | 12 |
| AX-158118551 | 12 | 13.608 | KV453011.1 | 1609496 | 12-scf00274 | 12 |
| AX-158118554 | 12 | 13.608 | KV453011.1 | 1611654 | 12-scf00274 | 12 |
| AX-158118555 | 12 | 13.608 | KV453011.1 | 1614238 | 12-scf00274 | 12 |
| AX-158118557 | 12 | 13.608 | KV453011.1 | 1615478 | 12-scf00274 | 12 |
| AX-158118561 | 12 | 13.608 | KV453011.1 | 1621138 | 12-scf00274 | 12 |
| AX-158118562 | 12 | 13.608 | KV453011.1 | 1621554 | 12-scf00274 | 12 |
| AX-158118563 | 12 | 13.608 | KV453011.1 | 1621934 | 12-scf00274 | 12 |
| AX-157744277 | 12 | 13.608 | KV453011.1 | 1623034 | 12-scf00274 | 12 |
| AX-158118574 | 12 | 13.608 | KV453011.1 | 1630038 | 12-scf00274 | 12 |
| AX-158118575 | 12 | 13.608 | KV453011.1 | 1630354 | 12-scf00274 | 12 |
| AX-158118577 | 12 | 13.608 | KV453011.1 | 1633221 | 12-scf00274 | 12 |
| AX-158118578 | 12 | 13.608 | KV453011.1 | 1633596 | 12-scf00274 | 12 |
| AX-158118579 | 12 | 13.608 | KV453011.1 | 1633984 | 12-scf00274 | 12 |

|              |    |        |            |         |               |    |
|--------------|----|--------|------------|---------|---------------|----|
| AX-157752171 | 12 | 13.608 | KV453011.1 | 1639807 | 12-scf00274   | 12 |
| AX-158118611 | 12 | 13.608 | KV453011.1 | 1675506 | 12-scf00274   | 12 |
| AX-158118634 | 12 | 13.608 | KV453011.1 | 1705701 | 12-scf00274   | 12 |
| AX-157717473 | 12 | 13.608 | KV453011.1 | 1738835 | 12-scf00274   | 12 |
| AX-158118663 | 12 | 13.608 | KV453011.1 | 1752193 | 12-scf00274   | 12 |
| AX-158118680 | 12 | 13.608 | KV453011.1 | 1770513 | 12-scf00274   | 12 |
| AX-158118682 | 12 | 13.608 | KV453011.1 | 1772168 | 12-scf00274   | 12 |
| AX-158118716 | 12 | 13.608 | KV453011.1 | 1823485 | 12-scf00274   | 12 |
| AX-158118722 | 12 | 13.608 | KV453011.1 | 1829232 | 12-scf00274   | 12 |
| AX-158120374 | 12 | 13.608 | KV453011.1 | 5027087 | 12-scf00274   | 12 |
| AX-157704274 | 12 | 13.608 | DX103350.1 | 94      | ORI212 lctalu | UN |
| AX-157740952 | 12 | 13.827 | KV453011.1 | 1637612 | 12-scf00274   | 12 |
| AX-158118585 | 12 | 13.827 | KV453011.1 | 1639417 | 12-scf00274   | 12 |
| AX-158118586 | 12 | 13.991 | KV453011.1 | 1640477 | 12-scf00274   | 12 |
| AX-158118594 | 12 | 14.154 | KV453011.1 | 1653638 | 12-scf00274   | 12 |
| AX-158118595 | 12 | 14.154 | KV453011.1 | 1653988 | 12-scf00274   | 12 |
| AX-158118596 | 12 | 14.154 | KV453011.1 | 1656358 | 12-scf00274   | 12 |
| AX-158118597 | 12 | 14.154 | KV453011.1 | 1660103 | 12-scf00274   | 12 |
| AX-158118600 | 12 | 14.154 | KV453011.1 | 1662262 | 12-scf00274   | 12 |
| AX-157828726 | 12 | 14.154 | KV453011.1 | 1665020 | 12-scf00274   | 12 |
| AX-158118607 | 12 | 14.154 | KV453011.1 | 1671055 | 12-scf00274   | 12 |
| AX-157726441 | 12 | 14.154 | KV453011.1 | 1671344 | 12-scf00274   | 12 |
| AX-158118591 | 12 | 14.155 | KV453011.1 | 1645150 | 12-scf00274   | 12 |
| AX-157695704 | 12 | 14.155 | KV453011.1 | 1647777 | 12-scf00274   | 12 |
| AX-157773410 | 12 | 14.155 | KV453011.1 | 1652830 | 12-scf00274   | 12 |
| AX-158118603 | 12 | 14.155 | KV453011.1 | 1665860 | 12-scf00274   | 12 |
| AX-158118604 | 12 | 14.155 | KV453011.1 | 1666408 | 12-scf00274   | 12 |
| AX-158118614 | 12 | 14.204 | KV453011.1 | 1678290 | 12-scf00274   | 12 |
| AX-158118588 | 12 | 14.264 | KV453011.1 | 1643627 | 12-scf00274   | 12 |
| AX-157771222 | 12 | 14.264 | KV453011.1 | 1680801 | 12-scf00274   | 12 |
| AX-157828728 | 12 | 14.264 | KV453011.1 | 1684618 | 12-scf00274   | 12 |
| AX-157745600 | 12 | 14.264 | KV453011.1 | 1684912 | 12-scf00274   | 12 |
| AX-158118618 | 12 | 14.264 | KV453011.1 | 1685029 | 12-scf00274   | 12 |
| AX-158118620 | 12 | 14.373 | KV453011.1 | 1685681 | 12-scf00274   | 12 |
| AX-158118622 | 12 | 14.373 | KV453011.1 | 1691886 | 12-scf00274   | 12 |
| AX-158118623 | 12 | 14.373 | KV453011.1 | 1692763 | 12-scf00274   | 12 |
| AX-158118624 | 12 | 14.373 | KV453011.1 | 1694254 | 12-scf00274   | 12 |
| AX-158118629 | 12 | 14.373 | KV453011.1 | 1701308 | 12-scf00274   | 12 |
| AX-158118631 | 12 | 14.373 | KV453011.1 | 1703078 | 12-scf00274   | 12 |
| AX-157857581 | 12 | 14.373 | KV453011.1 | 1709574 | 12-scf00274   | 12 |
| AX-158118639 | 12 | 14.373 | KV453011.1 | 1715374 | 12-scf00274   | 12 |
| AX-158118669 | 12 | 14.373 | KV453011.1 | 1758180 | 12-scf00274   | 12 |
| AX-158118378 | 12 | 14.592 | KV453011.1 | 1347625 | 12-scf00274   | 12 |
| AX-158118583 | 12 | 14.592 | KV453011.1 | 1637207 | 12-scf00274   | 12 |
| AX-158118601 | 12 | 14.592 | KV453011.1 | 1662758 | 12-scf00274   | 12 |
| AX-158118616 | 12 | 14.592 | KV453011.1 | 1680743 | 12-scf00274   | 12 |
| AX-158118641 | 12 | 14.592 | KV453011.1 | 1716635 | 12-scf00274   | 12 |
| AX-157828730 | 12 | 14.592 | KV453011.1 | 1722097 | 12-scf00274   | 12 |
| AX-158118650 | 12 | 14.592 | KV453011.1 | 1724264 | 12-scf00274   | 12 |
| AX-158118653 | 12 | 14.592 | KV453011.1 | 1729351 | 12-scf00274   | 12 |
| AX-158118654 | 12 | 14.592 | KV453011.1 | 1730074 | 12-scf00274   | 12 |

|              |    |        |            |         |             |    |
|--------------|----|--------|------------|---------|-------------|----|
| AX-157828732 | 12 | 14.592 | KV453011.1 | 1733168 | 12-scf00274 | 12 |
| AX-158380137 | 12 | 14.592 | KV453011.1 | 1736078 | 12-scf00274 | 12 |
| AX-158118655 | 12 | 14.592 | KV453011.1 | 1736545 | 12-scf00274 | 12 |
| AX-157857582 | 12 | 14.592 | KV453011.1 | 1739256 | 12-scf00274 | 12 |
| AX-158118661 | 12 | 14.592 | KV453011.1 | 1749948 | 12-scf00274 | 12 |
| AX-157828741 | 12 | 14.592 | KV453011.1 | 1754216 | 12-scf00274 | 12 |
| AX-158118665 | 12 | 14.592 | KV453011.1 | 1754586 | 12-scf00274 | 12 |
| AX-157828742 | 12 | 14.592 | KV453011.1 | 1755640 | 12-scf00274 | 12 |
| AX-158118666 | 12 | 14.592 | KV453011.1 | 1755851 | 12-scf00274 | 12 |
| AX-158118667 | 12 | 14.592 | KV453011.1 | 1756742 | 12-scf00274 | 12 |
| AX-157828743 | 12 | 14.592 | KV453011.1 | 1757862 | 12-scf00274 | 12 |
| AX-157828744 | 12 | 14.592 | KV453011.1 | 1758344 | 12-scf00274 | 12 |
| AX-158118670 | 12 | 14.592 | KV453011.1 | 1758841 | 12-scf00274 | 12 |
| AX-158118671 | 12 | 14.592 | KV453011.1 | 1759376 | 12-scf00274 | 12 |
| AX-157751809 | 12 | 14.592 | KV453011.1 | 1761908 | 12-scf00274 | 12 |
| AX-157828745 | 12 | 14.592 | KV453011.1 | 1761958 | 12-scf00274 | 12 |
| AX-158118678 | 12 | 14.592 | KV453011.1 | 1768526 | 12-scf00274 | 12 |
| AX-158118681 | 12 | 14.592 | KV453011.1 | 1771265 | 12-scf00274 | 12 |
| AX-158118698 | 12 | 14.592 | KV453011.1 | 1795588 | 12-scf00274 | 12 |
| AX-158118705 | 12 | 14.592 | KV453011.1 | 1804553 | 12-scf00274 | 12 |
| AX-158118736 | 12 | 14.592 | KV453011.1 | 1856215 | 12-scf00274 | 12 |
| AX-157828761 | 12 | 14.592 | KV453011.1 | 1868869 | 12-scf00274 | 12 |
| AX-158118684 | 12 | 14.626 | KV453011.1 | 1774550 | 12-scf00274 | 12 |
| AX-158118691 | 12 | 14.637 | KV453011.1 | 1783611 | 12-scf00274 | 12 |
| AX-158118500 | 12 | 14.657 | KV453011.1 | 1536981 | 12-scf00274 | 12 |
| AX-157828706 | 12 | 14.657 | KV453011.1 | 1542861 | 12-scf00274 | 12 |
| AX-158118521 | 12 | 14.657 | KV453011.1 | 1568441 | 12-scf00274 | 12 |
| AX-157828729 | 12 | 14.657 | KV453011.1 | 1692433 | 12-scf00274 | 12 |
| AX-158118637 | 12 | 14.657 | KV453011.1 | 1710324 | 12-scf00274 | 12 |
| AX-158118694 | 12 | 14.657 | KV453011.1 | 1790077 | 12-scf00274 | 12 |
| AX-158118711 | 12 | 14.657 | KV453011.1 | 1816780 | 12-scf00274 | 12 |
| AX-158118728 | 12 | 14.657 | KV453011.1 | 1838746 | 12-scf00274 | 12 |
| AX-158118744 | 12 | 14.657 | KV453011.1 | 1884493 | 12-scf00274 | 12 |
| AX-157717285 | 12 | 14.701 | KV453011.1 | 1654201 | 12-scf00274 | 12 |
| AX-158118638 | 12 | 14.701 | KV453011.1 | 1713279 | 12-scf00274 | 12 |
| AX-158118649 | 12 | 14.701 | KV453011.1 | 1722747 | 12-scf00274 | 12 |
| AX-158118668 | 12 | 14.701 | KV453011.1 | 1757569 | 12-scf00274 | 12 |
| AX-157828746 | 12 | 14.701 | KV453011.1 | 1764210 | 12-scf00274 | 12 |
| AX-158118692 | 12 | 14.701 | KV453011.1 | 1784364 | 12-scf00274 | 12 |
| AX-158118695 | 12 | 14.701 | KV453011.1 | 1790671 | 12-scf00274 | 12 |
| AX-158118696 | 12 | 14.701 | KV453011.1 | 1791973 | 12-scf00274 | 12 |
| AX-158118697 | 12 | 14.701 | KV453011.1 | 1792458 | 12-scf00274 | 12 |
| AX-157828748 | 12 | 14.701 | KV453011.1 | 1792741 | 12-scf00274 | 12 |
| AX-157828749 | 12 | 14.701 | KV453011.1 | 1793068 | 12-scf00274 | 12 |
| AX-157828750 | 12 | 14.701 | KV453011.1 | 1794085 | 12-scf00274 | 12 |
| AX-158417240 | 12 | 14.701 | KV453011.1 | 1801239 | 12-scf00274 | 12 |
| AX-158411041 | 12 | 14.701 | KV453011.1 | 1801294 | 12-scf00274 | 12 |
| AX-157758600 | 12 | 14.701 | KV453011.1 | 1819244 | 12-scf00274 | 12 |
| AX-158118715 | 12 | 14.701 | KV453011.1 | 1821483 | 12-scf00274 | 12 |
| AX-158118717 | 12 | 14.701 | KV453011.1 | 1825166 | 12-scf00274 | 12 |
| AX-158118719 | 12 | 14.701 | KV453011.1 | 1826131 | 12-scf00274 | 12 |

|              |    |        |            |         |             |    |
|--------------|----|--------|------------|---------|-------------|----|
| AX-158118724 | 12 | 14.701 | KV453011.1 | 1830701 | 12-scf00274 | 12 |
| AX-158118725 | 12 | 14.701 | KV453011.1 | 1834467 | 12-scf00274 | 12 |
| AX-158118729 | 12 | 14.701 | KV453011.1 | 1839435 | 12-scf00274 | 12 |
| AX-158118730 | 12 | 14.701 | KV453011.1 | 1839990 | 12-scf00274 | 12 |
| AX-157828758 | 12 | 14.701 | KV453011.1 | 1859563 | 12-scf00274 | 12 |
| AX-158417241 | 12 | 14.701 | KV453011.1 | 1876365 | 12-scf00274 | 12 |
| AX-157750812 | 12 | 14.701 | KV453011.1 | 2014442 | 12-scf00274 | 12 |
| AX-158118816 | 12 | 14.701 | KV453011.1 | 2019412 | 12-scf00274 | 12 |
| AX-158120271 | 12 | 14.701 | KV453011.1 | 4893297 | 12-scf00274 | 12 |
| AX-158120446 | 12 | 14.701 | KV453011.1 | 5127860 | 12-scf00274 | 12 |
| AX-158120526 | 12 | 14.701 | KV453011.1 | 5235338 | 12-scf00274 | 12 |
| AX-157828759 | 12 | 14.81  | KV453011.1 | 1867223 | 12-scf00274 | 12 |
| AX-157828760 | 12 | 14.81  | KV453011.1 | 1868429 | 12-scf00274 | 12 |
| AX-158118758 | 12 | 14.81  | KV453011.1 | 1917419 | 12-scf00274 | 12 |
| AX-158118759 | 12 | 14.81  | KV453011.1 | 1918454 | 12-scf00274 | 12 |
| AX-158118760 | 12 | 14.81  | KV453011.1 | 1918973 | 12-scf00274 | 12 |
| AX-158118761 | 12 | 14.81  | KV453011.1 | 1920846 | 12-scf00274 | 12 |
| AX-158118762 | 12 | 14.81  | KV453011.1 | 1922192 | 12-scf00274 | 12 |
| AX-158118763 | 12 | 14.81  | KV453011.1 | 1924348 | 12-scf00274 | 12 |
| AX-158118766 | 12 | 14.81  | KV453011.1 | 1937477 | 12-scf00274 | 12 |
| AX-158118767 | 12 | 14.81  | KV453011.1 | 1938052 | 12-scf00274 | 12 |
| AX-158118770 | 12 | 14.81  | KV453011.1 | 1942486 | 12-scf00274 | 12 |
| AX-158118771 | 12 | 14.81  | KV453011.1 | 1942827 | 12-scf00274 | 12 |
| AX-158118777 | 12 | 14.81  | KV453011.1 | 1952666 | 12-scf00274 | 12 |
| AX-158118778 | 12 | 14.81  | KV453011.1 | 1953128 | 12-scf00274 | 12 |
| AX-158118779 | 12 | 14.81  | KV453011.1 | 1953305 | 12-scf00274 | 12 |
| AX-158118780 | 12 | 14.81  | KV453011.1 | 1953867 | 12-scf00274 | 12 |
| AX-158118781 | 12 | 14.81  | KV453011.1 | 1954477 | 12-scf00274 | 12 |
| AX-157747368 | 12 | 14.81  | KV453011.1 | 1956927 | 12-scf00274 | 12 |
| AX-158118633 | 12 | 14.83  | KV453011.1 | 1704942 | 12-scf00274 | 12 |
| AX-158118769 | 12 | 14.83  | KV453011.1 | 1941977 | 12-scf00274 | 12 |
| AX-158118796 | 12 | 14.83  | KV453011.1 | 1996906 | 12-scf00274 | 12 |
| AX-158118809 | 12 | 14.83  | KV453011.1 | 2015306 | 12-scf00274 | 12 |
| AX-158119250 | 12 | 14.83  | KV453011.1 | 3410426 | 12-scf00274 | 12 |
| AX-158120399 | 12 | 14.83  | KV453011.1 | 5060455 | 12-scf00274 | 12 |
| AX-158118800 | 12 | 14.895 | KV453011.1 | 2000930 | 12-scf00274 | 12 |
| AX-158118801 | 12 | 14.934 | KV453011.1 | 2004160 | 12-scf00274 | 12 |
| AX-158118798 | 12 | 14.963 | KV453011.1 | 1998943 | 12-scf00274 | 12 |
| AX-158411051 | 12 | 14.963 | KV453011.1 | 2005392 | 12-scf00274 | 12 |
| AX-158118802 | 12 | 14.963 | KV453011.1 | 2005485 | 12-scf00274 | 12 |
| AX-158118803 | 12 | 14.963 | KV453011.1 | 2007742 | 12-scf00274 | 12 |
| AX-158118804 | 12 | 14.963 | KV453011.1 | 2008002 | 12-scf00274 | 12 |
| AX-158118820 | 12 | 14.989 | KV453011.1 | 2026534 | 12-scf00274 | 12 |
| AX-158118741 | 12 | 15.028 | KV453011.1 | 1863257 | 12-scf00274 | 12 |
| AX-158118772 | 12 | 15.028 | KV453011.1 | 1944650 | 12-scf00274 | 12 |
| AX-158118782 | 12 | 15.028 | KV453011.1 | 1963502 | 12-scf00274 | 12 |
| AX-158118784 | 12 | 15.028 | KV453011.1 | 1968744 | 12-scf00274 | 12 |
| AX-157791081 | 12 | 15.028 | KV453011.1 | 1975089 | 12-scf00274 | 12 |
| AX-158118827 | 12 | 15.028 | KV453011.1 | 2042222 | 12-scf00274 | 12 |
| AX-158118831 | 12 | 15.028 | KV453011.1 | 2055599 | 12-scf00274 | 12 |
| AX-158118837 | 12 | 15.028 | KV453011.1 | 2071333 | 12-scf00274 | 12 |

|              |    |        |            |         |             |    |
|--------------|----|--------|------------|---------|-------------|----|
| AX-158411054 | 12 | 15.028 | KV453011.1 | 2071675 | 12-scf00274 | 12 |
| AX-158118838 | 12 | 15.028 | KV453011.1 | 2079073 | 12-scf00274 | 12 |
| AX-158118839 | 12 | 15.028 | KV453011.1 | 2079431 | 12-scf00274 | 12 |
| AX-158118840 | 12 | 15.028 | KV453011.1 | 2082818 | 12-scf00274 | 12 |
| AX-158118841 | 12 | 15.028 | KV453011.1 | 2083875 | 12-scf00274 | 12 |
| AX-158118843 | 12 | 15.028 | KV453011.1 | 2087816 | 12-scf00274 | 12 |
| AX-158118844 | 12 | 15.028 | KV453011.1 | 2089179 | 12-scf00274 | 12 |
| AX-158118849 | 12 | 15.028 | KV453011.1 | 2098501 | 12-scf00274 | 12 |
| AX-158118850 | 12 | 15.028 | KV453011.1 | 2098908 | 12-scf00274 | 12 |
| AX-158118851 | 12 | 15.028 | KV453011.1 | 2099442 | 12-scf00274 | 12 |
| AX-158118852 | 12 | 15.028 | KV453011.1 | 2101991 | 12-scf00274 | 12 |
| AX-157693423 | 12 | 15.028 | KV453011.1 | 2102676 | 12-scf00274 | 12 |
| AX-157828781 | 12 | 15.028 | KV453011.1 | 2103915 | 12-scf00274 | 12 |
| AX-158118853 | 12 | 15.028 | KV453011.1 | 2104312 | 12-scf00274 | 12 |
| AX-158118862 | 12 | 15.028 | KV453011.1 | 2131582 | 12-scf00274 | 12 |
| AX-158118864 | 12 | 15.028 | KV453011.1 | 2151230 | 12-scf00274 | 12 |
| AX-158118866 | 12 | 15.028 | KV453011.1 | 2166809 | 12-scf00274 | 12 |
| AX-158118870 | 12 | 15.028 | KV453011.1 | 2179165 | 12-scf00274 | 12 |
| AX-157828783 | 12 | 15.028 | KV453011.1 | 2179549 | 12-scf00274 | 12 |
| AX-157828784 | 12 | 15.028 | KV453011.1 | 2190837 | 12-scf00274 | 12 |
| AX-158118871 | 12 | 15.028 | KV453011.1 | 2193482 | 12-scf00274 | 12 |
| AX-158118873 | 12 | 15.028 | KV453011.1 | 2197080 | 12-scf00274 | 12 |
| AX-158118875 | 12 | 15.028 | KV453011.1 | 2203108 | 12-scf00274 | 12 |
| AX-158118878 | 12 | 15.028 | KV453011.1 | 2209616 | 12-scf00274 | 12 |
| AX-158118879 | 12 | 15.028 | KV453011.1 | 2210771 | 12-scf00274 | 12 |
| AX-157828789 | 12 | 15.028 | KV453011.1 | 2223818 | 12-scf00274 | 12 |
| AX-158118883 | 12 | 15.028 | KV453011.1 | 2230918 | 12-scf00274 | 12 |
| AX-158118884 | 12 | 15.028 | KV453011.1 | 2237207 | 12-scf00274 | 12 |
| AX-158118887 | 12 | 15.028 | KV453011.1 | 2248606 | 12-scf00274 | 12 |
| AX-158118888 | 12 | 15.028 | KV453011.1 | 2251831 | 12-scf00274 | 12 |
| AX-158118889 | 12 | 15.028 | KV453011.1 | 2252117 | 12-scf00274 | 12 |
| AX-158118893 | 12 | 15.028 | KV453011.1 | 2258847 | 12-scf00274 | 12 |
| AX-158118894 | 12 | 15.028 | KV453011.1 | 2263635 | 12-scf00274 | 12 |
| AX-158411063 | 12 | 15.028 | KV453011.1 | 2274062 | 12-scf00274 | 12 |
| AX-158118899 | 12 | 15.028 | KV453011.1 | 2279542 | 12-scf00274 | 12 |
| AX-158118902 | 12 | 15.028 | KV453011.1 | 2281692 | 12-scf00274 | 12 |
| AX-158118904 | 12 | 15.028 | KV453011.1 | 2285674 | 12-scf00274 | 12 |
| AX-158118905 | 12 | 15.028 | KV453011.1 | 2287018 | 12-scf00274 | 12 |
| AX-158118906 | 12 | 15.028 | KV453011.1 | 2287443 | 12-scf00274 | 12 |
| AX-158118908 | 12 | 15.028 | KV453011.1 | 2292839 | 12-scf00274 | 12 |
| AX-158118909 | 12 | 15.028 | KV453011.1 | 2293513 | 12-scf00274 | 12 |
| AX-158118910 | 12 | 15.028 | KV453011.1 | 2295116 | 12-scf00274 | 12 |
| AX-158118914 | 12 | 15.028 | KV453011.1 | 2301108 | 12-scf00274 | 12 |
| AX-158118916 | 12 | 15.028 | KV453011.1 | 2312776 | 12-scf00274 | 12 |
| AX-158118917 | 12 | 15.028 | KV453011.1 | 2313038 | 12-scf00274 | 12 |
| AX-158118918 | 12 | 15.028 | KV453011.1 | 2317586 | 12-scf00274 | 12 |
| AX-158118919 | 12 | 15.028 | KV453011.1 | 2318507 | 12-scf00274 | 12 |
| AX-158118921 | 12 | 15.028 | KV453011.1 | 2325024 | 12-scf00274 | 12 |
| AX-158118922 | 12 | 15.028 | KV453011.1 | 2327311 | 12-scf00274 | 12 |
| AX-158118923 | 12 | 15.028 | KV453011.1 | 2331199 | 12-scf00274 | 12 |
| AX-158118924 | 12 | 15.028 | KV453011.1 | 2333131 | 12-scf00274 | 12 |



|              |    |        |            |         |             |    |
|--------------|----|--------|------------|---------|-------------|----|
| AX-158118925 | 12 | 15.028 | KV453011.1 | 2333564 | 12-scf00274 | 12 |
| AX-158118926 | 12 | 15.028 | KV453011.1 | 2333935 | 12-scf00274 | 12 |
| AX-158118927 | 12 | 15.028 | KV453011.1 | 2338568 | 12-scf00274 | 12 |
| AX-158118928 | 12 | 15.028 | KV453011.1 | 2343101 | 12-scf00274 | 12 |
| AX-158118930 | 12 | 15.028 | KV453011.1 | 2346742 | 12-scf00274 | 12 |
| AX-158118931 | 12 | 15.028 | KV453011.1 | 2351454 | 12-scf00274 | 12 |
| AX-158118932 | 12 | 15.028 | KV453011.1 | 2356538 | 12-scf00274 | 12 |
| AX-158118933 | 12 | 15.028 | KV453011.1 | 2358860 | 12-scf00274 | 12 |
| AX-158118940 | 12 | 15.028 | KV453011.1 | 2398872 | 12-scf00274 | 12 |
| AX-158118942 | 12 | 15.028 | KV453011.1 | 2404416 | 12-scf00274 | 12 |
| AX-158118943 | 12 | 15.028 | KV453011.1 | 2408332 | 12-scf00274 | 12 |
| AX-158118946 | 12 | 15.028 | KV453011.1 | 2421262 | 12-scf00274 | 12 |
| AX-158118949 | 12 | 15.028 | KV453011.1 | 2424744 | 12-scf00274 | 12 |
| AX-158118952 | 12 | 15.028 | KV453011.1 | 2428262 | 12-scf00274 | 12 |
| AX-158118956 | 12 | 15.028 | KV453011.1 | 2435689 | 12-scf00274 | 12 |
| AX-158118957 | 12 | 15.028 | KV453011.1 | 2436637 | 12-scf00274 | 12 |
| AX-158118959 | 12 | 15.028 | KV453011.1 | 2443409 | 12-scf00274 | 12 |
| AX-158118962 | 12 | 15.028 | KV453011.1 | 2461521 | 12-scf00274 | 12 |
| AX-158118967 | 12 | 15.028 | KV453011.1 | 2479718 | 12-scf00274 | 12 |
| AX-158118969 | 12 | 15.028 | KV453011.1 | 2484882 | 12-scf00274 | 12 |
| AX-158118971 | 12 | 15.028 | KV453011.1 | 2489541 | 12-scf00274 | 12 |
| AX-158118978 | 12 | 15.028 | KV453011.1 | 2499314 | 12-scf00274 | 12 |
| AX-158118979 | 12 | 15.028 | KV453011.1 | 2500903 | 12-scf00274 | 12 |
| AX-158118987 | 12 | 15.028 | KV453011.1 | 2511719 | 12-scf00274 | 12 |
| AX-158118989 | 12 | 15.028 | KV453011.1 | 2515829 | 12-scf00274 | 12 |
| AX-158118990 | 12 | 15.028 | KV453011.1 | 2519273 | 12-scf00274 | 12 |
| AX-158118994 | 12 | 15.028 | KV453011.1 | 2527389 | 12-scf00274 | 12 |
| AX-158411066 | 12 | 15.028 | KV453011.1 | 2577060 | 12-scf00274 | 12 |
| AX-158119019 | 12 | 15.028 | KV453011.1 | 2655419 | 12-scf00274 | 12 |
| AX-158119020 | 12 | 15.028 | KV453011.1 | 2661982 | 12-scf00274 | 12 |
| AX-158119021 | 12 | 15.028 | KV453011.1 | 2662373 | 12-scf00274 | 12 |
| AX-158119022 | 12 | 15.028 | KV453011.1 | 2663561 | 12-scf00274 | 12 |
| AX-158411067 | 12 | 15.028 | KV453011.1 | 2682671 | 12-scf00274 | 12 |
| AX-158119031 | 12 | 15.028 | KV453011.1 | 2723907 | 12-scf00274 | 12 |
| AX-158119033 | 12 | 15.028 | KV453011.1 | 2732517 | 12-scf00274 | 12 |
| AX-158119038 | 12 | 15.028 | KV453011.1 | 2760874 | 12-scf00274 | 12 |
| AX-158119040 | 12 | 15.028 | KV453011.1 | 2765822 | 12-scf00274 | 12 |
| AX-158119049 | 12 | 15.028 | KV453011.1 | 2791498 | 12-scf00274 | 12 |
| AX-158119050 | 12 | 15.028 | KV453011.1 | 2796479 | 12-scf00274 | 12 |
| AX-158119052 | 12 | 15.028 | KV453011.1 | 2798693 | 12-scf00274 | 12 |
| AX-158119055 | 12 | 15.028 | KV453011.1 | 2844017 | 12-scf00274 | 12 |
| AX-158119056 | 12 | 15.028 | KV453011.1 | 2844891 | 12-scf00274 | 12 |
| AX-158119058 | 12 | 15.028 | KV453011.1 | 2848792 | 12-scf00274 | 12 |
| AX-158119060 | 12 | 15.028 | KV453011.1 | 2854256 | 12-scf00274 | 12 |
| AX-158119061 | 12 | 15.028 | KV453011.1 | 2855006 | 12-scf00274 | 12 |
| AX-158417244 | 12 | 15.028 | KV453011.1 | 2858261 | 12-scf00274 | 12 |
| AX-158119063 | 12 | 15.028 | KV453011.1 | 2858913 | 12-scf00274 | 12 |
| AX-158119065 | 12 | 15.028 | KV453011.1 | 2870096 | 12-scf00274 | 12 |
| AX-158119066 | 12 | 15.028 | KV453011.1 | 2870792 | 12-scf00274 | 12 |
| AX-158119067 | 12 | 15.028 | KV453011.1 | 2876017 | 12-scf00274 | 12 |
| AX-158119072 | 12 | 15.028 | KV453011.1 | 2904961 | 12-scf00274 | 12 |

|              |    |        |            |         |             |    |
|--------------|----|--------|------------|---------|-------------|----|
| AX-158119073 | 12 | 15.028 | KV453011.1 | 2908173 | 12-scf00274 | 12 |
| AX-158119075 | 12 | 15.028 | KV453011.1 | 2910068 | 12-scf00274 | 12 |
| AX-158119078 | 12 | 15.028 | KV453011.1 | 2913720 | 12-scf00274 | 12 |
| AX-158119079 | 12 | 15.028 | KV453011.1 | 2914158 | 12-scf00274 | 12 |
| AX-158119080 | 12 | 15.028 | KV453011.1 | 2915763 | 12-scf00274 | 12 |
| AX-158119081 | 12 | 15.028 | KV453011.1 | 2917280 | 12-scf00274 | 12 |
| AX-158119083 | 12 | 15.028 | KV453011.1 | 2924646 | 12-scf00274 | 12 |
| AX-158119088 | 12 | 15.028 | KV453011.1 | 2940577 | 12-scf00274 | 12 |
| AX-158119092 | 12 | 15.028 | KV453011.1 | 2952997 | 12-scf00274 | 12 |
| AX-158119102 | 12 | 15.028 | KV453011.1 | 3019145 | 12-scf00274 | 12 |
| AX-158119105 | 12 | 15.028 | KV453011.1 | 3024322 | 12-scf00274 | 12 |
| AX-157751229 | 12 | 15.028 | KV453011.1 | 3024905 | 12-scf00274 | 12 |
| AX-158119106 | 12 | 15.028 | KV453011.1 | 3026088 | 12-scf00274 | 12 |
| AX-158119119 | 12 | 15.028 | KV453011.1 | 3082796 | 12-scf00274 | 12 |
| AX-158119129 | 12 | 15.028 | KV453011.1 | 3108674 | 12-scf00274 | 12 |
| AX-158119130 | 12 | 15.028 | KV453011.1 | 3111902 | 12-scf00274 | 12 |
| AX-158119134 | 12 | 15.028 | KV453011.1 | 3123991 | 12-scf00274 | 12 |
| AX-158119139 | 12 | 15.028 | KV453011.1 | 3130270 | 12-scf00274 | 12 |
| AX-158119144 | 12 | 15.028 | KV453011.1 | 3138900 | 12-scf00274 | 12 |
| AX-158119145 | 12 | 15.028 | KV453011.1 | 3139807 | 12-scf00274 | 12 |
| AX-158119147 | 12 | 15.028 | KV453011.1 | 3145864 | 12-scf00274 | 12 |
| AX-158119148 | 12 | 15.028 | KV453011.1 | 3149617 | 12-scf00274 | 12 |
| AX-158119150 | 12 | 15.028 | KV453011.1 | 3152303 | 12-scf00274 | 12 |
| AX-158119169 | 12 | 15.028 | KV453011.1 | 3211674 | 12-scf00274 | 12 |
| AX-158119171 | 12 | 15.028 | KV453011.1 | 3222533 | 12-scf00274 | 12 |
| AX-158119172 | 12 | 15.028 | KV453011.1 | 3223995 | 12-scf00274 | 12 |
| AX-158119174 | 12 | 15.028 | KV453011.1 | 3227671 | 12-scf00274 | 12 |
| AX-158385021 | 12 | 15.028 | KV453011.1 | 3255899 | 12-scf00274 | 12 |
| AX-158119194 | 12 | 15.028 | KV453011.1 | 3306531 | 12-scf00274 | 12 |
| AX-158119217 | 12 | 15.028 | KV453011.1 | 3355135 | 12-scf00274 | 12 |
| AX-158119235 | 12 | 15.028 | KV453011.1 | 3375704 | 12-scf00274 | 12 |
| AX-158119240 | 12 | 15.028 | KV453011.1 | 3383237 | 12-scf00274 | 12 |
| AX-158119245 | 12 | 15.028 | KV453011.1 | 3399071 | 12-scf00274 | 12 |
| AX-158119468 | 12 | 15.028 | KV453011.1 | 3744514 | 12-scf00274 | 12 |
| AX-158119480 | 12 | 15.028 | KV453011.1 | 3757550 | 12-scf00274 | 12 |
| AX-158119501 | 12 | 15.028 | KV453011.1 | 3786188 | 12-scf00274 | 12 |
| AX-158119503 | 12 | 15.028 | KV453011.1 | 3787225 | 12-scf00274 | 12 |
| AX-158119531 | 12 | 15.028 | KV453011.1 | 3810430 | 12-scf00274 | 12 |
| AX-158119546 | 12 | 15.028 | KV453011.1 | 3827916 | 12-scf00274 | 12 |
| AX-158119649 | 12 | 15.028 | KV453011.1 | 3972364 | 12-scf00274 | 12 |
| AX-157886024 | 12 | 15.028 | KV453011.1 | 3997407 | 12-scf00274 | 12 |
| AX-158119714 | 12 | 15.028 | KV453011.1 | 4087961 | 12-scf00274 | 12 |
| AX-158119730 | 12 | 15.028 | KV453011.1 | 4111191 | 12-scf00274 | 12 |
| AX-158119745 | 12 | 15.028 | KV453011.1 | 4133092 | 12-scf00274 | 12 |
| AX-158119760 | 12 | 15.028 | KV453011.1 | 4154710 | 12-scf00274 | 12 |
| AX-158119771 | 12 | 15.028 | KV453011.1 | 4167510 | 12-scf00274 | 12 |
| AX-158119794 | 12 | 15.028 | KV453011.1 | 4201536 | 12-scf00274 | 12 |
| AX-158119816 | 12 | 15.028 | KV453011.1 | 4236383 | 12-scf00274 | 12 |
| AX-158119869 | 12 | 15.028 | KV453011.1 | 4299685 | 12-scf00274 | 12 |
| AX-158119876 | 12 | 15.028 | KV453011.1 | 4306007 | 12-scf00274 | 12 |
| AX-158119883 | 12 | 15.028 | KV453011.1 | 4314514 | 12-scf00274 | 12 |

|              |    |        |            |         |             |    |
|--------------|----|--------|------------|---------|-------------|----|
| AX-157739218 | 12 | 15.028 | KV453011.1 | 4335161 | 12-scf00274 | 12 |
| AX-158119895 | 12 | 15.028 | KV453011.1 | 4336610 | 12-scf00274 | 12 |
| AX-158119907 | 12 | 15.028 | KV453011.1 | 4355743 | 12-scf00274 | 12 |
| AX-158385032 | 12 | 15.028 | KV453011.1 | 4384998 | 12-scf00274 | 12 |
| AX-158119958 | 12 | 15.028 | KV453011.1 | 4424125 | 12-scf00274 | 12 |
| AX-157857606 | 12 | 15.028 | KV453011.1 | 4434921 | 12-scf00274 | 12 |
| AX-158385037 | 12 | 15.028 | KV453011.1 | 4442875 | 12-scf00274 | 12 |
| AX-157828881 | 12 | 15.028 | KV453011.1 | 4552515 | 12-scf00274 | 12 |
| AX-158120070 | 12 | 15.028 | KV453011.1 | 4577868 | 12-scf00274 | 12 |
| AX-158120156 | 12 | 15.028 | KV453011.1 | 4707024 | 12-scf00274 | 12 |
| AX-158120162 | 12 | 15.028 | KV453011.1 | 4714816 | 12-scf00274 | 12 |
| AX-158120168 | 12 | 15.028 | KV453011.1 | 4723596 | 12-scf00274 | 12 |
| AX-158120177 | 12 | 15.028 | KV453011.1 | 4745144 | 12-scf00274 | 12 |
| AX-158120186 | 12 | 15.028 | KV453011.1 | 4756679 | 12-scf00274 | 12 |
| AX-158385039 | 12 | 15.028 | KV453011.1 | 4772563 | 12-scf00274 | 12 |
| AX-158120204 | 12 | 15.028 | KV453011.1 | 4792343 | 12-scf00274 | 12 |
| AX-158120206 | 12 | 15.028 | KV453011.1 | 4794269 | 12-scf00274 | 12 |
| AX-157744989 | 12 | 15.028 | KV453011.1 | 4823587 | 12-scf00274 | 12 |
| AX-157828916 | 12 | 15.028 | KV453011.1 | 4831804 | 12-scf00274 | 12 |
| AX-157694979 | 12 | 15.028 | KV453011.1 | 4883008 | 12-scf00274 | 12 |
| AX-158120278 | 12 | 15.028 | KV453011.1 | 4906384 | 12-scf00274 | 12 |
| AX-158120294 | 12 | 15.028 | KV453011.1 | 4929518 | 12-scf00274 | 12 |
| AX-158120304 | 12 | 15.028 | KV453011.1 | 4939700 | 12-scf00274 | 12 |
| AX-158120430 | 12 | 15.028 | KV453011.1 | 5111994 | 12-scf00274 | 12 |
| AX-157693147 | 12 | 15.028 | KV453011.1 | 5133246 | 12-scf00274 | 12 |
| AX-158120462 | 12 | 15.028 | KV453011.1 | 5158806 | 12-scf00274 | 12 |
| AX-158120474 | 12 | 15.028 | KV453011.1 | 5176850 | 12-scf00274 | 12 |
| AX-158120502 | 12 | 15.028 | KV453011.1 | 5208922 | 12-scf00274 | 12 |
| AX-158120521 | 12 | 15.028 | KV453011.1 | 5227561 | 12-scf00274 | 12 |
| AX-158120534 | 12 | 15.028 | KV453011.1 | 5253648 | 12-scf00274 | 12 |
| AX-158118996 | 12 | 15.035 | KV453011.1 | 2533122 | 12-scf00274 | 12 |
| AX-158119010 | 12 | 15.035 | KV453011.1 | 2598476 | 12-scf00274 | 12 |
| AX-158118998 | 12 | 15.045 | KV453011.1 | 2541744 | 12-scf00274 | 12 |
| AX-157877737 | 12 | 15.06  | KV453011.1 | 2794883 | 12-scf00274 | 12 |
| AX-158118845 | 12 | 15.074 | KV453011.1 | 2091126 | 12-scf00274 | 12 |
| AX-158119034 | 12 | 15.074 | KV453011.1 | 2743710 | 12-scf00274 | 12 |
| AX-158119044 | 12 | 15.074 | KV453011.1 | 2775543 | 12-scf00274 | 12 |
| AX-158119070 | 12 | 15.074 | KV453011.1 | 2893632 | 12-scf00274 | 12 |
| AX-158119085 | 12 | 15.074 | KV453011.1 | 2928309 | 12-scf00274 | 12 |
| AX-158119077 | 12 | 15.093 | KV453011.1 | 2912919 | 12-scf00274 | 12 |
| AX-158119082 | 12 | 15.107 | KV453011.1 | 2918671 | 12-scf00274 | 12 |
| AX-158119094 | 12 | 15.122 | KV453011.1 | 2984438 | 12-scf00274 | 12 |
| AX-158119104 | 12 | 15.13  | KV453011.1 | 3022604 | 12-scf00274 | 12 |
| AX-158119196 | 12 | 15.13  | KV453011.1 | 3309284 | 12-scf00274 | 12 |
| AX-158118765 | 12 | 15.138 | KV453011.1 | 1927914 | 12-scf00274 | 12 |
| AX-158118826 | 12 | 15.138 | KV453011.1 | 2040940 | 12-scf00274 | 12 |
| AX-158118834 | 12 | 15.138 | KV453011.1 | 2064337 | 12-scf00274 | 12 |
| AX-158118835 | 12 | 15.138 | KV453011.1 | 2068195 | 12-scf00274 | 12 |
| AX-158118854 | 12 | 15.138 | KV453011.1 | 2107659 | 12-scf00274 | 12 |
| AX-158118855 | 12 | 15.138 | KV453011.1 | 2112221 | 12-scf00274 | 12 |
| AX-158118868 | 12 | 15.138 | KV453011.1 | 2175461 | 12-scf00274 | 12 |

|              |    |        |            |         |             |    |
|--------------|----|--------|------------|---------|-------------|----|
| AX-157710730 | 12 | 15.138 | KV453011.1 | 2206938 | 12-scf00274 | 12 |
| AX-158118891 | 12 | 15.138 | KV453011.1 | 2257838 | 12-scf00274 | 12 |
| AX-158118898 | 12 | 15.138 | KV453011.1 | 2274262 | 12-scf00274 | 12 |
| AX-158118991 | 12 | 15.138 | KV453011.1 | 2521546 | 12-scf00274 | 12 |
| AX-158392702 | 12 | 15.138 | KV453011.1 | 2574753 | 12-scf00274 | 12 |
| AX-158119017 | 12 | 15.138 | KV453011.1 | 2640740 | 12-scf00274 | 12 |
| AX-158119035 | 12 | 15.138 | KV453011.1 | 2746212 | 12-scf00274 | 12 |
| AX-158119045 | 12 | 15.138 | KV453011.1 | 2783507 | 12-scf00274 | 12 |
| AX-158119068 | 12 | 15.138 | KV453011.1 | 2879990 | 12-scf00274 | 12 |
| AX-158119090 | 12 | 15.138 | KV453011.1 | 2951242 | 12-scf00274 | 12 |
| AX-157749044 | 12 | 15.138 | KV453011.1 | 2993230 | 12-scf00274 | 12 |
| AX-158119101 | 12 | 15.138 | KV453011.1 | 3012328 | 12-scf00274 | 12 |
| AX-158119114 | 12 | 15.138 | KV453011.1 | 3065608 | 12-scf00274 | 12 |
| AX-158119116 | 12 | 15.138 | KV453011.1 | 3070274 | 12-scf00274 | 12 |
| AX-158119127 | 12 | 15.138 | KV453011.1 | 3105441 | 12-scf00274 | 12 |
| AX-158119131 | 12 | 15.138 | KV453011.1 | 3115770 | 12-scf00274 | 12 |
| AX-158119135 | 12 | 15.138 | KV453011.1 | 3124715 | 12-scf00274 | 12 |
| AX-158119136 | 12 | 15.138 | KV453011.1 | 3126975 | 12-scf00274 | 12 |
| AX-158119141 | 12 | 15.138 | KV453011.1 | 3134807 | 12-scf00274 | 12 |
| AX-158119142 | 12 | 15.138 | KV453011.1 | 3136246 | 12-scf00274 | 12 |
| AX-158119143 | 12 | 15.138 | KV453011.1 | 3137392 | 12-scf00274 | 12 |
| AX-158119161 | 12 | 15.138 | KV453011.1 | 3194724 | 12-scf00274 | 12 |
| AX-158119163 | 12 | 15.138 | KV453011.1 | 3197709 | 12-scf00274 | 12 |
| AX-158119167 | 12 | 15.138 | KV453011.1 | 3209201 | 12-scf00274 | 12 |
| AX-158119175 | 12 | 15.138 | KV453011.1 | 3232276 | 12-scf00274 | 12 |
| AX-158119176 | 12 | 15.138 | KV453011.1 | 3244269 | 12-scf00274 | 12 |
| AX-158119185 | 12 | 15.138 | KV453011.1 | 3283886 | 12-scf00274 | 12 |
| AX-158119187 | 12 | 15.138 | KV453011.1 | 3292289 | 12-scf00274 | 12 |
| AX-157828795 | 12 | 15.138 | KV453011.1 | 3294758 | 12-scf00274 | 12 |
| AX-158119191 | 12 | 15.138 | KV453011.1 | 3300853 | 12-scf00274 | 12 |
| AX-158119193 | 12 | 15.138 | KV453011.1 | 3306160 | 12-scf00274 | 12 |
| AX-158119195 | 12 | 15.138 | KV453011.1 | 3307810 | 12-scf00274 | 12 |
| AX-158119197 | 12 | 15.138 | KV453011.1 | 3309677 | 12-scf00274 | 12 |
| AX-158119198 | 12 | 15.138 | KV453011.1 | 3312561 | 12-scf00274 | 12 |
| AX-158119200 | 12 | 15.138 | KV453011.1 | 3319032 | 12-scf00274 | 12 |
| AX-158119206 | 12 | 15.138 | KV453011.1 | 3335934 | 12-scf00274 | 12 |
| AX-158119207 | 12 | 15.138 | KV453011.1 | 3339614 | 12-scf00274 | 12 |
| AX-158119214 | 12 | 15.138 | KV453011.1 | 3350881 | 12-scf00274 | 12 |
| AX-158119226 | 12 | 15.138 | KV453011.1 | 3365816 | 12-scf00274 | 12 |
| AX-157772092 | 12 | 15.138 | KV453011.1 | 3378541 | 12-scf00274 | 12 |
| AX-158119237 | 12 | 15.138 | KV453011.1 | 3379828 | 12-scf00274 | 12 |
| AX-158119238 | 12 | 15.138 | KV453011.1 | 3380109 | 12-scf00274 | 12 |
| AX-158119246 | 12 | 15.138 | KV453011.1 | 3402593 | 12-scf00274 | 12 |
| AX-158120331 | 12 | 15.138 | KV453011.1 | 4971189 | 12-scf00274 | 12 |
| AX-157706393 | 12 | 15.138 | KV453020.1 | 226     | 12-scf07792 | 12 |
| AX-158118983 | 12 | 15.197 | KV453011.1 | 2505060 | 12-scf00274 | 12 |
| AX-158119091 | 12 | 15.197 | KV453011.1 | 2952337 | 12-scf00274 | 12 |
| AX-158119124 | 12 | 15.197 | KV453011.1 | 3092608 | 12-scf00274 | 12 |
| AX-158119184 | 12 | 15.197 | KV453011.1 | 3282808 | 12-scf00274 | 12 |
| AX-158119247 | 12 | 15.197 | KV453011.1 | 3405592 | 12-scf00274 | 12 |
| AX-158118974 | 12 | 15.285 | KV453011.1 | 2492617 | 12-scf00274 | 12 |

|              |    |        |            |         |             |    |
|--------------|----|--------|------------|---------|-------------|----|
| AX-158119181 | 12 | 15.285 | KV453011.1 | 3264177 | 12-scf00274 | 12 |
| AX-158119251 | 12 | 15.285 | KV453011.1 | 3411273 | 12-scf00274 | 12 |
| AX-158119254 | 12 | 15.285 | KV453011.1 | 3417630 | 12-scf00274 | 12 |
| AX-158119256 | 12 | 15.285 | KV453011.1 | 3420067 | 12-scf00274 | 12 |
| AX-158119257 | 12 | 15.285 | KV453011.1 | 3421071 | 12-scf00274 | 12 |
| AX-158119263 | 12 | 15.285 | KV453011.1 | 3428893 | 12-scf00274 | 12 |
| AX-157718554 | 12 | 15.43  | KV453011.1 | 3447999 | 12-scf00274 | 12 |
| AX-158119177 | 12 | 15.568 | KV453011.1 | 3245422 | 12-scf00274 | 12 |
| AX-158119188 | 12 | 15.568 | KV453011.1 | 3295053 | 12-scf00274 | 12 |
| AX-158119215 | 12 | 15.568 | KV453011.1 | 3352383 | 12-scf00274 | 12 |
| AX-158119276 | 12 | 15.568 | KV453011.1 | 3449650 | 12-scf00274 | 12 |
| AX-158119277 | 12 | 15.568 | KV453011.1 | 3450133 | 12-scf00274 | 12 |
| AX-158119278 | 12 | 15.568 | KV453011.1 | 3450486 | 12-scf00274 | 12 |
| AX-158119281 | 12 | 15.568 | KV453011.1 | 3452628 | 12-scf00274 | 12 |
| AX-158119288 | 12 | 15.568 | KV453011.1 | 3457907 | 12-scf00274 | 12 |
| AX-158120470 | 12 | 15.568 | KV453011.1 | 5171200 | 12-scf00274 | 12 |
| AX-158120520 | 12 | 15.568 | KV453011.1 | 5226247 | 12-scf00274 | 12 |
| AX-158120535 | 12 | 15.568 | KV453011.1 | 5255031 | 12-scf00274 | 12 |
| AX-158119279 | 12 | 15.569 | KV453011.1 | 3450982 | 12-scf00274 | 12 |
| AX-158120519 | 12 | 15.569 | KV453011.1 | 5225834 | 12-scf00274 | 12 |
| AX-157828960 | 12 | 15.574 | KV453011.1 | 5224843 | 12-scf00274 | 12 |
| AX-158119140 | 12 | 15.586 | KV453011.1 | 3132474 | 12-scf00274 | 12 |
| AX-157828958 | 12 | 15.586 | KV453011.1 | 5192874 | 12-scf00274 | 12 |
| AX-157886026 | 12 | 15.787 | KV453011.1 | 4065020 | 12-scf00274 | 12 |
| AX-157828941 | 12 | 15.787 | KV453011.1 | 5028770 | 12-scf00274 | 12 |
| AX-158120484 | 12 | 15.787 | KV453011.1 | 5191462 | 12-scf00274 | 12 |
| AX-158120475 | 12 | 15.799 | KV453011.1 | 5178087 | 12-scf00274 | 12 |
| AX-157743408 | 12 | 15.799 | KV453011.1 | 5184318 | 12-scf00274 | 12 |
| AX-157828956 | 12 | 15.961 | KV453011.1 | 5165810 | 12-scf00274 | 12 |
| AX-158120469 | 12 | 15.961 | KV453011.1 | 5169535 | 12-scf00274 | 12 |
| AX-158120464 | 12 | 16.121 | KV453011.1 | 5164882 | 12-scf00274 | 12 |
| AX-158120423 | 12 | 16.122 | KV453011.1 | 5103281 | 12-scf00274 | 12 |
| AX-157715223 | 12 | 16.178 | KV453011.1 | 5088957 | 12-scf00274 | 12 |
| AX-158120445 | 12 | 16.178 | KV453011.1 | 5127595 | 12-scf00274 | 12 |
| AX-157828950 | 12 | 16.232 | KV453011.1 | 5067303 | 12-scf00274 | 12 |
| AX-158120415 | 12 | 16.232 | KV453011.1 | 5082916 | 12-scf00274 | 12 |
| AX-158120421 | 12 | 16.232 | KV453011.1 | 5095967 | 12-scf00274 | 12 |
| AX-158120431 | 12 | 16.232 | KV453011.1 | 5112410 | 12-scf00274 | 12 |
| AX-158120405 | 12 | 16.296 | KV453011.1 | 5066774 | 12-scf00274 | 12 |
| AX-158120380 | 12 | 16.419 | KV453011.1 | 5038980 | 12-scf00274 | 12 |
| AX-158120381 | 12 | 16.419 | KV453011.1 | 5039607 | 12-scf00274 | 12 |
| AX-158120359 | 12 | 16.497 | KV453011.1 | 5010538 | 12-scf00274 | 12 |
| AX-158119684 | 12 | 16.607 | KV453011.1 | 4035464 | 12-scf00274 | 12 |
| AX-158120357 | 12 | 16.607 | KV453011.1 | 5009358 | 12-scf00274 | 12 |
| AX-158120361 | 12 | 16.607 | KV453011.1 | 5014767 | 12-scf00274 | 12 |
| AX-158120383 | 12 | 16.607 | KV453011.1 | 5045152 | 12-scf00274 | 12 |
| AX-158120047 | 12 | 16.608 | KV453011.1 | 4554364 | 12-scf00274 | 12 |
| AX-157828918 | 12 | 16.608 | KV453011.1 | 4835242 | 12-scf00274 | 12 |
| AX-157828935 | 12 | 16.608 | KV453011.1 | 4989382 | 12-scf00274 | 12 |
| AX-158120349 | 12 | 16.608 | KV453011.1 | 4992502 | 12-scf00274 | 12 |
| AX-158120363 | 12 | 16.608 | KV453011.1 | 5018113 | 12-scf00274 | 12 |

|              |    |        |            |         |             |    |
|--------------|----|--------|------------|---------|-------------|----|
| AX-158120340 | 12 | 16.755 | KV453011.1 | 4982741 | 12-scf00274 | 12 |
| AX-158120339 | 12 | 16.98  | KV453011.1 | 4982378 | 12-scf00274 | 12 |
| AX-157703741 | 12 | 16.981 | KV453011.1 | 4977705 | 12-scf00274 | 12 |
| AX-158120335 | 12 | 16.981 | KV453011.1 | 4978405 | 12-scf00274 | 12 |
| AX-157726495 | 12 | 16.981 | KV453011.1 | 4979011 | 12-scf00274 | 12 |
| AX-158120321 | 12 | 17.002 | KV453011.1 | 4960125 | 12-scf00274 | 12 |
| AX-158120312 | 12 | 17.219 | KV453011.1 | 4951323 | 12-scf00274 | 12 |
| AX-158120295 | 12 | 17.656 | KV453011.1 | 4930702 | 12-scf00274 | 12 |
| AX-158120293 | 12 | 17.658 | KV453011.1 | 4927446 | 12-scf00274 | 12 |
| AX-158120292 | 12 | 17.663 | KV453011.1 | 4926875 | 12-scf00274 | 12 |
| AX-158120291 | 12 | 17.668 | KV453011.1 | 4924809 | 12-scf00274 | 12 |
| AX-158120265 | 12 | 17.789 | KV453011.1 | 4880012 | 12-scf00274 | 12 |
| AX-158119668 | 12 | 17.79  | KV453011.1 | 3995019 | 12-scf00274 | 12 |
| AX-158119669 | 12 | 17.79  | KV453011.1 | 3995272 | 12-scf00274 | 12 |
| AX-158119952 | 12 | 17.79  | KV453011.1 | 4421122 | 12-scf00274 | 12 |
| AX-158120264 | 12 | 17.79  | KV453011.1 | 4878789 | 12-scf00274 | 12 |
| AX-158120270 | 12 | 17.79  | KV453011.1 | 4892314 | 12-scf00274 | 12 |
| AX-158120283 | 12 | 17.79  | KV453011.1 | 4916081 | 12-scf00274 | 12 |
| AX-158120596 | 12 | 17.79  | KV453011.1 | 5339842 | 12-scf00274 | 12 |
| AX-158120263 | 12 | 17.791 | KV453011.1 | 4876692 | 12-scf00274 | 12 |
| AX-158120198 | 12 | 17.792 | KV453011.1 | 4783848 | 12-scf00274 | 12 |
| AX-158120018 | 12 | 18.198 | KV453011.1 | 4513655 | 12-scf00274 | 12 |
| AX-158120029 | 12 | 18.198 | KV453011.1 | 4527137 | 12-scf00274 | 12 |
| AX-158120038 | 12 | 18.198 | KV453011.1 | 4543162 | 12-scf00274 | 12 |
| AX-158120055 | 12 | 18.198 | KV453011.1 | 4562203 | 12-scf00274 | 12 |
| AX-158120057 | 12 | 18.198 | KV453011.1 | 4565924 | 12-scf00274 | 12 |
| AX-157866133 | 12 | 18.198 | KV453011.1 | 4580969 | 12-scf00274 | 12 |
| AX-157828886 | 12 | 18.198 | KV453011.1 | 4589224 | 12-scf00274 | 12 |
| AX-157774877 | 12 | 18.198 | KV453011.1 | 4626605 | 12-scf00274 | 12 |
| AX-158120105 | 12 | 18.198 | KV453011.1 | 4632264 | 12-scf00274 | 12 |
| AX-158120113 | 12 | 18.198 | KV453011.1 | 4640938 | 12-scf00274 | 12 |
| AX-157871288 | 12 | 18.198 | KV453011.1 | 4701958 | 12-scf00274 | 12 |
| AX-157745425 | 12 | 18.198 | KV453011.1 | 4719417 | 12-scf00274 | 12 |
| AX-158120171 | 12 | 18.198 | KV453011.1 | 4727919 | 12-scf00274 | 12 |
| AX-158120173 | 12 | 18.198 | KV453011.1 | 4730270 | 12-scf00274 | 12 |
| AX-158120016 | 12 | 18.209 | KV453011.1 | 4512882 | 12-scf00274 | 12 |
| AX-158119997 | 12 | 18.221 | KV453011.1 | 4480591 | 12-scf00274 | 12 |
| AX-158120001 | 12 | 18.221 | KV453011.1 | 4486530 | 12-scf00274 | 12 |
| AX-158411103 | 12 | 18.221 | KV453011.1 | 4558042 | 12-scf00274 | 12 |
| AX-158120182 | 12 | 18.221 | KV453011.1 | 4752132 | 12-scf00274 | 12 |
| AX-158120277 | 12 | 18.221 | KV453011.1 | 4904152 | 12-scf00274 | 12 |
| AX-157828931 | 12 | 18.221 | KV453011.1 | 4904668 | 12-scf00274 | 12 |
| AX-158119996 | 12 | 18.529 | KV453011.1 | 4479948 | 12-scf00274 | 12 |
| AX-158119993 | 12 | 18.531 | KV453011.1 | 4478077 | 12-scf00274 | 12 |
| AX-158119987 | 12 | 18.553 | KV453011.1 | 4465954 | 12-scf00274 | 12 |
| AX-157828876 | 12 | 18.592 | KV453011.1 | 4450362 | 12-scf00274 | 12 |
| AX-158119976 | 12 | 18.64  | KV453011.1 | 4446328 | 12-scf00274 | 12 |
| AX-158119502 | 12 | 18.641 | KV453011.1 | 3786421 | 12-scf00274 | 12 |
| AX-158119583 | 12 | 18.641 | KV453011.1 | 3863077 | 12-scf00274 | 12 |
| AX-158119584 | 12 | 18.641 | KV453011.1 | 3865447 | 12-scf00274 | 12 |
| AX-158119731 | 12 | 18.641 | KV453011.1 | 4111798 | 12-scf00274 | 12 |

|              |    |        |            |         |             |    |
|--------------|----|--------|------------|---------|-------------|----|
| AX-158119806 | 12 | 18.641 | KV453011.1 | 4225676 | 12-scf00274 | 12 |
| AX-158119955 | 12 | 18.641 | KV453011.1 | 4422388 | 12-scf00274 | 12 |
| AX-158119966 | 12 | 18.641 | KV453011.1 | 4433508 | 12-scf00274 | 12 |
| AX-158120045 | 12 | 18.641 | KV453011.1 | 4552850 | 12-scf00274 | 12 |
| AX-158119945 | 12 | 18.967 | KV453011.1 | 4415799 | 12-scf00274 | 12 |
| AX-158119949 | 12 | 18.967 | KV453011.1 | 4418797 | 12-scf00274 | 12 |
| AX-158119887 | 12 | 18.968 | KV453011.1 | 4317876 | 12-scf00274 | 12 |
| AX-158119910 | 12 | 18.968 | KV453011.1 | 4358520 | 12-scf00274 | 12 |
| AX-158119912 | 12 | 18.968 | KV453011.1 | 4362902 | 12-scf00274 | 12 |
| AX-157713789 | 12 | 18.968 | KV453011.1 | 4377895 | 12-scf00274 | 12 |
| AX-158119924 | 12 | 18.968 | KV453011.1 | 4386979 | 12-scf00274 | 12 |
| AX-158119941 | 12 | 18.968 | KV453011.1 | 4409328 | 12-scf00274 | 12 |
| AX-157828873 | 12 | 18.968 | KV453011.1 | 4414673 | 12-scf00274 | 12 |
| AX-158119904 | 12 | 19.005 | KV453011.1 | 4345892 | 12-scf00274 | 12 |
| AX-158119938 | 12 | 19.005 | KV453011.1 | 4404909 | 12-scf00274 | 12 |
| AX-157828861 | 12 | 19.078 | KV453011.1 | 4258793 | 12-scf00274 | 12 |
| AX-158119867 | 12 | 19.078 | KV453011.1 | 4297433 | 12-scf00274 | 12 |
| AX-157741492 | 12 | 19.078 | KV453011.1 | 4303409 | 12-scf00274 | 12 |
| AX-158119873 | 12 | 19.078 | KV453011.1 | 4303808 | 12-scf00274 | 12 |
| AX-158119874 | 12 | 19.078 | KV453011.1 | 4304476 | 12-scf00274 | 12 |
| AX-158119875 | 12 | 19.078 | KV453011.1 | 4305452 | 12-scf00274 | 12 |
| AX-158119882 | 12 | 19.078 | KV453011.1 | 4313422 | 12-scf00274 | 12 |
| AX-157877759 | 12 | 19.078 | KV453011.1 | 4321619 | 12-scf00274 | 12 |
| AX-158119897 | 12 | 19.078 | KV453011.1 | 4338573 | 12-scf00274 | 12 |
| AX-158119898 | 12 | 19.078 | KV453011.1 | 4339308 | 12-scf00274 | 12 |
| AX-158119903 | 12 | 19.078 | KV453011.1 | 4344052 | 12-scf00274 | 12 |
| AX-158411095 | 12 | 19.078 | KV453011.1 | 4412068 | 12-scf00274 | 12 |
| AX-158119808 | 12 | 19.301 | KV453011.1 | 4230565 | 12-scf00274 | 12 |
| AX-158119855 | 12 | 19.301 | KV453011.1 | 4280266 | 12-scf00274 | 12 |
| AX-157828865 | 12 | 19.301 | KV453011.1 | 4287674 | 12-scf00274 | 12 |
| AX-157753197 | 12 | 19.301 | KV453011.1 | 4291043 | 12-scf00274 | 12 |
| AX-158119863 | 12 | 19.301 | KV453011.1 | 4294630 | 12-scf00274 | 12 |
| AX-158119677 | 12 | 19.728 | KV453011.1 | 4016699 | 12-scf00274 | 12 |
| AX-157723573 | 12 | 19.728 | KV453011.1 | 4041271 | 12-scf00274 | 12 |
| AX-158119687 | 12 | 19.728 | KV453011.1 | 4041513 | 12-scf00274 | 12 |
| AX-158119846 | 12 | 19.728 | KV453011.1 | 4273283 | 12-scf00274 | 12 |
| AX-157742198 | 12 | 19.728 | KV453011.1 | 4273974 | 12-scf00274 | 12 |
| AX-158119858 | 12 | 19.728 | KV453011.1 | 4287541 | 12-scf00274 | 12 |
| AX-158119843 | 12 | 19.738 | KV453011.1 | 4267868 | 12-scf00274 | 12 |
| AX-158119840 | 12 | 19.802 | KV453011.1 | 4263904 | 12-scf00274 | 12 |
| AX-158119804 | 12 | 19.821 | KV453011.1 | 4225018 | 12-scf00274 | 12 |
| AX-158119839 | 12 | 19.821 | KV453011.1 | 4263092 | 12-scf00274 | 12 |
| AX-158119821 | 12 | 19.887 | KV453011.1 | 4245203 | 12-scf00274 | 12 |
| AX-158119795 | 12 | 20.147 | KV453011.1 | 4202447 | 12-scf00274 | 12 |
| AX-158119811 | 12 | 20.156 | KV453011.1 | 4231815 | 12-scf00274 | 12 |
| AX-158119856 | 12 | 20.156 | KV453011.1 | 4280627 | 12-scf00274 | 12 |
| AX-158119810 | 12 | 20.158 | KV453011.1 | 4231415 | 12-scf00274 | 12 |
| AX-158119836 | 12 | 20.158 | KV453011.1 | 4259261 | 12-scf00274 | 12 |
| AX-158119685 | 12 | 20.171 | KV453011.1 | 4035839 | 12-scf00274 | 12 |
| AX-158119805 | 12 | 20.171 | KV453011.1 | 4225258 | 12-scf00274 | 12 |
| AX-158119834 | 12 | 20.171 | KV453011.1 | 4257342 | 12-scf00274 | 12 |

|              |    |        |            |         |             |    |
|--------------|----|--------|------------|---------|-------------|----|
| AX-158119657 | 12 | 20.33  | KV453011.1 | 3980454 | 12-scf00274 | 12 |
| AX-157828852 | 12 | 20.33  | KV453011.1 | 4169529 | 12-scf00274 | 12 |
| AX-158119585 | 12 | 20.458 | KV453011.1 | 3866250 | 12-scf00274 | 12 |
| AX-157753159 | 12 | 20.458 | KV453011.1 | 3958318 | 12-scf00274 | 12 |
| AX-158119655 | 12 | 20.458 | KV453011.1 | 3978892 | 12-scf00274 | 12 |
| AX-158119753 | 12 | 20.458 | KV453011.1 | 4142329 | 12-scf00274 | 12 |
| AX-157828854 | 12 | 20.458 | KV453011.1 | 4182441 | 12-scf00274 | 12 |
| AX-157772799 | 12 | 20.459 | KV453011.1 | 3830512 | 12-scf00274 | 12 |
| AX-157774462 | 12 | 20.459 | KV453011.1 | 4034016 | 12-scf00274 | 12 |
| AX-158119463 | 12 | 20.5   | KV453011.1 | 3740593 | 12-scf00274 | 12 |
| AX-158119498 | 12 | 20.5   | KV453011.1 | 3785452 | 12-scf00274 | 12 |
| AX-158119507 | 12 | 20.5   | KV453011.1 | 3789823 | 12-scf00274 | 12 |
| AX-158119536 | 12 | 20.5   | KV453011.1 | 3816134 | 12-scf00274 | 12 |
| AX-157828826 | 12 | 20.5   | KV453011.1 | 3816649 | 12-scf00274 | 12 |
| AX-157877749 | 12 | 20.5   | KV453011.1 | 3817011 | 12-scf00274 | 12 |
| AX-157774718 | 12 | 20.5   | KV453011.1 | 3834173 | 12-scf00274 | 12 |
| AX-158119581 | 12 | 20.5   | KV453011.1 | 3860635 | 12-scf00274 | 12 |
| AX-158119608 | 12 | 20.5   | KV453011.1 | 3914264 | 12-scf00274 | 12 |
| AX-157871280 | 12 | 20.5   | KV453011.1 | 4032489 | 12-scf00274 | 12 |
| AX-158119682 | 12 | 20.5   | KV453011.1 | 4033252 | 12-scf00274 | 12 |
| AX-158119741 | 12 | 20.5   | KV453011.1 | 4125791 | 12-scf00274 | 12 |
| AX-158119757 | 12 | 20.5   | KV453011.1 | 4151155 | 12-scf00274 | 12 |
| AX-158119767 | 12 | 20.5   | KV453011.1 | 4164752 | 12-scf00274 | 12 |
| AX-157828856 | 12 | 20.5   | KV453011.1 | 4209766 | 12-scf00274 | 12 |
| AX-158119528 | 12 | 20.524 | KV453011.1 | 3809080 | 12-scf00274 | 12 |
| AX-158119518 | 12 | 20.525 | KV453011.1 | 3801634 | 12-scf00274 | 12 |
| AX-158119525 | 12 | 20.525 | KV453011.1 | 3808249 | 12-scf00274 | 12 |
| AX-158119541 | 12 | 20.525 | KV453011.1 | 3823334 | 12-scf00274 | 12 |
| AX-157701720 | 12 | 20.525 | KV453011.1 | 4106613 | 12-scf00274 | 12 |
| AX-157723890 | 12 | 20.525 | KV453011.1 | 4160812 | 12-scf00274 | 12 |
| AX-157828906 | 12 | 20.525 | KV453011.1 | 4734765 | 12-scf00274 | 12 |
| AX-158119509 | 12 | 20.527 | KV453011.1 | 3793645 | 12-scf00274 | 12 |
| AX-157742160 | 12 | 20.527 | KV453011.1 | 3903691 | 12-scf00274 | 12 |
| AX-157886019 | 12 | 20.528 | KV453011.1 | 3720028 | 12-scf00274 | 12 |
| AX-158119440 | 12 | 20.53  | KV453011.1 | 3702609 | 12-scf00274 | 12 |
| AX-158119635 | 12 | 20.53  | KV453011.1 | 3961680 | 12-scf00274 | 12 |
| AX-157772780 | 12 | 20.94  | KV453011.1 | 3691348 | 12-scf00274 | 12 |
| AX-158119424 | 12 | 21.092 | KV453011.1 | 3665135 | 12-scf00274 | 12 |
| AX-158119419 | 12 | 21.29  | KV453011.1 | 3656303 | 12-scf00274 | 12 |
| AX-158119409 | 12 | 21.31  | KV453011.1 | 3634910 | 12-scf00274 | 12 |
| AX-158119310 | 12 | 21.814 | KV453011.1 | 3509586 | 12-scf00274 | 12 |
| AX-158119332 | 12 | 21.814 | KV453011.1 | 3540024 | 12-scf00274 | 12 |
| AX-158119353 | 12 | 21.814 | KV453011.1 | 3560883 | 12-scf00274 | 12 |
| AX-158119357 | 12 | 21.814 | KV453011.1 | 3568363 | 12-scf00274 | 12 |
| AX-158119358 | 12 | 21.814 | KV453011.1 | 3569171 | 12-scf00274 | 12 |
| AX-158119364 | 12 | 21.814 | KV453011.1 | 3572610 | 12-scf00274 | 12 |
| AX-158119366 | 12 | 21.814 | KV453011.1 | 3574885 | 12-scf00274 | 12 |
| AX-158119368 | 12 | 21.814 | KV453011.1 | 3576046 | 12-scf00274 | 12 |
| AX-158119372 | 12 | 21.814 | KV453011.1 | 3580797 | 12-scf00274 | 12 |
| AX-158119381 | 12 | 21.814 | KV453011.1 | 3590144 | 12-scf00274 | 12 |
| AX-158119406 | 12 | 21.814 | KV453011.1 | 3620191 | 12-scf00274 | 12 |



|              |    |        |            |         |             |    |
|--------------|----|--------|------------|---------|-------------|----|
| AX-157709582 | 12 | 21.814 | KV453011.1 | 4349084 | 12-scf00274 | 12 |
| AX-158119339 | 12 | 21.885 | KV453011.1 | 3546043 | 12-scf00274 | 12 |
| AX-157750729 | 12 | 21.947 | KV453011.1 | 3480035 | 12-scf00274 | 12 |
| AX-158119304 | 12 | 21.947 | KV453011.1 | 3499878 | 12-scf00274 | 12 |
| AX-158119330 | 12 | 21.947 | KV453011.1 | 3537630 | 12-scf00274 | 12 |
| AX-158119336 | 12 | 21.947 | KV453011.1 | 3543154 | 12-scf00274 | 12 |
| AX-158119345 | 12 | 21.947 | KV453011.1 | 3549901 | 12-scf00274 | 12 |
| AX-158120550 | 12 | 22.459 | KV453011.1 | 5276317 | 12-scf00274 | 12 |
| AX-158119095 | 12 | 22.471 | KV453011.1 | 2988608 | 12-scf00274 | 12 |
| AX-158119359 | 12 | 22.471 | KV453011.1 | 3569974 | 12-scf00274 | 12 |
| AX-158119423 | 12 | 22.471 | KV453011.1 | 3662677 | 12-scf00274 | 12 |
| AX-158119430 | 12 | 22.471 | KV453011.1 | 3688058 | 12-scf00274 | 12 |
| AX-158120549 | 12 | 22.471 | KV453011.1 | 5274506 | 12-scf00274 | 12 |
| AX-157828961 | 12 | 22.471 | KV453011.1 | 5278385 | 12-scf00274 | 12 |
| AX-157828962 | 12 | 22.471 | KV453011.1 | 5279518 | 12-scf00274 | 12 |
| AX-158120551 | 12 | 22.471 | KV453011.1 | 5280039 | 12-scf00274 | 12 |
| AX-157871295 | 12 | 22.471 | KV453011.1 | 5287114 | 12-scf00274 | 12 |
| AX-158120555 | 12 | 22.471 | KV453011.1 | 5287611 | 12-scf00274 | 12 |
| AX-158120558 | 12 | 22.471 | KV453011.1 | 5291328 | 12-scf00274 | 12 |
| AX-158120565 | 12 | 22.471 | KV453011.1 | 5296412 | 12-scf00274 | 12 |
| AX-157775715 | 12 | 22.471 | KV453011.1 | 5303370 | 12-scf00274 | 12 |
| AX-158120568 | 12 | 22.471 | KV453011.1 | 5304919 | 12-scf00274 | 12 |
| AX-158120571 | 12 | 22.471 | KV453011.1 | 5308741 | 12-scf00274 | 12 |
| AX-158120574 | 12 | 22.471 | KV453011.1 | 5311505 | 12-scf00274 | 12 |
| AX-158120576 | 12 | 22.471 | KV453011.1 | 5315207 | 12-scf00274 | 12 |
| AX-158120578 | 12 | 22.471 | KV453011.1 | 5316204 | 12-scf00274 | 12 |
| AX-158120581 | 12 | 22.471 | KV453011.1 | 5318459 | 12-scf00274 | 12 |
| AX-158120582 | 12 | 22.471 | KV453011.1 | 5321465 | 12-scf00274 | 12 |
| AX-157740471 | 12 | 22.471 | KV453011.1 | 5334110 | 12-scf00274 | 12 |
| AX-158120593 | 12 | 22.471 | KV453011.1 | 5337251 | 12-scf00274 | 12 |
| AX-158120594 | 12 | 22.471 | KV453011.1 | 5337457 | 12-scf00274 | 12 |
| AX-158120605 | 12 | 22.471 | KV453011.1 | 5354230 | 12-scf00274 | 12 |
| AX-158120616 | 12 | 22.471 | KV453011.1 | 5382078 | 12-scf00274 | 12 |
| AX-158120628 | 12 | 22.471 | KV453011.1 | 5396950 | 12-scf00274 | 12 |
| AX-157748258 | 12 | 22.471 | KV453011.1 | 5429359 | 12-scf00274 | 12 |
| AX-157740409 | 12 | 22.471 | KV453011.1 | 5437281 | 12-scf00274 | 12 |
| AX-158120691 | 12 | 22.471 | KV453011.1 | 5476963 | 12-scf00274 | 12 |
| AX-158120703 | 12 | 22.471 | KV453011.1 | 5489474 | 12-scf00274 | 12 |
| AX-157722885 | 12 | 22.471 | KV453011.1 | 5504793 | 12-scf00274 | 12 |
| AX-158120729 | 12 | 22.471 | KV453011.1 | 5521901 | 12-scf00274 | 12 |
| AX-158120730 | 12 | 22.471 | KV453011.1 | 5524563 | 12-scf00274 | 12 |
| AX-158120754 | 12 | 22.471 | KV453011.1 | 5574058 | 12-scf00274 | 12 |
| AX-157716692 | 12 | 22.471 | KV453011.1 | 5632221 | 12-scf00274 | 12 |
| AX-157857617 | 12 | 22.471 | KV453011.1 | 6001458 | 12-scf00274 | 12 |
| AX-158411158 | 12 | 22.471 | KV453011.1 | 6194863 | 12-scf00274 | 12 |
| AX-157716569 | 12 | 22.471 | KV453011.1 | 6292991 | 12-scf00274 | 12 |
| AX-158121267 | 12 | 22.471 | KV453011.1 | 6321332 | 12-scf00274 | 12 |
| AX-158121278 | 12 | 22.471 | KV453011.1 | 6334061 | 12-scf00274 | 12 |
| AX-157716969 | 12 | 22.471 | KV453011.1 | 6380836 | 12-scf00274 | 12 |
| AX-157708568 | 12 | 22.471 | KV453011.1 | 6524554 | 12-scf00274 | 12 |
| AX-157829065 | 12 | 22.471 | KV453011.1 | 6525950 | 12-scf00274 | 12 |

|              |    |        |            |          |             |    |
|--------------|----|--------|------------|----------|-------------|----|
| AX-158121452 | 12 | 22.471 | KV453011.1 | 6619952  | 12-scf00274 | 12 |
| AX-158121454 | 12 | 22.471 | KV453011.1 | 6620880  | 12-scf00274 | 12 |
| AX-157709978 | 12 | 22.471 | KV453011.1 | 6654058  | 12-scf00274 | 12 |
| AX-158121887 | 12 | 22.471 | KV453011.1 | 7380827  | 12-scf00274 | 12 |
| AX-158121890 | 12 | 22.471 | KV453011.1 | 7382821  | 12-scf00274 | 12 |
| AX-157744661 | 12 | 22.471 | KV453011.1 | 7384928  | 12-scf00274 | 12 |
| AX-158122327 | 12 | 22.471 | KV453011.1 | 8385102  | 12-scf00274 | 12 |
| AX-158122861 | 12 | 22.471 | KV453011.1 | 9424624  | 12-scf00274 | 12 |
| AX-158122953 | 12 | 22.471 | KV453011.1 | 9563206  | 12-scf00274 | 12 |
| AX-157750394 | 12 | 22.471 | KV453011.1 | 9724747  | 12-scf00274 | 12 |
| AX-158123046 | 12 | 22.471 | KV453011.1 | 9724833  | 12-scf00274 | 12 |
| AX-157746269 | 12 | 22.471 | KV453011.1 | 10188720 | 12-scf00274 | 12 |
| AX-158124016 | 12 | 22.471 | KV453011.1 | 12403925 | 12-scf00274 | 12 |
| AX-157828966 | 12 | 22.58  | KV453011.1 | 5325711  | 12-scf00274 | 12 |
| AX-158120591 | 12 | 22.58  | KV453011.1 | 5335242  | 12-scf00274 | 12 |
| AX-157866143 | 12 | 22.58  | KV453011.1 | 5340793  | 12-scf00274 | 12 |
| AX-158120601 | 12 | 22.614 | KV453011.1 | 5349506  | 12-scf00274 | 12 |
| AX-158120603 | 12 | 22.655 | KV453011.1 | 5351250  | 12-scf00274 | 12 |
| AX-158120602 | 12 | 22.689 | KV453011.1 | 5349839  | 12-scf00274 | 12 |
| AX-158120604 | 12 | 22.689 | KV453011.1 | 5353519  | 12-scf00274 | 12 |
| AX-158120607 | 12 | 22.689 | KV453011.1 | 5356607  | 12-scf00274 | 12 |
| AX-158120611 | 12 | 22.689 | KV453011.1 | 5367216  | 12-scf00274 | 12 |
| AX-158120613 | 12 | 22.689 | KV453011.1 | 5378327  | 12-scf00274 | 12 |
| AX-158120618 | 12 | 22.689 | KV453011.1 | 5383170  | 12-scf00274 | 12 |
| AX-157828969 | 12 | 22.689 | KV453011.1 | 5384640  | 12-scf00274 | 12 |
| AX-157828970 | 12 | 22.689 | KV453011.1 | 5384783  | 12-scf00274 | 12 |
| AX-158120620 | 12 | 22.689 | KV453011.1 | 5385993  | 12-scf00274 | 12 |
| AX-158120621 | 12 | 22.689 | KV453011.1 | 5388168  | 12-scf00274 | 12 |
| AX-158120624 | 12 | 22.689 | KV453011.1 | 5390115  | 12-scf00274 | 12 |
| AX-158120626 | 12 | 22.689 | KV453011.1 | 5393750  | 12-scf00274 | 12 |
| AX-157828803 | 12 | 22.799 | KV453011.1 | 3521606  | 12-scf00274 | 12 |
| AX-158120553 | 12 | 22.799 | KV453011.1 | 5282009  | 12-scf00274 | 12 |
| AX-158120573 | 12 | 22.799 | KV453011.1 | 5310284  | 12-scf00274 | 12 |
| AX-158120584 | 12 | 22.799 | KV453011.1 | 5323178  | 12-scf00274 | 12 |
| AX-158120586 | 12 | 22.799 | KV453011.1 | 5325119  | 12-scf00274 | 12 |
| AX-158120632 | 12 | 22.799 | KV453011.1 | 5403539  | 12-scf00274 | 12 |
| AX-158120634 | 12 | 22.799 | KV453011.1 | 5407299  | 12-scf00274 | 12 |
| AX-157828972 | 12 | 22.799 | KV453011.1 | 5420560  | 12-scf00274 | 12 |
| AX-157828973 | 12 | 22.799 | KV453011.1 | 5426379  | 12-scf00274 | 12 |
| AX-157716155 | 12 | 22.799 | KV453011.1 | 5426552  | 12-scf00274 | 12 |
| AX-158120643 | 12 | 22.799 | KV453011.1 | 5429824  | 12-scf00274 | 12 |
| AX-158120644 | 12 | 22.799 | KV453011.1 | 5430404  | 12-scf00274 | 12 |
| AX-157828975 | 12 | 22.799 | KV453011.1 | 5431054  | 12-scf00274 | 12 |
| AX-158120648 | 12 | 22.799 | KV453011.1 | 5436802  | 12-scf00274 | 12 |
| AX-158120649 | 12 | 22.799 | KV453011.1 | 5437394  | 12-scf00274 | 12 |
| AX-158120650 | 12 | 22.799 | KV453011.1 | 5437838  | 12-scf00274 | 12 |
| AX-158120651 | 12 | 22.799 | KV453011.1 | 5439073  | 12-scf00274 | 12 |
| AX-158120652 | 12 | 22.799 | KV453011.1 | 5439516  | 12-scf00274 | 12 |
| AX-158120653 | 12 | 22.799 | KV453011.1 | 5439739  | 12-scf00274 | 12 |
| AX-158120655 | 12 | 22.799 | KV453011.1 | 5441442  | 12-scf00274 | 12 |
| AX-158120656 | 12 | 22.799 | KV453011.1 | 5441739  | 12-scf00274 | 12 |

|              |    |        |            |         |             |    |
|--------------|----|--------|------------|---------|-------------|----|
| AX-158120658 | 12 | 22.799 | KV453011.1 | 5445057 | 12-scf00274 | 12 |
| AX-158120669 | 12 | 22.799 | KV453011.1 | 5453487 | 12-scf00274 | 12 |
| AX-157742180 | 12 | 22.799 | KV453011.1 | 5455396 | 12-scf00274 | 12 |
| AX-158120676 | 12 | 22.799 | KV453011.1 | 5464439 | 12-scf00274 | 12 |
| AX-158120677 | 12 | 22.799 | KV453011.1 | 5464716 | 12-scf00274 | 12 |
| AX-158120678 | 12 | 22.799 | KV453011.1 | 5465597 | 12-scf00274 | 12 |
| AX-158120679 | 12 | 22.799 | KV453011.1 | 5466030 | 12-scf00274 | 12 |
| AX-158120682 | 12 | 22.799 | KV453011.1 | 5467768 | 12-scf00274 | 12 |
| AX-158120687 | 12 | 22.799 | KV453011.1 | 5472823 | 12-scf00274 | 12 |
| AX-158120688 | 12 | 22.799 | KV453011.1 | 5473195 | 12-scf00274 | 12 |
| AX-157886040 | 12 | 22.799 | KV453011.1 | 5473416 | 12-scf00274 | 12 |
| AX-158120693 | 12 | 22.799 | KV453011.1 | 5478231 | 12-scf00274 | 12 |
| AX-158120699 | 12 | 22.799 | KV453011.1 | 5485838 | 12-scf00274 | 12 |
| AX-158120700 | 12 | 22.799 | KV453011.1 | 5487335 | 12-scf00274 | 12 |
| AX-158120701 | 12 | 22.799 | KV453011.1 | 5488170 | 12-scf00274 | 12 |
| AX-158120704 | 12 | 22.799 | KV453011.1 | 5490122 | 12-scf00274 | 12 |
| AX-158120705 | 12 | 22.799 | KV453011.1 | 5490947 | 12-scf00274 | 12 |
| AX-158120708 | 12 | 22.799 | KV453011.1 | 5493373 | 12-scf00274 | 12 |
| AX-158120709 | 12 | 22.799 | KV453011.1 | 5494531 | 12-scf00274 | 12 |
| AX-158120719 | 12 | 22.799 | KV453011.1 | 5513248 | 12-scf00274 | 12 |
| AX-158120721 | 12 | 22.799 | KV453011.1 | 5515542 | 12-scf00274 | 12 |
| AX-158120722 | 12 | 22.799 | KV453011.1 | 5515790 | 12-scf00274 | 12 |
| AX-158120725 | 12 | 22.799 | KV453011.1 | 5518923 | 12-scf00274 | 12 |
| AX-158120727 | 12 | 22.799 | KV453011.1 | 5519662 | 12-scf00274 | 12 |
| AX-158120728 | 12 | 22.799 | KV453011.1 | 5521203 | 12-scf00274 | 12 |
| AX-157828977 | 12 | 22.799 | KV453011.1 | 5522447 | 12-scf00274 | 12 |
| AX-157828978 | 12 | 22.799 | KV453011.1 | 5527310 | 12-scf00274 | 12 |
| AX-158120731 | 12 | 22.799 | KV453011.1 | 5527973 | 12-scf00274 | 12 |
| AX-158120732 | 12 | 22.799 | KV453011.1 | 5529314 | 12-scf00274 | 12 |
| AX-157743406 | 12 | 22.799 | KV453011.1 | 5538396 | 12-scf00274 | 12 |
| AX-158120736 | 12 | 22.799 | KV453011.1 | 5542777 | 12-scf00274 | 12 |
| AX-158120746 | 12 | 22.799 | KV453011.1 | 5552415 | 12-scf00274 | 12 |
| AX-158120758 | 12 | 22.799 | KV453011.1 | 5580736 | 12-scf00274 | 12 |
| AX-158120761 | 12 | 22.799 | KV453011.1 | 5582713 | 12-scf00274 | 12 |
| AX-158120791 | 12 | 22.799 | KV453011.1 | 5634345 | 12-scf00274 | 12 |
| AX-157828988 | 12 | 22.799 | KV453011.1 | 5648129 | 12-scf00274 | 12 |
| AX-157828990 | 12 | 22.799 | KV453011.1 | 5651149 | 12-scf00274 | 12 |
| AX-157828991 | 12 | 22.799 | KV453011.1 | 5698142 | 12-scf00274 | 12 |
| AX-157828996 | 12 | 22.799 | KV453011.1 | 5722866 | 12-scf00274 | 12 |
| AX-158380150 | 12 | 22.799 | KV453011.1 | 5742656 | 12-scf00274 | 12 |
| AX-158120871 | 12 | 22.799 | KV453011.1 | 5745931 | 12-scf00274 | 12 |
| AX-158120922 | 12 | 22.799 | KV453011.1 | 5809523 | 12-scf00274 | 12 |
| AX-158120935 | 12 | 22.799 | KV453011.1 | 5820549 | 12-scf00274 | 12 |
| AX-158120947 | 12 | 22.799 | KV453011.1 | 5835430 | 12-scf00274 | 12 |
| AX-157877770 | 12 | 22.799 | KV453011.1 | 6194264 | 12-scf00274 | 12 |
| AX-157829037 | 12 | 22.799 | KV453011.1 | 6340434 | 12-scf00274 | 12 |
| AX-158407888 | 12 | 22.799 | KV453011.1 | 6451934 | 12-scf00274 | 12 |
| AX-158120706 | 12 | 22.866 | KV453011.1 | 5491559 | 12-scf00274 | 12 |
| AX-158120748 | 12 | 22.866 | KV453011.1 | 5556314 | 12-scf00274 | 12 |
| AX-157828980 | 12 | 22.866 | KV453011.1 | 5582663 | 12-scf00274 | 12 |
| AX-158120774 | 12 | 22.866 | KV453011.1 | 5600147 | 12-scf00274 | 12 |

|              |    |        |            |         |             |    |
|--------------|----|--------|------------|---------|-------------|----|
| AX-158120804 | 12 | 22.866 | KV453011.1 | 5652603 | 12-scf00274 | 12 |
| AX-158120817 | 12 | 22.866 | KV453011.1 | 5662706 | 12-scf00274 | 12 |
| AX-157828992 | 12 | 22.866 | KV453011.1 | 5698178 | 12-scf00274 | 12 |
| AX-158120859 | 12 | 22.866 | KV453011.1 | 5726155 | 12-scf00274 | 12 |
| AX-158120928 | 12 | 22.866 | KV453011.1 | 5815397 | 12-scf00274 | 12 |
| AX-158120930 | 12 | 22.866 | KV453011.1 | 5817489 | 12-scf00274 | 12 |
| AX-158120956 | 12 | 22.866 | KV453011.1 | 5842832 | 12-scf00274 | 12 |
| AX-158120976 | 12 | 22.866 | KV453011.1 | 5866606 | 12-scf00274 | 12 |
| AX-158121003 | 12 | 22.866 | KV453011.1 | 5898212 | 12-scf00274 | 12 |
| AX-158119302 | 12 | 22.908 | KV453011.1 | 3496631 | 12-scf00274 | 12 |
| AX-157828800 | 12 | 22.908 | KV453011.1 | 3503308 | 12-scf00274 | 12 |
| AX-157714869 | 12 | 22.908 | KV453011.1 | 3639504 | 12-scf00274 | 12 |
| AX-158119431 | 12 | 22.908 | KV453011.1 | 3690023 | 12-scf00274 | 12 |
| AX-158119890 | 12 | 22.908 | KV453011.1 | 4322062 | 12-scf00274 | 12 |
| AX-157828963 | 12 | 22.908 | KV453011.1 | 5281233 | 12-scf00274 | 12 |
| AX-158120579 | 12 | 22.908 | KV453011.1 | 5316653 | 12-scf00274 | 12 |
| AX-158120638 | 12 | 22.908 | KV453011.1 | 5424804 | 12-scf00274 | 12 |
| AX-158120639 | 12 | 22.908 | KV453011.1 | 5425373 | 12-scf00274 | 12 |
| AX-158120712 | 12 | 22.908 | KV453011.1 | 5496754 | 12-scf00274 | 12 |
| AX-158120716 | 12 | 22.908 | KV453011.1 | 5502153 | 12-scf00274 | 12 |
| AX-158120741 | 12 | 22.908 | KV453011.1 | 5548074 | 12-scf00274 | 12 |
| AX-158120747 | 12 | 22.908 | KV453011.1 | 5553097 | 12-scf00274 | 12 |
| AX-158120752 | 12 | 22.908 | KV453011.1 | 5564460 | 12-scf00274 | 12 |
| AX-157739091 | 12 | 22.908 | KV453011.1 | 5567519 | 12-scf00274 | 12 |
| AX-158120753 | 12 | 22.908 | KV453011.1 | 5568229 | 12-scf00274 | 12 |
| AX-158120763 | 12 | 22.908 | KV453011.1 | 5583933 | 12-scf00274 | 12 |
| AX-158120764 | 12 | 22.908 | KV453011.1 | 5585264 | 12-scf00274 | 12 |
| AX-158120765 | 12 | 22.908 | KV453011.1 | 5585903 | 12-scf00274 | 12 |
| AX-158120766 | 12 | 22.908 | KV453011.1 | 5586382 | 12-scf00274 | 12 |
| AX-158120767 | 12 | 22.908 | KV453011.1 | 5587132 | 12-scf00274 | 12 |
| AX-157828981 | 12 | 22.908 | KV453011.1 | 5587173 | 12-scf00274 | 12 |
| AX-158120768 | 12 | 22.908 | KV453011.1 | 5588809 | 12-scf00274 | 12 |
| AX-158120769 | 12 | 22.908 | KV453011.1 | 5590946 | 12-scf00274 | 12 |
| AX-158120770 | 12 | 22.908 | KV453011.1 | 5591569 | 12-scf00274 | 12 |
| AX-158120772 | 12 | 22.908 | KV453011.1 | 5594700 | 12-scf00274 | 12 |
| AX-158120773 | 12 | 22.908 | KV453011.1 | 5599586 | 12-scf00274 | 12 |
| AX-158120775 | 12 | 22.908 | KV453011.1 | 5600457 | 12-scf00274 | 12 |
| AX-158120778 | 12 | 22.908 | KV453011.1 | 5602042 | 12-scf00274 | 12 |
| AX-158120782 | 12 | 22.908 | KV453011.1 | 5619663 | 12-scf00274 | 12 |
| AX-158120783 | 12 | 22.908 | KV453011.1 | 5620579 | 12-scf00274 | 12 |
| AX-158120785 | 12 | 22.908 | KV453011.1 | 5622122 | 12-scf00274 | 12 |
| AX-157720924 | 12 | 22.908 | KV453011.1 | 5622611 | 12-scf00274 | 12 |
| AX-158120786 | 12 | 22.908 | KV453011.1 | 5626239 | 12-scf00274 | 12 |
| AX-158120788 | 12 | 22.908 | KV453011.1 | 5627542 | 12-scf00274 | 12 |
| AX-157828985 | 12 | 22.908 | KV453011.1 | 5627780 | 12-scf00274 | 12 |
| AX-158120789 | 12 | 22.908 | KV453011.1 | 5628580 | 12-scf00274 | 12 |
| AX-158380149 | 12 | 22.908 | KV453011.1 | 5628869 | 12-scf00274 | 12 |
| AX-157828986 | 12 | 22.908 | KV453011.1 | 5632077 | 12-scf00274 | 12 |
| AX-158120795 | 12 | 22.908 | KV453011.1 | 5641780 | 12-scf00274 | 12 |
| AX-158120796 | 12 | 22.908 | KV453011.1 | 5643164 | 12-scf00274 | 12 |
| AX-158120798 | 12 | 22.908 | KV453011.1 | 5646728 | 12-scf00274 | 12 |

|              |    |        |            |         |             |    |
|--------------|----|--------|------------|---------|-------------|----|
| AX-158120802 | 12 | 22.908 | KV453011.1 | 5649616 | 12-scf00274 | 12 |
| AX-158120803 | 12 | 22.908 | KV453011.1 | 5652106 | 12-scf00274 | 12 |
| AX-158120805 | 12 | 22.908 | KV453011.1 | 5652892 | 12-scf00274 | 12 |
| AX-158120808 | 12 | 22.908 | KV453011.1 | 5655045 | 12-scf00274 | 12 |
| AX-158120812 | 12 | 22.908 | KV453011.1 | 5657460 | 12-scf00274 | 12 |
| AX-157774339 | 12 | 22.908 | KV453011.1 | 5660117 | 12-scf00274 | 12 |
| AX-158120816 | 12 | 22.908 | KV453011.1 | 5662263 | 12-scf00274 | 12 |
| AX-158120818 | 12 | 22.908 | KV453011.1 | 5663301 | 12-scf00274 | 12 |
| AX-158120821 | 12 | 22.908 | KV453011.1 | 5666067 | 12-scf00274 | 12 |
| AX-158120826 | 12 | 22.908 | KV453011.1 | 5672664 | 12-scf00274 | 12 |
| AX-158120827 | 12 | 22.908 | KV453011.1 | 5673609 | 12-scf00274 | 12 |
| AX-158411153 | 12 | 22.908 | KV453011.1 | 5676089 | 12-scf00274 | 12 |
| AX-158120831 | 12 | 22.908 | KV453011.1 | 5676956 | 12-scf00274 | 12 |
| AX-158120832 | 12 | 22.908 | KV453011.1 | 5678154 | 12-scf00274 | 12 |
| AX-158120834 | 12 | 22.908 | KV453011.1 | 5681486 | 12-scf00274 | 12 |
| AX-158120847 | 12 | 22.908 | KV453011.1 | 5707343 | 12-scf00274 | 12 |
| AX-157828994 | 12 | 22.908 | KV453011.1 | 5708368 | 12-scf00274 | 12 |
| AX-157828995 | 12 | 22.908 | KV453011.1 | 5709905 | 12-scf00274 | 12 |
| AX-158120852 | 12 | 22.908 | KV453011.1 | 5713792 | 12-scf00274 | 12 |
| AX-158120854 | 12 | 22.908 | KV453011.1 | 5715057 | 12-scf00274 | 12 |
| AX-158120855 | 12 | 22.908 | KV453011.1 | 5715989 | 12-scf00274 | 12 |
| AX-158120862 | 12 | 22.908 | KV453011.1 | 5729466 | 12-scf00274 | 12 |
| AX-158120868 | 12 | 22.908 | KV453011.1 | 5737110 | 12-scf00274 | 12 |
| AX-157828999 | 12 | 22.908 | KV453011.1 | 5738436 | 12-scf00274 | 12 |
| AX-158120873 | 12 | 22.908 | KV453011.1 | 5748704 | 12-scf00274 | 12 |
| AX-158120874 | 12 | 22.908 | KV453011.1 | 5750027 | 12-scf00274 | 12 |
| AX-158120878 | 12 | 22.908 | KV453011.1 | 5755026 | 12-scf00274 | 12 |
| AX-158120881 | 12 | 22.908 | KV453011.1 | 5757716 | 12-scf00274 | 12 |
| AX-158120882 | 12 | 22.908 | KV453011.1 | 5758013 | 12-scf00274 | 12 |
| AX-157748660 | 12 | 22.908 | KV453011.1 | 5779333 | 12-scf00274 | 12 |
| AX-158120897 | 12 | 22.908 | KV453011.1 | 5780714 | 12-scf00274 | 12 |
| AX-158120909 | 12 | 22.908 | KV453011.1 | 5791598 | 12-scf00274 | 12 |
| AX-158120910 | 12 | 22.908 | KV453011.1 | 5792167 | 12-scf00274 | 12 |
| AX-158120933 | 12 | 22.908 | KV453011.1 | 5819099 | 12-scf00274 | 12 |
| AX-158120934 | 12 | 22.908 | KV453011.1 | 5819840 | 12-scf00274 | 12 |
| AX-158120939 | 12 | 22.908 | KV453011.1 | 5826749 | 12-scf00274 | 12 |
| AX-158120941 | 12 | 22.908 | KV453011.1 | 5830042 | 12-scf00274 | 12 |
| AX-158120961 | 12 | 22.908 | KV453011.1 | 5850899 | 12-scf00274 | 12 |
| AX-158120973 | 12 | 22.908 | KV453011.1 | 5862769 | 12-scf00274 | 12 |
| AX-158120975 | 12 | 22.908 | KV453011.1 | 5865684 | 12-scf00274 | 12 |
| AX-158120991 | 12 | 22.908 | KV453011.1 | 5885566 | 12-scf00274 | 12 |
| AX-158120994 | 12 | 22.908 | KV453011.1 | 5890482 | 12-scf00274 | 12 |
| AX-158121006 | 12 | 22.908 | KV453011.1 | 5900866 | 12-scf00274 | 12 |
| AX-158121031 | 12 | 22.908 | KV453011.1 | 5930711 | 12-scf00274 | 12 |
| AX-157723466 | 12 | 22.908 | KV453011.1 | 5932025 | 12-scf00274 | 12 |
| AX-158121042 | 12 | 22.908 | KV453011.1 | 5943631 | 12-scf00274 | 12 |
| AX-158121067 | 12 | 22.908 | KV453011.1 | 5980895 | 12-scf00274 | 12 |
| AX-158121094 | 12 | 22.908 | KV453011.1 | 6023956 | 12-scf00274 | 12 |
| AX-157829016 | 12 | 22.908 | KV453011.1 | 6045824 | 12-scf00274 | 12 |
| AX-157709876 | 12 | 22.908 | KV453011.1 | 6056436 | 12-scf00274 | 12 |
| AX-158121110 | 12 | 22.908 | KV453011.1 | 6059274 | 12-scf00274 | 12 |

|              |    |        |            |         |             |    |
|--------------|----|--------|------------|---------|-------------|----|
| AX-158121111 | 12 | 22.908 | KV453011.1 | 6061698 | 12-scf00274 | 12 |
| AX-158121112 | 12 | 22.908 | KV453011.1 | 6062020 | 12-scf00274 | 12 |
| AX-158121114 | 12 | 22.908 | KV453011.1 | 6063303 | 12-scf00274 | 12 |
| AX-157877769 | 12 | 22.908 | KV453011.1 | 6083702 | 12-scf00274 | 12 |
| AX-158121140 | 12 | 22.908 | KV453011.1 | 6092424 | 12-scf00274 | 12 |
| AX-158121187 | 12 | 22.908 | KV453011.1 | 6193230 | 12-scf00274 | 12 |
| AX-157829026 | 12 | 22.908 | KV453011.1 | 6216468 | 12-scf00274 | 12 |
| AX-158121197 | 12 | 22.908 | KV453011.1 | 6234663 | 12-scf00274 | 12 |
| AX-158121208 | 12 | 22.908 | KV453011.1 | 6248453 | 12-scf00274 | 12 |
| AX-158121244 | 12 | 22.908 | KV453011.1 | 6292227 | 12-scf00274 | 12 |
| AX-158121271 | 12 | 22.908 | KV453011.1 | 6324786 | 12-scf00274 | 12 |
| AX-158121374 | 12 | 22.908 | KV453011.1 | 6504116 | 12-scf00274 | 12 |
| AX-158121387 | 12 | 22.908 | KV453011.1 | 6524336 | 12-scf00274 | 12 |
| AX-158121425 | 12 | 22.908 | KV453011.1 | 6575979 | 12-scf00274 | 12 |
| AX-158121436 | 12 | 22.908 | KV453011.1 | 6595988 | 12-scf00274 | 12 |
| AX-158121539 | 12 | 22.908 | KV453011.1 | 6731076 | 12-scf00274 | 12 |
| AX-157829090 | 12 | 22.908 | KV453011.1 | 6766602 | 12-scf00274 | 12 |
| AX-158121621 | 12 | 22.908 | KV453011.1 | 6877522 | 12-scf00274 | 12 |
| AX-158121715 | 12 | 22.908 | KV453011.1 | 7074716 | 12-scf00274 | 12 |
| AX-158121716 | 12 | 22.908 | KV453011.1 | 7075264 | 12-scf00274 | 12 |
| AX-158121841 | 12 | 22.908 | KV453011.1 | 7283948 | 12-scf00274 | 12 |
| AX-158121854 | 12 | 22.908 | KV453011.1 | 7322586 | 12-scf00274 | 12 |
| AX-158385057 | 12 | 22.908 | KV453011.1 | 7489185 | 12-scf00274 | 12 |
| AX-158121959 | 12 | 22.908 | KV453011.1 | 7612452 | 12-scf00274 | 12 |
| AX-157774664 | 12 | 22.908 | KV453011.1 | 7631414 | 12-scf00274 | 12 |
| AX-158121966 | 12 | 22.908 | KV453011.1 | 7631526 | 12-scf00274 | 12 |
| AX-158121998 | 12 | 22.908 | KV453011.1 | 7694911 | 12-scf00274 | 12 |
| AX-158122164 | 12 | 22.908 | KV453011.1 | 7975109 | 12-scf00274 | 12 |
| AX-158122177 | 12 | 22.908 | KV453011.1 | 7990911 | 12-scf00274 | 12 |
| AX-158122178 | 12 | 22.908 | KV453011.1 | 7991621 | 12-scf00274 | 12 |
| AX-158122179 | 12 | 22.908 | KV453011.1 | 7992029 | 12-scf00274 | 12 |
| AX-157829215 | 12 | 22.908 | KV453011.1 | 8002715 | 12-scf00274 | 12 |
| AX-158122187 | 12 | 22.908 | KV453011.1 | 8004707 | 12-scf00274 | 12 |
| AX-158122188 | 12 | 22.908 | KV453011.1 | 8006100 | 12-scf00274 | 12 |
| AX-158122235 | 12 | 22.908 | KV453011.1 | 8086495 | 12-scf00274 | 12 |
| AX-158122236 | 12 | 22.908 | KV453011.1 | 8095959 | 12-scf00274 | 12 |
| AX-158122238 | 12 | 22.908 | KV453011.1 | 8099336 | 12-scf00274 | 12 |
| AX-158122265 | 12 | 22.908 | KV453011.1 | 8159675 | 12-scf00274 | 12 |
| AX-158122299 | 12 | 22.908 | KV453011.1 | 8282511 | 12-scf00274 | 12 |
| AX-157727117 | 12 | 22.908 | KV453011.1 | 8373932 | 12-scf00274 | 12 |
| AX-158122465 | 12 | 22.908 | KV453011.1 | 8720673 | 12-scf00274 | 12 |
| AX-158122468 | 12 | 22.908 | KV453011.1 | 8735731 | 12-scf00274 | 12 |
| AX-157829271 | 12 | 22.908 | KV453011.1 | 8848274 | 12-scf00274 | 12 |
| AX-157726541 | 12 | 22.908 | KV453011.1 | 9108276 | 12-scf00274 | 12 |
| AX-158122641 | 12 | 22.908 | KV453011.1 | 9175650 | 12-scf00274 | 12 |
| AX-158122801 | 12 | 22.908 | KV453011.1 | 9350000 | 12-scf00274 | 12 |
| AX-158122842 | 12 | 22.908 | KV453011.1 | 9395844 | 12-scf00274 | 12 |
| AX-158422734 | 12 | 22.908 | KV453011.1 | 9435502 | 12-scf00274 | 12 |
| AX-157829290 | 12 | 22.908 | KV453011.1 | 9450404 | 12-scf00274 | 12 |
| AX-158122878 | 12 | 22.908 | KV453011.1 | 9453847 | 12-scf00274 | 12 |
| AX-158122916 | 12 | 22.908 | KV453011.1 | 9522537 | 12-scf00274 | 12 |

|              |    |        |            |          |             |    |
|--------------|----|--------|------------|----------|-------------|----|
| AX-158122936 | 12 | 22.908 | KV453011.1 | 9542997  | 12-scf00274 | 12 |
| AX-157829304 | 12 | 22.908 | KV453011.1 | 9561495  | 12-scf00274 | 12 |
| AX-157829314 | 12 | 22.908 | KV453011.1 | 9636606  | 12-scf00274 | 12 |
| AX-158123000 | 12 | 22.908 | KV453011.1 | 9638505  | 12-scf00274 | 12 |
| AX-157829316 | 12 | 22.908 | KV453011.1 | 9653166  | 12-scf00274 | 12 |
| AX-157829436 | 12 | 22.908 | KV453011.1 | 12351990 | 12-scf00274 | 12 |
| AX-158392725 | 12 | 23.017 | KV453011.1 | 5396843  | 12-scf00274 | 12 |
| AX-158120681 | 12 | 23.017 | KV453011.1 | 5467255  | 12-scf00274 | 12 |
| AX-158120771 | 12 | 23.017 | KV453011.1 | 5592353  | 12-scf00274 | 12 |
| AX-158120781 | 12 | 23.017 | KV453011.1 | 5618541  | 12-scf00274 | 12 |
| AX-158120787 | 12 | 23.017 | KV453011.1 | 5626585  | 12-scf00274 | 12 |
| AX-158120793 | 12 | 23.017 | KV453011.1 | 5636110  | 12-scf00274 | 12 |
| AX-158120797 | 12 | 23.017 | KV453011.1 | 5645517  | 12-scf00274 | 12 |
| AX-158120800 | 12 | 23.017 | KV453011.1 | 5647267  | 12-scf00274 | 12 |
| AX-157774831 | 12 | 23.017 | KV453011.1 | 5746616  | 12-scf00274 | 12 |
| AX-158120872 | 12 | 23.017 | KV453011.1 | 5747368  | 12-scf00274 | 12 |
| AX-158120875 | 12 | 23.017 | KV453011.1 | 5751967  | 12-scf00274 | 12 |
| AX-158120876 | 12 | 23.017 | KV453011.1 | 5753283  | 12-scf00274 | 12 |
| AX-158120877 | 12 | 23.017 | KV453011.1 | 5754405  | 12-scf00274 | 12 |
| AX-158120879 | 12 | 23.017 | KV453011.1 | 5755986  | 12-scf00274 | 12 |
| AX-158120888 | 12 | 23.017 | KV453011.1 | 5765906  | 12-scf00274 | 12 |
| AX-158120889 | 12 | 23.017 | KV453011.1 | 5766407  | 12-scf00274 | 12 |
| AX-158120893 | 12 | 23.017 | KV453011.1 | 5772861  | 12-scf00274 | 12 |
| AX-158120904 | 12 | 23.017 | KV453011.1 | 5788282  | 12-scf00274 | 12 |
| AX-158385045 | 12 | 23.017 | KV453011.1 | 5794297  | 12-scf00274 | 12 |
| AX-158120912 | 12 | 23.017 | KV453011.1 | 5794614  | 12-scf00274 | 12 |
| AX-158120913 | 12 | 23.017 | KV453011.1 | 5795535  | 12-scf00274 | 12 |
| AX-157857616 | 12 | 23.017 | KV453011.1 | 5804245  | 12-scf00274 | 12 |
| AX-158120918 | 12 | 23.017 | KV453011.1 | 5804473  | 12-scf00274 | 12 |
| AX-158120927 | 12 | 23.017 | KV453011.1 | 5814772  | 12-scf00274 | 12 |
| AX-158120929 | 12 | 23.017 | KV453011.1 | 5816407  | 12-scf00274 | 12 |
| AX-158417275 | 12 | 23.017 | KV453011.1 | 5828105  | 12-scf00274 | 12 |
| AX-158120940 | 12 | 23.017 | KV453011.1 | 5829642  | 12-scf00274 | 12 |
| AX-158120945 | 12 | 23.017 | KV453011.1 | 5833416  | 12-scf00274 | 12 |
| AX-158120946 | 12 | 23.017 | KV453011.1 | 5834327  | 12-scf00274 | 12 |
| AX-158120951 | 12 | 23.017 | KV453011.1 | 5839305  | 12-scf00274 | 12 |
| AX-158120952 | 12 | 23.017 | KV453011.1 | 5840138  | 12-scf00274 | 12 |
| AX-158120962 | 12 | 23.017 | KV453011.1 | 5851534  | 12-scf00274 | 12 |
| AX-158120966 | 12 | 23.017 | KV453011.1 | 5857101  | 12-scf00274 | 12 |
| AX-158120974 | 12 | 23.017 | KV453011.1 | 5864432  | 12-scf00274 | 12 |
| AX-158120983 | 12 | 23.017 | KV453011.1 | 5874447  | 12-scf00274 | 12 |
| AX-158120984 | 12 | 23.017 | KV453011.1 | 5875677  | 12-scf00274 | 12 |
| AX-158120990 | 12 | 23.017 | KV453011.1 | 5885048  | 12-scf00274 | 12 |
| AX-158120992 | 12 | 23.017 | KV453011.1 | 5886790  | 12-scf00274 | 12 |
| AX-158120993 | 12 | 23.017 | KV453011.1 | 5888170  | 12-scf00274 | 12 |
| AX-158120995 | 12 | 23.017 | KV453011.1 | 5891385  | 12-scf00274 | 12 |
| AX-158121004 | 12 | 23.017 | KV453011.1 | 5898316  | 12-scf00274 | 12 |
| AX-158121011 | 12 | 23.017 | KV453011.1 | 5907033  | 12-scf00274 | 12 |
| AX-158121012 | 12 | 23.017 | KV453011.1 | 5908134  | 12-scf00274 | 12 |
| AX-158121013 | 12 | 23.017 | KV453011.1 | 5908493  | 12-scf00274 | 12 |
| AX-158121020 | 12 | 23.017 | KV453011.1 | 5918875  | 12-scf00274 | 12 |

|              |    |        |            |          |             |    |
|--------------|----|--------|------------|----------|-------------|----|
| AX-158121035 | 12 | 23.017 | KV453011.1 | 5934560  | 12-scf00274 | 12 |
| AX-158121045 | 12 | 23.017 | KV453011.1 | 5948674  | 12-scf00274 | 12 |
| AX-157829014 | 12 | 23.017 | KV453011.1 | 6029064  | 12-scf00274 | 12 |
| AX-158121135 | 12 | 23.017 | KV453011.1 | 6088933  | 12-scf00274 | 12 |
| AX-158121153 | 12 | 23.017 | KV453011.1 | 6108279  | 12-scf00274 | 12 |
| AX-157829022 | 12 | 23.017 | KV453011.1 | 6188950  | 12-scf00274 | 12 |
| AX-158411162 | 12 | 23.017 | KV453011.1 | 6454581  | 12-scf00274 | 12 |
| AX-158121341 | 12 | 23.017 | KV453011.1 | 6462638  | 12-scf00274 | 12 |
| AX-158121364 | 12 | 23.017 | KV453011.1 | 6491570  | 12-scf00274 | 12 |
| AX-158121418 | 12 | 23.017 | KV453011.1 | 6567783  | 12-scf00274 | 12 |
| AX-158121624 | 12 | 23.017 | KV453011.1 | 6882385  | 12-scf00274 | 12 |
| AX-158121783 | 12 | 23.017 | KV453011.1 | 7176340  | 12-scf00274 | 12 |
| AX-158121898 | 12 | 23.017 | KV453011.1 | 7415762  | 12-scf00274 | 12 |
| AX-158121991 | 12 | 23.017 | KV453011.1 | 7678493  | 12-scf00274 | 12 |
| AX-158122256 | 12 | 23.017 | KV453011.1 | 8140622  | 12-scf00274 | 12 |
| AX-158122858 | 12 | 23.017 | KV453011.1 | 9421187  | 12-scf00274 | 12 |
| AX-158123231 | 12 | 23.017 | KV453011.1 | 10235201 | 12-scf00274 | 12 |
| AX-157751054 | 12 | 23.126 | KV453011.1 | 5807624  | 12-scf00274 | 12 |
| AX-158380151 | 12 | 23.126 | KV453011.1 | 5878051  | 12-scf00274 | 12 |
| AX-157752545 | 12 | 23.126 | KV453011.1 | 5880294  | 12-scf00274 | 12 |
| AX-158121015 | 12 | 23.126 | KV453011.1 | 5911677  | 12-scf00274 | 12 |
| AX-158121023 | 12 | 23.126 | KV453011.1 | 5921349  | 12-scf00274 | 12 |
| AX-158121024 | 12 | 23.126 | KV453011.1 | 5922219  | 12-scf00274 | 12 |
| AX-158121025 | 12 | 23.126 | KV453011.1 | 5924076  | 12-scf00274 | 12 |
| AX-158121029 | 12 | 23.126 | KV453011.1 | 5928292  | 12-scf00274 | 12 |
| AX-157740545 | 12 | 23.126 | KV453011.1 | 5932404  | 12-scf00274 | 12 |
| AX-158121036 | 12 | 23.126 | KV453011.1 | 5935155  | 12-scf00274 | 12 |
| AX-158121043 | 12 | 23.126 | KV453011.1 | 5945311  | 12-scf00274 | 12 |
| AX-158121044 | 12 | 23.126 | KV453011.1 | 5947305  | 12-scf00274 | 12 |
| AX-158121048 | 12 | 23.126 | KV453011.1 | 5950946  | 12-scf00274 | 12 |
| AX-158121054 | 12 | 23.126 | KV453011.1 | 5958405  | 12-scf00274 | 12 |
| AX-158121056 | 12 | 23.126 | KV453011.1 | 5962687  | 12-scf00274 | 12 |
| AX-158121063 | 12 | 23.126 | KV453011.1 | 5968786  | 12-scf00274 | 12 |
| AX-158121071 | 12 | 23.126 | KV453011.1 | 5986047  | 12-scf00274 | 12 |
| AX-158121119 | 12 | 23.126 | KV453011.1 | 6069409  | 12-scf00274 | 12 |
| AX-158121120 | 12 | 23.126 | KV453011.1 | 6069837  | 12-scf00274 | 12 |
| AX-158121150 | 12 | 23.126 | KV453011.1 | 6102761  | 12-scf00274 | 12 |
| AX-158121270 | 12 | 23.126 | KV453011.1 | 6324427  | 12-scf00274 | 12 |
| AX-158121804 | 12 | 23.126 | KV453011.1 | 7228201  | 12-scf00274 | 12 |
| AX-158121053 | 12 | 23.129 | KV453011.1 | 5958018  | 12-scf00274 | 12 |
| AX-158121057 | 12 | 23.129 | KV453011.1 | 5963592  | 12-scf00274 | 12 |
| AX-158120883 | 12 | 23.134 | KV453011.1 | 5758527  | 12-scf00274 | 12 |
| AX-158120957 | 12 | 23.134 | KV453011.1 | 5846464  | 12-scf00274 | 12 |
| AX-157757404 | 12 | 23.134 | KV453011.1 | 5914584  | 12-scf00274 | 12 |
| AX-157871300 | 12 | 23.134 | KV453011.1 | 5940151  | 12-scf00274 | 12 |
| AX-158121039 | 12 | 23.134 | KV453011.1 | 5941391  | 12-scf00274 | 12 |
| AX-158121040 | 12 | 23.134 | KV453011.1 | 5942566  | 12-scf00274 | 12 |
| AX-157725411 | 12 | 23.134 | KV453011.1 | 5949709  | 12-scf00274 | 12 |
| AX-158121068 | 12 | 23.134 | KV453011.1 | 5981718  | 12-scf00274 | 12 |
| AX-158121070 | 12 | 23.134 | KV453011.1 | 5984325  | 12-scf00274 | 12 |
| AX-158121072 | 12 | 23.134 | KV453011.1 | 5987054  | 12-scf00274 | 12 |



|              |    |        |            |         |             |    |
|--------------|----|--------|------------|---------|-------------|----|
| AX-158121073 | 12 | 23.134 | KV453011.1 | 5988939 | 12-scf00274 | 12 |
| AX-158121074 | 12 | 23.134 | KV453011.1 | 5991662 | 12-scf00274 | 12 |
| AX-158121075 | 12 | 23.134 | KV453011.1 | 5993895 | 12-scf00274 | 12 |
| AX-158121077 | 12 | 23.134 | KV453011.1 | 5997032 | 12-scf00274 | 12 |
| AX-158121080 | 12 | 23.134 | KV453011.1 | 6004424 | 12-scf00274 | 12 |
| AX-158121084 | 12 | 23.134 | KV453011.1 | 6011113 | 12-scf00274 | 12 |
| AX-158121097 | 12 | 23.134 | KV453011.1 | 6031544 | 12-scf00274 | 12 |
| AX-158121098 | 12 | 23.134 | KV453011.1 | 6031965 | 12-scf00274 | 12 |
| AX-157748709 | 12 | 23.134 | KV453011.1 | 6038914 | 12-scf00274 | 12 |
| AX-158121102 | 12 | 23.134 | KV453011.1 | 6039595 | 12-scf00274 | 12 |
| AX-158121103 | 12 | 23.134 | KV453011.1 | 6039991 | 12-scf00274 | 12 |
| AX-158121118 | 12 | 23.134 | KV453011.1 | 6069037 | 12-scf00274 | 12 |
| AX-158121122 | 12 | 23.134 | KV453011.1 | 6072675 | 12-scf00274 | 12 |
| AX-157753054 | 12 | 23.134 | KV453011.1 | 6077684 | 12-scf00274 | 12 |
| AX-158121129 | 12 | 23.134 | KV453011.1 | 6078260 | 12-scf00274 | 12 |
| AX-158121130 | 12 | 23.134 | KV453011.1 | 6083197 | 12-scf00274 | 12 |
| AX-158121131 | 12 | 23.134 | KV453011.1 | 6083877 | 12-scf00274 | 12 |
| AX-158121132 | 12 | 23.134 | KV453011.1 | 6085904 | 12-scf00274 | 12 |
| AX-158121133 | 12 | 23.134 | KV453011.1 | 6086128 | 12-scf00274 | 12 |
| AX-158121134 | 12 | 23.134 | KV453011.1 | 6088465 | 12-scf00274 | 12 |
| AX-158121136 | 12 | 23.134 | KV453011.1 | 6089265 | 12-scf00274 | 12 |
| AX-158121138 | 12 | 23.134 | KV453011.1 | 6090887 | 12-scf00274 | 12 |
| AX-158121139 | 12 | 23.134 | KV453011.1 | 6091604 | 12-scf00274 | 12 |
| AX-158121141 | 12 | 23.134 | KV453011.1 | 6093668 | 12-scf00274 | 12 |
| AX-158121142 | 12 | 23.134 | KV453011.1 | 6095148 | 12-scf00274 | 12 |
| AX-158121143 | 12 | 23.134 | KV453011.1 | 6096292 | 12-scf00274 | 12 |
| AX-158121144 | 12 | 23.134 | KV453011.1 | 6098850 | 12-scf00274 | 12 |
| AX-158121148 | 12 | 23.134 | KV453011.1 | 6101285 | 12-scf00274 | 12 |
| AX-158121151 | 12 | 23.134 | KV453011.1 | 6105002 | 12-scf00274 | 12 |
| AX-158121121 | 12 | 23.186 | KV453011.1 | 6071613 | 12-scf00274 | 12 |
| AX-158121152 | 12 | 23.223 | KV453011.1 | 6106765 | 12-scf00274 | 12 |
| AX-157829024 | 12 | 23.223 | KV453011.1 | 6193529 | 12-scf00274 | 12 |
| AX-158121156 | 12 | 23.263 | KV453011.1 | 6112652 | 12-scf00274 | 12 |
| AX-157829019 | 12 | 23.279 | KV453011.1 | 6184404 | 12-scf00274 | 12 |
| AX-158121182 | 12 | 23.319 | KV453011.1 | 6184508 | 12-scf00274 | 12 |
| AX-158121181 | 12 | 23.345 | KV453011.1 | 6183484 | 12-scf00274 | 12 |
| AX-158121183 | 12 | 23.345 | KV453011.1 | 6186020 | 12-scf00274 | 12 |
| AX-157710911 | 12 | 23.345 | KV453011.1 | 6187120 | 12-scf00274 | 12 |
| AX-158121184 | 12 | 23.345 | KV453011.1 | 6187721 | 12-scf00274 | 12 |
| AX-157829023 | 12 | 23.345 | KV453011.1 | 6191085 | 12-scf00274 | 12 |
| AX-158121189 | 12 | 23.345 | KV453011.1 | 6198307 | 12-scf00274 | 12 |
| AX-158121190 | 12 | 23.454 | KV453011.1 | 6200380 | 12-scf00274 | 12 |
| AX-157716654 | 12 | 23.454 | KV453011.1 | 6210435 | 12-scf00274 | 12 |
| AX-157740308 | 12 | 23.454 | KV453011.1 | 6210944 | 12-scf00274 | 12 |
| AX-157741088 | 12 | 23.673 | KV453011.1 | 6213160 | 12-scf00274 | 12 |
| AX-158121191 | 12 | 23.673 | KV453011.1 | 6214090 | 12-scf00274 | 12 |
| AX-158380153 | 12 | 23.673 | KV453011.1 | 6219456 | 12-scf00274 | 12 |
| AX-158121192 | 12 | 23.673 | KV453011.1 | 6220252 | 12-scf00274 | 12 |
| AX-158121193 | 12 | 23.673 | KV453011.1 | 6222783 | 12-scf00274 | 12 |
| AX-158121194 | 12 | 23.673 | KV453011.1 | 6224370 | 12-scf00274 | 12 |
| AX-158121196 | 12 | 23.782 | KV453011.1 | 6233774 | 12-scf00274 | 12 |

|              |    |        |            |          |             |    |
|--------------|----|--------|------------|----------|-------------|----|
| AX-158121201 | 12 | 23.782 | KV453011.1 | 6238382  | 12-scf00274 | 12 |
| AX-158121202 | 12 | 23.782 | KV453011.1 | 6238433  | 12-scf00274 | 12 |
| AX-158121204 | 12 | 23.782 | KV453011.1 | 6240474  | 12-scf00274 | 12 |
| AX-157829028 | 12 | 23.782 | KV453011.1 | 6248633  | 12-scf00274 | 12 |
| AX-158121251 | 12 | 23.782 | KV453011.1 | 6302343  | 12-scf00274 | 12 |
| AX-158121318 | 12 | 23.782 | KV453011.1 | 6425200  | 12-scf00274 | 12 |
| AX-158121209 | 12 | 23.943 | KV453011.1 | 6250428  | 12-scf00274 | 12 |
| AX-158121211 | 12 | 24.111 | KV453011.1 | 6253422  | 12-scf00274 | 12 |
| AX-158121213 | 12 | 24.111 | KV453011.1 | 6256457  | 12-scf00274 | 12 |
| AX-158121221 | 12 | 24.44  | KV453011.1 | 6267786  | 12-scf00274 | 12 |
| AX-158121223 | 12 | 24.769 | KV453011.1 | 6270231  | 12-scf00274 | 12 |
| AX-158121222 | 12 | 24.77  | KV453011.1 | 6270096  | 12-scf00274 | 12 |
| AX-158121224 | 12 | 24.77  | KV453011.1 | 6270916  | 12-scf00274 | 12 |
| AX-158121226 | 12 | 24.77  | KV453011.1 | 6272748  | 12-scf00274 | 12 |
| AX-158121227 | 12 | 24.77  | KV453011.1 | 6273507  | 12-scf00274 | 12 |
| AX-158121228 | 12 | 24.77  | KV453011.1 | 6274286  | 12-scf00274 | 12 |
| AX-158121229 | 12 | 24.77  | KV453011.1 | 6274975  | 12-scf00274 | 12 |
| AX-158121230 | 12 | 24.77  | KV453011.1 | 6275859  | 12-scf00274 | 12 |
| AX-158121233 | 12 | 24.77  | KV453011.1 | 6281180  | 12-scf00274 | 12 |
| AX-158121236 | 12 | 24.77  | KV453011.1 | 6284002  | 12-scf00274 | 12 |
| AX-157857621 | 12 | 24.77  | KV453011.1 | 6286156  | 12-scf00274 | 12 |
| AX-158121238 | 12 | 24.77  | KV453011.1 | 6286848  | 12-scf00274 | 12 |
| AX-158121240 | 12 | 24.77  | KV453011.1 | 6288361  | 12-scf00274 | 12 |
| AX-158121245 | 12 | 24.879 | KV453011.1 | 6296350  | 12-scf00274 | 12 |
| AX-158121246 | 12 | 24.879 | KV453011.1 | 6296631  | 12-scf00274 | 12 |
| AX-158121248 | 12 | 24.879 | KV453011.1 | 6298109  | 12-scf00274 | 12 |
| AX-158121250 | 12 | 24.879 | KV453011.1 | 6300637  | 12-scf00274 | 12 |
| AX-158121256 | 12 | 25.097 | KV453011.1 | 6308400  | 12-scf00274 | 12 |
| AX-157829030 | 12 | 25.097 | KV453011.1 | 6309087  | 12-scf00274 | 12 |
| AX-158121257 | 12 | 25.097 | KV453011.1 | 6309897  | 12-scf00274 | 12 |
| AX-158121258 | 12 | 25.097 | KV453011.1 | 6311924  | 12-scf00274 | 12 |
| AX-158121260 | 12 | 25.097 | KV453011.1 | 6313250  | 12-scf00274 | 12 |
| AX-157745909 | 12 | 25.097 | KV453011.1 | 6315662  | 12-scf00274 | 12 |
| AX-158121264 | 12 | 25.097 | KV453011.1 | 6318856  | 12-scf00274 | 12 |
| AX-158121265 | 12 | 25.097 | KV453011.1 | 6319374  | 12-scf00274 | 12 |
| AX-158121268 | 12 | 25.138 | KV453011.1 | 6322354  | 12-scf00274 | 12 |
| AX-158411166 | 12 | 25.138 | KV453011.1 | 6579854  | 12-scf00274 | 12 |
| AX-158123919 | 12 | 25.138 | KV453011.1 | 12270561 | 12-scf00274 | 12 |
| AX-157770639 | 12 | 25.168 | KV453011.1 | 6325158  | 12-scf00274 | 12 |
| AX-157829033 | 12 | 25.206 | KV453011.1 | 6325541  | 12-scf00274 | 12 |
| AX-157713357 | 12 | 25.206 | KV453011.1 | 6362327  | 12-scf00274 | 12 |
| AX-157829042 | 12 | 25.206 | KV453011.1 | 6383485  | 12-scf00274 | 12 |
| AX-157742467 | 12 | 25.24  | KV453011.1 | 6326260  | 12-scf00274 | 12 |
| AX-158121272 | 12 | 25.316 | KV453011.1 | 6327415  | 12-scf00274 | 12 |
| AX-158121273 | 12 | 25.316 | KV453011.1 | 6328342  | 12-scf00274 | 12 |
| AX-158121279 | 12 | 25.316 | KV453011.1 | 6338380  | 12-scf00274 | 12 |
| AX-157829036 | 12 | 25.316 | KV453011.1 | 6340028  | 12-scf00274 | 12 |
| AX-158121287 | 12 | 25.316 | KV453011.1 | 6351405  | 12-scf00274 | 12 |
| AX-158121288 | 12 | 25.316 | KV453011.1 | 6352226  | 12-scf00274 | 12 |
| AX-158121290 | 12 | 25.316 | KV453011.1 | 6357629  | 12-scf00274 | 12 |
| AX-158121300 | 12 | 25.316 | KV453011.1 | 6373441  | 12-scf00274 | 12 |

|              |    |        |            |         |             |    |
|--------------|----|--------|------------|---------|-------------|----|
| AX-158121301 | 12 | 25.316 | KV453011.1 | 6373879 | 12-scf00274 | 12 |
| AX-158121291 | 12 | 25.329 | KV453011.1 | 6358949 | 12-scf00274 | 12 |
| AX-158121296 | 12 | 25.371 | KV453011.1 | 6365366 | 12-scf00274 | 12 |
| AX-158121303 | 12 | 25.413 | KV453011.1 | 6376541 | 12-scf00274 | 12 |
| AX-158121262 | 12 | 25.425 | KV453011.1 | 6315353 | 12-scf00274 | 12 |
| AX-158121275 | 12 | 25.425 | KV453011.1 | 6329309 | 12-scf00274 | 12 |
| AX-157751682 | 12 | 25.425 | KV453011.1 | 6338867 | 12-scf00274 | 12 |
| AX-157877772 | 12 | 25.425 | KV453011.1 | 6343478 | 12-scf00274 | 12 |
| AX-157741372 | 12 | 25.425 | KV453011.1 | 6353848 | 12-scf00274 | 12 |
| AX-158121306 | 12 | 25.425 | KV453011.1 | 6383024 | 12-scf00274 | 12 |
| AX-157829043 | 12 | 25.425 | KV453011.1 | 6384062 | 12-scf00274 | 12 |
| AX-158121307 | 12 | 25.425 | KV453011.1 | 6384510 | 12-scf00274 | 12 |
| AX-158121309 | 12 | 25.425 | KV453011.1 | 6387518 | 12-scf00274 | 12 |
| AX-158121310 | 12 | 25.425 | KV453011.1 | 6389975 | 12-scf00274 | 12 |
| AX-158121311 | 12 | 25.425 | KV453011.1 | 6393140 | 12-scf00274 | 12 |
| AX-158121313 | 12 | 25.425 | KV453011.1 | 6396864 | 12-scf00274 | 12 |
| AX-158121782 | 12 | 25.425 | KV453011.1 | 7175939 | 12-scf00274 | 12 |
| AX-158121817 | 12 | 25.425 | KV453011.1 | 7251822 | 12-scf00274 | 12 |
| AX-158122628 | 12 | 25.425 | KV453011.1 | 9164850 | 12-scf00274 | 12 |
| AX-158122789 | 12 | 25.425 | KV453011.1 | 9336899 | 12-scf00274 | 12 |
| AX-157829035 | 12 | 25.643 | KV453011.1 | 6339293 | 12-scf00274 | 12 |
| AX-157829046 | 12 | 25.643 | KV453011.1 | 6400868 | 12-scf00274 | 12 |
| AX-157718248 | 12 | 25.644 | KV453011.1 | 6412182 | 12-scf00274 | 12 |
| AX-157713005 | 12 | 25.644 | KV453011.1 | 6414232 | 12-scf00274 | 12 |
| AX-158121316 | 12 | 25.644 | KV453011.1 | 6422505 | 12-scf00274 | 12 |
| AX-157748011 | 12 | 25.644 | KV453011.1 | 6482456 | 12-scf00274 | 12 |
| AX-158385073 | 12 | 25.644 | KV453011.1 | 9176175 | 12-scf00274 | 12 |
| AX-158121283 | 12 | 25.862 | KV453011.1 | 6341740 | 12-scf00274 | 12 |
| AX-158121289 | 12 | 25.862 | KV453011.1 | 6352622 | 12-scf00274 | 12 |
| AX-158121305 | 12 | 25.862 | KV453011.1 | 6382518 | 12-scf00274 | 12 |
| AX-158121321 | 12 | 25.862 | KV453011.1 | 6429545 | 12-scf00274 | 12 |
| AX-158121325 | 12 | 25.862 | KV453011.1 | 6434553 | 12-scf00274 | 12 |
| AX-158121327 | 12 | 25.862 | KV453011.1 | 6436626 | 12-scf00274 | 12 |
| AX-157886047 | 12 | 25.862 | KV453011.1 | 6437982 | 12-scf00274 | 12 |
| AX-158121328 | 12 | 25.862 | KV453011.1 | 6441568 | 12-scf00274 | 12 |
| AX-157748187 | 12 | 25.862 | KV453011.1 | 6453587 | 12-scf00274 | 12 |
| AX-158121336 | 12 | 25.919 | KV453011.1 | 6449186 | 12-scf00274 | 12 |
| AX-158121340 | 12 | 25.919 | KV453011.1 | 6459230 | 12-scf00274 | 12 |
| AX-158121401 | 12 | 25.919 | KV453011.1 | 6541833 | 12-scf00274 | 12 |
| AX-158121402 | 12 | 25.919 | KV453011.1 | 6543970 | 12-scf00274 | 12 |
| AX-158121448 | 12 | 25.919 | KV453011.1 | 6615090 | 12-scf00274 | 12 |
| AX-158121449 | 12 | 25.919 | KV453011.1 | 6618188 | 12-scf00274 | 12 |
| AX-158121496 | 12 | 25.919 | KV453011.1 | 6665344 | 12-scf00274 | 12 |
| AX-157724968 | 12 | 25.919 | KV453011.1 | 6828569 | 12-scf00274 | 12 |
| AX-158121322 | 12 | 25.971 | KV453011.1 | 6431674 | 12-scf00274 | 12 |
| AX-158121324 | 12 | 25.971 | KV453011.1 | 6434307 | 12-scf00274 | 12 |
| AX-158121331 | 12 | 25.971 | KV453011.1 | 6443563 | 12-scf00274 | 12 |
| AX-158121334 | 12 | 25.971 | KV453011.1 | 6447788 | 12-scf00274 | 12 |
| AX-158121335 | 12 | 25.971 | KV453011.1 | 6448607 | 12-scf00274 | 12 |
| AX-157752039 | 12 | 25.971 | KV453011.1 | 6460411 | 12-scf00274 | 12 |
| AX-158121342 | 12 | 25.971 | KV453011.1 | 6463451 | 12-scf00274 | 12 |

|              |    |        |            |         |             |    |
|--------------|----|--------|------------|---------|-------------|----|
| AX-158121343 | 12 | 25.971 | KV453011.1 | 6464892 | 12-scf00274 | 12 |
| AX-158121344 | 12 | 25.971 | KV453011.1 | 6465946 | 12-scf00274 | 12 |
| AX-158121345 | 12 | 25.971 | KV453011.1 | 6466446 | 12-scf00274 | 12 |
| AX-158121347 | 12 | 25.971 | KV453011.1 | 6470201 | 12-scf00274 | 12 |
| AX-158121349 | 12 | 25.971 | KV453011.1 | 6471024 | 12-scf00274 | 12 |
| AX-158121350 | 12 | 25.971 | KV453011.1 | 6471624 | 12-scf00274 | 12 |
| AX-158121351 | 12 | 25.971 | KV453011.1 | 6472266 | 12-scf00274 | 12 |
| AX-158121352 | 12 | 25.971 | KV453011.1 | 6474158 | 12-scf00274 | 12 |
| AX-158121355 | 12 | 25.971 | KV453011.1 | 6479500 | 12-scf00274 | 12 |
| AX-157829053 | 12 | 25.971 | KV453011.1 | 6479820 | 12-scf00274 | 12 |
| AX-158121358 | 12 | 25.971 | KV453011.1 | 6484001 | 12-scf00274 | 12 |
| AX-158121360 | 12 | 25.971 | KV453011.1 | 6485692 | 12-scf00274 | 12 |
| AX-158121361 | 12 | 25.971 | KV453011.1 | 6487387 | 12-scf00274 | 12 |
| AX-158121362 | 12 | 25.971 | KV453011.1 | 6487898 | 12-scf00274 | 12 |
| AX-157742632 | 12 | 25.971 | KV453011.1 | 6489822 | 12-scf00274 | 12 |
| AX-158121365 | 12 | 25.971 | KV453011.1 | 6493509 | 12-scf00274 | 12 |
| AX-157829055 | 12 | 25.971 | KV453011.1 | 6495338 | 12-scf00274 | 12 |
| AX-157829057 | 12 | 25.971 | KV453011.1 | 6496279 | 12-scf00274 | 12 |
| AX-158121367 | 12 | 25.971 | KV453011.1 | 6497241 | 12-scf00274 | 12 |
| AX-157717605 | 12 | 25.971 | KV453011.1 | 6504460 | 12-scf00274 | 12 |
| AX-157774647 | 12 | 25.971 | KV453011.1 | 6507900 | 12-scf00274 | 12 |
| AX-158121377 | 12 | 25.971 | KV453011.1 | 6508256 | 12-scf00274 | 12 |
| AX-158121378 | 12 | 25.971 | KV453011.1 | 6508492 | 12-scf00274 | 12 |
| AX-157829063 | 12 | 25.971 | KV453011.1 | 6513726 | 12-scf00274 | 12 |
| AX-158121381 | 12 | 25.971 | KV453011.1 | 6515517 | 12-scf00274 | 12 |
| AX-158121382 | 12 | 25.971 | KV453011.1 | 6515993 | 12-scf00274 | 12 |
| AX-158121383 | 12 | 25.971 | KV453011.1 | 6518217 | 12-scf00274 | 12 |
| AX-158121385 | 12 | 25.971 | KV453011.1 | 6521220 | 12-scf00274 | 12 |
| AX-158121386 | 12 | 25.971 | KV453011.1 | 6522703 | 12-scf00274 | 12 |
| AX-158121422 | 12 | 25.971 | KV453011.1 | 6571711 | 12-scf00274 | 12 |
| AX-157829076 | 12 | 25.971 | KV453011.1 | 6630322 | 12-scf00274 | 12 |
| AX-157829078 | 12 | 25.971 | KV453011.1 | 6640797 | 12-scf00274 | 12 |
| AX-157829080 | 12 | 25.971 | KV453011.1 | 6651076 | 12-scf00274 | 12 |
| AX-157727004 | 12 | 25.971 | KV453011.1 | 6679948 | 12-scf00274 | 12 |
| AX-157741521 | 12 | 25.971 | KV453011.1 | 6680419 | 12-scf00274 | 12 |
| AX-158121511 | 12 | 25.971 | KV453011.1 | 6696117 | 12-scf00274 | 12 |
| AX-158121537 | 12 | 25.971 | KV453011.1 | 6726168 | 12-scf00274 | 12 |
| AX-158121583 | 12 | 25.971 | KV453011.1 | 6815685 | 12-scf00274 | 12 |
| AX-158121593 | 12 | 25.971 | KV453011.1 | 6824442 | 12-scf00274 | 12 |
| AX-158121388 | 12 | 25.972 | KV453011.1 | 6526351 | 12-scf00274 | 12 |
| AX-158122325 | 12 | 25.972 | KV453011.1 | 8383781 | 12-scf00274 | 12 |
| AX-157829066 | 12 | 25.973 | KV453011.1 | 6539365 | 12-scf00274 | 12 |
| AX-158121403 | 12 | 25.973 | KV453011.1 | 6544472 | 12-scf00274 | 12 |
| AX-158121413 | 12 | 25.974 | KV453011.1 | 6562784 | 12-scf00274 | 12 |
| AX-158121368 | 12 | 26.299 | KV453011.1 | 6497713 | 12-scf00274 | 12 |
| AX-158407893 | 12 | 26.299 | KV453011.1 | 6525528 | 12-scf00274 | 12 |
| AX-158121391 | 12 | 26.299 | KV453011.1 | 6529336 | 12-scf00274 | 12 |
| AX-158121392 | 12 | 26.299 | KV453011.1 | 6529873 | 12-scf00274 | 12 |
| AX-158121394 | 12 | 26.299 | KV453011.1 | 6530561 | 12-scf00274 | 12 |
| AX-157829067 | 12 | 26.299 | KV453011.1 | 6540649 | 12-scf00274 | 12 |
| AX-158121405 | 12 | 26.299 | KV453011.1 | 6549538 | 12-scf00274 | 12 |

|              |    |        |            |         |             |    |
|--------------|----|--------|------------|---------|-------------|----|
| AX-158121424 | 12 | 26.299 | KV453011.1 | 6575310 | 12-scf00274 | 12 |
| AX-158121426 | 12 | 26.299 | KV453011.1 | 6576952 | 12-scf00274 | 12 |
| AX-158380155 | 12 | 26.299 | KV453011.1 | 6581648 | 12-scf00274 | 12 |
| AX-158121429 | 12 | 26.299 | KV453011.1 | 6584178 | 12-scf00274 | 12 |
| AX-158121433 | 12 | 26.299 | KV453011.1 | 6592160 | 12-scf00274 | 12 |
| AX-158121434 | 12 | 26.299 | KV453011.1 | 6593652 | 12-scf00274 | 12 |
| AX-158121439 | 12 | 26.299 | KV453011.1 | 6601294 | 12-scf00274 | 12 |
| AX-158121450 | 12 | 26.299 | KV453011.1 | 6618644 | 12-scf00274 | 12 |
| AX-158121451 | 12 | 26.299 | KV453011.1 | 6619417 | 12-scf00274 | 12 |
| AX-157829069 | 12 | 26.299 | KV453011.1 | 6619547 | 12-scf00274 | 12 |
| AX-158121453 | 12 | 26.299 | KV453011.1 | 6620204 | 12-scf00274 | 12 |
| AX-157829071 | 12 | 26.299 | KV453011.1 | 6621025 | 12-scf00274 | 12 |
| AX-157829072 | 12 | 26.299 | KV453011.1 | 6622624 | 12-scf00274 | 12 |
| AX-158121456 | 12 | 26.299 | KV453011.1 | 6622812 | 12-scf00274 | 12 |
| AX-157886050 | 12 | 26.299 | KV453011.1 | 6623022 | 12-scf00274 | 12 |
| AX-157829073 | 12 | 26.299 | KV453011.1 | 6625085 | 12-scf00274 | 12 |
| AX-158121459 | 12 | 26.299 | KV453011.1 | 6625465 | 12-scf00274 | 12 |
| AX-157714787 | 12 | 26.299 | KV453011.1 | 6626205 | 12-scf00274 | 12 |
| AX-157715000 | 12 | 26.299 | KV453011.1 | 6627748 | 12-scf00274 | 12 |
| AX-158121461 | 12 | 26.299 | KV453011.1 | 6629443 | 12-scf00274 | 12 |
| AX-157829075 | 12 | 26.299 | KV453011.1 | 6629773 | 12-scf00274 | 12 |
| AX-158121462 | 12 | 26.299 | KV453011.1 | 6631319 | 12-scf00274 | 12 |
| AX-157773290 | 12 | 26.299 | KV453011.1 | 6636864 | 12-scf00274 | 12 |
| AX-158121466 | 12 | 26.299 | KV453011.1 | 6639050 | 12-scf00274 | 12 |
| AX-158121481 | 12 | 26.299 | KV453011.1 | 6651233 | 12-scf00274 | 12 |
| AX-157709979 | 12 | 26.299 | KV453011.1 | 6654146 | 12-scf00274 | 12 |
| AX-158121485 | 12 | 26.299 | KV453011.1 | 6656325 | 12-scf00274 | 12 |
| AX-158121488 | 12 | 26.299 | KV453011.1 | 6658933 | 12-scf00274 | 12 |
| AX-158121490 | 12 | 26.299 | KV453011.1 | 6661068 | 12-scf00274 | 12 |
| AX-158121492 | 12 | 26.299 | KV453011.1 | 6662782 | 12-scf00274 | 12 |
| AX-158121494 | 12 | 26.299 | KV453011.1 | 6664165 | 12-scf00274 | 12 |
| AX-158121495 | 12 | 26.299 | KV453011.1 | 6664656 | 12-scf00274 | 12 |
| AX-158121497 | 12 | 26.299 | KV453011.1 | 6668159 | 12-scf00274 | 12 |
| AX-157748391 | 12 | 26.299 | KV453011.1 | 6669488 | 12-scf00274 | 12 |
| AX-158121503 | 12 | 26.299 | KV453011.1 | 6683415 | 12-scf00274 | 12 |
| AX-157829082 | 12 | 26.299 | KV453011.1 | 6684793 | 12-scf00274 | 12 |
| AX-158121504 | 12 | 26.299 | KV453011.1 | 6685234 | 12-scf00274 | 12 |
| AX-158121506 | 12 | 26.299 | KV453011.1 | 6688566 | 12-scf00274 | 12 |
| AX-158121507 | 12 | 26.299 | KV453011.1 | 6690840 | 12-scf00274 | 12 |
| AX-158121508 | 12 | 26.299 | KV453011.1 | 6691581 | 12-scf00274 | 12 |
| AX-158121509 | 12 | 26.299 | KV453011.1 | 6694640 | 12-scf00274 | 12 |
| AX-157726545 | 12 | 26.299 | KV453011.1 | 6694996 | 12-scf00274 | 12 |
| AX-157863354 | 12 | 26.299 | KV453011.1 | 6698276 | 12-scf00274 | 12 |
| AX-158121519 | 12 | 26.299 | KV453011.1 | 6704059 | 12-scf00274 | 12 |
| AX-158121520 | 12 | 26.299 | KV453011.1 | 6704716 | 12-scf00274 | 12 |
| AX-158121521 | 12 | 26.299 | KV453011.1 | 6705008 | 12-scf00274 | 12 |
| AX-158121522 | 12 | 26.299 | KV453011.1 | 6705322 | 12-scf00274 | 12 |
| AX-158121523 | 12 | 26.299 | KV453011.1 | 6705824 | 12-scf00274 | 12 |
| AX-158121526 | 12 | 26.299 | KV453011.1 | 6708694 | 12-scf00274 | 12 |
| AX-158121528 | 12 | 26.299 | KV453011.1 | 6709776 | 12-scf00274 | 12 |
| AX-158121532 | 12 | 26.299 | KV453011.1 | 6715908 | 12-scf00274 | 12 |

|              |    |        |            |         |             |    |
|--------------|----|--------|------------|---------|-------------|----|
| AX-158121534 | 12 | 26.299 | KV453011.1 | 6719369 | 12-scf00274 | 12 |
| AX-157829085 | 12 | 26.299 | KV453011.1 | 6721514 | 12-scf00274 | 12 |
| AX-158121535 | 12 | 26.299 | KV453011.1 | 6722053 | 12-scf00274 | 12 |
| AX-157726713 | 12 | 26.299 | KV453011.1 | 6731818 | 12-scf00274 | 12 |
| AX-158121540 | 12 | 26.299 | KV453011.1 | 6731974 | 12-scf00274 | 12 |
| AX-158121542 | 12 | 26.299 | KV453011.1 | 6741807 | 12-scf00274 | 12 |
| AX-158121576 | 12 | 26.299 | KV453011.1 | 6804440 | 12-scf00274 | 12 |
| AX-158122989 | 12 | 26.299 | KV453011.1 | 9620565 | 12-scf00274 | 12 |
| AX-158121444 | 12 | 26.408 | KV453011.1 | 6607322 | 12-scf00274 | 12 |
| AX-158121544 | 12 | 26.408 | KV453011.1 | 6744725 | 12-scf00274 | 12 |
| AX-158121546 | 12 | 26.408 | KV453011.1 | 6749062 | 12-scf00274 | 12 |
| AX-158121553 | 12 | 26.408 | KV453011.1 | 6756928 | 12-scf00274 | 12 |
| AX-158121554 | 12 | 26.408 | KV453011.1 | 6757662 | 12-scf00274 | 12 |
| AX-157829088 | 12 | 26.408 | KV453011.1 | 6761422 | 12-scf00274 | 12 |
| AX-157829089 | 12 | 26.408 | KV453011.1 | 6766350 | 12-scf00274 | 12 |
| AX-157829091 | 12 | 26.408 | KV453011.1 | 6769060 | 12-scf00274 | 12 |
| AX-158121557 | 12 | 26.408 | KV453011.1 | 6770078 | 12-scf00274 | 12 |
| AX-158121558 | 12 | 26.408 | KV453011.1 | 6771433 | 12-scf00274 | 12 |
| AX-157829092 | 12 | 26.408 | KV453011.1 | 6771984 | 12-scf00274 | 12 |
| AX-157829093 | 12 | 26.408 | KV453011.1 | 6772776 | 12-scf00274 | 12 |
| AX-158121563 | 12 | 26.408 | KV453011.1 | 6784784 | 12-scf00274 | 12 |
| AX-158121564 | 12 | 26.408 | KV453011.1 | 6785150 | 12-scf00274 | 12 |
| AX-158121565 | 12 | 26.408 | KV453011.1 | 6785656 | 12-scf00274 | 12 |
| AX-158121567 | 12 | 26.408 | KV453011.1 | 6787860 | 12-scf00274 | 12 |
| AX-157829098 | 12 | 26.408 | KV453011.1 | 6790295 | 12-scf00274 | 12 |
| AX-157829099 | 12 | 26.408 | KV453011.1 | 6790370 | 12-scf00274 | 12 |
| AX-158121569 | 12 | 26.408 | KV453011.1 | 6792598 | 12-scf00274 | 12 |
| AX-158121570 | 12 | 26.408 | KV453011.1 | 6795128 | 12-scf00274 | 12 |
| AX-158121571 | 12 | 26.408 | KV453011.1 | 6800349 | 12-scf00274 | 12 |
| AX-158121572 | 12 | 26.408 | KV453011.1 | 6800998 | 12-scf00274 | 12 |
| AX-158121573 | 12 | 26.408 | KV453011.1 | 6802166 | 12-scf00274 | 12 |
| AX-157725278 | 12 | 26.408 | KV453011.1 | 6808106 | 12-scf00274 | 12 |
| AX-158121628 | 12 | 26.408 | KV453011.1 | 6886837 | 12-scf00274 | 12 |
| AX-157753438 | 12 | 26.429 | KV453011.1 | 6801699 | 12-scf00274 | 12 |
| AX-158121577 | 12 | 26.448 | KV453011.1 | 6805050 | 12-scf00274 | 12 |
| AX-158121581 | 12 | 26.467 | KV453011.1 | 6813400 | 12-scf00274 | 12 |
| AX-158121589 | 12 | 26.481 | KV453011.1 | 6820091 | 12-scf00274 | 12 |
| AX-158121574 | 12 | 26.517 | KV453011.1 | 6803190 | 12-scf00274 | 12 |
| AX-158121584 | 12 | 26.517 | KV453011.1 | 6818003 | 12-scf00274 | 12 |
| AX-158121585 | 12 | 26.517 | KV453011.1 | 6818228 | 12-scf00274 | 12 |
| AX-157829101 | 12 | 26.517 | KV453011.1 | 6826510 | 12-scf00274 | 12 |
| AX-158121597 | 12 | 26.517 | KV453011.1 | 6827022 | 12-scf00274 | 12 |
| AX-158411174 | 12 | 26.517 | KV453011.1 | 6827985 | 12-scf00274 | 12 |
| AX-158121598 | 12 | 26.517 | KV453011.1 | 6829799 | 12-scf00274 | 12 |
| AX-158121600 | 12 | 26.626 | KV453011.1 | 6831279 | 12-scf00274 | 12 |
| AX-158121602 | 12 | 26.626 | KV453011.1 | 6834797 | 12-scf00274 | 12 |
| AX-158121603 | 12 | 26.626 | KV453011.1 | 6836840 | 12-scf00274 | 12 |
| AX-158121606 | 12 | 26.626 | KV453011.1 | 6840570 | 12-scf00274 | 12 |
| AX-158121607 | 12 | 26.627 | KV453011.1 | 6841698 | 12-scf00274 | 12 |
| AX-158121609 | 12 | 26.627 | KV453011.1 | 6844536 | 12-scf00274 | 12 |
| AX-157829105 | 12 | 26.79  | KV453011.1 | 6849547 | 12-scf00274 | 12 |

|              |    |        |            |         |             |    |
|--------------|----|--------|------------|---------|-------------|----|
| AX-157829107 | 12 | 26.954 | KV453011.1 | 6852146 | 12-scf00274 | 12 |
| AX-158121611 | 12 | 26.954 | KV453011.1 | 6852888 | 12-scf00274 | 12 |
| AX-158121446 | 12 | 26.955 | KV453011.1 | 6612575 | 12-scf00274 | 12 |
| AX-158121590 | 12 | 26.955 | KV453011.1 | 6820807 | 12-scf00274 | 12 |
| AX-158121617 | 12 | 26.955 | KV453011.1 | 6868342 | 12-scf00274 | 12 |
| AX-158121721 | 12 | 26.955 | KV453011.1 | 7083600 | 12-scf00274 | 12 |
| AX-157829139 | 12 | 26.955 | KV453011.1 | 7123449 | 12-scf00274 | 12 |
| AX-158120595 | 12 | 27.279 | KV453011.1 | 5339336 | 12-scf00274 | 12 |
| AX-158121406 | 12 | 27.279 | KV453011.1 | 6550229 | 12-scf00274 | 12 |
| AX-157738493 | 12 | 27.279 | KV453011.1 | 6876878 | 12-scf00274 | 12 |
| AX-158121635 | 12 | 27.279 | KV453011.1 | 6895752 | 12-scf00274 | 12 |
| AX-158121637 | 12 | 27.279 | KV453011.1 | 6896779 | 12-scf00274 | 12 |
| AX-158121638 | 12 | 27.279 | KV453011.1 | 6897398 | 12-scf00274 | 12 |
| AX-158121639 | 12 | 27.279 | KV453011.1 | 6897962 | 12-scf00274 | 12 |
| AX-158121642 | 12 | 27.279 | KV453011.1 | 6904988 | 12-scf00274 | 12 |
| AX-158121643 | 12 | 27.279 | KV453011.1 | 6905468 | 12-scf00274 | 12 |
| AX-157748062 | 12 | 27.279 | KV453011.1 | 6914016 | 12-scf00274 | 12 |
| AX-158121652 | 12 | 27.279 | KV453011.1 | 6923819 | 12-scf00274 | 12 |
| AX-158411182 | 12 | 27.279 | KV453011.1 | 6930424 | 12-scf00274 | 12 |
| AX-158392732 | 12 | 27.279 | KV453011.1 | 6937791 | 12-scf00274 | 12 |
| AX-158121661 | 12 | 27.279 | KV453011.1 | 6944231 | 12-scf00274 | 12 |
| AX-158121662 | 12 | 27.279 | KV453011.1 | 6948879 | 12-scf00274 | 12 |
| AX-157829115 | 12 | 27.279 | KV453011.1 | 6952396 | 12-scf00274 | 12 |
| AX-157720363 | 12 | 27.279 | KV453011.1 | 6954233 | 12-scf00274 | 12 |
| AX-158121667 | 12 | 27.279 | KV453011.1 | 6955470 | 12-scf00274 | 12 |
| AX-158385051 | 12 | 27.279 | KV453011.1 | 6964459 | 12-scf00274 | 12 |
| AX-157829116 | 12 | 27.279 | KV453011.1 | 6970910 | 12-scf00274 | 12 |
| AX-157829118 | 12 | 27.279 | KV453011.1 | 6971420 | 12-scf00274 | 12 |
| AX-158121677 | 12 | 27.279 | KV453011.1 | 6987487 | 12-scf00274 | 12 |
| AX-157774910 | 12 | 27.279 | KV453011.1 | 6988182 | 12-scf00274 | 12 |
| AX-157744220 | 12 | 27.279 | KV453011.1 | 7039688 | 12-scf00274 | 12 |
| AX-158121751 | 12 | 27.279 | KV453011.1 | 7142956 | 12-scf00274 | 12 |
| AX-157744439 | 12 | 27.279 | KV453011.1 | 7198465 | 12-scf00274 | 12 |
| AX-157829143 | 12 | 27.279 | KV453011.1 | 7227027 | 12-scf00274 | 12 |
| AX-157829156 | 12 | 27.279 | KV453011.1 | 7316798 | 12-scf00274 | 12 |
| AX-158122093 | 12 | 27.279 | KV453011.1 | 7858632 | 12-scf00274 | 12 |
| AX-158122150 | 12 | 27.279 | KV453011.1 | 7960362 | 12-scf00274 | 12 |
| AX-158122419 | 12 | 27.279 | KV453011.1 | 8572733 | 12-scf00274 | 12 |
| AX-158122578 | 12 | 27.279 | KV453011.1 | 9061469 | 12-scf00274 | 12 |
| AX-158122579 | 12 | 27.279 | KV453011.1 | 9062318 | 12-scf00274 | 12 |
| AX-157866151 | 12 | 27.281 | KV453011.1 | 6989851 | 12-scf00274 | 12 |
| AX-157829124 | 12 | 27.281 | KV453011.1 | 6991922 | 12-scf00274 | 12 |
| AX-157829135 | 12 | 27.281 | KV453011.1 | 7092262 | 12-scf00274 | 12 |
| AX-158121725 | 12 | 27.281 | KV453011.1 | 7094933 | 12-scf00274 | 12 |
| AX-158121686 | 12 | 27.284 | KV453011.1 | 7026722 | 12-scf00274 | 12 |
| AX-157748929 | 12 | 27.286 | KV453011.1 | 7028435 | 12-scf00274 | 12 |
| AX-158121687 | 12 | 27.399 | KV453011.1 | 7030544 | 12-scf00274 | 12 |
| AX-157746775 | 12 | 27.5   | KV453011.1 | 6989187 | 12-scf00274 | 12 |
| AX-157740615 | 12 | 27.5   | KV453011.1 | 7032097 | 12-scf00274 | 12 |
| AX-157829185 | 12 | 27.5   | KV453011.1 | 7681961 | 12-scf00274 | 12 |
| AX-158121688 | 12 | 27.501 | KV453011.1 | 7034777 | 12-scf00274 | 12 |

|              |    |        |            |         |             |    |
|--------------|----|--------|------------|---------|-------------|----|
| AX-157773298 | 12 | 27.501 | KV453011.1 | 7038718 | 12-scf00274 | 12 |
| AX-157751608 | 12 | 27.501 | KV453011.1 | 7040151 | 12-scf00274 | 12 |
| AX-158121690 | 12 | 27.501 | KV453011.1 | 7040507 | 12-scf00274 | 12 |
| AX-157829129 | 12 | 27.501 | KV453011.1 | 7040804 | 12-scf00274 | 12 |
| AX-158121691 | 12 | 27.501 | KV453011.1 | 7043693 | 12-scf00274 | 12 |
| AX-157829130 | 12 | 27.501 | KV453011.1 | 7045611 | 12-scf00274 | 12 |
| AX-157745183 | 12 | 27.501 | KV453011.1 | 7045669 | 12-scf00274 | 12 |
| AX-158121694 | 12 | 27.501 | KV453011.1 | 7046052 | 12-scf00274 | 12 |
| AX-158121707 | 12 | 27.501 | KV453011.1 | 7059893 | 12-scf00274 | 12 |
| AX-158121708 | 12 | 27.501 | KV453011.1 | 7060786 | 12-scf00274 | 12 |
| AX-158121709 | 12 | 27.501 | KV453011.1 | 7061614 | 12-scf00274 | 12 |
| AX-157750963 | 12 | 27.501 | KV453011.1 | 7072492 | 12-scf00274 | 12 |
| AX-158121776 | 12 | 27.501 | KV453011.1 | 7169155 | 12-scf00274 | 12 |
| AX-157829141 | 12 | 27.501 | KV453011.1 | 7169487 | 12-scf00274 | 12 |
| AX-158121778 | 12 | 27.501 | KV453011.1 | 7170557 | 12-scf00274 | 12 |
| AX-158121779 | 12 | 27.501 | KV453011.1 | 7171078 | 12-scf00274 | 12 |
| AX-158121780 | 12 | 27.501 | KV453011.1 | 7174342 | 12-scf00274 | 12 |
| AX-157745142 | 12 | 27.501 | KV453011.1 | 7179169 | 12-scf00274 | 12 |
| AX-157715890 | 12 | 27.501 | KV453011.1 | 7271267 | 12-scf00274 | 12 |
| AX-157829108 | 12 | 27.61  | KV453011.1 | 6856576 | 12-scf00274 | 12 |
| AX-157747811 | 12 | 27.61  | KV453011.1 | 7037801 | 12-scf00274 | 12 |
| AX-158121695 | 12 | 27.61  | KV453011.1 | 7046691 | 12-scf00274 | 12 |
| AX-157829132 | 12 | 27.61  | KV453011.1 | 7047797 | 12-scf00274 | 12 |
| AX-158121696 | 12 | 27.61  | KV453011.1 | 7048176 | 12-scf00274 | 12 |
| AX-158121722 | 12 | 27.61  | KV453011.1 | 7089025 | 12-scf00274 | 12 |
| AX-157714902 | 12 | 27.61  | KV453011.1 | 7089536 | 12-scf00274 | 12 |
| AX-158121731 | 12 | 27.61  | KV453011.1 | 7113215 | 12-scf00274 | 12 |
| AX-158392733 | 12 | 27.61  | KV453011.1 | 7113703 | 12-scf00274 | 12 |
| AX-157758626 | 12 | 27.61  | KV453011.1 | 7117607 | 12-scf00274 | 12 |
| AX-158121740 | 12 | 27.61  | KV453011.1 | 7128054 | 12-scf00274 | 12 |
| AX-157756856 | 12 | 27.61  | KV453011.1 | 7130327 | 12-scf00274 | 12 |
| AX-158121742 | 12 | 27.61  | KV453011.1 | 7131127 | 12-scf00274 | 12 |
| AX-158121747 | 12 | 27.61  | KV453011.1 | 7139332 | 12-scf00274 | 12 |
| AX-158121754 | 12 | 27.61  | KV453011.1 | 7145178 | 12-scf00274 | 12 |
| AX-158121758 | 12 | 27.61  | KV453011.1 | 7148455 | 12-scf00274 | 12 |
| AX-158121759 | 12 | 27.61  | KV453011.1 | 7148834 | 12-scf00274 | 12 |
| AX-158121762 | 12 | 27.61  | KV453011.1 | 7151042 | 12-scf00274 | 12 |
| AX-158121766 | 12 | 27.61  | KV453011.1 | 7155040 | 12-scf00274 | 12 |
| AX-158121767 | 12 | 27.61  | KV453011.1 | 7155567 | 12-scf00274 | 12 |
| AX-158121769 | 12 | 27.61  | KV453011.1 | 7158333 | 12-scf00274 | 12 |
| AX-158121772 | 12 | 27.61  | KV453011.1 | 7162351 | 12-scf00274 | 12 |
| AX-158121773 | 12 | 27.61  | KV453011.1 | 7165474 | 12-scf00274 | 12 |
| AX-158121785 | 12 | 27.61  | KV453011.1 | 7182797 | 12-scf00274 | 12 |
| AX-157739294 | 12 | 27.61  | KV453011.1 | 7183406 | 12-scf00274 | 12 |
| AX-158121786 | 12 | 27.61  | KV453011.1 | 7185515 | 12-scf00274 | 12 |
| AX-158121789 | 12 | 27.61  | KV453011.1 | 7190801 | 12-scf00274 | 12 |
| AX-158121790 | 12 | 27.61  | KV453011.1 | 7196928 | 12-scf00274 | 12 |
| AX-158121791 | 12 | 27.61  | KV453011.1 | 7199937 | 12-scf00274 | 12 |
| AX-158121794 | 12 | 27.61  | KV453011.1 | 7206699 | 12-scf00274 | 12 |
| AX-158121803 | 12 | 27.61  | KV453011.1 | 7226808 | 12-scf00274 | 12 |
| AX-157751901 | 12 | 27.61  | KV453011.1 | 7237385 | 12-scf00274 | 12 |



|              |    |        |            |         |             |    |
|--------------|----|--------|------------|---------|-------------|----|
| AX-158121808 | 12 | 27.61  | KV453011.1 | 7238001 | 12-scf00274 | 12 |
| AX-158380158 | 12 | 27.61  | KV453011.1 | 7238223 | 12-scf00274 | 12 |
| AX-158392734 | 12 | 27.61  | KV453011.1 | 7241097 | 12-scf00274 | 12 |
| AX-157724620 | 12 | 27.61  | KV453011.1 | 7241220 | 12-scf00274 | 12 |
| AX-158121812 | 12 | 27.61  | KV453011.1 | 7243935 | 12-scf00274 | 12 |
| AX-158121821 | 12 | 27.61  | KV453011.1 | 7260636 | 12-scf00274 | 12 |
| AX-158121833 | 12 | 27.61  | KV453011.1 | 7270291 | 12-scf00274 | 12 |
| AX-158121884 | 12 | 27.61  | KV453011.1 | 7375993 | 12-scf00274 | 12 |
| AX-158121885 | 12 | 27.61  | KV453011.1 | 7376377 | 12-scf00274 | 12 |
| AX-158121906 | 12 | 27.61  | KV453011.1 | 7443275 | 12-scf00274 | 12 |
| AX-158121967 | 12 | 27.61  | KV453011.1 | 7631694 | 12-scf00274 | 12 |
| AX-158121969 | 12 | 27.61  | KV453011.1 | 7634305 | 12-scf00274 | 12 |
| AX-158121972 | 12 | 27.61  | KV453011.1 | 7640228 | 12-scf00274 | 12 |
| AX-158121973 | 12 | 27.61  | KV453011.1 | 7640534 | 12-scf00274 | 12 |
| AX-158122003 | 12 | 27.61  | KV453011.1 | 7705917 | 12-scf00274 | 12 |
| AX-158122027 | 12 | 27.61  | KV453011.1 | 7737141 | 12-scf00274 | 12 |
| AX-158122032 | 12 | 27.61  | KV453011.1 | 7743601 | 12-scf00274 | 12 |
| AX-158417299 | 12 | 27.61  | KV453011.1 | 7786499 | 12-scf00274 | 12 |
| AX-158122065 | 12 | 27.61  | KV453011.1 | 7813756 | 12-scf00274 | 12 |
| AX-158122071 | 12 | 27.61  | KV453011.1 | 7829692 | 12-scf00274 | 12 |
| AX-157753795 | 12 | 27.61  | KV453011.1 | 7837409 | 12-scf00274 | 12 |
| AX-158122088 | 12 | 27.61  | KV453011.1 | 7847163 | 12-scf00274 | 12 |
| AX-157716293 | 12 | 27.61  | KV453011.1 | 7847440 | 12-scf00274 | 12 |
| AX-158122094 | 12 | 27.61  | KV453011.1 | 7860822 | 12-scf00274 | 12 |
| AX-158122096 | 12 | 27.61  | KV453011.1 | 7862691 | 12-scf00274 | 12 |
| AX-158122100 | 12 | 27.61  | KV453011.1 | 7869266 | 12-scf00274 | 12 |
| AX-157771441 | 12 | 27.61  | KV453011.1 | 7885504 | 12-scf00274 | 12 |
| AX-158122110 | 12 | 27.61  | KV453011.1 | 7891843 | 12-scf00274 | 12 |
| AX-157706469 | 12 | 27.61  | KV453011.1 | 7923172 | 12-scf00274 | 12 |
| AX-157829211 | 12 | 27.61  | KV453011.1 | 7923707 | 12-scf00274 | 12 |
| AX-158122156 | 12 | 27.61  | KV453011.1 | 7966085 | 12-scf00274 | 12 |
| AX-158411212 | 12 | 27.61  | KV453011.1 | 8119779 | 12-scf00274 | 12 |
| AX-158122267 | 12 | 27.61  | KV453011.1 | 8161874 | 12-scf00274 | 12 |
| AX-158122298 | 12 | 27.61  | KV453011.1 | 8281227 | 12-scf00274 | 12 |
| AX-157871317 | 12 | 27.61  | KV453011.1 | 8368741 | 12-scf00274 | 12 |
| AX-158122341 | 12 | 27.61  | KV453011.1 | 8405513 | 12-scf00274 | 12 |
| AX-157740067 | 12 | 27.61  | KV453011.1 | 8842831 | 12-scf00274 | 12 |
| AX-158122500 | 12 | 27.61  | KV453011.1 | 8844017 | 12-scf00274 | 12 |
| AX-158122501 | 12 | 27.61  | KV453011.1 | 8844692 | 12-scf00274 | 12 |
| AX-157829272 | 12 | 27.61  | KV453011.1 | 8851810 | 12-scf00274 | 12 |
| AX-158122507 | 12 | 27.61  | KV453011.1 | 8863036 | 12-scf00274 | 12 |
| AX-158122545 | 12 | 27.61  | KV453011.1 | 8974268 | 12-scf00274 | 12 |
| AX-158122631 | 12 | 27.61  | KV453011.1 | 9166700 | 12-scf00274 | 12 |
| AX-158122632 | 12 | 27.61  | KV453011.1 | 9167418 | 12-scf00274 | 12 |
| AX-158122691 | 12 | 27.61  | KV453011.1 | 9234321 | 12-scf00274 | 12 |
| AX-158122692 | 12 | 27.61  | KV453011.1 | 9234677 | 12-scf00274 | 12 |
| AX-157740622 | 12 | 27.631 | KV453011.1 | 7245229 | 12-scf00274 | 12 |
| AX-158121813 | 12 | 27.652 | KV453011.1 | 7245632 | 12-scf00274 | 12 |
| AX-158122614 | 12 | 27.652 | KV453011.1 | 9150839 | 12-scf00274 | 12 |
| AX-158411235 | 12 | 27.652 | KV453011.1 | 9623547 | 12-scf00274 | 12 |
| AX-157726261 | 12 | 27.667 | KV453011.1 | 7253449 | 12-scf00274 | 12 |

|              |    |        |            |         |             |    |
|--------------|----|--------|------------|---------|-------------|----|
| AX-157829146 | 12 | 27.684 | KV453011.1 | 7255262 | 12-scf00274 | 12 |
| AX-157829147 | 12 | 27.7   | KV453011.1 | 7256814 | 12-scf00274 | 12 |
| AX-157754288 | 12 | 27.707 | KV453011.1 | 7266711 | 12-scf00274 | 12 |
| AX-157753951 | 12 | 27.719 | KV453011.1 | 7157752 | 12-scf00274 | 12 |
| AX-158121826 | 12 | 27.719 | KV453011.1 | 7265832 | 12-scf00274 | 12 |
| AX-158121827 | 12 | 27.719 | KV453011.1 | 7268087 | 12-scf00274 | 12 |
| AX-158121834 | 12 | 27.719 | KV453011.1 | 7272024 | 12-scf00274 | 12 |
| AX-157829150 | 12 | 27.719 | KV453011.1 | 7276484 | 12-scf00274 | 12 |
| AX-157829152 | 12 | 27.719 | KV453011.1 | 7285765 | 12-scf00274 | 12 |
| AX-158411191 | 12 | 27.719 | KV453011.1 | 7313786 | 12-scf00274 | 12 |
| AX-157829160 | 12 | 27.782 | KV453011.1 | 7329740 | 12-scf00274 | 12 |
| AX-158121860 | 12 | 27.782 | KV453011.1 | 7330030 | 12-scf00274 | 12 |
| AX-157748650 | 12 | 27.782 | KV453011.1 | 7331066 | 12-scf00274 | 12 |
| AX-158119964 | 12 | 27.828 | KV453011.1 | 4428679 | 12-scf00274 | 12 |
| AX-158120303 | 12 | 27.828 | KV453011.1 | 4939577 | 12-scf00274 | 12 |
| AX-158120566 | 12 | 27.828 | KV453011.1 | 5296650 | 12-scf00274 | 12 |
| AX-157791262 | 12 | 27.828 | KV453011.1 | 5699133 | 12-scf00274 | 12 |
| AX-158121868 | 12 | 27.828 | KV453011.1 | 7338877 | 12-scf00274 | 12 |
| AX-158121869 | 12 | 27.828 | KV453011.1 | 7340674 | 12-scf00274 | 12 |
| AX-158392735 | 12 | 27.828 | KV453011.1 | 7341675 | 12-scf00274 | 12 |
| AX-158121875 | 12 | 27.828 | KV453011.1 | 7353120 | 12-scf00274 | 12 |
| AX-157857626 | 12 | 27.828 | KV453011.1 | 7364190 | 12-scf00274 | 12 |
| AX-157829162 | 12 | 27.828 | KV453011.1 | 7368907 | 12-scf00274 | 12 |
| AX-158121883 | 12 | 27.828 | KV453011.1 | 7372256 | 12-scf00274 | 12 |
| AX-158121901 | 12 | 27.828 | KV453011.1 | 7421997 | 12-scf00274 | 12 |
| AX-157829168 | 12 | 27.828 | KV453011.1 | 7473845 | 12-scf00274 | 12 |
| AX-158121924 | 12 | 27.828 | KV453011.1 | 7513670 | 12-scf00274 | 12 |
| AX-158121927 | 12 | 27.828 | KV453011.1 | 7521855 | 12-scf00274 | 12 |
| AX-158121929 | 12 | 27.828 | KV453011.1 | 7526919 | 12-scf00274 | 12 |
| AX-157829171 | 12 | 27.828 | KV453011.1 | 7531004 | 12-scf00274 | 12 |
| AX-157775668 | 12 | 27.828 | KV453011.1 | 7531869 | 12-scf00274 | 12 |
| AX-158121930 | 12 | 27.828 | KV453011.1 | 7537041 | 12-scf00274 | 12 |
| AX-158121935 | 12 | 27.828 | KV453011.1 | 7553487 | 12-scf00274 | 12 |
| AX-158121936 | 12 | 27.828 | KV453011.1 | 7555149 | 12-scf00274 | 12 |
| AX-158121938 | 12 | 27.828 | KV453011.1 | 7557373 | 12-scf00274 | 12 |
| AX-157747569 | 12 | 27.828 | KV453011.1 | 7590673 | 12-scf00274 | 12 |
| AX-157753274 | 12 | 27.828 | KV453011.1 | 7594370 | 12-scf00274 | 12 |
| AX-158121960 | 12 | 27.828 | KV453011.1 | 7613326 | 12-scf00274 | 12 |
| AX-158121965 | 12 | 27.828 | KV453011.1 | 7627921 | 12-scf00274 | 12 |
| AX-158121971 | 12 | 27.828 | KV453011.1 | 7639469 | 12-scf00274 | 12 |
| AX-157775232 | 12 | 27.828 | KV453011.1 | 7639780 | 12-scf00274 | 12 |
| AX-158121976 | 12 | 27.828 | KV453011.1 | 7646173 | 12-scf00274 | 12 |
| AX-158121980 | 12 | 27.828 | KV453011.1 | 7656811 | 12-scf00274 | 12 |
| AX-158121987 | 12 | 27.828 | KV453011.1 | 7662281 | 12-scf00274 | 12 |
| AX-158121996 | 12 | 27.828 | KV453011.1 | 7684122 | 12-scf00274 | 12 |
| AX-158122097 | 12 | 27.828 | KV453011.1 | 7865074 | 12-scf00274 | 12 |
| AX-157829201 | 12 | 27.828 | KV453011.1 | 7871125 | 12-scf00274 | 12 |
| AX-158122114 | 12 | 27.828 | KV453011.1 | 7894727 | 12-scf00274 | 12 |
| AX-157739754 | 12 | 27.828 | KV453011.1 | 7933471 | 12-scf00274 | 12 |
| AX-157708677 | 12 | 27.828 | KV453011.1 | 7969331 | 12-scf00274 | 12 |
| AX-158122159 | 12 | 27.828 | KV453011.1 | 7969688 | 12-scf00274 | 12 |

|              |    |        |            |         |             |    |
|--------------|----|--------|------------|---------|-------------|----|
| AX-157829223 | 12 | 27.828 | KV453011.1 | 8161616 | 12-scf00274 | 12 |
| AX-158122295 | 12 | 27.828 | KV453011.1 | 8278489 | 12-scf00274 | 12 |
| AX-158122297 | 12 | 27.828 | KV453011.1 | 8279674 | 12-scf00274 | 12 |
| AX-158122304 | 12 | 27.828 | KV453011.1 | 8317011 | 12-scf00274 | 12 |
| AX-158411217 | 12 | 27.828 | KV453011.1 | 8324149 | 12-scf00274 | 12 |
| AX-158122322 | 12 | 27.828 | KV453011.1 | 8378556 | 12-scf00274 | 12 |
| AX-158122355 | 12 | 27.828 | KV453011.1 | 8438020 | 12-scf00274 | 12 |
| AX-157829249 | 12 | 27.828 | KV453011.1 | 8438142 | 12-scf00274 | 12 |
| AX-158122374 | 12 | 27.828 | KV453011.1 | 8483582 | 12-scf00274 | 12 |
| AX-158122463 | 12 | 27.828 | KV453011.1 | 8715980 | 12-scf00274 | 12 |
| AX-158122485 | 12 | 27.828 | KV453011.1 | 8791662 | 12-scf00274 | 12 |
| AX-157752172 | 12 | 27.828 | KV453011.1 | 8793768 | 12-scf00274 | 12 |
| AX-158122550 | 12 | 27.828 | KV453011.1 | 8995113 | 12-scf00274 | 12 |
| AX-157720532 | 12 | 27.828 | KV453011.1 | 8995540 | 12-scf00274 | 12 |
| AX-158122558 | 12 | 27.828 | KV453011.1 | 9005874 | 12-scf00274 | 12 |
| AX-158122559 | 12 | 27.828 | KV453011.1 | 9006677 | 12-scf00274 | 12 |
| AX-158122560 | 12 | 27.828 | KV453011.1 | 9007754 | 12-scf00274 | 12 |
| AX-158122654 | 12 | 27.828 | KV453011.1 | 9186446 | 12-scf00274 | 12 |
| AX-158122656 | 12 | 27.828 | KV453011.1 | 9188145 | 12-scf00274 | 12 |
| AX-158122657 | 12 | 27.828 | KV453011.1 | 9188721 | 12-scf00274 | 12 |
| AX-158122662 | 12 | 27.828 | KV453011.1 | 9196893 | 12-scf00274 | 12 |
| AX-158122666 | 12 | 27.828 | KV453011.1 | 9205667 | 12-scf00274 | 12 |
| AX-158122667 | 12 | 27.828 | KV453011.1 | 9205706 | 12-scf00274 | 12 |
| AX-158411226 | 12 | 27.828 | KV453011.1 | 9206077 | 12-scf00274 | 12 |
| AX-158122675 | 12 | 27.828 | KV453011.1 | 9217322 | 12-scf00274 | 12 |
| AX-158122697 | 12 | 27.828 | KV453011.1 | 9240451 | 12-scf00274 | 12 |
| AX-158122711 | 12 | 27.828 | KV453011.1 | 9257483 | 12-scf00274 | 12 |
| AX-158122768 | 12 | 27.828 | KV453011.1 | 9316425 | 12-scf00274 | 12 |
| AX-158122851 | 12 | 27.828 | KV453011.1 | 9409576 | 12-scf00274 | 12 |
| AX-158122852 | 12 | 27.828 | KV453011.1 | 9409942 | 12-scf00274 | 12 |
| AX-158122856 | 12 | 27.828 | KV453011.1 | 9418660 | 12-scf00274 | 12 |
| AX-157719602 | 12 | 27.828 | KV453011.1 | 9452778 | 12-scf00274 | 12 |
| AX-158122880 | 12 | 27.828 | KV453011.1 | 9457484 | 12-scf00274 | 12 |
| AX-158121970 | 12 | 27.901 | KV453011.1 | 7636281 | 12-scf00274 | 12 |
| AX-158121975 | 12 | 27.984 | KV453011.1 | 7642374 | 12-scf00274 | 12 |
| AX-158119313 | 12 | 28.047 | KV453011.1 | 3511827 | 12-scf00274 | 12 |
| AX-158119387 | 12 | 28.047 | KV453011.1 | 3596846 | 12-scf00274 | 12 |
| AX-157727862 | 12 | 28.047 | KV453011.1 | 3630128 | 12-scf00274 | 12 |
| AX-158120609 | 12 | 28.047 | KV453011.1 | 5357666 | 12-scf00274 | 12 |
| AX-157829054 | 12 | 28.047 | KV453011.1 | 6483145 | 12-scf00274 | 12 |
| AX-158121407 | 12 | 28.047 | KV453011.1 | 6550619 | 12-scf00274 | 12 |
| AX-158121630 | 12 | 28.047 | KV453011.1 | 6888864 | 12-scf00274 | 12 |
| AX-158385050 | 12 | 28.047 | KV453011.1 | 6943182 | 12-scf00274 | 12 |
| AX-157725986 | 12 | 28.047 | KV453011.1 | 7105155 | 12-scf00274 | 12 |
| AX-158121729 | 12 | 28.047 | KV453011.1 | 7108873 | 12-scf00274 | 12 |
| AX-158121743 | 12 | 28.047 | KV453011.1 | 7131563 | 12-scf00274 | 12 |
| AX-158121874 | 12 | 28.047 | KV453011.1 | 7347413 | 12-scf00274 | 12 |
| AX-158121934 | 12 | 28.047 | KV453011.1 | 7550671 | 12-scf00274 | 12 |
| AX-158121937 | 12 | 28.047 | KV453011.1 | 7555328 | 12-scf00274 | 12 |
| AX-158121956 | 12 | 28.047 | KV453011.1 | 7610104 | 12-scf00274 | 12 |
| AX-158121974 | 12 | 28.047 | KV453011.1 | 7642172 | 12-scf00274 | 12 |

|              |    |        |            |         |             |    |
|--------------|----|--------|------------|---------|-------------|----|
| AX-158121994 | 12 | 28.047 | KV453011.1 | 7681889 | 12-scf00274 | 12 |
| AX-158121997 | 12 | 28.047 | KV453011.1 | 7686036 | 12-scf00274 | 12 |
| AX-158122007 | 12 | 28.047 | KV453011.1 | 7711491 | 12-scf00274 | 12 |
| AX-158122010 | 12 | 28.047 | KV453011.1 | 7717213 | 12-scf00274 | 12 |
| AX-158122011 | 12 | 28.047 | KV453011.1 | 7717443 | 12-scf00274 | 12 |
| AX-158122012 | 12 | 28.047 | KV453011.1 | 7718811 | 12-scf00274 | 12 |
| AX-158122014 | 12 | 28.047 | KV453011.1 | 7725080 | 12-scf00274 | 12 |
| AX-158122015 | 12 | 28.047 | KV453011.1 | 7725775 | 12-scf00274 | 12 |
| AX-158122016 | 12 | 28.047 | KV453011.1 | 7726431 | 12-scf00274 | 12 |
| AX-158122023 | 12 | 28.047 | KV453011.1 | 7732725 | 12-scf00274 | 12 |
| AX-158122025 | 12 | 28.047 | KV453011.1 | 7733395 | 12-scf00274 | 12 |
| AX-158122026 | 12 | 28.047 | KV453011.1 | 7736101 | 12-scf00274 | 12 |
| AX-158122029 | 12 | 28.047 | KV453011.1 | 7741280 | 12-scf00274 | 12 |
| AX-158122037 | 12 | 28.047 | KV453011.1 | 7763688 | 12-scf00274 | 12 |
| AX-158122046 | 12 | 28.047 | KV453011.1 | 7775434 | 12-scf00274 | 12 |
| AX-158122047 | 12 | 28.047 | KV453011.1 | 7777116 | 12-scf00274 | 12 |
| AX-158122051 | 12 | 28.047 | KV453011.1 | 7780289 | 12-scf00274 | 12 |
| AX-158122055 | 12 | 28.047 | KV453011.1 | 7783964 | 12-scf00274 | 12 |
| AX-158122059 | 12 | 28.047 | KV453011.1 | 7804406 | 12-scf00274 | 12 |
| AX-158122062 | 12 | 28.047 | KV453011.1 | 7808150 | 12-scf00274 | 12 |
| AX-158122063 | 12 | 28.047 | KV453011.1 | 7810107 | 12-scf00274 | 12 |
| AX-158122064 | 12 | 28.047 | KV453011.1 | 7813228 | 12-scf00274 | 12 |
| AX-158122067 | 12 | 28.047 | KV453011.1 | 7816684 | 12-scf00274 | 12 |
| AX-158122068 | 12 | 28.047 | KV453011.1 | 7817280 | 12-scf00274 | 12 |
| AX-157829191 | 12 | 28.047 | KV453011.1 | 7821889 | 12-scf00274 | 12 |
| AX-158122069 | 12 | 28.047 | KV453011.1 | 7828438 | 12-scf00274 | 12 |
| AX-158122073 | 12 | 28.047 | KV453011.1 | 7833075 | 12-scf00274 | 12 |
| AX-158122076 | 12 | 28.047 | KV453011.1 | 7834483 | 12-scf00274 | 12 |
| AX-158122077 | 12 | 28.047 | KV453011.1 | 7834897 | 12-scf00274 | 12 |
| AX-158122082 | 12 | 28.047 | KV453011.1 | 7840252 | 12-scf00274 | 12 |
| AX-157829192 | 12 | 28.047 | KV453011.1 | 7841953 | 12-scf00274 | 12 |
| AX-157829193 | 12 | 28.047 | KV453011.1 | 7842205 | 12-scf00274 | 12 |
| AX-157750584 | 12 | 28.047 | KV453011.1 | 7842903 | 12-scf00274 | 12 |
| AX-158122084 | 12 | 28.047 | KV453011.1 | 7843807 | 12-scf00274 | 12 |
| AX-158122085 | 12 | 28.047 | KV453011.1 | 7844574 | 12-scf00274 | 12 |
| AX-158122090 | 12 | 28.047 | KV453011.1 | 7851857 | 12-scf00274 | 12 |
| AX-157829202 | 12 | 28.047 | KV453011.1 | 7873642 | 12-scf00274 | 12 |
| AX-157829203 | 12 | 28.047 | KV453011.1 | 7875157 | 12-scf00274 | 12 |
| AX-158122103 | 12 | 28.047 | KV453011.1 | 7875318 | 12-scf00274 | 12 |
| AX-157829204 | 12 | 28.047 | KV453011.1 | 7875768 | 12-scf00274 | 12 |
| AX-157829205 | 12 | 28.047 | KV453011.1 | 7875822 | 12-scf00274 | 12 |
| AX-158122116 | 12 | 28.047 | KV453011.1 | 7897542 | 12-scf00274 | 12 |
| AX-158122121 | 12 | 28.047 | KV453011.1 | 7901405 | 12-scf00274 | 12 |
| AX-158122123 | 12 | 28.047 | KV453011.1 | 7905132 | 12-scf00274 | 12 |
| AX-158122124 | 12 | 28.047 | KV453011.1 | 7907671 | 12-scf00274 | 12 |
| AX-157829208 | 12 | 28.047 | KV453011.1 | 7910339 | 12-scf00274 | 12 |
| AX-158122131 | 12 | 28.047 | KV453011.1 | 7918805 | 12-scf00274 | 12 |
| AX-158122134 | 12 | 28.047 | KV453011.1 | 7926410 | 12-scf00274 | 12 |
| AX-158122135 | 12 | 28.047 | KV453011.1 | 7935171 | 12-scf00274 | 12 |
| AX-158122137 | 12 | 28.047 | KV453011.1 | 7945854 | 12-scf00274 | 12 |
| AX-157829213 | 12 | 28.047 | KV453011.1 | 7947389 | 12-scf00274 | 12 |

|              |    |        |            |         |             |    |
|--------------|----|--------|------------|---------|-------------|----|
| AX-157720904 | 12 | 28.047 | KV453011.1 | 7954980 | 12-scf00274 | 12 |
| AX-157726048 | 12 | 28.047 | KV453011.1 | 7968337 | 12-scf00274 | 12 |
| AX-158122169 | 12 | 28.047 | KV453011.1 | 7984161 | 12-scf00274 | 12 |
| AX-158122171 | 12 | 28.047 | KV453011.1 | 7986363 | 12-scf00274 | 12 |
| AX-157740648 | 12 | 28.047 | KV453011.1 | 7987495 | 12-scf00274 | 12 |
| AX-158122172 | 12 | 28.047 | KV453011.1 | 7988004 | 12-scf00274 | 12 |
| AX-158122174 | 12 | 28.047 | KV453011.1 | 7989214 | 12-scf00274 | 12 |
| AX-158122182 | 12 | 28.047 | KV453011.1 | 7996494 | 12-scf00274 | 12 |
| AX-158122185 | 12 | 28.047 | KV453011.1 | 8001900 | 12-scf00274 | 12 |
| AX-158122186 | 12 | 28.047 | KV453011.1 | 8003818 | 12-scf00274 | 12 |
| AX-158380162 | 12 | 28.047 | KV453011.1 | 8010081 | 12-scf00274 | 12 |
| AX-158122197 | 12 | 28.047 | KV453011.1 | 8019114 | 12-scf00274 | 12 |
| AX-157726440 | 12 | 28.047 | KV453011.1 | 8038094 | 12-scf00274 | 12 |
| AX-158122225 | 12 | 28.047 | KV453011.1 | 8043624 | 12-scf00274 | 12 |
| AX-157748545 | 12 | 28.047 | KV453011.1 | 8051147 | 12-scf00274 | 12 |
| AX-158122241 | 12 | 28.047 | KV453011.1 | 8104622 | 12-scf00274 | 12 |
| AX-158122243 | 12 | 28.047 | KV453011.1 | 8107386 | 12-scf00274 | 12 |
| AX-158122244 | 12 | 28.047 | KV453011.1 | 8110910 | 12-scf00274 | 12 |
| AX-158122245 | 12 | 28.047 | KV453011.1 | 8111856 | 12-scf00274 | 12 |
| AX-158122246 | 12 | 28.047 | KV453011.1 | 8112385 | 12-scf00274 | 12 |
| AX-157829221 | 12 | 28.047 | KV453011.1 | 8123612 | 12-scf00274 | 12 |
| AX-158122272 | 12 | 28.047 | KV453011.1 | 8187205 | 12-scf00274 | 12 |
| AX-157748573 | 12 | 28.047 | KV453011.1 | 8196736 | 12-scf00274 | 12 |
| AX-158122280 | 12 | 28.047 | KV453011.1 | 8222917 | 12-scf00274 | 12 |
| AX-158122317 | 12 | 28.047 | KV453011.1 | 8363773 | 12-scf00274 | 12 |
| AX-157829244 | 12 | 28.047 | KV453011.1 | 8378236 | 12-scf00274 | 12 |
| AX-157742604 | 12 | 28.047 | KV453011.1 | 8379629 | 12-scf00274 | 12 |
| AX-158122323 | 12 | 28.047 | KV453011.1 | 8381752 | 12-scf00274 | 12 |
| AX-158122324 | 12 | 28.047 | KV453011.1 | 8383398 | 12-scf00274 | 12 |
| AX-158122326 | 12 | 28.047 | KV453011.1 | 8384682 | 12-scf00274 | 12 |
| AX-158122347 | 12 | 28.047 | KV453011.1 | 8423801 | 12-scf00274 | 12 |
| AX-158122348 | 12 | 28.047 | KV453011.1 | 8424906 | 12-scf00274 | 12 |
| AX-158122350 | 12 | 28.047 | KV453011.1 | 8427163 | 12-scf00274 | 12 |
| AX-158122369 | 12 | 28.047 | KV453011.1 | 8477713 | 12-scf00274 | 12 |
| AX-158122376 | 12 | 28.047 | KV453011.1 | 8486629 | 12-scf00274 | 12 |
| AX-158122409 | 12 | 28.047 | KV453011.1 | 8544194 | 12-scf00274 | 12 |
| AX-157829251 | 12 | 28.047 | KV453011.1 | 8545311 | 12-scf00274 | 12 |
| AX-158122414 | 12 | 28.047 | KV453011.1 | 8555847 | 12-scf00274 | 12 |
| AX-157715561 | 12 | 28.047 | KV453011.1 | 8557011 | 12-scf00274 | 12 |
| AX-158122497 | 12 | 28.047 | KV453011.1 | 8827195 | 12-scf00274 | 12 |
| AX-158122534 | 12 | 28.047 | KV453011.1 | 8926547 | 12-scf00274 | 12 |
| AX-158122537 | 12 | 28.047 | KV453011.1 | 8942021 | 12-scf00274 | 12 |
| AX-158122544 | 12 | 28.047 | KV453011.1 | 8967467 | 12-scf00274 | 12 |
| AX-158122569 | 12 | 28.047 | KV453011.1 | 9016241 | 12-scf00274 | 12 |
| AX-157829280 | 12 | 28.047 | KV453011.1 | 9067479 | 12-scf00274 | 12 |
| AX-158122585 | 12 | 28.047 | KV453011.1 | 9080668 | 12-scf00274 | 12 |
| AX-158122588 | 12 | 28.047 | KV453011.1 | 9089160 | 12-scf00274 | 12 |
| AX-158122592 | 12 | 28.047 | KV453011.1 | 9091604 | 12-scf00274 | 12 |
| AX-158122601 | 12 | 28.047 | KV453011.1 | 9119163 | 12-scf00274 | 12 |
| AX-158385071 | 12 | 28.047 | KV453011.1 | 9148686 | 12-scf00274 | 12 |
| AX-158122638 | 12 | 28.047 | KV453011.1 | 9172430 | 12-scf00274 | 12 |

|              |    |        |             |         |             |    |
|--------------|----|--------|-------------|---------|-------------|----|
| AX-158122659 | 12 | 28.047 | KV453011.1  | 9192865 | 12-scf00274 | 12 |
| AX-158122686 | 12 | 28.047 | KV453011.1  | 9227438 | 12-scf00274 | 12 |
| AX-158122689 | 12 | 28.047 | KV453011.1  | 9231713 | 12-scf00274 | 12 |
| AX-158122708 | 12 | 28.047 | KV453011.1  | 9253785 | 12-scf00274 | 12 |
| AX-157755096 | 12 | 28.047 | KV453011.1  | 9296467 | 12-scf00274 | 12 |
| AX-158122797 | 12 | 28.047 | KV453011.1  | 9345225 | 12-scf00274 | 12 |
| AX-158122834 | 12 | 28.047 | KV453011.1  | 9387633 | 12-scf00274 | 12 |
| AX-158417309 | 12 | 28.047 | KV453011.1  | 9388641 | 12-scf00274 | 12 |
| AX-157745504 | 12 | 28.047 | KV453011.1  | 9416864 | 12-scf00274 | 12 |
| AX-158122860 | 12 | 28.047 | KV453011.1  | 9423632 | 12-scf00274 | 12 |
| AX-158122868 | 12 | 28.047 | KV453011.1  | 9431837 | 12-scf00274 | 12 |
| AX-158122875 | 12 | 28.047 | KV453011.1  | 9447786 | 12-scf00274 | 12 |
| AX-158122966 | 12 | 28.047 | KV453011.1  | 9580027 | 12-scf00274 | 12 |
| AX-157706688 | 12 | 28.047 | 3ML01032740 | 252     | scf08368_1  | UN |
| AX-158122377 | 12 | 28.067 | KV453011.1  | 8487487 | 12-scf00274 | 12 |
| AX-158121825 | 12 | 28.082 | KV453011.1  | 7264306 | 12-scf00274 | 12 |
| AX-158121926 | 12 | 28.082 | KV453011.1  | 7520571 | 12-scf00274 | 12 |
| AX-158122351 | 12 | 28.082 | KV453011.1  | 8427961 | 12-scf00274 | 12 |
| AX-158122385 | 12 | 28.082 | KV453011.1  | 8498370 | 12-scf00274 | 12 |
| AX-158122388 | 12 | 28.082 | KV453011.1  | 8500403 | 12-scf00274 | 12 |
| AX-158122397 | 12 | 28.098 | KV453011.1  | 8518640 | 12-scf00274 | 12 |
| AX-158122404 | 12 | 28.111 | KV453011.1  | 8540548 | 12-scf00274 | 12 |
| AX-158121663 | 12 | 28.115 | KV453011.1  | 6951180 | 12-scf00274 | 12 |
| AX-158121835 | 12 | 28.115 | KV453011.1  | 7274745 | 12-scf00274 | 12 |
| AX-158121961 | 12 | 28.115 | KV453011.1  | 7617511 | 12-scf00274 | 12 |
| AX-158122407 | 12 | 28.115 | KV453011.1  | 8543213 | 12-scf00274 | 12 |
| AX-158121893 | 12 | 28.128 | KV453011.1  | 7390864 | 12-scf00274 | 12 |
| AX-158121928 | 12 | 28.128 | KV453011.1  | 7522612 | 12-scf00274 | 12 |
| AX-157829170 | 12 | 28.128 | KV453011.1  | 7522739 | 12-scf00274 | 12 |
| AX-158122039 | 12 | 28.128 | KV453011.1  | 7768221 | 12-scf00274 | 12 |
| AX-158122066 | 12 | 28.128 | KV453011.1  | 7814316 | 12-scf00274 | 12 |
| AX-157722768 | 12 | 28.128 | KV453011.1  | 8211746 | 12-scf00274 | 12 |
| AX-158122279 | 12 | 28.128 | KV453011.1  | 8214628 | 12-scf00274 | 12 |
| AX-157727003 | 12 | 28.128 | KV453011.1  | 8272356 | 12-scf00274 | 12 |
| AX-158122330 | 12 | 28.128 | KV453011.1  | 8393765 | 12-scf00274 | 12 |
| AX-157829256 | 12 | 28.128 | KV453011.1  | 8647861 | 12-scf00274 | 12 |
| AX-158122453 | 12 | 28.128 | KV453011.1  | 8648612 | 12-scf00274 | 12 |
| AX-158122454 | 12 | 28.128 | KV453011.1  | 8650616 | 12-scf00274 | 12 |
| AX-158122540 | 12 | 28.128 | KV453011.1  | 8950743 | 12-scf00274 | 12 |
| AX-158122586 | 12 | 28.128 | KV453011.1  | 9084941 | 12-scf00274 | 12 |
| AX-158122589 | 12 | 28.128 | KV453011.1  | 9089346 | 12-scf00274 | 12 |
| AX-158122610 | 12 | 28.128 | KV453011.1  | 9137264 | 12-scf00274 | 12 |
| AX-158122612 | 12 | 28.128 | KV453011.1  | 9140183 | 12-scf00274 | 12 |
| AX-158122191 | 12 | 28.138 | KV453011.1  | 8010980 | 12-scf00274 | 12 |
| AX-158122457 | 12 | 28.138 | KV453011.1  | 8671281 | 12-scf00274 | 12 |
| AX-158122473 | 12 | 28.142 | KV453011.1  | 8766098 | 12-scf00274 | 12 |
| AX-157791390 | 12 | 28.156 | KV453011.1  | 7354265 | 12-scf00274 | 12 |
| AX-158121989 | 12 | 28.156 | KV453011.1  | 7672030 | 12-scf00274 | 12 |
| AX-158121993 | 12 | 28.156 | KV453011.1  | 7681179 | 12-scf00274 | 12 |
| AX-158411207 | 12 | 28.156 | KV453011.1  | 7767492 | 12-scf00274 | 12 |
| AX-158122158 | 12 | 28.156 | KV453011.1  | 7967904 | 12-scf00274 | 12 |

|              |    |        |            |         |             |    |
|--------------|----|--------|------------|---------|-------------|----|
| AX-158122288 | 12 | 28.156 | KV453011.1 | 8267425 | 12-scf00274 | 12 |
| AX-158122389 | 12 | 28.156 | KV453011.1 | 8503707 | 12-scf00274 | 12 |
| AX-158122481 | 12 | 28.156 | KV453011.1 | 8786001 | 12-scf00274 | 12 |
| AX-157829265 | 12 | 28.156 | KV453011.1 | 8803387 | 12-scf00274 | 12 |
| AX-158122490 | 12 | 28.156 | KV453011.1 | 8803814 | 12-scf00274 | 12 |
| AX-158122491 | 12 | 28.156 | KV453011.1 | 8805278 | 12-scf00274 | 12 |
| AX-157829266 | 12 | 28.156 | KV453011.1 | 8805642 | 12-scf00274 | 12 |
| AX-158122492 | 12 | 28.156 | KV453011.1 | 8806112 | 12-scf00274 | 12 |
| AX-157717170 | 12 | 28.156 | KV453011.1 | 8812483 | 12-scf00274 | 12 |
| AX-158122557 | 12 | 28.156 | KV453011.1 | 9003552 | 12-scf00274 | 12 |
| AX-158122564 | 12 | 28.156 | KV453011.1 | 9010097 | 12-scf00274 | 12 |
| AX-158122583 | 12 | 28.156 | KV453011.1 | 9075510 | 12-scf00274 | 12 |
| AX-158122600 | 12 | 28.156 | KV453011.1 | 9116499 | 12-scf00274 | 12 |
| AX-158122602 | 12 | 28.156 | KV453011.1 | 9120089 | 12-scf00274 | 12 |
| AX-158122604 | 12 | 28.156 | KV453011.1 | 9122621 | 12-scf00274 | 12 |
| AX-158122608 | 12 | 28.156 | KV453011.1 | 9134094 | 12-scf00274 | 12 |
| AX-158122611 | 12 | 28.156 | KV453011.1 | 9139396 | 12-scf00274 | 12 |
| AX-158122621 | 12 | 28.156 | KV453011.1 | 9158262 | 12-scf00274 | 12 |
| AX-158122623 | 12 | 28.156 | KV453011.1 | 9159048 | 12-scf00274 | 12 |
| AX-158121871 | 12 | 28.171 | KV453011.1 | 7344636 | 12-scf00274 | 12 |
| AX-158122117 | 12 | 28.171 | KV453011.1 | 7898770 | 12-scf00274 | 12 |
| AX-158122125 | 12 | 28.171 | KV453011.1 | 7908369 | 12-scf00274 | 12 |
| AX-158122590 | 12 | 28.171 | KV453011.1 | 9090279 | 12-scf00274 | 12 |
| AX-158122591 | 12 | 28.171 | KV453011.1 | 9090861 | 12-scf00274 | 12 |
| AX-158122625 | 12 | 28.171 | KV453011.1 | 9160248 | 12-scf00274 | 12 |
| AX-158411225 | 12 | 28.187 | KV453011.1 | 9160330 | 12-scf00274 | 12 |
| AX-157772942 | 12 | 28.206 | KV453011.1 | 9163568 | 12-scf00274 | 12 |
| AX-157752656 | 12 | 28.232 | KV453011.1 | 9198845 | 12-scf00274 | 12 |
| AX-158121981 | 12 | 28.265 | KV453011.1 | 7657560 | 12-scf00274 | 12 |
| AX-157871315 | 12 | 28.265 | KV453011.1 | 8072642 | 12-scf00274 | 12 |
| AX-158122281 | 12 | 28.265 | KV453011.1 | 8223711 | 12-scf00274 | 12 |
| AX-157774165 | 12 | 28.265 | KV453011.1 | 9010679 | 12-scf00274 | 12 |
| AX-158122565 | 12 | 28.265 | KV453011.1 | 9011225 | 12-scf00274 | 12 |
| AX-158122567 | 12 | 28.265 | KV453011.1 | 9014902 | 12-scf00274 | 12 |
| AX-158122571 | 12 | 28.265 | KV453011.1 | 9019737 | 12-scf00274 | 12 |
| AX-157741178 | 12 | 28.265 | KV453011.1 | 9120702 | 12-scf00274 | 12 |
| AX-158122605 | 12 | 28.265 | KV453011.1 | 9126131 | 12-scf00274 | 12 |
| AX-158122633 | 12 | 28.265 | KV453011.1 | 9169111 | 12-scf00274 | 12 |
| AX-158122679 | 12 | 28.265 | KV453011.1 | 9221353 | 12-scf00274 | 12 |
| AX-158122682 | 12 | 28.265 | KV453011.1 | 9224391 | 12-scf00274 | 12 |
| AX-157751484 | 12 | 28.265 | KV453011.1 | 9228201 | 12-scf00274 | 12 |
| AX-158122694 | 12 | 28.323 | KV453011.1 | 9238836 | 12-scf00274 | 12 |
| AX-158122305 | 12 | 28.374 | KV453011.1 | 8318669 | 12-scf00274 | 12 |
| AX-158122744 | 12 | 28.374 | KV453011.1 | 9292172 | 12-scf00274 | 12 |
| AX-158122995 | 12 | 28.374 | KV453011.1 | 9631030 | 12-scf00274 | 12 |
| AX-157716401 | 12 | 28.374 | KV453011.1 | 9659113 | 12-scf00274 | 12 |
| AX-158122775 | 12 | 28.484 | KV453011.1 | 9322482 | 12-scf00274 | 12 |
| AX-158122776 | 12 | 28.484 | KV453011.1 | 9323412 | 12-scf00274 | 12 |
| AX-157754644 | 12 | 28.484 | KV453011.1 | 9323845 | 12-scf00274 | 12 |
| AX-158122787 | 12 | 28.484 | KV453011.1 | 9333101 | 12-scf00274 | 12 |
| AX-158407954 | 12 | 28.484 | KV453011.1 | 9333556 | 12-scf00274 | 12 |

|              |    |        |            |          |             |    |
|--------------|----|--------|------------|----------|-------------|----|
| AX-158122790 | 12 | 28.484 | KV453011.1 | 9337862  | 12-scf00274 | 12 |
| AX-157748068 | 12 | 28.484 | KV453011.1 | 9348950  | 12-scf00274 | 12 |
| AX-158122804 | 12 | 28.484 | KV453011.1 | 9350752  | 12-scf00274 | 12 |
| AX-158122806 | 12 | 28.484 | KV453011.1 | 9353439  | 12-scf00274 | 12 |
| AX-157754813 | 12 | 28.484 | KV453011.1 | 9359148  | 12-scf00274 | 12 |
| AX-158122811 | 12 | 28.484 | KV453011.1 | 9360006  | 12-scf00274 | 12 |
| AX-158122847 | 12 | 28.484 | KV453011.1 | 9405720  | 12-scf00274 | 12 |
| AX-158122802 | 12 | 28.529 | KV453011.1 | 9350276  | 12-scf00274 | 12 |
| AX-158122814 | 12 | 28.529 | KV453011.1 | 9361550  | 12-scf00274 | 12 |
| AX-158122816 | 12 | 28.529 | KV453011.1 | 9362945  | 12-scf00274 | 12 |
| AX-158122817 | 12 | 28.529 | KV453011.1 | 9363178  | 12-scf00274 | 12 |
| AX-158122818 | 12 | 28.529 | KV453011.1 | 9363577  | 12-scf00274 | 12 |
| AX-158122827 | 12 | 28.529 | KV453011.1 | 9374329  | 12-scf00274 | 12 |
| AX-158122828 | 12 | 28.529 | KV453011.1 | 9374557  | 12-scf00274 | 12 |
| AX-158122832 | 12 | 28.529 | KV453011.1 | 9378507  | 12-scf00274 | 12 |
| AX-158122853 | 12 | 28.529 | KV453011.1 | 9412527  | 12-scf00274 | 12 |
| AX-158122925 | 12 | 28.529 | KV453011.1 | 9534508  | 12-scf00274 | 12 |
| AX-158122962 | 12 | 28.529 | KV453011.1 | 9572632  | 12-scf00274 | 12 |
| AX-158122978 | 12 | 28.529 | KV453011.1 | 9596464  | 12-scf00274 | 12 |
| AX-157871324 | 12 | 28.529 | KV453011.1 | 9624541  | 12-scf00274 | 12 |
| AX-158122996 | 12 | 28.529 | KV453011.1 | 9632620  | 12-scf00274 | 12 |
| AX-157773379 | 12 | 28.529 | KV453011.1 | 9659507  | 12-scf00274 | 12 |
| AX-158123024 | 12 | 28.529 | KV453011.1 | 9671831  | 12-scf00274 | 12 |
| AX-158123048 | 12 | 28.529 | KV453011.1 | 9727226  | 12-scf00274 | 12 |
| AX-158121819 | 12 | 28.541 | KV453011.1 | 7259125  | 12-scf00274 | 12 |
| AX-158122821 | 12 | 28.541 | KV453011.1 | 9366555  | 12-scf00274 | 12 |
| AX-158122846 | 12 | 28.541 | KV453011.1 | 9402524  | 12-scf00274 | 12 |
| AX-158121849 | 12 | 28.593 | KV453011.1 | 7304066  | 12-scf00274 | 12 |
| AX-158121931 | 12 | 28.593 | KV453011.1 | 7537285  | 12-scf00274 | 12 |
| AX-158121963 | 12 | 28.593 | KV453011.1 | 7619271  | 12-scf00274 | 12 |
| AX-158122838 | 12 | 28.593 | KV453011.1 | 9390584  | 12-scf00274 | 12 |
| AX-158122843 | 12 | 28.593 | KV453011.1 | 9397372  | 12-scf00274 | 12 |
| AX-157748163 | 12 | 28.593 | KV453011.1 | 9424039  | 12-scf00274 | 12 |
| AX-158122862 | 12 | 28.593 | KV453011.1 | 9426317  | 12-scf00274 | 12 |
| AX-158122865 | 12 | 28.593 | KV453011.1 | 9429020  | 12-scf00274 | 12 |
| AX-158122869 | 12 | 28.593 | KV453011.1 | 9436843  | 12-scf00274 | 12 |
| AX-158122877 | 12 | 28.593 | KV453011.1 | 9453624  | 12-scf00274 | 12 |
| AX-157708073 | 12 | 28.593 | KV453011.1 | 9454020  | 12-scf00274 | 12 |
| AX-158122885 | 12 | 28.593 | KV453011.1 | 9461283  | 12-scf00274 | 12 |
| AX-157717572 | 12 | 28.593 | KV453011.1 | 9461417  | 12-scf00274 | 12 |
| AX-157829295 | 12 | 28.593 | KV453011.1 | 9485123  | 12-scf00274 | 12 |
| AX-158122903 | 12 | 28.593 | KV453011.1 | 9493089  | 12-scf00274 | 12 |
| AX-158122904 | 12 | 28.593 | KV453011.1 | 9495006  | 12-scf00274 | 12 |
| AX-158122912 | 12 | 28.775 | KV453011.1 | 9514970  | 12-scf00274 | 12 |
| AX-158122915 | 12 | 28.777 | KV453011.1 | 9521193  | 12-scf00274 | 12 |
| AX-158385049 | 12 | 28.779 | KV453011.1 | 6710151  | 12-scf00274 | 12 |
| AX-158122354 | 12 | 28.779 | KV453011.1 | 8431168  | 12-scf00274 | 12 |
| AX-158122543 | 12 | 28.779 | KV453011.1 | 8965245  | 12-scf00274 | 12 |
| AX-158122769 | 12 | 28.779 | KV453011.1 | 9317296  | 12-scf00274 | 12 |
| AX-158392743 | 12 | 28.779 | KV453011.1 | 9540213  | 12-scf00274 | 12 |
| AX-158123220 | 12 | 28.779 | KV453011.1 | 10173109 | 12-scf00274 | 12 |



|              |    |        |            |          |             |    |
|--------------|----|--------|------------|----------|-------------|----|
| AX-158122955 | 12 | 28.781 | KV453011.1 | 9564878  | 12-scf00274 | 12 |
| AX-157829307 | 12 | 28.781 | KV453011.1 | 9566396  | 12-scf00274 | 12 |
| AX-157714760 | 12 | 28.864 | KV453011.1 | 9566451  | 12-scf00274 | 12 |
| AX-158122963 | 12 | 29.376 | KV453011.1 | 9573724  | 12-scf00274 | 12 |
| AX-158120597 | 12 | 29.392 | KV453011.1 | 5341045  | 12-scf00274 | 12 |
| AX-158121623 | 12 | 29.392 | KV453011.1 | 6881851  | 12-scf00274 | 12 |
| AX-158122972 | 12 | 29.392 | KV453011.1 | 9586917  | 12-scf00274 | 12 |
| AX-158122974 | 12 | 29.392 | KV453011.1 | 9589657  | 12-scf00274 | 12 |
| AX-158122977 | 12 | 29.392 | KV453011.1 | 9595725  | 12-scf00274 | 12 |
| AX-157774233 | 12 | 29.392 | KV453011.1 | 9596562  | 12-scf00274 | 12 |
| AX-158122983 | 12 | 29.392 | KV453011.1 | 9611316  | 12-scf00274 | 12 |
| AX-158123018 | 12 | 29.392 | KV453011.1 | 9666213  | 12-scf00274 | 12 |
| AX-158123037 | 12 | 29.392 | KV453011.1 | 9696988  | 12-scf00274 | 12 |
| AX-158123135 | 12 | 29.392 | KV453011.1 | 9956374  | 12-scf00274 | 12 |
| AX-158124003 | 12 | 29.392 | KV453011.1 | 12390503 | 12-scf00274 | 12 |
| AX-158121711 | 12 | 29.423 | KV453011.1 | 7063076  | 12-scf00274 | 12 |
| AX-157724149 | 12 | 29.423 | KV453011.1 | 9597157  | 12-scf00274 | 12 |
| AX-158122985 | 12 | 29.423 | KV453011.1 | 9613659  | 12-scf00274 | 12 |
| AX-157866182 | 12 | 29.423 | KV453011.1 | 10181623 | 12-scf00274 | 12 |
| AX-158122810 | 12 | 29.453 | KV453011.1 | 9359744  | 12-scf00274 | 12 |
| AX-157772378 | 12 | 29.453 | KV453011.1 | 9365152  | 12-scf00274 | 12 |
| AX-158122819 | 12 | 29.453 | KV453011.1 | 9365237  | 12-scf00274 | 12 |
| AX-157720686 | 12 | 29.453 | KV453011.1 | 9399229  | 12-scf00274 | 12 |
| AX-158122931 | 12 | 29.453 | KV453011.1 | 9539311  | 12-scf00274 | 12 |
| AX-157829309 | 12 | 29.453 | KV453011.1 | 9578224  | 12-scf00274 | 12 |
| AX-158122973 | 12 | 29.453 | KV453011.1 | 9589218  | 12-scf00274 | 12 |
| AX-158122987 | 12 | 29.453 | KV453011.1 | 9618247  | 12-scf00274 | 12 |
| AX-157713676 | 12 | 29.486 | KV453011.1 | 9622743  | 12-scf00274 | 12 |
| AX-158123002 | 12 | 29.486 | KV453011.1 | 9639569  | 12-scf00274 | 12 |
| AX-158123906 | 12 | 29.486 | KV453011.1 | 12251353 | 12-scf00274 | 12 |
| AX-158123908 | 12 | 29.486 | KV453011.1 | 12257287 | 12-scf00274 | 12 |
| AX-158123945 | 12 | 29.486 | KV453011.1 | 12315399 | 12-scf00274 | 12 |
| AX-158123952 | 12 | 29.486 | KV453011.1 | 12324680 | 12-scf00274 | 12 |
| AX-158123977 | 12 | 29.486 | KV453011.1 | 12359404 | 12-scf00274 | 12 |
| AX-158411233 | 12 | 29.521 | KV453011.1 | 9623096  | 12-scf00274 | 12 |
| AX-158411234 | 12 | 29.544 | KV453011.1 | 9623201  | 12-scf00274 | 12 |
| AX-158122458 | 12 | 29.577 | KV453011.1 | 8672017  | 12-scf00274 | 12 |
| AX-158122778 | 12 | 29.577 | KV453011.1 | 9325727  | 12-scf00274 | 12 |
| AX-158122799 | 12 | 29.577 | KV453011.1 | 9347105  | 12-scf00274 | 12 |
| AX-157719640 | 12 | 29.577 | KV453011.1 | 9515022  | 12-scf00274 | 12 |
| AX-157829297 | 12 | 29.577 | KV453011.1 | 9526532  | 12-scf00274 | 12 |
| AX-158122949 | 12 | 29.577 | KV453011.1 | 9552787  | 12-scf00274 | 12 |
| AX-158122994 | 12 | 29.577 | KV453011.1 | 9629278  | 12-scf00274 | 12 |
| AX-158411236 | 12 | 29.577 | KV453011.1 | 9640644  | 12-scf00274 | 12 |
| AX-158123006 | 12 | 29.577 | KV453011.1 | 9644707  | 12-scf00274 | 12 |
| AX-157829315 | 12 | 29.577 | KV453011.1 | 9646145  | 12-scf00274 | 12 |
| AX-158123008 | 12 | 29.577 | KV453011.1 | 9648378  | 12-scf00274 | 12 |
| AX-158123009 | 12 | 29.577 | KV453011.1 | 9649169  | 12-scf00274 | 12 |
| AX-158123010 | 12 | 29.577 | KV453011.1 | 9650624  | 12-scf00274 | 12 |
| AX-158123011 | 12 | 29.577 | KV453011.1 | 9651666  | 12-scf00274 | 12 |
| AX-158417311 | 12 | 29.577 | KV453011.1 | 9651710  | 12-scf00274 | 12 |

|              |    |        |            |          |             |    |
|--------------|----|--------|------------|----------|-------------|----|
| AX-158123012 | 12 | 29.577 | KV453011.1 | 9652316  | 12-scf00274 | 12 |
| AX-157717486 | 12 | 29.577 | KV453011.1 | 9654029  | 12-scf00274 | 12 |
| AX-158123017 | 12 | 29.577 | KV453011.1 | 9663586  | 12-scf00274 | 12 |
| AX-158123026 | 12 | 29.577 | KV453011.1 | 9673695  | 12-scf00274 | 12 |
| AX-157829317 | 12 | 29.577 | KV453011.1 | 9674381  | 12-scf00274 | 12 |
| AX-158123031 | 12 | 29.577 | KV453011.1 | 9688047  | 12-scf00274 | 12 |
| AX-158123033 | 12 | 29.577 | KV453011.1 | 9689360  | 12-scf00274 | 12 |
| AX-157829320 | 12 | 29.577 | KV453011.1 | 9701205  | 12-scf00274 | 12 |
| AX-158123044 | 12 | 29.577 | KV453011.1 | 9721002  | 12-scf00274 | 12 |
| AX-158123045 | 12 | 29.577 | KV453011.1 | 9724618  | 12-scf00274 | 12 |
| AX-158123058 | 12 | 29.577 | KV453011.1 | 9748411  | 12-scf00274 | 12 |
| AX-158123071 | 12 | 29.577 | KV453011.1 | 9779655  | 12-scf00274 | 12 |
| AX-158123076 | 12 | 29.577 | KV453011.1 | 9793852  | 12-scf00274 | 12 |
| AX-158123128 | 12 | 29.577 | KV453011.1 | 9936375  | 12-scf00274 | 12 |
| AX-158123534 | 12 | 29.577 | KV453011.1 | 11188485 | 12-scf00274 | 12 |
| AX-157829417 | 12 | 29.577 | KV453011.1 | 11396646 | 12-scf00274 | 12 |
| AX-157829418 | 12 | 29.577 | KV453011.1 | 11416462 | 12-scf00274 | 12 |
| AX-158123041 | 12 | 29.686 | KV453011.1 | 9707455  | 12-scf00274 | 12 |
| AX-158123079 | 12 | 29.686 | KV453011.1 | 9800307  | 12-scf00274 | 12 |
| AX-158123083 | 12 | 29.686 | KV453011.1 | 9804064  | 12-scf00274 | 12 |
| AX-158123086 | 12 | 29.686 | KV453011.1 | 9807237  | 12-scf00274 | 12 |
| AX-158123119 | 12 | 29.686 | KV453011.1 | 9889461  | 12-scf00274 | 12 |
| AX-158123121 | 12 | 29.686 | KV453011.1 | 9896754  | 12-scf00274 | 12 |
| AX-158123122 | 12 | 29.686 | KV453011.1 | 9896965  | 12-scf00274 | 12 |
| AX-158123123 | 12 | 29.686 | KV453011.1 | 9904020  | 12-scf00274 | 12 |
| AX-158123124 | 12 | 29.686 | KV453011.1 | 9907713  | 12-scf00274 | 12 |
| AX-158123130 | 12 | 29.686 | KV453011.1 | 9937405  | 12-scf00274 | 12 |
| AX-158123131 | 12 | 29.686 | KV453011.1 | 9940598  | 12-scf00274 | 12 |
| AX-157723338 | 12 | 29.686 | KV453011.1 | 9947763  | 12-scf00274 | 12 |
| AX-157702645 | 12 | 29.686 | KV453011.1 | 9952518  | 12-scf00274 | 12 |
| AX-158123132 | 12 | 29.686 | KV453011.1 | 9954635  | 12-scf00274 | 12 |
| AX-158123133 | 12 | 29.686 | KV453011.1 | 9955075  | 12-scf00274 | 12 |
| AX-158123134 | 12 | 29.686 | KV453011.1 | 9955500  | 12-scf00274 | 12 |
| AX-158123136 | 12 | 29.686 | KV453011.1 | 9957861  | 12-scf00274 | 12 |
| AX-158123137 | 12 | 29.686 | KV453011.1 | 9959901  | 12-scf00274 | 12 |
| AX-158123138 | 12 | 29.686 | KV453011.1 | 9962897  | 12-scf00274 | 12 |
| AX-158123144 | 12 | 29.686 | KV453011.1 | 9974584  | 12-scf00274 | 12 |
| AX-158123176 | 12 | 29.686 | KV453011.1 | 10033401 | 12-scf00274 | 12 |
| AX-158123181 | 12 | 29.686 | KV453011.1 | 10041403 | 12-scf00274 | 12 |
| AX-158123214 | 12 | 29.686 | KV453011.1 | 10138769 | 12-scf00274 | 12 |
| AX-158123218 | 12 | 29.686 | KV453011.1 | 10163918 | 12-scf00274 | 12 |
| AX-158123221 | 12 | 29.686 | KV453011.1 | 10180875 | 12-scf00274 | 12 |
| AX-158123225 | 12 | 29.686 | KV453011.1 | 10202251 | 12-scf00274 | 12 |
| AX-158123230 | 12 | 29.686 | KV453011.1 | 10227828 | 12-scf00274 | 12 |
| AX-158123239 | 12 | 29.686 | KV453011.1 | 10267891 | 12-scf00274 | 12 |
| AX-158123240 | 12 | 29.686 | KV453011.1 | 10269044 | 12-scf00274 | 12 |
| AX-158123241 | 12 | 29.686 | KV453011.1 | 10270042 | 12-scf00274 | 12 |
| AX-158123244 | 12 | 29.686 | KV453011.1 | 10285883 | 12-scf00274 | 12 |
| AX-158123247 | 12 | 29.686 | KV453011.1 | 10292233 | 12-scf00274 | 12 |
| AX-158123249 | 12 | 29.686 | KV453011.1 | 10295353 | 12-scf00274 | 12 |
| AX-158123271 | 12 | 29.686 | KV453011.1 | 10396238 | 12-scf00274 | 12 |

|              |    |        |            |          |             |    |
|--------------|----|--------|------------|----------|-------------|----|
| AX-158123277 | 12 | 29.686 | KV453011.1 | 10429044 | 12-scf00274 | 12 |
| AX-158123379 | 12 | 29.686 | KV453011.1 | 10753487 | 12-scf00274 | 12 |
| AX-157747127 | 12 | 29.686 | KV453011.1 | 10761646 | 12-scf00274 | 12 |
| AX-158123777 | 12 | 29.686 | KV453011.1 | 11921746 | 12-scf00274 | 12 |
| AX-157757245 | 12 | 29.686 | KV453011.1 | 11933468 | 12-scf00274 | 12 |
| AX-158123785 | 12 | 29.686 | KV453011.1 | 11947922 | 12-scf00274 | 12 |
| AX-158123790 | 12 | 29.686 | KV453011.1 | 11950793 | 12-scf00274 | 12 |
| AX-158123792 | 12 | 29.686 | KV453011.1 | 11955211 | 12-scf00274 | 12 |
| AX-158123820 | 12 | 29.686 | KV453011.1 | 12018474 | 12-scf00274 | 12 |
| AX-158123821 | 12 | 29.686 | KV453011.1 | 12020910 | 12-scf00274 | 12 |
| AX-158123853 | 12 | 29.686 | KV453011.1 | 12093917 | 12-scf00274 | 12 |
| AX-158120612 | 12 | 29.692 | KV453011.1 | 5368038  | 12-scf00274 | 12 |
| AX-157749806 | 12 | 29.692 | KV453011.1 | 6642705  | 12-scf00274 | 12 |
| AX-158411179 | 12 | 29.692 | KV453011.1 | 6859644  | 12-scf00274 | 12 |
| AX-158121797 | 12 | 29.692 | KV453011.1 | 7211705  | 12-scf00274 | 12 |
| AX-157829224 | 12 | 29.692 | KV453011.1 | 8162769  | 12-scf00274 | 12 |
| AX-158122372 | 12 | 29.692 | KV453011.1 | 8481578  | 12-scf00274 | 12 |
| AX-158122964 | 12 | 29.692 | KV453011.1 | 9574131  | 12-scf00274 | 12 |
| AX-158123028 | 12 | 29.692 | KV453011.1 | 9680210  | 12-scf00274 | 12 |
| AX-157829318 | 12 | 29.692 | KV453011.1 | 9683231  | 12-scf00274 | 12 |
| AX-157857677 | 12 | 29.692 | KV453011.1 | 9685605  | 12-scf00274 | 12 |
| AX-157740224 | 12 | 29.692 | KV453011.1 | 9690456  | 12-scf00274 | 12 |
| AX-158123228 | 12 | 29.692 | KV453011.1 | 10215862 | 12-scf00274 | 12 |
| AX-158123253 | 12 | 29.692 | KV453011.1 | 10310603 | 12-scf00274 | 12 |
| AX-158123259 | 12 | 29.708 | KV453011.1 | 10333327 | 12-scf00274 | 12 |
| AX-158380169 | 12 | 29.764 | KV453011.1 | 9724214  | 12-scf00274 | 12 |
| AX-158123591 | 12 | 29.764 | KV453011.1 | 11318198 | 12-scf00274 | 12 |
| AX-158123593 | 12 | 29.764 | KV453011.1 | 11321012 | 12-scf00274 | 12 |
| AX-158123598 | 12 | 29.764 | KV453011.1 | 11330297 | 12-scf00274 | 12 |
| AX-157829420 | 12 | 29.764 | KV453011.1 | 11430418 | 12-scf00274 | 12 |
| AX-158123594 | 12 | 29.807 | KV453011.1 | 11321965 | 12-scf00274 | 12 |
| AX-158123608 | 12 | 29.85  | KV453011.1 | 11440021 | 12-scf00274 | 12 |
| AX-158123609 | 12 | 29.866 | KV453011.1 | 11441831 | 12-scf00274 | 12 |
| AX-158123619 | 12 | 29.905 | KV453011.1 | 11474223 | 12-scf00274 | 12 |
| AX-158123639 | 12 | 29.905 | KV453011.1 | 11506295 | 12-scf00274 | 12 |
| AX-158123643 | 12 | 29.905 | KV453011.1 | 11514736 | 12-scf00274 | 12 |
| AX-158411295 | 12 | 29.905 | KV453011.1 | 11516378 | 12-scf00274 | 12 |
| AX-158123650 | 12 | 29.905 | KV453011.1 | 11542117 | 12-scf00274 | 12 |
| AX-158123651 | 12 | 29.905 | KV453011.1 | 11547085 | 12-scf00274 | 12 |
| AX-158123653 | 12 | 29.905 | KV453011.1 | 11559132 | 12-scf00274 | 12 |
| AX-158123654 | 12 | 29.905 | KV453011.1 | 11563614 | 12-scf00274 | 12 |
| AX-158123655 | 12 | 29.905 | KV453011.1 | 11568251 | 12-scf00274 | 12 |
| AX-158123656 | 12 | 29.905 | KV453011.1 | 11569255 | 12-scf00274 | 12 |
| AX-158123657 | 12 | 29.905 | KV453011.1 | 11574855 | 12-scf00274 | 12 |
| AX-158123658 | 12 | 29.905 | KV453011.1 | 11575952 | 12-scf00274 | 12 |
| AX-158123659 | 12 | 29.905 | KV453011.1 | 11578292 | 12-scf00274 | 12 |
| AX-158123660 | 12 | 29.905 | KV453011.1 | 11580169 | 12-scf00274 | 12 |
| AX-158123661 | 12 | 29.905 | KV453011.1 | 11580783 | 12-scf00274 | 12 |
| AX-158123663 | 12 | 29.905 | KV453011.1 | 11586281 | 12-scf00274 | 12 |
| AX-158123664 | 12 | 29.905 | KV453011.1 | 11587809 | 12-scf00274 | 12 |
| AX-158123665 | 12 | 29.905 | KV453011.1 | 11588596 | 12-scf00274 | 12 |

|              |    |        |            |          |             |    |
|--------------|----|--------|------------|----------|-------------|----|
| AX-158123666 | 12 | 29.905 | KV453011.1 | 11589183 | 12-scf00274 | 12 |
| AX-158123667 | 12 | 29.905 | KV453011.1 | 11590106 | 12-scf00274 | 12 |
| AX-158123670 | 12 | 29.905 | KV453011.1 | 11597940 | 12-scf00274 | 12 |
| AX-158123672 | 12 | 29.905 | KV453011.1 | 11608342 | 12-scf00274 | 12 |
| AX-158123673 | 12 | 29.905 | KV453011.1 | 11610284 | 12-scf00274 | 12 |
| AX-158123675 | 12 | 29.905 | KV453011.1 | 11617977 | 12-scf00274 | 12 |
| AX-158123676 | 12 | 29.905 | KV453011.1 | 11620819 | 12-scf00274 | 12 |
| AX-158123677 | 12 | 29.905 | KV453011.1 | 11624242 | 12-scf00274 | 12 |
| AX-158123680 | 12 | 29.905 | KV453011.1 | 11633726 | 12-scf00274 | 12 |
| AX-158123681 | 12 | 29.905 | KV453011.1 | 11635445 | 12-scf00274 | 12 |
| AX-158123684 | 12 | 29.905 | KV453011.1 | 11640985 | 12-scf00274 | 12 |
| AX-158123685 | 12 | 29.905 | KV453011.1 | 11641628 | 12-scf00274 | 12 |
| AX-158123690 | 12 | 29.905 | KV453011.1 | 11674603 | 12-scf00274 | 12 |
| AX-158123695 | 12 | 29.905 | KV453011.1 | 11688772 | 12-scf00274 | 12 |
| AX-158123696 | 12 | 29.905 | KV453011.1 | 11702860 | 12-scf00274 | 12 |
| AX-158123697 | 12 | 29.905 | KV453011.1 | 11711599 | 12-scf00274 | 12 |
| AX-158123711 | 12 | 29.905 | KV453011.1 | 11791482 | 12-scf00274 | 12 |
| AX-158123712 | 12 | 29.905 | KV453011.1 | 11794089 | 12-scf00274 | 12 |
| AX-158123716 | 12 | 29.905 | KV453011.1 | 11811304 | 12-scf00274 | 12 |
| AX-158123718 | 12 | 29.905 | KV453011.1 | 11817099 | 12-scf00274 | 12 |
| AX-158123726 | 12 | 29.905 | KV453011.1 | 11842216 | 12-scf00274 | 12 |
| AX-158123758 | 12 | 29.905 | KV453011.1 | 11887981 | 12-scf00274 | 12 |
| AX-158123759 | 12 | 29.905 | KV453011.1 | 11890177 | 12-scf00274 | 12 |
| AX-158123760 | 12 | 29.905 | KV453011.1 | 11892226 | 12-scf00274 | 12 |
| AX-158123771 | 12 | 29.905 | KV453011.1 | 11910553 | 12-scf00274 | 12 |
| AX-158123772 | 12 | 29.905 | KV453011.1 | 11910922 | 12-scf00274 | 12 |
| AX-158123774 | 12 | 29.905 | KV453011.1 | 11915750 | 12-scf00274 | 12 |
| AX-158123775 | 12 | 29.905 | KV453011.1 | 11917970 | 12-scf00274 | 12 |
| AX-158123776 | 12 | 29.905 | KV453011.1 | 11919382 | 12-scf00274 | 12 |
| AX-158123782 | 12 | 29.905 | KV453011.1 | 11940888 | 12-scf00274 | 12 |
| AX-158123783 | 12 | 29.905 | KV453011.1 | 11946071 | 12-scf00274 | 12 |
| AX-158123784 | 12 | 29.905 | KV453011.1 | 11946576 | 12-scf00274 | 12 |
| AX-158123787 | 12 | 29.905 | KV453011.1 | 11949123 | 12-scf00274 | 12 |
| AX-158123788 | 12 | 29.905 | KV453011.1 | 11949949 | 12-scf00274 | 12 |
| AX-158123789 | 12 | 29.905 | KV453011.1 | 11950162 | 12-scf00274 | 12 |
| AX-158123796 | 12 | 29.905 | KV453011.1 | 11960918 | 12-scf00274 | 12 |
| AX-158123797 | 12 | 29.905 | KV453011.1 | 11961395 | 12-scf00274 | 12 |
| AX-158411306 | 12 | 29.905 | KV453011.1 | 12354775 | 12-scf00274 | 12 |
| AX-157726316 | 12 | 30.123 | KV453011.1 | 9807958  | 12-scf00274 | 12 |
| AX-158123093 | 12 | 30.123 | KV453011.1 | 9821809  | 12-scf00274 | 12 |
| AX-158123097 | 12 | 30.123 | KV453011.1 | 9822779  | 12-scf00274 | 12 |
| AX-158123100 | 12 | 30.123 | KV453011.1 | 9825475  | 12-scf00274 | 12 |
| AX-158123125 | 12 | 30.123 | KV453011.1 | 9913822  | 12-scf00274 | 12 |
| AX-158123188 | 12 | 30.123 | KV453011.1 | 10051894 | 12-scf00274 | 12 |
| AX-158123189 | 12 | 30.123 | KV453011.1 | 10053731 | 12-scf00274 | 12 |
| AX-158123213 | 12 | 30.123 | KV453011.1 | 10130240 | 12-scf00274 | 12 |
| AX-158380170 | 12 | 30.123 | KV453011.1 | 10276584 | 12-scf00274 | 12 |
| AX-158123269 | 12 | 30.123 | KV453011.1 | 10367705 | 12-scf00274 | 12 |
| AX-158123273 | 12 | 30.123 | KV453011.1 | 10402009 | 12-scf00274 | 12 |
| AX-158123398 | 12 | 30.123 | KV453011.1 | 10806806 | 12-scf00274 | 12 |
| AX-158123412 | 12 | 30.123 | KV453011.1 | 10828614 | 12-scf00274 | 12 |

|              |    |        |            |          |             |    |
|--------------|----|--------|------------|----------|-------------|----|
| AX-158123431 | 12 | 30.123 | KV453011.1 | 10857548 | 12-scf00274 | 12 |
| AX-158123560 | 12 | 30.123 | KV453011.1 | 11240187 | 12-scf00274 | 12 |
| AX-158123564 | 12 | 30.123 | KV453011.1 | 11247749 | 12-scf00274 | 12 |
| AX-158123570 | 12 | 30.123 | KV453011.1 | 11254643 | 12-scf00274 | 12 |
| AX-157829410 | 12 | 30.123 | KV453011.1 | 11254983 | 12-scf00274 | 12 |
| AX-158123571 | 12 | 30.123 | KV453011.1 | 11256534 | 12-scf00274 | 12 |
| AX-158123572 | 12 | 30.123 | KV453011.1 | 11256738 | 12-scf00274 | 12 |
| AX-158123599 | 12 | 30.123 | KV453011.1 | 11332509 | 12-scf00274 | 12 |
| AX-158123607 | 12 | 30.123 | KV453011.1 | 11438832 | 12-scf00274 | 12 |
| AX-158123738 | 12 | 30.123 | KV453011.1 | 11866700 | 12-scf00274 | 12 |
| AX-158123799 | 12 | 30.123 | KV453011.1 | 11970336 | 12-scf00274 | 12 |
| AX-158123810 | 12 | 30.123 | KV453011.1 | 11992391 | 12-scf00274 | 12 |
| AX-158123811 | 12 | 30.123 | KV453011.1 | 11992766 | 12-scf00274 | 12 |
| AX-158123817 | 12 | 30.123 | KV453011.1 | 12014162 | 12-scf00274 | 12 |
| AX-158123838 | 12 | 30.123 | KV453011.1 | 12056251 | 12-scf00274 | 12 |
| AX-158123841 | 12 | 30.123 | KV453011.1 | 12070908 | 12-scf00274 | 12 |
| AX-158123843 | 12 | 30.123 | KV453011.1 | 12074332 | 12-scf00274 | 12 |
| AX-158123850 | 12 | 30.123 | KV453011.1 | 12089177 | 12-scf00274 | 12 |
| AX-157699222 | 12 | 30.123 | KV453011.1 | 12095014 | 12-scf00274 | 12 |
| AX-158123869 | 12 | 30.123 | KV453011.1 | 12120418 | 12-scf00274 | 12 |
| AX-158123880 | 12 | 30.123 | KV453011.1 | 12169598 | 12-scf00274 | 12 |
| AX-158123935 | 12 | 30.123 | KV453011.1 | 12295308 | 12-scf00274 | 12 |
| AX-157745290 | 12 | 30.123 | KV453011.1 | 12307930 | 12-scf00274 | 12 |
| AX-158123946 | 12 | 30.123 | KV453011.1 | 12316207 | 12-scf00274 | 12 |
| AX-158123949 | 12 | 30.123 | KV453011.1 | 12320377 | 12-scf00274 | 12 |
| AX-158123855 | 12 | 30.233 | KV453011.1 | 12098000 | 12-scf00274 | 12 |
| AX-158123860 | 12 | 30.289 | KV453011.1 | 12107242 | 12-scf00274 | 12 |
| AX-158120378 | 12 | 30.342 | KV453011.1 | 5035858  | 12-scf00274 | 12 |
| AX-158121801 | 12 | 30.342 | KV453011.1 | 7222421  | 12-scf00274 | 12 |
| AX-158122133 | 12 | 30.342 | KV453011.1 | 7925355  | 12-scf00274 | 12 |
| AX-157709195 | 12 | 30.342 | KV453011.1 | 7946387  | 12-scf00274 | 12 |
| AX-157857635 | 12 | 30.342 | KV453011.1 | 7963986  | 12-scf00274 | 12 |
| AX-157758500 | 12 | 30.342 | KV453011.1 | 8018285  | 12-scf00274 | 12 |
| AX-157877783 | 12 | 30.342 | KV453011.1 | 8032932  | 12-scf00274 | 12 |
| AX-158122287 | 12 | 30.342 | KV453011.1 | 8267017  | 12-scf00274 | 12 |
| AX-158122329 | 12 | 30.342 | KV453011.1 | 8392004  | 12-scf00274 | 12 |
| AX-157829246 | 12 | 30.342 | KV453011.1 | 8409904  | 12-scf00274 | 12 |
| AX-158122379 | 12 | 30.342 | KV453011.1 | 8491930  | 12-scf00274 | 12 |
| AX-158122392 | 12 | 30.342 | KV453011.1 | 8511784  | 12-scf00274 | 12 |
| AX-158122398 | 12 | 30.342 | KV453011.1 | 8519545  | 12-scf00274 | 12 |
| AX-158122645 | 12 | 30.342 | KV453011.1 | 9179004  | 12-scf00274 | 12 |
| AX-158122870 | 12 | 30.342 | KV453011.1 | 9437108  | 12-scf00274 | 12 |
| AX-158123013 | 12 | 30.342 | KV453011.1 | 9652722  | 12-scf00274 | 12 |
| AX-158123051 | 12 | 30.342 | KV453011.1 | 9737163  | 12-scf00274 | 12 |
| AX-158123248 | 12 | 30.342 | KV453011.1 | 10294467 | 12-scf00274 | 12 |
| AX-158123256 | 12 | 30.342 | KV453011.1 | 10324107 | 12-scf00274 | 12 |
| AX-158123257 | 12 | 30.342 | KV453011.1 | 10327851 | 12-scf00274 | 12 |
| AX-157866183 | 12 | 30.342 | KV453011.1 | 10330217 | 12-scf00274 | 12 |
| AX-158123261 | 12 | 30.342 | KV453011.1 | 10335510 | 12-scf00274 | 12 |
| AX-158123829 | 12 | 30.342 | KV453011.1 | 12034422 | 12-scf00274 | 12 |
| AX-158123830 | 12 | 30.342 | KV453011.1 | 12036177 | 12-scf00274 | 12 |

|              |    |        |            |          |             |    |
|--------------|----|--------|------------|----------|-------------|----|
| AX-158407980 | 12 | 30.342 | KV453011.1 | 12068672 | 12-scf00274 | 12 |
| AX-157829427 | 12 | 30.342 | KV453011.1 | 12098968 | 12-scf00274 | 12 |
| AX-158123856 | 12 | 30.342 | KV453011.1 | 12099449 | 12-scf00274 | 12 |
| AX-158123857 | 12 | 30.342 | KV453011.1 | 12100004 | 12-scf00274 | 12 |
| AX-158123864 | 12 | 30.342 | KV453011.1 | 12110723 | 12-scf00274 | 12 |
| AX-158123865 | 12 | 30.342 | KV453011.1 | 12112169 | 12-scf00274 | 12 |
| AX-157715850 | 12 | 30.342 | KV453011.1 | 12119881 | 12-scf00274 | 12 |
| AX-158123872 | 12 | 30.342 | KV453011.1 | 12127835 | 12-scf00274 | 12 |
| AX-158123873 | 12 | 30.342 | KV453011.1 | 12136841 | 12-scf00274 | 12 |
| AX-158123881 | 12 | 30.342 | KV453011.1 | 12172094 | 12-scf00274 | 12 |
| AX-158123882 | 12 | 30.342 | KV453011.1 | 12177906 | 12-scf00274 | 12 |
| AX-158380174 | 12 | 30.342 | KV453011.1 | 12182381 | 12-scf00274 | 12 |
| AX-158123884 | 12 | 30.342 | KV453011.1 | 12182459 | 12-scf00274 | 12 |
| AX-158123886 | 12 | 30.342 | KV453011.1 | 12187508 | 12-scf00274 | 12 |
| AX-157745884 | 12 | 30.342 | KV453011.1 | 12192444 | 12-scf00274 | 12 |
| AX-158123893 | 12 | 30.342 | KV453011.1 | 12209065 | 12-scf00274 | 12 |
| AX-158123897 | 12 | 30.342 | KV453011.1 | 12228659 | 12-scf00274 | 12 |
| AX-158123900 | 12 | 30.342 | KV453011.1 | 12234226 | 12-scf00274 | 12 |
| AX-158123903 | 12 | 30.342 | KV453011.1 | 12244396 | 12-scf00274 | 12 |
| AX-158123907 | 12 | 30.342 | KV453011.1 | 12256793 | 12-scf00274 | 12 |
| AX-158123911 | 12 | 30.342 | KV453011.1 | 12260492 | 12-scf00274 | 12 |
| AX-158123913 | 12 | 30.342 | KV453011.1 | 12261714 | 12-scf00274 | 12 |
| AX-158123914 | 12 | 30.342 | KV453011.1 | 12261958 | 12-scf00274 | 12 |
| AX-158123915 | 12 | 30.342 | KV453011.1 | 12263964 | 12-scf00274 | 12 |
| AX-157714567 | 12 | 30.342 | KV453011.1 | 12264558 | 12-scf00274 | 12 |
| AX-158123916 | 12 | 30.342 | KV453011.1 | 12265180 | 12-scf00274 | 12 |
| AX-158123917 | 12 | 30.342 | KV453011.1 | 12266132 | 12-scf00274 | 12 |
| AX-158123920 | 12 | 30.342 | KV453011.1 | 12272420 | 12-scf00274 | 12 |
| AX-158123925 | 12 | 30.342 | KV453011.1 | 12284222 | 12-scf00274 | 12 |
| AX-158123927 | 12 | 30.342 | KV453011.1 | 12286885 | 12-scf00274 | 12 |
| AX-158123930 | 12 | 30.342 | KV453011.1 | 12288620 | 12-scf00274 | 12 |
| AX-158123931 | 12 | 30.342 | KV453011.1 | 12289237 | 12-scf00274 | 12 |
| AX-158123932 | 12 | 30.342 | KV453011.1 | 12291374 | 12-scf00274 | 12 |
| AX-158123933 | 12 | 30.342 | KV453011.1 | 12293744 | 12-scf00274 | 12 |
| AX-157747691 | 12 | 30.342 | KV453011.1 | 12307141 | 12-scf00274 | 12 |
| AX-158123943 | 12 | 30.342 | KV453011.1 | 12314114 | 12-scf00274 | 12 |
| AX-158123947 | 12 | 30.342 | KV453011.1 | 12316580 | 12-scf00274 | 12 |
| AX-158123948 | 12 | 30.342 | KV453011.1 | 12318590 | 12-scf00274 | 12 |
| AX-158123959 | 12 | 30.342 | KV453011.1 | 12330591 | 12-scf00274 | 12 |
| AX-157711406 | 12 | 30.342 | KV453011.1 | 12336053 | 12-scf00274 | 12 |
| AX-158123964 | 12 | 30.342 | KV453011.1 | 12336386 | 12-scf00274 | 12 |
| AX-157747084 | 12 | 30.342 | KV453011.1 | 12336937 | 12-scf00274 | 12 |
| AX-158123968 | 12 | 30.342 | KV453011.1 | 12343894 | 12-scf00274 | 12 |
| AX-158123969 | 12 | 30.342 | KV453011.1 | 12344464 | 12-scf00274 | 12 |
| AX-158123973 | 12 | 30.342 | KV453011.1 | 12353062 | 12-scf00274 | 12 |
| AX-158123979 | 12 | 30.342 | KV453011.1 | 12361782 | 12-scf00274 | 12 |
| AX-158123981 | 12 | 30.342 | KV453011.1 | 12365025 | 12-scf00274 | 12 |
| AX-158123983 | 12 | 30.342 | KV453011.1 | 12367187 | 12-scf00274 | 12 |
| AX-158123988 | 12 | 30.342 | KV453011.1 | 12374585 | 12-scf00274 | 12 |
| AX-158123997 | 12 | 30.342 | KV453011.1 | 12383202 | 12-scf00274 | 12 |
| AX-158123998 | 12 | 30.342 | KV453011.1 | 12385260 | 12-scf00274 | 12 |

|              |    |        |            |          |             |    |
|--------------|----|--------|------------|----------|-------------|----|
| AX-157772279 | 12 | 30.342 | KV453011.1 | 12386952 | 12-scf00274 | 12 |
| AX-158124007 | 12 | 30.342 | KV453011.1 | 12394978 | 12-scf00274 | 12 |
| AX-158124012 | 12 | 30.342 | KV453011.1 | 12399517 | 12-scf00274 | 12 |
| AX-157742802 | 12 | 30.342 | KV453011.1 | 12404657 | 12-scf00274 | 12 |
| AX-158124018 | 12 | 30.342 | KV453011.1 | 12405080 | 12-scf00274 | 12 |
| AX-157791721 | 12 | 30.342 | KV453011.1 | 12406684 | 12-scf00274 | 12 |
| AX-158124022 | 12 | 30.342 | KV453011.1 | 12416375 | 12-scf00274 | 12 |
| AX-157829440 | 12 | 30.342 | KV453011.1 | 12416441 | 12-scf00274 | 12 |
| AX-158124026 | 12 | 30.342 | KV453011.1 | 12420727 | 12-scf00274 | 12 |
| AX-158124031 | 12 | 30.342 | KV453011.1 | 12423304 | 12-scf00274 | 12 |
| AX-158123970 | 12 | 30.344 | KV453011.1 | 12345503 | 12-scf00274 | 12 |
| AX-158123976 | 12 | 30.347 | KV453011.1 | 12359057 | 12-scf00274 | 12 |
| AX-158123688 | 12 | 30.35  | KV453011.1 | 11661390 | 12-scf00274 | 12 |
| AX-158123890 | 12 | 30.35  | KV453011.1 | 12204985 | 12-scf00274 | 12 |
| AX-158123978 | 12 | 30.35  | KV453011.1 | 12360084 | 12-scf00274 | 12 |
| AX-158123991 | 12 | 30.353 | KV453011.1 | 12376249 | 12-scf00274 | 12 |
| AX-158123994 | 12 | 30.356 | KV453011.1 | 12378982 | 12-scf00274 | 12 |
| AX-158124001 | 12 | 30.36  | KV453011.1 | 12389549 | 12-scf00274 | 12 |
| AX-158124005 | 12 | 30.613 | KV453011.1 | 12392376 | 12-scf00274 | 12 |
| AX-158124019 | 12 | 30.613 | KV453011.1 | 12412257 | 12-scf00274 | 12 |
| AX-158124020 | 12 | 30.613 | KV453011.1 | 12412567 | 12-scf00274 | 12 |
| AX-158124023 | 12 | 30.613 | KV453011.1 | 12416704 | 12-scf00274 | 12 |
| AX-158124024 | 12 | 30.88  | KV453011.1 | 12419467 | 12-scf00274 | 12 |
| AX-157721549 | 12 | 30.883 | KV453011.1 | 3466003  | 12-scf00274 | 12 |
| AX-157886044 | 12 | 30.883 | KV453011.1 | 6000703  | 12-scf00274 | 12 |
| AX-158124027 | 12 | 30.883 | KV453011.1 | 12420885 | 12-scf00274 | 12 |
| AX-158124029 | 12 | 30.884 | KV453011.1 | 12421951 | 12-scf00274 | 12 |
| AX-158123955 | 12 | 30.888 | KV453011.1 | 12328339 | 12-scf00274 | 12 |
| AX-158124033 | 12 | 30.888 | KV453011.1 | 12425792 | 12-scf00274 | 12 |
| AX-158124034 | 12 | 30.888 | KV453011.1 | 12428355 | 12-scf00274 | 12 |
| AX-158124036 | 12 | 30.888 | KV453011.1 | 12429219 | 12-scf00274 | 12 |
| AX-158124037 | 12 | 30.888 | KV453011.1 | 12429917 | 12-scf00274 | 12 |
| AX-158124043 | 12 | 30.888 | KV453011.1 | 12436643 | 12-scf00274 | 12 |
| AX-158124046 | 12 | 30.888 | KV453011.1 | 12440064 | 12-scf00274 | 12 |
| AX-158124050 | 12 | 31.087 | KV453011.1 | 12444150 | 12-scf00274 | 12 |
| AX-158124051 | 12 | 31.128 | KV453011.1 | 12445322 | 12-scf00274 | 12 |
| AX-158124067 | 12 | 31.128 | KV453011.1 | 12465500 | 12-scf00274 | 12 |
| AX-157857712 | 12 | 31.249 | KV453011.1 | 12445724 | 12-scf00274 | 12 |
| AX-158124055 | 12 | 31.337 | KV453011.1 | 12450859 | 12-scf00274 | 12 |
| AX-158124059 | 12 | 31.337 | KV453011.1 | 12454648 | 12-scf00274 | 12 |
| AX-158124060 | 12 | 31.337 | KV453011.1 | 12455090 | 12-scf00274 | 12 |
| AX-158124065 | 12 | 31.389 | KV453011.1 | 12461376 | 12-scf00274 | 12 |
| AX-158124066 | 12 | 31.545 | KV453011.1 | 12464391 | 12-scf00274 | 12 |
| AX-158124070 | 12 | 31.545 | KV453011.1 | 12469023 | 12-scf00274 | 12 |
| AX-158124072 | 12 | 31.545 | KV453011.1 | 12470785 | 12-scf00274 | 12 |
| AX-158122253 | 12 | 31.764 | KV453011.1 | 8136692  | 12-scf00274 | 12 |
| AX-157742001 | 12 | 31.764 | KV453011.1 | 12245914 | 12-scf00274 | 12 |
| AX-158123936 | 12 | 31.764 | KV453011.1 | 12296448 | 12-scf00274 | 12 |
| AX-157829430 | 12 | 31.764 | KV453011.1 | 12306723 | 12-scf00274 | 12 |
| AX-158123960 | 12 | 31.764 | KV453011.1 | 12331184 | 12-scf00274 | 12 |
| AX-158123965 | 12 | 31.764 | KV453011.1 | 12340250 | 12-scf00274 | 12 |

|              |    |        |            |          |             |    |
|--------------|----|--------|------------|----------|-------------|----|
| AX-158123971 | 12 | 31.764 | KV453011.1 | 12346257 | 12-scf00274 | 12 |
| AX-157829437 | 12 | 31.764 | KV453011.1 | 12353392 | 12-scf00274 | 12 |
| AX-157722627 | 12 | 31.764 | KV453011.1 | 12364188 | 12-scf00274 | 12 |
| AX-158124006 | 12 | 31.764 | KV453011.1 | 12393069 | 12-scf00274 | 12 |
| AX-158124008 | 12 | 31.764 | KV453011.1 | 12396019 | 12-scf00274 | 12 |
| AX-157829439 | 12 | 31.764 | KV453011.1 | 12413476 | 12-scf00274 | 12 |
| AX-158124028 | 12 | 31.764 | KV453011.1 | 12421871 | 12-scf00274 | 12 |
| AX-158124030 | 12 | 31.764 | KV453011.1 | 12422945 | 12-scf00274 | 12 |
| AX-158124053 | 12 | 31.764 | KV453011.1 | 12446573 | 12-scf00274 | 12 |
| AX-158124063 | 12 | 31.764 | KV453011.1 | 12457689 | 12-scf00274 | 12 |
| AX-158124076 | 12 | 31.764 | KV453011.1 | 12475162 | 12-scf00274 | 12 |
| AX-158124078 | 12 | 31.764 | KV453011.1 | 12478105 | 12-scf00274 | 12 |
| AX-158124081 | 12 | 31.764 | KV453011.1 | 12485555 | 12-scf00274 | 12 |
| AX-158124084 | 12 | 31.764 | KV453011.1 | 12493284 | 12-scf00274 | 12 |
| AX-158124086 | 12 | 31.764 | KV453011.1 | 12496448 | 12-scf00274 | 12 |
| AX-158124087 | 12 | 31.764 | KV453011.1 | 12499817 | 12-scf00274 | 12 |
| AX-157744399 | 12 | 31.764 | KV453011.1 | 12508049 | 12-scf00274 | 12 |
| AX-157746652 | 12 | 31.764 | KV453011.1 | 12509301 | 12-scf00274 | 12 |
| AX-158124093 | 12 | 31.764 | KV453011.1 | 12510473 | 12-scf00274 | 12 |
| AX-157713173 | 12 | 31.764 | KV453011.1 | 12511531 | 12-scf00274 | 12 |
| AX-158124094 | 12 | 31.764 | KV453011.1 | 12514665 | 12-scf00274 | 12 |
| AX-157717033 | 12 | 31.764 | KV453011.1 | 12516245 | 12-scf00274 | 12 |
| AX-158380176 | 12 | 31.764 | KV453011.1 | 12516461 | 12-scf00274 | 12 |
| AX-157829449 | 12 | 31.764 | KV453011.1 | 12520910 | 12-scf00274 | 12 |
| AX-158124113 | 12 | 31.764 | KV453011.1 | 12554127 | 12-scf00274 | 12 |
| AX-158124115 | 12 | 31.764 | KV453011.1 | 12555421 | 12-scf00274 | 12 |
| AX-157746893 | 12 | 31.764 | KV453011.1 | 12561162 | 12-scf00274 | 12 |
| AX-157829462 | 12 | 31.764 | KV453011.1 | 12563465 | 12-scf00274 | 12 |
| AX-157741234 | 12 | 31.764 | KV453011.1 | 12564181 | 12-scf00274 | 12 |
| AX-157829464 | 12 | 31.764 | KV453011.1 | 12575331 | 12-scf00274 | 12 |
| AX-158124129 | 12 | 31.764 | KV453011.1 | 12581263 | 12-scf00274 | 12 |
| AX-158124154 | 12 | 31.764 | KV453011.1 | 12626057 | 12-scf00274 | 12 |
| AX-158124155 | 12 | 31.764 | KV453011.1 | 12627072 | 12-scf00274 | 12 |
| AX-158124205 | 12 | 31.764 | KV453011.1 | 12711993 | 12-scf00274 | 12 |
| AX-157829448 | 12 | 31.873 | KV453011.1 | 12518122 | 12-scf00274 | 12 |
| AX-158124097 | 12 | 31.873 | KV453011.1 | 12524456 | 12-scf00274 | 12 |
| AX-158124102 | 12 | 31.941 | KV453011.1 | 12530222 | 12-scf00274 | 12 |
| AX-157739917 | 12 | 31.941 | KV453011.1 | 12530512 | 12-scf00274 | 12 |
| AX-158124105 | 12 | 31.983 | KV453011.1 | 12532851 | 12-scf00274 | 12 |
| AX-158124106 | 12 | 32.02  | KV453011.1 | 12533476 | 12-scf00274 | 12 |
| AX-158124111 | 12 | 32.02  | KV453011.1 | 12543899 | 12-scf00274 | 12 |
| AX-158124103 | 12 | 32.061 | KV453011.1 | 12531830 | 12-scf00274 | 12 |
| AX-158124107 | 12 | 32.061 | KV453011.1 | 12536368 | 12-scf00274 | 12 |
| AX-158124108 | 12 | 32.061 | KV453011.1 | 12536899 | 12-scf00274 | 12 |
| AX-158124119 | 12 | 32.061 | KV453011.1 | 12560159 | 12-scf00274 | 12 |
| AX-157829454 | 12 | 32.092 | KV453011.1 | 12538300 | 12-scf00274 | 12 |
| AX-158124109 | 12 | 32.092 | KV453011.1 | 12538586 | 12-scf00274 | 12 |
| AX-158124110 | 12 | 32.092 | KV453011.1 | 12541185 | 12-scf00274 | 12 |
| AX-158124069 | 12 | 32.192 | KV453011.1 | 12468519 | 12-scf00274 | 12 |
| AX-157829459 | 12 | 32.192 | KV453011.1 | 12551919 | 12-scf00274 | 12 |
| AX-157871330 | 12 | 32.31  | KV453011.1 | 12546787 | 12-scf00274 | 12 |



|              |    |        |            |          |             |    |
|--------------|----|--------|------------|----------|-------------|----|
| AX-158124117 | 12 | 32.31  | KV453011.1 | 12556197 | 12-scf00274 | 12 |
| AX-158411309 | 12 | 32.31  | KV453011.1 | 12577429 | 12-scf00274 | 12 |
| AX-158124123 | 12 | 32.31  | KV453011.1 | 12577587 | 12-scf00274 | 12 |
| AX-158124125 | 12 | 32.31  | KV453011.1 | 12578707 | 12-scf00274 | 12 |
| AX-158124132 | 12 | 32.31  | KV453011.1 | 12585200 | 12-scf00274 | 12 |
| AX-158124138 | 12 | 32.31  | KV453011.1 | 12598925 | 12-scf00274 | 12 |
| AX-158124140 | 12 | 32.31  | KV453011.1 | 12600206 | 12-scf00274 | 12 |
| AX-158124147 | 12 | 32.31  | KV453011.1 | 12616917 | 12-scf00274 | 12 |
| AX-158124127 | 12 | 32.355 | KV453011.1 | 12580234 | 12-scf00274 | 12 |
| AX-158124130 | 12 | 32.355 | KV453011.1 | 12582587 | 12-scf00274 | 12 |
| AX-158124128 | 12 | 32.378 | KV453011.1 | 12580645 | 12-scf00274 | 12 |
| AX-157871329 | 12 | 32.398 | KV453011.1 | 12511595 | 12-scf00274 | 12 |
| AX-157742167 | 12 | 32.398 | KV453011.1 | 12548221 | 12-scf00274 | 12 |
| AX-158124131 | 12 | 32.398 | KV453011.1 | 12582957 | 12-scf00274 | 12 |
| AX-158124064 | 12 | 32.42  | KV453011.1 | 12459470 | 12-scf00274 | 12 |
| AX-157829444 | 12 | 32.42  | KV453011.1 | 12483315 | 12-scf00274 | 12 |
| AX-157829446 | 12 | 32.42  | KV453011.1 | 12491179 | 12-scf00274 | 12 |
| AX-158124120 | 12 | 32.42  | KV453011.1 | 12562455 | 12-scf00274 | 12 |
| AX-158124121 | 12 | 32.42  | KV453011.1 | 12571038 | 12-scf00274 | 12 |
| AX-158124126 | 12 | 32.42  | KV453011.1 | 12579134 | 12-scf00274 | 12 |
| AX-158124133 | 12 | 32.42  | KV453011.1 | 12587682 | 12-scf00274 | 12 |
| AX-158124136 | 12 | 32.42  | KV453011.1 | 12595323 | 12-scf00274 | 12 |
| AX-157829467 | 12 | 32.42  | KV453011.1 | 12606785 | 12-scf00274 | 12 |
| AX-158124145 | 12 | 32.42  | KV453011.1 | 12614141 | 12-scf00274 | 12 |
| AX-157750322 | 12 | 32.42  | KV453011.1 | 12615643 | 12-scf00274 | 12 |
| AX-157829468 | 12 | 32.42  | KV453011.1 | 12619283 | 12-scf00274 | 12 |
| AX-158124148 | 12 | 32.42  | KV453011.1 | 12620028 | 12-scf00274 | 12 |
| AX-158124151 | 12 | 32.42  | KV453011.1 | 12623336 | 12-scf00274 | 12 |
| AX-158124156 | 12 | 32.42  | KV453011.1 | 12629772 | 12-scf00274 | 12 |
| AX-157740842 | 12 | 32.42  | KV453011.1 | 12631282 | 12-scf00274 | 12 |
| AX-158124162 | 12 | 32.42  | KV453011.1 | 12636618 | 12-scf00274 | 12 |
| AX-157745569 | 12 | 32.42  | KV453011.1 | 12676373 | 12-scf00274 | 12 |
| AX-158124158 | 12 | 32.464 | KV453011.1 | 12632287 | 12-scf00274 | 12 |
| AX-158124159 | 12 | 32.498 | KV453011.1 | 12632952 | 12-scf00274 | 12 |
| AX-158124160 | 12 | 32.529 | KV453011.1 | 12633395 | 12-scf00274 | 12 |
| AX-158124163 | 12 | 32.529 | KV453011.1 | 12637420 | 12-scf00274 | 12 |
| AX-158124164 | 12 | 32.747 | KV453011.1 | 12638174 | 12-scf00274 | 12 |
| AX-158124165 | 12 | 32.747 | KV453011.1 | 12639591 | 12-scf00274 | 12 |
| AX-158124168 | 12 | 32.747 | KV453011.1 | 12647299 | 12-scf00274 | 12 |
| AX-157741038 | 12 | 32.747 | KV453011.1 | 12647985 | 12-scf00274 | 12 |
| AX-158124174 | 12 | 32.747 | KV453011.1 | 12654237 | 12-scf00274 | 12 |
| AX-158124176 | 12 | 32.747 | KV453011.1 | 12658579 | 12-scf00274 | 12 |
| AX-158124177 | 12 | 32.747 | KV453011.1 | 12661405 | 12-scf00274 | 12 |
| AX-158124179 | 12 | 32.747 | KV453011.1 | 12664450 | 12-scf00274 | 12 |
| AX-158411313 | 12 | 32.747 | KV453011.1 | 12668629 | 12-scf00274 | 12 |
| AX-157742007 | 12 | 32.747 | KV453011.1 | 12674502 | 12-scf00274 | 12 |
| AX-157829470 | 12 | 32.747 | KV453011.1 | 12674586 | 12-scf00274 | 12 |
| AX-158124187 | 12 | 32.747 | KV453011.1 | 12685321 | 12-scf00274 | 12 |
| AX-158124191 | 12 | 32.747 | KV453011.1 | 12688977 | 12-scf00274 | 12 |
| AX-158124192 | 12 | 32.747 | KV453011.1 | 12693696 | 12-scf00274 | 12 |
| AX-157743775 | 12 | 32.911 | KV453011.1 | 12680300 | 12-scf00274 | 12 |

|              |    |        |            |          |             |    |
|--------------|----|--------|------------|----------|-------------|----|
| AX-157741276 | 12 | 32.911 | KV453011.1 | 12687276 | 12-scf00274 | 12 |
| AX-158124193 | 12 | 32.911 | KV453011.1 | 12694394 | 12-scf00274 | 12 |
| AX-158124196 | 12 | 33.075 | KV453011.1 | 12697827 | 12-scf00274 | 12 |
| AX-158124197 | 12 | 33.075 | KV453011.1 | 12698832 | 12-scf00274 | 12 |
| AX-157718279 | 12 | 33.246 | KV453011.1 | 12694951 | 12-scf00274 | 12 |
| AX-158124198 | 12 | 33.246 | KV453011.1 | 12699644 | 12-scf00274 | 12 |
| AX-158124200 | 12 | 33.246 | KV453011.1 | 12702247 | 12-scf00274 | 12 |
| AX-158124201 | 12 | 33.246 | KV453011.1 | 12705845 | 12-scf00274 | 12 |
| AX-158124203 | 12 | 33.246 | KV453011.1 | 12708170 | 12-scf00274 | 12 |
| AX-158124204 | 12 | 33.246 | KV453011.1 | 12710180 | 12-scf00274 | 12 |
| AX-158124214 | 12 | 33.761 | KV453011.1 | 12728328 | 12-scf00274 | 12 |
| AX-157877807 | 12 | 33.761 | KV453011.1 | 12730066 | 12-scf00274 | 12 |
| AX-158124216 | 12 | 33.761 | KV453011.1 | 12732356 | 12-scf00274 | 12 |
| AX-158124218 | 12 | 33.761 | KV453011.1 | 12735188 | 12-scf00274 | 12 |
| AX-158124219 | 12 | 33.761 | KV453011.1 | 12736215 | 12-scf00274 | 12 |
| AX-158124228 | 12 | 33.761 | KV453011.1 | 12742476 | 12-scf00274 | 12 |
| AX-158124230 | 12 | 33.761 | KV453011.1 | 12744039 | 12-scf00274 | 12 |
| AX-157857715 | 12 | 33.761 | KV453011.1 | 12744696 | 12-scf00274 | 12 |
| AX-158124233 | 12 | 33.761 | KV453011.1 | 12746037 | 12-scf00274 | 12 |
| AX-157751670 | 12 | 33.761 | KV453011.1 | 12749915 | 12-scf00274 | 12 |
| AX-158124244 | 12 | 33.761 | KV453011.1 | 12756562 | 12-scf00274 | 12 |
| AX-158124241 | 12 | 33.932 | KV453011.1 | 12754463 | 12-scf00274 | 12 |
| AX-158124243 | 12 | 33.932 | KV453011.1 | 12756269 | 12-scf00274 | 12 |
| AX-158124250 | 12 | 33.932 | KV453011.1 | 12763847 | 12-scf00274 | 12 |
| AX-158124251 | 12 | 33.932 | KV453011.1 | 12764288 | 12-scf00274 | 12 |
| AX-157829473 | 12 | 34.099 | KV453011.1 | 12736394 | 12-scf00274 | 12 |
| AX-158124253 | 12 | 34.099 | KV453011.1 | 12766537 | 12-scf00274 | 12 |
| AX-157741698 | 12 | 34.099 | KV453011.1 | 12767994 | 12-scf00274 | 12 |
| AX-158124258 | 12 | 34.099 | KV453011.1 | 12778150 | 12-scf00274 | 12 |
| AX-158124264 | 12 | 34.099 | KV453011.1 | 12783681 | 12-scf00274 | 12 |
| AX-158124267 | 12 | 34.099 | KV453011.1 | 12785019 | 12-scf00274 | 12 |
| AX-158124270 | 12 | 34.099 | KV453011.1 | 12789267 | 12-scf00274 | 12 |
| AX-157871331 | 12 | 34.099 | KV453011.1 | 12803815 | 12-scf00274 | 12 |
| AX-158124294 | 12 | 34.099 | KV453011.1 | 12824761 | 12-scf00274 | 12 |
| AX-158124300 | 12 | 34.099 | KV453011.1 | 12830468 | 12-scf00274 | 12 |
| AX-158124304 | 12 | 34.099 | KV453011.1 | 12836101 | 12-scf00274 | 12 |
| AX-157742656 | 12 | 34.099 | KV453011.1 | 12844935 | 12-scf00274 | 12 |
| AX-158124259 | 12 | 34.197 | KV453011.1 | 12778876 | 12-scf00274 | 12 |
| AX-157746949 | 12 | 34.39  | KV453011.1 | 12781546 | 12-scf00274 | 12 |
| AX-158124262 | 12 | 34.39  | KV453011.1 | 12782708 | 12-scf00274 | 12 |
| AX-158385136 | 12 | 34.472 | KV453011.1 | 12783850 | 12-scf00274 | 12 |
| AX-158124266 | 12 | 34.51  | KV453011.1 | 12784823 | 12-scf00274 | 12 |
| AX-158124298 | 12 | 34.51  | KV453011.1 | 12827961 | 12-scf00274 | 12 |
| AX-158124269 | 12 | 34.582 | KV453011.1 | 12788842 | 12-scf00274 | 12 |
| AX-158124271 | 12 | 34.64  | KV453011.1 | 12790235 | 12-scf00274 | 12 |
| AX-158124272 | 12 | 34.676 | KV453011.1 | 12792035 | 12-scf00274 | 12 |
| AX-158124327 | 12 | 34.676 | KV453011.1 | 12857572 | 12-scf00274 | 12 |
| AX-157752126 | 12 | 34.716 | KV453011.1 | 12794766 | 12-scf00274 | 12 |
| AX-158124276 | 12 | 34.716 | KV453011.1 | 12796419 | 12-scf00274 | 12 |
| AX-158124280 | 12 | 34.778 | KV453011.1 | 12803367 | 12-scf00274 | 12 |
| AX-158124282 | 12 | 34.809 | KV453011.1 | 12811113 | 12-scf00274 | 12 |

|              |    |        |            |          |             |    |
|--------------|----|--------|------------|----------|-------------|----|
| AX-158124283 | 12 | 34.869 | KV453011.1 | 12812216 | 12-scf00274 | 12 |
| AX-158124236 | 12 | 34.93  | KV453011.1 | 12748645 | 12-scf00274 | 12 |
| AX-157829474 | 12 | 34.93  | KV453011.1 | 12763320 | 12-scf00274 | 12 |
| AX-158124284 | 12 | 34.93  | KV453011.1 | 12814061 | 12-scf00274 | 12 |
| AX-158124285 | 12 | 34.935 | KV453011.1 | 12814364 | 12-scf00274 | 12 |
| AX-158124286 | 12 | 34.939 | KV453011.1 | 12815553 | 12-scf00274 | 12 |
| AX-158124290 | 12 | 35.2   | KV453011.1 | 12820217 | 12-scf00274 | 12 |
| AX-158124291 | 12 | 35.558 | KV453011.1 | 12821966 | 12-scf00274 | 12 |
| AX-158124292 | 12 | 35.569 | KV453011.1 | 12822432 | 12-scf00274 | 12 |
| AX-158124311 | 12 | 35.569 | KV453011.1 | 12840345 | 12-scf00274 | 12 |
| AX-158124293 | 12 | 35.579 | KV453011.1 | 12823407 | 12-scf00274 | 12 |
| AX-158124305 | 12 | 35.591 | KV453011.1 | 12836405 | 12-scf00274 | 12 |
| AX-157740570 | 12 | 35.591 | KV453011.1 | 12836468 | 12-scf00274 | 12 |
| AX-158124306 | 12 | 35.591 | KV453011.1 | 12837283 | 12-scf00274 | 12 |
| AX-158124307 | 12 | 35.591 | KV453011.1 | 12837748 | 12-scf00274 | 12 |
| AX-158124310 | 12 | 35.591 | KV453011.1 | 12838661 | 12-scf00274 | 12 |
| AX-158124312 | 12 | 35.591 | KV453011.1 | 12841916 | 12-scf00274 | 12 |
| AX-158124316 | 12 | 35.653 | KV453011.1 | 12844726 | 12-scf00274 | 12 |
| AX-158124318 | 12 | 35.7   | KV453011.1 | 12849772 | 12-scf00274 | 12 |
| AX-158124320 | 12 | 35.799 | KV453011.1 | 12853319 | 12-scf00274 | 12 |
| AX-158124319 | 12 | 35.919 | KV453011.1 | 12852721 | 12-scf00274 | 12 |
| AX-158124324 | 12 | 35.919 | KV453011.1 | 12854775 | 12-scf00274 | 12 |
| AX-158124325 | 12 | 35.919 | KV453011.1 | 12855491 | 12-scf00274 | 12 |
| AX-158124328 | 12 | 35.919 | KV453011.1 | 12859479 | 12-scf00274 | 12 |
| AX-158124330 | 12 | 35.919 | KV453011.1 | 12860973 | 12-scf00274 | 12 |
| AX-158124331 | 12 | 35.919 | KV453011.1 | 12861479 | 12-scf00274 | 12 |
| AX-158124683 | 12 | 35.919 | KV453011.1 | 13417571 | 12-scf00274 | 12 |
| AX-158124333 | 12 | 36.028 | KV453011.1 | 12862824 | 12-scf00274 | 12 |
| AX-158124334 | 12 | 36.028 | KV453011.1 | 12863042 | 12-scf00274 | 12 |
| AX-158124335 | 12 | 36.028 | KV453011.1 | 12864144 | 12-scf00274 | 12 |
| AX-158380178 | 12 | 36.028 | KV453011.1 | 12867357 | 12-scf00274 | 12 |
| AX-158124337 | 12 | 36.028 | KV453011.1 | 12875225 | 12-scf00274 | 12 |
| AX-158124338 | 12 | 36.028 | KV453011.1 | 12875459 | 12-scf00274 | 12 |
| AX-157829478 | 12 | 36.028 | KV453011.1 | 12875868 | 12-scf00274 | 12 |
| AX-157829481 | 12 | 36.028 | KV453011.1 | 12880350 | 12-scf00274 | 12 |
| AX-157829482 | 12 | 36.028 | KV453011.1 | 12884629 | 12-scf00274 | 12 |
| AX-158124342 | 12 | 36.028 | KV453011.1 | 12885194 | 12-scf00274 | 12 |
| AX-158124518 | 12 | 36.028 | KV453011.1 | 13140732 | 12-scf00274 | 12 |
| AX-158124343 | 12 | 36.193 | KV453011.1 | 12886824 | 12-scf00274 | 12 |
| AX-158124345 | 12 | 36.193 | KV453011.1 | 12887903 | 12-scf00274 | 12 |
| AX-158124346 | 12 | 36.193 | KV453011.1 | 12888246 | 12-scf00274 | 12 |
| AX-158124347 | 12 | 36.193 | KV453011.1 | 12888858 | 12-scf00274 | 12 |
| AX-158124352 | 12 | 36.355 | KV453011.1 | 12893852 | 12-scf00274 | 12 |
| AX-158124354 | 12 | 36.356 | KV453011.1 | 12896040 | 12-scf00274 | 12 |
| AX-158124355 | 12 | 36.356 | KV453011.1 | 12898322 | 12-scf00274 | 12 |
| AX-158124356 | 12 | 36.356 | KV453011.1 | 12899759 | 12-scf00274 | 12 |
| AX-158124357 | 12 | 36.356 | KV453011.1 | 12903060 | 12-scf00274 | 12 |
| AX-158124361 | 12 | 36.356 | KV453011.1 | 12908701 | 12-scf00274 | 12 |
| AX-158124363 | 12 | 36.356 | KV453011.1 | 12910563 | 12-scf00274 | 12 |
| AX-158124364 | 12 | 36.356 | KV453011.1 | 12913233 | 12-scf00274 | 12 |
| AX-158124367 | 12 | 36.356 | KV453011.1 | 12918372 | 12-scf00274 | 12 |

|              |    |        |            |          |             |    |
|--------------|----|--------|------------|----------|-------------|----|
| AX-158124369 | 12 | 36.356 | KV453011.1 | 12919457 | 12-scf00274 | 12 |
| AX-158124370 | 12 | 36.356 | KV453011.1 | 12920126 | 12-scf00274 | 12 |
| AX-158124377 | 12 | 36.356 | KV453011.1 | 12929960 | 12-scf00274 | 12 |
| AX-158124380 | 12 | 36.356 | KV453011.1 | 12935528 | 12-scf00274 | 12 |
| AX-157715510 | 12 | 36.356 | KV453011.1 | 12943018 | 12-scf00274 | 12 |
| AX-158124386 | 12 | 36.356 | KV453011.1 | 12943800 | 12-scf00274 | 12 |
| AX-158124388 | 12 | 36.356 | KV453011.1 | 12948214 | 12-scf00274 | 12 |
| AX-157747938 | 12 | 36.356 | KV453011.1 | 12951304 | 12-scf00274 | 12 |
| AX-157766639 | 12 | 36.356 | KV453011.1 | 12953998 | 12-scf00274 | 12 |
| AX-158124392 | 12 | 36.356 | KV453011.1 | 12954136 | 12-scf00274 | 12 |
| AX-157829483 | 12 | 36.356 | KV453011.1 | 12957091 | 12-scf00274 | 12 |
| AX-158124397 | 12 | 36.356 | KV453011.1 | 12960460 | 12-scf00274 | 12 |
| AX-157866193 | 12 | 36.356 | KV453011.1 | 12960646 | 12-scf00274 | 12 |
| AX-157829484 | 12 | 36.356 | KV453011.1 | 12961555 | 12-scf00274 | 12 |
| AX-158411322 | 12 | 36.356 | KV453011.1 | 12962570 | 12-scf00274 | 12 |
| AX-158407989 | 12 | 36.356 | KV453011.1 | 12962732 | 12-scf00274 | 12 |
| AX-158124398 | 12 | 36.356 | KV453011.1 | 12962823 | 12-scf00274 | 12 |
| AX-158392755 | 12 | 36.356 | KV453011.1 | 12966802 | 12-scf00274 | 12 |
| AX-158124406 | 12 | 36.356 | KV453011.1 | 12973679 | 12-scf00274 | 12 |
| AX-157700300 | 12 | 36.356 | KV453011.1 | 12977025 | 12-scf00274 | 12 |
| AX-158124412 | 12 | 36.356 | KV453011.1 | 12977584 | 12-scf00274 | 12 |
| AX-158124413 | 12 | 36.356 | KV453011.1 | 12978922 | 12-scf00274 | 12 |
| AX-158124417 | 12 | 36.356 | KV453011.1 | 12982444 | 12-scf00274 | 12 |
| AX-158124421 | 12 | 36.356 | KV453011.1 | 12990745 | 12-scf00274 | 12 |
| AX-158124426 | 12 | 36.356 | KV453011.1 | 12992988 | 12-scf00274 | 12 |
| AX-158124427 | 12 | 36.356 | KV453011.1 | 12993445 | 12-scf00274 | 12 |
| AX-158124429 | 12 | 36.356 | KV453011.1 | 12994957 | 12-scf00274 | 12 |
| AX-158124430 | 12 | 36.356 | KV453011.1 | 12995131 | 12-scf00274 | 12 |
| AX-158124433 | 12 | 36.356 | KV453011.1 | 12996900 | 12-scf00274 | 12 |
| AX-157773204 | 12 | 36.356 | KV453011.1 | 12997334 | 12-scf00274 | 12 |
| AX-158124434 | 12 | 36.356 | KV453011.1 | 12997522 | 12-scf00274 | 12 |
| AX-157756249 | 12 | 36.356 | KV453011.1 | 12999668 | 12-scf00274 | 12 |
| AX-158124437 | 12 | 36.356 | KV453011.1 | 12999752 | 12-scf00274 | 12 |
| AX-158124438 | 12 | 36.356 | KV453011.1 | 13003360 | 12-scf00274 | 12 |
| AX-158124439 | 12 | 36.356 | KV453011.1 | 13004199 | 12-scf00274 | 12 |
| AX-157871334 | 12 | 36.356 | KV453011.1 | 13004633 | 12-scf00274 | 12 |
| AX-158124442 | 12 | 36.356 | KV453011.1 | 13008212 | 12-scf00274 | 12 |
| AX-157757854 | 12 | 36.356 | KV453011.1 | 13013232 | 12-scf00274 | 12 |
| AX-158124449 | 12 | 36.356 | KV453011.1 | 13022495 | 12-scf00274 | 12 |
| AX-157829490 | 12 | 36.356 | KV453011.1 | 13024627 | 12-scf00274 | 12 |
| AX-158124456 | 12 | 36.356 | KV453011.1 | 13028563 | 12-scf00274 | 12 |
| AX-158124457 | 12 | 36.356 | KV453011.1 | 13029197 | 12-scf00274 | 12 |
| AX-158124458 | 12 | 36.356 | KV453011.1 | 13030356 | 12-scf00274 | 12 |
| AX-158392756 | 12 | 36.356 | KV453011.1 | 13030797 | 12-scf00274 | 12 |
| AX-157710524 | 12 | 36.356 | KV453011.1 | 13032986 | 12-scf00274 | 12 |
| AX-158124461 | 12 | 36.356 | KV453011.1 | 13036136 | 12-scf00274 | 12 |
| AX-158124463 | 12 | 36.356 | KV453011.1 | 13041186 | 12-scf00274 | 12 |
| AX-158124464 | 12 | 36.356 | KV453011.1 | 13043354 | 12-scf00274 | 12 |
| AX-158124465 | 12 | 36.356 | KV453011.1 | 13043715 | 12-scf00274 | 12 |
| AX-158124467 | 12 | 36.356 | KV453011.1 | 13045966 | 12-scf00274 | 12 |
| AX-158124470 | 12 | 36.356 | KV453011.1 | 13050166 | 12-scf00274 | 12 |

|              |    |        |            |          |             |    |
|--------------|----|--------|------------|----------|-------------|----|
| AX-157747243 | 12 | 36.356 | KV453011.1 | 13059445 | 12-scf00274 | 12 |
| AX-158124474 | 12 | 36.356 | KV453011.1 | 13061832 | 12-scf00274 | 12 |
| AX-158411327 | 12 | 36.356 | KV453011.1 | 13070812 | 12-scf00274 | 12 |
| AX-158422740 | 12 | 36.356 | KV453011.1 | 13070956 | 12-scf00274 | 12 |
| AX-158124478 | 12 | 36.356 | KV453011.1 | 13071847 | 12-scf00274 | 12 |
| AX-157829495 | 12 | 36.356 | KV453011.1 | 13072110 | 12-scf00274 | 12 |
| AX-158124479 | 12 | 36.356 | KV453011.1 | 13072460 | 12-scf00274 | 12 |
| AX-157740943 | 12 | 36.356 | KV453011.1 | 13075427 | 12-scf00274 | 12 |
| AX-158124481 | 12 | 36.356 | KV453011.1 | 13079357 | 12-scf00274 | 12 |
| AX-157754345 | 12 | 36.356 | KV453011.1 | 13080088 | 12-scf00274 | 12 |
| AX-158124487 | 12 | 36.356 | KV453011.1 | 13089989 | 12-scf00274 | 12 |
| AX-158124493 | 12 | 36.356 | KV453011.1 | 13096375 | 12-scf00274 | 12 |
| AX-158124494 | 12 | 36.356 | KV453011.1 | 13097459 | 12-scf00274 | 12 |
| AX-158124497 | 12 | 36.356 | KV453011.1 | 13099678 | 12-scf00274 | 12 |
| AX-158124499 | 12 | 36.356 | KV453011.1 | 13101875 | 12-scf00274 | 12 |
| AX-157829496 | 12 | 36.356 | KV453011.1 | 13103273 | 12-scf00274 | 12 |
| AX-157747047 | 12 | 36.356 | KV453011.1 | 13103724 | 12-scf00274 | 12 |
| AX-157716469 | 12 | 36.356 | KV453011.1 | 13105513 | 12-scf00274 | 12 |
| AX-157714849 | 12 | 36.356 | KV453011.1 | 13108062 | 12-scf00274 | 12 |
| AX-157829501 | 12 | 36.356 | KV453011.1 | 13145451 | 12-scf00274 | 12 |
| AX-158124536 | 12 | 36.356 | KV453011.1 | 13210039 | 12-scf00274 | 12 |
| AX-158124570 | 12 | 36.356 | KV453011.1 | 13244201 | 12-scf00274 | 12 |
| AX-158124585 | 12 | 36.356 | KV453011.1 | 13268974 | 12-scf00274 | 12 |
| AX-158124586 | 12 | 36.356 | KV453011.1 | 13269236 | 12-scf00274 | 12 |
| AX-158124607 | 12 | 36.356 | KV453011.1 | 13298611 | 12-scf00274 | 12 |
| AX-158124639 | 12 | 36.356 | KV453011.1 | 13340018 | 12-scf00274 | 12 |
| AX-158124641 | 12 | 36.356 | KV453011.1 | 13346994 | 12-scf00274 | 12 |
| AX-158124647 | 12 | 36.356 | KV453011.1 | 13356300 | 12-scf00274 | 12 |
| AX-158124650 | 12 | 36.356 | KV453011.1 | 13364957 | 12-scf00274 | 12 |
| AX-158124652 | 12 | 36.356 | KV453011.1 | 13371562 | 12-scf00274 | 12 |
| AX-158124658 | 12 | 36.356 | KV453011.1 | 13382269 | 12-scf00274 | 12 |
| AX-158124659 | 12 | 36.356 | KV453011.1 | 13382328 | 12-scf00274 | 12 |
| AX-158380181 | 12 | 36.356 | KV453011.1 | 13397561 | 12-scf00274 | 12 |
| AX-157857743 | 12 | 36.356 | KV453011.1 | 13400441 | 12-scf00274 | 12 |
| AX-158124680 | 12 | 36.356 | KV453011.1 | 13414451 | 12-scf00274 | 12 |
| AX-157829510 | 12 | 36.356 | KV453011.1 | 13418077 | 12-scf00274 | 12 |
| AX-158124684 | 12 | 36.356 | KV453011.1 | 13419545 | 12-scf00274 | 12 |
| AX-158124685 | 12 | 36.356 | KV453011.1 | 13421390 | 12-scf00274 | 12 |
| AX-158124698 | 12 | 36.356 | KV453011.1 | 13439396 | 12-scf00274 | 12 |
| AX-158411337 | 12 | 36.356 | KV453011.1 | 13439718 | 12-scf00274 | 12 |
| AX-157774997 | 12 | 36.356 | KV453011.1 | 13456668 | 12-scf00274 | 12 |
| AX-158124707 | 12 | 36.356 | KV453011.1 | 13458022 | 12-scf00274 | 12 |
| AX-158124916 | 12 | 36.356 | KV453011.1 | 14001664 | 12-scf00274 | 12 |
| AX-157751866 | 12 | 36.356 | KV453011.1 | 14370838 | 12-scf00274 | 12 |
| AX-158125208 | 12 | 36.356 | KV453011.1 | 14458790 | 12-scf00274 | 12 |
| AX-158125341 | 12 | 36.356 | KV453011.1 | 14629600 | 12-scf00274 | 12 |
| AX-158125358 | 12 | 36.356 | KV453011.1 | 14646018 | 12-scf00274 | 12 |
| AX-158125359 | 12 | 36.356 | KV453011.1 | 14646821 | 12-scf00274 | 12 |
| AX-158125445 | 12 | 36.356 | KV453011.1 | 14756636 | 12-scf00274 | 12 |
| AX-158125473 | 12 | 36.356 | KV453011.1 | 14784813 | 12-scf00274 | 12 |
| AX-158125484 | 12 | 36.356 | KV453011.1 | 14793921 | 12-scf00274 | 12 |

|              |    |        |             |          |             |    |
|--------------|----|--------|-------------|----------|-------------|----|
| AX-157829542 | 12 | 36.356 | KV453011.1  | 14805644 | 12-scf00274 | 12 |
| AX-157829545 | 12 | 36.356 | KV453011.1  | 14909150 | 12-scf00274 | 12 |
| AX-158125577 | 12 | 36.356 | KV453011.1  | 14917237 | 12-scf00274 | 12 |
| AX-158125579 | 12 | 36.356 | KV453011.1  | 14919681 | 12-scf00274 | 12 |
| AX-158125632 | 12 | 36.356 | KV453011.1  | 14976468 | 12-scf00274 | 12 |
| AX-157747634 | 12 | 36.356 | KV453011.1  | 15016596 | 12-scf00274 | 12 |
| AX-158125729 | 12 | 36.356 | KV453011.1  | 15135971 | 12-scf00274 | 12 |
| AX-158125758 | 12 | 36.356 | KV453011.1  | 15173958 | 12-scf00274 | 12 |
| AX-158125759 | 12 | 36.356 | KV453011.1  | 15174488 | 12-scf00274 | 12 |
| AX-158125888 | 12 | 36.356 | KV453011.1  | 15334306 | 12-scf00274 | 12 |
| AX-158125892 | 12 | 36.356 | KV453011.1  | 15341101 | 12-scf00274 | 12 |
| AX-158125894 | 12 | 36.356 | KV453011.1  | 15344639 | 12-scf00274 | 12 |
| AX-157771187 | 12 | 36.356 | KV453011.1  | 15346253 | 12-scf00274 | 12 |
| AX-158392789 | 12 | 36.356 | KV453011.1  | 15351072 | 12-scf00274 | 12 |
| AX-158125900 | 12 | 36.356 | KV453011.1  | 15351470 | 12-scf00274 | 12 |
| AX-158125922 | 12 | 36.356 | KV453011.1  | 15381427 | 12-scf00274 | 12 |
| AX-158125938 | 12 | 36.356 | KV453011.1  | 15398052 | 12-scf00274 | 12 |
| AX-158126351 | 12 | 36.356 | KV453011.1  | 15942835 | 12-scf00274 | 12 |
| AX-157707243 | 12 | 36.356 | 3ML01033796 | 235      | scf09462_1  | UN |
| AX-158124503 | 12 | 36.377 | KV453011.1  | 13111536 | 12-scf00274 | 12 |
| AX-158124516 | 12 | 36.414 | KV453011.1  | 13135301 | 12-scf00274 | 12 |
| AX-158124517 | 12 | 36.435 | KV453011.1  | 13138649 | 12-scf00274 | 12 |
| AX-157829500 | 12 | 36.465 | KV453011.1  | 13139975 | 12-scf00274 | 12 |
| AX-158124523 | 12 | 36.465 | KV453011.1  | 13154844 | 12-scf00274 | 12 |
| AX-158124353 | 12 | 36.575 | KV453011.1  | 12894982 | 12-scf00274 | 12 |
| AX-158124371 | 12 | 36.575 | KV453011.1  | 12921716 | 12-scf00274 | 12 |
| AX-158124372 | 12 | 36.575 | KV453011.1  | 12922736 | 12-scf00274 | 12 |
| AX-157745302 | 12 | 36.575 | KV453011.1  | 12961771 | 12-scf00274 | 12 |
| AX-158124399 | 12 | 36.575 | KV453011.1  | 12963807 | 12-scf00274 | 12 |
| AX-158124400 | 12 | 36.575 | KV453011.1  | 12965330 | 12-scf00274 | 12 |
| AX-158124401 | 12 | 36.575 | KV453011.1  | 12966061 | 12-scf00274 | 12 |
| AX-158124403 | 12 | 36.575 | KV453011.1  | 12969391 | 12-scf00274 | 12 |
| AX-158124411 | 12 | 36.575 | KV453011.1  | 12976821 | 12-scf00274 | 12 |
| AX-158124435 | 12 | 36.575 | KV453011.1  | 12998151 | 12-scf00274 | 12 |
| AX-157829486 | 12 | 36.575 | KV453011.1  | 13005779 | 12-scf00274 | 12 |
| AX-157829488 | 12 | 36.575 | KV453011.1  | 13011474 | 12-scf00274 | 12 |
| AX-158124443 | 12 | 36.575 | KV453011.1  | 13014328 | 12-scf00274 | 12 |
| AX-158124447 | 12 | 36.575 | KV453011.1  | 13020412 | 12-scf00274 | 12 |
| AX-158124450 | 12 | 36.575 | KV453011.1  | 13023085 | 12-scf00274 | 12 |
| AX-158124451 | 12 | 36.575 | KV453011.1  | 13023589 | 12-scf00274 | 12 |
| AX-157715654 | 12 | 36.575 | KV453011.1  | 13029838 | 12-scf00274 | 12 |
| AX-158124462 | 12 | 36.575 | KV453011.1  | 13040534 | 12-scf00274 | 12 |
| AX-158124486 | 12 | 36.575 | KV453011.1  | 13089059 | 12-scf00274 | 12 |
| AX-158124504 | 12 | 36.575 | KV453011.1  | 13113214 | 12-scf00274 | 12 |
| AX-158124510 | 12 | 36.575 | KV453011.1  | 13123343 | 12-scf00274 | 12 |
| AX-158124522 | 12 | 36.575 | KV453011.1  | 13151793 | 12-scf00274 | 12 |
| AX-158411334 | 12 | 36.575 | KV453011.1  | 13167102 | 12-scf00274 | 12 |
| AX-158124528 | 12 | 36.575 | KV453011.1  | 13179457 | 12-scf00274 | 12 |
| AX-158124535 | 12 | 36.575 | KV453011.1  | 13205489 | 12-scf00274 | 12 |
| AX-158392757 | 12 | 36.575 | KV453011.1  | 13215777 | 12-scf00274 | 12 |
| AX-157715145 | 12 | 36.575 | KV453011.1  | 13230216 | 12-scf00274 | 12 |

|              |    |        |            |          |             |    |
|--------------|----|--------|------------|----------|-------------|----|
| AX-158124566 | 12 | 36.575 | KV453011.1 | 13240470 | 12-scf00274 | 12 |
| AX-158124567 | 12 | 36.575 | KV453011.1 | 13240914 | 12-scf00274 | 12 |
| AX-157857736 | 12 | 36.575 | KV453011.1 | 13244362 | 12-scf00274 | 12 |
| AX-157857737 | 12 | 36.575 | KV453011.1 | 13244580 | 12-scf00274 | 12 |
| AX-157756759 | 12 | 36.575 | KV453011.1 | 13252561 | 12-scf00274 | 12 |
| AX-158124582 | 12 | 36.575 | KV453011.1 | 13254600 | 12-scf00274 | 12 |
| AX-158392760 | 12 | 36.575 | KV453011.1 | 13258026 | 12-scf00274 | 12 |
| AX-157857738 | 12 | 36.575 | KV453011.1 | 13265292 | 12-scf00274 | 12 |
| AX-158124587 | 12 | 36.575 | KV453011.1 | 13270627 | 12-scf00274 | 12 |
| AX-158124590 | 12 | 36.575 | KV453011.1 | 13275313 | 12-scf00274 | 12 |
| AX-157713152 | 12 | 36.575 | KV453011.1 | 13281389 | 12-scf00274 | 12 |
| AX-158124595 | 12 | 36.575 | KV453011.1 | 13281930 | 12-scf00274 | 12 |
| AX-158124598 | 12 | 36.575 | KV453011.1 | 13286889 | 12-scf00274 | 12 |
| AX-158124602 | 12 | 36.575 | KV453011.1 | 13293066 | 12-scf00274 | 12 |
| AX-158124604 | 12 | 36.575 | KV453011.1 | 13294778 | 12-scf00274 | 12 |
| AX-158124605 | 12 | 36.575 | KV453011.1 | 13295950 | 12-scf00274 | 12 |
| AX-158124611 | 12 | 36.575 | KV453011.1 | 13303291 | 12-scf00274 | 12 |
| AX-158124613 | 12 | 36.575 | KV453011.1 | 13304752 | 12-scf00274 | 12 |
| AX-158124623 | 12 | 36.575 | KV453011.1 | 13314791 | 12-scf00274 | 12 |
| AX-158392761 | 12 | 36.575 | KV453011.1 | 13318267 | 12-scf00274 | 12 |
| AX-158124629 | 12 | 36.575 | KV453011.1 | 13322858 | 12-scf00274 | 12 |
| AX-158124632 | 12 | 36.575 | KV453011.1 | 13327091 | 12-scf00274 | 12 |
| AX-158124640 | 12 | 36.575 | KV453011.1 | 13341324 | 12-scf00274 | 12 |
| AX-158124646 | 12 | 36.575 | KV453011.1 | 13353955 | 12-scf00274 | 12 |
| AX-157857744 | 12 | 36.575 | KV453011.1 | 13409480 | 12-scf00274 | 12 |
| AX-158392763 | 12 | 36.575 | KV453011.1 | 13423074 | 12-scf00274 | 12 |
| AX-158124688 | 12 | 36.575 | KV453011.1 | 13424628 | 12-scf00274 | 12 |
| AX-158124689 | 12 | 36.575 | KV453011.1 | 13426421 | 12-scf00274 | 12 |
| AX-158124697 | 12 | 36.575 | KV453011.1 | 13436640 | 12-scf00274 | 12 |
| AX-158124755 | 12 | 36.575 | KV453011.1 | 13562217 | 12-scf00274 | 12 |
| AX-158124763 | 12 | 36.575 | KV453011.1 | 13578741 | 12-scf00274 | 12 |
| AX-158124808 | 12 | 36.575 | KV453011.1 | 13738855 | 12-scf00274 | 12 |
| AX-158124822 | 12 | 36.575 | KV453011.1 | 13764495 | 12-scf00274 | 12 |
| AX-158125145 | 12 | 36.575 | KV453011.1 | 14362743 | 12-scf00274 | 12 |
| AX-158124425 | 12 | 36.644 | KV453011.1 | 12992778 | 12-scf00274 | 12 |
| AX-157829489 | 12 | 36.644 | KV453011.1 | 13013735 | 12-scf00274 | 12 |
| AX-158124649 | 12 | 36.644 | KV453011.1 | 13362762 | 12-scf00274 | 12 |
| AX-158124589 | 12 | 36.684 | KV453011.1 | 13271375 | 12-scf00274 | 12 |
| AX-158124626 | 12 | 36.684 | KV453011.1 | 13316558 | 12-scf00274 | 12 |
| AX-158124651 | 12 | 36.684 | KV453011.1 | 13368403 | 12-scf00274 | 12 |
| AX-158124660 | 12 | 36.684 | KV453011.1 | 13383022 | 12-scf00274 | 12 |
| AX-158124661 | 12 | 36.684 | KV453011.1 | 13383510 | 12-scf00274 | 12 |
| AX-157714484 | 12 | 36.684 | KV453011.1 | 13386327 | 12-scf00274 | 12 |
| AX-158124665 | 12 | 36.684 | KV453011.1 | 13387739 | 12-scf00274 | 12 |
| AX-157741426 | 12 | 36.684 | KV453011.1 | 13389243 | 12-scf00274 | 12 |
| AX-158124668 | 12 | 36.684 | KV453011.1 | 13392736 | 12-scf00274 | 12 |
| AX-158124675 | 12 | 36.684 | KV453011.1 | 13408301 | 12-scf00274 | 12 |
| AX-157744460 | 12 | 36.744 | KV453011.1 | 13444539 | 12-scf00274 | 12 |
| AX-158124379 | 12 | 36.793 | KV453011.1 | 12931348 | 12-scf00274 | 12 |
| AX-158124529 | 12 | 36.793 | KV453011.1 | 13185327 | 12-scf00274 | 12 |
| AX-158124703 | 12 | 36.793 | KV453011.1 | 13447364 | 12-scf00274 | 12 |

|              |    |        |            |          |             |    |
|--------------|----|--------|------------|----------|-------------|----|
| AX-158124706 | 12 | 36.793 | KV453011.1 | 13451935 | 12-scf00274 | 12 |
| AX-158124714 | 12 | 36.793 | KV453011.1 | 13466406 | 12-scf00274 | 12 |
| AX-158124715 | 12 | 36.793 | KV453011.1 | 13468559 | 12-scf00274 | 12 |
| AX-158124716 | 12 | 36.793 | KV453011.1 | 13470436 | 12-scf00274 | 12 |
| AX-158392765 | 12 | 36.793 | KV453011.1 | 13472661 | 12-scf00274 | 12 |
| AX-158124747 | 12 | 36.793 | KV453011.1 | 13527766 | 12-scf00274 | 12 |
| AX-158411340 | 12 | 36.793 | KV453011.1 | 13617695 | 12-scf00274 | 12 |
| AX-158124809 | 12 | 36.793 | KV453011.1 | 13741349 | 12-scf00274 | 12 |
| AX-158392767 | 12 | 36.793 | KV453011.1 | 13811234 | 12-scf00274 | 12 |
| AX-158124841 | 12 | 36.793 | KV453011.1 | 13814840 | 12-scf00274 | 12 |
| AX-158124855 | 12 | 36.793 | KV453011.1 | 13860952 | 12-scf00274 | 12 |
| AX-158124862 | 12 | 36.793 | KV453011.1 | 13886105 | 12-scf00274 | 12 |
| AX-158124877 | 12 | 36.793 | KV453011.1 | 13924819 | 12-scf00274 | 12 |
| AX-158124886 | 12 | 36.793 | KV453011.1 | 13945027 | 12-scf00274 | 12 |
| AX-158124888 | 12 | 36.793 | KV453011.1 | 13948931 | 12-scf00274 | 12 |
| AX-158124907 | 12 | 36.793 | KV453011.1 | 13989659 | 12-scf00274 | 12 |
| AX-158124909 | 12 | 36.793 | KV453011.1 | 13990938 | 12-scf00274 | 12 |
| AX-158124910 | 12 | 36.793 | KV453011.1 | 13991796 | 12-scf00274 | 12 |
| AX-158124912 | 12 | 36.793 | KV453011.1 | 13994368 | 12-scf00274 | 12 |
| AX-158392768 | 12 | 36.793 | KV453011.1 | 14021102 | 12-scf00274 | 12 |
| AX-158392769 | 12 | 36.793 | KV453011.1 | 14077888 | 12-scf00274 | 12 |
| AX-158125005 | 12 | 36.793 | KV453011.1 | 14168157 | 12-scf00274 | 12 |
| AX-158125081 | 12 | 36.793 | KV453011.1 | 14262304 | 12-scf00274 | 12 |
| AX-158125109 | 12 | 36.793 | KV453011.1 | 14293811 | 12-scf00274 | 12 |
| AX-157871340 | 12 | 36.793 | KV453011.1 | 14309751 | 12-scf00274 | 12 |
| AX-157711736 | 12 | 36.793 | KV453011.1 | 14317390 | 12-scf00274 | 12 |
| AX-158125122 | 12 | 36.793 | KV453011.1 | 14326027 | 12-scf00274 | 12 |
| AX-158125158 | 12 | 36.793 | KV453011.1 | 14382569 | 12-scf00274 | 12 |
| AX-158124627 | 12 | 36.809 | KV453011.1 | 13319696 | 12-scf00274 | 12 |
| AX-158124722 | 12 | 36.809 | KV453011.1 | 13479522 | 12-scf00274 | 12 |
| AX-158124775 | 12 | 36.809 | KV453011.1 | 13628058 | 12-scf00274 | 12 |
| AX-158125161 | 12 | 36.809 | KV453011.1 | 14386224 | 12-scf00274 | 12 |
| AX-158124723 | 12 | 36.837 | KV453011.1 | 13480552 | 12-scf00274 | 12 |
| AX-158124709 | 12 | 36.869 | KV453011.1 | 13461626 | 12-scf00274 | 12 |
| AX-158124724 | 12 | 36.869 | KV453011.1 | 13481485 | 12-scf00274 | 12 |
| AX-158124436 | 12 | 36.902 | KV453011.1 | 12999452 | 12-scf00274 | 12 |
| AX-158124475 | 12 | 36.902 | KV453011.1 | 13063136 | 12-scf00274 | 12 |
| AX-158124678 | 12 | 36.902 | KV453011.1 | 13411909 | 12-scf00274 | 12 |
| AX-158124728 | 12 | 36.902 | KV453011.1 | 13486606 | 12-scf00274 | 12 |
| AX-158124730 | 12 | 36.902 | KV453011.1 | 13490125 | 12-scf00274 | 12 |
| AX-157716847 | 12 | 36.902 | KV453011.1 | 13490785 | 12-scf00274 | 12 |
| AX-158124740 | 12 | 36.902 | KV453011.1 | 13519360 | 12-scf00274 | 12 |
| AX-158124744 | 12 | 36.902 | KV453011.1 | 13525070 | 12-scf00274 | 12 |
| AX-158124745 | 12 | 36.902 | KV453011.1 | 13526568 | 12-scf00274 | 12 |
| AX-158124746 | 12 | 36.902 | KV453011.1 | 13527220 | 12-scf00274 | 12 |
| AX-157716492 | 12 | 36.902 | KV453011.1 | 13535347 | 12-scf00274 | 12 |
| AX-157829516 | 12 | 36.902 | KV453011.1 | 13536124 | 12-scf00274 | 12 |
| AX-157718158 | 12 | 36.902 | KV453011.1 | 13536265 | 12-scf00274 | 12 |
| AX-157743045 | 12 | 36.902 | KV453011.1 | 13536740 | 12-scf00274 | 12 |
| AX-158380182 | 12 | 36.902 | KV453011.1 | 13537205 | 12-scf00274 | 12 |
| AX-158124751 | 12 | 36.902 | KV453011.1 | 13538971 | 12-scf00274 | 12 |



|              |    |        |            |          |             |    |
|--------------|----|--------|------------|----------|-------------|----|
| AX-158124752 | 12 | 36.902 | KV453011.1 | 13543010 | 12-scf00274 | 12 |
| AX-157739637 | 12 | 36.902 | KV453011.1 | 13543959 | 12-scf00274 | 12 |
| AX-157750968 | 12 | 36.902 | KV453011.1 | 13546462 | 12-scf00274 | 12 |
| AX-157771725 | 12 | 36.902 | KV453011.1 | 13547019 | 12-scf00274 | 12 |
| AX-158124770 | 12 | 36.902 | KV453011.1 | 13608032 | 12-scf00274 | 12 |
| AX-158124771 | 12 | 36.902 | KV453011.1 | 13609288 | 12-scf00274 | 12 |
| AX-158124772 | 12 | 36.902 | KV453011.1 | 13609901 | 12-scf00274 | 12 |
| AX-157757923 | 12 | 36.902 | KV453011.1 | 13616084 | 12-scf00274 | 12 |
| AX-158124779 | 12 | 36.902 | KV453011.1 | 13643701 | 12-scf00274 | 12 |
| AX-158124781 | 12 | 36.902 | KV453011.1 | 13649142 | 12-scf00274 | 12 |
| AX-158124782 | 12 | 36.902 | KV453011.1 | 13651356 | 12-scf00274 | 12 |
| AX-158124791 | 12 | 36.902 | KV453011.1 | 13670013 | 12-scf00274 | 12 |
| AX-158124796 | 12 | 36.902 | KV453011.1 | 13696511 | 12-scf00274 | 12 |
| AX-158385150 | 12 | 36.902 | KV453011.1 | 13722589 | 12-scf00274 | 12 |
| AX-158124825 | 12 | 36.902 | KV453011.1 | 13772650 | 12-scf00274 | 12 |
| AX-157744052 | 12 | 36.902 | KV453011.1 | 13825289 | 12-scf00274 | 12 |
| AX-158124851 | 12 | 36.902 | KV453011.1 | 13841075 | 12-scf00274 | 12 |
| AX-158124865 | 12 | 36.902 | KV453011.1 | 13889820 | 12-scf00274 | 12 |
| AX-158124866 | 12 | 36.902 | KV453011.1 | 13890700 | 12-scf00274 | 12 |
| AX-158124867 | 12 | 36.902 | KV453011.1 | 13891418 | 12-scf00274 | 12 |
| AX-158124874 | 12 | 36.902 | KV453011.1 | 13907479 | 12-scf00274 | 12 |
| AX-158124879 | 12 | 36.902 | KV453011.1 | 13928415 | 12-scf00274 | 12 |
| AX-157757588 | 12 | 36.902 | KV453011.1 | 13930117 | 12-scf00274 | 12 |
| AX-158124881 | 12 | 36.902 | KV453011.1 | 13939045 | 12-scf00274 | 12 |
| AX-158124883 | 12 | 36.902 | KV453011.1 | 13942529 | 12-scf00274 | 12 |
| AX-158124889 | 12 | 36.902 | KV453011.1 | 13949752 | 12-scf00274 | 12 |
| AX-158124923 | 12 | 36.902 | KV453011.1 | 14010731 | 12-scf00274 | 12 |
| AX-158124925 | 12 | 36.902 | KV453011.1 | 14014313 | 12-scf00274 | 12 |
| AX-158124935 | 12 | 36.902 | KV453011.1 | 14029633 | 12-scf00274 | 12 |
| AX-158124936 | 12 | 36.902 | KV453011.1 | 14031167 | 12-scf00274 | 12 |
| AX-158124939 | 12 | 36.902 | KV453011.1 | 14042448 | 12-scf00274 | 12 |
| AX-157757668 | 12 | 36.902 | KV453011.1 | 14070221 | 12-scf00274 | 12 |
| AX-158125068 | 12 | 36.902 | KV453011.1 | 14247221 | 12-scf00274 | 12 |
| AX-158125099 | 12 | 36.902 | KV453011.1 | 14276893 | 12-scf00274 | 12 |
| AX-158125107 | 12 | 36.902 | KV453011.1 | 14292235 | 12-scf00274 | 12 |
| AX-158125133 | 12 | 36.902 | KV453011.1 | 14347649 | 12-scf00274 | 12 |
| AX-158125142 | 12 | 36.902 | KV453011.1 | 14360139 | 12-scf00274 | 12 |
| AX-158125153 | 12 | 36.902 | KV453011.1 | 14373562 | 12-scf00274 | 12 |
| AX-157771191 | 12 | 36.902 | KV453011.1 | 14385131 | 12-scf00274 | 12 |
| AX-158125502 | 12 | 36.902 | KV453011.1 | 14817882 | 12-scf00274 | 12 |
| AX-158125970 | 12 | 36.902 | KV453011.1 | 15448402 | 12-scf00274 | 12 |
| AX-158126440 | 12 | 36.902 | KV453011.1 | 16073099 | 12-scf00274 | 12 |
| AX-158124381 | 12 | 37.121 | KV453011.1 | 12937815 | 12-scf00274 | 12 |
| AX-158124387 | 12 | 37.121 | KV453011.1 | 12944374 | 12-scf00274 | 12 |
| AX-158124460 | 12 | 37.121 | KV453011.1 | 13031423 | 12-scf00274 | 12 |
| AX-157829513 | 12 | 37.121 | KV453011.1 | 13517759 | 12-scf00274 | 12 |
| AX-158124766 | 12 | 37.121 | KV453011.1 | 13592281 | 12-scf00274 | 12 |
| AX-158124792 | 12 | 37.121 | KV453011.1 | 13674434 | 12-scf00274 | 12 |
| AX-157695807 | 12 | 37.121 | KV453011.1 | 13675989 | 12-scf00274 | 12 |
| AX-158124795 | 12 | 37.121 | KV453011.1 | 13685419 | 12-scf00274 | 12 |
| AX-158385149 | 12 | 37.121 | KV453011.1 | 13710182 | 12-scf00274 | 12 |

|              |    |        |            |          |             |    |
|--------------|----|--------|------------|----------|-------------|----|
| AX-158124801 | 12 | 37.121 | KV453011.1 | 13724441 | 12-scf00274 | 12 |
| AX-158124806 | 12 | 37.121 | KV453011.1 | 13734232 | 12-scf00274 | 12 |
| AX-158124810 | 12 | 37.121 | KV453011.1 | 13743102 | 12-scf00274 | 12 |
| AX-158124811 | 12 | 37.121 | KV453011.1 | 13743599 | 12-scf00274 | 12 |
| AX-158124812 | 12 | 37.121 | KV453011.1 | 13744241 | 12-scf00274 | 12 |
| AX-158124813 | 12 | 37.121 | KV453011.1 | 13745246 | 12-scf00274 | 12 |
| AX-158124814 | 12 | 37.121 | KV453011.1 | 13748644 | 12-scf00274 | 12 |
| AX-158124815 | 12 | 37.121 | KV453011.1 | 13749123 | 12-scf00274 | 12 |
| AX-158124816 | 12 | 37.121 | KV453011.1 | 13753738 | 12-scf00274 | 12 |
| AX-158124817 | 12 | 37.121 | KV453011.1 | 13754989 | 12-scf00274 | 12 |
| AX-158124818 | 12 | 37.121 | KV453011.1 | 13755492 | 12-scf00274 | 12 |
| AX-158124819 | 12 | 37.121 | KV453011.1 | 13756652 | 12-scf00274 | 12 |
| AX-158124820 | 12 | 37.121 | KV453011.1 | 13759083 | 12-scf00274 | 12 |
| AX-158124821 | 12 | 37.121 | KV453011.1 | 13762435 | 12-scf00274 | 12 |
| AX-158124823 | 12 | 37.121 | KV453011.1 | 13766612 | 12-scf00274 | 12 |
| AX-158124826 | 12 | 37.121 | KV453011.1 | 13775297 | 12-scf00274 | 12 |
| AX-158392766 | 12 | 37.121 | KV453011.1 | 13787079 | 12-scf00274 | 12 |
| AX-158124832 | 12 | 37.121 | KV453011.1 | 13789510 | 12-scf00274 | 12 |
| AX-158124839 | 12 | 37.121 | KV453011.1 | 13809228 | 12-scf00274 | 12 |
| AX-158124845 | 12 | 37.121 | KV453011.1 | 13820180 | 12-scf00274 | 12 |
| AX-158124847 | 12 | 37.121 | KV453011.1 | 13825819 | 12-scf00274 | 12 |
| AX-158417348 | 12 | 37.121 | KV453011.1 | 13828822 | 12-scf00274 | 12 |
| AX-158124848 | 12 | 37.121 | KV453011.1 | 13830883 | 12-scf00274 | 12 |
| AX-158124850 | 12 | 37.121 | KV453011.1 | 13837323 | 12-scf00274 | 12 |
| AX-158124852 | 12 | 37.121 | KV453011.1 | 13841687 | 12-scf00274 | 12 |
| AX-158124853 | 12 | 37.121 | KV453011.1 | 13856340 | 12-scf00274 | 12 |
| AX-157709839 | 12 | 37.121 | KV453011.1 | 13858016 | 12-scf00274 | 12 |
| AX-158124854 | 12 | 37.121 | KV453011.1 | 13859654 | 12-scf00274 | 12 |
| AX-158124859 | 12 | 37.121 | KV453011.1 | 13878420 | 12-scf00274 | 12 |
| AX-158124860 | 12 | 37.121 | KV453011.1 | 13884893 | 12-scf00274 | 12 |
| AX-158124861 | 12 | 37.121 | KV453011.1 | 13885558 | 12-scf00274 | 12 |
| AX-158124871 | 12 | 37.121 | KV453011.1 | 13904703 | 12-scf00274 | 12 |
| AX-158124878 | 12 | 37.121 | KV453011.1 | 13926812 | 12-scf00274 | 12 |
| AX-158124903 | 12 | 37.121 | KV453011.1 | 13983720 | 12-scf00274 | 12 |
| AX-158124908 | 12 | 37.121 | KV453011.1 | 13989910 | 12-scf00274 | 12 |
| AX-158124917 | 12 | 37.121 | KV453011.1 | 14005967 | 12-scf00274 | 12 |
| AX-158124927 | 12 | 37.121 | KV453011.1 | 14017269 | 12-scf00274 | 12 |
| AX-158124932 | 12 | 37.121 | KV453011.1 | 14023947 | 12-scf00274 | 12 |
| AX-158124943 | 12 | 37.121 | KV453011.1 | 14049533 | 12-scf00274 | 12 |
| AX-158124969 | 12 | 37.121 | KV453011.1 | 14112712 | 12-scf00274 | 12 |
| AX-157829523 | 12 | 37.121 | KV453011.1 | 14145613 | 12-scf00274 | 12 |
| AX-158124991 | 12 | 37.121 | KV453011.1 | 14149614 | 12-scf00274 | 12 |
| AX-158124997 | 12 | 37.121 | KV453011.1 | 14159562 | 12-scf00274 | 12 |
| AX-158125000 | 12 | 37.121 | KV453011.1 | 14161394 | 12-scf00274 | 12 |
| AX-158125004 | 12 | 37.121 | KV453011.1 | 14165692 | 12-scf00274 | 12 |
| AX-158125108 | 12 | 37.121 | KV453011.1 | 14293131 | 12-scf00274 | 12 |
| AX-157829527 | 12 | 37.121 | KV453011.1 | 14314977 | 12-scf00274 | 12 |
| AX-157829529 | 12 | 37.121 | KV453011.1 | 14319418 | 12-scf00274 | 12 |
| AX-158380185 | 12 | 37.121 | KV453011.1 | 14386698 | 12-scf00274 | 12 |
| AX-158125451 | 12 | 37.121 | KV453011.1 | 14763340 | 12-scf00274 | 12 |
| AX-158125495 | 12 | 37.121 | KV453011.1 | 14811875 | 12-scf00274 | 12 |

|              |    |        |            |          |             |    |
|--------------|----|--------|------------|----------|-------------|----|
| AX-157829560 | 12 | 37.121 | KV453011.1 | 15141670 | 12-scf00274 | 12 |
| AX-158125862 | 12 | 37.121 | KV453011.1 | 15302522 | 12-scf00274 | 12 |
| AX-158125914 | 12 | 37.121 | KV453011.1 | 15372109 | 12-scf00274 | 12 |
| AX-158126042 | 12 | 37.121 | KV453011.1 | 15540092 | 12-scf00274 | 12 |
| AX-158126110 | 12 | 37.121 | KV453011.1 | 15620476 | 12-scf00274 | 12 |
| AX-158124870 | 12 | 37.122 | KV453011.1 | 13903271 | 12-scf00274 | 12 |
| AX-158124873 | 12 | 37.124 | KV453011.1 | 13906702 | 12-scf00274 | 12 |
| AX-158124876 | 12 | 37.228 | KV453011.1 | 13921022 | 12-scf00274 | 12 |
| AX-158124887 | 12 | 37.23  | KV453011.1 | 13946534 | 12-scf00274 | 12 |
| AX-158124890 | 12 | 37.23  | KV453011.1 | 13955256 | 12-scf00274 | 12 |
| AX-158124892 | 12 | 37.23  | KV453011.1 | 13960741 | 12-scf00274 | 12 |
| AX-157772194 | 12 | 37.23  | KV453011.1 | 13961709 | 12-scf00274 | 12 |
| AX-158124894 | 12 | 37.23  | KV453011.1 | 13962636 | 12-scf00274 | 12 |
| AX-158124895 | 12 | 37.23  | KV453011.1 | 13963368 | 12-scf00274 | 12 |
| AX-158124896 | 12 | 37.23  | KV453011.1 | 13964477 | 12-scf00274 | 12 |
| AX-158124897 | 12 | 37.23  | KV453011.1 | 13966875 | 12-scf00274 | 12 |
| AX-158124899 | 12 | 37.23  | KV453011.1 | 13969898 | 12-scf00274 | 12 |
| AX-158124913 | 12 | 37.23  | KV453011.1 | 13995482 | 12-scf00274 | 12 |
| AX-158124919 | 12 | 37.23  | KV453011.1 | 14007349 | 12-scf00274 | 12 |
| AX-157726567 | 12 | 37.247 | KV453011.1 | 13664388 | 12-scf00274 | 12 |
| AX-158124924 | 12 | 37.247 | KV453011.1 | 14011925 | 12-scf00274 | 12 |
| AX-158124944 | 12 | 37.27  | KV453011.1 | 14058176 | 12-scf00274 | 12 |
| AX-158124945 | 12 | 37.288 | KV453011.1 | 14059974 | 12-scf00274 | 12 |
| AX-158124956 | 12 | 37.301 | KV453011.1 | 14088950 | 12-scf00274 | 12 |
| AX-158124468 | 12 | 37.319 | KV453011.1 | 13049103 | 12-scf00274 | 12 |
| AX-158124717 | 12 | 37.319 | KV453011.1 | 13471112 | 12-scf00274 | 12 |
| AX-158124965 | 12 | 37.319 | KV453011.1 | 14102015 | 12-scf00274 | 12 |
| AX-158124981 | 12 | 37.319 | KV453011.1 | 14131184 | 12-scf00274 | 12 |
| AX-157829512 | 12 | 37.339 | KV453011.1 | 13498980 | 12-scf00274 | 12 |
| AX-158124756 | 12 | 37.339 | KV453011.1 | 13564744 | 12-scf00274 | 12 |
| AX-158124757 | 12 | 37.339 | KV453011.1 | 13565325 | 12-scf00274 | 12 |
| AX-158124833 | 12 | 37.339 | KV453011.1 | 13792651 | 12-scf00274 | 12 |
| AX-158124949 | 12 | 37.339 | KV453011.1 | 14071732 | 12-scf00274 | 12 |
| AX-158124951 | 12 | 37.339 | KV453011.1 | 14080350 | 12-scf00274 | 12 |
| AX-157886103 | 12 | 37.339 | KV453011.1 | 14105732 | 12-scf00274 | 12 |
| AX-158124972 | 12 | 37.339 | KV453011.1 | 14116664 | 12-scf00274 | 12 |
| AX-158124982 | 12 | 37.339 | KV453011.1 | 14141298 | 12-scf00274 | 12 |
| AX-158124984 | 12 | 37.339 | KV453011.1 | 14142931 | 12-scf00274 | 12 |
| AX-158124996 | 12 | 37.339 | KV453011.1 | 14157029 | 12-scf00274 | 12 |
| AX-158411352 | 12 | 37.339 | KV453011.1 | 14157637 | 12-scf00274 | 12 |
| AX-157829525 | 12 | 37.339 | KV453011.1 | 14246440 | 12-scf00274 | 12 |
| AX-158125200 | 12 | 37.339 | KV453011.1 | 14452368 | 12-scf00274 | 12 |
| AX-158411353 | 12 | 37.377 | KV453011.1 | 14157685 | 12-scf00274 | 12 |
| AX-158124999 | 12 | 37.413 | KV453011.1 | 14160585 | 12-scf00274 | 12 |
| AX-158125012 | 12 | 37.448 | KV453011.1 | 14178453 | 12-scf00274 | 12 |
| AX-158125095 | 12 | 37.472 | KV453011.1 | 14273369 | 12-scf00274 | 12 |
| AX-158124797 | 12 | 37.495 | KV453011.1 | 13698368 | 12-scf00274 | 12 |
| AX-157829520 | 12 | 37.495 | KV453011.1 | 14080783 | 12-scf00274 | 12 |
| AX-158125110 | 12 | 37.495 | KV453011.1 | 14296051 | 12-scf00274 | 12 |
| AX-157727259 | 12 | 37.495 | KV453011.1 | 14296644 | 12-scf00274 | 12 |
| AX-157751232 | 12 | 37.495 | KV453011.1 | 14387323 | 12-scf00274 | 12 |

|              |    |        |            |          |             |    |
|--------------|----|--------|------------|----------|-------------|----|
| AX-158125115 | 12 | 37.512 | KV453011.1 | 14303476 | 12-scf00274 | 12 |
| AX-158124957 | 12 | 37.546 | KV453011.1 | 14090031 | 12-scf00274 | 12 |
| AX-158411360 | 12 | 37.546 | KV453011.1 | 14313445 | 12-scf00274 | 12 |
| AX-158124731 | 12 | 37.558 | KV453011.1 | 13491801 | 12-scf00274 | 12 |
| AX-158124915 | 12 | 37.558 | KV453011.1 | 13999224 | 12-scf00274 | 12 |
| AX-158124947 | 12 | 37.558 | KV453011.1 | 14064815 | 12-scf00274 | 12 |
| AX-158125073 | 12 | 37.558 | KV453011.1 | 14254318 | 12-scf00274 | 12 |
| AX-158380184 | 12 | 37.558 | KV453011.1 | 14328859 | 12-scf00274 | 12 |
| AX-158125127 | 12 | 37.558 | KV453011.1 | 14332685 | 12-scf00274 | 12 |
| AX-158125128 | 12 | 37.558 | KV453011.1 | 14333039 | 12-scf00274 | 12 |
| AX-157744611 | 12 | 37.558 | KV453011.1 | 14340007 | 12-scf00274 | 12 |
| AX-158125138 | 12 | 37.558 | KV453011.1 | 14355182 | 12-scf00274 | 12 |
| AX-158125139 | 12 | 37.558 | KV453011.1 | 14355496 | 12-scf00274 | 12 |
| AX-157829532 | 12 | 37.558 | KV453011.1 | 14356439 | 12-scf00274 | 12 |
| AX-158125140 | 12 | 37.558 | KV453011.1 | 14357575 | 12-scf00274 | 12 |
| AX-158125141 | 12 | 37.558 | KV453011.1 | 14359662 | 12-scf00274 | 12 |
| AX-158125144 | 12 | 37.558 | KV453011.1 | 14361222 | 12-scf00274 | 12 |
| AX-158125150 | 12 | 37.558 | KV453011.1 | 14369843 | 12-scf00274 | 12 |
| AX-157727139 | 12 | 37.558 | KV453011.1 | 14372415 | 12-scf00274 | 12 |
| AX-158125156 | 12 | 37.558 | KV453011.1 | 14376162 | 12-scf00274 | 12 |
| AX-157744744 | 12 | 37.558 | KV453011.1 | 14380459 | 12-scf00274 | 12 |
| AX-158125168 | 12 | 37.558 | KV453011.1 | 14403892 | 12-scf00274 | 12 |
| AX-158125428 | 12 | 37.558 | KV453011.1 | 14738447 | 12-scf00274 | 12 |
| AX-157713095 | 12 | 37.558 | KV453011.1 | 14748547 | 12-scf00274 | 12 |
| AX-158125463 | 12 | 37.558 | KV453011.1 | 14773038 | 12-scf00274 | 12 |
| AX-158125601 | 12 | 37.558 | KV453011.1 | 14949450 | 12-scf00274 | 12 |
| AX-158125604 | 12 | 37.558 | KV453011.1 | 14952178 | 12-scf00274 | 12 |
| AX-158125608 | 12 | 37.558 | KV453011.1 | 14954973 | 12-scf00274 | 12 |
| AX-158125663 | 12 | 37.558 | KV453011.1 | 15025257 | 12-scf00274 | 12 |
| AX-158125723 | 12 | 37.558 | KV453011.1 | 15128527 | 12-scf00274 | 12 |
| AX-158125886 | 12 | 37.558 | KV453011.1 | 15331686 | 12-scf00274 | 12 |
| AX-158125952 | 12 | 37.558 | KV453011.1 | 15421150 | 12-scf00274 | 12 |
| AX-158126115 | 12 | 37.558 | KV453011.1 | 15627648 | 12-scf00274 | 12 |
| AX-158392762 | 12 | 37.776 | KV453011.1 | 13372883 | 12-scf00274 | 12 |
| AX-158124901 | 12 | 37.776 | KV453011.1 | 13971982 | 12-scf00274 | 12 |
| AX-158125172 | 12 | 37.776 | KV453011.1 | 14409095 | 12-scf00274 | 12 |
| AX-158125173 | 12 | 37.776 | KV453011.1 | 14409945 | 12-scf00274 | 12 |
| AX-158125175 | 12 | 37.776 | KV453011.1 | 14411413 | 12-scf00274 | 12 |
| AX-158125177 | 12 | 37.776 | KV453011.1 | 14414259 | 12-scf00274 | 12 |
| AX-158411365 | 12 | 37.776 | KV453011.1 | 14417134 | 12-scf00274 | 12 |
| AX-158125178 | 12 | 37.776 | KV453011.1 | 14418049 | 12-scf00274 | 12 |
| AX-158125179 | 12 | 37.776 | KV453011.1 | 14420320 | 12-scf00274 | 12 |
| AX-157753998 | 12 | 37.776 | KV453011.1 | 14420893 | 12-scf00274 | 12 |
| AX-158125187 | 12 | 37.776 | KV453011.1 | 14429293 | 12-scf00274 | 12 |
| AX-158392777 | 12 | 37.776 | KV453011.1 | 14431734 | 12-scf00274 | 12 |
| AX-158125190 | 12 | 37.776 | KV453011.1 | 14434255 | 12-scf00274 | 12 |
| AX-158125192 | 12 | 37.776 | KV453011.1 | 14435900 | 12-scf00274 | 12 |
| AX-158125195 | 12 | 37.776 | KV453011.1 | 14437915 | 12-scf00274 | 12 |
| AX-157717055 | 12 | 37.776 | KV453011.1 | 14441304 | 12-scf00274 | 12 |
| AX-158125206 | 12 | 37.776 | KV453011.1 | 14457595 | 12-scf00274 | 12 |
| AX-158125211 | 12 | 37.776 | KV453011.1 | 14461771 | 12-scf00274 | 12 |

|              |    |        |            |          |             |    |
|--------------|----|--------|------------|----------|-------------|----|
| AX-157774135 | 12 | 37.776 | KV453011.1 | 14462595 | 12-scf00274 | 12 |
| AX-157713984 | 12 | 37.776 | KV453011.1 | 14464089 | 12-scf00274 | 12 |
| AX-158125212 | 12 | 37.776 | KV453011.1 | 14467666 | 12-scf00274 | 12 |
| AX-158125215 | 12 | 37.776 | KV453011.1 | 14468579 | 12-scf00274 | 12 |
| AX-158125217 | 12 | 37.776 | KV453011.1 | 14470547 | 12-scf00274 | 12 |
| AX-158125228 | 12 | 37.776 | KV453011.1 | 14489099 | 12-scf00274 | 12 |
| AX-158125230 | 12 | 37.776 | KV453011.1 | 14491460 | 12-scf00274 | 12 |
| AX-158125231 | 12 | 37.776 | KV453011.1 | 14491973 | 12-scf00274 | 12 |
| AX-158125238 | 12 | 37.776 | KV453011.1 | 14502472 | 12-scf00274 | 12 |
| AX-158125241 | 12 | 37.776 | KV453011.1 | 14504412 | 12-scf00274 | 12 |
| AX-158125242 | 12 | 37.776 | KV453011.1 | 14504930 | 12-scf00274 | 12 |
| AX-158125247 | 12 | 37.776 | KV453011.1 | 14508269 | 12-scf00274 | 12 |
| AX-158125248 | 12 | 37.776 | KV453011.1 | 14508494 | 12-scf00274 | 12 |
| AX-158125252 | 12 | 37.776 | KV453011.1 | 14511311 | 12-scf00274 | 12 |
| AX-158125253 | 12 | 37.776 | KV453011.1 | 14513424 | 12-scf00274 | 12 |
| AX-158125254 | 12 | 37.776 | KV453011.1 | 14514503 | 12-scf00274 | 12 |
| AX-158125260 | 12 | 37.776 | KV453011.1 | 14519197 | 12-scf00274 | 12 |
| AX-158125261 | 12 | 37.776 | KV453011.1 | 14519414 | 12-scf00274 | 12 |
| AX-158125262 | 12 | 37.776 | KV453011.1 | 14520951 | 12-scf00274 | 12 |
| AX-158125264 | 12 | 37.776 | KV453011.1 | 14523496 | 12-scf00274 | 12 |
| AX-158125265 | 12 | 37.776 | KV453011.1 | 14524420 | 12-scf00274 | 12 |
| AX-158125267 | 12 | 37.776 | KV453011.1 | 14527541 | 12-scf00274 | 12 |
| AX-158125268 | 12 | 37.776 | KV453011.1 | 14530002 | 12-scf00274 | 12 |
| AX-158125273 | 12 | 37.776 | KV453011.1 | 14538033 | 12-scf00274 | 12 |
| AX-158125276 | 12 | 37.776 | KV453011.1 | 14541844 | 12-scf00274 | 12 |
| AX-158125282 | 12 | 37.776 | KV453011.1 | 14548347 | 12-scf00274 | 12 |
| AX-158125283 | 12 | 37.776 | KV453011.1 | 14549367 | 12-scf00274 | 12 |
| AX-158125284 | 12 | 37.776 | KV453011.1 | 14550537 | 12-scf00274 | 12 |
| AX-158125289 | 12 | 37.776 | KV453011.1 | 14561544 | 12-scf00274 | 12 |
| AX-158125291 | 12 | 37.776 | KV453011.1 | 14563647 | 12-scf00274 | 12 |
| AX-158125297 | 12 | 37.776 | KV453011.1 | 14574358 | 12-scf00274 | 12 |
| AX-158125298 | 12 | 37.776 | KV453011.1 | 14576010 | 12-scf00274 | 12 |
| AX-158125300 | 12 | 37.776 | KV453011.1 | 14578780 | 12-scf00274 | 12 |
| AX-158125309 | 12 | 37.776 | KV453011.1 | 14587066 | 12-scf00274 | 12 |
| AX-158125310 | 12 | 37.776 | KV453011.1 | 14588375 | 12-scf00274 | 12 |
| AX-158392778 | 12 | 37.776 | KV453011.1 | 14619767 | 12-scf00274 | 12 |
| AX-158125334 | 12 | 37.776 | KV453011.1 | 14622529 | 12-scf00274 | 12 |
| AX-158125335 | 12 | 37.776 | KV453011.1 | 14622974 | 12-scf00274 | 12 |
| AX-158125339 | 12 | 37.776 | KV453011.1 | 14626115 | 12-scf00274 | 12 |
| AX-158125347 | 12 | 37.776 | KV453011.1 | 14636970 | 12-scf00274 | 12 |
| AX-158392779 | 12 | 37.776 | KV453011.1 | 14637040 | 12-scf00274 | 12 |
| AX-158125349 | 12 | 37.776 | KV453011.1 | 14638444 | 12-scf00274 | 12 |
| AX-158125350 | 12 | 37.776 | KV453011.1 | 14638586 | 12-scf00274 | 12 |
| AX-158125356 | 12 | 37.776 | KV453011.1 | 14644353 | 12-scf00274 | 12 |
| AX-158125364 | 12 | 37.776 | KV453011.1 | 14652060 | 12-scf00274 | 12 |
| AX-158125384 | 12 | 37.776 | KV453011.1 | 14681468 | 12-scf00274 | 12 |
| AX-158125386 | 12 | 37.776 | KV453011.1 | 14683417 | 12-scf00274 | 12 |
| AX-158125406 | 12 | 37.776 | KV453011.1 | 14713899 | 12-scf00274 | 12 |
| AX-158125407 | 12 | 37.776 | KV453011.1 | 14714347 | 12-scf00274 | 12 |
| AX-158125409 | 12 | 37.776 | KV453011.1 | 14715862 | 12-scf00274 | 12 |
| AX-158125412 | 12 | 37.776 | KV453011.1 | 14719273 | 12-scf00274 | 12 |

|              |    |        |            |          |             |    |
|--------------|----|--------|------------|----------|-------------|----|
| AX-158125421 | 12 | 37.776 | KV453011.1 | 14729347 | 12-scf00274 | 12 |
| AX-158125542 | 12 | 37.776 | KV453011.1 | 14865263 | 12-scf00274 | 12 |
| AX-158125953 | 12 | 37.776 | KV453011.1 | 15421593 | 12-scf00274 | 12 |
| AX-158126430 | 12 | 37.776 | KV453011.1 | 16059364 | 12-scf00274 | 12 |
| AX-158125269 | 12 | 37.806 | KV453011.1 | 14530924 | 12-scf00274 | 12 |
| AX-158125278 | 12 | 37.825 | KV453011.1 | 14543280 | 12-scf00274 | 12 |
| AX-158124648 | 12 | 37.841 | KV453011.1 | 13358489 | 12-scf00274 | 12 |
| AX-158124764 | 12 | 37.841 | KV453011.1 | 13588075 | 12-scf00274 | 12 |
| AX-158124840 | 12 | 37.841 | KV453011.1 | 13812758 | 12-scf00274 | 12 |
| AX-158125279 | 12 | 37.841 | KV453011.1 | 14546057 | 12-scf00274 | 12 |
| AX-158125306 | 12 | 37.841 | KV453011.1 | 14585263 | 12-scf00274 | 12 |
| AX-158125419 | 12 | 37.841 | KV453011.1 | 14727952 | 12-scf00274 | 12 |
| AX-158125425 | 12 | 37.841 | KV453011.1 | 14734362 | 12-scf00274 | 12 |
| AX-158125438 | 12 | 37.841 | KV453011.1 | 14750486 | 12-scf00274 | 12 |
| AX-158125548 | 12 | 37.841 | KV453011.1 | 14870996 | 12-scf00274 | 12 |
| AX-158125568 | 12 | 37.841 | KV453011.1 | 14898866 | 12-scf00274 | 12 |
| AX-158125569 | 12 | 37.841 | KV453011.1 | 14899465 | 12-scf00274 | 12 |
| AX-158125570 | 12 | 37.841 | KV453011.1 | 14900458 | 12-scf00274 | 12 |
| AX-158125599 | 12 | 37.841 | KV453011.1 | 14948987 | 12-scf00274 | 12 |
| AX-157722991 | 12 | 37.866 | KV453011.1 | 14554944 | 12-scf00274 | 12 |
| AX-158125287 | 12 | 37.885 | KV453011.1 | 14557015 | 12-scf00274 | 12 |
| AX-158125288 | 12 | 37.885 | KV453011.1 | 14560674 | 12-scf00274 | 12 |
| AX-158125290 | 12 | 37.885 | KV453011.1 | 14562086 | 12-scf00274 | 12 |
| AX-157694333 | 12 | 37.885 | KV453011.1 | 14565454 | 12-scf00274 | 12 |
| AX-158125292 | 12 | 37.885 | KV453011.1 | 14566537 | 12-scf00274 | 12 |
| AX-158125303 | 12 | 37.885 | KV453011.1 | 14581853 | 12-scf00274 | 12 |
| AX-157757290 | 12 | 37.885 | KV453011.1 | 14581952 | 12-scf00274 | 12 |
| AX-158125308 | 12 | 37.885 | KV453011.1 | 14586698 | 12-scf00274 | 12 |
| AX-158125490 | 12 | 37.885 | KV453011.1 | 14801242 | 12-scf00274 | 12 |
| AX-157754937 | 12 | 37.994 | KV453011.1 | 13955969 | 12-scf00274 | 12 |
| AX-158125167 | 12 | 37.994 | KV453011.1 | 14403645 | 12-scf00274 | 12 |
| AX-158125199 | 12 | 37.994 | KV453011.1 | 14447146 | 12-scf00274 | 12 |
| AX-158125293 | 12 | 37.994 | KV453011.1 | 14569557 | 12-scf00274 | 12 |
| AX-158125333 | 12 | 37.994 | KV453011.1 | 14618695 | 12-scf00274 | 12 |
| AX-158125336 | 12 | 37.994 | KV453011.1 | 14623440 | 12-scf00274 | 12 |
| AX-158125337 | 12 | 37.994 | KV453011.1 | 14623819 | 12-scf00274 | 12 |
| AX-157857773 | 12 | 37.994 | KV453011.1 | 14626848 | 12-scf00274 | 12 |
| AX-158125343 | 12 | 37.994 | KV453011.1 | 14630376 | 12-scf00274 | 12 |
| AX-158125348 | 12 | 37.994 | KV453011.1 | 14637995 | 12-scf00274 | 12 |
| AX-158125351 | 12 | 37.994 | KV453011.1 | 14639259 | 12-scf00274 | 12 |
| AX-158125353 | 12 | 37.994 | KV453011.1 | 14640125 | 12-scf00274 | 12 |
| AX-158125357 | 12 | 37.994 | KV453011.1 | 14645229 | 12-scf00274 | 12 |
| AX-158125363 | 12 | 37.994 | KV453011.1 | 14650494 | 12-scf00274 | 12 |
| AX-158125368 | 12 | 37.994 | KV453011.1 | 14658878 | 12-scf00274 | 12 |
| AX-158125370 | 12 | 37.994 | KV453011.1 | 14661978 | 12-scf00274 | 12 |
| AX-157773569 | 12 | 37.994 | KV453011.1 | 14668458 | 12-scf00274 | 12 |
| AX-158125374 | 12 | 37.994 | KV453011.1 | 14669228 | 12-scf00274 | 12 |
| AX-157723025 | 12 | 37.994 | KV453011.1 | 14670639 | 12-scf00274 | 12 |
| AX-158125376 | 12 | 37.994 | KV453011.1 | 14671107 | 12-scf00274 | 12 |
| AX-158125381 | 12 | 37.994 | KV453011.1 | 14674475 | 12-scf00274 | 12 |
| AX-158125382 | 12 | 37.994 | KV453011.1 | 14677879 | 12-scf00274 | 12 |

|              |    |        |             |          |             |    |
|--------------|----|--------|-------------|----------|-------------|----|
| AX-158125388 | 12 | 37.994 | KV453011.1  | 14686461 | 12-scf00274 | 12 |
| AX-158125392 | 12 | 37.994 | KV453011.1  | 14689823 | 12-scf00274 | 12 |
| AX-158125404 | 12 | 37.994 | KV453011.1  | 14712850 | 12-scf00274 | 12 |
| AX-157775831 | 12 | 37.994 | KV453011.1  | 14717058 | 12-scf00274 | 12 |
| AX-158125411 | 12 | 37.994 | KV453011.1  | 14718607 | 12-scf00274 | 12 |
| AX-158125414 | 12 | 37.994 | KV453011.1  | 14722126 | 12-scf00274 | 12 |
| AX-158125415 | 12 | 37.994 | KV453011.1  | 14723249 | 12-scf00274 | 12 |
| AX-158125417 | 12 | 37.994 | KV453011.1  | 14725764 | 12-scf00274 | 12 |
| AX-158125467 | 12 | 37.994 | KV453011.1  | 14777815 | 12-scf00274 | 12 |
| AX-157774604 | 12 | 37.994 | KV453011.1  | 14850763 | 12-scf00274 | 12 |
| AX-158125559 | 12 | 37.994 | KV453011.1  | 14882950 | 12-scf00274 | 12 |
| AX-157829579 | 12 | 37.994 | KV453011.1  | 15759836 | 12-scf00274 | 12 |
| AX-158126262 | 12 | 37.994 | KV453011.1  | 15811422 | 12-scf00274 | 12 |
| AX-157706527 | 12 | 37.994 | 3ML01032389 | 480      | scf08008_1  | UN |
| AX-158125379 | 12 | 38.103 | KV453011.1  | 14673206 | 12-scf00274 | 12 |
| AX-158125405 | 12 | 38.103 | KV453011.1  | 14713357 | 12-scf00274 | 12 |
| AX-157751910 | 12 | 38.103 | KV453011.1  | 14748181 | 12-scf00274 | 12 |
| AX-158125447 | 12 | 38.103 | KV453011.1  | 14758589 | 12-scf00274 | 12 |
| AX-158125450 | 12 | 38.103 | KV453011.1  | 14761055 | 12-scf00274 | 12 |
| AX-158125455 | 12 | 38.103 | KV453011.1  | 14767226 | 12-scf00274 | 12 |
| AX-158125456 | 12 | 38.103 | KV453011.1  | 14768470 | 12-scf00274 | 12 |
| AX-158125457 | 12 | 38.103 | KV453011.1  | 14768813 | 12-scf00274 | 12 |
| AX-158125458 | 12 | 38.103 | KV453011.1  | 14769646 | 12-scf00274 | 12 |
| AX-158125459 | 12 | 38.103 | KV453011.1  | 14769942 | 12-scf00274 | 12 |
| AX-158125462 | 12 | 38.103 | KV453011.1  | 14772733 | 12-scf00274 | 12 |
| AX-158125465 | 12 | 38.103 | KV453011.1  | 14775099 | 12-scf00274 | 12 |
| AX-158380186 | 12 | 38.103 | KV453011.1  | 14779920 | 12-scf00274 | 12 |
| AX-158125476 | 12 | 38.103 | KV453011.1  | 14786746 | 12-scf00274 | 12 |
| AX-158125520 | 12 | 38.103 | KV453011.1  | 14840089 | 12-scf00274 | 12 |
| AX-158125478 | 12 | 38.142 | KV453011.1  | 14788468 | 12-scf00274 | 12 |
| AX-158125500 | 12 | 38.142 | KV453011.1  | 14815916 | 12-scf00274 | 12 |
| AX-158125522 | 12 | 38.142 | KV453011.1  | 14842021 | 12-scf00274 | 12 |
| AX-158125529 | 12 | 38.142 | KV453011.1  | 14849205 | 12-scf00274 | 12 |
| AX-158125557 | 12 | 38.142 | KV453011.1  | 14880336 | 12-scf00274 | 12 |
| AX-158125561 | 12 | 38.142 | KV453011.1  | 14883794 | 12-scf00274 | 12 |
| AX-158125479 | 12 | 38.205 | KV453011.1  | 14788901 | 12-scf00274 | 12 |
| AX-158125442 | 12 | 38.269 | KV453011.1  | 14752853 | 12-scf00274 | 12 |
| AX-158125469 | 12 | 38.269 | KV453011.1  | 14779515 | 12-scf00274 | 12 |
| AX-158125485 | 12 | 38.269 | KV453011.1  | 14795104 | 12-scf00274 | 12 |
| AX-158125486 | 12 | 38.269 | KV453011.1  | 14795808 | 12-scf00274 | 12 |
| AX-157829541 | 12 | 38.269 | KV453011.1  | 14796402 | 12-scf00274 | 12 |
| AX-158125518 | 12 | 38.269 | KV453011.1  | 14838541 | 12-scf00274 | 12 |
| AX-158392784 | 12 | 38.269 | KV453011.1  | 14934681 | 12-scf00274 | 12 |
| AX-158125475 | 12 | 38.322 | KV453011.1  | 14785913 | 12-scf00274 | 12 |
| AX-158125477 | 12 | 38.322 | KV453011.1  | 14787675 | 12-scf00274 | 12 |
| AX-158125492 | 12 | 38.322 | KV453011.1  | 14802512 | 12-scf00274 | 12 |
| AX-158125506 | 12 | 38.322 | KV453011.1  | 14822484 | 12-scf00274 | 12 |
| AX-158125507 | 12 | 38.322 | KV453011.1  | 14824687 | 12-scf00274 | 12 |
| AX-157722504 | 12 | 38.322 | KV453011.1  | 14836140 | 12-scf00274 | 12 |
| AX-158125519 | 12 | 38.322 | KV453011.1  | 14839132 | 12-scf00274 | 12 |
| AX-158125523 | 12 | 38.322 | KV453011.1  | 14842669 | 12-scf00274 | 12 |

|              |    |        |            |          |             |    |
|--------------|----|--------|------------|----------|-------------|----|
| AX-158125533 | 12 | 38.322 | KV453011.1 | 14856988 | 12-scf00274 | 12 |
| AX-158125540 | 12 | 38.322 | KV453011.1 | 14862734 | 12-scf00274 | 12 |
| AX-158125553 | 12 | 38.322 | KV453011.1 | 14875443 | 12-scf00274 | 12 |
| AX-158125558 | 12 | 38.322 | KV453011.1 | 14880699 | 12-scf00274 | 12 |
| AX-158125564 | 12 | 38.322 | KV453011.1 | 14890886 | 12-scf00274 | 12 |
| AX-157741335 | 12 | 38.322 | KV453011.1 | 14908878 | 12-scf00274 | 12 |
| AX-157829546 | 12 | 38.322 | KV453011.1 | 14910651 | 12-scf00274 | 12 |
| AX-158125572 | 12 | 38.322 | KV453011.1 | 14910780 | 12-scf00274 | 12 |
| AX-158125584 | 12 | 38.322 | KV453011.1 | 14923160 | 12-scf00274 | 12 |
| AX-158125585 | 12 | 38.322 | KV453011.1 | 14924065 | 12-scf00274 | 12 |
| AX-158125586 | 12 | 38.322 | KV453011.1 | 14927128 | 12-scf00274 | 12 |
| AX-158392783 | 12 | 38.431 | KV453011.1 | 14788977 | 12-scf00274 | 12 |
| AX-158125480 | 12 | 38.431 | KV453011.1 | 14789399 | 12-scf00274 | 12 |
| AX-158125499 | 12 | 38.431 | KV453011.1 | 14815436 | 12-scf00274 | 12 |
| AX-158411367 | 12 | 38.431 | KV453011.1 | 14826027 | 12-scf00274 | 12 |
| AX-157727066 | 12 | 38.431 | KV453011.1 | 14845699 | 12-scf00274 | 12 |
| AX-158125549 | 12 | 38.431 | KV453011.1 | 14872031 | 12-scf00274 | 12 |
| AX-158125550 | 12 | 38.431 | KV453011.1 | 14872722 | 12-scf00274 | 12 |
| AX-158125565 | 12 | 38.431 | KV453011.1 | 14891339 | 12-scf00274 | 12 |
| AX-158125589 | 12 | 38.431 | KV453011.1 | 14937783 | 12-scf00274 | 12 |
| AX-158125590 | 12 | 38.431 | KV453011.1 | 14940066 | 12-scf00274 | 12 |
| AX-158125592 | 12 | 38.431 | KV453011.1 | 14940669 | 12-scf00274 | 12 |
| AX-157871341 | 12 | 38.431 | KV453011.1 | 14942447 | 12-scf00274 | 12 |
| AX-158125594 | 12 | 38.431 | KV453011.1 | 14945128 | 12-scf00274 | 12 |
| AX-158125596 | 12 | 38.431 | KV453011.1 | 14946433 | 12-scf00274 | 12 |
| AX-158125598 | 12 | 38.431 | KV453011.1 | 14948296 | 12-scf00274 | 12 |
| AX-158125609 | 12 | 38.431 | KV453011.1 | 14955279 | 12-scf00274 | 12 |
| AX-158125613 | 12 | 38.431 | KV453011.1 | 14960627 | 12-scf00274 | 12 |
| AX-157775134 | 12 | 38.431 | KV453011.1 | 14961223 | 12-scf00274 | 12 |
| AX-158125614 | 12 | 38.431 | KV453011.1 | 14961307 | 12-scf00274 | 12 |
| AX-158125616 | 12 | 38.431 | KV453011.1 | 14961931 | 12-scf00274 | 12 |
| AX-158125625 | 12 | 38.431 | KV453011.1 | 14969920 | 12-scf00274 | 12 |
| AX-158125633 | 12 | 38.431 | KV453011.1 | 14978019 | 12-scf00274 | 12 |
| AX-158125634 | 12 | 38.431 | KV453011.1 | 14978410 | 12-scf00274 | 12 |
| AX-158125636 | 12 | 38.431 | KV453011.1 | 14979524 | 12-scf00274 | 12 |
| AX-158125643 | 12 | 38.431 | KV453011.1 | 14990695 | 12-scf00274 | 12 |
| AX-158125644 | 12 | 38.431 | KV453011.1 | 14991139 | 12-scf00274 | 12 |
| AX-158125645 | 12 | 38.431 | KV453011.1 | 14991441 | 12-scf00274 | 12 |
| AX-158125649 | 12 | 38.431 | KV453011.1 | 14994657 | 12-scf00274 | 12 |
| AX-157829555 | 12 | 38.431 | KV453011.1 | 15082110 | 12-scf00274 | 12 |
| AX-157871343 | 12 | 38.431 | KV453011.1 | 15088626 | 12-scf00274 | 12 |
| AX-158125715 | 12 | 38.431 | KV453011.1 | 15119712 | 12-scf00274 | 12 |
| AX-158125767 | 12 | 38.431 | KV453011.1 | 15190045 | 12-scf00274 | 12 |
| AX-158125776 | 12 | 38.431 | KV453011.1 | 15200917 | 12-scf00274 | 12 |
| AX-158125778 | 12 | 38.431 | KV453011.1 | 15202941 | 12-scf00274 | 12 |
| AX-157829561 | 12 | 38.431 | KV453011.1 | 15243270 | 12-scf00274 | 12 |
| AX-158392787 | 12 | 38.431 | KV453011.1 | 15266421 | 12-scf00274 | 12 |
| AX-158392788 | 12 | 38.431 | KV453011.1 | 15291911 | 12-scf00274 | 12 |
| AX-158125865 | 12 | 38.431 | KV453011.1 | 15308838 | 12-scf00274 | 12 |
| AX-158125871 | 12 | 38.431 | KV453011.1 | 15319927 | 12-scf00274 | 12 |
| AX-158125901 | 12 | 38.431 | KV453011.1 | 15352139 | 12-scf00274 | 12 |



|              |    |        |            |          |             |    |
|--------------|----|--------|------------|----------|-------------|----|
| AX-158125904 | 12 | 38.431 | KV453011.1 | 15355299 | 12-scf00274 | 12 |
| AX-158125907 | 12 | 38.431 | KV453011.1 | 15358155 | 12-scf00274 | 12 |
| AX-158125910 | 12 | 38.431 | KV453011.1 | 15367675 | 12-scf00274 | 12 |
| AX-158125912 | 12 | 38.431 | KV453011.1 | 15369950 | 12-scf00274 | 12 |
| AX-158125934 | 12 | 38.431 | KV453011.1 | 15394613 | 12-scf00274 | 12 |
| AX-158125942 | 12 | 38.431 | KV453011.1 | 15405366 | 12-scf00274 | 12 |
| AX-158125945 | 12 | 38.431 | KV453011.1 | 15407319 | 12-scf00274 | 12 |
| AX-158125947 | 12 | 38.431 | KV453011.1 | 15410920 | 12-scf00274 | 12 |
| AX-157717049 | 12 | 38.431 | KV453011.1 | 15436229 | 12-scf00274 | 12 |
| AX-158125971 | 12 | 38.431 | KV453011.1 | 15449109 | 12-scf00274 | 12 |
| AX-157829566 | 12 | 38.431 | KV453011.1 | 15449294 | 12-scf00274 | 12 |
| AX-157726601 | 12 | 38.431 | KV453011.1 | 15464583 | 12-scf00274 | 12 |
| AX-158125989 | 12 | 38.431 | KV453011.1 | 15477809 | 12-scf00274 | 12 |
| AX-157771420 | 12 | 38.431 | KV453011.1 | 15478820 | 12-scf00274 | 12 |
| AX-158126031 | 12 | 38.431 | KV453011.1 | 15527018 | 12-scf00274 | 12 |
| AX-158126035 | 12 | 38.431 | KV453011.1 | 15534887 | 12-scf00274 | 12 |
| AX-157758023 | 12 | 38.431 | KV453011.1 | 15566055 | 12-scf00274 | 12 |
| AX-158126062 | 12 | 38.431 | KV453011.1 | 15568642 | 12-scf00274 | 12 |
| AX-158126085 | 12 | 38.431 | KV453011.1 | 15592179 | 12-scf00274 | 12 |
| AX-158126103 | 12 | 38.431 | KV453011.1 | 15612686 | 12-scf00274 | 12 |
| AX-158392790 | 12 | 38.431 | KV453011.1 | 15614051 | 12-scf00274 | 12 |
| AX-158126105 | 12 | 38.431 | KV453011.1 | 15616214 | 12-scf00274 | 12 |
| AX-158126130 | 12 | 38.431 | KV453011.1 | 15645466 | 12-scf00274 | 12 |
| AX-158126131 | 12 | 38.431 | KV453011.1 | 15645959 | 12-scf00274 | 12 |
| AX-158392791 | 12 | 38.431 | KV453011.1 | 15646798 | 12-scf00274 | 12 |
| AX-157695939 | 12 | 38.431 | KV453011.1 | 15647761 | 12-scf00274 | 12 |
| AX-158126148 | 12 | 38.431 | KV453011.1 | 15668585 | 12-scf00274 | 12 |
| AX-158126170 | 12 | 38.431 | KV453011.1 | 15688624 | 12-scf00274 | 12 |
| AX-158126182 | 12 | 38.431 | KV453011.1 | 15706595 | 12-scf00274 | 12 |
| AX-158126273 | 12 | 38.431 | KV453011.1 | 15831986 | 12-scf00274 | 12 |
| AX-158125597 | 12 | 38.443 | KV453011.1 | 14946925 | 12-scf00274 | 12 |
| AX-158125670 | 12 | 38.443 | KV453011.1 | 15039170 | 12-scf00274 | 12 |
| AX-157829552 | 12 | 38.443 | KV453011.1 | 15039372 | 12-scf00274 | 12 |
| AX-158125672 | 12 | 38.443 | KV453011.1 | 15040143 | 12-scf00274 | 12 |
| AX-158125829 | 12 | 38.443 | KV453011.1 | 15265985 | 12-scf00274 | 12 |
| AX-158125991 | 12 | 38.443 | KV453011.1 | 15479263 | 12-scf00274 | 12 |
| AX-158126247 | 12 | 38.443 | KV453011.1 | 15795863 | 12-scf00274 | 12 |
| AX-158126261 | 12 | 38.443 | KV453011.1 | 15810921 | 12-scf00274 | 12 |
| AX-158125671 | 12 | 38.54  | KV453011.1 | 15039593 | 12-scf00274 | 12 |
| AX-157743569 | 12 | 38.627 | KV453011.1 | 15056062 | 12-scf00274 | 12 |
| AX-158124931 | 12 | 38.65  | KV453011.1 | 14023506 | 12-scf00274 | 12 |
| AX-158125600 | 12 | 38.65  | KV453011.1 | 14949206 | 12-scf00274 | 12 |
| AX-158125626 | 12 | 38.65  | KV453011.1 | 14970834 | 12-scf00274 | 12 |
| AX-158125677 | 12 | 38.65  | KV453011.1 | 15055704 | 12-scf00274 | 12 |
| AX-158125689 | 12 | 38.65  | KV453011.1 | 15070951 | 12-scf00274 | 12 |
| AX-158125690 | 12 | 38.65  | KV453011.1 | 15071888 | 12-scf00274 | 12 |
| AX-158125692 | 12 | 38.65  | KV453011.1 | 15074547 | 12-scf00274 | 12 |
| AX-158125693 | 12 | 38.65  | KV453011.1 | 15075251 | 12-scf00274 | 12 |
| AX-157748548 | 12 | 38.65  | KV453011.1 | 15085343 | 12-scf00274 | 12 |
| AX-157857776 | 12 | 38.65  | KV453011.1 | 15087853 | 12-scf00274 | 12 |
| AX-158125698 | 12 | 38.65  | KV453011.1 | 15094177 | 12-scf00274 | 12 |

|              |    |        |            |          |             |    |
|--------------|----|--------|------------|----------|-------------|----|
| AX-158125700 | 12 | 38.65  | KV453011.1 | 15103787 | 12-scf00274 | 12 |
| AX-158125756 | 12 | 38.65  | KV453011.1 | 15172099 | 12-scf00274 | 12 |
| AX-158125766 | 12 | 38.65  | KV453011.1 | 15187420 | 12-scf00274 | 12 |
| AX-158125786 | 12 | 38.65  | KV453011.1 | 15213376 | 12-scf00274 | 12 |
| AX-158125868 | 12 | 38.65  | KV453011.1 | 15314195 | 12-scf00274 | 12 |
| AX-158125978 | 12 | 38.65  | KV453011.1 | 15456906 | 12-scf00274 | 12 |
| AX-158125983 | 12 | 38.65  | KV453011.1 | 15466139 | 12-scf00274 | 12 |
| AX-158126302 | 12 | 38.65  | KV453011.1 | 15871366 | 12-scf00274 | 12 |
| AX-158125701 | 12 | 38.684 | KV453011.1 | 15104219 | 12-scf00274 | 12 |
| AX-158124419 | 12 | 38.701 | KV453011.1 | 12986082 | 12-scf00274 | 12 |
| AX-157718452 | 12 | 38.701 | KV453011.1 | 13100561 | 12-scf00274 | 12 |
| AX-158124829 | 12 | 38.701 | KV453011.1 | 13781012 | 12-scf00274 | 12 |
| AX-158125016 | 12 | 38.701 | KV453011.1 | 14183190 | 12-scf00274 | 12 |
| AX-158125182 | 12 | 38.701 | KV453011.1 | 14423643 | 12-scf00274 | 12 |
| AX-157707826 | 12 | 38.701 | KV453011.1 | 14467283 | 12-scf00274 | 12 |
| AX-158125380 | 12 | 38.701 | KV453011.1 | 14673848 | 12-scf00274 | 12 |
| AX-158125427 | 12 | 38.701 | KV453011.1 | 14737961 | 12-scf00274 | 12 |
| AX-158125530 | 12 | 38.701 | KV453011.1 | 14849888 | 12-scf00274 | 12 |
| AX-158125647 | 12 | 38.701 | KV453011.1 | 14993467 | 12-scf00274 | 12 |
| AX-157745385 | 12 | 38.701 | KV453011.1 | 15002043 | 12-scf00274 | 12 |
| AX-157829550 | 12 | 38.701 | KV453011.1 | 15023438 | 12-scf00274 | 12 |
| AX-157741474 | 12 | 38.701 | KV453011.1 | 15026636 | 12-scf00274 | 12 |
| AX-157829553 | 12 | 38.701 | KV453011.1 | 15060700 | 12-scf00274 | 12 |
| AX-158125685 | 12 | 38.701 | KV453011.1 | 15066195 | 12-scf00274 | 12 |
| AX-158125691 | 12 | 38.701 | KV453011.1 | 15072355 | 12-scf00274 | 12 |
| AX-158125696 | 12 | 38.701 | KV453011.1 | 15091029 | 12-scf00274 | 12 |
| AX-158125697 | 12 | 38.701 | KV453011.1 | 15091953 | 12-scf00274 | 12 |
| AX-158125703 | 12 | 38.701 | KV453011.1 | 15107844 | 12-scf00274 | 12 |
| AX-158125712 | 12 | 38.731 | KV453011.1 | 15115766 | 12-scf00274 | 12 |
| AX-158125728 | 12 | 38.731 | KV453011.1 | 15132904 | 12-scf00274 | 12 |
| AX-158126176 | 12 | 38.731 | KV453011.1 | 15691770 | 12-scf00274 | 12 |
| AX-158126180 | 12 | 38.731 | KV453011.1 | 15701760 | 12-scf00274 | 12 |
| AX-158126240 | 12 | 38.731 | KV453011.1 | 15785835 | 12-scf00274 | 12 |
| AX-158126396 | 12 | 38.731 | KV453011.1 | 16009813 | 12-scf00274 | 12 |
| AX-158126433 | 12 | 38.731 | KV453011.1 | 16063473 | 12-scf00274 | 12 |
| AX-158126435 | 12 | 38.731 | KV453011.1 | 16067564 | 12-scf00274 | 12 |
| AX-158126461 | 12 | 38.731 | KV453011.1 | 16096818 | 12-scf00274 | 12 |
| AX-157857786 | 12 | 38.731 | KV453011.1 | 16104023 | 12-scf00274 | 12 |
| AX-158411374 | 12 | 38.759 | KV453011.1 | 15094590 | 12-scf00274 | 12 |
| AX-157740221 | 12 | 38.759 | KV453011.1 | 15141518 | 12-scf00274 | 12 |
| AX-158125648 | 12 | 38.829 | KV453011.1 | 14993685 | 12-scf00274 | 12 |
| AX-158125733 | 12 | 38.829 | KV453011.1 | 15150457 | 12-scf00274 | 12 |
| AX-158126402 | 12 | 38.829 | KV453011.1 | 16018196 | 12-scf00274 | 12 |
| AX-158126405 | 12 | 38.829 | KV453011.1 | 16020188 | 12-scf00274 | 12 |
| AX-158125077 | 12 | 38.869 | KV453011.1 | 14259332 | 12-scf00274 | 12 |
| AX-158125735 | 12 | 38.869 | KV453011.1 | 15152021 | 12-scf00274 | 12 |
| AX-158125736 | 12 | 38.869 | KV453011.1 | 15152633 | 12-scf00274 | 12 |
| AX-158125742 | 12 | 38.869 | KV453011.1 | 15159582 | 12-scf00274 | 12 |
| AX-158125743 | 12 | 38.869 | KV453011.1 | 15162049 | 12-scf00274 | 12 |
| AX-158125749 | 12 | 38.869 | KV453011.1 | 15166518 | 12-scf00274 | 12 |
| AX-158125750 | 12 | 38.869 | KV453011.1 | 15167375 | 12-scf00274 | 12 |

|              |    |        |            |          |             |    |
|--------------|----|--------|------------|----------|-------------|----|
| AX-158125751 | 12 | 38.869 | KV453011.1 | 15168192 | 12-scf00274 | 12 |
| AX-158125769 | 12 | 38.869 | KV453011.1 | 15191751 | 12-scf00274 | 12 |
| AX-158125754 | 12 | 39.169 | KV453011.1 | 15169970 | 12-scf00274 | 12 |
| AX-158125772 | 12 | 39.187 | KV453011.1 | 15198030 | 12-scf00274 | 12 |
| AX-157758012 | 12 | 39.202 | KV453011.1 | 13174851 | 12-scf00274 | 12 |
| AX-158125013 | 12 | 39.202 | KV453011.1 | 14180264 | 12-scf00274 | 12 |
| AX-158125234 | 12 | 39.202 | KV453011.1 | 14498288 | 12-scf00274 | 12 |
| AX-158125639 | 12 | 39.202 | KV453011.1 | 14982763 | 12-scf00274 | 12 |
| AX-158125678 | 12 | 39.202 | KV453011.1 | 15056362 | 12-scf00274 | 12 |
| AX-158125686 | 12 | 39.202 | KV453011.1 | 15066531 | 12-scf00274 | 12 |
| AX-158125717 | 12 | 39.202 | KV453011.1 | 15122213 | 12-scf00274 | 12 |
| AX-158125775 | 12 | 39.202 | KV453011.1 | 15200325 | 12-scf00274 | 12 |
| AX-157753003 | 12 | 39.202 | KV453011.1 | 15205948 | 12-scf00274 | 12 |
| AX-158125787 | 12 | 39.202 | KV453011.1 | 15214573 | 12-scf00274 | 12 |
| AX-158125788 | 12 | 39.202 | KV453011.1 | 15214951 | 12-scf00274 | 12 |
| AX-158125790 | 12 | 39.202 | KV453011.1 | 15217416 | 12-scf00274 | 12 |
| AX-158125793 | 12 | 39.202 | KV453011.1 | 15226416 | 12-scf00274 | 12 |
| AX-158125794 | 12 | 39.202 | KV453011.1 | 15229242 | 12-scf00274 | 12 |
| AX-158125796 | 12 | 39.202 | KV453011.1 | 15232089 | 12-scf00274 | 12 |
| AX-158125801 | 12 | 39.202 | KV453011.1 | 15237429 | 12-scf00274 | 12 |
| AX-158125805 | 12 | 39.202 | KV453011.1 | 15242283 | 12-scf00274 | 12 |
| AX-158125807 | 12 | 39.202 | KV453011.1 | 15244588 | 12-scf00274 | 12 |
| AX-158125808 | 12 | 39.202 | KV453011.1 | 15245419 | 12-scf00274 | 12 |
| AX-158125809 | 12 | 39.202 | KV453011.1 | 15245903 | 12-scf00274 | 12 |
| AX-158125811 | 12 | 39.202 | KV453011.1 | 15247830 | 12-scf00274 | 12 |
| AX-158125812 | 12 | 39.202 | KV453011.1 | 15248263 | 12-scf00274 | 12 |
| AX-158125814 | 12 | 39.202 | KV453011.1 | 15251499 | 12-scf00274 | 12 |
| AX-158125820 | 12 | 39.202 | KV453011.1 | 15258529 | 12-scf00274 | 12 |
| AX-158125823 | 12 | 39.202 | KV453011.1 | 15260850 | 12-scf00274 | 12 |
| AX-158125827 | 12 | 39.202 | KV453011.1 | 15264774 | 12-scf00274 | 12 |
| AX-158125830 | 12 | 39.202 | KV453011.1 | 15266578 | 12-scf00274 | 12 |
| AX-158125832 | 12 | 39.202 | KV453011.1 | 15269834 | 12-scf00274 | 12 |
| AX-158125833 | 12 | 39.202 | KV453011.1 | 15270243 | 12-scf00274 | 12 |
| AX-158125836 | 12 | 39.202 | KV453011.1 | 15273014 | 12-scf00274 | 12 |
| AX-158125837 | 12 | 39.202 | KV453011.1 | 15273568 | 12-scf00274 | 12 |
| AX-158125844 | 12 | 39.202 | KV453011.1 | 15280613 | 12-scf00274 | 12 |
| AX-158125847 | 12 | 39.202 | KV453011.1 | 15284283 | 12-scf00274 | 12 |
| AX-157718821 | 12 | 39.202 | KV453011.1 | 15298414 | 12-scf00274 | 12 |
| AX-158125858 | 12 | 39.202 | KV453011.1 | 15300215 | 12-scf00274 | 12 |
| AX-157709046 | 12 | 39.202 | KV453011.1 | 15301449 | 12-scf00274 | 12 |
| AX-158125864 | 12 | 39.202 | KV453011.1 | 15305640 | 12-scf00274 | 12 |
| AX-158125873 | 12 | 39.202 | KV453011.1 | 15321704 | 12-scf00274 | 12 |
| AX-158125874 | 12 | 39.202 | KV453011.1 | 15322297 | 12-scf00274 | 12 |
| AX-158125875 | 12 | 39.202 | KV453011.1 | 15323010 | 12-scf00274 | 12 |
| AX-158125876 | 12 | 39.202 | KV453011.1 | 15323580 | 12-scf00274 | 12 |
| AX-158125877 | 12 | 39.202 | KV453011.1 | 15323694 | 12-scf00274 | 12 |
| AX-158125880 | 12 | 39.202 | KV453011.1 | 15325890 | 12-scf00274 | 12 |
| AX-158125903 | 12 | 39.202 | KV453011.1 | 15354259 | 12-scf00274 | 12 |
| AX-158125905 | 12 | 39.202 | KV453011.1 | 15356961 | 12-scf00274 | 12 |
| AX-158125908 | 12 | 39.202 | KV453011.1 | 15358420 | 12-scf00274 | 12 |
| AX-158125909 | 12 | 39.202 | KV453011.1 | 15365435 | 12-scf00274 | 12 |

|              |    |        |            |          |             |    |
|--------------|----|--------|------------|----------|-------------|----|
| AX-158125915 | 12 | 39.202 | KV453011.1 | 15373012 | 12-scf00274 | 12 |
| AX-158125917 | 12 | 39.202 | KV453011.1 | 15374100 | 12-scf00274 | 12 |
| AX-158125920 | 12 | 39.202 | KV453011.1 | 15377242 | 12-scf00274 | 12 |
| AX-158125923 | 12 | 39.202 | KV453011.1 | 15382118 | 12-scf00274 | 12 |
| AX-158125925 | 12 | 39.202 | KV453011.1 | 15384565 | 12-scf00274 | 12 |
| AX-158125927 | 12 | 39.202 | KV453011.1 | 15387423 | 12-scf00274 | 12 |
| AX-158125929 | 12 | 39.202 | KV453011.1 | 15388332 | 12-scf00274 | 12 |
| AX-158125931 | 12 | 39.202 | KV453011.1 | 15390652 | 12-scf00274 | 12 |
| AX-158380188 | 12 | 39.202 | KV453011.1 | 15396624 | 12-scf00274 | 12 |
| AX-158125939 | 12 | 39.202 | KV453011.1 | 15399177 | 12-scf00274 | 12 |
| AX-158125940 | 12 | 39.202 | KV453011.1 | 15399976 | 12-scf00274 | 12 |
| AX-158125944 | 12 | 39.202 | KV453011.1 | 15406482 | 12-scf00274 | 12 |
| AX-158125950 | 12 | 39.202 | KV453011.1 | 15414360 | 12-scf00274 | 12 |
| AX-157714963 | 12 | 39.202 | KV453011.1 | 15427943 | 12-scf00274 | 12 |
| AX-158125960 | 12 | 39.202 | KV453011.1 | 15431599 | 12-scf00274 | 12 |
| AX-158125961 | 12 | 39.202 | KV453011.1 | 15431883 | 12-scf00274 | 12 |
| AX-158125966 | 12 | 39.202 | KV453011.1 | 15435684 | 12-scf00274 | 12 |
| AX-158125969 | 12 | 39.202 | KV453011.1 | 15445130 | 12-scf00274 | 12 |
| AX-158125977 | 12 | 39.202 | KV453011.1 | 15456251 | 12-scf00274 | 12 |
| AX-158125981 | 12 | 39.202 | KV453011.1 | 15463431 | 12-scf00274 | 12 |
| AX-157736589 | 12 | 39.202 | KV453011.1 | 15464296 | 12-scf00274 | 12 |
| AX-157751368 | 12 | 39.202 | KV453011.1 | 15469071 | 12-scf00274 | 12 |
| AX-157829567 | 12 | 39.202 | KV453011.1 | 15471324 | 12-scf00274 | 12 |
| AX-158125988 | 12 | 39.202 | KV453011.1 | 15476088 | 12-scf00274 | 12 |
| AX-158125994 | 12 | 39.202 | KV453011.1 | 15480597 | 12-scf00274 | 12 |
| AX-158125995 | 12 | 39.202 | KV453011.1 | 15481321 | 12-scf00274 | 12 |
| AX-158125997 | 12 | 39.202 | KV453011.1 | 15482106 | 12-scf00274 | 12 |
| AX-158125998 | 12 | 39.202 | KV453011.1 | 15482465 | 12-scf00274 | 12 |
| AX-158125999 | 12 | 39.202 | KV453011.1 | 15485294 | 12-scf00274 | 12 |
| AX-157829569 | 12 | 39.202 | KV453011.1 | 15486569 | 12-scf00274 | 12 |
| AX-157741021 | 12 | 39.202 | KV453011.1 | 15501646 | 12-scf00274 | 12 |
| AX-158126010 | 12 | 39.202 | KV453011.1 | 15502346 | 12-scf00274 | 12 |
| AX-158126011 | 12 | 39.202 | KV453011.1 | 15503831 | 12-scf00274 | 12 |
| AX-158126016 | 12 | 39.202 | KV453011.1 | 15509408 | 12-scf00274 | 12 |
| AX-158126017 | 12 | 39.202 | KV453011.1 | 15510074 | 12-scf00274 | 12 |
| AX-158126019 | 12 | 39.202 | KV453011.1 | 15511911 | 12-scf00274 | 12 |
| AX-157740053 | 12 | 39.202 | KV453011.1 | 15513645 | 12-scf00274 | 12 |
| AX-158126022 | 12 | 39.202 | KV453011.1 | 15517777 | 12-scf00274 | 12 |
| AX-158126024 | 12 | 39.202 | KV453011.1 | 15520535 | 12-scf00274 | 12 |
| AX-158126026 | 12 | 39.202 | KV453011.1 | 15521696 | 12-scf00274 | 12 |
| AX-158126028 | 12 | 39.202 | KV453011.1 | 15524398 | 12-scf00274 | 12 |
| AX-158126037 | 12 | 39.202 | KV453011.1 | 15536130 | 12-scf00274 | 12 |
| AX-158126043 | 12 | 39.202 | KV453011.1 | 15540808 | 12-scf00274 | 12 |
| AX-158126119 | 12 | 39.202 | KV453011.1 | 15633460 | 12-scf00274 | 12 |
| AX-158126173 | 12 | 39.202 | KV453011.1 | 15689851 | 12-scf00274 | 12 |
| AX-158126175 | 12 | 39.202 | KV453011.1 | 15690458 | 12-scf00274 | 12 |
| AX-157829570 | 12 | 39.202 | KV453011.1 | 15694194 | 12-scf00274 | 12 |
| AX-158126179 | 12 | 39.202 | KV453011.1 | 15696263 | 12-scf00274 | 12 |
| AX-158126233 | 12 | 39.202 | KV453011.1 | 15775903 | 12-scf00274 | 12 |
| AX-158126255 | 12 | 39.202 | KV453011.1 | 15802543 | 12-scf00274 | 12 |
| AX-158126256 | 12 | 39.202 | KV453011.1 | 15802990 | 12-scf00274 | 12 |

|              |    |        |            |          |             |    |
|--------------|----|--------|------------|----------|-------------|----|
| AX-158126336 | 12 | 39.202 | KV453011.1 | 15927007 | 12-scf00274 | 12 |
| AX-158126352 | 12 | 39.202 | KV453011.1 | 15943492 | 12-scf00274 | 12 |
| AX-158385171 | 12 | 39.202 | KV453011.1 | 16107265 | 12-scf00274 | 12 |
| AX-158126046 | 12 | 39.311 | KV453011.1 | 15543831 | 12-scf00274 | 12 |
| AX-158126053 | 12 | 39.333 | KV453011.1 | 15552402 | 12-scf00274 | 12 |
| AX-157829564 | 12 | 39.42  | KV453011.1 | 15438428 | 12-scf00274 | 12 |
| AX-158126054 | 12 | 39.42  | KV453011.1 | 15555116 | 12-scf00274 | 12 |
| AX-158126057 | 12 | 39.43  | KV453011.1 | 15562385 | 12-scf00274 | 12 |
| AX-158125493 | 12 | 39.446 | KV453011.1 | 14803890 | 12-scf00274 | 12 |
| AX-158126066 | 12 | 39.446 | KV453011.1 | 15573141 | 12-scf00274 | 12 |
| AX-158126077 | 12 | 39.469 | KV453011.1 | 15587405 | 12-scf00274 | 12 |
| AX-158126096 | 12 | 39.469 | KV453011.1 | 15606496 | 12-scf00274 | 12 |
| AX-158126079 | 12 | 39.48  | KV453011.1 | 15588325 | 12-scf00274 | 12 |
| AX-158125487 | 12 | 39.506 | KV453011.1 | 14796855 | 12-scf00274 | 12 |
| AX-158125642 | 12 | 39.506 | KV453011.1 | 14986591 | 12-scf00274 | 12 |
| AX-158125722 | 12 | 39.506 | KV453011.1 | 15128485 | 12-scf00274 | 12 |
| AX-158125785 | 12 | 39.506 | KV453011.1 | 15212041 | 12-scf00274 | 12 |
| AX-158125854 | 12 | 39.506 | KV453011.1 | 15295482 | 12-scf00274 | 12 |
| AX-158125866 | 12 | 39.506 | KV453011.1 | 15309484 | 12-scf00274 | 12 |
| AX-158126013 | 12 | 39.506 | KV453011.1 | 15505776 | 12-scf00274 | 12 |
| AX-158126050 | 12 | 39.506 | KV453011.1 | 15550310 | 12-scf00274 | 12 |
| AX-158126084 | 12 | 39.506 | KV453011.1 | 15591818 | 12-scf00274 | 12 |
| AX-158126088 | 12 | 39.506 | KV453011.1 | 15597707 | 12-scf00274 | 12 |
| AX-158125424 | 12 | 39.53  | KV453011.1 | 14733611 | 12-scf00274 | 12 |
| AX-158125440 | 12 | 39.53  | KV453011.1 | 14751694 | 12-scf00274 | 12 |
| AX-158125505 | 12 | 39.53  | KV453011.1 | 14821849 | 12-scf00274 | 12 |
| AX-158125509 | 12 | 39.53  | KV453011.1 | 14827917 | 12-scf00274 | 12 |
| AX-158125531 | 12 | 39.53  | KV453011.1 | 14851678 | 12-scf00274 | 12 |
| AX-158125534 | 12 | 39.53  | KV453011.1 | 14858055 | 12-scf00274 | 12 |
| AX-158125566 | 12 | 39.53  | KV453011.1 | 14892755 | 12-scf00274 | 12 |
| AX-157829547 | 12 | 39.53  | KV453011.1 | 14921226 | 12-scf00274 | 12 |
| AX-158125583 | 12 | 39.53  | KV453011.1 | 14922747 | 12-scf00274 | 12 |
| AX-158125673 | 12 | 39.53  | KV453011.1 | 15043758 | 12-scf00274 | 12 |
| AX-158125681 | 12 | 39.53  | KV453011.1 | 15062669 | 12-scf00274 | 12 |
| AX-158392785 | 12 | 39.53  | KV453011.1 | 15152733 | 12-scf00274 | 12 |
| AX-158125741 | 12 | 39.53  | KV453011.1 | 15158525 | 12-scf00274 | 12 |
| AX-158125746 | 12 | 39.53  | KV453011.1 | 15164320 | 12-scf00274 | 12 |
| AX-158392786 | 12 | 39.53  | KV453011.1 | 15259535 | 12-scf00274 | 12 |
| AX-158125849 | 12 | 39.53  | KV453011.1 | 15285816 | 12-scf00274 | 12 |
| AX-158125965 | 12 | 39.53  | KV453011.1 | 15435247 | 12-scf00274 | 12 |
| AX-158126003 | 12 | 39.53  | KV453011.1 | 15491676 | 12-scf00274 | 12 |
| AX-157707446 | 12 | 39.53  | KV453011.1 | 15493171 | 12-scf00274 | 12 |
| AX-158126014 | 12 | 39.53  | KV453011.1 | 15506557 | 12-scf00274 | 12 |
| AX-158126029 | 12 | 39.53  | KV453011.1 | 15525132 | 12-scf00274 | 12 |
| AX-158126030 | 12 | 39.53  | KV453011.1 | 15526485 | 12-scf00274 | 12 |
| AX-158126048 | 12 | 39.53  | KV453011.1 | 15549171 | 12-scf00274 | 12 |
| AX-158126090 | 12 | 39.53  | KV453011.1 | 15599500 | 12-scf00274 | 12 |
| AX-158126093 | 12 | 39.53  | KV453011.1 | 15604808 | 12-scf00274 | 12 |
| AX-158126094 | 12 | 39.53  | KV453011.1 | 15605199 | 12-scf00274 | 12 |
| AX-158126101 | 12 | 39.53  | KV453011.1 | 15609579 | 12-scf00274 | 12 |
| AX-158126102 | 12 | 39.53  | KV453011.1 | 15610196 | 12-scf00274 | 12 |

|              |    |        |            |          |             |    |
|--------------|----|--------|------------|----------|-------------|----|
| AX-158126116 | 12 | 39.53  | KV453011.1 | 15628539 | 12-scf00274 | 12 |
| AX-158126117 | 12 | 39.53  | KV453011.1 | 15629906 | 12-scf00274 | 12 |
| AX-158126128 | 12 | 39.53  | KV453011.1 | 15643324 | 12-scf00274 | 12 |
| AX-158126146 | 12 | 39.53  | KV453011.1 | 15665654 | 12-scf00274 | 12 |
| AX-157877849 | 12 | 39.53  | KV453011.1 | 15665820 | 12-scf00274 | 12 |
| AX-158126147 | 12 | 39.53  | KV453011.1 | 15666055 | 12-scf00274 | 12 |
| AX-158126152 | 12 | 39.53  | KV453011.1 | 15672676 | 12-scf00274 | 12 |
| AX-158126153 | 12 | 39.53  | KV453011.1 | 15673317 | 12-scf00274 | 12 |
| AX-158126158 | 12 | 39.53  | KV453011.1 | 15679137 | 12-scf00274 | 12 |
| AX-158126159 | 12 | 39.53  | KV453011.1 | 15679690 | 12-scf00274 | 12 |
| AX-158126167 | 12 | 39.53  | KV453011.1 | 15686560 | 12-scf00274 | 12 |
| AX-158126168 | 12 | 39.53  | KV453011.1 | 15687216 | 12-scf00274 | 12 |
| AX-158126172 | 12 | 39.53  | KV453011.1 | 15689614 | 12-scf00274 | 12 |
| AX-158126183 | 12 | 39.53  | KV453011.1 | 15708819 | 12-scf00274 | 12 |
| AX-157886119 | 12 | 39.53  | KV453011.1 | 15709799 | 12-scf00274 | 12 |
| AX-158126187 | 12 | 39.53  | KV453011.1 | 15712659 | 12-scf00274 | 12 |
| AX-158126372 | 12 | 39.53  | KV453011.1 | 15973952 | 12-scf00274 | 12 |
| AX-158126193 | 12 | 39.572 | KV453011.1 | 15721824 | 12-scf00274 | 12 |
| AX-158125840 | 12 | 39.639 | KV453011.1 | 15277228 | 12-scf00274 | 12 |
| AX-158125842 | 12 | 39.639 | KV453011.1 | 15277972 | 12-scf00274 | 12 |
| AX-158126154 | 12 | 39.639 | KV453011.1 | 15673962 | 12-scf00274 | 12 |
| AX-158126194 | 12 | 39.639 | KV453011.1 | 15723013 | 12-scf00274 | 12 |
| AX-158126195 | 12 | 39.639 | KV453011.1 | 15723625 | 12-scf00274 | 12 |
| AX-158126196 | 12 | 39.639 | KV453011.1 | 15724640 | 12-scf00274 | 12 |
| AX-157829572 | 12 | 39.639 | KV453011.1 | 15725292 | 12-scf00274 | 12 |
| AX-158126197 | 12 | 39.639 | KV453011.1 | 15726013 | 12-scf00274 | 12 |
| AX-157829573 | 12 | 39.639 | KV453011.1 | 15727123 | 12-scf00274 | 12 |
| AX-158126200 | 12 | 39.639 | KV453011.1 | 15730590 | 12-scf00274 | 12 |
| AX-158126201 | 12 | 39.639 | KV453011.1 | 15733498 | 12-scf00274 | 12 |
| AX-158126202 | 12 | 39.639 | KV453011.1 | 15733765 | 12-scf00274 | 12 |
| AX-157829574 | 12 | 39.639 | KV453011.1 | 15735662 | 12-scf00274 | 12 |
| AX-158126205 | 12 | 39.639 | KV453011.1 | 15737811 | 12-scf00274 | 12 |
| AX-157713363 | 12 | 39.639 | KV453011.1 | 15753408 | 12-scf00274 | 12 |
| AX-158126217 | 12 | 39.639 | KV453011.1 | 15754018 | 12-scf00274 | 12 |
| AX-157774483 | 12 | 39.639 | KV453011.1 | 15755945 | 12-scf00274 | 12 |
| AX-158126218 | 12 | 39.639 | KV453011.1 | 15758112 | 12-scf00274 | 12 |
| AX-158126220 | 12 | 39.639 | KV453011.1 | 15764100 | 12-scf00274 | 12 |
| AX-158126223 | 12 | 39.639 | KV453011.1 | 15766909 | 12-scf00274 | 12 |
| AX-158126225 | 12 | 39.639 | KV453011.1 | 15770218 | 12-scf00274 | 12 |
| AX-158126226 | 12 | 39.639 | KV453011.1 | 15770939 | 12-scf00274 | 12 |
| AX-158392792 | 12 | 39.639 | KV453011.1 | 15771533 | 12-scf00274 | 12 |
| AX-158126228 | 12 | 39.639 | KV453011.1 | 15772124 | 12-scf00274 | 12 |
| AX-158126229 | 12 | 39.639 | KV453011.1 | 15772874 | 12-scf00274 | 12 |
| AX-158126230 | 12 | 39.639 | KV453011.1 | 15773592 | 12-scf00274 | 12 |
| AX-158126231 | 12 | 39.639 | KV453011.1 | 15773967 | 12-scf00274 | 12 |
| AX-158126237 | 12 | 39.639 | KV453011.1 | 15778939 | 12-scf00274 | 12 |
| AX-158392793 | 12 | 39.639 | KV453011.1 | 15796346 | 12-scf00274 | 12 |
| AX-158126249 | 12 | 39.639 | KV453011.1 | 15797993 | 12-scf00274 | 12 |
| AX-157756442 | 12 | 39.639 | KV453011.1 | 15839184 | 12-scf00274 | 12 |
| AX-158126289 | 12 | 39.639 | KV453011.1 | 15853093 | 12-scf00274 | 12 |
| AX-158126307 | 12 | 39.639 | KV453011.1 | 15876856 | 12-scf00274 | 12 |

|              |    |        |            |          |             |    |
|--------------|----|--------|------------|----------|-------------|----|
| AX-158126308 | 12 | 39.639 | KV453011.1 | 15882448 | 12-scf00274 | 12 |
| AX-158126322 | 12 | 39.639 | KV453011.1 | 15903042 | 12-scf00274 | 12 |
| AX-158126361 | 12 | 39.639 | KV453011.1 | 15959266 | 12-scf00274 | 12 |
| AX-158126254 | 12 | 39.69  | KV453011.1 | 15802099 | 12-scf00274 | 12 |
| AX-158126257 | 12 | 39.705 | KV453011.1 | 15804572 | 12-scf00274 | 12 |
| AX-158411384 | 12 | 39.716 | KV453011.1 | 15817929 | 12-scf00274 | 12 |
| AX-157857785 | 12 | 39.73  | KV453011.1 | 15819528 | 12-scf00274 | 12 |
| AX-158126268 | 12 | 39.742 | KV453011.1 | 15822124 | 12-scf00274 | 12 |
| AX-158380190 | 12 | 39.742 | KV453011.1 | 15840546 | 12-scf00274 | 12 |
| AX-158126275 | 12 | 39.742 | KV453011.1 | 15840613 | 12-scf00274 | 12 |
| AX-158126006 | 12 | 39.748 | KV453011.1 | 15496471 | 12-scf00274 | 12 |
| AX-158126122 | 12 | 39.748 | KV453011.1 | 15636196 | 12-scf00274 | 12 |
| AX-158126137 | 12 | 39.748 | KV453011.1 | 15652977 | 12-scf00274 | 12 |
| AX-158126155 | 12 | 39.748 | KV453011.1 | 15674626 | 12-scf00274 | 12 |
| AX-158126162 | 12 | 39.748 | KV453011.1 | 15682283 | 12-scf00274 | 12 |
| AX-157829575 | 12 | 39.748 | KV453011.1 | 15744791 | 12-scf00274 | 12 |
| AX-158126214 | 12 | 39.748 | KV453011.1 | 15748245 | 12-scf00274 | 12 |
| AX-158126234 | 12 | 39.748 | KV453011.1 | 15776705 | 12-scf00274 | 12 |
| AX-158126269 | 12 | 39.748 | KV453011.1 | 15824968 | 12-scf00274 | 12 |
| AX-158126271 | 12 | 39.748 | KV453011.1 | 15827650 | 12-scf00274 | 12 |
| AX-158417356 | 12 | 39.748 | KV453011.1 | 15832631 | 12-scf00274 | 12 |
| AX-157774113 | 12 | 39.748 | KV453011.1 | 15833082 | 12-scf00274 | 12 |
| AX-158126274 | 12 | 39.748 | KV453011.1 | 15836594 | 12-scf00274 | 12 |
| AX-158126279 | 12 | 39.748 | KV453011.1 | 15843329 | 12-scf00274 | 12 |
| AX-158126281 | 12 | 39.748 | KV453011.1 | 15845346 | 12-scf00274 | 12 |
| AX-158126282 | 12 | 39.748 | KV453011.1 | 15845919 | 12-scf00274 | 12 |
| AX-158126285 | 12 | 39.748 | KV453011.1 | 15848459 | 12-scf00274 | 12 |
| AX-158126286 | 12 | 39.748 | KV453011.1 | 15849472 | 12-scf00274 | 12 |
| AX-158126298 | 12 | 39.748 | KV453011.1 | 15867662 | 12-scf00274 | 12 |
| AX-158126380 | 12 | 39.748 | KV453011.1 | 15984819 | 12-scf00274 | 12 |
| AX-157725997 | 12 | 39.748 | KV453011.1 | 16013140 | 12-scf00274 | 12 |
| AX-158126294 | 12 | 39.835 | KV453011.1 | 15861098 | 12-scf00274 | 12 |
| AX-158126203 | 12 | 39.911 | KV453011.1 | 15736076 | 12-scf00274 | 12 |
| AX-158126250 | 12 | 39.911 | KV453011.1 | 15799824 | 12-scf00274 | 12 |
| AX-158126295 | 12 | 39.911 | KV453011.1 | 15861785 | 12-scf00274 | 12 |
| AX-158126296 | 12 | 39.967 | KV453011.1 | 15865653 | 12-scf00274 | 12 |
| AX-158126300 | 12 | 39.967 | KV453011.1 | 15869215 | 12-scf00274 | 12 |
| AX-158126301 | 12 | 39.967 | KV453011.1 | 15869888 | 12-scf00274 | 12 |
| AX-158126303 | 12 | 39.967 | KV453011.1 | 15872679 | 12-scf00274 | 12 |
| AX-158126309 | 12 | 39.967 | KV453011.1 | 15882935 | 12-scf00274 | 12 |
| AX-158126311 | 12 | 39.967 | KV453011.1 | 15885455 | 12-scf00274 | 12 |
| AX-158126318 | 12 | 40.364 | KV453011.1 | 15899376 | 12-scf00274 | 12 |
| AX-158126316 | 12 | 40.365 | KV453011.1 | 15896460 | 12-scf00274 | 12 |
| AX-158126323 | 12 | 40.365 | KV453011.1 | 15905605 | 12-scf00274 | 12 |
| AX-158126326 | 12 | 40.365 | KV453011.1 | 15908693 | 12-scf00274 | 12 |
| AX-158126327 | 12 | 40.365 | KV453011.1 | 15909451 | 12-scf00274 | 12 |
| AX-158126328 | 12 | 40.365 | KV453011.1 | 15909932 | 12-scf00274 | 12 |
| AX-158126330 | 12 | 40.451 | KV453011.1 | 15911382 | 12-scf00274 | 12 |
| AX-158126335 | 12 | 40.538 | KV453011.1 | 15926328 | 12-scf00274 | 12 |
| AX-158126349 | 12 | 40.538 | KV453011.1 | 15941746 | 12-scf00274 | 12 |
| AX-158126342 | 12 | 40.637 | KV453011.1 | 15934571 | 12-scf00274 | 12 |

|              |    |        |            |          |             |    |
|--------------|----|--------|------------|----------|-------------|----|
| AX-158126314 | 12 | 40.655 | KV453011.1 | 15890494 | 12-scf00274 | 12 |
| AX-158126344 | 12 | 40.655 | KV453011.1 | 15935629 | 12-scf00274 | 12 |
| AX-158126369 | 12 | 40.655 | KV453011.1 | 15967923 | 12-scf00274 | 12 |
| AX-158125695 | 12 | 40.763 | KV453011.1 | 15084215 | 12-scf00274 | 12 |
| AX-158125704 | 12 | 40.763 | KV453011.1 | 15109503 | 12-scf00274 | 12 |
| AX-158125818 | 12 | 40.763 | KV453011.1 | 15257561 | 12-scf00274 | 12 |
| AX-158125826 | 12 | 40.763 | KV453011.1 | 15263632 | 12-scf00274 | 12 |
| AX-158125846 | 12 | 40.763 | KV453011.1 | 15283491 | 12-scf00274 | 12 |
| AX-158125857 | 12 | 40.763 | KV453011.1 | 15299807 | 12-scf00274 | 12 |
| AX-158125936 | 12 | 40.763 | KV453011.1 | 15396759 | 12-scf00274 | 12 |
| AX-157746581 | 12 | 40.763 | KV453011.1 | 15440949 | 12-scf00274 | 12 |
| AX-158125996 | 12 | 40.763 | KV453011.1 | 15481736 | 12-scf00274 | 12 |
| AX-158126061 | 12 | 40.763 | KV453011.1 | 15567554 | 12-scf00274 | 12 |
| AX-157725949 | 12 | 40.763 | KV453011.1 | 15622610 | 12-scf00274 | 12 |
| AX-158385168 | 12 | 40.763 | KV453011.1 | 15674212 | 12-scf00274 | 12 |
| AX-158126184 | 12 | 40.763 | KV453011.1 | 15710015 | 12-scf00274 | 12 |
| AX-158126207 | 12 | 40.763 | KV453011.1 | 15740064 | 12-scf00274 | 12 |
| AX-158126235 | 12 | 40.763 | KV453011.1 | 15777586 | 12-scf00274 | 12 |
| AX-157751585 | 12 | 40.763 | KV453011.1 | 15923633 | 12-scf00274 | 12 |
| AX-158126345 | 12 | 40.763 | KV453011.1 | 15936973 | 12-scf00274 | 12 |
| AX-158126346 | 12 | 40.763 | KV453011.1 | 15938278 | 12-scf00274 | 12 |
| AX-158126355 | 12 | 40.763 | KV453011.1 | 15947702 | 12-scf00274 | 12 |
| AX-158126379 | 12 | 40.763 | KV453011.1 | 15982595 | 12-scf00274 | 12 |
| AX-158126404 | 12 | 40.763 | KV453011.1 | 16019192 | 12-scf00274 | 12 |
| AX-158126357 | 12 | 40.764 | KV453011.1 | 15949546 | 12-scf00274 | 12 |
| AX-158126419 | 12 | 40.764 | KV453011.1 | 16041863 | 12-scf00274 | 12 |
| AX-158126208 | 12 | 40.765 | KV453011.1 | 15740471 | 12-scf00274 | 12 |
| AX-158126239 | 12 | 40.765 | KV453011.1 | 15780837 | 12-scf00274 | 12 |
| AX-158126258 | 12 | 40.765 | KV453011.1 | 15805189 | 12-scf00274 | 12 |
| AX-158126360 | 12 | 40.765 | KV453011.1 | 15955964 | 12-scf00274 | 12 |
| AX-158126339 | 12 | 41.159 | KV453011.1 | 15932356 | 12-scf00274 | 12 |
| AX-158126368 | 12 | 41.159 | KV453011.1 | 15966338 | 12-scf00274 | 12 |
| AX-158126319 | 12 | 41.16  | KV453011.1 | 15900015 | 12-scf00274 | 12 |
| AX-158126320 | 12 | 41.16  | KV453011.1 | 15900736 | 12-scf00274 | 12 |
| AX-158126371 | 12 | 41.16  | KV453011.1 | 15971612 | 12-scf00274 | 12 |
| AX-158126378 | 12 | 41.16  | KV453011.1 | 15981235 | 12-scf00274 | 12 |
| AX-158126425 | 12 | 41.16  | KV453011.1 | 16049515 | 12-scf00274 | 12 |
| AX-158126376 | 12 | 41.161 | KV453011.1 | 15980192 | 12-scf00274 | 12 |
| AX-158126383 | 12 | 41.161 | KV453011.1 | 15991218 | 12-scf00274 | 12 |
| AX-158126387 | 12 | 41.161 | KV453011.1 | 15994496 | 12-scf00274 | 12 |
| AX-158126389 | 12 | 41.161 | KV453011.1 | 15996218 | 12-scf00274 | 12 |
| AX-158126391 | 12 | 41.276 | KV453011.1 | 16002645 | 12-scf00274 | 12 |
| AX-158126395 | 12 | 41.36  | KV453011.1 | 16008424 | 12-scf00274 | 12 |
| AX-158126403 | 12 | 41.36  | KV453011.1 | 16018666 | 12-scf00274 | 12 |
| AX-158126398 | 12 | 41.559 | KV453011.1 | 16013839 | 12-scf00274 | 12 |
| AX-158126406 | 12 | 41.559 | KV453011.1 | 16020549 | 12-scf00274 | 12 |
| AX-158126413 | 12 | 41.559 | KV453011.1 | 16032614 | 12-scf00274 | 12 |
| AX-158126417 | 12 | 41.559 | KV453011.1 | 16037345 | 12-scf00274 | 12 |
| AX-158126427 | 12 | 41.559 | KV453011.1 | 16053716 | 12-scf00274 | 12 |
| AX-158126428 | 12 | 41.559 | KV453011.1 | 16055418 | 12-scf00274 | 12 |
| AX-158126464 | 12 | 41.559 | KV453011.1 | 16104235 | 12-scf00274 | 12 |



|              |    |        |            |          |             |    |
|--------------|----|--------|------------|----------|-------------|----|
| AX-158126500 | 12 | 41.559 | KV453011.1 | 16162771 | 12-scf00274 | 12 |
| AX-157829588 | 12 | 41.559 | KV453011.1 | 16237857 | 12-scf00274 | 12 |
| AX-157751628 | 12 | 41.559 | KV453011.1 | 16294054 | 12-scf00274 | 12 |
| AX-158126603 | 12 | 41.559 | KV453011.1 | 16299135 | 12-scf00274 | 12 |
| AX-158126609 | 12 | 41.559 | KV453011.1 | 16304149 | 12-scf00274 | 12 |
| AX-158126437 | 12 | 41.758 | KV453011.1 | 16070899 | 12-scf00274 | 12 |
| AX-158126442 | 12 | 41.758 | KV453011.1 | 16078849 | 12-scf00274 | 12 |
| AX-158126443 | 12 | 41.758 | KV453011.1 | 16079684 | 12-scf00274 | 12 |
| AX-158126445 | 12 | 41.758 | KV453011.1 | 16081936 | 12-scf00274 | 12 |
| AX-158126446 | 12 | 41.758 | KV453011.1 | 16082474 | 12-scf00274 | 12 |
| AX-158126450 | 12 | 41.758 | KV453011.1 | 16087177 | 12-scf00274 | 12 |
| AX-157708448 | 12 | 41.758 | KV453011.1 | 16090093 | 12-scf00274 | 12 |
| AX-158126453 | 12 | 41.758 | KV453011.1 | 16090907 | 12-scf00274 | 12 |
| AX-158126454 | 12 | 41.758 | KV453011.1 | 16091375 | 12-scf00274 | 12 |
| AX-158126455 | 12 | 41.758 | KV453011.1 | 16092294 | 12-scf00274 | 12 |
| AX-158126457 | 12 | 41.758 | KV453011.1 | 16094273 | 12-scf00274 | 12 |
| AX-158126462 | 12 | 41.758 | KV453011.1 | 16097380 | 12-scf00274 | 12 |
| AX-158126463 | 12 | 41.758 | KV453011.1 | 16101035 | 12-scf00274 | 12 |
| AX-158126465 | 12 | 41.758 | KV453011.1 | 16105773 | 12-scf00274 | 12 |
| AX-158126466 | 12 | 41.758 | KV453011.1 | 16108326 | 12-scf00274 | 12 |
| AX-158411390 | 12 | 42.153 | KV453011.1 | 16124425 | 12-scf00274 | 12 |
| AX-158126470 | 12 | 42.155 | KV453011.1 | 16116113 | 12-scf00274 | 12 |
| AX-157713081 | 12 | 42.155 | KV453011.1 | 16122220 | 12-scf00274 | 12 |
| AX-158126473 | 12 | 42.155 | KV453011.1 | 16125004 | 12-scf00274 | 12 |
| AX-158126476 | 12 | 42.155 | KV453011.1 | 16127147 | 12-scf00274 | 12 |
| AX-158126512 | 12 | 42.155 | KV453011.1 | 16185261 | 12-scf00274 | 12 |
| AX-158380191 | 12 | 42.155 | KV453011.1 | 16187011 | 12-scf00274 | 12 |
| AX-158126513 | 12 | 42.155 | KV453011.1 | 16187179 | 12-scf00274 | 12 |
| AX-158385172 | 12 | 42.155 | KV453011.1 | 16190117 | 12-scf00274 | 12 |
| AX-158126531 | 12 | 42.155 | KV453011.1 | 16209705 | 12-scf00274 | 12 |
| AX-158126629 | 12 | 42.155 | KV453011.1 | 16333267 | 12-scf00274 | 12 |
| AX-158126411 | 12 | 42.156 | KV453011.1 | 16031037 | 12-scf00274 | 12 |
| AX-158126414 | 12 | 42.156 | KV453011.1 | 16034573 | 12-scf00274 | 12 |
| AX-158126416 | 12 | 42.156 | KV453011.1 | 16036245 | 12-scf00274 | 12 |
| AX-158126441 | 12 | 42.156 | KV453011.1 | 16078007 | 12-scf00274 | 12 |
| AX-158126447 | 12 | 42.156 | KV453011.1 | 16083132 | 12-scf00274 | 12 |
| AX-157741674 | 12 | 42.156 | KV453011.1 | 16117022 | 12-scf00274 | 12 |
| AX-158126477 | 12 | 42.156 | KV453011.1 | 16127830 | 12-scf00274 | 12 |
| AX-157702597 | 12 | 42.156 | KV453011.1 | 16133846 | 12-scf00274 | 12 |
| AX-158126486 | 12 | 42.156 | KV453011.1 | 16144377 | 12-scf00274 | 12 |
| AX-158126487 | 12 | 42.156 | KV453011.1 | 16144632 | 12-scf00274 | 12 |
| AX-157749111 | 12 | 42.156 | KV453011.1 | 16145425 | 12-scf00274 | 12 |
| AX-158126494 | 12 | 42.156 | KV453011.1 | 16156128 | 12-scf00274 | 12 |
| AX-158126495 | 12 | 42.156 | KV453011.1 | 16156401 | 12-scf00274 | 12 |
| AX-158126499 | 12 | 42.156 | KV453011.1 | 16160511 | 12-scf00274 | 12 |
| AX-158126509 | 12 | 42.156 | KV453011.1 | 16181660 | 12-scf00274 | 12 |
| AX-158126511 | 12 | 42.156 | KV453011.1 | 16184108 | 12-scf00274 | 12 |
| AX-157741357 | 12 | 42.156 | KV453011.1 | 16184797 | 12-scf00274 | 12 |
| AX-157741690 | 12 | 42.156 | KV453011.1 | 16189274 | 12-scf00274 | 12 |
| AX-158126516 | 12 | 42.156 | KV453011.1 | 16192282 | 12-scf00274 | 12 |
| AX-158126521 | 12 | 42.156 | KV453011.1 | 16197748 | 12-scf00274 | 12 |

|              |    |        |            |          |             |    |
|--------------|----|--------|------------|----------|-------------|----|
| AX-158126524 | 12 | 42.156 | KV453011.1 | 16200462 | 12-scf00274 | 12 |
| AX-158126527 | 12 | 42.156 | KV453011.1 | 16205182 | 12-scf00274 | 12 |
| AX-158126530 | 12 | 42.156 | KV453011.1 | 16208885 | 12-scf00274 | 12 |
| AX-158126532 | 12 | 42.156 | KV453011.1 | 16210308 | 12-scf00274 | 12 |
| AX-158126537 | 12 | 42.156 | KV453011.1 | 16216515 | 12-scf00274 | 12 |
| AX-158126538 | 12 | 42.156 | KV453011.1 | 16217979 | 12-scf00274 | 12 |
| AX-158126541 | 12 | 42.156 | KV453011.1 | 16222289 | 12-scf00274 | 12 |
| AX-157775604 | 12 | 42.156 | KV453011.1 | 16227056 | 12-scf00274 | 12 |
| AX-158126544 | 12 | 42.156 | KV453011.1 | 16227419 | 12-scf00274 | 12 |
| AX-157886127 | 12 | 42.156 | KV453011.1 | 16228374 | 12-scf00274 | 12 |
| AX-158126547 | 12 | 42.156 | KV453011.1 | 16229079 | 12-scf00274 | 12 |
| AX-158126549 | 12 | 42.156 | KV453011.1 | 16230604 | 12-scf00274 | 12 |
| AX-158126550 | 12 | 42.156 | KV453011.1 | 16235850 | 12-scf00274 | 12 |
| AX-158126553 | 12 | 42.156 | KV453011.1 | 16239062 | 12-scf00274 | 12 |
| AX-158126566 | 12 | 42.156 | KV453011.1 | 16261167 | 12-scf00274 | 12 |
| AX-158126569 | 12 | 42.156 | KV453011.1 | 16265998 | 12-scf00274 | 12 |
| AX-158126574 | 12 | 42.156 | KV453011.1 | 16272021 | 12-scf00274 | 12 |
| AX-158126522 | 12 | 42.191 | KV453011.1 | 16199210 | 12-scf00274 | 12 |
| AX-158126557 | 12 | 42.191 | KV453011.1 | 16248830 | 12-scf00274 | 12 |
| AX-158126669 | 12 | 42.191 | KV453011.1 | 16385203 | 12-scf00274 | 12 |
| AX-158126558 | 12 | 42.221 | KV453011.1 | 16249205 | 12-scf00274 | 12 |
| AX-158126597 | 12 | 42.221 | KV453011.1 | 16293239 | 12-scf00274 | 12 |
| AX-158126561 | 12 | 42.265 | KV453011.1 | 16252407 | 12-scf00274 | 12 |
| AX-158126564 | 12 | 42.265 | KV453011.1 | 16255229 | 12-scf00274 | 12 |
| AX-158126565 | 12 | 42.265 | KV453011.1 | 16255775 | 12-scf00274 | 12 |
| AX-157724829 | 12 | 42.265 | KV453011.1 | 16259214 | 12-scf00274 | 12 |
| AX-158126567 | 12 | 42.265 | KV453011.1 | 16261503 | 12-scf00274 | 12 |
| AX-158411394 | 12 | 42.265 | KV453011.1 | 16263763 | 12-scf00274 | 12 |
| AX-157722766 | 12 | 42.265 | KV453011.1 | 16264375 | 12-scf00274 | 12 |
| AX-158126568 | 12 | 42.265 | KV453011.1 | 16265636 | 12-scf00274 | 12 |
| AX-158126571 | 12 | 42.265 | KV453011.1 | 16268523 | 12-scf00274 | 12 |
| AX-158126572 | 12 | 42.265 | KV453011.1 | 16269499 | 12-scf00274 | 12 |
| AX-157829591 | 12 | 42.265 | KV453011.1 | 16271587 | 12-scf00274 | 12 |
| AX-158126575 | 12 | 42.265 | KV453011.1 | 16272713 | 12-scf00274 | 12 |
| AX-158126576 | 12 | 42.265 | KV453011.1 | 16273383 | 12-scf00274 | 12 |
| AX-158126577 | 12 | 42.265 | KV453011.1 | 16273766 | 12-scf00274 | 12 |
| AX-158126580 | 12 | 42.265 | KV453011.1 | 16275880 | 12-scf00274 | 12 |
| AX-158126582 | 12 | 42.265 | KV453011.1 | 16277038 | 12-scf00274 | 12 |
| AX-158126608 | 12 | 42.265 | KV453011.1 | 16303726 | 12-scf00274 | 12 |
| AX-158126581 | 12 | 42.485 | KV453011.1 | 16276610 | 12-scf00274 | 12 |
| AX-158126586 | 12 | 42.485 | KV453011.1 | 16282926 | 12-scf00274 | 12 |
| AX-158126588 | 12 | 42.485 | KV453011.1 | 16284810 | 12-scf00274 | 12 |
| AX-158126590 | 12 | 42.485 | KV453011.1 | 16285781 | 12-scf00274 | 12 |
| AX-158126593 | 12 | 42.485 | KV453011.1 | 16288585 | 12-scf00274 | 12 |
| AX-157755706 | 12 | 42.485 | KV453011.1 | 16303011 | 12-scf00274 | 12 |
| AX-158126612 | 12 | 42.485 | KV453011.1 | 16307580 | 12-scf00274 | 12 |
| AX-158126628 | 12 | 42.485 | KV453011.1 | 16332378 | 12-scf00274 | 12 |
| AX-158126651 | 12 | 42.485 | KV453011.1 | 16361694 | 12-scf00274 | 12 |
| AX-158126652 | 12 | 42.485 | KV453011.1 | 16362084 | 12-scf00274 | 12 |
| AX-158126662 | 12 | 42.485 | KV453011.1 | 16371386 | 12-scf00274 | 12 |
| AX-158126707 | 12 | 42.485 | KV453011.1 | 16437556 | 12-scf00274 | 12 |

|              |    |        |            |          |             |    |
|--------------|----|--------|------------|----------|-------------|----|
| AX-158126591 | 12 | 42.519 | KV453011.1 | 16286074 | 12-scf00274 | 12 |
| AX-158126594 | 12 | 42.551 | KV453011.1 | 16289191 | 12-scf00274 | 12 |
| AX-158126604 | 12 | 42.593 | KV453011.1 | 16299642 | 12-scf00274 | 12 |
| AX-158126610 | 12 | 42.702 | KV453011.1 | 16304222 | 12-scf00274 | 12 |
| AX-158126606 | 12 | 42.812 | KV453011.1 | 16302239 | 12-scf00274 | 12 |
| AX-158126615 | 12 | 42.812 | KV453011.1 | 16310876 | 12-scf00274 | 12 |
| AX-158126616 | 12 | 42.812 | KV453011.1 | 16312949 | 12-scf00274 | 12 |
| AX-158126618 | 12 | 42.812 | KV453011.1 | 16318651 | 12-scf00274 | 12 |
| AX-158126621 | 12 | 42.812 | KV453011.1 | 16321281 | 12-scf00274 | 12 |
| AX-158126624 | 12 | 42.812 | KV453011.1 | 16327082 | 12-scf00274 | 12 |
| AX-158126630 | 12 | 42.812 | KV453011.1 | 16333780 | 12-scf00274 | 12 |
| AX-157749813 | 12 | 42.812 | KV453011.1 | 16334338 | 12-scf00274 | 12 |
| AX-158126632 | 12 | 42.812 | KV453011.1 | 16337055 | 12-scf00274 | 12 |
| AX-158126639 | 12 | 42.812 | KV453011.1 | 16345460 | 12-scf00274 | 12 |
| AX-158126753 | 12 | 42.812 | KV453011.1 | 16499764 | 12-scf00274 | 12 |
| AX-158126635 | 12 | 43.03  | KV453011.1 | 16341911 | 12-scf00274 | 12 |
| AX-158126636 | 12 | 43.03  | KV453011.1 | 16342219 | 12-scf00274 | 12 |
| AX-157722334 | 12 | 43.03  | KV453011.1 | 16346129 | 12-scf00274 | 12 |
| AX-158126641 | 12 | 43.03  | KV453011.1 | 16346883 | 12-scf00274 | 12 |
| AX-158126642 | 12 | 43.03  | KV453011.1 | 16350066 | 12-scf00274 | 12 |
| AX-158126647 | 12 | 43.078 | KV453011.1 | 16358260 | 12-scf00274 | 12 |
| AX-158126649 | 12 | 43.094 | KV453011.1 | 16359332 | 12-scf00274 | 12 |
| AX-158126650 | 12 | 43.139 | KV453011.1 | 16361035 | 12-scf00274 | 12 |
| AX-157698885 | 12 | 43.139 | KV453011.1 | 16362557 | 12-scf00274 | 12 |
| AX-158126653 | 12 | 43.187 | KV453011.1 | 16365022 | 12-scf00274 | 12 |
| AX-158126654 | 12 | 43.248 | KV453011.1 | 16365895 | 12-scf00274 | 12 |
| AX-158126656 | 12 | 43.248 | KV453011.1 | 16367192 | 12-scf00274 | 12 |
| AX-158126670 | 12 | 43.358 | KV453011.1 | 16386054 | 12-scf00274 | 12 |
| AX-157740816 | 12 | 43.358 | KV453011.1 | 16389503 | 12-scf00274 | 12 |
| AX-158126672 | 12 | 43.358 | KV453011.1 | 16390877 | 12-scf00274 | 12 |
| AX-158126688 | 12 | 43.358 | KV453011.1 | 16405559 | 12-scf00274 | 12 |
| AX-158126676 | 12 | 43.476 | KV453011.1 | 16393270 | 12-scf00274 | 12 |
| AX-158126664 | 12 | 43.576 | KV453011.1 | 16375092 | 12-scf00274 | 12 |
| AX-158126674 | 12 | 43.576 | KV453011.1 | 16392145 | 12-scf00274 | 12 |
| AX-157857788 | 12 | 43.576 | KV453011.1 | 16395249 | 12-scf00274 | 12 |
| AX-158126682 | 12 | 43.576 | KV453011.1 | 16399646 | 12-scf00274 | 12 |
| AX-158126683 | 12 | 43.576 | KV453011.1 | 16400895 | 12-scf00274 | 12 |
| AX-158126684 | 12 | 43.576 | KV453011.1 | 16402579 | 12-scf00274 | 12 |
| AX-158126687 | 12 | 43.576 | KV453011.1 | 16405139 | 12-scf00274 | 12 |
| AX-158126691 | 12 | 43.576 | KV453011.1 | 16407906 | 12-scf00274 | 12 |
| AX-158126692 | 12 | 43.663 | KV453011.1 | 16408798 | 12-scf00274 | 12 |
| AX-158126694 | 12 | 43.795 | KV453011.1 | 16409795 | 12-scf00274 | 12 |
| AX-158126701 | 12 | 44.22  | KV453011.1 | 16428592 | 12-scf00274 | 12 |
| AX-158126704 | 12 | 44.22  | KV453011.1 | 16434528 | 12-scf00274 | 12 |
| AX-157727064 | 12 | 44.22  | KV453011.1 | 16435307 | 12-scf00274 | 12 |
| AX-158126708 | 12 | 44.22  | KV453011.1 | 16438082 | 12-scf00274 | 12 |
| AX-158126752 | 12 | 44.22  | KV453011.1 | 16498336 | 12-scf00274 | 12 |
| AX-158126705 | 12 | 44.237 | KV453011.1 | 16435378 | 12-scf00274 | 12 |
| AX-158126706 | 12 | 44.253 | KV453011.1 | 16436784 | 12-scf00274 | 12 |
| AX-157757069 | 12 | 44.268 | KV453011.1 | 16372365 | 12-scf00274 | 12 |
| AX-158126709 | 12 | 44.268 | KV453011.1 | 16438946 | 12-scf00274 | 12 |

|              |    |        |            |          |             |    |
|--------------|----|--------|------------|----------|-------------|----|
| AX-158126698 | 12 | 44.383 | KV453011.1 | 16420408 | 12-scf00274 | 12 |
| AX-157725689 | 12 | 44.383 | KV453011.1 | 16439545 | 12-scf00274 | 12 |
| AX-158126713 | 12 | 44.383 | KV453011.1 | 16447271 | 12-scf00274 | 12 |
| AX-157721746 | 12 | 44.383 | KV453011.1 | 16448617 | 12-scf00274 | 12 |
| AX-157710936 | 12 | 44.383 | KV453011.1 | 16487355 | 12-scf00274 | 12 |
| AX-158126718 | 12 | 44.56  | KV453011.1 | 16452689 | 12-scf00274 | 12 |
| AX-157707624 | 12 | 44.56  | KV453011.1 | 16455160 | 12-scf00274 | 12 |
| AX-158126720 | 12 | 44.56  | KV453011.1 | 16457748 | 12-scf00274 | 12 |
| AX-158126723 | 12 | 44.56  | KV453011.1 | 16459601 | 12-scf00274 | 12 |
| AX-158126724 | 12 | 44.56  | KV453011.1 | 16460126 | 12-scf00274 | 12 |
| AX-158126725 | 12 | 44.56  | KV453011.1 | 16461569 | 12-scf00274 | 12 |
| AX-158126727 | 12 | 44.56  | KV453011.1 | 16462715 | 12-scf00274 | 12 |
| AX-158126729 | 12 | 44.56  | KV453011.1 | 16463398 | 12-scf00274 | 12 |
| AX-157829595 | 12 | 44.56  | KV453011.1 | 16467899 | 12-scf00274 | 12 |
| AX-158126733 | 12 | 44.613 | KV453011.1 | 16470922 | 12-scf00274 | 12 |
| AX-158126735 | 12 | 44.665 | KV453011.1 | 16472033 | 12-scf00274 | 12 |
| AX-158126734 | 12 | 44.733 | KV453011.1 | 16471805 | 12-scf00274 | 12 |
| AX-157829596 | 12 | 44.733 | KV453011.1 | 16472742 | 12-scf00274 | 12 |
| AX-158126738 | 12 | 44.778 | KV453011.1 | 16473905 | 12-scf00274 | 12 |
| AX-158126739 | 12 | 44.778 | KV453011.1 | 16474535 | 12-scf00274 | 12 |
| AX-158126740 | 12 | 44.778 | KV453011.1 | 16475000 | 12-scf00274 | 12 |
| AX-157748130 | 12 | 44.778 | KV453011.1 | 16479690 | 12-scf00274 | 12 |
| AX-158126747 | 12 | 44.778 | KV453011.1 | 16487824 | 12-scf00274 | 12 |
| AX-157829599 | 12 | 44.778 | KV453011.1 | 16488835 | 12-scf00274 | 12 |
| AX-158126750 | 12 | 44.778 | KV453011.1 | 16496300 | 12-scf00274 | 12 |
| AX-158126761 | 12 | 44.778 | KV453011.1 | 16509194 | 12-scf00274 | 12 |
| AX-158126763 | 12 | 44.778 | KV453011.1 | 16514031 | 12-scf00274 | 12 |
| AX-158126764 | 12 | 44.778 | KV453011.1 | 16516047 | 12-scf00274 | 12 |
| AX-158126765 | 12 | 44.778 | KV453011.1 | 16517031 | 12-scf00274 | 12 |
| AX-158126766 | 12 | 44.778 | KV453011.1 | 16517483 | 12-scf00274 | 12 |
| AX-158126767 | 12 | 44.778 | KV453011.1 | 16518025 | 12-scf00274 | 12 |
| AX-158126773 | 12 | 44.778 | KV453011.1 | 16521847 | 12-scf00274 | 12 |
| AX-158126776 | 12 | 44.778 | KV453011.1 | 16525883 | 12-scf00274 | 12 |
| AX-158126781 | 12 | 44.778 | KV453011.1 | 16534768 | 12-scf00274 | 12 |
| AX-158126793 | 12 | 44.778 | KV453011.1 | 16551342 | 12-scf00274 | 12 |
| AX-158126768 | 12 | 44.942 | KV453011.1 | 16518647 | 12-scf00274 | 12 |
| AX-158126772 | 12 | 45.105 | KV453011.1 | 16520534 | 12-scf00274 | 12 |
| AX-158126774 | 12 | 45.105 | KV453011.1 | 16522517 | 12-scf00274 | 12 |
| AX-158126780 | 12 | 45.105 | KV453011.1 | 16534409 | 12-scf00274 | 12 |
| AX-158126782 | 12 | 45.105 | KV453011.1 | 16535295 | 12-scf00274 | 12 |
| AX-158126783 | 12 | 45.115 | KV453011.1 | 16535963 | 12-scf00274 | 12 |
| AX-158126788 | 12 | 45.63  | KV453011.1 | 16541310 | 12-scf00274 | 12 |
| AX-158126801 | 12 | 45.677 | KV453011.1 | 16561709 | 12-scf00274 | 12 |
| AX-158126802 | 12 | 45.677 | KV453011.1 | 16562064 | 12-scf00274 | 12 |
| AX-158126804 | 12 | 45.677 | KV453011.1 | 16564370 | 12-scf00274 | 12 |
| AX-158126807 | 12 | 45.677 | KV453011.1 | 16566394 | 12-scf00274 | 12 |
| AX-158126808 | 12 | 45.968 | KV453011.1 | 16567812 | 12-scf00274 | 12 |
| AX-158126811 | 12 | 45.968 | KV453011.1 | 16573447 | 12-scf00274 | 12 |
| AX-158126805 | 12 | 45.97  | KV453011.1 | 16564765 | 12-scf00274 | 12 |
| AX-158126809 | 12 | 45.97  | KV453011.1 | 16568188 | 12-scf00274 | 12 |
| AX-158126813 | 12 | 45.97  | KV453011.1 | 16577166 | 12-scf00274 | 12 |

|              |    |        |            |          |             |    |
|--------------|----|--------|------------|----------|-------------|----|
| AX-158126814 | 12 | 46.157 | KV453011.1 | 16577378 | 12-scf00274 | 12 |
| AX-157857791 | 12 | 46.158 | KV453011.1 | 16582330 | 12-scf00274 | 12 |
| AX-158126817 | 12 | 46.162 | KV453011.1 | 16579677 | 12-scf00274 | 12 |
| AX-158126822 | 12 | 46.162 | KV453011.1 | 16583612 | 12-scf00274 | 12 |
| AX-158126826 | 12 | 46.162 | KV453011.1 | 16586088 | 12-scf00274 | 12 |
| AX-157756897 | 12 | 46.162 | KV453011.1 | 16589078 | 12-scf00274 | 12 |
| AX-158126831 | 12 | 46.533 | KV453011.1 | 16590934 | 12-scf00274 | 12 |
| AX-158126832 | 12 | 46.533 | KV453011.1 | 16591390 | 12-scf00274 | 12 |
| AX-157829600 | 12 | 46.533 | KV453011.1 | 16592678 | 12-scf00274 | 12 |
| AX-158126834 | 12 | 46.533 | KV453011.1 | 16594036 | 12-scf00274 | 12 |
| AX-158126840 | 12 | 46.533 | KV453011.1 | 16600789 | 12-scf00274 | 12 |
| AX-158126847 | 12 | 46.709 | KV453011.1 | 16610249 | 12-scf00274 | 12 |
| AX-158126643 | 12 | 46.715 | KV453011.1 | 16353011 | 12-scf00274 | 12 |
| AX-157727907 | 12 | 46.715 | KV453011.1 | 16611331 | 12-scf00274 | 12 |
| AX-157829603 | 12 | 46.715 | KV453011.1 | 16617470 | 12-scf00274 | 12 |
| AX-157747784 | 12 | 47.085 | KV453011.1 | 16618900 | 12-scf00274 | 12 |
| AX-157829605 | 12 | 47.359 | KV453011.1 | 16621164 | 12-scf00274 | 12 |
| AX-158126855 | 12 | 47.407 | KV453011.1 | 16629065 | 12-scf00274 | 12 |
| AX-158126857 | 12 | 47.407 | KV453011.1 | 16630369 | 12-scf00274 | 12 |
| AX-158126859 | 12 | 47.407 | KV453011.1 | 16632650 | 12-scf00274 | 12 |
| AX-158126861 | 12 | 47.407 | KV453011.1 | 16640681 | 12-scf00274 | 12 |
| AX-158126863 | 12 | 47.407 | KV453011.1 | 16643891 | 12-scf00274 | 12 |
| AX-157716662 | 12 | 47.407 | KV453011.1 | 16645045 | 12-scf00274 | 12 |
| AX-157750573 | 12 | 47.776 | KV453011.1 | 16650948 | 12-scf00274 | 12 |
| AX-158126867 | 12 | 47.961 | KV453011.1 | 16654380 | 12-scf00274 | 12 |
| AX-158126868 | 12 | 47.961 | KV453011.1 | 16655639 | 12-scf00274 | 12 |
| AX-158126869 | 12 | 48.041 | KV453011.1 | 16656928 | 12-scf00274 | 12 |
| AX-158126871 | 12 | 48.115 | KV453011.1 | 16657930 | 12-scf00274 | 12 |
| AX-158126874 | 12 | 48.116 | KV453011.1 | 16660493 | 12-scf00274 | 12 |
| AX-158126881 | 12 | 48.23  | KV453011.1 | 16665605 | 12-scf00274 | 12 |
| AX-157829606 | 12 | 48.338 | KV453011.1 | 16624307 | 12-scf00274 | 12 |
| AX-158126862 | 12 | 48.338 | KV453011.1 | 16641609 | 12-scf00274 | 12 |
| AX-157829607 | 12 | 48.338 | KV453011.1 | 16643685 | 12-scf00274 | 12 |
| AX-157829610 | 12 | 48.338 | KV453011.1 | 16655165 | 12-scf00274 | 12 |
| AX-158126883 | 12 | 48.338 | KV453011.1 | 16666790 | 12-scf00274 | 12 |
| AX-158126884 | 12 | 48.338 | KV453011.1 | 16667167 | 12-scf00274 | 12 |
| AX-158126886 | 12 | 48.338 | KV453011.1 | 16668792 | 12-scf00274 | 12 |
| AX-158126887 | 12 | 48.338 | KV453011.1 | 16671766 | 12-scf00274 | 12 |
| AX-158126888 | 12 | 48.338 | KV453011.1 | 16672017 | 12-scf00274 | 12 |
| AX-157720585 | 12 | 48.338 | KV453011.1 | 16678380 | 12-scf00274 | 12 |
| AX-157829613 | 12 | 48.338 | KV453011.1 | 16678583 | 12-scf00274 | 12 |
| AX-158126892 | 12 | 48.338 | KV453011.1 | 16679384 | 12-scf00274 | 12 |
| AX-158126895 | 12 | 48.338 | KV453011.1 | 16682885 | 12-scf00274 | 12 |
| AX-158126896 | 12 | 48.338 | KV453011.1 | 16687138 | 12-scf00274 | 12 |
| AX-158126898 | 12 | 48.338 | KV453011.1 | 16693790 | 12-scf00274 | 12 |
| AX-158126902 | 12 | 48.615 | KV453011.1 | 16699687 | 12-scf00274 | 12 |
| AX-158126904 | 12 | 48.615 | KV453011.1 | 16708815 | 12-scf00274 | 12 |
| AX-158126906 | 12 | 48.615 | KV453011.1 | 16710390 | 12-scf00274 | 12 |
| AX-158126910 | 12 | 48.615 | KV453011.1 | 16715470 | 12-scf00274 | 12 |
| AX-158126911 | 12 | 48.615 | KV453011.1 | 16715730 | 12-scf00274 | 12 |
| AX-157829615 | 12 | 48.615 | KV453011.1 | 16716176 | 12-scf00274 | 12 |

|              |    |        |            |          |             |    |
|--------------|----|--------|------------|----------|-------------|----|
| AX-158126915 | 12 | 48.944 | KV453011.1 | 16722457 | 12-scf00274 | 12 |
| AX-158126918 | 12 | 48.944 | KV453011.1 | 16723814 | 12-scf00274 | 12 |
| AX-158126919 | 12 | 48.944 | KV453011.1 | 16724560 | 12-scf00274 | 12 |
| AX-158126922 | 12 | 48.944 | KV453011.1 | 16725773 | 12-scf00274 | 12 |
| AX-158126925 | 12 | 48.944 | KV453011.1 | 16729748 | 12-scf00274 | 12 |
| AX-158126927 | 12 | 48.944 | KV453011.1 | 16730887 | 12-scf00274 | 12 |
| AX-158411398 | 12 | 48.944 | KV453011.1 | 16770740 | 12-scf00274 | 12 |
| AX-158126934 | 12 | 49.422 | KV453011.1 | 16745807 | 12-scf00274 | 12 |
| AX-158126943 | 12 | 49.422 | KV453011.1 | 16757211 | 12-scf00274 | 12 |
| AX-158126928 | 12 | 49.423 | KV453011.1 | 16733260 | 12-scf00274 | 12 |
| AX-158126937 | 12 | 49.423 | KV453011.1 | 16751369 | 12-scf00274 | 12 |
| AX-157745139 | 12 | 49.423 | KV453011.1 | 16759728 | 12-scf00274 | 12 |
| AX-158126950 | 12 | 49.423 | KV453011.1 | 16767048 | 12-scf00274 | 12 |
| AX-158126952 | 12 | 49.423 | KV453011.1 | 16767999 | 12-scf00274 | 12 |
| AX-158126972 | 12 | 49.423 | KV453011.1 | 16802987 | 12-scf00274 | 12 |
| AX-158126990 | 12 | 49.423 | KV453011.1 | 16825568 | 12-scf00274 | 12 |
| AX-158126938 | 12 | 49.424 | KV453011.1 | 16751655 | 12-scf00274 | 12 |
| AX-158126945 | 12 | 49.429 | KV453011.1 | 16760138 | 12-scf00274 | 12 |
| AX-158126933 | 12 | 49.436 | KV453011.1 | 16744574 | 12-scf00274 | 12 |
| AX-158126946 | 12 | 49.436 | KV453011.1 | 16760897 | 12-scf00274 | 12 |
| AX-158126951 | 12 | 49.436 | KV453011.1 | 16767611 | 12-scf00274 | 12 |
| AX-158126954 | 12 | 49.682 | KV453011.1 | 16770550 | 12-scf00274 | 12 |
| AX-158126956 | 12 | 49.682 | KV453011.1 | 16774247 | 12-scf00274 | 12 |
| AX-157747531 | 12 | 49.718 | KV453011.1 | 16777876 | 12-scf00274 | 12 |
| AX-158126963 | 12 | 49.778 | KV453011.1 | 16791091 | 12-scf00274 | 12 |
| AX-158126980 | 12 | 49.778 | KV453011.1 | 16810393 | 12-scf00274 | 12 |
| AX-158126989 | 12 | 49.778 | KV453011.1 | 16822952 | 12-scf00274 | 12 |
| AX-158126993 | 12 | 49.778 | KV453011.1 | 16830065 | 12-scf00274 | 12 |
| AX-157770860 | 12 | 49.831 | KV453011.1 | 16700124 | 12-scf00274 | 12 |
| AX-158126961 | 12 | 49.831 | KV453011.1 | 16786738 | 12-scf00274 | 12 |
| AX-158126965 | 12 | 49.831 | KV453011.1 | 16791702 | 12-scf00274 | 12 |
| AX-158126942 | 12 | 49.883 | KV453011.1 | 16756117 | 12-scf00274 | 12 |
| AX-158126970 | 12 | 49.883 | KV453011.1 | 16800063 | 12-scf00274 | 12 |
| AX-158126976 | 12 | 49.928 | KV453011.1 | 16808312 | 12-scf00274 | 12 |
| AX-158126981 | 12 | 49.928 | KV453011.1 | 16811695 | 12-scf00274 | 12 |
| AX-158126983 | 12 | 49.928 | KV453011.1 | 16812858 | 12-scf00274 | 12 |
| AX-158126984 | 12 | 49.928 | KV453011.1 | 16813497 | 12-scf00274 | 12 |
| AX-158126985 | 12 | 49.928 | KV453011.1 | 16814197 | 12-scf00274 | 12 |
| AX-158126986 | 12 | 50.101 | KV453011.1 | 16818524 | 12-scf00274 | 12 |
| AX-158126991 | 12 | 50.274 | KV453011.1 | 16825938 | 12-scf00274 | 12 |
| AX-158126992 | 12 | 50.274 | KV453011.1 | 16826870 | 12-scf00274 | 12 |
| AX-158127000 | 12 | 50.685 | KV453011.1 | 16841999 | 12-scf00274 | 12 |
| AX-158127002 | 12 | 50.685 | KV453011.1 | 16844659 | 12-scf00274 | 12 |
| AX-158127008 | 12 | 50.685 | KV453011.1 | 16848860 | 12-scf00274 | 12 |
| AX-158127009 | 12 | 50.822 | KV453011.1 | 16849654 | 12-scf00274 | 12 |
| AX-158385178 | 12 | 51.006 | KV453011.1 | 16859872 | 12-scf00274 | 12 |
| AX-157739145 | 12 | 51.352 | KV453011.1 | 16863377 | 12-scf00274 | 12 |
| AX-158127015 | 12 | 51.352 | KV453011.1 | 16864742 | 12-scf00274 | 12 |
| AX-158127016 | 12 | 51.352 | KV453011.1 | 16868174 | 12-scf00274 | 12 |
| AX-158127006 | 12 | 51.444 | KV453011.1 | 16848090 | 12-scf00274 | 12 |
| AX-157740864 | 12 | 51.444 | KV453011.1 | 16863931 | 12-scf00274 | 12 |

|              |    |        |            |          |             |    |
|--------------|----|--------|------------|----------|-------------|----|
| AX-158127017 | 12 | 51.444 | KV453011.1 | 16869634 | 12-scf00274 | 12 |
| AX-158127020 | 12 | 51.549 | KV453011.1 | 16875636 | 12-scf00274 | 12 |
| AX-158127025 | 12 | 51.55  | KV453011.1 | 16880454 | 12-scf00274 | 12 |
| AX-158127026 | 12 | 52.107 | KV453011.1 | 16882094 | 12-scf00274 | 12 |
| AX-158127028 | 12 | 52.122 | KV453011.1 | 16886374 | 12-scf00274 | 12 |
| AX-158127029 | 12 | 52.137 | KV453011.1 | 16887051 | 12-scf00274 | 12 |
| AX-158127032 | 12 | 52.138 | KV453011.1 | 16889000 | 12-scf00274 | 12 |
| AX-158127033 | 12 | 52.138 | KV453011.1 | 16890110 | 12-scf00274 | 12 |
| AX-158127036 | 12 | 52.139 | KV453011.1 | 16893888 | 12-scf00274 | 12 |
| AX-157774817 | 12 | 52.438 | KV453011.1 | 16894185 | 12-scf00274 | 12 |
| AX-158127037 | 12 | 52.441 | KV453011.1 | 16895753 | 12-scf00274 | 12 |
| AX-158127038 | 12 | 52.446 | KV453011.1 | 16896302 | 12-scf00274 | 12 |
| AX-158127041 | 12 | 52.446 | KV453011.1 | 16898491 | 12-scf00274 | 12 |
| AX-158127042 | 12 | 52.446 | KV453011.1 | 16899275 | 12-scf00274 | 12 |
| AX-157829629 | 12 | 52.446 | KV453011.1 | 16902341 | 12-scf00274 | 12 |
| AX-157772842 | 12 | 52.477 | KV453011.1 | 16903779 | 12-scf00274 | 12 |
| AX-157750749 | 12 | 52.506 | KV453011.1 | 16906076 | 12-scf00274 | 12 |
| AX-157712126 | 12 | 52.534 | KV453011.1 | 16908336 | 12-scf00274 | 12 |
| AX-157750518 | 12 | 52.555 | KV453011.1 | 16916551 | 12-scf00274 | 12 |
| AX-158127046 | 12 | 52.555 | KV453011.1 | 16917036 | 12-scf00274 | 12 |
| AX-158127048 | 12 | 52.555 | KV453011.1 | 16919662 | 12-scf00274 | 12 |
| AX-158127050 | 12 | 52.555 | KV453011.1 | 16921465 | 12-scf00274 | 12 |
| AX-158127051 | 12 | 52.555 | KV453011.1 | 16923785 | 12-scf00274 | 12 |
| AX-158127055 | 12 | 52.555 | KV453011.1 | 16925941 | 12-scf00274 | 12 |
| AX-158127058 | 12 | 52.555 | KV453011.1 | 16927865 | 12-scf00274 | 12 |
| AX-158127087 | 12 | 52.555 | KV453011.1 | 16974135 | 12-scf00274 | 12 |
| AX-158127060 | 12 | 52.581 | KV453011.1 | 16930480 | 12-scf00274 | 12 |
| AX-158127061 | 12 | 52.604 | KV453011.1 | 16931289 | 12-scf00274 | 12 |
| AX-158127062 | 12 | 52.604 | KV453011.1 | 16931390 | 12-scf00274 | 12 |
| AX-158127075 | 12 | 52.629 | KV453011.1 | 16956657 | 12-scf00274 | 12 |
| AX-157877867 | 12 | 52.638 | KV453011.1 | 16958301 | 12-scf00274 | 12 |
| AX-157877868 | 12 | 52.638 | KV453011.1 | 16958999 | 12-scf00274 | 12 |
| AX-158127092 | 12 | 52.638 | KV453011.1 | 16991312 | 12-scf00274 | 12 |
| AX-158127114 | 12 | 52.638 | KV453011.1 | 17016396 | 12-scf00274 | 12 |
| AX-157772934 | 12 | 52.664 | KV453011.1 | 16922385 | 12-scf00274 | 12 |
| AX-158392802 | 12 | 52.664 | KV453011.1 | 16923138 | 12-scf00274 | 12 |
| AX-158127054 | 12 | 52.664 | KV453011.1 | 16925418 | 12-scf00274 | 12 |
| AX-157771803 | 12 | 52.664 | KV453011.1 | 16951201 | 12-scf00274 | 12 |
| AX-158127073 | 12 | 52.664 | KV453011.1 | 16951741 | 12-scf00274 | 12 |
| AX-158127078 | 12 | 52.664 | KV453011.1 | 16961464 | 12-scf00274 | 12 |
| AX-157744144 | 12 | 52.664 | KV453011.1 | 16964270 | 12-scf00274 | 12 |
| AX-157829634 | 12 | 52.664 | KV453011.1 | 16968474 | 12-scf00274 | 12 |
| AX-158127083 | 12 | 52.664 | KV453011.1 | 16969487 | 12-scf00274 | 12 |
| AX-158127084 | 12 | 52.664 | KV453011.1 | 16970753 | 12-scf00274 | 12 |
| AX-158127086 | 12 | 52.664 | KV453011.1 | 16972655 | 12-scf00274 | 12 |
| AX-157747487 | 12 | 52.664 | KV453011.1 | 16976057 | 12-scf00274 | 12 |
| AX-158127089 | 12 | 52.664 | KV453011.1 | 16978049 | 12-scf00274 | 12 |
| AX-157829635 | 12 | 52.664 | KV453011.1 | 16978129 | 12-scf00274 | 12 |
| AX-157829636 | 12 | 52.664 | KV453011.1 | 16978820 | 12-scf00274 | 12 |
| AX-157829640 | 12 | 52.773 | KV453011.1 | 16987689 | 12-scf00274 | 12 |
| AX-158127097 | 12 | 52.773 | KV453011.1 | 16994862 | 12-scf00274 | 12 |

|              |    |        |             |          |             |    |
|--------------|----|--------|-------------|----------|-------------|----|
| AX-158127104 | 12 | 52.773 | KV453011.1  | 17000698 | 12-scf00274 | 12 |
| AX-158127107 | 12 | 52.773 | KV453011.1  | 17004744 | 12-scf00274 | 12 |
| AX-157829642 | 12 | 52.773 | KV453011.1  | 17005337 | 12-scf00274 | 12 |
| AX-158127108 | 12 | 52.841 | KV453011.1  | 17007136 | 12-scf00274 | 12 |
| AX-158127111 | 12 | 52.841 | KV453011.1  | 17013052 | 12-scf00274 | 12 |
| AX-157829641 | 12 | 52.992 | KV453011.1  | 16988812 | 12-scf00274 | 12 |
| AX-158127095 | 12 | 52.992 | KV453011.1  | 16993379 | 12-scf00274 | 12 |
| AX-158127096 | 12 | 52.992 | KV453011.1  | 16994361 | 12-scf00274 | 12 |
| AX-158127098 | 12 | 52.992 | KV453011.1  | 16995315 | 12-scf00274 | 12 |
| AX-158127102 | 12 | 52.992 | KV453011.1  | 16999584 | 12-scf00274 | 12 |
| AX-158127110 | 12 | 52.992 | KV453011.1  | 17009305 | 12-scf00274 | 12 |
| AX-157829643 | 12 | 52.992 | KV453011.1  | 17014352 | 12-scf00274 | 12 |
| AX-157714695 | 12 | 52.992 | KV453011.1  | 17015315 | 12-scf00274 | 12 |
| AX-157829645 | 12 | 52.992 | KV453011.1  | 17015728 | 12-scf00274 | 12 |
| AX-157829646 | 12 | 52.992 | KV453011.1  | 17025689 | 12-scf00274 | 12 |
| AX-158127123 | 12 | 52.992 | KV453011.1  | 17032065 | 12-scf00274 | 12 |
| AX-158127125 | 12 | 52.992 | KV453011.1  | 17044641 | 12-scf00274 | 12 |
| AX-157829651 | 12 | 52.992 | KV453011.1  | 17048253 | 12-scf00274 | 12 |
| AX-157829647 | 12 | 53.21  | KV453011.1  | 17025965 | 12-scf00274 | 12 |
| AX-158380197 | 12 | 53.21  | KV453011.1  | 17026390 | 12-scf00274 | 12 |
| AX-158127119 | 12 | 53.21  | KV453011.1  | 17026633 | 12-scf00274 | 12 |
| AX-158127121 | 12 | 53.21  | KV453011.1  | 17030505 | 12-scf00274 | 12 |
| AX-158127124 | 12 | 53.21  | KV453011.1  | 17033228 | 12-scf00274 | 12 |
| AX-157829648 | 12 | 53.21  | KV453011.1  | 17041330 | 12-scf00274 | 12 |
| AX-157829650 | 12 | 53.21  | KV453011.1  | 17045668 | 12-scf00274 | 12 |
| AX-157771263 | 12 | 53.21  | KV453011.1  | 17048803 | 12-scf00274 | 12 |
| AX-158127130 | 12 | 53.21  | KV453011.1  | 17050964 | 12-scf00274 | 12 |
| AX-157829652 | 12 | 53.212 | KV453011.1  | 17051014 | 12-scf00274 | 12 |
| AX-157746965 | 12 | 53.333 | KV453011.1  | 17053822 | 12-scf00274 | 12 |
| AX-158127147 | 12 | 53.333 | KV453011.1  | 17086030 | 12-scf00274 | 12 |
| AX-158127132 | 12 | 53.443 | KV453011.1  | 17059132 | 12-scf00274 | 12 |
| AX-158127134 | 12 | 53.502 | KV453011.1  | 17061149 | 12-scf00274 | 12 |
| AX-158411403 | 12 | 53.502 | KV453011.1  | 17062526 | 12-scf00274 | 12 |
| AX-158411404 | 12 | 53.584 | KV453011.1  | 17063444 | 12-scf00274 | 12 |
| AX-158127139 | 12 | 53.648 | KV453011.1  | 17072234 | 12-scf00274 | 12 |
| AX-157724141 | 12 | 53.648 | KV453011.1  | 17075503 | 12-scf00274 | 12 |
| AX-158127116 | 12 | 53.675 | KV453011.1  | 17019784 | 12-scf00274 | 12 |
| AX-158127133 | 12 | 53.675 | KV453011.1  | 17060787 | 12-scf00274 | 12 |
| AX-158127136 | 12 | 53.675 | KV453011.1  | 17070118 | 12-scf00274 | 12 |
| AX-158127141 | 12 | 53.675 | KV453011.1  | 17074559 | 12-scf00274 | 12 |
| AX-158127143 | 12 | 53.675 | KV453011.1  | 17077649 | 12-scf00274 | 12 |
| AX-157711761 | 12 | 53.675 | KV453011.1  | 17093847 | 12-scf00274 | 12 |
| AX-158127178 | 12 | 53.675 | KV453011.1  | 17133735 | 12-scf00274 | 12 |
| AX-158411417 | 12 | 53.675 | KV453011.1  | 17257628 | 12-scf00274 | 12 |
| AX-158411425 | 12 | 53.675 | KV453011.1  | 17277775 | 12-scf00274 | 12 |
| AX-157706072 | 12 | 53.675 | 3ML01031538 | 471      | scf07154_1  | UN |
| AX-157829653 | 12 | 53.757 | KV453011.1  | 17061694 | 12-scf00274 | 12 |
| AX-158127138 | 12 | 53.757 | KV453011.1  | 17071874 | 12-scf00274 | 12 |
| AX-158127145 | 12 | 53.757 | KV453011.1  | 17080086 | 12-scf00274 | 12 |
| AX-158411406 | 12 | 53.757 | KV453011.1  | 17080680 | 12-scf00274 | 12 |
| AX-158127146 | 12 | 53.762 | KV453011.1  | 17082139 | 12-scf00274 | 12 |



|              |    |        |            |          |             |    |
|--------------|----|--------|------------|----------|-------------|----|
| AX-158127151 | 12 | 53.762 | KV453011.1 | 17091148 | 12-scf00274 | 12 |
| AX-157721632 | 12 | 53.762 | KV453011.1 | 17576882 | 12-scf00274 | 12 |
| AX-158127148 | 12 | 53.901 | KV453011.1 | 17087422 | 12-scf00274 | 12 |
| AX-157741500 | 12 | 53.901 | KV453011.1 | 17090023 | 12-scf00274 | 12 |
| AX-157829656 | 12 | 53.901 | KV453011.1 | 17099564 | 12-scf00274 | 12 |
| AX-158127155 | 12 | 53.901 | KV453011.1 | 17100944 | 12-scf00274 | 12 |
| AX-158127160 | 12 | 53.901 | KV453011.1 | 17107058 | 12-scf00274 | 12 |
| AX-157886139 | 12 | 54.194 | KV453011.1 | 17064512 | 12-scf00274 | 12 |
| AX-158127142 | 12 | 54.194 | KV453011.1 | 17075970 | 12-scf00274 | 12 |
| AX-157758260 | 12 | 54.194 | KV453011.1 | 17106485 | 12-scf00274 | 12 |
| AX-157750679 | 12 | 54.194 | KV453011.1 | 17116328 | 12-scf00274 | 12 |
| AX-158127163 | 12 | 54.194 | KV453011.1 | 17118600 | 12-scf00274 | 12 |
| AX-158411410 | 12 | 54.194 | KV453011.1 | 17119145 | 12-scf00274 | 12 |
| AX-158127168 | 12 | 54.194 | KV453011.1 | 17123166 | 12-scf00274 | 12 |
| AX-157720911 | 12 | 54.194 | KV453011.1 | 17123524 | 12-scf00274 | 12 |
| AX-158127170 | 12 | 54.194 | KV453011.1 | 17125334 | 12-scf00274 | 12 |
| AX-158380198 | 12 | 54.194 | KV453011.1 | 17126265 | 12-scf00274 | 12 |
| AX-158127173 | 12 | 54.194 | KV453011.1 | 17127297 | 12-scf00274 | 12 |
| AX-157829659 | 12 | 54.194 | KV453011.1 | 17138868 | 12-scf00274 | 12 |
| AX-158127179 | 12 | 54.303 | KV453011.1 | 17134561 | 12-scf00274 | 12 |
| AX-158127181 | 12 | 54.412 | KV453011.1 | 17135735 | 12-scf00274 | 12 |
| AX-158127183 | 12 | 54.412 | KV453011.1 | 17137367 | 12-scf00274 | 12 |
| AX-158127184 | 12 | 54.505 | KV453011.1 | 17138806 | 12-scf00274 | 12 |
| AX-158127188 | 12 | 54.588 | KV453011.1 | 17143851 | 12-scf00274 | 12 |
| AX-158127192 | 12 | 54.62  | KV453011.1 | 17150243 | 12-scf00274 | 12 |
| AX-158127193 | 12 | 54.676 | KV453011.1 | 17150769 | 12-scf00274 | 12 |
| AX-157723744 | 12 | 54.74  | KV453011.1 | 17153189 | 12-scf00274 | 12 |
| AX-158127195 | 12 | 54.741 | KV453011.1 | 17154021 | 12-scf00274 | 12 |
| AX-158127196 | 12 | 54.741 | KV453011.1 | 17155665 | 12-scf00274 | 12 |
| AX-158127199 | 12 | 54.741 | KV453011.1 | 17157996 | 12-scf00274 | 12 |
| AX-158127200 | 12 | 54.741 | KV453011.1 | 17160147 | 12-scf00274 | 12 |
| AX-158127201 | 12 | 54.741 | KV453011.1 | 17160797 | 12-scf00274 | 12 |
| AX-158127202 | 12 | 54.741 | KV453011.1 | 17162965 | 12-scf00274 | 12 |
| AX-158127203 | 12 | 54.788 | KV453011.1 | 17163457 | 12-scf00274 | 12 |
| AX-158127206 | 12 | 54.85  | KV453011.1 | 17166331 | 12-scf00274 | 12 |
| AX-158127207 | 12 | 54.926 | KV453011.1 | 17166909 | 12-scf00274 | 12 |
| AX-158127213 | 12 | 54.926 | KV453011.1 | 17176158 | 12-scf00274 | 12 |
| AX-158127209 | 12 | 54.959 | KV453011.1 | 17170340 | 12-scf00274 | 12 |
| AX-158127211 | 12 | 54.959 | KV453011.1 | 17174300 | 12-scf00274 | 12 |
| AX-158127212 | 12 | 54.959 | KV453011.1 | 17175538 | 12-scf00274 | 12 |
| AX-157720356 | 12 | 55.178 | KV453011.1 | 17178618 | 12-scf00274 | 12 |
| AX-158127215 | 12 | 55.178 | KV453011.1 | 17181908 | 12-scf00274 | 12 |
| AX-158127216 | 12 | 55.396 | KV453011.1 | 17182485 | 12-scf00274 | 12 |
| AX-158127218 | 12 | 55.396 | KV453011.1 | 17183138 | 12-scf00274 | 12 |
| AX-157772633 | 12 | 55.396 | KV453011.1 | 17188398 | 12-scf00274 | 12 |
| AX-158127226 | 12 | 55.396 | KV453011.1 | 17188752 | 12-scf00274 | 12 |
| AX-158127227 | 12 | 55.396 | KV453011.1 | 17190215 | 12-scf00274 | 12 |
| AX-158127228 | 12 | 55.396 | KV453011.1 | 17191562 | 12-scf00274 | 12 |
| AX-157719253 | 12 | 55.428 | KV453011.1 | 17196564 | 12-scf00274 | 12 |
| AX-158127231 | 12 | 55.443 | KV453011.1 | 17198004 | 12-scf00274 | 12 |
| AX-158127234 | 12 | 55.471 | KV453011.1 | 17201120 | 12-scf00274 | 12 |

|              |    |        |            |          |             |    |
|--------------|----|--------|------------|----------|-------------|----|
| AX-158127235 | 12 | 55.504 | KV453011.1 | 17203030 | 12-scf00274 | 12 |
| AX-157722388 | 12 | 55.504 | KV453011.1 | 17206755 | 12-scf00274 | 12 |
| AX-158127238 | 12 | 55.701 | KV453011.1 | 17209899 | 12-scf00274 | 12 |
| AX-158127247 | 12 | 55.701 | KV453011.1 | 17228881 | 12-scf00274 | 12 |
| AX-158127239 | 12 | 55.897 | KV453011.1 | 17212505 | 12-scf00274 | 12 |
| AX-157877876 | 12 | 55.898 | KV453011.1 | 17214763 | 12-scf00274 | 12 |
| AX-158127245 | 12 | 55.899 | KV453011.1 | 17223321 | 12-scf00274 | 12 |
| AX-158127246 | 12 | 55.899 | KV453011.1 | 17223490 | 12-scf00274 | 12 |
| AX-157829664 | 12 | 55.899 | KV453011.1 | 17227935 | 12-scf00274 | 12 |
| AX-157829665 | 12 | 55.899 | KV453011.1 | 17229326 | 12-scf00274 | 12 |
| AX-157719955 | 12 | 56.009 | KV453011.1 | 17230275 | 12-scf00274 | 12 |
| AX-157715754 | 12 | 56.161 | KV453011.1 | 17234015 | 12-scf00274 | 12 |
| AX-157829666 | 12 | 56.161 | KV453011.1 | 17237197 | 12-scf00274 | 12 |
| AX-158127250 | 12 | 56.161 | KV453011.1 | 17238370 | 12-scf00274 | 12 |
| AX-158127251 | 12 | 56.161 | KV453011.1 | 17238700 | 12-scf00274 | 12 |
| AX-158127253 | 12 | 56.161 | KV453011.1 | 17240089 | 12-scf00274 | 12 |
| AX-157829668 | 12 | 56.161 | KV453011.1 | 17240753 | 12-scf00274 | 12 |
| AX-157717228 | 12 | 56.161 | KV453011.1 | 17242130 | 12-scf00274 | 12 |
| AX-158127255 | 12 | 56.161 | KV453011.1 | 17243599 | 12-scf00274 | 12 |
| AX-158127257 | 12 | 56.161 | KV453011.1 | 17244430 | 12-scf00274 | 12 |
| AX-158127258 | 12 | 56.161 | KV453011.1 | 17246527 | 12-scf00274 | 12 |
| AX-158127260 | 12 | 56.161 | KV453011.1 | 17248229 | 12-scf00274 | 12 |
| AX-157829669 | 12 | 56.161 | KV453011.1 | 17249701 | 12-scf00274 | 12 |
| AX-158127263 | 12 | 56.161 | KV453011.1 | 17250127 | 12-scf00274 | 12 |
| AX-158127268 | 12 | 56.161 | KV453011.1 | 17257417 | 12-scf00274 | 12 |
| AX-158127230 | 12 | 56.271 | KV453011.1 | 17196897 | 12-scf00274 | 12 |
| AX-157829661 | 12 | 56.271 | KV453011.1 | 17198275 | 12-scf00274 | 12 |
| AX-158127236 | 12 | 56.271 | KV453011.1 | 17205399 | 12-scf00274 | 12 |
| AX-158422753 | 12 | 56.271 | KV453011.1 | 17230682 | 12-scf00274 | 12 |
| AX-158127271 | 12 | 56.271 | KV453011.1 | 17262611 | 12-scf00274 | 12 |
| AX-158127272 | 12 | 56.271 | KV453011.1 | 17263607 | 12-scf00274 | 12 |
| AX-158127275 | 12 | 56.271 | KV453011.1 | 17267686 | 12-scf00274 | 12 |
| AX-157724337 | 12 | 56.271 | KV453011.1 | 17268323 | 12-scf00274 | 12 |
| AX-158411424 | 12 | 56.271 | KV453011.1 | 17277665 | 12-scf00274 | 12 |
| AX-158127279 | 12 | 56.49  | KV453011.1 | 17271600 | 12-scf00274 | 12 |
| AX-158127280 | 12 | 56.49  | KV453011.1 | 17272500 | 12-scf00274 | 12 |
| AX-158127281 | 12 | 56.49  | KV453011.1 | 17275998 | 12-scf00274 | 12 |
| AX-158127283 | 12 | 56.493 | KV453011.1 | 17300045 | 12-scf00274 | 12 |
| AX-158127301 | 12 | 56.926 | KV453011.1 | 17461276 | 12-scf00274 | 12 |
| AX-157829671 | 12 | 56.927 | KV453011.1 | 17456323 | 12-scf00274 | 12 |
| AX-158127302 | 12 | 56.927 | KV453011.1 | 17462178 | 12-scf00274 | 12 |
| AX-157721812 | 12 | 56.927 | KV453011.1 | 17464328 | 12-scf00274 | 12 |
| AX-158127305 | 12 | 56.927 | KV453011.1 | 17467863 | 12-scf00274 | 12 |
| AX-158380199 | 12 | 56.927 | KV453011.1 | 17468612 | 12-scf00274 | 12 |
| AX-158127307 | 12 | 56.954 | KV453011.1 | 17470847 | 12-scf00274 | 12 |
| AX-158127296 | 12 | 56.982 | KV453011.1 | 17456158 | 12-scf00274 | 12 |
| AX-157829672 | 12 | 56.982 | KV453011.1 | 17472412 | 12-scf00274 | 12 |
| AX-158127308 | 12 | 56.989 | KV453011.1 | 17471226 | 12-scf00274 | 12 |
| AX-158127309 | 12 | 56.989 | KV453011.1 | 17474117 | 12-scf00274 | 12 |
| AX-158127314 | 12 | 56.989 | KV453011.1 | 17487308 | 12-scf00274 | 12 |
| AX-157770905 | 12 | 57.01  | KV453011.1 | 17478449 | 12-scf00274 | 12 |

|              |    |        |            |          |             |    |
|--------------|----|--------|------------|----------|-------------|----|
| AX-157769642 | 12 | 57.01  | KV453011.1 | 17496906 | 12-scf00274 | 12 |
| AX-157708230 | 12 | 57.036 | KV453011.1 | 17491276 | 12-scf00274 | 12 |
| AX-157719883 | 12 | 57.036 | KV453011.1 | 17496082 | 12-scf00274 | 12 |
| AX-158127317 | 12 | 57.038 | KV453011.1 | 17492375 | 12-scf00274 | 12 |
| AX-158127321 | 12 | 57.199 | KV453011.1 | 17497004 | 12-scf00274 | 12 |
| AX-158127323 | 12 | 57.199 | KV453011.1 | 17502200 | 12-scf00274 | 12 |
| AX-158127325 | 12 | 57.199 | KV453011.1 | 17505489 | 12-scf00274 | 12 |
| AX-158127424 | 12 | 57.199 | KV453011.1 | 17654209 | 12-scf00274 | 12 |
| AX-158127322 | 12 | 57.364 | KV453011.1 | 17498055 | 12-scf00274 | 12 |
| AX-157829675 | 12 | 57.364 | KV453011.1 | 17509692 | 12-scf00274 | 12 |
| AX-158422755 | 12 | 57.364 | KV453011.1 | 17512525 | 12-scf00274 | 12 |
| AX-157744409 | 12 | 57.364 | KV453011.1 | 17513767 | 12-scf00274 | 12 |
| AX-158127331 | 12 | 57.364 | KV453011.1 | 17519315 | 12-scf00274 | 12 |
| AX-158127338 | 12 | 57.364 | KV453011.1 | 17528206 | 12-scf00274 | 12 |
| AX-158127342 | 12 | 57.364 | KV453011.1 | 17532989 | 12-scf00274 | 12 |
| AX-158127346 | 12 | 57.364 | KV453011.1 | 17539437 | 12-scf00274 | 12 |
| AX-157749402 | 12 | 57.364 | KV453011.1 | 17545215 | 12-scf00274 | 12 |
| AX-157829679 | 12 | 57.364 | KV453011.1 | 17551555 | 12-scf00274 | 12 |
| AX-158127355 | 12 | 57.364 | KV453011.1 | 17551914 | 12-scf00274 | 12 |
| AX-158127356 | 12 | 57.364 | KV453011.1 | 17553250 | 12-scf00274 | 12 |
| AX-158127357 | 12 | 57.364 | KV453011.1 | 17554278 | 12-scf00274 | 12 |
| AX-158127360 | 12 | 57.364 | KV453011.1 | 17557377 | 12-scf00274 | 12 |
| AX-158127361 | 12 | 57.364 | KV453011.1 | 17557858 | 12-scf00274 | 12 |
| AX-158127364 | 12 | 57.364 | KV453011.1 | 17560699 | 12-scf00274 | 12 |
| AX-158127365 | 12 | 57.364 | KV453011.1 | 17562697 | 12-scf00274 | 12 |
| AX-158127368 | 12 | 57.434 | KV453011.1 | 17565533 | 12-scf00274 | 12 |
| AX-158127375 | 12 | 57.434 | KV453011.1 | 17572809 | 12-scf00274 | 12 |
| AX-158127241 | 12 | 57.473 | KV453011.1 | 17214889 | 12-scf00274 | 12 |
| AX-158127264 | 12 | 57.473 | KV453011.1 | 17252424 | 12-scf00274 | 12 |
| AX-158127316 | 12 | 57.473 | KV453011.1 | 17489827 | 12-scf00274 | 12 |
| AX-158127327 | 12 | 57.473 | KV453011.1 | 17510262 | 12-scf00274 | 12 |
| AX-157829677 | 12 | 57.473 | KV453011.1 | 17516832 | 12-scf00274 | 12 |
| AX-158385182 | 12 | 57.473 | KV453011.1 | 17526393 | 12-scf00274 | 12 |
| AX-157774080 | 12 | 57.473 | KV453011.1 | 17528429 | 12-scf00274 | 12 |
| AX-158127369 | 12 | 57.473 | KV453011.1 | 17566791 | 12-scf00274 | 12 |
| AX-158127371 | 12 | 57.473 | KV453011.1 | 17568581 | 12-scf00274 | 12 |
| AX-158127372 | 12 | 57.473 | KV453011.1 | 17569714 | 12-scf00274 | 12 |
| AX-158127376 | 12 | 57.473 | KV453011.1 | 17573395 | 12-scf00274 | 12 |
| AX-158127386 | 12 | 57.473 | KV453011.1 | 17584073 | 12-scf00274 | 12 |
| AX-157829680 | 12 | 57.473 | KV453011.1 | 17587085 | 12-scf00274 | 12 |
| AX-158127388 | 12 | 57.473 | KV453011.1 | 17588635 | 12-scf00274 | 12 |
| AX-158127389 | 12 | 57.473 | KV453011.1 | 17589589 | 12-scf00274 | 12 |
| AX-157708997 | 12 | 57.473 | KV453011.1 | 17612643 | 12-scf00274 | 12 |
| AX-157741688 | 12 | 57.473 | KV453011.1 | 17617198 | 12-scf00274 | 12 |
| AX-157829684 | 12 | 57.473 | KV453011.1 | 17629498 | 12-scf00274 | 12 |
| AX-157829685 | 12 | 57.473 | KV453011.1 | 17629663 | 12-scf00274 | 12 |
| AX-157829687 | 12 | 57.473 | KV453011.1 | 17634999 | 12-scf00274 | 12 |
| AX-158127390 | 12 | 57.691 | KV453011.1 | 17591914 | 12-scf00274 | 12 |
| AX-158127393 | 12 | 57.691 | KV453011.1 | 17593398 | 12-scf00274 | 12 |
| AX-158127395 | 12 | 57.691 | KV453011.1 | 17595514 | 12-scf00274 | 12 |
| AX-158127396 | 12 | 57.691 | KV453011.1 | 17596027 | 12-scf00274 | 12 |

|              |    |        |            |          |             |    |
|--------------|----|--------|------------|----------|-------------|----|
| AX-158127398 | 12 | 57.691 | KV453011.1 | 17597562 | 12-scf00274 | 12 |
| AX-158127401 | 12 | 57.691 | KV453011.1 | 17602455 | 12-scf00274 | 12 |
| AX-157742673 | 12 | 57.691 | KV453011.1 | 17662807 | 12-scf00274 | 12 |
| AX-158127406 | 12 | 57.698 | KV453011.1 | 17614441 | 12-scf00274 | 12 |
| AX-158127408 | 12 | 58.144 | KV453011.1 | 17620348 | 12-scf00274 | 12 |
| AX-157829690 | 12 | 58.144 | KV453011.1 | 17644659 | 12-scf00274 | 12 |
| AX-158127410 | 12 | 58.151 | KV453011.1 | 17621818 | 12-scf00274 | 12 |
| AX-158127411 | 12 | 58.151 | KV453011.1 | 17622625 | 12-scf00274 | 12 |
| AX-158127412 | 12 | 58.151 | KV453011.1 | 17622969 | 12-scf00274 | 12 |
| AX-158127413 | 12 | 58.151 | KV453011.1 | 17626710 | 12-scf00274 | 12 |
| AX-157829686 | 12 | 58.456 | KV453011.1 | 17629708 | 12-scf00274 | 12 |
| AX-158127415 | 12 | 58.457 | KV453011.1 | 17634266 | 12-scf00274 | 12 |
| AX-158127418 | 12 | 58.457 | KV453011.1 | 17646759 | 12-scf00274 | 12 |
| AX-157741442 | 12 | 58.457 | KV453011.1 | 17653179 | 12-scf00274 | 12 |
| AX-158127423 | 12 | 58.457 | KV453011.1 | 17653689 | 12-scf00274 | 12 |
| AX-158127426 | 12 | 58.457 | KV453011.1 | 17657121 | 12-scf00274 | 12 |
| AX-157758684 | 12 | 58.457 | KV453011.1 | 17661136 | 12-scf00274 | 12 |
| AX-158127431 | 12 | 58.458 | KV453011.1 | 17662286 | 12-scf00274 | 12 |
| AX-158127434 | 12 | 58.458 | KV453011.1 | 17667009 | 12-scf00274 | 12 |
| AX-158127439 | 12 | 58.458 | KV453011.1 | 17671759 | 12-scf00274 | 12 |
| AX-158127438 | 12 | 58.783 | KV453011.1 | 17670574 | 12-scf00274 | 12 |
| AX-158127442 | 12 | 58.783 | KV453011.1 | 17673561 | 12-scf00274 | 12 |
| AX-157829691 | 12 | 58.784 | KV453011.1 | 17646913 | 12-scf00274 | 12 |
| AX-158127443 | 12 | 58.784 | KV453011.1 | 17674112 | 12-scf00274 | 12 |
| AX-158127445 | 12 | 58.784 | KV453011.1 | 17677836 | 12-scf00274 | 12 |
| AX-158127448 | 12 | 58.784 | KV453011.1 | 17679736 | 12-scf00274 | 12 |
| AX-158127451 | 12 | 58.784 | KV453011.1 | 17680656 | 12-scf00274 | 12 |
| AX-158127452 | 12 | 58.784 | KV453011.1 | 17681214 | 12-scf00274 | 12 |
| AX-158127454 | 12 | 58.784 | KV453011.1 | 17682200 | 12-scf00274 | 12 |
| AX-158127457 | 12 | 58.784 | KV453011.1 | 17683763 | 12-scf00274 | 12 |
| AX-158127458 | 12 | 58.784 | KV453011.1 | 17684321 | 12-scf00274 | 12 |
| AX-158127460 | 12 | 58.784 | KV453011.1 | 17686592 | 12-scf00274 | 12 |
| AX-158127461 | 12 | 58.784 | KV453011.1 | 17687083 | 12-scf00274 | 12 |
| AX-157871350 | 12 | 58.784 | KV453011.1 | 17688659 | 12-scf00274 | 12 |
| AX-158127463 | 12 | 58.784 | KV453011.1 | 17689733 | 12-scf00274 | 12 |
| AX-158127467 | 12 | 58.784 | KV453011.1 | 17698664 | 12-scf00274 | 12 |
| AX-158127470 | 12 | 58.784 | KV453011.1 | 17700428 | 12-scf00274 | 12 |
| AX-158127480 | 12 | 58.784 | KV453011.1 | 17707649 | 12-scf00274 | 12 |
| AX-158127487 | 12 | 58.784 | KV453011.1 | 17711647 | 12-scf00274 | 12 |
| AX-158127465 | 12 | 59.076 | KV453011.1 | 17692623 | 12-scf00274 | 12 |
| AX-158127469 | 12 | 59.222 | KV453011.1 | 17699877 | 12-scf00274 | 12 |
| AX-158127473 | 12 | 59.222 | KV453011.1 | 17703088 | 12-scf00274 | 12 |
| AX-158127474 | 12 | 59.222 | KV453011.1 | 17704090 | 12-scf00274 | 12 |
| AX-158127476 | 12 | 59.222 | KV453011.1 | 17705282 | 12-scf00274 | 12 |
| AX-158127477 | 12 | 59.222 | KV453011.1 | 17705822 | 12-scf00274 | 12 |
| AX-158127479 | 12 | 59.222 | KV453011.1 | 17707135 | 12-scf00274 | 12 |
| AX-158127484 | 12 | 59.287 | KV453011.1 | 17709681 | 12-scf00274 | 12 |
| AX-157886143 | 12 | 59.366 | KV453011.1 | 17712021 | 12-scf00274 | 12 |
| AX-158127496 | 12 | 59.415 | KV453011.1 | 17722018 | 12-scf00274 | 12 |
| AX-157829693 | 12 | 59.638 | KV453011.1 | 17724092 | 12-scf00274 | 12 |
| AX-158127506 | 12 | 59.638 | KV453011.1 | 17732427 | 12-scf00274 | 12 |

|              |    |        |            |          |             |    |
|--------------|----|--------|------------|----------|-------------|----|
| AX-158127511 | 12 | 59.638 | KV453011.1 | 17738199 | 12-scf00274 | 12 |
| AX-158127502 | 12 | 59.666 | KV453011.1 | 17728088 | 12-scf00274 | 12 |
| AX-158127513 | 12 | 59.916 | KV453011.1 | 17743039 | 12-scf00274 | 12 |
| AX-158127514 | 12 | 59.987 | KV453011.1 | 17746415 | 12-scf00274 | 12 |
| AX-158127516 | 12 | 59.987 | KV453011.1 | 17751575 | 12-scf00274 | 12 |
| AX-158127524 | 12 | 59.987 | KV453011.1 | 17766094 | 12-scf00274 | 12 |
| AX-158127492 | 12 | 59.988 | KV453011.1 | 17716786 | 12-scf00274 | 12 |
| AX-158127520 | 12 | 59.988 | KV453011.1 | 17758639 | 12-scf00274 | 12 |
| AX-158127521 | 12 | 59.988 | KV453011.1 | 17759357 | 12-scf00274 | 12 |
| AX-157829695 | 12 | 59.988 | KV453011.1 | 17760223 | 12-scf00274 | 12 |
| AX-157829696 | 12 | 59.988 | KV453011.1 | 17763564 | 12-scf00274 | 12 |
| AX-158127523 | 12 | 59.988 | KV453011.1 | 17764718 | 12-scf00274 | 12 |
| AX-157829697 | 12 | 59.988 | KV453011.1 | 17767966 | 12-scf00274 | 12 |
| AX-157829698 | 12 | 59.988 | KV453011.1 | 17775766 | 12-scf00274 | 12 |
| AX-158127528 | 12 | 60.024 | KV453011.1 | 17775978 | 12-scf00274 | 12 |
| AX-157871351 | 12 | 60.065 | KV453011.1 | 17784626 | 12-scf00274 | 12 |
| AX-158127529 | 12 | 60.097 | KV453011.1 | 17785434 | 12-scf00274 | 12 |
| AX-157775923 | 12 | 60.13  | KV453011.1 | 17757602 | 12-scf00274 | 12 |
| AX-158127530 | 12 | 60.13  | KV453011.1 | 17785763 | 12-scf00274 | 12 |
| AX-158127531 | 12 | 60.206 | KV453011.1 | 17786850 | 12-scf00274 | 12 |
| AX-157829699 | 12 | 60.316 | KV453011.1 | 17790190 | 12-scf00274 | 12 |
| AX-158127533 | 12 | 60.316 | KV453011.1 | 17792775 | 12-scf00274 | 12 |
| AX-157717870 | 12 | 60.316 | KV453011.1 | 17793370 | 12-scf00274 | 12 |
| AX-158127537 | 12 | 60.643 | KV453011.1 | 17797174 | 12-scf00274 | 12 |
| AX-158127538 | 12 | 60.643 | KV453011.1 | 17797649 | 12-scf00274 | 12 |
| AX-158127539 | 12 | 60.644 | KV453011.1 | 17798333 | 12-scf00274 | 12 |
| AX-158127541 | 12 | 60.644 | KV453011.1 | 17799164 | 12-scf00274 | 12 |
| AX-158127544 | 12 | 60.644 | KV453011.1 | 17802784 | 12-scf00274 | 12 |
| AX-158127545 | 12 | 60.644 | KV453011.1 | 17803208 | 12-scf00274 | 12 |
| AX-158127547 | 12 | 60.644 | KV453011.1 | 17809323 | 12-scf00274 | 12 |
| AX-157707570 | 12 | 60.644 | KV453011.1 | 17810115 | 12-scf00274 | 12 |
| AX-158127549 | 12 | 60.644 | KV453011.1 | 17813107 | 12-scf00274 | 12 |
| AX-158127550 | 12 | 60.644 | KV453011.1 | 17813644 | 12-scf00274 | 12 |
| AX-158127551 | 12 | 60.644 | KV453011.1 | 17815300 | 12-scf00274 | 12 |
| AX-158127553 | 12 | 60.644 | KV453011.1 | 17821729 | 12-scf00274 | 12 |
| AX-158127554 | 12 | 60.644 | KV453011.1 | 17824989 | 12-scf00274 | 12 |
| AX-158127555 | 12 | 60.644 | KV453011.1 | 17826415 | 12-scf00274 | 12 |
| AX-158127556 | 12 | 60.669 | KV453011.1 | 17828769 | 12-scf00274 | 12 |
| AX-158127559 | 12 | 60.702 | KV453011.1 | 17836964 | 12-scf00274 | 12 |
| AX-158127561 | 12 | 60.753 | KV453011.1 | 17838220 | 12-scf00274 | 12 |
| AX-158127562 | 12 | 60.862 | KV453011.1 | 17839995 | 12-scf00274 | 12 |
| AX-157722728 | 12 | 60.862 | KV453011.1 | 17842319 | 12-scf00274 | 12 |
| AX-158127563 | 12 | 60.862 | KV453011.1 | 17845210 | 12-scf00274 | 12 |
| AX-158127565 | 12 | 60.862 | KV453011.1 | 17846125 | 12-scf00274 | 12 |
| AX-157775786 | 12 | 60.862 | KV453011.1 | 17863225 | 12-scf00274 | 12 |
| AX-158127567 | 12 | 60.972 | KV453011.1 | 17849908 | 12-scf00274 | 12 |
| AX-157857796 | 12 | 61.096 | KV453011.1 | 17851393 | 12-scf00274 | 12 |
| AX-158127569 | 12 | 61.096 | KV453011.1 | 17851768 | 12-scf00274 | 12 |
| AX-158127570 | 12 | 61.096 | KV453011.1 | 17854505 | 12-scf00274 | 12 |
| AX-158127571 | 12 | 61.096 | KV453011.1 | 17866119 | 12-scf00274 | 12 |
| AX-158127574 | 12 | 61.33  | KV453011.1 | 17884752 | 12-scf00274 | 12 |

|              |    |        |            |          |             |    |
|--------------|----|--------|------------|----------|-------------|----|
| AX-158127578 | 12 | 61.564 | KV453011.1 | 17892117 | 12-scf00274 | 12 |
| AX-157750279 | 12 | 61.564 | KV453011.1 | 17904176 | 12-scf00274 | 12 |
| AX-158127585 | 12 | 62.133 | KV453011.1 | 17911978 | 12-scf00274 | 12 |
| AX-158127592 | 12 | 62.145 | KV453011.1 | 17923483 | 12-scf00274 | 12 |
| AX-158127594 | 12 | 62.56  | KV453011.1 | 17929601 | 12-scf00274 | 12 |
| AX-158127595 | 12 | 62.56  | KV453011.1 | 17930914 | 12-scf00274 | 12 |
| AX-158127596 | 12 | 62.56  | KV453011.1 | 17931696 | 12-scf00274 | 12 |
| AX-158127593 | 12 | 62.561 | KV453011.1 | 17928138 | 12-scf00274 | 12 |
| AX-158127597 | 12 | 62.561 | KV453011.1 | 17932427 | 12-scf00274 | 12 |
| AX-158127600 | 12 | 62.561 | KV453011.1 | 17935459 | 12-scf00274 | 12 |
| AX-158127601 | 12 | 62.561 | KV453011.1 | 17935843 | 12-scf00274 | 12 |
| AX-158127605 | 12 | 62.666 | KV453011.1 | 17943012 | 12-scf00274 | 12 |
| AX-158127607 | 12 | 62.908 | KV453011.1 | 17944974 | 12-scf00274 | 12 |
| AX-158127608 | 12 | 62.908 | KV453011.1 | 17946971 | 12-scf00274 | 12 |
| AX-158392806 | 12 | 62.908 | KV453011.1 | 17947022 | 12-scf00274 | 12 |
| AX-158127609 | 12 | 62.921 | KV453011.1 | 17948692 | 12-scf00274 | 12 |
| AX-158127610 | 12 | 62.953 | KV453011.1 | 17949449 | 12-scf00274 | 12 |
| AX-158127612 | 12 | 62.955 | KV453011.1 | 17950785 | 12-scf00274 | 12 |
| AX-158127617 | 12 | 63.815 | KV453011.1 | 17964936 | 12-scf00274 | 12 |
| AX-157747721 | 12 | 64.036 | KV453011.1 | 17967844 | 12-scf00274 | 12 |
| AX-158127618 | 12 | 64.036 | KV453011.1 | 17969953 | 12-scf00274 | 12 |
| AX-158127619 | 12 | 64.036 | KV453011.1 | 17970959 | 12-scf00274 | 12 |
| AX-158127621 | 12 | 64.036 | KV453011.1 | 17976215 | 12-scf00274 | 12 |
| AX-158127622 | 12 | 64.036 | KV453011.1 | 17977580 | 12-scf00274 | 12 |
| AX-158127625 | 12 | 64.036 | KV453011.1 | 17985357 | 12-scf00274 | 12 |
| AX-158127629 | 12 | 64.037 | KV453011.1 | 17991707 | 12-scf00274 | 12 |
| AX-158127632 | 12 | 64.037 | KV453011.1 | 18007699 | 12-scf00274 | 12 |
| AX-158127636 | 12 | 64.037 | KV453011.1 | 18017482 | 12-scf00274 | 12 |
| AX-158127645 | 12 | 64.037 | KV453011.1 | 18043237 | 12-scf00274 | 12 |
| AX-158127630 | 12 | 64.038 | KV453011.1 | 17992078 | 12-scf00274 | 12 |
| AX-157720051 | 12 | 64.04  | KV453011.1 | 17999179 | 12-scf00274 | 12 |
| AX-157740368 | 12 | 64.041 | KV453011.1 | 18000990 | 12-scf00274 | 12 |
| AX-157829703 | 12 | 64.042 | KV453011.1 | 18026519 | 12-scf00274 | 12 |
| AX-157747576 | 12 | 64.359 | KV453011.1 | 18029774 | 12-scf00274 | 12 |
| AX-158127635 | 12 | 64.36  | KV453011.1 | 18015165 | 12-scf00274 | 12 |
| AX-158127640 | 12 | 64.36  | KV453011.1 | 18030304 | 12-scf00274 | 12 |
| AX-158127642 | 12 | 64.369 | KV453011.1 | 18033290 | 12-scf00274 | 12 |
| AX-158127647 | 12 | 64.748 | KV453011.1 | 18051142 | 12-scf00274 | 12 |
| AX-157829705 | 12 | 64.938 | KV453011.1 | 18066315 | 12-scf00274 | 12 |
| AX-158127654 | 12 | 64.942 | KV453011.1 | 18068231 | 12-scf00274 | 12 |
| AX-158127656 | 12 | 65.648 | KV453011.1 | 18075248 | 12-scf00274 | 12 |
| AX-158127657 | 12 | 65.648 | KV453011.1 | 18077366 | 12-scf00274 | 12 |
| AX-158127660 | 12 | 65.648 | KV453011.1 | 18079152 | 12-scf00274 | 12 |
| AX-157829707 | 12 | 65.895 | KV453011.1 | 18083344 | 12-scf00274 | 12 |
| AX-157719371 | 12 | 65.895 | KV453011.1 | 18084263 | 12-scf00274 | 12 |
| AX-157744623 | 12 | 65.895 | KV453011.1 | 18086723 | 12-scf00274 | 12 |
| AX-158127664 | 12 | 65.895 | KV453011.1 | 18087417 | 12-scf00274 | 12 |
| AX-158380203 | 12 | 65.895 | KV453011.1 | 18091800 | 12-scf00274 | 12 |
| AX-157829709 | 12 | 65.895 | KV453011.1 | 18135263 | 12-scf00274 | 12 |
| AX-158127668 | 12 | 66.005 | KV453011.1 | 18094208 | 12-scf00274 | 12 |
| AX-158127669 | 12 | 66.005 | KV453011.1 | 18094595 | 12-scf00274 | 12 |

|              |    |        |            |          |             |    |
|--------------|----|--------|------------|----------|-------------|----|
| AX-158127670 | 12 | 66.005 | KV453011.1 | 18095213 | 12-scf00274 | 12 |
| AX-158127696 | 12 | 66.005 | KV453011.1 | 18129170 | 12-scf00274 | 12 |
| AX-158127700 | 12 | 66.005 | KV453011.1 | 18135055 | 12-scf00274 | 12 |
| AX-158127649 | 12 | 66.038 | KV453011.1 | 18057856 | 12-scf00274 | 12 |
| AX-157721385 | 12 | 66.038 | KV453011.1 | 18095643 | 12-scf00274 | 12 |
| AX-158127666 | 12 | 66.048 | KV453011.1 | 18091099 | 12-scf00274 | 12 |
| AX-158127674 | 12 | 66.048 | KV453011.1 | 18100088 | 12-scf00274 | 12 |
| AX-158127684 | 12 | 66.048 | KV453011.1 | 18111370 | 12-scf00274 | 12 |
| AX-158127677 | 12 | 66.062 | KV453011.1 | 18103353 | 12-scf00274 | 12 |
| AX-158127678 | 12 | 66.087 | KV453011.1 | 18104334 | 12-scf00274 | 12 |
| AX-158127662 | 12 | 66.114 | KV453011.1 | 18082530 | 12-scf00274 | 12 |
| AX-158127679 | 12 | 66.114 | KV453011.1 | 18106281 | 12-scf00274 | 12 |
| AX-158385190 | 12 | 66.139 | KV453011.1 | 18109138 | 12-scf00274 | 12 |
| AX-158127685 | 12 | 66.151 | KV453011.1 | 18112163 | 12-scf00274 | 12 |
| AX-158417377 | 12 | 66.186 | KV453011.1 | 18114090 | 12-scf00274 | 12 |
| AX-158127687 | 12 | 66.223 | KV453011.1 | 18114563 | 12-scf00274 | 12 |
| AX-158127690 | 12 | 66.223 | KV453011.1 | 18119997 | 12-scf00274 | 12 |
| AX-158127691 | 12 | 66.223 | KV453011.1 | 18121208 | 12-scf00274 | 12 |
| AX-157717133 | 12 | 66.223 | KV453011.1 | 18121659 | 12-scf00274 | 12 |
| AX-157686657 | 12 | 66.252 | KV453413.1 | 11137    | scf00714    | UN |
| AX-158127692 | 12 | 66.32  | KV453011.1 | 18124365 | 12-scf00274 | 12 |
| AX-158127693 | 12 | 66.388 | KV453011.1 | 18125548 | 12-scf00274 | 12 |
| AX-157724444 | 12 | 66.445 | KV453011.1 | 18130170 | 12-scf00274 | 12 |
| AX-158127699 | 12 | 66.445 | KV453011.1 | 18134067 | 12-scf00274 | 12 |
| AX-158127701 | 12 | 66.445 | KV453011.1 | 18137662 | 12-scf00274 | 12 |
| AX-158127702 | 12 | 66.658 | KV453011.1 | 18138544 | 12-scf00274 | 12 |
| AX-158127703 | 12 | 66.662 | KV453011.1 | 18139485 | 12-scf00274 | 12 |
| AX-158127704 | 12 | 66.812 | KV453011.1 | 18139901 | 12-scf00274 | 12 |
| AX-157829725 | 12 | 66.812 | KV453012.1 | 174850   | 12-scf00276 | 12 |
| AX-157711908 | 12 | 68.116 | KV453453.1 | 14127    | scf00778    | UN |
| AX-158127722 | 12 | 68.179 | KV453012.1 | 103682   | 12-scf00276 | 12 |
| AX-158127715 | 12 | 68.179 | KV453012.1 | 109923   | 12-scf00276 | 12 |
| AX-158127714 | 12 | 68.179 | KV453012.1 | 111413   | 12-scf00276 | 12 |
| AX-157829714 | 12 | 68.179 | KV453012.1 | 111454   | 12-scf00276 | 12 |
| AX-157774425 | 12 | 68.179 | KV453012.1 | 111957   | 12-scf00276 | 12 |
| AX-158127712 | 12 | 68.179 | KV453012.1 | 114610   | 12-scf00276 | 12 |
| AX-158127711 | 12 | 68.179 | KV453012.1 | 115076   | 12-scf00276 | 12 |
| AX-158127710 | 12 | 68.179 | KV453012.1 | 115689   | 12-scf00276 | 12 |
| AX-157829711 | 12 | 68.179 | KV453012.1 | 116368   | 12-scf00276 | 12 |
| AX-157718616 | 12 | 68.179 | KV453012.1 | 118484   | 12-scf00276 | 12 |
| AX-158127787 | 12 | 68.179 | KV453012.1 | 139245   | 12-scf00276 | 12 |
| AX-158127716 | 12 | 68.296 | KV453012.1 | 108981   | 12-scf00276 | 12 |
| AX-157742275 | 12 | 68.304 | KV453012.1 | 102769   | 12-scf00276 | 12 |
| AX-158127721 | 12 | 68.304 | KV453012.1 | 104599   | 12-scf00276 | 12 |
| AX-158127720 | 12 | 68.304 | KV453012.1 | 105377   | 12-scf00276 | 12 |
| AX-158127723 | 12 | 68.306 | KV453012.1 | 99153    | 12-scf00276 | 12 |
| AX-157774491 | 12 | 68.345 | KV453012.1 | 98133    | 12-scf00276 | 12 |
| AX-158127724 | 12 | 68.374 | KV453012.1 | 97907    | 12-scf00276 | 12 |
| AX-157829716 | 12 | 68.397 | KV453012.1 | 96480    | 12-scf00276 | 12 |
| AX-157720725 | 12 | 68.414 | KV453012.1 | 91886    | 12-scf00276 | 12 |
| AX-158127728 | 12 | 68.414 | KV453012.1 | 94366    | 12-scf00276 | 12 |

|              |    |        |             |        |             |    |
|--------------|----|--------|-------------|--------|-------------|----|
| AX-157829717 | 12 | 68.414 | KV453012.1  | 94730  | 12-scf00276 | 12 |
| AX-158127727 | 12 | 68.414 | KV453012.1  | 95878  | 12-scf00276 | 12 |
| AX-158127730 | 12 | 68.435 | KV453012.1  | 93885  | 12-scf00276 | 12 |
| AX-158127731 | 12 | 68.451 | KV453012.1  | 93023  | 12-scf00276 | 12 |
| AX-158127732 | 12 | 68.487 | KV453012.1  | 92326  | 12-scf00276 | 12 |
| AX-158127736 | 12 | 68.522 | KV453012.1  | 84882  | 12-scf00276 | 12 |
| AX-158127735 | 12 | 68.522 | KV453012.1  | 86113  | 12-scf00276 | 12 |
| AX-158127742 | 12 | 68.573 | KV453012.1  | 74514  | 12-scf00276 | 12 |
| AX-158127739 | 12 | 68.573 | KV453012.1  | 77468  | 12-scf00276 | 12 |
| AX-157877894 | 12 | 68.573 | KV453012.1  | 83413  | 12-scf00276 | 12 |
| AX-158127748 | 12 | 68.631 | KV453012.1  | 69209  | 12-scf00276 | 12 |
| AX-158127744 | 12 | 68.631 | KV453012.1  | 72096  | 12-scf00276 | 12 |
| AX-158127741 | 12 | 68.631 | KV453012.1  | 74596  | 12-scf00276 | 12 |
| AX-157727659 | 12 | 68.631 | KV453012.1  | 75877  | 12-scf00276 | 12 |
| AX-158127766 | 12 | 68.85  | KV453012.1  | 35557  | 12-scf00276 | 12 |
| AX-157829721 | 12 | 68.85  | KV453012.1  | 54911  | 12-scf00276 | 12 |
| AX-158127753 | 12 | 68.85  | KV453012.1  | 59203  | 12-scf00276 | 12 |
| AX-157740025 | 12 | 68.85  | KV453012.1  | 62029  | 12-scf00276 | 12 |
| AX-158127750 | 12 | 68.85  | KV453012.1  | 64288  | 12-scf00276 | 12 |
| AX-158127749 | 12 | 68.85  | KV453012.1  | 67102  | 12-scf00276 | 12 |
| AX-158127746 | 12 | 68.85  | KV453012.1  | 70346  | 12-scf00276 | 12 |
| AX-158127745 | 12 | 68.85  | KV453012.1  | 70905  | 12-scf00276 | 12 |
| AX-157829718 | 12 | 68.85  | KV453012.1  | 82242  | 12-scf00276 | 12 |
| AX-157772401 | 12 | 68.96  | KV453012.1  | 55529  | 12-scf00276 | 12 |
| AX-157829720 | 12 | 68.96  | KV453012.1  | 55866  | 12-scf00276 | 12 |
| AX-158127761 | 12 | 69.178 | KV453012.1  | 44830  | 12-scf00276 | 12 |
| AX-157772981 | 12 | 69.178 | KV453012.1  | 45047  | 12-scf00276 | 12 |
| AX-158127757 | 12 | 69.178 | KV453012.1  | 47794  | 12-scf00276 | 12 |
| AX-158127769 | 12 | 69.212 | KV453012.1  | 30282  | 12-scf00276 | 12 |
| AX-158127780 | 12 | 69.288 | KV453012.1  | 11200  | 12-scf00276 | 12 |
| AX-158127779 | 12 | 69.288 | KV453012.1  | 11799  | 12-scf00276 | 12 |
| AX-158127776 | 12 | 69.288 | KV453012.1  | 20844  | 12-scf00276 | 12 |
| AX-158127775 | 12 | 69.288 | KV453012.1  | 21160  | 12-scf00276 | 12 |
| AX-158127774 | 12 | 69.288 | KV453012.1  | 23404  | 12-scf00276 | 12 |
| AX-158127772 | 12 | 69.288 | KV453012.1  | 26096  | 12-scf00276 | 12 |
| AX-158392807 | 12 | 69.288 | KV453012.1  | 54160  | 12-scf00276 | 12 |
| AX-157688417 | 12 | 69.288 | 3ML01026118 | 1048   | scf01716_1  | UN |
| AX-157829722 | 12 | 70.669 | KV453012.1  | 135155 | 12-scf00276 | 12 |
| AX-158127784 | 12 | 70.815 | KV453012.1  | 136399 | 12-scf00276 | 12 |
| AX-157829723 | 12 | 70.815 | KV453012.1  | 136595 | 12-scf00276 | 12 |
| AX-158127785 | 12 | 70.815 | KV453012.1  | 137160 | 12-scf00276 | 12 |
| AX-158127788 | 12 | 70.815 | KV453012.1  | 139542 | 12-scf00276 | 12 |
| AX-157829724 | 12 | 70.815 | KV453012.1  | 140173 | 12-scf00276 | 12 |
| AX-158127790 | 12 | 70.896 | KV453012.1  | 142623 | 12-scf00276 | 12 |
| AX-158127792 | 12 | 70.915 | KV453012.1  | 144849 | 12-scf00276 | 12 |
| AX-158127801 | 12 | 70.915 | KV453012.1  | 152859 | 12-scf00276 | 12 |
| AX-158127793 | 12 | 70.937 | KV453012.1  | 146123 | 12-scf00276 | 12 |
| AX-158127794 | 12 | 70.953 | KV453012.1  | 146696 | 12-scf00276 | 12 |
| AX-158127795 | 12 | 70.967 | KV453012.1  | 147306 | 12-scf00276 | 12 |
| AX-158127798 | 12 | 70.967 | KV453012.1  | 151208 | 12-scf00276 | 12 |
| AX-158127800 | 12 | 70.967 | KV453012.1  | 152292 | 12-scf00276 | 12 |



|              |    |        |             |        |             |    |
|--------------|----|--------|-------------|--------|-------------|----|
| AX-158127802 | 12 | 70.967 | KV453012.1  | 154462 | 12-scf00276 | 12 |
| AX-158127804 | 12 | 70.967 | KV453012.1  | 157184 | 12-scf00276 | 12 |
| AX-158127763 | 12 | 71.257 | KV453012.1  | 39926  | 12-scf00276 | 12 |
| AX-158127806 | 12 | 71.257 | KV453012.1  | 158342 | 12-scf00276 | 12 |
| AX-158127807 | 12 | 71.257 | KV453012.1  | 159422 | 12-scf00276 | 12 |
| AX-158127809 | 12 | 71.257 | KV453012.1  | 161676 | 12-scf00276 | 12 |
| AX-158127812 | 12 | 71.257 | KV453012.1  | 167222 | 12-scf00276 | 12 |
| AX-158127813 | 12 | 71.257 | KV453012.1  | 167574 | 12-scf00276 | 12 |
| AX-158127814 | 12 | 71.257 | KV453012.1  | 168114 | 12-scf00276 | 12 |
| AX-158127815 | 12 | 71.257 | KV453012.1  | 170626 | 12-scf00276 | 12 |
| AX-158127816 | 12 | 71.257 | KV453012.1  | 171651 | 12-scf00276 | 12 |
| AX-158127817 | 12 | 71.257 | KV453012.1  | 172200 | 12-scf00276 | 12 |
| AX-158127819 | 12 | 71.257 | KV453012.1  | 174325 | 12-scf00276 | 12 |
| AX-157705353 | 12 | 71.257 | 3ML01029484 | 266    | scf05107_1  | UN |
| AX-158127825 | 12 | 71.749 | KV453012.1  | 179030 | 12-scf00276 | 12 |
| AX-158127826 | 12 | 71.749 | KV453012.1  | 180338 | 12-scf00276 | 12 |
| AX-158127828 | 12 | 71.749 | KV453012.1  | 181714 | 12-scf00276 | 12 |
| AX-158127834 | 12 | 71.749 | KV453012.1  | 190344 | 12-scf00276 | 12 |
| AX-158127830 | 12 | 71.75  | KV453012.1  | 184665 | 12-scf00276 | 12 |
| AX-158127831 | 12 | 71.75  | KV453012.1  | 186789 | 12-scf00276 | 12 |
| AX-158127832 | 12 | 71.757 | KV453012.1  | 188667 | 12-scf00276 | 12 |
| AX-158127837 | 12 | 72.075 | KV453012.1  | 192072 | 12-scf00276 | 12 |
| AX-158127820 | 12 | 72.076 | KV453012.1  | 174732 | 12-scf00276 | 12 |
| AX-158411442 | 12 | 72.076 | KV453012.1  | 195562 | 12-scf00276 | 12 |
| AX-157829726 | 12 | 72.076 | KV453012.1  | 195891 | 12-scf00276 | 12 |
| AX-157871354 | 12 | 72.076 | KV453012.1  | 199210 | 12-scf00276 | 12 |
| AX-158127840 | 12 | 72.156 | KV453012.1  | 201610 | 12-scf00276 | 12 |
| AX-158127841 | 12 | 72.241 | KV453012.1  | 202190 | 12-scf00276 | 12 |
| AX-157716138 | 12 | 72.241 | KV453012.1  | 202654 | 12-scf00276 | 12 |
| AX-158127842 | 12 | 72.241 | KV453012.1  | 203504 | 12-scf00276 | 12 |
| AX-158127864 | 12 | 72.241 | KV453012.1  | 257067 | 12-scf00276 | 12 |
| AX-158127844 | 12 | 72.268 | KV453012.1  | 207323 | 12-scf00276 | 12 |
| AX-157829728 | 12 | 72.278 | KV453012.1  | 208479 | 12-scf00276 | 12 |
| AX-157772689 | 12 | 72.312 | KV453012.1  | 213912 | 12-scf00276 | 12 |
| AX-158127848 | 12 | 72.35  | KV453012.1  | 221411 | 12-scf00276 | 12 |
| AX-158127850 | 12 | 72.35  | KV453012.1  | 223022 | 12-scf00276 | 12 |
| AX-157741519 | 12 | 72.35  | KV453012.1  | 227375 | 12-scf00276 | 12 |
| AX-157829730 | 12 | 72.35  | KV453012.1  | 232685 | 12-scf00276 | 12 |
| AX-158127853 | 12 | 72.35  | KV453012.1  | 235711 | 12-scf00276 | 12 |
| AX-157741725 | 12 | 72.35  | KV453012.1  | 241140 | 12-scf00276 | 12 |
| AX-158127857 | 12 | 72.35  | KV453012.1  | 243801 | 12-scf00276 | 12 |
| AX-158127858 | 12 | 72.35  | KV453012.1  | 246339 | 12-scf00276 | 12 |
| AX-158127860 | 12 | 72.403 | KV453012.1  | 248288 | 12-scf00276 | 12 |
| AX-158127863 | 12 | 72.403 | KV453012.1  | 255553 | 12-scf00276 | 12 |
| AX-158127861 | 12 | 72.569 | KV453012.1  | 249419 | 12-scf00276 | 12 |
| AX-157829733 | 12 | 72.569 | KV453012.1  | 250892 | 12-scf00276 | 12 |
| AX-157742888 | 12 | 72.569 | KV453012.1  | 250978 | 12-scf00276 | 12 |
| AX-157829734 | 12 | 72.569 | KV453012.1  | 251171 | 12-scf00276 | 12 |
| AX-157720040 | 12 | 72.569 | KV453012.1  | 252230 | 12-scf00276 | 12 |
| AX-158380205 | 12 | 72.569 | KV453012.1  | 258060 | 12-scf00276 | 12 |
| AX-158127869 | 12 | 72.569 | KV453012.1  | 259901 | 12-scf00276 | 12 |

|              |    |        |            |        |             |    |
|--------------|----|--------|------------|--------|-------------|----|
| AX-158127871 | 12 | 73.114 | KV453012.1 | 270519 | 12-scf00276 | 12 |
| AX-158127872 | 12 | 73.115 | KV453012.1 | 272935 | 12-scf00276 | 12 |
| AX-157877897 | 12 | 73.115 | KV453012.1 | 278819 | 12-scf00276 | 12 |
| AX-158127875 | 12 | 73.115 | KV453012.1 | 279652 | 12-scf00276 | 12 |
| AX-158127876 | 12 | 73.115 | KV453012.1 | 280679 | 12-scf00276 | 12 |
| AX-157721438 | 12 | 73.115 | KV453012.1 | 284241 | 12-scf00276 | 12 |
| AX-157871357 | 12 | 73.115 | KV453012.1 | 284612 | 12-scf00276 | 12 |
| AX-157762662 | 12 | 73.115 | KV453012.1 | 285804 | 12-scf00276 | 12 |
| AX-158127885 | 12 | 73.115 | KV453012.1 | 305708 | 12-scf00276 | 12 |
| AX-158127903 | 12 | 73.115 | KV453012.1 | 334698 | 12-scf00276 | 12 |
| AX-157773108 | 12 | 73.116 | KV453012.1 | 295684 | 12-scf00276 | 12 |
| AX-158127881 | 12 | 73.305 | KV453012.1 | 296084 | 12-scf00276 | 12 |
| AX-158127884 | 12 | 73.497 | KV453012.1 | 302596 | 12-scf00276 | 12 |
| AX-157752653 | 12 | 73.501 | KV453012.1 | 307372 | 12-scf00276 | 12 |
| AX-158127887 | 12 | 73.88  | KV453012.1 | 310139 | 12-scf00276 | 12 |
| AX-157829735 | 12 | 73.88  | KV453012.1 | 312028 | 12-scf00276 | 12 |
| AX-157742278 | 12 | 73.88  | KV453012.1 | 314825 | 12-scf00276 | 12 |
| AX-158127891 | 12 | 73.88  | KV453012.1 | 316641 | 12-scf00276 | 12 |
| AX-157829736 | 12 | 73.88  | KV453012.1 | 318077 | 12-scf00276 | 12 |
| AX-157829737 | 12 | 73.88  | KV453012.1 | 318121 | 12-scf00276 | 12 |
| AX-158127893 | 12 | 73.88  | KV453012.1 | 319030 | 12-scf00276 | 12 |
| AX-158127894 | 12 | 73.88  | KV453012.1 | 319711 | 12-scf00276 | 12 |
| AX-158127895 | 12 | 73.88  | KV453012.1 | 320236 | 12-scf00276 | 12 |
| AX-158127909 | 12 | 73.88  | KV453012.1 | 352473 | 12-scf00276 | 12 |
| AX-158127896 | 12 | 74.044 | KV453012.1 | 323762 | 12-scf00276 | 12 |
| AX-158127899 | 12 | 74.044 | KV453012.1 | 328184 | 12-scf00276 | 12 |
| AX-158127901 | 12 | 74.044 | KV453012.1 | 331146 | 12-scf00276 | 12 |
| AX-158127902 | 12 | 74.044 | KV453012.1 | 331551 | 12-scf00276 | 12 |
| AX-158127905 | 12 | 74.207 | KV453012.1 | 345896 | 12-scf00276 | 12 |
| AX-157719833 | 12 | 74.208 | KV453012.1 | 344171 | 12-scf00276 | 12 |
| AX-158127906 | 12 | 74.208 | KV453012.1 | 346421 | 12-scf00276 | 12 |
| AX-158127907 | 12 | 74.208 | KV453012.1 | 351035 | 12-scf00276 | 12 |
| AX-158127910 | 12 | 74.208 | KV453012.1 | 353587 | 12-scf00276 | 12 |
| AX-158127913 | 12 | 74.208 | KV453012.1 | 357604 | 12-scf00276 | 12 |
| AX-158127914 | 12 | 74.208 | KV453012.1 | 358692 | 12-scf00276 | 12 |
| AX-158127915 | 12 | 74.208 | KV453012.1 | 359776 | 12-scf00276 | 12 |
| AX-158127916 | 12 | 74.208 | KV453012.1 | 360489 | 12-scf00276 | 12 |
| AX-158127917 | 12 | 74.208 | KV453012.1 | 361502 | 12-scf00276 | 12 |
| AX-157742959 | 12 | 74.208 | KV453012.1 | 363834 | 12-scf00276 | 12 |
| AX-158127919 | 12 | 74.208 | KV453012.1 | 366812 | 12-scf00276 | 12 |
| AX-158127921 | 12 | 74.208 | KV453012.1 | 368142 | 12-scf00276 | 12 |
| AX-158127922 | 12 | 74.208 | KV453012.1 | 369030 | 12-scf00276 | 12 |
| AX-157748644 | 12 | 74.208 | KV453012.1 | 372783 | 12-scf00276 | 12 |
| AX-157774978 | 12 | 74.208 | KV453012.1 | 379802 | 12-scf00276 | 12 |
| AX-158127923 | 12 | 74.209 | KV453012.1 | 369304 | 12-scf00276 | 12 |
| AX-157690784 | 12 | 74.317 | KV453012.1 | 369623 | 12-scf00276 | 12 |
| AX-158127927 | 12 | 74.426 | KV453012.1 | 377797 | 12-scf00276 | 12 |
| AX-158127928 | 12 | 74.426 | KV453012.1 | 380454 | 12-scf00276 | 12 |
| AX-158127931 | 12 | 74.426 | KV453012.1 | 386196 | 12-scf00276 | 12 |
| AX-158127929 | 12 | 74.645 | KV453012.1 | 382746 | 12-scf00276 | 12 |
| AX-157829740 | 12 | 74.645 | KV453012.1 | 385022 | 12-scf00276 | 12 |

|              |    |        |            |        |                |    |
|--------------|----|--------|------------|--------|----------------|----|
| AX-158127930 | 12 | 74.645 | KV453012.1 | 385179 | 12-scf00276    | 12 |
| AX-158127933 | 12 | 74.645 | KV453012.1 | 387818 | 12-scf00276    | 12 |
| AX-158127934 | 12 | 74.645 | KV453012.1 | 389448 | 12-scf00276    | 12 |
| AX-158127936 | 12 | 74.645 | KV453012.1 | 393655 | 12-scf00276    | 12 |
| AX-158127937 | 12 | 74.645 | KV453012.1 | 394566 | 12-scf00276    | 12 |
| AX-157716318 | 12 | 74.645 | KV453012.1 | 409002 | 12-scf00276    | 12 |
| AX-158380207 | 12 | 74.645 | KV453012.1 | 463666 | 12-scf00276    | 12 |
| AX-157695523 | 12 | 74.645 | FI864409.1 | 40     | IORI212 lctalu | UN |
| AX-158127940 | 12 | 74.926 | KV453012.1 | 398764 | 12-scf00276    | 12 |
| AX-158127942 | 12 | 74.926 | KV453012.1 | 400061 | 12-scf00276    | 12 |
| AX-158127944 | 12 | 74.926 | KV453012.1 | 401712 | 12-scf00276    | 12 |
| AX-157829743 | 12 | 74.926 | KV453012.1 | 404407 | 12-scf00276    | 12 |
| AX-157713264 | 12 | 75.161 | KV453012.1 | 408336 | 12-scf00276    | 12 |
| AX-157829745 | 12 | 75.629 | KV453012.1 | 412503 | 12-scf00276    | 12 |
| AX-157829744 | 12 | 75.63  | KV453012.1 | 410333 | 12-scf00276    | 12 |
| AX-158127947 | 12 | 75.63  | KV453012.1 | 410670 | 12-scf00276    | 12 |
| AX-157829746 | 12 | 75.63  | KV453012.1 | 413851 | 12-scf00276    | 12 |
| AX-158127949 | 12 | 75.63  | KV453012.1 | 416955 | 12-scf00276    | 12 |
| AX-157829747 | 12 | 75.63  | KV453012.1 | 417598 | 12-scf00276    | 12 |
| AX-157714432 | 12 | 75.63  | KV453012.1 | 418048 | 12-scf00276    | 12 |
| AX-158127950 | 12 | 75.63  | KV453012.1 | 418363 | 12-scf00276    | 12 |
| AX-158127951 | 12 | 75.63  | KV453012.1 | 418422 | 12-scf00276    | 12 |
| AX-158127953 | 12 | 75.63  | KV453012.1 | 422101 | 12-scf00276    | 12 |
| AX-158127954 | 12 | 75.63  | KV453012.1 | 422727 | 12-scf00276    | 12 |
| AX-158127957 | 12 | 75.63  | KV453012.1 | 425620 | 12-scf00276    | 12 |
| AX-158127958 | 12 | 75.63  | KV453012.1 | 430778 | 12-scf00276    | 12 |
| AX-158127959 | 12 | 75.63  | KV453012.1 | 431411 | 12-scf00276    | 12 |
| AX-158127960 | 12 | 75.63  | KV453012.1 | 431940 | 12-scf00276    | 12 |
| AX-158127961 | 12 | 75.848 | KV453012.1 | 432678 | 12-scf00276    | 12 |
| AX-158127963 | 12 | 75.848 | KV453012.1 | 436275 | 12-scf00276    | 12 |
| AX-157749998 | 12 | 75.849 | KV453012.1 | 439070 | 12-scf00276    | 12 |
| AX-158127965 | 12 | 75.849 | KV453012.1 | 439195 | 12-scf00276    | 12 |
| AX-157722652 | 12 | 75.931 | KV453012.1 | 439838 | 12-scf00276    | 12 |
| AX-158127974 | 12 | 75.931 | KV453012.1 | 449058 | 12-scf00276    | 12 |
| AX-158127967 | 12 | 76.001 | KV453012.1 | 442183 | 12-scf00276    | 12 |
| AX-158127970 | 12 | 76.226 | KV453012.1 | 446111 | 12-scf00276    | 12 |
| AX-158127972 | 12 | 76.226 | KV453012.1 | 448030 | 12-scf00276    | 12 |
| AX-158385192 | 12 | 76.226 | KV453012.1 | 451167 | 12-scf00276    | 12 |
| AX-158127978 | 12 | 76.497 | KV453012.1 | 458220 | 12-scf00276    | 12 |
| AX-158127981 | 12 | 76.504 | KV453012.1 | 459612 | 12-scf00276    | 12 |
| AX-158127982 | 12 | 76.504 | KV453012.1 | 460602 | 12-scf00276    | 12 |
| AX-158127983 | 12 | 76.504 | KV453012.1 | 461679 | 12-scf00276    | 12 |
| AX-158127984 | 12 | 76.504 | KV453012.1 | 462061 | 12-scf00276    | 12 |
| AX-157771661 | 12 | 76.504 | KV453012.1 | 463058 | 12-scf00276    | 12 |
| AX-157866215 | 12 | 76.504 | KV453012.1 | 463536 | 12-scf00276    | 12 |
| AX-158127988 | 12 | 76.504 | KV453012.1 | 464589 | 12-scf00276    | 12 |
| AX-158127989 | 12 | 76.504 | KV453012.1 | 464961 | 12-scf00276    | 12 |
| AX-158127992 | 12 | 76.504 | KV453012.1 | 467513 | 12-scf00276    | 12 |
| AX-158127977 | 12 | 76.722 | KV453012.1 | 457449 | 12-scf00276    | 12 |
| AX-158127980 | 12 | 76.722 | KV453012.1 | 458963 | 12-scf00276    | 12 |
| AX-157829749 | 12 | 76.722 | KV453012.1 | 483463 | 12-scf00276    | 12 |

|              |    |        |            |        |             |    |
|--------------|----|--------|------------|--------|-------------|----|
| AX-158128000 | 12 | 76.722 | KV453012.1 | 487069 | 12-scf00276 | 12 |
| AX-157829750 | 12 | 76.722 | KV453012.1 | 491908 | 12-scf00276 | 12 |
| AX-158128003 | 12 | 76.722 | KV453012.1 | 496510 | 12-scf00276 | 12 |
| AX-158128006 | 12 | 76.722 | KV453012.1 | 499930 | 12-scf00276 | 12 |
| AX-158128007 | 12 | 76.722 | KV453012.1 | 500387 | 12-scf00276 | 12 |
| AX-158128008 | 12 | 76.722 | KV453012.1 | 500883 | 12-scf00276 | 12 |
| AX-158128010 | 12 | 76.722 | KV453012.1 | 503738 | 12-scf00276 | 12 |
| AX-158128012 | 12 | 76.722 | KV453012.1 | 505977 | 12-scf00276 | 12 |
| AX-158128015 | 12 | 76.722 | KV453012.1 | 509655 | 12-scf00276 | 12 |
| AX-158128016 | 12 | 76.722 | KV453012.1 | 512959 | 12-scf00276 | 12 |
| AX-157829752 | 12 | 76.875 | KV453012.1 | 519209 | 12-scf00276 | 12 |
| AX-157773666 | 12 | 76.941 | KV453012.1 | 519768 | 12-scf00276 | 12 |
| AX-158128020 | 12 | 76.941 | KV453012.1 | 520050 | 12-scf00276 | 12 |
| AX-157713670 | 12 | 76.941 | KV453012.1 | 521986 | 12-scf00276 | 12 |
| AX-158128021 | 12 | 76.941 | KV453012.1 | 523057 | 12-scf00276 | 12 |
| AX-158128027 | 12 | 77.16  | KV453012.1 | 527427 | 12-scf00276 | 12 |
| AX-158128028 | 12 | 77.16  | KV453012.1 | 527901 | 12-scf00276 | 12 |
| AX-157754402 | 12 | 77.16  | KV453012.1 | 531730 | 12-scf00276 | 12 |
| AX-157829754 | 12 | 77.16  | KV453012.1 | 533218 | 12-scf00276 | 12 |
| AX-158128032 | 12 | 77.38  | KV453012.1 | 536437 | 12-scf00276 | 12 |
| AX-157740391 | 12 | 77.444 | KV453012.1 | 537968 | 12-scf00276 | 12 |
| AX-157829756 | 12 | 77.515 | KV453012.1 | 540579 | 12-scf00276 | 12 |
| AX-158128034 | 12 | 77.515 | KV453012.1 | 541760 | 12-scf00276 | 12 |
| AX-157713156 | 12 | 77.74  | KV453012.1 | 544269 | 12-scf00276 | 12 |
| AX-157829758 | 12 | 77.74  | KV453012.1 | 546122 | 12-scf00276 | 12 |
| AX-158128036 | 12 | 77.74  | KV453012.1 | 546769 | 12-scf00276 | 12 |
| AX-158128037 | 12 | 77.74  | KV453012.1 | 548433 | 12-scf00276 | 12 |
| AX-158392811 | 12 | 77.74  | KV453012.1 | 548898 | 12-scf00276 | 12 |
| AX-158128038 | 12 | 77.996 | KV453012.1 | 550040 | 12-scf00276 | 12 |
| AX-158128041 | 12 | 77.997 | KV453012.1 | 566763 | 12-scf00276 | 12 |
| AX-158128042 | 12 | 77.997 | KV453012.1 | 568092 | 12-scf00276 | 12 |
| AX-158128045 | 12 | 78.253 | KV453012.1 | 581524 | 12-scf00276 | 12 |
| AX-158128046 | 12 | 78.253 | KV453012.1 | 581822 | 12-scf00276 | 12 |
| AX-158128049 | 12 | 78.253 | KV453012.1 | 584370 | 12-scf00276 | 12 |
| AX-158128051 | 12 | 78.253 | KV453012.1 | 586545 | 12-scf00276 | 12 |
| AX-158128053 | 12 | 78.253 | KV453012.1 | 588709 | 12-scf00276 | 12 |
| AX-157829764 | 12 | 78.253 | KV453012.1 | 589841 | 12-scf00276 | 12 |
| AX-157829765 | 12 | 78.254 | KV453012.1 | 590228 | 12-scf00276 | 12 |
| AX-158128054 | 12 | 78.254 | KV453012.1 | 590317 | 12-scf00276 | 12 |
| AX-158128055 | 12 | 78.417 | KV453012.1 | 590724 | 12-scf00276 | 12 |
| AX-157829766 | 12 | 78.417 | KV453012.1 | 592286 | 12-scf00276 | 12 |
| AX-158128056 | 12 | 78.417 | KV453012.1 | 593672 | 12-scf00276 | 12 |
| AX-158128060 | 12 | 78.417 | KV453012.1 | 603994 | 12-scf00276 | 12 |
| AX-157745609 | 12 | 78.495 | KV453012.1 | 598399 | 12-scf00276 | 12 |
| AX-157829763 | 12 | 78.581 | KV453012.1 | 589549 | 12-scf00276 | 12 |
| AX-158128058 | 12 | 78.581 | KV453012.1 | 599574 | 12-scf00276 | 12 |
| AX-158128059 | 12 | 78.581 | KV453012.1 | 600116 | 12-scf00276 | 12 |
| AX-158128062 | 12 | 78.581 | KV453012.1 | 605217 | 12-scf00276 | 12 |
| AX-158128063 | 12 | 78.581 | KV453012.1 | 605827 | 12-scf00276 | 12 |
| AX-157857803 | 12 | 78.581 | KV453012.1 | 607368 | 12-scf00276 | 12 |
| AX-158128066 | 12 | 78.581 | KV453012.1 | 609918 | 12-scf00276 | 12 |

|              |    |        |            |        |             |    |
|--------------|----|--------|------------|--------|-------------|----|
| AX-158128069 | 12 | 78.581 | KV453012.1 | 611700 | 12-scf00276 | 12 |
| AX-158128070 | 12 | 78.581 | KV453012.1 | 612139 | 12-scf00276 | 12 |
| AX-158128078 | 12 | 78.581 | KV453012.1 | 635681 | 12-scf00276 | 12 |
| AX-158128079 | 12 | 78.581 | KV453012.1 | 636177 | 12-scf00276 | 12 |
| AX-158128080 | 12 | 78.581 | KV453012.1 | 636640 | 12-scf00276 | 12 |
| AX-158128143 | 12 | 78.581 | KV453012.1 | 719657 | 12-scf00276 | 12 |
| AX-157710935 | 12 | 78.907 | KV453012.1 | 646455 | 12-scf00276 | 12 |
| AX-158128082 | 12 | 78.907 | KV453012.1 | 647243 | 12-scf00276 | 12 |
| AX-157829769 | 12 | 78.908 | KV453012.1 | 649949 | 12-scf00276 | 12 |
| AX-158128086 | 12 | 78.908 | KV453012.1 | 654618 | 12-scf00276 | 12 |
| AX-157829770 | 12 | 78.908 | KV453012.1 | 654998 | 12-scf00276 | 12 |
| AX-158128087 | 12 | 78.908 | KV453012.1 | 655461 | 12-scf00276 | 12 |
| AX-157743058 | 12 | 78.908 | KV453012.1 | 659548 | 12-scf00276 | 12 |
| AX-158128075 | 12 | 79.018 | KV453012.1 | 631623 | 12-scf00276 | 12 |
| AX-158128083 | 12 | 79.018 | KV453012.1 | 648168 | 12-scf00276 | 12 |
| AX-158128088 | 12 | 79.018 | KV453012.1 | 656135 | 12-scf00276 | 12 |
| AX-158128093 | 12 | 79.018 | KV453012.1 | 662458 | 12-scf00276 | 12 |
| AX-158128095 | 12 | 79.018 | KV453012.1 | 663267 | 12-scf00276 | 12 |
| AX-158128096 | 12 | 79.018 | KV453012.1 | 663727 | 12-scf00276 | 12 |
| AX-157773985 | 12 | 79.018 | KV453012.1 | 665522 | 12-scf00276 | 12 |
| AX-158128098 | 12 | 79.018 | KV453012.1 | 665910 | 12-scf00276 | 12 |
| AX-157755554 | 12 | 79.018 | KV453012.1 | 666475 | 12-scf00276 | 12 |
| AX-157750642 | 12 | 79.018 | KV453012.1 | 667767 | 12-scf00276 | 12 |
| AX-158128102 | 12 | 79.018 | KV453012.1 | 674842 | 12-scf00276 | 12 |
| AX-158380210 | 12 | 79.018 | KV453012.1 | 678967 | 12-scf00276 | 12 |
| AX-158128109 | 12 | 79.018 | KV453012.1 | 679182 | 12-scf00276 | 12 |
| AX-158128111 | 12 | 79.018 | KV453012.1 | 680637 | 12-scf00276 | 12 |
| AX-158128112 | 12 | 79.018 | KV453012.1 | 681094 | 12-scf00276 | 12 |
| AX-158128113 | 12 | 79.018 | KV453012.1 | 682088 | 12-scf00276 | 12 |
| AX-158128114 | 12 | 79.018 | KV453012.1 | 682647 | 12-scf00276 | 12 |
| AX-158128116 | 12 | 79.018 | KV453012.1 | 684154 | 12-scf00276 | 12 |
| AX-158128117 | 12 | 79.018 | KV453012.1 | 684647 | 12-scf00276 | 12 |
| AX-157829773 | 12 | 79.018 | KV453012.1 | 687528 | 12-scf00276 | 12 |
| AX-157857805 | 12 | 79.018 | KV453012.1 | 691631 | 12-scf00276 | 12 |
| AX-158128122 | 12 | 79.018 | KV453012.1 | 692252 | 12-scf00276 | 12 |
| AX-158128124 | 12 | 79.018 | KV453012.1 | 694029 | 12-scf00276 | 12 |
| AX-157745435 | 12 | 79.018 | KV453012.1 | 696681 | 12-scf00276 | 12 |
| AX-158128129 | 12 | 79.018 | KV453012.1 | 698503 | 12-scf00276 | 12 |
| AX-157713104 | 12 | 79.018 | KV453012.1 | 699163 | 12-scf00276 | 12 |
| AX-158128130 | 12 | 79.018 | KV453012.1 | 699979 | 12-scf00276 | 12 |
| AX-157871359 | 12 | 79.018 | KV453012.1 | 701657 | 12-scf00276 | 12 |
| AX-158128131 | 12 | 79.018 | KV453012.1 | 702216 | 12-scf00276 | 12 |
| AX-158128139 | 12 | 79.018 | KV453012.1 | 715597 | 12-scf00276 | 12 |
| AX-158128140 | 12 | 79.018 | KV453012.1 | 716419 | 12-scf00276 | 12 |
| AX-158128126 | 12 | 79.104 | KV453012.1 | 695033 | 12-scf00276 | 12 |
| AX-157701397 | 12 | 79.104 | KV453012.1 | 701184 | 12-scf00276 | 12 |
| AX-158128141 | 12 | 79.187 | KV453012.1 | 717884 | 12-scf00276 | 12 |
| AX-158128148 | 12 | 79.187 | KV453012.1 | 727061 | 12-scf00276 | 12 |
| AX-158128142 | 12 | 79.236 | KV453012.1 | 718257 | 12-scf00276 | 12 |
| AX-158128145 | 12 | 79.236 | KV453012.1 | 722736 | 12-scf00276 | 12 |
| AX-158128146 | 12 | 79.236 | KV453012.1 | 723136 | 12-scf00276 | 12 |

|              |    |        |            |        |             |    |
|--------------|----|--------|------------|--------|-------------|----|
| AX-158128147 | 12 | 79.236 | KV453012.1 | 725239 | 12-scf00276 | 12 |
| AX-158128153 | 12 | 79.454 | KV453012.1 | 729727 | 12-scf00276 | 12 |
| AX-158128154 | 12 | 79.454 | KV453012.1 | 731980 | 12-scf00276 | 12 |
| AX-158128156 | 12 | 79.454 | KV453012.1 | 733545 | 12-scf00276 | 12 |
| AX-158128158 | 12 | 79.454 | KV453012.1 | 735062 | 12-scf00276 | 12 |
| AX-158128159 | 12 | 79.454 | KV453012.1 | 735283 | 12-scf00276 | 12 |
| AX-158128161 | 12 | 79.454 | KV453012.1 | 736284 | 12-scf00276 | 12 |
| AX-158128163 | 12 | 79.454 | KV453012.1 | 737484 | 12-scf00276 | 12 |
| AX-158128164 | 12 | 79.454 | KV453012.1 | 738578 | 12-scf00276 | 12 |
| AX-158128172 | 12 | 79.454 | KV453012.1 | 748061 | 12-scf00276 | 12 |
| AX-158128167 | 12 | 79.673 | KV453012.1 | 743756 | 12-scf00276 | 12 |
| AX-158128170 | 12 | 79.673 | KV453012.1 | 746526 | 12-scf00276 | 12 |
| AX-158128174 | 12 | 79.732 | KV453012.1 | 750900 | 12-scf00276 | 12 |
| AX-157743718 | 12 | 79.782 | KV453012.1 | 736580 | 12-scf00276 | 12 |
| AX-158128175 | 12 | 79.782 | KV453012.1 | 752087 | 12-scf00276 | 12 |
| AX-158128176 | 12 | 79.782 | KV453012.1 | 753690 | 12-scf00276 | 12 |
| AX-158128179 | 12 | 79.891 | KV453012.1 | 756468 | 12-scf00276 | 12 |
| AX-157727306 | 12 | 79.891 | KV453012.1 | 757869 | 12-scf00276 | 12 |
| AX-158128180 | 12 | 79.891 | KV453012.1 | 757993 | 12-scf00276 | 12 |
| AX-158128181 | 12 | 79.891 | KV453012.1 | 758242 | 12-scf00276 | 12 |
| AX-158128183 | 12 | 79.891 | KV453012.1 | 761207 | 12-scf00276 | 12 |
| AX-157829775 | 12 | 79.891 | KV453012.1 | 761540 | 12-scf00276 | 12 |
| AX-157829776 | 12 | 79.891 | KV453012.1 | 762175 | 12-scf00276 | 12 |
| AX-158128185 | 12 | 79.891 | KV453012.1 | 767165 | 12-scf00276 | 12 |
| AX-158392813 | 12 | 79.916 | KV453012.1 | 765810 | 12-scf00276 | 12 |
| AX-158128187 | 12 | 79.942 | KV453012.1 | 770498 | 12-scf00276 | 12 |
| AX-158128190 | 12 | 79.942 | KV453012.1 | 772607 | 12-scf00276 | 12 |
| AX-158128193 | 12 | 79.942 | KV453012.1 | 776828 | 12-scf00276 | 12 |
| AX-158128194 | 12 | 80.127 | KV453012.1 | 778371 | 12-scf00276 | 12 |
| AX-158128196 | 12 | 80.127 | KV453012.1 | 779921 | 12-scf00276 | 12 |
| AX-158422759 | 12 | 80.131 | KV453012.1 | 784767 | 12-scf00276 | 12 |
| AX-158128201 | 12 | 80.237 | KV453012.1 | 793333 | 12-scf00276 | 12 |
| AX-157877900 | 12 | 80.763 | KV453012.1 | 793874 | 12-scf00276 | 12 |
| AX-157772410 | 12 | 80.763 | KV453012.1 | 796387 | 12-scf00276 | 12 |
| AX-158128203 | 12 | 80.763 | KV453012.1 | 797173 | 12-scf00276 | 12 |
| AX-157722442 | 12 | 81.093 | KV453012.1 | 787032 | 12-scf00276 | 12 |
| AX-158128204 | 12 | 81.093 | KV453012.1 | 798727 | 12-scf00276 | 12 |
| AX-158128208 | 12 | 81.093 | KV453012.1 | 802948 | 12-scf00276 | 12 |
| AX-157716666 | 12 | 81.093 | KV453012.1 | 803858 | 12-scf00276 | 12 |
| AX-158128210 | 12 | 81.093 | KV453012.1 | 805333 | 12-scf00276 | 12 |
| AX-157738834 | 12 | 81.105 | KV453012.1 | 808207 | 12-scf00276 | 12 |
| AX-158128230 | 12 | 81.105 | KV453012.1 | 833738 | 12-scf00276 | 12 |
| AX-157829777 | 12 | 81.105 | KV453012.1 | 835483 | 12-scf00276 | 12 |
| AX-158128213 | 12 | 81.115 | KV453012.1 | 809237 | 12-scf00276 | 12 |
| AX-158128220 | 12 | 81.115 | KV453012.1 | 819951 | 12-scf00276 | 12 |
| AX-157886149 | 12 | 81.115 | KV453012.1 | 843234 | 12-scf00276 | 12 |
| AX-157775391 | 12 | 81.126 | KV453012.1 | 813070 | 12-scf00276 | 12 |
| AX-158128273 | 12 | 81.126 | KV453012.1 | 892686 | 12-scf00276 | 12 |
| AX-157708615 | 12 | 81.126 | KV453012.1 | 913283 | 12-scf00276 | 12 |
| AX-158128635 | 12 | 81.126 | KV453013.1 | 146087 | 12-scf00278 | 12 |
| AX-157857816 | 12 | 81.126 | KV453013.1 | 420864 | 12-scf00278 | 12 |

|              |    |        |            |         |             |    |
|--------------|----|--------|------------|---------|-------------|----|
| AX-158128216 | 12 | 81.128 | KV453012.1 | 814442  | 12-scf00276 | 12 |
| AX-158128219 | 12 | 81.13  | KV453012.1 | 818673  | 12-scf00276 | 12 |
| AX-157758785 | 12 | 81.13  | KV453012.1 | 926290  | 12-scf00276 | 12 |
| AX-158128223 | 12 | 81.382 | KV453012.1 | 825491  | 12-scf00276 | 12 |
| AX-158128224 | 12 | 81.382 | KV453012.1 | 825981  | 12-scf00276 | 12 |
| AX-158128225 | 12 | 81.457 | KV453012.1 | 828560  | 12-scf00276 | 12 |
| AX-158128227 | 12 | 81.533 | KV453012.1 | 830717  | 12-scf00276 | 12 |
| AX-158128231 | 12 | 81.533 | KV453012.1 | 835135  | 12-scf00276 | 12 |
| AX-157829778 | 12 | 81.533 | KV453012.1 | 839640  | 12-scf00276 | 12 |
| AX-158128233 | 12 | 81.536 | KV453012.1 | 840553  | 12-scf00276 | 12 |
| AX-158128235 | 12 | 81.536 | KV453012.1 | 849318  | 12-scf00276 | 12 |
| AX-158128237 | 12 | 81.752 | KV453012.1 | 851809  | 12-scf00276 | 12 |
| AX-157829781 | 12 | 81.752 | KV453012.1 | 852037  | 12-scf00276 | 12 |
| AX-158128238 | 12 | 81.752 | KV453012.1 | 852886  | 12-scf00276 | 12 |
| AX-158128241 | 12 | 81.752 | KV453012.1 | 858798  | 12-scf00276 | 12 |
| AX-158128255 | 12 | 81.752 | KV453012.1 | 871374  | 12-scf00276 | 12 |
| AX-158128244 | 12 | 81.971 | KV453012.1 | 860712  | 12-scf00276 | 12 |
| AX-158128246 | 12 | 81.971 | KV453012.1 | 862350  | 12-scf00276 | 12 |
| AX-158128247 | 12 | 81.971 | KV453012.1 | 863822  | 12-scf00276 | 12 |
| AX-158128249 | 12 | 81.971 | KV453012.1 | 865750  | 12-scf00276 | 12 |
| AX-158128251 | 12 | 81.971 | KV453012.1 | 867093  | 12-scf00276 | 12 |
| AX-158128252 | 12 | 81.971 | KV453012.1 | 868719  | 12-scf00276 | 12 |
| AX-158128253 | 12 | 81.971 | KV453012.1 | 869286  | 12-scf00276 | 12 |
| AX-158128256 | 12 | 82.076 | KV453012.1 | 872402  | 12-scf00276 | 12 |
| AX-158128257 | 12 | 82.189 | KV453012.1 | 875390  | 12-scf00276 | 12 |
| AX-158128261 | 12 | 82.189 | KV453012.1 | 878961  | 12-scf00276 | 12 |
| AX-158128262 | 12 | 82.189 | KV453012.1 | 880468  | 12-scf00276 | 12 |
| AX-158128263 | 12 | 82.189 | KV453012.1 | 880616  | 12-scf00276 | 12 |
| AX-158128266 | 12 | 82.189 | KV453012.1 | 885222  | 12-scf00276 | 12 |
| AX-158128269 | 12 | 82.189 | KV453012.1 | 888662  | 12-scf00276 | 12 |
| AX-158128271 | 12 | 82.189 | KV453012.1 | 890870  | 12-scf00276 | 12 |
| AX-158128276 | 12 | 82.189 | KV453012.1 | 896186  | 12-scf00276 | 12 |
| AX-158128277 | 12 | 82.189 | KV453012.1 | 897003  | 12-scf00276 | 12 |
| AX-158128279 | 12 | 82.189 | KV453012.1 | 900714  | 12-scf00276 | 12 |
| AX-158128283 | 12 | 82.189 | KV453012.1 | 906432  | 12-scf00276 | 12 |
| AX-158128286 | 12 | 82.189 | KV453012.1 | 907973  | 12-scf00276 | 12 |
| AX-157721155 | 12 | 82.189 | KV453012.1 | 912072  | 12-scf00276 | 12 |
| AX-158380212 | 12 | 82.189 | KV453012.1 | 918811  | 12-scf00276 | 12 |
| AX-158128292 | 12 | 82.189 | KV453012.1 | 919281  | 12-scf00276 | 12 |
| AX-158128295 | 12 | 82.189 | KV453012.1 | 921065  | 12-scf00276 | 12 |
| AX-157829783 | 12 | 82.189 | KV453012.1 | 924756  | 12-scf00276 | 12 |
| AX-157829784 | 12 | 82.189 | KV453012.1 | 925401  | 12-scf00276 | 12 |
| AX-157715095 | 12 | 82.189 | KV453012.1 | 1013995 | 12-scf00276 | 12 |
| AX-157748400 | 12 | 82.189 | KV453012.1 | 1036319 | 12-scf00276 | 12 |
| AX-158128354 | 12 | 82.189 | KV453012.1 | 1044387 | 12-scf00276 | 12 |
| AX-157829801 | 12 | 82.189 | KV453012.1 | 1077979 | 12-scf00276 | 12 |
| AX-158411460 | 12 | 82.189 | KV453012.1 | 1348147 | 12-scf00276 | 12 |
| AX-158385200 | 12 | 82.189 | KV453012.1 | 1361936 | 12-scf00276 | 12 |
| AX-158128476 | 12 | 82.189 | KV453012.1 | 1488951 | 12-scf00276 | 12 |
| AX-158128490 | 12 | 82.189 | KV453012.1 | 1514933 | 12-scf00276 | 12 |
| AX-158128491 | 12 | 82.189 | KV453012.1 | 1515557 | 12-scf00276 | 12 |

|              |    |        |            |         |             |    |
|--------------|----|--------|------------|---------|-------------|----|
| AX-157829828 | 12 | 82.189 | KV453012.1 | 1538660 | 12-scf00276 | 12 |
| AX-158128510 | 12 | 82.189 | KV453012.1 | 1546686 | 12-scf00276 | 12 |
| AX-158128519 | 12 | 82.189 | KV453012.1 | 1563202 | 12-scf00276 | 12 |
| AX-157721241 | 12 | 82.189 | KV453012.1 | 1563351 | 12-scf00276 | 12 |
| AX-157757180 | 12 | 82.189 | KV453012.1 | 1589247 | 12-scf00276 | 12 |
| AX-158128622 | 12 | 82.189 | KV453013.1 | 133582  | 12-scf00278 | 12 |
| AX-158128624 | 12 | 82.189 | KV453013.1 | 134659  | 12-scf00278 | 12 |
| AX-158128626 | 12 | 82.189 | KV453013.1 | 135419  | 12-scf00278 | 12 |
| AX-158128628 | 12 | 82.189 | KV453013.1 | 137386  | 12-scf00278 | 12 |
| AX-158128650 | 12 | 82.189 | KV453013.1 | 165080  | 12-scf00278 | 12 |
| AX-158128274 | 12 | 82.298 | KV453012.1 | 893861  | 12-scf00276 | 12 |
| AX-158128301 | 12 | 82.298 | KV453012.1 | 931995  | 12-scf00276 | 12 |
| AX-157829786 | 12 | 82.298 | KV453012.1 | 937255  | 12-scf00276 | 12 |
| AX-157829787 | 12 | 82.298 | KV453012.1 | 938173  | 12-scf00276 | 12 |
| AX-158128308 | 12 | 82.298 | KV453012.1 | 942645  | 12-scf00276 | 12 |
| AX-158128310 | 12 | 82.298 | KV453012.1 | 943890  | 12-scf00276 | 12 |
| AX-158128311 | 12 | 82.298 | KV453012.1 | 945688  | 12-scf00276 | 12 |
| AX-157745223 | 12 | 82.298 | KV453012.1 | 947565  | 12-scf00276 | 12 |
| AX-157713909 | 12 | 82.298 | KV453012.1 | 951113  | 12-scf00276 | 12 |
| AX-158128313 | 12 | 82.298 | KV453012.1 | 952589  | 12-scf00276 | 12 |
| AX-158128322 | 12 | 82.298 | KV453012.1 | 974440  | 12-scf00276 | 12 |
| AX-158128356 | 12 | 82.298 | KV453012.1 | 1046698 | 12-scf00276 | 12 |
| AX-158128360 | 12 | 82.298 | KV453012.1 | 1055511 | 12-scf00276 | 12 |
| AX-158128376 | 12 | 82.298 | KV453012.1 | 1075603 | 12-scf00276 | 12 |
| AX-158128379 | 12 | 82.298 | KV453012.1 | 1080101 | 12-scf00276 | 12 |
| AX-158128465 | 12 | 82.298 | KV453012.1 | 1477457 | 12-scf00276 | 12 |
| AX-158128512 | 12 | 82.298 | KV453012.1 | 1551377 | 12-scf00276 | 12 |
| AX-158128646 | 12 | 82.298 | KV453013.1 | 159245  | 12-scf00278 | 12 |
| AX-158385205 | 12 | 82.298 | KV453013.1 | 358486  | 12-scf00278 | 12 |
| AX-157829921 | 12 | 82.298 | KV453014.1 | 456821  | 12-scf00279 | 12 |
| AX-158129938 | 12 | 82.298 | KV453016.1 | 650121  | 12-scf00280 | 12 |
| AX-157747309 | 12 | 82.375 | KV453012.1 | 973093  | 12-scf00276 | 12 |
| AX-158380213 | 12 | 82.439 | KV453012.1 | 980603  | 12-scf00276 | 12 |
| AX-158128323 | 12 | 82.517 | KV453012.1 | 989527  | 12-scf00276 | 12 |
| AX-158128325 | 12 | 82.542 | KV453012.1 | 991643  | 12-scf00276 | 12 |
| AX-158128345 | 12 | 82.542 | KV453012.1 | 1025578 | 12-scf00276 | 12 |
| AX-158128326 | 12 | 82.562 | KV453012.1 | 993727  | 12-scf00276 | 12 |
| AX-157716696 | 12 | 82.562 | KV453012.1 | 1001627 | 12-scf00276 | 12 |
| AX-158128347 | 12 | 82.562 | KV453012.1 | 1030893 | 12-scf00276 | 12 |
| AX-158128327 | 12 | 82.567 | KV453012.1 | 995117  | 12-scf00276 | 12 |
| AX-158128258 | 12 | 82.581 | KV453012.1 | 876417  | 12-scf00276 | 12 |
| AX-157755291 | 12 | 82.581 | KV453012.1 | 901505  | 12-scf00276 | 12 |
| AX-158128281 | 12 | 82.581 | KV453012.1 | 902297  | 12-scf00276 | 12 |
| AX-158128297 | 12 | 82.581 | KV453012.1 | 924985  | 12-scf00276 | 12 |
| AX-157829789 | 12 | 82.581 | KV453012.1 | 942980  | 12-scf00276 | 12 |
| AX-158128329 | 12 | 82.581 | KV453012.1 | 997305  | 12-scf00276 | 12 |
| AX-158128336 | 12 | 82.581 | KV453012.1 | 1004868 | 12-scf00276 | 12 |
| AX-157829798 | 12 | 82.581 | KV453012.1 | 1040161 | 12-scf00276 | 12 |
| AX-158128370 | 12 | 82.581 | KV453012.1 | 1069202 | 12-scf00276 | 12 |
| AX-157746195 | 12 | 82.581 | KV453012.1 | 1264675 | 12-scf00276 | 12 |
| AX-158128478 | 12 | 82.581 | KV453012.1 | 1491109 | 12-scf00276 | 12 |



|              |    |        |            |         |             |    |
|--------------|----|--------|------------|---------|-------------|----|
| AX-158128640 | 12 | 82.581 | KV453013.1 | 149663  | 12-scf00278 | 12 |
| AX-157713965 | 12 | 82.581 | KV453013.1 | 216280  | 12-scf00278 | 12 |
| AX-158411481 | 12 | 82.581 | KV453014.1 | 543709  | 12-scf00279 | 12 |
| AX-158128330 | 12 | 82.597 | KV453012.1 | 997898  | 12-scf00276 | 12 |
| AX-157745844 | 12 | 82.608 | KV453012.1 | 915721  | 12-scf00276 | 12 |
| AX-158128342 | 12 | 82.608 | KV453012.1 | 1022244 | 12-scf00276 | 12 |
| AX-157750701 | 12 | 82.626 | KV453012.1 | 1007147 | 12-scf00276 | 12 |
| AX-157829792 | 12 | 82.626 | KV453012.1 | 1012605 | 12-scf00276 | 12 |
| AX-157757250 | 12 | 82.626 | KV453012.1 | 1018608 | 12-scf00276 | 12 |
| AX-157857809 | 12 | 82.626 | KV453012.1 | 1026691 | 12-scf00276 | 12 |
| AX-157741971 | 12 | 82.626 | KV453012.1 | 1027171 | 12-scf00276 | 12 |
| AX-158380214 | 12 | 82.626 | KV453012.1 | 1035728 | 12-scf00276 | 12 |
| AX-157829795 | 12 | 82.626 | KV453012.1 | 1036724 | 12-scf00276 | 12 |
| AX-157829796 | 12 | 82.626 | KV453012.1 | 1037339 | 12-scf00276 | 12 |
| AX-158128353 | 12 | 82.626 | KV453012.1 | 1042535 | 12-scf00276 | 12 |
| AX-157722625 | 12 | 82.626 | KV453012.1 | 1043855 | 12-scf00276 | 12 |
| AX-158128357 | 12 | 82.626 | KV453012.1 | 1050521 | 12-scf00276 | 12 |
| AX-158128359 | 12 | 82.626 | KV453012.1 | 1054689 | 12-scf00276 | 12 |
| AX-158128362 | 12 | 82.626 | KV453012.1 | 1060780 | 12-scf00276 | 12 |
| AX-158128363 | 12 | 82.626 | KV453012.1 | 1062566 | 12-scf00276 | 12 |
| AX-158411452 | 12 | 82.626 | KV453012.1 | 1063009 | 12-scf00276 | 12 |
| AX-158128371 | 12 | 82.626 | KV453012.1 | 1069605 | 12-scf00276 | 12 |
| AX-158128372 | 12 | 82.626 | KV453012.1 | 1070796 | 12-scf00276 | 12 |
| AX-158128373 | 12 | 82.626 | KV453012.1 | 1072243 | 12-scf00276 | 12 |
| AX-158128404 | 12 | 82.626 | KV453012.1 | 1148742 | 12-scf00276 | 12 |
| AX-158128434 | 12 | 82.626 | KV453012.1 | 1266265 | 12-scf00276 | 12 |
| AX-157739711 | 12 | 82.626 | KV453012.1 | 1274739 | 12-scf00276 | 12 |
| AX-158128437 | 12 | 82.626 | KV453012.1 | 1278492 | 12-scf00276 | 12 |
| AX-157770894 | 12 | 82.626 | KV453012.1 | 1476548 | 12-scf00276 | 12 |
| AX-157829819 | 12 | 82.626 | KV453012.1 | 1476925 | 12-scf00276 | 12 |
| AX-158128467 | 12 | 82.626 | KV453012.1 | 1478177 | 12-scf00276 | 12 |
| AX-157866221 | 12 | 82.626 | KV453012.1 | 1478841 | 12-scf00276 | 12 |
| AX-158128472 | 12 | 82.626 | KV453012.1 | 1486936 | 12-scf00276 | 12 |
| AX-158128477 | 12 | 82.626 | KV453012.1 | 1489280 | 12-scf00276 | 12 |
| AX-158128479 | 12 | 82.626 | KV453012.1 | 1492076 | 12-scf00276 | 12 |
| AX-157829822 | 12 | 82.626 | KV453012.1 | 1499408 | 12-scf00276 | 12 |
| AX-158128488 | 12 | 82.626 | KV453012.1 | 1510261 | 12-scf00276 | 12 |
| AX-158128492 | 12 | 82.626 | KV453012.1 | 1517032 | 12-scf00276 | 12 |
| AX-157710724 | 12 | 82.626 | KV453012.1 | 1519793 | 12-scf00276 | 12 |
| AX-158128494 | 12 | 82.626 | KV453012.1 | 1520077 | 12-scf00276 | 12 |
| AX-157717579 | 12 | 82.626 | KV453012.1 | 1520902 | 12-scf00276 | 12 |
| AX-158128497 | 12 | 82.626 | KV453012.1 | 1523398 | 12-scf00276 | 12 |
| AX-157829826 | 12 | 82.626 | KV453012.1 | 1523615 | 12-scf00276 | 12 |
| AX-158128498 | 12 | 82.626 | KV453012.1 | 1526663 | 12-scf00276 | 12 |
| AX-158128501 | 12 | 82.626 | KV453012.1 | 1527891 | 12-scf00276 | 12 |
| AX-158128502 | 12 | 82.626 | KV453012.1 | 1532029 | 12-scf00276 | 12 |
| AX-158128504 | 12 | 82.626 | KV453012.1 | 1533096 | 12-scf00276 | 12 |
| AX-158128505 | 12 | 82.626 | KV453012.1 | 1533611 | 12-scf00276 | 12 |
| AX-158128506 | 12 | 82.626 | KV453012.1 | 1533935 | 12-scf00276 | 12 |
| AX-157829830 | 12 | 82.626 | KV453012.1 | 1542215 | 12-scf00276 | 12 |
| AX-158128509 | 12 | 82.626 | KV453012.1 | 1546052 | 12-scf00276 | 12 |

|              |    |        |            |         |             |    |
|--------------|----|--------|------------|---------|-------------|----|
| AX-158128511 | 12 | 82.626 | KV453012.1 | 1550002 | 12-scf00276 | 12 |
| AX-158128513 | 12 | 82.626 | KV453012.1 | 1554414 | 12-scf00276 | 12 |
| AX-158128516 | 12 | 82.626 | KV453012.1 | 1558613 | 12-scf00276 | 12 |
| AX-158128517 | 12 | 82.626 | KV453012.1 | 1558692 | 12-scf00276 | 12 |
| AX-158380216 | 12 | 82.626 | KV453012.1 | 1559911 | 12-scf00276 | 12 |
| AX-158128521 | 12 | 82.626 | KV453012.1 | 1566714 | 12-scf00276 | 12 |
| AX-158128522 | 12 | 82.626 | KV453012.1 | 1567535 | 12-scf00276 | 12 |
| AX-158128526 | 12 | 82.626 | KV453012.1 | 1572176 | 12-scf00276 | 12 |
| AX-157886153 | 12 | 82.626 | KV453012.1 | 1576275 | 12-scf00276 | 12 |
| AX-158128531 | 12 | 82.626 | KV453012.1 | 1579439 | 12-scf00276 | 12 |
| AX-158128533 | 12 | 82.626 | KV453012.1 | 1583253 | 12-scf00276 | 12 |
| AX-157712170 | 12 | 82.626 | KV453012.1 | 1612218 | 12-scf00276 | 12 |
| AX-158128669 | 12 | 82.626 | KV453013.1 | 186050  | 12-scf00278 | 12 |
| AX-158128840 | 12 | 82.626 | KV453013.1 | 521157  | 12-scf00278 | 12 |
| AX-158129407 | 12 | 82.626 | KV453014.1 | 676919  | 12-scf00279 | 12 |
| AX-158128527 | 12 | 82.651 | KV453012.1 | 1572778 | 12-scf00276 | 12 |
| AX-158128537 | 12 | 82.671 | KV453012.1 | 1595229 | 12-scf00276 | 12 |
| AX-157746001 | 12 | 82.683 | KV453012.1 | 1596058 | 12-scf00276 | 12 |
| AX-157754961 | 12 | 82.683 | KV453013.1 | 163282  | 12-scf00278 | 12 |
| AX-157829790 | 12 | 82.735 | KV453012.1 | 953592  | 12-scf00276 | 12 |
| AX-158128343 | 12 | 82.735 | KV453012.1 | 1024041 | 12-scf00276 | 12 |
| AX-157829799 | 12 | 82.735 | KV453012.1 | 1042599 | 12-scf00276 | 12 |
| AX-158128369 | 12 | 82.735 | KV453012.1 | 1067070 | 12-scf00276 | 12 |
| AX-157748553 | 12 | 82.735 | KV453012.1 | 1227897 | 12-scf00276 | 12 |
| AX-158128469 | 12 | 82.735 | KV453012.1 | 1482137 | 12-scf00276 | 12 |
| AX-158128473 | 12 | 82.735 | KV453012.1 | 1487360 | 12-scf00276 | 12 |
| AX-158128539 | 12 | 82.735 | KV453012.1 | 1600115 | 12-scf00276 | 12 |
| AX-157720792 | 12 | 82.735 | KV453012.1 | 1600578 | 12-scf00276 | 12 |
| AX-157829834 | 12 | 82.735 | KV453012.1 | 1600979 | 12-scf00276 | 12 |
| AX-157829835 | 12 | 82.735 | KV453012.1 | 1601990 | 12-scf00276 | 12 |
| AX-157715790 | 12 | 82.735 | KV453012.1 | 1602479 | 12-scf00276 | 12 |
| AX-158128540 | 12 | 82.735 | KV453012.1 | 1605449 | 12-scf00276 | 12 |
| AX-158128541 | 12 | 82.735 | KV453012.1 | 1605678 | 12-scf00276 | 12 |
| AX-158128543 | 12 | 82.735 | KV453012.1 | 1614707 | 12-scf00276 | 12 |
| AX-158128545 | 12 | 82.735 | KV453012.1 | 1618235 | 12-scf00276 | 12 |
| AX-158128547 | 12 | 82.735 | KV453012.1 | 1627403 | 12-scf00276 | 12 |
| AX-158128548 | 12 | 82.735 | KV453012.1 | 1628149 | 12-scf00276 | 12 |
| AX-158128549 | 12 | 82.735 | KV453012.1 | 1629811 | 12-scf00276 | 12 |
| AX-157829839 | 12 | 82.735 | KV453012.1 | 1631941 | 12-scf00276 | 12 |
| AX-158128573 | 12 | 82.735 | KV453013.1 | 61273   | 12-scf00278 | 12 |
| AX-158128641 | 12 | 82.735 | KV453013.1 | 150287  | 12-scf00278 | 12 |
| AX-158128340 | 12 | 82.845 | KV453012.1 | 1019509 | 12-scf00276 | 12 |
| AX-158128551 | 12 | 82.845 | KV453012.1 | 1635755 | 12-scf00276 | 12 |
| AX-158128553 | 12 | 82.845 | KV453012.1 | 1637149 | 12-scf00276 | 12 |
| AX-158128556 | 12 | 82.845 | KV453013.1 | 8204    | 12-scf00278 | 12 |
| AX-158128558 | 12 | 82.845 | KV453013.1 | 9006    | 12-scf00278 | 12 |
| AX-158128560 | 12 | 82.845 | KV453013.1 | 10952   | 12-scf00278 | 12 |
| AX-157866223 | 12 | 82.845 | KV453013.1 | 29107   | 12-scf00278 | 12 |
| AX-158129159 | 12 | 82.845 | KV453014.1 | 258474  | 12-scf00279 | 12 |
| AX-158129186 | 12 | 82.845 | KV453014.1 | 294197  | 12-scf00279 | 12 |
| AX-158129215 | 12 | 82.845 | KV453014.1 | 332524  | 12-scf00279 | 12 |

|              |    |        |            |         |             |    |
|--------------|----|--------|------------|---------|-------------|----|
| AX-158129226 | 12 | 82.845 | KV453014.1 | 350527  | 12-scf00279 | 12 |
| AX-158129745 | 12 | 82.845 | KV453016.1 | 298225  | 12-scf00280 | 12 |
| AX-158129766 | 12 | 82.845 | KV453016.1 | 349827  | 12-scf00280 | 12 |
| AX-158130008 | 12 | 82.845 | KV453015.1 | 177049  | 12-scf00281 | 12 |
| AX-157743579 | 12 | 82.845 | KV453015.1 | 179181  | 12-scf00281 | 12 |
| AX-158130011 | 12 | 82.845 | KV453015.1 | 200791  | 12-scf00281 | 12 |
| AX-158130017 | 12 | 82.845 | KV453015.1 | 211699  | 12-scf00281 | 12 |
| AX-158128259 | 12 | 83.063 | KV453012.1 | 876809  | 12-scf00276 | 12 |
| AX-157724242 | 12 | 83.063 | KV453012.1 | 1080872 | 12-scf00276 | 12 |
| AX-157746683 | 12 | 83.063 | KV453012.1 | 1538196 | 12-scf00276 | 12 |
| AX-157829827 | 12 | 83.063 | KV453012.1 | 1538433 | 12-scf00276 | 12 |
| AX-157722689 | 12 | 83.063 | KV453012.1 | 1560162 | 12-scf00276 | 12 |
| AX-157744897 | 12 | 83.063 | KV453012.1 | 1577134 | 12-scf00276 | 12 |
| AX-157829832 | 12 | 83.063 | KV453012.1 | 1577788 | 12-scf00276 | 12 |
| AX-158128564 | 12 | 83.063 | KV453013.1 | 33344   | 12-scf00278 | 12 |
| AX-157829841 | 12 | 83.063 | KV453013.1 | 33561   | 12-scf00278 | 12 |
| AX-158128568 | 12 | 83.063 | KV453013.1 | 47936   | 12-scf00278 | 12 |
| AX-157719402 | 12 | 83.063 | KV453013.1 | 50863   | 12-scf00278 | 12 |
| AX-157719595 | 12 | 83.063 | KV453013.1 | 54261   | 12-scf00278 | 12 |
| AX-158392814 | 12 | 83.063 | KV453013.1 | 65587   | 12-scf00278 | 12 |
| AX-158392815 | 12 | 83.063 | KV453013.1 | 68053   | 12-scf00278 | 12 |
| AX-158128581 | 12 | 83.063 | KV453013.1 | 75159   | 12-scf00278 | 12 |
| AX-158128583 | 12 | 83.063 | KV453013.1 | 77438   | 12-scf00278 | 12 |
| AX-158128585 | 12 | 83.063 | KV453013.1 | 79828   | 12-scf00278 | 12 |
| AX-157829848 | 12 | 83.063 | KV453013.1 | 80554   | 12-scf00278 | 12 |
| AX-158128586 | 12 | 83.063 | KV453013.1 | 81215   | 12-scf00278 | 12 |
| AX-157829849 | 12 | 83.063 | KV453013.1 | 81599   | 12-scf00278 | 12 |
| AX-158128587 | 12 | 83.063 | KV453013.1 | 82844   | 12-scf00278 | 12 |
| AX-158128589 | 12 | 83.063 | KV453013.1 | 88666   | 12-scf00278 | 12 |
| AX-158128591 | 12 | 83.063 | KV453013.1 | 91865   | 12-scf00278 | 12 |
| AX-158128598 | 12 | 83.063 | KV453013.1 | 100463  | 12-scf00278 | 12 |
| AX-158128599 | 12 | 83.063 | KV453013.1 | 101323  | 12-scf00278 | 12 |
| AX-157721266 | 12 | 83.063 | KV453013.1 | 103730  | 12-scf00278 | 12 |
| AX-158128604 | 12 | 83.063 | KV453013.1 | 106726  | 12-scf00278 | 12 |
| AX-158128606 | 12 | 83.063 | KV453013.1 | 107923  | 12-scf00278 | 12 |
| AX-157773763 | 12 | 83.063 | KV453013.1 | 112542  | 12-scf00278 | 12 |
| AX-158128611 | 12 | 83.063 | KV453013.1 | 116187  | 12-scf00278 | 12 |
| AX-158128612 | 12 | 83.063 | KV453013.1 | 116860  | 12-scf00278 | 12 |
| AX-158128613 | 12 | 83.063 | KV453013.1 | 117613  | 12-scf00278 | 12 |
| AX-158128614 | 12 | 83.063 | KV453013.1 | 118071  | 12-scf00278 | 12 |
| AX-158128616 | 12 | 83.063 | KV453013.1 | 120775  | 12-scf00278 | 12 |
| AX-158128617 | 12 | 83.063 | KV453013.1 | 124008  | 12-scf00278 | 12 |
| AX-158128618 | 12 | 83.063 | KV453013.1 | 124290  | 12-scf00278 | 12 |
| AX-157772328 | 12 | 83.063 | KV453013.1 | 124652  | 12-scf00278 | 12 |
| AX-158128625 | 12 | 83.063 | KV453013.1 | 134989  | 12-scf00278 | 12 |
| AX-158128639 | 12 | 83.063 | KV453013.1 | 149253  | 12-scf00278 | 12 |
| AX-158128643 | 12 | 83.063 | KV453013.1 | 153295  | 12-scf00278 | 12 |
| AX-158128644 | 12 | 83.063 | KV453013.1 | 155525  | 12-scf00278 | 12 |
| AX-157720023 | 12 | 83.063 | KV453013.1 | 156928  | 12-scf00278 | 12 |
| AX-158128647 | 12 | 83.063 | KV453013.1 | 159856  | 12-scf00278 | 12 |
| AX-158128648 | 12 | 83.063 | KV453013.1 | 160710  | 12-scf00278 | 12 |

|              |    |        |            |         |             |    |
|--------------|----|--------|------------|---------|-------------|----|
| AX-158128651 | 12 | 83.063 | KV453013.1 | 166088  | 12-scf00278 | 12 |
| AX-158128652 | 12 | 83.063 | KV453013.1 | 166528  | 12-scf00278 | 12 |
| AX-158128657 | 12 | 83.063 | KV453013.1 | 172081  | 12-scf00278 | 12 |
| AX-158128658 | 12 | 83.063 | KV453013.1 | 172873  | 12-scf00278 | 12 |
| AX-158128664 | 12 | 83.063 | KV453013.1 | 178387  | 12-scf00278 | 12 |
| AX-158128666 | 12 | 83.063 | KV453013.1 | 180372  | 12-scf00278 | 12 |
| AX-158128667 | 12 | 83.063 | KV453013.1 | 180782  | 12-scf00278 | 12 |
| AX-158128668 | 12 | 83.063 | KV453013.1 | 183003  | 12-scf00278 | 12 |
| AX-157758521 | 12 | 83.063 | KV453013.1 | 184783  | 12-scf00278 | 12 |
| AX-157740716 | 12 | 83.063 | KV453013.1 | 187042  | 12-scf00278 | 12 |
| AX-157829853 | 12 | 83.063 | KV453013.1 | 187254  | 12-scf00278 | 12 |
| AX-158128670 | 12 | 83.063 | KV453013.1 | 188237  | 12-scf00278 | 12 |
| AX-157829854 | 12 | 83.063 | KV453013.1 | 192965  | 12-scf00278 | 12 |
| AX-157746826 | 12 | 83.063 | KV453013.1 | 202293  | 12-scf00278 | 12 |
| AX-157754574 | 12 | 83.063 | KV453013.1 | 203799  | 12-scf00278 | 12 |
| AX-158128674 | 12 | 83.063 | KV453013.1 | 205883  | 12-scf00278 | 12 |
| AX-158128675 | 12 | 83.063 | KV453013.1 | 207044  | 12-scf00278 | 12 |
| AX-158128676 | 12 | 83.063 | KV453013.1 | 210911  | 12-scf00278 | 12 |
| AX-157871369 | 12 | 83.063 | KV453013.1 | 211995  | 12-scf00278 | 12 |
| AX-158128679 | 12 | 83.063 | KV453013.1 | 218253  | 12-scf00278 | 12 |
| AX-157739967 | 12 | 83.063 | KV453013.1 | 219408  | 12-scf00278 | 12 |
| AX-157740604 | 12 | 83.063 | KV453013.1 | 221945  | 12-scf00278 | 12 |
| AX-157857813 | 12 | 83.063 | KV453013.1 | 240991  | 12-scf00278 | 12 |
| AX-157741029 | 12 | 83.063 | KV453013.1 | 241819  | 12-scf00278 | 12 |
| AX-158128698 | 12 | 83.063 | KV453013.1 | 253684  | 12-scf00278 | 12 |
| AX-158128707 | 12 | 83.063 | KV453013.1 | 269998  | 12-scf00278 | 12 |
| AX-157718110 | 12 | 83.063 | KV453013.1 | 272548  | 12-scf00278 | 12 |
| AX-157773099 | 12 | 83.063 | KV453013.1 | 273055  | 12-scf00278 | 12 |
| AX-158128711 | 12 | 83.063 | KV453013.1 | 284451  | 12-scf00278 | 12 |
| AX-158128715 | 12 | 83.063 | KV453013.1 | 291938  | 12-scf00278 | 12 |
| AX-158128716 | 12 | 83.063 | KV453013.1 | 292375  | 12-scf00278 | 12 |
| AX-158128720 | 12 | 83.063 | KV453013.1 | 299989  | 12-scf00278 | 12 |
| AX-158128728 | 12 | 83.063 | KV453013.1 | 319092  | 12-scf00278 | 12 |
| AX-158128732 | 12 | 83.063 | KV453013.1 | 331453  | 12-scf00278 | 12 |
| AX-158128775 | 12 | 83.063 | KV453013.1 | 398927  | 12-scf00278 | 12 |
| AX-158128782 | 12 | 83.063 | KV453013.1 | 414132  | 12-scf00278 | 12 |
| AX-158385209 | 12 | 83.063 | KV453013.1 | 546345  | 12-scf00278 | 12 |
| AX-158128862 | 12 | 83.063 | KV453013.1 | 547549  | 12-scf00278 | 12 |
| AX-157829890 | 12 | 83.063 | KV453013.1 | 569921  | 12-scf00278 | 12 |
| AX-158128918 | 12 | 83.063 | KV453013.1 | 731701  | 12-scf00278 | 12 |
| AX-158128920 | 12 | 83.063 | KV453013.1 | 737319  | 12-scf00278 | 12 |
| AX-157750558 | 12 | 83.063 | KV453013.1 | 759219  | 12-scf00278 | 12 |
| AX-158128480 | 12 | 83.281 | KV453012.1 | 1494423 | 12-scf00276 | 12 |
| AX-157829842 | 12 | 83.281 | KV453013.1 | 35982   | 12-scf00278 | 12 |
| AX-157829847 | 12 | 83.281 | KV453013.1 | 63407   | 12-scf00278 | 12 |
| AX-158128595 | 12 | 83.281 | KV453013.1 | 97576   | 12-scf00278 | 12 |
| AX-158128608 | 12 | 83.281 | KV453013.1 | 109850  | 12-scf00278 | 12 |
| AX-158128609 | 12 | 83.281 | KV453013.1 | 112421  | 12-scf00278 | 12 |
| AX-158392816 | 12 | 83.281 | KV453013.1 | 114361  | 12-scf00278 | 12 |
| AX-158128610 | 12 | 83.281 | KV453013.1 | 114647  | 12-scf00278 | 12 |
| AX-158128653 | 12 | 83.281 | KV453013.1 | 166855  | 12-scf00278 | 12 |

|              |    |        |            |        |             |    |
|--------------|----|--------|------------|--------|-------------|----|
| AX-158128654 | 12 | 83.281 | KV453013.1 | 168287 | 12-scf00278 | 12 |
| AX-157829852 | 12 | 83.281 | KV453013.1 | 184300 | 12-scf00278 | 12 |
| AX-158128677 | 12 | 83.281 | KV453013.1 | 212735 | 12-scf00278 | 12 |
| AX-157708592 | 12 | 83.281 | KV453013.1 | 220196 | 12-scf00278 | 12 |
| AX-158128687 | 12 | 83.281 | KV453013.1 | 228212 | 12-scf00278 | 12 |
| AX-158128688 | 12 | 83.281 | KV453013.1 | 228955 | 12-scf00278 | 12 |
| AX-158128689 | 12 | 83.281 | KV453013.1 | 229562 | 12-scf00278 | 12 |
| AX-158128690 | 12 | 83.281 | KV453013.1 | 230188 | 12-scf00278 | 12 |
| AX-158128691 | 12 | 83.281 | KV453013.1 | 230739 | 12-scf00278 | 12 |
| AX-158128693 | 12 | 83.281 | KV453013.1 | 239508 | 12-scf00278 | 12 |
| AX-158128696 | 12 | 83.281 | KV453013.1 | 246205 | 12-scf00278 | 12 |
| AX-158128702 | 12 | 83.281 | KV453013.1 | 263192 | 12-scf00278 | 12 |
| AX-158128703 | 12 | 83.281 | KV453013.1 | 263470 | 12-scf00278 | 12 |
| AX-158128704 | 12 | 83.281 | KV453013.1 | 265367 | 12-scf00278 | 12 |
| AX-157829861 | 12 | 83.281 | KV453013.1 | 273761 | 12-scf00278 | 12 |
| AX-158128708 | 12 | 83.281 | KV453013.1 | 278729 | 12-scf00278 | 12 |
| AX-157829864 | 12 | 83.281 | KV453013.1 | 287087 | 12-scf00278 | 12 |
| AX-158128712 | 12 | 83.281 | KV453013.1 | 287757 | 12-scf00278 | 12 |
| AX-158128713 | 12 | 83.281 | KV453013.1 | 288727 | 12-scf00278 | 12 |
| AX-158380218 | 12 | 83.281 | KV453013.1 | 292961 | 12-scf00278 | 12 |
| AX-157715624 | 12 | 83.281 | KV453013.1 | 312903 | 12-scf00278 | 12 |
| AX-158128725 | 12 | 83.281 | KV453013.1 | 314950 | 12-scf00278 | 12 |
| AX-157829865 | 12 | 83.281 | KV453013.1 | 315338 | 12-scf00278 | 12 |
| AX-158128726 | 12 | 83.281 | KV453013.1 | 315583 | 12-scf00278 | 12 |
| AX-158128727 | 12 | 83.281 | KV453013.1 | 317149 | 12-scf00278 | 12 |
| AX-157829867 | 12 | 83.281 | KV453013.1 | 318148 | 12-scf00278 | 12 |
| AX-157699527 | 12 | 83.281 | KV453013.1 | 321997 | 12-scf00278 | 12 |
| AX-157829868 | 12 | 83.281 | KV453013.1 | 323003 | 12-scf00278 | 12 |
| AX-158128730 | 12 | 83.281 | KV453013.1 | 326707 | 12-scf00278 | 12 |
| AX-157747165 | 12 | 83.281 | KV453013.1 | 327287 | 12-scf00278 | 12 |
| AX-157829871 | 12 | 83.281 | KV453013.1 | 331313 | 12-scf00278 | 12 |
| AX-158128736 | 12 | 83.281 | KV453013.1 | 334626 | 12-scf00278 | 12 |
| AX-158128737 | 12 | 83.281 | KV453013.1 | 336826 | 12-scf00278 | 12 |
| AX-158128738 | 12 | 83.281 | KV453013.1 | 337137 | 12-scf00278 | 12 |
| AX-158128743 | 12 | 83.281 | KV453013.1 | 344345 | 12-scf00278 | 12 |
| AX-158128745 | 12 | 83.281 | KV453013.1 | 345660 | 12-scf00278 | 12 |
| AX-158128746 | 12 | 83.281 | KV453013.1 | 346957 | 12-scf00278 | 12 |
| AX-158128748 | 12 | 83.281 | KV453013.1 | 354197 | 12-scf00278 | 12 |
| AX-158128751 | 12 | 83.281 | KV453013.1 | 358282 | 12-scf00278 | 12 |
| AX-158128752 | 12 | 83.281 | KV453013.1 | 358778 | 12-scf00278 | 12 |
| AX-158128755 | 12 | 83.281 | KV453013.1 | 360986 | 12-scf00278 | 12 |
| AX-157829874 | 12 | 83.281 | KV453013.1 | 408285 | 12-scf00278 | 12 |
| AX-158128876 | 12 | 83.281 | KV453013.1 | 571050 | 12-scf00278 | 12 |
| AX-158128892 | 12 | 83.281 | KV453013.1 | 705177 | 12-scf00278 | 12 |
| AX-157857819 | 12 | 83.281 | KV453013.1 | 723625 | 12-scf00278 | 12 |
| AX-158128917 | 12 | 83.281 | KV453013.1 | 730658 | 12-scf00278 | 12 |
| AX-158129040 | 12 | 83.281 | KV453014.1 | 118345 | 12-scf00279 | 12 |
| AX-157727387 | 12 | 83.281 | KV453014.1 | 215358 | 12-scf00279 | 12 |
| AX-158129187 | 12 | 83.281 | KV453014.1 | 294721 | 12-scf00279 | 12 |
| AX-158129188 | 12 | 83.281 | KV453014.1 | 295390 | 12-scf00279 | 12 |
| AX-158129189 | 12 | 83.281 | KV453014.1 | 296360 | 12-scf00279 | 12 |

|              |    |        |            |         |             |    |
|--------------|----|--------|------------|---------|-------------|----|
| AX-158129190 | 12 | 83.281 | KV453014.1 | 297111  | 12-scf00279 | 12 |
| AX-158129244 | 12 | 83.281 | KV453014.1 | 375700  | 12-scf00279 | 12 |
| AX-158129257 | 12 | 83.281 | KV453014.1 | 412989  | 12-scf00279 | 12 |
| AX-157710795 | 12 | 83.281 | KV453014.1 | 542748  | 12-scf00279 | 12 |
| AX-158129354 | 12 | 83.281 | KV453014.1 | 578530  | 12-scf00279 | 12 |
| AX-158385220 | 12 | 83.281 | KV453014.1 | 758788  | 12-scf00279 | 12 |
| AX-157714096 | 12 | 83.281 | KV453016.1 | 603010  | 12-scf00280 | 12 |
| AX-157829816 | 12 | 83.5   | KV453012.1 | 1378685 | 12-scf00276 | 12 |
| AX-158128458 | 12 | 83.5   | KV453012.1 | 1404493 | 12-scf00276 | 12 |
| AX-157829820 | 12 | 83.5   | KV453012.1 | 1488536 | 12-scf00276 | 12 |
| AX-158408047 | 12 | 83.5   | KV453012.1 | 1583545 | 12-scf00276 | 12 |
| AX-157717910 | 12 | 83.5   | KV453013.1 | 15980   | 12-scf00278 | 12 |
| AX-158128563 | 12 | 83.5   | KV453013.1 | 29649   | 12-scf00278 | 12 |
| AX-158128659 | 12 | 83.5   | KV453013.1 | 173122  | 12-scf00278 | 12 |
| AX-158128709 | 12 | 83.5   | KV453013.1 | 283792  | 12-scf00278 | 12 |
| AX-158128723 | 12 | 83.5   | KV453013.1 | 311093  | 12-scf00278 | 12 |
| AX-158128724 | 12 | 83.5   | KV453013.1 | 311561  | 12-scf00278 | 12 |
| AX-157829869 | 12 | 83.5   | KV453013.1 | 328039  | 12-scf00278 | 12 |
| AX-157721192 | 12 | 83.5   | KV453013.1 | 332617  | 12-scf00278 | 12 |
| AX-158128753 | 12 | 83.5   | KV453013.1 | 359220  | 12-scf00278 | 12 |
| AX-158128757 | 12 | 83.5   | KV453013.1 | 366262  | 12-scf00278 | 12 |
| AX-158128758 | 12 | 83.5   | KV453013.1 | 367100  | 12-scf00278 | 12 |
| AX-157718086 | 12 | 83.5   | KV453013.1 | 367461  | 12-scf00278 | 12 |
| AX-158128761 | 12 | 83.5   | KV453013.1 | 376080  | 12-scf00278 | 12 |
| AX-158128762 | 12 | 83.5   | KV453013.1 | 378321  | 12-scf00278 | 12 |
| AX-158128763 | 12 | 83.5   | KV453013.1 | 378907  | 12-scf00278 | 12 |
| AX-158128765 | 12 | 83.5   | KV453013.1 | 381043  | 12-scf00278 | 12 |
| AX-158128766 | 12 | 83.5   | KV453013.1 | 382126  | 12-scf00278 | 12 |
| AX-158128768 | 12 | 83.5   | KV453013.1 | 385450  | 12-scf00278 | 12 |
| AX-157722509 | 12 | 83.5   | KV453013.1 | 403092  | 12-scf00278 | 12 |
| AX-157755894 | 12 | 83.5   | KV453013.1 | 405089  | 12-scf00278 | 12 |
| AX-158128778 | 12 | 83.5   | KV453013.1 | 405878  | 12-scf00278 | 12 |
| AX-157829875 | 12 | 83.5   | KV453013.1 | 408642  | 12-scf00278 | 12 |
| AX-158385207 | 12 | 83.5   | KV453013.1 | 409702  | 12-scf00278 | 12 |
| AX-158128779 | 12 | 83.5   | KV453013.1 | 410517  | 12-scf00278 | 12 |
| AX-157727280 | 12 | 83.5   | KV453013.1 | 412802  | 12-scf00278 | 12 |
| AX-158128783 | 12 | 83.5   | KV453013.1 | 416380  | 12-scf00278 | 12 |
| AX-158128788 | 12 | 83.5   | KV453013.1 | 421286  | 12-scf00278 | 12 |
| AX-158128789 | 12 | 83.5   | KV453013.1 | 422345  | 12-scf00278 | 12 |
| AX-158128792 | 12 | 83.5   | KV453013.1 | 427295  | 12-scf00278 | 12 |
| AX-158128794 | 12 | 83.5   | KV453013.1 | 429055  | 12-scf00278 | 12 |
| AX-157857817 | 12 | 83.5   | KV453013.1 | 429497  | 12-scf00278 | 12 |
| AX-158128795 | 12 | 83.5   | KV453013.1 | 432450  | 12-scf00278 | 12 |
| AX-158128796 | 12 | 83.5   | KV453013.1 | 432974  | 12-scf00278 | 12 |
| AX-158128797 | 12 | 83.5   | KV453013.1 | 433281  | 12-scf00278 | 12 |
| AX-157829877 | 12 | 83.5   | KV453013.1 | 436239  | 12-scf00278 | 12 |
| AX-158128798 | 12 | 83.5   | KV453013.1 | 437097  | 12-scf00278 | 12 |
| AX-158128800 | 12 | 83.5   | KV453013.1 | 440142  | 12-scf00278 | 12 |
| AX-158128801 | 12 | 83.5   | KV453013.1 | 440726  | 12-scf00278 | 12 |
| AX-158128803 | 12 | 83.5   | KV453013.1 | 444879  | 12-scf00278 | 12 |
| AX-158128804 | 12 | 83.5   | KV453013.1 | 446951  | 12-scf00278 | 12 |

|              |    |      |            |        |             |    |
|--------------|----|------|------------|--------|-------------|----|
| AX-157757310 | 12 | 83.5 | KV453013.1 | 448659 | 12-scf00278 | 12 |
| AX-158128806 | 12 | 83.5 | KV453013.1 | 455365 | 12-scf00278 | 12 |
| AX-158128808 | 12 | 83.5 | KV453013.1 | 462597 | 12-scf00278 | 12 |
| AX-158128810 | 12 | 83.5 | KV453013.1 | 466018 | 12-scf00278 | 12 |
| AX-158128813 | 12 | 83.5 | KV453013.1 | 474979 | 12-scf00278 | 12 |
| AX-158128814 | 12 | 83.5 | KV453013.1 | 475411 | 12-scf00278 | 12 |
| AX-157829879 | 12 | 83.5 | KV453013.1 | 478392 | 12-scf00278 | 12 |
| AX-157772208 | 12 | 83.5 | KV453013.1 | 478632 | 12-scf00278 | 12 |
| AX-157829880 | 12 | 83.5 | KV453013.1 | 478761 | 12-scf00278 | 12 |
| AX-158128817 | 12 | 83.5 | KV453013.1 | 478997 | 12-scf00278 | 12 |
| AX-158128821 | 12 | 83.5 | KV453013.1 | 484662 | 12-scf00278 | 12 |
| AX-158128823 | 12 | 83.5 | KV453013.1 | 485144 | 12-scf00278 | 12 |
| AX-158128824 | 12 | 83.5 | KV453013.1 | 485452 | 12-scf00278 | 12 |
| AX-157829882 | 12 | 83.5 | KV453013.1 | 486042 | 12-scf00278 | 12 |
| AX-157757501 | 12 | 83.5 | KV453013.1 | 489388 | 12-scf00278 | 12 |
| AX-157829883 | 12 | 83.5 | KV453013.1 | 489794 | 12-scf00278 | 12 |
| AX-158128825 | 12 | 83.5 | KV453013.1 | 491742 | 12-scf00278 | 12 |
| AX-158128828 | 12 | 83.5 | KV453013.1 | 496961 | 12-scf00278 | 12 |
| AX-157886155 | 12 | 83.5 | KV453013.1 | 498967 | 12-scf00278 | 12 |
| AX-157722243 | 12 | 83.5 | KV453013.1 | 500202 | 12-scf00278 | 12 |
| AX-157857818 | 12 | 83.5 | KV453013.1 | 501557 | 12-scf00278 | 12 |
| AX-158128831 | 12 | 83.5 | KV453013.1 | 503263 | 12-scf00278 | 12 |
| AX-158128832 | 12 | 83.5 | KV453013.1 | 507603 | 12-scf00278 | 12 |
| AX-158128833 | 12 | 83.5 | KV453013.1 | 512124 | 12-scf00278 | 12 |
| AX-158128834 | 12 | 83.5 | KV453013.1 | 512525 | 12-scf00278 | 12 |
| AX-158128835 | 12 | 83.5 | KV453013.1 | 513082 | 12-scf00278 | 12 |
| AX-158128836 | 12 | 83.5 | KV453013.1 | 513504 | 12-scf00278 | 12 |
| AX-157829884 | 12 | 83.5 | KV453013.1 | 517253 | 12-scf00278 | 12 |
| AX-158128842 | 12 | 83.5 | KV453013.1 | 523309 | 12-scf00278 | 12 |
| AX-158128843 | 12 | 83.5 | KV453013.1 | 524199 | 12-scf00278 | 12 |
| AX-158128852 | 12 | 83.5 | KV453013.1 | 537362 | 12-scf00278 | 12 |
| AX-157829892 | 12 | 83.5 | KV453013.1 | 570138 | 12-scf00278 | 12 |
| AX-157829893 | 12 | 83.5 | KV453013.1 | 574389 | 12-scf00278 | 12 |
| AX-158128878 | 12 | 83.5 | KV453013.1 | 575523 | 12-scf00278 | 12 |
| AX-157742784 | 12 | 83.5 | KV453013.1 | 575931 | 12-scf00278 | 12 |
| AX-157742383 | 12 | 83.5 | KV453013.1 | 577632 | 12-scf00278 | 12 |
| AX-158380221 | 12 | 83.5 | KV453013.1 | 702768 | 12-scf00278 | 12 |
| AX-158128893 | 12 | 83.5 | KV453013.1 | 705828 | 12-scf00278 | 12 |
| AX-158128895 | 12 | 83.5 | KV453013.1 | 707706 | 12-scf00278 | 12 |
| AX-158128896 | 12 | 83.5 | KV453013.1 | 708113 | 12-scf00278 | 12 |
| AX-158128899 | 12 | 83.5 | KV453013.1 | 710224 | 12-scf00278 | 12 |
| AX-157726534 | 12 | 83.5 | KV453013.1 | 711567 | 12-scf00278 | 12 |
| AX-158128907 | 12 | 83.5 | KV453013.1 | 719249 | 12-scf00278 | 12 |
| AX-157829897 | 12 | 83.5 | KV453013.1 | 720113 | 12-scf00278 | 12 |
| AX-158128909 | 12 | 83.5 | KV453013.1 | 722195 | 12-scf00278 | 12 |
| AX-157719491 | 12 | 83.5 | KV453013.1 | 724575 | 12-scf00278 | 12 |
| AX-157871371 | 12 | 83.5 | KV453013.1 | 725677 | 12-scf00278 | 12 |
| AX-158128910 | 12 | 83.5 | KV453013.1 | 726291 | 12-scf00278 | 12 |
| AX-158128911 | 12 | 83.5 | KV453013.1 | 726815 | 12-scf00278 | 12 |
| AX-158128912 | 12 | 83.5 | KV453013.1 | 727325 | 12-scf00278 | 12 |
| AX-158128913 | 12 | 83.5 | KV453013.1 | 727788 | 12-scf00278 | 12 |

|              |    |        |            |         |             |    |
|--------------|----|--------|------------|---------|-------------|----|
| AX-158128914 | 12 | 83.5   | KV453013.1 | 728095  | 12-scf00278 | 12 |
| AX-158128915 | 12 | 83.5   | KV453013.1 | 728358  | 12-scf00278 | 12 |
| AX-158128916 | 12 | 83.5   | KV453013.1 | 730231  | 12-scf00278 | 12 |
| AX-158128921 | 12 | 83.5   | KV453013.1 | 737977  | 12-scf00278 | 12 |
| AX-158128923 | 12 | 83.5   | KV453013.1 | 739163  | 12-scf00278 | 12 |
| AX-158128924 | 12 | 83.5   | KV453013.1 | 740906  | 12-scf00278 | 12 |
| AX-158408051 | 12 | 83.5   | KV453013.1 | 741537  | 12-scf00278 | 12 |
| AX-158128925 | 12 | 83.5   | KV453013.1 | 743200  | 12-scf00278 | 12 |
| AX-158128927 | 12 | 83.5   | KV453013.1 | 745559  | 12-scf00278 | 12 |
| AX-158128928 | 12 | 83.5   | KV453013.1 | 745998  | 12-scf00278 | 12 |
| AX-158128929 | 12 | 83.5   | KV453013.1 | 765384  | 12-scf00278 | 12 |
| AX-158128933 | 12 | 83.5   | KV453013.1 | 773091  | 12-scf00278 | 12 |
| AX-157717576 | 12 | 83.5   | KV453013.1 | 853191  | 12-scf00278 | 12 |
| AX-158128978 | 12 | 83.5   | KV453014.1 | 15111   | 12-scf00279 | 12 |
| AX-158128986 | 12 | 83.5   | KV453014.1 | 30082   | 12-scf00279 | 12 |
| AX-158128988 | 12 | 83.5   | KV453014.1 | 36785   | 12-scf00279 | 12 |
| AX-158128998 | 12 | 83.5   | KV453014.1 | 56178   | 12-scf00279 | 12 |
| AX-158129004 | 12 | 83.5   | KV453014.1 | 62168   | 12-scf00279 | 12 |
| AX-158129006 | 12 | 83.5   | KV453014.1 | 63387   | 12-scf00279 | 12 |
| AX-158129013 | 12 | 83.5   | KV453014.1 | 75633   | 12-scf00279 | 12 |
| AX-157771609 | 12 | 83.5   | KV453014.1 | 109261  | 12-scf00279 | 12 |
| AX-158129066 | 12 | 83.5   | KV453014.1 | 149367  | 12-scf00279 | 12 |
| AX-158129086 | 12 | 83.5   | KV453014.1 | 173895  | 12-scf00279 | 12 |
| AX-158129232 | 12 | 83.5   | KV453014.1 | 356126  | 12-scf00279 | 12 |
| AX-158129305 | 12 | 83.5   | KV453014.1 | 501850  | 12-scf00279 | 12 |
| AX-158129306 | 12 | 83.5   | KV453014.1 | 502418  | 12-scf00279 | 12 |
| AX-158129395 | 12 | 83.5   | KV453014.1 | 661426  | 12-scf00279 | 12 |
| AX-158129460 | 12 | 83.5   | KV453014.1 | 742430  | 12-scf00279 | 12 |
| AX-158129794 | 12 | 83.5   | KV453016.1 | 417901  | 12-scf00280 | 12 |
| AX-158129853 | 12 | 83.5   | KV453016.1 | 512218  | 12-scf00280 | 12 |
| AX-157713566 | 12 | 83.5   | KV453016.1 | 560397  | 12-scf00280 | 12 |
| AX-158130064 | 12 | 83.5   | KV453016.1 | 736193  | 12-scf00280 | 12 |
| AX-157792221 | 12 | 83.5   | KV453019.1 | 18035   | 12-scf00285 | 12 |
| AX-157792224 | 12 | 83.5   | KV453019.1 | 38724   | 12-scf00285 | 12 |
| AX-158128484 | 12 | 83.609 | KV453012.1 | 1501918 | 12-scf00276 | 12 |
| AX-158128588 | 12 | 83.609 | KV453013.1 | 83084   | 12-scf00278 | 12 |
| AX-158128692 | 12 | 83.609 | KV453013.1 | 233643  | 12-scf00278 | 12 |
| AX-157829859 | 12 | 83.609 | KV453013.1 | 247540  | 12-scf00278 | 12 |
| AX-158128759 | 12 | 83.609 | KV453013.1 | 367978  | 12-scf00278 | 12 |
| AX-158128769 | 12 | 83.609 | KV453013.1 | 388391  | 12-scf00278 | 12 |
| AX-158128770 | 12 | 83.609 | KV453013.1 | 389082  | 12-scf00278 | 12 |
| AX-157886154 | 12 | 83.609 | KV453013.1 | 390147  | 12-scf00278 | 12 |
| AX-158128781 | 12 | 83.609 | KV453013.1 | 412524  | 12-scf00278 | 12 |
| AX-158128793 | 12 | 83.609 | KV453013.1 | 427907  | 12-scf00278 | 12 |
| AX-158411474 | 12 | 83.609 | KV453013.1 | 466945  | 12-scf00278 | 12 |
| AX-158128818 | 12 | 83.609 | KV453013.1 | 479275  | 12-scf00278 | 12 |
| AX-157792090 | 12 | 83.609 | KV453013.1 | 494830  | 12-scf00278 | 12 |
| AX-157753163 | 12 | 83.609 | KV453013.1 | 504415  | 12-scf00278 | 12 |
| AX-158128845 | 12 | 83.609 | KV453013.1 | 526551  | 12-scf00278 | 12 |
| AX-158128847 | 12 | 83.609 | KV453013.1 | 528388  | 12-scf00278 | 12 |
| AX-158128854 | 12 | 83.609 | KV453013.1 | 539461  | 12-scf00278 | 12 |



|              |    |        |            |        |             |    |
|--------------|----|--------|------------|--------|-------------|----|
| AX-158128868 | 12 | 83.609 | KV453013.1 | 557136 | 12-scf00278 | 12 |
| AX-158128877 | 12 | 83.609 | KV453013.1 | 571516 | 12-scf00278 | 12 |
| AX-158128897 | 12 | 83.609 | KV453013.1 | 709355 | 12-scf00278 | 12 |
| AX-158128898 | 12 | 83.609 | KV453013.1 | 709520 | 12-scf00278 | 12 |
| AX-158128900 | 12 | 83.609 | KV453013.1 | 711122 | 12-scf00278 | 12 |
| AX-157742356 | 12 | 83.609 | KV453013.1 | 718372 | 12-scf00278 | 12 |
| AX-158128919 | 12 | 83.609 | KV453013.1 | 735267 | 12-scf00278 | 12 |
| AX-158128939 | 12 | 83.609 | KV453013.1 | 780251 | 12-scf00278 | 12 |
| AX-158128942 | 12 | 83.609 | KV453013.1 | 786572 | 12-scf00278 | 12 |
| AX-158128943 | 12 | 83.609 | KV453013.1 | 796483 | 12-scf00278 | 12 |
| AX-158128944 | 12 | 83.609 | KV453013.1 | 799553 | 12-scf00278 | 12 |
| AX-158128947 | 12 | 83.609 | KV453013.1 | 802020 | 12-scf00278 | 12 |
| AX-158380222 | 12 | 83.609 | KV453013.1 | 802304 | 12-scf00278 | 12 |
| AX-158128950 | 12 | 83.609 | KV453013.1 | 807943 | 12-scf00278 | 12 |
| AX-158128952 | 12 | 83.609 | KV453013.1 | 809581 | 12-scf00278 | 12 |
| AX-158128953 | 12 | 83.609 | KV453013.1 | 810253 | 12-scf00278 | 12 |
| AX-157829903 | 12 | 83.609 | KV453013.1 | 815805 | 12-scf00278 | 12 |
| AX-157713951 | 12 | 83.609 | KV453013.1 | 834416 | 12-scf00278 | 12 |
| AX-157717704 | 12 | 83.609 | KV453013.1 | 841536 | 12-scf00278 | 12 |
| AX-157886159 | 12 | 83.609 | KV453014.1 | 13341  | 12-scf00279 | 12 |
| AX-158128979 | 12 | 83.609 | KV453014.1 | 16212  | 12-scf00279 | 12 |
| AX-158128985 | 12 | 83.609 | KV453014.1 | 27026  | 12-scf00279 | 12 |
| AX-158128987 | 12 | 83.609 | KV453014.1 | 34128  | 12-scf00279 | 12 |
| AX-158128991 | 12 | 83.609 | KV453014.1 | 39998  | 12-scf00279 | 12 |
| AX-158128995 | 12 | 83.609 | KV453014.1 | 46219  | 12-scf00279 | 12 |
| AX-157756426 | 12 | 83.609 | KV453014.1 | 47150  | 12-scf00279 | 12 |
| AX-157751648 | 12 | 83.609 | KV453014.1 | 53227  | 12-scf00279 | 12 |
| AX-157829908 | 12 | 83.609 | KV453014.1 | 58329  | 12-scf00279 | 12 |
| AX-157763116 | 12 | 83.609 | KV453014.1 | 60293  | 12-scf00279 | 12 |
| AX-158129003 | 12 | 83.609 | KV453014.1 | 61826  | 12-scf00279 | 12 |
| AX-158129005 | 12 | 83.609 | KV453014.1 | 62936  | 12-scf00279 | 12 |
| AX-158129007 | 12 | 83.609 | KV453014.1 | 64600  | 12-scf00279 | 12 |
| AX-158129008 | 12 | 83.609 | KV453014.1 | 65180  | 12-scf00279 | 12 |
| AX-158129009 | 12 | 83.609 | KV453014.1 | 65404  | 12-scf00279 | 12 |
| AX-157829909 | 12 | 83.609 | KV453014.1 | 70477  | 12-scf00279 | 12 |
| AX-158129014 | 12 | 83.609 | KV453014.1 | 76046  | 12-scf00279 | 12 |
| AX-158129015 | 12 | 83.609 | KV453014.1 | 76694  | 12-scf00279 | 12 |
| AX-158129023 | 12 | 83.609 | KV453014.1 | 88034  | 12-scf00279 | 12 |
| AX-158129029 | 12 | 83.609 | KV453014.1 | 93437  | 12-scf00279 | 12 |
| AX-157742561 | 12 | 83.609 | KV453014.1 | 96527  | 12-scf00279 | 12 |
| AX-158380223 | 12 | 83.609 | KV453014.1 | 99756  | 12-scf00279 | 12 |
| AX-158129034 | 12 | 83.609 | KV453014.1 | 99957  | 12-scf00279 | 12 |
| AX-157775003 | 12 | 83.609 | KV453014.1 | 114945 | 12-scf00279 | 12 |
| AX-158129043 | 12 | 83.609 | KV453014.1 | 121044 | 12-scf00279 | 12 |
| AX-158129044 | 12 | 83.609 | KV453014.1 | 121515 | 12-scf00279 | 12 |
| AX-158129049 | 12 | 83.609 | KV453014.1 | 127500 | 12-scf00279 | 12 |
| AX-158129051 | 12 | 83.609 | KV453014.1 | 132293 | 12-scf00279 | 12 |
| AX-158129053 | 12 | 83.609 | KV453014.1 | 133771 | 12-scf00279 | 12 |
| AX-158129057 | 12 | 83.609 | KV453014.1 | 139360 | 12-scf00279 | 12 |
| AX-158129062 | 12 | 83.609 | KV453014.1 | 146457 | 12-scf00279 | 12 |
| AX-158129078 | 12 | 83.609 | KV453014.1 | 164258 | 12-scf00279 | 12 |

|              |    |        |            |         |             |    |
|--------------|----|--------|------------|---------|-------------|----|
| AX-158129081 | 12 | 83.609 | KV453014.1 | 166270  | 12-scf00279 | 12 |
| AX-158129083 | 12 | 83.609 | KV453014.1 | 167592  | 12-scf00279 | 12 |
| AX-158129090 | 12 | 83.609 | KV453014.1 | 178455  | 12-scf00279 | 12 |
| AX-158129091 | 12 | 83.609 | KV453014.1 | 179674  | 12-scf00279 | 12 |
| AX-158129098 | 12 | 83.609 | KV453014.1 | 186512  | 12-scf00279 | 12 |
| AX-157857823 | 12 | 83.609 | KV453014.1 | 205493  | 12-scf00279 | 12 |
| AX-158129138 | 12 | 83.609 | KV453014.1 | 228906  | 12-scf00279 | 12 |
| AX-158129192 | 12 | 83.609 | KV453014.1 | 301347  | 12-scf00279 | 12 |
| AX-158129193 | 12 | 83.609 | KV453014.1 | 302410  | 12-scf00279 | 12 |
| AX-158129194 | 12 | 83.609 | KV453014.1 | 303744  | 12-scf00279 | 12 |
| AX-158129195 | 12 | 83.609 | KV453014.1 | 304822  | 12-scf00279 | 12 |
| AX-158129196 | 12 | 83.609 | KV453014.1 | 305520  | 12-scf00279 | 12 |
| AX-157723634 | 12 | 83.609 | KV453014.1 | 305953  | 12-scf00279 | 12 |
| AX-158129197 | 12 | 83.609 | KV453014.1 | 307285  | 12-scf00279 | 12 |
| AX-158129198 | 12 | 83.609 | KV453014.1 | 310651  | 12-scf00279 | 12 |
| AX-157753175 | 12 | 83.609 | KV453014.1 | 312237  | 12-scf00279 | 12 |
| AX-158129203 | 12 | 83.609 | KV453014.1 | 318240  | 12-scf00279 | 12 |
| AX-158129214 | 12 | 83.609 | KV453014.1 | 330652  | 12-scf00279 | 12 |
| AX-158129217 | 12 | 83.609 | KV453014.1 | 334077  | 12-scf00279 | 12 |
| AX-158129237 | 12 | 83.609 | KV453014.1 | 363966  | 12-scf00279 | 12 |
| AX-157746644 | 12 | 83.609 | KV453014.1 | 419549  | 12-scf00279 | 12 |
| AX-157829916 | 12 | 83.609 | KV453014.1 | 423227  | 12-scf00279 | 12 |
| AX-158411479 | 12 | 83.609 | KV453014.1 | 439447  | 12-scf00279 | 12 |
| AX-158129269 | 12 | 83.609 | KV453014.1 | 442155  | 12-scf00279 | 12 |
| AX-157724940 | 12 | 83.609 | KV453014.1 | 470092  | 12-scf00279 | 12 |
| AX-157829925 | 12 | 83.609 | KV453014.1 | 531138  | 12-scf00279 | 12 |
| AX-158129329 | 12 | 83.609 | KV453014.1 | 539937  | 12-scf00279 | 12 |
| AX-158129337 | 12 | 83.609 | KV453014.1 | 550568  | 12-scf00279 | 12 |
| AX-158129338 | 12 | 83.609 | KV453014.1 | 550929  | 12-scf00279 | 12 |
| AX-158385213 | 12 | 83.609 | KV453014.1 | 552973  | 12-scf00279 | 12 |
| AX-158129340 | 12 | 83.609 | KV453014.1 | 553690  | 12-scf00279 | 12 |
| AX-158129351 | 12 | 83.609 | KV453014.1 | 572325  | 12-scf00279 | 12 |
| AX-158129355 | 12 | 83.609 | KV453014.1 | 579178  | 12-scf00279 | 12 |
| AX-158129363 | 12 | 83.609 | KV453014.1 | 597020  | 12-scf00279 | 12 |
| AX-158129375 | 12 | 83.609 | KV453014.1 | 616495  | 12-scf00279 | 12 |
| AX-157774376 | 12 | 83.609 | KV453014.1 | 660196  | 12-scf00279 | 12 |
| AX-158411488 | 12 | 83.609 | KV453014.1 | 703106  | 12-scf00279 | 12 |
| AX-158411489 | 12 | 83.609 | KV453014.1 | 703571  | 12-scf00279 | 12 |
| AX-158129430 | 12 | 83.609 | KV453014.1 | 705260  | 12-scf00279 | 12 |
| AX-158129456 | 12 | 83.609 | KV453014.1 | 734317  | 12-scf00279 | 12 |
| AX-158129475 | 12 | 83.609 | KV453014.1 | 773173  | 12-scf00279 | 12 |
| AX-158129476 | 12 | 83.609 | KV453014.1 | 774169  | 12-scf00279 | 12 |
| AX-158129495 | 12 | 83.609 | KV453014.1 | 796052  | 12-scf00279 | 12 |
| AX-157742174 | 12 | 83.609 | KV453014.1 | 851941  | 12-scf00279 | 12 |
| AX-158129561 | 12 | 83.609 | KV453014.1 | 903594  | 12-scf00279 | 12 |
| AX-157829955 | 12 | 83.609 | KV453014.1 | 952575  | 12-scf00279 | 12 |
| AX-158129604 | 12 | 83.609 | KV453014.1 | 1000769 | 12-scf00279 | 12 |
| AX-158129650 | 12 | 83.609 | KV453014.1 | 1161111 | 12-scf00279 | 12 |
| AX-158129788 | 12 | 83.609 | KV453016.1 | 406880  | 12-scf00280 | 12 |
| AX-158129789 | 12 | 83.609 | KV453016.1 | 407183  | 12-scf00280 | 12 |
| AX-158129792 | 12 | 83.609 | KV453016.1 | 414296  | 12-scf00280 | 12 |

|              |    |        |             |        |             |    |
|--------------|----|--------|-------------|--------|-------------|----|
| AX-158129793 | 12 | 83.609 | KV453016.1  | 416445 | 12-scf00280 | 12 |
| AX-158129797 | 12 | 83.609 | KV453016.1  | 424354 | 12-scf00280 | 12 |
| AX-158129799 | 12 | 83.609 | KV453016.1  | 425358 | 12-scf00280 | 12 |
| AX-158129986 | 12 | 83.609 | KV453015.1  | 101331 | 12-scf00281 | 12 |
| AX-157830011 | 12 | 83.609 | KV453015.1  | 106450 | 12-scf00281 | 12 |
| AX-158129987 | 12 | 83.609 | KV453015.1  | 108549 | 12-scf00281 | 12 |
| AX-158411513 | 12 | 83.609 | KV453015.1  | 111382 | 12-scf00281 | 12 |
| AX-157706428 | 12 | 83.609 | 3ML01032223 | 628    | scf07839_1  | UN |
| AX-157689941 | 12 | 83.609 |             | 68     | scf14589    | UN |
| AX-157871372 | 12 | 83.61  | KV453014.1  | 54417  | 12-scf00279 | 12 |
| AX-157772527 | 12 | 83.61  | KV453014.1  | 116621 | 12-scf00279 | 12 |
| AX-158129058 | 12 | 83.61  | KV453014.1  | 142736 | 12-scf00279 | 12 |
| AX-158129235 | 12 | 83.61  | KV453014.1  | 362749 | 12-scf00279 | 12 |
| AX-158129256 | 12 | 83.61  | KV453014.1  | 410757 | 12-scf00279 | 12 |
| AX-158129529 | 12 | 83.61  | KV453014.1  | 839414 | 12-scf00279 | 12 |
| AX-158129000 | 12 | 83.611 | KV453014.1  | 59190  | 12-scf00279 | 12 |
| AX-158129068 | 12 | 83.611 | KV453014.1  | 154608 | 12-scf00279 | 12 |
| AX-158129099 | 12 | 83.611 | KV453014.1  | 187113 | 12-scf00279 | 12 |
| AX-158129116 | 12 | 83.611 | KV453014.1  | 206837 | 12-scf00279 | 12 |
| AX-158129144 | 12 | 83.611 | KV453014.1  | 238193 | 12-scf00279 | 12 |
| AX-158129156 | 12 | 83.611 | KV453014.1  | 254229 | 12-scf00279 | 12 |
| AX-158129161 | 12 | 83.611 | KV453014.1  | 262480 | 12-scf00279 | 12 |
| AX-158129165 | 12 | 83.611 | KV453014.1  | 268733 | 12-scf00279 | 12 |
| AX-158129175 | 12 | 83.611 | KV453014.1  | 277723 | 12-scf00279 | 12 |
| AX-158129176 | 12 | 83.611 | KV453014.1  | 278553 | 12-scf00279 | 12 |
| AX-157744002 | 12 | 83.611 | KV453014.1  | 650680 | 12-scf00279 | 12 |
| AX-157756453 | 12 | 83.611 | KV453014.1  | 706396 | 12-scf00279 | 12 |
| AX-158129515 | 12 | 83.611 | KV453014.1  | 822263 | 12-scf00279 | 12 |
| AX-157871377 | 12 | 83.611 | KV453015.1  | 29740  | 12-scf00281 | 12 |
| AX-158129094 | 12 | 83.612 | KV453014.1  | 183758 | 12-scf00279 | 12 |
| AX-158129102 | 12 | 83.612 | KV453014.1  | 193075 | 12-scf00279 | 12 |
| AX-158129103 | 12 | 83.612 | KV453014.1  | 194453 | 12-scf00279 | 12 |
| AX-158129104 | 12 | 83.612 | KV453014.1  | 195593 | 12-scf00279 | 12 |
| AX-158129105 | 12 | 83.612 | KV453014.1  | 196036 | 12-scf00279 | 12 |
| AX-158129109 | 12 | 83.612 | KV453014.1  | 199131 | 12-scf00279 | 12 |
| AX-157829910 | 12 | 83.612 | KV453014.1  | 199239 | 12-scf00279 | 12 |
| AX-158129111 | 12 | 83.612 | KV453014.1  | 201776 | 12-scf00279 | 12 |
| AX-158129112 | 12 | 83.612 | KV453014.1  | 202472 | 12-scf00279 | 12 |
| AX-158129113 | 12 | 83.612 | KV453014.1  | 202753 | 12-scf00279 | 12 |
| AX-158129574 | 12 | 83.612 | KV453014.1  | 940403 | 12-scf00279 | 12 |
| AX-158129107 | 12 | 83.613 | KV453014.1  | 198153 | 12-scf00279 | 12 |
| AX-158129110 | 12 | 83.614 | KV453014.1  | 199756 | 12-scf00279 | 12 |
| AX-158129117 | 12 | 83.616 | KV453014.1  | 209124 | 12-scf00279 | 12 |
| AX-158129124 | 12 | 83.617 | KV453014.1  | 215851 | 12-scf00279 | 12 |
| AX-158129140 | 12 | 83.618 | KV453014.1  | 232187 | 12-scf00279 | 12 |
| AX-158129141 | 12 | 83.618 | KV453014.1  | 233560 | 12-scf00279 | 12 |
| AX-158129277 | 12 | 83.618 | KV453014.1  | 464605 | 12-scf00279 | 12 |
| AX-158129280 | 12 | 83.618 | KV453014.1  | 467765 | 12-scf00279 | 12 |
| AX-157721762 | 12 | 83.618 | KV453014.1  | 467959 | 12-scf00279 | 12 |
| AX-158129949 | 12 | 83.618 | KV453015.1  | 20353  | 12-scf00281 | 12 |
| AX-158129143 | 12 | 83.619 | KV453014.1  | 235078 | 12-scf00279 | 12 |

|              |    |        |            |        |             |    |
|--------------|----|--------|------------|--------|-------------|----|
| AX-158129146 | 12 | 83.619 | KV453014.1 | 242472 | 12-scf00279 | 12 |
| AX-158129149 | 12 | 83.619 | KV453014.1 | 244073 | 12-scf00279 | 12 |
| AX-158129151 | 12 | 83.619 | KV453014.1 | 249094 | 12-scf00279 | 12 |
| AX-158129152 | 12 | 83.619 | KV453014.1 | 250197 | 12-scf00279 | 12 |
| AX-158129505 | 12 | 83.619 | KV453014.1 | 810066 | 12-scf00279 | 12 |
| AX-158129145 | 12 | 83.621 | KV453014.1 | 238664 | 12-scf00279 | 12 |
| AX-158129157 | 12 | 83.623 | KV453014.1 | 254859 | 12-scf00279 | 12 |
| AX-158129191 | 12 | 83.625 | KV453014.1 | 299139 | 12-scf00279 | 12 |
| AX-157751759 | 12 | 83.627 | KV453014.1 | 303203 | 12-scf00279 | 12 |
| AX-158129408 | 12 | 83.627 | KV453014.1 | 678241 | 12-scf00279 | 12 |
| AX-158129118 | 12 | 83.628 | KV453014.1 | 209663 | 12-scf00279 | 12 |
| AX-158129133 | 12 | 83.628 | KV453014.1 | 224119 | 12-scf00279 | 12 |
| AX-158129202 | 12 | 83.628 | KV453014.1 | 317672 | 12-scf00279 | 12 |
| AX-158129478 | 12 | 83.628 | KV453014.1 | 775875 | 12-scf00279 | 12 |
| AX-158128592 | 12 | 83.629 | KV453013.1 | 92700  | 12-scf00278 | 12 |
| AX-158128864 | 12 | 83.629 | KV453013.1 | 552402 | 12-scf00278 | 12 |
| AX-158128903 | 12 | 83.629 | KV453013.1 | 712922 | 12-scf00278 | 12 |
| AX-158128937 | 12 | 83.629 | KV453013.1 | 779290 | 12-scf00278 | 12 |
| AX-158128997 | 12 | 83.629 | KV453014.1 | 51849  | 12-scf00279 | 12 |
| AX-158129061 | 12 | 83.629 | KV453014.1 | 145676 | 12-scf00279 | 12 |
| AX-158129137 | 12 | 83.629 | KV453014.1 | 228532 | 12-scf00279 | 12 |
| AX-158129168 | 12 | 83.629 | KV453014.1 | 271574 | 12-scf00279 | 12 |
| AX-158129199 | 12 | 83.629 | KV453014.1 | 311004 | 12-scf00279 | 12 |
| AX-158129251 | 12 | 83.629 | KV453014.1 | 393619 | 12-scf00279 | 12 |
| AX-157829915 | 12 | 83.629 | KV453014.1 | 413083 | 12-scf00279 | 12 |
| AX-158129291 | 12 | 83.629 | KV453014.1 | 480266 | 12-scf00279 | 12 |
| AX-158129330 | 12 | 83.629 | KV453014.1 | 540825 | 12-scf00279 | 12 |
| AX-158129345 | 12 | 83.629 | KV453014.1 | 562513 | 12-scf00279 | 12 |
| AX-157857826 | 12 | 83.629 | KV453014.1 | 563425 | 12-scf00279 | 12 |
| AX-158129387 | 12 | 83.629 | KV453014.1 | 642829 | 12-scf00279 | 12 |
| AX-158385214 | 12 | 83.629 | KV453014.1 | 664152 | 12-scf00279 | 12 |
| AX-158129401 | 12 | 83.629 | KV453014.1 | 667082 | 12-scf00279 | 12 |
| AX-158385218 | 12 | 83.629 | KV453014.1 | 723218 | 12-scf00279 | 12 |
| AX-158129453 | 12 | 83.629 | KV453014.1 | 726371 | 12-scf00279 | 12 |
| AX-158129484 | 12 | 83.629 | KV453014.1 | 784529 | 12-scf00279 | 12 |
| AX-158129494 | 12 | 83.629 | KV453014.1 | 795532 | 12-scf00279 | 12 |
| AX-158129509 | 12 | 83.629 | KV453014.1 | 814909 | 12-scf00279 | 12 |
| AX-158129513 | 12 | 83.629 | KV453014.1 | 821059 | 12-scf00279 | 12 |
| AX-158129542 | 12 | 83.629 | KV453014.1 | 858328 | 12-scf00279 | 12 |
| AX-157829960 | 12 | 83.629 | KV453014.1 | 957537 | 12-scf00279 | 12 |
| AX-157829961 | 12 | 83.629 | KV453014.1 | 957738 | 12-scf00279 | 12 |
| AX-157829914 | 12 | 83.631 | KV453014.1 | 412918 | 12-scf00279 | 12 |
| AX-157829920 | 12 | 83.648 | KV453014.1 | 456548 | 12-scf00279 | 12 |
| AX-158129403 | 12 | 83.648 | KV453014.1 | 668202 | 12-scf00279 | 12 |
| AX-158129276 | 12 | 83.654 | KV453014.1 | 460330 | 12-scf00279 | 12 |
| AX-158129278 | 12 | 83.657 | KV453014.1 | 465877 | 12-scf00279 | 12 |
| AX-158129074 | 12 | 83.663 | KV453014.1 | 159979 | 12-scf00279 | 12 |
| AX-158129231 | 12 | 83.663 | KV453014.1 | 354490 | 12-scf00279 | 12 |
| AX-158129292 | 12 | 83.663 | KV453014.1 | 484841 | 12-scf00279 | 12 |
| AX-158129295 | 12 | 83.663 | KV453014.1 | 489191 | 12-scf00279 | 12 |
| AX-158129310 | 12 | 83.666 | KV453014.1 | 509641 | 12-scf00279 | 12 |

|              |    |        |            |         |             |    |
|--------------|----|--------|------------|---------|-------------|----|
| AX-158129311 | 12 | 83.671 | KV453014.1 | 511340  | 12-scf00279 | 12 |
| AX-158129315 | 12 | 83.671 | KV453014.1 | 516779  | 12-scf00279 | 12 |
| AX-157829928 | 12 | 83.671 | KV453014.1 | 544856  | 12-scf00279 | 12 |
| AX-158128554 | 12 | 83.675 | KV453012.1 | 1637768 | 12-scf00276 | 12 |
| AX-158129312 | 12 | 83.675 | KV453014.1 | 512245  | 12-scf00279 | 12 |
| AX-158129313 | 12 | 83.675 | KV453014.1 | 512606  | 12-scf00279 | 12 |
| AX-158392822 | 12 | 83.675 | KV453014.1 | 524082  | 12-scf00279 | 12 |
| AX-158129319 | 12 | 83.68  | KV453014.1 | 522850  | 12-scf00279 | 12 |
| AX-158129321 | 12 | 83.682 | KV453014.1 | 524910  | 12-scf00279 | 12 |
| AX-157829924 | 12 | 83.684 | KV453014.1 | 530344  | 12-scf00279 | 12 |
| AX-158380224 | 12 | 83.689 | KV453014.1 | 531812  | 12-scf00279 | 12 |
| AX-158129339 | 12 | 83.689 | KV453014.1 | 552266  | 12-scf00279 | 12 |
| AX-158129326 | 12 | 83.693 | KV453014.1 | 531949  | 12-scf00279 | 12 |
| AX-158129341 | 12 | 83.699 | KV453014.1 | 557209  | 12-scf00279 | 12 |
| AX-158129343 | 12 | 83.705 | KV453014.1 | 558917  | 12-scf00279 | 12 |
| AX-158129348 | 12 | 83.71  | KV453014.1 | 568345  | 12-scf00279 | 12 |
| AX-157713656 | 12 | 83.715 | KV453014.1 | 570452  | 12-scf00279 | 12 |
| AX-157829905 | 12 | 83.718 | KV453013.1 | 835987  | 12-scf00278 | 12 |
| AX-157886160 | 12 | 83.718 | KV453014.1 | 57350   | 12-scf00279 | 12 |
| AX-158129012 | 12 | 83.718 | KV453014.1 | 73766   | 12-scf00279 | 12 |
| AX-158129032 | 12 | 83.718 | KV453014.1 | 95592   | 12-scf00279 | 12 |
| AX-157719093 | 12 | 83.718 | KV453014.1 | 106912  | 12-scf00279 | 12 |
| AX-158129042 | 12 | 83.718 | KV453014.1 | 119598  | 12-scf00279 | 12 |
| AX-158129046 | 12 | 83.718 | KV453014.1 | 125080  | 12-scf00279 | 12 |
| AX-158129120 | 12 | 83.718 | KV453014.1 | 211990  | 12-scf00279 | 12 |
| AX-158129122 | 12 | 83.718 | KV453014.1 | 213055  | 12-scf00279 | 12 |
| AX-158129126 | 12 | 83.718 | KV453014.1 | 216726  | 12-scf00279 | 12 |
| AX-158129127 | 12 | 83.718 | KV453014.1 | 217470  | 12-scf00279 | 12 |
| AX-158129136 | 12 | 83.718 | KV453014.1 | 227015  | 12-scf00279 | 12 |
| AX-158129153 | 12 | 83.718 | KV453014.1 | 250603  | 12-scf00279 | 12 |
| AX-158129167 | 12 | 83.718 | KV453014.1 | 270493  | 12-scf00279 | 12 |
| AX-158129170 | 12 | 83.718 | KV453014.1 | 273809  | 12-scf00279 | 12 |
| AX-158129173 | 12 | 83.718 | KV453014.1 | 275476  | 12-scf00279 | 12 |
| AX-158129174 | 12 | 83.718 | KV453014.1 | 276920  | 12-scf00279 | 12 |
| AX-158129177 | 12 | 83.718 | KV453014.1 | 280137  | 12-scf00279 | 12 |
| AX-158129178 | 12 | 83.718 | KV453014.1 | 282052  | 12-scf00279 | 12 |
| AX-158129181 | 12 | 83.718 | KV453014.1 | 284041  | 12-scf00279 | 12 |
| AX-158129183 | 12 | 83.718 | KV453014.1 | 288199  | 12-scf00279 | 12 |
| AX-158129185 | 12 | 83.718 | KV453014.1 | 293503  | 12-scf00279 | 12 |
| AX-158129201 | 12 | 83.718 | KV453014.1 | 316836  | 12-scf00279 | 12 |
| AX-158129204 | 12 | 83.718 | KV453014.1 | 319836  | 12-scf00279 | 12 |
| AX-158129209 | 12 | 83.718 | KV453014.1 | 325320  | 12-scf00279 | 12 |
| AX-158129211 | 12 | 83.718 | KV453014.1 | 326618  | 12-scf00279 | 12 |
| AX-158129222 | 12 | 83.718 | KV453014.1 | 341716  | 12-scf00279 | 12 |
| AX-158129224 | 12 | 83.718 | KV453014.1 | 343323  | 12-scf00279 | 12 |
| AX-158129229 | 12 | 83.718 | KV453014.1 | 352312  | 12-scf00279 | 12 |
| AX-158129230 | 12 | 83.718 | KV453014.1 | 352874  | 12-scf00279 | 12 |
| AX-157829913 | 12 | 83.718 | KV453014.1 | 398204  | 12-scf00279 | 12 |
| AX-158129304 | 12 | 83.718 | KV453014.1 | 501017  | 12-scf00279 | 12 |
| AX-158129307 | 12 | 83.718 | KV453014.1 | 504451  | 12-scf00279 | 12 |
| AX-158129308 | 12 | 83.718 | KV453014.1 | 504871  | 12-scf00279 | 12 |

|              |    |        |            |        |             |    |
|--------------|----|--------|------------|--------|-------------|----|
| AX-158129309 | 12 | 83.718 | KV453014.1 | 505312 | 12-scf00279 | 12 |
| AX-158129320 | 12 | 83.718 | KV453014.1 | 523891 | 12-scf00279 | 12 |
| AX-158129323 | 12 | 83.718 | KV453014.1 | 527082 | 12-scf00279 | 12 |
| AX-158129324 | 12 | 83.718 | KV453014.1 | 527835 | 12-scf00279 | 12 |
| AX-158129325 | 12 | 83.718 | KV453014.1 | 530284 | 12-scf00279 | 12 |
| AX-158129328 | 12 | 83.718 | KV453014.1 | 539477 | 12-scf00279 | 12 |
| AX-158129347 | 12 | 83.718 | KV453014.1 | 566097 | 12-scf00279 | 12 |
| AX-158129349 | 12 | 83.718 | KV453014.1 | 569883 | 12-scf00279 | 12 |
| AX-157726197 | 12 | 83.718 | KV453014.1 | 570736 | 12-scf00279 | 12 |
| AX-158129352 | 12 | 83.718 | KV453014.1 | 574474 | 12-scf00279 | 12 |
| AX-158129353 | 12 | 83.718 | KV453014.1 | 575658 | 12-scf00279 | 12 |
| AX-157748009 | 12 | 83.718 | KV453014.1 | 582460 | 12-scf00279 | 12 |
| AX-157829931 | 12 | 83.718 | KV453014.1 | 584494 | 12-scf00279 | 12 |
| AX-157829932 | 12 | 83.718 | KV453014.1 | 585689 | 12-scf00279 | 12 |
| AX-158129360 | 12 | 83.718 | KV453014.1 | 594765 | 12-scf00279 | 12 |
| AX-158129362 | 12 | 83.718 | KV453014.1 | 595976 | 12-scf00279 | 12 |
| AX-158129364 | 12 | 83.718 | KV453014.1 | 597988 | 12-scf00279 | 12 |
| AX-158129365 | 12 | 83.718 | KV453014.1 | 599254 | 12-scf00279 | 12 |
| AX-158129366 | 12 | 83.718 | KV453014.1 | 600493 | 12-scf00279 | 12 |
| AX-158129372 | 12 | 83.718 | KV453014.1 | 609254 | 12-scf00279 | 12 |
| AX-158129373 | 12 | 83.718 | KV453014.1 | 611875 | 12-scf00279 | 12 |
| AX-158129374 | 12 | 83.718 | KV453014.1 | 615524 | 12-scf00279 | 12 |
| AX-158129376 | 12 | 83.718 | KV453014.1 | 616915 | 12-scf00279 | 12 |
| AX-157757369 | 12 | 83.718 | KV453014.1 | 620812 | 12-scf00279 | 12 |
| AX-158129381 | 12 | 83.718 | KV453014.1 | 626519 | 12-scf00279 | 12 |
| AX-158129382 | 12 | 83.718 | KV453014.1 | 629383 | 12-scf00279 | 12 |
| AX-158129385 | 12 | 83.718 | KV453014.1 | 634036 | 12-scf00279 | 12 |
| AX-158411484 | 12 | 83.718 | KV453014.1 | 640922 | 12-scf00279 | 12 |
| AX-158129388 | 12 | 83.718 | KV453014.1 | 643568 | 12-scf00279 | 12 |
| AX-158380225 | 12 | 83.718 | KV453014.1 | 647786 | 12-scf00279 | 12 |
| AX-157829937 | 12 | 83.718 | KV453014.1 | 651749 | 12-scf00279 | 12 |
| AX-158422770 | 12 | 83.718 | KV453014.1 | 654582 | 12-scf00279 | 12 |
| AX-157774126 | 12 | 83.718 | KV453014.1 | 662925 | 12-scf00279 | 12 |
| AX-158385215 | 12 | 83.718 | KV453014.1 | 668634 | 12-scf00279 | 12 |
| AX-157716564 | 12 | 83.718 | KV453014.1 | 674744 | 12-scf00279 | 12 |
| AX-158129409 | 12 | 83.718 | KV453014.1 | 679378 | 12-scf00279 | 12 |
| AX-157877923 | 12 | 83.718 | KV453014.1 | 682244 | 12-scf00279 | 12 |
| AX-158129416 | 12 | 83.718 | KV453014.1 | 686944 | 12-scf00279 | 12 |
| AX-158129417 | 12 | 83.718 | KV453014.1 | 689008 | 12-scf00279 | 12 |
| AX-158129418 | 12 | 83.718 | KV453014.1 | 689943 | 12-scf00279 | 12 |
| AX-157758796 | 12 | 83.718 | KV453014.1 | 690832 | 12-scf00279 | 12 |
| AX-158129421 | 12 | 83.718 | KV453014.1 | 694386 | 12-scf00279 | 12 |
| AX-158129428 | 12 | 83.718 | KV453014.1 | 701424 | 12-scf00279 | 12 |
| AX-157723526 | 12 | 83.718 | KV453014.1 | 716801 | 12-scf00279 | 12 |
| AX-158129464 | 12 | 83.718 | KV453014.1 | 752501 | 12-scf00279 | 12 |
| AX-158129493 | 12 | 83.718 | KV453014.1 | 794879 | 12-scf00279 | 12 |
| AX-158411491 | 12 | 83.718 | KV453014.1 | 800898 | 12-scf00279 | 12 |
| AX-158129519 | 12 | 83.718 | KV453014.1 | 829868 | 12-scf00279 | 12 |
| AX-158129520 | 12 | 83.718 | KV453014.1 | 830761 | 12-scf00279 | 12 |
| AX-158129530 | 12 | 83.718 | KV453014.1 | 841945 | 12-scf00279 | 12 |
| AX-158129533 | 12 | 83.718 | KV453014.1 | 846129 | 12-scf00279 | 12 |

|              |    |        |             |        |             |    |
|--------------|----|--------|-------------|--------|-------------|----|
| AX-157829946 | 12 | 83.718 | KV453014.1  | 852117 | 12-scf00279 | 12 |
| AX-157720682 | 12 | 83.718 | KV453014.1  | 852923 | 12-scf00279 | 12 |
| AX-158129556 | 12 | 83.718 | KV453014.1  | 888504 | 12-scf00279 | 12 |
| AX-157723712 | 12 | 83.718 | KV453014.1  | 904113 | 12-scf00279 | 12 |
| AX-158129565 | 12 | 83.718 | KV453014.1  | 908992 | 12-scf00279 | 12 |
| AX-158129568 | 12 | 83.718 | KV453014.1  | 915891 | 12-scf00279 | 12 |
| AX-158129580 | 12 | 83.718 | KV453014.1  | 952613 | 12-scf00279 | 12 |
| AX-157829959 | 12 | 83.718 | KV453014.1  | 956989 | 12-scf00279 | 12 |
| AX-158129586 | 12 | 83.718 | KV453014.1  | 971699 | 12-scf00279 | 12 |
| AX-158129820 | 12 | 83.718 | KV453016.1  | 454662 | 12-scf00280 | 12 |
| AX-157829991 | 12 | 83.718 | KV453016.1  | 497280 | 12-scf00280 | 12 |
| AX-158129845 | 12 | 83.718 | KV453016.1  | 500913 | 12-scf00280 | 12 |
| AX-158129854 | 12 | 83.718 | KV453016.1  | 514006 | 12-scf00280 | 12 |
| AX-158129855 | 12 | 83.718 | KV453016.1  | 514220 | 12-scf00280 | 12 |
| AX-158129889 | 12 | 83.718 | KV453016.1  | 552754 | 12-scf00280 | 12 |
| AX-158130061 | 12 | 83.718 | KV453016.1  | 731894 | 12-scf00280 | 12 |
| AX-158411518 | 12 | 83.718 | KV453016.1  | 737051 | 12-scf00280 | 12 |
| AX-158130066 | 12 | 83.718 | KV453016.1  | 739042 | 12-scf00280 | 12 |
| AX-157830024 | 12 | 83.718 | KV453016.1  | 784827 | 12-scf00280 | 12 |
| AX-157714135 | 12 | 83.718 | KV453016.1  | 790463 | 12-scf00280 | 12 |
| AX-158129943 | 12 | 83.718 | KV453015.1  | 5473   | 12-scf00281 | 12 |
| AX-158129950 | 12 | 83.718 | KV453015.1  | 21436  | 12-scf00281 | 12 |
| AX-158129957 | 12 | 83.718 | KV453015.1  | 29206  | 12-scf00281 | 12 |
| AX-157830006 | 12 | 83.718 | KV453015.1  | 37440  | 12-scf00281 | 12 |
| AX-158129965 | 12 | 83.718 | KV453015.1  | 42992  | 12-scf00281 | 12 |
| AX-158129976 | 12 | 83.718 | KV453015.1  | 71519  | 12-scf00281 | 12 |
| AX-157830009 | 12 | 83.718 | KV453015.1  | 76863  | 12-scf00281 | 12 |
| AX-157689557 | 12 | 83.718 | 3ML01030499 | 855    | scf06098_1  | UN |
| AX-157770755 | 12 | 83.72  | KV453013.1  | 791974 | 12-scf00278 | 12 |
| AX-158129093 | 12 | 83.72  | KV453014.1  | 182626 | 12-scf00279 | 12 |
| AX-158129095 | 12 | 83.72  | KV453014.1  | 184196 | 12-scf00279 | 12 |
| AX-158129147 | 12 | 83.72  | KV453014.1  | 242858 | 12-scf00279 | 12 |
| AX-158129160 | 12 | 83.72  | KV453014.1  | 259302 | 12-scf00279 | 12 |
| AX-158129179 | 12 | 83.72  | KV453014.1  | 282493 | 12-scf00279 | 12 |
| AX-158129180 | 12 | 83.72  | KV453014.1  | 283201 | 12-scf00279 | 12 |
| AX-158129182 | 12 | 83.72  | KV453014.1  | 285542 | 12-scf00279 | 12 |
| AX-158129383 | 12 | 83.72  | KV453014.1  | 629957 | 12-scf00279 | 12 |
| AX-158129429 | 12 | 83.72  | KV453014.1  | 704402 | 12-scf00279 | 12 |
| AX-158129452 | 12 | 83.72  | KV453014.1  | 726005 | 12-scf00279 | 12 |
| AX-158129471 | 12 | 83.72  | KV453014.1  | 762928 | 12-scf00279 | 12 |
| AX-158129488 | 12 | 83.72  | KV453014.1  | 788054 | 12-scf00279 | 12 |
| AX-158129575 | 12 | 83.72  | KV453014.1  | 941429 | 12-scf00279 | 12 |
| AX-158129026 | 12 | 83.727 | KV453014.1  | 90785  | 12-scf00279 | 12 |
| AX-158129031 | 12 | 83.727 | KV453014.1  | 94964  | 12-scf00279 | 12 |
| AX-157727348 | 12 | 83.727 | KV453014.1  | 558608 | 12-scf00279 | 12 |
| AX-158129434 | 12 | 83.727 | KV453014.1  | 711063 | 12-scf00279 | 12 |
| AX-158129441 | 12 | 83.746 | KV453014.1  | 717697 | 12-scf00279 | 12 |
| AX-158129446 | 12 | 83.763 | KV453014.1  | 721355 | 12-scf00279 | 12 |
| AX-158128940 | 12 | 83.771 | KV453013.1  | 782485 | 12-scf00278 | 12 |
| AX-158129018 | 12 | 83.771 | KV453014.1  | 79850  | 12-scf00279 | 12 |
| AX-158129208 | 12 | 83.771 | KV453014.1  | 324585 | 12-scf00279 | 12 |

|              |    |        |            |         |             |    |
|--------------|----|--------|------------|---------|-------------|----|
| AX-157709968 | 12 | 83.771 | KV453014.1 | 666620  | 12-scf00279 | 12 |
| AX-158129451 | 12 | 83.771 | KV453014.1 | 725266  | 12-scf00279 | 12 |
| AX-158129524 | 12 | 83.771 | KV453014.1 | 832946  | 12-scf00279 | 12 |
| AX-157829953 | 12 | 83.771 | KV453014.1 | 896588  | 12-scf00279 | 12 |
| AX-157829965 | 12 | 83.771 | KV453014.1 | 964903  | 12-scf00279 | 12 |
| AX-158129592 | 12 | 83.771 | KV453014.1 | 978022  | 12-scf00279 | 12 |
| AX-158129593 | 12 | 83.771 | KV453014.1 | 978425  | 12-scf00279 | 12 |
| AX-158129642 | 12 | 83.771 | KV453014.1 | 1152857 | 12-scf00279 | 12 |
| AX-158129643 | 12 | 83.771 | KV453014.1 | 1154373 | 12-scf00279 | 12 |
| AX-158129647 | 12 | 83.771 | KV453014.1 | 1156758 | 12-scf00279 | 12 |
| AX-157774834 | 12 | 83.771 | KV453016.1 | 834255  | 12-scf00280 | 12 |
| AX-158129079 | 12 | 83.778 | KV453014.1 | 165270  | 12-scf00279 | 12 |
| AX-158129281 | 12 | 83.778 | KV453014.1 | 471359  | 12-scf00279 | 12 |
| AX-158129459 | 12 | 83.778 | KV453014.1 | 738777  | 12-scf00279 | 12 |
| AX-158129479 | 12 | 83.782 | KV453014.1 | 776468  | 12-scf00279 | 12 |
| AX-158129645 | 12 | 83.782 | KV453014.1 | 1155530 | 12-scf00279 | 12 |
| AX-158129801 | 12 | 83.782 | KV453016.1 | 431211  | 12-scf00280 | 12 |
| AX-158129847 | 12 | 83.782 | KV453016.1 | 505170  | 12-scf00280 | 12 |
| AX-157740100 | 12 | 83.782 | KV453015.1 | 20613   | 12-scf00281 | 12 |
| AX-158129953 | 12 | 83.782 | KV453015.1 | 23969   | 12-scf00281 | 12 |
| AX-158129964 | 12 | 83.782 | KV453015.1 | 41567   | 12-scf00281 | 12 |
| AX-158129481 | 12 | 83.783 | KV453014.1 | 778690  | 12-scf00279 | 12 |
| AX-158129483 | 12 | 83.787 | KV453014.1 | 779970  | 12-scf00279 | 12 |
| AX-158129486 | 12 | 83.79  | KV453014.1 | 786556  | 12-scf00279 | 12 |
| AX-158129487 | 12 | 83.794 | KV453014.1 | 787146  | 12-scf00279 | 12 |
| AX-158129498 | 12 | 83.797 | KV453014.1 | 801179  | 12-scf00279 | 12 |
| AX-158129496 | 12 | 83.802 | KV453014.1 | 797711  | 12-scf00279 | 12 |
| AX-157742258 | 12 | 83.802 | KV453014.1 | 801737  | 12-scf00279 | 12 |
| AX-158129501 | 12 | 83.802 | KV453014.1 | 804925  | 12-scf00279 | 12 |
| AX-158129502 | 12 | 83.802 | KV453014.1 | 806746  | 12-scf00279 | 12 |
| AX-158129499 | 12 | 83.805 | KV453014.1 | 803839  | 12-scf00279 | 12 |
| AX-158129508 | 12 | 83.806 | KV453014.1 | 813171  | 12-scf00279 | 12 |
| AX-158129511 | 12 | 83.808 | KV453014.1 | 817914  | 12-scf00279 | 12 |
| AX-158128957 | 12 | 83.811 | KV453013.1 | 823903  | 12-scf00278 | 12 |
| AX-158129272 | 12 | 83.811 | KV453014.1 | 443980  | 12-scf00279 | 12 |
| AX-158129361 | 12 | 83.811 | KV453014.1 | 595402  | 12-scf00279 | 12 |
| AX-158129523 | 12 | 83.811 | KV453014.1 | 832280  | 12-scf00279 | 12 |
| AX-158129525 | 12 | 83.811 | KV453014.1 | 834964  | 12-scf00279 | 12 |
| AX-158129567 | 12 | 83.811 | KV453014.1 | 914455  | 12-scf00279 | 12 |
| AX-158129544 | 12 | 83.813 | KV453014.1 | 859461  | 12-scf00279 | 12 |
| AX-158129546 | 12 | 83.815 | KV453014.1 | 864091  | 12-scf00279 | 12 |
| AX-158129424 | 12 | 83.817 | KV453014.1 | 698445  | 12-scf00279 | 12 |
| AX-158129547 | 12 | 83.817 | KV453014.1 | 864955  | 12-scf00279 | 12 |
| AX-158129489 | 12 | 83.818 | KV453014.1 | 788533  | 12-scf00279 | 12 |
| AX-157829948 | 12 | 83.818 | KV453014.1 | 866829  | 12-scf00279 | 12 |
| AX-158129549 | 12 | 83.818 | KV453014.1 | 869012  | 12-scf00279 | 12 |
| AX-157829951 | 12 | 83.818 | KV453014.1 | 875624  | 12-scf00279 | 12 |
| AX-158129840 | 12 | 83.818 | KV453016.1 | 490469  | 12-scf00280 | 12 |
| AX-157830003 | 12 | 83.818 | KV453015.1 | 12512   | 12-scf00281 | 12 |
| AX-157745543 | 12 | 83.818 | KV453015.1 | 12814   | 12-scf00281 | 12 |
| AX-158129548 | 12 | 83.82  | KV453014.1 | 868306  | 12-scf00279 | 12 |



|              |    |        |            |         |             |    |
|--------------|----|--------|------------|---------|-------------|----|
| AX-158129552 | 12 | 83.822 | KV453014.1 | 877234  | 12-scf00279 | 12 |
| AX-158129425 | 12 | 83.824 | KV453014.1 | 698902  | 12-scf00279 | 12 |
| AX-157829952 | 12 | 83.824 | KV453014.1 | 889444  | 12-scf00279 | 12 |
| AX-158129863 | 12 | 83.824 | KV453016.1 | 523107  | 12-scf00280 | 12 |
| AX-158129867 | 12 | 83.824 | KV453016.1 | 527947  | 12-scf00280 | 12 |
| AX-158129870 | 12 | 83.824 | KV453016.1 | 530591  | 12-scf00280 | 12 |
| AX-157877934 | 12 | 83.824 | KV453016.1 | 539842  | 12-scf00280 | 12 |
| AX-158129905 | 12 | 83.824 | KV453016.1 | 595136  | 12-scf00280 | 12 |
| AX-158129906 | 12 | 83.824 | KV453016.1 | 595714  | 12-scf00280 | 12 |
| AX-158130031 | 12 | 83.824 | KV453016.1 | 664879  | 12-scf00280 | 12 |
| AX-157830058 | 12 | 83.824 | KV453019.1 | 103821  | 12-scf00285 | 12 |
| AX-158128507 | 12 | 83.827 | KV453012.1 | 1535656 | 12-scf00276 | 12 |
| AX-157757190 | 12 | 83.827 | KV453013.1 | 158557  | 12-scf00278 | 12 |
| AX-158128871 | 12 | 83.827 | KV453013.1 | 564686  | 12-scf00278 | 12 |
| AX-158128906 | 12 | 83.827 | KV453013.1 | 718945  | 12-scf00278 | 12 |
| AX-158129041 | 12 | 83.827 | KV453014.1 | 119404  | 12-scf00279 | 12 |
| AX-158129084 | 12 | 83.827 | KV453014.1 | 168288  | 12-scf00279 | 12 |
| AX-158129108 | 12 | 83.827 | KV453014.1 | 198713  | 12-scf00279 | 12 |
| AX-157753333 | 12 | 83.827 | KV453014.1 | 239901  | 12-scf00279 | 12 |
| AX-157886163 | 12 | 83.827 | KV453014.1 | 291824  | 12-scf00279 | 12 |
| AX-158129288 | 12 | 83.827 | KV453014.1 | 477740  | 12-scf00279 | 12 |
| AX-158129397 | 12 | 83.827 | KV453014.1 | 664310  | 12-scf00279 | 12 |
| AX-158129399 | 12 | 83.827 | KV453014.1 | 665491  | 12-scf00279 | 12 |
| AX-158392823 | 12 | 83.827 | KV453014.1 | 668442  | 12-scf00279 | 12 |
| AX-158129500 | 12 | 83.827 | KV453014.1 | 804607  | 12-scf00279 | 12 |
| AX-158129557 | 12 | 83.827 | KV453014.1 | 889121  | 12-scf00279 | 12 |
| AX-157744256 | 12 | 83.827 | KV453014.1 | 895533  | 12-scf00279 | 12 |
| AX-158129569 | 12 | 83.827 | KV453014.1 | 918724  | 12-scf00279 | 12 |
| AX-158129577 | 12 | 83.827 | KV453014.1 | 947236  | 12-scf00279 | 12 |
| AX-157737853 | 12 | 83.827 | KV453014.1 | 970022  | 12-scf00279 | 12 |
| AX-157829967 | 12 | 83.827 | KV453014.1 | 984847  | 12-scf00279 | 12 |
| AX-157829968 | 12 | 83.827 | KV453014.1 | 986132  | 12-scf00279 | 12 |
| AX-158129602 | 12 | 83.827 | KV453014.1 | 991481  | 12-scf00279 | 12 |
| AX-157829969 | 12 | 83.827 | KV453014.1 | 994221  | 12-scf00279 | 12 |
| AX-158129648 | 12 | 83.827 | KV453014.1 | 1157574 | 12-scf00279 | 12 |
| AX-158129649 | 12 | 83.827 | KV453014.1 | 1159385 | 12-scf00279 | 12 |
| AX-158129697 | 12 | 83.827 | KV453016.1 | 129508  | 12-scf00280 | 12 |
| AX-158129699 | 12 | 83.827 | KV453016.1 | 137224  | 12-scf00280 | 12 |
| AX-158129701 | 12 | 83.827 | KV453016.1 | 144550  | 12-scf00280 | 12 |
| AX-158129772 | 12 | 83.827 | KV453016.1 | 360120  | 12-scf00280 | 12 |
| AX-158130069 | 12 | 83.827 | KV453016.1 | 745085  | 12-scf00280 | 12 |
| AX-158129952 | 12 | 83.827 | KV453015.1 | 22627   | 12-scf00281 | 12 |
| AX-158129955 | 12 | 83.827 | KV453015.1 | 26943   | 12-scf00281 | 12 |
| AX-158129956 | 12 | 83.827 | KV453015.1 | 28161   | 12-scf00281 | 12 |
| AX-158129961 | 12 | 83.827 | KV453015.1 | 39472   | 12-scf00281 | 12 |
| AX-158129962 | 12 | 83.827 | KV453015.1 | 40315   | 12-scf00281 | 12 |
| AX-158129974 | 12 | 83.827 | KV453015.1 | 62363   | 12-scf00281 | 12 |
| AX-158129977 | 12 | 83.827 | KV453015.1 | 74942   | 12-scf00281 | 12 |
| AX-158130007 | 12 | 83.827 | KV453015.1 | 174510  | 12-scf00281 | 12 |
| AX-157680141 | 12 | 83.827 | KV453018.1 | 6380    | 12-scf00283 | 12 |
| AX-157683574 | 12 | 83.827 | KV453018.1 | 7170    | 12-scf00283 | 12 |

|              |    |        |            |        |             |    |
|--------------|----|--------|------------|--------|-------------|----|
| AX-158130121 | 12 | 83.827 | KV453017.1 | 6273   | 12-scf00284 | 12 |
| AX-157830032 | 12 | 83.827 | KV453017.1 | 31415  | 12-scf00284 | 12 |
| AX-158130155 | 12 | 83.827 | KV453017.1 | 52814  | 12-scf00284 | 12 |
| AX-158130157 | 12 | 83.827 | KV453017.1 | 56109  | 12-scf00284 | 12 |
| AX-157830038 | 12 | 83.827 | KV453017.1 | 73882  | 12-scf00284 | 12 |
| AX-158130171 | 12 | 83.827 | KV453017.1 | 81785  | 12-scf00284 | 12 |
| AX-158130177 | 12 | 83.827 | KV453017.1 | 105512 | 12-scf00284 | 12 |
| AX-157830045 | 12 | 83.827 | KV453017.1 | 105949 | 12-scf00284 | 12 |
| AX-157829992 | 12 | 83.875 | KV453016.1 | 531024 | 12-scf00280 | 12 |
| AX-158129978 | 12 | 83.875 | KV453015.1 | 79189  | 12-scf00281 | 12 |
| AX-157718967 | 12 | 83.875 | KV453015.1 | 80700  | 12-scf00281 | 12 |
| AX-158129980 | 12 | 83.875 | KV453015.1 | 81041  | 12-scf00281 | 12 |
| AX-157743572 | 12 | 83.875 | KV453015.1 | 81505  | 12-scf00281 | 12 |
| AX-157721614 | 12 | 83.936 | KV453012.1 | 961598 | 12-scf00276 | 12 |
| AX-158128705 | 12 | 83.936 | KV453013.1 | 265990 | 12-scf00278 | 12 |
| AX-158128714 | 12 | 83.936 | KV453013.1 | 288845 | 12-scf00278 | 12 |
| AX-158392818 | 12 | 83.936 | KV453013.1 | 361446 | 12-scf00278 | 12 |
| AX-158128760 | 12 | 83.936 | KV453013.1 | 369510 | 12-scf00278 | 12 |
| AX-157829873 | 12 | 83.936 | KV453013.1 | 389482 | 12-scf00278 | 12 |
| AX-158128774 | 12 | 83.936 | KV453013.1 | 398173 | 12-scf00278 | 12 |
| AX-157829907 | 12 | 83.936 | KV453014.1 | 41492  | 12-scf00279 | 12 |
| AX-158129021 | 12 | 83.936 | KV453014.1 | 86892  | 12-scf00279 | 12 |
| AX-158129037 | 12 | 83.936 | KV453014.1 | 106286 | 12-scf00279 | 12 |
| AX-158129123 | 12 | 83.936 | KV453014.1 | 213544 | 12-scf00279 | 12 |
| AX-158129252 | 12 | 83.936 | KV453014.1 | 398584 | 12-scf00279 | 12 |
| AX-158129254 | 12 | 83.936 | KV453014.1 | 405245 | 12-scf00279 | 12 |
| AX-158129282 | 12 | 83.936 | KV453014.1 | 472076 | 12-scf00279 | 12 |
| AX-158129327 | 12 | 83.936 | KV453014.1 | 532775 | 12-scf00279 | 12 |
| AX-157756175 | 12 | 83.936 | KV453014.1 | 604231 | 12-scf00279 | 12 |
| AX-158129378 | 12 | 83.936 | KV453014.1 | 620021 | 12-scf00279 | 12 |
| AX-158129436 | 12 | 83.936 | KV453014.1 | 712386 | 12-scf00279 | 12 |
| AX-157717103 | 12 | 83.936 | KV453014.1 | 824355 | 12-scf00279 | 12 |
| AX-158129527 | 12 | 83.936 | KV453014.1 | 837267 | 12-scf00279 | 12 |
| AX-158129554 | 12 | 83.936 | KV453014.1 | 878614 | 12-scf00279 | 12 |
| AX-158129601 | 12 | 83.936 | KV453014.1 | 991182 | 12-scf00279 | 12 |
| AX-157721778 | 12 | 83.936 | KV453016.1 | 5174   | 12-scf00280 | 12 |
| AX-158129654 | 12 | 83.936 | KV453016.1 | 6926   | 12-scf00280 | 12 |
| AX-158129655 | 12 | 83.936 | KV453016.1 | 9695   | 12-scf00280 | 12 |
| AX-157720182 | 12 | 83.936 | KV453016.1 | 42339  | 12-scf00280 | 12 |
| AX-158129667 | 12 | 83.936 | KV453016.1 | 44979  | 12-scf00280 | 12 |
| AX-157829976 | 12 | 83.936 | KV453016.1 | 45858  | 12-scf00280 | 12 |
| AX-158129672 | 12 | 83.936 | KV453016.1 | 54100  | 12-scf00280 | 12 |
| AX-158129676 | 12 | 83.936 | KV453016.1 | 70064  | 12-scf00280 | 12 |
| AX-158129677 | 12 | 83.936 | KV453016.1 | 71300  | 12-scf00280 | 12 |
| AX-157771730 | 12 | 83.936 | KV453016.1 | 78446  | 12-scf00280 | 12 |
| AX-158129681 | 12 | 83.936 | KV453016.1 | 86449  | 12-scf00280 | 12 |
| AX-158129684 | 12 | 83.936 | KV453016.1 | 92563  | 12-scf00280 | 12 |
| AX-158129685 | 12 | 83.936 | KV453016.1 | 95808  | 12-scf00280 | 12 |
| AX-158129696 | 12 | 83.936 | KV453016.1 | 127247 | 12-scf00280 | 12 |
| AX-158129700 | 12 | 83.936 | KV453016.1 | 138676 | 12-scf00280 | 12 |
| AX-157829979 | 12 | 83.936 | KV453016.1 | 147250 | 12-scf00280 | 12 |

|              |    |        |            |        |             |    |
|--------------|----|--------|------------|--------|-------------|----|
| AX-158129703 | 12 | 83.936 | KV453016.1 | 158736 | 12-scf00280 | 12 |
| AX-158129705 | 12 | 83.936 | KV453016.1 | 162031 | 12-scf00280 | 12 |
| AX-158129706 | 12 | 83.936 | KV453016.1 | 163064 | 12-scf00280 | 12 |
| AX-158129708 | 12 | 83.936 | KV453016.1 | 178200 | 12-scf00280 | 12 |
| AX-158129709 | 12 | 83.936 | KV453016.1 | 178613 | 12-scf00280 | 12 |
| AX-158129714 | 12 | 83.936 | KV453016.1 | 188585 | 12-scf00280 | 12 |
| AX-157829983 | 12 | 83.936 | KV453016.1 | 188877 | 12-scf00280 | 12 |
| AX-158129715 | 12 | 83.936 | KV453016.1 | 189009 | 12-scf00280 | 12 |
| AX-158129716 | 12 | 83.936 | KV453016.1 | 189887 | 12-scf00280 | 12 |
| AX-157829984 | 12 | 83.936 | KV453016.1 | 190879 | 12-scf00280 | 12 |
| AX-158129722 | 12 | 83.936 | KV453016.1 | 204484 | 12-scf00280 | 12 |
| AX-158129724 | 12 | 83.936 | KV453016.1 | 209650 | 12-scf00280 | 12 |
| AX-158129728 | 12 | 83.936 | KV453016.1 | 220475 | 12-scf00280 | 12 |
| AX-158129731 | 12 | 83.936 | KV453016.1 | 226856 | 12-scf00280 | 12 |
| AX-158129733 | 12 | 83.936 | KV453016.1 | 235739 | 12-scf00280 | 12 |
| AX-158129736 | 12 | 83.936 | KV453016.1 | 255660 | 12-scf00280 | 12 |
| AX-157877932 | 12 | 83.936 | KV453016.1 | 256318 | 12-scf00280 | 12 |
| AX-158129737 | 12 | 83.936 | KV453016.1 | 267678 | 12-scf00280 | 12 |
| AX-158129740 | 12 | 83.936 | KV453016.1 | 270307 | 12-scf00280 | 12 |
| AX-158129741 | 12 | 83.936 | KV453016.1 | 272865 | 12-scf00280 | 12 |
| AX-158129742 | 12 | 83.936 | KV453016.1 | 279190 | 12-scf00280 | 12 |
| AX-158129744 | 12 | 83.936 | KV453016.1 | 296845 | 12-scf00280 | 12 |
| AX-158129747 | 12 | 83.936 | KV453016.1 | 307727 | 12-scf00280 | 12 |
| AX-158129750 | 12 | 83.936 | KV453016.1 | 312705 | 12-scf00280 | 12 |
| AX-158129751 | 12 | 83.936 | KV453016.1 | 313161 | 12-scf00280 | 12 |
| AX-158129752 | 12 | 83.936 | KV453016.1 | 322775 | 12-scf00280 | 12 |
| AX-158129754 | 12 | 83.936 | KV453016.1 | 328911 | 12-scf00280 | 12 |
| AX-158129757 | 12 | 83.936 | KV453016.1 | 334358 | 12-scf00280 | 12 |
| AX-157719684 | 12 | 83.936 | KV453016.1 | 337462 | 12-scf00280 | 12 |
| AX-158129759 | 12 | 83.936 | KV453016.1 | 343094 | 12-scf00280 | 12 |
| AX-158129760 | 12 | 83.936 | KV453016.1 | 346044 | 12-scf00280 | 12 |
| AX-158129761 | 12 | 83.936 | KV453016.1 | 346839 | 12-scf00280 | 12 |
| AX-158129762 | 12 | 83.936 | KV453016.1 | 347995 | 12-scf00280 | 12 |
| AX-158129763 | 12 | 83.936 | KV453016.1 | 348705 | 12-scf00280 | 12 |
| AX-158129764 | 12 | 83.936 | KV453016.1 | 349128 | 12-scf00280 | 12 |
| AX-158129765 | 12 | 83.936 | KV453016.1 | 349500 | 12-scf00280 | 12 |
| AX-158129767 | 12 | 83.936 | KV453016.1 | 354342 | 12-scf00280 | 12 |
| AX-158129768 | 12 | 83.936 | KV453016.1 | 355995 | 12-scf00280 | 12 |
| AX-158129769 | 12 | 83.936 | KV453016.1 | 358555 | 12-scf00280 | 12 |
| AX-158129771 | 12 | 83.936 | KV453016.1 | 359468 | 12-scf00280 | 12 |
| AX-158129773 | 12 | 83.936 | KV453016.1 | 363169 | 12-scf00280 | 12 |
| AX-158129775 | 12 | 83.936 | KV453016.1 | 367501 | 12-scf00280 | 12 |
| AX-158129778 | 12 | 83.936 | KV453016.1 | 372738 | 12-scf00280 | 12 |
| AX-158129779 | 12 | 83.936 | KV453016.1 | 373835 | 12-scf00280 | 12 |
| AX-158129780 | 12 | 83.936 | KV453016.1 | 374612 | 12-scf00280 | 12 |
| AX-158129781 | 12 | 83.936 | KV453016.1 | 375513 | 12-scf00280 | 12 |
| AX-157829987 | 12 | 83.936 | KV453016.1 | 375941 | 12-scf00280 | 12 |
| AX-158129782 | 12 | 83.936 | KV453016.1 | 376550 | 12-scf00280 | 12 |
| AX-158129783 | 12 | 83.936 | KV453016.1 | 377652 | 12-scf00280 | 12 |
| AX-158129784 | 12 | 83.936 | KV453016.1 | 377876 | 12-scf00280 | 12 |
| AX-158129785 | 12 | 83.936 | KV453016.1 | 378163 | 12-scf00280 | 12 |

|              |    |        |            |        |             |    |
|--------------|----|--------|------------|--------|-------------|----|
| AX-158129787 | 12 | 83.936 | KV453016.1 | 389619 | 12-scf00280 | 12 |
| AX-158129791 | 12 | 83.936 | KV453016.1 | 413914 | 12-scf00280 | 12 |
| AX-158129802 | 12 | 83.936 | KV453016.1 | 432138 | 12-scf00280 | 12 |
| AX-157792166 | 12 | 83.936 | KV453016.1 | 433599 | 12-scf00280 | 12 |
| AX-158129803 | 12 | 83.936 | KV453016.1 | 434317 | 12-scf00280 | 12 |
| AX-158129804 | 12 | 83.936 | KV453016.1 | 434943 | 12-scf00280 | 12 |
| AX-158129805 | 12 | 83.936 | KV453016.1 | 435332 | 12-scf00280 | 12 |
| AX-158129808 | 12 | 83.936 | KV453016.1 | 437399 | 12-scf00280 | 12 |
| AX-158129809 | 12 | 83.936 | KV453016.1 | 441672 | 12-scf00280 | 12 |
| AX-157792167 | 12 | 83.936 | KV453016.1 | 443494 | 12-scf00280 | 12 |
| AX-157747229 | 12 | 83.936 | KV453016.1 | 443636 | 12-scf00280 | 12 |
| AX-158129810 | 12 | 83.936 | KV453016.1 | 444124 | 12-scf00280 | 12 |
| AX-158129811 | 12 | 83.936 | KV453016.1 | 445218 | 12-scf00280 | 12 |
| AX-158129812 | 12 | 83.936 | KV453016.1 | 446211 | 12-scf00280 | 12 |
| AX-158129813 | 12 | 83.936 | KV453016.1 | 446753 | 12-scf00280 | 12 |
| AX-158129814 | 12 | 83.936 | KV453016.1 | 447410 | 12-scf00280 | 12 |
| AX-157744160 | 12 | 83.936 | KV453016.1 | 453285 | 12-scf00280 | 12 |
| AX-158129822 | 12 | 83.936 | KV453016.1 | 458912 | 12-scf00280 | 12 |
| AX-158129825 | 12 | 83.936 | KV453016.1 | 463218 | 12-scf00280 | 12 |
| AX-157829990 | 12 | 83.936 | KV453016.1 | 468308 | 12-scf00280 | 12 |
| AX-158129828 | 12 | 83.936 | KV453016.1 | 475475 | 12-scf00280 | 12 |
| AX-158129832 | 12 | 83.936 | KV453016.1 | 482911 | 12-scf00280 | 12 |
| AX-158129833 | 12 | 83.936 | KV453016.1 | 484166 | 12-scf00280 | 12 |
| AX-158129835 | 12 | 83.936 | KV453016.1 | 485782 | 12-scf00280 | 12 |
| AX-158129839 | 12 | 83.936 | KV453016.1 | 489605 | 12-scf00280 | 12 |
| AX-158129848 | 12 | 83.936 | KV453016.1 | 505434 | 12-scf00280 | 12 |
| AX-158129852 | 12 | 83.936 | KV453016.1 | 511061 | 12-scf00280 | 12 |
| AX-158129857 | 12 | 83.936 | KV453016.1 | 517534 | 12-scf00280 | 12 |
| AX-158129858 | 12 | 83.936 | KV453016.1 | 518296 | 12-scf00280 | 12 |
| AX-158129861 | 12 | 83.936 | KV453016.1 | 520644 | 12-scf00280 | 12 |
| AX-158129866 | 12 | 83.936 | KV453016.1 | 527022 | 12-scf00280 | 12 |
| AX-158129869 | 12 | 83.936 | KV453016.1 | 530286 | 12-scf00280 | 12 |
| AX-158129871 | 12 | 83.936 | KV453016.1 | 531917 | 12-scf00280 | 12 |
| AX-157716904 | 12 | 83.936 | KV453016.1 | 534043 | 12-scf00280 | 12 |
| AX-157739990 | 12 | 83.936 | KV453016.1 | 536901 | 12-scf00280 | 12 |
| AX-158129875 | 12 | 83.936 | KV453016.1 | 537698 | 12-scf00280 | 12 |
| AX-158129876 | 12 | 83.936 | KV453016.1 | 538408 | 12-scf00280 | 12 |
| AX-158129882 | 12 | 83.936 | KV453016.1 | 545689 | 12-scf00280 | 12 |
| AX-158129883 | 12 | 83.936 | KV453016.1 | 546244 | 12-scf00280 | 12 |
| AX-158129890 | 12 | 83.936 | KV453016.1 | 554231 | 12-scf00280 | 12 |
| AX-157775384 | 12 | 83.936 | KV453016.1 | 595263 | 12-scf00280 | 12 |
| AX-158129908 | 12 | 83.936 | KV453016.1 | 598305 | 12-scf00280 | 12 |
| AX-158129909 | 12 | 83.936 | KV453016.1 | 600711 | 12-scf00280 | 12 |
| AX-158129910 | 12 | 83.936 | KV453016.1 | 605303 | 12-scf00280 | 12 |
| AX-158129911 | 12 | 83.936 | KV453016.1 | 610195 | 12-scf00280 | 12 |
| AX-158129912 | 12 | 83.936 | KV453016.1 | 611607 | 12-scf00280 | 12 |
| AX-158129913 | 12 | 83.936 | KV453016.1 | 612123 | 12-scf00280 | 12 |
| AX-158129914 | 12 | 83.936 | KV453016.1 | 612567 | 12-scf00280 | 12 |
| AX-157717107 | 12 | 83.936 | KV453016.1 | 613781 | 12-scf00280 | 12 |
| AX-158129917 | 12 | 83.936 | KV453016.1 | 620390 | 12-scf00280 | 12 |
| AX-157772337 | 12 | 83.936 | KV453016.1 | 620741 | 12-scf00280 | 12 |

|              |    |        |            |        |             |    |
|--------------|----|--------|------------|--------|-------------|----|
| AX-158129919 | 12 | 83.936 | KV453016.1 | 622351 | 12-scf00280 | 12 |
| AX-158129922 | 12 | 83.936 | KV453016.1 | 624357 | 12-scf00280 | 12 |
| AX-158129923 | 12 | 83.936 | KV453016.1 | 625790 | 12-scf00280 | 12 |
| AX-158129924 | 12 | 83.936 | KV453016.1 | 627441 | 12-scf00280 | 12 |
| AX-157871376 | 12 | 83.936 | KV453016.1 | 629215 | 12-scf00280 | 12 |
| AX-158129925 | 12 | 83.936 | KV453016.1 | 629912 | 12-scf00280 | 12 |
| AX-158129926 | 12 | 83.936 | KV453016.1 | 630575 | 12-scf00280 | 12 |
| AX-157722373 | 12 | 83.936 | KV453016.1 | 630647 | 12-scf00280 | 12 |
| AX-158129927 | 12 | 83.936 | KV453016.1 | 631080 | 12-scf00280 | 12 |
| AX-158129931 | 12 | 83.936 | KV453016.1 | 633324 | 12-scf00280 | 12 |
| AX-158129933 | 12 | 83.936 | KV453016.1 | 638328 | 12-scf00280 | 12 |
| AX-158129935 | 12 | 83.936 | KV453016.1 | 641344 | 12-scf00280 | 12 |
| AX-158129939 | 12 | 83.936 | KV453016.1 | 650889 | 12-scf00280 | 12 |
| AX-157755160 | 12 | 83.936 | KV453016.1 | 662926 | 12-scf00280 | 12 |
| AX-158130030 | 12 | 83.936 | KV453016.1 | 663831 | 12-scf00280 | 12 |
| AX-158130032 | 12 | 83.936 | KV453016.1 | 669376 | 12-scf00280 | 12 |
| AX-158130033 | 12 | 83.936 | KV453016.1 | 669989 | 12-scf00280 | 12 |
| AX-157744093 | 12 | 83.936 | KV453016.1 | 670495 | 12-scf00280 | 12 |
| AX-157772908 | 12 | 83.936 | KV453016.1 | 679988 | 12-scf00280 | 12 |
| AX-157830018 | 12 | 83.936 | KV453016.1 | 684255 | 12-scf00280 | 12 |
| AX-158130038 | 12 | 83.936 | KV453016.1 | 695076 | 12-scf00280 | 12 |
| AX-158130041 | 12 | 83.936 | KV453016.1 | 698301 | 12-scf00280 | 12 |
| AX-157830019 | 12 | 83.936 | KV453016.1 | 702410 | 12-scf00280 | 12 |
| AX-158130043 | 12 | 83.936 | KV453016.1 | 704349 | 12-scf00280 | 12 |
| AX-157720609 | 12 | 83.936 | KV453016.1 | 710772 | 12-scf00280 | 12 |
| AX-158130048 | 12 | 83.936 | KV453016.1 | 717837 | 12-scf00280 | 12 |
| AX-157742715 | 12 | 83.936 | KV453016.1 | 719823 | 12-scf00280 | 12 |
| AX-158130049 | 12 | 83.936 | KV453016.1 | 723925 | 12-scf00280 | 12 |
| AX-158130053 | 12 | 83.936 | KV453016.1 | 726494 | 12-scf00280 | 12 |
| AX-158130060 | 12 | 83.936 | KV453016.1 | 731457 | 12-scf00280 | 12 |
| AX-157871379 | 12 | 83.936 | KV453016.1 | 732993 | 12-scf00280 | 12 |
| AX-157830022 | 12 | 83.936 | KV453016.1 | 734932 | 12-scf00280 | 12 |
| AX-158130067 | 12 | 83.936 | KV453016.1 | 743068 | 12-scf00280 | 12 |
| AX-157871380 | 12 | 83.936 | KV453016.1 | 750801 | 12-scf00280 | 12 |
| AX-158130071 | 12 | 83.936 | KV453016.1 | 753838 | 12-scf00280 | 12 |
| AX-157830023 | 12 | 83.936 | KV453016.1 | 756477 | 12-scf00280 | 12 |
| AX-158130072 | 12 | 83.936 | KV453016.1 | 756926 | 12-scf00280 | 12 |
| AX-158130073 | 12 | 83.936 | KV453016.1 | 758093 | 12-scf00280 | 12 |
| AX-158411521 | 12 | 83.936 | KV453016.1 | 764065 | 12-scf00280 | 12 |
| AX-158408091 | 12 | 83.936 | KV453016.1 | 766116 | 12-scf00280 | 12 |
| AX-157744969 | 12 | 83.936 | KV453016.1 | 767263 | 12-scf00280 | 12 |
| AX-158130075 | 12 | 83.936 | KV453016.1 | 769038 | 12-scf00280 | 12 |
| AX-158130076 | 12 | 83.936 | KV453016.1 | 772568 | 12-scf00280 | 12 |
| AX-158130078 | 12 | 83.936 | KV453016.1 | 774702 | 12-scf00280 | 12 |
| AX-158130079 | 12 | 83.936 | KV453016.1 | 775502 | 12-scf00280 | 12 |
| AX-158130080 | 12 | 83.936 | KV453016.1 | 776711 | 12-scf00280 | 12 |
| AX-158130082 | 12 | 83.936 | KV453016.1 | 780090 | 12-scf00280 | 12 |
| AX-158130083 | 12 | 83.936 | KV453016.1 | 780883 | 12-scf00280 | 12 |
| AX-158130086 | 12 | 83.936 | KV453016.1 | 783890 | 12-scf00280 | 12 |
| AX-158130087 | 12 | 83.936 | KV453016.1 | 784462 | 12-scf00280 | 12 |
| AX-158411528 | 12 | 83.936 | KV453016.1 | 788977 | 12-scf00280 | 12 |

|              |    |        |            |        |             |    |
|--------------|----|--------|------------|--------|-------------|----|
| AX-158385237 | 12 | 83.936 | KV453016.1 | 794352 | 12-scf00280 | 12 |
| AX-158130090 | 12 | 83.936 | KV453016.1 | 796461 | 12-scf00280 | 12 |
| AX-157708570 | 12 | 83.936 | KV453016.1 | 806906 | 12-scf00280 | 12 |
| AX-158130097 | 12 | 83.936 | KV453016.1 | 813069 | 12-scf00280 | 12 |
| AX-158130098 | 12 | 83.936 | KV453016.1 | 813577 | 12-scf00280 | 12 |
| AX-158130099 | 12 | 83.936 | KV453016.1 | 817415 | 12-scf00280 | 12 |
| AX-158130102 | 12 | 83.936 | KV453016.1 | 821633 | 12-scf00280 | 12 |
| AX-158130103 | 12 | 83.936 | KV453016.1 | 823494 | 12-scf00280 | 12 |
| AX-158130104 | 12 | 83.936 | KV453016.1 | 823855 | 12-scf00280 | 12 |
| AX-157739949 | 12 | 83.936 | KV453016.1 | 830108 | 12-scf00280 | 12 |
| AX-158130109 | 12 | 83.936 | KV453016.1 | 830682 | 12-scf00280 | 12 |
| AX-158130110 | 12 | 83.936 | KV453016.1 | 830925 | 12-scf00280 | 12 |
| AX-158130111 | 12 | 83.936 | KV453016.1 | 832610 | 12-scf00280 | 12 |
| AX-157857830 | 12 | 83.936 | KV453016.1 | 835610 | 12-scf00280 | 12 |
| AX-157830027 | 12 | 83.936 | KV453016.1 | 840858 | 12-scf00280 | 12 |
| AX-157746659 | 12 | 83.936 | KV453016.1 | 841053 | 12-scf00280 | 12 |
| AX-158129969 | 12 | 83.936 | KV453015.1 | 46970  | 12-scf00281 | 12 |
| AX-158129972 | 12 | 83.936 | KV453015.1 | 55417  | 12-scf00281 | 12 |
| AX-158392832 | 12 | 83.936 | KV453015.1 | 95777  | 12-scf00281 | 12 |
| AX-158129988 | 12 | 83.936 | KV453015.1 | 116673 | 12-scf00281 | 12 |
| AX-157830012 | 12 | 83.936 | KV453015.1 | 124339 | 12-scf00281 | 12 |
| AX-157830013 | 12 | 83.936 | KV453015.1 | 124643 | 12-scf00281 | 12 |
| AX-158129990 | 12 | 83.936 | KV453015.1 | 126777 | 12-scf00281 | 12 |
| AX-157830014 | 12 | 83.936 | KV453015.1 | 130119 | 12-scf00281 | 12 |
| AX-158392833 | 12 | 83.936 | KV453015.1 | 130901 | 12-scf00281 | 12 |
| AX-158129995 | 12 | 83.936 | KV453015.1 | 143358 | 12-scf00281 | 12 |
| AX-158130005 | 12 | 83.936 | KV453015.1 | 171867 | 12-scf00281 | 12 |
| AX-158130014 | 12 | 83.936 | KV453015.1 | 207176 | 12-scf00281 | 12 |
| AX-157830016 | 12 | 83.936 | KV453015.1 | 215130 | 12-scf00281 | 12 |
| AX-158130019 | 12 | 83.936 | KV453015.1 | 215393 | 12-scf00281 | 12 |
| AX-158130020 | 12 | 83.936 | KV453015.1 | 217239 | 12-scf00281 | 12 |
| AX-158130025 | 12 | 83.936 | KV453015.1 | 230736 | 12-scf00281 | 12 |
| AX-158130026 | 12 | 83.936 | KV453015.1 | 231893 | 12-scf00281 | 12 |
| AX-158130027 | 12 | 83.936 | KV453015.1 | 232325 | 12-scf00281 | 12 |
| AX-158130028 | 12 | 83.936 | KV453015.1 | 239077 | 12-scf00281 | 12 |
| AX-157683570 | 12 | 83.936 | KV453018.1 | 1157   | 12-scf00283 | 12 |
| AX-157680164 | 12 | 83.936 | KV453018.1 | 1289   | 12-scf00283 | 12 |
| AX-157683571 | 12 | 83.936 | KV453018.1 | 2693   | 12-scf00283 | 12 |
| AX-157683572 | 12 | 83.936 | KV453018.1 | 3321   | 12-scf00283 | 12 |
| AX-157683575 | 12 | 83.936 | KV453018.1 | 7485   | 12-scf00283 | 12 |
| AX-157710852 | 12 | 83.936 | KV453018.1 | 8802   | 12-scf00283 | 12 |
| AX-157680678 | 12 | 83.936 | KV453018.1 | 9020   | 12-scf00283 | 12 |
| AX-157708417 | 12 | 83.936 | KV453017.1 | 11588  | 12-scf00284 | 12 |
| AX-158408095 | 12 | 83.936 | KV453017.1 | 43943  | 12-scf00284 | 12 |
| AX-157877939 | 12 | 83.936 | KV453017.1 | 81096  | 12-scf00284 | 12 |
| AX-158130178 | 12 | 83.936 | KV453017.1 | 106139 | 12-scf00284 | 12 |
| AX-158130179 | 12 | 83.936 | KV453017.1 | 106688 | 12-scf00284 | 12 |
| AX-158130180 | 12 | 83.936 | KV453017.1 | 107306 | 12-scf00284 | 12 |
| AX-158130181 | 12 | 83.936 | KV453017.1 | 107619 | 12-scf00284 | 12 |
| AX-158130182 | 12 | 83.936 | KV453017.1 | 108240 | 12-scf00284 | 12 |
| AX-158130185 | 12 | 83.936 | KV453017.1 | 113837 | 12-scf00284 | 12 |

|              |    |        |             |        |             |    |
|--------------|----|--------|-------------|--------|-------------|----|
| AX-158130186 | 12 | 83.936 | KV453017.1  | 117085 | 12-scf00284 | 12 |
| AX-158130194 | 12 | 83.936 | KV453019.1  | 5496   | 12-scf00285 | 12 |
| AX-157792214 | 12 | 83.936 | KV453019.1  | 15745  | 12-scf00285 | 12 |
| AX-157792215 | 12 | 83.936 | KV453019.1  | 16496  | 12-scf00285 | 12 |
| AX-157792216 | 12 | 83.936 | KV453019.1  | 17018  | 12-scf00285 | 12 |
| AX-157792217 | 12 | 83.936 | KV453019.1  | 17114  | 12-scf00285 | 12 |
| AX-158411543 | 12 | 83.936 | KV453019.1  | 37675  | 12-scf00285 | 12 |
| AX-157792223 | 12 | 83.936 | KV453019.1  | 38638  | 12-scf00285 | 12 |
| AX-158411544 | 12 | 83.936 | KV453019.1  | 41583  | 12-scf00285 | 12 |
| AX-158130203 | 12 | 83.936 | KV453019.1  | 44840  | 12-scf00285 | 12 |
| AX-157708154 | 12 | 83.936 | KV453019.1  | 49808  | 12-scf00285 | 12 |
| AX-157877941 | 12 | 83.936 | KV453019.1  | 51660  | 12-scf00285 | 12 |
| AX-157792228 | 12 | 83.936 | KV453019.1  | 56207  | 12-scf00285 | 12 |
| AX-157742448 | 12 | 83.936 | KV453019.1  | 84589  | 12-scf00285 | 12 |
| AX-158130214 | 12 | 83.936 | KV453019.1  | 87314  | 12-scf00285 | 12 |
| AX-157717574 | 12 | 83.936 | KV453019.1  | 88535  | 12-scf00285 | 12 |
| AX-157830057 | 12 | 83.936 | KV453019.1  | 95919  | 12-scf00285 | 12 |
| AX-158130215 | 12 | 83.936 | KV453019.1  | 98240  | 12-scf00285 | 12 |
| AX-157871382 | 12 | 83.936 | KV453019.1  | 98316  | 12-scf00285 | 12 |
| AX-158130216 | 12 | 83.936 | KV453019.1  | 102667 | 12-scf00285 | 12 |
| AX-158130217 | 12 | 83.936 | KV453019.1  | 103150 | 12-scf00285 | 12 |
| AX-158130220 | 12 | 83.936 | KV453019.1  | 106896 | 12-scf00285 | 12 |
| AX-157830059 | 12 | 83.936 | KV453019.1  | 111970 | 12-scf00285 | 12 |
| AX-157688566 | 12 | 83.936 | 3ML01026477 | 1780   | scf02074_1  | UN |
| AX-157689556 | 12 | 83.936 | 3ML01030499 | 777    | scf06098_1  | UN |
| AX-157681147 | 12 | 83.936 |             | 174    | scf14329    | UN |
| AX-158130200 | 12 | 83.938 | KV453019.1  | 34737  | 12-scf00285 | 12 |
| AX-157792231 | 12 | 83.939 | KV453019.1  | 62237  | 12-scf00285 | 12 |
| AX-157830055 | 12 | 83.941 | KV453019.1  | 62431  | 12-scf00285 | 12 |
| AX-158130209 | 12 | 84.4   | KV453019.1  | 65222  | 12-scf00285 | 12 |
| AX-158130227 | 13 | 0      | KV453128.1  | 33160  | 18-scf00286 | 18 |
| AX-158130225 | 13 | 1.034  | KV453128.1  | 18985  | 18-scf00286 | 18 |
| AX-158130228 | 13 | 1.034  | KV453128.1  | 33814  | 18-scf00286 | 18 |
| AX-158130229 | 13 | 1.034  | KV453128.1  | 34354  | 18-scf00286 | 18 |
| AX-157772567 | 13 | 1.034  | KV453128.1  | 97063  | 18-scf00286 | 18 |
| AX-158130263 | 13 | 1.034  | KV453128.1  | 115133 | 18-scf00286 | 18 |
| AX-158130299 | 13 | 1.034  | KV453128.1  | 205734 | 18-scf00286 | 18 |
| AX-158130331 | 13 | 1.034  | KV453128.1  | 300423 | 18-scf00286 | 18 |
| AX-158130224 | 13 | 1.037  | KV453128.1  | 16778  | 18-scf00286 | 18 |
| AX-158130231 | 13 | 1.037  | KV453128.1  | 39979  | 18-scf00286 | 18 |
| AX-158130236 | 13 | 1.037  | KV453128.1  | 48008  | 18-scf00286 | 18 |
| AX-158130238 | 13 | 1.037  | KV453128.1  | 59705  | 18-scf00286 | 18 |
| AX-157830061 | 13 | 1.037  | KV453128.1  | 61304  | 18-scf00286 | 18 |
| AX-158130239 | 13 | 1.037  | KV453128.1  | 62343  | 18-scf00286 | 18 |
| AX-158130240 | 13 | 1.037  | KV453128.1  | 63015  | 18-scf00286 | 18 |
| AX-157716177 | 13 | 1.037  | KV453128.1  | 63797  | 18-scf00286 | 18 |
| AX-158130244 | 13 | 1.037  | KV453128.1  | 74438  | 18-scf00286 | 18 |
| AX-157700216 | 13 | 1.037  | KV453128.1  | 75722  | 18-scf00286 | 18 |
| AX-158130246 | 13 | 1.037  | KV453128.1  | 77303  | 18-scf00286 | 18 |
| AX-158130247 | 13 | 1.037  | KV453128.1  | 79452  | 18-scf00286 | 18 |
| AX-158130250 | 13 | 1.037  | KV453128.1  | 88486  | 18-scf00286 | 18 |

|              |    |       |            |        |             |    |
|--------------|----|-------|------------|--------|-------------|----|
| AX-158130251 | 13 | 1.037 | KV453128.1 | 88994  | 18-scf00286 | 18 |
| AX-157830062 | 13 | 1.037 | KV453128.1 | 89834  | 18-scf00286 | 18 |
| AX-158130252 | 13 | 1.037 | KV453128.1 | 90730  | 18-scf00286 | 18 |
| AX-158130256 | 13 | 1.037 | KV453128.1 | 104212 | 18-scf00286 | 18 |
| AX-158130257 | 13 | 1.037 | KV453128.1 | 105072 | 18-scf00286 | 18 |
| AX-158130258 | 13 | 1.037 | KV453128.1 | 105962 | 18-scf00286 | 18 |
| AX-158130259 | 13 | 1.037 | KV453128.1 | 108913 | 18-scf00286 | 18 |
| AX-158130260 | 13 | 1.037 | KV453128.1 | 109246 | 18-scf00286 | 18 |
| AX-158130261 | 13 | 1.037 | KV453128.1 | 111158 | 18-scf00286 | 18 |
| AX-157744796 | 13 | 1.037 | KV453128.1 | 128209 | 18-scf00286 | 18 |
| AX-157830064 | 13 | 1.037 | KV453128.1 | 130108 | 18-scf00286 | 18 |
| AX-157830065 | 13 | 1.037 | KV453128.1 | 132312 | 18-scf00286 | 18 |
| AX-158130270 | 13 | 1.037 | KV453128.1 | 143761 | 18-scf00286 | 18 |
| AX-158130278 | 13 | 1.037 | KV453128.1 | 169187 | 18-scf00286 | 18 |
| AX-158130281 | 13 | 1.037 | KV453128.1 | 176705 | 18-scf00286 | 18 |
| AX-158130282 | 13 | 1.037 | KV453128.1 | 177630 | 18-scf00286 | 18 |
| AX-158130284 | 13 | 1.037 | KV453128.1 | 179834 | 18-scf00286 | 18 |
| AX-158130285 | 13 | 1.037 | KV453128.1 | 180862 | 18-scf00286 | 18 |
| AX-158411546 | 13 | 1.037 | KV453128.1 | 182501 | 18-scf00286 | 18 |
| AX-158130286 | 13 | 1.037 | KV453128.1 | 183418 | 18-scf00286 | 18 |
| AX-158130287 | 13 | 1.037 | KV453128.1 | 183834 | 18-scf00286 | 18 |
| AX-158130289 | 13 | 1.037 | KV453128.1 | 184585 | 18-scf00286 | 18 |
| AX-158130291 | 13 | 1.037 | KV453128.1 | 187613 | 18-scf00286 | 18 |
| AX-158130294 | 13 | 1.037 | KV453128.1 | 193746 | 18-scf00286 | 18 |
| AX-158130296 | 13 | 1.037 | KV453128.1 | 198332 | 18-scf00286 | 18 |
| AX-158130297 | 13 | 1.037 | KV453128.1 | 199176 | 18-scf00286 | 18 |
| AX-158130298 | 13 | 1.037 | KV453128.1 | 202490 | 18-scf00286 | 18 |
| AX-157830069 | 13 | 1.037 | KV453128.1 | 204972 | 18-scf00286 | 18 |
| AX-158130300 | 13 | 1.037 | KV453128.1 | 206572 | 18-scf00286 | 18 |
| AX-158130301 | 13 | 1.037 | KV453128.1 | 209736 | 18-scf00286 | 18 |
| AX-158130305 | 13 | 1.037 | KV453128.1 | 229215 | 18-scf00286 | 18 |
| AX-158130306 | 13 | 1.037 | KV453128.1 | 234317 | 18-scf00286 | 18 |
| AX-157745794 | 13 | 1.037 | KV453128.1 | 241265 | 18-scf00286 | 18 |
| AX-158130313 | 13 | 1.037 | KV453128.1 | 255583 | 18-scf00286 | 18 |
| AX-158130314 | 13 | 1.037 | KV453128.1 | 258132 | 18-scf00286 | 18 |
| AX-158130317 | 13 | 1.037 | KV453128.1 | 264761 | 18-scf00286 | 18 |
| AX-158130322 | 13 | 1.037 | KV453128.1 | 283110 | 18-scf00286 | 18 |
| AX-158130323 | 13 | 1.037 | KV453128.1 | 283456 | 18-scf00286 | 18 |
| AX-157830077 | 13 | 1.037 | KV453128.1 | 285949 | 18-scf00286 | 18 |
| AX-158130325 | 13 | 1.037 | KV453128.1 | 286949 | 18-scf00286 | 18 |
| AX-158130328 | 13 | 1.037 | KV453128.1 | 295195 | 18-scf00286 | 18 |
| AX-158130332 | 13 | 1.037 | KV453128.1 | 300852 | 18-scf00286 | 18 |
| AX-158130333 | 13 | 1.037 | KV453128.1 | 302542 | 18-scf00286 | 18 |
| AX-158130334 | 13 | 1.037 | KV453128.1 | 303088 | 18-scf00286 | 18 |
| AX-158130336 | 13 | 1.037 | KV453128.1 | 312605 | 18-scf00286 | 18 |
| AX-157830081 | 13 | 1.037 | KV453128.1 | 327688 | 18-scf00286 | 18 |
| AX-158130344 | 13 | 1.037 | KV453128.1 | 328024 | 18-scf00286 | 18 |
| AX-158130345 | 13 | 1.037 | KV453128.1 | 328377 | 18-scf00286 | 18 |
| AX-158130347 | 13 | 1.037 | KV453128.1 | 331767 | 18-scf00286 | 18 |
| AX-157830082 | 13 | 1.037 | KV453128.1 | 332137 | 18-scf00286 | 18 |
| AX-158130348 | 13 | 1.037 | KV453128.1 | 334671 | 18-scf00286 | 18 |



|              |    |       |            |        |             |    |
|--------------|----|-------|------------|--------|-------------|----|
| AX-158130364 | 13 | 1.037 | KV453128.1 | 367705 | 18-scf00286 | 18 |
| AX-157772879 | 13 | 1.037 | KV453128.1 | 422652 | 18-scf00286 | 18 |
| AX-158130416 | 13 | 1.037 | KV453128.1 | 454131 | 18-scf00286 | 18 |
| AX-157830095 | 13 | 1.037 | KV453128.1 | 462681 | 18-scf00286 | 18 |
| AX-157755078 | 13 | 1.037 | KV453128.1 | 475456 | 18-scf00286 | 18 |
| AX-158130428 | 13 | 1.037 | KV453128.1 | 480907 | 18-scf00286 | 18 |
| AX-158130451 | 13 | 1.037 | KV453128.1 | 511733 | 18-scf00286 | 18 |
| AX-158130491 | 13 | 1.037 | KV453128.1 | 565222 | 18-scf00286 | 18 |
| AX-158130518 | 13 | 1.037 | KV453128.1 | 608139 | 18-scf00286 | 18 |
| AX-158130708 | 13 | 1.037 | KV453128.1 | 890089 | 18-scf00286 | 18 |
| AX-158130765 | 13 | 1.037 | KV453128.1 | 969721 | 18-scf00286 | 18 |
| AX-158130232 | 13 | 1.146 | KV453128.1 | 41542  | 18-scf00286 | 18 |
| AX-157830071 | 13 | 1.146 | KV453128.1 | 247579 | 18-scf00286 | 18 |
| AX-158380229 | 13 | 1.146 | KV453128.1 | 338753 | 18-scf00286 | 18 |
| AX-157830084 | 13 | 1.146 | KV453128.1 | 342199 | 18-scf00286 | 18 |
| AX-158130351 | 13 | 1.146 | KV453128.1 | 345737 | 18-scf00286 | 18 |
| AX-158130353 | 13 | 1.146 | KV453128.1 | 347652 | 18-scf00286 | 18 |
| AX-158130354 | 13 | 1.146 | KV453128.1 | 350238 | 18-scf00286 | 18 |
| AX-158130357 | 13 | 1.146 | KV453128.1 | 357575 | 18-scf00286 | 18 |
| AX-158130358 | 13 | 1.146 | KV453128.1 | 360998 | 18-scf00286 | 18 |
| AX-158130361 | 13 | 1.146 | KV453128.1 | 364793 | 18-scf00286 | 18 |
| AX-158130362 | 13 | 1.146 | KV453128.1 | 365709 | 18-scf00286 | 18 |
| AX-158130363 | 13 | 1.146 | KV453128.1 | 366713 | 18-scf00286 | 18 |
| AX-158130366 | 13 | 1.146 | KV453128.1 | 371779 | 18-scf00286 | 18 |
| AX-158130368 | 13 | 1.146 | KV453128.1 | 374569 | 18-scf00286 | 18 |
| AX-158130370 | 13 | 1.146 | KV453128.1 | 375875 | 18-scf00286 | 18 |
| AX-158130374 | 13 | 1.146 | KV453128.1 | 382899 | 18-scf00286 | 18 |
| AX-157830088 | 13 | 1.146 | KV453128.1 | 385598 | 18-scf00286 | 18 |
| AX-158130376 | 13 | 1.146 | KV453128.1 | 386437 | 18-scf00286 | 18 |
| AX-158130379 | 13 | 1.146 | KV453128.1 | 389851 | 18-scf00286 | 18 |
| AX-157739853 | 13 | 1.146 | KV453128.1 | 391833 | 18-scf00286 | 18 |
| AX-158130380 | 13 | 1.146 | KV453128.1 | 391935 | 18-scf00286 | 18 |
| AX-158130389 | 13 | 1.146 | KV453128.1 | 401166 | 18-scf00286 | 18 |
| AX-157748004 | 13 | 1.146 | KV453128.1 | 404053 | 18-scf00286 | 18 |
| AX-158130391 | 13 | 1.146 | KV453128.1 | 405704 | 18-scf00286 | 18 |
| AX-158130394 | 13 | 1.146 | KV453128.1 | 415402 | 18-scf00286 | 18 |
| AX-158130395 | 13 | 1.146 | KV453128.1 | 416564 | 18-scf00286 | 18 |
| AX-158130396 | 13 | 1.146 | KV453128.1 | 417916 | 18-scf00286 | 18 |
| AX-157830089 | 13 | 1.146 | KV453128.1 | 421594 | 18-scf00286 | 18 |
| AX-158130397 | 13 | 1.146 | KV453128.1 | 423438 | 18-scf00286 | 18 |
| AX-158130398 | 13 | 1.146 | KV453128.1 | 425368 | 18-scf00286 | 18 |
| AX-158130401 | 13 | 1.146 | KV453128.1 | 428555 | 18-scf00286 | 18 |
| AX-158130403 | 13 | 1.146 | KV453128.1 | 432267 | 18-scf00286 | 18 |
| AX-158130404 | 13 | 1.146 | KV453128.1 | 433175 | 18-scf00286 | 18 |
| AX-158130405 | 13 | 1.146 | KV453128.1 | 433717 | 18-scf00286 | 18 |
| AX-157739219 | 13 | 1.146 | KV453128.1 | 442719 | 18-scf00286 | 18 |
| AX-158130409 | 13 | 1.146 | KV453128.1 | 444567 | 18-scf00286 | 18 |
| AX-158130410 | 13 | 1.146 | KV453128.1 | 445932 | 18-scf00286 | 18 |
| AX-158130411 | 13 | 1.146 | KV453128.1 | 446310 | 18-scf00286 | 18 |
| AX-158130413 | 13 | 1.146 | KV453128.1 | 447897 | 18-scf00286 | 18 |
| AX-157714025 | 13 | 1.146 | KV453128.1 | 449677 | 18-scf00286 | 18 |

|              |    |       |            |         |             |    |
|--------------|----|-------|------------|---------|-------------|----|
| AX-158411548 | 13 | 1.146 | KV453128.1 | 451548  | 18-scf00286 | 18 |
| AX-157830092 | 13 | 1.146 | KV453128.1 | 454550  | 18-scf00286 | 18 |
| AX-157830093 | 13 | 1.146 | KV453128.1 | 454889  | 18-scf00286 | 18 |
| AX-158130441 | 13 | 1.146 | KV453128.1 | 496621  | 18-scf00286 | 18 |
| AX-157830102 | 13 | 1.146 | KV453128.1 | 599838  | 18-scf00286 | 18 |
| AX-157830126 | 13 | 1.146 | KV453128.1 | 818287  | 18-scf00286 | 18 |
| AX-158130697 | 13 | 1.146 | KV453128.1 | 870860  | 18-scf00286 | 18 |
| AX-158130761 | 13 | 1.146 | KV453128.1 | 964031  | 18-scf00286 | 18 |
| AX-158130839 | 13 | 1.146 | KV453128.1 | 1095290 | 18-scf00286 | 18 |
| AX-157886217 | 13 | 1.146 | KV453128.1 | 1191825 | 18-scf00286 | 18 |
| AX-157716284 | 13 | 1.255 | KV453128.1 | 459946  | 18-scf00286 | 18 |
| AX-158130417 | 13 | 1.255 | KV453128.1 | 463988  | 18-scf00286 | 18 |
| AX-157746641 | 13 | 1.255 | KV453128.1 | 468295  | 18-scf00286 | 18 |
| AX-158130419 | 13 | 1.255 | KV453128.1 | 468504  | 18-scf00286 | 18 |
| AX-158130422 | 13 | 1.255 | KV453128.1 | 472859  | 18-scf00286 | 18 |
| AX-158130423 | 13 | 1.255 | KV453128.1 | 473910  | 18-scf00286 | 18 |
| AX-158130424 | 13 | 1.255 | KV453128.1 | 474736  | 18-scf00286 | 18 |
| AX-158130431 | 13 | 1.255 | KV453128.1 | 483291  | 18-scf00286 | 18 |
| AX-158130436 | 13 | 1.255 | KV453128.1 | 489212  | 18-scf00286 | 18 |
| AX-158130448 | 13 | 1.255 | KV453128.1 | 507225  | 18-scf00286 | 18 |
| AX-158130510 | 13 | 1.255 | KV453128.1 | 596706  | 18-scf00286 | 18 |
| AX-157756380 | 13 | 1.313 | KV453128.1 | 488678  | 18-scf00286 | 18 |
| AX-158130266 | 13 | 1.364 | KV453128.1 | 120335  | 18-scf00286 | 18 |
| AX-158130310 | 13 | 1.364 | KV453128.1 | 244642  | 18-scf00286 | 18 |
| AX-157774438 | 13 | 1.364 | KV453128.1 | 254888  | 18-scf00286 | 18 |
| AX-158130316 | 13 | 1.364 | KV453128.1 | 262943  | 18-scf00286 | 18 |
| AX-158130335 | 13 | 1.364 | KV453128.1 | 311169  | 18-scf00286 | 18 |
| AX-158130339 | 13 | 1.364 | KV453128.1 | 320671  | 18-scf00286 | 18 |
| AX-157886212 | 13 | 1.364 | KV453128.1 | 334906  | 18-scf00286 | 18 |
| AX-158130373 | 13 | 1.364 | KV453128.1 | 378787  | 18-scf00286 | 18 |
| AX-158130433 | 13 | 1.364 | KV453128.1 | 485050  | 18-scf00286 | 18 |
| AX-158130438 | 13 | 1.364 | KV453128.1 | 492615  | 18-scf00286 | 18 |
| AX-158130442 | 13 | 1.364 | KV453128.1 | 497572  | 18-scf00286 | 18 |
| AX-158130445 | 13 | 1.364 | KV453128.1 | 502137  | 18-scf00286 | 18 |
| AX-157755145 | 13 | 1.364 | KV453128.1 | 511354  | 18-scf00286 | 18 |
| AX-158130453 | 13 | 1.364 | KV453128.1 | 513021  | 18-scf00286 | 18 |
| AX-158130455 | 13 | 1.364 | KV453128.1 | 517703  | 18-scf00286 | 18 |
| AX-158130458 | 13 | 1.364 | KV453128.1 | 519796  | 18-scf00286 | 18 |
| AX-158130459 | 13 | 1.364 | KV453128.1 | 522949  | 18-scf00286 | 18 |
| AX-158130460 | 13 | 1.364 | KV453128.1 | 524388  | 18-scf00286 | 18 |
| AX-158130461 | 13 | 1.364 | KV453128.1 | 526129  | 18-scf00286 | 18 |
| AX-157717883 | 13 | 1.364 | KV453128.1 | 527978  | 18-scf00286 | 18 |
| AX-158130462 | 13 | 1.364 | KV453128.1 | 528511  | 18-scf00286 | 18 |
| AX-158130463 | 13 | 1.364 | KV453128.1 | 529008  | 18-scf00286 | 18 |
| AX-158130465 | 13 | 1.364 | KV453128.1 | 530681  | 18-scf00286 | 18 |
| AX-158130471 | 13 | 1.364 | KV453128.1 | 538547  | 18-scf00286 | 18 |
| AX-158130507 | 13 | 1.364 | KV453128.1 | 590031  | 18-scf00286 | 18 |
| AX-158130562 | 13 | 1.364 | KV453128.1 | 685104  | 18-scf00286 | 18 |
| AX-158130569 | 13 | 1.364 | KV453128.1 | 692911  | 18-scf00286 | 18 |
| AX-158130596 | 13 | 1.364 | KV453128.1 | 737025  | 18-scf00286 | 18 |
| AX-158130703 | 13 | 1.364 | KV453128.1 | 887044  | 18-scf00286 | 18 |

|              |    |       |            |        |             |    |
|--------------|----|-------|------------|--------|-------------|----|
| AX-157877948 | 13 | 1.364 | KV453128.1 | 928217 | 18-scf00286 | 18 |
| AX-157713001 | 13 | 1.364 | KV453128.1 | 933520 | 18-scf00286 | 18 |
| AX-158130467 | 13 | 1.474 | KV453128.1 | 533157 | 18-scf00286 | 18 |
| AX-158130468 | 13 | 1.474 | KV453128.1 | 534664 | 18-scf00286 | 18 |
| AX-158130470 | 13 | 1.474 | KV453128.1 | 537084 | 18-scf00286 | 18 |
| AX-158130472 | 13 | 1.474 | KV453128.1 | 539214 | 18-scf00286 | 18 |
| AX-158130473 | 13 | 1.474 | KV453128.1 | 539706 | 18-scf00286 | 18 |
| AX-158130475 | 13 | 1.474 | KV453128.1 | 541900 | 18-scf00286 | 18 |
| AX-158130476 | 13 | 1.474 | KV453128.1 | 543710 | 18-scf00286 | 18 |
| AX-158130477 | 13 | 1.474 | KV453128.1 | 544456 | 18-scf00286 | 18 |
| AX-158130479 | 13 | 1.583 | KV453128.1 | 545937 | 18-scf00286 | 18 |
| AX-158130484 | 13 | 1.583 | KV453128.1 | 555058 | 18-scf00286 | 18 |
| AX-158130487 | 13 | 1.583 | KV453128.1 | 559612 | 18-scf00286 | 18 |
| AX-158130488 | 13 | 1.583 | KV453128.1 | 560644 | 18-scf00286 | 18 |
| AX-158130489 | 13 | 1.583 | KV453128.1 | 562398 | 18-scf00286 | 18 |
| AX-158130490 | 13 | 1.583 | KV453128.1 | 564528 | 18-scf00286 | 18 |
| AX-158130498 | 13 | 1.583 | KV453128.1 | 578921 | 18-scf00286 | 18 |
| AX-158130501 | 13 | 1.583 | KV453128.1 | 581837 | 18-scf00286 | 18 |
| AX-158130502 | 13 | 1.583 | KV453128.1 | 582903 | 18-scf00286 | 18 |
| AX-157830098 | 13 | 1.583 | KV453128.1 | 585084 | 18-scf00286 | 18 |
| AX-158130505 | 13 | 1.583 | KV453128.1 | 587419 | 18-scf00286 | 18 |
| AX-158130506 | 13 | 1.583 | KV453128.1 | 588365 | 18-scf00286 | 18 |
| AX-157830101 | 13 | 1.583 | KV453128.1 | 591598 | 18-scf00286 | 18 |
| AX-158130509 | 13 | 1.583 | KV453128.1 | 594540 | 18-scf00286 | 18 |
| AX-158130513 | 13 | 1.583 | KV453128.1 | 601264 | 18-scf00286 | 18 |
| AX-158130523 | 13 | 1.583 | KV453128.1 | 617381 | 18-scf00286 | 18 |
| AX-158130524 | 13 | 1.583 | KV453128.1 | 621505 | 18-scf00286 | 18 |
| AX-158130525 | 13 | 1.583 | KV453128.1 | 622217 | 18-scf00286 | 18 |
| AX-158130527 | 13 | 1.583 | KV453128.1 | 624049 | 18-scf00286 | 18 |
| AX-158130528 | 13 | 1.583 | KV453128.1 | 627360 | 18-scf00286 | 18 |
| AX-158130530 | 13 | 1.583 | KV453128.1 | 630571 | 18-scf00286 | 18 |
| AX-158130531 | 13 | 1.583 | KV453128.1 | 631294 | 18-scf00286 | 18 |
| AX-158130536 | 13 | 1.583 | KV453128.1 | 640091 | 18-scf00286 | 18 |
| AX-158411551 | 13 | 1.583 | KV453128.1 | 642757 | 18-scf00286 | 18 |
| AX-158130727 | 13 | 1.583 | KV453128.1 | 916942 | 18-scf00286 | 18 |
| AX-157713191 | 13 | 1.632 | KV453128.1 | 635475 | 18-scf00286 | 18 |
| AX-158130534 | 13 | 1.692 | KV453128.1 | 638076 | 18-scf00286 | 18 |
| AX-157830103 | 13 | 1.692 | KV453128.1 | 638262 | 18-scf00286 | 18 |
| AX-158130538 | 13 | 1.692 | KV453128.1 | 641989 | 18-scf00286 | 18 |
| AX-158411550 | 13 | 1.692 | KV453128.1 | 642319 | 18-scf00286 | 18 |
| AX-157743778 | 13 | 1.692 | KV453128.1 | 644861 | 18-scf00286 | 18 |
| AX-157774184 | 13 | 1.692 | KV453128.1 | 645306 | 18-scf00286 | 18 |
| AX-158130547 | 13 | 1.802 | KV453128.1 | 653007 | 18-scf00286 | 18 |
| AX-158130549 | 13 | 1.802 | KV453128.1 | 654117 | 18-scf00286 | 18 |
| AX-158130555 | 13 | 1.911 | KV453128.1 | 675006 | 18-scf00286 | 18 |
| AX-158130533 | 13 | 1.937 | KV453128.1 | 635926 | 18-scf00286 | 18 |
| AX-158130565 | 13 | 1.937 | KV453128.1 | 689145 | 18-scf00286 | 18 |
| AX-157722878 | 13 | 1.937 | KV453128.1 | 869605 | 18-scf00286 | 18 |
| AX-158130408 | 13 | 1.947 | KV453128.1 | 440214 | 18-scf00286 | 18 |
| AX-158130566 | 13 | 1.947 | KV453128.1 | 690149 | 18-scf00286 | 18 |
| AX-158130640 | 13 | 1.947 | KV453128.1 | 791615 | 18-scf00286 | 18 |

|              |    |       |            |         |             |    |
|--------------|----|-------|------------|---------|-------------|----|
| AX-157830125 | 13 | 1.947 | KV453128.1 | 817486  | 18-scf00286 | 18 |
| AX-157830129 | 13 | 1.947 | KV453128.1 | 862357  | 18-scf00286 | 18 |
| AX-158130734 | 13 | 1.947 | KV453128.1 | 923055  | 18-scf00286 | 18 |
| AX-157744207 | 13 | 1.971 | KV453128.1 | 318829  | 18-scf00286 | 18 |
| AX-158130435 | 13 | 1.971 | KV453128.1 | 488787  | 18-scf00286 | 18 |
| AX-158130474 | 13 | 1.971 | KV453128.1 | 540169  | 18-scf00286 | 18 |
| AX-158130567 | 13 | 1.971 | KV453128.1 | 691287  | 18-scf00286 | 18 |
| AX-158130588 | 13 | 1.971 | KV453128.1 | 728864  | 18-scf00286 | 18 |
| AX-157754000 | 13 | 1.971 | KV453128.1 | 840746  | 18-scf00286 | 18 |
| AX-158130568 | 13 | 2     | KV453128.1 | 692437  | 18-scf00286 | 18 |
| AX-158130572 | 13 | 2.02  | KV453128.1 | 697310  | 18-scf00286 | 18 |
| AX-158130573 | 13 | 2.02  | KV453128.1 | 700779  | 18-scf00286 | 18 |
| AX-157830108 | 13 | 2.02  | KV453128.1 | 705113  | 18-scf00286 | 18 |
| AX-157830110 | 13 | 2.02  | KV453128.1 | 707691  | 18-scf00286 | 18 |
| AX-158130575 | 13 | 2.02  | KV453128.1 | 707921  | 18-scf00286 | 18 |
| AX-157745658 | 13 | 2.02  | KV453128.1 | 710628  | 18-scf00286 | 18 |
| AX-158130576 | 13 | 2.02  | KV453128.1 | 712768  | 18-scf00286 | 18 |
| AX-158130577 | 13 | 2.02  | KV453128.1 | 713149  | 18-scf00286 | 18 |
| AX-157830112 | 13 | 2.02  | KV453128.1 | 713457  | 18-scf00286 | 18 |
| AX-157830113 | 13 | 2.02  | KV453128.1 | 713552  | 18-scf00286 | 18 |
| AX-157830114 | 13 | 2.02  | KV453128.1 | 715739  | 18-scf00286 | 18 |
| AX-157830115 | 13 | 2.02  | KV453128.1 | 716233  | 18-scf00286 | 18 |
| AX-158130578 | 13 | 2.02  | KV453128.1 | 716756  | 18-scf00286 | 18 |
| AX-158130591 | 13 | 2.02  | KV453128.1 | 730947  | 18-scf00286 | 18 |
| AX-158130584 | 13 | 2.129 | KV453128.1 | 725696  | 18-scf00286 | 18 |
| AX-158130586 | 13 | 2.129 | KV453128.1 | 727320  | 18-scf00286 | 18 |
| AX-158130594 | 13 | 2.129 | KV453128.1 | 735233  | 18-scf00286 | 18 |
| AX-157830117 | 13 | 2.129 | KV453128.1 | 742896  | 18-scf00286 | 18 |
| AX-158130600 | 13 | 2.129 | KV453128.1 | 745573  | 18-scf00286 | 18 |
| AX-158130602 | 13 | 2.129 | KV453128.1 | 747215  | 18-scf00286 | 18 |
| AX-158130603 | 13 | 2.129 | KV453128.1 | 748287  | 18-scf00286 | 18 |
| AX-158130604 | 13 | 2.129 | KV453128.1 | 750589  | 18-scf00286 | 18 |
| AX-158130605 | 13 | 2.129 | KV453128.1 | 754568  | 18-scf00286 | 18 |
| AX-158130608 | 13 | 2.129 | KV453128.1 | 756840  | 18-scf00286 | 18 |
| AX-158130610 | 13 | 2.129 | KV453128.1 | 757909  | 18-scf00286 | 18 |
| AX-158411552 | 13 | 2.176 | KV453128.1 | 652220  | 18-scf00286 | 18 |
| AX-158130548 | 13 | 2.176 | KV453128.1 | 653562  | 18-scf00286 | 18 |
| AX-157709025 | 13 | 2.176 | KV453128.1 | 722200  | 18-scf00286 | 18 |
| AX-158130609 | 13 | 2.176 | KV453128.1 | 757766  | 18-scf00286 | 18 |
| AX-157830118 | 13 | 2.176 | KV453128.1 | 759427  | 18-scf00286 | 18 |
| AX-157830122 | 13 | 2.176 | KV453128.1 | 775985  | 18-scf00286 | 18 |
| AX-157748091 | 13 | 2.176 | KV453128.1 | 786199  | 18-scf00286 | 18 |
| AX-157830123 | 13 | 2.176 | KV453128.1 | 788840  | 18-scf00286 | 18 |
| AX-158130662 | 13 | 2.176 | KV453128.1 | 822458  | 18-scf00286 | 18 |
| AX-158130666 | 13 | 2.176 | KV453128.1 | 829886  | 18-scf00286 | 18 |
| AX-158130791 | 13 | 2.176 | KV453128.1 | 1017245 | 18-scf00286 | 18 |
| AX-158130826 | 13 | 2.176 | KV453128.1 | 1065438 | 18-scf00286 | 18 |
| AX-158130496 | 13 | 2.195 | KV453128.1 | 574413  | 18-scf00286 | 18 |
| AX-158130556 | 13 | 2.195 | KV453128.1 | 676863  | 18-scf00286 | 18 |
| AX-157722007 | 13 | 2.195 | KV453128.1 | 695358  | 18-scf00286 | 18 |
| AX-158130611 | 13 | 2.195 | KV453128.1 | 758891  | 18-scf00286 | 18 |

|              |    |       |            |         |             |    |
|--------------|----|-------|------------|---------|-------------|----|
| AX-158130619 | 13 | 2.195 | KV453128.1 | 766961  | 18-scf00286 | 18 |
| AX-158130623 | 13 | 2.195 | KV453128.1 | 772801  | 18-scf00286 | 18 |
| AX-158130659 | 13 | 2.195 | KV453128.1 | 818846  | 18-scf00286 | 18 |
| AX-158130680 | 13 | 2.195 | KV453128.1 | 850535  | 18-scf00286 | 18 |
| AX-158130692 | 13 | 2.195 | KV453128.1 | 864185  | 18-scf00286 | 18 |
| AX-158130701 | 13 | 2.195 | KV453128.1 | 884652  | 18-scf00286 | 18 |
| AX-158130781 | 13 | 2.195 | KV453128.1 | 1006173 | 18-scf00286 | 18 |
| AX-158130614 | 13 | 2.239 | KV453128.1 | 764619  | 18-scf00286 | 18 |
| AX-157871384 | 13 | 2.348 | KV453128.1 | 766741  | 18-scf00286 | 18 |
| AX-158130621 | 13 | 2.348 | KV453128.1 | 771352  | 18-scf00286 | 18 |
| AX-158130624 | 13 | 2.348 | KV453128.1 | 773075  | 18-scf00286 | 18 |
| AX-158130629 | 13 | 2.348 | KV453128.1 | 777777  | 18-scf00286 | 18 |
| AX-158130630 | 13 | 2.348 | KV453128.1 | 778945  | 18-scf00286 | 18 |
| AX-158130633 | 13 | 2.348 | KV453128.1 | 780368  | 18-scf00286 | 18 |
| AX-158130635 | 13 | 2.348 | KV453128.1 | 781058  | 18-scf00286 | 18 |
| AX-158130639 | 13 | 2.348 | KV453128.1 | 790424  | 18-scf00286 | 18 |
| AX-158130641 | 13 | 2.348 | KV453128.1 | 795035  | 18-scf00286 | 18 |
| AX-158130642 | 13 | 2.348 | KV453128.1 | 795521  | 18-scf00286 | 18 |
| AX-158130643 | 13 | 2.348 | KV453128.1 | 796652  | 18-scf00286 | 18 |
| AX-158130644 | 13 | 2.348 | KV453128.1 | 797411  | 18-scf00286 | 18 |
| AX-157749865 | 13 | 2.348 | KV453128.1 | 800195  | 18-scf00286 | 18 |
| AX-158130645 | 13 | 2.348 | KV453128.1 | 800807  | 18-scf00286 | 18 |
| AX-158130647 | 13 | 2.348 | KV453128.1 | 804240  | 18-scf00286 | 18 |
| AX-158130648 | 13 | 2.348 | KV453128.1 | 805472  | 18-scf00286 | 18 |
| AX-158130649 | 13 | 2.348 | KV453128.1 | 805847  | 18-scf00286 | 18 |
| AX-158130651 | 13 | 2.457 | KV453128.1 | 808993  | 18-scf00286 | 18 |
| AX-158130654 | 13 | 2.457 | KV453128.1 | 811852  | 18-scf00286 | 18 |
| AX-158130660 | 13 | 2.457 | KV453128.1 | 821893  | 18-scf00286 | 18 |
| AX-158130663 | 13 | 2.457 | KV453128.1 | 823071  | 18-scf00286 | 18 |
| AX-158130665 | 13 | 2.457 | KV453128.1 | 827669  | 18-scf00286 | 18 |
| AX-158130668 | 13 | 2.457 | KV453128.1 | 831000  | 18-scf00286 | 18 |
| AX-158130670 | 13 | 2.457 | KV453128.1 | 836403  | 18-scf00286 | 18 |
| AX-158130671 | 13 | 2.457 | KV453128.1 | 837464  | 18-scf00286 | 18 |
| AX-158130674 | 13 | 2.457 | KV453128.1 | 845027  | 18-scf00286 | 18 |
| AX-157762340 | 13 | 2.457 | KV453128.1 | 845498  | 18-scf00286 | 18 |
| AX-158130678 | 13 | 2.457 | KV453128.1 | 848413  | 18-scf00286 | 18 |
| AX-158130682 | 13 | 2.457 | KV453128.1 | 851261  | 18-scf00286 | 18 |
| AX-158130683 | 13 | 2.457 | KV453128.1 | 851576  | 18-scf00286 | 18 |
| AX-158411554 | 13 | 2.457 | KV453128.1 | 860541  | 18-scf00286 | 18 |
| AX-157830128 | 13 | 2.457 | KV453128.1 | 862096  | 18-scf00286 | 18 |
| AX-157760958 | 13 | 2.457 | KV453128.1 | 911457  | 18-scf00286 | 18 |
| AX-158130732 | 13 | 2.457 | KV453128.1 | 921366  | 18-scf00286 | 18 |
| AX-158130743 | 13 | 2.457 | KV453128.1 | 931521  | 18-scf00286 | 18 |
| AX-157830141 | 13 | 2.457 | KV453128.1 | 958509  | 18-scf00286 | 18 |
| AX-158130694 | 13 | 2.566 | KV453128.1 | 865786  | 18-scf00286 | 18 |
| AX-158130699 | 13 | 2.566 | KV453128.1 | 881016  | 18-scf00286 | 18 |
| AX-158130702 | 13 | 2.566 | KV453128.1 | 886234  | 18-scf00286 | 18 |
| AX-158130704 | 13 | 2.566 | KV453128.1 | 887817  | 18-scf00286 | 18 |
| AX-158130707 | 13 | 2.566 | KV453128.1 | 889652  | 18-scf00286 | 18 |
| AX-157830132 | 13 | 2.566 | KV453128.1 | 899188  | 18-scf00286 | 18 |
| AX-158130710 | 13 | 2.566 | KV453128.1 | 899610  | 18-scf00286 | 18 |

|              |    |       |            |         |             |    |
|--------------|----|-------|------------|---------|-------------|----|
| AX-157830133 | 13 | 2.566 | KV453128.1 | 900444  | 18-scf00286 | 18 |
| AX-157830134 | 13 | 2.566 | KV453128.1 | 900746  | 18-scf00286 | 18 |
| AX-158130355 | 13 | 2.675 | KV453128.1 | 351565  | 18-scf00286 | 18 |
| AX-158130542 | 13 | 2.675 | KV453128.1 | 646765  | 18-scf00286 | 18 |
| AX-157830116 | 13 | 2.675 | KV453128.1 | 734150  | 18-scf00286 | 18 |
| AX-158130593 | 13 | 2.675 | KV453128.1 | 734583  | 18-scf00286 | 18 |
| AX-158130712 | 13 | 2.675 | KV453128.1 | 902168  | 18-scf00286 | 18 |
| AX-157830135 | 13 | 2.675 | KV453128.1 | 903934  | 18-scf00286 | 18 |
| AX-158130714 | 13 | 2.675 | KV453128.1 | 905497  | 18-scf00286 | 18 |
| AX-158130717 | 13 | 2.675 | KV453128.1 | 906977  | 18-scf00286 | 18 |
| AX-158130718 | 13 | 2.675 | KV453128.1 | 907868  | 18-scf00286 | 18 |
| AX-157792330 | 13 | 2.675 | KV453128.1 | 911056  | 18-scf00286 | 18 |
| AX-158130720 | 13 | 2.675 | KV453128.1 | 911392  | 18-scf00286 | 18 |
| AX-158130730 | 13 | 2.675 | KV453128.1 | 920456  | 18-scf00286 | 18 |
| AX-158130731 | 13 | 2.675 | KV453128.1 | 920979  | 18-scf00286 | 18 |
| AX-158130733 | 13 | 2.675 | KV453128.1 | 922236  | 18-scf00286 | 18 |
| AX-158130738 | 13 | 2.675 | KV453128.1 | 924697  | 18-scf00286 | 18 |
| AX-158130740 | 13 | 2.675 | KV453128.1 | 926106  | 18-scf00286 | 18 |
| AX-158130742 | 13 | 2.675 | KV453128.1 | 927150  | 18-scf00286 | 18 |
| AX-158130745 | 13 | 2.675 | KV453128.1 | 932285  | 18-scf00286 | 18 |
| AX-157830138 | 13 | 2.675 | KV453128.1 | 932647  | 18-scf00286 | 18 |
| AX-158130746 | 13 | 2.675 | KV453128.1 | 934900  | 18-scf00286 | 18 |
| AX-157830139 | 13 | 2.675 | KV453128.1 | 935165  | 18-scf00286 | 18 |
| AX-157745801 | 13 | 2.675 | KV453128.1 | 937345  | 18-scf00286 | 18 |
| AX-157746196 | 13 | 2.675 | KV453128.1 | 940149  | 18-scf00286 | 18 |
| AX-158130749 | 13 | 2.675 | KV453128.1 | 941490  | 18-scf00286 | 18 |
| AX-157726388 | 13 | 2.675 | KV453128.1 | 943898  | 18-scf00286 | 18 |
| AX-158130753 | 13 | 2.675 | KV453128.1 | 946618  | 18-scf00286 | 18 |
| AX-158130754 | 13 | 2.675 | KV453128.1 | 949129  | 18-scf00286 | 18 |
| AX-158130755 | 13 | 2.675 | KV453128.1 | 952559  | 18-scf00286 | 18 |
| AX-158130762 | 13 | 2.785 | KV453128.1 | 965819  | 18-scf00286 | 18 |
| AX-158130796 | 13 | 2.96  | KV453128.1 | 1022434 | 18-scf00286 | 18 |
| AX-158130800 | 13 | 3.113 | KV453128.1 | 1025718 | 18-scf00286 | 18 |
| AX-157703362 | 13 | 3.113 | KV453128.1 | 1031023 | 18-scf00286 | 18 |
| AX-158130805 | 13 | 3.113 | KV453128.1 | 1032890 | 18-scf00286 | 18 |
| AX-158130326 | 13 | 3.222 | KV453128.1 | 290279  | 18-scf00286 | 18 |
| AX-158130798 | 13 | 3.222 | KV453128.1 | 1024439 | 18-scf00286 | 18 |
| AX-158130803 | 13 | 3.222 | KV453128.1 | 1031188 | 18-scf00286 | 18 |
| AX-158130807 | 13 | 3.222 | KV453128.1 | 1036516 | 18-scf00286 | 18 |
| AX-158130812 | 13 | 3.222 | KV453128.1 | 1042674 | 18-scf00286 | 18 |
| AX-158130813 | 13 | 3.222 | KV453128.1 | 1044313 | 18-scf00286 | 18 |
| AX-158130814 | 13 | 3.222 | KV453128.1 | 1048455 | 18-scf00286 | 18 |
| AX-158130815 | 13 | 3.222 | KV453128.1 | 1049510 | 18-scf00286 | 18 |
| AX-158130816 | 13 | 3.222 | KV453128.1 | 1049953 | 18-scf00286 | 18 |
| AX-158130819 | 13 | 3.222 | KV453128.1 | 1052400 | 18-scf00286 | 18 |
| AX-157725554 | 13 | 3.222 | KV453128.1 | 1053360 | 18-scf00286 | 18 |
| AX-158130820 | 13 | 3.222 | KV453128.1 | 1054778 | 18-scf00286 | 18 |
| AX-158130822 | 13 | 3.222 | KV453128.1 | 1060766 | 18-scf00286 | 18 |
| AX-158130823 | 13 | 3.222 | KV453128.1 | 1062033 | 18-scf00286 | 18 |
| AX-158130825 | 13 | 3.222 | KV453128.1 | 1064491 | 18-scf00286 | 18 |
| AX-157857837 | 13 | 3.222 | KV453128.1 | 1066430 | 18-scf00286 | 18 |

|              |    |       |            |         |             |    |
|--------------|----|-------|------------|---------|-------------|----|
| AX-158130829 | 13 | 3.222 | KV453128.1 | 1072847 | 18-scf00286 | 18 |
| AX-158130830 | 13 | 3.222 | KV453128.1 | 1074517 | 18-scf00286 | 18 |
| AX-157749171 | 13 | 3.222 | KV453128.1 | 1074829 | 18-scf00286 | 18 |
| AX-158130831 | 13 | 3.222 | KV453128.1 | 1077047 | 18-scf00286 | 18 |
| AX-158130833 | 13 | 3.222 | KV453128.1 | 1083157 | 18-scf00286 | 18 |
| AX-158130834 | 13 | 3.222 | KV453128.1 | 1086577 | 18-scf00286 | 18 |
| AX-158130835 | 13 | 3.222 | KV453128.1 | 1088493 | 18-scf00286 | 18 |
| AX-158130836 | 13 | 3.222 | KV453128.1 | 1089253 | 18-scf00286 | 18 |
| AX-158130837 | 13 | 3.222 | KV453128.1 | 1089500 | 18-scf00286 | 18 |
| AX-158130841 | 13 | 3.222 | KV453128.1 | 1099117 | 18-scf00286 | 18 |
| AX-158130801 | 13 | 3.331 | KV453128.1 | 1028506 | 18-scf00286 | 18 |
| AX-158130838 | 13 | 3.331 | KV453128.1 | 1091057 | 18-scf00286 | 18 |
| AX-157746068 | 13 | 3.331 | KV453128.1 | 1091303 | 18-scf00286 | 18 |
| AX-157830153 | 13 | 3.331 | KV453128.1 | 1094320 | 18-scf00286 | 18 |
| AX-157716540 | 13 | 3.331 | KV453128.1 | 1105928 | 18-scf00286 | 18 |
| AX-158130844 | 13 | 3.44  | KV453128.1 | 1105489 | 18-scf00286 | 18 |
| AX-158130847 | 13 | 3.44  | KV453128.1 | 1109501 | 18-scf00286 | 18 |
| AX-157743485 | 13 | 3.44  | KV453128.1 | 1112579 | 18-scf00286 | 18 |
| AX-157830156 | 13 | 3.44  | KV453128.1 | 1112673 | 18-scf00286 | 18 |
| AX-157738792 | 13 | 3.44  | KV453128.1 | 1113366 | 18-scf00286 | 18 |
| AX-158130849 | 13 | 3.44  | KV453128.1 | 1116957 | 18-scf00286 | 18 |
| AX-158130850 | 13 | 3.44  | KV453128.1 | 1117646 | 18-scf00286 | 18 |
| AX-158130855 | 13 | 3.44  | KV453128.1 | 1125956 | 18-scf00286 | 18 |
| AX-158130856 | 13 | 3.44  | KV453128.1 | 1126389 | 18-scf00286 | 18 |
| AX-157866245 | 13 | 3.44  | KV453128.1 | 1130292 | 18-scf00286 | 18 |
| AX-158130859 | 13 | 3.44  | KV453128.1 | 1131474 | 18-scf00286 | 18 |
| AX-158130861 | 13 | 3.44  | KV453128.1 | 1132994 | 18-scf00286 | 18 |
| AX-158130857 | 13 | 3.441 | KV453128.1 | 1126854 | 18-scf00286 | 18 |
| AX-158130860 | 13 | 3.603 | KV453128.1 | 1132357 | 18-scf00286 | 18 |
| AX-158130866 | 13 | 3.603 | KV453128.1 | 1139906 | 18-scf00286 | 18 |
| AX-158130868 | 13 | 3.768 | KV453128.1 | 1142030 | 18-scf00286 | 18 |
| AX-158130869 | 13 | 3.768 | KV453128.1 | 1143253 | 18-scf00286 | 18 |
| AX-158130873 | 13 | 3.817 | KV453128.1 | 1149760 | 18-scf00286 | 18 |
| AX-158130877 | 13 | 3.817 | KV453128.1 | 1153009 | 18-scf00286 | 18 |
| AX-158130882 | 13 | 3.817 | KV453128.1 | 1155451 | 18-scf00286 | 18 |
| AX-158130871 | 13 | 3.877 | KV453128.1 | 1146336 | 18-scf00286 | 18 |
| AX-158130881 | 13 | 3.877 | KV453128.1 | 1154974 | 18-scf00286 | 18 |
| AX-158130886 | 13 | 3.877 | KV453128.1 | 1161630 | 18-scf00286 | 18 |
| AX-158130890 | 13 | 3.877 | KV453128.1 | 1168123 | 18-scf00286 | 18 |
| AX-158130893 | 13 | 3.877 | KV453128.1 | 1169971 | 18-scf00286 | 18 |
| AX-158130896 | 13 | 3.877 | KV453128.1 | 1175081 | 18-scf00286 | 18 |
| AX-158130898 | 13 | 3.877 | KV453128.1 | 1177509 | 18-scf00286 | 18 |
| AX-158130872 | 13 | 4.095 | KV453128.1 | 1147349 | 18-scf00286 | 18 |
| AX-158130895 | 13 | 4.095 | KV453128.1 | 1172903 | 18-scf00286 | 18 |
| AX-158130901 | 13 | 4.095 | KV453128.1 | 1182906 | 18-scf00286 | 18 |
| AX-158130906 | 13 | 4.095 | KV453128.1 | 1188502 | 18-scf00286 | 18 |
| AX-158130907 | 13 | 4.095 | KV453128.1 | 1188965 | 18-scf00286 | 18 |
| AX-158130908 | 13 | 4.095 | KV453128.1 | 1189585 | 18-scf00286 | 18 |
| AX-158130909 | 13 | 4.095 | KV453128.1 | 1190456 | 18-scf00286 | 18 |
| AX-158130910 | 13 | 4.095 | KV453128.1 | 1191412 | 18-scf00286 | 18 |
| AX-157743670 | 13 | 4.095 | KV453128.1 | 1203091 | 18-scf00286 | 18 |

|              |    |       |            |         |             |    |
|--------------|----|-------|------------|---------|-------------|----|
| AX-158130911 | 13 | 4.123 | KV453128.1 | 1192227 | 18-scf00286 | 18 |
| AX-158130912 | 13 | 4.154 | KV453128.1 | 1192643 | 18-scf00286 | 18 |
| AX-158130519 | 13 | 4.181 | KV453128.1 | 609790  | 18-scf00286 | 18 |
| AX-158130613 | 13 | 4.181 | KV453128.1 | 761752  | 18-scf00286 | 18 |
| AX-158130897 | 13 | 4.181 | KV453128.1 | 1176759 | 18-scf00286 | 18 |
| AX-158130914 | 13 | 4.181 | KV453128.1 | 1195420 | 18-scf00286 | 18 |
| AX-158130918 | 13 | 4.205 | KV453128.1 | 1198138 | 18-scf00286 | 18 |
| AX-158130920 | 13 | 4.282 | KV453128.1 | 1201601 | 18-scf00286 | 18 |
| AX-158130921 | 13 | 4.314 | KV453128.1 | 1204088 | 18-scf00286 | 18 |
| AX-158130922 | 13 | 4.314 | KV453128.1 | 1204794 | 18-scf00286 | 18 |
| AX-157830159 | 13 | 4.47  | KV453128.1 | 1207220 | 18-scf00286 | 18 |
| AX-158130924 | 13 | 4.47  | KV453128.1 | 1207368 | 18-scf00286 | 18 |
| AX-158130927 | 13 | 4.47  | KV453128.1 | 1214823 | 18-scf00286 | 18 |
| AX-158130925 | 13 | 4.481 | KV453128.1 | 1209373 | 18-scf00286 | 18 |
| AX-157830160 | 13 | 4.684 | KV453128.1 | 1212398 | 18-scf00286 | 18 |
| AX-158130929 | 13 | 4.684 | KV453128.1 | 1216175 | 18-scf00286 | 18 |
| AX-158130930 | 13 | 4.684 | KV453128.1 | 1217218 | 18-scf00286 | 18 |
| AX-158411562 | 13 | 4.684 | KV453128.1 | 1219840 | 18-scf00286 | 18 |
| AX-158130934 | 13 | 5.028 | KV453128.1 | 1223544 | 18-scf00286 | 18 |
| AX-158130938 | 13 | 5.028 | KV453128.1 | 1228461 | 18-scf00286 | 18 |
| AX-158130972 | 13 | 5.028 | KV453128.1 | 1277305 | 18-scf00286 | 18 |
| AX-158130940 | 13 | 5.239 | KV453128.1 | 1230216 | 18-scf00286 | 18 |
| AX-158130945 | 13 | 5.391 | KV453128.1 | 1237308 | 18-scf00286 | 18 |
| AX-158130946 | 13 | 5.532 | KV453128.1 | 1237730 | 18-scf00286 | 18 |
| AX-158130947 | 13 | 5.546 | KV453128.1 | 1238201 | 18-scf00286 | 18 |
| AX-158130949 | 13 | 5.554 | KV453128.1 | 1239690 | 18-scf00286 | 18 |
| AX-158130951 | 13 | 5.554 | KV453128.1 | 1240792 | 18-scf00286 | 18 |
| AX-157830162 | 13 | 5.554 | KV453128.1 | 1256660 | 18-scf00286 | 18 |
| AX-157830164 | 13 | 5.554 | KV453128.1 | 1269146 | 18-scf00286 | 18 |
| AX-158130977 | 13 | 5.554 | KV453128.1 | 1284143 | 18-scf00286 | 18 |
| AX-158130950 | 13 | 5.577 | KV453128.1 | 1240441 | 18-scf00286 | 18 |
| AX-158130953 | 13 | 5.577 | KV453128.1 | 1241858 | 18-scf00286 | 18 |
| AX-158130956 | 13 | 5.577 | KV453128.1 | 1246196 | 18-scf00286 | 18 |
| AX-158130957 | 13 | 5.577 | KV453128.1 | 1246517 | 18-scf00286 | 18 |
| AX-158130961 | 13 | 5.577 | KV453128.1 | 1250364 | 18-scf00286 | 18 |
| AX-158130964 | 13 | 5.577 | KV453128.1 | 1265140 | 18-scf00286 | 18 |
| AX-158130965 | 13 | 5.577 | KV453128.1 | 1270021 | 18-scf00286 | 18 |
| AX-158130968 | 13 | 5.577 | KV453128.1 | 1273414 | 18-scf00286 | 18 |
| AX-158130963 | 13 | 5.737 | KV453128.1 | 1262339 | 18-scf00286 | 18 |
| AX-158130967 | 13 | 5.748 | KV453128.1 | 1272919 | 18-scf00286 | 18 |
| AX-157740998 | 13 | 5.767 | KV453128.1 | 1274851 | 18-scf00286 | 18 |
| AX-157729072 | 13 | 5.79  | KV453128.1 | 1275535 | 18-scf00286 | 18 |
| AX-158130971 | 13 | 5.813 | KV453128.1 | 1276555 | 18-scf00286 | 18 |
| AX-158130976 | 13 | 5.841 | KV453128.1 | 1281940 | 18-scf00286 | 18 |
| AX-158130982 | 13 | 5.841 | KV453128.1 | 1290370 | 18-scf00286 | 18 |
| AX-157726941 | 13 | 5.846 | KV453128.1 | 1282686 | 18-scf00286 | 18 |
| AX-158130979 | 13 | 5.846 | KV453128.1 | 1287824 | 18-scf00286 | 18 |
| AX-158130980 | 13 | 5.846 | KV453128.1 | 1288583 | 18-scf00286 | 18 |
| AX-158130994 | 13 | 6.338 | KV453128.1 | 1303626 | 18-scf00286 | 18 |
| AX-158130996 | 13 | 6.338 | KV453128.1 | 1306796 | 18-scf00286 | 18 |
| AX-158380236 | 13 | 6.338 | KV453128.1 | 1313108 | 18-scf00286 | 18 |



|              |    |       |            |         |             |    |
|--------------|----|-------|------------|---------|-------------|----|
| AX-158130999 | 13 | 6.338 | KV453128.1 | 1313698 | 18-scf00286 | 18 |
| AX-158131000 | 13 | 6.338 | KV453128.1 | 1314725 | 18-scf00286 | 18 |
| AX-157877955 | 13 | 6.338 | KV453128.1 | 1314862 | 18-scf00286 | 18 |
| AX-158131002 | 13 | 6.338 | KV453128.1 | 1317786 | 18-scf00286 | 18 |
| AX-158131020 | 13 | 6.501 | KV453128.1 | 1335873 | 18-scf00286 | 18 |
| AX-158131021 | 13 | 6.501 | KV453128.1 | 1336575 | 18-scf00286 | 18 |
| AX-158131022 | 13 | 6.501 | KV453128.1 | 1338895 | 18-scf00286 | 18 |
| AX-158131023 | 13 | 6.501 | KV453128.1 | 1339368 | 18-scf00286 | 18 |
| AX-157719959 | 13 | 6.501 | KV453128.1 | 1339452 | 18-scf00286 | 18 |
| AX-158131025 | 13 | 6.501 | KV453128.1 | 1341096 | 18-scf00286 | 18 |
| AX-157739466 | 13 | 6.501 | KV453128.1 | 1343135 | 18-scf00286 | 18 |
| AX-157747318 | 13 | 6.501 | KV453128.1 | 1344982 | 18-scf00286 | 18 |
| AX-157716853 | 13 | 6.502 | KV453128.1 | 1338700 | 18-scf00286 | 18 |
| AX-158131026 | 13 | 6.502 | KV453128.1 | 1347825 | 18-scf00286 | 18 |
| AX-158131027 | 13 | 6.502 | KV453128.1 | 1349956 | 18-scf00286 | 18 |
| AX-158131028 | 13 | 6.502 | KV453128.1 | 1351063 | 18-scf00286 | 18 |
| AX-158131032 | 13 | 6.502 | KV453128.1 | 1357559 | 18-scf00286 | 18 |
| AX-157713754 | 13 | 6.793 | KV453128.1 | 1362917 | 18-scf00286 | 18 |
| AX-158131036 | 13 | 6.793 | KV453128.1 | 1366233 | 18-scf00286 | 18 |
| AX-158131037 | 13 | 6.865 | KV453128.1 | 1366958 | 18-scf00286 | 18 |
| AX-158131035 | 13 | 6.939 | KV453128.1 | 1360224 | 18-scf00286 | 18 |
| AX-158131038 | 13 | 6.939 | KV453128.1 | 1368051 | 18-scf00286 | 18 |
| AX-158131039 | 13 | 6.939 | KV453128.1 | 1368547 | 18-scf00286 | 18 |
| AX-157830170 | 13 | 6.939 | KV453128.1 | 1370721 | 18-scf00286 | 18 |
| AX-158131040 | 13 | 6.939 | KV453128.1 | 1376446 | 18-scf00286 | 18 |
| AX-158131041 | 13 | 6.939 | KV453128.1 | 1378965 | 18-scf00286 | 18 |
| AX-158131042 | 13 | 6.939 | KV453128.1 | 1379192 | 18-scf00286 | 18 |
| AX-158131044 | 13 | 6.939 | KV453128.1 | 1379700 | 18-scf00286 | 18 |
| AX-158131045 | 13 | 6.939 | KV453128.1 | 1380495 | 18-scf00286 | 18 |
| AX-158131046 | 13 | 6.939 | KV453128.1 | 1380991 | 18-scf00286 | 18 |
| AX-158131047 | 13 | 6.939 | KV453128.1 | 1381639 | 18-scf00286 | 18 |
| AX-158131049 | 13 | 6.939 | KV453128.1 | 1385565 | 18-scf00286 | 18 |
| AX-158131050 | 13 | 6.939 | KV453128.1 | 1389061 | 18-scf00286 | 18 |
| AX-158131051 | 13 | 6.939 | KV453128.1 | 1389685 | 18-scf00286 | 18 |
| AX-158131054 | 13 | 6.939 | KV453128.1 | 1391436 | 18-scf00286 | 18 |
| AX-158131056 | 13 | 7.103 | KV453128.1 | 1393725 | 18-scf00286 | 18 |
| AX-158131057 | 13 | 7.103 | KV453128.1 | 1394483 | 18-scf00286 | 18 |
| AX-158131058 | 13 | 7.103 | KV453128.1 | 1396106 | 18-scf00286 | 18 |
| AX-158131059 | 13 | 7.103 | KV453128.1 | 1396658 | 18-scf00286 | 18 |
| AX-158131060 | 13 | 7.103 | KV453128.1 | 1397123 | 18-scf00286 | 18 |
| AX-158131061 | 13 | 7.103 | KV453128.1 | 1401111 | 18-scf00286 | 18 |
| AX-158131064 | 13 | 7.103 | KV453128.1 | 1403671 | 18-scf00286 | 18 |
| AX-158131068 | 13 | 7.431 | KV453128.1 | 1409391 | 18-scf00286 | 18 |
| AX-158131069 | 13 | 7.431 | KV453128.1 | 1409981 | 18-scf00286 | 18 |
| AX-157775164 | 13 | 7.431 | KV453128.1 | 1410512 | 18-scf00286 | 18 |
| AX-158131070 | 13 | 7.431 | KV453128.1 | 1412169 | 18-scf00286 | 18 |
| AX-158131077 | 13 | 7.431 | KV453128.1 | 1417626 | 18-scf00286 | 18 |
| AX-157753678 | 13 | 7.432 | KV453128.1 | 1412799 | 18-scf00286 | 18 |
| AX-158131073 | 13 | 7.508 | KV453128.1 | 1414975 | 18-scf00286 | 18 |
| AX-158131075 | 13 | 7.591 | KV453128.1 | 1415987 | 18-scf00286 | 18 |
| AX-158131076 | 13 | 7.591 | KV453128.1 | 1416625 | 18-scf00286 | 18 |

|              |    |       |             |         |             |    |
|--------------|----|-------|-------------|---------|-------------|----|
| AX-158131078 | 13 | 7.591 | KV453128.1  | 1418187 | 18-scf00286 | 18 |
| AX-158131079 | 13 | 7.591 | KV453128.1  | 1418683 | 18-scf00286 | 18 |
| AX-158131080 | 13 | 7.757 | KV453128.1  | 1419866 | 18-scf00286 | 18 |
| AX-158380237 | 13 | 7.922 | KV453128.1  | 1425520 | 18-scf00286 | 18 |
| AX-158131072 | 13 | 7.923 | KV453128.1  | 1414307 | 18-scf00286 | 18 |
| AX-158131084 | 13 | 7.923 | KV453128.1  | 1426079 | 18-scf00286 | 18 |
| AX-158131085 | 13 | 7.923 | KV453128.1  | 1426959 | 18-scf00286 | 18 |
| AX-157774302 | 13 | 7.923 | KV453128.1  | 1430207 | 18-scf00286 | 18 |
| AX-158131086 | 13 | 7.923 | KV453128.1  | 1431093 | 18-scf00286 | 18 |
| AX-158131087 | 13 | 7.923 | KV453128.1  | 1432116 | 18-scf00286 | 18 |
| AX-157750307 | 13 | 7.923 | KV453128.1  | 1438486 | 18-scf00286 | 18 |
| AX-158411564 | 13 | 8.087 | KV453128.1  | 1439385 | 18-scf00286 | 18 |
| AX-158131090 | 13 | 8.087 | KV453128.1  | 1440985 | 18-scf00286 | 18 |
| AX-157775139 | 13 | 8.087 | KV453128.1  | 1441355 | 18-scf00286 | 18 |
| AX-157830173 | 13 | 8.25  | KV453128.1  | 1445361 | 18-scf00286 | 18 |
| AX-158131092 | 13 | 8.25  | KV453128.1  | 1448548 | 18-scf00286 | 18 |
| AX-158131095 | 13 | 8.25  | KV453128.1  | 1452123 | 18-scf00286 | 18 |
| AX-158131098 | 13 | 8.25  | KV453128.1  | 1454002 | 18-scf00286 | 18 |
| AX-158131099 | 13 | 8.25  | KV453128.1  | 1454764 | 18-scf00286 | 18 |
| AX-158131106 | 13 | 8.25  | KV453128.1  | 1470875 | 18-scf00286 | 18 |
| AX-158131110 | 13 | 8.25  | KV453128.1  | 1474967 | 18-scf00286 | 18 |
| AX-158131100 | 13 | 8.251 | KV453128.1  | 1457854 | 18-scf00286 | 18 |
| AX-158131101 | 13 | 8.251 | KV453128.1  | 1458158 | 18-scf00286 | 18 |
| AX-158131089 | 13 | 8.347 | KV453128.1  | 1436038 | 18-scf00286 | 18 |
| AX-157705940 | 13 | 8.347 | 3ML01031284 | 146     | scf06892_1  | UN |
| AX-158131102 | 13 | 8.441 | KV453128.1  | 1459817 | 18-scf00286 | 18 |
| AX-158131108 | 13 | 8.578 | KV453128.1  | 1473845 | 18-scf00286 | 18 |
| AX-158131128 | 13 | 8.578 | KV453128.1  | 1501456 | 18-scf00286 | 18 |
| AX-158131111 | 13 | 8.579 | KV453128.1  | 1475202 | 18-scf00286 | 18 |
| AX-158131113 | 13 | 8.688 | KV453128.1  | 1477762 | 18-scf00286 | 18 |
| AX-158131114 | 13 | 8.688 | KV453128.1  | 1479294 | 18-scf00286 | 18 |
| AX-158131117 | 13 | 8.688 | KV453128.1  | 1482787 | 18-scf00286 | 18 |
| AX-158131118 | 13 | 8.688 | KV453128.1  | 1483228 | 18-scf00286 | 18 |
| AX-157830176 | 13 | 8.688 | KV453128.1  | 1485208 | 18-scf00286 | 18 |
| AX-158131120 | 13 | 8.688 | KV453128.1  | 1485417 | 18-scf00286 | 18 |
| AX-158131123 | 13 | 8.688 | KV453128.1  | 1487505 | 18-scf00286 | 18 |
| AX-158131125 | 13 | 8.688 | KV453128.1  | 1490167 | 18-scf00286 | 18 |
| AX-158131126 | 13 | 8.688 | KV453128.1  | 1491404 | 18-scf00286 | 18 |
| AX-158131130 | 13 | 8.688 | KV453128.1  | 1503242 | 18-scf00286 | 18 |
| AX-157715360 | 13 | 8.688 | KV453128.1  | 1513112 | 18-scf00286 | 18 |
| AX-157739490 | 13 | 8.688 | KV453128.1  | 1514294 | 18-scf00286 | 18 |
| AX-158131139 | 13 | 8.688 | KV453128.1  | 1517083 | 18-scf00286 | 18 |
| AX-158131131 | 13 | 8.744 | KV453128.1  | 1504909 | 18-scf00286 | 18 |
| AX-158131132 | 13 | 8.779 | KV453128.1  | 1505211 | 18-scf00286 | 18 |
| AX-158131133 | 13 | 8.813 | KV453128.1  | 1509395 | 18-scf00286 | 18 |
| AX-158131135 | 13 | 8.852 | KV453128.1  | 1510273 | 18-scf00286 | 18 |
| AX-158131136 | 13 | 8.852 | KV453128.1  | 1510872 | 18-scf00286 | 18 |
| AX-157744258 | 13 | 8.931 | KV453128.1  | 1514653 | 18-scf00286 | 18 |
| AX-158131141 | 13 | 8.931 | KV453128.1  | 1519264 | 18-scf00286 | 18 |
| AX-157751770 | 13 | 9.016 | KV453128.1  | 1517633 | 18-scf00286 | 18 |
| AX-157830179 | 13 | 9.016 | KV453128.1  | 1518987 | 18-scf00286 | 18 |

|              |    |       |            |         |             |    |
|--------------|----|-------|------------|---------|-------------|----|
| AX-158131142 | 13 | 9.016 | KV453128.1 | 1519929 | 18-scf00286 | 18 |
| AX-158131143 | 13 | 9.016 | KV453128.1 | 1520391 | 18-scf00286 | 18 |
| AX-158131145 | 13 | 9.016 | KV453128.1 | 1523103 | 18-scf00286 | 18 |
| AX-157715492 | 13 | 9.016 | KV453128.1 | 1526694 | 18-scf00286 | 18 |
| AX-157830181 | 13 | 9.016 | KV453128.1 | 1526881 | 18-scf00286 | 18 |
| AX-157738575 | 13 | 9.016 | KV453128.1 | 1527086 | 18-scf00286 | 18 |
| AX-157725584 | 13 | 9.016 | KV453128.1 | 1529071 | 18-scf00286 | 18 |
| AX-158131147 | 13 | 9.016 | KV453128.1 | 1530038 | 18-scf00286 | 18 |
| AX-158131152 | 13 | 9.016 | KV453128.1 | 1532506 | 18-scf00286 | 18 |
| AX-157857839 | 13 | 9.016 | KV453128.1 | 1539072 | 18-scf00286 | 18 |
| AX-157772303 | 13 | 9.016 | KV453128.1 | 1561373 | 18-scf00286 | 18 |
| AX-158131148 | 13 | 9.105 | KV453128.1 | 1530474 | 18-scf00286 | 18 |
| AX-158131150 | 13 | 9.252 | KV453128.1 | 1531263 | 18-scf00286 | 18 |
| AX-158131151 | 13 | 9.343 | KV453128.1 | 1532142 | 18-scf00286 | 18 |
| AX-157792364 | 13 | 9.343 | KV453128.1 | 1539662 | 18-scf00286 | 18 |
| AX-157715432 | 13 | 9.344 | KV453128.1 | 1522281 | 18-scf00286 | 18 |
| AX-158131159 | 13 | 9.344 | KV453128.1 | 1545350 | 18-scf00286 | 18 |
| AX-157744529 | 13 | 9.344 | KV453128.1 | 1546550 | 18-scf00286 | 18 |
| AX-158131161 | 13 | 9.344 | KV453128.1 | 1547065 | 18-scf00286 | 18 |
| AX-158131162 | 13 | 9.344 | KV453128.1 | 1551863 | 18-scf00286 | 18 |
| AX-158131164 | 13 | 9.344 | KV453128.1 | 1552763 | 18-scf00286 | 18 |
| AX-158131165 | 13 | 9.344 | KV453128.1 | 1554660 | 18-scf00286 | 18 |
| AX-158131166 | 13 | 9.344 | KV453128.1 | 1555915 | 18-scf00286 | 18 |
| AX-157710744 | 13 | 9.344 | KV453128.1 | 1556205 | 18-scf00286 | 18 |
| AX-158131170 | 13 | 9.344 | KV453128.1 | 1560118 | 18-scf00286 | 18 |
| AX-158131178 | 13 | 9.508 | KV453128.1 | 1568474 | 18-scf00286 | 18 |
| AX-158131179 | 13 | 9.672 | KV453128.1 | 1574081 | 18-scf00286 | 18 |
| AX-158131181 | 13 | 9.672 | KV453128.1 | 1575391 | 18-scf00286 | 18 |
| AX-157871389 | 13 | 9.672 | KV453128.1 | 1584890 | 18-scf00286 | 18 |
| AX-157830188 | 13 | 9.672 | KV453128.1 | 1589712 | 18-scf00286 | 18 |
| AX-158131189 | 13 | 9.672 | KV453128.1 | 1594728 | 18-scf00286 | 18 |
| AX-158131190 | 13 | 9.672 | KV453128.1 | 1595225 | 18-scf00286 | 18 |
| AX-158131195 | 13 | 9.672 | KV453128.1 | 1599618 | 18-scf00286 | 18 |
| AX-158131197 | 13 | 9.672 | KV453128.1 | 1603491 | 18-scf00286 | 18 |
| AX-158131203 | 13 | 9.672 | KV453128.1 | 1608106 | 18-scf00286 | 18 |
| AX-158131204 | 13 | 9.672 | KV453128.1 | 1608878 | 18-scf00286 | 18 |
| AX-158131209 | 13 | 9.672 | KV453128.1 | 1613516 | 18-scf00286 | 18 |
| AX-158131210 | 13 | 9.672 | KV453128.1 | 1615732 | 18-scf00286 | 18 |
| AX-157857840 | 13 | 9.672 | KV453128.1 | 1621174 | 18-scf00286 | 18 |
| AX-158131214 | 13 | 9.672 | KV453128.1 | 1621716 | 18-scf00286 | 18 |
| AX-158131219 | 13 | 9.672 | KV453128.1 | 1625818 | 18-scf00286 | 18 |
| AX-158131220 | 13 | 9.672 | KV453128.1 | 1626093 | 18-scf00286 | 18 |
| AX-157830192 | 13 | 9.672 | KV453128.1 | 1629500 | 18-scf00286 | 18 |
| AX-158131227 | 13 | 9.705 | KV453128.1 | 1631608 | 18-scf00286 | 18 |
| AX-158131228 | 13 | 9.74  | KV453128.1 | 1632712 | 18-scf00286 | 18 |
| AX-158131229 | 13 | 9.776 | KV453128.1 | 1633436 | 18-scf00286 | 18 |
| AX-158131230 | 13 | 9.836 | KV453128.1 | 1634113 | 18-scf00286 | 18 |
| AX-158131183 | 13 | 9.89  | KV453128.1 | 1577415 | 18-scf00286 | 18 |
| AX-158131187 | 13 | 9.89  | KV453128.1 | 1587403 | 18-scf00286 | 18 |
| AX-158131198 | 13 | 9.89  | KV453128.1 | 1604458 | 18-scf00286 | 18 |
| AX-157830190 | 13 | 9.89  | KV453128.1 | 1607666 | 18-scf00286 | 18 |

|              |    |        |            |         |             |    |
|--------------|----|--------|------------|---------|-------------|----|
| AX-157830191 | 13 | 9.89   | KV453128.1 | 1611754 | 18-scf00286 | 18 |
| AX-158131208 | 13 | 9.89   | KV453128.1 | 1612937 | 18-scf00286 | 18 |
| AX-158131212 | 13 | 9.89   | KV453128.1 | 1620754 | 18-scf00286 | 18 |
| AX-158131213 | 13 | 9.89   | KV453128.1 | 1621488 | 18-scf00286 | 18 |
| AX-158131231 | 13 | 9.89   | KV453128.1 | 1634559 | 18-scf00286 | 18 |
| AX-157830193 | 13 | 9.89   | KV453128.1 | 1635110 | 18-scf00286 | 18 |
| AX-158131234 | 13 | 9.89   | KV453128.1 | 1638385 | 18-scf00286 | 18 |
| AX-158131235 | 13 | 9.89   | KV453128.1 | 1640571 | 18-scf00286 | 18 |
| AX-158131236 | 13 | 9.89   | KV453128.1 | 1641448 | 18-scf00286 | 18 |
| AX-158131239 | 13 | 9.89   | KV453128.1 | 1644956 | 18-scf00286 | 18 |
| AX-158131240 | 13 | 9.89   | KV453128.1 | 1646497 | 18-scf00286 | 18 |
| AX-158131241 | 13 | 9.89   | KV453128.1 | 1647402 | 18-scf00286 | 18 |
| AX-158131242 | 13 | 9.89   | KV453128.1 | 1647608 | 18-scf00286 | 18 |
| AX-158131243 | 13 | 9.89   | KV453128.1 | 1648021 | 18-scf00286 | 18 |
| AX-158131246 | 13 | 9.89   | KV453128.1 | 1649443 | 18-scf00286 | 18 |
| AX-158131247 | 13 | 9.89   | KV453128.1 | 1651330 | 18-scf00286 | 18 |
| AX-158131248 | 13 | 9.89   | KV453128.1 | 1653012 | 18-scf00286 | 18 |
| AX-158131249 | 13 | 9.89   | KV453128.1 | 1655978 | 18-scf00286 | 18 |
| AX-158131252 | 13 | 9.89   | KV453128.1 | 1660472 | 18-scf00286 | 18 |
| AX-158131254 | 13 | 9.89   | KV453128.1 | 1661948 | 18-scf00286 | 18 |
| AX-158131256 | 13 | 9.89   | KV453128.1 | 1662690 | 18-scf00286 | 18 |
| AX-158131258 | 13 | 9.89   | KV453128.1 | 1667758 | 18-scf00286 | 18 |
| AX-158131272 | 13 | 9.89   | KV453128.1 | 1687046 | 18-scf00286 | 18 |
| AX-158131081 | 13 | 9.999  | KV453128.1 | 1420726 | 18-scf00286 | 18 |
| AX-157830189 | 13 | 9.999  | KV453128.1 | 1605446 | 18-scf00286 | 18 |
| AX-157714650 | 13 | 9.999  | KV453128.1 | 1667244 | 18-scf00286 | 18 |
| AX-157716036 | 13 | 9.999  | KV453128.1 | 1670079 | 18-scf00286 | 18 |
| AX-158131261 | 13 | 9.999  | KV453128.1 | 1670547 | 18-scf00286 | 18 |
| AX-157724203 | 13 | 9.999  | KV453128.1 | 1671196 | 18-scf00286 | 18 |
| AX-158131263 | 13 | 9.999  | KV453128.1 | 1673293 | 18-scf00286 | 18 |
| AX-158131267 | 13 | 9.999  | KV453128.1 | 1681904 | 18-scf00286 | 18 |
| AX-158131268 | 13 | 9.999  | KV453128.1 | 1682303 | 18-scf00286 | 18 |
| AX-158131270 | 13 | 9.999  | KV453128.1 | 1685801 | 18-scf00286 | 18 |
| AX-157830194 | 13 | 9.999  | KV453128.1 | 1686530 | 18-scf00286 | 18 |
| AX-158131273 | 13 | 9.999  | KV453128.1 | 1689348 | 18-scf00286 | 18 |
| AX-158131279 | 13 | 9.999  | KV453128.1 | 1696121 | 18-scf00286 | 18 |
| AX-158131282 | 13 | 9.999  | KV453128.1 | 1703138 | 18-scf00286 | 18 |
| AX-158131286 | 13 | 9.999  | KV453128.1 | 1709556 | 18-scf00286 | 18 |
| AX-157830196 | 13 | 9.999  | KV453128.1 | 1717438 | 18-scf00286 | 18 |
| AX-158131306 | 13 | 9.999  | KV453128.1 | 1747097 | 18-scf00286 | 18 |
| AX-158131310 | 13 | 9.999  | KV453128.1 | 1756822 | 18-scf00286 | 18 |
| AX-158131265 | 13 | 10     | KV453128.1 | 1679867 | 18-scf00286 | 18 |
| AX-158131280 | 13 | 10     | KV453128.1 | 1701283 | 18-scf00286 | 18 |
| AX-158131281 | 13 | 10     | KV453128.1 | 1701897 | 18-scf00286 | 18 |
| AX-157749593 | 13 | 10     | KV453128.1 | 1702508 | 18-scf00286 | 18 |
| AX-158131283 | 13 | 10.147 | KV453128.1 | 1703747 | 18-scf00286 | 18 |
| AX-158131285 | 13 | 10.212 | KV453128.1 | 1706152 | 18-scf00286 | 18 |
| AX-158131290 | 13 | 10.215 | KV453128.1 | 1712006 | 18-scf00286 | 18 |
| AX-158131291 | 13 | 10.218 | KV453128.1 | 1716796 | 18-scf00286 | 18 |
| AX-157715231 | 13 | 10.222 | KV453128.1 | 1737533 | 18-scf00286 | 18 |
| AX-158131297 | 13 | 10.222 | KV453128.1 | 1738096 | 18-scf00286 | 18 |

|              |    |        |            |         |             |    |
|--------------|----|--------|------------|---------|-------------|----|
| AX-158131298 | 13 | 10.319 | KV453128.1 | 1739272 | 18-scf00286 | 18 |
| AX-157747122 | 13 | 10.387 | KV453128.1 | 1571147 | 18-scf00286 | 18 |
| AX-158131200 | 13 | 10.387 | KV453128.1 | 1606047 | 18-scf00286 | 18 |
| AX-157830195 | 13 | 10.387 | KV453128.1 | 1699314 | 18-scf00286 | 18 |
| AX-158131293 | 13 | 10.387 | KV453128.1 | 1720424 | 18-scf00286 | 18 |
| AX-158131299 | 13 | 10.387 | KV453128.1 | 1742335 | 18-scf00286 | 18 |
| AX-158131300 | 13 | 10.387 | KV453128.1 | 1742691 | 18-scf00286 | 18 |
| AX-158131303 | 13 | 10.387 | KV453128.1 | 1744982 | 18-scf00286 | 18 |
| AX-158131304 | 13 | 10.387 | KV453128.1 | 1745554 | 18-scf00286 | 18 |
| AX-158131309 | 13 | 10.387 | KV453128.1 | 1756122 | 18-scf00286 | 18 |
| AX-158131311 | 13 | 10.387 | KV453128.1 | 1757554 | 18-scf00286 | 18 |
| AX-158131312 | 13 | 10.387 | KV453128.1 | 1759189 | 18-scf00286 | 18 |
| AX-158131315 | 13 | 10.857 | KV453128.1 | 1764965 | 18-scf00286 | 18 |
| AX-158131316 | 13 | 10.857 | KV453128.1 | 1765486 | 18-scf00286 | 18 |
| AX-158131319 | 13 | 10.857 | KV453128.1 | 1770185 | 18-scf00286 | 18 |
| AX-157756910 | 13 | 10.857 | KV453128.1 | 1773227 | 18-scf00286 | 18 |
| AX-158131336 | 13 | 10.857 | KV453128.1 | 1788623 | 18-scf00286 | 18 |
| AX-158131320 | 13 | 10.858 | KV453128.1 | 1770334 | 18-scf00286 | 18 |
| AX-158131322 | 13 | 10.881 | KV453128.1 | 1772311 | 18-scf00286 | 18 |
| AX-158131323 | 13 | 10.881 | KV453128.1 | 1774921 | 18-scf00286 | 18 |
| AX-158131353 | 13 | 10.881 | KV453128.1 | 1817617 | 18-scf00286 | 18 |
| AX-158131327 | 13 | 11.498 | KV453128.1 | 1780277 | 18-scf00286 | 18 |
| AX-158131329 | 13 | 11.499 | KV453128.1 | 1782020 | 18-scf00286 | 18 |
| AX-158131332 | 13 | 11.499 | KV453128.1 | 1784531 | 18-scf00286 | 18 |
| AX-158131333 | 13 | 11.499 | KV453128.1 | 1785279 | 18-scf00286 | 18 |
| AX-158131334 | 13 | 11.499 | KV453128.1 | 1786014 | 18-scf00286 | 18 |
| AX-158131346 | 13 | 11.499 | KV453128.1 | 1798437 | 18-scf00286 | 18 |
| AX-158131339 | 13 | 11.612 | KV453128.1 | 1791694 | 18-scf00286 | 18 |
| AX-158131342 | 13 | 11.738 | KV453128.1 | 1795076 | 18-scf00286 | 18 |
| AX-158131343 | 13 | 11.754 | KV453128.1 | 1795699 | 18-scf00286 | 18 |
| AX-158131344 | 13 | 11.754 | KV453128.1 | 1796744 | 18-scf00286 | 18 |
| AX-158131348 | 13 | 11.754 | KV453128.1 | 1805576 | 18-scf00286 | 18 |
| AX-158131349 | 13 | 11.754 | KV453128.1 | 1807047 | 18-scf00286 | 18 |
| AX-158131351 | 13 | 11.754 | KV453128.1 | 1810890 | 18-scf00286 | 18 |
| AX-158131355 | 13 | 11.754 | KV453128.1 | 1818365 | 18-scf00286 | 18 |
| AX-158131350 | 13 | 11.755 | KV453128.1 | 1810162 | 18-scf00286 | 18 |
| AX-158131360 | 13 | 12.459 | KV453128.1 | 1826239 | 18-scf00286 | 18 |
| AX-158131361 | 13 | 12.459 | KV453128.1 | 1826779 | 18-scf00286 | 18 |
| AX-157830202 | 13 | 12.459 | KV453128.1 | 1864727 | 18-scf00286 | 18 |
| AX-158131413 | 13 | 12.459 | KV453128.1 | 1906983 | 18-scf00286 | 18 |
| AX-158131362 | 13 | 12.506 | KV453128.1 | 1827350 | 18-scf00286 | 18 |
| AX-158131364 | 13 | 12.554 | KV453128.1 | 1833228 | 18-scf00286 | 18 |
| AX-158131365 | 13 | 12.554 | KV453128.1 | 1835329 | 18-scf00286 | 18 |
| AX-158131367 | 13 | 12.554 | KV453128.1 | 1837698 | 18-scf00286 | 18 |
| AX-158131366 | 13 | 12.616 | KV453128.1 | 1835798 | 18-scf00286 | 18 |
| AX-158131368 | 13 | 12.695 | KV453128.1 | 1838153 | 18-scf00286 | 18 |
| AX-158131369 | 13 | 12.732 | KV453128.1 | 1839897 | 18-scf00286 | 18 |
| AX-158131370 | 13 | 12.732 | KV453128.1 | 1841292 | 18-scf00286 | 18 |
| AX-158131374 | 13 | 12.732 | KV453128.1 | 1847410 | 18-scf00286 | 18 |
| AX-158131377 | 13 | 12.732 | KV453128.1 | 1850971 | 18-scf00286 | 18 |
| AX-157830199 | 13 | 12.732 | KV453128.1 | 1851190 | 18-scf00286 | 18 |

|              |    |        |            |         |             |    |
|--------------|----|--------|------------|---------|-------------|----|
| AX-158131380 | 13 | 12.732 | KV453128.1 | 1853182 | 18-scf00286 | 18 |
| AX-158131384 | 13 | 12.732 | KV453128.1 | 1869028 | 18-scf00286 | 18 |
| AX-158131388 | 13 | 12.732 | KV453128.1 | 1874845 | 18-scf00286 | 18 |
| AX-158131393 | 13 | 12.732 | KV453128.1 | 1879487 | 18-scf00286 | 18 |
| AX-158131395 | 13 | 12.732 | KV453128.1 | 1881734 | 18-scf00286 | 18 |
| AX-158131397 | 13 | 12.732 | KV453128.1 | 1885212 | 18-scf00286 | 18 |
| AX-158131405 | 13 | 12.732 | KV453128.1 | 1891522 | 18-scf00286 | 18 |
| AX-158131438 | 13 | 12.732 | KV453128.1 | 1943922 | 18-scf00286 | 18 |
| AX-158131461 | 13 | 12.732 | KV453128.1 | 1982000 | 18-scf00286 | 18 |
| AX-158411571 | 13 | 12.732 | KV453128.1 | 2135515 | 18-scf00286 | 18 |
| AX-158131399 | 13 | 12.95  | KV453128.1 | 1886822 | 18-scf00286 | 18 |
| AX-157716001 | 13 | 12.951 | KV453128.1 | 1865877 | 18-scf00286 | 18 |
| AX-157877967 | 13 | 12.951 | KV453128.1 | 1869838 | 18-scf00286 | 18 |
| AX-158131401 | 13 | 12.951 | KV453128.1 | 1887902 | 18-scf00286 | 18 |
| AX-157830206 | 13 | 12.951 | KV453128.1 | 1888995 | 18-scf00286 | 18 |
| AX-158131406 | 13 | 12.951 | KV453128.1 | 1892549 | 18-scf00286 | 18 |
| AX-158131407 | 13 | 12.951 | KV453128.1 | 1895934 | 18-scf00286 | 18 |
| AX-158131409 | 13 | 12.951 | KV453128.1 | 1902115 | 18-scf00286 | 18 |
| AX-158131411 | 13 | 12.951 | KV453128.1 | 1903811 | 18-scf00286 | 18 |
| AX-157744402 | 13 | 12.951 | KV453128.1 | 1907810 | 18-scf00286 | 18 |
| AX-158131424 | 13 | 12.951 | KV453128.1 | 1921004 | 18-scf00286 | 18 |
| AX-158131432 | 13 | 12.951 | KV453128.1 | 1930479 | 18-scf00286 | 18 |
| AX-158131436 | 13 | 12.951 | KV453128.1 | 1939880 | 18-scf00286 | 18 |
| AX-158131469 | 13 | 12.951 | KV453128.1 | 1988181 | 18-scf00286 | 18 |
| AX-158131416 | 13 | 13.087 | KV453128.1 | 1911785 | 18-scf00286 | 18 |
| AX-158131420 | 13 | 13.087 | KV453128.1 | 1917433 | 18-scf00286 | 18 |
| AX-158131422 | 13 | 13.087 | KV453128.1 | 1918206 | 18-scf00286 | 18 |
| AX-157830207 | 13 | 13.14  | KV453128.1 | 1920769 | 18-scf00286 | 18 |
| AX-158131427 | 13 | 13.224 | KV453128.1 | 1923540 | 18-scf00286 | 18 |
| AX-158131433 | 13 | 13.224 | KV453128.1 | 1933012 | 18-scf00286 | 18 |
| AX-158131435 | 13 | 13.224 | KV453128.1 | 1936611 | 18-scf00286 | 18 |
| AX-158131439 | 13 | 13.301 | KV453128.1 | 1944840 | 18-scf00286 | 18 |
| AX-158131440 | 13 | 13.497 | KV453128.1 | 1946581 | 18-scf00286 | 18 |
| AX-157746605 | 13 | 13.497 | KV453128.1 | 1950468 | 18-scf00286 | 18 |
| AX-158131442 | 13 | 13.497 | KV453128.1 | 1952857 | 18-scf00286 | 18 |
| AX-157751520 | 13 | 13.497 | KV453128.1 | 1954269 | 18-scf00286 | 18 |
| AX-157773824 | 13 | 13.497 | KV453128.1 | 1955800 | 18-scf00286 | 18 |
| AX-158131430 | 13 | 13.61  | KV453128.1 | 1928615 | 18-scf00286 | 18 |
| AX-157830214 | 13 | 13.61  | KV453128.1 | 1957782 | 18-scf00286 | 18 |
| AX-158131448 | 13 | 13.702 | KV453128.1 | 1962438 | 18-scf00286 | 18 |
| AX-158131449 | 13 | 13.702 | KV453128.1 | 1962907 | 18-scf00286 | 18 |
| AX-157726921 | 13 | 14.011 | KV453128.1 | 1966391 | 18-scf00286 | 18 |
| AX-158131457 | 13 | 14.319 | KV453128.1 | 1976596 | 18-scf00286 | 18 |
| AX-158131458 | 13 | 14.319 | KV453128.1 | 1978102 | 18-scf00286 | 18 |
| AX-158131472 | 13 | 14.319 | KV453128.1 | 1992546 | 18-scf00286 | 18 |
| AX-158131473 | 13 | 14.319 | KV453128.1 | 1993077 | 18-scf00286 | 18 |
| AX-158131475 | 13 | 14.483 | KV453128.1 | 1995662 | 18-scf00286 | 18 |
| AX-158131476 | 13 | 14.483 | KV453128.1 | 1996042 | 18-scf00286 | 18 |
| AX-157725098 | 13 | 14.483 | KV453128.1 | 1999026 | 18-scf00286 | 18 |
| AX-158131480 | 13 | 14.495 | KV453128.1 | 1999572 | 18-scf00286 | 18 |
| AX-157721104 | 13 | 14.526 | KV453128.1 | 2002312 | 18-scf00286 | 18 |

|              |    |        |             |         |             |    |
|--------------|----|--------|-------------|---------|-------------|----|
| AX-158131482 | 13 | 14.537 | KV453128.1  | 2002707 | 18-scf00286 | 18 |
| AX-158131483 | 13 | 14.567 | KV453128.1  | 2003265 | 18-scf00286 | 18 |
| AX-158131484 | 13 | 14.588 | KV453128.1  | 2003940 | 18-scf00286 | 18 |
| AX-157886227 | 13 | 14.619 | KV453128.1  | 2005226 | 18-scf00286 | 18 |
| AX-158131467 | 13 | 14.647 | KV453128.1  | 1986668 | 18-scf00286 | 18 |
| AX-158131486 | 13 | 14.647 | KV453128.1  | 2006793 | 18-scf00286 | 18 |
| AX-157725536 | 13 | 14.811 | KV453128.1  | 2011588 | 18-scf00286 | 18 |
| AX-158392842 | 13 | 14.811 | KV453128.1  | 2012301 | 18-scf00286 | 18 |
| AX-158131489 | 13 | 14.811 | KV453128.1  | 2012992 | 18-scf00286 | 18 |
| AX-158131492 | 13 | 14.811 | KV453128.1  | 2016249 | 18-scf00286 | 18 |
| AX-158131494 | 13 | 14.993 | KV453128.1  | 2018836 | 18-scf00286 | 18 |
| AX-158131496 | 13 | 15.038 | KV453128.1  | 2020433 | 18-scf00286 | 18 |
| AX-157697213 | 13 | 15.084 | KV453128.1  | 2020514 | 18-scf00286 | 18 |
| AX-158131500 | 13 | 15.084 | KV453128.1  | 2024806 | 18-scf00286 | 18 |
| AX-158380242 | 13 | 15.084 | KV453128.1  | 2028968 | 18-scf00286 | 18 |
| AX-158131508 | 13 | 15.344 | KV453128.1  | 2035474 | 18-scf00286 | 18 |
| AX-158131501 | 13 | 15.366 | KV453128.1  | 2026954 | 18-scf00286 | 18 |
| AX-158131509 | 13 | 15.366 | KV453128.1  | 2037986 | 18-scf00286 | 18 |
| AX-158131510 | 13 | 15.371 | KV453128.1  | 2039006 | 18-scf00286 | 18 |
| AX-158131517 | 13 | 15.635 | KV453128.1  | 2050235 | 18-scf00286 | 18 |
| AX-158131518 | 13 | 15.635 | KV453128.1  | 2051065 | 18-scf00286 | 18 |
| AX-158131519 | 13 | 15.635 | KV453128.1  | 2052721 | 18-scf00286 | 18 |
| AX-158131520 | 13 | 15.635 | KV453128.1  | 2053551 | 18-scf00286 | 18 |
| AX-158131521 | 13 | 15.636 | KV453128.1  | 2054147 | 18-scf00286 | 18 |
| AX-158131557 | 13 | 15.636 | KV453128.1  | 2103304 | 18-scf00286 | 18 |
| AX-158131504 | 13 | 15.69  | KV453128.1  | 2029642 | 18-scf00286 | 18 |
| AX-158131533 | 13 | 15.69  | KV453128.1  | 2066855 | 18-scf00286 | 18 |
| AX-158131534 | 13 | 15.69  | KV453128.1  | 2069857 | 18-scf00286 | 18 |
| AX-158131538 | 13 | 15.716 | KV453128.1  | 2074962 | 18-scf00286 | 18 |
| AX-158131514 | 13 | 15.777 | KV453128.1  | 2046607 | 18-scf00286 | 18 |
| AX-158131539 | 13 | 15.777 | KV453128.1  | 2076098 | 18-scf00286 | 18 |
| AX-158131541 | 13 | 15.968 | KV453128.1  | 2078618 | 18-scf00286 | 18 |
| AX-157725077 | 13 | 16.177 | KV453128.1  | 2087743 | 18-scf00286 | 18 |
| AX-158131545 | 13 | 16.325 | KV453128.1  | 2088201 | 18-scf00286 | 18 |
| AX-158131547 | 13 | 16.33  | KV453128.1  | 2090327 | 18-scf00286 | 18 |
| AX-158131550 | 13 | 16.336 | KV453128.1  | 2092668 | 18-scf00286 | 18 |
| AX-158131543 | 13 | 16.343 | KV453128.1  | 2081587 | 18-scf00286 | 18 |
| AX-158131552 | 13 | 16.343 | KV453128.1  | 2095133 | 18-scf00286 | 18 |
| AX-158131560 | 13 | 16.343 | KV453128.1  | 2104707 | 18-scf00286 | 18 |
| AX-158131561 | 13 | 16.343 | KV453128.1  | 2104931 | 18-scf00286 | 18 |
| AX-158131562 | 13 | 16.343 | KV453128.1  | 2105877 | 18-scf00286 | 18 |
| AX-157742931 | 13 | 16.343 | KV453128.1  | 2107122 | 18-scf00286 | 18 |
| AX-158131565 | 13 | 16.343 | KV453128.1  | 2111271 | 18-scf00286 | 18 |
| AX-157886228 | 13 | 16.343 | KV453128.1  | 2112476 | 18-scf00286 | 18 |
| AX-157706298 | 13 | 16.343 | 3ML01032007 | 432     | scf07624_1  | UN |
| AX-158131542 | 13 | 16.524 | KV453128.1  | 2080591 | 18-scf00286 | 18 |
| AX-158131570 | 13 | 16.524 | KV453128.1  | 2123459 | 18-scf00286 | 18 |
| AX-158131540 | 13 | 16.67  | KV453128.1  | 2077199 | 18-scf00286 | 18 |
| AX-158131555 | 13 | 16.67  | KV453128.1  | 2097200 | 18-scf00286 | 18 |
| AX-157830223 | 13 | 16.67  | KV453128.1  | 2100453 | 18-scf00286 | 18 |
| AX-158131567 | 13 | 16.67  | KV453128.1  | 2113169 | 18-scf00286 | 18 |

|              |    |        |            |         |             |    |
|--------------|----|--------|------------|---------|-------------|----|
| AX-158131571 | 13 | 16.67  | KV453128.1 | 2123706 | 18-scf00286 | 18 |
| AX-158408122 | 13 | 16.67  | KV453128.1 | 2125436 | 18-scf00286 | 18 |
| AX-157714679 | 13 | 16.67  | KV453128.1 | 2126273 | 18-scf00286 | 18 |
| AX-158131572 | 13 | 16.67  | KV453128.1 | 2127538 | 18-scf00286 | 18 |
| AX-157830226 | 13 | 16.67  | KV453128.1 | 2127971 | 18-scf00286 | 18 |
| AX-157830228 | 13 | 16.823 | KV453128.1 | 2133025 | 18-scf00286 | 18 |
| AX-158131575 | 13 | 16.894 | KV453128.1 | 2139572 | 18-scf00286 | 18 |
| AX-158380243 | 13 | 17.01  | KV453128.1 | 2140803 | 18-scf00286 | 18 |
| AX-158131576 | 13 | 17.147 | KV453128.1 | 2142489 | 18-scf00286 | 18 |
| AX-157723655 | 13 | 17.147 | KV453128.1 | 2157565 | 18-scf00286 | 18 |
| AX-158131577 | 13 | 17.35  | KV453128.1 | 2143391 | 18-scf00286 | 18 |
| AX-157719368 | 13 | 17.351 | KV453128.1 | 2145508 | 18-scf00286 | 18 |
| AX-158131578 | 13 | 17.351 | KV453128.1 | 2146193 | 18-scf00286 | 18 |
| AX-158131580 | 13 | 17.351 | KV453128.1 | 2147902 | 18-scf00286 | 18 |
| AX-157716323 | 13 | 17.691 | KV453128.1 | 2153276 | 18-scf00286 | 18 |
| AX-158131583 | 13 | 17.691 | KV453128.1 | 2155959 | 18-scf00286 | 18 |
| AX-157830230 | 13 | 17.691 | KV453128.1 | 2156097 | 18-scf00286 | 18 |
| AX-158131585 | 13 | 17.691 | KV453128.1 | 2158108 | 18-scf00286 | 18 |
| AX-158131586 | 13 | 17.691 | KV453128.1 | 2159339 | 18-scf00286 | 18 |
| AX-158131590 | 13 | 17.691 | KV453128.1 | 2165129 | 18-scf00286 | 18 |
| AX-158131593 | 13 | 17.691 | KV453128.1 | 2167341 | 18-scf00286 | 18 |
| AX-158131594 | 13 | 17.691 | KV453128.1 | 2167773 | 18-scf00286 | 18 |
| AX-158131598 | 13 | 17.691 | KV453128.1 | 2171900 | 18-scf00286 | 18 |
| AX-158131600 | 13 | 17.691 | KV453128.1 | 2175109 | 18-scf00286 | 18 |
| AX-158131597 | 13 | 17.97  | KV453128.1 | 2170253 | 18-scf00286 | 18 |
| AX-158131637 | 13 | 17.97  | KV453128.1 | 2216522 | 18-scf00286 | 18 |
| AX-158131601 | 13 | 18.249 | KV453128.1 | 2176203 | 18-scf00286 | 18 |
| AX-158131605 | 13 | 18.525 | KV453128.1 | 2180738 | 18-scf00286 | 18 |
| AX-158131606 | 13 | 18.525 | KV453128.1 | 2181894 | 18-scf00286 | 18 |
| AX-157830232 | 13 | 18.623 | KV453128.1 | 2183130 | 18-scf00286 | 18 |
| AX-157772469 | 13 | 18.646 | KV453128.1 | 2183444 | 18-scf00286 | 18 |
| AX-158131607 | 13 | 18.646 | KV453128.1 | 2183931 | 18-scf00286 | 18 |
| AX-158131608 | 13 | 18.646 | KV453128.1 | 2184510 | 18-scf00286 | 18 |
| AX-158131609 | 13 | 18.646 | KV453128.1 | 2184760 | 18-scf00286 | 18 |
| AX-158131610 | 13 | 18.646 | KV453128.1 | 2185143 | 18-scf00286 | 18 |
| AX-157748184 | 13 | 18.646 | KV453128.1 | 2199064 | 18-scf00286 | 18 |
| AX-158385259 | 13 | 18.646 | KV453128.1 | 2247353 | 18-scf00286 | 18 |
| AX-158131676 | 13 | 18.646 | KV453128.1 | 2263624 | 18-scf00286 | 18 |
| AX-158131615 | 13 | 18.996 | KV453128.1 | 2190395 | 18-scf00286 | 18 |
| AX-158131616 | 13 | 18.997 | KV453128.1 | 2191138 | 18-scf00286 | 18 |
| AX-157722102 | 13 | 18.997 | KV453128.1 | 2202659 | 18-scf00286 | 18 |
| AX-157738474 | 13 | 18.997 | KV453128.1 | 2204007 | 18-scf00286 | 18 |
| AX-158131626 | 13 | 19.034 | KV453128.1 | 2205379 | 18-scf00286 | 18 |
| AX-158131631 | 13 | 19.173 | KV453128.1 | 2210884 | 18-scf00286 | 18 |
| AX-158131632 | 13 | 19.173 | KV453128.1 | 2211680 | 18-scf00286 | 18 |
| AX-158131641 | 13 | 19.806 | KV453128.1 | 2221481 | 18-scf00286 | 18 |
| AX-158131646 | 13 | 19.807 | KV453128.1 | 2229904 | 18-scf00286 | 18 |
| AX-158131648 | 13 | 19.807 | KV453128.1 | 2232828 | 18-scf00286 | 18 |
| AX-158131650 | 13 | 19.807 | KV453128.1 | 2237662 | 18-scf00286 | 18 |
| AX-158131662 | 13 | 19.807 | KV453128.1 | 2247475 | 18-scf00286 | 18 |
| AX-158131667 | 13 | 19.807 | KV453128.1 | 2253057 | 18-scf00286 | 18 |



|              |    |        |             |         |             |    |
|--------------|----|--------|-------------|---------|-------------|----|
| AX-158131663 | 13 | 19.818 | KV453128.1  | 2248193 | 18-scf00286 | 18 |
| AX-158131666 | 13 | 19.819 | KV453128.1  | 2252159 | 18-scf00286 | 18 |
| AX-158131669 | 13 | 19.819 | KV453128.1  | 2254235 | 18-scf00286 | 18 |
| AX-158131670 | 13 | 19.82  | KV453128.1  | 2254987 | 18-scf00286 | 18 |
| AX-158131671 | 13 | 20.178 | KV453128.1  | 2255770 | 18-scf00286 | 18 |
| AX-158131672 | 13 | 20.178 | KV453128.1  | 2259614 | 18-scf00286 | 18 |
| AX-158131674 | 13 | 20.303 | KV453128.1  | 2261029 | 18-scf00286 | 18 |
| AX-158131678 | 13 | 20.303 | KV453128.1  | 2264954 | 18-scf00286 | 18 |
| AX-158131679 | 13 | 20.303 | KV453128.1  | 2265369 | 18-scf00286 | 18 |
| AX-158131680 | 13 | 20.303 | KV453128.1  | 2265992 | 18-scf00286 | 18 |
| AX-158131682 | 13 | 20.303 | KV453128.1  | 2270144 | 18-scf00286 | 18 |
| AX-158131683 | 13 | 20.303 | KV453128.1  | 2271415 | 18-scf00286 | 18 |
| AX-157747272 | 13 | 20.676 | KV453128.1  | 2274965 | 18-scf00286 | 18 |
| AX-158131686 | 13 | 20.677 | KV453128.1  | 2275822 | 18-scf00286 | 18 |
| AX-158131692 | 13 | 20.864 | KV453128.1  | 2282700 | 18-scf00286 | 18 |
| AX-158131694 | 13 | 21.052 | KV453128.1  | 2284983 | 18-scf00286 | 18 |
| AX-158131696 | 13 | 21.052 | KV453128.1  | 2286014 | 18-scf00286 | 18 |
| AX-158131697 | 13 | 21.052 | KV453128.1  | 2287252 | 18-scf00286 | 18 |
| AX-158131698 | 13 | 21.052 | KV453128.1  | 2287767 | 18-scf00286 | 18 |
| AX-158131699 | 13 | 21.052 | KV453128.1  | 2288590 | 18-scf00286 | 18 |
| AX-158385260 | 13 | 21.052 | KV453128.1  | 2290534 | 18-scf00286 | 18 |
| AX-158131700 | 13 | 21.38  | KV453128.1  | 2291296 | 18-scf00286 | 18 |
| AX-158131702 | 13 | 21.38  | KV453128.1  | 2293851 | 18-scf00286 | 18 |
| AX-157726217 | 13 | 21.43  | KV453128.1  | 2295202 | 18-scf00286 | 18 |
| AX-157704912 | 13 | 21.456 | 3ML01027897 | 178     | scf03505_1  | UN |
| AX-158131707 | 13 | 21.489 | KV453128.1  | 2299082 | 18-scf00286 | 18 |
| AX-158131708 | 13 | 21.489 | KV453128.1  | 2300905 | 18-scf00286 | 18 |
| AX-158131710 | 13 | 21.489 | KV453128.1  | 2304914 | 18-scf00286 | 18 |
| AX-158131712 | 13 | 21.489 | KV453128.1  | 2307053 | 18-scf00286 | 18 |
| AX-158131709 | 13 | 21.49  | KV453128.1  | 2303706 | 18-scf00286 | 18 |
| AX-158131711 | 13 | 21.49  | KV453128.1  | 2305363 | 18-scf00286 | 18 |
| AX-158131713 | 13 | 21.49  | KV453128.1  | 2308954 | 18-scf00286 | 18 |
| AX-158131722 | 13 | 21.49  | KV453128.1  | 2316220 | 18-scf00286 | 18 |
| AX-158131716 | 13 | 21.653 | KV453128.1  | 2310559 | 18-scf00286 | 18 |
| AX-158131717 | 13 | 21.653 | KV453128.1  | 2311914 | 18-scf00286 | 18 |
| AX-158131718 | 13 | 21.742 | KV453128.1  | 2312708 | 18-scf00286 | 18 |
| AX-158131721 | 13 | 21.819 | KV453128.1  | 2315847 | 18-scf00286 | 18 |
| AX-158131723 | 13 | 21.819 | KV453128.1  | 2316642 | 18-scf00286 | 18 |
| AX-157857845 | 13 | 21.989 | KV453128.1  | 2321494 | 18-scf00286 | 18 |
| AX-158131725 | 13 | 21.989 | KV453128.1  | 2323701 | 18-scf00286 | 18 |
| AX-158131728 | 13 | 22.148 | KV453128.1  | 2326050 | 18-scf00286 | 18 |
| AX-158131729 | 13 | 22.148 | KV453128.1  | 2326964 | 18-scf00286 | 18 |
| AX-158131730 | 13 | 22.267 | KV453128.1  | 2329453 | 18-scf00286 | 18 |
| AX-158131733 | 13 | 22.477 | KV453128.1  | 2333205 | 18-scf00286 | 18 |
| AX-158131734 | 13 | 22.477 | KV453128.1  | 2333934 | 18-scf00286 | 18 |
| AX-158131737 | 13 | 22.477 | KV453128.1  | 2338127 | 18-scf00286 | 18 |
| AX-158131738 | 13 | 22.477 | KV453128.1  | 2341569 | 18-scf00286 | 18 |
| AX-158131743 | 13 | 22.477 | KV453128.1  | 2347113 | 18-scf00286 | 18 |
| AX-158131744 | 13 | 22.477 | KV453128.1  | 2351323 | 18-scf00286 | 18 |
| AX-158131746 | 13 | 22.697 | KV453128.1  | 2355102 | 18-scf00286 | 18 |
| AX-158131747 | 13 | 22.697 | KV453128.1  | 2355577 | 18-scf00286 | 18 |

|              |    |        |            |         |             |    |
|--------------|----|--------|------------|---------|-------------|----|
| AX-158131748 | 13 | 22.697 | KV453128.1 | 2356175 | 18-scf00286 | 18 |
| AX-158131749 | 13 | 22.697 | KV453128.1 | 2358032 | 18-scf00286 | 18 |
| AX-158131750 | 13 | 22.806 | KV453128.1 | 2358470 | 18-scf00286 | 18 |
| AX-158131751 | 13 | 22.806 | KV453128.1 | 2361386 | 18-scf00286 | 18 |
| AX-158131752 | 13 | 22.806 | KV453128.1 | 2361804 | 18-scf00286 | 18 |
| AX-158131754 | 13 | 22.806 | KV453128.1 | 2362723 | 18-scf00286 | 18 |
| AX-158131757 | 13 | 22.806 | KV453128.1 | 2365556 | 18-scf00286 | 18 |
| AX-158131759 | 13 | 22.806 | KV453128.1 | 2367483 | 18-scf00286 | 18 |
| AX-158131760 | 13 | 22.806 | KV453128.1 | 2367881 | 18-scf00286 | 18 |
| AX-158131763 | 13 | 22.807 | KV453128.1 | 2369600 | 18-scf00286 | 18 |
| AX-158131764 | 13 | 23.164 | KV453128.1 | 2372354 | 18-scf00286 | 18 |
| AX-158131765 | 13 | 23.165 | KV453128.1 | 2372868 | 18-scf00286 | 18 |
| AX-158131767 | 13 | 23.245 | KV453128.1 | 2374571 | 18-scf00286 | 18 |
| AX-158131769 | 13 | 23.245 | KV453128.1 | 2376274 | 18-scf00286 | 18 |
| AX-158131768 | 13 | 23.585 | KV453128.1 | 2375885 | 18-scf00286 | 18 |
| AX-158131781 | 13 | 23.585 | KV453128.1 | 2391605 | 18-scf00286 | 18 |
| AX-158131770 | 13 | 23.622 | KV453128.1 | 2378671 | 18-scf00286 | 18 |
| AX-158131775 | 13 | 23.622 | KV453128.1 | 2383975 | 18-scf00286 | 18 |
| AX-157886235 | 13 | 23.622 | KV453128.1 | 2384762 | 18-scf00286 | 18 |
| AX-158131777 | 13 | 23.622 | KV453128.1 | 2386192 | 18-scf00286 | 18 |
| AX-158131779 | 13 | 23.622 | KV453128.1 | 2388717 | 18-scf00286 | 18 |
| AX-157877982 | 13 | 23.622 | KV453128.1 | 2392412 | 18-scf00286 | 18 |
| AX-158131782 | 13 | 23.622 | KV453128.1 | 2392477 | 18-scf00286 | 18 |
| AX-158131792 | 13 | 23.622 | KV453128.1 | 2406177 | 18-scf00286 | 18 |
| AX-158131800 | 13 | 23.622 | KV453128.1 | 2419737 | 18-scf00286 | 18 |
| AX-158131922 | 13 | 23.622 | KV453128.1 | 2590903 | 18-scf00286 | 18 |
| AX-158411575 | 13 | 23.789 | KV453128.1 | 2398784 | 18-scf00286 | 18 |
| AX-158131789 | 13 | 23.79  | KV453128.1 | 2399850 | 18-scf00286 | 18 |
| AX-158131791 | 13 | 23.79  | KV453128.1 | 2402560 | 18-scf00286 | 18 |
| AX-158131793 | 13 | 23.79  | KV453128.1 | 2406647 | 18-scf00286 | 18 |
| AX-158131795 | 13 | 23.79  | KV453128.1 | 2410790 | 18-scf00286 | 18 |
| AX-158131796 | 13 | 23.79  | KV453128.1 | 2411474 | 18-scf00286 | 18 |
| AX-157710495 | 13 | 23.79  | KV453128.1 | 2412424 | 18-scf00286 | 18 |
| AX-157708933 | 13 | 23.79  | KV453128.1 | 2412833 | 18-scf00286 | 18 |
| AX-158131798 | 13 | 23.79  | KV453128.1 | 2415433 | 18-scf00286 | 18 |
| AX-158131825 | 13 | 23.79  | KV453128.1 | 2447486 | 18-scf00286 | 18 |
| AX-158131799 | 13 | 23.899 | KV453128.1 | 2416943 | 18-scf00286 | 18 |
| AX-158131801 | 13 | 23.899 | KV453128.1 | 2420726 | 18-scf00286 | 18 |
| AX-158131802 | 13 | 23.899 | KV453128.1 | 2421596 | 18-scf00286 | 18 |
| AX-158131803 | 13 | 23.899 | KV453128.1 | 2422888 | 18-scf00286 | 18 |
| AX-158131807 | 13 | 23.899 | KV453128.1 | 2427376 | 18-scf00286 | 18 |
| AX-157750905 | 13 | 23.899 | KV453128.1 | 2428544 | 18-scf00286 | 18 |
| AX-158131808 | 13 | 23.899 | KV453128.1 | 2429673 | 18-scf00286 | 18 |
| AX-158131809 | 13 | 23.899 | KV453128.1 | 2430101 | 18-scf00286 | 18 |
| AX-158131811 | 13 | 23.95  | KV453128.1 | 2433828 | 18-scf00286 | 18 |
| AX-158131813 | 13 | 24.008 | KV453128.1 | 2437084 | 18-scf00286 | 18 |
| AX-158131818 | 13 | 24.092 | KV453128.1 | 2442626 | 18-scf00286 | 18 |
| AX-158131819 | 13 | 24.092 | KV453128.1 | 2443155 | 18-scf00286 | 18 |
| AX-157717959 | 13 | 24.092 | KV453128.1 | 2456514 | 18-scf00286 | 18 |
| AX-158131820 | 13 | 24.162 | KV453128.1 | 2443530 | 18-scf00286 | 18 |
| AX-158403795 | 13 | 24.162 | KV453128.1 | 2475434 | 18-scf00286 | 18 |

|              |    |        |            |         |             |    |
|--------------|----|--------|------------|---------|-------------|----|
| AX-158131848 | 13 | 24.162 | KV453128.1 | 2479016 | 18-scf00286 | 18 |
| AX-158131812 | 13 | 24.227 | KV453128.1 | 2435707 | 18-scf00286 | 18 |
| AX-157830235 | 13 | 24.227 | KV453128.1 | 2445318 | 18-scf00286 | 18 |
| AX-158131823 | 13 | 24.227 | KV453128.1 | 2446276 | 18-scf00286 | 18 |
| AX-158131824 | 13 | 24.227 | KV453128.1 | 2446648 | 18-scf00286 | 18 |
| AX-158131827 | 13 | 24.227 | KV453128.1 | 2449404 | 18-scf00286 | 18 |
| AX-158131828 | 13 | 24.227 | KV453128.1 | 2449988 | 18-scf00286 | 18 |
| AX-158131830 | 13 | 24.227 | KV453128.1 | 2451544 | 18-scf00286 | 18 |
| AX-157830236 | 13 | 24.227 | KV453128.1 | 2454901 | 18-scf00286 | 18 |
| AX-157727792 | 13 | 24.227 | KV453128.1 | 2455052 | 18-scf00286 | 18 |
| AX-158131832 | 13 | 24.227 | KV453128.1 | 2455517 | 18-scf00286 | 18 |
| AX-158131835 | 13 | 24.227 | KV453128.1 | 2460325 | 18-scf00286 | 18 |
| AX-158131839 | 13 | 24.227 | KV453128.1 | 2465135 | 18-scf00286 | 18 |
| AX-158131840 | 13 | 24.227 | KV453128.1 | 2467075 | 18-scf00286 | 18 |
| AX-158131844 | 13 | 24.227 | KV453128.1 | 2472773 | 18-scf00286 | 18 |
| AX-158131845 | 13 | 24.227 | KV453128.1 | 2474036 | 18-scf00286 | 18 |
| AX-158131847 | 13 | 24.227 | KV453128.1 | 2477868 | 18-scf00286 | 18 |
| AX-158131911 | 13 | 24.227 | KV453128.1 | 2571347 | 18-scf00286 | 18 |
| AX-157701709 | 13 | 24.553 | KV453128.1 | 2479646 | 18-scf00286 | 18 |
| AX-158131853 | 13 | 24.554 | KV453128.1 | 2487158 | 18-scf00286 | 18 |
| AX-158131854 | 13 | 24.554 | KV453128.1 | 2487946 | 18-scf00286 | 18 |
| AX-158131857 | 13 | 24.554 | KV453128.1 | 2493062 | 18-scf00286 | 18 |
| AX-158131858 | 13 | 24.554 | KV453128.1 | 2494032 | 18-scf00286 | 18 |
| AX-158131860 | 13 | 24.554 | KV453128.1 | 2495458 | 18-scf00286 | 18 |
| AX-158131861 | 13 | 24.554 | KV453128.1 | 2496316 | 18-scf00286 | 18 |
| AX-158385269 | 13 | 24.554 | KV453128.1 | 2499176 | 18-scf00286 | 18 |
| AX-158131864 | 13 | 24.554 | KV453128.1 | 2502329 | 18-scf00286 | 18 |
| AX-158131865 | 13 | 24.554 | KV453128.1 | 2503743 | 18-scf00286 | 18 |
| AX-158131866 | 13 | 24.554 | KV453128.1 | 2505702 | 18-scf00286 | 18 |
| AX-158131867 | 13 | 24.554 | KV453128.1 | 2506294 | 18-scf00286 | 18 |
| AX-158131868 | 13 | 24.554 | KV453128.1 | 2506700 | 18-scf00286 | 18 |
| AX-158131869 | 13 | 24.554 | KV453128.1 | 2506926 | 18-scf00286 | 18 |
| AX-158131871 | 13 | 24.554 | KV453128.1 | 2508158 | 18-scf00286 | 18 |
| AX-157877987 | 13 | 24.554 | KV453128.1 | 2636969 | 18-scf00286 | 18 |
| AX-158131873 | 13 | 24.608 | KV453128.1 | 2511607 | 18-scf00286 | 18 |
| AX-157830237 | 13 | 24.63  | KV453128.1 | 2514339 | 18-scf00286 | 18 |
| AX-158131961 | 13 | 24.63  | KV453128.1 | 2676107 | 18-scf00286 | 18 |
| AX-157871396 | 13 | 24.63  | KV453128.1 | 2680250 | 18-scf00286 | 18 |
| AX-158131987 | 13 | 24.63  | KV453128.1 | 2714490 | 18-scf00286 | 18 |
| AX-158131996 | 13 | 24.63  | KV453128.1 | 2723413 | 18-scf00286 | 18 |
| AX-158132013 | 13 | 24.63  | KV453128.1 | 2754126 | 18-scf00286 | 18 |
| AX-158131783 | 13 | 24.664 | KV453128.1 | 2393311 | 18-scf00286 | 18 |
| AX-158131822 | 13 | 24.664 | KV453128.1 | 2445917 | 18-scf00286 | 18 |
| AX-158131843 | 13 | 24.664 | KV453128.1 | 2471115 | 18-scf00286 | 18 |
| AX-158131846 | 13 | 24.664 | KV453128.1 | 2477052 | 18-scf00286 | 18 |
| AX-157722580 | 13 | 24.664 | KV453128.1 | 2491613 | 18-scf00286 | 18 |
| AX-158131872 | 13 | 24.664 | KV453128.1 | 2511229 | 18-scf00286 | 18 |
| AX-158131876 | 13 | 24.664 | KV453128.1 | 2513922 | 18-scf00286 | 18 |
| AX-157721564 | 13 | 24.664 | KV453128.1 | 2518082 | 18-scf00286 | 18 |
| AX-158385270 | 13 | 24.664 | KV453128.1 | 2521708 | 18-scf00286 | 18 |
| AX-158131879 | 13 | 24.664 | KV453128.1 | 2523296 | 18-scf00286 | 18 |

|              |    |        |            |         |             |    |
|--------------|----|--------|------------|---------|-------------|----|
| AX-158131880 | 13 | 24.664 | KV453128.1 | 2523669 | 18-scf00286 | 18 |
| AX-158131883 | 13 | 24.664 | KV453128.1 | 2526718 | 18-scf00286 | 18 |
| AX-158131887 | 13 | 24.664 | KV453128.1 | 2533636 | 18-scf00286 | 18 |
| AX-158131889 | 13 | 24.664 | KV453128.1 | 2536681 | 18-scf00286 | 18 |
| AX-158131891 | 13 | 24.664 | KV453128.1 | 2539404 | 18-scf00286 | 18 |
| AX-157695422 | 13 | 24.664 | KV453128.1 | 2542369 | 18-scf00286 | 18 |
| AX-158131892 | 13 | 24.664 | KV453128.1 | 2545190 | 18-scf00286 | 18 |
| AX-158131894 | 13 | 24.664 | KV453128.1 | 2546737 | 18-scf00286 | 18 |
| AX-158131895 | 13 | 24.664 | KV453128.1 | 2547277 | 18-scf00286 | 18 |
| AX-158131896 | 13 | 24.664 | KV453128.1 | 2548372 | 18-scf00286 | 18 |
| AX-158131900 | 13 | 24.664 | KV453128.1 | 2552621 | 18-scf00286 | 18 |
| AX-158131901 | 13 | 24.664 | KV453128.1 | 2552976 | 18-scf00286 | 18 |
| AX-158131904 | 13 | 24.664 | KV453128.1 | 2557718 | 18-scf00286 | 18 |
| AX-158380246 | 13 | 24.664 | KV453128.1 | 2558537 | 18-scf00286 | 18 |
| AX-158385272 | 13 | 24.664 | KV453128.1 | 2561453 | 18-scf00286 | 18 |
| AX-158131906 | 13 | 24.664 | KV453128.1 | 2562519 | 18-scf00286 | 18 |
| AX-157886236 | 13 | 24.664 | KV453128.1 | 2570808 | 18-scf00286 | 18 |
| AX-158131910 | 13 | 24.664 | KV453128.1 | 2570903 | 18-scf00286 | 18 |
| AX-158131913 | 13 | 24.664 | KV453128.1 | 2574756 | 18-scf00286 | 18 |
| AX-157830240 | 13 | 24.664 | KV453128.1 | 2575022 | 18-scf00286 | 18 |
| AX-158131914 | 13 | 24.664 | KV453128.1 | 2576474 | 18-scf00286 | 18 |
| AX-158131916 | 13 | 24.664 | KV453128.1 | 2578979 | 18-scf00286 | 18 |
| AX-157857847 | 13 | 24.664 | KV453128.1 | 2579303 | 18-scf00286 | 18 |
| AX-158131918 | 13 | 24.664 | KV453128.1 | 2586553 | 18-scf00286 | 18 |
| AX-158131919 | 13 | 24.664 | KV453128.1 | 2587122 | 18-scf00286 | 18 |
| AX-158131920 | 13 | 24.664 | KV453128.1 | 2587638 | 18-scf00286 | 18 |
| AX-158131923 | 13 | 24.664 | KV453128.1 | 2591551 | 18-scf00286 | 18 |
| AX-158131924 | 13 | 24.664 | KV453128.1 | 2593019 | 18-scf00286 | 18 |
| AX-158131937 | 13 | 24.664 | KV453128.1 | 2616629 | 18-scf00286 | 18 |
| AX-158131967 | 13 | 24.664 | KV453128.1 | 2686600 | 18-scf00286 | 18 |
| AX-158131995 | 13 | 24.664 | KV453128.1 | 2721026 | 18-scf00286 | 18 |
| AX-158131921 | 13 | 24.68  | KV453128.1 | 2590355 | 18-scf00286 | 18 |
| AX-158131977 | 13 | 24.68  | KV453128.1 | 2703099 | 18-scf00286 | 18 |
| AX-157857848 | 13 | 24.697 | KV453128.1 | 2591272 | 18-scf00286 | 18 |
| AX-158131917 | 13 | 24.713 | KV453128.1 | 2586392 | 18-scf00286 | 18 |
| AX-158131925 | 13 | 24.713 | KV453128.1 | 2596184 | 18-scf00286 | 18 |
| AX-158131934 | 13 | 24.713 | KV453128.1 | 2612812 | 18-scf00286 | 18 |
| AX-158131936 | 13 | 24.713 | KV453128.1 | 2614470 | 18-scf00286 | 18 |
| AX-158131938 | 13 | 24.713 | KV453128.1 | 2618354 | 18-scf00286 | 18 |
| AX-158131928 | 13 | 24.735 | KV453128.1 | 2605959 | 18-scf00286 | 18 |
| AX-158131931 | 13 | 24.773 | KV453128.1 | 2609747 | 18-scf00286 | 18 |
| AX-158131932 | 13 | 24.773 | KV453128.1 | 2610423 | 18-scf00286 | 18 |
| AX-158131935 | 13 | 24.813 | KV453128.1 | 2612953 | 18-scf00286 | 18 |
| AX-158131940 | 13 | 24.851 | KV453128.1 | 2622372 | 18-scf00286 | 18 |
| AX-158131859 | 13 | 24.882 | KV453128.1 | 2495052 | 18-scf00286 | 18 |
| AX-157710294 | 13 | 24.882 | KV453128.1 | 2504028 | 18-scf00286 | 18 |
| AX-158131884 | 13 | 24.882 | KV453128.1 | 2529533 | 18-scf00286 | 18 |
| AX-158131942 | 13 | 24.882 | KV453128.1 | 2624843 | 18-scf00286 | 18 |
| AX-158131945 | 13 | 24.882 | KV453128.1 | 2628430 | 18-scf00286 | 18 |
| AX-158131980 | 13 | 24.882 | KV453128.1 | 2707016 | 18-scf00286 | 18 |
| AX-158131991 | 13 | 24.882 | KV453128.1 | 2716842 | 18-scf00286 | 18 |

|              |    |        |            |         |             |    |
|--------------|----|--------|------------|---------|-------------|----|
| AX-158131957 | 13 | 25.128 | KV453128.1 | 2664325 | 18-scf00286 | 18 |
| AX-158131959 | 13 | 25.374 | KV453128.1 | 2669335 | 18-scf00286 | 18 |
| AX-157736030 | 13 | 25.374 | KV453128.1 | 2670146 | 18-scf00286 | 18 |
| AX-158131960 | 13 | 25.374 | KV453128.1 | 2674731 | 18-scf00286 | 18 |
| AX-157729697 | 13 | 25.374 | KV453128.1 | 2677422 | 18-scf00286 | 18 |
| AX-158131963 | 13 | 25.374 | KV453128.1 | 2678477 | 18-scf00286 | 18 |
| AX-158131964 | 13 | 25.374 | KV453128.1 | 2682179 | 18-scf00286 | 18 |
| AX-157830241 | 13 | 25.374 | KV453128.1 | 2686263 | 18-scf00286 | 18 |
| AX-158132032 | 13 | 25.374 | KV453128.1 | 2772937 | 18-scf00286 | 18 |
| AX-158131968 | 13 | 25.435 | KV453128.1 | 2689499 | 18-scf00286 | 18 |
| AX-157857849 | 13 | 25.493 | KV453128.1 | 2615099 | 18-scf00286 | 18 |
| AX-157750689 | 13 | 25.493 | KV453128.1 | 2679840 | 18-scf00286 | 18 |
| AX-158131969 | 13 | 25.493 | KV453128.1 | 2690583 | 18-scf00286 | 18 |
| AX-158131970 | 13 | 25.493 | KV453128.1 | 2691367 | 18-scf00286 | 18 |
| AX-158131974 | 13 | 25.493 | KV453128.1 | 2694014 | 18-scf00286 | 18 |
| AX-158132005 | 13 | 25.493 | KV453128.1 | 2739957 | 18-scf00286 | 18 |
| AX-158131973 | 13 | 25.538 | KV453128.1 | 2692575 | 18-scf00286 | 18 |
| AX-157830242 | 13 | 25.538 | KV453128.1 | 2692804 | 18-scf00286 | 18 |
| AX-157718933 | 13 | 25.538 | KV453128.1 | 2696797 | 18-scf00286 | 18 |
| AX-158131976 | 13 | 25.538 | KV453128.1 | 2700368 | 18-scf00286 | 18 |
| AX-158131908 | 13 | 25.756 | KV453128.1 | 2565062 | 18-scf00286 | 18 |
| AX-157773693 | 13 | 25.756 | KV453128.1 | 2686377 | 18-scf00286 | 18 |
| AX-158131978 | 13 | 25.756 | KV453128.1 | 2705119 | 18-scf00286 | 18 |
| AX-157708908 | 13 | 25.756 | KV453128.1 | 2708987 | 18-scf00286 | 18 |
| AX-157708909 | 13 | 25.756 | KV453128.1 | 2709036 | 18-scf00286 | 18 |
| AX-158131982 | 13 | 25.756 | KV453128.1 | 2709204 | 18-scf00286 | 18 |
| AX-158131983 | 13 | 25.756 | KV453128.1 | 2710282 | 18-scf00286 | 18 |
| AX-158131985 | 13 | 25.756 | KV453128.1 | 2712027 | 18-scf00286 | 18 |
| AX-158131986 | 13 | 25.756 | KV453128.1 | 2712931 | 18-scf00286 | 18 |
| AX-158131988 | 13 | 25.756 | KV453128.1 | 2714943 | 18-scf00286 | 18 |
| AX-158131989 | 13 | 25.756 | KV453128.1 | 2715614 | 18-scf00286 | 18 |
| AX-158131990 | 13 | 25.756 | KV453128.1 | 2716051 | 18-scf00286 | 18 |
| AX-158131994 | 13 | 25.756 | KV453128.1 | 2719483 | 18-scf00286 | 18 |
| AX-157830244 | 13 | 25.756 | KV453128.1 | 2720581 | 18-scf00286 | 18 |
| AX-158131997 | 13 | 25.756 | KV453128.1 | 2725413 | 18-scf00286 | 18 |
| AX-158131998 | 13 | 25.756 | KV453128.1 | 2727735 | 18-scf00286 | 18 |
| AX-157830245 | 13 | 25.756 | KV453128.1 | 2728024 | 18-scf00286 | 18 |
| AX-158131999 | 13 | 25.756 | KV453128.1 | 2728679 | 18-scf00286 | 18 |
| AX-157830246 | 13 | 25.756 | KV453128.1 | 2730635 | 18-scf00286 | 18 |
| AX-157741904 | 13 | 25.756 | KV453128.1 | 2733712 | 18-scf00286 | 18 |
| AX-158132002 | 13 | 25.756 | KV453128.1 | 2733930 | 18-scf00286 | 18 |
| AX-157830247 | 13 | 25.756 | KV453128.1 | 2735232 | 18-scf00286 | 18 |
| AX-158132003 | 13 | 25.756 | KV453128.1 | 2736580 | 18-scf00286 | 18 |
| AX-158132006 | 13 | 25.756 | KV453128.1 | 2740855 | 18-scf00286 | 18 |
| AX-158132007 | 13 | 25.756 | KV453128.1 | 2742142 | 18-scf00286 | 18 |
| AX-158132009 | 13 | 25.756 | KV453128.1 | 2744652 | 18-scf00286 | 18 |
| AX-158132010 | 13 | 25.756 | KV453128.1 | 2746871 | 18-scf00286 | 18 |
| AX-157830248 | 13 | 25.756 | KV453128.1 | 2746916 | 18-scf00286 | 18 |
| AX-158132011 | 13 | 25.756 | KV453128.1 | 2747685 | 18-scf00286 | 18 |
| AX-157773933 | 13 | 25.756 | KV453128.1 | 2748381 | 18-scf00286 | 18 |
| AX-158380248 | 13 | 25.756 | KV453128.1 | 2749591 | 18-scf00286 | 18 |

|              |    |        |            |         |             |    |
|--------------|----|--------|------------|---------|-------------|----|
| AX-158132012 | 13 | 25.756 | KV453128.1 | 2753049 | 18-scf00286 | 18 |
| AX-158132014 | 13 | 25.756 | KV453128.1 | 2755385 | 18-scf00286 | 18 |
| AX-158132015 | 13 | 25.756 | KV453128.1 | 2755796 | 18-scf00286 | 18 |
| AX-158132016 | 13 | 25.756 | KV453128.1 | 2756664 | 18-scf00286 | 18 |
| AX-158132017 | 13 | 25.756 | KV453128.1 | 2757388 | 18-scf00286 | 18 |
| AX-158132018 | 13 | 25.756 | KV453128.1 | 2758095 | 18-scf00286 | 18 |
| AX-157830249 | 13 | 25.756 | KV453128.1 | 2759440 | 18-scf00286 | 18 |
| AX-158132020 | 13 | 25.756 | KV453128.1 | 2761411 | 18-scf00286 | 18 |
| AX-158132022 | 13 | 25.756 | KV453128.1 | 2762012 | 18-scf00286 | 18 |
| AX-158132025 | 13 | 25.756 | KV453128.1 | 2764245 | 18-scf00286 | 18 |
| AX-158132026 | 13 | 25.756 | KV453128.1 | 2764826 | 18-scf00286 | 18 |
| AX-158132027 | 13 | 25.756 | KV453128.1 | 2765434 | 18-scf00286 | 18 |
| AX-158132028 | 13 | 25.756 | KV453128.1 | 2765848 | 18-scf00286 | 18 |
| AX-158132029 | 13 | 25.756 | KV453128.1 | 2767456 | 18-scf00286 | 18 |
| AX-158132033 | 13 | 25.974 | KV453128.1 | 2774320 | 18-scf00286 | 18 |
| AX-158132034 | 13 | 25.974 | KV453128.1 | 2775792 | 18-scf00286 | 18 |
| AX-158132036 | 13 | 25.974 | KV453128.1 | 2777037 | 18-scf00286 | 18 |
| AX-157830250 | 13 | 25.974 | KV453128.1 | 2777869 | 18-scf00286 | 18 |
| AX-158132037 | 13 | 25.974 | KV453128.1 | 2779362 | 18-scf00286 | 18 |
| AX-157830251 | 13 | 25.974 | KV453128.1 | 2781101 | 18-scf00286 | 18 |
| AX-157739575 | 13 | 25.975 | KV453128.1 | 2782047 | 18-scf00286 | 18 |
| AX-157747139 | 13 | 26.302 | KV453128.1 | 2767009 | 18-scf00286 | 18 |
| AX-158132040 | 13 | 26.302 | KV453128.1 | 2784908 | 18-scf00286 | 18 |
| AX-158132041 | 13 | 26.302 | KV453128.1 | 2785557 | 18-scf00286 | 18 |
| AX-158132043 | 13 | 26.302 | KV453128.1 | 2787137 | 18-scf00286 | 18 |
| AX-158132044 | 13 | 26.302 | KV453128.1 | 2787548 | 18-scf00286 | 18 |
| AX-158132047 | 13 | 26.302 | KV453128.1 | 2791575 | 18-scf00286 | 18 |
| AX-158132048 | 13 | 26.302 | KV453128.1 | 2792290 | 18-scf00286 | 18 |
| AX-158132050 | 13 | 26.302 | KV453128.1 | 2794732 | 18-scf00286 | 18 |
| AX-157830253 | 13 | 26.302 | KV453128.1 | 2794993 | 18-scf00286 | 18 |
| AX-158132052 | 13 | 26.302 | KV453128.1 | 2796073 | 18-scf00286 | 18 |
| AX-158132054 | 13 | 26.302 | KV453128.1 | 2799798 | 18-scf00286 | 18 |
| AX-157772599 | 13 | 26.302 | KV453128.1 | 2803739 | 18-scf00286 | 18 |
| AX-158132056 | 13 | 26.302 | KV453128.1 | 2804395 | 18-scf00286 | 18 |
| AX-158132059 | 13 | 26.302 | KV453128.1 | 2807322 | 18-scf00286 | 18 |
| AX-157723575 | 13 | 26.302 | KV453128.1 | 2808722 | 18-scf00286 | 18 |
| AX-158132068 | 13 | 26.302 | KV453128.1 | 2884255 | 18-scf00286 | 18 |
| AX-158132069 | 13 | 26.302 | KV453128.1 | 2888120 | 18-scf00286 | 18 |
| AX-157830255 | 13 | 26.302 | KV453128.1 | 2889181 | 18-scf00286 | 18 |
| AX-158132046 | 13 | 26.492 | KV453128.1 | 2790451 | 18-scf00286 | 18 |
| AX-158132055 | 13 | 26.492 | KV453128.1 | 2803080 | 18-scf00286 | 18 |
| AX-158132071 | 13 | 26.492 | KV453128.1 | 2890072 | 18-scf00286 | 18 |
| AX-158385277 | 13 | 26.492 | KV453128.1 | 2890888 | 18-scf00286 | 18 |
| AX-158132073 | 13 | 26.492 | KV453128.1 | 2892655 | 18-scf00286 | 18 |
| AX-157830256 | 13 | 26.492 | KV453128.1 | 2893805 | 18-scf00286 | 18 |
| AX-158132075 | 13 | 26.492 | KV453128.1 | 2896430 | 18-scf00286 | 18 |
| AX-158132077 | 13 | 26.492 | KV453128.1 | 2897977 | 18-scf00286 | 18 |
| AX-157877991 | 13 | 26.492 | KV453128.1 | 2901747 | 18-scf00286 | 18 |
| AX-158132078 | 13 | 26.492 | KV453128.1 | 2903038 | 18-scf00286 | 18 |
| AX-158132079 | 13 | 26.492 | KV453128.1 | 2903802 | 18-scf00286 | 18 |
| AX-158132080 | 13 | 26.492 | KV453128.1 | 2904375 | 18-scf00286 | 18 |

|              |    |        |            |         |             |    |
|--------------|----|--------|------------|---------|-------------|----|
| AX-158132081 | 13 | 26.492 | KV453128.1 | 2905276 | 18-scf00286 | 18 |
| AX-157744727 | 13 | 26.492 | KV453128.1 | 2905998 | 18-scf00286 | 18 |
| AX-158132083 | 13 | 26.492 | KV453128.1 | 2907646 | 18-scf00286 | 18 |
| AX-157830259 | 13 | 26.492 | KV453128.1 | 2916471 | 18-scf00286 | 18 |
| AX-157711362 | 13 | 26.492 | KV453128.1 | 2927250 | 18-scf00286 | 18 |
| AX-158132084 | 13 | 26.558 | KV453128.1 | 2909075 | 18-scf00286 | 18 |
| AX-158132090 | 13 | 26.813 | KV453128.1 | 2914187 | 18-scf00286 | 18 |
| AX-158132094 | 13 | 26.902 | KV453128.1 | 2918027 | 18-scf00286 | 18 |
| AX-158132096 | 13 | 27.068 | KV453128.1 | 2920206 | 18-scf00286 | 18 |
| AX-157830260 | 13 | 27.068 | KV453128.1 | 2922960 | 18-scf00286 | 18 |
| AX-158132097 | 13 | 27.068 | KV453128.1 | 2923201 | 18-scf00286 | 18 |
| AX-157830261 | 13 | 27.068 | KV453128.1 | 2925418 | 18-scf00286 | 18 |
| AX-157830262 | 13 | 27.114 | KV453128.1 | 2929135 | 18-scf00286 | 18 |
| AX-158132102 | 13 | 27.177 | KV453128.1 | 2929721 | 18-scf00286 | 18 |
| AX-157770833 | 13 | 27.177 | KV453128.1 | 2930557 | 18-scf00286 | 18 |
| AX-157830263 | 13 | 27.177 | KV453128.1 | 2931148 | 18-scf00286 | 18 |
| AX-157713345 | 13 | 27.177 | KV453128.1 | 2931990 | 18-scf00286 | 18 |
| AX-157830264 | 13 | 27.177 | KV453128.1 | 2932714 | 18-scf00286 | 18 |
| AX-158132103 | 13 | 27.177 | KV453128.1 | 2935250 | 18-scf00286 | 18 |
| AX-158132105 | 13 | 27.177 | KV453128.1 | 2936170 | 18-scf00286 | 18 |
| AX-158132106 | 13 | 27.177 | KV453128.1 | 2937009 | 18-scf00286 | 18 |
| AX-158132107 | 13 | 27.177 | KV453128.1 | 2937968 | 18-scf00286 | 18 |
| AX-157724481 | 13 | 27.177 | KV453128.1 | 2939892 | 18-scf00286 | 18 |
| AX-158132110 | 13 | 27.177 | KV453128.1 | 2942908 | 18-scf00286 | 18 |
| AX-157739914 | 13 | 27.177 | KV453128.1 | 2944851 | 18-scf00286 | 18 |
| AX-157830266 | 13 | 27.177 | KV453128.1 | 2945865 | 18-scf00286 | 18 |
| AX-158132112 | 13 | 27.177 | KV453128.1 | 2945926 | 18-scf00286 | 18 |
| AX-157830267 | 13 | 27.177 | KV453128.1 | 2945978 | 18-scf00286 | 18 |
| AX-158132113 | 13 | 27.177 | KV453128.1 | 2946496 | 18-scf00286 | 18 |
| AX-158132114 | 13 | 27.177 | KV453128.1 | 2949230 | 18-scf00286 | 18 |
| AX-157716260 | 13 | 27.177 | KV453128.1 | 2950965 | 18-scf00286 | 18 |
| AX-158132122 | 13 | 27.177 | KV453128.1 | 2958650 | 18-scf00286 | 18 |
| AX-158132115 | 13 | 27.286 | KV453128.1 | 2952849 | 18-scf00286 | 18 |
| AX-158132116 | 13 | 27.286 | KV453128.1 | 2954173 | 18-scf00286 | 18 |
| AX-158132117 | 13 | 27.286 | KV453128.1 | 2954803 | 18-scf00286 | 18 |
| AX-158132119 | 13 | 27.286 | KV453128.1 | 2956152 | 18-scf00286 | 18 |
| AX-157772177 | 13 | 27.286 | KV453128.1 | 2957019 | 18-scf00286 | 18 |
| AX-158132121 | 13 | 27.543 | KV453128.1 | 2957982 | 18-scf00286 | 18 |
| AX-157830269 | 13 | 27.551 | KV453128.1 | 2959844 | 18-scf00286 | 18 |
| AX-158132128 | 13 | 28.05  | KV453128.1 | 2971586 | 18-scf00286 | 18 |
| AX-158411584 | 13 | 28.05  | KV453128.1 | 2981475 | 18-scf00286 | 18 |
| AX-157830272 | 13 | 28.052 | KV453128.1 | 2978497 | 18-scf00286 | 18 |
| AX-157743831 | 13 | 28.052 | KV453128.1 | 2979164 | 18-scf00286 | 18 |
| AX-158132132 | 13 | 28.052 | KV453128.1 | 2982855 | 18-scf00286 | 18 |
| AX-157830274 | 13 | 28.078 | KV453128.1 | 2985296 | 18-scf00286 | 18 |
| AX-158132135 | 13 | 28.088 | KV453128.1 | 2988677 | 18-scf00286 | 18 |
| AX-158132144 | 13 | 28.088 | KV453128.1 | 3000854 | 18-scf00286 | 18 |
| AX-158380250 | 13 | 28.088 | KV453128.1 | 3005155 | 18-scf00286 | 18 |
| AX-158132136 | 13 | 28.113 | KV453128.1 | 2990465 | 18-scf00286 | 18 |
| AX-158132138 | 13 | 28.135 | KV453128.1 | 2991553 | 18-scf00286 | 18 |
| AX-158132133 | 13 | 28.161 | KV453128.1 | 2986363 | 18-scf00286 | 18 |

|              |    |        |            |         |             |    |
|--------------|----|--------|------------|---------|-------------|----|
| AX-158132139 | 13 | 28.161 | KV453128.1 | 2992046 | 18-scf00286 | 18 |
| AX-157830275 | 13 | 28.161 | KV453128.1 | 2995099 | 18-scf00286 | 18 |
| AX-157772805 | 13 | 28.212 | KV453128.1 | 2974844 | 18-scf00286 | 18 |
| AX-158132142 | 13 | 28.212 | KV453128.1 | 2996018 | 18-scf00286 | 18 |
| AX-157714062 | 13 | 28.212 | KV453128.1 | 3001654 | 18-scf00286 | 18 |
| AX-158132130 | 13 | 28.27  | KV453128.1 | 2975724 | 18-scf00286 | 18 |
| AX-157714956 | 13 | 28.27  | KV453128.1 | 2977871 | 18-scf00286 | 18 |
| AX-158132131 | 13 | 28.27  | KV453128.1 | 2979602 | 18-scf00286 | 18 |
| AX-158132134 | 13 | 28.27  | KV453128.1 | 2986829 | 18-scf00286 | 18 |
| AX-158132141 | 13 | 28.27  | KV453128.1 | 2994413 | 18-scf00286 | 18 |
| AX-157742037 | 13 | 28.27  | KV453128.1 | 2998630 | 18-scf00286 | 18 |
| AX-157830276 | 13 | 28.27  | KV453128.1 | 3001531 | 18-scf00286 | 18 |
| AX-158132147 | 13 | 28.27  | KV453128.1 | 3006645 | 18-scf00286 | 18 |
| AX-158132149 | 13 | 28.27  | KV453128.1 | 3014202 | 18-scf00286 | 18 |
| AX-158132151 | 13 | 28.27  | KV453128.1 | 3015898 | 18-scf00286 | 18 |
| AX-158132152 | 13 | 28.27  | KV453128.1 | 3019269 | 18-scf00286 | 18 |
| AX-157722827 | 13 | 28.27  | KV453128.1 | 3019318 | 18-scf00286 | 18 |
| AX-157772802 | 13 | 28.27  | KV453128.1 | 3019713 | 18-scf00286 | 18 |
| AX-158132153 | 13 | 28.27  | KV453128.1 | 3019790 | 18-scf00286 | 18 |
| AX-158132154 | 13 | 28.27  | KV453128.1 | 3023255 | 18-scf00286 | 18 |
| AX-157830279 | 13 | 28.27  | KV453128.1 | 3027442 | 18-scf00286 | 18 |
| AX-158132156 | 13 | 28.27  | KV453128.1 | 3028148 | 18-scf00286 | 18 |
| AX-158132157 | 13 | 28.27  | KV453128.1 | 3028582 | 18-scf00286 | 18 |
| AX-157746489 | 13 | 28.27  | KV453128.1 | 3032231 | 18-scf00286 | 18 |
| AX-157727922 | 13 | 28.38  | KV453128.1 | 3035167 | 18-scf00286 | 18 |
| AX-158132159 | 13 | 28.38  | KV453128.1 | 3036217 | 18-scf00286 | 18 |
| AX-157727730 | 13 | 28.38  | KV453128.1 | 3037232 | 18-scf00286 | 18 |
| AX-158132160 | 13 | 28.38  | KV453128.1 | 3038536 | 18-scf00286 | 18 |
| AX-158132163 | 13 | 28.38  | KV453128.1 | 3044489 | 18-scf00286 | 18 |
| AX-158132161 | 13 | 28.543 | KV453128.1 | 3039250 | 18-scf00286 | 18 |
| AX-157830280 | 13 | 28.603 | KV453128.1 | 3035716 | 18-scf00286 | 18 |
| AX-157830282 | 13 | 28.603 | KV453128.1 | 3039589 | 18-scf00286 | 18 |
| AX-158132168 | 13 | 28.603 | KV453128.1 | 3049280 | 18-scf00286 | 18 |
| AX-157830283 | 13 | 28.707 | KV453128.1 | 3045293 | 18-scf00286 | 18 |
| AX-158132165 | 13 | 28.707 | KV453128.1 | 3046232 | 18-scf00286 | 18 |
| AX-157701912 | 13 | 28.707 | KV453128.1 | 3047816 | 18-scf00286 | 18 |
| AX-157718569 | 13 | 28.707 | KV453128.1 | 3048037 | 18-scf00286 | 18 |
| AX-158132171 | 13 | 28.707 | KV453128.1 | 3053027 | 18-scf00286 | 18 |
| AX-158132172 | 13 | 28.707 | KV453128.1 | 3055125 | 18-scf00286 | 18 |
| AX-158132180 | 13 | 28.707 | KV453128.1 | 3071819 | 18-scf00286 | 18 |
| AX-158132173 | 13 | 28.816 | KV453128.1 | 3058024 | 18-scf00286 | 18 |
| AX-158132174 | 13 | 28.816 | KV453128.1 | 3062670 | 18-scf00286 | 18 |
| AX-158132175 | 13 | 28.816 | KV453128.1 | 3063033 | 18-scf00286 | 18 |
| AX-157830284 | 13 | 28.816 | KV453128.1 | 3066295 | 18-scf00286 | 18 |
| AX-158132177 | 13 | 28.816 | KV453128.1 | 3068218 | 18-scf00286 | 18 |
| AX-158132178 | 13 | 28.816 | KV453128.1 | 3068568 | 18-scf00286 | 18 |
| AX-158132179 | 13 | 28.816 | KV453128.1 | 3069635 | 18-scf00286 | 18 |
| AX-157749165 | 13 | 28.816 | KV453128.1 | 3071305 | 18-scf00286 | 18 |
| AX-158132181 | 13 | 28.816 | KV453128.1 | 3073630 | 18-scf00286 | 18 |
| AX-158132182 | 13 | 28.816 | KV453128.1 | 3075197 | 18-scf00286 | 18 |
| AX-158411586 | 13 | 28.816 | KV453128.1 | 3077182 | 18-scf00286 | 18 |



|              |    |        |            |         |             |    |
|--------------|----|--------|------------|---------|-------------|----|
| AX-157746378 | 13 | 28.816 | KV453128.1 | 3080991 | 18-scf00286 | 18 |
| AX-158132185 | 13 | 28.816 | KV453128.1 | 3084616 | 18-scf00286 | 18 |
| AX-158132187 | 13 | 28.816 | KV453128.1 | 3088306 | 18-scf00286 | 18 |
| AX-158132188 | 13 | 28.816 | KV453128.1 | 3088772 | 18-scf00286 | 18 |
| AX-157698980 | 13 | 28.816 | KV453128.1 | 3102578 | 18-scf00286 | 18 |
| AX-158132191 | 13 | 28.817 | KV453128.1 | 3090804 | 18-scf00286 | 18 |
| AX-157830285 | 13 | 29.035 | KV453128.1 | 3084933 | 18-scf00286 | 18 |
| AX-158132189 | 13 | 29.035 | KV453128.1 | 3089600 | 18-scf00286 | 18 |
| AX-157721414 | 13 | 29.035 | KV453128.1 | 3092020 | 18-scf00286 | 18 |
| AX-158132193 | 13 | 29.035 | KV453128.1 | 3094529 | 18-scf00286 | 18 |
| AX-158392849 | 13 | 29.035 | KV453128.1 | 3094613 | 18-scf00286 | 18 |
| AX-158132195 | 13 | 29.035 | KV453128.1 | 3097280 | 18-scf00286 | 18 |
| AX-158132196 | 13 | 29.035 | KV453128.1 | 3097917 | 18-scf00286 | 18 |
| AX-158380251 | 13 | 29.035 | KV453128.1 | 3097990 | 18-scf00286 | 18 |
| AX-158132201 | 13 | 29.035 | KV453128.1 | 3106689 | 18-scf00286 | 18 |
| AX-158132203 | 13 | 29.049 | KV453128.1 | 3108061 | 18-scf00286 | 18 |
| AX-158132205 | 13 | 29.566 | KV453128.1 | 3110764 | 18-scf00286 | 18 |
| AX-158132207 | 13 | 29.581 | KV453128.1 | 3113454 | 18-scf00286 | 18 |
| AX-158132208 | 13 | 29.581 | KV453128.1 | 3114719 | 18-scf00286 | 18 |
| AX-158132209 | 13 | 29.581 | KV453128.1 | 3115267 | 18-scf00286 | 18 |
| AX-158132211 | 13 | 29.581 | KV453128.1 | 3117643 | 18-scf00286 | 18 |
| AX-158132212 | 13 | 29.581 | KV453128.1 | 3117851 | 18-scf00286 | 18 |
| AX-158132217 | 13 | 29.623 | KV453128.1 | 3123886 | 18-scf00286 | 18 |
| AX-158132219 | 13 | 29.656 | KV453128.1 | 3126829 | 18-scf00286 | 18 |
| AX-158411588 | 13 | 29.69  | KV453128.1 | 3127975 | 18-scf00286 | 18 |
| AX-158132220 | 13 | 29.736 | KV453128.1 | 3127824 | 18-scf00286 | 18 |
| AX-158132222 | 13 | 29.736 | KV453128.1 | 3129613 | 18-scf00286 | 18 |
| AX-157716235 | 13 | 29.8   | KV453128.1 | 3131062 | 18-scf00286 | 18 |
| AX-158132224 | 13 | 29.8   | KV453128.1 | 3133857 | 18-scf00286 | 18 |
| AX-157720518 | 13 | 29.8   | KV453128.1 | 3137487 | 18-scf00286 | 18 |
| AX-157877996 | 13 | 30.232 | KV453128.1 | 3138815 | 18-scf00286 | 18 |
| AX-158132229 | 13 | 30.237 | KV453128.1 | 3139092 | 18-scf00286 | 18 |
| AX-157716393 | 13 | 30.237 | KV453128.1 | 3141593 | 18-scf00286 | 18 |
| AX-158132233 | 13 | 30.237 | KV453128.1 | 3147722 | 18-scf00286 | 18 |
| AX-158132236 | 13 | 30.237 | KV453128.1 | 3151242 | 18-scf00286 | 18 |
| AX-158132238 | 13 | 30.237 | KV453128.1 | 3152484 | 18-scf00286 | 18 |
| AX-158132239 | 13 | 30.237 | KV453128.1 | 3152967 | 18-scf00286 | 18 |
| AX-158132240 | 13 | 30.237 | KV453128.1 | 3153776 | 18-scf00286 | 18 |
| AX-158132241 | 13 | 30.237 | KV453128.1 | 3154121 | 18-scf00286 | 18 |
| AX-158132242 | 13 | 30.237 | KV453128.1 | 3155106 | 18-scf00286 | 18 |
| AX-158132243 | 13 | 30.237 | KV453128.1 | 3155874 | 18-scf00286 | 18 |
| AX-158132247 | 13 | 30.237 | KV453128.1 | 3161539 | 18-scf00286 | 18 |
| AX-157754985 | 13 | 30.237 | KV453128.1 | 3162480 | 18-scf00286 | 18 |
| AX-158132328 | 13 | 30.237 | KV453128.1 | 3274847 | 18-scf00286 | 18 |
| AX-158132249 | 13 | 30.292 | KV453128.1 | 3164394 | 18-scf00286 | 18 |
| AX-158132250 | 13 | 30.346 | KV453128.1 | 3165247 | 18-scf00286 | 18 |
| AX-158132251 | 13 | 30.346 | KV453128.1 | 3165957 | 18-scf00286 | 18 |
| AX-158132252 | 13 | 30.346 | KV453128.1 | 3166159 | 18-scf00286 | 18 |
| AX-158132254 | 13 | 30.346 | KV453128.1 | 3169219 | 18-scf00286 | 18 |
| AX-158132255 | 13 | 30.346 | KV453128.1 | 3170213 | 18-scf00286 | 18 |
| AX-157830291 | 13 | 30.346 | KV453128.1 | 3174207 | 18-scf00286 | 18 |

|              |    |        |             |         |             |    |
|--------------|----|--------|-------------|---------|-------------|----|
| AX-157747206 | 13 | 30.346 | KV453128.1  | 3175142 | 18-scf00286 | 18 |
| AX-158132259 | 13 | 30.346 | KV453128.1  | 3176727 | 18-scf00286 | 18 |
| AX-157830292 | 13 | 30.406 | KV453128.1  | 3177488 | 18-scf00286 | 18 |
| AX-158132260 | 13 | 30.455 | KV453128.1  | 3178568 | 18-scf00286 | 18 |
| AX-157727196 | 13 | 30.455 | KV453128.1  | 3180747 | 18-scf00286 | 18 |
| AX-158132262 | 13 | 30.455 | KV453128.1  | 3182494 | 18-scf00286 | 18 |
| AX-157754219 | 13 | 30.455 | KV453128.1  | 3182664 | 18-scf00286 | 18 |
| AX-158132264 | 13 | 30.455 | KV453128.1  | 3183586 | 18-scf00286 | 18 |
| AX-157733436 | 13 | 30.782 | KV453128.1  | 3184740 | 18-scf00286 | 18 |
| AX-158132265 | 13 | 30.782 | KV453128.1  | 3187876 | 18-scf00286 | 18 |
| AX-157830294 | 13 | 30.782 | KV453128.1  | 3188894 | 18-scf00286 | 18 |
| AX-158132268 | 13 | 30.782 | KV453128.1  | 3189967 | 18-scf00286 | 18 |
| AX-157830295 | 13 | 30.782 | KV453128.1  | 3195361 | 18-scf00286 | 18 |
| AX-158132290 | 13 | 30.782 | KV453128.1  | 3230827 | 18-scf00286 | 18 |
| AX-158132267 | 13 | 30.892 | KV453128.1  | 3189643 | 18-scf00286 | 18 |
| AX-157830296 | 13 | 30.892 | KV453128.1  | 3196365 | 18-scf00286 | 18 |
| AX-157775610 | 13 | 30.892 | KV453128.1  | 3197288 | 18-scf00286 | 18 |
| AX-157857851 | 13 | 30.892 | KV453128.1  | 3197389 | 18-scf00286 | 18 |
| AX-158132271 | 13 | 30.892 | KV453128.1  | 3198265 | 18-scf00286 | 18 |
| AX-157830297 | 13 | 30.892 | KV453128.1  | 3198724 | 18-scf00286 | 18 |
| AX-158132272 | 13 | 30.892 | KV453128.1  | 3199382 | 18-scf00286 | 18 |
| AX-158132273 | 13 | 30.892 | KV453128.1  | 3202162 | 18-scf00286 | 18 |
| AX-157744983 | 13 | 30.892 | KV453128.1  | 3205187 | 18-scf00286 | 18 |
| AX-157716742 | 13 | 30.892 | KV453128.1  | 3206029 | 18-scf00286 | 18 |
| AX-157719610 | 13 | 30.892 | KV453128.1  | 3207501 | 18-scf00286 | 18 |
| AX-157830304 | 13 | 30.892 | KV453128.1  | 3232251 | 18-scf00286 | 18 |
| AX-157706259 | 13 | 30.892 | 3ML01031970 | 267     | scf07587_1  | UN |
| AX-158132276 | 13 | 30.913 | KV453128.1  | 3208785 | 18-scf00286 | 18 |
| AX-157871405 | 13 | 30.913 | KV453128.1  | 3246031 | 18-scf00286 | 18 |
| AX-158132278 | 13 | 30.959 | KV453128.1  | 3213786 | 18-scf00286 | 18 |
| AX-158132279 | 13 | 30.959 | KV453128.1  | 3214365 | 18-scf00286 | 18 |
| AX-158132124 | 13 | 31.001 | KV453128.1  | 2966299 | 18-scf00286 | 18 |
| AX-158132129 | 13 | 31.001 | KV453128.1  | 2972911 | 18-scf00286 | 18 |
| AX-157830273 | 13 | 31.001 | KV453128.1  | 2984836 | 18-scf00286 | 18 |
| AX-157772001 | 13 | 31.001 | KV453128.1  | 2988816 | 18-scf00286 | 18 |
| AX-158132143 | 13 | 31.001 | KV453128.1  | 2997295 | 18-scf00286 | 18 |
| AX-158132230 | 13 | 31.001 | KV453128.1  | 3141984 | 18-scf00286 | 18 |
| AX-157707922 | 13 | 31.001 | KV453128.1  | 3209537 | 18-scf00286 | 18 |
| AX-158132281 | 13 | 31.001 | KV453128.1  | 3216525 | 18-scf00286 | 18 |
| AX-158132282 | 13 | 31.001 | KV453128.1  | 3217636 | 18-scf00286 | 18 |
| AX-157830301 | 13 | 31.001 | KV453128.1  | 3219840 | 18-scf00286 | 18 |
| AX-157747410 | 13 | 31.001 | KV453128.1  | 3224776 | 18-scf00286 | 18 |
| AX-158132287 | 13 | 31.001 | KV453128.1  | 3226289 | 18-scf00286 | 18 |
| AX-158132288 | 13 | 31.001 | KV453128.1  | 3228294 | 18-scf00286 | 18 |
| AX-158380252 | 13 | 31.001 | KV453128.1  | 3228544 | 18-scf00286 | 18 |
| AX-158132289 | 13 | 31.001 | KV453128.1  | 3230572 | 18-scf00286 | 18 |
| AX-157747976 | 13 | 31.001 | KV453128.1  | 3231356 | 18-scf00286 | 18 |
| AX-158132291 | 13 | 31.001 | KV453128.1  | 3233334 | 18-scf00286 | 18 |
| AX-158132293 | 13 | 31.001 | KV453128.1  | 3235275 | 18-scf00286 | 18 |
| AX-158132294 | 13 | 31.001 | KV453128.1  | 3236319 | 18-scf00286 | 18 |
| AX-157830305 | 13 | 31.001 | KV453128.1  | 3237935 | 18-scf00286 | 18 |

|              |    |        |             |         |             |    |
|--------------|----|--------|-------------|---------|-------------|----|
| AX-158132305 | 13 | 31.001 | KV453128.1  | 3254148 | 18-scf00286 | 18 |
| AX-157772533 | 13 | 31.001 | KV453128.1  | 3264862 | 18-scf00286 | 18 |
| AX-157706260 | 13 | 31.001 | 3ML01031970 | 658     | scf07587_1  | UN |
| AX-158132295 | 13 | 31.118 | KV453128.1  | 3242000 | 18-scf00286 | 18 |
| AX-158132298 | 13 | 31.219 | KV453128.1  | 3244799 | 18-scf00286 | 18 |
| AX-158132300 | 13 | 31.219 | KV453128.1  | 3246869 | 18-scf00286 | 18 |
| AX-158132301 | 13 | 31.219 | KV453128.1  | 3249047 | 18-scf00286 | 18 |
| AX-158132302 | 13 | 31.219 | KV453128.1  | 3249420 | 18-scf00286 | 18 |
| AX-158132303 | 13 | 31.219 | KV453128.1  | 3251303 | 18-scf00286 | 18 |
| AX-158132311 | 13 | 31.219 | KV453128.1  | 3259708 | 18-scf00286 | 18 |
| AX-158132306 | 13 | 31.281 | KV453128.1  | 3255265 | 18-scf00286 | 18 |
| AX-158132307 | 13 | 31.328 | KV453128.1  | 3256275 | 18-scf00286 | 18 |
| AX-158132304 | 13 | 31.329 | KV453128.1  | 3253566 | 18-scf00286 | 18 |
| AX-158132308 | 13 | 31.329 | KV453128.1  | 3256910 | 18-scf00286 | 18 |
| AX-158132309 | 13 | 31.329 | KV453128.1  | 3257859 | 18-scf00286 | 18 |
| AX-158132310 | 13 | 31.547 | KV453128.1  | 3258670 | 18-scf00286 | 18 |
| AX-158132312 | 13 | 31.547 | KV453128.1  | 3261376 | 18-scf00286 | 18 |
| AX-158132313 | 13 | 31.547 | KV453128.1  | 3262445 | 18-scf00286 | 18 |
| AX-157830306 | 13 | 31.547 | KV453128.1  | 3263845 | 18-scf00286 | 18 |
| AX-158132314 | 13 | 31.547 | KV453128.1  | 3266023 | 18-scf00286 | 18 |
| AX-158132316 | 13 | 31.547 | KV453128.1  | 3267010 | 18-scf00286 | 18 |
| AX-158132317 | 13 | 31.547 | KV453128.1  | 3267703 | 18-scf00286 | 18 |
| AX-158132318 | 13 | 31.547 | KV453128.1  | 3267937 | 18-scf00286 | 18 |
| AX-158132320 | 13 | 31.547 | KV453128.1  | 3269265 | 18-scf00286 | 18 |
| AX-158132321 | 13 | 31.547 | KV453128.1  | 3269526 | 18-scf00286 | 18 |
| AX-158132322 | 13 | 32.078 | KV453128.1  | 3270923 | 18-scf00286 | 18 |
| AX-158408141 | 13 | 32.078 | KV453128.1  | 3288183 | 18-scf00286 | 18 |
| AX-158132344 | 13 | 32.078 | KV453128.1  | 3291114 | 18-scf00286 | 18 |
| AX-158132329 | 13 | 32.093 | KV453128.1  | 3275360 | 18-scf00286 | 18 |
| AX-158132330 | 13 | 32.093 | KV453128.1  | 3279892 | 18-scf00286 | 18 |
| AX-158132337 | 13 | 32.093 | KV453128.1  | 3286463 | 18-scf00286 | 18 |
| AX-158411591 | 13 | 32.093 | KV453128.1  | 3288147 | 18-scf00286 | 18 |
| AX-158132340 | 13 | 32.093 | KV453128.1  | 3289245 | 18-scf00286 | 18 |
| AX-158132342 | 13 | 32.093 | KV453128.1  | 3290015 | 18-scf00286 | 18 |
| AX-158132343 | 13 | 32.093 | KV453128.1  | 3290794 | 18-scf00286 | 18 |
| AX-158132346 | 13 | 32.093 | KV453128.1  | 3292762 | 18-scf00286 | 18 |
| AX-158132347 | 13 | 32.093 | KV453128.1  | 3293192 | 18-scf00286 | 18 |
| AX-157739561 | 13 | 32.17  | KV453128.1  | 3295009 | 18-scf00286 | 18 |
| AX-158132349 | 13 | 32.202 | KV453128.1  | 3295079 | 18-scf00286 | 18 |
| AX-157727776 | 13 | 32.202 | KV453128.1  | 3295720 | 18-scf00286 | 18 |
| AX-158132350 | 13 | 32.202 | KV453128.1  | 3295833 | 18-scf00286 | 18 |
| AX-158132355 | 13 | 32.317 | KV453128.1  | 3299731 | 18-scf00286 | 18 |
| AX-158132333 | 13 | 32.421 | KV453128.1  | 3283361 | 18-scf00286 | 18 |
| AX-158132341 | 13 | 32.421 | KV453128.1  | 3289642 | 18-scf00286 | 18 |
| AX-158132348 | 13 | 32.421 | KV453128.1  | 3294286 | 18-scf00286 | 18 |
| AX-158132351 | 13 | 32.421 | KV453128.1  | 3297690 | 18-scf00286 | 18 |
| AX-158132352 | 13 | 32.421 | KV453128.1  | 3298761 | 18-scf00286 | 18 |
| AX-158132353 | 13 | 32.421 | KV453128.1  | 3299282 | 18-scf00286 | 18 |
| AX-158132354 | 13 | 32.421 | KV453128.1  | 3299494 | 18-scf00286 | 18 |
| AX-158132357 | 13 | 32.421 | KV453128.1  | 3301707 | 18-scf00286 | 18 |
| AX-158132360 | 13 | 32.421 | KV453128.1  | 3302643 | 18-scf00286 | 18 |

|              |    |        |            |         |             |    |
|--------------|----|--------|------------|---------|-------------|----|
| AX-158132361 | 13 | 32.421 | KV453128.1 | 3304828 | 18-scf00286 | 18 |
| AX-158132362 | 13 | 32.421 | KV453128.1 | 3305757 | 18-scf00286 | 18 |
| AX-158132363 | 13 | 32.421 | KV453128.1 | 3306183 | 18-scf00286 | 18 |
| AX-158132365 | 13 | 32.421 | KV453128.1 | 3306840 | 18-scf00286 | 18 |
| AX-157756738 | 13 | 32.421 | KV453128.1 | 3307412 | 18-scf00286 | 18 |
| AX-158132367 | 13 | 32.421 | KV453128.1 | 3308922 | 18-scf00286 | 18 |
| AX-158132368 | 13 | 32.421 | KV453128.1 | 3312347 | 18-scf00286 | 18 |
| AX-158132369 | 13 | 32.421 | KV453128.1 | 3313221 | 18-scf00286 | 18 |
| AX-158132373 | 13 | 32.421 | KV453128.1 | 3316541 | 18-scf00286 | 18 |
| AX-157830308 | 13 | 32.421 | KV453128.1 | 3317032 | 18-scf00286 | 18 |
| AX-158132374 | 13 | 32.421 | KV453128.1 | 3318016 | 18-scf00286 | 18 |
| AX-158132376 | 13 | 32.421 | KV453128.1 | 3319571 | 18-scf00286 | 18 |
| AX-158132378 | 13 | 32.421 | KV453128.1 | 3320515 | 18-scf00286 | 18 |
| AX-157709994 | 13 | 32.421 | KV453128.1 | 3323243 | 18-scf00286 | 18 |
| AX-158132379 | 13 | 32.421 | KV453128.1 | 3324775 | 18-scf00286 | 18 |
| AX-158132380 | 13 | 32.421 | KV453128.1 | 3325158 | 18-scf00286 | 18 |
| AX-158132384 | 13 | 32.421 | KV453128.1 | 3328392 | 18-scf00286 | 18 |
| AX-158132385 | 13 | 32.421 | KV453128.1 | 3329646 | 18-scf00286 | 18 |
| AX-158132388 | 13 | 32.421 | KV453128.1 | 3333330 | 18-scf00286 | 18 |
| AX-158132390 | 13 | 32.421 | KV453128.1 | 3337823 | 18-scf00286 | 18 |
| AX-158132391 | 13 | 32.421 | KV453128.1 | 3338294 | 18-scf00286 | 18 |
| AX-157698011 | 13 | 32.421 | KV453128.1 | 3339270 | 18-scf00286 | 18 |
| AX-158132392 | 13 | 32.421 | KV453128.1 | 3341849 | 18-scf00286 | 18 |
| AX-158132393 | 13 | 32.421 | KV453128.1 | 3343058 | 18-scf00286 | 18 |
| AX-158132394 | 13 | 32.421 | KV453128.1 | 3344072 | 18-scf00286 | 18 |
| AX-158132397 | 13 | 32.421 | KV453128.1 | 3347768 | 18-scf00286 | 18 |
| AX-158132398 | 13 | 32.421 | KV453128.1 | 3348871 | 18-scf00286 | 18 |
| AX-158132399 | 13 | 32.421 | KV453128.1 | 3353172 | 18-scf00286 | 18 |
| AX-158132400 | 13 | 32.421 | KV453128.1 | 3354525 | 18-scf00286 | 18 |
| AX-158380253 | 13 | 32.421 | KV453128.1 | 3354656 | 18-scf00286 | 18 |
| AX-158132402 | 13 | 32.421 | KV453128.1 | 3360005 | 18-scf00286 | 18 |
| AX-158132403 | 13 | 32.421 | KV453128.1 | 3360586 | 18-scf00286 | 18 |
| AX-158132405 | 13 | 32.421 | KV453128.1 | 3361677 | 18-scf00286 | 18 |
| AX-158132406 | 13 | 32.421 | KV453128.1 | 3362232 | 18-scf00286 | 18 |
| AX-158132416 | 13 | 32.421 | KV453128.1 | 3377357 | 18-scf00286 | 18 |
| AX-158132417 | 13 | 32.421 | KV453128.1 | 3378544 | 18-scf00286 | 18 |
| AX-158132407 | 13 | 32.527 | KV453128.1 | 3364227 | 18-scf00286 | 18 |
| AX-158132410 | 13 | 32.639 | KV453128.1 | 3370079 | 18-scf00286 | 18 |
| AX-158132413 | 13 | 32.639 | KV453128.1 | 3375705 | 18-scf00286 | 18 |
| AX-158132414 | 13 | 32.639 | KV453128.1 | 3376183 | 18-scf00286 | 18 |
| AX-158132418 | 13 | 32.639 | KV453128.1 | 3379116 | 18-scf00286 | 18 |
| AX-158132420 | 13 | 32.639 | KV453128.1 | 3380751 | 18-scf00286 | 18 |
| AX-158132421 | 13 | 32.639 | KV453128.1 | 3381847 | 18-scf00286 | 18 |
| AX-158132423 | 13 | 32.639 | KV453128.1 | 3382478 | 18-scf00286 | 18 |
| AX-158132424 | 13 | 32.639 | KV453128.1 | 3383113 | 18-scf00286 | 18 |
| AX-158132438 | 13 | 32.639 | KV453128.1 | 3404479 | 18-scf00286 | 18 |
| AX-158132562 | 13 | 32.639 | KV453128.1 | 3536908 | 18-scf00286 | 18 |
| AX-158132425 | 13 | 32.694 | KV453128.1 | 3385174 | 18-scf00286 | 18 |
| AX-158132427 | 13 | 32.748 | KV453128.1 | 3388058 | 18-scf00286 | 18 |
| AX-158132429 | 13 | 32.748 | KV453128.1 | 3390659 | 18-scf00286 | 18 |
| AX-158132430 | 13 | 32.748 | KV453128.1 | 3391443 | 18-scf00286 | 18 |

|              |    |        |            |         |             |    |
|--------------|----|--------|------------|---------|-------------|----|
| AX-158132431 | 13 | 32.748 | KV453128.1 | 3392354 | 18-scf00286 | 18 |
| AX-158132432 | 13 | 32.748 | KV453128.1 | 3393828 | 18-scf00286 | 18 |
| AX-158132433 | 13 | 32.782 | KV453128.1 | 3396146 | 18-scf00286 | 18 |
| AX-158132415 | 13 | 32.82  | KV453128.1 | 3377133 | 18-scf00286 | 18 |
| AX-158132435 | 13 | 32.82  | KV453128.1 | 3398751 | 18-scf00286 | 18 |
| AX-158132437 | 13 | 32.858 | KV453128.1 | 3403881 | 18-scf00286 | 18 |
| AX-158132439 | 13 | 32.912 | KV453128.1 | 3405212 | 18-scf00286 | 18 |
| AX-158132442 | 13 | 32.967 | KV453128.1 | 3406710 | 18-scf00286 | 18 |
| AX-158132445 | 13 | 32.967 | KV453128.1 | 3409254 | 18-scf00286 | 18 |
| AX-158132449 | 13 | 32.967 | KV453128.1 | 3413980 | 18-scf00286 | 18 |
| AX-158132450 | 13 | 32.967 | KV453128.1 | 3414613 | 18-scf00286 | 18 |
| AX-158132440 | 13 | 33.071 | KV453128.1 | 3405662 | 18-scf00286 | 18 |
| AX-158132452 | 13 | 33.071 | KV453128.1 | 3417068 | 18-scf00286 | 18 |
| AX-158132470 | 13 | 33.071 | KV453128.1 | 3440132 | 18-scf00286 | 18 |
| AX-158132457 | 13 | 33.185 | KV453128.1 | 3422801 | 18-scf00286 | 18 |
| AX-158132458 | 13 | 33.185 | KV453128.1 | 3423193 | 18-scf00286 | 18 |
| AX-158132459 | 13 | 33.185 | KV453128.1 | 3424051 | 18-scf00286 | 18 |
| AX-158132460 | 13 | 33.185 | KV453128.1 | 3425917 | 18-scf00286 | 18 |
| AX-158132461 | 13 | 33.185 | KV453128.1 | 3427455 | 18-scf00286 | 18 |
| AX-158132462 | 13 | 33.185 | KV453128.1 | 3427661 | 18-scf00286 | 18 |
| AX-157830310 | 13 | 33.185 | KV453128.1 | 3428434 | 18-scf00286 | 18 |
| AX-158132463 | 13 | 33.202 | KV453128.1 | 3429113 | 18-scf00286 | 18 |
| AX-157830311 | 13 | 33.22  | KV453128.1 | 3429404 | 18-scf00286 | 18 |
| AX-158132465 | 13 | 33.235 | KV453128.1 | 3430694 | 18-scf00286 | 18 |
| AX-158132467 | 13 | 33.249 | KV453128.1 | 3433750 | 18-scf00286 | 18 |
| AX-157830317 | 13 | 33.249 | KV453128.1 | 3504743 | 18-scf00286 | 18 |
| AX-157749115 | 13 | 33.266 | KV453128.1 | 3436543 | 18-scf00286 | 18 |
| AX-158132469 | 13 | 33.295 | KV453128.1 | 3438669 | 18-scf00286 | 18 |
| AX-158132471 | 13 | 33.295 | KV453128.1 | 3440865 | 18-scf00286 | 18 |
| AX-158132472 | 13 | 33.35  | KV453128.1 | 3442960 | 18-scf00286 | 18 |
| AX-158385282 | 13 | 33.404 | KV453128.1 | 3445371 | 18-scf00286 | 18 |
| AX-158132473 | 13 | 33.404 | KV453128.1 | 3446063 | 18-scf00286 | 18 |
| AX-158132474 | 13 | 33.404 | KV453128.1 | 3446546 | 18-scf00286 | 18 |
| AX-158132484 | 13 | 33.404 | KV453128.1 | 3455858 | 18-scf00286 | 18 |
| AX-158132485 | 13 | 33.45  | KV453128.1 | 3456720 | 18-scf00286 | 18 |
| AX-158132500 | 13 | 33.45  | KV453128.1 | 3481515 | 18-scf00286 | 18 |
| AX-158132486 | 13 | 33.476 | KV453128.1 | 3459276 | 18-scf00286 | 18 |
| AX-158132475 | 13 | 33.498 | KV453128.1 | 3446914 | 18-scf00286 | 18 |
| AX-158132479 | 13 | 33.498 | KV453128.1 | 3452626 | 18-scf00286 | 18 |
| AX-157714313 | 13 | 33.498 | KV453128.1 | 3460777 | 18-scf00286 | 18 |
| AX-158132481 | 13 | 33.513 | KV453128.1 | 3454023 | 18-scf00286 | 18 |
| AX-158132488 | 13 | 33.513 | KV453128.1 | 3465736 | 18-scf00286 | 18 |
| AX-158132489 | 13 | 33.513 | KV453128.1 | 3466201 | 18-scf00286 | 18 |
| AX-158132490 | 13 | 33.513 | KV453128.1 | 3466464 | 18-scf00286 | 18 |
| AX-158132491 | 13 | 33.513 | KV453128.1 | 3467105 | 18-scf00286 | 18 |
| AX-158132492 | 13 | 33.513 | KV453128.1 | 3468112 | 18-scf00286 | 18 |
| AX-158132495 | 13 | 33.513 | KV453128.1 | 3472120 | 18-scf00286 | 18 |
| AX-158132497 | 13 | 33.513 | KV453128.1 | 3474651 | 18-scf00286 | 18 |
| AX-157721384 | 13 | 33.513 | KV453128.1 | 3477791 | 18-scf00286 | 18 |
| AX-158132508 | 13 | 33.95  | KV453128.1 | 3490506 | 18-scf00286 | 18 |
| AX-158132509 | 13 | 33.95  | KV453128.1 | 3491013 | 18-scf00286 | 18 |

|              |    |        |            |         |             |    |
|--------------|----|--------|------------|---------|-------------|----|
| AX-158132512 | 13 | 33.95  | KV453128.1 | 3493448 | 18-scf00286 | 18 |
| AX-158132517 | 13 | 33.95  | KV453128.1 | 3498852 | 18-scf00286 | 18 |
| AX-158132518 | 13 | 33.95  | KV453128.1 | 3499780 | 18-scf00286 | 18 |
| AX-158132519 | 13 | 33.95  | KV453128.1 | 3500192 | 18-scf00286 | 18 |
| AX-158132520 | 13 | 33.95  | KV453128.1 | 3501274 | 18-scf00286 | 18 |
| AX-158132521 | 13 | 33.95  | KV453128.1 | 3501697 | 18-scf00286 | 18 |
| AX-158132526 | 13 | 33.95  | KV453128.1 | 3504355 | 18-scf00286 | 18 |
| AX-158132527 | 13 | 33.95  | KV453128.1 | 3506373 | 18-scf00286 | 18 |
| AX-158132528 | 13 | 33.95  | KV453128.1 | 3506913 | 18-scf00286 | 18 |
| AX-158132530 | 13 | 33.95  | KV453128.1 | 3507949 | 18-scf00286 | 18 |
| AX-158132531 | 13 | 33.95  | KV453128.1 | 3508673 | 18-scf00286 | 18 |
| AX-158132532 | 13 | 33.95  | KV453128.1 | 3508956 | 18-scf00286 | 18 |
| AX-157830318 | 13 | 33.95  | KV453128.1 | 3509670 | 18-scf00286 | 18 |
| AX-158132533 | 13 | 33.95  | KV453128.1 | 3510318 | 18-scf00286 | 18 |
| AX-157726040 | 13 | 33.95  | KV453128.1 | 3511127 | 18-scf00286 | 18 |
| AX-158132534 | 13 | 33.95  | KV453128.1 | 3511858 | 18-scf00286 | 18 |
| AX-158132536 | 13 | 33.95  | KV453128.1 | 3514638 | 18-scf00286 | 18 |
| AX-158132538 | 13 | 33.95  | KV453128.1 | 3516098 | 18-scf00286 | 18 |
| AX-158132539 | 13 | 33.95  | KV453128.1 | 3516999 | 18-scf00286 | 18 |
| AX-158132540 | 13 | 33.95  | KV453128.1 | 3517301 | 18-scf00286 | 18 |
| AX-158132541 | 13 | 33.95  | KV453128.1 | 3517906 | 18-scf00286 | 18 |
| AX-158132542 | 13 | 33.95  | KV453128.1 | 3518393 | 18-scf00286 | 18 |
| AX-158132546 | 13 | 33.95  | KV453128.1 | 3522615 | 18-scf00286 | 18 |
| AX-158132547 | 13 | 33.95  | KV453128.1 | 3522841 | 18-scf00286 | 18 |
| AX-158132548 | 13 | 33.95  | KV453128.1 | 3524394 | 18-scf00286 | 18 |
| AX-158132551 | 13 | 33.95  | KV453128.1 | 3525887 | 18-scf00286 | 18 |
| AX-157724059 | 13 | 33.95  | KV453128.1 | 3527865 | 18-scf00286 | 18 |
| AX-158132554 | 13 | 33.95  | KV453128.1 | 3529574 | 18-scf00286 | 18 |
| AX-158132555 | 13 | 33.95  | KV453128.1 | 3530024 | 18-scf00286 | 18 |
| AX-158132556 | 13 | 33.95  | KV453128.1 | 3530688 | 18-scf00286 | 18 |
| AX-158132557 | 13 | 33.95  | KV453128.1 | 3531267 | 18-scf00286 | 18 |
| AX-158132558 | 13 | 33.95  | KV453128.1 | 3531561 | 18-scf00286 | 18 |
| AX-158132559 | 13 | 33.95  | KV453128.1 | 3532262 | 18-scf00286 | 18 |
| AX-158132560 | 13 | 33.95  | KV453128.1 | 3533195 | 18-scf00286 | 18 |
| AX-157771975 | 13 | 33.95  | KV453128.1 | 3534300 | 18-scf00286 | 18 |
| AX-158132583 | 13 | 33.95  | KV453128.1 | 3553964 | 18-scf00286 | 18 |
| AX-158132510 | 13 | 34.059 | KV453128.1 | 3491577 | 18-scf00286 | 18 |
| AX-158132535 | 13 | 34.059 | KV453128.1 | 3512093 | 18-scf00286 | 18 |
| AX-158132565 | 13 | 34.059 | KV453128.1 | 3538748 | 18-scf00286 | 18 |
| AX-158132566 | 13 | 34.059 | KV453128.1 | 3539305 | 18-scf00286 | 18 |
| AX-158132568 | 13 | 34.059 | KV453128.1 | 3541828 | 18-scf00286 | 18 |
| AX-158132570 | 13 | 34.059 | KV453128.1 | 3544403 | 18-scf00286 | 18 |
| AX-158132571 | 13 | 34.059 | KV453128.1 | 3545343 | 18-scf00286 | 18 |
| AX-158132580 | 13 | 34.059 | KV453128.1 | 3550960 | 18-scf00286 | 18 |
| AX-158132589 | 13 | 34.059 | KV453128.1 | 3562491 | 18-scf00286 | 18 |
| AX-158132591 | 13 | 34.059 | KV453128.1 | 3563667 | 18-scf00286 | 18 |
| AX-157830324 | 13 | 34.059 | KV453128.1 | 3566750 | 18-scf00286 | 18 |
| AX-158132503 | 13 | 34.168 | KV453128.1 | 3484485 | 18-scf00286 | 18 |
| AX-158132529 | 13 | 34.168 | KV453128.1 | 3507295 | 18-scf00286 | 18 |
| AX-158132573 | 13 | 34.168 | KV453128.1 | 3546621 | 18-scf00286 | 18 |
| AX-158132574 | 13 | 34.168 | KV453128.1 | 3547046 | 18-scf00286 | 18 |

|              |    |        |            |         |             |    |
|--------------|----|--------|------------|---------|-------------|----|
| AX-158132577 | 13 | 34.168 | KV453128.1 | 3549910 | 18-scf00286 | 18 |
| AX-158132578 | 13 | 34.168 | KV453128.1 | 3550161 | 18-scf00286 | 18 |
| AX-158132579 | 13 | 34.168 | KV453128.1 | 3550747 | 18-scf00286 | 18 |
| AX-158132584 | 13 | 34.168 | KV453128.1 | 3554879 | 18-scf00286 | 18 |
| AX-157830320 | 13 | 34.168 | KV453128.1 | 3562056 | 18-scf00286 | 18 |
| AX-158132592 | 13 | 34.168 | KV453128.1 | 3563996 | 18-scf00286 | 18 |
| AX-157830322 | 13 | 34.168 | KV453128.1 | 3564239 | 18-scf00286 | 18 |
| AX-158132593 | 13 | 34.168 | KV453128.1 | 3564901 | 18-scf00286 | 18 |
| AX-157830323 | 13 | 34.168 | KV453128.1 | 3565367 | 18-scf00286 | 18 |
| AX-158132594 | 13 | 34.277 | KV453128.1 | 3567172 | 18-scf00286 | 18 |
| AX-158132595 | 13 | 34.277 | KV453128.1 | 3567768 | 18-scf00286 | 18 |
| AX-158132596 | 13 | 34.277 | KV453128.1 | 3568185 | 18-scf00286 | 18 |
| AX-158132597 | 13 | 34.277 | KV453128.1 | 3568461 | 18-scf00286 | 18 |
| AX-158132600 | 13 | 34.497 | KV453128.1 | 3570181 | 18-scf00286 | 18 |
| AX-158132603 | 13 | 34.632 | KV453128.1 | 3574187 | 18-scf00286 | 18 |
| AX-158132658 | 13 | 34.632 | KV453128.1 | 3634202 | 18-scf00286 | 18 |
| AX-158132604 | 13 | 34.713 | KV453128.1 | 3575702 | 18-scf00286 | 18 |
| AX-158132606 | 13 | 34.714 | KV453128.1 | 3577391 | 18-scf00286 | 18 |
| AX-158132608 | 13 | 34.714 | KV453128.1 | 3578164 | 18-scf00286 | 18 |
| AX-158132612 | 13 | 34.714 | KV453128.1 | 3581798 | 18-scf00286 | 18 |
| AX-158132614 | 13 | 34.714 | KV453128.1 | 3583460 | 18-scf00286 | 18 |
| AX-158132615 | 13 | 34.714 | KV453128.1 | 3583674 | 18-scf00286 | 18 |
| AX-158132616 | 13 | 34.714 | KV453128.1 | 3584205 | 18-scf00286 | 18 |
| AX-158411598 | 13 | 34.714 | KV453128.1 | 3590045 | 18-scf00286 | 18 |
| AX-158132642 | 13 | 34.714 | KV453128.1 | 3617182 | 18-scf00286 | 18 |
| AX-158132647 | 13 | 34.714 | KV453128.1 | 3623247 | 18-scf00286 | 18 |
| AX-158132624 | 13 | 34.937 | KV453128.1 | 3596630 | 18-scf00286 | 18 |
| AX-158132628 | 13 | 34.937 | KV453128.1 | 3600844 | 18-scf00286 | 18 |
| AX-158132625 | 13 | 35.144 | KV453128.1 | 3597040 | 18-scf00286 | 18 |
| AX-158132634 | 13 | 35.144 | KV453128.1 | 3606749 | 18-scf00286 | 18 |
| AX-158132629 | 13 | 35.147 | KV453128.1 | 3600945 | 18-scf00286 | 18 |
| AX-157741340 | 13 | 35.149 | KV453128.1 | 3602090 | 18-scf00286 | 18 |
| AX-158132630 | 13 | 35.151 | KV453128.1 | 3603247 | 18-scf00286 | 18 |
| AX-157886241 | 13 | 35.151 | KV453128.1 | 3605511 | 18-scf00286 | 18 |
| AX-158132637 | 13 | 35.151 | KV453128.1 | 3612680 | 18-scf00286 | 18 |
| AX-158132638 | 13 | 35.151 | KV453128.1 | 3613957 | 18-scf00286 | 18 |
| AX-157830327 | 13 | 35.151 | KV453128.1 | 3618687 | 18-scf00286 | 18 |
| AX-158132643 | 13 | 35.151 | KV453128.1 | 3619978 | 18-scf00286 | 18 |
| AX-158132649 | 13 | 35.151 | KV453128.1 | 3624756 | 18-scf00286 | 18 |
| AX-158132650 | 13 | 35.151 | KV453128.1 | 3626047 | 18-scf00286 | 18 |
| AX-158132652 | 13 | 35.151 | KV453128.1 | 3630093 | 18-scf00286 | 18 |
| AX-157830328 | 13 | 35.151 | KV453128.1 | 3630295 | 18-scf00286 | 18 |
| AX-158132654 | 13 | 35.151 | KV453128.1 | 3631631 | 18-scf00286 | 18 |
| AX-158132656 | 13 | 35.151 | KV453128.1 | 3633209 | 18-scf00286 | 18 |
| AX-158132657 | 13 | 35.151 | KV453128.1 | 3633755 | 18-scf00286 | 18 |
| AX-158132661 | 13 | 35.151 | KV453128.1 | 3636602 | 18-scf00286 | 18 |
| AX-158132663 | 13 | 35.151 | KV453128.1 | 3639782 | 18-scf00286 | 18 |
| AX-157740835 | 13 | 35.151 | KV453128.1 | 3709733 | 18-scf00286 | 18 |
| AX-158132666 | 13 | 35.198 | KV453128.1 | 3644658 | 18-scf00286 | 18 |
| AX-158132669 | 13 | 35.241 | KV453128.1 | 3649048 | 18-scf00286 | 18 |
| AX-158132646 | 13 | 35.261 | KV453128.1 | 3622718 | 18-scf00286 | 18 |

|              |    |        |            |         |             |    |
|--------------|----|--------|------------|---------|-------------|----|
| AX-158132651 | 13 | 35.261 | KV453128.1 | 3628548 | 18-scf00286 | 18 |
| AX-158132653 | 13 | 35.261 | KV453128.1 | 3630691 | 18-scf00286 | 18 |
| AX-158132668 | 13 | 35.261 | KV453128.1 | 3647772 | 18-scf00286 | 18 |
| AX-158132670 | 13 | 35.261 | KV453128.1 | 3649616 | 18-scf00286 | 18 |
| AX-158132671 | 13 | 35.261 | KV453128.1 | 3650030 | 18-scf00286 | 18 |
| AX-158132672 | 13 | 35.261 | KV453128.1 | 3650602 | 18-scf00286 | 18 |
| AX-158132673 | 13 | 35.261 | KV453128.1 | 3651326 | 18-scf00286 | 18 |
| AX-158132674 | 13 | 35.261 | KV453128.1 | 3651799 | 18-scf00286 | 18 |
| AX-158132675 | 13 | 35.261 | KV453128.1 | 3652611 | 18-scf00286 | 18 |
| AX-158132676 | 13 | 35.261 | KV453128.1 | 3655634 | 18-scf00286 | 18 |
| AX-158132679 | 13 | 35.261 | KV453128.1 | 3659896 | 18-scf00286 | 18 |
| AX-158132681 | 13 | 35.261 | KV453128.1 | 3661473 | 18-scf00286 | 18 |
| AX-158132682 | 13 | 35.261 | KV453128.1 | 3662305 | 18-scf00286 | 18 |
| AX-158132684 | 13 | 35.261 | KV453128.1 | 3663619 | 18-scf00286 | 18 |
| AX-158132685 | 13 | 35.261 | KV453128.1 | 3664228 | 18-scf00286 | 18 |
| AX-157830326 | 13 | 35.479 | KV453128.1 | 3608538 | 18-scf00286 | 18 |
| AX-158132689 | 13 | 35.479 | KV453128.1 | 3669991 | 18-scf00286 | 18 |
| AX-158132690 | 13 | 35.479 | KV453128.1 | 3670818 | 18-scf00286 | 18 |
| AX-158132692 | 13 | 35.479 | KV453128.1 | 3672487 | 18-scf00286 | 18 |
| AX-158132695 | 13 | 35.479 | KV453128.1 | 3676018 | 18-scf00286 | 18 |
| AX-158132696 | 13 | 35.479 | KV453128.1 | 3676723 | 18-scf00286 | 18 |
| AX-157830329 | 13 | 35.479 | KV453128.1 | 3677199 | 18-scf00286 | 18 |
| AX-157771587 | 13 | 35.479 | KV453128.1 | 3677380 | 18-scf00286 | 18 |
| AX-158132697 | 13 | 35.479 | KV453128.1 | 3677835 | 18-scf00286 | 18 |
| AX-158132699 | 13 | 35.479 | KV453128.1 | 3679193 | 18-scf00286 | 18 |
| AX-158132701 | 13 | 35.479 | KV453128.1 | 3680417 | 18-scf00286 | 18 |
| AX-158132702 | 13 | 35.479 | KV453128.1 | 3681634 | 18-scf00286 | 18 |
| AX-158132714 | 13 | 35.479 | KV453128.1 | 3691009 | 18-scf00286 | 18 |
| AX-158132735 | 13 | 35.479 | KV453128.1 | 3714894 | 18-scf00286 | 18 |
| AX-158132819 | 13 | 35.479 | KV453128.1 | 3819536 | 18-scf00286 | 18 |
| AX-157753583 | 13 | 35.542 | KV453128.1 | 3681120 | 18-scf00286 | 18 |
| AX-158132703 | 13 | 35.542 | KV453128.1 | 3682724 | 18-scf00286 | 18 |
| AX-158385284 | 13 | 35.588 | KV453128.1 | 3630618 | 18-scf00286 | 18 |
| AX-158132662 | 13 | 35.588 | KV453128.1 | 3637418 | 18-scf00286 | 18 |
| AX-158132667 | 13 | 35.588 | KV453128.1 | 3646226 | 18-scf00286 | 18 |
| AX-158132704 | 13 | 35.588 | KV453128.1 | 3683170 | 18-scf00286 | 18 |
| AX-158408147 | 13 | 35.588 | KV453128.1 | 3684051 | 18-scf00286 | 18 |
| AX-158132707 | 13 | 35.588 | KV453128.1 | 3687588 | 18-scf00286 | 18 |
| AX-158132715 | 13 | 35.588 | KV453128.1 | 3691705 | 18-scf00286 | 18 |
| AX-158132717 | 13 | 35.588 | KV453128.1 | 3696439 | 18-scf00286 | 18 |
| AX-158132700 | 13 | 35.618 | KV453128.1 | 3679636 | 18-scf00286 | 18 |
| AX-158132710 | 13 | 35.618 | KV453128.1 | 3688690 | 18-scf00286 | 18 |
| AX-158132713 | 13 | 35.649 | KV453128.1 | 3690435 | 18-scf00286 | 18 |
| AX-157830331 | 13 | 35.679 | KV453128.1 | 3696496 | 18-scf00286 | 18 |
| AX-158132720 | 13 | 35.697 | KV453128.1 | 3697624 | 18-scf00286 | 18 |
| AX-157830332 | 13 | 35.697 | KV453128.1 | 3698410 | 18-scf00286 | 18 |
| AX-158132687 | 13 | 35.757 | KV453128.1 | 3666867 | 18-scf00286 | 18 |
| AX-158132721 | 13 | 35.757 | KV453128.1 | 3699654 | 18-scf00286 | 18 |
| AX-157830334 | 13 | 35.861 | KV453128.1 | 3700160 | 18-scf00286 | 18 |
| AX-158133151 | 13 | 35.861 | KV453128.1 | 4227875 | 18-scf00286 | 18 |
| AX-158132722 | 13 | 36.025 | KV453128.1 | 3702009 | 18-scf00286 | 18 |



|              |    |        |            |         |             |    |
|--------------|----|--------|------------|---------|-------------|----|
| AX-158132723 | 13 | 36.025 | KV453128.1 | 3703382 | 18-scf00286 | 18 |
| AX-158132724 | 13 | 36.025 | KV453128.1 | 3704085 | 18-scf00286 | 18 |
| AX-158132725 | 13 | 36.025 | KV453128.1 | 3704634 | 18-scf00286 | 18 |
| AX-158132728 | 13 | 36.025 | KV453128.1 | 3709058 | 18-scf00286 | 18 |
| AX-158132729 | 13 | 36.025 | KV453128.1 | 3709915 | 18-scf00286 | 18 |
| AX-158132732 | 13 | 36.025 | KV453128.1 | 3712933 | 18-scf00286 | 18 |
| AX-158132733 | 13 | 36.025 | KV453128.1 | 3713316 | 18-scf00286 | 18 |
| AX-158392851 | 13 | 36.025 | KV453128.1 | 3721267 | 18-scf00286 | 18 |
| AX-158132737 | 13 | 36.025 | KV453128.1 | 3722022 | 18-scf00286 | 18 |
| AX-158132738 | 13 | 36.025 | KV453128.1 | 3723733 | 18-scf00286 | 18 |
| AX-158132739 | 13 | 36.025 | KV453128.1 | 3723884 | 18-scf00286 | 18 |
| AX-158132741 | 13 | 36.025 | KV453128.1 | 3725848 | 18-scf00286 | 18 |
| AX-158132743 | 13 | 36.025 | KV453128.1 | 3727009 | 18-scf00286 | 18 |
| AX-158411602 | 13 | 36.025 | KV453128.1 | 3728002 | 18-scf00286 | 18 |
| AX-158132744 | 13 | 36.025 | KV453128.1 | 3728833 | 18-scf00286 | 18 |
| AX-158132745 | 13 | 36.025 | KV453128.1 | 3729738 | 18-scf00286 | 18 |
| AX-158132746 | 13 | 36.025 | KV453128.1 | 3730690 | 18-scf00286 | 18 |
| AX-158132748 | 13 | 36.025 | KV453128.1 | 3732180 | 18-scf00286 | 18 |
| AX-158132749 | 13 | 36.025 | KV453128.1 | 3734618 | 18-scf00286 | 18 |
| AX-157830339 | 13 | 36.025 | KV453128.1 | 3740078 | 18-scf00286 | 18 |
| AX-157830340 | 13 | 36.025 | KV453128.1 | 3741757 | 18-scf00286 | 18 |
| AX-158132752 | 13 | 36.025 | KV453128.1 | 3742048 | 18-scf00286 | 18 |
| AX-158132753 | 13 | 36.025 | KV453128.1 | 3743388 | 18-scf00286 | 18 |
| AX-158132760 | 13 | 36.025 | KV453128.1 | 3748300 | 18-scf00286 | 18 |
| AX-157878002 | 13 | 36.025 | KV453128.1 | 3789006 | 18-scf00286 | 18 |
| AX-158132806 | 13 | 36.025 | KV453128.1 | 3806269 | 18-scf00286 | 18 |
| AX-158132927 | 13 | 36.025 | KV453128.1 | 3951356 | 18-scf00286 | 18 |
| AX-157717954 | 13 | 36.025 | KV453128.1 | 4049723 | 18-scf00286 | 18 |
| AX-158133060 | 13 | 36.025 | KV453128.1 | 4119414 | 18-scf00286 | 18 |
| AX-158133371 | 13 | 36.025 | KV453128.1 | 4554913 | 18-scf00286 | 18 |
| AX-158133442 | 13 | 36.025 | KV453128.1 | 4659214 | 18-scf00286 | 18 |
| AX-158132730 | 13 | 36.135 | KV453128.1 | 3711331 | 18-scf00286 | 18 |
| AX-157830338 | 13 | 36.135 | KV453128.1 | 3737547 | 18-scf00286 | 18 |
| AX-157830336 | 13 | 36.244 | KV453128.1 | 3717849 | 18-scf00286 | 18 |
| AX-158132754 | 13 | 36.244 | KV453128.1 | 3743595 | 18-scf00286 | 18 |
| AX-158132755 | 13 | 36.244 | KV453128.1 | 3743940 | 18-scf00286 | 18 |
| AX-158132756 | 13 | 36.244 | KV453128.1 | 3746490 | 18-scf00286 | 18 |
| AX-157744250 | 13 | 36.244 | KV453128.1 | 3746751 | 18-scf00286 | 18 |
| AX-158132761 | 13 | 36.244 | KV453128.1 | 3748938 | 18-scf00286 | 18 |
| AX-158132763 | 13 | 36.244 | KV453128.1 | 3750587 | 18-scf00286 | 18 |
| AX-157738863 | 13 | 36.244 | KV453128.1 | 3751636 | 18-scf00286 | 18 |
| AX-158132764 | 13 | 36.244 | KV453128.1 | 3752517 | 18-scf00286 | 18 |
| AX-158132765 | 13 | 36.244 | KV453128.1 | 3755268 | 18-scf00286 | 18 |
| AX-158132766 | 13 | 36.244 | KV453128.1 | 3756589 | 18-scf00286 | 18 |
| AX-158408149 | 13 | 36.244 | KV453128.1 | 3759408 | 18-scf00286 | 18 |
| AX-158132770 | 13 | 36.244 | KV453128.1 | 3763689 | 18-scf00286 | 18 |
| AX-157830348 | 13 | 36.244 | KV453128.1 | 3778521 | 18-scf00286 | 18 |
| AX-158132786 | 13 | 36.244 | KV453128.1 | 3783092 | 18-scf00286 | 18 |
| AX-157830354 | 13 | 36.244 | KV453128.1 | 3799189 | 18-scf00286 | 18 |
| AX-158132805 | 13 | 36.244 | KV453128.1 | 3805692 | 18-scf00286 | 18 |
| AX-158132816 | 13 | 36.244 | KV453128.1 | 3816030 | 18-scf00286 | 18 |

|              |    |        |            |         |             |    |
|--------------|----|--------|------------|---------|-------------|----|
| AX-158132817 | 13 | 36.244 | KV453128.1 | 3817562 | 18-scf00286 | 18 |
| AX-157830357 | 13 | 36.244 | KV453128.1 | 3831213 | 18-scf00286 | 18 |
| AX-158132833 | 13 | 36.244 | KV453128.1 | 3842047 | 18-scf00286 | 18 |
| AX-158132839 | 13 | 36.244 | KV453128.1 | 3848081 | 18-scf00286 | 18 |
| AX-158132857 | 13 | 36.244 | KV453128.1 | 3866100 | 18-scf00286 | 18 |
| AX-157830366 | 13 | 36.244 | KV453128.1 | 3871231 | 18-scf00286 | 18 |
| AX-158132864 | 13 | 36.244 | KV453128.1 | 3876145 | 18-scf00286 | 18 |
| AX-158132866 | 13 | 36.244 | KV453128.1 | 3878437 | 18-scf00286 | 18 |
| AX-158132869 | 13 | 36.244 | KV453128.1 | 3882510 | 18-scf00286 | 18 |
| AX-158132876 | 13 | 36.244 | KV453128.1 | 3892739 | 18-scf00286 | 18 |
| AX-158132882 | 13 | 36.244 | KV453128.1 | 3902974 | 18-scf00286 | 18 |
| AX-157830379 | 13 | 36.244 | KV453128.1 | 4038080 | 18-scf00286 | 18 |
| AX-158132768 | 13 | 36.301 | KV453128.1 | 3761031 | 18-scf00286 | 18 |
| AX-158132747 | 13 | 36.353 | KV453128.1 | 3731485 | 18-scf00286 | 18 |
| AX-158132750 | 13 | 36.353 | KV453128.1 | 3739174 | 18-scf00286 | 18 |
| AX-158132758 | 13 | 36.353 | KV453128.1 | 3747488 | 18-scf00286 | 18 |
| AX-157830343 | 13 | 36.353 | KV453128.1 | 3764082 | 18-scf00286 | 18 |
| AX-157716700 | 13 | 36.353 | KV453128.1 | 3764167 | 18-scf00286 | 18 |
| AX-158132771 | 13 | 36.353 | KV453128.1 | 3765204 | 18-scf00286 | 18 |
| AX-158132773 | 13 | 36.353 | KV453128.1 | 3767442 | 18-scf00286 | 18 |
| AX-158132775 | 13 | 36.353 | KV453128.1 | 3770878 | 18-scf00286 | 18 |
| AX-158132776 | 13 | 36.353 | KV453128.1 | 3772440 | 18-scf00286 | 18 |
| AX-158132777 | 13 | 36.353 | KV453128.1 | 3773046 | 18-scf00286 | 18 |
| AX-157830344 | 13 | 36.353 | KV453128.1 | 3775695 | 18-scf00286 | 18 |
| AX-157830347 | 13 | 36.353 | KV453128.1 | 3776985 | 18-scf00286 | 18 |
| AX-158132783 | 13 | 36.353 | KV453128.1 | 3780453 | 18-scf00286 | 18 |
| AX-158132784 | 13 | 36.353 | KV453128.1 | 3781125 | 18-scf00286 | 18 |
| AX-158132787 | 13 | 36.353 | KV453128.1 | 3783623 | 18-scf00286 | 18 |
| AX-158132788 | 13 | 36.353 | KV453128.1 | 3784610 | 18-scf00286 | 18 |
| AX-158132789 | 13 | 36.353 | KV453128.1 | 3785665 | 18-scf00286 | 18 |
| AX-158132790 | 13 | 36.353 | KV453128.1 | 3785927 | 18-scf00286 | 18 |
| AX-157709457 | 13 | 36.353 | KV453128.1 | 3788394 | 18-scf00286 | 18 |
| AX-158132791 | 13 | 36.353 | KV453128.1 | 3788708 | 18-scf00286 | 18 |
| AX-158132792 | 13 | 36.353 | KV453128.1 | 3791093 | 18-scf00286 | 18 |
| AX-157830350 | 13 | 36.353 | KV453128.1 | 3792586 | 18-scf00286 | 18 |
| AX-157710483 | 13 | 36.353 | KV453128.1 | 3793285 | 18-scf00286 | 18 |
| AX-158132794 | 13 | 36.353 | KV453128.1 | 3793979 | 18-scf00286 | 18 |
| AX-158132797 | 13 | 36.353 | KV453128.1 | 3796453 | 18-scf00286 | 18 |
| AX-158132801 | 13 | 36.353 | KV453128.1 | 3801200 | 18-scf00286 | 18 |
| AX-158132808 | 13 | 36.353 | KV453128.1 | 3807110 | 18-scf00286 | 18 |
| AX-158132809 | 13 | 36.353 | KV453128.1 | 3808816 | 18-scf00286 | 18 |
| AX-158132814 | 13 | 36.353 | KV453128.1 | 3814685 | 18-scf00286 | 18 |
| AX-157762807 | 13 | 36.353 | KV453128.1 | 3818253 | 18-scf00286 | 18 |
| AX-158132818 | 13 | 36.353 | KV453128.1 | 3819105 | 18-scf00286 | 18 |
| AX-158132821 | 13 | 36.353 | KV453128.1 | 3821121 | 18-scf00286 | 18 |
| AX-158132824 | 13 | 36.353 | KV453128.1 | 3825399 | 18-scf00286 | 18 |
| AX-158132825 | 13 | 36.353 | KV453128.1 | 3826131 | 18-scf00286 | 18 |
| AX-157830356 | 13 | 36.353 | KV453128.1 | 3826559 | 18-scf00286 | 18 |
| AX-157830360 | 13 | 36.353 | KV453128.1 | 3843485 | 18-scf00286 | 18 |
| AX-157830361 | 13 | 36.353 | KV453128.1 | 3851034 | 18-scf00286 | 18 |
| AX-158132858 | 13 | 36.353 | KV453128.1 | 3866607 | 18-scf00286 | 18 |

|              |    |        |            |         |             |    |
|--------------|----|--------|------------|---------|-------------|----|
| AX-158132860 | 13 | 36.353 | KV453128.1 | 3872263 | 18-scf00286 | 18 |
| AX-158132861 | 13 | 36.353 | KV453128.1 | 3872559 | 18-scf00286 | 18 |
| AX-158132883 | 13 | 36.353 | KV453128.1 | 3903474 | 18-scf00286 | 18 |
| AX-158132888 | 13 | 36.353 | KV453128.1 | 3912410 | 18-scf00286 | 18 |
| AX-158132890 | 13 | 36.353 | KV453128.1 | 3914690 | 18-scf00286 | 18 |
| AX-158132915 | 13 | 36.353 | KV453128.1 | 3935503 | 18-scf00286 | 18 |
| AX-158133341 | 13 | 36.353 | KV453128.1 | 4504568 | 18-scf00286 | 18 |
| AX-158132830 | 13 | 36.462 | KV453128.1 | 3837510 | 18-scf00286 | 18 |
| AX-157746513 | 13 | 36.462 | KV453128.1 | 3838052 | 18-scf00286 | 18 |
| AX-158132832 | 13 | 36.462 | KV453128.1 | 3839381 | 18-scf00286 | 18 |
| AX-157830359 | 13 | 36.462 | KV453128.1 | 3842221 | 18-scf00286 | 18 |
| AX-158132834 | 13 | 36.462 | KV453128.1 | 3842638 | 18-scf00286 | 18 |
| AX-158132836 | 13 | 36.462 | KV453128.1 | 3846146 | 18-scf00286 | 18 |
| AX-158132837 | 13 | 36.462 | KV453128.1 | 3846502 | 18-scf00286 | 18 |
| AX-158132842 | 13 | 36.462 | KV453128.1 | 3849659 | 18-scf00286 | 18 |
| AX-158132843 | 13 | 36.462 | KV453128.1 | 3850385 | 18-scf00286 | 18 |
| AX-158380256 | 13 | 36.462 | KV453128.1 | 3851826 | 18-scf00286 | 18 |
| AX-157830364 | 13 | 36.462 | KV453128.1 | 3854282 | 18-scf00286 | 18 |
| AX-157747795 | 13 | 36.462 | KV453128.1 | 3854425 | 18-scf00286 | 18 |
| AX-158132850 | 13 | 36.462 | KV453128.1 | 3860974 | 18-scf00286 | 18 |
| AX-158132859 | 13 | 36.462 | KV453128.1 | 3868323 | 18-scf00286 | 18 |
| AX-157830367 | 13 | 36.462 | KV453128.1 | 3871559 | 18-scf00286 | 18 |
| AX-158132862 | 13 | 36.462 | KV453128.1 | 3874578 | 18-scf00286 | 18 |
| AX-158132863 | 13 | 36.462 | KV453128.1 | 3874733 | 18-scf00286 | 18 |
| AX-158132865 | 13 | 36.462 | KV453128.1 | 3877407 | 18-scf00286 | 18 |
| AX-158132867 | 13 | 36.462 | KV453128.1 | 3879496 | 18-scf00286 | 18 |
| AX-158132868 | 13 | 36.462 | KV453128.1 | 3881155 | 18-scf00286 | 18 |
| AX-157878004 | 13 | 36.462 | KV453128.1 | 3881919 | 18-scf00286 | 18 |
| AX-158132873 | 13 | 36.462 | KV453128.1 | 3887263 | 18-scf00286 | 18 |
| AX-158132874 | 13 | 36.462 | KV453128.1 | 3888930 | 18-scf00286 | 18 |
| AX-158132881 | 13 | 36.462 | KV453128.1 | 3900572 | 18-scf00286 | 18 |
| AX-158132886 | 13 | 36.462 | KV453128.1 | 3908068 | 18-scf00286 | 18 |
| AX-158132889 | 13 | 36.462 | KV453128.1 | 3912701 | 18-scf00286 | 18 |
| AX-158411607 | 13 | 36.462 | KV453128.1 | 3913460 | 18-scf00286 | 18 |
| AX-158132892 | 13 | 36.462 | KV453128.1 | 3916846 | 18-scf00286 | 18 |
| AX-158132893 | 13 | 36.462 | KV453128.1 | 3917600 | 18-scf00286 | 18 |
| AX-158133281 | 13 | 36.462 | KV453128.1 | 4419060 | 18-scf00286 | 18 |
| AX-158132778 | 13 | 36.68  | KV453128.1 | 3773592 | 18-scf00286 | 18 |
| AX-158132782 | 13 | 36.68  | KV453128.1 | 3779330 | 18-scf00286 | 18 |
| AX-158132796 | 13 | 36.68  | KV453128.1 | 3795332 | 18-scf00286 | 18 |
| AX-158132897 | 13 | 36.68  | KV453128.1 | 3919443 | 18-scf00286 | 18 |
| AX-158132898 | 13 | 36.68  | KV453128.1 | 3919913 | 18-scf00286 | 18 |
| AX-158132903 | 13 | 36.68  | KV453128.1 | 3924290 | 18-scf00286 | 18 |
| AX-158132904 | 13 | 36.68  | KV453128.1 | 3924860 | 18-scf00286 | 18 |
| AX-158132906 | 13 | 36.68  | KV453128.1 | 3928761 | 18-scf00286 | 18 |
| AX-158132908 | 13 | 36.68  | KV453128.1 | 3931104 | 18-scf00286 | 18 |
| AX-157693987 | 13 | 36.68  | KV453128.1 | 3931278 | 18-scf00286 | 18 |
| AX-158132909 | 13 | 36.68  | KV453128.1 | 3931547 | 18-scf00286 | 18 |
| AX-158132910 | 13 | 36.68  | KV453128.1 | 3932335 | 18-scf00286 | 18 |
| AX-158132912 | 13 | 36.68  | KV453128.1 | 3934104 | 18-scf00286 | 18 |
| AX-157830368 | 13 | 36.68  | KV453128.1 | 3934813 | 18-scf00286 | 18 |

|              |    |        |            |         |             |    |
|--------------|----|--------|------------|---------|-------------|----|
| AX-158132914 | 13 | 36.68  | KV453128.1 | 3935101 | 18-scf00286 | 18 |
| AX-158132916 | 13 | 36.68  | KV453128.1 | 3936446 | 18-scf00286 | 18 |
| AX-158132917 | 13 | 36.68  | KV453128.1 | 3937297 | 18-scf00286 | 18 |
| AX-158132918 | 13 | 36.68  | KV453128.1 | 3937705 | 18-scf00286 | 18 |
| AX-158132921 | 13 | 36.68  | KV453128.1 | 3942400 | 18-scf00286 | 18 |
| AX-158132962 | 13 | 36.68  | KV453128.1 | 3993561 | 18-scf00286 | 18 |
| AX-158132967 | 13 | 36.68  | KV453128.1 | 4000722 | 18-scf00286 | 18 |
| AX-158132911 | 13 | 36.79  | KV453128.1 | 3932861 | 18-scf00286 | 18 |
| AX-158132919 | 13 | 36.79  | KV453128.1 | 3938154 | 18-scf00286 | 18 |
| AX-158132924 | 13 | 36.79  | KV453128.1 | 3946711 | 18-scf00286 | 18 |
| AX-158132925 | 13 | 36.79  | KV453128.1 | 3947200 | 18-scf00286 | 18 |
| AX-158132928 | 13 | 36.79  | KV453128.1 | 3951912 | 18-scf00286 | 18 |
| AX-157886243 | 13 | 36.79  | KV453128.1 | 3953087 | 18-scf00286 | 18 |
| AX-158132930 | 13 | 36.79  | KV453128.1 | 3953941 | 18-scf00286 | 18 |
| AX-158132931 | 13 | 36.79  | KV453128.1 | 3955078 | 18-scf00286 | 18 |
| AX-158133152 | 13 | 36.79  | KV453128.1 | 4228776 | 18-scf00286 | 18 |
| AX-158133156 | 13 | 36.79  | KV453128.1 | 4236131 | 18-scf00286 | 18 |
| AX-158133219 | 13 | 36.79  | KV453128.1 | 4319998 | 18-scf00286 | 18 |
| AX-158133278 | 13 | 36.79  | KV453128.1 | 4416794 | 18-scf00286 | 18 |
| AX-158133279 | 13 | 36.79  | KV453128.1 | 4417447 | 18-scf00286 | 18 |
| AX-157886253 | 13 | 36.79  | KV453128.1 | 4610629 | 18-scf00286 | 18 |
| AX-158132933 | 13 | 36.868 | KV453128.1 | 3956011 | 18-scf00286 | 18 |
| AX-158132934 | 13 | 36.89  | KV453128.1 | 3956962 | 18-scf00286 | 18 |
| AX-157740259 | 13 | 36.949 | KV453128.1 | 3957823 | 18-scf00286 | 18 |
| AX-158132936 | 13 | 37.008 | KV453128.1 | 3960096 | 18-scf00286 | 18 |
| AX-158132939 | 13 | 37.008 | KV453128.1 | 3961480 | 18-scf00286 | 18 |
| AX-158132940 | 13 | 37.008 | KV453128.1 | 3962512 | 18-scf00286 | 18 |
| AX-158132941 | 13 | 37.008 | KV453128.1 | 3963369 | 18-scf00286 | 18 |
| AX-158132942 | 13 | 37.03  | KV453128.1 | 3967814 | 18-scf00286 | 18 |
| AX-158132943 | 13 | 37.05  | KV453128.1 | 3968894 | 18-scf00286 | 18 |
| AX-158132947 | 13 | 37.05  | KV453128.1 | 3974093 | 18-scf00286 | 18 |
| AX-158132944 | 13 | 37.072 | KV453128.1 | 3971452 | 18-scf00286 | 18 |
| AX-158132945 | 13 | 37.094 | KV453128.1 | 3971957 | 18-scf00286 | 18 |
| AX-158132948 | 13 | 37.117 | KV453128.1 | 3976399 | 18-scf00286 | 18 |
| AX-158132955 | 13 | 37.227 | KV453128.1 | 3986054 | 18-scf00286 | 18 |
| AX-158132956 | 13 | 37.227 | KV453128.1 | 3986653 | 18-scf00286 | 18 |
| AX-158132929 | 13 | 37.336 | KV453128.1 | 3953248 | 18-scf00286 | 18 |
| AX-158132951 | 13 | 37.336 | KV453128.1 | 3979391 | 18-scf00286 | 18 |
| AX-158132959 | 13 | 37.336 | KV453128.1 | 3989119 | 18-scf00286 | 18 |
| AX-158132961 | 13 | 37.336 | KV453128.1 | 3991751 | 18-scf00286 | 18 |
| AX-157830370 | 13 | 37.336 | KV453128.1 | 3998027 | 18-scf00286 | 18 |
| AX-158132965 | 13 | 37.336 | KV453128.1 | 3998699 | 18-scf00286 | 18 |
| AX-158132966 | 13 | 37.336 | KV453128.1 | 3999990 | 18-scf00286 | 18 |
| AX-157830373 | 13 | 37.38  | KV453128.1 | 4002020 | 18-scf00286 | 18 |
| AX-158132964 | 13 | 37.417 | KV453128.1 | 3997509 | 18-scf00286 | 18 |
| AX-158132968 | 13 | 37.417 | KV453128.1 | 4002448 | 18-scf00286 | 18 |
| AX-158132901 | 13 | 37.445 | KV453128.1 | 3921457 | 18-scf00286 | 18 |
| AX-157830374 | 13 | 37.445 | KV453128.1 | 4003687 | 18-scf00286 | 18 |
| AX-157693933 | 13 | 37.484 | KV453128.1 | 3923550 | 18-scf00286 | 18 |
| AX-158132953 | 13 | 37.484 | KV453128.1 | 3982523 | 18-scf00286 | 18 |
| AX-158132969 | 13 | 37.484 | KV453128.1 | 4004254 | 18-scf00286 | 18 |

|              |    |        |            |         |             |    |
|--------------|----|--------|------------|---------|-------------|----|
| AX-158132970 | 13 | 37.509 | KV453128.1 | 4004669 | 18-scf00286 | 18 |
| AX-157830375 | 13 | 37.554 | KV453128.1 | 4005816 | 18-scf00286 | 18 |
| AX-158132972 | 13 | 37.554 | KV453128.1 | 4012178 | 18-scf00286 | 18 |
| AX-158132973 | 13 | 37.554 | KV453128.1 | 4013573 | 18-scf00286 | 18 |
| AX-158132975 | 13 | 37.664 | KV453128.1 | 4015941 | 18-scf00286 | 18 |
| AX-158132977 | 13 | 37.708 | KV453128.1 | 4021343 | 18-scf00286 | 18 |
| AX-158132979 | 13 | 37.756 | KV453128.1 | 4024000 | 18-scf00286 | 18 |
| AX-158132960 | 13 | 37.773 | KV453128.1 | 3990105 | 18-scf00286 | 18 |
| AX-157713586 | 13 | 37.773 | KV453128.1 | 4013019 | 18-scf00286 | 18 |
| AX-158132981 | 13 | 37.773 | KV453128.1 | 4027137 | 18-scf00286 | 18 |
| AX-158132982 | 13 | 37.773 | KV453128.1 | 4028388 | 18-scf00286 | 18 |
| AX-158132983 | 13 | 37.773 | KV453128.1 | 4029562 | 18-scf00286 | 18 |
| AX-158132984 | 13 | 37.773 | KV453128.1 | 4030576 | 18-scf00286 | 18 |
| AX-157830376 | 13 | 37.773 | KV453128.1 | 4030656 | 18-scf00286 | 18 |
| AX-157830377 | 13 | 37.773 | KV453128.1 | 4032592 | 18-scf00286 | 18 |
| AX-158132988 | 13 | 37.773 | KV453128.1 | 4034963 | 18-scf00286 | 18 |
| AX-157830378 | 13 | 37.773 | KV453128.1 | 4035652 | 18-scf00286 | 18 |
| AX-158132990 | 13 | 37.773 | KV453128.1 | 4037593 | 18-scf00286 | 18 |
| AX-158132992 | 13 | 37.773 | KV453128.1 | 4039066 | 18-scf00286 | 18 |
| AX-157830381 | 13 | 37.773 | KV453128.1 | 4047812 | 18-scf00286 | 18 |
| AX-158133004 | 13 | 37.773 | KV453128.1 | 4053050 | 18-scf00286 | 18 |
| AX-158133006 | 13 | 37.773 | KV453128.1 | 4054627 | 18-scf00286 | 18 |
| AX-158132995 | 13 | 37.992 | KV453128.1 | 4041695 | 18-scf00286 | 18 |
| AX-158132997 | 13 | 37.992 | KV453128.1 | 4045264 | 18-scf00286 | 18 |
| AX-157727363 | 13 | 37.992 | KV453128.1 | 4045326 | 18-scf00286 | 18 |
| AX-158133000 | 13 | 38.104 | KV453128.1 | 4049808 | 18-scf00286 | 18 |
| AX-158133005 | 13 | 38.21  | KV453128.1 | 4054190 | 18-scf00286 | 18 |
| AX-157830383 | 13 | 38.21  | KV453128.1 | 4055282 | 18-scf00286 | 18 |
| AX-158133008 | 13 | 38.21  | KV453128.1 | 4056351 | 18-scf00286 | 18 |
| AX-158133011 | 13 | 38.21  | KV453128.1 | 4064230 | 18-scf00286 | 18 |
| AX-158133012 | 13 | 38.21  | KV453128.1 | 4065572 | 18-scf00286 | 18 |
| AX-158133015 | 13 | 38.21  | KV453128.1 | 4067303 | 18-scf00286 | 18 |
| AX-158133017 | 13 | 38.21  | KV453128.1 | 4068195 | 18-scf00286 | 18 |
| AX-158133018 | 13 | 38.21  | KV453128.1 | 4068970 | 18-scf00286 | 18 |
| AX-158133021 | 13 | 38.21  | KV453128.1 | 4070292 | 18-scf00286 | 18 |
| AX-158133139 | 13 | 38.21  | KV453128.1 | 4214856 | 18-scf00286 | 18 |
| AX-158133029 | 13 | 38.429 | KV453128.1 | 4079936 | 18-scf00286 | 18 |
| AX-158133031 | 13 | 38.429 | KV453128.1 | 4083431 | 18-scf00286 | 18 |
| AX-158133032 | 13 | 38.429 | KV453128.1 | 4084429 | 18-scf00286 | 18 |
| AX-158133038 | 13 | 38.429 | KV453128.1 | 4089547 | 18-scf00286 | 18 |
| AX-158133040 | 13 | 38.429 | KV453128.1 | 4090207 | 18-scf00286 | 18 |
| AX-158133041 | 13 | 38.429 | KV453128.1 | 4092424 | 18-scf00286 | 18 |
| AX-158133044 | 13 | 38.429 | KV453128.1 | 4096678 | 18-scf00286 | 18 |
| AX-158133045 | 13 | 38.429 | KV453128.1 | 4097128 | 18-scf00286 | 18 |
| AX-157745376 | 13 | 38.429 | KV453128.1 | 4097485 | 18-scf00286 | 18 |
| AX-158133047 | 13 | 38.429 | KV453128.1 | 4099802 | 18-scf00286 | 18 |
| AX-158133048 | 13 | 38.429 | KV453128.1 | 4100584 | 18-scf00286 | 18 |
| AX-158133052 | 13 | 38.429 | KV453128.1 | 4113336 | 18-scf00286 | 18 |
| AX-158133053 | 13 | 38.429 | KV453128.1 | 4113826 | 18-scf00286 | 18 |
| AX-158133054 | 13 | 38.429 | KV453128.1 | 4114231 | 18-scf00286 | 18 |
| AX-158133055 | 13 | 38.429 | KV453128.1 | 4114705 | 18-scf00286 | 18 |

|              |    |        |            |         |             |    |
|--------------|----|--------|------------|---------|-------------|----|
| AX-158133059 | 13 | 38.429 | KV453128.1 | 4118170 | 18-scf00286 | 18 |
| AX-158133062 | 13 | 38.429 | KV453128.1 | 4121198 | 18-scf00286 | 18 |
| AX-158133134 | 13 | 38.429 | KV453128.1 | 4208298 | 18-scf00286 | 18 |
| AX-158133181 | 13 | 38.429 | KV453128.1 | 4267028 | 18-scf00286 | 18 |
| AX-158132991 | 13 | 38.538 | KV453128.1 | 4038244 | 18-scf00286 | 18 |
| AX-158133025 | 13 | 38.538 | KV453128.1 | 4074256 | 18-scf00286 | 18 |
| AX-158133027 | 13 | 38.538 | KV453128.1 | 4075626 | 18-scf00286 | 18 |
| AX-158133037 | 13 | 38.538 | KV453128.1 | 4088885 | 18-scf00286 | 18 |
| AX-157886244 | 13 | 38.538 | KV453128.1 | 4098536 | 18-scf00286 | 18 |
| AX-158133065 | 13 | 38.538 | KV453128.1 | 4122959 | 18-scf00286 | 18 |
| AX-158133066 | 13 | 38.538 | KV453128.1 | 4123846 | 18-scf00286 | 18 |
| AX-158133068 | 13 | 38.538 | KV453128.1 | 4127206 | 18-scf00286 | 18 |
| AX-158133070 | 13 | 38.538 | KV453128.1 | 4129794 | 18-scf00286 | 18 |
| AX-158133071 | 13 | 38.538 | KV453128.1 | 4130642 | 18-scf00286 | 18 |
| AX-158133074 | 13 | 38.538 | KV453128.1 | 4132323 | 18-scf00286 | 18 |
| AX-157830386 | 13 | 38.538 | KV453128.1 | 4132686 | 18-scf00286 | 18 |
| AX-157753976 | 13 | 38.538 | KV453128.1 | 4135028 | 18-scf00286 | 18 |
| AX-158133090 | 13 | 38.538 | KV453128.1 | 4150224 | 18-scf00286 | 18 |
| AX-158133102 | 13 | 38.538 | KV453128.1 | 4176045 | 18-scf00286 | 18 |
| AX-157830389 | 13 | 38.538 | KV453128.1 | 4275090 | 18-scf00286 | 18 |
| AX-157830392 | 13 | 38.538 | KV453128.1 | 4282697 | 18-scf00286 | 18 |
| AX-158133190 | 13 | 38.538 | KV453128.1 | 4283777 | 18-scf00286 | 18 |
| AX-158133353 | 13 | 38.538 | KV453128.1 | 4525352 | 18-scf00286 | 18 |
| AX-158133039 | 13 | 38.648 | KV453128.1 | 4089831 | 18-scf00286 | 18 |
| AX-158133057 | 13 | 38.648 | KV453128.1 | 4116543 | 18-scf00286 | 18 |
| AX-157830387 | 13 | 38.648 | KV453128.1 | 4142720 | 18-scf00286 | 18 |
| AX-158133087 | 13 | 38.648 | KV453128.1 | 4148069 | 18-scf00286 | 18 |
| AX-158133089 | 13 | 38.648 | KV453128.1 | 4149762 | 18-scf00286 | 18 |
| AX-158133092 | 13 | 38.648 | KV453128.1 | 4154284 | 18-scf00286 | 18 |
| AX-158133093 | 13 | 38.648 | KV453128.1 | 4156899 | 18-scf00286 | 18 |
| AX-158133094 | 13 | 38.648 | KV453128.1 | 4158333 | 18-scf00286 | 18 |
| AX-157857856 | 13 | 38.648 | KV453128.1 | 4159928 | 18-scf00286 | 18 |
| AX-157740768 | 13 | 38.648 | KV453128.1 | 4161904 | 18-scf00286 | 18 |
| AX-158392852 | 13 | 38.648 | KV453128.1 | 4162914 | 18-scf00286 | 18 |
| AX-157742102 | 13 | 38.648 | KV453128.1 | 4164138 | 18-scf00286 | 18 |
| AX-158133097 | 13 | 38.648 | KV453128.1 | 4165743 | 18-scf00286 | 18 |
| AX-158133099 | 13 | 38.648 | KV453128.1 | 4169038 | 18-scf00286 | 18 |
| AX-158133101 | 13 | 38.648 | KV453128.1 | 4175336 | 18-scf00286 | 18 |
| AX-158133107 | 13 | 38.648 | KV453128.1 | 4180966 | 18-scf00286 | 18 |
| AX-157756416 | 13 | 38.648 | KV453128.1 | 4183573 | 18-scf00286 | 18 |
| AX-158133110 | 13 | 38.648 | KV453128.1 | 4186434 | 18-scf00286 | 18 |
| AX-158133111 | 13 | 38.648 | KV453128.1 | 4186790 | 18-scf00286 | 18 |
| AX-158133113 | 13 | 38.648 | KV453128.1 | 4188651 | 18-scf00286 | 18 |
| AX-158133119 | 13 | 38.648 | KV453128.1 | 4194180 | 18-scf00286 | 18 |
| AX-158380258 | 13 | 38.648 | KV453128.1 | 4200187 | 18-scf00286 | 18 |
| AX-158133131 | 13 | 38.648 | KV453128.1 | 4205871 | 18-scf00286 | 18 |
| AX-158133135 | 13 | 38.648 | KV453128.1 | 4209120 | 18-scf00286 | 18 |
| AX-158133138 | 13 | 38.648 | KV453128.1 | 4213554 | 18-scf00286 | 18 |
| AX-158133143 | 13 | 38.648 | KV453128.1 | 4217213 | 18-scf00286 | 18 |
| AX-158133158 | 13 | 38.648 | KV453128.1 | 4241677 | 18-scf00286 | 18 |
| AX-158133167 | 13 | 38.648 | KV453128.1 | 4248803 | 18-scf00286 | 18 |

|              |    |        |            |         |             |    |
|--------------|----|--------|------------|---------|-------------|----|
| AX-158133291 | 13 | 38.648 | KV453128.1 | 4430339 | 18-scf00286 | 18 |
| AX-158133389 | 13 | 38.648 | KV453128.1 | 4576836 | 18-scf00286 | 18 |
| AX-158133414 | 13 | 38.648 | KV453128.1 | 4616492 | 18-scf00286 | 18 |
| AX-157871411 | 13 | 38.658 | KV453128.1 | 4082316 | 18-scf00286 | 18 |
| AX-158133049 | 13 | 38.658 | KV453128.1 | 4101421 | 18-scf00286 | 18 |
| AX-157830385 | 13 | 38.658 | KV453128.1 | 4132270 | 18-scf00286 | 18 |
| AX-158133145 | 13 | 38.658 | KV453128.1 | 4220310 | 18-scf00286 | 18 |
| AX-158133188 | 13 | 38.658 | KV453128.1 | 4276079 | 18-scf00286 | 18 |
| AX-158133224 | 13 | 38.658 | KV453128.1 | 4330131 | 18-scf00286 | 18 |
| AX-158133431 | 13 | 38.658 | KV453128.1 | 4641630 | 18-scf00286 | 18 |
| AX-158133141 | 13 | 38.668 | KV453128.1 | 4216262 | 18-scf00286 | 18 |
| AX-158133146 | 13 | 38.668 | KV453128.1 | 4221660 | 18-scf00286 | 18 |
| AX-158133149 | 13 | 38.668 | KV453128.1 | 4224920 | 18-scf00286 | 18 |
| AX-157750373 | 13 | 38.668 | KV453128.1 | 4303453 | 18-scf00286 | 18 |
| AX-158133161 | 13 | 38.679 | KV453128.1 | 4243333 | 18-scf00286 | 18 |
| AX-158133162 | 13 | 38.695 | KV453128.1 | 4243782 | 18-scf00286 | 18 |
| AX-158133163 | 13 | 38.704 | KV453128.1 | 4245837 | 18-scf00286 | 18 |
| AX-158133164 | 13 | 38.724 | KV453128.1 | 4246145 | 18-scf00286 | 18 |
| AX-158133171 | 13 | 38.741 | KV453128.1 | 4251198 | 18-scf00286 | 18 |
| AX-157745605 | 13 | 38.757 | KV453128.1 | 3708862 | 18-scf00286 | 18 |
| AX-157830341 | 13 | 38.757 | KV453128.1 | 3747011 | 18-scf00286 | 18 |
| AX-158132774 | 13 | 38.757 | KV453128.1 | 3767948 | 18-scf00286 | 18 |
| AX-158132900 | 13 | 38.757 | KV453128.1 | 3921142 | 18-scf00286 | 18 |
| AX-158132905 | 13 | 38.757 | KV453128.1 | 3925757 | 18-scf00286 | 18 |
| AX-158132923 | 13 | 38.757 | KV453128.1 | 3944635 | 18-scf00286 | 18 |
| AX-158133030 | 13 | 38.757 | KV453128.1 | 4082694 | 18-scf00286 | 18 |
| AX-158133036 | 13 | 38.757 | KV453128.1 | 4086813 | 18-scf00286 | 18 |
| AX-158133042 | 13 | 38.757 | KV453128.1 | 4095507 | 18-scf00286 | 18 |
| AX-158133058 | 13 | 38.757 | KV453128.1 | 4117483 | 18-scf00286 | 18 |
| AX-158133064 | 13 | 38.757 | KV453128.1 | 4122560 | 18-scf00286 | 18 |
| AX-158133083 | 13 | 38.757 | KV453128.1 | 4144190 | 18-scf00286 | 18 |
| AX-158133084 | 13 | 38.757 | KV453128.1 | 4145165 | 18-scf00286 | 18 |
| AX-158133095 | 13 | 38.757 | KV453128.1 | 4159240 | 18-scf00286 | 18 |
| AX-158133125 | 13 | 38.757 | KV453128.1 | 4200655 | 18-scf00286 | 18 |
| AX-158133126 | 13 | 38.757 | KV453128.1 | 4201196 | 18-scf00286 | 18 |
| AX-158133140 | 13 | 38.757 | KV453128.1 | 4215884 | 18-scf00286 | 18 |
| AX-158133159 | 13 | 38.757 | KV453128.1 | 4242172 | 18-scf00286 | 18 |
| AX-158133160 | 13 | 38.757 | KV453128.1 | 4243061 | 18-scf00286 | 18 |
| AX-157830388 | 13 | 38.757 | KV453128.1 | 4247771 | 18-scf00286 | 18 |
| AX-158133168 | 13 | 38.757 | KV453128.1 | 4249044 | 18-scf00286 | 18 |
| AX-158133170 | 13 | 38.757 | KV453128.1 | 4250782 | 18-scf00286 | 18 |
| AX-158133173 | 13 | 38.757 | KV453128.1 | 4258820 | 18-scf00286 | 18 |
| AX-158133174 | 13 | 38.757 | KV453128.1 | 4259908 | 18-scf00286 | 18 |
| AX-158133175 | 13 | 38.757 | KV453128.1 | 4260646 | 18-scf00286 | 18 |
| AX-158133176 | 13 | 38.757 | KV453128.1 | 4261074 | 18-scf00286 | 18 |
| AX-157740522 | 13 | 38.757 | KV453128.1 | 4261810 | 18-scf00286 | 18 |
| AX-158133180 | 13 | 38.757 | KV453128.1 | 4266207 | 18-scf00286 | 18 |
| AX-158133182 | 13 | 38.757 | KV453128.1 | 4268701 | 18-scf00286 | 18 |
| AX-158133183 | 13 | 38.757 | KV453128.1 | 4268988 | 18-scf00286 | 18 |
| AX-158133184 | 13 | 38.757 | KV453128.1 | 4271084 | 18-scf00286 | 18 |
| AX-158133186 | 13 | 38.757 | KV453128.1 | 4272950 | 18-scf00286 | 18 |

|              |    |        |            |         |             |    |
|--------------|----|--------|------------|---------|-------------|----|
| AX-158133189 | 13 | 38.757 | KV453128.1 | 4276554 | 18-scf00286 | 18 |
| AX-157830390 | 13 | 38.757 | KV453128.1 | 4278061 | 18-scf00286 | 18 |
| AX-157715320 | 13 | 38.757 | KV453128.1 | 4280008 | 18-scf00286 | 18 |
| AX-158133191 | 13 | 38.757 | KV453128.1 | 4284190 | 18-scf00286 | 18 |
| AX-158133194 | 13 | 38.757 | KV453128.1 | 4289172 | 18-scf00286 | 18 |
| AX-157727098 | 13 | 38.757 | KV453128.1 | 4296298 | 18-scf00286 | 18 |
| AX-158133198 | 13 | 38.757 | KV453128.1 | 4297218 | 18-scf00286 | 18 |
| AX-158133199 | 13 | 38.757 | KV453128.1 | 4298366 | 18-scf00286 | 18 |
| AX-158133201 | 13 | 38.757 | KV453128.1 | 4299574 | 18-scf00286 | 18 |
| AX-158133202 | 13 | 38.757 | KV453128.1 | 4300289 | 18-scf00286 | 18 |
| AX-158133203 | 13 | 38.757 | KV453128.1 | 4300765 | 18-scf00286 | 18 |
| AX-157749461 | 13 | 38.757 | KV453128.1 | 4304087 | 18-scf00286 | 18 |
| AX-158133205 | 13 | 38.757 | KV453128.1 | 4304535 | 18-scf00286 | 18 |
| AX-158133206 | 13 | 38.757 | KV453128.1 | 4306463 | 18-scf00286 | 18 |
| AX-158133208 | 13 | 38.757 | KV453128.1 | 4310097 | 18-scf00286 | 18 |
| AX-158133222 | 13 | 38.757 | KV453128.1 | 4327069 | 18-scf00286 | 18 |
| AX-158133223 | 13 | 38.757 | KV453128.1 | 4328625 | 18-scf00286 | 18 |
| AX-158133229 | 13 | 38.757 | KV453128.1 | 4337945 | 18-scf00286 | 18 |
| AX-158133273 | 13 | 38.757 | KV453128.1 | 4410205 | 18-scf00286 | 18 |
| AX-158133282 | 13 | 38.757 | KV453128.1 | 4422005 | 18-scf00286 | 18 |
| AX-158133309 | 13 | 38.757 | KV453128.1 | 4455578 | 18-scf00286 | 18 |
| AX-158133340 | 13 | 38.757 | KV453128.1 | 4504072 | 18-scf00286 | 18 |
| AX-158133366 | 13 | 38.757 | KV453128.1 | 4550154 | 18-scf00286 | 18 |
| AX-158133373 | 13 | 38.757 | KV453128.1 | 4557337 | 18-scf00286 | 18 |
| AX-158133212 | 13 | 38.866 | KV453128.1 | 4314079 | 18-scf00286 | 18 |
| AX-158133240 | 13 | 38.866 | KV453128.1 | 4352362 | 18-scf00286 | 18 |
| AX-158133197 | 13 | 38.975 | KV453128.1 | 4295001 | 18-scf00286 | 18 |
| AX-158133215 | 13 | 38.975 | KV453128.1 | 4317211 | 18-scf00286 | 18 |
| AX-158133216 | 13 | 38.975 | KV453128.1 | 4318347 | 18-scf00286 | 18 |
| AX-158133217 | 13 | 38.975 | KV453128.1 | 4318853 | 18-scf00286 | 18 |
| AX-158133121 | 13 | 39.085 | KV453128.1 | 4195948 | 18-scf00286 | 18 |
| AX-158133122 | 13 | 39.085 | KV453128.1 | 4197717 | 18-scf00286 | 18 |
| AX-158133124 | 13 | 39.085 | KV453128.1 | 4200098 | 18-scf00286 | 18 |
| AX-158133165 | 13 | 39.085 | KV453128.1 | 4246885 | 18-scf00286 | 18 |
| AX-158133226 | 13 | 39.085 | KV453128.1 | 4335344 | 18-scf00286 | 18 |
| AX-158133227 | 13 | 39.085 | KV453128.1 | 4336502 | 18-scf00286 | 18 |
| AX-157886246 | 13 | 39.085 | KV453128.1 | 4338084 | 18-scf00286 | 18 |
| AX-158133232 | 13 | 39.085 | KV453128.1 | 4342161 | 18-scf00286 | 18 |
| AX-158133234 | 13 | 39.085 | KV453128.1 | 4345592 | 18-scf00286 | 18 |
| AX-158133239 | 13 | 39.085 | KV453128.1 | 4352138 | 18-scf00286 | 18 |
| AX-158133242 | 13 | 39.085 | KV453128.1 | 4355004 | 18-scf00286 | 18 |
| AX-158385294 | 13 | 39.085 | KV453128.1 | 4370976 | 18-scf00286 | 18 |
| AX-158133248 | 13 | 39.085 | KV453128.1 | 4371151 | 18-scf00286 | 18 |
| AX-158133249 | 13 | 39.085 | KV453128.1 | 4372638 | 18-scf00286 | 18 |
| AX-158133250 | 13 | 39.085 | KV453128.1 | 4374181 | 18-scf00286 | 18 |
| AX-158133251 | 13 | 39.085 | KV453128.1 | 4376752 | 18-scf00286 | 18 |
| AX-158133307 | 13 | 39.085 | KV453128.1 | 4454033 | 18-scf00286 | 18 |
| AX-158133365 | 13 | 39.085 | KV453128.1 | 4549095 | 18-scf00286 | 18 |
| AX-158133412 | 13 | 39.085 | KV453128.1 | 4614663 | 18-scf00286 | 18 |
| AX-158133129 | 13 | 39.194 | KV453128.1 | 4203270 | 18-scf00286 | 18 |
| AX-158133136 | 13 | 39.194 | KV453128.1 | 4210445 | 18-scf00286 | 18 |



|              |    |        |            |         |             |    |
|--------------|----|--------|------------|---------|-------------|----|
| AX-158133148 | 13 | 39.194 | KV453128.1 | 4224430 | 18-scf00286 | 18 |
| AX-157725735 | 13 | 39.194 | KV453128.1 | 4375595 | 18-scf00286 | 18 |
| AX-158133252 | 13 | 39.194 | KV453128.1 | 4381569 | 18-scf00286 | 18 |
| AX-158133255 | 13 | 39.194 | KV453128.1 | 4383125 | 18-scf00286 | 18 |
| AX-158411615 | 13 | 39.194 | KV453128.1 | 4385509 | 18-scf00286 | 18 |
| AX-158133257 | 13 | 39.194 | KV453128.1 | 4389039 | 18-scf00286 | 18 |
| AX-158133259 | 13 | 39.194 | KV453128.1 | 4390638 | 18-scf00286 | 18 |
| AX-158133265 | 13 | 39.194 | KV453128.1 | 4397953 | 18-scf00286 | 18 |
| AX-158133266 | 13 | 39.194 | KV453128.1 | 4400687 | 18-scf00286 | 18 |
| AX-158133267 | 13 | 39.194 | KV453128.1 | 4401421 | 18-scf00286 | 18 |
| AX-158133268 | 13 | 39.194 | KV453128.1 | 4402572 | 18-scf00286 | 18 |
| AX-158133269 | 13 | 39.194 | KV453128.1 | 4404414 | 18-scf00286 | 18 |
| AX-158133270 | 13 | 39.194 | KV453128.1 | 4405500 | 18-scf00286 | 18 |
| AX-157830394 | 13 | 39.194 | KV453128.1 | 4406305 | 18-scf00286 | 18 |
| AX-158133271 | 13 | 39.194 | KV453128.1 | 4406779 | 18-scf00286 | 18 |
| AX-158133272 | 13 | 39.194 | KV453128.1 | 4407180 | 18-scf00286 | 18 |
| AX-158133276 | 13 | 39.194 | KV453128.1 | 4413179 | 18-scf00286 | 18 |
| AX-158133277 | 13 | 39.194 | KV453128.1 | 4414346 | 18-scf00286 | 18 |
| AX-158133284 | 13 | 39.194 | KV453128.1 | 4424130 | 18-scf00286 | 18 |
| AX-158133287 | 13 | 39.194 | KV453128.1 | 4426126 | 18-scf00286 | 18 |
| AX-158133289 | 13 | 39.194 | KV453128.1 | 4428782 | 18-scf00286 | 18 |
| AX-158133294 | 13 | 39.194 | KV453128.1 | 4432995 | 18-scf00286 | 18 |
| AX-158133296 | 13 | 39.194 | KV453128.1 | 4436551 | 18-scf00286 | 18 |
| AX-158133298 | 13 | 39.194 | KV453128.1 | 4441049 | 18-scf00286 | 18 |
| AX-158133302 | 13 | 39.194 | KV453128.1 | 4446836 | 18-scf00286 | 18 |
| AX-158133304 | 13 | 39.194 | KV453128.1 | 4449227 | 18-scf00286 | 18 |
| AX-158133314 | 13 | 39.194 | KV453128.1 | 4460920 | 18-scf00286 | 18 |
| AX-158133334 | 13 | 39.194 | KV453128.1 | 4492835 | 18-scf00286 | 18 |
| AX-158133350 | 13 | 39.194 | KV453128.1 | 4520409 | 18-scf00286 | 18 |
| AX-157726828 | 13 | 39.194 | KV453128.1 | 4543433 | 18-scf00286 | 18 |
| AX-158133376 | 13 | 39.194 | KV453128.1 | 4559942 | 18-scf00286 | 18 |
| AX-158133387 | 13 | 39.194 | KV453128.1 | 4574549 | 18-scf00286 | 18 |
| AX-158133419 | 13 | 39.194 | KV453128.1 | 4625659 | 18-scf00286 | 18 |
| AX-158133468 | 13 | 39.194 | KV453128.1 | 4697512 | 18-scf00286 | 18 |
| AX-157830427 | 13 | 39.194 | KV453128.1 | 4932199 | 18-scf00286 | 18 |
| AX-158380259 | 13 | 39.22  | KV453128.1 | 4457303 | 18-scf00286 | 18 |
| AX-157715960 | 13 | 39.243 | KV453128.1 | 4457989 | 18-scf00286 | 18 |
| AX-158133315 | 13 | 39.274 | KV453128.1 | 4461468 | 18-scf00286 | 18 |
| AX-158133218 | 13 | 39.303 | KV453128.1 | 4319214 | 18-scf00286 | 18 |
| AX-158133253 | 13 | 39.303 | KV453128.1 | 4382144 | 18-scf00286 | 18 |
| AX-158133303 | 13 | 39.303 | KV453128.1 | 4448122 | 18-scf00286 | 18 |
| AX-158133316 | 13 | 39.303 | KV453128.1 | 4462318 | 18-scf00286 | 18 |
| AX-158133317 | 13 | 39.303 | KV453128.1 | 4465471 | 18-scf00286 | 18 |
| AX-158133319 | 13 | 39.303 | KV453128.1 | 4470563 | 18-scf00286 | 18 |
| AX-158133323 | 13 | 39.303 | KV453128.1 | 4474557 | 18-scf00286 | 18 |
| AX-158133324 | 13 | 39.303 | KV453128.1 | 4475201 | 18-scf00286 | 18 |
| AX-158133325 | 13 | 39.303 | KV453128.1 | 4477197 | 18-scf00286 | 18 |
| AX-158133326 | 13 | 39.303 | KV453128.1 | 4480351 | 18-scf00286 | 18 |
| AX-158411619 | 13 | 39.303 | KV453128.1 | 4480394 | 18-scf00286 | 18 |
| AX-158133354 | 13 | 39.303 | KV453128.1 | 4527212 | 18-scf00286 | 18 |
| AX-158133377 | 13 | 39.303 | KV453128.1 | 4560420 | 18-scf00286 | 18 |

|              |    |        |             |         |             |    |
|--------------|----|--------|-------------|---------|-------------|----|
| AX-158133383 | 13 | 39.303 | KV453128.1  | 4569464 | 18-scf00286 | 18 |
| AX-158133385 | 13 | 39.303 | KV453128.1  | 4572607 | 18-scf00286 | 18 |
| AX-158133427 | 13 | 39.303 | KV453128.1  | 4634117 | 18-scf00286 | 18 |
| AX-158385300 | 13 | 39.303 | KV453128.1  | 4719323 | 18-scf00286 | 18 |
| AX-157706004 | 13 | 39.303 | 3ML01031417 | 491     | scf07030_1  | UN |
| AX-158133327 | 13 | 39.341 | KV453128.1  | 4481569 | 18-scf00286 | 18 |
| AX-158133328 | 13 | 39.382 | KV453128.1  | 4485730 | 18-scf00286 | 18 |
| AX-158133237 | 13 | 39.412 | KV453128.1  | 4350251 | 18-scf00286 | 18 |
| AX-158133241 | 13 | 39.412 | KV453128.1  | 4353498 | 18-scf00286 | 18 |
| AX-158133288 | 13 | 39.412 | KV453128.1  | 4426721 | 18-scf00286 | 18 |
| AX-158133318 | 13 | 39.412 | KV453128.1  | 4466193 | 18-scf00286 | 18 |
| AX-158133329 | 13 | 39.412 | KV453128.1  | 4486523 | 18-scf00286 | 18 |
| AX-158133330 | 13 | 39.412 | KV453128.1  | 4488482 | 18-scf00286 | 18 |
| AX-158133331 | 13 | 39.412 | KV453128.1  | 4488783 | 18-scf00286 | 18 |
| AX-158133332 | 13 | 39.412 | KV453128.1  | 4490240 | 18-scf00286 | 18 |
| AX-157752137 | 13 | 39.412 | KV453128.1  | 4492312 | 18-scf00286 | 18 |
| AX-158133335 | 13 | 39.412 | KV453128.1  | 4493728 | 18-scf00286 | 18 |
| AX-158133336 | 13 | 39.412 | KV453128.1  | 4495698 | 18-scf00286 | 18 |
| AX-158133338 | 13 | 39.412 | KV453128.1  | 4499879 | 18-scf00286 | 18 |
| AX-158133339 | 13 | 39.412 | KV453128.1  | 4503048 | 18-scf00286 | 18 |
| AX-158133344 | 13 | 39.412 | KV453128.1  | 4508423 | 18-scf00286 | 18 |
| AX-157695785 | 13 | 39.412 | KV453128.1  | 4511034 | 18-scf00286 | 18 |
| AX-157886249 | 13 | 39.412 | KV453128.1  | 4518581 | 18-scf00286 | 18 |
| AX-158133349 | 13 | 39.412 | KV453128.1  | 4519944 | 18-scf00286 | 18 |
| AX-158133351 | 13 | 39.412 | KV453128.1  | 4522416 | 18-scf00286 | 18 |
| AX-158133355 | 13 | 39.412 | KV453128.1  | 4527900 | 18-scf00286 | 18 |
| AX-157749149 | 13 | 39.412 | KV453128.1  | 4529684 | 18-scf00286 | 18 |
| AX-158133358 | 13 | 39.412 | KV453128.1  | 4533373 | 18-scf00286 | 18 |
| AX-157751687 | 13 | 39.412 | KV453128.1  | 4537218 | 18-scf00286 | 18 |
| AX-158133361 | 13 | 39.412 | KV453128.1  | 4540933 | 18-scf00286 | 18 |
| AX-158133362 | 13 | 39.412 | KV453128.1  | 4542556 | 18-scf00286 | 18 |
| AX-158133363 | 13 | 39.412 | KV453128.1  | 4545726 | 18-scf00286 | 18 |
| AX-158133364 | 13 | 39.412 | KV453128.1  | 4547947 | 18-scf00286 | 18 |
| AX-158133369 | 13 | 39.412 | KV453128.1  | 4552258 | 18-scf00286 | 18 |
| AX-158133751 | 13 | 39.412 | KV453128.1  | 5152046 | 18-scf00286 | 18 |
| AX-158133372 | 13 | 39.478 | KV453128.1  | 4555862 | 18-scf00286 | 18 |
| AX-158133213 | 13 | 39.522 | KV453128.1  | 4315158 | 18-scf00286 | 18 |
| AX-158133295 | 13 | 39.522 | KV453128.1  | 4433369 | 18-scf00286 | 18 |
| AX-158133305 | 13 | 39.522 | KV453128.1  | 4450620 | 18-scf00286 | 18 |
| AX-158133321 | 13 | 39.522 | KV453128.1  | 4472476 | 18-scf00286 | 18 |
| AX-157741703 | 13 | 39.522 | KV453128.1  | 4556639 | 18-scf00286 | 18 |
| AX-158133374 | 13 | 39.522 | KV453128.1  | 4557881 | 18-scf00286 | 18 |
| AX-158133375 | 13 | 39.522 | KV453128.1  | 4559187 | 18-scf00286 | 18 |
| AX-158133381 | 13 | 39.522 | KV453128.1  | 4565803 | 18-scf00286 | 18 |
| AX-158133382 | 13 | 39.522 | KV453128.1  | 4567583 | 18-scf00286 | 18 |
| AX-158408162 | 13 | 39.522 | KV453128.1  | 4567878 | 18-scf00286 | 18 |
| AX-158133386 | 13 | 39.522 | KV453128.1  | 4574005 | 18-scf00286 | 18 |
| AX-158133417 | 13 | 39.522 | KV453128.1  | 4623858 | 18-scf00286 | 18 |
| AX-157886251 | 13 | 39.552 | KV453128.1  | 4569684 | 18-scf00286 | 18 |
| AX-158133384 | 13 | 39.58  | KV453128.1  | 4570472 | 18-scf00286 | 18 |
| AX-158133388 | 13 | 39.604 | KV453128.1  | 4575581 | 18-scf00286 | 18 |

|              |    |        |            |         |             |    |
|--------------|----|--------|------------|---------|-------------|----|
| AX-158133392 | 13 | 39.623 | KV453128.1 | 4578709 | 18-scf00286 | 18 |
| AX-158133393 | 13 | 39.631 | KV453128.1 | 4579661 | 18-scf00286 | 18 |
| AX-158133394 | 13 | 39.631 | KV453128.1 | 4581425 | 18-scf00286 | 18 |
| AX-158133396 | 13 | 39.631 | KV453128.1 | 4583240 | 18-scf00286 | 18 |
| AX-158133397 | 13 | 39.631 | KV453128.1 | 4583742 | 18-scf00286 | 18 |
| AX-158133401 | 13 | 39.631 | KV453128.1 | 4588878 | 18-scf00286 | 18 |
| AX-158411621 | 13 | 39.631 | KV453128.1 | 4589221 | 18-scf00286 | 18 |
| AX-158133402 | 13 | 39.631 | KV453128.1 | 4594724 | 18-scf00286 | 18 |
| AX-158133403 | 13 | 39.631 | KV453128.1 | 4595242 | 18-scf00286 | 18 |
| AX-157878015 | 13 | 39.631 | KV453128.1 | 4601748 | 18-scf00286 | 18 |
| AX-158385298 | 13 | 39.631 | KV453128.1 | 4602516 | 18-scf00286 | 18 |
| AX-158133405 | 13 | 39.631 | KV453128.1 | 4604183 | 18-scf00286 | 18 |
| AX-158133408 | 13 | 39.631 | KV453128.1 | 4607054 | 18-scf00286 | 18 |
| AX-158133409 | 13 | 39.631 | KV453128.1 | 4607680 | 18-scf00286 | 18 |
| AX-158385299 | 13 | 39.631 | KV453128.1 | 4611220 | 18-scf00286 | 18 |
| AX-158133426 | 13 | 39.631 | KV453128.1 | 4632017 | 18-scf00286 | 18 |
| AX-158133671 | 13 | 39.631 | KV453128.1 | 5036160 | 18-scf00286 | 18 |
| AX-158133413 | 13 | 39.649 | KV453128.1 | 4615512 | 18-scf00286 | 18 |
| AX-158133415 | 13 | 39.668 | KV453128.1 | 4617359 | 18-scf00286 | 18 |
| AX-158133416 | 13 | 39.703 | KV453128.1 | 4619010 | 18-scf00286 | 18 |
| AX-158133404 | 13 | 39.74  | KV453128.1 | 4597998 | 18-scf00286 | 18 |
| AX-158133418 | 13 | 39.74  | KV453128.1 | 4624776 | 18-scf00286 | 18 |
| AX-158133422 | 13 | 39.74  | KV453128.1 | 4629203 | 18-scf00286 | 18 |
| AX-158133423 | 13 | 39.74  | KV453128.1 | 4629784 | 18-scf00286 | 18 |
| AX-158133424 | 13 | 39.74  | KV453128.1 | 4630584 | 18-scf00286 | 18 |
| AX-158133428 | 13 | 39.74  | KV453128.1 | 4634588 | 18-scf00286 | 18 |
| AX-158133429 | 13 | 39.74  | KV453128.1 | 4635137 | 18-scf00286 | 18 |
| AX-158133430 | 13 | 39.74  | KV453128.1 | 4637168 | 18-scf00286 | 18 |
| AX-158133432 | 13 | 39.74  | KV453128.1 | 4642127 | 18-scf00286 | 18 |
| AX-158133438 | 13 | 39.812 | KV453128.1 | 4655333 | 18-scf00286 | 18 |
| AX-158133439 | 13 | 39.905 | KV453128.1 | 4656430 | 18-scf00286 | 18 |
| AX-158133446 | 13 | 40.067 | KV453128.1 | 4661298 | 18-scf00286 | 18 |
| AX-158133459 | 13 | 40.067 | KV453128.1 | 4683280 | 18-scf00286 | 18 |
| AX-158133636 | 13 | 40.067 | KV453128.1 | 4983464 | 18-scf00286 | 18 |
| AX-157830430 | 13 | 40.067 | KV453128.1 | 4989891 | 18-scf00286 | 18 |
| AX-158133718 | 13 | 40.067 | KV453128.1 | 5099492 | 18-scf00286 | 18 |
| AX-158133835 | 13 | 40.067 | KV453128.1 | 5252211 | 18-scf00286 | 18 |
| AX-158133850 | 13 | 40.067 | KV453128.1 | 5266087 | 18-scf00286 | 18 |
| AX-158133447 | 13 | 40.068 | KV453128.1 | 4665533 | 18-scf00286 | 18 |
| AX-158133448 | 13 | 40.069 | KV453128.1 | 4667694 | 18-scf00286 | 18 |
| AX-158133451 | 13 | 40.069 | KV453128.1 | 4672864 | 18-scf00286 | 18 |
| AX-158133452 | 13 | 40.069 | KV453128.1 | 4674296 | 18-scf00286 | 18 |
| AX-157830400 | 13 | 40.069 | KV453128.1 | 4712868 | 18-scf00286 | 18 |
| AX-158133566 | 13 | 40.069 | KV453128.1 | 4854060 | 18-scf00286 | 18 |
| AX-158133458 | 13 | 40.287 | KV453128.1 | 4680687 | 18-scf00286 | 18 |
| AX-158133462 | 13 | 40.287 | KV453128.1 | 4690551 | 18-scf00286 | 18 |
| AX-158133463 | 13 | 40.287 | KV453128.1 | 4691046 | 18-scf00286 | 18 |
| AX-158411613 | 13 | 40.396 | KV453128.1 | 4289646 | 18-scf00286 | 18 |
| AX-158133454 | 13 | 40.396 | KV453128.1 | 4676064 | 18-scf00286 | 18 |
| AX-158133470 | 13 | 40.396 | KV453128.1 | 4702375 | 18-scf00286 | 18 |
| AX-158133474 | 13 | 40.396 | KV453128.1 | 4706199 | 18-scf00286 | 18 |

|              |    |        |            |         |             |    |
|--------------|----|--------|------------|---------|-------------|----|
| AX-158133475 | 13 | 40.396 | KV453128.1 | 4707289 | 18-scf00286 | 18 |
| AX-158133476 | 13 | 40.396 | KV453128.1 | 4708048 | 18-scf00286 | 18 |
| AX-158133478 | 13 | 40.396 | KV453128.1 | 4709952 | 18-scf00286 | 18 |
| AX-157772745 | 13 | 40.396 | KV453128.1 | 4710438 | 18-scf00286 | 18 |
| AX-158133479 | 13 | 40.396 | KV453128.1 | 4711409 | 18-scf00286 | 18 |
| AX-157830398 | 13 | 40.396 | KV453128.1 | 4712427 | 18-scf00286 | 18 |
| AX-158133481 | 13 | 40.396 | KV453128.1 | 4713510 | 18-scf00286 | 18 |
| AX-158133482 | 13 | 40.396 | KV453128.1 | 4714896 | 18-scf00286 | 18 |
| AX-158133483 | 13 | 40.396 | KV453128.1 | 4715392 | 18-scf00286 | 18 |
| AX-158133484 | 13 | 40.396 | KV453128.1 | 4715863 | 18-scf00286 | 18 |
| AX-158133485 | 13 | 40.396 | KV453128.1 | 4716294 | 18-scf00286 | 18 |
| AX-158133486 | 13 | 40.396 | KV453128.1 | 4716810 | 18-scf00286 | 18 |
| AX-158133487 | 13 | 40.396 | KV453128.1 | 4718779 | 18-scf00286 | 18 |
| AX-158133488 | 13 | 40.396 | KV453128.1 | 4719750 | 18-scf00286 | 18 |
| AX-158133491 | 13 | 40.396 | KV453128.1 | 4725100 | 18-scf00286 | 18 |
| AX-158133492 | 13 | 40.396 | KV453128.1 | 4726389 | 18-scf00286 | 18 |
| AX-158133493 | 13 | 40.396 | KV453128.1 | 4726760 | 18-scf00286 | 18 |
| AX-158133494 | 13 | 40.396 | KV453128.1 | 4727786 | 18-scf00286 | 18 |
| AX-157741917 | 13 | 40.396 | KV453128.1 | 4732136 | 18-scf00286 | 18 |
| AX-158133500 | 13 | 40.396 | KV453128.1 | 4732889 | 18-scf00286 | 18 |
| AX-158133502 | 13 | 40.396 | KV453128.1 | 4734831 | 18-scf00286 | 18 |
| AX-158392858 | 13 | 40.396 | KV453128.1 | 4743149 | 18-scf00286 | 18 |
| AX-158133578 | 13 | 40.396 | KV453128.1 | 4887107 | 18-scf00286 | 18 |
| AX-158133579 | 13 | 40.396 | KV453128.1 | 4889834 | 18-scf00286 | 18 |
| AX-158133580 | 13 | 40.396 | KV453128.1 | 4890190 | 18-scf00286 | 18 |
| AX-158133594 | 13 | 40.396 | KV453128.1 | 4924237 | 18-scf00286 | 18 |
| AX-157830432 | 13 | 40.396 | KV453128.1 | 5029152 | 18-scf00286 | 18 |
| AX-158133698 | 13 | 40.396 | KV453128.1 | 5073367 | 18-scf00286 | 18 |
| AX-158133504 | 13 | 40.428 | KV453128.1 | 4741443 | 18-scf00286 | 18 |
| AX-158133466 | 13 | 40.505 | KV453128.1 | 4694657 | 18-scf00286 | 18 |
| AX-158133506 | 13 | 40.505 | KV453128.1 | 4743271 | 18-scf00286 | 18 |
| AX-158133508 | 13 | 40.505 | KV453128.1 | 4746115 | 18-scf00286 | 18 |
| AX-158133509 | 13 | 40.505 | KV453128.1 | 4748446 | 18-scf00286 | 18 |
| AX-158133515 | 13 | 40.505 | KV453128.1 | 4757025 | 18-scf00286 | 18 |
| AX-158133518 | 13 | 40.505 | KV453128.1 | 4762630 | 18-scf00286 | 18 |
| AX-158133519 | 13 | 40.505 | KV453128.1 | 4763753 | 18-scf00286 | 18 |
| AX-158133523 | 13 | 40.505 | KV453128.1 | 4770129 | 18-scf00286 | 18 |
| AX-158133524 | 13 | 40.505 | KV453128.1 | 4771880 | 18-scf00286 | 18 |
| AX-157830403 | 13 | 40.505 | KV453128.1 | 4773363 | 18-scf00286 | 18 |
| AX-158133525 | 13 | 40.505 | KV453128.1 | 4774963 | 18-scf00286 | 18 |
| AX-158133526 | 13 | 40.505 | KV453128.1 | 4775452 | 18-scf00286 | 18 |
| AX-157719919 | 13 | 40.505 | KV453128.1 | 4782736 | 18-scf00286 | 18 |
| AX-158133527 | 13 | 40.505 | KV453128.1 | 4783505 | 18-scf00286 | 18 |
| AX-158133528 | 13 | 40.505 | KV453128.1 | 4784072 | 18-scf00286 | 18 |
| AX-158133529 | 13 | 40.505 | KV453128.1 | 4784455 | 18-scf00286 | 18 |
| AX-158133530 | 13 | 40.505 | KV453128.1 | 4784766 | 18-scf00286 | 18 |
| AX-157830406 | 13 | 40.505 | KV453128.1 | 4786862 | 18-scf00286 | 18 |
| AX-157715086 | 13 | 40.505 | KV453128.1 | 4787221 | 18-scf00286 | 18 |
| AX-158385302 | 13 | 40.505 | KV453128.1 | 4790094 | 18-scf00286 | 18 |
| AX-158133531 | 13 | 40.505 | KV453128.1 | 4790156 | 18-scf00286 | 18 |
| AX-158133532 | 13 | 40.505 | KV453128.1 | 4791850 | 18-scf00286 | 18 |

|              |    |        |            |         |             |    |
|--------------|----|--------|------------|---------|-------------|----|
| AX-158133541 | 13 | 40.505 | KV453128.1 | 4822094 | 18-scf00286 | 18 |
| AX-158133544 | 13 | 40.505 | KV453128.1 | 4824487 | 18-scf00286 | 18 |
| AX-157727377 | 13 | 40.505 | KV453128.1 | 4826227 | 18-scf00286 | 18 |
| AX-158133545 | 13 | 40.505 | KV453128.1 | 4828598 | 18-scf00286 | 18 |
| AX-158133546 | 13 | 40.505 | KV453128.1 | 4828892 | 18-scf00286 | 18 |
| AX-158133547 | 13 | 40.505 | KV453128.1 | 4830582 | 18-scf00286 | 18 |
| AX-157727587 | 13 | 40.505 | KV453128.1 | 4831763 | 18-scf00286 | 18 |
| AX-158133549 | 13 | 40.505 | KV453128.1 | 4832723 | 18-scf00286 | 18 |
| AX-158133550 | 13 | 40.505 | KV453128.1 | 4835049 | 18-scf00286 | 18 |
| AX-158133551 | 13 | 40.505 | KV453128.1 | 4835659 | 18-scf00286 | 18 |
| AX-158133553 | 13 | 40.505 | KV453128.1 | 4839227 | 18-scf00286 | 18 |
| AX-158133555 | 13 | 40.505 | KV453128.1 | 4840647 | 18-scf00286 | 18 |
| AX-158133556 | 13 | 40.505 | KV453128.1 | 4841074 | 18-scf00286 | 18 |
| AX-158133557 | 13 | 40.505 | KV453128.1 | 4842544 | 18-scf00286 | 18 |
| AX-158133558 | 13 | 40.505 | KV453128.1 | 4842875 | 18-scf00286 | 18 |
| AX-157871413 | 13 | 40.505 | KV453128.1 | 4846290 | 18-scf00286 | 18 |
| AX-158133561 | 13 | 40.505 | KV453128.1 | 4847239 | 18-scf00286 | 18 |
| AX-157830420 | 13 | 40.505 | KV453128.1 | 4848199 | 18-scf00286 | 18 |
| AX-158133562 | 13 | 40.505 | KV453128.1 | 4848525 | 18-scf00286 | 18 |
| AX-157830421 | 13 | 40.505 | KV453128.1 | 4850135 | 18-scf00286 | 18 |
| AX-157714653 | 13 | 40.505 | KV453128.1 | 4851452 | 18-scf00286 | 18 |
| AX-158133563 | 13 | 40.505 | KV453128.1 | 4852724 | 18-scf00286 | 18 |
| AX-158133564 | 13 | 40.505 | KV453128.1 | 4853078 | 18-scf00286 | 18 |
| AX-158133565 | 13 | 40.505 | KV453128.1 | 4853144 | 18-scf00286 | 18 |
| AX-157830422 | 13 | 40.505 | KV453128.1 | 4853530 | 18-scf00286 | 18 |
| AX-158133567 | 13 | 40.505 | KV453128.1 | 4854590 | 18-scf00286 | 18 |
| AX-157830423 | 13 | 40.505 | KV453128.1 | 4857736 | 18-scf00286 | 18 |
| AX-157830424 | 13 | 40.505 | KV453128.1 | 4857970 | 18-scf00286 | 18 |
| AX-158133568 | 13 | 40.505 | KV453128.1 | 4861215 | 18-scf00286 | 18 |
| AX-158422783 | 13 | 40.505 | KV453128.1 | 4865421 | 18-scf00286 | 18 |
| AX-158133569 | 13 | 40.505 | KV453128.1 | 4867953 | 18-scf00286 | 18 |
| AX-158133570 | 13 | 40.505 | KV453128.1 | 4870555 | 18-scf00286 | 18 |
| AX-158133572 | 13 | 40.505 | KV453128.1 | 4873475 | 18-scf00286 | 18 |
| AX-158133575 | 13 | 40.505 | KV453128.1 | 4879316 | 18-scf00286 | 18 |
| AX-158133577 | 13 | 40.505 | KV453128.1 | 4883274 | 18-scf00286 | 18 |
| AX-158133582 | 13 | 40.505 | KV453128.1 | 4900592 | 18-scf00286 | 18 |
| AX-158133584 | 13 | 40.505 | KV453128.1 | 4904666 | 18-scf00286 | 18 |
| AX-158133585 | 13 | 40.505 | KV453128.1 | 4905051 | 18-scf00286 | 18 |
| AX-158133586 | 13 | 40.505 | KV453128.1 | 4905446 | 18-scf00286 | 18 |
| AX-158133588 | 13 | 40.505 | KV453128.1 | 4909625 | 18-scf00286 | 18 |
| AX-157714368 | 13 | 40.505 | KV453128.1 | 4916114 | 18-scf00286 | 18 |
| AX-158411633 | 13 | 40.505 | KV453128.1 | 4918734 | 18-scf00286 | 18 |
| AX-157830426 | 13 | 40.505 | KV453128.1 | 4924894 | 18-scf00286 | 18 |
| AX-158133596 | 13 | 40.505 | KV453128.1 | 4925906 | 18-scf00286 | 18 |
| AX-158133597 | 13 | 40.505 | KV453128.1 | 4926525 | 18-scf00286 | 18 |
| AX-158133598 | 13 | 40.505 | KV453128.1 | 4927367 | 18-scf00286 | 18 |
| AX-158133599 | 13 | 40.505 | KV453128.1 | 4927724 | 18-scf00286 | 18 |
| AX-158133602 | 13 | 40.505 | KV453128.1 | 4936493 | 18-scf00286 | 18 |
| AX-158133603 | 13 | 40.505 | KV453128.1 | 4937427 | 18-scf00286 | 18 |
| AX-158133604 | 13 | 40.505 | KV453128.1 | 4937657 | 18-scf00286 | 18 |
| AX-157866270 | 13 | 40.505 | KV453128.1 | 4942252 | 18-scf00286 | 18 |

|              |    |        |            |         |             |    |
|--------------|----|--------|------------|---------|-------------|----|
| AX-158133610 | 13 | 40.505 | KV453128.1 | 4945204 | 18-scf00286 | 18 |
| AX-158133621 | 13 | 40.505 | KV453128.1 | 4963438 | 18-scf00286 | 18 |
| AX-158133622 | 13 | 40.505 | KV453128.1 | 4964503 | 18-scf00286 | 18 |
| AX-157743779 | 13 | 40.505 | KV453128.1 | 4966467 | 18-scf00286 | 18 |
| AX-157726624 | 13 | 40.505 | KV453128.1 | 4966881 | 18-scf00286 | 18 |
| AX-158133633 | 13 | 40.505 | KV453128.1 | 4979555 | 18-scf00286 | 18 |
| AX-157830431 | 13 | 40.505 | KV453128.1 | 4990120 | 18-scf00286 | 18 |
| AX-158133640 | 13 | 40.505 | KV453128.1 | 4991298 | 18-scf00286 | 18 |
| AX-158133657 | 13 | 40.505 | KV453128.1 | 5008857 | 18-scf00286 | 18 |
| AX-157717650 | 13 | 40.505 | KV453128.1 | 5065425 | 18-scf00286 | 18 |
| AX-158133692 | 13 | 40.505 | KV453128.1 | 5065543 | 18-scf00286 | 18 |
| AX-157717419 | 13 | 40.505 | KV453128.1 | 5095870 | 18-scf00286 | 18 |
| AX-157830445 | 13 | 40.505 | KV453128.1 | 5103739 | 18-scf00286 | 18 |
| AX-158133728 | 13 | 40.505 | KV453128.1 | 5114407 | 18-scf00286 | 18 |
| AX-158133740 | 13 | 40.505 | KV453128.1 | 5136202 | 18-scf00286 | 18 |
| AX-157830449 | 13 | 40.505 | KV453128.1 | 5136840 | 18-scf00286 | 18 |
| AX-158133748 | 13 | 40.505 | KV453128.1 | 5146491 | 18-scf00286 | 18 |
| AX-158133469 | 13 | 40.615 | KV453128.1 | 4701995 | 18-scf00286 | 18 |
| AX-158133480 | 13 | 40.615 | KV453128.1 | 4712212 | 18-scf00286 | 18 |
| AX-158133503 | 13 | 40.615 | KV453128.1 | 4736567 | 18-scf00286 | 18 |
| AX-158133510 | 13 | 40.615 | KV453128.1 | 4750965 | 18-scf00286 | 18 |
| AX-158133520 | 13 | 40.615 | KV453128.1 | 4767176 | 18-scf00286 | 18 |
| AX-158133522 | 13 | 40.615 | KV453128.1 | 4767983 | 18-scf00286 | 18 |
| AX-157752147 | 13 | 40.615 | KV453128.1 | 4775026 | 18-scf00286 | 18 |
| AX-157830405 | 13 | 40.615 | KV453128.1 | 4785319 | 18-scf00286 | 18 |
| AX-157830425 | 13 | 40.615 | KV453128.1 | 4862238 | 18-scf00286 | 18 |
| AX-158133606 | 13 | 40.615 | KV453128.1 | 4938815 | 18-scf00286 | 18 |
| AX-158133608 | 13 | 40.615 | KV453128.1 | 4940095 | 18-scf00286 | 18 |
| AX-157886256 | 13 | 40.615 | KV453128.1 | 4941321 | 18-scf00286 | 18 |
| AX-158133609 | 13 | 40.615 | KV453128.1 | 4943558 | 18-scf00286 | 18 |
| AX-158133611 | 13 | 40.615 | KV453128.1 | 4947331 | 18-scf00286 | 18 |
| AX-158133614 | 13 | 40.615 | KV453128.1 | 4951350 | 18-scf00286 | 18 |
| AX-158133623 | 13 | 40.615 | KV453128.1 | 4965625 | 18-scf00286 | 18 |
| AX-158133624 | 13 | 40.615 | KV453128.1 | 4967212 | 18-scf00286 | 18 |
| AX-158133626 | 13 | 40.615 | KV453128.1 | 4968987 | 18-scf00286 | 18 |
| AX-158133627 | 13 | 40.615 | KV453128.1 | 4971032 | 18-scf00286 | 18 |
| AX-158133628 | 13 | 40.615 | KV453128.1 | 4971519 | 18-scf00286 | 18 |
| AX-158133629 | 13 | 40.615 | KV453128.1 | 4976254 | 18-scf00286 | 18 |
| AX-158133630 | 13 | 40.615 | KV453128.1 | 4976829 | 18-scf00286 | 18 |
| AX-158133632 | 13 | 40.615 | KV453128.1 | 4978688 | 18-scf00286 | 18 |
| AX-158133634 | 13 | 40.615 | KV453128.1 | 4980513 | 18-scf00286 | 18 |
| AX-158133638 | 13 | 40.615 | KV453128.1 | 4988348 | 18-scf00286 | 18 |
| AX-158133641 | 13 | 40.615 | KV453128.1 | 4991647 | 18-scf00286 | 18 |
| AX-158133642 | 13 | 40.615 | KV453128.1 | 4992110 | 18-scf00286 | 18 |
| AX-157740703 | 13 | 40.615 | KV453128.1 | 4992786 | 18-scf00286 | 18 |
| AX-158133648 | 13 | 40.615 | KV453128.1 | 5000607 | 18-scf00286 | 18 |
| AX-156517533 | 13 | 40.615 | KV453128.1 | 5001176 | 18-scf00286 | 18 |
| AX-158133650 | 13 | 40.615 | KV453128.1 | 5002467 | 18-scf00286 | 18 |
| AX-158133651 | 13 | 40.615 | KV453128.1 | 5003942 | 18-scf00286 | 18 |
| AX-158133654 | 13 | 40.615 | KV453128.1 | 5005202 | 18-scf00286 | 18 |
| AX-158133655 | 13 | 40.615 | KV453128.1 | 5007349 | 18-scf00286 | 18 |

|              |    |        |             |         |             |    |
|--------------|----|--------|-------------|---------|-------------|----|
| AX-158133656 | 13 | 40.615 | KV453128.1  | 5008515 | 18-scf00286 | 18 |
| AX-158133658 | 13 | 40.615 | KV453128.1  | 5009350 | 18-scf00286 | 18 |
| AX-158133660 | 13 | 40.615 | KV453128.1  | 5011724 | 18-scf00286 | 18 |
| AX-158133663 | 13 | 40.615 | KV453128.1  | 5016443 | 18-scf00286 | 18 |
| AX-158133665 | 13 | 40.615 | KV453128.1  | 5019052 | 18-scf00286 | 18 |
| AX-158133666 | 13 | 40.615 | KV453128.1  | 5021136 | 18-scf00286 | 18 |
| AX-157713856 | 13 | 40.615 | KV453128.1  | 5021855 | 18-scf00286 | 18 |
| AX-158133670 | 13 | 40.615 | KV453128.1  | 5031901 | 18-scf00286 | 18 |
| AX-157878019 | 13 | 40.615 | KV453128.1  | 5032977 | 18-scf00286 | 18 |
| AX-157716010 | 13 | 40.615 | KV453128.1  | 5034745 | 18-scf00286 | 18 |
| AX-158133673 | 13 | 40.615 | KV453128.1  | 5041061 | 18-scf00286 | 18 |
| AX-158133674 | 13 | 40.615 | KV453128.1  | 5041425 | 18-scf00286 | 18 |
| AX-158133675 | 13 | 40.615 | KV453128.1  | 5042087 | 18-scf00286 | 18 |
| AX-157830433 | 13 | 40.615 | KV453128.1  | 5043794 | 18-scf00286 | 18 |
| AX-158133677 | 13 | 40.615 | KV453128.1  | 5044259 | 18-scf00286 | 18 |
| AX-157830434 | 13 | 40.615 | KV453128.1  | 5048513 | 18-scf00286 | 18 |
| AX-158133679 | 13 | 40.615 | KV453128.1  | 5049515 | 18-scf00286 | 18 |
| AX-157878020 | 13 | 40.615 | KV453128.1  | 5049736 | 18-scf00286 | 18 |
| AX-158133680 | 13 | 40.615 | KV453128.1  | 5049950 | 18-scf00286 | 18 |
| AX-158385305 | 13 | 40.615 | KV453128.1  | 5050054 | 18-scf00286 | 18 |
| AX-158133682 | 13 | 40.615 | KV453128.1  | 5051487 | 18-scf00286 | 18 |
| AX-158133683 | 13 | 40.615 | KV453128.1  | 5052216 | 18-scf00286 | 18 |
| AX-158133687 | 13 | 40.615 | KV453128.1  | 5060893 | 18-scf00286 | 18 |
| AX-157830436 | 13 | 40.615 | KV453128.1  | 5062016 | 18-scf00286 | 18 |
| AX-158133691 | 13 | 40.615 | KV453128.1  | 5065051 | 18-scf00286 | 18 |
| AX-158133693 | 13 | 40.615 | KV453128.1  | 5066601 | 18-scf00286 | 18 |
| AX-157830437 | 13 | 40.615 | KV453128.1  | 5068821 | 18-scf00286 | 18 |
| AX-157830438 | 13 | 40.615 | KV453128.1  | 5069359 | 18-scf00286 | 18 |
| AX-157830439 | 13 | 40.615 | KV453128.1  | 5070976 | 18-scf00286 | 18 |
| AX-158133696 | 13 | 40.615 | KV453128.1  | 5072083 | 18-scf00286 | 18 |
| AX-158133697 | 13 | 40.615 | KV453128.1  | 5072849 | 18-scf00286 | 18 |
| AX-158133699 | 13 | 40.615 | KV453128.1  | 5074543 | 18-scf00286 | 18 |
| AX-157830440 | 13 | 40.615 | KV453128.1  | 5074857 | 18-scf00286 | 18 |
| AX-158133700 | 13 | 40.615 | KV453128.1  | 5075153 | 18-scf00286 | 18 |
| AX-158133704 | 13 | 40.615 | KV453128.1  | 5079356 | 18-scf00286 | 18 |
| AX-158133705 | 13 | 40.615 | KV453128.1  | 5082160 | 18-scf00286 | 18 |
| AX-158133706 | 13 | 40.615 | KV453128.1  | 5083150 | 18-scf00286 | 18 |
| AX-158133708 | 13 | 40.615 | KV453128.1  | 5085495 | 18-scf00286 | 18 |
| AX-158133709 | 13 | 40.615 | KV453128.1  | 5087695 | 18-scf00286 | 18 |
| AX-158133710 | 13 | 40.615 | KV453128.1  | 5092115 | 18-scf00286 | 18 |
| AX-158133712 | 13 | 40.615 | KV453128.1  | 5094581 | 18-scf00286 | 18 |
| AX-158133713 | 13 | 40.615 | KV453128.1  | 5095290 | 18-scf00286 | 18 |
| AX-158133714 | 13 | 40.615 | KV453128.1  | 5096277 | 18-scf00286 | 18 |
| AX-158133769 | 13 | 40.615 | KV453128.1  | 5177198 | 18-scf00286 | 18 |
| AX-158133797 | 13 | 40.615 | KV453128.1  | 5216568 | 18-scf00286 | 18 |
| AX-158133798 | 13 | 40.615 | KV453128.1  | 5216895 | 18-scf00286 | 18 |
| AX-158133805 | 13 | 40.615 | KV453128.1  | 5222398 | 18-scf00286 | 18 |
| AX-157705466 | 13 | 40.615 | 3ML01029865 | 207     | scf05487_1  | UN |
| AX-157711969 | 13 | 40.615 | 3ML01029865 | 603     | scf05487_1  | UN |
| AX-158133717 | 13 | 40.651 | KV453128.1  | 5097924 | 18-scf00286 | 18 |
| AX-158133719 | 13 | 40.686 | KV453128.1  | 5102498 | 18-scf00286 | 18 |

|              |    |        |            |         |             |    |
|--------------|----|--------|------------|---------|-------------|----|
| AX-158133723 | 13 | 40.686 | KV453128.1 | 5105605 | 18-scf00286 | 18 |
| AX-158133888 | 13 | 40.686 | KV453128.1 | 5327001 | 18-scf00286 | 18 |
| AX-157830428 | 13 | 40.724 | KV453128.1 | 4941692 | 18-scf00286 | 18 |
| AX-158133619 | 13 | 40.724 | KV453128.1 | 4958475 | 18-scf00286 | 18 |
| AX-157830435 | 13 | 40.724 | KV453128.1 | 5051045 | 18-scf00286 | 18 |
| AX-158133724 | 13 | 40.724 | KV453128.1 | 5109187 | 18-scf00286 | 18 |
| AX-158133725 | 13 | 40.724 | KV453128.1 | 5111182 | 18-scf00286 | 18 |
| AX-158133726 | 13 | 40.724 | KV453128.1 | 5112234 | 18-scf00286 | 18 |
| AX-158133727 | 13 | 40.724 | KV453128.1 | 5113959 | 18-scf00286 | 18 |
| AX-157830446 | 13 | 40.724 | KV453128.1 | 5118498 | 18-scf00286 | 18 |
| AX-158133732 | 13 | 40.724 | KV453128.1 | 5119226 | 18-scf00286 | 18 |
| AX-157830447 | 13 | 40.724 | KV453128.1 | 5119962 | 18-scf00286 | 18 |
| AX-157830448 | 13 | 40.724 | KV453128.1 | 5120420 | 18-scf00286 | 18 |
| AX-158133734 | 13 | 40.724 | KV453128.1 | 5128837 | 18-scf00286 | 18 |
| AX-158133735 | 13 | 40.724 | KV453128.1 | 5129065 | 18-scf00286 | 18 |
| AX-158133737 | 13 | 40.724 | KV453128.1 | 5131958 | 18-scf00286 | 18 |
| AX-158133741 | 13 | 40.724 | KV453128.1 | 5138012 | 18-scf00286 | 18 |
| AX-158133744 | 13 | 40.724 | KV453128.1 | 5140961 | 18-scf00286 | 18 |
| AX-158133758 | 13 | 40.724 | KV453128.1 | 5162533 | 18-scf00286 | 18 |
| AX-158133770 | 13 | 40.724 | KV453128.1 | 5183326 | 18-scf00286 | 18 |
| AX-158133777 | 13 | 40.724 | KV453128.1 | 5196567 | 18-scf00286 | 18 |
| AX-157715811 | 13 | 40.724 | KV453128.1 | 5201723 | 18-scf00286 | 18 |
| AX-158133743 | 13 | 40.798 | KV453128.1 | 5139181 | 18-scf00286 | 18 |
| AX-158133746 | 13 | 40.833 | KV453128.1 | 5144832 | 18-scf00286 | 18 |
| AX-158133747 | 13 | 40.833 | KV453128.1 | 5145738 | 18-scf00286 | 18 |
| AX-158133749 | 13 | 40.833 | KV453128.1 | 5150787 | 18-scf00286 | 18 |
| AX-158133750 | 13 | 40.833 | KV453128.1 | 5151627 | 18-scf00286 | 18 |
| AX-158133756 | 13 | 40.833 | KV453128.1 | 5156093 | 18-scf00286 | 18 |
| AX-157830452 | 13 | 40.833 | KV453128.1 | 5156300 | 18-scf00286 | 18 |
| AX-157830453 | 13 | 40.833 | KV453128.1 | 5156737 | 18-scf00286 | 18 |
| AX-157714639 | 13 | 40.833 | KV453128.1 | 5158321 | 18-scf00286 | 18 |
| AX-158133759 | 13 | 40.833 | KV453128.1 | 5163409 | 18-scf00286 | 18 |
| AX-158133760 | 13 | 40.921 | KV453128.1 | 5164052 | 18-scf00286 | 18 |
| AX-158133761 | 13 | 40.98  | KV453128.1 | 5166201 | 18-scf00286 | 18 |
| AX-158133762 | 13 | 41.052 | KV453128.1 | 5167553 | 18-scf00286 | 18 |
| AX-158133763 | 13 | 41.052 | KV453128.1 | 5168917 | 18-scf00286 | 18 |
| AX-158133765 | 13 | 41.052 | KV453128.1 | 5172213 | 18-scf00286 | 18 |
| AX-157693466 | 13 | 41.052 | KV453128.1 | 5172441 | 18-scf00286 | 18 |
| AX-158133767 | 13 | 41.052 | KV453128.1 | 5175261 | 18-scf00286 | 18 |
| AX-157830454 | 13 | 41.052 | KV453128.1 | 5178680 | 18-scf00286 | 18 |
| AX-157830455 | 13 | 41.052 | KV453128.1 | 5178887 | 18-scf00286 | 18 |
| AX-157830456 | 13 | 41.052 | KV453128.1 | 5180193 | 18-scf00286 | 18 |
| AX-157830457 | 13 | 41.052 | KV453128.1 | 5180325 | 18-scf00286 | 18 |
| AX-158133772 | 13 | 41.052 | KV453128.1 | 5187031 | 18-scf00286 | 18 |
| AX-157830459 | 13 | 41.052 | KV453128.1 | 5188838 | 18-scf00286 | 18 |
| AX-157752288 | 13 | 41.052 | KV453128.1 | 5191312 | 18-scf00286 | 18 |
| AX-158133773 | 13 | 41.052 | KV453128.1 | 5193376 | 18-scf00286 | 18 |
| AX-158133775 | 13 | 41.27  | KV453128.1 | 5195648 | 18-scf00286 | 18 |
| AX-158133778 | 13 | 41.27  | KV453128.1 | 5197739 | 18-scf00286 | 18 |
| AX-158133779 | 13 | 41.27  | KV453128.1 | 5198243 | 18-scf00286 | 18 |
| AX-158133781 | 13 | 41.379 | KV453128.1 | 5200786 | 18-scf00286 | 18 |



|              |    |        |            |         |             |    |
|--------------|----|--------|------------|---------|-------------|----|
| AX-158133783 | 13 | 41.379 | KV453128.1 | 5202265 | 18-scf00286 | 18 |
| AX-158133784 | 13 | 41.379 | KV453128.1 | 5203000 | 18-scf00286 | 18 |
| AX-158133782 | 13 | 41.598 | KV453128.1 | 5202041 | 18-scf00286 | 18 |
| AX-158133785 | 13 | 41.598 | KV453128.1 | 5204799 | 18-scf00286 | 18 |
| AX-158133786 | 13 | 41.598 | KV453128.1 | 5205608 | 18-scf00286 | 18 |
| AX-158133787 | 13 | 41.598 | KV453128.1 | 5207223 | 18-scf00286 | 18 |
| AX-158133788 | 13 | 41.598 | KV453128.1 | 5207544 | 18-scf00286 | 18 |
| AX-158133789 | 13 | 41.598 | KV453128.1 | 5208031 | 18-scf00286 | 18 |
| AX-158133790 | 13 | 41.598 | KV453128.1 | 5208977 | 18-scf00286 | 18 |
| AX-158133791 | 13 | 41.598 | KV453128.1 | 5209718 | 18-scf00286 | 18 |
| AX-158133792 | 13 | 41.598 | KV453128.1 | 5210689 | 18-scf00286 | 18 |
| AX-157830460 | 13 | 41.598 | KV453128.1 | 5211900 | 18-scf00286 | 18 |
| AX-157748597 | 13 | 41.598 | KV453128.1 | 5213639 | 18-scf00286 | 18 |
| AX-158133795 | 13 | 41.598 | KV453128.1 | 5213751 | 18-scf00286 | 18 |
| AX-157710359 | 13 | 41.598 | KV453128.1 | 5215509 | 18-scf00286 | 18 |
| AX-157747298 | 13 | 41.598 | KV453128.1 | 5219820 | 18-scf00286 | 18 |
| AX-158133813 | 13 | 41.598 | KV453128.1 | 5232924 | 18-scf00286 | 18 |
| AX-158133841 | 13 | 41.598 | KV453128.1 | 5256755 | 18-scf00286 | 18 |
| AX-158133843 | 13 | 41.598 | KV453128.1 | 5257950 | 18-scf00286 | 18 |
| AX-158411623 | 13 | 41.707 | KV453128.1 | 4668323 | 18-scf00286 | 18 |
| AX-158133800 | 13 | 41.707 | KV453128.1 | 5217855 | 18-scf00286 | 18 |
| AX-158133801 | 13 | 41.707 | KV453128.1 | 5218843 | 18-scf00286 | 18 |
| AX-158133802 | 13 | 41.707 | KV453128.1 | 5219570 | 18-scf00286 | 18 |
| AX-158133804 | 13 | 41.707 | KV453128.1 | 5220732 | 18-scf00286 | 18 |
| AX-158133806 | 13 | 41.707 | KV453128.1 | 5222672 | 18-scf00286 | 18 |
| AX-158133808 | 13 | 41.707 | KV453128.1 | 5224511 | 18-scf00286 | 18 |
| AX-158133810 | 13 | 41.707 | KV453128.1 | 5229341 | 18-scf00286 | 18 |
| AX-158133811 | 13 | 41.707 | KV453128.1 | 5231221 | 18-scf00286 | 18 |
| AX-157742438 | 13 | 41.707 | KV453128.1 | 5233179 | 18-scf00286 | 18 |
| AX-158133818 | 13 | 41.707 | KV453128.1 | 5237920 | 18-scf00286 | 18 |
| AX-158133819 | 13 | 41.925 | KV453128.1 | 5238494 | 18-scf00286 | 18 |
| AX-158133821 | 13 | 41.925 | KV453128.1 | 5240151 | 18-scf00286 | 18 |
| AX-158133823 | 13 | 41.925 | KV453128.1 | 5242813 | 18-scf00286 | 18 |
| AX-158133827 | 13 | 41.925 | KV453128.1 | 5244621 | 18-scf00286 | 18 |
| AX-158133828 | 13 | 41.925 | KV453128.1 | 5245490 | 18-scf00286 | 18 |
| AX-158133830 | 13 | 41.925 | KV453128.1 | 5246222 | 18-scf00286 | 18 |
| AX-158133831 | 13 | 41.925 | KV453128.1 | 5247555 | 18-scf00286 | 18 |
| AX-158133834 | 13 | 41.925 | KV453128.1 | 5250695 | 18-scf00286 | 18 |
| AX-158133837 | 13 | 41.952 | KV453128.1 | 5254266 | 18-scf00286 | 18 |
| AX-158133839 | 13 | 41.974 | KV453128.1 | 5255391 | 18-scf00286 | 18 |
| AX-158133840 | 13 | 41.995 | KV453128.1 | 5256007 | 18-scf00286 | 18 |
| AX-158133842 | 13 | 42.014 | KV453128.1 | 5257588 | 18-scf00286 | 18 |
| AX-157886258 | 13 | 42.034 | KV453128.1 | 5253759 | 18-scf00286 | 18 |
| AX-158133847 | 13 | 42.034 | KV453128.1 | 5261491 | 18-scf00286 | 18 |
| AX-158133849 | 13 | 42.034 | KV453128.1 | 5263496 | 18-scf00286 | 18 |
| AX-158133851 | 13 | 42.034 | KV453128.1 | 5267250 | 18-scf00286 | 18 |
| AX-158411642 | 13 | 42.034 | KV453128.1 | 5268054 | 18-scf00286 | 18 |
| AX-158133852 | 13 | 42.034 | KV453128.1 | 5269850 | 18-scf00286 | 18 |
| AX-157830463 | 13 | 42.034 | KV453128.1 | 5270233 | 18-scf00286 | 18 |
| AX-158133853 | 13 | 42.034 | KV453128.1 | 5270716 | 18-scf00286 | 18 |
| AX-158133856 | 13 | 42.034 | KV453128.1 | 5272736 | 18-scf00286 | 18 |

|              |    |        |            |         |             |    |
|--------------|----|--------|------------|---------|-------------|----|
| AX-158133858 | 13 | 42.144 | KV453128.1 | 5276576 | 18-scf00286 | 18 |
| AX-158133864 | 13 | 42.144 | KV453128.1 | 5284798 | 18-scf00286 | 18 |
| AX-157742963 | 13 | 42.15  | KV453128.1 | 5277266 | 18-scf00286 | 18 |
| AX-158133861 | 13 | 42.16  | KV453128.1 | 5281647 | 18-scf00286 | 18 |
| AX-158133862 | 13 | 42.266 | KV453128.1 | 5282982 | 18-scf00286 | 18 |
| AX-158133865 | 13 | 42.274 | KV453128.1 | 5287168 | 18-scf00286 | 18 |
| AX-157830465 | 13 | 42.416 | KV453128.1 | 5288650 | 18-scf00286 | 18 |
| AX-157771245 | 13 | 42.416 | KV453128.1 | 5291017 | 18-scf00286 | 18 |
| AX-158133874 | 13 | 43.014 | KV453128.1 | 5307722 | 18-scf00286 | 18 |
| AX-158133896 | 13 | 43.014 | KV453128.1 | 5335401 | 18-scf00286 | 18 |
| AX-158133875 | 13 | 43.018 | KV453128.1 | 5308729 | 18-scf00286 | 18 |
| AX-158133876 | 13 | 43.018 | KV453128.1 | 5310278 | 18-scf00286 | 18 |
| AX-157830467 | 13 | 43.018 | KV453128.1 | 5312201 | 18-scf00286 | 18 |
| AX-157857860 | 13 | 43.018 | KV453128.1 | 5313065 | 18-scf00286 | 18 |
| AX-158133879 | 13 | 43.018 | KV453128.1 | 5317479 | 18-scf00286 | 18 |
| AX-157830468 | 13 | 43.018 | KV453128.1 | 5320329 | 18-scf00286 | 18 |
| AX-158133881 | 13 | 43.018 | KV453128.1 | 5321449 | 18-scf00286 | 18 |
| AX-158133882 | 13 | 43.018 | KV453128.1 | 5322257 | 18-scf00286 | 18 |
| AX-158133887 | 13 | 43.018 | KV453128.1 | 5325968 | 18-scf00286 | 18 |
| AX-158134058 | 13 | 43.018 | KV453128.1 | 5551112 | 18-scf00286 | 18 |
| AX-158134061 | 13 | 43.018 | KV453128.1 | 5554288 | 18-scf00286 | 18 |
| AX-158134448 | 13 | 43.018 | KV453128.1 | 6049626 | 18-scf00286 | 18 |
| AX-158133890 | 13 | 43.06  | KV453128.1 | 5329218 | 18-scf00286 | 18 |
| AX-158133892 | 13 | 43.06  | KV453128.1 | 5332714 | 18-scf00286 | 18 |
| AX-158133893 | 13 | 43.06  | KV453128.1 | 5333209 | 18-scf00286 | 18 |
| AX-158133891 | 13 | 43.127 | KV453128.1 | 5330808 | 18-scf00286 | 18 |
| AX-157739834 | 13 | 43.127 | KV453128.1 | 5333558 | 18-scf00286 | 18 |
| AX-158133895 | 13 | 43.127 | KV453128.1 | 5334897 | 18-scf00286 | 18 |
| AX-158133897 | 13 | 43.149 | KV453128.1 | 5335924 | 18-scf00286 | 18 |
| AX-158133901 | 13 | 43.191 | KV453128.1 | 5341371 | 18-scf00286 | 18 |
| AX-158133899 | 13 | 43.236 | KV453128.1 | 5338164 | 18-scf00286 | 18 |
| AX-158133904 | 13 | 43.236 | KV453128.1 | 5344359 | 18-scf00286 | 18 |
| AX-158133905 | 13 | 43.236 | KV453128.1 | 5346315 | 18-scf00286 | 18 |
| AX-158133906 | 13 | 43.307 | KV453128.1 | 5347414 | 18-scf00286 | 18 |
| AX-157830469 | 13 | 43.346 | KV453128.1 | 5347806 | 18-scf00286 | 18 |
| AX-157747984 | 13 | 43.346 | KV453128.1 | 5348231 | 18-scf00286 | 18 |
| AX-158133908 | 13 | 43.346 | KV453128.1 | 5349117 | 18-scf00286 | 18 |
| AX-158133911 | 13 | 43.346 | KV453128.1 | 5353731 | 18-scf00286 | 18 |
| AX-158133903 | 13 | 43.478 | KV453128.1 | 5343340 | 18-scf00286 | 18 |
| AX-157830470 | 13 | 43.478 | KV453128.1 | 5367496 | 18-scf00286 | 18 |
| AX-157830472 | 13 | 43.478 | KV453128.1 | 5377324 | 18-scf00286 | 18 |
| AX-158133912 | 13 | 43.593 | KV453128.1 | 5354300 | 18-scf00286 | 18 |
| AX-158408175 | 13 | 43.593 | KV453128.1 | 5369531 | 18-scf00286 | 18 |
| AX-158133922 | 13 | 43.674 | KV453128.1 | 5383298 | 18-scf00286 | 18 |
| AX-157747271 | 13 | 43.674 | KV453128.1 | 5388204 | 18-scf00286 | 18 |
| AX-158133925 | 13 | 43.674 | KV453128.1 | 5388875 | 18-scf00286 | 18 |
| AX-158133926 | 13 | 43.674 | KV453128.1 | 5392247 | 18-scf00286 | 18 |
| AX-158133929 | 13 | 43.674 | KV453128.1 | 5394098 | 18-scf00286 | 18 |
| AX-158133933 | 13 | 43.726 | KV453128.1 | 5399736 | 18-scf00286 | 18 |
| AX-158133965 | 13 | 43.726 | KV453128.1 | 5437678 | 18-scf00286 | 18 |
| AX-158385316 | 13 | 43.726 | KV453128.1 | 5834238 | 18-scf00286 | 18 |

|              |    |        |            |         |             |    |
|--------------|----|--------|------------|---------|-------------|----|
| AX-158134456 | 13 | 43.726 | KV453128.1 | 6066683 | 18-scf00286 | 18 |
| AX-158134482 | 13 | 43.726 | KV453128.1 | 6107747 | 18-scf00286 | 18 |
| AX-157698880 | 13 | 43.783 | KV453128.1 | 5367269 | 18-scf00286 | 18 |
| AX-157830473 | 13 | 43.783 | KV453128.1 | 5394705 | 18-scf00286 | 18 |
| AX-158133936 | 13 | 43.783 | KV453128.1 | 5401091 | 18-scf00286 | 18 |
| AX-158133938 | 13 | 43.783 | KV453128.1 | 5401707 | 18-scf00286 | 18 |
| AX-158133939 | 13 | 43.783 | KV453128.1 | 5402424 | 18-scf00286 | 18 |
| AX-158133940 | 13 | 43.783 | KV453128.1 | 5405089 | 18-scf00286 | 18 |
| AX-158133942 | 13 | 43.783 | KV453128.1 | 5405935 | 18-scf00286 | 18 |
| AX-158133943 | 13 | 43.783 | KV453128.1 | 5407252 | 18-scf00286 | 18 |
| AX-158133945 | 13 | 43.783 | KV453128.1 | 5410712 | 18-scf00286 | 18 |
| AX-158133947 | 13 | 43.783 | KV453128.1 | 5411860 | 18-scf00286 | 18 |
| AX-157830474 | 13 | 43.783 | KV453128.1 | 5412163 | 18-scf00286 | 18 |
| AX-158133960 | 13 | 43.783 | KV453128.1 | 5432760 | 18-scf00286 | 18 |
| AX-158134130 | 13 | 43.783 | KV453128.1 | 5655525 | 18-scf00286 | 18 |
| AX-157770985 | 13 | 43.892 | KV453128.1 | 5360395 | 18-scf00286 | 18 |
| AX-157830475 | 13 | 43.892 | KV453128.1 | 5415692 | 18-scf00286 | 18 |
| AX-157748546 | 13 | 43.892 | KV453128.1 | 5417039 | 18-scf00286 | 18 |
| AX-158133950 | 13 | 43.892 | KV453128.1 | 5419704 | 18-scf00286 | 18 |
| AX-158133953 | 13 | 43.892 | KV453128.1 | 5426026 | 18-scf00286 | 18 |
| AX-158133955 | 13 | 43.892 | KV453128.1 | 5427617 | 18-scf00286 | 18 |
| AX-158133957 | 13 | 43.892 | KV453128.1 | 5429156 | 18-scf00286 | 18 |
| AX-158133959 | 13 | 43.892 | KV453128.1 | 5432341 | 18-scf00286 | 18 |
| AX-158133964 | 13 | 43.892 | KV453128.1 | 5437328 | 18-scf00286 | 18 |
| AX-158133967 | 13 | 43.892 | KV453128.1 | 5440079 | 18-scf00286 | 18 |
| AX-158133968 | 13 | 43.892 | KV453128.1 | 5441092 | 18-scf00286 | 18 |
| AX-158133971 | 13 | 43.892 | KV453128.1 | 5444465 | 18-scf00286 | 18 |
| AX-158133972 | 13 | 43.892 | KV453128.1 | 5445021 | 18-scf00286 | 18 |
| AX-158133976 | 13 | 43.892 | KV453128.1 | 5450534 | 18-scf00286 | 18 |
| AX-157830466 | 13 | 44.001 | KV453128.1 | 5291212 | 18-scf00286 | 18 |
| AX-158133915 | 13 | 44.001 | KV453128.1 | 5372982 | 18-scf00286 | 18 |
| AX-158133937 | 13 | 44.001 | KV453128.1 | 5401573 | 18-scf00286 | 18 |
| AX-158133941 | 13 | 44.001 | KV453128.1 | 5405495 | 18-scf00286 | 18 |
| AX-157830477 | 13 | 44.001 | KV453128.1 | 5445482 | 18-scf00286 | 18 |
| AX-158133979 | 13 | 44.001 | KV453128.1 | 5453999 | 18-scf00286 | 18 |
| AX-157752500 | 13 | 44.001 | KV453128.1 | 5455950 | 18-scf00286 | 18 |
| AX-157830478 | 13 | 44.001 | KV453128.1 | 5456130 | 18-scf00286 | 18 |
| AX-158133981 | 13 | 44.001 | KV453128.1 | 5456875 | 18-scf00286 | 18 |
| AX-158133982 | 13 | 44.001 | KV453128.1 | 5458146 | 18-scf00286 | 18 |
| AX-158133983 | 13 | 44.001 | KV453128.1 | 5460447 | 18-scf00286 | 18 |
| AX-158133984 | 13 | 44.001 | KV453128.1 | 5461795 | 18-scf00286 | 18 |
| AX-158133989 | 13 | 44.001 | KV453128.1 | 5466453 | 18-scf00286 | 18 |
| AX-158133996 | 13 | 44.001 | KV453128.1 | 5477334 | 18-scf00286 | 18 |
| AX-158134007 | 13 | 44.001 | KV453128.1 | 5486033 | 18-scf00286 | 18 |
| AX-158134009 | 13 | 44.001 | KV453128.1 | 5488913 | 18-scf00286 | 18 |
| AX-157830482 | 13 | 44.001 | KV453128.1 | 5493458 | 18-scf00286 | 18 |
| AX-158134018 | 13 | 44.001 | KV453128.1 | 5499338 | 18-scf00286 | 18 |
| AX-158134023 | 13 | 44.001 | KV453128.1 | 5510739 | 18-scf00286 | 18 |
| AX-158134047 | 13 | 44.001 | KV453128.1 | 5543214 | 18-scf00286 | 18 |
| AX-158392860 | 13 | 44.001 | KV453128.1 | 5552981 | 18-scf00286 | 18 |
| AX-158134075 | 13 | 44.001 | KV453128.1 | 5570355 | 18-scf00286 | 18 |

|              |    |        |            |         |             |    |
|--------------|----|--------|------------|---------|-------------|----|
| AX-158134077 | 13 | 44.001 | KV453128.1 | 5572533 | 18-scf00286 | 18 |
| AX-157758383 | 13 | 44.001 | KV453128.1 | 5578017 | 18-scf00286 | 18 |
| AX-158134117 | 13 | 44.001 | KV453128.1 | 5626557 | 18-scf00286 | 18 |
| AX-158134175 | 13 | 44.001 | KV453128.1 | 5726141 | 18-scf00286 | 18 |
| AX-158134213 | 13 | 44.001 | KV453128.1 | 5766348 | 18-scf00286 | 18 |
| AX-158134235 | 13 | 44.001 | KV453128.1 | 5790027 | 18-scf00286 | 18 |
| AX-158134237 | 13 | 44.001 | KV453128.1 | 5793503 | 18-scf00286 | 18 |
| AX-158134241 | 13 | 44.001 | KV453128.1 | 5799030 | 18-scf00286 | 18 |
| AX-158134243 | 13 | 44.001 | KV453128.1 | 5799722 | 18-scf00286 | 18 |
| AX-158134251 | 13 | 44.001 | KV453128.1 | 5808787 | 18-scf00286 | 18 |
| AX-158134447 | 13 | 44.001 | KV453128.1 | 6044801 | 18-scf00286 | 18 |
| AX-158134461 | 13 | 44.001 | KV453128.1 | 6070714 | 18-scf00286 | 18 |
| AX-158134550 | 13 | 44.001 | KV453128.1 | 6216060 | 18-scf00286 | 18 |
| AX-158134603 | 13 | 44.001 | KV453128.1 | 6301443 | 18-scf00286 | 18 |
| AX-158134767 | 13 | 44.001 | KV453128.1 | 6536876 | 18-scf00286 | 18 |
| AX-158135414 | 13 | 44.001 | KV453128.1 | 7535021 | 18-scf00286 | 18 |
| AX-158135433 | 13 | 44.001 | KV453128.1 | 7558669 | 18-scf00286 | 18 |
| AX-158135534 | 13 | 44.001 | KV453128.1 | 7680095 | 18-scf00286 | 18 |
| AX-158380279 | 13 | 44.001 | KV453137.1 | 12744   | 18-scf00291 | 18 |
| AX-157830755 | 13 | 44.001 | KV453135.1 | 12763   | 18-scf00292 | 18 |
| AX-158411765 | 13 | 44.001 | KV453135.1 | 23763   | 18-scf00292 | 18 |
| AX-157792759 | 13 | 44.001 | KV453135.1 | 170999  | 18-scf00292 | 18 |
| AX-157792764 | 13 | 44.001 | KV453135.1 | 256420  | 18-scf00292 | 18 |
| AX-157708333 | 13 | 44.001 | KV453135.1 | 301701  | 18-scf00292 | 18 |
| AX-157792768 | 13 | 44.001 | KV453135.1 | 324936  | 18-scf00292 | 18 |
| AX-158411771 | 13 | 44.001 | KV453135.1 | 376471  | 18-scf00292 | 18 |
| AX-157830761 | 13 | 44.001 | KV453135.1 | 376843  | 18-scf00292 | 18 |
| AX-157830762 | 13 | 44.001 | KV453135.1 | 378040  | 18-scf00292 | 18 |
| AX-158392916 | 13 | 44.001 | KV453135.1 | 420462  | 18-scf00292 | 18 |
| AX-158411776 | 13 | 44.001 | KV453135.1 | 421582  | 18-scf00292 | 18 |
| AX-158392917 | 13 | 44.001 | KV453135.1 | 493376  | 18-scf00292 | 18 |
| AX-158408278 | 13 | 44.001 | KV453135.1 | 1405865 | 18-scf00292 | 18 |
| AX-157773345 | 13 | 44.001 | KV453131.1 | 32782   | 18-scf00293 | 18 |
| AX-158137144 | 13 | 44.001 | KV453131.1 | 181536  | 18-scf00293 | 18 |
| AX-158392881 | 13 | 44.001 | KV453131.1 | 488662  | 18-scf00293 | 18 |
| AX-158135963 | 13 | 44.001 | KV453131.1 | 505485  | 18-scf00293 | 18 |
| AX-158135914 | 13 | 44.001 | KV453131.1 | 576921  | 18-scf00293 | 18 |
| AX-158137252 | 13 | 44.001 | KV453136.1 | 92849   | 18-scf00294 | 18 |
| AX-157830830 | 13 | 44.001 | KV453136.1 | 95535   | 18-scf00294 | 18 |
| AX-158137253 | 13 | 44.001 | KV453136.1 | 96021   | 18-scf00294 | 18 |
| AX-157830841 | 13 | 44.001 | KV453132.1 | 8310    | 18-scf00295 | 18 |
| AX-157712928 | 13 | 44.001 | KV453132.1 | 59239   | 18-scf00295 | 18 |
| AX-157830843 | 13 | 44.001 | KV453132.1 | 67466   | 18-scf00295 | 18 |
| AX-157792880 | 13 | 44.001 | KV453132.1 | 77321   | 18-scf00295 | 18 |
| AX-158137330 | 13 | 44.001 | KV453132.1 | 78519   | 18-scf00295 | 18 |
| AX-157709120 | 13 | 44.001 | KV453132.1 | 97099   | 18-scf00295 | 18 |
| AX-158411846 | 13 | 44.001 | KV453132.1 | 129207  | 18-scf00295 | 18 |
| AX-158417516 | 13 | 44.001 | KV453132.1 | 273943  | 18-scf00295 | 18 |
| AX-158411849 | 13 | 44.001 | KV453132.1 | 285242  | 18-scf00295 | 18 |
| AX-158411850 | 13 | 44.001 | KV453132.1 | 285339  | 18-scf00295 | 18 |
| AX-158411851 | 13 | 44.001 | KV453132.1 | 323291  | 18-scf00295 | 18 |

|              |    |        |            |         |             |    |
|--------------|----|--------|------------|---------|-------------|----|
| AX-158417518 | 13 | 44.001 | KV453132.1 | 326396  | 18-scf00295 | 18 |
| AX-158411861 | 13 | 44.001 | KV453132.1 | 435499  | 18-scf00295 | 18 |
| AX-157830848 | 13 | 44.001 | KV453134.1 | 132744  | 18-scf00296 | 18 |
| AX-157699647 | 13 | 44.001 | KV453384.1 | 59555   | scf00668    | UN |
| AX-157866274 | 13 | 44.11  | KV453128.1 | 5402769 | 18-scf00286 | 18 |
| AX-158133954 | 13 | 44.11  | KV453128.1 | 5426466 | 18-scf00286 | 18 |
| AX-158133973 | 13 | 44.11  | KV453128.1 | 5445428 | 18-scf00286 | 18 |
| AX-158133987 | 13 | 44.11  | KV453128.1 | 5463180 | 18-scf00286 | 18 |
| AX-158133988 | 13 | 44.11  | KV453128.1 | 5464196 | 18-scf00286 | 18 |
| AX-157694730 | 13 | 44.11  | KV453128.1 | 5464920 | 18-scf00286 | 18 |
| AX-158133990 | 13 | 44.11  | KV453128.1 | 5467879 | 18-scf00286 | 18 |
| AX-157830481 | 13 | 44.11  | KV453128.1 | 5469465 | 18-scf00286 | 18 |
| AX-158133993 | 13 | 44.11  | KV453128.1 | 5473176 | 18-scf00286 | 18 |
| AX-158133994 | 13 | 44.11  | KV453128.1 | 5474742 | 18-scf00286 | 18 |
| AX-158133995 | 13 | 44.11  | KV453128.1 | 5476391 | 18-scf00286 | 18 |
| AX-158133997 | 13 | 44.11  | KV453128.1 | 5477712 | 18-scf00286 | 18 |
| AX-158134000 | 13 | 44.11  | KV453128.1 | 5479255 | 18-scf00286 | 18 |
| AX-158134003 | 13 | 44.11  | KV453128.1 | 5482444 | 18-scf00286 | 18 |
| AX-158134010 | 13 | 44.11  | KV453128.1 | 5492181 | 18-scf00286 | 18 |
| AX-158134012 | 13 | 44.11  | KV453128.1 | 5493201 | 18-scf00286 | 18 |
| AX-158134013 | 13 | 44.11  | KV453128.1 | 5494354 | 18-scf00286 | 18 |
| AX-158134015 | 13 | 44.11  | KV453128.1 | 5496564 | 18-scf00286 | 18 |
| AX-157830483 | 13 | 44.11  | KV453128.1 | 5499233 | 18-scf00286 | 18 |
| AX-158134019 | 13 | 44.11  | KV453128.1 | 5503443 | 18-scf00286 | 18 |
| AX-158134020 | 13 | 44.11  | KV453128.1 | 5504239 | 18-scf00286 | 18 |
| AX-158134024 | 13 | 44.11  | KV453128.1 | 5511970 | 18-scf00286 | 18 |
| AX-158134027 | 13 | 44.11  | KV453128.1 | 5518891 | 18-scf00286 | 18 |
| AX-157857861 | 13 | 44.11  | KV453128.1 | 5519007 | 18-scf00286 | 18 |
| AX-158134029 | 13 | 44.11  | KV453128.1 | 5521071 | 18-scf00286 | 18 |
| AX-158134030 | 13 | 44.11  | KV453128.1 | 5523684 | 18-scf00286 | 18 |
| AX-157878024 | 13 | 44.11  | KV453128.1 | 5524091 | 18-scf00286 | 18 |
| AX-158134033 | 13 | 44.11  | KV453128.1 | 5528168 | 18-scf00286 | 18 |
| AX-158134036 | 13 | 44.11  | KV453128.1 | 5531454 | 18-scf00286 | 18 |
| AX-158134039 | 13 | 44.11  | KV453128.1 | 5532607 | 18-scf00286 | 18 |
| AX-158134041 | 13 | 44.11  | KV453128.1 | 5534386 | 18-scf00286 | 18 |
| AX-158134043 | 13 | 44.11  | KV453128.1 | 5538537 | 18-scf00286 | 18 |
| AX-158134045 | 13 | 44.11  | KV453128.1 | 5541253 | 18-scf00286 | 18 |
| AX-158134049 | 13 | 44.11  | KV453128.1 | 5544077 | 18-scf00286 | 18 |
| AX-158134050 | 13 | 44.11  | KV453128.1 | 5544500 | 18-scf00286 | 18 |
| AX-158134054 | 13 | 44.11  | KV453128.1 | 5546725 | 18-scf00286 | 18 |
| AX-158134055 | 13 | 44.11  | KV453128.1 | 5548880 | 18-scf00286 | 18 |
| AX-158134064 | 13 | 44.11  | KV453128.1 | 5558058 | 18-scf00286 | 18 |
| AX-158134068 | 13 | 44.11  | KV453128.1 | 5565379 | 18-scf00286 | 18 |
| AX-158134082 | 13 | 44.11  | KV453128.1 | 5579130 | 18-scf00286 | 18 |
| AX-158134090 | 13 | 44.11  | KV453128.1 | 5585822 | 18-scf00286 | 18 |
| AX-158134107 | 13 | 44.11  | KV453128.1 | 5616629 | 18-scf00286 | 18 |
| AX-158134129 | 13 | 44.11  | KV453128.1 | 5652519 | 18-scf00286 | 18 |
| AX-158134180 | 13 | 44.11  | KV453128.1 | 5734179 | 18-scf00286 | 18 |
| AX-158134190 | 13 | 44.11  | KV453128.1 | 5742432 | 18-scf00286 | 18 |
| AX-158134255 | 13 | 44.11  | KV453128.1 | 5814542 | 18-scf00286 | 18 |
| AX-158134350 | 13 | 44.11  | KV453128.1 | 5910973 | 18-scf00286 | 18 |

|              |    |        |            |         |             |    |
|--------------|----|--------|------------|---------|-------------|----|
| AX-158134358 | 13 | 44.11  | KV453128.1 | 5925281 | 18-scf00286 | 18 |
| AX-158134387 | 13 | 44.11  | KV453128.1 | 5960838 | 18-scf00286 | 18 |
| AX-158134390 | 13 | 44.11  | KV453128.1 | 5965235 | 18-scf00286 | 18 |
| AX-157878037 | 13 | 44.11  | KV453128.1 | 6087023 | 18-scf00286 | 18 |
| AX-158134475 | 13 | 44.11  | KV453128.1 | 6094396 | 18-scf00286 | 18 |
| AX-158134490 | 13 | 44.11  | KV453128.1 | 6119078 | 18-scf00286 | 18 |
| AX-158134492 | 13 | 44.11  | KV453128.1 | 6120261 | 18-scf00286 | 18 |
| AX-158135573 | 13 | 44.11  | KV453130.1 | 345068  | 18-scf00290 | 18 |
| AX-158137759 | 13 | 44.11  | KV453138.1 | 522226  | 18-scf00300 | 18 |
| AX-158134056 | 13 | 44.141 | KV453128.1 | 5549906 | 18-scf00286 | 18 |
| AX-158134149 | 13 | 44.141 | KV453128.1 | 5683245 | 18-scf00286 | 18 |
| AX-158134323 | 13 | 44.141 | KV453128.1 | 5876195 | 18-scf00286 | 18 |
| AX-157830498 | 13 | 44.141 | KV453128.1 | 5890514 | 18-scf00286 | 18 |
| AX-158134057 | 13 | 44.178 | KV453128.1 | 5550059 | 18-scf00286 | 18 |
| AX-158134005 | 13 | 44.22  | KV453128.1 | 5484698 | 18-scf00286 | 18 |
| AX-158134011 | 13 | 44.22  | KV453128.1 | 5493022 | 18-scf00286 | 18 |
| AX-158134046 | 13 | 44.22  | KV453128.1 | 5541644 | 18-scf00286 | 18 |
| AX-158134051 | 13 | 44.22  | KV453128.1 | 5545302 | 18-scf00286 | 18 |
| AX-158134053 | 13 | 44.22  | KV453128.1 | 5546294 | 18-scf00286 | 18 |
| AX-158134062 | 13 | 44.22  | KV453128.1 | 5556295 | 18-scf00286 | 18 |
| AX-157830484 | 13 | 44.22  | KV453128.1 | 5558681 | 18-scf00286 | 18 |
| AX-158134066 | 13 | 44.22  | KV453128.1 | 5563156 | 18-scf00286 | 18 |
| AX-158134067 | 13 | 44.22  | KV453128.1 | 5563720 | 18-scf00286 | 18 |
| AX-158134076 | 13 | 44.22  | KV453128.1 | 5571271 | 18-scf00286 | 18 |
| AX-158134078 | 13 | 44.22  | KV453128.1 | 5573477 | 18-scf00286 | 18 |
| AX-158134080 | 13 | 44.22  | KV453128.1 | 5574493 | 18-scf00286 | 18 |
| AX-158134081 | 13 | 44.22  | KV453128.1 | 5578731 | 18-scf00286 | 18 |
| AX-158134086 | 13 | 44.22  | KV453128.1 | 5581029 | 18-scf00286 | 18 |
| AX-158134087 | 13 | 44.22  | KV453128.1 | 5581640 | 18-scf00286 | 18 |
| AX-158134089 | 13 | 44.22  | KV453128.1 | 5583382 | 18-scf00286 | 18 |
| AX-157697403 | 13 | 44.22  | KV453128.1 | 5584047 | 18-scf00286 | 18 |
| AX-158134095 | 13 | 44.22  | KV453128.1 | 5591218 | 18-scf00286 | 18 |
| AX-158134097 | 13 | 44.22  | KV453128.1 | 5592303 | 18-scf00286 | 18 |
| AX-158134098 | 13 | 44.22  | KV453128.1 | 5593960 | 18-scf00286 | 18 |
| AX-157774735 | 13 | 44.22  | KV453128.1 | 5594907 | 18-scf00286 | 18 |
| AX-158417474 | 13 | 44.22  | KV453128.1 | 5595773 | 18-scf00286 | 18 |
| AX-157830487 | 13 | 44.22  | KV453128.1 | 5599338 | 18-scf00286 | 18 |
| AX-157830488 | 13 | 44.22  | KV453128.1 | 5602684 | 18-scf00286 | 18 |
| AX-157745094 | 13 | 44.22  | KV453128.1 | 5603193 | 18-scf00286 | 18 |
| AX-158134104 | 13 | 44.22  | KV453128.1 | 5614176 | 18-scf00286 | 18 |
| AX-158380266 | 13 | 44.22  | KV453128.1 | 5617144 | 18-scf00286 | 18 |
| AX-158134113 | 13 | 44.22  | KV453128.1 | 5620834 | 18-scf00286 | 18 |
| AX-158134115 | 13 | 44.22  | KV453128.1 | 5622445 | 18-scf00286 | 18 |
| AX-158134126 | 13 | 44.22  | KV453128.1 | 5641310 | 18-scf00286 | 18 |
| AX-158385315 | 13 | 44.22  | KV453128.1 | 5654922 | 18-scf00286 | 18 |
| AX-158134133 | 13 | 44.22  | KV453128.1 | 5660003 | 18-scf00286 | 18 |
| AX-158134136 | 13 | 44.22  | KV453128.1 | 5662532 | 18-scf00286 | 18 |
| AX-158134139 | 13 | 44.22  | KV453128.1 | 5667420 | 18-scf00286 | 18 |
| AX-158134158 | 13 | 44.22  | KV453128.1 | 5695155 | 18-scf00286 | 18 |
| AX-158134181 | 13 | 44.22  | KV453128.1 | 5734578 | 18-scf00286 | 18 |
| AX-158134231 | 13 | 44.22  | KV453128.1 | 5785184 | 18-scf00286 | 18 |

|              |    |        |            |         |             |    |
|--------------|----|--------|------------|---------|-------------|----|
| AX-158134232 | 13 | 44.22  | KV453128.1 | 5786679 | 18-scf00286 | 18 |
| AX-158134252 | 13 | 44.22  | KV453128.1 | 5808990 | 18-scf00286 | 18 |
| AX-158134253 | 13 | 44.22  | KV453128.1 | 5811309 | 18-scf00286 | 18 |
| AX-158134366 | 13 | 44.22  | KV453128.1 | 5932914 | 18-scf00286 | 18 |
| AX-158134369 | 13 | 44.22  | KV453128.1 | 5936319 | 18-scf00286 | 18 |
| AX-158134370 | 13 | 44.22  | KV453128.1 | 5937289 | 18-scf00286 | 18 |
| AX-158134403 | 13 | 44.22  | KV453128.1 | 5980953 | 18-scf00286 | 18 |
| AX-158134405 | 13 | 44.22  | KV453128.1 | 5983551 | 18-scf00286 | 18 |
| AX-158134411 | 13 | 44.22  | KV453128.1 | 5985715 | 18-scf00286 | 18 |
| AX-158134413 | 13 | 44.22  | KV453128.1 | 5988805 | 18-scf00286 | 18 |
| AX-158134415 | 13 | 44.22  | KV453128.1 | 5990051 | 18-scf00286 | 18 |
| AX-158134419 | 13 | 44.22  | KV453128.1 | 5993215 | 18-scf00286 | 18 |
| AX-158134433 | 13 | 44.22  | KV453128.1 | 6017313 | 18-scf00286 | 18 |
| AX-158134436 | 13 | 44.22  | KV453128.1 | 6024611 | 18-scf00286 | 18 |
| AX-158134480 | 13 | 44.22  | KV453128.1 | 6105934 | 18-scf00286 | 18 |
| AX-157830514 | 13 | 44.22  | KV453128.1 | 6130587 | 18-scf00286 | 18 |
| AX-158134498 | 13 | 44.22  | KV453128.1 | 6130742 | 18-scf00286 | 18 |
| AX-158134504 | 13 | 44.22  | KV453128.1 | 6146642 | 18-scf00286 | 18 |
| AX-157830485 | 13 | 44.236 | KV453128.1 | 5590621 | 18-scf00286 | 18 |
| AX-158134099 | 13 | 44.236 | KV453128.1 | 5600102 | 18-scf00286 | 18 |
| AX-158134127 | 13 | 44.236 | KV453128.1 | 5643861 | 18-scf00286 | 18 |
| AX-158134372 | 13 | 44.236 | KV453128.1 | 5945459 | 18-scf00286 | 18 |
| AX-158134391 | 13 | 44.236 | KV453128.1 | 5966545 | 18-scf00286 | 18 |
| AX-158134428 | 13 | 44.236 | KV453128.1 | 6005734 | 18-scf00286 | 18 |
| AX-157775103 | 13 | 44.236 | KV453128.1 | 6007068 | 18-scf00286 | 18 |
| AX-158134923 | 13 | 44.236 | KV453128.1 | 6748426 | 18-scf00286 | 18 |
| AX-158134990 | 13 | 44.236 | KV453128.1 | 6894899 | 18-scf00286 | 18 |
| AX-158135008 | 13 | 44.236 | KV453128.1 | 6917894 | 18-scf00286 | 18 |
| AX-158135020 | 13 | 44.236 | KV453128.1 | 6948382 | 18-scf00286 | 18 |
| AX-158135346 | 13 | 44.236 | KV453128.1 | 7448614 | 18-scf00286 | 18 |
| AX-158135577 | 13 | 44.236 | KV453130.1 | 340105  | 18-scf00290 | 18 |
| AX-157830679 | 13 | 44.236 | KV453137.1 | 205323  | 18-scf00291 | 18 |
| AX-158136199 | 13 | 44.236 | KV453137.1 | 324167  | 18-scf00291 | 18 |
| AX-158136715 | 13 | 44.236 | KV453135.1 | 435013  | 18-scf00292 | 18 |
| AX-158137663 | 13 | 44.236 | KV453138.1 | 810629  | 18-scf00300 | 18 |
| AX-158134150 | 13 | 44.26  | KV453128.1 | 5684014 | 18-scf00286 | 18 |
| AX-158134151 | 13 | 44.279 | KV453128.1 | 5684347 | 18-scf00286 | 18 |
| AX-158134152 | 13 | 44.3   | KV453128.1 | 5685086 | 18-scf00286 | 18 |
| AX-157771735 | 13 | 44.319 | KV453128.1 | 5603660 | 18-scf00286 | 18 |
| AX-158134142 | 13 | 44.319 | KV453128.1 | 5671779 | 18-scf00286 | 18 |
| AX-158134155 | 13 | 44.319 | KV453128.1 | 5687595 | 18-scf00286 | 18 |
| AX-158134159 | 13 | 44.319 | KV453128.1 | 5696420 | 18-scf00286 | 18 |
| AX-158134365 | 13 | 44.319 | KV453128.1 | 5932418 | 18-scf00286 | 18 |
| AX-158134374 | 13 | 44.319 | KV453128.1 | 5950366 | 18-scf00286 | 18 |
| AX-158134435 | 13 | 44.319 | KV453128.1 | 6022934 | 18-scf00286 | 18 |
| AX-158134443 | 13 | 44.319 | KV453128.1 | 6032840 | 18-scf00286 | 18 |
| AX-158134462 | 13 | 44.319 | KV453128.1 | 6071134 | 18-scf00286 | 18 |
| AX-158134476 | 13 | 44.319 | KV453128.1 | 6097715 | 18-scf00286 | 18 |
| AX-158134501 | 13 | 44.319 | KV453128.1 | 6138487 | 18-scf00286 | 18 |
| AX-158134508 | 13 | 44.319 | KV453128.1 | 6150738 | 18-scf00286 | 18 |
| AX-157830517 | 13 | 44.319 | KV453128.1 | 6151728 | 18-scf00286 | 18 |

|              |    |        |            |         |             |    |
|--------------|----|--------|------------|---------|-------------|----|
| AX-158134871 | 13 | 44.319 | KV453128.1 | 6684255 | 18-scf00286 | 18 |
| AX-157830573 | 13 | 44.319 | KV453128.1 | 6870798 | 18-scf00286 | 18 |
| AX-158134002 | 13 | 44.329 | KV453128.1 | 5480758 | 18-scf00286 | 18 |
| AX-158134016 | 13 | 44.329 | KV453128.1 | 5497654 | 18-scf00286 | 18 |
| AX-158134025 | 13 | 44.329 | KV453128.1 | 5515001 | 18-scf00286 | 18 |
| AX-158411650 | 13 | 44.329 | KV453128.1 | 5515487 | 18-scf00286 | 18 |
| AX-158417472 | 13 | 44.329 | KV453128.1 | 5539254 | 18-scf00286 | 18 |
| AX-158134060 | 13 | 44.329 | KV453128.1 | 5553598 | 18-scf00286 | 18 |
| AX-158134071 | 13 | 44.329 | KV453128.1 | 5567728 | 18-scf00286 | 18 |
| AX-157886260 | 13 | 44.329 | KV453128.1 | 5590281 | 18-scf00286 | 18 |
| AX-157830486 | 13 | 44.329 | KV453128.1 | 5597982 | 18-scf00286 | 18 |
| AX-158134112 | 13 | 44.329 | KV453128.1 | 5620128 | 18-scf00286 | 18 |
| AX-158134114 | 13 | 44.329 | KV453128.1 | 5621897 | 18-scf00286 | 18 |
| AX-158411651 | 13 | 44.329 | KV453128.1 | 5639462 | 18-scf00286 | 18 |
| AX-158134131 | 13 | 44.329 | KV453128.1 | 5658481 | 18-scf00286 | 18 |
| AX-158134135 | 13 | 44.329 | KV453128.1 | 5662199 | 18-scf00286 | 18 |
| AX-158134144 | 13 | 44.329 | KV453128.1 | 5673640 | 18-scf00286 | 18 |
| AX-158134146 | 13 | 44.329 | KV453128.1 | 5678689 | 18-scf00286 | 18 |
| AX-158134156 | 13 | 44.329 | KV453128.1 | 5688124 | 18-scf00286 | 18 |
| AX-158134157 | 13 | 44.329 | KV453128.1 | 5694780 | 18-scf00286 | 18 |
| AX-158134160 | 13 | 44.329 | KV453128.1 | 5697390 | 18-scf00286 | 18 |
| AX-158134161 | 13 | 44.329 | KV453128.1 | 5697609 | 18-scf00286 | 18 |
| AX-158134162 | 13 | 44.329 | KV453128.1 | 5697902 | 18-scf00286 | 18 |
| AX-158134163 | 13 | 44.329 | KV453128.1 | 5698676 | 18-scf00286 | 18 |
| AX-158134164 | 13 | 44.329 | KV453128.1 | 5708708 | 18-scf00286 | 18 |
| AX-158134166 | 13 | 44.329 | KV453128.1 | 5713098 | 18-scf00286 | 18 |
| AX-158134167 | 13 | 44.329 | KV453128.1 | 5715535 | 18-scf00286 | 18 |
| AX-158134168 | 13 | 44.329 | KV453128.1 | 5716479 | 18-scf00286 | 18 |
| AX-158134172 | 13 | 44.329 | KV453128.1 | 5723480 | 18-scf00286 | 18 |
| AX-158134173 | 13 | 44.329 | KV453128.1 | 5724451 | 18-scf00286 | 18 |
| AX-158134174 | 13 | 44.329 | KV453128.1 | 5725308 | 18-scf00286 | 18 |
| AX-158134176 | 13 | 44.329 | KV453128.1 | 5727897 | 18-scf00286 | 18 |
| AX-158134177 | 13 | 44.329 | KV453128.1 | 5730130 | 18-scf00286 | 18 |
| AX-158134178 | 13 | 44.329 | KV453128.1 | 5732714 | 18-scf00286 | 18 |
| AX-158134182 | 13 | 44.329 | KV453128.1 | 5734940 | 18-scf00286 | 18 |
| AX-158134183 | 13 | 44.329 | KV453128.1 | 5735631 | 18-scf00286 | 18 |
| AX-158134184 | 13 | 44.329 | KV453128.1 | 5736345 | 18-scf00286 | 18 |
| AX-158134185 | 13 | 44.329 | KV453128.1 | 5736928 | 18-scf00286 | 18 |
| AX-158134186 | 13 | 44.329 | KV453128.1 | 5738470 | 18-scf00286 | 18 |
| AX-158134187 | 13 | 44.329 | KV453128.1 | 5739128 | 18-scf00286 | 18 |
| AX-158134189 | 13 | 44.329 | KV453128.1 | 5740545 | 18-scf00286 | 18 |
| AX-158134191 | 13 | 44.329 | KV453128.1 | 5743571 | 18-scf00286 | 18 |
| AX-158134192 | 13 | 44.329 | KV453128.1 | 5744075 | 18-scf00286 | 18 |
| AX-158134193 | 13 | 44.329 | KV453128.1 | 5744745 | 18-scf00286 | 18 |
| AX-158134194 | 13 | 44.329 | KV453128.1 | 5746255 | 18-scf00286 | 18 |
| AX-157830489 | 13 | 44.329 | KV453128.1 | 5746915 | 18-scf00286 | 18 |
| AX-158134195 | 13 | 44.329 | KV453128.1 | 5748659 | 18-scf00286 | 18 |
| AX-158134196 | 13 | 44.329 | KV453128.1 | 5750724 | 18-scf00286 | 18 |
| AX-158134197 | 13 | 44.329 | KV453128.1 | 5751831 | 18-scf00286 | 18 |
| AX-158134198 | 13 | 44.329 | KV453128.1 | 5753257 | 18-scf00286 | 18 |
| AX-158134200 | 13 | 44.329 | KV453128.1 | 5754186 | 18-scf00286 | 18 |



|              |    |        |            |         |             |    |
|--------------|----|--------|------------|---------|-------------|----|
| AX-158134202 | 13 | 44.329 | KV453128.1 | 5754575 | 18-scf00286 | 18 |
| AX-158134203 | 13 | 44.329 | KV453128.1 | 5755679 | 18-scf00286 | 18 |
| AX-158134204 | 13 | 44.329 | KV453128.1 | 5756274 | 18-scf00286 | 18 |
| AX-158134205 | 13 | 44.329 | KV453128.1 | 5756670 | 18-scf00286 | 18 |
| AX-158134206 | 13 | 44.329 | KV453128.1 | 5758930 | 18-scf00286 | 18 |
| AX-158134207 | 13 | 44.329 | KV453128.1 | 5759386 | 18-scf00286 | 18 |
| AX-158134208 | 13 | 44.329 | KV453128.1 | 5762801 | 18-scf00286 | 18 |
| AX-158134209 | 13 | 44.329 | KV453128.1 | 5763640 | 18-scf00286 | 18 |
| AX-158134210 | 13 | 44.329 | KV453128.1 | 5764470 | 18-scf00286 | 18 |
| AX-158134211 | 13 | 44.329 | KV453128.1 | 5765280 | 18-scf00286 | 18 |
| AX-158134212 | 13 | 44.329 | KV453128.1 | 5766100 | 18-scf00286 | 18 |
| AX-158134214 | 13 | 44.329 | KV453128.1 | 5768474 | 18-scf00286 | 18 |
| AX-158134215 | 13 | 44.329 | KV453128.1 | 5769033 | 18-scf00286 | 18 |
| AX-158134216 | 13 | 44.329 | KV453128.1 | 5770373 | 18-scf00286 | 18 |
| AX-158134217 | 13 | 44.329 | KV453128.1 | 5772571 | 18-scf00286 | 18 |
| AX-158134218 | 13 | 44.329 | KV453128.1 | 5773409 | 18-scf00286 | 18 |
| AX-158134219 | 13 | 44.329 | KV453128.1 | 5773798 | 18-scf00286 | 18 |
| AX-158134220 | 13 | 44.329 | KV453128.1 | 5774246 | 18-scf00286 | 18 |
| AX-158134222 | 13 | 44.329 | KV453128.1 | 5775153 | 18-scf00286 | 18 |
| AX-158134223 | 13 | 44.329 | KV453128.1 | 5777279 | 18-scf00286 | 18 |
| AX-158134224 | 13 | 44.329 | KV453128.1 | 5777947 | 18-scf00286 | 18 |
| AX-158134225 | 13 | 44.329 | KV453128.1 | 5779317 | 18-scf00286 | 18 |
| AX-157696407 | 13 | 44.329 | KV453128.1 | 5780065 | 18-scf00286 | 18 |
| AX-158134226 | 13 | 44.329 | KV453128.1 | 5781022 | 18-scf00286 | 18 |
| AX-158134227 | 13 | 44.329 | KV453128.1 | 5782520 | 18-scf00286 | 18 |
| AX-158134228 | 13 | 44.329 | KV453128.1 | 5782832 | 18-scf00286 | 18 |
| AX-158134229 | 13 | 44.329 | KV453128.1 | 5783119 | 18-scf00286 | 18 |
| AX-158134230 | 13 | 44.329 | KV453128.1 | 5783836 | 18-scf00286 | 18 |
| AX-157746500 | 13 | 44.329 | KV453128.1 | 5784257 | 18-scf00286 | 18 |
| AX-158134233 | 13 | 44.329 | KV453128.1 | 5787040 | 18-scf00286 | 18 |
| AX-158134234 | 13 | 44.329 | KV453128.1 | 5789068 | 18-scf00286 | 18 |
| AX-158134236 | 13 | 44.329 | KV453128.1 | 5790893 | 18-scf00286 | 18 |
| AX-158134239 | 13 | 44.329 | KV453128.1 | 5798436 | 18-scf00286 | 18 |
| AX-158134242 | 13 | 44.329 | KV453128.1 | 5799383 | 18-scf00286 | 18 |
| AX-158134244 | 13 | 44.329 | KV453128.1 | 5801018 | 18-scf00286 | 18 |
| AX-158134245 | 13 | 44.329 | KV453128.1 | 5801290 | 18-scf00286 | 18 |
| AX-157710906 | 13 | 44.329 | KV453128.1 | 5801467 | 18-scf00286 | 18 |
| AX-158134246 | 13 | 44.329 | KV453128.1 | 5801761 | 18-scf00286 | 18 |
| AX-158134247 | 13 | 44.329 | KV453128.1 | 5802898 | 18-scf00286 | 18 |
| AX-158134249 | 13 | 44.329 | KV453128.1 | 5805389 | 18-scf00286 | 18 |
| AX-158134250 | 13 | 44.329 | KV453128.1 | 5805479 | 18-scf00286 | 18 |
| AX-158134256 | 13 | 44.329 | KV453128.1 | 5815433 | 18-scf00286 | 18 |
| AX-158134257 | 13 | 44.329 | KV453128.1 | 5815917 | 18-scf00286 | 18 |
| AX-158134258 | 13 | 44.329 | KV453128.1 | 5818505 | 18-scf00286 | 18 |
| AX-158134259 | 13 | 44.329 | KV453128.1 | 5818715 | 18-scf00286 | 18 |
| AX-158134260 | 13 | 44.329 | KV453128.1 | 5819238 | 18-scf00286 | 18 |
| AX-158134261 | 13 | 44.329 | KV453128.1 | 5819809 | 18-scf00286 | 18 |
| AX-158134262 | 13 | 44.329 | KV453128.1 | 5821197 | 18-scf00286 | 18 |
| AX-158134263 | 13 | 44.329 | KV453128.1 | 5821593 | 18-scf00286 | 18 |
| AX-158134264 | 13 | 44.329 | KV453128.1 | 5822457 | 18-scf00286 | 18 |
| AX-158134265 | 13 | 44.329 | KV453128.1 | 5823193 | 18-scf00286 | 18 |

|              |    |        |            |         |             |    |
|--------------|----|--------|------------|---------|-------------|----|
| AX-158134266 | 13 | 44.329 | KV453128.1 | 5823308 | 18-scf00286 | 18 |
| AX-158134269 | 13 | 44.329 | KV453128.1 | 5825527 | 18-scf00286 | 18 |
| AX-158134271 | 13 | 44.329 | KV453128.1 | 5826619 | 18-scf00286 | 18 |
| AX-158134273 | 13 | 44.329 | KV453128.1 | 5827572 | 18-scf00286 | 18 |
| AX-158134274 | 13 | 44.329 | KV453128.1 | 5828350 | 18-scf00286 | 18 |
| AX-158134275 | 13 | 44.329 | KV453128.1 | 5829239 | 18-scf00286 | 18 |
| AX-158134276 | 13 | 44.329 | KV453128.1 | 5829968 | 18-scf00286 | 18 |
| AX-158134277 | 13 | 44.329 | KV453128.1 | 5830400 | 18-scf00286 | 18 |
| AX-158134278 | 13 | 44.329 | KV453128.1 | 5830827 | 18-scf00286 | 18 |
| AX-158134279 | 13 | 44.329 | KV453128.1 | 5831436 | 18-scf00286 | 18 |
| AX-157878028 | 13 | 44.329 | KV453128.1 | 5832374 | 18-scf00286 | 18 |
| AX-158134280 | 13 | 44.329 | KV453128.1 | 5832765 | 18-scf00286 | 18 |
| AX-158134281 | 13 | 44.329 | KV453128.1 | 5833217 | 18-scf00286 | 18 |
| AX-158134282 | 13 | 44.329 | KV453128.1 | 5833687 | 18-scf00286 | 18 |
| AX-158134283 | 13 | 44.329 | KV453128.1 | 5834663 | 18-scf00286 | 18 |
| AX-158134284 | 13 | 44.329 | KV453128.1 | 5835024 | 18-scf00286 | 18 |
| AX-158134285 | 13 | 44.329 | KV453128.1 | 5835738 | 18-scf00286 | 18 |
| AX-158134286 | 13 | 44.329 | KV453128.1 | 5836194 | 18-scf00286 | 18 |
| AX-158134287 | 13 | 44.329 | KV453128.1 | 5836896 | 18-scf00286 | 18 |
| AX-158134289 | 13 | 44.329 | KV453128.1 | 5838621 | 18-scf00286 | 18 |
| AX-157830491 | 13 | 44.329 | KV453128.1 | 5839303 | 18-scf00286 | 18 |
| AX-158134290 | 13 | 44.329 | KV453128.1 | 5839350 | 18-scf00286 | 18 |
| AX-158134291 | 13 | 44.329 | KV453128.1 | 5839934 | 18-scf00286 | 18 |
| AX-158134292 | 13 | 44.329 | KV453128.1 | 5840458 | 18-scf00286 | 18 |
| AX-158134293 | 13 | 44.329 | KV453128.1 | 5841188 | 18-scf00286 | 18 |
| AX-158134294 | 13 | 44.329 | KV453128.1 | 5841993 | 18-scf00286 | 18 |
| AX-158134295 | 13 | 44.329 | KV453128.1 | 5842808 | 18-scf00286 | 18 |
| AX-158134296 | 13 | 44.329 | KV453128.1 | 5843387 | 18-scf00286 | 18 |
| AX-158134297 | 13 | 44.329 | KV453128.1 | 5843930 | 18-scf00286 | 18 |
| AX-158134298 | 13 | 44.329 | KV453128.1 | 5844608 | 18-scf00286 | 18 |
| AX-158134299 | 13 | 44.329 | KV453128.1 | 5845449 | 18-scf00286 | 18 |
| AX-158134300 | 13 | 44.329 | KV453128.1 | 5846237 | 18-scf00286 | 18 |
| AX-158134301 | 13 | 44.329 | KV453128.1 | 5846797 | 18-scf00286 | 18 |
| AX-158134302 | 13 | 44.329 | KV453128.1 | 5849179 | 18-scf00286 | 18 |
| AX-157830492 | 13 | 44.329 | KV453128.1 | 5849688 | 18-scf00286 | 18 |
| AX-158134303 | 13 | 44.329 | KV453128.1 | 5849868 | 18-scf00286 | 18 |
| AX-158134304 | 13 | 44.329 | KV453128.1 | 5850625 | 18-scf00286 | 18 |
| AX-158134305 | 13 | 44.329 | KV453128.1 | 5851306 | 18-scf00286 | 18 |
| AX-158134307 | 13 | 44.329 | KV453128.1 | 5852654 | 18-scf00286 | 18 |
| AX-158134308 | 13 | 44.329 | KV453128.1 | 5853028 | 18-scf00286 | 18 |
| AX-157830493 | 13 | 44.329 | KV453128.1 | 5853459 | 18-scf00286 | 18 |
| AX-158134309 | 13 | 44.329 | KV453128.1 | 5854135 | 18-scf00286 | 18 |
| AX-157765444 | 13 | 44.329 | KV453128.1 | 5854462 | 18-scf00286 | 18 |
| AX-158134310 | 13 | 44.329 | KV453128.1 | 5854548 | 18-scf00286 | 18 |
| AX-158134311 | 13 | 44.329 | KV453128.1 | 5855143 | 18-scf00286 | 18 |
| AX-158134312 | 13 | 44.329 | KV453128.1 | 5856048 | 18-scf00286 | 18 |
| AX-158134313 | 13 | 44.329 | KV453128.1 | 5856487 | 18-scf00286 | 18 |
| AX-157878029 | 13 | 44.329 | KV453128.1 | 5856942 | 18-scf00286 | 18 |
| AX-158134314 | 13 | 44.329 | KV453128.1 | 5857123 | 18-scf00286 | 18 |
| AX-158134315 | 13 | 44.329 | KV453128.1 | 5857290 | 18-scf00286 | 18 |
| AX-158134317 | 13 | 44.329 | KV453128.1 | 5858824 | 18-scf00286 | 18 |

|              |    |        |            |         |             |    |
|--------------|----|--------|------------|---------|-------------|----|
| AX-158134318 | 13 | 44.329 | KV453128.1 | 5859729 | 18-scf00286 | 18 |
| AX-158134319 | 13 | 44.329 | KV453128.1 | 5865332 | 18-scf00286 | 18 |
| AX-158134320 | 13 | 44.329 | KV453128.1 | 5865872 | 18-scf00286 | 18 |
| AX-157878030 | 13 | 44.329 | KV453128.1 | 5873727 | 18-scf00286 | 18 |
| AX-158134322 | 13 | 44.329 | KV453128.1 | 5874532 | 18-scf00286 | 18 |
| AX-157878031 | 13 | 44.329 | KV453128.1 | 5875505 | 18-scf00286 | 18 |
| AX-158134324 | 13 | 44.329 | KV453128.1 | 5876656 | 18-scf00286 | 18 |
| AX-158134325 | 13 | 44.329 | KV453128.1 | 5877570 | 18-scf00286 | 18 |
| AX-158134326 | 13 | 44.329 | KV453128.1 | 5878886 | 18-scf00286 | 18 |
| AX-158134327 | 13 | 44.329 | KV453128.1 | 5879181 | 18-scf00286 | 18 |
| AX-158134328 | 13 | 44.329 | KV453128.1 | 5879571 | 18-scf00286 | 18 |
| AX-157830494 | 13 | 44.329 | KV453128.1 | 5880533 | 18-scf00286 | 18 |
| AX-157830495 | 13 | 44.329 | KV453128.1 | 5881477 | 18-scf00286 | 18 |
| AX-158134329 | 13 | 44.329 | KV453128.1 | 5882025 | 18-scf00286 | 18 |
| AX-158134330 | 13 | 44.329 | KV453128.1 | 5882508 | 18-scf00286 | 18 |
| AX-157830496 | 13 | 44.329 | KV453128.1 | 5882998 | 18-scf00286 | 18 |
| AX-157747874 | 13 | 44.329 | KV453128.1 | 5883089 | 18-scf00286 | 18 |
| AX-157708722 | 13 | 44.329 | KV453128.1 | 5886984 | 18-scf00286 | 18 |
| AX-157830497 | 13 | 44.329 | KV453128.1 | 5887755 | 18-scf00286 | 18 |
| AX-158134331 | 13 | 44.329 | KV453128.1 | 5888326 | 18-scf00286 | 18 |
| AX-158134332 | 13 | 44.329 | KV453128.1 | 5888663 | 18-scf00286 | 18 |
| AX-158134333 | 13 | 44.329 | KV453128.1 | 5889213 | 18-scf00286 | 18 |
| AX-158134334 | 13 | 44.329 | KV453128.1 | 5889776 | 18-scf00286 | 18 |
| AX-158134335 | 13 | 44.329 | KV453128.1 | 5890887 | 18-scf00286 | 18 |
| AX-158134336 | 13 | 44.329 | KV453128.1 | 5891536 | 18-scf00286 | 18 |
| AX-157830499 | 13 | 44.329 | KV453128.1 | 5892065 | 18-scf00286 | 18 |
| AX-157830500 | 13 | 44.329 | KV453128.1 | 5893597 | 18-scf00286 | 18 |
| AX-158134340 | 13 | 44.329 | KV453128.1 | 5896652 | 18-scf00286 | 18 |
| AX-158134341 | 13 | 44.329 | KV453128.1 | 5897092 | 18-scf00286 | 18 |
| AX-157714426 | 13 | 44.329 | KV453128.1 | 5897525 | 18-scf00286 | 18 |
| AX-158134342 | 13 | 44.329 | KV453128.1 | 5898080 | 18-scf00286 | 18 |
| AX-158134343 | 13 | 44.329 | KV453128.1 | 5899192 | 18-scf00286 | 18 |
| AX-157878033 | 13 | 44.329 | KV453128.1 | 5900805 | 18-scf00286 | 18 |
| AX-158134345 | 13 | 44.329 | KV453128.1 | 5902146 | 18-scf00286 | 18 |
| AX-158134347 | 13 | 44.329 | KV453128.1 | 5904673 | 18-scf00286 | 18 |
| AX-158134348 | 13 | 44.329 | KV453128.1 | 5904891 | 18-scf00286 | 18 |
| AX-158134349 | 13 | 44.329 | KV453128.1 | 5908812 | 18-scf00286 | 18 |
| AX-157716652 | 13 | 44.329 | KV453128.1 | 5915641 | 18-scf00286 | 18 |
| AX-158134352 | 13 | 44.329 | KV453128.1 | 5918238 | 18-scf00286 | 18 |
| AX-158134353 | 13 | 44.329 | KV453128.1 | 5918519 | 18-scf00286 | 18 |
| AX-158134354 | 13 | 44.329 | KV453128.1 | 5919019 | 18-scf00286 | 18 |
| AX-158134355 | 13 | 44.329 | KV453128.1 | 5920593 | 18-scf00286 | 18 |
| AX-157739651 | 13 | 44.329 | KV453128.1 | 5923682 | 18-scf00286 | 18 |
| AX-158134359 | 13 | 44.329 | KV453128.1 | 5925609 | 18-scf00286 | 18 |
| AX-158134360 | 13 | 44.329 | KV453128.1 | 5927799 | 18-scf00286 | 18 |
| AX-158134361 | 13 | 44.329 | KV453128.1 | 5929007 | 18-scf00286 | 18 |
| AX-157830501 | 13 | 44.329 | KV453128.1 | 5929417 | 18-scf00286 | 18 |
| AX-158134362 | 13 | 44.329 | KV453128.1 | 5930451 | 18-scf00286 | 18 |
| AX-158134363 | 13 | 44.329 | KV453128.1 | 5930766 | 18-scf00286 | 18 |
| AX-158134364 | 13 | 44.329 | KV453128.1 | 5931573 | 18-scf00286 | 18 |
| AX-158134367 | 13 | 44.329 | KV453128.1 | 5933478 | 18-scf00286 | 18 |

|              |    |        |            |         |             |    |
|--------------|----|--------|------------|---------|-------------|----|
| AX-158134368 | 13 | 44.329 | KV453128.1 | 5933729 | 18-scf00286 | 18 |
| AX-158134371 | 13 | 44.329 | KV453128.1 | 5940708 | 18-scf00286 | 18 |
| AX-158134373 | 13 | 44.329 | KV453128.1 | 5949856 | 18-scf00286 | 18 |
| AX-158134375 | 13 | 44.329 | KV453128.1 | 5950819 | 18-scf00286 | 18 |
| AX-158134376 | 13 | 44.329 | KV453128.1 | 5951321 | 18-scf00286 | 18 |
| AX-158134377 | 13 | 44.329 | KV453128.1 | 5951841 | 18-scf00286 | 18 |
| AX-158134379 | 13 | 44.329 | KV453128.1 | 5953742 | 18-scf00286 | 18 |
| AX-158134380 | 13 | 44.329 | KV453128.1 | 5954110 | 18-scf00286 | 18 |
| AX-158134381 | 13 | 44.329 | KV453128.1 | 5954547 | 18-scf00286 | 18 |
| AX-158134382 | 13 | 44.329 | KV453128.1 | 5955840 | 18-scf00286 | 18 |
| AX-158134386 | 13 | 44.329 | KV453128.1 | 5960596 | 18-scf00286 | 18 |
| AX-158134389 | 13 | 44.329 | KV453128.1 | 5961532 | 18-scf00286 | 18 |
| AX-157708412 | 13 | 44.329 | KV453128.1 | 5964450 | 18-scf00286 | 18 |
| AX-158134392 | 13 | 44.329 | KV453128.1 | 5967284 | 18-scf00286 | 18 |
| AX-158134393 | 13 | 44.329 | KV453128.1 | 5967625 | 18-scf00286 | 18 |
| AX-158134396 | 13 | 44.329 | KV453128.1 | 5972545 | 18-scf00286 | 18 |
| AX-158134401 | 13 | 44.329 | KV453128.1 | 5979067 | 18-scf00286 | 18 |
| AX-158134402 | 13 | 44.329 | KV453128.1 | 5979786 | 18-scf00286 | 18 |
| AX-158134406 | 13 | 44.329 | KV453128.1 | 5983859 | 18-scf00286 | 18 |
| AX-158134407 | 13 | 44.329 | KV453128.1 | 5984278 | 18-scf00286 | 18 |
| AX-158134408 | 13 | 44.329 | KV453128.1 | 5984917 | 18-scf00286 | 18 |
| AX-157878035 | 13 | 44.329 | KV453128.1 | 5992442 | 18-scf00286 | 18 |
| AX-158134418 | 13 | 44.329 | KV453128.1 | 5992782 | 18-scf00286 | 18 |
| AX-158134420 | 13 | 44.329 | KV453128.1 | 5993956 | 18-scf00286 | 18 |
| AX-158134421 | 13 | 44.329 | KV453128.1 | 5994587 | 18-scf00286 | 18 |
| AX-158134422 | 13 | 44.329 | KV453128.1 | 5995082 | 18-scf00286 | 18 |
| AX-158134423 | 13 | 44.329 | KV453128.1 | 5995747 | 18-scf00286 | 18 |
| AX-157830503 | 13 | 44.329 | KV453128.1 | 5999387 | 18-scf00286 | 18 |
| AX-158134425 | 13 | 44.329 | KV453128.1 | 6001478 | 18-scf00286 | 18 |
| AX-158134426 | 13 | 44.329 | KV453128.1 | 6002033 | 18-scf00286 | 18 |
| AX-158134427 | 13 | 44.329 | KV453128.1 | 6002507 | 18-scf00286 | 18 |
| AX-158134429 | 13 | 44.329 | KV453128.1 | 6006835 | 18-scf00286 | 18 |
| AX-157714430 | 13 | 44.329 | KV453128.1 | 6015432 | 18-scf00286 | 18 |
| AX-158134432 | 13 | 44.329 | KV453128.1 | 6016402 | 18-scf00286 | 18 |
| AX-157830506 | 13 | 44.329 | KV453128.1 | 6019432 | 18-scf00286 | 18 |
| AX-157830507 | 13 | 44.329 | KV453128.1 | 6021712 | 18-scf00286 | 18 |
| AX-158134434 | 13 | 44.329 | KV453128.1 | 6022357 | 18-scf00286 | 18 |
| AX-158134437 | 13 | 44.329 | KV453128.1 | 6028346 | 18-scf00286 | 18 |
| AX-158134439 | 13 | 44.329 | KV453128.1 | 6030641 | 18-scf00286 | 18 |
| AX-158134441 | 13 | 44.329 | KV453128.1 | 6031273 | 18-scf00286 | 18 |
| AX-158134442 | 13 | 44.329 | KV453128.1 | 6031916 | 18-scf00286 | 18 |
| AX-157727240 | 13 | 44.329 | KV453128.1 | 6032445 | 18-scf00286 | 18 |
| AX-158134445 | 13 | 44.329 | KV453128.1 | 6035930 | 18-scf00286 | 18 |
| AX-158134446 | 13 | 44.329 | KV453128.1 | 6038943 | 18-scf00286 | 18 |
| AX-157830508 | 13 | 44.329 | KV453128.1 | 6041477 | 18-scf00286 | 18 |
| AX-157775822 | 13 | 44.329 | KV453128.1 | 6045673 | 18-scf00286 | 18 |
| AX-157830509 | 13 | 44.329 | KV453128.1 | 6049833 | 18-scf00286 | 18 |
| AX-157830510 | 13 | 44.329 | KV453128.1 | 6049998 | 18-scf00286 | 18 |
| AX-158134449 | 13 | 44.329 | KV453128.1 | 6050553 | 18-scf00286 | 18 |
| AX-158134450 | 13 | 44.329 | KV453128.1 | 6051304 | 18-scf00286 | 18 |
| AX-157756715 | 13 | 44.329 | KV453128.1 | 6054284 | 18-scf00286 | 18 |

|              |    |        |            |         |             |    |
|--------------|----|--------|------------|---------|-------------|----|
| AX-158134452 | 13 | 44.329 | KV453128.1 | 6054852 | 18-scf00286 | 18 |
| AX-157739109 | 13 | 44.329 | KV453128.1 | 6060167 | 18-scf00286 | 18 |
| AX-157699797 | 13 | 44.329 | KV453128.1 | 6062544 | 18-scf00286 | 18 |
| AX-158134457 | 13 | 44.329 | KV453128.1 | 6067487 | 18-scf00286 | 18 |
| AX-158134458 | 13 | 44.329 | KV453128.1 | 6068031 | 18-scf00286 | 18 |
| AX-158134459 | 13 | 44.329 | KV453128.1 | 6068394 | 18-scf00286 | 18 |
| AX-158134460 | 13 | 44.329 | KV453128.1 | 6070214 | 18-scf00286 | 18 |
| AX-158134463 | 13 | 44.329 | KV453128.1 | 6072488 | 18-scf00286 | 18 |
| AX-158134464 | 13 | 44.329 | KV453128.1 | 6073915 | 18-scf00286 | 18 |
| AX-158134465 | 13 | 44.329 | KV453128.1 | 6074391 | 18-scf00286 | 18 |
| AX-158134466 | 13 | 44.329 | KV453128.1 | 6075347 | 18-scf00286 | 18 |
| AX-158134468 | 13 | 44.329 | KV453128.1 | 6078576 | 18-scf00286 | 18 |
| AX-158134469 | 13 | 44.329 | KV453128.1 | 6079541 | 18-scf00286 | 18 |
| AX-158134470 | 13 | 44.329 | KV453128.1 | 6080460 | 18-scf00286 | 18 |
| AX-158385318 | 13 | 44.329 | KV453128.1 | 6081096 | 18-scf00286 | 18 |
| AX-158134471 | 13 | 44.329 | KV453128.1 | 6083538 | 18-scf00286 | 18 |
| AX-158134472 | 13 | 44.329 | KV453128.1 | 6084609 | 18-scf00286 | 18 |
| AX-158134473 | 13 | 44.329 | KV453128.1 | 6089306 | 18-scf00286 | 18 |
| AX-157766624 | 13 | 44.329 | KV453128.1 | 6091793 | 18-scf00286 | 18 |
| AX-158134474 | 13 | 44.329 | KV453128.1 | 6093325 | 18-scf00286 | 18 |
| AX-158134477 | 13 | 44.329 | KV453128.1 | 6099597 | 18-scf00286 | 18 |
| AX-158134478 | 13 | 44.329 | KV453128.1 | 6102818 | 18-scf00286 | 18 |
| AX-157830512 | 13 | 44.329 | KV453128.1 | 6106540 | 18-scf00286 | 18 |
| AX-158134486 | 13 | 44.329 | KV453128.1 | 6111042 | 18-scf00286 | 18 |
| AX-158134487 | 13 | 44.329 | KV453128.1 | 6111318 | 18-scf00286 | 18 |
| AX-157773280 | 13 | 44.329 | KV453128.1 | 6113115 | 18-scf00286 | 18 |
| AX-158134488 | 13 | 44.329 | KV453128.1 | 6113554 | 18-scf00286 | 18 |
| AX-158134489 | 13 | 44.329 | KV453128.1 | 6114290 | 18-scf00286 | 18 |
| AX-157830513 | 13 | 44.329 | KV453128.1 | 6125421 | 18-scf00286 | 18 |
| AX-157830515 | 13 | 44.329 | KV453128.1 | 6131639 | 18-scf00286 | 18 |
| AX-157722480 | 13 | 44.329 | KV453128.1 | 6137584 | 18-scf00286 | 18 |
| AX-158134500 | 13 | 44.329 | KV453128.1 | 6137961 | 18-scf00286 | 18 |
| AX-157830516 | 13 | 44.329 | KV453128.1 | 6140270 | 18-scf00286 | 18 |
| AX-158134502 | 13 | 44.329 | KV453128.1 | 6140609 | 18-scf00286 | 18 |
| AX-157748634 | 13 | 44.329 | KV453128.1 | 6141323 | 18-scf00286 | 18 |
| AX-158134505 | 13 | 44.329 | KV453128.1 | 6147604 | 18-scf00286 | 18 |
| AX-158134513 | 13 | 44.329 | KV453128.1 | 6162453 | 18-scf00286 | 18 |
| AX-158134526 | 13 | 44.329 | KV453128.1 | 6178290 | 18-scf00286 | 18 |
| AX-157830527 | 13 | 44.329 | KV453128.1 | 6225207 | 18-scf00286 | 18 |
| AX-158135362 | 13 | 44.329 | KV453128.1 | 7468455 | 18-scf00286 | 18 |
| AX-158135805 | 13 | 44.329 | KV453130.1 | 57665   | 18-scf00290 | 18 |
| AX-158136858 | 13 | 44.329 | KV453135.1 | 985401  | 18-scf00292 | 18 |
| AX-158137389 | 13 | 44.329 | KV453134.1 | 57161   | 18-scf00296 | 18 |
| AX-157689968 | 13 | 44.329 |            | 89      | scf17162    | UN |
| AX-157757846 | 13 | 44.474 | KV453128.1 | 6156491 | 18-scf00286 | 18 |
| AX-157746119 | 13 | 44.62  | KV453128.1 | 6168392 | 18-scf00286 | 18 |
| AX-158134527 | 13 | 44.62  | KV453128.1 | 6178640 | 18-scf00286 | 18 |
| AX-158134519 | 13 | 44.693 | KV453128.1 | 6170732 | 18-scf00286 | 18 |
| AX-158134516 | 13 | 44.766 | KV453128.1 | 6166544 | 18-scf00286 | 18 |
| AX-158134520 | 13 | 44.766 | KV453128.1 | 6172890 | 18-scf00286 | 18 |
| AX-158134522 | 13 | 44.766 | KV453128.1 | 6175212 | 18-scf00286 | 18 |

|              |    |        |            |         |             |    |
|--------------|----|--------|------------|---------|-------------|----|
| AX-158134524 | 13 | 44.766 | KV453128.1 | 6176479 | 18-scf00286 | 18 |
| AX-158134525 | 13 | 44.766 | KV453128.1 | 6176745 | 18-scf00286 | 18 |
| AX-157830520 | 13 | 44.766 | KV453128.1 | 6176820 | 18-scf00286 | 18 |
| AX-158134529 | 13 | 44.766 | KV453128.1 | 6180591 | 18-scf00286 | 18 |
| AX-158134530 | 13 | 44.766 | KV453128.1 | 6181180 | 18-scf00286 | 18 |
| AX-158134533 | 13 | 44.766 | KV453128.1 | 6183666 | 18-scf00286 | 18 |
| AX-158134535 | 13 | 44.766 | KV453128.1 | 6185722 | 18-scf00286 | 18 |
| AX-158134536 | 13 | 44.766 | KV453128.1 | 6187045 | 18-scf00286 | 18 |
| AX-158134538 | 13 | 44.766 | KV453128.1 | 6188380 | 18-scf00286 | 18 |
| AX-157830521 | 13 | 44.766 | KV453128.1 | 6193887 | 18-scf00286 | 18 |
| AX-158134541 | 13 | 44.766 | KV453128.1 | 6194267 | 18-scf00286 | 18 |
| AX-158134542 | 13 | 44.766 | KV453128.1 | 6196874 | 18-scf00286 | 18 |
| AX-158134543 | 13 | 44.766 | KV453128.1 | 6198883 | 18-scf00286 | 18 |
| AX-158134544 | 13 | 45.039 | KV453128.1 | 6199661 | 18-scf00286 | 18 |
| AX-158134545 | 13 | 45.04  | KV453128.1 | 6202005 | 18-scf00286 | 18 |
| AX-158134546 | 13 | 45.153 | KV453128.1 | 6205935 | 18-scf00286 | 18 |
| AX-158134518 | 13 | 45.313 | KV453128.1 | 6169994 | 18-scf00286 | 18 |
| AX-157830524 | 13 | 45.313 | KV453128.1 | 6206431 | 18-scf00286 | 18 |
| AX-157748274 | 13 | 45.313 | KV453128.1 | 6206699 | 18-scf00286 | 18 |
| AX-158134547 | 13 | 45.313 | KV453128.1 | 6207087 | 18-scf00286 | 18 |
| AX-157774497 | 13 | 45.313 | KV453128.1 | 6207489 | 18-scf00286 | 18 |
| AX-157830525 | 13 | 45.313 | KV453128.1 | 6207819 | 18-scf00286 | 18 |
| AX-157830526 | 13 | 45.313 | KV453128.1 | 6208980 | 18-scf00286 | 18 |
| AX-157871433 | 13 | 45.313 | KV453131.1 | 619028  | 18-scf00293 | 18 |
| AX-158411655 | 13 | 45.401 | KV453128.1 | 6214691 | 18-scf00286 | 18 |
| AX-158134551 | 13 | 45.472 | KV453128.1 | 6217947 | 18-scf00286 | 18 |
| AX-158134531 | 13 | 45.531 | KV453128.1 | 6181498 | 18-scf00286 | 18 |
| AX-158134555 | 13 | 45.531 | KV453128.1 | 6222960 | 18-scf00286 | 18 |
| AX-158134559 | 13 | 45.531 | KV453128.1 | 6230840 | 18-scf00286 | 18 |
| AX-158134560 | 13 | 45.531 | KV453128.1 | 6232708 | 18-scf00286 | 18 |
| AX-158134561 | 13 | 45.531 | KV453128.1 | 6233865 | 18-scf00286 | 18 |
| AX-158134616 | 13 | 45.531 | KV453128.1 | 6324829 | 18-scf00286 | 18 |
| AX-158134640 | 13 | 45.531 | KV453128.1 | 6359325 | 18-scf00286 | 18 |
| AX-157726063 | 13 | 45.531 | KV453128.1 | 6758362 | 18-scf00286 | 18 |
| AX-158137279 | 13 | 45.531 | KV453136.1 | 190641  | 18-scf00294 | 18 |
| AX-158134563 | 13 | 45.583 | KV453128.1 | 6239558 | 18-scf00286 | 18 |
| AX-158134554 | 13 | 45.64  | KV453128.1 | 6220666 | 18-scf00286 | 18 |
| AX-158134564 | 13 | 45.64  | KV453128.1 | 6241408 | 18-scf00286 | 18 |
| AX-158134568 | 13 | 45.64  | KV453128.1 | 6247414 | 18-scf00286 | 18 |
| AX-158134570 | 13 | 45.64  | KV453128.1 | 6248924 | 18-scf00286 | 18 |
| AX-158134571 | 13 | 45.64  | KV453128.1 | 6249487 | 18-scf00286 | 18 |
| AX-158134572 | 13 | 45.64  | KV453128.1 | 6250940 | 18-scf00286 | 18 |
| AX-158134573 | 13 | 45.64  | KV453128.1 | 6252138 | 18-scf00286 | 18 |
| AX-158134575 | 13 | 45.64  | KV453128.1 | 6254956 | 18-scf00286 | 18 |
| AX-158134576 | 13 | 45.64  | KV453128.1 | 6257847 | 18-scf00286 | 18 |
| AX-157878043 | 13 | 45.64  | KV453128.1 | 6263435 | 18-scf00286 | 18 |
| AX-158134580 | 13 | 45.64  | KV453128.1 | 6265803 | 18-scf00286 | 18 |
| AX-158134594 | 13 | 45.64  | KV453128.1 | 6289429 | 18-scf00286 | 18 |
| AX-158134606 | 13 | 45.64  | KV453128.1 | 6306000 | 18-scf00286 | 18 |
| AX-158134613 | 13 | 45.64  | KV453128.1 | 6320312 | 18-scf00286 | 18 |
| AX-158135217 | 13 | 45.64  | KV453128.1 | 7249701 | 18-scf00286 | 18 |

|              |    |        |            |         |             |    |
|--------------|----|--------|------------|---------|-------------|----|
| AX-158135270 | 13 | 45.64  | KV453128.1 | 7332690 | 18-scf00286 | 18 |
| AX-157830952 | 13 | 45.64  | KV453138.1 | 348794  | 18-scf00300 | 18 |
| AX-157830924 | 13 | 45.64  | KV453138.1 | 800272  | 18-scf00300 | 18 |
| AX-158138886 | 13 | 45.64  | KV453138.1 | 3322401 | 18-scf00300 | 18 |
| AX-158134578 | 13 | 45.681 | KV453128.1 | 6259101 | 18-scf00286 | 18 |
| AX-158411656 | 13 | 45.718 | KV453128.1 | 6267701 | 18-scf00286 | 18 |
| AX-158134582 | 13 | 45.75  | KV453128.1 | 6268031 | 18-scf00286 | 18 |
| AX-158134583 | 13 | 45.75  | KV453128.1 | 6269679 | 18-scf00286 | 18 |
| AX-158134584 | 13 | 45.75  | KV453128.1 | 6270032 | 18-scf00286 | 18 |
| AX-158134585 | 13 | 45.75  | KV453128.1 | 6270466 | 18-scf00286 | 18 |
| AX-158134586 | 13 | 45.75  | KV453128.1 | 6272422 | 18-scf00286 | 18 |
| AX-157830530 | 13 | 45.75  | KV453128.1 | 6304675 | 18-scf00286 | 18 |
| AX-158134587 | 13 | 45.806 | KV453128.1 | 6274473 | 18-scf00286 | 18 |
| AX-158134588 | 13 | 45.859 | KV453128.1 | 6275395 | 18-scf00286 | 18 |
| AX-158134590 | 13 | 45.859 | KV453128.1 | 6279710 | 18-scf00286 | 18 |
| AX-158134591 | 13 | 45.859 | KV453128.1 | 6282999 | 18-scf00286 | 18 |
| AX-157830529 | 13 | 45.859 | KV453128.1 | 6283700 | 18-scf00286 | 18 |
| AX-158134592 | 13 | 45.859 | KV453128.1 | 6287295 | 18-scf00286 | 18 |
| AX-158134595 | 13 | 45.893 | KV453128.1 | 6289816 | 18-scf00286 | 18 |
| AX-158134579 | 13 | 45.922 | KV453128.1 | 6264754 | 18-scf00286 | 18 |
| AX-158134602 | 13 | 45.922 | KV453128.1 | 6300596 | 18-scf00286 | 18 |
| AX-158134604 | 13 | 45.946 | KV453128.1 | 6303879 | 18-scf00286 | 18 |
| AX-158134607 | 13 | 45.968 | KV453128.1 | 6308829 | 18-scf00286 | 18 |
| AX-158134608 | 13 | 45.992 | KV453128.1 | 6312002 | 18-scf00286 | 18 |
| AX-158135123 | 13 | 45.992 | KV453128.1 | 7111441 | 18-scf00286 | 18 |
| AX-158136100 | 13 | 45.992 | KV453137.1 | 24698   | 18-scf00291 | 18 |
| AX-158134609 | 13 | 46.024 | KV453128.1 | 6313185 | 18-scf00286 | 18 |
| AX-158134611 | 13 | 46.184 | KV453128.1 | 6317076 | 18-scf00286 | 18 |
| AX-158134614 | 13 | 46.185 | KV453128.1 | 6323027 | 18-scf00286 | 18 |
| AX-158134615 | 13 | 46.185 | KV453128.1 | 6324094 | 18-scf00286 | 18 |
| AX-158134619 | 13 | 46.186 | KV453128.1 | 6329678 | 18-scf00286 | 18 |
| AX-158134621 | 13 | 46.187 | KV453128.1 | 6334675 | 18-scf00286 | 18 |
| AX-157742134 | 13 | 46.187 | KV453128.1 | 6337079 | 18-scf00286 | 18 |
| AX-157720036 | 13 | 46.187 | KV453128.1 | 6338066 | 18-scf00286 | 18 |
| AX-157830531 | 13 | 46.187 | KV453128.1 | 6338690 | 18-scf00286 | 18 |
| AX-158134624 | 13 | 46.187 | KV453128.1 | 6339073 | 18-scf00286 | 18 |
| AX-158134625 | 13 | 46.187 | KV453128.1 | 6340270 | 18-scf00286 | 18 |
| AX-158134626 | 13 | 46.187 | KV453128.1 | 6340982 | 18-scf00286 | 18 |
| AX-158137329 | 13 | 46.187 | KV453132.1 | 74719   | 18-scf00295 | 18 |
| AX-158134627 | 13 | 46.226 | KV453128.1 | 6346054 | 18-scf00286 | 18 |
| AX-158134628 | 13 | 46.296 | KV453128.1 | 6347217 | 18-scf00286 | 18 |
| AX-158134630 | 13 | 46.296 | KV453128.1 | 6349932 | 18-scf00286 | 18 |
| AX-158134631 | 13 | 46.296 | KV453128.1 | 6350851 | 18-scf00286 | 18 |
| AX-158134632 | 13 | 46.296 | KV453128.1 | 6351799 | 18-scf00286 | 18 |
| AX-157719913 | 13 | 46.296 | KV453128.1 | 6354801 | 18-scf00286 | 18 |
| AX-158134636 | 13 | 46.296 | KV453128.1 | 6355391 | 18-scf00286 | 18 |
| AX-158134638 | 13 | 46.296 | KV453128.1 | 6357621 | 18-scf00286 | 18 |
| AX-158134646 | 13 | 46.296 | KV453128.1 | 6364844 | 18-scf00286 | 18 |
| AX-158134650 | 13 | 46.296 | KV453128.1 | 6369036 | 18-scf00286 | 18 |
| AX-158134647 | 13 | 46.497 | KV453128.1 | 6365773 | 18-scf00286 | 18 |
| AX-158134651 | 13 | 46.497 | KV453128.1 | 6369428 | 18-scf00286 | 18 |

|              |    |        |            |         |             |    |
|--------------|----|--------|------------|---------|-------------|----|
| AX-158134653 | 13 | 46.497 | KV453128.1 | 6371187 | 18-scf00286 | 18 |
| AX-158134661 | 13 | 46.497 | KV453128.1 | 6379395 | 18-scf00286 | 18 |
| AX-158134663 | 13 | 46.516 | KV453128.1 | 6384099 | 18-scf00286 | 18 |
| AX-158392862 | 13 | 46.532 | KV453128.1 | 6385871 | 18-scf00286 | 18 |
| AX-158134665 | 13 | 46.532 | KV453128.1 | 6387046 | 18-scf00286 | 18 |
| AX-158134666 | 13 | 46.732 | KV453128.1 | 6387956 | 18-scf00286 | 18 |
| AX-158134667 | 13 | 46.732 | KV453128.1 | 6389427 | 18-scf00286 | 18 |
| AX-158134675 | 13 | 46.732 | KV453128.1 | 6396148 | 18-scf00286 | 18 |
| AX-157830536 | 13 | 46.732 | KV453128.1 | 6452499 | 18-scf00286 | 18 |
| AX-158134652 | 13 | 46.733 | KV453128.1 | 6371078 | 18-scf00286 | 18 |
| AX-157722566 | 13 | 46.733 | KV453128.1 | 6401251 | 18-scf00286 | 18 |
| AX-158134679 | 13 | 46.733 | KV453128.1 | 6402781 | 18-scf00286 | 18 |
| AX-158134685 | 13 | 46.733 | KV453128.1 | 6410097 | 18-scf00286 | 18 |
| AX-158134687 | 13 | 46.733 | KV453128.1 | 6412237 | 18-scf00286 | 18 |
| AX-158134689 | 13 | 46.733 | KV453128.1 | 6415438 | 18-scf00286 | 18 |
| AX-158134690 | 13 | 46.733 | KV453128.1 | 6416660 | 18-scf00286 | 18 |
| AX-158411660 | 13 | 46.733 | KV453128.1 | 6419804 | 18-scf00286 | 18 |
| AX-157721451 | 13 | 46.733 | KV453128.1 | 6422745 | 18-scf00286 | 18 |
| AX-158134692 | 13 | 46.733 | KV453128.1 | 6426125 | 18-scf00286 | 18 |
| AX-158134693 | 13 | 46.733 | KV453128.1 | 6426939 | 18-scf00286 | 18 |
| AX-158134694 | 13 | 46.733 | KV453128.1 | 6427649 | 18-scf00286 | 18 |
| AX-157757039 | 13 | 46.733 | KV453128.1 | 6430557 | 18-scf00286 | 18 |
| AX-158134698 | 13 | 46.733 | KV453128.1 | 6431102 | 18-scf00286 | 18 |
| AX-158134700 | 13 | 46.778 | KV453128.1 | 6432707 | 18-scf00286 | 18 |
| AX-158134702 | 13 | 46.778 | KV453128.1 | 6439091 | 18-scf00286 | 18 |
| AX-158392876 | 13 | 46.778 | KV453130.1 | 73419   | 18-scf00290 | 18 |
| AX-158136210 | 13 | 46.778 | KV453137.1 | 375574  | 18-scf00291 | 18 |
| AX-158136739 | 13 | 46.778 | KV453135.1 | 600077  | 18-scf00292 | 18 |
| AX-157871483 | 13 | 46.778 | KV453134.1 | 40204   | 18-scf00296 | 18 |
| AX-158137382 | 13 | 46.778 | KV453134.1 | 41287   | 18-scf00296 | 18 |
| AX-158392943 | 13 | 46.778 | KV453134.1 | 271251  | 18-scf00296 | 18 |
| AX-158137472 | 13 | 46.778 | KV453134.1 | 285269  | 18-scf00296 | 18 |
| AX-158137473 | 13 | 46.778 | KV453134.1 | 286128  | 18-scf00296 | 18 |
| AX-157830861 | 13 | 46.778 | KV453134.1 | 292954  | 18-scf00296 | 18 |
| AX-157830862 | 13 | 46.778 | KV453134.1 | 293043  | 18-scf00296 | 18 |
| AX-158137486 | 13 | 46.778 | KV453134.1 | 368906  | 18-scf00296 | 18 |
| AX-158138125 | 13 | 46.778 | KV453138.1 | 1789717 | 18-scf00300 | 18 |
| AX-158138145 | 13 | 46.778 | KV453138.1 | 1838782 | 18-scf00300 | 18 |
| AX-158138412 | 13 | 46.778 | KV453138.1 | 2533379 | 18-scf00300 | 18 |
| AX-158138889 | 13 | 46.778 | KV453138.1 | 3324141 | 18-scf00300 | 18 |
| AX-158138987 | 13 | 46.778 | KV453138.1 | 3480799 | 18-scf00300 | 18 |
| AX-157756665 | 13 | 46.778 | KV453138.1 | 4054161 | 18-scf00300 | 18 |
| AX-158134683 | 13 | 46.842 | KV453128.1 | 6406919 | 18-scf00286 | 18 |
| AX-157886267 | 13 | 46.842 | KV453128.1 | 6409060 | 18-scf00286 | 18 |
| AX-158134684 | 13 | 46.842 | KV453128.1 | 6409317 | 18-scf00286 | 18 |
| AX-157830535 | 13 | 46.842 | KV453128.1 | 6446295 | 18-scf00286 | 18 |
| AX-158134704 | 13 | 46.842 | KV453128.1 | 6449598 | 18-scf00286 | 18 |
| AX-158134705 | 13 | 46.842 | KV453128.1 | 6453359 | 18-scf00286 | 18 |
| AX-158134708 | 13 | 46.842 | KV453128.1 | 6457430 | 18-scf00286 | 18 |
| AX-158134713 | 13 | 46.842 | KV453128.1 | 6460329 | 18-scf00286 | 18 |
| AX-158134723 | 13 | 46.951 | KV453128.1 | 6483185 | 18-scf00286 | 18 |



|              |    |        |            |         |             |    |
|--------------|----|--------|------------|---------|-------------|----|
| AX-158134724 | 13 | 46.951 | KV453128.1 | 6483933 | 18-scf00286 | 18 |
| AX-157750473 | 13 | 46.951 | KV453128.1 | 6484069 | 18-scf00286 | 18 |
| AX-158134725 | 13 | 46.951 | KV453128.1 | 6484884 | 18-scf00286 | 18 |
| AX-158134729 | 13 | 46.951 | KV453128.1 | 6489279 | 18-scf00286 | 18 |
| AX-158134740 | 13 | 46.951 | KV453128.1 | 6505511 | 18-scf00286 | 18 |
| AX-157830542 | 13 | 46.951 | KV453128.1 | 6506133 | 18-scf00286 | 18 |
| AX-158134754 | 13 | 46.951 | KV453128.1 | 6519955 | 18-scf00286 | 18 |
| AX-157740970 | 13 | 46.951 | KV453128.1 | 6559574 | 18-scf00286 | 18 |
| AX-158134741 | 13 | 47.005 | KV453128.1 | 6506271 | 18-scf00286 | 18 |
| AX-158134649 | 13 | 47.06  | KV453128.1 | 6368511 | 18-scf00286 | 18 |
| AX-158134660 | 13 | 47.06  | KV453128.1 | 6379060 | 18-scf00286 | 18 |
| AX-158134664 | 13 | 47.06  | KV453128.1 | 6386460 | 18-scf00286 | 18 |
| AX-158134668 | 13 | 47.06  | KV453128.1 | 6389997 | 18-scf00286 | 18 |
| AX-158134669 | 13 | 47.06  | KV453128.1 | 6390518 | 18-scf00286 | 18 |
| AX-158134671 | 13 | 47.06  | KV453128.1 | 6393872 | 18-scf00286 | 18 |
| AX-158134745 | 13 | 47.06  | KV453128.1 | 6508990 | 18-scf00286 | 18 |
| AX-158134746 | 13 | 47.06  | KV453128.1 | 6509707 | 18-scf00286 | 18 |
| AX-158134747 | 13 | 47.06  | KV453128.1 | 6511142 | 18-scf00286 | 18 |
| AX-158134749 | 13 | 47.06  | KV453128.1 | 6512615 | 18-scf00286 | 18 |
| AX-158134750 | 13 | 47.06  | KV453128.1 | 6513325 | 18-scf00286 | 18 |
| AX-158134751 | 13 | 47.06  | KV453128.1 | 6514094 | 18-scf00286 | 18 |
| AX-158134756 | 13 | 47.06  | KV453128.1 | 6523407 | 18-scf00286 | 18 |
| AX-158134757 | 13 | 47.06  | KV453128.1 | 6524516 | 18-scf00286 | 18 |
| AX-158134759 | 13 | 47.06  | KV453128.1 | 6526389 | 18-scf00286 | 18 |
| AX-158134762 | 13 | 47.06  | KV453128.1 | 6529479 | 18-scf00286 | 18 |
| AX-158134763 | 13 | 47.06  | KV453128.1 | 6529984 | 18-scf00286 | 18 |
| AX-157830543 | 13 | 47.06  | KV453128.1 | 6531353 | 18-scf00286 | 18 |
| AX-158134784 | 13 | 47.06  | KV453128.1 | 6556394 | 18-scf00286 | 18 |
| AX-158134851 | 13 | 47.06  | KV453128.1 | 6656588 | 18-scf00286 | 18 |
| AX-157830855 | 13 | 47.06  | KV453134.1 | 235800  | 18-scf00296 | 18 |
| AX-158137477 | 13 | 47.06  | KV453134.1 | 293606  | 18-scf00296 | 18 |
| AX-158411879 | 13 | 47.06  | KV453134.1 | 355691  | 18-scf00296 | 18 |
| AX-158134764 | 13 | 47.134 | KV453128.1 | 6530658 | 18-scf00286 | 18 |
| AX-158134765 | 13 | 47.206 | KV453128.1 | 6532520 | 18-scf00286 | 18 |
| AX-158134874 | 13 | 47.206 | KV453128.1 | 6685599 | 18-scf00286 | 18 |
| AX-157857868 | 13 | 47.279 | KV453128.1 | 6532578 | 18-scf00286 | 18 |
| AX-158134766 | 13 | 47.388 | KV453128.1 | 6535748 | 18-scf00286 | 18 |
| AX-158134768 | 13 | 47.388 | KV453128.1 | 6538547 | 18-scf00286 | 18 |
| AX-158134771 | 13 | 47.388 | KV453128.1 | 6546387 | 18-scf00286 | 18 |
| AX-158134775 | 13 | 47.388 | KV453128.1 | 6550081 | 18-scf00286 | 18 |
| AX-158134778 | 13 | 47.431 | KV453128.1 | 6552040 | 18-scf00286 | 18 |
| AX-158134779 | 13 | 47.457 | KV453128.1 | 6552402 | 18-scf00286 | 18 |
| AX-158134780 | 13 | 47.498 | KV453128.1 | 6553604 | 18-scf00286 | 18 |
| AX-158134670 | 13 | 47.517 | KV453128.1 | 6391223 | 18-scf00286 | 18 |
| AX-158134781 | 13 | 47.517 | KV453128.1 | 6554223 | 18-scf00286 | 18 |
| AX-158134782 | 13 | 47.528 | KV453128.1 | 6555200 | 18-scf00286 | 18 |
| AX-158134786 | 13 | 47.547 | KV453128.1 | 6557769 | 18-scf00286 | 18 |
| AX-158134789 | 13 | 47.562 | KV453128.1 | 6562489 | 18-scf00286 | 18 |
| AX-158134753 | 13 | 47.573 | KV453128.1 | 6515879 | 18-scf00286 | 18 |
| AX-158134755 | 13 | 47.573 | KV453128.1 | 6521948 | 18-scf00286 | 18 |
| AX-158134790 | 13 | 47.573 | KV453128.1 | 6562732 | 18-scf00286 | 18 |

|              |    |        |            |         |             |    |
|--------------|----|--------|------------|---------|-------------|----|
| AX-158134796 | 13 | 47.59  | KV453128.1 | 6575637 | 18-scf00286 | 18 |
| AX-158134798 | 13 | 47.607 | KV453128.1 | 6576615 | 18-scf00286 | 18 |
| AX-158134800 | 13 | 47.607 | KV453128.1 | 6578365 | 18-scf00286 | 18 |
| AX-158134805 | 13 | 47.607 | KV453128.1 | 6586343 | 18-scf00286 | 18 |
| AX-157709698 | 13 | 47.607 | KV453128.1 | 6586604 | 18-scf00286 | 18 |
| AX-157709697 | 13 | 47.607 | KV453128.1 | 6586666 | 18-scf00286 | 18 |
| AX-158134807 | 13 | 47.607 | KV453128.1 | 6588831 | 18-scf00286 | 18 |
| AX-157738939 | 13 | 47.607 | KV453128.1 | 6589764 | 18-scf00286 | 18 |
| AX-158134809 | 13 | 47.698 | KV453128.1 | 6594119 | 18-scf00286 | 18 |
| AX-158134812 | 13 | 47.815 | KV453128.1 | 6596271 | 18-scf00286 | 18 |
| AX-158134816 | 13 | 47.935 | KV453128.1 | 6608272 | 18-scf00286 | 18 |
| AX-158137837 | 13 | 47.935 | KV453138.1 | 218835  | 18-scf00300 | 18 |
| AX-158137851 | 13 | 47.935 | KV453138.1 | 1204302 | 18-scf00300 | 18 |
| AX-158134817 | 13 | 47.991 | KV453128.1 | 6608663 | 18-scf00286 | 18 |
| AX-158134788 | 13 | 48.044 | KV453128.1 | 6560753 | 18-scf00286 | 18 |
| AX-158134801 | 13 | 48.044 | KV453128.1 | 6580109 | 18-scf00286 | 18 |
| AX-158134806 | 13 | 48.044 | KV453128.1 | 6587248 | 18-scf00286 | 18 |
| AX-158134818 | 13 | 48.044 | KV453128.1 | 6609898 | 18-scf00286 | 18 |
| AX-158134819 | 13 | 48.044 | KV453128.1 | 6610440 | 18-scf00286 | 18 |
| AX-157753085 | 13 | 48.044 | KV453128.1 | 6624629 | 18-scf00286 | 18 |
| AX-158134783 | 13 | 48.09  | KV453128.1 | 6556214 | 18-scf00286 | 18 |
| AX-157830549 | 13 | 48.09  | KV453128.1 | 6613266 | 18-scf00286 | 18 |
| AX-158134824 | 13 | 48.136 | KV453128.1 | 6615827 | 18-scf00286 | 18 |
| AX-158134830 | 13 | 48.153 | KV453128.1 | 6627334 | 18-scf00286 | 18 |
| AX-157748145 | 13 | 48.17  | KV453128.1 | 6627946 | 18-scf00286 | 18 |
| AX-158134996 | 13 | 48.17  | KV453128.1 | 6898570 | 18-scf00286 | 18 |
| AX-158134832 | 13 | 48.199 | KV453128.1 | 6629884 | 18-scf00286 | 18 |
| AX-158134839 | 13 | 48.199 | KV453128.1 | 6640034 | 18-scf00286 | 18 |
| AX-158134834 | 13 | 48.222 | KV453128.1 | 6631499 | 18-scf00286 | 18 |
| AX-158134838 | 13 | 48.263 | KV453128.1 | 6638620 | 18-scf00286 | 18 |
| AX-158135387 | 13 | 48.263 | KV453128.1 | 7498159 | 18-scf00286 | 18 |
| AX-158134840 | 13 | 48.296 | KV453128.1 | 6641211 | 18-scf00286 | 18 |
| AX-158134845 | 13 | 48.31  | KV453128.1 | 6647370 | 18-scf00286 | 18 |
| AX-158134869 | 13 | 48.31  | KV453128.1 | 6683262 | 18-scf00286 | 18 |
| AX-158134846 | 13 | 48.33  | KV453128.1 | 6648400 | 18-scf00286 | 18 |
| AX-158134938 | 13 | 48.33  | KV453128.1 | 6775018 | 18-scf00286 | 18 |
| AX-158134532 | 13 | 48.372 | KV453128.1 | 6181940 | 18-scf00286 | 18 |
| AX-158134842 | 13 | 48.372 | KV453128.1 | 6644272 | 18-scf00286 | 18 |
| AX-157857869 | 13 | 48.372 | KV453128.1 | 6650068 | 18-scf00286 | 18 |
| AX-158134847 | 13 | 48.372 | KV453128.1 | 6650928 | 18-scf00286 | 18 |
| AX-157725261 | 13 | 48.372 | KV453128.1 | 6652058 | 18-scf00286 | 18 |
| AX-158134849 | 13 | 48.372 | KV453128.1 | 6655098 | 18-scf00286 | 18 |
| AX-157744687 | 13 | 48.372 | KV453128.1 | 6660399 | 18-scf00286 | 18 |
| AX-158134853 | 13 | 48.372 | KV453128.1 | 6662566 | 18-scf00286 | 18 |
| AX-158134855 | 13 | 48.372 | KV453128.1 | 6663737 | 18-scf00286 | 18 |
| AX-157772144 | 13 | 48.372 | KV453128.1 | 6667527 | 18-scf00286 | 18 |
| AX-158134857 | 13 | 48.372 | KV453128.1 | 6667917 | 18-scf00286 | 18 |
| AX-158134859 | 13 | 48.372 | KV453128.1 | 6671290 | 18-scf00286 | 18 |
| AX-158134860 | 13 | 48.372 | KV453128.1 | 6671842 | 18-scf00286 | 18 |
| AX-158134862 | 13 | 48.372 | KV453128.1 | 6674084 | 18-scf00286 | 18 |
| AX-158134870 | 13 | 48.372 | KV453128.1 | 6683860 | 18-scf00286 | 18 |

|              |    |        |            |         |             |    |
|--------------|----|--------|------------|---------|-------------|----|
| AX-158134872 | 13 | 48.372 | KV453128.1 | 6684649 | 18-scf00286 | 18 |
| AX-158134873 | 13 | 48.372 | KV453128.1 | 6685051 | 18-scf00286 | 18 |
| AX-158134875 | 13 | 48.372 | KV453128.1 | 6686002 | 18-scf00286 | 18 |
| AX-158134876 | 13 | 48.372 | KV453128.1 | 6687593 | 18-scf00286 | 18 |
| AX-158134880 | 13 | 48.372 | KV453128.1 | 6692355 | 18-scf00286 | 18 |
| AX-158417480 | 13 | 48.372 | KV453128.1 | 6694045 | 18-scf00286 | 18 |
| AX-158134924 | 13 | 48.372 | KV453128.1 | 6749036 | 18-scf00286 | 18 |
| AX-158134944 | 13 | 48.372 | KV453128.1 | 6788502 | 18-scf00286 | 18 |
| AX-157830561 | 13 | 48.372 | KV453128.1 | 6802343 | 18-scf00286 | 18 |
| AX-158135023 | 13 | 48.372 | KV453128.1 | 6952621 | 18-scf00286 | 18 |
| AX-158135026 | 13 | 48.372 | KV453128.1 | 6958007 | 18-scf00286 | 18 |
| AX-158135222 | 13 | 48.372 | KV453128.1 | 7255633 | 18-scf00286 | 18 |
| AX-158135280 | 13 | 48.372 | KV453128.1 | 7351019 | 18-scf00286 | 18 |
| AX-157739447 | 13 | 48.372 | KV453128.1 | 7515665 | 18-scf00286 | 18 |
| AX-157683609 | 13 | 48.372 | KV453130.1 | 21149   | 18-scf00290 | 18 |
| AX-158136174 | 13 | 48.372 | KV453137.1 | 261293  | 18-scf00291 | 18 |
| AX-158411705 | 13 | 48.372 | KV453137.1 | 291573  | 18-scf00291 | 18 |
| AX-158136218 | 13 | 48.372 | KV453137.1 | 401650  | 18-scf00291 | 18 |
| AX-158136265 | 13 | 48.372 | KV453137.1 | 519741  | 18-scf00291 | 18 |
| AX-157708485 | 13 | 48.372 | KV453137.1 | 628475  | 18-scf00291 | 18 |
| AX-157830765 | 13 | 48.372 | KV453135.1 | 494848  | 18-scf00292 | 18 |
| AX-158411813 | 13 | 48.372 | KV453135.1 | 932877  | 18-scf00292 | 18 |
| AX-158137102 | 13 | 48.372 | KV453131.1 | 301092  | 18-scf00293 | 18 |
| AX-158135991 | 13 | 48.372 | KV453131.1 | 456001  | 18-scf00293 | 18 |
| AX-158135956 | 13 | 48.372 | KV453131.1 | 520085  | 18-scf00293 | 18 |
| AX-158137278 | 13 | 48.372 | KV453136.1 | 190515  | 18-scf00294 | 18 |
| AX-158411874 | 13 | 48.372 | KV453134.1 | 354533  | 18-scf00296 | 18 |
| AX-158137495 | 13 | 48.372 | KV453134.1 | 435597  | 18-scf00296 | 18 |
| AX-158138760 | 13 | 48.372 | KV453138.1 | 3183683 | 18-scf00300 | 18 |
| AX-158134884 | 13 | 48.59  | KV453128.1 | 6698426 | 18-scf00286 | 18 |
| AX-158134887 | 13 | 48.59  | KV453128.1 | 6702284 | 18-scf00286 | 18 |
| AX-157775926 | 13 | 48.59  | KV453128.1 | 6707947 | 18-scf00286 | 18 |
| AX-158134890 | 13 | 48.59  | KV453128.1 | 6709419 | 18-scf00286 | 18 |
| AX-158134892 | 13 | 48.59  | KV453128.1 | 6712017 | 18-scf00286 | 18 |
| AX-158134895 | 13 | 48.59  | KV453128.1 | 6715494 | 18-scf00286 | 18 |
| AX-158134897 | 13 | 48.59  | KV453128.1 | 6716778 | 18-scf00286 | 18 |
| AX-158134903 | 13 | 48.59  | KV453128.1 | 6725854 | 18-scf00286 | 18 |
| AX-158411664 | 13 | 48.59  | KV453128.1 | 6744989 | 18-scf00286 | 18 |
| AX-158134937 | 13 | 48.59  | KV453128.1 | 6772921 | 18-scf00286 | 18 |
| AX-157830559 | 13 | 48.59  | KV453128.1 | 6793331 | 18-scf00286 | 18 |
| AX-157753095 | 13 | 48.59  | KV453128.1 | 6959319 | 18-scf00286 | 18 |
| AX-158134898 | 13 | 48.651 | KV453128.1 | 6717995 | 18-scf00286 | 18 |
| AX-158134879 | 13 | 48.699 | KV453128.1 | 6691568 | 18-scf00286 | 18 |
| AX-157746674 | 13 | 48.699 | KV453128.1 | 6721698 | 18-scf00286 | 18 |
| AX-158134901 | 13 | 48.699 | KV453128.1 | 6722694 | 18-scf00286 | 18 |
| AX-158134902 | 13 | 48.699 | KV453128.1 | 6725186 | 18-scf00286 | 18 |
| AX-158134904 | 13 | 48.699 | KV453128.1 | 6726351 | 18-scf00286 | 18 |
| AX-158134905 | 13 | 48.699 | KV453128.1 | 6727376 | 18-scf00286 | 18 |
| AX-158134906 | 13 | 48.699 | KV453128.1 | 6728848 | 18-scf00286 | 18 |
| AX-158380271 | 13 | 48.699 | KV453128.1 | 6731601 | 18-scf00286 | 18 |
| AX-158134910 | 13 | 48.699 | KV453128.1 | 6731999 | 18-scf00286 | 18 |

|              |    |        |            |         |             |    |
|--------------|----|--------|------------|---------|-------------|----|
| AX-157775510 | 13 | 48.699 | KV453128.1 | 6732973 | 18-scf00286 | 18 |
| AX-158134911 | 13 | 48.699 | KV453128.1 | 6733743 | 18-scf00286 | 18 |
| AX-158134920 | 13 | 48.699 | KV453128.1 | 6743094 | 18-scf00286 | 18 |
| AX-157886269 | 13 | 48.699 | KV453128.1 | 6743169 | 18-scf00286 | 18 |
| AX-158134922 | 13 | 48.699 | KV453128.1 | 6747322 | 18-scf00286 | 18 |
| AX-158134925 | 13 | 48.699 | KV453128.1 | 6749404 | 18-scf00286 | 18 |
| AX-158134927 | 13 | 48.699 | KV453128.1 | 6755698 | 18-scf00286 | 18 |
| AX-158134930 | 13 | 48.699 | KV453128.1 | 6759362 | 18-scf00286 | 18 |
| AX-157748289 | 13 | 48.699 | KV453128.1 | 6760510 | 18-scf00286 | 18 |
| AX-157830553 | 13 | 48.699 | KV453128.1 | 6762946 | 18-scf00286 | 18 |
| AX-158134932 | 13 | 48.699 | KV453128.1 | 6764052 | 18-scf00286 | 18 |
| AX-158134933 | 13 | 48.699 | KV453128.1 | 6766245 | 18-scf00286 | 18 |
| AX-158134935 | 13 | 48.699 | KV453128.1 | 6769550 | 18-scf00286 | 18 |
| AX-157830554 | 13 | 48.699 | KV453128.1 | 6769806 | 18-scf00286 | 18 |
| AX-157752687 | 13 | 48.699 | KV453128.1 | 6771146 | 18-scf00286 | 18 |
| AX-157830555 | 13 | 48.699 | KV453128.1 | 6771877 | 18-scf00286 | 18 |
| AX-157830557 | 13 | 48.699 | KV453128.1 | 6775749 | 18-scf00286 | 18 |
| AX-158134940 | 13 | 48.699 | KV453128.1 | 6776193 | 18-scf00286 | 18 |
| AX-158134942 | 13 | 48.699 | KV453128.1 | 6782175 | 18-scf00286 | 18 |
| AX-157830558 | 13 | 48.699 | KV453128.1 | 6788192 | 18-scf00286 | 18 |
| AX-157886270 | 13 | 48.699 | KV453128.1 | 6796387 | 18-scf00286 | 18 |
| AX-157830560 | 13 | 48.699 | KV453128.1 | 6799783 | 18-scf00286 | 18 |
| AX-157715582 | 13 | 48.699 | KV453128.1 | 6810603 | 18-scf00286 | 18 |
| AX-158135027 | 13 | 48.699 | KV453128.1 | 6959976 | 18-scf00286 | 18 |
| AX-158392887 | 13 | 48.699 | KV453137.1 | 161515  | 18-scf00291 | 18 |
| AX-158136163 | 13 | 48.699 | KV453137.1 | 208967  | 18-scf00291 | 18 |
| AX-158411687 | 13 | 48.699 | KV453131.1 | 468440  | 18-scf00293 | 18 |
| AX-158392880 | 13 | 48.699 | KV453131.1 | 574458  | 18-scf00293 | 18 |
| AX-158137494 | 13 | 48.699 | KV453134.1 | 434456  | 18-scf00296 | 18 |
| AX-157830878 | 13 | 48.699 | KV453134.1 | 523359  | 18-scf00296 | 18 |
| AX-158134949 | 13 | 48.724 | KV453128.1 | 6806091 | 18-scf00286 | 18 |
| AX-158134950 | 13 | 48.748 | KV453128.1 | 6806639 | 18-scf00286 | 18 |
| AX-158135149 | 13 | 48.748 | KV453128.1 | 7152822 | 18-scf00286 | 18 |
| AX-157745014 | 13 | 48.771 | KV453128.1 | 6806846 | 18-scf00286 | 18 |
| AX-157830552 | 13 | 48.809 | KV453128.1 | 6755107 | 18-scf00286 | 18 |
| AX-158134928 | 13 | 48.809 | KV453128.1 | 6756117 | 18-scf00286 | 18 |
| AX-158134945 | 13 | 48.809 | KV453128.1 | 6793508 | 18-scf00286 | 18 |
| AX-158134953 | 13 | 48.809 | KV453128.1 | 6807783 | 18-scf00286 | 18 |
| AX-158134954 | 13 | 48.809 | KV453128.1 | 6809032 | 18-scf00286 | 18 |
| AX-158134955 | 13 | 48.809 | KV453128.1 | 6809464 | 18-scf00286 | 18 |
| AX-158134956 | 13 | 48.809 | KV453128.1 | 6811887 | 18-scf00286 | 18 |
| AX-158134957 | 13 | 48.809 | KV453128.1 | 6812800 | 18-scf00286 | 18 |
| AX-158134958 | 13 | 48.809 | KV453128.1 | 6814287 | 18-scf00286 | 18 |
| AX-157773490 | 13 | 48.809 | KV453128.1 | 6846968 | 18-scf00286 | 18 |
| AX-157752015 | 13 | 48.809 | KV453128.1 | 6853633 | 18-scf00286 | 18 |
| AX-157830571 | 13 | 48.809 | KV453128.1 | 6855682 | 18-scf00286 | 18 |
| AX-158134977 | 13 | 48.809 | KV453128.1 | 6856614 | 18-scf00286 | 18 |
| AX-158134979 | 13 | 48.809 | KV453128.1 | 6866207 | 18-scf00286 | 18 |
| AX-158134980 | 13 | 48.809 | KV453128.1 | 6871332 | 18-scf00286 | 18 |
| AX-158134983 | 13 | 48.809 | KV453128.1 | 6876397 | 18-scf00286 | 18 |
| AX-157830574 | 13 | 48.809 | KV453128.1 | 6876713 | 18-scf00286 | 18 |

|              |    |        |            |         |             |    |
|--------------|----|--------|------------|---------|-------------|----|
| AX-157740332 | 13 | 48.809 | KV453128.1 | 6878295 | 18-scf00286 | 18 |
| AX-157830575 | 13 | 48.809 | KV453128.1 | 6878891 | 18-scf00286 | 18 |
| AX-158134984 | 13 | 48.809 | KV453128.1 | 6884283 | 18-scf00286 | 18 |
| AX-157830576 | 13 | 48.809 | KV453128.1 | 6886638 | 18-scf00286 | 18 |
| AX-158134988 | 13 | 48.809 | KV453128.1 | 6891450 | 18-scf00286 | 18 |
| AX-158134992 | 13 | 48.809 | KV453128.1 | 6896196 | 18-scf00286 | 18 |
| AX-158135000 | 13 | 48.809 | KV453128.1 | 6903223 | 18-scf00286 | 18 |
| AX-158135001 | 13 | 48.809 | KV453128.1 | 6905010 | 18-scf00286 | 18 |
| AX-158135002 | 13 | 48.809 | KV453128.1 | 6905188 | 18-scf00286 | 18 |
| AX-157774516 | 13 | 48.809 | KV453128.1 | 6906310 | 18-scf00286 | 18 |
| AX-158135003 | 13 | 48.809 | KV453128.1 | 6911893 | 18-scf00286 | 18 |
| AX-158135005 | 13 | 48.809 | KV453128.1 | 6914040 | 18-scf00286 | 18 |
| AX-157775404 | 13 | 48.809 | KV453128.1 | 6915469 | 18-scf00286 | 18 |
| AX-157830578 | 13 | 48.809 | KV453128.1 | 6918882 | 18-scf00286 | 18 |
| AX-158135013 | 13 | 48.809 | KV453128.1 | 6929667 | 18-scf00286 | 18 |
| AX-158135016 | 13 | 48.809 | KV453128.1 | 6942695 | 18-scf00286 | 18 |
| AX-158135018 | 13 | 48.809 | KV453128.1 | 6946066 | 18-scf00286 | 18 |
| AX-158135031 | 13 | 48.809 | KV453128.1 | 6965305 | 18-scf00286 | 18 |
| AX-158135042 | 13 | 48.809 | KV453128.1 | 6975077 | 18-scf00286 | 18 |
| AX-158135144 | 13 | 48.809 | KV453128.1 | 7145919 | 18-scf00286 | 18 |
| AX-158135236 | 13 | 48.809 | KV453128.1 | 7277326 | 18-scf00286 | 18 |
| AX-157697072 | 13 | 48.809 | FI880168.1 | 79      | 18-scf00286 | UN |
| AX-158134985 | 13 | 48.918 | KV453128.1 | 6885061 | 18-scf00286 | 18 |
| AX-158135009 | 13 | 48.918 | KV453128.1 | 6919734 | 18-scf00286 | 18 |
| AX-158135012 | 13 | 48.918 | KV453128.1 | 6927947 | 18-scf00286 | 18 |
| AX-157749232 | 13 | 48.918 | KV453128.1 | 6928342 | 18-scf00286 | 18 |
| AX-158137299 | 13 | 48.918 | KV453136.1 | 260511  | 18-scf00294 | 18 |
| AX-157830915 | 13 | 48.918 | KV453138.1 | 830666  | 18-scf00300 | 18 |
| AX-158135017 | 13 | 48.966 | KV453128.1 | 6943131 | 18-scf00286 | 18 |
| AX-157830579 | 13 | 49.002 | KV453128.1 | 6946467 | 18-scf00286 | 18 |
| AX-158134841 | 13 | 49.027 | KV453128.1 | 6642111 | 18-scf00286 | 18 |
| AX-158134866 | 13 | 49.027 | KV453128.1 | 6681007 | 18-scf00286 | 18 |
| AX-158134999 | 13 | 49.027 | KV453128.1 | 6902110 | 18-scf00286 | 18 |
| AX-158135019 | 13 | 49.027 | KV453128.1 | 6947260 | 18-scf00286 | 18 |
| AX-158135022 | 13 | 49.027 | KV453128.1 | 6951780 | 18-scf00286 | 18 |
| AX-158135025 | 13 | 49.027 | KV453128.1 | 6957073 | 18-scf00286 | 18 |
| AX-157727576 | 13 | 49.245 | KV453128.1 | 6972650 | 18-scf00286 | 18 |
| AX-158135039 | 13 | 49.245 | KV453128.1 | 6972806 | 18-scf00286 | 18 |
| AX-158380273 | 13 | 49.245 | KV453128.1 | 6975927 | 18-scf00286 | 18 |
| AX-157830580 | 13 | 49.245 | KV453128.1 | 6977865 | 18-scf00286 | 18 |
| AX-158135045 | 13 | 49.245 | KV453128.1 | 6979563 | 18-scf00286 | 18 |
| AX-158135046 | 13 | 49.245 | KV453128.1 | 6982460 | 18-scf00286 | 18 |
| AX-158135050 | 13 | 49.597 | KV453128.1 | 6992616 | 18-scf00286 | 18 |
| AX-158135066 | 13 | 49.597 | KV453128.1 | 7013271 | 18-scf00286 | 18 |
| AX-158135055 | 13 | 49.672 | KV453128.1 | 7000770 | 18-scf00286 | 18 |
| AX-157830582 | 13 | 49.772 | KV453128.1 | 7003973 | 18-scf00286 | 18 |
| AX-158135058 | 13 | 49.772 | KV453128.1 | 7004360 | 18-scf00286 | 18 |
| AX-157878051 | 13 | 49.772 | KV453128.1 | 7007329 | 18-scf00286 | 18 |
| AX-158135061 | 13 | 49.772 | KV453128.1 | 7007633 | 18-scf00286 | 18 |
| AX-158135062 | 13 | 49.772 | KV453128.1 | 7010291 | 18-scf00286 | 18 |
| AX-158135065 | 13 | 49.772 | KV453128.1 | 7012269 | 18-scf00286 | 18 |

|              |    |        |             |         |             |    |
|--------------|----|--------|-------------|---------|-------------|----|
| AX-158385330 | 13 | 49.772 | KV453128.1  | 7012455 | 18-scf00286 | 18 |
| AX-158135093 | 13 | 49.772 | KV453128.1  | 7067079 | 18-scf00286 | 18 |
| AX-158135108 | 13 | 49.772 | KV453128.1  | 7090300 | 18-scf00286 | 18 |
| AX-158135160 | 13 | 49.772 | KV453128.1  | 7169236 | 18-scf00286 | 18 |
| AX-158135063 | 13 | 49.89  | KV453128.1  | 7011495 | 18-scf00286 | 18 |
| AX-158135049 | 13 | 49.901 | KV453128.1  | 6992254 | 18-scf00286 | 18 |
| AX-157830581 | 13 | 49.901 | KV453128.1  | 6996148 | 18-scf00286 | 18 |
| AX-158135070 | 13 | 49.901 | KV453128.1  | 7022785 | 18-scf00286 | 18 |
| AX-158135072 | 13 | 49.901 | KV453128.1  | 7025646 | 18-scf00286 | 18 |
| AX-158135073 | 13 | 49.901 | KV453128.1  | 7027226 | 18-scf00286 | 18 |
| AX-158135074 | 13 | 49.901 | KV453128.1  | 7027713 | 18-scf00286 | 18 |
| AX-158135075 | 13 | 49.901 | KV453128.1  | 7028682 | 18-scf00286 | 18 |
| AX-158411665 | 13 | 49.901 | KV453128.1  | 7039665 | 18-scf00286 | 18 |
| AX-157830586 | 13 | 50.01  | KV453128.1  | 7045295 | 18-scf00286 | 18 |
| AX-157713368 | 13 | 50.01  | KV453128.1  | 7047957 | 18-scf00286 | 18 |
| AX-158135082 | 13 | 50.01  | KV453128.1  | 7048382 | 18-scf00286 | 18 |
| AX-157830587 | 13 | 50.01  | KV453128.1  | 7051144 | 18-scf00286 | 18 |
| AX-158135084 | 13 | 50.01  | KV453128.1  | 7053660 | 18-scf00286 | 18 |
| AX-158135088 | 13 | 50.01  | KV453128.1  | 7057500 | 18-scf00286 | 18 |
| AX-157689488 | 13 | 50.01  | 3ML01030006 | 118     | scf05628_1  | UN |
| AX-158135095 | 13 | 50.119 | KV453128.1  | 7068766 | 18-scf00286 | 18 |
| AX-158135097 | 13 | 50.119 | KV453128.1  | 7073829 | 18-scf00286 | 18 |
| AX-158135098 | 13 | 50.119 | KV453128.1  | 7075549 | 18-scf00286 | 18 |
| AX-158135125 | 13 | 50.119 | KV453128.1  | 7114239 | 18-scf00286 | 18 |
| AX-158135099 | 13 | 50.191 | KV453128.1  | 7076456 | 18-scf00286 | 18 |
| AX-158134948 | 13 | 50.229 | KV453128.1  | 6802461 | 18-scf00286 | 18 |
| AX-158135068 | 13 | 50.229 | KV453128.1  | 7018839 | 18-scf00286 | 18 |
| AX-158135080 | 13 | 50.229 | KV453128.1  | 7045456 | 18-scf00286 | 18 |
| AX-158135094 | 13 | 50.229 | KV453128.1  | 7068101 | 18-scf00286 | 18 |
| AX-157697444 | 13 | 50.229 | KV453128.1  | 7078901 | 18-scf00286 | 18 |
| AX-158135101 | 13 | 50.229 | KV453128.1  | 7079856 | 18-scf00286 | 18 |
| AX-158135102 | 13 | 50.229 | KV453128.1  | 7080446 | 18-scf00286 | 18 |
| AX-158135105 | 13 | 50.229 | KV453128.1  | 7084849 | 18-scf00286 | 18 |
| AX-158135106 | 13 | 50.229 | KV453128.1  | 7088171 | 18-scf00286 | 18 |
| AX-157718839 | 13 | 50.229 | KV453128.1  | 7090750 | 18-scf00286 | 18 |
| AX-158135109 | 13 | 50.229 | KV453128.1  | 7092253 | 18-scf00286 | 18 |
| AX-158135111 | 13 | 50.229 | KV453128.1  | 7095532 | 18-scf00286 | 18 |
| AX-158135113 | 13 | 50.229 | KV453128.1  | 7097871 | 18-scf00286 | 18 |
| AX-158135115 | 13 | 50.229 | KV453128.1  | 7099431 | 18-scf00286 | 18 |
| AX-158135116 | 13 | 50.229 | KV453128.1  | 7099863 | 18-scf00286 | 18 |
| AX-157758526 | 13 | 50.229 | KV453128.1  | 7105635 | 18-scf00286 | 18 |
| AX-158135120 | 13 | 50.229 | KV453128.1  | 7108075 | 18-scf00286 | 18 |
| AX-158135121 | 13 | 50.229 | KV453128.1  | 7108997 | 18-scf00286 | 18 |
| AX-158135122 | 13 | 50.229 | KV453128.1  | 7109357 | 18-scf00286 | 18 |
| AX-157722176 | 13 | 50.229 | KV453128.1  | 7114722 | 18-scf00286 | 18 |
| AX-158135126 | 13 | 50.229 | KV453128.1  | 7115654 | 18-scf00286 | 18 |
| AX-157731042 | 13 | 50.229 | KV453128.1  | 7120618 | 18-scf00286 | 18 |
| AX-158135131 | 13 | 50.229 | KV453128.1  | 7120970 | 18-scf00286 | 18 |
| AX-157830588 | 13 | 50.229 | KV453128.1  | 7121483 | 18-scf00286 | 18 |
| AX-157757145 | 13 | 50.229 | KV453128.1  | 7135946 | 18-scf00286 | 18 |
| AX-158385333 | 13 | 50.229 | KV453128.1  | 7138479 | 18-scf00286 | 18 |

|              |    |        |            |         |             |    |
|--------------|----|--------|------------|---------|-------------|----|
| AX-158135141 | 13 | 50.229 | KV453128.1 | 7142481 | 18-scf00286 | 18 |
| AX-158135142 | 13 | 50.229 | KV453128.1 | 7142727 | 18-scf00286 | 18 |
| AX-158135143 | 13 | 50.229 | KV453128.1 | 7144663 | 18-scf00286 | 18 |
| AX-158135146 | 13 | 50.229 | KV453128.1 | 7148069 | 18-scf00286 | 18 |
| AX-157725420 | 13 | 50.229 | KV453128.1 | 7152900 | 18-scf00286 | 18 |
| AX-157871542 | 13 | 50.229 | KV453138.1 | 817770  | 18-scf00300 | 18 |
| AX-158135128 | 13 | 50.338 | KV453128.1 | 7118132 | 18-scf00286 | 18 |
| AX-158135147 | 13 | 50.338 | KV453128.1 | 7150693 | 18-scf00286 | 18 |
| AX-158135148 | 13 | 50.338 | KV453128.1 | 7151653 | 18-scf00286 | 18 |
| AX-158135156 | 13 | 50.338 | KV453128.1 | 7161017 | 18-scf00286 | 18 |
| AX-157772949 | 13 | 50.362 | KV453128.1 | 7156158 | 18-scf00286 | 18 |
| AX-157721568 | 13 | 50.362 | KV453128.1 | 7179149 | 18-scf00286 | 18 |
| AX-158135155 | 13 | 50.37  | KV453128.1 | 7159969 | 18-scf00286 | 18 |
| AX-158135157 | 13 | 50.396 | KV453128.1 | 7166244 | 18-scf00286 | 18 |
| AX-157830593 | 13 | 50.422 | KV453128.1 | 7168194 | 18-scf00286 | 18 |
| AX-158135159 | 13 | 50.447 | KV453128.1 | 7168394 | 18-scf00286 | 18 |
| AX-158135161 | 13 | 50.447 | KV453128.1 | 7170077 | 18-scf00286 | 18 |
| AX-158135162 | 13 | 50.447 | KV453128.1 | 7170858 | 18-scf00286 | 18 |
| AX-158135164 | 13 | 50.447 | KV453128.1 | 7173413 | 18-scf00286 | 18 |
| AX-157717199 | 13 | 50.447 | KV453128.1 | 7175460 | 18-scf00286 | 18 |
| AX-158135167 | 13 | 50.447 | KV453128.1 | 7178154 | 18-scf00286 | 18 |
| AX-157714084 | 13 | 50.447 | KV453128.1 | 7179824 | 18-scf00286 | 18 |
| AX-157878054 | 13 | 50.447 | KV453128.1 | 7180553 | 18-scf00286 | 18 |
| AX-158135169 | 13 | 50.447 | KV453128.1 | 7182281 | 18-scf00286 | 18 |
| AX-157830595 | 13 | 50.447 | KV453128.1 | 7182995 | 18-scf00286 | 18 |
| AX-158135170 | 13 | 50.447 | KV453128.1 | 7183437 | 18-scf00286 | 18 |
| AX-158134896 | 13 | 50.775 | KV453128.1 | 6716101 | 18-scf00286 | 18 |
| AX-157830596 | 13 | 50.775 | KV453128.1 | 7187246 | 18-scf00286 | 18 |
| AX-158135174 | 13 | 50.775 | KV453128.1 | 7188231 | 18-scf00286 | 18 |
| AX-158135176 | 13 | 50.775 | KV453128.1 | 7190329 | 18-scf00286 | 18 |
| AX-158135177 | 13 | 50.775 | KV453128.1 | 7190420 | 18-scf00286 | 18 |
| AX-158135178 | 13 | 50.775 | KV453128.1 | 7190692 | 18-scf00286 | 18 |
| AX-158135179 | 13 | 50.775 | KV453128.1 | 7191192 | 18-scf00286 | 18 |
| AX-158135180 | 13 | 50.775 | KV453128.1 | 7191251 | 18-scf00286 | 18 |
| AX-157830597 | 13 | 50.775 | KV453128.1 | 7193449 | 18-scf00286 | 18 |
| AX-157830598 | 13 | 50.775 | KV453128.1 | 7198406 | 18-scf00286 | 18 |
| AX-158135184 | 13 | 50.775 | KV453128.1 | 7200597 | 18-scf00286 | 18 |
| AX-157830600 | 13 | 50.775 | KV453128.1 | 7210448 | 18-scf00286 | 18 |
| AX-158135191 | 13 | 50.775 | KV453128.1 | 7211487 | 18-scf00286 | 18 |
| AX-158135193 | 13 | 50.775 | KV453128.1 | 7213075 | 18-scf00286 | 18 |
| AX-158135194 | 13 | 50.775 | KV453128.1 | 7213438 | 18-scf00286 | 18 |
| AX-158135195 | 13 | 50.775 | KV453128.1 | 7215386 | 18-scf00286 | 18 |
| AX-158135647 | 13 | 50.775 | KV453130.1 | 263869  | 18-scf00290 | 18 |
| AX-158411703 | 13 | 50.775 | KV453137.1 | 282651  | 18-scf00291 | 18 |
| AX-157871465 | 13 | 50.775 | KV453135.1 | 540686  | 18-scf00292 | 18 |
| AX-158411784 | 13 | 50.775 | KV453135.1 | 557692  | 18-scf00292 | 18 |
| AX-157830772 | 13 | 50.775 | KV453135.1 | 585526  | 18-scf00292 | 18 |
| AX-157830773 | 13 | 50.775 | KV453135.1 | 599210  | 18-scf00292 | 18 |
| AX-157830788 | 13 | 50.775 | KV453135.1 | 875283  | 18-scf00292 | 18 |
| AX-158408204 | 13 | 50.775 | KV453131.1 | 436610  | 18-scf00293 | 18 |
| AX-158135918 | 13 | 50.775 | KV453131.1 | 572491  | 18-scf00293 | 18 |

|              |    |        |            |         |             |    |
|--------------|----|--------|------------|---------|-------------|----|
| AX-158135916 | 13 | 50.775 | KV453131.1 | 574639  | 18-scf00293 | 18 |
| AX-158135894 | 13 | 50.775 | KV453131.1 | 615139  | 18-scf00293 | 18 |
| AX-158135891 | 13 | 50.775 | KV453131.1 | 619795  | 18-scf00293 | 18 |
| AX-157871432 | 13 | 50.775 | KV453131.1 | 620062  | 18-scf00293 | 18 |
| AX-158135886 | 13 | 50.775 | KV453131.1 | 634117  | 18-scf00293 | 18 |
| AX-157830846 | 13 | 50.775 | KV453134.1 | 34689   | 18-scf00296 | 18 |
| AX-158137404 | 13 | 50.775 | KV453134.1 | 80677   | 18-scf00296 | 18 |
| AX-158392934 | 13 | 50.775 | KV453134.1 | 93279   | 18-scf00296 | 18 |
| AX-157886298 | 13 | 50.775 | KV453134.1 | 145885  | 18-scf00296 | 18 |
| AX-157871487 | 13 | 50.775 | KV453134.1 | 150268  | 18-scf00296 | 18 |
| AX-158137439 | 13 | 50.775 | KV453134.1 | 169876  | 18-scf00296 | 18 |
| AX-158137449 | 13 | 50.775 | KV453134.1 | 211504  | 18-scf00296 | 18 |
| AX-157871488 | 13 | 50.775 | KV453134.1 | 212261  | 18-scf00296 | 18 |
| AX-157871490 | 13 | 50.775 | KV453134.1 | 223588  | 18-scf00296 | 18 |
| AX-158137455 | 13 | 50.775 | KV453134.1 | 232600  | 18-scf00296 | 18 |
| AX-157871493 | 13 | 50.775 | KV453134.1 | 244185  | 18-scf00296 | 18 |
| AX-158392941 | 13 | 50.775 | KV453134.1 | 255308  | 18-scf00296 | 18 |
| AX-158137462 | 13 | 50.775 | KV453134.1 | 261247  | 18-scf00296 | 18 |
| AX-157871501 | 13 | 50.775 | KV453134.1 | 261783  | 18-scf00296 | 18 |
| AX-158137470 | 13 | 50.775 | KV453134.1 | 272562  | 18-scf00296 | 18 |
| AX-157830858 | 13 | 50.775 | KV453134.1 | 287603  | 18-scf00296 | 18 |
| AX-158137480 | 13 | 50.775 | KV453134.1 | 309589  | 18-scf00296 | 18 |
| AX-157830867 | 13 | 50.775 | KV453134.1 | 354407  | 18-scf00296 | 18 |
| AX-158411876 | 13 | 50.775 | KV453134.1 | 354729  | 18-scf00296 | 18 |
| AX-158411877 | 13 | 50.775 | KV453134.1 | 355388  | 18-scf00296 | 18 |
| AX-158411882 | 13 | 50.775 | KV453134.1 | 357013  | 18-scf00296 | 18 |
| AX-158417521 | 13 | 50.775 | KV453134.1 | 360451  | 18-scf00296 | 18 |
| AX-157871508 | 13 | 50.775 | KV453134.1 | 374354  | 18-scf00296 | 18 |
| AX-157863431 | 13 | 50.775 | KV453134.1 | 377868  | 18-scf00296 | 18 |
| AX-157830869 | 13 | 50.775 | KV453134.1 | 385516  | 18-scf00296 | 18 |
| AX-158417522 | 13 | 50.775 | KV453134.1 | 389154  | 18-scf00296 | 18 |
| AX-158137491 | 13 | 50.775 | KV453134.1 | 403557  | 18-scf00296 | 18 |
| AX-158137492 | 13 | 50.775 | KV453134.1 | 406888  | 18-scf00296 | 18 |
| AX-157871516 | 13 | 50.775 | KV453134.1 | 408166  | 18-scf00296 | 18 |
| AX-157830873 | 13 | 50.775 | KV453134.1 | 419148  | 18-scf00296 | 18 |
| AX-157830874 | 13 | 50.775 | KV453134.1 | 421270  | 18-scf00296 | 18 |
| AX-157857921 | 13 | 50.775 | KV453134.1 | 432950  | 18-scf00296 | 18 |
| AX-158137502 | 13 | 50.775 | KV453134.1 | 449980  | 18-scf00296 | 18 |
| AX-157871521 | 13 | 50.775 | KV453134.1 | 453577  | 18-scf00296 | 18 |
| AX-158137503 | 13 | 50.775 | KV453134.1 | 464640  | 18-scf00296 | 18 |
| AX-157830876 | 13 | 50.775 | KV453134.1 | 474307  | 18-scf00296 | 18 |
| AX-158392953 | 13 | 50.775 | KV453134.1 | 498151  | 18-scf00296 | 18 |
| AX-157871522 | 13 | 50.775 | KV453134.1 | 534690  | 18-scf00296 | 18 |
| AX-158137514 | 13 | 50.775 | KV453134.1 | 539635  | 18-scf00296 | 18 |
| AX-158137515 | 13 | 50.775 | KV453134.1 | 541817  | 18-scf00296 | 18 |
| AX-158392955 | 13 | 50.775 | KV453134.1 | 550805  | 18-scf00296 | 18 |
| AX-157830919 | 13 | 50.775 | KV453138.1 | 813970  | 18-scf00300 | 18 |
| AX-158138092 | 13 | 50.775 | KV453138.1 | 1711510 | 18-scf00300 | 18 |
| AX-158135196 | 13 | 50.993 | KV453128.1 | 7217084 | 18-scf00286 | 18 |
| AX-158135197 | 13 | 50.993 | KV453128.1 | 7218087 | 18-scf00286 | 18 |
| AX-158135198 | 13 | 50.993 | KV453128.1 | 7218629 | 18-scf00286 | 18 |



|              |    |        |            |         |             |    |
|--------------|----|--------|------------|---------|-------------|----|
| AX-158135200 | 13 | 50.993 | KV453128.1 | 7220270 | 18-scf00286 | 18 |
| AX-158135201 | 13 | 50.993 | KV453128.1 | 7220774 | 18-scf00286 | 18 |
| AX-158135202 | 13 | 50.993 | KV453128.1 | 7224026 | 18-scf00286 | 18 |
| AX-158135203 | 13 | 50.993 | KV453128.1 | 7225905 | 18-scf00286 | 18 |
| AX-158135204 | 13 | 50.993 | KV453128.1 | 7226579 | 18-scf00286 | 18 |
| AX-158135205 | 13 | 50.993 | KV453128.1 | 7228028 | 18-scf00286 | 18 |
| AX-158135206 | 13 | 50.993 | KV453128.1 | 7228453 | 18-scf00286 | 18 |
| AX-158411668 | 13 | 50.993 | KV453128.1 | 7229609 | 18-scf00286 | 18 |
| AX-158135208 | 13 | 50.993 | KV453128.1 | 7230225 | 18-scf00286 | 18 |
| AX-158135209 | 13 | 50.993 | KV453128.1 | 7230937 | 18-scf00286 | 18 |
| AX-158135210 | 13 | 50.993 | KV453128.1 | 7232348 | 18-scf00286 | 18 |
| AX-157857871 | 13 | 50.993 | KV453128.1 | 7250326 | 18-scf00286 | 18 |
| AX-158135229 | 13 | 50.993 | KV453128.1 | 7263737 | 18-scf00286 | 18 |
| AX-158135232 | 13 | 50.993 | KV453128.1 | 7265039 | 18-scf00286 | 18 |
| AX-158135211 | 13 | 51.019 | KV453128.1 | 7234122 | 18-scf00286 | 18 |
| AX-158135213 | 13 | 51.037 | KV453128.1 | 7237640 | 18-scf00286 | 18 |
| AX-157878055 | 13 | 51.037 | KV453128.1 | 7249415 | 18-scf00286 | 18 |
| AX-157830602 | 13 | 51.066 | KV453128.1 | 7237839 | 18-scf00286 | 18 |
| AX-158135215 | 13 | 51.102 | KV453128.1 | 7241054 | 18-scf00286 | 18 |
| AX-158135216 | 13 | 51.102 | KV453128.1 | 7241955 | 18-scf00286 | 18 |
| AX-157830603 | 13 | 51.102 | KV453128.1 | 7243986 | 18-scf00286 | 18 |
| AX-157866282 | 13 | 51.102 | KV453128.1 | 7245112 | 18-scf00286 | 18 |
| AX-158411672 | 13 | 51.211 | KV453128.1 | 7245809 | 18-scf00286 | 18 |
| AX-158135218 | 13 | 51.211 | KV453128.1 | 7251384 | 18-scf00286 | 18 |
| AX-158135220 | 13 | 51.211 | KV453128.1 | 7254593 | 18-scf00286 | 18 |
| AX-158135223 | 13 | 51.211 | KV453128.1 | 7256089 | 18-scf00286 | 18 |
| AX-158135224 | 13 | 51.211 | KV453128.1 | 7256556 | 18-scf00286 | 18 |
| AX-158135225 | 13 | 51.321 | KV453128.1 | 7258112 | 18-scf00286 | 18 |
| AX-157830604 | 13 | 51.321 | KV453128.1 | 7261662 | 18-scf00286 | 18 |
| AX-158135228 | 13 | 51.321 | KV453128.1 | 7263121 | 18-scf00286 | 18 |
| AX-157830605 | 13 | 51.501 | KV453128.1 | 7266216 | 18-scf00286 | 18 |
| AX-158135234 | 13 | 51.501 | KV453128.1 | 7276147 | 18-scf00286 | 18 |
| AX-158135237 | 13 | 51.501 | KV453128.1 | 7277844 | 18-scf00286 | 18 |
| AX-158135259 | 13 | 51.501 | KV453128.1 | 7317555 | 18-scf00286 | 18 |
| AX-158135289 | 13 | 51.501 | KV453128.1 | 7359000 | 18-scf00286 | 18 |
| AX-158135292 | 13 | 51.501 | KV453128.1 | 7364495 | 18-scf00286 | 18 |
| AX-157830607 | 13 | 51.597 | KV453128.1 | 7292591 | 18-scf00286 | 18 |
| AX-158135247 | 13 | 51.597 | KV453128.1 | 7298861 | 18-scf00286 | 18 |
| AX-157830608 | 13 | 51.597 | KV453128.1 | 7300046 | 18-scf00286 | 18 |
| AX-158135248 | 13 | 51.597 | KV453128.1 | 7303852 | 18-scf00286 | 18 |
| AX-157750615 | 13 | 51.597 | KV453128.1 | 7305130 | 18-scf00286 | 18 |
| AX-158135254 | 13 | 51.597 | KV453128.1 | 7309684 | 18-scf00286 | 18 |
| AX-157713570 | 13 | 51.597 | KV453128.1 | 7311211 | 18-scf00286 | 18 |
| AX-158135256 | 13 | 51.597 | KV453128.1 | 7313727 | 18-scf00286 | 18 |
| AX-158135361 | 13 | 51.597 | KV453128.1 | 7468290 | 18-scf00286 | 18 |
| AX-158135252 | 13 | 51.867 | KV453128.1 | 7308225 | 18-scf00286 | 18 |
| AX-158135257 | 13 | 51.867 | KV453128.1 | 7314335 | 18-scf00286 | 18 |
| AX-158135258 | 13 | 51.867 | KV453128.1 | 7315845 | 18-scf00286 | 18 |
| AX-158135260 | 13 | 51.867 | KV453128.1 | 7318630 | 18-scf00286 | 18 |
| AX-157757428 | 13 | 51.867 | KV453128.1 | 7322801 | 18-scf00286 | 18 |
| AX-158135262 | 13 | 51.867 | KV453128.1 | 7324638 | 18-scf00286 | 18 |

|              |    |        |            |         |             |    |
|--------------|----|--------|------------|---------|-------------|----|
| AX-157717730 | 13 | 51.867 | KV453128.1 | 7324946 | 18-scf00286 | 18 |
| AX-158135264 | 13 | 51.867 | KV453128.1 | 7327214 | 18-scf00286 | 18 |
| AX-158135265 | 13 | 51.867 | KV453128.1 | 7328032 | 18-scf00286 | 18 |
| AX-158135266 | 13 | 51.867 | KV453128.1 | 7329052 | 18-scf00286 | 18 |
| AX-158135268 | 13 | 51.867 | KV453128.1 | 7331393 | 18-scf00286 | 18 |
| AX-158135269 | 13 | 51.867 | KV453128.1 | 7332184 | 18-scf00286 | 18 |
| AX-157830610 | 13 | 51.867 | KV453128.1 | 7335681 | 18-scf00286 | 18 |
| AX-157742012 | 13 | 51.867 | KV453128.1 | 7341083 | 18-scf00286 | 18 |
| AX-158135275 | 13 | 51.867 | KV453128.1 | 7345398 | 18-scf00286 | 18 |
| AX-158135277 | 13 | 51.867 | KV453128.1 | 7347989 | 18-scf00286 | 18 |
| AX-158411675 | 13 | 51.867 | KV453128.1 | 7349903 | 18-scf00286 | 18 |
| AX-158135282 | 13 | 51.867 | KV453128.1 | 7352238 | 18-scf00286 | 18 |
| AX-158135283 | 13 | 51.867 | KV453128.1 | 7352766 | 18-scf00286 | 18 |
| AX-158135285 | 13 | 51.867 | KV453128.1 | 7354567 | 18-scf00286 | 18 |
| AX-157775846 | 13 | 51.867 | KV453128.1 | 7355234 | 18-scf00286 | 18 |
| AX-158135288 | 13 | 51.867 | KV453128.1 | 7358557 | 18-scf00286 | 18 |
| AX-158380276 | 13 | 51.867 | KV453128.1 | 7364905 | 18-scf00286 | 18 |
| AX-158135295 | 13 | 51.867 | KV453128.1 | 7366688 | 18-scf00286 | 18 |
| AX-158135307 | 13 | 51.867 | KV453128.1 | 7390491 | 18-scf00286 | 18 |
| AX-158136786 | 13 | 51.867 | KV453135.1 | 805356  | 18-scf00292 | 18 |
| AX-158136790 | 13 | 51.867 | KV453135.1 | 822265  | 18-scf00292 | 18 |
| AX-158136865 | 13 | 51.867 | KV453135.1 | 994368  | 18-scf00292 | 18 |
| AX-157830959 | 13 | 51.867 | KV453138.1 | 242997  | 18-scf00300 | 18 |
| AX-158135294 | 13 | 51.92  | KV453128.1 | 7366449 | 18-scf00286 | 18 |
| AX-158135253 | 13 | 51.976 | KV453128.1 | 7308593 | 18-scf00286 | 18 |
| AX-158135255 | 13 | 51.976 | KV453128.1 | 7310064 | 18-scf00286 | 18 |
| AX-158135276 | 13 | 51.976 | KV453128.1 | 7345753 | 18-scf00286 | 18 |
| AX-158411674 | 13 | 51.976 | KV453128.1 | 7349776 | 18-scf00286 | 18 |
| AX-157830611 | 13 | 51.976 | KV453128.1 | 7370761 | 18-scf00286 | 18 |
| AX-157739836 | 13 | 51.976 | KV453128.1 | 7370848 | 18-scf00286 | 18 |
| AX-157830612 | 13 | 51.976 | KV453128.1 | 7371983 | 18-scf00286 | 18 |
| AX-158135298 | 13 | 51.976 | KV453128.1 | 7373627 | 18-scf00286 | 18 |
| AX-158135299 | 13 | 51.976 | KV453128.1 | 7376350 | 18-scf00286 | 18 |
| AX-158135301 | 13 | 51.976 | KV453128.1 | 7380319 | 18-scf00286 | 18 |
| AX-158135302 | 13 | 51.976 | KV453128.1 | 7381707 | 18-scf00286 | 18 |
| AX-158135303 | 13 | 51.976 | KV453128.1 | 7384562 | 18-scf00286 | 18 |
| AX-158135306 | 13 | 51.976 | KV453128.1 | 7388096 | 18-scf00286 | 18 |
| AX-157830613 | 13 | 51.976 | KV453128.1 | 7389182 | 18-scf00286 | 18 |
| AX-158135310 | 13 | 51.976 | KV453128.1 | 7396007 | 18-scf00286 | 18 |
| AX-157871428 | 13 | 51.976 | KV453128.1 | 7397248 | 18-scf00286 | 18 |
| AX-158135311 | 13 | 51.976 | KV453128.1 | 7399224 | 18-scf00286 | 18 |
| AX-157857872 | 13 | 51.976 | KV453128.1 | 7400373 | 18-scf00286 | 18 |
| AX-158135312 | 13 | 51.976 | KV453128.1 | 7400839 | 18-scf00286 | 18 |
| AX-158135315 | 13 | 51.976 | KV453128.1 | 7402566 | 18-scf00286 | 18 |
| AX-158135316 | 13 | 51.976 | KV453128.1 | 7406196 | 18-scf00286 | 18 |
| AX-158135318 | 13 | 51.976 | KV453128.1 | 7408696 | 18-scf00286 | 18 |
| AX-158135320 | 13 | 51.976 | KV453128.1 | 7409886 | 18-scf00286 | 18 |
| AX-158135321 | 13 | 51.976 | KV453128.1 | 7410166 | 18-scf00286 | 18 |
| AX-158135365 | 13 | 51.976 | KV453128.1 | 7471405 | 18-scf00286 | 18 |
| AX-158135774 | 13 | 51.976 | KV453130.1 | 97691   | 18-scf00290 | 18 |
| AX-157723391 | 13 | 52.303 | KV453128.1 | 7438238 | 18-scf00286 | 18 |

|              |    |        |            |         |             |    |
|--------------|----|--------|------------|---------|-------------|----|
| AX-157714879 | 13 | 52.303 | KV453128.1 | 7444029 | 18-scf00286 | 18 |
| AX-158135273 | 13 | 52.304 | KV453128.1 | 7343773 | 18-scf00286 | 18 |
| AX-158135286 | 13 | 52.304 | KV453128.1 | 7354834 | 18-scf00286 | 18 |
| AX-158135340 | 13 | 52.304 | KV453128.1 | 7443200 | 18-scf00286 | 18 |
| AX-158135341 | 13 | 52.304 | KV453128.1 | 7444861 | 18-scf00286 | 18 |
| AX-158135342 | 13 | 52.304 | KV453128.1 | 7445329 | 18-scf00286 | 18 |
| AX-158135344 | 13 | 52.304 | KV453128.1 | 7446950 | 18-scf00286 | 18 |
| AX-158135345 | 13 | 52.304 | KV453128.1 | 7447397 | 18-scf00286 | 18 |
| AX-158135349 | 13 | 52.304 | KV453128.1 | 7452327 | 18-scf00286 | 18 |
| AX-158135350 | 13 | 52.304 | KV453128.1 | 7454998 | 18-scf00286 | 18 |
| AX-158135351 | 13 | 52.304 | KV453128.1 | 7455475 | 18-scf00286 | 18 |
| AX-158135352 | 13 | 52.304 | KV453128.1 | 7456258 | 18-scf00286 | 18 |
| AX-158135353 | 13 | 52.304 | KV453128.1 | 7458885 | 18-scf00286 | 18 |
| AX-158135354 | 13 | 52.304 | KV453128.1 | 7459644 | 18-scf00286 | 18 |
| AX-158135356 | 13 | 52.304 | KV453128.1 | 7461675 | 18-scf00286 | 18 |
| AX-158135357 | 13 | 52.304 | KV453128.1 | 7463241 | 18-scf00286 | 18 |
| AX-157878062 | 13 | 52.304 | KV453128.1 | 7466974 | 18-scf00286 | 18 |
| AX-158135363 | 13 | 52.304 | KV453128.1 | 7469585 | 18-scf00286 | 18 |
| AX-158135364 | 13 | 52.304 | KV453128.1 | 7470229 | 18-scf00286 | 18 |
| AX-158135367 | 13 | 52.304 | KV453128.1 | 7476184 | 18-scf00286 | 18 |
| AX-158135368 | 13 | 52.304 | KV453128.1 | 7476809 | 18-scf00286 | 18 |
| AX-158135370 | 13 | 52.304 | KV453128.1 | 7478033 | 18-scf00286 | 18 |
| AX-158135384 | 13 | 52.304 | KV453128.1 | 7494003 | 18-scf00286 | 18 |
| AX-157830626 | 13 | 52.304 | KV453128.1 | 7565315 | 18-scf00286 | 18 |
| AX-157830989 | 13 | 52.304 | KV453138.1 | 1874671 | 18-scf00300 | 18 |
| AX-158135378 | 13 | 52.522 | KV453128.1 | 7484168 | 18-scf00286 | 18 |
| AX-158135379 | 13 | 52.522 | KV453128.1 | 7485018 | 18-scf00286 | 18 |
| AX-158135380 | 13 | 52.522 | KV453128.1 | 7486380 | 18-scf00286 | 18 |
| AX-158135381 | 13 | 52.522 | KV453128.1 | 7492056 | 18-scf00286 | 18 |
| AX-158135385 | 13 | 52.572 | KV453128.1 | 7494776 | 18-scf00286 | 18 |
| AX-158135366 | 13 | 52.613 | KV453128.1 | 7475326 | 18-scf00286 | 18 |
| AX-157754952 | 13 | 52.613 | KV453128.1 | 7478169 | 18-scf00286 | 18 |
| AX-158135382 | 13 | 52.613 | KV453128.1 | 7492415 | 18-scf00286 | 18 |
| AX-158135388 | 13 | 52.613 | KV453128.1 | 7498886 | 18-scf00286 | 18 |
| AX-158135389 | 13 | 52.613 | KV453128.1 | 7499425 | 18-scf00286 | 18 |
| AX-158135390 | 13 | 52.631 | KV453128.1 | 7499520 | 18-scf00286 | 18 |
| AX-158135393 | 13 | 52.631 | KV453128.1 | 7504814 | 18-scf00286 | 18 |
| AX-158135394 | 13 | 52.631 | KV453128.1 | 7506450 | 18-scf00286 | 18 |
| AX-158135395 | 13 | 52.631 | KV453128.1 | 7508782 | 18-scf00286 | 18 |
| AX-158135397 | 13 | 52.631 | KV453128.1 | 7510912 | 18-scf00286 | 18 |
| AX-157830617 | 13 | 52.631 | KV453128.1 | 7516477 | 18-scf00286 | 18 |
| AX-157830620 | 13 | 52.631 | KV453128.1 | 7519890 | 18-scf00286 | 18 |
| AX-158135401 | 13 | 52.631 | KV453128.1 | 7520741 | 18-scf00286 | 18 |
| AX-158135404 | 13 | 52.631 | KV453128.1 | 7522935 | 18-scf00286 | 18 |
| AX-158135405 | 13 | 52.631 | KV453128.1 | 7525367 | 18-scf00286 | 18 |
| AX-158135406 | 13 | 52.631 | KV453128.1 | 7526664 | 18-scf00286 | 18 |
| AX-158135407 | 13 | 52.631 | KV453128.1 | 7528775 | 18-scf00286 | 18 |
| AX-158392868 | 13 | 52.631 | KV453128.1 | 7569237 | 18-scf00286 | 18 |
| AX-157755050 | 13 | 52.631 | KV453130.1 | 224873  | 18-scf00290 | 18 |
| AX-158135409 | 13 | 52.67  | KV453128.1 | 7530322 | 18-scf00286 | 18 |
| AX-158135413 | 13 | 52.712 | KV453128.1 | 7533014 | 18-scf00286 | 18 |

|              |    |        |            |         |             |    |
|--------------|----|--------|------------|---------|-------------|----|
| AX-158135499 | 13 | 52.712 | KV453128.1 | 7629585 | 18-scf00286 | 18 |
| AX-157752686 | 13 | 52.741 | KV453128.1 | 7532918 | 18-scf00286 | 18 |
| AX-158135415 | 13 | 52.741 | KV453128.1 | 7535273 | 18-scf00286 | 18 |
| AX-158135419 | 13 | 52.741 | KV453128.1 | 7537919 | 18-scf00286 | 18 |
| AX-158135421 | 13 | 52.741 | KV453128.1 | 7540625 | 18-scf00286 | 18 |
| AX-157716034 | 13 | 52.741 | KV453128.1 | 7542064 | 18-scf00286 | 18 |
| AX-158135423 | 13 | 52.741 | KV453128.1 | 7543297 | 18-scf00286 | 18 |
| AX-158135427 | 13 | 52.741 | KV453128.1 | 7545701 | 18-scf00286 | 18 |
| AX-158135428 | 13 | 52.741 | KV453128.1 | 7546506 | 18-scf00286 | 18 |
| AX-157747770 | 13 | 52.741 | KV453128.1 | 7547329 | 18-scf00286 | 18 |
| AX-158135432 | 13 | 52.741 | KV453128.1 | 7555399 | 18-scf00286 | 18 |
| AX-157750798 | 13 | 52.741 | KV453128.1 | 7557244 | 18-scf00286 | 18 |
| AX-158135434 | 13 | 52.741 | KV453128.1 | 7559235 | 18-scf00286 | 18 |
| AX-158135436 | 13 | 52.741 | KV453128.1 | 7560261 | 18-scf00286 | 18 |
| AX-157830624 | 13 | 52.741 | KV453128.1 | 7560963 | 18-scf00286 | 18 |
| AX-158135437 | 13 | 52.741 | KV453128.1 | 7561037 | 18-scf00286 | 18 |
| AX-158135438 | 13 | 52.741 | KV453128.1 | 7561843 | 18-scf00286 | 18 |
| AX-158135439 | 13 | 52.741 | KV453128.1 | 7562815 | 18-scf00286 | 18 |
| AX-158135440 | 13 | 52.741 | KV453128.1 | 7565444 | 18-scf00286 | 18 |
| AX-158135441 | 13 | 52.741 | KV453128.1 | 7566199 | 18-scf00286 | 18 |
| AX-158135443 | 13 | 52.741 | KV453128.1 | 7567263 | 18-scf00286 | 18 |
| AX-157830627 | 13 | 52.741 | KV453128.1 | 7567900 | 18-scf00286 | 18 |
| AX-158135446 | 13 | 52.741 | KV453128.1 | 7570919 | 18-scf00286 | 18 |
| AX-157830629 | 13 | 52.741 | KV453128.1 | 7574636 | 18-scf00286 | 18 |
| AX-158135453 | 13 | 52.741 | KV453128.1 | 7579011 | 18-scf00286 | 18 |
| AX-158135454 | 13 | 52.741 | KV453128.1 | 7579791 | 18-scf00286 | 18 |
| AX-157748864 | 13 | 52.741 | KV453128.1 | 7580492 | 18-scf00286 | 18 |
| AX-158135455 | 13 | 52.741 | KV453128.1 | 7580907 | 18-scf00286 | 18 |
| AX-158135462 | 13 | 52.741 | KV453128.1 | 7589995 | 18-scf00286 | 18 |
| AX-158135463 | 13 | 52.741 | KV453128.1 | 7590910 | 18-scf00286 | 18 |
| AX-158135465 | 13 | 52.741 | KV453128.1 | 7592778 | 18-scf00286 | 18 |
| AX-158135466 | 13 | 52.741 | KV453128.1 | 7593216 | 18-scf00286 | 18 |
| AX-158135468 | 13 | 52.741 | KV453128.1 | 7597794 | 18-scf00286 | 18 |
| AX-158135469 | 13 | 52.741 | KV453128.1 | 7598851 | 18-scf00286 | 18 |
| AX-158135470 | 13 | 52.741 | KV453128.1 | 7599582 | 18-scf00286 | 18 |
| AX-158135473 | 13 | 52.741 | KV453128.1 | 7601263 | 18-scf00286 | 18 |
| AX-158135474 | 13 | 52.741 | KV453128.1 | 7601835 | 18-scf00286 | 18 |
| AX-158135475 | 13 | 52.741 | KV453128.1 | 7602414 | 18-scf00286 | 18 |
| AX-158135478 | 13 | 52.741 | KV453128.1 | 7603629 | 18-scf00286 | 18 |
| AX-158135479 | 13 | 52.741 | KV453128.1 | 7604022 | 18-scf00286 | 18 |
| AX-157717160 | 13 | 52.741 | KV453128.1 | 7604398 | 18-scf00286 | 18 |
| AX-158135480 | 13 | 52.741 | KV453128.1 | 7604914 | 18-scf00286 | 18 |
| AX-158135484 | 13 | 52.741 | KV453128.1 | 7611757 | 18-scf00286 | 18 |
| AX-158135486 | 13 | 52.741 | KV453128.1 | 7616242 | 18-scf00286 | 18 |
| AX-158135487 | 13 | 52.741 | KV453128.1 | 7616899 | 18-scf00286 | 18 |
| AX-158135488 | 13 | 52.741 | KV453128.1 | 7617911 | 18-scf00286 | 18 |
| AX-158135489 | 13 | 52.741 | KV453128.1 | 7619578 | 18-scf00286 | 18 |
| AX-158135491 | 13 | 52.741 | KV453128.1 | 7621203 | 18-scf00286 | 18 |
| AX-158135492 | 13 | 52.741 | KV453128.1 | 7622814 | 18-scf00286 | 18 |
| AX-158135497 | 13 | 52.741 | KV453128.1 | 7627921 | 18-scf00286 | 18 |
| AX-158135498 | 13 | 52.741 | KV453128.1 | 7628983 | 18-scf00286 | 18 |

|              |    |        |            |         |             |    |
|--------------|----|--------|------------|---------|-------------|----|
| AX-158135500 | 13 | 52.741 | KV453128.1 | 7630596 | 18-scf00286 | 18 |
| AX-158135501 | 13 | 52.741 | KV453128.1 | 7631387 | 18-scf00286 | 18 |
| AX-158135536 | 13 | 52.741 | KV453128.1 | 7682975 | 18-scf00286 | 18 |
| AX-157751722 | 13 | 52.741 | KV453128.1 | 7695985 | 18-scf00286 | 18 |
| AX-158135775 | 13 | 52.741 | KV453130.1 | 97391   | 18-scf00290 | 18 |
| AX-157744789 | 13 | 52.741 | KV453130.1 | 106137  | 18-scf00290 | 18 |
| AX-158135687 | 13 | 52.741 | KV453130.1 | 221710  | 18-scf00290 | 18 |
| AX-158135674 | 13 | 52.741 | KV453130.1 | 234462  | 18-scf00290 | 18 |
| AX-158135623 | 13 | 52.741 | KV453130.1 | 290067  | 18-scf00290 | 18 |
| AX-158135620 | 13 | 52.741 | KV453130.1 | 291950  | 18-scf00290 | 18 |
| AX-158135619 | 13 | 52.741 | KV453130.1 | 292395  | 18-scf00290 | 18 |
| AX-157886278 | 13 | 52.741 | KV453130.1 | 346856  | 18-scf00290 | 18 |
| AX-157830644 | 13 | 52.741 | KV453131.1 | 664553  | 18-scf00293 | 18 |
| AX-157857969 | 13 | 52.741 | KV453138.1 | 2722481 | 18-scf00300 | 18 |
| AX-158135502 | 13 | 52.766 | KV453128.1 | 7633721 | 18-scf00286 | 18 |
| AX-158135505 | 13 | 52.784 | KV453128.1 | 7636663 | 18-scf00286 | 18 |
| AX-158135507 | 13 | 52.812 | KV453128.1 | 7640157 | 18-scf00286 | 18 |
| AX-158380278 | 13 | 52.812 | KV453128.1 | 7648514 | 18-scf00286 | 18 |
| AX-158135654 | 13 | 52.812 | KV453130.1 | 256625  | 18-scf00290 | 18 |
| AX-158135579 | 13 | 52.812 | KV453130.1 | 335383  | 18-scf00290 | 18 |
| AX-158135376 | 13 | 52.829 | KV453128.1 | 7483216 | 18-scf00286 | 18 |
| AX-158135392 | 13 | 52.829 | KV453128.1 | 7502493 | 18-scf00286 | 18 |
| AX-158135511 | 13 | 52.829 | KV453128.1 | 7646616 | 18-scf00286 | 18 |
| AX-157830619 | 13 | 52.85  | KV453128.1 | 7519190 | 18-scf00286 | 18 |
| AX-158135460 | 13 | 52.85  | KV453128.1 | 7587765 | 18-scf00286 | 18 |
| AX-158135506 | 13 | 52.85  | KV453128.1 | 7638263 | 18-scf00286 | 18 |
| AX-158135514 | 13 | 52.85  | KV453128.1 | 7651133 | 18-scf00286 | 18 |
| AX-158135521 | 13 | 52.85  | KV453128.1 | 7664348 | 18-scf00286 | 18 |
| AX-158135522 | 13 | 52.85  | KV453128.1 | 7666204 | 18-scf00286 | 18 |
| AX-158135523 | 13 | 52.85  | KV453128.1 | 7667873 | 18-scf00286 | 18 |
| AX-158135524 | 13 | 52.85  | KV453128.1 | 7668101 | 18-scf00286 | 18 |
| AX-158135525 | 13 | 52.85  | KV453128.1 | 7668529 | 18-scf00286 | 18 |
| AX-158135527 | 13 | 52.85  | KV453128.1 | 7670775 | 18-scf00286 | 18 |
| AX-158135529 | 13 | 52.85  | KV453128.1 | 7672874 | 18-scf00286 | 18 |
| AX-158135538 | 13 | 52.85  | KV453128.1 | 7687613 | 18-scf00286 | 18 |
| AX-158135539 | 13 | 52.85  | KV453128.1 | 7689314 | 18-scf00286 | 18 |
| AX-158135541 | 13 | 52.85  | KV453128.1 | 7691948 | 18-scf00286 | 18 |
| AX-158135543 | 13 | 52.85  | KV453128.1 | 7693161 | 18-scf00286 | 18 |
| AX-157719492 | 13 | 52.85  | KV453128.1 | 7700850 | 18-scf00286 | 18 |
| AX-158135558 | 13 | 52.85  | KV453128.1 | 7717330 | 18-scf00286 | 18 |
| AX-157683600 | 13 | 52.85  | KV453129.1 | 1182    | 18-scf00287 | 18 |
| AX-158135720 | 13 | 52.85  | KV453130.1 | 180315  | 18-scf00290 | 18 |
| AX-158135653 | 13 | 52.85  | KV453130.1 | 257357  | 18-scf00290 | 18 |
| AX-158135648 | 13 | 52.85  | KV453130.1 | 262927  | 18-scf00290 | 18 |
| AX-158135610 | 13 | 52.85  | KV453130.1 | 301224  | 18-scf00290 | 18 |
| AX-158135584 | 13 | 52.85  | KV453130.1 | 329974  | 18-scf00290 | 18 |
| AX-158135583 | 13 | 52.85  | KV453130.1 | 330885  | 18-scf00290 | 18 |
| AX-158135582 | 13 | 52.85  | KV453130.1 | 331741  | 18-scf00290 | 18 |
| AX-158135580 | 13 | 52.85  | KV453130.1 | 333652  | 18-scf00290 | 18 |
| AX-158135576 | 13 | 52.85  | KV453130.1 | 341282  | 18-scf00290 | 18 |
| AX-158135570 | 13 | 52.85  | KV453130.1 | 347051  | 18-scf00290 | 18 |

|              |    |        |            |         |             |    |
|--------------|----|--------|------------|---------|-------------|----|
| AX-158135569 | 13 | 52.85  | KV453130.1 | 347541  | 18-scf00290 | 18 |
| AX-158135568 | 13 | 52.85  | KV453130.1 | 348273  | 18-scf00290 | 18 |
| AX-157726350 | 13 | 52.85  | KV453130.1 | 348927  | 18-scf00290 | 18 |
| AX-158135563 | 13 | 52.85  | KV453130.1 | 356634  | 18-scf00290 | 18 |
| AX-158135562 | 13 | 52.85  | KV453130.1 | 358247  | 18-scf00290 | 18 |
| AX-158137202 | 13 | 52.85  | KV453131.1 | 49454   | 18-scf00293 | 18 |
| AX-158135585 | 13 | 52.902 | KV453130.1 | 329501  | 18-scf00290 | 18 |
| AX-158135668 | 13 | 52.959 | KV453130.1 | 238897  | 18-scf00290 | 18 |
| AX-158135591 | 13 | 52.959 | KV453130.1 | 323471  | 18-scf00290 | 18 |
| AX-158135586 | 13 | 52.959 | KV453130.1 | 328570  | 18-scf00290 | 18 |
| AX-157830614 | 13 | 53.068 | KV453128.1 | 7506934 | 18-scf00286 | 18 |
| AX-158135416 | 13 | 53.068 | KV453128.1 | 7535953 | 18-scf00286 | 18 |
| AX-158135417 | 13 | 53.068 | KV453128.1 | 7536784 | 18-scf00286 | 18 |
| AX-158135424 | 13 | 53.068 | KV453128.1 | 7543940 | 18-scf00286 | 18 |
| AX-158135426 | 13 | 53.068 | KV453128.1 | 7544746 | 18-scf00286 | 18 |
| AX-158135464 | 13 | 53.068 | KV453128.1 | 7591462 | 18-scf00286 | 18 |
| AX-158135477 | 13 | 53.068 | KV453128.1 | 7603259 | 18-scf00286 | 18 |
| AX-158135496 | 13 | 53.068 | KV453128.1 | 7626957 | 18-scf00286 | 18 |
| AX-158135545 | 13 | 53.068 | KV453128.1 | 7702818 | 18-scf00286 | 18 |
| AX-158392874 | 13 | 53.068 | KV453130.1 | 121789  | 18-scf00290 | 18 |
| AX-158135757 | 13 | 53.068 | KV453130.1 | 127579  | 18-scf00290 | 18 |
| AX-158135689 | 13 | 53.068 | KV453130.1 | 220821  | 18-scf00290 | 18 |
| AX-158135655 | 13 | 53.068 | KV453130.1 | 255345  | 18-scf00290 | 18 |
| AX-158135651 | 13 | 53.068 | KV453130.1 | 258438  | 18-scf00290 | 18 |
| AX-158135643 | 13 | 53.068 | KV453130.1 | 267736  | 18-scf00290 | 18 |
| AX-158135642 | 13 | 53.068 | KV453130.1 | 268295  | 18-scf00290 | 18 |
| AX-158135639 | 13 | 53.068 | KV453130.1 | 271635  | 18-scf00290 | 18 |
| AX-157708225 | 13 | 53.068 | KV453130.1 | 273322  | 18-scf00290 | 18 |
| AX-158135637 | 13 | 53.068 | KV453130.1 | 273701  | 18-scf00290 | 18 |
| AX-157830635 | 13 | 53.068 | KV453130.1 | 276785  | 18-scf00290 | 18 |
| AX-158135630 | 13 | 53.068 | KV453130.1 | 278101  | 18-scf00290 | 18 |
| AX-158135628 | 13 | 53.068 | KV453130.1 | 281794  | 18-scf00290 | 18 |
| AX-158135627 | 13 | 53.068 | KV453130.1 | 283088  | 18-scf00290 | 18 |
| AX-158135626 | 13 | 53.068 | KV453130.1 | 285020  | 18-scf00290 | 18 |
| AX-158135625 | 13 | 53.068 | KV453130.1 | 285530  | 18-scf00290 | 18 |
| AX-158135624 | 13 | 53.068 | KV453130.1 | 289174  | 18-scf00290 | 18 |
| AX-158135622 | 13 | 53.068 | KV453130.1 | 290637  | 18-scf00290 | 18 |
| AX-158135621 | 13 | 53.068 | KV453130.1 | 291199  | 18-scf00290 | 18 |
| AX-158135618 | 13 | 53.068 | KV453130.1 | 293158  | 18-scf00290 | 18 |
| AX-158135615 | 13 | 53.068 | KV453130.1 | 294378  | 18-scf00290 | 18 |
| AX-158135614 | 13 | 53.068 | KV453130.1 | 295829  | 18-scf00290 | 18 |
| AX-157878074 | 13 | 53.068 | KV453130.1 | 298529  | 18-scf00290 | 18 |
| AX-157724191 | 13 | 53.068 | KV453130.1 | 308802  | 18-scf00290 | 18 |
| AX-158135604 | 13 | 53.068 | KV453130.1 | 310751  | 18-scf00290 | 18 |
| AX-158135600 | 13 | 53.068 | KV453130.1 | 313179  | 18-scf00290 | 18 |
| AX-158135595 | 13 | 53.068 | KV453130.1 | 319143  | 18-scf00290 | 18 |
| AX-158135594 | 13 | 53.068 | KV453130.1 | 320128  | 18-scf00290 | 18 |
| AX-158136420 | 13 | 53.068 | KV453137.1 | 869340  | 18-scf00291 | 18 |
| AX-158411848 | 13 | 53.068 | KV453132.1 | 188367  | 18-scf00295 | 18 |
| AX-158137437 | 13 | 53.068 | KV453134.1 | 167702  | 18-scf00296 | 18 |
| AX-158137844 | 13 | 53.068 | KV453138.1 | 202666  | 18-scf00300 | 18 |

|              |    |        |            |         |             |    |
|--------------|----|--------|------------|---------|-------------|----|
| AX-158135442 | 13 | 53.078 | KV453128.1 | 7566668 | 18-scf00286 | 18 |
| AX-158135445 | 13 | 53.078 | KV453128.1 | 7570176 | 18-scf00286 | 18 |
| AX-158135551 | 13 | 53.078 | KV453128.1 | 7711036 | 18-scf00286 | 18 |
| AX-158135786 | 13 | 53.078 | KV453130.1 | 83834   | 18-scf00290 | 18 |
| AX-158135649 | 13 | 53.078 | KV453130.1 | 262681  | 18-scf00290 | 18 |
| AX-158135571 | 13 | 53.078 | KV453130.1 | 346686  | 18-scf00290 | 18 |
| AX-158411811 | 13 | 53.078 | KV453135.1 | 931991  | 18-scf00292 | 18 |
| AX-158137597 | 13 | 53.078 | KV453138.1 | 1080568 | 18-scf00300 | 18 |
| AX-157830622 | 13 | 53.177 | KV453128.1 | 7528981 | 18-scf00286 | 18 |
| AX-158135425 | 13 | 53.177 | KV453128.1 | 7544544 | 18-scf00286 | 18 |
| AX-158135481 | 13 | 53.177 | KV453128.1 | 7605332 | 18-scf00286 | 18 |
| AX-158135549 | 13 | 53.177 | KV453128.1 | 7706450 | 18-scf00286 | 18 |
| AX-157775730 | 13 | 53.177 | KV453130.1 | 59684   | 18-scf00290 | 18 |
| AX-158135802 | 13 | 53.177 | KV453130.1 | 59761   | 18-scf00290 | 18 |
| AX-158135768 | 13 | 53.177 | KV453130.1 | 101185  | 18-scf00290 | 18 |
| AX-158135766 | 13 | 53.177 | KV453130.1 | 104717  | 18-scf00290 | 18 |
| AX-158135765 | 13 | 53.177 | KV453130.1 | 114727  | 18-scf00290 | 18 |
| AX-158135764 | 13 | 53.177 | KV453130.1 | 116459  | 18-scf00290 | 18 |
| AX-158135763 | 13 | 53.177 | KV453130.1 | 118288  | 18-scf00290 | 18 |
| AX-158135760 | 13 | 53.177 | KV453130.1 | 121443  | 18-scf00290 | 18 |
| AX-157830638 | 13 | 53.177 | KV453130.1 | 126801  | 18-scf00290 | 18 |
| AX-158135756 | 13 | 53.177 | KV453130.1 | 128048  | 18-scf00290 | 18 |
| AX-158135754 | 13 | 53.177 | KV453130.1 | 132576  | 18-scf00290 | 18 |
| AX-158135752 | 13 | 53.177 | KV453130.1 | 135285  | 18-scf00290 | 18 |
| AX-158135751 | 13 | 53.177 | KV453130.1 | 136177  | 18-scf00290 | 18 |
| AX-158135750 | 13 | 53.177 | KV453130.1 | 139304  | 18-scf00290 | 18 |
| AX-158135749 | 13 | 53.177 | KV453130.1 | 141979  | 18-scf00290 | 18 |
| AX-157742480 | 13 | 53.177 | KV453130.1 | 218863  | 18-scf00290 | 18 |
| AX-158135690 | 13 | 53.177 | KV453130.1 | 220162  | 18-scf00290 | 18 |
| AX-158135686 | 13 | 53.177 | KV453130.1 | 222076  | 18-scf00290 | 18 |
| AX-158135683 | 13 | 53.177 | KV453130.1 | 225905  | 18-scf00290 | 18 |
| AX-158135676 | 13 | 53.177 | KV453130.1 | 233537  | 18-scf00290 | 18 |
| AX-158135675 | 13 | 53.177 | KV453130.1 | 233969  | 18-scf00290 | 18 |
| AX-158135664 | 13 | 53.177 | KV453130.1 | 241279  | 18-scf00290 | 18 |
| AX-158135663 | 13 | 53.177 | KV453130.1 | 241740  | 18-scf00290 | 18 |
| AX-158135661 | 13 | 53.177 | KV453130.1 | 250258  | 18-scf00290 | 18 |
| AX-158135646 | 13 | 53.177 | KV453130.1 | 264798  | 18-scf00290 | 18 |
| AX-157878072 | 13 | 53.177 | KV453130.1 | 335026  | 18-scf00290 | 18 |
| AX-157715834 | 13 | 53.177 | KV453130.1 | 338891  | 18-scf00290 | 18 |
| AX-157747109 | 13 | 53.177 | KV453131.1 | 429428  | 18-scf00293 | 18 |
| AX-158135878 | 13 | 53.177 | KV453131.1 | 647544  | 18-scf00293 | 18 |
| AX-158135846 | 13 | 53.177 | KV453131.1 | 694939  | 18-scf00293 | 18 |
| AX-158135837 | 13 | 53.177 | KV453131.1 | 706176  | 18-scf00293 | 18 |
| AX-158135773 | 13 | 53.182 | KV453130.1 | 98417   | 18-scf00290 | 18 |
| AX-158135776 | 13 | 53.187 | KV453130.1 | 96832   | 18-scf00290 | 18 |
| AX-158135793 | 13 | 53.193 | KV453130.1 | 72761   | 18-scf00290 | 18 |
| AX-158135565 | 13 | 53.193 | KV453130.1 | 353102  | 18-scf00290 | 18 |
| AX-158135794 | 13 | 53.205 | KV453130.1 | 72045   | 18-scf00290 | 18 |
| AX-158135796 | 13 | 53.218 | KV453130.1 | 70346   | 18-scf00290 | 18 |
| AX-158135797 | 13 | 53.23  | KV453130.1 | 69418   | 18-scf00290 | 18 |
| AX-157683617 | 13 | 53.239 | KV453130.1 | 26810   | 18-scf00290 | 18 |

|              |    |        |            |        |             |    |
|--------------|----|--------|------------|--------|-------------|----|
| AX-158135824 | 13 | 53.239 | KV453130.1 | 39925  | 18-scf00290 | 18 |
| AX-158135806 | 13 | 53.239 | KV453130.1 | 57302  | 18-scf00290 | 18 |
| AX-158135777 | 13 | 53.239 | KV453130.1 | 96235  | 18-scf00290 | 18 |
| AX-158135810 | 13 | 53.251 | KV453130.1 | 54196  | 18-scf00290 | 18 |
| AX-157878085 | 13 | 53.264 | KV453130.1 | 52647  | 18-scf00290 | 18 |
| AX-158135812 | 13 | 53.276 | KV453130.1 | 51570  | 18-scf00290 | 18 |
| AX-158135825 | 13 | 53.287 | KV453130.1 | 38640  | 18-scf00290 | 18 |
| AX-157774498 | 13 | 53.287 | KV453130.1 | 39337  | 18-scf00290 | 18 |
| AX-158135822 | 13 | 53.287 | KV453130.1 | 42422  | 18-scf00290 | 18 |
| AX-158135818 | 13 | 53.287 | KV453130.1 | 44529  | 18-scf00290 | 18 |
| AX-158135816 | 13 | 53.287 | KV453130.1 | 46171  | 18-scf00290 | 18 |
| AX-157749608 | 13 | 53.287 | KV453130.1 | 48004  | 18-scf00290 | 18 |
| AX-158135815 | 13 | 53.287 | KV453130.1 | 48371  | 18-scf00290 | 18 |
| AX-158135813 | 13 | 53.287 | KV453130.1 | 49510  | 18-scf00290 | 18 |
| AX-157754755 | 13 | 53.287 | KV453130.1 | 50687  | 18-scf00290 | 18 |
| AX-158135795 | 13 | 53.287 | KV453130.1 | 71446  | 18-scf00290 | 18 |
| AX-158135691 | 13 | 53.287 | KV453130.1 | 218959 | 18-scf00290 | 18 |
| AX-158135830 | 13 | 53.296 | KV453131.1 | 718686 | 18-scf00293 | 18 |
| AX-158137660 | 13 | 53.296 | KV453138.1 | 818126 | 18-scf00300 | 18 |
| AX-158135831 | 13 | 53.304 | KV453131.1 | 717981 | 18-scf00293 | 18 |
| AX-158135833 | 13 | 53.325 | KV453131.1 | 715300 | 18-scf00293 | 18 |
| AX-157681361 | 13 | 53.347 | KV453130.1 | 6702   | 18-scf00290 | 18 |
| AX-157683607 | 13 | 53.347 | KV453130.1 | 13005  | 18-scf00290 | 18 |
| AX-157683608 | 13 | 53.347 | KV453130.1 | 16460  | 18-scf00290 | 18 |
| AX-158135828 | 13 | 53.347 | KV453130.1 | 35016  | 18-scf00290 | 18 |
| AX-158135827 | 13 | 53.347 | KV453130.1 | 35757  | 18-scf00290 | 18 |
| AX-158135826 | 13 | 53.347 | KV453130.1 | 35825  | 18-scf00290 | 18 |
| AX-158135823 | 13 | 53.347 | KV453130.1 | 42006  | 18-scf00290 | 18 |
| AX-158135820 | 13 | 53.347 | KV453130.1 | 43716  | 18-scf00290 | 18 |
| AX-158135819 | 13 | 53.347 | KV453130.1 | 44231  | 18-scf00290 | 18 |
| AX-158135807 | 13 | 53.347 | KV453130.1 | 55339  | 18-scf00290 | 18 |
| AX-158135804 | 13 | 53.347 | KV453130.1 | 58561  | 18-scf00290 | 18 |
| AX-158135803 | 13 | 53.347 | KV453130.1 | 58894  | 18-scf00290 | 18 |
| AX-158135801 | 13 | 53.347 | KV453130.1 | 62072  | 18-scf00290 | 18 |
| AX-158135800 | 13 | 53.347 | KV453130.1 | 62634  | 18-scf00290 | 18 |
| AX-158135799 | 13 | 53.347 | KV453130.1 | 64634  | 18-scf00290 | 18 |
| AX-158135790 | 13 | 53.347 | KV453130.1 | 74671  | 18-scf00290 | 18 |
| AX-158135789 | 13 | 53.347 | KV453130.1 | 75064  | 18-scf00290 | 18 |
| AX-158135788 | 13 | 53.347 | KV453130.1 | 81953  | 18-scf00290 | 18 |
| AX-158135787 | 13 | 53.347 | KV453130.1 | 82423  | 18-scf00290 | 18 |
| AX-158135785 | 13 | 53.347 | KV453130.1 | 85918  | 18-scf00290 | 18 |
| AX-158135783 | 13 | 53.347 | KV453130.1 | 87140  | 18-scf00290 | 18 |
| AX-158135782 | 13 | 53.347 | KV453130.1 | 88623  | 18-scf00290 | 18 |
| AX-158135779 | 13 | 53.347 | KV453130.1 | 94949  | 18-scf00290 | 18 |
| AX-158136344 | 13 | 53.347 | KV453137.1 | 688206 | 18-scf00291 | 18 |
| AX-158135911 | 13 | 53.347 | KV453131.1 | 579810 | 18-scf00293 | 18 |
| AX-158135847 | 13 | 53.347 | KV453131.1 | 691489 | 18-scf00293 | 18 |
| AX-158135844 | 13 | 53.347 | KV453131.1 | 697073 | 18-scf00293 | 18 |
| AX-158135843 | 13 | 53.347 | KV453131.1 | 697696 | 18-scf00293 | 18 |
| AX-158385345 | 13 | 53.347 | KV453131.1 | 710643 | 18-scf00293 | 18 |
| AX-158135836 | 13 | 53.347 | KV453131.1 | 712655 | 18-scf00293 | 18 |



|              |    |        |            |         |             |    |
|--------------|----|--------|------------|---------|-------------|----|
| AX-158135835 | 13 | 53.347 | KV453131.1 | 714188  | 18-scf00293 | 18 |
| AX-157871565 | 13 | 53.347 | KV453138.1 | 3328624 | 18-scf00300 | 18 |
| AX-158135838 | 13 | 53.371 | KV453131.1 | 705500  | 18-scf00293 | 18 |
| AX-158135839 | 13 | 53.385 | KV453131.1 | 703080  | 18-scf00293 | 18 |
| AX-157713549 | 13 | 53.396 | KV453131.1 | 672669  | 18-scf00293 | 18 |
| AX-157748041 | 13 | 53.396 | KV453131.1 | 677034  | 18-scf00293 | 18 |
| AX-158135856 | 13 | 53.396 | KV453131.1 | 678870  | 18-scf00293 | 18 |
| AX-158135852 | 13 | 53.396 | KV453131.1 | 685523  | 18-scf00293 | 18 |
| AX-158135851 | 13 | 53.396 | KV453131.1 | 687516  | 18-scf00293 | 18 |
| AX-158135845 | 13 | 53.396 | KV453131.1 | 695668  | 18-scf00293 | 18 |
| AX-158135841 | 13 | 53.396 | KV453131.1 | 699290  | 18-scf00293 | 18 |
| AX-158385346 | 13 | 53.426 | KV453131.1 | 674273  | 18-scf00293 | 18 |
| AX-158135861 | 13 | 53.452 | KV453131.1 | 665525  | 18-scf00293 | 18 |
| AX-158135864 | 13 | 53.479 | KV453131.1 | 661876  | 18-scf00293 | 18 |
| AX-157830844 | 13 | 53.479 | KV453132.1 | 190754  | 18-scf00295 | 18 |
| AX-158137349 | 13 | 53.479 | KV453132.1 | 337637  | 18-scf00295 | 18 |
| AX-157878087 | 13 | 53.505 | KV453131.1 | 641919  | 18-scf00293 | 18 |
| AX-158135877 | 13 | 53.505 | KV453131.1 | 648080  | 18-scf00293 | 18 |
| AX-158135876 | 13 | 53.505 | KV453131.1 | 649269  | 18-scf00293 | 18 |
| AX-157830645 | 13 | 53.505 | KV453131.1 | 651511  | 18-scf00293 | 18 |
| AX-158135873 | 13 | 53.505 | KV453131.1 | 651773  | 18-scf00293 | 18 |
| AX-158135871 | 13 | 53.505 | KV453131.1 | 653660  | 18-scf00293 | 18 |
| AX-157746684 | 13 | 53.505 | KV453131.1 | 655063  | 18-scf00293 | 18 |
| AX-158135855 | 13 | 53.505 | KV453131.1 | 679862  | 18-scf00293 | 18 |
| AX-158135881 | 13 | 53.529 | KV453131.1 | 641499  | 18-scf00293 | 18 |
| AX-158135681 | 13 | 53.547 | KV453130.1 | 228137  | 18-scf00290 | 18 |
| AX-158135606 | 13 | 53.547 | KV453130.1 | 308519  | 18-scf00290 | 18 |
| AX-158135597 | 13 | 53.547 | KV453130.1 | 317651  | 18-scf00290 | 18 |
| AX-158135882 | 13 | 53.547 | KV453131.1 | 637979  | 18-scf00293 | 18 |
| AX-158137370 | 13 | 53.547 | KV453134.1 | 17327   | 18-scf00296 | 18 |
| AX-158135883 | 13 | 53.561 | KV453131.1 | 637506  | 18-scf00293 | 18 |
| AX-158135889 | 13 | 53.572 | KV453131.1 | 626471  | 18-scf00293 | 18 |
| AX-158135900 | 13 | 53.583 | KV453131.1 | 606591  | 18-scf00293 | 18 |
| AX-158135892 | 13 | 53.583 | KV453131.1 | 617991  | 18-scf00293 | 18 |
| AX-158135939 | 13 | 53.594 | KV453131.1 | 547069  | 18-scf00293 | 18 |
| AX-158135903 | 13 | 53.594 | KV453131.1 | 595554  | 18-scf00293 | 18 |
| AX-158135902 | 13 | 53.594 | KV453131.1 | 596055  | 18-scf00293 | 18 |
| AX-158137388 | 13 | 53.594 | KV453134.1 | 54524   | 18-scf00296 | 18 |
| AX-158137393 | 13 | 53.594 | KV453134.1 | 62756   | 18-scf00296 | 18 |
| AX-157683603 | 13 | 53.614 | KV453130.1 | 3456    | 18-scf00290 | 18 |
| AX-157681161 | 13 | 53.614 | KV453130.1 | 4114    | 18-scf00290 | 18 |
| AX-157683611 | 13 | 53.614 | KV453130.1 | 24137   | 18-scf00290 | 18 |
| AX-157683616 | 13 | 53.614 | KV453130.1 | 26175   | 18-scf00290 | 18 |
| AX-157680684 | 13 | 53.614 | KV453130.1 | 31621   | 18-scf00290 | 18 |
| AX-158411694 | 13 | 53.614 | KV453130.1 | 31810   | 18-scf00290 | 18 |
| AX-158135817 | 13 | 53.614 | KV453130.1 | 45436   | 18-scf00290 | 18 |
| AX-158411682 | 13 | 53.614 | KV453130.1 | 48467   | 18-scf00290 | 18 |
| AX-158135809 | 13 | 53.614 | KV453130.1 | 54550   | 18-scf00290 | 18 |
| AX-158135784 | 13 | 53.614 | KV453130.1 | 86576   | 18-scf00290 | 18 |
| AX-158392875 | 13 | 53.614 | KV453130.1 | 88834   | 18-scf00290 | 18 |
| AX-158135781 | 13 | 53.614 | KV453130.1 | 89478   | 18-scf00290 | 18 |

|              |    |        |            |         |             |    |
|--------------|----|--------|------------|---------|-------------|----|
| AX-158136962 | 13 | 53.614 | KV453135.1 | 1285584 | 18-scf00292 | 18 |
| AX-157830815 | 13 | 53.614 | KV453131.1 | 297266  | 18-scf00293 | 18 |
| AX-158135998 | 13 | 53.614 | KV453131.1 | 436307  | 18-scf00293 | 18 |
| AX-158135995 | 13 | 53.614 | KV453131.1 | 451793  | 18-scf00293 | 18 |
| AX-158135994 | 13 | 53.614 | KV453131.1 | 453066  | 18-scf00293 | 18 |
| AX-158411691 | 13 | 53.614 | KV453131.1 | 467010  | 18-scf00293 | 18 |
| AX-158135983 | 13 | 53.614 | KV453131.1 | 471414  | 18-scf00293 | 18 |
| AX-158135979 | 13 | 53.614 | KV453131.1 | 483364  | 18-scf00293 | 18 |
| AX-158135977 | 13 | 53.614 | KV453131.1 | 490687  | 18-scf00293 | 18 |
| AX-157830657 | 13 | 53.614 | KV453131.1 | 491293  | 18-scf00293 | 18 |
| AX-158135972 | 13 | 53.614 | KV453131.1 | 497973  | 18-scf00293 | 18 |
| AX-158135964 | 13 | 53.614 | KV453131.1 | 505401  | 18-scf00293 | 18 |
| AX-158135961 | 13 | 53.614 | KV453131.1 | 507861  | 18-scf00293 | 18 |
| AX-158135960 | 13 | 53.614 | KV453131.1 | 510328  | 18-scf00293 | 18 |
| AX-158135957 | 13 | 53.614 | KV453131.1 | 517986  | 18-scf00293 | 18 |
| AX-158135954 | 13 | 53.614 | KV453131.1 | 523191  | 18-scf00293 | 18 |
| AX-158135938 | 13 | 53.614 | KV453131.1 | 548470  | 18-scf00293 | 18 |
| AX-157830653 | 13 | 53.614 | KV453131.1 | 553456  | 18-scf00293 | 18 |
| AX-158135930 | 13 | 53.614 | KV453131.1 | 558584  | 18-scf00293 | 18 |
| AX-158135929 | 13 | 53.614 | KV453131.1 | 559032  | 18-scf00293 | 18 |
| AX-158135928 | 13 | 53.614 | KV453131.1 | 561368  | 18-scf00293 | 18 |
| AX-157830652 | 13 | 53.614 | KV453131.1 | 561679  | 18-scf00293 | 18 |
| AX-157744263 | 13 | 53.614 | KV453131.1 | 561817  | 18-scf00293 | 18 |
| AX-158135927 | 13 | 53.614 | KV453131.1 | 563084  | 18-scf00293 | 18 |
| AX-158135925 | 13 | 53.614 | KV453131.1 | 565990  | 18-scf00293 | 18 |
| AX-158135924 | 13 | 53.614 | KV453131.1 | 566881  | 18-scf00293 | 18 |
| AX-158411683 | 13 | 53.614 | KV453131.1 | 568129  | 18-scf00293 | 18 |
| AX-157830651 | 13 | 53.614 | KV453131.1 | 569270  | 18-scf00293 | 18 |
| AX-158135921 | 13 | 53.614 | KV453131.1 | 570665  | 18-scf00293 | 18 |
| AX-157830650 | 13 | 53.614 | KV453131.1 | 570897  | 18-scf00293 | 18 |
| AX-158135920 | 13 | 53.614 | KV453131.1 | 571440  | 18-scf00293 | 18 |
| AX-158135917 | 13 | 53.614 | KV453131.1 | 572748  | 18-scf00293 | 18 |
| AX-158135915 | 13 | 53.614 | KV453131.1 | 575791  | 18-scf00293 | 18 |
| AX-158135912 | 13 | 53.614 | KV453131.1 | 578851  | 18-scf00293 | 18 |
| AX-157772827 | 13 | 53.614 | KV453131.1 | 579300  | 18-scf00293 | 18 |
| AX-157716292 | 13 | 53.614 | KV453131.1 | 580131  | 18-scf00293 | 18 |
| AX-158135907 | 13 | 53.614 | KV453131.1 | 584918  | 18-scf00293 | 18 |
| AX-158135906 | 13 | 53.614 | KV453131.1 | 585448  | 18-scf00293 | 18 |
| AX-158135905 | 13 | 53.614 | KV453131.1 | 586902  | 18-scf00293 | 18 |
| AX-157830646 | 13 | 53.614 | KV453131.1 | 639822  | 18-scf00293 | 18 |
| AX-158392877 | 13 | 53.614 | KV453131.1 | 668874  | 18-scf00293 | 18 |
| AX-158135829 | 13 | 53.614 | KV453131.1 | 718980  | 18-scf00293 | 18 |
| AX-157722959 | 13 | 53.614 | KV453138.1 | 1892518 | 18-scf00300 | 18 |
| AX-158137131 | 13 | 53.669 | KV453131.1 | 226497  | 18-scf00293 | 18 |
| AX-158136004 | 13 | 53.669 | KV453131.1 | 423424  | 18-scf00293 | 18 |
| AX-158135999 | 13 | 53.669 | KV453131.1 | 433377  | 18-scf00293 | 18 |
| AX-158135992 | 13 | 53.669 | KV453131.1 | 455457  | 18-scf00293 | 18 |
| AX-157830660 | 13 | 53.669 | KV453131.1 | 458148  | 18-scf00293 | 18 |
| AX-157830847 | 13 | 53.669 | KV453134.1 | 118168  | 18-scf00296 | 18 |
| AX-158136003 | 13 | 53.699 | KV453131.1 | 423635  | 18-scf00293 | 18 |
| AX-158136930 | 13 | 53.723 | KV453135.1 | 1215407 | 18-scf00292 | 18 |

|              |    |        |            |         |             |    |
|--------------|----|--------|------------|---------|-------------|----|
| AX-158137091 | 13 | 53.723 | KV453135.1 | 1868051 | 18-scf00292 | 18 |
| AX-158137214 | 13 | 53.723 | KV453131.1 | 13671   | 18-scf00293 | 18 |
| AX-157830821 | 13 | 53.723 | KV453131.1 | 115217  | 18-scf00293 | 18 |
| AX-158137165 | 13 | 53.723 | KV453131.1 | 140419  | 18-scf00293 | 18 |
| AX-157830817 | 13 | 53.723 | KV453131.1 | 201599  | 18-scf00293 | 18 |
| AX-157857912 | 13 | 53.723 | KV453131.1 | 239567  | 18-scf00293 | 18 |
| AX-158137120 | 13 | 53.723 | KV453131.1 | 245364  | 18-scf00293 | 18 |
| AX-158137119 | 13 | 53.723 | KV453131.1 | 246313  | 18-scf00293 | 18 |
| AX-157857910 | 13 | 53.723 | KV453131.1 | 258025  | 18-scf00293 | 18 |
| AX-158137113 | 13 | 53.723 | KV453131.1 | 276502  | 18-scf00293 | 18 |
| AX-158137112 | 13 | 53.723 | KV453131.1 | 277525  | 18-scf00293 | 18 |
| AX-158137110 | 13 | 53.723 | KV453131.1 | 280345  | 18-scf00293 | 18 |
| AX-158137109 | 13 | 53.723 | KV453131.1 | 280570  | 18-scf00293 | 18 |
| AX-158137108 | 13 | 53.723 | KV453131.1 | 285346  | 18-scf00293 | 18 |
| AX-158137106 | 13 | 53.723 | KV453131.1 | 289586  | 18-scf00293 | 18 |
| AX-158137105 | 13 | 53.723 | KV453131.1 | 292709  | 18-scf00293 | 18 |
| AX-158137100 | 13 | 53.723 | KV453131.1 | 304853  | 18-scf00293 | 18 |
| AX-157830813 | 13 | 53.723 | KV453131.1 | 306987  | 18-scf00293 | 18 |
| AX-157830812 | 13 | 53.723 | KV453131.1 | 307238  | 18-scf00293 | 18 |
| AX-158136079 | 13 | 53.723 | KV453131.1 | 311389  | 18-scf00293 | 18 |
| AX-157830665 | 13 | 53.723 | KV453131.1 | 311865  | 18-scf00293 | 18 |
| AX-158136075 | 13 | 53.723 | KV453131.1 | 317489  | 18-scf00293 | 18 |
| AX-157857884 | 13 | 53.723 | KV453131.1 | 317953  | 18-scf00293 | 18 |
| AX-157830663 | 13 | 53.723 | KV453131.1 | 321603  | 18-scf00293 | 18 |
| AX-158136074 | 13 | 53.723 | KV453131.1 | 321880  | 18-scf00293 | 18 |
| AX-157857883 | 13 | 53.723 | KV453131.1 | 325108  | 18-scf00293 | 18 |
| AX-158136069 | 13 | 53.723 | KV453131.1 | 333781  | 18-scf00293 | 18 |
| AX-157735741 | 13 | 53.723 | KV453131.1 | 336542  | 18-scf00293 | 18 |
| AX-157871438 | 13 | 53.723 | KV453131.1 | 336799  | 18-scf00293 | 18 |
| AX-157871437 | 13 | 53.723 | KV453131.1 | 337231  | 18-scf00293 | 18 |
| AX-158136068 | 13 | 53.723 | KV453131.1 | 337812  | 18-scf00293 | 18 |
| AX-157857882 | 13 | 53.723 | KV453131.1 | 341333  | 18-scf00293 | 18 |
| AX-158136065 | 13 | 53.723 | KV453131.1 | 341691  | 18-scf00293 | 18 |
| AX-158136063 | 13 | 53.723 | KV453131.1 | 342868  | 18-scf00293 | 18 |
| AX-158136062 | 13 | 53.723 | KV453131.1 | 343465  | 18-scf00293 | 18 |
| AX-157830662 | 13 | 53.723 | KV453131.1 | 344791  | 18-scf00293 | 18 |
| AX-158136061 | 13 | 53.723 | KV453131.1 | 345211  | 18-scf00293 | 18 |
| AX-157830661 | 13 | 53.723 | KV453131.1 | 345631  | 18-scf00293 | 18 |
| AX-158136058 | 13 | 53.723 | KV453131.1 | 348226  | 18-scf00293 | 18 |
| AX-158136057 | 13 | 53.723 | KV453131.1 | 348647  | 18-scf00293 | 18 |
| AX-158136056 | 13 | 53.723 | KV453131.1 | 349043  | 18-scf00293 | 18 |
| AX-158136053 | 13 | 53.723 | KV453131.1 | 353187  | 18-scf00293 | 18 |
| AX-158136051 | 13 | 53.723 | KV453131.1 | 355194  | 18-scf00293 | 18 |
| AX-158136049 | 13 | 53.723 | KV453131.1 | 356970  | 18-scf00293 | 18 |
| AX-158136048 | 13 | 53.723 | KV453131.1 | 357294  | 18-scf00293 | 18 |
| AX-158136047 | 13 | 53.723 | KV453131.1 | 357500  | 18-scf00293 | 18 |
| AX-157878089 | 13 | 53.723 | KV453131.1 | 363850  | 18-scf00293 | 18 |
| AX-158136042 | 13 | 53.723 | KV453131.1 | 366692  | 18-scf00293 | 18 |
| AX-158136041 | 13 | 53.723 | KV453131.1 | 366943  | 18-scf00293 | 18 |
| AX-158136040 | 13 | 53.723 | KV453131.1 | 367306  | 18-scf00293 | 18 |
| AX-158136039 | 13 | 53.723 | KV453131.1 | 367615  | 18-scf00293 | 18 |

|              |    |        |            |         |             |    |
|--------------|----|--------|------------|---------|-------------|----|
| AX-158136038 | 13 | 53.723 | KV453131.1 | 368909  | 18-scf00293 | 18 |
| AX-158136036 | 13 | 53.723 | KV453131.1 | 370274  | 18-scf00293 | 18 |
| AX-158136035 | 13 | 53.723 | KV453131.1 | 370672  | 18-scf00293 | 18 |
| AX-157754724 | 13 | 53.723 | KV453131.1 | 371086  | 18-scf00293 | 18 |
| AX-158136033 | 13 | 53.723 | KV453131.1 | 373661  | 18-scf00293 | 18 |
| AX-157857881 | 13 | 53.723 | KV453131.1 | 373792  | 18-scf00293 | 18 |
| AX-158136032 | 13 | 53.723 | KV453131.1 | 374610  | 18-scf00293 | 18 |
| AX-158136031 | 13 | 53.723 | KV453131.1 | 375914  | 18-scf00293 | 18 |
| AX-158136029 | 13 | 53.723 | KV453131.1 | 377002  | 18-scf00293 | 18 |
| AX-157871436 | 13 | 53.723 | KV453131.1 | 378242  | 18-scf00293 | 18 |
| AX-158136028 | 13 | 53.723 | KV453131.1 | 378878  | 18-scf00293 | 18 |
| AX-158136024 | 13 | 53.723 | KV453131.1 | 384636  | 18-scf00293 | 18 |
| AX-158136022 | 13 | 53.723 | KV453131.1 | 386786  | 18-scf00293 | 18 |
| AX-158136021 | 13 | 53.723 | KV453131.1 | 389923  | 18-scf00293 | 18 |
| AX-158136020 | 13 | 53.723 | KV453131.1 | 392168  | 18-scf00293 | 18 |
| AX-157857880 | 13 | 53.723 | KV453131.1 | 405521  | 18-scf00293 | 18 |
| AX-158135919 | 13 | 53.723 | KV453131.1 | 572031  | 18-scf00293 | 18 |
| AX-157830641 | 13 | 53.723 | KV453131.1 | 689581  | 18-scf00293 | 18 |
| AX-158137293 | 13 | 53.723 | KV453136.1 | 234183  | 18-scf00294 | 18 |
| AX-158137394 | 13 | 53.723 | KV453134.1 | 69527   | 18-scf00296 | 18 |
| AX-158137841 | 13 | 53.723 | KV453138.1 | 215364  | 18-scf00300 | 18 |
| AX-158137745 | 13 | 53.723 | KV453138.1 | 565782  | 18-scf00300 | 18 |
| AX-158137711 | 13 | 53.723 | KV453138.1 | 677654  | 18-scf00300 | 18 |
| AX-158137678 | 13 | 53.723 | KV453138.1 | 773867  | 18-scf00300 | 18 |
| AX-158137672 | 13 | 53.723 | KV453138.1 | 780980  | 18-scf00300 | 18 |
| AX-157830911 | 13 | 53.723 | KV453138.1 | 891659  | 18-scf00300 | 18 |
| AX-158422838 | 13 | 53.723 | KV453138.1 | 1400627 | 18-scf00300 | 18 |
| AX-158139125 | 13 | 53.723 | KV453138.1 | 3703609 | 18-scf00300 | 18 |
| AX-158136066 | 13 | 53.725 | KV453131.1 | 339494  | 18-scf00293 | 18 |
| AX-158136070 | 13 | 53.727 | KV453131.1 | 328298  | 18-scf00293 | 18 |
| AX-158136072 | 13 | 53.729 | KV453131.1 | 324906  | 18-scf00293 | 18 |
| AX-158136077 | 13 | 53.731 | KV453131.1 | 313848  | 18-scf00293 | 18 |
| AX-157683601 | 13 | 53.889 | KV453130.1 | 2528    | 18-scf00290 | 18 |
| AX-157680680 | 13 | 54.027 | KV453130.1 | 5322    | 18-scf00290 | 18 |
| AX-157680411 | 13 | 54.027 | KV453130.1 | 9311    | 18-scf00290 | 18 |
| AX-157830642 | 13 | 54.027 | KV453131.1 | 678123  | 18-scf00293 | 18 |
| AX-158135857 | 13 | 54.027 | KV453131.1 | 678361  | 18-scf00293 | 18 |
| AX-157681362 | 13 | 54.035 | KV453130.1 | 10249   | 18-scf00290 | 18 |
| AX-157830871 | 13 | 54.035 | KV453134.1 | 393021  | 18-scf00296 | 18 |
| AX-157683612 | 13 | 54.059 | KV453130.1 | 24234   | 18-scf00290 | 18 |
| AX-157723110 | 13 | 54.059 | KV453131.1 | 388635  | 18-scf00293 | 18 |
| AX-157683613 | 13 | 54.083 | KV453130.1 | 24810   | 18-scf00290 | 18 |
| AX-157683615 | 13 | 54.104 | KV453130.1 | 25576   | 18-scf00290 | 18 |
| AX-157680682 | 13 | 54.104 | KV453130.1 | 28091   | 18-scf00290 | 18 |
| AX-157680683 | 13 | 54.104 | KV453130.1 | 29859   | 18-scf00290 | 18 |
| AX-157681363 | 13 | 54.104 | KV453130.1 | 33220   | 18-scf00290 | 18 |
| AX-158136266 | 13 | 54.104 | KV453137.1 | 520278  | 18-scf00291 | 18 |
| AX-158385331 | 13 | 54.379 | KV453128.1 | 7062736 | 18-scf00286 | 18 |
| AX-157792777 | 13 | 54.379 | KV453135.1 | 385149  | 18-scf00292 | 18 |
| AX-158136861 | 13 | 54.379 | KV453135.1 | 987233  | 18-scf00292 | 18 |
| AX-158136866 | 13 | 54.379 | KV453135.1 | 1000882 | 18-scf00292 | 18 |

|              |    |        |            |         |             |    |
|--------------|----|--------|------------|---------|-------------|----|
| AX-158137139 | 13 | 54.379 | KV453131.1 | 198277  | 18-scf00293 | 18 |
| AX-157745415 | 13 | 54.379 | KV453131.1 | 200890  | 18-scf00293 | 18 |
| AX-158137134 | 13 | 54.379 | KV453131.1 | 217951  | 18-scf00293 | 18 |
| AX-158137129 | 13 | 54.379 | KV453131.1 | 228814  | 18-scf00293 | 18 |
| AX-158137127 | 13 | 54.379 | KV453131.1 | 231657  | 18-scf00293 | 18 |
| AX-158137123 | 13 | 54.379 | KV453131.1 | 239476  | 18-scf00293 | 18 |
| AX-158137121 | 13 | 54.379 | KV453131.1 | 241372  | 18-scf00293 | 18 |
| AX-157857911 | 13 | 54.379 | KV453131.1 | 256007  | 18-scf00293 | 18 |
| AX-157723977 | 13 | 54.379 | KV453131.1 | 259313  | 18-scf00293 | 18 |
| AX-157721328 | 13 | 54.379 | KV453131.1 | 262417  | 18-scf00293 | 18 |
| AX-157740447 | 13 | 54.379 | KV453131.1 | 277629  | 18-scf00293 | 18 |
| AX-157871479 | 13 | 54.379 | KV453131.1 | 281113  | 18-scf00293 | 18 |
| AX-157830816 | 13 | 54.379 | KV453131.1 | 295762  | 18-scf00293 | 18 |
| AX-157857909 | 13 | 54.379 | KV453131.1 | 304176  | 18-scf00293 | 18 |
| AX-157871478 | 13 | 54.379 | KV453131.1 | 308699  | 18-scf00293 | 18 |
| AX-158136037 | 13 | 54.379 | KV453131.1 | 369864  | 18-scf00293 | 18 |
| AX-158136034 | 13 | 54.379 | KV453131.1 | 371472  | 18-scf00293 | 18 |
| AX-158136026 | 13 | 54.379 | KV453131.1 | 380543  | 18-scf00293 | 18 |
| AX-157863427 | 13 | 54.379 | KV453132.1 | 106402  | 18-scf00295 | 18 |
| AX-158137341 | 13 | 54.379 | KV453132.1 | 169656  | 18-scf00295 | 18 |
| AX-158408292 | 13 | 54.379 | KV453132.1 | 325382  | 18-scf00295 | 18 |
| AX-158411858 | 13 | 54.379 | KV453132.1 | 328341  | 18-scf00295 | 18 |
| AX-158392949 | 13 | 54.379 | KV453134.1 | 363374  | 18-scf00296 | 18 |
| AX-157871511 | 13 | 54.379 | KV453134.1 | 402875  | 18-scf00296 | 18 |
| AX-157683624 | 13 | 54.379 | KV453133.1 | 33498   | 18-scf00297 | 18 |
| AX-158137143 | 13 | 54.406 | KV453131.1 | 185244  | 18-scf00293 | 18 |
| AX-157725845 | 13 | 54.433 | KV453131.1 | 175829  | 18-scf00293 | 18 |
| AX-158137191 | 13 | 54.472 | KV453131.1 | 79268   | 18-scf00293 | 18 |
| AX-158137189 | 13 | 54.472 | KV453131.1 | 80684   | 18-scf00293 | 18 |
| AX-157857913 | 13 | 54.472 | KV453131.1 | 80776   | 18-scf00293 | 18 |
| AX-157871480 | 13 | 54.472 | KV453131.1 | 99889   | 18-scf00293 | 18 |
| AX-157830818 | 13 | 54.472 | KV453131.1 | 164144  | 18-scf00293 | 18 |
| AX-158137148 | 13 | 54.472 | KV453131.1 | 174896  | 18-scf00293 | 18 |
| AX-158411836 | 13 | 54.472 | KV453131.1 | 178337  | 18-scf00293 | 18 |
| AX-158408288 | 13 | 54.472 | KV453131.1 | 178631  | 18-scf00293 | 18 |
| AX-158137150 | 13 | 54.486 | KV453131.1 | 171895  | 18-scf00293 | 18 |
| AX-158135798 | 13 | 54.488 | KV453130.1 | 65435   | 18-scf00290 | 18 |
| AX-157857874 | 13 | 54.488 | KV453130.1 | 220392  | 18-scf00290 | 18 |
| AX-158136165 | 13 | 54.488 | KV453137.1 | 213048  | 18-scf00291 | 18 |
| AX-158136383 | 13 | 54.488 | KV453137.1 | 788333  | 18-scf00291 | 18 |
| AX-158136744 | 13 | 54.488 | KV453135.1 | 614788  | 18-scf00292 | 18 |
| AX-158137011 | 13 | 54.488 | KV453135.1 | 1408296 | 18-scf00292 | 18 |
| AX-157830823 | 13 | 54.488 | KV453131.1 | 22865   | 18-scf00293 | 18 |
| AX-158137204 | 13 | 54.488 | KV453131.1 | 45500   | 18-scf00293 | 18 |
| AX-158137200 | 13 | 54.488 | KV453131.1 | 62398   | 18-scf00293 | 18 |
| AX-158137197 | 13 | 54.488 | KV453131.1 | 67387   | 18-scf00293 | 18 |
| AX-158137188 | 13 | 54.488 | KV453131.1 | 83731   | 18-scf00293 | 18 |
| AX-157830822 | 13 | 54.488 | KV453131.1 | 86243   | 18-scf00293 | 18 |
| AX-158137186 | 13 | 54.488 | KV453131.1 | 91656   | 18-scf00293 | 18 |
| AX-158137183 | 13 | 54.488 | KV453131.1 | 96390   | 18-scf00293 | 18 |
| AX-158137178 | 13 | 54.488 | KV453131.1 | 115674  | 18-scf00293 | 18 |

|              |    |        |            |         |             |    |
|--------------|----|--------|------------|---------|-------------|----|
| AX-158137176 | 13 | 54.488 | KV453131.1 | 118010  | 18-scf00293 | 18 |
| AX-158137175 | 13 | 54.488 | KV453131.1 | 118689  | 18-scf00293 | 18 |
| AX-158137174 | 13 | 54.488 | KV453131.1 | 119158  | 18-scf00293 | 18 |
| AX-158137173 | 13 | 54.488 | KV453131.1 | 119785  | 18-scf00293 | 18 |
| AX-157830820 | 13 | 54.488 | KV453131.1 | 119966  | 18-scf00293 | 18 |
| AX-158137171 | 13 | 54.488 | KV453131.1 | 124975  | 18-scf00293 | 18 |
| AX-158137169 | 13 | 54.488 | KV453131.1 | 127231  | 18-scf00293 | 18 |
| AX-157756543 | 13 | 54.488 | KV453131.1 | 128455  | 18-scf00293 | 18 |
| AX-158137167 | 13 | 54.488 | KV453131.1 | 131756  | 18-scf00293 | 18 |
| AX-158137164 | 13 | 54.488 | KV453131.1 | 141379  | 18-scf00293 | 18 |
| AX-158137163 | 13 | 54.488 | KV453131.1 | 142318  | 18-scf00293 | 18 |
| AX-158137161 | 13 | 54.488 | KV453131.1 | 147982  | 18-scf00293 | 18 |
| AX-158137160 | 13 | 54.488 | KV453131.1 | 149594  | 18-scf00293 | 18 |
| AX-157758156 | 13 | 54.488 | KV453131.1 | 152445  | 18-scf00293 | 18 |
| AX-158392928 | 13 | 54.488 | KV453131.1 | 152830  | 18-scf00293 | 18 |
| AX-158137155 | 13 | 54.488 | KV453131.1 | 163429  | 18-scf00293 | 18 |
| AX-158137154 | 13 | 54.488 | KV453131.1 | 164637  | 18-scf00293 | 18 |
| AX-158137153 | 13 | 54.488 | KV453131.1 | 170306  | 18-scf00293 | 18 |
| AX-158137147 | 13 | 54.488 | KV453131.1 | 176072  | 18-scf00293 | 18 |
| AX-158136071 | 13 | 54.488 | KV453131.1 | 327452  | 18-scf00293 | 18 |
| AX-158136025 | 13 | 54.488 | KV453131.1 | 383900  | 18-scf00293 | 18 |
| AX-158136009 | 13 | 54.488 | KV453131.1 | 416646  | 18-scf00293 | 18 |
| AX-158136008 | 13 | 54.488 | KV453131.1 | 417291  | 18-scf00293 | 18 |
| AX-158136007 | 13 | 54.488 | KV453131.1 | 418948  | 18-scf00293 | 18 |
| AX-158136006 | 13 | 54.488 | KV453131.1 | 420196  | 18-scf00293 | 18 |
| AX-158136005 | 13 | 54.488 | KV453131.1 | 421711  | 18-scf00293 | 18 |
| AX-157751663 | 13 | 54.488 | KV453131.1 | 535290  | 18-scf00293 | 18 |
| AX-158135884 | 13 | 54.488 | KV453131.1 | 636738  | 18-scf00293 | 18 |
| AX-158135875 | 13 | 54.488 | KV453131.1 | 650136  | 18-scf00293 | 18 |
| AX-158135869 | 13 | 54.488 | KV453131.1 | 656206  | 18-scf00293 | 18 |
| AX-158135867 | 13 | 54.488 | KV453131.1 | 658719  | 18-scf00293 | 18 |
| AX-158135866 | 13 | 54.488 | KV453131.1 | 659897  | 18-scf00293 | 18 |
| AX-158135862 | 13 | 54.488 | KV453131.1 | 665471  | 18-scf00293 | 18 |
| AX-157830643 | 13 | 54.488 | KV453131.1 | 666121  | 18-scf00293 | 18 |
| AX-158135860 | 13 | 54.488 | KV453131.1 | 666659  | 18-scf00293 | 18 |
| AX-158392878 | 13 | 54.488 | KV453131.1 | 667195  | 18-scf00293 | 18 |
| AX-158135859 | 13 | 54.488 | KV453131.1 | 674334  | 18-scf00293 | 18 |
| AX-158135858 | 13 | 54.488 | KV453131.1 | 676174  | 18-scf00293 | 18 |
| AX-158135854 | 13 | 54.488 | KV453131.1 | 684377  | 18-scf00293 | 18 |
| AX-158135853 | 13 | 54.488 | KV453131.1 | 684533  | 18-scf00293 | 18 |
| AX-158135850 | 13 | 54.488 | KV453131.1 | 689333  | 18-scf00293 | 18 |
| AX-158135848 | 13 | 54.488 | KV453131.1 | 690319  | 18-scf00293 | 18 |
| AX-157830640 | 13 | 54.488 | KV453131.1 | 705026  | 18-scf00293 | 18 |
| AX-158135832 | 13 | 54.488 | KV453131.1 | 717492  | 18-scf00293 | 18 |
| AX-158137368 | 13 | 54.488 | KV453134.1 | 11978   | 18-scf00296 | 18 |
| AX-157720905 | 13 | 54.488 | KV453134.1 | 15668   | 18-scf00296 | 18 |
| AX-158137438 | 13 | 54.488 | KV453134.1 | 167976  | 18-scf00296 | 18 |
| AX-158137809 | 13 | 54.488 | KV453138.1 | 296056  | 18-scf00300 | 18 |
| AX-158137951 | 13 | 54.488 | KV453138.1 | 1418187 | 18-scf00300 | 18 |
| AX-158137987 | 13 | 54.488 | KV453138.1 | 1483845 | 18-scf00300 | 18 |
| AX-158138415 | 13 | 54.488 | KV453138.1 | 2538049 | 18-scf00300 | 18 |

|              |    |        |            |         |             |    |
|--------------|----|--------|------------|---------|-------------|----|
| AX-158136695 | 13 | 54.815 | KV453135.1 | 393     | 18-scf00292 | 18 |
| AX-157830756 | 13 | 54.815 | KV453135.1 | 52542   | 18-scf00292 | 18 |
| AX-158135429 | 13 | 54.816 | KV453128.1 | 7548003 | 18-scf00286 | 18 |
| AX-158135519 | 13 | 54.816 | KV453128.1 | 7659870 | 18-scf00286 | 18 |
| AX-158136089 | 13 | 54.816 | KV453137.1 | 10478   | 18-scf00291 | 18 |
| AX-158136098 | 13 | 54.816 | KV453137.1 | 21174   | 18-scf00291 | 18 |
| AX-158136101 | 13 | 54.816 | KV453137.1 | 27306   | 18-scf00291 | 18 |
| AX-158136103 | 13 | 54.816 | KV453137.1 | 28295   | 18-scf00291 | 18 |
| AX-157830668 | 13 | 54.816 | KV453137.1 | 33379   | 18-scf00291 | 18 |
| AX-158136108 | 13 | 54.816 | KV453137.1 | 36711   | 18-scf00291 | 18 |
| AX-158136111 | 13 | 54.816 | KV453137.1 | 40930   | 18-scf00291 | 18 |
| AX-158136118 | 13 | 54.816 | KV453137.1 | 50061   | 18-scf00291 | 18 |
| AX-157830674 | 13 | 54.816 | KV453137.1 | 63726   | 18-scf00291 | 18 |
| AX-158136125 | 13 | 54.816 | KV453137.1 | 66496   | 18-scf00291 | 18 |
| AX-158136150 | 13 | 54.816 | KV453137.1 | 148698  | 18-scf00291 | 18 |
| AX-158136178 | 13 | 54.816 | KV453137.1 | 272366  | 18-scf00291 | 18 |
| AX-157750591 | 13 | 54.816 | KV453137.1 | 309348  | 18-scf00291 | 18 |
| AX-158136206 | 13 | 54.816 | KV453137.1 | 362135  | 18-scf00291 | 18 |
| AX-158136234 | 13 | 54.816 | KV453137.1 | 440252  | 18-scf00291 | 18 |
| AX-157830706 | 13 | 54.816 | KV453137.1 | 479933  | 18-scf00291 | 18 |
| AX-158136261 | 13 | 54.816 | KV453137.1 | 506941  | 18-scf00291 | 18 |
| AX-158136276 | 13 | 54.816 | KV453137.1 | 545580  | 18-scf00291 | 18 |
| AX-157866288 | 13 | 54.816 | KV453137.1 | 549443  | 18-scf00291 | 18 |
| AX-158136305 | 13 | 54.816 | KV453137.1 | 623649  | 18-scf00291 | 18 |
| AX-158136310 | 13 | 54.816 | KV453137.1 | 630917  | 18-scf00291 | 18 |
| AX-157709983 | 13 | 54.816 | KV453137.1 | 724601  | 18-scf00291 | 18 |
| AX-158136370 | 13 | 54.816 | KV453137.1 | 761588  | 18-scf00291 | 18 |
| AX-158136378 | 13 | 54.816 | KV453137.1 | 774318  | 18-scf00291 | 18 |
| AX-158136379 | 13 | 54.816 | KV453137.1 | 774764  | 18-scf00291 | 18 |
| AX-157871450 | 13 | 54.816 | KV453137.1 | 795176  | 18-scf00291 | 18 |
| AX-158136388 | 13 | 54.816 | KV453137.1 | 797355  | 18-scf00291 | 18 |
| AX-158136392 | 13 | 54.816 | KV453137.1 | 803783  | 18-scf00291 | 18 |
| AX-158136395 | 13 | 54.816 | KV453137.1 | 806967  | 18-scf00291 | 18 |
| AX-158136398 | 13 | 54.816 | KV453137.1 | 810313  | 18-scf00291 | 18 |
| AX-157830716 | 13 | 54.816 | KV453137.1 | 812834  | 18-scf00291 | 18 |
| AX-158136409 | 13 | 54.816 | KV453137.1 | 845854  | 18-scf00291 | 18 |
| AX-158136410 | 13 | 54.816 | KV453137.1 | 849140  | 18-scf00291 | 18 |
| AX-158136418 | 13 | 54.816 | KV453137.1 | 864572  | 18-scf00291 | 18 |
| AX-158136441 | 13 | 54.816 | KV453137.1 | 908445  | 18-scf00291 | 18 |
| AX-158136450 | 13 | 54.816 | KV453137.1 | 922590  | 18-scf00291 | 18 |
| AX-158136451 | 13 | 54.816 | KV453137.1 | 924131  | 18-scf00291 | 18 |
| AX-158136453 | 13 | 54.816 | KV453137.1 | 928608  | 18-scf00291 | 18 |
| AX-158136454 | 13 | 54.816 | KV453137.1 | 929574  | 18-scf00291 | 18 |
| AX-158136468 | 13 | 54.816 | KV453137.1 | 959664  | 18-scf00291 | 18 |
| AX-158136469 | 13 | 54.816 | KV453137.1 | 960757  | 18-scf00291 | 18 |
| AX-158136471 | 13 | 54.816 | KV453137.1 | 968432  | 18-scf00291 | 18 |
| AX-158136494 | 13 | 54.816 | KV453137.1 | 1048515 | 18-scf00291 | 18 |
| AX-158136497 | 13 | 54.816 | KV453137.1 | 1050749 | 18-scf00291 | 18 |
| AX-158136513 | 13 | 54.816 | KV453137.1 | 1083205 | 18-scf00291 | 18 |
| AX-158136538 | 13 | 54.816 | KV453137.1 | 1159850 | 18-scf00291 | 18 |
| AX-158136539 | 13 | 54.816 | KV453137.1 | 1162824 | 18-scf00291 | 18 |

|              |    |        |            |         |             |    |
|--------------|----|--------|------------|---------|-------------|----|
| AX-158136552 | 13 | 54.816 | KV453137.1 | 1219897 | 18-scf00291 | 18 |
| AX-158136554 | 13 | 54.816 | KV453137.1 | 1222564 | 18-scf00291 | 18 |
| AX-158136559 | 13 | 54.816 | KV453137.1 | 1230921 | 18-scf00291 | 18 |
| AX-157757418 | 13 | 54.816 | KV453137.1 | 1266451 | 18-scf00291 | 18 |
| AX-157830744 | 13 | 54.816 | KV453137.1 | 1576709 | 18-scf00291 | 18 |
| AX-158136657 | 13 | 54.816 | KV453137.1 | 1612263 | 18-scf00291 | 18 |
| AX-158136667 | 13 | 54.816 | KV453137.1 | 1622186 | 18-scf00291 | 18 |
| AX-158136696 | 13 | 54.816 | KV453135.1 | 30484   | 18-scf00292 | 18 |
| AX-158136698 | 13 | 54.816 | KV453135.1 | 40637   | 18-scf00292 | 18 |
| AX-157830758 | 13 | 54.816 | KV453135.1 | 185987  | 18-scf00292 | 18 |
| AX-158136703 | 13 | 54.816 | KV453135.1 | 214942  | 18-scf00292 | 18 |
| AX-158136705 | 13 | 54.816 | KV453135.1 | 241169  | 18-scf00292 | 18 |
| AX-157830759 | 13 | 54.816 | KV453135.1 | 285852  | 18-scf00292 | 18 |
| AX-158411770 | 13 | 54.816 | KV453135.1 | 286403  | 18-scf00292 | 18 |
| AX-158411775 | 13 | 54.816 | KV453135.1 | 421370  | 18-scf00292 | 18 |
| AX-158411777 | 13 | 54.816 | KV453135.1 | 421837  | 18-scf00292 | 18 |
| AX-157725553 | 13 | 54.816 | KV453135.1 | 489214  | 18-scf00292 | 18 |
| AX-158136721 | 13 | 54.816 | KV453135.1 | 495684  | 18-scf00292 | 18 |
| AX-158136722 | 13 | 54.816 | KV453135.1 | 504375  | 18-scf00292 | 18 |
| AX-157830768 | 13 | 54.816 | KV453135.1 | 507096  | 18-scf00292 | 18 |
| AX-158136729 | 13 | 54.816 | KV453135.1 | 521520  | 18-scf00292 | 18 |
| AX-158136730 | 13 | 54.816 | KV453135.1 | 523798  | 18-scf00292 | 18 |
| AX-158136731 | 13 | 54.816 | KV453135.1 | 534052  | 18-scf00292 | 18 |
| AX-158136732 | 13 | 54.816 | KV453135.1 | 534934  | 18-scf00292 | 18 |
| AX-158136734 | 13 | 54.816 | KV453135.1 | 557898  | 18-scf00292 | 18 |
| AX-158136736 | 13 | 54.816 | KV453135.1 | 577075  | 18-scf00292 | 18 |
| AX-157871466 | 13 | 54.816 | KV453135.1 | 581030  | 18-scf00292 | 18 |
| AX-158136737 | 13 | 54.816 | KV453135.1 | 581585  | 18-scf00292 | 18 |
| AX-158136738 | 13 | 54.816 | KV453135.1 | 582472  | 18-scf00292 | 18 |
| AX-157722858 | 13 | 54.816 | KV453135.1 | 606813  | 18-scf00292 | 18 |
| AX-158136742 | 13 | 54.816 | KV453135.1 | 609741  | 18-scf00292 | 18 |
| AX-158136743 | 13 | 54.816 | KV453135.1 | 610100  | 18-scf00292 | 18 |
| AX-158136749 | 13 | 54.816 | KV453135.1 | 632431  | 18-scf00292 | 18 |
| AX-158136750 | 13 | 54.816 | KV453135.1 | 639848  | 18-scf00292 | 18 |
| AX-158136752 | 13 | 54.816 | KV453135.1 | 650863  | 18-scf00292 | 18 |
| AX-158411790 | 13 | 54.816 | KV453135.1 | 680605  | 18-scf00292 | 18 |
| AX-158136759 | 13 | 54.816 | KV453135.1 | 684810  | 18-scf00292 | 18 |
| AX-158136763 | 13 | 54.816 | KV453135.1 | 701360  | 18-scf00292 | 18 |
| AX-158136769 | 13 | 54.816 | KV453135.1 | 732242  | 18-scf00292 | 18 |
| AX-158136770 | 13 | 54.816 | KV453135.1 | 733711  | 18-scf00292 | 18 |
| AX-158422812 | 13 | 54.816 | KV453135.1 | 752092  | 18-scf00292 | 18 |
| AX-157871469 | 13 | 54.816 | KV453135.1 | 768584  | 18-scf00292 | 18 |
| AX-158411798 | 13 | 54.816 | KV453135.1 | 777719  | 18-scf00292 | 18 |
| AX-158136785 | 13 | 54.816 | KV453135.1 | 793318  | 18-scf00292 | 18 |
| AX-158136795 | 13 | 54.816 | KV453135.1 | 829864  | 18-scf00292 | 18 |
| AX-157871473 | 13 | 54.816 | KV453135.1 | 833192  | 18-scf00292 | 18 |
| AX-157751302 | 13 | 54.816 | KV453135.1 | 835278  | 18-scf00292 | 18 |
| AX-158392923 | 13 | 54.816 | KV453135.1 | 836937  | 18-scf00292 | 18 |
| AX-158136803 | 13 | 54.816 | KV453135.1 | 859497  | 18-scf00292 | 18 |
| AX-158136804 | 13 | 54.816 | KV453135.1 | 860052  | 18-scf00292 | 18 |
| AX-158136805 | 13 | 54.816 | KV453135.1 | 860743  | 18-scf00292 | 18 |



|              |    |        |            |         |             |    |
|--------------|----|--------|------------|---------|-------------|----|
| AX-157713470 | 13 | 54.816 | KV453135.1 | 904611  | 18-scf00292 | 18 |
| AX-158411808 | 13 | 54.816 | KV453135.1 | 926728  | 18-scf00292 | 18 |
| AX-158136828 | 13 | 54.816 | KV453135.1 | 936214  | 18-scf00292 | 18 |
| AX-157762038 | 13 | 54.816 | KV453135.1 | 947717  | 18-scf00292 | 18 |
| AX-158136834 | 13 | 54.816 | KV453135.1 | 954672  | 18-scf00292 | 18 |
| AX-158136840 | 13 | 54.816 | KV453135.1 | 961865  | 18-scf00292 | 18 |
| AX-158136845 | 13 | 54.816 | KV453135.1 | 968793  | 18-scf00292 | 18 |
| AX-158136851 | 13 | 54.816 | KV453135.1 | 976571  | 18-scf00292 | 18 |
| AX-158136867 | 13 | 54.816 | KV453135.1 | 1001290 | 18-scf00292 | 18 |
| AX-158136869 | 13 | 54.816 | KV453135.1 | 1006189 | 18-scf00292 | 18 |
| AX-158136870 | 13 | 54.816 | KV453135.1 | 1007665 | 18-scf00292 | 18 |
| AX-158136871 | 13 | 54.816 | KV453135.1 | 1009845 | 18-scf00292 | 18 |
| AX-158136874 | 13 | 54.816 | KV453135.1 | 1021055 | 18-scf00292 | 18 |
| AX-158136875 | 13 | 54.816 | KV453135.1 | 1021618 | 18-scf00292 | 18 |
| AX-157830800 | 13 | 54.816 | KV453135.1 | 1023372 | 18-scf00292 | 18 |
| AX-158136879 | 13 | 54.816 | KV453135.1 | 1025784 | 18-scf00292 | 18 |
| AX-158136881 | 13 | 54.816 | KV453135.1 | 1026281 | 18-scf00292 | 18 |
| AX-158136882 | 13 | 54.816 | KV453135.1 | 1026803 | 18-scf00292 | 18 |
| AX-158136883 | 13 | 54.816 | KV453135.1 | 1027244 | 18-scf00292 | 18 |
| AX-158136886 | 13 | 54.816 | KV453135.1 | 1028926 | 18-scf00292 | 18 |
| AX-157751488 | 13 | 54.816 | KV453135.1 | 1043097 | 18-scf00292 | 18 |
| AX-158136893 | 13 | 54.816 | KV453135.1 | 1069213 | 18-scf00292 | 18 |
| AX-157830802 | 13 | 54.816 | KV453135.1 | 1082483 | 18-scf00292 | 18 |
| AX-158136896 | 13 | 54.816 | KV453135.1 | 1089655 | 18-scf00292 | 18 |
| AX-158136897 | 13 | 54.816 | KV453135.1 | 1093537 | 18-scf00292 | 18 |
| AX-158136898 | 13 | 54.816 | KV453135.1 | 1101755 | 18-scf00292 | 18 |
| AX-158136901 | 13 | 54.816 | KV453135.1 | 1107839 | 18-scf00292 | 18 |
| AX-158136902 | 13 | 54.816 | KV453135.1 | 1112106 | 18-scf00292 | 18 |
| AX-158411818 | 13 | 54.816 | KV453135.1 | 1116299 | 18-scf00292 | 18 |
| AX-158136904 | 13 | 54.816 | KV453135.1 | 1116974 | 18-scf00292 | 18 |
| AX-158136912 | 13 | 54.816 | KV453135.1 | 1155048 | 18-scf00292 | 18 |
| AX-158136913 | 13 | 54.816 | KV453135.1 | 1155474 | 18-scf00292 | 18 |
| AX-158136922 | 13 | 54.816 | KV453135.1 | 1177850 | 18-scf00292 | 18 |
| AX-158136928 | 13 | 54.816 | KV453135.1 | 1212131 | 18-scf00292 | 18 |
| AX-158136931 | 13 | 54.816 | KV453135.1 | 1217267 | 18-scf00292 | 18 |
| AX-158136932 | 13 | 54.816 | KV453135.1 | 1217885 | 18-scf00292 | 18 |
| AX-158136933 | 13 | 54.816 | KV453135.1 | 1223468 | 18-scf00292 | 18 |
| AX-158136937 | 13 | 54.816 | KV453135.1 | 1231785 | 18-scf00292 | 18 |
| AX-157886295 | 13 | 54.816 | KV453135.1 | 1251745 | 18-scf00292 | 18 |
| AX-158136952 | 13 | 54.816 | KV453135.1 | 1267836 | 18-scf00292 | 18 |
| AX-158136960 | 13 | 54.816 | KV453135.1 | 1284026 | 18-scf00292 | 18 |
| AX-158136968 | 13 | 54.816 | KV453135.1 | 1299735 | 18-scf00292 | 18 |
| AX-158136972 | 13 | 54.816 | KV453135.1 | 1305028 | 18-scf00292 | 18 |
| AX-157709246 | 13 | 54.816 | KV453135.1 | 1325331 | 18-scf00292 | 18 |
| AX-158136977 | 13 | 54.816 | KV453135.1 | 1326847 | 18-scf00292 | 18 |
| AX-158136980 | 13 | 54.816 | KV453135.1 | 1331135 | 18-scf00292 | 18 |
| AX-158136983 | 13 | 54.816 | KV453135.1 | 1338060 | 18-scf00292 | 18 |
| AX-158136990 | 13 | 54.816 | KV453135.1 | 1350688 | 18-scf00292 | 18 |
| AX-158136994 | 13 | 54.816 | KV453135.1 | 1361201 | 18-scf00292 | 18 |
| AX-158411820 | 13 | 54.816 | KV453135.1 | 1363243 | 18-scf00292 | 18 |
| AX-158136997 | 13 | 54.816 | KV453135.1 | 1369230 | 18-scf00292 | 18 |

|              |    |        |            |         |             |    |
|--------------|----|--------|------------|---------|-------------|----|
| AX-158136998 | 13 | 54.816 | KV453135.1 | 1369829 | 18-scf00292 | 18 |
| AX-158137001 | 13 | 54.816 | KV453135.1 | 1382035 | 18-scf00292 | 18 |
| AX-158137003 | 13 | 54.816 | KV453135.1 | 1389082 | 18-scf00292 | 18 |
| AX-158137006 | 13 | 54.816 | KV453135.1 | 1394011 | 18-scf00292 | 18 |
| AX-158137008 | 13 | 54.816 | KV453135.1 | 1400925 | 18-scf00292 | 18 |
| AX-158137010 | 13 | 54.816 | KV453135.1 | 1402904 | 18-scf00292 | 18 |
| AX-158137016 | 13 | 54.816 | KV453135.1 | 1426005 | 18-scf00292 | 18 |
| AX-158137021 | 13 | 54.816 | KV453135.1 | 1448622 | 18-scf00292 | 18 |
| AX-158137040 | 13 | 54.816 | KV453135.1 | 1563909 | 18-scf00292 | 18 |
| AX-158137044 | 13 | 54.816 | KV453135.1 | 1610306 | 18-scf00292 | 18 |
| AX-158137051 | 13 | 54.816 | KV453135.1 | 1654059 | 18-scf00292 | 18 |
| AX-158137056 | 13 | 54.816 | KV453135.1 | 1669099 | 18-scf00292 | 18 |
| AX-158137057 | 13 | 54.816 | KV453135.1 | 1677431 | 18-scf00292 | 18 |
| AX-158137064 | 13 | 54.816 | KV453135.1 | 1718047 | 18-scf00292 | 18 |
| AX-158137073 | 13 | 54.816 | KV453135.1 | 1754975 | 18-scf00292 | 18 |
| AX-158137074 | 13 | 54.816 | KV453135.1 | 1763726 | 18-scf00292 | 18 |
| AX-158137080 | 13 | 54.816 | KV453135.1 | 1806115 | 18-scf00292 | 18 |
| AX-158137084 | 13 | 54.816 | KV453135.1 | 1825837 | 18-scf00292 | 18 |
| AX-158411828 | 13 | 54.816 | KV453135.1 | 1862371 | 18-scf00292 | 18 |
| AX-157830811 | 13 | 54.816 | KV453135.1 | 1879545 | 18-scf00292 | 18 |
| AX-158137093 | 13 | 54.816 | KV453135.1 | 1891376 | 18-scf00292 | 18 |
| AX-158137094 | 13 | 54.816 | KV453135.1 | 1901880 | 18-scf00292 | 18 |
| AX-158137095 | 13 | 54.816 | KV453135.1 | 1903665 | 18-scf00292 | 18 |
| AX-158137096 | 13 | 54.816 | KV453135.1 | 1907417 | 18-scf00292 | 18 |
| AX-158137097 | 13 | 54.816 | KV453135.1 | 1908241 | 18-scf00292 | 18 |
| AX-158137125 | 13 | 54.816 | KV453131.1 | 237848  | 18-scf00293 | 18 |
| AX-158136045 | 13 | 54.816 | KV453131.1 | 362381  | 18-scf00293 | 18 |
| AX-158137217 | 13 | 54.816 | KV453136.1 | 4457    | 18-scf00294 | 18 |
| AX-158137218 | 13 | 54.816 | KV453136.1 | 6408    | 18-scf00294 | 18 |
| AX-158137219 | 13 | 54.816 | KV453136.1 | 7097    | 18-scf00294 | 18 |
| AX-158137222 | 13 | 54.816 | KV453136.1 | 12547   | 18-scf00294 | 18 |
| AX-158137224 | 13 | 54.816 | KV453136.1 | 23810   | 18-scf00294 | 18 |
| AX-158137226 | 13 | 54.816 | KV453136.1 | 24465   | 18-scf00294 | 18 |
| AX-157830826 | 13 | 54.816 | KV453136.1 | 25881   | 18-scf00294 | 18 |
| AX-158137227 | 13 | 54.816 | KV453136.1 | 26842   | 18-scf00294 | 18 |
| AX-157726901 | 13 | 54.816 | KV453136.1 | 65246   | 18-scf00294 | 18 |
| AX-158137257 | 13 | 54.816 | KV453136.1 | 127752  | 18-scf00294 | 18 |
| AX-158137258 | 13 | 54.816 | KV453136.1 | 130251  | 18-scf00294 | 18 |
| AX-158137268 | 13 | 54.816 | KV453136.1 | 165590  | 18-scf00294 | 18 |
| AX-158137274 | 13 | 54.816 | KV453136.1 | 177219  | 18-scf00294 | 18 |
| AX-158137291 | 13 | 54.816 | KV453136.1 | 224993  | 18-scf00294 | 18 |
| AX-158137306 | 13 | 54.816 | KV453136.1 | 277002  | 18-scf00294 | 18 |
| AX-158137333 | 13 | 54.816 | KV453132.1 | 131080  | 18-scf00295 | 18 |
| AX-158137334 | 13 | 54.816 | KV453132.1 | 149235  | 18-scf00295 | 18 |
| AX-158137335 | 13 | 54.816 | KV453132.1 | 152781  | 18-scf00295 | 18 |
| AX-158137336 | 13 | 54.816 | KV453132.1 | 154992  | 18-scf00295 | 18 |
| AX-158137337 | 13 | 54.816 | KV453132.1 | 157504  | 18-scf00295 | 18 |
| AX-158137338 | 13 | 54.816 | KV453132.1 | 159485  | 18-scf00295 | 18 |
| AX-158137339 | 13 | 54.816 | KV453132.1 | 161867  | 18-scf00295 | 18 |
| AX-158137340 | 13 | 54.816 | KV453132.1 | 167034  | 18-scf00295 | 18 |
| AX-158408293 | 13 | 54.816 | KV453132.1 | 326732  | 18-scf00295 | 18 |

|              |    |        |            |         |             |    |
|--------------|----|--------|------------|---------|-------------|----|
| AX-158411859 | 13 | 54.816 | KV453132.1 | 328831  | 18-scf00295 | 18 |
| AX-158137350 | 13 | 54.816 | KV453132.1 | 351803  | 18-scf00295 | 18 |
| AX-158137353 | 13 | 54.816 | KV453132.1 | 403966  | 18-scf00295 | 18 |
| AX-158137354 | 13 | 54.816 | KV453132.1 | 412965  | 18-scf00295 | 18 |
| AX-158137363 | 13 | 54.816 | KV453132.1 | 575874  | 18-scf00295 | 18 |
| AX-158137378 | 13 | 54.816 | KV453134.1 | 29907   | 18-scf00296 | 18 |
| AX-158137383 | 13 | 54.816 | KV453134.1 | 42042   | 18-scf00296 | 18 |
| AX-158137384 | 13 | 54.816 | KV453134.1 | 44971   | 18-scf00296 | 18 |
| AX-158137412 | 13 | 54.816 | KV453134.1 | 98918   | 18-scf00296 | 18 |
| AX-158137415 | 13 | 54.816 | KV453134.1 | 107101  | 18-scf00296 | 18 |
| AX-158137418 | 13 | 54.816 | KV453134.1 | 120149  | 18-scf00296 | 18 |
| AX-158137419 | 13 | 54.816 | KV453134.1 | 120645  | 18-scf00296 | 18 |
| AX-157744668 | 13 | 54.816 | KV453134.1 | 121403  | 18-scf00296 | 18 |
| AX-158137422 | 13 | 54.816 | KV453134.1 | 127319  | 18-scf00296 | 18 |
| AX-158137425 | 13 | 54.816 | KV453134.1 | 135155  | 18-scf00296 | 18 |
| AX-158137426 | 13 | 54.816 | KV453134.1 | 137008  | 18-scf00296 | 18 |
| AX-158137427 | 13 | 54.816 | KV453134.1 | 137720  | 18-scf00296 | 18 |
| AX-158137432 | 13 | 54.816 | KV453134.1 | 157359  | 18-scf00296 | 18 |
| AX-158137440 | 13 | 54.816 | KV453134.1 | 171877  | 18-scf00296 | 18 |
| AX-158137445 | 13 | 54.816 | KV453134.1 | 189873  | 18-scf00296 | 18 |
| AX-158137447 | 13 | 54.816 | KV453134.1 | 210066  | 18-scf00296 | 18 |
| AX-158137448 | 13 | 54.816 | KV453134.1 | 210465  | 18-scf00296 | 18 |
| AX-157744251 | 13 | 54.816 | KV453134.1 | 212181  | 18-scf00296 | 18 |
| AX-158137461 | 13 | 54.816 | KV453134.1 | 255940  | 18-scf00296 | 18 |
| AX-157683625 | 13 | 54.816 | KV453133.1 | 61347   | 18-scf00297 | 18 |
| AX-158143451 | 13 | 54.816 | KV453138.1 | 92509   | 18-scf00300 | 18 |
| AX-158143477 | 13 | 54.816 | KV453138.1 | 188471  | 18-scf00300 | 18 |
| AX-158137848 | 13 | 54.816 | KV453138.1 | 197691  | 18-scf00300 | 18 |
| AX-158137843 | 13 | 54.816 | KV453138.1 | 203446  | 18-scf00300 | 18 |
| AX-158137731 | 13 | 54.816 | KV453138.1 | 605340  | 18-scf00300 | 18 |
| AX-158137698 | 13 | 54.816 | KV453138.1 | 712761  | 18-scf00300 | 18 |
| AX-158137696 | 13 | 54.816 | KV453138.1 | 723437  | 18-scf00300 | 18 |
| AX-158137674 | 13 | 54.816 | KV453138.1 | 778395  | 18-scf00300 | 18 |
| AX-158137637 | 13 | 54.816 | KV453138.1 | 957035  | 18-scf00300 | 18 |
| AX-158137878 | 13 | 54.816 | KV453138.1 | 1259354 | 18-scf00300 | 18 |
| AX-158137926 | 13 | 54.816 | KV453138.1 | 1366703 | 18-scf00300 | 18 |
| AX-157700203 | 13 | 54.816 | KV453138.1 | 1513029 | 18-scf00300 | 18 |
| AX-158138033 | 13 | 54.816 | KV453138.1 | 1539633 | 18-scf00300 | 18 |
| AX-158138046 | 13 | 54.816 | KV453138.1 | 1564864 | 18-scf00300 | 18 |
| AX-158138049 | 13 | 54.816 | KV453138.1 | 1572073 | 18-scf00300 | 18 |
| AX-158138095 | 13 | 54.816 | KV453138.1 | 1720816 | 18-scf00300 | 18 |
| AX-158138100 | 13 | 54.816 | KV453138.1 | 1740508 | 18-scf00300 | 18 |
| AX-158138128 | 13 | 54.816 | KV453138.1 | 1797428 | 18-scf00300 | 18 |
| AX-158138201 | 13 | 54.816 | KV453138.1 | 1985618 | 18-scf00300 | 18 |
| AX-157720050 | 13 | 54.816 | KV453138.1 | 2167037 | 18-scf00300 | 18 |
| AX-158138371 | 13 | 54.816 | KV453138.1 | 2449132 | 18-scf00300 | 18 |
| AX-157724919 | 13 | 54.816 | KV453138.1 | 2464651 | 18-scf00300 | 18 |
| AX-158138423 | 13 | 54.816 | KV453138.1 | 2554705 | 18-scf00300 | 18 |
| AX-158138467 | 13 | 54.816 | KV453138.1 | 2641163 | 18-scf00300 | 18 |
| AX-158138468 | 13 | 54.816 | KV453138.1 | 2653488 | 18-scf00300 | 18 |
| AX-157831011 | 13 | 54.816 | KV453138.1 | 2689844 | 18-scf00300 | 18 |

|              |    |        |             |         |             |    |
|--------------|----|--------|-------------|---------|-------------|----|
| AX-158138533 | 13 | 54.816 | KV453138.1  | 2808219 | 18-scf00300 | 18 |
| AX-158138600 | 13 | 54.816 | KV453138.1  | 2943478 | 18-scf00300 | 18 |
| AX-157831037 | 13 | 54.816 | KV453138.1  | 2951603 | 18-scf00300 | 18 |
| AX-158138706 | 13 | 54.816 | KV453138.1  | 3093179 | 18-scf00300 | 18 |
| AX-158138735 | 13 | 54.816 | KV453138.1  | 3131442 | 18-scf00300 | 18 |
| AX-158138783 | 13 | 54.816 | KV453138.1  | 3220418 | 18-scf00300 | 18 |
| AX-158138816 | 13 | 54.816 | KV453138.1  | 3248846 | 18-scf00300 | 18 |
| AX-157774750 | 13 | 54.816 | KV453138.1  | 3306022 | 18-scf00300 | 18 |
| AX-158138954 | 13 | 54.816 | KV453138.1  | 3442177 | 18-scf00300 | 18 |
| AX-158139282 | 13 | 54.816 | KV453138.1  | 4015875 | 18-scf00300 | 18 |
| AX-157830689 | 13 | 54.925 | KV453137.1  | 318423  | 18-scf00291 | 18 |
| AX-157830796 | 13 | 54.925 | KV453135.1  | 949954  | 18-scf00292 | 18 |
| AX-158136848 | 13 | 54.925 | KV453135.1  | 971462  | 18-scf00292 | 18 |
| AX-158136878 | 13 | 54.925 | KV453135.1  | 1025548 | 18-scf00292 | 18 |
| AX-157704879 | 13 | 54.925 | KV453131.1  | 253030  | 18-scf00293 | 18 |
| AX-158136052 | 13 | 54.925 | KV453131.1  | 354333  | 18-scf00293 | 18 |
| AX-158137369 | 13 | 54.925 | KV453134.1  | 15159   | 18-scf00296 | 18 |
| AX-158137372 | 13 | 54.925 | KV453134.1  | 19933   | 18-scf00296 | 18 |
| AX-158137376 | 13 | 54.925 | KV453134.1  | 23657   | 18-scf00296 | 18 |
| AX-158137386 | 13 | 54.925 | KV453134.1  | 45956   | 18-scf00296 | 18 |
| AX-158137395 | 13 | 54.925 | KV453134.1  | 71374   | 18-scf00296 | 18 |
| AX-158137400 | 13 | 54.925 | KV453134.1  | 75611   | 18-scf00296 | 18 |
| AX-158137413 | 13 | 54.925 | KV453134.1  | 99784   | 18-scf00296 | 18 |
| AX-158137414 | 13 | 54.925 | KV453134.1  | 102946  | 18-scf00296 | 18 |
| AX-158137417 | 13 | 54.925 | KV453134.1  | 117486  | 18-scf00296 | 18 |
| AX-158137420 | 13 | 54.925 | KV453134.1  | 122093  | 18-scf00296 | 18 |
| AX-157715720 | 13 | 54.925 | KV453134.1  | 124669  | 18-scf00296 | 18 |
| AX-158137421 | 13 | 54.925 | KV453134.1  | 125976  | 18-scf00296 | 18 |
| AX-158137428 | 13 | 54.925 | KV453134.1  | 139562  | 18-scf00296 | 18 |
| AX-158137429 | 13 | 54.925 | KV453134.1  | 139864  | 18-scf00296 | 18 |
| AX-157756335 | 13 | 54.925 | KV453134.1  | 143201  | 18-scf00296 | 18 |
| AX-157830849 | 13 | 54.925 | KV453134.1  | 145493  | 18-scf00296 | 18 |
| AX-158137431 | 13 | 54.925 | KV453134.1  | 154118  | 18-scf00296 | 18 |
| AX-157711957 | 13 | 54.925 | 3ML01029522 | 328     | scf05145_1  | UN |
| AX-157830852 | 13 | 54.933 | KV453134.1  | 208255  | 18-scf00296 | 18 |
| AX-157871492 | 13 | 54.936 | KV453134.1  | 243119  | 18-scf00296 | 18 |
| AX-158137459 | 13 | 54.939 | KV453134.1  | 245506  | 18-scf00296 | 18 |
| AX-157871504 | 13 | 54.943 | KV453134.1  | 266444  | 18-scf00296 | 18 |
| AX-158137467 | 13 | 54.947 | KV453134.1  | 268616  | 18-scf00296 | 18 |
| AX-158137475 | 13 | 54.958 | KV453134.1  | 290617  | 18-scf00296 | 18 |
| AX-158137476 | 13 | 54.967 | KV453134.1  | 291586  | 18-scf00296 | 18 |
| AX-157830863 | 13 | 54.974 | KV453134.1  | 296223  | 18-scf00296 | 18 |
| AX-158137479 | 13 | 54.985 | KV453134.1  | 300441  | 18-scf00296 | 18 |
| AX-157830632 | 13 | 54.989 | KV453128.1  | 7655753 | 18-scf00286 | 18 |
| AX-158136801 | 13 | 54.989 | KV453135.1  | 847668  | 18-scf00292 | 18 |
| AX-157792874 | 13 | 54.989 | KV453132.1  | 3760    | 18-scf00295 | 18 |
| AX-158411871 | 13 | 54.989 | KV453134.1  | 306511  | 18-scf00296 | 18 |
| AX-158411883 | 13 | 54.989 | KV453134.1  | 358139  | 18-scf00296 | 18 |
| AX-158137500 | 13 | 54.989 | KV453134.1  | 447131  | 18-scf00296 | 18 |
| AX-158137508 | 13 | 54.989 | KV453134.1  | 509820  | 18-scf00296 | 18 |
| AX-158137720 | 13 | 54.989 | KV453138.1  | 641923  | 18-scf00300 | 18 |

|              |    |        |            |         |             |    |
|--------------|----|--------|------------|---------|-------------|----|
| AX-158136949 | 13 | 54.998 | KV453135.1 | 1255273 | 18-scf00292 | 18 |
| AX-158137245 | 13 | 54.998 | KV453136.1 | 69774   | 18-scf00294 | 18 |
| AX-158137248 | 13 | 54.998 | KV453136.1 | 77658   | 18-scf00294 | 18 |
| AX-158137474 | 13 | 54.998 | KV453134.1 | 288487  | 18-scf00296 | 18 |
| AX-158137478 | 13 | 54.998 | KV453134.1 | 296611  | 18-scf00296 | 18 |
| AX-158411886 | 13 | 54.998 | KV453134.1 | 362272  | 18-scf00296 | 18 |
| AX-158137507 | 13 | 54.998 | KV453134.1 | 503681  | 18-scf00296 | 18 |
| AX-157871512 | 13 | 55.001 | KV453134.1 | 403213  | 18-scf00296 | 18 |
| AX-157871513 | 13 | 55.003 | KV453134.1 | 403915  | 18-scf00296 | 18 |
| AX-158135901 | 13 | 55.006 | KV453131.1 | 599766  | 18-scf00293 | 18 |
| AX-157871485 | 13 | 55.006 | KV453134.1 | 43841   | 18-scf00296 | 18 |
| AX-157871518 | 13 | 55.006 | KV453134.1 | 438854  | 18-scf00296 | 18 |
| AX-158137498 | 13 | 55.009 | KV453134.1 | 441137  | 18-scf00296 | 18 |
| AX-158411895 | 13 | 55.016 | KV453134.1 | 553869  | 18-scf00296 | 18 |
| AX-158135004 | 13 | 55.034 | KV453128.1 | 6913307 | 18-scf00286 | 18 |
| AX-158135814 | 13 | 55.034 | KV453130.1 | 49152   | 18-scf00290 | 18 |
| AX-158136080 | 13 | 55.034 | KV453137.1 | 3211    | 18-scf00291 | 18 |
| AX-158136081 | 13 | 55.034 | KV453137.1 | 3987    | 18-scf00291 | 18 |
| AX-158136083 | 13 | 55.034 | KV453137.1 | 5658    | 18-scf00291 | 18 |
| AX-158136087 | 13 | 55.034 | KV453137.1 | 9690    | 18-scf00291 | 18 |
| AX-158136090 | 13 | 55.034 | KV453137.1 | 10797   | 18-scf00291 | 18 |
| AX-158136091 | 13 | 55.034 | KV453137.1 | 11122   | 18-scf00291 | 18 |
| AX-158136092 | 13 | 55.034 | KV453137.1 | 11435   | 18-scf00291 | 18 |
| AX-158136093 | 13 | 55.034 | KV453137.1 | 11665   | 18-scf00291 | 18 |
| AX-158136094 | 13 | 55.034 | KV453137.1 | 12526   | 18-scf00291 | 18 |
| AX-158136102 | 13 | 55.034 | KV453137.1 | 27685   | 18-scf00291 | 18 |
| AX-158136104 | 13 | 55.034 | KV453137.1 | 30807   | 18-scf00291 | 18 |
| AX-157830666 | 13 | 55.034 | KV453137.1 | 30977   | 18-scf00291 | 18 |
| AX-158136105 | 13 | 55.034 | KV453137.1 | 31701   | 18-scf00291 | 18 |
| AX-157830667 | 13 | 55.034 | KV453137.1 | 32537   | 18-scf00291 | 18 |
| AX-158136106 | 13 | 55.034 | KV453137.1 | 32722   | 18-scf00291 | 18 |
| AX-157857885 | 13 | 55.034 | KV453137.1 | 34841   | 18-scf00291 | 18 |
| AX-157830669 | 13 | 55.034 | KV453137.1 | 35038   | 18-scf00291 | 18 |
| AX-158136107 | 13 | 55.034 | KV453137.1 | 36277   | 18-scf00291 | 18 |
| AX-158136112 | 13 | 55.034 | KV453137.1 | 42269   | 18-scf00291 | 18 |
| AX-158136117 | 13 | 55.034 | KV453137.1 | 49056   | 18-scf00291 | 18 |
| AX-158136121 | 13 | 55.034 | KV453137.1 | 55174   | 18-scf00291 | 18 |
| AX-157830671 | 13 | 55.034 | KV453137.1 | 60402   | 18-scf00291 | 18 |
| AX-158136126 | 13 | 55.034 | KV453137.1 | 66958   | 18-scf00291 | 18 |
| AX-157774081 | 13 | 55.034 | KV453137.1 | 88647   | 18-scf00291 | 18 |
| AX-158136134 | 13 | 55.034 | KV453137.1 | 93641   | 18-scf00291 | 18 |
| AX-158136135 | 13 | 55.034 | KV453137.1 | 98131   | 18-scf00291 | 18 |
| AX-158136141 | 13 | 55.034 | KV453137.1 | 115956  | 18-scf00291 | 18 |
| AX-158136143 | 13 | 55.034 | KV453137.1 | 126338  | 18-scf00291 | 18 |
| AX-158136146 | 13 | 55.034 | KV453137.1 | 134225  | 18-scf00291 | 18 |
| AX-158136158 | 13 | 55.034 | KV453137.1 | 181084  | 18-scf00291 | 18 |
| AX-158136160 | 13 | 55.034 | KV453137.1 | 186744  | 18-scf00291 | 18 |
| AX-158136179 | 13 | 55.034 | KV453137.1 | 273480  | 18-scf00291 | 18 |
| AX-158136180 | 13 | 55.034 | KV453137.1 | 274373  | 18-scf00291 | 18 |
| AX-157748675 | 13 | 55.034 | KV453137.1 | 276025  | 18-scf00291 | 18 |
| AX-158136183 | 13 | 55.034 | KV453137.1 | 279507  | 18-scf00291 | 18 |

|              |    |        |            |        |             |    |
|--------------|----|--------|------------|--------|-------------|----|
| AX-158136185 | 13 | 55.034 | KV453137.1 | 286058 | 18-scf00291 | 18 |
| AX-158136189 | 13 | 55.034 | KV453137.1 | 292493 | 18-scf00291 | 18 |
| AX-157792674 | 13 | 55.034 | KV453137.1 | 304114 | 18-scf00291 | 18 |
| AX-157830688 | 13 | 55.034 | KV453137.1 | 316115 | 18-scf00291 | 18 |
| AX-158136204 | 13 | 55.034 | KV453137.1 | 341437 | 18-scf00291 | 18 |
| AX-157747627 | 13 | 55.034 | KV453137.1 | 390930 | 18-scf00291 | 18 |
| AX-158136219 | 13 | 55.034 | KV453137.1 | 405293 | 18-scf00291 | 18 |
| AX-157830705 | 13 | 55.034 | KV453137.1 | 430490 | 18-scf00291 | 18 |
| AX-158136235 | 13 | 55.034 | KV453137.1 | 442945 | 18-scf00291 | 18 |
| AX-158136236 | 13 | 55.034 | KV453137.1 | 444502 | 18-scf00291 | 18 |
| AX-158136237 | 13 | 55.034 | KV453137.1 | 445897 | 18-scf00291 | 18 |
| AX-158136238 | 13 | 55.034 | KV453137.1 | 447085 | 18-scf00291 | 18 |
| AX-158136240 | 13 | 55.034 | KV453137.1 | 450469 | 18-scf00291 | 18 |
| AX-158136241 | 13 | 55.034 | KV453137.1 | 452000 | 18-scf00291 | 18 |
| AX-158136268 | 13 | 55.034 | KV453137.1 | 524985 | 18-scf00291 | 18 |
| AX-157878104 | 13 | 55.034 | KV453137.1 | 525885 | 18-scf00291 | 18 |
| AX-158136269 | 13 | 55.034 | KV453137.1 | 527786 | 18-scf00291 | 18 |
| AX-158136270 | 13 | 55.034 | KV453137.1 | 529296 | 18-scf00291 | 18 |
| AX-158411713 | 13 | 55.034 | KV453137.1 | 532696 | 18-scf00291 | 18 |
| AX-158136272 | 13 | 55.034 | KV453137.1 | 539189 | 18-scf00291 | 18 |
| AX-158136273 | 13 | 55.034 | KV453137.1 | 539674 | 18-scf00291 | 18 |
| AX-158136274 | 13 | 55.034 | KV453137.1 | 540060 | 18-scf00291 | 18 |
| AX-158136275 | 13 | 55.034 | KV453137.1 | 540331 | 18-scf00291 | 18 |
| AX-158136278 | 13 | 55.034 | KV453137.1 | 546133 | 18-scf00291 | 18 |
| AX-158136282 | 13 | 55.034 | KV453137.1 | 562902 | 18-scf00291 | 18 |
| AX-158136283 | 13 | 55.034 | KV453137.1 | 564764 | 18-scf00291 | 18 |
| AX-158136285 | 13 | 55.034 | KV453137.1 | 568953 | 18-scf00291 | 18 |
| AX-158136288 | 13 | 55.034 | KV453137.1 | 573786 | 18-scf00291 | 18 |
| AX-158136289 | 13 | 55.034 | KV453137.1 | 576017 | 18-scf00291 | 18 |
| AX-158136291 | 13 | 55.034 | KV453137.1 | 585671 | 18-scf00291 | 18 |
| AX-158136297 | 13 | 55.034 | KV453137.1 | 604403 | 18-scf00291 | 18 |
| AX-158136304 | 13 | 55.034 | KV453137.1 | 619671 | 18-scf00291 | 18 |
| AX-157697992 | 13 | 55.034 | KV453137.1 | 621552 | 18-scf00291 | 18 |
| AX-158136308 | 13 | 55.034 | KV453137.1 | 627691 | 18-scf00291 | 18 |
| AX-158136309 | 13 | 55.034 | KV453137.1 | 628843 | 18-scf00291 | 18 |
| AX-158136314 | 13 | 55.034 | KV453137.1 | 634986 | 18-scf00291 | 18 |
| AX-158136315 | 13 | 55.034 | KV453137.1 | 638148 | 18-scf00291 | 18 |
| AX-157830715 | 13 | 55.034 | KV453137.1 | 645256 | 18-scf00291 | 18 |
| AX-158136321 | 13 | 55.034 | KV453137.1 | 652295 | 18-scf00291 | 18 |
| AX-158136325 | 13 | 55.034 | KV453137.1 | 659342 | 18-scf00291 | 18 |
| AX-158136326 | 13 | 55.034 | KV453137.1 | 660038 | 18-scf00291 | 18 |
| AX-158136327 | 13 | 55.034 | KV453137.1 | 660478 | 18-scf00291 | 18 |
| AX-158136328 | 13 | 55.034 | KV453137.1 | 660568 | 18-scf00291 | 18 |
| AX-158136333 | 13 | 55.034 | KV453137.1 | 669510 | 18-scf00291 | 18 |
| AX-158136336 | 13 | 55.034 | KV453137.1 | 672093 | 18-scf00291 | 18 |
| AX-158136342 | 13 | 55.034 | KV453137.1 | 687231 | 18-scf00291 | 18 |
| AX-158136343 | 13 | 55.034 | KV453137.1 | 687803 | 18-scf00291 | 18 |
| AX-157878105 | 13 | 55.034 | KV453137.1 | 703292 | 18-scf00291 | 18 |
| AX-158136351 | 13 | 55.034 | KV453137.1 | 710638 | 18-scf00291 | 18 |
| AX-157693630 | 13 | 55.034 | KV453137.1 | 711202 | 18-scf00291 | 18 |
| AX-158411716 | 13 | 55.034 | KV453137.1 | 729179 | 18-scf00291 | 18 |

|              |    |        |            |         |             |    |
|--------------|----|--------|------------|---------|-------------|----|
| AX-158136361 | 13 | 55.034 | KV453137.1 | 743279  | 18-scf00291 | 18 |
| AX-158136362 | 13 | 55.034 | KV453137.1 | 744282  | 18-scf00291 | 18 |
| AX-158136365 | 13 | 55.034 | KV453137.1 | 748158  | 18-scf00291 | 18 |
| AX-158136366 | 13 | 55.034 | KV453137.1 | 752965  | 18-scf00291 | 18 |
| AX-158136368 | 13 | 55.034 | KV453137.1 | 759818  | 18-scf00291 | 18 |
| AX-158136369 | 13 | 55.034 | KV453137.1 | 760689  | 18-scf00291 | 18 |
| AX-158136373 | 13 | 55.034 | KV453137.1 | 766797  | 18-scf00291 | 18 |
| AX-158136377 | 13 | 55.034 | KV453137.1 | 773928  | 18-scf00291 | 18 |
| AX-158136380 | 13 | 55.034 | KV453137.1 | 775415  | 18-scf00291 | 18 |
| AX-158136381 | 13 | 55.034 | KV453137.1 | 776500  | 18-scf00291 | 18 |
| AX-158136382 | 13 | 55.034 | KV453137.1 | 778679  | 18-scf00291 | 18 |
| AX-158136384 | 13 | 55.034 | KV453137.1 | 788613  | 18-scf00291 | 18 |
| AX-158136385 | 13 | 55.034 | KV453137.1 | 790475  | 18-scf00291 | 18 |
| AX-158136387 | 13 | 55.034 | KV453137.1 | 791188  | 18-scf00291 | 18 |
| AX-158136391 | 13 | 55.034 | KV453137.1 | 803400  | 18-scf00291 | 18 |
| AX-158136397 | 13 | 55.034 | KV453137.1 | 809490  | 18-scf00291 | 18 |
| AX-158136439 | 13 | 55.034 | KV453137.1 | 903994  | 18-scf00291 | 18 |
| AX-157886291 | 13 | 55.034 | KV453137.1 | 921922  | 18-scf00291 | 18 |
| AX-158136457 | 13 | 55.034 | KV453137.1 | 935265  | 18-scf00291 | 18 |
| AX-158136463 | 13 | 55.034 | KV453137.1 | 942907  | 18-scf00291 | 18 |
| AX-158136485 | 13 | 55.034 | KV453137.1 | 1028820 | 18-scf00291 | 18 |
| AX-158136498 | 13 | 55.034 | KV453137.1 | 1051618 | 18-scf00291 | 18 |
| AX-158136682 | 13 | 55.034 | KV453137.1 | 1661692 | 18-scf00291 | 18 |
| AX-157830748 | 13 | 55.034 | KV453137.1 | 1662102 | 18-scf00291 | 18 |
| AX-158136686 | 13 | 55.034 | KV453137.1 | 1667454 | 18-scf00291 | 18 |
| AX-157830763 | 13 | 55.034 | KV453135.1 | 474756  | 18-scf00292 | 18 |
| AX-157830764 | 13 | 55.034 | KV453135.1 | 481298  | 18-scf00292 | 18 |
| AX-158411782 | 13 | 55.034 | KV453135.1 | 483963  | 18-scf00292 | 18 |
| AX-158136720 | 13 | 55.034 | KV453135.1 | 487896  | 18-scf00292 | 18 |
| AX-158136753 | 13 | 55.034 | KV453135.1 | 658289  | 18-scf00292 | 18 |
| AX-158136755 | 13 | 55.034 | KV453135.1 | 661244  | 18-scf00292 | 18 |
| AX-158136756 | 13 | 55.034 | KV453135.1 | 669341  | 18-scf00292 | 18 |
| AX-158136757 | 13 | 55.034 | KV453135.1 | 680682  | 18-scf00292 | 18 |
| AX-157695569 | 13 | 55.034 | KV453135.1 | 715723  | 18-scf00292 | 18 |
| AX-158136768 | 13 | 55.034 | KV453135.1 | 723667  | 18-scf00292 | 18 |
| AX-158136796 | 13 | 55.034 | KV453135.1 | 830525  | 18-scf00292 | 18 |
| AX-158136806 | 13 | 55.034 | KV453135.1 | 861182  | 18-scf00292 | 18 |
| AX-158136824 | 13 | 55.034 | KV453135.1 | 924954  | 18-scf00292 | 18 |
| AX-158136832 | 13 | 55.034 | KV453135.1 | 952204  | 18-scf00292 | 18 |
| AX-158136833 | 13 | 55.034 | KV453135.1 | 953017  | 18-scf00292 | 18 |
| AX-158136842 | 13 | 55.034 | KV453135.1 | 965346  | 18-scf00292 | 18 |
| AX-158136849 | 13 | 55.034 | KV453135.1 | 973372  | 18-scf00292 | 18 |
| AX-158136854 | 13 | 55.034 | KV453135.1 | 981744  | 18-scf00292 | 18 |
| AX-158136857 | 13 | 55.034 | KV453135.1 | 984626  | 18-scf00292 | 18 |
| AX-158136905 | 13 | 55.034 | KV453135.1 | 1122196 | 18-scf00292 | 18 |
| AX-158136907 | 13 | 55.034 | KV453135.1 | 1134417 | 18-scf00292 | 18 |
| AX-158136910 | 13 | 55.034 | KV453135.1 | 1152146 | 18-scf00292 | 18 |
| AX-158136934 | 13 | 55.034 | KV453135.1 | 1224485 | 18-scf00292 | 18 |
| AX-158136935 | 13 | 55.034 | KV453135.1 | 1229868 | 18-scf00292 | 18 |
| AX-158136939 | 13 | 55.034 | KV453135.1 | 1232753 | 18-scf00292 | 18 |
| AX-158136940 | 13 | 55.034 | KV453135.1 | 1234353 | 18-scf00292 | 18 |

|              |    |        |            |         |             |    |
|--------------|----|--------|------------|---------|-------------|----|
| AX-158136951 | 13 | 55.034 | KV453135.1 | 1263016 | 18-scf00292 | 18 |
| AX-158136956 | 13 | 55.034 | KV453135.1 | 1276035 | 18-scf00292 | 18 |
| AX-158136957 | 13 | 55.034 | KV453135.1 | 1277852 | 18-scf00292 | 18 |
| AX-158136958 | 13 | 55.034 | KV453135.1 | 1279164 | 18-scf00292 | 18 |
| AX-158136966 | 13 | 55.034 | KV453135.1 | 1294351 | 18-scf00292 | 18 |
| AX-158136967 | 13 | 55.034 | KV453135.1 | 1299177 | 18-scf00292 | 18 |
| AX-158136969 | 13 | 55.034 | KV453135.1 | 1300280 | 18-scf00292 | 18 |
| AX-158136970 | 13 | 55.034 | KV453135.1 | 1301460 | 18-scf00292 | 18 |
| AX-158136971 | 13 | 55.034 | KV453135.1 | 1304599 | 18-scf00292 | 18 |
| AX-158136974 | 13 | 55.034 | KV453135.1 | 1317918 | 18-scf00292 | 18 |
| AX-158136978 | 13 | 55.034 | KV453135.1 | 1327724 | 18-scf00292 | 18 |
| AX-158136979 | 13 | 55.034 | KV453135.1 | 1329094 | 18-scf00292 | 18 |
| AX-158136981 | 13 | 55.034 | KV453135.1 | 1336918 | 18-scf00292 | 18 |
| AX-158136982 | 13 | 55.034 | KV453135.1 | 1337533 | 18-scf00292 | 18 |
| AX-158136984 | 13 | 55.034 | KV453135.1 | 1340961 | 18-scf00292 | 18 |
| AX-158136987 | 13 | 55.034 | KV453135.1 | 1344607 | 18-scf00292 | 18 |
| AX-158136989 | 13 | 55.034 | KV453135.1 | 1349118 | 18-scf00292 | 18 |
| AX-158136991 | 13 | 55.034 | KV453135.1 | 1351352 | 18-scf00292 | 18 |
| AX-158136992 | 13 | 55.034 | KV453135.1 | 1355272 | 18-scf00292 | 18 |
| AX-158136996 | 13 | 55.034 | KV453135.1 | 1367650 | 18-scf00292 | 18 |
| AX-157830804 | 13 | 55.034 | KV453135.1 | 1377909 | 18-scf00292 | 18 |
| AX-158411821 | 13 | 55.034 | KV453135.1 | 1402532 | 18-scf00292 | 18 |
| AX-158137015 | 13 | 55.034 | KV453135.1 | 1423440 | 18-scf00292 | 18 |
| AX-158137066 | 13 | 55.034 | KV453135.1 | 1723884 | 18-scf00292 | 18 |
| AX-158137082 | 13 | 55.034 | KV453135.1 | 1815467 | 18-scf00292 | 18 |
| AX-157863424 | 13 | 55.034 | KV453135.1 | 1909799 | 18-scf00292 | 18 |
| AX-158137146 | 13 | 55.034 | KV453131.1 | 176790  | 18-scf00293 | 18 |
| AX-158411692 | 13 | 55.034 | KV453131.1 | 465477  | 18-scf00293 | 18 |
| AX-158137220 | 13 | 55.034 | KV453136.1 | 7197    | 18-scf00294 | 18 |
| AX-158137223 | 13 | 55.034 | KV453136.1 | 23146   | 18-scf00294 | 18 |
| AX-158137225 | 13 | 55.034 | KV453136.1 | 24138   | 18-scf00294 | 18 |
| AX-158137228 | 13 | 55.034 | KV453136.1 | 29627   | 18-scf00294 | 18 |
| AX-158137230 | 13 | 55.034 | KV453136.1 | 31493   | 18-scf00294 | 18 |
| AX-158137232 | 13 | 55.034 | KV453136.1 | 34138   | 18-scf00294 | 18 |
| AX-158137234 | 13 | 55.034 | KV453136.1 | 35268   | 18-scf00294 | 18 |
| AX-158137239 | 13 | 55.034 | KV453136.1 | 47873   | 18-scf00294 | 18 |
| AX-158137240 | 13 | 55.034 | KV453136.1 | 49791   | 18-scf00294 | 18 |
| AX-158137241 | 13 | 55.034 | KV453136.1 | 52045   | 18-scf00294 | 18 |
| AX-157830827 | 13 | 55.034 | KV453136.1 | 59672   | 18-scf00294 | 18 |
| AX-158137244 | 13 | 55.034 | KV453136.1 | 60792   | 18-scf00294 | 18 |
| AX-158137246 | 13 | 55.034 | KV453136.1 | 73325   | 18-scf00294 | 18 |
| AX-158137247 | 13 | 55.034 | KV453136.1 | 76445   | 18-scf00294 | 18 |
| AX-158137249 | 13 | 55.034 | KV453136.1 | 79060   | 18-scf00294 | 18 |
| AX-158137250 | 13 | 55.034 | KV453136.1 | 81622   | 18-scf00294 | 18 |
| AX-158137255 | 13 | 55.034 | KV453136.1 | 106693  | 18-scf00294 | 18 |
| AX-158137273 | 13 | 55.034 | KV453136.1 | 176512  | 18-scf00294 | 18 |
| AX-158137276 | 13 | 55.034 | KV453136.1 | 188216  | 18-scf00294 | 18 |
| AX-158137277 | 13 | 55.034 | KV453136.1 | 188955  | 18-scf00294 | 18 |
| AX-158137280 | 13 | 55.034 | KV453136.1 | 190950  | 18-scf00294 | 18 |
| AX-158137281 | 13 | 55.034 | KV453136.1 | 193517  | 18-scf00294 | 18 |
| AX-158137286 | 13 | 55.034 | KV453136.1 | 201778  | 18-scf00294 | 18 |



|              |    |        |             |         |             |    |
|--------------|----|--------|-------------|---------|-------------|----|
| AX-158137287 | 13 | 55.034 | KV453136.1  | 202556  | 18-scf00294 | 18 |
| AX-158137288 | 13 | 55.034 | KV453136.1  | 211221  | 18-scf00294 | 18 |
| AX-158137290 | 13 | 55.034 | KV453136.1  | 224377  | 18-scf00294 | 18 |
| AX-158137292 | 13 | 55.034 | KV453136.1  | 229377  | 18-scf00294 | 18 |
| AX-158137304 | 13 | 55.034 | KV453136.1  | 268322  | 18-scf00294 | 18 |
| AX-157878136 | 13 | 55.034 | KV453136.1  | 274911  | 18-scf00294 | 18 |
| AX-158137313 | 13 | 55.034 | KV453136.1  | 287351  | 18-scf00294 | 18 |
| AX-158137315 | 13 | 55.034 | KV453136.1  | 291605  | 18-scf00294 | 18 |
| AX-158137319 | 13 | 55.034 | KV453136.1  | 300904  | 18-scf00294 | 18 |
| AX-158137321 | 13 | 55.034 | KV453136.1  | 302535  | 18-scf00294 | 18 |
| AX-158411857 | 13 | 55.034 | KV453132.1  | 328297  | 18-scf00295 | 18 |
| AX-157695594 | 13 | 55.034 | KV453132.1  | 357390  | 18-scf00295 | 18 |
| AX-158137803 | 13 | 55.034 | KV453138.1  | 315783  | 18-scf00300 | 18 |
| AX-158137725 | 13 | 55.034 | KV453138.1  | 630748  | 18-scf00300 | 18 |
| AX-158138054 | 13 | 55.034 | KV453138.1  | 1585677 | 18-scf00300 | 18 |
| AX-157830978 | 13 | 55.034 | KV453138.1  | 1635270 | 18-scf00300 | 18 |
| AX-158138115 | 13 | 55.034 | KV453138.1  | 1765988 | 18-scf00300 | 18 |
| AX-158138158 | 13 | 55.034 | KV453138.1  | 1875286 | 18-scf00300 | 18 |
| AX-157830993 | 13 | 55.034 | KV453138.1  | 1938147 | 18-scf00300 | 18 |
| AX-158411975 | 13 | 55.034 | KV453138.1  | 2037019 | 18-scf00300 | 18 |
| AX-158138235 | 13 | 55.034 | KV453138.1  | 2090315 | 18-scf00300 | 18 |
| AX-158138258 | 13 | 55.034 | KV453138.1  | 2137112 | 18-scf00300 | 18 |
| AX-158138386 | 13 | 55.034 | KV453138.1  | 2476594 | 18-scf00300 | 18 |
| AX-157831005 | 13 | 55.034 | KV453138.1  | 2552004 | 18-scf00300 | 18 |
| AX-157701775 | 13 | 55.034 | KV453138.1  | 2553714 | 18-scf00300 | 18 |
| AX-158138456 | 13 | 55.034 | KV453138.1  | 2611835 | 18-scf00300 | 18 |
| AX-157708770 | 13 | 55.034 | KV453138.1  | 2618827 | 18-scf00300 | 18 |
| AX-158138473 | 13 | 55.034 | KV453138.1  | 2670836 | 18-scf00300 | 18 |
| AX-157752826 | 13 | 55.034 | KV453138.1  | 2695968 | 18-scf00300 | 18 |
| AX-158138488 | 13 | 55.034 | KV453138.1  | 2705078 | 18-scf00300 | 18 |
| AX-158138562 | 13 | 55.034 | KV453138.1  | 2858653 | 18-scf00300 | 18 |
| AX-158139059 | 13 | 55.034 | KV453138.1  | 3588816 | 18-scf00300 | 18 |
| AX-158139671 | 13 | 55.034 | KV453138.1  | 4574225 | 18-scf00300 | 18 |
| AX-157707408 | 13 | 55.034 | 3ML01034216 | 405     | scf09886_1  | UN |
| AX-157774128 | 13 | 55.144 | KV453137.1  | 806340  | 18-scf00291 | 18 |
| AX-158136421 | 13 | 55.144 | KV453137.1  | 869831  | 18-scf00291 | 18 |
| AX-158136423 | 13 | 55.144 | KV453137.1  | 871476  | 18-scf00291 | 18 |
| AX-158136424 | 13 | 55.144 | KV453137.1  | 872507  | 18-scf00291 | 18 |
| AX-158136425 | 13 | 55.144 | KV453137.1  | 874071  | 18-scf00291 | 18 |
| AX-158136436 | 13 | 55.144 | KV453137.1  | 895137  | 18-scf00291 | 18 |
| AX-158136437 | 13 | 55.144 | KV453137.1  | 896335  | 18-scf00291 | 18 |
| AX-158136448 | 13 | 55.144 | KV453137.1  | 917875  | 18-scf00291 | 18 |
| AX-158136449 | 13 | 55.144 | KV453137.1  | 921876  | 18-scf00291 | 18 |
| AX-158136455 | 13 | 55.144 | KV453137.1  | 934130  | 18-scf00291 | 18 |
| AX-157755962 | 13 | 55.144 | KV453137.1  | 934649  | 18-scf00291 | 18 |
| AX-158136459 | 13 | 55.144 | KV453137.1  | 938894  | 18-scf00291 | 18 |
| AX-157831004 | 13 | 55.144 | KV453138.1  | 2547326 | 18-scf00300 | 18 |
| AX-157725506 | 13 | 55.171 | KV453137.1  | 939705  | 18-scf00291 | 18 |
| AX-158136460 | 13 | 55.198 | KV453137.1  | 940135  | 18-scf00291 | 18 |
| AX-157747283 | 13 | 55.198 | KV453138.1  | 185113  | 18-scf00300 | 18 |
| AX-157831587 | 13 | 55.198 | KV453138.1  | 186665  | 18-scf00300 | 18 |

|              |    |        |            |         |             |    |
|--------------|----|--------|------------|---------|-------------|----|
| AX-158136461 | 13 | 55.226 | KV453137.1 | 941795  | 18-scf00291 | 18 |
| AX-158136088 | 13 | 55.253 | KV453137.1 | 10225   | 18-scf00291 | 18 |
| AX-157758292 | 13 | 55.253 | KV453137.1 | 200302  | 18-scf00291 | 18 |
| AX-157830685 | 13 | 55.253 | KV453137.1 | 262613  | 18-scf00291 | 18 |
| AX-158136458 | 13 | 55.253 | KV453137.1 | 938054  | 18-scf00291 | 18 |
| AX-158136462 | 13 | 55.253 | KV453137.1 | 942204  | 18-scf00291 | 18 |
| AX-158136464 | 13 | 55.253 | KV453137.1 | 947005  | 18-scf00291 | 18 |
| AX-158136467 | 13 | 55.253 | KV453137.1 | 950851  | 18-scf00291 | 18 |
| AX-158136478 | 13 | 55.253 | KV453137.1 | 1000057 | 18-scf00291 | 18 |
| AX-158392905 | 13 | 55.253 | KV453137.1 | 1006628 | 18-scf00291 | 18 |
| AX-157830720 | 13 | 55.253 | KV453137.1 | 1014548 | 18-scf00291 | 18 |
| AX-158136482 | 13 | 55.253 | KV453137.1 | 1025111 | 18-scf00291 | 18 |
| AX-157700697 | 13 | 55.253 | KV453137.1 | 1026896 | 18-scf00291 | 18 |
| AX-157830723 | 13 | 55.253 | KV453137.1 | 1028582 | 18-scf00291 | 18 |
| AX-158411723 | 13 | 55.253 | KV453137.1 | 1032533 | 18-scf00291 | 18 |
| AX-158411724 | 13 | 55.253 | KV453137.1 | 1034041 | 18-scf00291 | 18 |
| AX-158136499 | 13 | 55.253 | KV453137.1 | 1054932 | 18-scf00291 | 18 |
| AX-158136504 | 13 | 55.253 | KV453137.1 | 1069870 | 18-scf00291 | 18 |
| AX-158136506 | 13 | 55.253 | KV453137.1 | 1074259 | 18-scf00291 | 18 |
| AX-158136507 | 13 | 55.253 | KV453137.1 | 1075562 | 18-scf00291 | 18 |
| AX-158136509 | 13 | 55.253 | KV453137.1 | 1077015 | 18-scf00291 | 18 |
| AX-158136510 | 13 | 55.253 | KV453137.1 | 1081425 | 18-scf00291 | 18 |
| AX-158136560 | 13 | 55.253 | KV453137.1 | 1232046 | 18-scf00291 | 18 |
| AX-158136580 | 13 | 55.253 | KV453137.1 | 1301077 | 18-scf00291 | 18 |
| AX-158136598 | 13 | 55.253 | KV453137.1 | 1349693 | 18-scf00291 | 18 |
| AX-158136605 | 13 | 55.253 | KV453137.1 | 1368747 | 18-scf00291 | 18 |
| AX-158136618 | 13 | 55.253 | KV453137.1 | 1425549 | 18-scf00291 | 18 |
| AX-158136620 | 13 | 55.253 | KV453137.1 | 1436140 | 18-scf00291 | 18 |
| AX-158136633 | 13 | 55.253 | KV453137.1 | 1498198 | 18-scf00291 | 18 |
| AX-158411738 | 13 | 55.253 | KV453137.1 | 1502612 | 18-scf00291 | 18 |
| AX-157857900 | 13 | 55.253 | KV453137.1 | 1515898 | 18-scf00291 | 18 |
| AX-158136637 | 13 | 55.253 | KV453137.1 | 1516216 | 18-scf00291 | 18 |
| AX-157830743 | 13 | 55.253 | KV453137.1 | 1564804 | 18-scf00291 | 18 |
| AX-158136651 | 13 | 55.253 | KV453137.1 | 1601847 | 18-scf00291 | 18 |
| AX-158136652 | 13 | 55.253 | KV453137.1 | 1608312 | 18-scf00291 | 18 |
| AX-158136653 | 13 | 55.253 | KV453137.1 | 1608819 | 18-scf00291 | 18 |
| AX-158136654 | 13 | 55.253 | KV453137.1 | 1609749 | 18-scf00291 | 18 |
| AX-158136656 | 13 | 55.253 | KV453137.1 | 1611581 | 18-scf00291 | 18 |
| AX-157830745 | 13 | 55.253 | KV453137.1 | 1612656 | 18-scf00291 | 18 |
| AX-158136658 | 13 | 55.253 | KV453137.1 | 1612693 | 18-scf00291 | 18 |
| AX-158136659 | 13 | 55.253 | KV453137.1 | 1613655 | 18-scf00291 | 18 |
| AX-158136661 | 13 | 55.253 | KV453137.1 | 1615284 | 18-scf00291 | 18 |
| AX-158136662 | 13 | 55.253 | KV453137.1 | 1616301 | 18-scf00291 | 18 |
| AX-158136663 | 13 | 55.253 | KV453137.1 | 1616555 | 18-scf00291 | 18 |
| AX-157830746 | 13 | 55.253 | KV453137.1 | 1619510 | 18-scf00291 | 18 |
| AX-157830747 | 13 | 55.253 | KV453137.1 | 1619986 | 18-scf00291 | 18 |
| AX-158136665 | 13 | 55.253 | KV453137.1 | 1620187 | 18-scf00291 | 18 |
| AX-158136668 | 13 | 55.253 | KV453137.1 | 1623056 | 18-scf00291 | 18 |
| AX-158136679 | 13 | 55.253 | KV453137.1 | 1644248 | 18-scf00291 | 18 |
| AX-158136683 | 13 | 55.253 | KV453137.1 | 1662627 | 18-scf00291 | 18 |
| AX-157857903 | 13 | 55.253 | KV453137.1 | 1687118 | 18-scf00291 | 18 |

|              |    |        |            |         |             |    |
|--------------|----|--------|------------|---------|-------------|----|
| AX-158408239 | 13 | 55.253 | KV453137.1 | 1691645 | 18-scf00291 | 18 |
| AX-158136692 | 13 | 55.253 | KV453137.1 | 1706808 | 18-scf00291 | 18 |
| AX-158137261 | 13 | 55.253 | KV453136.1 | 144263  | 18-scf00294 | 18 |
| AX-158412210 | 13 | 55.253 | KV453138.1 | 1703    | 18-scf00300 | 18 |
| AX-158412211 | 13 | 55.253 | KV453138.1 | 1852    | 18-scf00300 | 18 |
| AX-158412212 | 13 | 55.253 | KV453138.1 | 2268    | 18-scf00300 | 18 |
| AX-158143439 | 13 | 55.253 | KV453138.1 | 11519   | 18-scf00300 | 18 |
| AX-158143441 | 13 | 55.253 | KV453138.1 | 23919   | 18-scf00300 | 18 |
| AX-157705998 | 13 | 55.253 | KV453138.1 | 31254   | 18-scf00300 | 18 |
| AX-157831571 | 13 | 55.253 | KV453138.1 | 47551   | 18-scf00300 | 18 |
| AX-158143446 | 13 | 55.253 | KV453138.1 | 49987   | 18-scf00300 | 18 |
| AX-157727217 | 13 | 55.253 | KV453138.1 | 53031   | 18-scf00300 | 18 |
| AX-157831572 | 13 | 55.253 | KV453138.1 | 55396   | 18-scf00300 | 18 |
| AX-158143449 | 13 | 55.253 | KV453138.1 | 60183   | 18-scf00300 | 18 |
| AX-158143454 | 13 | 55.253 | KV453138.1 | 133858  | 18-scf00300 | 18 |
| AX-158143461 | 13 | 55.253 | KV453138.1 | 150197  | 18-scf00300 | 18 |
| AX-158143465 | 13 | 55.253 | KV453138.1 | 162757  | 18-scf00300 | 18 |
| AX-157857933 | 13 | 55.253 | KV453138.1 | 214068  | 18-scf00300 | 18 |
| AX-157793025 | 13 | 55.253 | KV453138.1 | 215607  | 18-scf00300 | 18 |
| AX-157857931 | 13 | 55.253 | KV453138.1 | 215890  | 18-scf00300 | 18 |
| AX-157793024 | 13 | 55.253 | KV453138.1 | 219572  | 18-scf00300 | 18 |
| AX-157857930 | 13 | 55.253 | KV453138.1 | 232931  | 18-scf00300 | 18 |
| AX-158137824 | 13 | 55.253 | KV453138.1 | 250581  | 18-scf00300 | 18 |
| AX-157878155 | 13 | 55.253 | KV453138.1 | 269526  | 18-scf00300 | 18 |
| AX-158137675 | 13 | 55.253 | KV453138.1 | 777338  | 18-scf00300 | 18 |
| AX-157701651 | 13 | 55.253 | KV453138.1 | 2051448 | 18-scf00300 | 18 |
| AX-158138361 | 13 | 55.253 | KV453138.1 | 2416560 | 18-scf00300 | 18 |
| AX-158138400 | 13 | 55.253 | KV453138.1 | 2510784 | 18-scf00300 | 18 |
| AX-157701196 | 13 | 55.253 | KV453138.1 | 3463274 | 18-scf00300 | 18 |
| AX-157831076 | 13 | 55.253 | KV453138.1 | 3507357 | 18-scf00300 | 18 |
| AX-158139203 | 13 | 55.253 | KV453138.1 | 3877198 | 18-scf00300 | 18 |
| AX-157725048 | 13 | 55.253 | KV453138.1 | 4765331 | 18-scf00300 | 18 |
| AX-158143455 | 13 | 55.377 | KV453138.1 | 134350  | 18-scf00300 | 18 |
| AX-158137555 | 13 | 55.377 | KV453138.1 | 1192707 | 18-scf00300 | 18 |
| AX-158412218 | 13 | 55.426 | KV453138.1 | 151040  | 18-scf00300 | 18 |
| AX-158135243 | 13 | 55.581 | KV453128.1 | 7293089 | 18-scf00286 | 18 |
| AX-157720425 | 13 | 55.581 | KV453137.1 | 220481  | 18-scf00291 | 18 |
| AX-158136167 | 13 | 55.581 | KV453137.1 | 221561  | 18-scf00291 | 18 |
| AX-157753145 | 13 | 55.581 | KV453137.1 | 776982  | 18-scf00291 | 18 |
| AX-158136412 | 13 | 55.581 | KV453137.1 | 857124  | 18-scf00291 | 18 |
| AX-158136522 | 13 | 55.581 | KV453137.1 | 1113726 | 18-scf00291 | 18 |
| AX-158136585 | 13 | 55.581 | KV453137.1 | 1307477 | 18-scf00291 | 18 |
| AX-158136589 | 13 | 55.581 | KV453137.1 | 1318386 | 18-scf00291 | 18 |
| AX-158411732 | 13 | 55.581 | KV453137.1 | 1327589 | 18-scf00291 | 18 |
| AX-158136603 | 13 | 55.581 | KV453137.1 | 1358994 | 18-scf00291 | 18 |
| AX-158136607 | 13 | 55.581 | KV453137.1 | 1370988 | 18-scf00291 | 18 |
| AX-158136614 | 13 | 55.581 | KV453137.1 | 1400103 | 18-scf00291 | 18 |
| AX-158136628 | 13 | 55.581 | KV453137.1 | 1462489 | 18-scf00291 | 18 |
| AX-158136645 | 13 | 55.581 | KV453137.1 | 1552134 | 18-scf00291 | 18 |
| AX-158411741 | 13 | 55.581 | KV453137.1 | 1565542 | 18-scf00291 | 18 |
| AX-158136669 | 13 | 55.581 | KV453137.1 | 1624242 | 18-scf00291 | 18 |

|              |    |        |            |         |             |    |
|--------------|----|--------|------------|---------|-------------|----|
| AX-158411746 | 13 | 55.581 | KV453137.1 | 1690586 | 18-scf00291 | 18 |
| AX-157748088 | 13 | 55.581 | KV453137.1 | 1708114 | 18-scf00291 | 18 |
| AX-157830753 | 13 | 55.581 | KV453137.1 | 1741679 | 18-scf00291 | 18 |
| AX-158136711 | 13 | 55.581 | KV453135.1 | 349103  | 18-scf00292 | 18 |
| AX-157830769 | 13 | 55.581 | KV453135.1 | 507405  | 18-scf00292 | 18 |
| AX-158136771 | 13 | 55.581 | KV453135.1 | 736498  | 18-scf00292 | 18 |
| AX-158136822 | 13 | 55.581 | KV453135.1 | 907230  | 18-scf00292 | 18 |
| AX-158136862 | 13 | 55.581 | KV453135.1 | 989053  | 18-scf00292 | 18 |
| AX-157758895 | 13 | 55.581 | KV453135.1 | 993165  | 18-scf00292 | 18 |
| AX-157830799 | 13 | 55.581 | KV453135.1 | 1010300 | 18-scf00292 | 18 |
| AX-157830659 | 13 | 55.581 | KV453131.1 | 464728  | 18-scf00293 | 18 |
| AX-157792906 | 13 | 55.581 | KV453134.1 | 238330  | 18-scf00296 | 18 |
| AX-157871499 | 13 | 55.581 | KV453134.1 | 259290  | 18-scf00296 | 18 |
| AX-157831580 | 13 | 55.581 | KV453138.1 | 83615   | 18-scf00300 | 18 |
| AX-158143453 | 13 | 55.581 | KV453138.1 | 123258  | 18-scf00300 | 18 |
| AX-157858029 | 13 | 55.581 | KV453138.1 | 154731  | 18-scf00300 | 18 |
| AX-158411956 | 13 | 55.581 | KV453138.1 | 198684  | 18-scf00300 | 18 |
| AX-157830961 | 13 | 55.581 | KV453138.1 | 199437  | 18-scf00300 | 18 |
| AX-158137838 | 13 | 55.581 | KV453138.1 | 218231  | 18-scf00300 | 18 |
| AX-158137773 | 13 | 55.581 | KV453138.1 | 435000  | 18-scf00300 | 18 |
| AX-158408310 | 13 | 55.581 | KV453138.1 | 707034  | 18-scf00300 | 18 |
| AX-158137687 | 13 | 55.581 | KV453138.1 | 737269  | 18-scf00300 | 18 |
| AX-158408307 | 13 | 55.581 | KV453138.1 | 766813  | 18-scf00300 | 18 |
| AX-158137662 | 13 | 55.581 | KV453138.1 | 813706  | 18-scf00300 | 18 |
| AX-157830912 | 13 | 55.581 | KV453138.1 | 860358  | 18-scf00300 | 18 |
| AX-158411911 | 13 | 55.581 | KV453138.1 | 910923  | 18-scf00300 | 18 |
| AX-158137640 | 13 | 55.581 | KV453138.1 | 938221  | 18-scf00300 | 18 |
| AX-158137635 | 13 | 55.581 | KV453138.1 | 963088  | 18-scf00300 | 18 |
| AX-158137634 | 13 | 55.581 | KV453138.1 | 964340  | 18-scf00300 | 18 |
| AX-158137632 | 13 | 55.581 | KV453138.1 | 968726  | 18-scf00300 | 18 |
| AX-158411904 | 13 | 55.581 | KV453138.1 | 1029379 | 18-scf00300 | 18 |
| AX-158137614 | 13 | 55.581 | KV453138.1 | 1032240 | 18-scf00300 | 18 |
| AX-158137612 | 13 | 55.581 | KV453138.1 | 1033434 | 18-scf00300 | 18 |
| AX-158137610 | 13 | 55.581 | KV453138.1 | 1044132 | 18-scf00300 | 18 |
| AX-158137599 | 13 | 55.581 | KV453138.1 | 1074505 | 18-scf00300 | 18 |
| AX-158137595 | 13 | 55.581 | KV453138.1 | 1083142 | 18-scf00300 | 18 |
| AX-158137594 | 13 | 55.581 | KV453138.1 | 1083401 | 18-scf00300 | 18 |
| AX-157775757 | 13 | 55.581 | KV453138.1 | 1084373 | 18-scf00300 | 18 |
| AX-158137593 | 13 | 55.581 | KV453138.1 | 1086319 | 18-scf00300 | 18 |
| AX-158137591 | 13 | 55.581 | KV453138.1 | 1087393 | 18-scf00300 | 18 |
| AX-158137590 | 13 | 55.581 | KV453138.1 | 1088834 | 18-scf00300 | 18 |
| AX-158137587 | 13 | 55.581 | KV453138.1 | 1090660 | 18-scf00300 | 18 |
| AX-158137586 | 13 | 55.581 | KV453138.1 | 1091302 | 18-scf00300 | 18 |
| AX-158137585 | 13 | 55.581 | KV453138.1 | 1092703 | 18-scf00300 | 18 |
| AX-157830896 | 13 | 55.581 | KV453138.1 | 1105574 | 18-scf00300 | 18 |
| AX-157830895 | 13 | 55.581 | KV453138.1 | 1110174 | 18-scf00300 | 18 |
| AX-158137577 | 13 | 55.581 | KV453138.1 | 1110469 | 18-scf00300 | 18 |
| AX-158137576 | 13 | 55.581 | KV453138.1 | 1111783 | 18-scf00300 | 18 |
| AX-157871530 | 13 | 55.581 | KV453138.1 | 1112187 | 18-scf00300 | 18 |
| AX-158137570 | 13 | 55.581 | KV453138.1 | 1123806 | 18-scf00300 | 18 |
| AX-158137567 | 13 | 55.581 | KV453138.1 | 1139733 | 18-scf00300 | 18 |

|              |    |        |            |         |             |    |
|--------------|----|--------|------------|---------|-------------|----|
| AX-157830891 | 13 | 55.581 | KV453138.1 | 1152182 | 18-scf00300 | 18 |
| AX-158137559 | 13 | 55.581 | KV453138.1 | 1173706 | 18-scf00300 | 18 |
| AX-158137557 | 13 | 55.581 | KV453138.1 | 1177062 | 18-scf00300 | 18 |
| AX-158137556 | 13 | 55.581 | KV453138.1 | 1184642 | 18-scf00300 | 18 |
| AX-157830881 | 13 | 55.581 | KV453138.1 | 1186094 | 18-scf00300 | 18 |
| AX-158137554 | 13 | 55.581 | KV453138.1 | 1192932 | 18-scf00300 | 18 |
| AX-158137553 | 13 | 55.581 | KV453138.1 | 1193320 | 18-scf00300 | 18 |
| AX-158137551 | 13 | 55.581 | KV453138.1 | 1194492 | 18-scf00300 | 18 |
| AX-158137548 | 13 | 55.581 | KV453138.1 | 1201853 | 18-scf00300 | 18 |
| AX-158137850 | 13 | 55.581 | KV453138.1 | 1202983 | 18-scf00300 | 18 |
| AX-158137852 | 13 | 55.581 | KV453138.1 | 1207895 | 18-scf00300 | 18 |
| AX-158137853 | 13 | 55.581 | KV453138.1 | 1208251 | 18-scf00300 | 18 |
| AX-158137854 | 13 | 55.581 | KV453138.1 | 1212964 | 18-scf00300 | 18 |
| AX-158137856 | 13 | 55.581 | KV453138.1 | 1219974 | 18-scf00300 | 18 |
| AX-158137857 | 13 | 55.581 | KV453138.1 | 1220640 | 18-scf00300 | 18 |
| AX-158137859 | 13 | 55.581 | KV453138.1 | 1226597 | 18-scf00300 | 18 |
| AX-158137864 | 13 | 55.581 | KV453138.1 | 1232643 | 18-scf00300 | 18 |
| AX-158137867 | 13 | 55.581 | KV453138.1 | 1239392 | 18-scf00300 | 18 |
| AX-158137868 | 13 | 55.581 | KV453138.1 | 1241358 | 18-scf00300 | 18 |
| AX-157751683 | 13 | 55.581 | KV453138.1 | 1251553 | 18-scf00300 | 18 |
| AX-157830968 | 13 | 55.581 | KV453138.1 | 1275176 | 18-scf00300 | 18 |
| AX-157714232 | 13 | 55.581 | KV453138.1 | 1289775 | 18-scf00300 | 18 |
| AX-158137889 | 13 | 55.581 | KV453138.1 | 1292405 | 18-scf00300 | 18 |
| AX-158137897 | 13 | 55.581 | KV453138.1 | 1305846 | 18-scf00300 | 18 |
| AX-158137905 | 13 | 55.581 | KV453138.1 | 1318058 | 18-scf00300 | 18 |
| AX-157830972 | 13 | 55.581 | KV453138.1 | 1323601 | 18-scf00300 | 18 |
| AX-158137911 | 13 | 55.581 | KV453138.1 | 1328428 | 18-scf00300 | 18 |
| AX-157739139 | 13 | 55.581 | KV453138.1 | 1329046 | 18-scf00300 | 18 |
| AX-158137945 | 13 | 55.581 | KV453138.1 | 1401960 | 18-scf00300 | 18 |
| AX-158138006 | 13 | 55.581 | KV453138.1 | 1508625 | 18-scf00300 | 18 |
| AX-158411965 | 13 | 55.581 | KV453138.1 | 1513736 | 18-scf00300 | 18 |
| AX-158138117 | 13 | 55.581 | KV453138.1 | 1774491 | 18-scf00300 | 18 |
| AX-157709425 | 13 | 55.581 | KV453138.1 | 1894634 | 18-scf00300 | 18 |
| AX-158138183 | 13 | 55.581 | KV453138.1 | 1951293 | 18-scf00300 | 18 |
| AX-158138184 | 13 | 55.581 | KV453138.1 | 1951396 | 18-scf00300 | 18 |
| AX-158138203 | 13 | 55.581 | KV453138.1 | 1987279 | 18-scf00300 | 18 |
| AX-158138220 | 13 | 55.581 | KV453138.1 | 2037284 | 18-scf00300 | 18 |
| AX-158138308 | 13 | 55.581 | KV453138.1 | 2293904 | 18-scf00300 | 18 |
| AX-158138322 | 13 | 55.581 | KV453138.1 | 2317606 | 18-scf00300 | 18 |
| AX-158138332 | 13 | 55.581 | KV453138.1 | 2348194 | 18-scf00300 | 18 |
| AX-157723397 | 13 | 55.581 | KV453138.1 | 2400643 | 18-scf00300 | 18 |
| AX-157831036 | 13 | 55.581 | KV453138.1 | 2951218 | 18-scf00300 | 18 |
| AX-158138691 | 13 | 55.581 | KV453138.1 | 3079428 | 18-scf00300 | 18 |
| AX-158138762 | 13 | 55.581 | KV453138.1 | 3186147 | 18-scf00300 | 18 |
| AX-158138799 | 13 | 55.581 | KV453138.1 | 3231758 | 18-scf00300 | 18 |
| AX-157726924 | 13 | 55.581 | KV453138.1 | 3241661 | 18-scf00300 | 18 |
| AX-158138831 | 13 | 55.581 | KV453138.1 | 3265941 | 18-scf00300 | 18 |
| AX-158138833 | 13 | 55.581 | KV453138.1 | 3268842 | 18-scf00300 | 18 |
| AX-158138892 | 13 | 55.581 | KV453138.1 | 3326658 | 18-scf00300 | 18 |
| AX-157725028 | 13 | 55.581 | KV453138.1 | 3334044 | 18-scf00300 | 18 |
| AX-158138977 | 13 | 55.581 | KV453138.1 | 3471202 | 18-scf00300 | 18 |

|              |    |        |             |         |             |    |
|--------------|----|--------|-------------|---------|-------------|----|
| AX-158139042 | 13 | 55.581 | KV453138.1  | 3570562 | 18-scf00300 | 18 |
| AX-158139043 | 13 | 55.581 | KV453138.1  | 3570713 | 18-scf00300 | 18 |
| AX-158139074 | 13 | 55.581 | KV453138.1  | 3616832 | 18-scf00300 | 18 |
| AX-158139087 | 13 | 55.581 | KV453138.1  | 3632109 | 18-scf00300 | 18 |
| AX-158139106 | 13 | 55.581 | KV453138.1  | 3666533 | 18-scf00300 | 18 |
| AX-158139161 | 13 | 55.581 | KV453138.1  | 3779017 | 18-scf00300 | 18 |
| AX-158139163 | 13 | 55.581 | KV453138.1  | 3783205 | 18-scf00300 | 18 |
| AX-158139303 | 13 | 55.581 | KV453138.1  | 4038503 | 18-scf00300 | 18 |
| AX-158139317 | 13 | 55.581 | KV453138.1  | 4052071 | 18-scf00300 | 18 |
| AX-158392992 | 13 | 55.581 | KV453138.1  | 4156345 | 18-scf00300 | 18 |
| AX-158139446 | 13 | 55.581 | KV453138.1  | 4244756 | 18-scf00300 | 18 |
| AX-157831148 | 13 | 55.581 | KV453138.1  | 4498590 | 18-scf00300 | 18 |
| AX-157706887 | 13 | 55.581 | 3ML01033100 | 381     | scf08737_1  | UN |
| AX-158137645 | 13 | 55.582 | KV453138.1  | 929951  | 18-scf00300 | 18 |
| AX-157830908 | 13 | 55.588 | KV453138.1  | 919347  | 18-scf00300 | 18 |
| AX-158137702 | 13 | 55.595 | KV453138.1  | 701533  | 18-scf00300 | 18 |
| AX-158137652 | 13 | 55.595 | KV453138.1  | 886295  | 18-scf00300 | 18 |
| AX-158411908 | 13 | 55.595 | KV453138.1  | 912234  | 18-scf00300 | 18 |
| AX-158139406 | 13 | 55.595 | KV453138.1  | 4200205 | 18-scf00300 | 18 |
| AX-157713898 | 13 | 55.595 | KV453138.1  | 4344832 | 18-scf00300 | 18 |
| AX-158137665 | 13 | 55.603 | KV453138.1  | 808197  | 18-scf00300 | 18 |
| AX-158137669 | 13 | 55.611 | KV453138.1  | 796635  | 18-scf00300 | 18 |
| AX-158137671 | 13 | 55.617 | KV453138.1  | 783782  | 18-scf00300 | 18 |
| AX-158137949 | 13 | 55.617 | KV453138.1  | 1416627 | 18-scf00300 | 18 |
| AX-158392961 | 13 | 55.63  | KV453138.1  | 761097  | 18-scf00300 | 18 |
| AX-158392965 | 13 | 55.644 | KV453138.1  | 716506  | 18-scf00300 | 18 |
| AX-157830932 | 13 | 55.656 | KV453138.1  | 672936  | 18-scf00300 | 18 |
| AX-158137712 | 13 | 55.668 | KV453138.1  | 672554  | 18-scf00300 | 18 |
| AX-158137714 | 13 | 55.679 | KV453138.1  | 668211  | 18-scf00300 | 18 |
| AX-158136147 | 13 | 55.69  | KV453137.1  | 135718  | 18-scf00291 | 18 |
| AX-157742826 | 13 | 55.69  | KV453137.1  | 371472  | 18-scf00291 | 18 |
| AX-157724616 | 13 | 55.69  | KV453137.1  | 615114  | 18-scf00291 | 18 |
| AX-157715059 | 13 | 55.69  | KV453137.1  | 704806  | 18-scf00291 | 18 |
| AX-158136401 | 13 | 55.69  | KV453137.1  | 822603  | 18-scf00291 | 18 |
| AX-158136407 | 13 | 55.69  | KV453137.1  | 831852  | 18-scf00291 | 18 |
| AX-158136434 | 13 | 55.69  | KV453137.1  | 886733  | 18-scf00291 | 18 |
| AX-157830722 | 13 | 55.69  | KV453137.1  | 1018265 | 18-scf00291 | 18 |
| AX-158136556 | 13 | 55.69  | KV453137.1  | 1224802 | 18-scf00291 | 18 |
| AX-158136581 | 13 | 55.69  | KV453137.1  | 1301844 | 18-scf00291 | 18 |
| AX-157713815 | 13 | 55.69  | KV453137.1  | 1319175 | 18-scf00291 | 18 |
| AX-158136592 | 13 | 55.69  | KV453137.1  | 1325128 | 18-scf00291 | 18 |
| AX-158136594 | 13 | 55.69  | KV453137.1  | 1342289 | 18-scf00291 | 18 |
| AX-158136599 | 13 | 55.69  | KV453137.1  | 1350690 | 18-scf00291 | 18 |
| AX-158136601 | 13 | 55.69  | KV453137.1  | 1352550 | 18-scf00291 | 18 |
| AX-158136808 | 13 | 55.69  | KV453135.1  | 865777  | 18-scf00292 | 18 |
| AX-158136855 | 13 | 55.69  | KV453135.1  | 982341  | 18-scf00292 | 18 |
| AX-158136891 | 13 | 55.69  | KV453135.1  | 1058145 | 18-scf00292 | 18 |
| AX-158137030 | 13 | 55.69  | KV453135.1  | 1506515 | 18-scf00292 | 18 |
| AX-157830839 | 13 | 55.69  | KV453136.1  | 295749  | 18-scf00294 | 18 |
| AX-158137327 | 13 | 55.69  | KV453132.1  | 64337   | 18-scf00295 | 18 |
| AX-158137434 | 13 | 55.69  | KV453134.1  | 163633  | 18-scf00296 | 18 |

|              |    |       |            |         |             |    |
|--------------|----|-------|------------|---------|-------------|----|
| AX-158143450 | 13 | 55.69 | KV453138.1 | 79755   | 18-scf00300 | 18 |
| AX-158137812 | 13 | 55.69 | KV453138.1 | 282953  | 18-scf00300 | 18 |
| AX-157830956 | 13 | 55.69 | KV453138.1 | 320511  | 18-scf00300 | 18 |
| AX-158137794 | 13 | 55.69 | KV453138.1 | 362499  | 18-scf00300 | 18 |
| AX-158137790 | 13 | 55.69 | KV453138.1 | 384255  | 18-scf00300 | 18 |
| AX-158137787 | 13 | 55.69 | KV453138.1 | 386978  | 18-scf00300 | 18 |
| AX-157830950 | 13 | 55.69 | KV453138.1 | 387882  | 18-scf00300 | 18 |
| AX-158137786 | 13 | 55.69 | KV453138.1 | 389540  | 18-scf00300 | 18 |
| AX-157830949 | 13 | 55.69 | KV453138.1 | 390565  | 18-scf00300 | 18 |
| AX-158137784 | 13 | 55.69 | KV453138.1 | 397478  | 18-scf00300 | 18 |
| AX-158411944 | 13 | 55.69 | KV453138.1 | 399968  | 18-scf00300 | 18 |
| AX-158137781 | 13 | 55.69 | KV453138.1 | 409523  | 18-scf00300 | 18 |
| AX-157751877 | 13 | 55.69 | KV453138.1 | 413016  | 18-scf00300 | 18 |
| AX-158137779 | 13 | 55.69 | KV453138.1 | 413528  | 18-scf00300 | 18 |
| AX-158137778 | 13 | 55.69 | KV453138.1 | 413998  | 18-scf00300 | 18 |
| AX-158137777 | 13 | 55.69 | KV453138.1 | 414422  | 18-scf00300 | 18 |
| AX-158137775 | 13 | 55.69 | KV453138.1 | 427291  | 18-scf00300 | 18 |
| AX-158137771 | 13 | 55.69 | KV453138.1 | 438303  | 18-scf00300 | 18 |
| AX-157830947 | 13 | 55.69 | KV453138.1 | 447018  | 18-scf00300 | 18 |
| AX-158137769 | 13 | 55.69 | KV453138.1 | 458686  | 18-scf00300 | 18 |
| AX-158137768 | 13 | 55.69 | KV453138.1 | 459232  | 18-scf00300 | 18 |
| AX-158137767 | 13 | 55.69 | KV453138.1 | 462245  | 18-scf00300 | 18 |
| AX-158137765 | 13 | 55.69 | KV453138.1 | 473222  | 18-scf00300 | 18 |
| AX-158137762 | 13 | 55.69 | KV453138.1 | 492642  | 18-scf00300 | 18 |
| AX-158137758 | 13 | 55.69 | KV453138.1 | 524489  | 18-scf00300 | 18 |
| AX-158137756 | 13 | 55.69 | KV453138.1 | 527945  | 18-scf00300 | 18 |
| AX-157830944 | 13 | 55.69 | KV453138.1 | 531031  | 18-scf00300 | 18 |
| AX-157830943 | 13 | 55.69 | KV453138.1 | 535044  | 18-scf00300 | 18 |
| AX-157830942 | 13 | 55.69 | KV453138.1 | 536018  | 18-scf00300 | 18 |
| AX-158137751 | 13 | 55.69 | KV453138.1 | 543384  | 18-scf00300 | 18 |
| AX-158137749 | 13 | 55.69 | KV453138.1 | 551680  | 18-scf00300 | 18 |
| AX-157830939 | 13 | 55.69 | KV453138.1 | 560975  | 18-scf00300 | 18 |
| AX-157830938 | 13 | 55.69 | KV453138.1 | 561368  | 18-scf00300 | 18 |
| AX-157830936 | 13 | 55.69 | KV453138.1 | 565485  | 18-scf00300 | 18 |
| AX-158137743 | 13 | 55.69 | KV453138.1 | 570158  | 18-scf00300 | 18 |
| AX-158137741 | 13 | 55.69 | KV453138.1 | 574092  | 18-scf00300 | 18 |
| AX-158137739 | 13 | 55.69 | KV453138.1 | 577169  | 18-scf00300 | 18 |
| AX-158137736 | 13 | 55.69 | KV453138.1 | 581213  | 18-scf00300 | 18 |
| AX-158137735 | 13 | 55.69 | KV453138.1 | 584984  | 18-scf00300 | 18 |
| AX-158137734 | 13 | 55.69 | KV453138.1 | 590401  | 18-scf00300 | 18 |
| AX-158137733 | 13 | 55.69 | KV453138.1 | 593714  | 18-scf00300 | 18 |
| AX-158137732 | 13 | 55.69 | KV453138.1 | 600170  | 18-scf00300 | 18 |
| AX-158137730 | 13 | 55.69 | KV453138.1 | 609579  | 18-scf00300 | 18 |
| AX-158137729 | 13 | 55.69 | KV453138.1 | 621231  | 18-scf00300 | 18 |
| AX-158137694 | 13 | 55.69 | KV453138.1 | 730570  | 18-scf00300 | 18 |
| AX-158137642 | 13 | 55.69 | KV453138.1 | 933693  | 18-scf00300 | 18 |
| AX-158137639 | 13 | 55.69 | KV453138.1 | 949690  | 18-scf00300 | 18 |
| AX-158137616 | 13 | 55.69 | KV453138.1 | 1024645 | 18-scf00300 | 18 |
| AX-158137603 | 13 | 55.69 | KV453138.1 | 1067861 | 18-scf00300 | 18 |
| AX-158137589 | 13 | 55.69 | KV453138.1 | 1089082 | 18-scf00300 | 18 |
| AX-158137572 | 13 | 55.69 | KV453138.1 | 1116680 | 18-scf00300 | 18 |

|              |    |        |            |         |             |    |
|--------------|----|--------|------------|---------|-------------|----|
| AX-157830887 | 13 | 55.69  | KV453138.1 | 1159706 | 18-scf00300 | 18 |
| AX-158137860 | 13 | 55.69  | KV453138.1 | 1227382 | 18-scf00300 | 18 |
| AX-158137879 | 13 | 55.69  | KV453138.1 | 1269086 | 18-scf00300 | 18 |
| AX-158138137 | 13 | 55.69  | KV453138.1 | 1823498 | 18-scf00300 | 18 |
| AX-158138152 | 13 | 55.69  | KV453138.1 | 1860886 | 18-scf00300 | 18 |
| AX-158138153 | 13 | 55.69  | KV453138.1 | 1861946 | 18-scf00300 | 18 |
| AX-158138254 | 13 | 55.69  | KV453138.1 | 2118132 | 18-scf00300 | 18 |
| AX-158138324 | 13 | 55.69  | KV453138.1 | 2326260 | 18-scf00300 | 18 |
| AX-158138396 | 13 | 55.69  | KV453138.1 | 2495453 | 18-scf00300 | 18 |
| AX-158138459 | 13 | 55.69  | KV453138.1 | 2622358 | 18-scf00300 | 18 |
| AX-158138663 | 13 | 55.69  | KV453138.1 | 3050316 | 18-scf00300 | 18 |
| AX-158138939 | 13 | 55.69  | KV453138.1 | 3417507 | 18-scf00300 | 18 |
| AX-157871568 | 13 | 55.69  | KV453138.1 | 3423333 | 18-scf00300 | 18 |
| AX-158138944 | 13 | 55.69  | KV453138.1 | 3423770 | 18-scf00300 | 18 |
| AX-158138945 | 13 | 55.69  | KV453138.1 | 3424675 | 18-scf00300 | 18 |
| AX-158138946 | 13 | 55.69  | KV453138.1 | 3424922 | 18-scf00300 | 18 |
| AX-158138948 | 13 | 55.69  | KV453138.1 | 3426837 | 18-scf00300 | 18 |
| AX-158392987 | 13 | 55.69  | KV453138.1 | 3440045 | 18-scf00300 | 18 |
| AX-158138956 | 13 | 55.69  | KV453138.1 | 3445145 | 18-scf00300 | 18 |
| AX-158138957 | 13 | 55.69  | KV453138.1 | 3447908 | 18-scf00300 | 18 |
| AX-158138960 | 13 | 55.69  | KV453138.1 | 3451652 | 18-scf00300 | 18 |
| AX-158138962 | 13 | 55.69  | KV453138.1 | 3453115 | 18-scf00300 | 18 |
| AX-158138967 | 13 | 55.69  | KV453138.1 | 3458046 | 18-scf00300 | 18 |
| AX-158138968 | 13 | 55.69  | KV453138.1 | 3460173 | 18-scf00300 | 18 |
| AX-158138972 | 13 | 55.69  | KV453138.1 | 3463913 | 18-scf00300 | 18 |
| AX-158139519 | 13 | 55.69  | KV453138.1 | 4372543 | 18-scf00300 | 18 |
| AX-158139609 | 13 | 55.69  | KV453138.1 | 4496262 | 18-scf00300 | 18 |
| AX-157703456 | 13 | 55.799 | KV453128.1 | 6928482 | 18-scf00286 | 18 |
| AX-158136915 | 13 | 55.799 | KV453135.1 | 1159785 | 18-scf00292 | 18 |
| AX-158136944 | 13 | 55.799 | KV453135.1 | 1243673 | 18-scf00292 | 18 |
| AX-158136948 | 13 | 55.799 | KV453135.1 | 1254262 | 18-scf00292 | 18 |
| AX-158136950 | 13 | 55.799 | KV453135.1 | 1255628 | 18-scf00292 | 18 |
| AX-158136965 | 13 | 55.799 | KV453135.1 | 1291322 | 18-scf00292 | 18 |
| AX-158136973 | 13 | 55.799 | KV453135.1 | 1305732 | 18-scf00292 | 18 |
| AX-158136975 | 13 | 55.799 | KV453135.1 | 1318558 | 18-scf00292 | 18 |
| AX-158137033 | 13 | 55.799 | KV453135.1 | 1526030 | 18-scf00292 | 18 |
| AX-158137039 | 13 | 55.799 | KV453135.1 | 1551246 | 18-scf00292 | 18 |
| AX-158137043 | 13 | 55.799 | KV453135.1 | 1605844 | 18-scf00292 | 18 |
| AX-158137048 | 13 | 55.799 | KV453135.1 | 1627362 | 18-scf00292 | 18 |
| AX-158137049 | 13 | 55.799 | KV453135.1 | 1636838 | 18-scf00292 | 18 |
| AX-158137050 | 13 | 55.799 | KV453135.1 | 1645819 | 18-scf00292 | 18 |
| AX-158137052 | 13 | 55.799 | KV453135.1 | 1654886 | 18-scf00292 | 18 |
| AX-158137060 | 13 | 55.799 | KV453135.1 | 1693974 | 18-scf00292 | 18 |
| AX-158137061 | 13 | 55.799 | KV453135.1 | 1696877 | 18-scf00292 | 18 |
| AX-158137065 | 13 | 55.799 | KV453135.1 | 1718788 | 18-scf00292 | 18 |
| AX-158137075 | 13 | 55.799 | KV453135.1 | 1771357 | 18-scf00292 | 18 |
| AX-158137085 | 13 | 55.799 | KV453135.1 | 1828625 | 18-scf00292 | 18 |
| AX-158137254 | 13 | 55.799 | KV453136.1 | 105883  | 18-scf00294 | 18 |
| AX-158137262 | 13 | 55.799 | KV453136.1 | 147704  | 18-scf00294 | 18 |
| AX-157744202 | 13 | 55.799 | KV453138.1 | 245361  | 18-scf00300 | 18 |
| AX-158137825 | 13 | 55.799 | KV453138.1 | 248565  | 18-scf00300 | 18 |



|              |    |        |            |         |             |    |
|--------------|----|--------|------------|---------|-------------|----|
| AX-158137817 | 13 | 55.799 | KV453138.1 | 259945  | 18-scf00300 | 18 |
| AX-158137813 | 13 | 55.799 | KV453138.1 | 280434  | 18-scf00300 | 18 |
| AX-158137810 | 13 | 55.799 | KV453138.1 | 295358  | 18-scf00300 | 18 |
| AX-158137807 | 13 | 55.799 | KV453138.1 | 298015  | 18-scf00300 | 18 |
| AX-158137806 | 13 | 55.799 | KV453138.1 | 300216  | 18-scf00300 | 18 |
| AX-157830957 | 13 | 55.799 | KV453138.1 | 302543  | 18-scf00300 | 18 |
| AX-157748052 | 13 | 55.799 | KV453138.1 | 302700  | 18-scf00300 | 18 |
| AX-158411947 | 13 | 55.799 | KV453138.1 | 322874  | 18-scf00300 | 18 |
| AX-158422832 | 13 | 55.799 | KV453138.1 | 322950  | 18-scf00300 | 18 |
| AX-158137797 | 13 | 55.799 | KV453138.1 | 339573  | 18-scf00300 | 18 |
| AX-157830953 | 13 | 55.799 | KV453138.1 | 347927  | 18-scf00300 | 18 |
| AX-158138209 | 13 | 55.799 | KV453138.1 | 2002530 | 18-scf00300 | 18 |
| AX-158138312 | 13 | 55.799 | KV453138.1 | 2303670 | 18-scf00300 | 18 |
| AX-158138316 | 13 | 55.799 | KV453138.1 | 2308997 | 18-scf00300 | 18 |
| AX-158138433 | 13 | 55.799 | KV453138.1 | 2570173 | 18-scf00300 | 18 |
| AX-158138442 | 13 | 55.799 | KV453138.1 | 2587576 | 18-scf00300 | 18 |
| AX-158138477 | 13 | 55.799 | KV453138.1 | 2682523 | 18-scf00300 | 18 |
| AX-158137840 | 13 | 55.8   | KV453138.1 | 216962  | 18-scf00300 | 18 |
| AX-158137836 | 13 | 55.8   | KV453138.1 | 219776  | 18-scf00300 | 18 |
| AX-158137831 | 13 | 55.8   | KV453138.1 | 228548  | 18-scf00300 | 18 |
| AX-158137828 | 13 | 55.8   | KV453138.1 | 241383  | 18-scf00300 | 18 |
| AX-158411955 | 13 | 55.801 | KV453138.1 | 198969  | 18-scf00300 | 18 |
| AX-158137636 | 13 | 55.801 | KV453138.1 | 960067  | 18-scf00300 | 18 |
| AX-158137584 | 13 | 55.801 | KV453138.1 | 1093435 | 18-scf00300 | 18 |
| AX-158137861 | 13 | 55.801 | KV453138.1 | 1228150 | 18-scf00300 | 18 |
| AX-158137862 | 13 | 55.801 | KV453138.1 | 1228920 | 18-scf00300 | 18 |
| AX-157830963 | 13 | 55.801 | KV453138.1 | 1229406 | 18-scf00300 | 18 |
| AX-158137863 | 13 | 55.801 | KV453138.1 | 1230389 | 18-scf00300 | 18 |
| AX-158137866 | 13 | 55.801 | KV453138.1 | 1238717 | 18-scf00300 | 18 |
| AX-158138438 | 13 | 55.801 | KV453138.1 | 2575316 | 18-scf00300 | 18 |
| AX-158137070 | 13 | 56.127 | KV453135.1 | 1739495 | 18-scf00292 | 18 |
| AX-158137818 | 13 | 56.127 | KV453138.1 | 259269  | 18-scf00300 | 18 |
| AX-158411957 | 13 | 56.127 | KV453138.1 | 1240187 | 18-scf00300 | 18 |
| AX-158137872 | 13 | 56.127 | KV453138.1 | 1249053 | 18-scf00300 | 18 |
| AX-158137888 | 13 | 56.127 | KV453138.1 | 1291950 | 18-scf00300 | 18 |
| AX-158137892 | 13 | 56.127 | KV453138.1 | 1299052 | 18-scf00300 | 18 |
| AX-158137900 | 13 | 56.127 | KV453138.1 | 1308588 | 18-scf00300 | 18 |
| AX-158137902 | 13 | 56.127 | KV453138.1 | 1313601 | 18-scf00300 | 18 |
| AX-158411960 | 13 | 56.127 | KV453138.1 | 1317353 | 18-scf00300 | 18 |
| AX-158137906 | 13 | 56.127 | KV453138.1 | 1321012 | 18-scf00300 | 18 |
| AX-158137907 | 13 | 56.127 | KV453138.1 | 1321521 | 18-scf00300 | 18 |
| AX-158137910 | 13 | 56.127 | KV453138.1 | 1326823 | 18-scf00300 | 18 |
| AX-157752878 | 13 | 56.127 | KV453138.1 | 1327445 | 18-scf00300 | 18 |
| AX-158385369 | 13 | 56.127 | KV453138.1 | 1334330 | 18-scf00300 | 18 |
| AX-158137913 | 13 | 56.127 | KV453138.1 | 1337999 | 18-scf00300 | 18 |
| AX-158137914 | 13 | 56.127 | KV453138.1 | 1338362 | 18-scf00300 | 18 |
| AX-158137915 | 13 | 56.127 | KV453138.1 | 1339226 | 18-scf00300 | 18 |
| AX-158137916 | 13 | 56.127 | KV453138.1 | 1339825 | 18-scf00300 | 18 |
| AX-158137920 | 13 | 56.127 | KV453138.1 | 1358732 | 18-scf00300 | 18 |
| AX-158137922 | 13 | 56.127 | KV453138.1 | 1360941 | 18-scf00300 | 18 |
| AX-158137928 | 13 | 56.127 | KV453138.1 | 1372766 | 18-scf00300 | 18 |

|              |    |        |            |         |             |    |
|--------------|----|--------|------------|---------|-------------|----|
| AX-157712958 | 13 | 56.127 | KV453138.1 | 1373672 | 18-scf00300 | 18 |
| AX-158137929 | 13 | 56.127 | KV453138.1 | 1374771 | 18-scf00300 | 18 |
| AX-158137930 | 13 | 56.127 | KV453138.1 | 1375192 | 18-scf00300 | 18 |
| AX-158137932 | 13 | 56.127 | KV453138.1 | 1378179 | 18-scf00300 | 18 |
| AX-158137933 | 13 | 56.127 | KV453138.1 | 1382422 | 18-scf00300 | 18 |
| AX-158137934 | 13 | 56.127 | KV453138.1 | 1384602 | 18-scf00300 | 18 |
| AX-158137935 | 13 | 56.127 | KV453138.1 | 1386003 | 18-scf00300 | 18 |
| AX-158137936 | 13 | 56.127 | KV453138.1 | 1387184 | 18-scf00300 | 18 |
| AX-158137938 | 13 | 56.127 | KV453138.1 | 1391648 | 18-scf00300 | 18 |
| AX-158137941 | 13 | 56.127 | KV453138.1 | 1395234 | 18-scf00300 | 18 |
| AX-157725197 | 13 | 56.127 | KV453138.1 | 1425894 | 18-scf00300 | 18 |
| AX-158137956 | 13 | 56.127 | KV453138.1 | 1426709 | 18-scf00300 | 18 |
| AX-158137957 | 13 | 56.127 | KV453138.1 | 1427158 | 18-scf00300 | 18 |
| AX-158411967 | 13 | 56.127 | KV453138.1 | 1546183 | 18-scf00300 | 18 |
| AX-158138068 | 13 | 56.127 | KV453138.1 | 1629095 | 18-scf00300 | 18 |
| AX-158138069 | 13 | 56.127 | KV453138.1 | 1629845 | 18-scf00300 | 18 |
| AX-158138748 | 13 | 56.127 | KV453138.1 | 3171536 | 18-scf00300 | 18 |
| AX-158138777 | 13 | 56.127 | KV453138.1 | 3214138 | 18-scf00300 | 18 |
| AX-158138826 | 13 | 56.127 | KV453138.1 | 3260777 | 18-scf00300 | 18 |
| AX-158138828 | 13 | 56.127 | KV453138.1 | 3261278 | 18-scf00300 | 18 |
| AX-158138830 | 13 | 56.127 | KV453138.1 | 3265641 | 18-scf00300 | 18 |
| AX-158138871 | 13 | 56.127 | KV453138.1 | 3309542 | 18-scf00300 | 18 |
| AX-158139142 | 13 | 56.127 | KV453138.1 | 3747608 | 18-scf00300 | 18 |
| AX-158139215 | 13 | 56.127 | KV453138.1 | 3887816 | 18-scf00300 | 18 |
| AX-158139216 | 13 | 56.127 | KV453138.1 | 3888499 | 18-scf00300 | 18 |
| AX-158139228 | 13 | 56.127 | KV453138.1 | 3900908 | 18-scf00300 | 18 |
| AX-158139315 | 13 | 56.127 | KV453138.1 | 4049555 | 18-scf00300 | 18 |
| AX-158137955 | 13 | 56.155 | KV453138.1 | 1425020 | 18-scf00300 | 18 |
| AX-158134831 | 13 | 56.236 | KV453128.1 | 6628584 | 18-scf00286 | 18 |
| AX-157830569 | 13 | 56.236 | KV453128.1 | 6849941 | 18-scf00286 | 18 |
| AX-157830577 | 13 | 56.236 | KV453128.1 | 6887312 | 18-scf00286 | 18 |
| AX-158135692 | 13 | 56.236 | KV453130.1 | 215127  | 18-scf00290 | 18 |
| AX-158136203 | 13 | 56.236 | KV453137.1 | 335992  | 18-scf00291 | 18 |
| AX-158136356 | 13 | 56.236 | KV453137.1 | 731406  | 18-scf00291 | 18 |
| AX-158136358 | 13 | 56.236 | KV453137.1 | 737029  | 18-scf00291 | 18 |
| AX-158136403 | 13 | 56.236 | KV453137.1 | 829072  | 18-scf00291 | 18 |
| AX-158136466 | 13 | 56.236 | KV453137.1 | 948807  | 18-scf00291 | 18 |
| AX-158136487 | 13 | 56.236 | KV453137.1 | 1037698 | 18-scf00291 | 18 |
| AX-157830724 | 13 | 56.236 | KV453137.1 | 1069214 | 18-scf00291 | 18 |
| AX-158136505 | 13 | 56.236 | KV453137.1 | 1071746 | 18-scf00291 | 18 |
| AX-158136514 | 13 | 56.236 | KV453137.1 | 1083588 | 18-scf00291 | 18 |
| AX-158136516 | 13 | 56.236 | KV453137.1 | 1086543 | 18-scf00291 | 18 |
| AX-158392908 | 13 | 56.236 | KV453137.1 | 1106801 | 18-scf00291 | 18 |
| AX-158136572 | 13 | 56.236 | KV453137.1 | 1256460 | 18-scf00291 | 18 |
| AX-158136600 | 13 | 56.236 | KV453137.1 | 1351444 | 18-scf00291 | 18 |
| AX-158136610 | 13 | 56.236 | KV453137.1 | 1384748 | 18-scf00291 | 18 |
| AX-158136671 | 13 | 56.236 | KV453137.1 | 1629641 | 18-scf00291 | 18 |
| AX-158136676 | 13 | 56.236 | KV453137.1 | 1636983 | 18-scf00291 | 18 |
| AX-158136681 | 13 | 56.236 | KV453137.1 | 1655633 | 18-scf00291 | 18 |
| AX-158136697 | 13 | 56.236 | KV453135.1 | 36099   | 18-scf00292 | 18 |
| AX-158136710 | 13 | 56.236 | KV453135.1 | 338956  | 18-scf00292 | 18 |

|              |    |        |            |         |             |    |
|--------------|----|--------|------------|---------|-------------|----|
| AX-158136764 | 13 | 56.236 | KV453135.1 | 712352  | 18-scf00292 | 18 |
| AX-158136767 | 13 | 56.236 | KV453135.1 | 720794  | 18-scf00292 | 18 |
| AX-158136797 | 13 | 56.236 | KV453135.1 | 833524  | 18-scf00292 | 18 |
| AX-158136820 | 13 | 56.236 | KV453135.1 | 900345  | 18-scf00292 | 18 |
| AX-158136899 | 13 | 56.236 | KV453135.1 | 1102387 | 18-scf00292 | 18 |
| AX-158411830 | 13 | 56.236 | KV453135.1 | 1862951 | 18-scf00292 | 18 |
| AX-158137207 | 13 | 56.236 | KV453131.1 | 31196   | 18-scf00293 | 18 |
| AX-157878130 | 13 | 56.236 | KV453131.1 | 36984   | 18-scf00293 | 18 |
| AX-157752932 | 13 | 56.236 | KV453131.1 | 96025   | 18-scf00293 | 18 |
| AX-158137180 | 13 | 56.236 | KV453131.1 | 111360  | 18-scf00293 | 18 |
| AX-158137136 | 13 | 56.236 | KV453131.1 | 212294  | 18-scf00293 | 18 |
| AX-158135996 | 13 | 56.236 | KV453131.1 | 441212  | 18-scf00293 | 18 |
| AX-158135931 | 13 | 56.236 | KV453131.1 | 557787  | 18-scf00293 | 18 |
| AX-158137233 | 13 | 56.236 | KV453136.1 | 34968   | 18-scf00294 | 18 |
| AX-158137264 | 13 | 56.236 | KV453136.1 | 159475  | 18-scf00294 | 18 |
| AX-157753601 | 13 | 56.236 | KV453134.1 | 56147   | 18-scf00296 | 18 |
| AX-158137390 | 13 | 56.236 | KV453134.1 | 57644   | 18-scf00296 | 18 |
| AX-158137401 | 13 | 56.236 | KV453134.1 | 76055   | 18-scf00296 | 18 |
| AX-158137405 | 13 | 56.236 | KV453134.1 | 81654   | 18-scf00296 | 18 |
| AX-157710781 | 13 | 56.236 | KV453134.1 | 129965  | 18-scf00296 | 18 |
| AX-158137442 | 13 | 56.236 | KV453134.1 | 177902  | 18-scf00296 | 18 |
| AX-157857920 | 13 | 56.236 | KV453134.1 | 408834  | 18-scf00296 | 18 |
| AX-157830962 | 13 | 56.236 | KV453138.1 | 197465  | 18-scf00300 | 18 |
| AX-157830960 | 13 | 56.236 | KV453138.1 | 232697  | 18-scf00300 | 18 |
| AX-158137830 | 13 | 56.236 | KV453138.1 | 237854  | 18-scf00300 | 18 |
| AX-157878154 | 13 | 56.236 | KV453138.1 | 292749  | 18-scf00300 | 18 |
| AX-158422835 | 13 | 56.236 | KV453138.1 | 307557  | 18-scf00300 | 18 |
| AX-158137782 | 13 | 56.236 | KV453138.1 | 406395  | 18-scf00300 | 18 |
| AX-157857927 | 13 | 56.236 | KV453138.1 | 532447  | 18-scf00300 | 18 |
| AX-158137754 | 13 | 56.236 | KV453138.1 | 532806  | 18-scf00300 | 18 |
| AX-158411942 | 13 | 56.236 | KV453138.1 | 538261  | 18-scf00300 | 18 |
| AX-158137750 | 13 | 56.236 | KV453138.1 | 549937  | 18-scf00300 | 18 |
| AX-158137746 | 13 | 56.236 | KV453138.1 | 561147  | 18-scf00300 | 18 |
| AX-157696860 | 13 | 56.236 | KV453138.1 | 567290  | 18-scf00300 | 18 |
| AX-158137738 | 13 | 56.236 | KV453138.1 | 578874  | 18-scf00300 | 18 |
| AX-158137717 | 13 | 56.236 | KV453138.1 | 654113  | 18-scf00300 | 18 |
| AX-158137716 | 13 | 56.236 | KV453138.1 | 659314  | 18-scf00300 | 18 |
| AX-158417535 | 13 | 56.236 | KV453138.1 | 666249  | 18-scf00300 | 18 |
| AX-157830935 | 13 | 56.236 | KV453138.1 | 670447  | 18-scf00300 | 18 |
| AX-157857926 | 13 | 56.236 | KV453138.1 | 671776  | 18-scf00300 | 18 |
| AX-158137708 | 13 | 56.236 | KV453138.1 | 690193  | 18-scf00300 | 18 |
| AX-158137707 | 13 | 56.236 | KV453138.1 | 694978  | 18-scf00300 | 18 |
| AX-158137706 | 13 | 56.236 | KV453138.1 | 695952  | 18-scf00300 | 18 |
| AX-157863434 | 13 | 56.236 | KV453138.1 | 696368  | 18-scf00300 | 18 |
| AX-158137703 | 13 | 56.236 | KV453138.1 | 699649  | 18-scf00300 | 18 |
| AX-157871552 | 13 | 56.236 | KV453138.1 | 700133  | 18-scf00300 | 18 |
| AX-158137701 | 13 | 56.236 | KV453138.1 | 701931  | 18-scf00300 | 18 |
| AX-157830930 | 13 | 56.236 | KV453138.1 | 705916  | 18-scf00300 | 18 |
| AX-157702606 | 13 | 56.236 | KV453138.1 | 709061  | 18-scf00300 | 18 |
| AX-158392966 | 13 | 56.236 | KV453138.1 | 712312  | 18-scf00300 | 18 |
| AX-158137697 | 13 | 56.236 | KV453138.1 | 722167  | 18-scf00300 | 18 |

|              |    |        |            |         |             |    |
|--------------|----|--------|------------|---------|-------------|----|
| AX-157830929 | 13 | 56.236 | KV453138.1 | 729394  | 18-scf00300 | 18 |
| AX-158137695 | 13 | 56.236 | KV453138.1 | 729454  | 18-scf00300 | 18 |
| AX-158392964 | 13 | 56.236 | KV453138.1 | 729623  | 18-scf00300 | 18 |
| AX-158408309 | 13 | 56.236 | KV453138.1 | 729756  | 18-scf00300 | 18 |
| AX-158411934 | 13 | 56.236 | KV453138.1 | 730058  | 18-scf00300 | 18 |
| AX-157830928 | 13 | 56.236 | KV453138.1 | 755247  | 18-scf00300 | 18 |
| AX-157830927 | 13 | 56.236 | KV453138.1 | 769706  | 18-scf00300 | 18 |
| AX-157830926 | 13 | 56.236 | KV453138.1 | 770561  | 18-scf00300 | 18 |
| AX-157871548 | 13 | 56.236 | KV453138.1 | 797523  | 18-scf00300 | 18 |
| AX-158137668 | 13 | 56.236 | KV453138.1 | 798620  | 18-scf00300 | 18 |
| AX-157830923 | 13 | 56.236 | KV453138.1 | 800424  | 18-scf00300 | 18 |
| AX-158137666 | 13 | 56.236 | KV453138.1 | 801994  | 18-scf00300 | 18 |
| AX-157830921 | 13 | 56.236 | KV453138.1 | 802981  | 18-scf00300 | 18 |
| AX-157830920 | 13 | 56.236 | KV453138.1 | 807300  | 18-scf00300 | 18 |
| AX-158137664 | 13 | 56.236 | KV453138.1 | 809901  | 18-scf00300 | 18 |
| AX-157830917 | 13 | 56.236 | KV453138.1 | 817186  | 18-scf00300 | 18 |
| AX-158137661 | 13 | 56.236 | KV453138.1 | 818001  | 18-scf00300 | 18 |
| AX-157830916 | 13 | 56.236 | KV453138.1 | 825391  | 18-scf00300 | 18 |
| AX-158137657 | 13 | 56.236 | KV453138.1 | 834711  | 18-scf00300 | 18 |
| AX-158411925 | 13 | 56.236 | KV453138.1 | 837344  | 18-scf00300 | 18 |
| AX-157871540 | 13 | 56.236 | KV453138.1 | 841840  | 18-scf00300 | 18 |
| AX-157871539 | 13 | 56.236 | KV453138.1 | 848692  | 18-scf00300 | 18 |
| AX-158411924 | 13 | 56.236 | KV453138.1 | 852271  | 18-scf00300 | 18 |
| AX-157857923 | 13 | 56.236 | KV453138.1 | 876063  | 18-scf00300 | 18 |
| AX-157698633 | 13 | 56.236 | KV453138.1 | 898986  | 18-scf00300 | 18 |
| AX-157830910 | 13 | 56.236 | KV453138.1 | 903513  | 18-scf00300 | 18 |
| AX-158411923 | 13 | 56.236 | KV453138.1 | 904183  | 18-scf00300 | 18 |
| AX-158411922 | 13 | 56.236 | KV453138.1 | 904230  | 18-scf00300 | 18 |
| AX-158408302 | 13 | 56.236 | KV453138.1 | 905780  | 18-scf00300 | 18 |
| AX-158411919 | 13 | 56.236 | KV453138.1 | 907015  | 18-scf00300 | 18 |
| AX-158411918 | 13 | 56.236 | KV453138.1 | 907066  | 18-scf00300 | 18 |
| AX-158411915 | 13 | 56.236 | KV453138.1 | 907775  | 18-scf00300 | 18 |
| AX-158408300 | 13 | 56.236 | KV453138.1 | 908209  | 18-scf00300 | 18 |
| AX-158411913 | 13 | 56.236 | KV453138.1 | 909953  | 18-scf00300 | 18 |
| AX-158411912 | 13 | 56.236 | KV453138.1 | 910467  | 18-scf00300 | 18 |
| AX-158411910 | 13 | 56.236 | KV453138.1 | 911104  | 18-scf00300 | 18 |
| AX-158411907 | 13 | 56.236 | KV453138.1 | 912815  | 18-scf00300 | 18 |
| AX-157871538 | 13 | 56.236 | KV453138.1 | 919723  | 18-scf00300 | 18 |
| AX-158417529 | 13 | 56.236 | KV453138.1 | 923435  | 18-scf00300 | 18 |
| AX-158411906 | 13 | 56.236 | KV453138.1 | 923474  | 18-scf00300 | 18 |
| AX-158137630 | 13 | 56.236 | KV453138.1 | 972348  | 18-scf00300 | 18 |
| AX-158137620 | 13 | 56.236 | KV453138.1 | 1016220 | 18-scf00300 | 18 |
| AX-158137613 | 13 | 56.236 | KV453138.1 | 1032566 | 18-scf00300 | 18 |
| AX-158137609 | 13 | 56.236 | KV453138.1 | 1047849 | 18-scf00300 | 18 |
| AX-158137608 | 13 | 56.236 | KV453138.1 | 1051313 | 18-scf00300 | 18 |
| AX-158137600 | 13 | 56.236 | KV453138.1 | 1070202 | 18-scf00300 | 18 |
| AX-158137569 | 13 | 56.236 | KV453138.1 | 1125612 | 18-scf00300 | 18 |
| AX-157830894 | 13 | 56.236 | KV453138.1 | 1126059 | 18-scf00300 | 18 |
| AX-157830892 | 13 | 56.236 | KV453138.1 | 1136426 | 18-scf00300 | 18 |
| AX-158137558 | 13 | 56.236 | KV453138.1 | 1175146 | 18-scf00300 | 18 |
| AX-157871525 | 13 | 56.236 | KV453138.1 | 1182304 | 18-scf00300 | 18 |

|              |    |        |            |         |             |    |
|--------------|----|--------|------------|---------|-------------|----|
| AX-157871524 | 13 | 56.236 | KV453138.1 | 1182544 | 18-scf00300 | 18 |
| AX-158137549 | 13 | 56.236 | KV453138.1 | 1199268 | 18-scf00300 | 18 |
| AX-157793026 | 13 | 56.236 | KV453138.1 | 1212652 | 18-scf00300 | 18 |
| AX-158137858 | 13 | 56.236 | KV453138.1 | 1223410 | 18-scf00300 | 18 |
| AX-157857935 | 13 | 56.236 | KV453138.1 | 1223874 | 18-scf00300 | 18 |
| AX-157709109 | 13 | 56.236 | KV453138.1 | 1229016 | 18-scf00300 | 18 |
| AX-158137873 | 13 | 56.236 | KV453138.1 | 1252321 | 18-scf00300 | 18 |
| AX-157830966 | 13 | 56.236 | KV453138.1 | 1261810 | 18-scf00300 | 18 |
| AX-158392969 | 13 | 56.236 | KV453138.1 | 1272813 | 18-scf00300 | 18 |
| AX-158137881 | 13 | 56.236 | KV453138.1 | 1280672 | 18-scf00300 | 18 |
| AX-158137885 | 13 | 56.236 | KV453138.1 | 1287841 | 18-scf00300 | 18 |
| AX-158137886 | 13 | 56.236 | KV453138.1 | 1288240 | 18-scf00300 | 18 |
| AX-158137894 | 13 | 56.236 | KV453138.1 | 1303527 | 18-scf00300 | 18 |
| AX-158137901 | 13 | 56.236 | KV453138.1 | 1309015 | 18-scf00300 | 18 |
| AX-158137919 | 13 | 56.236 | KV453138.1 | 1355004 | 18-scf00300 | 18 |
| AX-157857936 | 13 | 56.236 | KV453138.1 | 1381673 | 18-scf00300 | 18 |
| AX-158137944 | 13 | 56.236 | KV453138.1 | 1399026 | 18-scf00300 | 18 |
| AX-158137958 | 13 | 56.236 | KV453138.1 | 1429485 | 18-scf00300 | 18 |
| AX-158137961 | 13 | 56.236 | KV453138.1 | 1439011 | 18-scf00300 | 18 |
| AX-158137962 | 13 | 56.236 | KV453138.1 | 1439588 | 18-scf00300 | 18 |
| AX-158137963 | 13 | 56.236 | KV453138.1 | 1440623 | 18-scf00300 | 18 |
| AX-158137968 | 13 | 56.236 | KV453138.1 | 1449061 | 18-scf00300 | 18 |
| AX-158137971 | 13 | 56.236 | KV453138.1 | 1454074 | 18-scf00300 | 18 |
| AX-158137974 | 13 | 56.236 | KV453138.1 | 1456665 | 18-scf00300 | 18 |
| AX-158137975 | 13 | 56.236 | KV453138.1 | 1456734 | 18-scf00300 | 18 |
| AX-158137988 | 13 | 56.236 | KV453138.1 | 1484687 | 18-scf00300 | 18 |
| AX-158138001 | 13 | 56.236 | KV453138.1 | 1501826 | 18-scf00300 | 18 |
| AX-158138009 | 13 | 56.236 | KV453138.1 | 1512227 | 18-scf00300 | 18 |
| AX-158138012 | 13 | 56.236 | KV453138.1 | 1515004 | 18-scf00300 | 18 |
| AX-158138013 | 13 | 56.236 | KV453138.1 | 1516465 | 18-scf00300 | 18 |
| AX-158138014 | 13 | 56.236 | KV453138.1 | 1516996 | 18-scf00300 | 18 |
| AX-158138015 | 13 | 56.236 | KV453138.1 | 1518443 | 18-scf00300 | 18 |
| AX-158138020 | 13 | 56.236 | KV453138.1 | 1521825 | 18-scf00300 | 18 |
| AX-158138022 | 13 | 56.236 | KV453138.1 | 1523618 | 18-scf00300 | 18 |
| AX-158138026 | 13 | 56.236 | KV453138.1 | 1530396 | 18-scf00300 | 18 |
| AX-158138029 | 13 | 56.236 | KV453138.1 | 1536333 | 18-scf00300 | 18 |
| AX-158138031 | 13 | 56.236 | KV453138.1 | 1537233 | 18-scf00300 | 18 |
| AX-158138032 | 13 | 56.236 | KV453138.1 | 1538445 | 18-scf00300 | 18 |
| AX-158138036 | 13 | 56.236 | KV453138.1 | 1544843 | 18-scf00300 | 18 |
| AX-158411966 | 13 | 56.236 | KV453138.1 | 1545783 | 18-scf00300 | 18 |
| AX-158138037 | 13 | 56.236 | KV453138.1 | 1547749 | 18-scf00300 | 18 |
| AX-158138041 | 13 | 56.236 | KV453138.1 | 1556140 | 18-scf00300 | 18 |
| AX-158138042 | 13 | 56.236 | KV453138.1 | 1556770 | 18-scf00300 | 18 |
| AX-158138043 | 13 | 56.236 | KV453138.1 | 1558269 | 18-scf00300 | 18 |
| AX-158138044 | 13 | 56.236 | KV453138.1 | 1561024 | 18-scf00300 | 18 |
| AX-157723874 | 13 | 56.236 | KV453138.1 | 1562711 | 18-scf00300 | 18 |
| AX-157830974 | 13 | 56.236 | KV453138.1 | 1586522 | 18-scf00300 | 18 |
| AX-158138058 | 13 | 56.236 | KV453138.1 | 1591873 | 18-scf00300 | 18 |
| AX-158138060 | 13 | 56.236 | KV453138.1 | 1603587 | 18-scf00300 | 18 |
| AX-158138061 | 13 | 56.236 | KV453138.1 | 1606355 | 18-scf00300 | 18 |
| AX-158138063 | 13 | 56.236 | KV453138.1 | 1614028 | 18-scf00300 | 18 |

|              |    |        |            |         |             |    |
|--------------|----|--------|------------|---------|-------------|----|
| AX-158403980 | 13 | 56.236 | KV453138.1 | 1621902 | 18-scf00300 | 18 |
| AX-157754308 | 13 | 56.236 | KV453138.1 | 1626455 | 18-scf00300 | 18 |
| AX-157745529 | 13 | 56.236 | KV453138.1 | 1628483 | 18-scf00300 | 18 |
| AX-158138070 | 13 | 56.236 | KV453138.1 | 1630137 | 18-scf00300 | 18 |
| AX-158138071 | 13 | 56.236 | KV453138.1 | 1630789 | 18-scf00300 | 18 |
| AX-158138086 | 13 | 56.236 | KV453138.1 | 1694824 | 18-scf00300 | 18 |
| AX-158138087 | 13 | 56.236 | KV453138.1 | 1695771 | 18-scf00300 | 18 |
| AX-158138093 | 13 | 56.236 | KV453138.1 | 1713996 | 18-scf00300 | 18 |
| AX-158138096 | 13 | 56.236 | KV453138.1 | 1727113 | 18-scf00300 | 18 |
| AX-158138097 | 13 | 56.236 | KV453138.1 | 1728566 | 18-scf00300 | 18 |
| AX-158138099 | 13 | 56.236 | KV453138.1 | 1732840 | 18-scf00300 | 18 |
| AX-158138106 | 13 | 56.236 | KV453138.1 | 1752119 | 18-scf00300 | 18 |
| AX-158138111 | 13 | 56.236 | KV453138.1 | 1758763 | 18-scf00300 | 18 |
| AX-158138133 | 13 | 56.236 | KV453138.1 | 1809054 | 18-scf00300 | 18 |
| AX-157752603 | 13 | 56.236 | KV453138.1 | 1819013 | 18-scf00300 | 18 |
| AX-158138140 | 13 | 56.236 | KV453138.1 | 1829364 | 18-scf00300 | 18 |
| AX-158138143 | 13 | 56.236 | KV453138.1 | 1835357 | 18-scf00300 | 18 |
| AX-158138156 | 13 | 56.236 | KV453138.1 | 1867516 | 18-scf00300 | 18 |
| AX-158138157 | 13 | 56.236 | KV453138.1 | 1871017 | 18-scf00300 | 18 |
| AX-158411971 | 13 | 56.236 | KV453138.1 | 1883508 | 18-scf00300 | 18 |
| AX-157857948 | 13 | 56.236 | KV453138.1 | 1883619 | 18-scf00300 | 18 |
| AX-158138163 | 13 | 56.236 | KV453138.1 | 1884844 | 18-scf00300 | 18 |
| AX-158138165 | 13 | 56.236 | KV453138.1 | 1888003 | 18-scf00300 | 18 |
| AX-158138166 | 13 | 56.236 | KV453138.1 | 1888657 | 18-scf00300 | 18 |
| AX-158138169 | 13 | 56.236 | KV453138.1 | 1898446 | 18-scf00300 | 18 |
| AX-158138176 | 13 | 56.236 | KV453138.1 | 1937267 | 18-scf00300 | 18 |
| AX-157830992 | 13 | 56.236 | KV453138.1 | 1937998 | 18-scf00300 | 18 |
| AX-158138182 | 13 | 56.236 | KV453138.1 | 1949904 | 18-scf00300 | 18 |
| AX-158138196 | 13 | 56.236 | KV453138.1 | 1974085 | 18-scf00300 | 18 |
| AX-158138197 | 13 | 56.236 | KV453138.1 | 1974625 | 18-scf00300 | 18 |
| AX-157830994 | 13 | 56.236 | KV453138.1 | 1975383 | 18-scf00300 | 18 |
| AX-158138198 | 13 | 56.236 | KV453138.1 | 1976444 | 18-scf00300 | 18 |
| AX-157830995 | 13 | 56.236 | KV453138.1 | 1977170 | 18-scf00300 | 18 |
| AX-158138199 | 13 | 56.236 | KV453138.1 | 1977502 | 18-scf00300 | 18 |
| AX-158138200 | 13 | 56.236 | KV453138.1 | 1984161 | 18-scf00300 | 18 |
| AX-158138211 | 13 | 56.236 | KV453138.1 | 2008875 | 18-scf00300 | 18 |
| AX-158411974 | 13 | 56.236 | KV453138.1 | 2030682 | 18-scf00300 | 18 |
| AX-158411976 | 13 | 56.236 | KV453138.1 | 2052301 | 18-scf00300 | 18 |
| AX-158138222 | 13 | 56.236 | KV453138.1 | 2054986 | 18-scf00300 | 18 |
| AX-157830997 | 13 | 56.236 | KV453138.1 | 2057230 | 18-scf00300 | 18 |
| AX-158138225 | 13 | 56.236 | KV453138.1 | 2059547 | 18-scf00300 | 18 |
| AX-158138226 | 13 | 56.236 | KV453138.1 | 2060789 | 18-scf00300 | 18 |
| AX-158138229 | 13 | 56.236 | KV453138.1 | 2076603 | 18-scf00300 | 18 |
| AX-158138230 | 13 | 56.236 | KV453138.1 | 2078841 | 18-scf00300 | 18 |
| AX-157774858 | 13 | 56.236 | KV453138.1 | 2080442 | 18-scf00300 | 18 |
| AX-157857950 | 13 | 56.236 | KV453138.1 | 2091225 | 18-scf00300 | 18 |
| AX-158138237 | 13 | 56.236 | KV453138.1 | 2096425 | 18-scf00300 | 18 |
| AX-158138238 | 13 | 56.236 | KV453138.1 | 2098514 | 18-scf00300 | 18 |
| AX-158138239 | 13 | 56.236 | KV453138.1 | 2098931 | 18-scf00300 | 18 |
| AX-158138242 | 13 | 56.236 | KV453138.1 | 2102052 | 18-scf00300 | 18 |
| AX-158138243 | 13 | 56.236 | KV453138.1 | 2103897 | 18-scf00300 | 18 |

|              |    |        |            |         |             |    |
|--------------|----|--------|------------|---------|-------------|----|
| AX-158138245 | 13 | 56.236 | KV453138.1 | 2105939 | 18-scf00300 | 18 |
| AX-158138247 | 13 | 56.236 | KV453138.1 | 2107622 | 18-scf00300 | 18 |
| AX-158138249 | 13 | 56.236 | KV453138.1 | 2109236 | 18-scf00300 | 18 |
| AX-158138251 | 13 | 56.236 | KV453138.1 | 2111925 | 18-scf00300 | 18 |
| AX-157721651 | 13 | 56.236 | KV453138.1 | 2114719 | 18-scf00300 | 18 |
| AX-158392973 | 13 | 56.236 | KV453138.1 | 2121712 | 18-scf00300 | 18 |
| AX-157857951 | 13 | 56.236 | KV453138.1 | 2133476 | 18-scf00300 | 18 |
| AX-158138262 | 13 | 56.236 | KV453138.1 | 2145976 | 18-scf00300 | 18 |
| AX-158138270 | 13 | 56.236 | KV453138.1 | 2177004 | 18-scf00300 | 18 |
| AX-158138273 | 13 | 56.236 | KV453138.1 | 2180713 | 18-scf00300 | 18 |
| AX-158138274 | 13 | 56.236 | KV453138.1 | 2185097 | 18-scf00300 | 18 |
| AX-158138276 | 13 | 56.236 | KV453138.1 | 2185969 | 18-scf00300 | 18 |
| AX-158138277 | 13 | 56.236 | KV453138.1 | 2186614 | 18-scf00300 | 18 |
| AX-158138286 | 13 | 56.236 | KV453138.1 | 2214664 | 18-scf00300 | 18 |
| AX-158138300 | 13 | 56.236 | KV453138.1 | 2275928 | 18-scf00300 | 18 |
| AX-158138302 | 13 | 56.236 | KV453138.1 | 2281635 | 18-scf00300 | 18 |
| AX-158138310 | 13 | 56.236 | KV453138.1 | 2299804 | 18-scf00300 | 18 |
| AX-157831001 | 13 | 56.236 | KV453138.1 | 2302079 | 18-scf00300 | 18 |
| AX-158138311 | 13 | 56.236 | KV453138.1 | 2302984 | 18-scf00300 | 18 |
| AX-158138335 | 13 | 56.236 | KV453138.1 | 2352473 | 18-scf00300 | 18 |
| AX-158138336 | 13 | 56.236 | KV453138.1 | 2352834 | 18-scf00300 | 18 |
| AX-157739819 | 13 | 56.236 | KV453138.1 | 2360090 | 18-scf00300 | 18 |
| AX-158138339 | 13 | 56.236 | KV453138.1 | 2361366 | 18-scf00300 | 18 |
| AX-158138340 | 13 | 56.236 | KV453138.1 | 2362056 | 18-scf00300 | 18 |
| AX-158138341 | 13 | 56.236 | KV453138.1 | 2363448 | 18-scf00300 | 18 |
| AX-158138342 | 13 | 56.236 | KV453138.1 | 2364986 | 18-scf00300 | 18 |
| AX-158392976 | 13 | 56.236 | KV453138.1 | 2369477 | 18-scf00300 | 18 |
| AX-158138346 | 13 | 56.236 | KV453138.1 | 2371202 | 18-scf00300 | 18 |
| AX-157857953 | 13 | 56.236 | KV453138.1 | 2388555 | 18-scf00300 | 18 |
| AX-157700858 | 13 | 56.236 | KV453138.1 | 2389931 | 18-scf00300 | 18 |
| AX-158408330 | 13 | 56.236 | KV453138.1 | 2400392 | 18-scf00300 | 18 |
| AX-158138356 | 13 | 56.236 | KV453138.1 | 2406250 | 18-scf00300 | 18 |
| AX-157696522 | 13 | 56.236 | KV453138.1 | 2438705 | 18-scf00300 | 18 |
| AX-158138383 | 13 | 56.236 | KV453138.1 | 2471556 | 18-scf00300 | 18 |
| AX-158138384 | 13 | 56.236 | KV453138.1 | 2472678 | 18-scf00300 | 18 |
| AX-157747407 | 13 | 56.236 | KV453138.1 | 2475654 | 18-scf00300 | 18 |
| AX-157831002 | 13 | 56.236 | KV453138.1 | 2516688 | 18-scf00300 | 18 |
| AX-158138406 | 13 | 56.236 | KV453138.1 | 2521699 | 18-scf00300 | 18 |
| AX-158138410 | 13 | 56.236 | KV453138.1 | 2531535 | 18-scf00300 | 18 |
| AX-158138413 | 13 | 56.236 | KV453138.1 | 2536907 | 18-scf00300 | 18 |
| AX-158138414 | 13 | 56.236 | KV453138.1 | 2537308 | 18-scf00300 | 18 |
| AX-158138419 | 13 | 56.236 | KV453138.1 | 2550585 | 18-scf00300 | 18 |
| AX-158138421 | 13 | 56.236 | KV453138.1 | 2552739 | 18-scf00300 | 18 |
| AX-158138422 | 13 | 56.236 | KV453138.1 | 2553938 | 18-scf00300 | 18 |
| AX-158138430 | 13 | 56.236 | KV453138.1 | 2566931 | 18-scf00300 | 18 |
| AX-158138431 | 13 | 56.236 | KV453138.1 | 2568030 | 18-scf00300 | 18 |
| AX-158138432 | 13 | 56.236 | KV453138.1 | 2569179 | 18-scf00300 | 18 |
| AX-158138439 | 13 | 56.236 | KV453138.1 | 2575889 | 18-scf00300 | 18 |
| AX-158411988 | 13 | 56.236 | KV453138.1 | 2591972 | 18-scf00300 | 18 |
| AX-158392980 | 13 | 56.236 | KV453138.1 | 2604001 | 18-scf00300 | 18 |
| AX-158138453 | 13 | 56.236 | KV453138.1 | 2606581 | 18-scf00300 | 18 |

|              |    |        |            |         |             |    |
|--------------|----|--------|------------|---------|-------------|----|
| AX-157718355 | 13 | 56.236 | KV453138.1 | 2610421 | 18-scf00300 | 18 |
| AX-157743913 | 13 | 56.236 | KV453138.1 | 2617876 | 18-scf00300 | 18 |
| AX-158138458 | 13 | 56.236 | KV453138.1 | 2621538 | 18-scf00300 | 18 |
| AX-158138470 | 13 | 56.236 | KV453138.1 | 2661420 | 18-scf00300 | 18 |
| AX-158138475 | 13 | 56.236 | KV453138.1 | 2679250 | 18-scf00300 | 18 |
| AX-158138480 | 13 | 56.236 | KV453138.1 | 2687192 | 18-scf00300 | 18 |
| AX-157857967 | 13 | 56.236 | KV453138.1 | 2703290 | 18-scf00300 | 18 |
| AX-157693277 | 13 | 56.236 | KV453138.1 | 2708709 | 18-scf00300 | 18 |
| AX-158138492 | 13 | 56.236 | KV453138.1 | 2714412 | 18-scf00300 | 18 |
| AX-157886312 | 13 | 56.236 | KV453138.1 | 2722532 | 18-scf00300 | 18 |
| AX-158138495 | 13 | 56.236 | KV453138.1 | 2722737 | 18-scf00300 | 18 |
| AX-158138496 | 13 | 56.236 | KV453138.1 | 2723463 | 18-scf00300 | 18 |
| AX-157724426 | 13 | 56.236 | KV453138.1 | 2734906 | 18-scf00300 | 18 |
| AX-158138502 | 13 | 56.236 | KV453138.1 | 2735492 | 18-scf00300 | 18 |
| AX-158138503 | 13 | 56.236 | KV453138.1 | 2735893 | 18-scf00300 | 18 |
| AX-158138504 | 13 | 56.236 | KV453138.1 | 2737906 | 18-scf00300 | 18 |
| AX-158138505 | 13 | 56.236 | KV453138.1 | 2740472 | 18-scf00300 | 18 |
| AX-158138506 | 13 | 56.236 | KV453138.1 | 2742820 | 18-scf00300 | 18 |
| AX-158138507 | 13 | 56.236 | KV453138.1 | 2744687 | 18-scf00300 | 18 |
| AX-158138508 | 13 | 56.236 | KV453138.1 | 2746435 | 18-scf00300 | 18 |
| AX-158138528 | 13 | 56.236 | KV453138.1 | 2794748 | 18-scf00300 | 18 |
| AX-158138529 | 13 | 56.236 | KV453138.1 | 2796868 | 18-scf00300 | 18 |
| AX-158138531 | 13 | 56.236 | KV453138.1 | 2803889 | 18-scf00300 | 18 |
| AX-158138534 | 13 | 56.236 | KV453138.1 | 2812377 | 18-scf00300 | 18 |
| AX-158138535 | 13 | 56.236 | KV453138.1 | 2813442 | 18-scf00300 | 18 |
| AX-158138541 | 13 | 56.236 | KV453138.1 | 2819022 | 18-scf00300 | 18 |
| AX-158138542 | 13 | 56.236 | KV453138.1 | 2824292 | 18-scf00300 | 18 |
| AX-157768420 | 13 | 56.236 | KV453138.1 | 2824991 | 18-scf00300 | 18 |
| AX-158138544 | 13 | 56.236 | KV453138.1 | 2825764 | 18-scf00300 | 18 |
| AX-158138545 | 13 | 56.236 | KV453138.1 | 2828071 | 18-scf00300 | 18 |
| AX-157722661 | 13 | 56.236 | KV453138.1 | 2828591 | 18-scf00300 | 18 |
| AX-157831017 | 13 | 56.236 | KV453138.1 | 2828717 | 18-scf00300 | 18 |
| AX-158138546 | 13 | 56.236 | KV453138.1 | 2828932 | 18-scf00300 | 18 |
| AX-157766784 | 13 | 56.236 | KV453138.1 | 2830782 | 18-scf00300 | 18 |
| AX-157831018 | 13 | 56.236 | KV453138.1 | 2831102 | 18-scf00300 | 18 |
| AX-158138547 | 13 | 56.236 | KV453138.1 | 2832424 | 18-scf00300 | 18 |
| AX-158138548 | 13 | 56.236 | KV453138.1 | 2832805 | 18-scf00300 | 18 |
| AX-158138550 | 13 | 56.236 | KV453138.1 | 2834536 | 18-scf00300 | 18 |
| AX-158138571 | 13 | 56.236 | KV453138.1 | 2869570 | 18-scf00300 | 18 |
| AX-158138574 | 13 | 56.236 | KV453138.1 | 2877656 | 18-scf00300 | 18 |
| AX-157714638 | 13 | 56.236 | KV453138.1 | 2885461 | 18-scf00300 | 18 |
| AX-158138578 | 13 | 56.236 | KV453138.1 | 2888966 | 18-scf00300 | 18 |
| AX-157747518 | 13 | 56.236 | KV453138.1 | 2899279 | 18-scf00300 | 18 |
| AX-158138587 | 13 | 56.236 | KV453138.1 | 2903629 | 18-scf00300 | 18 |
| AX-157831026 | 13 | 56.236 | KV453138.1 | 2906978 | 18-scf00300 | 18 |
| AX-157831035 | 13 | 56.236 | KV453138.1 | 2943100 | 18-scf00300 | 18 |
| AX-158392982 | 13 | 56.236 | KV453138.1 | 2952140 | 18-scf00300 | 18 |
| AX-158138606 | 13 | 56.236 | KV453138.1 | 2954392 | 18-scf00300 | 18 |
| AX-158138609 | 13 | 56.236 | KV453138.1 | 2959031 | 18-scf00300 | 18 |
| AX-158138618 | 13 | 56.236 | KV453138.1 | 2985393 | 18-scf00300 | 18 |
| AX-158138622 | 13 | 56.236 | KV453138.1 | 2991504 | 18-scf00300 | 18 |



|              |    |        |            |         |             |    |
|--------------|----|--------|------------|---------|-------------|----|
| AX-157831040 | 13 | 56.236 | KV453138.1 | 2997646 | 18-scf00300 | 18 |
| AX-158138627 | 13 | 56.236 | KV453138.1 | 2998992 | 18-scf00300 | 18 |
| AX-157831041 | 13 | 56.236 | KV453138.1 | 2999901 | 18-scf00300 | 18 |
| AX-158138632 | 13 | 56.236 | KV453138.1 | 3008141 | 18-scf00300 | 18 |
| AX-158138642 | 13 | 56.236 | KV453138.1 | 3026772 | 18-scf00300 | 18 |
| AX-157831052 | 13 | 56.236 | KV453138.1 | 3106780 | 18-scf00300 | 18 |
| AX-158138755 | 13 | 56.236 | KV453138.1 | 3177414 | 18-scf00300 | 18 |
| AX-157871563 | 13 | 56.236 | KV453138.1 | 3186557 | 18-scf00300 | 18 |
| AX-158138780 | 13 | 56.236 | KV453138.1 | 3218071 | 18-scf00300 | 18 |
| AX-158138797 | 13 | 56.236 | KV453138.1 | 3229773 | 18-scf00300 | 18 |
| AX-158138800 | 13 | 56.236 | KV453138.1 | 3232043 | 18-scf00300 | 18 |
| AX-158138895 | 13 | 56.236 | KV453138.1 | 3333721 | 18-scf00300 | 18 |
| AX-158138899 | 13 | 56.236 | KV453138.1 | 3336089 | 18-scf00300 | 18 |
| AX-158138902 | 13 | 56.236 | KV453138.1 | 3340616 | 18-scf00300 | 18 |
| AX-158138910 | 13 | 56.236 | KV453138.1 | 3346046 | 18-scf00300 | 18 |
| AX-158138912 | 13 | 56.236 | KV453138.1 | 3349181 | 18-scf00300 | 18 |
| AX-157831065 | 13 | 56.236 | KV453138.1 | 3352189 | 18-scf00300 | 18 |
| AX-158392986 | 13 | 56.236 | KV453138.1 | 3355705 | 18-scf00300 | 18 |
| AX-158138917 | 13 | 56.236 | KV453138.1 | 3358955 | 18-scf00300 | 18 |
| AX-158138942 | 13 | 56.236 | KV453138.1 | 3419944 | 18-scf00300 | 18 |
| AX-158392988 | 13 | 56.236 | KV453138.1 | 3504983 | 18-scf00300 | 18 |
| AX-158139011 | 13 | 56.236 | KV453138.1 | 3519102 | 18-scf00300 | 18 |
| AX-158139047 | 13 | 56.236 | KV453138.1 | 3575075 | 18-scf00300 | 18 |
| AX-158139095 | 13 | 56.236 | KV453138.1 | 3647574 | 18-scf00300 | 18 |
| AX-158412015 | 13 | 56.236 | KV453138.1 | 3769628 | 18-scf00300 | 18 |
| AX-158139197 | 13 | 56.236 | KV453138.1 | 3861541 | 18-scf00300 | 18 |
| AX-158139199 | 13 | 56.236 | KV453138.1 | 3867610 | 18-scf00300 | 18 |
| AX-157831094 | 13 | 56.236 | KV453138.1 | 3871502 | 18-scf00300 | 18 |
| AX-158139202 | 13 | 56.236 | KV453138.1 | 3873581 | 18-scf00300 | 18 |
| AX-158139218 | 13 | 56.236 | KV453138.1 | 3889794 | 18-scf00300 | 18 |
| AX-158139220 | 13 | 56.236 | KV453138.1 | 3891098 | 18-scf00300 | 18 |
| AX-158139232 | 13 | 56.236 | KV453138.1 | 3914513 | 18-scf00300 | 18 |
| AX-158412019 | 13 | 56.236 | KV453138.1 | 3931436 | 18-scf00300 | 18 |
| AX-157755856 | 13 | 56.236 | KV453138.1 | 3953384 | 18-scf00300 | 18 |
| AX-157775760 | 13 | 56.236 | KV453138.1 | 4069968 | 18-scf00300 | 18 |
| AX-158139365 | 13 | 56.236 | KV453138.1 | 4140579 | 18-scf00300 | 18 |
| AX-157714060 | 13 | 56.236 | KV453138.1 | 4152087 | 18-scf00300 | 18 |
| AX-158139445 | 13 | 56.236 | KV453138.1 | 4243431 | 18-scf00300 | 18 |
| AX-158139465 | 13 | 56.236 | KV453138.1 | 4273508 | 18-scf00300 | 18 |
| AX-158139700 | 13 | 56.236 | KV453138.1 | 4611246 | 18-scf00300 | 18 |
| AX-158139751 | 13 | 56.236 | KV453138.1 | 4695887 | 18-scf00300 | 18 |
| AX-158140031 | 13 | 56.236 | KV453138.1 | 5115101 | 18-scf00300 | 18 |
| AX-158140212 | 13 | 56.236 | KV453138.1 | 5376244 | 18-scf00300 | 18 |
| AX-158138566 | 13 | 56.291 | KV453138.1 | 2865833 | 18-scf00300 | 18 |
| AX-158137783 | 13 | 56.345 | KV453138.1 | 399469  | 18-scf00300 | 18 |
| AX-158137899 | 13 | 56.345 | KV453138.1 | 1307595 | 18-scf00300 | 18 |
| AX-158137903 | 13 | 56.345 | KV453138.1 | 1315274 | 18-scf00300 | 18 |
| AX-158137904 | 13 | 56.345 | KV453138.1 | 1316909 | 18-scf00300 | 18 |
| AX-157715126 | 13 | 56.345 | KV453138.1 | 1456267 | 18-scf00300 | 18 |
| AX-158138102 | 13 | 56.345 | KV453138.1 | 1745939 | 18-scf00300 | 18 |
| AX-158138126 | 13 | 56.345 | KV453138.1 | 1792536 | 18-scf00300 | 18 |

|              |    |        |            |         |             |    |
|--------------|----|--------|------------|---------|-------------|----|
| AX-158138131 | 13 | 56.345 | KV453138.1 | 1807086 | 18-scf00300 | 18 |
| AX-158138141 | 13 | 56.345 | KV453138.1 | 1833219 | 18-scf00300 | 18 |
| AX-158138207 | 13 | 56.345 | KV453138.1 | 1999151 | 18-scf00300 | 18 |
| AX-158138329 | 13 | 56.345 | KV453138.1 | 2337209 | 18-scf00300 | 18 |
| AX-158138345 | 13 | 56.345 | KV453138.1 | 2370171 | 18-scf00300 | 18 |
| AX-157857955 | 13 | 56.345 | KV453138.1 | 2415836 | 18-scf00300 | 18 |
| AX-158138489 | 13 | 56.345 | KV453138.1 | 2706290 | 18-scf00300 | 18 |
| AX-158138564 | 13 | 56.345 | KV453138.1 | 2862712 | 18-scf00300 | 18 |
| AX-158138567 | 13 | 56.345 | KV453138.1 | 2866123 | 18-scf00300 | 18 |
| AX-158138569 | 13 | 56.345 | KV453138.1 | 2866903 | 18-scf00300 | 18 |
| AX-158138575 | 13 | 56.345 | KV453138.1 | 2877987 | 18-scf00300 | 18 |
| AX-158138576 | 13 | 56.345 | KV453138.1 | 2883585 | 18-scf00300 | 18 |
| AX-158411999 | 13 | 56.345 | KV453138.1 | 2884129 | 18-scf00300 | 18 |
| AX-157831024 | 13 | 56.345 | KV453138.1 | 2884585 | 18-scf00300 | 18 |
| AX-158138577 | 13 | 56.345 | KV453138.1 | 2887963 | 18-scf00300 | 18 |
| AX-158138579 | 13 | 56.345 | KV453138.1 | 2892897 | 18-scf00300 | 18 |
| AX-158138580 | 13 | 56.345 | KV453138.1 | 2893302 | 18-scf00300 | 18 |
| AX-158138581 | 13 | 56.345 | KV453138.1 | 2893861 | 18-scf00300 | 18 |
| AX-158138582 | 13 | 56.345 | KV453138.1 | 2894764 | 18-scf00300 | 18 |
| AX-157720185 | 13 | 56.345 | KV453138.1 | 2897395 | 18-scf00300 | 18 |
| AX-158138584 | 13 | 56.345 | KV453138.1 | 2900859 | 18-scf00300 | 18 |
| AX-158138588 | 13 | 56.345 | KV453138.1 | 2904297 | 18-scf00300 | 18 |
| AX-157770885 | 13 | 56.345 | KV453138.1 | 2905020 | 18-scf00300 | 18 |
| AX-158138591 | 13 | 56.345 | KV453138.1 | 2911499 | 18-scf00300 | 18 |
| AX-158138593 | 13 | 56.345 | KV453138.1 | 2914293 | 18-scf00300 | 18 |
| AX-158138594 | 13 | 56.345 | KV453138.1 | 2915231 | 18-scf00300 | 18 |
| AX-157746509 | 13 | 56.345 | KV453138.1 | 2917010 | 18-scf00300 | 18 |
| AX-157694142 | 13 | 56.345 | KV453138.1 | 2923422 | 18-scf00300 | 18 |
| AX-157831030 | 13 | 56.345 | KV453138.1 | 2923963 | 18-scf00300 | 18 |
| AX-157831031 | 13 | 56.345 | KV453138.1 | 2925879 | 18-scf00300 | 18 |
| AX-157831032 | 13 | 56.345 | KV453138.1 | 2926958 | 18-scf00300 | 18 |
| AX-157831033 | 13 | 56.345 | KV453138.1 | 2927741 | 18-scf00300 | 18 |
| AX-157831034 | 13 | 56.345 | KV453138.1 | 2929077 | 18-scf00300 | 18 |
| AX-158138597 | 13 | 56.345 | KV453138.1 | 2936449 | 18-scf00300 | 18 |
| AX-158138598 | 13 | 56.345 | KV453138.1 | 2937922 | 18-scf00300 | 18 |
| AX-158138599 | 13 | 56.345 | KV453138.1 | 2938487 | 18-scf00300 | 18 |
| AX-157745559 | 13 | 56.345 | KV453138.1 | 2942348 | 18-scf00300 | 18 |
| AX-158138601 | 13 | 56.345 | KV453138.1 | 2944296 | 18-scf00300 | 18 |
| AX-158138602 | 13 | 56.345 | KV453138.1 | 2947460 | 18-scf00300 | 18 |
| AX-158138615 | 13 | 56.345 | KV453138.1 | 2976075 | 18-scf00300 | 18 |
| AX-158138617 | 13 | 56.345 | KV453138.1 | 2980476 | 18-scf00300 | 18 |
| AX-158138621 | 13 | 56.345 | KV453138.1 | 2990238 | 18-scf00300 | 18 |
| AX-158138624 | 13 | 56.345 | KV453138.1 | 2996060 | 18-scf00300 | 18 |
| AX-158138626 | 13 | 56.345 | KV453138.1 | 2997277 | 18-scf00300 | 18 |
| AX-158138628 | 13 | 56.345 | KV453138.1 | 2999278 | 18-scf00300 | 18 |
| AX-158138630 | 13 | 56.345 | KV453138.1 | 3005282 | 18-scf00300 | 18 |
| AX-158138631 | 13 | 56.345 | KV453138.1 | 3006596 | 18-scf00300 | 18 |
| AX-157744023 | 13 | 56.345 | KV453138.1 | 3007873 | 18-scf00300 | 18 |
| AX-158138634 | 13 | 56.345 | KV453138.1 | 3016274 | 18-scf00300 | 18 |
| AX-158138636 | 13 | 56.345 | KV453138.1 | 3017647 | 18-scf00300 | 18 |
| AX-158138638 | 13 | 56.345 | KV453138.1 | 3020969 | 18-scf00300 | 18 |

|              |    |        |            |         |             |    |
|--------------|----|--------|------------|---------|-------------|----|
| AX-158138640 | 13 | 56.345 | KV453138.1 | 3025210 | 18-scf00300 | 18 |
| AX-158138644 | 13 | 56.345 | KV453138.1 | 3028686 | 18-scf00300 | 18 |
| AX-158138645 | 13 | 56.345 | KV453138.1 | 3029386 | 18-scf00300 | 18 |
| AX-158138648 | 13 | 56.345 | KV453138.1 | 3033192 | 18-scf00300 | 18 |
| AX-157831043 | 13 | 56.345 | KV453138.1 | 3033343 | 18-scf00300 | 18 |
| AX-158138665 | 13 | 56.345 | KV453138.1 | 3054295 | 18-scf00300 | 18 |
| AX-157749061 | 13 | 56.345 | KV453138.1 | 3055405 | 18-scf00300 | 18 |
| AX-157866301 | 13 | 56.345 | KV453138.1 | 3059175 | 18-scf00300 | 18 |
| AX-158138667 | 13 | 56.345 | KV453138.1 | 3059516 | 18-scf00300 | 18 |
| AX-158138670 | 13 | 56.345 | KV453138.1 | 3061727 | 18-scf00300 | 18 |
| AX-158138673 | 13 | 56.345 | KV453138.1 | 3064101 | 18-scf00300 | 18 |
| AX-158138675 | 13 | 56.345 | KV453138.1 | 3065731 | 18-scf00300 | 18 |
| AX-158138677 | 13 | 56.345 | KV453138.1 | 3067828 | 18-scf00300 | 18 |
| AX-158138678 | 13 | 56.345 | KV453138.1 | 3068440 | 18-scf00300 | 18 |
| AX-158138682 | 13 | 56.345 | KV453138.1 | 3071293 | 18-scf00300 | 18 |
| AX-158138683 | 13 | 56.345 | KV453138.1 | 3071580 | 18-scf00300 | 18 |
| AX-158138685 | 13 | 56.345 | KV453138.1 | 3074131 | 18-scf00300 | 18 |
| AX-158138686 | 13 | 56.345 | KV453138.1 | 3075779 | 18-scf00300 | 18 |
| AX-158138688 | 13 | 56.345 | KV453138.1 | 3077084 | 18-scf00300 | 18 |
| AX-158138696 | 13 | 56.345 | KV453138.1 | 3083226 | 18-scf00300 | 18 |
| AX-158138712 | 13 | 56.345 | KV453138.1 | 3104955 | 18-scf00300 | 18 |
| AX-158138713 | 13 | 56.345 | KV453138.1 | 3105240 | 18-scf00300 | 18 |
| AX-158138717 | 13 | 56.345 | KV453138.1 | 3107055 | 18-scf00300 | 18 |
| AX-158138731 | 13 | 56.345 | KV453138.1 | 3124869 | 18-scf00300 | 18 |
| AX-158138758 | 13 | 56.345 | KV453138.1 | 3182845 | 18-scf00300 | 18 |
| AX-158138761 | 13 | 56.345 | KV453138.1 | 3185125 | 18-scf00300 | 18 |
| AX-158138976 | 13 | 56.345 | KV453138.1 | 3470621 | 18-scf00300 | 18 |
| AX-158138979 | 13 | 56.345 | KV453138.1 | 3472702 | 18-scf00300 | 18 |
| AX-157720861 | 13 | 56.345 | KV453138.1 | 3480418 | 18-scf00300 | 18 |
| AX-158139062 | 13 | 56.345 | KV453138.1 | 3595346 | 18-scf00300 | 18 |
| AX-158139204 | 13 | 56.345 | KV453138.1 | 3877937 | 18-scf00300 | 18 |
| AX-158139205 | 13 | 56.345 | KV453138.1 | 3878292 | 18-scf00300 | 18 |
| AX-158139227 | 13 | 56.345 | KV453138.1 | 3896327 | 18-scf00300 | 18 |
| AX-158139231 | 13 | 56.345 | KV453138.1 | 3908220 | 18-scf00300 | 18 |
| AX-157710369 | 13 | 56.345 | KV453138.1 | 3979553 | 18-scf00300 | 18 |
| AX-158139340 | 13 | 56.345 | KV453138.1 | 4090861 | 18-scf00300 | 18 |
| AX-157750767 | 13 | 56.345 | KV453138.1 | 4537813 | 18-scf00300 | 18 |
| AX-158136690 | 13 | 56.368 | KV453137.1 | 1686927 | 18-scf00291 | 18 |
| AX-158411747 | 13 | 56.368 | KV453137.1 | 1690666 | 18-scf00291 | 18 |
| AX-158137626 | 13 | 56.368 | KV453138.1 | 976000  | 18-scf00300 | 18 |
| AX-158137908 | 13 | 56.368 | KV453138.1 | 1324273 | 18-scf00300 | 18 |
| AX-158138674 | 13 | 56.368 | KV453138.1 | 3064730 | 18-scf00300 | 18 |
| AX-158138676 | 13 | 56.368 | KV453138.1 | 3066559 | 18-scf00300 | 18 |
| AX-158138694 | 13 | 56.368 | KV453138.1 | 3082619 | 18-scf00300 | 18 |
| AX-158138697 | 13 | 56.368 | KV453138.1 | 3083947 | 18-scf00300 | 18 |
| AX-158138699 | 13 | 56.368 | KV453138.1 | 3085716 | 18-scf00300 | 18 |
| AX-158138700 | 13 | 56.368 | KV453138.1 | 3087284 | 18-scf00300 | 18 |
| AX-158138808 | 13 | 56.368 | KV453138.1 | 3239051 | 18-scf00300 | 18 |
| AX-158138698 | 13 | 56.395 | KV453138.1 | 3084396 | 18-scf00300 | 18 |
| AX-158136479 | 13 | 56.423 | KV453137.1 | 1003583 | 18-scf00291 | 18 |
| AX-158138668 | 13 | 56.423 | KV453138.1 | 3060174 | 18-scf00300 | 18 |

|              |    |        |            |         |             |    |
|--------------|----|--------|------------|---------|-------------|----|
| AX-157771929 | 13 | 56.423 | KV453138.1 | 3085316 | 18-scf00300 | 18 |
| AX-158138701 | 13 | 56.423 | KV453138.1 | 3088365 | 18-scf00300 | 18 |
| AX-158138969 | 13 | 56.423 | KV453138.1 | 3461905 | 18-scf00300 | 18 |
| AX-158139312 | 13 | 56.423 | KV453138.1 | 4047857 | 18-scf00300 | 18 |
| AX-158139512 | 13 | 56.423 | KV453138.1 | 4361645 | 18-scf00300 | 18 |
| AX-158139544 | 13 | 56.423 | KV453138.1 | 4402076 | 18-scf00300 | 18 |
| AX-158139629 | 13 | 56.423 | KV453138.1 | 4526087 | 18-scf00300 | 18 |
| AX-157831047 | 13 | 56.433 | KV453138.1 | 3087591 | 18-scf00300 | 18 |
| AX-158138105 | 13 | 56.454 | KV453138.1 | 1751020 | 18-scf00300 | 18 |
| AX-158138108 | 13 | 56.454 | KV453138.1 | 1753213 | 18-scf00300 | 18 |
| AX-158138136 | 13 | 56.454 | KV453138.1 | 1821054 | 18-scf00300 | 18 |
| AX-158138639 | 13 | 56.454 | KV453138.1 | 3022618 | 18-scf00300 | 18 |
| AX-158138702 | 13 | 56.454 | KV453138.1 | 3089176 | 18-scf00300 | 18 |
| AX-158138704 | 13 | 56.454 | KV453138.1 | 3090588 | 18-scf00300 | 18 |
| AX-158138711 | 13 | 56.454 | KV453138.1 | 3104002 | 18-scf00300 | 18 |
| AX-158138720 | 13 | 56.454 | KV453138.1 | 3112360 | 18-scf00300 | 18 |
| AX-158138728 | 13 | 56.454 | KV453138.1 | 3121270 | 18-scf00300 | 18 |
| AX-158138729 | 13 | 56.454 | KV453138.1 | 3122545 | 18-scf00300 | 18 |
| AX-157831055 | 13 | 56.454 | KV453138.1 | 3127100 | 18-scf00300 | 18 |
| AX-157831056 | 13 | 56.454 | KV453138.1 | 3127519 | 18-scf00300 | 18 |
| AX-157793104 | 13 | 56.454 | KV453138.1 | 3149344 | 18-scf00300 | 18 |
| AX-158138752 | 13 | 56.454 | KV453138.1 | 3174451 | 18-scf00300 | 18 |
| AX-158138765 | 13 | 56.454 | KV453138.1 | 3188256 | 18-scf00300 | 18 |
| AX-158138782 | 13 | 56.454 | KV453138.1 | 3219214 | 18-scf00300 | 18 |
| AX-158139008 | 13 | 56.454 | KV453138.1 | 3514081 | 18-scf00300 | 18 |
| AX-157831053 | 13 | 56.463 | KV453138.1 | 3106819 | 18-scf00300 | 18 |
| AX-157752433 | 13 | 56.463 | KV453138.1 | 3188765 | 18-scf00300 | 18 |
| AX-158138856 | 13 | 56.463 | KV453138.1 | 3292344 | 18-scf00300 | 18 |
| AX-158138858 | 13 | 56.463 | KV453138.1 | 3293720 | 18-scf00300 | 18 |
| AX-158138768 | 13 | 56.507 | KV453138.1 | 3198365 | 18-scf00300 | 18 |
| AX-158133951 | 13 | 56.563 | KV453128.1 | 5420513 | 18-scf00286 | 18 |
| AX-158411717 | 13 | 56.563 | KV453137.1 | 831544  | 18-scf00291 | 18 |
| AX-158136415 | 13 | 56.563 | KV453137.1 | 860917  | 18-scf00291 | 18 |
| AX-158136477 | 13 | 56.563 | KV453137.1 | 991201  | 18-scf00291 | 18 |
| AX-158136626 | 13 | 56.563 | KV453137.1 | 1449868 | 18-scf00291 | 18 |
| AX-158136629 | 13 | 56.563 | KV453137.1 | 1481593 | 18-scf00291 | 18 |
| AX-158136648 | 13 | 56.563 | KV453137.1 | 1577199 | 18-scf00291 | 18 |
| AX-158411762 | 13 | 56.563 | KV453137.1 | 1696962 | 18-scf00291 | 18 |
| AX-158136716 | 13 | 56.563 | KV453135.1 | 458465  | 18-scf00292 | 18 |
| AX-157830766 | 13 | 56.563 | KV453135.1 | 500191  | 18-scf00292 | 18 |
| AX-158143448 | 13 | 56.563 | KV453138.1 | 56117   | 18-scf00300 | 18 |
| AX-157831582 | 13 | 56.563 | KV453138.1 | 127107  | 18-scf00300 | 18 |
| AX-158137811 | 13 | 56.563 | KV453138.1 | 286740  | 18-scf00300 | 18 |
| AX-158417528 | 13 | 56.563 | KV453138.1 | 942076  | 18-scf00300 | 18 |
| AX-158137588 | 13 | 56.563 | KV453138.1 | 1089555 | 18-scf00300 | 18 |
| AX-158137575 | 13 | 56.563 | KV453138.1 | 1113779 | 18-scf00300 | 18 |
| AX-158137565 | 13 | 56.563 | KV453138.1 | 1142625 | 18-scf00300 | 18 |
| AX-158137855 | 13 | 56.563 | KV453138.1 | 1216557 | 18-scf00300 | 18 |
| AX-158137970 | 13 | 56.563 | KV453138.1 | 1451550 | 18-scf00300 | 18 |
| AX-157744001 | 13 | 56.563 | KV453138.1 | 1545220 | 18-scf00300 | 18 |
| AX-158138103 | 13 | 56.563 | KV453138.1 | 1746646 | 18-scf00300 | 18 |

|              |    |        |            |         |             |    |
|--------------|----|--------|------------|---------|-------------|----|
| AX-158138107 | 13 | 56.563 | KV453138.1 | 1752826 | 18-scf00300 | 18 |
| AX-158138275 | 13 | 56.563 | KV453138.1 | 2185552 | 18-scf00300 | 18 |
| AX-158138500 | 13 | 56.563 | KV453138.1 | 2732041 | 18-scf00300 | 18 |
| AX-157724403 | 13 | 56.563 | KV453138.1 | 3043071 | 18-scf00300 | 18 |
| AX-158138721 | 13 | 56.563 | KV453138.1 | 3112919 | 18-scf00300 | 18 |
| AX-158138732 | 13 | 56.563 | KV453138.1 | 3128002 | 18-scf00300 | 18 |
| AX-158138763 | 13 | 56.563 | KV453138.1 | 3187170 | 18-scf00300 | 18 |
| AX-157831058 | 13 | 56.563 | KV453138.1 | 3196062 | 18-scf00300 | 18 |
| AX-157831059 | 13 | 56.563 | KV453138.1 | 3196326 | 18-scf00300 | 18 |
| AX-158138769 | 13 | 56.563 | KV453138.1 | 3198918 | 18-scf00300 | 18 |
| AX-158138770 | 13 | 56.563 | KV453138.1 | 3199348 | 18-scf00300 | 18 |
| AX-158138771 | 13 | 56.563 | KV453138.1 | 3199995 | 18-scf00300 | 18 |
| AX-158138775 | 13 | 56.563 | KV453138.1 | 3209178 | 18-scf00300 | 18 |
| AX-158138778 | 13 | 56.563 | KV453138.1 | 3216521 | 18-scf00300 | 18 |
| AX-158138787 | 13 | 56.563 | KV453138.1 | 3223820 | 18-scf00300 | 18 |
| AX-157871564 | 13 | 56.563 | KV453138.1 | 3224408 | 18-scf00300 | 18 |
| AX-158138789 | 13 | 56.563 | KV453138.1 | 3226468 | 18-scf00300 | 18 |
| AX-158138790 | 13 | 56.563 | KV453138.1 | 3227025 | 18-scf00300 | 18 |
| AX-158138792 | 13 | 56.563 | KV453138.1 | 3227890 | 18-scf00300 | 18 |
| AX-158138793 | 13 | 56.563 | KV453138.1 | 3228450 | 18-scf00300 | 18 |
| AX-158138794 | 13 | 56.563 | KV453138.1 | 3228749 | 18-scf00300 | 18 |
| AX-158138795 | 13 | 56.563 | KV453138.1 | 3229130 | 18-scf00300 | 18 |
| AX-158138796 | 13 | 56.563 | KV453138.1 | 3229534 | 18-scf00300 | 18 |
| AX-158138801 | 13 | 56.563 | KV453138.1 | 3233233 | 18-scf00300 | 18 |
| AX-158138802 | 13 | 56.563 | KV453138.1 | 3233820 | 18-scf00300 | 18 |
| AX-158138813 | 13 | 56.563 | KV453138.1 | 3246473 | 18-scf00300 | 18 |
| AX-157739003 | 13 | 56.563 | KV453138.1 | 3247169 | 18-scf00300 | 18 |
| AX-158138825 | 13 | 56.563 | KV453138.1 | 3260095 | 18-scf00300 | 18 |
| AX-158138827 | 13 | 56.563 | KV453138.1 | 3261023 | 18-scf00300 | 18 |
| AX-157831060 | 13 | 56.563 | KV453138.1 | 3264089 | 18-scf00300 | 18 |
| AX-158138832 | 13 | 56.563 | KV453138.1 | 3266749 | 18-scf00300 | 18 |
| AX-158138834 | 13 | 56.563 | KV453138.1 | 3269280 | 18-scf00300 | 18 |
| AX-157707814 | 13 | 56.563 | KV453138.1 | 3273244 | 18-scf00300 | 18 |
| AX-158138836 | 13 | 56.563 | KV453138.1 | 3274191 | 18-scf00300 | 18 |
| AX-158138838 | 13 | 56.563 | KV453138.1 | 3277120 | 18-scf00300 | 18 |
| AX-158138839 | 13 | 56.563 | KV453138.1 | 3278195 | 18-scf00300 | 18 |
| AX-158138840 | 13 | 56.563 | KV453138.1 | 3278587 | 18-scf00300 | 18 |
| AX-158138841 | 13 | 56.563 | KV453138.1 | 3279059 | 18-scf00300 | 18 |
| AX-158138843 | 13 | 56.563 | KV453138.1 | 3280534 | 18-scf00300 | 18 |
| AX-157749316 | 13 | 56.563 | KV453138.1 | 3281845 | 18-scf00300 | 18 |
| AX-158138845 | 13 | 56.563 | KV453138.1 | 3282265 | 18-scf00300 | 18 |
| AX-158138847 | 13 | 56.563 | KV453138.1 | 3285498 | 18-scf00300 | 18 |
| AX-158138848 | 13 | 56.563 | KV453138.1 | 3285838 | 18-scf00300 | 18 |
| AX-158138849 | 13 | 56.563 | KV453138.1 | 3286518 | 18-scf00300 | 18 |
| AX-158138850 | 13 | 56.563 | KV453138.1 | 3286810 | 18-scf00300 | 18 |
| AX-158138851 | 13 | 56.563 | KV453138.1 | 3287562 | 18-scf00300 | 18 |
| AX-158138854 | 13 | 56.563 | KV453138.1 | 3288709 | 18-scf00300 | 18 |
| AX-157831062 | 13 | 56.563 | KV453138.1 | 3289042 | 18-scf00300 | 18 |
| AX-158138855 | 13 | 56.563 | KV453138.1 | 3289561 | 18-scf00300 | 18 |
| AX-158138857 | 13 | 56.563 | KV453138.1 | 3293223 | 18-scf00300 | 18 |
| AX-158138859 | 13 | 56.563 | KV453138.1 | 3294492 | 18-scf00300 | 18 |

|              |    |        |            |         |             |    |
|--------------|----|--------|------------|---------|-------------|----|
| AX-158138862 | 13 | 56.563 | KV453138.1 | 3296963 | 18-scf00300 | 18 |
| AX-158138864 | 13 | 56.563 | KV453138.1 | 3299450 | 18-scf00300 | 18 |
| AX-158138865 | 13 | 56.563 | KV453138.1 | 3302320 | 18-scf00300 | 18 |
| AX-158138866 | 13 | 56.563 | KV453138.1 | 3303570 | 18-scf00300 | 18 |
| AX-158138869 | 13 | 56.563 | KV453138.1 | 3308418 | 18-scf00300 | 18 |
| AX-158138870 | 13 | 56.563 | KV453138.1 | 3309100 | 18-scf00300 | 18 |
| AX-157755421 | 13 | 56.563 | KV453138.1 | 3314324 | 18-scf00300 | 18 |
| AX-158138876 | 13 | 56.563 | KV453138.1 | 3315481 | 18-scf00300 | 18 |
| AX-158138877 | 13 | 56.563 | KV453138.1 | 3316749 | 18-scf00300 | 18 |
| AX-158138881 | 13 | 56.563 | KV453138.1 | 3318150 | 18-scf00300 | 18 |
| AX-158138883 | 13 | 56.563 | KV453138.1 | 3321040 | 18-scf00300 | 18 |
| AX-158138888 | 13 | 56.563 | KV453138.1 | 3323880 | 18-scf00300 | 18 |
| AX-158138925 | 13 | 56.563 | KV453138.1 | 3370920 | 18-scf00300 | 18 |
| AX-158138926 | 13 | 56.563 | KV453138.1 | 3371444 | 18-scf00300 | 18 |
| AX-158138927 | 13 | 56.563 | KV453138.1 | 3373290 | 18-scf00300 | 18 |
| AX-158138932 | 13 | 56.563 | KV453138.1 | 3401696 | 18-scf00300 | 18 |
| AX-158138933 | 13 | 56.563 | KV453138.1 | 3403555 | 18-scf00300 | 18 |
| AX-158138994 | 13 | 56.563 | KV453138.1 | 3491470 | 18-scf00300 | 18 |
| AX-158139099 | 13 | 56.563 | KV453138.1 | 3658571 | 18-scf00300 | 18 |
| AX-158139128 | 13 | 56.563 | KV453138.1 | 3712530 | 18-scf00300 | 18 |
| AX-158139130 | 13 | 56.563 | KV453138.1 | 3720699 | 18-scf00300 | 18 |
| AX-158139158 | 13 | 56.563 | KV453138.1 | 3776002 | 18-scf00300 | 18 |
| AX-158139182 | 13 | 56.563 | KV453138.1 | 3821178 | 18-scf00300 | 18 |
| AX-158139183 | 13 | 56.563 | KV453138.1 | 3822561 | 18-scf00300 | 18 |
| AX-158139184 | 13 | 56.563 | KV453138.1 | 3836770 | 18-scf00300 | 18 |
| AX-158139284 | 13 | 56.563 | KV453138.1 | 4020856 | 18-scf00300 | 18 |
| AX-158139334 | 13 | 56.563 | KV453138.1 | 4080228 | 18-scf00300 | 18 |
| AX-158139337 | 13 | 56.563 | KV453138.1 | 4083046 | 18-scf00300 | 18 |
| AX-158137882 | 13 | 56.673 | KV453138.1 | 1285393 | 18-scf00300 | 18 |
| AX-158137925 | 13 | 56.673 | KV453138.1 | 1366238 | 18-scf00300 | 18 |
| AX-158138882 | 13 | 56.673 | KV453138.1 | 3320702 | 18-scf00300 | 18 |
| AX-158138884 | 13 | 56.673 | KV453138.1 | 3321646 | 18-scf00300 | 18 |
| AX-158138887 | 13 | 56.673 | KV453138.1 | 3322669 | 18-scf00300 | 18 |
| AX-158134912 | 13 | 56.782 | KV453128.1 | 6735317 | 18-scf00286 | 18 |
| AX-158136095 | 13 | 56.782 | KV453137.1 | 13845   | 18-scf00291 | 18 |
| AX-157830670 | 13 | 56.782 | KV453137.1 | 52399   | 18-scf00291 | 18 |
| AX-158411696 | 13 | 56.782 | KV453137.1 | 152297  | 18-scf00291 | 18 |
| AX-158136152 | 13 | 56.782 | KV453137.1 | 158227  | 18-scf00291 | 18 |
| AX-157766084 | 13 | 56.782 | KV453137.1 | 200614  | 18-scf00291 | 18 |
| AX-157830676 | 13 | 56.782 | KV453137.1 | 202303  | 18-scf00291 | 18 |
| AX-157830682 | 13 | 56.782 | KV453137.1 | 212280  | 18-scf00291 | 18 |
| AX-158136166 | 13 | 56.782 | KV453137.1 | 214454  | 18-scf00291 | 18 |
| AX-158392890 | 13 | 56.782 | KV453137.1 | 254505  | 18-scf00291 | 18 |
| AX-158392891 | 13 | 56.782 | KV453137.1 | 293911  | 18-scf00291 | 18 |
| AX-158392892 | 13 | 56.782 | KV453137.1 | 335489  | 18-scf00291 | 18 |
| AX-158136205 | 13 | 56.782 | KV453137.1 | 353568  | 18-scf00291 | 18 |
| AX-157830696 | 13 | 56.782 | KV453137.1 | 365391  | 18-scf00291 | 18 |
| AX-158408221 | 13 | 56.782 | KV453137.1 | 385562  | 18-scf00291 | 18 |
| AX-158422797 | 13 | 56.782 | KV453137.1 | 386275  | 18-scf00291 | 18 |
| AX-158136243 | 13 | 56.782 | KV453137.1 | 453975  | 18-scf00291 | 18 |
| AX-158417498 | 13 | 56.782 | KV453137.1 | 460707  | 18-scf00291 | 18 |

|              |    |        |            |         |             |    |
|--------------|----|--------|------------|---------|-------------|----|
| AX-158136248 | 13 | 56.782 | KV453137.1 | 466265  | 18-scf00291 | 18 |
| AX-158392895 | 13 | 56.782 | KV453137.1 | 519463  | 18-scf00291 | 18 |
| AX-158136271 | 13 | 56.782 | KV453137.1 | 534465  | 18-scf00291 | 18 |
| AX-158392896 | 13 | 56.782 | KV453137.1 | 579208  | 18-scf00291 | 18 |
| AX-157830714 | 13 | 56.782 | KV453137.1 | 644901  | 18-scf00291 | 18 |
| AX-158136331 | 13 | 56.782 | KV453137.1 | 664891  | 18-scf00291 | 18 |
| AX-158136347 | 13 | 56.782 | KV453137.1 | 698753  | 18-scf00291 | 18 |
| AX-158136349 | 13 | 56.782 | KV453137.1 | 701779  | 18-scf00291 | 18 |
| AX-158392900 | 13 | 56.782 | KV453137.1 | 819367  | 18-scf00291 | 18 |
| AX-158392901 | 13 | 56.782 | KV453137.1 | 824813  | 18-scf00291 | 18 |
| AX-158411721 | 13 | 56.782 | KV453137.1 | 883521  | 18-scf00291 | 18 |
| AX-158392903 | 13 | 56.782 | KV453137.1 | 897247  | 18-scf00291 | 18 |
| AX-158136481 | 13 | 56.782 | KV453137.1 | 1009890 | 18-scf00291 | 18 |
| AX-157693321 | 13 | 56.782 | KV453137.1 | 1038798 | 18-scf00291 | 18 |
| AX-158136536 | 13 | 56.782 | KV453137.1 | 1155654 | 18-scf00291 | 18 |
| AX-158411726 | 13 | 56.782 | KV453137.1 | 1162943 | 18-scf00291 | 18 |
| AX-158136541 | 13 | 56.782 | KV453137.1 | 1170733 | 18-scf00291 | 18 |
| AX-158136547 | 13 | 56.782 | KV453137.1 | 1194570 | 18-scf00291 | 18 |
| AX-158136563 | 13 | 56.782 | KV453137.1 | 1236577 | 18-scf00291 | 18 |
| AX-157709608 | 13 | 56.782 | KV453137.1 | 1256116 | 18-scf00291 | 18 |
| AX-157857896 | 13 | 56.782 | KV453137.1 | 1447907 | 18-scf00291 | 18 |
| AX-157857897 | 13 | 56.782 | KV453137.1 | 1455856 | 18-scf00291 | 18 |
| AX-157830738 | 13 | 56.782 | KV453137.1 | 1482065 | 18-scf00291 | 18 |
| AX-158136631 | 13 | 56.782 | KV453137.1 | 1492389 | 18-scf00291 | 18 |
| AX-158136646 | 13 | 56.782 | KV453137.1 | 1561711 | 18-scf00291 | 18 |
| AX-158136688 | 13 | 56.782 | KV453137.1 | 1674431 | 18-scf00291 | 18 |
| AX-158422805 | 13 | 56.782 | KV453137.1 | 1676421 | 18-scf00291 | 18 |
| AX-158411744 | 13 | 56.782 | KV453137.1 | 1676496 | 18-scf00291 | 18 |
| AX-158411748 | 13 | 56.782 | KV453137.1 | 1691703 | 18-scf00291 | 18 |
| AX-158411749 | 13 | 56.782 | KV453137.1 | 1691784 | 18-scf00291 | 18 |
| AX-158411755 | 13 | 56.782 | KV453137.1 | 1692961 | 18-scf00291 | 18 |
| AX-158411759 | 13 | 56.782 | KV453137.1 | 1695142 | 18-scf00291 | 18 |
| AX-158136693 | 13 | 56.782 | KV453137.1 | 1727603 | 18-scf00291 | 18 |
| AX-157830754 | 13 | 56.782 | KV453137.1 | 1755373 | 18-scf00291 | 18 |
| AX-158411764 | 13 | 56.782 | KV453137.1 | 1757191 | 18-scf00291 | 18 |
| AX-158417501 | 13 | 56.782 | KV453137.1 | 1757300 | 18-scf00291 | 18 |
| AX-157704090 | 13 | 56.782 | KV453135.1 | 668954  | 18-scf00292 | 18 |
| AX-157830776 | 13 | 56.782 | KV453135.1 | 713083  | 18-scf00292 | 18 |
| AX-158136779 | 13 | 56.782 | KV453135.1 | 770845  | 18-scf00292 | 18 |
| AX-158417506 | 13 | 56.782 | KV453135.1 | 778398  | 18-scf00292 | 18 |
| AX-157830779 | 13 | 56.782 | KV453135.1 | 787271  | 18-scf00292 | 18 |
| AX-157871472 | 13 | 56.782 | KV453135.1 | 795951  | 18-scf00292 | 18 |
| AX-158417507 | 13 | 56.782 | KV453135.1 | 837200  | 18-scf00292 | 18 |
| AX-157871477 | 13 | 56.782 | KV453135.1 | 945843  | 18-scf00292 | 18 |
| AX-158137090 | 13 | 56.782 | KV453135.1 | 1855350 | 18-scf00292 | 18 |
| AX-158135973 | 13 | 56.782 | KV453131.1 | 496976  | 18-scf00293 | 18 |
| AX-158135965 | 13 | 56.782 | KV453131.1 | 504934  | 18-scf00293 | 18 |
| AX-158135946 | 13 | 56.782 | KV453131.1 | 541036  | 18-scf00293 | 18 |
| AX-158135941 | 13 | 56.782 | KV453131.1 | 545833  | 18-scf00293 | 18 |
| AX-157830829 | 13 | 56.782 | KV453136.1 | 93819   | 18-scf00294 | 18 |
| AX-157830837 | 13 | 56.782 | KV453136.1 | 249222  | 18-scf00294 | 18 |

|              |    |        |            |         |             |    |
|--------------|----|--------|------------|---------|-------------|----|
| AX-157878138 | 13 | 56.782 | KV453136.1 | 281420  | 18-scf00294 | 18 |
| AX-157830840 | 13 | 56.782 | KV453136.1 | 300542  | 18-scf00294 | 18 |
| AX-158137343 | 13 | 56.782 | KV453132.1 | 200720  | 18-scf00295 | 18 |
| AX-158137351 | 13 | 56.782 | KV453132.1 | 354032  | 18-scf00295 | 18 |
| AX-157871498 | 13 | 56.782 | KV453134.1 | 246646  | 18-scf00296 | 18 |
| AX-158137469 | 13 | 56.782 | KV453134.1 | 270277  | 18-scf00296 | 18 |
| AX-158137483 | 13 | 56.782 | KV453134.1 | 339062  | 18-scf00296 | 18 |
| AX-158411873 | 13 | 56.782 | KV453134.1 | 346025  | 18-scf00296 | 18 |
| AX-157871514 | 13 | 56.782 | KV453134.1 | 404412  | 18-scf00296 | 18 |
| AX-158137499 | 13 | 56.782 | KV453134.1 | 443120  | 18-scf00296 | 18 |
| AX-158412216 | 13 | 56.782 | KV453138.1 | 3632    | 18-scf00300 | 18 |
| AX-157858025 | 13 | 56.782 | KV453138.1 | 3758    | 18-scf00300 | 18 |
| AX-158143443 | 13 | 56.782 | KV453138.1 | 34505   | 18-scf00300 | 18 |
| AX-157831570 | 13 | 56.782 | KV453138.1 | 34813   | 18-scf00300 | 18 |
| AX-157858028 | 13 | 56.782 | KV453138.1 | 62084   | 18-scf00300 | 18 |
| AX-157863462 | 13 | 56.782 | KV453138.1 | 84736   | 18-scf00300 | 18 |
| AX-157831581 | 13 | 56.782 | KV453138.1 | 111285  | 18-scf00300 | 18 |
| AX-158411948 | 13 | 56.782 | KV453138.1 | 322820  | 18-scf00300 | 18 |
| AX-158411945 | 13 | 56.782 | KV453138.1 | 344321  | 18-scf00300 | 18 |
| AX-158137791 | 13 | 56.782 | KV453138.1 | 380512  | 18-scf00300 | 18 |
| AX-158137788 | 13 | 56.782 | KV453138.1 | 385727  | 18-scf00300 | 18 |
| AX-158137780 | 13 | 56.782 | KV453138.1 | 410433  | 18-scf00300 | 18 |
| AX-157830931 | 13 | 56.782 | KV453138.1 | 692278  | 18-scf00300 | 18 |
| AX-158392962 | 13 | 56.782 | KV453138.1 | 756477  | 18-scf00300 | 18 |
| AX-158137681 | 13 | 56.782 | KV453138.1 | 760524  | 18-scf00300 | 18 |
| AX-157830925 | 13 | 56.782 | KV453138.1 | 794945  | 18-scf00300 | 18 |
| AX-157871547 | 13 | 56.782 | KV453138.1 | 807718  | 18-scf00300 | 18 |
| AX-158137633 | 13 | 56.782 | KV453138.1 | 968473  | 18-scf00300 | 18 |
| AX-158137625 | 13 | 56.782 | KV453138.1 | 979940  | 18-scf00300 | 18 |
| AX-157830888 | 13 | 56.782 | KV453138.1 | 1157743 | 18-scf00300 | 18 |
| AX-157722711 | 13 | 56.782 | KV453138.1 | 1407988 | 18-scf00300 | 18 |
| AX-158137989 | 13 | 56.782 | KV453138.1 | 1484922 | 18-scf00300 | 18 |
| AX-158408322 | 13 | 56.782 | KV453138.1 | 1681262 | 18-scf00300 | 18 |
| AX-158138098 | 13 | 56.782 | KV453138.1 | 1730622 | 18-scf00300 | 18 |
| AX-158138109 | 13 | 56.782 | KV453138.1 | 1754535 | 18-scf00300 | 18 |
| AX-157716202 | 13 | 56.782 | KV453138.1 | 1754719 | 18-scf00300 | 18 |
| AX-158138121 | 13 | 56.782 | KV453138.1 | 1784393 | 18-scf00300 | 18 |
| AX-158138161 | 13 | 56.782 | KV453138.1 | 1880050 | 18-scf00300 | 18 |
| AX-157830991 | 13 | 56.782 | KV453138.1 | 1911298 | 18-scf00300 | 18 |
| AX-158411972 | 13 | 56.782 | KV453138.1 | 1966308 | 18-scf00300 | 18 |
| AX-157857949 | 13 | 56.782 | KV453138.1 | 2043669 | 18-scf00300 | 18 |
| AX-158138221 | 13 | 56.782 | KV453138.1 | 2043771 | 18-scf00300 | 18 |
| AX-158417540 | 13 | 56.782 | KV453138.1 | 2045398 | 18-scf00300 | 18 |
| AX-157732574 | 13 | 56.782 | KV453138.1 | 2068158 | 18-scf00300 | 18 |
| AX-158138263 | 13 | 56.782 | KV453138.1 | 2149221 | 18-scf00300 | 18 |
| AX-157831000 | 13 | 56.782 | KV453138.1 | 2235725 | 18-scf00300 | 18 |
| AX-158422839 | 13 | 56.782 | KV453138.1 | 2334815 | 18-scf00300 | 18 |
| AX-158138330 | 13 | 56.782 | KV453138.1 | 2338957 | 18-scf00300 | 18 |
| AX-158411981 | 13 | 56.782 | KV453138.1 | 2375620 | 18-scf00300 | 18 |
| AX-158138395 | 13 | 56.782 | KV453138.1 | 2492498 | 18-scf00300 | 18 |
| AX-158138401 | 13 | 56.782 | KV453138.1 | 2513684 | 18-scf00300 | 18 |



|              |    |        |            |         |             |    |
|--------------|----|--------|------------|---------|-------------|----|
| AX-157831009 | 13 | 56.782 | KV453138.1 | 2656494 | 18-scf00300 | 18 |
| AX-158138482 | 13 | 56.782 | KV453138.1 | 2691574 | 18-scf00300 | 18 |
| AX-158392981 | 13 | 56.782 | KV453138.1 | 2725546 | 18-scf00300 | 18 |
| AX-158138499 | 13 | 56.782 | KV453138.1 | 2728507 | 18-scf00300 | 18 |
| AX-158138518 | 13 | 56.782 | KV453138.1 | 2770591 | 18-scf00300 | 18 |
| AX-158138733 | 13 | 56.782 | KV453138.1 | 3128475 | 18-scf00300 | 18 |
| AX-158138743 | 13 | 56.782 | KV453138.1 | 3165427 | 18-scf00300 | 18 |
| AX-158138852 | 13 | 56.782 | KV453138.1 | 3288002 | 18-scf00300 | 18 |
| AX-158138853 | 13 | 56.782 | KV453138.1 | 3288312 | 18-scf00300 | 18 |
| AX-158138894 | 13 | 56.782 | KV453138.1 | 3328046 | 18-scf00300 | 18 |
| AX-158138897 | 13 | 56.782 | KV453138.1 | 3335145 | 18-scf00300 | 18 |
| AX-157752246 | 13 | 56.782 | KV453138.1 | 3338008 | 18-scf00300 | 18 |
| AX-157831064 | 13 | 56.782 | KV453138.1 | 3341154 | 18-scf00300 | 18 |
| AX-158138906 | 13 | 56.782 | KV453138.1 | 3343675 | 18-scf00300 | 18 |
| AX-158138908 | 13 | 56.782 | KV453138.1 | 3345285 | 18-scf00300 | 18 |
| AX-157831066 | 13 | 56.782 | KV453138.1 | 3354585 | 18-scf00300 | 18 |
| AX-158138915 | 13 | 56.782 | KV453138.1 | 3356167 | 18-scf00300 | 18 |
| AX-158138919 | 13 | 56.782 | KV453138.1 | 3363556 | 18-scf00300 | 18 |
| AX-158138920 | 13 | 56.782 | KV453138.1 | 3365512 | 18-scf00300 | 18 |
| AX-158138921 | 13 | 56.782 | KV453138.1 | 3366024 | 18-scf00300 | 18 |
| AX-158138922 | 13 | 56.782 | KV453138.1 | 3366956 | 18-scf00300 | 18 |
| AX-157745050 | 13 | 56.782 | KV453138.1 | 3395323 | 18-scf00300 | 18 |
| AX-158138934 | 13 | 56.782 | KV453138.1 | 3404120 | 18-scf00300 | 18 |
| AX-157871567 | 13 | 56.782 | KV453138.1 | 3406965 | 18-scf00300 | 18 |
| AX-158138935 | 13 | 56.782 | KV453138.1 | 3408705 | 18-scf00300 | 18 |
| AX-158138936 | 13 | 56.782 | KV453138.1 | 3409442 | 18-scf00300 | 18 |
| AX-158138937 | 13 | 56.782 | KV453138.1 | 3410822 | 18-scf00300 | 18 |
| AX-158412009 | 13 | 56.782 | KV453138.1 | 3412105 | 18-scf00300 | 18 |
| AX-157831071 | 13 | 56.782 | KV453138.1 | 3427227 | 18-scf00300 | 18 |
| AX-158138949 | 13 | 56.782 | KV453138.1 | 3427271 | 18-scf00300 | 18 |
| AX-157714443 | 13 | 56.782 | KV453138.1 | 3428076 | 18-scf00300 | 18 |
| AX-157775245 | 13 | 56.782 | KV453138.1 | 3428907 | 18-scf00300 | 18 |
| AX-158138951 | 13 | 56.782 | KV453138.1 | 3430143 | 18-scf00300 | 18 |
| AX-157831072 | 13 | 56.782 | KV453138.1 | 3433415 | 18-scf00300 | 18 |
| AX-158138953 | 13 | 56.782 | KV453138.1 | 3436222 | 18-scf00300 | 18 |
| AX-157742862 | 13 | 56.782 | KV453138.1 | 3453650 | 18-scf00300 | 18 |
| AX-158138963 | 13 | 56.782 | KV453138.1 | 3454537 | 18-scf00300 | 18 |
| AX-158380293 | 13 | 56.782 | KV453138.1 | 3463513 | 18-scf00300 | 18 |
| AX-158138974 | 13 | 56.782 | KV453138.1 | 3469627 | 18-scf00300 | 18 |
| AX-158138984 | 13 | 56.782 | KV453138.1 | 3477211 | 18-scf00300 | 18 |
| AX-158138985 | 13 | 56.782 | KV453138.1 | 3478847 | 18-scf00300 | 18 |
| AX-158138986 | 13 | 56.782 | KV453138.1 | 3479727 | 18-scf00300 | 18 |
| AX-158138990 | 13 | 56.782 | KV453138.1 | 3486665 | 18-scf00300 | 18 |
| AX-158138992 | 13 | 56.782 | KV453138.1 | 3489724 | 18-scf00300 | 18 |
| AX-158138993 | 13 | 56.782 | KV453138.1 | 3490485 | 18-scf00300 | 18 |
| AX-158138997 | 13 | 56.782 | KV453138.1 | 3495644 | 18-scf00300 | 18 |
| AX-158138998 | 13 | 56.782 | KV453138.1 | 3498434 | 18-scf00300 | 18 |
| AX-158139000 | 13 | 56.782 | KV453138.1 | 3501868 | 18-scf00300 | 18 |
| AX-158139001 | 13 | 56.782 | KV453138.1 | 3502427 | 18-scf00300 | 18 |
| AX-158139002 | 13 | 56.782 | KV453138.1 | 3502826 | 18-scf00300 | 18 |
| AX-157831078 | 13 | 56.782 | KV453138.1 | 3532852 | 18-scf00300 | 18 |

|              |    |        |            |         |                |    |
|--------------|----|--------|------------|---------|----------------|----|
| AX-158139020 | 13 | 56.782 | KV453138.1 | 3538367 | 18-scf00300    | 18 |
| AX-158139021 | 13 | 56.782 | KV453138.1 | 3538857 | 18-scf00300    | 18 |
| AX-158139030 | 13 | 56.782 | KV453138.1 | 3552885 | 18-scf00300    | 18 |
| AX-158139034 | 13 | 56.782 | KV453138.1 | 3557869 | 18-scf00300    | 18 |
| AX-158139035 | 13 | 56.782 | KV453138.1 | 3559616 | 18-scf00300    | 18 |
| AX-158139046 | 13 | 56.782 | KV453138.1 | 3574235 | 18-scf00300    | 18 |
| AX-158139057 | 13 | 56.782 | KV453138.1 | 3586961 | 18-scf00300    | 18 |
| AX-158139065 | 13 | 56.782 | KV453138.1 | 3601074 | 18-scf00300    | 18 |
| AX-158139066 | 13 | 56.782 | KV453138.1 | 3601585 | 18-scf00300    | 18 |
| AX-158139068 | 13 | 56.782 | KV453138.1 | 3610686 | 18-scf00300    | 18 |
| AX-158139069 | 13 | 56.782 | KV453138.1 | 3611418 | 18-scf00300    | 18 |
| AX-158139073 | 13 | 56.782 | KV453138.1 | 3615531 | 18-scf00300    | 18 |
| AX-157758127 | 13 | 56.782 | KV453138.1 | 3624221 | 18-scf00300    | 18 |
| AX-158139086 | 13 | 56.782 | KV453138.1 | 3631673 | 18-scf00300    | 18 |
| AX-158139096 | 13 | 56.782 | KV453138.1 | 3650604 | 18-scf00300    | 18 |
| AX-158139097 | 13 | 56.782 | KV453138.1 | 3654442 | 18-scf00300    | 18 |
| AX-158139098 | 13 | 56.782 | KV453138.1 | 3656176 | 18-scf00300    | 18 |
| AX-158139100 | 13 | 56.782 | KV453138.1 | 3660222 | 18-scf00300    | 18 |
| AX-157831083 | 13 | 56.782 | KV453138.1 | 3662209 | 18-scf00300    | 18 |
| AX-158139104 | 13 | 56.782 | KV453138.1 | 3664823 | 18-scf00300    | 18 |
| AX-158139105 | 13 | 56.782 | KV453138.1 | 3665184 | 18-scf00300    | 18 |
| AX-158139109 | 13 | 56.782 | KV453138.1 | 3671793 | 18-scf00300    | 18 |
| AX-158139111 | 13 | 56.782 | KV453138.1 | 3674365 | 18-scf00300    | 18 |
| AX-158139112 | 13 | 56.782 | KV453138.1 | 3674905 | 18-scf00300    | 18 |
| AX-158139117 | 13 | 56.782 | KV453138.1 | 3680624 | 18-scf00300    | 18 |
| AX-158139119 | 13 | 56.782 | KV453138.1 | 3683337 | 18-scf00300    | 18 |
| AX-158139121 | 13 | 56.782 | KV453138.1 | 3695909 | 18-scf00300    | 18 |
| AX-158139160 | 13 | 56.782 | KV453138.1 | 3777241 | 18-scf00300    | 18 |
| AX-158139210 | 13 | 56.782 | KV453138.1 | 3881220 | 18-scf00300    | 18 |
| AX-158139254 | 13 | 56.782 | KV453138.1 | 3963104 | 18-scf00300    | 18 |
| AX-158139289 | 13 | 56.782 | KV453138.1 | 4024561 | 18-scf00300    | 18 |
| AX-158139291 | 13 | 56.782 | KV453138.1 | 4025426 | 18-scf00300    | 18 |
| AX-158139300 | 13 | 56.782 | KV453138.1 | 4034455 | 18-scf00300    | 18 |
| AX-158139310 | 13 | 56.782 | KV453138.1 | 4046319 | 18-scf00300    | 18 |
| AX-158139322 | 13 | 56.782 | KV453138.1 | 4060741 | 18-scf00300    | 18 |
| AX-158139336 | 13 | 56.782 | KV453138.1 | 4082113 | 18-scf00300    | 18 |
| AX-158140625 | 13 | 56.782 | KV453138.1 | 5973638 | 18-scf00300    | 18 |
| AX-157704201 | 13 | 56.782 | DX102912.1 | 168     | !ORI212 lctalu | UN |
| AX-157681221 | 13 | 56.782 | KV453606.1 | 6814    | scf01018       | UN |
| AX-158139133 | 13 | 56.825 | KV453138.1 | 3731605 | 18-scf00300    | 18 |
| AX-158136634 | 13 | 56.891 | KV453137.1 | 1499221 | 18-scf00291    | 18 |
| AX-158136719 | 13 | 56.891 | KV453135.1 | 476407  | 18-scf00292    | 18 |
| AX-158136817 | 13 | 56.891 | KV453135.1 | 896045  | 18-scf00292    | 18 |
| AX-158136941 | 13 | 56.891 | KV453135.1 | 1236439 | 18-scf00292    | 18 |
| AX-158137433 | 13 | 56.891 | KV453134.1 | 158392  | 18-scf00296    | 18 |
| AX-158137823 | 13 | 56.891 | KV453138.1 | 250791  | 18-scf00300    | 18 |
| AX-157830958 | 13 | 56.891 | KV453138.1 | 257474  | 18-scf00300    | 18 |
| AX-158137656 | 13 | 56.891 | KV453138.1 | 853998  | 18-scf00300    | 18 |
| AX-158137646 | 13 | 56.891 | KV453138.1 | 929543  | 18-scf00300    | 18 |
| AX-158137877 | 13 | 56.891 | KV453138.1 | 1258833 | 18-scf00300    | 18 |
| AX-158137948 | 13 | 56.891 | KV453138.1 | 1415617 | 18-scf00300    | 18 |

|              |    |        |            |         |             |    |
|--------------|----|--------|------------|---------|-------------|----|
| AX-158138127 | 13 | 56.891 | KV453138.1 | 1793776 | 18-scf00300 | 18 |
| AX-158138269 | 13 | 56.891 | KV453138.1 | 2171767 | 18-scf00300 | 18 |
| AX-158138427 | 13 | 56.891 | KV453138.1 | 2559955 | 18-scf00300 | 18 |
| AX-158385376 | 13 | 56.891 | KV453138.1 | 2573542 | 18-scf00300 | 18 |
| AX-158138457 | 13 | 56.891 | KV453138.1 | 2617020 | 18-scf00300 | 18 |
| AX-158138466 | 13 | 56.891 | KV453138.1 | 2640564 | 18-scf00300 | 18 |
| AX-158138510 | 13 | 56.891 | KV453138.1 | 2755362 | 18-scf00300 | 18 |
| AX-158138523 | 13 | 56.891 | KV453138.1 | 2776837 | 18-scf00300 | 18 |
| AX-158138524 | 13 | 56.891 | KV453138.1 | 2777292 | 18-scf00300 | 18 |
| AX-158138603 | 13 | 56.891 | KV453138.1 | 2949283 | 18-scf00300 | 18 |
| AX-158138669 | 13 | 56.891 | KV453138.1 | 3061172 | 18-scf00300 | 18 |
| AX-158138692 | 13 | 56.891 | KV453138.1 | 3080205 | 18-scf00300 | 18 |
| AX-158138772 | 13 | 56.891 | KV453138.1 | 3202014 | 18-scf00300 | 18 |
| AX-158138879 | 13 | 56.891 | KV453138.1 | 3317253 | 18-scf00300 | 18 |
| AX-157722715 | 13 | 56.891 | KV453138.1 | 3345209 | 18-scf00300 | 18 |
| AX-158138938 | 13 | 56.891 | KV453138.1 | 3414706 | 18-scf00300 | 18 |
| AX-158138955 | 13 | 56.891 | KV453138.1 | 3444040 | 18-scf00300 | 18 |
| AX-157878166 | 13 | 56.891 | KV453138.1 | 3484913 | 18-scf00300 | 18 |
| AX-158139018 | 13 | 56.891 | KV453138.1 | 3537008 | 18-scf00300 | 18 |
| AX-158139033 | 13 | 56.891 | KV453138.1 | 3556348 | 18-scf00300 | 18 |
| AX-157703500 | 13 | 56.891 | KV453138.1 | 3625440 | 18-scf00300 | 18 |
| AX-158139110 | 13 | 56.891 | KV453138.1 | 3672810 | 18-scf00300 | 18 |
| AX-158139135 | 13 | 56.891 | KV453138.1 | 3733572 | 18-scf00300 | 18 |
| AX-158139138 | 13 | 56.891 | KV453138.1 | 3737776 | 18-scf00300 | 18 |
| AX-158139143 | 13 | 56.891 | KV453138.1 | 3748613 | 18-scf00300 | 18 |
| AX-158139145 | 13 | 56.891 | KV453138.1 | 3750517 | 18-scf00300 | 18 |
| AX-158139147 | 13 | 56.891 | KV453138.1 | 3754363 | 18-scf00300 | 18 |
| AX-158139149 | 13 | 56.891 | KV453138.1 | 3761646 | 18-scf00300 | 18 |
| AX-158139150 | 13 | 56.891 | KV453138.1 | 3764193 | 18-scf00300 | 18 |
| AX-158139151 | 13 | 56.891 | KV453138.1 | 3765439 | 18-scf00300 | 18 |
| AX-157698245 | 13 | 56.891 | KV453138.1 | 3767999 | 18-scf00300 | 18 |
| AX-158139154 | 13 | 56.891 | KV453138.1 | 3768839 | 18-scf00300 | 18 |
| AX-158139156 | 13 | 56.891 | KV453138.1 | 3771797 | 18-scf00300 | 18 |
| AX-158139159 | 13 | 56.891 | KV453138.1 | 3776498 | 18-scf00300 | 18 |
| AX-157754645 | 13 | 56.891 | KV453138.1 | 3782339 | 18-scf00300 | 18 |
| AX-158139164 | 13 | 56.891 | KV453138.1 | 3788211 | 18-scf00300 | 18 |
| AX-158139165 | 13 | 56.891 | KV453138.1 | 3789260 | 18-scf00300 | 18 |
| AX-158139166 | 13 | 56.891 | KV453138.1 | 3792181 | 18-scf00300 | 18 |
| AX-158139168 | 13 | 56.891 | KV453138.1 | 3801914 | 18-scf00300 | 18 |
| AX-158139170 | 13 | 56.891 | KV453138.1 | 3802961 | 18-scf00300 | 18 |
| AX-157831087 | 13 | 56.891 | KV453138.1 | 3803026 | 18-scf00300 | 18 |
| AX-158139175 | 13 | 56.891 | KV453138.1 | 3809189 | 18-scf00300 | 18 |
| AX-158139178 | 13 | 56.891 | KV453138.1 | 3812968 | 18-scf00300 | 18 |
| AX-158139180 | 13 | 56.891 | KV453138.1 | 3817403 | 18-scf00300 | 18 |
| AX-157831090 | 13 | 56.891 | KV453138.1 | 3817718 | 18-scf00300 | 18 |
| AX-157831091 | 13 | 56.891 | KV453138.1 | 3821912 | 18-scf00300 | 18 |
| AX-158139188 | 13 | 56.891 | KV453138.1 | 3842573 | 18-scf00300 | 18 |
| AX-158139190 | 13 | 56.891 | KV453138.1 | 3849865 | 18-scf00300 | 18 |
| AX-157857975 | 13 | 56.891 | KV453138.1 | 3850867 | 18-scf00300 | 18 |
| AX-158139192 | 13 | 56.891 | KV453138.1 | 3851370 | 18-scf00300 | 18 |
| AX-158139193 | 13 | 56.891 | KV453138.1 | 3852353 | 18-scf00300 | 18 |

|              |    |        |            |         |             |    |
|--------------|----|--------|------------|---------|-------------|----|
| AX-158139194 | 13 | 56.891 | KV453138.1 | 3853544 | 18-scf00300 | 18 |
| AX-158139195 | 13 | 56.891 | KV453138.1 | 3857691 | 18-scf00300 | 18 |
| AX-158139196 | 13 | 56.891 | KV453138.1 | 3859151 | 18-scf00300 | 18 |
| AX-157711525 | 13 | 56.891 | KV453138.1 | 3869479 | 18-scf00300 | 18 |
| AX-158139200 | 13 | 56.891 | KV453138.1 | 3870387 | 18-scf00300 | 18 |
| AX-157713255 | 13 | 56.891 | KV453138.1 | 3875657 | 18-scf00300 | 18 |
| AX-158139206 | 13 | 56.891 | KV453138.1 | 3879445 | 18-scf00300 | 18 |
| AX-158139207 | 13 | 56.891 | KV453138.1 | 3879637 | 18-scf00300 | 18 |
| AX-158139208 | 13 | 56.891 | KV453138.1 | 3880596 | 18-scf00300 | 18 |
| AX-158139211 | 13 | 56.891 | KV453138.1 | 3881436 | 18-scf00300 | 18 |
| AX-157724197 | 13 | 56.891 | KV453138.1 | 3883870 | 18-scf00300 | 18 |
| AX-157696631 | 13 | 56.891 | KV453138.1 | 3884557 | 18-scf00300 | 18 |
| AX-158139213 | 13 | 56.891 | KV453138.1 | 3886689 | 18-scf00300 | 18 |
| AX-158139214 | 13 | 56.891 | KV453138.1 | 3887198 | 18-scf00300 | 18 |
| AX-158139217 | 13 | 56.891 | KV453138.1 | 3888854 | 18-scf00300 | 18 |
| AX-158139219 | 13 | 56.891 | KV453138.1 | 3890391 | 18-scf00300 | 18 |
| AX-158139226 | 13 | 56.891 | KV453138.1 | 3895656 | 18-scf00300 | 18 |
| AX-158139230 | 13 | 56.891 | KV453138.1 | 3907146 | 18-scf00300 | 18 |
| AX-158139235 | 13 | 56.891 | KV453138.1 | 3918832 | 18-scf00300 | 18 |
| AX-158139236 | 13 | 56.891 | KV453138.1 | 3923680 | 18-scf00300 | 18 |
| AX-158139238 | 13 | 56.891 | KV453138.1 | 3926306 | 18-scf00300 | 18 |
| AX-158139239 | 13 | 56.891 | KV453138.1 | 3926835 | 18-scf00300 | 18 |
| AX-158139240 | 13 | 56.891 | KV453138.1 | 3930805 | 18-scf00300 | 18 |
| AX-158139242 | 13 | 56.891 | KV453138.1 | 3937103 | 18-scf00300 | 18 |
| AX-157831096 | 13 | 56.891 | KV453138.1 | 3937644 | 18-scf00300 | 18 |
| AX-158139243 | 13 | 56.891 | KV453138.1 | 3938828 | 18-scf00300 | 18 |
| AX-158139249 | 13 | 56.891 | KV453138.1 | 3956419 | 18-scf00300 | 18 |
| AX-158139253 | 13 | 56.891 | KV453138.1 | 3962903 | 18-scf00300 | 18 |
| AX-158139256 | 13 | 56.891 | KV453138.1 | 3968999 | 18-scf00300 | 18 |
| AX-158139257 | 13 | 56.891 | KV453138.1 | 3970011 | 18-scf00300 | 18 |
| AX-158139262 | 13 | 56.891 | KV453138.1 | 3977331 | 18-scf00300 | 18 |
| AX-158139263 | 13 | 56.891 | KV453138.1 | 3977373 | 18-scf00300 | 18 |
| AX-158139264 | 13 | 56.891 | KV453138.1 | 3977982 | 18-scf00300 | 18 |
| AX-157774350 | 13 | 56.891 | KV453138.1 | 3978084 | 18-scf00300 | 18 |
| AX-158139266 | 13 | 56.891 | KV453138.1 | 3981788 | 18-scf00300 | 18 |
| AX-157718845 | 13 | 56.891 | KV453138.1 | 3982933 | 18-scf00300 | 18 |
| AX-158139267 | 13 | 56.891 | KV453138.1 | 3983925 | 18-scf00300 | 18 |
| AX-158139268 | 13 | 56.891 | KV453138.1 | 3985224 | 18-scf00300 | 18 |
| AX-158139269 | 13 | 56.891 | KV453138.1 | 3986032 | 18-scf00300 | 18 |
| AX-158139270 | 13 | 56.891 | KV453138.1 | 3991401 | 18-scf00300 | 18 |
| AX-158139271 | 13 | 56.891 | KV453138.1 | 3992211 | 18-scf00300 | 18 |
| AX-158139272 | 13 | 56.891 | KV453138.1 | 3992652 | 18-scf00300 | 18 |
| AX-157831099 | 13 | 56.891 | KV453138.1 | 3995152 | 18-scf00300 | 18 |
| AX-158139273 | 13 | 56.891 | KV453138.1 | 3995417 | 18-scf00300 | 18 |
| AX-158139278 | 13 | 56.891 | KV453138.1 | 4001968 | 18-scf00300 | 18 |
| AX-158139279 | 13 | 56.891 | KV453138.1 | 4004710 | 18-scf00300 | 18 |
| AX-158139280 | 13 | 56.891 | KV453138.1 | 4006309 | 18-scf00300 | 18 |
| AX-158139287 | 13 | 56.891 | KV453138.1 | 4023323 | 18-scf00300 | 18 |
| AX-158139290 | 13 | 56.891 | KV453138.1 | 4025011 | 18-scf00300 | 18 |
| AX-158139297 | 13 | 56.891 | KV453138.1 | 4031516 | 18-scf00300 | 18 |
| AX-158139298 | 13 | 56.891 | KV453138.1 | 4031771 | 18-scf00300 | 18 |

|              |    |        |            |         |             |    |
|--------------|----|--------|------------|---------|-------------|----|
| AX-158139299 | 13 | 56.891 | KV453138.1 | 4032350 | 18-scf00300 | 18 |
| AX-158139301 | 13 | 56.891 | KV453138.1 | 4035466 | 18-scf00300 | 18 |
| AX-158139302 | 13 | 56.891 | KV453138.1 | 4035980 | 18-scf00300 | 18 |
| AX-158139305 | 13 | 56.891 | KV453138.1 | 4041260 | 18-scf00300 | 18 |
| AX-158139306 | 13 | 56.891 | KV453138.1 | 4041971 | 18-scf00300 | 18 |
| AX-158139309 | 13 | 56.891 | KV453138.1 | 4045892 | 18-scf00300 | 18 |
| AX-158139316 | 13 | 56.891 | KV453138.1 | 4050760 | 18-scf00300 | 18 |
| AX-158139319 | 13 | 56.891 | KV453138.1 | 4056893 | 18-scf00300 | 18 |
| AX-158139321 | 13 | 56.891 | KV453138.1 | 4058893 | 18-scf00300 | 18 |
| AX-158139327 | 13 | 56.891 | KV453138.1 | 4071931 | 18-scf00300 | 18 |
| AX-158139329 | 13 | 56.891 | KV453138.1 | 4073965 | 18-scf00300 | 18 |
| AX-157758725 | 13 | 56.891 | KV453138.1 | 4091579 | 18-scf00300 | 18 |
| AX-157857978 | 13 | 56.891 | KV453138.1 | 4454074 | 18-scf00300 | 18 |
| AX-158139328 | 13 | 56.9   | KV453138.1 | 4072338 | 18-scf00300 | 18 |
| AX-158139335 | 13 | 56.906 | KV453138.1 | 4081448 | 18-scf00300 | 18 |
| AX-158139338 | 13 | 57     | KV453138.1 | 4087960 | 18-scf00300 | 18 |
| AX-158139342 | 13 | 57.05  | KV453138.1 | 4093348 | 18-scf00300 | 18 |
| AX-157831103 | 13 | 57.11  | KV453138.1 | 4093581 | 18-scf00300 | 18 |
| AX-158139344 | 13 | 57.153 | KV453138.1 | 4097783 | 18-scf00300 | 18 |
| AX-157831104 | 13 | 57.161 | KV453138.1 | 4098363 | 18-scf00300 | 18 |
| AX-157717397 | 13 | 57.188 | KV453138.1 | 4098411 | 18-scf00300 | 18 |
| AX-158139345 | 13 | 57.188 | KV453138.1 | 4100921 | 18-scf00300 | 18 |
| AX-158136319 | 13 | 57.219 | KV453137.1 | 646951  | 18-scf00291 | 18 |
| AX-158135951 | 13 | 57.219 | KV453131.1 | 528774  | 18-scf00293 | 18 |
| AX-158138213 | 13 | 57.219 | KV453138.1 | 2017607 | 18-scf00300 | 18 |
| AX-158138736 | 13 | 57.219 | KV453138.1 | 3140515 | 18-scf00300 | 18 |
| AX-158138740 | 13 | 57.219 | KV453138.1 | 3153027 | 18-scf00300 | 18 |
| AX-158139052 | 13 | 57.219 | KV453138.1 | 3581407 | 18-scf00300 | 18 |
| AX-158139244 | 13 | 57.219 | KV453138.1 | 3939168 | 18-scf00300 | 18 |
| AX-158139288 | 13 | 57.219 | KV453138.1 | 4023629 | 18-scf00300 | 18 |
| AX-158139323 | 13 | 57.219 | KV453138.1 | 4060968 | 18-scf00300 | 18 |
| AX-157726357 | 13 | 57.219 | KV453138.1 | 4095102 | 18-scf00300 | 18 |
| AX-157739636 | 13 | 57.219 | KV453138.1 | 4100747 | 18-scf00300 | 18 |
| AX-158139346 | 13 | 57.219 | KV453138.1 | 4104375 | 18-scf00300 | 18 |
| AX-157831106 | 13 | 57.219 | KV453138.1 | 4104880 | 18-scf00300 | 18 |
| AX-158139347 | 13 | 57.219 | KV453138.1 | 4107160 | 18-scf00300 | 18 |
| AX-158139348 | 13 | 57.219 | KV453138.1 | 4110841 | 18-scf00300 | 18 |
| AX-158139350 | 13 | 57.219 | KV453138.1 | 4113621 | 18-scf00300 | 18 |
| AX-158139351 | 13 | 57.219 | KV453138.1 | 4114283 | 18-scf00300 | 18 |
| AX-158139352 | 13 | 57.219 | KV453138.1 | 4115586 | 18-scf00300 | 18 |
| AX-158139353 | 13 | 57.219 | KV453138.1 | 4116368 | 18-scf00300 | 18 |
| AX-158139354 | 13 | 57.219 | KV453138.1 | 4120787 | 18-scf00300 | 18 |
| AX-158139357 | 13 | 57.219 | KV453138.1 | 4123972 | 18-scf00300 | 18 |
| AX-158139358 | 13 | 57.219 | KV453138.1 | 4129648 | 18-scf00300 | 18 |
| AX-158139359 | 13 | 57.219 | KV453138.1 | 4129990 | 18-scf00300 | 18 |
| AX-158139361 | 13 | 57.219 | KV453138.1 | 4132836 | 18-scf00300 | 18 |
| AX-158139363 | 13 | 57.221 | KV453138.1 | 4135073 | 18-scf00300 | 18 |
| AX-157708342 | 13 | 57.225 | KV453138.1 | 4133901 | 18-scf00300 | 18 |
| AX-157830905 | 13 | 57.652 | KV453138.1 | 992700  | 18-scf00300 | 18 |
| AX-158137921 | 13 | 57.652 | KV453138.1 | 1359549 | 18-scf00300 | 18 |
| AX-157830987 | 13 | 57.652 | KV453138.1 | 1863417 | 18-scf00300 | 18 |

|              |    |        |            |         |             |    |
|--------------|----|--------|------------|---------|-------------|----|
| AX-158138806 | 13 | 57.652 | KV453138.1 | 3237940 | 18-scf00300 | 18 |
| AX-157775932 | 13 | 57.652 | KV453138.1 | 3387424 | 18-scf00300 | 18 |
| AX-158138930 | 13 | 57.652 | KV453138.1 | 3398521 | 18-scf00300 | 18 |
| AX-158138931 | 13 | 57.652 | KV453138.1 | 3399877 | 18-scf00300 | 18 |
| AX-157831112 | 13 | 57.652 | KV453138.1 | 4142264 | 18-scf00300 | 18 |
| AX-158139409 | 13 | 57.652 | KV453138.1 | 4206605 | 18-scf00300 | 18 |
| AX-158139415 | 13 | 57.652 | KV453138.1 | 4211862 | 18-scf00300 | 18 |
| AX-158139517 | 13 | 57.652 | KV453138.1 | 4369905 | 18-scf00300 | 18 |
| AX-158139520 | 13 | 57.652 | KV453138.1 | 4373112 | 18-scf00300 | 18 |
| AX-158139367 | 13 | 57.656 | KV453138.1 | 4143128 | 18-scf00300 | 18 |
| AX-158139369 | 13 | 57.656 | KV453138.1 | 4147790 | 18-scf00300 | 18 |
| AX-157831114 | 13 | 57.656 | KV453138.1 | 4149137 | 18-scf00300 | 18 |
| AX-158139370 | 13 | 57.701 | KV453138.1 | 4150910 | 18-scf00300 | 18 |
| AX-158139372 | 13 | 57.766 | KV453138.1 | 4152988 | 18-scf00300 | 18 |
| AX-158139373 | 13 | 57.766 | KV453138.1 | 4153369 | 18-scf00300 | 18 |
| AX-158139377 | 13 | 57.766 | KV453138.1 | 4160398 | 18-scf00300 | 18 |
| AX-157866310 | 13 | 57.766 | KV453138.1 | 4225861 | 18-scf00300 | 18 |
| AX-158139606 | 13 | 57.766 | KV453138.1 | 4493015 | 18-scf00300 | 18 |
| AX-158139679 | 13 | 57.766 | KV453138.1 | 4583460 | 18-scf00300 | 18 |
| AX-158139378 | 13 | 57.984 | KV453138.1 | 4163317 | 18-scf00300 | 18 |
| AX-158139379 | 13 | 57.984 | KV453138.1 | 4166104 | 18-scf00300 | 18 |
| AX-158139380 | 13 | 57.984 | KV453138.1 | 4167620 | 18-scf00300 | 18 |
| AX-158139381 | 13 | 57.984 | KV453138.1 | 4168428 | 18-scf00300 | 18 |
| AX-157831116 | 13 | 58.093 | KV453138.1 | 4152766 | 18-scf00300 | 18 |
| AX-158139382 | 13 | 58.093 | KV453138.1 | 4169174 | 18-scf00300 | 18 |
| AX-158139384 | 13 | 58.093 | KV453138.1 | 4172702 | 18-scf00300 | 18 |
| AX-157758585 | 13 | 58.093 | KV453138.1 | 4174598 | 18-scf00300 | 18 |
| AX-158139385 | 13 | 58.093 | KV453138.1 | 4175225 | 18-scf00300 | 18 |
| AX-158139386 | 13 | 58.093 | KV453138.1 | 4176624 | 18-scf00300 | 18 |
| AX-158139387 | 13 | 58.093 | KV453138.1 | 4177080 | 18-scf00300 | 18 |
| AX-158139388 | 13 | 58.093 | KV453138.1 | 4177690 | 18-scf00300 | 18 |
| AX-157753882 | 13 | 58.093 | KV453138.1 | 4181601 | 18-scf00300 | 18 |
| AX-158139419 | 13 | 58.093 | KV453138.1 | 4220344 | 18-scf00300 | 18 |
| AX-158139623 | 13 | 58.093 | KV453138.1 | 4518331 | 18-scf00300 | 18 |
| AX-158139652 | 13 | 58.093 | KV453138.1 | 4547985 | 18-scf00300 | 18 |
| AX-158139389 | 13 | 58.146 | KV453138.1 | 4179960 | 18-scf00300 | 18 |
| AX-158139391 | 13 | 58.146 | KV453138.1 | 4182414 | 18-scf00300 | 18 |
| AX-158139393 | 13 | 58.201 | KV453138.1 | 4185809 | 18-scf00300 | 18 |
| AX-158139438 | 13 | 58.201 | KV453138.1 | 4235741 | 18-scf00300 | 18 |
| AX-158139453 | 13 | 58.201 | KV453138.1 | 4253952 | 18-scf00300 | 18 |
| AX-158139395 | 13 | 58.25  | KV453138.1 | 4188419 | 18-scf00300 | 18 |
| AX-158139396 | 13 | 58.312 | KV453138.1 | 4190121 | 18-scf00300 | 18 |
| AX-158139400 | 13 | 58.312 | KV453138.1 | 4196020 | 18-scf00300 | 18 |
| AX-158139401 | 13 | 58.312 | KV453138.1 | 4196473 | 18-scf00300 | 18 |
| AX-158139403 | 13 | 58.312 | KV453138.1 | 4198635 | 18-scf00300 | 18 |
| AX-158139404 | 13 | 58.312 | KV453138.1 | 4199249 | 18-scf00300 | 18 |
| AX-158139451 | 13 | 58.312 | KV453138.1 | 4250580 | 18-scf00300 | 18 |
| AX-158139413 | 13 | 58.325 | KV453138.1 | 4210724 | 18-scf00300 | 18 |
| AX-158139449 | 13 | 58.325 | KV453138.1 | 4248883 | 18-scf00300 | 18 |
| AX-158139414 | 13 | 58.331 | KV453138.1 | 4211443 | 18-scf00300 | 18 |
| AX-158139416 | 13 | 58.338 | KV453138.1 | 4215153 | 18-scf00300 | 18 |

|              |    |        |            |         |             |    |
|--------------|----|--------|------------|---------|-------------|----|
| AX-157831118 | 13 | 58.342 | KV453138.1 | 4218549 | 18-scf00300 | 18 |
| AX-158139420 | 13 | 58.347 | KV453138.1 | 4222411 | 18-scf00300 | 18 |
| AX-158139421 | 13 | 58.348 | KV453138.1 | 4223497 | 18-scf00300 | 18 |
| AX-158139425 | 13 | 58.348 | KV453138.1 | 4225280 | 18-scf00300 | 18 |
| AX-158139430 | 13 | 58.353 | KV453138.1 | 4227945 | 18-scf00300 | 18 |
| AX-158139433 | 13 | 58.363 | KV453138.1 | 4230466 | 18-scf00300 | 18 |
| AX-158139604 | 13 | 58.363 | KV453138.1 | 4489129 | 18-scf00300 | 18 |
| AX-158139631 | 13 | 58.363 | KV453138.1 | 4527614 | 18-scf00300 | 18 |
| AX-158139649 | 13 | 58.363 | KV453138.1 | 4544568 | 18-scf00300 | 18 |
| AX-158139434 | 13 | 58.37  | KV453138.1 | 4232319 | 18-scf00300 | 18 |
| AX-158139435 | 13 | 58.37  | KV453138.1 | 4232757 | 18-scf00300 | 18 |
| AX-158139436 | 13 | 58.37  | KV453138.1 | 4233233 | 18-scf00300 | 18 |
| AX-158139424 | 13 | 58.379 | KV453138.1 | 4224723 | 18-scf00300 | 18 |
| AX-158139437 | 13 | 58.379 | KV453138.1 | 4235304 | 18-scf00300 | 18 |
| AX-157831130 | 13 | 58.379 | KV453138.1 | 4371511 | 18-scf00300 | 18 |
| AX-158139549 | 13 | 58.379 | KV453138.1 | 4409388 | 18-scf00300 | 18 |
| AX-157741656 | 13 | 58.379 | KV453138.1 | 4425547 | 18-scf00300 | 18 |
| AX-158139566 | 13 | 58.379 | KV453138.1 | 4430013 | 18-scf00300 | 18 |
| AX-157774821 | 13 | 58.379 | KV453138.1 | 4541623 | 18-scf00300 | 18 |
| AX-158385388 | 13 | 58.379 | KV453138.1 | 4597277 | 18-scf00300 | 18 |
| AX-157886319 | 13 | 58.382 | KV453138.1 | 4242370 | 18-scf00300 | 18 |
| AX-158139402 | 13 | 58.393 | KV453138.1 | 4197006 | 18-scf00300 | 18 |
| AX-157717014 | 13 | 58.393 | KV453138.1 | 4198064 | 18-scf00300 | 18 |
| AX-158139429 | 13 | 58.393 | KV453138.1 | 4227616 | 18-scf00300 | 18 |
| AX-158139431 | 13 | 58.393 | KV453138.1 | 4229273 | 18-scf00300 | 18 |
| AX-158139440 | 13 | 58.393 | KV453138.1 | 4237198 | 18-scf00300 | 18 |
| AX-158139450 | 13 | 58.393 | KV453138.1 | 4249796 | 18-scf00300 | 18 |
| AX-158139484 | 13 | 58.393 | KV453138.1 | 4315846 | 18-scf00300 | 18 |
| AX-158139558 | 13 | 58.393 | KV453138.1 | 4420733 | 18-scf00300 | 18 |
| AX-158139563 | 13 | 58.393 | KV453138.1 | 4427465 | 18-scf00300 | 18 |
| AX-157747584 | 13 | 58.393 | KV453138.1 | 4525129 | 18-scf00300 | 18 |
| AX-158139455 | 13 | 58.401 | KV453138.1 | 4257247 | 18-scf00300 | 18 |
| AX-158139457 | 13 | 58.408 | KV453138.1 | 4258736 | 18-scf00300 | 18 |
| AX-157720665 | 13 | 58.408 | KV453138.1 | 4515691 | 18-scf00300 | 18 |
| AX-158139463 | 13 | 58.421 | KV453138.1 | 4271368 | 18-scf00300 | 18 |
| AX-158139466 | 13 | 58.421 | KV453138.1 | 4277597 | 18-scf00300 | 18 |
| AX-158139467 | 13 | 58.421 | KV453138.1 | 4279113 | 18-scf00300 | 18 |
| AX-158139428 | 13 | 58.53  | KV453138.1 | 4226993 | 18-scf00300 | 18 |
| AX-158139470 | 13 | 58.53  | KV453138.1 | 4285532 | 18-scf00300 | 18 |
| AX-158139471 | 13 | 58.53  | KV453138.1 | 4288555 | 18-scf00300 | 18 |
| AX-157831121 | 13 | 58.53  | KV453138.1 | 4305736 | 18-scf00300 | 18 |
| AX-158139475 | 13 | 58.53  | KV453138.1 | 4306203 | 18-scf00300 | 18 |
| AX-158139476 | 13 | 58.53  | KV453138.1 | 4306643 | 18-scf00300 | 18 |
| AX-158139477 | 13 | 58.53  | KV453138.1 | 4308921 | 18-scf00300 | 18 |
| AX-158139478 | 13 | 58.53  | KV453138.1 | 4310008 | 18-scf00300 | 18 |
| AX-158139479 | 13 | 58.53  | KV453138.1 | 4310513 | 18-scf00300 | 18 |
| AX-158139480 | 13 | 58.53  | KV453138.1 | 4311441 | 18-scf00300 | 18 |
| AX-158139481 | 13 | 58.53  | KV453138.1 | 4313498 | 18-scf00300 | 18 |
| AX-158139482 | 13 | 58.53  | KV453138.1 | 4314256 | 18-scf00300 | 18 |
| AX-158139483 | 13 | 58.53  | KV453138.1 | 4315531 | 18-scf00300 | 18 |
| AX-157831122 | 13 | 58.53  | KV453138.1 | 4320410 | 18-scf00300 | 18 |

|              |    |        |            |         |             |    |
|--------------|----|--------|------------|---------|-------------|----|
| AX-158139488 | 13 | 58.53  | KV453138.1 | 4322938 | 18-scf00300 | 18 |
| AX-158139489 | 13 | 58.53  | KV453138.1 | 4323241 | 18-scf00300 | 18 |
| AX-158139490 | 13 | 58.53  | KV453138.1 | 4323617 | 18-scf00300 | 18 |
| AX-158139493 | 13 | 58.53  | KV453138.1 | 4331512 | 18-scf00300 | 18 |
| AX-158139494 | 13 | 58.53  | KV453138.1 | 4331693 | 18-scf00300 | 18 |
| AX-157831124 | 13 | 58.53  | KV453138.1 | 4336944 | 18-scf00300 | 18 |
| AX-157757363 | 13 | 58.53  | KV453138.1 | 4342435 | 18-scf00300 | 18 |
| AX-157719148 | 13 | 58.53  | KV453138.1 | 4343583 | 18-scf00300 | 18 |
| AX-158139510 | 13 | 58.53  | KV453138.1 | 4360834 | 18-scf00300 | 18 |
| AX-158139536 | 13 | 58.53  | KV453138.1 | 4395057 | 18-scf00300 | 18 |
| AX-158139537 | 13 | 58.53  | KV453138.1 | 4395526 | 18-scf00300 | 18 |
| AX-158139605 | 13 | 58.53  | KV453138.1 | 4491265 | 18-scf00300 | 18 |
| AX-158139619 | 13 | 58.53  | KV453138.1 | 4509834 | 18-scf00300 | 18 |
| AX-158139625 | 13 | 58.53  | KV453138.1 | 4521970 | 18-scf00300 | 18 |
| AX-158139661 | 13 | 58.53  | KV453138.1 | 4556034 | 18-scf00300 | 18 |
| AX-158139692 | 13 | 58.53  | KV453138.1 | 4597935 | 18-scf00300 | 18 |
| AX-157831126 | 13 | 58.639 | KV453138.1 | 4351649 | 18-scf00300 | 18 |
| AX-158139394 | 13 | 58.748 | KV453138.1 | 4188066 | 18-scf00300 | 18 |
| AX-157714055 | 13 | 58.748 | KV453138.1 | 4225564 | 18-scf00300 | 18 |
| AX-157773269 | 13 | 58.748 | KV453138.1 | 4360910 | 18-scf00300 | 18 |
| AX-158139513 | 13 | 58.748 | KV453138.1 | 4363295 | 18-scf00300 | 18 |
| AX-157770775 | 13 | 58.748 | KV453138.1 | 4367210 | 18-scf00300 | 18 |
| AX-157831131 | 13 | 58.748 | KV453138.1 | 4372291 | 18-scf00300 | 18 |
| AX-158139523 | 13 | 58.748 | KV453138.1 | 4377786 | 18-scf00300 | 18 |
| AX-158139526 | 13 | 58.748 | KV453138.1 | 4383358 | 18-scf00300 | 18 |
| AX-158139532 | 13 | 58.748 | KV453138.1 | 4391530 | 18-scf00300 | 18 |
| AX-158139533 | 13 | 58.748 | KV453138.1 | 4392529 | 18-scf00300 | 18 |
| AX-158139538 | 13 | 58.748 | KV453138.1 | 4397169 | 18-scf00300 | 18 |
| AX-158139539 | 13 | 58.748 | KV453138.1 | 4398610 | 18-scf00300 | 18 |
| AX-158139541 | 13 | 58.748 | KV453138.1 | 4399878 | 18-scf00300 | 18 |
| AX-158139543 | 13 | 58.748 | KV453138.1 | 4400679 | 18-scf00300 | 18 |
| AX-157831132 | 13 | 58.748 | KV453138.1 | 4400898 | 18-scf00300 | 18 |
| AX-157831133 | 13 | 58.748 | KV453138.1 | 4401335 | 18-scf00300 | 18 |
| AX-157831134 | 13 | 58.748 | KV453138.1 | 4401796 | 18-scf00300 | 18 |
| AX-157771256 | 13 | 58.748 | KV453138.1 | 4404224 | 18-scf00300 | 18 |
| AX-158139545 | 13 | 58.748 | KV453138.1 | 4404940 | 18-scf00300 | 18 |
| AX-158139546 | 13 | 58.748 | KV453138.1 | 4405554 | 18-scf00300 | 18 |
| AX-158139547 | 13 | 58.748 | KV453138.1 | 4407503 | 18-scf00300 | 18 |
| AX-158139551 | 13 | 58.748 | KV453138.1 | 4411835 | 18-scf00300 | 18 |
| AX-158139552 | 13 | 58.748 | KV453138.1 | 4414664 | 18-scf00300 | 18 |
| AX-158139553 | 13 | 58.748 | KV453138.1 | 4415054 | 18-scf00300 | 18 |
| AX-158139554 | 13 | 58.748 | KV453138.1 | 4415961 | 18-scf00300 | 18 |
| AX-158139555 | 13 | 58.748 | KV453138.1 | 4416720 | 18-scf00300 | 18 |
| AX-158139556 | 13 | 58.748 | KV453138.1 | 4418579 | 18-scf00300 | 18 |
| AX-157713837 | 13 | 58.748 | KV453138.1 | 4480121 | 18-scf00300 | 18 |
| AX-157831143 | 13 | 58.748 | KV453138.1 | 4485164 | 18-scf00300 | 18 |
| AX-157857979 | 13 | 58.748 | KV453138.1 | 4489972 | 18-scf00300 | 18 |
| AX-158139626 | 13 | 58.748 | KV453138.1 | 4522629 | 18-scf00300 | 18 |
| AX-158139627 | 13 | 58.748 | KV453138.1 | 4523055 | 18-scf00300 | 18 |
| AX-157831152 | 13 | 58.748 | KV453138.1 | 4524494 | 18-scf00300 | 18 |
| AX-157716117 | 13 | 58.807 | KV453138.1 | 4419972 | 18-scf00300 | 18 |



|              |    |        |            |         |             |    |
|--------------|----|--------|------------|---------|-------------|----|
| AX-157709108 | 13 | 58.858 | KV453138.1 | 1229132 | 18-scf00300 | 18 |
| AX-158137939 | 13 | 58.858 | KV453138.1 | 1393967 | 18-scf00300 | 18 |
| AX-157831073 | 13 | 58.858 | KV453138.1 | 3470448 | 18-scf00300 | 18 |
| AX-158139375 | 13 | 58.858 | KV453138.1 | 4157700 | 18-scf00300 | 18 |
| AX-157831123 | 13 | 58.858 | KV453138.1 | 4328330 | 18-scf00300 | 18 |
| AX-158139502 | 13 | 58.858 | KV453138.1 | 4351920 | 18-scf00300 | 18 |
| AX-158139504 | 13 | 58.858 | KV453138.1 | 4353988 | 18-scf00300 | 18 |
| AX-158139507 | 13 | 58.858 | KV453138.1 | 4357011 | 18-scf00300 | 18 |
| AX-158139522 | 13 | 58.858 | KV453138.1 | 4377151 | 18-scf00300 | 18 |
| AX-158139525 | 13 | 58.858 | KV453138.1 | 4382264 | 18-scf00300 | 18 |
| AX-158139557 | 13 | 58.858 | KV453138.1 | 4418809 | 18-scf00300 | 18 |
| AX-157831135 | 13 | 58.858 | KV453138.1 | 4421293 | 18-scf00300 | 18 |
| AX-158139559 | 13 | 58.858 | KV453138.1 | 4423534 | 18-scf00300 | 18 |
| AX-158139560 | 13 | 58.858 | KV453138.1 | 4424943 | 18-scf00300 | 18 |
| AX-158139561 | 13 | 58.858 | KV453138.1 | 4426037 | 18-scf00300 | 18 |
| AX-158139562 | 13 | 58.858 | KV453138.1 | 4426675 | 18-scf00300 | 18 |
| AX-158139568 | 13 | 58.858 | KV453138.1 | 4431302 | 18-scf00300 | 18 |
| AX-158139570 | 13 | 58.858 | KV453138.1 | 4435607 | 18-scf00300 | 18 |
| AX-158139571 | 13 | 58.858 | KV453138.1 | 4436238 | 18-scf00300 | 18 |
| AX-158139572 | 13 | 58.858 | KV453138.1 | 4437541 | 18-scf00300 | 18 |
| AX-158139573 | 13 | 58.858 | KV453138.1 | 4438926 | 18-scf00300 | 18 |
| AX-158139574 | 13 | 58.858 | KV453138.1 | 4440280 | 18-scf00300 | 18 |
| AX-158139575 | 13 | 58.858 | KV453138.1 | 4441457 | 18-scf00300 | 18 |
| AX-158139576 | 13 | 58.858 | KV453138.1 | 4442795 | 18-scf00300 | 18 |
| AX-158139578 | 13 | 58.858 | KV453138.1 | 4444631 | 18-scf00300 | 18 |
| AX-158139579 | 13 | 58.858 | KV453138.1 | 4445205 | 18-scf00300 | 18 |
| AX-158139580 | 13 | 58.858 | KV453138.1 | 4445915 | 18-scf00300 | 18 |
| AX-157708236 | 13 | 58.858 | KV453138.1 | 4446155 | 18-scf00300 | 18 |
| AX-157831137 | 13 | 58.858 | KV453138.1 | 4451060 | 18-scf00300 | 18 |
| AX-158417554 | 13 | 58.858 | KV453138.1 | 4455680 | 18-scf00300 | 18 |
| AX-158139582 | 13 | 58.858 | KV453138.1 | 4458894 | 18-scf00300 | 18 |
| AX-158139584 | 13 | 58.858 | KV453138.1 | 4461740 | 18-scf00300 | 18 |
| AX-157738693 | 13 | 58.858 | KV453138.1 | 4463432 | 18-scf00300 | 18 |
| AX-158139586 | 13 | 58.858 | KV453138.1 | 4468327 | 18-scf00300 | 18 |
| AX-157831141 | 13 | 58.858 | KV453138.1 | 4468912 | 18-scf00300 | 18 |
| AX-158139587 | 13 | 58.858 | KV453138.1 | 4469116 | 18-scf00300 | 18 |
| AX-157831142 | 13 | 58.858 | KV453138.1 | 4471197 | 18-scf00300 | 18 |
| AX-158139590 | 13 | 58.858 | KV453138.1 | 4471674 | 18-scf00300 | 18 |
| AX-158139592 | 13 | 58.858 | KV453138.1 | 4472738 | 18-scf00300 | 18 |
| AX-158139593 | 13 | 58.858 | KV453138.1 | 4477337 | 18-scf00300 | 18 |
| AX-158139596 | 13 | 58.858 | KV453138.1 | 4480064 | 18-scf00300 | 18 |
| AX-158139597 | 13 | 58.858 | KV453138.1 | 4481805 | 18-scf00300 | 18 |
| AX-157750078 | 13 | 58.858 | KV453138.1 | 4483521 | 18-scf00300 | 18 |
| AX-158139600 | 13 | 58.858 | KV453138.1 | 4483981 | 18-scf00300 | 18 |
| AX-158139603 | 13 | 58.858 | KV453138.1 | 4487471 | 18-scf00300 | 18 |
| AX-157831144 | 13 | 58.858 | KV453138.1 | 4490542 | 18-scf00300 | 18 |
| AX-157831145 | 13 | 58.858 | KV453138.1 | 4493913 | 18-scf00300 | 18 |
| AX-158139607 | 13 | 58.858 | KV453138.1 | 4494691 | 18-scf00300 | 18 |
| AX-158139608 | 13 | 58.858 | KV453138.1 | 4495227 | 18-scf00300 | 18 |
| AX-158139612 | 13 | 58.858 | KV453138.1 | 4501087 | 18-scf00300 | 18 |
| AX-158139613 | 13 | 58.858 | KV453138.1 | 4503114 | 18-scf00300 | 18 |

|              |    |        |            |         |             |    |
|--------------|----|--------|------------|---------|-------------|----|
| AX-158139614 | 13 | 58.858 | KV453138.1 | 4504747 | 18-scf00300 | 18 |
| AX-158139615 | 13 | 58.858 | KV453138.1 | 4504988 | 18-scf00300 | 18 |
| AX-158139616 | 13 | 58.858 | KV453138.1 | 4506211 | 18-scf00300 | 18 |
| AX-158139617 | 13 | 58.858 | KV453138.1 | 4506421 | 18-scf00300 | 18 |
| AX-157745187 | 13 | 58.858 | KV453138.1 | 4509139 | 18-scf00300 | 18 |
| AX-158139621 | 13 | 58.858 | KV453138.1 | 4511570 | 18-scf00300 | 18 |
| AX-157831149 | 13 | 58.858 | KV453138.1 | 4517236 | 18-scf00300 | 18 |
| AX-157831151 | 13 | 58.858 | KV453138.1 | 4521086 | 18-scf00300 | 18 |
| AX-158139673 | 13 | 58.858 | KV453138.1 | 4576186 | 18-scf00300 | 18 |
| AX-157754313 | 13 | 58.858 | KV453138.1 | 4581302 | 18-scf00300 | 18 |
| AX-158139891 | 13 | 58.858 | KV453138.1 | 4899994 | 18-scf00300 | 18 |
| AX-157886320 | 13 | 58.967 | KV453138.1 | 4260976 | 18-scf00300 | 18 |
| AX-158412024 | 13 | 58.967 | KV453138.1 | 4524153 | 18-scf00300 | 18 |
| AX-158139630 | 13 | 58.967 | KV453138.1 | 4526853 | 18-scf00300 | 18 |
| AX-158139634 | 13 | 58.967 | KV453138.1 | 4528681 | 18-scf00300 | 18 |
| AX-158139644 | 13 | 58.967 | KV453138.1 | 4540103 | 18-scf00300 | 18 |
| AX-157696311 | 13 | 58.967 | KV453138.1 | 4544429 | 18-scf00300 | 18 |
| AX-158139650 | 13 | 58.967 | KV453138.1 | 4546459 | 18-scf00300 | 18 |
| AX-158139653 | 13 | 58.967 | KV453138.1 | 4550051 | 18-scf00300 | 18 |
| AX-158139654 | 13 | 58.967 | KV453138.1 | 4551420 | 18-scf00300 | 18 |
| AX-157694478 | 13 | 58.967 | KV453138.1 | 4552864 | 18-scf00300 | 18 |
| AX-158139656 | 13 | 58.967 | KV453138.1 | 4553245 | 18-scf00300 | 18 |
| AX-158139658 | 13 | 58.967 | KV453138.1 | 4554807 | 18-scf00300 | 18 |
| AX-158139659 | 13 | 58.967 | KV453138.1 | 4555387 | 18-scf00300 | 18 |
| AX-158139660 | 13 | 58.967 | KV453138.1 | 4555784 | 18-scf00300 | 18 |
| AX-158139663 | 13 | 58.967 | KV453138.1 | 4559239 | 18-scf00300 | 18 |
| AX-157831153 | 13 | 58.967 | KV453138.1 | 4560308 | 18-scf00300 | 18 |
| AX-158139664 | 13 | 58.967 | KV453138.1 | 4560440 | 18-scf00300 | 18 |
| AX-158139672 | 13 | 58.967 | KV453138.1 | 4575210 | 18-scf00300 | 18 |
| AX-157831206 | 13 | 58.967 | KV453138.1 | 5578079 | 18-scf00300 | 18 |
| AX-158139668 | 13 | 59.031 | KV453138.1 | 4565726 | 18-scf00300 | 18 |
| AX-158139529 | 13 | 59.076 | KV453138.1 | 4386441 | 18-scf00300 | 18 |
| AX-157831140 | 13 | 59.076 | KV453138.1 | 4462897 | 18-scf00300 | 18 |
| AX-158139680 | 13 | 59.076 | KV453138.1 | 4587220 | 18-scf00300 | 18 |
| AX-158139682 | 13 | 59.076 | KV453138.1 | 4589443 | 18-scf00300 | 18 |
| AX-158139683 | 13 | 59.076 | KV453138.1 | 4590497 | 18-scf00300 | 18 |
| AX-158139686 | 13 | 59.076 | KV453138.1 | 4593982 | 18-scf00300 | 18 |
| AX-158139687 | 13 | 59.076 | KV453138.1 | 4594345 | 18-scf00300 | 18 |
| AX-158139688 | 13 | 59.076 | KV453138.1 | 4594881 | 18-scf00300 | 18 |
| AX-158139690 | 13 | 59.076 | KV453138.1 | 4596403 | 18-scf00300 | 18 |
| AX-158139693 | 13 | 59.076 | KV453138.1 | 4603750 | 18-scf00300 | 18 |
| AX-158139695 | 13 | 59.076 | KV453138.1 | 4606277 | 18-scf00300 | 18 |
| AX-158139698 | 13 | 59.076 | KV453138.1 | 4609106 | 18-scf00300 | 18 |
| AX-158139710 | 13 | 59.076 | KV453138.1 | 4629122 | 18-scf00300 | 18 |
| AX-158139823 | 13 | 59.076 | KV453138.1 | 4820818 | 18-scf00300 | 18 |
| AX-158139565 | 13 | 59.185 | KV453138.1 | 4429338 | 18-scf00300 | 18 |
| AX-158139703 | 13 | 59.185 | KV453138.1 | 4618778 | 18-scf00300 | 18 |
| AX-158139704 | 13 | 59.185 | KV453138.1 | 4622051 | 18-scf00300 | 18 |
| AX-158139705 | 13 | 59.228 | KV453138.1 | 4622825 | 18-scf00300 | 18 |
| AX-158139708 | 13 | 59.228 | KV453138.1 | 4625207 | 18-scf00300 | 18 |
| AX-158139749 | 13 | 59.228 | KV453138.1 | 4693528 | 18-scf00300 | 18 |

|              |    |        |            |         |             |    |
|--------------|----|--------|------------|---------|-------------|----|
| AX-158139706 | 13 | 59.256 | KV453138.1 | 4623248 | 18-scf00300 | 18 |
| AX-158139709 | 13 | 59.294 | KV453138.1 | 4625813 | 18-scf00300 | 18 |
| AX-157741999 | 13 | 59.294 | KV453138.1 | 4628462 | 18-scf00300 | 18 |
| AX-158139712 | 13 | 59.349 | KV453138.1 | 4632611 | 18-scf00300 | 18 |
| AX-158139713 | 13 | 59.404 | KV453138.1 | 4634475 | 18-scf00300 | 18 |
| AX-158139714 | 13 | 59.404 | KV453138.1 | 4635378 | 18-scf00300 | 18 |
| AX-158139715 | 13 | 59.404 | KV453138.1 | 4637757 | 18-scf00300 | 18 |
| AX-158139716 | 13 | 59.404 | KV453138.1 | 4639964 | 18-scf00300 | 18 |
| AX-158139717 | 13 | 59.404 | KV453138.1 | 4643897 | 18-scf00300 | 18 |
| AX-158139718 | 13 | 59.404 | KV453138.1 | 4644589 | 18-scf00300 | 18 |
| AX-158412026 | 13 | 59.404 | KV453138.1 | 4646890 | 18-scf00300 | 18 |
| AX-158139719 | 13 | 59.404 | KV453138.1 | 4647420 | 18-scf00300 | 18 |
| AX-158139725 | 13 | 59.404 | KV453138.1 | 4655173 | 18-scf00300 | 18 |
| AX-158139729 | 13 | 59.404 | KV453138.1 | 4661583 | 18-scf00300 | 18 |
| AX-158139730 | 13 | 59.404 | KV453138.1 | 4663326 | 18-scf00300 | 18 |
| AX-158139735 | 13 | 59.404 | KV453138.1 | 4667584 | 18-scf00300 | 18 |
| AX-158139736 | 13 | 59.404 | KV453138.1 | 4668770 | 18-scf00300 | 18 |
| AX-158139740 | 13 | 59.404 | KV453138.1 | 4674551 | 18-scf00300 | 18 |
| AX-158139741 | 13 | 59.404 | KV453138.1 | 4675706 | 18-scf00300 | 18 |
| AX-158139745 | 13 | 59.404 | KV453138.1 | 4681645 | 18-scf00300 | 18 |
| AX-158139746 | 13 | 59.404 | KV453138.1 | 4685176 | 18-scf00300 | 18 |
| AX-158139748 | 13 | 59.404 | KV453138.1 | 4690876 | 18-scf00300 | 18 |
| AX-157742693 | 13 | 59.404 | KV453138.1 | 4691669 | 18-scf00300 | 18 |
| AX-158139756 | 13 | 59.404 | KV453138.1 | 4704542 | 18-scf00300 | 18 |
| AX-158139757 | 13 | 59.41  | KV453138.1 | 4704953 | 18-scf00300 | 18 |
| AX-158139766 | 13 | 59.418 | KV453138.1 | 4724501 | 18-scf00300 | 18 |
| AX-158139802 | 13 | 59.418 | KV453138.1 | 4777652 | 18-scf00300 | 18 |
| AX-158139803 | 13 | 59.418 | KV453138.1 | 4778578 | 18-scf00300 | 18 |
| AX-158139893 | 13 | 59.418 | KV453138.1 | 4902230 | 18-scf00300 | 18 |
| AX-158140047 | 13 | 59.418 | KV453138.1 | 5135477 | 18-scf00300 | 18 |
| AX-158139767 | 13 | 59.424 | KV453138.1 | 4725300 | 18-scf00300 | 18 |
| AX-158139927 | 13 | 59.424 | KV453138.1 | 4944235 | 18-scf00300 | 18 |
| AX-158139768 | 13 | 59.432 | KV453138.1 | 4725864 | 18-scf00300 | 18 |
| AX-158139772 | 13 | 59.434 | KV453138.1 | 4734136 | 18-scf00300 | 18 |
| AX-158139773 | 13 | 59.442 | KV453138.1 | 4735588 | 18-scf00300 | 18 |
| AX-158139731 | 13 | 59.45  | KV453138.1 | 4663769 | 18-scf00300 | 18 |
| AX-158139733 | 13 | 59.45  | KV453138.1 | 4665000 | 18-scf00300 | 18 |
| AX-158139774 | 13 | 59.45  | KV453138.1 | 4736456 | 18-scf00300 | 18 |
| AX-158140195 | 13 | 59.45  | KV453138.1 | 5358230 | 18-scf00300 | 18 |
| AX-158139739 | 13 | 59.456 | KV453138.1 | 4674013 | 18-scf00300 | 18 |
| AX-157866313 | 13 | 59.456 | KV453138.1 | 4739215 | 18-scf00300 | 18 |
| AX-158139782 | 13 | 59.456 | KV453138.1 | 4748786 | 18-scf00300 | 18 |
| AX-157739269 | 13 | 59.456 | KV453138.1 | 4804683 | 18-scf00300 | 18 |
| AX-157871586 | 13 | 59.456 | KV453138.1 | 4873086 | 18-scf00300 | 18 |
| AX-158139777 | 13 | 59.467 | KV453138.1 | 4741052 | 18-scf00300 | 18 |
| AX-158139789 | 13 | 59.477 | KV453138.1 | 4753527 | 18-scf00300 | 18 |
| AX-158412028 | 13 | 59.485 | KV453138.1 | 4709354 | 18-scf00300 | 18 |
| AX-158139780 | 13 | 59.485 | KV453138.1 | 4744909 | 18-scf00300 | 18 |
| AX-158139781 | 13 | 59.485 | KV453138.1 | 4747237 | 18-scf00300 | 18 |
| AX-158139786 | 13 | 59.485 | KV453138.1 | 4751455 | 18-scf00300 | 18 |
| AX-158139790 | 13 | 59.485 | KV453138.1 | 4754275 | 18-scf00300 | 18 |

|              |    |        |            |         |             |    |
|--------------|----|--------|------------|---------|-------------|----|
| AX-158139883 | 13 | 59.485 | KV453138.1 | 4894275 | 18-scf00300 | 18 |
| AX-158140164 | 13 | 59.485 | KV453138.1 | 5312106 | 18-scf00300 | 18 |
| AX-158140165 | 13 | 59.485 | KV453138.1 | 5313596 | 18-scf00300 | 18 |
| AX-158139723 | 13 | 59.492 | KV453138.1 | 4652746 | 18-scf00300 | 18 |
| AX-158139792 | 13 | 59.492 | KV453138.1 | 4758095 | 18-scf00300 | 18 |
| AX-158139821 | 13 | 59.492 | KV453138.1 | 4817159 | 18-scf00300 | 18 |
| AX-158139865 | 13 | 59.492 | KV453138.1 | 4876338 | 18-scf00300 | 18 |
| AX-158139868 | 13 | 59.492 | KV453138.1 | 4879002 | 18-scf00300 | 18 |
| AX-157758201 | 13 | 59.503 | KV453138.1 | 4763675 | 18-scf00300 | 18 |
| AX-157742230 | 13 | 59.513 | KV453138.1 | 4641721 | 18-scf00300 | 18 |
| AX-158139744 | 13 | 59.513 | KV453138.1 | 4679311 | 18-scf00300 | 18 |
| AX-158139755 | 13 | 59.513 | KV453138.1 | 4703197 | 18-scf00300 | 18 |
| AX-158412031 | 13 | 59.513 | KV453138.1 | 4737795 | 18-scf00300 | 18 |
| AX-158139788 | 13 | 59.513 | KV453138.1 | 4752820 | 18-scf00300 | 18 |
| AX-157831155 | 13 | 59.513 | KV453138.1 | 4771079 | 18-scf00300 | 18 |
| AX-158139799 | 13 | 59.513 | KV453138.1 | 4773828 | 18-scf00300 | 18 |
| AX-158139804 | 13 | 59.513 | KV453138.1 | 4780176 | 18-scf00300 | 18 |
| AX-158139805 | 13 | 59.513 | KV453138.1 | 4780647 | 18-scf00300 | 18 |
| AX-158139806 | 13 | 59.513 | KV453138.1 | 4781160 | 18-scf00300 | 18 |
| AX-158139811 | 13 | 59.513 | KV453138.1 | 4791664 | 18-scf00300 | 18 |
| AX-158139812 | 13 | 59.513 | KV453138.1 | 4792202 | 18-scf00300 | 18 |
| AX-158139815 | 13 | 59.513 | KV453138.1 | 4803226 | 18-scf00300 | 18 |
| AX-158139816 | 13 | 59.513 | KV453138.1 | 4804265 | 18-scf00300 | 18 |
| AX-157722252 | 13 | 59.513 | KV453138.1 | 4806916 | 18-scf00300 | 18 |
| AX-157756322 | 13 | 59.513 | KV453138.1 | 4807419 | 18-scf00300 | 18 |
| AX-158139817 | 13 | 59.513 | KV453138.1 | 4808495 | 18-scf00300 | 18 |
| AX-157739916 | 13 | 59.513 | KV453138.1 | 4808933 | 18-scf00300 | 18 |
| AX-158139820 | 13 | 59.513 | KV453138.1 | 4814699 | 18-scf00300 | 18 |
| AX-158139830 | 13 | 59.513 | KV453138.1 | 4828864 | 18-scf00300 | 18 |
| AX-158139833 | 13 | 59.513 | KV453138.1 | 4832080 | 18-scf00300 | 18 |
| AX-158139834 | 13 | 59.513 | KV453138.1 | 4832633 | 18-scf00300 | 18 |
| AX-158139836 | 13 | 59.513 | KV453138.1 | 4834729 | 18-scf00300 | 18 |
| AX-157831158 | 13 | 59.513 | KV453138.1 | 4840348 | 18-scf00300 | 18 |
| AX-158139840 | 13 | 59.513 | KV453138.1 | 4842200 | 18-scf00300 | 18 |
| AX-158139842 | 13 | 59.513 | KV453138.1 | 4843297 | 18-scf00300 | 18 |
| AX-158139843 | 13 | 59.513 | KV453138.1 | 4844379 | 18-scf00300 | 18 |
| AX-158139845 | 13 | 59.513 | KV453138.1 | 4849880 | 18-scf00300 | 18 |
| AX-158139846 | 13 | 59.513 | KV453138.1 | 4850103 | 18-scf00300 | 18 |
| AX-158139847 | 13 | 59.513 | KV453138.1 | 4850361 | 18-scf00300 | 18 |
| AX-158139848 | 13 | 59.513 | KV453138.1 | 4850754 | 18-scf00300 | 18 |
| AX-158139850 | 13 | 59.513 | KV453138.1 | 4851739 | 18-scf00300 | 18 |
| AX-158139852 | 13 | 59.513 | KV453138.1 | 4855216 | 18-scf00300 | 18 |
| AX-158139855 | 13 | 59.513 | KV453138.1 | 4859957 | 18-scf00300 | 18 |
| AX-158139858 | 13 | 59.513 | KV453138.1 | 4866935 | 18-scf00300 | 18 |
| AX-158139859 | 13 | 59.513 | KV453138.1 | 4868701 | 18-scf00300 | 18 |
| AX-157772732 | 13 | 59.513 | KV453138.1 | 4868747 | 18-scf00300 | 18 |
| AX-158139862 | 13 | 59.513 | KV453138.1 | 4874142 | 18-scf00300 | 18 |
| AX-158139863 | 13 | 59.513 | KV453138.1 | 4874615 | 18-scf00300 | 18 |
| AX-158139864 | 13 | 59.513 | KV453138.1 | 4876127 | 18-scf00300 | 18 |
| AX-158139866 | 13 | 59.513 | KV453138.1 | 4878182 | 18-scf00300 | 18 |
| AX-158139867 | 13 | 59.513 | KV453138.1 | 4878491 | 18-scf00300 | 18 |

|              |    |        |            |         |             |    |
|--------------|----|--------|------------|---------|-------------|----|
| AX-158139869 | 13 | 59.513 | KV453138.1 | 4879766 | 18-scf00300 | 18 |
| AX-158139870 | 13 | 59.513 | KV453138.1 | 4880905 | 18-scf00300 | 18 |
| AX-158139871 | 13 | 59.513 | KV453138.1 | 4882182 | 18-scf00300 | 18 |
| AX-158139903 | 13 | 59.513 | KV453138.1 | 4913289 | 18-scf00300 | 18 |
| AX-157831160 | 13 | 59.513 | KV453138.1 | 4946324 | 18-scf00300 | 18 |
| AX-158139936 | 13 | 59.513 | KV453138.1 | 4952665 | 18-scf00300 | 18 |
| AX-158139978 | 13 | 59.513 | KV453138.1 | 5030471 | 18-scf00300 | 18 |
| AX-158140021 | 13 | 59.513 | KV453138.1 | 5089417 | 18-scf00300 | 18 |
| AX-158140030 | 13 | 59.513 | KV453138.1 | 5113423 | 18-scf00300 | 18 |
| AX-158140100 | 13 | 59.513 | KV453138.1 | 5217018 | 18-scf00300 | 18 |
| AX-158380299 | 13 | 59.547 | KV453138.1 | 4880942 | 18-scf00300 | 18 |
| AX-158139874 | 13 | 59.583 | KV453138.1 | 4885315 | 18-scf00300 | 18 |
| AX-158139726 | 13 | 59.622 | KV453138.1 | 4655774 | 18-scf00300 | 18 |
| AX-158139727 | 13 | 59.622 | KV453138.1 | 4656417 | 18-scf00300 | 18 |
| AX-158139747 | 13 | 59.622 | KV453138.1 | 4685647 | 18-scf00300 | 18 |
| AX-158139758 | 13 | 59.622 | KV453138.1 | 4705462 | 18-scf00300 | 18 |
| AX-158139759 | 13 | 59.622 | KV453138.1 | 4706459 | 18-scf00300 | 18 |
| AX-158139760 | 13 | 59.622 | KV453138.1 | 4709954 | 18-scf00300 | 18 |
| AX-158139763 | 13 | 59.622 | KV453138.1 | 4719131 | 18-scf00300 | 18 |
| AX-158139765 | 13 | 59.622 | KV453138.1 | 4722891 | 18-scf00300 | 18 |
| AX-158139878 | 13 | 59.622 | KV453138.1 | 4891796 | 18-scf00300 | 18 |
| AX-158139882 | 13 | 59.622 | KV453138.1 | 4893858 | 18-scf00300 | 18 |
| AX-158139884 | 13 | 59.622 | KV453138.1 | 4894841 | 18-scf00300 | 18 |
| AX-158139885 | 13 | 59.622 | KV453138.1 | 4894925 | 18-scf00300 | 18 |
| AX-158139887 | 13 | 59.622 | KV453138.1 | 4897278 | 18-scf00300 | 18 |
| AX-158139888 | 13 | 59.622 | KV453138.1 | 4898208 | 18-scf00300 | 18 |
| AX-158139889 | 13 | 59.622 | KV453138.1 | 4898979 | 18-scf00300 | 18 |
| AX-158139890 | 13 | 59.622 | KV453138.1 | 4899781 | 18-scf00300 | 18 |
| AX-158139892 | 13 | 59.622 | KV453138.1 | 4900711 | 18-scf00300 | 18 |
| AX-158139899 | 13 | 59.622 | KV453138.1 | 4910132 | 18-scf00300 | 18 |
| AX-158139900 | 13 | 59.622 | KV453138.1 | 4911456 | 18-scf00300 | 18 |
| AX-158139901 | 13 | 59.622 | KV453138.1 | 4912348 | 18-scf00300 | 18 |
| AX-158412038 | 13 | 59.622 | KV453138.1 | 4912448 | 18-scf00300 | 18 |
| AX-158139904 | 13 | 59.622 | KV453138.1 | 4916240 | 18-scf00300 | 18 |
| AX-158139905 | 13 | 59.622 | KV453138.1 | 4916912 | 18-scf00300 | 18 |
| AX-158139906 | 13 | 59.622 | KV453138.1 | 4917844 | 18-scf00300 | 18 |
| AX-158139907 | 13 | 59.622 | KV453138.1 | 4917964 | 18-scf00300 | 18 |
| AX-158139916 | 13 | 59.622 | KV453138.1 | 4924407 | 18-scf00300 | 18 |
| AX-158139917 | 13 | 59.622 | KV453138.1 | 4925138 | 18-scf00300 | 18 |
| AX-158139921 | 13 | 59.622 | KV453138.1 | 4930564 | 18-scf00300 | 18 |
| AX-158139923 | 13 | 59.622 | KV453138.1 | 4933045 | 18-scf00300 | 18 |
| AX-158139924 | 13 | 59.622 | KV453138.1 | 4936770 | 18-scf00300 | 18 |
| AX-158139925 | 13 | 59.622 | KV453138.1 | 4937543 | 18-scf00300 | 18 |
| AX-157831159 | 13 | 59.622 | KV453138.1 | 4938235 | 18-scf00300 | 18 |
| AX-158139926 | 13 | 59.622 | KV453138.1 | 4941709 | 18-scf00300 | 18 |
| AX-158139930 | 13 | 59.622 | KV453138.1 | 4948074 | 18-scf00300 | 18 |
| AX-158139932 | 13 | 59.622 | KV453138.1 | 4949504 | 18-scf00300 | 18 |
| AX-157742241 | 13 | 59.622 | KV453138.1 | 4950110 | 18-scf00300 | 18 |
| AX-158139935 | 13 | 59.622 | KV453138.1 | 4951391 | 18-scf00300 | 18 |
| AX-158139937 | 13 | 59.622 | KV453138.1 | 4955279 | 18-scf00300 | 18 |
| AX-158139938 | 13 | 59.622 | KV453138.1 | 4959838 | 18-scf00300 | 18 |

|              |    |        |            |         |             |    |
|--------------|----|--------|------------|---------|-------------|----|
| AX-158139939 | 13 | 59.622 | KV453138.1 | 4962451 | 18-scf00300 | 18 |
| AX-158412045 | 13 | 59.622 | KV453138.1 | 5021095 | 18-scf00300 | 18 |
| AX-158140001 | 13 | 59.622 | KV453138.1 | 5057126 | 18-scf00300 | 18 |
| AX-158140010 | 13 | 59.622 | KV453138.1 | 5072568 | 18-scf00300 | 18 |
| AX-158140081 | 13 | 59.622 | KV453138.1 | 5193623 | 18-scf00300 | 18 |
| AX-158140099 | 13 | 59.622 | KV453138.1 | 5215418 | 18-scf00300 | 18 |
| AX-158140107 | 13 | 59.622 | KV453138.1 | 5228058 | 18-scf00300 | 18 |
| AX-158140140 | 13 | 59.622 | KV453138.1 | 5278276 | 18-scf00300 | 18 |
| AX-158136426 | 13 | 59.731 | KV453137.1 | 874777  | 18-scf00291 | 18 |
| AX-158136452 | 13 | 59.731 | KV453137.1 | 927707  | 18-scf00291 | 18 |
| AX-158137181 | 13 | 59.731 | KV453131.1 | 105972  | 18-scf00293 | 18 |
| AX-158137700 | 13 | 59.731 | KV453138.1 | 706174  | 18-scf00300 | 18 |
| AX-158138024 | 13 | 59.731 | KV453138.1 | 1526445 | 18-scf00300 | 18 |
| AX-158138038 | 13 | 59.731 | KV453138.1 | 1550009 | 18-scf00300 | 18 |
| AX-158138551 | 13 | 59.731 | KV453138.1 | 2835462 | 18-scf00300 | 18 |
| AX-158139122 | 13 | 59.731 | KV453138.1 | 3697910 | 18-scf00300 | 18 |
| AX-157752926 | 13 | 59.731 | KV453138.1 | 3730005 | 18-scf00300 | 18 |
| AX-158139139 | 13 | 59.731 | KV453138.1 | 3739580 | 18-scf00300 | 18 |
| AX-158139331 | 13 | 59.731 | KV453138.1 | 4075958 | 18-scf00300 | 18 |
| AX-158139913 | 13 | 59.731 | KV453138.1 | 4921905 | 18-scf00300 | 18 |
| AX-158139934 | 13 | 59.731 | KV453138.1 | 4950461 | 18-scf00300 | 18 |
| AX-158139941 | 13 | 59.731 | KV453138.1 | 4967805 | 18-scf00300 | 18 |
| AX-158139947 | 13 | 59.731 | KV453138.1 | 4981181 | 18-scf00300 | 18 |
| AX-158139954 | 13 | 59.731 | KV453138.1 | 4997011 | 18-scf00300 | 18 |
| AX-158139963 | 13 | 59.731 | KV453138.1 | 5011774 | 18-scf00300 | 18 |
| AX-158139967 | 13 | 59.731 | KV453138.1 | 5017033 | 18-scf00300 | 18 |
| AX-158139968 | 13 | 59.731 | KV453138.1 | 5017248 | 18-scf00300 | 18 |
| AX-158139969 | 13 | 59.731 | KV453138.1 | 5018549 | 18-scf00300 | 18 |
| AX-158139971 | 13 | 59.731 | KV453138.1 | 5019110 | 18-scf00300 | 18 |
| AX-158139972 | 13 | 59.731 | KV453138.1 | 5024803 | 18-scf00300 | 18 |
| AX-158139973 | 13 | 59.731 | KV453138.1 | 5025883 | 18-scf00300 | 18 |
| AX-158139974 | 13 | 59.731 | KV453138.1 | 5026527 | 18-scf00300 | 18 |
| AX-158139975 | 13 | 59.731 | KV453138.1 | 5027792 | 18-scf00300 | 18 |
| AX-158139977 | 13 | 59.731 | KV453138.1 | 5029749 | 18-scf00300 | 18 |
| AX-158139979 | 13 | 59.731 | KV453138.1 | 5031170 | 18-scf00300 | 18 |
| AX-158139981 | 13 | 59.731 | KV453138.1 | 5032838 | 18-scf00300 | 18 |
| AX-158139982 | 13 | 59.731 | KV453138.1 | 5035521 | 18-scf00300 | 18 |
| AX-158139984 | 13 | 59.731 | KV453138.1 | 5036419 | 18-scf00300 | 18 |
| AX-158139986 | 13 | 59.731 | KV453138.1 | 5038115 | 18-scf00300 | 18 |
| AX-158139990 | 13 | 59.731 | KV453138.1 | 5043615 | 18-scf00300 | 18 |
| AX-158139991 | 13 | 59.731 | KV453138.1 | 5044297 | 18-scf00300 | 18 |
| AX-158392996 | 13 | 59.731 | KV453138.1 | 5047046 | 18-scf00300 | 18 |
| AX-158139994 | 13 | 59.731 | KV453138.1 | 5048225 | 18-scf00300 | 18 |
| AX-158139995 | 13 | 59.731 | KV453138.1 | 5048832 | 18-scf00300 | 18 |
| AX-158139996 | 13 | 59.731 | KV453138.1 | 5049375 | 18-scf00300 | 18 |
| AX-158139997 | 13 | 59.731 | KV453138.1 | 5049989 | 18-scf00300 | 18 |
| AX-158140000 | 13 | 59.731 | KV453138.1 | 5055912 | 18-scf00300 | 18 |
| AX-157831163 | 13 | 59.731 | KV453138.1 | 5056500 | 18-scf00300 | 18 |
| AX-157773331 | 13 | 59.731 | KV453138.1 | 5057667 | 18-scf00300 | 18 |
| AX-158140003 | 13 | 59.731 | KV453138.1 | 5059877 | 18-scf00300 | 18 |
| AX-158140004 | 13 | 59.731 | KV453138.1 | 5060315 | 18-scf00300 | 18 |

|              |    |        |             |         |             |    |
|--------------|----|--------|-------------|---------|-------------|----|
| AX-158140005 | 13 | 59.731 | KV453138.1  | 5063120 | 18-scf00300 | 18 |
| AX-157752595 | 13 | 59.731 | KV453138.1  | 5065610 | 18-scf00300 | 18 |
| AX-158140006 | 13 | 59.731 | KV453138.1  | 5068803 | 18-scf00300 | 18 |
| AX-158140007 | 13 | 59.731 | KV453138.1  | 5070066 | 18-scf00300 | 18 |
| AX-158140008 | 13 | 59.731 | KV453138.1  | 5070400 | 18-scf00300 | 18 |
| AX-158140009 | 13 | 59.731 | KV453138.1  | 5071621 | 18-scf00300 | 18 |
| AX-158140011 | 13 | 59.731 | KV453138.1  | 5073004 | 18-scf00300 | 18 |
| AX-158140012 | 13 | 59.731 | KV453138.1  | 5074009 | 18-scf00300 | 18 |
| AX-158140013 | 13 | 59.731 | KV453138.1  | 5075325 | 18-scf00300 | 18 |
| AX-158140016 | 13 | 59.731 | KV453138.1  | 5079568 | 18-scf00300 | 18 |
| AX-158140017 | 13 | 59.731 | KV453138.1  | 5081382 | 18-scf00300 | 18 |
| AX-158140018 | 13 | 59.731 | KV453138.1  | 5083322 | 18-scf00300 | 18 |
| AX-158140019 | 13 | 59.731 | KV453138.1  | 5084583 | 18-scf00300 | 18 |
| AX-158140020 | 13 | 59.731 | KV453138.1  | 5086139 | 18-scf00300 | 18 |
| AX-158140023 | 13 | 59.731 | KV453138.1  | 5090830 | 18-scf00300 | 18 |
| AX-158140025 | 13 | 59.731 | KV453138.1  | 5092476 | 18-scf00300 | 18 |
| AX-158140026 | 13 | 59.731 | KV453138.1  | 5100538 | 18-scf00300 | 18 |
| AX-158140033 | 13 | 59.731 | KV453138.1  | 5116412 | 18-scf00300 | 18 |
| AX-158140040 | 13 | 59.731 | KV453138.1  | 5129941 | 18-scf00300 | 18 |
| AX-157741349 | 13 | 59.731 | KV453138.1  | 5144517 | 18-scf00300 | 18 |
| AX-157878176 | 13 | 59.731 | KV453138.1  | 5156875 | 18-scf00300 | 18 |
| AX-158140097 | 13 | 59.731 | KV453138.1  | 5212603 | 18-scf00300 | 18 |
| AX-157747843 | 13 | 59.731 | KV453138.1  | 5282923 | 18-scf00300 | 18 |
| AX-158139797 | 13 | 59.84  | KV453138.1  | 4771786 | 18-scf00300 | 18 |
| AX-157709909 | 13 | 59.84  | KV453138.1  | 4776060 | 18-scf00300 | 18 |
| AX-158139946 | 13 | 59.84  | KV453138.1  | 4972145 | 18-scf00300 | 18 |
| AX-158140027 | 13 | 59.84  | KV453138.1  | 5101992 | 18-scf00300 | 18 |
| AX-158140034 | 13 | 59.84  | KV453138.1  | 5116827 | 18-scf00300 | 18 |
| AX-158140035 | 13 | 59.84  | KV453138.1  | 5119282 | 18-scf00300 | 18 |
| AX-158140036 | 13 | 59.84  | KV453138.1  | 5120079 | 18-scf00300 | 18 |
| AX-158412051 | 13 | 59.84  | KV453138.1  | 5121821 | 18-scf00300 | 18 |
| AX-158412052 | 13 | 59.84  | KV453138.1  | 5121883 | 18-scf00300 | 18 |
| AX-158392997 | 13 | 59.84  | KV453138.1  | 5122267 | 18-scf00300 | 18 |
| AX-157701391 | 13 | 59.84  | KV453138.1  | 5122449 | 18-scf00300 | 18 |
| AX-158140041 | 13 | 59.84  | KV453138.1  | 5131199 | 18-scf00300 | 18 |
| AX-158140045 | 13 | 59.84  | KV453138.1  | 5134077 | 18-scf00300 | 18 |
| AX-158140046 | 13 | 59.84  | KV453138.1  | 5134929 | 18-scf00300 | 18 |
| AX-157772215 | 13 | 59.84  | KV453138.1  | 5136680 | 18-scf00300 | 18 |
| AX-158140048 | 13 | 59.84  | KV453138.1  | 5137347 | 18-scf00300 | 18 |
| AX-158140054 | 13 | 59.84  | KV453138.1  | 5149599 | 18-scf00300 | 18 |
| AX-157743379 | 13 | 59.84  | KV453138.1  | 5155342 | 18-scf00300 | 18 |
| AX-158140057 | 13 | 59.84  | KV453138.1  | 5156617 | 18-scf00300 | 18 |
| AX-158140058 | 13 | 59.84  | KV453138.1  | 5157440 | 18-scf00300 | 18 |
| AX-158140059 | 13 | 59.84  | KV453138.1  | 5158014 | 18-scf00300 | 18 |
| AX-158140116 | 13 | 59.84  | KV453138.1  | 5243341 | 18-scf00300 | 18 |
| AX-157831177 | 13 | 59.84  | KV453138.1  | 5275828 | 18-scf00300 | 18 |
| AX-157831178 | 13 | 59.84  | KV453138.1  | 5276180 | 18-scf00300 | 18 |
| AX-157689789 | 13 | 59.84  | 3ML01032457 | 154     | scf08078_1  | UN |
| AX-158140061 | 13 | 59.926 | KV453138.1  | 5161810 | 18-scf00300 | 18 |
| AX-158140062 | 13 | 59.989 | KV453138.1  | 5162887 | 18-scf00300 | 18 |
| AX-158412054 | 13 | 60.059 | KV453138.1  | 5165760 | 18-scf00300 | 18 |

|              |    |        |            |         |             |    |
|--------------|----|--------|------------|---------|-------------|----|
| AX-158140064 | 13 | 60.059 | KV453138.1 | 5168447 | 18-scf00300 | 18 |
| AX-158140065 | 13 | 60.059 | KV453138.1 | 5169375 | 18-scf00300 | 18 |
| AX-158140066 | 13 | 60.059 | KV453138.1 | 5170130 | 18-scf00300 | 18 |
| AX-158140067 | 13 | 60.059 | KV453138.1 | 5170639 | 18-scf00300 | 18 |
| AX-158140068 | 13 | 60.059 | KV453138.1 | 5171379 | 18-scf00300 | 18 |
| AX-157749269 | 13 | 60.059 | KV453138.1 | 5172563 | 18-scf00300 | 18 |
| AX-158140070 | 13 | 60.059 | KV453138.1 | 5176546 | 18-scf00300 | 18 |
| AX-158412055 | 13 | 60.059 | KV453138.1 | 5177467 | 18-scf00300 | 18 |
| AX-158408359 | 13 | 60.059 | KV453138.1 | 5177991 | 18-scf00300 | 18 |
| AX-158140071 | 13 | 60.059 | KV453138.1 | 5178791 | 18-scf00300 | 18 |
| AX-158140072 | 13 | 60.059 | KV453138.1 | 5179791 | 18-scf00300 | 18 |
| AX-158140073 | 13 | 60.059 | KV453138.1 | 5180621 | 18-scf00300 | 18 |
| AX-158140074 | 13 | 60.059 | KV453138.1 | 5182923 | 18-scf00300 | 18 |
| AX-158140075 | 13 | 60.059 | KV453138.1 | 5183628 | 18-scf00300 | 18 |
| AX-158140077 | 13 | 60.059 | KV453138.1 | 5187331 | 18-scf00300 | 18 |
| AX-158140079 | 13 | 60.059 | KV453138.1 | 5191144 | 18-scf00300 | 18 |
| AX-158140086 | 13 | 60.059 | KV453138.1 | 5199489 | 18-scf00300 | 18 |
| AX-158140087 | 13 | 60.059 | KV453138.1 | 5200017 | 18-scf00300 | 18 |
| AX-158140088 | 13 | 60.059 | KV453138.1 | 5200886 | 18-scf00300 | 18 |
| AX-158140089 | 13 | 60.059 | KV453138.1 | 5201331 | 18-scf00300 | 18 |
| AX-158140094 | 13 | 60.059 | KV453138.1 | 5206962 | 18-scf00300 | 18 |
| AX-157723717 | 13 | 60.059 | KV453138.1 | 5207928 | 18-scf00300 | 18 |
| AX-158140095 | 13 | 60.059 | KV453138.1 | 5208850 | 18-scf00300 | 18 |
| AX-158140096 | 13 | 60.059 | KV453138.1 | 5211021 | 18-scf00300 | 18 |
| AX-158140125 | 13 | 60.059 | KV453138.1 | 5257879 | 18-scf00300 | 18 |
| AX-158140162 | 13 | 60.059 | KV453138.1 | 5309698 | 18-scf00300 | 18 |
| AX-158140098 | 13 | 60.277 | KV453138.1 | 5213783 | 18-scf00300 | 18 |
| AX-158140101 | 13 | 60.277 | KV453138.1 | 5217447 | 18-scf00300 | 18 |
| AX-158140102 | 13 | 60.277 | KV453138.1 | 5217807 | 18-scf00300 | 18 |
| AX-158140103 | 13 | 60.277 | KV453138.1 | 5218257 | 18-scf00300 | 18 |
| AX-158140105 | 13 | 60.277 | KV453138.1 | 5222115 | 18-scf00300 | 18 |
| AX-158140108 | 13 | 60.277 | KV453138.1 | 5229033 | 18-scf00300 | 18 |
| AX-158140109 | 13 | 60.277 | KV453138.1 | 5229894 | 18-scf00300 | 18 |
| AX-158140110 | 13 | 60.277 | KV453138.1 | 5230421 | 18-scf00300 | 18 |
| AX-158140113 | 13 | 60.277 | KV453138.1 | 5234264 | 18-scf00300 | 18 |
| AX-158140114 | 13 | 60.277 | KV453138.1 | 5238600 | 18-scf00300 | 18 |
| AX-158140115 | 13 | 60.277 | KV453138.1 | 5242404 | 18-scf00300 | 18 |
| AX-157831172 | 13 | 60.277 | KV453138.1 | 5250826 | 18-scf00300 | 18 |
| AX-157738950 | 13 | 60.277 | KV453138.1 | 5251321 | 18-scf00300 | 18 |
| AX-158140119 | 13 | 60.277 | KV453138.1 | 5251939 | 18-scf00300 | 18 |
| AX-158140120 | 13 | 60.277 | KV453138.1 | 5252431 | 18-scf00300 | 18 |
| AX-158140123 | 13 | 60.277 | KV453138.1 | 5256666 | 18-scf00300 | 18 |
| AX-158140124 | 13 | 60.277 | KV453138.1 | 5257226 | 18-scf00300 | 18 |
| AX-157720828 | 13 | 60.277 | KV453138.1 | 5257292 | 18-scf00300 | 18 |
| AX-158140126 | 13 | 60.277 | KV453138.1 | 5260765 | 18-scf00300 | 18 |
| AX-158140176 | 13 | 60.277 | KV453138.1 | 5325720 | 18-scf00300 | 18 |
| AX-158140127 | 13 | 60.325 | KV453138.1 | 5261604 | 18-scf00300 | 18 |
| AX-158140128 | 13 | 60.344 | KV453138.1 | 5262541 | 18-scf00300 | 18 |
| AX-158140289 | 13 | 60.344 | KV453138.1 | 5480068 | 18-scf00300 | 18 |
| AX-158140133 | 13 | 60.386 | KV453138.1 | 5267263 | 18-scf00300 | 18 |
| AX-157831176 | 13 | 60.386 | KV453138.1 | 5267878 | 18-scf00300 | 18 |



|              |    |        |            |         |             |    |
|--------------|----|--------|------------|---------|-------------|----|
| AX-158140135 | 13 | 60.386 | KV453138.1 | 5271896 | 18-scf00300 | 18 |
| AX-158140136 | 13 | 60.386 | KV453138.1 | 5272885 | 18-scf00300 | 18 |
| AX-158140139 | 13 | 60.434 | KV453138.1 | 5277980 | 18-scf00300 | 18 |
| AX-157716703 | 13 | 60.455 | KV453138.1 | 5278684 | 18-scf00300 | 18 |
| AX-158139770 | 13 | 60.496 | KV453138.1 | 4729573 | 18-scf00300 | 18 |
| AX-158139814 | 13 | 60.496 | KV453138.1 | 4796953 | 18-scf00300 | 18 |
| AX-158139835 | 13 | 60.496 | KV453138.1 | 4834133 | 18-scf00300 | 18 |
| AX-158385394 | 13 | 60.496 | KV453138.1 | 5138414 | 18-scf00300 | 18 |
| AX-158140118 | 13 | 60.496 | KV453138.1 | 5246761 | 18-scf00300 | 18 |
| AX-158140143 | 13 | 60.496 | KV453138.1 | 5280882 | 18-scf00300 | 18 |
| AX-158140144 | 13 | 60.496 | KV453138.1 | 5281260 | 18-scf00300 | 18 |
| AX-158140145 | 13 | 60.496 | KV453138.1 | 5282058 | 18-scf00300 | 18 |
| AX-158140146 | 13 | 60.496 | KV453138.1 | 5284350 | 18-scf00300 | 18 |
| AX-157831180 | 13 | 60.496 | KV453138.1 | 5284784 | 18-scf00300 | 18 |
| AX-158140147 | 13 | 60.496 | KV453138.1 | 5285649 | 18-scf00300 | 18 |
| AX-157886325 | 13 | 60.496 | KV453138.1 | 5286483 | 18-scf00300 | 18 |
| AX-158140150 | 13 | 60.496 | KV453138.1 | 5288274 | 18-scf00300 | 18 |
| AX-158140151 | 13 | 60.496 | KV453138.1 | 5289087 | 18-scf00300 | 18 |
| AX-158140152 | 13 | 60.496 | KV453138.1 | 5291307 | 18-scf00300 | 18 |
| AX-158417563 | 13 | 60.496 | KV453138.1 | 5291734 | 18-scf00300 | 18 |
| AX-158140153 | 13 | 60.496 | KV453138.1 | 5292583 | 18-scf00300 | 18 |
| AX-158140154 | 13 | 60.496 | KV453138.1 | 5297756 | 18-scf00300 | 18 |
| AX-158140155 | 13 | 60.496 | KV453138.1 | 5298309 | 18-scf00300 | 18 |
| AX-158140157 | 13 | 60.496 | KV453138.1 | 5299553 | 18-scf00300 | 18 |
| AX-157871590 | 13 | 60.496 | KV453138.1 | 5300814 | 18-scf00300 | 18 |
| AX-158140166 | 13 | 60.496 | KV453138.1 | 5314731 | 18-scf00300 | 18 |
| AX-158140171 | 13 | 60.496 | KV453138.1 | 5321134 | 18-scf00300 | 18 |
| AX-158140174 | 13 | 60.496 | KV453138.1 | 5324044 | 18-scf00300 | 18 |
| AX-158140175 | 13 | 60.496 | KV453138.1 | 5324568 | 18-scf00300 | 18 |
| AX-158140179 | 13 | 60.496 | KV453138.1 | 5331025 | 18-scf00300 | 18 |
| AX-158140182 | 13 | 60.496 | KV453138.1 | 5334155 | 18-scf00300 | 18 |
| AX-158140183 | 13 | 60.496 | KV453138.1 | 5335843 | 18-scf00300 | 18 |
| AX-158140187 | 13 | 60.496 | KV453138.1 | 5342548 | 18-scf00300 | 18 |
| AX-158140188 | 13 | 60.496 | KV453138.1 | 5343777 | 18-scf00300 | 18 |
| AX-157758389 | 13 | 60.496 | KV453138.1 | 5348123 | 18-scf00300 | 18 |
| AX-158140190 | 13 | 60.496 | KV453138.1 | 5348960 | 18-scf00300 | 18 |
| AX-158140191 | 13 | 60.496 | KV453138.1 | 5349603 | 18-scf00300 | 18 |
| AX-157831184 | 13 | 60.496 | KV453138.1 | 5351407 | 18-scf00300 | 18 |
| AX-158140192 | 13 | 60.496 | KV453138.1 | 5352567 | 18-scf00300 | 18 |
| AX-158140193 | 13 | 60.496 | KV453138.1 | 5353664 | 18-scf00300 | 18 |
| AX-158412061 | 13 | 60.496 | KV453138.1 | 5356373 | 18-scf00300 | 18 |
| AX-158140194 | 13 | 60.496 | KV453138.1 | 5357292 | 18-scf00300 | 18 |
| AX-158140196 | 13 | 60.496 | KV453138.1 | 5358699 | 18-scf00300 | 18 |
| AX-158140197 | 13 | 60.496 | KV453138.1 | 5359386 | 18-scf00300 | 18 |
| AX-158140211 | 13 | 60.496 | KV453138.1 | 5375274 | 18-scf00300 | 18 |
| AX-158140214 | 13 | 60.496 | KV453138.1 | 5383813 | 18-scf00300 | 18 |
| AX-158140216 | 13 | 60.496 | KV453138.1 | 5386576 | 18-scf00300 | 18 |
| AX-157857983 | 13 | 60.496 | KV453138.1 | 5393708 | 18-scf00300 | 18 |
| AX-158140220 | 13 | 60.496 | KV453138.1 | 5394256 | 18-scf00300 | 18 |
| AX-158140223 | 13 | 60.496 | KV453138.1 | 5397203 | 18-scf00300 | 18 |
| AX-158140224 | 13 | 60.496 | KV453138.1 | 5400717 | 18-scf00300 | 18 |

|              |    |        |            |         |             |    |
|--------------|----|--------|------------|---------|-------------|----|
| AX-158140304 | 13 | 60.496 | KV453138.1 | 5499102 | 18-scf00300 | 18 |
| AX-157773113 | 13 | 60.531 | KV453138.1 | 5360106 | 18-scf00300 | 18 |
| AX-158140200 | 13 | 60.556 | KV453138.1 | 5363460 | 18-scf00300 | 18 |
| AX-158139827 | 13 | 60.605 | KV453138.1 | 4826974 | 18-scf00300 | 18 |
| AX-158139838 | 13 | 60.605 | KV453138.1 | 4838047 | 18-scf00300 | 18 |
| AX-158139911 | 13 | 60.605 | KV453138.1 | 4920447 | 18-scf00300 | 18 |
| AX-158139912 | 13 | 60.605 | KV453138.1 | 4921665 | 18-scf00300 | 18 |
| AX-157857981 | 13 | 60.605 | KV453138.1 | 4938340 | 18-scf00300 | 18 |
| AX-158140106 | 13 | 60.605 | KV453138.1 | 5224855 | 18-scf00300 | 18 |
| AX-157831168 | 13 | 60.605 | KV453138.1 | 5227294 | 18-scf00300 | 18 |
| AX-158140161 | 13 | 60.605 | KV453138.1 | 5309188 | 18-scf00300 | 18 |
| AX-158140189 | 13 | 60.605 | KV453138.1 | 5345449 | 18-scf00300 | 18 |
| AX-158140201 | 13 | 60.605 | KV453138.1 | 5363761 | 18-scf00300 | 18 |
| AX-158140203 | 13 | 60.605 | KV453138.1 | 5365597 | 18-scf00300 | 18 |
| AX-157720035 | 13 | 60.605 | KV453138.1 | 5366020 | 18-scf00300 | 18 |
| AX-158380300 | 13 | 60.605 | KV453138.1 | 5368341 | 18-scf00300 | 18 |
| AX-158140205 | 13 | 60.605 | KV453138.1 | 5368479 | 18-scf00300 | 18 |
| AX-157831185 | 13 | 60.605 | KV453138.1 | 5369229 | 18-scf00300 | 18 |
| AX-158140207 | 13 | 60.605 | KV453138.1 | 5372704 | 18-scf00300 | 18 |
| AX-158140210 | 13 | 60.605 | KV453138.1 | 5374249 | 18-scf00300 | 18 |
| AX-157831187 | 13 | 60.605 | KV453138.1 | 5383216 | 18-scf00300 | 18 |
| AX-158140217 | 13 | 60.605 | KV453138.1 | 5387328 | 18-scf00300 | 18 |
| AX-157831188 | 13 | 60.605 | KV453138.1 | 5389430 | 18-scf00300 | 18 |
| AX-158140218 | 13 | 60.605 | KV453138.1 | 5391631 | 18-scf00300 | 18 |
| AX-158140221 | 13 | 60.605 | KV453138.1 | 5395066 | 18-scf00300 | 18 |
| AX-158140222 | 13 | 60.605 | KV453138.1 | 5396673 | 18-scf00300 | 18 |
| AX-158140225 | 13 | 60.605 | KV453138.1 | 5401100 | 18-scf00300 | 18 |
| AX-158140238 | 13 | 60.605 | KV453138.1 | 5421021 | 18-scf00300 | 18 |
| AX-158140259 | 13 | 60.605 | KV453138.1 | 5440281 | 18-scf00300 | 18 |
| AX-158140276 | 13 | 60.605 | KV453138.1 | 5465978 | 18-scf00300 | 18 |
| AX-158140229 | 13 | 60.714 | KV453138.1 | 5409327 | 18-scf00300 | 18 |
| AX-158140231 | 13 | 60.771 | KV453138.1 | 5410663 | 18-scf00300 | 18 |
| AX-158140232 | 13 | 60.823 | KV453138.1 | 5411701 | 18-scf00300 | 18 |
| AX-158140233 | 13 | 60.823 | KV453138.1 | 5413168 | 18-scf00300 | 18 |
| AX-158140234 | 13 | 60.823 | KV453138.1 | 5414454 | 18-scf00300 | 18 |
| AX-157831189 | 13 | 60.823 | KV453138.1 | 5417115 | 18-scf00300 | 18 |
| AX-158140236 | 13 | 60.823 | KV453138.1 | 5417343 | 18-scf00300 | 18 |
| AX-157712198 | 13 | 60.823 | KV453138.1 | 5430733 | 18-scf00300 | 18 |
| AX-158140202 | 13 | 61.042 | KV453138.1 | 5365217 | 18-scf00300 | 18 |
| AX-158140237 | 13 | 61.042 | KV453138.1 | 5420412 | 18-scf00300 | 18 |
| AX-158140240 | 13 | 61.042 | KV453138.1 | 5422254 | 18-scf00300 | 18 |
| AX-157751857 | 13 | 61.042 | KV453138.1 | 5422821 | 18-scf00300 | 18 |
| AX-158140241 | 13 | 61.042 | KV453138.1 | 5423260 | 18-scf00300 | 18 |
| AX-158140242 | 13 | 61.042 | KV453138.1 | 5423540 | 18-scf00300 | 18 |
| AX-158140243 | 13 | 61.042 | KV453138.1 | 5424483 | 18-scf00300 | 18 |
| AX-157831191 | 13 | 61.042 | KV453138.1 | 5425453 | 18-scf00300 | 18 |
| AX-158140244 | 13 | 61.042 | KV453138.1 | 5425791 | 18-scf00300 | 18 |
| AX-158140255 | 13 | 61.042 | KV453138.1 | 5435982 | 18-scf00300 | 18 |
| AX-158140256 | 13 | 61.042 | KV453138.1 | 5437437 | 18-scf00300 | 18 |
| AX-157741828 | 13 | 61.055 | KV453138.1 | 5428021 | 18-scf00300 | 18 |
| AX-158140246 | 13 | 61.084 | KV453138.1 | 5428239 | 18-scf00300 | 18 |

|              |    |        |             |         |             |    |
|--------------|----|--------|-------------|---------|-------------|----|
| AX-157831192 | 13 | 61.084 | KV453138.1  | 5428853 | 18-scf00300 | 18 |
| AX-158140249 | 13 | 61.084 | KV453138.1  | 5431209 | 18-scf00300 | 18 |
| AX-158140247 | 13 | 61.115 | KV453138.1  | 5429762 | 18-scf00300 | 18 |
| AX-158140257 | 13 | 61.151 | KV453138.1  | 5438993 | 18-scf00300 | 18 |
| AX-158140258 | 13 | 61.208 | KV453138.1  | 5439633 | 18-scf00300 | 18 |
| AX-158140261 | 13 | 61.26  | KV453138.1  | 5442280 | 18-scf00300 | 18 |
| AX-157757293 | 13 | 61.26  | KV453138.1  | 5452011 | 18-scf00300 | 18 |
| AX-158140267 | 13 | 61.26  | KV453138.1  | 5454638 | 18-scf00300 | 18 |
| AX-158140269 | 13 | 61.26  | KV453138.1  | 5459156 | 18-scf00300 | 18 |
| AX-157707207 | 13 | 61.26  | 3ML01033746 | 113     | scf09410_1  | UN |
| AX-158140270 | 13 | 61.333 | KV453138.1  | 5460001 | 18-scf00300 | 18 |
| AX-158140277 | 13 | 61.389 | KV453138.1  | 5466481 | 18-scf00300 | 18 |
| AX-158140266 | 13 | 61.479 | KV453138.1  | 5453816 | 18-scf00300 | 18 |
| AX-158140278 | 13 | 61.479 | KV453138.1  | 5467495 | 18-scf00300 | 18 |
| AX-158140279 | 13 | 61.479 | KV453138.1  | 5470474 | 18-scf00300 | 18 |
| AX-158140280 | 13 | 61.479 | KV453138.1  | 5472032 | 18-scf00300 | 18 |
| AX-158140281 | 13 | 61.479 | KV453138.1  | 5472696 | 18-scf00300 | 18 |
| AX-158140283 | 13 | 61.479 | KV453138.1  | 5474449 | 18-scf00300 | 18 |
| AX-158140285 | 13 | 61.479 | KV453138.1  | 5475800 | 18-scf00300 | 18 |
| AX-158140286 | 13 | 61.479 | KV453138.1  | 5476234 | 18-scf00300 | 18 |
| AX-157831195 | 13 | 61.479 | KV453138.1  | 5477740 | 18-scf00300 | 18 |
| AX-158140254 | 13 | 61.588 | KV453138.1  | 5434231 | 18-scf00300 | 18 |
| AX-158140291 | 13 | 61.588 | KV453138.1  | 5483682 | 18-scf00300 | 18 |
| AX-158140293 | 13 | 61.588 | KV453138.1  | 5486907 | 18-scf00300 | 18 |
| AX-158140294 | 13 | 61.588 | KV453138.1  | 5487912 | 18-scf00300 | 18 |
| AX-158140298 | 13 | 61.588 | KV453138.1  | 5490534 | 18-scf00300 | 18 |
| AX-158140299 | 13 | 61.588 | KV453138.1  | 5491225 | 18-scf00300 | 18 |
| AX-157722048 | 13 | 61.588 | KV453138.1  | 5492051 | 18-scf00300 | 18 |
| AX-158140300 | 13 | 61.588 | KV453138.1  | 5492667 | 18-scf00300 | 18 |
| AX-158140369 | 13 | 61.588 | KV453138.1  | 5592879 | 18-scf00300 | 18 |
| AX-158140375 | 13 | 61.588 | KV453138.1  | 5601294 | 18-scf00300 | 18 |
| AX-158140387 | 13 | 61.588 | KV453138.1  | 5614374 | 18-scf00300 | 18 |
| AX-158140301 | 13 | 61.697 | KV453138.1  | 5492882 | 18-scf00300 | 18 |
| AX-157831196 | 13 | 61.697 | KV453138.1  | 5498090 | 18-scf00300 | 18 |
| AX-158140306 | 13 | 61.697 | KV453138.1  | 5501595 | 18-scf00300 | 18 |
| AX-158140307 | 13 | 61.697 | KV453138.1  | 5502323 | 18-scf00300 | 18 |
| AX-158140308 | 13 | 61.697 | KV453138.1  | 5503081 | 18-scf00300 | 18 |
| AX-158140309 | 13 | 61.697 | KV453138.1  | 5504456 | 18-scf00300 | 18 |
| AX-158140310 | 13 | 61.697 | KV453138.1  | 5504598 | 18-scf00300 | 18 |
| AX-157831197 | 13 | 61.697 | KV453138.1  | 5523982 | 18-scf00300 | 18 |
| AX-158139761 | 13 | 61.752 | KV453138.1  | 4712984 | 18-scf00300 | 18 |
| AX-157878175 | 13 | 61.752 | KV453138.1  | 4773363 | 18-scf00300 | 18 |
| AX-158139844 | 13 | 61.752 | KV453138.1  | 4849551 | 18-scf00300 | 18 |
| AX-158139854 | 13 | 61.752 | KV453138.1  | 4856165 | 18-scf00300 | 18 |
| AX-158139942 | 13 | 61.752 | KV453138.1  | 4968335 | 18-scf00300 | 18 |
| AX-158140264 | 13 | 61.752 | KV453138.1  | 5446084 | 18-scf00300 | 18 |
| AX-158140311 | 13 | 61.752 | KV453138.1  | 5506309 | 18-scf00300 | 18 |
| AX-157723124 | 13 | 61.752 | KV453138.1  | 5594748 | 18-scf00300 | 18 |
| AX-158140402 | 13 | 61.752 | KV453138.1  | 5646665 | 18-scf00300 | 18 |
| AX-158139724 | 13 | 61.771 | KV453138.1  | 4654170 | 18-scf00300 | 18 |
| AX-158140319 | 13 | 61.81  | KV453138.1  | 5517412 | 18-scf00300 | 18 |

|              |    |        |            |         |             |    |
|--------------|----|--------|------------|---------|-------------|----|
| AX-158140322 | 13 | 61.87  | KV453138.1 | 5521269 | 18-scf00300 | 18 |
| AX-158140297 | 13 | 61.916 | KV453138.1 | 5489267 | 18-scf00300 | 18 |
| AX-158140321 | 13 | 61.916 | KV453138.1 | 5520051 | 18-scf00300 | 18 |
| AX-158140323 | 13 | 61.916 | KV453138.1 | 5521633 | 18-scf00300 | 18 |
| AX-158140325 | 13 | 61.916 | KV453138.1 | 5524520 | 18-scf00300 | 18 |
| AX-158140326 | 13 | 61.916 | KV453138.1 | 5525039 | 18-scf00300 | 18 |
| AX-158140328 | 13 | 61.916 | KV453138.1 | 5527692 | 18-scf00300 | 18 |
| AX-158140329 | 13 | 61.916 | KV453138.1 | 5527807 | 18-scf00300 | 18 |
| AX-158140331 | 13 | 61.916 | KV453138.1 | 5530716 | 18-scf00300 | 18 |
| AX-158140336 | 13 | 61.916 | KV453138.1 | 5543199 | 18-scf00300 | 18 |
| AX-158140337 | 13 | 61.916 | KV453138.1 | 5543854 | 18-scf00300 | 18 |
| AX-157886326 | 13 | 61.916 | KV453138.1 | 5545285 | 18-scf00300 | 18 |
| AX-158140339 | 13 | 61.916 | KV453138.1 | 5548493 | 18-scf00300 | 18 |
| AX-158140341 | 13 | 61.916 | KV453138.1 | 5551313 | 18-scf00300 | 18 |
| AX-157740552 | 13 | 61.916 | KV453138.1 | 5552659 | 18-scf00300 | 18 |
| AX-158140377 | 13 | 61.916 | KV453138.1 | 5605338 | 18-scf00300 | 18 |
| AX-158140343 | 13 | 61.972 | KV453138.1 | 5556168 | 18-scf00300 | 18 |
| AX-157741730 | 13 | 62.025 | KV453138.1 | 5523861 | 18-scf00300 | 18 |
| AX-158140335 | 13 | 62.025 | KV453138.1 | 5542449 | 18-scf00300 | 18 |
| AX-158140338 | 13 | 62.025 | KV453138.1 | 5544268 | 18-scf00300 | 18 |
| AX-157831202 | 13 | 62.025 | KV453138.1 | 5556724 | 18-scf00300 | 18 |
| AX-157712276 | 13 | 62.025 | KV453138.1 | 5558023 | 18-scf00300 | 18 |
| AX-158140344 | 13 | 62.025 | KV453138.1 | 5558829 | 18-scf00300 | 18 |
| AX-157747910 | 13 | 62.025 | KV453138.1 | 5561187 | 18-scf00300 | 18 |
| AX-158140346 | 13 | 62.025 | KV453138.1 | 5563566 | 18-scf00300 | 18 |
| AX-157831204 | 13 | 62.025 | KV453138.1 | 5564099 | 18-scf00300 | 18 |
| AX-158140350 | 13 | 62.025 | KV453138.1 | 5569629 | 18-scf00300 | 18 |
| AX-157740840 | 13 | 62.025 | KV453138.1 | 5571822 | 18-scf00300 | 18 |
| AX-158140354 | 13 | 62.025 | KV453138.1 | 5575609 | 18-scf00300 | 18 |
| AX-158140364 | 13 | 62.061 | KV453138.1 | 5589233 | 18-scf00300 | 18 |
| AX-158140365 | 13 | 62.1   | KV453138.1 | 5590060 | 18-scf00300 | 18 |
| AX-158140367 | 13 | 62.113 | KV453138.1 | 5592108 | 18-scf00300 | 18 |
| AX-158140345 | 13 | 62.134 | KV453138.1 | 5559652 | 18-scf00300 | 18 |
| AX-157831203 | 13 | 62.134 | KV453138.1 | 5563051 | 18-scf00300 | 18 |
| AX-158140363 | 13 | 62.134 | KV453138.1 | 5588720 | 18-scf00300 | 18 |
| AX-157710296 | 13 | 62.134 | KV453138.1 | 5593762 | 18-scf00300 | 18 |
| AX-158140370 | 13 | 62.134 | KV453138.1 | 5594003 | 18-scf00300 | 18 |
| AX-158140371 | 13 | 62.134 | KV453138.1 | 5594210 | 18-scf00300 | 18 |
| AX-157857987 | 13 | 62.134 | KV453138.1 | 5594618 | 18-scf00300 | 18 |
| AX-158140373 | 13 | 62.134 | KV453138.1 | 5597436 | 18-scf00300 | 18 |
| AX-157857988 | 13 | 62.134 | KV453138.1 | 5603616 | 18-scf00300 | 18 |
| AX-158140378 | 13 | 62.134 | KV453138.1 | 5606875 | 18-scf00300 | 18 |
| AX-158140379 | 13 | 62.134 | KV453138.1 | 5607670 | 18-scf00300 | 18 |
| AX-158140380 | 13 | 62.134 | KV453138.1 | 5609069 | 18-scf00300 | 18 |
| AX-158140385 | 13 | 62.215 | KV453138.1 | 5613022 | 18-scf00300 | 18 |
| AX-158140386 | 13 | 62.297 | KV453138.1 | 5613875 | 18-scf00300 | 18 |
| AX-157748621 | 13 | 62.353 | KV453138.1 | 5614926 | 18-scf00300 | 18 |
| AX-157831205 | 13 | 62.572 | KV453138.1 | 5567172 | 18-scf00300 | 18 |
| AX-158140383 | 13 | 62.572 | KV453138.1 | 5611210 | 18-scf00300 | 18 |
| AX-158140388 | 13 | 62.572 | KV453138.1 | 5618551 | 18-scf00300 | 18 |
| AX-158140390 | 13 | 62.572 | KV453138.1 | 5621058 | 18-scf00300 | 18 |

|              |    |        |            |         |             |    |
|--------------|----|--------|------------|---------|-------------|----|
| AX-158140391 | 13 | 62.572 | KV453138.1 | 5621511 | 18-scf00300 | 18 |
| AX-158140393 | 13 | 62.572 | KV453138.1 | 5622836 | 18-scf00300 | 18 |
| AX-158140394 | 13 | 62.572 | KV453138.1 | 5623293 | 18-scf00300 | 18 |
| AX-158140396 | 13 | 62.572 | KV453138.1 | 5624967 | 18-scf00300 | 18 |
| AX-157831208 | 13 | 62.572 | KV453138.1 | 5625673 | 18-scf00300 | 18 |
| AX-158140397 | 13 | 62.572 | KV453138.1 | 5626374 | 18-scf00300 | 18 |
| AX-157831209 | 13 | 62.572 | KV453138.1 | 5627940 | 18-scf00300 | 18 |
| AX-157831212 | 13 | 62.572 | KV453138.1 | 5631685 | 18-scf00300 | 18 |
| AX-157744119 | 13 | 62.572 | KV453138.1 | 5632040 | 18-scf00300 | 18 |
| AX-157831213 | 13 | 62.572 | KV453138.1 | 5633276 | 18-scf00300 | 18 |
| AX-158140398 | 13 | 62.572 | KV453138.1 | 5634216 | 18-scf00300 | 18 |
| AX-157831215 | 13 | 62.572 | KV453138.1 | 5635465 | 18-scf00300 | 18 |
| AX-157738356 | 13 | 62.572 | KV453138.1 | 5639468 | 18-scf00300 | 18 |
| AX-157831217 | 13 | 62.572 | KV453138.1 | 5639673 | 18-scf00300 | 18 |
| AX-158140403 | 13 | 62.572 | KV453138.1 | 5646900 | 18-scf00300 | 18 |
| AX-158140405 | 13 | 62.572 | KV453138.1 | 5650171 | 18-scf00300 | 18 |
| AX-157831219 | 13 | 62.572 | KV453138.1 | 5653490 | 18-scf00300 | 18 |
| AX-157746064 | 13 | 62.789 | KV453138.1 | 5655431 | 18-scf00300 | 18 |
| AX-158140409 | 13 | 63.007 | KV453138.1 | 5660248 | 18-scf00300 | 18 |
| AX-157719975 | 13 | 63.014 | KV453138.1 | 5661611 | 18-scf00300 | 18 |
| AX-158140411 | 13 | 63.014 | KV453138.1 | 5661971 | 18-scf00300 | 18 |
| AX-157831220 | 13 | 63.014 | KV453138.1 | 5662387 | 18-scf00300 | 18 |
| AX-157831223 | 13 | 63.014 | KV453138.1 | 5674129 | 18-scf00300 | 18 |
| AX-157831221 | 13 | 63.172 | KV453138.1 | 5663736 | 18-scf00300 | 18 |
| AX-158140414 | 13 | 63.337 | KV453138.1 | 5665864 | 18-scf00300 | 18 |
| AX-158140417 | 13 | 63.337 | KV453138.1 | 5672538 | 18-scf00300 | 18 |
| AX-158140418 | 13 | 63.353 | KV453138.1 | 5674602 | 18-scf00300 | 18 |
| AX-158140420 | 13 | 63.699 | KV453138.1 | 5680824 | 18-scf00300 | 18 |
| AX-158140412 | 13 | 63.882 | KV453138.1 | 5662941 | 18-scf00300 | 18 |
| AX-158140421 | 13 | 63.882 | KV453138.1 | 5682003 | 18-scf00300 | 18 |
| AX-158140424 | 13 | 63.884 | KV453138.1 | 5688384 | 18-scf00300 | 18 |
| AX-158140425 | 13 | 63.884 | KV453138.1 | 5690714 | 18-scf00300 | 18 |
| AX-158140426 | 13 | 63.884 | KV453138.1 | 5692100 | 18-scf00300 | 18 |
| AX-158140427 | 13 | 63.884 | KV453138.1 | 5692810 | 18-scf00300 | 18 |
| AX-158140428 | 13 | 63.884 | KV453138.1 | 5694277 | 18-scf00300 | 18 |
| AX-158140430 | 13 | 63.884 | KV453138.1 | 5697142 | 18-scf00300 | 18 |
| AX-158140431 | 13 | 63.884 | KV453138.1 | 5697525 | 18-scf00300 | 18 |
| AX-158140432 | 13 | 63.884 | KV453138.1 | 5700529 | 18-scf00300 | 18 |
| AX-158140434 | 13 | 63.884 | KV453138.1 | 5702763 | 18-scf00300 | 18 |
| AX-158140435 | 13 | 63.884 | KV453138.1 | 5704628 | 18-scf00300 | 18 |
| AX-157751604 | 13 | 63.9   | KV453138.1 | 5706470 | 18-scf00300 | 18 |
| AX-158140437 | 13 | 63.92  | KV453138.1 | 5707845 | 18-scf00300 | 18 |
| AX-158140441 | 13 | 63.954 | KV453138.1 | 5715539 | 18-scf00300 | 18 |
| AX-158140442 | 13 | 63.993 | KV453138.1 | 5716295 | 18-scf00300 | 18 |
| AX-158140443 | 13 | 63.993 | KV453138.1 | 5717153 | 18-scf00300 | 18 |
| AX-158140284 | 13 | 64.102 | KV453138.1 | 5475512 | 18-scf00300 | 18 |
| AX-157715302 | 13 | 64.102 | KV453138.1 | 5717833 | 18-scf00300 | 18 |
| AX-158380303 | 13 | 64.21  | KV453138.1 | 5729216 | 18-scf00300 | 18 |
| AX-157720743 | 13 | 64.21  | KV453138.1 | 5732140 | 18-scf00300 | 18 |
| AX-158140450 | 13 | 64.21  | KV453138.1 | 5734672 | 18-scf00300 | 18 |
| AX-157719443 | 13 | 64.212 | KV453138.1 | 5722988 | 18-scf00300 | 18 |

|              |    |        |            |         |             |    |
|--------------|----|--------|------------|---------|-------------|----|
| AX-158140449 | 13 | 64.212 | KV453138.1 | 5733261 | 18-scf00300 | 18 |
| AX-157831225 | 13 | 64.212 | KV453138.1 | 5738123 | 18-scf00300 | 18 |
| AX-158140451 | 13 | 64.212 | KV453138.1 | 5739901 | 18-scf00300 | 18 |
| AX-158140452 | 13 | 64.212 | KV453138.1 | 5740587 | 18-scf00300 | 18 |
| AX-158140464 | 13 | 64.597 | KV453138.1 | 5766174 | 18-scf00300 | 18 |
| AX-158140469 | 13 | 64.976 | KV453138.1 | 5776716 | 18-scf00300 | 18 |
| AX-158140465 | 13 | 64.978 | KV453138.1 | 5768120 | 18-scf00300 | 18 |
| AX-158140466 | 13 | 64.978 | KV453138.1 | 5769239 | 18-scf00300 | 18 |
| AX-158140467 | 13 | 64.978 | KV453138.1 | 5772594 | 18-scf00300 | 18 |
| AX-158140471 | 13 | 64.978 | KV453138.1 | 5778959 | 18-scf00300 | 18 |
| AX-158140472 | 13 | 64.978 | KV453138.1 | 5780269 | 18-scf00300 | 18 |
| AX-158140474 | 13 | 64.978 | KV453138.1 | 5783721 | 18-scf00300 | 18 |
| AX-157752490 | 13 | 64.978 | KV453138.1 | 5808124 | 18-scf00300 | 18 |
| AX-158140544 | 13 | 64.978 | KV453138.1 | 5870213 | 18-scf00300 | 18 |
| AX-158385400 | 13 | 64.978 | KV453138.1 | 5873969 | 18-scf00300 | 18 |
| AX-158140579 | 13 | 64.978 | KV453138.1 | 5918973 | 18-scf00300 | 18 |
| AX-158140583 | 13 | 64.978 | KV453138.1 | 5921694 | 18-scf00300 | 18 |
| AX-158140704 | 13 | 64.978 | KV453138.1 | 6070441 | 18-scf00300 | 18 |
| AX-158140475 | 13 | 65.087 | KV453138.1 | 5785332 | 18-scf00300 | 18 |
| AX-158140476 | 13 | 65.11  | KV453138.1 | 5786544 | 18-scf00300 | 18 |
| AX-158140478 | 13 | 65.141 | KV453138.1 | 5789567 | 18-scf00300 | 18 |
| AX-158140480 | 13 | 65.17  | KV453138.1 | 5791141 | 18-scf00300 | 18 |
| AX-158140481 | 13 | 65.196 | KV453138.1 | 5791560 | 18-scf00300 | 18 |
| AX-158140473 | 13 | 65.27  | KV453138.1 | 5781121 | 18-scf00300 | 18 |
| AX-158140483 | 13 | 65.27  | KV453138.1 | 5794358 | 18-scf00300 | 18 |
| AX-157757360 | 13 | 65.27  | KV453138.1 | 5794766 | 18-scf00300 | 18 |
| AX-158140482 | 13 | 65.305 | KV453138.1 | 5793677 | 18-scf00300 | 18 |
| AX-157709168 | 13 | 65.305 | KV453138.1 | 5795285 | 18-scf00300 | 18 |
| AX-158140486 | 13 | 65.305 | KV453138.1 | 5797176 | 18-scf00300 | 18 |
| AX-157831227 | 13 | 65.305 | KV453138.1 | 5798933 | 18-scf00300 | 18 |
| AX-158140487 | 13 | 65.305 | KV453138.1 | 5802545 | 18-scf00300 | 18 |
| AX-157831228 | 13 | 65.404 | KV453138.1 | 5807985 | 18-scf00300 | 18 |
| AX-158140492 | 13 | 65.524 | KV453138.1 | 5810480 | 18-scf00300 | 18 |
| AX-158140494 | 13 | 65.524 | KV453138.1 | 5813897 | 18-scf00300 | 18 |
| AX-157753620 | 13 | 65.524 | KV453138.1 | 5815225 | 18-scf00300 | 18 |
| AX-158140496 | 13 | 65.524 | KV453138.1 | 5817778 | 18-scf00300 | 18 |
| AX-158140498 | 13 | 65.524 | KV453138.1 | 5819172 | 18-scf00300 | 18 |
| AX-157718553 | 13 | 65.524 | KV453138.1 | 5860167 | 18-scf00300 | 18 |
| AX-158140549 | 13 | 65.524 | KV453138.1 | 5876620 | 18-scf00300 | 18 |
| AX-158140677 | 13 | 65.524 | KV453138.1 | 6028245 | 18-scf00300 | 18 |
| AX-158140499 | 13 | 65.585 | KV453138.1 | 5819584 | 18-scf00300 | 18 |
| AX-158140538 | 13 | 65.585 | KV453138.1 | 5863490 | 18-scf00300 | 18 |
| AX-158140502 | 13 | 65.619 | KV453138.1 | 5823465 | 18-scf00300 | 18 |
| AX-158140504 | 13 | 65.633 | KV453138.1 | 5824942 | 18-scf00300 | 18 |
| AX-158140505 | 13 | 65.633 | KV453138.1 | 5826296 | 18-scf00300 | 18 |
| AX-158140508 | 13 | 65.633 | KV453138.1 | 5831445 | 18-scf00300 | 18 |
| AX-157755755 | 13 | 65.633 | KV453138.1 | 5832350 | 18-scf00300 | 18 |
| AX-158140511 | 13 | 65.633 | KV453138.1 | 5835989 | 18-scf00300 | 18 |
| AX-158140468 | 13 | 65.742 | KV453138.1 | 5773947 | 18-scf00300 | 18 |
| AX-158140470 | 13 | 65.742 | KV453138.1 | 5778209 | 18-scf00300 | 18 |
| AX-158140510 | 13 | 65.742 | KV453138.1 | 5835599 | 18-scf00300 | 18 |

|              |    |        |            |         |             |    |
|--------------|----|--------|------------|---------|-------------|----|
| AX-158140512 | 13 | 65.742 | KV453138.1 | 5836637 | 18-scf00300 | 18 |
| AX-158140513 | 13 | 65.742 | KV453138.1 | 5837805 | 18-scf00300 | 18 |
| AX-158140514 | 13 | 65.742 | KV453138.1 | 5838290 | 18-scf00300 | 18 |
| AX-158140515 | 13 | 65.742 | KV453138.1 | 5840353 | 18-scf00300 | 18 |
| AX-158140519 | 13 | 65.742 | KV453138.1 | 5844527 | 18-scf00300 | 18 |
| AX-158140521 | 13 | 65.742 | KV453138.1 | 5845870 | 18-scf00300 | 18 |
| AX-158140522 | 13 | 65.742 | KV453138.1 | 5847983 | 18-scf00300 | 18 |
| AX-158140523 | 13 | 65.742 | KV453138.1 | 5848600 | 18-scf00300 | 18 |
| AX-158140524 | 13 | 65.742 | KV453138.1 | 5853113 | 18-scf00300 | 18 |
| AX-158140525 | 13 | 65.742 | KV453138.1 | 5853949 | 18-scf00300 | 18 |
| AX-158140526 | 13 | 65.742 | KV453138.1 | 5854741 | 18-scf00300 | 18 |
| AX-158140528 | 13 | 65.742 | KV453138.1 | 5856308 | 18-scf00300 | 18 |
| AX-158140530 | 13 | 65.742 | KV453138.1 | 5857761 | 18-scf00300 | 18 |
| AX-158140531 | 13 | 65.742 | KV453138.1 | 5858663 | 18-scf00300 | 18 |
| AX-158140533 | 13 | 65.742 | KV453138.1 | 5861126 | 18-scf00300 | 18 |
| AX-158140534 | 13 | 65.742 | KV453138.1 | 5861518 | 18-scf00300 | 18 |
| AX-158140535 | 13 | 65.742 | KV453138.1 | 5861883 | 18-scf00300 | 18 |
| AX-158140541 | 13 | 65.742 | KV453138.1 | 5867082 | 18-scf00300 | 18 |
| AX-158140543 | 13 | 65.742 | KV453138.1 | 5869707 | 18-scf00300 | 18 |
| AX-158380304 | 13 | 65.742 | KV453138.1 | 5870432 | 18-scf00300 | 18 |
| AX-158140546 | 13 | 65.742 | KV453138.1 | 5872806 | 18-scf00300 | 18 |
| AX-158140550 | 13 | 65.742 | KV453138.1 | 5879025 | 18-scf00300 | 18 |
| AX-158140562 | 13 | 65.742 | KV453138.1 | 5891421 | 18-scf00300 | 18 |
| AX-158393004 | 13 | 65.742 | KV453138.1 | 5898724 | 18-scf00300 | 18 |
| AX-158140571 | 13 | 65.742 | KV453138.1 | 5909537 | 18-scf00300 | 18 |
| AX-157747221 | 13 | 65.742 | KV453138.1 | 5945936 | 18-scf00300 | 18 |
| AX-158412074 | 13 | 65.742 | KV453138.1 | 6039609 | 18-scf00300 | 18 |
| AX-158140553 | 13 | 65.852 | KV453138.1 | 5880977 | 18-scf00300 | 18 |
| AX-158140555 | 13 | 65.911 | KV453138.1 | 5882922 | 18-scf00300 | 18 |
| AX-158140536 | 13 | 65.961 | KV453138.1 | 5862412 | 18-scf00300 | 18 |
| AX-158140556 | 13 | 65.961 | KV453138.1 | 5883929 | 18-scf00300 | 18 |
| AX-158140557 | 13 | 65.961 | KV453138.1 | 5884931 | 18-scf00300 | 18 |
| AX-158140558 | 13 | 65.961 | KV453138.1 | 5885966 | 18-scf00300 | 18 |
| AX-158140559 | 13 | 65.961 | KV453138.1 | 5886125 | 18-scf00300 | 18 |
| AX-158140561 | 13 | 65.961 | KV453138.1 | 5889440 | 18-scf00300 | 18 |
| AX-158140563 | 13 | 65.961 | KV453138.1 | 5892631 | 18-scf00300 | 18 |
| AX-158140565 | 13 | 65.961 | KV453138.1 | 5899762 | 18-scf00300 | 18 |
| AX-158140566 | 13 | 65.961 | KV453138.1 | 5901898 | 18-scf00300 | 18 |
| AX-158140569 | 13 | 65.961 | KV453138.1 | 5904346 | 18-scf00300 | 18 |
| AX-158140570 | 13 | 65.961 | KV453138.1 | 5905136 | 18-scf00300 | 18 |
| AX-158140575 | 13 | 65.961 | KV453138.1 | 5913779 | 18-scf00300 | 18 |
| AX-158140577 | 13 | 65.961 | KV453138.1 | 5917110 | 18-scf00300 | 18 |
| AX-158140580 | 13 | 65.961 | KV453138.1 | 5919406 | 18-scf00300 | 18 |
| AX-158140532 | 13 | 66.07  | KV453138.1 | 5859648 | 18-scf00300 | 18 |
| AX-158140581 | 13 | 66.07  | KV453138.1 | 5920341 | 18-scf00300 | 18 |
| AX-158140582 | 13 | 66.07  | KV453138.1 | 5921264 | 18-scf00300 | 18 |
| AX-158140585 | 13 | 66.07  | KV453138.1 | 5924552 | 18-scf00300 | 18 |
| AX-157755783 | 13 | 66.07  | KV453138.1 | 5925064 | 18-scf00300 | 18 |
| AX-158140586 | 13 | 66.07  | KV453138.1 | 5925758 | 18-scf00300 | 18 |
| AX-157754446 | 13 | 66.07  | KV453138.1 | 5929746 | 18-scf00300 | 18 |
| AX-158140589 | 13 | 66.07  | KV453138.1 | 5929790 | 18-scf00300 | 18 |

|              |    |        |            |         |             |    |
|--------------|----|--------|------------|---------|-------------|----|
| AX-158140591 | 13 | 66.07  | KV453138.1 | 5930778 | 18-scf00300 | 18 |
| AX-157700213 | 13 | 66.07  | KV453138.1 | 5932362 | 18-scf00300 | 18 |
| AX-158140596 | 13 | 66.07  | KV453138.1 | 5934485 | 18-scf00300 | 18 |
| AX-158140597 | 13 | 66.07  | KV453138.1 | 5935132 | 18-scf00300 | 18 |
| AX-158140598 | 13 | 66.07  | KV453138.1 | 5935608 | 18-scf00300 | 18 |
| AX-158140599 | 13 | 66.07  | KV453138.1 | 5938885 | 18-scf00300 | 18 |
| AX-157857990 | 13 | 66.07  | KV453138.1 | 5941216 | 18-scf00300 | 18 |
| AX-158140600 | 13 | 66.07  | KV453138.1 | 5943346 | 18-scf00300 | 18 |
| AX-158140602 | 13 | 66.07  | KV453138.1 | 5949242 | 18-scf00300 | 18 |
| AX-158140603 | 13 | 66.07  | KV453138.1 | 5951656 | 18-scf00300 | 18 |
| AX-158140604 | 13 | 66.07  | KV453138.1 | 5954257 | 18-scf00300 | 18 |
| AX-158140616 | 13 | 66.07  | KV453138.1 | 5964864 | 18-scf00300 | 18 |
| AX-158140628 | 13 | 66.07  | KV453138.1 | 5980458 | 18-scf00300 | 18 |
| AX-158140651 | 13 | 66.07  | KV453138.1 | 6005592 | 18-scf00300 | 18 |
| AX-158140605 | 13 | 66.076 | KV453138.1 | 5954714 | 18-scf00300 | 18 |
| AX-158140607 | 13 | 66.096 | KV453138.1 | 5955901 | 18-scf00300 | 18 |
| AX-158140574 | 13 | 66.116 | KV453138.1 | 5913496 | 18-scf00300 | 18 |
| AX-158140610 | 13 | 66.116 | KV453138.1 | 5957737 | 18-scf00300 | 18 |
| AX-158140613 | 13 | 66.128 | KV453138.1 | 5962969 | 18-scf00300 | 18 |
| AX-158140614 | 13 | 66.139 | KV453138.1 | 5963474 | 18-scf00300 | 18 |
| AX-158140621 | 13 | 66.139 | KV453138.1 | 5969440 | 18-scf00300 | 18 |
| AX-158140647 | 13 | 66.139 | KV453138.1 | 6004128 | 18-scf00300 | 18 |
| AX-158140652 | 13 | 66.139 | KV453138.1 | 6006040 | 18-scf00300 | 18 |
| AX-158140615 | 13 | 66.143 | KV453138.1 | 5964450 | 18-scf00300 | 18 |
| AX-158140622 | 13 | 66.154 | KV453138.1 | 5970271 | 18-scf00300 | 18 |
| AX-158140633 | 13 | 66.154 | KV453138.1 | 5990582 | 18-scf00300 | 18 |
| AX-158140624 | 13 | 66.164 | KV453138.1 | 5971275 | 18-scf00300 | 18 |
| AX-158140518 | 13 | 66.179 | KV453138.1 | 5842745 | 18-scf00300 | 18 |
| AX-157710155 | 13 | 66.179 | KV453138.1 | 5958631 | 18-scf00300 | 18 |
| AX-158140626 | 13 | 66.179 | KV453138.1 | 5974467 | 18-scf00300 | 18 |
| AX-158140627 | 13 | 66.179 | KV453138.1 | 5974897 | 18-scf00300 | 18 |
| AX-158140629 | 13 | 66.179 | KV453138.1 | 5980703 | 18-scf00300 | 18 |
| AX-158140631 | 13 | 66.179 | KV453138.1 | 5981597 | 18-scf00300 | 18 |
| AX-158140635 | 13 | 66.179 | KV453138.1 | 5991852 | 18-scf00300 | 18 |
| AX-158412072 | 13 | 66.179 | KV453138.1 | 5993532 | 18-scf00300 | 18 |
| AX-157831232 | 13 | 66.179 | KV453138.1 | 5993616 | 18-scf00300 | 18 |
| AX-158140637 | 13 | 66.179 | KV453138.1 | 5993879 | 18-scf00300 | 18 |
| AX-158140640 | 13 | 66.179 | KV453138.1 | 5997798 | 18-scf00300 | 18 |
| AX-157708156 | 13 | 66.179 | KV453138.1 | 5999946 | 18-scf00300 | 18 |
| AX-157708155 | 13 | 66.179 | KV453138.1 | 6000031 | 18-scf00300 | 18 |
| AX-158140642 | 13 | 66.179 | KV453138.1 | 6001306 | 18-scf00300 | 18 |
| AX-158140644 | 13 | 66.179 | KV453138.1 | 6001842 | 18-scf00300 | 18 |
| AX-158140645 | 13 | 66.179 | KV453138.1 | 6002524 | 18-scf00300 | 18 |
| AX-158140646 | 13 | 66.179 | KV453138.1 | 6002762 | 18-scf00300 | 18 |
| AX-158140648 | 13 | 66.179 | KV453138.1 | 6004336 | 18-scf00300 | 18 |
| AX-158140649 | 13 | 66.179 | KV453138.1 | 6004688 | 18-scf00300 | 18 |
| AX-158140653 | 13 | 66.179 | KV453138.1 | 6008341 | 18-scf00300 | 18 |
| AX-157831233 | 13 | 66.179 | KV453138.1 | 6008710 | 18-scf00300 | 18 |
| AX-158140656 | 13 | 66.179 | KV453138.1 | 6010375 | 18-scf00300 | 18 |
| AX-158140657 | 13 | 66.179 | KV453138.1 | 6010900 | 18-scf00300 | 18 |
| AX-158140681 | 13 | 66.179 | KV453138.1 | 6032823 | 18-scf00300 | 18 |



|              |    |        |            |         |             |    |
|--------------|----|--------|------------|---------|-------------|----|
| AX-158140660 | 13 | 66.288 | KV453138.1 | 6013306 | 18-scf00300 | 18 |
| AX-158140661 | 13 | 66.288 | KV453138.1 | 6014025 | 18-scf00300 | 18 |
| AX-158140679 | 13 | 66.288 | KV453138.1 | 6031570 | 18-scf00300 | 18 |
| AX-158140662 | 13 | 66.318 | KV453138.1 | 6015132 | 18-scf00300 | 18 |
| AX-157758394 | 13 | 66.334 | KV453138.1 | 6017931 | 18-scf00300 | 18 |
| AX-158140667 | 13 | 66.349 | KV453138.1 | 6020722 | 18-scf00300 | 18 |
| AX-158140663 | 13 | 66.375 | KV453138.1 | 6015753 | 18-scf00300 | 18 |
| AX-158140668 | 13 | 66.375 | KV453138.1 | 6021318 | 18-scf00300 | 18 |
| AX-158140674 | 13 | 66.375 | KV453138.1 | 6025567 | 18-scf00300 | 18 |
| AX-158140675 | 13 | 66.375 | KV453138.1 | 6026945 | 18-scf00300 | 18 |
| AX-158412075 | 13 | 66.375 | KV453138.1 | 6041981 | 18-scf00300 | 18 |
| AX-158140692 | 13 | 66.375 | KV453138.1 | 6051354 | 18-scf00300 | 18 |
| AX-158140669 | 13 | 66.381 | KV453138.1 | 6021985 | 18-scf00300 | 18 |
| AX-158140670 | 13 | 66.388 | KV453138.1 | 6023330 | 18-scf00300 | 18 |
| AX-158140671 | 13 | 66.398 | KV453138.1 | 6024067 | 18-scf00300 | 18 |
| AX-158140672 | 13 | 66.398 | KV453138.1 | 6024483 | 18-scf00300 | 18 |
| AX-158140673 | 13 | 66.398 | KV453138.1 | 6025090 | 18-scf00300 | 18 |
| AX-158140676 | 13 | 66.398 | KV453138.1 | 6027909 | 18-scf00300 | 18 |
| AX-158140678 | 13 | 66.398 | KV453138.1 | 6030403 | 18-scf00300 | 18 |
| AX-158140680 | 13 | 66.398 | KV453138.1 | 6032434 | 18-scf00300 | 18 |
| AX-157701255 | 13 | 66.427 | KV453138.1 | 6035780 | 18-scf00300 | 18 |
| AX-158140687 | 13 | 66.493 | KV453138.1 | 6042210 | 18-scf00300 | 18 |
| AX-158140690 | 13 | 66.493 | KV453138.1 | 6046116 | 18-scf00300 | 18 |
| AX-158140688 | 13 | 66.507 | KV453138.1 | 6044678 | 18-scf00300 | 18 |
| AX-158140689 | 13 | 66.507 | KV453138.1 | 6045613 | 18-scf00300 | 18 |
| AX-158140691 | 13 | 66.507 | KV453138.1 | 6049520 | 18-scf00300 | 18 |
| AX-158140693 | 13 | 66.507 | KV453138.1 | 6054096 | 18-scf00300 | 18 |
| AX-158140694 | 13 | 66.507 | KV453138.1 | 6055562 | 18-scf00300 | 18 |
| AX-158140696 | 13 | 66.507 | KV453138.1 | 6057710 | 18-scf00300 | 18 |
| AX-158140697 | 13 | 66.507 | KV453138.1 | 6058400 | 18-scf00300 | 18 |
| AX-158140698 | 13 | 66.616 | KV453138.1 | 6058961 | 18-scf00300 | 18 |
| AX-158140701 | 13 | 66.616 | KV453138.1 | 6062474 | 18-scf00300 | 18 |
| AX-158140712 | 13 | 66.725 | KV453138.1 | 6080604 | 18-scf00300 | 18 |
| AX-158140713 | 13 | 66.725 | KV453138.1 | 6081112 | 18-scf00300 | 18 |
| AX-158140714 | 13 | 66.725 | KV453138.1 | 6081753 | 18-scf00300 | 18 |
| AX-158140715 | 13 | 66.725 | KV453138.1 | 6083940 | 18-scf00300 | 18 |
| AX-158140716 | 13 | 66.725 | KV453138.1 | 6086023 | 18-scf00300 | 18 |
| AX-158140717 | 13 | 66.725 | KV453138.1 | 6088383 | 18-scf00300 | 18 |
| AX-158412073 | 13 | 66.726 | KV453138.1 | 6037063 | 18-scf00300 | 18 |
| AX-157754575 | 13 | 66.726 | KV453138.1 | 6039091 | 18-scf00300 | 18 |
| AX-158140718 | 13 | 66.726 | KV453138.1 | 6092644 | 18-scf00300 | 18 |
| AX-158140719 | 13 | 66.726 | KV453138.1 | 6094612 | 18-scf00300 | 18 |
| AX-158140726 | 13 | 66.83  | KV453138.1 | 6102363 | 18-scf00300 | 18 |
| AX-158140745 | 13 | 66.83  | KV453138.1 | 6138334 | 18-scf00300 | 18 |
| AX-158140728 | 13 | 66.936 | KV453138.1 | 6105200 | 18-scf00300 | 18 |
| AX-158140732 | 13 | 67.053 | KV453138.1 | 6115384 | 18-scf00300 | 18 |
| AX-158140733 | 13 | 67.053 | KV453138.1 | 6117405 | 18-scf00300 | 18 |
| AX-158140735 | 13 | 67.053 | KV453138.1 | 6120246 | 18-scf00300 | 18 |
| AX-158140739 | 13 | 67.053 | KV453138.1 | 6123753 | 18-scf00300 | 18 |
| AX-158140740 | 13 | 67.053 | KV453138.1 | 6124804 | 18-scf00300 | 18 |
| AX-158140750 | 13 | 67.053 | KV453138.1 | 6144337 | 18-scf00300 | 18 |

|              |    |        |            |         |             |    |
|--------------|----|--------|------------|---------|-------------|----|
| AX-158140783 | 13 | 67.053 | KV453138.1 | 6204283 | 18-scf00300 | 18 |
| AX-157886333 | 13 | 67.077 | KV453138.1 | 6128703 | 18-scf00300 | 18 |
| AX-157857991 | 13 | 67.083 | KV453138.1 | 6129022 | 18-scf00300 | 18 |
| AX-158140742 | 13 | 67.114 | KV453138.1 | 6135243 | 18-scf00300 | 18 |
| AX-158140744 | 13 | 67.142 | KV453138.1 | 6137044 | 18-scf00300 | 18 |
| AX-158140746 | 13 | 67.163 | KV453138.1 | 6138793 | 18-scf00300 | 18 |
| AX-157743598 | 13 | 67.173 | KV453138.1 | 6139839 | 18-scf00300 | 18 |
| AX-158140747 | 13 | 67.191 | KV453138.1 | 6140830 | 18-scf00300 | 18 |
| AX-158412082 | 13 | 67.21  | KV453138.1 | 6141022 | 18-scf00300 | 18 |
| AX-158385403 | 13 | 67.21  | KV453138.1 | 6163012 | 18-scf00300 | 18 |
| AX-158140751 | 13 | 67.272 | KV453138.1 | 6147619 | 18-scf00300 | 18 |
| AX-158140754 | 13 | 67.381 | KV453138.1 | 6151608 | 18-scf00300 | 18 |
| AX-157773187 | 13 | 67.381 | KV453138.1 | 6155917 | 18-scf00300 | 18 |
| AX-158140755 | 13 | 67.381 | KV453138.1 | 6158807 | 18-scf00300 | 18 |
| AX-158140756 | 13 | 67.381 | KV453138.1 | 6159601 | 18-scf00300 | 18 |
| AX-158140757 | 13 | 67.381 | KV453138.1 | 6160172 | 18-scf00300 | 18 |
| AX-157718411 | 13 | 67.599 | KV453138.1 | 6149506 | 18-scf00300 | 18 |
| AX-158140759 | 13 | 67.599 | KV453138.1 | 6163743 | 18-scf00300 | 18 |
| AX-158412084 | 13 | 67.599 | KV453138.1 | 6164181 | 18-scf00300 | 18 |
| AX-158140760 | 13 | 67.599 | KV453138.1 | 6165749 | 18-scf00300 | 18 |
| AX-158140762 | 13 | 67.599 | KV453138.1 | 6168425 | 18-scf00300 | 18 |
| AX-158140753 | 13 | 67.709 | KV453138.1 | 6151125 | 18-scf00300 | 18 |
| AX-158140758 | 13 | 67.709 | KV453138.1 | 6162586 | 18-scf00300 | 18 |
| AX-157715471 | 13 | 67.709 | KV453138.1 | 6176225 | 18-scf00300 | 18 |
| AX-157724346 | 13 | 67.709 | KV453138.1 | 6176937 | 18-scf00300 | 18 |
| AX-157714861 | 13 | 67.709 | KV453138.1 | 6179847 | 18-scf00300 | 18 |
| AX-158140765 | 13 | 67.709 | KV453138.1 | 6180780 | 18-scf00300 | 18 |
| AX-158140768 | 13 | 67.709 | KV453138.1 | 6184239 | 18-scf00300 | 18 |
| AX-158140770 | 13 | 67.709 | KV453138.1 | 6186192 | 18-scf00300 | 18 |
| AX-158140773 | 13 | 67.709 | KV453138.1 | 6191044 | 18-scf00300 | 18 |
| AX-158140774 | 13 | 67.709 | KV453138.1 | 6191751 | 18-scf00300 | 18 |
| AX-158140776 | 13 | 67.709 | KV453138.1 | 6193116 | 18-scf00300 | 18 |
| AX-158140779 | 13 | 67.709 | KV453138.1 | 6198409 | 18-scf00300 | 18 |
| AX-158140784 | 13 | 67.709 | KV453138.1 | 6204757 | 18-scf00300 | 18 |
| AX-158140814 | 13 | 67.709 | KV453138.1 | 6247349 | 18-scf00300 | 18 |
| AX-158140835 | 13 | 67.709 | KV453138.1 | 6269536 | 18-scf00300 | 18 |
| AX-158140836 | 13 | 67.709 | KV453138.1 | 6270119 | 18-scf00300 | 18 |
| AX-157736611 | 13 | 67.709 | KV453138.1 | 6295306 | 18-scf00300 | 18 |
| AX-158140856 | 13 | 67.709 | KV453138.1 | 6295787 | 18-scf00300 | 18 |
| AX-158140876 | 13 | 67.709 | KV453138.1 | 6343808 | 18-scf00300 | 18 |
| AX-158140977 | 13 | 67.709 | KV453138.1 | 6492870 | 18-scf00300 | 18 |
| AX-158141005 | 13 | 67.709 | KV453138.1 | 6546615 | 18-scf00300 | 18 |
| AX-158141015 | 13 | 67.709 | KV453138.1 | 6565177 | 18-scf00300 | 18 |
| AX-158141041 | 13 | 67.709 | KV453138.1 | 6600447 | 18-scf00300 | 18 |
| AX-158140782 | 13 | 67.873 | KV453138.1 | 6201865 | 18-scf00300 | 18 |
| AX-157741530 | 13 | 68.036 | KV453138.1 | 6205859 | 18-scf00300 | 18 |
| AX-158140763 | 13 | 68.037 | KV453138.1 | 6172313 | 18-scf00300 | 18 |
| AX-158140813 | 13 | 68.037 | KV453138.1 | 6246946 | 18-scf00300 | 18 |
| AX-158140818 | 13 | 68.037 | KV453138.1 | 6251450 | 18-scf00300 | 18 |
| AX-158140822 | 13 | 68.037 | KV453138.1 | 6253318 | 18-scf00300 | 18 |
| AX-158140823 | 13 | 68.037 | KV453138.1 | 6254710 | 18-scf00300 | 18 |

|              |    |        |            |         |             |    |
|--------------|----|--------|------------|---------|-------------|----|
| AX-158140826 | 13 | 68.037 | KV453138.1 | 6256067 | 18-scf00300 | 18 |
| AX-158140830 | 13 | 68.037 | KV453138.1 | 6264356 | 18-scf00300 | 18 |
| AX-157755808 | 13 | 68.037 | KV453138.1 | 6264963 | 18-scf00300 | 18 |
| AX-158140831 | 13 | 68.037 | KV453138.1 | 6265709 | 18-scf00300 | 18 |
| AX-158140832 | 13 | 68.037 | KV453138.1 | 6266391 | 18-scf00300 | 18 |
| AX-158140840 | 13 | 68.037 | KV453138.1 | 6273212 | 18-scf00300 | 18 |
| AX-158140841 | 13 | 68.037 | KV453138.1 | 6273830 | 18-scf00300 | 18 |
| AX-158140843 | 13 | 68.037 | KV453138.1 | 6277340 | 18-scf00300 | 18 |
| AX-158140849 | 13 | 68.037 | KV453138.1 | 6287394 | 18-scf00300 | 18 |
| AX-158140850 | 13 | 68.037 | KV453138.1 | 6289316 | 18-scf00300 | 18 |
| AX-158140851 | 13 | 68.037 | KV453138.1 | 6290556 | 18-scf00300 | 18 |
| AX-158140853 | 13 | 68.037 | KV453138.1 | 6293842 | 18-scf00300 | 18 |
| AX-158412091 | 13 | 68.037 | KV453138.1 | 6294020 | 18-scf00300 | 18 |
| AX-158140855 | 13 | 68.037 | KV453138.1 | 6295559 | 18-scf00300 | 18 |
| AX-157722936 | 13 | 68.037 | KV453138.1 | 6298468 | 18-scf00300 | 18 |
| AX-158140859 | 13 | 68.037 | KV453138.1 | 6299757 | 18-scf00300 | 18 |
| AX-158140873 | 13 | 68.037 | KV453138.1 | 6331620 | 18-scf00300 | 18 |
| AX-158140882 | 13 | 68.037 | KV453138.1 | 6350102 | 18-scf00300 | 18 |
| AX-157866327 | 13 | 68.037 | KV453138.1 | 6457443 | 18-scf00300 | 18 |
| AX-158412100 | 13 | 68.037 | KV453138.1 | 6577977 | 18-scf00300 | 18 |
| AX-157722112 | 13 | 68.056 | KV453138.1 | 6277514 | 18-scf00300 | 18 |
| AX-157831238 | 13 | 68.056 | KV453138.1 | 6287664 | 18-scf00300 | 18 |
| AX-158140862 | 13 | 68.056 | KV453138.1 | 6304267 | 18-scf00300 | 18 |
| AX-157831243 | 13 | 68.056 | KV453138.1 | 6317623 | 18-scf00300 | 18 |
| AX-157857993 | 13 | 68.056 | KV453138.1 | 6445401 | 18-scf00300 | 18 |
| AX-157831240 | 13 | 68.075 | KV453138.1 | 6308703 | 18-scf00300 | 18 |
| AX-158140866 | 13 | 68.096 | KV453138.1 | 6314663 | 18-scf00300 | 18 |
| AX-158140869 | 13 | 68.109 | KV453138.1 | 6321110 | 18-scf00300 | 18 |
| AX-158140884 | 13 | 68.109 | KV453138.1 | 6354406 | 18-scf00300 | 18 |
| AX-158140871 | 13 | 68.123 | KV453138.1 | 6328404 | 18-scf00300 | 18 |
| AX-158140872 | 13 | 68.129 | KV453138.1 | 6328894 | 18-scf00300 | 18 |
| AX-158140780 | 13 | 68.135 | KV453138.1 | 6200054 | 18-scf00300 | 18 |
| AX-158140820 | 13 | 68.135 | KV453138.1 | 6252639 | 18-scf00300 | 18 |
| AX-157831237 | 13 | 68.135 | KV453138.1 | 6270496 | 18-scf00300 | 18 |
| AX-158140860 | 13 | 68.135 | KV453138.1 | 6300609 | 18-scf00300 | 18 |
| AX-157831241 | 13 | 68.135 | KV453138.1 | 6309436 | 18-scf00300 | 18 |
| AX-157878188 | 13 | 68.135 | KV453138.1 | 6332987 | 18-scf00300 | 18 |
| AX-157744469 | 13 | 68.135 | KV453138.1 | 6334632 | 18-scf00300 | 18 |
| AX-158140878 | 13 | 68.135 | KV453138.1 | 6344450 | 18-scf00300 | 18 |
| AX-157831246 | 13 | 68.135 | KV453138.1 | 6352866 | 18-scf00300 | 18 |
| AX-158412094 | 13 | 68.135 | KV453138.1 | 6360107 | 18-scf00300 | 18 |
| AX-158140926 | 13 | 68.135 | KV453138.1 | 6433477 | 18-scf00300 | 18 |
| AX-158140928 | 13 | 68.135 | KV453138.1 | 6434307 | 18-scf00300 | 18 |
| AX-158140877 | 13 | 68.146 | KV453138.1 | 6344144 | 18-scf00300 | 18 |
| AX-157871594 | 13 | 68.146 | KV453138.1 | 6346935 | 18-scf00300 | 18 |
| AX-158140879 | 13 | 68.146 | KV453138.1 | 6347825 | 18-scf00300 | 18 |
| AX-157878190 | 13 | 68.146 | KV453138.1 | 6350608 | 18-scf00300 | 18 |
| AX-157752133 | 13 | 68.146 | KV453138.1 | 6350795 | 18-scf00300 | 18 |
| AX-157745525 | 13 | 68.146 | KV453138.1 | 6353263 | 18-scf00300 | 18 |
| AX-158140890 | 13 | 68.223 | KV453138.1 | 6367213 | 18-scf00300 | 18 |
| AX-157831247 | 13 | 68.255 | KV453138.1 | 6368756 | 18-scf00300 | 18 |

|              |    |        |             |         |             |    |
|--------------|----|--------|-------------|---------|-------------|----|
| AX-158412096 | 13 | 68.255 | KV453138.1  | 6370011 | 18-scf00300 | 18 |
| AX-157725861 | 13 | 68.255 | KV453138.1  | 6386470 | 18-scf00300 | 18 |
| AX-157774639 | 13 | 68.255 | KV453138.1  | 6386832 | 18-scf00300 | 18 |
| AX-158140902 | 13 | 68.364 | KV453138.1  | 6392761 | 18-scf00300 | 18 |
| AX-157886334 | 13 | 68.474 | KV453138.1  | 6199079 | 18-scf00300 | 18 |
| AX-157739017 | 13 | 68.474 | KV453138.1  | 6209552 | 18-scf00300 | 18 |
| AX-158140824 | 13 | 68.474 | KV453138.1  | 6255107 | 18-scf00300 | 18 |
| AX-157750623 | 13 | 68.474 | KV453138.1  | 6310430 | 18-scf00300 | 18 |
| AX-158408368 | 13 | 68.474 | KV453138.1  | 6370372 | 18-scf00300 | 18 |
| AX-158140900 | 13 | 68.474 | KV453138.1  | 6388755 | 18-scf00300 | 18 |
| AX-158140908 | 13 | 68.474 | KV453138.1  | 6397000 | 18-scf00300 | 18 |
| AX-158140909 | 13 | 68.474 | KV453138.1  | 6397679 | 18-scf00300 | 18 |
| AX-158140911 | 13 | 68.474 | KV453138.1  | 6401268 | 18-scf00300 | 18 |
| AX-158140912 | 13 | 68.474 | KV453138.1  | 6402304 | 18-scf00300 | 18 |
| AX-158140918 | 13 | 68.474 | KV453138.1  | 6422517 | 18-scf00300 | 18 |
| AX-158140921 | 13 | 68.474 | KV453138.1  | 6428423 | 18-scf00300 | 18 |
| AX-158140924 | 13 | 68.474 | KV453138.1  | 6431475 | 18-scf00300 | 18 |
| AX-158140931 | 13 | 68.474 | KV453138.1  | 6438645 | 18-scf00300 | 18 |
| AX-158140932 | 13 | 68.474 | KV453138.1  | 6441510 | 18-scf00300 | 18 |
| AX-158140934 | 13 | 68.474 | KV453138.1  | 6446065 | 18-scf00300 | 18 |
| AX-158140935 | 13 | 68.474 | KV453138.1  | 6446266 | 18-scf00300 | 18 |
| AX-158140940 | 13 | 68.474 | KV453138.1  | 6449993 | 18-scf00300 | 18 |
| AX-158140941 | 13 | 68.474 | KV453138.1  | 6450419 | 18-scf00300 | 18 |
| AX-158140942 | 13 | 68.474 | KV453138.1  | 6451808 | 18-scf00300 | 18 |
| AX-158140944 | 13 | 68.474 | KV453138.1  | 6454259 | 18-scf00300 | 18 |
| AX-158140945 | 13 | 68.474 | KV453138.1  | 6454519 | 18-scf00300 | 18 |
| AX-158140948 | 13 | 68.474 | KV453138.1  | 6459012 | 18-scf00300 | 18 |
| AX-158140951 | 13 | 68.474 | KV453138.1  | 6460939 | 18-scf00300 | 18 |
| AX-157772958 | 13 | 68.474 | KV453138.1  | 6461432 | 18-scf00300 | 18 |
| AX-158140953 | 13 | 68.474 | KV453138.1  | 6466813 | 18-scf00300 | 18 |
| AX-158140955 | 13 | 68.474 | KV453138.1  | 6470777 | 18-scf00300 | 18 |
| AX-158140957 | 13 | 68.474 | KV453138.1  | 6472604 | 18-scf00300 | 18 |
| AX-158140959 | 13 | 68.474 | KV453138.1  | 6476759 | 18-scf00300 | 18 |
| AX-158140974 | 13 | 68.474 | KV453138.1  | 6491190 | 18-scf00300 | 18 |
| AX-157701830 | 13 | 68.474 | KV453138.1  | 6491324 | 18-scf00300 | 18 |
| AX-158141029 | 13 | 68.474 | KV453138.1  | 6584040 | 18-scf00300 | 18 |
| AX-158141031 | 13 | 68.474 | KV453138.1  | 6588361 | 18-scf00300 | 18 |
| AX-158393010 | 13 | 68.474 | KV453138.1  | 6589776 | 18-scf00300 | 18 |
| AX-158141043 | 13 | 68.474 | KV453138.1  | 6603786 | 18-scf00300 | 18 |
| AX-158141050 | 13 | 68.474 | KV453138.1  | 6610876 | 18-scf00300 | 18 |
| AX-158141051 | 13 | 68.474 | KV453138.1  | 6612503 | 18-scf00300 | 18 |
| AX-158141110 | 13 | 68.474 | KV453138.1  | 6698955 | 18-scf00300 | 18 |
| AX-157707458 | 13 | 68.474 | 3ML01034323 | 65      | scf09996_1  | UN |
| AX-158140967 | 13 | 68.533 | KV453138.1  | 6481785 | 18-scf00300 | 18 |
| AX-158140971 | 13 | 68.559 | KV453138.1  | 6488026 | 18-scf00300 | 18 |
| AX-157753124 | 13 | 68.559 | KV453138.1  | 6495790 | 18-scf00300 | 18 |
| AX-158140986 | 13 | 68.559 | KV453138.1  | 6510890 | 18-scf00300 | 18 |
| AX-158140972 | 13 | 68.622 | KV453138.1  | 6488797 | 18-scf00300 | 18 |
| AX-158140975 | 13 | 68.692 | KV453138.1  | 6491847 | 18-scf00300 | 18 |
| AX-158140978 | 13 | 68.692 | KV453138.1  | 6493427 | 18-scf00300 | 18 |
| AX-158140979 | 13 | 68.692 | KV453138.1  | 6496219 | 18-scf00300 | 18 |

|              |    |        |            |         |             |    |
|--------------|----|--------|------------|---------|-------------|----|
| AX-158140981 | 13 | 68.692 | KV453138.1 | 6498273 | 18-scf00300 | 18 |
| AX-158140982 | 13 | 68.692 | KV453138.1 | 6498983 | 18-scf00300 | 18 |
| AX-158140983 | 13 | 68.692 | KV453138.1 | 6500206 | 18-scf00300 | 18 |
| AX-157772123 | 13 | 68.692 | KV453138.1 | 6509069 | 18-scf00300 | 18 |
| AX-158141002 | 13 | 68.692 | KV453138.1 | 6543566 | 18-scf00300 | 18 |
| AX-158141009 | 13 | 68.692 | KV453138.1 | 6552369 | 18-scf00300 | 18 |
| AX-157831251 | 13 | 68.747 | KV453138.1 | 6516349 | 18-scf00300 | 18 |
| AX-158140939 | 13 | 68.802 | KV453138.1 | 6449728 | 18-scf00300 | 18 |
| AX-158140946 | 13 | 68.802 | KV453138.1 | 6455104 | 18-scf00300 | 18 |
| AX-157753520 | 13 | 68.802 | KV453138.1 | 6501835 | 18-scf00300 | 18 |
| AX-157713022 | 13 | 68.802 | KV453138.1 | 6508470 | 18-scf00300 | 18 |
| AX-158140988 | 13 | 68.802 | KV453138.1 | 6519292 | 18-scf00300 | 18 |
| AX-158140989 | 13 | 68.802 | KV453138.1 | 6521032 | 18-scf00300 | 18 |
| AX-158140990 | 13 | 68.802 | KV453138.1 | 6524901 | 18-scf00300 | 18 |
| AX-157714907 | 13 | 68.802 | KV453138.1 | 6529391 | 18-scf00300 | 18 |
| AX-158380307 | 13 | 68.802 | KV453138.1 | 6531337 | 18-scf00300 | 18 |
| AX-158140998 | 13 | 68.802 | KV453138.1 | 6533861 | 18-scf00300 | 18 |
| AX-157720722 | 13 | 68.802 | KV453138.1 | 6548325 | 18-scf00300 | 18 |
| AX-158141008 | 13 | 68.802 | KV453138.1 | 6550360 | 18-scf00300 | 18 |
| AX-158141010 | 13 | 68.802 | KV453138.1 | 6553521 | 18-scf00300 | 18 |
| AX-157831253 | 13 | 68.802 | KV453138.1 | 6554284 | 18-scf00300 | 18 |
| AX-157857994 | 13 | 68.802 | KV453138.1 | 6556563 | 18-scf00300 | 18 |
| AX-157743202 | 13 | 68.802 | KV453138.1 | 6557691 | 18-scf00300 | 18 |
| AX-157831255 | 13 | 68.802 | KV453138.1 | 6558565 | 18-scf00300 | 18 |
| AX-158141014 | 13 | 68.802 | KV453138.1 | 6562493 | 18-scf00300 | 18 |
| AX-158141017 | 13 | 68.802 | KV453138.1 | 6566085 | 18-scf00300 | 18 |
| AX-158141020 | 13 | 68.802 | KV453138.1 | 6571796 | 18-scf00300 | 18 |
| AX-158141024 | 13 | 68.802 | KV453138.1 | 6578369 | 18-scf00300 | 18 |
| AX-157831258 | 13 | 68.802 | KV453138.1 | 6579593 | 18-scf00300 | 18 |
| AX-158141027 | 13 | 68.802 | KV453138.1 | 6581722 | 18-scf00300 | 18 |
| AX-158141028 | 13 | 68.802 | KV453138.1 | 6583513 | 18-scf00300 | 18 |
| AX-157831259 | 13 | 68.802 | KV453138.1 | 6589726 | 18-scf00300 | 18 |
| AX-157831260 | 13 | 68.802 | KV453138.1 | 6590049 | 18-scf00300 | 18 |
| AX-158141032 | 13 | 68.802 | KV453138.1 | 6592987 | 18-scf00300 | 18 |
| AX-158141033 | 13 | 68.802 | KV453138.1 | 6593661 | 18-scf00300 | 18 |
| AX-157716305 | 13 | 68.802 | KV453138.1 | 6596286 | 18-scf00300 | 18 |
| AX-158412102 | 13 | 68.802 | KV453138.1 | 6596542 | 18-scf00300 | 18 |
| AX-157831261 | 13 | 68.802 | KV453138.1 | 6596577 | 18-scf00300 | 18 |
| AX-158141036 | 13 | 68.802 | KV453138.1 | 6597087 | 18-scf00300 | 18 |
| AX-157755349 | 13 | 68.802 | KV453138.1 | 6598906 | 18-scf00300 | 18 |
| AX-158141038 | 13 | 68.802 | KV453138.1 | 6598947 | 18-scf00300 | 18 |
| AX-157871596 | 13 | 68.802 | KV453138.1 | 6607395 | 18-scf00300 | 18 |
| AX-158141052 | 13 | 68.802 | KV453138.1 | 6613764 | 18-scf00300 | 18 |
| AX-157747036 | 13 | 68.802 | KV453138.1 | 6626739 | 18-scf00300 | 18 |
| AX-158141061 | 13 | 68.802 | KV453138.1 | 6637538 | 18-scf00300 | 18 |
| AX-158141106 | 13 | 68.802 | KV453138.1 | 6695787 | 18-scf00300 | 18 |
| AX-158141109 | 13 | 68.802 | KV453138.1 | 6698365 | 18-scf00300 | 18 |
| AX-158141044 | 13 | 68.861 | KV453138.1 | 6606107 | 18-scf00300 | 18 |
| AX-158141048 | 13 | 68.911 | KV453138.1 | 6608677 | 18-scf00300 | 18 |
| AX-158140987 | 13 | 69.13  | KV453138.1 | 6518976 | 18-scf00300 | 18 |
| AX-158141000 | 13 | 69.13  | KV453138.1 | 6538416 | 18-scf00300 | 18 |

|              |    |        |            |         |             |    |
|--------------|----|--------|------------|---------|-------------|----|
| AX-158141030 | 13 | 69.13  | KV453138.1 | 6587449 | 18-scf00300 | 18 |
| AX-158141054 | 13 | 69.13  | KV453138.1 | 6615691 | 18-scf00300 | 18 |
| AX-158141056 | 13 | 69.13  | KV453138.1 | 6619169 | 18-scf00300 | 18 |
| AX-158141057 | 13 | 69.13  | KV453138.1 | 6623034 | 18-scf00300 | 18 |
| AX-158141059 | 13 | 69.13  | KV453138.1 | 6627461 | 18-scf00300 | 18 |
| AX-157831265 | 13 | 69.13  | KV453138.1 | 6628432 | 18-scf00300 | 18 |
| AX-158141060 | 13 | 69.13  | KV453138.1 | 6629779 | 18-scf00300 | 18 |
| AX-157831267 | 13 | 69.13  | KV453138.1 | 6638117 | 18-scf00300 | 18 |
| AX-157831268 | 13 | 69.13  | KV453138.1 | 6638250 | 18-scf00300 | 18 |
| AX-158141062 | 13 | 69.13  | KV453138.1 | 6640551 | 18-scf00300 | 18 |
| AX-158141063 | 13 | 69.13  | KV453138.1 | 6644698 | 18-scf00300 | 18 |
| AX-158393011 | 13 | 69.13  | KV453138.1 | 6645789 | 18-scf00300 | 18 |
| AX-158141064 | 13 | 69.13  | KV453138.1 | 6645896 | 18-scf00300 | 18 |
| AX-158141066 | 13 | 69.161 | KV453138.1 | 6646709 | 18-scf00300 | 18 |
| AX-158140995 | 13 | 69.176 | KV453138.1 | 6532588 | 18-scf00300 | 18 |
| AX-158141001 | 13 | 69.176 | KV453138.1 | 6538745 | 18-scf00300 | 18 |
| AX-158412101 | 13 | 69.176 | KV453138.1 | 6596381 | 18-scf00300 | 18 |
| AX-158141067 | 13 | 69.176 | KV453138.1 | 6648168 | 18-scf00300 | 18 |
| AX-157694846 | 13 | 69.176 | KV453138.1 | 6717096 | 18-scf00300 | 18 |
| AX-158141074 | 13 | 69.192 | KV453138.1 | 6655572 | 18-scf00300 | 18 |
| AX-158140910 | 13 | 69.212 | KV453138.1 | 6398764 | 18-scf00300 | 18 |
| AX-158141077 | 13 | 69.212 | KV453138.1 | 6656672 | 18-scf00300 | 18 |
| AX-157831270 | 13 | 69.212 | KV453138.1 | 6658528 | 18-scf00300 | 18 |
| AX-158141079 | 13 | 69.212 | KV453138.1 | 6659119 | 18-scf00300 | 18 |
| AX-158141102 | 13 | 69.212 | KV453138.1 | 6692302 | 18-scf00300 | 18 |
| AX-158141080 | 13 | 69.239 | KV453138.1 | 6659564 | 18-scf00300 | 18 |
| AX-158412106 | 13 | 69.239 | KV453138.1 | 6663414 | 18-scf00300 | 18 |
| AX-158141081 | 13 | 69.239 | KV453138.1 | 6664731 | 18-scf00300 | 18 |
| AX-158141082 | 13 | 69.239 | KV453138.1 | 6668976 | 18-scf00300 | 18 |
| AX-158141084 | 13 | 69.239 | KV453138.1 | 6670481 | 18-scf00300 | 18 |
| AX-158141089 | 13 | 69.239 | KV453138.1 | 6678421 | 18-scf00300 | 18 |
| AX-158141091 | 13 | 69.239 | KV453138.1 | 6682367 | 18-scf00300 | 18 |
| AX-158141093 | 13 | 69.239 | KV453138.1 | 6685223 | 18-scf00300 | 18 |
| AX-158141094 | 13 | 69.348 | KV453138.1 | 6686389 | 18-scf00300 | 18 |
| AX-158141095 | 13 | 69.348 | KV453138.1 | 6687799 | 18-scf00300 | 18 |
| AX-158141097 | 13 | 69.348 | KV453138.1 | 6688831 | 18-scf00300 | 18 |
| AX-158141111 | 13 | 69.348 | KV453138.1 | 6699900 | 18-scf00300 | 18 |
| AX-157831272 | 13 | 69.39  | KV453138.1 | 6707476 | 18-scf00300 | 18 |
| AX-158141113 | 13 | 69.457 | KV453138.1 | 6705097 | 18-scf00300 | 18 |
| AX-158141114 | 13 | 69.457 | KV453138.1 | 6709419 | 18-scf00300 | 18 |
| AX-158141115 | 13 | 69.457 | KV453138.1 | 6709927 | 18-scf00300 | 18 |
| AX-158141116 | 13 | 69.457 | KV453138.1 | 6711572 | 18-scf00300 | 18 |
| AX-158141118 | 13 | 69.457 | KV453138.1 | 6712360 | 18-scf00300 | 18 |
| AX-157723360 | 13 | 69.622 | KV453138.1 | 6717707 | 18-scf00300 | 18 |
| AX-157871597 | 13 | 69.784 | KV453138.1 | 6719593 | 18-scf00300 | 18 |
| AX-158141120 | 13 | 69.784 | KV453138.1 | 6720567 | 18-scf00300 | 18 |
| AX-157831280 | 13 | 69.784 | KV453138.1 | 6819371 | 18-scf00300 | 18 |
| AX-158141122 | 13 | 69.785 | KV453138.1 | 6724997 | 18-scf00300 | 18 |
| AX-157726387 | 13 | 69.785 | KV453138.1 | 6725974 | 18-scf00300 | 18 |
| AX-158141124 | 13 | 69.894 | KV453138.1 | 6727565 | 18-scf00300 | 18 |
| AX-158141125 | 13 | 69.894 | KV453138.1 | 6728104 | 18-scf00300 | 18 |

|              |    |        |            |         |             |    |
|--------------|----|--------|------------|---------|-------------|----|
| AX-158141129 | 13 | 69.894 | KV453138.1 | 6732321 | 18-scf00300 | 18 |
| AX-157831273 | 13 | 69.894 | KV453138.1 | 6734105 | 18-scf00300 | 18 |
| AX-157831275 | 13 | 69.894 | KV453138.1 | 6737902 | 18-scf00300 | 18 |
| AX-157757698 | 13 | 69.894 | KV453138.1 | 6738837 | 18-scf00300 | 18 |
| AX-158141132 | 13 | 69.916 | KV453138.1 | 6739543 | 18-scf00300 | 18 |
| AX-158141133 | 13 | 69.939 | KV453138.1 | 6740196 | 18-scf00300 | 18 |
| AX-158141135 | 13 | 69.954 | KV453138.1 | 6741313 | 18-scf00300 | 18 |
| AX-158141130 | 13 | 69.977 | KV453138.1 | 6733293 | 18-scf00300 | 18 |
| AX-158141138 | 13 | 69.977 | KV453138.1 | 6745293 | 18-scf00300 | 18 |
| AX-158141142 | 13 | 69.977 | KV453138.1 | 6747062 | 18-scf00300 | 18 |
| AX-157831276 | 13 | 69.977 | KV453138.1 | 6748310 | 18-scf00300 | 18 |
| AX-158141150 | 13 | 69.977 | KV453138.1 | 6758157 | 18-scf00300 | 18 |
| AX-158141155 | 13 | 69.977 | KV453138.1 | 6765724 | 18-scf00300 | 18 |
| AX-157713857 | 13 | 69.977 | KV453138.1 | 6917835 | 18-scf00300 | 18 |
| AX-158141126 | 13 | 70.003 | KV453138.1 | 6728478 | 18-scf00300 | 18 |
| AX-158141140 | 13 | 70.003 | KV453138.1 | 6746257 | 18-scf00300 | 18 |
| AX-157740227 | 13 | 70.003 | KV453138.1 | 6747570 | 18-scf00300 | 18 |
| AX-158141146 | 13 | 70.003 | KV453138.1 | 6755053 | 18-scf00300 | 18 |
| AX-158141148 | 13 | 70.003 | KV453138.1 | 6756154 | 18-scf00300 | 18 |
| AX-158141149 | 13 | 70.003 | KV453138.1 | 6756766 | 18-scf00300 | 18 |
| AX-158141152 | 13 | 70.003 | KV453138.1 | 6761520 | 18-scf00300 | 18 |
| AX-158141153 | 13 | 70.003 | KV453138.1 | 6763862 | 18-scf00300 | 18 |
| AX-158141156 | 13 | 70.003 | KV453138.1 | 6766511 | 18-scf00300 | 18 |
| AX-158141158 | 13 | 70.003 | KV453138.1 | 6767199 | 18-scf00300 | 18 |
| AX-158141161 | 13 | 70.003 | KV453138.1 | 6768314 | 18-scf00300 | 18 |
| AX-158141162 | 13 | 70.003 | KV453138.1 | 6769001 | 18-scf00300 | 18 |
| AX-158141163 | 13 | 70.003 | KV453138.1 | 6770683 | 18-scf00300 | 18 |
| AX-158141164 | 13 | 70.003 | KV453138.1 | 6771593 | 18-scf00300 | 18 |
| AX-158141165 | 13 | 70.003 | KV453138.1 | 6772360 | 18-scf00300 | 18 |
| AX-158141166 | 13 | 70.003 | KV453138.1 | 6773542 | 18-scf00300 | 18 |
| AX-158141168 | 13 | 70.003 | KV453138.1 | 6776341 | 18-scf00300 | 18 |
| AX-158141169 | 13 | 70.003 | KV453138.1 | 6776635 | 18-scf00300 | 18 |
| AX-158141170 | 13 | 70.003 | KV453138.1 | 6776739 | 18-scf00300 | 18 |
| AX-158141171 | 13 | 70.003 | KV453138.1 | 6777308 | 18-scf00300 | 18 |
| AX-158141173 | 13 | 70.003 | KV453138.1 | 6781467 | 18-scf00300 | 18 |
| AX-158141174 | 13 | 70.003 | KV453138.1 | 6782157 | 18-scf00300 | 18 |
| AX-158141180 | 13 | 70.003 | KV453138.1 | 6788058 | 18-scf00300 | 18 |
| AX-158141184 | 13 | 70.003 | KV453138.1 | 6793051 | 18-scf00300 | 18 |
| AX-158141203 | 13 | 70.003 | KV453138.1 | 6834247 | 18-scf00300 | 18 |
| AX-158141212 | 13 | 70.003 | KV453138.1 | 6849094 | 18-scf00300 | 18 |
| AX-158141228 | 13 | 70.003 | KV453138.1 | 6867507 | 18-scf00300 | 18 |
| AX-157831295 | 13 | 70.003 | KV453138.1 | 6902522 | 18-scf00300 | 18 |
| AX-157755665 | 13 | 70.003 | KV453138.1 | 6913185 | 18-scf00300 | 18 |
| AX-158141250 | 13 | 70.003 | KV453138.1 | 6917449 | 18-scf00300 | 18 |
| AX-157745466 | 13 | 70.003 | KV453138.1 | 6944651 | 18-scf00300 | 18 |
| AX-158141266 | 13 | 70.003 | KV453138.1 | 6951911 | 18-scf00300 | 18 |
| AX-158141268 | 13 | 70.003 | KV453138.1 | 6954403 | 18-scf00300 | 18 |
| AX-157831271 | 13 | 70.112 | KV453138.1 | 6707288 | 18-scf00300 | 18 |
| AX-158141127 | 13 | 70.112 | KV453138.1 | 6729251 | 18-scf00300 | 18 |
| AX-158141136 | 13 | 70.112 | KV453138.1 | 6742281 | 18-scf00300 | 18 |
| AX-158141175 | 13 | 70.112 | KV453138.1 | 6782411 | 18-scf00300 | 18 |

|              |    |        |            |         |             |    |
|--------------|----|--------|------------|---------|-------------|----|
| AX-158141178 | 13 | 70.112 | KV453138.1 | 6786631 | 18-scf00300 | 18 |
| AX-157749278 | 13 | 70.112 | KV453138.1 | 6789053 | 18-scf00300 | 18 |
| AX-158141185 | 13 | 70.112 | KV453138.1 | 6794485 | 18-scf00300 | 18 |
| AX-158393013 | 13 | 70.112 | KV453138.1 | 6800218 | 18-scf00300 | 18 |
| AX-158141191 | 13 | 70.112 | KV453138.1 | 6807026 | 18-scf00300 | 18 |
| AX-157774192 | 13 | 70.112 | KV453138.1 | 6810657 | 18-scf00300 | 18 |
| AX-158141192 | 13 | 70.112 | KV453138.1 | 6811542 | 18-scf00300 | 18 |
| AX-157747469 | 13 | 70.112 | KV453138.1 | 6813130 | 18-scf00300 | 18 |
| AX-157831279 | 13 | 70.112 | KV453138.1 | 6814095 | 18-scf00300 | 18 |
| AX-158141194 | 13 | 70.112 | KV453138.1 | 6815047 | 18-scf00300 | 18 |
| AX-158141197 | 13 | 70.112 | KV453138.1 | 6820175 | 18-scf00300 | 18 |
| AX-158141198 | 13 | 70.112 | KV453138.1 | 6824948 | 18-scf00300 | 18 |
| AX-158141199 | 13 | 70.112 | KV453138.1 | 6828937 | 18-scf00300 | 18 |
| AX-158141200 | 13 | 70.112 | KV453138.1 | 6830287 | 18-scf00300 | 18 |
| AX-158141201 | 13 | 70.112 | KV453138.1 | 6833014 | 18-scf00300 | 18 |
| AX-158141202 | 13 | 70.112 | KV453138.1 | 6833518 | 18-scf00300 | 18 |
| AX-158141205 | 13 | 70.112 | KV453138.1 | 6835893 | 18-scf00300 | 18 |
| AX-158141206 | 13 | 70.112 | KV453138.1 | 6842240 | 18-scf00300 | 18 |
| AX-158141209 | 13 | 70.112 | KV453138.1 | 6847549 | 18-scf00300 | 18 |
| AX-158141232 | 13 | 70.112 | KV453138.1 | 6873561 | 18-scf00300 | 18 |
| AX-157831287 | 13 | 70.112 | KV453138.1 | 6883291 | 18-scf00300 | 18 |
| AX-158141246 | 13 | 70.112 | KV453138.1 | 6912565 | 18-scf00300 | 18 |
| AX-158141270 | 13 | 70.112 | KV453138.1 | 6957744 | 18-scf00300 | 18 |
| AX-158141210 | 13 | 70.139 | KV453138.1 | 6848330 | 18-scf00300 | 18 |
| AX-158141213 | 13 | 70.167 | KV453138.1 | 6851134 | 18-scf00300 | 18 |
| AX-158141214 | 13 | 70.179 | KV453138.1 | 6851989 | 18-scf00300 | 18 |
| AX-158141216 | 13 | 70.188 | KV453138.1 | 6855036 | 18-scf00300 | 18 |
| AX-158141193 | 13 | 70.222 | KV453138.1 | 6813657 | 18-scf00300 | 18 |
| AX-158141219 | 13 | 70.222 | KV453138.1 | 6857572 | 18-scf00300 | 18 |
| AX-158141223 | 13 | 70.222 | KV453138.1 | 6861292 | 18-scf00300 | 18 |
| AX-158141224 | 13 | 70.222 | KV453138.1 | 6863874 | 18-scf00300 | 18 |
| AX-158141225 | 13 | 70.222 | KV453138.1 | 6864089 | 18-scf00300 | 18 |
| AX-158141226 | 13 | 70.222 | KV453138.1 | 6865135 | 18-scf00300 | 18 |
| AX-158141227 | 13 | 70.222 | KV453138.1 | 6865358 | 18-scf00300 | 18 |
| AX-157831285 | 13 | 70.222 | KV453138.1 | 6867208 | 18-scf00300 | 18 |
| AX-158141231 | 13 | 70.222 | KV453138.1 | 6872434 | 18-scf00300 | 18 |
| AX-158141233 | 13 | 70.222 | KV453138.1 | 6874551 | 18-scf00300 | 18 |
| AX-158141234 | 13 | 70.222 | KV453138.1 | 6877642 | 18-scf00300 | 18 |
| AX-158141235 | 13 | 70.222 | KV453138.1 | 6878505 | 18-scf00300 | 18 |
| AX-157717890 | 13 | 70.222 | KV453138.1 | 6882146 | 18-scf00300 | 18 |
| AX-158141239 | 13 | 70.222 | KV453138.1 | 6888114 | 18-scf00300 | 18 |
| AX-158141316 | 13 | 70.222 | KV453138.1 | 7022129 | 18-scf00300 | 18 |
| AX-157871598 | 13 | 70.239 | KV453138.1 | 6879567 | 18-scf00300 | 18 |
| AX-158141238 | 13 | 70.239 | KV453138.1 | 6887468 | 18-scf00300 | 18 |
| AX-158141240 | 13 | 70.239 | KV453138.1 | 6890628 | 18-scf00300 | 18 |
| AX-158141236 | 13 | 70.275 | KV453138.1 | 6881771 | 18-scf00300 | 18 |
| AX-157736924 | 13 | 70.275 | KV453138.1 | 6902029 | 18-scf00300 | 18 |
| AX-157831292 | 13 | 70.331 | KV453138.1 | 6889544 | 18-scf00300 | 18 |
| AX-158141243 | 13 | 70.331 | KV453138.1 | 6907485 | 18-scf00300 | 18 |
| AX-158141244 | 13 | 70.331 | KV453138.1 | 6908597 | 18-scf00300 | 18 |
| AX-158141247 | 13 | 70.331 | KV453138.1 | 6912977 | 18-scf00300 | 18 |



|              |    |        |            |         |             |    |
|--------------|----|--------|------------|---------|-------------|----|
| AX-158141248 | 13 | 70.331 | KV453138.1 | 6913854 | 18-scf00300 | 18 |
| AX-158141249 | 13 | 70.331 | KV453138.1 | 6915967 | 18-scf00300 | 18 |
| AX-158141252 | 13 | 70.331 | KV453138.1 | 6922497 | 18-scf00300 | 18 |
| AX-157878205 | 13 | 70.331 | KV453138.1 | 6972182 | 18-scf00300 | 18 |
| AX-158141255 | 13 | 70.44  | KV453138.1 | 6929250 | 18-scf00300 | 18 |
| AX-158141256 | 13 | 70.44  | KV453138.1 | 6929675 | 18-scf00300 | 18 |
| AX-158141260 | 13 | 70.44  | KV453138.1 | 6942743 | 18-scf00300 | 18 |
| AX-158141261 | 13 | 70.44  | KV453138.1 | 6944957 | 18-scf00300 | 18 |
| AX-158141262 | 13 | 70.44  | KV453138.1 | 6945534 | 18-scf00300 | 18 |
| AX-158141296 | 13 | 70.44  | KV453138.1 | 6990659 | 18-scf00300 | 18 |
| AX-158141310 | 13 | 70.44  | KV453138.1 | 7017836 | 18-scf00300 | 18 |
| AX-158141311 | 13 | 70.44  | KV453138.1 | 7018138 | 18-scf00300 | 18 |
| AX-158141314 | 13 | 70.44  | KV453138.1 | 7019934 | 18-scf00300 | 18 |
| AX-158141329 | 13 | 70.44  | KV453138.1 | 7032686 | 18-scf00300 | 18 |
| AX-157831313 | 13 | 70.44  | KV453138.1 | 7043964 | 18-scf00300 | 18 |
| AX-158141342 | 13 | 70.44  | KV453138.1 | 7060791 | 18-scf00300 | 18 |
| AX-158141267 | 13 | 70.471 | KV453138.1 | 6953527 | 18-scf00300 | 18 |
| AX-158141275 | 13 | 70.513 | KV453138.1 | 6965020 | 18-scf00300 | 18 |
| AX-158141278 | 13 | 70.558 | KV453138.1 | 6971156 | 18-scf00300 | 18 |
| AX-158141343 | 13 | 70.558 | KV453138.1 | 7063233 | 18-scf00300 | 18 |
| AX-158141291 | 13 | 70.599 | KV453138.1 | 6984135 | 18-scf00300 | 18 |
| AX-158141374 | 13 | 70.599 | KV453138.1 | 7105818 | 18-scf00300 | 18 |
| AX-158141282 | 13 | 70.659 | KV453138.1 | 6975375 | 18-scf00300 | 18 |
| AX-157831304 | 13 | 70.659 | KV453138.1 | 6991823 | 18-scf00300 | 18 |
| AX-158141300 | 13 | 70.659 | KV453138.1 | 6996623 | 18-scf00300 | 18 |
| AX-158141301 | 13 | 70.659 | KV453138.1 | 6997047 | 18-scf00300 | 18 |
| AX-158141303 | 13 | 70.659 | KV453138.1 | 6999728 | 18-scf00300 | 18 |
| AX-157831305 | 13 | 70.659 | KV453138.1 | 7001449 | 18-scf00300 | 18 |
| AX-158141309 | 13 | 70.659 | KV453138.1 | 7013340 | 18-scf00300 | 18 |
| AX-158141315 | 13 | 70.659 | KV453138.1 | 7021070 | 18-scf00300 | 18 |
| AX-158141318 | 13 | 70.768 | KV453138.1 | 7022907 | 18-scf00300 | 18 |
| AX-158141321 | 13 | 70.877 | KV453138.1 | 7026371 | 18-scf00300 | 18 |
| AX-157831306 | 13 | 70.919 | KV453138.1 | 7030109 | 18-scf00300 | 18 |
| AX-158141313 | 13 | 70.945 | KV453138.1 | 7019073 | 18-scf00300 | 18 |
| AX-158141317 | 13 | 70.945 | KV453138.1 | 7022309 | 18-scf00300 | 18 |
| AX-158141327 | 13 | 70.945 | KV453138.1 | 7031858 | 18-scf00300 | 18 |
| AX-158141290 | 13 | 70.986 | KV453138.1 | 6983799 | 18-scf00300 | 18 |
| AX-158141308 | 13 | 70.986 | KV453138.1 | 7012588 | 18-scf00300 | 18 |
| AX-158141328 | 13 | 70.986 | KV453138.1 | 7032254 | 18-scf00300 | 18 |
| AX-158141330 | 13 | 70.986 | KV453138.1 | 7037053 | 18-scf00300 | 18 |
| AX-157831308 | 13 | 70.986 | KV453138.1 | 7038672 | 18-scf00300 | 18 |
| AX-157831309 | 13 | 70.986 | KV453138.1 | 7038815 | 18-scf00300 | 18 |
| AX-157831310 | 13 | 71.009 | KV453138.1 | 7039746 | 18-scf00300 | 18 |
| AX-157831312 | 13 | 71.032 | KV453138.1 | 7042838 | 18-scf00300 | 18 |
| AX-157770710 | 13 | 71.059 | KV453138.1 | 6955521 | 18-scf00300 | 18 |
| AX-158141269 | 13 | 71.059 | KV453138.1 | 6957375 | 18-scf00300 | 18 |
| AX-157727926 | 13 | 71.059 | KV453138.1 | 7042934 | 18-scf00300 | 18 |
| AX-158141341 | 13 | 71.059 | KV453138.1 | 7058738 | 18-scf00300 | 18 |
| AX-158141337 | 13 | 71.096 | KV453138.1 | 7051405 | 18-scf00300 | 18 |
| AX-158141338 | 13 | 71.096 | KV453138.1 | 7052028 | 18-scf00300 | 18 |
| AX-158141339 | 13 | 71.096 | KV453138.1 | 7053760 | 18-scf00300 | 18 |

|              |    |        |            |         |             |    |
|--------------|----|--------|------------|---------|-------------|----|
| AX-158141340 | 13 | 71.096 | KV453138.1 | 7057802 | 18-scf00300 | 18 |
| AX-157715505 | 13 | 71.096 | KV453138.1 | 7058176 | 18-scf00300 | 18 |
| AX-158141346 | 13 | 71.096 | KV453138.1 | 7066881 | 18-scf00300 | 18 |
| AX-158141347 | 13 | 71.096 | KV453138.1 | 7067622 | 18-scf00300 | 18 |
| AX-158141349 | 13 | 71.096 | KV453138.1 | 7069868 | 18-scf00300 | 18 |
| AX-158141351 | 13 | 71.096 | KV453138.1 | 7075045 | 18-scf00300 | 18 |
| AX-157770910 | 13 | 71.096 | KV453138.1 | 7096741 | 18-scf00300 | 18 |
| AX-158141355 | 13 | 71.314 | KV453138.1 | 7080281 | 18-scf00300 | 18 |
| AX-158141356 | 13 | 71.314 | KV453138.1 | 7080984 | 18-scf00300 | 18 |
| AX-158141357 | 13 | 71.314 | KV453138.1 | 7082185 | 18-scf00300 | 18 |
| AX-157770947 | 13 | 71.314 | KV453138.1 | 7082938 | 18-scf00300 | 18 |
| AX-158141358 | 13 | 71.314 | KV453138.1 | 7083714 | 18-scf00300 | 18 |
| AX-158141359 | 13 | 71.314 | KV453138.1 | 7084270 | 18-scf00300 | 18 |
| AX-158141363 | 13 | 71.314 | KV453138.1 | 7093107 | 18-scf00300 | 18 |
| AX-158141364 | 13 | 71.314 | KV453138.1 | 7093542 | 18-scf00300 | 18 |
| AX-158141361 | 13 | 71.319 | KV453138.1 | 7086164 | 18-scf00300 | 18 |
| AX-157746434 | 13 | 71.324 | KV453138.1 | 7091285 | 18-scf00300 | 18 |
| AX-158141273 | 13 | 71.448 | KV453138.1 | 6963245 | 18-scf00300 | 18 |
| AX-158141332 | 13 | 71.448 | KV453138.1 | 7044302 | 18-scf00300 | 18 |
| AX-158141334 | 13 | 71.448 | KV453138.1 | 7047866 | 18-scf00300 | 18 |
| AX-158141365 | 13 | 71.448 | KV453138.1 | 7097593 | 18-scf00300 | 18 |
| AX-158141370 | 13 | 71.448 | KV453138.1 | 7101399 | 18-scf00300 | 18 |
| AX-158141372 | 13 | 71.448 | KV453138.1 | 7103931 | 18-scf00300 | 18 |
| AX-158141373 | 13 | 71.571 | KV453138.1 | 7105619 | 18-scf00300 | 18 |
| AX-158141391 | 13 | 71.571 | KV453138.1 | 7130838 | 18-scf00300 | 18 |
| AX-158141384 | 13 | 71.72  | KV453138.1 | 7121766 | 18-scf00300 | 18 |
| AX-158141385 | 13 | 71.857 | KV453138.1 | 7122081 | 18-scf00300 | 18 |
| AX-157708623 | 13 | 71.857 | KV453138.1 | 7124273 | 18-scf00300 | 18 |
| AX-157857997 | 13 | 71.858 | KV453138.1 | 7124976 | 18-scf00300 | 18 |
| AX-158141387 | 13 | 71.859 | KV453138.1 | 7125871 | 18-scf00300 | 18 |
| AX-158141390 | 13 | 71.859 | KV453138.1 | 7129364 | 18-scf00300 | 18 |
| AX-158141392 | 13 | 71.86  | KV453138.1 | 7131571 | 18-scf00300 | 18 |
| AX-158141393 | 13 | 71.86  | KV453138.1 | 7132715 | 18-scf00300 | 18 |
| AX-157886339 | 13 | 71.86  | KV453138.1 | 7134367 | 18-scf00300 | 18 |
| AX-158141276 | 13 | 72.042 | KV453138.1 | 6965226 | 18-scf00300 | 18 |
| AX-157831302 | 13 | 72.042 | KV453138.1 | 6986332 | 18-scf00300 | 18 |
| AX-157878206 | 13 | 72.042 | KV453138.1 | 7018181 | 18-scf00300 | 18 |
| AX-158141394 | 13 | 72.042 | KV453138.1 | 7134196 | 18-scf00300 | 18 |
| AX-158141395 | 13 | 72.042 | KV453138.1 | 7138146 | 18-scf00300 | 18 |
| AX-158141399 | 13 | 72.042 | KV453138.1 | 7148402 | 18-scf00300 | 18 |
| AX-158141403 | 13 | 72.407 | KV453138.1 | 7156254 | 18-scf00300 | 18 |
| AX-158141404 | 13 | 72.407 | KV453138.1 | 7156535 | 18-scf00300 | 18 |
| AX-158141406 | 13 | 72.407 | KV453138.1 | 7159567 | 18-scf00300 | 18 |
| AX-158141407 | 13 | 72.407 | KV453138.1 | 7162983 | 18-scf00300 | 18 |
| AX-157775653 | 13 | 72.407 | KV453138.1 | 7163508 | 18-scf00300 | 18 |
| AX-157831319 | 13 | 72.407 | KV453138.1 | 7165226 | 18-scf00300 | 18 |
| AX-158141408 | 13 | 72.407 | KV453138.1 | 7166175 | 18-scf00300 | 18 |
| AX-158141409 | 13 | 72.407 | KV453138.1 | 7168929 | 18-scf00300 | 18 |
| AX-157718479 | 13 | 72.407 | KV453138.1 | 7169584 | 18-scf00300 | 18 |
| AX-158141415 | 13 | 72.407 | KV453138.1 | 7177424 | 18-scf00300 | 18 |
| AX-157831321 | 13 | 72.407 | KV453138.1 | 7184429 | 18-scf00300 | 18 |

|              |    |        |            |         |             |    |
|--------------|----|--------|------------|---------|-------------|----|
| AX-158141411 | 13 | 72.516 | KV453138.1 | 7173414 | 18-scf00300 | 18 |
| AX-158141412 | 13 | 72.563 | KV453138.1 | 7173823 | 18-scf00300 | 18 |
| AX-158141417 | 13 | 72.643 | KV453138.1 | 7179688 | 18-scf00300 | 18 |
| AX-158141418 | 13 | 72.735 | KV453138.1 | 7180463 | 18-scf00300 | 18 |
| AX-158385410 | 13 | 72.735 | KV453138.1 | 7182369 | 18-scf00300 | 18 |
| AX-158141419 | 13 | 72.735 | KV453138.1 | 7182430 | 18-scf00300 | 18 |
| AX-158141420 | 13 | 72.735 | KV453138.1 | 7183205 | 18-scf00300 | 18 |
| AX-157715097 | 13 | 72.735 | KV453138.1 | 7185285 | 18-scf00300 | 18 |
| AX-157831323 | 13 | 73.571 | KV453138.1 | 7188915 | 18-scf00300 | 18 |
| AX-158141426 | 13 | 73.871 | KV453138.1 | 7198459 | 18-scf00300 | 18 |
| AX-158141431 | 13 | 73.878 | KV453138.1 | 7201699 | 18-scf00300 | 18 |
| AX-158141428 | 13 | 73.886 | KV453138.1 | 7199731 | 18-scf00300 | 18 |
| AX-158141432 | 13 | 73.886 | KV453138.1 | 7207681 | 18-scf00300 | 18 |
| AX-158141433 | 13 | 73.933 | KV453138.1 | 7209237 | 18-scf00300 | 18 |
| AX-158141437 | 13 | 74.034 | KV453138.1 | 7215185 | 18-scf00300 | 18 |
| AX-158141439 | 13 | 74.37  | KV453138.1 | 7216978 | 18-scf00300 | 18 |
| AX-158141434 | 13 | 74.373 | KV453138.1 | 7212533 | 18-scf00300 | 18 |
| AX-158141435 | 13 | 74.373 | KV453138.1 | 7213272 | 18-scf00300 | 18 |
| AX-158141438 | 13 | 74.373 | KV453138.1 | 7215841 | 18-scf00300 | 18 |
| AX-158141441 | 13 | 74.373 | KV453138.1 | 7218767 | 18-scf00300 | 18 |
| AX-158141455 | 13 | 74.373 | KV453138.1 | 7240806 | 18-scf00300 | 18 |
| AX-158141447 | 13 | 74.379 | KV453138.1 | 7228248 | 18-scf00300 | 18 |
| AX-158141450 | 13 | 74.379 | KV453138.1 | 7229998 | 18-scf00300 | 18 |
| AX-158141452 | 13 | 74.379 | KV453138.1 | 7231947 | 18-scf00300 | 18 |
| AX-158141454 | 13 | 74.379 | KV453138.1 | 7238025 | 18-scf00300 | 18 |
| AX-157831325 | 13 | 74.379 | KV453138.1 | 7239488 | 18-scf00300 | 18 |
| AX-157743744 | 13 | 74.379 | KV453138.1 | 7241836 | 18-scf00300 | 18 |
| AX-158141456 | 13 | 74.379 | KV453138.1 | 7243081 | 18-scf00300 | 18 |
| AX-158417574 | 13 | 74.597 | KV453138.1 | 7244384 | 18-scf00300 | 18 |
| AX-157831327 | 13 | 74.597 | KV453138.1 | 7249103 | 18-scf00300 | 18 |
| AX-158141458 | 13 | 74.597 | KV453138.1 | 7249501 | 18-scf00300 | 18 |
| AX-158141462 | 13 | 74.597 | KV453138.1 | 7256542 | 18-scf00300 | 18 |
| AX-158141467 | 13 | 74.597 | KV453138.1 | 7267569 | 18-scf00300 | 18 |
| AX-158141468 | 13 | 74.607 | KV453138.1 | 7268233 | 18-scf00300 | 18 |
| AX-158141469 | 13 | 74.621 | KV453138.1 | 7269514 | 18-scf00300 | 18 |
| AX-158141470 | 13 | 74.635 | KV453138.1 | 7270808 | 18-scf00300 | 18 |
| AX-158141471 | 13 | 75.037 | KV453138.1 | 7271072 | 18-scf00300 | 18 |
| AX-158141475 | 13 | 75.309 | KV453138.1 | 7277801 | 18-scf00300 | 18 |
| AX-157831329 | 13 | 75.536 | KV453138.1 | 7284355 | 18-scf00300 | 18 |
| AX-157831330 | 13 | 75.536 | KV453138.1 | 7285239 | 18-scf00300 | 18 |
| AX-158141477 | 13 | 75.536 | KV453138.1 | 7287522 | 18-scf00300 | 18 |
| AX-158141478 | 13 | 75.536 | KV453138.1 | 7289417 | 18-scf00300 | 18 |
| AX-158385412 | 13 | 75.536 | KV453138.1 | 7291454 | 18-scf00300 | 18 |
| AX-158141479 | 13 | 75.536 | KV453138.1 | 7292767 | 18-scf00300 | 18 |
| AX-158141489 | 13 | 75.536 | KV453138.1 | 7308351 | 18-scf00300 | 18 |
| AX-158141480 | 13 | 75.541 | KV453138.1 | 7294334 | 18-scf00300 | 18 |
| AX-158141474 | 13 | 75.661 | KV453138.1 | 7277476 | 18-scf00300 | 18 |
| AX-158141482 | 13 | 75.661 | KV453138.1 | 7299819 | 18-scf00300 | 18 |
| AX-158141483 | 13 | 75.711 | KV453138.1 | 7301421 | 18-scf00300 | 18 |
| AX-158141486 | 13 | 76.239 | KV453138.1 | 7305888 | 18-scf00300 | 18 |
| AX-158141488 | 13 | 76.239 | KV453138.1 | 7307364 | 18-scf00300 | 18 |

|              |    |        |            |         |             |    |
|--------------|----|--------|------------|---------|-------------|----|
| AX-158141507 | 13 | 76.239 | KV453138.1 | 7329528 | 18-scf00300 | 18 |
| AX-158141492 | 13 | 76.342 | KV453138.1 | 7312885 | 18-scf00300 | 18 |
| AX-157831335 | 13 | 76.432 | KV453138.1 | 7315833 | 18-scf00300 | 18 |
| AX-158141495 | 13 | 76.432 | KV453138.1 | 7315999 | 18-scf00300 | 18 |
| AX-158141496 | 13 | 76.432 | KV453138.1 | 7316519 | 18-scf00300 | 18 |
| AX-158141497 | 13 | 76.432 | KV453138.1 | 7317385 | 18-scf00300 | 18 |
| AX-158141501 | 13 | 76.625 | KV453138.1 | 7322552 | 18-scf00300 | 18 |
| AX-158141503 | 13 | 76.625 | KV453138.1 | 7324672 | 18-scf00300 | 18 |
| AX-158141508 | 13 | 76.625 | KV453138.1 | 7330799 | 18-scf00300 | 18 |
| AX-158141509 | 13 | 76.996 | KV453138.1 | 7332160 | 18-scf00300 | 18 |
| AX-158141500 | 13 | 76.998 | KV453138.1 | 7321522 | 18-scf00300 | 18 |
| AX-158141510 | 13 | 76.998 | KV453138.1 | 7332642 | 18-scf00300 | 18 |
| AX-158141511 | 13 | 76.998 | KV453138.1 | 7333606 | 18-scf00300 | 18 |
| AX-158141512 | 13 | 76.998 | KV453138.1 | 7335956 | 18-scf00300 | 18 |
| AX-158141513 | 13 | 76.998 | KV453138.1 | 7338114 | 18-scf00300 | 18 |
| AX-158141515 | 13 | 76.998 | KV453138.1 | 7339822 | 18-scf00300 | 18 |
| AX-157772356 | 13 | 76.998 | KV453138.1 | 7347792 | 18-scf00300 | 18 |
| AX-158412121 | 13 | 76.998 | KV453138.1 | 7349366 | 18-scf00300 | 18 |
| AX-158385414 | 13 | 77.015 | KV453138.1 | 7342172 | 18-scf00300 | 18 |
| AX-158141520 | 13 | 77.201 | KV453138.1 | 7346692 | 18-scf00300 | 18 |
| AX-157831336 | 13 | 77.336 | KV453138.1 | 7351165 | 18-scf00300 | 18 |
| AX-157751637 | 13 | 77.336 | KV453138.1 | 7353318 | 18-scf00300 | 18 |
| AX-157743128 | 13 | 77.336 | KV453138.1 | 7355328 | 18-scf00300 | 18 |
| AX-157725462 | 13 | 77.521 | KV453138.1 | 7357803 | 18-scf00300 | 18 |
| AX-157753967 | 13 | 77.521 | KV453138.1 | 7360111 | 18-scf00300 | 18 |
| AX-158141525 | 13 | 77.521 | KV453138.1 | 7361732 | 18-scf00300 | 18 |
| AX-158141537 | 13 | 77.521 | KV453138.1 | 7376647 | 18-scf00300 | 18 |
| AX-158141547 | 13 | 77.521 | KV453138.1 | 7386893 | 18-scf00300 | 18 |
| AX-157771129 | 13 | 77.87  | KV453138.1 | 7365641 | 18-scf00300 | 18 |
| AX-158141528 | 13 | 77.883 | KV453138.1 | 7366127 | 18-scf00300 | 18 |
| AX-158141531 | 13 | 77.883 | KV453138.1 | 7369092 | 18-scf00300 | 18 |
| AX-158141532 | 13 | 77.883 | KV453138.1 | 7371798 | 18-scf00300 | 18 |
| AX-158141533 | 13 | 77.883 | KV453138.1 | 7373031 | 18-scf00300 | 18 |
| AX-158141534 | 13 | 77.883 | KV453138.1 | 7373790 | 18-scf00300 | 18 |
| AX-158141538 | 13 | 77.883 | KV453138.1 | 7378094 | 18-scf00300 | 18 |
| AX-158141539 | 13 | 77.883 | KV453138.1 | 7378317 | 18-scf00300 | 18 |
| AX-157710734 | 13 | 77.883 | KV453138.1 | 7382023 | 18-scf00300 | 18 |
| AX-158141541 | 13 | 77.883 | KV453138.1 | 7382613 | 18-scf00300 | 18 |
| AX-158141529 | 13 | 77.992 | KV453138.1 | 7367274 | 18-scf00300 | 18 |
| AX-158141543 | 13 | 77.992 | KV453138.1 | 7384095 | 18-scf00300 | 18 |
| AX-158141544 | 13 | 77.992 | KV453138.1 | 7385026 | 18-scf00300 | 18 |
| AX-157738606 | 13 | 77.992 | KV453138.1 | 7385280 | 18-scf00300 | 18 |
| AX-158141545 | 13 | 78.063 | KV453138.1 | 7385324 | 18-scf00300 | 18 |
| AX-158141546 | 13 | 78.156 | KV453138.1 | 7386682 | 18-scf00300 | 18 |
| AX-158141549 | 13 | 78.156 | KV453138.1 | 7388247 | 18-scf00300 | 18 |
| AX-158141550 | 13 | 78.32  | KV453138.1 | 7389909 | 18-scf00300 | 18 |
| AX-157726404 | 13 | 78.32  | KV453138.1 | 7393248 | 18-scf00300 | 18 |
| AX-158141551 | 13 | 78.32  | KV453138.1 | 7394216 | 18-scf00300 | 18 |
| AX-158141555 | 13 | 78.484 | KV453138.1 | 7399827 | 18-scf00300 | 18 |
| AX-158141559 | 13 | 78.749 | KV453138.1 | 7408711 | 18-scf00300 | 18 |
| AX-158141561 | 13 | 78.911 | KV453138.1 | 7410833 | 18-scf00300 | 18 |

|              |    |        |            |         |             |    |
|--------------|----|--------|------------|---------|-------------|----|
| AX-158141563 | 13 | 79.306 | KV453138.1 | 7413572 | 18-scf00300 | 18 |
| AX-158141564 | 13 | 79.306 | KV453138.1 | 7416693 | 18-scf00300 | 18 |
| AX-158141565 | 13 | 79.306 | KV453138.1 | 7417255 | 18-scf00300 | 18 |
| AX-158141567 | 13 | 79.306 | KV453138.1 | 7418560 | 18-scf00300 | 18 |
| AX-157713878 | 13 | 79.373 | KV453138.1 | 7419493 | 18-scf00300 | 18 |
| AX-157754096 | 13 | 79.437 | KV453138.1 | 7421319 | 18-scf00300 | 18 |
| AX-158141574 | 13 | 79.961 | KV453138.1 | 7435951 | 18-scf00300 | 18 |
| AX-158141575 | 13 | 79.961 | KV453138.1 | 7436449 | 18-scf00300 | 18 |
| AX-158141577 | 13 | 79.961 | KV453138.1 | 7439281 | 18-scf00300 | 18 |
| AX-158141579 | 13 | 79.961 | KV453138.1 | 7441221 | 18-scf00300 | 18 |
| AX-158380314 | 13 | 80.01  | KV453138.1 | 7442593 | 18-scf00300 | 18 |
| AX-158141580 | 13 | 80.067 | KV453138.1 | 7442820 | 18-scf00300 | 18 |
| AX-158141581 | 13 | 80.18  | KV453138.1 | 7443890 | 18-scf00300 | 18 |
| AX-158141583 | 13 | 80.18  | KV453138.1 | 7445715 | 18-scf00300 | 18 |
| AX-158141584 | 13 | 80.18  | KV453138.1 | 7446699 | 18-scf00300 | 18 |
| AX-158141585 | 13 | 80.18  | KV453138.1 | 7447773 | 18-scf00300 | 18 |
| AX-158141586 | 13 | 80.18  | KV453138.1 | 7448276 | 18-scf00300 | 18 |
| AX-158141588 | 13 | 80.18  | KV453138.1 | 7450367 | 18-scf00300 | 18 |
| AX-157752271 | 13 | 80.18  | KV453138.1 | 7458399 | 18-scf00300 | 18 |
| AX-158141592 | 13 | 80.338 | KV453138.1 | 7457430 | 18-scf00300 | 18 |
| AX-157749108 | 13 | 80.567 | KV453138.1 | 7462448 | 18-scf00300 | 18 |
| AX-158408383 | 13 | 80.796 | KV453138.1 | 7463327 | 18-scf00300 | 18 |
| AX-157756286 | 13 | 80.796 | KV453138.1 | 7464682 | 18-scf00300 | 18 |
| AX-157698968 | 13 | 81.163 | KV453138.1 | 7466763 | 18-scf00300 | 18 |
| AX-158141596 | 13 | 81.163 | KV453138.1 | 7467872 | 18-scf00300 | 18 |
| AX-158393018 | 13 | 81.164 | KV453138.1 | 7449189 | 18-scf00300 | 18 |
| AX-157878217 | 13 | 81.164 | KV453138.1 | 7470448 | 18-scf00300 | 18 |
| AX-158141598 | 13 | 81.164 | KV453138.1 | 7471633 | 18-scf00300 | 18 |
| AX-158141599 | 13 | 81.164 | KV453138.1 | 7473365 | 18-scf00300 | 18 |
| AX-158141600 | 13 | 81.164 | KV453138.1 | 7474251 | 18-scf00300 | 18 |
| AX-158141606 | 13 | 81.634 | KV453138.1 | 7483509 | 18-scf00300 | 18 |
| AX-158141607 | 13 | 81.634 | KV453138.1 | 7484796 | 18-scf00300 | 18 |
| AX-158141609 | 13 | 81.869 | KV453138.1 | 7486290 | 18-scf00300 | 18 |
| AX-158141612 | 13 | 81.869 | KV453138.1 | 7489794 | 18-scf00300 | 18 |
| AX-158141615 | 13 | 81.869 | KV453138.1 | 7492339 | 18-scf00300 | 18 |
| AX-158141618 | 13 | 81.869 | KV453138.1 | 7496007 | 18-scf00300 | 18 |
| AX-158141619 | 13 | 81.875 | KV453138.1 | 7496733 | 18-scf00300 | 18 |
| AX-158141611 | 13 | 82.122 | KV453138.1 | 7489525 | 18-scf00300 | 18 |
| AX-158141614 | 13 | 82.122 | KV453138.1 | 7492031 | 18-scf00300 | 18 |
| AX-158141620 | 13 | 82.122 | KV453138.1 | 7498407 | 18-scf00300 | 18 |
| AX-158141623 | 13 | 82.122 | KV453138.1 | 7503118 | 18-scf00300 | 18 |
| AX-157751954 | 13 | 82.122 | KV453138.1 | 7522763 | 18-scf00300 | 18 |
| AX-157857999 | 13 | 82.242 | KV453138.1 | 7499000 | 18-scf00300 | 18 |
| AX-158141622 | 13 | 82.389 | KV453138.1 | 7501849 | 18-scf00300 | 18 |
| AX-158141626 | 13 | 82.393 | KV453138.1 | 7507454 | 18-scf00300 | 18 |
| AX-158141629 | 13 | 82.576 | KV453138.1 | 7512753 | 18-scf00300 | 18 |
| AX-158141630 | 13 | 82.745 | KV453138.1 | 7513206 | 18-scf00300 | 18 |
| AX-158141632 | 13 | 82.745 | KV453138.1 | 7515130 | 18-scf00300 | 18 |
| AX-158141627 | 13 | 82.748 | KV453138.1 | 7510434 | 18-scf00300 | 18 |
| AX-158141636 | 13 | 82.748 | KV453138.1 | 7519051 | 18-scf00300 | 18 |
| AX-158141643 | 13 | 83.355 | KV453138.1 | 7535390 | 18-scf00300 | 18 |

|              |    |        |             |         |             |    |
|--------------|----|--------|-------------|---------|-------------|----|
| AX-158141644 | 13 | 83.355 | KV453138.1  | 7536450 | 18-scf00300 | 18 |
| AX-158141647 | 13 | 83.355 | KV453138.1  | 7540367 | 18-scf00300 | 18 |
| AX-158141648 | 13 | 83.355 | KV453138.1  | 7541848 | 18-scf00300 | 18 |
| AX-158141649 | 13 | 83.355 | KV453138.1  | 7542217 | 18-scf00300 | 18 |
| AX-158141650 | 13 | 83.355 | KV453138.1  | 7542658 | 18-scf00300 | 18 |
| AX-157858000 | 13 | 83.355 | KV453138.1  | 7543938 | 18-scf00300 | 18 |
| AX-158141652 | 13 | 83.355 | KV453138.1  | 7544430 | 18-scf00300 | 18 |
| AX-158141659 | 13 | 83.355 | KV453138.1  | 7557353 | 18-scf00300 | 18 |
| AX-158141655 | 13 | 83.728 | KV453138.1  | 7550515 | 18-scf00300 | 18 |
| AX-158141657 | 13 | 84.103 | KV453138.1  | 7552175 | 18-scf00300 | 18 |
| AX-157772555 | 13 | 84.23  | KV453138.1  | 7563401 | 18-scf00300 | 18 |
| AX-158141664 | 13 | 84.267 | KV453138.1  | 7563752 | 18-scf00300 | 18 |
| AX-158141665 | 13 | 84.272 | KV453138.1  | 7564224 | 18-scf00300 | 18 |
| AX-158141672 | 13 | 84.782 | KV453138.1  | 7576658 | 18-scf00300 | 18 |
| AX-158141676 | 13 | 84.788 | KV453138.1  | 7580178 | 18-scf00300 | 18 |
| AX-158141677 | 13 | 84.788 | KV453138.1  | 7580970 | 18-scf00300 | 18 |
| AX-158141679 | 13 | 84.788 | KV453138.1  | 7582257 | 18-scf00300 | 18 |
| AX-158141680 | 13 | 84.788 | KV453138.1  | 7584636 | 18-scf00300 | 18 |
| AX-157707286 | 13 | 84.788 | 3ML01033907 | 282     | scf09576_1  | UN |
| AX-157720536 | 13 | 84.808 | KV453138.1  | 7571621 | 18-scf00300 | 18 |
| AX-158141683 | 13 | 84.808 | KV453138.1  | 7589896 | 18-scf00300 | 18 |
| AX-158141684 | 13 | 84.942 | KV453138.1  | 7590568 | 18-scf00300 | 18 |
| AX-158141685 | 13 | 85.007 | KV453138.1  | 7591235 | 18-scf00300 | 18 |
| AX-158141686 | 13 | 85.051 | KV453138.1  | 7591662 | 18-scf00300 | 18 |
| AX-158141689 | 13 | 85.051 | KV453138.1  | 7593169 | 18-scf00300 | 18 |
| AX-157717670 | 13 | 85.051 | KV453138.1  | 7595372 | 18-scf00300 | 18 |
| AX-158141691 | 13 | 85.051 | KV453138.1  | 7601943 | 18-scf00300 | 18 |
| AX-157722320 | 13 | 85.258 | KV453138.1  | 7597868 | 18-scf00300 | 18 |
| AX-158141692 | 13 | 85.258 | KV453138.1  | 7602535 | 18-scf00300 | 18 |
| AX-158141693 | 13 | 85.296 | KV453138.1  | 7607897 | 18-scf00300 | 18 |
| AX-158141694 | 13 | 85.296 | KV453138.1  | 7611224 | 18-scf00300 | 18 |
| AX-158141698 | 13 | 85.512 | KV453138.1  | 7619026 | 18-scf00300 | 18 |
| AX-157771143 | 13 | 85.622 | KV453138.1  | 7619703 | 18-scf00300 | 18 |
| AX-158141701 | 13 | 85.728 | KV453138.1  | 7623466 | 18-scf00300 | 18 |
| AX-157831340 | 13 | 85.728 | KV453138.1  | 7624487 | 18-scf00300 | 18 |
| AX-157773063 | 13 | 85.728 | KV453138.1  | 7626476 | 18-scf00300 | 18 |
| AX-158141702 | 13 | 85.897 | KV453138.1  | 7634456 | 18-scf00300 | 18 |
| AX-158141703 | 13 | 85.897 | KV453138.1  | 7637594 | 18-scf00300 | 18 |
| AX-158141704 | 13 | 85.897 | KV453138.1  | 7638263 | 18-scf00300 | 18 |
| AX-157719351 | 13 | 85.897 | KV453138.1  | 7641036 | 18-scf00300 | 18 |
| AX-158380316 | 13 | 85.897 | KV453138.1  | 7641937 | 18-scf00300 | 18 |
| AX-158141706 | 13 | 85.897 | KV453138.1  | 7642557 | 18-scf00300 | 18 |
| AX-158141707 | 13 | 85.897 | KV453138.1  | 7643094 | 18-scf00300 | 18 |
| AX-158141708 | 13 | 85.897 | KV453138.1  | 7643315 | 18-scf00300 | 18 |
| AX-157710451 | 13 | 86.066 | KV453138.1  | 7646561 | 18-scf00300 | 18 |
| AX-158141710 | 13 | 86.066 | KV453138.1  | 7649761 | 18-scf00300 | 18 |
| AX-157752738 | 13 | 86.066 | KV453138.1  | 7652264 | 18-scf00300 | 18 |
| AX-157831346 | 13 | 86.066 | KV453138.1  | 7652730 | 18-scf00300 | 18 |
| AX-158141711 | 13 | 86.066 | KV453138.1  | 7653135 | 18-scf00300 | 18 |
| AX-158141712 | 13 | 86.066 | KV453138.1  | 7656342 | 18-scf00300 | 18 |
| AX-158141717 | 13 | 86.066 | KV453138.1  | 7664165 | 18-scf00300 | 18 |

|              |    |        |            |         |             |    |
|--------------|----|--------|------------|---------|-------------|----|
| AX-157831345 | 13 | 86.179 | KV453138.1 | 7648405 | 18-scf00300 | 18 |
| AX-158141715 | 13 | 86.179 | KV453138.1 | 7662777 | 18-scf00300 | 18 |
| AX-158141723 | 13 | 86.179 | KV453138.1 | 7671470 | 18-scf00300 | 18 |
| AX-158141724 | 13 | 86.179 | KV453138.1 | 7677577 | 18-scf00300 | 18 |
| AX-158141727 | 13 | 86.179 | KV453138.1 | 7679966 | 18-scf00300 | 18 |
| AX-157831350 | 13 | 86.516 | KV453138.1 | 7692826 | 18-scf00300 | 18 |
| AX-158141736 | 13 | 86.516 | KV453138.1 | 7694436 | 18-scf00300 | 18 |
| AX-158141737 | 13 | 86.516 | KV453138.1 | 7696205 | 18-scf00300 | 18 |
| AX-157716891 | 13 | 86.517 | KV453138.1 | 7698212 | 18-scf00300 | 18 |
| AX-158141742 | 13 | 86.517 | KV453138.1 | 7708021 | 18-scf00300 | 18 |
| AX-158141744 | 13 | 86.517 | KV453138.1 | 7708436 | 18-scf00300 | 18 |
| AX-158141745 | 13 | 86.517 | KV453138.1 | 7708697 | 18-scf00300 | 18 |
| AX-158141746 | 13 | 86.517 | KV453138.1 | 7711727 | 18-scf00300 | 18 |
| AX-158141748 | 13 | 86.842 | KV453138.1 | 7716186 | 18-scf00300 | 18 |
| AX-158141718 | 13 | 87.463 | KV453138.1 | 7665167 | 18-scf00300 | 18 |
| AX-158141753 | 13 | 87.463 | KV453138.1 | 7727802 | 18-scf00300 | 18 |
| AX-157708370 | 13 | 87.5   | KV453138.1 | 7736669 | 18-scf00300 | 18 |
| AX-158141696 | 13 | 87.511 | KV453138.1 | 7612283 | 18-scf00300 | 18 |
| AX-157831341 | 13 | 87.511 | KV453138.1 | 7626639 | 18-scf00300 | 18 |
| AX-157752343 | 13 | 87.511 | KV453138.1 | 7706973 | 18-scf00300 | 18 |
| AX-157831351 | 13 | 87.511 | KV453138.1 | 7716676 | 18-scf00300 | 18 |
| AX-158141759 | 13 | 87.511 | KV453138.1 | 7741561 | 18-scf00300 | 18 |
| AX-158141763 | 13 | 87.751 | KV453138.1 | 7746567 | 18-scf00300 | 18 |
| AX-158141764 | 13 | 87.752 | KV453138.1 | 7747481 | 18-scf00300 | 18 |
| AX-158141765 | 13 | 87.752 | KV453138.1 | 7748070 | 18-scf00300 | 18 |
| AX-158141766 | 13 | 87.752 | KV453138.1 | 7749893 | 18-scf00300 | 18 |
| AX-158141770 | 13 | 87.752 | KV453138.1 | 7755041 | 18-scf00300 | 18 |
| AX-158141773 | 13 | 87.752 | KV453138.1 | 7759913 | 18-scf00300 | 18 |
| AX-158141774 | 13 | 87.752 | KV453138.1 | 7761237 | 18-scf00300 | 18 |
| AX-158141776 | 13 | 87.752 | KV453138.1 | 7762927 | 18-scf00300 | 18 |
| AX-157858001 | 13 | 87.752 | KV453138.1 | 7763351 | 18-scf00300 | 18 |
| AX-158141780 | 13 | 87.752 | KV453138.1 | 7766370 | 18-scf00300 | 18 |
| AX-157858002 | 13 | 87.752 | KV453138.1 | 7767846 | 18-scf00300 | 18 |
| AX-158141781 | 13 | 87.752 | KV453138.1 | 7768241 | 18-scf00300 | 18 |
| AX-157716172 | 13 | 87.752 | KV453138.1 | 7771634 | 18-scf00300 | 18 |
| AX-158141782 | 13 | 87.752 | KV453138.1 | 7772919 | 18-scf00300 | 18 |
| AX-157831353 | 13 | 88.026 | KV453138.1 | 7777480 | 18-scf00300 | 18 |
| AX-158141797 | 13 | 88.193 | KV453138.1 | 7787963 | 18-scf00300 | 18 |
| AX-158141777 | 13 | 88.299 | KV453138.1 | 7764071 | 18-scf00300 | 18 |
| AX-157771611 | 13 | 88.299 | KV453138.1 | 7788889 | 18-scf00300 | 18 |
| AX-158141799 | 13 | 88.299 | KV453138.1 | 7789362 | 18-scf00300 | 18 |
| AX-157831356 | 13 | 88.299 | KV453138.1 | 7789870 | 18-scf00300 | 18 |
| AX-158141802 | 13 | 88.299 | KV453138.1 | 7792817 | 18-scf00300 | 18 |
| AX-157831357 | 13 | 88.299 | KV453138.1 | 7796827 | 18-scf00300 | 18 |
| AX-158141810 | 13 | 88.299 | KV453138.1 | 7805965 | 18-scf00300 | 18 |
| AX-158141831 | 13 | 88.299 | KV453138.1 | 7844595 | 18-scf00300 | 18 |
| AX-157831358 | 13 | 88.309 | KV453138.1 | 7797139 | 18-scf00300 | 18 |
| AX-157771533 | 13 | 88.319 | KV453138.1 | 7799061 | 18-scf00300 | 18 |
| AX-157725979 | 13 | 88.331 | KV453138.1 | 7799505 | 18-scf00300 | 18 |
| AX-158141805 | 13 | 88.345 | KV453138.1 | 7801579 | 18-scf00300 | 18 |
| AX-158141807 | 13 | 88.356 | KV453138.1 | 7802549 | 18-scf00300 | 18 |

|              |    |        |             |         |             |    |
|--------------|----|--------|-------------|---------|-------------|----|
| AX-158141808 | 13 | 88.367 | KV453138.1  | 7803000 | 18-scf00300 | 18 |
| AX-157727062 | 13 | 88.387 | KV453138.1  | 7807292 | 18-scf00300 | 18 |
| AX-158141798 | 13 | 88.408 | KV453138.1  | 7788686 | 18-scf00300 | 18 |
| AX-158412127 | 13 | 88.408 | KV453138.1  | 7796136 | 18-scf00300 | 18 |
| AX-157831363 | 13 | 88.408 | KV453138.1  | 7827037 | 18-scf00300 | 18 |
| AX-157831366 | 13 | 88.408 | KV453138.1  | 7833865 | 18-scf00300 | 18 |
| AX-158141823 | 13 | 88.408 | KV453138.1  | 7834258 | 18-scf00300 | 18 |
| AX-158141828 | 13 | 88.408 | KV453138.1  | 7839573 | 18-scf00300 | 18 |
| AX-158141835 | 13 | 88.408 | KV453138.1  | 7848626 | 18-scf00300 | 18 |
| AX-158141833 | 13 | 88.411 | KV453138.1  | 7846460 | 18-scf00300 | 18 |
| AX-158141806 | 13 | 88.413 | KV453138.1  | 7801935 | 18-scf00300 | 18 |
| AX-158141813 | 13 | 88.413 | KV453138.1  | 7814236 | 18-scf00300 | 18 |
| AX-157831367 | 13 | 88.413 | KV453138.1  | 7848130 | 18-scf00300 | 18 |
| AX-158141836 | 13 | 88.414 | KV453138.1  | 7849598 | 18-scf00300 | 18 |
| AX-158141839 | 13 | 88.416 | KV453138.1  | 7852203 | 18-scf00300 | 18 |
| AX-158141841 | 13 | 88.487 | KV453138.1  | 7855919 | 18-scf00300 | 18 |
| AX-158141842 | 13 | 88.543 | KV453138.1  | 7858820 | 18-scf00300 | 18 |
| AX-158141849 | 13 | 88.68  | KV453138.1  | 7868578 | 18-scf00300 | 18 |
| AX-158141850 | 13 | 88.955 | KV453138.1  | 7870106 | 18-scf00300 | 18 |
| AX-157697234 | 13 | 88.955 | KV453138.1  | 7871146 | 18-scf00300 | 18 |
| AX-158141852 | 13 | 88.955 | KV453138.1  | 7873844 | 18-scf00300 | 18 |
| AX-158141855 | 13 | 88.955 | KV453138.1  | 7878200 | 18-scf00300 | 18 |
| AX-158141856 | 13 | 88.955 | KV453138.1  | 7879074 | 18-scf00300 | 18 |
| AX-158141857 | 13 | 88.955 | KV453138.1  | 7880488 | 18-scf00300 | 18 |
| AX-158141861 | 13 | 88.955 | KV453138.1  | 7885019 | 18-scf00300 | 18 |
| AX-158141864 | 13 | 88.955 | KV453138.1  | 7888978 | 18-scf00300 | 18 |
| AX-157706829 | 13 | 88.955 | 3ML01032993 | 170     | scf08627_1  | UN |
| AX-157752338 | 13 | 89.17  | KV453138.1  | 7893604 | 18-scf00300 | 18 |
| AX-158141869 | 13 | 89.176 | KV453138.1  | 7896903 | 18-scf00300 | 18 |
| AX-158141871 | 13 | 89.176 | KV453138.1  | 7898701 | 18-scf00300 | 18 |
| AX-158141874 | 13 | 89.276 | KV453138.1  | 7903930 | 18-scf00300 | 18 |
| AX-158141875 | 13 | 89.503 | KV453138.1  | 7906974 | 18-scf00300 | 18 |
| AX-158141876 | 13 | 89.504 | KV453138.1  | 7907148 | 18-scf00300 | 18 |
| AX-157831369 | 13 | 89.83  | KV453138.1  | 7924632 | 18-scf00300 | 18 |
| AX-158141882 | 13 | 89.831 | KV453138.1  | 7925885 | 18-scf00300 | 18 |
| AX-157831370 | 13 | 89.831 | KV453138.1  | 7926364 | 18-scf00300 | 18 |
| AX-158141883 | 13 | 89.831 | KV453138.1  | 7926697 | 18-scf00300 | 18 |
| AX-157831372 | 13 | 89.831 | KV453138.1  | 7928494 | 18-scf00300 | 18 |
| AX-157831373 | 13 | 89.899 | KV453138.1  | 7931343 | 18-scf00300 | 18 |
| AX-158141885 | 13 | 89.94  | KV453138.1  | 7932381 | 18-scf00300 | 18 |
| AX-158141887 | 13 | 89.94  | KV453138.1  | 7933824 | 18-scf00300 | 18 |
| AX-157720638 | 13 | 89.94  | KV453138.1  | 7942034 | 18-scf00300 | 18 |
| AX-158141889 | 13 | 90.108 | KV453138.1  | 7951338 | 18-scf00300 | 18 |
| AX-158141892 | 13 | 90.108 | KV453138.1  | 7953022 | 18-scf00300 | 18 |
| AX-158141893 | 13 | 90.111 | KV453138.1  | 7956551 | 18-scf00300 | 18 |
| AX-157831375 | 13 | 90.255 | KV453138.1  | 7944986 | 18-scf00300 | 18 |
| AX-158141894 | 13 | 90.255 | KV453138.1  | 7961460 | 18-scf00300 | 18 |
| AX-158141904 | 13 | 90.574 | KV453138.1  | 7974681 | 18-scf00300 | 18 |
| AX-158141905 | 13 | 90.574 | KV453138.1  | 7975411 | 18-scf00300 | 18 |
| AX-157746820 | 13 | 90.698 | KV453138.1  | 7980245 | 18-scf00300 | 18 |
| AX-158141910 | 13 | 90.698 | KV453138.1  | 7986328 | 18-scf00300 | 18 |



|              |    |        |            |         |             |    |
|--------------|----|--------|------------|---------|-------------|----|
| AX-158141911 | 13 | 90.698 | KV453138.1 | 7987153 | 18-scf00300 | 18 |
| AX-158141922 | 13 | 90.698 | KV453138.1 | 8001395 | 18-scf00300 | 18 |
| AX-158141925 | 13 | 90.698 | KV453138.1 | 8008975 | 18-scf00300 | 18 |
| AX-158141912 | 13 | 90.701 | KV453138.1 | 7987496 | 18-scf00300 | 18 |
| AX-158141913 | 13 | 90.706 | KV453138.1 | 7988832 | 18-scf00300 | 18 |
| AX-158141914 | 13 | 90.743 | KV453138.1 | 7990276 | 18-scf00300 | 18 |
| AX-158141917 | 13 | 90.779 | KV453138.1 | 7996483 | 18-scf00300 | 18 |
| AX-158141921 | 13 | 90.815 | KV453138.1 | 8001016 | 18-scf00300 | 18 |
| AX-157831379 | 13 | 90.815 | KV453138.1 | 8002021 | 18-scf00300 | 18 |
| AX-157831380 | 13 | 90.815 | KV453138.1 | 8005329 | 18-scf00300 | 18 |
| AX-158141926 | 13 | 90.815 | KV453138.1 | 8009784 | 18-scf00300 | 18 |
| AX-158141918 | 13 | 90.823 | KV453138.1 | 7998275 | 18-scf00300 | 18 |
| AX-157750813 | 13 | 90.823 | KV453138.1 | 8003131 | 18-scf00300 | 18 |
| AX-158380318 | 13 | 90.823 | KV453138.1 | 8018222 | 18-scf00300 | 18 |
| AX-158141971 | 13 | 90.823 | KV453138.1 | 8084721 | 18-scf00300 | 18 |
| AX-157741557 | 13 | 90.823 | KV453138.1 | 8090493 | 18-scf00300 | 18 |
| AX-158141930 | 13 | 90.831 | KV453138.1 | 8025111 | 18-scf00300 | 18 |
| AX-157726145 | 13 | 90.838 | KV453138.1 | 8025769 | 18-scf00300 | 18 |
| AX-158412132 | 13 | 90.838 | KV453138.1 | 8050353 | 18-scf00300 | 18 |
| AX-157714399 | 13 | 90.937 | KV453138.1 | 7978045 | 18-scf00300 | 18 |
| AX-158141927 | 13 | 90.937 | KV453138.1 | 8011777 | 18-scf00300 | 18 |
| AX-158141931 | 13 | 90.937 | KV453138.1 | 8027969 | 18-scf00300 | 18 |
| AX-158141937 | 13 | 90.937 | KV453138.1 | 8037285 | 18-scf00300 | 18 |
| AX-158141938 | 13 | 90.937 | KV453138.1 | 8037645 | 18-scf00300 | 18 |
| AX-158141939 | 13 | 90.937 | KV453138.1 | 8039528 | 18-scf00300 | 18 |
| AX-158141942 | 13 | 90.942 | KV453138.1 | 8043103 | 18-scf00300 | 18 |
| AX-158141947 | 13 | 90.942 | KV453138.1 | 8058674 | 18-scf00300 | 18 |
| AX-158141959 | 13 | 90.942 | KV453138.1 | 8070615 | 18-scf00300 | 18 |
| AX-158141944 | 13 | 91.005 | KV453138.1 | 8044814 | 18-scf00300 | 18 |
| AX-158412133 | 13 | 91.09  | KV453138.1 | 8050551 | 18-scf00300 | 18 |
| AX-158141945 | 13 | 91.09  | KV453138.1 | 8052894 | 18-scf00300 | 18 |
| AX-158141963 | 13 | 91.09  | KV453138.1 | 8074981 | 18-scf00300 | 18 |
| AX-158141952 | 13 | 91.646 | KV453138.1 | 8064351 | 18-scf00300 | 18 |
| AX-158141957 | 13 | 91.646 | KV453138.1 | 8068202 | 18-scf00300 | 18 |
| AX-158141967 | 13 | 91.779 | KV453138.1 | 8079567 | 18-scf00300 | 18 |
| AX-157886347 | 13 | 91.779 | KV453138.1 | 8093040 | 18-scf00300 | 18 |
| AX-158141968 | 13 | 91.798 | KV453138.1 | 8080465 | 18-scf00300 | 18 |
| AX-158141973 | 13 | 91.798 | KV453138.1 | 8086784 | 18-scf00300 | 18 |
| AX-158141969 | 13 | 91.8   | KV453138.1 | 8081458 | 18-scf00300 | 18 |
| AX-158141970 | 13 | 91.964 | KV453138.1 | 8082552 | 18-scf00300 | 18 |
| AX-158142009 | 13 | 91.964 | KV453138.1 | 8142664 | 18-scf00300 | 18 |
| AX-158408388 | 13 | 92.02  | KV453138.1 | 8087417 | 18-scf00300 | 18 |
| AX-158141974 | 13 | 92.162 | KV453138.1 | 8087766 | 18-scf00300 | 18 |
| AX-158141975 | 13 | 92.163 | KV453138.1 | 8088393 | 18-scf00300 | 18 |
| AX-158141977 | 13 | 92.163 | KV453138.1 | 8091925 | 18-scf00300 | 18 |
| AX-158141978 | 13 | 92.187 | KV453138.1 | 8092320 | 18-scf00300 | 18 |
| AX-158141982 | 13 | 92.368 | KV453138.1 | 8096106 | 18-scf00300 | 18 |
| AX-158141984 | 13 | 92.408 | KV453138.1 | 8098893 | 18-scf00300 | 18 |
| AX-158141989 | 13 | 92.676 | KV453138.1 | 8108075 | 18-scf00300 | 18 |
| AX-158141995 | 13 | 92.997 | KV453138.1 | 8117466 | 18-scf00300 | 18 |
| AX-157738548 | 13 | 92.997 | KV453138.1 | 8120443 | 18-scf00300 | 18 |

|              |    |        |            |         |             |    |
|--------------|----|--------|------------|---------|-------------|----|
| AX-157831384 | 13 | 92.997 | KV453138.1 | 8123925 | 18-scf00300 | 18 |
| AX-157858006 | 13 | 92.997 | KV453138.1 | 8126154 | 18-scf00300 | 18 |
| AX-158141998 | 13 | 93.002 | KV453138.1 | 8126277 | 18-scf00300 | 18 |
| AX-158142005 | 13 | 93.64  | KV453138.1 | 8134997 | 18-scf00300 | 18 |
| AX-158142008 | 13 | 93.695 | KV453138.1 | 8140276 | 18-scf00300 | 18 |
| AX-158142017 | 13 | 93.704 | KV453138.1 | 8156713 | 18-scf00300 | 18 |
| AX-158142018 | 13 | 93.704 | KV453138.1 | 8157182 | 18-scf00300 | 18 |
| AX-158142020 | 13 | 94.27  | KV453138.1 | 8158729 | 18-scf00300 | 18 |
| AX-158142021 | 13 | 94.322 | KV453138.1 | 8160627 | 18-scf00300 | 18 |
| AX-158142023 | 13 | 94.322 | KV453138.1 | 8162765 | 18-scf00300 | 18 |
| AX-158142025 | 13 | 94.322 | KV453138.1 | 8165355 | 18-scf00300 | 18 |
| AX-158142026 | 13 | 94.328 | KV453138.1 | 8167614 | 18-scf00300 | 18 |
| AX-157740736 | 13 | 94.328 | KV453138.1 | 8174949 | 18-scf00300 | 18 |
| AX-158142029 | 13 | 94.332 | KV453138.1 | 8172098 | 18-scf00300 | 18 |
| AX-158142031 | 13 | 94.79  | KV453138.1 | 8174058 | 18-scf00300 | 18 |
| AX-158142032 | 13 | 94.79  | KV453138.1 | 8175397 | 18-scf00300 | 18 |
| AX-158142033 | 13 | 94.79  | KV453138.1 | 8176438 | 18-scf00300 | 18 |
| AX-157886348 | 13 | 94.79  | KV453138.1 | 8179740 | 18-scf00300 | 18 |
| AX-158142034 | 13 | 94.79  | KV453138.1 | 8180185 | 18-scf00300 | 18 |
| AX-158142042 | 13 | 95.258 | KV453138.1 | 8188650 | 18-scf00300 | 18 |
| AX-158142035 | 13 | 95.726 | KV453138.1 | 8181062 | 18-scf00300 | 18 |
| AX-157748308 | 13 | 95.726 | KV453138.1 | 8193135 | 18-scf00300 | 18 |
| AX-157831387 | 13 | 95.726 | KV453138.1 | 8198087 | 18-scf00300 | 18 |
| AX-158142047 | 13 | 95.726 | KV453138.1 | 8200159 | 18-scf00300 | 18 |
| AX-158142048 | 13 | 95.726 | KV453138.1 | 8202935 | 18-scf00300 | 18 |
| AX-158142049 | 13 | 95.726 | KV453138.1 | 8203691 | 18-scf00300 | 18 |
| AX-157831388 | 13 | 95.726 | KV453138.1 | 8205472 | 18-scf00300 | 18 |
| AX-158142050 | 13 | 95.726 | KV453138.1 | 8206722 | 18-scf00300 | 18 |
| AX-157747509 | 13 | 95.726 | KV453138.1 | 8210347 | 18-scf00300 | 18 |
| AX-158142052 | 13 | 95.726 | KV453138.1 | 8213434 | 18-scf00300 | 18 |
| AX-158142057 | 13 | 95.726 | KV453138.1 | 8219386 | 18-scf00300 | 18 |
| AX-158142063 | 13 | 95.726 | KV453138.1 | 8228325 | 18-scf00300 | 18 |
| AX-158142099 | 13 | 95.726 | KV453138.1 | 8288657 | 18-scf00300 | 18 |
| AX-157739331 | 13 | 95.797 | KV453138.1 | 8208869 | 18-scf00300 | 18 |
| AX-158142041 | 13 | 95.872 | KV453138.1 | 8187997 | 18-scf00300 | 18 |
| AX-158142055 | 13 | 95.872 | KV453138.1 | 8217789 | 18-scf00300 | 18 |
| AX-158142062 | 13 | 95.877 | KV453138.1 | 8227914 | 18-scf00300 | 18 |
| AX-158142069 | 13 | 96.005 | KV453138.1 | 8240593 | 18-scf00300 | 18 |
| AX-158142070 | 13 | 96.513 | KV453138.1 | 8241361 | 18-scf00300 | 18 |
| AX-157708649 | 13 | 96.513 | KV453138.1 | 8242168 | 18-scf00300 | 18 |
| AX-158142071 | 13 | 96.513 | KV453138.1 | 8242753 | 18-scf00300 | 18 |
| AX-158142072 | 13 | 96.513 | KV453138.1 | 8245204 | 18-scf00300 | 18 |
| AX-158142073 | 13 | 96.513 | KV453138.1 | 8246637 | 18-scf00300 | 18 |
| AX-157831390 | 13 | 96.513 | KV453138.1 | 8247194 | 18-scf00300 | 18 |
| AX-157831392 | 13 | 96.513 | KV453138.1 | 8248920 | 18-scf00300 | 18 |
| AX-157831393 | 13 | 96.513 | KV453138.1 | 8249653 | 18-scf00300 | 18 |
| AX-158142074 | 13 | 96.513 | KV453138.1 | 8250533 | 18-scf00300 | 18 |
| AX-157831395 | 13 | 96.513 | KV453138.1 | 8253528 | 18-scf00300 | 18 |
| AX-157831397 | 13 | 96.513 | KV453138.1 | 8254154 | 18-scf00300 | 18 |
| AX-158142076 | 13 | 96.513 | KV453138.1 | 8255093 | 18-scf00300 | 18 |
| AX-158142077 | 13 | 96.513 | KV453138.1 | 8255634 | 18-scf00300 | 18 |

|              |    |        |            |         |             |    |
|--------------|----|--------|------------|---------|-------------|----|
| AX-158142078 | 13 | 96.513 | KV453138.1 | 8256349 | 18-scf00300 | 18 |
| AX-158142108 | 13 | 96.513 | KV453138.1 | 8315553 | 18-scf00300 | 18 |
| AX-158142206 | 13 | 96.513 | KV453138.1 | 8442119 | 18-scf00300 | 18 |
| AX-157712202 | 13 | 96.656 | KV453138.1 | 8248538 | 18-scf00300 | 18 |
| AX-158142084 | 13 | 96.656 | KV453138.1 | 8261314 | 18-scf00300 | 18 |
| AX-158142086 | 13 | 96.656 | KV453138.1 | 8263885 | 18-scf00300 | 18 |
| AX-158142091 | 13 | 96.656 | KV453138.1 | 8266862 | 18-scf00300 | 18 |
| AX-157831403 | 13 | 96.656 | KV453138.1 | 8271885 | 18-scf00300 | 18 |
| AX-157831404 | 13 | 96.656 | KV453138.1 | 8272037 | 18-scf00300 | 18 |
| AX-158142093 | 13 | 96.656 | KV453138.1 | 8273879 | 18-scf00300 | 18 |
| AX-157752488 | 13 | 96.656 | KV453138.1 | 8274975 | 18-scf00300 | 18 |
| AX-157716613 | 13 | 96.656 | KV453138.1 | 8280610 | 18-scf00300 | 18 |
| AX-157831406 | 13 | 96.656 | KV453138.1 | 8283350 | 18-scf00300 | 18 |
| AX-158142097 | 13 | 96.656 | KV453138.1 | 8283676 | 18-scf00300 | 18 |
| AX-157749053 | 13 | 96.656 | KV453138.1 | 8310902 | 18-scf00300 | 18 |
| AX-158142098 | 13 | 96.926 | KV453138.1 | 8287766 | 18-scf00300 | 18 |
| AX-158142102 | 13 | 96.926 | KV453138.1 | 8293158 | 18-scf00300 | 18 |
| AX-158142103 | 13 | 97.034 | KV453138.1 | 8293755 | 18-scf00300 | 18 |
| AX-157831409 | 13 | 97.059 | KV453138.1 | 8300974 | 18-scf00300 | 18 |
| AX-157831411 | 13 | 97.059 | KV453138.1 | 8303617 | 18-scf00300 | 18 |
| AX-157831412 | 13 | 97.059 | KV453138.1 | 8308287 | 18-scf00300 | 18 |
| AX-158142106 | 13 | 97.059 | KV453138.1 | 8308834 | 18-scf00300 | 18 |
| AX-157726353 | 13 | 97.059 | KV453138.1 | 8309384 | 18-scf00300 | 18 |
| AX-157831414 | 13 | 97.168 | KV453138.1 | 8320888 | 18-scf00300 | 18 |
| AX-158142112 | 13 | 97.183 | KV453138.1 | 8323827 | 18-scf00300 | 18 |
| AX-158142121 | 13 | 97.201 | KV453138.1 | 8334578 | 18-scf00300 | 18 |
| AX-157746886 | 13 | 97.233 | KV453138.1 | 8338153 | 18-scf00300 | 18 |
| AX-158142140 | 13 | 97.233 | KV453138.1 | 8355702 | 18-scf00300 | 18 |
| AX-158142173 | 13 | 97.233 | KV453138.1 | 8391522 | 18-scf00300 | 18 |
| AX-157831416 | 13 | 97.277 | KV453138.1 | 8338815 | 18-scf00300 | 18 |
| AX-157745075 | 13 | 97.277 | KV453138.1 | 8342245 | 18-scf00300 | 18 |
| AX-158142123 | 13 | 97.277 | KV453138.1 | 8342533 | 18-scf00300 | 18 |
| AX-158142127 | 13 | 97.277 | KV453138.1 | 8343975 | 18-scf00300 | 18 |
| AX-158142130 | 13 | 97.277 | KV453138.1 | 8348435 | 18-scf00300 | 18 |
| AX-158142134 | 13 | 97.277 | KV453138.1 | 8351796 | 18-scf00300 | 18 |
| AX-158142138 | 13 | 97.277 | KV453138.1 | 8354172 | 18-scf00300 | 18 |
| AX-158142141 | 13 | 97.277 | KV453138.1 | 8356483 | 18-scf00300 | 18 |
| AX-158142142 | 13 | 97.277 | KV453138.1 | 8357316 | 18-scf00300 | 18 |
| AX-158142144 | 13 | 97.277 | KV453138.1 | 8358265 | 18-scf00300 | 18 |
| AX-158142146 | 13 | 97.277 | KV453138.1 | 8359320 | 18-scf00300 | 18 |
| AX-158142104 | 13 | 97.387 | KV453138.1 | 8301231 | 18-scf00300 | 18 |
| AX-158142133 | 13 | 97.387 | KV453138.1 | 8350920 | 18-scf00300 | 18 |
| AX-158142147 | 13 | 97.387 | KV453138.1 | 8359929 | 18-scf00300 | 18 |
| AX-158142149 | 13 | 97.387 | KV453138.1 | 8363277 | 18-scf00300 | 18 |
| AX-158142152 | 13 | 97.387 | KV453138.1 | 8365080 | 18-scf00300 | 18 |
| AX-158142154 | 13 | 97.387 | KV453138.1 | 8367136 | 18-scf00300 | 18 |
| AX-158142168 | 13 | 97.387 | KV453138.1 | 8387390 | 18-scf00300 | 18 |
| AX-158142169 | 13 | 97.387 | KV453138.1 | 8388089 | 18-scf00300 | 18 |
| AX-158142171 | 13 | 97.387 | KV453138.1 | 8390718 | 18-scf00300 | 18 |
| AX-158142175 | 13 | 97.387 | KV453138.1 | 8393985 | 18-scf00300 | 18 |
| AX-158142176 | 13 | 97.387 | KV453138.1 | 8394362 | 18-scf00300 | 18 |

|              |    |        |            |         |             |    |
|--------------|----|--------|------------|---------|-------------|----|
| AX-158142178 | 13 | 97.387 | KV453138.1 | 8395321 | 18-scf00300 | 18 |
| AX-157740101 | 13 | 97.387 | KV453138.1 | 8396299 | 18-scf00300 | 18 |
| AX-158142179 | 13 | 97.387 | KV453138.1 | 8401412 | 18-scf00300 | 18 |
| AX-158142182 | 13 | 97.387 | KV453138.1 | 8404301 | 18-scf00300 | 18 |
| AX-158142183 | 13 | 97.387 | KV453138.1 | 8406188 | 18-scf00300 | 18 |
| AX-158142184 | 13 | 97.387 | KV453138.1 | 8406394 | 18-scf00300 | 18 |
| AX-157714404 | 13 | 97.387 | KV453138.1 | 8408345 | 18-scf00300 | 18 |
| AX-158142186 | 13 | 97.387 | KV453138.1 | 8412943 | 18-scf00300 | 18 |
| AX-158142187 | 13 | 97.387 | KV453138.1 | 8413465 | 18-scf00300 | 18 |
| AX-158142192 | 13 | 97.387 | KV453138.1 | 8416909 | 18-scf00300 | 18 |
| AX-157831423 | 13 | 97.387 | KV453138.1 | 8427631 | 18-scf00300 | 18 |
| AX-158142219 | 13 | 97.387 | KV453138.1 | 8463107 | 18-scf00300 | 18 |
| AX-158142189 | 13 | 97.406 | KV453138.1 | 8415463 | 18-scf00300 | 18 |
| AX-158142190 | 13 | 97.428 | KV453138.1 | 8416026 | 18-scf00300 | 18 |
| AX-158142162 | 13 | 97.453 | KV453138.1 | 8380929 | 18-scf00300 | 18 |
| AX-158142167 | 13 | 97.453 | KV453138.1 | 8386850 | 18-scf00300 | 18 |
| AX-157762833 | 13 | 97.453 | KV453138.1 | 8396727 | 18-scf00300 | 18 |
| AX-157727905 | 13 | 97.453 | KV453138.1 | 8421343 | 18-scf00300 | 18 |
| AX-158142212 | 13 | 97.453 | KV453138.1 | 8452143 | 18-scf00300 | 18 |
| AX-158142194 | 13 | 97.472 | KV453138.1 | 8417884 | 18-scf00300 | 18 |
| AX-157745825 | 13 | 97.472 | KV453138.1 | 8418307 | 18-scf00300 | 18 |
| AX-157724439 | 13 | 97.472 | KV453138.1 | 8430909 | 18-scf00300 | 18 |
| AX-158142202 | 13 | 97.472 | KV453138.1 | 8438958 | 18-scf00300 | 18 |
| AX-157708234 | 13 | 97.479 | KV453138.1 | 8378759 | 18-scf00300 | 18 |
| AX-158142185 | 13 | 97.479 | KV453138.1 | 8407236 | 18-scf00300 | 18 |
| AX-158393027 | 13 | 97.479 | KV453138.1 | 8434856 | 18-scf00300 | 18 |
| AX-158422862 | 13 | 97.496 | KV453138.1 | 8409991 | 18-scf00300 | 18 |
| AX-158142203 | 13 | 97.496 | KV453138.1 | 8439902 | 18-scf00300 | 18 |
| AX-158142204 | 13 | 97.496 | KV453138.1 | 8440432 | 18-scf00300 | 18 |
| AX-158142208 | 13 | 97.496 | KV453138.1 | 8448611 | 18-scf00300 | 18 |
| AX-158142209 | 13 | 97.496 | KV453138.1 | 8449849 | 18-scf00300 | 18 |
| AX-158142215 | 13 | 97.496 | KV453138.1 | 8454394 | 18-scf00300 | 18 |
| AX-157831425 | 13 | 97.496 | KV453138.1 | 8455021 | 18-scf00300 | 18 |
| AX-158142217 | 13 | 97.496 | KV453138.1 | 8457709 | 18-scf00300 | 18 |
| AX-158142220 | 13 | 97.542 | KV453138.1 | 8464335 | 18-scf00300 | 18 |
| AX-158142221 | 13 | 97.567 | KV453138.1 | 8464732 | 18-scf00300 | 18 |
| AX-157721531 | 13 | 97.567 | KV453138.1 | 8497196 | 18-scf00300 | 18 |
| AX-158142148 | 13 | 97.605 | KV453138.1 | 8361426 | 18-scf00300 | 18 |
| AX-157871608 | 13 | 97.605 | KV453138.1 | 8397346 | 18-scf00300 | 18 |
| AX-157831422 | 13 | 97.605 | KV453138.1 | 8423601 | 18-scf00300 | 18 |
| AX-158142223 | 13 | 97.605 | KV453138.1 | 8466801 | 18-scf00300 | 18 |
| AX-158142224 | 13 | 97.605 | KV453138.1 | 8467103 | 18-scf00300 | 18 |
| AX-158142229 | 13 | 97.605 | KV453138.1 | 8471075 | 18-scf00300 | 18 |
| AX-158142230 | 13 | 97.605 | KV453138.1 | 8471585 | 18-scf00300 | 18 |
| AX-158142233 | 13 | 97.605 | KV453138.1 | 8473385 | 18-scf00300 | 18 |
| AX-157753453 | 13 | 97.605 | KV453138.1 | 8475131 | 18-scf00300 | 18 |
| AX-158142237 | 13 | 97.605 | KV453138.1 | 8475898 | 18-scf00300 | 18 |
| AX-158142238 | 13 | 97.605 | KV453138.1 | 8476236 | 18-scf00300 | 18 |
| AX-158142239 | 13 | 97.605 | KV453138.1 | 8477394 | 18-scf00300 | 18 |
| AX-158142242 | 13 | 97.605 | KV453138.1 | 8486539 | 18-scf00300 | 18 |
| AX-158142160 | 13 | 97.61  | KV453138.1 | 8379802 | 18-scf00300 | 18 |

|              |    |        |            |         |                |    |
|--------------|----|--------|------------|---------|----------------|----|
| AX-157831427 | 13 | 97.61  | KV453138.1 | 8491209 | 18-scf00300    | 18 |
| AX-158142321 | 13 | 97.61  | KV453138.1 | 8574111 | 18-scf00300    | 18 |
| AX-157858009 | 13 | 97.61  | KV453138.1 | 8577700 | 18-scf00300    | 18 |
| AX-158142336 | 13 | 97.61  | KV453138.1 | 8589318 | 18-scf00300    | 18 |
| AX-157831428 | 13 | 97.612 | KV453138.1 | 8491376 | 18-scf00300    | 18 |
| AX-158142250 | 13 | 97.819 | KV453138.1 | 8493405 | 18-scf00300    | 18 |
| AX-158142254 | 13 | 97.819 | KV453138.1 | 8500865 | 18-scf00300    | 18 |
| AX-158142240 | 13 | 98.043 | KV453138.1 | 8481838 | 18-scf00300    | 18 |
| AX-158142258 | 13 | 98.043 | KV453138.1 | 8505513 | 18-scf00300    | 18 |
| AX-157770937 | 13 | 98.043 | KV453138.1 | 8506134 | 18-scf00300    | 18 |
| AX-158142260 | 13 | 98.043 | KV453138.1 | 8510760 | 18-scf00300    | 18 |
| AX-158142261 | 13 | 98.043 | KV453138.1 | 8510890 | 18-scf00300    | 18 |
| AX-158142262 | 13 | 98.043 | KV453138.1 | 8512128 | 18-scf00300    | 18 |
| AX-158142117 | 13 | 98.152 | KV453138.1 | 8329089 | 18-scf00300    | 18 |
| AX-158385426 | 13 | 98.152 | KV453138.1 | 8363205 | 18-scf00300    | 18 |
| AX-158142166 | 13 | 98.152 | KV453138.1 | 8386277 | 18-scf00300    | 18 |
| AX-158142197 | 13 | 98.152 | KV453138.1 | 8426301 | 18-scf00300    | 18 |
| AX-158142246 | 13 | 98.152 | KV453138.1 | 8489828 | 18-scf00300    | 18 |
| AX-157858007 | 13 | 98.152 | KV453138.1 | 8494877 | 18-scf00300    | 18 |
| AX-157831429 | 13 | 98.152 | KV453138.1 | 8495908 | 18-scf00300    | 18 |
| AX-157748681 | 13 | 98.152 | KV453138.1 | 8512067 | 18-scf00300    | 18 |
| AX-158142263 | 13 | 98.152 | KV453138.1 | 8514438 | 18-scf00300    | 18 |
| AX-158142265 | 13 | 98.152 | KV453138.1 | 8515431 | 18-scf00300    | 18 |
| AX-158142269 | 13 | 98.152 | KV453138.1 | 8518415 | 18-scf00300    | 18 |
| AX-157741536 | 13 | 98.152 | KV453138.1 | 8520625 | 18-scf00300    | 18 |
| AX-158142270 | 13 | 98.152 | KV453138.1 | 8520868 | 18-scf00300    | 18 |
| AX-157773633 | 13 | 98.152 | KV453138.1 | 8521909 | 18-scf00300    | 18 |
| AX-158142271 | 13 | 98.152 | KV453138.1 | 8522766 | 18-scf00300    | 18 |
| AX-158142272 | 13 | 98.152 | KV453138.1 | 8523631 | 18-scf00300    | 18 |
| AX-157831431 | 13 | 98.152 | KV453138.1 | 8523996 | 18-scf00300    | 18 |
| AX-157708314 | 13 | 98.152 | KV453138.1 | 8524597 | 18-scf00300    | 18 |
| AX-158142273 | 13 | 98.152 | KV453138.1 | 8525559 | 18-scf00300    | 18 |
| AX-157831432 | 13 | 98.152 | KV453138.1 | 8525843 | 18-scf00300    | 18 |
| AX-158142275 | 13 | 98.152 | KV453138.1 | 8527970 | 18-scf00300    | 18 |
| AX-157749736 | 13 | 98.152 | KV453138.1 | 8528422 | 18-scf00300    | 18 |
| AX-158142276 | 13 | 98.152 | KV453138.1 | 8528566 | 18-scf00300    | 18 |
| AX-158142277 | 13 | 98.152 | KV453138.1 | 8529136 | 18-scf00300    | 18 |
| AX-158142278 | 13 | 98.152 | KV453138.1 | 8529478 | 18-scf00300    | 18 |
| AX-158142279 | 13 | 98.152 | KV453138.1 | 8530013 | 18-scf00300    | 18 |
| AX-158142281 | 13 | 98.152 | KV453138.1 | 8530992 | 18-scf00300    | 18 |
| AX-158142282 | 13 | 98.152 | KV453138.1 | 8531969 | 18-scf00300    | 18 |
| AX-158142283 | 13 | 98.152 | KV453138.1 | 8532859 | 18-scf00300    | 18 |
| AX-158412141 | 13 | 98.152 | KV453138.1 | 8537639 | 18-scf00300    | 18 |
| AX-157721604 | 13 | 98.152 | KV453138.1 | 8538067 | 18-scf00300    | 18 |
| AX-158142319 | 13 | 98.152 | KV453138.1 | 8570961 | 18-scf00300    | 18 |
| AX-157878223 | 13 | 98.152 | KV453138.1 | 8581690 | 18-scf00300    | 18 |
| AX-157693305 | 13 | 98.152 | FI879268.1 | 245     | IORI212 lctalu | UN |
| AX-158142290 | 13 | 98.387 | KV453138.1 | 8540364 | 18-scf00300    | 18 |
| AX-158142361 | 13 | 98.387 | KV453138.1 | 8619047 | 18-scf00300    | 18 |
| AX-157831442 | 13 | 98.387 | KV453138.1 | 8644970 | 18-scf00300    | 18 |
| AX-158142294 | 13 | 98.589 | KV453138.1 | 8545420 | 18-scf00300    | 18 |

|              |    |        |            |         |             |    |
|--------------|----|--------|------------|---------|-------------|----|
| AX-158142298 | 13 | 98.589 | KV453138.1 | 8549062 | 18-scf00300 | 18 |
| AX-158142299 | 13 | 98.589 | KV453138.1 | 8551097 | 18-scf00300 | 18 |
| AX-158142301 | 13 | 98.589 | KV453138.1 | 8552455 | 18-scf00300 | 18 |
| AX-158142303 | 13 | 98.589 | KV453138.1 | 8553514 | 18-scf00300 | 18 |
| AX-158142304 | 13 | 98.589 | KV453138.1 | 8553901 | 18-scf00300 | 18 |
| AX-157738907 | 13 | 98.589 | KV453138.1 | 8554390 | 18-scf00300 | 18 |
| AX-158142308 | 13 | 98.589 | KV453138.1 | 8560652 | 18-scf00300 | 18 |
| AX-158142309 | 13 | 98.589 | KV453138.1 | 8561173 | 18-scf00300 | 18 |
| AX-158142310 | 13 | 98.589 | KV453138.1 | 8562447 | 18-scf00300 | 18 |
| AX-157858008 | 13 | 98.589 | KV453138.1 | 8565014 | 18-scf00300 | 18 |
| AX-158142313 | 13 | 98.589 | KV453138.1 | 8566306 | 18-scf00300 | 18 |
| AX-158142316 | 13 | 98.589 | KV453138.1 | 8569019 | 18-scf00300 | 18 |
| AX-158142318 | 13 | 98.589 | KV453138.1 | 8570197 | 18-scf00300 | 18 |
| AX-158142322 | 13 | 98.589 | KV453138.1 | 8574738 | 18-scf00300 | 18 |
| AX-158142326 | 13 | 98.589 | KV453138.1 | 8577402 | 18-scf00300 | 18 |
| AX-158142330 | 13 | 98.589 | KV453138.1 | 8585008 | 18-scf00300 | 18 |
| AX-158142419 | 13 | 98.589 | KV453138.1 | 8706853 | 18-scf00300 | 18 |
| AX-158142332 | 13 | 98.699 | KV453138.1 | 8586393 | 18-scf00300 | 18 |
| AX-158142333 | 13 | 98.699 | KV453138.1 | 8587305 | 18-scf00300 | 18 |
| AX-158142335 | 13 | 98.699 | KV453138.1 | 8588951 | 18-scf00300 | 18 |
| AX-158142297 | 13 | 98.737 | KV453138.1 | 8546973 | 18-scf00300 | 18 |
| AX-158142337 | 13 | 98.737 | KV453138.1 | 8590049 | 18-scf00300 | 18 |
| AX-158142339 | 13 | 98.737 | KV453138.1 | 8594609 | 18-scf00300 | 18 |
| AX-158142338 | 13 | 98.773 | KV453138.1 | 8591104 | 18-scf00300 | 18 |
| AX-158142340 | 13 | 98.808 | KV453138.1 | 8595218 | 18-scf00300 | 18 |
| AX-158142343 | 13 | 98.808 | KV453138.1 | 8597322 | 18-scf00300 | 18 |
| AX-158142345 | 13 | 98.808 | KV453138.1 | 8598208 | 18-scf00300 | 18 |
| AX-157831438 | 13 | 98.808 | KV453138.1 | 8598862 | 18-scf00300 | 18 |
| AX-157717807 | 13 | 98.808 | KV453138.1 | 8599206 | 18-scf00300 | 18 |
| AX-158142347 | 13 | 98.808 | KV453138.1 | 8600956 | 18-scf00300 | 18 |
| AX-158142350 | 13 | 98.808 | KV453138.1 | 8604594 | 18-scf00300 | 18 |
| AX-157755290 | 13 | 98.808 | KV453138.1 | 8605863 | 18-scf00300 | 18 |
| AX-158142323 | 13 | 98.917 | KV453138.1 | 8575743 | 18-scf00300 | 18 |
| AX-158142354 | 13 | 98.917 | KV453138.1 | 8608993 | 18-scf00300 | 18 |
| AX-158142355 | 13 | 98.917 | KV453138.1 | 8609454 | 18-scf00300 | 18 |
| AX-157746468 | 13 | 98.917 | KV453138.1 | 8609970 | 18-scf00300 | 18 |
| AX-158142364 | 13 | 98.917 | KV453138.1 | 8631803 | 18-scf00300 | 18 |
| AX-158142365 | 13 | 98.917 | KV453138.1 | 8632332 | 18-scf00300 | 18 |
| AX-157707970 | 13 | 98.917 | KV453138.1 | 8634154 | 18-scf00300 | 18 |
| AX-157723844 | 13 | 98.975 | KV453138.1 | 8612569 | 18-scf00300 | 18 |
| AX-158142369 | 13 | 98.975 | KV453138.1 | 8639473 | 18-scf00300 | 18 |
| AX-158142378 | 13 | 98.975 | KV453138.1 | 8662159 | 18-scf00300 | 18 |
| AX-158142379 | 13 | 98.975 | KV453138.1 | 8662485 | 18-scf00300 | 18 |
| AX-158142421 | 13 | 98.975 | KV453138.1 | 8709775 | 18-scf00300 | 18 |
| AX-158142468 | 13 | 98.975 | KV453138.1 | 8797082 | 18-scf00300 | 18 |
| AX-157773493 | 13 | 99.136 | KV453138.1 | 8607766 | 18-scf00300 | 18 |
| AX-157831439 | 13 | 99.136 | KV453138.1 | 8613341 | 18-scf00300 | 18 |
| AX-158142359 | 13 | 99.136 | KV453138.1 | 8615728 | 18-scf00300 | 18 |
| AX-158142367 | 13 | 99.241 | KV453138.1 | 8633083 | 18-scf00300 | 18 |
| AX-157750646 | 13 | 99.354 | KV453138.1 | 8639970 | 18-scf00300 | 18 |
| AX-157831446 | 13 | 99.354 | KV453138.1 | 8654680 | 18-scf00300 | 18 |

|              |    |        |            |         |             |    |
|--------------|----|--------|------------|---------|-------------|----|
| AX-158142376 | 13 | 99.354 | KV453138.1 | 8656303 | 18-scf00300 | 18 |
| AX-157831447 | 13 | 99.354 | KV453138.1 | 8664823 | 18-scf00300 | 18 |
| AX-157831448 | 13 | 99.354 | KV453138.1 | 8664861 | 18-scf00300 | 18 |
| AX-157721522 | 13 | 99.354 | KV453138.1 | 8667634 | 18-scf00300 | 18 |
| AX-158142391 | 13 | 99.354 | KV453138.1 | 8676103 | 18-scf00300 | 18 |
| AX-158412143 | 13 | 99.354 | KV453138.1 | 8677939 | 18-scf00300 | 18 |
| AX-158142445 | 13 | 99.354 | KV453138.1 | 8761527 | 18-scf00300 | 18 |
| AX-158142456 | 13 | 99.354 | KV453138.1 | 8785151 | 18-scf00300 | 18 |
| AX-158142394 | 13 | 99.398 | KV453138.1 | 8680209 | 18-scf00300 | 18 |
| AX-158142395 | 13 | 99.421 | KV453138.1 | 8680963 | 18-scf00300 | 18 |
| AX-158142385 | 13 | 99.431 | KV453138.1 | 8669258 | 18-scf00300 | 18 |
| AX-157831449 | 13 | 99.431 | KV453138.1 | 8673058 | 18-scf00300 | 18 |
| AX-158142398 | 13 | 99.431 | KV453138.1 | 8684535 | 18-scf00300 | 18 |
| AX-158142399 | 13 | 99.431 | KV453138.1 | 8686008 | 18-scf00300 | 18 |
| AX-158142408 | 13 | 99.431 | KV453138.1 | 8692855 | 18-scf00300 | 18 |
| AX-158142368 | 13 | 99.463 | KV453138.1 | 8635554 | 18-scf00300 | 18 |
| AX-158142386 | 13 | 99.463 | KV453138.1 | 8670268 | 18-scf00300 | 18 |
| AX-158142387 | 13 | 99.463 | KV453138.1 | 8670747 | 18-scf00300 | 18 |
| AX-157744103 | 13 | 99.463 | KV453138.1 | 8674997 | 18-scf00300 | 18 |
| AX-157727549 | 13 | 99.463 | KV453138.1 | 8681485 | 18-scf00300 | 18 |
| AX-158142402 | 13 | 99.463 | KV453138.1 | 8688509 | 18-scf00300 | 18 |
| AX-157831450 | 13 | 99.463 | KV453138.1 | 8697074 | 18-scf00300 | 18 |
| AX-158142410 | 13 | 99.463 | KV453138.1 | 8698030 | 18-scf00300 | 18 |
| AX-158142412 | 13 | 99.463 | KV453138.1 | 8700822 | 18-scf00300 | 18 |
| AX-157831451 | 13 | 99.463 | KV453138.1 | 8701545 | 18-scf00300 | 18 |
| AX-158142413 | 13 | 99.463 | KV453138.1 | 8701618 | 18-scf00300 | 18 |
| AX-158142415 | 13 | 99.463 | KV453138.1 | 8703438 | 18-scf00300 | 18 |
| AX-157772297 | 13 | 99.463 | KV453138.1 | 8704128 | 18-scf00300 | 18 |
| AX-157831455 | 13 | 99.463 | KV453138.1 | 8715492 | 18-scf00300 | 18 |
| AX-158142443 | 13 | 99.463 | KV453138.1 | 8760374 | 18-scf00300 | 18 |
| AX-157739387 | 13 | 99.516 | KV453138.1 | 8718234 | 18-scf00300 | 18 |
| AX-158142465 | 13 | 99.516 | KV453138.1 | 8794181 | 18-scf00300 | 18 |
| AX-158142424 | 13 | 99.573 | KV453138.1 | 8725649 | 18-scf00300 | 18 |
| AX-158142425 | 13 | 99.573 | KV453138.1 | 8726604 | 18-scf00300 | 18 |
| AX-158142426 | 13 | 99.573 | KV453138.1 | 8727091 | 18-scf00300 | 18 |
| AX-158142429 | 13 | 99.573 | KV453138.1 | 8730457 | 18-scf00300 | 18 |
| AX-158142431 | 13 | 99.573 | KV453138.1 | 8734029 | 18-scf00300 | 18 |
| AX-157744046 | 13 | 99.573 | KV453138.1 | 8734075 | 18-scf00300 | 18 |
| AX-158142432 | 13 | 99.573 | KV453138.1 | 8734463 | 18-scf00300 | 18 |
| AX-158142433 | 13 | 99.573 | KV453138.1 | 8734815 | 18-scf00300 | 18 |
| AX-158142435 | 13 | 99.573 | KV453138.1 | 8738045 | 18-scf00300 | 18 |
| AX-157831458 | 13 | 99.573 | KV453138.1 | 8739264 | 18-scf00300 | 18 |
| AX-158385430 | 13 | 99.573 | KV453138.1 | 8743749 | 18-scf00300 | 18 |
| AX-158142442 | 13 | 99.645 | KV453138.1 | 8759357 | 18-scf00300 | 18 |
| AX-158142450 | 13 | 99.682 | KV453138.1 | 8769157 | 18-scf00300 | 18 |
| AX-158142452 | 13 | 99.791 | KV453138.1 | 8775107 | 18-scf00300 | 18 |
| AX-157858013 | 13 | 99.842 | KV453138.1 | 8779351 | 18-scf00300 | 18 |
| AX-158142455 | 13 | 99.901 | KV453138.1 | 8780541 | 18-scf00300 | 18 |
| AX-158412145 | 13 | 99.901 | KV453138.1 | 8785324 | 18-scf00300 | 18 |
| AX-157756353 | 13 | 99.931 | KV453138.1 | 8727522 | 18-scf00300 | 18 |
| AX-157746810 | 13 | 99.931 | KV453138.1 | 8741048 | 18-scf00300 | 18 |

|              |    |         |            |         |             |    |
|--------------|----|---------|------------|---------|-------------|----|
| AX-158142458 | 13 | 99.931  | KV453138.1 | 8786658 | 18-scf00300 | 18 |
| AX-158142459 | 13 | 99.956  | KV453138.1 | 8789227 | 18-scf00300 | 18 |
| AX-158142460 | 13 | 99.975  | KV453138.1 | 8790219 | 18-scf00300 | 18 |
| AX-158142414 | 13 | 100.01  | KV453138.1 | 8702478 | 18-scf00300 | 18 |
| AX-158142461 | 13 | 100.01  | KV453138.1 | 8790790 | 18-scf00300 | 18 |
| AX-158142463 | 13 | 100.01  | KV453138.1 | 8793024 | 18-scf00300 | 18 |
| AX-158142464 | 13 | 100.01  | KV453138.1 | 8793741 | 18-scf00300 | 18 |
| AX-157831463 | 13 | 100.01  | KV453138.1 | 8795928 | 18-scf00300 | 18 |
| AX-158142467 | 13 | 100.01  | KV453138.1 | 8796706 | 18-scf00300 | 18 |
| AX-158142469 | 13 | 100.01  | KV453138.1 | 8797628 | 18-scf00300 | 18 |
| AX-158142470 | 13 | 100.01  | KV453138.1 | 8798615 | 18-scf00300 | 18 |
| AX-158142471 | 13 | 100.01  | KV453138.1 | 8798851 | 18-scf00300 | 18 |
| AX-158142473 | 13 | 100.01  | KV453138.1 | 8800064 | 18-scf00300 | 18 |
| AX-158142488 | 13 | 100.01  | KV453138.1 | 8818987 | 18-scf00300 | 18 |
| AX-158142475 | 13 | 100.156 | KV453138.1 | 8803807 | 18-scf00300 | 18 |
| AX-158142477 | 13 | 100.156 | KV453138.1 | 8805883 | 18-scf00300 | 18 |
| AX-158142484 | 13 | 100.302 | KV453138.1 | 8814151 | 18-scf00300 | 18 |
| AX-158142485 | 13 | 100.444 | KV453138.1 | 8815986 | 18-scf00300 | 18 |
| AX-158142487 | 13 | 100.447 | KV453138.1 | 8818154 | 18-scf00300 | 18 |
| AX-158142490 | 13 | 100.447 | KV453138.1 | 8820548 | 18-scf00300 | 18 |
| AX-158142492 | 13 | 100.447 | KV453138.1 | 8823306 | 18-scf00300 | 18 |
| AX-158142493 | 13 | 100.447 | KV453138.1 | 8823681 | 18-scf00300 | 18 |
| AX-158142494 | 13 | 100.447 | KV453138.1 | 8824642 | 18-scf00300 | 18 |
| AX-158142495 | 13 | 100.447 | KV453138.1 | 8825948 | 18-scf00300 | 18 |
| AX-158142497 | 13 | 100.447 | KV453138.1 | 8827151 | 18-scf00300 | 18 |
| AX-158142498 | 13 | 100.447 | KV453138.1 | 8827228 | 18-scf00300 | 18 |
| AX-158142499 | 13 | 100.447 | KV453138.1 | 8829028 | 18-scf00300 | 18 |
| AX-157740972 | 13 | 100.447 | KV453138.1 | 8837773 | 18-scf00300 | 18 |
| AX-158412146 | 13 | 100.447 | KV453138.1 | 8839102 | 18-scf00300 | 18 |
| AX-158412147 | 13 | 100.447 | KV453138.1 | 8839296 | 18-scf00300 | 18 |
| AX-158417583 | 13 | 100.447 | KV453138.1 | 8845341 | 18-scf00300 | 18 |
| AX-158142480 | 13 | 100.666 | KV453138.1 | 8811746 | 18-scf00300 | 18 |
| AX-158142483 | 13 | 100.666 | KV453138.1 | 8813463 | 18-scf00300 | 18 |
| AX-157866350 | 13 | 100.666 | KV453138.1 | 8855040 | 18-scf00300 | 18 |
| AX-158142508 | 13 | 100.666 | KV453138.1 | 8858355 | 18-scf00300 | 18 |
| AX-157871610 | 13 | 100.666 | KV453138.1 | 8873022 | 18-scf00300 | 18 |
| AX-158142515 | 13 | 100.666 | KV453138.1 | 8873632 | 18-scf00300 | 18 |
| AX-158142516 | 13 | 100.666 | KV453138.1 | 8873972 | 18-scf00300 | 18 |
| AX-158142522 | 13 | 100.666 | KV453138.1 | 8883294 | 18-scf00300 | 18 |
| AX-158142525 | 13 | 100.666 | KV453138.1 | 8888310 | 18-scf00300 | 18 |
| AX-158142526 | 13 | 100.666 | KV453138.1 | 8888826 | 18-scf00300 | 18 |
| AX-158142527 | 13 | 100.666 | KV453138.1 | 8889153 | 18-scf00300 | 18 |
| AX-158142529 | 13 | 100.666 | KV453138.1 | 8889715 | 18-scf00300 | 18 |
| AX-158142530 | 13 | 100.666 | KV453138.1 | 8890403 | 18-scf00300 | 18 |
| AX-158142531 | 13 | 100.666 | KV453138.1 | 8891656 | 18-scf00300 | 18 |
| AX-158142532 | 13 | 100.666 | KV453138.1 | 8892496 | 18-scf00300 | 18 |
| AX-158142534 | 13 | 100.666 | KV453138.1 | 8896081 | 18-scf00300 | 18 |
| AX-158142535 | 13 | 100.666 | KV453138.1 | 8896827 | 18-scf00300 | 18 |
| AX-158142536 | 13 | 100.666 | KV453138.1 | 8898217 | 18-scf00300 | 18 |
| AX-158142537 | 13 | 100.666 | KV453138.1 | 8899688 | 18-scf00300 | 18 |
| AX-157725877 | 13 | 100.817 | KV453138.1 | 8900872 | 18-scf00300 | 18 |



|              |    |         |            |         |             |    |
|--------------|----|---------|------------|---------|-------------|----|
| AX-158142540 | 13 | 100.993 | KV453138.1 | 8903229 | 18-scf00300 | 18 |
| AX-157695190 | 13 | 100.993 | KV453138.1 | 8903759 | 18-scf00300 | 18 |
| AX-158142541 | 13 | 100.993 | KV453138.1 | 8905437 | 18-scf00300 | 18 |
| AX-157740938 | 13 | 100.993 | KV453138.1 | 8905869 | 18-scf00300 | 18 |
| AX-158142546 | 13 | 100.993 | KV453138.1 | 8912161 | 18-scf00300 | 18 |
| AX-158142542 | 13 | 101.028 | KV453138.1 | 8906497 | 18-scf00300 | 18 |
| AX-158142543 | 13 | 101.066 | KV453138.1 | 8907413 | 18-scf00300 | 18 |
| AX-158142544 | 13 | 101.103 | KV453138.1 | 8910291 | 18-scf00300 | 18 |
| AX-158142547 | 13 | 101.103 | KV453138.1 | 8912687 | 18-scf00300 | 18 |
| AX-157858016 | 13 | 101.103 | KV453138.1 | 8914722 | 18-scf00300 | 18 |
| AX-158142548 | 13 | 101.103 | KV453138.1 | 8916490 | 18-scf00300 | 18 |
| AX-158142549 | 13 | 101.103 | KV453138.1 | 8918475 | 18-scf00300 | 18 |
| AX-158142551 | 13 | 101.535 | KV453138.1 | 8921600 | 18-scf00300 | 18 |
| AX-158142554 | 13 | 101.537 | KV453138.1 | 8926551 | 18-scf00300 | 18 |
| AX-158142555 | 13 | 101.539 | KV453138.1 | 8926750 | 18-scf00300 | 18 |
| AX-158142556 | 13 | 101.539 | KV453138.1 | 8928898 | 18-scf00300 | 18 |
| AX-157726953 | 13 | 101.539 | KV453138.1 | 8930774 | 18-scf00300 | 18 |
| AX-158142561 | 13 | 101.539 | KV453138.1 | 8934692 | 18-scf00300 | 18 |
| AX-157775357 | 13 | 101.539 | KV453138.1 | 8936727 | 18-scf00300 | 18 |
| AX-158142563 | 13 | 101.539 | KV453138.1 | 8938751 | 18-scf00300 | 18 |
| AX-158142564 | 13 | 101.539 | KV453138.1 | 8939550 | 18-scf00300 | 18 |
| AX-158142565 | 13 | 101.539 | KV453138.1 | 8941355 | 18-scf00300 | 18 |
| AX-157773720 | 13 | 101.539 | KV453138.1 | 8941831 | 18-scf00300 | 18 |
| AX-158142568 | 13 | 101.539 | KV453138.1 | 8944080 | 18-scf00300 | 18 |
| AX-158142570 | 13 | 101.539 | KV453138.1 | 8948386 | 18-scf00300 | 18 |
| AX-157720651 | 13 | 101.758 | KV453138.1 | 8949263 | 18-scf00300 | 18 |
| AX-158142571 | 13 | 101.758 | KV453138.1 | 8950178 | 18-scf00300 | 18 |
| AX-157773338 | 13 | 101.867 | KV453138.1 | 8954188 | 18-scf00300 | 18 |
| AX-158142575 | 13 | 101.867 | KV453138.1 | 8955218 | 18-scf00300 | 18 |
| AX-158142579 | 13 | 101.888 | KV453138.1 | 8959481 | 18-scf00300 | 18 |
| AX-157710514 | 13 | 101.888 | KV453138.1 | 8964908 | 18-scf00300 | 18 |
| AX-158142597 | 13 | 101.888 | KV453138.1 | 8988486 | 18-scf00300 | 18 |
| AX-157831479 | 13 | 101.888 | KV453138.1 | 9001332 | 18-scf00300 | 18 |
| AX-158142573 | 13 | 101.907 | KV453138.1 | 8951409 | 18-scf00300 | 18 |
| AX-157744465 | 13 | 101.907 | KV453138.1 | 8965897 | 18-scf00300 | 18 |
| AX-158142585 | 13 | 101.914 | KV453138.1 | 8966725 | 18-scf00300 | 18 |
| AX-158142603 | 13 | 101.914 | KV453138.1 | 8995613 | 18-scf00300 | 18 |
| AX-158142588 | 13 | 101.934 | KV453138.1 | 8975060 | 18-scf00300 | 18 |
| AX-157831473 | 13 | 101.955 | KV453138.1 | 8977299 | 18-scf00300 | 18 |
| AX-158142594 | 13 | 101.976 | KV453138.1 | 8981247 | 18-scf00300 | 18 |
| AX-157831475 | 13 | 101.976 | KV453138.1 | 8986931 | 18-scf00300 | 18 |
| AX-157831478 | 13 | 101.976 | KV453138.1 | 8997331 | 18-scf00300 | 18 |
| AX-158142607 | 13 | 101.976 | KV453138.1 | 9000241 | 18-scf00300 | 18 |
| AX-158142578 | 13 | 101.996 | KV453138.1 | 8956904 | 18-scf00300 | 18 |
| AX-157886352 | 13 | 101.996 | KV453138.1 | 8960635 | 18-scf00300 | 18 |
| AX-158142584 | 13 | 101.996 | KV453138.1 | 8966650 | 18-scf00300 | 18 |
| AX-158142596 | 13 | 101.996 | KV453138.1 | 8982687 | 18-scf00300 | 18 |
| AX-157831474 | 13 | 102.027 | KV453138.1 | 8985594 | 18-scf00300 | 18 |
| AX-158142595 | 13 | 102.057 | KV453138.1 | 8982030 | 18-scf00300 | 18 |
| AX-157716675 | 13 | 102.057 | KV453138.1 | 8987743 | 18-scf00300 | 18 |
| AX-158142600 | 13 | 102.086 | KV453138.1 | 8991471 | 18-scf00300 | 18 |

|              |    |         |            |         |             |    |
|--------------|----|---------|------------|---------|-------------|----|
| AX-158412149 | 13 | 102.086 | KV453138.1 | 8992165 | 18-scf00300 | 18 |
| AX-158142615 | 13 | 102.086 | KV453138.1 | 9009759 | 18-scf00300 | 18 |
| AX-158142601 | 13 | 102.221 | KV453138.1 | 8994103 | 18-scf00300 | 18 |
| AX-158142606 | 13 | 102.359 | KV453138.1 | 8999618 | 18-scf00300 | 18 |
| AX-157745027 | 13 | 102.359 | KV453138.1 | 8999678 | 18-scf00300 | 18 |
| AX-158142604 | 13 | 102.632 | KV453138.1 | 8997548 | 18-scf00300 | 18 |
| AX-158142608 | 13 | 102.632 | KV453138.1 | 9000690 | 18-scf00300 | 18 |
| AX-158142614 | 13 | 102.632 | KV453138.1 | 9009471 | 18-scf00300 | 18 |
| AX-158142613 | 13 | 102.752 | KV453138.1 | 9008517 | 18-scf00300 | 18 |
| AX-158142617 | 13 | 102.752 | KV453138.1 | 9011711 | 18-scf00300 | 18 |
| AX-158142620 | 13 | 102.752 | KV453138.1 | 9013230 | 18-scf00300 | 18 |
| AX-158142631 | 13 | 102.752 | KV453138.1 | 9024391 | 18-scf00300 | 18 |
| AX-158142634 | 13 | 102.752 | KV453138.1 | 9028991 | 18-scf00300 | 18 |
| AX-158142636 | 13 | 102.752 | KV453138.1 | 9031401 | 18-scf00300 | 18 |
| AX-158142624 | 13 | 102.851 | KV453138.1 | 9016820 | 18-scf00300 | 18 |
| AX-158142630 | 13 | 102.851 | KV453138.1 | 9023730 | 18-scf00300 | 18 |
| AX-158412152 | 13 | 102.851 | KV453138.1 | 9024581 | 18-scf00300 | 18 |
| AX-158142655 | 13 | 102.851 | KV453138.1 | 9059374 | 18-scf00300 | 18 |
| AX-158422863 | 13 | 103.069 | KV453138.1 | 9024850 | 18-scf00300 | 18 |
| AX-158412154 | 13 | 103.069 | KV453138.1 | 9030840 | 18-scf00300 | 18 |
| AX-158142637 | 13 | 103.122 | KV453138.1 | 9034394 | 18-scf00300 | 18 |
| AX-158142638 | 13 | 103.122 | KV453138.1 | 9035234 | 18-scf00300 | 18 |
| AX-158142610 | 13 | 103.179 | KV453138.1 | 9004289 | 18-scf00300 | 18 |
| AX-158393029 | 13 | 103.179 | KV453138.1 | 9036775 | 18-scf00300 | 18 |
| AX-158142640 | 13 | 103.179 | KV453138.1 | 9037301 | 18-scf00300 | 18 |
| AX-158142642 | 13 | 103.179 | KV453138.1 | 9041938 | 18-scf00300 | 18 |
| AX-158142643 | 13 | 103.179 | KV453138.1 | 9044473 | 18-scf00300 | 18 |
| AX-158142647 | 13 | 103.179 | KV453138.1 | 9048732 | 18-scf00300 | 18 |
| AX-158142648 | 13 | 103.179 | KV453138.1 | 9050884 | 18-scf00300 | 18 |
| AX-158142649 | 13 | 103.179 | KV453138.1 | 9051671 | 18-scf00300 | 18 |
| AX-158412156 | 13 | 103.179 | KV453138.1 | 9053040 | 18-scf00300 | 18 |
| AX-157831481 | 13 | 103.179 | KV453138.1 | 9054255 | 18-scf00300 | 18 |
| AX-158142650 | 13 | 103.179 | KV453138.1 | 9055443 | 18-scf00300 | 18 |
| AX-158142651 | 13 | 103.179 | KV453138.1 | 9056011 | 18-scf00300 | 18 |
| AX-158142667 | 13 | 103.179 | KV453138.1 | 9069003 | 18-scf00300 | 18 |
| AX-158412159 | 13 | 103.179 | KV453138.1 | 9098763 | 18-scf00300 | 18 |
| AX-158142652 | 13 | 103.397 | KV453138.1 | 9057873 | 18-scf00300 | 18 |
| AX-158142653 | 13 | 103.616 | KV453138.1 | 9058468 | 18-scf00300 | 18 |
| AX-158142654 | 13 | 103.616 | KV453138.1 | 9058853 | 18-scf00300 | 18 |
| AX-157772280 | 13 | 103.616 | KV453138.1 | 9060310 | 18-scf00300 | 18 |
| AX-158142659 | 13 | 103.616 | KV453138.1 | 9062000 | 18-scf00300 | 18 |
| AX-157831482 | 13 | 103.616 | KV453138.1 | 9062055 | 18-scf00300 | 18 |
| AX-157886354 | 13 | 103.616 | KV453138.1 | 9062306 | 18-scf00300 | 18 |
| AX-158142661 | 13 | 103.616 | KV453138.1 | 9062613 | 18-scf00300 | 18 |
| AX-158142673 | 13 | 103.616 | KV453138.1 | 9077731 | 18-scf00300 | 18 |
| AX-157831489 | 13 | 103.616 | KV453138.1 | 9141643 | 18-scf00300 | 18 |
| AX-158142744 | 13 | 103.616 | KV453138.1 | 9177747 | 18-scf00300 | 18 |
| AX-157831505 | 13 | 103.616 | KV453138.1 | 9260187 | 18-scf00300 | 18 |
| AX-158142662 | 13 | 103.834 | KV453138.1 | 9063035 | 18-scf00300 | 18 |
| AX-158385434 | 13 | 103.834 | KV453138.1 | 9063887 | 18-scf00300 | 18 |
| AX-158142665 | 13 | 103.834 | KV453138.1 | 9067653 | 18-scf00300 | 18 |

|              |    |         |            |         |             |    |
|--------------|----|---------|------------|---------|-------------|----|
| AX-158142666 | 13 | 103.834 | KV453138.1 | 9068372 | 18-scf00300 | 18 |
| AX-158142674 | 13 | 103.834 | KV453138.1 | 9078601 | 18-scf00300 | 18 |
| AX-158142675 | 13 | 103.834 | KV453138.1 | 9081894 | 18-scf00300 | 18 |
| AX-158142677 | 13 | 103.834 | KV453138.1 | 9084118 | 18-scf00300 | 18 |
| AX-158142678 | 13 | 103.834 | KV453138.1 | 9084473 | 18-scf00300 | 18 |
| AX-158142679 | 13 | 103.834 | KV453138.1 | 9085303 | 18-scf00300 | 18 |
| AX-158142681 | 13 | 103.834 | KV453138.1 | 9086695 | 18-scf00300 | 18 |
| AX-158142683 | 13 | 103.834 | KV453138.1 | 9088711 | 18-scf00300 | 18 |
| AX-158142684 | 13 | 103.834 | KV453138.1 | 9089712 | 18-scf00300 | 18 |
| AX-158142687 | 13 | 103.834 | KV453138.1 | 9094647 | 18-scf00300 | 18 |
| AX-158142688 | 13 | 103.834 | KV453138.1 | 9095982 | 18-scf00300 | 18 |
| AX-158142689 | 13 | 103.834 | KV453138.1 | 9096293 | 18-scf00300 | 18 |
| AX-158142691 | 13 | 103.877 | KV453138.1 | 9097433 | 18-scf00300 | 18 |
| AX-158142693 | 13 | 103.896 | KV453138.1 | 9100143 | 18-scf00300 | 18 |
| AX-158142694 | 13 | 103.943 | KV453138.1 | 9102649 | 18-scf00300 | 18 |
| AX-158142695 | 13 | 103.943 | KV453138.1 | 9103501 | 18-scf00300 | 18 |
| AX-157886355 | 13 | 103.945 | KV453138.1 | 9104214 | 18-scf00300 | 18 |
| AX-158142696 | 13 | 103.947 | KV453138.1 | 9104594 | 18-scf00300 | 18 |
| AX-158142682 | 13 | 104.304 | KV453138.1 | 9087691 | 18-scf00300 | 18 |
| AX-158142697 | 13 | 104.304 | KV453138.1 | 9105862 | 18-scf00300 | 18 |
| AX-157727845 | 13 | 104.305 | KV453138.1 | 9106723 | 18-scf00300 | 18 |
| AX-158142702 | 13 | 104.306 | KV453138.1 | 9112631 | 18-scf00300 | 18 |
| AX-158142664 | 13 | 104.308 | KV453138.1 | 9066676 | 18-scf00300 | 18 |
| AX-158142692 | 13 | 104.308 | KV453138.1 | 9099766 | 18-scf00300 | 18 |
| AX-157831484 | 13 | 104.308 | KV453138.1 | 9112936 | 18-scf00300 | 18 |
| AX-158142716 | 13 | 104.308 | KV453138.1 | 9134243 | 18-scf00300 | 18 |
| AX-158142717 | 13 | 104.308 | KV453138.1 | 9135772 | 18-scf00300 | 18 |
| AX-157831487 | 13 | 104.308 | KV453138.1 | 9139482 | 18-scf00300 | 18 |
| AX-157831488 | 13 | 104.308 | KV453138.1 | 9140826 | 18-scf00300 | 18 |
| AX-157858018 | 13 | 104.308 | KV453138.1 | 9143424 | 18-scf00300 | 18 |
| AX-158142737 | 13 | 104.308 | KV453138.1 | 9168801 | 18-scf00300 | 18 |
| AX-157716627 | 13 | 104.308 | KV453138.1 | 9172986 | 18-scf00300 | 18 |
| AX-158142747 | 13 | 104.308 | KV453138.1 | 9182780 | 18-scf00300 | 18 |
| AX-158142753 | 13 | 104.308 | KV453138.1 | 9196960 | 18-scf00300 | 18 |
| AX-158142761 | 13 | 104.308 | KV453138.1 | 9206972 | 18-scf00300 | 18 |
| AX-158142855 | 13 | 104.308 | KV453138.1 | 9342152 | 18-scf00300 | 18 |
| AX-158142701 | 13 | 104.397 | KV453138.1 | 9111307 | 18-scf00300 | 18 |
| AX-158142720 | 13 | 104.397 | KV453138.1 | 9142492 | 18-scf00300 | 18 |
| AX-157871613 | 13 | 104.397 | KV453138.1 | 9155962 | 18-scf00300 | 18 |
| AX-158142734 | 13 | 104.397 | KV453138.1 | 9164374 | 18-scf00300 | 18 |
| AX-158142740 | 13 | 104.397 | KV453138.1 | 9173094 | 18-scf00300 | 18 |
| AX-157831490 | 13 | 104.49  | KV453138.1 | 9148061 | 18-scf00300 | 18 |
| AX-158142723 | 13 | 104.49  | KV453138.1 | 9148462 | 18-scf00300 | 18 |
| AX-158142726 | 13 | 104.49  | KV453138.1 | 9151849 | 18-scf00300 | 18 |
| AX-158142727 | 13 | 104.49  | KV453138.1 | 9153354 | 18-scf00300 | 18 |
| AX-157831491 | 13 | 104.49  | KV453138.1 | 9156253 | 18-scf00300 | 18 |
| AX-157831492 | 13 | 104.49  | KV453138.1 | 9156372 | 18-scf00300 | 18 |
| AX-157831494 | 13 | 104.49  | KV453138.1 | 9156664 | 18-scf00300 | 18 |
| AX-158142731 | 13 | 104.49  | KV453138.1 | 9159499 | 18-scf00300 | 18 |
| AX-157831496 | 13 | 104.49  | KV453138.1 | 9164909 | 18-scf00300 | 18 |
| AX-158142732 | 13 | 104.534 | KV453138.1 | 9159877 | 18-scf00300 | 18 |

|              |    |         |            |         |             |    |
|--------------|----|---------|------------|---------|-------------|----|
| AX-158142733 | 13 | 104.57  | KV453138.1 | 9161204 | 18-scf00300 | 18 |
| AX-158142736 | 13 | 104.599 | KV453138.1 | 9168201 | 18-scf00300 | 18 |
| AX-157831499 | 13 | 104.668 | KV453138.1 | 9171360 | 18-scf00300 | 18 |
| AX-158142715 | 13 | 104.679 | KV453138.1 | 9133821 | 18-scf00300 | 18 |
| AX-158142728 | 13 | 104.679 | KV453138.1 | 9154237 | 18-scf00300 | 18 |
| AX-157831493 | 13 | 104.679 | KV453138.1 | 9156544 | 18-scf00300 | 18 |
| AX-158142743 | 13 | 104.679 | KV453138.1 | 9177056 | 18-scf00300 | 18 |
| AX-157831501 | 13 | 104.679 | KV453138.1 | 9187031 | 18-scf00300 | 18 |
| AX-158142759 | 13 | 104.679 | KV453138.1 | 9205613 | 18-scf00300 | 18 |
| AX-158142745 | 13 | 104.72  | KV453138.1 | 9178769 | 18-scf00300 | 18 |
| AX-157758483 | 13 | 104.771 | KV453138.1 | 9185756 | 18-scf00300 | 18 |
| AX-158142750 | 13 | 104.817 | KV453138.1 | 9190516 | 18-scf00300 | 18 |
| AX-158385437 | 13 | 104.927 | KV453138.1 | 9191728 | 18-scf00300 | 18 |
| AX-157749968 | 13 | 104.927 | KV453138.1 | 9194703 | 18-scf00300 | 18 |
| AX-158142755 | 13 | 104.927 | KV453138.1 | 9198276 | 18-scf00300 | 18 |
| AX-157831502 | 13 | 104.927 | KV453138.1 | 9198380 | 18-scf00300 | 18 |
| AX-157726609 | 13 | 105.036 | KV453138.1 | 9200542 | 18-scf00300 | 18 |
| AX-158142760 | 13 | 105.094 | KV453138.1 | 9206170 | 18-scf00300 | 18 |
| AX-158142762 | 13 | 105.146 | KV453138.1 | 9208136 | 18-scf00300 | 18 |
| AX-157751119 | 13 | 105.255 | KV453138.1 | 9210064 | 18-scf00300 | 18 |
| AX-158142793 | 13 | 105.255 | KV453138.1 | 9256831 | 18-scf00300 | 18 |
| AX-158142798 | 13 | 105.255 | KV453138.1 | 9264598 | 18-scf00300 | 18 |
| AX-158142814 | 13 | 105.255 | KV453138.1 | 9283231 | 18-scf00300 | 18 |
| AX-157721500 | 13 | 105.364 | KV453138.1 | 9212969 | 18-scf00300 | 18 |
| AX-158142768 | 13 | 105.364 | KV453138.1 | 9214984 | 18-scf00300 | 18 |
| AX-158142769 | 13 | 105.364 | KV453138.1 | 9216025 | 18-scf00300 | 18 |
| AX-158380327 | 13 | 105.364 | KV453138.1 | 9219860 | 18-scf00300 | 18 |
| AX-157866355 | 13 | 105.364 | KV453138.1 | 9258712 | 18-scf00300 | 18 |
| AX-158142818 | 13 | 105.364 | KV453138.1 | 9291597 | 18-scf00300 | 18 |
| AX-158142771 | 13 | 105.418 | KV453138.1 | 9220623 | 18-scf00300 | 18 |
| AX-157757128 | 13 | 105.473 | KV453138.1 | 9227162 | 18-scf00300 | 18 |
| AX-157758252 | 13 | 105.473 | KV453138.1 | 9231456 | 18-scf00300 | 18 |
| AX-158142774 | 13 | 105.473 | KV453138.1 | 9232892 | 18-scf00300 | 18 |
| AX-158142775 | 13 | 105.473 | KV453138.1 | 9234107 | 18-scf00300 | 18 |
| AX-158142777 | 13 | 105.473 | KV453138.1 | 9235350 | 18-scf00300 | 18 |
| AX-158142778 | 13 | 105.473 | KV453138.1 | 9235616 | 18-scf00300 | 18 |
| AX-158142780 | 13 | 105.473 | KV453138.1 | 9236378 | 18-scf00300 | 18 |
| AX-158142781 | 13 | 105.473 | KV453138.1 | 9237988 | 18-scf00300 | 18 |
| AX-158142785 | 13 | 105.625 | KV453138.1 | 9246995 | 18-scf00300 | 18 |
| AX-158142787 | 13 | 105.629 | KV453138.1 | 9250141 | 18-scf00300 | 18 |
| AX-158142788 | 13 | 105.868 | KV453138.1 | 9250601 | 18-scf00300 | 18 |
| AX-158142799 | 13 | 105.868 | KV453138.1 | 9265596 | 18-scf00300 | 18 |
| AX-158142794 | 13 | 106.02  | KV453138.1 | 9259139 | 18-scf00300 | 18 |
| AX-158142797 | 13 | 106.02  | KV453138.1 | 9263212 | 18-scf00300 | 18 |
| AX-158142800 | 13 | 106.02  | KV453138.1 | 9266733 | 18-scf00300 | 18 |
| AX-158142803 | 13 | 106.02  | KV453138.1 | 9269219 | 18-scf00300 | 18 |
| AX-158142806 | 13 | 106.02  | KV453138.1 | 9273429 | 18-scf00300 | 18 |
| AX-158142808 | 13 | 106.02  | KV453138.1 | 9277596 | 18-scf00300 | 18 |
| AX-158142811 | 13 | 106.02  | KV453138.1 | 9279543 | 18-scf00300 | 18 |
| AX-158142813 | 13 | 106.02  | KV453138.1 | 9282478 | 18-scf00300 | 18 |
| AX-158142815 | 13 | 106.02  | KV453138.1 | 9285645 | 18-scf00300 | 18 |

|              |    |         |            |          |             |    |
|--------------|----|---------|------------|----------|-------------|----|
| AX-158142816 | 13 | 106.02  | KV453138.1 | 9289981  | 18-scf00300 | 18 |
| AX-158142817 | 13 | 106.02  | KV453138.1 | 9290890  | 18-scf00300 | 18 |
| AX-158142820 | 13 | 106.02  | KV453138.1 | 9292464  | 18-scf00300 | 18 |
| AX-158142822 | 13 | 106.02  | KV453138.1 | 9294053  | 18-scf00300 | 18 |
| AX-158142823 | 13 | 106.02  | KV453138.1 | 9294782  | 18-scf00300 | 18 |
| AX-158142824 | 13 | 106.02  | KV453138.1 | 9295178  | 18-scf00300 | 18 |
| AX-158142827 | 13 | 106.02  | KV453138.1 | 9298477  | 18-scf00300 | 18 |
| AX-158142834 | 13 | 106.02  | KV453138.1 | 9304285  | 18-scf00300 | 18 |
| AX-158142835 | 13 | 106.02  | KV453138.1 | 9306943  | 18-scf00300 | 18 |
| AX-158142836 | 13 | 106.02  | KV453138.1 | 9307302  | 18-scf00300 | 18 |
| AX-158142837 | 13 | 106.02  | KV453138.1 | 9312999  | 18-scf00300 | 18 |
| AX-158142838 | 13 | 106.02  | KV453138.1 | 9315205  | 18-scf00300 | 18 |
| AX-158142840 | 13 | 106.02  | KV453138.1 | 9319655  | 18-scf00300 | 18 |
| AX-158142843 | 13 | 106.02  | KV453138.1 | 9323163  | 18-scf00300 | 18 |
| AX-158142845 | 13 | 106.02  | KV453138.1 | 9326693  | 18-scf00300 | 18 |
| AX-158142846 | 13 | 106.02  | KV453138.1 | 9327952  | 18-scf00300 | 18 |
| AX-157716400 | 13 | 106.02  | KV453138.1 | 9328813  | 18-scf00300 | 18 |
| AX-158142847 | 13 | 106.02  | KV453138.1 | 9331204  | 18-scf00300 | 18 |
| AX-158142848 | 13 | 106.02  | KV453138.1 | 9333269  | 18-scf00300 | 18 |
| AX-158142854 | 13 | 106.02  | KV453138.1 | 9339423  | 18-scf00300 | 18 |
| AX-158142859 | 13 | 106.02  | KV453138.1 | 9348887  | 18-scf00300 | 18 |
| AX-158142867 | 13 | 106.02  | KV453138.1 | 9355148  | 18-scf00300 | 18 |
| AX-158142871 | 13 | 106.02  | KV453138.1 | 9358813  | 18-scf00300 | 18 |
| AX-158142891 | 13 | 106.02  | KV453138.1 | 9389645  | 18-scf00300 | 18 |
| AX-158142902 | 13 | 106.02  | KV453138.1 | 9405065  | 18-scf00300 | 18 |
| AX-158142916 | 13 | 106.02  | KV453138.1 | 9421594  | 18-scf00300 | 18 |
| AX-158142944 | 13 | 106.02  | KV453138.1 | 9456311  | 18-scf00300 | 18 |
| AX-158142969 | 13 | 106.02  | KV453138.1 | 9486659  | 18-scf00300 | 18 |
| AX-157858019 | 13 | 106.02  | KV453138.1 | 9496059  | 18-scf00300 | 18 |
| AX-158142991 | 13 | 106.02  | KV453138.1 | 9518998  | 18-scf00300 | 18 |
| AX-157831510 | 13 | 106.02  | KV453138.1 | 9547661  | 18-scf00300 | 18 |
| AX-157831513 | 13 | 106.02  | KV453138.1 | 9551382  | 18-scf00300 | 18 |
| AX-157751204 | 13 | 106.02  | KV453138.1 | 9572560  | 18-scf00300 | 18 |
| AX-158143229 | 13 | 106.02  | KV453138.1 | 9890632  | 18-scf00300 | 18 |
| AX-158143231 | 13 | 106.02  | KV453138.1 | 9892637  | 18-scf00300 | 18 |
| AX-157858022 | 13 | 106.02  | KV453138.1 | 9910318  | 18-scf00300 | 18 |
| AX-158143286 | 13 | 106.02  | KV453138.1 | 9975549  | 18-scf00300 | 18 |
| AX-158143295 | 13 | 106.02  | KV453138.1 | 10001962 | 18-scf00300 | 18 |
| AX-158143307 | 13 | 106.02  | KV453138.1 | 10024924 | 18-scf00300 | 18 |
| AX-158143316 | 13 | 106.02  | KV453138.1 | 10041013 | 18-scf00300 | 18 |
| AX-158143347 | 13 | 106.02  | KV453138.1 | 10115714 | 18-scf00300 | 18 |
| AX-157831562 | 13 | 106.02  | KV453138.1 | 10123047 | 18-scf00300 | 18 |
| AX-158142852 | 13 | 106.1   | KV453138.1 | 9336250  | 18-scf00300 | 18 |
| AX-158412162 | 13 | 106.129 | KV453138.1 | 9220157  | 18-scf00300 | 18 |
| AX-158142784 | 13 | 106.129 | KV453138.1 | 9243073  | 18-scf00300 | 18 |
| AX-158142796 | 13 | 106.129 | KV453138.1 | 9262161  | 18-scf00300 | 18 |
| AX-158142809 | 13 | 106.129 | KV453138.1 | 9278104  | 18-scf00300 | 18 |
| AX-158142810 | 13 | 106.129 | KV453138.1 | 9278501  | 18-scf00300 | 18 |
| AX-158142826 | 13 | 106.129 | KV453138.1 | 9297607  | 18-scf00300 | 18 |
| AX-158142844 | 13 | 106.129 | KV453138.1 | 9323866  | 18-scf00300 | 18 |
| AX-158142851 | 13 | 106.129 | KV453138.1 | 9335395  | 18-scf00300 | 18 |

|              |    |         |             |         |             |    |
|--------------|----|---------|-------------|---------|-------------|----|
| AX-158142856 | 13 | 106.129 | KV453138.1  | 9343606 | 18-scf00300 | 18 |
| AX-158142860 | 13 | 106.129 | KV453138.1  | 9349971 | 18-scf00300 | 18 |
| AX-158142861 | 13 | 106.129 | KV453138.1  | 9350966 | 18-scf00300 | 18 |
| AX-158142863 | 13 | 106.129 | KV453138.1  | 9351992 | 18-scf00300 | 18 |
| AX-158142865 | 13 | 106.129 | KV453138.1  | 9352871 | 18-scf00300 | 18 |
| AX-158142868 | 13 | 106.129 | KV453138.1  | 9355392 | 18-scf00300 | 18 |
| AX-158142870 | 13 | 106.129 | KV453138.1  | 9357959 | 18-scf00300 | 18 |
| AX-158142882 | 13 | 106.129 | KV453138.1  | 9378907 | 18-scf00300 | 18 |
| AX-157871614 | 13 | 106.129 | KV453138.1  | 9426679 | 18-scf00300 | 18 |
| AX-158142975 | 13 | 106.129 | KV453138.1  | 9492539 | 18-scf00300 | 18 |
| AX-157706484 | 13 | 106.129 | 3ML01032321 | 378     | scf07936_1  | UN |
| AX-158142872 | 13 | 106.19  | KV453138.1  | 9359300 | 18-scf00300 | 18 |
| AX-158142970 | 13 | 106.19  | KV453138.1  | 9487105 | 18-scf00300 | 18 |
| AX-158142873 | 13 | 106.238 | KV453138.1  | 9365612 | 18-scf00300 | 18 |
| AX-158142874 | 13 | 106.238 | KV453138.1  | 9367521 | 18-scf00300 | 18 |
| AX-158142875 | 13 | 106.238 | KV453138.1  | 9370126 | 18-scf00300 | 18 |
| AX-158142876 | 13 | 106.238 | KV453138.1  | 9370636 | 18-scf00300 | 18 |
| AX-158142877 | 13 | 106.238 | KV453138.1  | 9371955 | 18-scf00300 | 18 |
| AX-158142880 | 13 | 106.238 | KV453138.1  | 9377219 | 18-scf00300 | 18 |
| AX-158142884 | 13 | 106.238 | KV453138.1  | 9380735 | 18-scf00300 | 18 |
| AX-158142886 | 13 | 106.238 | KV453138.1  | 9383773 | 18-scf00300 | 18 |
| AX-158142887 | 13 | 106.238 | KV453138.1  | 9384291 | 18-scf00300 | 18 |
| AX-158142888 | 13 | 106.238 | KV453138.1  | 9385064 | 18-scf00300 | 18 |
| AX-158142889 | 13 | 106.238 | KV453138.1  | 9385860 | 18-scf00300 | 18 |
| AX-158142892 | 13 | 106.238 | KV453138.1  | 9390416 | 18-scf00300 | 18 |
| AX-158142893 | 13 | 106.238 | KV453138.1  | 9391677 | 18-scf00300 | 18 |
| AX-158142894 | 13 | 106.238 | KV453138.1  | 9393575 | 18-scf00300 | 18 |
| AX-158142896 | 13 | 106.238 | KV453138.1  | 9397363 | 18-scf00300 | 18 |
| AX-158142897 | 13 | 106.238 | KV453138.1  | 9398721 | 18-scf00300 | 18 |
| AX-158142901 | 13 | 106.238 | KV453138.1  | 9404774 | 18-scf00300 | 18 |
| AX-158142912 | 13 | 106.238 | KV453138.1  | 9417092 | 18-scf00300 | 18 |
| AX-157742924 | 13 | 106.238 | KV453138.1  | 9417766 | 18-scf00300 | 18 |
| AX-158142920 | 13 | 106.238 | KV453138.1  | 9428021 | 18-scf00300 | 18 |
| AX-158142928 | 13 | 106.238 | KV453138.1  | 9434830 | 18-scf00300 | 18 |
| AX-158142939 | 13 | 106.238 | KV453138.1  | 9450569 | 18-scf00300 | 18 |
| AX-158142940 | 13 | 106.238 | KV453138.1  | 9451217 | 18-scf00300 | 18 |
| AX-158142942 | 13 | 106.238 | KV453138.1  | 9453691 | 18-scf00300 | 18 |
| AX-158142966 | 13 | 106.238 | KV453138.1  | 9481500 | 18-scf00300 | 18 |
| AX-158143036 | 13 | 106.238 | KV453138.1  | 9612703 | 18-scf00300 | 18 |
| AX-158142904 | 13 | 106.347 | KV453138.1  | 9406853 | 18-scf00300 | 18 |
| AX-158142906 | 13 | 106.347 | KV453138.1  | 9410062 | 18-scf00300 | 18 |
| AX-158142909 | 13 | 106.347 | KV453138.1  | 9414429 | 18-scf00300 | 18 |
| AX-158142911 | 13 | 106.347 | KV453138.1  | 9416548 | 18-scf00300 | 18 |
| AX-158142914 | 13 | 106.347 | KV453138.1  | 9418769 | 18-scf00300 | 18 |
| AX-158142917 | 13 | 106.347 | KV453138.1  | 9422481 | 18-scf00300 | 18 |
| AX-158142918 | 13 | 106.347 | KV453138.1  | 9424780 | 18-scf00300 | 18 |
| AX-158142919 | 13 | 106.347 | KV453138.1  | 9425881 | 18-scf00300 | 18 |
| AX-158142921 | 13 | 106.347 | KV453138.1  | 9428594 | 18-scf00300 | 18 |
| AX-158142923 | 13 | 106.347 | KV453138.1  | 9430030 | 18-scf00300 | 18 |
| AX-158142925 | 13 | 106.347 | KV453138.1  | 9430638 | 18-scf00300 | 18 |
| AX-157774616 | 13 | 106.347 | KV453138.1  | 9431502 | 18-scf00300 | 18 |

|              |    |         |            |         |             |    |
|--------------|----|---------|------------|---------|-------------|----|
| AX-157831506 | 13 | 106.347 | KV453138.1 | 9433995 | 18-scf00300 | 18 |
| AX-157831507 | 13 | 106.347 | KV453138.1 | 9434972 | 18-scf00300 | 18 |
| AX-158142937 | 13 | 106.347 | KV453138.1 | 9448551 | 18-scf00300 | 18 |
| AX-158142941 | 13 | 106.347 | KV453138.1 | 9452033 | 18-scf00300 | 18 |
| AX-157708037 | 13 | 106.347 | KV453138.1 | 9465511 | 18-scf00300 | 18 |
| AX-157757837 | 13 | 106.347 | KV453138.1 | 9495230 | 18-scf00300 | 18 |
| AX-158142910 | 13 | 106.456 | KV453138.1 | 9414806 | 18-scf00300 | 18 |
| AX-158142915 | 13 | 106.456 | KV453138.1 | 9420698 | 18-scf00300 | 18 |
| AX-157831508 | 13 | 106.456 | KV453138.1 | 9438888 | 18-scf00300 | 18 |
| AX-158142930 | 13 | 106.456 | KV453138.1 | 9440461 | 18-scf00300 | 18 |
| AX-158142931 | 13 | 106.456 | KV453138.1 | 9441582 | 18-scf00300 | 18 |
| AX-158142932 | 13 | 106.456 | KV453138.1 | 9442057 | 18-scf00300 | 18 |
| AX-158142935 | 13 | 106.456 | KV453138.1 | 9444803 | 18-scf00300 | 18 |
| AX-158142938 | 13 | 106.456 | KV453138.1 | 9450215 | 18-scf00300 | 18 |
| AX-158142943 | 13 | 106.456 | KV453138.1 | 9455545 | 18-scf00300 | 18 |
| AX-158142945 | 13 | 106.456 | KV453138.1 | 9457307 | 18-scf00300 | 18 |
| AX-158142947 | 13 | 106.456 | KV453138.1 | 9460403 | 18-scf00300 | 18 |
| AX-158142949 | 13 | 106.456 | KV453138.1 | 9461303 | 18-scf00300 | 18 |
| AX-158142950 | 13 | 106.456 | KV453138.1 | 9462138 | 18-scf00300 | 18 |
| AX-158142951 | 13 | 106.456 | KV453138.1 | 9462573 | 18-scf00300 | 18 |
| AX-158142952 | 13 | 106.456 | KV453138.1 | 9464257 | 18-scf00300 | 18 |
| AX-158142954 | 13 | 106.456 | KV453138.1 | 9467361 | 18-scf00300 | 18 |
| AX-158142958 | 13 | 106.456 | KV453138.1 | 9473491 | 18-scf00300 | 18 |
| AX-158142961 | 13 | 106.456 | KV453138.1 | 9476958 | 18-scf00300 | 18 |
| AX-157771748 | 13 | 106.456 | KV453138.1 | 9482910 | 18-scf00300 | 18 |
| AX-158142967 | 13 | 106.456 | KV453138.1 | 9483559 | 18-scf00300 | 18 |
| AX-158142973 | 13 | 106.456 | KV453138.1 | 9491553 | 18-scf00300 | 18 |
| AX-157752275 | 13 | 106.456 | KV453138.1 | 9595659 | 18-scf00300 | 18 |
| AX-158143029 | 13 | 106.456 | KV453138.1 | 9607958 | 18-scf00300 | 18 |
| AX-158143064 | 13 | 106.456 | KV453138.1 | 9652056 | 18-scf00300 | 18 |
| AX-158143082 | 13 | 106.456 | KV453138.1 | 9668474 | 18-scf00300 | 18 |
| AX-158143085 | 13 | 106.456 | KV453138.1 | 9670691 | 18-scf00300 | 18 |
| AX-158143108 | 13 | 106.456 | KV453138.1 | 9704631 | 18-scf00300 | 18 |
| AX-158143115 | 13 | 106.456 | KV453138.1 | 9715919 | 18-scf00300 | 18 |
| AX-158142839 | 13 | 106.529 | KV453138.1 | 9317267 | 18-scf00300 | 18 |
| AX-158142977 | 13 | 106.529 | KV453138.1 | 9497028 | 18-scf00300 | 18 |
| AX-158142857 | 13 | 106.566 | KV453138.1 | 9344708 | 18-scf00300 | 18 |
| AX-158142978 | 13 | 106.566 | KV453138.1 | 9497704 | 18-scf00300 | 18 |
| AX-158142980 | 13 | 106.566 | KV453138.1 | 9499210 | 18-scf00300 | 18 |
| AX-158142981 | 13 | 106.566 | KV453138.1 | 9499569 | 18-scf00300 | 18 |
| AX-158142983 | 13 | 106.566 | KV453138.1 | 9503682 | 18-scf00300 | 18 |
| AX-157712955 | 13 | 106.675 | KV453138.1 | 9510493 | 18-scf00300 | 18 |
| AX-158142988 | 13 | 106.675 | KV453138.1 | 9512434 | 18-scf00300 | 18 |
| AX-157770730 | 13 | 106.675 | KV453138.1 | 9512553 | 18-scf00300 | 18 |
| AX-157750827 | 13 | 106.675 | KV453138.1 | 9518910 | 18-scf00300 | 18 |
| AX-157748838 | 13 | 106.675 | KV453138.1 | 9521509 | 18-scf00300 | 18 |
| AX-158142994 | 13 | 106.675 | KV453138.1 | 9527214 | 18-scf00300 | 18 |
| AX-157741008 | 13 | 106.675 | KV453138.1 | 9530208 | 18-scf00300 | 18 |
| AX-157696322 | 13 | 106.675 | KV453138.1 | 9530383 | 18-scf00300 | 18 |
| AX-158142995 | 13 | 106.675 | KV453138.1 | 9532188 | 18-scf00300 | 18 |
| AX-158142957 | 13 | 107.002 | KV453138.1 | 9470924 | 18-scf00300 | 18 |

|              |    |         |            |          |             |    |
|--------------|----|---------|------------|----------|-------------|----|
| AX-158142959 | 13 | 107.002 | KV453138.1 | 9474968  | 18-scf00300 | 18 |
| AX-158142987 | 13 | 107.002 | KV453138.1 | 9509553  | 18-scf00300 | 18 |
| AX-158143003 | 13 | 107.002 | KV453138.1 | 9555213  | 18-scf00300 | 18 |
| AX-158143045 | 13 | 107.002 | KV453138.1 | 9626302  | 18-scf00300 | 18 |
| AX-157775054 | 13 | 107.002 | KV453138.1 | 9716724  | 18-scf00300 | 18 |
| AX-157831541 | 13 | 107.002 | KV453138.1 | 9959498  | 18-scf00300 | 18 |
| AX-158143004 | 13 | 107.003 | KV453138.1 | 9555512  | 18-scf00300 | 18 |
| AX-158143005 | 13 | 107.003 | KV453138.1 | 9557511  | 18-scf00300 | 18 |
| AX-158143007 | 13 | 107.003 | KV453138.1 | 9559479  | 18-scf00300 | 18 |
| AX-157831515 | 13 | 107.003 | KV453138.1 | 9560548  | 18-scf00300 | 18 |
| AX-157775221 | 13 | 107.003 | KV453138.1 | 9568879  | 18-scf00300 | 18 |
| AX-158143009 | 13 | 107.003 | KV453138.1 | 9569472  | 18-scf00300 | 18 |
| AX-158143011 | 13 | 107.003 | KV453138.1 | 9572829  | 18-scf00300 | 18 |
| AX-157743625 | 13 | 107.003 | KV453138.1 | 9574543  | 18-scf00300 | 18 |
| AX-158143013 | 13 | 107.003 | KV453138.1 | 9577895  | 18-scf00300 | 18 |
| AX-158143016 | 13 | 107.003 | KV453138.1 | 9581472  | 18-scf00300 | 18 |
| AX-157714934 | 13 | 107.003 | KV453138.1 | 9582178  | 18-scf00300 | 18 |
| AX-158143026 | 13 | 107.003 | KV453138.1 | 9604370  | 18-scf00300 | 18 |
| AX-158143028 | 13 | 107.003 | KV453138.1 | 9607173  | 18-scf00300 | 18 |
| AX-158143031 | 13 | 107.003 | KV453138.1 | 9609608  | 18-scf00300 | 18 |
| AX-158143033 | 13 | 107.003 | KV453138.1 | 9611130  | 18-scf00300 | 18 |
| AX-158143038 | 13 | 107.003 | KV453138.1 | 9616963  | 18-scf00300 | 18 |
| AX-157772464 | 13 | 107.003 | KV453138.1 | 9620277  | 18-scf00300 | 18 |
| AX-158143042 | 13 | 107.003 | KV453138.1 | 9621756  | 18-scf00300 | 18 |
| AX-157714961 | 13 | 107.003 | KV453138.1 | 9627881  | 18-scf00300 | 18 |
| AX-157775590 | 13 | 107.033 | KV453138.1 | 9627021  | 18-scf00300 | 18 |
| AX-158143046 | 13 | 107.053 | KV453138.1 | 9627280  | 18-scf00300 | 18 |
| AX-157831516 | 13 | 107.083 | KV453138.1 | 9564214  | 18-scf00300 | 18 |
| AX-158143010 | 13 | 107.083 | KV453138.1 | 9570493  | 18-scf00300 | 18 |
| AX-157831518 | 13 | 107.083 | KV453138.1 | 9620754  | 18-scf00300 | 18 |
| AX-158143043 | 13 | 107.083 | KV453138.1 | 9622484  | 18-scf00300 | 18 |
| AX-157831520 | 13 | 107.083 | KV453138.1 | 9628711  | 18-scf00300 | 18 |
| AX-157714985 | 13 | 107.083 | KV453138.1 | 9751977  | 18-scf00300 | 18 |
| AX-158143272 | 13 | 107.083 | KV453138.1 | 9956834  | 18-scf00300 | 18 |
| AX-158412184 | 13 | 107.083 | KV453138.1 | 9985183  | 18-scf00300 | 18 |
| AX-157831545 | 13 | 107.083 | KV453138.1 | 9992091  | 18-scf00300 | 18 |
| AX-158143390 | 13 | 107.083 | KV453138.1 | 10203360 | 18-scf00300 | 18 |
| AX-158143395 | 13 | 107.083 | KV453138.1 | 10210635 | 18-scf00300 | 18 |
| AX-158143399 | 13 | 107.083 | KV453138.1 | 10217892 | 18-scf00300 | 18 |
| AX-157708038 | 13 | 107.112 | KV453138.1 | 9465383  | 18-scf00300 | 18 |
| AX-157831512 | 13 | 107.112 | KV453138.1 | 9548015  | 18-scf00300 | 18 |
| AX-158142999 | 13 | 107.112 | KV453138.1 | 9548887  | 18-scf00300 | 18 |
| AX-158143001 | 13 | 107.112 | KV453138.1 | 9551092  | 18-scf00300 | 18 |
| AX-157831514 | 13 | 107.112 | KV453138.1 | 9558201  | 18-scf00300 | 18 |
| AX-158143006 | 13 | 107.112 | KV453138.1 | 9559269  | 18-scf00300 | 18 |
| AX-158143008 | 13 | 107.112 | KV453138.1 | 9561421  | 18-scf00300 | 18 |
| AX-158143014 | 13 | 107.112 | KV453138.1 | 9578588  | 18-scf00300 | 18 |
| AX-157713817 | 13 | 107.112 | KV453138.1 | 9583312  | 18-scf00300 | 18 |
| AX-158143018 | 13 | 107.112 | KV453138.1 | 9589263  | 18-scf00300 | 18 |
| AX-157770678 | 13 | 107.112 | KV453138.1 | 9591609  | 18-scf00300 | 18 |
| AX-157772766 | 13 | 107.112 | KV453138.1 | 9605057  | 18-scf00300 | 18 |



|              |    |         |            |          |             |    |
|--------------|----|---------|------------|----------|-------------|----|
| AX-157740548 | 13 | 107.112 | KV453138.1 | 9614604  | 18-scf00300 | 18 |
| AX-158143044 | 13 | 107.112 | KV453138.1 | 9625385  | 18-scf00300 | 18 |
| AX-158143047 | 13 | 107.112 | KV453138.1 | 9628467  | 18-scf00300 | 18 |
| AX-157866358 | 13 | 107.112 | KV453138.1 | 9649653  | 18-scf00300 | 18 |
| AX-157745914 | 13 | 107.112 | KV453138.1 | 9652275  | 18-scf00300 | 18 |
| AX-158143066 | 13 | 107.112 | KV453138.1 | 9654448  | 18-scf00300 | 18 |
| AX-158143071 | 13 | 107.112 | KV453138.1 | 9657902  | 18-scf00300 | 18 |
| AX-158143073 | 13 | 107.112 | KV453138.1 | 9660394  | 18-scf00300 | 18 |
| AX-158143074 | 13 | 107.112 | KV453138.1 | 9661488  | 18-scf00300 | 18 |
| AX-157774726 | 13 | 107.112 | KV453138.1 | 9661574  | 18-scf00300 | 18 |
| AX-158412168 | 13 | 107.112 | KV453138.1 | 9662749  | 18-scf00300 | 18 |
| AX-157719880 | 13 | 107.112 | KV453138.1 | 9663400  | 18-scf00300 | 18 |
| AX-158143076 | 13 | 107.112 | KV453138.1 | 9664496  | 18-scf00300 | 18 |
| AX-158143077 | 13 | 107.112 | KV453138.1 | 9665336  | 18-scf00300 | 18 |
| AX-158143081 | 13 | 107.112 | KV453138.1 | 9668173  | 18-scf00300 | 18 |
| AX-158143084 | 13 | 107.112 | KV453138.1 | 9670098  | 18-scf00300 | 18 |
| AX-157772365 | 13 | 107.112 | KV453138.1 | 9671308  | 18-scf00300 | 18 |
| AX-158143086 | 13 | 107.112 | KV453138.1 | 9671386  | 18-scf00300 | 18 |
| AX-158143087 | 13 | 107.112 | KV453138.1 | 9673538  | 18-scf00300 | 18 |
| AX-158143089 | 13 | 107.112 | KV453138.1 | 9675394  | 18-scf00300 | 18 |
| AX-158143090 | 13 | 107.112 | KV453138.1 | 9675903  | 18-scf00300 | 18 |
| AX-157878239 | 13 | 107.112 | KV453138.1 | 9677203  | 18-scf00300 | 18 |
| AX-157831528 | 13 | 107.112 | KV453138.1 | 9677606  | 18-scf00300 | 18 |
| AX-157693367 | 13 | 107.112 | KV453138.1 | 9678477  | 18-scf00300 | 18 |
| AX-158143094 | 13 | 107.112 | KV453138.1 | 9683135  | 18-scf00300 | 18 |
| AX-158143095 | 13 | 107.112 | KV453138.1 | 9683606  | 18-scf00300 | 18 |
| AX-157755912 | 13 | 107.112 | KV453138.1 | 9684169  | 18-scf00300 | 18 |
| AX-158143096 | 13 | 107.112 | KV453138.1 | 9686677  | 18-scf00300 | 18 |
| AX-157724532 | 13 | 107.112 | KV453138.1 | 9687703  | 18-scf00300 | 18 |
| AX-158143100 | 13 | 107.112 | KV453138.1 | 9693997  | 18-scf00300 | 18 |
| AX-158143101 | 13 | 107.112 | KV453138.1 | 9694702  | 18-scf00300 | 18 |
| AX-158143104 | 13 | 107.112 | KV453138.1 | 9697619  | 18-scf00300 | 18 |
| AX-158143105 | 13 | 107.112 | KV453138.1 | 9699360  | 18-scf00300 | 18 |
| AX-157831529 | 13 | 107.112 | KV453138.1 | 9699775  | 18-scf00300 | 18 |
| AX-158143123 | 13 | 107.112 | KV453138.1 | 9726236  | 18-scf00300 | 18 |
| AX-158143141 | 13 | 107.112 | KV453138.1 | 9748040  | 18-scf00300 | 18 |
| AX-158143182 | 13 | 107.112 | KV453138.1 | 9800183  | 18-scf00300 | 18 |
| AX-158143190 | 13 | 107.112 | KV453138.1 | 9816643  | 18-scf00300 | 18 |
| AX-158412175 | 13 | 107.112 | KV453138.1 | 9826205  | 18-scf00300 | 18 |
| AX-158143201 | 13 | 107.112 | KV453138.1 | 9836783  | 18-scf00300 | 18 |
| AX-158143202 | 13 | 107.112 | KV453138.1 | 9838078  | 18-scf00300 | 18 |
| AX-158143225 | 13 | 107.112 | KV453138.1 | 9879730  | 18-scf00300 | 18 |
| AX-158143255 | 13 | 107.112 | KV453138.1 | 9925547  | 18-scf00300 | 18 |
| AX-158380332 | 13 | 107.112 | KV453138.1 | 9946143  | 18-scf00300 | 18 |
| AX-158143323 | 13 | 107.112 | KV453138.1 | 10065504 | 18-scf00300 | 18 |
| AX-158380333 | 13 | 107.112 | KV453138.1 | 10066325 | 18-scf00300 | 18 |
| AX-158143330 | 13 | 107.112 | KV453138.1 | 10080334 | 18-scf00300 | 18 |
| AX-158143339 | 13 | 107.112 | KV453138.1 | 10099411 | 18-scf00300 | 18 |
| AX-158143346 | 13 | 107.112 | KV453138.1 | 10109507 | 18-scf00300 | 18 |
| AX-158143381 | 13 | 107.112 | KV453138.1 | 10192809 | 18-scf00300 | 18 |
| AX-158143417 | 13 | 107.112 | KV453138.1 | 10257408 | 18-scf00300 | 18 |

|              |    |         |            |          |             |    |
|--------------|----|---------|------------|----------|-------------|----|
| AX-157756006 | 13 | 107.221 | KV453138.1 | 9626137  | 18-scf00300 | 18 |
| AX-158143075 | 13 | 107.221 | KV453138.1 | 9663802  | 18-scf00300 | 18 |
| AX-157831530 | 13 | 107.221 | KV453138.1 | 9700704  | 18-scf00300 | 18 |
| AX-158143107 | 13 | 107.221 | KV453138.1 | 9703749  | 18-scf00300 | 18 |
| AX-157738437 | 13 | 107.221 | KV453138.1 | 9705608  | 18-scf00300 | 18 |
| AX-157772450 | 13 | 107.221 | KV453138.1 | 9708194  | 18-scf00300 | 18 |
| AX-157772932 | 13 | 107.221 | KV453138.1 | 9713377  | 18-scf00300 | 18 |
| AX-158143113 | 13 | 107.221 | KV453138.1 | 9714082  | 18-scf00300 | 18 |
| AX-157756575 | 13 | 107.221 | KV453138.1 | 10016020 | 18-scf00300 | 18 |
| AX-157866362 | 13 | 107.221 | KV453138.1 | 10199104 | 18-scf00300 | 18 |
| AX-157718896 | 13 | 107.221 | KV453138.1 | 10202842 | 18-scf00300 | 18 |
| AX-158143401 | 13 | 107.221 | KV453138.1 | 10219342 | 18-scf00300 | 18 |
| AX-158143403 | 13 | 107.221 | KV453138.1 | 10221350 | 18-scf00300 | 18 |
| AX-158143408 | 13 | 107.221 | KV453138.1 | 10227827 | 18-scf00300 | 18 |
| AX-158143414 | 13 | 107.221 | KV453138.1 | 10254011 | 18-scf00300 | 18 |
| AX-158142984 | 13 | 107.251 | KV453138.1 | 9504265  | 18-scf00300 | 18 |
| AX-157831526 | 13 | 107.251 | KV453138.1 | 9669481  | 18-scf00300 | 18 |
| AX-158143109 | 13 | 107.251 | KV453138.1 | 9704767  | 18-scf00300 | 18 |
| AX-158143114 | 13 | 107.251 | KV453138.1 | 9714650  | 18-scf00300 | 18 |
| AX-158143117 | 13 | 107.251 | KV453138.1 | 9718977  | 18-scf00300 | 18 |
| AX-158143125 | 13 | 107.251 | KV453138.1 | 9727583  | 18-scf00300 | 18 |
| AX-158143129 | 13 | 107.251 | KV453138.1 | 9734293  | 18-scf00300 | 18 |
| AX-158412174 | 13 | 107.251 | KV453138.1 | 9742571  | 18-scf00300 | 18 |
| AX-158143142 | 13 | 107.251 | KV453138.1 | 9749193  | 18-scf00300 | 18 |
| AX-157831535 | 13 | 107.251 | KV453138.1 | 9795240  | 18-scf00300 | 18 |
| AX-158143183 | 13 | 107.251 | KV453138.1 | 9801676  | 18-scf00300 | 18 |
| AX-157831539 | 13 | 107.251 | KV453138.1 | 9869387  | 18-scf00300 | 18 |
| AX-158143217 | 13 | 107.251 | KV453138.1 | 9870280  | 18-scf00300 | 18 |
| AX-158412180 | 13 | 107.251 | KV453138.1 | 9881092  | 18-scf00300 | 18 |
| AX-158143233 | 13 | 107.251 | KV453138.1 | 9895787  | 18-scf00300 | 18 |
| AX-158143389 | 13 | 107.251 | KV453138.1 | 10201541 | 18-scf00300 | 18 |
| AX-158143431 | 13 | 107.251 | KV453138.1 | 10285858 | 18-scf00300 | 18 |
| AX-158412173 | 13 | 107.29  | KV453138.1 | 9718528  | 18-scf00300 | 18 |
| AX-158143119 | 13 | 107.33  | KV453138.1 | 9720366  | 18-scf00300 | 18 |
| AX-158143120 | 13 | 107.33  | KV453138.1 | 9721362  | 18-scf00300 | 18 |
| AX-158143121 | 13 | 107.33  | KV453138.1 | 9724429  | 18-scf00300 | 18 |
| AX-158143122 | 13 | 107.33  | KV453138.1 | 9724748  | 18-scf00300 | 18 |
| AX-158142946 | 13 | 107.439 | KV453138.1 | 9458223  | 18-scf00300 | 18 |
| AX-157751285 | 13 | 107.439 | KV453138.1 | 9509178  | 18-scf00300 | 18 |
| AX-158143103 | 13 | 107.439 | KV453138.1 | 9697213  | 18-scf00300 | 18 |
| AX-158143128 | 13 | 107.439 | KV453138.1 | 9733598  | 18-scf00300 | 18 |
| AX-157741138 | 13 | 107.439 | KV453138.1 | 9736665  | 18-scf00300 | 18 |
| AX-158143134 | 13 | 107.439 | KV453138.1 | 9740027  | 18-scf00300 | 18 |
| AX-158143135 | 13 | 107.439 | KV453138.1 | 9740441  | 18-scf00300 | 18 |
| AX-158143136 | 13 | 107.439 | KV453138.1 | 9741467  | 18-scf00300 | 18 |
| AX-158143137 | 13 | 107.439 | KV453138.1 | 9744089  | 18-scf00300 | 18 |
| AX-158143138 | 13 | 107.439 | KV453138.1 | 9746272  | 18-scf00300 | 18 |
| AX-158143139 | 13 | 107.439 | KV453138.1 | 9746749  | 18-scf00300 | 18 |
| AX-158143140 | 13 | 107.439 | KV453138.1 | 9747398  | 18-scf00300 | 18 |
| AX-158143143 | 13 | 107.439 | KV453138.1 | 9750501  | 18-scf00300 | 18 |
| AX-158143144 | 13 | 107.439 | KV453138.1 | 9750973  | 18-scf00300 | 18 |

|              |    |         |            |          |             |    |
|--------------|----|---------|------------|----------|-------------|----|
| AX-157721520 | 13 | 107.439 | KV453138.1 | 9755979  | 18-scf00300 | 18 |
| AX-157758800 | 13 | 107.439 | KV453138.1 | 9756344  | 18-scf00300 | 18 |
| AX-158143150 | 13 | 107.439 | KV453138.1 | 9762692  | 18-scf00300 | 18 |
| AX-158143151 | 13 | 107.439 | KV453138.1 | 9763593  | 18-scf00300 | 18 |
| AX-158143152 | 13 | 107.439 | KV453138.1 | 9765701  | 18-scf00300 | 18 |
| AX-158143153 | 13 | 107.439 | KV453138.1 | 9767228  | 18-scf00300 | 18 |
| AX-158143154 | 13 | 107.439 | KV453138.1 | 9768437  | 18-scf00300 | 18 |
| AX-158143155 | 13 | 107.439 | KV453138.1 | 9769453  | 18-scf00300 | 18 |
| AX-158143157 | 13 | 107.439 | KV453138.1 | 9771615  | 18-scf00300 | 18 |
| AX-158143167 | 13 | 107.439 | KV453138.1 | 9786959  | 18-scf00300 | 18 |
| AX-158143168 | 13 | 107.439 | KV453138.1 | 9787782  | 18-scf00300 | 18 |
| AX-158143169 | 13 | 107.439 | KV453138.1 | 9788476  | 18-scf00300 | 18 |
| AX-158143170 | 13 | 107.439 | KV453138.1 | 9789244  | 18-scf00300 | 18 |
| AX-158143174 | 13 | 107.439 | KV453138.1 | 9792344  | 18-scf00300 | 18 |
| AX-158143175 | 13 | 107.439 | KV453138.1 | 9792722  | 18-scf00300 | 18 |
| AX-157831534 | 13 | 107.439 | KV453138.1 | 9795108  | 18-scf00300 | 18 |
| AX-157744107 | 13 | 107.439 | KV453138.1 | 9795287  | 18-scf00300 | 18 |
| AX-158143268 | 13 | 107.439 | KV453138.1 | 9949131  | 18-scf00300 | 18 |
| AX-158143343 | 13 | 107.439 | KV453138.1 | 10105548 | 18-scf00300 | 18 |
| AX-158143177 | 13 | 107.549 | KV453138.1 | 9797412  | 18-scf00300 | 18 |
| AX-158143179 | 13 | 107.591 | KV453138.1 | 9798313  | 18-scf00300 | 18 |
| AX-158143130 | 13 | 107.658 | KV453138.1 | 9737443  | 18-scf00300 | 18 |
| AX-157831537 | 13 | 107.658 | KV453138.1 | 9804646  | 18-scf00300 | 18 |
| AX-157773455 | 13 | 107.658 | KV453138.1 | 9814409  | 18-scf00300 | 18 |
| AX-157715744 | 13 | 107.658 | KV453138.1 | 9829874  | 18-scf00300 | 18 |
| AX-158143196 | 13 | 107.658 | KV453138.1 | 9831650  | 18-scf00300 | 18 |
| AX-158143197 | 13 | 107.658 | KV453138.1 | 9832268  | 18-scf00300 | 18 |
| AX-158143199 | 13 | 107.658 | KV453138.1 | 9834946  | 18-scf00300 | 18 |
| AX-157750536 | 13 | 107.658 | KV453138.1 | 9853795  | 18-scf00300 | 18 |
| AX-158143210 | 13 | 107.658 | KV453138.1 | 9854374  | 18-scf00300 | 18 |
| AX-158143211 | 13 | 107.658 | KV453138.1 | 9856195  | 18-scf00300 | 18 |
| AX-158143212 | 13 | 107.658 | KV453138.1 | 9857332  | 18-scf00300 | 18 |
| AX-158143244 | 13 | 107.658 | KV453138.1 | 9914129  | 18-scf00300 | 18 |
| AX-158143248 | 13 | 107.658 | KV453138.1 | 9917528  | 18-scf00300 | 18 |
| AX-158143132 | 13 | 107.767 | KV453138.1 | 9738507  | 18-scf00300 | 18 |
| AX-158143192 | 13 | 107.767 | KV453138.1 | 9818887  | 18-scf00300 | 18 |
| AX-158143205 | 13 | 107.767 | KV453138.1 | 9845682  | 18-scf00300 | 18 |
| AX-158380331 | 13 | 107.767 | KV453138.1 | 9866616  | 18-scf00300 | 18 |
| AX-158143216 | 13 | 107.767 | KV453138.1 | 9869039  | 18-scf00300 | 18 |
| AX-158412177 | 13 | 107.767 | KV453138.1 | 9869572  | 18-scf00300 | 18 |
| AX-158143218 | 13 | 107.767 | KV453138.1 | 9871463  | 18-scf00300 | 18 |
| AX-158143222 | 13 | 107.767 | KV453138.1 | 9876850  | 18-scf00300 | 18 |
| AX-157739271 | 13 | 107.767 | KV453138.1 | 9883414  | 18-scf00300 | 18 |
| AX-157709624 | 13 | 107.767 | KV453138.1 | 9886199  | 18-scf00300 | 18 |
| AX-158143228 | 13 | 107.767 | KV453138.1 | 9888610  | 18-scf00300 | 18 |
| AX-158143230 | 13 | 107.767 | KV453138.1 | 9891567  | 18-scf00300 | 18 |
| AX-157831540 | 13 | 107.767 | KV453138.1 | 9898772  | 18-scf00300 | 18 |
| AX-158143241 | 13 | 107.767 | KV453138.1 | 9912520  | 18-scf00300 | 18 |
| AX-158143262 | 13 | 107.767 | KV453138.1 | 9934637  | 18-scf00300 | 18 |
| AX-158143293 | 13 | 107.767 | KV453138.1 | 9993493  | 18-scf00300 | 18 |
| AX-157831547 | 13 | 107.767 | KV453138.1 | 10014915 | 18-scf00300 | 18 |

|              |    |         |            |          |             |    |
|--------------|----|---------|------------|----------|-------------|----|
| AX-158143352 | 13 | 107.767 | KV453138.1 | 10127632 | 18-scf00300 | 18 |
| AX-158143223 | 13 | 107.807 | KV453138.1 | 9877744  | 18-scf00300 | 18 |
| AX-158143239 | 13 | 107.807 | KV453138.1 | 9909453  | 18-scf00300 | 18 |
| AX-158143242 | 13 | 107.807 | KV453138.1 | 9913038  | 18-scf00300 | 18 |
| AX-158143250 | 13 | 107.807 | KV453138.1 | 9918836  | 18-scf00300 | 18 |
| AX-158143259 | 13 | 107.807 | KV453138.1 | 9929977  | 18-scf00300 | 18 |
| AX-158143271 | 13 | 107.807 | KV453138.1 | 9953129  | 18-scf00300 | 18 |
| AX-158143296 | 13 | 107.807 | KV453138.1 | 10003299 | 18-scf00300 | 18 |
| AX-158143315 | 13 | 107.807 | KV453138.1 | 10040969 | 18-scf00300 | 18 |
| AX-157831563 | 13 | 107.807 | KV453138.1 | 10127782 | 18-scf00300 | 18 |
| AX-158143251 | 13 | 107.842 | KV453138.1 | 9919319  | 18-scf00300 | 18 |
| AX-158143252 | 13 | 107.891 | KV453138.1 | 9921257  | 18-scf00300 | 18 |
| AX-157831546 | 13 | 107.891 | KV453138.1 | 9996461  | 18-scf00300 | 18 |
| AX-158143398 | 13 | 107.891 | KV453138.1 | 10216551 | 18-scf00300 | 18 |
| AX-158143263 | 13 | 107.97  | KV453138.1 | 9936579  | 18-scf00300 | 18 |
| AX-158143270 | 13 | 108.091 | KV453138.1 | 9952091  | 18-scf00300 | 18 |
| AX-158143274 | 13 | 108.211 | KV453138.1 | 9957472  | 18-scf00300 | 18 |
| AX-158142998 | 13 | 108.314 | KV453138.1 | 9536051  | 18-scf00300 | 18 |
| AX-157831532 | 13 | 108.314 | KV453138.1 | 9751930  | 18-scf00300 | 18 |
| AX-157775903 | 13 | 108.314 | KV453138.1 | 9807361  | 18-scf00300 | 18 |
| AX-157871616 | 13 | 108.314 | KV453138.1 | 9820214  | 18-scf00300 | 18 |
| AX-158143207 | 13 | 108.314 | KV453138.1 | 9850034  | 18-scf00300 | 18 |
| AX-158143247 | 13 | 108.314 | KV453138.1 | 9916803  | 18-scf00300 | 18 |
| AX-158143254 | 13 | 108.314 | KV453138.1 | 9923089  | 18-scf00300 | 18 |
| AX-157772421 | 13 | 108.314 | KV453138.1 | 9929325  | 18-scf00300 | 18 |
| AX-158143261 | 13 | 108.314 | KV453138.1 | 9934198  | 18-scf00300 | 18 |
| AX-158143265 | 13 | 108.314 | KV453138.1 | 9939380  | 18-scf00300 | 18 |
| AX-158143275 | 13 | 108.314 | KV453138.1 | 9958614  | 18-scf00300 | 18 |
| AX-157714615 | 13 | 108.314 | KV453138.1 | 9959313  | 18-scf00300 | 18 |
| AX-158143284 | 13 | 108.314 | KV453138.1 | 9973192  | 18-scf00300 | 18 |
| AX-158143287 | 13 | 108.314 | KV453138.1 | 9977855  | 18-scf00300 | 18 |
| AX-158412190 | 13 | 108.314 | KV453138.1 | 9986406  | 18-scf00300 | 18 |
| AX-157831543 | 13 | 108.314 | KV453138.1 | 9986863  | 18-scf00300 | 18 |
| AX-157831544 | 13 | 108.314 | KV453138.1 | 9988248  | 18-scf00300 | 18 |
| AX-158143290 | 13 | 108.314 | KV453138.1 | 9988356  | 18-scf00300 | 18 |
| AX-158143291 | 13 | 108.314 | KV453138.1 | 9988796  | 18-scf00300 | 18 |
| AX-157727913 | 13 | 108.314 | KV453138.1 | 10003493 | 18-scf00300 | 18 |
| AX-158143297 | 13 | 108.314 | KV453138.1 | 10005770 | 18-scf00300 | 18 |
| AX-158143300 | 13 | 108.314 | KV453138.1 | 10009463 | 18-scf00300 | 18 |
| AX-158143301 | 13 | 108.314 | KV453138.1 | 10011098 | 18-scf00300 | 18 |
| AX-158143303 | 13 | 108.314 | KV453138.1 | 10016240 | 18-scf00300 | 18 |
| AX-157745947 | 13 | 108.314 | KV453138.1 | 10019754 | 18-scf00300 | 18 |
| AX-157762123 | 13 | 108.314 | KV453138.1 | 10023937 | 18-scf00300 | 18 |
| AX-157831549 | 13 | 108.314 | KV453138.1 | 10024055 | 18-scf00300 | 18 |
| AX-157831550 | 13 | 108.314 | KV453138.1 | 10025216 | 18-scf00300 | 18 |
| AX-157831551 | 13 | 108.314 | KV453138.1 | 10026869 | 18-scf00300 | 18 |
| AX-158143309 | 13 | 108.314 | KV453138.1 | 10027047 | 18-scf00300 | 18 |
| AX-158143311 | 13 | 108.314 | KV453138.1 | 10029727 | 18-scf00300 | 18 |
| AX-158143312 | 13 | 108.314 | KV453138.1 | 10031322 | 18-scf00300 | 18 |
| AX-158143313 | 13 | 108.314 | KV453138.1 | 10034528 | 18-scf00300 | 18 |
| AX-157715499 | 13 | 108.314 | KV453138.1 | 10036832 | 18-scf00300 | 18 |

|              |    |         |             |          |             |    |
|--------------|----|---------|-------------|----------|-------------|----|
| AX-158143318 | 13 | 108.314 | KV453138.1  | 10046241 | 18-scf00300 | 18 |
| AX-157831554 | 13 | 108.314 | KV453138.1  | 10050007 | 18-scf00300 | 18 |
| AX-158143319 | 13 | 108.314 | KV453138.1  | 10051432 | 18-scf00300 | 18 |
| AX-158143320 | 13 | 108.314 | KV453138.1  | 10063481 | 18-scf00300 | 18 |
| AX-158143322 | 13 | 108.314 | KV453138.1  | 10064873 | 18-scf00300 | 18 |
| AX-158143325 | 13 | 108.314 | KV453138.1  | 10068351 | 18-scf00300 | 18 |
| AX-158143326 | 13 | 108.314 | KV453138.1  | 10071509 | 18-scf00300 | 18 |
| AX-158143327 | 13 | 108.314 | KV453138.1  | 10073712 | 18-scf00300 | 18 |
| AX-157831556 | 13 | 108.314 | KV453138.1  | 10079552 | 18-scf00300 | 18 |
| AX-158143331 | 13 | 108.314 | KV453138.1  | 10081560 | 18-scf00300 | 18 |
| AX-158143332 | 13 | 108.314 | KV453138.1  | 10085291 | 18-scf00300 | 18 |
| AX-158143334 | 13 | 108.314 | KV453138.1  | 10086210 | 18-scf00300 | 18 |
| AX-157758351 | 13 | 108.314 | KV453138.1  | 10086298 | 18-scf00300 | 18 |
| AX-157831558 | 13 | 108.314 | KV453138.1  | 10087245 | 18-scf00300 | 18 |
| AX-158143335 | 13 | 108.314 | KV453138.1  | 10088567 | 18-scf00300 | 18 |
| AX-158143341 | 13 | 108.314 | KV453138.1  | 10102654 | 18-scf00300 | 18 |
| AX-158143348 | 13 | 108.314 | KV453138.1  | 10116493 | 18-scf00300 | 18 |
| AX-158412201 | 13 | 108.314 | KV453138.1  | 10119727 | 18-scf00300 | 18 |
| AX-158143349 | 13 | 108.314 | KV453138.1  | 10123648 | 18-scf00300 | 18 |
| AX-158143350 | 13 | 108.314 | KV453138.1  | 10124144 | 18-scf00300 | 18 |
| AX-158143351 | 13 | 108.314 | KV453138.1  | 10124742 | 18-scf00300 | 18 |
| AX-158408425 | 13 | 108.314 | KV453138.1  | 10129175 | 18-scf00300 | 18 |
| AX-158422874 | 13 | 108.314 | KV453138.1  | 10129346 | 18-scf00300 | 18 |
| AX-158143353 | 13 | 108.314 | KV453138.1  | 10130371 | 18-scf00300 | 18 |
| AX-158143354 | 13 | 108.314 | KV453138.1  | 10131069 | 18-scf00300 | 18 |
| AX-158143355 | 13 | 108.314 | KV453138.1  | 10132234 | 18-scf00300 | 18 |
| AX-158143357 | 13 | 108.314 | KV453138.1  | 10133229 | 18-scf00300 | 18 |
| AX-158143358 | 13 | 108.314 | KV453138.1  | 10134639 | 18-scf00300 | 18 |
| AX-158143359 | 13 | 108.314 | KV453138.1  | 10136117 | 18-scf00300 | 18 |
| AX-158143360 | 13 | 108.314 | KV453138.1  | 10139485 | 18-scf00300 | 18 |
| AX-158143362 | 13 | 108.314 | KV453138.1  | 10141288 | 18-scf00300 | 18 |
| AX-158143364 | 13 | 108.314 | KV453138.1  | 10145780 | 18-scf00300 | 18 |
| AX-157866361 | 13 | 108.314 | KV453138.1  | 10147137 | 18-scf00300 | 18 |
| AX-157858024 | 13 | 108.314 | KV453138.1  | 10149061 | 18-scf00300 | 18 |
| AX-157719024 | 13 | 108.314 | KV453138.1  | 10151835 | 18-scf00300 | 18 |
| AX-157831565 | 13 | 108.314 | KV453138.1  | 10164040 | 18-scf00300 | 18 |
| AX-158143369 | 13 | 108.314 | KV453138.1  | 10164896 | 18-scf00300 | 18 |
| AX-158143370 | 13 | 108.314 | KV453138.1  | 10165933 | 18-scf00300 | 18 |
| AX-158143371 | 13 | 108.314 | KV453138.1  | 10167361 | 18-scf00300 | 18 |
| AX-158143373 | 13 | 108.314 | KV453138.1  | 10168483 | 18-scf00300 | 18 |
| AX-158143375 | 13 | 108.314 | KV453138.1  | 10176670 | 18-scf00300 | 18 |
| AX-157715877 | 13 | 108.314 | KV453138.1  | 10178171 | 18-scf00300 | 18 |
| AX-158143425 | 13 | 108.314 | KV453138.1  | 10267010 | 18-scf00300 | 18 |
| AX-158143427 | 13 | 108.314 | KV453138.1  | 10271827 | 18-scf00300 | 18 |
| AX-158143428 | 13 | 108.314 | KV453138.1  | 10277126 | 18-scf00300 | 18 |
| AX-157707118 | 13 | 108.314 | 3ML01033540 | 488      | scf09195_1  | UN |
| AX-158143382 | 13 | 108.424 | KV453138.1  | 10193441 | 18-scf00300 | 18 |
| AX-158143383 | 13 | 108.424 | KV453138.1  | 10194113 | 18-scf00300 | 18 |
| AX-158143384 | 13 | 108.424 | KV453138.1  | 10194304 | 18-scf00300 | 18 |
| AX-158143385 | 13 | 108.424 | KV453138.1  | 10195985 | 18-scf00300 | 18 |
| AX-158143386 | 13 | 108.424 | KV453138.1  | 10196389 | 18-scf00300 | 18 |

|              |    |         |            |          |             |    |
|--------------|----|---------|------------|----------|-------------|----|
| AX-158143391 | 13 | 108.424 | KV453138.1 | 10204032 | 18-scf00300 | 18 |
| AX-158143392 | 13 | 108.424 | KV453138.1 | 10204425 | 18-scf00300 | 18 |
| AX-157713294 | 13 | 108.424 | KV453138.1 | 10204944 | 18-scf00300 | 18 |
| AX-158143394 | 13 | 108.424 | KV453138.1 | 10209643 | 18-scf00300 | 18 |
| AX-158143397 | 13 | 108.424 | KV453138.1 | 10215965 | 18-scf00300 | 18 |
| AX-158143400 | 13 | 108.424 | KV453138.1 | 10219078 | 18-scf00300 | 18 |
| AX-158385444 | 13 | 108.424 | KV453138.1 | 10220187 | 18-scf00300 | 18 |
| AX-157831567 | 13 | 108.424 | KV453138.1 | 10221786 | 18-scf00300 | 18 |
| AX-157707741 | 13 | 108.424 | KV453138.1 | 10223520 | 18-scf00300 | 18 |
| AX-158143404 | 13 | 108.424 | KV453138.1 | 10224403 | 18-scf00300 | 18 |
| AX-157758186 | 13 | 108.424 | KV453138.1 | 10225643 | 18-scf00300 | 18 |
| AX-158143406 | 13 | 108.424 | KV453138.1 | 10226436 | 18-scf00300 | 18 |
| AX-158143407 | 13 | 108.424 | KV453138.1 | 10227366 | 18-scf00300 | 18 |
| AX-158143409 | 13 | 108.424 | KV453138.1 | 10228048 | 18-scf00300 | 18 |
| AX-158143411 | 13 | 108.424 | KV453138.1 | 10239984 | 18-scf00300 | 18 |
| AX-158143413 | 13 | 108.424 | KV453138.1 | 10248682 | 18-scf00300 | 18 |
| AX-158412208 | 13 | 108.424 | KV453138.1 | 10255702 | 18-scf00300 | 18 |
| AX-158143415 | 13 | 108.424 | KV453138.1 | 10255794 | 18-scf00300 | 18 |
| AX-158143416 | 13 | 108.424 | KV453138.1 | 10256270 | 18-scf00300 | 18 |
| AX-158385445 | 13 | 108.424 | KV453138.1 | 10259889 | 18-scf00300 | 18 |
| AX-158143420 | 13 | 108.424 | KV453138.1 | 10261766 | 18-scf00300 | 18 |
| AX-158143424 | 13 | 108.424 | KV453138.1 | 10266218 | 18-scf00300 | 18 |
| AX-157831568 | 13 | 108.424 | KV453138.1 | 10279583 | 18-scf00300 | 18 |
| AX-158143430 | 13 | 108.424 | KV453138.1 | 10283351 | 18-scf00300 | 18 |
| AX-158143432 | 13 | 108.424 | KV453138.1 | 10287676 | 18-scf00300 | 18 |
| AX-158143437 | 13 | 108.424 | KV453138.1 | 10299870 | 18-scf00300 | 18 |
| AX-158143435 | 13 | 109.138 | KV453138.1 | 10297467 | 18-scf00300 | 18 |
| AX-157744822 | 14 | 0       | KV453315.1 | 11214    | 28-scf00301 | 28 |
| AX-158143485 | 14 | 0       | KV453315.1 | 18184    | 28-scf00301 | 28 |
| AX-157683636 | 14 | 0       | KV453318.1 | 7561     | 28-scf00304 | 28 |
| AX-158143481 | 14 | 0.011   | KV453315.1 | 14184    | 28-scf00301 | 28 |
| AX-157714665 | 14 | 0.011   | KV453315.1 | 24124    | 28-scf00301 | 28 |
| AX-157720806 | 14 | 0.011   | KV453315.1 | 26561    | 28-scf00301 | 28 |
| AX-158143488 | 14 | 0.011   | KV453315.1 | 35730    | 28-scf00301 | 28 |
| AX-157866364 | 14 | 0.011   | KV453315.1 | 38602    | 28-scf00301 | 28 |
| AX-157754066 | 14 | 0.011   | KV453315.1 | 45363    | 28-scf00301 | 28 |
| AX-158417591 | 14 | 0.011   | KV453315.1 | 50751    | 28-scf00301 | 28 |
| AX-158143493 | 14 | 0.011   | KV453315.1 | 53786    | 28-scf00301 | 28 |
| AX-158143494 | 14 | 0.011   | KV453315.1 | 55942    | 28-scf00301 | 28 |
| AX-158143495 | 14 | 0.011   | KV453315.1 | 56901    | 28-scf00301 | 28 |
| AX-158143496 | 14 | 0.011   | KV453315.1 | 57050    | 28-scf00301 | 28 |
| AX-157831589 | 14 | 0.011   | KV453315.1 | 72345    | 28-scf00301 | 28 |
| AX-157774086 | 14 | 0.011   | KV453315.1 | 73601    | 28-scf00301 | 28 |
| AX-158143498 | 14 | 0.011   | KV453315.1 | 74734    | 28-scf00301 | 28 |
| AX-158143499 | 14 | 0.011   | KV453315.1 | 76780    | 28-scf00301 | 28 |
| AX-157750033 | 14 | 0.011   | KV453315.1 | 79865    | 28-scf00301 | 28 |
| AX-158143500 | 14 | 0.011   | KV453315.1 | 80688    | 28-scf00301 | 28 |
| AX-158143501 | 14 | 0.011   | KV453315.1 | 85256    | 28-scf00301 | 28 |
| AX-157878255 | 14 | 0.011   | KV453315.1 | 94797    | 28-scf00301 | 28 |
| AX-157831591 | 14 | 0.011   | KV453315.1 | 117310   | 28-scf00301 | 28 |
| AX-157831592 | 14 | 0.011   | KV453315.1 | 119589   | 28-scf00301 | 28 |

|              |    |       |             |        |             |    |
|--------------|----|-------|-------------|--------|-------------|----|
| AX-157831594 | 14 | 0.011 | KV453315.1  | 125370 | 28-scf00301 | 28 |
| AX-158143508 | 14 | 0.011 | KV453315.1  | 130998 | 28-scf00301 | 28 |
| AX-157831595 | 14 | 0.011 | KV453315.1  | 137217 | 28-scf00301 | 28 |
| AX-158143514 | 14 | 0.011 | KV453315.1  | 142712 | 28-scf00301 | 28 |
| AX-157755991 | 14 | 0.011 | KV453315.1  | 150111 | 28-scf00301 | 28 |
| AX-158143517 | 14 | 0.011 | KV453315.1  | 151495 | 28-scf00301 | 28 |
| AX-158143518 | 14 | 0.011 | KV453315.1  | 153633 | 28-scf00301 | 28 |
| AX-158143519 | 14 | 0.011 | KV453315.1  | 155097 | 28-scf00301 | 28 |
| AX-157680687 | 14 | 0.011 | KV453314.1  | 5038   | 28-scf00302 | 28 |
| AX-157683634 | 14 | 0.011 | KV453314.1  | 13867  | 28-scf00302 | 28 |
| AX-158143523 | 14 | 0.011 | KV453317.1  | 5786   | 28-scf00303 | 28 |
| AX-158143525 | 14 | 0.011 | KV453317.1  | 7045   | 28-scf00303 | 28 |
| AX-158143526 | 14 | 0.011 | KV453317.1  | 8828   | 28-scf00303 | 28 |
| AX-158393034 | 14 | 0.011 | KV453317.1  | 10223  | 28-scf00303 | 28 |
| AX-157740194 | 14 | 0.011 | KV453317.1  | 18001  | 28-scf00303 | 28 |
| AX-157715409 | 14 | 0.011 | KV453317.1  | 22516  | 28-scf00303 | 28 |
| AX-158143530 | 14 | 0.011 | KV453317.1  | 23669  | 28-scf00303 | 28 |
| AX-158143531 | 14 | 0.011 | KV453317.1  | 24281  | 28-scf00303 | 28 |
| AX-158412226 | 14 | 0.011 | KV453317.1  | 108534 | 28-scf00303 | 28 |
| AX-158385449 | 14 | 0.011 | KV453317.1  | 111531 | 28-scf00303 | 28 |
| AX-158143596 | 14 | 0.011 | KV453319.1  | 24858  | 28-scf00306 | 28 |
| AX-157886373 | 14 | 0.011 | KV453319.1  | 264953 | 28-scf00306 | 28 |
| AX-157689721 | 14 | 0.011 | 3ML01031647 | 199    | scf07264_1  | UN |
| AX-157717508 | 14 | 0.23  | KV453315.1  | 14044  | 28-scf00301 | 28 |
| AX-158143483 | 14 | 0.23  | KV453315.1  | 15138  | 28-scf00301 | 28 |
| AX-158143484 | 14 | 0.23  | KV453315.1  | 17978  | 28-scf00301 | 28 |
| AX-158143489 | 14 | 0.23  | KV453315.1  | 36961  | 28-scf00301 | 28 |
| AX-157871619 | 14 | 0.23  | KV453315.1  | 38251  | 28-scf00301 | 28 |
| AX-158143502 | 14 | 0.23  | KV453315.1  | 95181  | 28-scf00301 | 28 |
| AX-158412222 | 14 | 0.23  | KV453315.1  | 116195 | 28-scf00301 | 28 |
| AX-157831597 | 14 | 0.23  | KV453315.1  | 156592 | 28-scf00301 | 28 |
| AX-157747401 | 14 | 0.23  | KV453317.1  | 14592  | 28-scf00303 | 28 |
| AX-158143532 | 14 | 0.23  | KV453317.1  | 26098  | 28-scf00303 | 28 |
| AX-157717840 | 14 | 0.23  | KV453317.1  | 29276  | 28-scf00303 | 28 |
| AX-158143533 | 14 | 0.23  | KV453317.1  | 32284  | 28-scf00303 | 28 |
| AX-157744799 | 14 | 0.23  | KV453317.1  | 32513  | 28-scf00303 | 28 |
| AX-157720411 | 14 | 0.23  | KV453317.1  | 34712  | 28-scf00303 | 28 |
| AX-158143534 | 14 | 0.23  | KV453317.1  | 35630  | 28-scf00303 | 28 |
| AX-158143535 | 14 | 0.23  | KV453317.1  | 49975  | 28-scf00303 | 28 |
| AX-158143540 | 14 | 0.23  | KV453317.1  | 59451  | 28-scf00303 | 28 |
| AX-158143541 | 14 | 0.23  | KV453317.1  | 59971  | 28-scf00303 | 28 |
| AX-158143542 | 14 | 0.23  | KV453317.1  | 61729  | 28-scf00303 | 28 |
| AX-158143544 | 14 | 0.23  | KV453317.1  | 64406  | 28-scf00303 | 28 |
| AX-158143546 | 14 | 0.23  | KV453317.1  | 67107  | 28-scf00303 | 28 |
| AX-158143548 | 14 | 0.23  | KV453317.1  | 67659  | 28-scf00303 | 28 |
| AX-158385446 | 14 | 0.23  | KV453317.1  | 72716  | 28-scf00303 | 28 |
| AX-158143549 | 14 | 0.23  | KV453317.1  | 74965  | 28-scf00303 | 28 |
| AX-157722392 | 14 | 0.23  | KV453317.1  | 75333  | 28-scf00303 | 28 |
| AX-158143550 | 14 | 0.23  | KV453317.1  | 77080  | 28-scf00303 | 28 |
| AX-158143551 | 14 | 0.23  | KV453317.1  | 83225  | 28-scf00303 | 28 |
| AX-158143552 | 14 | 0.23  | KV453317.1  | 84654  | 28-scf00303 | 28 |

|              |    |       |            |        |             |    |
|--------------|----|-------|------------|--------|-------------|----|
| AX-158143553 | 14 | 0.23  | KV453317.1 | 85395  | 28-scf00303 | 28 |
| AX-158143554 | 14 | 0.23  | KV453317.1 | 85833  | 28-scf00303 | 28 |
| AX-157720752 | 14 | 0.23  | KV453317.1 | 87928  | 28-scf00303 | 28 |
| AX-158143559 | 14 | 0.23  | KV453317.1 | 92595  | 28-scf00303 | 28 |
| AX-158385448 | 14 | 0.23  | KV453317.1 | 93002  | 28-scf00303 | 28 |
| AX-158143560 | 14 | 0.23  | KV453317.1 | 93648  | 28-scf00303 | 28 |
| AX-158143561 | 14 | 0.23  | KV453317.1 | 94237  | 28-scf00303 | 28 |
| AX-157878257 | 14 | 0.23  | KV453317.1 | 94514  | 28-scf00303 | 28 |
| AX-158143563 | 14 | 0.23  | KV453317.1 | 96108  | 28-scf00303 | 28 |
| AX-158143564 | 14 | 0.23  | KV453317.1 | 97145  | 28-scf00303 | 28 |
| AX-158143565 | 14 | 0.23  | KV453317.1 | 101084 | 28-scf00303 | 28 |
| AX-158143566 | 14 | 0.23  | KV453317.1 | 102242 | 28-scf00303 | 28 |
| AX-158412225 | 14 | 0.23  | KV453317.1 | 102665 | 28-scf00303 | 28 |
| AX-158143567 | 14 | 0.23  | KV453317.1 | 106848 | 28-scf00303 | 28 |
| AX-158412227 | 14 | 0.23  | KV453317.1 | 109999 | 28-scf00303 | 28 |
| AX-158143569 | 14 | 0.23  | KV453317.1 | 110391 | 28-scf00303 | 28 |
| AX-158143574 | 14 | 0.23  | KV453317.1 | 122918 | 28-scf00303 | 28 |
| AX-158143584 | 14 | 0.23  | KV453317.1 | 150579 | 28-scf00303 | 28 |
| AX-157683637 | 14 | 0.23  | KV453318.1 | 9404   | 28-scf00304 | 28 |
| AX-157683646 | 14 | 0.23  | KV453318.1 | 21832  | 28-scf00304 | 28 |
| AX-157683647 | 14 | 0.23  | KV453318.1 | 22582  | 28-scf00304 | 28 |
| AX-157683653 | 14 | 0.23  | KV453318.1 | 40203  | 28-scf00304 | 28 |
| AX-157680408 | 14 | 0.23  | KV453318.1 | 45407  | 28-scf00304 | 28 |
| AX-157831631 | 14 | 0.23  | KV453319.1 | 315448 | 28-scf00306 | 28 |
| AX-157688468 | 14 | 0.23  | KV453313.1 | 591    | 28-scf01839 | 28 |
| AX-157681526 | 14 | 0.23  | KV453313.1 | 985    | 28-scf01839 | 28 |
| AX-158143575 | 14 | 0.276 | KV453317.1 | 123931 | 28-scf00303 | 28 |
| AX-157708233 | 14 | 0.339 | KV453317.1 | 78808  | 28-scf00303 | 28 |
| AX-158143576 | 14 | 0.339 | KV453317.1 | 126793 | 28-scf00303 | 28 |
| AX-157831602 | 14 | 0.339 | KV453317.1 | 130476 | 28-scf00303 | 28 |
| AX-158143579 | 14 | 0.464 | KV453317.1 | 137857 | 28-scf00303 | 28 |
| AX-158143580 | 14 | 0.464 | KV453317.1 | 138621 | 28-scf00303 | 28 |
| AX-157831603 | 14 | 0.464 | KV453317.1 | 142907 | 28-scf00303 | 28 |
| AX-158412229 | 14 | 0.464 | KV453317.1 | 146185 | 28-scf00303 | 28 |
| AX-157721652 | 14 | 0.464 | KV453319.1 | 315955 | 28-scf00306 | 28 |
| AX-157680689 | 14 | 0.706 | KV453318.1 | 4139   | 28-scf00304 | 28 |
| AX-157683635 | 14 | 0.839 | KV453318.1 | 6010   | 28-scf00304 | 28 |
| AX-157683641 | 14 | 0.839 | KV453318.1 | 14210  | 28-scf00304 | 28 |
| AX-157683643 | 14 | 0.84  | KV453318.1 | 15513  | 28-scf00304 | 28 |
| AX-157681613 | 14 | 0.841 | KV453318.1 | 16096  | 28-scf00304 | 28 |
| AX-158143590 | 14 | 0.841 | KV453319.1 | 15331  | 28-scf00306 | 28 |
| AX-157683649 | 14 | 1.214 | KV453318.1 | 32284  | 28-scf00304 | 28 |
| AX-157680688 | 14 | 1.215 | KV453314.1 | 12760  | 28-scf00302 | 28 |
| AX-157680271 | 14 | 1.215 | KV453318.1 | 5489   | 28-scf00304 | 28 |
| AX-157683650 | 14 | 1.215 | KV453318.1 | 34260  | 28-scf00304 | 28 |
| AX-157683651 | 14 | 1.215 | KV453318.1 | 39112  | 28-scf00304 | 28 |
| AX-157683652 | 14 | 1.215 | KV453318.1 | 39862  | 28-scf00304 | 28 |
| AX-157683654 | 14 | 1.215 | KV453318.1 | 40675  | 28-scf00304 | 28 |
| AX-157679970 | 14 | 1.215 | KV453318.1 | 41246  | 28-scf00304 | 28 |
| AX-157683655 | 14 | 1.215 | KV453318.1 | 42309  | 28-scf00304 | 28 |
| AX-157682160 | 14 | 1.215 | KV453318.1 | 44569  | 28-scf00304 | 28 |



|              |    |       |             |        |             |    |
|--------------|----|-------|-------------|--------|-------------|----|
| AX-157682161 | 14 | 1.215 | KV453318.1  | 47232  | 28-scf00304 | 28 |
| AX-157683658 | 14 | 1.215 | KV453318.1  | 48060  | 28-scf00304 | 28 |
| AX-157683660 | 14 | 1.215 | KV453318.1  | 49155  | 28-scf00304 | 28 |
| AX-157683661 | 14 | 1.215 | KV453318.1  | 49891  | 28-scf00304 | 28 |
| AX-157683664 | 14 | 1.215 | KV453316.1  | 1153   | 28-scf00305 | 28 |
| AX-157680416 | 14 | 1.215 | 3ML01026891 | 1029   | scf02492_1  | UN |
| AX-157688739 | 14 | 1.215 | 3ML01026891 | 1184   | scf02492_1  | UN |
| AX-158143586 | 14 | 1.542 | KV453319.1  | 3136   | 28-scf00306 | 28 |
| AX-158143588 | 14 | 1.542 | KV453319.1  | 7102   | 28-scf00306 | 28 |
| AX-157740781 | 14 | 1.542 | KV453319.1  | 8502   | 28-scf00306 | 28 |
| AX-158143591 | 14 | 1.593 | KV453319.1  | 17638  | 28-scf00306 | 28 |
| AX-158143594 | 14 | 1.651 | KV453319.1  | 19711  | 28-scf00306 | 28 |
| AX-157858032 | 14 | 1.651 | KV453319.1  | 22256  | 28-scf00306 | 28 |
| AX-158143595 | 14 | 1.87  | KV453319.1  | 24068  | 28-scf00306 | 28 |
| AX-157720407 | 14 | 1.87  | KV453319.1  | 28611  | 28-scf00306 | 28 |
| AX-158143600 | 14 | 1.87  | KV453319.1  | 30283  | 28-scf00306 | 28 |
| AX-158143601 | 14 | 1.87  | KV453319.1  | 30881  | 28-scf00306 | 28 |
| AX-158143602 | 14 | 1.87  | KV453319.1  | 33182  | 28-scf00306 | 28 |
| AX-157714889 | 14 | 1.87  | KV453319.1  | 33534  | 28-scf00306 | 28 |
| AX-158143603 | 14 | 1.87  | KV453319.1  | 34689  | 28-scf00306 | 28 |
| AX-157831606 | 14 | 1.87  | KV453319.1  | 36097  | 28-scf00306 | 28 |
| AX-158143605 | 14 | 1.87  | KV453319.1  | 37061  | 28-scf00306 | 28 |
| AX-158143606 | 14 | 1.87  | KV453319.1  | 37804  | 28-scf00306 | 28 |
| AX-158143607 | 14 | 1.87  | KV453319.1  | 38233  | 28-scf00306 | 28 |
| AX-158143608 | 14 | 1.87  | KV453319.1  | 39266  | 28-scf00306 | 28 |
| AX-158143611 | 14 | 1.87  | KV453319.1  | 43320  | 28-scf00306 | 28 |
| AX-158143612 | 14 | 1.87  | KV453319.1  | 43487  | 28-scf00306 | 28 |
| AX-158143613 | 14 | 1.87  | KV453319.1  | 46397  | 28-scf00306 | 28 |
| AX-158143614 | 14 | 1.87  | KV453319.1  | 46817  | 28-scf00306 | 28 |
| AX-158143618 | 14 | 1.87  | KV453319.1  | 51840  | 28-scf00306 | 28 |
| AX-158143638 | 14 | 1.87  | KV453319.1  | 91096  | 28-scf00306 | 28 |
| AX-157831607 | 14 | 1.87  | KV453319.1  | 91140  | 28-scf00306 | 28 |
| AX-158143693 | 14 | 1.87  | KV453319.1  | 205114 | 28-scf00306 | 28 |
| AX-157688176 | 14 | 1.87  | KV453766.1  | 2893   | scf01331    | UN |
| AX-157689136 | 14 | 1.87  | 3ML01028346 | 433    | scf03951_1  | UN |
| AX-158143617 | 14 | 1.871 | KV453319.1  | 49904  | 28-scf00306 | 28 |
| AX-158143491 | 14 | 2.053 | KV453315.1  | 40172  | 28-scf00301 | 28 |
| AX-158143623 | 14 | 2.053 | KV453319.1  | 58760  | 28-scf00306 | 28 |
| AX-158143624 | 14 | 2.237 | KV453319.1  | 63494  | 28-scf00306 | 28 |
| AX-157741738 | 14 | 2.237 | KV453319.1  | 64375  | 28-scf00306 | 28 |
| AX-158143627 | 14 | 2.417 | KV453319.1  | 70516  | 28-scf00306 | 28 |
| AX-158143630 | 14 | 2.417 | KV453319.1  | 78858  | 28-scf00306 | 28 |
| AX-158143631 | 14 | 2.417 | KV453319.1  | 79585  | 28-scf00306 | 28 |
| AX-158143634 | 14 | 2.475 | KV453319.1  | 81639  | 28-scf00306 | 28 |
| AX-158143639 | 14 | 2.527 | KV453319.1  | 91987  | 28-scf00306 | 28 |
| AX-158143640 | 14 | 2.527 | KV453319.1  | 92455  | 28-scf00306 | 28 |
| AX-158143641 | 14 | 2.636 | KV453319.1  | 100048 | 28-scf00306 | 28 |
| AX-157725847 | 14 | 2.636 | KV453319.1  | 102442 | 28-scf00306 | 28 |
| AX-158143643 | 14 | 2.636 | KV453319.1  | 103206 | 28-scf00306 | 28 |
| AX-157752109 | 14 | 2.636 | KV453319.1  | 106763 | 28-scf00306 | 28 |
| AX-157858033 | 14 | 2.936 | KV453319.1  | 109261 | 28-scf00306 | 28 |

|              |    |       |             |        |             |    |
|--------------|----|-------|-------------|--------|-------------|----|
| AX-158143646 | 14 | 2.936 | KV453319.1  | 109586 | 28-scf00306 | 28 |
| AX-157722650 | 14 | 2.936 | KV453319.1  | 112450 | 28-scf00306 | 28 |
| AX-158143649 | 14 | 2.977 | KV453319.1  | 118395 | 28-scf00306 | 28 |
| AX-158143652 | 14 | 3.292 | KV453319.1  | 124259 | 28-scf00306 | 28 |
| AX-158143653 | 14 | 3.292 | KV453319.1  | 125496 | 28-scf00306 | 28 |
| AX-158143654 | 14 | 3.292 | KV453319.1  | 126179 | 28-scf00306 | 28 |
| AX-158143655 | 14 | 3.292 | KV453319.1  | 127419 | 28-scf00306 | 28 |
| AX-158143658 | 14 | 3.292 | KV453319.1  | 129939 | 28-scf00306 | 28 |
| AX-157758788 | 14 | 3.292 | KV453319.1  | 130510 | 28-scf00306 | 28 |
| AX-158143660 | 14 | 3.292 | KV453319.1  | 131145 | 28-scf00306 | 28 |
| AX-157831610 | 14 | 3.292 | KV453319.1  | 137122 | 28-scf00306 | 28 |
| AX-157831611 | 14 | 3.292 | KV453319.1  | 137816 | 28-scf00306 | 28 |
| AX-158143765 | 14 | 3.292 | KV453319.1  | 317009 | 28-scf00306 | 28 |
| AX-158143663 | 14 | 3.401 | KV453319.1  | 142947 | 28-scf00306 | 28 |
| AX-157831614 | 14 | 3.401 | KV453319.1  | 143662 | 28-scf00306 | 28 |
| AX-158143664 | 14 | 3.401 | KV453319.1  | 145656 | 28-scf00306 | 28 |
| AX-158143666 | 14 | 3.45  | KV453319.1  | 147110 | 28-scf00306 | 28 |
| AX-157740536 | 14 | 3.51  | KV453319.1  | 143998 | 28-scf00306 | 28 |
| AX-157831617 | 14 | 3.51  | KV453319.1  | 148883 | 28-scf00306 | 28 |
| AX-157747435 | 14 | 3.51  | KV453319.1  | 148955 | 28-scf00306 | 28 |
| AX-158143669 | 14 | 3.51  | KV453319.1  | 157158 | 28-scf00306 | 28 |
| AX-157831615 | 14 | 3.511 | KV453319.1  | 145028 | 28-scf00306 | 28 |
| AX-157858034 | 14 | 3.511 | KV453319.1  | 157992 | 28-scf00306 | 28 |
| AX-157714053 | 14 | 3.511 | KV453319.1  | 158812 | 28-scf00306 | 28 |
| AX-158143670 | 14 | 3.512 | KV453319.1  | 161839 | 28-scf00306 | 28 |
| AX-157831618 | 14 | 3.838 | KV453319.1  | 166324 | 28-scf00306 | 28 |
| AX-158143672 | 14 | 3.838 | KV453319.1  | 168656 | 28-scf00306 | 28 |
| AX-158143674 | 14 | 3.838 | KV453319.1  | 176395 | 28-scf00306 | 28 |
| AX-158143676 | 14 | 3.838 | KV453319.1  | 176910 | 28-scf00306 | 28 |
| AX-158143677 | 14 | 3.838 | KV453319.1  | 177270 | 28-scf00306 | 28 |
| AX-158143678 | 14 | 3.838 | KV453319.1  | 178229 | 28-scf00306 | 28 |
| AX-158143679 | 14 | 3.838 | KV453319.1  | 179508 | 28-scf00306 | 28 |
| AX-158143683 | 14 | 3.838 | KV453319.1  | 189599 | 28-scf00306 | 28 |
| AX-157746380 | 14 | 3.838 | KV453319.1  | 190377 | 28-scf00306 | 28 |
| AX-158143696 | 14 | 3.838 | KV453319.1  | 210110 | 28-scf00306 | 28 |
| AX-158143703 | 14 | 3.838 | KV453319.1  | 216832 | 28-scf00306 | 28 |
| AX-158143708 | 14 | 3.838 | KV453319.1  | 221804 | 28-scf00306 | 28 |
| AX-157831621 | 14 | 3.838 | KV453319.1  | 235250 | 28-scf00306 | 28 |
| AX-157831626 | 14 | 3.838 | KV453319.1  | 288872 | 28-scf00306 | 28 |
| AX-157866374 | 14 | 3.838 | KV453319.1  | 296858 | 28-scf00306 | 28 |
| AX-158143788 | 14 | 3.838 | KV453319.1  | 361801 | 28-scf00306 | 28 |
| AX-157689633 | 14 | 3.838 | 3ML01030977 | 592    | scf06581_1  | UN |
| AX-157705935 | 14 | 3.838 | 3ML01031266 | 558    | scf06874_1  | UN |
| AX-158143686 | 14 | 3.947 | KV453319.1  | 192776 | 28-scf00306 | 28 |
| AX-158143687 | 14 | 3.947 | KV453319.1  | 193021 | 28-scf00306 | 28 |
| AX-158143688 | 14 | 3.947 | KV453319.1  | 194037 | 28-scf00306 | 28 |
| AX-157708665 | 14 | 3.947 | KV453319.1  | 195062 | 28-scf00306 | 28 |
| AX-158143689 | 14 | 3.947 | KV453319.1  | 195654 | 28-scf00306 | 28 |
| AX-157831620 | 14 | 3.947 | KV453319.1  | 196487 | 28-scf00306 | 28 |
| AX-157774440 | 14 | 3.947 | KV453319.1  | 198877 | 28-scf00306 | 28 |
| AX-157756447 | 14 | 3.947 | KV453319.1  | 201370 | 28-scf00306 | 28 |

|              |    |       |             |        |             |    |
|--------------|----|-------|-------------|--------|-------------|----|
| AX-158143691 | 14 | 3.947 | KV453319.1  | 202145 | 28-scf00306 | 28 |
| AX-158143692 | 14 | 3.947 | KV453319.1  | 202704 | 28-scf00306 | 28 |
| AX-158143694 | 14 | 3.947 | KV453319.1  | 207321 | 28-scf00306 | 28 |
| AX-157750655 | 14 | 3.947 | KV453319.1  | 210885 | 28-scf00306 | 28 |
| AX-158143697 | 14 | 3.947 | KV453319.1  | 211309 | 28-scf00306 | 28 |
| AX-158143700 | 14 | 3.947 | KV453319.1  | 214494 | 28-scf00306 | 28 |
| AX-158143710 | 14 | 3.947 | KV453319.1  | 225090 | 28-scf00306 | 28 |
| AX-158143772 | 14 | 3.947 | KV453319.1  | 330635 | 28-scf00306 | 28 |
| AX-158143715 | 14 | 3.983 | KV453319.1  | 230931 | 28-scf00306 | 28 |
| AX-158143716 | 14 | 4.022 | KV453319.1  | 231331 | 28-scf00306 | 28 |
| AX-158143721 | 14 | 4.056 | KV453319.1  | 245948 | 28-scf00306 | 28 |
| AX-158143724 | 14 | 4.056 | KV453319.1  | 252974 | 28-scf00306 | 28 |
| AX-158143761 | 14 | 4.056 | KV453319.1  | 309891 | 28-scf00306 | 28 |
| AX-158143729 | 14 | 4.132 | KV453319.1  | 260292 | 28-scf00306 | 28 |
| AX-158143731 | 14 | 4.166 | KV453319.1  | 261766 | 28-scf00306 | 28 |
| AX-157722195 | 14 | 4.166 | KV453319.1  | 263621 | 28-scf00306 | 28 |
| AX-157721181 | 14 | 4.166 | KV453319.1  | 267230 | 28-scf00306 | 28 |
| AX-157831625 | 14 | 4.166 | KV453319.1  | 267332 | 28-scf00306 | 28 |
| AX-158143735 | 14 | 4.166 | KV453319.1  | 272659 | 28-scf00306 | 28 |
| AX-157712070 | 14 | 4.166 | 3ML01033343 | 286    | scf08990_1  | UN |
| AX-157747896 | 14 | 4.196 | KV453319.1  | 243979 | 28-scf00306 | 28 |
| AX-158143736 | 14 | 4.196 | KV453319.1  | 272897 | 28-scf00306 | 28 |
| AX-158143737 | 14 | 4.196 | KV453319.1  | 273483 | 28-scf00306 | 28 |
| AX-158143740 | 14 | 4.233 | KV453319.1  | 277180 | 28-scf00306 | 28 |
| AX-158143741 | 14 | 4.275 | KV453319.1  | 278271 | 28-scf00306 | 28 |
| AX-158143742 | 14 | 4.275 | KV453319.1  | 279902 | 28-scf00306 | 28 |
| AX-158143743 | 14 | 4.275 | KV453319.1  | 282566 | 28-scf00306 | 28 |
| AX-157878264 | 14 | 4.275 | KV453319.1  | 288223 | 28-scf00306 | 28 |
| AX-158143746 | 14 | 4.275 | KV453319.1  | 288354 | 28-scf00306 | 28 |
| AX-158143749 | 14 | 4.275 | KV453319.1  | 289790 | 28-scf00306 | 28 |
| AX-157770907 | 14 | 4.275 | KV453319.1  | 291231 | 28-scf00306 | 28 |
| AX-158143750 | 14 | 4.275 | KV453319.1  | 291966 | 28-scf00306 | 28 |
| AX-158143752 | 14 | 4.275 | KV453319.1  | 293282 | 28-scf00306 | 28 |
| AX-158143753 | 14 | 4.275 | KV453319.1  | 293782 | 28-scf00306 | 28 |
| AX-158143754 | 14 | 4.275 | KV453319.1  | 295313 | 28-scf00306 | 28 |
| AX-158143755 | 14 | 4.275 | KV453319.1  | 295852 | 28-scf00306 | 28 |
| AX-158143756 | 14 | 4.275 | KV453319.1  | 296265 | 28-scf00306 | 28 |
| AX-157751063 | 14 | 4.275 | KV453319.1  | 297141 | 28-scf00306 | 28 |
| AX-158412232 | 14 | 4.275 | KV453319.1  | 298540 | 28-scf00306 | 28 |
| AX-158143757 | 14 | 4.275 | KV453319.1  | 300903 | 28-scf00306 | 28 |
| AX-157831627 | 14 | 4.275 | KV453319.1  | 302455 | 28-scf00306 | 28 |
| AX-158143764 | 14 | 4.275 | KV453319.1  | 316014 | 28-scf00306 | 28 |
| AX-157755020 | 14 | 4.384 | KV453319.1  | 220671 | 28-scf00306 | 28 |
| AX-157753527 | 14 | 4.384 | KV453319.1  | 268789 | 28-scf00306 | 28 |
| AX-157831628 | 14 | 4.384 | KV453319.1  | 307510 | 28-scf00306 | 28 |
| AX-157831630 | 14 | 4.384 | KV453319.1  | 309733 | 28-scf00306 | 28 |
| AX-158143762 | 14 | 4.384 | KV453319.1  | 314221 | 28-scf00306 | 28 |
| AX-158143763 | 14 | 4.384 | KV453319.1  | 314887 | 28-scf00306 | 28 |
| AX-157696484 | 14 | 4.384 | KV453319.1  | 316426 | 28-scf00306 | 28 |
| AX-158143767 | 14 | 4.553 | KV453319.1  | 322979 | 28-scf00306 | 28 |
| AX-158143771 | 14 | 4.711 | KV453319.1  | 326229 | 28-scf00306 | 28 |

|              |    |       |             |         |             |    |
|--------------|----|-------|-------------|---------|-------------|----|
| AX-157773897 | 14 | 4.712 | KV453319.1  | 330918  | 28-scf00306 | 28 |
| AX-158143774 | 14 | 4.712 | KV453319.1  | 331580  | 28-scf00306 | 28 |
| AX-158143775 | 14 | 4.712 | KV453319.1  | 332876  | 28-scf00306 | 28 |
| AX-158143778 | 14 | 4.712 | KV453319.1  | 336926  | 28-scf00306 | 28 |
| AX-158143779 | 14 | 4.712 | KV453319.1  | 338776  | 28-scf00306 | 28 |
| AX-157689632 | 14 | 4.712 | 3ML01030977 | 377     | scf06581_1  | UN |
| AX-158143781 | 14 | 4.93  | KV453319.1  | 343683  | 28-scf00306 | 28 |
| AX-157831633 | 14 | 4.93  | KV453319.1  | 344542  | 28-scf00306 | 28 |
| AX-157771889 | 14 | 5.149 | KV453319.1  | 353961  | 28-scf00306 | 28 |
| AX-157831636 | 14 | 5.149 | KV453319.1  | 356344  | 28-scf00306 | 28 |
| AX-158143785 | 14 | 5.149 | KV453319.1  | 359121  | 28-scf00306 | 28 |
| AX-157747642 | 14 | 5.149 | KV453319.1  | 360480  | 28-scf00306 | 28 |
| AX-158143786 | 14 | 5.149 | KV453319.1  | 360593  | 28-scf00306 | 28 |
| AX-158143787 | 14 | 5.149 | KV453319.1  | 361208  | 28-scf00306 | 28 |
| AX-157744448 | 14 | 5.149 | KV453319.1  | 362895  | 28-scf00306 | 28 |
| AX-157754191 | 14 | 5.149 | KV453319.1  | 363516  | 28-scf00306 | 28 |
| AX-157831638 | 14 | 5.149 | KV453319.1  | 366324  | 28-scf00306 | 28 |
| AX-158143790 | 14 | 5.149 | KV453319.1  | 367038  | 28-scf00306 | 28 |
| AX-158143792 | 14 | 5.149 | KV453319.1  | 368392  | 28-scf00306 | 28 |
| AX-158143793 | 14 | 5.149 | KV453319.1  | 370622  | 28-scf00306 | 28 |
| AX-158143795 | 14 | 5.149 | KV453319.1  | 376969  | 28-scf00306 | 28 |
| AX-158143797 | 14 | 5.331 | KV453319.1  | 379753  | 28-scf00306 | 28 |
| AX-157688073 | 14 | 5.476 | KV453699.1  | 4835    | scf01206    | UN |
| AX-157681224 | 14 | 5.476 | KV453782.1  | 2981    | scf01357    | UN |
| AX-157689655 | 14 | 5.476 | 3ML01031135 | 457     | scf06741_1  | UN |
| AX-157682124 | 14 | 5.476 | 3ML01033958 | 90      | scf09627_1  | UN |
| AX-157689867 | 14 | 5.476 | 3ML01033958 | 285     | scf09627_1  | UN |
| AX-158143796 | 14 | 5.507 | KV453319.1  | 379341  | 28-scf00306 | 28 |
| AX-157831639 | 14 | 5.507 | KV453319.1  | 383872  | 28-scf00306 | 28 |
| AX-158143799 | 14 | 5.507 | KV453319.1  | 385145  | 28-scf00306 | 28 |
| AX-158143800 | 14 | 5.507 | KV453319.1  | 386500  | 28-scf00306 | 28 |
| AX-158143801 | 14 | 5.507 | KV453319.1  | 389938  | 28-scf00306 | 28 |
| AX-157752810 | 14 | 5.818 | KV453321.1  | 107462  | 28-scf00307 | 28 |
| AX-158412236 | 14 | 5.818 | KV453321.1  | 111440  | 28-scf00307 | 28 |
| AX-158143867 | 14 | 5.818 | KV453321.1  | 114251  | 28-scf00307 | 28 |
| AX-158143868 | 14 | 5.818 | KV453321.1  | 114796  | 28-scf00307 | 28 |
| AX-158143869 | 14 | 5.818 | KV453321.1  | 118378  | 28-scf00307 | 28 |
| AX-158143870 | 14 | 5.818 | KV453321.1  | 119403  | 28-scf00307 | 28 |
| AX-157717654 | 14 | 5.818 | KV453321.1  | 120282  | 28-scf00307 | 28 |
| AX-157689620 | 14 | 5.818 | KV453320.1  | 783     | 28-scf06462 | 28 |
| AX-158143871 | 14 | 5.819 | KV453321.1  | 123079  | 28-scf00307 | 28 |
| AX-158143872 | 14 | 6.807 | KV453321.1  | 127689  | 28-scf00307 | 28 |
| AX-158143873 | 14 | 6.824 | KV453321.1  | 128850  | 28-scf00307 | 28 |
| AX-158143876 | 14 | 6.826 | KV453321.1  | 133166  | 28-scf00307 | 28 |
| AX-158143879 | 14 | 6.827 | KV453321.1  | 136794  | 28-scf00307 | 28 |
| AX-158143895 | 14 | 9.285 | KV453324.1  | 34591   | 28-scf00308 | 28 |
| AX-158143924 | 14 | 9.285 | KV453324.1  | 72956   | 28-scf00308 | 28 |
| AX-158143896 | 14 | 9.37  | KV453324.1  | 39248   | 28-scf00308 | 28 |
| AX-157831688 | 14 | 9.37  | KV453324.1  | 420450  | 28-scf00308 | 28 |
| AX-157831744 | 14 | 9.37  | KV453324.1  | 1100426 | 28-scf00308 | 28 |
| AX-157742335 | 14 | 9.37  | KV453324.1  | 1109094 | 28-scf00308 | 28 |

|              |    |       |            |        |             |    |
|--------------|----|-------|------------|--------|-------------|----|
| AX-158412243 | 14 | 9.773 | KV453324.1 | 223186 | 28-scf00308 | 28 |
| AX-157718999 | 14 | 9.775 | KV453324.1 | 137237 | 28-scf00308 | 28 |
| AX-158144021 | 14 | 9.775 | KV453324.1 | 223626 | 28-scf00308 | 28 |
| AX-158144076 | 14 | 9.775 | KV453324.1 | 327062 | 28-scf00308 | 28 |
| AX-158143898 | 14 | 9.776 | KV453324.1 | 43313  | 28-scf00308 | 28 |
| AX-157831653 | 14 | 9.776 | KV453324.1 | 94974  | 28-scf00308 | 28 |
| AX-158143942 | 14 | 9.776 | KV453324.1 | 103690 | 28-scf00308 | 28 |
| AX-158143948 | 14 | 9.776 | KV453324.1 | 107875 | 28-scf00308 | 28 |
| AX-158143949 | 14 | 9.776 | KV453324.1 | 109997 | 28-scf00308 | 28 |
| AX-157831658 | 14 | 9.776 | KV453324.1 | 155100 | 28-scf00308 | 28 |
| AX-157878269 | 14 | 9.776 | KV453324.1 | 159906 | 28-scf00308 | 28 |
| AX-158144000 | 14 | 9.776 | KV453324.1 | 193488 | 28-scf00308 | 28 |
| AX-158144015 | 14 | 9.776 | KV453324.1 | 215920 | 28-scf00308 | 28 |
| AX-158144018 | 14 | 9.776 | KV453324.1 | 220419 | 28-scf00308 | 28 |
| AX-158144025 | 14 | 9.776 | KV453324.1 | 229482 | 28-scf00308 | 28 |
| AX-158144026 | 14 | 9.776 | KV453324.1 | 233691 | 28-scf00308 | 28 |
| AX-158144028 | 14 | 9.776 | KV453324.1 | 239109 | 28-scf00308 | 28 |
| AX-158144031 | 14 | 9.776 | KV453324.1 | 241243 | 28-scf00308 | 28 |
| AX-158144033 | 14 | 9.776 | KV453324.1 | 246991 | 28-scf00308 | 28 |
| AX-157831668 | 14 | 9.776 | KV453324.1 | 251522 | 28-scf00308 | 28 |
| AX-158144035 | 14 | 9.776 | KV453324.1 | 252898 | 28-scf00308 | 28 |
| AX-158412246 | 14 | 9.776 | KV453324.1 | 264558 | 28-scf00308 | 28 |
| AX-158144041 | 14 | 9.776 | KV453324.1 | 266793 | 28-scf00308 | 28 |
| AX-157773726 | 14 | 9.776 | KV453324.1 | 268842 | 28-scf00308 | 28 |
| AX-158144043 | 14 | 9.776 | KV453324.1 | 276390 | 28-scf00308 | 28 |
| AX-157717826 | 14 | 9.776 | KV453324.1 | 280422 | 28-scf00308 | 28 |
| AX-157831672 | 14 | 9.776 | KV453324.1 | 281143 | 28-scf00308 | 28 |
| AX-158144046 | 14 | 9.776 | KV453324.1 | 282157 | 28-scf00308 | 28 |
| AX-158144048 | 14 | 9.776 | KV453324.1 | 284846 | 28-scf00308 | 28 |
| AX-157831673 | 14 | 9.776 | KV453324.1 | 293026 | 28-scf00308 | 28 |
| AX-158144053 | 14 | 9.776 | KV453324.1 | 297081 | 28-scf00308 | 28 |
| AX-158144069 | 14 | 9.776 | KV453324.1 | 318703 | 28-scf00308 | 28 |
| AX-158144073 | 14 | 9.776 | KV453324.1 | 324934 | 28-scf00308 | 28 |
| AX-158144074 | 14 | 9.776 | KV453324.1 | 325454 | 28-scf00308 | 28 |
| AX-158144079 | 14 | 9.776 | KV453324.1 | 329020 | 28-scf00308 | 28 |
| AX-158144080 | 14 | 9.776 | KV453324.1 | 331256 | 28-scf00308 | 28 |
| AX-158144082 | 14 | 9.776 | KV453324.1 | 332066 | 28-scf00308 | 28 |
| AX-158144083 | 14 | 9.776 | KV453324.1 | 332499 | 28-scf00308 | 28 |
| AX-158144085 | 14 | 9.776 | KV453324.1 | 335733 | 28-scf00308 | 28 |
| AX-157858038 | 14 | 9.776 | KV453324.1 | 336477 | 28-scf00308 | 28 |
| AX-158144086 | 14 | 9.776 | KV453324.1 | 337056 | 28-scf00308 | 28 |
| AX-158144088 | 14 | 9.776 | KV453324.1 | 340265 | 28-scf00308 | 28 |
| AX-157717110 | 14 | 9.776 | KV453324.1 | 344937 | 28-scf00308 | 28 |
| AX-158144090 | 14 | 9.776 | KV453324.1 | 345314 | 28-scf00308 | 28 |
| AX-158144091 | 14 | 9.776 | KV453324.1 | 345938 | 28-scf00308 | 28 |
| AX-158144093 | 14 | 9.776 | KV453324.1 | 346468 | 28-scf00308 | 28 |
| AX-158144094 | 14 | 9.776 | KV453324.1 | 348208 | 28-scf00308 | 28 |
| AX-158144095 | 14 | 9.776 | KV453324.1 | 349869 | 28-scf00308 | 28 |
| AX-157741721 | 14 | 9.776 | KV453324.1 | 352350 | 28-scf00308 | 28 |
| AX-157871627 | 14 | 9.776 | KV453324.1 | 352684 | 28-scf00308 | 28 |
| AX-158144096 | 14 | 9.776 | KV453324.1 | 357006 | 28-scf00308 | 28 |

|              |    |       |            |        |             |    |
|--------------|----|-------|------------|--------|-------------|----|
| AX-157742424 | 14 | 9.776 | KV453324.1 | 358131 | 28-scf00308 | 28 |
| AX-158144097 | 14 | 9.776 | KV453324.1 | 358567 | 28-scf00308 | 28 |
| AX-158144098 | 14 | 9.776 | KV453324.1 | 359486 | 28-scf00308 | 28 |
| AX-158144099 | 14 | 9.776 | KV453324.1 | 360029 | 28-scf00308 | 28 |
| AX-158144100 | 14 | 9.776 | KV453324.1 | 360818 | 28-scf00308 | 28 |
| AX-157831678 | 14 | 9.776 | KV453324.1 | 362800 | 28-scf00308 | 28 |
| AX-158144102 | 14 | 9.776 | KV453324.1 | 364429 | 28-scf00308 | 28 |
| AX-158144103 | 14 | 9.776 | KV453324.1 | 367186 | 28-scf00308 | 28 |
| AX-158144104 | 14 | 9.776 | KV453324.1 | 367920 | 28-scf00308 | 28 |
| AX-158144105 | 14 | 9.776 | KV453324.1 | 368826 | 28-scf00308 | 28 |
| AX-158144106 | 14 | 9.776 | KV453324.1 | 369308 | 28-scf00308 | 28 |
| AX-158144107 | 14 | 9.776 | KV453324.1 | 369774 | 28-scf00308 | 28 |
| AX-158144108 | 14 | 9.776 | KV453324.1 | 371077 | 28-scf00308 | 28 |
| AX-158144109 | 14 | 9.776 | KV453324.1 | 371385 | 28-scf00308 | 28 |
| AX-157831680 | 14 | 9.776 | KV453324.1 | 376330 | 28-scf00308 | 28 |
| AX-158144111 | 14 | 9.776 | KV453324.1 | 380018 | 28-scf00308 | 28 |
| AX-158144112 | 14 | 9.776 | KV453324.1 | 382057 | 28-scf00308 | 28 |
| AX-157831681 | 14 | 9.776 | KV453324.1 | 382300 | 28-scf00308 | 28 |
| AX-157831683 | 14 | 9.776 | KV453324.1 | 385195 | 28-scf00308 | 28 |
| AX-158144116 | 14 | 9.776 | KV453324.1 | 385739 | 28-scf00308 | 28 |
| AX-158144117 | 14 | 9.776 | KV453324.1 | 387028 | 28-scf00308 | 28 |
| AX-158144118 | 14 | 9.776 | KV453324.1 | 387390 | 28-scf00308 | 28 |
| AX-158144119 | 14 | 9.776 | KV453324.1 | 388166 | 28-scf00308 | 28 |
| AX-158144122 | 14 | 9.776 | KV453324.1 | 391101 | 28-scf00308 | 28 |
| AX-158144123 | 14 | 9.776 | KV453324.1 | 392343 | 28-scf00308 | 28 |
| AX-158144124 | 14 | 9.776 | KV453324.1 | 393575 | 28-scf00308 | 28 |
| AX-158144128 | 14 | 9.776 | KV453324.1 | 396182 | 28-scf00308 | 28 |
| AX-158144129 | 14 | 9.776 | KV453324.1 | 396419 | 28-scf00308 | 28 |
| AX-157720608 | 14 | 9.776 | KV453324.1 | 398250 | 28-scf00308 | 28 |
| AX-158144131 | 14 | 9.776 | KV453324.1 | 398750 | 28-scf00308 | 28 |
| AX-158144133 | 14 | 9.776 | KV453324.1 | 399742 | 28-scf00308 | 28 |
| AX-158144134 | 14 | 9.776 | KV453324.1 | 400350 | 28-scf00308 | 28 |
| AX-158144136 | 14 | 9.776 | KV453324.1 | 402363 | 28-scf00308 | 28 |
| AX-157831684 | 14 | 9.776 | KV453324.1 | 403106 | 28-scf00308 | 28 |
| AX-157831687 | 14 | 9.776 | KV453324.1 | 417515 | 28-scf00308 | 28 |
| AX-157755462 | 14 | 9.776 | KV453324.1 | 452834 | 28-scf00308 | 28 |
| AX-158144166 | 14 | 9.776 | KV453324.1 | 464136 | 28-scf00308 | 28 |
| AX-158144169 | 14 | 9.776 | KV453324.1 | 466364 | 28-scf00308 | 28 |
| AX-158144171 | 14 | 9.776 | KV453324.1 | 466950 | 28-scf00308 | 28 |
| AX-157718358 | 14 | 9.776 | KV453324.1 | 513908 | 28-scf00308 | 28 |
| AX-158144228 | 14 | 9.776 | KV453324.1 | 554626 | 28-scf00308 | 28 |
| AX-158144233 | 14 | 9.776 | KV453324.1 | 559452 | 28-scf00308 | 28 |
| AX-158144239 | 14 | 9.776 | KV453324.1 | 563984 | 28-scf00308 | 28 |
| AX-158144241 | 14 | 9.776 | KV453324.1 | 564709 | 28-scf00308 | 28 |
| AX-158144243 | 14 | 9.776 | KV453324.1 | 565340 | 28-scf00308 | 28 |
| AX-158144245 | 14 | 9.776 | KV453324.1 | 566675 | 28-scf00308 | 28 |
| AX-157831715 | 14 | 9.776 | KV453324.1 | 700806 | 28-scf00308 | 28 |
| AX-158144317 | 14 | 9.776 | KV453324.1 | 738342 | 28-scf00308 | 28 |
| AX-157715442 | 14 | 9.776 | KV453324.1 | 795196 | 28-scf00308 | 28 |
| AX-157831725 | 14 | 9.776 | KV453324.1 | 894954 | 28-scf00308 | 28 |
| AX-157723217 | 14 | 9.776 | KV453324.1 | 897267 | 28-scf00308 | 28 |

|              |    |       |            |         |               |    |
|--------------|----|-------|------------|---------|---------------|----|
| AX-158144417 | 14 | 9.776 | KV453324.1 | 938689  | 28-scf00308   | 28 |
| AX-158144445 | 14 | 9.776 | KV453324.1 | 982953  | 28-scf00308   | 28 |
| AX-158412260 | 14 | 9.776 | KV453324.1 | 988491  | 28-scf00308   | 28 |
| AX-158144457 | 14 | 9.776 | KV453324.1 | 995998  | 28-scf00308   | 28 |
| AX-158144479 | 14 | 9.776 | KV453324.1 | 1035725 | 28-scf00308   | 28 |
| AX-157679989 | 14 | 9.776 | KV453323.1 | 21578   | 28-scf00310   | 28 |
| AX-157693058 | 14 | 9.776 |            | 503     | :227033_g5_i! | UN |
| AX-157711024 | 14 | 9.776 |            | 1320    | :227033_g5_i! | UN |
| AX-158144137 | 14 | 9.805 | KV453324.1 | 406228  | 28-scf00308   | 28 |
| AX-158144139 | 14 | 9.827 | KV453324.1 | 409061  | 28-scf00308   | 28 |
| AX-158143981 | 14 | 9.852 | KV453324.1 | 165422  | 28-scf00308   | 28 |
| AX-157714044 | 14 | 9.852 | KV453324.1 | 417565  | 28-scf00308   | 28 |
| AX-158144141 | 14 | 9.852 | KV453324.1 | 419813  | 28-scf00308   | 28 |
| AX-158144142 | 14 | 9.852 | KV453324.1 | 421634  | 28-scf00308   | 28 |
| AX-158144143 | 14 | 9.852 | KV453324.1 | 422605  | 28-scf00308   | 28 |
| AX-158144259 | 14 | 9.852 | KV453324.1 | 593145  | 28-scf00308   | 28 |
| AX-158144283 | 14 | 9.852 | KV453324.1 | 658785  | 28-scf00308   | 28 |
| AX-157748173 | 14 | 9.852 | KV453324.1 | 722190  | 28-scf00308   | 28 |
| AX-158144441 | 14 | 9.852 | KV453324.1 | 975663  | 28-scf00308   | 28 |
| AX-158144448 | 14 | 9.852 | KV453324.1 | 986672  | 28-scf00308   | 28 |
| AX-158143917 | 14 | 9.862 | KV453324.1 | 63762   | 28-scf00308   | 28 |
| AX-158143919 | 14 | 9.862 | KV453324.1 | 64516   | 28-scf00308   | 28 |
| AX-158143980 | 14 | 9.862 | KV453324.1 | 165027  | 28-scf00308   | 28 |
| AX-158144012 | 14 | 9.862 | KV453324.1 | 213762  | 28-scf00308   | 28 |
| AX-157720576 | 14 | 9.862 | KV453324.1 | 263755  | 28-scf00308   | 28 |
| AX-158144152 | 14 | 9.862 | KV453324.1 | 441745  | 28-scf00308   | 28 |
| AX-158144154 | 14 | 9.862 | KV453324.1 | 443658  | 28-scf00308   | 28 |
| AX-158417597 | 14 | 9.862 | KV453324.1 | 446637  | 28-scf00308   | 28 |
| AX-158417598 | 14 | 9.862 | KV453324.1 | 447235  | 28-scf00308   | 28 |
| AX-158144155 | 14 | 9.862 | KV453324.1 | 448644  | 28-scf00308   | 28 |
| AX-158144156 | 14 | 9.862 | KV453324.1 | 449627  | 28-scf00308   | 28 |
| AX-157739933 | 14 | 9.862 | KV453324.1 | 451523  | 28-scf00308   | 28 |
| AX-158144160 | 14 | 9.862 | KV453324.1 | 456812  | 28-scf00308   | 28 |
| AX-158144260 | 14 | 9.862 | KV453324.1 | 593438  | 28-scf00308   | 28 |
| AX-157831740 | 14 | 9.862 | KV453324.1 | 1093586 | 28-scf00308   | 28 |
| AX-158380337 | 14 | 9.886 | KV453324.1 | 94553   | 28-scf00308   | 28 |
| AX-158143943 | 14 | 9.886 | KV453324.1 | 103883  | 28-scf00308   | 28 |
| AX-158143944 | 14 | 9.886 | KV453324.1 | 104409  | 28-scf00308   | 28 |
| AX-158143957 | 14 | 9.886 | KV453324.1 | 122465  | 28-scf00308   | 28 |
| AX-157831671 | 14 | 9.886 | KV453324.1 | 281037  | 28-scf00308   | 28 |
| AX-158144051 | 14 | 9.886 | KV453324.1 | 293463  | 28-scf00308   | 28 |
| AX-158144052 | 14 | 9.886 | KV453324.1 | 294243  | 28-scf00308   | 28 |
| AX-158144066 | 14 | 9.886 | KV453324.1 | 315327  | 28-scf00308   | 28 |
| AX-158144126 | 14 | 9.886 | KV453324.1 | 393896  | 28-scf00308   | 28 |
| AX-158144162 | 14 | 9.886 | KV453324.1 | 459574  | 28-scf00308   | 28 |
| AX-158144167 | 14 | 9.886 | KV453324.1 | 464855  | 28-scf00308   | 28 |
| AX-158144170 | 14 | 9.886 | KV453324.1 | 466584  | 28-scf00308   | 28 |
| AX-158144172 | 14 | 9.886 | KV453324.1 | 468630  | 28-scf00308   | 28 |
| AX-158144173 | 14 | 9.886 | KV453324.1 | 469852  | 28-scf00308   | 28 |
| AX-158144174 | 14 | 9.886 | KV453324.1 | 470377  | 28-scf00308   | 28 |
| AX-158144175 | 14 | 9.886 | KV453324.1 | 470940  | 28-scf00308   | 28 |

|              |    |        |             |         |               |    |
|--------------|----|--------|-------------|---------|---------------|----|
| AX-158144176 | 14 | 9.886  | KV453324.1  | 471527  | 28-scf00308   | 28 |
| AX-158144179 | 14 | 9.886  | KV453324.1  | 473739  | 28-scf00308   | 28 |
| AX-158144181 | 14 | 9.886  | KV453324.1  | 475927  | 28-scf00308   | 28 |
| AX-158144182 | 14 | 9.886  | KV453324.1  | 481506  | 28-scf00308   | 28 |
| AX-158144183 | 14 | 9.886  | KV453324.1  | 482442  | 28-scf00308   | 28 |
| AX-157712157 | 14 | 9.886  | KV453324.1  | 482640  | 28-scf00308   | 28 |
| AX-157831690 | 14 | 9.886  | KV453324.1  | 482970  | 28-scf00308   | 28 |
| AX-157831691 | 14 | 9.886  | KV453324.1  | 484890  | 28-scf00308   | 28 |
| AX-157831692 | 14 | 9.886  | KV453324.1  | 486261  | 28-scf00308   | 28 |
| AX-158144185 | 14 | 9.886  | KV453324.1  | 486809  | 28-scf00308   | 28 |
| AX-158144188 | 14 | 9.886  | KV453324.1  | 489612  | 28-scf00308   | 28 |
| AX-158144189 | 14 | 9.886  | KV453324.1  | 490823  | 28-scf00308   | 28 |
| AX-158144192 | 14 | 9.886  | KV453324.1  | 493162  | 28-scf00308   | 28 |
| AX-158144194 | 14 | 9.886  | KV453324.1  | 495883  | 28-scf00308   | 28 |
| AX-158144196 | 14 | 9.886  | KV453324.1  | 496977  | 28-scf00308   | 28 |
| AX-158144197 | 14 | 9.886  | KV453324.1  | 497576  | 28-scf00308   | 28 |
| AX-158144199 | 14 | 9.886  | KV453324.1  | 499488  | 28-scf00308   | 28 |
| AX-158144200 | 14 | 9.886  | KV453324.1  | 500765  | 28-scf00308   | 28 |
| AX-157831695 | 14 | 9.886  | KV453324.1  | 506870  | 28-scf00308   | 28 |
| AX-157718943 | 14 | 9.886  | KV453324.1  | 509448  | 28-scf00308   | 28 |
| AX-158144201 | 14 | 9.886  | KV453324.1  | 510695  | 28-scf00308   | 28 |
| AX-157758451 | 14 | 9.886  | KV453324.1  | 512291  | 28-scf00308   | 28 |
| AX-158144204 | 14 | 9.886  | KV453324.1  | 512391  | 28-scf00308   | 28 |
| AX-158144205 | 14 | 9.886  | KV453324.1  | 513180  | 28-scf00308   | 28 |
| AX-157831697 | 14 | 9.886  | KV453324.1  | 513554  | 28-scf00308   | 28 |
| AX-157863468 | 14 | 9.886  | KV453324.1  | 516290  | 28-scf00308   | 28 |
| AX-158412255 | 14 | 9.886  | KV453324.1  | 519861  | 28-scf00308   | 28 |
| AX-157831699 | 14 | 9.886  | KV453324.1  | 520384  | 28-scf00308   | 28 |
| AX-158144209 | 14 | 9.886  | KV453324.1  | 521787  | 28-scf00308   | 28 |
| AX-158144211 | 14 | 9.886  | KV453324.1  | 526222  | 28-scf00308   | 28 |
| AX-158412256 | 14 | 9.886  | KV453324.1  | 526920  | 28-scf00308   | 28 |
| AX-158144212 | 14 | 9.886  | KV453324.1  | 527702  | 28-scf00308   | 28 |
| AX-158144219 | 14 | 9.886  | KV453324.1  | 540301  | 28-scf00308   | 28 |
| AX-158144223 | 14 | 9.886  | KV453324.1  | 545791  | 28-scf00308   | 28 |
| AX-158144224 | 14 | 9.886  | KV453324.1  | 549917  | 28-scf00308   | 28 |
| AX-158144225 | 14 | 9.886  | KV453324.1  | 551086  | 28-scf00308   | 28 |
| AX-158144230 | 14 | 9.886  | KV453324.1  | 555863  | 28-scf00308   | 28 |
| AX-158144257 | 14 | 9.886  | KV453324.1  | 592402  | 28-scf00308   | 28 |
| AX-158144258 | 14 | 9.886  | KV453324.1  | 592857  | 28-scf00308   | 28 |
| AX-158144421 | 14 | 9.886  | KV453324.1  | 951330  | 28-scf00308   | 28 |
| AX-157747113 | 14 | 9.886  | KV453324.1  | 958899  | 28-scf00308   | 28 |
| AX-157713658 | 14 | 9.886  | KV453324.1  | 1183159 | 28-scf00308   | 28 |
| AX-157689520 | 14 | 10.016 | 3ML01030255 | 261     | scf05849_1    | UN |
| AX-158143900 | 14 | 10.105 | KV453324.1  | 44133   | 28-scf00308   | 28 |
| AX-158143963 | 14 | 10.105 | KV453324.1  | 134349  | 28-scf00308   | 28 |
| AX-158412239 | 14 | 10.105 | KV453324.1  | 156139  | 28-scf00308   | 28 |
| AX-157693095 | 14 | 10.105 |             | 60      | :232102_g8_i: | UN |
| AX-157696669 | 14 | 11.191 | KV453324.1  | 624597  | 28-scf00308   | 28 |
| AX-158144287 | 14 | 11.193 | KV453324.1  | 672474  | 28-scf00308   | 28 |
| AX-158412251 | 14 | 11.195 | KV453324.1  | 460545  | 28-scf00308   | 28 |
| AX-158144163 | 14 | 11.195 | KV453324.1  | 461655  | 28-scf00308   | 28 |



|              |    |        |            |         |             |    |
|--------------|----|--------|------------|---------|-------------|----|
| AX-157831698 | 14 | 11.195 | KV453324.1 | 518125  | 28-scf00308 | 28 |
| AX-157770919 | 14 | 11.195 | KV453324.1 | 674235  | 28-scf00308 | 28 |
| AX-158144427 | 14 | 11.195 | KV453324.1 | 957172  | 28-scf00308 | 28 |
| AX-158144290 | 14 | 11.196 | KV453324.1 | 678927  | 28-scf00308 | 28 |
| AX-157831712 | 14 | 11.197 | KV453324.1 | 680468  | 28-scf00308 | 28 |
| AX-158144291 | 14 | 11.197 | KV453324.1 | 683027  | 28-scf00308 | 28 |
| AX-158144292 | 14 | 11.197 | KV453324.1 | 683799  | 28-scf00308 | 28 |
| AX-158144293 | 14 | 11.197 | KV453324.1 | 683866  | 28-scf00308 | 28 |
| AX-158144294 | 14 | 11.197 | KV453324.1 | 685131  | 28-scf00308 | 28 |
| AX-158144295 | 14 | 11.197 | KV453324.1 | 685401  | 28-scf00308 | 28 |
| AX-158144297 | 14 | 11.197 | KV453324.1 | 687431  | 28-scf00308 | 28 |
| AX-157751111 | 14 | 11.197 | KV453324.1 | 689044  | 28-scf00308 | 28 |
| AX-157831713 | 14 | 11.197 | KV453324.1 | 690342  | 28-scf00308 | 28 |
| AX-158144300 | 14 | 11.197 | KV453324.1 | 693453  | 28-scf00308 | 28 |
| AX-158144302 | 14 | 11.197 | KV453324.1 | 694709  | 28-scf00308 | 28 |
| AX-158144303 | 14 | 11.197 | KV453324.1 | 698657  | 28-scf00308 | 28 |
| AX-158144305 | 14 | 11.197 | KV453324.1 | 702717  | 28-scf00308 | 28 |
| AX-157831717 | 14 | 11.197 | KV453324.1 | 718124  | 28-scf00308 | 28 |
| AX-158144470 | 14 | 11.197 | KV453324.1 | 1009235 | 28-scf00308 | 28 |
| AX-158144471 | 14 | 11.197 | KV453324.1 | 1009667 | 28-scf00308 | 28 |
| AX-157831737 | 14 | 11.197 | KV453324.1 | 1052252 | 28-scf00308 | 28 |
| AX-158144575 | 14 | 11.197 | KV453324.1 | 1204916 | 28-scf00308 | 28 |
| AX-158144577 | 14 | 11.197 | KV453324.1 | 1206222 | 28-scf00308 | 28 |
| AX-158143905 | 14 | 11.225 | KV453324.1 | 49994   | 28-scf00308 | 28 |
| AX-158144288 | 14 | 11.225 | KV453324.1 | 676394  | 28-scf00308 | 28 |
| AX-157866380 | 14 | 11.225 | KV453324.1 | 699142  | 28-scf00308 | 28 |
| AX-158144318 | 14 | 11.225 | KV453324.1 | 738603  | 28-scf00308 | 28 |
| AX-158393044 | 14 | 11.225 | KV453324.1 | 1052391 | 28-scf00308 | 28 |
| AX-158144516 | 14 | 11.225 | KV453324.1 | 1116507 | 28-scf00308 | 28 |
| AX-158144574 | 14 | 11.225 | KV453324.1 | 1204273 | 28-scf00308 | 28 |
| AX-158144676 | 14 | 11.225 | KV453324.1 | 1429755 | 28-scf00308 | 28 |
| AX-158144202 | 14 | 11.252 | KV453324.1 | 511539  | 28-scf00308 | 28 |
| AX-158144203 | 14 | 11.252 | KV453324.1 | 511721  | 28-scf00308 | 28 |
| AX-158144215 | 14 | 11.252 | KV453324.1 | 530067  | 28-scf00308 | 28 |
| AX-158144252 | 14 | 11.252 | KV453324.1 | 578145  | 28-scf00308 | 28 |
| AX-158144264 | 14 | 11.252 | KV453324.1 | 602986  | 28-scf00308 | 28 |
| AX-158144306 | 14 | 11.252 | KV453324.1 | 704003  | 28-scf00308 | 28 |
| AX-158144352 | 14 | 11.252 | KV453324.1 | 810088  | 28-scf00308 | 28 |
| AX-157866382 | 14 | 11.252 | KV453324.1 | 829431  | 28-scf00308 | 28 |
| AX-158144383 | 14 | 11.252 | KV453324.1 | 864105  | 28-scf00308 | 28 |
| AX-158144413 | 14 | 11.252 | KV453324.1 | 928435  | 28-scf00308 | 28 |
| AX-158144432 | 14 | 11.252 | KV453324.1 | 965163  | 28-scf00308 | 28 |
| AX-158144447 | 14 | 11.252 | KV453324.1 | 985695  | 28-scf00308 | 28 |
| AX-158412261 | 14 | 11.252 | KV453324.1 | 989591  | 28-scf00308 | 28 |
| AX-157831738 | 14 | 11.252 | KV453324.1 | 1072496 | 28-scf00308 | 28 |
| AX-158144509 | 14 | 11.252 | KV453324.1 | 1103075 | 28-scf00308 | 28 |
| AX-158144511 | 14 | 11.252 | KV453324.1 | 1106070 | 28-scf00308 | 28 |
| AX-157886388 | 14 | 11.252 | KV453324.1 | 1273231 | 28-scf00308 | 28 |
| AX-157871635 | 14 | 11.252 | KV453324.1 | 1307581 | 28-scf00308 | 28 |
| AX-157858040 | 14 | 11.268 | KV453324.1 | 708952  | 28-scf00308 | 28 |
| AX-158144307 | 14 | 11.285 | KV453324.1 | 708998  | 28-scf00308 | 28 |

|              |    |        |             |         |             |    |
|--------------|----|--------|-------------|---------|-------------|----|
| AX-158143974 | 14 | 11.306 | KV453324.1  | 149511  | 28-scf00308 | 28 |
| AX-158144309 | 14 | 11.306 | KV453324.1  | 722724  | 28-scf00308 | 28 |
| AX-158144310 | 14 | 11.306 | KV453324.1  | 725017  | 28-scf00308 | 28 |
| AX-158144312 | 14 | 11.306 | KV453324.1  | 727844  | 28-scf00308 | 28 |
| AX-158144316 | 14 | 11.306 | KV453324.1  | 737688  | 28-scf00308 | 28 |
| AX-158144319 | 14 | 11.306 | KV453324.1  | 739732  | 28-scf00308 | 28 |
| AX-157831718 | 14 | 11.306 | KV453324.1  | 744650  | 28-scf00308 | 28 |
| AX-157831720 | 14 | 11.306 | KV453324.1  | 745192  | 28-scf00308 | 28 |
| AX-158144321 | 14 | 11.306 | KV453324.1  | 745386  | 28-scf00308 | 28 |
| AX-158144322 | 14 | 11.306 | KV453324.1  | 749572  | 28-scf00308 | 28 |
| AX-158144323 | 14 | 11.306 | KV453324.1  | 750202  | 28-scf00308 | 28 |
| AX-158144324 | 14 | 11.306 | KV453324.1  | 751853  | 28-scf00308 | 28 |
| AX-158144326 | 14 | 11.306 | KV453324.1  | 752693  | 28-scf00308 | 28 |
| AX-158144327 | 14 | 11.306 | KV453324.1  | 755223  | 28-scf00308 | 28 |
| AX-158144340 | 14 | 11.306 | KV453324.1  | 791497  | 28-scf00308 | 28 |
| AX-158144341 | 14 | 11.306 | KV453324.1  | 793460  | 28-scf00308 | 28 |
| AX-158144342 | 14 | 11.306 | KV453324.1  | 797189  | 28-scf00308 | 28 |
| AX-158144347 | 14 | 11.306 | KV453324.1  | 804807  | 28-scf00308 | 28 |
| AX-158144349 | 14 | 11.306 | KV453324.1  | 808203  | 28-scf00308 | 28 |
| AX-158144356 | 14 | 11.306 | KV453324.1  | 814518  | 28-scf00308 | 28 |
| AX-158144357 | 14 | 11.306 | KV453324.1  | 815293  | 28-scf00308 | 28 |
| AX-158144362 | 14 | 11.306 | KV453324.1  | 825459  | 28-scf00308 | 28 |
| AX-158144364 | 14 | 11.306 | KV453324.1  | 829673  | 28-scf00308 | 28 |
| AX-158144429 | 14 | 11.306 | KV453324.1  | 963173  | 28-scf00308 | 28 |
| AX-157831733 | 14 | 11.306 | KV453324.1  | 1012093 | 28-scf00308 | 28 |
| AX-158144484 | 14 | 11.306 | KV453324.1  | 1050394 | 28-scf00308 | 28 |
| AX-158144520 | 14 | 11.306 | KV453324.1  | 1121080 | 28-scf00308 | 28 |
| AX-158144571 | 14 | 11.306 | KV453324.1  | 1202119 | 28-scf00308 | 28 |
| AX-158144629 | 14 | 11.306 | KV453324.1  | 1298826 | 28-scf00308 | 28 |
| AX-157706447 | 14 | 11.306 | 3ML01032254 | 536     | scf07869_1  | UN |
| AX-158144365 | 14 | 11.395 | KV453324.1  | 837097  | 28-scf00308 | 28 |
| AX-158143925 | 14 | 11.473 | KV453324.1  | 75808   | 28-scf00308 | 28 |
| AX-157750028 | 14 | 11.473 | KV453324.1  | 838540  | 28-scf00308 | 28 |
| AX-157831650 | 14 | 11.474 | KV453324.1  | 25202   | 28-scf00308 | 28 |
| AX-158143915 | 14 | 11.474 | KV453324.1  | 63229   | 28-scf00308 | 28 |
| AX-158144367 | 14 | 11.474 | KV453324.1  | 840083  | 28-scf00308 | 28 |
| AX-158144387 | 14 | 11.474 | KV453324.1  | 884719  | 28-scf00308 | 28 |
| AX-158144390 | 14 | 11.474 | KV453324.1  | 888225  | 28-scf00308 | 28 |
| AX-158144426 | 14 | 11.474 | KV453324.1  | 956500  | 28-scf00308 | 28 |
| AX-157709148 | 14 | 11.474 | KV453324.1  | 1108086 | 28-scf00308 | 28 |
| AX-157858041 | 14 | 11.551 | KV453324.1  | 725463  | 28-scf00308 | 28 |
| AX-158144369 | 14 | 11.551 | KV453324.1  | 843463  | 28-scf00308 | 28 |
| AX-157719669 | 14 | 11.634 | KV453324.1  | 711082  | 28-scf00308 | 28 |
| AX-157738924 | 14 | 11.634 | KV453324.1  | 850922  | 28-scf00308 | 28 |
| AX-158144374 | 14 | 11.634 | KV453324.1  | 853193  | 28-scf00308 | 28 |
| AX-158144376 | 14 | 11.634 | KV453324.1  | 855785  | 28-scf00308 | 28 |
| AX-158144377 | 14 | 11.634 | KV453324.1  | 857074  | 28-scf00308 | 28 |
| AX-157750946 | 14 | 11.634 | KV453324.1  | 857795  | 28-scf00308 | 28 |
| AX-158144378 | 14 | 11.634 | KV453324.1  | 858755  | 28-scf00308 | 28 |
| AX-158144379 | 14 | 11.634 | KV453324.1  | 859930  | 28-scf00308 | 28 |
| AX-158144380 | 14 | 11.634 | KV453324.1  | 861085  | 28-scf00308 | 28 |

|              |    |        |             |         |             |    |
|--------------|----|--------|-------------|---------|-------------|----|
| AX-158144381 | 14 | 11.634 | KV453324.1  | 861763  | 28-scf00308 | 28 |
| AX-157773284 | 14 | 11.634 | KV453324.1  | 863599  | 28-scf00308 | 28 |
| AX-158144382 | 14 | 11.634 | KV453324.1  | 863960  | 28-scf00308 | 28 |
| AX-157831723 | 14 | 11.634 | KV453324.1  | 866528  | 28-scf00308 | 28 |
| AX-157705291 | 14 | 11.634 | 3ML01029318 | 937     | scf04939_1  | UN |
| AX-158144386 | 14 | 11.781 | KV453324.1  | 882643  | 28-scf00308 | 28 |
| AX-158144388 | 14 | 11.928 | KV453324.1  | 886626  | 28-scf00308 | 28 |
| AX-158144389 | 14 | 11.928 | KV453324.1  | 887119  | 28-scf00308 | 28 |
| AX-158144391 | 14 | 11.999 | KV453324.1  | 890347  | 28-scf00308 | 28 |
| AX-158144393 | 14 | 12.064 | KV453324.1  | 893702  | 28-scf00308 | 28 |
| AX-158144394 | 14 | 12.064 | KV453324.1  | 895104  | 28-scf00308 | 28 |
| AX-157775835 | 14 | 12.065 | KV453324.1  | 895992  | 28-scf00308 | 28 |
| AX-158144395 | 14 | 12.065 | KV453324.1  | 896106  | 28-scf00308 | 28 |
| AX-158144400 | 14 | 12.066 | KV453324.1  | 906758  | 28-scf00308 | 28 |
| AX-158144401 | 14 | 12.066 | KV453324.1  | 908290  | 28-scf00308 | 28 |
| AX-158144424 | 14 | 12.066 | KV453324.1  | 953748  | 28-scf00308 | 28 |
| AX-157722119 | 14 | 12.066 | KV453324.1  | 1062594 | 28-scf00308 | 28 |
| AX-157754669 | 14 | 12.066 | KV453324.1  | 1280261 | 28-scf00308 | 28 |
| AX-158144398 | 14 | 12.067 | KV453324.1  | 905431  | 28-scf00308 | 28 |
| AX-158144403 | 14 | 12.067 | KV453324.1  | 914508  | 28-scf00308 | 28 |
| AX-158144408 | 14 | 12.067 | KV453324.1  | 921258  | 28-scf00308 | 28 |
| AX-158144409 | 14 | 12.067 | KV453324.1  | 922497  | 28-scf00308 | 28 |
| AX-158144410 | 14 | 12.067 | KV453324.1  | 923121  | 28-scf00308 | 28 |
| AX-158144265 | 14 | 12.068 | KV453324.1  | 603091  | 28-scf00308 | 28 |
| AX-157719586 | 14 | 12.068 | KV453324.1  | 935000  | 28-scf00308 | 28 |
| AX-158144418 | 14 | 12.068 | KV453324.1  | 939632  | 28-scf00308 | 28 |
| AX-158144419 | 14 | 12.069 | KV453324.1  | 947645  | 28-scf00308 | 28 |
| AX-157743432 | 14 | 12.07  | KV453324.1  | 685890  | 28-scf00308 | 28 |
| AX-158144425 | 14 | 12.07  | KV453324.1  | 955230  | 28-scf00308 | 28 |
| AX-158144428 | 14 | 12.07  | KV453324.1  | 962022  | 28-scf00308 | 28 |
| AX-158144430 | 14 | 12.07  | KV453324.1  | 964156  | 28-scf00308 | 28 |
| AX-157831728 | 14 | 12.07  | KV453324.1  | 971944  | 28-scf00308 | 28 |
| AX-158144438 | 14 | 12.07  | KV453324.1  | 972260  | 28-scf00308 | 28 |
| AX-157725594 | 14 | 12.07  | KV453324.1  | 973141  | 28-scf00308 | 28 |
| AX-157793593 | 14 | 12.07  | KV453324.1  | 974064  | 28-scf00308 | 28 |
| AX-158144444 | 14 | 12.07  | KV453324.1  | 979739  | 28-scf00308 | 28 |
| AX-157878278 | 14 | 12.07  | KV453324.1  | 981510  | 28-scf00308 | 28 |
| AX-158144449 | 14 | 12.07  | KV453324.1  | 987333  | 28-scf00308 | 28 |
| AX-158144460 | 14 | 12.07  | KV453324.1  | 998734  | 28-scf00308 | 28 |
| AX-157719503 | 14 | 12.071 | KV453324.1  | 976999  | 28-scf00308 | 28 |
| AX-158380344 | 14 | 12.071 | KV453324.1  | 986413  | 28-scf00308 | 28 |
| AX-158144453 | 14 | 12.071 | KV453324.1  | 993765  | 28-scf00308 | 28 |
| AX-158144455 | 14 | 12.071 | KV453324.1  | 995313  | 28-scf00308 | 28 |
| AX-158144456 | 14 | 12.071 | KV453324.1  | 995457  | 28-scf00308 | 28 |
| AX-158144461 | 14 | 12.071 | KV453324.1  | 999976  | 28-scf00308 | 28 |
| AX-158144465 | 14 | 12.071 | KV453324.1  | 1005067 | 28-scf00308 | 28 |
| AX-157709170 | 14 | 12.071 | KV453324.1  | 1007723 | 28-scf00308 | 28 |
| AX-157878274 | 14 | 12.945 | KV453324.1  | 711568  | 28-scf00308 | 28 |
| AX-157750985 | 14 | 12.945 | KV453324.1  | 713084  | 28-scf00308 | 28 |
| AX-158144368 | 14 | 12.945 | KV453324.1  | 842971  | 28-scf00308 | 28 |
| AX-158144402 | 14 | 12.945 | KV453324.1  | 910004  | 28-scf00308 | 28 |

|              |    |        |             |         |             |    |
|--------------|----|--------|-------------|---------|-------------|----|
| AX-157886386 | 14 | 12.945 | KV453324.1  | 958000  | 28-scf00308 | 28 |
| AX-157717413 | 14 | 12.945 | KV453324.1  | 1011550 | 28-scf00308 | 28 |
| AX-157831732 | 14 | 12.945 | KV453324.1  | 1012010 | 28-scf00308 | 28 |
| AX-158144481 | 14 | 12.945 | KV453324.1  | 1039878 | 28-scf00308 | 28 |
| AX-157745939 | 14 | 12.945 | KV453324.1  | 1040744 | 28-scf00308 | 28 |
| AX-158144487 | 14 | 12.945 | KV453324.1  | 1059074 | 28-scf00308 | 28 |
| AX-158144488 | 14 | 12.945 | KV453324.1  | 1059571 | 28-scf00308 | 28 |
| AX-158144489 | 14 | 12.945 | KV453324.1  | 1060548 | 28-scf00308 | 28 |
| AX-158144490 | 14 | 12.945 | KV453324.1  | 1062954 | 28-scf00308 | 28 |
| AX-158144493 | 14 | 12.945 | KV453324.1  | 1067700 | 28-scf00308 | 28 |
| AX-158144495 | 14 | 12.945 | KV453324.1  | 1068748 | 28-scf00308 | 28 |
| AX-158144496 | 14 | 12.945 | KV453324.1  | 1072185 | 28-scf00308 | 28 |
| AX-158144499 | 14 | 12.945 | KV453324.1  | 1077988 | 28-scf00308 | 28 |
| AX-158144500 | 14 | 12.945 | KV453324.1  | 1078816 | 28-scf00308 | 28 |
| AX-158144501 | 14 | 12.945 | KV453324.1  | 1079703 | 28-scf00308 | 28 |
| AX-158144502 | 14 | 12.945 | KV453324.1  | 1079850 | 28-scf00308 | 28 |
| AX-158144503 | 14 | 12.945 | KV453324.1  | 1081176 | 28-scf00308 | 28 |
| AX-157713547 | 14 | 12.945 | KV453324.1  | 1083000 | 28-scf00308 | 28 |
| AX-158144504 | 14 | 12.945 | KV453324.1  | 1084483 | 28-scf00308 | 28 |
| AX-158380345 | 14 | 12.945 | KV453324.1  | 1084561 | 28-scf00308 | 28 |
| AX-157750415 | 14 | 12.945 | KV453324.1  | 1084946 | 28-scf00308 | 28 |
| AX-157831741 | 14 | 12.945 | KV453324.1  | 1095470 | 28-scf00308 | 28 |
| AX-158144514 | 14 | 12.945 | KV453324.1  | 1114199 | 28-scf00308 | 28 |
| AX-157772195 | 14 | 12.945 | KV453324.1  | 1115213 | 28-scf00308 | 28 |
| AX-158144524 | 14 | 12.945 | KV453324.1  | 1127624 | 28-scf00308 | 28 |
| AX-157738846 | 14 | 12.945 | KV453324.1  | 1128452 | 28-scf00308 | 28 |
| AX-157831745 | 14 | 12.945 | KV453324.1  | 1129319 | 28-scf00308 | 28 |
| AX-158144525 | 14 | 12.945 | KV453324.1  | 1134505 | 28-scf00308 | 28 |
| AX-158144526 | 14 | 12.945 | KV453324.1  | 1135994 | 28-scf00308 | 28 |
| AX-158144550 | 14 | 12.945 | KV453324.1  | 1157964 | 28-scf00308 | 28 |
| AX-158144551 | 14 | 12.945 | KV453324.1  | 1158363 | 28-scf00308 | 28 |
| AX-158144554 | 14 | 12.945 | KV453324.1  | 1163419 | 28-scf00308 | 28 |
| AX-158144560 | 14 | 12.945 | KV453324.1  | 1179651 | 28-scf00308 | 28 |
| AX-158144593 | 14 | 12.945 | KV453324.1  | 1246699 | 28-scf00308 | 28 |
| AX-158144704 | 14 | 12.945 | KV453324.1  | 1470643 | 28-scf00308 | 28 |
| AX-157693357 | 14 | 12.945 | 3ML01025329 | 2033    | scf01091_1  | UN |
| AX-158143939 | 14 | 13.054 | KV453324.1  | 95917   | 28-scf00308 | 28 |
| AX-158144267 | 14 | 13.054 | KV453324.1  | 615126  | 28-scf00308 | 28 |
| AX-158144396 | 14 | 13.054 | KV453324.1  | 897816  | 28-scf00308 | 28 |
| AX-158144531 | 14 | 13.054 | KV453324.1  | 1144673 | 28-scf00308 | 28 |
| AX-158144532 | 14 | 13.054 | KV453324.1  | 1145680 | 28-scf00308 | 28 |
| AX-158144539 | 14 | 13.054 | KV453324.1  | 1150751 | 28-scf00308 | 28 |
| AX-158144542 | 14 | 13.054 | KV453324.1  | 1151941 | 28-scf00308 | 28 |
| AX-158144548 | 14 | 13.054 | KV453324.1  | 1156822 | 28-scf00308 | 28 |
| AX-158144553 | 14 | 13.054 | KV453324.1  | 1159180 | 28-scf00308 | 28 |
| AX-158417601 | 14 | 13.054 | KV453324.1  | 1159706 | 28-scf00308 | 28 |
| AX-157742011 | 14 | 13.054 | KV453324.1  | 1163962 | 28-scf00308 | 28 |
| AX-158144555 | 14 | 13.054 | KV453324.1  | 1171500 | 28-scf00308 | 28 |
| AX-158144561 | 14 | 13.054 | KV453324.1  | 1180859 | 28-scf00308 | 28 |
| AX-157742929 | 14 | 13.054 | KV453324.1  | 1181445 | 28-scf00308 | 28 |
| AX-157831752 | 14 | 13.054 | KV453324.1  | 1181917 | 28-scf00308 | 28 |

|              |    |        |             |         |                |    |
|--------------|----|--------|-------------|---------|----------------|----|
| AX-157761001 | 14 | 13.054 | KV453324.1  | 1183219 | 28-scf00308    | 28 |
| AX-158144562 | 14 | 13.054 | KV453324.1  | 1184835 | 28-scf00308    | 28 |
| AX-157831754 | 14 | 13.054 | KV453324.1  | 1188577 | 28-scf00308    | 28 |
| AX-158144564 | 14 | 13.054 | KV453324.1  | 1189351 | 28-scf00308    | 28 |
| AX-157831755 | 14 | 13.054 | KV453324.1  | 1190551 | 28-scf00308    | 28 |
| AX-157739776 | 14 | 13.054 | KV453324.1  | 1191142 | 28-scf00308    | 28 |
| AX-158144696 | 14 | 13.054 | KV453324.1  | 1462622 | 28-scf00308    | 28 |
| AX-158144697 | 14 | 13.054 | KV453324.1  | 1463666 | 28-scf00308    | 28 |
| AX-158144579 | 14 | 13.09  | KV453324.1  | 1209048 | 28-scf00308    | 28 |
| AX-158144580 | 14 | 13.125 | KV453324.1  | 1210743 | 28-scf00308    | 28 |
| AX-158144867 | 14 | 13.125 | KV453324.1  | 1687748 | 28-scf00308    | 28 |
| AX-157831786 | 14 | 13.125 | KV453324.1  | 1743570 | 28-scf00308    | 28 |
| AX-158144547 | 14 | 13.163 | KV453324.1  | 1156387 | 28-scf00308    | 28 |
| AX-157831757 | 14 | 13.163 | KV453324.1  | 1213920 | 28-scf00308    | 28 |
| AX-157719778 | 14 | 13.163 | KV453324.1  | 1219799 | 28-scf00308    | 28 |
| AX-157750445 | 14 | 13.163 | KV453324.1  | 1223530 | 28-scf00308    | 28 |
| AX-158144584 | 14 | 13.163 | KV453324.1  | 1227769 | 28-scf00308    | 28 |
| AX-157715693 | 14 | 13.163 | KV453324.1  | 1235796 | 28-scf00308    | 28 |
| AX-158144588 | 14 | 13.163 | KV453324.1  | 1236122 | 28-scf00308    | 28 |
| AX-158144589 | 14 | 13.163 | KV453324.1  | 1236191 | 28-scf00308    | 28 |
| AX-157831761 | 14 | 13.163 | KV453324.1  | 1240301 | 28-scf00308    | 28 |
| AX-158144591 | 14 | 13.163 | KV453324.1  | 1243034 | 28-scf00308    | 28 |
| AX-158144592 | 14 | 13.163 | KV453324.1  | 1244333 | 28-scf00308    | 28 |
| AX-157752261 | 14 | 13.163 | KV453324.1  | 1245154 | 28-scf00308    | 28 |
| AX-158144594 | 14 | 13.163 | KV453324.1  | 1249349 | 28-scf00308    | 28 |
| AX-158144596 | 14 | 13.163 | KV453324.1  | 1253637 | 28-scf00308    | 28 |
| AX-158144598 | 14 | 13.163 | KV453324.1  | 1262632 | 28-scf00308    | 28 |
| AX-158144634 | 14 | 13.163 | KV453324.1  | 1305018 | 28-scf00308    | 28 |
| AX-158144647 | 14 | 13.163 | KV453324.1  | 1333549 | 28-scf00308    | 28 |
| AX-158144709 | 14 | 13.163 | KV453324.1  | 1478737 | 28-scf00308    | 28 |
| AX-158144776 | 14 | 13.163 | KV453324.1  | 1563931 | 28-scf00308    | 28 |
| AX-158145241 | 14 | 13.163 | KV453324.1  | 2187485 | 28-scf00308    | 28 |
| AX-157683678 | 14 | 13.163 | KV453323.1  | 15742   | 28-scf00310    | 28 |
| AX-157683686 | 14 | 13.163 | KV453323.1  | 27719   | 28-scf00310    | 28 |
| AX-158144654 | 14 | 13.208 | KV453324.1  | 1342924 | 28-scf00308    | 28 |
| AX-157680700 | 14 | 13.208 | KV453323.1  | 37000   | 28-scf00310    | 28 |
| AX-157701156 | 14 | 13.208 | DX083535.1  | 277     | IORI212 lctalk | UN |
| AX-157704741 | 14 | 13.208 | 3ML01027208 | 1336    | scf02813_1     | UN |
| AX-158144590 | 14 | 13.248 | KV453324.1  | 1241422 | 28-scf00308    | 28 |
| AX-158144600 | 14 | 13.248 | KV453324.1  | 1266671 | 28-scf00308    | 28 |
| AX-158144603 | 14 | 13.273 | KV453324.1  | 1268826 | 28-scf00308    | 28 |
| AX-157708599 | 14 | 13.273 | KV453324.1  | 1270774 | 28-scf00308    | 28 |
| AX-158144606 | 14 | 13.273 | KV453324.1  | 1271724 | 28-scf00308    | 28 |
| AX-158144665 | 14 | 13.273 | KV453324.1  | 1363402 | 28-scf00308    | 28 |
| AX-158412264 | 14 | 13.341 | KV453324.1  | 1272212 | 28-scf00308    | 28 |
| AX-158144578 | 14 | 13.382 | KV453324.1  | 1208493 | 28-scf00308    | 28 |
| AX-158144595 | 14 | 13.382 | KV453324.1  | 1249774 | 28-scf00308    | 28 |
| AX-157831763 | 14 | 13.382 | KV453324.1  | 1274333 | 28-scf00308    | 28 |
| AX-158144610 | 14 | 13.382 | KV453324.1  | 1276790 | 28-scf00308    | 28 |
| AX-158144611 | 14 | 13.382 | KV453324.1  | 1277860 | 28-scf00308    | 28 |
| AX-158144613 | 14 | 13.382 | KV453324.1  | 1279241 | 28-scf00308    | 28 |

|              |    |        |            |         |             |    |
|--------------|----|--------|------------|---------|-------------|----|
| AX-157831764 | 14 | 13.382 | KV453324.1 | 1279566 | 28-scf00308 | 28 |
| AX-158144614 | 14 | 13.382 | KV453324.1 | 1279760 | 28-scf00308 | 28 |
| AX-157831765 | 14 | 13.382 | KV453324.1 | 1281616 | 28-scf00308 | 28 |
| AX-158144618 | 14 | 13.382 | KV453324.1 | 1284205 | 28-scf00308 | 28 |
| AX-158144620 | 14 | 13.382 | KV453324.1 | 1286927 | 28-scf00308 | 28 |
| AX-158144621 | 14 | 13.382 | KV453324.1 | 1287546 | 28-scf00308 | 28 |
| AX-158380347 | 14 | 13.382 | KV453324.1 | 1289170 | 28-scf00308 | 28 |
| AX-158144623 | 14 | 13.382 | KV453324.1 | 1292170 | 28-scf00308 | 28 |
| AX-158144625 | 14 | 13.382 | KV453324.1 | 1293686 | 28-scf00308 | 28 |
| AX-158144626 | 14 | 13.382 | KV453324.1 | 1294842 | 28-scf00308 | 28 |
| AX-157831767 | 14 | 13.382 | KV453324.1 | 1297749 | 28-scf00308 | 28 |
| AX-158144630 | 14 | 13.382 | KV453324.1 | 1301916 | 28-scf00308 | 28 |
| AX-158144631 | 14 | 13.382 | KV453324.1 | 1302351 | 28-scf00308 | 28 |
| AX-158144632 | 14 | 13.382 | KV453324.1 | 1303006 | 28-scf00308 | 28 |
| AX-158144633 | 14 | 13.382 | KV453324.1 | 1304690 | 28-scf00308 | 28 |
| AX-158144636 | 14 | 13.382 | KV453324.1 | 1308426 | 28-scf00308 | 28 |
| AX-158144637 | 14 | 13.382 | KV453324.1 | 1308863 | 28-scf00308 | 28 |
| AX-158144638 | 14 | 13.382 | KV453324.1 | 1309367 | 28-scf00308 | 28 |
| AX-158144640 | 14 | 13.382 | KV453324.1 | 1310002 | 28-scf00308 | 28 |
| AX-158144642 | 14 | 13.382 | KV453324.1 | 1312397 | 28-scf00308 | 28 |
| AX-157773385 | 14 | 13.382 | KV453324.1 | 1312867 | 28-scf00308 | 28 |
| AX-157772731 | 14 | 13.382 | KV453324.1 | 1314073 | 28-scf00308 | 28 |
| AX-158144643 | 14 | 13.382 | KV453324.1 | 1315205 | 28-scf00308 | 28 |
| AX-157831769 | 14 | 13.382 | KV453324.1 | 1319575 | 28-scf00308 | 28 |
| AX-157755887 | 14 | 13.382 | KV453324.1 | 1337857 | 28-scf00308 | 28 |
| AX-158144660 | 14 | 13.382 | KV453324.1 | 1351728 | 28-scf00308 | 28 |
| AX-157720362 | 14 | 13.382 | KV453324.1 | 1352836 | 28-scf00308 | 28 |
| AX-158144913 | 14 | 13.382 | KV453324.1 | 1746835 | 28-scf00308 | 28 |
| AX-158144981 | 14 | 13.382 | KV453324.1 | 1856823 | 28-scf00308 | 28 |
| AX-158144986 | 14 | 13.382 | KV453324.1 | 1861754 | 28-scf00308 | 28 |
| AX-158145184 | 14 | 13.382 | KV453324.1 | 2105762 | 28-scf00308 | 28 |
| AX-158145192 | 14 | 13.382 | KV453324.1 | 2116605 | 28-scf00308 | 28 |
| AX-157683677 | 14 | 13.382 | KV453323.1 | 14347   | 28-scf00310 | 28 |
| AX-157774056 | 14 | 13.6   | KV453324.1 | 1259964 | 28-scf00308 | 28 |
| AX-158144648 | 14 | 13.6   | KV453324.1 | 1335898 | 28-scf00308 | 28 |
| AX-158144649 | 14 | 13.6   | KV453324.1 | 1339266 | 28-scf00308 | 28 |
| AX-158144650 | 14 | 13.6   | KV453324.1 | 1339760 | 28-scf00308 | 28 |
| AX-158144651 | 14 | 13.6   | KV453324.1 | 1340274 | 28-scf00308 | 28 |
| AX-158144652 | 14 | 13.6   | KV453324.1 | 1340684 | 28-scf00308 | 28 |
| AX-158144653 | 14 | 13.6   | KV453324.1 | 1341401 | 28-scf00308 | 28 |
| AX-158144645 | 14 | 13.928 | KV453324.1 | 1326446 | 28-scf00308 | 28 |
| AX-158144646 | 14 | 13.928 | KV453324.1 | 1328837 | 28-scf00308 | 28 |
| AX-158144657 | 14 | 13.928 | KV453324.1 | 1348712 | 28-scf00308 | 28 |
| AX-158144658 | 14 | 13.928 | KV453324.1 | 1349557 | 28-scf00308 | 28 |
| AX-158144663 | 14 | 13.928 | KV453324.1 | 1358775 | 28-scf00308 | 28 |
| AX-157748312 | 14 | 13.928 | KV453324.1 | 1360153 | 28-scf00308 | 28 |
| AX-158144664 | 14 | 13.928 | KV453324.1 | 1361426 | 28-scf00308 | 28 |
| AX-158144666 | 14 | 13.928 | KV453324.1 | 1364455 | 28-scf00308 | 28 |
| AX-158144667 | 14 | 13.928 | KV453324.1 | 1364788 | 28-scf00308 | 28 |
| AX-157831773 | 14 | 13.928 | KV453324.1 | 1366831 | 28-scf00308 | 28 |
| AX-158144670 | 14 | 13.928 | KV453324.1 | 1370098 | 28-scf00308 | 28 |

|              |    |        |            |         |             |    |
|--------------|----|--------|------------|---------|-------------|----|
| AX-157711619 | 14 | 13.928 | KV453324.1 | 1371575 | 28-scf00308 | 28 |
| AX-158144701 | 14 | 13.928 | KV453324.1 | 1466750 | 28-scf00308 | 28 |
| AX-158144731 | 14 | 13.928 | KV453324.1 | 1500880 | 28-scf00308 | 28 |
| AX-157687482 | 14 | 13.928 | KV453322.1 | 5919    | 28-scf00897 | 28 |
| AX-158144656 | 14 | 14.037 | KV453324.1 | 1347838 | 28-scf00308 | 28 |
| AX-158144662 | 14 | 14.037 | KV453324.1 | 1355837 | 28-scf00308 | 28 |
| AX-157831771 | 14 | 14.037 | KV453324.1 | 1364417 | 28-scf00308 | 28 |
| AX-158144678 | 14 | 14.037 | KV453324.1 | 1440256 | 28-scf00308 | 28 |
| AX-158144680 | 14 | 14.037 | KV453324.1 | 1441359 | 28-scf00308 | 28 |
| AX-158144681 | 14 | 14.037 | KV453324.1 | 1442964 | 28-scf00308 | 28 |
| AX-158144682 | 14 | 14.037 | KV453324.1 | 1446987 | 28-scf00308 | 28 |
| AX-158144683 | 14 | 14.037 | KV453324.1 | 1448289 | 28-scf00308 | 28 |
| AX-158144685 | 14 | 14.037 | KV453324.1 | 1449731 | 28-scf00308 | 28 |
| AX-157878282 | 14 | 14.037 | KV453324.1 | 1452940 | 28-scf00308 | 28 |
| AX-158144689 | 14 | 14.037 | KV453324.1 | 1456417 | 28-scf00308 | 28 |
| AX-158144691 | 14 | 14.037 | KV453324.1 | 1457995 | 28-scf00308 | 28 |
| AX-158144693 | 14 | 14.037 | KV453324.1 | 1459676 | 28-scf00308 | 28 |
| AX-158144702 | 14 | 14.037 | KV453324.1 | 1469648 | 28-scf00308 | 28 |
| AX-158144710 | 14 | 14.037 | KV453324.1 | 1479946 | 28-scf00308 | 28 |
| AX-158144713 | 14 | 14.037 | KV453324.1 | 1483171 | 28-scf00308 | 28 |
| AX-158144722 | 14 | 14.328 | KV453324.1 | 1493288 | 28-scf00308 | 28 |
| AX-158144724 | 14 | 14.328 | KV453324.1 | 1493987 | 28-scf00308 | 28 |
| AX-158144726 | 14 | 14.357 | KV453324.1 | 1495943 | 28-scf00308 | 28 |
| AX-158144727 | 14 | 14.357 | KV453324.1 | 1496429 | 28-scf00308 | 28 |
| AX-158144747 | 14 | 14.357 | KV453324.1 | 1520159 | 28-scf00308 | 28 |
| AX-158144719 | 14 | 14.474 | KV453324.1 | 1490399 | 28-scf00308 | 28 |
| AX-157772494 | 14 | 14.474 | KV453324.1 | 1499727 | 28-scf00308 | 28 |
| AX-158144733 | 14 | 14.474 | KV453324.1 | 1502014 | 28-scf00308 | 28 |
| AX-158144742 | 14 | 14.474 | KV453324.1 | 1516738 | 28-scf00308 | 28 |
| AX-158144745 | 14 | 14.474 | KV453324.1 | 1518788 | 28-scf00308 | 28 |
| AX-158144748 | 14 | 14.474 | KV453324.1 | 1522286 | 28-scf00308 | 28 |
| AX-158144750 | 14 | 14.474 | KV453324.1 | 1526226 | 28-scf00308 | 28 |
| AX-158144751 | 14 | 14.474 | KV453324.1 | 1527148 | 28-scf00308 | 28 |
| AX-158144753 | 14 | 14.474 | KV453324.1 | 1528296 | 28-scf00308 | 28 |
| AX-157831775 | 14 | 14.474 | KV453324.1 | 1529262 | 28-scf00308 | 28 |
| AX-158144755 | 14 | 14.474 | KV453324.1 | 1531947 | 28-scf00308 | 28 |
| AX-158144756 | 14 | 14.535 | KV453324.1 | 1532337 | 28-scf00308 | 28 |
| AX-158144757 | 14 | 14.594 | KV453324.1 | 1534353 | 28-scf00308 | 28 |
| AX-158144760 | 14 | 14.728 | KV453324.1 | 1539091 | 28-scf00308 | 28 |
| AX-158144793 | 14 | 14.728 | KV453324.1 | 1584680 | 28-scf00308 | 28 |
| AX-158144758 | 14 | 14.729 | KV453324.1 | 1535097 | 28-scf00308 | 28 |
| AX-158144761 | 14 | 14.729 | KV453324.1 | 1540144 | 28-scf00308 | 28 |
| AX-157755192 | 14 | 14.729 | KV453324.1 | 1542325 | 28-scf00308 | 28 |
| AX-158144764 | 14 | 14.729 | KV453324.1 | 1542752 | 28-scf00308 | 28 |
| AX-158144766 | 14 | 14.729 | KV453324.1 | 1543740 | 28-scf00308 | 28 |
| AX-158144767 | 14 | 14.729 | KV453324.1 | 1544464 | 28-scf00308 | 28 |
| AX-158144769 | 14 | 14.729 | KV453324.1 | 1546003 | 28-scf00308 | 28 |
| AX-158144808 | 14 | 14.729 | KV453324.1 | 1603334 | 28-scf00308 | 28 |
| AX-158145266 | 14 | 14.729 | KV453324.1 | 2228215 | 28-scf00308 | 28 |
| AX-157858049 | 14 | 14.736 | KV453324.1 | 1540520 | 28-scf00308 | 28 |
| AX-158144773 | 14 | 14.736 | KV453324.1 | 1552123 | 28-scf00308 | 28 |

|              |    |        |            |         |             |    |
|--------------|----|--------|------------|---------|-------------|----|
| AX-158144792 | 14 | 14.736 | KV453324.1 | 1583623 | 28-scf00308 | 28 |
| AX-158144802 | 14 | 14.736 | KV453324.1 | 1598759 | 28-scf00308 | 28 |
| AX-157886395 | 14 | 14.773 | KV453324.1 | 1559012 | 28-scf00308 | 28 |
| AX-158144777 | 14 | 14.811 | KV453324.1 | 1564355 | 28-scf00308 | 28 |
| AX-158144825 | 14 | 14.811 | KV453324.1 | 1626547 | 28-scf00308 | 28 |
| AX-157886394 | 14 | 14.856 | KV453324.1 | 1547829 | 28-scf00308 | 28 |
| AX-158144774 | 14 | 14.856 | KV453324.1 | 1553595 | 28-scf00308 | 28 |
| AX-158144778 | 14 | 14.856 | KV453324.1 | 1564870 | 28-scf00308 | 28 |
| AX-158144779 | 14 | 14.856 | KV453324.1 | 1565776 | 28-scf00308 | 28 |
| AX-158144780 | 14 | 14.856 | KV453324.1 | 1567689 | 28-scf00308 | 28 |
| AX-158144781 | 14 | 14.856 | KV453324.1 | 1573121 | 28-scf00308 | 28 |
| AX-158144782 | 14 | 14.856 | KV453324.1 | 1574480 | 28-scf00308 | 28 |
| AX-158144783 | 14 | 14.856 | KV453324.1 | 1574814 | 28-scf00308 | 28 |
| AX-158144784 | 14 | 14.856 | KV453324.1 | 1575025 | 28-scf00308 | 28 |
| AX-158144787 | 14 | 14.856 | KV453324.1 | 1578915 | 28-scf00308 | 28 |
| AX-157831777 | 14 | 14.856 | KV453324.1 | 1579245 | 28-scf00308 | 28 |
| AX-158144788 | 14 | 14.856 | KV453324.1 | 1579812 | 28-scf00308 | 28 |
| AX-157831778 | 14 | 14.859 | KV453324.1 | 1582679 | 28-scf00308 | 28 |
| AX-158144795 | 14 | 14.874 | KV453324.1 | 1586597 | 28-scf00308 | 28 |
| AX-158412267 | 14 | 14.891 | KV453324.1 | 1602181 | 28-scf00308 | 28 |
| AX-157741888 | 14 | 14.891 | KV453324.1 | 1609427 | 28-scf00308 | 28 |
| AX-158144809 | 14 | 14.901 | KV453324.1 | 1604789 | 28-scf00308 | 28 |
| AX-158144815 | 14 | 14.92  | KV453324.1 | 1612528 | 28-scf00308 | 28 |
| AX-158144839 | 14 | 14.92  | KV453324.1 | 1647703 | 28-scf00308 | 28 |
| AX-158145260 | 14 | 14.92  | KV453324.1 | 2217177 | 28-scf00308 | 28 |
| AX-157680695 | 14 | 14.92  | KV453323.1 | 16440   | 28-scf00310 | 28 |
| AX-157831780 | 14 | 14.938 | KV453324.1 | 1621490 | 28-scf00308 | 28 |
| AX-158144824 | 14 | 14.949 | KV453324.1 | 1622923 | 28-scf00308 | 28 |
| AX-157831781 | 14 | 14.965 | KV453324.1 | 1624481 | 28-scf00308 | 28 |
| AX-157719505 | 14 | 14.983 | KV453324.1 | 1625444 | 28-scf00308 | 28 |
| AX-158144826 | 14 | 14.983 | KV453324.1 | 1629357 | 28-scf00308 | 28 |
| AX-158144830 | 14 | 14.983 | KV453324.1 | 1636710 | 28-scf00308 | 28 |
| AX-157831782 | 14 | 14.984 | KV453324.1 | 1631973 | 28-scf00308 | 28 |
| AX-158144827 | 14 | 14.984 | KV453324.1 | 1632249 | 28-scf00308 | 28 |
| AX-158144828 | 14 | 15.238 | KV453324.1 | 1635046 | 28-scf00308 | 28 |
| AX-158144829 | 14 | 15.238 | KV453324.1 | 1635538 | 28-scf00308 | 28 |
| AX-157720074 | 14 | 15.238 | KV453324.1 | 1636838 | 28-scf00308 | 28 |
| AX-158144837 | 14 | 15.238 | KV453324.1 | 1645937 | 28-scf00308 | 28 |
| AX-158144872 | 14 | 15.238 | KV453324.1 | 1694263 | 28-scf00308 | 28 |
| AX-157831808 | 14 | 15.238 | KV453324.1 | 1898038 | 28-scf00308 | 28 |
| AX-158145005 | 14 | 15.238 | KV453324.1 | 1900774 | 28-scf00308 | 28 |
| AX-158144805 | 14 | 15.366 | KV453324.1 | 1600136 | 28-scf00308 | 28 |
| AX-158144833 | 14 | 15.366 | KV453324.1 | 1640819 | 28-scf00308 | 28 |
| AX-158144834 | 14 | 15.366 | KV453324.1 | 1643437 | 28-scf00308 | 28 |
| AX-158144835 | 14 | 15.366 | KV453324.1 | 1644674 | 28-scf00308 | 28 |
| AX-158144836 | 14 | 15.366 | KV453324.1 | 1645538 | 28-scf00308 | 28 |
| AX-157714850 | 14 | 15.366 | KV453324.1 | 1646920 | 28-scf00308 | 28 |
| AX-158144838 | 14 | 15.366 | KV453324.1 | 1647011 | 28-scf00308 | 28 |
| AX-158144843 | 14 | 15.366 | KV453324.1 | 1657028 | 28-scf00308 | 28 |
| AX-157858051 | 14 | 15.366 | KV453324.1 | 1662872 | 28-scf00308 | 28 |
| AX-158144851 | 14 | 15.366 | KV453324.1 | 1664788 | 28-scf00308 | 28 |



|              |    |        |            |         |             |    |
|--------------|----|--------|------------|---------|-------------|----|
| AX-158144868 | 14 | 15.444 | KV453324.1 | 1688449 | 28-scf00308 | 28 |
| AX-158144870 | 14 | 15.444 | KV453324.1 | 1692979 | 28-scf00308 | 28 |
| AX-158144941 | 14 | 15.444 | KV453324.1 | 1790784 | 28-scf00308 | 28 |
| AX-158145059 | 14 | 15.444 | KV453324.1 | 1980622 | 28-scf00308 | 28 |
| AX-158145072 | 14 | 15.444 | KV453324.1 | 1991768 | 28-scf00308 | 28 |
| AX-158144873 | 14 | 15.555 | KV453324.1 | 1694837 | 28-scf00308 | 28 |
| AX-158144785 | 14 | 15.62  | KV453324.1 | 1575668 | 28-scf00308 | 28 |
| AX-158144786 | 14 | 15.62  | KV453324.1 | 1576874 | 28-scf00308 | 28 |
| AX-158144803 | 14 | 15.62  | KV453324.1 | 1599650 | 28-scf00308 | 28 |
| AX-158144804 | 14 | 15.62  | KV453324.1 | 1599998 | 28-scf00308 | 28 |
| AX-158144807 | 14 | 15.62  | KV453324.1 | 1601411 | 28-scf00308 | 28 |
| AX-158144816 | 14 | 15.62  | KV453324.1 | 1612757 | 28-scf00308 | 28 |
| AX-158144832 | 14 | 15.62  | KV453324.1 | 1640308 | 28-scf00308 | 28 |
| AX-158144847 | 14 | 15.62  | KV453324.1 | 1661033 | 28-scf00308 | 28 |
| AX-158144848 | 14 | 15.62  | KV453324.1 | 1662725 | 28-scf00308 | 28 |
| AX-158144864 | 14 | 15.62  | KV453324.1 | 1684921 | 28-scf00308 | 28 |
| AX-158144865 | 14 | 15.62  | KV453324.1 | 1686034 | 28-scf00308 | 28 |
| AX-158144875 | 14 | 15.62  | KV453324.1 | 1696973 | 28-scf00308 | 28 |
| AX-158144929 | 14 | 15.62  | KV453324.1 | 1770210 | 28-scf00308 | 28 |
| AX-158144963 | 14 | 15.62  | KV453324.1 | 1833390 | 28-scf00308 | 28 |
| AX-158144987 | 14 | 15.62  | KV453324.1 | 1862160 | 28-scf00308 | 28 |
| AX-158145004 | 14 | 15.62  | KV453324.1 | 1899407 | 28-scf00308 | 28 |
| AX-158145016 | 14 | 15.62  | KV453324.1 | 1911526 | 28-scf00308 | 28 |
| AX-158145021 | 14 | 15.62  | KV453324.1 | 1915304 | 28-scf00308 | 28 |
| AX-158145047 | 14 | 15.62  | KV453324.1 | 1958950 | 28-scf00308 | 28 |
| AX-157775487 | 14 | 15.62  | KV453324.1 | 1973464 | 28-scf00308 | 28 |
| AX-158145069 | 14 | 15.62  | KV453324.1 | 1990207 | 28-scf00308 | 28 |
| AX-158385483 | 14 | 15.62  | KV453324.1 | 2002400 | 28-scf00308 | 28 |
| AX-158145086 | 14 | 15.62  | KV453324.1 | 2009987 | 28-scf00308 | 28 |
| AX-158145091 | 14 | 15.62  | KV453324.1 | 2017028 | 28-scf00308 | 28 |
| AX-158145094 | 14 | 15.62  | KV453324.1 | 2017907 | 28-scf00308 | 28 |
| AX-158145101 | 14 | 15.62  | KV453324.1 | 2022993 | 28-scf00308 | 28 |
| AX-158145111 | 14 | 15.62  | KV453324.1 | 2031551 | 28-scf00308 | 28 |
| AX-158145112 | 14 | 15.62  | KV453324.1 | 2032102 | 28-scf00308 | 28 |
| AX-158145132 | 14 | 15.62  | KV453324.1 | 2053514 | 28-scf00308 | 28 |
| AX-158145163 | 14 | 15.62  | KV453324.1 | 2081827 | 28-scf00308 | 28 |
| AX-158144849 | 14 | 15.621 | KV453324.1 | 1663530 | 28-scf00308 | 28 |
| AX-158144881 | 14 | 15.621 | KV453324.1 | 1703043 | 28-scf00308 | 28 |
| AX-158144882 | 14 | 15.621 | KV453324.1 | 1703420 | 28-scf00308 | 28 |
| AX-158144883 | 14 | 15.621 | KV453324.1 | 1704014 | 28-scf00308 | 28 |
| AX-158144884 | 14 | 15.621 | KV453324.1 | 1705320 | 28-scf00308 | 28 |
| AX-158144885 | 14 | 15.621 | KV453324.1 | 1705953 | 28-scf00308 | 28 |
| AX-157831784 | 14 | 15.621 | KV453324.1 | 1708013 | 28-scf00308 | 28 |
| AX-158144886 | 14 | 15.621 | KV453324.1 | 1708487 | 28-scf00308 | 28 |
| AX-158144887 | 14 | 15.621 | KV453324.1 | 1709143 | 28-scf00308 | 28 |
| AX-158144888 | 14 | 15.621 | KV453324.1 | 1710847 | 28-scf00308 | 28 |
| AX-158144889 | 14 | 15.621 | KV453324.1 | 1713137 | 28-scf00308 | 28 |
| AX-158144891 | 14 | 15.621 | KV453324.1 | 1715579 | 28-scf00308 | 28 |
| AX-158144892 | 14 | 15.621 | KV453324.1 | 1716222 | 28-scf00308 | 28 |
| AX-158144895 | 14 | 15.621 | KV453324.1 | 1724015 | 28-scf00308 | 28 |
| AX-158144899 | 14 | 15.621 | KV453324.1 | 1726543 | 28-scf00308 | 28 |

|              |    |        |            |         |             |    |
|--------------|----|--------|------------|---------|-------------|----|
| AX-158144900 | 14 | 15.621 | KV453324.1 | 1726941 | 28-scf00308 | 28 |
| AX-158144901 | 14 | 15.621 | KV453324.1 | 1727855 | 28-scf00308 | 28 |
| AX-157713117 | 14 | 15.621 | KV453324.1 | 1753776 | 28-scf00308 | 28 |
| AX-157716576 | 14 | 15.621 | KV453324.1 | 1824261 | 28-scf00308 | 28 |
| AX-158412270 | 14 | 15.621 | KV453324.1 | 1826766 | 28-scf00308 | 28 |
| AX-158144966 | 14 | 15.621 | KV453324.1 | 1836492 | 28-scf00308 | 28 |
| AX-158145002 | 14 | 15.621 | KV453324.1 | 1896595 | 28-scf00308 | 28 |
| AX-158145041 | 14 | 15.621 | KV453324.1 | 1947218 | 28-scf00308 | 28 |
| AX-158145143 | 14 | 15.621 | KV453324.1 | 2063520 | 28-scf00308 | 28 |
| AX-158145158 | 14 | 15.621 | KV453324.1 | 2078117 | 28-scf00308 | 28 |
| AX-157695722 | 14 | 15.748 | KV453324.1 | 1732298 | 28-scf00308 | 28 |
| AX-158144905 | 14 | 15.748 | KV453324.1 | 1732831 | 28-scf00308 | 28 |
| AX-158144909 | 14 | 15.748 | KV453324.1 | 1742375 | 28-scf00308 | 28 |
| AX-158144914 | 14 | 15.748 | KV453324.1 | 1748669 | 28-scf00308 | 28 |
| AX-158144916 | 14 | 15.748 | KV453324.1 | 1750483 | 28-scf00308 | 28 |
| AX-157831790 | 14 | 15.748 | KV453324.1 | 1757767 | 28-scf00308 | 28 |
| AX-158144921 | 14 | 15.748 | KV453324.1 | 1759744 | 28-scf00308 | 28 |
| AX-157725254 | 14 | 15.748 | KV453324.1 | 1760534 | 28-scf00308 | 28 |
| AX-158144922 | 14 | 15.748 | KV453324.1 | 1762037 | 28-scf00308 | 28 |
| AX-158144923 | 14 | 15.748 | KV453324.1 | 1762294 | 28-scf00308 | 28 |
| AX-158144924 | 14 | 15.748 | KV453324.1 | 1762558 | 28-scf00308 | 28 |
| AX-157831799 | 14 | 15.748 | KV453324.1 | 1852184 | 28-scf00308 | 28 |
| AX-158145064 | 14 | 15.748 | KV453324.1 | 1985265 | 28-scf00308 | 28 |
| AX-158145109 | 14 | 15.748 | KV453324.1 | 2030560 | 28-scf00308 | 28 |
| AX-157721921 | 14 | 15.748 | KV453324.1 | 2081275 | 28-scf00308 | 28 |
| AX-158144798 | 14 | 15.875 | KV453324.1 | 1588267 | 28-scf00308 | 28 |
| AX-157724638 | 14 | 15.875 | KV453324.1 | 1772912 | 28-scf00308 | 28 |
| AX-158144934 | 14 | 15.875 | KV453324.1 | 1779085 | 28-scf00308 | 28 |
| AX-158144936 | 14 | 15.875 | KV453324.1 | 1786329 | 28-scf00308 | 28 |
| AX-158144938 | 14 | 15.875 | KV453324.1 | 1788013 | 28-scf00308 | 28 |
| AX-158144939 | 14 | 15.875 | KV453324.1 | 1789009 | 28-scf00308 | 28 |
| AX-158144940 | 14 | 15.875 | KV453324.1 | 1789186 | 28-scf00308 | 28 |
| AX-158144943 | 14 | 15.875 | KV453324.1 | 1795981 | 28-scf00308 | 28 |
| AX-158144945 | 14 | 15.875 | KV453324.1 | 1797016 | 28-scf00308 | 28 |
| AX-158144946 | 14 | 15.875 | KV453324.1 | 1798081 | 28-scf00308 | 28 |
| AX-157753076 | 14 | 15.875 | KV453324.1 | 1799179 | 28-scf00308 | 28 |
| AX-157747171 | 14 | 15.875 | KV453324.1 | 1804851 | 28-scf00308 | 28 |
| AX-158144949 | 14 | 15.875 | KV453324.1 | 1805532 | 28-scf00308 | 28 |
| AX-158144951 | 14 | 15.875 | KV453324.1 | 1808654 | 28-scf00308 | 28 |
| AX-158144960 | 14 | 15.875 | KV453324.1 | 1822436 | 28-scf00308 | 28 |
| AX-158144962 | 14 | 15.875 | KV453324.1 | 1830997 | 28-scf00308 | 28 |
| AX-157757458 | 14 | 15.875 | KV453324.1 | 1831930 | 28-scf00308 | 28 |
| AX-158144965 | 14 | 15.875 | KV453324.1 | 1834530 | 28-scf00308 | 28 |
| AX-157878287 | 14 | 15.875 | KV453324.1 | 1845494 | 28-scf00308 | 28 |
| AX-158144971 | 14 | 15.875 | KV453324.1 | 1850030 | 28-scf00308 | 28 |
| AX-158144972 | 14 | 15.875 | KV453324.1 | 1850987 | 28-scf00308 | 28 |
| AX-158144974 | 14 | 15.875 | KV453324.1 | 1851591 | 28-scf00308 | 28 |
| AX-158144975 | 14 | 15.875 | KV453324.1 | 1851713 | 28-scf00308 | 28 |
| AX-158144980 | 14 | 15.875 | KV453324.1 | 1856053 | 28-scf00308 | 28 |
| AX-157793652 | 14 | 15.875 | KV453324.1 | 1856758 | 28-scf00308 | 28 |
| AX-157878289 | 14 | 15.875 | KV453324.1 | 1856989 | 28-scf00308 | 28 |

|              |    |        |            |         |             |    |
|--------------|----|--------|------------|---------|-------------|----|
| AX-158144982 | 14 | 15.875 | KV453324.1 | 1857983 | 28-scf00308 | 28 |
| AX-158380349 | 14 | 15.875 | KV453324.1 | 1858530 | 28-scf00308 | 28 |
| AX-158144983 | 14 | 15.875 | KV453324.1 | 1858672 | 28-scf00308 | 28 |
| AX-158144985 | 14 | 15.875 | KV453324.1 | 1860664 | 28-scf00308 | 28 |
| AX-158144988 | 14 | 15.875 | KV453324.1 | 1862971 | 28-scf00308 | 28 |
| AX-157878290 | 14 | 15.875 | KV453324.1 | 1863251 | 28-scf00308 | 28 |
| AX-158144989 | 14 | 15.875 | KV453324.1 | 1865016 | 28-scf00308 | 28 |
| AX-157714365 | 14 | 15.875 | KV453324.1 | 1869488 | 28-scf00308 | 28 |
| AX-157831801 | 14 | 15.875 | KV453324.1 | 1872145 | 28-scf00308 | 28 |
| AX-157831805 | 14 | 15.875 | KV453324.1 | 1877939 | 28-scf00308 | 28 |
| AX-158144992 | 14 | 15.875 | KV453324.1 | 1880115 | 28-scf00308 | 28 |
| AX-158144993 | 14 | 15.875 | KV453324.1 | 1880944 | 28-scf00308 | 28 |
| AX-158144994 | 14 | 15.875 | KV453324.1 | 1881869 | 28-scf00308 | 28 |
| AX-157831806 | 14 | 15.875 | KV453324.1 | 1882683 | 28-scf00308 | 28 |
| AX-158144998 | 14 | 15.875 | KV453324.1 | 1890005 | 28-scf00308 | 28 |
| AX-158145000 | 14 | 15.875 | KV453324.1 | 1893322 | 28-scf00308 | 28 |
| AX-157831807 | 14 | 15.875 | KV453324.1 | 1894097 | 28-scf00308 | 28 |
| AX-158145001 | 14 | 15.875 | KV453324.1 | 1895136 | 28-scf00308 | 28 |
| AX-158145006 | 14 | 15.875 | KV453324.1 | 1902089 | 28-scf00308 | 28 |
| AX-158145008 | 14 | 15.875 | KV453324.1 | 1903225 | 28-scf00308 | 28 |
| AX-158145009 | 14 | 15.875 | KV453324.1 | 1905432 | 28-scf00308 | 28 |
| AX-158145012 | 14 | 15.875 | KV453324.1 | 1908690 | 28-scf00308 | 28 |
| AX-158145013 | 14 | 15.875 | KV453324.1 | 1909190 | 28-scf00308 | 28 |
| AX-158145018 | 14 | 15.875 | KV453324.1 | 1912521 | 28-scf00308 | 28 |
| AX-158145019 | 14 | 15.875 | KV453324.1 | 1913802 | 28-scf00308 | 28 |
| AX-158145020 | 14 | 15.875 | KV453324.1 | 1915029 | 28-scf00308 | 28 |
| AX-158145023 | 14 | 15.875 | KV453324.1 | 1916605 | 28-scf00308 | 28 |
| AX-158145024 | 14 | 15.875 | KV453324.1 | 1918551 | 28-scf00308 | 28 |
| AX-158145025 | 14 | 15.875 | KV453324.1 | 1919303 | 28-scf00308 | 28 |
| AX-158145026 | 14 | 15.875 | KV453324.1 | 1919471 | 28-scf00308 | 28 |
| AX-158145056 | 14 | 15.875 | KV453324.1 | 1976864 | 28-scf00308 | 28 |
| AX-158145074 | 14 | 15.875 | KV453324.1 | 1994433 | 28-scf00308 | 28 |
| AX-158144863 | 14 | 16.002 | KV453324.1 | 1681419 | 28-scf00308 | 28 |
| AX-158144898 | 14 | 16.002 | KV453324.1 | 1725810 | 28-scf00308 | 28 |
| AX-158144910 | 14 | 16.002 | KV453324.1 | 1743018 | 28-scf00308 | 28 |
| AX-157831789 | 14 | 16.002 | KV453324.1 | 1757380 | 28-scf00308 | 28 |
| AX-158144947 | 14 | 16.002 | KV453324.1 | 1803101 | 28-scf00308 | 28 |
| AX-158412269 | 14 | 16.002 | KV453324.1 | 1806954 | 28-scf00308 | 28 |
| AX-158144970 | 14 | 16.002 | KV453324.1 | 1848772 | 28-scf00308 | 28 |
| AX-157831804 | 14 | 16.002 | KV453324.1 | 1876223 | 28-scf00308 | 28 |
| AX-158144995 | 14 | 16.002 | KV453324.1 | 1884452 | 28-scf00308 | 28 |
| AX-158144999 | 14 | 16.002 | KV453324.1 | 1891959 | 28-scf00308 | 28 |
| AX-158145003 | 14 | 16.002 | KV453324.1 | 1898226 | 28-scf00308 | 28 |
| AX-158145010 | 14 | 16.002 | KV453324.1 | 1907043 | 28-scf00308 | 28 |
| AX-158145028 | 14 | 16.002 | KV453324.1 | 1921548 | 28-scf00308 | 28 |
| AX-158145029 | 14 | 16.002 | KV453324.1 | 1925497 | 28-scf00308 | 28 |
| AX-158145031 | 14 | 16.002 | KV453324.1 | 1927611 | 28-scf00308 | 28 |
| AX-158145033 | 14 | 16.002 | KV453324.1 | 1929423 | 28-scf00308 | 28 |
| AX-158145034 | 14 | 16.002 | KV453324.1 | 1931115 | 28-scf00308 | 28 |
| AX-158145036 | 14 | 16.002 | KV453324.1 | 1935742 | 28-scf00308 | 28 |
| AX-158145037 | 14 | 16.002 | KV453324.1 | 1938445 | 28-scf00308 | 28 |

|              |    |        |             |         |             |    |
|--------------|----|--------|-------------|---------|-------------|----|
| AX-158145038 | 14 | 16.002 | KV453324.1  | 1939577 | 28-scf00308 | 28 |
| AX-158145039 | 14 | 16.002 | KV453324.1  | 1942312 | 28-scf00308 | 28 |
| AX-158145040 | 14 | 16.002 | KV453324.1  | 1943592 | 28-scf00308 | 28 |
| AX-158145042 | 14 | 16.002 | KV453324.1  | 1949937 | 28-scf00308 | 28 |
| AX-158145044 | 14 | 16.002 | KV453324.1  | 1953364 | 28-scf00308 | 28 |
| AX-158145046 | 14 | 16.002 | KV453324.1  | 1956803 | 28-scf00308 | 28 |
| AX-158145049 | 14 | 16.002 | KV453324.1  | 1963902 | 28-scf00308 | 28 |
| AX-158145051 | 14 | 16.002 | KV453324.1  | 1967702 | 28-scf00308 | 28 |
| AX-158145080 | 14 | 16.002 | KV453324.1  | 2000986 | 28-scf00308 | 28 |
| AX-158145082 | 14 | 16.002 | KV453324.1  | 2005887 | 28-scf00308 | 28 |
| AX-158145085 | 14 | 16.002 | KV453324.1  | 2009357 | 28-scf00308 | 28 |
| AX-158145136 | 14 | 16.002 | KV453324.1  | 2056804 | 28-scf00308 | 28 |
| AX-157706088 | 14 | 16.002 | 3ML01031581 | 346     | scf07199_1  | UN |
| AX-158145048 | 14 | 16.043 | KV453324.1  | 1961901 | 28-scf00308 | 28 |
| AX-158145054 | 14 | 16.09  | KV453324.1  | 1973857 | 28-scf00308 | 28 |
| AX-157773782 | 14 | 16.13  | KV453324.1  | 1657927 | 28-scf00308 | 28 |
| AX-158144844 | 14 | 16.13  | KV453324.1  | 1659144 | 28-scf00308 | 28 |
| AX-158144858 | 14 | 16.13  | KV453324.1  | 1671952 | 28-scf00308 | 28 |
| AX-158144912 | 14 | 16.13  | KV453324.1  | 1744089 | 28-scf00308 | 28 |
| AX-157831787 | 14 | 16.13  | KV453324.1  | 1753207 | 28-scf00308 | 28 |
| AX-158144942 | 14 | 16.13  | KV453324.1  | 1791063 | 28-scf00308 | 28 |
| AX-158145022 | 14 | 16.13  | KV453324.1  | 1915954 | 28-scf00308 | 28 |
| AX-158145057 | 14 | 16.13  | KV453324.1  | 1977532 | 28-scf00308 | 28 |
| AX-158145061 | 14 | 16.13  | KV453324.1  | 1982796 | 28-scf00308 | 28 |
| AX-157775277 | 14 | 16.13  | KV453324.1  | 1983725 | 28-scf00308 | 28 |
| AX-158145062 | 14 | 16.13  | KV453324.1  | 1984431 | 28-scf00308 | 28 |
| AX-158145063 | 14 | 16.13  | KV453324.1  | 1984818 | 28-scf00308 | 28 |
| AX-158145068 | 14 | 16.13  | KV453324.1  | 1989559 | 28-scf00308 | 28 |
| AX-158145075 | 14 | 16.13  | KV453324.1  | 1995898 | 28-scf00308 | 28 |
| AX-158145076 | 14 | 16.13  | KV453324.1  | 1996482 | 28-scf00308 | 28 |
| AX-158145077 | 14 | 16.13  | KV453324.1  | 1998420 | 28-scf00308 | 28 |
| AX-158145078 | 14 | 16.13  | KV453324.1  | 1998978 | 28-scf00308 | 28 |
| AX-157723251 | 14 | 16.13  | KV453324.1  | 1999865 | 28-scf00308 | 28 |
| AX-158145083 | 14 | 16.13  | KV453324.1  | 2008556 | 28-scf00308 | 28 |
| AX-158145084 | 14 | 16.13  | KV453324.1  | 2008741 | 28-scf00308 | 28 |
| AX-158145089 | 14 | 16.13  | KV453324.1  | 2015358 | 28-scf00308 | 28 |
| AX-158145090 | 14 | 16.13  | KV453324.1  | 2015932 | 28-scf00308 | 28 |
| AX-158145092 | 14 | 16.13  | KV453324.1  | 2017380 | 28-scf00308 | 28 |
| AX-158145093 | 14 | 16.13  | KV453324.1  | 2017661 | 28-scf00308 | 28 |
| AX-158145095 | 14 | 16.13  | KV453324.1  | 2018974 | 28-scf00308 | 28 |
| AX-158145104 | 14 | 16.13  | KV453324.1  | 2025683 | 28-scf00308 | 28 |
| AX-157886397 | 14 | 16.13  | KV453324.1  | 2032252 | 28-scf00308 | 28 |
| AX-157886398 | 14 | 16.13  | KV453324.1  | 2032367 | 28-scf00308 | 28 |
| AX-158145142 | 14 | 16.13  | KV453324.1  | 2062831 | 28-scf00308 | 28 |
| AX-158145147 | 14 | 16.13  | KV453324.1  | 2066574 | 28-scf00308 | 28 |
| AX-158145156 | 14 | 16.13  | KV453324.1  | 2076082 | 28-scf00308 | 28 |
| AX-158145160 | 14 | 16.13  | KV453324.1  | 2078952 | 28-scf00308 | 28 |
| AX-158145208 | 14 | 16.13  | KV453324.1  | 2140455 | 28-scf00308 | 28 |
| AX-158145110 | 14 | 16.217 | KV453324.1  | 2031237 | 28-scf00308 | 28 |
| AX-158144967 | 14 | 16.309 | KV453324.1  | 1838401 | 28-scf00308 | 28 |
| AX-158145120 | 14 | 16.309 | KV453324.1  | 2037796 | 28-scf00308 | 28 |

|              |    |        |            |         |             |    |
|--------------|----|--------|------------|---------|-------------|----|
| AX-158145127 | 14 | 16.309 | KV453324.1 | 2046970 | 28-scf00308 | 28 |
| AX-158145128 | 14 | 16.309 | KV453324.1 | 2048385 | 28-scf00308 | 28 |
| AX-158145140 | 14 | 16.309 | KV453324.1 | 2059326 | 28-scf00308 | 28 |
| AX-158145144 | 14 | 16.309 | KV453324.1 | 2064056 | 28-scf00308 | 28 |
| AX-158145154 | 14 | 16.309 | KV453324.1 | 2075334 | 28-scf00308 | 28 |
| AX-158145155 | 14 | 16.309 | KV453324.1 | 2075642 | 28-scf00308 | 28 |
| AX-158145178 | 14 | 16.571 | KV453324.1 | 2101359 | 28-scf00308 | 28 |
| AX-158145205 | 14 | 16.735 | KV453324.1 | 2135006 | 28-scf00308 | 28 |
| AX-158145175 | 14 | 16.885 | KV453324.1 | 2097956 | 28-scf00308 | 28 |
| AX-157714583 | 14 | 16.885 | KV453324.1 | 2142073 | 28-scf00308 | 28 |
| AX-158145237 | 14 | 16.885 | KV453324.1 | 2185037 | 28-scf00308 | 28 |
| AX-158145315 | 14 | 16.885 | KV453324.1 | 2292813 | 28-scf00308 | 28 |
| AX-158145211 | 14 | 16.895 | KV453324.1 | 2143292 | 28-scf00308 | 28 |
| AX-158412286 | 14 | 17.022 | KV453324.1 | 2161785 | 28-scf00308 | 28 |
| AX-158145223 | 14 | 17.022 | KV453324.1 | 2166531 | 28-scf00308 | 28 |
| AX-158145229 | 14 | 17.15  | KV453324.1 | 2174484 | 28-scf00308 | 28 |
| AX-158145243 | 14 | 17.277 | KV453324.1 | 2191343 | 28-scf00308 | 28 |
| AX-158145255 | 14 | 17.317 | KV453324.1 | 2213966 | 28-scf00308 | 28 |
| AX-158145252 | 14 | 17.358 | KV453324.1 | 2210050 | 28-scf00308 | 28 |
| AX-158145258 | 14 | 17.358 | KV453324.1 | 2215193 | 28-scf00308 | 28 |
| AX-158145210 | 14 | 17.405 | KV453324.1 | 2141387 | 28-scf00308 | 28 |
| AX-157754627 | 14 | 17.405 | KV453324.1 | 2167040 | 28-scf00308 | 28 |
| AX-158145256 | 14 | 17.405 | KV453324.1 | 2214242 | 28-scf00308 | 28 |
| AX-158145264 | 14 | 17.405 | KV453324.1 | 2222513 | 28-scf00308 | 28 |
| AX-158145265 | 14 | 17.405 | KV453324.1 | 2225549 | 28-scf00308 | 28 |
| AX-158145273 | 14 | 17.468 | KV453324.1 | 2234517 | 28-scf00308 | 28 |
| AX-158144877 | 14 | 17.532 | KV453324.1 | 1698838 | 28-scf00308 | 28 |
| AX-157748410 | 14 | 17.532 | KV453324.1 | 2204563 | 28-scf00308 | 28 |
| AX-158145274 | 14 | 17.532 | KV453324.1 | 2235492 | 28-scf00308 | 28 |
| AX-158145275 | 14 | 17.532 | KV453324.1 | 2236383 | 28-scf00308 | 28 |
| AX-158380351 | 14 | 17.532 | KV453324.1 | 2237048 | 28-scf00308 | 28 |
| AX-158145276 | 14 | 17.532 | KV453324.1 | 2237928 | 28-scf00308 | 28 |
| AX-158145278 | 14 | 17.532 | KV453324.1 | 2239998 | 28-scf00308 | 28 |
| AX-158145279 | 14 | 17.532 | KV453324.1 | 2241791 | 28-scf00308 | 28 |
| AX-158145280 | 14 | 17.532 | KV453324.1 | 2242707 | 28-scf00308 | 28 |
| AX-158145281 | 14 | 17.532 | KV453324.1 | 2243826 | 28-scf00308 | 28 |
| AX-157714897 | 14 | 17.532 | KV453324.1 | 2246230 | 28-scf00308 | 28 |
| AX-158145283 | 14 | 17.532 | KV453324.1 | 2246857 | 28-scf00308 | 28 |
| AX-158145284 | 14 | 17.532 | KV453324.1 | 2247437 | 28-scf00308 | 28 |
| AX-158145285 | 14 | 17.532 | KV453324.1 | 2248475 | 28-scf00308 | 28 |
| AX-158145287 | 14 | 17.532 | KV453324.1 | 2251278 | 28-scf00308 | 28 |
| AX-158145290 | 14 | 17.532 | KV453324.1 | 2253514 | 28-scf00308 | 28 |
| AX-158145291 | 14 | 17.532 | KV453324.1 | 2255694 | 28-scf00308 | 28 |
| AX-157831830 | 14 | 17.532 | KV453324.1 | 2259259 | 28-scf00308 | 28 |
| AX-157700012 | 14 | 17.532 | KV453324.1 | 2272492 | 28-scf00308 | 28 |
| AX-158145303 | 14 | 17.532 | KV453324.1 | 2273826 | 28-scf00308 | 28 |
| AX-158145308 | 14 | 17.532 | KV453324.1 | 2278553 | 28-scf00308 | 28 |
| AX-158145324 | 14 | 17.532 | KV453324.1 | 2302940 | 28-scf00308 | 28 |
| AX-158145353 | 14 | 17.532 | KV453324.1 | 2346043 | 28-scf00308 | 28 |
| AX-158145359 | 14 | 17.532 | KV453324.1 | 2352788 | 28-scf00308 | 28 |
| AX-157831844 | 14 | 17.532 | KV453324.1 | 2405656 | 28-scf00308 | 28 |

|              |    |        |            |         |                |    |
|--------------|----|--------|------------|---------|----------------|----|
| AX-157696275 | 14 | 17.532 | FI870926.1 | 737     | IORI212 lctalu | UN |
| AX-158145247 | 14 | 17.659 | KV453324.1 | 2197412 | 28-scf00308    | 28 |
| AX-158145292 | 14 | 17.659 | KV453324.1 | 2257528 | 28-scf00308    | 28 |
| AX-157749563 | 14 | 17.659 | KV453324.1 | 2259129 | 28-scf00308    | 28 |
| AX-158145293 | 14 | 17.659 | KV453324.1 | 2260120 | 28-scf00308    | 28 |
| AX-158145295 | 14 | 17.659 | KV453324.1 | 2264682 | 28-scf00308    | 28 |
| AX-158145296 | 14 | 17.659 | KV453324.1 | 2265140 | 28-scf00308    | 28 |
| AX-158145297 | 14 | 17.659 | KV453324.1 | 2267041 | 28-scf00308    | 28 |
| AX-158145299 | 14 | 17.659 | KV453324.1 | 2268176 | 28-scf00308    | 28 |
| AX-158145300 | 14 | 17.659 | KV453324.1 | 2268697 | 28-scf00308    | 28 |
| AX-157831832 | 14 | 17.659 | KV453324.1 | 2272926 | 28-scf00308    | 28 |
| AX-158144840 | 14 | 17.914 | KV453324.1 | 1648018 | 28-scf00308    | 28 |
| AX-158145301 | 14 | 17.914 | KV453324.1 | 2269520 | 28-scf00308    | 28 |
| AX-157831831 | 14 | 17.914 | KV453324.1 | 2271047 | 28-scf00308    | 28 |
| AX-158145309 | 14 | 17.914 | KV453324.1 | 2279537 | 28-scf00308    | 28 |
| AX-157831833 | 14 | 17.914 | KV453324.1 | 2280576 | 28-scf00308    | 28 |
| AX-158145310 | 14 | 17.914 | KV453324.1 | 2287397 | 28-scf00308    | 28 |
| AX-158145312 | 14 | 17.914 | KV453324.1 | 2289713 | 28-scf00308    | 28 |
| AX-157719182 | 14 | 17.914 | KV453324.1 | 2291092 | 28-scf00308    | 28 |
| AX-158145314 | 14 | 17.914 | KV453324.1 | 2291965 | 28-scf00308    | 28 |
| AX-158145317 | 14 | 17.914 | KV453324.1 | 2294493 | 28-scf00308    | 28 |
| AX-158145318 | 14 | 17.914 | KV453324.1 | 2297113 | 28-scf00308    | 28 |
| AX-158145319 | 14 | 17.914 | KV453324.1 | 2297676 | 28-scf00308    | 28 |
| AX-157743877 | 14 | 17.914 | KV453324.1 | 2298665 | 28-scf00308    | 28 |
| AX-158145320 | 14 | 17.914 | KV453324.1 | 2300298 | 28-scf00308    | 28 |
| AX-158145321 | 14 | 17.914 | KV453324.1 | 2300712 | 28-scf00308    | 28 |
| AX-158145322 | 14 | 17.914 | KV453324.1 | 2301071 | 28-scf00308    | 28 |
| AX-158145323 | 14 | 17.914 | KV453324.1 | 2301636 | 28-scf00308    | 28 |
| AX-158145326 | 14 | 17.914 | KV453324.1 | 2304359 | 28-scf00308    | 28 |
| AX-157708520 | 14 | 17.914 | KV453324.1 | 2309523 | 28-scf00308    | 28 |
| AX-158412289 | 14 | 17.914 | KV453324.1 | 2312416 | 28-scf00308    | 28 |
| AX-158408457 | 14 | 17.914 | KV453324.1 | 2312737 | 28-scf00308    | 28 |
| AX-158145330 | 14 | 17.914 | KV453324.1 | 2313683 | 28-scf00308    | 28 |
| AX-158145331 | 14 | 17.914 | KV453324.1 | 2314855 | 28-scf00308    | 28 |
| AX-158145332 | 14 | 17.914 | KV453324.1 | 2317503 | 28-scf00308    | 28 |
| AX-158145334 | 14 | 17.914 | KV453324.1 | 2318565 | 28-scf00308    | 28 |
| AX-158145336 | 14 | 17.914 | KV453324.1 | 2320406 | 28-scf00308    | 28 |
| AX-158145337 | 14 | 17.914 | KV453324.1 | 2321038 | 28-scf00308    | 28 |
| AX-158145338 | 14 | 17.914 | KV453324.1 | 2321909 | 28-scf00308    | 28 |
| AX-158145339 | 14 | 17.914 | KV453324.1 | 2322996 | 28-scf00308    | 28 |
| AX-158145340 | 14 | 17.914 | KV453324.1 | 2324365 | 28-scf00308    | 28 |
| AX-158145341 | 14 | 17.914 | KV453324.1 | 2326812 | 28-scf00308    | 28 |
| AX-157831834 | 14 | 17.914 | KV453324.1 | 2329292 | 28-scf00308    | 28 |
| AX-157739539 | 14 | 17.914 | KV453324.1 | 2333919 | 28-scf00308    | 28 |
| AX-158145346 | 14 | 17.914 | KV453324.1 | 2335064 | 28-scf00308    | 28 |
| AX-158145347 | 14 | 17.914 | KV453324.1 | 2337214 | 28-scf00308    | 28 |
| AX-157831835 | 14 | 17.914 | KV453324.1 | 2342349 | 28-scf00308    | 28 |
| AX-158145350 | 14 | 17.914 | KV453324.1 | 2342645 | 28-scf00308    | 28 |
| AX-158412290 | 14 | 17.914 | KV453324.1 | 2345822 | 28-scf00308    | 28 |
| AX-158145354 | 14 | 17.914 | KV453324.1 | 2346808 | 28-scf00308    | 28 |
| AX-158145358 | 14 | 17.914 | KV453324.1 | 2352120 | 28-scf00308    | 28 |

|              |    |        |            |         |             |    |
|--------------|----|--------|------------|---------|-------------|----|
| AX-157721548 | 14 | 17.914 | KV453324.1 | 2356847 | 28-scf00308 | 28 |
| AX-158145371 | 14 | 17.914 | KV453324.1 | 2383598 | 28-scf00308 | 28 |
| AX-158145373 | 14 | 17.914 | KV453324.1 | 2390429 | 28-scf00308 | 28 |
| AX-158145377 | 14 | 17.914 | KV453324.1 | 2393813 | 28-scf00308 | 28 |
| AX-158145378 | 14 | 17.914 | KV453324.1 | 2394145 | 28-scf00308 | 28 |
| AX-157748924 | 14 | 17.914 | KV453324.1 | 2422949 | 28-scf00308 | 28 |
| AX-157831836 | 14 | 17.977 | KV453324.1 | 2344637 | 28-scf00308 | 28 |
| AX-158145344 | 14 | 18.04  | KV453324.1 | 2331916 | 28-scf00308 | 28 |
| AX-157743847 | 14 | 18.04  | KV453324.1 | 2347552 | 28-scf00308 | 28 |
| AX-158145355 | 14 | 18.04  | KV453324.1 | 2348420 | 28-scf00308 | 28 |
| AX-158145360 | 14 | 18.04  | KV453324.1 | 2357459 | 28-scf00308 | 28 |
| AX-157745568 | 14 | 18.04  | KV453324.1 | 2363070 | 28-scf00308 | 28 |
| AX-157714771 | 14 | 18.04  | KV453324.1 | 2367405 | 28-scf00308 | 28 |
| AX-158145366 | 14 | 18.04  | KV453324.1 | 2371578 | 28-scf00308 | 28 |
| AX-157751255 | 14 | 18.04  | KV453324.1 | 2374107 | 28-scf00308 | 28 |
| AX-157831840 | 14 | 18.04  | KV453324.1 | 2376168 | 28-scf00308 | 28 |
| AX-157831841 | 14 | 18.04  | KV453324.1 | 2376955 | 28-scf00308 | 28 |
| AX-158145368 | 14 | 18.04  | KV453324.1 | 2378732 | 28-scf00308 | 28 |
| AX-158145369 | 14 | 18.04  | KV453324.1 | 2379208 | 28-scf00308 | 28 |
| AX-157831842 | 14 | 18.04  | KV453324.1 | 2382558 | 28-scf00308 | 28 |
| AX-158145367 | 14 | 18.098 | KV453324.1 | 2377112 | 28-scf00308 | 28 |
| AX-158145379 | 14 | 18.166 | KV453324.1 | 2397556 | 28-scf00308 | 28 |
| AX-158145380 | 14 | 18.166 | KV453324.1 | 2398286 | 28-scf00308 | 28 |
| AX-158145381 | 14 | 18.166 | KV453324.1 | 2398688 | 28-scf00308 | 28 |
| AX-158145382 | 14 | 18.166 | KV453324.1 | 2400305 | 28-scf00308 | 28 |
| AX-158145383 | 14 | 18.166 | KV453324.1 | 2401223 | 28-scf00308 | 28 |
| AX-157831837 | 14 | 18.232 | KV453324.1 | 2368975 | 28-scf00308 | 28 |
| AX-158145386 | 14 | 18.232 | KV453324.1 | 2404489 | 28-scf00308 | 28 |
| AX-158145388 | 14 | 18.291 | KV453324.1 | 2405386 | 28-scf00308 | 28 |
| AX-158145389 | 14 | 18.481 | KV453324.1 | 2408711 | 28-scf00308 | 28 |
| AX-158145391 | 14 | 18.496 | KV453324.1 | 2415344 | 28-scf00308 | 28 |
| AX-158145392 | 14 | 18.523 | KV453324.1 | 2416588 | 28-scf00308 | 28 |
| AX-158145393 | 14 | 18.6   | KV453324.1 | 2417445 | 28-scf00308 | 28 |
| AX-158145395 | 14 | 18.669 | KV453324.1 | 2418208 | 28-scf00308 | 28 |
| AX-158145396 | 14 | 18.67  | KV453324.1 | 2419549 | 28-scf00308 | 28 |
| AX-157831846 | 14 | 18.67  | KV453324.1 | 2419809 | 28-scf00308 | 28 |
| AX-158145397 | 14 | 18.67  | KV453324.1 | 2421351 | 28-scf00308 | 28 |
| AX-158145398 | 14 | 18.67  | KV453324.1 | 2422459 | 28-scf00308 | 28 |
| AX-157878294 | 14 | 18.67  | KV453324.1 | 2424286 | 28-scf00308 | 28 |
| AX-157831847 | 14 | 18.67  | KV453324.1 | 2425679 | 28-scf00308 | 28 |
| AX-157831850 | 14 | 18.709 | KV453324.1 | 2433664 | 28-scf00308 | 28 |
| AX-158145407 | 14 | 18.752 | KV453324.1 | 2435772 | 28-scf00308 | 28 |
| AX-157831848 | 14 | 18.764 | KV453324.1 | 2430386 | 28-scf00308 | 28 |
| AX-157715884 | 14 | 18.764 | KV453324.1 | 2436477 | 28-scf00308 | 28 |
| AX-158145416 | 14 | 18.764 | KV453324.1 | 2450066 | 28-scf00308 | 28 |
| AX-158145428 | 14 | 18.764 | KV453324.1 | 2462648 | 28-scf00308 | 28 |
| AX-158145411 | 14 | 18.796 | KV453324.1 | 2445263 | 28-scf00308 | 28 |
| AX-158145413 | 14 | 18.796 | KV453324.1 | 2447899 | 28-scf00308 | 28 |
| AX-158145417 | 14 | 18.796 | KV453324.1 | 2450623 | 28-scf00308 | 28 |
| AX-158145419 | 14 | 18.796 | KV453324.1 | 2452709 | 28-scf00308 | 28 |
| AX-158145420 | 14 | 18.814 | KV453324.1 | 2453471 | 28-scf00308 | 28 |

|              |    |        |            |         |             |    |
|--------------|----|--------|------------|---------|-------------|----|
| AX-158145421 | 14 | 18.922 | KV453324.1 | 2455006 | 28-scf00308 | 28 |
| AX-158145427 | 14 | 18.922 | KV453324.1 | 2460376 | 28-scf00308 | 28 |
| AX-158145430 | 14 | 18.922 | KV453324.1 | 2466885 | 28-scf00308 | 28 |
| AX-158145432 | 14 | 19.027 | KV453324.1 | 2469836 | 28-scf00308 | 28 |
| AX-158145433 | 14 | 19.174 | KV453324.1 | 2470299 | 28-scf00308 | 28 |
| AX-158145452 | 14 | 19.174 | KV453324.1 | 2496505 | 28-scf00308 | 28 |
| AX-158145485 | 14 | 19.174 | KV453324.1 | 2538384 | 28-scf00308 | 28 |
| AX-157831860 | 14 | 19.174 | KV453324.1 | 2540386 | 28-scf00308 | 28 |
| AX-158145400 | 14 | 19.3   | KV453324.1 | 2426193 | 28-scf00308 | 28 |
| AX-158145408 | 14 | 19.3   | KV453324.1 | 2442376 | 28-scf00308 | 28 |
| AX-157725848 | 14 | 19.3   | KV453324.1 | 2465198 | 28-scf00308 | 28 |
| AX-158145429 | 14 | 19.3   | KV453324.1 | 2466124 | 28-scf00308 | 28 |
| AX-157831854 | 14 | 19.3   | KV453324.1 | 2466241 | 28-scf00308 | 28 |
| AX-158145435 | 14 | 19.3   | KV453324.1 | 2474249 | 28-scf00308 | 28 |
| AX-158145437 | 14 | 19.3   | KV453324.1 | 2474964 | 28-scf00308 | 28 |
| AX-158145439 | 14 | 19.3   | KV453324.1 | 2477832 | 28-scf00308 | 28 |
| AX-158145443 | 14 | 19.3   | KV453324.1 | 2484698 | 28-scf00308 | 28 |
| AX-158145448 | 14 | 19.3   | KV453324.1 | 2494894 | 28-scf00308 | 28 |
| AX-158145450 | 14 | 19.3   | KV453324.1 | 2496029 | 28-scf00308 | 28 |
| AX-158145451 | 14 | 19.3   | KV453324.1 | 2496293 | 28-scf00308 | 28 |
| AX-158145453 | 14 | 19.3   | KV453324.1 | 2496864 | 28-scf00308 | 28 |
| AX-158145456 | 14 | 19.3   | KV453324.1 | 2502381 | 28-scf00308 | 28 |
| AX-158145459 | 14 | 19.3   | KV453324.1 | 2503478 | 28-scf00308 | 28 |
| AX-158145460 | 14 | 19.3   | KV453324.1 | 2504194 | 28-scf00308 | 28 |
| AX-158145461 | 14 | 19.3   | KV453324.1 | 2504489 | 28-scf00308 | 28 |
| AX-158145462 | 14 | 19.3   | KV453324.1 | 2506709 | 28-scf00308 | 28 |
| AX-158145463 | 14 | 19.3   | KV453324.1 | 2506881 | 28-scf00308 | 28 |
| AX-158145464 | 14 | 19.3   | KV453324.1 | 2508432 | 28-scf00308 | 28 |
| AX-158145465 | 14 | 19.3   | KV453324.1 | 2509077 | 28-scf00308 | 28 |
| AX-157831859 | 14 | 19.3   | KV453324.1 | 2511988 | 28-scf00308 | 28 |
| AX-158145466 | 14 | 19.3   | KV453324.1 | 2515606 | 28-scf00308 | 28 |
| AX-158145469 | 14 | 19.3   | KV453324.1 | 2517684 | 28-scf00308 | 28 |
| AX-158145470 | 14 | 19.3   | KV453324.1 | 2517997 | 28-scf00308 | 28 |
| AX-158145471 | 14 | 19.3   | KV453324.1 | 2518335 | 28-scf00308 | 28 |
| AX-158145473 | 14 | 19.3   | KV453324.1 | 2520735 | 28-scf00308 | 28 |
| AX-157715828 | 14 | 19.3   | KV453324.1 | 2527328 | 28-scf00308 | 28 |
| AX-158145477 | 14 | 19.3   | KV453324.1 | 2528664 | 28-scf00308 | 28 |
| AX-158145478 | 14 | 19.3   | KV453324.1 | 2529271 | 28-scf00308 | 28 |
| AX-158412293 | 14 | 19.3   | KV453324.1 | 2531505 | 28-scf00308 | 28 |
| AX-158145481 | 14 | 19.3   | KV453324.1 | 2535518 | 28-scf00308 | 28 |
| AX-158145483 | 14 | 19.3   | KV453324.1 | 2536039 | 28-scf00308 | 28 |
| AX-158145484 | 14 | 19.3   | KV453324.1 | 2538160 | 28-scf00308 | 28 |
| AX-158145486 | 14 | 19.3   | KV453324.1 | 2540789 | 28-scf00308 | 28 |
| AX-158145488 | 14 | 19.3   | KV453324.1 | 2541923 | 28-scf00308 | 28 |
| AX-157774238 | 14 | 19.3   | KV453324.1 | 2548523 | 28-scf00308 | 28 |
| AX-158145496 | 14 | 19.3   | KV453324.1 | 2549605 | 28-scf00308 | 28 |
| AX-157831861 | 14 | 19.3   | KV453324.1 | 2550169 | 28-scf00308 | 28 |
| AX-158145499 | 14 | 19.3   | KV453324.1 | 2553582 | 28-scf00308 | 28 |
| AX-158145502 | 14 | 19.3   | KV453324.1 | 2558414 | 28-scf00308 | 28 |
| AX-158145504 | 14 | 19.3   | KV453324.1 | 2565257 | 28-scf00308 | 28 |
| AX-157831862 | 14 | 19.3   | KV453324.1 | 2566394 | 28-scf00308 | 28 |



|              |    |        |            |         |             |    |
|--------------|----|--------|------------|---------|-------------|----|
| AX-157886404 | 14 | 19.3   | KV453324.1 | 2570024 | 28-scf00308 | 28 |
| AX-158145506 | 14 | 19.3   | KV453324.1 | 2570499 | 28-scf00308 | 28 |
| AX-158145507 | 14 | 19.3   | KV453324.1 | 2570892 | 28-scf00308 | 28 |
| AX-158145515 | 14 | 19.3   | KV453324.1 | 2585894 | 28-scf00308 | 28 |
| AX-158145517 | 14 | 19.3   | KV453324.1 | 2587779 | 28-scf00308 | 28 |
| AX-158145518 | 14 | 19.3   | KV453324.1 | 2589124 | 28-scf00308 | 28 |
| AX-158145521 | 14 | 19.3   | KV453324.1 | 2593841 | 28-scf00308 | 28 |
| AX-158145534 | 14 | 19.3   | KV453324.1 | 2605829 | 28-scf00308 | 28 |
| AX-158145561 | 14 | 19.3   | KV453324.1 | 2636195 | 28-scf00308 | 28 |
| AX-158145564 | 14 | 19.3   | KV453324.1 | 2639001 | 28-scf00308 | 28 |
| AX-158145509 | 14 | 19.426 | KV453324.1 | 2578674 | 28-scf00308 | 28 |
| AX-158145510 | 14 | 19.426 | KV453324.1 | 2580755 | 28-scf00308 | 28 |
| AX-158145511 | 14 | 19.426 | KV453324.1 | 2582939 | 28-scf00308 | 28 |
| AX-158385493 | 14 | 19.426 | KV453324.1 | 2592543 | 28-scf00308 | 28 |
| AX-158145520 | 14 | 19.426 | KV453324.1 | 2593347 | 28-scf00308 | 28 |
| AX-158145522 | 14 | 19.426 | KV453324.1 | 2594204 | 28-scf00308 | 28 |
| AX-158145523 | 14 | 19.426 | KV453324.1 | 2594566 | 28-scf00308 | 28 |
| AX-158145524 | 14 | 19.426 | KV453324.1 | 2596001 | 28-scf00308 | 28 |
| AX-158145526 | 14 | 19.426 | KV453324.1 | 2597751 | 28-scf00308 | 28 |
| AX-158145527 | 14 | 19.426 | KV453324.1 | 2598125 | 28-scf00308 | 28 |
| AX-158385494 | 14 | 19.426 | KV453324.1 | 2600552 | 28-scf00308 | 28 |
| AX-158145531 | 14 | 19.426 | KV453324.1 | 2601323 | 28-scf00308 | 28 |
| AX-158145532 | 14 | 19.426 | KV453324.1 | 2603057 | 28-scf00308 | 28 |
| AX-158145535 | 14 | 19.426 | KV453324.1 | 2607314 | 28-scf00308 | 28 |
| AX-158145440 | 14 | 19.552 | KV453324.1 | 2479204 | 28-scf00308 | 28 |
| AX-157748426 | 14 | 19.552 | KV453324.1 | 2481911 | 28-scf00308 | 28 |
| AX-157871644 | 14 | 19.552 | KV453324.1 | 2552708 | 28-scf00308 | 28 |
| AX-158145538 | 14 | 19.552 | KV453324.1 | 2609355 | 28-scf00308 | 28 |
| AX-158145539 | 14 | 19.552 | KV453324.1 | 2609710 | 28-scf00308 | 28 |
| AX-158145540 | 14 | 19.552 | KV453324.1 | 2611127 | 28-scf00308 | 28 |
| AX-158145542 | 14 | 19.804 | KV453324.1 | 2614514 | 28-scf00308 | 28 |
| AX-158145543 | 14 | 19.804 | KV453324.1 | 2615481 | 28-scf00308 | 28 |
| AX-158145544 | 14 | 19.804 | KV453324.1 | 2615859 | 28-scf00308 | 28 |
| AX-158145545 | 14 | 19.804 | KV453324.1 | 2617214 | 28-scf00308 | 28 |
| AX-158145549 | 14 | 19.804 | KV453324.1 | 2619186 | 28-scf00308 | 28 |
| AX-157702748 | 14 | 19.804 | KV453324.1 | 2619674 | 28-scf00308 | 28 |
| AX-158145550 | 14 | 19.804 | KV453324.1 | 2619828 | 28-scf00308 | 28 |
| AX-158145553 | 14 | 19.804 | KV453324.1 | 2622146 | 28-scf00308 | 28 |
| AX-158145555 | 14 | 19.804 | KV453324.1 | 2623384 | 28-scf00308 | 28 |
| AX-158145597 | 14 | 19.804 | KV453324.1 | 2677292 | 28-scf00308 | 28 |
| AX-158145626 | 14 | 19.804 | KV453324.1 | 2704267 | 28-scf00308 | 28 |
| AX-158145659 | 14 | 19.804 | KV453324.1 | 2742419 | 28-scf00308 | 28 |
| AX-158145667 | 14 | 19.804 | KV453324.1 | 2748487 | 28-scf00308 | 28 |
| AX-157743039 | 14 | 19.864 | KV453324.1 | 2623779 | 28-scf00308 | 28 |
| AX-158145554 | 14 | 19.93  | KV453324.1 | 2623016 | 28-scf00308 | 28 |
| AX-158145556 | 14 | 19.93  | KV453324.1 | 2625555 | 28-scf00308 | 28 |
| AX-158145557 | 14 | 19.93  | KV453324.1 | 2627994 | 28-scf00308 | 28 |
| AX-158385497 | 14 | 19.93  | KV453324.1 | 2640479 | 28-scf00308 | 28 |
| AX-158145565 | 14 | 19.93  | KV453324.1 | 2640886 | 28-scf00308 | 28 |
| AX-158145567 | 14 | 19.994 | KV453324.1 | 2644652 | 28-scf00308 | 28 |
| AX-158145623 | 14 | 19.994 | KV453324.1 | 2702208 | 28-scf00308 | 28 |

|              |    |        |            |         |             |    |
|--------------|----|--------|------------|---------|-------------|----|
| AX-158145569 | 14 | 20.056 | KV453324.1 | 2646977 | 28-scf00308 | 28 |
| AX-157773541 | 14 | 20.056 | KV453324.1 | 2648789 | 28-scf00308 | 28 |
| AX-158145573 | 14 | 20.056 | KV453324.1 | 2650863 | 28-scf00308 | 28 |
| AX-157750164 | 14 | 20.056 | KV453324.1 | 2658212 | 28-scf00308 | 28 |
| AX-158145578 | 14 | 20.056 | KV453324.1 | 2659013 | 28-scf00308 | 28 |
| AX-158145580 | 14 | 20.056 | KV453324.1 | 2659978 | 28-scf00308 | 28 |
| AX-158145581 | 14 | 20.056 | KV453324.1 | 2661176 | 28-scf00308 | 28 |
| AX-158145648 | 14 | 20.056 | KV453324.1 | 2732051 | 28-scf00308 | 28 |
| AX-158145559 | 14 | 20.182 | KV453324.1 | 2629860 | 28-scf00308 | 28 |
| AX-158393061 | 14 | 20.182 | KV453324.1 | 2634270 | 28-scf00308 | 28 |
| AX-158145562 | 14 | 20.182 | KV453324.1 | 2637160 | 28-scf00308 | 28 |
| AX-158145572 | 14 | 20.182 | KV453324.1 | 2650167 | 28-scf00308 | 28 |
| AX-157722289 | 14 | 20.182 | KV453324.1 | 2652710 | 28-scf00308 | 28 |
| AX-158145582 | 14 | 20.182 | KV453324.1 | 2663531 | 28-scf00308 | 28 |
| AX-158145584 | 14 | 20.182 | KV453324.1 | 2664509 | 28-scf00308 | 28 |
| AX-158145587 | 14 | 20.182 | KV453324.1 | 2668224 | 28-scf00308 | 28 |
| AX-158145590 | 14 | 20.182 | KV453324.1 | 2670142 | 28-scf00308 | 28 |
| AX-158145591 | 14 | 20.182 | KV453324.1 | 2670921 | 28-scf00308 | 28 |
| AX-158145592 | 14 | 20.182 | KV453324.1 | 2672459 | 28-scf00308 | 28 |
| AX-158145593 | 14 | 20.182 | KV453324.1 | 2673155 | 28-scf00308 | 28 |
| AX-158145596 | 14 | 20.182 | KV453324.1 | 2676330 | 28-scf00308 | 28 |
| AX-157707718 | 14 | 20.182 | KV453324.1 | 2680714 | 28-scf00308 | 28 |
| AX-157756295 | 14 | 20.182 | KV453324.1 | 2681066 | 28-scf00308 | 28 |
| AX-158145604 | 14 | 20.182 | KV453324.1 | 2683754 | 28-scf00308 | 28 |
| AX-158145606 | 14 | 20.182 | KV453324.1 | 2685030 | 28-scf00308 | 28 |
| AX-157773081 | 14 | 20.182 | KV453324.1 | 2686816 | 28-scf00308 | 28 |
| AX-158145609 | 14 | 20.182 | KV453324.1 | 2687372 | 28-scf00308 | 28 |
| AX-158145610 | 14 | 20.182 | KV453324.1 | 2687945 | 28-scf00308 | 28 |
| AX-158145611 | 14 | 20.182 | KV453324.1 | 2688513 | 28-scf00308 | 28 |
| AX-157702497 | 14 | 20.182 | KV453324.1 | 2691316 | 28-scf00308 | 28 |
| AX-158145618 | 14 | 20.182 | KV453324.1 | 2697893 | 28-scf00308 | 28 |
| AX-158145630 | 14 | 20.182 | KV453324.1 | 2707363 | 28-scf00308 | 28 |
| AX-158145647 | 14 | 20.182 | KV453324.1 | 2731520 | 28-scf00308 | 28 |
| AX-158145681 | 14 | 20.182 | KV453324.1 | 2764084 | 28-scf00308 | 28 |
| AX-157748996 | 14 | 20.224 | KV453324.1 | 2691484 | 28-scf00308 | 28 |
| AX-158145551 | 14 | 20.267 | KV453324.1 | 2620764 | 28-scf00308 | 28 |
| AX-158145614 | 14 | 20.267 | KV453324.1 | 2691853 | 28-scf00308 | 28 |
| AX-158145666 | 14 | 20.267 | KV453324.1 | 2747621 | 28-scf00308 | 28 |
| AX-158145615 | 14 | 20.308 | KV453324.1 | 2694136 | 28-scf00308 | 28 |
| AX-158145619 | 14 | 20.308 | KV453324.1 | 2698265 | 28-scf00308 | 28 |
| AX-158145622 | 14 | 20.308 | KV453324.1 | 2700740 | 28-scf00308 | 28 |
| AX-158145624 | 14 | 20.308 | KV453324.1 | 2702965 | 28-scf00308 | 28 |
| AX-158145627 | 14 | 20.308 | KV453324.1 | 2704711 | 28-scf00308 | 28 |
| AX-158145628 | 14 | 20.308 | KV453324.1 | 2705393 | 28-scf00308 | 28 |
| AX-158145629 | 14 | 20.308 | KV453324.1 | 2706271 | 28-scf00308 | 28 |
| AX-158145646 | 14 | 20.308 | KV453324.1 | 2730291 | 28-scf00308 | 28 |
| AX-158145632 | 14 | 20.559 | KV453324.1 | 2711884 | 28-scf00308 | 28 |
| AX-158145633 | 14 | 20.56  | KV453324.1 | 2712680 | 28-scf00308 | 28 |
| AX-158145640 | 14 | 20.928 | KV453324.1 | 2721469 | 28-scf00308 | 28 |
| AX-158145643 | 14 | 20.929 | KV453324.1 | 2722846 | 28-scf00308 | 28 |
| AX-158145644 | 14 | 20.933 | KV453324.1 | 2724272 | 28-scf00308 | 28 |

|              |    |        |             |         |             |    |
|--------------|----|--------|-------------|---------|-------------|----|
| AX-158145645 | 14 | 21.079 | KV453324.1  | 2727554 | 28-scf00308 | 28 |
| AX-158145649 | 14 | 21.19  | KV453324.1  | 2732630 | 28-scf00308 | 28 |
| AX-158145650 | 14 | 21.19  | KV453324.1  | 2733076 | 28-scf00308 | 28 |
| AX-158145651 | 14 | 21.19  | KV453324.1  | 2734435 | 28-scf00308 | 28 |
| AX-158145652 | 14 | 21.19  | KV453324.1  | 2736148 | 28-scf00308 | 28 |
| AX-158145653 | 14 | 21.19  | KV453324.1  | 2736560 | 28-scf00308 | 28 |
| AX-158412301 | 14 | 21.19  | KV453324.1  | 2738322 | 28-scf00308 | 28 |
| AX-158145655 | 14 | 21.19  | KV453324.1  | 2739409 | 28-scf00308 | 28 |
| AX-158145657 | 14 | 21.274 | KV453324.1  | 2740830 | 28-scf00308 | 28 |
| AX-158380354 | 14 | 21.355 | KV453324.1  | 2744642 | 28-scf00308 | 28 |
| AX-158145665 | 14 | 21.355 | KV453324.1  | 2747072 | 28-scf00308 | 28 |
| AX-157831865 | 14 | 21.442 | KV453324.1  | 2748531 | 28-scf00308 | 28 |
| AX-158145670 | 14 | 21.442 | KV453324.1  | 2751241 | 28-scf00308 | 28 |
| AX-158145671 | 14 | 21.442 | KV453324.1  | 2752412 | 28-scf00308 | 28 |
| AX-158145672 | 14 | 21.442 | KV453324.1  | 2753933 | 28-scf00308 | 28 |
| AX-158145673 | 14 | 21.442 | KV453324.1  | 2755058 | 28-scf00308 | 28 |
| AX-157758315 | 14 | 21.442 | KV453324.1  | 2756490 | 28-scf00308 | 28 |
| AX-158145675 | 14 | 21.568 | KV453324.1  | 2757711 | 28-scf00308 | 28 |
| AX-158145676 | 14 | 21.568 | KV453324.1  | 2758330 | 28-scf00308 | 28 |
| AX-158145677 | 14 | 21.568 | KV453324.1  | 2760664 | 28-scf00308 | 28 |
| AX-158145680 | 14 | 21.82  | KV453324.1  | 2763070 | 28-scf00308 | 28 |
| AX-158145682 | 14 | 21.82  | KV453324.1  | 2765212 | 28-scf00308 | 28 |
| AX-158145684 | 14 | 21.82  | KV453324.1  | 2766645 | 28-scf00308 | 28 |
| AX-158145687 | 14 | 21.955 | KV453324.1  | 2772816 | 28-scf00308 | 28 |
| AX-157710566 | 14 | 22.072 | KV453324.1  | 2767912 | 28-scf00308 | 28 |
| AX-158145688 | 14 | 22.072 | KV453324.1  | 2774046 | 28-scf00308 | 28 |
| AX-158145689 | 14 | 22.072 | KV453324.1  | 2774535 | 28-scf00308 | 28 |
| AX-158145690 | 14 | 22.072 | KV453324.1  | 2775963 | 28-scf00308 | 28 |
| AX-158417612 | 14 | 22.072 | KV453324.1  | 2776446 | 28-scf00308 | 28 |
| AX-158145692 | 14 | 22.072 | KV453324.1  | 2779504 | 28-scf00308 | 28 |
| AX-158145694 | 14 | 22.072 | KV453324.1  | 2785401 | 28-scf00308 | 28 |
| AX-157704990 | 14 | 22.072 | 3ML01028209 | 1058    | scf03814_1  | UN |
| AX-158412304 | 14 | 22.179 | KV453324.1  | 2776543 | 28-scf00308 | 28 |
| AX-157700906 | 14 | 22.179 | KV453324.1  | 2785742 | 28-scf00308 | 28 |
| AX-157886408 | 14 | 22.304 | KV453324.1  | 2791916 | 28-scf00308 | 28 |
| AX-158145697 | 14 | 22.304 | KV453324.1  | 2794200 | 28-scf00308 | 28 |
| AX-158145698 | 14 | 22.304 | KV453324.1  | 2794843 | 28-scf00308 | 28 |
| AX-158145700 | 14 | 22.304 | KV453324.1  | 2795924 | 28-scf00308 | 28 |
| AX-158145701 | 14 | 22.304 | KV453324.1  | 2796583 | 28-scf00308 | 28 |
| AX-158145708 | 14 | 22.343 | KV453324.1  | 2803509 | 28-scf00308 | 28 |
| AX-158145709 | 14 | 22.575 | KV453324.1  | 2804377 | 28-scf00308 | 28 |
| AX-158145710 | 14 | 22.576 | KV453324.1  | 2805217 | 28-scf00308 | 28 |
| AX-158145714 | 14 | 22.576 | KV453324.1  | 2807700 | 28-scf00308 | 28 |
| AX-158145715 | 14 | 22.702 | KV453324.1  | 2809114 | 28-scf00308 | 28 |
| AX-157753042 | 14 | 22.702 | KV453324.1  | 2810850 | 28-scf00308 | 28 |
| AX-158145718 | 14 | 22.953 | KV453324.1  | 2812464 | 28-scf00308 | 28 |
| AX-158145720 | 14 | 22.953 | KV453324.1  | 2813691 | 28-scf00308 | 28 |
| AX-158145722 | 14 | 22.953 | KV453324.1  | 2815599 | 28-scf00308 | 28 |
| AX-157886409 | 14 | 22.953 | KV453324.1  | 2816638 | 28-scf00308 | 28 |
| AX-158145726 | 14 | 22.953 | KV453324.1  | 2818696 | 28-scf00308 | 28 |
| AX-158145728 | 14 | 22.953 | KV453324.1  | 2819752 | 28-scf00308 | 28 |

|              |    |        |             |         |                |    |
|--------------|----|--------|-------------|---------|----------------|----|
| AX-158145730 | 14 | 22.953 | KV453324.1  | 2820501 | 28-scf00308    | 28 |
| AX-158145753 | 14 | 22.953 | KV453324.1  | 2843399 | 28-scf00308    | 28 |
| AX-158145760 | 14 | 22.953 | KV453324.1  | 2851282 | 28-scf00308    | 28 |
| AX-158145761 | 14 | 22.953 | KV453324.1  | 2851766 | 28-scf00308    | 28 |
| AX-158145767 | 14 | 22.953 | KV453324.1  | 2857754 | 28-scf00308    | 28 |
| AX-157723024 | 14 | 22.953 | KV453324.1  | 2884370 | 28-scf00308    | 28 |
| AX-158145791 | 14 | 22.953 | KV453324.1  | 2893562 | 28-scf00308    | 28 |
| AX-157886411 | 14 | 22.953 | KV453324.1  | 2897057 | 28-scf00308    | 28 |
| AX-158145733 | 14 | 23.08  | KV453324.1  | 2823064 | 28-scf00308    | 28 |
| AX-158145735 | 14 | 23.08  | KV453324.1  | 2824205 | 28-scf00308    | 28 |
| AX-158145741 | 14 | 23.08  | KV453324.1  | 2830759 | 28-scf00308    | 28 |
| AX-158145739 | 14 | 23.205 | KV453324.1  | 2828028 | 28-scf00308    | 28 |
| AX-158145750 | 14 | 23.205 | KV453324.1  | 2839278 | 28-scf00308    | 28 |
| AX-158145740 | 14 | 23.267 | KV453324.1  | 2829224 | 28-scf00308    | 28 |
| AX-158145745 | 14 | 23.331 | KV453324.1  | 2833565 | 28-scf00308    | 28 |
| AX-158145746 | 14 | 23.331 | KV453324.1  | 2835717 | 28-scf00308    | 28 |
| AX-157740926 | 14 | 23.457 | KV453324.1  | 2838266 | 28-scf00308    | 28 |
| AX-158145749 | 14 | 23.457 | KV453324.1  | 2838540 | 28-scf00308    | 28 |
| AX-157774119 | 14 | 23.457 | KV453324.1  | 2846777 | 28-scf00308    | 28 |
| AX-157756203 | 14 | 23.457 | KV453324.1  | 2852594 | 28-scf00308    | 28 |
| AX-157697681 | 14 | 23.457 | FI867074.1  | 138     | IORI212 lctalu | UN |
| AX-158145757 | 14 | 23.542 | KV453324.1  | 2849053 | 28-scf00308    | 28 |
| AX-158145770 | 14 | 23.542 | KV453324.1  | 2862771 | 28-scf00308    | 28 |
| AX-158145771 | 14 | 23.618 | KV453324.1  | 2863242 | 28-scf00308    | 28 |
| AX-158145772 | 14 | 23.71  | KV453324.1  | 2864673 | 28-scf00308    | 28 |
| AX-158145774 | 14 | 23.71  | KV453324.1  | 2867183 | 28-scf00308    | 28 |
| AX-158145773 | 14 | 23.711 | KV453324.1  | 2866572 | 28-scf00308    | 28 |
| AX-158145764 | 14 | 23.961 | KV453324.1  | 2854302 | 28-scf00308    | 28 |
| AX-158145775 | 14 | 23.961 | KV453324.1  | 2869988 | 28-scf00308    | 28 |
| AX-158145776 | 14 | 23.961 | KV453324.1  | 2873522 | 28-scf00308    | 28 |
| AX-158145779 | 14 | 23.961 | KV453324.1  | 2874951 | 28-scf00308    | 28 |
| AX-158145782 | 14 | 23.961 | KV453324.1  | 2879548 | 28-scf00308    | 28 |
| AX-158145783 | 14 | 23.961 | KV453324.1  | 2880588 | 28-scf00308    | 28 |
| AX-157720313 | 14 | 23.961 | KV453324.1  | 2883009 | 28-scf00308    | 28 |
| AX-157831870 | 14 | 23.961 | KV453324.1  | 2883538 | 28-scf00308    | 28 |
| AX-157709351 | 14 | 24.087 | KV453324.1  | 2872636 | 28-scf00308    | 28 |
| AX-158145788 | 14 | 24.087 | KV453324.1  | 2889946 | 28-scf00308    | 28 |
| AX-158145789 | 14 | 24.087 | KV453324.1  | 2891574 | 28-scf00308    | 28 |
| AX-158145792 | 14 | 24.087 | KV453324.1  | 2894158 | 28-scf00308    | 28 |
| AX-158145795 | 14 | 24.087 | KV453324.1  | 2895769 | 28-scf00308    | 28 |
| AX-158145798 | 14 | 24.087 | KV453324.1  | 2899768 | 28-scf00308    | 28 |
| AX-158145799 | 14 | 24.087 | KV453324.1  | 2900170 | 28-scf00308    | 28 |
| AX-158145800 | 14 | 24.087 | KV453324.1  | 2901304 | 28-scf00308    | 28 |
| AX-158145803 | 14 | 24.087 | KV453324.1  | 2904866 | 28-scf00308    | 28 |
| AX-158145804 | 14 | 24.087 | KV453324.1  | 2905301 | 28-scf00308    | 28 |
| AX-158145806 | 14 | 24.087 | KV453324.1  | 2906122 | 28-scf00308    | 28 |
| AX-158145807 | 14 | 24.087 | KV453324.1  | 2906603 | 28-scf00308    | 28 |
| AX-157886412 | 14 | 24.087 | KV453324.1  | 2914060 | 28-scf00308    | 28 |
| AX-158145815 | 14 | 24.087 | KV453324.1  | 2917624 | 28-scf00308    | 28 |
| AX-157886413 | 14 | 24.087 | KV453324.1  | 2920302 | 28-scf00308    | 28 |
| AX-157706573 | 14 | 24.087 | 3ML01032500 | 145     | scf08121_1     | UN |

|              |    |        |             |         |             |    |
|--------------|----|--------|-------------|---------|-------------|----|
| AX-157706574 | 14 | 24.087 | 3ML01032500 | 436     | scf08121_1  | UN |
| AX-158145808 | 14 | 24.339 | KV453324.1  | 2907864 | 28-scf00308 | 28 |
| AX-158145809 | 14 | 24.339 | KV453324.1  | 2908860 | 28-scf00308 | 28 |
| AX-158145810 | 14 | 24.339 | KV453324.1  | 2909732 | 28-scf00308 | 28 |
| AX-158145811 | 14 | 24.339 | KV453324.1  | 2911023 | 28-scf00308 | 28 |
| AX-158145819 | 14 | 24.339 | KV453324.1  | 2920638 | 28-scf00308 | 28 |
| AX-158145820 | 14 | 24.339 | KV453324.1  | 2921245 | 28-scf00308 | 28 |
| AX-157688419 | 14 | 24.41  | 3ML01026119 | 1214    | scf01717_1  | UN |
| AX-158145813 | 14 | 24.465 | KV453324.1  | 2914628 | 28-scf00308 | 28 |
| AX-158145823 | 14 | 24.465 | KV453324.1  | 2925683 | 28-scf00308 | 28 |
| AX-158145828 | 14 | 24.465 | KV453324.1  | 2932400 | 28-scf00308 | 28 |
| AX-158145827 | 14 | 24.468 | KV453324.1  | 2931460 | 28-scf00308 | 28 |
| AX-158145866 | 14 | 25.842 | KV453324.1  | 2974170 | 28-scf00308 | 28 |
| AX-158145867 | 14 | 25.851 | KV453324.1  | 2977435 | 28-scf00308 | 28 |
| AX-158145868 | 14 | 25.851 | KV453324.1  | 2978950 | 28-scf00308 | 28 |
| AX-158145869 | 14 | 25.851 | KV453324.1  | 2979614 | 28-scf00308 | 28 |
| AX-158145871 | 14 | 25.851 | KV453324.1  | 2981128 | 28-scf00308 | 28 |
| AX-157754555 | 14 | 25.851 | KV453324.1  | 2983794 | 28-scf00308 | 28 |
| AX-158145875 | 14 | 25.851 | KV453324.1  | 2983934 | 28-scf00308 | 28 |
| AX-158145888 | 14 | 25.851 | KV453324.1  | 2999963 | 28-scf00308 | 28 |
| AX-158145876 | 14 | 25.944 | KV453324.1  | 2985528 | 28-scf00308 | 28 |
| AX-158145877 | 14 | 25.98  | KV453324.1  | 2986190 | 28-scf00308 | 28 |
| AX-158146002 | 14 | 25.98  | KV453324.1  | 3151095 | 28-scf00308 | 28 |
| AX-158145879 | 14 | 26.009 | KV453324.1  | 2991248 | 28-scf00308 | 28 |
| AX-158145880 | 14 | 26.103 | KV453324.1  | 2992431 | 28-scf00308 | 28 |
| AX-158145885 | 14 | 26.148 | KV453324.1  | 2997955 | 28-scf00308 | 28 |
| AX-158145991 | 14 | 26.148 | KV453324.1  | 3134586 | 28-scf00308 | 28 |
| AX-157702598 | 14 | 26.229 | KV453324.1  | 2998089 | 28-scf00308 | 28 |
| AX-158145886 | 14 | 26.229 | KV453324.1  | 2998372 | 28-scf00308 | 28 |
| AX-158145893 | 14 | 26.229 | KV453324.1  | 3002035 | 28-scf00308 | 28 |
| AX-158145896 | 14 | 26.229 | KV453324.1  | 3005954 | 28-scf00308 | 28 |
| AX-158145919 | 14 | 26.229 | KV453324.1  | 3039361 | 28-scf00308 | 28 |
| AX-158145943 | 14 | 26.229 | KV453324.1  | 3063001 | 28-scf00308 | 28 |
| AX-158145968 | 14 | 26.229 | KV453324.1  | 3096057 | 28-scf00308 | 28 |
| AX-158145902 | 14 | 26.293 | KV453324.1  | 3015275 | 28-scf00308 | 28 |
| AX-158145963 | 14 | 26.293 | KV453324.1  | 3090817 | 28-scf00308 | 28 |
| AX-158145900 | 14 | 26.355 | KV453324.1  | 3014280 | 28-scf00308 | 28 |
| AX-158145906 | 14 | 26.355 | KV453324.1  | 3020781 | 28-scf00308 | 28 |
| AX-158145927 | 14 | 26.355 | KV453324.1  | 3046479 | 28-scf00308 | 28 |
| AX-158145951 | 14 | 26.355 | KV453324.1  | 3071388 | 28-scf00308 | 28 |
| AX-158145965 | 14 | 26.355 | KV453324.1  | 3093916 | 28-scf00308 | 28 |
| AX-158145967 | 14 | 26.355 | KV453324.1  | 3095258 | 28-scf00308 | 28 |
| AX-158146058 | 14 | 26.355 | KV453324.1  | 3241369 | 28-scf00308 | 28 |
| AX-158145970 | 14 | 26.383 | KV453324.1  | 3098096 | 28-scf00308 | 28 |
| AX-158145958 | 14 | 26.417 | KV453324.1  | 3086632 | 28-scf00308 | 28 |
| AX-158145971 | 14 | 26.417 | KV453324.1  | 3099773 | 28-scf00308 | 28 |
| AX-157773539 | 14 | 26.417 | KV453324.1  | 3125220 | 28-scf00308 | 28 |
| AX-158145972 | 14 | 26.448 | KV453324.1  | 3101202 | 28-scf00308 | 28 |
| AX-158145903 | 14 | 26.481 | KV453324.1  | 3015712 | 28-scf00308 | 28 |
| AX-158145979 | 14 | 26.481 | KV453324.1  | 3109976 | 28-scf00308 | 28 |
| AX-157858059 | 14 | 26.481 | KV453324.1  | 3112740 | 28-scf00308 | 28 |

|              |    |        |            |         |                |    |
|--------------|----|--------|------------|---------|----------------|----|
| AX-158145986 | 14 | 26.481 | KV453324.1 | 3128627 | 28-scf00308    | 28 |
| AX-157773422 | 14 | 26.481 | KV453324.1 | 3141209 | 28-scf00308    | 28 |
| AX-158412309 | 14 | 26.481 | KV453324.1 | 3149788 | 28-scf00308    | 28 |
| AX-158146007 | 14 | 26.481 | KV453324.1 | 3167313 | 28-scf00308    | 28 |
| AX-157831889 | 14 | 26.481 | KV453324.1 | 3208039 | 28-scf00308    | 28 |
| AX-157711450 | 14 | 26.481 | FI862933.1 | 251     | IORI212 lctalu | UN |
| AX-157727844 | 14 | 26.514 | KV453324.1 | 3167380 | 28-scf00308    | 28 |
| AX-157746130 | 14 | 26.514 | KV453324.1 | 3373970 | 28-scf00308    | 28 |
| AX-158146017 | 14 | 26.537 | KV453324.1 | 3179649 | 28-scf00308    | 28 |
| AX-158146018 | 14 | 26.572 | KV453324.1 | 3180414 | 28-scf00308    | 28 |
| AX-158146012 | 14 | 26.607 | KV453324.1 | 3174491 | 28-scf00308    | 28 |
| AX-158146019 | 14 | 26.607 | KV453324.1 | 3182723 | 28-scf00308    | 28 |
| AX-158146021 | 14 | 26.607 | KV453324.1 | 3185201 | 28-scf00308    | 28 |
| AX-158146040 | 14 | 26.607 | KV453324.1 | 3215816 | 28-scf00308    | 28 |
| AX-158145969 | 14 | 26.643 | KV453324.1 | 3096785 | 28-scf00308    | 28 |
| AX-158146059 | 14 | 26.643 | KV453324.1 | 3242617 | 28-scf00308    | 28 |
| AX-158145929 | 14 | 26.671 | KV453324.1 | 3047955 | 28-scf00308    | 28 |
| AX-158146060 | 14 | 26.671 | KV453324.1 | 3242874 | 28-scf00308    | 28 |
| AX-158146064 | 14 | 26.7   | KV453324.1 | 3246896 | 28-scf00308    | 28 |
| AX-158146065 | 14 | 26.733 | KV453324.1 | 3247198 | 28-scf00308    | 28 |
| AX-158146069 | 14 | 26.733 | KV453324.1 | 3253896 | 28-scf00308    | 28 |
| AX-158146080 | 14 | 26.733 | KV453324.1 | 3264693 | 28-scf00308    | 28 |
| AX-158146085 | 14 | 26.759 | KV453324.1 | 3271183 | 28-scf00308    | 28 |
| AX-158146095 | 14 | 26.784 | KV453324.1 | 3285110 | 28-scf00308    | 28 |
| AX-158146098 | 14 | 26.809 | KV453324.1 | 3287043 | 28-scf00308    | 28 |
| AX-158146033 | 14 | 26.832 | KV453324.1 | 3207603 | 28-scf00308    | 28 |
| AX-158146076 | 14 | 26.832 | KV453324.1 | 3262343 | 28-scf00308    | 28 |
| AX-158146077 | 14 | 26.832 | KV453324.1 | 3262576 | 28-scf00308    | 28 |
| AX-158146091 | 14 | 26.832 | KV453324.1 | 3280646 | 28-scf00308    | 28 |
| AX-158412311 | 14 | 26.832 | KV453324.1 | 3287796 | 28-scf00308    | 28 |
| AX-158146102 | 14 | 26.832 | KV453324.1 | 3292457 | 28-scf00308    | 28 |
| AX-158146108 | 14 | 26.832 | KV453324.1 | 3300935 | 28-scf00308    | 28 |
| AX-158146193 | 14 | 26.832 | KV453324.1 | 3396923 | 28-scf00308    | 28 |
| AX-158146243 | 14 | 26.832 | KV453324.1 | 3453622 | 28-scf00308    | 28 |
| AX-157831913 | 14 | 26.832 | KV453324.1 | 3467016 | 28-scf00308    | 28 |
| AX-158146274 | 14 | 26.832 | KV453324.1 | 3499299 | 28-scf00308    | 28 |
| AX-158146393 | 14 | 26.832 | KV453324.1 | 3664491 | 28-scf00308    | 28 |
| AX-158146418 | 14 | 26.832 | KV453324.1 | 3693512 | 28-scf00308    | 28 |
| AX-158146439 | 14 | 26.832 | KV453324.1 | 3724617 | 28-scf00308    | 28 |
| AX-158146063 | 14 | 26.859 | KV453324.1 | 3245735 | 28-scf00308    | 28 |
| AX-158146090 | 14 | 26.859 | KV453324.1 | 3279129 | 28-scf00308    | 28 |
| AX-158146099 | 14 | 26.859 | KV453324.1 | 3289834 | 28-scf00308    | 28 |
| AX-157770583 | 14 | 26.917 | KV453324.1 | 3295523 | 28-scf00308    | 28 |
| AX-157716435 | 14 | 26.985 | KV453324.1 | 3298430 | 28-scf00308    | 28 |
| AX-158146106 | 14 | 26.985 | KV453324.1 | 3299930 | 28-scf00308    | 28 |
| AX-157756480 | 14 | 27.176 | KV453324.1 | 3308290 | 28-scf00308    | 28 |
| AX-158146115 | 14 | 27.362 | KV453324.1 | 3311910 | 28-scf00308    | 28 |
| AX-158146113 | 14 | 27.363 | KV453324.1 | 3310170 | 28-scf00308    | 28 |
| AX-158146120 | 14 | 27.363 | KV453324.1 | 3316622 | 28-scf00308    | 28 |
| AX-158146121 | 14 | 27.363 | KV453324.1 | 3316706 | 28-scf00308    | 28 |
| AX-157886422 | 14 | 27.363 | KV453324.1 | 3316752 | 28-scf00308    | 28 |

|              |    |        |            |         |             |    |
|--------------|----|--------|------------|---------|-------------|----|
| AX-158146124 | 14 | 27.363 | KV453324.1 | 3318859 | 28-scf00308 | 28 |
| AX-158146143 | 14 | 27.363 | KV453324.1 | 3341042 | 28-scf00308 | 28 |
| AX-158146146 | 14 | 27.363 | KV453324.1 | 3342669 | 28-scf00308 | 28 |
| AX-158146151 | 14 | 27.363 | KV453324.1 | 3345526 | 28-scf00308 | 28 |
| AX-158146152 | 14 | 27.363 | KV453324.1 | 3347637 | 28-scf00308 | 28 |
| AX-158146157 | 14 | 27.363 | KV453324.1 | 3351821 | 28-scf00308 | 28 |
| AX-158146159 | 14 | 27.363 | KV453324.1 | 3352767 | 28-scf00308 | 28 |
| AX-158146189 | 14 | 27.363 | KV453324.1 | 3389631 | 28-scf00308 | 28 |
| AX-158146207 | 14 | 27.363 | KV453324.1 | 3423522 | 28-scf00308 | 28 |
| AX-158146084 | 14 | 27.615 | KV453324.1 | 3270560 | 28-scf00308 | 28 |
| AX-158146097 | 14 | 27.615 | KV453324.1 | 3286464 | 28-scf00308 | 28 |
| AX-158146104 | 14 | 27.615 | KV453324.1 | 3295478 | 28-scf00308 | 28 |
| AX-158146109 | 14 | 27.615 | KV453324.1 | 3302042 | 28-scf00308 | 28 |
| AX-158146160 | 14 | 27.615 | KV453324.1 | 3356439 | 28-scf00308 | 28 |
| AX-158146161 | 14 | 27.615 | KV453324.1 | 3357240 | 28-scf00308 | 28 |
| AX-158146164 | 14 | 27.615 | KV453324.1 | 3358412 | 28-scf00308 | 28 |
| AX-158146168 | 14 | 27.615 | KV453324.1 | 3361312 | 28-scf00308 | 28 |
| AX-157866404 | 14 | 27.615 | KV453324.1 | 3362857 | 28-scf00308 | 28 |
| AX-158146171 | 14 | 27.615 | KV453324.1 | 3363531 | 28-scf00308 | 28 |
| AX-157831898 | 14 | 27.615 | KV453324.1 | 3363818 | 28-scf00308 | 28 |
| AX-157831899 | 14 | 27.615 | KV453324.1 | 3365272 | 28-scf00308 | 28 |
| AX-157722414 | 14 | 27.615 | KV453324.1 | 3367907 | 28-scf00308 | 28 |
| AX-157831900 | 14 | 27.615 | KV453324.1 | 3371616 | 28-scf00308 | 28 |
| AX-157718865 | 14 | 27.615 | KV453324.1 | 3374330 | 28-scf00308 | 28 |
| AX-158146178 | 14 | 27.615 | KV453324.1 | 3375841 | 28-scf00308 | 28 |
| AX-158146180 | 14 | 27.615 | KV453324.1 | 3378066 | 28-scf00308 | 28 |
| AX-157831902 | 14 | 27.615 | KV453324.1 | 3378463 | 28-scf00308 | 28 |
| AX-158146183 | 14 | 27.615 | KV453324.1 | 3380184 | 28-scf00308 | 28 |
| AX-158146184 | 14 | 27.615 | KV453324.1 | 3385423 | 28-scf00308 | 28 |
| AX-158146186 | 14 | 27.615 | KV453324.1 | 3386667 | 28-scf00308 | 28 |
| AX-158412317 | 14 | 27.615 | KV453324.1 | 3404047 | 28-scf00308 | 28 |
| AX-157831905 | 14 | 27.615 | KV453324.1 | 3404229 | 28-scf00308 | 28 |
| AX-158146250 | 14 | 27.615 | KV453324.1 | 3472730 | 28-scf00308 | 28 |
| AX-157886426 | 14 | 27.615 | KV453324.1 | 3479236 | 28-scf00308 | 28 |
| AX-158412316 | 14 | 27.675 | KV453324.1 | 3403896 | 28-scf00308 | 28 |
| AX-158146162 | 14 | 27.741 | KV453324.1 | 3357594 | 28-scf00308 | 28 |
| AX-158146199 | 14 | 27.741 | KV453324.1 | 3407457 | 28-scf00308 | 28 |
| AX-157831908 | 14 | 27.741 | KV453324.1 | 3412304 | 28-scf00308 | 28 |
| AX-158146206 | 14 | 27.741 | KV453324.1 | 3422547 | 28-scf00308 | 28 |
| AX-158412321 | 14 | 27.741 | KV453324.1 | 3470610 | 28-scf00308 | 28 |
| AX-158146208 | 14 | 27.748 | KV453324.1 | 3424695 | 28-scf00308 | 28 |
| AX-158146210 | 14 | 27.748 | KV453324.1 | 3427137 | 28-scf00308 | 28 |
| AX-158146211 | 14 | 27.748 | KV453324.1 | 3427545 | 28-scf00308 | 28 |
| AX-158146212 | 14 | 27.748 | KV453324.1 | 3427999 | 28-scf00308 | 28 |
| AX-158146216 | 14 | 27.748 | KV453324.1 | 3430431 | 28-scf00308 | 28 |
| AX-158146234 | 14 | 27.748 | KV453324.1 | 3446969 | 28-scf00308 | 28 |
| AX-158146236 | 14 | 27.748 | KV453324.1 | 3448028 | 28-scf00308 | 28 |
| AX-157831917 | 14 | 27.748 | KV453324.1 | 3476016 | 28-scf00308 | 28 |
| AX-158146215 | 14 | 27.753 | KV453324.1 | 3429994 | 28-scf00308 | 28 |
| AX-158146229 | 14 | 27.758 | KV453324.1 | 3442479 | 28-scf00308 | 28 |
| AX-158146230 | 14 | 27.773 | KV453324.1 | 3443702 | 28-scf00308 | 28 |

|              |    |        |            |         |             |    |
|--------------|----|--------|------------|---------|-------------|----|
| AX-158146202 | 14 | 27.789 | KV453324.1 | 3415734 | 28-scf00308 | 28 |
| AX-158146233 | 14 | 27.789 | KV453324.1 | 3445774 | 28-scf00308 | 28 |
| AX-157863474 | 14 | 27.789 | KV453324.1 | 3471492 | 28-scf00308 | 28 |
| AX-157831912 | 14 | 27.807 | KV453324.1 | 3448273 | 28-scf00308 | 28 |
| AX-157746059 | 14 | 27.823 | KV453324.1 | 3449961 | 28-scf00308 | 28 |
| AX-158146240 | 14 | 27.899 | KV453324.1 | 3450744 | 28-scf00308 | 28 |
| AX-158146190 | 14 | 27.996 | KV453324.1 | 3389875 | 28-scf00308 | 28 |
| AX-158146195 | 14 | 27.996 | KV453324.1 | 3397923 | 28-scf00308 | 28 |
| AX-158412318 | 14 | 27.996 | KV453324.1 | 3405951 | 28-scf00308 | 28 |
| AX-158146242 | 14 | 27.996 | KV453324.1 | 3453170 | 28-scf00308 | 28 |
| AX-158146244 | 14 | 27.996 | KV453324.1 | 3453918 | 28-scf00308 | 28 |
| AX-157713908 | 14 | 27.996 | KV453324.1 | 3457498 | 28-scf00308 | 28 |
| AX-158146245 | 14 | 27.996 | KV453324.1 | 3466316 | 28-scf00308 | 28 |
| AX-157713869 | 14 | 27.996 | KV453324.1 | 3467297 | 28-scf00308 | 28 |
| AX-157831915 | 14 | 27.996 | KV453324.1 | 3471284 | 28-scf00308 | 28 |
| AX-158146249 | 14 | 27.996 | KV453324.1 | 3471791 | 28-scf00308 | 28 |
| AX-158146251 | 14 | 27.996 | KV453324.1 | 3473229 | 28-scf00308 | 28 |
| AX-157793701 | 14 | 27.996 | KV453324.1 | 3475031 | 28-scf00308 | 28 |
| AX-158146254 | 14 | 27.996 | KV453324.1 | 3476448 | 28-scf00308 | 28 |
| AX-157831918 | 14 | 27.996 | KV453324.1 | 3478275 | 28-scf00308 | 28 |
| AX-157758073 | 14 | 27.996 | KV453324.1 | 3478776 | 28-scf00308 | 28 |
| AX-158146256 | 14 | 27.996 | KV453324.1 | 3479148 | 28-scf00308 | 28 |
| AX-158146258 | 14 | 27.996 | KV453324.1 | 3480194 | 28-scf00308 | 28 |
| AX-158146271 | 14 | 27.996 | KV453324.1 | 3496763 | 28-scf00308 | 28 |
| AX-158146294 | 14 | 27.996 | KV453324.1 | 3519650 | 28-scf00308 | 28 |
| AX-158146356 | 14 | 27.996 | KV453324.1 | 3617721 | 28-scf00308 | 28 |
| AX-158146276 | 14 | 28.124 | KV453324.1 | 3501722 | 28-scf00308 | 28 |
| AX-158146277 | 14 | 28.124 | KV453324.1 | 3502811 | 28-scf00308 | 28 |
| AX-158146280 | 14 | 28.124 | KV453324.1 | 3506248 | 28-scf00308 | 28 |
| AX-157749828 | 14 | 28.124 | KV453324.1 | 3508049 | 28-scf00308 | 28 |
| AX-158146286 | 14 | 28.124 | KV453324.1 | 3513975 | 28-scf00308 | 28 |
| AX-158146287 | 14 | 28.124 | KV453324.1 | 3514894 | 28-scf00308 | 28 |
| AX-158146288 | 14 | 28.252 | KV453324.1 | 3515212 | 28-scf00308 | 28 |
| AX-157699430 | 14 | 28.252 | KV453324.1 | 3655506 | 28-scf00308 | 28 |
| AX-158146289 | 14 | 28.381 | KV453324.1 | 3515938 | 28-scf00308 | 28 |
| AX-158146297 | 14 | 28.381 | KV453324.1 | 3524147 | 28-scf00308 | 28 |
| AX-157871649 | 14 | 28.381 | KV453324.1 | 3524786 | 28-scf00308 | 28 |
| AX-158146301 | 14 | 28.381 | KV453324.1 | 3528520 | 28-scf00308 | 28 |
| AX-158146302 | 14 | 28.381 | KV453324.1 | 3529174 | 28-scf00308 | 28 |
| AX-158146304 | 14 | 28.381 | KV453324.1 | 3530412 | 28-scf00308 | 28 |
| AX-158146305 | 14 | 28.381 | KV453324.1 | 3530834 | 28-scf00308 | 28 |
| AX-158146327 | 14 | 28.381 | KV453324.1 | 3566209 | 28-scf00308 | 28 |
| AX-158146332 | 14 | 28.381 | KV453324.1 | 3574964 | 28-scf00308 | 28 |
| AX-158146339 | 14 | 28.381 | KV453324.1 | 3587265 | 28-scf00308 | 28 |
| AX-158146349 | 14 | 28.381 | KV453324.1 | 3597828 | 28-scf00308 | 28 |
| AX-158146224 | 14 | 28.509 | KV453324.1 | 3437697 | 28-scf00308 | 28 |
| AX-157831910 | 14 | 28.509 | KV453324.1 | 3437831 | 28-scf00308 | 28 |
| AX-158146307 | 14 | 28.509 | KV453324.1 | 3533201 | 28-scf00308 | 28 |
| AX-158146318 | 14 | 28.509 | KV453324.1 | 3556075 | 28-scf00308 | 28 |
| AX-158146319 | 14 | 28.509 | KV453324.1 | 3556351 | 28-scf00308 | 28 |
| AX-157746818 | 14 | 28.509 | KV453324.1 | 3556652 | 28-scf00308 | 28 |



|              |    |        |            |         |             |    |
|--------------|----|--------|------------|---------|-------------|----|
| AX-158146321 | 14 | 28.509 | KV453324.1 | 3557451 | 28-scf00308 | 28 |
| AX-158146322 | 14 | 28.509 | KV453324.1 | 3557948 | 28-scf00308 | 28 |
| AX-158146325 | 14 | 28.509 | KV453324.1 | 3563245 | 28-scf00308 | 28 |
| AX-158146326 | 14 | 28.509 | KV453324.1 | 3565427 | 28-scf00308 | 28 |
| AX-158146328 | 14 | 28.509 | KV453324.1 | 3568491 | 28-scf00308 | 28 |
| AX-158146329 | 14 | 28.509 | KV453324.1 | 3569608 | 28-scf00308 | 28 |
| AX-158146330 | 14 | 28.509 | KV453324.1 | 3571765 | 28-scf00308 | 28 |
| AX-158146334 | 14 | 28.509 | KV453324.1 | 3577151 | 28-scf00308 | 28 |
| AX-158146337 | 14 | 28.509 | KV453324.1 | 3585351 | 28-scf00308 | 28 |
| AX-158146341 | 14 | 28.509 | KV453324.1 | 3588737 | 28-scf00308 | 28 |
| AX-158146342 | 14 | 28.509 | KV453324.1 | 3590575 | 28-scf00308 | 28 |
| AX-158146343 | 14 | 28.509 | KV453324.1 | 3591514 | 28-scf00308 | 28 |
| AX-158146346 | 14 | 28.509 | KV453324.1 | 3593616 | 28-scf00308 | 28 |
| AX-157700352 | 14 | 28.509 | KV453324.1 | 3600169 | 28-scf00308 | 28 |
| AX-157718225 | 14 | 28.509 | KV453324.1 | 3600325 | 28-scf00308 | 28 |
| AX-157831926 | 14 | 28.509 | KV453324.1 | 3601213 | 28-scf00308 | 28 |
| AX-158146352 | 14 | 28.509 | KV453324.1 | 3602161 | 28-scf00308 | 28 |
| AX-158146359 | 14 | 28.509 | KV453324.1 | 3622784 | 28-scf00308 | 28 |
| AX-158146367 | 14 | 28.509 | KV453324.1 | 3637550 | 28-scf00308 | 28 |
| AX-158146379 | 14 | 28.509 | KV453324.1 | 3647636 | 28-scf00308 | 28 |
| AX-158146403 | 14 | 28.509 | KV453324.1 | 3674477 | 28-scf00308 | 28 |
| AX-157831927 | 14 | 28.55  | KV453324.1 | 3604026 | 28-scf00308 | 28 |
| AX-158146353 | 14 | 28.593 | KV453324.1 | 3604447 | 28-scf00308 | 28 |
| AX-158146125 | 14 | 28.637 | KV453324.1 | 3320201 | 28-scf00308 | 28 |
| AX-158146203 | 14 | 28.637 | KV453324.1 | 3417947 | 28-scf00308 | 28 |
| AX-158146355 | 14 | 28.637 | KV453324.1 | 3610977 | 28-scf00308 | 28 |
| AX-157741901 | 14 | 28.637 | KV453324.1 | 3631243 | 28-scf00308 | 28 |
| AX-158146381 | 14 | 28.637 | KV453324.1 | 3649239 | 28-scf00308 | 28 |
| AX-158146438 | 14 | 28.637 | KV453324.1 | 3724020 | 28-scf00308 | 28 |
| AX-158146293 | 14 | 28.675 | KV453324.1 | 3518973 | 28-scf00308 | 28 |
| AX-158146365 | 14 | 28.675 | KV453324.1 | 3636281 | 28-scf00308 | 28 |
| AX-157831929 | 14 | 28.716 | KV453324.1 | 3636421 | 28-scf00308 | 28 |
| AX-158146431 | 14 | 28.716 | KV453324.1 | 3715560 | 28-scf00308 | 28 |
| AX-158146446 | 14 | 28.716 | KV453324.1 | 3731306 | 28-scf00308 | 28 |
| AX-158146373 | 14 | 28.725 | KV453324.1 | 3642141 | 28-scf00308 | 28 |
| AX-158146380 | 14 | 28.725 | KV453324.1 | 3648360 | 28-scf00308 | 28 |
| AX-158146386 | 14 | 28.765 | KV453324.1 | 3657137 | 28-scf00308 | 28 |
| AX-158146388 | 14 | 28.765 | KV453324.1 | 3659874 | 28-scf00308 | 28 |
| AX-158146396 | 14 | 28.765 | KV453324.1 | 3668611 | 28-scf00308 | 28 |
| AX-158146390 | 14 | 28.766 | KV453324.1 | 3662591 | 28-scf00308 | 28 |
| AX-158146392 | 14 | 28.766 | KV453324.1 | 3664128 | 28-scf00308 | 28 |
| AX-158146397 | 14 | 28.972 | KV453324.1 | 3669404 | 28-scf00308 | 28 |
| AX-158146400 | 14 | 29.021 | KV453324.1 | 3671505 | 28-scf00308 | 28 |
| AX-158146398 | 14 | 29.022 | KV453324.1 | 3669803 | 28-scf00308 | 28 |
| AX-158146401 | 14 | 29.022 | KV453324.1 | 3672444 | 28-scf00308 | 28 |
| AX-158146402 | 14 | 29.022 | KV453324.1 | 3673665 | 28-scf00308 | 28 |
| AX-158146407 | 14 | 29.022 | KV453324.1 | 3676675 | 28-scf00308 | 28 |
| AX-158145955 | 14 | 29.15  | KV453324.1 | 3080420 | 28-scf00308 | 28 |
| AX-158145993 | 14 | 29.15  | KV453324.1 | 3135475 | 28-scf00308 | 28 |
| AX-157831884 | 14 | 29.15  | KV453324.1 | 3179987 | 28-scf00308 | 28 |
| AX-158146116 | 14 | 29.15  | KV453324.1 | 3312507 | 28-scf00308 | 28 |

|              |    |        |             |         |             |    |
|--------------|----|--------|-------------|---------|-------------|----|
| AX-158146119 | 14 | 29.15  | KV453324.1  | 3315262 | 28-scf00308 | 28 |
| AX-158146268 | 14 | 29.15  | KV453324.1  | 3492410 | 28-scf00308 | 28 |
| AX-158146384 | 14 | 29.15  | KV453324.1  | 3654954 | 28-scf00308 | 28 |
| AX-158146412 | 14 | 29.15  | KV453324.1  | 3686401 | 28-scf00308 | 28 |
| AX-158146413 | 14 | 29.15  | KV453324.1  | 3689128 | 28-scf00308 | 28 |
| AX-158146415 | 14 | 29.15  | KV453324.1  | 3691472 | 28-scf00308 | 28 |
| AX-158146417 | 14 | 29.15  | KV453324.1  | 3693153 | 28-scf00308 | 28 |
| AX-158146420 | 14 | 29.15  | KV453324.1  | 3696304 | 28-scf00308 | 28 |
| AX-158146425 | 14 | 29.15  | KV453324.1  | 3703953 | 28-scf00308 | 28 |
| AX-158146427 | 14 | 29.22  | KV453324.1  | 3708783 | 28-scf00308 | 28 |
| AX-158146430 | 14 | 29.31  | KV453324.1  | 3714202 | 28-scf00308 | 28 |
| AX-158146435 | 14 | 29.406 | KV453324.1  | 3719916 | 28-scf00308 | 28 |
| AX-158146436 | 14 | 29.406 | KV453324.1  | 3721443 | 28-scf00308 | 28 |
| AX-157742049 | 14 | 29.534 | KV453324.1  | 3553513 | 28-scf00308 | 28 |
| AX-158146320 | 14 | 29.534 | KV453324.1  | 3557172 | 28-scf00308 | 28 |
| AX-158146324 | 14 | 29.534 | KV453324.1  | 3562390 | 28-scf00308 | 28 |
| AX-158146375 | 14 | 29.534 | KV453324.1  | 3644906 | 28-scf00308 | 28 |
| AX-158146437 | 14 | 29.534 | KV453324.1  | 3722864 | 28-scf00308 | 28 |
| AX-158146444 | 14 | 29.534 | KV453324.1  | 3729270 | 28-scf00308 | 28 |
| AX-158146445 | 14 | 29.534 | KV453324.1  | 3730219 | 28-scf00308 | 28 |
| AX-158146447 | 14 | 29.534 | KV453324.1  | 3732363 | 28-scf00308 | 28 |
| AX-158146448 | 14 | 29.534 | KV453324.1  | 3733400 | 28-scf00308 | 28 |
| AX-158380358 | 14 | 29.534 | KV453324.1  | 3733785 | 28-scf00308 | 28 |
| AX-158146449 | 14 | 29.538 | KV453324.1  | 3734484 | 28-scf00308 | 28 |
| AX-158146450 | 14 | 29.541 | KV453324.1  | 3735886 | 28-scf00308 | 28 |
| AX-158146434 | 14 | 29.919 | KV453324.1  | 3718265 | 28-scf00308 | 28 |
| AX-158146452 | 14 | 29.919 | KV453324.1  | 3737370 | 28-scf00308 | 28 |
| AX-158146456 | 14 | 29.919 | KV453324.1  | 3740077 | 28-scf00308 | 28 |
| AX-157726195 | 14 | 29.919 | KV453324.1  | 3743417 | 28-scf00308 | 28 |
| AX-157720531 | 14 | 29.919 | KV453324.1  | 3748354 | 28-scf00308 | 28 |
| AX-158146466 | 14 | 29.919 | KV453324.1  | 3760520 | 28-scf00308 | 28 |
| AX-157831931 | 14 | 29.919 | KV453324.1  | 3763958 | 28-scf00308 | 28 |
| AX-158146469 | 14 | 29.919 | KV453324.1  | 3764196 | 28-scf00308 | 28 |
| AX-158412337 | 14 | 29.919 | KV453324.1  | 3766115 | 28-scf00308 | 28 |
| AX-158146472 | 14 | 29.919 | KV453324.1  | 3767461 | 28-scf00308 | 28 |
| AX-157831933 | 14 | 29.919 | KV453324.1  | 3768794 | 28-scf00308 | 28 |
| AX-158146476 | 14 | 29.919 | KV453324.1  | 3771607 | 28-scf00308 | 28 |
| AX-158146478 | 14 | 29.919 | KV453324.1  | 3772176 | 28-scf00308 | 28 |
| AX-158146490 | 14 | 29.919 | KV453324.1  | 3788522 | 28-scf00308 | 28 |
| AX-158146502 | 14 | 29.919 | KV453324.1  | 3798846 | 28-scf00308 | 28 |
| AX-158146483 | 14 | 29.944 | KV453324.1  | 3778188 | 28-scf00308 | 28 |
| AX-158146457 | 14 | 29.96  | KV453324.1  | 3741217 | 28-scf00308 | 28 |
| AX-157831930 | 14 | 29.96  | KV453324.1  | 3758283 | 28-scf00308 | 28 |
| AX-157831937 | 14 | 29.96  | KV453324.1  | 3775193 | 28-scf00308 | 28 |
| AX-158146484 | 14 | 29.96  | KV453324.1  | 3778954 | 28-scf00308 | 28 |
| AX-158146485 | 14 | 29.96  | KV453324.1  | 3780643 | 28-scf00308 | 28 |
| AX-158146486 | 14 | 29.96  | KV453324.1  | 3782971 | 28-scf00308 | 28 |
| AX-157858063 | 14 | 29.96  | KV453324.1  | 3838238 | 28-scf00308 | 28 |
| AX-157705548 | 14 | 30.253 | 3ML01030263 | 822     | scf05857_1  | UN |
| AX-158146458 | 14 | 30.432 | KV453324.1  | 3743644 | 28-scf00308 | 28 |
| AX-158146459 | 14 | 30.432 | KV453324.1  | 3745351 | 28-scf00308 | 28 |

|              |    |        |             |         |             |    |
|--------------|----|--------|-------------|---------|-------------|----|
| AX-158412334 | 14 | 30.432 | KV453324.1  | 3756045 | 28-scf00308 | 28 |
| AX-157871651 | 14 | 30.432 | KV453324.1  | 3761158 | 28-scf00308 | 28 |
| AX-158412336 | 14 | 30.432 | KV453324.1  | 3765885 | 28-scf00308 | 28 |
| AX-157745370 | 14 | 30.432 | KV453324.1  | 3781794 | 28-scf00308 | 28 |
| AX-158146491 | 14 | 30.432 | KV453324.1  | 3790484 | 28-scf00308 | 28 |
| AX-157758515 | 14 | 30.432 | KV453324.1  | 3790759 | 28-scf00308 | 28 |
| AX-158146492 | 14 | 30.432 | KV453324.1  | 3790921 | 28-scf00308 | 28 |
| AX-158146493 | 14 | 30.432 | KV453324.1  | 3791424 | 28-scf00308 | 28 |
| AX-158146500 | 14 | 30.432 | KV453324.1  | 3797611 | 28-scf00308 | 28 |
| AX-157717276 | 14 | 30.432 | KV453324.1  | 3808352 | 28-scf00308 | 28 |
| AX-157712050 | 14 | 30.432 | 3ML01032581 | 46      | scf08204_1  | UN |
| AX-158146501 | 14 | 30.433 | KV453324.1  | 3797829 | 28-scf00308 | 28 |
| AX-158146506 | 14 | 30.945 | KV453324.1  | 3803888 | 28-scf00308 | 28 |
| AX-157831940 | 14 | 30.945 | KV453324.1  | 3804591 | 28-scf00308 | 28 |
| AX-158146509 | 14 | 30.945 | KV453324.1  | 3807623 | 28-scf00308 | 28 |
| AX-158146511 | 14 | 30.945 | KV453324.1  | 3810683 | 28-scf00308 | 28 |
| AX-158146512 | 14 | 30.945 | KV453324.1  | 3812722 | 28-scf00308 | 28 |
| AX-157748061 | 14 | 30.945 | KV453324.1  | 3813354 | 28-scf00308 | 28 |
| AX-158146470 | 14 | 30.946 | KV453324.1  | 3765469 | 28-scf00308 | 28 |
| AX-158146513 | 14 | 30.946 | KV453324.1  | 3813980 | 28-scf00308 | 28 |
| AX-158146525 | 14 | 30.946 | KV453324.1  | 3830098 | 28-scf00308 | 28 |
| AX-158146532 | 14 | 30.946 | KV453324.1  | 3842244 | 28-scf00308 | 28 |
| AX-158146519 | 14 | 30.953 | KV453324.1  | 3820253 | 28-scf00308 | 28 |
| AX-157831944 | 14 | 31.302 | KV453324.1  | 3826125 | 28-scf00308 | 28 |
| AX-158146523 | 14 | 31.31  | KV453324.1  | 3826642 | 28-scf00308 | 28 |
| AX-158146524 | 14 | 31.31  | KV453324.1  | 3827550 | 28-scf00308 | 28 |
| AX-158146528 | 14 | 31.31  | KV453324.1  | 3835240 | 28-scf00308 | 28 |
| AX-157740037 | 14 | 31.31  | KV453324.1  | 3840024 | 28-scf00308 | 28 |
| AX-158146534 | 14 | 31.372 | KV453324.1  | 3845506 | 28-scf00308 | 28 |
| AX-158146535 | 14 | 31.647 | KV453324.1  | 3846864 | 28-scf00308 | 28 |
| AX-158146536 | 14 | 31.647 | KV453324.1  | 3847711 | 28-scf00308 | 28 |
| AX-157711316 | 14 | 31.647 | KV453324.1  | 3981056 | 28-scf00308 | 28 |
| AX-158146643 | 14 | 31.647 | KV453324.1  | 3983686 | 28-scf00308 | 28 |
| AX-158146778 | 14 | 31.647 | KV453324.1  | 4161128 | 28-scf00308 | 28 |
| AX-157831981 | 14 | 31.647 | KV453324.1  | 4185063 | 28-scf00308 | 28 |
| AX-158146820 | 14 | 31.647 | KV453324.1  | 4220568 | 28-scf00308 | 28 |
| AX-158147621 | 14 | 31.647 | KV453327.1  | 585941  | 28-scf00311 | 28 |
| AX-158147622 | 14 | 31.647 | KV453327.1  | 586708  | 28-scf00311 | 28 |
| AX-157747188 | 14 | 31.647 | KV453327.1  | 587957  | 28-scf00311 | 28 |
| AX-158147623 | 14 | 31.647 | KV453327.1  | 588772  | 28-scf00311 | 28 |
| AX-158147655 | 14 | 31.647 | KV453327.1  | 632423  | 28-scf00311 | 28 |
| AX-158147768 | 14 | 31.647 | KV453327.1  | 806933  | 28-scf00311 | 28 |
| AX-158147772 | 14 | 31.647 | KV453327.1  | 815420  | 28-scf00311 | 28 |
| AX-158147789 | 14 | 31.647 | KV453327.1  | 835200  | 28-scf00311 | 28 |
| AX-158148227 | 14 | 31.647 | KV453327.1  | 2200599 | 28-scf00311 | 28 |
| AX-158148238 | 14 | 31.647 | KV453327.1  | 2209562 | 28-scf00311 | 28 |
| AX-158148246 | 14 | 31.647 | KV453327.1  | 2218021 | 28-scf00311 | 28 |
| AX-158148252 | 14 | 31.647 | KV453327.1  | 2222101 | 28-scf00311 | 28 |
| AX-158148259 | 14 | 31.647 | KV453327.1  | 2234373 | 28-scf00311 | 28 |
| AX-158148281 | 14 | 31.647 | KV453327.1  | 2257719 | 28-scf00311 | 28 |
| AX-158148302 | 14 | 31.647 | KV453327.1  | 2294292 | 28-scf00311 | 28 |

|              |    |        |            |         |             |    |
|--------------|----|--------|------------|---------|-------------|----|
| AX-158148316 | 14 | 31.647 | KV453327.1 | 2312496 | 28-scf00311 | 28 |
| AX-158148324 | 14 | 31.647 | KV453327.1 | 2323090 | 28-scf00311 | 28 |
| AX-158380359 | 14 | 31.649 | KV453324.1 | 3850659 | 28-scf00308 | 28 |
| AX-158146540 | 14 | 31.678 | KV453324.1 | 3855704 | 28-scf00308 | 28 |
| AX-158146547 | 14 | 31.864 | KV453324.1 | 3866041 | 28-scf00308 | 28 |
| AX-158146548 | 14 | 32.34  | KV453324.1 | 3867096 | 28-scf00308 | 28 |
| AX-158146556 | 14 | 32.34  | KV453324.1 | 3878961 | 28-scf00308 | 28 |
| AX-157878305 | 14 | 32.34  | KV453324.1 | 3884169 | 28-scf00308 | 28 |
| AX-158146583 | 14 | 32.34  | KV453324.1 | 3914055 | 28-scf00308 | 28 |
| AX-157858067 | 14 | 32.34  | KV453324.1 | 3976319 | 28-scf00308 | 28 |
| AX-158146702 | 14 | 32.34  | KV453324.1 | 4072913 | 28-scf00308 | 28 |
| AX-158146900 | 14 | 32.34  | KV453324.1 | 4332725 | 28-scf00308 | 28 |
| AX-158146904 | 14 | 32.34  | KV453324.1 | 4337548 | 28-scf00308 | 28 |
| AX-158146932 | 14 | 32.34  | KV453324.1 | 4367856 | 28-scf00308 | 28 |
| AX-157774484 | 14 | 32.34  | KV453327.1 | 362840  | 28-scf00311 | 28 |
| AX-158147955 | 14 | 32.34  | KV453327.1 | 1121138 | 28-scf00311 | 28 |
| AX-158147957 | 14 | 32.34  | KV453327.1 | 1122786 | 28-scf00311 | 28 |
| AX-157832100 | 14 | 32.34  | KV453327.1 | 1125806 | 28-scf00311 | 28 |
| AX-158148043 | 14 | 32.34  | KV453327.1 | 1232787 | 28-scf00311 | 28 |
| AX-158148125 | 14 | 32.34  | KV453327.1 | 1485252 | 28-scf00311 | 28 |
| AX-157832179 | 14 | 32.34  | KV453327.1 | 2576991 | 28-scf00311 | 28 |
| AX-158148685 | 14 | 32.34  | KV453327.1 | 2852659 | 28-scf00311 | 28 |
| AX-158148708 | 14 | 32.34  | KV453327.1 | 2880784 | 28-scf00311 | 28 |
| AX-158148782 | 14 | 32.34  | KV453327.1 | 2972437 | 28-scf00311 | 28 |
| AX-158148789 | 14 | 32.34  | KV453327.1 | 2979426 | 28-scf00311 | 28 |
| AX-157831945 | 14 | 32.356 | KV453324.1 | 3851671 | 28-scf00308 | 28 |
| AX-158146549 | 14 | 32.356 | KV453324.1 | 3867774 | 28-scf00308 | 28 |
| AX-158146551 | 14 | 32.356 | KV453324.1 | 3872531 | 28-scf00308 | 28 |
| AX-157831947 | 14 | 32.357 | KV453324.1 | 3873900 | 28-scf00308 | 28 |
| AX-158146553 | 14 | 32.357 | KV453324.1 | 3876105 | 28-scf00308 | 28 |
| AX-157715500 | 14 | 32.485 | KV453324.1 | 3883964 | 28-scf00308 | 28 |
| AX-158146563 | 14 | 32.485 | KV453324.1 | 3884982 | 28-scf00308 | 28 |
| AX-158146564 | 14 | 32.533 | KV453324.1 | 3885190 | 28-scf00308 | 28 |
| AX-157741341 | 14 | 32.574 | KV453324.1 | 3888194 | 28-scf00308 | 28 |
| AX-158146557 | 14 | 32.613 | KV453324.1 | 3880046 | 28-scf00308 | 28 |
| AX-157831950 | 14 | 32.613 | KV453324.1 | 3888884 | 28-scf00308 | 28 |
| AX-157755611 | 14 | 32.613 | KV453324.1 | 3890342 | 28-scf00308 | 28 |
| AX-158146567 | 14 | 32.613 | KV453324.1 | 3892275 | 28-scf00308 | 28 |
| AX-157742389 | 14 | 32.613 | KV453324.1 | 3894700 | 28-scf00308 | 28 |
| AX-157727705 | 14 | 32.613 | KV453324.1 | 3895652 | 28-scf00308 | 28 |
| AX-158146570 | 14 | 32.613 | KV453324.1 | 3896118 | 28-scf00308 | 28 |
| AX-157878306 | 14 | 32.685 | KV453324.1 | 3898099 | 28-scf00308 | 28 |
| AX-158146573 | 14 | 32.742 | KV453324.1 | 3899153 | 28-scf00308 | 28 |
| AX-158146576 | 14 | 32.742 | KV453324.1 | 3902257 | 28-scf00308 | 28 |
| AX-158146578 | 14 | 32.753 | KV453324.1 | 3904084 | 28-scf00308 | 28 |
| AX-157716282 | 14 | 32.929 | KV453324.1 | 3904747 | 28-scf00308 | 28 |
| AX-158146580 | 14 | 32.929 | KV453324.1 | 3908703 | 28-scf00308 | 28 |
| AX-158146704 | 14 | 32.929 | KV453324.1 | 4075324 | 28-scf00308 | 28 |
| AX-158146584 | 14 | 33.125 | KV453324.1 | 3914486 | 28-scf00308 | 28 |
| AX-158146586 | 14 | 33.125 | KV453324.1 | 3915622 | 28-scf00308 | 28 |
| AX-158146587 | 14 | 33.125 | KV453324.1 | 3916022 | 28-scf00308 | 28 |

|              |    |        |            |         |             |    |
|--------------|----|--------|------------|---------|-------------|----|
| AX-158146590 | 14 | 33.126 | KV453324.1 | 3918767 | 28-scf00308 | 28 |
| AX-158146593 | 14 | 33.126 | KV453324.1 | 3920538 | 28-scf00308 | 28 |
| AX-158146594 | 14 | 33.126 | KV453324.1 | 3920936 | 28-scf00308 | 28 |
| AX-157831955 | 14 | 33.126 | KV453324.1 | 3921126 | 28-scf00308 | 28 |
| AX-157831956 | 14 | 33.126 | KV453324.1 | 3921277 | 28-scf00308 | 28 |
| AX-158146595 | 14 | 33.126 | KV453324.1 | 3921350 | 28-scf00308 | 28 |
| AX-158146596 | 14 | 33.175 | KV453324.1 | 3921865 | 28-scf00308 | 28 |
| AX-158146599 | 14 | 33.235 | KV453324.1 | 3923736 | 28-scf00308 | 28 |
| AX-158146627 | 14 | 33.235 | KV453324.1 | 3964435 | 28-scf00308 | 28 |
| AX-158146601 | 14 | 33.255 | KV453324.1 | 3927378 | 28-scf00308 | 28 |
| AX-158146602 | 14 | 33.255 | KV453324.1 | 3927763 | 28-scf00308 | 28 |
| AX-158146603 | 14 | 33.255 | KV453324.1 | 3928647 | 28-scf00308 | 28 |
| AX-158146609 | 14 | 33.255 | KV453324.1 | 3939743 | 28-scf00308 | 28 |
| AX-158146610 | 14 | 33.255 | KV453324.1 | 3940478 | 28-scf00308 | 28 |
| AX-158146606 | 14 | 33.317 | KV453324.1 | 3932094 | 28-scf00308 | 28 |
| AX-157716575 | 14 | 33.383 | KV453324.1 | 3944882 | 28-scf00308 | 28 |
| AX-157831959 | 14 | 33.383 | KV453324.1 | 3946409 | 28-scf00308 | 28 |
| AX-157745580 | 14 | 33.436 | KV453324.1 | 3947021 | 28-scf00308 | 28 |
| AX-158146613 | 14 | 33.492 | KV453324.1 | 3947976 | 28-scf00308 | 28 |
| AX-158412340 | 14 | 33.492 | KV453324.1 | 4117503 | 28-scf00308 | 28 |
| AX-157716537 | 14 | 33.492 | KV453324.1 | 4195962 | 28-scf00308 | 28 |
| AX-158146833 | 14 | 33.492 | KV453324.1 | 4239187 | 28-scf00308 | 28 |
| AX-158146614 | 14 | 33.511 | KV453324.1 | 3948535 | 28-scf00308 | 28 |
| AX-158146616 | 14 | 33.511 | KV453324.1 | 3951118 | 28-scf00308 | 28 |
| AX-157831960 | 14 | 33.511 | KV453324.1 | 3951625 | 28-scf00308 | 28 |
| AX-157746088 | 14 | 33.511 | KV453324.1 | 3951853 | 28-scf00308 | 28 |
| AX-158146617 | 14 | 33.511 | KV453324.1 | 3955096 | 28-scf00308 | 28 |
| AX-158146618 | 14 | 33.511 | KV453324.1 | 3955649 | 28-scf00308 | 28 |
| AX-157831962 | 14 | 33.511 | KV453324.1 | 3957913 | 28-scf00308 | 28 |
| AX-157775104 | 14 | 33.511 | KV453324.1 | 3958193 | 28-scf00308 | 28 |
| AX-158146621 | 14 | 33.511 | KV453324.1 | 3960136 | 28-scf00308 | 28 |
| AX-158146624 | 14 | 33.511 | KV453324.1 | 3962012 | 28-scf00308 | 28 |
| AX-158146626 | 14 | 33.511 | KV453324.1 | 3963926 | 28-scf00308 | 28 |
| AX-158146630 | 14 | 33.511 | KV453324.1 | 3970967 | 28-scf00308 | 28 |
| AX-158146631 | 14 | 33.511 | KV453324.1 | 3972123 | 28-scf00308 | 28 |
| AX-158146633 | 14 | 33.511 | KV453324.1 | 3973808 | 28-scf00308 | 28 |
| AX-158146634 | 14 | 33.511 | KV453324.1 | 3974508 | 28-scf00308 | 28 |
| AX-158146636 | 14 | 33.511 | KV453324.1 | 3975165 | 28-scf00308 | 28 |
| AX-158146641 | 14 | 33.511 | KV453324.1 | 3978768 | 28-scf00308 | 28 |
| AX-157709325 | 14 | 33.511 | KV453324.1 | 3979130 | 28-scf00308 | 28 |
| AX-158146652 | 14 | 33.511 | KV453324.1 | 3992902 | 28-scf00308 | 28 |
| AX-158146663 | 14 | 33.511 | KV453324.1 | 4006552 | 28-scf00308 | 28 |
| AX-158146680 | 14 | 33.511 | KV453324.1 | 4034267 | 28-scf00308 | 28 |
| AX-158146697 | 14 | 33.511 | KV453324.1 | 4068237 | 28-scf00308 | 28 |
| AX-158146737 | 14 | 33.511 | KV453324.1 | 4114543 | 28-scf00308 | 28 |
| AX-158146781 | 14 | 33.511 | KV453324.1 | 4165287 | 28-scf00308 | 28 |
| AX-158146645 | 14 | 33.597 | KV453324.1 | 3987522 | 28-scf00308 | 28 |
| AX-158146646 | 14 | 33.675 | KV453324.1 | 3988100 | 28-scf00308 | 28 |
| AX-158146651 | 14 | 33.675 | KV453324.1 | 3992173 | 28-scf00308 | 28 |
| AX-157886432 | 14 | 33.675 | KV453324.1 | 4023696 | 28-scf00308 | 28 |
| AX-158146684 | 14 | 33.675 | KV453324.1 | 4045116 | 28-scf00308 | 28 |

|              |    |        |            |         |             |    |
|--------------|----|--------|------------|---------|-------------|----|
| AX-158146739 | 14 | 33.675 | KV453324.1 | 4116845 | 28-scf00308 | 28 |
| AX-158146756 | 14 | 33.675 | KV453324.1 | 4132580 | 28-scf00308 | 28 |
| AX-158146780 | 14 | 33.675 | KV453324.1 | 4164769 | 28-scf00308 | 28 |
| AX-157742221 | 14 | 33.839 | KV453324.1 | 3994854 | 28-scf00308 | 28 |
| AX-157831963 | 14 | 33.839 | KV453324.1 | 3995436 | 28-scf00308 | 28 |
| AX-157831965 | 14 | 33.839 | KV453324.1 | 3999557 | 28-scf00308 | 28 |
| AX-158146655 | 14 | 33.839 | KV453324.1 | 3999919 | 28-scf00308 | 28 |
| AX-157719910 | 14 | 33.839 | KV453324.1 | 4001580 | 28-scf00308 | 28 |
| AX-157738383 | 14 | 33.839 | KV453324.1 | 4002121 | 28-scf00308 | 28 |
| AX-158146660 | 14 | 33.839 | KV453324.1 | 4003673 | 28-scf00308 | 28 |
| AX-157831967 | 14 | 33.839 | KV453324.1 | 4004554 | 28-scf00308 | 28 |
| AX-158146698 | 14 | 33.839 | KV453324.1 | 4068591 | 28-scf00308 | 28 |
| AX-158146725 | 14 | 33.839 | KV453324.1 | 4103038 | 28-scf00308 | 28 |
| AX-158146666 | 14 | 33.948 | KV453324.1 | 4011227 | 28-scf00308 | 28 |
| AX-158146669 | 14 | 33.948 | KV453324.1 | 4018125 | 28-scf00308 | 28 |
| AX-157831968 | 14 | 33.948 | KV453324.1 | 4018885 | 28-scf00308 | 28 |
| AX-157750325 | 14 | 33.948 | KV453324.1 | 4021525 | 28-scf00308 | 28 |
| AX-158146674 | 14 | 33.948 | KV453324.1 | 4023601 | 28-scf00308 | 28 |
| AX-158146676 | 14 | 33.948 | KV453324.1 | 4027831 | 28-scf00308 | 28 |
| AX-158380361 | 14 | 33.948 | KV453324.1 | 4029859 | 28-scf00308 | 28 |
| AX-157886433 | 14 | 33.948 | KV453324.1 | 4030211 | 28-scf00308 | 28 |
| AX-157831970 | 14 | 33.948 | KV453324.1 | 4035996 | 28-scf00308 | 28 |
| AX-158146681 | 14 | 33.948 | KV453324.1 | 4037298 | 28-scf00308 | 28 |
| AX-157721533 | 14 | 33.948 | KV453324.1 | 4042841 | 28-scf00308 | 28 |
| AX-158146696 | 14 | 33.948 | KV453324.1 | 4067142 | 28-scf00308 | 28 |
| AX-158146719 | 14 | 33.948 | KV453324.1 | 4098544 | 28-scf00308 | 28 |
| AX-158146720 | 14 | 33.948 | KV453324.1 | 4099482 | 28-scf00308 | 28 |
| AX-157753073 | 14 | 33.948 | KV453324.1 | 4099892 | 28-scf00308 | 28 |
| AX-158146721 | 14 | 33.948 | KV453324.1 | 4100622 | 28-scf00308 | 28 |
| AX-158146750 | 14 | 33.948 | KV453324.1 | 4127505 | 28-scf00308 | 28 |
| AX-158146656 | 14 | 34.057 | KV453324.1 | 4000325 | 28-scf00308 | 28 |
| AX-158146659 | 14 | 34.057 | KV453324.1 | 4003244 | 28-scf00308 | 28 |
| AX-158146661 | 14 | 34.057 | KV453324.1 | 4004165 | 28-scf00308 | 28 |
| AX-158146686 | 14 | 34.057 | KV453324.1 | 4050638 | 28-scf00308 | 28 |
| AX-157831977 | 14 | 34.057 | KV453324.1 | 4110080 | 28-scf00308 | 28 |
| AX-158146735 | 14 | 34.057 | KV453324.1 | 4113496 | 28-scf00308 | 28 |
| AX-157727092 | 14 | 34.057 | KV453324.1 | 4116178 | 28-scf00308 | 28 |
| AX-158146742 | 14 | 34.057 | KV453324.1 | 4118698 | 28-scf00308 | 28 |
| AX-157831978 | 14 | 34.057 | KV453324.1 | 4119164 | 28-scf00308 | 28 |
| AX-158146744 | 14 | 34.057 | KV453324.1 | 4120984 | 28-scf00308 | 28 |
| AX-157886440 | 14 | 34.057 | KV453324.1 | 4332395 | 28-scf00308 | 28 |
| AX-158147750 | 14 | 34.057 | KV453327.1 | 773186  | 28-scf00311 | 28 |
| AX-158148236 | 14 | 34.057 | KV453327.1 | 2208239 | 28-scf00311 | 28 |
| AX-158412457 | 14 | 34.057 | KV453327.1 | 2234133 | 28-scf00311 | 28 |
| AX-158148327 | 14 | 34.057 | KV453327.1 | 2327284 | 28-scf00311 | 28 |
| AX-158146664 | 14 | 34.166 | KV453324.1 | 4008970 | 28-scf00308 | 28 |
| AX-157744588 | 14 | 34.166 | KV453324.1 | 4017583 | 28-scf00308 | 28 |
| AX-158146671 | 14 | 34.166 | KV453324.1 | 4018949 | 28-scf00308 | 28 |
| AX-157831971 | 14 | 34.166 | KV453324.1 | 4040065 | 28-scf00308 | 28 |
| AX-158146685 | 14 | 34.166 | KV453324.1 | 4049766 | 28-scf00308 | 28 |
| AX-158146695 | 14 | 34.166 | KV453324.1 | 4063787 | 28-scf00308 | 28 |

|              |    |        |            |         |             |    |
|--------------|----|--------|------------|---------|-------------|----|
| AX-158146700 | 14 | 34.166 | KV453324.1 | 4069595 | 28-scf00308 | 28 |
| AX-158146734 | 14 | 34.166 | KV453324.1 | 4113006 | 28-scf00308 | 28 |
| AX-158146736 | 14 | 34.166 | KV453324.1 | 4113948 | 28-scf00308 | 28 |
| AX-158146746 | 14 | 34.166 | KV453324.1 | 4122158 | 28-scf00308 | 28 |
| AX-158146748 | 14 | 34.166 | KV453324.1 | 4123785 | 28-scf00308 | 28 |
| AX-158146749 | 14 | 34.166 | KV453324.1 | 4124240 | 28-scf00308 | 28 |
| AX-158146752 | 14 | 34.166 | KV453324.1 | 4128843 | 28-scf00308 | 28 |
| AX-158146753 | 14 | 34.166 | KV453324.1 | 4129246 | 28-scf00308 | 28 |
| AX-158146755 | 14 | 34.166 | KV453324.1 | 4132171 | 28-scf00308 | 28 |
| AX-158146760 | 14 | 34.166 | KV453324.1 | 4139179 | 28-scf00308 | 28 |
| AX-158146762 | 14 | 34.166 | KV453324.1 | 4141790 | 28-scf00308 | 28 |
| AX-158146763 | 14 | 34.166 | KV453324.1 | 4142691 | 28-scf00308 | 28 |
| AX-158146764 | 14 | 34.166 | KV453324.1 | 4145102 | 28-scf00308 | 28 |
| AX-158146766 | 14 | 34.166 | KV453324.1 | 4148635 | 28-scf00308 | 28 |
| AX-158146767 | 14 | 34.166 | KV453324.1 | 4150015 | 28-scf00308 | 28 |
| AX-158146768 | 14 | 34.166 | KV453324.1 | 4150705 | 28-scf00308 | 28 |
| AX-158146772 | 14 | 34.166 | KV453324.1 | 4153774 | 28-scf00308 | 28 |
| AX-158146773 | 14 | 34.166 | KV453324.1 | 4154546 | 28-scf00308 | 28 |
| AX-158146774 | 14 | 34.166 | KV453324.1 | 4156509 | 28-scf00308 | 28 |
| AX-157831979 | 14 | 34.166 | KV453324.1 | 4159139 | 28-scf00308 | 28 |
| AX-157831964 | 14 | 34.255 | KV453324.1 | 3998324 | 28-scf00308 | 28 |
| AX-158146779 | 14 | 34.255 | KV453324.1 | 4163112 | 28-scf00308 | 28 |
| AX-158148438 | 14 | 34.255 | KV453327.1 | 2489904 | 28-scf00311 | 28 |
| AX-158146784 | 14 | 34.331 | KV453324.1 | 4171893 | 28-scf00308 | 28 |
| AX-158146785 | 14 | 34.493 | KV453324.1 | 4172276 | 28-scf00308 | 28 |
| AX-158146747 | 14 | 34.494 | KV453324.1 | 4123079 | 28-scf00308 | 28 |
| AX-157831980 | 14 | 34.494 | KV453324.1 | 4164438 | 28-scf00308 | 28 |
| AX-158146786 | 14 | 34.494 | KV453324.1 | 4174467 | 28-scf00308 | 28 |
| AX-158380362 | 14 | 34.494 | KV453324.1 | 4178309 | 28-scf00308 | 28 |
| AX-158146789 | 14 | 34.494 | KV453324.1 | 4178623 | 28-scf00308 | 28 |
| AX-158146792 | 14 | 34.494 | KV453324.1 | 4185727 | 28-scf00308 | 28 |
| AX-158146796 | 14 | 34.712 | KV453324.1 | 4188677 | 28-scf00308 | 28 |
| AX-158146801 | 14 | 34.712 | KV453324.1 | 4193248 | 28-scf00308 | 28 |
| AX-157698651 | 14 | 34.712 | KV453324.1 | 4193532 | 28-scf00308 | 28 |
| AX-158146802 | 14 | 34.712 | KV453324.1 | 4198332 | 28-scf00308 | 28 |
| AX-158146834 | 14 | 34.712 | KV453324.1 | 4241347 | 28-scf00308 | 28 |
| AX-158146863 | 14 | 34.712 | KV453324.1 | 4283045 | 28-scf00308 | 28 |
| AX-158146898 | 14 | 34.712 | KV453324.1 | 4331359 | 28-scf00308 | 28 |
| AX-158380363 | 14 | 34.822 | KV453324.1 | 4242928 | 28-scf00308 | 28 |
| AX-158146836 | 14 | 34.822 | KV453324.1 | 4243202 | 28-scf00308 | 28 |
| AX-157831984 | 14 | 34.822 | KV453324.1 | 4244509 | 28-scf00308 | 28 |
| AX-158146837 | 14 | 34.822 | KV453324.1 | 4244869 | 28-scf00308 | 28 |
| AX-158146838 | 14 | 34.822 | KV453324.1 | 4245094 | 28-scf00308 | 28 |
| AX-157831986 | 14 | 34.822 | KV453324.1 | 4248222 | 28-scf00308 | 28 |
| AX-157831989 | 14 | 34.822 | KV453324.1 | 4281504 | 28-scf00308 | 28 |
| AX-158146861 | 14 | 34.822 | KV453324.1 | 4281559 | 28-scf00308 | 28 |
| AX-158146888 | 14 | 34.822 | KV453324.1 | 4315136 | 28-scf00308 | 28 |
| AX-158146843 | 14 | 34.873 | KV453324.1 | 4248757 | 28-scf00308 | 28 |
| AX-158146677 | 14 | 34.985 | KV453324.1 | 4030171 | 28-scf00308 | 28 |
| AX-158146743 | 14 | 34.985 | KV453324.1 | 4120192 | 28-scf00308 | 28 |
| AX-157831985 | 14 | 34.985 | KV453324.1 | 4245149 | 28-scf00308 | 28 |

|              |    |        |            |         |             |    |
|--------------|----|--------|------------|---------|-------------|----|
| AX-157742615 | 14 | 34.985 | KV453324.1 | 4268022 | 28-scf00308 | 28 |
| AX-158146854 | 14 | 34.985 | KV453324.1 | 4268150 | 28-scf00308 | 28 |
| AX-158146857 | 14 | 34.985 | KV453324.1 | 4274076 | 28-scf00308 | 28 |
| AX-158146858 | 14 | 34.985 | KV453324.1 | 4275290 | 28-scf00308 | 28 |
| AX-158146860 | 14 | 34.985 | KV453324.1 | 4278900 | 28-scf00308 | 28 |
| AX-157831990 | 14 | 34.985 | KV453324.1 | 4284544 | 28-scf00308 | 28 |
| AX-157831991 | 14 | 34.985 | KV453324.1 | 4284690 | 28-scf00308 | 28 |
| AX-158146865 | 14 | 34.985 | KV453324.1 | 4284936 | 28-scf00308 | 28 |
| AX-158146866 | 14 | 34.985 | KV453324.1 | 4285666 | 28-scf00308 | 28 |
| AX-158147234 | 14 | 34.985 | KV453324.1 | 5694532 | 28-scf00308 | 28 |
| AX-158146868 | 14 | 35.149 | KV453324.1 | 4288163 | 28-scf00308 | 28 |
| AX-158146869 | 14 | 35.149 | KV453324.1 | 4289198 | 28-scf00308 | 28 |
| AX-158146642 | 14 | 35.258 | KV453324.1 | 3980939 | 28-scf00308 | 28 |
| AX-158146687 | 14 | 35.258 | KV453324.1 | 4051929 | 28-scf00308 | 28 |
| AX-158146872 | 14 | 35.258 | KV453324.1 | 4291808 | 28-scf00308 | 28 |
| AX-158146875 | 14 | 35.258 | KV453324.1 | 4295516 | 28-scf00308 | 28 |
| AX-158146879 | 14 | 35.258 | KV453324.1 | 4297630 | 28-scf00308 | 28 |
| AX-158146882 | 14 | 35.258 | KV453324.1 | 4300248 | 28-scf00308 | 28 |
| AX-157831992 | 14 | 35.258 | KV453324.1 | 4309021 | 28-scf00308 | 28 |
| AX-158146887 | 14 | 35.258 | KV453324.1 | 4312405 | 28-scf00308 | 28 |
| AX-158146890 | 14 | 35.258 | KV453324.1 | 4317087 | 28-scf00308 | 28 |
| AX-158146891 | 14 | 35.258 | KV453324.1 | 4318429 | 28-scf00308 | 28 |
| AX-157831993 | 14 | 35.258 | KV453324.1 | 4322134 | 28-scf00308 | 28 |
| AX-158146894 | 14 | 35.258 | KV453324.1 | 4323603 | 28-scf00308 | 28 |
| AX-158146899 | 14 | 35.258 | KV453324.1 | 4332013 | 28-scf00308 | 28 |
| AX-158146727 | 14 | 35.351 | KV453324.1 | 4104217 | 28-scf00308 | 28 |
| AX-158146790 | 14 | 35.351 | KV453324.1 | 4180424 | 28-scf00308 | 28 |
| AX-158146903 | 14 | 35.351 | KV453324.1 | 4335559 | 28-scf00308 | 28 |
| AX-158147760 | 14 | 35.351 | KV453327.1 | 793755  | 28-scf00311 | 28 |
| AX-158148318 | 14 | 35.351 | KV453327.1 | 2313318 | 28-scf00311 | 28 |
| AX-158146909 | 14 | 35.476 | KV453324.1 | 4341412 | 28-scf00308 | 28 |
| AX-158146911 | 14 | 35.476 | KV453324.1 | 4348788 | 28-scf00308 | 28 |
| AX-158146912 | 14 | 35.476 | KV453324.1 | 4349257 | 28-scf00308 | 28 |
| AX-158146915 | 14 | 35.476 | KV453324.1 | 4351553 | 28-scf00308 | 28 |
| AX-158146916 | 14 | 35.538 | KV453324.1 | 4351744 | 28-scf00308 | 28 |
| AX-158146800 | 14 | 35.586 | KV453324.1 | 4192463 | 28-scf00308 | 28 |
| AX-158146918 | 14 | 35.586 | KV453324.1 | 4352873 | 28-scf00308 | 28 |
| AX-158146924 | 14 | 35.586 | KV453324.1 | 4359702 | 28-scf00308 | 28 |
| AX-158146919 | 14 | 35.634 | KV453324.1 | 4354707 | 28-scf00308 | 28 |
| AX-158393079 | 14 | 35.66  | KV453324.1 | 4353148 | 28-scf00308 | 28 |
| AX-158146920 | 14 | 35.66  | KV453324.1 | 4355459 | 28-scf00308 | 28 |
| AX-158146921 | 14 | 35.695 | KV453324.1 | 4355805 | 28-scf00308 | 28 |
| AX-158146923 | 14 | 35.695 | KV453324.1 | 4357178 | 28-scf00308 | 28 |
| AX-158146948 | 14 | 35.695 | KV453324.1 | 4394090 | 28-scf00308 | 28 |
| AX-158146925 | 14 | 35.697 | KV453324.1 | 4361482 | 28-scf00308 | 28 |
| AX-158146926 | 14 | 35.698 | KV453324.1 | 4362033 | 28-scf00308 | 28 |
| AX-158146927 | 14 | 35.699 | KV453324.1 | 4362526 | 28-scf00308 | 28 |
| AX-158146928 | 14 | 36.023 | KV453324.1 | 4363318 | 28-scf00308 | 28 |
| AX-158146935 | 14 | 36.023 | KV453324.1 | 4371988 | 28-scf00308 | 28 |
| AX-158146940 | 14 | 36.023 | KV453324.1 | 4384171 | 28-scf00308 | 28 |
| AX-158146941 | 14 | 36.023 | KV453324.1 | 4384880 | 28-scf00308 | 28 |



|              |    |        |             |         |             |    |
|--------------|----|--------|-------------|---------|-------------|----|
| AX-158146943 | 14 | 36.023 | KV453324.1  | 4386474 | 28-scf00308 | 28 |
| AX-158146944 | 14 | 36.023 | KV453324.1  | 4387005 | 28-scf00308 | 28 |
| AX-158146945 | 14 | 36.023 | KV453324.1  | 4388304 | 28-scf00308 | 28 |
| AX-157705969 | 14 | 36.065 | 3ML01031333 | 567     | scf06943_1  | UN |
| AX-158146947 | 14 | 36.1   | KV453324.1  | 4393020 | 28-scf00308 | 28 |
| AX-158146951 | 14 | 36.132 | KV453324.1  | 4396600 | 28-scf00308 | 28 |
| AX-157831995 | 14 | 36.132 | KV453324.1  | 4397863 | 28-scf00308 | 28 |
| AX-158146952 | 14 | 36.132 | KV453324.1  | 4399315 | 28-scf00308 | 28 |
| AX-158146961 | 14 | 36.2   | KV453324.1  | 4408281 | 28-scf00308 | 28 |
| AX-158146902 | 14 | 36.241 | KV453324.1  | 4334050 | 28-scf00308 | 28 |
| AX-158146934 | 14 | 36.241 | KV453324.1  | 4371468 | 28-scf00308 | 28 |
| AX-158146938 | 14 | 36.241 | KV453324.1  | 4379351 | 28-scf00308 | 28 |
| AX-157748671 | 14 | 36.241 | KV453324.1  | 4395500 | 28-scf00308 | 28 |
| AX-158146962 | 14 | 36.241 | KV453324.1  | 4410816 | 28-scf00308 | 28 |
| AX-158146963 | 14 | 36.241 | KV453324.1  | 4412064 | 28-scf00308 | 28 |
| AX-158377800 | 14 | 36.241 | KV453364.1  | 141288  | scf00615    | UN |
| AX-158146964 | 14 | 36.3   | KV453324.1  | 4413429 | 28-scf00308 | 28 |
| AX-158146965 | 14 | 36.351 | KV453324.1  | 4415878 | 28-scf00308 | 28 |
| AX-158146966 | 14 | 36.351 | KV453324.1  | 4416586 | 28-scf00308 | 28 |
| AX-158146968 | 14 | 36.351 | KV453324.1  | 4418346 | 28-scf00308 | 28 |
| AX-158146969 | 14 | 36.351 | KV453324.1  | 4418773 | 28-scf00308 | 28 |
| AX-158146970 | 14 | 36.351 | KV453324.1  | 4418936 | 28-scf00308 | 28 |
| AX-158146972 | 14 | 36.351 | KV453324.1  | 4420442 | 28-scf00308 | 28 |
| AX-158146975 | 14 | 36.351 | KV453324.1  | 4425404 | 28-scf00308 | 28 |
| AX-158146977 | 14 | 36.351 | KV453324.1  | 4427364 | 28-scf00308 | 28 |
| AX-158146979 | 14 | 36.351 | KV453324.1  | 4428919 | 28-scf00308 | 28 |
| AX-158146980 | 14 | 36.351 | KV453324.1  | 4430690 | 28-scf00308 | 28 |
| AX-158146981 | 14 | 36.351 | KV453324.1  | 4431146 | 28-scf00308 | 28 |
| AX-158146982 | 14 | 36.351 | KV453324.1  | 4431660 | 28-scf00308 | 28 |
| AX-158146985 | 14 | 36.351 | KV453324.1  | 4434312 | 28-scf00308 | 28 |
| AX-158146994 | 14 | 36.351 | KV453324.1  | 4456886 | 28-scf00308 | 28 |
| AX-158147391 | 14 | 36.351 | KV453327.1  | 154822  | 28-scf00311 | 28 |
| AX-158147587 | 14 | 36.351 | KV453327.1  | 486658  | 28-scf00311 | 28 |
| AX-158147748 | 14 | 36.351 | KV453327.1  | 769218  | 28-scf00311 | 28 |
| AX-158147780 | 14 | 36.351 | KV453327.1  | 827515  | 28-scf00311 | 28 |
| AX-157773918 | 14 | 36.351 | KV453327.1  | 1031631 | 28-scf00311 | 28 |
| AX-158148446 | 14 | 36.351 | KV453327.1  | 2498275 | 28-scf00311 | 28 |
| AX-158148471 | 14 | 36.351 | KV453327.1  | 2536287 | 28-scf00311 | 28 |
| AX-158146998 | 14 | 36.375 | KV453324.1  | 4471910 | 28-scf00308 | 28 |
| AX-158146999 | 14 | 36.375 | KV453324.1  | 4474476 | 28-scf00308 | 28 |
| AX-158147003 | 14 | 36.375 | KV453324.1  | 4481726 | 28-scf00308 | 28 |
| AX-158147079 | 14 | 36.375 | KV453324.1  | 4642167 | 28-scf00308 | 28 |
| AX-158147081 | 14 | 36.375 | KV453324.1  | 4657814 | 28-scf00308 | 28 |
| AX-157871653 | 14 | 36.375 | KV453324.1  | 4657872 | 28-scf00308 | 28 |
| AX-158147082 | 14 | 36.375 | KV453324.1  | 4659007 | 28-scf00308 | 28 |
| AX-158393083 | 14 | 36.375 | KV453324.1  | 4731403 | 28-scf00308 | 28 |
| AX-157886443 | 14 | 36.375 | KV453324.1  | 5245486 | 28-scf00308 | 28 |
| AX-157871671 | 14 | 36.375 | KV453324.1  | 5373831 | 28-scf00308 | 28 |
| AX-158147190 | 14 | 36.375 | KV453324.1  | 5503359 | 28-scf00308 | 28 |
| AX-158147191 | 14 | 36.375 | KV453324.1  | 5513515 | 28-scf00308 | 28 |
| AX-158147192 | 14 | 36.375 | KV453324.1  | 5515014 | 28-scf00308 | 28 |

|              |    |        |            |         |             |    |
|--------------|----|--------|------------|---------|-------------|----|
| AX-158147193 | 14 | 36.375 | KV453324.1 | 5515866 | 28-scf00308 | 28 |
| AX-158147198 | 14 | 36.375 | KV453324.1 | 5525851 | 28-scf00308 | 28 |
| AX-158147199 | 14 | 36.375 | KV453324.1 | 5530418 | 28-scf00308 | 28 |
| AX-158147202 | 14 | 36.375 | KV453324.1 | 5535751 | 28-scf00308 | 28 |
| AX-158147206 | 14 | 36.375 | KV453324.1 | 5548280 | 28-scf00308 | 28 |
| AX-158412391 | 14 | 36.375 | KV453324.1 | 5550500 | 28-scf00308 | 28 |
| AX-158147210 | 14 | 36.375 | KV453324.1 | 5558882 | 28-scf00308 | 28 |
| AX-158147215 | 14 | 36.375 | KV453324.1 | 5574692 | 28-scf00308 | 28 |
| AX-158147218 | 14 | 36.375 | KV453324.1 | 5590427 | 28-scf00308 | 28 |
| AX-158147224 | 14 | 36.375 | KV453324.1 | 5619213 | 28-scf00308 | 28 |
| AX-158147249 | 14 | 36.375 | KV453324.1 | 5749940 | 28-scf00308 | 28 |
| AX-158147287 | 14 | 36.375 | KV453324.1 | 5849504 | 28-scf00308 | 28 |
| AX-157832036 | 14 | 36.375 | KV453324.1 | 5963104 | 28-scf00308 | 28 |
| AX-158147307 | 14 | 36.375 | KV453324.1 | 6036191 | 28-scf00308 | 28 |
| AX-157746181 | 14 | 36.375 | KV453324.1 | 6039714 | 28-scf00308 | 28 |
| AX-158147310 | 14 | 36.375 | KV453324.1 | 6095211 | 28-scf00308 | 28 |
| AX-158147316 | 14 | 36.375 | KV453324.1 | 6182191 | 28-scf00308 | 28 |
| AX-158147564 | 14 | 36.375 | KV453327.1 | 459629  | 28-scf00311 | 28 |
| AX-158147566 | 14 | 36.375 | KV453327.1 | 460933  | 28-scf00311 | 28 |
| AX-158147579 | 14 | 36.375 | KV453327.1 | 471883  | 28-scf00311 | 28 |
| AX-158147605 | 14 | 36.375 | KV453327.1 | 550169  | 28-scf00311 | 28 |
| AX-157866415 | 14 | 36.375 | KV453327.1 | 580984  | 28-scf00311 | 28 |
| AX-158147639 | 14 | 36.375 | KV453327.1 | 610352  | 28-scf00311 | 28 |
| AX-157858080 | 14 | 36.375 | KV453327.1 | 611751  | 28-scf00311 | 28 |
| AX-158147644 | 14 | 36.375 | KV453327.1 | 618503  | 28-scf00311 | 28 |
| AX-158147647 | 14 | 36.375 | KV453327.1 | 624483  | 28-scf00311 | 28 |
| AX-158147653 | 14 | 36.375 | KV453327.1 | 631193  | 28-scf00311 | 28 |
| AX-158147681 | 14 | 36.375 | KV453327.1 | 681027  | 28-scf00311 | 28 |
| AX-158148473 | 14 | 36.375 | KV453327.1 | 2538823 | 28-scf00311 | 28 |
| AX-158377367 | 14 | 36.375 | KV453325.1 | 112447  | 28-scf00604 | 28 |
| AX-158147011 | 14 | 36.431 | KV453324.1 | 4498741 | 28-scf00308 | 28 |
| AX-158147615 | 14 | 36.431 | KV453327.1 | 577682  | 28-scf00311 | 28 |
| AX-158147642 | 14 | 36.431 | KV453327.1 | 616569  | 28-scf00311 | 28 |
| AX-158146544 | 14 | 36.46  | KV453324.1 | 3860557 | 28-scf00308 | 28 |
| AX-158146913 | 14 | 36.46  | KV453324.1 | 4349819 | 28-scf00308 | 28 |
| AX-158146931 | 14 | 36.46  | KV453324.1 | 4366298 | 28-scf00308 | 28 |
| AX-158146949 | 14 | 36.46  | KV453324.1 | 4394536 | 28-scf00308 | 28 |
| AX-158146974 | 14 | 36.46  | KV453324.1 | 4421469 | 28-scf00308 | 28 |
| AX-158146996 | 14 | 36.46  | KV453324.1 | 4466826 | 28-scf00308 | 28 |
| AX-157858070 | 14 | 36.46  | KV453324.1 | 4474145 | 28-scf00308 | 28 |
| AX-158412349 | 14 | 36.46  | KV453324.1 | 4491391 | 28-scf00308 | 28 |
| AX-158412350 | 14 | 36.46  | KV453324.1 | 4492302 | 28-scf00308 | 28 |
| AX-158147007 | 14 | 36.46  | KV453324.1 | 4495954 | 28-scf00308 | 28 |
| AX-158147008 | 14 | 36.46  | KV453324.1 | 4496494 | 28-scf00308 | 28 |
| AX-158147009 | 14 | 36.46  | KV453324.1 | 4496637 | 28-scf00308 | 28 |
| AX-158147010 | 14 | 36.46  | KV453324.1 | 4497224 | 28-scf00308 | 28 |
| AX-158147012 | 14 | 36.46  | KV453324.1 | 4499954 | 28-scf00308 | 28 |
| AX-158408490 | 14 | 36.46  | KV453324.1 | 4500925 | 28-scf00308 | 28 |
| AX-158147013 | 14 | 36.46  | KV453324.1 | 4502622 | 28-scf00308 | 28 |
| AX-158147019 | 14 | 36.46  | KV453324.1 | 4515469 | 28-scf00308 | 28 |
| AX-158147020 | 14 | 36.46  | KV453324.1 | 4516625 | 28-scf00308 | 28 |

|              |    |       |            |         |             |    |
|--------------|----|-------|------------|---------|-------------|----|
| AX-158147026 | 14 | 36.46 | KV453324.1 | 4527817 | 28-scf00308 | 28 |
| AX-157832000 | 14 | 36.46 | KV453324.1 | 4538549 | 28-scf00308 | 28 |
| AX-157748729 | 14 | 36.46 | KV453324.1 | 4543603 | 28-scf00308 | 28 |
| AX-158147052 | 14 | 36.46 | KV453324.1 | 4552017 | 28-scf00308 | 28 |
| AX-158147053 | 14 | 36.46 | KV453324.1 | 4552374 | 28-scf00308 | 28 |
| AX-157713303 | 14 | 36.46 | KV453324.1 | 4552739 | 28-scf00308 | 28 |
| AX-157832001 | 14 | 36.46 | KV453324.1 | 4552923 | 28-scf00308 | 28 |
| AX-158147060 | 14 | 36.46 | KV453324.1 | 4567149 | 28-scf00308 | 28 |
| AX-157749458 | 14 | 36.46 | KV453324.1 | 4571905 | 28-scf00308 | 28 |
| AX-158147064 | 14 | 36.46 | KV453324.1 | 4573930 | 28-scf00308 | 28 |
| AX-158147065 | 14 | 36.46 | KV453324.1 | 4585768 | 28-scf00308 | 28 |
| AX-158147066 | 14 | 36.46 | KV453324.1 | 4586421 | 28-scf00308 | 28 |
| AX-157717130 | 14 | 36.46 | KV453324.1 | 4587232 | 28-scf00308 | 28 |
| AX-158147068 | 14 | 36.46 | KV453324.1 | 4589085 | 28-scf00308 | 28 |
| AX-158147069 | 14 | 36.46 | KV453324.1 | 4589926 | 28-scf00308 | 28 |
| AX-158147073 | 14 | 36.46 | KV453324.1 | 4597459 | 28-scf00308 | 28 |
| AX-158147075 | 14 | 36.46 | KV453324.1 | 4606922 | 28-scf00308 | 28 |
| AX-158147077 | 14 | 36.46 | KV453324.1 | 4622355 | 28-scf00308 | 28 |
| AX-158393081 | 14 | 36.46 | KV453324.1 | 4636247 | 28-scf00308 | 28 |
| AX-158147078 | 14 | 36.46 | KV453324.1 | 4637591 | 28-scf00308 | 28 |
| AX-158147080 | 14 | 36.46 | KV453324.1 | 4653225 | 28-scf00308 | 28 |
| AX-158147084 | 14 | 36.46 | KV453324.1 | 4674618 | 28-scf00308 | 28 |
| AX-158147086 | 14 | 36.46 | KV453324.1 | 4687161 | 28-scf00308 | 28 |
| AX-158147087 | 14 | 36.46 | KV453324.1 | 4689176 | 28-scf00308 | 28 |
| AX-158147088 | 14 | 36.46 | KV453324.1 | 4703470 | 28-scf00308 | 28 |
| AX-158147093 | 14 | 36.46 | KV453324.1 | 4750898 | 28-scf00308 | 28 |
| AX-158147094 | 14 | 36.46 | KV453324.1 | 4754023 | 28-scf00308 | 28 |
| AX-158147095 | 14 | 36.46 | KV453324.1 | 4765341 | 28-scf00308 | 28 |
| AX-158147097 | 14 | 36.46 | KV453324.1 | 4798355 | 28-scf00308 | 28 |
| AX-158147099 | 14 | 36.46 | KV453324.1 | 4821488 | 28-scf00308 | 28 |
| AX-158147101 | 14 | 36.46 | KV453324.1 | 4841499 | 28-scf00308 | 28 |
| AX-157858071 | 14 | 36.46 | KV453324.1 | 4916890 | 28-scf00308 | 28 |
| AX-158147108 | 14 | 36.46 | KV453324.1 | 4953926 | 28-scf00308 | 28 |
| AX-158147109 | 14 | 36.46 | KV453324.1 | 4963839 | 28-scf00308 | 28 |
| AX-157755603 | 14 | 36.46 | KV453324.1 | 5077993 | 28-scf00308 | 28 |
| AX-158412375 | 14 | 36.46 | KV453324.1 | 5107184 | 28-scf00308 | 28 |
| AX-157756789 | 14 | 36.46 | KV453324.1 | 5125404 | 28-scf00308 | 28 |
| AX-158147117 | 14 | 36.46 | KV453324.1 | 5206700 | 28-scf00308 | 28 |
| AX-158408495 | 14 | 36.46 | KV453324.1 | 5218957 | 28-scf00308 | 28 |
| AX-158147120 | 14 | 36.46 | KV453324.1 | 5221072 | 28-scf00308 | 28 |
| AX-158393095 | 14 | 36.46 | KV453324.1 | 5237474 | 28-scf00308 | 28 |
| AX-158147132 | 14 | 36.46 | KV453324.1 | 5256501 | 28-scf00308 | 28 |
| AX-157886444 | 14 | 36.46 | KV453324.1 | 5273874 | 28-scf00308 | 28 |
| AX-157871657 | 14 | 36.46 | KV453324.1 | 5276136 | 28-scf00308 | 28 |
| AX-158147142 | 14 | 36.46 | KV453324.1 | 5280506 | 28-scf00308 | 28 |
| AX-158147147 | 14 | 36.46 | KV453324.1 | 5313206 | 28-scf00308 | 28 |
| AX-158147150 | 14 | 36.46 | KV453324.1 | 5323746 | 28-scf00308 | 28 |
| AX-158147151 | 14 | 36.46 | KV453324.1 | 5330251 | 28-scf00308 | 28 |
| AX-158147152 | 14 | 36.46 | KV453324.1 | 5337655 | 28-scf00308 | 28 |
| AX-158147162 | 14 | 36.46 | KV453324.1 | 5372356 | 28-scf00308 | 28 |
| AX-158147164 | 14 | 36.46 | KV453324.1 | 5381797 | 28-scf00308 | 28 |

|              |    |       |            |         |             |    |
|--------------|----|-------|------------|---------|-------------|----|
| AX-158147167 | 14 | 36.46 | KV453324.1 | 5393156 | 28-scf00308 | 28 |
| AX-158147172 | 14 | 36.46 | KV453324.1 | 5403662 | 28-scf00308 | 28 |
| AX-158147179 | 14 | 36.46 | KV453324.1 | 5452212 | 28-scf00308 | 28 |
| AX-158147188 | 14 | 36.46 | KV453324.1 | 5498840 | 28-scf00308 | 28 |
| AX-158147189 | 14 | 36.46 | KV453324.1 | 5502693 | 28-scf00308 | 28 |
| AX-157832019 | 14 | 36.46 | KV453324.1 | 5514402 | 28-scf00308 | 28 |
| AX-158147194 | 14 | 36.46 | KV453324.1 | 5516893 | 28-scf00308 | 28 |
| AX-158393107 | 14 | 36.46 | KV453324.1 | 5517274 | 28-scf00308 | 28 |
| AX-158147196 | 14 | 36.46 | KV453324.1 | 5520211 | 28-scf00308 | 28 |
| AX-158147197 | 14 | 36.46 | KV453324.1 | 5521284 | 28-scf00308 | 28 |
| AX-157832020 | 14 | 36.46 | KV453324.1 | 5534900 | 28-scf00308 | 28 |
| AX-158147204 | 14 | 36.46 | KV453324.1 | 5543232 | 28-scf00308 | 28 |
| AX-158147207 | 14 | 36.46 | KV453324.1 | 5549292 | 28-scf00308 | 28 |
| AX-158147211 | 14 | 36.46 | KV453324.1 | 5561048 | 28-scf00308 | 28 |
| AX-158147212 | 14 | 36.46 | KV453324.1 | 5565078 | 28-scf00308 | 28 |
| AX-158147216 | 14 | 36.46 | KV453324.1 | 5580359 | 28-scf00308 | 28 |
| AX-157726487 | 14 | 36.46 | KV453324.1 | 5593229 | 28-scf00308 | 28 |
| AX-158147222 | 14 | 36.46 | KV453324.1 | 5610097 | 28-scf00308 | 28 |
| AX-158147225 | 14 | 36.46 | KV453324.1 | 5625603 | 28-scf00308 | 28 |
| AX-157832022 | 14 | 36.46 | KV453324.1 | 5702289 | 28-scf00308 | 28 |
| AX-158147237 | 14 | 36.46 | KV453324.1 | 5706911 | 28-scf00308 | 28 |
| AX-157832023 | 14 | 36.46 | KV453324.1 | 5707595 | 28-scf00308 | 28 |
| AX-158147242 | 14 | 36.46 | KV453324.1 | 5726889 | 28-scf00308 | 28 |
| AX-158147251 | 14 | 36.46 | KV453324.1 | 5754936 | 28-scf00308 | 28 |
| AX-158147256 | 14 | 36.46 | KV453324.1 | 5768189 | 28-scf00308 | 28 |
| AX-158147295 | 14 | 36.46 | KV453324.1 | 5906816 | 28-scf00308 | 28 |
| AX-158147296 | 14 | 36.46 | KV453324.1 | 5913138 | 28-scf00308 | 28 |
| AX-158147297 | 14 | 36.46 | KV453324.1 | 5925603 | 28-scf00308 | 28 |
| AX-158147299 | 14 | 36.46 | KV453324.1 | 5950831 | 28-scf00308 | 28 |
| AX-158147300 | 14 | 36.46 | KV453324.1 | 5954088 | 28-scf00308 | 28 |
| AX-158393117 | 14 | 36.46 | KV453324.1 | 5955090 | 28-scf00308 | 28 |
| AX-158147305 | 14 | 36.46 | KV453324.1 | 6027523 | 28-scf00308 | 28 |
| AX-158147312 | 14 | 36.46 | KV453324.1 | 6125985 | 28-scf00308 | 28 |
| AX-158147314 | 14 | 36.46 | KV453324.1 | 6175344 | 28-scf00308 | 28 |
| AX-158147319 | 14 | 36.46 | KV453324.1 | 6189183 | 28-scf00308 | 28 |
| AX-158147321 | 14 | 36.46 | KV453324.1 | 6199786 | 28-scf00308 | 28 |
| AX-157832039 | 14 | 36.46 | KV453324.1 | 6206018 | 28-scf00308 | 28 |
| AX-158147346 | 14 | 36.46 | KV453324.1 | 6266856 | 28-scf00308 | 28 |
| AX-157748044 | 14 | 36.46 | KV453327.1 | 118132  | 28-scf00311 | 28 |
| AX-158147437 | 14 | 36.46 | KV453327.1 | 238300  | 28-scf00311 | 28 |
| AX-158147468 | 14 | 36.46 | KV453327.1 | 295055  | 28-scf00311 | 28 |
| AX-158147482 | 14 | 36.46 | KV453327.1 | 329392  | 28-scf00311 | 28 |
| AX-157725501 | 14 | 36.46 | KV453327.1 | 338011  | 28-scf00311 | 28 |
| AX-158147492 | 14 | 36.46 | KV453327.1 | 345712  | 28-scf00311 | 28 |
| AX-158147495 | 14 | 36.46 | KV453327.1 | 347369  | 28-scf00311 | 28 |
| AX-158147502 | 14 | 36.46 | KV453327.1 | 357110  | 28-scf00311 | 28 |
| AX-157740306 | 14 | 36.46 | KV453327.1 | 359343  | 28-scf00311 | 28 |
| AX-158147504 | 14 | 36.46 | KV453327.1 | 361685  | 28-scf00311 | 28 |
| AX-157722754 | 14 | 36.46 | KV453327.1 | 364434  | 28-scf00311 | 28 |
| AX-158147506 | 14 | 36.46 | KV453327.1 | 365561  | 28-scf00311 | 28 |
| AX-158147508 | 14 | 36.46 | KV453327.1 | 366600  | 28-scf00311 | 28 |

|              |    |       |            |        |             |    |
|--------------|----|-------|------------|--------|-------------|----|
| AX-158147509 | 14 | 36.46 | KV453327.1 | 367039 | 28-scf00311 | 28 |
| AX-158147512 | 14 | 36.46 | KV453327.1 | 369480 | 28-scf00311 | 28 |
| AX-158147513 | 14 | 36.46 | KV453327.1 | 370509 | 28-scf00311 | 28 |
| AX-158147515 | 14 | 36.46 | KV453327.1 | 372231 | 28-scf00311 | 28 |
| AX-158147516 | 14 | 36.46 | KV453327.1 | 373119 | 28-scf00311 | 28 |
| AX-158147517 | 14 | 36.46 | KV453327.1 | 373869 | 28-scf00311 | 28 |
| AX-157708736 | 14 | 36.46 | KV453327.1 | 379274 | 28-scf00311 | 28 |
| AX-158147534 | 14 | 36.46 | KV453327.1 | 413149 | 28-scf00311 | 28 |
| AX-158147545 | 14 | 36.46 | KV453327.1 | 432066 | 28-scf00311 | 28 |
| AX-158147554 | 14 | 36.46 | KV453327.1 | 447529 | 28-scf00311 | 28 |
| AX-158147559 | 14 | 36.46 | KV453327.1 | 456526 | 28-scf00311 | 28 |
| AX-158147560 | 14 | 36.46 | KV453327.1 | 456972 | 28-scf00311 | 28 |
| AX-158147562 | 14 | 36.46 | KV453327.1 | 457937 | 28-scf00311 | 28 |
| AX-158147565 | 14 | 36.46 | KV453327.1 | 460113 | 28-scf00311 | 28 |
| AX-158147570 | 14 | 36.46 | KV453327.1 | 463217 | 28-scf00311 | 28 |
| AX-158147571 | 14 | 36.46 | KV453327.1 | 463973 | 28-scf00311 | 28 |
| AX-158147578 | 14 | 36.46 | KV453327.1 | 471204 | 28-scf00311 | 28 |
| AX-157755863 | 14 | 36.46 | KV453327.1 | 476917 | 28-scf00311 | 28 |
| AX-158147582 | 14 | 36.46 | KV453327.1 | 478746 | 28-scf00311 | 28 |
| AX-158147585 | 14 | 36.46 | KV453327.1 | 482010 | 28-scf00311 | 28 |
| AX-158147589 | 14 | 36.46 | KV453327.1 | 489611 | 28-scf00311 | 28 |
| AX-157724285 | 14 | 36.46 | KV453327.1 | 514275 | 28-scf00311 | 28 |
| AX-158147595 | 14 | 36.46 | KV453327.1 | 517839 | 28-scf00311 | 28 |
| AX-158147596 | 14 | 36.46 | KV453327.1 | 518416 | 28-scf00311 | 28 |
| AX-158147602 | 14 | 36.46 | KV453327.1 | 540219 | 28-scf00311 | 28 |
| AX-158147603 | 14 | 36.46 | KV453327.1 | 542087 | 28-scf00311 | 28 |
| AX-158147604 | 14 | 36.46 | KV453327.1 | 542899 | 28-scf00311 | 28 |
| AX-157715391 | 14 | 36.46 | KV453327.1 | 556627 | 28-scf00311 | 28 |
| AX-157832066 | 14 | 36.46 | KV453327.1 | 560045 | 28-scf00311 | 28 |
| AX-158147610 | 14 | 36.46 | KV453327.1 | 563188 | 28-scf00311 | 28 |
| AX-158147614 | 14 | 36.46 | KV453327.1 | 577026 | 28-scf00311 | 28 |
| AX-158147616 | 14 | 36.46 | KV453327.1 | 579826 | 28-scf00311 | 28 |
| AX-157724140 | 14 | 36.46 | KV453327.1 | 580927 | 28-scf00311 | 28 |
| AX-157832067 | 14 | 36.46 | KV453327.1 | 583102 | 28-scf00311 | 28 |
| AX-158147627 | 14 | 36.46 | KV453327.1 | 596055 | 28-scf00311 | 28 |
| AX-158147628 | 14 | 36.46 | KV453327.1 | 598047 | 28-scf00311 | 28 |
| AX-158147634 | 14 | 36.46 | KV453327.1 | 602850 | 28-scf00311 | 28 |
| AX-158147637 | 14 | 36.46 | KV453327.1 | 607709 | 28-scf00311 | 28 |
| AX-157748053 | 14 | 36.46 | KV453327.1 | 613427 | 28-scf00311 | 28 |
| AX-157832070 | 14 | 36.46 | KV453327.1 | 617344 | 28-scf00311 | 28 |
| AX-158147643 | 14 | 36.46 | KV453327.1 | 618281 | 28-scf00311 | 28 |
| AX-157832071 | 14 | 36.46 | KV453327.1 | 622296 | 28-scf00311 | 28 |
| AX-157832072 | 14 | 36.46 | KV453327.1 | 622647 | 28-scf00311 | 28 |
| AX-158147674 | 14 | 36.46 | KV453327.1 | 673215 | 28-scf00311 | 28 |
| AX-158147676 | 14 | 36.46 | KV453327.1 | 675386 | 28-scf00311 | 28 |
| AX-158147680 | 14 | 36.46 | KV453327.1 | 680779 | 28-scf00311 | 28 |
| AX-158147688 | 14 | 36.46 | KV453327.1 | 692849 | 28-scf00311 | 28 |
| AX-158147689 | 14 | 36.46 | KV453327.1 | 693299 | 28-scf00311 | 28 |
| AX-158147720 | 14 | 36.46 | KV453327.1 | 735236 | 28-scf00311 | 28 |
| AX-157723991 | 14 | 36.46 | KV453327.1 | 743218 | 28-scf00311 | 28 |
| AX-158147729 | 14 | 36.46 | KV453327.1 | 745645 | 28-scf00311 | 28 |

|              |    |        |            |         |             |    |
|--------------|----|--------|------------|---------|-------------|----|
| AX-158147749 | 14 | 36.46  | KV453327.1 | 770703  | 28-scf00311 | 28 |
| AX-158147777 | 14 | 36.46  | KV453327.1 | 825987  | 28-scf00311 | 28 |
| AX-158147778 | 14 | 36.46  | KV453327.1 | 826577  | 28-scf00311 | 28 |
| AX-158147805 | 14 | 36.46  | KV453327.1 | 852314  | 28-scf00311 | 28 |
| AX-157832088 | 14 | 36.46  | KV453327.1 | 986926  | 28-scf00311 | 28 |
| AX-158147958 | 14 | 36.46  | KV453327.1 | 1124010 | 28-scf00311 | 28 |
| AX-158148005 | 14 | 36.46  | KV453327.1 | 1187266 | 28-scf00311 | 28 |
| AX-158148032 | 14 | 36.46  | KV453327.1 | 1223077 | 28-scf00311 | 28 |
| AX-158148037 | 14 | 36.46  | KV453327.1 | 1227781 | 28-scf00311 | 28 |
| AX-158148068 | 14 | 36.46  | KV453327.1 | 1264542 | 28-scf00311 | 28 |
| AX-158148102 | 14 | 36.46  | KV453327.1 | 1342941 | 28-scf00311 | 28 |
| AX-158148103 | 14 | 36.46  | KV453327.1 | 1345883 | 28-scf00311 | 28 |
| AX-158148105 | 14 | 36.46  | KV453327.1 | 1354274 | 28-scf00311 | 28 |
| AX-157713086 | 14 | 36.46  | KV453327.1 | 2112694 | 28-scf00311 | 28 |
| AX-158148186 | 14 | 36.46  | KV453327.1 | 2123854 | 28-scf00311 | 28 |
| AX-158148250 | 14 | 36.46  | KV453327.1 | 2220974 | 28-scf00311 | 28 |
| AX-158148253 | 14 | 36.46  | KV453327.1 | 2225465 | 28-scf00311 | 28 |
| AX-158148286 | 14 | 36.46  | KV453327.1 | 2264402 | 28-scf00311 | 28 |
| AX-158148329 | 14 | 36.46  | KV453327.1 | 2329339 | 28-scf00311 | 28 |
| AX-158148379 | 14 | 36.46  | KV453327.1 | 2420305 | 28-scf00311 | 28 |
| AX-158148401 | 14 | 36.46  | KV453327.1 | 2445493 | 28-scf00311 | 28 |
| AX-158148469 | 14 | 36.46  | KV453327.1 | 2530647 | 28-scf00311 | 28 |
| AX-158148482 | 14 | 36.46  | KV453327.1 | 2549711 | 28-scf00311 | 28 |
| AX-158148485 | 14 | 36.46  | KV453327.1 | 2556768 | 28-scf00311 | 28 |
| AX-158148533 | 14 | 36.46  | KV453327.1 | 2629324 | 28-scf00311 | 28 |
| AX-158148538 | 14 | 36.46  | KV453327.1 | 2635171 | 28-scf00311 | 28 |
| AX-158148547 | 14 | 36.46  | KV453327.1 | 2645995 | 28-scf00311 | 28 |
| AX-157832213 | 14 | 36.46  | KV453327.1 | 2929857 | 28-scf00311 | 28 |
| AX-157752591 | 14 | 36.46  | KV453326.1 | 219473  | 28-scf00594 | 28 |
| AX-157853417 | 14 | 36.46  | KV453325.1 | 124430  | 28-scf00604 | 28 |
| AX-158377782 | 14 | 36.46  | KV453364.1 | 99305   | scf00615    | UN |
| AX-158377799 | 14 | 36.46  | KV453364.1 | 141132  | scf00615    | UN |
| AX-158147735 | 14 | 36.489 | KV453327.1 | 751787  | 28-scf00311 | 28 |
| AX-158146463 | 14 | 36.569 | KV453324.1 | 3751640 | 28-scf00308 | 28 |
| AX-158146922 | 14 | 36.569 | KV453324.1 | 4356451 | 28-scf00308 | 28 |
| AX-158146953 | 14 | 36.569 | KV453324.1 | 4399709 | 28-scf00308 | 28 |
| AX-158146955 | 14 | 36.569 | KV453324.1 | 4402505 | 28-scf00308 | 28 |
| AX-158146971 | 14 | 36.569 | KV453324.1 | 4419705 | 28-scf00308 | 28 |
| AX-158146978 | 14 | 36.569 | KV453324.1 | 4428180 | 28-scf00308 | 28 |
| AX-158146986 | 14 | 36.569 | KV453324.1 | 4438158 | 28-scf00308 | 28 |
| AX-158385517 | 14 | 36.569 | KV453324.1 | 4438796 | 28-scf00308 | 28 |
| AX-158146992 | 14 | 36.569 | KV453324.1 | 4453594 | 28-scf00308 | 28 |
| AX-158146997 | 14 | 36.569 | KV453324.1 | 4470014 | 28-scf00308 | 28 |
| AX-158147005 | 14 | 36.569 | KV453324.1 | 4487952 | 28-scf00308 | 28 |
| AX-158147006 | 14 | 36.569 | KV453324.1 | 4495660 | 28-scf00308 | 28 |
| AX-158147070 | 14 | 36.569 | KV453324.1 | 4591702 | 28-scf00308 | 28 |
| AX-158147091 | 14 | 36.569 | KV453324.1 | 4739800 | 28-scf00308 | 28 |
| AX-157723612 | 14 | 36.569 | KV453324.1 | 5151242 | 28-scf00308 | 28 |
| AX-158147118 | 14 | 36.569 | KV453324.1 | 5211877 | 28-scf00308 | 28 |
| AX-158147153 | 14 | 36.569 | KV453324.1 | 5340307 | 28-scf00308 | 28 |
| AX-158147288 | 14 | 36.569 | KV453324.1 | 5857417 | 28-scf00308 | 28 |

|              |    |        |            |         |             |    |
|--------------|----|--------|------------|---------|-------------|----|
| AX-158147308 | 14 | 36.569 | KV453324.1 | 6048474 | 28-scf00308 | 28 |
| AX-158393118 | 14 | 36.569 | KV453324.1 | 6065263 | 28-scf00308 | 28 |
| AX-158393120 | 14 | 36.569 | KV453324.1 | 6125389 | 28-scf00308 | 28 |
| AX-158147318 | 14 | 36.569 | KV453324.1 | 6185422 | 28-scf00308 | 28 |
| AX-158147320 | 14 | 36.569 | KV453324.1 | 6197772 | 28-scf00308 | 28 |
| AX-157727036 | 14 | 36.569 | KV453327.1 | 157776  | 28-scf00311 | 28 |
| AX-158147436 | 14 | 36.569 | KV453327.1 | 235346  | 28-scf00311 | 28 |
| AX-158147531 | 14 | 36.569 | KV453327.1 | 402316  | 28-scf00311 | 28 |
| AX-158147597 | 14 | 36.569 | KV453327.1 | 519744  | 28-scf00311 | 28 |
| AX-158147601 | 14 | 36.569 | KV453327.1 | 538769  | 28-scf00311 | 28 |
| AX-158147606 | 14 | 36.569 | KV453327.1 | 554856  | 28-scf00311 | 28 |
| AX-157832065 | 14 | 36.569 | KV453327.1 | 555442  | 28-scf00311 | 28 |
| AX-158147611 | 14 | 36.569 | KV453327.1 | 565603  | 28-scf00311 | 28 |
| AX-157722542 | 14 | 36.569 | KV453327.1 | 587158  | 28-scf00311 | 28 |
| AX-158147624 | 14 | 36.569 | KV453327.1 | 590647  | 28-scf00311 | 28 |
| AX-158147633 | 14 | 36.569 | KV453327.1 | 602476  | 28-scf00311 | 28 |
| AX-157722853 | 14 | 36.569 | KV453327.1 | 650893  | 28-scf00311 | 28 |
| AX-158147664 | 14 | 36.569 | KV453327.1 | 652822  | 28-scf00311 | 28 |
| AX-158147675 | 14 | 36.569 | KV453327.1 | 673964  | 28-scf00311 | 28 |
| AX-158147684 | 14 | 36.569 | KV453327.1 | 686966  | 28-scf00311 | 28 |
| AX-158147685 | 14 | 36.569 | KV453327.1 | 688032  | 28-scf00311 | 28 |
| AX-158147728 | 14 | 36.569 | KV453327.1 | 744791  | 28-scf00311 | 28 |
| AX-158147739 | 14 | 36.569 | KV453327.1 | 755006  | 28-scf00311 | 28 |
| AX-158147744 | 14 | 36.569 | KV453327.1 | 759663  | 28-scf00311 | 28 |
| AX-158147745 | 14 | 36.569 | KV453327.1 | 761805  | 28-scf00311 | 28 |
| AX-157744731 | 14 | 36.569 | KV453327.1 | 762537  | 28-scf00311 | 28 |
| AX-158147747 | 14 | 36.569 | KV453327.1 | 767297  | 28-scf00311 | 28 |
| AX-158147751 | 14 | 36.569 | KV453327.1 | 775014  | 28-scf00311 | 28 |
| AX-158147753 | 14 | 36.569 | KV453327.1 | 779839  | 28-scf00311 | 28 |
| AX-157886446 | 14 | 36.569 | KV453327.1 | 781549  | 28-scf00311 | 28 |
| AX-158147754 | 14 | 36.569 | KV453327.1 | 781804  | 28-scf00311 | 28 |
| AX-158147755 | 14 | 36.569 | KV453327.1 | 784762  | 28-scf00311 | 28 |
| AX-158147756 | 14 | 36.569 | KV453327.1 | 785344  | 28-scf00311 | 28 |
| AX-158147758 | 14 | 36.569 | KV453327.1 | 786729  | 28-scf00311 | 28 |
| AX-158147759 | 14 | 36.569 | KV453327.1 | 791527  | 28-scf00311 | 28 |
| AX-158147762 | 14 | 36.569 | KV453327.1 | 794522  | 28-scf00311 | 28 |
| AX-158147763 | 14 | 36.569 | KV453327.1 | 794986  | 28-scf00311 | 28 |
| AX-158147769 | 14 | 36.569 | KV453327.1 | 809334  | 28-scf00311 | 28 |
| AX-157771098 | 14 | 36.569 | KV453327.1 | 809527  | 28-scf00311 | 28 |
| AX-158147770 | 14 | 36.569 | KV453327.1 | 810427  | 28-scf00311 | 28 |
| AX-158147774 | 14 | 36.569 | KV453327.1 | 822710  | 28-scf00311 | 28 |
| AX-158147776 | 14 | 36.569 | KV453327.1 | 824114  | 28-scf00311 | 28 |
| AX-158147781 | 14 | 36.569 | KV453327.1 | 827907  | 28-scf00311 | 28 |
| AX-158147783 | 14 | 36.569 | KV453327.1 | 829773  | 28-scf00311 | 28 |
| AX-158147786 | 14 | 36.569 | KV453327.1 | 832856  | 28-scf00311 | 28 |
| AX-158147793 | 14 | 36.569 | KV453327.1 | 837706  | 28-scf00311 | 28 |
| AX-158147798 | 14 | 36.569 | KV453327.1 | 843607  | 28-scf00311 | 28 |
| AX-158147800 | 14 | 36.569 | KV453327.1 | 849727  | 28-scf00311 | 28 |
| AX-158147803 | 14 | 36.569 | KV453327.1 | 851078  | 28-scf00311 | 28 |
| AX-158412410 | 14 | 36.569 | KV453327.1 | 861066  | 28-scf00311 | 28 |
| AX-158147810 | 14 | 36.569 | KV453327.1 | 864066  | 28-scf00311 | 28 |

|              |    |        |            |         |             |    |
|--------------|----|--------|------------|---------|-------------|----|
| AX-158147812 | 14 | 36.569 | KV453327.1 | 865692  | 28-scf00311 | 28 |
| AX-157858086 | 14 | 36.569 | KV453327.1 | 868138  | 28-scf00311 | 28 |
| AX-158147814 | 14 | 36.569 | KV453327.1 | 868280  | 28-scf00311 | 28 |
| AX-158147816 | 14 | 36.569 | KV453327.1 | 869737  | 28-scf00311 | 28 |
| AX-158147818 | 14 | 36.569 | KV453327.1 | 871514  | 28-scf00311 | 28 |
| AX-158147819 | 14 | 36.569 | KV453327.1 | 872824  | 28-scf00311 | 28 |
| AX-158147820 | 14 | 36.569 | KV453327.1 | 879430  | 28-scf00311 | 28 |
| AX-158147821 | 14 | 36.569 | KV453327.1 | 879899  | 28-scf00311 | 28 |
| AX-158147822 | 14 | 36.569 | KV453327.1 | 881737  | 28-scf00311 | 28 |
| AX-158147825 | 14 | 36.569 | KV453327.1 | 885677  | 28-scf00311 | 28 |
| AX-158147838 | 14 | 36.569 | KV453327.1 | 905260  | 28-scf00311 | 28 |
| AX-157762097 | 14 | 36.569 | KV453327.1 | 910752  | 28-scf00311 | 28 |
| AX-158412413 | 14 | 36.569 | KV453327.1 | 935326  | 28-scf00311 | 28 |
| AX-158147879 | 14 | 36.569 | KV453327.1 | 953094  | 28-scf00311 | 28 |
| AX-158147880 | 14 | 36.569 | KV453327.1 | 953697  | 28-scf00311 | 28 |
| AX-158147881 | 14 | 36.569 | KV453327.1 | 954278  | 28-scf00311 | 28 |
| AX-158147884 | 14 | 36.569 | KV453327.1 | 957722  | 28-scf00311 | 28 |
| AX-157740725 | 14 | 36.569 | KV453327.1 | 957973  | 28-scf00311 | 28 |
| AX-158147887 | 14 | 36.569 | KV453327.1 | 959755  | 28-scf00311 | 28 |
| AX-157832085 | 14 | 36.569 | KV453327.1 | 961489  | 28-scf00311 | 28 |
| AX-158147895 | 14 | 36.569 | KV453327.1 | 967416  | 28-scf00311 | 28 |
| AX-157753897 | 14 | 36.569 | KV453327.1 | 970881  | 28-scf00311 | 28 |
| AX-157832089 | 14 | 36.569 | KV453327.1 | 991032  | 28-scf00311 | 28 |
| AX-158147911 | 14 | 36.569 | KV453327.1 | 992653  | 28-scf00311 | 28 |
| AX-157743574 | 14 | 36.569 | KV453327.1 | 994714  | 28-scf00311 | 28 |
| AX-158147913 | 14 | 36.569 | KV453327.1 | 997368  | 28-scf00311 | 28 |
| AX-158147915 | 14 | 36.569 | KV453327.1 | 1001639 | 28-scf00311 | 28 |
| AX-158147916 | 14 | 36.569 | KV453327.1 | 1002640 | 28-scf00311 | 28 |
| AX-158147918 | 14 | 36.569 | KV453327.1 | 1009422 | 28-scf00311 | 28 |
| AX-158147924 | 14 | 36.569 | KV453327.1 | 1027982 | 28-scf00311 | 28 |
| AX-158147925 | 14 | 36.569 | KV453327.1 | 1032067 | 28-scf00311 | 28 |
| AX-157832092 | 14 | 36.569 | KV453327.1 | 1032713 | 28-scf00311 | 28 |
| AX-158147929 | 14 | 36.569 | KV453327.1 | 1039312 | 28-scf00311 | 28 |
| AX-157832093 | 14 | 36.569 | KV453327.1 | 1063353 | 28-scf00311 | 28 |
| AX-157832094 | 14 | 36.569 | KV453327.1 | 1064120 | 28-scf00311 | 28 |
| AX-158147932 | 14 | 36.569 | KV453327.1 | 1064785 | 28-scf00311 | 28 |
| AX-158147933 | 14 | 36.569 | KV453327.1 | 1066656 | 28-scf00311 | 28 |
| AX-158147935 | 14 | 36.569 | KV453327.1 | 1069696 | 28-scf00311 | 28 |
| AX-157832096 | 14 | 36.569 | KV453327.1 | 1090635 | 28-scf00311 | 28 |
| AX-157871699 | 14 | 36.569 | KV453327.1 | 1092424 | 28-scf00311 | 28 |
| AX-158147942 | 14 | 36.569 | KV453327.1 | 1103377 | 28-scf00311 | 28 |
| AX-158147946 | 14 | 36.569 | KV453327.1 | 1109257 | 28-scf00311 | 28 |
| AX-158147948 | 14 | 36.569 | KV453327.1 | 1110652 | 28-scf00311 | 28 |
| AX-158147953 | 14 | 36.569 | KV453327.1 | 1118653 | 28-scf00311 | 28 |
| AX-158147960 | 14 | 36.569 | KV453327.1 | 1126181 | 28-scf00311 | 28 |
| AX-157832101 | 14 | 36.569 | KV453327.1 | 1126548 | 28-scf00311 | 28 |
| AX-158147985 | 14 | 36.569 | KV453327.1 | 1158797 | 28-scf00311 | 28 |
| AX-157832103 | 14 | 36.569 | KV453327.1 | 1163387 | 28-scf00311 | 28 |
| AX-157832106 | 14 | 36.569 | KV453327.1 | 1169714 | 28-scf00311 | 28 |
| AX-158147992 | 14 | 36.569 | KV453327.1 | 1173111 | 28-scf00311 | 28 |
| AX-158147998 | 14 | 36.569 | KV453327.1 | 1181738 | 28-scf00311 | 28 |



|              |    |        |            |         |             |    |
|--------------|----|--------|------------|---------|-------------|----|
| AX-158147999 | 14 | 36.569 | KV453327.1 | 1183011 | 28-scf00311 | 28 |
| AX-158148000 | 14 | 36.569 | KV453327.1 | 1183362 | 28-scf00311 | 28 |
| AX-158148003 | 14 | 36.569 | KV453327.1 | 1186406 | 28-scf00311 | 28 |
| AX-158148004 | 14 | 36.569 | KV453327.1 | 1186501 | 28-scf00311 | 28 |
| AX-158148018 | 14 | 36.569 | KV453327.1 | 1204538 | 28-scf00311 | 28 |
| AX-158148019 | 14 | 36.569 | KV453327.1 | 1205001 | 28-scf00311 | 28 |
| AX-157832108 | 14 | 36.569 | KV453327.1 | 1207210 | 28-scf00311 | 28 |
| AX-158148022 | 14 | 36.569 | KV453327.1 | 1209594 | 28-scf00311 | 28 |
| AX-158148023 | 14 | 36.569 | KV453327.1 | 1210933 | 28-scf00311 | 28 |
| AX-158148024 | 14 | 36.569 | KV453327.1 | 1211467 | 28-scf00311 | 28 |
| AX-157749879 | 14 | 36.569 | KV453327.1 | 1212162 | 28-scf00311 | 28 |
| AX-158148025 | 14 | 36.569 | KV453327.1 | 1212376 | 28-scf00311 | 28 |
| AX-158148026 | 14 | 36.569 | KV453327.1 | 1212852 | 28-scf00311 | 28 |
| AX-157832109 | 14 | 36.569 | KV453327.1 | 1219785 | 28-scf00311 | 28 |
| AX-158148030 | 14 | 36.569 | KV453327.1 | 1220357 | 28-scf00311 | 28 |
| AX-157713652 | 14 | 36.569 | KV453327.1 | 1220923 | 28-scf00311 | 28 |
| AX-158148033 | 14 | 36.569 | KV453327.1 | 1223679 | 28-scf00311 | 28 |
| AX-158148034 | 14 | 36.569 | KV453327.1 | 1224242 | 28-scf00311 | 28 |
| AX-157832110 | 14 | 36.569 | KV453327.1 | 1228344 | 28-scf00311 | 28 |
| AX-158148038 | 14 | 36.569 | KV453327.1 | 1229088 | 28-scf00311 | 28 |
| AX-158148041 | 14 | 36.569 | KV453327.1 | 1232002 | 28-scf00311 | 28 |
| AX-158148046 | 14 | 36.569 | KV453327.1 | 1235063 | 28-scf00311 | 28 |
| AX-158148048 | 14 | 36.569 | KV453327.1 | 1240487 | 28-scf00311 | 28 |
| AX-158148050 | 14 | 36.569 | KV453327.1 | 1241613 | 28-scf00311 | 28 |
| AX-158148052 | 14 | 36.569 | KV453327.1 | 1243818 | 28-scf00311 | 28 |
| AX-158148053 | 14 | 36.569 | KV453327.1 | 1246042 | 28-scf00311 | 28 |
| AX-158148056 | 14 | 36.569 | KV453327.1 | 1250614 | 28-scf00311 | 28 |
| AX-157725999 | 14 | 36.569 | KV453327.1 | 1253937 | 28-scf00311 | 28 |
| AX-158148061 | 14 | 36.569 | KV453327.1 | 1259101 | 28-scf00311 | 28 |
| AX-158148065 | 14 | 36.569 | KV453327.1 | 1262153 | 28-scf00311 | 28 |
| AX-158148071 | 14 | 36.569 | KV453327.1 | 1267003 | 28-scf00311 | 28 |
| AX-158148073 | 14 | 36.569 | KV453327.1 | 1268808 | 28-scf00311 | 28 |
| AX-158148075 | 14 | 36.569 | KV453327.1 | 1270050 | 28-scf00311 | 28 |
| AX-158412433 | 14 | 36.569 | KV453327.1 | 1275915 | 28-scf00311 | 28 |
| AX-157746640 | 14 | 36.569 | KV453327.1 | 1276844 | 28-scf00311 | 28 |
| AX-157832112 | 14 | 36.569 | KV453327.1 | 1277432 | 28-scf00311 | 28 |
| AX-156489854 | 14 | 36.569 | KV453327.1 | 1279028 | 28-scf00311 | 28 |
| AX-158148077 | 14 | 36.569 | KV453327.1 | 1281146 | 28-scf00311 | 28 |
| AX-157754930 | 14 | 36.569 | KV453327.1 | 1284076 | 28-scf00311 | 28 |
| AX-158148079 | 14 | 36.569 | KV453327.1 | 1287984 | 28-scf00311 | 28 |
| AX-158148082 | 14 | 36.569 | KV453327.1 | 1292764 | 28-scf00311 | 28 |
| AX-158148083 | 14 | 36.569 | KV453327.1 | 1295497 | 28-scf00311 | 28 |
| AX-158148084 | 14 | 36.569 | KV453327.1 | 1296977 | 28-scf00311 | 28 |
| AX-157832114 | 14 | 36.569 | KV453327.1 | 1298226 | 28-scf00311 | 28 |
| AX-158148086 | 14 | 36.569 | KV453327.1 | 1298648 | 28-scf00311 | 28 |
| AX-158148087 | 14 | 36.569 | KV453327.1 | 1301992 | 28-scf00311 | 28 |
| AX-158148090 | 14 | 36.569 | KV453327.1 | 1325569 | 28-scf00311 | 28 |
| AX-158148091 | 14 | 36.569 | KV453327.1 | 1326376 | 28-scf00311 | 28 |
| AX-158148092 | 14 | 36.569 | KV453327.1 | 1328107 | 28-scf00311 | 28 |
| AX-158148095 | 14 | 36.569 | KV453327.1 | 1331584 | 28-scf00311 | 28 |
| AX-158148097 | 14 | 36.569 | KV453327.1 | 1335171 | 28-scf00311 | 28 |

|              |    |        |            |         |             |    |
|--------------|----|--------|------------|---------|-------------|----|
| AX-158148099 | 14 | 36.569 | KV453327.1 | 1337034 | 28-scf00311 | 28 |
| AX-157832117 | 14 | 36.569 | KV453327.1 | 1343876 | 28-scf00311 | 28 |
| AX-158148106 | 14 | 36.569 | KV453327.1 | 1355647 | 28-scf00311 | 28 |
| AX-157832118 | 14 | 36.569 | KV453327.1 | 1368106 | 28-scf00311 | 28 |
| AX-158148108 | 14 | 36.569 | KV453327.1 | 1374675 | 28-scf00311 | 28 |
| AX-158148109 | 14 | 36.569 | KV453327.1 | 1381231 | 28-scf00311 | 28 |
| AX-158148110 | 14 | 36.569 | KV453327.1 | 1382408 | 28-scf00311 | 28 |
| AX-157772067 | 14 | 36.569 | KV453327.1 | 1385139 | 28-scf00311 | 28 |
| AX-158148112 | 14 | 36.569 | KV453327.1 | 1421568 | 28-scf00311 | 28 |
| AX-158148113 | 14 | 36.569 | KV453327.1 | 1438399 | 28-scf00311 | 28 |
| AX-158148114 | 14 | 36.569 | KV453327.1 | 1443399 | 28-scf00311 | 28 |
| AX-158148115 | 14 | 36.569 | KV453327.1 | 1444148 | 28-scf00311 | 28 |
| AX-158148116 | 14 | 36.569 | KV453327.1 | 1444471 | 28-scf00311 | 28 |
| AX-158148117 | 14 | 36.569 | KV453327.1 | 1447419 | 28-scf00311 | 28 |
| AX-158148119 | 14 | 36.569 | KV453327.1 | 1465184 | 28-scf00311 | 28 |
| AX-158148120 | 14 | 36.569 | KV453327.1 | 1468193 | 28-scf00311 | 28 |
| AX-158148123 | 14 | 36.569 | KV453327.1 | 1480362 | 28-scf00311 | 28 |
| AX-158148124 | 14 | 36.569 | KV453327.1 | 1481246 | 28-scf00311 | 28 |
| AX-158148126 | 14 | 36.569 | KV453327.1 | 1486738 | 28-scf00311 | 28 |
| AX-158148127 | 14 | 36.569 | KV453327.1 | 1513344 | 28-scf00311 | 28 |
| AX-158148128 | 14 | 36.569 | KV453327.1 | 1540717 | 28-scf00311 | 28 |
| AX-158148129 | 14 | 36.569 | KV453327.1 | 1584533 | 28-scf00311 | 28 |
| AX-158148130 | 14 | 36.569 | KV453327.1 | 1588019 | 28-scf00311 | 28 |
| AX-158148131 | 14 | 36.569 | KV453327.1 | 1603415 | 28-scf00311 | 28 |
| AX-158148132 | 14 | 36.569 | KV453327.1 | 1606573 | 28-scf00311 | 28 |
| AX-158148134 | 14 | 36.569 | KV453327.1 | 1624399 | 28-scf00311 | 28 |
| AX-157832119 | 14 | 36.569 | KV453327.1 | 1698151 | 28-scf00311 | 28 |
| AX-158148139 | 14 | 36.569 | KV453327.1 | 1715930 | 28-scf00311 | 28 |
| AX-158148144 | 14 | 36.569 | KV453327.1 | 1768879 | 28-scf00311 | 28 |
| AX-158422903 | 14 | 36.569 | KV453327.1 | 1797920 | 28-scf00311 | 28 |
| AX-158148150 | 14 | 36.569 | KV453327.1 | 1861895 | 28-scf00311 | 28 |
| AX-158148153 | 14 | 36.569 | KV453327.1 | 1870769 | 28-scf00311 | 28 |
| AX-158148154 | 14 | 36.569 | KV453327.1 | 1870855 | 28-scf00311 | 28 |
| AX-158148157 | 14 | 36.569 | KV453327.1 | 1880119 | 28-scf00311 | 28 |
| AX-158148159 | 14 | 36.569 | KV453327.1 | 1885369 | 28-scf00311 | 28 |
| AX-158148160 | 14 | 36.569 | KV453327.1 | 1896216 | 28-scf00311 | 28 |
| AX-158148164 | 14 | 36.569 | KV453327.1 | 2001475 | 28-scf00311 | 28 |
| AX-158148168 | 14 | 36.569 | KV453327.1 | 2046749 | 28-scf00311 | 28 |
| AX-158148169 | 14 | 36.569 | KV453327.1 | 2073431 | 28-scf00311 | 28 |
| AX-158148176 | 14 | 36.569 | KV453327.1 | 2092637 | 28-scf00311 | 28 |
| AX-157713298 | 14 | 36.569 | KV453327.1 | 2103478 | 28-scf00311 | 28 |
| AX-158148180 | 14 | 36.569 | KV453327.1 | 2104590 | 28-scf00311 | 28 |
| AX-157717604 | 14 | 36.569 | KV453327.1 | 2110040 | 28-scf00311 | 28 |
| AX-158148207 | 14 | 36.569 | KV453327.1 | 2161826 | 28-scf00311 | 28 |
| AX-158148209 | 14 | 36.569 | KV453327.1 | 2165445 | 28-scf00311 | 28 |
| AX-158148212 | 14 | 36.569 | KV453327.1 | 2170461 | 28-scf00311 | 28 |
| AX-157714076 | 14 | 36.569 | KV453327.1 | 2184543 | 28-scf00311 | 28 |
| AX-158148217 | 14 | 36.569 | KV453327.1 | 2190926 | 28-scf00311 | 28 |
| AX-158148218 | 14 | 36.569 | KV453327.1 | 2191478 | 28-scf00311 | 28 |
| AX-157832136 | 14 | 36.569 | KV453327.1 | 2193935 | 28-scf00311 | 28 |
| AX-158148220 | 14 | 36.569 | KV453327.1 | 2194160 | 28-scf00311 | 28 |

|              |    |        |            |         |             |    |
|--------------|----|--------|------------|---------|-------------|----|
| AX-158148221 | 14 | 36.569 | KV453327.1 | 2194574 | 28-scf00311 | 28 |
| AX-158148222 | 14 | 36.569 | KV453327.1 | 2194675 | 28-scf00311 | 28 |
| AX-158148223 | 14 | 36.569 | KV453327.1 | 2194957 | 28-scf00311 | 28 |
| AX-158148224 | 14 | 36.569 | KV453327.1 | 2196322 | 28-scf00311 | 28 |
| AX-158148226 | 14 | 36.569 | KV453327.1 | 2200205 | 28-scf00311 | 28 |
| AX-158148228 | 14 | 36.569 | KV453327.1 | 2201717 | 28-scf00311 | 28 |
| AX-158148229 | 14 | 36.569 | KV453327.1 | 2202585 | 28-scf00311 | 28 |
| AX-158148230 | 14 | 36.569 | KV453327.1 | 2203147 | 28-scf00311 | 28 |
| AX-158148231 | 14 | 36.569 | KV453327.1 | 2203613 | 28-scf00311 | 28 |
| AX-158148232 | 14 | 36.569 | KV453327.1 | 2203838 | 28-scf00311 | 28 |
| AX-158148237 | 14 | 36.569 | KV453327.1 | 2208548 | 28-scf00311 | 28 |
| AX-157727640 | 14 | 36.569 | KV453327.1 | 2211020 | 28-scf00311 | 28 |
| AX-158148240 | 14 | 36.569 | KV453327.1 | 2211683 | 28-scf00311 | 28 |
| AX-157871703 | 14 | 36.569 | KV453327.1 | 2212216 | 28-scf00311 | 28 |
| AX-158148241 | 14 | 36.569 | KV453327.1 | 2212727 | 28-scf00311 | 28 |
| AX-158148244 | 14 | 36.569 | KV453327.1 | 2213821 | 28-scf00311 | 28 |
| AX-158148245 | 14 | 36.569 | KV453327.1 | 2216136 | 28-scf00311 | 28 |
| AX-158148247 | 14 | 36.569 | KV453327.1 | 2218853 | 28-scf00311 | 28 |
| AX-158148248 | 14 | 36.569 | KV453327.1 | 2219579 | 28-scf00311 | 28 |
| AX-158148249 | 14 | 36.569 | KV453327.1 | 2220019 | 28-scf00311 | 28 |
| AX-158148251 | 14 | 36.569 | KV453327.1 | 2221815 | 28-scf00311 | 28 |
| AX-158148254 | 14 | 36.569 | KV453327.1 | 2225979 | 28-scf00311 | 28 |
| AX-158148256 | 14 | 36.569 | KV453327.1 | 2227607 | 28-scf00311 | 28 |
| AX-158148257 | 14 | 36.569 | KV453327.1 | 2229280 | 28-scf00311 | 28 |
| AX-158148258 | 14 | 36.569 | KV453327.1 | 2233302 | 28-scf00311 | 28 |
| AX-158148260 | 14 | 36.569 | KV453327.1 | 2235721 | 28-scf00311 | 28 |
| AX-158148261 | 14 | 36.569 | KV453327.1 | 2236444 | 28-scf00311 | 28 |
| AX-158148262 | 14 | 36.569 | KV453327.1 | 2237349 | 28-scf00311 | 28 |
| AX-158148263 | 14 | 36.569 | KV453327.1 | 2237991 | 28-scf00311 | 28 |
| AX-158148264 | 14 | 36.569 | KV453327.1 | 2238386 | 28-scf00311 | 28 |
| AX-158148265 | 14 | 36.569 | KV453327.1 | 2238966 | 28-scf00311 | 28 |
| AX-158148266 | 14 | 36.569 | KV453327.1 | 2239491 | 28-scf00311 | 28 |
| AX-158148267 | 14 | 36.569 | KV453327.1 | 2241351 | 28-scf00311 | 28 |
| AX-158148268 | 14 | 36.569 | KV453327.1 | 2242670 | 28-scf00311 | 28 |
| AX-158148269 | 14 | 36.569 | KV453327.1 | 2243259 | 28-scf00311 | 28 |
| AX-158148270 | 14 | 36.569 | KV453327.1 | 2243767 | 28-scf00311 | 28 |
| AX-157832138 | 14 | 36.569 | KV453327.1 | 2249068 | 28-scf00311 | 28 |
| AX-158148273 | 14 | 36.569 | KV453327.1 | 2249417 | 28-scf00311 | 28 |
| AX-158148274 | 14 | 36.569 | KV453327.1 | 2250421 | 28-scf00311 | 28 |
| AX-158148275 | 14 | 36.569 | KV453327.1 | 2252121 | 28-scf00311 | 28 |
| AX-158148276 | 14 | 36.569 | KV453327.1 | 2252545 | 28-scf00311 | 28 |
| AX-158148279 | 14 | 36.569 | KV453327.1 | 2256573 | 28-scf00311 | 28 |
| AX-158148280 | 14 | 36.569 | KV453327.1 | 2257110 | 28-scf00311 | 28 |
| AX-158148282 | 14 | 36.569 | KV453327.1 | 2258462 | 28-scf00311 | 28 |
| AX-158148283 | 14 | 36.569 | KV453327.1 | 2258952 | 28-scf00311 | 28 |
| AX-157858093 | 14 | 36.569 | KV453327.1 | 2261197 | 28-scf00311 | 28 |
| AX-158148284 | 14 | 36.569 | KV453327.1 | 2262553 | 28-scf00311 | 28 |
| AX-157832139 | 14 | 36.569 | KV453327.1 | 2263183 | 28-scf00311 | 28 |
| AX-158148285 | 14 | 36.569 | KV453327.1 | 2264129 | 28-scf00311 | 28 |
| AX-158148288 | 14 | 36.569 | KV453327.1 | 2267127 | 28-scf00311 | 28 |
| AX-158148289 | 14 | 36.569 | KV453327.1 | 2268525 | 28-scf00311 | 28 |

|              |    |        |            |         |             |    |
|--------------|----|--------|------------|---------|-------------|----|
| AX-157749737 | 14 | 36.569 | KV453327.1 | 2270675 | 28-scf00311 | 28 |
| AX-158148291 | 14 | 36.569 | KV453327.1 | 2273442 | 28-scf00311 | 28 |
| AX-158148292 | 14 | 36.569 | KV453327.1 | 2276042 | 28-scf00311 | 28 |
| AX-158148295 | 14 | 36.569 | KV453327.1 | 2278611 | 28-scf00311 | 28 |
| AX-158148297 | 14 | 36.569 | KV453327.1 | 2280530 | 28-scf00311 | 28 |
| AX-157832143 | 14 | 36.569 | KV453327.1 | 2285043 | 28-scf00311 | 28 |
| AX-158148300 | 14 | 36.569 | KV453327.1 | 2291902 | 28-scf00311 | 28 |
| AX-158148303 | 14 | 36.569 | KV453327.1 | 2296712 | 28-scf00311 | 28 |
| AX-157832145 | 14 | 36.569 | KV453327.1 | 2298937 | 28-scf00311 | 28 |
| AX-158393145 | 14 | 36.569 | KV453327.1 | 2299721 | 28-scf00311 | 28 |
| AX-158148305 | 14 | 36.569 | KV453327.1 | 2299807 | 28-scf00311 | 28 |
| AX-158148306 | 14 | 36.569 | KV453327.1 | 2301284 | 28-scf00311 | 28 |
| AX-157742413 | 14 | 36.569 | KV453327.1 | 2301675 | 28-scf00311 | 28 |
| AX-158148307 | 14 | 36.569 | KV453327.1 | 2302433 | 28-scf00311 | 28 |
| AX-158148308 | 14 | 36.569 | KV453327.1 | 2302905 | 28-scf00311 | 28 |
| AX-157832147 | 14 | 36.569 | KV453327.1 | 2302965 | 28-scf00311 | 28 |
| AX-157832149 | 14 | 36.569 | KV453327.1 | 2306350 | 28-scf00311 | 28 |
| AX-157832150 | 14 | 36.569 | KV453327.1 | 2307410 | 28-scf00311 | 28 |
| AX-158148312 | 14 | 36.569 | KV453327.1 | 2308695 | 28-scf00311 | 28 |
| AX-158148314 | 14 | 36.569 | KV453327.1 | 2310207 | 28-scf00311 | 28 |
| AX-158148315 | 14 | 36.569 | KV453327.1 | 2311784 | 28-scf00311 | 28 |
| AX-158148317 | 14 | 36.569 | KV453327.1 | 2312770 | 28-scf00311 | 28 |
| AX-158148319 | 14 | 36.569 | KV453327.1 | 2315109 | 28-scf00311 | 28 |
| AX-158148321 | 14 | 36.569 | KV453327.1 | 2317330 | 28-scf00311 | 28 |
| AX-158148322 | 14 | 36.569 | KV453327.1 | 2319707 | 28-scf00311 | 28 |
| AX-158148323 | 14 | 36.569 | KV453327.1 | 2320476 | 28-scf00311 | 28 |
| AX-158148325 | 14 | 36.569 | KV453327.1 | 2324604 | 28-scf00311 | 28 |
| AX-157832151 | 14 | 36.569 | KV453327.1 | 2325296 | 28-scf00311 | 28 |
| AX-157832152 | 14 | 36.569 | KV453327.1 | 2325895 | 28-scf00311 | 28 |
| AX-157832153 | 14 | 36.569 | KV453327.1 | 2326311 | 28-scf00311 | 28 |
| AX-158148326 | 14 | 36.569 | KV453327.1 | 2326430 | 28-scf00311 | 28 |
| AX-158148328 | 14 | 36.569 | KV453327.1 | 2328648 | 28-scf00311 | 28 |
| AX-157702721 | 14 | 36.569 | KV453327.1 | 2329758 | 28-scf00311 | 28 |
| AX-158148330 | 14 | 36.569 | KV453327.1 | 2330395 | 28-scf00311 | 28 |
| AX-157832154 | 14 | 36.569 | KV453327.1 | 2330827 | 28-scf00311 | 28 |
| AX-158148331 | 14 | 36.569 | KV453327.1 | 2331191 | 28-scf00311 | 28 |
| AX-158148336 | 14 | 36.569 | KV453327.1 | 2344356 | 28-scf00311 | 28 |
| AX-158148337 | 14 | 36.569 | KV453327.1 | 2344638 | 28-scf00311 | 28 |
| AX-158148338 | 14 | 36.569 | KV453327.1 | 2345698 | 28-scf00311 | 28 |
| AX-158148341 | 14 | 36.569 | KV453327.1 | 2350694 | 28-scf00311 | 28 |
| AX-158148343 | 14 | 36.569 | KV453327.1 | 2352838 | 28-scf00311 | 28 |
| AX-158148345 | 14 | 36.569 | KV453327.1 | 2353581 | 28-scf00311 | 28 |
| AX-158148346 | 14 | 36.569 | KV453327.1 | 2367438 | 28-scf00311 | 28 |
| AX-158148350 | 14 | 36.569 | KV453327.1 | 2373928 | 28-scf00311 | 28 |
| AX-158148351 | 14 | 36.569 | KV453327.1 | 2375021 | 28-scf00311 | 28 |
| AX-158148353 | 14 | 36.569 | KV453327.1 | 2376810 | 28-scf00311 | 28 |
| AX-158148354 | 14 | 36.569 | KV453327.1 | 2377372 | 28-scf00311 | 28 |
| AX-158148357 | 14 | 36.569 | KV453327.1 | 2380793 | 28-scf00311 | 28 |
| AX-158148358 | 14 | 36.569 | KV453327.1 | 2383603 | 28-scf00311 | 28 |
| AX-157832155 | 14 | 36.569 | KV453327.1 | 2383834 | 28-scf00311 | 28 |
| AX-158148359 | 14 | 36.569 | KV453327.1 | 2386691 | 28-scf00311 | 28 |

|              |    |        |            |         |             |    |
|--------------|----|--------|------------|---------|-------------|----|
| AX-158148360 | 14 | 36.569 | KV453327.1 | 2387413 | 28-scf00311 | 28 |
| AX-158148361 | 14 | 36.569 | KV453327.1 | 2387907 | 28-scf00311 | 28 |
| AX-158148371 | 14 | 36.569 | KV453327.1 | 2403728 | 28-scf00311 | 28 |
| AX-158148374 | 14 | 36.569 | KV453327.1 | 2406069 | 28-scf00311 | 28 |
| AX-158148375 | 14 | 36.569 | KV453327.1 | 2407140 | 28-scf00311 | 28 |
| AX-157739358 | 14 | 36.569 | KV453327.1 | 2413118 | 28-scf00311 | 28 |
| AX-157832158 | 14 | 36.569 | KV453327.1 | 2413446 | 28-scf00311 | 28 |
| AX-158148377 | 14 | 36.569 | KV453327.1 | 2417611 | 28-scf00311 | 28 |
| AX-158148378 | 14 | 36.569 | KV453327.1 | 2418730 | 28-scf00311 | 28 |
| AX-158148380 | 14 | 36.569 | KV453327.1 | 2420759 | 28-scf00311 | 28 |
| AX-157832161 | 14 | 36.569 | KV453327.1 | 2428929 | 28-scf00311 | 28 |
| AX-157832162 | 14 | 36.569 | KV453327.1 | 2429819 | 28-scf00311 | 28 |
| AX-157832163 | 14 | 36.569 | KV453327.1 | 2430241 | 28-scf00311 | 28 |
| AX-158148385 | 14 | 36.569 | KV453327.1 | 2430678 | 28-scf00311 | 28 |
| AX-158148386 | 14 | 36.569 | KV453327.1 | 2431245 | 28-scf00311 | 28 |
| AX-157746126 | 14 | 36.569 | KV453327.1 | 2435177 | 28-scf00311 | 28 |
| AX-158148389 | 14 | 36.569 | KV453327.1 | 2435491 | 28-scf00311 | 28 |
| AX-158148391 | 14 | 36.569 | KV453327.1 | 2437321 | 28-scf00311 | 28 |
| AX-158148394 | 14 | 36.569 | KV453327.1 | 2441772 | 28-scf00311 | 28 |
| AX-158148398 | 14 | 36.569 | KV453327.1 | 2443564 | 28-scf00311 | 28 |
| AX-158148402 | 14 | 36.569 | KV453327.1 | 2447817 | 28-scf00311 | 28 |
| AX-158148403 | 14 | 36.569 | KV453327.1 | 2449617 | 28-scf00311 | 28 |
| AX-158148405 | 14 | 36.569 | KV453327.1 | 2451896 | 28-scf00311 | 28 |
| AX-158148406 | 14 | 36.569 | KV453327.1 | 2452414 | 28-scf00311 | 28 |
| AX-157832165 | 14 | 36.569 | KV453327.1 | 2453452 | 28-scf00311 | 28 |
| AX-158148408 | 14 | 36.569 | KV453327.1 | 2454035 | 28-scf00311 | 28 |
| AX-158148411 | 14 | 36.569 | KV453327.1 | 2456945 | 28-scf00311 | 28 |
| AX-158148412 | 14 | 36.569 | KV453327.1 | 2458399 | 28-scf00311 | 28 |
| AX-158148413 | 14 | 36.569 | KV453327.1 | 2461580 | 28-scf00311 | 28 |
| AX-158148415 | 14 | 36.569 | KV453327.1 | 2462687 | 28-scf00311 | 28 |
| AX-158148417 | 14 | 36.569 | KV453327.1 | 2463388 | 28-scf00311 | 28 |
| AX-158148418 | 14 | 36.569 | KV453327.1 | 2463807 | 28-scf00311 | 28 |
| AX-158148419 | 14 | 36.569 | KV453327.1 | 2464302 | 28-scf00311 | 28 |
| AX-158148423 | 14 | 36.569 | KV453327.1 | 2466970 | 28-scf00311 | 28 |
| AX-158422905 | 14 | 36.569 | KV453327.1 | 2467615 | 28-scf00311 | 28 |
| AX-157832167 | 14 | 36.569 | KV453327.1 | 2468164 | 28-scf00311 | 28 |
| AX-158380370 | 14 | 36.569 | KV453327.1 | 2468294 | 28-scf00311 | 28 |
| AX-158148424 | 14 | 36.569 | KV453327.1 | 2468581 | 28-scf00311 | 28 |
| AX-158148427 | 14 | 36.569 | KV453327.1 | 2473668 | 28-scf00311 | 28 |
| AX-157832168 | 14 | 36.569 | KV453327.1 | 2473809 | 28-scf00311 | 28 |
| AX-158148429 | 14 | 36.569 | KV453327.1 | 2475328 | 28-scf00311 | 28 |
| AX-158148430 | 14 | 36.569 | KV453327.1 | 2475996 | 28-scf00311 | 28 |
| AX-157752365 | 14 | 36.569 | KV453327.1 | 2480028 | 28-scf00311 | 28 |
| AX-157832169 | 14 | 36.569 | KV453327.1 | 2480954 | 28-scf00311 | 28 |
| AX-157756010 | 14 | 36.569 | KV453327.1 | 2482929 | 28-scf00311 | 28 |
| AX-158148432 | 14 | 36.569 | KV453327.1 | 2483664 | 28-scf00311 | 28 |
| AX-158148433 | 14 | 36.569 | KV453327.1 | 2485477 | 28-scf00311 | 28 |
| AX-158148434 | 14 | 36.569 | KV453327.1 | 2486403 | 28-scf00311 | 28 |
| AX-158148435 | 14 | 36.569 | KV453327.1 | 2487669 | 28-scf00311 | 28 |
| AX-158148436 | 14 | 36.569 | KV453327.1 | 2488236 | 28-scf00311 | 28 |
| AX-158148437 | 14 | 36.569 | KV453327.1 | 2488492 | 28-scf00311 | 28 |

|              |    |        |            |         |             |    |
|--------------|----|--------|------------|---------|-------------|----|
| AX-158148439 | 14 | 36.569 | KV453327.1 | 2491560 | 28-scf00311 | 28 |
| AX-158148442 | 14 | 36.569 | KV453327.1 | 2494892 | 28-scf00311 | 28 |
| AX-158148444 | 14 | 36.569 | KV453327.1 | 2496324 | 28-scf00311 | 28 |
| AX-158148448 | 14 | 36.569 | KV453327.1 | 2499762 | 28-scf00311 | 28 |
| AX-158148452 | 14 | 36.569 | KV453327.1 | 2506318 | 28-scf00311 | 28 |
| AX-158148454 | 14 | 36.569 | KV453327.1 | 2508137 | 28-scf00311 | 28 |
| AX-158148455 | 14 | 36.569 | KV453327.1 | 2508511 | 28-scf00311 | 28 |
| AX-158148456 | 14 | 36.569 | KV453327.1 | 2509025 | 28-scf00311 | 28 |
| AX-158148457 | 14 | 36.569 | KV453327.1 | 2509599 | 28-scf00311 | 28 |
| AX-158148466 | 14 | 36.569 | KV453327.1 | 2522351 | 28-scf00311 | 28 |
| AX-157832172 | 14 | 36.569 | KV453327.1 | 2523187 | 28-scf00311 | 28 |
| AX-158148468 | 14 | 36.569 | KV453327.1 | 2525132 | 28-scf00311 | 28 |
| AX-158148470 | 14 | 36.569 | KV453327.1 | 2533665 | 28-scf00311 | 28 |
| AX-157713469 | 14 | 36.569 | KV453327.1 | 2537400 | 28-scf00311 | 28 |
| AX-158148474 | 14 | 36.569 | KV453327.1 | 2539569 | 28-scf00311 | 28 |
| AX-158148475 | 14 | 36.569 | KV453327.1 | 2539850 | 28-scf00311 | 28 |
| AX-157832175 | 14 | 36.569 | KV453327.1 | 2540507 | 28-scf00311 | 28 |
| AX-158148476 | 14 | 36.569 | KV453327.1 | 2541043 | 28-scf00311 | 28 |
| AX-158148478 | 14 | 36.569 | KV453327.1 | 2546490 | 28-scf00311 | 28 |
| AX-158393146 | 14 | 36.569 | KV453327.1 | 2548385 | 28-scf00311 | 28 |
| AX-158148481 | 14 | 36.569 | KV453327.1 | 2549359 | 28-scf00311 | 28 |
| AX-158380371 | 14 | 36.569 | KV453327.1 | 2554331 | 28-scf00311 | 28 |
| AX-158148486 | 14 | 36.569 | KV453327.1 | 2558334 | 28-scf00311 | 28 |
| AX-158148487 | 14 | 36.569 | KV453327.1 | 2559229 | 28-scf00311 | 28 |
| AX-158148488 | 14 | 36.569 | KV453327.1 | 2561326 | 28-scf00311 | 28 |
| AX-158148489 | 14 | 36.569 | KV453327.1 | 2562956 | 28-scf00311 | 28 |
| AX-158148490 | 14 | 36.569 | KV453327.1 | 2563603 | 28-scf00311 | 28 |
| AX-158148491 | 14 | 36.569 | KV453327.1 | 2564771 | 28-scf00311 | 28 |
| AX-157832177 | 14 | 36.569 | KV453327.1 | 2565599 | 28-scf00311 | 28 |
| AX-157832178 | 14 | 36.569 | KV453327.1 | 2566526 | 28-scf00311 | 28 |
| AX-158148496 | 14 | 36.569 | KV453327.1 | 2570655 | 28-scf00311 | 28 |
| AX-158148497 | 14 | 36.569 | KV453327.1 | 2571544 | 28-scf00311 | 28 |
| AX-158148498 | 14 | 36.569 | KV453327.1 | 2572164 | 28-scf00311 | 28 |
| AX-158393147 | 14 | 36.569 | KV453327.1 | 2574891 | 28-scf00311 | 28 |
| AX-158148500 | 14 | 36.569 | KV453327.1 | 2578912 | 28-scf00311 | 28 |
| AX-158148502 | 14 | 36.569 | KV453327.1 | 2581236 | 28-scf00311 | 28 |
| AX-158148504 | 14 | 36.569 | KV453327.1 | 2585262 | 28-scf00311 | 28 |
| AX-158148505 | 14 | 36.569 | KV453327.1 | 2586569 | 28-scf00311 | 28 |
| AX-158148506 | 14 | 36.569 | KV453327.1 | 2587139 | 28-scf00311 | 28 |
| AX-158148511 | 14 | 36.569 | KV453327.1 | 2593525 | 28-scf00311 | 28 |
| AX-158148515 | 14 | 36.569 | KV453327.1 | 2601154 | 28-scf00311 | 28 |
| AX-158148517 | 14 | 36.569 | KV453327.1 | 2603977 | 28-scf00311 | 28 |
| AX-157832184 | 14 | 36.569 | KV453327.1 | 2621744 | 28-scf00311 | 28 |
| AX-158148535 | 14 | 36.569 | KV453327.1 | 2633270 | 28-scf00311 | 28 |
| AX-158148536 | 14 | 36.569 | KV453327.1 | 2633589 | 28-scf00311 | 28 |
| AX-158148537 | 14 | 36.569 | KV453327.1 | 2634568 | 28-scf00311 | 28 |
| AX-158148544 | 14 | 36.569 | KV453327.1 | 2644534 | 28-scf00311 | 28 |
| AX-158148545 | 14 | 36.569 | KV453327.1 | 2644979 | 28-scf00311 | 28 |
| AX-157832187 | 14 | 36.569 | KV453327.1 | 2662029 | 28-scf00311 | 28 |
| AX-157715958 | 14 | 36.569 | KV453327.1 | 2667455 | 28-scf00311 | 28 |
| AX-158148567 | 14 | 36.569 | KV453327.1 | 2672211 | 28-scf00311 | 28 |

|              |    |        |             |         |                |    |
|--------------|----|--------|-------------|---------|----------------|----|
| AX-158148570 | 14 | 36.569 | KV453327.1  | 2674501 | 28-scf00311    | 28 |
| AX-158148579 | 14 | 36.569 | KV453327.1  | 2682502 | 28-scf00311    | 28 |
| AX-158393150 | 14 | 36.569 | KV453327.1  | 2687060 | 28-scf00311    | 28 |
| AX-158148588 | 14 | 36.569 | KV453327.1  | 2704256 | 28-scf00311    | 28 |
| AX-157720162 | 14 | 36.569 | KV453327.1  | 2712115 | 28-scf00311    | 28 |
| AX-158148594 | 14 | 36.569 | KV453327.1  | 2713337 | 28-scf00311    | 28 |
| AX-158148595 | 14 | 36.569 | KV453327.1  | 2717348 | 28-scf00311    | 28 |
| AX-158148605 | 14 | 36.569 | KV453327.1  | 2727239 | 28-scf00311    | 28 |
| AX-158148606 | 14 | 36.569 | KV453327.1  | 2730501 | 28-scf00311    | 28 |
| AX-158148607 | 14 | 36.569 | KV453327.1  | 2731134 | 28-scf00311    | 28 |
| AX-158148618 | 14 | 36.569 | KV453327.1  | 2748028 | 28-scf00311    | 28 |
| AX-158148619 | 14 | 36.569 | KV453327.1  | 2751190 | 28-scf00311    | 28 |
| AX-158148620 | 14 | 36.569 | KV453327.1  | 2752818 | 28-scf00311    | 28 |
| AX-158148622 | 14 | 36.569 | KV453327.1  | 2755271 | 28-scf00311    | 28 |
| AX-158148623 | 14 | 36.569 | KV453327.1  | 2757053 | 28-scf00311    | 28 |
| AX-157832196 | 14 | 36.569 | KV453327.1  | 2770889 | 28-scf00311    | 28 |
| AX-158148642 | 14 | 36.569 | KV453327.1  | 2782916 | 28-scf00311    | 28 |
| AX-158148651 | 14 | 36.569 | KV453327.1  | 2802853 | 28-scf00311    | 28 |
| AX-158148676 | 14 | 36.569 | KV453327.1  | 2836726 | 28-scf00311    | 28 |
| AX-158148715 | 14 | 36.569 | KV453327.1  | 2887556 | 28-scf00311    | 28 |
| AX-158377357 | 14 | 36.569 | KV453325.1  | 93810   | 28-scf00604    | 28 |
| AX-158421437 | 14 | 36.569 | FI874355.1  | 74      | IORI212 lctalu | UN |
| AX-157686703 | 14 | 36.569 | 3ML01024479 | 5458    | scf00723_1     | UN |
| AX-157686716 | 14 | 36.569 | 3ML01024479 | 33736   | scf00723_1     | UN |
| AX-157705615 | 14 | 36.569 | 3ML01030412 | 55      | scf06009_1     | UN |
| AX-157739346 | 14 | 36.678 | KV453324.1  | 4588550 | 28-scf00308    | 28 |
| AX-157886442 | 14 | 36.678 | KV453324.1  | 5226382 | 28-scf00308    | 28 |
| AX-157858079 | 14 | 36.678 | KV453327.1  | 237141  | 28-scf00311    | 28 |
| AX-158147608 | 14 | 36.678 | KV453327.1  | 560863  | 28-scf00311    | 28 |
| AX-157709547 | 14 | 36.678 | KV453327.1  | 577266  | 28-scf00311    | 28 |
| AX-157709548 | 14 | 36.678 | KV453327.1  | 577493  | 28-scf00311    | 28 |
| AX-158147672 | 14 | 36.678 | KV453327.1  | 669607  | 28-scf00311    | 28 |
| AX-158147771 | 14 | 36.678 | KV453327.1  | 813916  | 28-scf00311    | 28 |
| AX-158147824 | 14 | 36.678 | KV453327.1  | 884724  | 28-scf00311    | 28 |
| AX-157757870 | 14 | 36.678 | KV453327.1  | 925062  | 28-scf00311    | 28 |
| AX-158147878 | 14 | 36.678 | KV453327.1  | 951412  | 28-scf00311    | 28 |
| AX-158147903 | 14 | 36.678 | KV453327.1  | 979021  | 28-scf00311    | 28 |
| AX-158147910 | 14 | 36.678 | KV453327.1  | 989037  | 28-scf00311    | 28 |
| AX-158147917 | 14 | 36.678 | KV453327.1  | 1006339 | 28-scf00311    | 28 |
| AX-158147994 | 14 | 36.678 | KV453327.1  | 1179014 | 28-scf00311    | 28 |
| AX-158148118 | 14 | 36.678 | KV453327.1  | 1461794 | 28-scf00311    | 28 |
| AX-157871700 | 14 | 36.678 | KV453327.1  | 1696495 | 28-scf00311    | 28 |
| AX-158148151 | 14 | 36.678 | KV453327.1  | 1863771 | 28-scf00311    | 28 |
| AX-158148152 | 14 | 36.678 | KV453327.1  | 1864262 | 28-scf00311    | 28 |
| AX-158148366 | 14 | 36.678 | KV453327.1  | 2395751 | 28-scf00311    | 28 |
| AX-158148388 | 14 | 36.678 | KV453327.1  | 2435061 | 28-scf00311    | 28 |
| AX-158148407 | 14 | 36.678 | KV453327.1  | 2452805 | 28-scf00311    | 28 |
| AX-158148451 | 14 | 36.678 | KV453327.1  | 2505296 | 28-scf00311    | 28 |
| AX-158148472 | 14 | 36.678 | KV453327.1  | 2537920 | 28-scf00311    | 28 |
| AX-158148483 | 14 | 36.678 | KV453327.1  | 2554743 | 28-scf00311    | 28 |
| AX-157721141 | 14 | 36.678 | KV453327.1  | 2560545 | 28-scf00311    | 28 |

|              |    |        |            |         |             |    |
|--------------|----|--------|------------|---------|-------------|----|
| AX-157711814 | 14 | 36.678 | KV453327.1 | 2577765 | 28-scf00311 | 28 |
| AX-158148501 | 14 | 36.678 | KV453327.1 | 2579377 | 28-scf00311 | 28 |
| AX-158148512 | 14 | 36.678 | KV453327.1 | 2594787 | 28-scf00311 | 28 |
| AX-157832180 | 14 | 36.678 | KV453327.1 | 2595491 | 28-scf00311 | 28 |
| AX-158148514 | 14 | 36.678 | KV453327.1 | 2598981 | 28-scf00311 | 28 |
| AX-157832182 | 14 | 36.678 | KV453327.1 | 2599086 | 28-scf00311 | 28 |
| AX-158148516 | 14 | 36.678 | KV453327.1 | 2602025 | 28-scf00311 | 28 |
| AX-158148518 | 14 | 36.678 | KV453327.1 | 2604992 | 28-scf00311 | 28 |
| AX-158148523 | 14 | 36.678 | KV453327.1 | 2610230 | 28-scf00311 | 28 |
| AX-158148524 | 14 | 36.678 | KV453327.1 | 2612445 | 28-scf00311 | 28 |
| AX-157748656 | 14 | 36.678 | KV453327.1 | 2612940 | 28-scf00311 | 28 |
| AX-158148526 | 14 | 36.678 | KV453327.1 | 2614355 | 28-scf00311 | 28 |
| AX-157832183 | 14 | 36.678 | KV453327.1 | 2617035 | 28-scf00311 | 28 |
| AX-158148531 | 14 | 36.678 | KV453327.1 | 2624058 | 28-scf00311 | 28 |
| AX-157748326 | 14 | 36.678 | KV453327.1 | 2624234 | 28-scf00311 | 28 |
| AX-158148532 | 14 | 36.678 | KV453327.1 | 2625406 | 28-scf00311 | 28 |
| AX-158148534 | 14 | 36.678 | KV453327.1 | 2631984 | 28-scf00311 | 28 |
| AX-158148540 | 14 | 36.678 | KV453327.1 | 2639230 | 28-scf00311 | 28 |
| AX-158148549 | 14 | 36.678 | KV453327.1 | 2648968 | 28-scf00311 | 28 |
| AX-158148550 | 14 | 36.678 | KV453327.1 | 2650908 | 28-scf00311 | 28 |
| AX-158148552 | 14 | 36.678 | KV453327.1 | 2654673 | 28-scf00311 | 28 |
| AX-158148553 | 14 | 36.678 | KV453327.1 | 2656080 | 28-scf00311 | 28 |
| AX-158380372 | 14 | 36.678 | KV453327.1 | 2656996 | 28-scf00311 | 28 |
| AX-158148558 | 14 | 36.678 | KV453327.1 | 2659756 | 28-scf00311 | 28 |
| AX-158148559 | 14 | 36.678 | KV453327.1 | 2660626 | 28-scf00311 | 28 |
| AX-158148560 | 14 | 36.678 | KV453327.1 | 2663297 | 28-scf00311 | 28 |
| AX-158148561 | 14 | 36.678 | KV453327.1 | 2663630 | 28-scf00311 | 28 |
| AX-157832188 | 14 | 36.678 | KV453327.1 | 2666127 | 28-scf00311 | 28 |
| AX-158148565 | 14 | 36.678 | KV453327.1 | 2669139 | 28-scf00311 | 28 |
| AX-158148566 | 14 | 36.678 | KV453327.1 | 2669885 | 28-scf00311 | 28 |
| AX-158148568 | 14 | 36.678 | KV453327.1 | 2673337 | 28-scf00311 | 28 |
| AX-158148569 | 14 | 36.678 | KV453327.1 | 2673876 | 28-scf00311 | 28 |
| AX-158148571 | 14 | 36.678 | KV453327.1 | 2675251 | 28-scf00311 | 28 |
| AX-158148572 | 14 | 36.678 | KV453327.1 | 2677575 | 28-scf00311 | 28 |
| AX-158148573 | 14 | 36.678 | KV453327.1 | 2678498 | 28-scf00311 | 28 |
| AX-157832190 | 14 | 36.678 | KV453327.1 | 2678804 | 28-scf00311 | 28 |
| AX-158148577 | 14 | 36.678 | KV453327.1 | 2681240 | 28-scf00311 | 28 |
| AX-158148581 | 14 | 36.678 | KV453327.1 | 2684375 | 28-scf00311 | 28 |
| AX-158148582 | 14 | 36.678 | KV453327.1 | 2693955 | 28-scf00311 | 28 |
| AX-157752664 | 14 | 36.678 | KV453327.1 | 2694342 | 28-scf00311 | 28 |
| AX-158148583 | 14 | 36.678 | KV453327.1 | 2695473 | 28-scf00311 | 28 |
| AX-158148584 | 14 | 36.678 | KV453327.1 | 2697304 | 28-scf00311 | 28 |
| AX-158148585 | 14 | 36.678 | KV453327.1 | 2697880 | 28-scf00311 | 28 |
| AX-158148589 | 14 | 36.678 | KV453327.1 | 2704713 | 28-scf00311 | 28 |
| AX-158148590 | 14 | 36.678 | KV453327.1 | 2705530 | 28-scf00311 | 28 |
| AX-158148592 | 14 | 36.678 | KV453327.1 | 2708193 | 28-scf00311 | 28 |
| AX-158148593 | 14 | 36.678 | KV453327.1 | 2710143 | 28-scf00311 | 28 |
| AX-157757201 | 14 | 36.678 | KV453327.1 | 2710952 | 28-scf00311 | 28 |
| AX-158148597 | 14 | 36.678 | KV453327.1 | 2719091 | 28-scf00311 | 28 |
| AX-158148609 | 14 | 36.678 | KV453327.1 | 2734109 | 28-scf00311 | 28 |
| AX-158148611 | 14 | 36.678 | KV453327.1 | 2736633 | 28-scf00311 | 28 |



|              |    |        |            |         |                |    |
|--------------|----|--------|------------|---------|----------------|----|
| AX-157858096 | 14 | 36.678 | KV453327.1 | 2736807 | 28-scf00311    | 28 |
| AX-158148612 | 14 | 36.678 | KV453327.1 | 2740646 | 28-scf00311    | 28 |
| AX-158148613 | 14 | 36.678 | KV453327.1 | 2741277 | 28-scf00311    | 28 |
| AX-158148615 | 14 | 36.678 | KV453327.1 | 2744942 | 28-scf00311    | 28 |
| AX-157832192 | 14 | 36.678 | KV453327.1 | 2746077 | 28-scf00311    | 28 |
| AX-158148617 | 14 | 36.678 | KV453327.1 | 2746295 | 28-scf00311    | 28 |
| AX-157699427 | 14 | 36.678 | FI873651.1 | 195     | IORI212 lctalu | UN |
| AX-157832195 | 14 | 36.776 | KV453327.1 | 2770249 | 28-scf00311    | 28 |
| AX-158148638 | 14 | 36.842 | KV453327.1 | 2773313 | 28-scf00311    | 28 |
| AX-158380373 | 14 | 36.842 | KV453327.1 | 2775423 | 28-scf00311    | 28 |
| AX-157832197 | 14 | 36.842 | KV453327.1 | 2776413 | 28-scf00311    | 28 |
| AX-158148639 | 14 | 36.842 | KV453327.1 | 2777000 | 28-scf00311    | 28 |
| AX-157832199 | 14 | 36.842 | KV453327.1 | 2780546 | 28-scf00311    | 28 |
| AX-157832200 | 14 | 37.006 | KV453327.1 | 2784140 | 28-scf00311    | 28 |
| AX-157774824 | 14 | 37.006 | KV453327.1 | 2784251 | 28-scf00311    | 28 |
| AX-157758912 | 14 | 37.006 | KV453327.1 | 2821930 | 28-scf00311    | 28 |
| AX-158148670 | 14 | 37.006 | KV453327.1 | 2827912 | 28-scf00311    | 28 |
| AX-158148643 | 14 | 37.115 | KV453327.1 | 2788838 | 28-scf00311    | 28 |
| AX-157832201 | 14 | 37.115 | KV453327.1 | 2791776 | 28-scf00311    | 28 |
| AX-158148645 | 14 | 37.115 | KV453327.1 | 2794862 | 28-scf00311    | 28 |
| AX-157832202 | 14 | 37.115 | KV453327.1 | 2800030 | 28-scf00311    | 28 |
| AX-157832204 | 14 | 37.115 | KV453327.1 | 2801770 | 28-scf00311    | 28 |
| AX-158148653 | 14 | 37.115 | KV453327.1 | 2804175 | 28-scf00311    | 28 |
| AX-158148654 | 14 | 37.115 | KV453327.1 | 2804595 | 28-scf00311    | 28 |
| AX-157832205 | 14 | 37.115 | KV453327.1 | 2806571 | 28-scf00311    | 28 |
| AX-158148656 | 14 | 37.115 | KV453327.1 | 2808063 | 28-scf00311    | 28 |
| AX-158148657 | 14 | 37.115 | KV453327.1 | 2808602 | 28-scf00311    | 28 |
| AX-158148659 | 14 | 37.115 | KV453327.1 | 2809743 | 28-scf00311    | 28 |
| AX-158148660 | 14 | 37.115 | KV453327.1 | 2810582 | 28-scf00311    | 28 |
| AX-158148661 | 14 | 37.115 | KV453327.1 | 2811371 | 28-scf00311    | 28 |
| AX-157715501 | 14 | 37.115 | KV453327.1 | 2811529 | 28-scf00311    | 28 |
| AX-158148664 | 14 | 37.115 | KV453327.1 | 2817683 | 28-scf00311    | 28 |
| AX-158148665 | 14 | 37.115 | KV453327.1 | 2821110 | 28-scf00311    | 28 |
| AX-158148668 | 14 | 37.115 | KV453327.1 | 2826034 | 28-scf00311    | 28 |
| AX-158148669 | 14 | 37.115 | KV453327.1 | 2827109 | 28-scf00311    | 28 |
| AX-158148671 | 14 | 37.115 | KV453327.1 | 2830073 | 28-scf00311    | 28 |
| AX-158148672 | 14 | 37.115 | KV453327.1 | 2831099 | 28-scf00311    | 28 |
| AX-158148674 | 14 | 37.115 | KV453327.1 | 2833650 | 28-scf00311    | 28 |
| AX-158148675 | 14 | 37.115 | KV453327.1 | 2834792 | 28-scf00311    | 28 |
| AX-158148677 | 14 | 37.115 | KV453327.1 | 2837343 | 28-scf00311    | 28 |
| AX-157748684 | 14 | 37.115 | KV453327.1 | 2839802 | 28-scf00311    | 28 |
| AX-158148679 | 14 | 37.115 | KV453327.1 | 2842819 | 28-scf00311    | 28 |
| AX-158148682 | 14 | 37.115 | KV453327.1 | 2846444 | 28-scf00311    | 28 |
| AX-158148690 | 14 | 37.115 | KV453327.1 | 2863241 | 28-scf00311    | 28 |
| AX-158412463 | 14 | 37.115 | KV453327.1 | 2865372 | 28-scf00311    | 28 |
| AX-158148699 | 14 | 37.115 | KV453327.1 | 2871989 | 28-scf00311    | 28 |
| AX-158148730 | 14 | 37.115 | KV453327.1 | 2903174 | 28-scf00311    | 28 |
| AX-158148772 | 14 | 37.115 | KV453327.1 | 2960965 | 28-scf00311    | 28 |
| AX-158148680 | 14 | 37.131 | KV453327.1 | 2844367 | 28-scf00311    | 28 |
| AX-158148704 | 14 | 37.131 | KV453327.1 | 2877712 | 28-scf00311    | 28 |
| AX-158148681 | 14 | 37.149 | KV453327.1 | 2846280 | 28-scf00311    | 28 |

|              |    |        |            |         |             |    |
|--------------|----|--------|------------|---------|-------------|----|
| AX-158385541 | 14 | 37.168 | KV453327.1 | 2848423 | 28-scf00311 | 28 |
| AX-158148693 | 14 | 37.168 | KV453327.1 | 2865938 | 28-scf00311 | 28 |
| AX-158148707 | 14 | 37.168 | KV453327.1 | 2879985 | 28-scf00311 | 28 |
| AX-158380374 | 14 | 37.186 | KV453327.1 | 2854247 | 28-scf00311 | 28 |
| AX-158148687 | 14 | 37.205 | KV453327.1 | 2855389 | 28-scf00311 | 28 |
| AX-158148688 | 14 | 37.224 | KV453327.1 | 2858140 | 28-scf00311 | 28 |
| AX-157716017 | 14 | 37.224 | KV453327.1 | 2861539 | 28-scf00311 | 28 |
| AX-158148691 | 14 | 37.224 | KV453327.1 | 2864078 | 28-scf00311 | 28 |
| AX-158148720 | 14 | 37.224 | KV453327.1 | 2893569 | 28-scf00311 | 28 |
| AX-158148692 | 14 | 37.242 | KV453327.1 | 2864468 | 28-scf00311 | 28 |
| AX-158148662 | 14 | 37.266 | KV453327.1 | 2814906 | 28-scf00311 | 28 |
| AX-158148683 | 14 | 37.266 | KV453327.1 | 2849832 | 28-scf00311 | 28 |
| AX-157832208 | 14 | 37.266 | KV453327.1 | 2853122 | 28-scf00311 | 28 |
| AX-158148698 | 14 | 37.266 | KV453327.1 | 2870836 | 28-scf00311 | 28 |
| AX-158148705 | 14 | 37.266 | KV453327.1 | 2878447 | 28-scf00311 | 28 |
| AX-158148784 | 14 | 37.266 | KV453327.1 | 2975280 | 28-scf00311 | 28 |
| AX-158148702 | 14 | 37.284 | KV453327.1 | 2875306 | 28-scf00311 | 28 |
| AX-158148703 | 14 | 37.306 | KV453327.1 | 2876794 | 28-scf00311 | 28 |
| AX-158148701 | 14 | 37.334 | KV453327.1 | 2874246 | 28-scf00311 | 28 |
| AX-158148712 | 14 | 37.334 | KV453327.1 | 2884954 | 28-scf00311 | 28 |
| AX-158148718 | 14 | 37.334 | KV453327.1 | 2892583 | 28-scf00311 | 28 |
| AX-158148719 | 14 | 37.334 | KV453327.1 | 2892784 | 28-scf00311 | 28 |
| AX-158148721 | 14 | 37.334 | KV453327.1 | 2894308 | 28-scf00311 | 28 |
| AX-158148722 | 14 | 37.334 | KV453327.1 | 2895572 | 28-scf00311 | 28 |
| AX-158148723 | 14 | 37.334 | KV453327.1 | 2895811 | 28-scf00311 | 28 |
| AX-158148706 | 14 | 37.443 | KV453327.1 | 2879372 | 28-scf00311 | 28 |
| AX-158148724 | 14 | 37.443 | KV453327.1 | 2896414 | 28-scf00311 | 28 |
| AX-158148725 | 14 | 37.443 | KV453327.1 | 2896803 | 28-scf00311 | 28 |
| AX-157775233 | 14 | 37.477 | KV453327.1 | 2897844 | 28-scf00311 | 28 |
| AX-158148644 | 14 | 37.513 | KV453327.1 | 2791886 | 28-scf00311 | 28 |
| AX-158148726 | 14 | 37.513 | KV453327.1 | 2897950 | 28-scf00311 | 28 |
| AX-157693219 | 14 | 37.552 | KV453327.1 | 2900560 | 28-scf00311 | 28 |
| AX-157775215 | 14 | 37.552 | KV453327.1 | 2904969 | 28-scf00311 | 28 |
| AX-158148733 | 14 | 37.552 | KV453327.1 | 2906253 | 28-scf00311 | 28 |
| AX-158148734 | 14 | 37.552 | KV453327.1 | 2906525 | 28-scf00311 | 28 |
| AX-158408562 | 14 | 37.552 | KV453327.1 | 2907150 | 28-scf00311 | 28 |
| AX-157832211 | 14 | 37.552 | KV453327.1 | 2923474 | 28-scf00311 | 28 |
| AX-158148736 | 14 | 37.604 | KV453327.1 | 2909366 | 28-scf00311 | 28 |
| AX-157832209 | 14 | 37.661 | KV453327.1 | 2861447 | 28-scf00311 | 28 |
| AX-158148737 | 14 | 37.661 | KV453327.1 | 2909795 | 28-scf00311 | 28 |
| AX-158148740 | 14 | 37.661 | KV453327.1 | 2911853 | 28-scf00311 | 28 |
| AX-158148742 | 14 | 37.661 | KV453327.1 | 2912808 | 28-scf00311 | 28 |
| AX-157703823 | 14 | 37.661 | KV453327.1 | 2913765 | 28-scf00311 | 28 |
| AX-158148744 | 14 | 37.661 | KV453327.1 | 2915937 | 28-scf00311 | 28 |
| AX-158148750 | 14 | 37.661 | KV453327.1 | 2919405 | 28-scf00311 | 28 |
| AX-158148752 | 14 | 37.661 | KV453327.1 | 2921578 | 28-scf00311 | 28 |
| AX-158148754 | 14 | 37.661 | KV453327.1 | 2922821 | 28-scf00311 | 28 |
| AX-158148755 | 14 | 37.661 | KV453327.1 | 2923725 | 28-scf00311 | 28 |
| AX-158148757 | 14 | 37.661 | KV453327.1 | 2924401 | 28-scf00311 | 28 |
| AX-157871704 | 14 | 37.661 | KV453327.1 | 2928194 | 28-scf00311 | 28 |
| AX-157832224 | 14 | 37.661 | KV453327.1 | 2961190 | 28-scf00311 | 28 |

|              |    |        |             |         |             |    |
|--------------|----|--------|-------------|---------|-------------|----|
| AX-158148779 | 14 | 37.661 | KV453327.1  | 2970771 | 28-scf00311 | 28 |
| AX-158149037 | 14 | 37.661 | KV453327.1  | 3291283 | 28-scf00311 | 28 |
| AX-158149299 | 14 | 37.661 | KV453327.1  | 3621359 | 28-scf00311 | 28 |
| AX-158149300 | 14 | 37.661 | KV453327.1  | 3624062 | 28-scf00311 | 28 |
| AX-158149320 | 14 | 37.661 | KV453327.1  | 3642856 | 28-scf00311 | 28 |
| AX-158149335 | 14 | 37.661 | KV453327.1  | 3660935 | 28-scf00311 | 28 |
| AX-158149336 | 14 | 37.661 | KV453327.1  | 3661580 | 28-scf00311 | 28 |
| AX-158149337 | 14 | 37.661 | KV453327.1  | 3662137 | 28-scf00311 | 28 |
| AX-158149430 | 14 | 37.661 | KV453327.1  | 3779328 | 28-scf00311 | 28 |
| AX-158149461 | 14 | 37.661 | KV453327.1  | 3808362 | 28-scf00311 | 28 |
| AX-158148758 | 14 | 37.737 | KV453327.1  | 2924891 | 28-scf00311 | 28 |
| AX-158148760 | 14 | 37.77  | KV453327.1  | 2927953 | 28-scf00311 | 28 |
| AX-157740893 | 14 | 37.77  | KV453327.1  | 2933952 | 28-scf00311 | 28 |
| AX-157832214 | 14 | 37.77  | KV453327.1  | 2934865 | 28-scf00311 | 28 |
| AX-157832215 | 14 | 37.77  | KV453327.1  | 2935297 | 28-scf00311 | 28 |
| AX-157715009 | 14 | 37.77  | KV453327.1  | 2939345 | 28-scf00311 | 28 |
| AX-158385542 | 14 | 37.77  | KV453327.1  | 2942564 | 28-scf00311 | 28 |
| AX-157747537 | 14 | 37.77  | KV453327.1  | 2942701 | 28-scf00311 | 28 |
| AX-157723877 | 14 | 37.77  | KV453327.1  | 2943590 | 28-scf00311 | 28 |
| AX-158148763 | 14 | 37.77  | KV453327.1  | 2944791 | 28-scf00311 | 28 |
| AX-158148764 | 14 | 37.77  | KV453327.1  | 2946073 | 28-scf00311 | 28 |
| AX-157832219 | 14 | 37.77  | KV453327.1  | 2949645 | 28-scf00311 | 28 |
| AX-158148769 | 14 | 37.77  | KV453327.1  | 2952051 | 28-scf00311 | 28 |
| AX-157832220 | 14 | 37.77  | KV453327.1  | 2952570 | 28-scf00311 | 28 |
| AX-158148771 | 14 | 37.871 | KV453327.1  | 2953502 | 28-scf00311 | 28 |
| AX-157832221 | 14 | 37.876 | KV453327.1  | 2956426 | 28-scf00311 | 28 |
| AX-158148751 | 14 | 37.88  | KV453327.1  | 2920979 | 28-scf00311 | 28 |
| AX-157832218 | 14 | 37.88  | KV453327.1  | 2946395 | 28-scf00311 | 28 |
| AX-158148768 | 14 | 37.88  | KV453327.1  | 2949885 | 28-scf00311 | 28 |
| AX-157832225 | 14 | 37.88  | KV453327.1  | 2962073 | 28-scf00311 | 28 |
| AX-158148775 | 14 | 37.88  | KV453327.1  | 2969372 | 28-scf00311 | 28 |
| AX-158148776 | 14 | 37.88  | KV453327.1  | 2969976 | 28-scf00311 | 28 |
| AX-158148777 | 14 | 37.88  | KV453327.1  | 2970235 | 28-scf00311 | 28 |
| AX-158148781 | 14 | 37.88  | KV453327.1  | 2971953 | 28-scf00311 | 28 |
| AX-158148785 | 14 | 37.88  | KV453327.1  | 2975518 | 28-scf00311 | 28 |
| AX-158148787 | 14 | 37.88  | KV453327.1  | 2977359 | 28-scf00311 | 28 |
| AX-157704756 | 14 | 37.88  | 3ML01027281 | 1278    | scf02887_1  | UN |
| AX-158148783 | 14 | 38.098 | KV453327.1  | 2974153 | 28-scf00311 | 28 |
| AX-158148790 | 14 | 38.098 | KV453327.1  | 2981772 | 28-scf00311 | 28 |
| AX-158148795 | 14 | 38.098 | KV453327.1  | 2987004 | 28-scf00311 | 28 |
| AX-158148796 | 14 | 38.098 | KV453327.1  | 2987883 | 28-scf00311 | 28 |
| AX-158148797 | 14 | 38.098 | KV453327.1  | 2989569 | 28-scf00311 | 28 |
| AX-158148798 | 14 | 38.098 | KV453327.1  | 2990647 | 28-scf00311 | 28 |
| AX-158148800 | 14 | 38.098 | KV453327.1  | 2993332 | 28-scf00311 | 28 |
| AX-158148801 | 14 | 38.098 | KV453327.1  | 2994696 | 28-scf00311 | 28 |
| AX-158148803 | 14 | 38.098 | KV453327.1  | 2995995 | 28-scf00311 | 28 |
| AX-158148804 | 14 | 38.098 | KV453327.1  | 2996419 | 28-scf00311 | 28 |
| AX-157858097 | 14 | 38.098 | KV453327.1  | 2996666 | 28-scf00311 | 28 |
| AX-158148805 | 14 | 38.098 | KV453327.1  | 2997363 | 28-scf00311 | 28 |
| AX-158148806 | 14 | 38.098 | KV453327.1  | 2998644 | 28-scf00311 | 28 |
| AX-158148807 | 14 | 38.098 | KV453327.1  | 2999160 | 28-scf00311 | 28 |

|              |    |        |            |         |             |    |
|--------------|----|--------|------------|---------|-------------|----|
| AX-158148808 | 14 | 38.098 | KV453327.1 | 3001268 | 28-scf00311 | 28 |
| AX-158148809 | 14 | 38.098 | KV453327.1 | 3002205 | 28-scf00311 | 28 |
| AX-158148810 | 14 | 38.098 | KV453327.1 | 3003753 | 28-scf00311 | 28 |
| AX-158380375 | 14 | 38.098 | KV453327.1 | 3003879 | 28-scf00311 | 28 |
| AX-158148814 | 14 | 38.098 | KV453327.1 | 3008229 | 28-scf00311 | 28 |
| AX-158148835 | 14 | 38.098 | KV453327.1 | 3031791 | 28-scf00311 | 28 |
| AX-158148858 | 14 | 38.098 | KV453327.1 | 3053513 | 28-scf00311 | 28 |
| AX-158148865 | 14 | 38.098 | KV453327.1 | 3060624 | 28-scf00311 | 28 |
| AX-157832228 | 14 | 38.098 | KV453327.1 | 3092742 | 28-scf00311 | 28 |
| AX-158148939 | 14 | 38.098 | KV453327.1 | 3168682 | 28-scf00311 | 28 |
| AX-158148994 | 14 | 38.098 | KV453327.1 | 3213983 | 28-scf00311 | 28 |
| AX-158149118 | 14 | 38.098 | KV453327.1 | 3385577 | 28-scf00311 | 28 |
| AX-157832286 | 14 | 38.098 | KV453327.1 | 3617165 | 28-scf00311 | 28 |
| AX-158149296 | 14 | 38.098 | KV453327.1 | 3617703 | 28-scf00311 | 28 |
| AX-158149302 | 14 | 38.098 | KV453327.1 | 3625907 | 28-scf00311 | 28 |
| AX-158149312 | 14 | 38.098 | KV453327.1 | 3632800 | 28-scf00311 | 28 |
| AX-158149314 | 14 | 38.098 | KV453327.1 | 3634192 | 28-scf00311 | 28 |
| AX-158149333 | 14 | 38.098 | KV453327.1 | 3660257 | 28-scf00311 | 28 |
| AX-158149334 | 14 | 38.098 | KV453327.1 | 3660816 | 28-scf00311 | 28 |
| AX-158148812 | 14 | 38.116 | KV453327.1 | 3006369 | 28-scf00311 | 28 |
| AX-158148813 | 14 | 38.144 | KV453327.1 | 3007404 | 28-scf00311 | 28 |
| AX-158149170 | 14 | 38.144 | KV453327.1 | 3439960 | 28-scf00311 | 28 |
| AX-158148815 | 14 | 38.173 | KV453327.1 | 3011747 | 28-scf00311 | 28 |
| AX-158148818 | 14 | 38.173 | KV453327.1 | 3013085 | 28-scf00311 | 28 |
| AX-158148822 | 14 | 38.173 | KV453327.1 | 3017200 | 28-scf00311 | 28 |
| AX-158148861 | 14 | 38.173 | KV453327.1 | 3056609 | 28-scf00311 | 28 |
| AX-158148819 | 14 | 38.207 | KV453327.1 | 3014022 | 28-scf00311 | 28 |
| AX-158148820 | 14 | 38.207 | KV453327.1 | 3015014 | 28-scf00311 | 28 |
| AX-157832223 | 14 | 38.316 | KV453327.1 | 2959678 | 28-scf00311 | 28 |
| AX-158148823 | 14 | 38.316 | KV453327.1 | 3017583 | 28-scf00311 | 28 |
| AX-158148825 | 14 | 38.316 | KV453327.1 | 3019968 | 28-scf00311 | 28 |
| AX-158148826 | 14 | 38.316 | KV453327.1 | 3022334 | 28-scf00311 | 28 |
| AX-158148827 | 14 | 38.316 | KV453327.1 | 3023912 | 28-scf00311 | 28 |
| AX-158148829 | 14 | 38.316 | KV453327.1 | 3026913 | 28-scf00311 | 28 |
| AX-158148830 | 14 | 38.316 | KV453327.1 | 3027472 | 28-scf00311 | 28 |
| AX-158148831 | 14 | 38.316 | KV453327.1 | 3027964 | 28-scf00311 | 28 |
| AX-158148832 | 14 | 38.316 | KV453327.1 | 3029192 | 28-scf00311 | 28 |
| AX-157771490 | 14 | 38.316 | KV453327.1 | 3030077 | 28-scf00311 | 28 |
| AX-158148833 | 14 | 38.316 | KV453327.1 | 3030716 | 28-scf00311 | 28 |
| AX-158148834 | 14 | 38.316 | KV453327.1 | 3031153 | 28-scf00311 | 28 |
| AX-158148836 | 14 | 38.316 | KV453327.1 | 3032074 | 28-scf00311 | 28 |
| AX-158148837 | 14 | 38.316 | KV453327.1 | 3034226 | 28-scf00311 | 28 |
| AX-157772733 | 14 | 38.316 | KV453327.1 | 3034751 | 28-scf00311 | 28 |
| AX-158148839 | 14 | 38.316 | KV453327.1 | 3036270 | 28-scf00311 | 28 |
| AX-158148840 | 14 | 38.316 | KV453327.1 | 3036612 | 28-scf00311 | 28 |
| AX-158148841 | 14 | 38.316 | KV453327.1 | 3038096 | 28-scf00311 | 28 |
| AX-158148843 | 14 | 38.316 | KV453327.1 | 3040131 | 28-scf00311 | 28 |
| AX-158148844 | 14 | 38.316 | KV453327.1 | 3040864 | 28-scf00311 | 28 |
| AX-158148845 | 14 | 38.316 | KV453327.1 | 3041801 | 28-scf00311 | 28 |
| AX-158148846 | 14 | 38.316 | KV453327.1 | 3042324 | 28-scf00311 | 28 |
| AX-158148848 | 14 | 38.316 | KV453327.1 | 3044067 | 28-scf00311 | 28 |

|              |    |        |            |         |             |    |
|--------------|----|--------|------------|---------|-------------|----|
| AX-158148849 | 14 | 38.316 | KV453327.1 | 3044825 | 28-scf00311 | 28 |
| AX-158148850 | 14 | 38.316 | KV453327.1 | 3045813 | 28-scf00311 | 28 |
| AX-158148851 | 14 | 38.316 | KV453327.1 | 3047315 | 28-scf00311 | 28 |
| AX-158148853 | 14 | 38.316 | KV453327.1 | 3049678 | 28-scf00311 | 28 |
| AX-158148854 | 14 | 38.316 | KV453327.1 | 3050525 | 28-scf00311 | 28 |
| AX-158148855 | 14 | 38.316 | KV453327.1 | 3051221 | 28-scf00311 | 28 |
| AX-158148856 | 14 | 38.316 | KV453327.1 | 3052176 | 28-scf00311 | 28 |
| AX-158148857 | 14 | 38.316 | KV453327.1 | 3053125 | 28-scf00311 | 28 |
| AX-158148870 | 14 | 38.316 | KV453327.1 | 3065864 | 28-scf00311 | 28 |
| AX-158148887 | 14 | 38.316 | KV453327.1 | 3083102 | 28-scf00311 | 28 |
| AX-158148891 | 14 | 38.316 | KV453327.1 | 3086735 | 28-scf00311 | 28 |
| AX-158385543 | 14 | 38.316 | KV453327.1 | 3101408 | 28-scf00311 | 28 |
| AX-158148859 | 14 | 38.352 | KV453327.1 | 3054961 | 28-scf00311 | 28 |
| AX-158148863 | 14 | 38.379 | KV453327.1 | 3058431 | 28-scf00311 | 28 |
| AX-158148860 | 14 | 38.426 | KV453327.1 | 3056142 | 28-scf00311 | 28 |
| AX-158148864 | 14 | 38.426 | KV453327.1 | 3058901 | 28-scf00311 | 28 |
| AX-158412465 | 14 | 38.426 | KV453327.1 | 3060877 | 28-scf00311 | 28 |
| AX-157721465 | 14 | 38.426 | KV453327.1 | 3061809 | 28-scf00311 | 28 |
| AX-158148866 | 14 | 38.426 | KV453327.1 | 3062918 | 28-scf00311 | 28 |
| AX-158148869 | 14 | 38.644 | KV453327.1 | 3065387 | 28-scf00311 | 28 |
| AX-158148873 | 14 | 38.644 | KV453327.1 | 3068206 | 28-scf00311 | 28 |
| AX-158148875 | 14 | 38.644 | KV453327.1 | 3070560 | 28-scf00311 | 28 |
| AX-158148878 | 14 | 38.644 | KV453327.1 | 3072197 | 28-scf00311 | 28 |
| AX-158148880 | 14 | 38.644 | KV453327.1 | 3076026 | 28-scf00311 | 28 |
| AX-158148882 | 14 | 38.644 | KV453327.1 | 3077895 | 28-scf00311 | 28 |
| AX-158148884 | 14 | 38.644 | KV453327.1 | 3080572 | 28-scf00311 | 28 |
| AX-158148888 | 14 | 38.644 | KV453327.1 | 3083290 | 28-scf00311 | 28 |
| AX-158148889 | 14 | 38.644 | KV453327.1 | 3083647 | 28-scf00311 | 28 |
| AX-157775568 | 14 | 38.644 | KV453327.1 | 3086554 | 28-scf00311 | 28 |
| AX-157886451 | 14 | 38.644 | KV453327.1 | 3088224 | 28-scf00311 | 28 |
| AX-158148892 | 14 | 38.644 | KV453327.1 | 3088828 | 28-scf00311 | 28 |
| AX-157832227 | 14 | 38.644 | KV453327.1 | 3089234 | 28-scf00311 | 28 |
| AX-158148894 | 14 | 38.644 | KV453327.1 | 3090457 | 28-scf00311 | 28 |
| AX-158148895 | 14 | 38.644 | KV453327.1 | 3091569 | 28-scf00311 | 28 |
| AX-158148896 | 14 | 38.644 | KV453327.1 | 3091919 | 28-scf00311 | 28 |
| AX-158148897 | 14 | 38.644 | KV453327.1 | 3092200 | 28-scf00311 | 28 |
| AX-157832229 | 14 | 38.644 | KV453327.1 | 3093509 | 28-scf00311 | 28 |
| AX-158148899 | 14 | 38.644 | KV453327.1 | 3095235 | 28-scf00311 | 28 |
| AX-158148902 | 14 | 38.644 | KV453327.1 | 3099547 | 28-scf00311 | 28 |
| AX-158148903 | 14 | 38.644 | KV453327.1 | 3100828 | 28-scf00311 | 28 |
| AX-158148904 | 14 | 38.644 | KV453327.1 | 3101950 | 28-scf00311 | 28 |
| AX-158148905 | 14 | 38.644 | KV453327.1 | 3102302 | 28-scf00311 | 28 |
| AX-157832234 | 14 | 38.644 | KV453327.1 | 3159561 | 28-scf00311 | 28 |
| AX-158148872 | 14 | 38.696 | KV453327.1 | 3067322 | 28-scf00311 | 28 |
| AX-158148907 | 14 | 38.696 | KV453327.1 | 3107185 | 28-scf00311 | 28 |
| AX-157832230 | 14 | 38.734 | KV453327.1 | 3108666 | 28-scf00311 | 28 |
| AX-157832231 | 14 | 38.753 | KV453327.1 | 3109048 | 28-scf00311 | 28 |
| AX-158148908 | 14 | 38.811 | KV453327.1 | 3109430 | 28-scf00311 | 28 |
| AX-158148911 | 14 | 38.862 | KV453327.1 | 3114580 | 28-scf00311 | 28 |
| AX-158148915 | 14 | 38.895 | KV453327.1 | 3124815 | 28-scf00311 | 28 |
| AX-158148919 | 14 | 38.972 | KV453327.1 | 3130020 | 28-scf00311 | 28 |

|              |    |        |            |         |             |    |
|--------------|----|--------|------------|---------|-------------|----|
| AX-158148922 | 14 | 39.081 | KV453327.1 | 3136501 | 28-scf00311 | 28 |
| AX-158148923 | 14 | 39.081 | KV453327.1 | 3138160 | 28-scf00311 | 28 |
| AX-158148924 | 14 | 39.081 | KV453327.1 | 3139878 | 28-scf00311 | 28 |
| AX-158148925 | 14 | 39.081 | KV453327.1 | 3140437 | 28-scf00311 | 28 |
| AX-158148926 | 14 | 39.081 | KV453327.1 | 3141108 | 28-scf00311 | 28 |
| AX-158148927 | 14 | 39.081 | KV453327.1 | 3142186 | 28-scf00311 | 28 |
| AX-158148928 | 14 | 39.081 | KV453327.1 | 3143474 | 28-scf00311 | 28 |
| AX-158148929 | 14 | 39.081 | KV453327.1 | 3144244 | 28-scf00311 | 28 |
| AX-158148930 | 14 | 39.081 | KV453327.1 | 3146227 | 28-scf00311 | 28 |
| AX-158148931 | 14 | 39.081 | KV453327.1 | 3146618 | 28-scf00311 | 28 |
| AX-158148932 | 14 | 39.081 | KV453327.1 | 3147244 | 28-scf00311 | 28 |
| AX-158148933 | 14 | 39.081 | KV453327.1 | 3152354 | 28-scf00311 | 28 |
| AX-158148934 | 14 | 39.081 | KV453327.1 | 3158438 | 28-scf00311 | 28 |
| AX-157832236 | 14 | 39.081 | KV453327.1 | 3165334 | 28-scf00311 | 28 |
| AX-158417644 | 14 | 39.081 | KV453327.1 | 3166316 | 28-scf00311 | 28 |
| AX-158148938 | 14 | 39.081 | KV453327.1 | 3166774 | 28-scf00311 | 28 |
| AX-158148942 | 14 | 39.081 | KV453327.1 | 3172026 | 28-scf00311 | 28 |
| AX-158148943 | 14 | 39.081 | KV453327.1 | 3172588 | 28-scf00311 | 28 |
| AX-158148944 | 14 | 39.081 | KV453327.1 | 3172794 | 28-scf00311 | 28 |
| AX-158148945 | 14 | 39.081 | KV453327.1 | 3173519 | 28-scf00311 | 28 |
| AX-157772127 | 14 | 39.081 | KV453327.1 | 3174008 | 28-scf00311 | 28 |
| AX-158148946 | 14 | 39.081 | KV453327.1 | 3176676 | 28-scf00311 | 28 |
| AX-158148947 | 14 | 39.081 | KV453327.1 | 3177070 | 28-scf00311 | 28 |
| AX-158148948 | 14 | 39.081 | KV453327.1 | 3177523 | 28-scf00311 | 28 |
| AX-158148949 | 14 | 39.081 | KV453327.1 | 3177893 | 28-scf00311 | 28 |
| AX-158148953 | 14 | 39.081 | KV453327.1 | 3180215 | 28-scf00311 | 28 |
| AX-158148954 | 14 | 39.081 | KV453327.1 | 3180446 | 28-scf00311 | 28 |
| AX-158148955 | 14 | 39.081 | KV453327.1 | 3180733 | 28-scf00311 | 28 |
| AX-158148957 | 14 | 39.081 | KV453327.1 | 3182014 | 28-scf00311 | 28 |
| AX-158148959 | 14 | 39.081 | KV453327.1 | 3183408 | 28-scf00311 | 28 |
| AX-158148960 | 14 | 39.081 | KV453327.1 | 3184127 | 28-scf00311 | 28 |
| AX-158148961 | 14 | 39.081 | KV453327.1 | 3184767 | 28-scf00311 | 28 |
| AX-158148963 | 14 | 39.081 | KV453327.1 | 3187085 | 28-scf00311 | 28 |
| AX-158148964 | 14 | 39.081 | KV453327.1 | 3189454 | 28-scf00311 | 28 |
| AX-158148966 | 14 | 39.081 | KV453327.1 | 3190547 | 28-scf00311 | 28 |
| AX-158148967 | 14 | 39.081 | KV453327.1 | 3192645 | 28-scf00311 | 28 |
| AX-158148970 | 14 | 39.081 | KV453327.1 | 3194718 | 28-scf00311 | 28 |
| AX-158148972 | 14 | 39.081 | KV453327.1 | 3197776 | 28-scf00311 | 28 |
| AX-158148973 | 14 | 39.081 | KV453327.1 | 3198656 | 28-scf00311 | 28 |
| AX-158148975 | 14 | 39.081 | KV453327.1 | 3199547 | 28-scf00311 | 28 |
| AX-158148976 | 14 | 39.081 | KV453327.1 | 3199795 | 28-scf00311 | 28 |
| AX-158148977 | 14 | 39.081 | KV453327.1 | 3200054 | 28-scf00311 | 28 |
| AX-158148979 | 14 | 39.081 | KV453327.1 | 3201508 | 28-scf00311 | 28 |
| AX-158148980 | 14 | 39.081 | KV453327.1 | 3202430 | 28-scf00311 | 28 |
| AX-158148981 | 14 | 39.081 | KV453327.1 | 3203386 | 28-scf00311 | 28 |
| AX-158148984 | 14 | 39.081 | KV453327.1 | 3205093 | 28-scf00311 | 28 |
| AX-158148989 | 14 | 39.081 | KV453327.1 | 3210971 | 28-scf00311 | 28 |
| AX-158148991 | 14 | 39.081 | KV453327.1 | 3212387 | 28-scf00311 | 28 |
| AX-158417645 | 14 | 39.081 | KV453327.1 | 3215288 | 28-scf00311 | 28 |
| AX-157832238 | 14 | 39.081 | KV453327.1 | 3215899 | 28-scf00311 | 28 |
| AX-157832239 | 14 | 39.081 | KV453327.1 | 3216658 | 28-scf00311 | 28 |

|              |    |        |            |         |             |    |
|--------------|----|--------|------------|---------|-------------|----|
| AX-157740680 | 14 | 39.081 | KV453327.1 | 3222053 | 28-scf00311 | 28 |
| AX-157714763 | 14 | 39.081 | KV453327.1 | 3223545 | 28-scf00311 | 28 |
| AX-157745686 | 14 | 39.081 | KV453327.1 | 3226670 | 28-scf00311 | 28 |
| AX-158149000 | 14 | 39.081 | KV453327.1 | 3232631 | 28-scf00311 | 28 |
| AX-158149001 | 14 | 39.081 | KV453327.1 | 3233032 | 28-scf00311 | 28 |
| AX-158417646 | 14 | 39.081 | KV453327.1 | 3234033 | 28-scf00311 | 28 |
| AX-158149004 | 14 | 39.081 | KV453327.1 | 3237555 | 28-scf00311 | 28 |
| AX-158149006 | 14 | 39.081 | KV453327.1 | 3243016 | 28-scf00311 | 28 |
| AX-158149007 | 14 | 39.081 | KV453327.1 | 3244274 | 28-scf00311 | 28 |
| AX-158149008 | 14 | 39.081 | KV453327.1 | 3245362 | 28-scf00311 | 28 |
| AX-158149010 | 14 | 39.081 | KV453327.1 | 3248155 | 28-scf00311 | 28 |
| AX-158149011 | 14 | 39.081 | KV453327.1 | 3250616 | 28-scf00311 | 28 |
| AX-157832243 | 14 | 39.081 | KV453327.1 | 3251432 | 28-scf00311 | 28 |
| AX-157746236 | 14 | 39.081 | KV453327.1 | 3251910 | 28-scf00311 | 28 |
| AX-158149013 | 14 | 39.081 | KV453327.1 | 3253141 | 28-scf00311 | 28 |
| AX-157832245 | 14 | 39.081 | KV453327.1 | 3253186 | 28-scf00311 | 28 |
| AX-158149014 | 14 | 39.081 | KV453327.1 | 3253887 | 28-scf00311 | 28 |
| AX-157766461 | 14 | 39.081 | KV453327.1 | 3259753 | 28-scf00311 | 28 |
| AX-158149019 | 14 | 39.081 | KV453327.1 | 3260441 | 28-scf00311 | 28 |
| AX-158149020 | 14 | 39.081 | KV453327.1 | 3263892 | 28-scf00311 | 28 |
| AX-158149021 | 14 | 39.081 | KV453327.1 | 3264404 | 28-scf00311 | 28 |
| AX-158149022 | 14 | 39.081 | KV453327.1 | 3265005 | 28-scf00311 | 28 |
| AX-158149023 | 14 | 39.081 | KV453327.1 | 3265466 | 28-scf00311 | 28 |
| AX-157832247 | 14 | 39.081 | KV453327.1 | 3267628 | 28-scf00311 | 28 |
| AX-158149025 | 14 | 39.081 | KV453327.1 | 3268254 | 28-scf00311 | 28 |
| AX-157832248 | 14 | 39.081 | KV453327.1 | 3270994 | 28-scf00311 | 28 |
| AX-158149026 | 14 | 39.081 | KV453327.1 | 3271085 | 28-scf00311 | 28 |
| AX-157832250 | 14 | 39.081 | KV453327.1 | 3273538 | 28-scf00311 | 28 |
| AX-157832251 | 14 | 39.081 | KV453327.1 | 3273602 | 28-scf00311 | 28 |
| AX-157741495 | 14 | 39.081 | KV453327.1 | 3274839 | 28-scf00311 | 28 |
| AX-157858098 | 14 | 39.081 | KV453327.1 | 3275205 | 28-scf00311 | 28 |
| AX-158149036 | 14 | 39.081 | KV453327.1 | 3288185 | 28-scf00311 | 28 |
| AX-158149042 | 14 | 39.081 | KV453327.1 | 3296682 | 28-scf00311 | 28 |
| AX-158149043 | 14 | 39.081 | KV453327.1 | 3297171 | 28-scf00311 | 28 |
| AX-158149050 | 14 | 39.081 | KV453327.1 | 3304315 | 28-scf00311 | 28 |
| AX-158149053 | 14 | 39.081 | KV453327.1 | 3305823 | 28-scf00311 | 28 |
| AX-157715234 | 14 | 39.081 | KV453327.1 | 3307889 | 28-scf00311 | 28 |
| AX-158393156 | 14 | 39.081 | KV453327.1 | 3309589 | 28-scf00311 | 28 |
| AX-157832255 | 14 | 39.081 | KV453327.1 | 3310201 | 28-scf00311 | 28 |
| AX-158149071 | 14 | 39.081 | KV453327.1 | 3329098 | 28-scf00311 | 28 |
| AX-157725394 | 14 | 39.081 | KV453327.1 | 3335494 | 28-scf00311 | 28 |
| AX-158149117 | 14 | 39.081 | KV453327.1 | 3385334 | 28-scf00311 | 28 |
| AX-158408574 | 14 | 39.081 | KV453327.1 | 3413087 | 28-scf00311 | 28 |
| AX-158149145 | 14 | 39.081 | KV453327.1 | 3413499 | 28-scf00311 | 28 |
| AX-158149146 | 14 | 39.081 | KV453327.1 | 3413552 | 28-scf00311 | 28 |
| AX-158149159 | 14 | 39.081 | KV453327.1 | 3424656 | 28-scf00311 | 28 |
| AX-158149227 | 14 | 39.081 | KV453327.1 | 3523281 | 28-scf00311 | 28 |
| AX-158149239 | 14 | 39.081 | KV453327.1 | 3544300 | 28-scf00311 | 28 |
| AX-158149274 | 14 | 39.081 | KV453327.1 | 3581682 | 28-scf00311 | 28 |
| AX-158149310 | 14 | 39.081 | KV453327.1 | 3631386 | 28-scf00311 | 28 |
| AX-157718719 | 14 | 39.081 | KV453327.1 | 3677848 | 28-scf00311 | 28 |

|              |    |        |             |         |             |    |
|--------------|----|--------|-------------|---------|-------------|----|
| AX-158149364 | 14 | 39.081 | KV453327.1  | 3703805 | 28-scf00311 | 28 |
| AX-158412481 | 14 | 39.081 | KV453327.1  | 3771482 | 28-scf00311 | 28 |
| AX-158149500 | 14 | 39.081 | KV453327.1  | 3868240 | 28-scf00311 | 28 |
| AX-158149562 | 14 | 39.081 | KV453327.1  | 3932480 | 28-scf00311 | 28 |
| AX-158149568 | 14 | 39.081 | KV453327.1  | 3939372 | 28-scf00311 | 28 |
| AX-158149589 | 14 | 39.081 | KV453327.1  | 3968907 | 28-scf00311 | 28 |
| AX-158149594 | 14 | 39.081 | KV453327.1  | 3974337 | 28-scf00311 | 28 |
| AX-158149603 | 14 | 39.081 | KV453327.1  | 3994034 | 28-scf00311 | 28 |
| AX-158149606 | 14 | 39.081 | KV453327.1  | 3997124 | 28-scf00311 | 28 |
| AX-157871717 | 14 | 39.081 | KV453330.1  | 11140   | 28-scf00313 | 28 |
| AX-157871718 | 14 | 39.081 | KV453330.1  | 15522   | 28-scf00313 | 28 |
| AX-158149679 | 14 | 39.081 | KV453330.1  | 78515   | 28-scf00313 | 28 |
| AX-158149681 | 14 | 39.081 | KV453330.1  | 80274   | 28-scf00313 | 28 |
| AX-158149694 | 14 | 39.081 | KV453330.1  | 89991   | 28-scf00313 | 28 |
| AX-158149713 | 14 | 39.081 | KV453330.1  | 109407  | 28-scf00313 | 28 |
| AX-157832373 | 14 | 39.081 | KV453330.1  | 523389  | 28-scf00313 | 28 |
| AX-158150064 | 14 | 39.081 | KV453330.1  | 567537  | 28-scf00313 | 28 |
| AX-158150076 | 14 | 39.081 | KV453330.1  | 597027  | 28-scf00313 | 28 |
| AX-158412499 | 14 | 39.081 | KV453330.1  | 676069  | 28-scf00313 | 28 |
| AX-158150386 | 14 | 39.081 | KV453330.1  | 1055739 | 28-scf00313 | 28 |
| AX-157724134 | 14 | 39.081 | KV453330.1  | 1296221 | 28-scf00313 | 28 |
| AX-157751807 | 14 | 39.081 | KV453330.1  | 1390441 | 28-scf00313 | 28 |
| AX-158150684 | 14 | 39.081 | KV453330.1  | 1459268 | 28-scf00313 | 28 |
| AX-157753680 | 14 | 39.081 | KV453330.1  | 1541071 | 28-scf00313 | 28 |
| AX-157759096 | 14 | 39.081 | KV453330.1  | 1598972 | 28-scf00313 | 28 |
| AX-157832452 | 14 | 39.081 | KV453330.1  | 1623494 | 28-scf00313 | 28 |
| AX-158150821 | 14 | 39.081 | KV453330.1  | 1624531 | 28-scf00313 | 28 |
| AX-158150851 | 14 | 39.081 | KV453330.1  | 1675782 | 28-scf00313 | 28 |
| AX-157858118 | 14 | 39.081 | KV453330.1  | 1704122 | 28-scf00313 | 28 |
| AX-158150918 | 14 | 39.081 | KV453330.1  | 1767015 | 28-scf00313 | 28 |
| AX-158150920 | 14 | 39.081 | KV453330.1  | 1769402 | 28-scf00313 | 28 |
| AX-158150940 | 14 | 39.081 | KV453330.1  | 1795527 | 28-scf00313 | 28 |
| AX-158150941 | 14 | 39.081 | KV453330.1  | 1796124 | 28-scf00313 | 28 |
| AX-158150946 | 14 | 39.081 | KV453330.1  | 1802004 | 28-scf00313 | 28 |
| AX-157681803 | 14 | 39.081 | 3ML01026329 | 1010    | scf01924_1  | UN |
| AX-158149034 | 14 | 39.1   | KV453327.1  | 3284991 | 28-scf00311 | 28 |
| AX-158149035 | 14 | 39.122 | KV453327.1  | 3285642 | 28-scf00311 | 28 |
| AX-158149039 | 14 | 39.152 | KV453327.1  | 3292853 | 28-scf00311 | 28 |
| AX-158149031 | 14 | 39.191 | KV453327.1  | 3281863 | 28-scf00311 | 28 |
| AX-157832253 | 14 | 39.191 | KV453327.1  | 3297812 | 28-scf00311 | 28 |
| AX-158149046 | 14 | 39.191 | KV453327.1  | 3301292 | 28-scf00311 | 28 |
| AX-158149047 | 14 | 39.191 | KV453327.1  | 3301887 | 28-scf00311 | 28 |
| AX-158149048 | 14 | 39.191 | KV453327.1  | 3302310 | 28-scf00311 | 28 |
| AX-158149051 | 14 | 39.191 | KV453327.1  | 3304416 | 28-scf00311 | 28 |
| AX-157715965 | 14 | 39.191 | KV453327.1  | 3305575 | 28-scf00311 | 28 |
| AX-157718509 | 14 | 39.191 | KV453327.1  | 3306236 | 28-scf00311 | 28 |
| AX-158149054 | 14 | 39.191 | KV453327.1  | 3310815 | 28-scf00311 | 28 |
| AX-158149104 | 14 | 39.191 | KV453327.1  | 3367737 | 28-scf00311 | 28 |
| AX-158149106 | 14 | 39.191 | KV453327.1  | 3370041 | 28-scf00311 | 28 |
| AX-158149107 | 14 | 39.191 | KV453327.1  | 3370530 | 28-scf00311 | 28 |
| AX-157832263 | 14 | 39.191 | KV453327.1  | 3386113 | 28-scf00311 | 28 |



|              |    |        |             |         |             |    |
|--------------|----|--------|-------------|---------|-------------|----|
| AX-157707423 | 14 | 39.191 | 3ML01034257 | 245     | scf09927_1  | UN |
| AX-158149060 | 14 | 39.261 | KV453327.1  | 3316915 | 28-scf00311 | 28 |
| AX-158149044 | 14 | 39.286 | KV453327.1  | 3299131 | 28-scf00311 | 28 |
| AX-158149061 | 14 | 39.286 | KV453327.1  | 3317252 | 28-scf00311 | 28 |
| AX-158149066 | 14 | 39.286 | KV453327.1  | 3320593 | 28-scf00311 | 28 |
| AX-158149073 | 14 | 39.286 | KV453327.1  | 3333155 | 28-scf00311 | 28 |
| AX-158149121 | 14 | 39.286 | KV453327.1  | 3390406 | 28-scf00311 | 28 |
| AX-158149199 | 14 | 39.286 | KV453327.1  | 3485723 | 28-scf00311 | 28 |
| AX-158149215 | 14 | 39.286 | KV453327.1  | 3509853 | 28-scf00311 | 28 |
| AX-158149231 | 14 | 39.286 | KV453327.1  | 3528792 | 28-scf00311 | 28 |
| AX-158149291 | 14 | 39.286 | KV453327.1  | 3608975 | 28-scf00311 | 28 |
| AX-158149544 | 14 | 39.286 | KV453327.1  | 3911969 | 28-scf00311 | 28 |
| AX-157832242 | 14 | 39.3   | KV453327.1  | 3242969 | 28-scf00311 | 28 |
| AX-158149040 | 14 | 39.3   | KV453327.1  | 3295214 | 28-scf00311 | 28 |
| AX-158149045 | 14 | 39.3   | KV453327.1  | 3299829 | 28-scf00311 | 28 |
| AX-158149057 | 14 | 39.3   | KV453327.1  | 3313740 | 28-scf00311 | 28 |
| AX-158149058 | 14 | 39.3   | KV453327.1  | 3314387 | 28-scf00311 | 28 |
| AX-158149063 | 14 | 39.3   | KV453327.1  | 3318892 | 28-scf00311 | 28 |
| AX-158149064 | 14 | 39.3   | KV453327.1  | 3319560 | 28-scf00311 | 28 |
| AX-158149065 | 14 | 39.3   | KV453327.1  | 3320351 | 28-scf00311 | 28 |
| AX-158149067 | 14 | 39.3   | KV453327.1  | 3320839 | 28-scf00311 | 28 |
| AX-158149068 | 14 | 39.3   | KV453327.1  | 3322492 | 28-scf00311 | 28 |
| AX-158149069 | 14 | 39.3   | KV453327.1  | 3324371 | 28-scf00311 | 28 |
| AX-158149070 | 14 | 39.3   | KV453327.1  | 3324685 | 28-scf00311 | 28 |
| AX-157832257 | 14 | 39.3   | KV453327.1  | 3326043 | 28-scf00311 | 28 |
| AX-157832258 | 14 | 39.3   | KV453327.1  | 3328605 | 28-scf00311 | 28 |
| AX-157775158 | 14 | 39.3   | KV453327.1  | 3331339 | 28-scf00311 | 28 |
| AX-158149072 | 14 | 39.3   | KV453327.1  | 3331840 | 28-scf00311 | 28 |
| AX-158149074 | 14 | 39.3   | KV453327.1  | 3333608 | 28-scf00311 | 28 |
| AX-158149075 | 14 | 39.3   | KV453327.1  | 3334682 | 28-scf00311 | 28 |
| AX-158149080 | 14 | 39.3   | KV453327.1  | 3338079 | 28-scf00311 | 28 |
| AX-158149083 | 14 | 39.3   | KV453327.1  | 3341363 | 28-scf00311 | 28 |
| AX-158149085 | 14 | 39.3   | KV453327.1  | 3342675 | 28-scf00311 | 28 |
| AX-158149088 | 14 | 39.3   | KV453327.1  | 3345200 | 28-scf00311 | 28 |
| AX-157871707 | 14 | 39.3   | KV453327.1  | 3345668 | 28-scf00311 | 28 |
| AX-158149089 | 14 | 39.3   | KV453327.1  | 3346294 | 28-scf00311 | 28 |
| AX-157871708 | 14 | 39.3   | KV453327.1  | 3346766 | 28-scf00311 | 28 |
| AX-158149090 | 14 | 39.3   | KV453327.1  | 3347932 | 28-scf00311 | 28 |
| AX-158149093 | 14 | 39.3   | KV453327.1  | 3353064 | 28-scf00311 | 28 |
| AX-158149096 | 14 | 39.3   | KV453327.1  | 3357144 | 28-scf00311 | 28 |
| AX-158149097 | 14 | 39.3   | KV453327.1  | 3357828 | 28-scf00311 | 28 |
| AX-157748403 | 14 | 39.3   | KV453327.1  | 3358361 | 28-scf00311 | 28 |
| AX-158149101 | 14 | 39.3   | KV453327.1  | 3362122 | 28-scf00311 | 28 |
| AX-158149134 | 14 | 39.3   | KV453327.1  | 3405447 | 28-scf00311 | 28 |
| AX-158149154 | 14 | 39.3   | KV453327.1  | 3419073 | 28-scf00311 | 28 |
| AX-158149217 | 14 | 39.3   | KV453327.1  | 3515155 | 28-scf00311 | 28 |
| AX-158149218 | 14 | 39.3   | KV453327.1  | 3517051 | 28-scf00311 | 28 |
| AX-158149225 | 14 | 39.3   | KV453327.1  | 3521128 | 28-scf00311 | 28 |
| AX-158149226 | 14 | 39.3   | KV453327.1  | 3521934 | 28-scf00311 | 28 |
| AX-157832271 | 14 | 39.3   | KV453327.1  | 3522518 | 28-scf00311 | 28 |
| AX-157832459 | 14 | 39.3   | KV453330.1  | 1677605 | 28-scf00313 | 28 |

|              |    |        |            |         |             |    |
|--------------|----|--------|------------|---------|-------------|----|
| AX-158149092 | 14 | 39.354 | KV453327.1 | 3352057 | 28-scf00311 | 28 |
| AX-158148909 | 14 | 39.409 | KV453327.1 | 3109673 | 28-scf00311 | 28 |
| AX-158149027 | 14 | 39.409 | KV453327.1 | 3278253 | 28-scf00311 | 28 |
| AX-158149094 | 14 | 39.409 | KV453327.1 | 3353792 | 28-scf00311 | 28 |
| AX-158149095 | 14 | 39.409 | KV453327.1 | 3356432 | 28-scf00311 | 28 |
| AX-158149098 | 14 | 39.409 | KV453327.1 | 3359694 | 28-scf00311 | 28 |
| AX-157767580 | 14 | 39.409 | KV453327.1 | 3362073 | 28-scf00311 | 28 |
| AX-158149103 | 14 | 39.409 | KV453327.1 | 3366249 | 28-scf00311 | 28 |
| AX-157832260 | 14 | 39.409 | KV453327.1 | 3370324 | 28-scf00311 | 28 |
| AX-158149108 | 14 | 39.409 | KV453327.1 | 3373144 | 28-scf00311 | 28 |
| AX-158149109 | 14 | 39.409 | KV453327.1 | 3374247 | 28-scf00311 | 28 |
| AX-158149110 | 14 | 39.409 | KV453327.1 | 3376062 | 28-scf00311 | 28 |
| AX-157832261 | 14 | 39.409 | KV453327.1 | 3378112 | 28-scf00311 | 28 |
| AX-158149113 | 14 | 39.409 | KV453327.1 | 3380967 | 28-scf00311 | 28 |
| AX-158149114 | 14 | 39.409 | KV453327.1 | 3381334 | 28-scf00311 | 28 |
| AX-158149115 | 14 | 39.409 | KV453327.1 | 3382062 | 28-scf00311 | 28 |
| AX-157832262 | 14 | 39.409 | KV453327.1 | 3384252 | 28-scf00311 | 28 |
| AX-158149120 | 14 | 39.409 | KV453327.1 | 3389720 | 28-scf00311 | 28 |
| AX-158149123 | 14 | 39.409 | KV453327.1 | 3392494 | 28-scf00311 | 28 |
| AX-158149126 | 14 | 39.409 | KV453327.1 | 3396621 | 28-scf00311 | 28 |
| AX-158149129 | 14 | 39.409 | KV453327.1 | 3398738 | 28-scf00311 | 28 |
| AX-158149130 | 14 | 39.409 | KV453327.1 | 3400261 | 28-scf00311 | 28 |
| AX-158149131 | 14 | 39.409 | KV453327.1 | 3401286 | 28-scf00311 | 28 |
| AX-158149133 | 14 | 39.409 | KV453327.1 | 3404070 | 28-scf00311 | 28 |
| AX-158149136 | 14 | 39.409 | KV453327.1 | 3406986 | 28-scf00311 | 28 |
| AX-158149138 | 14 | 39.409 | KV453327.1 | 3407918 | 28-scf00311 | 28 |
| AX-158149142 | 14 | 39.409 | KV453327.1 | 3411020 | 28-scf00311 | 28 |
| AX-158149144 | 14 | 39.409 | KV453327.1 | 3412660 | 28-scf00311 | 28 |
| AX-158149147 | 14 | 39.409 | KV453327.1 | 3414594 | 28-scf00311 | 28 |
| AX-158149150 | 14 | 39.409 | KV453327.1 | 3415699 | 28-scf00311 | 28 |
| AX-158149151 | 14 | 39.409 | KV453327.1 | 3415852 | 28-scf00311 | 28 |
| AX-158149161 | 14 | 39.409 | KV453327.1 | 3426553 | 28-scf00311 | 28 |
| AX-158149171 | 14 | 39.409 | KV453327.1 | 3440989 | 28-scf00311 | 28 |
| AX-158149190 | 14 | 39.409 | KV453327.1 | 3461320 | 28-scf00311 | 28 |
| AX-158149198 | 14 | 39.409 | KV453327.1 | 3481447 | 28-scf00311 | 28 |
| AX-157718528 | 14 | 39.409 | KV453327.1 | 3541560 | 28-scf00311 | 28 |
| AX-158149240 | 14 | 39.409 | KV453327.1 | 3545069 | 28-scf00311 | 28 |
| AX-157832279 | 14 | 39.409 | KV453327.1 | 3547253 | 28-scf00311 | 28 |
| AX-158149279 | 14 | 39.409 | KV453327.1 | 3587126 | 28-scf00311 | 28 |
| AX-158149017 | 14 | 39.425 | KV453327.1 | 3256658 | 28-scf00311 | 28 |
| AX-158149148 | 14 | 39.425 | KV453327.1 | 3414866 | 28-scf00311 | 28 |
| AX-158149301 | 14 | 39.425 | KV453327.1 | 3624452 | 28-scf00311 | 28 |
| AX-158149803 | 14 | 39.425 | KV453330.1 | 210735  | 28-scf00313 | 28 |
| AX-158149153 | 14 | 39.472 | KV453327.1 | 3418759 | 28-scf00311 | 28 |
| AX-158149156 | 14 | 39.483 | KV453327.1 | 3420766 | 28-scf00311 | 28 |
| AX-158149157 | 14 | 39.495 | KV453327.1 | 3421182 | 28-scf00311 | 28 |
| AX-158149165 | 14 | 39.502 | KV453327.1 | 3430044 | 28-scf00311 | 28 |
| AX-158412475 | 14 | 39.509 | KV453327.1 | 3434945 | 28-scf00311 | 28 |
| AX-158149169 | 14 | 39.512 | KV453327.1 | 3438079 | 28-scf00311 | 28 |
| AX-158149172 | 14 | 39.515 | KV453327.1 | 3441650 | 28-scf00311 | 28 |
| AX-158149174 | 14 | 39.516 | KV453327.1 | 3443488 | 28-scf00311 | 28 |

|              |    |        |            |         |             |    |
|--------------|----|--------|------------|---------|-------------|----|
| AX-158149175 | 14 | 39.517 | KV453327.1 | 3444125 | 28-scf00311 | 28 |
| AX-157832346 | 14 | 39.517 | KV453330.1 | 297903  | 28-scf00313 | 28 |
| AX-158149015 | 14 | 39.518 | KV453327.1 | 3255019 | 28-scf00311 | 28 |
| AX-158149141 | 14 | 39.518 | KV453327.1 | 3410198 | 28-scf00311 | 28 |
| AX-158149162 | 14 | 39.518 | KV453327.1 | 3427128 | 28-scf00311 | 28 |
| AX-158149173 | 14 | 39.518 | KV453327.1 | 3442961 | 28-scf00311 | 28 |
| AX-158149184 | 14 | 39.518 | KV453327.1 | 3455705 | 28-scf00311 | 28 |
| AX-158149185 | 14 | 39.518 | KV453327.1 | 3457732 | 28-scf00311 | 28 |
| AX-158149188 | 14 | 39.518 | KV453327.1 | 3459771 | 28-scf00311 | 28 |
| AX-158149189 | 14 | 39.518 | KV453327.1 | 3460191 | 28-scf00311 | 28 |
| AX-158380378 | 14 | 39.518 | KV453327.1 | 3461080 | 28-scf00311 | 28 |
| AX-158149191 | 14 | 39.518 | KV453327.1 | 3462188 | 28-scf00311 | 28 |
| AX-158149192 | 14 | 39.518 | KV453327.1 | 3464324 | 28-scf00311 | 28 |
| AX-158149193 | 14 | 39.518 | KV453327.1 | 3465017 | 28-scf00311 | 28 |
| AX-158149194 | 14 | 39.518 | KV453327.1 | 3467194 | 28-scf00311 | 28 |
| AX-157713726 | 14 | 39.518 | KV453327.1 | 3469123 | 28-scf00311 | 28 |
| AX-157750312 | 14 | 39.518 | KV453327.1 | 3478017 | 28-scf00311 | 28 |
| AX-158149197 | 14 | 39.518 | KV453327.1 | 3480735 | 28-scf00311 | 28 |
| AX-158412476 | 14 | 39.518 | KV453327.1 | 3483391 | 28-scf00311 | 28 |
| AX-157832266 | 14 | 39.518 | KV453327.1 | 3484018 | 28-scf00311 | 28 |
| AX-157832267 | 14 | 39.518 | KV453327.1 | 3487043 | 28-scf00311 | 28 |
| AX-158149204 | 14 | 39.518 | KV453327.1 | 3496303 | 28-scf00311 | 28 |
| AX-158149212 | 14 | 39.518 | KV453327.1 | 3506268 | 28-scf00311 | 28 |
| AX-157751992 | 14 | 39.518 | KV453327.1 | 3507950 | 28-scf00311 | 28 |
| AX-157747479 | 14 | 39.518 | KV453327.1 | 3515850 | 28-scf00311 | 28 |
| AX-158149221 | 14 | 39.518 | KV453327.1 | 3518487 | 28-scf00311 | 28 |
| AX-158149222 | 14 | 39.518 | KV453327.1 | 3518700 | 28-scf00311 | 28 |
| AX-157832270 | 14 | 39.518 | KV453327.1 | 3521375 | 28-scf00311 | 28 |
| AX-158149228 | 14 | 39.518 | KV453327.1 | 3523703 | 28-scf00311 | 28 |
| AX-158149229 | 14 | 39.518 | KV453327.1 | 3526652 | 28-scf00311 | 28 |
| AX-158149232 | 14 | 39.518 | KV453327.1 | 3529092 | 28-scf00311 | 28 |
| AX-158149234 | 14 | 39.518 | KV453327.1 | 3534262 | 28-scf00311 | 28 |
| AX-158149237 | 14 | 39.518 | KV453327.1 | 3537533 | 28-scf00311 | 28 |
| AX-158149238 | 14 | 39.518 | KV453327.1 | 3539420 | 28-scf00311 | 28 |
| AX-157832276 | 14 | 39.518 | KV453327.1 | 3539775 | 28-scf00311 | 28 |
| AX-157738475 | 14 | 39.518 | KV453327.1 | 3543108 | 28-scf00311 | 28 |
| AX-157744559 | 14 | 39.518 | KV453327.1 | 3547559 | 28-scf00311 | 28 |
| AX-157739687 | 14 | 39.518 | KV453327.1 | 3548665 | 28-scf00311 | 28 |
| AX-157832280 | 14 | 39.518 | KV453327.1 | 3550505 | 28-scf00311 | 28 |
| AX-157744435 | 14 | 39.518 | KV453327.1 | 3552550 | 28-scf00311 | 28 |
| AX-158149252 | 14 | 39.518 | KV453327.1 | 3560718 | 28-scf00311 | 28 |
| AX-158149253 | 14 | 39.518 | KV453327.1 | 3561588 | 28-scf00311 | 28 |
| AX-158149255 | 14 | 39.518 | KV453327.1 | 3564029 | 28-scf00311 | 28 |
| AX-158149256 | 14 | 39.518 | KV453327.1 | 3564420 | 28-scf00311 | 28 |
| AX-158149257 | 14 | 39.518 | KV453327.1 | 3565268 | 28-scf00311 | 28 |
| AX-158149258 | 14 | 39.518 | KV453327.1 | 3565985 | 28-scf00311 | 28 |
| AX-158149260 | 14 | 39.518 | KV453327.1 | 3567447 | 28-scf00311 | 28 |
| AX-158149265 | 14 | 39.518 | KV453327.1 | 3576192 | 28-scf00311 | 28 |
| AX-158149266 | 14 | 39.518 | KV453327.1 | 3576790 | 28-scf00311 | 28 |
| AX-158149272 | 14 | 39.518 | KV453327.1 | 3579986 | 28-scf00311 | 28 |
| AX-158149273 | 14 | 39.518 | KV453327.1 | 3580358 | 28-scf00311 | 28 |

|              |    |        |            |         |             |    |
|--------------|----|--------|------------|---------|-------------|----|
| AX-158149282 | 14 | 39.518 | KV453327.1 | 3589521 | 28-scf00311 | 28 |
| AX-157832283 | 14 | 39.518 | KV453327.1 | 3605457 | 28-scf00311 | 28 |
| AX-158149292 | 14 | 39.518 | KV453327.1 | 3610805 | 28-scf00311 | 28 |
| AX-158149297 | 14 | 39.518 | KV453327.1 | 3619446 | 28-scf00311 | 28 |
| AX-158149305 | 14 | 39.518 | KV453327.1 | 3628666 | 28-scf00311 | 28 |
| AX-157832290 | 14 | 39.518 | KV453327.1 | 3650891 | 28-scf00311 | 28 |
| AX-158149348 | 14 | 39.518 | KV453327.1 | 3676263 | 28-scf00311 | 28 |
| AX-158149350 | 14 | 39.518 | KV453327.1 | 3677174 | 28-scf00311 | 28 |
| AX-158149439 | 14 | 39.518 | KV453327.1 | 3789832 | 28-scf00311 | 28 |
| AX-158149454 | 14 | 39.518 | KV453327.1 | 3801407 | 28-scf00311 | 28 |
| AX-158149455 | 14 | 39.518 | KV453327.1 | 3802216 | 28-scf00311 | 28 |
| AX-158149456 | 14 | 39.518 | KV453327.1 | 3803133 | 28-scf00311 | 28 |
| AX-158149460 | 14 | 39.518 | KV453327.1 | 3807605 | 28-scf00311 | 28 |
| AX-158149484 | 14 | 39.518 | KV453327.1 | 3845175 | 28-scf00311 | 28 |
| AX-158149570 | 14 | 39.518 | KV453327.1 | 3941762 | 28-scf00311 | 28 |
| AX-157832318 | 14 | 39.518 | KV453330.1 | 21765   | 28-scf00313 | 28 |
| AX-158149688 | 14 | 39.518 | KV453330.1 | 86538   | 28-scf00313 | 28 |
| AX-158385554 | 14 | 39.518 | KV453330.1 | 806302  | 28-scf00313 | 28 |
| AX-158150813 | 14 | 39.518 | KV453330.1 | 1617548 | 28-scf00313 | 28 |
| AX-158149259 | 14 | 39.627 | KV453327.1 | 3566895 | 28-scf00311 | 28 |
| AX-157718841 | 14 | 39.627 | KV453327.1 | 3572864 | 28-scf00311 | 28 |
| AX-158393160 | 14 | 39.627 | KV453330.1 | 92182   | 28-scf00313 | 28 |
| AX-158149176 | 14 | 39.737 | KV453327.1 | 3446175 | 28-scf00311 | 28 |
| AX-158149182 | 14 | 39.737 | KV453327.1 | 3453916 | 28-scf00311 | 28 |
| AX-158149196 | 14 | 39.737 | KV453327.1 | 3479254 | 28-scf00311 | 28 |
| AX-158149200 | 14 | 39.737 | KV453327.1 | 3487561 | 28-scf00311 | 28 |
| AX-157832268 | 14 | 39.737 | KV453327.1 | 3495752 | 28-scf00311 | 28 |
| AX-158149207 | 14 | 39.737 | KV453327.1 | 3499616 | 28-scf00311 | 28 |
| AX-158149208 | 14 | 39.737 | KV453327.1 | 3500173 | 28-scf00311 | 28 |
| AX-158149209 | 14 | 39.737 | KV453327.1 | 3500878 | 28-scf00311 | 28 |
| AX-158149210 | 14 | 39.737 | KV453327.1 | 3501280 | 28-scf00311 | 28 |
| AX-157832269 | 14 | 39.737 | KV453327.1 | 3504308 | 28-scf00311 | 28 |
| AX-158149219 | 14 | 39.737 | KV453327.1 | 3517390 | 28-scf00311 | 28 |
| AX-158149230 | 14 | 39.737 | KV453327.1 | 3527832 | 28-scf00311 | 28 |
| AX-158149233 | 14 | 39.737 | KV453327.1 | 3531000 | 28-scf00311 | 28 |
| AX-157832274 | 14 | 39.737 | KV453327.1 | 3531296 | 28-scf00311 | 28 |
| AX-157832277 | 14 | 39.737 | KV453327.1 | 3540987 | 28-scf00311 | 28 |
| AX-157742786 | 14 | 39.737 | KV453327.1 | 3560081 | 28-scf00311 | 28 |
| AX-158149262 | 14 | 39.737 | KV453327.1 | 3573594 | 28-scf00311 | 28 |
| AX-158149264 | 14 | 39.737 | KV453327.1 | 3575244 | 28-scf00311 | 28 |
| AX-158149270 | 14 | 39.737 | KV453327.1 | 3578581 | 28-scf00311 | 28 |
| AX-158149271 | 14 | 39.737 | KV453327.1 | 3579112 | 28-scf00311 | 28 |
| AX-158149276 | 14 | 39.737 | KV453327.1 | 3583737 | 28-scf00311 | 28 |
| AX-158149277 | 14 | 39.737 | KV453327.1 | 3585634 | 28-scf00311 | 28 |
| AX-158149283 | 14 | 39.737 | KV453327.1 | 3592944 | 28-scf00311 | 28 |
| AX-157832281 | 14 | 39.737 | KV453327.1 | 3599439 | 28-scf00311 | 28 |
| AX-158149287 | 14 | 39.737 | KV453327.1 | 3600375 | 28-scf00311 | 28 |
| AX-158149288 | 14 | 39.737 | KV453327.1 | 3603914 | 28-scf00311 | 28 |
| AX-157740944 | 14 | 39.737 | KV453327.1 | 3604376 | 28-scf00311 | 28 |
| AX-157832284 | 14 | 39.737 | KV453327.1 | 3605725 | 28-scf00311 | 28 |
| AX-157832285 | 14 | 39.737 | KV453327.1 | 3608012 | 28-scf00311 | 28 |

|              |    |        |            |         |             |    |
|--------------|----|--------|------------|---------|-------------|----|
| AX-158149294 | 14 | 39.737 | KV453327.1 | 3613709 | 28-scf00311 | 28 |
| AX-158149298 | 14 | 39.737 | KV453327.1 | 3620112 | 28-scf00311 | 28 |
| AX-158149303 | 14 | 39.737 | KV453327.1 | 3626779 | 28-scf00311 | 28 |
| AX-158149306 | 14 | 39.737 | KV453327.1 | 3629012 | 28-scf00311 | 28 |
| AX-158149307 | 14 | 39.737 | KV453327.1 | 3629601 | 28-scf00311 | 28 |
| AX-158149308 | 14 | 39.737 | KV453327.1 | 3629918 | 28-scf00311 | 28 |
| AX-158149309 | 14 | 39.737 | KV453327.1 | 3631044 | 28-scf00311 | 28 |
| AX-158149311 | 14 | 39.737 | KV453327.1 | 3632221 | 28-scf00311 | 28 |
| AX-158149313 | 14 | 39.737 | KV453327.1 | 3633577 | 28-scf00311 | 28 |
| AX-158149315 | 14 | 39.737 | KV453327.1 | 3635018 | 28-scf00311 | 28 |
| AX-158149319 | 14 | 39.737 | KV453327.1 | 3637493 | 28-scf00311 | 28 |
| AX-158149321 | 14 | 39.737 | KV453327.1 | 3643093 | 28-scf00311 | 28 |
| AX-158149322 | 14 | 39.737 | KV453327.1 | 3645221 | 28-scf00311 | 28 |
| AX-158149323 | 14 | 39.737 | KV453327.1 | 3645832 | 28-scf00311 | 28 |
| AX-158149324 | 14 | 39.737 | KV453327.1 | 3646204 | 28-scf00311 | 28 |
| AX-157832288 | 14 | 39.737 | KV453327.1 | 3647596 | 28-scf00311 | 28 |
| AX-158149325 | 14 | 39.737 | KV453327.1 | 3648439 | 28-scf00311 | 28 |
| AX-157832289 | 14 | 39.737 | KV453327.1 | 3650006 | 28-scf00311 | 28 |
| AX-158149326 | 14 | 39.737 | KV453327.1 | 3650225 | 28-scf00311 | 28 |
| AX-158149327 | 14 | 39.737 | KV453327.1 | 3652214 | 28-scf00311 | 28 |
| AX-157832291 | 14 | 39.737 | KV453327.1 | 3652632 | 28-scf00311 | 28 |
| AX-158149342 | 14 | 39.737 | KV453327.1 | 3666790 | 28-scf00311 | 28 |
| AX-158149343 | 14 | 39.737 | KV453327.1 | 3669354 | 28-scf00311 | 28 |
| AX-158149344 | 14 | 39.737 | KV453327.1 | 3670395 | 28-scf00311 | 28 |
| AX-158149345 | 14 | 39.737 | KV453327.1 | 3673008 | 28-scf00311 | 28 |
| AX-158149346 | 14 | 39.737 | KV453327.1 | 3674311 | 28-scf00311 | 28 |
| AX-158149347 | 14 | 39.737 | KV453327.1 | 3675236 | 28-scf00311 | 28 |
| AX-157832294 | 14 | 39.737 | KV453327.1 | 3675766 | 28-scf00311 | 28 |
| AX-158149351 | 14 | 39.737 | KV453327.1 | 3679837 | 28-scf00311 | 28 |
| AX-158149354 | 14 | 39.737 | KV453327.1 | 3682155 | 28-scf00311 | 28 |
| AX-158149355 | 14 | 39.737 | KV453327.1 | 3693150 | 28-scf00311 | 28 |
| AX-158393158 | 14 | 39.737 | KV453327.1 | 3694060 | 28-scf00311 | 28 |
| AX-158149356 | 14 | 39.737 | KV453327.1 | 3694780 | 28-scf00311 | 28 |
| AX-158149357 | 14 | 39.737 | KV453327.1 | 3695517 | 28-scf00311 | 28 |
| AX-158149380 | 14 | 39.737 | KV453327.1 | 3717987 | 28-scf00311 | 28 |
| AX-158149390 | 14 | 39.737 | KV453327.1 | 3727076 | 28-scf00311 | 28 |
| AX-158149538 | 14 | 39.737 | KV453327.1 | 3901456 | 28-scf00311 | 28 |
| AX-158149827 | 14 | 39.737 | KV453330.1 | 243136  | 28-scf00313 | 28 |
| AX-157716659 | 14 | 39.846 | KV453327.1 | 3601419 | 28-scf00311 | 28 |
| AX-157716503 | 14 | 39.846 | KV453327.1 | 3707546 | 28-scf00311 | 28 |
| AX-158393159 | 14 | 39.846 | KV453327.1 | 3708255 | 28-scf00311 | 28 |
| AX-158149370 | 14 | 39.846 | KV453327.1 | 3710505 | 28-scf00311 | 28 |
| AX-158149371 | 14 | 39.846 | KV453327.1 | 3710958 | 28-scf00311 | 28 |
| AX-158149372 | 14 | 39.846 | KV453327.1 | 3711480 | 28-scf00311 | 28 |
| AX-158149375 | 14 | 39.846 | KV453327.1 | 3714397 | 28-scf00311 | 28 |
| AX-158149377 | 14 | 39.846 | KV453327.1 | 3715455 | 28-scf00311 | 28 |
| AX-158149379 | 14 | 39.846 | KV453327.1 | 3716984 | 28-scf00311 | 28 |
| AX-158149382 | 14 | 39.846 | KV453327.1 | 3718909 | 28-scf00311 | 28 |
| AX-157832298 | 14 | 39.846 | KV453327.1 | 3721475 | 28-scf00311 | 28 |
| AX-158149383 | 14 | 39.846 | KV453327.1 | 3721682 | 28-scf00311 | 28 |
| AX-158149388 | 14 | 39.846 | KV453327.1 | 3725789 | 28-scf00311 | 28 |

|              |    |        |             |         |             |    |
|--------------|----|--------|-------------|---------|-------------|----|
| AX-158149392 | 14 | 39.846 | KV453327.1  | 3728744 | 28-scf00311 | 28 |
| AX-158149396 | 14 | 39.92  | KV453327.1  | 3732761 | 28-scf00311 | 28 |
| AX-158149395 | 14 | 39.955 | KV453327.1  | 3730875 | 28-scf00311 | 28 |
| AX-158149397 | 14 | 39.955 | KV453327.1  | 3736034 | 28-scf00311 | 28 |
| AX-158149399 | 14 | 39.955 | KV453327.1  | 3739367 | 28-scf00311 | 28 |
| AX-158149400 | 14 | 39.955 | KV453327.1  | 3739636 | 28-scf00311 | 28 |
| AX-158149401 | 14 | 39.955 | KV453327.1  | 3740267 | 28-scf00311 | 28 |
| AX-158149403 | 14 | 39.955 | KV453327.1  | 3741109 | 28-scf00311 | 28 |
| AX-157740174 | 14 | 39.955 | KV453327.1  | 3741219 | 28-scf00311 | 28 |
| AX-158149407 | 14 | 39.955 | KV453327.1  | 3744033 | 28-scf00311 | 28 |
| AX-158149501 | 14 | 39.955 | KV453327.1  | 3870917 | 28-scf00311 | 28 |
| AX-157725337 | 14 | 39.955 | KV453327.1  | 3873084 | 28-scf00311 | 28 |
| AX-158149504 | 14 | 39.955 | KV453327.1  | 3873695 | 28-scf00311 | 28 |
| AX-158149709 | 14 | 39.955 | KV453330.1  | 107420  | 28-scf00313 | 28 |
| AX-158149404 | 14 | 39.97  | KV453327.1  | 3742188 | 28-scf00311 | 28 |
| AX-158149406 | 14 | 39.999 | KV453327.1  | 3743681 | 28-scf00311 | 28 |
| AX-157871706 | 14 | 40.017 | KV453327.1  | 3227753 | 28-scf00311 | 28 |
| AX-157707726 | 14 | 40.017 | KV453327.1  | 3423284 | 28-scf00311 | 28 |
| AX-158149167 | 14 | 40.017 | KV453327.1  | 3433815 | 28-scf00311 | 28 |
| AX-158149213 | 14 | 40.017 | KV453327.1  | 3508458 | 28-scf00311 | 28 |
| AX-158149220 | 14 | 40.017 | KV453327.1  | 3518268 | 28-scf00311 | 28 |
| AX-158149224 | 14 | 40.017 | KV453327.1  | 3520741 | 28-scf00311 | 28 |
| AX-157832275 | 14 | 40.017 | KV453327.1  | 3533693 | 28-scf00311 | 28 |
| AX-158149241 | 14 | 40.017 | KV453327.1  | 3545974 | 28-scf00311 | 28 |
| AX-158149353 | 14 | 40.017 | KV453327.1  | 3681196 | 28-scf00311 | 28 |
| AX-157832296 | 14 | 40.017 | KV453327.1  | 3697940 | 28-scf00311 | 28 |
| AX-158149374 | 14 | 40.017 | KV453327.1  | 3713369 | 28-scf00311 | 28 |
| AX-158149402 | 14 | 40.017 | KV453327.1  | 3740555 | 28-scf00311 | 28 |
| AX-158149409 | 14 | 40.017 | KV453327.1  | 3747407 | 28-scf00311 | 28 |
| AX-158149412 | 14 | 40.017 | KV453327.1  | 3750815 | 28-scf00311 | 28 |
| AX-157720275 | 14 | 40.017 | KV453327.1  | 3751320 | 28-scf00311 | 28 |
| AX-158149491 | 14 | 40.017 | KV453327.1  | 3853558 | 28-scf00311 | 28 |
| AX-158149512 | 14 | 40.017 | KV453327.1  | 3881813 | 28-scf00311 | 28 |
| AX-158149528 | 14 | 40.017 | KV453327.1  | 3896110 | 28-scf00311 | 28 |
| AX-157832307 | 14 | 40.017 | KV453327.1  | 3902676 | 28-scf00311 | 28 |
| AX-157832308 | 14 | 40.017 | KV453327.1  | 3902810 | 28-scf00311 | 28 |
| AX-157772938 | 14 | 40.017 | KV453327.1  | 3903462 | 28-scf00311 | 28 |
| AX-158149565 | 14 | 40.017 | KV453327.1  | 3937584 | 28-scf00311 | 28 |
| AX-157705870 | 14 | 40.017 | 3ML01031122 | 723     | scf06728_1  | UN |
| AX-158149411 | 14 | 40.028 | KV453327.1  | 3750085 | 28-scf00311 | 28 |
| AX-158149418 | 14 | 40.04  | KV453327.1  | 3757070 | 28-scf00311 | 28 |
| AX-158149426 | 14 | 40.051 | KV453327.1  | 3769808 | 28-scf00311 | 28 |
| AX-158149436 | 14 | 40.051 | KV453327.1  | 3786333 | 28-scf00311 | 28 |
| AX-158149450 | 14 | 40.051 | KV453327.1  | 3798211 | 28-scf00311 | 28 |
| AX-158149452 | 14 | 40.051 | KV453327.1  | 3800028 | 28-scf00311 | 28 |
| AX-158149453 | 14 | 40.051 | KV453327.1  | 3800641 | 28-scf00311 | 28 |
| AX-158149464 | 14 | 40.051 | KV453327.1  | 3814556 | 28-scf00311 | 28 |
| AX-158412469 | 14 | 40.064 | KV453327.1  | 3350707 | 28-scf00311 | 28 |
| AX-158149177 | 14 | 40.064 | KV453327.1  | 3447190 | 28-scf00311 | 28 |
| AX-158149183 | 14 | 40.064 | KV453327.1  | 3454785 | 28-scf00311 | 28 |
| AX-158149269 | 14 | 40.064 | KV453327.1  | 3578182 | 28-scf00311 | 28 |

|              |    |        |            |         |             |    |
|--------------|----|--------|------------|---------|-------------|----|
| AX-158149284 | 14 | 40.064 | KV453327.1 | 3594516 | 28-scf00311 | 28 |
| AX-157775645 | 14 | 40.064 | KV453327.1 | 3707127 | 28-scf00311 | 28 |
| AX-158149368 | 14 | 40.064 | KV453327.1 | 3709254 | 28-scf00311 | 28 |
| AX-158149387 | 14 | 40.064 | KV453327.1 | 3725063 | 28-scf00311 | 28 |
| AX-158149394 | 14 | 40.064 | KV453327.1 | 3729657 | 28-scf00311 | 28 |
| AX-157832300 | 14 | 40.064 | KV453327.1 | 3756108 | 28-scf00311 | 28 |
| AX-158149419 | 14 | 40.064 | KV453327.1 | 3757963 | 28-scf00311 | 28 |
| AX-158149427 | 14 | 40.064 | KV453327.1 | 3770268 | 28-scf00311 | 28 |
| AX-158412479 | 14 | 40.064 | KV453327.1 | 3771367 | 28-scf00311 | 28 |
| AX-158412480 | 14 | 40.064 | KV453327.1 | 3771436 | 28-scf00311 | 28 |
| AX-158149429 | 14 | 40.064 | KV453327.1 | 3778572 | 28-scf00311 | 28 |
| AX-158149431 | 14 | 40.064 | KV453327.1 | 3782189 | 28-scf00311 | 28 |
| AX-158149432 | 14 | 40.064 | KV453327.1 | 3782974 | 28-scf00311 | 28 |
| AX-158149437 | 14 | 40.064 | KV453327.1 | 3786919 | 28-scf00311 | 28 |
| AX-158149440 | 14 | 40.064 | KV453327.1 | 3790238 | 28-scf00311 | 28 |
| AX-158149441 | 14 | 40.064 | KV453327.1 | 3790611 | 28-scf00311 | 28 |
| AX-158149442 | 14 | 40.064 | KV453327.1 | 3791312 | 28-scf00311 | 28 |
| AX-158149444 | 14 | 40.064 | KV453327.1 | 3792659 | 28-scf00311 | 28 |
| AX-158149445 | 14 | 40.064 | KV453327.1 | 3793706 | 28-scf00311 | 28 |
| AX-158149446 | 14 | 40.064 | KV453327.1 | 3795953 | 28-scf00311 | 28 |
| AX-158149447 | 14 | 40.064 | KV453327.1 | 3796326 | 28-scf00311 | 28 |
| AX-158149448 | 14 | 40.064 | KV453327.1 | 3796875 | 28-scf00311 | 28 |
| AX-158149449 | 14 | 40.064 | KV453327.1 | 3797401 | 28-scf00311 | 28 |
| AX-158149457 | 14 | 40.064 | KV453327.1 | 3803976 | 28-scf00311 | 28 |
| AX-158149458 | 14 | 40.064 | KV453327.1 | 3804533 | 28-scf00311 | 28 |
| AX-158149459 | 14 | 40.064 | KV453327.1 | 3805046 | 28-scf00311 | 28 |
| AX-158149463 | 14 | 40.064 | KV453327.1 | 3812978 | 28-scf00311 | 28 |
| AX-157832301 | 14 | 40.064 | KV453327.1 | 3816195 | 28-scf00311 | 28 |
| AX-158149466 | 14 | 40.064 | KV453327.1 | 3816398 | 28-scf00311 | 28 |
| AX-158149472 | 14 | 40.064 | KV453327.1 | 3829839 | 28-scf00311 | 28 |
| AX-158149473 | 14 | 40.064 | KV453327.1 | 3830321 | 28-scf00311 | 28 |
| AX-158149476 | 14 | 40.064 | KV453327.1 | 3832881 | 28-scf00311 | 28 |
| AX-158149477 | 14 | 40.064 | KV453327.1 | 3833695 | 28-scf00311 | 28 |
| AX-158149479 | 14 | 40.064 | KV453327.1 | 3834816 | 28-scf00311 | 28 |
| AX-157832302 | 14 | 40.064 | KV453327.1 | 3834911 | 28-scf00311 | 28 |
| AX-158149481 | 14 | 40.064 | KV453327.1 | 3837056 | 28-scf00311 | 28 |
| AX-158149482 | 14 | 40.064 | KV453327.1 | 3837305 | 28-scf00311 | 28 |
| AX-158149485 | 14 | 40.064 | KV453327.1 | 3846919 | 28-scf00311 | 28 |
| AX-158149486 | 14 | 40.064 | KV453327.1 | 3847284 | 28-scf00311 | 28 |
| AX-158149487 | 14 | 40.064 | KV453327.1 | 3847998 | 28-scf00311 | 28 |
| AX-158149488 | 14 | 40.064 | KV453327.1 | 3849159 | 28-scf00311 | 28 |
| AX-158149489 | 14 | 40.064 | KV453327.1 | 3849465 | 28-scf00311 | 28 |
| AX-158149495 | 14 | 40.064 | KV453327.1 | 3860199 | 28-scf00311 | 28 |
| AX-158149496 | 14 | 40.064 | KV453327.1 | 3861876 | 28-scf00311 | 28 |
| AX-158149498 | 14 | 40.064 | KV453327.1 | 3864210 | 28-scf00311 | 28 |
| AX-158149499 | 14 | 40.064 | KV453327.1 | 3864697 | 28-scf00311 | 28 |
| AX-157711257 | 14 | 40.064 | KV453327.1 | 3874627 | 28-scf00311 | 28 |
| AX-158149506 | 14 | 40.064 | KV453327.1 | 3877993 | 28-scf00311 | 28 |
| AX-158149508 | 14 | 40.064 | KV453327.1 | 3879078 | 28-scf00311 | 28 |
| AX-157832305 | 14 | 40.064 | KV453327.1 | 3879310 | 28-scf00311 | 28 |
| AX-158149510 | 14 | 40.064 | KV453327.1 | 3881015 | 28-scf00311 | 28 |

|              |    |        |            |         |             |    |
|--------------|----|--------|------------|---------|-------------|----|
| AX-158149513 | 14 | 40.064 | KV453327.1 | 3882756 | 28-scf00311 | 28 |
| AX-158149514 | 14 | 40.064 | KV453327.1 | 3886242 | 28-scf00311 | 28 |
| AX-158149515 | 14 | 40.064 | KV453327.1 | 3888079 | 28-scf00311 | 28 |
| AX-158149516 | 14 | 40.064 | KV453327.1 | 3888566 | 28-scf00311 | 28 |
| AX-158149517 | 14 | 40.064 | KV453327.1 | 3888939 | 28-scf00311 | 28 |
| AX-158149519 | 14 | 40.064 | KV453327.1 | 3890808 | 28-scf00311 | 28 |
| AX-158149521 | 14 | 40.064 | KV453327.1 | 3891826 | 28-scf00311 | 28 |
| AX-158149522 | 14 | 40.064 | KV453327.1 | 3892072 | 28-scf00311 | 28 |
| AX-158149523 | 14 | 40.064 | KV453327.1 | 3893868 | 28-scf00311 | 28 |
| AX-158149524 | 14 | 40.064 | KV453327.1 | 3894173 | 28-scf00311 | 28 |
| AX-158149525 | 14 | 40.064 | KV453327.1 | 3894401 | 28-scf00311 | 28 |
| AX-158149535 | 14 | 40.064 | KV453327.1 | 3899575 | 28-scf00311 | 28 |
| AX-158149537 | 14 | 40.064 | KV453327.1 | 3901103 | 28-scf00311 | 28 |
| AX-157832309 | 14 | 40.064 | KV453327.1 | 3904326 | 28-scf00311 | 28 |
| AX-157832310 | 14 | 40.064 | KV453327.1 | 3904475 | 28-scf00311 | 28 |
| AX-158149540 | 14 | 40.064 | KV453327.1 | 3906640 | 28-scf00311 | 28 |
| AX-158380380 | 14 | 40.064 | KV453327.1 | 3912249 | 28-scf00311 | 28 |
| AX-158149545 | 14 | 40.064 | KV453327.1 | 3912771 | 28-scf00311 | 28 |
| AX-157832311 | 14 | 40.064 | KV453327.1 | 3914399 | 28-scf00311 | 28 |
| AX-158149546 | 14 | 40.064 | KV453327.1 | 3914872 | 28-scf00311 | 28 |
| AX-158149547 | 14 | 40.064 | KV453327.1 | 3915816 | 28-scf00311 | 28 |
| AX-158149548 | 14 | 40.064 | KV453327.1 | 3916935 | 28-scf00311 | 28 |
| AX-158149551 | 14 | 40.064 | KV453327.1 | 3919603 | 28-scf00311 | 28 |
| AX-157714975 | 14 | 40.064 | KV453327.1 | 3921726 | 28-scf00311 | 28 |
| AX-158149552 | 14 | 40.064 | KV453327.1 | 3924610 | 28-scf00311 | 28 |
| AX-158149553 | 14 | 40.064 | KV453327.1 | 3925130 | 28-scf00311 | 28 |
| AX-158149555 | 14 | 40.064 | KV453327.1 | 3926027 | 28-scf00311 | 28 |
| AX-158149556 | 14 | 40.064 | KV453327.1 | 3926616 | 28-scf00311 | 28 |
| AX-157832312 | 14 | 40.064 | KV453327.1 | 3927385 | 28-scf00311 | 28 |
| AX-157720864 | 14 | 40.064 | KV453327.1 | 3929151 | 28-scf00311 | 28 |
| AX-158149560 | 14 | 40.064 | KV453327.1 | 3931414 | 28-scf00311 | 28 |
| AX-158149561 | 14 | 40.064 | KV453327.1 | 3932232 | 28-scf00311 | 28 |
| AX-158149563 | 14 | 40.064 | KV453327.1 | 3935575 | 28-scf00311 | 28 |
| AX-158149569 | 14 | 40.064 | KV453327.1 | 3940904 | 28-scf00311 | 28 |
| AX-158149571 | 14 | 40.064 | KV453327.1 | 3945261 | 28-scf00311 | 28 |
| AX-157724497 | 14 | 40.064 | KV453327.1 | 3946092 | 28-scf00311 | 28 |
| AX-158149572 | 14 | 40.064 | KV453327.1 | 3946696 | 28-scf00311 | 28 |
| AX-157726926 | 14 | 40.064 | KV453327.1 | 3947284 | 28-scf00311 | 28 |
| AX-158149573 | 14 | 40.064 | KV453327.1 | 3948053 | 28-scf00311 | 28 |
| AX-158149576 | 14 | 40.064 | KV453327.1 | 3954017 | 28-scf00311 | 28 |
| AX-158149578 | 14 | 40.064 | KV453327.1 | 3955121 | 28-scf00311 | 28 |
| AX-158149584 | 14 | 40.064 | KV453327.1 | 3963134 | 28-scf00311 | 28 |
| AX-158149585 | 14 | 40.064 | KV453327.1 | 3963613 | 28-scf00311 | 28 |
| AX-158149586 | 14 | 40.064 | KV453327.1 | 3964894 | 28-scf00311 | 28 |
| AX-158149587 | 14 | 40.064 | KV453327.1 | 3965276 | 28-scf00311 | 28 |
| AX-157773750 | 14 | 40.064 | KV453327.1 | 3967423 | 28-scf00311 | 28 |
| AX-158149588 | 14 | 40.064 | KV453327.1 | 3968351 | 28-scf00311 | 28 |
| AX-158149590 | 14 | 40.064 | KV453327.1 | 3969795 | 28-scf00311 | 28 |
| AX-158149591 | 14 | 40.064 | KV453327.1 | 3971308 | 28-scf00311 | 28 |
| AX-158149600 | 14 | 40.064 | KV453327.1 | 3988880 | 28-scf00311 | 28 |
| AX-157832314 | 14 | 40.064 | KV453327.1 | 3994868 | 28-scf00311 | 28 |



|              |    |        |            |         |             |    |
|--------------|----|--------|------------|---------|-------------|----|
| AX-158149616 | 14 | 40.064 | KV453330.1 | 2408    | 28-scf00313 | 28 |
| AX-158149617 | 14 | 40.064 | KV453330.1 | 3724    | 28-scf00313 | 28 |
| AX-158149619 | 14 | 40.064 | KV453330.1 | 7275    | 28-scf00313 | 28 |
| AX-158149620 | 14 | 40.064 | KV453330.1 | 9334    | 28-scf00313 | 28 |
| AX-158149623 | 14 | 40.064 | KV453330.1 | 12311   | 28-scf00313 | 28 |
| AX-158149624 | 14 | 40.064 | KV453330.1 | 16112   | 28-scf00313 | 28 |
| AX-157722374 | 14 | 40.064 | KV453330.1 | 17204   | 28-scf00313 | 28 |
| AX-158149635 | 14 | 40.064 | KV453330.1 | 26899   | 28-scf00313 | 28 |
| AX-158149686 | 14 | 40.064 | KV453330.1 | 85292   | 28-scf00313 | 28 |
| AX-158149698 | 14 | 40.064 | KV453330.1 | 93806   | 28-scf00313 | 28 |
| AX-157773516 | 14 | 40.064 | KV453330.1 | 97699   | 28-scf00313 | 28 |
| AX-158149712 | 14 | 40.064 | KV453330.1 | 108576  | 28-scf00313 | 28 |
| AX-158149714 | 14 | 40.064 | KV453330.1 | 110192  | 28-scf00313 | 28 |
| AX-157832322 | 14 | 40.064 | KV453330.1 | 124109  | 28-scf00313 | 28 |
| AX-158149745 | 14 | 40.064 | KV453330.1 | 144403  | 28-scf00313 | 28 |
| AX-158149813 | 14 | 40.064 | KV453330.1 | 223292  | 28-scf00313 | 28 |
| AX-157680000 | 14 | 40.064 | KV453328.1 | 6128    | 28-scf00838 | 28 |
| AX-157688482 | 14 | 40.064 | KV453329.1 | 171     | 28-scf01874 | 28 |
| AX-158149626 | 14 | 40.15  | KV453330.1 | 19530   | 28-scf00313 | 28 |
| AX-158149318 | 14 | 40.174 | KV453327.1 | 3636916 | 28-scf00311 | 28 |
| AX-158149329 | 14 | 40.174 | KV453327.1 | 3654683 | 28-scf00311 | 28 |
| AX-158149629 | 14 | 40.174 | KV453330.1 | 23785   | 28-scf00313 | 28 |
| AX-158149633 | 14 | 40.174 | KV453330.1 | 25962   | 28-scf00313 | 28 |
| AX-158149634 | 14 | 40.174 | KV453330.1 | 26399   | 28-scf00313 | 28 |
| AX-158150579 | 14 | 40.174 | KV453330.1 | 1307759 | 28-scf00313 | 28 |
| AX-158149632 | 14 | 40.283 | KV453330.1 | 25515   | 28-scf00313 | 28 |
| AX-158149642 | 14 | 40.283 | KV453330.1 | 35796   | 28-scf00313 | 28 |
| AX-158149643 | 14 | 40.283 | KV453330.1 | 36394   | 28-scf00313 | 28 |
| AX-158149644 | 14 | 40.283 | KV453330.1 | 36890   | 28-scf00313 | 28 |
| AX-157748386 | 14 | 40.283 | KV453330.1 | 39680   | 28-scf00313 | 28 |
| AX-158149649 | 14 | 40.283 | KV453330.1 | 41343   | 28-scf00313 | 28 |
| AX-158149650 | 14 | 40.283 | KV453330.1 | 42279   | 28-scf00313 | 28 |
| AX-158149651 | 14 | 40.283 | KV453330.1 | 43404   | 28-scf00313 | 28 |
| AX-158149652 | 14 | 40.283 | KV453330.1 | 44574   | 28-scf00313 | 28 |
| AX-158149653 | 14 | 40.283 | KV453330.1 | 45817   | 28-scf00313 | 28 |
| AX-158149654 | 14 | 40.283 | KV453330.1 | 46141   | 28-scf00313 | 28 |
| AX-158149656 | 14 | 40.283 | KV453330.1 | 47011   | 28-scf00313 | 28 |
| AX-157832321 | 14 | 40.283 | KV453330.1 | 59977   | 28-scf00313 | 28 |
| AX-158149665 | 14 | 40.283 | KV453330.1 | 61217   | 28-scf00313 | 28 |
| AX-158149666 | 14 | 40.283 | KV453330.1 | 62012   | 28-scf00313 | 28 |
| AX-158149667 | 14 | 40.283 | KV453330.1 | 63017   | 28-scf00313 | 28 |
| AX-158149668 | 14 | 40.283 | KV453330.1 | 64820   | 28-scf00313 | 28 |
| AX-158149670 | 14 | 40.283 | KV453330.1 | 68763   | 28-scf00313 | 28 |
| AX-158149672 | 14 | 40.283 | KV453330.1 | 70809   | 28-scf00313 | 28 |
| AX-158385548 | 14 | 40.283 | KV453330.1 | 105716  | 28-scf00313 | 28 |
| AX-158149720 | 14 | 40.283 | KV453330.1 | 114457  | 28-scf00313 | 28 |
| AX-158149676 | 14 | 40.392 | KV453330.1 | 75415   | 28-scf00313 | 28 |
| AX-158149677 | 14 | 40.392 | KV453330.1 | 76325   | 28-scf00313 | 28 |
| AX-158149680 | 14 | 40.392 | KV453330.1 | 79151   | 28-scf00313 | 28 |
| AX-158149685 | 14 | 40.392 | KV453330.1 | 84234   | 28-scf00313 | 28 |
| AX-157886459 | 14 | 40.392 | KV453330.1 | 85911   | 28-scf00313 | 28 |

|              |    |        |             |         |                |    |
|--------------|----|--------|-------------|---------|----------------|----|
| AX-158149690 | 14 | 40.392 | KV453330.1  | 87283   | 28-scf00313    | 28 |
| AX-158149692 | 14 | 40.392 | KV453330.1  | 89194   | 28-scf00313    | 28 |
| AX-158149697 | 14 | 40.392 | KV453330.1  | 92137   | 28-scf00313    | 28 |
| AX-158149699 | 14 | 40.392 | KV453330.1  | 94363   | 28-scf00313    | 28 |
| AX-158149700 | 14 | 40.392 | KV453330.1  | 96522   | 28-scf00313    | 28 |
| AX-158149701 | 14 | 40.392 | KV453330.1  | 99021   | 28-scf00313    | 28 |
| AX-158149702 | 14 | 40.392 | KV453330.1  | 101179  | 28-scf00313    | 28 |
| AX-158149703 | 14 | 40.392 | KV453330.1  | 101872  | 28-scf00313    | 28 |
| AX-158149704 | 14 | 40.392 | KV453330.1  | 102546  | 28-scf00313    | 28 |
| AX-158149707 | 14 | 40.392 | KV453330.1  | 106991  | 28-scf00313    | 28 |
| AX-158149722 | 14 | 40.392 | KV453330.1  | 115668  | 28-scf00313    | 28 |
| AX-158149724 | 14 | 40.392 | KV453330.1  | 118476  | 28-scf00313    | 28 |
| AX-158149725 | 14 | 40.392 | KV453330.1  | 119143  | 28-scf00313    | 28 |
| AX-158149726 | 14 | 40.392 | KV453330.1  | 120053  | 28-scf00313    | 28 |
| AX-158149731 | 14 | 40.392 | KV453330.1  | 125193  | 28-scf00313    | 28 |
| AX-157702590 | 14 | 40.392 | DX093090.1  | 569     | -ORI212 lctalt | UN |
| AX-157694821 | 14 | 40.392 | FI869038.1  | 265     | ORI212 lctalu  | UN |
| AX-157708101 | 14 | 40.392 | 3ML01025681 | 2016    | scf01326_1     | UN |
| AX-157688447 | 14 | 40.392 | 3ML01026183 | 483     | scf01780_1     | UN |
| AX-158149732 | 14 | 40.443 | KV453330.1  | 125931  | 28-scf00313    | 28 |
| AX-158149684 | 14 | 40.501 | KV453330.1  | 82565   | 28-scf00313    | 28 |
| AX-158149693 | 14 | 40.501 | KV453330.1  | 89581   | 28-scf00313    | 28 |
| AX-158149696 | 14 | 40.501 | KV453330.1  | 91486   | 28-scf00313    | 28 |
| AX-158149706 | 14 | 40.501 | KV453330.1  | 105267  | 28-scf00313    | 28 |
| AX-158149708 | 14 | 40.501 | KV453330.1  | 107203  | 28-scf00313    | 28 |
| AX-158149711 | 14 | 40.501 | KV453330.1  | 107964  | 28-scf00313    | 28 |
| AX-158149716 | 14 | 40.501 | KV453330.1  | 111507  | 28-scf00313    | 28 |
| AX-158412485 | 14 | 40.501 | KV453330.1  | 116433  | 28-scf00313    | 28 |
| AX-158149734 | 14 | 40.501 | KV453330.1  | 129207  | 28-scf00313    | 28 |
| AX-158149735 | 14 | 40.501 | KV453330.1  | 129653  | 28-scf00313    | 28 |
| AX-158149736 | 14 | 40.501 | KV453330.1  | 130408  | 28-scf00313    | 28 |
| AX-157720394 | 14 | 40.501 | KV453330.1  | 131205  | 28-scf00313    | 28 |
| AX-158149738 | 14 | 40.501 | KV453330.1  | 133234  | 28-scf00313    | 28 |
| AX-158149739 | 14 | 40.501 | KV453330.1  | 134181  | 28-scf00313    | 28 |
| AX-158149740 | 14 | 40.501 | KV453330.1  | 135913  | 28-scf00313    | 28 |
| AX-158149742 | 14 | 40.501 | KV453330.1  | 139878  | 28-scf00313    | 28 |
| AX-158149743 | 14 | 40.501 | KV453330.1  | 140483  | 28-scf00313    | 28 |
| AX-157754934 | 14 | 40.501 | KV453330.1  | 142484  | 28-scf00313    | 28 |
| AX-158149744 | 14 | 40.501 | KV453330.1  | 143636  | 28-scf00313    | 28 |
| AX-157743617 | 14 | 40.501 | KV453330.1  | 145174  | 28-scf00313    | 28 |
| AX-158149748 | 14 | 40.501 | KV453330.1  | 149850  | 28-scf00313    | 28 |
| AX-158149757 | 14 | 40.501 | KV453330.1  | 159340  | 28-scf00313    | 28 |
| AX-157832323 | 14 | 40.501 | KV453330.1  | 159549  | 28-scf00313    | 28 |
| AX-158149759 | 14 | 40.501 | KV453330.1  | 160970  | 28-scf00313    | 28 |
| AX-157832328 | 14 | 40.501 | KV453330.1  | 196327  | 28-scf00313    | 28 |
| AX-158149998 | 14 | 40.501 | KV453330.1  | 467449  | 28-scf00313    | 28 |
| AX-158150610 | 14 | 40.501 | KV453330.1  | 1343359 | 28-scf00313    | 28 |
| AX-158149762 | 14 | 40.61  | KV453330.1  | 165751  | 28-scf00313    | 28 |
| AX-158149766 | 14 | 40.61  | KV453330.1  | 169151  | 28-scf00313    | 28 |
| AX-158149770 | 14 | 40.61  | KV453330.1  | 170511  | 28-scf00313    | 28 |
| AX-158149776 | 14 | 40.61  | KV453330.1  | 173301  | 28-scf00313    | 28 |

|              |    |        |             |         |             |    |
|--------------|----|--------|-------------|---------|-------------|----|
| AX-158149777 | 14 | 40.61  | KV453330.1  | 173743  | 28-scf00313 | 28 |
| AX-158149778 | 14 | 40.61  | KV453330.1  | 174133  | 28-scf00313 | 28 |
| AX-158149779 | 14 | 40.61  | KV453330.1  | 174521  | 28-scf00313 | 28 |
| AX-158149781 | 14 | 40.61  | KV453330.1  | 176767  | 28-scf00313 | 28 |
| AX-158149784 | 14 | 40.61  | KV453330.1  | 179783  | 28-scf00313 | 28 |
| AX-157832324 | 14 | 40.61  | KV453330.1  | 180509  | 28-scf00313 | 28 |
| AX-158149786 | 14 | 40.61  | KV453330.1  | 187261  | 28-scf00313 | 28 |
| AX-158149790 | 14 | 40.61  | KV453330.1  | 193635  | 28-scf00313 | 28 |
| AX-157832326 | 14 | 40.61  | KV453330.1  | 194273  | 28-scf00313 | 28 |
| AX-157775813 | 14 | 40.61  | KV453330.1  | 201496  | 28-scf00313 | 28 |
| AX-158149796 | 14 | 40.61  | KV453330.1  | 201565  | 28-scf00313 | 28 |
| AX-157832335 | 14 | 40.61  | KV453330.1  | 214544  | 28-scf00313 | 28 |
| AX-158149824 | 14 | 40.61  | KV453330.1  | 235184  | 28-scf00313 | 28 |
| AX-158149849 | 14 | 40.61  | KV453330.1  | 269859  | 28-scf00313 | 28 |
| AX-158149922 | 14 | 40.61  | KV453330.1  | 370211  | 28-scf00313 | 28 |
| AX-158149962 | 14 | 40.61  | KV453330.1  | 419591  | 28-scf00313 | 28 |
| AX-158150361 | 14 | 40.61  | KV453330.1  | 1016459 | 28-scf00313 | 28 |
| AX-157712067 | 14 | 40.61  | 3ML01033219 | 189     | scf08859_1  | UN |
| AX-157832327 | 14 | 40.642 | KV453330.1  | 194756  | 28-scf00313 | 28 |
| AX-157771625 | 14 | 40.72  | KV453330.1  | 199134  | 28-scf00313 | 28 |
| AX-157832330 | 14 | 40.72  | KV453330.1  | 200054  | 28-scf00313 | 28 |
| AX-158149798 | 14 | 40.72  | KV453330.1  | 203437  | 28-scf00313 | 28 |
| AX-158149961 | 14 | 40.72  | KV453330.1  | 418600  | 28-scf00313 | 28 |
| AX-158150345 | 14 | 40.72  | KV453330.1  | 999545  | 28-scf00313 | 28 |
| AX-158149608 | 14 | 40.763 | KV453327.1  | 4017874 | 28-scf00311 | 28 |
| AX-157878324 | 14 | 40.763 | KV453327.1  | 4062980 | 28-scf00311 | 28 |
| AX-158149674 | 14 | 40.763 | KV453330.1  | 73680   | 28-scf00313 | 28 |
| AX-158149806 | 14 | 40.763 | KV453330.1  | 215064  | 28-scf00313 | 28 |
| AX-158149809 | 14 | 40.763 | KV453330.1  | 220669  | 28-scf00313 | 28 |
| AX-157832352 | 14 | 40.763 | KV453330.1  | 363141  | 28-scf00313 | 28 |
| AX-158149931 | 14 | 40.763 | KV453330.1  | 376121  | 28-scf00313 | 28 |
| AX-158149945 | 14 | 40.763 | KV453330.1  | 391493  | 28-scf00313 | 28 |
| AX-157738385 | 14 | 40.763 | KV453330.1  | 714359  | 28-scf00313 | 28 |
| AX-158150581 | 14 | 40.763 | KV453330.1  | 1308581 | 28-scf00313 | 28 |
| AX-157886475 | 14 | 40.763 | KV453330.1  | 1358603 | 28-scf00313 | 28 |
| AX-158150696 | 14 | 40.763 | KV453330.1  | 1472239 | 28-scf00313 | 28 |
| AX-158150812 | 14 | 40.763 | KV453330.1  | 1616695 | 28-scf00313 | 28 |
| AX-158149474 | 14 | 40.781 | KV453327.1  | 3830717 | 28-scf00311 | 28 |
| AX-158149475 | 14 | 40.781 | KV453327.1  | 3831365 | 28-scf00311 | 28 |
| AX-158149543 | 14 | 40.781 | KV453327.1  | 3909693 | 28-scf00311 | 28 |
| AX-158149549 | 14 | 40.781 | KV453327.1  | 3917829 | 28-scf00311 | 28 |
| AX-158149554 | 14 | 40.781 | KV453327.1  | 3925624 | 28-scf00311 | 28 |
| AX-158149557 | 14 | 40.781 | KV453327.1  | 3927036 | 28-scf00311 | 28 |
| AX-158149754 | 14 | 40.781 | KV453330.1  | 156702  | 28-scf00313 | 28 |
| AX-158149758 | 14 | 40.781 | KV453330.1  | 160764  | 28-scf00313 | 28 |
| AX-157832331 | 14 | 40.781 | KV453330.1  | 207787  | 28-scf00313 | 28 |
| AX-158149810 | 14 | 40.781 | KV453330.1  | 221128  | 28-scf00313 | 28 |
| AX-158149814 | 14 | 40.781 | KV453330.1  | 224384  | 28-scf00313 | 28 |
| AX-158149886 | 14 | 40.781 | KV453330.1  | 331264  | 28-scf00313 | 28 |
| AX-158149892 | 14 | 40.781 | KV453330.1  | 335011  | 28-scf00313 | 28 |
| AX-158149812 | 14 | 40.81  | KV453330.1  | 222589  | 28-scf00313 | 28 |

|              |    |        |            |        |             |    |
|--------------|----|--------|------------|--------|-------------|----|
| AX-158149780 | 14 | 40.829 | KV453330.1 | 175511 | 28-scf00313 | 28 |
| AX-158149797 | 14 | 40.829 | KV453330.1 | 201998 | 28-scf00313 | 28 |
| AX-158149801 | 14 | 40.829 | KV453330.1 | 208023 | 28-scf00313 | 28 |
| AX-158149805 | 14 | 40.829 | KV453330.1 | 213786 | 28-scf00313 | 28 |
| AX-157832336 | 14 | 40.829 | KV453330.1 | 222916 | 28-scf00313 | 28 |
| AX-157717638 | 14 | 40.829 | KV453330.1 | 227108 | 28-scf00313 | 28 |
| AX-158149819 | 14 | 40.829 | KV453330.1 | 228720 | 28-scf00313 | 28 |
| AX-157832340 | 14 | 40.829 | KV453330.1 | 231102 | 28-scf00313 | 28 |
| AX-157832341 | 14 | 40.829 | KV453330.1 | 231360 | 28-scf00313 | 28 |
| AX-158149820 | 14 | 40.829 | KV453330.1 | 232042 | 28-scf00313 | 28 |
| AX-158149823 | 14 | 40.829 | KV453330.1 | 234217 | 28-scf00313 | 28 |
| AX-157832343 | 14 | 40.829 | KV453330.1 | 237399 | 28-scf00313 | 28 |
| AX-158149826 | 14 | 40.829 | KV453330.1 | 242441 | 28-scf00313 | 28 |
| AX-158149830 | 14 | 40.829 | KV453330.1 | 247170 | 28-scf00313 | 28 |
| AX-158149832 | 14 | 40.829 | KV453330.1 | 248565 | 28-scf00313 | 28 |
| AX-158149833 | 14 | 40.829 | KV453330.1 | 251127 | 28-scf00313 | 28 |
| AX-158149870 | 14 | 40.829 | KV453330.1 | 308741 | 28-scf00313 | 28 |
| AX-158149912 | 14 | 40.829 | KV453330.1 | 358007 | 28-scf00313 | 28 |
| AX-158149989 | 14 | 40.829 | KV453330.1 | 453253 | 28-scf00313 | 28 |
| AX-158149844 | 14 | 40.867 | KV453330.1 | 263241 | 28-scf00313 | 28 |
| AX-158149746 | 14 | 40.938 | KV453330.1 | 146104 | 28-scf00313 | 28 |
| AX-158149772 | 14 | 40.938 | KV453330.1 | 171283 | 28-scf00313 | 28 |
| AX-158149792 | 14 | 40.938 | KV453330.1 | 197573 | 28-scf00313 | 28 |
| AX-157832329 | 14 | 40.938 | KV453330.1 | 199684 | 28-scf00313 | 28 |
| AX-158149795 | 14 | 40.938 | KV453330.1 | 201219 | 28-scf00313 | 28 |
| AX-158149839 | 14 | 40.938 | KV453330.1 | 256768 | 28-scf00313 | 28 |
| AX-158149845 | 14 | 40.938 | KV453330.1 | 265398 | 28-scf00313 | 28 |
| AX-158149846 | 14 | 40.938 | KV453330.1 | 265588 | 28-scf00313 | 28 |
| AX-158149861 | 14 | 40.938 | KV453330.1 | 293114 | 28-scf00313 | 28 |
| AX-157738318 | 14 | 40.938 | KV453330.1 | 299187 | 28-scf00313 | 28 |
| AX-158149863 | 14 | 40.938 | KV453330.1 | 299363 | 28-scf00313 | 28 |
| AX-158149865 | 14 | 40.938 | KV453330.1 | 300829 | 28-scf00313 | 28 |
| AX-158149868 | 14 | 40.938 | KV453330.1 | 303414 | 28-scf00313 | 28 |
| AX-157832347 | 14 | 40.938 | KV453330.1 | 303815 | 28-scf00313 | 28 |
| AX-158149869 | 14 | 40.938 | KV453330.1 | 304170 | 28-scf00313 | 28 |
| AX-157794046 | 14 | 40.938 | KV453330.1 | 305831 | 28-scf00313 | 28 |
| AX-158149871 | 14 | 40.938 | KV453330.1 | 309396 | 28-scf00313 | 28 |
| AX-158149873 | 14 | 40.938 | KV453330.1 | 310301 | 28-scf00313 | 28 |
| AX-157871722 | 14 | 40.938 | KV453330.1 | 312214 | 28-scf00313 | 28 |
| AX-158149876 | 14 | 40.938 | KV453330.1 | 315824 | 28-scf00313 | 28 |
| AX-158149877 | 14 | 40.938 | KV453330.1 | 316692 | 28-scf00313 | 28 |
| AX-158149880 | 14 | 40.938 | KV453330.1 | 318229 | 28-scf00313 | 28 |
| AX-158149882 | 14 | 40.938 | KV453330.1 | 319538 | 28-scf00313 | 28 |
| AX-157832348 | 14 | 40.938 | KV453330.1 | 319672 | 28-scf00313 | 28 |
| AX-157715088 | 14 | 40.938 | KV453330.1 | 323202 | 28-scf00313 | 28 |
| AX-158149883 | 14 | 40.938 | KV453330.1 | 324771 | 28-scf00313 | 28 |
| AX-157832349 | 14 | 40.938 | KV453330.1 | 325097 | 28-scf00313 | 28 |
| AX-158149884 | 14 | 40.938 | KV453330.1 | 329457 | 28-scf00313 | 28 |
| AX-158149887 | 14 | 40.938 | KV453330.1 | 332062 | 28-scf00313 | 28 |
| AX-158149888 | 14 | 40.938 | KV453330.1 | 333282 | 28-scf00313 | 28 |
| AX-158149890 | 14 | 40.938 | KV453330.1 | 334044 | 28-scf00313 | 28 |

|              |    |        |            |        |             |    |
|--------------|----|--------|------------|--------|-------------|----|
| AX-158149894 | 14 | 40.938 | KV453330.1 | 337209 | 28-scf00313 | 28 |
| AX-157832350 | 14 | 40.938 | KV453330.1 | 337355 | 28-scf00313 | 28 |
| AX-158149896 | 14 | 40.938 | KV453330.1 | 340712 | 28-scf00313 | 28 |
| AX-158149898 | 14 | 40.938 | KV453330.1 | 344392 | 28-scf00313 | 28 |
| AX-158380384 | 14 | 40.938 | KV453330.1 | 348099 | 28-scf00313 | 28 |
| AX-158149905 | 14 | 40.938 | KV453330.1 | 348925 | 28-scf00313 | 28 |
| AX-158149907 | 14 | 40.938 | KV453330.1 | 349680 | 28-scf00313 | 28 |
| AX-158149909 | 14 | 40.938 | KV453330.1 | 351449 | 28-scf00313 | 28 |
| AX-157718107 | 14 | 40.938 | KV453330.1 | 357212 | 28-scf00313 | 28 |
| AX-158149918 | 14 | 40.938 | KV453330.1 | 366572 | 28-scf00313 | 28 |
| AX-158149919 | 14 | 40.938 | KV453330.1 | 368132 | 28-scf00313 | 28 |
| AX-158149920 | 14 | 40.938 | KV453330.1 | 369054 | 28-scf00313 | 28 |
| AX-158149921 | 14 | 40.938 | KV453330.1 | 369399 | 28-scf00313 | 28 |
| AX-158149923 | 14 | 40.938 | KV453330.1 | 371113 | 28-scf00313 | 28 |
| AX-158149924 | 14 | 40.938 | KV453330.1 | 371537 | 28-scf00313 | 28 |
| AX-158149925 | 14 | 40.938 | KV453330.1 | 371635 | 28-scf00313 | 28 |
| AX-158149927 | 14 | 40.938 | KV453330.1 | 372841 | 28-scf00313 | 28 |
| AX-158149928 | 14 | 40.938 | KV453330.1 | 374106 | 28-scf00313 | 28 |
| AX-158385550 | 14 | 40.938 | KV453330.1 | 374714 | 28-scf00313 | 28 |
| AX-158149929 | 14 | 40.938 | KV453330.1 | 374761 | 28-scf00313 | 28 |
| AX-158149930 | 14 | 40.938 | KV453330.1 | 375528 | 28-scf00313 | 28 |
| AX-157886462 | 14 | 40.938 | KV453330.1 | 376209 | 28-scf00313 | 28 |
| AX-158149932 | 14 | 40.938 | KV453330.1 | 376663 | 28-scf00313 | 28 |
| AX-158149933 | 14 | 40.938 | KV453330.1 | 377339 | 28-scf00313 | 28 |
| AX-158149936 | 14 | 40.938 | KV453330.1 | 379825 | 28-scf00313 | 28 |
| AX-158149937 | 14 | 40.938 | KV453330.1 | 381527 | 28-scf00313 | 28 |
| AX-158393164 | 14 | 40.938 | KV453330.1 | 381594 | 28-scf00313 | 28 |
| AX-158149939 | 14 | 40.938 | KV453330.1 | 382852 | 28-scf00313 | 28 |
| AX-158149940 | 14 | 40.938 | KV453330.1 | 383930 | 28-scf00313 | 28 |
| AX-158149943 | 14 | 40.938 | KV453330.1 | 387638 | 28-scf00313 | 28 |
| AX-158149944 | 14 | 40.938 | KV453330.1 | 388958 | 28-scf00313 | 28 |
| AX-158149949 | 14 | 40.938 | KV453330.1 | 396576 | 28-scf00313 | 28 |
| AX-157775643 | 14 | 40.938 | KV453330.1 | 398088 | 28-scf00313 | 28 |
| AX-158149950 | 14 | 40.938 | KV453330.1 | 398286 | 28-scf00313 | 28 |
| AX-158149951 | 14 | 40.938 | KV453330.1 | 401628 | 28-scf00313 | 28 |
| AX-157832355 | 14 | 40.938 | KV453330.1 | 405825 | 28-scf00313 | 28 |
| AX-158149954 | 14 | 40.938 | KV453330.1 | 408244 | 28-scf00313 | 28 |
| AX-157832358 | 14 | 40.938 | KV453330.1 | 414110 | 28-scf00313 | 28 |
| AX-158149971 | 14 | 40.938 | KV453330.1 | 428958 | 28-scf00313 | 28 |
| AX-158149985 | 14 | 40.938 | KV453330.1 | 450056 | 28-scf00313 | 28 |
| AX-158149995 | 14 | 40.938 | KV453330.1 | 462827 | 28-scf00313 | 28 |
| AX-158149996 | 14 | 40.938 | KV453330.1 | 463848 | 28-scf00313 | 28 |
| AX-158150011 | 14 | 40.938 | KV453330.1 | 482375 | 28-scf00313 | 28 |
| AX-158150030 | 14 | 40.938 | KV453330.1 | 509989 | 28-scf00313 | 28 |
| AX-158150034 | 14 | 40.938 | KV453330.1 | 516301 | 28-scf00313 | 28 |
| AX-157832378 | 14 | 40.938 | KV453330.1 | 539617 | 28-scf00313 | 28 |
| AX-158150054 | 14 | 40.938 | KV453330.1 | 541801 | 28-scf00313 | 28 |
| AX-158150071 | 14 | 40.938 | KV453330.1 | 582544 | 28-scf00313 | 28 |
| AX-158150072 | 14 | 40.938 | KV453330.1 | 583590 | 28-scf00313 | 28 |
| AX-158150090 | 14 | 40.938 | KV453330.1 | 655548 | 28-scf00313 | 28 |
| AX-158150303 | 14 | 40.938 | KV453330.1 | 950888 | 28-scf00313 | 28 |

|              |    |        |            |         |             |    |
|--------------|----|--------|------------|---------|-------------|----|
| AX-158150423 | 14 | 40.938 | KV453330.1 | 1102767 | 28-scf00313 | 28 |
| AX-158150551 | 14 | 40.938 | KV453330.1 | 1266248 | 28-scf00313 | 28 |
| AX-158149775 | 14 | 41.047 | KV453330.1 | 172887  | 28-scf00313 | 28 |
| AX-157832334 | 14 | 41.047 | KV453330.1 | 213392  | 28-scf00313 | 28 |
| AX-158149825 | 14 | 41.047 | KV453330.1 | 240082  | 28-scf00313 | 28 |
| AX-158149840 | 14 | 41.047 | KV453330.1 | 257299  | 28-scf00313 | 28 |
| AX-158149848 | 14 | 41.047 | KV453330.1 | 267600  | 28-scf00313 | 28 |
| AX-158149867 | 14 | 41.047 | KV453330.1 | 302275  | 28-scf00313 | 28 |
| AX-158149885 | 14 | 41.047 | KV453330.1 | 330246  | 28-scf00313 | 28 |
| AX-158149891 | 14 | 41.047 | KV453330.1 | 334550  | 28-scf00313 | 28 |
| AX-157753001 | 14 | 41.047 | KV453330.1 | 335575  | 28-scf00313 | 28 |
| AX-158149911 | 14 | 41.047 | KV453330.1 | 356953  | 28-scf00313 | 28 |
| AX-158149914 | 14 | 41.047 | KV453330.1 | 361719  | 28-scf00313 | 28 |
| AX-158149942 | 14 | 41.047 | KV453330.1 | 384950  | 28-scf00313 | 28 |
| AX-158149948 | 14 | 41.047 | KV453330.1 | 395530  | 28-scf00313 | 28 |
| AX-158149957 | 14 | 41.047 | KV453330.1 | 411302  | 28-scf00313 | 28 |
| AX-157832356 | 14 | 41.047 | KV453330.1 | 413692  | 28-scf00313 | 28 |
| AX-158149959 | 14 | 41.047 | KV453330.1 | 413889  | 28-scf00313 | 28 |
| AX-157832357 | 14 | 41.047 | KV453330.1 | 414071  | 28-scf00313 | 28 |
| AX-158149960 | 14 | 41.047 | KV453330.1 | 417940  | 28-scf00313 | 28 |
| AX-157719266 | 14 | 41.047 | KV453330.1 | 421120  | 28-scf00313 | 28 |
| AX-158149963 | 14 | 41.047 | KV453330.1 | 423030  | 28-scf00313 | 28 |
| AX-158149967 | 14 | 41.047 | KV453330.1 | 424830  | 28-scf00313 | 28 |
| AX-158149970 | 14 | 41.047 | KV453330.1 | 427474  | 28-scf00313 | 28 |
| AX-157832359 | 14 | 41.047 | KV453330.1 | 429340  | 28-scf00313 | 28 |
| AX-157832360 | 14 | 41.047 | KV453330.1 | 430830  | 28-scf00313 | 28 |
| AX-158149974 | 14 | 41.047 | KV453330.1 | 431966  | 28-scf00313 | 28 |
| AX-158149975 | 14 | 41.047 | KV453330.1 | 432539  | 28-scf00313 | 28 |
| AX-157832361 | 14 | 41.047 | KV453330.1 | 436969  | 28-scf00313 | 28 |
| AX-157832362 | 14 | 41.047 | KV453330.1 | 438790  | 28-scf00313 | 28 |
| AX-158149977 | 14 | 41.047 | KV453330.1 | 439092  | 28-scf00313 | 28 |
| AX-158149978 | 14 | 41.047 | KV453330.1 | 441790  | 28-scf00313 | 28 |
| AX-158412487 | 14 | 41.047 | KV453330.1 | 444456  | 28-scf00313 | 28 |
| AX-157832365 | 14 | 41.047 | KV453330.1 | 448067  | 28-scf00313 | 28 |
| AX-157832369 | 14 | 41.047 | KV453330.1 | 449035  | 28-scf00313 | 28 |
| AX-158149984 | 14 | 41.047 | KV453330.1 | 449633  | 28-scf00313 | 28 |
| AX-158149987 | 14 | 41.047 | KV453330.1 | 452331  | 28-scf00313 | 28 |
| AX-158149988 | 14 | 41.047 | KV453330.1 | 452803  | 28-scf00313 | 28 |
| AX-158149992 | 14 | 41.047 | KV453330.1 | 457424  | 28-scf00313 | 28 |
| AX-158149994 | 14 | 41.047 | KV453330.1 | 462571  | 28-scf00313 | 28 |
| AX-157724039 | 14 | 41.047 | KV453330.1 | 465778  | 28-scf00313 | 28 |
| AX-158149997 | 14 | 41.047 | KV453330.1 | 467055  | 28-scf00313 | 28 |
| AX-158150000 | 14 | 41.047 | KV453330.1 | 468013  | 28-scf00313 | 28 |
| AX-158150003 | 14 | 41.047 | KV453330.1 | 474767  | 28-scf00313 | 28 |
| AX-157832371 | 14 | 41.047 | KV453330.1 | 475142  | 28-scf00313 | 28 |
| AX-158150004 | 14 | 41.047 | KV453330.1 | 475464  | 28-scf00313 | 28 |
| AX-158150005 | 14 | 41.047 | KV453330.1 | 475859  | 28-scf00313 | 28 |
| AX-158150007 | 14 | 41.047 | KV453330.1 | 477702  | 28-scf00313 | 28 |
| AX-158150008 | 14 | 41.047 | KV453330.1 | 478628  | 28-scf00313 | 28 |
| AX-158150009 | 14 | 41.047 | KV453330.1 | 479791  | 28-scf00313 | 28 |
| AX-158150010 | 14 | 41.047 | KV453330.1 | 480341  | 28-scf00313 | 28 |

|              |    |        |            |        |             |    |
|--------------|----|--------|------------|--------|-------------|----|
| AX-158150012 | 14 | 41.047 | KV453330.1 | 483977 | 28-scf00313 | 28 |
| AX-158150013 | 14 | 41.047 | KV453330.1 | 484577 | 28-scf00313 | 28 |
| AX-158150014 | 14 | 41.047 | KV453330.1 | 485714 | 28-scf00313 | 28 |
| AX-158150015 | 14 | 41.047 | KV453330.1 | 486745 | 28-scf00313 | 28 |
| AX-158150016 | 14 | 41.047 | KV453330.1 | 487140 | 28-scf00313 | 28 |
| AX-157747649 | 14 | 41.047 | KV453330.1 | 490877 | 28-scf00313 | 28 |
| AX-158150018 | 14 | 41.047 | KV453330.1 | 493083 | 28-scf00313 | 28 |
| AX-158150019 | 14 | 41.047 | KV453330.1 | 493477 | 28-scf00313 | 28 |
| AX-158150020 | 14 | 41.047 | KV453330.1 | 495015 | 28-scf00313 | 28 |
| AX-158150022 | 14 | 41.047 | KV453330.1 | 498723 | 28-scf00313 | 28 |
| AX-158150023 | 14 | 41.047 | KV453330.1 | 498867 | 28-scf00313 | 28 |
| AX-158150025 | 14 | 41.047 | KV453330.1 | 500488 | 28-scf00313 | 28 |
| AX-158150026 | 14 | 41.047 | KV453330.1 | 501920 | 28-scf00313 | 28 |
| AX-158412494 | 14 | 41.047 | KV453330.1 | 503487 | 28-scf00313 | 28 |
| AX-157722629 | 14 | 41.047 | KV453330.1 | 504561 | 28-scf00313 | 28 |
| AX-158150027 | 14 | 41.047 | KV453330.1 | 505347 | 28-scf00313 | 28 |
| AX-158150028 | 14 | 41.047 | KV453330.1 | 505768 | 28-scf00313 | 28 |
| AX-158150029 | 14 | 41.047 | KV453330.1 | 508274 | 28-scf00313 | 28 |
| AX-158150031 | 14 | 41.047 | KV453330.1 | 510505 | 28-scf00313 | 28 |
| AX-158150032 | 14 | 41.047 | KV453330.1 | 511331 | 28-scf00313 | 28 |
| AX-157698618 | 14 | 41.047 | KV453330.1 | 511682 | 28-scf00313 | 28 |
| AX-158150033 | 14 | 41.047 | KV453330.1 | 514963 | 28-scf00313 | 28 |
| AX-158150035 | 14 | 41.047 | KV453330.1 | 517905 | 28-scf00313 | 28 |
| AX-158150036 | 14 | 41.047 | KV453330.1 | 518170 | 28-scf00313 | 28 |
| AX-157713432 | 14 | 41.047 | KV453330.1 | 522969 | 28-scf00313 | 28 |
| AX-158150043 | 14 | 41.047 | KV453330.1 | 524317 | 28-scf00313 | 28 |
| AX-157832374 | 14 | 41.047 | KV453330.1 | 524781 | 28-scf00313 | 28 |
| AX-158150045 | 14 | 41.047 | KV453330.1 | 525759 | 28-scf00313 | 28 |
| AX-157775897 | 14 | 41.047 | KV453330.1 | 526444 | 28-scf00313 | 28 |
| AX-157717450 | 14 | 41.047 | KV453330.1 | 528869 | 28-scf00313 | 28 |
| AX-157832375 | 14 | 41.047 | KV453330.1 | 529141 | 28-scf00313 | 28 |
| AX-157832376 | 14 | 41.047 | KV453330.1 | 530981 | 28-scf00313 | 28 |
| AX-157745668 | 14 | 41.047 | KV453330.1 | 537890 | 28-scf00313 | 28 |
| AX-158150052 | 14 | 41.047 | KV453330.1 | 538645 | 28-scf00313 | 28 |
| AX-158150053 | 14 | 41.047 | KV453330.1 | 539676 | 28-scf00313 | 28 |
| AX-157832379 | 14 | 41.047 | KV453330.1 | 541681 | 28-scf00313 | 28 |
| AX-158150055 | 14 | 41.047 | KV453330.1 | 542732 | 28-scf00313 | 28 |
| AX-157832380 | 14 | 41.047 | KV453330.1 | 543319 | 28-scf00313 | 28 |
| AX-157832381 | 14 | 41.047 | KV453330.1 | 545749 | 28-scf00313 | 28 |
| AX-158150056 | 14 | 41.047 | KV453330.1 | 551018 | 28-scf00313 | 28 |
| AX-158150057 | 14 | 41.047 | KV453330.1 | 555703 | 28-scf00313 | 28 |
| AX-158150058 | 14 | 41.047 | KV453330.1 | 557889 | 28-scf00313 | 28 |
| AX-157832382 | 14 | 41.047 | KV453330.1 | 558463 | 28-scf00313 | 28 |
| AX-158380385 | 14 | 41.047 | KV453330.1 | 560243 | 28-scf00313 | 28 |
| AX-157832383 | 14 | 41.047 | KV453330.1 | 562704 | 28-scf00313 | 28 |
| AX-158150061 | 14 | 41.047 | KV453330.1 | 564223 | 28-scf00313 | 28 |
| AX-157755952 | 14 | 41.047 | KV453330.1 | 565207 | 28-scf00313 | 28 |
| AX-158150073 | 14 | 41.047 | KV453330.1 | 587294 | 28-scf00313 | 28 |
| AX-158150082 | 14 | 41.047 | KV453330.1 | 608595 | 28-scf00313 | 28 |
| AX-158150125 | 14 | 41.047 | KV453330.1 | 697030 | 28-scf00313 | 28 |
| AX-158150145 | 14 | 41.047 | KV453330.1 | 728627 | 28-scf00313 | 28 |

|              |    |        |            |         |                |    |
|--------------|----|--------|------------|---------|----------------|----|
| AX-157772288 | 14 | 41.047 | KV453330.1 | 736053  | 28-scf00313    | 28 |
| AX-158150286 | 14 | 41.047 | KV453330.1 | 930173  | 28-scf00313    | 28 |
| AX-158150329 | 14 | 41.047 | KV453330.1 | 976223  | 28-scf00313    | 28 |
| AX-158150394 | 14 | 41.047 | KV453330.1 | 1064179 | 28-scf00313    | 28 |
| AX-158150405 | 14 | 41.047 | KV453330.1 | 1076342 | 28-scf00313    | 28 |
| AX-158150436 | 14 | 41.047 | KV453330.1 | 1116987 | 28-scf00313    | 28 |
| AX-158150445 | 14 | 41.047 | KV453330.1 | 1124011 | 28-scf00313    | 28 |
| AX-158150446 | 14 | 41.047 | KV453330.1 | 1124690 | 28-scf00313    | 28 |
| AX-158150448 | 14 | 41.047 | KV453330.1 | 1127270 | 28-scf00313    | 28 |
| AX-158150451 | 14 | 41.047 | KV453330.1 | 1132091 | 28-scf00313    | 28 |
| AX-157866445 | 14 | 41.047 | KV453330.1 | 1179808 | 28-scf00313    | 28 |
| AX-157832431 | 14 | 41.047 | KV453330.1 | 1187248 | 28-scf00313    | 28 |
| AX-158150506 | 14 | 41.047 | KV453330.1 | 1203390 | 28-scf00313    | 28 |
| AX-157695618 | 14 | 41.047 | FI870703.1 | 639     | IORI212 lctalu | UN |
| AX-158150063 | 14 | 41.156 | KV453330.1 | 565379  | 28-scf00313    | 28 |
| AX-157747248 | 14 | 41.156 | KV453330.1 | 592503  | 28-scf00313    | 28 |
| AX-157747668 | 14 | 41.156 | KV453330.1 | 595758  | 28-scf00313    | 28 |
| AX-158150077 | 14 | 41.211 | KV453330.1 | 597395  | 28-scf00313    | 28 |
| AX-158150134 | 14 | 41.211 | KV453330.1 | 710574  | 28-scf00313    | 28 |
| AX-158150244 | 14 | 41.211 | KV453330.1 | 867984  | 28-scf00313    | 28 |
| AX-158150367 | 14 | 41.211 | KV453330.1 | 1027267 | 28-scf00313    | 28 |
| AX-157832389 | 14 | 41.266 | KV453330.1 | 603642  | 28-scf00313    | 28 |
| AX-158150080 | 14 | 41.266 | KV453330.1 | 605690  | 28-scf00313    | 28 |
| AX-157745864 | 14 | 41.266 | KV453330.1 | 606240  | 28-scf00313    | 28 |
| AX-158150081 | 14 | 41.266 | KV453330.1 | 606681  | 28-scf00313    | 28 |
| AX-158385551 | 14 | 41.266 | KV453330.1 | 620975  | 28-scf00313    | 28 |
| AX-158150089 | 14 | 41.266 | KV453330.1 | 654950  | 28-scf00313    | 28 |
| AX-158150091 | 14 | 41.266 | KV453330.1 | 655666  | 28-scf00313    | 28 |
| AX-158412496 | 14 | 41.266 | KV453330.1 | 657543  | 28-scf00313    | 28 |
| AX-158150098 | 14 | 41.266 | KV453330.1 | 662159  | 28-scf00313    | 28 |
| AX-158150099 | 14 | 41.266 | KV453330.1 | 663740  | 28-scf00313    | 28 |
| AX-158150100 | 14 | 41.266 | KV453330.1 | 664434  | 28-scf00313    | 28 |
| AX-157750517 | 14 | 41.266 | KV453330.1 | 665871  | 28-scf00313    | 28 |
| AX-157886466 | 14 | 41.266 | KV453330.1 | 665979  | 28-scf00313    | 28 |
| AX-157719061 | 14 | 41.266 | KV453330.1 | 666457  | 28-scf00313    | 28 |
| AX-158150102 | 14 | 41.266 | KV453330.1 | 667162  | 28-scf00313    | 28 |
| AX-158150104 | 14 | 41.266 | KV453330.1 | 668577  | 28-scf00313    | 28 |
| AX-158150114 | 14 | 41.266 | KV453330.1 | 680196  | 28-scf00313    | 28 |
| AX-158150127 | 14 | 41.266 | KV453330.1 | 705365  | 28-scf00313    | 28 |
| AX-158150128 | 14 | 41.266 | KV453330.1 | 706445  | 28-scf00313    | 28 |
| AX-158150147 | 14 | 41.266 | KV453330.1 | 732412  | 28-scf00313    | 28 |
| AX-158150617 | 14 | 41.266 | KV453330.1 | 1350666 | 28-scf00313    | 28 |
| AX-158150105 | 14 | 41.294 | KV453330.1 | 670396  | 28-scf00313    | 28 |
| AX-158150505 | 14 | 41.294 | KV453330.1 | 1198851 | 28-scf00313    | 28 |
| AX-158150107 | 14 | 41.321 | KV453330.1 | 674913  | 28-scf00313    | 28 |
| AX-158150131 | 14 | 41.321 | KV453330.1 | 708742  | 28-scf00313    | 28 |
| AX-158150109 | 14 | 41.331 | KV453330.1 | 675839  | 28-scf00313    | 28 |
| AX-158150110 | 14 | 41.341 | KV453330.1 | 676569  | 28-scf00313    | 28 |
| AX-157727519 | 14 | 41.375 | KV453330.1 | 458662  | 28-scf00313    | 28 |
| AX-157765532 | 14 | 41.375 | KV453330.1 | 593387  | 28-scf00313    | 28 |
| AX-158150078 | 14 | 41.375 | KV453330.1 | 604635  | 28-scf00313    | 28 |



|              |    |        |            |         |             |    |
|--------------|----|--------|------------|---------|-------------|----|
| AX-158150112 | 14 | 41.375 | KV453330.1 | 677733  | 28-scf00313 | 28 |
| AX-158150115 | 14 | 41.375 | KV453330.1 | 680340  | 28-scf00313 | 28 |
| AX-158150116 | 14 | 41.375 | KV453330.1 | 680759  | 28-scf00313 | 28 |
| AX-158412500 | 14 | 41.375 | KV453330.1 | 685198  | 28-scf00313 | 28 |
| AX-158150119 | 14 | 41.375 | KV453330.1 | 687061  | 28-scf00313 | 28 |
| AX-158150120 | 14 | 41.375 | KV453330.1 | 687839  | 28-scf00313 | 28 |
| AX-158150123 | 14 | 41.375 | KV453330.1 | 691572  | 28-scf00313 | 28 |
| AX-158150135 | 14 | 41.375 | KV453330.1 | 712598  | 28-scf00313 | 28 |
| AX-158150136 | 14 | 41.375 | KV453330.1 | 719029  | 28-scf00313 | 28 |
| AX-157832395 | 14 | 41.375 | KV453330.1 | 721825  | 28-scf00313 | 28 |
| AX-158150139 | 14 | 41.375 | KV453330.1 | 722342  | 28-scf00313 | 28 |
| AX-158150143 | 14 | 41.375 | KV453330.1 | 726821  | 28-scf00313 | 28 |
| AX-157858109 | 14 | 41.375 | KV453330.1 | 728408  | 28-scf00313 | 28 |
| AX-158150149 | 14 | 41.375 | KV453330.1 | 740609  | 28-scf00313 | 28 |
| AX-158150159 | 14 | 41.375 | KV453330.1 | 753250  | 28-scf00313 | 28 |
| AX-158150182 | 14 | 41.375 | KV453330.1 | 780788  | 28-scf00313 | 28 |
| AX-158150190 | 14 | 41.375 | KV453330.1 | 785339  | 28-scf00313 | 28 |
| AX-158150226 | 14 | 41.375 | KV453330.1 | 841728  | 28-scf00313 | 28 |
| AX-158150282 | 14 | 41.375 | KV453330.1 | 923217  | 28-scf00313 | 28 |
| AX-158150289 | 14 | 41.375 | KV453330.1 | 933066  | 28-scf00313 | 28 |
| AX-158150295 | 14 | 41.375 | KV453330.1 | 940880  | 28-scf00313 | 28 |
| AX-158412505 | 14 | 41.375 | KV453330.1 | 975594  | 28-scf00313 | 28 |
| AX-157832419 | 14 | 41.375 | KV453330.1 | 985721  | 28-scf00313 | 28 |
| AX-158150364 | 14 | 41.375 | KV453330.1 | 1018789 | 28-scf00313 | 28 |
| AX-158150422 | 14 | 41.375 | KV453330.1 | 1102407 | 28-scf00313 | 28 |
| AX-157832425 | 14 | 41.375 | KV453330.1 | 1117288 | 28-scf00313 | 28 |
| AX-158150438 | 14 | 41.375 | KV453330.1 | 1117796 | 28-scf00313 | 28 |
| AX-158150439 | 14 | 41.375 | KV453330.1 | 1119170 | 28-scf00313 | 28 |
| AX-158150447 | 14 | 41.375 | KV453330.1 | 1126233 | 28-scf00313 | 28 |
| AX-158150458 | 14 | 41.375 | KV453330.1 | 1140647 | 28-scf00313 | 28 |
| AX-158150459 | 14 | 41.375 | KV453330.1 | 1142599 | 28-scf00313 | 28 |
| AX-157871733 | 14 | 41.375 | KV453330.1 | 1168502 | 28-scf00313 | 28 |
| AX-158151048 | 14 | 41.375 | KV453330.1 | 1990717 | 28-scf00313 | 28 |
| AX-158150150 | 14 | 41.484 | KV453330.1 | 743366  | 28-scf00313 | 28 |
| AX-157832398 | 14 | 41.484 | KV453330.1 | 744380  | 28-scf00313 | 28 |
| AX-158150151 | 14 | 41.533 | KV453330.1 | 745006  | 28-scf00313 | 28 |
| AX-158150311 | 14 | 41.533 | KV453330.1 | 961605  | 28-scf00313 | 28 |
| AX-158150538 | 14 | 41.533 | KV453330.1 | 1245280 | 28-scf00313 | 28 |
| AX-158150044 | 14 | 41.593 | KV453330.1 | 525246  | 28-scf00313 | 28 |
| AX-157866441 | 14 | 41.593 | KV453330.1 | 692757  | 28-scf00313 | 28 |
| AX-158150126 | 14 | 41.593 | KV453330.1 | 699686  | 28-scf00313 | 28 |
| AX-157832393 | 14 | 41.593 | KV453330.1 | 701906  | 28-scf00313 | 28 |
| AX-157858108 | 14 | 41.593 | KV453330.1 | 720730  | 28-scf00313 | 28 |
| AX-158150152 | 14 | 41.593 | KV453330.1 | 746180  | 28-scf00313 | 28 |
| AX-158150153 | 14 | 41.593 | KV453330.1 | 749093  | 28-scf00313 | 28 |
| AX-158150155 | 14 | 41.593 | KV453330.1 | 750672  | 28-scf00313 | 28 |
| AX-158150156 | 14 | 41.593 | KV453330.1 | 751110  | 28-scf00313 | 28 |
| AX-158150157 | 14 | 41.593 | KV453330.1 | 751779  | 28-scf00313 | 28 |
| AX-158150158 | 14 | 41.593 | KV453330.1 | 752631  | 28-scf00313 | 28 |
| AX-158150160 | 14 | 41.593 | KV453330.1 | 754826  | 28-scf00313 | 28 |
| AX-158150162 | 14 | 41.593 | KV453330.1 | 758219  | 28-scf00313 | 28 |

|              |    |        |            |        |             |    |
|--------------|----|--------|------------|--------|-------------|----|
| AX-157710074 | 14 | 41.593 | KV453330.1 | 762716 | 28-scf00313 | 28 |
| AX-158150164 | 14 | 41.593 | KV453330.1 | 764941 | 28-scf00313 | 28 |
| AX-158150167 | 14 | 41.593 | KV453330.1 | 770057 | 28-scf00313 | 28 |
| AX-158150169 | 14 | 41.593 | KV453330.1 | 771628 | 28-scf00313 | 28 |
| AX-158150172 | 14 | 41.593 | KV453330.1 | 774221 | 28-scf00313 | 28 |
| AX-158150173 | 14 | 41.593 | KV453330.1 | 774643 | 28-scf00313 | 28 |
| AX-158150174 | 14 | 41.593 | KV453330.1 | 776287 | 28-scf00313 | 28 |
| AX-158150178 | 14 | 41.593 | KV453330.1 | 778579 | 28-scf00313 | 28 |
| AX-158150179 | 14 | 41.593 | KV453330.1 | 779332 | 28-scf00313 | 28 |
| AX-158150180 | 14 | 41.593 | KV453330.1 | 779727 | 28-scf00313 | 28 |
| AX-157866442 | 14 | 41.593 | KV453330.1 | 779991 | 28-scf00313 | 28 |
| AX-158150185 | 14 | 41.593 | KV453330.1 | 782700 | 28-scf00313 | 28 |
| AX-158150186 | 14 | 41.593 | KV453330.1 | 783181 | 28-scf00313 | 28 |
| AX-158150187 | 14 | 41.593 | KV453330.1 | 784028 | 28-scf00313 | 28 |
| AX-158150188 | 14 | 41.593 | KV453330.1 | 784418 | 28-scf00313 | 28 |
| AX-158150192 | 14 | 41.593 | KV453330.1 | 786986 | 28-scf00313 | 28 |
| AX-157866443 | 14 | 41.593 | KV453330.1 | 787832 | 28-scf00313 | 28 |
| AX-158150194 | 14 | 41.593 | KV453330.1 | 788894 | 28-scf00313 | 28 |
| AX-158150196 | 14 | 41.593 | KV453330.1 | 791948 | 28-scf00313 | 28 |
| AX-158150197 | 14 | 41.593 | KV453330.1 | 792806 | 28-scf00313 | 28 |
| AX-158150199 | 14 | 41.593 | KV453330.1 | 794538 | 28-scf00313 | 28 |
| AX-158150200 | 14 | 41.593 | KV453330.1 | 794986 | 28-scf00313 | 28 |
| AX-158150202 | 14 | 41.593 | KV453330.1 | 799385 | 28-scf00313 | 28 |
| AX-158150205 | 14 | 41.593 | KV453330.1 | 801924 | 28-scf00313 | 28 |
| AX-158150206 | 14 | 41.593 | KV453330.1 | 802550 | 28-scf00313 | 28 |
| AX-158150207 | 14 | 41.593 | KV453330.1 | 804247 | 28-scf00313 | 28 |
| AX-158150208 | 14 | 41.593 | KV453330.1 | 805482 | 28-scf00313 | 28 |
| AX-158150209 | 14 | 41.593 | KV453330.1 | 805845 | 28-scf00313 | 28 |
| AX-157740885 | 14 | 41.593 | KV453330.1 | 808139 | 28-scf00313 | 28 |
| AX-158150210 | 14 | 41.593 | KV453330.1 | 808698 | 28-scf00313 | 28 |
| AX-158150213 | 14 | 41.593 | KV453330.1 | 812150 | 28-scf00313 | 28 |
| AX-158150214 | 14 | 41.593 | KV453330.1 | 814206 | 28-scf00313 | 28 |
| AX-158150215 | 14 | 41.593 | KV453330.1 | 815460 | 28-scf00313 | 28 |
| AX-158150216 | 14 | 41.593 | KV453330.1 | 818801 | 28-scf00313 | 28 |
| AX-157752667 | 14 | 41.593 | KV453330.1 | 820699 | 28-scf00313 | 28 |
| AX-158150217 | 14 | 41.593 | KV453330.1 | 821264 | 28-scf00313 | 28 |
| AX-157832405 | 14 | 41.593 | KV453330.1 | 825369 | 28-scf00313 | 28 |
| AX-158150221 | 14 | 41.593 | KV453330.1 | 832096 | 28-scf00313 | 28 |
| AX-157747244 | 14 | 41.593 | KV453330.1 | 834689 | 28-scf00313 | 28 |
| AX-158150222 | 14 | 41.593 | KV453330.1 | 835980 | 28-scf00313 | 28 |
| AX-157832407 | 14 | 41.593 | KV453330.1 | 836555 | 28-scf00313 | 28 |
| AX-158150223 | 14 | 41.593 | KV453330.1 | 836983 | 28-scf00313 | 28 |
| AX-158150224 | 14 | 41.593 | KV453330.1 | 838612 | 28-scf00313 | 28 |
| AX-158150225 | 14 | 41.593 | KV453330.1 | 838895 | 28-scf00313 | 28 |
| AX-158150228 | 14 | 41.593 | KV453330.1 | 848424 | 28-scf00313 | 28 |
| AX-158150230 | 14 | 41.593 | KV453330.1 | 850288 | 28-scf00313 | 28 |
| AX-158150240 | 14 | 41.593 | KV453330.1 | 863801 | 28-scf00313 | 28 |
| AX-158150241 | 14 | 41.593 | KV453330.1 | 864187 | 28-scf00313 | 28 |
| AX-158150242 | 14 | 41.593 | KV453330.1 | 864639 | 28-scf00313 | 28 |
| AX-158150243 | 14 | 41.593 | KV453330.1 | 865659 | 28-scf00313 | 28 |
| AX-157832409 | 14 | 41.593 | KV453330.1 | 865816 | 28-scf00313 | 28 |

|              |    |        |            |        |             |    |
|--------------|----|--------|------------|--------|-------------|----|
| AX-157832410 | 14 | 41.593 | KV453330.1 | 867032 | 28-scf00313 | 28 |
| AX-158150245 | 14 | 41.593 | KV453330.1 | 870161 | 28-scf00313 | 28 |
| AX-158150246 | 14 | 41.593 | KV453330.1 | 871950 | 28-scf00313 | 28 |
| AX-158150248 | 14 | 41.593 | KV453330.1 | 872965 | 28-scf00313 | 28 |
| AX-158150249 | 14 | 41.593 | KV453330.1 | 874919 | 28-scf00313 | 28 |
| AX-158150250 | 14 | 41.593 | KV453330.1 | 875772 | 28-scf00313 | 28 |
| AX-158150251 | 14 | 41.593 | KV453330.1 | 876759 | 28-scf00313 | 28 |
| AX-158150252 | 14 | 41.593 | KV453330.1 | 877236 | 28-scf00313 | 28 |
| AX-158150254 | 14 | 41.593 | KV453330.1 | 880213 | 28-scf00313 | 28 |
| AX-158150255 | 14 | 41.593 | KV453330.1 | 881907 | 28-scf00313 | 28 |
| AX-158150256 | 14 | 41.593 | KV453330.1 | 882272 | 28-scf00313 | 28 |
| AX-158150261 | 14 | 41.593 | KV453330.1 | 893295 | 28-scf00313 | 28 |
| AX-158150266 | 14 | 41.593 | KV453330.1 | 906098 | 28-scf00313 | 28 |
| AX-158150267 | 14 | 41.593 | KV453330.1 | 907050 | 28-scf00313 | 28 |
| AX-158150269 | 14 | 41.593 | KV453330.1 | 908615 | 28-scf00313 | 28 |
| AX-158150270 | 14 | 41.593 | KV453330.1 | 909191 | 28-scf00313 | 28 |
| AX-158408606 | 14 | 41.593 | KV453330.1 | 911031 | 28-scf00313 | 28 |
| AX-158408607 | 14 | 41.593 | KV453330.1 | 911077 | 28-scf00313 | 28 |
| AX-158150271 | 14 | 41.593 | KV453330.1 | 911759 | 28-scf00313 | 28 |
| AX-158150272 | 14 | 41.593 | KV453330.1 | 912265 | 28-scf00313 | 28 |
| AX-158150275 | 14 | 41.593 | KV453330.1 | 914394 | 28-scf00313 | 28 |
| AX-158150277 | 14 | 41.593 | KV453330.1 | 916254 | 28-scf00313 | 28 |
| AX-158150278 | 14 | 41.593 | KV453330.1 | 916839 | 28-scf00313 | 28 |
| AX-158150279 | 14 | 41.593 | KV453330.1 | 917492 | 28-scf00313 | 28 |
| AX-158150280 | 14 | 41.593 | KV453330.1 | 919956 | 28-scf00313 | 28 |
| AX-158150281 | 14 | 41.593 | KV453330.1 | 920292 | 28-scf00313 | 28 |
| AX-157832411 | 14 | 41.593 | KV453330.1 | 920804 | 28-scf00313 | 28 |
| AX-158150283 | 14 | 41.593 | KV453330.1 | 926737 | 28-scf00313 | 28 |
| AX-158150284 | 14 | 41.593 | KV453330.1 | 927301 | 28-scf00313 | 28 |
| AX-157716355 | 14 | 41.593 | KV453330.1 | 929655 | 28-scf00313 | 28 |
| AX-158150287 | 14 | 41.593 | KV453330.1 | 930825 | 28-scf00313 | 28 |
| AX-158150288 | 14 | 41.593 | KV453330.1 | 932005 | 28-scf00313 | 28 |
| AX-157832412 | 14 | 41.593 | KV453330.1 | 934097 | 28-scf00313 | 28 |
| AX-158150290 | 14 | 41.593 | KV453330.1 | 935157 | 28-scf00313 | 28 |
| AX-158150291 | 14 | 41.593 | KV453330.1 | 935836 | 28-scf00313 | 28 |
| AX-158150292 | 14 | 41.593 | KV453330.1 | 936080 | 28-scf00313 | 28 |
| AX-157711630 | 14 | 41.593 | KV453330.1 | 936466 | 28-scf00313 | 28 |
| AX-158150293 | 14 | 41.593 | KV453330.1 | 939194 | 28-scf00313 | 28 |
| AX-157832415 | 14 | 41.593 | KV453330.1 | 939915 | 28-scf00313 | 28 |
| AX-158150294 | 14 | 41.593 | KV453330.1 | 940456 | 28-scf00313 | 28 |
| AX-158150299 | 14 | 41.593 | KV453330.1 | 943800 | 28-scf00313 | 28 |
| AX-158150300 | 14 | 41.593 | KV453330.1 | 944314 | 28-scf00313 | 28 |
| AX-157858111 | 14 | 41.593 | KV453330.1 | 947945 | 28-scf00313 | 28 |
| AX-157832417 | 14 | 41.593 | KV453330.1 | 948105 | 28-scf00313 | 28 |
| AX-157745068 | 14 | 41.593 | KV453330.1 | 948507 | 28-scf00313 | 28 |
| AX-157832418 | 14 | 41.593 | KV453330.1 | 949206 | 28-scf00313 | 28 |
| AX-157752822 | 14 | 41.593 | KV453330.1 | 951013 | 28-scf00313 | 28 |
| AX-158150310 | 14 | 41.593 | KV453330.1 | 960956 | 28-scf00313 | 28 |
| AX-158150312 | 14 | 41.593 | KV453330.1 | 962880 | 28-scf00313 | 28 |
| AX-158150315 | 14 | 41.593 | KV453330.1 | 964449 | 28-scf00313 | 28 |
| AX-158150316 | 14 | 41.593 | KV453330.1 | 964761 | 28-scf00313 | 28 |

|              |    |        |            |         |             |    |
|--------------|----|--------|------------|---------|-------------|----|
| AX-158150321 | 14 | 41.593 | KV453330.1 | 968124  | 28-scf00313 | 28 |
| AX-158150324 | 14 | 41.593 | KV453330.1 | 969677  | 28-scf00313 | 28 |
| AX-158150327 | 14 | 41.593 | KV453330.1 | 973703  | 28-scf00313 | 28 |
| AX-158150328 | 14 | 41.593 | KV453330.1 | 974455  | 28-scf00313 | 28 |
| AX-158150331 | 14 | 41.593 | KV453330.1 | 978632  | 28-scf00313 | 28 |
| AX-158150332 | 14 | 41.593 | KV453330.1 | 979275  | 28-scf00313 | 28 |
| AX-158150333 | 14 | 41.593 | KV453330.1 | 980010  | 28-scf00313 | 28 |
| AX-158150335 | 14 | 41.593 | KV453330.1 | 982472  | 28-scf00313 | 28 |
| AX-158150338 | 14 | 41.593 | KV453330.1 | 986585  | 28-scf00313 | 28 |
| AX-157878328 | 14 | 41.593 | KV453330.1 | 987811  | 28-scf00313 | 28 |
| AX-157718551 | 14 | 41.593 | KV453330.1 | 993514  | 28-scf00313 | 28 |
| AX-158380387 | 14 | 41.593 | KV453330.1 | 993559  | 28-scf00313 | 28 |
| AX-158150341 | 14 | 41.593 | KV453330.1 | 996405  | 28-scf00313 | 28 |
| AX-158150344 | 14 | 41.593 | KV453330.1 | 998257  | 28-scf00313 | 28 |
| AX-158150346 | 14 | 41.593 | KV453330.1 | 1000480 | 28-scf00313 | 28 |
| AX-158150347 | 14 | 41.593 | KV453330.1 | 1002982 | 28-scf00313 | 28 |
| AX-158150348 | 14 | 41.593 | KV453330.1 | 1003276 | 28-scf00313 | 28 |
| AX-158150349 | 14 | 41.593 | KV453330.1 | 1003968 | 28-scf00313 | 28 |
| AX-158150350 | 14 | 41.593 | KV453330.1 | 1004507 | 28-scf00313 | 28 |
| AX-157775881 | 14 | 41.593 | KV453330.1 | 1005230 | 28-scf00313 | 28 |
| AX-158150351 | 14 | 41.593 | KV453330.1 | 1006258 | 28-scf00313 | 28 |
| AX-158150353 | 14 | 41.593 | KV453330.1 | 1007819 | 28-scf00313 | 28 |
| AX-158150354 | 14 | 41.593 | KV453330.1 | 1008366 | 28-scf00313 | 28 |
| AX-158150355 | 14 | 41.593 | KV453330.1 | 1010010 | 28-scf00313 | 28 |
| AX-158150357 | 14 | 41.593 | KV453330.1 | 1011515 | 28-scf00313 | 28 |
| AX-158150358 | 14 | 41.593 | KV453330.1 | 1012604 | 28-scf00313 | 28 |
| AX-158150360 | 14 | 41.593 | KV453330.1 | 1015492 | 28-scf00313 | 28 |
| AX-158150363 | 14 | 41.593 | KV453330.1 | 1017916 | 28-scf00313 | 28 |
| AX-157832421 | 14 | 41.593 | KV453330.1 | 1019025 | 28-scf00313 | 28 |
| AX-158150365 | 14 | 41.593 | KV453330.1 | 1019432 | 28-scf00313 | 28 |
| AX-158150366 | 14 | 41.593 | KV453330.1 | 1022529 | 28-scf00313 | 28 |
| AX-157832422 | 14 | 41.593 | KV453330.1 | 1024061 | 28-scf00313 | 28 |
| AX-158150377 | 14 | 41.593 | KV453330.1 | 1040778 | 28-scf00313 | 28 |
| AX-158150378 | 14 | 41.593 | KV453330.1 | 1041095 | 28-scf00313 | 28 |
| AX-158150381 | 14 | 41.593 | KV453330.1 | 1042978 | 28-scf00313 | 28 |
| AX-158150383 | 14 | 41.593 | KV453330.1 | 1046545 | 28-scf00313 | 28 |
| AX-158150392 | 14 | 41.593 | KV453330.1 | 1062396 | 28-scf00313 | 28 |
| AX-158150396 | 14 | 41.593 | KV453330.1 | 1066906 | 28-scf00313 | 28 |
| AX-157710026 | 14 | 41.593 | KV453330.1 | 1069835 | 28-scf00313 | 28 |
| AX-158150398 | 14 | 41.593 | KV453330.1 | 1070525 | 28-scf00313 | 28 |
| AX-158150400 | 14 | 41.593 | KV453330.1 | 1071631 | 28-scf00313 | 28 |
| AX-158150401 | 14 | 41.593 | KV453330.1 | 1072995 | 28-scf00313 | 28 |
| AX-158150402 | 14 | 41.593 | KV453330.1 | 1073893 | 28-scf00313 | 28 |
| AX-158150403 | 14 | 41.593 | KV453330.1 | 1074853 | 28-scf00313 | 28 |
| AX-158150404 | 14 | 41.593 | KV453330.1 | 1075408 | 28-scf00313 | 28 |
| AX-158150407 | 14 | 41.593 | KV453330.1 | 1078175 | 28-scf00313 | 28 |
| AX-158150408 | 14 | 41.593 | KV453330.1 | 1079052 | 28-scf00313 | 28 |
| AX-157726819 | 14 | 41.593 | KV453330.1 | 1080196 | 28-scf00313 | 28 |
| AX-157724381 | 14 | 41.593 | KV453330.1 | 1081218 | 28-scf00313 | 28 |
| AX-158150410 | 14 | 41.593 | KV453330.1 | 1085088 | 28-scf00313 | 28 |
| AX-158150411 | 14 | 41.593 | KV453330.1 | 1085539 | 28-scf00313 | 28 |

|              |    |        |            |         |             |    |
|--------------|----|--------|------------|---------|-------------|----|
| AX-158150412 | 14 | 41.593 | KV453330.1 | 1087315 | 28-scf00313 | 28 |
| AX-158150413 | 14 | 41.593 | KV453330.1 | 1087821 | 28-scf00313 | 28 |
| AX-158150414 | 14 | 41.593 | KV453330.1 | 1088597 | 28-scf00313 | 28 |
| AX-157886470 | 14 | 41.593 | KV453330.1 | 1091278 | 28-scf00313 | 28 |
| AX-158150418 | 14 | 41.593 | KV453330.1 | 1093773 | 28-scf00313 | 28 |
| AX-158150419 | 14 | 41.593 | KV453330.1 | 1096440 | 28-scf00313 | 28 |
| AX-158150420 | 14 | 41.593 | KV453330.1 | 1096839 | 28-scf00313 | 28 |
| AX-157886471 | 14 | 41.593 | KV453330.1 | 1098511 | 28-scf00313 | 28 |
| AX-157774197 | 14 | 41.593 | KV453330.1 | 1101601 | 28-scf00313 | 28 |
| AX-158150424 | 14 | 41.593 | KV453330.1 | 1103558 | 28-scf00313 | 28 |
| AX-158150429 | 14 | 41.593 | KV453330.1 | 1108356 | 28-scf00313 | 28 |
| AX-158150433 | 14 | 41.593 | KV453330.1 | 1111602 | 28-scf00313 | 28 |
| AX-158150434 | 14 | 41.593 | KV453330.1 | 1113261 | 28-scf00313 | 28 |
| AX-158150440 | 14 | 41.593 | KV453330.1 | 1119618 | 28-scf00313 | 28 |
| AX-158150442 | 14 | 41.593 | KV453330.1 | 1122393 | 28-scf00313 | 28 |
| AX-158150452 | 14 | 41.593 | KV453330.1 | 1134043 | 28-scf00313 | 28 |
| AX-158150466 | 14 | 41.593 | KV453330.1 | 1149582 | 28-scf00313 | 28 |
| AX-157832427 | 14 | 41.593 | KV453330.1 | 1150141 | 28-scf00313 | 28 |
| AX-158150471 | 14 | 41.593 | KV453330.1 | 1154866 | 28-scf00313 | 28 |
| AX-157871732 | 14 | 41.593 | KV453330.1 | 1155662 | 28-scf00313 | 28 |
| AX-158150472 | 14 | 41.593 | KV453330.1 | 1156823 | 28-scf00313 | 28 |
| AX-157858114 | 14 | 41.593 | KV453330.1 | 1157442 | 28-scf00313 | 28 |
| AX-158150475 | 14 | 41.593 | KV453330.1 | 1160750 | 28-scf00313 | 28 |
| AX-158150477 | 14 | 41.593 | KV453330.1 | 1164098 | 28-scf00313 | 28 |
| AX-158150478 | 14 | 41.593 | KV453330.1 | 1164402 | 28-scf00313 | 28 |
| AX-157738746 | 14 | 41.593 | KV453330.1 | 1165082 | 28-scf00313 | 28 |
| AX-157718099 | 14 | 41.593 | KV453330.1 | 1166375 | 28-scf00313 | 28 |
| AX-157871734 | 14 | 41.593 | KV453330.1 | 1170509 | 28-scf00313 | 28 |
| AX-158150481 | 14 | 41.593 | KV453330.1 | 1172467 | 28-scf00313 | 28 |
| AX-158150483 | 14 | 41.593 | KV453330.1 | 1173941 | 28-scf00313 | 28 |
| AX-158150484 | 14 | 41.593 | KV453330.1 | 1174278 | 28-scf00313 | 28 |
| AX-158150485 | 14 | 41.593 | KV453330.1 | 1175165 | 28-scf00313 | 28 |
| AX-158150487 | 14 | 41.593 | KV453330.1 | 1176927 | 28-scf00313 | 28 |
| AX-158150490 | 14 | 41.593 | KV453330.1 | 1180502 | 28-scf00313 | 28 |
| AX-158150491 | 14 | 41.593 | KV453330.1 | 1181119 | 28-scf00313 | 28 |
| AX-158150492 | 14 | 41.593 | KV453330.1 | 1182173 | 28-scf00313 | 28 |
| AX-157738488 | 14 | 41.593 | KV453330.1 | 1182691 | 28-scf00313 | 28 |
| AX-158150493 | 14 | 41.593 | KV453330.1 | 1183079 | 28-scf00313 | 28 |
| AX-158150496 | 14 | 41.593 | KV453330.1 | 1185186 | 28-scf00313 | 28 |
| AX-158150498 | 14 | 41.593 | KV453330.1 | 1187404 | 28-scf00313 | 28 |
| AX-158150499 | 14 | 41.593 | KV453330.1 | 1187920 | 28-scf00313 | 28 |
| AX-157858115 | 14 | 41.593 | KV453330.1 | 1188907 | 28-scf00313 | 28 |
| AX-158150500 | 14 | 41.593 | KV453330.1 | 1191051 | 28-scf00313 | 28 |
| AX-157832432 | 14 | 41.593 | KV453330.1 | 1192498 | 28-scf00313 | 28 |
| AX-157858116 | 14 | 41.593 | KV453330.1 | 1192722 | 28-scf00313 | 28 |
| AX-158150501 | 14 | 41.593 | KV453330.1 | 1194144 | 28-scf00313 | 28 |
| AX-157714663 | 14 | 41.593 | KV453330.1 | 1197698 | 28-scf00313 | 28 |
| AX-158150504 | 14 | 41.593 | KV453330.1 | 1198068 | 28-scf00313 | 28 |
| AX-158150509 | 14 | 41.593 | KV453330.1 | 1207289 | 28-scf00313 | 28 |
| AX-158150510 | 14 | 41.593 | KV453330.1 | 1207500 | 28-scf00313 | 28 |
| AX-158150511 | 14 | 41.593 | KV453330.1 | 1209574 | 28-scf00313 | 28 |

|              |    |        |             |         |                |    |
|--------------|----|--------|-------------|---------|----------------|----|
| AX-158150514 | 14 | 41.593 | KV453330.1  | 1213321 | 28-scf00313    | 28 |
| AX-158150520 | 14 | 41.593 | KV453330.1  | 1221428 | 28-scf00313    | 28 |
| AX-158150521 | 14 | 41.593 | KV453330.1  | 1224228 | 28-scf00313    | 28 |
| AX-158150522 | 14 | 41.593 | KV453330.1  | 1224272 | 28-scf00313    | 28 |
| AX-157832435 | 14 | 41.593 | KV453330.1  | 1226851 | 28-scf00313    | 28 |
| AX-158150532 | 14 | 41.593 | KV453330.1  | 1236638 | 28-scf00313    | 28 |
| AX-158150536 | 14 | 41.593 | KV453330.1  | 1243940 | 28-scf00313    | 28 |
| AX-158380388 | 14 | 41.593 | KV453330.1  | 1244101 | 28-scf00313    | 28 |
| AX-158150537 | 14 | 41.593 | KV453330.1  | 1244377 | 28-scf00313    | 28 |
| AX-157832437 | 14 | 41.593 | KV453330.1  | 1245392 | 28-scf00313    | 28 |
| AX-157727574 | 14 | 41.593 | KV453330.1  | 1254832 | 28-scf00313    | 28 |
| AX-158150546 | 14 | 41.593 | KV453330.1  | 1258097 | 28-scf00313    | 28 |
| AX-157832442 | 14 | 41.593 | KV453330.1  | 1282314 | 28-scf00313    | 28 |
| AX-157727939 | 14 | 41.593 | KV453330.1  | 1300762 | 28-scf00313    | 28 |
| AX-158150585 | 14 | 41.593 | KV453330.1  | 1313843 | 28-scf00313    | 28 |
| AX-158150586 | 14 | 41.593 | KV453330.1  | 1315136 | 28-scf00313    | 28 |
| AX-158150588 | 14 | 41.593 | KV453330.1  | 1316362 | 28-scf00313    | 28 |
| AX-158150692 | 14 | 41.593 | KV453330.1  | 1469531 | 28-scf00313    | 28 |
| AX-157695353 | 14 | 41.593 | FI869699.1  | 84      | IORI212 lctalu | UN |
| AX-157681139 | 14 | 41.593 | 3ML01032644 | 566     | scf08269_1     | UN |
| AX-158149423 | 14 | 41.702 | KV453327.1  | 3761599 | 28-scf00311    | 28 |
| AX-157871721 | 14 | 41.702 | KV453330.1  | 267179  | 28-scf00313    | 28 |
| AX-158150204 | 14 | 41.702 | KV453330.1  | 800893  | 28-scf00313    | 28 |
| AX-158150253 | 14 | 41.702 | KV453330.1  | 878820  | 28-scf00313    | 28 |
| AX-158150305 | 14 | 41.702 | KV453330.1  | 951910  | 28-scf00313    | 28 |
| AX-158150309 | 14 | 41.702 | KV453330.1  | 957609  | 28-scf00313    | 28 |
| AX-158150380 | 14 | 41.702 | KV453330.1  | 1042857 | 28-scf00313    | 28 |
| AX-157832434 | 14 | 41.702 | KV453330.1  | 1211679 | 28-scf00313    | 28 |
| AX-158150512 | 14 | 41.702 | KV453330.1  | 1212654 | 28-scf00313    | 28 |
| AX-158150513 | 14 | 41.702 | KV453330.1  | 1213100 | 28-scf00313    | 28 |
| AX-158150515 | 14 | 41.702 | KV453330.1  | 1215363 | 28-scf00313    | 28 |
| AX-158150516 | 14 | 41.702 | KV453330.1  | 1215956 | 28-scf00313    | 28 |
| AX-158150531 | 14 | 41.702 | KV453330.1  | 1233982 | 28-scf00313    | 28 |
| AX-158150535 | 14 | 41.702 | KV453330.1  | 1240551 | 28-scf00313    | 28 |
| AX-157725386 | 14 | 41.702 | KV453330.1  | 1248905 | 28-scf00313    | 28 |
| AX-158150540 | 14 | 41.702 | KV453330.1  | 1249717 | 28-scf00313    | 28 |
| AX-158412508 | 14 | 41.702 | KV453330.1  | 1257485 | 28-scf00313    | 28 |
| AX-157723807 | 14 | 41.702 | KV453330.1  | 1257561 | 28-scf00313    | 28 |
| AX-157832438 | 14 | 41.702 | KV453330.1  | 1258005 | 28-scf00313    | 28 |
| AX-158150548 | 14 | 41.702 | KV453330.1  | 1261218 | 28-scf00313    | 28 |
| AX-158150552 | 14 | 41.702 | KV453330.1  | 1268911 | 28-scf00313    | 28 |
| AX-158150553 | 14 | 41.702 | KV453330.1  | 1269300 | 28-scf00313    | 28 |
| AX-158150555 | 14 | 41.702 | KV453330.1  | 1270614 | 28-scf00313    | 28 |
| AX-157705893 | 14 | 41.702 | 3ML01031180 | 191     | scf06786_1     | UN |
| AX-158150556 | 14 | 41.921 | KV453330.1  | 1275628 | 28-scf00313    | 28 |
| AX-157832440 | 14 | 41.921 | KV453330.1  | 1276103 | 28-scf00313    | 28 |
| AX-158412509 | 14 | 41.921 | KV453330.1  | 1280883 | 28-scf00313    | 28 |
| AX-158150559 | 14 | 41.921 | KV453330.1  | 1281826 | 28-scf00313    | 28 |
| AX-158150560 | 14 | 41.921 | KV453330.1  | 1284232 | 28-scf00313    | 28 |
| AX-158150561 | 14 | 41.921 | KV453330.1  | 1284630 | 28-scf00313    | 28 |
| AX-158150562 | 14 | 41.921 | KV453330.1  | 1286265 | 28-scf00313    | 28 |

|              |    |        |            |         |             |    |
|--------------|----|--------|------------|---------|-------------|----|
| AX-158385561 | 14 | 41.921 | KV453330.1 | 1289481 | 28-scf00313 | 28 |
| AX-158150570 | 14 | 41.921 | KV453330.1 | 1302752 | 28-scf00313 | 28 |
| AX-158150571 | 14 | 41.921 | KV453330.1 | 1303376 | 28-scf00313 | 28 |
| AX-158150576 | 14 | 41.921 | KV453330.1 | 1306696 | 28-scf00313 | 28 |
| AX-158150578 | 14 | 41.921 | KV453330.1 | 1307341 | 28-scf00313 | 28 |
| AX-158150580 | 14 | 41.921 | KV453330.1 | 1308224 | 28-scf00313 | 28 |
| AX-158150582 | 14 | 41.921 | KV453330.1 | 1308884 | 28-scf00313 | 28 |
| AX-157832443 | 14 | 41.921 | KV453330.1 | 1312166 | 28-scf00313 | 28 |
| AX-158150590 | 14 | 41.921 | KV453330.1 | 1318681 | 28-scf00313 | 28 |
| AX-158150622 | 14 | 41.921 | KV453330.1 | 1355421 | 28-scf00313 | 28 |
| AX-158150772 | 14 | 41.921 | KV453330.1 | 1567495 | 28-scf00313 | 28 |
| AX-158150047 | 14 | 42.03  | KV453330.1 | 531219  | 28-scf00313 | 28 |
| AX-158150530 | 14 | 42.03  | KV453330.1 | 1233635 | 28-scf00313 | 28 |
| AX-158150549 | 14 | 42.03  | KV453330.1 | 1263600 | 28-scf00313 | 28 |
| AX-158150577 | 14 | 42.03  | KV453330.1 | 1306899 | 28-scf00313 | 28 |
| AX-158150583 | 14 | 42.03  | KV453330.1 | 1309378 | 28-scf00313 | 28 |
| AX-158150587 | 14 | 42.03  | KV453330.1 | 1315735 | 28-scf00313 | 28 |
| AX-157832444 | 14 | 42.03  | KV453330.1 | 1319587 | 28-scf00313 | 28 |
| AX-158150594 | 14 | 42.03  | KV453330.1 | 1324182 | 28-scf00313 | 28 |
| AX-158150595 | 14 | 42.03  | KV453330.1 | 1325282 | 28-scf00313 | 28 |
| AX-158150596 | 14 | 42.03  | KV453330.1 | 1325676 | 28-scf00313 | 28 |
| AX-158150597 | 14 | 42.03  | KV453330.1 | 1328447 | 28-scf00313 | 28 |
| AX-158412510 | 14 | 42.03  | KV453330.1 | 1329536 | 28-scf00313 | 28 |
| AX-158150598 | 14 | 42.03  | KV453330.1 | 1330262 | 28-scf00313 | 28 |
| AX-158150600 | 14 | 42.03  | KV453330.1 | 1331614 | 28-scf00313 | 28 |
| AX-158150601 | 14 | 42.03  | KV453330.1 | 1332208 | 28-scf00313 | 28 |
| AX-158150608 | 14 | 42.03  | KV453330.1 | 1341882 | 28-scf00313 | 28 |
| AX-158150612 | 14 | 42.03  | KV453330.1 | 1345886 | 28-scf00313 | 28 |
| AX-158380389 | 14 | 42.03  | KV453330.1 | 1349583 | 28-scf00313 | 28 |
| AX-158150630 | 14 | 42.03  | KV453330.1 | 1370050 | 28-scf00313 | 28 |
| AX-158385562 | 14 | 42.03  | KV453330.1 | 1371055 | 28-scf00313 | 28 |
| AX-158150632 | 14 | 42.03  | KV453330.1 | 1375040 | 28-scf00313 | 28 |
| AX-157832446 | 14 | 42.03  | KV453330.1 | 1375873 | 28-scf00313 | 28 |
| AX-158150633 | 14 | 42.03  | KV453330.1 | 1377253 | 28-scf00313 | 28 |
| AX-158150645 | 14 | 42.03  | KV453330.1 | 1405530 | 28-scf00313 | 28 |
| AX-158150650 | 14 | 42.03  | KV453330.1 | 1417091 | 28-scf00313 | 28 |
| AX-158150665 | 14 | 42.03  | KV453330.1 | 1442198 | 28-scf00313 | 28 |
| AX-158150672 | 14 | 42.03  | KV453330.1 | 1450824 | 28-scf00313 | 28 |
| AX-158150676 | 14 | 42.03  | KV453330.1 | 1453250 | 28-scf00313 | 28 |
| AX-158150690 | 14 | 42.03  | KV453330.1 | 1465283 | 28-scf00313 | 28 |
| AX-158150693 | 14 | 42.03  | KV453330.1 | 1470422 | 28-scf00313 | 28 |
| AX-158150694 | 14 | 42.03  | KV453330.1 | 1470801 | 28-scf00313 | 28 |
| AX-158150695 | 14 | 42.03  | KV453330.1 | 1471365 | 28-scf00313 | 28 |
| AX-158150711 | 14 | 42.03  | KV453330.1 | 1492088 | 28-scf00313 | 28 |
| AX-158150723 | 14 | 42.03  | KV453330.1 | 1504223 | 28-scf00313 | 28 |
| AX-158150724 | 14 | 42.03  | KV453330.1 | 1507231 | 28-scf00313 | 28 |
| AX-158150727 | 14 | 42.03  | KV453330.1 | 1511519 | 28-scf00313 | 28 |
| AX-158412513 | 14 | 42.03  | KV453330.1 | 1512208 | 28-scf00313 | 28 |
| AX-158150728 | 14 | 42.03  | KV453330.1 | 1513501 | 28-scf00313 | 28 |
| AX-158150731 | 14 | 42.03  | KV453330.1 | 1516604 | 28-scf00313 | 28 |
| AX-158150732 | 14 | 42.03  | KV453330.1 | 1517335 | 28-scf00313 | 28 |

|              |    |       |            |         |             |    |
|--------------|----|-------|------------|---------|-------------|----|
| AX-158150733 | 14 | 42.03 | KV453330.1 | 1517715 | 28-scf00313 | 28 |
| AX-158150736 | 14 | 42.03 | KV453330.1 | 1519537 | 28-scf00313 | 28 |
| AX-158150737 | 14 | 42.03 | KV453330.1 | 1520836 | 28-scf00313 | 28 |
| AX-158150740 | 14 | 42.03 | KV453330.1 | 1523177 | 28-scf00313 | 28 |
| AX-158150741 | 14 | 42.03 | KV453330.1 | 1524263 | 28-scf00313 | 28 |
| AX-158150742 | 14 | 42.03 | KV453330.1 | 1525392 | 28-scf00313 | 28 |
| AX-158150743 | 14 | 42.03 | KV453330.1 | 1526114 | 28-scf00313 | 28 |
| AX-158150744 | 14 | 42.03 | KV453330.1 | 1527163 | 28-scf00313 | 28 |
| AX-158150745 | 14 | 42.03 | KV453330.1 | 1527885 | 28-scf00313 | 28 |
| AX-158150746 | 14 | 42.03 | KV453330.1 | 1528888 | 28-scf00313 | 28 |
| AX-158150747 | 14 | 42.03 | KV453330.1 | 1529298 | 28-scf00313 | 28 |
| AX-158150748 | 14 | 42.03 | KV453330.1 | 1530494 | 28-scf00313 | 28 |
| AX-158150749 | 14 | 42.03 | KV453330.1 | 1530776 | 28-scf00313 | 28 |
| AX-158150751 | 14 | 42.03 | KV453330.1 | 1535588 | 28-scf00313 | 28 |
| AX-158150752 | 14 | 42.03 | KV453330.1 | 1536275 | 28-scf00313 | 28 |
| AX-158150753 | 14 | 42.03 | KV453330.1 | 1538457 | 28-scf00313 | 28 |
| AX-158150754 | 14 | 42.03 | KV453330.1 | 1542259 | 28-scf00313 | 28 |
| AX-158150756 | 14 | 42.03 | KV453330.1 | 1543243 | 28-scf00313 | 28 |
| AX-158150757 | 14 | 42.03 | KV453330.1 | 1544097 | 28-scf00313 | 28 |
| AX-158150758 | 14 | 42.03 | KV453330.1 | 1545395 | 28-scf00313 | 28 |
| AX-158150760 | 14 | 42.03 | KV453330.1 | 1548293 | 28-scf00313 | 28 |
| AX-158150761 | 14 | 42.03 | KV453330.1 | 1549367 | 28-scf00313 | 28 |
| AX-158150763 | 14 | 42.03 | KV453330.1 | 1551787 | 28-scf00313 | 28 |
| AX-158150764 | 14 | 42.03 | KV453330.1 | 1552927 | 28-scf00313 | 28 |
| AX-158150765 | 14 | 42.03 | KV453330.1 | 1555363 | 28-scf00313 | 28 |
| AX-158150766 | 14 | 42.03 | KV453330.1 | 1557560 | 28-scf00313 | 28 |
| AX-158150768 | 14 | 42.03 | KV453330.1 | 1560066 | 28-scf00313 | 28 |
| AX-158150771 | 14 | 42.03 | KV453330.1 | 1565081 | 28-scf00313 | 28 |
| AX-158150774 | 14 | 42.03 | KV453330.1 | 1569229 | 28-scf00313 | 28 |
| AX-158150776 | 14 | 42.03 | KV453330.1 | 1572514 | 28-scf00313 | 28 |
| AX-157740619 | 14 | 42.03 | KV453330.1 | 1573363 | 28-scf00313 | 28 |
| AX-158150777 | 14 | 42.03 | KV453330.1 | 1574267 | 28-scf00313 | 28 |
| AX-158150778 | 14 | 42.03 | KV453330.1 | 1574865 | 28-scf00313 | 28 |
| AX-158150780 | 14 | 42.03 | KV453330.1 | 1576073 | 28-scf00313 | 28 |
| AX-158150781 | 14 | 42.03 | KV453330.1 | 1578948 | 28-scf00313 | 28 |
| AX-158150784 | 14 | 42.03 | KV453330.1 | 1581952 | 28-scf00313 | 28 |
| AX-158150785 | 14 | 42.03 | KV453330.1 | 1582202 | 28-scf00313 | 28 |
| AX-158150786 | 14 | 42.03 | KV453330.1 | 1582776 | 28-scf00313 | 28 |
| AX-158150790 | 14 | 42.03 | KV453330.1 | 1588758 | 28-scf00313 | 28 |
| AX-158150791 | 14 | 42.03 | KV453330.1 | 1589391 | 28-scf00313 | 28 |
| AX-158412514 | 14 | 42.03 | KV453330.1 | 1592012 | 28-scf00313 | 28 |
| AX-158150794 | 14 | 42.03 | KV453330.1 | 1592414 | 28-scf00313 | 28 |
| AX-158150795 | 14 | 42.03 | KV453330.1 | 1596082 | 28-scf00313 | 28 |
| AX-158150797 | 14 | 42.03 | KV453330.1 | 1598913 | 28-scf00313 | 28 |
| AX-158150798 | 14 | 42.03 | KV453330.1 | 1600541 | 28-scf00313 | 28 |
| AX-158150799 | 14 | 42.03 | KV453330.1 | 1601341 | 28-scf00313 | 28 |
| AX-158150801 | 14 | 42.03 | KV453330.1 | 1603054 | 28-scf00313 | 28 |
| AX-157832449 | 14 | 42.03 | KV453330.1 | 1603935 | 28-scf00313 | 28 |
| AX-158150805 | 14 | 42.03 | KV453330.1 | 1608767 | 28-scf00313 | 28 |
| AX-158150807 | 14 | 42.03 | KV453330.1 | 1610615 | 28-scf00313 | 28 |
| AX-157832450 | 14 | 42.03 | KV453330.1 | 1611033 | 28-scf00313 | 28 |



|              |    |        |            |         |                 |    |
|--------------|----|--------|------------|---------|-----------------|----|
| AX-158150809 | 14 | 42.03  | KV453330.1 | 1613009 | 28-scf00313     | 28 |
| AX-157832451 | 14 | 42.03  | KV453330.1 | 1614552 | 28-scf00313     | 28 |
| AX-158150814 | 14 | 42.03  | KV453330.1 | 1619019 | 28-scf00313     | 28 |
| AX-158150815 | 14 | 42.03  | KV453330.1 | 1619280 | 28-scf00313     | 28 |
| AX-158150816 | 14 | 42.03  | KV453330.1 | 1619899 | 28-scf00313     | 28 |
| AX-158150817 | 14 | 42.03  | KV453330.1 | 1621046 | 28-scf00313     | 28 |
| AX-157745503 | 14 | 42.03  | KV453330.1 | 1627115 | 28-scf00313     | 28 |
| AX-158150825 | 14 | 42.03  | KV453330.1 | 1634879 | 28-scf00313     | 28 |
| AX-158150827 | 14 | 42.03  | KV453330.1 | 1636574 | 28-scf00313     | 28 |
| AX-158150831 | 14 | 42.03  | KV453330.1 | 1641316 | 28-scf00313     | 28 |
| AX-158150910 | 14 | 42.03  | KV453330.1 | 1756816 | 28-scf00313     | 28 |
| AX-158150939 | 14 | 42.03  | KV453330.1 | 1794299 | 28-scf00313     | 28 |
| AX-158150992 | 14 | 42.03  | KV453330.1 | 1882886 | 28-scf00313     | 28 |
| AX-158151022 | 14 | 42.03  | KV453330.1 | 1931225 | 28-scf00313     | 28 |
| AX-158151066 | 14 | 42.03  | KV453330.1 | 2010232 | 28-scf00313     | 28 |
| AX-157697036 | 14 | 42.03  | FI880404.1 | 595     | -IORI212 lctalt | UN |
| AX-157832454 | 14 | 42.203 | KV453330.1 | 1628387 | 28-scf00313     | 28 |
| AX-158150686 | 14 | 42.249 | KV453330.1 | 1460708 | 28-scf00313     | 28 |
| AX-158150714 | 14 | 42.249 | KV453330.1 | 1494872 | 28-scf00313     | 28 |
| AX-158150720 | 14 | 42.249 | KV453330.1 | 1499617 | 28-scf00313     | 28 |
| AX-158150822 | 14 | 42.249 | KV453330.1 | 1629239 | 28-scf00313     | 28 |
| AX-157832455 | 14 | 42.249 | KV453330.1 | 1634245 | 28-scf00313     | 28 |
| AX-158150832 | 14 | 42.249 | KV453330.1 | 1642239 | 28-scf00313     | 28 |
| AX-158150833 | 14 | 42.249 | KV453330.1 | 1645972 | 28-scf00313     | 28 |
| AX-158150962 | 14 | 42.249 | KV453330.1 | 1824098 | 28-scf00313     | 28 |
| AX-158412540 | 14 | 42.249 | KV453330.1 | 2002697 | 28-scf00313     | 28 |
| AX-158151061 | 14 | 42.249 | KV453330.1 | 2004088 | 28-scf00313     | 28 |
| AX-157858122 | 14 | 42.249 | KV453330.1 | 2055655 | 28-scf00313     | 28 |
| AX-158150834 | 14 | 42.3   | KV453330.1 | 1647929 | 28-scf00313     | 28 |
| AX-158150836 | 14 | 42.351 | KV453330.1 | 1651553 | 28-scf00313     | 28 |
| AX-158380390 | 14 | 42.358 | KV453330.1 | 1651642 | 28-scf00313     | 28 |
| AX-158412516 | 14 | 42.358 | KV453330.1 | 1651900 | 28-scf00313     | 28 |
| AX-158150837 | 14 | 42.358 | KV453330.1 | 1654269 | 28-scf00313     | 28 |
| AX-158393186 | 14 | 42.358 | KV453330.1 | 1656696 | 28-scf00313     | 28 |
| AX-158150838 | 14 | 42.358 | KV453330.1 | 1656802 | 28-scf00313     | 28 |
| AX-158150839 | 14 | 42.358 | KV453330.1 | 1657431 | 28-scf00313     | 28 |
| AX-158150840 | 14 | 42.358 | KV453330.1 | 1658597 | 28-scf00313     | 28 |
| AX-158150842 | 14 | 42.358 | KV453330.1 | 1661846 | 28-scf00313     | 28 |
| AX-158150843 | 14 | 42.358 | KV453330.1 | 1662494 | 28-scf00313     | 28 |
| AX-157716145 | 14 | 42.358 | KV453330.1 | 1666637 | 28-scf00313     | 28 |
| AX-157832457 | 14 | 42.358 | KV453330.1 | 1668219 | 28-scf00313     | 28 |
| AX-158150847 | 14 | 42.358 | KV453330.1 | 1671198 | 28-scf00313     | 28 |
| AX-158150849 | 14 | 42.358 | KV453330.1 | 1674443 | 28-scf00313     | 28 |
| AX-157744410 | 14 | 42.358 | KV453330.1 | 1677713 | 28-scf00313     | 28 |
| AX-157832460 | 14 | 42.358 | KV453330.1 | 1679187 | 28-scf00313     | 28 |
| AX-158150854 | 14 | 42.358 | KV453330.1 | 1681986 | 28-scf00313     | 28 |
| AX-158150856 | 14 | 42.358 | KV453330.1 | 1683365 | 28-scf00313     | 28 |
| AX-158150858 | 14 | 42.358 | KV453330.1 | 1685413 | 28-scf00313     | 28 |
| AX-158150864 | 14 | 42.358 | KV453330.1 | 1691280 | 28-scf00313     | 28 |
| AX-157832464 | 14 | 42.358 | KV453330.1 | 1693151 | 28-scf00313     | 28 |
| AX-158412517 | 14 | 42.358 | KV453330.1 | 1693989 | 28-scf00313     | 28 |

|              |    |        |             |         |             |    |
|--------------|----|--------|-------------|---------|-------------|----|
| AX-158150865 | 14 | 42.358 | KV453330.1  | 1695141 | 28-scf00313 | 28 |
| AX-157832465 | 14 | 42.358 | KV453330.1  | 1695299 | 28-scf00313 | 28 |
| AX-158412520 | 14 | 42.358 | KV453330.1  | 1753020 | 28-scf00313 | 28 |
| AX-158150964 | 14 | 42.358 | KV453330.1  | 1830748 | 28-scf00313 | 28 |
| AX-158150995 | 14 | 42.358 | KV453330.1  | 1887054 | 28-scf00313 | 28 |
| AX-158150869 | 14 | 42.383 | KV453330.1  | 1703453 | 28-scf00313 | 28 |
| AX-158150859 | 14 | 42.402 | KV453330.1  | 1686065 | 28-scf00313 | 28 |
| AX-158150872 | 14 | 42.402 | KV453330.1  | 1711235 | 28-scf00313 | 28 |
| AX-158150919 | 14 | 42.402 | KV453330.1  | 1768532 | 28-scf00313 | 28 |
| AX-158150874 | 14 | 42.432 | KV453330.1  | 1713469 | 28-scf00313 | 28 |
| AX-158150660 | 14 | 42.467 | KV453330.1  | 1436729 | 28-scf00313 | 28 |
| AX-157858117 | 14 | 42.467 | KV453330.1  | 1440156 | 28-scf00313 | 28 |
| AX-157725095 | 14 | 42.467 | KV453330.1  | 1512425 | 28-scf00313 | 28 |
| AX-158150770 | 14 | 42.467 | KV453330.1  | 1563422 | 28-scf00313 | 28 |
| AX-158150773 | 14 | 42.467 | KV453330.1  | 1568818 | 28-scf00313 | 28 |
| AX-158150871 | 14 | 42.467 | KV453330.1  | 1706731 | 28-scf00313 | 28 |
| AX-158150876 | 14 | 42.467 | KV453330.1  | 1714800 | 28-scf00313 | 28 |
| AX-158150877 | 14 | 42.467 | KV453330.1  | 1715539 | 28-scf00313 | 28 |
| AX-158150880 | 14 | 42.467 | KV453330.1  | 1719209 | 28-scf00313 | 28 |
| AX-157832469 | 14 | 42.467 | KV453330.1  | 1719441 | 28-scf00313 | 28 |
| AX-158150881 | 14 | 42.467 | KV453330.1  | 1719655 | 28-scf00313 | 28 |
| AX-158150886 | 14 | 42.467 | KV453330.1  | 1722347 | 28-scf00313 | 28 |
| AX-158150887 | 14 | 42.467 | KV453330.1  | 1723007 | 28-scf00313 | 28 |
| AX-158150888 | 14 | 42.467 | KV453330.1  | 1723568 | 28-scf00313 | 28 |
| AX-158150890 | 14 | 42.467 | KV453330.1  | 1726536 | 28-scf00313 | 28 |
| AX-158150893 | 14 | 42.467 | KV453330.1  | 1729954 | 28-scf00313 | 28 |
| AX-157832470 | 14 | 42.467 | KV453330.1  | 1730226 | 28-scf00313 | 28 |
| AX-158150896 | 14 | 42.467 | KV453330.1  | 1737552 | 28-scf00313 | 28 |
| AX-158150900 | 14 | 42.467 | KV453330.1  | 1745154 | 28-scf00313 | 28 |
| AX-158150902 | 14 | 42.467 | KV453330.1  | 1748010 | 28-scf00313 | 28 |
| AX-158150904 | 14 | 42.467 | KV453330.1  | 1749532 | 28-scf00313 | 28 |
| AX-158150906 | 14 | 42.467 | KV453330.1  | 1752030 | 28-scf00313 | 28 |
| AX-158412521 | 14 | 42.467 | KV453330.1  | 1753343 | 28-scf00313 | 28 |
| AX-158150907 | 14 | 42.467 | KV453330.1  | 1753904 | 28-scf00313 | 28 |
| AX-158150908 | 14 | 42.467 | KV453330.1  | 1754338 | 28-scf00313 | 28 |
| AX-158150909 | 14 | 42.467 | KV453330.1  | 1755427 | 28-scf00313 | 28 |
| AX-158150932 | 14 | 42.467 | KV453330.1  | 1783771 | 28-scf00313 | 28 |
| AX-158150960 | 14 | 42.467 | KV453330.1  | 1822508 | 28-scf00313 | 28 |
| AX-158150975 | 14 | 42.467 | KV453330.1  | 1850907 | 28-scf00313 | 28 |
| AX-158150988 | 14 | 42.467 | KV453330.1  | 1873277 | 28-scf00313 | 28 |
| AX-158151028 | 14 | 42.467 | KV453330.1  | 1950754 | 28-scf00313 | 28 |
| AX-157706665 | 14 | 42.528 | 3ML01032710 | 295     | scf08337_1  | UN |
| AX-158150923 | 14 | 42.576 | KV453330.1  | 1773905 | 28-scf00313 | 28 |
| AX-158150924 | 14 | 42.576 | KV453330.1  | 1774325 | 28-scf00313 | 28 |
| AX-158150929 | 14 | 42.576 | KV453330.1  | 1780904 | 28-scf00313 | 28 |
| AX-158150931 | 14 | 42.576 | KV453330.1  | 1782759 | 28-scf00313 | 28 |
| AX-158150933 | 14 | 42.576 | KV453330.1  | 1785341 | 28-scf00313 | 28 |
| AX-158150935 | 14 | 42.576 | KV453330.1  | 1787960 | 28-scf00313 | 28 |
| AX-157832474 | 14 | 42.576 | KV453330.1  | 1788898 | 28-scf00313 | 28 |
| AX-158150938 | 14 | 42.576 | KV453330.1  | 1793743 | 28-scf00313 | 28 |
| AX-158393190 | 14 | 42.576 | KV453330.1  | 1798070 | 28-scf00313 | 28 |

|              |    |        |            |         |             |    |
|--------------|----|--------|------------|---------|-------------|----|
| AX-158150949 | 14 | 42.576 | KV453330.1 | 1804184 | 28-scf00313 | 28 |
| AX-157751834 | 14 | 42.576 | KV453330.1 | 1805438 | 28-scf00313 | 28 |
| AX-157832476 | 14 | 42.576 | KV453330.1 | 1805550 | 28-scf00313 | 28 |
| AX-157772955 | 14 | 42.576 | KV453330.1 | 1806170 | 28-scf00313 | 28 |
| AX-158151007 | 14 | 42.576 | KV453330.1 | 1901330 | 28-scf00313 | 28 |
| AX-158151032 | 14 | 42.576 | KV453330.1 | 1963901 | 28-scf00313 | 28 |
| AX-158151147 | 14 | 42.576 | KV453330.1 | 2083844 | 28-scf00313 | 28 |
| AX-158151148 | 14 | 42.576 | KV453330.1 | 2084292 | 28-scf00313 | 28 |
| AX-158150950 | 14 | 42.597 | KV453330.1 | 1807493 | 28-scf00313 | 28 |
| AX-158150951 | 14 | 42.636 | KV453330.1 | 1808940 | 28-scf00313 | 28 |
| AX-158150952 | 14 | 42.636 | KV453330.1 | 1810035 | 28-scf00313 | 28 |
| AX-157832478 | 14 | 42.636 | KV453330.1 | 1814554 | 28-scf00313 | 28 |
| AX-158150972 | 14 | 42.636 | KV453330.1 | 1844254 | 28-scf00313 | 28 |
| AX-158150973 | 14 | 42.636 | KV453330.1 | 1845069 | 28-scf00313 | 28 |
| AX-158150953 | 14 | 42.659 | KV453330.1 | 1812159 | 28-scf00313 | 28 |
| AX-158150517 | 14 | 42.686 | KV453330.1 | 1217402 | 28-scf00313 | 28 |
| AX-157718762 | 14 | 42.686 | KV453330.1 | 1363866 | 28-scf00313 | 28 |
| AX-158150734 | 14 | 42.686 | KV453330.1 | 1518671 | 28-scf00313 | 28 |
| AX-158150735 | 14 | 42.686 | KV453330.1 | 1519171 | 28-scf00313 | 28 |
| AX-158150846 | 14 | 42.686 | KV453330.1 | 1669600 | 28-scf00313 | 28 |
| AX-158150848 | 14 | 42.686 | KV453330.1 | 1672560 | 28-scf00313 | 28 |
| AX-157723354 | 14 | 42.686 | KV453330.1 | 1727698 | 28-scf00313 | 28 |
| AX-158150894 | 14 | 42.686 | KV453330.1 | 1730732 | 28-scf00313 | 28 |
| AX-158150916 | 14 | 42.686 | KV453330.1 | 1765024 | 28-scf00313 | 28 |
| AX-158150926 | 14 | 42.686 | KV453330.1 | 1777067 | 28-scf00313 | 28 |
| AX-158150928 | 14 | 42.686 | KV453330.1 | 1780547 | 28-scf00313 | 28 |
| AX-158150942 | 14 | 42.686 | KV453330.1 | 1796622 | 28-scf00313 | 28 |
| AX-157832477 | 14 | 42.686 | KV453330.1 | 1811197 | 28-scf00313 | 28 |
| AX-158412524 | 14 | 42.686 | KV453330.1 | 1812313 | 28-scf00313 | 28 |
| AX-158150954 | 14 | 42.686 | KV453330.1 | 1812421 | 28-scf00313 | 28 |
| AX-158380391 | 14 | 42.686 | KV453330.1 | 1812544 | 28-scf00313 | 28 |
| AX-157742918 | 14 | 42.686 | KV453330.1 | 1812594 | 28-scf00313 | 28 |
| AX-158150955 | 14 | 42.686 | KV453330.1 | 1812745 | 28-scf00313 | 28 |
| AX-158150957 | 14 | 42.686 | KV453330.1 | 1813928 | 28-scf00313 | 28 |
| AX-157832479 | 14 | 42.686 | KV453330.1 | 1815086 | 28-scf00313 | 28 |
| AX-158150961 | 14 | 42.686 | KV453330.1 | 1822975 | 28-scf00313 | 28 |
| AX-158150963 | 14 | 42.686 | KV453330.1 | 1828428 | 28-scf00313 | 28 |
| AX-158150965 | 14 | 42.686 | KV453330.1 | 1831500 | 28-scf00313 | 28 |
| AX-158422910 | 14 | 42.686 | KV453330.1 | 1834942 | 28-scf00313 | 28 |
| AX-158150966 | 14 | 42.686 | KV453330.1 | 1838151 | 28-scf00313 | 28 |
| AX-158150970 | 14 | 42.686 | KV453330.1 | 1842395 | 28-scf00313 | 28 |
| AX-158150971 | 14 | 42.686 | KV453330.1 | 1843419 | 28-scf00313 | 28 |
| AX-158150974 | 14 | 42.686 | KV453330.1 | 1849822 | 28-scf00313 | 28 |
| AX-158150976 | 14 | 42.686 | KV453330.1 | 1851471 | 28-scf00313 | 28 |
| AX-158412527 | 14 | 42.686 | KV453330.1 | 1852968 | 28-scf00313 | 28 |
| AX-158422912 | 14 | 42.686 | KV453330.1 | 1855209 | 28-scf00313 | 28 |
| AX-158412530 | 14 | 42.686 | KV453330.1 | 1855297 | 28-scf00313 | 28 |
| AX-158412531 | 14 | 42.686 | KV453330.1 | 1855370 | 28-scf00313 | 28 |
| AX-158150979 | 14 | 42.686 | KV453330.1 | 1857510 | 28-scf00313 | 28 |
| AX-158150980 | 14 | 42.686 | KV453330.1 | 1858215 | 28-scf00313 | 28 |
| AX-158150981 | 14 | 42.686 | KV453330.1 | 1859201 | 28-scf00313 | 28 |

|              |    |        |            |         |             |    |
|--------------|----|--------|------------|---------|-------------|----|
| AX-158150982 | 14 | 42.686 | KV453330.1 | 1859616 | 28-scf00313 | 28 |
| AX-158150983 | 14 | 42.686 | KV453330.1 | 1860703 | 28-scf00313 | 28 |
| AX-157744285 | 14 | 42.686 | KV453330.1 | 1862526 | 28-scf00313 | 28 |
| AX-157740925 | 14 | 42.686 | KV453330.1 | 1862910 | 28-scf00313 | 28 |
| AX-158150984 | 14 | 42.686 | KV453330.1 | 1867310 | 28-scf00313 | 28 |
| AX-158150985 | 14 | 42.686 | KV453330.1 | 1870571 | 28-scf00313 | 28 |
| AX-158150987 | 14 | 42.686 | KV453330.1 | 1872661 | 28-scf00313 | 28 |
| AX-158150989 | 14 | 42.686 | KV453330.1 | 1874248 | 28-scf00313 | 28 |
| AX-158150990 | 14 | 42.686 | KV453330.1 | 1874992 | 28-scf00313 | 28 |
| AX-157743861 | 14 | 42.686 | KV453330.1 | 1881726 | 28-scf00313 | 28 |
| AX-158150996 | 14 | 42.686 | KV453330.1 | 1888563 | 28-scf00313 | 28 |
| AX-158150997 | 14 | 42.686 | KV453330.1 | 1889312 | 28-scf00313 | 28 |
| AX-158150999 | 14 | 42.686 | KV453330.1 | 1890957 | 28-scf00313 | 28 |
| AX-158151000 | 14 | 42.686 | KV453330.1 | 1892588 | 28-scf00313 | 28 |
| AX-158151001 | 14 | 42.686 | KV453330.1 | 1892874 | 28-scf00313 | 28 |
| AX-158151002 | 14 | 42.686 | KV453330.1 | 1894355 | 28-scf00313 | 28 |
| AX-157740187 | 14 | 42.686 | KV453330.1 | 1896311 | 28-scf00313 | 28 |
| AX-157832483 | 14 | 42.686 | KV453330.1 | 1897226 | 28-scf00313 | 28 |
| AX-157832484 | 14 | 42.686 | KV453330.1 | 1897658 | 28-scf00313 | 28 |
| AX-157724902 | 14 | 42.686 | KV453330.1 | 1897860 | 28-scf00313 | 28 |
| AX-158151004 | 14 | 42.686 | KV453330.1 | 1898760 | 28-scf00313 | 28 |
| AX-158151005 | 14 | 42.686 | KV453330.1 | 1900250 | 28-scf00313 | 28 |
| AX-158151008 | 14 | 42.686 | KV453330.1 | 1902155 | 28-scf00313 | 28 |
| AX-158151009 | 14 | 42.686 | KV453330.1 | 1906209 | 28-scf00313 | 28 |
| AX-158151012 | 14 | 42.686 | KV453330.1 | 1910178 | 28-scf00313 | 28 |
| AX-158151013 | 14 | 42.686 | KV453330.1 | 1911054 | 28-scf00313 | 28 |
| AX-158151015 | 14 | 42.686 | KV453330.1 | 1915385 | 28-scf00313 | 28 |
| AX-157832486 | 14 | 42.686 | KV453330.1 | 1915694 | 28-scf00313 | 28 |
| AX-158151019 | 14 | 42.686 | KV453330.1 | 1925832 | 28-scf00313 | 28 |
| AX-157832487 | 14 | 42.686 | KV453330.1 | 1928595 | 28-scf00313 | 28 |
| AX-158151021 | 14 | 42.686 | KV453330.1 | 1930294 | 28-scf00313 | 28 |
| AX-158151023 | 14 | 42.686 | KV453330.1 | 1932001 | 28-scf00313 | 28 |
| AX-157832488 | 14 | 42.686 | KV453330.1 | 1933334 | 28-scf00313 | 28 |
| AX-158151025 | 14 | 42.686 | KV453330.1 | 1934248 | 28-scf00313 | 28 |
| AX-157871742 | 14 | 42.686 | KV453330.1 | 1939314 | 28-scf00313 | 28 |
| AX-157725730 | 14 | 42.686 | KV453330.1 | 1954096 | 28-scf00313 | 28 |
| AX-157832490 | 14 | 42.686 | KV453330.1 | 1955680 | 28-scf00313 | 28 |
| AX-157832491 | 14 | 42.686 | KV453330.1 | 1956401 | 28-scf00313 | 28 |
| AX-158151030 | 14 | 42.686 | KV453330.1 | 1958476 | 28-scf00313 | 28 |
| AX-158151031 | 14 | 42.686 | KV453330.1 | 1959113 | 28-scf00313 | 28 |
| AX-158380392 | 14 | 42.686 | KV453330.1 | 1960887 | 28-scf00313 | 28 |
| AX-157748055 | 14 | 42.686 | KV453330.1 | 1961139 | 28-scf00313 | 28 |
| AX-158151033 | 14 | 42.686 | KV453330.1 | 1966443 | 28-scf00313 | 28 |
| AX-158151036 | 14 | 42.686 | KV453330.1 | 1974335 | 28-scf00313 | 28 |
| AX-158151038 | 14 | 42.686 | KV453330.1 | 1976643 | 28-scf00313 | 28 |
| AX-158151041 | 14 | 42.686 | KV453330.1 | 1980475 | 28-scf00313 | 28 |
| AX-158151043 | 14 | 42.686 | KV453330.1 | 1982308 | 28-scf00313 | 28 |
| AX-158151044 | 14 | 42.686 | KV453330.1 | 1984580 | 28-scf00313 | 28 |
| AX-158412536 | 14 | 42.686 | KV453330.1 | 1987584 | 28-scf00313 | 28 |
| AX-158412538 | 14 | 42.686 | KV453330.1 | 1988395 | 28-scf00313 | 28 |
| AX-158151045 | 14 | 42.686 | KV453330.1 | 1988805 | 28-scf00313 | 28 |

|              |    |        |            |         |             |    |
|--------------|----|--------|------------|---------|-------------|----|
| AX-158151046 | 14 | 42.686 | KV453330.1 | 1989231 | 28-scf00313 | 28 |
| AX-158151047 | 14 | 42.686 | KV453330.1 | 1989856 | 28-scf00313 | 28 |
| AX-158151050 | 14 | 42.686 | KV453330.1 | 1995163 | 28-scf00313 | 28 |
| AX-157886477 | 14 | 42.686 | KV453330.1 | 1995449 | 28-scf00313 | 28 |
| AX-158151052 | 14 | 42.686 | KV453330.1 | 1996498 | 28-scf00313 | 28 |
| AX-158151056 | 14 | 42.686 | KV453330.1 | 1999847 | 28-scf00313 | 28 |
| AX-158151057 | 14 | 42.686 | KV453330.1 | 2001357 | 28-scf00313 | 28 |
| AX-158408636 | 14 | 42.686 | KV453330.1 | 2002577 | 28-scf00313 | 28 |
| AX-158151063 | 14 | 42.686 | KV453330.1 | 2007446 | 28-scf00313 | 28 |
| AX-158151064 | 14 | 42.686 | KV453330.1 | 2008462 | 28-scf00313 | 28 |
| AX-157832496 | 14 | 42.686 | KV453330.1 | 2009444 | 28-scf00313 | 28 |
| AX-157832497 | 14 | 42.686 | KV453330.1 | 2010835 | 28-scf00313 | 28 |
| AX-157858119 | 14 | 42.686 | KV453330.1 | 2010969 | 28-scf00313 | 28 |
| AX-157832498 | 14 | 42.686 | KV453330.1 | 2011007 | 28-scf00313 | 28 |
| AX-158151069 | 14 | 42.686 | KV453330.1 | 2012531 | 28-scf00313 | 28 |
| AX-158151070 | 14 | 42.686 | KV453330.1 | 2014497 | 28-scf00313 | 28 |
| AX-158151072 | 14 | 42.686 | KV453330.1 | 2015318 | 28-scf00313 | 28 |
| AX-158151074 | 14 | 42.686 | KV453330.1 | 2019685 | 28-scf00313 | 28 |
| AX-158151075 | 14 | 42.686 | KV453330.1 | 2020961 | 28-scf00313 | 28 |
| AX-158151076 | 14 | 42.686 | KV453330.1 | 2021686 | 28-scf00313 | 28 |
| AX-157741359 | 14 | 42.686 | KV453330.1 | 2029162 | 28-scf00313 | 28 |
| AX-157724175 | 14 | 42.686 | KV453330.1 | 2030343 | 28-scf00313 | 28 |
| AX-158151080 | 14 | 42.686 | KV453330.1 | 2031518 | 28-scf00313 | 28 |
| AX-158151081 | 14 | 42.686 | KV453330.1 | 2031943 | 28-scf00313 | 28 |
| AX-158151082 | 14 | 42.686 | KV453330.1 | 2033627 | 28-scf00313 | 28 |
| AX-158151084 | 14 | 42.686 | KV453330.1 | 2034484 | 28-scf00313 | 28 |
| AX-158151089 | 14 | 42.686 | KV453330.1 | 2037518 | 28-scf00313 | 28 |
| AX-158151091 | 14 | 42.686 | KV453330.1 | 2038647 | 28-scf00313 | 28 |
| AX-158151092 | 14 | 42.686 | KV453330.1 | 2038960 | 28-scf00313 | 28 |
| AX-158151093 | 14 | 42.686 | KV453330.1 | 2040944 | 28-scf00313 | 28 |
| AX-158151100 | 14 | 42.686 | KV453330.1 | 2047153 | 28-scf00313 | 28 |
| AX-158151103 | 14 | 42.686 | KV453330.1 | 2051376 | 28-scf00313 | 28 |
| AX-158151106 | 14 | 42.686 | KV453330.1 | 2054962 | 28-scf00313 | 28 |
| AX-158151107 | 14 | 42.686 | KV453330.1 | 2055197 | 28-scf00313 | 28 |
| AX-158151113 | 14 | 42.686 | KV453330.1 | 2061205 | 28-scf00313 | 28 |
| AX-158151117 | 14 | 42.686 | KV453330.1 | 2063431 | 28-scf00313 | 28 |
| AX-158151119 | 14 | 42.686 | KV453330.1 | 2064040 | 28-scf00313 | 28 |
| AX-158151120 | 14 | 42.686 | KV453330.1 | 2064300 | 28-scf00313 | 28 |
| AX-158151121 | 14 | 42.686 | KV453330.1 | 2064943 | 28-scf00313 | 28 |
| AX-157755681 | 14 | 42.686 | KV453330.1 | 2067342 | 28-scf00313 | 28 |
| AX-157832501 | 14 | 42.686 | KV453330.1 | 2068368 | 28-scf00313 | 28 |
| AX-158151124 | 14 | 42.686 | KV453330.1 | 2069379 | 28-scf00313 | 28 |
| AX-158151125 | 14 | 42.686 | KV453330.1 | 2069741 | 28-scf00313 | 28 |
| AX-158151127 | 14 | 42.686 | KV453330.1 | 2070380 | 28-scf00313 | 28 |
| AX-158151131 | 14 | 42.686 | KV453330.1 | 2072270 | 28-scf00313 | 28 |
| AX-158151132 | 14 | 42.686 | KV453330.1 | 2072850 | 28-scf00313 | 28 |
| AX-158151134 | 14 | 42.686 | KV453330.1 | 2073844 | 28-scf00313 | 28 |
| AX-158151135 | 14 | 42.686 | KV453330.1 | 2074899 | 28-scf00313 | 28 |
| AX-158151136 | 14 | 42.686 | KV453330.1 | 2076226 | 28-scf00313 | 28 |
| AX-158151138 | 14 | 42.686 | KV453330.1 | 2077566 | 28-scf00313 | 28 |
| AX-158151139 | 14 | 42.686 | KV453330.1 | 2077994 | 28-scf00313 | 28 |

|              |    |        |            |         |             |    |
|--------------|----|--------|------------|---------|-------------|----|
| AX-158151140 | 14 | 42.686 | KV453330.1 | 2078145 | 28-scf00313 | 28 |
| AX-158151143 | 14 | 42.686 | KV453330.1 | 2080495 | 28-scf00313 | 28 |
| AX-157886479 | 14 | 42.686 | KV453330.1 | 2082828 | 28-scf00313 | 28 |
| AX-157724724 | 14 | 42.686 | KV453330.1 | 2084104 | 28-scf00313 | 28 |
| AX-158151149 | 14 | 42.686 | KV453330.1 | 2084772 | 28-scf00313 | 28 |
| AX-158151151 | 14 | 42.686 | KV453330.1 | 2086200 | 28-scf00313 | 28 |
| AX-158151154 | 14 | 42.686 | KV453330.1 | 2090706 | 28-scf00313 | 28 |
| AX-158151155 | 14 | 42.686 | KV453330.1 | 2092543 | 28-scf00313 | 28 |
| AX-158151156 | 14 | 42.686 | KV453330.1 | 2093906 | 28-scf00313 | 28 |
| AX-158151157 | 14 | 42.686 | KV453330.1 | 2095220 | 28-scf00313 | 28 |
| AX-158151158 | 14 | 42.686 | KV453330.1 | 2095626 | 28-scf00313 | 28 |
| AX-158151166 | 14 | 42.686 | KV453330.1 | 2104572 | 28-scf00313 | 28 |
| AX-158151168 | 14 | 42.686 | KV453330.1 | 2105866 | 28-scf00313 | 28 |
| AX-158151177 | 14 | 42.686 | KV453330.1 | 2117703 | 28-scf00313 | 28 |
| AX-157866451 | 14 | 42.686 | KV453330.1 | 2134512 | 28-scf00313 | 28 |
| AX-157739067 | 14 | 42.686 | KV453330.1 | 2148698 | 28-scf00313 | 28 |
| AX-158151211 | 14 | 42.686 | KV453330.1 | 2164606 | 28-scf00313 | 28 |
| AX-157832512 | 14 | 42.686 | KV453330.1 | 2164817 | 28-scf00313 | 28 |
| AX-158151223 | 14 | 42.686 | KV453330.1 | 2175924 | 28-scf00313 | 28 |
| AX-158151231 | 14 | 42.686 | KV453330.1 | 2184721 | 28-scf00313 | 28 |
| AX-157794019 | 14 | 42.741 | KV453327.1 | 3688256 | 28-scf00311 | 28 |
| AX-158150263 | 14 | 42.741 | KV453330.1 | 900935  | 28-scf00313 | 28 |
| AX-158150543 | 14 | 42.741 | KV453330.1 | 1253012 | 28-scf00313 | 28 |
| AX-158151096 | 14 | 42.741 | KV453330.1 | 2045421 | 28-scf00313 | 28 |
| AX-158151159 | 14 | 42.741 | KV453330.1 | 2097019 | 28-scf00313 | 28 |
| AX-157866450 | 14 | 42.795 | KV453330.1 | 2103099 | 28-scf00313 | 28 |
| AX-158151165 | 14 | 42.795 | KV453330.1 | 2103559 | 28-scf00313 | 28 |
| AX-157719796 | 14 | 42.904 | KV453330.1 | 1915122 | 28-scf00313 | 28 |
| AX-158151018 | 14 | 42.904 | KV453330.1 | 1924916 | 28-scf00313 | 28 |
| AX-158151088 | 14 | 42.904 | KV453330.1 | 2037181 | 28-scf00313 | 28 |
| AX-158151099 | 14 | 42.904 | KV453330.1 | 2046725 | 28-scf00313 | 28 |
| AX-158151108 | 14 | 42.904 | KV453330.1 | 2057669 | 28-scf00313 | 28 |
| AX-158151109 | 14 | 42.904 | KV453330.1 | 2058458 | 28-scf00313 | 28 |
| AX-158151126 | 14 | 42.904 | KV453330.1 | 2069866 | 28-scf00313 | 28 |
| AX-158151128 | 14 | 42.904 | KV453330.1 | 2071103 | 28-scf00313 | 28 |
| AX-158151172 | 14 | 42.904 | KV453330.1 | 2108947 | 28-scf00313 | 28 |
| AX-157710931 | 14 | 42.904 | KV453330.1 | 2110105 | 28-scf00313 | 28 |
| AX-158151174 | 14 | 42.904 | KV453330.1 | 2110958 | 28-scf00313 | 28 |
| AX-158151175 | 14 | 42.904 | KV453330.1 | 2111922 | 28-scf00313 | 28 |
| AX-158151179 | 14 | 42.904 | KV453330.1 | 2118892 | 28-scf00313 | 28 |
| AX-158151180 | 14 | 42.904 | KV453330.1 | 2119636 | 28-scf00313 | 28 |
| AX-157832505 | 14 | 42.904 | KV453330.1 | 2122373 | 28-scf00313 | 28 |
| AX-157775269 | 14 | 42.904 | KV453330.1 | 2123318 | 28-scf00313 | 28 |
| AX-158151182 | 14 | 42.904 | KV453330.1 | 2126770 | 28-scf00313 | 28 |
| AX-158151183 | 14 | 42.904 | KV453330.1 | 2127819 | 28-scf00313 | 28 |
| AX-157832506 | 14 | 42.904 | KV453330.1 | 2128614 | 28-scf00313 | 28 |
| AX-157715631 | 14 | 42.904 | KV453330.1 | 2136363 | 28-scf00313 | 28 |
| AX-158151292 | 14 | 42.904 | KV453330.1 | 2277573 | 28-scf00313 | 28 |
| AX-157886481 | 14 | 42.958 | KV453330.1 | 2139968 | 28-scf00313 | 28 |
| AX-158151194 | 14 | 43.013 | KV453330.1 | 2144754 | 28-scf00313 | 28 |
| AX-158151195 | 14 | 43.013 | KV453330.1 | 2145655 | 28-scf00313 | 28 |

|              |    |        |            |         |             |    |
|--------------|----|--------|------------|---------|-------------|----|
| AX-157743526 | 14 | 43.013 | KV453330.1 | 2150621 | 28-scf00313 | 28 |
| AX-158151197 | 14 | 43.013 | KV453330.1 | 2150860 | 28-scf00313 | 28 |
| AX-158151200 | 14 | 43.013 | KV453330.1 | 2152844 | 28-scf00313 | 28 |
| AX-158151201 | 14 | 43.013 | KV453330.1 | 2153170 | 28-scf00313 | 28 |
| AX-158151205 | 14 | 43.013 | KV453330.1 | 2156062 | 28-scf00313 | 28 |
| AX-158151210 | 14 | 43.013 | KV453330.1 | 2164210 | 28-scf00313 | 28 |
| AX-158151212 | 14 | 43.013 | KV453330.1 | 2165086 | 28-scf00313 | 28 |
| AX-158151214 | 14 | 43.013 | KV453330.1 | 2165782 | 28-scf00313 | 28 |
| AX-157726431 | 14 | 43.013 | KV453330.1 | 2167875 | 28-scf00313 | 28 |
| AX-158151217 | 14 | 43.013 | KV453330.1 | 2169267 | 28-scf00313 | 28 |
| AX-158151220 | 14 | 43.013 | KV453330.1 | 2171325 | 28-scf00313 | 28 |
| AX-158151218 | 14 | 43.014 | KV453330.1 | 2170133 | 28-scf00313 | 28 |
| AX-158151227 | 14 | 43.341 | KV453330.1 | 2181475 | 28-scf00313 | 28 |
| AX-158151228 | 14 | 43.341 | KV453330.1 | 2182757 | 28-scf00313 | 28 |
| AX-158385568 | 14 | 43.341 | KV453330.1 | 2183651 | 28-scf00313 | 28 |
| AX-158151230 | 14 | 43.341 | KV453330.1 | 2184226 | 28-scf00313 | 28 |
| AX-158151249 | 14 | 43.341 | KV453330.1 | 2212202 | 28-scf00313 | 28 |
| AX-157770679 | 14 | 43.45  | KV453330.1 | 2189760 | 28-scf00313 | 28 |
| AX-158151234 | 14 | 43.45  | KV453330.1 | 2190292 | 28-scf00313 | 28 |
| AX-158380393 | 14 | 43.45  | KV453330.1 | 2190423 | 28-scf00313 | 28 |
| AX-158151235 | 14 | 43.45  | KV453330.1 | 2190769 | 28-scf00313 | 28 |
| AX-158151236 | 14 | 43.478 | KV453330.1 | 2194470 | 28-scf00313 | 28 |
| AX-157755725 | 14 | 43.505 | KV453330.1 | 2195506 | 28-scf00313 | 28 |
| AX-158151238 | 14 | 43.559 | KV453330.1 | 2198723 | 28-scf00313 | 28 |
| AX-157771792 | 14 | 43.559 | KV453330.1 | 2199840 | 28-scf00313 | 28 |
| AX-158150661 | 14 | 43.614 | KV453330.1 | 1437393 | 28-scf00313 | 28 |
| AX-158150679 | 14 | 43.614 | KV453330.1 | 1454457 | 28-scf00313 | 28 |
| AX-158151239 | 14 | 43.614 | KV453330.1 | 2200287 | 28-scf00313 | 28 |
| AX-158151240 | 14 | 43.614 | KV453330.1 | 2200720 | 28-scf00313 | 28 |
| AX-158151242 | 14 | 43.669 | KV453330.1 | 2204752 | 28-scf00313 | 28 |
| AX-158151245 | 14 | 43.669 | KV453330.1 | 2207303 | 28-scf00313 | 28 |
| AX-158151246 | 14 | 43.669 | KV453330.1 | 2209284 | 28-scf00313 | 28 |
| AX-158151247 | 14 | 43.669 | KV453330.1 | 2209687 | 28-scf00313 | 28 |
| AX-158151248 | 14 | 43.701 | KV453330.1 | 2211147 | 28-scf00313 | 28 |
| AX-158412547 | 14 | 43.778 | KV453330.1 | 2216083 | 28-scf00313 | 28 |
| AX-158412548 | 14 | 43.778 | KV453330.1 | 2217475 | 28-scf00313 | 28 |
| AX-157832513 | 14 | 43.778 | KV453330.1 | 2217867 | 28-scf00313 | 28 |
| AX-158151251 | 14 | 43.778 | KV453330.1 | 2218258 | 28-scf00313 | 28 |
| AX-157746738 | 14 | 43.778 | KV453330.1 | 2219381 | 28-scf00313 | 28 |
| AX-157741919 | 14 | 43.832 | KV453330.1 | 2221640 | 28-scf00313 | 28 |
| AX-157718078 | 14 | 43.887 | KV453330.1 | 2222463 | 28-scf00313 | 28 |
| AX-158151252 | 14 | 43.887 | KV453330.1 | 2222996 | 28-scf00313 | 28 |
| AX-157715182 | 14 | 43.996 | KV453330.1 | 2227281 | 28-scf00313 | 28 |
| AX-157747693 | 14 | 43.996 | KV453330.1 | 2227321 | 28-scf00313 | 28 |
| AX-158151255 | 14 | 43.996 | KV453330.1 | 2228656 | 28-scf00313 | 28 |
| AX-158151258 | 14 | 43.996 | KV453330.1 | 2231860 | 28-scf00313 | 28 |
| AX-158151260 | 14 | 44.105 | KV453330.1 | 2234315 | 28-scf00313 | 28 |
| AX-158151263 | 14 | 44.186 | KV453330.1 | 2236636 | 28-scf00313 | 28 |
| AX-158151264 | 14 | 44.324 | KV453330.1 | 2237208 | 28-scf00313 | 28 |
| AX-158151266 | 14 | 44.324 | KV453330.1 | 2238772 | 28-scf00313 | 28 |
| AX-157758061 | 14 | 44.324 | KV453330.1 | 2239589 | 28-scf00313 | 28 |

|              |    |        |            |         |             |    |
|--------------|----|--------|------------|---------|-------------|----|
| AX-157871751 | 14 | 44.324 | KV453330.1 | 2240555 | 28-scf00313 | 28 |
| AX-158151268 | 14 | 44.324 | KV453330.1 | 2240777 | 28-scf00313 | 28 |
| AX-157726575 | 14 | 44.324 | KV453330.1 | 2241457 | 28-scf00313 | 28 |
| AX-157745724 | 14 | 44.324 | KV453330.1 | 2243074 | 28-scf00313 | 28 |
| AX-158151271 | 14 | 44.324 | KV453330.1 | 2245881 | 28-scf00313 | 28 |
| AX-157753225 | 14 | 44.324 | KV453330.1 | 2247612 | 28-scf00313 | 28 |
| AX-158151272 | 14 | 44.324 | KV453330.1 | 2248823 | 28-scf00313 | 28 |
| AX-158151273 | 14 | 44.324 | KV453330.1 | 2249829 | 28-scf00313 | 28 |
| AX-158151275 | 14 | 44.324 | KV453330.1 | 2254988 | 28-scf00313 | 28 |
| AX-157832539 | 14 | 44.324 | KV453330.1 | 2465591 | 28-scf00313 | 28 |
| AX-158151259 | 14 | 44.341 | KV453330.1 | 2232810 | 28-scf00313 | 28 |
| AX-158151261 | 14 | 44.341 | KV453330.1 | 2235155 | 28-scf00313 | 28 |
| AX-158151280 | 14 | 44.341 | KV453330.1 | 2261831 | 28-scf00313 | 28 |
| AX-157866452 | 14 | 44.341 | KV453330.1 | 2274042 | 28-scf00313 | 28 |
| AX-158408639 | 14 | 44.341 | KV453330.1 | 2289104 | 28-scf00313 | 28 |
| AX-158151313 | 14 | 44.341 | KV453330.1 | 2308282 | 28-scf00313 | 28 |
| AX-157794202 | 14 | 44.341 | KV453330.1 | 2427914 | 28-scf00313 | 28 |
| AX-158151277 | 14 | 44.543 | KV453330.1 | 2255961 | 28-scf00313 | 28 |
| AX-157832518 | 14 | 44.543 | KV453330.1 | 2259448 | 28-scf00313 | 28 |
| AX-157744662 | 14 | 44.543 | KV453330.1 | 2265258 | 28-scf00313 | 28 |
| AX-158151282 | 14 | 44.543 | KV453330.1 | 2267008 | 28-scf00313 | 28 |
| AX-157749333 | 14 | 44.543 | KV453330.1 | 2272133 | 28-scf00313 | 28 |
| AX-158151284 | 14 | 44.543 | KV453330.1 | 2272702 | 28-scf00313 | 28 |
| AX-157751173 | 14 | 44.543 | KV453330.1 | 2274755 | 28-scf00313 | 28 |
| AX-158151286 | 14 | 44.543 | KV453330.1 | 2275053 | 28-scf00313 | 28 |
| AX-158151287 | 14 | 44.543 | KV453330.1 | 2275403 | 28-scf00313 | 28 |
| AX-158151291 | 14 | 44.543 | KV453330.1 | 2277296 | 28-scf00313 | 28 |
| AX-158151295 | 14 | 44.543 | KV453330.1 | 2282040 | 28-scf00313 | 28 |
| AX-158385570 | 14 | 44.543 | KV453330.1 | 2282843 | 28-scf00313 | 28 |
| AX-158151296 | 14 | 44.543 | KV453330.1 | 2284546 | 28-scf00313 | 28 |
| AX-158151297 | 14 | 44.543 | KV453330.1 | 2285604 | 28-scf00313 | 28 |
| AX-158151298 | 14 | 44.543 | KV453330.1 | 2286081 | 28-scf00313 | 28 |
| AX-158151299 | 14 | 44.543 | KV453330.1 | 2286652 | 28-scf00313 | 28 |
| AX-158151300 | 14 | 44.543 | KV453330.1 | 2287079 | 28-scf00313 | 28 |
| AX-158151301 | 14 | 44.543 | KV453330.1 | 2287809 | 28-scf00313 | 28 |
| AX-157742197 | 14 | 44.543 | KV453330.1 | 2291133 | 28-scf00313 | 28 |
| AX-158151302 | 14 | 44.543 | KV453330.1 | 2292395 | 28-scf00313 | 28 |
| AX-158151305 | 14 | 44.543 | KV453330.1 | 2296148 | 28-scf00313 | 28 |
| AX-158151308 | 14 | 44.543 | KV453330.1 | 2301050 | 28-scf00313 | 28 |
| AX-158151310 | 14 | 44.543 | KV453330.1 | 2304008 | 28-scf00313 | 28 |
| AX-158151315 | 14 | 44.543 | KV453330.1 | 2309224 | 28-scf00313 | 28 |
| AX-158151316 | 14 | 44.543 | KV453330.1 | 2309809 | 28-scf00313 | 28 |
| AX-158151320 | 14 | 44.543 | KV453330.1 | 2317368 | 28-scf00313 | 28 |
| AX-158151323 | 14 | 44.543 | KV453330.1 | 2319219 | 28-scf00313 | 28 |
| AX-158151324 | 14 | 44.543 | KV453330.1 | 2321000 | 28-scf00313 | 28 |
| AX-158151325 | 14 | 44.543 | KV453330.1 | 2321894 | 28-scf00313 | 28 |
| AX-158151328 | 14 | 44.543 | KV453330.1 | 2326553 | 28-scf00313 | 28 |
| AX-158151329 | 14 | 44.543 | KV453330.1 | 2327266 | 28-scf00313 | 28 |
| AX-158151332 | 14 | 44.543 | KV453330.1 | 2328512 | 28-scf00313 | 28 |
| AX-157715526 | 14 | 44.543 | KV453330.1 | 2338807 | 28-scf00313 | 28 |
| AX-158151338 | 14 | 44.543 | KV453330.1 | 2339560 | 28-scf00313 | 28 |



|              |    |        |             |         |                 |    |
|--------------|----|--------|-------------|---------|-----------------|----|
| AX-158151352 | 14 | 44.543 | KV453330.1  | 2373651 | 28-scf00313     | 28 |
| AX-157832535 | 14 | 44.543 | KV453330.1  | 2451935 | 28-scf00313     | 28 |
| AX-158151422 | 14 | 44.543 | KV453330.1  | 2484082 | 28-scf00313     | 28 |
| AX-157694168 | 14 | 44.543 | FI896103.1  | 239     | -HORI212 lctali | UN |
| AX-158151333 | 14 | 44.565 | KV453330.1  | 2328847 | 28-scf00313     | 28 |
| AX-157725917 | 14 | 44.591 | KV453330.1  | 2335334 | 28-scf00313     | 28 |
| AX-157697752 | 14 | 44.612 | KV453330.1  | 2336628 | 28-scf00313     | 28 |
| AX-158151257 | 14 | 44.631 | KV453330.1  | 2230779 | 28-scf00313     | 28 |
| AX-157697753 | 14 | 44.631 | KV453330.1  | 2336770 | 28-scf00313     | 28 |
| AX-157770702 | 14 | 44.641 | KV453330.1  | 2211626 | 28-scf00313     | 28 |
| AX-157713423 | 14 | 44.641 | KV453330.1  | 2340956 | 28-scf00313     | 28 |
| AX-158151289 | 14 | 44.648 | KV453330.1  | 2276522 | 28-scf00313     | 28 |
| AX-158151339 | 14 | 44.648 | KV453330.1  | 2342555 | 28-scf00313     | 28 |
| AX-157775283 | 14 | 44.652 | KV453330.1  | 2210349 | 28-scf00313     | 28 |
| AX-157749463 | 14 | 44.652 | KV453330.1  | 2316148 | 28-scf00313     | 28 |
| AX-157726380 | 14 | 44.652 | KV453330.1  | 2331842 | 28-scf00313     | 28 |
| AX-157832522 | 14 | 44.652 | KV453330.1  | 2345754 | 28-scf00313     | 28 |
| AX-158151340 | 14 | 44.652 | KV453330.1  | 2346189 | 28-scf00313     | 28 |
| AX-158151342 | 14 | 44.652 | KV453330.1  | 2347717 | 28-scf00313     | 28 |
| AX-157714269 | 14 | 44.652 | KV453330.1  | 2350029 | 28-scf00313     | 28 |
| AX-157746630 | 14 | 44.652 | KV453330.1  | 2357830 | 28-scf00313     | 28 |
| AX-158151303 | 14 | 44.654 | KV453330.1  | 2292781 | 28-scf00313     | 28 |
| AX-158151345 | 14 | 44.654 | KV453330.1  | 2358199 | 28-scf00313     | 28 |
| AX-158151346 | 14 | 44.718 | KV453330.1  | 2362076 | 28-scf00313     | 28 |
| AX-158151288 | 14 | 44.782 | KV453330.1  | 2275970 | 28-scf00313     | 28 |
| AX-158151347 | 14 | 44.782 | KV453330.1  | 2364362 | 28-scf00313     | 28 |
| AX-157751835 | 14 | 44.782 | KV453330.1  | 2365325 | 28-scf00313     | 28 |
| AX-158151348 | 14 | 44.782 | KV453330.1  | 2366802 | 28-scf00313     | 28 |
| AX-157706205 | 14 | 44.782 | 3ML01031817 | 243     | scf07438_1      | UN |
| AX-158151349 | 14 | 44.783 | KV453330.1  | 2368248 | 28-scf00313     | 28 |
| AX-158151350 | 14 | 44.783 | KV453330.1  | 2369227 | 28-scf00313     | 28 |
| AX-158151351 | 14 | 44.783 | KV453330.1  | 2369559 | 28-scf00313     | 28 |
| AX-158151265 | 14 | 45.307 | KV453330.1  | 2237441 | 28-scf00313     | 28 |
| AX-157832516 | 14 | 45.307 | KV453330.1  | 2247173 | 28-scf00313     | 28 |
| AX-157710295 | 14 | 45.307 | KV453330.1  | 2312614 | 28-scf00313     | 28 |
| AX-157753191 | 14 | 45.307 | KV453330.1  | 2331034 | 28-scf00313     | 28 |
| AX-158151334 | 14 | 45.307 | KV453330.1  | 2333678 | 28-scf00313     | 28 |
| AX-157832531 | 14 | 45.307 | KV453330.1  | 2440797 | 28-scf00313     | 28 |
| AX-158151397 | 14 | 45.307 | KV453330.1  | 2442332 | 28-scf00313     | 28 |
| AX-158151398 | 14 | 45.307 | KV453330.1  | 2444462 | 28-scf00313     | 28 |
| AX-158151399 | 14 | 45.307 | KV453330.1  | 2444777 | 28-scf00313     | 28 |
| AX-158151400 | 14 | 45.307 | KV453330.1  | 2445158 | 28-scf00313     | 28 |
| AX-158151401 | 14 | 45.307 | KV453330.1  | 2447919 | 28-scf00313     | 28 |
| AX-157832534 | 14 | 45.307 | KV453330.1  | 2450311 | 28-scf00313     | 28 |
| AX-157714992 | 14 | 45.307 | KV453330.1  | 2451229 | 28-scf00313     | 28 |
| AX-158151418 | 14 | 45.307 | KV453330.1  | 2477245 | 28-scf00313     | 28 |
| AX-158151483 | 14 | 45.307 | KV453330.1  | 2590116 | 28-scf00313     | 28 |
| AX-158151409 | 14 | 45.416 | KV453330.1  | 2462715 | 28-scf00313     | 28 |
| AX-157832537 | 14 | 45.416 | KV453330.1  | 2463803 | 28-scf00313     | 28 |
| AX-157832538 | 14 | 45.416 | KV453330.1  | 2465435 | 28-scf00313     | 28 |
| AX-158151411 | 14 | 45.416 | KV453330.1  | 2466604 | 28-scf00313     | 28 |

|              |    |        |            |         |             |    |
|--------------|----|--------|------------|---------|-------------|----|
| AX-158151412 | 14 | 45.416 | KV453330.1 | 2467036 | 28-scf00313 | 28 |
| AX-158151413 | 14 | 45.416 | KV453330.1 | 2468232 | 28-scf00313 | 28 |
| AX-157758381 | 14 | 45.416 | KV453330.1 | 2469547 | 28-scf00313 | 28 |
| AX-158151415 | 14 | 45.416 | KV453330.1 | 2471155 | 28-scf00313 | 28 |
| AX-158151416 | 14 | 45.416 | KV453330.1 | 2474838 | 28-scf00313 | 28 |
| AX-158151417 | 14 | 45.416 | KV453330.1 | 2476007 | 28-scf00313 | 28 |
| AX-157832540 | 14 | 45.416 | KV453330.1 | 2476185 | 28-scf00313 | 28 |
| AX-158151420 | 14 | 45.416 | KV453330.1 | 2480516 | 28-scf00313 | 28 |
| AX-158151421 | 14 | 45.416 | KV453330.1 | 2482043 | 28-scf00313 | 28 |
| AX-158151426 | 14 | 45.416 | KV453330.1 | 2491214 | 28-scf00313 | 28 |
| AX-158151486 | 14 | 45.416 | KV453330.1 | 2597797 | 28-scf00313 | 28 |
| AX-158151414 | 14 | 45.525 | KV453330.1 | 2470882 | 28-scf00313 | 28 |
| AX-158151428 | 14 | 45.525 | KV453330.1 | 2492555 | 28-scf00313 | 28 |
| AX-158151433 | 14 | 45.525 | KV453330.1 | 2496862 | 28-scf00313 | 28 |
| AX-158151434 | 14 | 45.525 | KV453330.1 | 2497853 | 28-scf00313 | 28 |
| AX-158151435 | 14 | 45.525 | KV453330.1 | 2498383 | 28-scf00313 | 28 |
| AX-158151436 | 14 | 45.525 | KV453330.1 | 2498636 | 28-scf00313 | 28 |
| AX-158151437 | 14 | 45.525 | KV453330.1 | 2499828 | 28-scf00313 | 28 |
| AX-158151438 | 14 | 45.525 | KV453330.1 | 2500678 | 28-scf00313 | 28 |
| AX-157726463 | 14 | 45.525 | KV453330.1 | 2501388 | 28-scf00313 | 28 |
| AX-157832542 | 14 | 45.525 | KV453330.1 | 2514463 | 28-scf00313 | 28 |
| AX-158151458 | 14 | 45.525 | KV453330.1 | 2540713 | 28-scf00313 | 28 |
| AX-157832544 | 14 | 45.525 | KV453330.1 | 2563086 | 28-scf00313 | 28 |
| AX-158151476 | 14 | 45.525 | KV453330.1 | 2577046 | 28-scf00313 | 28 |
| AX-158151479 | 14 | 45.525 | KV453330.1 | 2584616 | 28-scf00313 | 28 |
| AX-157832552 | 14 | 45.525 | KV453330.1 | 2608518 | 28-scf00313 | 28 |
| AX-158151733 | 14 | 45.525 | KV453330.1 | 3008488 | 28-scf00313 | 28 |
| AX-158151444 | 14 | 45.581 | KV453330.1 | 2512503 | 28-scf00313 | 28 |
| AX-158151424 | 14 | 45.635 | KV453330.1 | 2489257 | 28-scf00313 | 28 |
| AX-158151445 | 14 | 45.635 | KV453330.1 | 2513144 | 28-scf00313 | 28 |
| AX-158151446 | 14 | 45.635 | KV453330.1 | 2513687 | 28-scf00313 | 28 |
| AX-157858128 | 14 | 45.635 | KV453330.1 | 2513905 | 28-scf00313 | 28 |
| AX-157832541 | 14 | 45.635 | KV453330.1 | 2514209 | 28-scf00313 | 28 |
| AX-158151447 | 14 | 45.635 | KV453330.1 | 2515413 | 28-scf00313 | 28 |
| AX-158151448 | 14 | 45.635 | KV453330.1 | 2517212 | 28-scf00313 | 28 |
| AX-157858129 | 14 | 45.635 | KV453330.1 | 2518698 | 28-scf00313 | 28 |
| AX-158151449 | 14 | 45.635 | KV453330.1 | 2519249 | 28-scf00313 | 28 |
| AX-158151451 | 14 | 45.635 | KV453330.1 | 2520995 | 28-scf00313 | 28 |
| AX-158151452 | 14 | 45.635 | KV453330.1 | 2521555 | 28-scf00313 | 28 |
| AX-158412551 | 14 | 45.635 | KV453330.1 | 2522047 | 28-scf00313 | 28 |
| AX-158151453 | 14 | 45.635 | KV453330.1 | 2523213 | 28-scf00313 | 28 |
| AX-157742454 | 14 | 45.635 | KV453330.1 | 2523970 | 28-scf00313 | 28 |
| AX-158151455 | 14 | 45.635 | KV453330.1 | 2527594 | 28-scf00313 | 28 |
| AX-157758168 | 14 | 45.635 | KV453330.1 | 2536575 | 28-scf00313 | 28 |
| AX-157772916 | 14 | 45.635 | KV453330.1 | 2537267 | 28-scf00313 | 28 |
| AX-158412562 | 14 | 45.635 | KV453330.1 | 2786648 | 28-scf00313 | 28 |
| AX-158151597 | 14 | 45.635 | KV453330.1 | 2812866 | 28-scf00313 | 28 |
| AX-158151344 | 14 | 45.744 | KV453330.1 | 2353167 | 28-scf00313 | 28 |
| AX-158151429 | 14 | 45.744 | KV453330.1 | 2494832 | 28-scf00313 | 28 |
| AX-158151443 | 14 | 45.744 | KV453330.1 | 2508137 | 28-scf00313 | 28 |
| AX-158151457 | 14 | 45.744 | KV453330.1 | 2539929 | 28-scf00313 | 28 |

|              |    |        |             |         |             |    |
|--------------|----|--------|-------------|---------|-------------|----|
| AX-158151460 | 14 | 45.744 | KV453330.1  | 2543971 | 28-scf00313 | 28 |
| AX-157774545 | 14 | 45.744 | KV453330.1  | 2545793 | 28-scf00313 | 28 |
| AX-158151461 | 14 | 45.744 | KV453330.1  | 2548460 | 28-scf00313 | 28 |
| AX-158151462 | 14 | 45.744 | KV453330.1  | 2549089 | 28-scf00313 | 28 |
| AX-158151465 | 14 | 45.744 | KV453330.1  | 2552083 | 28-scf00313 | 28 |
| AX-158151466 | 14 | 45.744 | KV453330.1  | 2554303 | 28-scf00313 | 28 |
| AX-157725832 | 14 | 45.744 | KV453330.1  | 2558616 | 28-scf00313 | 28 |
| AX-157832545 | 14 | 45.744 | KV453330.1  | 2563427 | 28-scf00313 | 28 |
| AX-157832546 | 14 | 45.744 | KV453330.1  | 2565669 | 28-scf00313 | 28 |
| AX-157832547 | 14 | 45.744 | KV453330.1  | 2566516 | 28-scf00313 | 28 |
| AX-158151469 | 14 | 45.744 | KV453330.1  | 2569063 | 28-scf00313 | 28 |
| AX-158151480 | 14 | 45.744 | KV453330.1  | 2585007 | 28-scf00313 | 28 |
| AX-158151482 | 14 | 45.744 | KV453330.1  | 2586414 | 28-scf00313 | 28 |
| AX-158151498 | 14 | 45.744 | KV453330.1  | 2612421 | 28-scf00313 | 28 |
| AX-157832578 | 14 | 45.744 | KV453330.1  | 2853543 | 28-scf00313 | 28 |
| AX-158151470 | 14 | 45.754 | KV453330.1  | 2569722 | 28-scf00313 | 28 |
| AX-157705240 | 14 | 45.754 | 3ML01029135 | 955     | scf04755_1  | UN |
| AX-158151472 | 14 | 45.763 | KV453330.1  | 2572102 | 28-scf00313 | 28 |
| AX-158151474 | 14 | 45.808 | KV453330.1  | 2574107 | 28-scf00313 | 28 |
| AX-158151402 | 14 | 45.853 | KV453330.1  | 2448490 | 28-scf00313 | 28 |
| AX-158151454 | 14 | 45.853 | KV453330.1  | 2525018 | 28-scf00313 | 28 |
| AX-158151485 | 14 | 45.853 | KV453330.1  | 2594074 | 28-scf00313 | 28 |
| AX-158151488 | 14 | 45.853 | KV453330.1  | 2600470 | 28-scf00313 | 28 |
| AX-158151491 | 14 | 45.853 | KV453330.1  | 2602959 | 28-scf00313 | 28 |
| AX-158151492 | 14 | 45.853 | KV453330.1  | 2603560 | 28-scf00313 | 28 |
| AX-158151494 | 14 | 45.853 | KV453330.1  | 2605185 | 28-scf00313 | 28 |
| AX-157832551 | 14 | 45.853 | KV453330.1  | 2607807 | 28-scf00313 | 28 |
| AX-157832553 | 14 | 45.853 | KV453330.1  | 2613570 | 28-scf00313 | 28 |
| AX-158151503 | 14 | 45.853 | KV453330.1  | 2618003 | 28-scf00313 | 28 |
| AX-158151505 | 14 | 45.853 | KV453330.1  | 2618782 | 28-scf00313 | 28 |
| AX-158151507 | 14 | 45.853 | KV453330.1  | 2621429 | 28-scf00313 | 28 |
| AX-157832555 | 14 | 45.853 | KV453330.1  | 2632952 | 28-scf00313 | 28 |
| AX-158412556 | 14 | 45.853 | KV453330.1  | 2634385 | 28-scf00313 | 28 |
| AX-157832557 | 14 | 45.853 | KV453330.1  | 2635535 | 28-scf00313 | 28 |
| AX-157832558 | 14 | 45.853 | KV453330.1  | 2636930 | 28-scf00313 | 28 |
| AX-157705239 | 14 | 45.853 | 3ML01029135 | 857     | scf04755_1  | UN |
| AX-158151508 | 14 | 46.071 | KV453330.1  | 2622253 | 28-scf00313 | 28 |
| AX-158151515 | 14 | 46.071 | KV453330.1  | 2639378 | 28-scf00313 | 28 |
| AX-158151542 | 14 | 46.071 | KV453330.1  | 2678966 | 28-scf00313 | 28 |
| AX-158151543 | 14 | 46.071 | KV453330.1  | 2681176 | 28-scf00313 | 28 |
| AX-158151548 | 14 | 46.071 | KV453330.1  | 2686696 | 28-scf00313 | 28 |
| AX-157709342 | 14 | 46.071 | KV453330.1  | 2690310 | 28-scf00313 | 28 |
| AX-158151550 | 14 | 46.071 | KV453330.1  | 2693480 | 28-scf00313 | 28 |
| AX-158151551 | 14 | 46.071 | KV453330.1  | 2694500 | 28-scf00313 | 28 |
| AX-157717813 | 14 | 46.071 | KV453330.1  | 2694601 | 28-scf00313 | 28 |
| AX-157832563 | 14 | 46.071 | KV453330.1  | 2695008 | 28-scf00313 | 28 |
| AX-157715439 | 14 | 46.071 | KV453330.1  | 2706035 | 28-scf00313 | 28 |
| AX-157866456 | 14 | 46.071 | KV453330.1  | 2710013 | 28-scf00313 | 28 |
| AX-158151556 | 14 | 46.071 | KV453330.1  | 2712526 | 28-scf00313 | 28 |
| AX-158412568 | 14 | 46.071 | KV453330.1  | 2791246 | 28-scf00313 | 28 |
| AX-158151581 | 14 | 46.071 | KV453330.1  | 2796461 | 28-scf00313 | 28 |

|              |    |        |            |         |             |    |
|--------------|----|--------|------------|---------|-------------|----|
| AX-158151609 | 14 | 46.071 | KV453330.1 | 2823391 | 28-scf00313 | 28 |
| AX-158412572 | 14 | 46.071 | KV453330.1 | 2833477 | 28-scf00313 | 28 |
| AX-157832548 | 14 | 46.181 | KV453330.1 | 2605546 | 28-scf00313 | 28 |
| AX-158412557 | 14 | 46.181 | KV453330.1 | 2642127 | 28-scf00313 | 28 |
| AX-157707862 | 14 | 46.181 | KV453330.1 | 2667451 | 28-scf00313 | 28 |
| AX-158151544 | 14 | 46.181 | KV453330.1 | 2681721 | 28-scf00313 | 28 |
| AX-157710599 | 14 | 46.181 | KV453330.1 | 2683963 | 28-scf00313 | 28 |
| AX-157753028 | 14 | 46.181 | KV453330.1 | 2700033 | 28-scf00313 | 28 |
| AX-157773888 | 14 | 46.181 | KV453330.1 | 2708525 | 28-scf00313 | 28 |
| AX-158151558 | 14 | 46.181 | KV453330.1 | 2724380 | 28-scf00313 | 28 |
| AX-158151559 | 14 | 46.181 | KV453330.1 | 2725160 | 28-scf00313 | 28 |
| AX-157748990 | 14 | 46.181 | KV453330.1 | 2725394 | 28-scf00313 | 28 |
| AX-158151560 | 14 | 46.181 | KV453330.1 | 2729932 | 28-scf00313 | 28 |
| AX-157721705 | 14 | 46.181 | KV453330.1 | 2731688 | 28-scf00313 | 28 |
| AX-157832565 | 14 | 46.181 | KV453330.1 | 2733615 | 28-scf00313 | 28 |
| AX-158151562 | 14 | 46.181 | KV453330.1 | 2735744 | 28-scf00313 | 28 |
| AX-157750143 | 14 | 46.181 | KV453330.1 | 2735813 | 28-scf00313 | 28 |
| AX-157832566 | 14 | 46.181 | KV453330.1 | 2736455 | 28-scf00313 | 28 |
| AX-157794224 | 14 | 46.181 | KV453330.1 | 2737393 | 28-scf00313 | 28 |
| AX-158151563 | 14 | 46.181 | KV453330.1 | 2739546 | 28-scf00313 | 28 |
| AX-157878332 | 14 | 46.181 | KV453330.1 | 2745064 | 28-scf00313 | 28 |
| AX-158151571 | 14 | 46.181 | KV453330.1 | 2780582 | 28-scf00313 | 28 |
| AX-158151574 | 14 | 46.181 | KV453330.1 | 2784590 | 28-scf00313 | 28 |
| AX-158151575 | 14 | 46.181 | KV453330.1 | 2784848 | 28-scf00313 | 28 |
| AX-158412561 | 14 | 46.181 | KV453330.1 | 2786466 | 28-scf00313 | 28 |
| AX-158151579 | 14 | 46.181 | KV453330.1 | 2793245 | 28-scf00313 | 28 |
| AX-157832568 | 14 | 46.181 | KV453330.1 | 2794698 | 28-scf00313 | 28 |
| AX-157715814 | 14 | 46.181 | KV453330.1 | 2795966 | 28-scf00313 | 28 |
| AX-158151582 | 14 | 46.181 | KV453330.1 | 2796843 | 28-scf00313 | 28 |
| AX-158151584 | 14 | 46.181 | KV453330.1 | 2798241 | 28-scf00313 | 28 |
| AX-157832569 | 14 | 46.181 | KV453330.1 | 2798961 | 28-scf00313 | 28 |
| AX-158151585 | 14 | 46.181 | KV453330.1 | 2799501 | 28-scf00313 | 28 |
| AX-158151586 | 14 | 46.181 | KV453330.1 | 2799737 | 28-scf00313 | 28 |
| AX-158151587 | 14 | 46.181 | KV453330.1 | 2800866 | 28-scf00313 | 28 |
| AX-158151589 | 14 | 46.181 | KV453330.1 | 2802935 | 28-scf00313 | 28 |
| AX-157832570 | 14 | 46.181 | KV453330.1 | 2805119 | 28-scf00313 | 28 |
| AX-158151591 | 14 | 46.181 | KV453330.1 | 2806228 | 28-scf00313 | 28 |
| AX-158151592 | 14 | 46.181 | KV453330.1 | 2806897 | 28-scf00313 | 28 |
| AX-158151594 | 14 | 46.181 | KV453330.1 | 2807796 | 28-scf00313 | 28 |
| AX-158151595 | 14 | 46.181 | KV453330.1 | 2811610 | 28-scf00313 | 28 |
| AX-158151596 | 14 | 46.181 | KV453330.1 | 2812020 | 28-scf00313 | 28 |
| AX-158151598 | 14 | 46.181 | KV453330.1 | 2813226 | 28-scf00313 | 28 |
| AX-158151600 | 14 | 46.181 | KV453330.1 | 2814592 | 28-scf00313 | 28 |
| AX-158151601 | 14 | 46.181 | KV453330.1 | 2815313 | 28-scf00313 | 28 |
| AX-158151602 | 14 | 46.181 | KV453330.1 | 2815619 | 28-scf00313 | 28 |
| AX-158151603 | 14 | 46.181 | KV453330.1 | 2816145 | 28-scf00313 | 28 |
| AX-158151604 | 14 | 46.181 | KV453330.1 | 2816543 | 28-scf00313 | 28 |
| AX-158151606 | 14 | 46.181 | KV453330.1 | 2818533 | 28-scf00313 | 28 |
| AX-158151607 | 14 | 46.181 | KV453330.1 | 2821968 | 28-scf00313 | 28 |
| AX-158151610 | 14 | 46.181 | KV453330.1 | 2824223 | 28-scf00313 | 28 |
| AX-157832572 | 14 | 46.181 | KV453330.1 | 2828360 | 28-scf00313 | 28 |

|              |    |        |             |         |             |    |
|--------------|----|--------|-------------|---------|-------------|----|
| AX-158151613 | 14 | 46.181 | KV453330.1  | 2828848 | 28-scf00313 | 28 |
| AX-158151614 | 14 | 46.181 | KV453330.1  | 2831197 | 28-scf00313 | 28 |
| AX-157697105 | 14 | 46.181 | KV453330.1  | 2835307 | 28-scf00313 | 28 |
| AX-157832573 | 14 | 46.181 | KV453330.1  | 2837740 | 28-scf00313 | 28 |
| AX-157832575 | 14 | 46.181 | KV453330.1  | 2839374 | 28-scf00313 | 28 |
| AX-157832576 | 14 | 46.181 | KV453330.1  | 2840454 | 28-scf00313 | 28 |
| AX-158151619 | 14 | 46.181 | KV453330.1  | 2843126 | 28-scf00313 | 28 |
| AX-158151623 | 14 | 46.181 | KV453330.1  | 2849236 | 28-scf00313 | 28 |
| AX-158151624 | 14 | 46.181 | KV453330.1  | 2849958 | 28-scf00313 | 28 |
| AX-158151625 | 14 | 46.181 | KV453330.1  | 2854532 | 28-scf00313 | 28 |
| AX-157770854 | 14 | 46.181 | KV453330.1  | 2858586 | 28-scf00313 | 28 |
| AX-158151630 | 14 | 46.181 | KV453330.1  | 2861577 | 28-scf00313 | 28 |
| AX-158151641 | 14 | 46.181 | KV453330.1  | 2871157 | 28-scf00313 | 28 |
| AX-158151642 | 14 | 46.181 | KV453330.1  | 2871880 | 28-scf00313 | 28 |
| AX-158151643 | 14 | 46.181 | KV453330.1  | 2872936 | 28-scf00313 | 28 |
| AX-157832585 | 14 | 46.181 | KV453330.1  | 2918070 | 28-scf00313 | 28 |
| AX-157832587 | 14 | 46.181 | KV453330.1  | 2921725 | 28-scf00313 | 28 |
| AX-158151715 | 14 | 46.181 | KV453330.1  | 2981965 | 28-scf00313 | 28 |
| AX-158151734 | 14 | 46.181 | KV453330.1  | 3009109 | 28-scf00313 | 28 |
| AX-157712072 | 14 | 46.181 | 3ML01033677 | 380     | scf09338_1  | UN |
| AX-158151629 | 14 | 46.29  | KV453330.1  | 2859708 | 28-scf00313 | 28 |
| AX-158151631 | 14 | 46.29  | KV453330.1  | 2862134 | 28-scf00313 | 28 |
| AX-158151632 | 14 | 46.29  | KV453330.1  | 2863059 | 28-scf00313 | 28 |
| AX-157749294 | 14 | 46.399 | KV453330.1  | 2867243 | 28-scf00313 | 28 |
| AX-158151637 | 14 | 46.399 | KV453330.1  | 2867739 | 28-scf00313 | 28 |
| AX-158151639 | 14 | 46.399 | KV453330.1  | 2870336 | 28-scf00313 | 28 |
| AX-158151640 | 14 | 46.399 | KV453330.1  | 2870731 | 28-scf00313 | 28 |
| AX-158151651 | 14 | 46.508 | KV453330.1  | 2882620 | 28-scf00313 | 28 |
| AX-158151652 | 14 | 46.508 | KV453330.1  | 2884308 | 28-scf00313 | 28 |
| AX-158151653 | 14 | 46.508 | KV453330.1  | 2885246 | 28-scf00313 | 28 |
| AX-157747991 | 14 | 46.508 | KV453330.1  | 2888079 | 28-scf00313 | 28 |
| AX-158151655 | 14 | 46.527 | KV453330.1  | 2888806 | 28-scf00313 | 28 |
| AX-158151656 | 14 | 46.551 | KV453330.1  | 2889496 | 28-scf00313 | 28 |
| AX-157832582 | 14 | 46.575 | KV453330.1  | 2895331 | 28-scf00313 | 28 |
| AX-158380397 | 14 | 46.594 | KV453330.1  | 2895671 | 28-scf00313 | 28 |
| AX-158151673 | 14 | 46.594 | KV453330.1  | 2913574 | 28-scf00313 | 28 |
| AX-158151423 | 14 | 46.617 | KV453330.1  | 2484794 | 28-scf00313 | 28 |
| AX-158151545 | 14 | 46.617 | KV453330.1  | 2682222 | 28-scf00313 | 28 |
| AX-157714147 | 14 | 46.617 | KV453330.1  | 2867654 | 28-scf00313 | 28 |
| AX-158151644 | 14 | 46.617 | KV453330.1  | 2875455 | 28-scf00313 | 28 |
| AX-158151654 | 14 | 46.617 | KV453330.1  | 2887303 | 28-scf00313 | 28 |
| AX-158151661 | 14 | 46.617 | KV453330.1  | 2899928 | 28-scf00313 | 28 |
| AX-158151662 | 14 | 46.617 | KV453330.1  | 2900556 | 28-scf00313 | 28 |
| AX-158151663 | 14 | 46.617 | KV453330.1  | 2901144 | 28-scf00313 | 28 |
| AX-157752646 | 14 | 46.617 | KV453330.1  | 2904678 | 28-scf00313 | 28 |
| AX-158151667 | 14 | 46.617 | KV453330.1  | 2907088 | 28-scf00313 | 28 |
| AX-158151669 | 14 | 46.617 | KV453330.1  | 2909402 | 28-scf00313 | 28 |
| AX-158151671 | 14 | 46.617 | KV453330.1  | 2912380 | 28-scf00313 | 28 |
| AX-158151675 | 14 | 46.617 | KV453330.1  | 2914457 | 28-scf00313 | 28 |
| AX-157721574 | 14 | 46.617 | KV453330.1  | 2916992 | 28-scf00313 | 28 |
| AX-158151679 | 14 | 46.617 | KV453330.1  | 2921872 | 28-scf00313 | 28 |

|              |    |        |            |         |             |    |
|--------------|----|--------|------------|---------|-------------|----|
| AX-158151684 | 14 | 46.617 | KV453330.1 | 2930974 | 28-scf00313 | 28 |
| AX-157750503 | 14 | 46.726 | KV453330.1 | 2926470 | 28-scf00313 | 28 |
| AX-158151682 | 14 | 46.726 | KV453330.1 | 2927082 | 28-scf00313 | 28 |
| AX-158151686 | 14 | 46.728 | KV453330.1 | 2932873 | 28-scf00313 | 28 |
| AX-157774539 | 14 | 46.795 | KV453330.1 | 2940356 | 28-scf00313 | 28 |
| AX-158151690 | 14 | 46.901 | KV453330.1 | 2941043 | 28-scf00313 | 28 |
| AX-158151691 | 14 | 46.901 | KV453330.1 | 2942751 | 28-scf00313 | 28 |
| AX-157719745 | 14 | 47.557 | KV453330.1 | 2946258 | 28-scf00313 | 28 |
| AX-157719238 | 14 | 47.568 | KV453330.1 | 2947700 | 28-scf00313 | 28 |
| AX-158151693 | 14 | 47.578 | KV453330.1 | 2950289 | 28-scf00313 | 28 |
| AX-157832591 | 14 | 47.578 | KV453330.1 | 2965489 | 28-scf00313 | 28 |
| AX-157749321 | 14 | 47.588 | KV453330.1 | 2944629 | 28-scf00313 | 28 |
| AX-158151700 | 14 | 47.588 | KV453330.1 | 2960494 | 28-scf00313 | 28 |
| AX-158151701 | 14 | 47.601 | KV453330.1 | 2962324 | 28-scf00313 | 28 |
| AX-158151702 | 14 | 47.601 | KV453330.1 | 2962891 | 28-scf00313 | 28 |
| AX-157753551 | 14 | 47.601 | KV453330.1 | 2964843 | 28-scf00313 | 28 |
| AX-158151705 | 14 | 47.601 | KV453330.1 | 2966424 | 28-scf00313 | 28 |
| AX-158151707 | 14 | 47.601 | KV453330.1 | 2967568 | 28-scf00313 | 28 |
| AX-158151713 | 14 | 47.601 | KV453330.1 | 2975814 | 28-scf00313 | 28 |
| AX-157716777 | 14 | 47.601 | KV453330.1 | 2976981 | 28-scf00313 | 28 |
| AX-158151714 | 14 | 47.601 | KV453330.1 | 2979326 | 28-scf00313 | 28 |
| AX-157713476 | 14 | 47.601 | KV453330.1 | 2979935 | 28-scf00313 | 28 |
| AX-158151718 | 14 | 47.601 | KV453330.1 | 2986949 | 28-scf00313 | 28 |
| AX-158151719 | 14 | 47.601 | KV453330.1 | 2988438 | 28-scf00313 | 28 |
| AX-158151724 | 14 | 47.601 | KV453330.1 | 2996243 | 28-scf00313 | 28 |
| AX-158151727 | 14 | 47.601 | KV453330.1 | 2999561 | 28-scf00313 | 28 |
| AX-158151735 | 14 | 47.601 | KV453330.1 | 3009524 | 28-scf00313 | 28 |
| AX-158151741 | 14 | 47.601 | KV453330.1 | 3015398 | 28-scf00313 | 28 |
| AX-157747142 | 14 | 47.601 | KV453330.1 | 3090875 | 28-scf00313 | 28 |
| AX-158151729 | 14 | 47.819 | KV453330.1 | 3003253 | 28-scf00313 | 28 |
| AX-158151730 | 14 | 47.819 | KV453330.1 | 3005146 | 28-scf00313 | 28 |
| AX-158151738 | 14 | 47.819 | KV453330.1 | 3012561 | 28-scf00313 | 28 |
| AX-158151740 | 14 | 47.819 | KV453330.1 | 3014731 | 28-scf00313 | 28 |
| AX-158151744 | 14 | 47.819 | KV453330.1 | 3018480 | 28-scf00313 | 28 |
| AX-158151745 | 14 | 47.819 | KV453330.1 | 3020698 | 28-scf00313 | 28 |
| AX-158151746 | 14 | 47.819 | KV453330.1 | 3024906 | 28-scf00313 | 28 |
| AX-158151747 | 14 | 47.819 | KV453330.1 | 3029401 | 28-scf00313 | 28 |
| AX-158151748 | 14 | 48.038 | KV453330.1 | 3032055 | 28-scf00313 | 28 |
| AX-158151750 | 14 | 48.038 | KV453330.1 | 3033389 | 28-scf00313 | 28 |
| AX-158151751 | 14 | 48.038 | KV453330.1 | 3034393 | 28-scf00313 | 28 |
| AX-157742564 | 14 | 48.076 | KV453330.1 | 3035986 | 28-scf00313 | 28 |
| AX-158151754 | 14 | 48.113 | KV453330.1 | 3037989 | 28-scf00313 | 28 |
| AX-158151755 | 14 | 48.147 | KV453330.1 | 3038400 | 28-scf00313 | 28 |
| AX-158151756 | 14 | 48.178 | KV453330.1 | 3045429 | 28-scf00313 | 28 |
| AX-158151695 | 14 | 48.202 | KV453330.1 | 2952038 | 28-scf00313 | 28 |
| AX-158151760 | 14 | 48.214 | KV453330.1 | 3050496 | 28-scf00313 | 28 |
| AX-157754184 | 14 | 48.256 | KV453330.1 | 3051554 | 28-scf00313 | 28 |
| AX-158151761 | 14 | 48.256 | KV453330.1 | 3051650 | 28-scf00313 | 28 |
| AX-157773253 | 14 | 48.256 | KV453330.1 | 3052559 | 28-scf00313 | 28 |
| AX-158151764 | 14 | 48.256 | KV453330.1 | 3055381 | 28-scf00313 | 28 |
| AX-157832595 | 14 | 48.502 | KV453330.1 | 3070084 | 28-scf00313 | 28 |

|              |    |        |            |         |             |    |
|--------------|----|--------|------------|---------|-------------|----|
| AX-158151770 | 14 | 48.502 | KV453330.1 | 3070427 | 28-scf00313 | 28 |
| AX-157769161 | 14 | 48.502 | KV453330.1 | 3072728 | 28-scf00313 | 28 |
| AX-157713739 | 14 | 48.502 | KV453330.1 | 3072954 | 28-scf00313 | 28 |
| AX-158151773 | 14 | 48.502 | KV453330.1 | 3074444 | 28-scf00313 | 28 |
| AX-157832598 | 14 | 48.502 | KV453330.1 | 3077256 | 28-scf00313 | 28 |
| AX-158151776 | 14 | 48.502 | KV453330.1 | 3079744 | 28-scf00313 | 28 |
| AX-158151778 | 14 | 48.502 | KV453330.1 | 3082308 | 28-scf00313 | 28 |
| AX-158151779 | 14 | 48.502 | KV453330.1 | 3083793 | 28-scf00313 | 28 |
| AX-158151781 | 14 | 48.574 | KV453330.1 | 3084997 | 28-scf00313 | 28 |
| AX-157716571 | 14 | 48.654 | KV453330.1 | 3087535 | 28-scf00313 | 28 |
| AX-158151785 | 14 | 48.654 | KV453330.1 | 3089696 | 28-scf00313 | 28 |
| AX-158151784 | 14 | 48.748 | KV453330.1 | 3088648 | 28-scf00313 | 28 |
| AX-158151788 | 14 | 48.872 | KV453330.1 | 3093048 | 28-scf00313 | 28 |
| AX-158151789 | 14 | 48.872 | KV453330.1 | 3093406 | 28-scf00313 | 28 |
| AX-158151687 | 14 | 49.238 | KV453330.1 | 2934491 | 28-scf00313 | 28 |
| AX-158151791 | 14 | 49.238 | KV453330.1 | 3095562 | 28-scf00313 | 28 |
| AX-158151792 | 14 | 49.239 | KV453330.1 | 3099955 | 28-scf00313 | 28 |
| AX-158151793 | 14 | 49.241 | KV453330.1 | 3101102 | 28-scf00313 | 28 |
| AX-158151795 | 14 | 49.241 | KV453330.1 | 3103590 | 28-scf00313 | 28 |
| AX-158151796 | 14 | 49.241 | KV453330.1 | 3104513 | 28-scf00313 | 28 |
| AX-158151797 | 14 | 49.241 | KV453330.1 | 3105305 | 28-scf00313 | 28 |
| AX-158151798 | 14 | 49.241 | KV453330.1 | 3106102 | 28-scf00313 | 28 |
| AX-158151806 | 14 | 49.241 | KV453330.1 | 3116411 | 28-scf00313 | 28 |
| AX-158151799 | 14 | 49.319 | KV453330.1 | 3108208 | 28-scf00313 | 28 |
| AX-158151803 | 14 | 49.35  | KV453330.1 | 3113694 | 28-scf00313 | 28 |
| AX-158151805 | 14 | 49.35  | KV453330.1 | 3114725 | 28-scf00313 | 28 |
| AX-158151809 | 14 | 49.449 | KV453330.1 | 3119758 | 28-scf00313 | 28 |
| AX-158151811 | 14 | 49.449 | KV453330.1 | 3122347 | 28-scf00313 | 28 |
| AX-158151800 | 14 | 49.569 | KV453330.1 | 3109740 | 28-scf00313 | 28 |
| AX-158151812 | 14 | 49.569 | KV453330.1 | 3122877 | 28-scf00313 | 28 |
| AX-158151813 | 14 | 49.569 | KV453330.1 | 3124111 | 28-scf00313 | 28 |
| AX-158151814 | 14 | 49.569 | KV453330.1 | 3125706 | 28-scf00313 | 28 |
| AX-158151815 | 14 | 49.626 | KV453330.1 | 3126831 | 28-scf00313 | 28 |
| AX-157832600 | 14 | 49.626 | KV453330.1 | 3143053 | 28-scf00313 | 28 |
| AX-158151860 | 14 | 49.626 | KV453330.1 | 3182961 | 28-scf00313 | 28 |
| AX-158151946 | 14 | 49.626 | KV453331.1 | 63325   | 28-scf00315 | 28 |
| AX-158151817 | 14 | 49.678 | KV453330.1 | 3128003 | 28-scf00313 | 28 |
| AX-158151895 | 14 | 49.678 | KV453331.1 | 6323    | 28-scf00315 | 28 |
| AX-158151896 | 14 | 49.678 | KV453331.1 | 6607    | 28-scf00315 | 28 |
| AX-157858133 | 14 | 49.869 | KV453330.1 | 3128264 | 28-scf00313 | 28 |
| AX-158151819 | 14 | 50.107 | KV453330.1 | 3129960 | 28-scf00313 | 28 |
| AX-157753829 | 14 | 50.109 | KV453330.1 | 3131456 | 28-scf00313 | 28 |
| AX-158151821 | 14 | 50.112 | KV453330.1 | 3131718 | 28-scf00313 | 28 |
| AX-158151822 | 14 | 50.115 | KV453330.1 | 3132795 | 28-scf00313 | 28 |
| AX-158393207 | 14 | 50.115 | KV453331.1 | 60459   | 28-scf00315 | 28 |
| AX-158151818 | 14 | 50.116 | KV453330.1 | 3129604 | 28-scf00313 | 28 |
| AX-158151823 | 14 | 50.116 | KV453330.1 | 3134862 | 28-scf00313 | 28 |
| AX-158151824 | 14 | 50.116 | KV453330.1 | 3135863 | 28-scf00313 | 28 |
| AX-158151825 | 14 | 50.116 | KV453330.1 | 3136785 | 28-scf00313 | 28 |
| AX-157866460 | 14 | 50.116 | KV453330.1 | 3137993 | 28-scf00313 | 28 |
| AX-158151826 | 14 | 50.116 | KV453330.1 | 3139043 | 28-scf00313 | 28 |

|              |    |        |            |         |             |    |
|--------------|----|--------|------------|---------|-------------|----|
| AX-158151827 | 14 | 50.116 | KV453330.1 | 3140597 | 28-scf00313 | 28 |
| AX-158151828 | 14 | 50.118 | KV453330.1 | 3140840 | 28-scf00313 | 28 |
| AX-158151833 | 14 | 50.374 | KV453330.1 | 3150099 | 28-scf00313 | 28 |
| AX-158380400 | 14 | 50.374 | KV453330.1 | 3152029 | 28-scf00313 | 28 |
| AX-158151835 | 14 | 50.489 | KV453330.1 | 3152426 | 28-scf00313 | 28 |
| AX-158151836 | 14 | 50.66  | KV453330.1 | 3153614 | 28-scf00313 | 28 |
| AX-158151838 | 14 | 50.661 | KV453330.1 | 3156606 | 28-scf00313 | 28 |
| AX-158151839 | 14 | 50.662 | KV453330.1 | 3160402 | 28-scf00313 | 28 |
| AX-158151845 | 14 | 50.662 | KV453330.1 | 3165276 | 28-scf00313 | 28 |
| AX-158151766 | 14 | 50.881 | KV453330.1 | 3058321 | 28-scf00313 | 28 |
| AX-158151780 | 14 | 50.881 | KV453330.1 | 3084624 | 28-scf00313 | 28 |
| AX-158151840 | 14 | 50.881 | KV453330.1 | 3160789 | 28-scf00313 | 28 |
| AX-158151844 | 14 | 50.881 | KV453330.1 | 3165109 | 28-scf00313 | 28 |
| AX-158151849 | 14 | 50.881 | KV453330.1 | 3172281 | 28-scf00313 | 28 |
| AX-158151850 | 14 | 50.881 | KV453330.1 | 3173433 | 28-scf00313 | 28 |
| AX-158151852 | 14 | 50.881 | KV453330.1 | 3174296 | 28-scf00313 | 28 |
| AX-158151855 | 14 | 50.881 | KV453330.1 | 3177439 | 28-scf00313 | 28 |
| AX-158151856 | 14 | 50.881 | KV453330.1 | 3179988 | 28-scf00313 | 28 |
| AX-158151857 | 14 | 50.881 | KV453330.1 | 3180627 | 28-scf00313 | 28 |
| AX-157748090 | 14 | 50.881 | KV453330.1 | 3181427 | 28-scf00313 | 28 |
| AX-158151858 | 14 | 50.881 | KV453330.1 | 3182112 | 28-scf00313 | 28 |
| AX-158151862 | 14 | 50.881 | KV453330.1 | 3191178 | 28-scf00313 | 28 |
| AX-158151863 | 14 | 50.881 | KV453330.1 | 3192185 | 28-scf00313 | 28 |
| AX-158151864 | 14 | 50.881 | KV453330.1 | 3194062 | 28-scf00313 | 28 |
| AX-158151865 | 14 | 50.881 | KV453330.1 | 3197220 | 28-scf00313 | 28 |
| AX-158151866 | 14 | 50.881 | KV453330.1 | 3197976 | 28-scf00313 | 28 |
| AX-157727694 | 14 | 50.881 | KV453330.1 | 3199645 | 28-scf00313 | 28 |
| AX-157878336 | 14 | 50.881 | KV453330.1 | 3200197 | 28-scf00313 | 28 |
| AX-158151871 | 14 | 50.881 | KV453330.1 | 3205932 | 28-scf00313 | 28 |
| AX-158151872 | 14 | 50.881 | KV453330.1 | 3208307 | 28-scf00313 | 28 |
| AX-158151876 | 14 | 50.881 | KV453330.1 | 3212797 | 28-scf00313 | 28 |
| AX-158151879 | 14 | 50.881 | KV453330.1 | 3217671 | 28-scf00313 | 28 |
| AX-158151880 | 14 | 50.881 | KV453330.1 | 3218064 | 28-scf00313 | 28 |
| AX-158151884 | 14 | 50.881 | KV453330.1 | 3221069 | 28-scf00313 | 28 |
| AX-158151885 | 14 | 50.881 | KV453330.1 | 3222328 | 28-scf00313 | 28 |
| AX-157720734 | 14 | 50.881 | KV453330.1 | 3223072 | 28-scf00313 | 28 |
| AX-158151886 | 14 | 50.881 | KV453330.1 | 3227375 | 28-scf00313 | 28 |
| AX-158151888 | 14 | 50.881 | KV453330.1 | 3229485 | 28-scf00313 | 28 |
| AX-158151892 | 14 | 50.881 | KV453330.1 | 3232505 | 28-scf00313 | 28 |
| AX-158151894 | 14 | 50.881 | KV453331.1 | 4453    | 28-scf00315 | 28 |
| AX-157710658 | 14 | 50.881 | KV453331.1 | 6924    | 28-scf00315 | 28 |
| AX-158151918 | 14 | 50.881 | KV453331.1 | 27152   | 28-scf00315 | 28 |
| AX-158151937 | 14 | 50.881 | KV453331.1 | 54448   | 28-scf00315 | 28 |
| AX-158151976 | 14 | 50.881 | KV453331.1 | 109140  | 28-scf00315 | 28 |
| AX-158151899 | 14 | 50.882 | KV453331.1 | 8735    | 28-scf00315 | 28 |
| AX-158151905 | 14 | 51.23  | KV453331.1 | 15118   | 28-scf00315 | 28 |
| AX-158151903 | 14 | 51.28  | KV453331.1 | 12800   | 28-scf00315 | 28 |
| AX-157753166 | 14 | 51.28  | KV453331.1 | 15828   | 28-scf00315 | 28 |
| AX-158151906 | 14 | 51.28  | KV453331.1 | 16317   | 28-scf00315 | 28 |
| AX-158151909 | 14 | 51.28  | KV453331.1 | 19320   | 28-scf00315 | 28 |
| AX-157743803 | 14 | 51.464 | KV453330.1 | 3042532 | 28-scf00313 | 28 |



|              |    |        |            |         |             |    |
|--------------|----|--------|------------|---------|-------------|----|
| AX-158385576 | 14 | 51.464 | KV453330.1 | 3084081 | 28-scf00313 | 28 |
| AX-158151794 | 14 | 51.464 | KV453330.1 | 3102844 | 28-scf00313 | 28 |
| AX-158151834 | 14 | 51.464 | KV453330.1 | 3151871 | 28-scf00313 | 28 |
| AX-158151911 | 14 | 51.464 | KV453331.1 | 21127   | 28-scf00315 | 28 |
| AX-158151912 | 14 | 51.549 | KV453331.1 | 22283   | 28-scf00315 | 28 |
| AX-158151916 | 14 | 51.645 | KV453331.1 | 26163   | 28-scf00315 | 28 |
| AX-157749422 | 14 | 51.646 | KV453331.1 | 18100   | 28-scf00315 | 28 |
| AX-158151915 | 14 | 51.646 | KV453331.1 | 25335   | 28-scf00315 | 28 |
| AX-158151919 | 14 | 51.646 | KV453331.1 | 33218   | 28-scf00315 | 28 |
| AX-158151920 | 14 | 51.646 | KV453331.1 | 33628   | 28-scf00315 | 28 |
| AX-158151921 | 14 | 51.646 | KV453331.1 | 34678   | 28-scf00315 | 28 |
| AX-158151922 | 14 | 51.646 | KV453331.1 | 35316   | 28-scf00315 | 28 |
| AX-158151923 | 14 | 51.646 | KV453331.1 | 36749   | 28-scf00315 | 28 |
| AX-158151924 | 14 | 51.796 | KV453331.1 | 38187   | 28-scf00315 | 28 |
| AX-158151925 | 14 | 51.883 | KV453331.1 | 38512   | 28-scf00315 | 28 |
| AX-158151928 | 14 | 51.942 | KV453331.1 | 42136   | 28-scf00315 | 28 |
| AX-158151931 | 14 | 52.119 | KV453331.1 | 47650   | 28-scf00315 | 28 |
| AX-158151933 | 14 | 52.356 | KV453331.1 | 50778   | 28-scf00315 | 28 |
| AX-158151942 | 14 | 52.489 | KV453331.1 | 60230   | 28-scf00315 | 28 |
| AX-158151951 | 14 | 52.603 | KV453331.1 | 72787   | 28-scf00315 | 28 |
| AX-157741611 | 14 | 52.749 | KV453331.1 | 75488   | 28-scf00315 | 28 |
| AX-158151953 | 14 | 52.831 | KV453331.1 | 78029   | 28-scf00315 | 28 |
| AX-158151958 | 14 | 52.831 | KV453331.1 | 88144   | 28-scf00315 | 28 |
| AX-157716340 | 14 | 52.831 | KV453331.1 | 144893  | 28-scf00315 | 28 |
| AX-158151954 | 14 | 52.838 | KV453331.1 | 79195   | 28-scf00315 | 28 |
| AX-158151957 | 14 | 52.845 | KV453331.1 | 86641   | 28-scf00315 | 28 |
| AX-158151950 | 14 | 52.853 | KV453331.1 | 71942   | 28-scf00315 | 28 |
| AX-158151960 | 14 | 52.853 | KV453331.1 | 90236   | 28-scf00315 | 28 |
| AX-158151962 | 14 | 52.853 | KV453331.1 | 92055   | 28-scf00315 | 28 |
| AX-158151963 | 14 | 52.853 | KV453331.1 | 94378   | 28-scf00315 | 28 |
| AX-158151970 | 14 | 52.853 | KV453331.1 | 101244  | 28-scf00315 | 28 |
| AX-157771511 | 14 | 52.853 | KV453331.1 | 104108  | 28-scf00315 | 28 |
| AX-158151974 | 14 | 52.853 | KV453331.1 | 105250  | 28-scf00315 | 28 |
| AX-158151979 | 14 | 52.853 | KV453331.1 | 110955  | 28-scf00315 | 28 |
| AX-158151981 | 14 | 52.853 | KV453331.1 | 113480  | 28-scf00315 | 28 |
| AX-158151982 | 14 | 52.853 | KV453331.1 | 113963  | 28-scf00315 | 28 |
| AX-158152013 | 14 | 52.853 | KV453331.1 | 159242  | 28-scf00315 | 28 |
| AX-158151987 | 14 | 53.13  | KV453331.1 | 123036  | 28-scf00315 | 28 |
| AX-158151988 | 14 | 53.13  | KV453331.1 | 124016  | 28-scf00315 | 28 |
| AX-158151989 | 14 | 53.51  | KV453331.1 | 125405  | 28-scf00315 | 28 |
| AX-158151990 | 14 | 53.511 | KV453331.1 | 126302  | 28-scf00315 | 28 |
| AX-158151991 | 14 | 53.514 | KV453331.1 | 127545  | 28-scf00315 | 28 |
| AX-158151995 | 14 | 53.517 | KV453331.1 | 131646  | 28-scf00315 | 28 |
| AX-158151993 | 14 | 53.947 | KV453331.1 | 129435  | 28-scf00315 | 28 |
| AX-158151997 | 14 | 53.947 | KV453331.1 | 135519  | 28-scf00315 | 28 |
| AX-158151999 | 14 | 53.947 | KV453331.1 | 136450  | 28-scf00315 | 28 |
| AX-158152001 | 14 | 53.947 | KV453331.1 | 139524  | 28-scf00315 | 28 |
| AX-158152002 | 14 | 53.947 | KV453331.1 | 140126  | 28-scf00315 | 28 |
| AX-157832602 | 14 | 53.947 | KV453331.1 | 141663  | 28-scf00315 | 28 |
| AX-158152005 | 14 | 53.947 | KV453331.1 | 143713  | 28-scf00315 | 28 |
| AX-158152008 | 14 | 53.947 | KV453331.1 | 149149  | 28-scf00315 | 28 |

|              |    |        |            |        |             |    |
|--------------|----|--------|------------|--------|-------------|----|
| AX-158152011 | 14 | 53.947 | KV453331.1 | 153980 | 28-scf00315 | 28 |
| AX-158152014 | 14 | 53.947 | KV453331.1 | 161129 | 28-scf00315 | 28 |
| AX-158152015 | 14 | 53.947 | KV453331.1 | 163165 | 28-scf00315 | 28 |
| AX-158152019 | 14 | 53.947 | KV453331.1 | 170768 | 28-scf00315 | 28 |
| AX-158152020 | 14 | 53.947 | KV453331.1 | 171478 | 28-scf00315 | 28 |
| AX-158152026 | 14 | 54.221 | KV453331.1 | 180632 | 28-scf00315 | 28 |
| AX-158152027 | 14 | 54.494 | KV453331.1 | 182046 | 28-scf00315 | 28 |
| AX-158152030 | 14 | 54.494 | KV453331.1 | 185801 | 28-scf00315 | 28 |
| AX-158152035 | 14 | 54.494 | KV453331.1 | 190813 | 28-scf00315 | 28 |
| AX-158152037 | 14 | 54.494 | KV453331.1 | 193166 | 28-scf00315 | 28 |
| AX-158152038 | 14 | 54.494 | KV453331.1 | 193770 | 28-scf00315 | 28 |
| AX-158152039 | 14 | 54.494 | KV453331.1 | 194731 | 28-scf00315 | 28 |
| AX-158152042 | 14 | 54.494 | KV453331.1 | 205894 | 28-scf00315 | 28 |
| AX-158152072 | 14 | 54.494 | KV453331.1 | 244904 | 28-scf00315 | 28 |
| AX-158152207 | 14 | 54.494 | KV453331.1 | 463352 | 28-scf00315 | 28 |
| AX-158152041 | 14 | 54.712 | KV453331.1 | 197879 | 28-scf00315 | 28 |
| AX-157866461 | 14 | 54.712 | KV453331.1 | 202274 | 28-scf00315 | 28 |
| AX-158152047 | 14 | 54.712 | KV453331.1 | 212911 | 28-scf00315 | 28 |
| AX-158152048 | 14 | 54.712 | KV453331.1 | 213420 | 28-scf00315 | 28 |
| AX-157886490 | 14 | 54.712 | KV453331.1 | 215685 | 28-scf00315 | 28 |
| AX-158152051 | 14 | 54.712 | KV453331.1 | 216001 | 28-scf00315 | 28 |
| AX-158152052 | 14 | 54.712 | KV453331.1 | 216330 | 28-scf00315 | 28 |
| AX-158152053 | 14 | 54.822 | KV453331.1 | 217917 | 28-scf00315 | 28 |
| AX-157757486 | 14 | 54.822 | KV453331.1 | 221597 | 28-scf00315 | 28 |
| AX-157719399 | 14 | 54.862 | KV453331.1 | 222021 | 28-scf00315 | 28 |
| AX-157712950 | 14 | 54.862 | KV453331.1 | 224252 | 28-scf00315 | 28 |
| AX-158152057 | 14 | 54.931 | KV453331.1 | 223666 | 28-scf00315 | 28 |
| AX-158152058 | 14 | 54.932 | KV453331.1 | 224570 | 28-scf00315 | 28 |
| AX-158152062 | 14 | 54.932 | KV453331.1 | 230386 | 28-scf00315 | 28 |
| AX-158152127 | 14 | 54.932 | KV453331.1 | 353972 | 28-scf00315 | 28 |
| AX-157832615 | 14 | 54.932 | KV453331.1 | 380321 | 28-scf00315 | 28 |
| AX-158152202 | 14 | 54.932 | KV453331.1 | 458104 | 28-scf00315 | 28 |
| AX-158152059 | 14 | 55.257 | KV453331.1 | 226624 | 28-scf00315 | 28 |
| AX-158152063 | 14 | 55.259 | KV453331.1 | 231587 | 28-scf00315 | 28 |
| AX-157727610 | 14 | 55.381 | KV453331.1 | 232945 | 28-scf00315 | 28 |
| AX-158152064 | 14 | 55.381 | KV453331.1 | 233415 | 28-scf00315 | 28 |
| AX-158152065 | 14 | 55.381 | KV453331.1 | 234204 | 28-scf00315 | 28 |
| AX-157772156 | 14 | 55.381 | KV453331.1 | 237373 | 28-scf00315 | 28 |
| AX-158152068 | 14 | 55.381 | KV453331.1 | 238442 | 28-scf00315 | 28 |
| AX-158152070 | 14 | 55.403 | KV453331.1 | 240169 | 28-scf00315 | 28 |
| AX-157832604 | 14 | 56.018 | KV453331.1 | 253197 | 28-scf00315 | 28 |
| AX-158152079 | 14 | 56.334 | KV453331.1 | 267033 | 28-scf00315 | 28 |
| AX-158152082 | 14 | 56.334 | KV453331.1 | 270881 | 28-scf00315 | 28 |
| AX-158152084 | 14 | 56.334 | KV453331.1 | 276981 | 28-scf00315 | 28 |
| AX-158152125 | 14 | 56.334 | KV453331.1 | 352905 | 28-scf00315 | 28 |
| AX-158152126 | 14 | 56.334 | KV453331.1 | 353262 | 28-scf00315 | 28 |
| AX-158152155 | 14 | 56.334 | KV453331.1 | 397851 | 28-scf00315 | 28 |
| AX-158152247 | 14 | 56.334 | KV453331.1 | 536469 | 28-scf00315 | 28 |
| AX-158152321 | 14 | 56.334 | KV453331.1 | 627794 | 28-scf00315 | 28 |
| AX-158152335 | 14 | 56.334 | KV453331.1 | 642321 | 28-scf00315 | 28 |
| AX-157866463 | 14 | 56.388 | KV453331.1 | 279148 | 28-scf00315 | 28 |

|              |    |        |            |        |             |    |
|--------------|----|--------|------------|--------|-------------|----|
| AX-158152086 | 14 | 56.455 | KV453331.1 | 280800 | 28-scf00315 | 28 |
| AX-157751247 | 14 | 56.575 | KV453331.1 | 254056 | 28-scf00315 | 28 |
| AX-157740414 | 14 | 56.575 | KV453331.1 | 270211 | 28-scf00315 | 28 |
| AX-158152083 | 14 | 56.575 | KV453331.1 | 276277 | 28-scf00315 | 28 |
| AX-158152088 | 14 | 56.575 | KV453331.1 | 285251 | 28-scf00315 | 28 |
| AX-157752376 | 14 | 56.575 | KV453331.1 | 286489 | 28-scf00315 | 28 |
| AX-158152092 | 14 | 56.575 | KV453331.1 | 291630 | 28-scf00315 | 28 |
| AX-158152093 | 14 | 56.575 | KV453331.1 | 292015 | 28-scf00315 | 28 |
| AX-158393210 | 14 | 56.575 | KV453331.1 | 298582 | 28-scf00315 | 28 |
| AX-158152097 | 14 | 56.575 | KV453331.1 | 298964 | 28-scf00315 | 28 |
| AX-157716440 | 14 | 56.575 | KV453331.1 | 300253 | 28-scf00315 | 28 |
| AX-158152100 | 14 | 56.575 | KV453331.1 | 302109 | 28-scf00315 | 28 |
| AX-158152101 | 14 | 56.575 | KV453331.1 | 302830 | 28-scf00315 | 28 |
| AX-158152102 | 14 | 56.575 | KV453331.1 | 303185 | 28-scf00315 | 28 |
| AX-158152108 | 14 | 56.575 | KV453331.1 | 319680 | 28-scf00315 | 28 |
| AX-158412580 | 14 | 56.575 | KV453331.1 | 326558 | 28-scf00315 | 28 |
| AX-158152109 | 14 | 56.575 | KV453331.1 | 326641 | 28-scf00315 | 28 |
| AX-158412581 | 14 | 56.575 | KV453331.1 | 327522 | 28-scf00315 | 28 |
| AX-158152111 | 14 | 56.575 | KV453331.1 | 328786 | 28-scf00315 | 28 |
| AX-157832607 | 14 | 56.575 | KV453331.1 | 329117 | 28-scf00315 | 28 |
| AX-157832608 | 14 | 56.575 | KV453331.1 | 329913 | 28-scf00315 | 28 |
| AX-157743529 | 14 | 56.575 | KV453331.1 | 330001 | 28-scf00315 | 28 |
| AX-158152120 | 14 | 56.575 | KV453331.1 | 345966 | 28-scf00315 | 28 |
| AX-158152129 | 14 | 56.575 | KV453331.1 | 355412 | 28-scf00315 | 28 |
| AX-158152140 | 14 | 56.575 | KV453331.1 | 367417 | 28-scf00315 | 28 |
| AX-157771998 | 14 | 56.575 | KV453331.1 | 372070 | 28-scf00315 | 28 |
| AX-157749670 | 14 | 56.575 | KV453331.1 | 374811 | 28-scf00315 | 28 |
| AX-157746651 | 14 | 56.575 | KV453331.1 | 393570 | 28-scf00315 | 28 |
| AX-157770735 | 14 | 56.575 | KV453331.1 | 422020 | 28-scf00315 | 28 |
| AX-158152188 | 14 | 56.575 | KV453331.1 | 437145 | 28-scf00315 | 28 |
| AX-158412582 | 14 | 56.575 | KV453331.1 | 438223 | 28-scf00315 | 28 |
| AX-158412583 | 14 | 56.575 | KV453331.1 | 438711 | 28-scf00315 | 28 |
| AX-157832626 | 14 | 56.575 | KV453331.1 | 491126 | 28-scf00315 | 28 |
| AX-158152232 | 14 | 56.575 | KV453331.1 | 502922 | 28-scf00315 | 28 |
| AX-158152114 | 14 | 56.697 | KV453331.1 | 335276 | 28-scf00315 | 28 |
| AX-158152091 | 14 | 56.794 | KV453331.1 | 289131 | 28-scf00315 | 28 |
| AX-158152094 | 14 | 56.794 | KV453331.1 | 294560 | 28-scf00315 | 28 |
| AX-157832609 | 14 | 56.794 | KV453331.1 | 338896 | 28-scf00315 | 28 |
| AX-158152115 | 14 | 56.794 | KV453331.1 | 339825 | 28-scf00315 | 28 |
| AX-158152116 | 14 | 56.794 | KV453331.1 | 340225 | 28-scf00315 | 28 |
| AX-158152118 | 14 | 56.794 | KV453331.1 | 341381 | 28-scf00315 | 28 |
| AX-157832611 | 14 | 56.794 | KV453331.1 | 343555 | 28-scf00315 | 28 |
| AX-157832612 | 14 | 56.794 | KV453331.1 | 344842 | 28-scf00315 | 28 |
| AX-157832613 | 14 | 56.794 | KV453331.1 | 346324 | 28-scf00315 | 28 |
| AX-158152121 | 14 | 56.794 | KV453331.1 | 347223 | 28-scf00315 | 28 |
| AX-158152122 | 14 | 56.794 | KV453331.1 | 348359 | 28-scf00315 | 28 |
| AX-158152124 | 14 | 56.794 | KV453331.1 | 352760 | 28-scf00315 | 28 |
| AX-158152128 | 14 | 56.794 | KV453331.1 | 354927 | 28-scf00315 | 28 |
| AX-158152134 | 14 | 56.794 | KV453331.1 | 362601 | 28-scf00315 | 28 |
| AX-158152136 | 14 | 56.794 | KV453331.1 | 363988 | 28-scf00315 | 28 |
| AX-158152139 | 14 | 56.794 | KV453331.1 | 366268 | 28-scf00315 | 28 |

|              |    |        |            |        |             |    |
|--------------|----|--------|------------|--------|-------------|----|
| AX-158152143 | 14 | 56.794 | KV453331.1 | 369530 | 28-scf00315 | 28 |
| AX-157886491 | 14 | 56.794 | KV453331.1 | 376045 | 28-scf00315 | 28 |
| AX-157751418 | 14 | 56.794 | KV453331.1 | 379736 | 28-scf00315 | 28 |
| AX-158152146 | 14 | 56.794 | KV453331.1 | 380820 | 28-scf00315 | 28 |
| AX-157832616 | 14 | 56.794 | KV453331.1 | 384110 | 28-scf00315 | 28 |
| AX-158152148 | 14 | 56.794 | KV453331.1 | 384243 | 28-scf00315 | 28 |
| AX-158152149 | 14 | 56.794 | KV453331.1 | 385816 | 28-scf00315 | 28 |
| AX-158152150 | 14 | 56.794 | KV453331.1 | 386203 | 28-scf00315 | 28 |
| AX-158152153 | 14 | 56.794 | KV453331.1 | 391624 | 28-scf00315 | 28 |
| AX-158152154 | 14 | 56.794 | KV453331.1 | 393975 | 28-scf00315 | 28 |
| AX-158152156 | 14 | 56.794 | KV453331.1 | 398348 | 28-scf00315 | 28 |
| AX-158152158 | 14 | 56.794 | KV453331.1 | 399556 | 28-scf00315 | 28 |
| AX-158152159 | 14 | 56.794 | KV453331.1 | 399852 | 28-scf00315 | 28 |
| AX-158152160 | 14 | 56.794 | KV453331.1 | 401889 | 28-scf00315 | 28 |
| AX-158152161 | 14 | 56.794 | KV453331.1 | 403411 | 28-scf00315 | 28 |
| AX-157832617 | 14 | 56.794 | KV453331.1 | 403687 | 28-scf00315 | 28 |
| AX-157724871 | 14 | 56.794 | KV453331.1 | 404869 | 28-scf00315 | 28 |
| AX-157751919 | 14 | 56.794 | KV453331.1 | 405500 | 28-scf00315 | 28 |
| AX-157832618 | 14 | 56.794 | KV453331.1 | 406100 | 28-scf00315 | 28 |
| AX-158152162 | 14 | 56.794 | KV453331.1 | 407057 | 28-scf00315 | 28 |
| AX-157756861 | 14 | 56.794 | KV453331.1 | 407327 | 28-scf00315 | 28 |
| AX-158152169 | 14 | 56.794 | KV453331.1 | 417279 | 28-scf00315 | 28 |
| AX-158152182 | 14 | 56.794 | KV453331.1 | 431190 | 28-scf00315 | 28 |
| AX-157727215 | 14 | 56.794 | KV453331.1 | 432731 | 28-scf00315 | 28 |
| AX-158152185 | 14 | 56.794 | KV453331.1 | 433064 | 28-scf00315 | 28 |
| AX-157723323 | 14 | 56.794 | KV453331.1 | 435563 | 28-scf00315 | 28 |
| AX-158152218 | 14 | 56.794 | KV453331.1 | 484431 | 28-scf00315 | 28 |
| AX-158152164 | 14 | 56.903 | KV453331.1 | 411756 | 28-scf00315 | 28 |
| AX-158152187 | 14 | 56.903 | KV453331.1 | 436642 | 28-scf00315 | 28 |
| AX-158152189 | 14 | 57.016 | KV453331.1 | 437614 | 28-scf00315 | 28 |
| AX-157832620 | 14 | 57.122 | KV453331.1 | 446140 | 28-scf00315 | 28 |
| AX-158152194 | 14 | 57.122 | KV453331.1 | 447377 | 28-scf00315 | 28 |
| AX-158152196 | 14 | 57.122 | KV453331.1 | 451125 | 28-scf00315 | 28 |
| AX-158152199 | 14 | 57.122 | KV453331.1 | 454654 | 28-scf00315 | 28 |
| AX-158385581 | 14 | 57.122 | KV453331.1 | 471537 | 28-scf00315 | 28 |
| AX-158152211 | 14 | 57.122 | KV453331.1 | 473584 | 28-scf00315 | 28 |
| AX-158152212 | 14 | 57.122 | KV453331.1 | 474038 | 28-scf00315 | 28 |
| AX-157832623 | 14 | 57.122 | KV453331.1 | 475737 | 28-scf00315 | 28 |
| AX-158152214 | 14 | 57.122 | KV453331.1 | 476043 | 28-scf00315 | 28 |
| AX-158152216 | 14 | 57.122 | KV453331.1 | 479173 | 28-scf00315 | 28 |
| AX-157720146 | 14 | 57.122 | KV453331.1 | 482745 | 28-scf00315 | 28 |
| AX-157748655 | 14 | 57.122 | KV453331.1 | 484256 | 28-scf00315 | 28 |
| AX-157832624 | 14 | 57.122 | KV453331.1 | 486575 | 28-scf00315 | 28 |
| AX-158152220 | 14 | 57.122 | KV453331.1 | 487896 | 28-scf00315 | 28 |
| AX-158152225 | 14 | 57.173 | KV453331.1 | 497136 | 28-scf00315 | 28 |
| AX-158152099 | 14 | 57.231 | KV453331.1 | 301799 | 28-scf00315 | 28 |
| AX-158152176 | 14 | 57.231 | KV453331.1 | 423295 | 28-scf00315 | 28 |
| AX-158412586 | 14 | 57.231 | KV453331.1 | 500673 | 28-scf00315 | 28 |
| AX-158152230 | 14 | 57.231 | KV453331.1 | 501122 | 28-scf00315 | 28 |
| AX-158152236 | 14 | 57.231 | KV453331.1 | 507073 | 28-scf00315 | 28 |
| AX-158152238 | 14 | 57.231 | KV453331.1 | 512071 | 28-scf00315 | 28 |

|              |    |        |            |        |             |    |
|--------------|----|--------|------------|--------|-------------|----|
| AX-157866466 | 14 | 57.231 | KV453331.1 | 516577 | 28-scf00315 | 28 |
| AX-157771050 | 14 | 57.231 | KV453331.1 | 547436 | 28-scf00315 | 28 |
| AX-157775853 | 14 | 57.231 | KV453331.1 | 588577 | 28-scf00315 | 28 |
| AX-158152287 | 14 | 57.231 | KV453331.1 | 588839 | 28-scf00315 | 28 |
| AX-158152307 | 14 | 57.231 | KV453331.1 | 609993 | 28-scf00315 | 28 |
| AX-158152312 | 14 | 57.231 | KV453331.1 | 618729 | 28-scf00315 | 28 |
| AX-158152313 | 14 | 57.231 | KV453331.1 | 619906 | 28-scf00315 | 28 |
| AX-158152320 | 14 | 57.231 | KV453331.1 | 626460 | 28-scf00315 | 28 |
| AX-158152244 | 14 | 57.558 | KV453331.1 | 527245 | 28-scf00315 | 28 |
| AX-157716971 | 14 | 57.558 | KV453331.1 | 529976 | 28-scf00315 | 28 |
| AX-157756736 | 14 | 57.558 | KV453331.1 | 531375 | 28-scf00315 | 28 |
| AX-158152245 | 14 | 57.558 | KV453331.1 | 531774 | 28-scf00315 | 28 |
| AX-158152246 | 14 | 57.558 | KV453331.1 | 533346 | 28-scf00315 | 28 |
| AX-157710011 | 14 | 57.594 | KV453331.1 | 528455 | 28-scf00315 | 28 |
| AX-157858137 | 14 | 57.594 | KV453331.1 | 536281 | 28-scf00315 | 28 |
| AX-158152248 | 14 | 57.629 | KV453331.1 | 539054 | 28-scf00315 | 28 |
| AX-158152267 | 14 | 57.629 | KV453331.1 | 560612 | 28-scf00315 | 28 |
| AX-158152293 | 14 | 57.629 | KV453331.1 | 594012 | 28-scf00315 | 28 |
| AX-158152250 | 14 | 57.668 | KV453331.1 | 544559 | 28-scf00315 | 28 |
| AX-158152253 | 14 | 57.668 | KV453331.1 | 548061 | 28-scf00315 | 28 |
| AX-158152254 | 14 | 57.668 | KV453331.1 | 548516 | 28-scf00315 | 28 |
| AX-158152256 | 14 | 57.668 | KV453331.1 | 549685 | 28-scf00315 | 28 |
| AX-158380405 | 14 | 57.668 | KV453331.1 | 550519 | 28-scf00315 | 28 |
| AX-158152262 | 14 | 57.668 | KV453331.1 | 554753 | 28-scf00315 | 28 |
| AX-158152264 | 14 | 57.668 | KV453331.1 | 557836 | 28-scf00315 | 28 |
| AX-158152265 | 14 | 57.668 | KV453331.1 | 558311 | 28-scf00315 | 28 |
| AX-158152291 | 14 | 57.668 | KV453331.1 | 591465 | 28-scf00315 | 28 |
| AX-158152268 | 14 | 57.702 | KV453331.1 | 560998 | 28-scf00315 | 28 |
| AX-158152272 | 14 | 57.734 | KV453331.1 | 566275 | 28-scf00315 | 28 |
| AX-158152281 | 14 | 57.734 | KV453331.1 | 578850 | 28-scf00315 | 28 |
| AX-157717261 | 14 | 57.762 | KV453331.1 | 523297 | 28-scf00315 | 28 |
| AX-158152273 | 14 | 57.762 | KV453331.1 | 567167 | 28-scf00315 | 28 |
| AX-158152269 | 14 | 57.777 | KV453331.1 | 562168 | 28-scf00315 | 28 |
| AX-158152276 | 14 | 57.777 | KV453331.1 | 568805 | 28-scf00315 | 28 |
| AX-158152277 | 14 | 57.777 | KV453331.1 | 568980 | 28-scf00315 | 28 |
| AX-158152289 | 14 | 57.777 | KV453331.1 | 589918 | 28-scf00315 | 28 |
| AX-158152299 | 14 | 57.777 | KV453331.1 | 601713 | 28-scf00315 | 28 |
| AX-158152302 | 14 | 57.777 | KV453331.1 | 603764 | 28-scf00315 | 28 |
| AX-158152172 | 14 | 57.995 | KV453331.1 | 420725 | 28-scf00315 | 28 |
| AX-158152179 | 14 | 57.995 | KV453331.1 | 427374 | 28-scf00315 | 28 |
| AX-158152190 | 14 | 57.995 | KV453331.1 | 439633 | 28-scf00315 | 28 |
| AX-158152206 | 14 | 57.995 | KV453331.1 | 462756 | 28-scf00315 | 28 |
| AX-158152231 | 14 | 57.995 | KV453331.1 | 502253 | 28-scf00315 | 28 |
| AX-158152235 | 14 | 57.995 | KV453331.1 | 505693 | 28-scf00315 | 28 |
| AX-158152249 | 14 | 57.995 | KV453331.1 | 541708 | 28-scf00315 | 28 |
| AX-158152263 | 14 | 57.995 | KV453331.1 | 556692 | 28-scf00315 | 28 |
| AX-157886495 | 14 | 57.995 | KV453331.1 | 565559 | 28-scf00315 | 28 |
| AX-157741035 | 14 | 57.995 | KV453331.1 | 599625 | 28-scf00315 | 28 |
| AX-158152308 | 14 | 57.995 | KV453331.1 | 610406 | 28-scf00315 | 28 |
| AX-158152309 | 14 | 57.995 | KV453331.1 | 610910 | 28-scf00315 | 28 |
| AX-158152314 | 14 | 57.995 | KV453331.1 | 620466 | 28-scf00315 | 28 |

|              |    |        |            |        |             |    |
|--------------|----|--------|------------|--------|-------------|----|
| AX-158152315 | 14 | 57.995 | KV453331.1 | 620835 | 28-scf00315 | 28 |
| AX-157710154 | 14 | 57.995 | KV453331.1 | 623116 | 28-scf00315 | 28 |
| AX-158152318 | 14 | 57.995 | KV453331.1 | 625164 | 28-scf00315 | 28 |
| AX-158152319 | 14 | 57.995 | KV453331.1 | 626095 | 28-scf00315 | 28 |
| AX-157708648 | 14 | 58.106 | KV453331.1 | 315880 | 28-scf00315 | 28 |
| AX-158152325 | 14 | 58.106 | KV453331.1 | 632481 | 28-scf00315 | 28 |
| AX-158152328 | 14 | 58.323 | KV453331.1 | 635542 | 28-scf00315 | 28 |
| AX-158152329 | 14 | 58.323 | KV453331.1 | 636630 | 28-scf00315 | 28 |
| AX-158152331 | 14 | 58.323 | KV453331.1 | 638311 | 28-scf00315 | 28 |
| AX-158152332 | 14 | 58.323 | KV453331.1 | 638698 | 28-scf00315 | 28 |
| AX-158152333 | 14 | 58.323 | KV453331.1 | 639707 | 28-scf00315 | 28 |
| AX-158152334 | 14 | 58.323 | KV453331.1 | 640165 | 28-scf00315 | 28 |
| AX-157747745 | 14 | 58.398 | KV453331.1 | 649838 | 28-scf00315 | 28 |
| AX-158152339 | 14 | 58.432 | KV453331.1 | 650195 | 28-scf00315 | 28 |
| AX-158152340 | 14 | 58.432 | KV453331.1 | 650828 | 28-scf00315 | 28 |
| AX-157713169 | 14 | 58.432 | KV453331.1 | 652187 | 28-scf00315 | 28 |
| AX-157832635 | 14 | 58.432 | KV453331.1 | 652498 | 28-scf00315 | 28 |
| AX-158152341 | 14 | 58.432 | KV453331.1 | 653068 | 28-scf00315 | 28 |
| AX-158393213 | 14 | 58.432 | KV453331.1 | 690689 | 28-scf00315 | 28 |
| AX-158152342 | 14 | 58.541 | KV453331.1 | 654083 | 28-scf00315 | 28 |
| AX-157832636 | 14 | 58.541 | KV453331.1 | 654754 | 28-scf00315 | 28 |
| AX-158152343 | 14 | 58.541 | KV453331.1 | 655084 | 28-scf00315 | 28 |
| AX-157749883 | 14 | 58.541 | KV453331.1 | 655948 | 28-scf00315 | 28 |
| AX-158152346 | 14 | 58.651 | KV453331.1 | 662617 | 28-scf00315 | 28 |
| AX-158152347 | 14 | 58.651 | KV453331.1 | 664825 | 28-scf00315 | 28 |
| AX-157719982 | 14 | 58.703 | KV453331.1 | 671173 | 28-scf00315 | 28 |
| AX-158152349 | 14 | 58.703 | KV453331.1 | 672530 | 28-scf00315 | 28 |
| AX-158152350 | 14 | 58.715 | KV453331.1 | 672923 | 28-scf00315 | 28 |
| AX-157832638 | 14 | 58.734 | KV453331.1 | 678173 | 28-scf00315 | 28 |
| AX-158152361 | 14 | 58.734 | KV453331.1 | 689346 | 28-scf00315 | 28 |
| AX-158152368 | 14 | 58.734 | KV453331.1 | 701067 | 28-scf00315 | 28 |
| AX-158152353 | 14 | 58.76  | KV453331.1 | 679561 | 28-scf00315 | 28 |
| AX-157709536 | 14 | 58.76  | KV453331.1 | 680382 | 28-scf00315 | 28 |
| AX-158152354 | 14 | 58.76  | KV453331.1 | 680780 | 28-scf00315 | 28 |
| AX-158152355 | 14 | 58.76  | KV453331.1 | 682264 | 28-scf00315 | 28 |
| AX-158385582 | 14 | 58.76  | KV453331.1 | 698315 | 28-scf00315 | 28 |
| AX-158152356 | 14 | 58.761 | KV453331.1 | 683982 | 28-scf00315 | 28 |
| AX-158152360 | 14 | 58.924 | KV453331.1 | 687618 | 28-scf00315 | 28 |
| AX-158152352 | 14 | 59.088 | KV453331.1 | 678551 | 28-scf00315 | 28 |
| AX-158152364 | 14 | 59.088 | KV453331.1 | 692977 | 28-scf00315 | 28 |
| AX-158152365 | 14 | 59.088 | KV453331.1 | 693895 | 28-scf00315 | 28 |
| AX-158152367 | 14 | 59.088 | KV453331.1 | 699145 | 28-scf00315 | 28 |
| AX-157832641 | 14 | 59.088 | KV453331.1 | 699569 | 28-scf00315 | 28 |
| AX-158152294 | 14 | 59.207 | KV453331.1 | 594582 | 28-scf00315 | 28 |
| AX-157832642 | 14 | 59.207 | KV453331.1 | 701109 | 28-scf00315 | 28 |
| AX-158152370 | 14 | 59.312 | KV453331.1 | 708394 | 28-scf00315 | 28 |
| AX-157740334 | 14 | 59.312 | KV453331.1 | 739498 | 28-scf00315 | 28 |
| AX-158152387 | 14 | 59.312 | KV453331.1 | 742543 | 28-scf00315 | 28 |
| AX-157832646 | 14 | 59.417 | KV453331.1 | 735812 | 28-scf00315 | 28 |
| AX-158152386 | 14 | 59.744 | KV453331.1 | 742123 | 28-scf00315 | 28 |
| AX-158152388 | 14 | 59.744 | KV453331.1 | 742999 | 28-scf00315 | 28 |

|              |    |        |            |        |             |    |
|--------------|----|--------|------------|--------|-------------|----|
| AX-158152389 | 14 | 59.744 | KV453331.1 | 744487 | 28-scf00315 | 28 |
| AX-158152390 | 14 | 59.744 | KV453331.1 | 745517 | 28-scf00315 | 28 |
| AX-158152391 | 14 | 59.744 | KV453331.1 | 746847 | 28-scf00315 | 28 |
| AX-158152394 | 14 | 59.744 | KV453331.1 | 749156 | 28-scf00315 | 28 |
| AX-158152395 | 14 | 59.744 | KV453331.1 | 750803 | 28-scf00315 | 28 |
| AX-158152399 | 14 | 59.744 | KV453331.1 | 754167 | 28-scf00315 | 28 |
| AX-158152400 | 14 | 59.744 | KV453331.1 | 754568 | 28-scf00315 | 28 |
| AX-158152402 | 14 | 59.744 | KV453331.1 | 757635 | 28-scf00315 | 28 |
| AX-157725108 | 14 | 59.744 | KV453331.1 | 761020 | 28-scf00315 | 28 |
| AX-158152404 | 14 | 59.744 | KV453331.1 | 761970 | 28-scf00315 | 28 |
| AX-158152405 | 14 | 59.744 | KV453331.1 | 762819 | 28-scf00315 | 28 |
| AX-158152411 | 14 | 59.744 | KV453331.1 | 770609 | 28-scf00315 | 28 |
| AX-157757618 | 14 | 59.744 | KV453331.1 | 771520 | 28-scf00315 | 28 |
| AX-158152407 | 14 | 59.853 | KV453331.1 | 764216 | 28-scf00315 | 28 |
| AX-158152408 | 14 | 59.853 | KV453331.1 | 765428 | 28-scf00315 | 28 |
| AX-158152409 | 14 | 59.853 | KV453331.1 | 767450 | 28-scf00315 | 28 |
| AX-158152412 | 14 | 59.948 | KV453331.1 | 772386 | 28-scf00315 | 28 |
| AX-158152410 | 14 | 59.99  | KV453331.1 | 767977 | 28-scf00315 | 28 |
| AX-158152413 | 14 | 59.99  | KV453331.1 | 774360 | 28-scf00315 | 28 |
| AX-158152414 | 14 | 59.99  | KV453331.1 | 775081 | 28-scf00315 | 28 |
| AX-158152418 | 14 | 60.127 | KV453331.1 | 778661 | 28-scf00315 | 28 |
| AX-158152419 | 14 | 60.127 | KV453331.1 | 780369 | 28-scf00315 | 28 |
| AX-157886500 | 14 | 60.127 | KV453331.1 | 781336 | 28-scf00315 | 28 |
| AX-158152420 | 14 | 60.127 | KV453331.1 | 781936 | 28-scf00315 | 28 |
| AX-158152421 | 14 | 60.127 | KV453331.1 | 782154 | 28-scf00315 | 28 |
| AX-158152423 | 14 | 60.129 | KV453331.1 | 784661 | 28-scf00315 | 28 |
| AX-158152424 | 14 | 60.277 | KV453331.1 | 785286 | 28-scf00315 | 28 |
| AX-158152428 | 14 | 60.396 | KV453331.1 | 788902 | 28-scf00315 | 28 |
| AX-158152430 | 14 | 60.568 | KV453331.1 | 793513 | 28-scf00315 | 28 |
| AX-158152431 | 14 | 60.888 | KV453331.1 | 794264 | 28-scf00315 | 28 |
| AX-158152432 | 14 | 60.947 | KV453331.1 | 794938 | 28-scf00315 | 28 |
| AX-158152433 | 14 | 60.947 | KV453331.1 | 795317 | 28-scf00315 | 28 |
| AX-158152434 | 14 | 60.947 | KV453331.1 | 796389 | 28-scf00315 | 28 |
| AX-158152437 | 14 | 60.947 | KV453331.1 | 799393 | 28-scf00315 | 28 |
| AX-158152439 | 14 | 60.947 | KV453331.1 | 801366 | 28-scf00315 | 28 |
| AX-158152440 | 14 | 60.947 | KV453331.1 | 802240 | 28-scf00315 | 28 |
| AX-157758593 | 14 | 60.947 | KV453331.1 | 804547 | 28-scf00315 | 28 |
| AX-158152444 | 14 | 60.947 | KV453331.1 | 806371 | 28-scf00315 | 28 |
| AX-158152445 | 14 | 60.947 | KV453331.1 | 809031 | 28-scf00315 | 28 |
| AX-157878357 | 14 | 60.947 | KV453331.1 | 810031 | 28-scf00315 | 28 |
| AX-158152448 | 14 | 60.947 | KV453331.1 | 811667 | 28-scf00315 | 28 |
| AX-158152449 | 14 | 60.947 | KV453331.1 | 812222 | 28-scf00315 | 28 |
| AX-158152450 | 14 | 60.947 | KV453331.1 | 812641 | 28-scf00315 | 28 |
| AX-158152451 | 14 | 61.057 | KV453331.1 | 816616 | 28-scf00315 | 28 |
| AX-158152452 | 14 | 61.057 | KV453331.1 | 818519 | 28-scf00315 | 28 |
| AX-158152436 | 14 | 61.183 | KV453331.1 | 798082 | 28-scf00315 | 28 |
| AX-157755839 | 14 | 61.183 | KV453331.1 | 819234 | 28-scf00315 | 28 |
| AX-158152453 | 14 | 61.183 | KV453331.1 | 819673 | 28-scf00315 | 28 |
| AX-157747810 | 14 | 61.183 | KV453331.1 | 821249 | 28-scf00315 | 28 |
| AX-157878358 | 14 | 61.183 | KV453331.1 | 858821 | 28-scf00315 | 28 |
| AX-158152460 | 14 | 61.533 | KV453331.1 | 833327 | 28-scf00315 | 28 |

|              |    |        |            |        |             |    |
|--------------|----|--------|------------|--------|-------------|----|
| AX-157832648 | 14 | 61.596 | KV453331.1 | 834639 | 28-scf00315 | 28 |
| AX-157751873 | 14 | 61.597 | KV453331.1 | 834048 | 28-scf00315 | 28 |
| AX-158152461 | 14 | 61.597 | KV453331.1 | 834911 | 28-scf00315 | 28 |
| AX-157716168 | 14 | 61.943 | KV453331.1 | 836054 | 28-scf00315 | 28 |
| AX-158152462 | 14 | 61.943 | KV453331.1 | 839791 | 28-scf00315 | 28 |
| AX-158152463 | 14 | 61.943 | KV453331.1 | 840063 | 28-scf00315 | 28 |
| AX-158152464 | 14 | 61.943 | KV453331.1 | 841757 | 28-scf00315 | 28 |
| AX-158152466 | 14 | 61.948 | KV453331.1 | 842850 | 28-scf00315 | 28 |
| AX-157742551 | 14 | 61.948 | KV453331.1 | 843176 | 28-scf00315 | 28 |
| AX-158152469 | 14 | 61.948 | KV453331.1 | 846087 | 28-scf00315 | 28 |
| AX-158152470 | 14 | 61.948 | KV453331.1 | 849274 | 28-scf00315 | 28 |
| AX-158393216 | 14 | 62.199 | KV453331.1 | 856651 | 28-scf00315 | 28 |
| AX-158152473 | 14 | 62.199 | KV453331.1 | 857493 | 28-scf00315 | 28 |
| AX-158152476 | 14 | 62.326 | KV453331.1 | 860136 | 28-scf00315 | 28 |
| AX-158152478 | 14 | 62.453 | KV453331.1 | 862858 | 28-scf00315 | 28 |
| AX-158152479 | 14 | 62.453 | KV453331.1 | 864474 | 28-scf00315 | 28 |
| AX-158152480 | 14 | 62.453 | KV453331.1 | 869335 | 28-scf00315 | 28 |
| AX-158152481 | 14 | 62.453 | KV453331.1 | 870322 | 28-scf00315 | 28 |
| AX-158152482 | 14 | 62.706 | KV453331.1 | 875867 | 28-scf00315 | 28 |
| AX-158152483 | 14 | 62.706 | KV453331.1 | 876077 | 28-scf00315 | 28 |
| AX-158152484 | 14 | 62.706 | KV453331.1 | 876446 | 28-scf00315 | 28 |
| AX-158152485 | 14 | 62.706 | KV453331.1 | 877057 | 28-scf00315 | 28 |
| AX-157773202 | 14 | 62.706 | KV453331.1 | 877209 | 28-scf00315 | 28 |
| AX-158152492 | 14 | 62.712 | KV453331.1 | 884097 | 28-scf00315 | 28 |
| AX-158152500 | 14 | 62.712 | KV453331.1 | 893330 | 28-scf00315 | 28 |
| AX-157866470 | 14 | 62.712 | KV453331.1 | 966749 | 28-scf00315 | 28 |
| AX-158152564 | 14 | 62.712 | KV453331.1 | 975575 | 28-scf00315 | 28 |
| AX-158152493 | 14 | 62.716 | KV453331.1 | 885434 | 28-scf00315 | 28 |
| AX-158152491 | 14 | 63.081 | KV453331.1 | 883238 | 28-scf00315 | 28 |
| AX-157722620 | 14 | 63.081 | KV453331.1 | 888818 | 28-scf00315 | 28 |
| AX-158152496 | 14 | 63.088 | KV453331.1 | 889629 | 28-scf00315 | 28 |
| AX-157752244 | 14 | 63.088 | KV453331.1 | 898624 | 28-scf00315 | 28 |
| AX-158152505 | 14 | 63.088 | KV453331.1 | 901914 | 28-scf00315 | 28 |
| AX-158152512 | 14 | 63.088 | KV453331.1 | 908714 | 28-scf00315 | 28 |
| AX-158152511 | 14 | 63.278 | KV453331.1 | 907379 | 28-scf00315 | 28 |
| AX-158152503 | 14 | 63.466 | KV453331.1 | 899953 | 28-scf00315 | 28 |
| AX-157757021 | 14 | 63.466 | KV453331.1 | 910178 | 28-scf00315 | 28 |
| AX-158152518 | 14 | 63.466 | KV453331.1 | 916317 | 28-scf00315 | 28 |
| AX-158152522 | 14 | 63.466 | KV453331.1 | 923858 | 28-scf00315 | 28 |
| AX-158152519 | 14 | 63.467 | KV453331.1 | 920237 | 28-scf00315 | 28 |
| AX-158152520 | 14 | 63.468 | KV453331.1 | 921122 | 28-scf00315 | 28 |
| AX-158152526 | 14 | 63.468 | KV453331.1 | 926511 | 28-scf00315 | 28 |
| AX-158152528 | 14 | 63.468 | KV453331.1 | 927828 | 28-scf00315 | 28 |
| AX-158152530 | 14 | 63.468 | KV453331.1 | 929582 | 28-scf00315 | 28 |
| AX-157832651 | 14 | 63.468 | KV453331.1 | 930590 | 28-scf00315 | 28 |
| AX-158152532 | 14 | 63.468 | KV453331.1 | 930734 | 28-scf00315 | 28 |
| AX-158152533 | 14 | 63.468 | KV453331.1 | 931366 | 28-scf00315 | 28 |
| AX-158412594 | 14 | 63.468 | KV453331.1 | 932143 | 28-scf00315 | 28 |
| AX-158152554 | 14 | 63.468 | KV453331.1 | 961899 | 28-scf00315 | 28 |
| AX-158152498 | 14 | 63.686 | KV453331.1 | 892196 | 28-scf00315 | 28 |
| AX-158152539 | 14 | 63.686 | KV453331.1 | 941848 | 28-scf00315 | 28 |



|              |    |        |            |         |             |    |
|--------------|----|--------|------------|---------|-------------|----|
| AX-158412595 | 14 | 63.686 | KV453331.1 | 945996  | 28-scf00315 | 28 |
| AX-158152541 | 14 | 63.686 | KV453331.1 | 947722  | 28-scf00315 | 28 |
| AX-157745180 | 14 | 63.686 | KV453331.1 | 949129  | 28-scf00315 | 28 |
| AX-158152542 | 14 | 63.686 | KV453331.1 | 949994  | 28-scf00315 | 28 |
| AX-157832652 | 14 | 63.69  | KV453331.1 | 949671  | 28-scf00315 | 28 |
| AX-158152545 | 14 | 63.699 | KV453331.1 | 955380  | 28-scf00315 | 28 |
| AX-157832653 | 14 | 63.811 | KV453331.1 | 955564  | 28-scf00315 | 28 |
| AX-157886504 | 14 | 63.811 | KV453331.1 | 957295  | 28-scf00315 | 28 |
| AX-158152550 | 14 | 63.811 | KV453331.1 | 959092  | 28-scf00315 | 28 |
| AX-158152551 | 14 | 63.812 | KV453331.1 | 960720  | 28-scf00315 | 28 |
| AX-158152559 | 14 | 63.812 | KV453331.1 | 970616  | 28-scf00315 | 28 |
| AX-158152561 | 14 | 63.812 | KV453331.1 | 973283  | 28-scf00315 | 28 |
| AX-158152556 | 14 | 63.828 | KV453331.1 | 966472  | 28-scf00315 | 28 |
| AX-158152566 | 14 | 64.123 | KV453331.1 | 978318  | 28-scf00315 | 28 |
| AX-158152596 | 14 | 64.123 | KV453331.1 | 1018857 | 28-scf00315 | 28 |
| AX-158152570 | 14 | 64.452 | KV453331.1 | 987669  | 28-scf00315 | 28 |
| AX-158152575 | 14 | 64.452 | KV453331.1 | 990320  | 28-scf00315 | 28 |
| AX-158152576 | 14 | 64.452 | KV453331.1 | 992513  | 28-scf00315 | 28 |
| AX-158152586 | 14 | 64.452 | KV453331.1 | 1006430 | 28-scf00315 | 28 |
| AX-158152588 | 14 | 64.452 | KV453331.1 | 1008747 | 28-scf00315 | 28 |
| AX-157832654 | 14 | 64.452 | KV453331.1 | 1011267 | 28-scf00315 | 28 |
| AX-158152592 | 14 | 64.452 | KV453331.1 | 1012925 | 28-scf00315 | 28 |
| AX-157717752 | 14 | 64.452 | KV453331.1 | 1014096 | 28-scf00315 | 28 |
| AX-158152573 | 14 | 64.495 | KV453331.1 | 989354  | 28-scf00315 | 28 |
| AX-158152578 | 14 | 64.495 | KV453331.1 | 994726  | 28-scf00315 | 28 |
| AX-158152593 | 14 | 64.495 | KV453331.1 | 1015627 | 28-scf00315 | 28 |
| AX-157713084 | 14 | 64.518 | KV453331.1 | 1017539 | 28-scf00315 | 28 |
| AX-158152599 | 14 | 64.542 | KV453331.1 | 1025390 | 28-scf00315 | 28 |
| AX-158152594 | 14 | 64.562 | KV453331.1 | 1016267 | 28-scf00315 | 28 |
| AX-157710362 | 14 | 64.562 | KV453331.1 | 1025679 | 28-scf00315 | 28 |
| AX-158152601 | 14 | 64.562 | KV453331.1 | 1027400 | 28-scf00315 | 28 |
| AX-158152602 | 14 | 64.562 | KV453331.1 | 1028039 | 28-scf00315 | 28 |
| AX-158152604 | 14 | 64.562 | KV453331.1 | 1032541 | 28-scf00315 | 28 |
| AX-158152605 | 14 | 64.562 | KV453331.1 | 1032834 | 28-scf00315 | 28 |
| AX-158152606 | 14 | 64.562 | KV453331.1 | 1033422 | 28-scf00315 | 28 |
| AX-158152607 | 14 | 64.562 | KV453331.1 | 1035886 | 28-scf00315 | 28 |
| AX-158152572 | 14 | 64.564 | KV453331.1 | 988821  | 28-scf00315 | 28 |
| AX-157746243 | 14 | 64.564 | KV453331.1 | 1037424 | 28-scf00315 | 28 |
| AX-158152609 | 14 | 64.757 | KV453331.1 | 1038428 | 28-scf00315 | 28 |
| AX-158152615 | 14 | 64.758 | KV453331.1 | 1044205 | 28-scf00315 | 28 |
| AX-158152616 | 14 | 64.758 | KV453331.1 | 1045248 | 28-scf00315 | 28 |
| AX-158152618 | 14 | 64.759 | KV453331.1 | 1046220 | 28-scf00315 | 28 |
| AX-158152620 | 14 | 64.759 | KV453331.1 | 1047443 | 28-scf00315 | 28 |
| AX-158152625 | 14 | 64.759 | KV453331.1 | 1050507 | 28-scf00315 | 28 |
| AX-158152626 | 14 | 64.759 | KV453331.1 | 1051125 | 28-scf00315 | 28 |
| AX-158152627 | 14 | 65.263 | KV453331.1 | 1051949 | 28-scf00315 | 28 |
| AX-158152632 | 14 | 65.327 | KV453331.1 | 1056581 | 28-scf00315 | 28 |
| AX-158380409 | 14 | 65.327 | KV453331.1 | 1056848 | 28-scf00315 | 28 |
| AX-158152634 | 14 | 65.327 | KV453331.1 | 1057955 | 28-scf00315 | 28 |
| AX-158152635 | 14 | 65.327 | KV453331.1 | 1058697 | 28-scf00315 | 28 |
| AX-158152637 | 14 | 65.327 | KV453331.1 | 1060152 | 28-scf00315 | 28 |

|              |    |        |            |         |             |    |
|--------------|----|--------|------------|---------|-------------|----|
| AX-158152633 | 14 | 65.328 | KV453331.1 | 1056958 | 28-scf00315 | 28 |
| AX-158152643 | 14 | 65.328 | KV453331.1 | 1066428 | 28-scf00315 | 28 |
| AX-158152640 | 14 | 65.655 | KV453331.1 | 1064464 | 28-scf00315 | 28 |
| AX-158152642 | 14 | 65.655 | KV453331.1 | 1065963 | 28-scf00315 | 28 |
| AX-158152646 | 14 | 65.655 | KV453331.1 | 1068981 | 28-scf00315 | 28 |
| AX-157858141 | 14 | 65.655 | KV453331.1 | 1071761 | 28-scf00315 | 28 |
| AX-158152656 | 14 | 65.655 | KV453331.1 | 1082985 | 28-scf00315 | 28 |
| AX-158152641 | 14 | 65.782 | KV453331.1 | 1065584 | 28-scf00315 | 28 |
| AX-158152645 | 14 | 65.782 | KV453331.1 | 1067958 | 28-scf00315 | 28 |
| AX-158152648 | 14 | 65.782 | KV453331.1 | 1072595 | 28-scf00315 | 28 |
| AX-158152653 | 14 | 65.782 | KV453331.1 | 1078933 | 28-scf00315 | 28 |
| AX-157722789 | 14 | 65.782 | KV453331.1 | 1079745 | 28-scf00315 | 28 |
| AX-158152657 | 14 | 65.782 | KV453331.1 | 1083579 | 28-scf00315 | 28 |
| AX-157758642 | 14 | 65.939 | KV453331.1 | 1081576 | 28-scf00315 | 28 |
| AX-158385585 | 14 | 66.023 | KV453331.1 | 1083451 | 28-scf00315 | 28 |
| AX-158152658 | 14 | 66.101 | KV453331.1 | 1084064 | 28-scf00315 | 28 |
| AX-158152659 | 14 | 66.421 | KV453331.1 | 1084725 | 28-scf00315 | 28 |
| AX-157832656 | 14 | 66.421 | KV453331.1 | 1087999 | 28-scf00315 | 28 |
| AX-158152660 | 14 | 66.421 | KV453331.1 | 1088046 | 28-scf00315 | 28 |
| AX-158152661 | 14 | 66.421 | KV453331.1 | 1090545 | 28-scf00315 | 28 |
| AX-158152662 | 14 | 66.421 | KV453331.1 | 1091277 | 28-scf00315 | 28 |
| AX-158152665 | 14 | 66.562 | KV453331.1 | 1097623 | 28-scf00315 | 28 |
| AX-158152667 | 14 | 66.562 | KV453331.1 | 1099111 | 28-scf00315 | 28 |
| AX-157878360 | 14 | 66.844 | KV453331.1 | 1105038 | 28-scf00315 | 28 |
| AX-157717120 | 14 | 66.844 | KV453331.1 | 1105630 | 28-scf00315 | 28 |
| AX-158152675 | 14 | 66.846 | KV453331.1 | 1109637 | 28-scf00315 | 28 |
| AX-158152676 | 14 | 66.848 | KV453331.1 | 1111416 | 28-scf00315 | 28 |
| AX-158152677 | 14 | 67.267 | KV453331.1 | 1113108 | 28-scf00315 | 28 |
| AX-157832657 | 14 | 67.403 | KV453331.1 | 1117813 | 28-scf00315 | 28 |
| AX-158152682 | 14 | 67.403 | KV453331.1 | 1117947 | 28-scf00315 | 28 |
| AX-157758873 | 14 | 67.406 | KV453331.1 | 1118666 | 28-scf00315 | 28 |
| AX-158152684 | 14 | 67.406 | KV453331.1 | 1120080 | 28-scf00315 | 28 |
| AX-158152695 | 14 | 67.406 | KV453331.1 | 1136095 | 28-scf00315 | 28 |
| AX-158152686 | 14 | 67.407 | KV453331.1 | 1122966 | 28-scf00315 | 28 |
| AX-158152691 | 14 | 67.407 | KV453331.1 | 1129826 | 28-scf00315 | 28 |
| AX-158152697 | 14 | 67.407 | KV453331.1 | 1136803 | 28-scf00315 | 28 |
| AX-157727824 | 14 | 67.56  | KV453331.1 | 1141507 | 28-scf00315 | 28 |
| AX-158152707 | 14 | 67.56  | KV453331.1 | 1160439 | 28-scf00315 | 28 |
| AX-157723289 | 14 | 67.56  | KV453331.1 | 1163270 | 28-scf00315 | 28 |
| AX-158152717 | 14 | 67.56  | KV453331.1 | 1172508 | 28-scf00315 | 28 |
| AX-157720620 | 14 | 67.712 | KV453331.1 | 1142488 | 28-scf00315 | 28 |
| AX-157886507 | 14 | 67.713 | KV453331.1 | 1143234 | 28-scf00315 | 28 |
| AX-158152701 | 14 | 67.713 | KV453331.1 | 1149820 | 28-scf00315 | 28 |
| AX-158152703 | 14 | 67.713 | KV453331.1 | 1152278 | 28-scf00315 | 28 |
| AX-157741202 | 14 | 67.713 | KV453331.1 | 1152735 | 28-scf00315 | 28 |
| AX-158152704 | 14 | 67.713 | KV453331.1 | 1155314 | 28-scf00315 | 28 |
| AX-158152705 | 14 | 67.825 | KV453331.1 | 1155905 | 28-scf00315 | 28 |
| AX-158152708 | 14 | 67.942 | KV453331.1 | 1162026 | 28-scf00315 | 28 |
| AX-158152709 | 14 | 67.942 | KV453331.1 | 1163855 | 28-scf00315 | 28 |
| AX-158152715 | 14 | 68.172 | KV453331.1 | 1170948 | 28-scf00315 | 28 |
| AX-158152716 | 14 | 68.172 | KV453331.1 | 1171374 | 28-scf00315 | 28 |

|              |    |        |             |         |             |    |
|--------------|----|--------|-------------|---------|-------------|----|
| AX-158152718 | 14 | 68.172 | KV453331.1  | 1174786 | 28-scf00315 | 28 |
| AX-158152719 | 14 | 68.173 | KV453331.1  | 1175506 | 28-scf00315 | 28 |
| AX-157771503 | 14 | 68.358 | KV453331.1  | 1175803 | 28-scf00315 | 28 |
| AX-157719757 | 14 | 68.44  | KV453331.1  | 1176973 | 28-scf00315 | 28 |
| AX-158152720 | 14 | 68.5   | KV453331.1  | 1178718 | 28-scf00315 | 28 |
| AX-158152721 | 14 | 68.5   | KV453331.1  | 1180044 | 28-scf00315 | 28 |
| AX-158152722 | 14 | 68.5   | KV453331.1  | 1180732 | 28-scf00315 | 28 |
| AX-158152723 | 14 | 68.5   | KV453331.1  | 1181439 | 28-scf00315 | 28 |
| AX-158152724 | 14 | 68.5   | KV453331.1  | 1181979 | 28-scf00315 | 28 |
| AX-158152727 | 14 | 68.828 | KV453331.1  | 1184743 | 28-scf00315 | 28 |
| AX-158152729 | 14 | 68.828 | KV453331.1  | 1188181 | 28-scf00315 | 28 |
| AX-158152730 | 14 | 68.828 | KV453331.1  | 1188850 | 28-scf00315 | 28 |
| AX-158152731 | 14 | 68.828 | KV453331.1  | 1193262 | 28-scf00315 | 28 |
| AX-158152734 | 14 | 68.828 | KV453331.1  | 1196153 | 28-scf00315 | 28 |
| AX-158152714 | 14 | 69.046 | KV453331.1  | 1167383 | 28-scf00315 | 28 |
| AX-158152737 | 14 | 69.046 | KV453331.1  | 1199473 | 28-scf00315 | 28 |
| AX-158152738 | 14 | 69.046 | KV453331.1  | 1200427 | 28-scf00315 | 28 |
| AX-158152744 | 14 | 69.046 | KV453331.1  | 1206286 | 28-scf00315 | 28 |
| AX-158152745 | 14 | 69.046 | KV453331.1  | 1207167 | 28-scf00315 | 28 |
| AX-158152746 | 14 | 69.155 | KV453331.1  | 1208148 | 28-scf00315 | 28 |
| AX-157832658 | 14 | 69.178 | KV453331.1  | 1209023 | 28-scf00315 | 28 |
| AX-158152747 | 14 | 69.215 | KV453331.1  | 1209112 | 28-scf00315 | 28 |
| AX-158152748 | 14 | 69.265 | KV453331.1  | 1209752 | 28-scf00315 | 28 |
| AX-158152750 | 14 | 69.265 | KV453331.1  | 1213931 | 28-scf00315 | 28 |
| AX-158380410 | 14 | 69.265 | KV453331.1  | 1214121 | 28-scf00315 | 28 |
| AX-158152751 | 14 | 69.265 | KV453331.1  | 1217405 | 28-scf00315 | 28 |
| AX-158152754 | 14 | 69.265 | KV453331.1  | 1220613 | 28-scf00315 | 28 |
| AX-158152756 | 14 | 69.265 | KV453331.1  | 1224006 | 28-scf00315 | 28 |
| AX-158152757 | 14 | 69.265 | KV453331.1  | 1224450 | 28-scf00315 | 28 |
| AX-158152760 | 14 | 69.265 | KV453331.1  | 1228407 | 28-scf00315 | 28 |
| AX-157720631 | 14 | 69.265 | KV453331.1  | 1228809 | 28-scf00315 | 28 |
| AX-158152763 | 14 | 69.265 | KV453331.1  | 1236625 | 28-scf00315 | 28 |
| AX-158152766 | 14 | 69.265 | KV453331.1  | 1241634 | 28-scf00315 | 28 |
| AX-158152767 | 14 | 69.265 | KV453331.1  | 1242246 | 28-scf00315 | 28 |
| AX-157705305 | 14 | 69.265 | 3ML01029358 | 312     | scf04979_1  | UN |
| AX-157705306 | 14 | 69.265 | 3ML01029358 | 433     | scf04979_1  | UN |
| AX-158152768 | 14 | 69.483 | KV453331.1  | 1242874 | 28-scf00315 | 28 |
| AX-158152769 | 14 | 69.483 | KV453331.1  | 1246703 | 28-scf00315 | 28 |
| AX-157719904 | 14 | 69.483 | KV453331.1  | 1250497 | 28-scf00315 | 28 |
| AX-158152772 | 14 | 69.602 | KV453331.1  | 1252690 | 28-scf00315 | 28 |
| AX-157832659 | 14 | 69.702 | KV453331.1  | 1255767 | 28-scf00315 | 28 |
| AX-158152773 | 14 | 69.702 | KV453331.1  | 1256602 | 28-scf00315 | 28 |
| AX-158152774 | 14 | 69.702 | KV453331.1  | 1257103 | 28-scf00315 | 28 |
| AX-157832660 | 14 | 69.702 | KV453331.1  | 1257454 | 28-scf00315 | 28 |
| AX-158152775 | 14 | 69.702 | KV453331.1  | 1258045 | 28-scf00315 | 28 |
| AX-158152776 | 14 | 69.703 | KV453331.1  | 1263752 | 28-scf00315 | 28 |
| AX-158152777 | 14 | 69.703 | KV453331.1  | 1265474 | 28-scf00315 | 28 |
| AX-158152779 | 14 | 70.029 | KV453331.1  | 1268185 | 28-scf00315 | 28 |
| AX-158152781 | 14 | 70.029 | KV453331.1  | 1271505 | 28-scf00315 | 28 |
| AX-158152782 | 14 | 70.029 | KV453331.1  | 1271728 | 28-scf00315 | 28 |
| AX-158152783 | 14 | 70.029 | KV453331.1  | 1273600 | 28-scf00315 | 28 |

|              |    |        |            |         |               |    |
|--------------|----|--------|------------|---------|---------------|----|
| AX-158152785 | 14 | 70.104 | KV453331.1 | 1277072 | 28-scf00315   | 28 |
| AX-158152788 | 14 | 70.193 | KV453331.1 | 1280362 | 28-scf00315   | 28 |
| AX-158152797 | 14 | 70.193 | KV453331.1 | 1291924 | 28-scf00315   | 28 |
| AX-157771519 | 14 | 70.357 | KV453331.1 | 1281103 | 28-scf00315   | 28 |
| AX-158152795 | 14 | 70.357 | KV453331.1 | 1290460 | 28-scf00315   | 28 |
| AX-158152796 | 14 | 70.423 | KV453331.1 | 1291527 | 28-scf00315   | 28 |
| AX-158152799 | 14 | 70.522 | KV453331.1 | 1295011 | 28-scf00315   | 28 |
| AX-158152800 | 14 | 70.522 | KV453331.1 | 1297800 | 28-scf00315   | 28 |
| AX-158152802 | 14 | 70.522 | KV453331.1 | 1299204 | 28-scf00315   | 28 |
| AX-158152803 | 14 | 70.686 | KV453331.1 | 1301307 | 28-scf00315   | 28 |
| AX-158152804 | 14 | 70.686 | KV453331.1 | 1304745 | 28-scf00315   | 28 |
| AX-158152818 | 14 | 70.686 | KV453331.1 | 1319304 | 28-scf00315   | 28 |
| AX-158152820 | 14 | 70.686 | KV453331.1 | 1320808 | 28-scf00315   | 28 |
| AX-157694875 | 14 | 70.686 | FI869193.1 | 132     | ORI212 lctalu | UN |
| AX-157750082 | 14 | 70.905 | KV453331.1 | 1322677 | 28-scf00315   | 28 |
| AX-158152822 | 14 | 71.014 | KV453331.1 | 1323609 | 28-scf00315   | 28 |
| AX-158152825 | 14 | 71.014 | KV453331.1 | 1326791 | 28-scf00315   | 28 |
| AX-158152826 | 14 | 71.014 | KV453331.1 | 1328258 | 28-scf00315   | 28 |
| AX-157832661 | 14 | 71.014 | KV453331.1 | 1328691 | 28-scf00315   | 28 |
| AX-157832662 | 14 | 71.014 | KV453331.1 | 1328752 | 28-scf00315   | 28 |
| AX-158152828 | 14 | 71.014 | KV453331.1 | 1330805 | 28-scf00315   | 28 |
| AX-158152829 | 14 | 71.014 | KV453331.1 | 1331251 | 28-scf00315   | 28 |
| AX-158152833 | 14 | 71.014 | KV453331.1 | 1335301 | 28-scf00315   | 28 |
| AX-158152830 | 14 | 71.067 | KV453331.1 | 1331366 | 28-scf00315   | 28 |
| AX-158152831 | 14 | 71.067 | KV453331.1 | 1331849 | 28-scf00315   | 28 |
| AX-158152837 | 14 | 71.067 | KV453331.1 | 1337741 | 28-scf00315   | 28 |
| AX-158152841 | 14 | 71.067 | KV453331.1 | 1346849 | 28-scf00315   | 28 |
| AX-158152846 | 14 | 71.067 | KV453331.1 | 1351526 | 28-scf00315   | 28 |
| AX-158152864 | 14 | 71.067 | KV453331.1 | 1375190 | 28-scf00315   | 28 |
| AX-158152875 | 14 | 71.067 | KV453331.1 | 1386025 | 28-scf00315   | 28 |
| AX-158152835 | 14 | 71.123 | KV453331.1 | 1336434 | 28-scf00315   | 28 |
| AX-158152836 | 14 | 71.184 | KV453331.1 | 1337238 | 28-scf00315   | 28 |
| AX-158152838 | 14 | 71.233 | KV453331.1 | 1342669 | 28-scf00315   | 28 |
| AX-158152839 | 14 | 71.233 | KV453331.1 | 1343771 | 28-scf00315   | 28 |
| AX-158152840 | 14 | 71.233 | KV453331.1 | 1345800 | 28-scf00315   | 28 |
| AX-158152843 | 14 | 71.451 | KV453331.1 | 1349163 | 28-scf00315   | 28 |
| AX-158152844 | 14 | 71.451 | KV453331.1 | 1350457 | 28-scf00315   | 28 |
| AX-157750877 | 14 | 71.451 | KV453331.1 | 1351992 | 28-scf00315   | 28 |
| AX-158152847 | 14 | 71.451 | KV453331.1 | 1353142 | 28-scf00315   | 28 |
| AX-158152849 | 14 | 71.451 | KV453331.1 | 1355932 | 28-scf00315   | 28 |
| AX-158152851 | 14 | 71.453 | KV453331.1 | 1356761 | 28-scf00315   | 28 |
| AX-158152852 | 14 | 71.456 | KV453331.1 | 1357469 | 28-scf00315   | 28 |
| AX-158152857 | 14 | 71.741 | KV453331.1 | 1364590 | 28-scf00315   | 28 |
| AX-158152858 | 14 | 71.741 | KV453331.1 | 1364937 | 28-scf00315   | 28 |
| AX-158152889 | 14 | 71.741 | KV453331.1 | 1401013 | 28-scf00315   | 28 |
| AX-158152859 | 14 | 71.887 | KV453331.1 | 1367334 | 28-scf00315   | 28 |
| AX-158152860 | 14 | 71.888 | KV453331.1 | 1368224 | 28-scf00315   | 28 |
| AX-158152862 | 14 | 71.997 | KV453331.1 | 1370221 | 28-scf00315   | 28 |
| AX-158152863 | 14 | 71.997 | KV453331.1 | 1370947 | 28-scf00315   | 28 |
| AX-157753203 | 14 | 71.997 | KV453331.1 | 1373546 | 28-scf00315   | 28 |
| AX-158152865 | 14 | 72.068 | KV453331.1 | 1376057 | 28-scf00315   | 28 |

|              |    |        |            |         |             |    |
|--------------|----|--------|------------|---------|-------------|----|
| AX-158152868 | 14 | 72.116 | KV453331.1 | 1379235 | 28-scf00315 | 28 |
| AX-158385588 | 14 | 72.149 | KV453331.1 | 1383727 | 28-scf00315 | 28 |
| AX-158152872 | 14 | 72.217 | KV453331.1 | 1383910 | 28-scf00315 | 28 |
| AX-158152867 | 14 | 72.326 | KV453331.1 | 1377573 | 28-scf00315 | 28 |
| AX-158152873 | 14 | 72.326 | KV453331.1 | 1385043 | 28-scf00315 | 28 |
| AX-158152877 | 14 | 72.369 | KV453331.1 | 1390292 | 28-scf00315 | 28 |
| AX-158152878 | 14 | 72.369 | KV453331.1 | 1391159 | 28-scf00315 | 28 |
| AX-158152888 | 14 | 72.369 | KV453331.1 | 1400617 | 28-scf00315 | 28 |
| AX-158152879 | 14 | 72.39  | KV453331.1 | 1393199 | 28-scf00315 | 28 |
| AX-157708732 | 14 | 72.436 | KV453331.1 | 1394042 | 28-scf00315 | 28 |
| AX-158152881 | 14 | 72.445 | KV453331.1 | 1395992 | 28-scf00315 | 28 |
| AX-158152882 | 14 | 72.467 | KV453331.1 | 1396901 | 28-scf00315 | 28 |
| AX-158152883 | 14 | 72.611 | KV453331.1 | 1397451 | 28-scf00315 | 28 |
| AX-158152890 | 14 | 72.745 | KV453331.1 | 1402960 | 28-scf00315 | 28 |
| AX-158152891 | 14 | 72.745 | KV453331.1 | 1404148 | 28-scf00315 | 28 |
| AX-158152893 | 14 | 72.745 | KV453331.1 | 1405308 | 28-scf00315 | 28 |
| AX-158152894 | 14 | 73.059 | KV453331.1 | 1410029 | 28-scf00315 | 28 |
| AX-157878364 | 14 | 73.374 | KV453331.1 | 1413296 | 28-scf00315 | 28 |
| AX-158152896 | 14 | 73.374 | KV453331.1 | 1413453 | 28-scf00315 | 28 |
| AX-157697445 | 14 | 73.424 | KV453331.1 | 1418741 | 28-scf00315 | 28 |
| AX-157757829 | 14 | 73.453 | KV453331.1 | 1420555 | 28-scf00315 | 28 |
| AX-158152903 | 14 | 73.48  | KV453331.1 | 1422488 | 28-scf00315 | 28 |
| AX-158152904 | 14 | 73.53  | KV453331.1 | 1423208 | 28-scf00315 | 28 |
| AX-157751409 | 14 | 73.531 | KV453331.1 | 1423873 | 28-scf00315 | 28 |
| AX-157858143 | 14 | 73.531 | KV453331.1 | 1423938 | 28-scf00315 | 28 |
| AX-158152907 | 14 | 73.735 | KV453331.1 | 1433821 | 28-scf00315 | 28 |
| AX-158152909 | 14 | 73.735 | KV453331.1 | 1435536 | 28-scf00315 | 28 |
| AX-158152910 | 14 | 73.735 | KV453331.1 | 1436394 | 28-scf00315 | 28 |
| AX-158152913 | 14 | 73.764 | KV453331.1 | 1439291 | 28-scf00315 | 28 |
| AX-158152911 | 14 | 73.968 | KV453331.1 | 1436989 | 28-scf00315 | 28 |
| AX-158152914 | 14 | 73.968 | KV453331.1 | 1439935 | 28-scf00315 | 28 |
| AX-157724182 | 14 | 73.968 | KV453331.1 | 1440668 | 28-scf00315 | 28 |
| AX-158152917 | 14 | 73.968 | KV453331.1 | 1445027 | 28-scf00315 | 28 |
| AX-158152918 | 14 | 73.968 | KV453331.1 | 1446616 | 28-scf00315 | 28 |
| AX-158152921 | 14 | 73.968 | KV453331.1 | 1448951 | 28-scf00315 | 28 |
| AX-157772703 | 14 | 73.968 | KV453331.1 | 1449567 | 28-scf00315 | 28 |
| AX-158152922 | 14 | 73.968 | KV453331.1 | 1450736 | 28-scf00315 | 28 |
| AX-158152923 | 14 | 73.968 | KV453331.1 | 1451525 | 28-scf00315 | 28 |
| AX-158152924 | 14 | 73.968 | KV453331.1 | 1452616 | 28-scf00315 | 28 |
| AX-158152925 | 14 | 73.968 | KV453331.1 | 1453457 | 28-scf00315 | 28 |
| AX-158152926 | 14 | 73.968 | KV453331.1 | 1454156 | 28-scf00315 | 28 |
| AX-158152929 | 14 | 74.012 | KV453331.1 | 1458438 | 28-scf00315 | 28 |
| AX-158152906 | 14 | 74.03  | KV453331.1 | 1432751 | 28-scf00315 | 28 |
| AX-158152931 | 14 | 74.03  | KV453331.1 | 1460511 | 28-scf00315 | 28 |
| AX-157878367 | 14 | 74.077 | KV453331.1 | 1460363 | 28-scf00315 | 28 |
| AX-158152932 | 14 | 74.077 | KV453331.1 | 1461082 | 28-scf00315 | 28 |
| AX-158152933 | 14 | 74.077 | KV453331.1 | 1462110 | 28-scf00315 | 28 |
| AX-158152935 | 14 | 74.077 | KV453331.1 | 1467801 | 28-scf00315 | 28 |
| AX-158152936 | 14 | 74.077 | KV453331.1 | 1469398 | 28-scf00315 | 28 |
| AX-158152939 | 14 | 74.077 | KV453331.1 | 1477379 | 28-scf00315 | 28 |
| AX-158152943 | 14 | 74.077 | KV453331.1 | 1482131 | 28-scf00315 | 28 |

|              |    |        |            |         |             |    |
|--------------|----|--------|------------|---------|-------------|----|
| AX-157740441 | 14 | 74.187 | KV453331.1 | 1470002 | 28-scf00315 | 28 |
| AX-158152937 | 14 | 74.489 | KV453331.1 | 1474682 | 28-scf00315 | 28 |
| AX-158152940 | 14 | 74.489 | KV453331.1 | 1479364 | 28-scf00315 | 28 |
| AX-158152945 | 14 | 74.79  | KV453331.1 | 1485635 | 28-scf00315 | 28 |
| AX-158152946 | 14 | 74.79  | KV453331.1 | 1486402 | 28-scf00315 | 28 |
| AX-157832664 | 14 | 74.79  | KV453331.1 | 1486998 | 28-scf00315 | 28 |
| AX-158152947 | 14 | 74.79  | KV453331.1 | 1490402 | 28-scf00315 | 28 |
| AX-158152948 | 14 | 74.79  | KV453331.1 | 1490986 | 28-scf00315 | 28 |
| AX-158152950 | 14 | 74.79  | KV453331.1 | 1492375 | 28-scf00315 | 28 |
| AX-158152951 | 14 | 74.79  | KV453331.1 | 1493209 | 28-scf00315 | 28 |
| AX-158152952 | 14 | 74.79  | KV453331.1 | 1495016 | 28-scf00315 | 28 |
| AX-158152953 | 14 | 74.79  | KV453331.1 | 1495520 | 28-scf00315 | 28 |
| AX-158152964 | 14 | 74.79  | KV453331.1 | 1509381 | 28-scf00315 | 28 |
| AX-157754331 | 14 | 74.794 | KV453331.1 | 1496161 | 28-scf00315 | 28 |
| AX-158152954 | 14 | 74.794 | KV453331.1 | 1497902 | 28-scf00315 | 28 |
| AX-158412614 | 14 | 74.794 | KV453331.1 | 1499934 | 28-scf00315 | 28 |
| AX-158152959 | 14 | 74.798 | KV453331.1 | 1504185 | 28-scf00315 | 28 |
| AX-158152965 | 14 | 75.251 | KV453331.1 | 1511141 | 28-scf00315 | 28 |
| AX-157720628 | 14 | 75.251 | KV453331.1 | 1513813 | 28-scf00315 | 28 |
| AX-158152966 | 14 | 75.251 | KV453331.1 | 1515885 | 28-scf00315 | 28 |
| AX-158152969 | 14 | 75.251 | KV453331.1 | 1519422 | 28-scf00315 | 28 |
| AX-158152971 | 14 | 75.391 | KV453331.1 | 1520618 | 28-scf00315 | 28 |
| AX-158152972 | 14 | 75.391 | KV453331.1 | 1521716 | 28-scf00315 | 28 |
| AX-158152975 | 14 | 75.392 | KV453331.1 | 1523582 | 28-scf00315 | 28 |
| AX-158152976 | 14 | 75.392 | KV453331.1 | 1524965 | 28-scf00315 | 28 |
| AX-158152979 | 14 | 75.501 | KV453331.1 | 1526901 | 28-scf00315 | 28 |
| AX-158152980 | 14 | 75.501 | KV453331.1 | 1528873 | 28-scf00315 | 28 |
| AX-158152981 | 14 | 75.501 | KV453331.1 | 1529537 | 28-scf00315 | 28 |
| AX-158152982 | 14 | 75.716 | KV453331.1 | 1531005 | 28-scf00315 | 28 |
| AX-157753920 | 14 | 75.722 | KV453331.1 | 1531678 | 28-scf00315 | 28 |
| AX-158152985 | 14 | 76.047 | KV453331.1 | 1535239 | 28-scf00315 | 28 |
| AX-158152986 | 14 | 76.047 | KV453331.1 | 1535475 | 28-scf00315 | 28 |
| AX-158152990 | 14 | 76.047 | KV453331.1 | 1538231 | 28-scf00315 | 28 |
| AX-158152955 | 14 | 76.112 | KV453331.1 | 1499640 | 28-scf00315 | 28 |
| AX-158152983 | 14 | 76.112 | KV453331.1 | 1533019 | 28-scf00315 | 28 |
| AX-158152987 | 14 | 76.112 | KV453331.1 | 1536392 | 28-scf00315 | 28 |
| AX-158153002 | 14 | 76.112 | KV453331.1 | 1553103 | 28-scf00315 | 28 |
| AX-158152992 | 14 | 76.194 | KV453331.1 | 1539904 | 28-scf00315 | 28 |
| AX-157739086 | 14 | 76.194 | KV453331.1 | 1540775 | 28-scf00315 | 28 |
| AX-157742470 | 14 | 76.194 | KV453331.1 | 1541131 | 28-scf00315 | 28 |
| AX-158152994 | 14 | 76.194 | KV453331.1 | 1546282 | 28-scf00315 | 28 |
| AX-158152995 | 14 | 76.194 | KV453331.1 | 1546527 | 28-scf00315 | 28 |
| AX-157739319 | 14 | 76.478 | KV453331.1 | 1546717 | 28-scf00315 | 28 |
| AX-158152997 | 14 | 76.484 | KV453331.1 | 1548594 | 28-scf00315 | 28 |
| AX-158152998 | 14 | 76.484 | KV453331.1 | 1549574 | 28-scf00315 | 28 |
| AX-158412617 | 14 | 76.55  | KV453331.1 | 1552513 | 28-scf00315 | 28 |
| AX-158153004 | 14 | 76.637 | KV453331.1 | 1556053 | 28-scf00315 | 28 |
| AX-158153008 | 14 | 76.637 | KV453331.1 | 1557370 | 28-scf00315 | 28 |
| AX-157739065 | 14 | 76.866 | KV453331.1 | 1565325 | 28-scf00315 | 28 |
| AX-158153012 | 14 | 76.867 | KV453331.1 | 1566538 | 28-scf00315 | 28 |
| AX-158153013 | 14 | 77.097 | KV453331.1 | 1567290 | 28-scf00315 | 28 |

|              |    |        |             |         |             |    |
|--------------|----|--------|-------------|---------|-------------|----|
| AX-158153016 | 14 | 77.097 | KV453331.1  | 1571607 | 28-scf00315 | 28 |
| AX-158153018 | 14 | 77.097 | KV453331.1  | 1574457 | 28-scf00315 | 28 |
| AX-158153020 | 14 | 77.097 | KV453331.1  | 1575745 | 28-scf00315 | 28 |
| AX-158153049 | 14 | 77.097 | KV453331.1  | 1623932 | 28-scf00315 | 28 |
| AX-158153021 | 14 | 77.246 | KV453331.1  | 1577738 | 28-scf00315 | 28 |
| AX-158153028 | 14 | 77.246 | KV453331.1  | 1584867 | 28-scf00315 | 28 |
| AX-158153022 | 14 | 77.247 | KV453331.1  | 1579984 | 28-scf00315 | 28 |
| AX-158153019 | 14 | 77.249 | KV453331.1  | 1575200 | 28-scf00315 | 28 |
| AX-158153023 | 14 | 77.249 | KV453331.1  | 1580958 | 28-scf00315 | 28 |
| AX-158153024 | 14 | 77.249 | KV453331.1  | 1581831 | 28-scf00315 | 28 |
| AX-158153025 | 14 | 77.249 | KV453331.1  | 1583267 | 28-scf00315 | 28 |
| AX-158153026 | 14 | 77.249 | KV453331.1  | 1583794 | 28-scf00315 | 28 |
| AX-158153027 | 14 | 77.249 | KV453331.1  | 1584402 | 28-scf00315 | 28 |
| AX-157739796 | 14 | 77.249 | KV453331.1  | 1588668 | 28-scf00315 | 28 |
| AX-158153029 | 14 | 77.249 | KV453331.1  | 1591213 | 28-scf00315 | 28 |
| AX-158153032 | 14 | 77.249 | KV453331.1  | 1594233 | 28-scf00315 | 28 |
| AX-157743013 | 14 | 77.249 | KV453331.1  | 1601719 | 28-scf00315 | 28 |
| AX-158153037 | 14 | 77.249 | KV453331.1  | 1603978 | 28-scf00315 | 28 |
| AX-158153038 | 14 | 77.249 | KV453331.1  | 1604740 | 28-scf00315 | 28 |
| AX-158153039 | 14 | 77.249 | KV453331.1  | 1605111 | 28-scf00315 | 28 |
| AX-158393221 | 14 | 77.249 | KV453331.1  | 1615183 | 28-scf00315 | 28 |
| AX-158153048 | 14 | 77.249 | KV453331.1  | 1621914 | 28-scf00315 | 28 |
| AX-158153051 | 14 | 77.249 | KV453331.1  | 1627768 | 28-scf00315 | 28 |
| AX-157770669 | 14 | 77.249 | KV453331.1  | 1638782 | 28-scf00315 | 28 |
| AX-158385598 | 14 | 77.249 | KV453331.1  | 1720738 | 28-scf00315 | 28 |
| AX-157707311 | 14 | 77.249 | 3ML01033999 | 190     | scf09669_1  | UN |
| AX-157751154 | 14 | 77.299 | KV453331.1  | 1588790 | 28-scf00315 | 28 |
| AX-158153042 | 14 | 77.299 | KV453331.1  | 1612503 | 28-scf00315 | 28 |
| AX-158385595 | 14 | 77.358 | KV453331.1  | 1612899 | 28-scf00315 | 28 |
| AX-157717373 | 14 | 77.358 | KV453331.1  | 1613503 | 28-scf00315 | 28 |
| AX-158153043 | 14 | 77.358 | KV453331.1  | 1615961 | 28-scf00315 | 28 |
| AX-158153045 | 14 | 77.358 | KV453331.1  | 1618923 | 28-scf00315 | 28 |
| AX-158153047 | 14 | 77.47  | KV453331.1  | 1620530 | 28-scf00315 | 28 |
| AX-158153054 | 14 | 77.577 | KV453331.1  | 1636616 | 28-scf00315 | 28 |
| AX-158153055 | 14 | 77.577 | KV453331.1  | 1637669 | 28-scf00315 | 28 |
| AX-158153056 | 14 | 77.577 | KV453331.1  | 1638322 | 28-scf00315 | 28 |
| AX-158153058 | 14 | 77.577 | KV453331.1  | 1641711 | 28-scf00315 | 28 |
| AX-158153059 | 14 | 77.577 | KV453331.1  | 1642170 | 28-scf00315 | 28 |
| AX-157751477 | 14 | 77.577 | KV453331.1  | 1643134 | 28-scf00315 | 28 |
| AX-157724921 | 14 | 77.577 | KV453331.1  | 1645388 | 28-scf00315 | 28 |
| AX-158153062 | 14 | 77.577 | KV453331.1  | 1646172 | 28-scf00315 | 28 |
| AX-158153063 | 14 | 77.577 | KV453331.1  | 1649250 | 28-scf00315 | 28 |
| AX-158153064 | 14 | 77.577 | KV453331.1  | 1649622 | 28-scf00315 | 28 |
| AX-158153066 | 14 | 77.669 | KV453331.1  | 1655855 | 28-scf00315 | 28 |
| AX-158153069 | 14 | 77.669 | KV453331.1  | 1657823 | 28-scf00315 | 28 |
| AX-158153074 | 14 | 77.858 | KV453331.1  | 1662470 | 28-scf00315 | 28 |
| AX-158153078 | 14 | 77.96  | KV453331.1  | 1667543 | 28-scf00315 | 28 |
| AX-158153081 | 14 | 77.962 | KV453331.1  | 1669252 | 28-scf00315 | 28 |
| AX-158153080 | 14 | 77.963 | KV453331.1  | 1668711 | 28-scf00315 | 28 |
| AX-158153082 | 14 | 77.963 | KV453331.1  | 1670905 | 28-scf00315 | 28 |
| AX-158153083 | 14 | 77.963 | KV453331.1  | 1672611 | 28-scf00315 | 28 |

|              |    |        |            |         |             |    |
|--------------|----|--------|------------|---------|-------------|----|
| AX-158153087 | 14 | 78.312 | KV453331.1 | 1679146 | 28-scf00315 | 28 |
| AX-158153091 | 14 | 78.312 | KV453331.1 | 1686309 | 28-scf00315 | 28 |
| AX-158153110 | 14 | 78.312 | KV453331.1 | 1712761 | 28-scf00315 | 28 |
| AX-158153086 | 14 | 78.342 | KV453331.1 | 1676361 | 28-scf00315 | 28 |
| AX-158153088 | 14 | 78.342 | KV453331.1 | 1681573 | 28-scf00315 | 28 |
| AX-158153089 | 14 | 78.342 | KV453331.1 | 1682306 | 28-scf00315 | 28 |
| AX-158153090 | 14 | 78.342 | KV453331.1 | 1685788 | 28-scf00315 | 28 |
| AX-158153092 | 14 | 78.342 | KV453331.1 | 1687164 | 28-scf00315 | 28 |
| AX-158153094 | 14 | 78.342 | KV453331.1 | 1689525 | 28-scf00315 | 28 |
| AX-158153095 | 14 | 78.342 | KV453331.1 | 1692694 | 28-scf00315 | 28 |
| AX-158153097 | 14 | 78.342 | KV453331.1 | 1695308 | 28-scf00315 | 28 |
| AX-158153085 | 14 | 78.39  | KV453331.1 | 1674157 | 28-scf00315 | 28 |
| AX-158153098 | 14 | 78.39  | KV453331.1 | 1695664 | 28-scf00315 | 28 |
| AX-157878372 | 14 | 78.451 | KV453331.1 | 1696068 | 28-scf00315 | 28 |
| AX-158153100 | 14 | 78.451 | KV453331.1 | 1697385 | 28-scf00315 | 28 |
| AX-158153101 | 14 | 78.451 | KV453331.1 | 1697823 | 28-scf00315 | 28 |
| AX-158153103 | 14 | 78.451 | KV453331.1 | 1701238 | 28-scf00315 | 28 |
| AX-157742603 | 14 | 78.451 | KV453331.1 | 1701307 | 28-scf00315 | 28 |
| AX-158153105 | 14 | 78.451 | KV453331.1 | 1702976 | 28-scf00315 | 28 |
| AX-157724956 | 14 | 78.451 | KV453331.1 | 1703763 | 28-scf00315 | 28 |
| AX-158153107 | 14 | 78.451 | KV453331.1 | 1704893 | 28-scf00315 | 28 |
| AX-157886513 | 14 | 78.451 | KV453331.1 | 1707034 | 28-scf00315 | 28 |
| AX-158153108 | 14 | 78.451 | KV453331.1 | 1707232 | 28-scf00315 | 28 |
| AX-157754916 | 14 | 78.451 | KV453331.1 | 1710832 | 28-scf00315 | 28 |
| AX-157750237 | 14 | 78.451 | KV453331.1 | 1713483 | 28-scf00315 | 28 |
| AX-158153113 | 14 | 78.451 | KV453331.1 | 1716429 | 28-scf00315 | 28 |
| AX-157703659 | 14 | 78.451 | KV453331.1 | 1716976 | 28-scf00315 | 28 |
| AX-157720484 | 14 | 78.561 | KV453331.1 | 1713124 | 28-scf00315 | 28 |
| AX-158153119 | 14 | 78.561 | KV453331.1 | 1728680 | 28-scf00315 | 28 |
| AX-158153120 | 14 | 78.561 | KV453331.1 | 1729271 | 28-scf00315 | 28 |
| AX-158153121 | 14 | 78.561 | KV453331.1 | 1731579 | 28-scf00315 | 28 |
| AX-158153122 | 14 | 78.561 | KV453331.1 | 1732226 | 28-scf00315 | 28 |
| AX-158153128 | 14 | 78.602 | KV453331.1 | 1738238 | 28-scf00315 | 28 |
| AX-158153076 | 14 | 78.67  | KV453331.1 | 1664653 | 28-scf00315 | 28 |
| AX-158153129 | 14 | 78.67  | KV453331.1 | 1741808 | 28-scf00315 | 28 |
| AX-158153130 | 14 | 78.67  | KV453331.1 | 1742267 | 28-scf00315 | 28 |
| AX-158153132 | 14 | 78.67  | KV453331.1 | 1746169 | 28-scf00315 | 28 |
| AX-158153133 | 14 | 78.67  | KV453331.1 | 1746947 | 28-scf00315 | 28 |
| AX-158153134 | 14 | 78.67  | KV453331.1 | 1747591 | 28-scf00315 | 28 |
| AX-158153135 | 14 | 78.67  | KV453331.1 | 1751022 | 28-scf00315 | 28 |
| AX-158153137 | 14 | 78.67  | KV453331.1 | 1755017 | 28-scf00315 | 28 |
| AX-157832666 | 14 | 78.67  | KV453331.1 | 1757156 | 28-scf00315 | 28 |
| AX-157832667 | 14 | 78.67  | KV453331.1 | 1757850 | 28-scf00315 | 28 |
| AX-157732572 | 14 | 78.778 | KV453331.1 | 1759259 | 28-scf00315 | 28 |
| AX-157717137 | 14 | 78.888 | KV453331.1 | 1761993 | 28-scf00315 | 28 |
| AX-158153140 | 14 | 78.888 | KV453331.1 | 1765897 | 28-scf00315 | 28 |
| AX-158153142 | 14 | 78.888 | KV453331.1 | 1768862 | 28-scf00315 | 28 |
| AX-158153143 | 14 | 78.888 | KV453331.1 | 1769135 | 28-scf00315 | 28 |
| AX-158153144 | 14 | 78.888 | KV453331.1 | 1769547 | 28-scf00315 | 28 |
| AX-158153145 | 14 | 78.888 | KV453331.1 | 1770657 | 28-scf00315 | 28 |
| AX-158153146 | 14 | 78.888 | KV453331.1 | 1771056 | 28-scf00315 | 28 |



|              |    |        |            |         |             |    |
|--------------|----|--------|------------|---------|-------------|----|
| AX-158153148 | 14 | 78.888 | KV453331.1 | 1772419 | 28-scf00315 | 28 |
| AX-158153151 | 14 | 78.888 | KV453331.1 | 1775336 | 28-scf00315 | 28 |
| AX-158153152 | 14 | 78.888 | KV453331.1 | 1776368 | 28-scf00315 | 28 |
| AX-158153153 | 14 | 78.891 | KV453331.1 | 1776845 | 28-scf00315 | 28 |
| AX-158153156 | 14 | 78.894 | KV453331.1 | 1779750 | 28-scf00315 | 28 |
| AX-158153159 | 14 | 79.104 | KV453331.1 | 1783690 | 28-scf00315 | 28 |
| AX-158153160 | 14 | 79.326 | KV453331.1 | 1784193 | 28-scf00315 | 28 |
| AX-158153161 | 14 | 79.326 | KV453331.1 | 1785006 | 28-scf00315 | 28 |
| AX-158153162 | 14 | 79.326 | KV453331.1 | 1786278 | 28-scf00315 | 28 |
| AX-157696114 | 14 | 79.326 | KV453331.1 | 1786485 | 28-scf00315 | 28 |
| AX-157738607 | 14 | 79.326 | KV453331.1 | 1786745 | 28-scf00315 | 28 |
| AX-158153165 | 14 | 79.326 | KV453331.1 | 1789035 | 28-scf00315 | 28 |
| AX-158153166 | 14 | 79.326 | KV453331.1 | 1790324 | 28-scf00315 | 28 |
| AX-158153169 | 14 | 79.544 | KV453331.1 | 1798255 | 28-scf00315 | 28 |
| AX-158153172 | 14 | 79.544 | KV453331.1 | 1800535 | 28-scf00315 | 28 |
| AX-158153173 | 14 | 79.557 | KV453331.1 | 1801555 | 28-scf00315 | 28 |
| AX-158153174 | 14 | 79.57  | KV453331.1 | 1802563 | 28-scf00315 | 28 |
| AX-157832672 | 14 | 79.589 | KV453331.1 | 1807730 | 28-scf00315 | 28 |
| AX-158153182 | 14 | 79.607 | KV453331.1 | 1813325 | 28-scf00315 | 28 |
| AX-157832676 | 14 | 79.627 | KV453331.1 | 1816316 | 28-scf00315 | 28 |
| AX-158153183 | 14 | 79.653 | KV453331.1 | 1816407 | 28-scf00315 | 28 |
| AX-157770928 | 14 | 79.653 | KV453331.1 | 1817245 | 28-scf00315 | 28 |
| AX-158153185 | 14 | 79.762 | KV453331.1 | 1822550 | 28-scf00315 | 28 |
| AX-158153186 | 14 | 79.762 | KV453331.1 | 1830192 | 28-scf00315 | 28 |
| AX-157858144 | 14 | 79.762 | KV453331.1 | 1927278 | 28-scf00315 | 28 |
| AX-157832670 | 14 | 79.872 | KV453331.1 | 1793948 | 28-scf00315 | 28 |
| AX-157832671 | 14 | 79.872 | KV453331.1 | 1800239 | 28-scf00315 | 28 |
| AX-158153177 | 14 | 79.872 | KV453331.1 | 1807619 | 28-scf00315 | 28 |
| AX-158417701 | 14 | 79.872 | KV453331.1 | 1810550 | 28-scf00315 | 28 |
| AX-158153181 | 14 | 79.872 | KV453331.1 | 1811947 | 28-scf00315 | 28 |
| AX-157717410 | 14 | 79.872 | KV453331.1 | 1824823 | 28-scf00315 | 28 |
| AX-158153188 | 14 | 79.872 | KV453331.1 | 1834521 | 28-scf00315 | 28 |
| AX-158153191 | 14 | 79.872 | KV453331.1 | 1837227 | 28-scf00315 | 28 |
| AX-158153192 | 14 | 79.872 | KV453331.1 | 1838439 | 28-scf00315 | 28 |
| AX-158153194 | 14 | 79.872 | KV453331.1 | 1841180 | 28-scf00315 | 28 |
| AX-158153195 | 14 | 79.872 | KV453331.1 | 1843559 | 28-scf00315 | 28 |
| AX-157832679 | 14 | 79.872 | KV453331.1 | 1844852 | 28-scf00315 | 28 |
| AX-158153196 | 14 | 79.872 | KV453331.1 | 1845269 | 28-scf00315 | 28 |
| AX-157832682 | 14 | 79.872 | KV453331.1 | 1848027 | 28-scf00315 | 28 |
| AX-158153201 | 14 | 79.872 | KV453331.1 | 1849996 | 28-scf00315 | 28 |
| AX-158153202 | 14 | 79.872 | KV453331.1 | 1852339 | 28-scf00315 | 28 |
| AX-157721286 | 14 | 79.872 | KV453331.1 | 1853473 | 28-scf00315 | 28 |
| AX-157694241 | 14 | 79.872 | KV453331.1 | 1853715 | 28-scf00315 | 28 |
| AX-158153205 | 14 | 79.872 | KV453331.1 | 1856994 | 28-scf00315 | 28 |
| AX-158153206 | 14 | 79.872 | KV453331.1 | 1859382 | 28-scf00315 | 28 |
| AX-158153208 | 14 | 79.872 | KV453331.1 | 1861134 | 28-scf00315 | 28 |
| AX-158153211 | 14 | 79.872 | KV453331.1 | 1862926 | 28-scf00315 | 28 |
| AX-158153212 | 14 | 79.872 | KV453331.1 | 1863777 | 28-scf00315 | 28 |
| AX-158153213 | 14 | 79.872 | KV453331.1 | 1865072 | 28-scf00315 | 28 |
| AX-158153228 | 14 | 79.872 | KV453331.1 | 1883038 | 28-scf00315 | 28 |
| AX-158153216 | 14 | 79.981 | KV453331.1 | 1868272 | 28-scf00315 | 28 |

|              |    |        |            |         |             |    |
|--------------|----|--------|------------|---------|-------------|----|
| AX-158153217 | 14 | 79.981 | KV453331.1 | 1870513 | 28-scf00315 | 28 |
| AX-158153218 | 14 | 79.981 | KV453331.1 | 1870659 | 28-scf00315 | 28 |
| AX-158153223 | 14 | 79.981 | KV453331.1 | 1876367 | 28-scf00315 | 28 |
| AX-158153224 | 14 | 79.981 | KV453331.1 | 1876818 | 28-scf00315 | 28 |
| AX-158153225 | 14 | 79.981 | KV453331.1 | 1877601 | 28-scf00315 | 28 |
| AX-158153229 | 14 | 79.981 | KV453331.1 | 1884196 | 28-scf00315 | 28 |
| AX-158153231 | 14 | 80.011 | KV453331.1 | 1885545 | 28-scf00315 | 28 |
| AX-158412622 | 14 | 80.09  | KV453331.1 | 1886279 | 28-scf00315 | 28 |
| AX-157775437 | 14 | 80.09  | KV453331.1 | 1888331 | 28-scf00315 | 28 |
| AX-158153234 | 14 | 80.2   | KV453331.1 | 1896110 | 28-scf00315 | 28 |
| AX-158153235 | 14 | 80.309 | KV453331.1 | 1898861 | 28-scf00315 | 28 |
| AX-157752809 | 14 | 80.528 | KV453331.1 | 1836380 | 28-scf00315 | 28 |
| AX-157747587 | 14 | 80.528 | KV453331.1 | 1850556 | 28-scf00315 | 28 |
| AX-158153207 | 14 | 80.528 | KV453331.1 | 1860598 | 28-scf00315 | 28 |
| AX-158385601 | 14 | 80.528 | KV453331.1 | 1863082 | 28-scf00315 | 28 |
| AX-158153236 | 14 | 80.528 | KV453331.1 | 1899945 | 28-scf00315 | 28 |
| AX-158153238 | 14 | 80.528 | KV453331.1 | 1902027 | 28-scf00315 | 28 |
| AX-158153240 | 14 | 80.528 | KV453331.1 | 1903944 | 28-scf00315 | 28 |
| AX-158153241 | 14 | 80.528 | KV453331.1 | 1904777 | 28-scf00315 | 28 |
| AX-158153242 | 14 | 80.528 | KV453331.1 | 1905581 | 28-scf00315 | 28 |
| AX-158153243 | 14 | 80.528 | KV453331.1 | 1906265 | 28-scf00315 | 28 |
| AX-158153245 | 14 | 80.528 | KV453331.1 | 1911374 | 28-scf00315 | 28 |
| AX-158153246 | 14 | 80.528 | KV453331.1 | 1912997 | 28-scf00315 | 28 |
| AX-158153249 | 14 | 80.528 | KV453331.1 | 1917075 | 28-scf00315 | 28 |
| AX-157753871 | 14 | 80.528 | KV453331.1 | 1917558 | 28-scf00315 | 28 |
| AX-158153250 | 14 | 80.528 | KV453331.1 | 1918493 | 28-scf00315 | 28 |
| AX-158153253 | 14 | 80.528 | KV453331.1 | 1921587 | 28-scf00315 | 28 |
| AX-158153254 | 14 | 80.528 | KV453331.1 | 1921808 | 28-scf00315 | 28 |
| AX-158153256 | 14 | 80.528 | KV453331.1 | 1924163 | 28-scf00315 | 28 |
| AX-158153257 | 14 | 80.528 | KV453331.1 | 1925009 | 28-scf00315 | 28 |
| AX-158153258 | 14 | 80.528 | KV453331.1 | 1927088 | 28-scf00315 | 28 |
| AX-158153261 | 14 | 80.528 | KV453331.1 | 1934886 | 28-scf00315 | 28 |
| AX-158153262 | 14 | 80.528 | KV453331.1 | 1935675 | 28-scf00315 | 28 |
| AX-158153263 | 14 | 80.528 | KV453331.1 | 1936243 | 28-scf00315 | 28 |
| AX-158153264 | 14 | 80.528 | KV453331.1 | 1937468 | 28-scf00315 | 28 |
| AX-158153265 | 14 | 80.528 | KV453331.1 | 1939154 | 28-scf00315 | 28 |
| AX-158153266 | 14 | 80.528 | KV453331.1 | 1939942 | 28-scf00315 | 28 |
| AX-158153270 | 14 | 80.528 | KV453331.1 | 1953675 | 28-scf00315 | 28 |
| AX-158380415 | 14 | 80.528 | KV453331.1 | 1955927 | 28-scf00315 | 28 |
| AX-158153273 | 14 | 80.528 | KV453331.1 | 1957840 | 28-scf00315 | 28 |
| AX-157724939 | 14 | 80.528 | KV453331.1 | 2044864 | 28-scf00315 | 28 |
| AX-158153280 | 14 | 80.965 | KV453331.1 | 1970417 | 28-scf00315 | 28 |
| AX-157727894 | 14 | 81.184 | KV453331.1 | 1974171 | 28-scf00315 | 28 |
| AX-158153288 | 14 | 81.184 | KV453331.1 | 1979192 | 28-scf00315 | 28 |
| AX-158153289 | 14 | 81.184 | KV453331.1 | 1979999 | 28-scf00315 | 28 |
| AX-157757167 | 14 | 81.184 | KV453331.1 | 1980443 | 28-scf00315 | 28 |
| AX-157832687 | 14 | 81.184 | KV453331.1 | 1981056 | 28-scf00315 | 28 |
| AX-158153290 | 14 | 81.184 | KV453331.1 | 1981736 | 28-scf00315 | 28 |
| AX-158153291 | 14 | 81.184 | KV453331.1 | 1983728 | 28-scf00315 | 28 |
| AX-158153292 | 14 | 81.184 | KV453331.1 | 1983970 | 28-scf00315 | 28 |
| AX-158153296 | 14 | 81.184 | KV453331.1 | 1991826 | 28-scf00315 | 28 |

|              |    |        |            |         |             |    |
|--------------|----|--------|------------|---------|-------------|----|
| AX-158153297 | 14 | 81.184 | KV453331.1 | 1994485 | 28-scf00315 | 28 |
| AX-158153300 | 14 | 81.184 | KV453331.1 | 1997069 | 28-scf00315 | 28 |
| AX-158153301 | 14 | 81.184 | KV453331.1 | 1997408 | 28-scf00315 | 28 |
| AX-158153316 | 14 | 81.184 | KV453331.1 | 2028259 | 28-scf00315 | 28 |
| AX-158412626 | 14 | 81.184 | KV453331.1 | 2032475 | 28-scf00315 | 28 |
| AX-158153322 | 14 | 81.184 | KV453331.1 | 2043738 | 28-scf00315 | 28 |
| AX-158153302 | 14 | 81.186 | KV453331.1 | 1997647 | 28-scf00315 | 28 |
| AX-158153303 | 14 | 81.189 | KV453331.1 | 1998688 | 28-scf00315 | 28 |
| AX-157832689 | 14 | 81.314 | KV453331.1 | 1999467 | 28-scf00315 | 28 |
| AX-158153305 | 14 | 81.445 | KV453331.1 | 2000793 | 28-scf00315 | 28 |
| AX-157713040 | 14 | 81.708 | KV453331.1 | 1999889 | 28-scf00315 | 28 |
| AX-158153307 | 14 | 81.708 | KV453331.1 | 2005108 | 28-scf00315 | 28 |
| AX-158153309 | 14 | 81.708 | KV453331.1 | 2006765 | 28-scf00315 | 28 |
| AX-157743737 | 14 | 81.708 | KV453331.1 | 2007386 | 28-scf00315 | 28 |
| AX-157832693 | 14 | 81.708 | KV453331.1 | 2010031 | 28-scf00315 | 28 |
| AX-157720529 | 14 | 81.708 | KV453331.1 | 2010238 | 28-scf00315 | 28 |
| AX-158153314 | 14 | 81.708 | KV453331.1 | 2022812 | 28-scf00315 | 28 |
| AX-157832697 | 14 | 81.708 | KV453331.1 | 2038286 | 28-scf00315 | 28 |
| AX-157722382 | 14 | 81.768 | KV453331.1 | 2025294 | 28-scf00315 | 28 |
| AX-158153313 | 14 | 81.84  | KV453331.1 | 2012763 | 28-scf00315 | 28 |
| AX-157832695 | 14 | 81.84  | KV453331.1 | 2030629 | 28-scf00315 | 28 |
| AX-157718036 | 14 | 81.84  | KV453331.1 | 2032207 | 28-scf00315 | 28 |
| AX-158153319 | 14 | 81.84  | KV453331.1 | 2039585 | 28-scf00315 | 28 |
| AX-157727334 | 14 | 81.84  | KV453331.1 | 2040260 | 28-scf00315 | 28 |
| AX-157774648 | 14 | 81.84  | KV453331.1 | 2041214 | 28-scf00315 | 28 |
| AX-158153320 | 14 | 81.84  | KV453331.1 | 2042492 | 28-scf00315 | 28 |
| AX-158153321 | 14 | 81.84  | KV453331.1 | 2043002 | 28-scf00315 | 28 |
| AX-157775143 | 14 | 81.84  | KV453331.1 | 2049761 | 28-scf00315 | 28 |
| AX-158153323 | 14 | 81.84  | KV453331.1 | 2052336 | 28-scf00315 | 28 |
| AX-158153324 | 14 | 81.84  | KV453331.1 | 2053977 | 28-scf00315 | 28 |
| AX-158153325 | 14 | 81.84  | KV453331.1 | 2054773 | 28-scf00315 | 28 |
| AX-158153326 | 14 | 81.84  | KV453331.1 | 2055906 | 28-scf00315 | 28 |
| AX-158153328 | 14 | 81.84  | KV453331.1 | 2058075 | 28-scf00315 | 28 |
| AX-158153332 | 14 | 82.167 | KV453331.1 | 2069171 | 28-scf00315 | 28 |
| AX-158153333 | 14 | 82.167 | KV453331.1 | 2069795 | 28-scf00315 | 28 |
| AX-158153334 | 14 | 82.167 | KV453331.1 | 2072512 | 28-scf00315 | 28 |
| AX-158153335 | 14 | 82.167 | KV453331.1 | 2072977 | 28-scf00315 | 28 |
| AX-158153336 | 14 | 82.167 | KV453331.1 | 2073913 | 28-scf00315 | 28 |
| AX-157774237 | 14 | 82.167 | KV453331.1 | 2075945 | 28-scf00315 | 28 |
| AX-157722571 | 14 | 82.167 | KV453331.1 | 2077543 | 28-scf00315 | 28 |
| AX-158153343 | 14 | 82.167 | KV453331.1 | 2079722 | 28-scf00315 | 28 |
| AX-158153344 | 14 | 82.167 | KV453331.1 | 2081029 | 28-scf00315 | 28 |
| AX-157741859 | 14 | 82.167 | KV453331.1 | 2086538 | 28-scf00315 | 28 |
| AX-158380416 | 14 | 82.167 | KV453331.1 | 2086580 | 28-scf00315 | 28 |
| AX-157721453 | 14 | 82.167 | KV453331.1 | 2086986 | 28-scf00315 | 28 |
| AX-157858145 | 14 | 82.167 | KV453331.1 | 2087665 | 28-scf00315 | 28 |
| AX-158153345 | 14 | 82.167 | KV453331.1 | 2088517 | 28-scf00315 | 28 |
| AX-157715512 | 14 | 82.167 | KV453331.1 | 2102257 | 28-scf00315 | 28 |
| AX-157744740 | 14 | 82.386 | KV453331.1 | 2091165 | 28-scf00315 | 28 |
| AX-158153348 | 14 | 82.386 | KV453331.1 | 2098956 | 28-scf00315 | 28 |
| AX-158153349 | 14 | 82.386 | KV453331.1 | 2099998 | 28-scf00315 | 28 |

|              |    |        |            |         |             |    |
|--------------|----|--------|------------|---------|-------------|----|
| AX-158153347 | 14 | 82.605 | KV453331.1 | 2094227 | 28-scf00315 | 28 |
| AX-157858146 | 14 | 82.605 | KV453331.1 | 2102142 | 28-scf00315 | 28 |
| AX-158153350 | 14 | 82.605 | KV453331.1 | 2104198 | 28-scf00315 | 28 |
| AX-158153351 | 14 | 82.605 | KV453331.1 | 2105218 | 28-scf00315 | 28 |
| AX-158153353 | 14 | 82.933 | KV453331.1 | 2114340 | 28-scf00315 | 28 |
| AX-158153356 | 14 | 83.262 | KV453331.1 | 2126197 | 28-scf00315 | 28 |
| AX-157740394 | 14 | 83.276 | KV453331.1 | 2126899 | 28-scf00315 | 28 |
| AX-158153367 | 14 | 83.276 | KV453331.1 | 2165778 | 28-scf00315 | 28 |
| AX-158153362 | 14 | 83.321 | KV453331.1 | 2139405 | 28-scf00315 | 28 |
| AX-158153364 | 14 | 83.372 | KV453331.1 | 2148538 | 28-scf00315 | 28 |
| AX-157740371 | 14 | 83.372 | KV453331.1 | 2150805 | 28-scf00315 | 28 |
| AX-157740982 | 14 | 83.518 | KV453331.1 | 2154657 | 28-scf00315 | 28 |
| AX-158153370 | 14 | 83.809 | KV453331.1 | 2176071 | 28-scf00315 | 28 |
| AX-158153371 | 14 | 83.809 | KV453331.1 | 2176987 | 28-scf00315 | 28 |
| AX-157832702 | 14 | 83.809 | KV453331.1 | 2178090 | 28-scf00315 | 28 |
| AX-158153374 | 14 | 83.818 | KV453331.1 | 2183129 | 28-scf00315 | 28 |
| AX-158153377 | 14 | 83.844 | KV453331.1 | 2185219 | 28-scf00315 | 28 |
| AX-157832703 | 14 | 83.844 | KV453331.1 | 2185703 | 28-scf00315 | 28 |
| AX-158153378 | 14 | 83.85  | KV453331.1 | 2186614 | 28-scf00315 | 28 |
| AX-157739993 | 14 | 83.85  | KV453331.1 | 2280477 | 28-scf00315 | 28 |
| AX-158153380 | 14 | 83.882 | KV453331.1 | 2187327 | 28-scf00315 | 28 |
| AX-158153383 | 14 | 83.919 | KV453331.1 | 2188427 | 28-scf00315 | 28 |
| AX-158153384 | 14 | 83.919 | KV453331.1 | 2189869 | 28-scf00315 | 28 |
| AX-158153385 | 14 | 83.919 | KV453331.1 | 2191216 | 28-scf00315 | 28 |
| AX-157832704 | 14 | 83.919 | KV453331.1 | 2191418 | 28-scf00315 | 28 |
| AX-158153388 | 14 | 83.994 | KV453331.1 | 2193234 | 28-scf00315 | 28 |
| AX-158153369 | 14 | 84.076 | KV453331.1 | 2174813 | 28-scf00315 | 28 |
| AX-158153389 | 14 | 84.076 | KV453331.1 | 2193563 | 28-scf00315 | 28 |
| AX-158153396 | 14 | 84.137 | KV453331.1 | 2203590 | 28-scf00315 | 28 |
| AX-158153397 | 14 | 84.137 | KV453331.1 | 2204081 | 28-scf00315 | 28 |
| AX-157832705 | 14 | 84.137 | KV453331.1 | 2205986 | 28-scf00315 | 28 |
| AX-157718231 | 14 | 84.137 | KV453331.1 | 2207692 | 28-scf00315 | 28 |
| AX-158153399 | 14 | 84.137 | KV453331.1 | 2208016 | 28-scf00315 | 28 |
| AX-158153400 | 14 | 84.137 | KV453331.1 | 2209340 | 28-scf00315 | 28 |
| AX-158153402 | 14 | 84.137 | KV453331.1 | 2212032 | 28-scf00315 | 28 |
| AX-158153408 | 14 | 84.137 | KV453331.1 | 2219070 | 28-scf00315 | 28 |
| AX-158153410 | 14 | 84.137 | KV453331.1 | 2221476 | 28-scf00315 | 28 |
| AX-158412630 | 14 | 84.137 | KV453331.1 | 2221565 | 28-scf00315 | 28 |
| AX-158153411 | 14 | 84.137 | KV453331.1 | 2222614 | 28-scf00315 | 28 |
| AX-158153412 | 14 | 84.137 | KV453331.1 | 2223508 | 28-scf00315 | 28 |
| AX-158153413 | 14 | 84.137 | KV453331.1 | 2226036 | 28-scf00315 | 28 |
| AX-158153414 | 14 | 84.137 | KV453331.1 | 2226442 | 28-scf00315 | 28 |
| AX-158153415 | 14 | 84.137 | KV453331.1 | 2227412 | 28-scf00315 | 28 |
| AX-158153416 | 14 | 84.137 | KV453331.1 | 2227816 | 28-scf00315 | 28 |
| AX-158385604 | 14 | 84.137 | KV453331.1 | 2231347 | 28-scf00315 | 28 |
| AX-158153419 | 14 | 84.137 | KV453331.1 | 2232756 | 28-scf00315 | 28 |
| AX-158153420 | 14 | 84.137 | KV453331.1 | 2233391 | 28-scf00315 | 28 |
| AX-158153421 | 14 | 84.137 | KV453331.1 | 2233669 | 28-scf00315 | 28 |
| AX-158153422 | 14 | 84.137 | KV453331.1 | 2235801 | 28-scf00315 | 28 |
| AX-158153424 | 14 | 84.137 | KV453331.1 | 2236806 | 28-scf00315 | 28 |
| AX-157754497 | 14 | 84.137 | KV453331.1 | 2238476 | 28-scf00315 | 28 |

|              |    |        |            |         |             |    |
|--------------|----|--------|------------|---------|-------------|----|
| AX-157866475 | 14 | 84.137 | KV453331.1 | 2240865 | 28-scf00315 | 28 |
| AX-158153428 | 14 | 84.137 | KV453331.1 | 2241270 | 28-scf00315 | 28 |
| AX-158153429 | 14 | 84.137 | KV453331.1 | 2241736 | 28-scf00315 | 28 |
| AX-158153430 | 14 | 84.137 | KV453331.1 | 2244455 | 28-scf00315 | 28 |
| AX-157866476 | 14 | 84.137 | KV453331.1 | 2245375 | 28-scf00315 | 28 |
| AX-158153431 | 14 | 84.137 | KV453331.1 | 2246321 | 28-scf00315 | 28 |
| AX-158153432 | 14 | 84.137 | KV453331.1 | 2247646 | 28-scf00315 | 28 |
| AX-158153440 | 14 | 84.137 | KV453331.1 | 2256040 | 28-scf00315 | 28 |
| AX-158153445 | 14 | 84.137 | KV453331.1 | 2271184 | 28-scf00315 | 28 |
| AX-157832706 | 14 | 84.301 | KV453331.1 | 2252242 | 28-scf00315 | 28 |
| AX-158153436 | 14 | 84.301 | KV453331.1 | 2253004 | 28-scf00315 | 28 |
| AX-157832707 | 14 | 84.301 | KV453331.1 | 2253963 | 28-scf00315 | 28 |
| AX-157752596 | 14 | 84.301 | KV453331.1 | 2255340 | 28-scf00315 | 28 |
| AX-158153437 | 14 | 84.38  | KV453331.1 | 2255417 | 28-scf00315 | 28 |
| AX-158153441 | 14 | 84.465 | KV453331.1 | 2260013 | 28-scf00315 | 28 |
| AX-158153443 | 14 | 84.465 | KV453331.1 | 2269566 | 28-scf00315 | 28 |
| AX-158153444 | 14 | 84.465 | KV453331.1 | 2269938 | 28-scf00315 | 28 |
| AX-157750826 | 14 | 84.465 | KV453331.1 | 2273214 | 28-scf00315 | 28 |
| AX-158153446 | 14 | 84.465 | KV453331.1 | 2273693 | 28-scf00315 | 28 |
| AX-158153447 | 14 | 84.465 | KV453331.1 | 2275670 | 28-scf00315 | 28 |
| AX-158153448 | 14 | 84.465 | KV453331.1 | 2277806 | 28-scf00315 | 28 |
| AX-158153454 | 14 | 84.534 | KV453331.1 | 2282675 | 28-scf00315 | 28 |
| AX-158153456 | 14 | 84.574 | KV453331.1 | 2285849 | 28-scf00315 | 28 |
| AX-158153457 | 14 | 84.574 | KV453331.1 | 2286673 | 28-scf00315 | 28 |
| AX-158153459 | 14 | 84.639 | KV453331.1 | 2288490 | 28-scf00315 | 28 |
| AX-158153460 | 14 | 84.639 | KV453331.1 | 2290776 | 28-scf00315 | 28 |
| AX-158153467 | 14 | 84.639 | KV453331.1 | 2310853 | 28-scf00315 | 28 |
| AX-158153486 | 14 | 84.639 | KV453331.1 | 2333201 | 28-scf00315 | 28 |
| AX-158153455 | 14 | 84.683 | KV453331.1 | 2284426 | 28-scf00315 | 28 |
| AX-158153461 | 14 | 84.683 | KV453331.1 | 2291836 | 28-scf00315 | 28 |
| AX-158153463 | 14 | 84.683 | KV453331.1 | 2298999 | 28-scf00315 | 28 |
| AX-157774028 | 14 | 84.683 | KV453331.1 | 2300913 | 28-scf00315 | 28 |
| AX-158153464 | 14 | 84.683 | KV453331.1 | 2304567 | 28-scf00315 | 28 |
| AX-158153465 | 14 | 84.683 | KV453331.1 | 2308191 | 28-scf00315 | 28 |
| AX-158153466 | 14 | 84.683 | KV453331.1 | 2310018 | 28-scf00315 | 28 |
| AX-158153469 | 14 | 84.683 | KV453331.1 | 2313805 | 28-scf00315 | 28 |
| AX-158153475 | 14 | 84.683 | KV453331.1 | 2323237 | 28-scf00315 | 28 |
| AX-158153480 | 14 | 84.683 | KV453331.1 | 2328201 | 28-scf00315 | 28 |
| AX-158153489 | 14 | 84.683 | KV453331.1 | 2335966 | 28-scf00315 | 28 |
| AX-158153490 | 14 | 84.683 | KV453331.1 | 2339353 | 28-scf00315 | 28 |
| AX-158153492 | 14 | 84.683 | KV453331.1 | 2341304 | 28-scf00315 | 28 |
| AX-158153493 | 14 | 84.902 | KV453331.1 | 2342103 | 28-scf00315 | 28 |
| AX-158153494 | 14 | 84.902 | KV453331.1 | 2343578 | 28-scf00315 | 28 |
| AX-158153496 | 14 | 84.902 | KV453331.1 | 2345028 | 28-scf00315 | 28 |
| AX-158153497 | 14 | 84.902 | KV453331.1 | 2345360 | 28-scf00315 | 28 |
| AX-158153498 | 14 | 84.902 | KV453331.1 | 2346397 | 28-scf00315 | 28 |
| AX-158153501 | 14 | 84.902 | KV453331.1 | 2348079 | 28-scf00315 | 28 |
| AX-157832714 | 14 | 84.902 | KV453331.1 | 2352566 | 28-scf00315 | 28 |
| AX-158153504 | 14 | 84.902 | KV453331.1 | 2352884 | 28-scf00315 | 28 |
| AX-157832715 | 14 | 84.902 | KV453331.1 | 2352978 | 28-scf00315 | 28 |
| AX-157717318 | 14 | 84.902 | KV453331.1 | 2355379 | 28-scf00315 | 28 |

|              |    |        |            |         |             |    |
|--------------|----|--------|------------|---------|-------------|----|
| AX-157748502 | 14 | 84.902 | KV453331.1 | 2364725 | 28-scf00315 | 28 |
| AX-157832720 | 14 | 84.902 | KV453331.1 | 2367340 | 28-scf00315 | 28 |
| AX-157716723 | 14 | 84.902 | KV453331.1 | 2368062 | 28-scf00315 | 28 |
| AX-158153529 | 14 | 84.902 | KV453331.1 | 2394577 | 28-scf00315 | 28 |
| AX-157683730 | 14 | 84.902 | KV453335.1 | 60630   | 28-scf00316 | 28 |
| AX-158153645 | 14 | 84.902 | KV453333.1 | 149519  | 28-scf00317 | 28 |
| AX-158380418 | 14 | 84.961 | KV453331.1 | 2362458 | 28-scf00315 | 28 |
| AX-157683767 | 14 | 84.961 | KV453334.1 | 11288   | 28-scf00319 | 28 |
| AX-157832718 | 14 | 85.011 | KV453331.1 | 2366355 | 28-scf00315 | 28 |
| AX-157832721 | 14 | 85.011 | KV453331.1 | 2368187 | 28-scf00315 | 28 |
| AX-158153509 | 14 | 85.011 | KV453331.1 | 2369557 | 28-scf00315 | 28 |
| AX-157770892 | 14 | 85.011 | KV453331.1 | 2370249 | 28-scf00315 | 28 |
| AX-158153510 | 14 | 85.011 | KV453331.1 | 2371082 | 28-scf00315 | 28 |
| AX-158153515 | 14 | 85.011 | KV453331.1 | 2376406 | 28-scf00315 | 28 |
| AX-157754379 | 14 | 85.011 | KV453331.1 | 2376841 | 28-scf00315 | 28 |
| AX-158153517 | 14 | 85.011 | KV453331.1 | 2380392 | 28-scf00315 | 28 |
| AX-158153518 | 14 | 85.011 | KV453331.1 | 2380652 | 28-scf00315 | 28 |
| AX-157832724 | 14 | 85.011 | KV453331.1 | 2382664 | 28-scf00315 | 28 |
| AX-158153520 | 14 | 85.011 | KV453331.1 | 2384151 | 28-scf00315 | 28 |
| AX-158153522 | 14 | 85.011 | KV453331.1 | 2385125 | 28-scf00315 | 28 |
| AX-158153524 | 14 | 85.011 | KV453331.1 | 2390632 | 28-scf00315 | 28 |
| AX-158153525 | 14 | 85.011 | KV453331.1 | 2391969 | 28-scf00315 | 28 |
| AX-158153527 | 14 | 85.011 | KV453331.1 | 2393409 | 28-scf00315 | 28 |
| AX-158153530 | 14 | 85.011 | KV453331.1 | 2398266 | 28-scf00315 | 28 |
| AX-158153531 | 14 | 85.011 | KV453331.1 | 2398906 | 28-scf00315 | 28 |
| AX-158153532 | 14 | 85.121 | KV453331.1 | 2402296 | 28-scf00315 | 28 |
| AX-157744464 | 14 | 85.23  | KV453331.1 | 2356562 | 28-scf00315 | 28 |
| AX-158153512 | 14 | 85.23  | KV453331.1 | 2372032 | 28-scf00315 | 28 |
| AX-158412634 | 14 | 85.23  | KV453331.1 | 2415101 | 28-scf00315 | 28 |
| AX-157832726 | 14 | 85.23  | KV453331.1 | 2419654 | 28-scf00315 | 28 |
| AX-158153542 | 14 | 85.23  | KV453331.1 | 2422944 | 28-scf00315 | 28 |
| AX-157832729 | 14 | 85.23  | KV453331.1 | 2432620 | 28-scf00315 | 28 |
| AX-158153546 | 14 | 85.23  | KV453331.1 | 2433573 | 28-scf00315 | 28 |
| AX-158153548 | 14 | 85.23  | KV453331.1 | 2437887 | 28-scf00315 | 28 |
| AX-158153549 | 14 | 85.23  | KV453331.1 | 2440945 | 28-scf00315 | 28 |
| AX-158153551 | 14 | 85.23  | KV453331.1 | 2444092 | 28-scf00315 | 28 |
| AX-158153556 | 14 | 85.23  | KV453331.1 | 2450836 | 28-scf00315 | 28 |
| AX-158153557 | 14 | 85.23  | KV453331.1 | 2451049 | 28-scf00315 | 28 |
| AX-158153558 | 14 | 85.23  | KV453331.1 | 2453427 | 28-scf00315 | 28 |
| AX-158153559 | 14 | 85.23  | KV453331.1 | 2453828 | 28-scf00315 | 28 |
| AX-158153566 | 14 | 85.23  | KV453331.1 | 2459804 | 28-scf00315 | 28 |
| AX-158153569 | 14 | 85.23  | KV453331.1 | 2467199 | 28-scf00315 | 28 |
| AX-157832731 | 14 | 85.23  | KV453331.1 | 2472646 | 28-scf00315 | 28 |
| AX-157886520 | 14 | 85.23  | KV453331.1 | 2473838 | 28-scf00315 | 28 |
| AX-157709621 | 14 | 85.23  | KV453331.1 | 2498595 | 28-scf00315 | 28 |
| AX-157683709 | 14 | 85.23  | KV453335.1 | 29424   | 28-scf00316 | 28 |
| AX-157683712 | 14 | 85.23  | KV453335.1 | 32963   | 28-scf00316 | 28 |
| AX-157832733 | 14 | 85.23  | KV453333.1 | 2071    | 28-scf00317 | 28 |
| AX-157832734 | 14 | 85.23  | KV453333.1 | 2513    | 28-scf00317 | 28 |
| AX-158153588 | 14 | 85.23  | KV453333.1 | 7984    | 28-scf00317 | 28 |
| AX-157832735 | 14 | 85.23  | KV453333.1 | 121064  | 28-scf00317 | 28 |

|              |    |        |            |         |             |    |
|--------------|----|--------|------------|---------|-------------|----|
| AX-158153653 | 14 | 85.23  | KV453333.1 | 163952  | 28-scf00317 | 28 |
| AX-158153671 | 14 | 85.23  | KV453333.1 | 213703  | 28-scf00317 | 28 |
| AX-158153731 | 14 | 85.23  | KV453333.1 | 448818  | 28-scf00317 | 28 |
| AX-157683763 | 14 | 85.23  | KV453336.1 | 54812   | 28-scf00318 | 28 |
| AX-157878388 | 14 | 85.448 | KV453331.1 | 2513741 | 28-scf00315 | 28 |
| AX-158153584 | 14 | 85.558 | KV453331.1 | 2515104 | 28-scf00315 | 28 |
| AX-158153601 | 14 | 85.776 | KV453333.1 | 31507   | 28-scf00317 | 28 |
| AX-158153613 | 14 | 85.837 | KV453333.1 | 62006   | 28-scf00317 | 28 |
| AX-157739429 | 14 | 85.886 | KV453331.1 | 2208866 | 28-scf00315 | 28 |
| AX-158153404 | 14 | 85.886 | KV453331.1 | 2213644 | 28-scf00315 | 28 |
| AX-158153534 | 14 | 85.886 | KV453331.1 | 2406033 | 28-scf00315 | 28 |
| AX-158153538 | 14 | 85.886 | KV453331.1 | 2419217 | 28-scf00315 | 28 |
| AX-157832728 | 14 | 85.886 | KV453331.1 | 2423094 | 28-scf00315 | 28 |
| AX-158153545 | 14 | 85.886 | KV453331.1 | 2426842 | 28-scf00315 | 28 |
| AX-158153547 | 14 | 85.886 | KV453331.1 | 2435548 | 28-scf00315 | 28 |
| AX-158153552 | 14 | 85.886 | KV453331.1 | 2445511 | 28-scf00315 | 28 |
| AX-158153565 | 14 | 85.886 | KV453331.1 | 2458273 | 28-scf00315 | 28 |
| AX-158153568 | 14 | 85.886 | KV453331.1 | 2461058 | 28-scf00315 | 28 |
| AX-158153575 | 14 | 85.886 | KV453331.1 | 2479616 | 28-scf00315 | 28 |
| AX-158153577 | 14 | 85.886 | KV453331.1 | 2482380 | 28-scf00315 | 28 |
| AX-158153587 | 14 | 85.886 | KV453333.1 | 6226    | 28-scf00317 | 28 |
| AX-157772015 | 14 | 85.886 | KV453333.1 | 8129    | 28-scf00317 | 28 |
| AX-158153590 | 14 | 85.886 | KV453333.1 | 12825   | 28-scf00317 | 28 |
| AX-158153615 | 14 | 85.886 | KV453333.1 | 65572   | 28-scf00317 | 28 |
| AX-158153616 | 14 | 85.886 | KV453333.1 | 67121   | 28-scf00317 | 28 |
| AX-158153627 | 14 | 85.886 | KV453333.1 | 123522  | 28-scf00317 | 28 |
| AX-158153629 | 14 | 85.886 | KV453333.1 | 124508  | 28-scf00317 | 28 |
| AX-158153631 | 14 | 85.886 | KV453333.1 | 125742  | 28-scf00317 | 28 |
| AX-158153633 | 14 | 85.886 | KV453333.1 | 135648  | 28-scf00317 | 28 |
| AX-158153634 | 14 | 85.886 | KV453333.1 | 136400  | 28-scf00317 | 28 |
| AX-158153635 | 14 | 85.886 | KV453333.1 | 138363  | 28-scf00317 | 28 |
| AX-158153639 | 14 | 85.886 | KV453333.1 | 141356  | 28-scf00317 | 28 |
| AX-158153640 | 14 | 85.886 | KV453333.1 | 143110  | 28-scf00317 | 28 |
| AX-158153641 | 14 | 85.886 | KV453333.1 | 144088  | 28-scf00317 | 28 |
| AX-158153646 | 14 | 85.886 | KV453333.1 | 153015  | 28-scf00317 | 28 |
| AX-157725889 | 14 | 85.886 | KV453333.1 | 161837  | 28-scf00317 | 28 |
| AX-158153654 | 14 | 85.886 | KV453333.1 | 165933  | 28-scf00317 | 28 |
| AX-158153656 | 14 | 85.886 | KV453333.1 | 166971  | 28-scf00317 | 28 |
| AX-158153657 | 14 | 85.886 | KV453333.1 | 168821  | 28-scf00317 | 28 |
| AX-158153658 | 14 | 85.886 | KV453333.1 | 170895  | 28-scf00317 | 28 |
| AX-157832739 | 14 | 85.886 | KV453333.1 | 174155  | 28-scf00317 | 28 |
| AX-158153659 | 14 | 85.886 | KV453333.1 | 174359  | 28-scf00317 | 28 |
| AX-158153661 | 14 | 85.886 | KV453333.1 | 181453  | 28-scf00317 | 28 |
| AX-158153662 | 14 | 85.886 | KV453333.1 | 183060  | 28-scf00317 | 28 |
| AX-158153678 | 14 | 85.886 | KV453333.1 | 226249  | 28-scf00317 | 28 |
| AX-157683761 | 14 | 85.886 | KV453336.1 | 53480   | 28-scf00318 | 28 |
| AX-157688094 | 14 | 85.886 | KV453712.1 | 2839    | scf01227    | UN |
| AX-157681279 | 14 | 85.886 |            | 294     | scf13556    | UN |
| AX-157680227 | 14 | 85.995 | KV453335.1 | 56372   | 28-scf00316 | 28 |
| AX-158153611 | 14 | 85.995 | KV453333.1 | 60013   | 28-scf00317 | 28 |
| AX-158153622 | 14 | 85.995 | KV453333.1 | 81972   | 28-scf00317 | 28 |

|              |    |        |            |        |             |    |
|--------------|----|--------|------------|--------|-------------|----|
| AX-158153637 | 14 | 85.995 | KV453333.1 | 139553 | 28-scf00317 | 28 |
| AX-157755169 | 14 | 85.995 | KV453333.1 | 197330 | 28-scf00317 | 28 |
| AX-157832740 | 14 | 85.995 | KV453333.1 | 201490 | 28-scf00317 | 28 |
| AX-157832741 | 14 | 85.995 | KV453333.1 | 201858 | 28-scf00317 | 28 |
| AX-158153667 | 14 | 85.995 | KV453333.1 | 202328 | 28-scf00317 | 28 |
| AX-158153668 | 14 | 85.995 | KV453333.1 | 202949 | 28-scf00317 | 28 |
| AX-157716538 | 14 | 85.995 | KV453333.1 | 203919 | 28-scf00317 | 28 |
| AX-157756574 | 14 | 85.995 | KV453333.1 | 208403 | 28-scf00317 | 28 |
| AX-158153672 | 14 | 85.995 | KV453333.1 | 214344 | 28-scf00317 | 28 |
| AX-158153674 | 14 | 85.995 | KV453333.1 | 215569 | 28-scf00317 | 28 |
| AX-158153676 | 14 | 85.995 | KV453333.1 | 218856 | 28-scf00317 | 28 |
| AX-157832743 | 14 | 85.995 | KV453333.1 | 222923 | 28-scf00317 | 28 |
| AX-157832744 | 14 | 85.995 | KV453333.1 | 230353 | 28-scf00317 | 28 |
| AX-158153679 | 14 | 85.995 | KV453333.1 | 232175 | 28-scf00317 | 28 |
| AX-158153680 | 14 | 85.995 | KV453333.1 | 233294 | 28-scf00317 | 28 |
| AX-158153681 | 14 | 85.995 | KV453333.1 | 234973 | 28-scf00317 | 28 |
| AX-157739779 | 14 | 85.995 | KV453333.1 | 238958 | 28-scf00317 | 28 |
| AX-158153683 | 14 | 85.995 | KV453333.1 | 240552 | 28-scf00317 | 28 |
| AX-158153684 | 14 | 85.995 | KV453333.1 | 241506 | 28-scf00317 | 28 |
| AX-158153685 | 14 | 85.995 | KV453333.1 | 241866 | 28-scf00317 | 28 |
| AX-158153687 | 14 | 85.995 | KV453333.1 | 242813 | 28-scf00317 | 28 |
| AX-158412643 | 14 | 85.995 | KV453333.1 | 245462 | 28-scf00317 | 28 |
| AX-157832747 | 14 | 85.995 | KV453333.1 | 263911 | 28-scf00317 | 28 |
| AX-158153693 | 14 | 85.995 | KV453333.1 | 272884 | 28-scf00317 | 28 |
| AX-157832749 | 14 | 85.995 | KV453333.1 | 274119 | 28-scf00317 | 28 |
| AX-158380421 | 14 | 85.995 | KV453333.1 | 317670 | 28-scf00317 | 28 |
| AX-158412649 | 14 | 85.995 | KV453333.1 | 328162 | 28-scf00317 | 28 |
| AX-158412650 | 14 | 85.995 | KV453333.1 | 328403 | 28-scf00317 | 28 |
| AX-158153703 | 14 | 85.995 | KV453333.1 | 343619 | 28-scf00317 | 28 |
| AX-157718961 | 14 | 85.995 | KV453333.1 | 345479 | 28-scf00317 | 28 |
| AX-158412655 | 14 | 85.995 | KV453333.1 | 347470 | 28-scf00317 | 28 |
| AX-158412656 | 14 | 85.995 | KV453333.1 | 349542 | 28-scf00317 | 28 |
| AX-158412657 | 14 | 85.995 | KV453333.1 | 350155 | 28-scf00317 | 28 |
| AX-158153704 | 14 | 85.995 | KV453333.1 | 353368 | 28-scf00317 | 28 |
| AX-158153705 | 14 | 85.995 | KV453333.1 | 357187 | 28-scf00317 | 28 |
| AX-158153706 | 14 | 85.995 | KV453333.1 | 360127 | 28-scf00317 | 28 |
| AX-158153707 | 14 | 85.995 | KV453333.1 | 361816 | 28-scf00317 | 28 |
| AX-158153709 | 14 | 85.995 | KV453333.1 | 381963 | 28-scf00317 | 28 |
| AX-157832753 | 14 | 85.995 | KV453333.1 | 385774 | 28-scf00317 | 28 |
| AX-157832754 | 14 | 85.995 | KV453333.1 | 386068 | 28-scf00317 | 28 |
| AX-157751525 | 14 | 85.995 | KV453333.1 | 388973 | 28-scf00317 | 28 |
| AX-157832755 | 14 | 85.995 | KV453333.1 | 392844 | 28-scf00317 | 28 |
| AX-158153710 | 14 | 85.995 | KV453333.1 | 393148 | 28-scf00317 | 28 |
| AX-158153712 | 14 | 85.995 | KV453333.1 | 394273 | 28-scf00317 | 28 |
| AX-158153713 | 14 | 85.995 | KV453333.1 | 397260 | 28-scf00317 | 28 |
| AX-158153714 | 14 | 85.995 | KV453333.1 | 397917 | 28-scf00317 | 28 |
| AX-158153716 | 14 | 85.995 | KV453333.1 | 400130 | 28-scf00317 | 28 |
| AX-157743491 | 14 | 85.995 | KV453333.1 | 403309 | 28-scf00317 | 28 |
| AX-158153717 | 14 | 85.995 | KV453333.1 | 403777 | 28-scf00317 | 28 |
| AX-158153718 | 14 | 85.995 | KV453333.1 | 404160 | 28-scf00317 | 28 |
| AX-157832756 | 14 | 85.995 | KV453333.1 | 406978 | 28-scf00317 | 28 |



|              |    |        |             |        |             |    |
|--------------|----|--------|-------------|--------|-------------|----|
| AX-157832757 | 14 | 85.995 | KV453333.1  | 416845 | 28-scf00317 | 28 |
| AX-158153721 | 14 | 85.995 | KV453333.1  | 417889 | 28-scf00317 | 28 |
| AX-158153722 | 14 | 85.995 | KV453333.1  | 423864 | 28-scf00317 | 28 |
| AX-158153723 | 14 | 85.995 | KV453333.1  | 424450 | 28-scf00317 | 28 |
| AX-157714462 | 14 | 85.995 | KV453333.1  | 425635 | 28-scf00317 | 28 |
| AX-157832758 | 14 | 85.995 | KV453333.1  | 425707 | 28-scf00317 | 28 |
| AX-158153726 | 14 | 85.995 | KV453333.1  | 436633 | 28-scf00317 | 28 |
| AX-158153727 | 14 | 85.995 | KV453333.1  | 437492 | 28-scf00317 | 28 |
| AX-158153728 | 14 | 85.995 | KV453333.1  | 442236 | 28-scf00317 | 28 |
| AX-158153729 | 14 | 85.995 | KV453333.1  | 443505 | 28-scf00317 | 28 |
| AX-158153730 | 14 | 85.995 | KV453333.1  | 446329 | 28-scf00317 | 28 |
| AX-158153733 | 14 | 85.995 | KV453333.1  | 462764 | 28-scf00317 | 28 |
| AX-157715446 | 14 | 85.995 | KV453333.1  | 465088 | 28-scf00317 | 28 |
| AX-157832761 | 14 | 85.995 | KV453333.1  | 465265 | 28-scf00317 | 28 |
| AX-157832762 | 14 | 85.995 | KV453333.1  | 484025 | 28-scf00317 | 28 |
| AX-158153735 | 14 | 85.995 | KV453333.1  | 488393 | 28-scf00317 | 28 |
| AX-158153736 | 14 | 85.995 | KV453333.1  | 488890 | 28-scf00317 | 28 |
| AX-157832732 | 14 | 86.432 | KV453333.1  | 707    | 28-scf00317 | 28 |
| AX-157683766 | 14 | 86.432 | KV453334.1  | 3776   | 28-scf00319 | 28 |
| AX-157683768 | 14 | 86.432 | KV453334.1  | 14286  | 28-scf00319 | 28 |
| AX-157683770 | 14 | 86.432 | KV453334.1  | 19945  | 28-scf00319 | 28 |
| AX-157683732 | 14 | 86.541 | KV453336.1  | 5115   | 28-scf00318 | 28 |
| AX-157683733 | 14 | 86.541 | KV453336.1  | 6905   | 28-scf00318 | 28 |
| AX-157683744 | 14 | 86.541 | KV453336.1  | 25398  | 28-scf00318 | 28 |
| AX-157683772 | 14 | 86.541 | KV453334.1  | 21788  | 28-scf00319 | 28 |
| AX-157683774 | 14 | 86.541 | KV453334.1  | 32711  | 28-scf00319 | 28 |
| AX-157683775 | 14 | 86.541 | KV453334.1  | 34448  | 28-scf00319 | 28 |
| AX-157683776 | 14 | 86.541 | KV453334.1  | 35245  | 28-scf00319 | 28 |
| AX-157688418 | 14 | 86.541 | 3ML01026119 | 550    | scf01717_1  | UN |
| AX-157683695 | 14 | 86.65  | KV453335.1  | 8017   | 28-scf00316 | 28 |
| AX-157683699 | 14 | 86.65  | KV453335.1  | 12095  | 28-scf00316 | 28 |
| AX-157683700 | 14 | 86.65  | KV453335.1  | 12954  | 28-scf00316 | 28 |
| AX-157680377 | 14 | 86.65  | KV453335.1  | 20922  | 28-scf00316 | 28 |
| AX-157683705 | 14 | 86.65  | KV453335.1  | 25275  | 28-scf00316 | 28 |
| AX-157683706 | 14 | 86.65  | KV453335.1  | 26274  | 28-scf00316 | 28 |
| AX-157683707 | 14 | 86.65  | KV453335.1  | 27830  | 28-scf00316 | 28 |
| AX-157683708 | 14 | 86.65  | KV453335.1  | 28314  | 28-scf00316 | 28 |
| AX-158412637 | 14 | 86.65  | KV453335.1  | 30156  | 28-scf00316 | 28 |
| AX-157683710 | 14 | 86.65  | KV453335.1  | 31627  | 28-scf00316 | 28 |
| AX-157683713 | 14 | 86.65  | KV453335.1  | 34151  | 28-scf00316 | 28 |
| AX-157680333 | 14 | 86.65  | KV453335.1  | 35474  | 28-scf00316 | 28 |
| AX-158412639 | 14 | 86.65  | KV453335.1  | 36127  | 28-scf00316 | 28 |
| AX-157683714 | 14 | 86.65  | KV453335.1  | 38596  | 28-scf00316 | 28 |
| AX-157683715 | 14 | 86.65  | KV453335.1  | 40322  | 28-scf00316 | 28 |
| AX-157683716 | 14 | 86.65  | KV453335.1  | 40764  | 28-scf00316 | 28 |
| AX-157683717 | 14 | 86.65  | KV453335.1  | 41524  | 28-scf00316 | 28 |
| AX-157683719 | 14 | 86.65  | KV453335.1  | 43549  | 28-scf00316 | 28 |
| AX-157683721 | 14 | 86.65  | KV453335.1  | 45739  | 28-scf00316 | 28 |
| AX-157683722 | 14 | 86.65  | KV453335.1  | 46723  | 28-scf00316 | 28 |
| AX-157683724 | 14 | 86.65  | KV453335.1  | 52752  | 28-scf00316 | 28 |
| AX-157721882 | 14 | 86.65  | KV453333.1  | 13371  | 28-scf00317 | 28 |

|              |    |        |            |         |             |    |
|--------------|----|--------|------------|---------|-------------|----|
| AX-158153600 | 14 | 86.65  | KV453333.1 | 29497   | 28-scf00317 | 28 |
| AX-157755397 | 14 | 86.65  | KV453333.1 | 48298   | 28-scf00317 | 28 |
| AX-158153612 | 14 | 86.65  | KV453333.1 | 61062   | 28-scf00317 | 28 |
| AX-158393224 | 14 | 86.65  | KV453333.1 | 79253   | 28-scf00317 | 28 |
| AX-158380420 | 14 | 86.65  | KV453333.1 | 183419  | 28-scf00317 | 28 |
| AX-157716343 | 14 | 86.65  | KV453333.1 | 183464  | 28-scf00317 | 28 |
| AX-157713129 | 14 | 86.65  | KV453333.1 | 192785  | 28-scf00317 | 28 |
| AX-158153675 | 14 | 86.65  | KV453333.1 | 216730  | 28-scf00317 | 28 |
| AX-157683764 | 14 | 86.65  | KV453336.1 | 55778   | 28-scf00318 | 28 |
| AX-157680704 | 14 | 86.65  | KV453336.1 | 58403   | 28-scf00318 | 28 |
| AX-157683692 | 14 | 86.759 | KV453335.1 | 2038    | 28-scf00316 | 28 |
| AX-157683731 | 14 | 86.759 | KV453336.1 | 987     | 28-scf00318 | 28 |
| AX-157683736 | 14 | 86.759 | KV453336.1 | 12691   | 28-scf00318 | 28 |
| AX-157683737 | 14 | 86.759 | KV453336.1 | 16257   | 28-scf00318 | 28 |
| AX-157683739 | 14 | 86.759 | KV453336.1 | 18216   | 28-scf00318 | 28 |
| AX-157683740 | 14 | 86.759 | KV453336.1 | 19826   | 28-scf00318 | 28 |
| AX-157683742 | 14 | 86.759 | KV453336.1 | 21460   | 28-scf00318 | 28 |
| AX-157688095 | 14 | 86.759 | KV453712.1 | 3271    | scf01227    | UN |
| AX-158153555 | 14 | 86.76  | KV453331.1 | 2449172 | 28-scf00315 | 28 |
| AX-157771445 | 14 | 86.76  | KV453333.1 | 144636  | 28-scf00317 | 28 |
| AX-157683755 | 14 | 86.76  | KV453336.1 | 46922   | 28-scf00318 | 28 |
| AX-157680101 | 14 | 86.76  | KV453336.1 | 53044   | 28-scf00318 | 28 |
| AX-157683765 | 14 | 86.76  | KV453336.1 | 56963   | 28-scf00318 | 28 |
| AX-157721455 | 15 | 0      | KV453075.1 | 5981    | 15-scf00320 | 15 |
| AX-157832765 | 15 | 0      | KV453075.1 | 11686   | 15-scf00320 | 15 |
| AX-157832767 | 15 | 0      | KV453075.1 | 16913   | 15-scf00320 | 15 |
| AX-157832768 | 15 | 0      | KV453075.1 | 17889   | 15-scf00320 | 15 |
| AX-158153742 | 15 | 0      | KV453075.1 | 26768   | 15-scf00320 | 15 |
| AX-157832772 | 15 | 0      | KV453075.1 | 30481   | 15-scf00320 | 15 |
| AX-157702897 | 15 | 0      | KV453075.1 | 35020   | 15-scf00320 | 15 |
| AX-157775108 | 15 | 0      | KV453075.1 | 43999   | 15-scf00320 | 15 |
| AX-158153748 | 15 | 0      | KV453075.1 | 47504   | 15-scf00320 | 15 |
| AX-158153751 | 15 | 0      | KV453075.1 | 49222   | 15-scf00320 | 15 |
| AX-158153755 | 15 | 0      | KV453075.1 | 59336   | 15-scf00320 | 15 |
| AX-158153760 | 15 | 0      | KV453075.1 | 69735   | 15-scf00320 | 15 |
| AX-157886527 | 15 | 0      | KV453075.1 | 70987   | 15-scf00320 | 15 |
| AX-158153766 | 15 | 0      | KV453075.1 | 75632   | 15-scf00320 | 15 |
| AX-157832780 | 15 | 0      | KV453075.1 | 90350   | 15-scf00320 | 15 |
| AX-158153778 | 15 | 0      | KV453075.1 | 90695   | 15-scf00320 | 15 |
| AX-158153780 | 15 | 0      | KV453075.1 | 95924   | 15-scf00320 | 15 |
| AX-158385616 | 15 | 0      | KV453075.1 | 98089   | 15-scf00320 | 15 |
| AX-157709450 | 15 | 0      | KV453075.1 | 114141  | 15-scf00320 | 15 |
| AX-158153788 | 15 | 0      | KV453075.1 | 118481  | 15-scf00320 | 15 |
| AX-158153790 | 15 | 0      | KV453075.1 | 124497  | 15-scf00320 | 15 |
| AX-157858156 | 15 | 0      | KV453075.1 | 127376  | 15-scf00320 | 15 |
| AX-157858157 | 15 | 0      | KV453075.1 | 127565  | 15-scf00320 | 15 |
| AX-157858159 | 15 | 0      | KV453075.1 | 142277  | 15-scf00320 | 15 |
| AX-157858160 | 15 | 0      | KV453075.1 | 150092  | 15-scf00320 | 15 |
| AX-158153802 | 15 | 0      | KV453075.1 | 154111  | 15-scf00320 | 15 |
| AX-157858161 | 15 | 0      | KV453075.1 | 169770  | 15-scf00320 | 15 |
| AX-158153815 | 15 | 0      | KV453075.1 | 171256  | 15-scf00320 | 15 |

|              |    |   |            |        |             |    |
|--------------|----|---|------------|--------|-------------|----|
| AX-158153817 | 15 | 0 | KV453075.1 | 173614 | 15-scf00320 | 15 |
| AX-157886529 | 15 | 0 | KV453075.1 | 176130 | 15-scf00320 | 15 |
| AX-157858163 | 15 | 0 | KV453075.1 | 182110 | 15-scf00320 | 15 |
| AX-157858164 | 15 | 0 | KV453075.1 | 186540 | 15-scf00320 | 15 |
| AX-158153825 | 15 | 0 | KV453075.1 | 187609 | 15-scf00320 | 15 |
| AX-158153827 | 15 | 0 | KV453075.1 | 195055 | 15-scf00320 | 15 |
| AX-158153831 | 15 | 0 | KV453075.1 | 199024 | 15-scf00320 | 15 |
| AX-158385618 | 15 | 0 | KV453075.1 | 227223 | 15-scf00320 | 15 |
| AX-158153851 | 15 | 0 | KV453075.1 | 230571 | 15-scf00320 | 15 |
| AX-158153853 | 15 | 0 | KV453075.1 | 248034 | 15-scf00320 | 15 |
| AX-157858169 | 15 | 0 | KV453075.1 | 249844 | 15-scf00320 | 15 |
| AX-157858170 | 15 | 0 | KV453075.1 | 254769 | 15-scf00320 | 15 |
| AX-157858171 | 15 | 0 | KV453075.1 | 263216 | 15-scf00320 | 15 |
| AX-158153864 | 15 | 0 | KV453075.1 | 268123 | 15-scf00320 | 15 |
| AX-158153865 | 15 | 0 | KV453075.1 | 268706 | 15-scf00320 | 15 |
| AX-157858174 | 15 | 0 | KV453075.1 | 269647 | 15-scf00320 | 15 |
| AX-158153870 | 15 | 0 | KV453075.1 | 277189 | 15-scf00320 | 15 |
| AX-158153872 | 15 | 0 | KV453075.1 | 284883 | 15-scf00320 | 15 |
| AX-158153875 | 15 | 0 | KV453075.1 | 291434 | 15-scf00320 | 15 |
| AX-158153877 | 15 | 0 | KV453075.1 | 296511 | 15-scf00320 | 15 |
| AX-158153878 | 15 | 0 | KV453075.1 | 297663 | 15-scf00320 | 15 |
| AX-157720655 | 15 | 0 | KV453075.1 | 299337 | 15-scf00320 | 15 |
| AX-157858177 | 15 | 0 | KV453075.1 | 330210 | 15-scf00320 | 15 |
| AX-157704229 | 15 | 0 | KV453075.1 | 355401 | 15-scf00320 | 15 |
| AX-158412675 | 15 | 0 | KV453075.1 | 369491 | 15-scf00320 | 15 |
| AX-158412676 | 15 | 0 | KV453075.1 | 369696 | 15-scf00320 | 15 |
| AX-158412677 | 15 | 0 | KV453075.1 | 378480 | 15-scf00320 | 15 |
| AX-158153904 | 15 | 0 | KV453075.1 | 380838 | 15-scf00320 | 15 |
| AX-158153908 | 15 | 0 | KV453075.1 | 384850 | 15-scf00320 | 15 |
| AX-158385623 | 15 | 0 | KV453075.1 | 388949 | 15-scf00320 | 15 |
| AX-158153912 | 15 | 0 | KV453075.1 | 393142 | 15-scf00320 | 15 |
| AX-158153914 | 15 | 0 | KV453075.1 | 405610 | 15-scf00320 | 15 |
| AX-158153915 | 15 | 0 | KV453075.1 | 407192 | 15-scf00320 | 15 |
| AX-158153921 | 15 | 0 | KV453075.1 | 424211 | 15-scf00320 | 15 |
| AX-158153924 | 15 | 0 | KV453075.1 | 436200 | 15-scf00320 | 15 |
| AX-158153933 | 15 | 0 | KV453075.1 | 454582 | 15-scf00320 | 15 |
| AX-158153934 | 15 | 0 | KV453075.1 | 455105 | 15-scf00320 | 15 |
| AX-157858186 | 15 | 0 | KV453075.1 | 455927 | 15-scf00320 | 15 |
| AX-158385626 | 15 | 0 | KV453075.1 | 457413 | 15-scf00320 | 15 |
| AX-158385627 | 15 | 0 | KV453075.1 | 459136 | 15-scf00320 | 15 |
| AX-158153936 | 15 | 0 | KV453075.1 | 469874 | 15-scf00320 | 15 |
| AX-158153939 | 15 | 0 | KV453075.1 | 477041 | 15-scf00320 | 15 |
| AX-158153941 | 15 | 0 | KV453075.1 | 477844 | 15-scf00320 | 15 |
| AX-158385628 | 15 | 0 | KV453075.1 | 478484 | 15-scf00320 | 15 |
| AX-158412682 | 15 | 0 | KV453075.1 | 498829 | 15-scf00320 | 15 |
| AX-158417714 | 15 | 0 | KV453075.1 | 499143 | 15-scf00320 | 15 |
| AX-158153947 | 15 | 0 | KV453075.1 | 506292 | 15-scf00320 | 15 |
| AX-158153949 | 15 | 0 | KV453075.1 | 509855 | 15-scf00320 | 15 |
| AX-158153951 | 15 | 0 | KV453075.1 | 519851 | 15-scf00320 | 15 |
| AX-158153953 | 15 | 0 | KV453075.1 | 532395 | 15-scf00320 | 15 |
| AX-157858189 | 15 | 0 | KV453075.1 | 533528 | 15-scf00320 | 15 |

|              |    |   |            |        |             |    |
|--------------|----|---|------------|--------|-------------|----|
| AX-158385629 | 15 | 0 | KV453075.1 | 533953 | 15-scf00320 | 15 |
| AX-158153956 | 15 | 0 | KV453075.1 | 536899 | 15-scf00320 | 15 |
| AX-157858193 | 15 | 0 | KV453075.1 | 548551 | 15-scf00320 | 15 |
| AX-158153964 | 15 | 0 | KV453075.1 | 549431 | 15-scf00320 | 15 |
| AX-157832786 | 15 | 0 | KV453075.1 | 578436 | 15-scf00320 | 15 |
| AX-158153968 | 15 | 0 | KV453075.1 | 581810 | 15-scf00320 | 15 |
| AX-158153969 | 15 | 0 | KV453075.1 | 582807 | 15-scf00320 | 15 |
| AX-157832788 | 15 | 0 | KV453075.1 | 602784 | 15-scf00320 | 15 |
| AX-158153972 | 15 | 0 | KV453075.1 | 605396 | 15-scf00320 | 15 |
| AX-158153977 | 15 | 0 | KV453075.1 | 620271 | 15-scf00320 | 15 |
| AX-157878399 | 15 | 0 | KV453075.1 | 644045 | 15-scf00320 | 15 |
| AX-158412685 | 15 | 0 | KV453075.1 | 651410 | 15-scf00320 | 15 |
| AX-158408699 | 15 | 0 | KV453075.1 | 661084 | 15-scf00320 | 15 |
| AX-158153987 | 15 | 0 | KV453075.1 | 676039 | 15-scf00320 | 15 |
| AX-158412688 | 15 | 0 | KV453075.1 | 677313 | 15-scf00320 | 15 |
| AX-158412689 | 15 | 0 | KV453075.1 | 678267 | 15-scf00320 | 15 |
| AX-158417717 | 15 | 0 | KV453075.1 | 679845 | 15-scf00320 | 15 |
| AX-158153989 | 15 | 0 | KV453075.1 | 690107 | 15-scf00320 | 15 |
| AX-158153993 | 15 | 0 | KV453075.1 | 706186 | 15-scf00320 | 15 |
| AX-157858199 | 15 | 0 | KV453074.1 | 6349   | 15-scf00321 | 15 |
| AX-158154000 | 15 | 0 | KV453074.1 | 21174  | 15-scf00321 | 15 |
| AX-157832789 | 15 | 0 | KV453074.1 | 27209  | 15-scf00321 | 15 |
| AX-158154003 | 15 | 0 | KV453074.1 | 29272  | 15-scf00321 | 15 |
| AX-157832791 | 15 | 0 | KV453074.1 | 53720  | 15-scf00321 | 15 |
| AX-158154007 | 15 | 0 | KV453074.1 | 66615  | 15-scf00321 | 15 |
| AX-157755842 | 15 | 0 | KV453074.1 | 82620  | 15-scf00321 | 15 |
| AX-158154014 | 15 | 0 | KV453074.1 | 89787  | 15-scf00321 | 15 |
| AX-158154015 | 15 | 0 | KV453074.1 | 90010  | 15-scf00321 | 15 |
| AX-158154016 | 15 | 0 | KV453074.1 | 98652  | 15-scf00321 | 15 |
| AX-158154020 | 15 | 0 | KV453074.1 | 112034 | 15-scf00321 | 15 |
| AX-157721272 | 15 | 0 | KV453074.1 | 116519 | 15-scf00321 | 15 |
| AX-157832794 | 15 | 0 | KV453074.1 | 117277 | 15-scf00321 | 15 |
| AX-158154023 | 15 | 0 | KV453074.1 | 124776 | 15-scf00321 | 15 |
| AX-157832797 | 15 | 0 | KV453074.1 | 125411 | 15-scf00321 | 15 |
| AX-158154029 | 15 | 0 | KV453074.1 | 145144 | 15-scf00321 | 15 |
| AX-158154030 | 15 | 0 | KV453074.1 | 145396 | 15-scf00321 | 15 |
| AX-158154031 | 15 | 0 | KV453074.1 | 146834 | 15-scf00321 | 15 |
| AX-157832799 | 15 | 0 | KV453074.1 | 148794 | 15-scf00321 | 15 |
| AX-158154033 | 15 | 0 | KV453074.1 | 152953 | 15-scf00321 | 15 |
| AX-158154043 | 15 | 0 | KV453074.1 | 164547 | 15-scf00321 | 15 |
| AX-157832801 | 15 | 0 | KV453074.1 | 166045 | 15-scf00321 | 15 |
| AX-157713715 | 15 | 0 | KV453074.1 | 167896 | 15-scf00321 | 15 |
| AX-158154046 | 15 | 0 | KV453074.1 | 169334 | 15-scf00321 | 15 |
| AX-158154050 | 15 | 0 | KV453074.1 | 176373 | 15-scf00321 | 15 |
| AX-158154051 | 15 | 0 | KV453074.1 | 178655 | 15-scf00321 | 15 |
| AX-158412694 | 15 | 0 | KV453074.1 | 187022 | 15-scf00321 | 15 |
| AX-158154056 | 15 | 0 | KV453074.1 | 188433 | 15-scf00321 | 15 |
| AX-158154058 | 15 | 0 | KV453074.1 | 196175 | 15-scf00321 | 15 |
| AX-158154061 | 15 | 0 | KV453074.1 | 210399 | 15-scf00321 | 15 |
| AX-157832802 | 15 | 0 | KV453074.1 | 212530 | 15-scf00321 | 15 |
| AX-158154063 | 15 | 0 | KV453074.1 | 218424 | 15-scf00321 | 15 |

|              |    |   |            |        |             |    |
|--------------|----|---|------------|--------|-------------|----|
| AX-158154064 | 15 | 0 | KV453074.1 | 220797 | 15-scf00321 | 15 |
| AX-157832804 | 15 | 0 | KV453074.1 | 228907 | 15-scf00321 | 15 |
| AX-157886536 | 15 | 0 | KV453074.1 | 245998 | 15-scf00321 | 15 |
| AX-158154072 | 15 | 0 | KV453074.1 | 247128 | 15-scf00321 | 15 |
| AX-158154073 | 15 | 0 | KV453074.1 | 248716 | 15-scf00321 | 15 |
| AX-157858205 | 15 | 0 | KV453074.1 | 258197 | 15-scf00321 | 15 |
| AX-158154078 | 15 | 0 | KV453074.1 | 275237 | 15-scf00321 | 15 |
| AX-158154079 | 15 | 0 | KV453074.1 | 278648 | 15-scf00321 | 15 |
| AX-158154085 | 15 | 0 | KV453074.1 | 295249 | 15-scf00321 | 15 |
| AX-158154086 | 15 | 0 | KV453074.1 | 295709 | 15-scf00321 | 15 |
| AX-157716566 | 15 | 0 | KV453074.1 | 301985 | 15-scf00321 | 15 |
| AX-157832813 | 15 | 0 | KV453074.1 | 312023 | 15-scf00321 | 15 |
| AX-158154092 | 15 | 0 | KV453074.1 | 314471 | 15-scf00321 | 15 |
| AX-158154093 | 15 | 0 | KV453074.1 | 316850 | 15-scf00321 | 15 |
| AX-157832814 | 15 | 0 | KV453074.1 | 318212 | 15-scf00321 | 15 |
| AX-158154094 | 15 | 0 | KV453074.1 | 323379 | 15-scf00321 | 15 |
| AX-157832816 | 15 | 0 | KV453074.1 | 336009 | 15-scf00321 | 15 |
| AX-158154098 | 15 | 0 | KV453074.1 | 338252 | 15-scf00321 | 15 |
| AX-157832817 | 15 | 0 | KV453074.1 | 344673 | 15-scf00321 | 15 |
| AX-158154101 | 15 | 0 | KV453074.1 | 347264 | 15-scf00321 | 15 |
| AX-158154105 | 15 | 0 | KV453074.1 | 351098 | 15-scf00321 | 15 |
| AX-158154106 | 15 | 0 | KV453074.1 | 352276 | 15-scf00321 | 15 |
| AX-157757652 | 15 | 0 | KV453074.1 | 389022 | 15-scf00321 | 15 |
| AX-158385636 | 15 | 0 | KV453074.1 | 416089 | 15-scf00321 | 15 |
| AX-158154130 | 15 | 0 | KV453074.1 | 420064 | 15-scf00321 | 15 |
| AX-158154135 | 15 | 0 | KV453074.1 | 434274 | 15-scf00321 | 15 |
| AX-158154136 | 15 | 0 | KV453074.1 | 435147 | 15-scf00321 | 15 |
| AX-158154137 | 15 | 0 | KV453074.1 | 437478 | 15-scf00321 | 15 |
| AX-157832821 | 15 | 0 | KV453074.1 | 442803 | 15-scf00321 | 15 |
| AX-158154140 | 15 | 0 | KV453074.1 | 442854 | 15-scf00321 | 15 |
| AX-158154142 | 15 | 0 | KV453074.1 | 447822 | 15-scf00321 | 15 |
| AX-158154151 | 15 | 0 | KV453074.1 | 455930 | 15-scf00321 | 15 |
| AX-158154152 | 15 | 0 | KV453074.1 | 456481 | 15-scf00321 | 15 |
| AX-158154153 | 15 | 0 | KV453074.1 | 456866 | 15-scf00321 | 15 |
| AX-158154155 | 15 | 0 | KV453074.1 | 459824 | 15-scf00321 | 15 |
| AX-158154157 | 15 | 0 | KV453074.1 | 461710 | 15-scf00321 | 15 |
| AX-157832825 | 15 | 0 | KV453074.1 | 465512 | 15-scf00321 | 15 |
| AX-158154160 | 15 | 0 | KV453074.1 | 466962 | 15-scf00321 | 15 |
| AX-158417724 | 15 | 0 | KV453074.1 | 475438 | 15-scf00321 | 15 |
| AX-157724198 | 15 | 0 | KV453074.1 | 478539 | 15-scf00321 | 15 |
| AX-158154162 | 15 | 0 | KV453074.1 | 483117 | 15-scf00321 | 15 |
| AX-158412702 | 15 | 0 | KV453074.1 | 485438 | 15-scf00321 | 15 |
| AX-157858212 | 15 | 0 | KV453074.1 | 485973 | 15-scf00321 | 15 |
| AX-158154176 | 15 | 0 | KV453074.1 | 515733 | 15-scf00321 | 15 |
| AX-158154179 | 15 | 0 | KV453074.1 | 530867 | 15-scf00321 | 15 |
| AX-158154184 | 15 | 0 | KV453074.1 | 537448 | 15-scf00321 | 15 |
| AX-158154185 | 15 | 0 | KV453074.1 | 543439 | 15-scf00321 | 15 |
| AX-158154186 | 15 | 0 | KV453074.1 | 543832 | 15-scf00321 | 15 |
| AX-157753606 | 15 | 0 | KV453074.1 | 557669 | 15-scf00321 | 15 |
| AX-157714675 | 15 | 0 | KV453074.1 | 561742 | 15-scf00321 | 15 |
| AX-158154190 | 15 | 0 | KV453074.1 | 562717 | 15-scf00321 | 15 |

|              |    |       |             |        |             |    |
|--------------|----|-------|-------------|--------|-------------|----|
| AX-157832832 | 15 | 0     | KV453074.1  | 578508 | 15-scf00321 | 15 |
| AX-158154194 | 15 | 0     | KV453074.1  | 581083 | 15-scf00321 | 15 |
| AX-158154196 | 15 | 0     | KV453074.1  | 582842 | 15-scf00321 | 15 |
| AX-158154197 | 15 | 0     | KV453074.1  | 590371 | 15-scf00321 | 15 |
| AX-158154204 | 15 | 0     | KV453074.1  | 614969 | 15-scf00321 | 15 |
| AX-158154213 | 15 | 0     | KV453074.1  | 642191 | 15-scf00321 | 15 |
| AX-157858215 | 15 | 0     | KV453074.1  | 647944 | 15-scf00321 | 15 |
| AX-158154219 | 15 | 0     | KV453074.1  | 656304 | 15-scf00321 | 15 |
| AX-158154220 | 15 | 0     | KV453074.1  | 661894 | 15-scf00321 | 15 |
| AX-158154225 | 15 | 0     | KV453074.1  | 675276 | 15-scf00321 | 15 |
| AX-158154228 | 15 | 0     | KV453074.1  | 679994 | 15-scf00321 | 15 |
| AX-158154230 | 15 | 0     | KV453074.1  | 687081 | 15-scf00321 | 15 |
| AX-158154234 | 15 | 0     | KV453074.1  | 690881 | 15-scf00321 | 15 |
| AX-158154243 | 15 | 0     | KV453074.1  | 704837 | 15-scf00321 | 15 |
| AX-158154245 | 15 | 0     | KV453074.1  | 705782 | 15-scf00321 | 15 |
| AX-158154247 | 15 | 0     | KV453074.1  | 707923 | 15-scf00321 | 15 |
| AX-158154250 | 15 | 0     | KV453074.1  | 716875 | 15-scf00321 | 15 |
| AX-158154252 | 15 | 0     | KV453074.1  | 719948 | 15-scf00321 | 15 |
| AX-158154260 | 15 | 0     | KV453074.1  | 727442 | 15-scf00321 | 15 |
| AX-158154271 | 15 | 0     | KV453076.1  | 15478  | 15-scf00322 | 15 |
| AX-157739478 | 15 | 0     | KV453076.1  | 17958  | 15-scf00322 | 15 |
| AX-158154282 | 15 | 0     | KV453076.1  | 26494  | 15-scf00322 | 15 |
| AX-158154342 | 15 | 0     | KV453076.1  | 91218  | 15-scf00322 | 15 |
| AX-157689663 | 15 | 0     | 3ML01031175 | 156    | scf06781_1  | UN |
| AX-157687021 | 15 | 0.183 | KV453452.1  | 1398   | scf00777    | UN |
| AX-158153737 | 15 | 0.388 | KV453075.1  | 5014   | 15-scf00320 | 15 |
| AX-158154287 | 15 | 0.388 | KV453076.1  | 30444  | 15-scf00322 | 15 |
| AX-157832771 | 15 | 0.438 | KV453075.1  | 30428  | 15-scf00320 | 15 |
| AX-157717001 | 15 | 0.438 | KV453075.1  | 62435  | 15-scf00320 | 15 |
| AX-157832775 | 15 | 0.438 | KV453075.1  | 64665  | 15-scf00320 | 15 |
| AX-157714584 | 15 | 0.438 | KV453075.1  | 66524  | 15-scf00320 | 15 |
| AX-158153769 | 15 | 0.438 | KV453075.1  | 81671  | 15-scf00320 | 15 |
| AX-158153771 | 15 | 0.438 | KV453075.1  | 84255  | 15-scf00320 | 15 |
| AX-158154013 | 15 | 0.438 | KV453074.1  | 89491  | 15-scf00321 | 15 |
| AX-158154249 | 15 | 0.438 | KV453074.1  | 715428 | 15-scf00321 | 15 |
| AX-157722326 | 15 | 0.487 | KV453075.1  | 90233  | 15-scf00320 | 15 |
| AX-158153785 | 15 | 0.508 | KV453075.1  | 109674 | 15-scf00320 | 15 |
| AX-158153758 | 15 | 0.547 | KV453075.1  | 63831  | 15-scf00320 | 15 |
| AX-158412665 | 15 | 0.547 | KV453075.1  | 111720 | 15-scf00320 | 15 |
| AX-158153796 | 15 | 0.547 | KV453075.1  | 134236 | 15-scf00320 | 15 |
| AX-157832783 | 15 | 0.547 | KV453075.1  | 253993 | 15-scf00320 | 15 |
| AX-158153971 | 15 | 0.547 | KV453075.1  | 599165 | 15-scf00320 | 15 |
| AX-158154027 | 15 | 0.547 | KV453074.1  | 137495 | 15-scf00321 | 15 |
| AX-157871764 | 15 | 0.547 | KV453074.1  | 145943 | 15-scf00321 | 15 |
| AX-158154246 | 15 | 0.547 | KV453074.1  | 707361 | 15-scf00321 | 15 |
| AX-158154269 | 15 | 0.547 | KV453076.1  | 14330  | 15-scf00322 | 15 |
| AX-158154277 | 15 | 0.547 | KV453076.1  | 21202  | 15-scf00322 | 15 |
| AX-158154290 | 15 | 0.547 | KV453076.1  | 34462  | 15-scf00322 | 15 |
| AX-158153798 | 15 | 0.656 | KV453075.1  | 140469 | 15-scf00320 | 15 |
| AX-157755456 | 15 | 0.656 | KV453075.1  | 159433 | 15-scf00320 | 15 |
| AX-158153808 | 15 | 0.656 | KV453075.1  | 162367 | 15-scf00320 | 15 |

|              |    |       |            |        |                |    |
|--------------|----|-------|------------|--------|----------------|----|
| AX-158153810 | 15 | 0.656 | KV453075.1 | 164474 | 15-scf00320    | 15 |
| AX-157858162 | 15 | 0.656 | KV453075.1 | 175528 | 15-scf00320    | 15 |
| AX-158153821 | 15 | 0.656 | KV453075.1 | 179594 | 15-scf00320    | 15 |
| AX-158153828 | 15 | 0.656 | KV453075.1 | 196820 | 15-scf00320    | 15 |
| AX-158153829 | 15 | 0.656 | KV453075.1 | 197678 | 15-scf00320    | 15 |
| AX-158153833 | 15 | 0.656 | KV453075.1 | 206919 | 15-scf00320    | 15 |
| AX-158153834 | 15 | 0.656 | KV453075.1 | 208440 | 15-scf00320    | 15 |
| AX-158153841 | 15 | 0.656 | KV453075.1 | 216855 | 15-scf00320    | 15 |
| AX-158153843 | 15 | 0.656 | KV453075.1 | 218839 | 15-scf00320    | 15 |
| AX-158153846 | 15 | 0.656 | KV453075.1 | 226080 | 15-scf00320    | 15 |
| AX-157775445 | 15 | 0.656 | KV453075.1 | 226455 | 15-scf00320    | 15 |
| AX-158153850 | 15 | 0.656 | KV453075.1 | 229702 | 15-scf00320    | 15 |
| AX-158153858 | 15 | 0.656 | KV453075.1 | 254857 | 15-scf00320    | 15 |
| AX-158153861 | 15 | 0.656 | KV453075.1 | 261570 | 15-scf00320    | 15 |
| AX-158153881 | 15 | 0.656 | KV453075.1 | 311252 | 15-scf00320    | 15 |
| AX-158153882 | 15 | 0.656 | KV453075.1 | 313248 | 15-scf00320    | 15 |
| AX-158153884 | 15 | 0.656 | KV453075.1 | 315032 | 15-scf00320    | 15 |
| AX-158153894 | 15 | 0.656 | KV453075.1 | 352915 | 15-scf00320    | 15 |
| AX-158153981 | 15 | 0.656 | KV453075.1 | 638615 | 15-scf00320    | 15 |
| AX-158153986 | 15 | 0.656 | KV453075.1 | 668993 | 15-scf00320    | 15 |
| AX-158153994 | 15 | 0.656 | KV453075.1 | 710857 | 15-scf00320    | 15 |
| AX-158154113 | 15 | 0.656 | KV453074.1 | 371926 | 15-scf00321    | 15 |
| AX-158154118 | 15 | 0.656 | KV453074.1 | 385480 | 15-scf00321    | 15 |
| AX-158154119 | 15 | 0.656 | KV453074.1 | 389525 | 15-scf00321    | 15 |
| AX-158154163 | 15 | 0.656 | KV453074.1 | 486129 | 15-scf00321    | 15 |
| AX-158154278 | 15 | 0.656 | KV453076.1 | 21523  | 15-scf00322    | 15 |
| AX-158154286 | 15 | 0.656 | KV453076.1 | 29901  | 15-scf00322    | 15 |
| AX-157698492 | 15 | 0.656 | FI873384.1 | 138    | IORI212 Ictalu | UN |
| AX-158153899 | 15 | 0.765 | KV453075.1 | 371657 | 15-scf00320    | 15 |
| AX-157725639 | 15 | 0.765 | KV453075.1 | 374464 | 15-scf00320    | 15 |
| AX-157886533 | 15 | 0.765 | KV453075.1 | 375897 | 15-scf00320    | 15 |
| AX-158153905 | 15 | 0.765 | KV453075.1 | 381775 | 15-scf00320    | 15 |
| AX-157858182 | 15 | 0.765 | KV453075.1 | 389515 | 15-scf00320    | 15 |
| AX-158153911 | 15 | 0.765 | KV453075.1 | 392443 | 15-scf00320    | 15 |
| AX-158153938 | 15 | 0.765 | KV453075.1 | 474000 | 15-scf00320    | 15 |
| AX-158412680 | 15 | 0.765 | KV453075.1 | 497881 | 15-scf00320    | 15 |
| AX-157858187 | 15 | 0.765 | KV453075.1 | 530437 | 15-scf00320    | 15 |
| AX-157858192 | 15 | 0.765 | KV453075.1 | 540881 | 15-scf00320    | 15 |
| AX-158153974 | 15 | 0.765 | KV453075.1 | 609352 | 15-scf00320    | 15 |
| AX-158153983 | 15 | 0.765 | KV453075.1 | 650571 | 15-scf00320    | 15 |
| AX-158153988 | 15 | 0.765 | KV453075.1 | 688972 | 15-scf00320    | 15 |
| AX-158154057 | 15 | 0.765 | KV453074.1 | 191890 | 15-scf00321    | 15 |
| AX-158154117 | 15 | 0.765 | KV453074.1 | 384342 | 15-scf00321    | 15 |
| AX-158412669 | 15 | 0.767 | KV453075.1 | 219754 | 15-scf00320    | 15 |
| AX-158153859 | 15 | 0.767 | KV453075.1 | 256923 | 15-scf00320    | 15 |
| AX-157713193 | 15 | 0.767 | KV453075.1 | 699062 | 15-scf00320    | 15 |
| AX-158153992 | 15 | 0.767 | KV453075.1 | 705624 | 15-scf00320    | 15 |
| AX-157715399 | 15 | 0.767 | KV453074.1 | 336530 | 15-scf00321    | 15 |
| AX-157775136 | 15 | 1.196 | KV453076.1 | 6251   | 15-scf00322    | 15 |
| AX-157832838 | 15 | 1.196 | KV453076.1 | 6996   | 15-scf00322    | 15 |
| AX-158154381 | 15 | 1.196 | KV453076.1 | 137407 | 15-scf00322    | 15 |

|              |    |       |             |        |             |    |
|--------------|----|-------|-------------|--------|-------------|----|
| AX-158154266 | 15 | 1.197 | KV453076.1  | 7324   | 15-scf00322 | 15 |
| AX-157832770 | 15 | 1.198 | KV453075.1  | 22084  | 15-scf00320 | 15 |
| AX-158154267 | 15 | 1.198 | KV453076.1  | 9370   | 15-scf00322 | 15 |
| AX-158154281 | 15 | 1.198 | KV453076.1  | 26175  | 15-scf00322 | 15 |
| AX-157832841 | 15 | 1.198 | KV453076.1  | 30648  | 15-scf00322 | 15 |
| AX-158154363 | 15 | 1.198 | KV453076.1  | 115742 | 15-scf00322 | 15 |
| AX-157687838 | 15 | 1.198 | 3ML01025267 | 5004   | scf01054_1  | UN |
| AX-158153975 | 15 | 1.199 | KV453075.1  | 617229 | 15-scf00320 | 15 |
| AX-158154022 | 15 | 1.199 | KV453074.1  | 121898 | 15-scf00321 | 15 |
| AX-158154270 | 15 | 1.199 | KV453076.1  | 14975  | 15-scf00322 | 15 |
| AX-157689330 | 15 | 1.199 | 3ML01029181 | 682    | scf04801_1  | UN |
| AX-158154273 | 15 | 1.201 | KV453076.1  | 16624  | 15-scf00322 | 15 |
| AX-158153869 | 15 | 1.202 | KV453075.1  | 276362 | 15-scf00320 | 15 |
| AX-158153876 | 15 | 1.202 | KV453075.1  | 294794 | 15-scf00320 | 15 |
| AX-158153940 | 15 | 1.202 | KV453075.1  | 477469 | 15-scf00320 | 15 |
| AX-157871765 | 15 | 1.202 | KV453074.1  | 224336 | 15-scf00321 | 15 |
| AX-157878403 | 15 | 1.202 | KV453074.1  | 276742 | 15-scf00321 | 15 |
| AX-158154090 | 15 | 1.202 | KV453074.1  | 312670 | 15-scf00321 | 15 |
| AX-158154091 | 15 | 1.202 | KV453074.1  | 313122 | 15-scf00321 | 15 |
| AX-158154123 | 15 | 1.202 | KV453074.1  | 401758 | 15-scf00321 | 15 |
| AX-158154244 | 15 | 1.202 | KV453074.1  | 705175 | 15-scf00321 | 15 |
| AX-158154274 | 15 | 1.202 | KV453076.1  | 18759  | 15-scf00322 | 15 |
| AX-158154276 | 15 | 1.202 | KV453076.1  | 19847  | 15-scf00322 | 15 |
| AX-157832840 | 15 | 1.202 | KV453076.1  | 25269  | 15-scf00322 | 15 |
| AX-157738341 | 15 | 1.202 | KV453076.1  | 29130  | 15-scf00322 | 15 |
| AX-158154285 | 15 | 1.202 | KV453076.1  | 29364  | 15-scf00322 | 15 |
| AX-157723122 | 15 | 1.202 | KV453076.1  | 31426  | 15-scf00322 | 15 |
| AX-158154288 | 15 | 1.202 | KV453076.1  | 32085  | 15-scf00322 | 15 |
| AX-158153773 | 15 | 1.311 | KV453075.1  | 86564  | 15-scf00320 | 15 |
| AX-158153782 | 15 | 1.311 | KV453075.1  | 99831  | 15-scf00320 | 15 |
| AX-158153888 | 15 | 1.311 | KV453075.1  | 342421 | 15-scf00320 | 15 |
| AX-158154139 | 15 | 1.311 | KV453074.1  | 440199 | 15-scf00321 | 15 |
| AX-157745109 | 15 | 1.311 | KV453074.1  | 523519 | 15-scf00321 | 15 |
| AX-157832829 | 15 | 1.311 | KV453074.1  | 524095 | 15-scf00321 | 15 |
| AX-158154295 | 15 | 1.311 | KV453076.1  | 39283  | 15-scf00322 | 15 |
| AX-157832843 | 15 | 1.311 | KV453076.1  | 40317  | 15-scf00322 | 15 |
| AX-158154297 | 15 | 1.311 | KV453076.1  | 41855  | 15-scf00322 | 15 |
| AX-158154302 | 15 | 1.311 | KV453076.1  | 45444  | 15-scf00322 | 15 |
| AX-158154303 | 15 | 1.311 | KV453076.1  | 45943  | 15-scf00322 | 15 |
| AX-158154304 | 15 | 1.311 | KV453076.1  | 46573  | 15-scf00322 | 15 |
| AX-157871769 | 15 | 1.311 | KV453076.1  | 53336  | 15-scf00322 | 15 |
| AX-157832847 | 15 | 1.311 | KV453076.1  | 53715  | 15-scf00322 | 15 |
| AX-158154314 | 15 | 1.311 | KV453076.1  | 56470  | 15-scf00322 | 15 |
| AX-158154315 | 15 | 1.311 | KV453076.1  | 56860  | 15-scf00322 | 15 |
| AX-158154318 | 15 | 1.311 | KV453076.1  | 58960  | 15-scf00322 | 15 |
| AX-157713546 | 15 | 1.311 | KV453076.1  | 60747  | 15-scf00322 | 15 |
| AX-157832848 | 15 | 1.311 | KV453076.1  | 63141  | 15-scf00322 | 15 |
| AX-158154319 | 15 | 1.311 | KV453076.1  | 65266  | 15-scf00322 | 15 |
| AX-158154320 | 15 | 1.311 | KV453076.1  | 65509  | 15-scf00322 | 15 |
| AX-158154321 | 15 | 1.311 | KV453076.1  | 66472  | 15-scf00322 | 15 |
| AX-158154322 | 15 | 1.311 | KV453076.1  | 67864  | 15-scf00322 | 15 |



|              |    |       |            |        |             |    |
|--------------|----|-------|------------|--------|-------------|----|
| AX-158154327 | 15 | 1.311 | KV453076.1 | 72164  | 15-scf00322 | 15 |
| AX-157751326 | 15 | 1.311 | KV453076.1 | 74408  | 15-scf00322 | 15 |
| AX-157717273 | 15 | 1.311 | KV453076.1 | 83221  | 15-scf00322 | 15 |
| AX-158154337 | 15 | 1.311 | KV453076.1 | 89140  | 15-scf00322 | 15 |
| AX-157739564 | 15 | 1.311 | KV453076.1 | 91182  | 15-scf00322 | 15 |
| AX-157742219 | 15 | 1.311 | KV453076.1 | 115689 | 15-scf00322 | 15 |
| AX-157722433 | 15 | 1.311 | KV453076.1 | 134286 | 15-scf00322 | 15 |
| AX-158154388 | 15 | 1.311 | KV453076.1 | 146742 | 15-scf00322 | 15 |
| AX-158154114 | 15 | 1.421 | KV453074.1 | 376572 | 15-scf00321 | 15 |
| AX-158154312 | 15 | 1.421 | KV453076.1 | 54045  | 15-scf00322 | 15 |
| AX-158154325 | 15 | 1.421 | KV453076.1 | 71060  | 15-scf00322 | 15 |
| AX-157832849 | 15 | 1.421 | KV453076.1 | 73492  | 15-scf00322 | 15 |
| AX-158154332 | 15 | 1.421 | KV453076.1 | 80645  | 15-scf00322 | 15 |
| AX-157832855 | 15 | 1.421 | KV453076.1 | 83079  | 15-scf00322 | 15 |
| AX-158154339 | 15 | 1.421 | KV453076.1 | 90321  | 15-scf00322 | 15 |
| AX-158154340 | 15 | 1.421 | KV453076.1 | 90661  | 15-scf00322 | 15 |
| AX-157709526 | 15 | 1.421 | KV453076.1 | 100788 | 15-scf00322 | 15 |
| AX-158154353 | 15 | 1.421 | KV453076.1 | 104632 | 15-scf00322 | 15 |
| AX-158154367 | 15 | 1.421 | KV453076.1 | 120993 | 15-scf00322 | 15 |
| AX-158154369 | 15 | 1.421 | KV453076.1 | 122437 | 15-scf00322 | 15 |
| AX-158154396 | 15 | 1.421 | KV453076.1 | 154704 | 15-scf00322 | 15 |
| AX-158154347 | 15 | 1.422 | KV453076.1 | 98684  | 15-scf00322 | 15 |
| AX-158154351 | 15 | 1.584 | KV453076.1 | 102888 | 15-scf00322 | 15 |
| AX-158154374 | 15 | 1.584 | KV453076.1 | 125333 | 15-scf00322 | 15 |
| AX-157832857 | 15 | 1.64  | KV453076.1 | 114910 | 15-scf00322 | 15 |
| AX-158154370 | 15 | 1.7   | KV453076.1 | 122821 | 15-scf00322 | 15 |
| AX-158154293 | 15 | 1.749 | KV453076.1 | 37956  | 15-scf00322 | 15 |
| AX-158154329 | 15 | 1.749 | KV453076.1 | 75029  | 15-scf00322 | 15 |
| AX-157832854 | 15 | 1.749 | KV453076.1 | 78229  | 15-scf00322 | 15 |
| AX-158154336 | 15 | 1.749 | KV453076.1 | 88411  | 15-scf00322 | 15 |
| AX-158154341 | 15 | 1.749 | KV453076.1 | 90960  | 15-scf00322 | 15 |
| AX-158154349 | 15 | 1.749 | KV453076.1 | 99960  | 15-scf00322 | 15 |
| AX-158154368 | 15 | 1.749 | KV453076.1 | 121472 | 15-scf00322 | 15 |
| AX-158154373 | 15 | 1.749 | KV453076.1 | 124731 | 15-scf00322 | 15 |
| AX-158154376 | 15 | 1.749 | KV453076.1 | 128338 | 15-scf00322 | 15 |
| AX-158154379 | 15 | 1.749 | KV453076.1 | 135935 | 15-scf00322 | 15 |
| AX-158154380 | 15 | 1.749 | KV453076.1 | 137017 | 15-scf00322 | 15 |
| AX-158154383 | 15 | 1.749 | KV453076.1 | 138572 | 15-scf00322 | 15 |
| AX-158154386 | 15 | 1.749 | KV453076.1 | 144442 | 15-scf00322 | 15 |
| AX-158154387 | 15 | 1.749 | KV453076.1 | 146286 | 15-scf00322 | 15 |
| AX-158154389 | 15 | 1.749 | KV453076.1 | 148041 | 15-scf00322 | 15 |
| AX-158154391 | 15 | 1.749 | KV453076.1 | 151029 | 15-scf00322 | 15 |
| AX-158154393 | 15 | 1.749 | KV453076.1 | 153616 | 15-scf00322 | 15 |
| AX-158154394 | 15 | 1.749 | KV453076.1 | 154121 | 15-scf00322 | 15 |
| AX-158154395 | 15 | 1.749 | KV453076.1 | 154507 | 15-scf00322 | 15 |
| AX-158154398 | 15 | 1.749 | KV453076.1 | 158319 | 15-scf00322 | 15 |
| AX-157832850 | 15 | 1.858 | KV453076.1 | 73527  | 15-scf00322 | 15 |
| AX-158154359 | 15 | 1.858 | KV453076.1 | 111320 | 15-scf00322 | 15 |
| AX-158154365 | 15 | 1.858 | KV453076.1 | 117091 | 15-scf00322 | 15 |
| AX-157721887 | 15 | 1.858 | KV453076.1 | 158793 | 15-scf00322 | 15 |
| AX-158154399 | 15 | 1.858 | KV453076.1 | 159507 | 15-scf00322 | 15 |

|              |    |       |            |        |             |    |
|--------------|----|-------|------------|--------|-------------|----|
| AX-157742552 | 15 | 1.858 | KV453076.1 | 160386 | 15-scf00322 | 15 |
| AX-158154408 | 15 | 1.858 | KV453076.1 | 170743 | 15-scf00322 | 15 |
| AX-158154402 | 15 | 2.077 | KV453076.1 | 163319 | 15-scf00322 | 15 |
| AX-158154414 | 15 | 2.077 | KV453076.1 | 191193 | 15-scf00322 | 15 |
| AX-158154418 | 15 | 2.113 | KV453076.1 | 198383 | 15-scf00322 | 15 |
| AX-158154426 | 15 | 2.129 | KV453076.1 | 208551 | 15-scf00322 | 15 |
| AX-158154429 | 15 | 2.158 | KV453076.1 | 210702 | 15-scf00322 | 15 |
| AX-157744148 | 15 | 2.158 | KV453076.1 | 289908 | 15-scf00322 | 15 |
| AX-158154431 | 15 | 2.186 | KV453076.1 | 212940 | 15-scf00322 | 15 |
| AX-158154433 | 15 | 2.186 | KV453076.1 | 214729 | 15-scf00322 | 15 |
| AX-157774710 | 15 | 2.186 | KV453076.1 | 215096 | 15-scf00322 | 15 |
| AX-158154434 | 15 | 2.186 | KV453076.1 | 215549 | 15-scf00322 | 15 |
| AX-158154436 | 15 | 2.186 | KV453076.1 | 217433 | 15-scf00322 | 15 |
| AX-158154437 | 15 | 2.186 | KV453076.1 | 218953 | 15-scf00322 | 15 |
| AX-158154439 | 15 | 2.186 | KV453076.1 | 221864 | 15-scf00322 | 15 |
| AX-158154441 | 15 | 2.186 | KV453076.1 | 224261 | 15-scf00322 | 15 |
| AX-157753066 | 15 | 2.186 | KV453076.1 | 225871 | 15-scf00322 | 15 |
| AX-157743900 | 15 | 2.186 | KV453076.1 | 230960 | 15-scf00322 | 15 |
| AX-157832860 | 15 | 2.186 | KV453076.1 | 231055 | 15-scf00322 | 15 |
| AX-158154451 | 15 | 2.186 | KV453076.1 | 236453 | 15-scf00322 | 15 |
| AX-158154452 | 15 | 2.186 | KV453076.1 | 240591 | 15-scf00322 | 15 |
| AX-157743506 | 15 | 2.186 | KV453076.1 | 241448 | 15-scf00322 | 15 |
| AX-158154455 | 15 | 2.186 | KV453076.1 | 242239 | 15-scf00322 | 15 |
| AX-158154456 | 15 | 2.186 | KV453076.1 | 242555 | 15-scf00322 | 15 |
| AX-158154457 | 15 | 2.186 | KV453076.1 | 243322 | 15-scf00322 | 15 |
| AX-157832862 | 15 | 2.186 | KV453076.1 | 244607 | 15-scf00322 | 15 |
| AX-157739080 | 15 | 2.186 | KV453076.1 | 245140 | 15-scf00322 | 15 |
| AX-157726557 | 15 | 2.186 | KV453076.1 | 246753 | 15-scf00322 | 15 |
| AX-157695404 | 15 | 2.186 | KV453076.1 | 249546 | 15-scf00322 | 15 |
| AX-158154499 | 15 | 2.186 | KV453076.1 | 307901 | 15-scf00322 | 15 |
| AX-158154446 | 15 | 2.295 | KV453076.1 | 227872 | 15-scf00322 | 15 |
| AX-158154463 | 15 | 2.295 | KV453076.1 | 250537 | 15-scf00322 | 15 |
| AX-158154466 | 15 | 2.295 | KV453076.1 | 254321 | 15-scf00322 | 15 |
| AX-158154467 | 15 | 2.295 | KV453076.1 | 254966 | 15-scf00322 | 15 |
| AX-158154471 | 15 | 2.295 | KV453076.1 | 259444 | 15-scf00322 | 15 |
| AX-158154472 | 15 | 2.295 | KV453076.1 | 262465 | 15-scf00322 | 15 |
| AX-158154475 | 15 | 2.295 | KV453076.1 | 265871 | 15-scf00322 | 15 |
| AX-158154476 | 15 | 2.295 | KV453076.1 | 266320 | 15-scf00322 | 15 |
| AX-158154482 | 15 | 2.295 | KV453076.1 | 275722 | 15-scf00322 | 15 |
| AX-157832868 | 15 | 2.295 | KV453076.1 | 281383 | 15-scf00322 | 15 |
| AX-158154486 | 15 | 2.295 | KV453076.1 | 287384 | 15-scf00322 | 15 |
| AX-158154488 | 15 | 2.295 | KV453076.1 | 289127 | 15-scf00322 | 15 |
| AX-158154489 | 15 | 2.295 | KV453076.1 | 290762 | 15-scf00322 | 15 |
| AX-158154490 | 15 | 2.295 | KV453076.1 | 296462 | 15-scf00322 | 15 |
| AX-158154492 | 15 | 2.295 | KV453076.1 | 297835 | 15-scf00322 | 15 |
| AX-158154495 | 15 | 2.295 | KV453076.1 | 300638 | 15-scf00322 | 15 |
| AX-158154498 | 15 | 2.295 | KV453076.1 | 307722 | 15-scf00322 | 15 |
| AX-157858216 | 15 | 2.295 | KV453076.1 | 310503 | 15-scf00322 | 15 |
| AX-158154540 | 15 | 2.295 | KV453076.1 | 370519 | 15-scf00322 | 15 |
| AX-157718030 | 15 | 2.351 | KV453076.1 | 311951 | 15-scf00322 | 15 |
| AX-157886541 | 15 | 2.404 | KV453076.1 | 129426 | 15-scf00322 | 15 |

|              |    |       |            |        |             |    |
|--------------|----|-------|------------|--------|-------------|----|
| AX-158154419 | 15 | 2.404 | KV453076.1 | 199865 | 15-scf00322 | 15 |
| AX-158154448 | 15 | 2.404 | KV453076.1 | 232545 | 15-scf00322 | 15 |
| AX-157721397 | 15 | 2.404 | KV453076.1 | 286618 | 15-scf00322 | 15 |
| AX-158154502 | 15 | 2.404 | KV453076.1 | 313724 | 15-scf00322 | 15 |
| AX-157832869 | 15 | 2.404 | KV453076.1 | 318104 | 15-scf00322 | 15 |
| AX-158154508 | 15 | 2.404 | KV453076.1 | 322734 | 15-scf00322 | 15 |
| AX-158154510 | 15 | 2.404 | KV453076.1 | 330336 | 15-scf00322 | 15 |
| AX-158154512 | 15 | 2.404 | KV453076.1 | 331530 | 15-scf00322 | 15 |
| AX-158154513 | 15 | 2.404 | KV453076.1 | 332201 | 15-scf00322 | 15 |
| AX-158154516 | 15 | 2.404 | KV453076.1 | 334683 | 15-scf00322 | 15 |
| AX-158154518 | 15 | 2.404 | KV453076.1 | 336118 | 15-scf00322 | 15 |
| AX-158154519 | 15 | 2.404 | KV453076.1 | 340504 | 15-scf00322 | 15 |
| AX-157722432 | 15 | 2.404 | KV453076.1 | 343082 | 15-scf00322 | 15 |
| AX-158154521 | 15 | 2.404 | KV453076.1 | 346129 | 15-scf00322 | 15 |
| AX-158154523 | 15 | 2.404 | KV453076.1 | 347692 | 15-scf00322 | 15 |
| AX-158380427 | 15 | 2.404 | KV453076.1 | 350404 | 15-scf00322 | 15 |
| AX-158154525 | 15 | 2.404 | KV453076.1 | 351819 | 15-scf00322 | 15 |
| AX-158154526 | 15 | 2.404 | KV453076.1 | 353025 | 15-scf00322 | 15 |
| AX-158154527 | 15 | 2.404 | KV453076.1 | 355818 | 15-scf00322 | 15 |
| AX-158154528 | 15 | 2.404 | KV453076.1 | 358081 | 15-scf00322 | 15 |
| AX-158154532 | 15 | 2.404 | KV453076.1 | 364758 | 15-scf00322 | 15 |
| AX-158154534 | 15 | 2.404 | KV453076.1 | 365825 | 15-scf00322 | 15 |
| AX-158154542 | 15 | 2.404 | KV453076.1 | 372015 | 15-scf00322 | 15 |
| AX-158154522 | 15 | 2.568 | KV453076.1 | 346757 | 15-scf00322 | 15 |
| AX-158154533 | 15 | 2.568 | KV453076.1 | 365512 | 15-scf00322 | 15 |
| AX-158154536 | 15 | 2.568 | KV453076.1 | 367328 | 15-scf00322 | 15 |
| AX-158154537 | 15 | 2.568 | KV453076.1 | 367957 | 15-scf00322 | 15 |
| AX-158154539 | 15 | 2.73  | KV453076.1 | 370135 | 15-scf00322 | 15 |
| AX-157832871 | 15 | 2.731 | KV453076.1 | 370963 | 15-scf00322 | 15 |
| AX-158154548 | 15 | 2.732 | KV453076.1 | 385354 | 15-scf00322 | 15 |
| AX-158154551 | 15 | 2.732 | KV453076.1 | 388392 | 15-scf00322 | 15 |
| AX-158154552 | 15 | 2.732 | KV453076.1 | 388773 | 15-scf00322 | 15 |
| AX-158154556 | 15 | 2.732 | KV453076.1 | 398581 | 15-scf00322 | 15 |
| AX-158154558 | 15 | 2.732 | KV453076.1 | 400381 | 15-scf00322 | 15 |
| AX-158154825 | 15 | 2.732 | KV453076.1 | 770853 | 15-scf00322 | 15 |
| AX-158154906 | 15 | 2.732 | KV453076.1 | 887326 | 15-scf00322 | 15 |
| AX-158154570 | 15 | 2.786 | KV453076.1 | 419540 | 15-scf00322 | 15 |
| AX-158154569 | 15 | 2.841 | KV453076.1 | 419017 | 15-scf00322 | 15 |
| AX-158154571 | 15 | 2.841 | KV453076.1 | 420727 | 15-scf00322 | 15 |
| AX-158154574 | 15 | 2.851 | KV453076.1 | 423335 | 15-scf00322 | 15 |
| AX-158154469 | 15 | 2.857 | KV453076.1 | 256794 | 15-scf00322 | 15 |
| AX-157832863 | 15 | 2.857 | KV453076.1 | 264023 | 15-scf00322 | 15 |
| AX-157832866 | 15 | 2.857 | KV453076.1 | 276594 | 15-scf00322 | 15 |
| AX-158385638 | 15 | 2.857 | KV453076.1 | 345392 | 15-scf00322 | 15 |
| AX-158154543 | 15 | 2.857 | KV453076.1 | 372837 | 15-scf00322 | 15 |
| AX-157832872 | 15 | 2.857 | KV453076.1 | 376732 | 15-scf00322 | 15 |
| AX-158154575 | 15 | 2.857 | KV453076.1 | 426975 | 15-scf00322 | 15 |
| AX-158393242 | 15 | 2.857 | KV453076.1 | 427848 | 15-scf00322 | 15 |
| AX-158154584 | 15 | 2.857 | KV453076.1 | 440848 | 15-scf00322 | 15 |
| AX-158154592 | 15 | 2.857 | KV453076.1 | 449328 | 15-scf00322 | 15 |
| AX-158154595 | 15 | 2.857 | KV453076.1 | 453640 | 15-scf00322 | 15 |

|              |    |       |            |        |             |    |
|--------------|----|-------|------------|--------|-------------|----|
| AX-157701935 | 15 | 2.857 | KV453076.1 | 462579 | 15-scf00322 | 15 |
| AX-158154645 | 15 | 2.857 | KV453076.1 | 525670 | 15-scf00322 | 15 |
| AX-158154578 | 15 | 2.897 | KV453076.1 | 431460 | 15-scf00322 | 15 |
| AX-158154447 | 15 | 2.95  | KV453076.1 | 229304 | 15-scf00322 | 15 |
| AX-158154461 | 15 | 2.95  | KV453076.1 | 249310 | 15-scf00322 | 15 |
| AX-158154478 | 15 | 2.95  | KV453076.1 | 269612 | 15-scf00322 | 15 |
| AX-158154494 | 15 | 2.95  | KV453076.1 | 300303 | 15-scf00322 | 15 |
| AX-157832870 | 15 | 2.95  | KV453076.1 | 363927 | 15-scf00322 | 15 |
| AX-157858217 | 15 | 2.95  | KV453076.1 | 377430 | 15-scf00322 | 15 |
| AX-158154557 | 15 | 2.95  | KV453076.1 | 399599 | 15-scf00322 | 15 |
| AX-158393241 | 15 | 2.95  | KV453076.1 | 422280 | 15-scf00322 | 15 |
| AX-158154579 | 15 | 2.95  | KV453076.1 | 432682 | 15-scf00322 | 15 |
| AX-158154580 | 15 | 2.95  | KV453076.1 | 433928 | 15-scf00322 | 15 |
| AX-158154586 | 15 | 2.95  | KV453076.1 | 443817 | 15-scf00322 | 15 |
| AX-158154589 | 15 | 2.95  | KV453076.1 | 446040 | 15-scf00322 | 15 |
| AX-158154590 | 15 | 2.95  | KV453076.1 | 446965 | 15-scf00322 | 15 |
| AX-158154593 | 15 | 2.95  | KV453076.1 | 451020 | 15-scf00322 | 15 |
| AX-158154597 | 15 | 2.95  | KV453076.1 | 456816 | 15-scf00322 | 15 |
| AX-158154599 | 15 | 2.95  | KV453076.1 | 457769 | 15-scf00322 | 15 |
| AX-158154601 | 15 | 2.95  | KV453076.1 | 459269 | 15-scf00322 | 15 |
| AX-158154602 | 15 | 2.95  | KV453076.1 | 461693 | 15-scf00322 | 15 |
| AX-158154604 | 15 | 2.95  | KV453076.1 | 463725 | 15-scf00322 | 15 |
| AX-158154613 | 15 | 2.95  | KV453076.1 | 477660 | 15-scf00322 | 15 |
| AX-158154618 | 15 | 2.95  | KV453076.1 | 483335 | 15-scf00322 | 15 |
| AX-158154619 | 15 | 2.95  | KV453076.1 | 484499 | 15-scf00322 | 15 |
| AX-158154625 | 15 | 2.95  | KV453076.1 | 490404 | 15-scf00322 | 15 |
| AX-158154631 | 15 | 2.95  | KV453076.1 | 504439 | 15-scf00322 | 15 |
| AX-158154634 | 15 | 2.95  | KV453076.1 | 509105 | 15-scf00322 | 15 |
| AX-158154635 | 15 | 2.95  | KV453076.1 | 509456 | 15-scf00322 | 15 |
| AX-157722949 | 15 | 2.95  | KV453076.1 | 512552 | 15-scf00322 | 15 |
| AX-158154639 | 15 | 2.95  | KV453076.1 | 519054 | 15-scf00322 | 15 |
| AX-158154640 | 15 | 2.95  | KV453076.1 | 519759 | 15-scf00322 | 15 |
| AX-158154834 | 15 | 2.95  | KV453076.1 | 787504 | 15-scf00322 | 15 |
| AX-158154945 | 15 | 2.95  | KV453076.1 | 940117 | 15-scf00322 | 15 |
| AX-157756166 | 15 | 3.168 | KV453076.1 | 529170 | 15-scf00322 | 15 |
| AX-158154653 | 15 | 3.168 | KV453076.1 | 537672 | 15-scf00322 | 15 |
| AX-158154655 | 15 | 3.168 | KV453076.1 | 540791 | 15-scf00322 | 15 |
| AX-158154656 | 15 | 3.168 | KV453076.1 | 541400 | 15-scf00322 | 15 |
| AX-157832878 | 15 | 3.168 | KV453076.1 | 549846 | 15-scf00322 | 15 |
| AX-158154672 | 15 | 3.168 | KV453076.1 | 567855 | 15-scf00322 | 15 |
| AX-158154646 | 15 | 3.387 | KV453076.1 | 526885 | 15-scf00322 | 15 |
| AX-158154651 | 15 | 3.387 | KV453076.1 | 536305 | 15-scf00322 | 15 |
| AX-158154652 | 15 | 3.387 | KV453076.1 | 537206 | 15-scf00322 | 15 |
| AX-157832875 | 15 | 3.387 | KV453076.1 | 537572 | 15-scf00322 | 15 |
| AX-158154665 | 15 | 3.387 | KV453076.1 | 562180 | 15-scf00322 | 15 |
| AX-158154668 | 15 | 3.387 | KV453076.1 | 564336 | 15-scf00322 | 15 |
| AX-158154674 | 15 | 3.387 | KV453076.1 | 570478 | 15-scf00322 | 15 |
| AX-158154678 | 15 | 3.387 | KV453076.1 | 574696 | 15-scf00322 | 15 |
| AX-158154684 | 15 | 3.387 | KV453076.1 | 581972 | 15-scf00322 | 15 |
| AX-157721924 | 15 | 3.387 | KV453076.1 | 586531 | 15-scf00322 | 15 |
| AX-158154689 | 15 | 3.387 | KV453076.1 | 588181 | 15-scf00322 | 15 |

|              |    |       |            |        |             |    |
|--------------|----|-------|------------|--------|-------------|----|
| AX-158154691 | 15 | 3.387 | KV453076.1 | 589486 | 15-scf00322 | 15 |
| AX-158154701 | 15 | 3.387 | KV453076.1 | 603782 | 15-scf00322 | 15 |
| AX-158154702 | 15 | 3.387 | KV453076.1 | 604396 | 15-scf00322 | 15 |
| AX-158154703 | 15 | 3.387 | KV453076.1 | 605325 | 15-scf00322 | 15 |
| AX-158154710 | 15 | 3.387 | KV453076.1 | 613812 | 15-scf00322 | 15 |
| AX-158154711 | 15 | 3.387 | KV453076.1 | 615207 | 15-scf00322 | 15 |
| AX-158154712 | 15 | 3.387 | KV453076.1 | 615841 | 15-scf00322 | 15 |
| AX-157832880 | 15 | 3.387 | KV453076.1 | 617516 | 15-scf00322 | 15 |
| AX-158154723 | 15 | 3.387 | KV453076.1 | 643039 | 15-scf00322 | 15 |
| AX-158154724 | 15 | 3.387 | KV453076.1 | 643866 | 15-scf00322 | 15 |
| AX-157858224 | 15 | 3.387 | KV453076.1 | 644268 | 15-scf00322 | 15 |
| AX-158154725 | 15 | 3.387 | KV453076.1 | 645096 | 15-scf00322 | 15 |
| AX-158154726 | 15 | 3.387 | KV453076.1 | 645347 | 15-scf00322 | 15 |
| AX-157747405 | 15 | 3.387 | KV453076.1 | 645554 | 15-scf00322 | 15 |
| AX-157832886 | 15 | 3.387 | KV453076.1 | 647677 | 15-scf00322 | 15 |
| AX-158393240 | 15 | 3.496 | KV453076.1 | 419610 | 15-scf00322 | 15 |
| AX-158154572 | 15 | 3.496 | KV453076.1 | 421672 | 15-scf00322 | 15 |
| AX-157858220 | 15 | 3.496 | KV453076.1 | 531056 | 15-scf00322 | 15 |
| AX-157832879 | 15 | 3.496 | KV453076.1 | 553471 | 15-scf00322 | 15 |
| AX-158154666 | 15 | 3.496 | KV453076.1 | 562885 | 15-scf00322 | 15 |
| AX-157832887 | 15 | 3.496 | KV453076.1 | 655112 | 15-scf00322 | 15 |
| AX-158154733 | 15 | 3.496 | KV453076.1 | 660399 | 15-scf00322 | 15 |
| AX-158154734 | 15 | 3.496 | KV453076.1 | 661261 | 15-scf00322 | 15 |
| AX-158154735 | 15 | 3.496 | KV453076.1 | 662297 | 15-scf00322 | 15 |
| AX-158154737 | 15 | 3.496 | KV453076.1 | 663285 | 15-scf00322 | 15 |
| AX-158154738 | 15 | 3.496 | KV453076.1 | 664399 | 15-scf00322 | 15 |
| AX-158154739 | 15 | 3.496 | KV453076.1 | 669382 | 15-scf00322 | 15 |
| AX-158154747 | 15 | 3.496 | KV453076.1 | 682695 | 15-scf00322 | 15 |
| AX-158154823 | 15 | 3.496 | KV453076.1 | 769308 | 15-scf00322 | 15 |
| AX-158154833 | 15 | 3.496 | KV453076.1 | 786881 | 15-scf00322 | 15 |
| AX-158154847 | 15 | 3.496 | KV453076.1 | 801073 | 15-scf00322 | 15 |
| AX-158154859 | 15 | 3.496 | KV453076.1 | 817881 | 15-scf00322 | 15 |
| AX-157858223 | 15 | 3.605 | KV453076.1 | 638229 | 15-scf00322 | 15 |
| AX-157832885 | 15 | 3.605 | KV453076.1 | 642534 | 15-scf00322 | 15 |
| AX-158154741 | 15 | 3.605 | KV453076.1 | 670888 | 15-scf00322 | 15 |
| AX-158154749 | 15 | 3.605 | KV453076.1 | 687642 | 15-scf00322 | 15 |
| AX-158154750 | 15 | 3.605 | KV453076.1 | 688606 | 15-scf00322 | 15 |
| AX-158380429 | 15 | 3.605 | KV453076.1 | 696668 | 15-scf00322 | 15 |
| AX-158154763 | 15 | 3.605 | KV453076.1 | 698764 | 15-scf00322 | 15 |
| AX-158154764 | 15 | 3.605 | KV453076.1 | 699253 | 15-scf00322 | 15 |
| AX-158154767 | 15 | 3.605 | KV453076.1 | 707195 | 15-scf00322 | 15 |
| AX-158154849 | 15 | 3.605 | KV453076.1 | 802877 | 15-scf00322 | 15 |
| AX-157725023 | 15 | 3.605 | KV453076.1 | 810921 | 15-scf00322 | 15 |
| AX-158154776 | 15 | 3.62  | KV453076.1 | 716393 | 15-scf00322 | 15 |
| AX-158154777 | 15 | 3.637 | KV453076.1 | 717796 | 15-scf00322 | 15 |
| AX-158154778 | 15 | 3.653 | KV453076.1 | 718218 | 15-scf00322 | 15 |
| AX-158154780 | 15 | 3.666 | KV453076.1 | 720623 | 15-scf00322 | 15 |
| AX-158154744 | 15 | 3.673 | KV453076.1 | 675551 | 15-scf00322 | 15 |
| AX-158154782 | 15 | 3.673 | KV453076.1 | 724122 | 15-scf00322 | 15 |
| AX-158154787 | 15 | 3.684 | KV453076.1 | 729213 | 15-scf00322 | 15 |
| AX-158154794 | 15 | 3.69  | KV453076.1 | 734030 | 15-scf00322 | 15 |

|              |    |       |            |        |             |    |
|--------------|----|-------|------------|--------|-------------|----|
| AX-158154922 | 15 | 3.69  | KV453076.1 | 907575 | 15-scf00322 | 15 |
| AX-158154796 | 15 | 3.701 | KV453076.1 | 734995 | 15-scf00322 | 15 |
| AX-158154789 | 15 | 3.714 | KV453076.1 | 730448 | 15-scf00322 | 15 |
| AX-158154821 | 15 | 3.714 | KV453076.1 | 762728 | 15-scf00322 | 15 |
| AX-157832890 | 15 | 3.714 | KV453076.1 | 768214 | 15-scf00322 | 15 |
| AX-157858226 | 15 | 3.824 | KV453076.1 | 728467 | 15-scf00322 | 15 |
| AX-157832891 | 15 | 3.824 | KV453076.1 | 775678 | 15-scf00322 | 15 |
| AX-158154830 | 15 | 3.824 | KV453076.1 | 776753 | 15-scf00322 | 15 |
| AX-158154837 | 15 | 3.824 | KV453076.1 | 795614 | 15-scf00322 | 15 |
| AX-158154838 | 15 | 3.824 | KV453076.1 | 796079 | 15-scf00322 | 15 |
| AX-158154839 | 15 | 3.824 | KV453076.1 | 796216 | 15-scf00322 | 15 |
| AX-158154842 | 15 | 3.824 | KV453076.1 | 797507 | 15-scf00322 | 15 |
| AX-158154846 | 15 | 3.824 | KV453076.1 | 800140 | 15-scf00322 | 15 |
| AX-157775473 | 15 | 3.824 | KV453076.1 | 803361 | 15-scf00322 | 15 |
| AX-158154851 | 15 | 3.824 | KV453076.1 | 804823 | 15-scf00322 | 15 |
| AX-158154853 | 15 | 3.824 | KV453076.1 | 808679 | 15-scf00322 | 15 |
| AX-157832892 | 15 | 3.824 | KV453076.1 | 809896 | 15-scf00322 | 15 |
| AX-158154855 | 15 | 3.824 | KV453076.1 | 814673 | 15-scf00322 | 15 |
| AX-158154856 | 15 | 3.824 | KV453076.1 | 815110 | 15-scf00322 | 15 |
| AX-158154745 | 15 | 3.874 | KV453076.1 | 681665 | 15-scf00322 | 15 |
| AX-158154758 | 15 | 3.874 | KV453076.1 | 695897 | 15-scf00322 | 15 |
| AX-158154784 | 15 | 3.874 | KV453076.1 | 726273 | 15-scf00322 | 15 |
| AX-158154786 | 15 | 3.874 | KV453076.1 | 728194 | 15-scf00322 | 15 |
| AX-158154836 | 15 | 3.874 | KV453076.1 | 792928 | 15-scf00322 | 15 |
| AX-158154860 | 15 | 3.874 | KV453076.1 | 820342 | 15-scf00322 | 15 |
| AX-158154861 | 15 | 3.874 | KV453076.1 | 821108 | 15-scf00322 | 15 |
| AX-158154866 | 15 | 3.874 | KV453076.1 | 829766 | 15-scf00322 | 15 |
| AX-157739069 | 15 | 3.874 | KV453076.1 | 832325 | 15-scf00322 | 15 |
| AX-158154951 | 15 | 3.874 | KV453076.1 | 950310 | 15-scf00322 | 15 |
| AX-158154953 | 15 | 3.874 | KV453076.1 | 952097 | 15-scf00322 | 15 |
| AX-158154959 | 15 | 3.874 | KV453076.1 | 956208 | 15-scf00322 | 15 |
| AX-157772628 | 15 | 3.933 | KV453076.1 | 701371 | 15-scf00322 | 15 |
| AX-158154868 | 15 | 3.933 | KV453076.1 | 832227 | 15-scf00322 | 15 |
| AX-158154870 | 15 | 3.933 | KV453076.1 | 837182 | 15-scf00322 | 15 |
| AX-158154871 | 15 | 3.933 | KV453076.1 | 837541 | 15-scf00322 | 15 |
| AX-157771249 | 15 | 3.933 | KV453076.1 | 838851 | 15-scf00322 | 15 |
| AX-157759089 | 15 | 3.933 | KV453076.1 | 872548 | 15-scf00322 | 15 |
| AX-158154876 | 15 | 4.042 | KV453076.1 | 844079 | 15-scf00322 | 15 |
| AX-158154878 | 15 | 4.042 | KV453076.1 | 846185 | 15-scf00322 | 15 |
| AX-158154879 | 15 | 4.042 | KV453076.1 | 846885 | 15-scf00322 | 15 |
| AX-157751991 | 15 | 4.103 | KV453076.1 | 851619 | 15-scf00322 | 15 |
| AX-158154657 | 15 | 4.164 | KV453076.1 | 543779 | 15-scf00322 | 15 |
| AX-158154886 | 15 | 4.164 | KV453076.1 | 854857 | 15-scf00322 | 15 |
| AX-158154892 | 15 | 4.204 | KV453076.1 | 865245 | 15-scf00322 | 15 |
| AX-158154896 | 15 | 4.23  | KV453076.1 | 867428 | 15-scf00322 | 15 |
| AX-158154704 | 15 | 4.261 | KV453076.1 | 606216 | 15-scf00322 | 15 |
| AX-157720627 | 15 | 4.261 | KV453076.1 | 681066 | 15-scf00322 | 15 |
| AX-158385642 | 15 | 4.261 | KV453076.1 | 682596 | 15-scf00322 | 15 |
| AX-158412713 | 15 | 4.261 | KV453076.1 | 684966 | 15-scf00322 | 15 |
| AX-158154753 | 15 | 4.261 | KV453076.1 | 690993 | 15-scf00322 | 15 |
| AX-158154757 | 15 | 4.261 | KV453076.1 | 694979 | 15-scf00322 | 15 |

|              |    |       |            |        |             |    |
|--------------|----|-------|------------|--------|-------------|----|
| AX-157708011 | 15 | 4.261 | KV453076.1 | 702399 | 15-scf00322 | 15 |
| AX-158154809 | 15 | 4.261 | KV453076.1 | 751193 | 15-scf00322 | 15 |
| AX-158154816 | 15 | 4.261 | KV453076.1 | 755807 | 15-scf00322 | 15 |
| AX-158154850 | 15 | 4.261 | KV453076.1 | 803109 | 15-scf00322 | 15 |
| AX-157757869 | 15 | 4.261 | KV453076.1 | 807953 | 15-scf00322 | 15 |
| AX-158154852 | 15 | 4.261 | KV453076.1 | 808135 | 15-scf00322 | 15 |
| AX-158154872 | 15 | 4.261 | KV453076.1 | 838133 | 15-scf00322 | 15 |
| AX-158154873 | 15 | 4.261 | KV453076.1 | 839639 | 15-scf00322 | 15 |
| AX-158154881 | 15 | 4.261 | KV453076.1 | 850622 | 15-scf00322 | 15 |
| AX-158154882 | 15 | 4.261 | KV453076.1 | 851345 | 15-scf00322 | 15 |
| AX-157753557 | 15 | 4.261 | KV453076.1 | 861329 | 15-scf00322 | 15 |
| AX-158154894 | 15 | 4.261 | KV453076.1 | 866318 | 15-scf00322 | 15 |
| AX-157832896 | 15 | 4.261 | KV453076.1 | 869209 | 15-scf00322 | 15 |
| AX-158154897 | 15 | 4.261 | KV453076.1 | 870813 | 15-scf00322 | 15 |
| AX-158154898 | 15 | 4.261 | KV453076.1 | 871426 | 15-scf00322 | 15 |
| AX-157714101 | 15 | 4.261 | KV453076.1 | 871649 | 15-scf00322 | 15 |
| AX-158154900 | 15 | 4.261 | KV453076.1 | 879199 | 15-scf00322 | 15 |
| AX-158154903 | 15 | 4.261 | KV453076.1 | 882875 | 15-scf00322 | 15 |
| AX-158154904 | 15 | 4.261 | KV453076.1 | 884226 | 15-scf00322 | 15 |
| AX-158154905 | 15 | 4.261 | KV453076.1 | 885063 | 15-scf00322 | 15 |
| AX-158154908 | 15 | 4.261 | KV453076.1 | 892279 | 15-scf00322 | 15 |
| AX-158154910 | 15 | 4.261 | KV453076.1 | 893515 | 15-scf00322 | 15 |
| AX-157745578 | 15 | 4.261 | KV453076.1 | 896103 | 15-scf00322 | 15 |
| AX-158154912 | 15 | 4.261 | KV453076.1 | 896274 | 15-scf00322 | 15 |
| AX-157832897 | 15 | 4.261 | KV453076.1 | 897814 | 15-scf00322 | 15 |
| AX-158154913 | 15 | 4.261 | KV453076.1 | 898381 | 15-scf00322 | 15 |
| AX-158154915 | 15 | 4.261 | KV453076.1 | 901040 | 15-scf00322 | 15 |
| AX-158154916 | 15 | 4.261 | KV453076.1 | 901761 | 15-scf00322 | 15 |
| AX-158154917 | 15 | 4.261 | KV453076.1 | 903323 | 15-scf00322 | 15 |
| AX-158154918 | 15 | 4.261 | KV453076.1 | 903635 | 15-scf00322 | 15 |
| AX-158154923 | 15 | 4.261 | KV453076.1 | 908067 | 15-scf00322 | 15 |
| AX-158154926 | 15 | 4.261 | KV453076.1 | 912773 | 15-scf00322 | 15 |
| AX-158154928 | 15 | 4.261 | KV453076.1 | 914556 | 15-scf00322 | 15 |
| AX-158154929 | 15 | 4.261 | KV453076.1 | 915217 | 15-scf00322 | 15 |
| AX-158154935 | 15 | 4.261 | KV453076.1 | 924986 | 15-scf00322 | 15 |
| AX-158154936 | 15 | 4.261 | KV453076.1 | 925407 | 15-scf00322 | 15 |
| AX-158154938 | 15 | 4.261 | KV453076.1 | 931307 | 15-scf00322 | 15 |
| AX-157713665 | 15 | 4.261 | KV453076.1 | 933273 | 15-scf00322 | 15 |
| AX-158154941 | 15 | 4.261 | KV453076.1 | 934575 | 15-scf00322 | 15 |
| AX-158154956 | 15 | 4.261 | KV453076.1 | 953998 | 15-scf00322 | 15 |
| AX-158154957 | 15 | 4.261 | KV453076.1 | 954773 | 15-scf00322 | 15 |
| AX-157886547 | 15 | 4.261 | KV453076.1 | 955225 | 15-scf00322 | 15 |
| AX-158154960 | 15 | 4.261 | KV453076.1 | 956306 | 15-scf00322 | 15 |
| AX-158154961 | 15 | 4.261 | KV453076.1 | 959335 | 15-scf00322 | 15 |
| AX-158154962 | 15 | 4.261 | KV453076.1 | 960743 | 15-scf00322 | 15 |
| AX-158154963 | 15 | 4.261 | KV453076.1 | 961513 | 15-scf00322 | 15 |
| AX-158154964 | 15 | 4.261 | KV453076.1 | 961879 | 15-scf00322 | 15 |
| AX-158154966 | 15 | 4.261 | KV453076.1 | 963701 | 15-scf00322 | 15 |
| AX-158154968 | 15 | 4.261 | KV453076.1 | 966052 | 15-scf00322 | 15 |
| AX-158154970 | 15 | 4.261 | KV453076.1 | 968441 | 15-scf00322 | 15 |
| AX-157832901 | 15 | 4.261 | KV453076.1 | 972711 | 15-scf00322 | 15 |

|              |    |       |             |         |             |    |
|--------------|----|-------|-------------|---------|-------------|----|
| AX-157713343 | 15 | 4.261 | KV453076.1  | 978512  | 15-scf00322 | 15 |
| AX-158154978 | 15 | 4.261 | KV453076.1  | 980240  | 15-scf00322 | 15 |
| AX-158154982 | 15 | 4.261 | KV453076.1  | 987401  | 15-scf00322 | 15 |
| AX-157712005 | 15 | 4.261 | 3ML01031145 | 408     | scf06751_1  | UN |
| AX-157707057 | 15 | 4.261 | 3ML01033417 | 114     | scf09066_1  | UN |
| AX-158154973 | 15 | 4.289 | KV453076.1  | 970650  | 15-scf00322 | 15 |
| AX-158154976 | 15 | 4.314 | KV453076.1  | 979170  | 15-scf00322 | 15 |
| AX-158154981 | 15 | 4.347 | KV453076.1  | 986384  | 15-scf00322 | 15 |
| AX-158154911 | 15 | 4.351 | KV453076.1  | 894716  | 15-scf00322 | 15 |
| AX-158154952 | 15 | 4.351 | KV453076.1  | 951259  | 15-scf00322 | 15 |
| AX-158154983 | 15 | 4.351 | KV453076.1  | 988364  | 15-scf00322 | 15 |
| AX-157866495 | 15 | 4.351 | KV453076.1  | 1340410 | 15-scf00322 | 15 |
| AX-157832903 | 15 | 4.37  | KV453076.1  | 989344  | 15-scf00322 | 15 |
| AX-158154986 | 15 | 4.37  | KV453076.1  | 992185  | 15-scf00322 | 15 |
| AX-158154987 | 15 | 4.479 | KV453076.1  | 993273  | 15-scf00322 | 15 |
| AX-158154988 | 15 | 4.479 | KV453076.1  | 995748  | 15-scf00322 | 15 |
| AX-157715515 | 15 | 4.479 | KV453076.1  | 996192  | 15-scf00322 | 15 |
| AX-158155046 | 15 | 4.479 | KV453076.1  | 1076846 | 15-scf00322 | 15 |
| AX-157746114 | 15 | 4.479 | KV453076.1  | 1162120 | 15-scf00322 | 15 |
| AX-157832917 | 15 | 4.479 | KV453076.1  | 1178114 | 15-scf00322 | 15 |
| AX-158155142 | 15 | 4.479 | KV453076.1  | 1190818 | 15-scf00322 | 15 |
| AX-157832922 | 15 | 4.479 | KV453076.1  | 1196189 | 15-scf00322 | 15 |
| AX-158155253 | 15 | 4.479 | KV453076.1  | 1343260 | 15-scf00322 | 15 |
| AX-158155259 | 15 | 4.479 | KV453076.1  | 1351182 | 15-scf00322 | 15 |
| AX-158155337 | 15 | 4.479 | KV453076.1  | 1460101 | 15-scf00322 | 15 |
| AX-158155338 | 15 | 4.479 | KV453076.1  | 1463167 | 15-scf00322 | 15 |
| AX-158155359 | 15 | 4.479 | KV453076.1  | 1489757 | 15-scf00322 | 15 |
| AX-158154989 | 15 | 4.501 | KV453076.1  | 996559  | 15-scf00322 | 15 |
| AX-157748624 | 15 | 4.605 | KV453076.1  | 1001050 | 15-scf00322 | 15 |
| AX-158154984 | 15 | 4.698 | KV453076.1  | 989071  | 15-scf00322 | 15 |
| AX-157832905 | 15 | 4.698 | KV453076.1  | 1004001 | 15-scf00322 | 15 |
| AX-158154990 | 15 | 4.698 | KV453076.1  | 1004828 | 15-scf00322 | 15 |
| AX-158154992 | 15 | 4.698 | KV453076.1  | 1007959 | 15-scf00322 | 15 |
| AX-158154993 | 15 | 4.698 | KV453076.1  | 1008610 | 15-scf00322 | 15 |
| AX-157832906 | 15 | 4.698 | KV453076.1  | 1010448 | 15-scf00322 | 15 |
| AX-157832907 | 15 | 4.698 | KV453076.1  | 1011765 | 15-scf00322 | 15 |
| AX-158154996 | 15 | 4.698 | KV453076.1  | 1013483 | 15-scf00322 | 15 |
| AX-158155003 | 15 | 4.698 | KV453076.1  | 1023324 | 15-scf00322 | 15 |
| AX-158155006 | 15 | 4.698 | KV453076.1  | 1027268 | 15-scf00322 | 15 |
| AX-158155007 | 15 | 4.698 | KV453076.1  | 1030116 | 15-scf00322 | 15 |
| AX-158155010 | 15 | 4.698 | KV453076.1  | 1032817 | 15-scf00322 | 15 |
| AX-158155012 | 15 | 4.698 | KV453076.1  | 1033978 | 15-scf00322 | 15 |
| AX-158155013 | 15 | 4.698 | KV453076.1  | 1035421 | 15-scf00322 | 15 |
| AX-157754581 | 15 | 4.698 | KV453076.1  | 1036073 | 15-scf00322 | 15 |
| AX-158155015 | 15 | 4.698 | KV453076.1  | 1038062 | 15-scf00322 | 15 |
| AX-158155016 | 15 | 4.698 | KV453076.1  | 1040059 | 15-scf00322 | 15 |
| AX-158155018 | 15 | 4.698 | KV453076.1  | 1042251 | 15-scf00322 | 15 |
| AX-158385647 | 15 | 4.698 | KV453076.1  | 1045489 | 15-scf00322 | 15 |
| AX-158155021 | 15 | 4.698 | KV453076.1  | 1046824 | 15-scf00322 | 15 |
| AX-158155022 | 15 | 4.698 | KV453076.1  | 1048039 | 15-scf00322 | 15 |
| AX-158155024 | 15 | 4.698 | KV453076.1  | 1049154 | 15-scf00322 | 15 |



|              |    |       |            |         |             |    |
|--------------|----|-------|------------|---------|-------------|----|
| AX-158155028 | 15 | 4.698 | KV453076.1 | 1051424 | 15-scf00322 | 15 |
| AX-158155029 | 15 | 4.698 | KV453076.1 | 1052843 | 15-scf00322 | 15 |
| AX-158155030 | 15 | 4.698 | KV453076.1 | 1053514 | 15-scf00322 | 15 |
| AX-158155031 | 15 | 4.698 | KV453076.1 | 1055067 | 15-scf00322 | 15 |
| AX-158412718 | 15 | 4.698 | KV453076.1 | 1057635 | 15-scf00322 | 15 |
| AX-158155032 | 15 | 4.698 | KV453076.1 | 1058258 | 15-scf00322 | 15 |
| AX-158155033 | 15 | 4.698 | KV453076.1 | 1058916 | 15-scf00322 | 15 |
| AX-158155034 | 15 | 4.698 | KV453076.1 | 1059793 | 15-scf00322 | 15 |
| AX-158155035 | 15 | 4.698 | KV453076.1 | 1061229 | 15-scf00322 | 15 |
| AX-157744626 | 15 | 4.698 | KV453076.1 | 1061703 | 15-scf00322 | 15 |
| AX-157702926 | 15 | 4.698 | KV453076.1 | 1063857 | 15-scf00322 | 15 |
| AX-157832910 | 15 | 4.698 | KV453076.1 | 1072670 | 15-scf00322 | 15 |
| AX-158155044 | 15 | 4.698 | KV453076.1 | 1074299 | 15-scf00322 | 15 |
| AX-158155045 | 15 | 4.698 | KV453076.1 | 1074897 | 15-scf00322 | 15 |
| AX-158155037 | 15 | 4.754 | KV453076.1 | 1063665 | 15-scf00322 | 15 |
| AX-158155047 | 15 | 4.754 | KV453076.1 | 1079042 | 15-scf00322 | 15 |
| AX-158155011 | 15 | 4.807 | KV453076.1 | 1033505 | 15-scf00322 | 15 |
| AX-158155043 | 15 | 4.807 | KV453076.1 | 1071881 | 15-scf00322 | 15 |
| AX-158155055 | 15 | 4.807 | KV453076.1 | 1092971 | 15-scf00322 | 15 |
| AX-158155056 | 15 | 4.807 | KV453076.1 | 1093560 | 15-scf00322 | 15 |
| AX-158155059 | 15 | 4.807 | KV453076.1 | 1095937 | 15-scf00322 | 15 |
| AX-158155060 | 15 | 4.807 | KV453076.1 | 1097227 | 15-scf00322 | 15 |
| AX-158155062 | 15 | 4.807 | KV453076.1 | 1098887 | 15-scf00322 | 15 |
| AX-158155063 | 15 | 4.807 | KV453076.1 | 1100189 | 15-scf00322 | 15 |
| AX-158155064 | 15 | 4.807 | KV453076.1 | 1102416 | 15-scf00322 | 15 |
| AX-158155065 | 15 | 4.807 | KV453076.1 | 1104130 | 15-scf00322 | 15 |
| AX-158155066 | 15 | 4.807 | KV453076.1 | 1104763 | 15-scf00322 | 15 |
| AX-158155067 | 15 | 4.807 | KV453076.1 | 1105095 | 15-scf00322 | 15 |
| AX-158155070 | 15 | 4.807 | KV453076.1 | 1107442 | 15-scf00322 | 15 |
| AX-158155072 | 15 | 4.807 | KV453076.1 | 1112147 | 15-scf00322 | 15 |
| AX-157695815 | 15 | 4.807 | KV453076.1 | 1150707 | 15-scf00322 | 15 |
| AX-157743872 | 15 | 4.807 | KV453076.1 | 1170516 | 15-scf00322 | 15 |
| AX-158155157 | 15 | 4.807 | KV453076.1 | 1212864 | 15-scf00322 | 15 |
| AX-158155158 | 15 | 4.807 | KV453076.1 | 1213887 | 15-scf00322 | 15 |
| AX-158155077 | 15 | 4.873 | KV453076.1 | 1116187 | 15-scf00322 | 15 |
| AX-158155002 | 15 | 5.025 | KV453076.1 | 1022865 | 15-scf00322 | 15 |
| AX-157832909 | 15 | 5.025 | KV453076.1 | 1067350 | 15-scf00322 | 15 |
| AX-158155082 | 15 | 5.025 | KV453076.1 | 1119759 | 15-scf00322 | 15 |
| AX-158155086 | 15 | 5.025 | KV453076.1 | 1122471 | 15-scf00322 | 15 |
| AX-157832913 | 15 | 5.025 | KV453076.1 | 1125694 | 15-scf00322 | 15 |
| AX-158155092 | 15 | 5.025 | KV453076.1 | 1129974 | 15-scf00322 | 15 |
| AX-157832914 | 15 | 5.025 | KV453076.1 | 1135134 | 15-scf00322 | 15 |
| AX-158155098 | 15 | 5.025 | KV453076.1 | 1136053 | 15-scf00322 | 15 |
| AX-158155099 | 15 | 5.025 | KV453076.1 | 1137222 | 15-scf00322 | 15 |
| AX-158155103 | 15 | 5.025 | KV453076.1 | 1141487 | 15-scf00322 | 15 |
| AX-158155108 | 15 | 5.025 | KV453076.1 | 1144805 | 15-scf00322 | 15 |
| AX-158155115 | 15 | 5.025 | KV453076.1 | 1158209 | 15-scf00322 | 15 |
| AX-158155116 | 15 | 5.025 | KV453076.1 | 1160108 | 15-scf00322 | 15 |
| AX-158155117 | 15 | 5.025 | KV453076.1 | 1161089 | 15-scf00322 | 15 |
| AX-158155126 | 15 | 5.025 | KV453076.1 | 1174713 | 15-scf00322 | 15 |
| AX-158155127 | 15 | 5.025 | KV453076.1 | 1175028 | 15-scf00322 | 15 |

|              |    |       |            |         |             |    |
|--------------|----|-------|------------|---------|-------------|----|
| AX-158155160 | 15 | 5.025 | KV453076.1 | 1215182 | 15-scf00322 | 15 |
| AX-157745973 | 15 | 5.025 | KV453076.1 | 1218382 | 15-scf00322 | 15 |
| AX-158155214 | 15 | 5.025 | KV453076.1 | 1294454 | 15-scf00322 | 15 |
| AX-158155129 | 15 | 5.084 | KV453076.1 | 1178645 | 15-scf00322 | 15 |
| AX-158155089 | 15 | 5.135 | KV453076.1 | 1126156 | 15-scf00322 | 15 |
| AX-157714247 | 15 | 5.135 | KV453076.1 | 1133348 | 15-scf00322 | 15 |
| AX-158155102 | 15 | 5.135 | KV453076.1 | 1141010 | 15-scf00322 | 15 |
| AX-158155119 | 15 | 5.135 | KV453076.1 | 1162748 | 15-scf00322 | 15 |
| AX-157746029 | 15 | 5.135 | KV453076.1 | 1181502 | 15-scf00322 | 15 |
| AX-157832919 | 15 | 5.135 | KV453076.1 | 1183086 | 15-scf00322 | 15 |
| AX-157742231 | 15 | 5.135 | KV453076.1 | 1184241 | 15-scf00322 | 15 |
| AX-158155139 | 15 | 5.135 | KV453076.1 | 1189020 | 15-scf00322 | 15 |
| AX-158155146 | 15 | 5.135 | KV453076.1 | 1193766 | 15-scf00322 | 15 |
| AX-157719480 | 15 | 5.135 | KV453076.1 | 1195882 | 15-scf00322 | 15 |
| AX-158155149 | 15 | 5.135 | KV453076.1 | 1196532 | 15-scf00322 | 15 |
| AX-158155152 | 15 | 5.135 | KV453076.1 | 1201423 | 15-scf00322 | 15 |
| AX-158155154 | 15 | 5.135 | KV453076.1 | 1208700 | 15-scf00322 | 15 |
| AX-158155155 | 15 | 5.135 | KV453076.1 | 1209366 | 15-scf00322 | 15 |
| AX-158155156 | 15 | 5.135 | KV453076.1 | 1209628 | 15-scf00322 | 15 |
| AX-158155162 | 15 | 5.135 | KV453076.1 | 1217258 | 15-scf00322 | 15 |
| AX-158155189 | 15 | 5.135 | KV453076.1 | 1262450 | 15-scf00322 | 15 |
| AX-157716767 | 15 | 5.135 | KV453076.1 | 1928759 | 15-scf00322 | 15 |
| AX-157717224 | 15 | 5.244 | KV453076.1 | 997328  | 15-scf00322 | 15 |
| AX-158154997 | 15 | 5.244 | KV453076.1 | 1014289 | 15-scf00322 | 15 |
| AX-158154999 | 15 | 5.244 | KV453076.1 | 1018654 | 15-scf00322 | 15 |
| AX-158155017 | 15 | 5.244 | KV453076.1 | 1040746 | 15-scf00322 | 15 |
| AX-158155023 | 15 | 5.244 | KV453076.1 | 1048811 | 15-scf00322 | 15 |
| AX-157775743 | 15 | 5.244 | KV453076.1 | 1095111 | 15-scf00322 | 15 |
| AX-157832912 | 15 | 5.244 | KV453076.1 | 1098210 | 15-scf00322 | 15 |
| AX-158155074 | 15 | 5.244 | KV453076.1 | 1113112 | 15-scf00322 | 15 |
| AX-158155084 | 15 | 5.244 | KV453076.1 | 1120495 | 15-scf00322 | 15 |
| AX-158155101 | 15 | 5.244 | KV453076.1 | 1139162 | 15-scf00322 | 15 |
| AX-158155105 | 15 | 5.244 | KV453076.1 | 1142782 | 15-scf00322 | 15 |
| AX-157832923 | 15 | 5.244 | KV453076.1 | 1199954 | 15-scf00322 | 15 |
| AX-157754912 | 15 | 5.244 | KV453076.1 | 1225950 | 15-scf00322 | 15 |
| AX-158155169 | 15 | 5.244 | KV453076.1 | 1226594 | 15-scf00322 | 15 |
| AX-158155171 | 15 | 5.244 | KV453076.1 | 1227460 | 15-scf00322 | 15 |
| AX-158155176 | 15 | 5.244 | KV453076.1 | 1234241 | 15-scf00322 | 15 |
| AX-157832928 | 15 | 5.244 | KV453076.1 | 1236700 | 15-scf00322 | 15 |
| AX-157756983 | 15 | 5.244 | KV453076.1 | 1240268 | 15-scf00322 | 15 |
| AX-157733328 | 15 | 5.244 | KV453076.1 | 1242432 | 15-scf00322 | 15 |
| AX-157832929 | 15 | 5.244 | KV453076.1 | 1242834 | 15-scf00322 | 15 |
| AX-158155181 | 15 | 5.244 | KV453076.1 | 1247625 | 15-scf00322 | 15 |
| AX-158155182 | 15 | 5.244 | KV453076.1 | 1247895 | 15-scf00322 | 15 |
| AX-157742823 | 15 | 5.244 | KV453076.1 | 1248673 | 15-scf00322 | 15 |
| AX-158155183 | 15 | 5.244 | KV453076.1 | 1255966 | 15-scf00322 | 15 |
| AX-158155184 | 15 | 5.244 | KV453076.1 | 1256293 | 15-scf00322 | 15 |
| AX-157832932 | 15 | 5.244 | KV453076.1 | 1261550 | 15-scf00322 | 15 |
| AX-157832933 | 15 | 5.244 | KV453076.1 | 1261651 | 15-scf00322 | 15 |
| AX-158155194 | 15 | 5.244 | KV453076.1 | 1267230 | 15-scf00322 | 15 |
| AX-158155201 | 15 | 5.244 | KV453076.1 | 1279192 | 15-scf00322 | 15 |

|              |    |       |             |         |             |    |
|--------------|----|-------|-------------|---------|-------------|----|
| AX-158155203 | 15 | 5.244 | KV453076.1  | 1280106 | 15-scf00322 | 15 |
| AX-158155242 | 15 | 5.244 | KV453076.1  | 1333119 | 15-scf00322 | 15 |
| AX-157749791 | 15 | 5.244 | KV453076.1  | 1368894 | 15-scf00322 | 15 |
| AX-157832948 | 15 | 5.244 | KV453076.1  | 1386912 | 15-scf00322 | 15 |
| AX-158155319 | 15 | 5.244 | KV453076.1  | 1430568 | 15-scf00322 | 15 |
| AX-158412724 | 15 | 5.244 | KV453076.1  | 1447920 | 15-scf00322 | 15 |
| AX-158155336 | 15 | 5.244 | KV453076.1  | 1459363 | 15-scf00322 | 15 |
| AX-158155356 | 15 | 5.244 | KV453076.1  | 1482719 | 15-scf00322 | 15 |
| AX-158155399 | 15 | 5.244 | KV453076.1  | 1536549 | 15-scf00322 | 15 |
| AX-157707178 | 15 | 5.244 | 3ML01033665 | 481     | scf09325_1  | UN |
| AX-158155193 | 15 | 5.295 | KV453076.1  | 1266586 | 15-scf00322 | 15 |
| AX-158155195 | 15 | 5.354 | KV453076.1  | 1268264 | 15-scf00322 | 15 |
| AX-157832940 | 15 | 5.354 | KV453076.1  | 1306604 | 15-scf00322 | 15 |
| AX-158155232 | 15 | 5.354 | KV453076.1  | 1323933 | 15-scf00322 | 15 |
| AX-158155330 | 15 | 5.354 | KV453076.1  | 1447749 | 15-scf00322 | 15 |
| AX-158155199 | 15 | 5.393 | KV453076.1  | 1276982 | 15-scf00322 | 15 |
| AX-158155083 | 15 | 5.462 | KV453076.1  | 1120048 | 15-scf00322 | 15 |
| AX-158155144 | 15 | 5.462 | KV453076.1  | 1192051 | 15-scf00322 | 15 |
| AX-158155159 | 15 | 5.462 | KV453076.1  | 1214364 | 15-scf00322 | 15 |
| AX-158155163 | 15 | 5.462 | KV453076.1  | 1219398 | 15-scf00322 | 15 |
| AX-158155168 | 15 | 5.462 | KV453076.1  | 1225753 | 15-scf00322 | 15 |
| AX-157832926 | 15 | 5.462 | KV453076.1  | 1227796 | 15-scf00322 | 15 |
| AX-157832931 | 15 | 5.462 | KV453076.1  | 1261385 | 15-scf00322 | 15 |
| AX-158155198 | 15 | 5.462 | KV453076.1  | 1276465 | 15-scf00322 | 15 |
| AX-158155202 | 15 | 5.462 | KV453076.1  | 1279736 | 15-scf00322 | 15 |
| AX-158155207 | 15 | 5.462 | KV453076.1  | 1286124 | 15-scf00322 | 15 |
| AX-158155210 | 15 | 5.462 | KV453076.1  | 1291337 | 15-scf00322 | 15 |
| AX-158155211 | 15 | 5.462 | KV453076.1  | 1291579 | 15-scf00322 | 15 |
| AX-157832938 | 15 | 5.462 | KV453076.1  | 1292140 | 15-scf00322 | 15 |
| AX-158155218 | 15 | 5.462 | KV453076.1  | 1298323 | 15-scf00322 | 15 |
| AX-158155221 | 15 | 5.462 | KV453076.1  | 1303398 | 15-scf00322 | 15 |
| AX-158155222 | 15 | 5.462 | KV453076.1  | 1307064 | 15-scf00322 | 15 |
| AX-158155223 | 15 | 5.462 | KV453076.1  | 1310733 | 15-scf00322 | 15 |
| AX-157832941 | 15 | 5.626 | KV453076.1  | 1314825 | 15-scf00322 | 15 |
| AX-158155230 | 15 | 5.741 | KV453076.1  | 1321170 | 15-scf00322 | 15 |
| AX-157832943 | 15 | 5.79  | KV453076.1  | 1328943 | 15-scf00322 | 15 |
| AX-157832944 | 15 | 5.79  | KV453076.1  | 1329874 | 15-scf00322 | 15 |
| AX-158155241 | 15 | 5.84  | KV453076.1  | 1332822 | 15-scf00322 | 15 |
| AX-158155243 | 15 | 5.899 | KV453076.1  | 1335182 | 15-scf00322 | 15 |
| AX-158155244 | 15 | 5.899 | KV453076.1  | 1335393 | 15-scf00322 | 15 |
| AX-158155246 | 15 | 5.899 | KV453076.1  | 1336306 | 15-scf00322 | 15 |
| AX-158155281 | 15 | 5.899 | KV453076.1  | 1372356 | 15-scf00322 | 15 |
| AX-158155247 | 15 | 5.907 | KV453076.1  | 1337934 | 15-scf00322 | 15 |
| AX-158155249 | 15 | 5.912 | KV453076.1  | 1339651 | 15-scf00322 | 15 |
| AX-158155250 | 15 | 5.915 | KV453076.1  | 1340176 | 15-scf00322 | 15 |
| AX-158155258 | 15 | 5.922 | KV453076.1  | 1350018 | 15-scf00322 | 15 |
| AX-158155260 | 15 | 5.928 | KV453076.1  | 1351593 | 15-scf00322 | 15 |
| AX-158155267 | 15 | 5.928 | KV453076.1  | 1357411 | 15-scf00322 | 15 |
| AX-158155317 | 15 | 5.928 | KV453076.1  | 1426505 | 15-scf00322 | 15 |
| AX-158155344 | 15 | 5.928 | KV453076.1  | 1469433 | 15-scf00322 | 15 |
| AX-158155268 | 15 | 5.942 | KV453076.1  | 1357816 | 15-scf00322 | 15 |

|              |    |       |            |         |             |    |
|--------------|----|-------|------------|---------|-------------|----|
| AX-158155269 | 15 | 5.957 | KV453076.1 | 1358303 | 15-scf00322 | 15 |
| AX-157832946 | 15 | 5.971 | KV453076.1 | 1359264 | 15-scf00322 | 15 |
| AX-158155270 | 15 | 5.979 | KV453076.1 | 1361402 | 15-scf00322 | 15 |
| AX-157707600 | 15 | 5.991 | KV453076.1 | 1362292 | 15-scf00322 | 15 |
| AX-158155310 | 15 | 5.991 | KV453076.1 | 1408421 | 15-scf00322 | 15 |
| AX-158155275 | 15 | 6.009 | KV453076.1 | 1364564 | 15-scf00322 | 15 |
| AX-158155276 | 15 | 6.009 | KV453076.1 | 1365603 | 15-scf00322 | 15 |
| AX-158155278 | 15 | 6.009 | KV453076.1 | 1366823 | 15-scf00322 | 15 |
| AX-158155284 | 15 | 6.009 | KV453076.1 | 1377078 | 15-scf00322 | 15 |
| AX-158155285 | 15 | 6.009 | KV453076.1 | 1377995 | 15-scf00322 | 15 |
| AX-157741325 | 15 | 6.009 | KV453076.1 | 1379119 | 15-scf00322 | 15 |
| AX-158155286 | 15 | 6.009 | KV453076.1 | 1379986 | 15-scf00322 | 15 |
| AX-158155289 | 15 | 6.053 | KV453076.1 | 1383916 | 15-scf00322 | 15 |
| AX-157745102 | 15 | 6.146 | KV453076.1 | 1381473 | 15-scf00322 | 15 |
| AX-158155294 | 15 | 6.146 | KV453076.1 | 1386569 | 15-scf00322 | 15 |
| AX-158155295 | 15 | 6.146 | KV453076.1 | 1388279 | 15-scf00322 | 15 |
| AX-158155298 | 15 | 6.146 | KV453076.1 | 1393267 | 15-scf00322 | 15 |
| AX-158155299 | 15 | 6.146 | KV453076.1 | 1393876 | 15-scf00322 | 15 |
| AX-158155300 | 15 | 6.146 | KV453076.1 | 1394386 | 15-scf00322 | 15 |
| AX-158155301 | 15 | 6.146 | KV453076.1 | 1395786 | 15-scf00322 | 15 |
| AX-158155302 | 15 | 6.146 | KV453076.1 | 1397010 | 15-scf00322 | 15 |
| AX-158155304 | 15 | 6.146 | KV453076.1 | 1399219 | 15-scf00322 | 15 |
| AX-158155305 | 15 | 6.146 | KV453076.1 | 1400568 | 15-scf00322 | 15 |
| AX-158155306 | 15 | 6.146 | KV453076.1 | 1405095 | 15-scf00322 | 15 |
| AX-158393247 | 15 | 6.214 | KV453076.1 | 1406000 | 15-scf00322 | 15 |
| AX-157771168 | 15 | 6.282 | KV453076.1 | 1346958 | 15-scf00322 | 15 |
| AX-158155307 | 15 | 6.282 | KV453076.1 | 1406295 | 15-scf00322 | 15 |
| AX-158155315 | 15 | 6.282 | KV453076.1 | 1420841 | 15-scf00322 | 15 |
| AX-157832949 | 15 | 6.282 | KV453076.1 | 1422922 | 15-scf00322 | 15 |
| AX-157878417 | 15 | 6.282 | KV453076.1 | 1426182 | 15-scf00322 | 15 |
| AX-158155401 | 15 | 6.282 | KV453076.1 | 1541371 | 15-scf00322 | 15 |
| AX-158155416 | 15 | 6.282 | KV453076.1 | 1558297 | 15-scf00322 | 15 |
| AX-158155320 | 15 | 6.338 | KV453076.1 | 1434569 | 15-scf00322 | 15 |
| AX-158155324 | 15 | 6.427 | KV453076.1 | 1440878 | 15-scf00322 | 15 |
| AX-157699627 | 15 | 6.427 | KV453076.1 | 1444360 | 15-scf00322 | 15 |
| AX-157832950 | 15 | 6.552 | KV453076.1 | 1468412 | 15-scf00322 | 15 |
| AX-157858231 | 15 | 6.555 | KV453076.1 | 1107141 | 15-scf00322 | 15 |
| AX-157871777 | 15 | 6.555 | KV453076.1 | 1189756 | 15-scf00322 | 15 |
| AX-158155167 | 15 | 6.555 | KV453076.1 | 1222515 | 15-scf00322 | 15 |
| AX-157832927 | 15 | 6.555 | KV453076.1 | 1229907 | 15-scf00322 | 15 |
| AX-158155208 | 15 | 6.555 | KV453076.1 | 1286595 | 15-scf00322 | 15 |
| AX-157832939 | 15 | 6.555 | KV453076.1 | 1294234 | 15-scf00322 | 15 |
| AX-158155219 | 15 | 6.555 | KV453076.1 | 1299742 | 15-scf00322 | 15 |
| AX-157713824 | 15 | 6.555 | KV453076.1 | 1305389 | 15-scf00322 | 15 |
| AX-158155227 | 15 | 6.555 | KV453076.1 | 1319016 | 15-scf00322 | 15 |
| AX-158155265 | 15 | 6.555 | KV453076.1 | 1354019 | 15-scf00322 | 15 |
| AX-157771074 | 15 | 6.555 | KV453076.1 | 1430144 | 15-scf00322 | 15 |
| AX-158155323 | 15 | 6.555 | KV453076.1 | 1440180 | 15-scf00322 | 15 |
| AX-158155325 | 15 | 6.555 | KV453076.1 | 1441330 | 15-scf00322 | 15 |
| AX-158155327 | 15 | 6.555 | KV453076.1 | 1443336 | 15-scf00322 | 15 |
| AX-158155332 | 15 | 6.555 | KV453076.1 | 1455589 | 15-scf00322 | 15 |

|              |    |       |            |         |             |    |
|--------------|----|-------|------------|---------|-------------|----|
| AX-158155335 | 15 | 6.555 | KV453076.1 | 1458255 | 15-scf00322 | 15 |
| AX-158155340 | 15 | 6.555 | KV453076.1 | 1466413 | 15-scf00322 | 15 |
| AX-158155341 | 15 | 6.555 | KV453076.1 | 1466541 | 15-scf00322 | 15 |
| AX-158155345 | 15 | 6.555 | KV453076.1 | 1469844 | 15-scf00322 | 15 |
| AX-158155347 | 15 | 6.555 | KV453076.1 | 1473184 | 15-scf00322 | 15 |
| AX-158155355 | 15 | 6.555 | KV453076.1 | 1481827 | 15-scf00322 | 15 |
| AX-158155357 | 15 | 6.555 | KV453076.1 | 1484831 | 15-scf00322 | 15 |
| AX-157886549 | 15 | 6.555 | KV453076.1 | 1486864 | 15-scf00322 | 15 |
| AX-158155360 | 15 | 6.555 | KV453076.1 | 1491131 | 15-scf00322 | 15 |
| AX-158155362 | 15 | 6.555 | KV453076.1 | 1493586 | 15-scf00322 | 15 |
| AX-158155363 | 15 | 6.555 | KV453076.1 | 1494181 | 15-scf00322 | 15 |
| AX-158155364 | 15 | 6.555 | KV453076.1 | 1494624 | 15-scf00322 | 15 |
| AX-158155365 | 15 | 6.555 | KV453076.1 | 1495118 | 15-scf00322 | 15 |
| AX-158155372 | 15 | 6.555 | KV453076.1 | 1502545 | 15-scf00322 | 15 |
| AX-158155374 | 15 | 6.555 | KV453076.1 | 1504680 | 15-scf00322 | 15 |
| AX-158155375 | 15 | 6.555 | KV453076.1 | 1505405 | 15-scf00322 | 15 |
| AX-158155380 | 15 | 6.555 | KV453076.1 | 1508463 | 15-scf00322 | 15 |
| AX-157832951 | 15 | 6.555 | KV453076.1 | 1509661 | 15-scf00322 | 15 |
| AX-158155381 | 15 | 6.555 | KV453076.1 | 1510440 | 15-scf00322 | 15 |
| AX-158155382 | 15 | 6.555 | KV453076.1 | 1511693 | 15-scf00322 | 15 |
| AX-157717859 | 15 | 6.555 | KV453076.1 | 1517596 | 15-scf00322 | 15 |
| AX-158155384 | 15 | 6.555 | KV453076.1 | 1518808 | 15-scf00322 | 15 |
| AX-158155385 | 15 | 6.555 | KV453076.1 | 1519117 | 15-scf00322 | 15 |
| AX-157832954 | 15 | 6.555 | KV453076.1 | 1520397 | 15-scf00322 | 15 |
| AX-158155388 | 15 | 6.555 | KV453076.1 | 1522008 | 15-scf00322 | 15 |
| AX-158155389 | 15 | 6.555 | KV453076.1 | 1522438 | 15-scf00322 | 15 |
| AX-158155390 | 15 | 6.555 | KV453076.1 | 1523440 | 15-scf00322 | 15 |
| AX-158155391 | 15 | 6.555 | KV453076.1 | 1523720 | 15-scf00322 | 15 |
| AX-157832955 | 15 | 6.555 | KV453076.1 | 1525112 | 15-scf00322 | 15 |
| AX-158155394 | 15 | 6.555 | KV453076.1 | 1528169 | 15-scf00322 | 15 |
| AX-158155395 | 15 | 6.555 | KV453076.1 | 1533645 | 15-scf00322 | 15 |
| AX-157832956 | 15 | 6.555 | KV453076.1 | 1539229 | 15-scf00322 | 15 |
| AX-157832957 | 15 | 6.555 | KV453076.1 | 1542040 | 15-scf00322 | 15 |
| AX-158155402 | 15 | 6.555 | KV453076.1 | 1542615 | 15-scf00322 | 15 |
| AX-158155403 | 15 | 6.555 | KV453076.1 | 1544031 | 15-scf00322 | 15 |
| AX-158155404 | 15 | 6.555 | KV453076.1 | 1544527 | 15-scf00322 | 15 |
| AX-158155405 | 15 | 6.555 | KV453076.1 | 1544947 | 15-scf00322 | 15 |
| AX-158155407 | 15 | 6.555 | KV453076.1 | 1546312 | 15-scf00322 | 15 |
| AX-158155409 | 15 | 6.555 | KV453076.1 | 1547838 | 15-scf00322 | 15 |
| AX-158155410 | 15 | 6.555 | KV453076.1 | 1552378 | 15-scf00322 | 15 |
| AX-158155411 | 15 | 6.555 | KV453076.1 | 1553939 | 15-scf00322 | 15 |
| AX-158155412 | 15 | 6.555 | KV453076.1 | 1554508 | 15-scf00322 | 15 |
| AX-158155418 | 15 | 6.555 | KV453076.1 | 1561661 | 15-scf00322 | 15 |
| AX-157866498 | 15 | 6.555 | KV453076.1 | 1564593 | 15-scf00322 | 15 |
| AX-158155422 | 15 | 6.555 | KV453076.1 | 1569696 | 15-scf00322 | 15 |
| AX-157832969 | 15 | 6.555 | KV453076.1 | 1663881 | 15-scf00322 | 15 |
| AX-158155555 | 15 | 6.555 | KV453076.1 | 1869618 | 15-scf00322 | 15 |
| AX-158155757 | 15 | 6.555 | KV453076.1 | 2118965 | 15-scf00322 | 15 |
| AX-157693911 | 15 | 6.555 | FI888459.1 | 248     | 15-scf00322 | UN |
| AX-158155351 | 15 | 6.664 | KV453076.1 | 1476813 | 15-scf00322 | 15 |
| AX-158155419 | 15 | 6.664 | KV453076.1 | 1562369 | 15-scf00322 | 15 |

|              |    |       |            |         |             |    |
|--------------|----|-------|------------|---------|-------------|----|
| AX-157715103 | 15 | 6.664 | KV453076.1 | 1578000 | 15-scf00322 | 15 |
| AX-158155426 | 15 | 6.664 | KV453076.1 | 1578807 | 15-scf00322 | 15 |
| AX-158155427 | 15 | 6.664 | KV453076.1 | 1579205 | 15-scf00322 | 15 |
| AX-158155428 | 15 | 6.664 | KV453076.1 | 1579890 | 15-scf00322 | 15 |
| AX-158155431 | 15 | 6.664 | KV453076.1 | 1583062 | 15-scf00322 | 15 |
| AX-157774077 | 15 | 6.664 | KV453076.1 | 1583857 | 15-scf00322 | 15 |
| AX-158155432 | 15 | 6.664 | KV453076.1 | 1586010 | 15-scf00322 | 15 |
| AX-158155433 | 15 | 6.664 | KV453076.1 | 1588736 | 15-scf00322 | 15 |
| AX-158155437 | 15 | 6.664 | KV453076.1 | 1597475 | 15-scf00322 | 15 |
| AX-158155441 | 15 | 6.664 | KV453076.1 | 1600531 | 15-scf00322 | 15 |
| AX-158155458 | 15 | 6.664 | KV453076.1 | 1627359 | 15-scf00322 | 15 |
| AX-158155614 | 15 | 6.664 | KV453076.1 | 1969440 | 15-scf00322 | 15 |
| AX-158155383 | 15 | 6.774 | KV453076.1 | 1516293 | 15-scf00322 | 15 |
| AX-158155435 | 15 | 6.774 | KV453076.1 | 1594883 | 15-scf00322 | 15 |
| AX-158155438 | 15 | 6.774 | KV453076.1 | 1598383 | 15-scf00322 | 15 |
| AX-158155440 | 15 | 6.774 | KV453076.1 | 1599709 | 15-scf00322 | 15 |
| AX-157744691 | 15 | 6.774 | KV453076.1 | 1601319 | 15-scf00322 | 15 |
| AX-158155442 | 15 | 6.774 | KV453076.1 | 1601849 | 15-scf00322 | 15 |
| AX-157702599 | 15 | 6.774 | KV453076.1 | 1602766 | 15-scf00322 | 15 |
| AX-158155443 | 15 | 6.774 | KV453076.1 | 1605058 | 15-scf00322 | 15 |
| AX-158155446 | 15 | 6.774 | KV453076.1 | 1608097 | 15-scf00322 | 15 |
| AX-158155447 | 15 | 6.774 | KV453076.1 | 1609304 | 15-scf00322 | 15 |
| AX-158155450 | 15 | 6.774 | KV453076.1 | 1613878 | 15-scf00322 | 15 |
| AX-157832961 | 15 | 6.774 | KV453076.1 | 1617479 | 15-scf00322 | 15 |
| AX-157723375 | 15 | 6.774 | KV453076.1 | 1620767 | 15-scf00322 | 15 |
| AX-158155455 | 15 | 6.774 | KV453076.1 | 1623016 | 15-scf00322 | 15 |
| AX-158155456 | 15 | 6.774 | KV453076.1 | 1623390 | 15-scf00322 | 15 |
| AX-157832962 | 15 | 6.774 | KV453076.1 | 1627115 | 15-scf00322 | 15 |
| AX-157832964 | 15 | 6.774 | KV453076.1 | 1634773 | 15-scf00322 | 15 |
| AX-157832965 | 15 | 6.774 | KV453076.1 | 1635974 | 15-scf00322 | 15 |
| AX-158155461 | 15 | 6.774 | KV453076.1 | 1636530 | 15-scf00322 | 15 |
| AX-157832966 | 15 | 6.774 | KV453076.1 | 1637330 | 15-scf00322 | 15 |
| AX-158155462 | 15 | 6.774 | KV453076.1 | 1640474 | 15-scf00322 | 15 |
| AX-158155464 | 15 | 6.774 | KV453076.1 | 1642600 | 15-scf00322 | 15 |
| AX-158155477 | 15 | 6.774 | KV453076.1 | 1670743 | 15-scf00322 | 15 |
| AX-158155518 | 15 | 6.774 | KV453076.1 | 1718071 | 15-scf00322 | 15 |
| AX-158155628 | 15 | 6.774 | KV453076.1 | 1983538 | 15-scf00322 | 15 |
| AX-158155473 | 15 | 6.8   | KV453076.1 | 1667001 | 15-scf00322 | 15 |
| AX-158155474 | 15 | 6.818 | KV453076.1 | 1668019 | 15-scf00322 | 15 |
| AX-158155482 | 15 | 6.844 | KV453076.1 | 1675342 | 15-scf00322 | 15 |
| AX-158155505 | 15 | 6.863 | KV453076.1 | 1703374 | 15-scf00322 | 15 |
| AX-157832981 | 15 | 6.863 | KV453076.1 | 1760942 | 15-scf00322 | 15 |
| AX-157832985 | 15 | 6.863 | KV453076.1 | 1869530 | 15-scf00322 | 15 |
| AX-158155560 | 15 | 6.863 | KV453076.1 | 1884561 | 15-scf00322 | 15 |
| AX-158155561 | 15 | 6.863 | KV453076.1 | 1885197 | 15-scf00322 | 15 |
| AX-158155562 | 15 | 6.863 | KV453076.1 | 1886155 | 15-scf00322 | 15 |
| AX-158155584 | 15 | 6.863 | KV453076.1 | 1916003 | 15-scf00322 | 15 |
| AX-157832991 | 15 | 6.863 | KV453076.1 | 1917204 | 15-scf00322 | 15 |
| AX-157878418 | 15 | 6.863 | KV453076.1 | 1939638 | 15-scf00322 | 15 |
| AX-157871780 | 15 | 6.863 | KV453076.1 | 1957540 | 15-scf00322 | 15 |
| AX-158155661 | 15 | 6.863 | KV453076.1 | 2016962 | 15-scf00322 | 15 |

|              |    |       |            |         |             |    |
|--------------|----|-------|------------|---------|-------------|----|
| AX-158155667 | 15 | 6.863 | KV453076.1 | 2021363 | 15-scf00322 | 15 |
| AX-158155676 | 15 | 6.863 | KV453076.1 | 2031902 | 15-scf00322 | 15 |
| AX-158155506 | 15 | 6.883 | KV453076.1 | 1704042 | 15-scf00322 | 15 |
| AX-157755539 | 15 | 6.883 | KV453076.1 | 1704133 | 15-scf00322 | 15 |
| AX-158155507 | 15 | 6.883 | KV453076.1 | 1705367 | 15-scf00322 | 15 |
| AX-158155570 | 15 | 6.883 | KV453076.1 | 1897135 | 15-scf00322 | 15 |
| AX-158155516 | 15 | 6.922 | KV453076.1 | 1713815 | 15-scf00322 | 15 |
| AX-158155517 | 15 | 6.954 | KV453076.1 | 1714934 | 15-scf00322 | 15 |
| AX-158155636 | 15 | 6.954 | KV453076.1 | 1990627 | 15-scf00322 | 15 |
| AX-158155480 | 15 | 6.992 | KV453076.1 | 1674217 | 15-scf00322 | 15 |
| AX-158155500 | 15 | 6.992 | KV453076.1 | 1698445 | 15-scf00322 | 15 |
| AX-158155514 | 15 | 6.992 | KV453076.1 | 1712962 | 15-scf00322 | 15 |
| AX-158408756 | 15 | 6.992 | KV453076.1 | 1727739 | 15-scf00322 | 15 |
| AX-157832973 | 15 | 6.992 | KV453076.1 | 1730326 | 15-scf00322 | 15 |
| AX-158155524 | 15 | 6.992 | KV453076.1 | 1732644 | 15-scf00322 | 15 |
| AX-158155525 | 15 | 6.992 | KV453076.1 | 1735997 | 15-scf00322 | 15 |
| AX-157832976 | 15 | 6.992 | KV453076.1 | 1748543 | 15-scf00322 | 15 |
| AX-157713599 | 15 | 6.992 | KV453076.1 | 1757273 | 15-scf00322 | 15 |
| AX-157832979 | 15 | 6.992 | KV453076.1 | 1757966 | 15-scf00322 | 15 |
| AX-158155531 | 15 | 6.992 | KV453076.1 | 1766356 | 15-scf00322 | 15 |
| AX-158155537 | 15 | 6.992 | KV453076.1 | 1774772 | 15-scf00322 | 15 |
| AX-158155546 | 15 | 6.992 | KV453076.1 | 1830940 | 15-scf00322 | 15 |
| AX-157832984 | 15 | 6.992 | KV453076.1 | 1863716 | 15-scf00322 | 15 |
| AX-158155554 | 15 | 6.992 | KV453076.1 | 1866817 | 15-scf00322 | 15 |
| AX-158155558 | 15 | 6.992 | KV453076.1 | 1882112 | 15-scf00322 | 15 |
| AX-158155566 | 15 | 6.992 | KV453076.1 | 1891169 | 15-scf00322 | 15 |
| AX-158155567 | 15 | 6.992 | KV453076.1 | 1892137 | 15-scf00322 | 15 |
| AX-158155569 | 15 | 6.992 | KV453076.1 | 1893447 | 15-scf00322 | 15 |
| AX-158155571 | 15 | 6.992 | KV453076.1 | 1898280 | 15-scf00322 | 15 |
| AX-158155572 | 15 | 6.992 | KV453076.1 | 1899334 | 15-scf00322 | 15 |
| AX-158155577 | 15 | 6.992 | KV453076.1 | 1907075 | 15-scf00322 | 15 |
| AX-158155580 | 15 | 6.992 | KV453076.1 | 1908577 | 15-scf00322 | 15 |
| AX-158155582 | 15 | 6.992 | KV453076.1 | 1910094 | 15-scf00322 | 15 |
| AX-157747731 | 15 | 6.992 | KV453076.1 | 1915102 | 15-scf00322 | 15 |
| AX-158155585 | 15 | 6.992 | KV453076.1 | 1916363 | 15-scf00322 | 15 |
| AX-158155589 | 15 | 6.992 | KV453076.1 | 1921900 | 15-scf00322 | 15 |
| AX-157832992 | 15 | 6.992 | KV453076.1 | 1926127 | 15-scf00322 | 15 |
| AX-158155599 | 15 | 6.992 | KV453076.1 | 1944452 | 15-scf00322 | 15 |
| AX-157832996 | 15 | 6.992 | KV453076.1 | 1953915 | 15-scf00322 | 15 |
| AX-158155608 | 15 | 6.992 | KV453076.1 | 1959911 | 15-scf00322 | 15 |
| AX-157832997 | 15 | 6.992 | KV453076.1 | 1960228 | 15-scf00322 | 15 |
| AX-157832998 | 15 | 6.992 | KV453076.1 | 1961234 | 15-scf00322 | 15 |
| AX-157739481 | 15 | 6.992 | KV453076.1 | 1990468 | 15-scf00322 | 15 |
| AX-158155662 | 15 | 6.992 | KV453076.1 | 2017416 | 15-scf00322 | 15 |
| AX-157832999 | 15 | 7.045 | KV453076.1 | 1964078 | 15-scf00322 | 15 |
| AX-158155659 | 15 | 7.045 | KV453076.1 | 2012157 | 15-scf00322 | 15 |
| AX-158155668 | 15 | 7.045 | KV453076.1 | 2022074 | 15-scf00322 | 15 |
| AX-158155613 | 15 | 7.101 | KV453076.1 | 1968668 | 15-scf00322 | 15 |
| AX-158155625 | 15 | 7.103 | KV453076.1 | 1981819 | 15-scf00322 | 15 |
| AX-158155629 | 15 | 7.106 | KV453076.1 | 1983904 | 15-scf00322 | 15 |
| AX-158155630 | 15 | 7.106 | KV453076.1 | 1984694 | 15-scf00322 | 15 |

|              |    |       |            |         |             |    |
|--------------|----|-------|------------|---------|-------------|----|
| AX-157772007 | 15 | 7.536 | KV453076.1 | 1993367 | 15-scf00322 | 15 |
| AX-158155654 | 15 | 7.536 | KV453076.1 | 2009202 | 15-scf00322 | 15 |
| AX-158155439 | 15 | 7.538 | KV453076.1 | 1599237 | 15-scf00322 | 15 |
| AX-158155449 | 15 | 7.538 | KV453076.1 | 1613513 | 15-scf00322 | 15 |
| AX-158155512 | 15 | 7.538 | KV453076.1 | 1711510 | 15-scf00322 | 15 |
| AX-158155527 | 15 | 7.538 | KV453076.1 | 1755192 | 15-scf00322 | 15 |
| AX-158155634 | 15 | 7.538 | KV453076.1 | 1989309 | 15-scf00322 | 15 |
| AX-158155638 | 15 | 7.538 | KV453076.1 | 1993537 | 15-scf00322 | 15 |
| AX-158155640 | 15 | 7.538 | KV453076.1 | 1996115 | 15-scf00322 | 15 |
| AX-158155641 | 15 | 7.538 | KV453076.1 | 1997359 | 15-scf00322 | 15 |
| AX-158155643 | 15 | 7.538 | KV453076.1 | 1997887 | 15-scf00322 | 15 |
| AX-158155644 | 15 | 7.538 | KV453076.1 | 1998291 | 15-scf00322 | 15 |
| AX-158155645 | 15 | 7.538 | KV453076.1 | 1999000 | 15-scf00322 | 15 |
| AX-157833000 | 15 | 7.538 | KV453076.1 | 1999602 | 15-scf00322 | 15 |
| AX-158155646 | 15 | 7.538 | KV453076.1 | 2000395 | 15-scf00322 | 15 |
| AX-157745601 | 15 | 7.538 | KV453076.1 | 2000745 | 15-scf00322 | 15 |
| AX-158155650 | 15 | 7.538 | KV453076.1 | 2004195 | 15-scf00322 | 15 |
| AX-158155653 | 15 | 7.538 | KV453076.1 | 2008819 | 15-scf00322 | 15 |
| AX-157686534 | 15 | 7.538 | KV453404.1 | 11857   | scf00701    | UN |
| AX-158155655 | 15 | 7.541 | KV453076.1 | 2009655 | 15-scf00322 | 15 |
| AX-158155656 | 15 | 7.544 | KV453076.1 | 2010049 | 15-scf00322 | 15 |
| AX-158155697 | 15 | 8.302 | KV453076.1 | 2051281 | 15-scf00322 | 15 |
| AX-158155698 | 15 | 8.302 | KV453076.1 | 2052066 | 15-scf00322 | 15 |
| AX-158155702 | 15 | 8.302 | KV453076.1 | 2055096 | 15-scf00322 | 15 |
| AX-158155703 | 15 | 8.302 | KV453076.1 | 2055599 | 15-scf00322 | 15 |
| AX-158155704 | 15 | 8.302 | KV453076.1 | 2055996 | 15-scf00322 | 15 |
| AX-158155705 | 15 | 8.302 | KV453076.1 | 2059255 | 15-scf00322 | 15 |
| AX-158155706 | 15 | 8.302 | KV453076.1 | 2060530 | 15-scf00322 | 15 |
| AX-158155710 | 15 | 8.302 | KV453076.1 | 2063968 | 15-scf00322 | 15 |
| AX-158155711 | 15 | 8.302 | KV453076.1 | 2065638 | 15-scf00322 | 15 |
| AX-158155717 | 15 | 8.302 | KV453076.1 | 2072991 | 15-scf00322 | 15 |
| AX-158155718 | 15 | 8.302 | KV453076.1 | 2073342 | 15-scf00322 | 15 |
| AX-157756535 | 15 | 8.302 | KV453076.1 | 2074958 | 15-scf00322 | 15 |
| AX-158155721 | 15 | 8.302 | KV453076.1 | 2078753 | 15-scf00322 | 15 |
| AX-158155719 | 15 | 8.351 | KV453076.1 | 2077515 | 15-scf00322 | 15 |
| AX-158155542 | 15 | 8.521 | KV453076.1 | 1827822 | 15-scf00322 | 15 |
| AX-158155694 | 15 | 8.521 | KV453076.1 | 2049779 | 15-scf00322 | 15 |
| AX-158155700 | 15 | 8.521 | KV453076.1 | 2053580 | 15-scf00322 | 15 |
| AX-158155701 | 15 | 8.521 | KV453076.1 | 2054452 | 15-scf00322 | 15 |
| AX-157833001 | 15 | 8.521 | KV453076.1 | 2063737 | 15-scf00322 | 15 |
| AX-157726610 | 15 | 8.521 | KV453076.1 | 2076205 | 15-scf00322 | 15 |
| AX-158155726 | 15 | 8.521 | KV453076.1 | 2082881 | 15-scf00322 | 15 |
| AX-158155727 | 15 | 8.521 | KV453076.1 | 2083525 | 15-scf00322 | 15 |
| AX-158155731 | 15 | 8.521 | KV453076.1 | 2087195 | 15-scf00322 | 15 |
| AX-158155732 | 15 | 8.521 | KV453076.1 | 2087763 | 15-scf00322 | 15 |
| AX-158155733 | 15 | 8.521 | KV453076.1 | 2088251 | 15-scf00322 | 15 |
| AX-158155735 | 15 | 8.521 | KV453076.1 | 2089233 | 15-scf00322 | 15 |
| AX-157744804 | 15 | 8.521 | KV453076.1 | 2090082 | 15-scf00322 | 15 |
| AX-158155736 | 15 | 8.521 | KV453076.1 | 2092076 | 15-scf00322 | 15 |
| AX-158155737 | 15 | 8.521 | KV453076.1 | 2092445 | 15-scf00322 | 15 |
| AX-158155739 | 15 | 8.521 | KV453076.1 | 2095361 | 15-scf00322 | 15 |



|              |    |       |            |         |             |    |
|--------------|----|-------|------------|---------|-------------|----|
| AX-157757705 | 15 | 8.521 | KV453076.1 | 2095764 | 15-scf00322 | 15 |
| AX-158155740 | 15 | 8.521 | KV453076.1 | 2096328 | 15-scf00322 | 15 |
| AX-157775809 | 15 | 8.521 | KV453076.1 | 2098075 | 15-scf00322 | 15 |
| AX-158393249 | 15 | 8.521 | KV453076.1 | 2101451 | 15-scf00322 | 15 |
| AX-158155741 | 15 | 8.521 | KV453076.1 | 2102450 | 15-scf00322 | 15 |
| AX-158155745 | 15 | 8.521 | KV453076.1 | 2107607 | 15-scf00322 | 15 |
| AX-158155746 | 15 | 8.521 | KV453076.1 | 2108088 | 15-scf00322 | 15 |
| AX-158155747 | 15 | 8.521 | KV453076.1 | 2108858 | 15-scf00322 | 15 |
| AX-158155753 | 15 | 8.521 | KV453076.1 | 2113077 | 15-scf00322 | 15 |
| AX-158155754 | 15 | 8.521 | KV453076.1 | 2113830 | 15-scf00322 | 15 |
| AX-158155755 | 15 | 8.521 | KV453076.1 | 2114567 | 15-scf00322 | 15 |
| AX-158155758 | 15 | 8.521 | KV453076.1 | 2123648 | 15-scf00322 | 15 |
| AX-157833007 | 15 | 8.521 | KV453076.1 | 2125192 | 15-scf00322 | 15 |
| AX-158155759 | 15 | 8.521 | KV453076.1 | 2129011 | 15-scf00322 | 15 |
| AX-158155768 | 15 | 8.521 | KV453076.1 | 2145159 | 15-scf00322 | 15 |
| AX-158155771 | 15 | 8.521 | KV453076.1 | 2146655 | 15-scf00322 | 15 |
| AX-158155773 | 15 | 8.521 | KV453076.1 | 2147961 | 15-scf00322 | 15 |
| AX-158155775 | 15 | 8.521 | KV453076.1 | 2149298 | 15-scf00322 | 15 |
| AX-158155776 | 15 | 8.521 | KV453076.1 | 2150418 | 15-scf00322 | 15 |
| AX-158155778 | 15 | 8.521 | KV453076.1 | 2151304 | 15-scf00322 | 15 |
| AX-158155779 | 15 | 8.521 | KV453076.1 | 2151508 | 15-scf00322 | 15 |
| AX-157833009 | 15 | 8.521 | KV453076.1 | 2151730 | 15-scf00322 | 15 |
| AX-158155801 | 15 | 8.521 | KV453076.1 | 2172805 | 15-scf00322 | 15 |
| AX-158155802 | 15 | 8.521 | KV453076.1 | 2173733 | 15-scf00322 | 15 |
| AX-158155827 | 15 | 8.521 | KV453076.1 | 2209653 | 15-scf00322 | 15 |
| AX-158155837 | 15 | 8.521 | KV453076.1 | 2218112 | 15-scf00322 | 15 |
| AX-157686533 | 15 | 8.521 | KV453404.1 | 5257    | scf00701    | UN |
| AX-158155722 | 15 | 8.676 | KV453076.1 | 2079903 | 15-scf00322 | 15 |
| AX-158155752 | 15 | 8.676 | KV453076.1 | 2112691 | 15-scf00322 | 15 |
| AX-158155784 | 15 | 8.676 | KV453076.1 | 2158529 | 15-scf00322 | 15 |
| AX-158155787 | 15 | 8.848 | KV453076.1 | 2162748 | 15-scf00322 | 15 |
| AX-158155790 | 15 | 8.849 | KV453076.1 | 2164497 | 15-scf00322 | 15 |
| AX-158155792 | 15 | 8.849 | KV453076.1 | 2165600 | 15-scf00322 | 15 |
| AX-157724298 | 15 | 8.849 | KV453076.1 | 2173497 | 15-scf00322 | 15 |
| AX-158155803 | 15 | 8.849 | KV453076.1 | 2175066 | 15-scf00322 | 15 |
| AX-158155806 | 15 | 8.849 | KV453076.1 | 2177057 | 15-scf00322 | 15 |
| AX-158155777 | 15 | 9.013 | KV453076.1 | 2150982 | 15-scf00322 | 15 |
| AX-158155809 | 15 | 9.013 | KV453076.1 | 2180969 | 15-scf00322 | 15 |
| AX-158155813 | 15 | 9.013 | KV453076.1 | 2186391 | 15-scf00322 | 15 |
| AX-158155840 | 15 | 9.013 | KV453076.1 | 2221406 | 15-scf00322 | 15 |
| AX-158155889 | 15 | 9.013 | KV453076.1 | 2278246 | 15-scf00322 | 15 |
| AX-157833017 | 15 | 9.013 | KV453076.1 | 2298998 | 15-scf00322 | 15 |
| AX-158155997 | 15 | 9.013 | KV453076.1 | 2429238 | 15-scf00322 | 15 |
| AX-157721093 | 15 | 9.177 | KV453076.1 | 2189253 | 15-scf00322 | 15 |
| AX-158155814 | 15 | 9.177 | KV453076.1 | 2190434 | 15-scf00322 | 15 |
| AX-158380439 | 15 | 9.177 | KV453076.1 | 2192603 | 15-scf00322 | 15 |
| AX-157757988 | 15 | 9.177 | KV453076.1 | 2194427 | 15-scf00322 | 15 |
| AX-158155817 | 15 | 9.231 | KV453076.1 | 2196142 | 15-scf00322 | 15 |
| AX-158155821 | 15 | 9.315 | KV453076.1 | 2201866 | 15-scf00322 | 15 |
| AX-158155822 | 15 | 9.491 | KV453076.1 | 2204045 | 15-scf00322 | 15 |
| AX-158155824 | 15 | 9.491 | KV453076.1 | 2205698 | 15-scf00322 | 15 |

|              |    |        |             |         |             |    |
|--------------|----|--------|-------------|---------|-------------|----|
| AX-158155826 | 15 | 9.491  | KV453076.1  | 2207708 | 15-scf00322 | 15 |
| AX-157833011 | 15 | 9.491  | KV453076.1  | 2208628 | 15-scf00322 | 15 |
| AX-157871781 | 15 | 9.491  | KV453076.1  | 2216719 | 15-scf00322 | 15 |
| AX-157886552 | 15 | 9.491  | KV453076.1  | 2217421 | 15-scf00322 | 15 |
| AX-158155836 | 15 | 9.491  | KV453076.1  | 2217476 | 15-scf00322 | 15 |
| AX-158155838 | 15 | 9.491  | KV453076.1  | 2219095 | 15-scf00322 | 15 |
| AX-158155839 | 15 | 9.491  | KV453076.1  | 2220173 | 15-scf00322 | 15 |
| AX-158156205 | 15 | 9.491  | KV453076.1  | 2843972 | 15-scf00322 | 15 |
| AX-157707227 | 15 | 9.536  | 3ML01033773 | 100     | scf09439_1  | UN |
| AX-157741648 | 15 | 9.833  | KV453076.1  | 2226733 | 15-scf00322 | 15 |
| AX-158155845 | 15 | 9.833  | KV453076.1  | 2229479 | 15-scf00322 | 15 |
| AX-157771429 | 15 | 9.833  | KV453076.1  | 2231680 | 15-scf00322 | 15 |
| AX-158155847 | 15 | 9.847  | KV453076.1  | 2233386 | 15-scf00322 | 15 |
| AX-158155872 | 15 | 9.847  | KV453076.1  | 2258377 | 15-scf00322 | 15 |
| AX-157886553 | 15 | 9.847  | KV453076.1  | 2261645 | 15-scf00322 | 15 |
| AX-158155906 | 15 | 9.847  | KV453076.1  | 2302652 | 15-scf00322 | 15 |
| AX-158155848 | 15 | 9.866  | KV453076.1  | 2233677 | 15-scf00322 | 15 |
| AX-157723192 | 15 | 9.883  | KV453076.1  | 2246009 | 15-scf00322 | 15 |
| AX-157858238 | 15 | 9.889  | KV453076.1  | 2247411 | 15-scf00322 | 15 |
| AX-158155868 | 15 | 9.901  | KV453076.1  | 2253492 | 15-scf00322 | 15 |
| AX-157745458 | 15 | 9.921  | KV453076.1  | 2257048 | 15-scf00322 | 15 |
| AX-158155874 | 15 | 9.943  | KV453076.1  | 2259314 | 15-scf00322 | 15 |
| AX-158155882 | 15 | 9.943  | KV453076.1  | 2272172 | 15-scf00322 | 15 |
| AX-158155884 | 15 | 9.943  | KV453076.1  | 2273254 | 15-scf00322 | 15 |
| AX-158155902 | 15 | 9.973  | KV453076.1  | 2298791 | 15-scf00322 | 15 |
| AX-158380440 | 15 | 10.02  | KV453076.1  | 2231733 | 15-scf00322 | 15 |
| AX-158155850 | 15 | 10.02  | KV453076.1  | 2236184 | 15-scf00322 | 15 |
| AX-157707982 | 15 | 10.02  | KV453076.1  | 2300908 | 15-scf00322 | 15 |
| AX-158155961 | 15 | 10.02  | KV453076.1  | 2380176 | 15-scf00322 | 15 |
| AX-158155869 | 15 | 10.052 | KV453076.1  | 2256525 | 15-scf00322 | 15 |
| AX-158155912 | 15 | 10.052 | KV453076.1  | 2311917 | 15-scf00322 | 15 |
| AX-157745346 | 15 | 10.052 | KV453076.1  | 2314421 | 15-scf00322 | 15 |
| AX-158155913 | 15 | 10.052 | KV453076.1  | 2316379 | 15-scf00322 | 15 |
| AX-158155917 | 15 | 10.052 | KV453076.1  | 2319763 | 15-scf00322 | 15 |
| AX-158380441 | 15 | 10.052 | KV453076.1  | 2319923 | 15-scf00322 | 15 |
| AX-158155835 | 15 | 10.085 | KV453076.1  | 2216913 | 15-scf00322 | 15 |
| AX-158155853 | 15 | 10.085 | KV453076.1  | 2238876 | 15-scf00322 | 15 |
| AX-158155862 | 15 | 10.085 | KV453076.1  | 2248493 | 15-scf00322 | 15 |
| AX-157750843 | 15 | 10.085 | KV453076.1  | 2295706 | 15-scf00322 | 15 |
| AX-158155900 | 15 | 10.085 | KV453076.1  | 2295913 | 15-scf00322 | 15 |
| AX-158155903 | 15 | 10.085 | KV453076.1  | 2299488 | 15-scf00322 | 15 |
| AX-158155911 | 15 | 10.085 | KV453076.1  | 2307966 | 15-scf00322 | 15 |
| AX-158155918 | 15 | 10.085 | KV453076.1  | 2320685 | 15-scf00322 | 15 |
| AX-158155926 | 15 | 10.085 | KV453076.1  | 2330293 | 15-scf00322 | 15 |
| AX-157773346 | 15 | 10.085 | KV453076.1  | 2332540 | 15-scf00322 | 15 |
| AX-158155927 | 15 | 10.085 | KV453076.1  | 2333915 | 15-scf00322 | 15 |
| AX-157866502 | 15 | 10.085 | KV453076.1  | 2337417 | 15-scf00322 | 15 |
| AX-158155929 | 15 | 10.085 | KV453076.1  | 2340759 | 15-scf00322 | 15 |
| AX-158155930 | 15 | 10.085 | KV453076.1  | 2341468 | 15-scf00322 | 15 |
| AX-157723622 | 15 | 10.085 | KV453076.1  | 2351374 | 15-scf00322 | 15 |
| AX-157770748 | 15 | 10.085 | KV453076.1  | 2369734 | 15-scf00322 | 15 |

|              |    |        |            |         |             |    |
|--------------|----|--------|------------|---------|-------------|----|
| AX-158417744 | 15 | 10.085 | KV453076.1 | 2491693 | 15-scf00322 | 15 |
| AX-158155920 | 15 | 10.105 | KV453076.1 | 2324738 | 15-scf00322 | 15 |
| AX-158155932 | 15 | 10.105 | KV453076.1 | 2342803 | 15-scf00322 | 15 |
| AX-157833025 | 15 | 10.105 | KV453076.1 | 2343176 | 15-scf00322 | 15 |
| AX-158155933 | 15 | 10.127 | KV453076.1 | 2348041 | 15-scf00322 | 15 |
| AX-157871783 | 15 | 10.161 | KV453076.1 | 2274459 | 15-scf00322 | 15 |
| AX-158155886 | 15 | 10.161 | KV453076.1 | 2274522 | 15-scf00322 | 15 |
| AX-158155947 | 15 | 10.161 | KV453076.1 | 2362777 | 15-scf00322 | 15 |
| AX-157708829 | 15 | 10.161 | KV453076.1 | 2364951 | 15-scf00322 | 15 |
| AX-158155948 | 15 | 10.161 | KV453076.1 | 2365180 | 15-scf00322 | 15 |
| AX-158155951 | 15 | 10.161 | KV453076.1 | 2367196 | 15-scf00322 | 15 |
| AX-158155955 | 15 | 10.161 | KV453076.1 | 2372063 | 15-scf00322 | 15 |
| AX-158155956 | 15 | 10.161 | KV453076.1 | 2372766 | 15-scf00322 | 15 |
| AX-158155959 | 15 | 10.161 | KV453076.1 | 2377036 | 15-scf00322 | 15 |
| AX-158155962 | 15 | 10.161 | KV453076.1 | 2382294 | 15-scf00322 | 15 |
| AX-158155963 | 15 | 10.161 | KV453076.1 | 2383585 | 15-scf00322 | 15 |
| AX-158155967 | 15 | 10.161 | KV453076.1 | 2386937 | 15-scf00322 | 15 |
| AX-158155968 | 15 | 10.161 | KV453076.1 | 2388170 | 15-scf00322 | 15 |
| AX-158155969 | 15 | 10.161 | KV453076.1 | 2388707 | 15-scf00322 | 15 |
| AX-158155970 | 15 | 10.161 | KV453076.1 | 2389403 | 15-scf00322 | 15 |
| AX-158156330 | 15 | 10.161 | KV453076.1 | 3199869 | 15-scf00322 | 15 |
| AX-158155888 | 15 | 10.27  | KV453076.1 | 2277345 | 15-scf00322 | 15 |
| AX-158155974 | 15 | 10.27  | KV453076.1 | 2397800 | 15-scf00322 | 15 |
| AX-158155975 | 15 | 10.27  | KV453076.1 | 2398792 | 15-scf00322 | 15 |
| AX-158155976 | 15 | 10.27  | KV453076.1 | 2399870 | 15-scf00322 | 15 |
| AX-158155979 | 15 | 10.27  | KV453076.1 | 2403998 | 15-scf00322 | 15 |
| AX-158155982 | 15 | 10.27  | KV453076.1 | 2409465 | 15-scf00322 | 15 |
| AX-158155983 | 15 | 10.27  | KV453076.1 | 2410331 | 15-scf00322 | 15 |
| AX-158155985 | 15 | 10.27  | KV453076.1 | 2414656 | 15-scf00322 | 15 |
| AX-158155987 | 15 | 10.27  | KV453076.1 | 2418146 | 15-scf00322 | 15 |
| AX-158155988 | 15 | 10.27  | KV453076.1 | 2418997 | 15-scf00322 | 15 |
| AX-158156020 | 15 | 10.27  | KV453076.1 | 2452118 | 15-scf00322 | 15 |
| AX-158155949 | 15 | 10.379 | KV453076.1 | 2365586 | 15-scf00322 | 15 |
| AX-158155950 | 15 | 10.379 | KV453076.1 | 2366773 | 15-scf00322 | 15 |
| AX-158155980 | 15 | 10.379 | KV453076.1 | 2406288 | 15-scf00322 | 15 |
| AX-158155990 | 15 | 10.379 | KV453076.1 | 2421446 | 15-scf00322 | 15 |
| AX-158155993 | 15 | 10.379 | KV453076.1 | 2424723 | 15-scf00322 | 15 |
| AX-158155994 | 15 | 10.379 | KV453076.1 | 2426638 | 15-scf00322 | 15 |
| AX-158155995 | 15 | 10.379 | KV453076.1 | 2427129 | 15-scf00322 | 15 |
| AX-158155999 | 15 | 10.379 | KV453076.1 | 2432149 | 15-scf00322 | 15 |
| AX-157833027 | 15 | 10.379 | KV453076.1 | 2433890 | 15-scf00322 | 15 |
| AX-158156003 | 15 | 10.379 | KV453076.1 | 2436198 | 15-scf00322 | 15 |
| AX-157833028 | 15 | 10.379 | KV453076.1 | 2440460 | 15-scf00322 | 15 |
| AX-158156009 | 15 | 10.379 | KV453076.1 | 2442979 | 15-scf00322 | 15 |
| AX-158156010 | 15 | 10.379 | KV453076.1 | 2443693 | 15-scf00322 | 15 |
| AX-158156012 | 15 | 10.379 | KV453076.1 | 2445625 | 15-scf00322 | 15 |
| AX-158156013 | 15 | 10.379 | KV453076.1 | 2446035 | 15-scf00322 | 15 |
| AX-158156019 | 15 | 10.379 | KV453076.1 | 2451737 | 15-scf00322 | 15 |
| AX-158156021 | 15 | 10.379 | KV453076.1 | 2454399 | 15-scf00322 | 15 |
| AX-158156024 | 15 | 10.379 | KV453076.1 | 2457029 | 15-scf00322 | 15 |
| AX-158156028 | 15 | 10.379 | KV453076.1 | 2461736 | 15-scf00322 | 15 |

|              |    |        |            |         |             |    |
|--------------|----|--------|------------|---------|-------------|----|
| AX-157833030 | 15 | 10.379 | KV453076.1 | 2466210 | 15-scf00322 | 15 |
| AX-158156048 | 15 | 10.379 | KV453076.1 | 2491279 | 15-scf00322 | 15 |
| AX-158156055 | 15 | 10.379 | KV453076.1 | 2505013 | 15-scf00322 | 15 |
| AX-157694688 | 15 | 10.379 | KV453076.1 | 2558884 | 15-scf00322 | 15 |
| AX-158156095 | 15 | 10.379 | KV453076.1 | 2576996 | 15-scf00322 | 15 |
| AX-158156103 | 15 | 10.379 | KV453076.1 | 2587322 | 15-scf00322 | 15 |
| AX-158156242 | 15 | 10.379 | KV453076.1 | 2946145 | 15-scf00322 | 15 |
| AX-158156262 | 15 | 10.379 | KV453076.1 | 3049180 | 15-scf00322 | 15 |
| AX-158156267 | 15 | 10.379 | KV453076.1 | 3058301 | 15-scf00322 | 15 |
| AX-157833092 | 15 | 10.379 | KV453076.1 | 3182618 | 15-scf00322 | 15 |
| AX-158156331 | 15 | 10.379 | KV453076.1 | 3200646 | 15-scf00322 | 15 |
| AX-157833031 | 15 | 10.428 | KV453076.1 | 2468501 | 15-scf00322 | 15 |
| AX-158156035 | 15 | 10.489 | KV453076.1 | 2473481 | 15-scf00322 | 15 |
| AX-158156036 | 15 | 10.489 | KV453076.1 | 2475357 | 15-scf00322 | 15 |
| AX-157773858 | 15 | 10.489 | KV453076.1 | 2563970 | 15-scf00322 | 15 |
| AX-158156110 | 15 | 10.489 | KV453076.1 | 2599093 | 15-scf00322 | 15 |
| AX-158156044 | 15 | 10.598 | KV453076.1 | 2488291 | 15-scf00322 | 15 |
| AX-158156045 | 15 | 10.598 | KV453076.1 | 2489124 | 15-scf00322 | 15 |
| AX-158156054 | 15 | 10.598 | KV453076.1 | 2502645 | 15-scf00322 | 15 |
| AX-158156058 | 15 | 10.598 | KV453076.1 | 2508178 | 15-scf00322 | 15 |
| AX-158156060 | 15 | 10.598 | KV453076.1 | 2510780 | 15-scf00322 | 15 |
| AX-158156061 | 15 | 10.598 | KV453076.1 | 2511439 | 15-scf00322 | 15 |
| AX-157833033 | 15 | 10.598 | KV453076.1 | 2511876 | 15-scf00322 | 15 |
| AX-157833034 | 15 | 10.598 | KV453076.1 | 2515067 | 15-scf00322 | 15 |
| AX-157878425 | 15 | 10.598 | KV453076.1 | 2664020 | 15-scf00322 | 15 |
| AX-157878426 | 15 | 10.598 | KV453076.1 | 2686209 | 15-scf00322 | 15 |
| AX-158156163 | 15 | 10.598 | KV453076.1 | 2707907 | 15-scf00322 | 15 |
| AX-158156171 | 15 | 10.598 | KV453076.1 | 2725514 | 15-scf00322 | 15 |
| AX-158156064 | 15 | 10.608 | KV453076.1 | 2517687 | 15-scf00322 | 15 |
| AX-158156067 | 15 | 10.608 | KV453076.1 | 2520397 | 15-scf00322 | 15 |
| AX-158156075 | 15 | 10.623 | KV453076.1 | 2525304 | 15-scf00322 | 15 |
| AX-158156081 | 15 | 10.637 | KV453076.1 | 2537983 | 15-scf00322 | 15 |
| AX-158156080 | 15 | 10.655 | KV453076.1 | 2534718 | 15-scf00322 | 15 |
| AX-158156085 | 15 | 10.655 | KV453076.1 | 2542053 | 15-scf00322 | 15 |
| AX-158156001 | 15 | 10.707 | KV453076.1 | 2433460 | 15-scf00322 | 15 |
| AX-158156015 | 15 | 10.707 | KV453076.1 | 2449168 | 15-scf00322 | 15 |
| AX-158393253 | 15 | 10.707 | KV453076.1 | 2469348 | 15-scf00322 | 15 |
| AX-158156051 | 15 | 10.707 | KV453076.1 | 2497001 | 15-scf00322 | 15 |
| AX-158156052 | 15 | 10.707 | KV453076.1 | 2499570 | 15-scf00322 | 15 |
| AX-157833036 | 15 | 10.707 | KV453076.1 | 2551597 | 15-scf00322 | 15 |
| AX-158156087 | 15 | 10.707 | KV453076.1 | 2552396 | 15-scf00322 | 15 |
| AX-158156088 | 15 | 10.707 | KV453076.1 | 2553381 | 15-scf00322 | 15 |
| AX-158156089 | 15 | 10.707 | KV453076.1 | 2554668 | 15-scf00322 | 15 |
| AX-158156090 | 15 | 10.707 | KV453076.1 | 2555433 | 15-scf00322 | 15 |
| AX-158412737 | 15 | 10.707 | KV453076.1 | 2557863 | 15-scf00322 | 15 |
| AX-158156096 | 15 | 10.707 | KV453076.1 | 2578065 | 15-scf00322 | 15 |
| AX-158380453 | 15 | 10.707 | KV453078.1 | 459653  | 15-scf00323 | 15 |
| AX-158155945 | 15 | 10.816 | KV453076.1 | 2360419 | 15-scf00322 | 15 |
| AX-158155991 | 15 | 10.816 | KV453076.1 | 2422525 | 15-scf00322 | 15 |
| AX-157886557 | 15 | 10.816 | KV453076.1 | 2467647 | 15-scf00322 | 15 |
| AX-158156065 | 15 | 10.816 | KV453076.1 | 2518029 | 15-scf00322 | 15 |

|              |    |        |            |         |             |    |
|--------------|----|--------|------------|---------|-------------|----|
| AX-158156068 | 15 | 10.816 | KV453076.1 | 2521224 | 15-scf00322 | 15 |
| AX-158156084 | 15 | 10.816 | KV453076.1 | 2540354 | 15-scf00322 | 15 |
| AX-158156107 | 15 | 10.816 | KV453076.1 | 2593533 | 15-scf00322 | 15 |
| AX-158156109 | 15 | 10.816 | KV453076.1 | 2595573 | 15-scf00322 | 15 |
| AX-158380442 | 15 | 10.816 | KV453076.1 | 2604130 | 15-scf00322 | 15 |
| AX-158156115 | 15 | 10.816 | KV453076.1 | 2620498 | 15-scf00322 | 15 |
| AX-157833046 | 15 | 10.816 | KV453076.1 | 2621735 | 15-scf00322 | 15 |
| AX-158156117 | 15 | 10.816 | KV453076.1 | 2630671 | 15-scf00322 | 15 |
| AX-157878424 | 15 | 10.816 | KV453076.1 | 2632844 | 15-scf00322 | 15 |
| AX-157698965 | 15 | 10.816 | KV453076.1 | 2634754 | 15-scf00322 | 15 |
| AX-158156118 | 15 | 10.816 | KV453076.1 | 2635761 | 15-scf00322 | 15 |
| AX-158156119 | 15 | 10.816 | KV453076.1 | 2636240 | 15-scf00322 | 15 |
| AX-158156125 | 15 | 10.816 | KV453076.1 | 2648807 | 15-scf00322 | 15 |
| AX-158156126 | 15 | 10.816 | KV453076.1 | 2649094 | 15-scf00322 | 15 |
| AX-158156127 | 15 | 10.816 | KV453076.1 | 2649581 | 15-scf00322 | 15 |
| AX-158156130 | 15 | 10.816 | KV453076.1 | 2660196 | 15-scf00322 | 15 |
| AX-158156131 | 15 | 10.816 | KV453076.1 | 2663570 | 15-scf00322 | 15 |
| AX-158156132 | 15 | 10.816 | KV453076.1 | 2664656 | 15-scf00322 | 15 |
| AX-158156133 | 15 | 10.816 | KV453076.1 | 2665168 | 15-scf00322 | 15 |
| AX-158156134 | 15 | 10.816 | KV453076.1 | 2665675 | 15-scf00322 | 15 |
| AX-158156135 | 15 | 10.816 | KV453076.1 | 2666646 | 15-scf00322 | 15 |
| AX-158156137 | 15 | 10.816 | KV453076.1 | 2667718 | 15-scf00322 | 15 |
| AX-158156138 | 15 | 10.816 | KV453076.1 | 2669502 | 15-scf00322 | 15 |
| AX-158156139 | 15 | 10.816 | KV453076.1 | 2672377 | 15-scf00322 | 15 |
| AX-158156140 | 15 | 10.816 | KV453076.1 | 2673070 | 15-scf00322 | 15 |
| AX-158156141 | 15 | 10.816 | KV453076.1 | 2674411 | 15-scf00322 | 15 |
| AX-158156142 | 15 | 10.816 | KV453076.1 | 2675261 | 15-scf00322 | 15 |
| AX-158156143 | 15 | 10.816 | KV453076.1 | 2676608 | 15-scf00322 | 15 |
| AX-157833051 | 15 | 10.816 | KV453076.1 | 2678945 | 15-scf00322 | 15 |
| AX-157833052 | 15 | 10.816 | KV453076.1 | 2679169 | 15-scf00322 | 15 |
| AX-157833053 | 15 | 10.816 | KV453076.1 | 2682274 | 15-scf00322 | 15 |
| AX-158156148 | 15 | 10.816 | KV453076.1 | 2683531 | 15-scf00322 | 15 |
| AX-158156149 | 15 | 10.816 | KV453076.1 | 2686294 | 15-scf00322 | 15 |
| AX-158156150 | 15 | 10.816 | KV453076.1 | 2686739 | 15-scf00322 | 15 |
| AX-158156152 | 15 | 10.816 | KV453076.1 | 2689380 | 15-scf00322 | 15 |
| AX-158156153 | 15 | 10.816 | KV453076.1 | 2691101 | 15-scf00322 | 15 |
| AX-158156154 | 15 | 10.816 | KV453076.1 | 2692065 | 15-scf00322 | 15 |
| AX-158156155 | 15 | 10.816 | KV453076.1 | 2693730 | 15-scf00322 | 15 |
| AX-158156156 | 15 | 10.816 | KV453076.1 | 2694541 | 15-scf00322 | 15 |
| AX-158156157 | 15 | 10.816 | KV453076.1 | 2697127 | 15-scf00322 | 15 |
| AX-158156158 | 15 | 10.816 | KV453076.1 | 2697528 | 15-scf00322 | 15 |
| AX-158156159 | 15 | 10.816 | KV453076.1 | 2700835 | 15-scf00322 | 15 |
| AX-157833054 | 15 | 10.816 | KV453076.1 | 2701569 | 15-scf00322 | 15 |
| AX-157833056 | 15 | 10.816 | KV453076.1 | 2702509 | 15-scf00322 | 15 |
| AX-158156161 | 15 | 10.816 | KV453076.1 | 2704633 | 15-scf00322 | 15 |
| AX-158156164 | 15 | 10.816 | KV453076.1 | 2709089 | 15-scf00322 | 15 |
| AX-157833057 | 15 | 10.816 | KV453076.1 | 2709830 | 15-scf00322 | 15 |
| AX-157833058 | 15 | 10.816 | KV453076.1 | 2712236 | 15-scf00322 | 15 |
| AX-158156166 | 15 | 10.816 | KV453076.1 | 2713840 | 15-scf00322 | 15 |
| AX-158156167 | 15 | 10.816 | KV453076.1 | 2715326 | 15-scf00322 | 15 |
| AX-158156169 | 15 | 10.816 | KV453076.1 | 2716977 | 15-scf00322 | 15 |

|              |    |        |            |         |             |    |
|--------------|----|--------|------------|---------|-------------|----|
| AX-158412740 | 15 | 10.816 | KV453076.1 | 2719586 | 15-scf00322 | 15 |
| AX-158156170 | 15 | 10.816 | KV453076.1 | 2721020 | 15-scf00322 | 15 |
| AX-157833059 | 15 | 10.816 | KV453076.1 | 2723225 | 15-scf00322 | 15 |
| AX-158412742 | 15 | 10.816 | KV453076.1 | 2728197 | 15-scf00322 | 15 |
| AX-157833061 | 15 | 10.816 | KV453076.1 | 2734719 | 15-scf00322 | 15 |
| AX-158156173 | 15 | 10.816 | KV453076.1 | 2739312 | 15-scf00322 | 15 |
| AX-158156175 | 15 | 10.816 | KV453076.1 | 2745453 | 15-scf00322 | 15 |
| AX-158156176 | 15 | 10.816 | KV453076.1 | 2745840 | 15-scf00322 | 15 |
| AX-158156177 | 15 | 10.816 | KV453076.1 | 2747966 | 15-scf00322 | 15 |
| AX-158156178 | 15 | 10.816 | KV453076.1 | 2748470 | 15-scf00322 | 15 |
| AX-158156179 | 15 | 10.816 | KV453076.1 | 2755211 | 15-scf00322 | 15 |
| AX-158156180 | 15 | 10.816 | KV453076.1 | 2760794 | 15-scf00322 | 15 |
| AX-157747202 | 15 | 10.816 | KV453076.1 | 2761550 | 15-scf00322 | 15 |
| AX-158156183 | 15 | 10.816 | KV453076.1 | 2776513 | 15-scf00322 | 15 |
| AX-158156184 | 15 | 10.816 | KV453076.1 | 2777208 | 15-scf00322 | 15 |
| AX-157833064 | 15 | 10.816 | KV453076.1 | 2788878 | 15-scf00322 | 15 |
| AX-157833065 | 15 | 10.816 | KV453076.1 | 2790201 | 15-scf00322 | 15 |
| AX-158156189 | 15 | 10.816 | KV453076.1 | 2791816 | 15-scf00322 | 15 |
| AX-158156191 | 15 | 10.816 | KV453076.1 | 2795814 | 15-scf00322 | 15 |
| AX-158156192 | 15 | 10.816 | KV453076.1 | 2796212 | 15-scf00322 | 15 |
| AX-157709206 | 15 | 10.816 | KV453076.1 | 2802952 | 15-scf00322 | 15 |
| AX-158156194 | 15 | 10.816 | KV453076.1 | 2803133 | 15-scf00322 | 15 |
| AX-158412746 | 15 | 10.816 | KV453076.1 | 2804919 | 15-scf00322 | 15 |
| AX-158156195 | 15 | 10.816 | KV453076.1 | 2806390 | 15-scf00322 | 15 |
| AX-157833067 | 15 | 10.816 | KV453076.1 | 2812704 | 15-scf00322 | 15 |
| AX-158393257 | 15 | 10.816 | KV453076.1 | 2819157 | 15-scf00322 | 15 |
| AX-158156199 | 15 | 10.816 | KV453076.1 | 2826683 | 15-scf00322 | 15 |
| AX-158156201 | 15 | 10.816 | KV453076.1 | 2829139 | 15-scf00322 | 15 |
| AX-158412747 | 15 | 10.816 | KV453076.1 | 2835545 | 15-scf00322 | 15 |
| AX-158156204 | 15 | 10.816 | KV453076.1 | 2842949 | 15-scf00322 | 15 |
| AX-158156206 | 15 | 10.816 | KV453076.1 | 2844949 | 15-scf00322 | 15 |
| AX-158156209 | 15 | 10.816 | KV453076.1 | 2850743 | 15-scf00322 | 15 |
| AX-158156210 | 15 | 10.816 | KV453076.1 | 2855990 | 15-scf00322 | 15 |
| AX-158156211 | 15 | 10.816 | KV453076.1 | 2856379 | 15-scf00322 | 15 |
| AX-158156212 | 15 | 10.816 | KV453076.1 | 2857112 | 15-scf00322 | 15 |
| AX-158156213 | 15 | 10.816 | KV453076.1 | 2866063 | 15-scf00322 | 15 |
| AX-158156216 | 15 | 10.816 | KV453076.1 | 2875084 | 15-scf00322 | 15 |
| AX-158156217 | 15 | 10.816 | KV453076.1 | 2876273 | 15-scf00322 | 15 |
| AX-158412750 | 15 | 10.816 | KV453076.1 | 2878064 | 15-scf00322 | 15 |
| AX-158412751 | 15 | 10.816 | KV453076.1 | 2878767 | 15-scf00322 | 15 |
| AX-158412754 | 15 | 10.816 | KV453076.1 | 2879444 | 15-scf00322 | 15 |
| AX-157858244 | 15 | 10.816 | KV453076.1 | 2880535 | 15-scf00322 | 15 |
| AX-158156218 | 15 | 10.816 | KV453076.1 | 2880792 | 15-scf00322 | 15 |
| AX-158156220 | 15 | 10.816 | KV453076.1 | 2883546 | 15-scf00322 | 15 |
| AX-158156221 | 15 | 10.816 | KV453076.1 | 2888869 | 15-scf00322 | 15 |
| AX-157833068 | 15 | 10.816 | KV453076.1 | 2889966 | 15-scf00322 | 15 |
| AX-158156222 | 15 | 10.816 | KV453076.1 | 2890772 | 15-scf00322 | 15 |
| AX-158156223 | 15 | 10.816 | KV453076.1 | 2897548 | 15-scf00322 | 15 |
| AX-157833069 | 15 | 10.816 | KV453076.1 | 2900494 | 15-scf00322 | 15 |
| AX-158156225 | 15 | 10.816 | KV453076.1 | 2901524 | 15-scf00322 | 15 |
| AX-158156227 | 15 | 10.816 | KV453076.1 | 2906984 | 15-scf00322 | 15 |

|              |    |        |            |         |             |    |
|--------------|----|--------|------------|---------|-------------|----|
| AX-157833071 | 15 | 10.816 | KV453076.1 | 2907136 | 15-scf00322 | 15 |
| AX-158156228 | 15 | 10.816 | KV453076.1 | 2908520 | 15-scf00322 | 15 |
| AX-158393258 | 15 | 10.816 | KV453076.1 | 2913029 | 15-scf00322 | 15 |
| AX-157734432 | 15 | 10.816 | KV453076.1 | 2913720 | 15-scf00322 | 15 |
| AX-157871785 | 15 | 10.816 | KV453076.1 | 2915320 | 15-scf00322 | 15 |
| AX-158156230 | 15 | 10.816 | KV453076.1 | 2916908 | 15-scf00322 | 15 |
| AX-158156232 | 15 | 10.816 | KV453076.1 | 2920206 | 15-scf00322 | 15 |
| AX-158156233 | 15 | 10.816 | KV453076.1 | 2921343 | 15-scf00322 | 15 |
| AX-157833072 | 15 | 10.816 | KV453076.1 | 2923587 | 15-scf00322 | 15 |
| AX-157858245 | 15 | 10.816 | KV453076.1 | 2924260 | 15-scf00322 | 15 |
| AX-157833073 | 15 | 10.816 | KV453076.1 | 2926787 | 15-scf00322 | 15 |
| AX-157833074 | 15 | 10.816 | KV453076.1 | 2927708 | 15-scf00322 | 15 |
| AX-157833075 | 15 | 10.816 | KV453076.1 | 2934049 | 15-scf00322 | 15 |
| AX-158408776 | 15 | 10.816 | KV453076.1 | 2935055 | 15-scf00322 | 15 |
| AX-157712355 | 15 | 10.816 | KV453076.1 | 2935516 | 15-scf00322 | 15 |
| AX-158412757 | 15 | 10.816 | KV453076.1 | 2935764 | 15-scf00322 | 15 |
| AX-158156237 | 15 | 10.816 | KV453076.1 | 2936510 | 15-scf00322 | 15 |
| AX-158156239 | 15 | 10.816 | KV453076.1 | 2938970 | 15-scf00322 | 15 |
| AX-157858246 | 15 | 10.816 | KV453076.1 | 2944509 | 15-scf00322 | 15 |
| AX-158156243 | 15 | 10.816 | KV453076.1 | 2947150 | 15-scf00322 | 15 |
| AX-158393259 | 15 | 10.816 | KV453076.1 | 2949086 | 15-scf00322 | 15 |
| AX-158412758 | 15 | 10.816 | KV453076.1 | 2951917 | 15-scf00322 | 15 |
| AX-158156246 | 15 | 10.816 | KV453076.1 | 2955560 | 15-scf00322 | 15 |
| AX-157833076 | 15 | 10.816 | KV453076.1 | 2955858 | 15-scf00322 | 15 |
| AX-157833077 | 15 | 10.816 | KV453076.1 | 2960600 | 15-scf00322 | 15 |
| AX-157833078 | 15 | 10.816 | KV453076.1 | 2961743 | 15-scf00322 | 15 |
| AX-158156248 | 15 | 10.816 | KV453076.1 | 2963010 | 15-scf00322 | 15 |
| AX-158393260 | 15 | 10.816 | KV453076.1 | 2969250 | 15-scf00322 | 15 |
| AX-157871786 | 15 | 10.816 | KV453076.1 | 2971833 | 15-scf00322 | 15 |
| AX-158156249 | 15 | 10.816 | KV453076.1 | 2972101 | 15-scf00322 | 15 |
| AX-158156253 | 15 | 10.816 | KV453076.1 | 3003024 | 15-scf00322 | 15 |
| AX-157833079 | 15 | 10.816 | KV453076.1 | 3035305 | 15-scf00322 | 15 |
| AX-158156261 | 15 | 10.816 | KV453076.1 | 3042671 | 15-scf00322 | 15 |
| AX-158408777 | 15 | 10.816 | KV453076.1 | 3045963 | 15-scf00322 | 15 |
| AX-158412759 | 15 | 10.816 | KV453076.1 | 3046521 | 15-scf00322 | 15 |
| AX-158156264 | 15 | 10.816 | KV453076.1 | 3051305 | 15-scf00322 | 15 |
| AX-158156265 | 15 | 10.816 | KV453076.1 | 3052787 | 15-scf00322 | 15 |
| AX-158156266 | 15 | 10.816 | KV453076.1 | 3053349 | 15-scf00322 | 15 |
| AX-157748566 | 15 | 10.816 | KV453076.1 | 3055892 | 15-scf00322 | 15 |
| AX-157775120 | 15 | 10.816 | KV453076.1 | 3056422 | 15-scf00322 | 15 |
| AX-158156268 | 15 | 10.816 | KV453076.1 | 3059273 | 15-scf00322 | 15 |
| AX-158156269 | 15 | 10.816 | KV453076.1 | 3062188 | 15-scf00322 | 15 |
| AX-158156270 | 15 | 10.816 | KV453076.1 | 3063689 | 15-scf00322 | 15 |
| AX-158156272 | 15 | 10.816 | KV453076.1 | 3067993 | 15-scf00322 | 15 |
| AX-158156273 | 15 | 10.816 | KV453076.1 | 3069094 | 15-scf00322 | 15 |
| AX-158156274 | 15 | 10.816 | KV453076.1 | 3070896 | 15-scf00322 | 15 |
| AX-158156275 | 15 | 10.816 | KV453076.1 | 3074747 | 15-scf00322 | 15 |
| AX-157743449 | 15 | 10.816 | KV453076.1 | 3075273 | 15-scf00322 | 15 |
| AX-158156277 | 15 | 10.816 | KV453076.1 | 3076350 | 15-scf00322 | 15 |
| AX-157722239 | 15 | 10.816 | KV453076.1 | 3076874 | 15-scf00322 | 15 |
| AX-158156282 | 15 | 10.816 | KV453076.1 | 3090585 | 15-scf00322 | 15 |

|              |    |        |            |         |             |    |
|--------------|----|--------|------------|---------|-------------|----|
| AX-157707911 | 15 | 10.816 | KV453076.1 | 3093807 | 15-scf00322 | 15 |
| AX-157744874 | 15 | 10.816 | KV453076.1 | 3096526 | 15-scf00322 | 15 |
| AX-157746372 | 15 | 10.816 | KV453076.1 | 3100990 | 15-scf00322 | 15 |
| AX-158156286 | 15 | 10.816 | KV453076.1 | 3104192 | 15-scf00322 | 15 |
| AX-158156287 | 15 | 10.816 | KV453076.1 | 3105611 | 15-scf00322 | 15 |
| AX-158156289 | 15 | 10.816 | KV453076.1 | 3108415 | 15-scf00322 | 15 |
| AX-158156290 | 15 | 10.816 | KV453076.1 | 3109712 | 15-scf00322 | 15 |
| AX-158156291 | 15 | 10.816 | KV453076.1 | 3110071 | 15-scf00322 | 15 |
| AX-157858248 | 15 | 10.816 | KV453076.1 | 3110484 | 15-scf00322 | 15 |
| AX-158156293 | 15 | 10.816 | KV453076.1 | 3113399 | 15-scf00322 | 15 |
| AX-158156294 | 15 | 10.816 | KV453076.1 | 3113990 | 15-scf00322 | 15 |
| AX-158412762 | 15 | 10.816 | KV453076.1 | 3115476 | 15-scf00322 | 15 |
| AX-158156295 | 15 | 10.816 | KV453076.1 | 3116844 | 15-scf00322 | 15 |
| AX-158156296 | 15 | 10.816 | KV453076.1 | 3117197 | 15-scf00322 | 15 |
| AX-158156297 | 15 | 10.816 | KV453076.1 | 3119398 | 15-scf00322 | 15 |
| AX-158156312 | 15 | 10.816 | KV453076.1 | 3143454 | 15-scf00322 | 15 |
| AX-157833087 | 15 | 10.816 | KV453076.1 | 3147051 | 15-scf00322 | 15 |
| AX-157833088 | 15 | 10.816 | KV453076.1 | 3148854 | 15-scf00322 | 15 |
| AX-158156314 | 15 | 10.816 | KV453076.1 | 3152455 | 15-scf00322 | 15 |
| AX-158156315 | 15 | 10.816 | KV453076.1 | 3153323 | 15-scf00322 | 15 |
| AX-158156316 | 15 | 10.816 | KV453076.1 | 3156291 | 15-scf00322 | 15 |
| AX-158156319 | 15 | 10.816 | KV453076.1 | 3171165 | 15-scf00322 | 15 |
| AX-157713379 | 15 | 10.816 | KV453076.1 | 3177413 | 15-scf00322 | 15 |
| AX-158156321 | 15 | 10.816 | KV453076.1 | 3180353 | 15-scf00322 | 15 |
| AX-158156322 | 15 | 10.816 | KV453076.1 | 3181116 | 15-scf00322 | 15 |
| AX-158156325 | 15 | 10.816 | KV453076.1 | 3185854 | 15-scf00322 | 15 |
| AX-157833093 | 15 | 10.816 | KV453076.1 | 3187979 | 15-scf00322 | 15 |
| AX-158156326 | 15 | 10.816 | KV453076.1 | 3190106 | 15-scf00322 | 15 |
| AX-158156332 | 15 | 10.816 | KV453076.1 | 3204305 | 15-scf00322 | 15 |
| AX-157833097 | 15 | 10.816 | KV453076.1 | 3220035 | 15-scf00322 | 15 |
| AX-157833108 | 15 | 10.816 | KV453076.1 | 3279226 | 15-scf00322 | 15 |
| AX-158156403 | 15 | 10.816 | KV453076.1 | 3348087 | 15-scf00322 | 15 |
| AX-157741121 | 15 | 10.816 | KV453076.1 | 3446642 | 15-scf00322 | 15 |
| AX-158156496 | 15 | 10.816 | KV453076.1 | 3475344 | 15-scf00322 | 15 |
| AX-158156617 | 15 | 10.816 | KV453076.1 | 3623458 | 15-scf00322 | 15 |
| AX-158156661 | 15 | 10.816 | KV453076.1 | 3689466 | 15-scf00322 | 15 |
| AX-158156674 | 15 | 10.816 | KV453076.1 | 3711111 | 15-scf00322 | 15 |
| AX-157833146 | 15 | 10.816 | KV453076.1 | 3745834 | 15-scf00322 | 15 |
| AX-158156780 | 15 | 10.816 | KV453076.1 | 3845019 | 15-scf00322 | 15 |
| AX-158156828 | 15 | 10.816 | KV453076.1 | 3895376 | 15-scf00322 | 15 |
| AX-158156885 | 15 | 10.816 | KV453076.1 | 3970210 | 15-scf00322 | 15 |
| AX-158156976 | 15 | 10.816 | KV453078.1 | 118360  | 15-scf00323 | 15 |
| AX-157833096 | 15 | 11.035 | KV453076.1 | 3205704 | 15-scf00322 | 15 |
| AX-158156333 | 15 | 11.035 | KV453076.1 | 3206636 | 15-scf00322 | 15 |
| AX-158156337 | 15 | 11.035 | KV453076.1 | 3214132 | 15-scf00322 | 15 |
| AX-157698179 | 15 | 11.035 | KV453076.1 | 3214603 | 15-scf00322 | 15 |
| AX-158156339 | 15 | 11.035 | KV453076.1 | 3215496 | 15-scf00322 | 15 |
| AX-158156385 | 15 | 11.035 | KV453076.1 | 3322554 | 15-scf00322 | 15 |
| AX-158156411 | 15 | 11.035 | KV453076.1 | 3368343 | 15-scf00322 | 15 |
| AX-157833102 | 15 | 11.144 | KV453076.1 | 3253402 | 15-scf00322 | 15 |
| AX-157833103 | 15 | 11.144 | KV453076.1 | 3257948 | 15-scf00322 | 15 |



|              |    |        |             |         |             |    |
|--------------|----|--------|-------------|---------|-------------|----|
| AX-157866505 | 15 | 11.144 | KV453076.1  | 3270266 | 15-scf00322 | 15 |
| AX-157833106 | 15 | 11.144 | KV453076.1  | 3272837 | 15-scf00322 | 15 |
| AX-158156359 | 15 | 11.144 | KV453076.1  | 3277514 | 15-scf00322 | 15 |
| AX-158156368 | 15 | 11.144 | KV453076.1  | 3287869 | 15-scf00322 | 15 |
| AX-158156374 | 15 | 11.144 | KV453076.1  | 3307743 | 15-scf00322 | 15 |
| AX-157751561 | 15 | 11.144 | KV453076.1  | 3309330 | 15-scf00322 | 15 |
| AX-158156378 | 15 | 11.144 | KV453076.1  | 3313778 | 15-scf00322 | 15 |
| AX-158156383 | 15 | 11.144 | KV453076.1  | 3320330 | 15-scf00322 | 15 |
| AX-157752979 | 15 | 11.144 | KV453076.1  | 3352081 | 15-scf00322 | 15 |
| AX-158156405 | 15 | 11.144 | KV453076.1  | 3355087 | 15-scf00322 | 15 |
| AX-158380445 | 15 | 11.144 | KV453076.1  | 3365208 | 15-scf00322 | 15 |
| AX-158156413 | 15 | 11.144 | KV453076.1  | 3373076 | 15-scf00322 | 15 |
| AX-157878431 | 15 | 11.144 | KV453076.1  | 3397150 | 15-scf00322 | 15 |
| AX-157833109 | 15 | 11.189 | KV453076.1  | 3279440 | 15-scf00322 | 15 |
| AX-158156375 | 15 | 11.189 | KV453076.1  | 3309924 | 15-scf00322 | 15 |
| AX-158156395 | 15 | 11.189 | KV453076.1  | 3334087 | 15-scf00322 | 15 |
| AX-158156397 | 15 | 11.189 | KV453076.1  | 3335069 | 15-scf00322 | 15 |
| AX-157745567 | 15 | 11.189 | KV453076.1  | 3353904 | 15-scf00322 | 15 |
| AX-158156373 | 15 | 11.222 | KV453076.1  | 3307235 | 15-scf00322 | 15 |
| AX-158156386 | 15 | 11.222 | KV453076.1  | 3322871 | 15-scf00322 | 15 |
| AX-157725665 | 15 | 11.253 | KV453076.1  | 2343962 | 15-scf00322 | 15 |
| AX-157696113 | 15 | 11.253 | KV453076.1  | 2587955 | 15-scf00322 | 15 |
| AX-158156252 | 15 | 11.253 | KV453076.1  | 2996357 | 15-scf00322 | 15 |
| AX-157833105 | 15 | 11.253 | KV453076.1  | 3272221 | 15-scf00322 | 15 |
| AX-157833112 | 15 | 11.253 | KV453076.1  | 3311380 | 15-scf00322 | 15 |
| AX-158156380 | 15 | 11.253 | KV453076.1  | 3317895 | 15-scf00322 | 15 |
| AX-158156390 | 15 | 11.253 | KV453076.1  | 3327773 | 15-scf00322 | 15 |
| AX-157833113 | 15 | 11.253 | KV453076.1  | 3327942 | 15-scf00322 | 15 |
| AX-158156396 | 15 | 11.253 | KV453076.1  | 3334397 | 15-scf00322 | 15 |
| AX-157740927 | 15 | 11.253 | KV453076.1  | 3339773 | 15-scf00322 | 15 |
| AX-158156400 | 15 | 11.253 | KV453076.1  | 3341500 | 15-scf00322 | 15 |
| AX-158412770 | 15 | 11.253 | KV453076.1  | 3344716 | 15-scf00322 | 15 |
| AX-157833114 | 15 | 11.253 | KV453076.1  | 3348138 | 15-scf00322 | 15 |
| AX-157833115 | 15 | 11.253 | KV453076.1  | 3354548 | 15-scf00322 | 15 |
| AX-158156407 | 15 | 11.253 | KV453076.1  | 3357264 | 15-scf00322 | 15 |
| AX-158156415 | 15 | 11.253 | KV453076.1  | 3375133 | 15-scf00322 | 15 |
| AX-158156418 | 15 | 11.253 | KV453076.1  | 3376760 | 15-scf00322 | 15 |
| AX-158156425 | 15 | 11.253 | KV453076.1  | 3384921 | 15-scf00322 | 15 |
| AX-157878430 | 15 | 11.253 | KV453076.1  | 3387098 | 15-scf00322 | 15 |
| AX-158156430 | 15 | 11.253 | KV453076.1  | 3394442 | 15-scf00322 | 15 |
| AX-158156546 | 15 | 11.253 | KV453076.1  | 3538513 | 15-scf00322 | 15 |
| AX-157833151 | 15 | 11.253 | KV453076.1  | 3824032 | 15-scf00322 | 15 |
| AX-157871792 | 15 | 11.253 | KV453076.1  | 3831631 | 15-scf00322 | 15 |
| AX-158156778 | 15 | 11.253 | KV453076.1  | 3844133 | 15-scf00322 | 15 |
| AX-158156782 | 15 | 11.253 | KV453076.1  | 3850924 | 15-scf00322 | 15 |
| AX-157705544 | 15 | 11.253 | 3ML01030189 | 887     | scf05781_1  | UN |
| AX-158156441 | 15 | 11.417 | KV453076.1  | 3409252 | 15-scf00322 | 15 |
| AX-158156443 | 15 | 11.417 | KV453076.1  | 3410793 | 15-scf00322 | 15 |
| AX-158156450 | 15 | 11.58  | KV453076.1  | 3418637 | 15-scf00322 | 15 |
| AX-158156440 | 15 | 11.581 | KV453076.1  | 3408853 | 15-scf00322 | 15 |
| AX-158156451 | 15 | 11.581 | KV453076.1  | 3419455 | 15-scf00322 | 15 |

|              |    |        |            |         |             |    |
|--------------|----|--------|------------|---------|-------------|----|
| AX-158156452 | 15 | 11.581 | KV453076.1 | 3419637 | 15-scf00322 | 15 |
| AX-158156453 | 15 | 11.581 | KV453076.1 | 3420608 | 15-scf00322 | 15 |
| AX-158156454 | 15 | 11.581 | KV453076.1 | 3423404 | 15-scf00322 | 15 |
| AX-158156461 | 15 | 11.581 | KV453076.1 | 3434838 | 15-scf00322 | 15 |
| AX-158156464 | 15 | 11.581 | KV453076.1 | 3438584 | 15-scf00322 | 15 |
| AX-157833119 | 15 | 11.581 | KV453076.1 | 3440775 | 15-scf00322 | 15 |
| AX-158380446 | 15 | 11.581 | KV453076.1 | 3443163 | 15-scf00322 | 15 |
| AX-157750152 | 15 | 11.581 | KV453076.1 | 3443256 | 15-scf00322 | 15 |
| AX-158156468 | 15 | 11.581 | KV453076.1 | 3444058 | 15-scf00322 | 15 |
| AX-158156474 | 15 | 11.581 | KV453076.1 | 3450846 | 15-scf00322 | 15 |
| AX-158156488 | 15 | 11.581 | KV453076.1 | 3468258 | 15-scf00322 | 15 |
| AX-158156497 | 15 | 11.581 | KV453076.1 | 3475907 | 15-scf00322 | 15 |
| AX-158156506 | 15 | 11.581 | KV453076.1 | 3482707 | 15-scf00322 | 15 |
| AX-158156507 | 15 | 11.581 | KV453076.1 | 3483160 | 15-scf00322 | 15 |
| AX-158156508 | 15 | 11.581 | KV453076.1 | 3483677 | 15-scf00322 | 15 |
| AX-158156521 | 15 | 11.581 | KV453076.1 | 3497807 | 15-scf00322 | 15 |
| AX-158156478 | 15 | 11.582 | KV453076.1 | 3456299 | 15-scf00322 | 15 |
| AX-158156479 | 15 | 11.582 | KV453076.1 | 3457217 | 15-scf00322 | 15 |
| AX-158156481 | 15 | 11.582 | KV453076.1 | 3457949 | 15-scf00322 | 15 |
| AX-158156480 | 15 | 11.634 | KV453076.1 | 3457768 | 15-scf00322 | 15 |
| AX-158156463 | 15 | 11.69  | KV453076.1 | 3437554 | 15-scf00322 | 15 |
| AX-158156467 | 15 | 11.69  | KV453076.1 | 3442007 | 15-scf00322 | 15 |
| AX-158156472 | 15 | 11.69  | KV453076.1 | 3449142 | 15-scf00322 | 15 |
| AX-158156473 | 15 | 11.69  | KV453076.1 | 3449707 | 15-scf00322 | 15 |
| AX-158156476 | 15 | 11.69  | KV453076.1 | 3452559 | 15-scf00322 | 15 |
| AX-158412777 | 15 | 11.69  | KV453076.1 | 3459425 | 15-scf00322 | 15 |
| AX-157833122 | 15 | 11.69  | KV453076.1 | 3461496 | 15-scf00322 | 15 |
| AX-158156485 | 15 | 11.69  | KV453076.1 | 3465170 | 15-scf00322 | 15 |
| AX-157775305 | 15 | 11.69  | KV453076.1 | 3467253 | 15-scf00322 | 15 |
| AX-158156492 | 15 | 11.69  | KV453076.1 | 3471565 | 15-scf00322 | 15 |
| AX-158156500 | 15 | 11.69  | KV453076.1 | 3478678 | 15-scf00322 | 15 |
| AX-158156503 | 15 | 11.69  | KV453076.1 | 3479888 | 15-scf00322 | 15 |
| AX-158156504 | 15 | 11.69  | KV453076.1 | 3480823 | 15-scf00322 | 15 |
| AX-158156509 | 15 | 11.69  | KV453076.1 | 3484383 | 15-scf00322 | 15 |
| AX-158156511 | 15 | 11.69  | KV453076.1 | 3486600 | 15-scf00322 | 15 |
| AX-158156513 | 15 | 11.69  | KV453076.1 | 3487486 | 15-scf00322 | 15 |
| AX-157722512 | 15 | 11.69  | KV453076.1 | 3489199 | 15-scf00322 | 15 |
| AX-158156517 | 15 | 11.69  | KV453076.1 | 3492780 | 15-scf00322 | 15 |
| AX-158156525 | 15 | 11.69  | KV453076.1 | 3502504 | 15-scf00322 | 15 |
| AX-158156673 | 15 | 11.69  | KV453076.1 | 3710198 | 15-scf00322 | 15 |
| AX-158156535 | 15 | 11.908 | KV453076.1 | 3520339 | 15-scf00322 | 15 |
| AX-158156538 | 15 | 11.908 | KV453076.1 | 3523485 | 15-scf00322 | 15 |
| AX-158156539 | 15 | 11.908 | KV453076.1 | 3523914 | 15-scf00322 | 15 |
| AX-158156541 | 15 | 11.908 | KV453076.1 | 3525363 | 15-scf00322 | 15 |
| AX-157833124 | 15 | 11.908 | KV453076.1 | 3534186 | 15-scf00322 | 15 |
| AX-158156545 | 15 | 11.908 | KV453076.1 | 3535939 | 15-scf00322 | 15 |
| AX-158156551 | 15 | 11.908 | KV453076.1 | 3544657 | 15-scf00322 | 15 |
| AX-157747568 | 15 | 11.908 | KV453076.1 | 3552883 | 15-scf00322 | 15 |
| AX-158156593 | 15 | 11.908 | KV453076.1 | 3601301 | 15-scf00322 | 15 |
| AX-158156596 | 15 | 11.908 | KV453076.1 | 3604632 | 15-scf00322 | 15 |
| AX-158156623 | 15 | 11.908 | KV453076.1 | 3638499 | 15-scf00322 | 15 |

|              |    |        |             |         |             |    |
|--------------|----|--------|-------------|---------|-------------|----|
| AX-158156642 | 15 | 11.908 | KV453076.1  | 3670308 | 15-scf00322 | 15 |
| AX-157833138 | 15 | 11.908 | KV453076.1  | 3684015 | 15-scf00322 | 15 |
| AX-158156658 | 15 | 11.908 | KV453076.1  | 3688029 | 15-scf00322 | 15 |
| AX-157745712 | 15 | 12.127 | KV453076.1  | 3531126 | 15-scf00322 | 15 |
| AX-158156552 | 15 | 12.127 | KV453076.1  | 3546795 | 15-scf00322 | 15 |
| AX-158412782 | 15 | 12.127 | KV453076.1  | 3553903 | 15-scf00322 | 15 |
| AX-158156555 | 15 | 12.127 | KV453076.1  | 3556636 | 15-scf00322 | 15 |
| AX-158156577 | 15 | 12.127 | KV453076.1  | 3581379 | 15-scf00322 | 15 |
| AX-158156578 | 15 | 12.127 | KV453076.1  | 3583085 | 15-scf00322 | 15 |
| AX-157833126 | 15 | 12.127 | KV453076.1  | 3586551 | 15-scf00322 | 15 |
| AX-158156582 | 15 | 12.127 | KV453076.1  | 3586757 | 15-scf00322 | 15 |
| AX-157833127 | 15 | 12.127 | KV453076.1  | 3590273 | 15-scf00322 | 15 |
| AX-158156588 | 15 | 12.127 | KV453076.1  | 3598508 | 15-scf00322 | 15 |
| AX-158156590 | 15 | 12.127 | KV453076.1  | 3599801 | 15-scf00322 | 15 |
| AX-158156591 | 15 | 12.127 | KV453076.1  | 3600748 | 15-scf00322 | 15 |
| AX-158156598 | 15 | 12.127 | KV453076.1  | 3605223 | 15-scf00322 | 15 |
| AX-158156599 | 15 | 12.127 | KV453076.1  | 3605751 | 15-scf00322 | 15 |
| AX-158156601 | 15 | 12.127 | KV453076.1  | 3606863 | 15-scf00322 | 15 |
| AX-157833129 | 15 | 12.127 | KV453076.1  | 3610172 | 15-scf00322 | 15 |
| AX-158156603 | 15 | 12.127 | KV453076.1  | 3611255 | 15-scf00322 | 15 |
| AX-158156604 | 15 | 12.127 | KV453076.1  | 3611917 | 15-scf00322 | 15 |
| AX-158156606 | 15 | 12.127 | KV453076.1  | 3614484 | 15-scf00322 | 15 |
| AX-158156608 | 15 | 12.127 | KV453076.1  | 3615665 | 15-scf00322 | 15 |
| AX-158156612 | 15 | 12.127 | KV453076.1  | 3618374 | 15-scf00322 | 15 |
| AX-158156620 | 15 | 12.127 | KV453076.1  | 3632362 | 15-scf00322 | 15 |
| AX-157706596 | 15 | 12.127 | 3ML01032543 | 304     | scf08165_1  | UN |
| AX-157706597 | 15 | 12.127 | 3ML01032543 | 410     | scf08165_1  | UN |
| AX-158156622 | 15 | 12.219 | KV453076.1  | 3635093 | 15-scf00322 | 15 |
| AX-158156667 | 15 | 12.219 | KV453076.1  | 3704353 | 15-scf00322 | 15 |
| AX-158156499 | 15 | 12.345 | KV453076.1  | 3477375 | 15-scf00322 | 15 |
| AX-158156524 | 15 | 12.345 | KV453076.1  | 3501639 | 15-scf00322 | 15 |
| AX-158156580 | 15 | 12.345 | KV453076.1  | 3585467 | 15-scf00322 | 15 |
| AX-158156600 | 15 | 12.345 | KV453076.1  | 3606552 | 15-scf00322 | 15 |
| AX-158156624 | 15 | 12.345 | KV453076.1  | 3639889 | 15-scf00322 | 15 |
| AX-158156625 | 15 | 12.345 | KV453076.1  | 3642440 | 15-scf00322 | 15 |
| AX-158156626 | 15 | 12.345 | KV453076.1  | 3644343 | 15-scf00322 | 15 |
| AX-158156627 | 15 | 12.345 | KV453076.1  | 3644963 | 15-scf00322 | 15 |
| AX-158156628 | 15 | 12.345 | KV453076.1  | 3646260 | 15-scf00322 | 15 |
| AX-158156629 | 15 | 12.345 | KV453076.1  | 3646951 | 15-scf00322 | 15 |
| AX-158156630 | 15 | 12.345 | KV453076.1  | 3647526 | 15-scf00322 | 15 |
| AX-158156636 | 15 | 12.345 | KV453076.1  | 3662689 | 15-scf00322 | 15 |
| AX-158156638 | 15 | 12.345 | KV453076.1  | 3663889 | 15-scf00322 | 15 |
| AX-157754844 | 15 | 12.345 | KV453076.1  | 3667323 | 15-scf00322 | 15 |
| AX-158156652 | 15 | 12.345 | KV453076.1  | 3681196 | 15-scf00322 | 15 |
| AX-158156653 | 15 | 12.345 | KV453076.1  | 3681436 | 15-scf00322 | 15 |
| AX-158156655 | 15 | 12.345 | KV453076.1  | 3682742 | 15-scf00322 | 15 |
| AX-158156669 | 15 | 12.345 | KV453076.1  | 3706100 | 15-scf00322 | 15 |
| AX-158156671 | 15 | 12.345 | KV453076.1  | 3707474 | 15-scf00322 | 15 |
| AX-158156679 | 15 | 12.345 | KV453076.1  | 3715831 | 15-scf00322 | 15 |
| AX-158156681 | 15 | 12.345 | KV453076.1  | 3720290 | 15-scf00322 | 15 |
| AX-158156682 | 15 | 12.345 | KV453076.1  | 3720959 | 15-scf00322 | 15 |

|              |    |        |             |         |             |    |
|--------------|----|--------|-------------|---------|-------------|----|
| AX-158156683 | 15 | 12.345 | KV453076.1  | 3721915 | 15-scf00322 | 15 |
| AX-157756997 | 15 | 12.345 | KV453076.1  | 3726038 | 15-scf00322 | 15 |
| AX-158156685 | 15 | 12.345 | KV453076.1  | 3728166 | 15-scf00322 | 15 |
| AX-158156687 | 15 | 12.345 | KV453076.1  | 3729032 | 15-scf00322 | 15 |
| AX-158156690 | 15 | 12.345 | KV453076.1  | 3731318 | 15-scf00322 | 15 |
| AX-158156694 | 15 | 12.345 | KV453076.1  | 3738021 | 15-scf00322 | 15 |
| AX-157833145 | 15 | 12.345 | KV453076.1  | 3741957 | 15-scf00322 | 15 |
| AX-158156740 | 15 | 12.345 | KV453076.1  | 3792390 | 15-scf00322 | 15 |
| AX-157866514 | 15 | 12.345 | KV453076.1  | 3833106 | 15-scf00322 | 15 |
| AX-157833180 | 15 | 12.345 | KV453078.1  | 144561  | 15-scf00323 | 15 |
| AX-157833184 | 15 | 12.345 | KV453078.1  | 165264  | 15-scf00323 | 15 |
| AX-158156700 | 15 | 12.509 | KV453076.1  | 3746989 | 15-scf00322 | 15 |
| AX-158156702 | 15 | 12.509 | KV453076.1  | 3748287 | 15-scf00322 | 15 |
| AX-158156703 | 15 | 12.599 | KV453076.1  | 3749585 | 15-scf00322 | 15 |
| AX-157746706 | 15 | 12.673 | KV453076.1  | 2621445 | 15-scf00322 | 15 |
| AX-158156424 | 15 | 12.673 | KV453076.1  | 3383805 | 15-scf00322 | 15 |
| AX-157742157 | 15 | 12.673 | KV453076.1  | 3622224 | 15-scf00322 | 15 |
| AX-158156706 | 15 | 12.673 | KV453076.1  | 3754089 | 15-scf00322 | 15 |
| AX-158156731 | 15 | 12.673 | KV453076.1  | 3778611 | 15-scf00322 | 15 |
| AX-158156732 | 15 | 12.673 | KV453076.1  | 3784387 | 15-scf00322 | 15 |
| AX-158156733 | 15 | 12.673 | KV453076.1  | 3786275 | 15-scf00322 | 15 |
| AX-158156745 | 15 | 12.673 | KV453076.1  | 3798391 | 15-scf00322 | 15 |
| AX-158156748 | 15 | 12.673 | KV453076.1  | 3803143 | 15-scf00322 | 15 |
| AX-158156749 | 15 | 12.673 | KV453076.1  | 3803814 | 15-scf00322 | 15 |
| AX-157723785 | 15 | 12.673 | KV453076.1  | 3804524 | 15-scf00322 | 15 |
| AX-158156750 | 15 | 12.673 | KV453076.1  | 3805295 | 15-scf00322 | 15 |
| AX-158156753 | 15 | 12.673 | KV453076.1  | 3810989 | 15-scf00322 | 15 |
| AX-158156754 | 15 | 12.673 | KV453076.1  | 3816678 | 15-scf00322 | 15 |
| AX-158156755 | 15 | 12.673 | KV453076.1  | 3816975 | 15-scf00322 | 15 |
| AX-157715448 | 15 | 12.673 | KV453076.1  | 3818220 | 15-scf00322 | 15 |
| AX-158156756 | 15 | 12.673 | KV453076.1  | 3818291 | 15-scf00322 | 15 |
| AX-158156757 | 15 | 12.673 | KV453076.1  | 3818989 | 15-scf00322 | 15 |
| AX-158156759 | 15 | 12.673 | KV453076.1  | 3820551 | 15-scf00322 | 15 |
| AX-158156760 | 15 | 12.673 | KV453076.1  | 3821982 | 15-scf00322 | 15 |
| AX-157741259 | 15 | 12.673 | KV453076.1  | 3822725 | 15-scf00322 | 15 |
| AX-158156761 | 15 | 12.673 | KV453076.1  | 3823178 | 15-scf00322 | 15 |
| AX-157770725 | 15 | 12.673 | KV453076.1  | 3836507 | 15-scf00322 | 15 |
| AX-157866515 | 15 | 12.673 | KV453076.1  | 3838678 | 15-scf00322 | 15 |
| AX-157833152 | 15 | 12.673 | KV453076.1  | 3839327 | 15-scf00322 | 15 |
| AX-157713286 | 15 | 12.673 | KV453076.1  | 3839478 | 15-scf00322 | 15 |
| AX-157773846 | 15 | 12.673 | KV453076.1  | 3848565 | 15-scf00322 | 15 |
| AX-158156787 | 15 | 12.673 | KV453076.1  | 3853416 | 15-scf00322 | 15 |
| AX-157833205 | 15 | 12.673 | KV453078.1  | 274150  | 15-scf00323 | 15 |
| AX-158157304 | 15 | 12.673 | KV453078.1  | 599844  | 15-scf00323 | 15 |
| AX-157705944 | 15 | 12.673 | 3ML01031288 | 749     | scf06896_1  | UN |
| AX-158156794 | 15 | 12.694 | KV453076.1  | 3859705 | 15-scf00322 | 15 |
| AX-158156819 | 15 | 12.694 | KV453076.1  | 3887739 | 15-scf00322 | 15 |
| AX-158156795 | 15 | 12.707 | KV453076.1  | 3860444 | 15-scf00322 | 15 |
| AX-158156796 | 15 | 12.731 | KV453076.1  | 3862457 | 15-scf00322 | 15 |
| AX-158156797 | 15 | 12.748 | KV453076.1  | 3863901 | 15-scf00322 | 15 |
| AX-158156718 | 15 | 12.782 | KV453076.1  | 3771102 | 15-scf00322 | 15 |

|              |    |        |            |         |             |    |
|--------------|----|--------|------------|---------|-------------|----|
| AX-158156799 | 15 | 12.782 | KV453076.1 | 3865838 | 15-scf00322 | 15 |
| AX-158156806 | 15 | 12.782 | KV453076.1 | 3871540 | 15-scf00322 | 15 |
| AX-158156808 | 15 | 12.782 | KV453076.1 | 3872897 | 15-scf00322 | 15 |
| AX-158156809 | 15 | 12.782 | KV453076.1 | 3873589 | 15-scf00322 | 15 |
| AX-158156810 | 15 | 12.782 | KV453076.1 | 3875151 | 15-scf00322 | 15 |
| AX-158156814 | 15 | 12.782 | KV453076.1 | 3883531 | 15-scf00322 | 15 |
| AX-158156815 | 15 | 12.782 | KV453076.1 | 3884334 | 15-scf00322 | 15 |
| AX-158156817 | 15 | 12.782 | KV453076.1 | 3886513 | 15-scf00322 | 15 |
| AX-158156818 | 15 | 12.782 | KV453076.1 | 3887213 | 15-scf00322 | 15 |
| AX-158156820 | 15 | 12.782 | KV453076.1 | 3888262 | 15-scf00322 | 15 |
| AX-158156822 | 15 | 12.782 | KV453076.1 | 3889942 | 15-scf00322 | 15 |
| AX-158156825 | 15 | 12.782 | KV453076.1 | 3890886 | 15-scf00322 | 15 |
| AX-158156826 | 15 | 12.782 | KV453076.1 | 3891490 | 15-scf00322 | 15 |
| AX-158156839 | 15 | 12.782 | KV453076.1 | 3909404 | 15-scf00322 | 15 |
| AX-157709133 | 15 | 13.001 | KV453076.1 | 2309555 | 15-scf00322 | 15 |
| AX-158155923 | 15 | 13.001 | KV453076.1 | 2327276 | 15-scf00322 | 15 |
| AX-158156520 | 15 | 13.001 | KV453076.1 | 3497355 | 15-scf00322 | 15 |
| AX-158156659 | 15 | 13.001 | KV453076.1 | 3688802 | 15-scf00322 | 15 |
| AX-158156720 | 15 | 13.001 | KV453076.1 | 3773138 | 15-scf00322 | 15 |
| AX-158156738 | 15 | 13.001 | KV453076.1 | 3790099 | 15-scf00322 | 15 |
| AX-158156742 | 15 | 13.001 | KV453076.1 | 3793769 | 15-scf00322 | 15 |
| AX-157833155 | 15 | 13.001 | KV453076.1 | 3891804 | 15-scf00322 | 15 |
| AX-158156827 | 15 | 13.001 | KV453076.1 | 3894686 | 15-scf00322 | 15 |
| AX-157713528 | 15 | 13.001 | KV453076.1 | 3899740 | 15-scf00322 | 15 |
| AX-158156829 | 15 | 13.001 | KV453076.1 | 3900356 | 15-scf00322 | 15 |
| AX-158156835 | 15 | 13.001 | KV453076.1 | 3906671 | 15-scf00322 | 15 |
| AX-158156847 | 15 | 13.001 | KV453076.1 | 3917574 | 15-scf00322 | 15 |
| AX-158156848 | 15 | 13.001 | KV453076.1 | 3918506 | 15-scf00322 | 15 |
| AX-158156850 | 15 | 13.001 | KV453076.1 | 3920831 | 15-scf00322 | 15 |
| AX-158156851 | 15 | 13.001 | KV453076.1 | 3921047 | 15-scf00322 | 15 |
| AX-158156856 | 15 | 13.001 | KV453076.1 | 3925341 | 15-scf00322 | 15 |
| AX-158380449 | 15 | 13.001 | KV453076.1 | 3936531 | 15-scf00322 | 15 |
| AX-158412790 | 15 | 13.001 | KV453076.1 | 3955966 | 15-scf00322 | 15 |
| AX-158156960 | 15 | 13.001 | KV453078.1 | 98156   | 15-scf00323 | 15 |
| AX-158156857 | 15 | 13.035 | KV453076.1 | 3928667 | 15-scf00322 | 15 |
| AX-158156743 | 15 | 13.056 | KV453076.1 | 3795310 | 15-scf00322 | 15 |
| AX-158156770 | 15 | 13.056 | KV453076.1 | 3835478 | 15-scf00322 | 15 |
| AX-158156803 | 15 | 13.056 | KV453076.1 | 3867636 | 15-scf00322 | 15 |
| AX-158156859 | 15 | 13.056 | KV453076.1 | 3930425 | 15-scf00322 | 15 |
| AX-157833158 | 15 | 13.081 | KV453076.1 | 3937922 | 15-scf00322 | 15 |
| AX-158156868 | 15 | 13.11  | KV453076.1 | 3941230 | 15-scf00322 | 15 |
| AX-157833159 | 15 | 13.11  | KV453076.1 | 3942916 | 15-scf00322 | 15 |
| AX-158156872 | 15 | 13.11  | KV453076.1 | 3948867 | 15-scf00322 | 15 |
| AX-157719533 | 15 | 13.133 | KV453076.1 | 3951334 | 15-scf00322 | 15 |
| AX-157833157 | 15 | 13.38  | KV453076.1 | 3931680 | 15-scf00322 | 15 |
| AX-158156879 | 15 | 13.38  | KV453076.1 | 3958240 | 15-scf00322 | 15 |
| AX-158156880 | 15 | 13.38  | KV453076.1 | 3958810 | 15-scf00322 | 15 |
| AX-157833161 | 15 | 13.38  | KV453076.1 | 3972459 | 15-scf00322 | 15 |
| AX-157717294 | 15 | 13.656 | KV453076.1 | 3943204 | 15-scf00322 | 15 |
| AX-158156888 | 15 | 13.656 | KV453076.1 | 3979896 | 15-scf00322 | 15 |
| AX-158156889 | 15 | 13.656 | KV453076.1 | 3980848 | 15-scf00322 | 15 |

|              |    |        |            |         |             |    |
|--------------|----|--------|------------|---------|-------------|----|
| AX-157886561 | 15 | 13.656 | KV453076.1 | 3986376 | 15-scf00322 | 15 |
| AX-157744880 | 15 | 13.657 | KV453076.1 | 3986704 | 15-scf00322 | 15 |
| AX-158156891 | 15 | 13.657 | KV453076.1 | 3990304 | 15-scf00322 | 15 |
| AX-157717703 | 15 | 13.657 | KV453076.1 | 3992645 | 15-scf00322 | 15 |
| AX-158156894 | 15 | 13.766 | KV453076.1 | 3999943 | 15-scf00322 | 15 |
| AX-158156897 | 15 | 13.766 | KV453076.1 | 4002864 | 15-scf00322 | 15 |
| AX-158156899 | 15 | 13.766 | KV453076.1 | 4004322 | 15-scf00322 | 15 |
| AX-158156901 | 15 | 13.78  | KV453076.1 | 4008085 | 15-scf00322 | 15 |
| AX-158156902 | 15 | 13.78  | KV453076.1 | 4008497 | 15-scf00322 | 15 |
| AX-157683778 | 15 | 13.798 | KV453077.1 | 833     | 15-scf00324 | 15 |
| AX-158156120 | 15 | 13.817 | KV453076.1 | 2640701 | 15-scf00322 | 15 |
| AX-158156214 | 15 | 13.817 | KV453076.1 | 2866539 | 15-scf00322 | 15 |
| AX-158156281 | 15 | 13.817 | KV453076.1 | 3087853 | 15-scf00322 | 15 |
| AX-157833081 | 15 | 13.817 | KV453076.1 | 3096656 | 15-scf00322 | 15 |
| AX-157748169 | 15 | 13.817 | KV453076.1 | 3097365 | 15-scf00322 | 15 |
| AX-157833085 | 15 | 13.817 | KV453076.1 | 3140271 | 15-scf00322 | 15 |
| AX-158156318 | 15 | 13.817 | KV453076.1 | 3166625 | 15-scf00322 | 15 |
| AX-158156328 | 15 | 13.817 | KV453076.1 | 3194108 | 15-scf00322 | 15 |
| AX-158156356 | 15 | 13.817 | KV453076.1 | 3274287 | 15-scf00322 | 15 |
| AX-158156360 | 15 | 13.817 | KV453076.1 | 3278132 | 15-scf00322 | 15 |
| AX-158156361 | 15 | 13.817 | KV453076.1 | 3279171 | 15-scf00322 | 15 |
| AX-158156381 | 15 | 13.817 | KV453076.1 | 3319373 | 15-scf00322 | 15 |
| AX-158156475 | 15 | 13.817 | KV453076.1 | 3451748 | 15-scf00322 | 15 |
| AX-157886558 | 15 | 13.817 | KV453076.1 | 3468697 | 15-scf00322 | 15 |
| AX-157871789 | 15 | 13.817 | KV453076.1 | 3496006 | 15-scf00322 | 15 |
| AX-158156542 | 15 | 13.817 | KV453076.1 | 3525787 | 15-scf00322 | 15 |
| AX-158156559 | 15 | 13.817 | KV453076.1 | 3562921 | 15-scf00322 | 15 |
| AX-158156579 | 15 | 13.817 | KV453076.1 | 3583980 | 15-scf00322 | 15 |
| AX-158156585 | 15 | 13.817 | KV453076.1 | 3593024 | 15-scf00322 | 15 |
| AX-158156592 | 15 | 13.817 | KV453076.1 | 3601093 | 15-scf00322 | 15 |
| AX-158156597 | 15 | 13.817 | KV453076.1 | 3604891 | 15-scf00322 | 15 |
| AX-157866512 | 15 | 13.817 | KV453076.1 | 3651558 | 15-scf00322 | 15 |
| AX-157726104 | 15 | 13.817 | KV453076.1 | 3695100 | 15-scf00322 | 15 |
| AX-158156663 | 15 | 13.817 | KV453076.1 | 3697121 | 15-scf00322 | 15 |
| AX-157747434 | 15 | 13.817 | KV453076.1 | 3726925 | 15-scf00322 | 15 |
| AX-158156708 | 15 | 13.817 | KV453076.1 | 3757582 | 15-scf00322 | 15 |
| AX-158156717 | 15 | 13.817 | KV453076.1 | 3769810 | 15-scf00322 | 15 |
| AX-158156746 | 15 | 13.817 | KV453076.1 | 3798749 | 15-scf00322 | 15 |
| AX-158156786 | 15 | 13.817 | KV453076.1 | 3853056 | 15-scf00322 | 15 |
| AX-158156790 | 15 | 13.817 | KV453076.1 | 3855710 | 15-scf00322 | 15 |
| AX-158156792 | 15 | 13.817 | KV453076.1 | 3857900 | 15-scf00322 | 15 |
| AX-158156840 | 15 | 13.817 | KV453076.1 | 3910694 | 15-scf00322 | 15 |
| AX-158156875 | 15 | 13.817 | KV453076.1 | 3953852 | 15-scf00322 | 15 |
| AX-158156965 | 15 | 13.817 | KV453078.1 | 102879  | 15-scf00323 | 15 |
| AX-158156985 | 15 | 13.817 | KV453078.1 | 130497  | 15-scf00323 | 15 |
| AX-158156993 | 15 | 13.817 | KV453078.1 | 139834  | 15-scf00323 | 15 |
| AX-158157000 | 15 | 13.817 | KV453078.1 | 148068  | 15-scf00323 | 15 |
| AX-158157074 | 15 | 13.817 | KV453078.1 | 263261  | 15-scf00323 | 15 |
| AX-157833203 | 15 | 13.817 | KV453078.1 | 271555  | 15-scf00323 | 15 |
| AX-158157098 | 15 | 13.817 | KV453078.1 | 296187  | 15-scf00323 | 15 |
| AX-157833209 | 15 | 13.817 | KV453078.1 | 305022  | 15-scf00323 | 15 |

|              |    |        |            |         |             |    |
|--------------|----|--------|------------|---------|-------------|----|
| AX-158157111 | 15 | 13.817 | KV453078.1 | 311886  | 15-scf00323 | 15 |
| AX-157866521 | 15 | 13.817 | KV453078.1 | 410542  | 15-scf00323 | 15 |
| AX-158412799 | 15 | 13.817 | KV453078.1 | 414552  | 15-scf00323 | 15 |
| AX-157772113 | 15 | 13.817 | KV453078.1 | 425534  | 15-scf00323 | 15 |
| AX-157833218 | 15 | 13.817 | KV453078.1 | 431969  | 15-scf00323 | 15 |
| AX-157833222 | 15 | 13.817 | KV453078.1 | 449005  | 15-scf00323 | 15 |
| AX-158157270 | 15 | 13.817 | KV453078.1 | 556610  | 15-scf00323 | 15 |
| AX-158157303 | 15 | 13.817 | KV453078.1 | 599469  | 15-scf00323 | 15 |
| AX-157752793 | 15 | 13.817 | KV453078.1 | 618443  | 15-scf00323 | 15 |
| AX-157833227 | 15 | 13.817 | KV453078.1 | 634801  | 15-scf00323 | 15 |
| AX-158157332 | 15 | 13.817 | KV453078.1 | 634865  | 15-scf00323 | 15 |
| AX-157683779 | 15 | 13.817 | KV453077.1 | 1125    | 15-scf00324 | 15 |
| AX-158156911 | 15 | 13.824 | KV453078.1 | 26439   | 15-scf00323 | 15 |
| AX-158157183 | 15 | 13.824 | KV453078.1 | 450428  | 15-scf00323 | 15 |
| AX-158156918 | 15 | 13.842 | KV453078.1 | 33725   | 15-scf00323 | 15 |
| AX-158156919 | 15 | 13.853 | KV453078.1 | 34355   | 15-scf00323 | 15 |
| AX-158156923 | 15 | 13.862 | KV453078.1 | 37998   | 15-scf00323 | 15 |
| AX-158156924 | 15 | 13.875 | KV453078.1 | 41127   | 15-scf00323 | 15 |
| AX-158156925 | 15 | 13.875 | KV453078.1 | 46670   | 15-scf00323 | 15 |
| AX-157721625 | 15 | 13.875 | KV453078.1 | 48821   | 15-scf00323 | 15 |
| AX-157745893 | 15 | 13.875 | KV453078.1 | 50289   | 15-scf00323 | 15 |
| AX-158156927 | 15 | 13.875 | KV453078.1 | 52134   | 15-scf00323 | 15 |
| AX-158156934 | 15 | 13.875 | KV453078.1 | 67492   | 15-scf00323 | 15 |
| AX-158156935 | 15 | 13.875 | KV453078.1 | 69720   | 15-scf00323 | 15 |
| AX-158156938 | 15 | 13.875 | KV453078.1 | 72760   | 15-scf00323 | 15 |
| AX-158156939 | 15 | 13.875 | KV453078.1 | 73588   | 15-scf00323 | 15 |
| AX-158156964 | 15 | 13.875 | KV453078.1 | 101865  | 15-scf00323 | 15 |
| AX-158156967 | 15 | 13.875 | KV453078.1 | 105135  | 15-scf00323 | 15 |
| AX-158156833 | 15 | 13.904 | KV453076.1 | 3905328 | 15-scf00322 | 15 |
| AX-157743536 | 15 | 13.904 | KV453078.1 | 74860   | 15-scf00323 | 15 |
| AX-158412781 | 15 | 13.929 | KV453076.1 | 3531272 | 15-scf00322 | 15 |
| AX-158156952 | 15 | 13.929 | KV453078.1 | 90444   | 15-scf00323 | 15 |
| AX-158156973 | 15 | 13.929 | KV453078.1 | 114027  | 15-scf00323 | 15 |
| AX-157756436 | 15 | 13.958 | KV453076.1 | 3424070 | 15-scf00322 | 15 |
| AX-158156958 | 15 | 13.958 | KV453078.1 | 95774   | 15-scf00323 | 15 |
| AX-158156989 | 15 | 13.958 | KV453078.1 | 135401  | 15-scf00323 | 15 |
| AX-158156932 | 15 | 13.985 | KV453078.1 | 63762   | 15-scf00323 | 15 |
| AX-158156954 | 15 | 13.985 | KV453078.1 | 91683   | 15-scf00323 | 15 |
| AX-157833174 | 15 | 13.985 | KV453078.1 | 104825  | 15-scf00323 | 15 |
| AX-157833175 | 15 | 13.985 | KV453078.1 | 107744  | 15-scf00323 | 15 |
| AX-157833176 | 15 | 13.985 | KV453078.1 | 116794  | 15-scf00323 | 15 |
| AX-158156979 | 15 | 13.985 | KV453078.1 | 121630  | 15-scf00323 | 15 |
| AX-158156980 | 15 | 13.985 | KV453078.1 | 122000  | 15-scf00323 | 15 |
| AX-157833194 | 15 | 13.985 | KV453078.1 | 199217  | 15-scf00323 | 15 |
| AX-158157058 | 15 | 13.985 | KV453078.1 | 241860  | 15-scf00323 | 15 |
| AX-158156959 | 15 | 14.203 | KV453078.1 | 96848   | 15-scf00323 | 15 |
| AX-158156983 | 15 | 14.203 | KV453078.1 | 129000  | 15-scf00323 | 15 |
| AX-157833178 | 15 | 14.203 | KV453078.1 | 132284  | 15-scf00323 | 15 |
| AX-158156995 | 15 | 14.203 | KV453078.1 | 141175  | 15-scf00323 | 15 |
| AX-157738963 | 15 | 14.203 | KV453078.1 | 142719  | 15-scf00323 | 15 |
| AX-158156997 | 15 | 14.203 | KV453078.1 | 143004  | 15-scf00323 | 15 |

|              |    |        |            |         |             |    |
|--------------|----|--------|------------|---------|-------------|----|
| AX-158156998 | 15 | 14.203 | KV453078.1 | 146157  | 15-scf00323 | 15 |
| AX-158157002 | 15 | 14.203 | KV453078.1 | 151352  | 15-scf00323 | 15 |
| AX-158157005 | 15 | 14.203 | KV453078.1 | 157534  | 15-scf00323 | 15 |
| AX-157833181 | 15 | 14.203 | KV453078.1 | 157941  | 15-scf00323 | 15 |
| AX-157833183 | 15 | 14.203 | KV453078.1 | 161486  | 15-scf00323 | 15 |
| AX-158157052 | 15 | 14.203 | KV453078.1 | 235731  | 15-scf00323 | 15 |
| AX-158156448 | 15 | 14.421 | KV453076.1 | 3417428 | 15-scf00322 | 15 |
| AX-158156536 | 15 | 14.421 | KV453076.1 | 3521210 | 15-scf00322 | 15 |
| AX-158156921 | 15 | 14.421 | KV453078.1 | 36300   | 15-scf00323 | 15 |
| AX-157745143 | 15 | 14.421 | KV453078.1 | 171188  | 15-scf00323 | 15 |
| AX-158157012 | 15 | 14.421 | KV453078.1 | 171533  | 15-scf00323 | 15 |
| AX-158157015 | 15 | 14.421 | KV453078.1 | 176106  | 15-scf00323 | 15 |
| AX-158157017 | 15 | 14.421 | KV453078.1 | 178984  | 15-scf00323 | 15 |
| AX-158157019 | 15 | 14.421 | KV453078.1 | 180547  | 15-scf00323 | 15 |
| AX-158157021 | 15 | 14.421 | KV453078.1 | 183290  | 15-scf00323 | 15 |
| AX-158157023 | 15 | 14.421 | KV453078.1 | 185906  | 15-scf00323 | 15 |
| AX-158157025 | 15 | 14.421 | KV453078.1 | 187876  | 15-scf00323 | 15 |
| AX-158157026 | 15 | 14.421 | KV453078.1 | 190885  | 15-scf00323 | 15 |
| AX-158157027 | 15 | 14.421 | KV453078.1 | 192228  | 15-scf00323 | 15 |
| AX-158157028 | 15 | 14.421 | KV453078.1 | 193023  | 15-scf00323 | 15 |
| AX-157833189 | 15 | 14.421 | KV453078.1 | 195857  | 15-scf00323 | 15 |
| AX-157833192 | 15 | 14.421 | KV453078.1 | 197670  | 15-scf00323 | 15 |
| AX-157833193 | 15 | 14.421 | KV453078.1 | 198061  | 15-scf00323 | 15 |
| AX-158157030 | 15 | 14.421 | KV453078.1 | 199463  | 15-scf00323 | 15 |
| AX-158157032 | 15 | 14.421 | KV453078.1 | 209856  | 15-scf00323 | 15 |
| AX-158157033 | 15 | 14.421 | KV453078.1 | 211576  | 15-scf00323 | 15 |
| AX-158157038 | 15 | 14.421 | KV453078.1 | 217358  | 15-scf00323 | 15 |
| AX-158157039 | 15 | 14.421 | KV453078.1 | 221098  | 15-scf00323 | 15 |
| AX-158157041 | 15 | 14.421 | KV453078.1 | 223334  | 15-scf00323 | 15 |
| AX-158157042 | 15 | 14.421 | KV453078.1 | 225882  | 15-scf00323 | 15 |
| AX-158157043 | 15 | 14.421 | KV453078.1 | 226948  | 15-scf00323 | 15 |
| AX-158157049 | 15 | 14.421 | KV453078.1 | 233678  | 15-scf00323 | 15 |
| AX-158157051 | 15 | 14.421 | KV453078.1 | 234673  | 15-scf00323 | 15 |
| AX-158157054 | 15 | 14.421 | KV453078.1 | 238544  | 15-scf00323 | 15 |
| AX-158157055 | 15 | 14.421 | KV453078.1 | 238811  | 15-scf00323 | 15 |
| AX-157771457 | 15 | 14.421 | KV453078.1 | 243983  | 15-scf00323 | 15 |
| AX-158412797 | 15 | 14.421 | KV453078.1 | 245766  | 15-scf00323 | 15 |
| AX-158157064 | 15 | 14.421 | KV453078.1 | 251280  | 15-scf00323 | 15 |
| AX-158157066 | 15 | 14.421 | KV453078.1 | 253432  | 15-scf00323 | 15 |
| AX-158157067 | 15 | 14.421 | KV453078.1 | 253789  | 15-scf00323 | 15 |
| AX-157747629 | 15 | 14.421 | KV453078.1 | 254664  | 15-scf00323 | 15 |
| AX-158157068 | 15 | 14.421 | KV453078.1 | 255355  | 15-scf00323 | 15 |
| AX-158157071 | 15 | 14.421 | KV453078.1 | 258137  | 15-scf00323 | 15 |
| AX-158157072 | 15 | 14.421 | KV453078.1 | 261349  | 15-scf00323 | 15 |
| AX-158157073 | 15 | 14.421 | KV453078.1 | 262363  | 15-scf00323 | 15 |
| AX-158157076 | 15 | 14.421 | KV453078.1 | 266883  | 15-scf00323 | 15 |
| AX-157718150 | 15 | 14.421 | KV453078.1 | 272515  | 15-scf00323 | 15 |
| AX-158157082 | 15 | 14.421 | KV453078.1 | 276847  | 15-scf00323 | 15 |
| AX-157833207 | 15 | 14.421 | KV453078.1 | 279385  | 15-scf00323 | 15 |
| AX-158157084 | 15 | 14.421 | KV453078.1 | 280358  | 15-scf00323 | 15 |
| AX-158157087 | 15 | 14.421 | KV453078.1 | 282877  | 15-scf00323 | 15 |



|              |    |        |             |         |             |    |
|--------------|----|--------|-------------|---------|-------------|----|
| AX-158157102 | 15 | 14.421 | KV453078.1  | 302146  | 15-scf00323 | 15 |
| AX-157713450 | 15 | 14.421 | KV453078.1  | 309337  | 15-scf00323 | 15 |
| AX-158157119 | 15 | 14.421 | KV453078.1  | 324156  | 15-scf00323 | 15 |
| AX-157756796 | 15 | 14.421 | KV453078.1  | 344798  | 15-scf00323 | 15 |
| AX-158157171 | 15 | 14.421 | KV453078.1  | 420893  | 15-scf00323 | 15 |
| AX-157774070 | 15 | 14.421 | KV453078.1  | 473249  | 15-scf00323 | 15 |
| AX-158157200 | 15 | 14.421 | KV453078.1  | 473811  | 15-scf00323 | 15 |
| AX-158157246 | 15 | 14.421 | KV453078.1  | 524688  | 15-scf00323 | 15 |
| AX-157706785 | 15 | 14.421 | 3ML01032909 | 240     | scf08540_1  | UN |
| AX-157749307 | 15 | 14.43  | KV453076.1  | 3462007 | 15-scf00322 | 15 |
| AX-158156893 | 15 | 14.43  | KV453076.1  | 3999297 | 15-scf00322 | 15 |
| AX-158157086 | 15 | 14.43  | KV453078.1  | 282390  | 15-scf00323 | 15 |
| AX-158157088 | 15 | 14.43  | KV453078.1  | 283789  | 15-scf00323 | 15 |
| AX-158157089 | 15 | 14.43  | KV453078.1  | 284130  | 15-scf00323 | 15 |
| AX-158157048 | 15 | 14.468 | KV453078.1  | 233416  | 15-scf00323 | 15 |
| AX-157694744 | 15 | 14.468 | KV453078.1  | 285339  | 15-scf00323 | 15 |
| AX-158157095 | 15 | 14.468 | KV453078.1  | 291668  | 15-scf00323 | 15 |
| AX-158157099 | 15 | 14.468 | KV453078.1  | 298826  | 15-scf00323 | 15 |
| AX-158157139 | 15 | 14.468 | KV453078.1  | 351258  | 15-scf00323 | 15 |
| AX-158156999 | 15 | 14.495 | KV453078.1  | 147637  | 15-scf00323 | 15 |
| AX-158157093 | 15 | 14.495 | KV453078.1  | 289209  | 15-scf00323 | 15 |
| AX-157746864 | 15 | 14.495 | KV453078.1  | 311793  | 15-scf00323 | 15 |
| AX-158157122 | 15 | 14.495 | KV453078.1  | 328927  | 15-scf00323 | 15 |
| AX-158157156 | 15 | 14.495 | KV453078.1  | 404495  | 15-scf00323 | 15 |
| AX-157833094 | 15 | 14.53  | KV453076.1  | 3193220 | 15-scf00322 | 15 |
| AX-157722321 | 15 | 14.53  | KV453076.1  | 3390453 | 15-scf00322 | 15 |
| AX-158156442 | 15 | 14.53  | KV453076.1  | 3410403 | 15-scf00322 | 15 |
| AX-157699422 | 15 | 14.53  | KV453076.1  | 3415366 | 15-scf00322 | 15 |
| AX-158156447 | 15 | 14.53  | KV453076.1  | 3415996 | 15-scf00322 | 15 |
| AX-158156686 | 15 | 14.53  | KV453076.1  | 3728961 | 15-scf00322 | 15 |
| AX-158156776 | 15 | 14.53  | KV453076.1  | 3842938 | 15-scf00322 | 15 |
| AX-158157050 | 15 | 14.53  | KV453078.1  | 234467  | 15-scf00323 | 15 |
| AX-157775681 | 15 | 14.53  | KV453078.1  | 293463  | 15-scf00323 | 15 |
| AX-158157105 | 15 | 14.53  | KV453078.1  | 306462  | 15-scf00323 | 15 |
| AX-158157110 | 15 | 14.53  | KV453078.1  | 309054  | 15-scf00323 | 15 |
| AX-158157113 | 15 | 14.53  | KV453078.1  | 315001  | 15-scf00323 | 15 |
| AX-157833210 | 15 | 14.53  | KV453078.1  | 325088  | 15-scf00323 | 15 |
| AX-158157123 | 15 | 14.53  | KV453078.1  | 329527  | 15-scf00323 | 15 |
| AX-158157124 | 15 | 14.53  | KV453078.1  | 329996  | 15-scf00323 | 15 |
| AX-158157125 | 15 | 14.53  | KV453078.1  | 331048  | 15-scf00323 | 15 |
| AX-158157126 | 15 | 14.53  | KV453078.1  | 331887  | 15-scf00323 | 15 |
| AX-158157127 | 15 | 14.53  | KV453078.1  | 333084  | 15-scf00323 | 15 |
| AX-158157128 | 15 | 14.53  | KV453078.1  | 334064  | 15-scf00323 | 15 |
| AX-158157129 | 15 | 14.53  | KV453078.1  | 334351  | 15-scf00323 | 15 |
| AX-158157135 | 15 | 14.53  | KV453078.1  | 340637  | 15-scf00323 | 15 |
| AX-158380452 | 15 | 14.53  | KV453078.1  | 345077  | 15-scf00323 | 15 |
| AX-158157137 | 15 | 14.53  | KV453078.1  | 346105  | 15-scf00323 | 15 |
| AX-158157138 | 15 | 14.53  | KV453078.1  | 346800  | 15-scf00323 | 15 |
| AX-158157145 | 15 | 14.53  | KV453078.1  | 363352  | 15-scf00323 | 15 |
| AX-158157147 | 15 | 14.53  | KV453078.1  | 366171  | 15-scf00323 | 15 |
| AX-157833213 | 15 | 14.53  | KV453078.1  | 395630  | 15-scf00323 | 15 |

|              |    |        |            |         |             |    |
|--------------|----|--------|------------|---------|-------------|----|
| AX-158157149 | 15 | 14.53  | KV453078.1 | 396709  | 15-scf00323 | 15 |
| AX-158157150 | 15 | 14.53  | KV453078.1 | 397403  | 15-scf00323 | 15 |
| AX-158157157 | 15 | 14.53  | KV453078.1 | 404970  | 15-scf00323 | 15 |
| AX-158157159 | 15 | 14.53  | KV453078.1 | 406275  | 15-scf00323 | 15 |
| AX-158157160 | 15 | 14.53  | KV453078.1 | 406600  | 15-scf00323 | 15 |
| AX-158157162 | 15 | 14.53  | KV453078.1 | 408905  | 15-scf00323 | 15 |
| AX-158157163 | 15 | 14.53  | KV453078.1 | 409833  | 15-scf00323 | 15 |
| AX-158157165 | 15 | 14.53  | KV453078.1 | 411258  | 15-scf00323 | 15 |
| AX-158157167 | 15 | 14.53  | KV453078.1 | 413766  | 15-scf00323 | 15 |
| AX-158157169 | 15 | 14.53  | KV453078.1 | 415809  | 15-scf00323 | 15 |
| AX-158157173 | 15 | 14.53  | KV453078.1 | 422214  | 15-scf00323 | 15 |
| AX-158157229 | 15 | 14.53  | KV453078.1 | 512184  | 15-scf00323 | 15 |
| AX-158157255 | 15 | 14.53  | KV453078.1 | 540856  | 15-scf00323 | 15 |
| AX-157753750 | 15 | 14.53  | KV453078.1 | 569123  | 15-scf00323 | 15 |
| AX-158157175 | 15 | 14.565 | KV453078.1 | 427689  | 15-scf00323 | 15 |
| AX-158156691 | 15 | 14.639 | KV453076.1 | 3732018 | 15-scf00322 | 15 |
| AX-158156725 | 15 | 14.639 | KV453076.1 | 3775200 | 15-scf00322 | 15 |
| AX-158156881 | 15 | 14.639 | KV453076.1 | 3960085 | 15-scf00322 | 15 |
| AX-158156928 | 15 | 14.639 | KV453078.1 | 53778   | 15-scf00323 | 15 |
| AX-158393265 | 15 | 14.639 | KV453078.1 | 134593  | 15-scf00323 | 15 |
| AX-157833190 | 15 | 14.639 | KV453078.1 | 196087  | 15-scf00323 | 15 |
| AX-158157029 | 15 | 14.639 | KV453078.1 | 196735  | 15-scf00323 | 15 |
| AX-157717405 | 15 | 14.639 | KV453078.1 | 205212  | 15-scf00323 | 15 |
| AX-158157153 | 15 | 14.639 | KV453078.1 | 401392  | 15-scf00323 | 15 |
| AX-157833217 | 15 | 14.639 | KV453078.1 | 427104  | 15-scf00323 | 15 |
| AX-158157177 | 15 | 14.639 | KV453078.1 | 431554  | 15-scf00323 | 15 |
| AX-157715894 | 15 | 14.639 | KV453078.1 | 437503  | 15-scf00323 | 15 |
| AX-157858254 | 15 | 14.639 | KV453078.1 | 438107  | 15-scf00323 | 15 |
| AX-158157180 | 15 | 14.639 | KV453078.1 | 440108  | 15-scf00323 | 15 |
| AX-157739475 | 15 | 14.639 | KV453078.1 | 445782  | 15-scf00323 | 15 |
| AX-157739035 | 15 | 14.639 | KV453078.1 | 450281  | 15-scf00323 | 15 |
| AX-158157184 | 15 | 14.639 | KV453078.1 | 451400  | 15-scf00323 | 15 |
| AX-157833225 | 15 | 14.639 | KV453078.1 | 457974  | 15-scf00323 | 15 |
| AX-158157185 | 15 | 14.639 | KV453078.1 | 458643  | 15-scf00323 | 15 |
| AX-158157186 | 15 | 14.639 | KV453078.1 | 459355  | 15-scf00323 | 15 |
| AX-158412801 | 15 | 14.639 | KV453078.1 | 463981  | 15-scf00323 | 15 |
| AX-157717364 | 15 | 14.639 | KV453078.1 | 468655  | 15-scf00323 | 15 |
| AX-158157201 | 15 | 14.639 | KV453078.1 | 474888  | 15-scf00323 | 15 |
| AX-157725085 | 15 | 14.639 | KV453078.1 | 477846  | 15-scf00323 | 15 |
| AX-158157205 | 15 | 14.639 | KV453078.1 | 480632  | 15-scf00323 | 15 |
| AX-158157206 | 15 | 14.639 | KV453078.1 | 482366  | 15-scf00323 | 15 |
| AX-158157227 | 15 | 14.639 | KV453078.1 | 507694  | 15-scf00323 | 15 |
| AX-158157240 | 15 | 14.639 | KV453078.1 | 520018  | 15-scf00323 | 15 |
| AX-158157266 | 15 | 14.639 | KV453078.1 | 553539  | 15-scf00323 | 15 |
| AX-158157276 | 15 | 14.639 | KV453078.1 | 565493  | 15-scf00323 | 15 |
| AX-158157282 | 15 | 14.639 | KV453078.1 | 578438  | 15-scf00323 | 15 |
| AX-158157310 | 15 | 14.639 | KV453078.1 | 607440  | 15-scf00323 | 15 |
| AX-158156951 | 15 | 14.858 | KV453078.1 | 86152   | 15-scf00323 | 15 |
| AX-158157140 | 15 | 14.858 | KV453078.1 | 352342  | 15-scf00323 | 15 |
| AX-158157176 | 15 | 14.858 | KV453078.1 | 429307  | 15-scf00323 | 15 |
| AX-157858255 | 15 | 14.858 | KV453078.1 | 439041  | 15-scf00323 | 15 |

|              |    |        |            |        |             |    |
|--------------|----|--------|------------|--------|-------------|----|
| AX-157833221 | 15 | 14.858 | KV453078.1 | 446357 | 15-scf00323 | 15 |
| AX-157721289 | 15 | 14.858 | KV453078.1 | 446691 | 15-scf00323 | 15 |
| AX-157709541 | 15 | 14.858 | KV453078.1 | 452366 | 15-scf00323 | 15 |
| AX-158157196 | 15 | 14.858 | KV453078.1 | 468407 | 15-scf00323 | 15 |
| AX-157833226 | 15 | 14.858 | KV453078.1 | 468728 | 15-scf00323 | 15 |
| AX-157772537 | 15 | 14.858 | KV453078.1 | 474376 | 15-scf00323 | 15 |
| AX-158157204 | 15 | 14.858 | KV453078.1 | 479278 | 15-scf00323 | 15 |
| AX-158157207 | 15 | 14.858 | KV453078.1 | 483550 | 15-scf00323 | 15 |
| AX-158157208 | 15 | 14.858 | KV453078.1 | 484418 | 15-scf00323 | 15 |
| AX-158157209 | 15 | 14.858 | KV453078.1 | 485320 | 15-scf00323 | 15 |
| AX-158157213 | 15 | 14.858 | KV453078.1 | 488767 | 15-scf00323 | 15 |
| AX-157741451 | 15 | 14.858 | KV453078.1 | 490856 | 15-scf00323 | 15 |
| AX-158157215 | 15 | 14.858 | KV453078.1 | 493008 | 15-scf00323 | 15 |
| AX-158157218 | 15 | 14.858 | KV453078.1 | 496398 | 15-scf00323 | 15 |
| AX-158157220 | 15 | 14.858 | KV453078.1 | 498331 | 15-scf00323 | 15 |
| AX-158157221 | 15 | 14.858 | KV453078.1 | 498506 | 15-scf00323 | 15 |
| AX-158157224 | 15 | 14.858 | KV453078.1 | 504816 | 15-scf00323 | 15 |
| AX-158157225 | 15 | 14.858 | KV453078.1 | 505711 | 15-scf00323 | 15 |
| AX-158157226 | 15 | 14.858 | KV453078.1 | 506354 | 15-scf00323 | 15 |
| AX-158157233 | 15 | 14.858 | KV453078.1 | 515374 | 15-scf00323 | 15 |
| AX-158157238 | 15 | 14.858 | KV453078.1 | 517514 | 15-scf00323 | 15 |
| AX-157744573 | 15 | 14.858 | KV453078.1 | 521330 | 15-scf00323 | 15 |
| AX-158157245 | 15 | 14.858 | KV453078.1 | 523927 | 15-scf00323 | 15 |
| AX-157866524 | 15 | 14.858 | KV453078.1 | 528817 | 15-scf00323 | 15 |
| AX-158157248 | 15 | 14.858 | KV453078.1 | 529078 | 15-scf00323 | 15 |
| AX-158157250 | 15 | 14.858 | KV453078.1 | 532661 | 15-scf00323 | 15 |
| AX-158157251 | 15 | 14.858 | KV453078.1 | 534974 | 15-scf00323 | 15 |
| AX-158157252 | 15 | 14.858 | KV453078.1 | 537449 | 15-scf00323 | 15 |
| AX-158157253 | 15 | 14.858 | KV453078.1 | 539252 | 15-scf00323 | 15 |
| AX-157744404 | 15 | 14.858 | KV453078.1 | 544190 | 15-scf00323 | 15 |
| AX-158157260 | 15 | 14.858 | KV453078.1 | 547210 | 15-scf00323 | 15 |
| AX-158157262 | 15 | 14.858 | KV453078.1 | 549348 | 15-scf00323 | 15 |
| AX-158157263 | 15 | 14.858 | KV453078.1 | 550662 | 15-scf00323 | 15 |
| AX-158157265 | 15 | 14.858 | KV453078.1 | 552762 | 15-scf00323 | 15 |
| AX-157718292 | 15 | 14.858 | KV453078.1 | 557227 | 15-scf00323 | 15 |
| AX-158157275 | 15 | 14.858 | KV453078.1 | 564740 | 15-scf00323 | 15 |
| AX-158157277 | 15 | 14.858 | KV453078.1 | 567991 | 15-scf00323 | 15 |
| AX-158157281 | 15 | 14.858 | KV453078.1 | 575134 | 15-scf00323 | 15 |
| AX-157708039 | 15 | 14.858 | KV453078.1 | 576215 | 15-scf00323 | 15 |
| AX-158157283 | 15 | 14.858 | KV453078.1 | 579695 | 15-scf00323 | 15 |
| AX-158157284 | 15 | 14.858 | KV453078.1 | 582495 | 15-scf00323 | 15 |
| AX-158157286 | 15 | 14.858 | KV453078.1 | 584216 | 15-scf00323 | 15 |
| AX-158157289 | 15 | 14.858 | KV453078.1 | 585809 | 15-scf00323 | 15 |
| AX-158157295 | 15 | 14.858 | KV453078.1 | 593155 | 15-scf00323 | 15 |
| AX-158157296 | 15 | 14.858 | KV453078.1 | 593716 | 15-scf00323 | 15 |
| AX-158157297 | 15 | 14.858 | KV453078.1 | 595507 | 15-scf00323 | 15 |
| AX-158157305 | 15 | 14.858 | KV453078.1 | 602131 | 15-scf00323 | 15 |
| AX-158157378 | 15 | 14.858 | KV453078.1 | 687329 | 15-scf00323 | 15 |
| AX-157833236 | 15 | 14.858 | KV453078.1 | 723409 | 15-scf00323 | 15 |
| AX-158157423 | 15 | 14.858 | KV453078.1 | 753117 | 15-scf00323 | 15 |
| AX-158157480 | 15 | 14.858 | KV453078.1 | 823691 | 15-scf00323 | 15 |

|              |    |        |            |         |             |    |
|--------------|----|--------|------------|---------|-------------|----|
| AX-158157292 | 15 | 14.859 | KV453078.1 | 589291  | 15-scf00323 | 15 |
| AX-158157300 | 15 | 14.862 | KV453078.1 | 598052  | 15-scf00323 | 15 |
| AX-158157377 | 15 | 15.003 | KV453078.1 | 686878  | 15-scf00323 | 15 |
| AX-158157379 | 15 | 15.003 | KV453078.1 | 687670  | 15-scf00323 | 15 |
| AX-158157439 | 15 | 15.003 | KV453078.1 | 772406  | 15-scf00323 | 15 |
| AX-158157274 | 15 | 15.149 | KV453078.1 | 564207  | 15-scf00323 | 15 |
| AX-158157376 | 15 | 15.149 | KV453078.1 | 686330  | 15-scf00323 | 15 |
| AX-158157381 | 15 | 15.149 | KV453078.1 | 689763  | 15-scf00323 | 15 |
| AX-157746570 | 15 | 15.149 | KV453078.1 | 692362  | 15-scf00323 | 15 |
| AX-158157382 | 15 | 15.149 | KV453078.1 | 695949  | 15-scf00323 | 15 |
| AX-158157440 | 15 | 15.149 | KV453078.1 | 775784  | 15-scf00323 | 15 |
| AX-158157391 | 15 | 15.295 | KV453078.1 | 713259  | 15-scf00323 | 15 |
| AX-158157394 | 15 | 15.295 | KV453078.1 | 719773  | 15-scf00323 | 15 |
| AX-158157395 | 15 | 15.295 | KV453078.1 | 721049  | 15-scf00323 | 15 |
| AX-158157398 | 15 | 15.295 | KV453078.1 | 723099  | 15-scf00323 | 15 |
| AX-157833237 | 15 | 15.295 | KV453078.1 | 729358  | 15-scf00323 | 15 |
| AX-158157404 | 15 | 15.295 | KV453078.1 | 732198  | 15-scf00323 | 15 |
| AX-158157406 | 15 | 15.295 | KV453078.1 | 733828  | 15-scf00323 | 15 |
| AX-158157407 | 15 | 15.295 | KV453078.1 | 734523  | 15-scf00323 | 15 |
| AX-158157411 | 15 | 15.295 | KV453078.1 | 738991  | 15-scf00323 | 15 |
| AX-157833238 | 15 | 15.295 | KV453078.1 | 739525  | 15-scf00323 | 15 |
| AX-158157412 | 15 | 15.295 | KV453078.1 | 740138  | 15-scf00323 | 15 |
| AX-158157413 | 15 | 15.295 | KV453078.1 | 741273  | 15-scf00323 | 15 |
| AX-157710151 | 15 | 15.295 | KV453078.1 | 775676  | 15-scf00323 | 15 |
| AX-157833289 | 15 | 15.295 | KV453078.1 | 1337379 | 15-scf00323 | 15 |
| AX-158158193 | 15 | 15.295 | KV453078.1 | 1857447 | 15-scf00323 | 15 |
| AX-158158322 | 15 | 15.295 | KV453078.1 | 2018843 | 15-scf00323 | 15 |
| AX-157833414 | 15 | 15.295 | KV453080.1 | 14237   | 15-scf00327 | 15 |
| AX-158158853 | 15 | 15.295 | KV453080.1 | 15291   | 15-scf00327 | 15 |
| AX-158159706 | 15 | 15.295 | KV453080.1 | 1539001 | 15-scf00327 | 15 |
| AX-158380467 | 15 | 15.295 | KV453080.1 | 1903649 | 15-scf00327 | 15 |
| AX-158160977 | 15 | 15.295 | KV453080.1 | 5510188 | 15-scf00327 | 15 |
| AX-158161109 | 15 | 15.295 | KV453080.1 | 5783169 | 15-scf00327 | 15 |
| AX-158161111 | 15 | 15.295 | KV453080.1 | 5795139 | 15-scf00327 | 15 |
| AX-158161131 | 15 | 15.295 | KV453080.1 | 5826543 | 15-scf00327 | 15 |
| AX-158161413 | 15 | 15.295 | KV453080.1 | 6524099 | 15-scf00327 | 15 |
| AX-158157203 | 15 | 15.313 | KV453078.1 | 478584  | 15-scf00323 | 15 |
| AX-158412803 | 15 | 15.313 | KV453078.1 | 543130  | 15-scf00323 | 15 |
| AX-158157294 | 15 | 15.313 | KV453078.1 | 592593  | 15-scf00323 | 15 |
| AX-158157302 | 15 | 15.313 | KV453078.1 | 598889  | 15-scf00323 | 15 |
| AX-158157317 | 15 | 15.313 | KV453078.1 | 616779  | 15-scf00323 | 15 |
| AX-158157415 | 15 | 15.313 | KV453078.1 | 744218  | 15-scf00323 | 15 |
| AX-158157429 | 15 | 15.313 | KV453078.1 | 758656  | 15-scf00323 | 15 |
| AX-158157457 | 15 | 15.313 | KV453078.1 | 792291  | 15-scf00323 | 15 |
| AX-158157416 | 15 | 15.339 | KV453078.1 | 745696  | 15-scf00323 | 15 |
| AX-157833239 | 15 | 15.358 | KV453078.1 | 747435  | 15-scf00323 | 15 |
| AX-158157430 | 15 | 15.373 | KV453078.1 | 760097  | 15-scf00323 | 15 |
| AX-158157469 | 15 | 15.373 | KV453078.1 | 803922  | 15-scf00323 | 15 |
| AX-157748402 | 15 | 15.382 | KV453078.1 | 767176  | 15-scf00323 | 15 |
| AX-158157435 | 15 | 15.404 | KV453078.1 | 767556  | 15-scf00323 | 15 |
| AX-157694445 | 15 | 15.404 | KV453078.1 | 768994  | 15-scf00323 | 15 |

|              |    |        |            |         |             |    |
|--------------|----|--------|------------|---------|-------------|----|
| AX-158157441 | 15 | 15.458 | KV453078.1 | 776305  | 15-scf00323 | 15 |
| AX-158157114 | 15 | 15.513 | KV453078.1 | 317595  | 15-scf00323 | 15 |
| AX-158157437 | 15 | 15.513 | KV453078.1 | 769952  | 15-scf00323 | 15 |
| AX-158157442 | 15 | 15.513 | KV453078.1 | 776878  | 15-scf00323 | 15 |
| AX-157747108 | 15 | 15.513 | KV453078.1 | 778481  | 15-scf00323 | 15 |
| AX-157833240 | 15 | 15.513 | KV453078.1 | 778586  | 15-scf00323 | 15 |
| AX-158157443 | 15 | 15.513 | KV453078.1 | 779179  | 15-scf00323 | 15 |
| AX-158157444 | 15 | 15.513 | KV453078.1 | 779407  | 15-scf00323 | 15 |
| AX-158157446 | 15 | 15.513 | KV453078.1 | 782183  | 15-scf00323 | 15 |
| AX-158157452 | 15 | 15.513 | KV453078.1 | 786560  | 15-scf00323 | 15 |
| AX-157713970 | 15 | 15.513 | KV453078.1 | 786860  | 15-scf00323 | 15 |
| AX-158157453 | 15 | 15.513 | KV453078.1 | 788472  | 15-scf00323 | 15 |
| AX-158157454 | 15 | 15.513 | KV453078.1 | 790394  | 15-scf00323 | 15 |
| AX-158157458 | 15 | 15.513 | KV453078.1 | 792759  | 15-scf00323 | 15 |
| AX-158157460 | 15 | 15.513 | KV453078.1 | 795963  | 15-scf00323 | 15 |
| AX-157833243 | 15 | 15.513 | KV453078.1 | 798103  | 15-scf00323 | 15 |
| AX-158157461 | 15 | 15.513 | KV453078.1 | 798499  | 15-scf00323 | 15 |
| AX-158157462 | 15 | 15.513 | KV453078.1 | 800999  | 15-scf00323 | 15 |
| AX-158157464 | 15 | 15.513 | KV453078.1 | 802032  | 15-scf00323 | 15 |
| AX-158157465 | 15 | 15.513 | KV453078.1 | 802285  | 15-scf00323 | 15 |
| AX-158157474 | 15 | 15.513 | KV453078.1 | 813232  | 15-scf00323 | 15 |
| AX-158157482 | 15 | 15.513 | KV453078.1 | 830029  | 15-scf00323 | 15 |
| AX-158157471 | 15 | 15.6   | KV453078.1 | 808163  | 15-scf00323 | 15 |
| AX-157833241 | 15 | 15.686 | KV453078.1 | 781535  | 15-scf00323 | 15 |
| AX-157833244 | 15 | 15.686 | KV453078.1 | 809644  | 15-scf00323 | 15 |
| AX-158157476 | 15 | 15.732 | KV453078.1 | 815970  | 15-scf00323 | 15 |
| AX-158157477 | 15 | 15.732 | KV453078.1 | 818911  | 15-scf00323 | 15 |
| AX-157833247 | 15 | 15.732 | KV453078.1 | 833139  | 15-scf00323 | 15 |
| AX-158157486 | 15 | 15.951 | KV453078.1 | 836265  | 15-scf00323 | 15 |
| AX-158157487 | 15 | 15.951 | KV453078.1 | 837456  | 15-scf00323 | 15 |
| AX-158157489 | 15 | 15.951 | KV453078.1 | 842596  | 15-scf00323 | 15 |
| AX-158157497 | 15 | 16.068 | KV453078.1 | 852824  | 15-scf00323 | 15 |
| AX-158157499 | 15 | 16.115 | KV453078.1 | 855676  | 15-scf00323 | 15 |
| AX-158157501 | 15 | 16.279 | KV453078.1 | 856919  | 15-scf00323 | 15 |
| AX-158157504 | 15 | 16.279 | KV453078.1 | 859033  | 15-scf00323 | 15 |
| AX-158157507 | 15 | 16.279 | KV453078.1 | 863600  | 15-scf00323 | 15 |
| AX-158157508 | 15 | 16.279 | KV453078.1 | 864933  | 15-scf00323 | 15 |
| AX-158157509 | 15 | 16.279 | KV453078.1 | 865804  | 15-scf00323 | 15 |
| AX-158157510 | 15 | 16.279 | KV453078.1 | 866550  | 15-scf00323 | 15 |
| AX-158157511 | 15 | 16.279 | KV453078.1 | 867198  | 15-scf00323 | 15 |
| AX-158157514 | 15 | 16.279 | KV453078.1 | 870632  | 15-scf00323 | 15 |
| AX-157833257 | 15 | 16.279 | KV453078.1 | 888547  | 15-scf00323 | 15 |
| AX-158157527 | 15 | 16.279 | KV453078.1 | 892735  | 15-scf00323 | 15 |
| AX-157858258 | 15 | 16.281 | KV453078.1 | 774294  | 15-scf00323 | 15 |
| AX-158157502 | 15 | 16.281 | KV453078.1 | 858112  | 15-scf00323 | 15 |
| AX-158157515 | 15 | 16.281 | KV453078.1 | 870850  | 15-scf00323 | 15 |
| AX-157833255 | 15 | 16.281 | KV453078.1 | 875413  | 15-scf00323 | 15 |
| AX-157866525 | 15 | 16.281 | KV453078.1 | 969684  | 15-scf00323 | 15 |
| AX-158157969 | 15 | 16.281 | KV453078.1 | 1495283 | 15-scf00323 | 15 |
| AX-158158089 | 15 | 16.281 | KV453078.1 | 1654891 | 15-scf00323 | 15 |
| AX-158158090 | 15 | 16.281 | KV453078.1 | 1657943 | 15-scf00323 | 15 |

|              |    |        |            |         |             |    |
|--------------|----|--------|------------|---------|-------------|----|
| AX-157866531 | 15 | 16.281 | KV453078.1 | 1823632 | 15-scf00323 | 15 |
| AX-158158279 | 15 | 16.281 | KV453078.1 | 1961060 | 15-scf00323 | 15 |
| AX-158158344 | 15 | 16.281 | KV453078.1 | 2056020 | 15-scf00323 | 15 |
| AX-157726669 | 15 | 16.281 | KV453078.1 | 2057998 | 15-scf00323 | 15 |
| AX-158158345 | 15 | 16.281 | KV453078.1 | 2062067 | 15-scf00323 | 15 |
| AX-158158398 | 15 | 16.281 | KV453078.1 | 2133266 | 15-scf00323 | 15 |
| AX-157741387 | 15 | 16.281 | KV453078.1 | 2279103 | 15-scf00323 | 15 |
| AX-158158503 | 15 | 16.281 | KV453078.1 | 2302729 | 15-scf00323 | 15 |
| AX-158158601 | 15 | 16.281 | KV453078.1 | 2439474 | 15-scf00323 | 15 |
| AX-157738613 | 15 | 16.281 | KV453078.1 | 2701686 | 15-scf00323 | 15 |
| AX-158158758 | 15 | 16.281 | KV453078.1 | 2745013 | 15-scf00323 | 15 |
| AX-158158810 | 15 | 16.281 | KV453078.1 | 2823985 | 15-scf00323 | 15 |
| AX-158158826 | 15 | 16.281 | KV453078.1 | 2857035 | 15-scf00323 | 15 |
| AX-158158859 | 15 | 16.281 | KV453080.1 | 27879   | 15-scf00327 | 15 |
| AX-158158874 | 15 | 16.281 | KV453080.1 | 54801   | 15-scf00327 | 15 |
| AX-158158910 | 15 | 16.281 | KV453080.1 | 129256  | 15-scf00327 | 15 |
| AX-158158936 | 15 | 16.281 | KV453080.1 | 205665  | 15-scf00327 | 15 |
| AX-157718868 | 15 | 16.281 | KV453080.1 | 248004  | 15-scf00327 | 15 |
| AX-157758427 | 15 | 16.281 | KV453080.1 | 1942453 | 15-scf00327 | 15 |
| AX-157726334 | 15 | 16.281 | KV453080.1 | 1954165 | 15-scf00327 | 15 |
| AX-158159979 | 15 | 16.281 | KV453080.1 | 2217951 | 15-scf00327 | 15 |
| AX-158160054 | 15 | 16.281 | KV453080.1 | 2470032 | 15-scf00327 | 15 |
| AX-158160071 | 15 | 16.281 | KV453080.1 | 2499901 | 15-scf00327 | 15 |
| AX-158160073 | 15 | 16.281 | KV453080.1 | 2501374 | 15-scf00327 | 15 |
| AX-158160079 | 15 | 16.281 | KV453080.1 | 2506552 | 15-scf00327 | 15 |
| AX-158160080 | 15 | 16.281 | KV453080.1 | 2507404 | 15-scf00327 | 15 |
| AX-157756891 | 15 | 16.281 | KV453080.1 | 2541167 | 15-scf00327 | 15 |
| AX-158160104 | 15 | 16.281 | KV453080.1 | 2568168 | 15-scf00327 | 15 |
| AX-158160150 | 15 | 16.281 | KV453080.1 | 2677813 | 15-scf00327 | 15 |
| AX-158160199 | 15 | 16.281 | KV453080.1 | 2866584 | 15-scf00327 | 15 |
| AX-158160237 | 15 | 16.281 | KV453080.1 | 2948464 | 15-scf00327 | 15 |
| AX-158160268 | 15 | 16.281 | KV453080.1 | 2991202 | 15-scf00327 | 15 |
| AX-157718741 | 15 | 16.281 | KV453080.1 | 3074617 | 15-scf00327 | 15 |
| AX-158160319 | 15 | 16.281 | KV453080.1 | 3123991 | 15-scf00327 | 15 |
| AX-157722848 | 15 | 16.281 | KV453080.1 | 3130732 | 15-scf00327 | 15 |
| AX-157748366 | 15 | 16.281 | KV453080.1 | 3142087 | 15-scf00327 | 15 |
| AX-158160512 | 15 | 16.281 | KV453080.1 | 3943866 | 15-scf00327 | 15 |
| AX-157833700 | 15 | 16.281 | KV453080.1 | 4771427 | 15-scf00327 | 15 |
| AX-158412947 | 15 | 16.281 | KV453080.1 | 4800420 | 15-scf00327 | 15 |
| AX-158412950 | 15 | 16.281 | KV453080.1 | 4836781 | 15-scf00327 | 15 |
| AX-158160745 | 15 | 16.281 | KV453080.1 | 4916495 | 15-scf00327 | 15 |
| AX-158160751 | 15 | 16.281 | KV453080.1 | 4933691 | 15-scf00327 | 15 |
| AX-157763500 | 15 | 16.281 | KV453080.1 | 4933887 | 15-scf00327 | 15 |
| AX-158160792 | 15 | 16.281 | KV453080.1 | 5090391 | 15-scf00327 | 15 |
| AX-158160831 | 15 | 16.281 | KV453080.1 | 5198648 | 15-scf00327 | 15 |
| AX-158160862 | 15 | 16.281 | KV453080.1 | 5305707 | 15-scf00327 | 15 |
| AX-158160927 | 15 | 16.281 | KV453080.1 | 5394484 | 15-scf00327 | 15 |
| AX-158160932 | 15 | 16.281 | KV453080.1 | 5406116 | 15-scf00327 | 15 |
| AX-158160958 | 15 | 16.281 | KV453080.1 | 5449377 | 15-scf00327 | 15 |
| AX-158161005 | 15 | 16.281 | KV453080.1 | 5552104 | 15-scf00327 | 15 |
| AX-157833761 | 15 | 16.281 | KV453080.1 | 5705174 | 15-scf00327 | 15 |

|              |    |        |            |         |             |    |
|--------------|----|--------|------------|---------|-------------|----|
| AX-157833791 | 15 | 16.281 | KV453080.1 | 6005243 | 15-scf00327 | 15 |
| AX-158385704 | 15 | 16.281 | KV453080.1 | 6033675 | 15-scf00327 | 15 |
| AX-158161264 | 15 | 16.281 | KV453080.1 | 6112155 | 15-scf00327 | 15 |
| AX-158161282 | 15 | 16.281 | KV453080.1 | 6147930 | 15-scf00327 | 15 |
| AX-158161287 | 15 | 16.281 | KV453080.1 | 6155891 | 15-scf00327 | 15 |
| AX-158161298 | 15 | 16.281 | KV453080.1 | 6174109 | 15-scf00327 | 15 |
| AX-158161382 | 15 | 16.281 | KV453080.1 | 6408765 | 15-scf00327 | 15 |
| AX-158161394 | 15 | 16.281 | KV453080.1 | 6461514 | 15-scf00327 | 15 |
| AX-157754306 | 15 | 16.281 | KV453080.1 | 6464469 | 15-scf00327 | 15 |
| AX-158157520 | 15 | 16.283 | KV453078.1 | 877054  | 15-scf00323 | 15 |
| AX-158157521 | 15 | 16.284 | KV453078.1 | 878144  | 15-scf00323 | 15 |
| AX-157833274 | 15 | 16.284 | KV453078.1 | 1130238 | 15-scf00323 | 15 |
| AX-157833250 | 15 | 16.286 | KV453078.1 | 864494  | 15-scf00323 | 15 |
| AX-158157523 | 15 | 16.286 | KV453078.1 | 880163  | 15-scf00323 | 15 |
| AX-157833256 | 15 | 16.286 | KV453078.1 | 886713  | 15-scf00323 | 15 |
| AX-158157525 | 15 | 16.287 | KV453078.1 | 887295  | 15-scf00323 | 15 |
| AX-158157528 | 15 | 16.422 | KV453078.1 | 894281  | 15-scf00323 | 15 |
| AX-158157529 | 15 | 16.716 | KV453078.1 | 896193  | 15-scf00323 | 15 |
| AX-158157530 | 15 | 16.716 | KV453078.1 | 896557  | 15-scf00323 | 15 |
| AX-158157532 | 15 | 16.716 | KV453078.1 | 898966  | 15-scf00323 | 15 |
| AX-157833260 | 15 | 16.716 | KV453078.1 | 909017  | 15-scf00323 | 15 |
| AX-157770908 | 15 | 16.716 | KV453078.1 | 909632  | 15-scf00323 | 15 |
| AX-158157540 | 15 | 16.716 | KV453078.1 | 912510  | 15-scf00323 | 15 |
| AX-158157542 | 15 | 16.716 | KV453078.1 | 914339  | 15-scf00323 | 15 |
| AX-158157543 | 15 | 16.716 | KV453078.1 | 915180  | 15-scf00323 | 15 |
| AX-158157546 | 15 | 16.716 | KV453078.1 | 917968  | 15-scf00323 | 15 |
| AX-158380457 | 15 | 16.716 | KV453078.1 | 918593  | 15-scf00323 | 15 |
| AX-158157550 | 15 | 16.716 | KV453078.1 | 922926  | 15-scf00323 | 15 |
| AX-158157551 | 15 | 16.716 | KV453078.1 | 923813  | 15-scf00323 | 15 |
| AX-158157555 | 15 | 16.716 | KV453078.1 | 927233  | 15-scf00323 | 15 |
| AX-157741948 | 15 | 16.716 | KV453078.1 | 929884  | 15-scf00323 | 15 |
| AX-158157559 | 15 | 16.716 | KV453078.1 | 931529  | 15-scf00323 | 15 |
| AX-158157560 | 15 | 16.716 | KV453078.1 | 932012  | 15-scf00323 | 15 |
| AX-158157562 | 15 | 16.716 | KV453078.1 | 933474  | 15-scf00323 | 15 |
| AX-158157564 | 15 | 16.716 | KV453078.1 | 934656  | 15-scf00323 | 15 |
| AX-158157566 | 15 | 16.716 | KV453078.1 | 935599  | 15-scf00323 | 15 |
| AX-157757099 | 15 | 16.716 | KV453078.1 | 940433  | 15-scf00323 | 15 |
| AX-158157574 | 15 | 16.716 | KV453078.1 | 943456  | 15-scf00323 | 15 |
| AX-158157579 | 15 | 16.716 | KV453078.1 | 952394  | 15-scf00323 | 15 |
| AX-158157581 | 15 | 16.716 | KV453078.1 | 953971  | 15-scf00323 | 15 |
| AX-158157588 | 15 | 16.716 | KV453078.1 | 961449  | 15-scf00323 | 15 |
| AX-158157853 | 15 | 16.716 | KV453078.1 | 1325122 | 15-scf00323 | 15 |
| AX-158157556 | 15 | 16.753 | KV453078.1 | 927961  | 15-scf00323 | 15 |
| AX-158157582 | 15 | 16.753 | KV453078.1 | 954913  | 15-scf00323 | 15 |
| AX-157858259 | 15 | 16.783 | KV453078.1 | 957838  | 15-scf00323 | 15 |
| AX-158157593 | 15 | 16.825 | KV453078.1 | 964929  | 15-scf00323 | 15 |
| AX-158157598 | 15 | 16.825 | KV453078.1 | 970879  | 15-scf00323 | 15 |
| AX-158157599 | 15 | 16.825 | KV453078.1 | 972099  | 15-scf00323 | 15 |
| AX-158157601 | 15 | 16.89  | KV453078.1 | 975011  | 15-scf00323 | 15 |
| AX-158157604 | 15 | 16.903 | KV453078.1 | 976743  | 15-scf00323 | 15 |
| AX-158157547 | 15 | 16.906 | KV453078.1 | 918672  | 15-scf00323 | 15 |

|              |    |        |            |         |             |    |
|--------------|----|--------|------------|---------|-------------|----|
| AX-158157572 | 15 | 16.906 | KV453078.1 | 941332  | 15-scf00323 | 15 |
| AX-158157605 | 15 | 16.906 | KV453078.1 | 977089  | 15-scf00323 | 15 |
| AX-158157608 | 15 | 16.906 | KV453078.1 | 978910  | 15-scf00323 | 15 |
| AX-158157612 | 15 | 16.906 | KV453078.1 | 984190  | 15-scf00323 | 15 |
| AX-158157613 | 15 | 16.906 | KV453078.1 | 985540  | 15-scf00323 | 15 |
| AX-158157615 | 15 | 16.906 | KV453078.1 | 986744  | 15-scf00323 | 15 |
| AX-158157617 | 15 | 16.906 | KV453078.1 | 990055  | 15-scf00323 | 15 |
| AX-158157629 | 15 | 16.906 | KV453078.1 | 1015993 | 15-scf00323 | 15 |
| AX-157833264 | 15 | 16.906 | KV453078.1 | 1016249 | 15-scf00323 | 15 |
| AX-158157630 | 15 | 16.906 | KV453078.1 | 1017643 | 15-scf00323 | 15 |
| AX-158157632 | 15 | 16.906 | KV453078.1 | 1021450 | 15-scf00323 | 15 |
| AX-158157633 | 15 | 16.906 | KV453078.1 | 1023442 | 15-scf00323 | 15 |
| AX-158393273 | 15 | 16.906 | KV453078.1 | 1028356 | 15-scf00323 | 15 |
| AX-157714737 | 15 | 16.906 | KV453078.1 | 1032051 | 15-scf00323 | 15 |
| AX-158157642 | 15 | 16.906 | KV453078.1 | 1033550 | 15-scf00323 | 15 |
| AX-158157816 | 15 | 16.906 | KV453078.1 | 1279494 | 15-scf00323 | 15 |
| AX-157833301 | 15 | 16.906 | KV453078.1 | 1388094 | 15-scf00323 | 15 |
| AX-157833261 | 15 | 16.908 | KV453078.1 | 929083  | 15-scf00323 | 15 |
| AX-158157620 | 15 | 16.908 | KV453078.1 | 994901  | 15-scf00323 | 15 |
| AX-157725913 | 15 | 16.908 | KV453078.1 | 996937  | 15-scf00323 | 15 |
| AX-158157414 | 15 | 16.909 | KV453078.1 | 742274  | 15-scf00323 | 15 |
| AX-158157512 | 15 | 16.909 | KV453078.1 | 868207  | 15-scf00323 | 15 |
| AX-158157616 | 15 | 16.909 | KV453078.1 | 989890  | 15-scf00323 | 15 |
| AX-158157621 | 15 | 16.909 | KV453078.1 | 998431  | 15-scf00323 | 15 |
| AX-158157622 | 15 | 16.909 | KV453078.1 | 998834  | 15-scf00323 | 15 |
| AX-158157623 | 15 | 16.909 | KV453078.1 | 1000162 | 15-scf00323 | 15 |
| AX-158157624 | 15 | 16.909 | KV453078.1 | 1001230 | 15-scf00323 | 15 |
| AX-158157625 | 15 | 16.909 | KV453078.1 | 1001480 | 15-scf00323 | 15 |
| AX-158157626 | 15 | 16.909 | KV453078.1 | 1002313 | 15-scf00323 | 15 |
| AX-158157648 | 15 | 16.909 | KV453078.1 | 1042186 | 15-scf00323 | 15 |
| AX-158157649 | 15 | 16.909 | KV453078.1 | 1042655 | 15-scf00323 | 15 |
| AX-157716850 | 15 | 16.909 | KV453078.1 | 1051641 | 15-scf00323 | 15 |
| AX-158157652 | 15 | 16.909 | KV453078.1 | 1052657 | 15-scf00323 | 15 |
| AX-158157654 | 15 | 16.909 | KV453078.1 | 1054066 | 15-scf00323 | 15 |
| AX-158157783 | 15 | 16.909 | KV453078.1 | 1248714 | 15-scf00323 | 15 |
| AX-157683789 | 15 | 16.909 | KV453079.1 | 19795   | 15-scf00326 | 15 |
| AX-157683790 | 15 | 16.909 | KV453079.1 | 20425   | 15-scf00326 | 15 |
| AX-158157631 | 15 | 16.91  | KV453078.1 | 1018465 | 15-scf00323 | 15 |
| AX-158157700 | 15 | 16.912 | KV453078.1 | 1128559 | 15-scf00323 | 15 |
| AX-158157717 | 15 | 16.912 | KV453078.1 | 1152612 | 15-scf00323 | 15 |
| AX-158157634 | 15 | 16.913 | KV453078.1 | 1023728 | 15-scf00323 | 15 |
| AX-158157635 | 15 | 16.915 | KV453078.1 | 1024867 | 15-scf00323 | 15 |
| AX-158157526 | 15 | 16.917 | KV453078.1 | 889230  | 15-scf00323 | 15 |
| AX-158157577 | 15 | 16.917 | KV453078.1 | 949913  | 15-scf00323 | 15 |
| AX-158157664 | 15 | 16.917 | KV453078.1 | 1073961 | 15-scf00323 | 15 |
| AX-158157667 | 15 | 16.917 | KV453078.1 | 1076295 | 15-scf00323 | 15 |
| AX-158157772 | 15 | 16.917 | KV453078.1 | 1230165 | 15-scf00323 | 15 |
| AX-158157493 | 15 | 16.919 | KV453078.1 | 849625  | 15-scf00323 | 15 |
| AX-158157663 | 15 | 16.919 | KV453078.1 | 1071081 | 15-scf00323 | 15 |
| AX-157727849 | 15 | 16.921 | KV453078.1 | 1074030 | 15-scf00323 | 15 |
| AX-158157670 | 15 | 16.923 | KV453078.1 | 1079187 | 15-scf00323 | 15 |



|              |    |        |            |         |             |    |
|--------------|----|--------|------------|---------|-------------|----|
| AX-157757398 | 15 | 16.926 | KV453078.1 | 1085991 | 15-scf00323 | 15 |
| AX-158157675 | 15 | 16.929 | KV453078.1 | 1086190 | 15-scf00323 | 15 |
| AX-157833248 | 15 | 16.931 | KV453078.1 | 860742  | 15-scf00323 | 15 |
| AX-158157677 | 15 | 16.931 | KV453078.1 | 1089623 | 15-scf00323 | 15 |
| AX-158157554 | 15 | 16.935 | KV453078.1 | 926514  | 15-scf00323 | 15 |
| AX-158157590 | 15 | 16.935 | KV453078.1 | 963335  | 15-scf00323 | 15 |
| AX-158157592 | 15 | 16.935 | KV453078.1 | 964581  | 15-scf00323 | 15 |
| AX-158157597 | 15 | 16.935 | KV453078.1 | 970296  | 15-scf00323 | 15 |
| AX-158157628 | 15 | 16.935 | KV453078.1 | 1014906 | 15-scf00323 | 15 |
| AX-158157669 | 15 | 16.935 | KV453078.1 | 1077798 | 15-scf00323 | 15 |
| AX-158157672 | 15 | 16.935 | KV453078.1 | 1081735 | 15-scf00323 | 15 |
| AX-158157674 | 15 | 16.935 | KV453078.1 | 1083368 | 15-scf00323 | 15 |
| AX-158157678 | 15 | 16.935 | KV453078.1 | 1090463 | 15-scf00323 | 15 |
| AX-158157679 | 15 | 16.935 | KV453078.1 | 1090916 | 15-scf00323 | 15 |
| AX-158157680 | 15 | 16.935 | KV453078.1 | 1093063 | 15-scf00323 | 15 |
| AX-158157681 | 15 | 16.935 | KV453078.1 | 1096719 | 15-scf00323 | 15 |
| AX-158157682 | 15 | 16.935 | KV453078.1 | 1099782 | 15-scf00323 | 15 |
| AX-158157683 | 15 | 16.935 | KV453078.1 | 1101359 | 15-scf00323 | 15 |
| AX-158157684 | 15 | 16.935 | KV453078.1 | 1103805 | 15-scf00323 | 15 |
| AX-158157685 | 15 | 16.935 | KV453078.1 | 1104012 | 15-scf00323 | 15 |
| AX-157755018 | 15 | 16.935 | KV453078.1 | 1106474 | 15-scf00323 | 15 |
| AX-158157688 | 15 | 16.935 | KV453078.1 | 1106551 | 15-scf00323 | 15 |
| AX-158157690 | 15 | 16.935 | KV453078.1 | 1108367 | 15-scf00323 | 15 |
| AX-158412808 | 15 | 16.935 | KV453078.1 | 1109333 | 15-scf00323 | 15 |
| AX-157833272 | 15 | 16.935 | KV453078.1 | 1109689 | 15-scf00323 | 15 |
| AX-157698684 | 15 | 16.935 | KV453078.1 | 1113156 | 15-scf00323 | 15 |
| AX-157713108 | 15 | 16.935 | KV453078.1 | 1113337 | 15-scf00323 | 15 |
| AX-158157692 | 15 | 16.935 | KV453078.1 | 1113797 | 15-scf00323 | 15 |
| AX-158157693 | 15 | 16.935 | KV453078.1 | 1115481 | 15-scf00323 | 15 |
| AX-158157694 | 15 | 16.935 | KV453078.1 | 1116453 | 15-scf00323 | 15 |
| AX-158157695 | 15 | 16.935 | KV453078.1 | 1117402 | 15-scf00323 | 15 |
| AX-157740979 | 15 | 16.935 | KV453078.1 | 1129874 | 15-scf00323 | 15 |
| AX-157744033 | 15 | 16.935 | KV453078.1 | 1133832 | 15-scf00323 | 15 |
| AX-158157704 | 15 | 16.935 | KV453078.1 | 1137620 | 15-scf00323 | 15 |
| AX-158157705 | 15 | 16.935 | KV453078.1 | 1140765 | 15-scf00323 | 15 |
| AX-157751002 | 15 | 16.935 | KV453078.1 | 1141946 | 15-scf00323 | 15 |
| AX-158157712 | 15 | 16.935 | KV453078.1 | 1145123 | 15-scf00323 | 15 |
| AX-158157716 | 15 | 16.935 | KV453078.1 | 1152380 | 15-scf00323 | 15 |
| AX-158157718 | 15 | 16.935 | KV453078.1 | 1153679 | 15-scf00323 | 15 |
| AX-158157722 | 15 | 16.935 | KV453078.1 | 1158697 | 15-scf00323 | 15 |
| AX-158157723 | 15 | 16.935 | KV453078.1 | 1160088 | 15-scf00323 | 15 |
| AX-157708000 | 15 | 16.935 | KV453078.1 | 1162814 | 15-scf00323 | 15 |
| AX-158157725 | 15 | 16.935 | KV453078.1 | 1164704 | 15-scf00323 | 15 |
| AX-158157735 | 15 | 16.935 | KV453078.1 | 1179447 | 15-scf00323 | 15 |
| AX-158157739 | 15 | 16.935 | KV453078.1 | 1185141 | 15-scf00323 | 15 |
| AX-158157740 | 15 | 16.935 | KV453078.1 | 1186260 | 15-scf00323 | 15 |
| AX-158157742 | 15 | 16.935 | KV453078.1 | 1187713 | 15-scf00323 | 15 |
| AX-158157747 | 15 | 16.935 | KV453078.1 | 1192025 | 15-scf00323 | 15 |
| AX-158157748 | 15 | 16.935 | KV453078.1 | 1193054 | 15-scf00323 | 15 |
| AX-158157750 | 15 | 16.935 | KV453078.1 | 1194424 | 15-scf00323 | 15 |
| AX-157833279 | 15 | 16.935 | KV453078.1 | 1198923 | 15-scf00323 | 15 |

|              |    |        |            |         |             |    |
|--------------|----|--------|------------|---------|-------------|----|
| AX-157833281 | 15 | 16.935 | KV453078.1 | 1203367 | 15-scf00323 | 15 |
| AX-158157756 | 15 | 16.935 | KV453078.1 | 1208680 | 15-scf00323 | 15 |
| AX-158157759 | 15 | 16.935 | KV453078.1 | 1212967 | 15-scf00323 | 15 |
| AX-158157762 | 15 | 16.935 | KV453078.1 | 1218300 | 15-scf00323 | 15 |
| AX-158157763 | 15 | 16.935 | KV453078.1 | 1220496 | 15-scf00323 | 15 |
| AX-158157764 | 15 | 16.935 | KV453078.1 | 1221441 | 15-scf00323 | 15 |
| AX-158157765 | 15 | 16.935 | KV453078.1 | 1222049 | 15-scf00323 | 15 |
| AX-158157767 | 15 | 16.935 | KV453078.1 | 1223455 | 15-scf00323 | 15 |
| AX-158157770 | 15 | 16.935 | KV453078.1 | 1227326 | 15-scf00323 | 15 |
| AX-158157771 | 15 | 16.935 | KV453078.1 | 1229381 | 15-scf00323 | 15 |
| AX-158157775 | 15 | 16.935 | KV453078.1 | 1237455 | 15-scf00323 | 15 |
| AX-158157777 | 15 | 16.935 | KV453078.1 | 1239456 | 15-scf00323 | 15 |
| AX-157720624 | 15 | 16.935 | KV453078.1 | 1246994 | 15-scf00323 | 15 |
| AX-158157789 | 15 | 16.935 | KV453078.1 | 1253763 | 15-scf00323 | 15 |
| AX-158157790 | 15 | 16.935 | KV453078.1 | 1254261 | 15-scf00323 | 15 |
| AX-158157792 | 15 | 16.935 | KV453078.1 | 1255729 | 15-scf00323 | 15 |
| AX-158157801 | 15 | 16.935 | KV453078.1 | 1266124 | 15-scf00323 | 15 |
| AX-158380459 | 15 | 16.935 | KV453078.1 | 1267128 | 15-scf00323 | 15 |
| AX-158157803 | 15 | 16.935 | KV453078.1 | 1267626 | 15-scf00323 | 15 |
| AX-158157805 | 15 | 16.935 | KV453078.1 | 1269510 | 15-scf00323 | 15 |
| AX-158157806 | 15 | 16.935 | KV453078.1 | 1270037 | 15-scf00323 | 15 |
| AX-158157807 | 15 | 16.935 | KV453078.1 | 1270582 | 15-scf00323 | 15 |
| AX-158157809 | 15 | 16.935 | KV453078.1 | 1271708 | 15-scf00323 | 15 |
| AX-158157813 | 15 | 16.935 | KV453078.1 | 1274643 | 15-scf00323 | 15 |
| AX-158157815 | 15 | 16.935 | KV453078.1 | 1278933 | 15-scf00323 | 15 |
| AX-158157818 | 15 | 16.935 | KV453078.1 | 1281622 | 15-scf00323 | 15 |
| AX-157833287 | 15 | 16.935 | KV453078.1 | 1283275 | 15-scf00323 | 15 |
| AX-158157820 | 15 | 16.935 | KV453078.1 | 1284045 | 15-scf00323 | 15 |
| AX-157709010 | 15 | 16.935 | KV453078.1 | 1285746 | 15-scf00323 | 15 |
| AX-158157821 | 15 | 16.935 | KV453078.1 | 1286954 | 15-scf00323 | 15 |
| AX-158157824 | 15 | 16.935 | KV453078.1 | 1288509 | 15-scf00323 | 15 |
| AX-158157825 | 15 | 16.935 | KV453078.1 | 1289030 | 15-scf00323 | 15 |
| AX-158157831 | 15 | 16.935 | KV453078.1 | 1298348 | 15-scf00323 | 15 |
| AX-157726618 | 15 | 16.935 | KV453078.1 | 1377464 | 15-scf00323 | 15 |
| AX-158156108 | 15 | 17.044 | KV453076.1 | 2594911 | 15-scf00322 | 15 |
| AX-158156196 | 15 | 17.044 | KV453076.1 | 2809980 | 15-scf00322 | 15 |
| AX-157833089 | 15 | 17.044 | KV453076.1 | 3159498 | 15-scf00322 | 15 |
| AX-158156365 | 15 | 17.044 | KV453076.1 | 3281649 | 15-scf00322 | 15 |
| AX-158157505 | 15 | 17.044 | KV453078.1 | 859819  | 15-scf00323 | 15 |
| AX-158157637 | 15 | 17.044 | KV453078.1 | 1027184 | 15-scf00323 | 15 |
| AX-158157661 | 15 | 17.044 | KV453078.1 | 1066876 | 15-scf00323 | 15 |
| AX-158157662 | 15 | 17.044 | KV453078.1 | 1067970 | 15-scf00323 | 15 |
| AX-158157699 | 15 | 17.044 | KV453078.1 | 1125898 | 15-scf00323 | 15 |
| AX-158157732 | 15 | 17.044 | KV453078.1 | 1177739 | 15-scf00323 | 15 |
| AX-157833278 | 15 | 17.044 | KV453078.1 | 1178224 | 15-scf00323 | 15 |
| AX-158157819 | 15 | 17.044 | KV453078.1 | 1281902 | 15-scf00323 | 15 |
| AX-158157833 | 15 | 17.044 | KV453078.1 | 1300238 | 15-scf00323 | 15 |
| AX-158157835 | 15 | 17.044 | KV453078.1 | 1300875 | 15-scf00323 | 15 |
| AX-158157836 | 15 | 17.044 | KV453078.1 | 1301497 | 15-scf00323 | 15 |
| AX-158157845 | 15 | 17.044 | KV453078.1 | 1309370 | 15-scf00323 | 15 |
| AX-158157846 | 15 | 17.044 | KV453078.1 | 1309906 | 15-scf00323 | 15 |

|              |    |        |            |         |             |    |
|--------------|----|--------|------------|---------|-------------|----|
| AX-158157847 | 15 | 17.044 | KV453078.1 | 1310206 | 15-scf00323 | 15 |
| AX-158157848 | 15 | 17.044 | KV453078.1 | 1311967 | 15-scf00323 | 15 |
| AX-158157849 | 15 | 17.044 | KV453078.1 | 1312120 | 15-scf00323 | 15 |
| AX-158157850 | 15 | 17.044 | KV453078.1 | 1313191 | 15-scf00323 | 15 |
| AX-157833296 | 15 | 17.044 | KV453078.1 | 1377011 | 15-scf00323 | 15 |
| AX-157833299 | 15 | 17.044 | KV453078.1 | 1383493 | 15-scf00323 | 15 |
| AX-157833303 | 15 | 17.044 | KV453078.1 | 1395076 | 15-scf00323 | 15 |
| AX-158157941 | 15 | 17.044 | KV453078.1 | 1456515 | 15-scf00323 | 15 |
| AX-157694444 | 15 | 17.262 | KV453078.1 | 768724  | 15-scf00323 | 15 |
| AX-158157522 | 15 | 17.262 | KV453078.1 | 879206  | 15-scf00323 | 15 |
| AX-158157536 | 15 | 17.262 | KV453078.1 | 902000  | 15-scf00323 | 15 |
| AX-157833263 | 15 | 17.262 | KV453078.1 | 981086  | 15-scf00323 | 15 |
| AX-158157641 | 15 | 17.262 | KV453078.1 | 1030537 | 15-scf00323 | 15 |
| AX-158157734 | 15 | 17.262 | KV453078.1 | 1179028 | 15-scf00323 | 15 |
| AX-158157736 | 15 | 17.262 | KV453078.1 | 1181525 | 15-scf00323 | 15 |
| AX-158157737 | 15 | 17.262 | KV453078.1 | 1182989 | 15-scf00323 | 15 |
| AX-158157852 | 15 | 17.262 | KV453078.1 | 1323758 | 15-scf00323 | 15 |
| AX-158157854 | 15 | 17.262 | KV453078.1 | 1327766 | 15-scf00323 | 15 |
| AX-158157855 | 15 | 17.262 | KV453078.1 | 1328476 | 15-scf00323 | 15 |
| AX-157712240 | 15 | 17.262 | KV453078.1 | 1334364 | 15-scf00323 | 15 |
| AX-158157858 | 15 | 17.262 | KV453078.1 | 1335485 | 15-scf00323 | 15 |
| AX-158157860 | 15 | 17.262 | KV453078.1 | 1339861 | 15-scf00323 | 15 |
| AX-158157861 | 15 | 17.262 | KV453078.1 | 1340487 | 15-scf00323 | 15 |
| AX-158157864 | 15 | 17.262 | KV453078.1 | 1342286 | 15-scf00323 | 15 |
| AX-158157865 | 15 | 17.262 | KV453078.1 | 1343072 | 15-scf00323 | 15 |
| AX-158157866 | 15 | 17.262 | KV453078.1 | 1344035 | 15-scf00323 | 15 |
| AX-158157868 | 15 | 17.262 | KV453078.1 | 1346068 | 15-scf00323 | 15 |
| AX-158157869 | 15 | 17.262 | KV453078.1 | 1346404 | 15-scf00323 | 15 |
| AX-157833291 | 15 | 17.262 | KV453078.1 | 1362353 | 15-scf00323 | 15 |
| AX-158157873 | 15 | 17.262 | KV453078.1 | 1363072 | 15-scf00323 | 15 |
| AX-158157874 | 15 | 17.262 | KV453078.1 | 1364539 | 15-scf00323 | 15 |
| AX-158157885 | 15 | 17.262 | KV453078.1 | 1384138 | 15-scf00323 | 15 |
| AX-157878449 | 15 | 17.262 | KV453078.1 | 1388589 | 15-scf00323 | 15 |
| AX-157743132 | 15 | 17.262 | KV453078.1 | 1388740 | 15-scf00323 | 15 |
| AX-157833298 | 15 | 17.48  | KV453078.1 | 1381943 | 15-scf00323 | 15 |
| AX-158157887 | 15 | 17.48  | KV453078.1 | 1390415 | 15-scf00323 | 15 |
| AX-157833302 | 15 | 17.48  | KV453078.1 | 1391373 | 15-scf00323 | 15 |
| AX-158157888 | 15 | 17.48  | KV453078.1 | 1391945 | 15-scf00323 | 15 |
| AX-158157894 | 15 | 17.48  | KV453078.1 | 1405753 | 15-scf00323 | 15 |
| AX-157714515 | 15 | 17.48  | KV453078.1 | 1406647 | 15-scf00323 | 15 |
| AX-158157895 | 15 | 17.48  | KV453078.1 | 1407789 | 15-scf00323 | 15 |
| AX-158157899 | 15 | 17.48  | KV453078.1 | 1410842 | 15-scf00323 | 15 |
| AX-158157900 | 15 | 17.48  | KV453078.1 | 1411451 | 15-scf00323 | 15 |
| AX-158157902 | 15 | 17.48  | KV453078.1 | 1412881 | 15-scf00323 | 15 |
| AX-158157903 | 15 | 17.48  | KV453078.1 | 1413784 | 15-scf00323 | 15 |
| AX-158157904 | 15 | 17.48  | KV453078.1 | 1414161 | 15-scf00323 | 15 |
| AX-158157905 | 15 | 17.48  | KV453078.1 | 1414792 | 15-scf00323 | 15 |
| AX-158157906 | 15 | 17.48  | KV453078.1 | 1416326 | 15-scf00323 | 15 |
| AX-158157908 | 15 | 17.48  | KV453078.1 | 1421787 | 15-scf00323 | 15 |
| AX-158157914 | 15 | 17.48  | KV453078.1 | 1426825 | 15-scf00323 | 15 |
| AX-158157919 | 15 | 17.48  | KV453078.1 | 1438634 | 15-scf00323 | 15 |

|              |    |        |            |         |             |    |
|--------------|----|--------|------------|---------|-------------|----|
| AX-158157927 | 15 | 17.48  | KV453078.1 | 1445412 | 15-scf00323 | 15 |
| AX-157710832 | 15 | 17.48  | KV453078.1 | 1450650 | 15-scf00323 | 15 |
| AX-158157938 | 15 | 17.48  | KV453078.1 | 1453609 | 15-scf00323 | 15 |
| AX-157746427 | 15 | 17.48  | KV453078.1 | 1460044 | 15-scf00323 | 15 |
| AX-158157949 | 15 | 17.48  | KV453078.1 | 1469668 | 15-scf00323 | 15 |
| AX-157694126 | 15 | 17.48  | FI895869.1 | 54      | 15-scf00323 | UN |
| AX-158157907 | 15 | 17.506 | KV453078.1 | 1420972 | 15-scf00323 | 15 |
| AX-158157911 | 15 | 17.526 | KV453078.1 | 1423498 | 15-scf00323 | 15 |
| AX-158157915 | 15 | 17.559 | KV453078.1 | 1427532 | 15-scf00323 | 15 |
| AX-157738567 | 15 | 17.59  | KV453078.1 | 1438009 | 15-scf00323 | 15 |
| AX-158157925 | 15 | 17.59  | KV453078.1 | 1443640 | 15-scf00323 | 15 |
| AX-158157926 | 15 | 17.59  | KV453078.1 | 1444734 | 15-scf00323 | 15 |
| AX-158157931 | 15 | 17.59  | KV453078.1 | 1447706 | 15-scf00323 | 15 |
| AX-158157933 | 15 | 17.59  | KV453078.1 | 1450355 | 15-scf00323 | 15 |
| AX-158157936 | 15 | 17.59  | KV453078.1 | 1452123 | 15-scf00323 | 15 |
| AX-158157937 | 15 | 17.59  | KV453078.1 | 1452922 | 15-scf00323 | 15 |
| AX-157833305 | 15 | 17.59  | KV453078.1 | 1454319 | 15-scf00323 | 15 |
| AX-158157944 | 15 | 17.59  | KV453078.1 | 1462239 | 15-scf00323 | 15 |
| AX-158157950 | 15 | 17.59  | KV453078.1 | 1470471 | 15-scf00323 | 15 |
| AX-158157952 | 15 | 17.59  | KV453078.1 | 1472662 | 15-scf00323 | 15 |
| AX-158157955 | 15 | 17.59  | KV453078.1 | 1475383 | 15-scf00323 | 15 |
| AX-157833307 | 15 | 17.59  | KV453078.1 | 1525515 | 15-scf00323 | 15 |
| AX-158157954 | 15 | 17.699 | KV453078.1 | 1474030 | 15-scf00323 | 15 |
| AX-158157962 | 15 | 17.699 | KV453078.1 | 1482482 | 15-scf00323 | 15 |
| AX-158157964 | 15 | 17.699 | KV453078.1 | 1486179 | 15-scf00323 | 15 |
| AX-157725147 | 15 | 17.699 | KV453078.1 | 1507767 | 15-scf00323 | 15 |
| AX-158157988 | 15 | 17.699 | KV453078.1 | 1510465 | 15-scf00323 | 15 |
| AX-158158004 | 15 | 17.699 | KV453078.1 | 1523167 | 15-scf00323 | 15 |
| AX-157833230 | 15 | 17.808 | KV453078.1 | 697593  | 15-scf00323 | 15 |
| AX-158157408 | 15 | 17.808 | KV453078.1 | 736560  | 15-scf00323 | 15 |
| AX-157833254 | 15 | 17.808 | KV453078.1 | 867086  | 15-scf00323 | 15 |
| AX-157741960 | 15 | 17.808 | KV453078.1 | 1058029 | 15-scf00323 | 15 |
| AX-157833286 | 15 | 17.808 | KV453078.1 | 1255629 | 15-scf00323 | 15 |
| AX-158157814 | 15 | 17.808 | KV453078.1 | 1276525 | 15-scf00323 | 15 |
| AX-157743166 | 15 | 17.808 | KV453078.1 | 1395291 | 15-scf00323 | 15 |
| AX-158157965 | 15 | 17.808 | KV453078.1 | 1488192 | 15-scf00323 | 15 |
| AX-158157967 | 15 | 17.808 | KV453078.1 | 1493310 | 15-scf00323 | 15 |
| AX-158380460 | 15 | 17.808 | KV453078.1 | 1493465 | 15-scf00323 | 15 |
| AX-157741209 | 15 | 17.808 | KV453078.1 | 1493749 | 15-scf00323 | 15 |
| AX-158157973 | 15 | 17.808 | KV453078.1 | 1497345 | 15-scf00323 | 15 |
| AX-158157982 | 15 | 17.808 | KV453078.1 | 1505130 | 15-scf00323 | 15 |
| AX-158157984 | 15 | 17.808 | KV453078.1 | 1506133 | 15-scf00323 | 15 |
| AX-158157985 | 15 | 17.808 | KV453078.1 | 1506916 | 15-scf00323 | 15 |
| AX-158157986 | 15 | 17.808 | KV453078.1 | 1508629 | 15-scf00323 | 15 |
| AX-158157993 | 15 | 17.808 | KV453078.1 | 1513292 | 15-scf00323 | 15 |
| AX-158157994 | 15 | 17.808 | KV453078.1 | 1514603 | 15-scf00323 | 15 |
| AX-158157995 | 15 | 17.808 | KV453078.1 | 1515087 | 15-scf00323 | 15 |
| AX-157858262 | 15 | 17.808 | KV453078.1 | 1516149 | 15-scf00323 | 15 |
| AX-158158000 | 15 | 17.808 | KV453078.1 | 1519347 | 15-scf00323 | 15 |
| AX-158158007 | 15 | 17.808 | KV453078.1 | 1526274 | 15-scf00323 | 15 |
| AX-158158008 | 15 | 17.808 | KV453078.1 | 1527217 | 15-scf00323 | 15 |

|              |    |        |            |         |             |    |
|--------------|----|--------|------------|---------|-------------|----|
| AX-158158010 | 15 | 17.808 | KV453078.1 | 1529408 | 15-scf00323 | 15 |
| AX-158158012 | 15 | 17.808 | KV453078.1 | 1534742 | 15-scf00323 | 15 |
| AX-158158013 | 15 | 17.808 | KV453078.1 | 1535185 | 15-scf00323 | 15 |
| AX-158158015 | 15 | 17.808 | KV453078.1 | 1538923 | 15-scf00323 | 15 |
| AX-158158024 | 15 | 17.808 | KV453078.1 | 1545554 | 15-scf00323 | 15 |
| AX-158158025 | 15 | 17.808 | KV453078.1 | 1546515 | 15-scf00323 | 15 |
| AX-158158027 | 15 | 17.808 | KV453078.1 | 1549639 | 15-scf00323 | 15 |
| AX-158158028 | 15 | 17.808 | KV453078.1 | 1551391 | 15-scf00323 | 15 |
| AX-157753819 | 15 | 17.808 | KV453078.1 | 1560585 | 15-scf00323 | 15 |
| AX-158158034 | 15 | 17.808 | KV453078.1 | 1565736 | 15-scf00323 | 15 |
| AX-158158037 | 15 | 17.808 | KV453078.1 | 1569594 | 15-scf00323 | 15 |
| AX-158158041 | 15 | 17.808 | KV453078.1 | 1573722 | 15-scf00323 | 15 |
| AX-157721940 | 15 | 17.808 | KV453078.1 | 1580220 | 15-scf00323 | 15 |
| AX-158158048 | 15 | 17.808 | KV453078.1 | 1583234 | 15-scf00323 | 15 |
| AX-158158049 | 15 | 17.808 | KV453078.1 | 1583725 | 15-scf00323 | 15 |
| AX-158158050 | 15 | 17.808 | KV453078.1 | 1584947 | 15-scf00323 | 15 |
| AX-158158052 | 15 | 17.808 | KV453078.1 | 1586220 | 15-scf00323 | 15 |
| AX-158158058 | 15 | 17.808 | KV453078.1 | 1595778 | 15-scf00323 | 15 |
| AX-158158063 | 15 | 17.808 | KV453078.1 | 1606716 | 15-scf00323 | 15 |
| AX-158158074 | 15 | 17.808 | KV453078.1 | 1634639 | 15-scf00323 | 15 |
| AX-158158084 | 15 | 17.808 | KV453078.1 | 1649454 | 15-scf00323 | 15 |
| AX-158158096 | 15 | 17.808 | KV453078.1 | 1668929 | 15-scf00323 | 15 |
| AX-158158097 | 15 | 17.808 | KV453078.1 | 1669405 | 15-scf00323 | 15 |
| AX-158158098 | 15 | 17.808 | KV453078.1 | 1671065 | 15-scf00323 | 15 |
| AX-158158099 | 15 | 17.808 | KV453078.1 | 1671477 | 15-scf00323 | 15 |
| AX-158158100 | 15 | 17.808 | KV453078.1 | 1671687 | 15-scf00323 | 15 |
| AX-158158103 | 15 | 17.808 | KV453078.1 | 1677708 | 15-scf00323 | 15 |
| AX-158158159 | 15 | 17.808 | KV453078.1 | 1808032 | 15-scf00323 | 15 |
| AX-158158163 | 15 | 17.808 | KV453078.1 | 1815132 | 15-scf00323 | 15 |
| AX-158158269 | 15 | 17.808 | KV453078.1 | 1949010 | 15-scf00323 | 15 |
| AX-158158298 | 15 | 17.808 | KV453078.1 | 1990019 | 15-scf00323 | 15 |
| AX-158158777 | 15 | 17.808 | KV453078.1 | 2764176 | 15-scf00323 | 15 |
| AX-158417793 | 15 | 17.808 | KV453079.1 | 35800   | 15-scf00326 | 15 |
| AX-158161267 | 15 | 17.808 | KV453080.1 | 6121979 | 15-scf00327 | 15 |
| AX-158157935 | 15 | 17.824 | KV453078.1 | 1451855 | 15-scf00323 | 15 |
| AX-157742880 | 15 | 17.824 | KV453078.1 | 1522677 | 15-scf00323 | 15 |
| AX-158158036 | 15 | 17.824 | KV453078.1 | 1568839 | 15-scf00323 | 15 |
| AX-158158039 | 15 | 17.824 | KV453078.1 | 1570820 | 15-scf00323 | 15 |
| AX-158158064 | 15 | 17.824 | KV453078.1 | 1609058 | 15-scf00323 | 15 |
| AX-158158073 | 15 | 17.824 | KV453078.1 | 1630504 | 15-scf00323 | 15 |
| AX-158408867 | 15 | 17.824 | KV453080.1 | 231067  | 15-scf00327 | 15 |
| AX-158159837 | 15 | 17.824 | KV453080.1 | 1804066 | 15-scf00327 | 15 |
| AX-157723931 | 15 | 17.824 | KV453080.1 | 1824858 | 15-scf00327 | 15 |
| AX-157708578 | 15 | 17.824 | KV453080.1 | 5556801 | 15-scf00327 | 15 |
| AX-158157793 | 15 | 17.917 | KV453078.1 | 1255947 | 15-scf00323 | 15 |
| AX-158157917 | 15 | 17.917 | KV453078.1 | 1428590 | 15-scf00323 | 15 |
| AX-158157991 | 15 | 17.917 | KV453078.1 | 1511434 | 15-scf00323 | 15 |
| AX-158158023 | 15 | 17.917 | KV453078.1 | 1545081 | 15-scf00323 | 15 |
| AX-157833310 | 15 | 17.917 | KV453078.1 | 1549123 | 15-scf00323 | 15 |
| AX-158158040 | 15 | 17.917 | KV453078.1 | 1572064 | 15-scf00323 | 15 |
| AX-158158044 | 15 | 17.917 | KV453078.1 | 1579752 | 15-scf00323 | 15 |

|              |    |        |             |         |             |    |
|--------------|----|--------|-------------|---------|-------------|----|
| AX-157833311 | 15 | 17.917 | KV453078.1  | 1580329 | 15-scf00323 | 15 |
| AX-157833312 | 15 | 17.917 | KV453078.1  | 1606917 | 15-scf00323 | 15 |
| AX-158158065 | 15 | 17.917 | KV453078.1  | 1614771 | 15-scf00323 | 15 |
| AX-158158067 | 15 | 17.917 | KV453078.1  | 1615765 | 15-scf00323 | 15 |
| AX-158158071 | 15 | 17.917 | KV453078.1  | 1627852 | 15-scf00323 | 15 |
| AX-158158072 | 15 | 17.917 | KV453078.1  | 1629952 | 15-scf00323 | 15 |
| AX-158158076 | 15 | 17.917 | KV453078.1  | 1635417 | 15-scf00323 | 15 |
| AX-158412818 | 15 | 17.917 | KV453078.1  | 1648268 | 15-scf00323 | 15 |
| AX-157833314 | 15 | 17.917 | KV453078.1  | 1649551 | 15-scf00323 | 15 |
| AX-158158085 | 15 | 17.917 | KV453078.1  | 1651083 | 15-scf00323 | 15 |
| AX-158158087 | 15 | 17.917 | KV453078.1  | 1651902 | 15-scf00323 | 15 |
| AX-158158101 | 15 | 17.917 | KV453078.1  | 1673180 | 15-scf00323 | 15 |
| AX-158158120 | 15 | 17.917 | KV453078.1  | 1723495 | 15-scf00323 | 15 |
| AX-158158160 | 15 | 17.917 | KV453078.1  | 1808530 | 15-scf00323 | 15 |
| AX-157683781 | 15 | 17.917 | KV453079.1  | 1692    | 15-scf00326 | 15 |
| AX-157680183 | 15 | 17.917 | KV453079.1  | 2140    | 15-scf00326 | 15 |
| AX-157683788 | 15 | 17.917 | KV453079.1  | 18954   | 15-scf00326 | 15 |
| AX-157683792 | 15 | 17.917 | KV453079.1  | 21510   | 15-scf00326 | 15 |
| AX-157683799 | 15 | 17.917 | KV453079.1  | 27074   | 15-scf00326 | 15 |
| AX-158412834 | 15 | 17.917 | KV453079.1  | 33982   | 15-scf00326 | 15 |
| AX-157680706 | 15 | 17.917 | KV453079.1  | 38153   | 15-scf00326 | 15 |
| AX-157683804 | 15 | 17.917 | KV453079.1  | 38720   | 15-scf00326 | 15 |
| AX-157683805 | 15 | 17.917 | KV453079.1  | 39383   | 15-scf00326 | 15 |
| AX-157683807 | 15 | 17.917 | KV453079.1  | 39801   | 15-scf00326 | 15 |
| AX-157683808 | 15 | 17.917 | KV453079.1  | 40123   | 15-scf00326 | 15 |
| AX-157683811 | 15 | 17.917 | KV453079.1  | 42252   | 15-scf00326 | 15 |
| AX-157680707 | 15 | 17.917 | KV453079.1  | 42590   | 15-scf00326 | 15 |
| AX-157683812 | 15 | 17.917 | KV453079.1  | 43776   | 15-scf00326 | 15 |
| AX-157683813 | 15 | 17.917 | KV453079.1  | 43831   | 15-scf00326 | 15 |
| AX-157680708 | 15 | 17.917 | KV453079.1  | 44304   | 15-scf00326 | 15 |
| AX-157688493 | 15 | 17.917 | 3ML01026306 | 1201    | scf01901_1  | UN |
| AX-158157575 | 15 | 18.136 | KV453078.1  | 946847  | 15-scf00323 | 15 |
| AX-158157644 | 15 | 18.136 | KV453078.1  | 1036258 | 15-scf00323 | 15 |
| AX-158158062 | 15 | 18.136 | KV453078.1  | 1605441 | 15-scf00323 | 15 |
| AX-158158106 | 15 | 18.136 | KV453078.1  | 1701253 | 15-scf00323 | 15 |
| AX-157833317 | 15 | 18.136 | KV453078.1  | 1703281 | 15-scf00323 | 15 |
| AX-158158127 | 15 | 18.136 | KV453078.1  | 1732381 | 15-scf00323 | 15 |
| AX-158158130 | 15 | 18.136 | KV453078.1  | 1737107 | 15-scf00323 | 15 |
| AX-158158131 | 15 | 18.136 | KV453078.1  | 1737362 | 15-scf00323 | 15 |
| AX-157833326 | 15 | 18.136 | KV453078.1  | 1737670 | 15-scf00323 | 15 |
| AX-158158138 | 15 | 18.136 | KV453078.1  | 1767278 | 15-scf00323 | 15 |
| AX-157746443 | 15 | 18.136 | KV453078.1  | 1770786 | 15-scf00323 | 15 |
| AX-158158143 | 15 | 18.136 | KV453078.1  | 1779131 | 15-scf00323 | 15 |
| AX-157833327 | 15 | 18.136 | KV453078.1  | 1781451 | 15-scf00323 | 15 |
| AX-158158299 | 15 | 18.136 | KV453078.1  | 1990133 | 15-scf00323 | 15 |
| AX-157705650 | 15 | 18.136 | 3ML01030521 | 847     | scf06121_1  | UN |
| AX-157689928 | 15 | 18.136 |             | 117     | scf13646    | UN |
| AX-157833328 | 15 | 18.169 | KV453078.1  | 1782858 | 15-scf00323 | 15 |
| AX-157833329 | 15 | 18.211 | KV453078.1  | 1783361 | 15-scf00323 | 15 |
| AX-158158146 | 15 | 18.211 | KV453078.1  | 1787227 | 15-scf00323 | 15 |
| AX-158158145 | 15 | 18.245 | KV453078.1  | 1786667 | 15-scf00323 | 15 |

|              |    |        |            |         |             |    |
|--------------|----|--------|------------|---------|-------------|----|
| AX-158158147 | 15 | 18.245 | KV453078.1 | 1787402 | 15-scf00323 | 15 |
| AX-158158151 | 15 | 18.245 | KV453078.1 | 1792628 | 15-scf00323 | 15 |
| AX-157833330 | 15 | 18.245 | KV453078.1 | 1793222 | 15-scf00323 | 15 |
| AX-158158153 | 15 | 18.245 | KV453078.1 | 1796347 | 15-scf00323 | 15 |
| AX-158158154 | 15 | 18.245 | KV453078.1 | 1797329 | 15-scf00323 | 15 |
| AX-158158155 | 15 | 18.245 | KV453078.1 | 1800860 | 15-scf00323 | 15 |
| AX-157746165 | 15 | 18.245 | KV453078.1 | 1802910 | 15-scf00323 | 15 |
| AX-158158157 | 15 | 18.245 | KV453078.1 | 1805732 | 15-scf00323 | 15 |
| AX-158158165 | 15 | 18.277 | KV453078.1 | 1816598 | 15-scf00323 | 15 |
| AX-158158166 | 15 | 18.354 | KV453078.1 | 1817045 | 15-scf00323 | 15 |
| AX-157858265 | 15 | 18.354 | KV453078.1 | 1822128 | 15-scf00323 | 15 |
| AX-158158171 | 15 | 18.354 | KV453078.1 | 1825659 | 15-scf00323 | 15 |
| AX-157858266 | 15 | 18.354 | KV453078.1 | 1825907 | 15-scf00323 | 15 |
| AX-158158173 | 15 | 18.393 | KV453078.1 | 1827470 | 15-scf00323 | 15 |
| AX-157752661 | 15 | 18.427 | KV453078.1 | 1832616 | 15-scf00323 | 15 |
| AX-157693129 | 15 | 18.463 | KV453078.1 | 1390312 | 15-scf00323 | 15 |
| AX-158417778 | 15 | 18.463 | KV453078.1 | 1752116 | 15-scf00323 | 15 |
| AX-157878451 | 15 | 18.463 | KV453078.1 | 1752958 | 15-scf00323 | 15 |
| AX-157871804 | 15 | 18.463 | KV453078.1 | 1766595 | 15-scf00323 | 15 |
| AX-158158139 | 15 | 18.463 | KV453078.1 | 1771158 | 15-scf00323 | 15 |
| AX-158158140 | 15 | 18.463 | KV453078.1 | 1772376 | 15-scf00323 | 15 |
| AX-158158187 | 15 | 18.463 | KV453078.1 | 1848148 | 15-scf00323 | 15 |
| AX-157773221 | 15 | 18.463 | KV453078.1 | 1853245 | 15-scf00323 | 15 |
| AX-158158197 | 15 | 18.463 | KV453078.1 | 1862468 | 15-scf00323 | 15 |
| AX-158158205 | 15 | 18.463 | KV453078.1 | 1873290 | 15-scf00323 | 15 |
| AX-158158206 | 15 | 18.463 | KV453078.1 | 1873520 | 15-scf00323 | 15 |
| AX-158158207 | 15 | 18.463 | KV453078.1 | 1875788 | 15-scf00323 | 15 |
| AX-157757703 | 15 | 18.463 | KV453078.1 | 1878110 | 15-scf00323 | 15 |
| AX-157740541 | 15 | 18.463 | KV453078.1 | 1879412 | 15-scf00323 | 15 |
| AX-157708392 | 15 | 18.463 | KV453078.1 | 1915576 | 15-scf00323 | 15 |
| AX-158158255 | 15 | 18.463 | KV453078.1 | 1926082 | 15-scf00323 | 15 |
| AX-158158214 | 15 | 18.483 | KV453078.1 | 1888980 | 15-scf00323 | 15 |
| AX-158158215 | 15 | 18.499 | KV453078.1 | 1890106 | 15-scf00323 | 15 |
| AX-158158216 | 15 | 18.517 | KV453078.1 | 1890817 | 15-scf00323 | 15 |
| AX-158158223 | 15 | 18.533 | KV453078.1 | 1895812 | 15-scf00323 | 15 |
| AX-158158231 | 15 | 18.533 | KV453078.1 | 1904203 | 15-scf00323 | 15 |
| AX-158158246 | 15 | 18.533 | KV453078.1 | 1916682 | 15-scf00323 | 15 |
| AX-158158272 | 15 | 18.533 | KV453078.1 | 1952710 | 15-scf00323 | 15 |
| AX-158158224 | 15 | 18.557 | KV453078.1 | 1896293 | 15-scf00323 | 15 |
| AX-158158227 | 15 | 18.575 | KV453078.1 | 1898944 | 15-scf00323 | 15 |
| AX-157871805 | 15 | 18.601 | KV453078.1 | 1899916 | 15-scf00323 | 15 |
| AX-158158150 | 15 | 18.627 | KV453078.1 | 1791399 | 15-scf00323 | 15 |
| AX-158158152 | 15 | 18.627 | KV453078.1 | 1793009 | 15-scf00323 | 15 |
| AX-158158156 | 15 | 18.627 | KV453078.1 | 1805387 | 15-scf00323 | 15 |
| AX-157774733 | 15 | 18.627 | KV453078.1 | 1900562 | 15-scf00323 | 15 |
| AX-158158230 | 15 | 18.645 | KV453078.1 | 1902755 | 15-scf00323 | 15 |
| AX-158158234 | 15 | 18.65  | KV453078.1 | 1908000 | 15-scf00323 | 15 |
| AX-158158268 | 15 | 18.65  | KV453078.1 | 1948583 | 15-scf00323 | 15 |
| AX-158158270 | 15 | 18.65  | KV453078.1 | 1950998 | 15-scf00323 | 15 |
| AX-158158235 | 15 | 18.656 | KV453078.1 | 1909402 | 15-scf00323 | 15 |
| AX-158158236 | 15 | 18.671 | KV453078.1 | 1909785 | 15-scf00323 | 15 |

|              |    |        |            |         |                |    |
|--------------|----|--------|------------|---------|----------------|----|
| AX-158158175 | 15 | 18.674 | KV453078.1 | 1831498 | 15-scf00323    | 15 |
| AX-158158210 | 15 | 18.674 | KV453078.1 | 1882731 | 15-scf00323    | 15 |
| AX-158158238 | 15 | 18.674 | KV453078.1 | 1910773 | 15-scf00323    | 15 |
| AX-158158259 | 15 | 18.674 | KV453078.1 | 1932899 | 15-scf00323    | 15 |
| AX-158158174 | 15 | 18.682 | KV453078.1 | 1831127 | 15-scf00323    | 15 |
| AX-157723764 | 15 | 18.682 | KV453078.1 | 1833499 | 15-scf00323    | 15 |
| AX-158158244 | 15 | 18.682 | KV453078.1 | 1914723 | 15-scf00323    | 15 |
| AX-158158247 | 15 | 18.682 | KV453078.1 | 1917156 | 15-scf00323    | 15 |
| AX-158158249 | 15 | 18.682 | KV453078.1 | 1920170 | 15-scf00323    | 15 |
| AX-158158256 | 15 | 18.682 | KV453078.1 | 1926992 | 15-scf00323    | 15 |
| AX-158158265 | 15 | 18.682 | KV453078.1 | 1944291 | 15-scf00323    | 15 |
| AX-158158267 | 15 | 18.682 | KV453078.1 | 1946452 | 15-scf00323    | 15 |
| AX-157747564 | 15 | 18.682 | KV453078.1 | 1947533 | 15-scf00323    | 15 |
| AX-158158271 | 15 | 18.682 | KV453078.1 | 1951984 | 15-scf00323    | 15 |
| AX-157833335 | 15 | 18.682 | KV453078.1 | 1962403 | 15-scf00323    | 15 |
| AX-158158209 | 15 | 18.702 | KV453078.1 | 1882349 | 15-scf00323    | 15 |
| AX-158158239 | 15 | 18.702 | KV453078.1 | 1911788 | 15-scf00323    | 15 |
| AX-158158275 | 15 | 18.702 | KV453078.1 | 1955764 | 15-scf00323    | 15 |
| AX-157771431 | 15 | 18.702 | KV453078.1 | 2282270 | 15-scf00323    | 15 |
| AX-158158602 | 15 | 18.702 | KV453078.1 | 2439858 | 15-scf00323    | 15 |
| AX-158158632 | 15 | 18.702 | KV453078.1 | 2508746 | 15-scf00323    | 15 |
| AX-158158756 | 15 | 18.702 | KV453078.1 | 2736801 | 15-scf00323    | 15 |
| AX-158158764 | 15 | 18.702 | KV453078.1 | 2751957 | 15-scf00323    | 15 |
| AX-158158767 | 15 | 18.702 | KV453078.1 | 2754633 | 15-scf00323    | 15 |
| AX-158159985 | 15 | 18.702 | KV453080.1 | 2241480 | 15-scf00327    | 15 |
| AX-158160991 | 15 | 18.702 | KV453080.1 | 5528214 | 15-scf00327    | 15 |
| AX-157724406 | 15 | 18.702 | KV453080.1 | 5539456 | 15-scf00327    | 15 |
| AX-158161168 | 15 | 18.702 | KV453080.1 | 5889181 | 15-scf00327    | 15 |
| AX-157718734 | 15 | 18.702 | KV453080.1 | 6367605 | 15-scf00327    | 15 |
| AX-158158281 | 15 | 18.773 | KV453078.1 | 1964082 | 15-scf00323    | 15 |
| AX-158158167 | 15 | 18.791 | KV453078.1 | 1819322 | 15-scf00323    | 15 |
| AX-158158189 | 15 | 18.791 | KV453078.1 | 1850146 | 15-scf00323    | 15 |
| AX-157747365 | 15 | 18.791 | KV453078.1 | 1856233 | 15-scf00323    | 15 |
| AX-158158203 | 15 | 18.791 | KV453078.1 | 1871659 | 15-scf00323    | 15 |
| AX-158158212 | 15 | 18.791 | KV453078.1 | 1886146 | 15-scf00323    | 15 |
| AX-158158213 | 15 | 18.791 | KV453078.1 | 1888449 | 15-scf00323    | 15 |
| AX-158158218 | 15 | 18.791 | KV453078.1 | 1891639 | 15-scf00323    | 15 |
| AX-158158243 | 15 | 18.791 | KV453078.1 | 1914541 | 15-scf00323    | 15 |
| AX-158158252 | 15 | 18.791 | KV453078.1 | 1923530 | 15-scf00323    | 15 |
| AX-158158260 | 15 | 18.791 | KV453078.1 | 1936028 | 15-scf00323    | 15 |
| AX-158158261 | 15 | 18.791 | KV453078.1 | 1937570 | 15-scf00323    | 15 |
| AX-157757085 | 15 | 18.791 | KV453078.1 | 1941234 | 15-scf00323    | 15 |
| AX-158158286 | 15 | 18.791 | KV453078.1 | 1968934 | 15-scf00323    | 15 |
| AX-157701163 | 15 | 18.791 | DX083561.1 | 92      | 10RI212 lctalt | UN |
| AX-158412825 | 15 | 19.104 | KV453078.1 | 1970949 | 15-scf00323    | 15 |
| AX-158158287 | 15 | 19.104 | KV453078.1 | 1972537 | 15-scf00323    | 15 |
| AX-158158288 | 15 | 19.149 | KV453078.1 | 1973786 | 15-scf00323    | 15 |
| AX-158158289 | 15 | 19.149 | KV453078.1 | 1974747 | 15-scf00323    | 15 |
| AX-158158290 | 15 | 19.445 | KV453078.1 | 1975405 | 15-scf00323    | 15 |
| AX-158158291 | 15 | 19.446 | KV453078.1 | 1977070 | 15-scf00323    | 15 |
| AX-158158292 | 15 | 19.446 | KV453078.1 | 1980608 | 15-scf00323    | 15 |



|              |    |        |            |         |             |    |
|--------------|----|--------|------------|---------|-------------|----|
| AX-158158293 | 15 | 19.594 | KV453078.1 | 1981967 | 15-scf00323 | 15 |
| AX-158158296 | 15 | 19.742 | KV453078.1 | 1986263 | 15-scf00323 | 15 |
| AX-158158301 | 15 | 19.771 | KV453078.1 | 1991383 | 15-scf00323 | 15 |
| AX-158158303 | 15 | 19.815 | KV453078.1 | 1992866 | 15-scf00323 | 15 |
| AX-158158305 | 15 | 19.868 | KV453078.1 | 1995052 | 15-scf00323 | 15 |
| AX-158158310 | 15 | 19.868 | KV453078.1 | 2002203 | 15-scf00323 | 15 |
| AX-157833338 | 15 | 19.868 | KV453078.1 | 2006380 | 15-scf00323 | 15 |
| AX-158158326 | 15 | 19.868 | KV453078.1 | 2023180 | 15-scf00323 | 15 |
| AX-157833340 | 15 | 19.868 | KV453078.1 | 2026818 | 15-scf00323 | 15 |
| AX-157833341 | 15 | 19.869 | KV453078.1 | 2028651 | 15-scf00323 | 15 |
| AX-158158295 | 15 | 19.888 | KV453078.1 | 1984745 | 15-scf00323 | 15 |
| AX-158158300 | 15 | 19.888 | KV453078.1 | 1990733 | 15-scf00323 | 15 |
| AX-158158308 | 15 | 19.888 | KV453078.1 | 1997694 | 15-scf00323 | 15 |
| AX-158158313 | 15 | 19.888 | KV453078.1 | 2006750 | 15-scf00323 | 15 |
| AX-158158323 | 15 | 19.888 | KV453078.1 | 2021184 | 15-scf00323 | 15 |
| AX-157833343 | 15 | 19.888 | KV453078.1 | 2032502 | 15-scf00323 | 15 |
| AX-158158331 | 15 | 20.106 | KV453078.1 | 2038233 | 15-scf00323 | 15 |
| AX-158158333 | 15 | 20.32  | KV453078.1 | 2039660 | 15-scf00323 | 15 |
| AX-158157611 | 15 | 20.321 | KV453078.1 | 983783  | 15-scf00323 | 15 |
| AX-158157968 | 15 | 20.321 | KV453078.1 | 1494371 | 15-scf00323 | 15 |
| AX-158157976 | 15 | 20.321 | KV453078.1 | 1499383 | 15-scf00323 | 15 |
| AX-158158030 | 15 | 20.321 | KV453078.1 | 1556316 | 15-scf00323 | 15 |
| AX-158158136 | 15 | 20.321 | KV453078.1 | 1752214 | 15-scf00323 | 15 |
| AX-158158182 | 15 | 20.321 | KV453078.1 | 1842087 | 15-scf00323 | 15 |
| AX-158158191 | 15 | 20.321 | KV453078.1 | 1855481 | 15-scf00323 | 15 |
| AX-158158233 | 15 | 20.321 | KV453078.1 | 1907532 | 15-scf00323 | 15 |
| AX-158158315 | 15 | 20.321 | KV453078.1 | 2008673 | 15-scf00323 | 15 |
| AX-158158336 | 15 | 20.321 | KV453078.1 | 2043760 | 15-scf00323 | 15 |
| AX-157756666 | 15 | 20.321 | KV453078.1 | 2044638 | 15-scf00323 | 15 |
| AX-158158337 | 15 | 20.321 | KV453078.1 | 2047616 | 15-scf00323 | 15 |
| AX-158158340 | 15 | 20.321 | KV453078.1 | 2051571 | 15-scf00323 | 15 |
| AX-158158356 | 15 | 20.321 | KV453078.1 | 2075753 | 15-scf00323 | 15 |
| AX-158158376 | 15 | 20.321 | KV453078.1 | 2101401 | 15-scf00323 | 15 |
| AX-158158342 | 15 | 20.346 | KV453078.1 | 2052811 | 15-scf00323 | 15 |
| AX-157833344 | 15 | 20.385 | KV453078.1 | 2058054 | 15-scf00323 | 15 |
| AX-157833346 | 15 | 20.385 | KV453078.1 | 2074771 | 15-scf00323 | 15 |
| AX-158158349 | 15 | 20.431 | KV453078.1 | 2064497 | 15-scf00323 | 15 |
| AX-158158363 | 15 | 20.431 | KV453078.1 | 2083521 | 15-scf00323 | 15 |
| AX-158158353 | 15 | 20.488 | KV453078.1 | 2069557 | 15-scf00323 | 15 |
| AX-157775725 | 15 | 20.512 | KV453078.1 | 2066718 | 15-scf00323 | 15 |
| AX-158158354 | 15 | 20.512 | KV453078.1 | 2070644 | 15-scf00323 | 15 |
| AX-158158361 | 15 | 20.54  | KV453078.1 | 2081792 | 15-scf00323 | 15 |
| AX-158158364 | 15 | 20.649 | KV453078.1 | 2085442 | 15-scf00323 | 15 |
| AX-158158366 | 15 | 20.649 | KV453078.1 | 2089098 | 15-scf00323 | 15 |
| AX-157744507 | 15 | 20.649 | KV453078.1 | 2089282 | 15-scf00323 | 15 |
| AX-158158371 | 15 | 20.649 | KV453078.1 | 2096027 | 15-scf00323 | 15 |
| AX-157858269 | 15 | 20.649 | KV453078.1 | 2113069 | 15-scf00323 | 15 |
| AX-158158339 | 15 | 20.688 | KV453078.1 | 2050713 | 15-scf00323 | 15 |
| AX-158158370 | 15 | 20.688 | KV453078.1 | 2095026 | 15-scf00323 | 15 |
| AX-158158373 | 15 | 20.797 | KV453078.1 | 2098123 | 15-scf00323 | 15 |
| AX-157878448 | 15 | 20.868 | KV453078.1 | 1347804 | 15-scf00323 | 15 |

|              |    |        |            |         |             |    |
|--------------|----|--------|------------|---------|-------------|----|
| AX-157750866 | 15 | 20.868 | KV453078.1 | 2102048 | 15-scf00323 | 15 |
| AX-157753067 | 15 | 20.868 | KV453078.1 | 2102902 | 15-scf00323 | 15 |
| AX-158158377 | 15 | 20.868 | KV453078.1 | 2103501 | 15-scf00323 | 15 |
| AX-158158378 | 15 | 20.868 | KV453078.1 | 2103833 | 15-scf00323 | 15 |
| AX-158158379 | 15 | 20.868 | KV453078.1 | 2104309 | 15-scf00323 | 15 |
| AX-158158380 | 15 | 20.868 | KV453078.1 | 2104740 | 15-scf00323 | 15 |
| AX-158158381 | 15 | 20.868 | KV453078.1 | 2105717 | 15-scf00323 | 15 |
| AX-158158384 | 15 | 20.868 | KV453078.1 | 2107700 | 15-scf00323 | 15 |
| AX-157878459 | 15 | 20.868 | KV453078.1 | 2109561 | 15-scf00323 | 15 |
| AX-158158385 | 15 | 20.868 | KV453078.1 | 2109638 | 15-scf00323 | 15 |
| AX-157833348 | 15 | 20.868 | KV453078.1 | 2112653 | 15-scf00323 | 15 |
| AX-157743633 | 15 | 20.868 | KV453078.1 | 2118200 | 15-scf00323 | 15 |
| AX-158422958 | 15 | 20.868 | KV453078.1 | 2125166 | 15-scf00323 | 15 |
| AX-158158392 | 15 | 20.868 | KV453078.1 | 2126188 | 15-scf00323 | 15 |
| AX-158160218 | 15 | 20.868 | KV453080.1 | 2910108 | 15-scf00327 | 15 |
| AX-158161155 | 15 | 20.868 | KV453080.1 | 5866100 | 15-scf00327 | 15 |
| AX-158158405 | 15 | 20.869 | KV453078.1 | 2149136 | 15-scf00323 | 15 |
| AX-158158409 | 15 | 21.195 | KV453078.1 | 2150838 | 15-scf00323 | 15 |
| AX-158158410 | 15 | 21.195 | KV453078.1 | 2151104 | 15-scf00323 | 15 |
| AX-158158411 | 15 | 21.195 | KV453078.1 | 2151756 | 15-scf00323 | 15 |
| AX-157708172 | 15 | 21.195 | KV453078.1 | 2153450 | 15-scf00323 | 15 |
| AX-157758945 | 15 | 21.195 | KV453078.1 | 2156020 | 15-scf00323 | 15 |
| AX-158158414 | 15 | 21.195 | KV453078.1 | 2159961 | 15-scf00323 | 15 |
| AX-157708498 | 15 | 21.195 | KV453078.1 | 2160833 | 15-scf00323 | 15 |
| AX-158158480 | 15 | 21.195 | KV453078.1 | 2253311 | 15-scf00323 | 15 |
| AX-158158250 | 15 | 21.304 | KV453078.1 | 1920598 | 15-scf00323 | 15 |
| AX-158158418 | 15 | 21.304 | KV453078.1 | 2163756 | 15-scf00323 | 15 |
| AX-157833349 | 15 | 21.304 | KV453078.1 | 2166987 | 15-scf00323 | 15 |
| AX-157726767 | 15 | 21.304 | KV453078.1 | 2168396 | 15-scf00323 | 15 |
| AX-158161119 | 15 | 21.304 | KV453080.1 | 5806439 | 15-scf00327 | 15 |
| AX-158161377 | 15 | 21.304 | KV453080.1 | 6364383 | 15-scf00327 | 15 |
| AX-158158425 | 15 | 21.414 | KV453078.1 | 2180512 | 15-scf00323 | 15 |
| AX-158158428 | 15 | 21.414 | KV453078.1 | 2185199 | 15-scf00323 | 15 |
| AX-158158429 | 15 | 21.414 | KV453078.1 | 2185816 | 15-scf00323 | 15 |
| AX-158158430 | 15 | 21.414 | KV453078.1 | 2186887 | 15-scf00323 | 15 |
| AX-158158435 | 15 | 21.414 | KV453078.1 | 2191008 | 15-scf00323 | 15 |
| AX-158158436 | 15 | 21.414 | KV453078.1 | 2195344 | 15-scf00323 | 15 |
| AX-158158440 | 15 | 21.414 | KV453078.1 | 2201147 | 15-scf00323 | 15 |
| AX-158158446 | 15 | 21.414 | KV453078.1 | 2205276 | 15-scf00323 | 15 |
| AX-158158452 | 15 | 21.414 | KV453078.1 | 2212098 | 15-scf00323 | 15 |
| AX-158158458 | 15 | 21.414 | KV453078.1 | 2219283 | 15-scf00323 | 15 |
| AX-158158463 | 15 | 21.414 | KV453078.1 | 2222729 | 15-scf00323 | 15 |
| AX-158158438 | 15 | 21.443 | KV453078.1 | 2197487 | 15-scf00323 | 15 |
| AX-158158439 | 15 | 21.498 | KV453078.1 | 2198364 | 15-scf00323 | 15 |
| AX-158158404 | 15 | 21.523 | KV453078.1 | 2148847 | 15-scf00323 | 15 |
| AX-158158441 | 15 | 21.523 | KV453078.1 | 2202082 | 15-scf00323 | 15 |
| AX-158158443 | 15 | 21.523 | KV453078.1 | 2202672 | 15-scf00323 | 15 |
| AX-158158445 | 15 | 21.523 | KV453078.1 | 2203643 | 15-scf00323 | 15 |
| AX-158158450 | 15 | 21.523 | KV453078.1 | 2210362 | 15-scf00323 | 15 |
| AX-158158451 | 15 | 21.523 | KV453078.1 | 2211053 | 15-scf00323 | 15 |
| AX-158158453 | 15 | 21.523 | KV453078.1 | 2213158 | 15-scf00323 | 15 |

|              |    |        |            |         |             |    |
|--------------|----|--------|------------|---------|-------------|----|
| AX-157754616 | 15 | 21.523 | KV453078.1 | 2216832 | 15-scf00323 | 15 |
| AX-158158460 | 15 | 21.523 | KV453078.1 | 2221827 | 15-scf00323 | 15 |
| AX-157741286 | 15 | 21.556 | KV453078.1 | 2224591 | 15-scf00323 | 15 |
| AX-158158467 | 15 | 21.585 | KV453078.1 | 2226008 | 15-scf00323 | 15 |
| AX-158158471 | 15 | 21.585 | KV453078.1 | 2236168 | 15-scf00323 | 15 |
| AX-158158472 | 15 | 21.585 | KV453078.1 | 2238069 | 15-scf00323 | 15 |
| AX-158158477 | 15 | 21.585 | KV453078.1 | 2246771 | 15-scf00323 | 15 |
| AX-157715479 | 15 | 21.585 | KV453078.1 | 2261249 | 15-scf00323 | 15 |
| AX-158158497 | 15 | 21.585 | KV453078.1 | 2295980 | 15-scf00323 | 15 |
| AX-158158483 | 15 | 21.604 | KV453078.1 | 2264331 | 15-scf00323 | 15 |
| AX-157866527 | 15 | 21.632 | KV453078.1 | 1418889 | 15-scf00323 | 15 |
| AX-158158372 | 15 | 21.632 | KV453078.1 | 2097382 | 15-scf00323 | 15 |
| AX-158158444 | 15 | 21.632 | KV453078.1 | 2202982 | 15-scf00323 | 15 |
| AX-158158449 | 15 | 21.632 | KV453078.1 | 2209888 | 15-scf00323 | 15 |
| AX-158158469 | 15 | 21.632 | KV453078.1 | 2232083 | 15-scf00323 | 15 |
| AX-158158485 | 15 | 21.632 | KV453078.1 | 2268167 | 15-scf00323 | 15 |
| AX-158158487 | 15 | 21.632 | KV453078.1 | 2272482 | 15-scf00323 | 15 |
| AX-158158489 | 15 | 21.632 | KV453078.1 | 2278705 | 15-scf00323 | 15 |
| AX-158158490 | 15 | 21.632 | KV453078.1 | 2279397 | 15-scf00323 | 15 |
| AX-157833359 | 15 | 21.632 | KV453078.1 | 2291123 | 15-scf00323 | 15 |
| AX-157833360 | 15 | 21.632 | KV453078.1 | 2291379 | 15-scf00323 | 15 |
| AX-158158535 | 15 | 21.632 | KV453078.1 | 2340984 | 15-scf00323 | 15 |
| AX-157753563 | 15 | 21.632 | KV453078.1 | 2658375 | 15-scf00323 | 15 |
| AX-158158801 | 15 | 21.632 | KV453078.1 | 2810158 | 15-scf00323 | 15 |
| AX-158159836 | 15 | 21.632 | KV453080.1 | 1803323 | 15-scf00327 | 15 |
| AX-158160289 | 15 | 21.632 | KV453080.1 | 3033033 | 15-scf00327 | 15 |
| AX-158161013 | 15 | 21.632 | KV453080.1 | 5560631 | 15-scf00327 | 15 |
| AX-158161112 | 15 | 21.632 | KV453080.1 | 5796853 | 15-scf00327 | 15 |
| AX-158161118 | 15 | 21.632 | KV453080.1 | 5805766 | 15-scf00327 | 15 |
| AX-158158498 | 15 | 21.68  | KV453078.1 | 2296374 | 15-scf00323 | 15 |
| AX-157770606 | 15 | 21.741 | KV453078.1 | 2302096 | 15-scf00323 | 15 |
| AX-158158506 | 15 | 21.803 | KV453078.1 | 2306328 | 15-scf00323 | 15 |
| AX-158158511 | 15 | 21.841 | KV453078.1 | 2313104 | 15-scf00323 | 15 |
| AX-158158516 | 15 | 21.899 | KV453078.1 | 2318616 | 15-scf00323 | 15 |
| AX-158158518 | 15 | 21.96  | KV453078.1 | 2319708 | 15-scf00323 | 15 |
| AX-158158520 | 15 | 21.96  | KV453078.1 | 2322115 | 15-scf00323 | 15 |
| AX-158158522 | 15 | 21.96  | KV453078.1 | 2323226 | 15-scf00323 | 15 |
| AX-157833367 | 15 | 21.96  | KV453078.1 | 2349460 | 15-scf00323 | 15 |
| AX-158158468 | 15 | 22.069 | KV453078.1 | 2231790 | 15-scf00323 | 15 |
| AX-158158470 | 15 | 22.069 | KV453078.1 | 2235937 | 15-scf00323 | 15 |
| AX-157833354 | 15 | 22.069 | KV453078.1 | 2253638 | 15-scf00323 | 15 |
| AX-158158488 | 15 | 22.069 | KV453078.1 | 2278277 | 15-scf00323 | 15 |
| AX-158158491 | 15 | 22.069 | KV453078.1 | 2279905 | 15-scf00323 | 15 |
| AX-158158504 | 15 | 22.069 | KV453078.1 | 2303252 | 15-scf00323 | 15 |
| AX-158158510 | 15 | 22.069 | KV453078.1 | 2312492 | 15-scf00323 | 15 |
| AX-158158512 | 15 | 22.069 | KV453078.1 | 2314820 | 15-scf00323 | 15 |
| AX-158158513 | 15 | 22.069 | KV453078.1 | 2315535 | 15-scf00323 | 15 |
| AX-158158526 | 15 | 22.069 | KV453078.1 | 2327360 | 15-scf00323 | 15 |
| AX-158158530 | 15 | 22.069 | KV453078.1 | 2331372 | 15-scf00323 | 15 |
| AX-157717247 | 15 | 22.069 | KV453078.1 | 2335148 | 15-scf00323 | 15 |
| AX-157833366 | 15 | 22.069 | KV453078.1 | 2338223 | 15-scf00323 | 15 |

|              |    |        |            |         |             |    |
|--------------|----|--------|------------|---------|-------------|----|
| AX-158158536 | 15 | 22.069 | KV453078.1 | 2342911 | 15-scf00323 | 15 |
| AX-158158537 | 15 | 22.069 | KV453078.1 | 2344042 | 15-scf00323 | 15 |
| AX-158158538 | 15 | 22.069 | KV453078.1 | 2345580 | 15-scf00323 | 15 |
| AX-157746501 | 15 | 22.069 | KV453078.1 | 2347036 | 15-scf00323 | 15 |
| AX-157749994 | 15 | 22.069 | KV453078.1 | 2347421 | 15-scf00323 | 15 |
| AX-157886589 | 15 | 22.069 | KV453078.1 | 2357833 | 15-scf00323 | 15 |
| AX-158158544 | 15 | 22.069 | KV453078.1 | 2358351 | 15-scf00323 | 15 |
| AX-158158545 | 15 | 22.069 | KV453078.1 | 2358804 | 15-scf00323 | 15 |
| AX-157718124 | 15 | 22.069 | KV453078.1 | 2358894 | 15-scf00323 | 15 |
| AX-158158546 | 15 | 22.069 | KV453078.1 | 2359027 | 15-scf00323 | 15 |
| AX-158158547 | 15 | 22.069 | KV453078.1 | 2365358 | 15-scf00323 | 15 |
| AX-158158548 | 15 | 22.069 | KV453078.1 | 2366120 | 15-scf00323 | 15 |
| AX-158158550 | 15 | 22.069 | KV453078.1 | 2370032 | 15-scf00323 | 15 |
| AX-158158551 | 15 | 22.069 | KV453078.1 | 2370683 | 15-scf00323 | 15 |
| AX-158158552 | 15 | 22.069 | KV453078.1 | 2371061 | 15-scf00323 | 15 |
| AX-158158564 | 15 | 22.069 | KV453078.1 | 2393988 | 15-scf00323 | 15 |
| AX-158158610 | 15 | 22.069 | KV453078.1 | 2453788 | 15-scf00323 | 15 |
| AX-157886595 | 15 | 22.069 | KV453078.1 | 2551955 | 15-scf00323 | 15 |
| AX-158158670 | 15 | 22.069 | KV453078.1 | 2580434 | 15-scf00323 | 15 |
| AX-157772472 | 15 | 22.069 | KV453080.1 | 5984979 | 15-scf00327 | 15 |
| AX-157717232 | 15 | 22.117 | KV453078.1 | 2376249 | 15-scf00323 | 15 |
| AX-158158434 | 15 | 22.178 | KV453078.1 | 2190391 | 15-scf00323 | 15 |
| AX-158158481 | 15 | 22.178 | KV453078.1 | 2257235 | 15-scf00323 | 15 |
| AX-157833362 | 15 | 22.178 | KV453078.1 | 2314632 | 15-scf00323 | 15 |
| AX-157748185 | 15 | 22.178 | KV453078.1 | 2360251 | 15-scf00323 | 15 |
| AX-158158549 | 15 | 22.178 | KV453078.1 | 2366806 | 15-scf00323 | 15 |
| AX-158158555 | 15 | 22.178 | KV453078.1 | 2377342 | 15-scf00323 | 15 |
| AX-158158556 | 15 | 22.178 | KV453078.1 | 2379781 | 15-scf00323 | 15 |
| AX-158158559 | 15 | 22.178 | KV453078.1 | 2386436 | 15-scf00323 | 15 |
| AX-158158561 | 15 | 22.178 | KV453078.1 | 2390320 | 15-scf00323 | 15 |
| AX-157727940 | 15 | 22.178 | KV453078.1 | 2392082 | 15-scf00323 | 15 |
| AX-157725925 | 15 | 22.178 | KV453078.1 | 2395848 | 15-scf00323 | 15 |
| AX-158158573 | 15 | 22.178 | KV453078.1 | 2402739 | 15-scf00323 | 15 |
| AX-158158583 | 15 | 22.178 | KV453078.1 | 2417839 | 15-scf00323 | 15 |
| AX-158158587 | 15 | 22.178 | KV453078.1 | 2425330 | 15-scf00323 | 15 |
| AX-158158589 | 15 | 22.178 | KV453078.1 | 2427781 | 15-scf00323 | 15 |
| AX-158158592 | 15 | 22.178 | KV453078.1 | 2433598 | 15-scf00323 | 15 |
| AX-158158596 | 15 | 22.178 | KV453078.1 | 2436063 | 15-scf00323 | 15 |
| AX-158158615 | 15 | 22.178 | KV453078.1 | 2462282 | 15-scf00323 | 15 |
| AX-157833380 | 15 | 22.178 | KV453078.1 | 2550472 | 15-scf00323 | 15 |
| AX-158158698 | 15 | 22.178 | KV453078.1 | 2629145 | 15-scf00323 | 15 |
| AX-157746145 | 15 | 22.178 | KV453078.1 | 2645573 | 15-scf00323 | 15 |
| AX-158158542 | 15 | 22.244 | KV453078.1 | 2355531 | 15-scf00323 | 15 |
| AX-158158617 | 15 | 22.244 | KV453078.1 | 2470636 | 15-scf00323 | 15 |
| AX-158158646 | 15 | 22.244 | KV453078.1 | 2524963 | 15-scf00323 | 15 |
| AX-158158690 | 15 | 22.244 | KV453078.1 | 2611995 | 15-scf00323 | 15 |
| AX-158158629 | 15 | 22.302 | KV453078.1 | 2501146 | 15-scf00323 | 15 |
| AX-158158586 | 15 | 22.358 | KV453078.1 | 2423373 | 15-scf00323 | 15 |
| AX-158158599 | 15 | 22.358 | KV453078.1 | 2438543 | 15-scf00323 | 15 |
| AX-158158609 | 15 | 22.358 | KV453078.1 | 2452180 | 15-scf00323 | 15 |
| AX-157858272 | 15 | 22.358 | KV453078.1 | 2454178 | 15-scf00323 | 15 |

|              |    |        |             |         |             |    |
|--------------|----|--------|-------------|---------|-------------|----|
| AX-158158648 | 15 | 22.358 | KV453078.1  | 2526361 | 15-scf00323 | 15 |
| AX-157706147 | 15 | 22.375 | 3ML01031714 | 588     | scf07334_1  | UN |
| AX-157886594 | 15 | 22.441 | KV453078.1  | 2546784 | 15-scf00323 | 15 |
| AX-157886598 | 15 | 22.441 | KV453078.1  | 2642422 | 15-scf00323 | 15 |
| AX-157886599 | 15 | 22.441 | KV453078.1  | 2642927 | 15-scf00323 | 15 |
| AX-157866539 | 15 | 22.441 | KV453078.1  | 2645350 | 15-scf00323 | 15 |
| AX-157866540 | 15 | 22.441 | KV453078.1  | 2646230 | 15-scf00323 | 15 |
| AX-158157568 | 15 | 22.506 | KV453078.1  | 937364  | 15-scf00323 | 15 |
| AX-158158170 | 15 | 22.506 | KV453078.1  | 1824146 | 15-scf00323 | 15 |
| AX-158158553 | 15 | 22.506 | KV453078.1  | 2373380 | 15-scf00323 | 15 |
| AX-158158568 | 15 | 22.506 | KV453078.1  | 2398558 | 15-scf00323 | 15 |
| AX-158158569 | 15 | 22.506 | KV453078.1  | 2399131 | 15-scf00323 | 15 |
| AX-158158574 | 15 | 22.506 | KV453078.1  | 2403591 | 15-scf00323 | 15 |
| AX-157886590 | 15 | 22.506 | KV453078.1  | 2407024 | 15-scf00323 | 15 |
| AX-158158590 | 15 | 22.506 | KV453078.1  | 2429929 | 15-scf00323 | 15 |
| AX-157858271 | 15 | 22.506 | KV453078.1  | 2447783 | 15-scf00323 | 15 |
| AX-158158608 | 15 | 22.506 | KV453078.1  | 2448427 | 15-scf00323 | 15 |
| AX-158158618 | 15 | 22.506 | KV453078.1  | 2471388 | 15-scf00323 | 15 |
| AX-157772760 | 15 | 22.506 | KV453078.1  | 2471856 | 15-scf00323 | 15 |
| AX-157833375 | 15 | 22.506 | KV453078.1  | 2482730 | 15-scf00323 | 15 |
| AX-158158628 | 15 | 22.506 | KV453078.1  | 2493337 | 15-scf00323 | 15 |
| AX-157886592 | 15 | 22.506 | KV453078.1  | 2522809 | 15-scf00323 | 15 |
| AX-158158647 | 15 | 22.506 | KV453078.1  | 2525754 | 15-scf00323 | 15 |
| AX-158158658 | 15 | 22.506 | KV453078.1  | 2551612 | 15-scf00323 | 15 |
| AX-158158663 | 15 | 22.506 | KV453078.1  | 2569488 | 15-scf00323 | 15 |
| AX-158158665 | 15 | 22.506 | KV453078.1  | 2572880 | 15-scf00323 | 15 |
| AX-158158669 | 15 | 22.506 | KV453078.1  | 2577461 | 15-scf00323 | 15 |
| AX-158158671 | 15 | 22.506 | KV453078.1  | 2581173 | 15-scf00323 | 15 |
| AX-158158672 | 15 | 22.506 | KV453078.1  | 2582433 | 15-scf00323 | 15 |
| AX-158158673 | 15 | 22.506 | KV453078.1  | 2585166 | 15-scf00323 | 15 |
| AX-158158675 | 15 | 22.506 | KV453078.1  | 2592957 | 15-scf00323 | 15 |
| AX-158158679 | 15 | 22.506 | KV453078.1  | 2601378 | 15-scf00323 | 15 |
| AX-158158684 | 15 | 22.506 | KV453078.1  | 2604849 | 15-scf00323 | 15 |
| AX-158158686 | 15 | 22.506 | KV453078.1  | 2606054 | 15-scf00323 | 15 |
| AX-158158687 | 15 | 22.506 | KV453078.1  | 2606753 | 15-scf00323 | 15 |
| AX-158158688 | 15 | 22.506 | KV453078.1  | 2607225 | 15-scf00323 | 15 |
| AX-158158691 | 15 | 22.506 | KV453078.1  | 2613034 | 15-scf00323 | 15 |
| AX-157833386 | 15 | 22.506 | KV453078.1  | 2614117 | 15-scf00323 | 15 |
| AX-157775214 | 15 | 22.506 | KV453078.1  | 2615856 | 15-scf00323 | 15 |
| AX-157713136 | 15 | 22.506 | KV453078.1  | 2616454 | 15-scf00323 | 15 |
| AX-158158692 | 15 | 22.506 | KV453078.1  | 2617054 | 15-scf00323 | 15 |
| AX-158158693 | 15 | 22.506 | KV453078.1  | 2618969 | 15-scf00323 | 15 |
| AX-158158695 | 15 | 22.506 | KV453078.1  | 2621296 | 15-scf00323 | 15 |
| AX-158158696 | 15 | 22.506 | KV453078.1  | 2624741 | 15-scf00323 | 15 |
| AX-157833387 | 15 | 22.506 | KV453078.1  | 2625424 | 15-scf00323 | 15 |
| AX-157833388 | 15 | 22.506 | KV453078.1  | 2625583 | 15-scf00323 | 15 |
| AX-158158697 | 15 | 22.506 | KV453078.1  | 2626473 | 15-scf00323 | 15 |
| AX-158158700 | 15 | 22.506 | KV453078.1  | 2632520 | 15-scf00323 | 15 |
| AX-158158701 | 15 | 22.506 | KV453078.1  | 2636114 | 15-scf00323 | 15 |
| AX-158158702 | 15 | 22.506 | KV453078.1  | 2636764 | 15-scf00323 | 15 |
| AX-158158705 | 15 | 22.506 | KV453078.1  | 2644800 | 15-scf00323 | 15 |

|              |    |        |            |         |             |    |
|--------------|----|--------|------------|---------|-------------|----|
| AX-158158708 | 15 | 22.506 | KV453078.1 | 2654484 | 15-scf00323 | 15 |
| AX-158158709 | 15 | 22.506 | KV453078.1 | 2654986 | 15-scf00323 | 15 |
| AX-158158713 | 15 | 22.506 | KV453078.1 | 2658983 | 15-scf00323 | 15 |
| AX-158158714 | 15 | 22.506 | KV453078.1 | 2660311 | 15-scf00323 | 15 |
| AX-158158715 | 15 | 22.506 | KV453078.1 | 2660862 | 15-scf00323 | 15 |
| AX-157833391 | 15 | 22.506 | KV453078.1 | 2667379 | 15-scf00323 | 15 |
| AX-158158717 | 15 | 22.506 | KV453078.1 | 2668161 | 15-scf00323 | 15 |
| AX-158158720 | 15 | 22.506 | KV453078.1 | 2673089 | 15-scf00323 | 15 |
| AX-158158722 | 15 | 22.506 | KV453078.1 | 2673854 | 15-scf00323 | 15 |
| AX-158158723 | 15 | 22.506 | KV453078.1 | 2674506 | 15-scf00323 | 15 |
| AX-158158724 | 15 | 22.506 | KV453078.1 | 2675159 | 15-scf00323 | 15 |
| AX-158158727 | 15 | 22.506 | KV453078.1 | 2677006 | 15-scf00323 | 15 |
| AX-158158728 | 15 | 22.506 | KV453078.1 | 2677570 | 15-scf00323 | 15 |
| AX-157858274 | 15 | 22.506 | KV453078.1 | 2706373 | 15-scf00323 | 15 |
| AX-157748126 | 15 | 22.506 | KV453078.1 | 2716279 | 15-scf00323 | 15 |
| AX-158158776 | 15 | 22.506 | KV453078.1 | 2763968 | 15-scf00323 | 15 |
| AX-157749539 | 15 | 22.506 | KV453080.1 | 6362093 | 15-scf00327 | 15 |
| AX-158158721 | 15 | 22.537 | KV453078.1 | 2673342 | 15-scf00323 | 15 |
| AX-158158726 | 15 | 22.549 | KV453078.1 | 2676082 | 15-scf00323 | 15 |
| AX-158158729 | 15 | 22.591 | KV453078.1 | 2680814 | 15-scf00323 | 15 |
| AX-158158678 | 15 | 22.601 | KV453078.1 | 2598354 | 15-scf00323 | 15 |
| AX-158158730 | 15 | 22.601 | KV453078.1 | 2684502 | 15-scf00323 | 15 |
| AX-158158731 | 15 | 22.607 | KV453078.1 | 2687207 | 15-scf00323 | 15 |
| AX-158158685 | 15 | 22.611 | KV453078.1 | 2605488 | 15-scf00323 | 15 |
| AX-157833393 | 15 | 22.611 | KV453078.1 | 2690992 | 15-scf00323 | 15 |
| AX-157727014 | 15 | 22.611 | KV453078.1 | 2691384 | 15-scf00323 | 15 |
| AX-157833394 | 15 | 22.616 | KV453078.1 | 2691864 | 15-scf00323 | 15 |
| AX-158158734 | 15 | 22.654 | KV453078.1 | 2692543 | 15-scf00323 | 15 |
| AX-158158740 | 15 | 22.698 | KV453078.1 | 2707555 | 15-scf00323 | 15 |
| AX-158158741 | 15 | 22.725 | KV453078.1 | 2708420 | 15-scf00323 | 15 |
| AX-158158743 | 15 | 22.764 | KV453078.1 | 2716881 | 15-scf00323 | 15 |
| AX-158158633 | 15 | 22.834 | KV453078.1 | 2509260 | 15-scf00323 | 15 |
| AX-158158644 | 15 | 22.834 | KV453078.1 | 2517741 | 15-scf00323 | 15 |
| AX-158158742 | 15 | 22.834 | KV453078.1 | 2709292 | 15-scf00323 | 15 |
| AX-158158744 | 15 | 22.834 | KV453078.1 | 2717795 | 15-scf00323 | 15 |
| AX-158158749 | 15 | 22.834 | KV453078.1 | 2726901 | 15-scf00323 | 15 |
| AX-158158750 | 15 | 22.834 | KV453078.1 | 2727278 | 15-scf00323 | 15 |
| AX-158158753 | 15 | 22.834 | KV453078.1 | 2731276 | 15-scf00323 | 15 |
| AX-158158755 | 15 | 22.834 | KV453078.1 | 2732346 | 15-scf00323 | 15 |
| AX-157833402 | 15 | 22.834 | KV453078.1 | 2733187 | 15-scf00323 | 15 |
| AX-157709013 | 15 | 22.834 | KV453078.1 | 2734368 | 15-scf00323 | 15 |
| AX-158158763 | 15 | 22.943 | KV453078.1 | 2751715 | 15-scf00323 | 15 |
| AX-158158766 | 15 | 22.943 | KV453078.1 | 2754051 | 15-scf00323 | 15 |
| AX-158158775 | 15 | 22.943 | KV453078.1 | 2762301 | 15-scf00323 | 15 |
| AX-158158781 | 15 | 22.943 | KV453078.1 | 2768303 | 15-scf00323 | 15 |
| AX-157833405 | 15 | 22.943 | KV453078.1 | 2770506 | 15-scf00323 | 15 |
| AX-158158783 | 15 | 23.233 | KV453078.1 | 2774519 | 15-scf00323 | 15 |
| AX-158158784 | 15 | 23.291 | KV453078.1 | 2775802 | 15-scf00323 | 15 |
| AX-158158787 | 15 | 23.56  | KV453078.1 | 2778772 | 15-scf00323 | 15 |
| AX-158158788 | 15 | 23.708 | KV453078.1 | 2782101 | 15-scf00323 | 15 |
| AX-158158793 | 15 | 23.708 | KV453078.1 | 2791514 | 15-scf00323 | 15 |

|              |    |        |            |         |             |    |
|--------------|----|--------|------------|---------|-------------|----|
| AX-158158794 | 15 | 23.708 | KV453078.1 | 2792270 | 15-scf00323 | 15 |
| AX-158158795 | 15 | 23.708 | KV453078.1 | 2793325 | 15-scf00323 | 15 |
| AX-158158798 | 15 | 23.708 | KV453078.1 | 2804292 | 15-scf00323 | 15 |
| AX-158158800 | 15 | 23.708 | KV453078.1 | 2806640 | 15-scf00323 | 15 |
| AX-158158803 | 15 | 23.708 | KV453078.1 | 2813880 | 15-scf00323 | 15 |
| AX-158158804 | 15 | 23.708 | KV453078.1 | 2814529 | 15-scf00323 | 15 |
| AX-158158807 | 15 | 23.708 | KV453078.1 | 2821266 | 15-scf00323 | 15 |
| AX-158158806 | 15 | 23.978 | KV453078.1 | 2820431 | 15-scf00323 | 15 |
| AX-158158811 | 15 | 23.978 | KV453078.1 | 2824653 | 15-scf00323 | 15 |
| AX-158158812 | 15 | 23.978 | KV453078.1 | 2824867 | 15-scf00323 | 15 |
| AX-158158818 | 15 | 23.978 | KV453078.1 | 2838121 | 15-scf00323 | 15 |
| AX-157744674 | 15 | 23.978 | KV453078.1 | 2869688 | 15-scf00323 | 15 |
| AX-158158847 | 15 | 23.978 | KV453080.1 | 7735    | 15-scf00327 | 15 |
| AX-157833527 | 15 | 23.978 | KV453080.1 | 1414850 | 15-scf00327 | 15 |
| AX-157833822 | 15 | 23.978 | KV453080.1 | 6567538 | 15-scf00327 | 15 |
| AX-158158808 | 15 | 24.074 | KV453078.1 | 2822814 | 15-scf00323 | 15 |
| AX-157833408 | 15 | 24.074 | KV453078.1 | 2838472 | 15-scf00323 | 15 |
| AX-158158822 | 15 | 24.074 | KV453078.1 | 2848637 | 15-scf00323 | 15 |
| AX-157833409 | 15 | 24.074 | KV453078.1 | 2861079 | 15-scf00323 | 15 |
| AX-158158881 | 15 | 24.074 | KV453080.1 | 80258   | 15-scf00327 | 15 |
| AX-158158830 | 15 | 24.254 | KV453078.1 | 2867169 | 15-scf00323 | 15 |
| AX-158158836 | 15 | 24.254 | KV453078.1 | 2888337 | 15-scf00323 | 15 |
| AX-158158837 | 15 | 24.254 | KV453078.1 | 2890660 | 15-scf00323 | 15 |
| AX-158158838 | 15 | 24.254 | KV453078.1 | 2890957 | 15-scf00323 | 15 |
| AX-157833411 | 15 | 24.254 | KV453078.1 | 2891949 | 15-scf00323 | 15 |
| AX-157833412 | 15 | 24.254 | KV453078.1 | 2892506 | 15-scf00323 | 15 |
| AX-157710790 | 15 | 24.254 | KV453078.1 | 2901199 | 15-scf00323 | 15 |
| AX-158408859 | 15 | 24.418 | KV453078.1 | 2906704 | 15-scf00323 | 15 |
| AX-157858275 | 15 | 24.515 | KV453080.1 | 12748   | 15-scf00327 | 15 |
| AX-158158857 | 15 | 24.582 | KV453080.1 | 24394   | 15-scf00327 | 15 |
| AX-158158860 | 15 | 24.582 | KV453080.1 | 29222   | 15-scf00327 | 15 |
| AX-158380461 | 15 | 24.582 | KV453080.1 | 29904   | 15-scf00327 | 15 |
| AX-158158861 | 15 | 24.582 | KV453080.1 | 30141   | 15-scf00327 | 15 |
| AX-158158862 | 15 | 24.582 | KV453080.1 | 34252   | 15-scf00327 | 15 |
| AX-158158863 | 15 | 24.582 | KV453080.1 | 35219   | 15-scf00327 | 15 |
| AX-158158865 | 15 | 24.582 | KV453080.1 | 38196   | 15-scf00327 | 15 |
| AX-158158868 | 15 | 24.582 | KV453080.1 | 40655   | 15-scf00327 | 15 |
| AX-157754018 | 15 | 24.582 | KV453080.1 | 62490   | 15-scf00327 | 15 |
| AX-158158877 | 15 | 24.582 | KV453080.1 | 66321   | 15-scf00327 | 15 |
| AX-158158887 | 15 | 24.582 | KV453080.1 | 92478   | 15-scf00327 | 15 |
| AX-157765445 | 15 | 24.801 | KV453080.1 | 83763   | 15-scf00327 | 15 |
| AX-158158883 | 15 | 24.801 | KV453080.1 | 86739   | 15-scf00327 | 15 |
| AX-157756250 | 15 | 24.801 | KV453080.1 | 93317   | 15-scf00327 | 15 |
| AX-158158888 | 15 | 25.019 | KV453080.1 | 93658   | 15-scf00327 | 15 |
| AX-158158892 | 15 | 25.019 | KV453080.1 | 102007  | 15-scf00327 | 15 |
| AX-158158895 | 15 | 25.019 | KV453080.1 | 103130  | 15-scf00327 | 15 |
| AX-158158896 | 15 | 25.019 | KV453080.1 | 103528  | 15-scf00327 | 15 |
| AX-157833421 | 15 | 25.059 | KV453080.1 | 122398  | 15-scf00327 | 15 |
| AX-158158835 | 15 | 25.099 | KV453078.1 | 2884000 | 15-scf00323 | 15 |
| AX-158380462 | 15 | 25.099 | KV453080.1 | 128487  | 15-scf00327 | 15 |
| AX-157833398 | 15 | 25.128 | KV453078.1 | 2695105 | 15-scf00323 | 15 |

|              |    |        |            |         |             |    |
|--------------|----|--------|------------|---------|-------------|----|
| AX-158158820 | 15 | 25.128 | KV453078.1 | 2843742 | 15-scf00323 | 15 |
| AX-158158889 | 15 | 25.128 | KV453080.1 | 97624   | 15-scf00327 | 15 |
| AX-157720470 | 15 | 25.128 | KV453080.1 | 140181  | 15-scf00327 | 15 |
| AX-158158917 | 15 | 25.128 | KV453080.1 | 165001  | 15-scf00327 | 15 |
| AX-158158925 | 15 | 25.128 | KV453080.1 | 179479  | 15-scf00327 | 15 |
| AX-158158937 | 15 | 25.128 | KV453080.1 | 206024  | 15-scf00327 | 15 |
| AX-157713757 | 15 | 25.128 | KV453080.1 | 222000  | 15-scf00327 | 15 |
| AX-157720414 | 15 | 25.128 | KV453080.1 | 222787  | 15-scf00327 | 15 |
| AX-157747080 | 15 | 25.128 | KV453080.1 | 229049  | 15-scf00327 | 15 |
| AX-158158948 | 15 | 25.128 | KV453080.1 | 236688  | 15-scf00327 | 15 |
| AX-158158962 | 15 | 25.128 | KV453080.1 | 263464  | 15-scf00327 | 15 |
| AX-158158963 | 15 | 25.128 | KV453080.1 | 267632  | 15-scf00327 | 15 |
| AX-158158967 | 15 | 25.128 | KV453080.1 | 278934  | 15-scf00327 | 15 |
| AX-158159066 | 15 | 25.128 | KV453080.1 | 421713  | 15-scf00327 | 15 |
| AX-158159326 | 15 | 25.128 | KV453080.1 | 852706  | 15-scf00327 | 15 |
| AX-158159545 | 15 | 25.128 | KV453080.1 | 1282020 | 15-scf00327 | 15 |
| AX-158159551 | 15 | 25.128 | KV453080.1 | 1290623 | 15-scf00327 | 15 |
| AX-158159574 | 15 | 25.128 | KV453080.1 | 1315726 | 15-scf00327 | 15 |
| AX-158159575 | 15 | 25.128 | KV453080.1 | 1317609 | 15-scf00327 | 15 |
| AX-157742442 | 15 | 25.128 | KV453080.1 | 1317660 | 15-scf00327 | 15 |
| AX-157886606 | 15 | 25.128 | KV453080.1 | 1326197 | 15-scf00327 | 15 |
| AX-158159605 | 15 | 25.128 | KV453080.1 | 1364033 | 15-scf00327 | 15 |
| AX-157833520 | 15 | 25.128 | KV453080.1 | 1368892 | 15-scf00327 | 15 |
| AX-158159654 | 15 | 25.128 | KV453080.1 | 1432880 | 15-scf00327 | 15 |
| AX-158159679 | 15 | 25.128 | KV453080.1 | 1488501 | 15-scf00327 | 15 |
| AX-158159950 | 15 | 25.128 | KV453080.1 | 2133591 | 15-scf00327 | 15 |
| AX-157833601 | 15 | 25.128 | KV453080.1 | 2150450 | 15-scf00327 | 15 |
| AX-158159959 | 15 | 25.128 | KV453080.1 | 2152574 | 15-scf00327 | 15 |
| AX-157833604 | 15 | 25.128 | KV453080.1 | 2167332 | 15-scf00327 | 15 |
| AX-158159981 | 15 | 25.128 | KV453080.1 | 2222690 | 15-scf00327 | 15 |
| AX-157833607 | 15 | 25.128 | KV453080.1 | 2439346 | 15-scf00327 | 15 |
| AX-158160086 | 15 | 25.128 | KV453080.1 | 2514796 | 15-scf00327 | 15 |
| AX-158160087 | 15 | 25.128 | KV453080.1 | 2515751 | 15-scf00327 | 15 |
| AX-158160090 | 15 | 25.128 | KV453080.1 | 2518045 | 15-scf00327 | 15 |
| AX-158160091 | 15 | 25.128 | KV453080.1 | 2520093 | 15-scf00327 | 15 |
| AX-158160092 | 15 | 25.128 | KV453080.1 | 2520716 | 15-scf00327 | 15 |
| AX-158160093 | 15 | 25.128 | KV453080.1 | 2521304 | 15-scf00327 | 15 |
| AX-158160103 | 15 | 25.128 | KV453080.1 | 2566532 | 15-scf00327 | 15 |
| AX-158160205 | 15 | 25.128 | KV453080.1 | 2879075 | 15-scf00327 | 15 |
| AX-158160223 | 15 | 25.128 | KV453080.1 | 2916062 | 15-scf00327 | 15 |
| AX-158160269 | 15 | 25.128 | KV453080.1 | 2998339 | 15-scf00327 | 15 |
| AX-158160285 | 15 | 25.128 | KV453080.1 | 3022386 | 15-scf00327 | 15 |
| AX-158160784 | 15 | 25.128 | KV453080.1 | 5052267 | 15-scf00327 | 15 |
| AX-158160798 | 15 | 25.128 | KV453080.1 | 5116661 | 15-scf00327 | 15 |
| AX-157752691 | 15 | 25.128 | KV453080.1 | 5473535 | 15-scf00327 | 15 |
| AX-158160983 | 15 | 25.128 | KV453080.1 | 5521532 | 15-scf00327 | 15 |
| AX-158160986 | 15 | 25.128 | KV453080.1 | 5523929 | 15-scf00327 | 15 |
| AX-158161039 | 15 | 25.128 | KV453080.1 | 5615653 | 15-scf00327 | 15 |
| AX-158161065 | 15 | 25.128 | KV453080.1 | 5667438 | 15-scf00327 | 15 |
| AX-158161873 | 15 | 25.128 | KV453080.1 | 7611425 | 15-scf00327 | 15 |
| AX-157833427 | 15 | 25.136 | KV453080.1 | 193529  | 15-scf00327 | 15 |



|              |    |        |            |         |             |    |
|--------------|----|--------|------------|---------|-------------|----|
| AX-157775115 | 15 | 25.136 | KV453080.1 | 1418872 | 15-scf00327 | 15 |
| AX-157833535 | 15 | 25.146 | KV453080.1 | 1431716 | 15-scf00327 | 15 |
| AX-158159675 | 15 | 25.17  | KV453080.1 | 1483004 | 15-scf00327 | 15 |
| AX-157757444 | 15 | 25.17  | KV453080.1 | 1491147 | 15-scf00327 | 15 |
| AX-158159678 | 15 | 25.184 | KV453080.1 | 1486483 | 15-scf00327 | 15 |
| AX-158159682 | 15 | 25.209 | KV453080.1 | 1493718 | 15-scf00327 | 15 |
| AX-157708212 | 15 | 25.209 | KV453080.1 | 1637548 | 15-scf00327 | 15 |
| AX-158159969 | 15 | 25.209 | KV453080.1 | 2185520 | 15-scf00327 | 15 |
| AX-158157561 | 15 | 25.238 | KV453078.1 | 932940  | 15-scf00323 | 15 |
| AX-158157701 | 15 | 25.238 | KV453078.1 | 1133579 | 15-scf00323 | 15 |
| AX-157858261 | 15 | 25.238 | KV453078.1 | 1423944 | 15-scf00323 | 15 |
| AX-158157989 | 15 | 25.238 | KV453078.1 | 1510511 | 15-scf00323 | 15 |
| AX-158158142 | 15 | 25.238 | KV453078.1 | 1778192 | 15-scf00323 | 15 |
| AX-158158190 | 15 | 25.238 | KV453078.1 | 1854661 | 15-scf00323 | 15 |
| AX-158158241 | 15 | 25.238 | KV453078.1 | 1912920 | 15-scf00323 | 15 |
| AX-158158258 | 15 | 25.238 | KV453078.1 | 1931748 | 15-scf00323 | 15 |
| AX-158158406 | 15 | 25.238 | KV453078.1 | 2149486 | 15-scf00323 | 15 |
| AX-157833372 | 15 | 25.238 | KV453078.1 | 2443896 | 15-scf00323 | 15 |
| AX-158158626 | 15 | 25.238 | KV453078.1 | 2490825 | 15-scf00323 | 15 |
| AX-157833382 | 15 | 25.238 | KV453078.1 | 2587211 | 15-scf00323 | 15 |
| AX-157755390 | 15 | 25.238 | KV453078.1 | 2730461 | 15-scf00323 | 15 |
| AX-158158841 | 15 | 25.238 | KV453078.1 | 2900028 | 15-scf00323 | 15 |
| AX-158158869 | 15 | 25.238 | KV453080.1 | 41260   | 15-scf00327 | 15 |
| AX-158158898 | 15 | 25.238 | KV453080.1 | 107023  | 15-scf00327 | 15 |
| AX-157717589 | 15 | 25.238 | KV453080.1 | 123371  | 15-scf00327 | 15 |
| AX-157833423 | 15 | 25.238 | KV453080.1 | 137932  | 15-scf00327 | 15 |
| AX-158158916 | 15 | 25.238 | KV453080.1 | 162087  | 15-scf00327 | 15 |
| AX-158158922 | 15 | 25.238 | KV453080.1 | 172836  | 15-scf00327 | 15 |
| AX-158158933 | 15 | 25.238 | KV453080.1 | 203221  | 15-scf00327 | 15 |
| AX-158158934 | 15 | 25.238 | KV453080.1 | 204537  | 15-scf00327 | 15 |
| AX-157833430 | 15 | 25.238 | KV453080.1 | 258582  | 15-scf00327 | 15 |
| AX-157886602 | 15 | 25.238 | KV453080.1 | 284077  | 15-scf00327 | 15 |
| AX-158158980 | 15 | 25.238 | KV453080.1 | 299138  | 15-scf00327 | 15 |
| AX-157886603 | 15 | 25.238 | KV453080.1 | 318681  | 15-scf00327 | 15 |
| AX-158159078 | 15 | 25.238 | KV453080.1 | 450958  | 15-scf00327 | 15 |
| AX-157833439 | 15 | 25.238 | KV453080.1 | 467677  | 15-scf00327 | 15 |
| AX-158159564 | 15 | 25.238 | KV453080.1 | 1306457 | 15-scf00327 | 15 |
| AX-158159640 | 15 | 25.238 | KV453080.1 | 1406284 | 15-scf00327 | 15 |
| AX-158159650 | 15 | 25.238 | KV453080.1 | 1423978 | 15-scf00327 | 15 |
| AX-158159677 | 15 | 25.238 | KV453080.1 | 1485678 | 15-scf00327 | 15 |
| AX-157833544 | 15 | 25.238 | KV453080.1 | 1504597 | 15-scf00327 | 15 |
| AX-158159689 | 15 | 25.238 | KV453080.1 | 1505698 | 15-scf00327 | 15 |
| AX-158159693 | 15 | 25.238 | KV453080.1 | 1510779 | 15-scf00327 | 15 |
| AX-158159700 | 15 | 25.238 | KV453080.1 | 1524477 | 15-scf00327 | 15 |
| AX-157866545 | 15 | 25.238 | KV453080.1 | 1526856 | 15-scf00327 | 15 |
| AX-158159724 | 15 | 25.238 | KV453080.1 | 1570662 | 15-scf00327 | 15 |
| AX-158159725 | 15 | 25.238 | KV453080.1 | 1572300 | 15-scf00327 | 15 |
| AX-158159728 | 15 | 25.238 | KV453080.1 | 1579157 | 15-scf00327 | 15 |
| AX-158159736 | 15 | 25.238 | KV453080.1 | 1612268 | 15-scf00327 | 15 |
| AX-158159737 | 15 | 25.238 | KV453080.1 | 1613022 | 15-scf00327 | 15 |
| AX-158159738 | 15 | 25.238 | KV453080.1 | 1613474 | 15-scf00327 | 15 |

|              |    |        |            |         |             |    |
|--------------|----|--------|------------|---------|-------------|----|
| AX-158159746 | 15 | 25.238 | KV453080.1 | 1625268 | 15-scf00327 | 15 |
| AX-158159751 | 15 | 25.238 | KV453080.1 | 1631971 | 15-scf00327 | 15 |
| AX-158159753 | 15 | 25.238 | KV453080.1 | 1636913 | 15-scf00327 | 15 |
| AX-157833562 | 15 | 25.238 | KV453080.1 | 1659968 | 15-scf00327 | 15 |
| AX-158159769 | 15 | 25.238 | KV453080.1 | 1666092 | 15-scf00327 | 15 |
| AX-157833564 | 15 | 25.238 | KV453080.1 | 1671661 | 15-scf00327 | 15 |
| AX-158159774 | 15 | 25.238 | KV453080.1 | 1672694 | 15-scf00327 | 15 |
| AX-158159775 | 15 | 25.238 | KV453080.1 | 1673034 | 15-scf00327 | 15 |
| AX-158159776 | 15 | 25.238 | KV453080.1 | 1674141 | 15-scf00327 | 15 |
| AX-158159777 | 15 | 25.238 | KV453080.1 | 1676372 | 15-scf00327 | 15 |
| AX-158159778 | 15 | 25.238 | KV453080.1 | 1677152 | 15-scf00327 | 15 |
| AX-158159781 | 15 | 25.238 | KV453080.1 | 1682903 | 15-scf00327 | 15 |
| AX-158159787 | 15 | 25.238 | KV453080.1 | 1691982 | 15-scf00327 | 15 |
| AX-158159788 | 15 | 25.238 | KV453080.1 | 1692647 | 15-scf00327 | 15 |
| AX-158159792 | 15 | 25.238 | KV453080.1 | 1697648 | 15-scf00327 | 15 |
| AX-158159794 | 15 | 25.238 | KV453080.1 | 1703642 | 15-scf00327 | 15 |
| AX-158159795 | 15 | 25.238 | KV453080.1 | 1706426 | 15-scf00327 | 15 |
| AX-158159798 | 15 | 25.238 | KV453080.1 | 1710560 | 15-scf00327 | 15 |
| AX-158159801 | 15 | 25.238 | KV453080.1 | 1713551 | 15-scf00327 | 15 |
| AX-158159802 | 15 | 25.238 | KV453080.1 | 1714537 | 15-scf00327 | 15 |
| AX-158159804 | 15 | 25.238 | KV453080.1 | 1719960 | 15-scf00327 | 15 |
| AX-157833567 | 15 | 25.238 | KV453080.1 | 1754847 | 15-scf00327 | 15 |
| AX-157833568 | 15 | 25.238 | KV453080.1 | 1756211 | 15-scf00327 | 15 |
| AX-157833569 | 15 | 25.238 | KV453080.1 | 1756946 | 15-scf00327 | 15 |
| AX-158159819 | 15 | 25.238 | KV453080.1 | 1761424 | 15-scf00327 | 15 |
| AX-158159820 | 15 | 25.238 | KV453080.1 | 1763773 | 15-scf00327 | 15 |
| AX-158159821 | 15 | 25.238 | KV453080.1 | 1764614 | 15-scf00327 | 15 |
| AX-158159827 | 15 | 25.238 | KV453080.1 | 1795942 | 15-scf00327 | 15 |
| AX-158159830 | 15 | 25.238 | KV453080.1 | 1798130 | 15-scf00327 | 15 |
| AX-157754679 | 15 | 25.238 | KV453080.1 | 1799466 | 15-scf00327 | 15 |
| AX-158159832 | 15 | 25.238 | KV453080.1 | 1799531 | 15-scf00327 | 15 |
| AX-158159833 | 15 | 25.238 | KV453080.1 | 1800141 | 15-scf00327 | 15 |
| AX-157771576 | 15 | 25.238 | KV453080.1 | 1801397 | 15-scf00327 | 15 |
| AX-158159835 | 15 | 25.238 | KV453080.1 | 1802295 | 15-scf00327 | 15 |
| AX-158159840 | 15 | 25.238 | KV453080.1 | 1807082 | 15-scf00327 | 15 |
| AX-158159845 | 15 | 25.238 | KV453080.1 | 1818808 | 15-scf00327 | 15 |
| AX-158159852 | 15 | 25.238 | KV453080.1 | 1842483 | 15-scf00327 | 15 |
| AX-158159859 | 15 | 25.238 | KV453080.1 | 1855564 | 15-scf00327 | 15 |
| AX-157725700 | 15 | 25.238 | KV453080.1 | 1864229 | 15-scf00327 | 15 |
| AX-158159898 | 15 | 25.238 | KV453080.1 | 1956517 | 15-scf00327 | 15 |
| AX-158159903 | 15 | 25.238 | KV453080.1 | 1987425 | 15-scf00327 | 15 |
| AX-157713266 | 15 | 25.238 | KV453080.1 | 2035938 | 15-scf00327 | 15 |
| AX-157747424 | 15 | 25.238 | KV453080.1 | 2040335 | 15-scf00327 | 15 |
| AX-158159926 | 15 | 25.238 | KV453080.1 | 2041393 | 15-scf00327 | 15 |
| AX-157713699 | 15 | 25.238 | KV453080.1 | 2043066 | 15-scf00327 | 15 |
| AX-157833589 | 15 | 25.238 | KV453080.1 | 2048231 | 15-scf00327 | 15 |
| AX-157717003 | 15 | 25.238 | KV453080.1 | 2065236 | 15-scf00327 | 15 |
| AX-157739456 | 15 | 25.238 | KV453080.1 | 2066406 | 15-scf00327 | 15 |
| AX-158159937 | 15 | 25.238 | KV453080.1 | 2074924 | 15-scf00327 | 15 |
| AX-158159941 | 15 | 25.238 | KV453080.1 | 2096239 | 15-scf00327 | 15 |
| AX-157697324 | 15 | 25.238 | KV453080.1 | 2111757 | 15-scf00327 | 15 |

|              |    |        |            |         |             |    |
|--------------|----|--------|------------|---------|-------------|----|
| AX-158393307 | 15 | 25.238 | KV453080.1 | 2113279 | 15-scf00327 | 15 |
| AX-158159957 | 15 | 25.238 | KV453080.1 | 2149243 | 15-scf00327 | 15 |
| AX-158159966 | 15 | 25.238 | KV453080.1 | 2179088 | 15-scf00327 | 15 |
| AX-158159967 | 15 | 25.238 | KV453080.1 | 2181098 | 15-scf00327 | 15 |
| AX-158159968 | 15 | 25.238 | KV453080.1 | 2184588 | 15-scf00327 | 15 |
| AX-158159970 | 15 | 25.238 | KV453080.1 | 2186373 | 15-scf00327 | 15 |
| AX-158159972 | 15 | 25.238 | KV453080.1 | 2190602 | 15-scf00327 | 15 |
| AX-158159973 | 15 | 25.238 | KV453080.1 | 2192703 | 15-scf00327 | 15 |
| AX-158159975 | 15 | 25.238 | KV453080.1 | 2197498 | 15-scf00327 | 15 |
| AX-158159976 | 15 | 25.238 | KV453080.1 | 2199118 | 15-scf00327 | 15 |
| AX-158159980 | 15 | 25.238 | KV453080.1 | 2221198 | 15-scf00327 | 15 |
| AX-158159983 | 15 | 25.238 | KV453080.1 | 2227123 | 15-scf00327 | 15 |
| AX-158159999 | 15 | 25.238 | KV453080.1 | 2309135 | 15-scf00327 | 15 |
| AX-158160026 | 15 | 25.238 | KV453080.1 | 2395757 | 15-scf00327 | 15 |
| AX-158160031 | 15 | 25.238 | KV453080.1 | 2410280 | 15-scf00327 | 15 |
| AX-158160040 | 15 | 25.238 | KV453080.1 | 2441834 | 15-scf00327 | 15 |
| AX-158160043 | 15 | 25.238 | KV453080.1 | 2450514 | 15-scf00327 | 15 |
| AX-158160046 | 15 | 25.238 | KV453080.1 | 2459541 | 15-scf00327 | 15 |
| AX-158160050 | 15 | 25.238 | KV453080.1 | 2467378 | 15-scf00327 | 15 |
| AX-157833608 | 15 | 25.238 | KV453080.1 | 2468572 | 15-scf00327 | 15 |
| AX-158160053 | 15 | 25.238 | KV453080.1 | 2469140 | 15-scf00327 | 15 |
| AX-158160055 | 15 | 25.238 | KV453080.1 | 2470831 | 15-scf00327 | 15 |
| AX-158160056 | 15 | 25.238 | KV453080.1 | 2471591 | 15-scf00327 | 15 |
| AX-158160058 | 15 | 25.238 | KV453080.1 | 2473323 | 15-scf00327 | 15 |
| AX-158160068 | 15 | 25.238 | KV453080.1 | 2494596 | 15-scf00327 | 15 |
| AX-158160072 | 15 | 25.238 | KV453080.1 | 2500682 | 15-scf00327 | 15 |
| AX-158160074 | 15 | 25.238 | KV453080.1 | 2502196 | 15-scf00327 | 15 |
| AX-158160075 | 15 | 25.238 | KV453080.1 | 2502814 | 15-scf00327 | 15 |
| AX-158160076 | 15 | 25.238 | KV453080.1 | 2503182 | 15-scf00327 | 15 |
| AX-158160082 | 15 | 25.238 | KV453080.1 | 2509207 | 15-scf00327 | 15 |
| AX-158160083 | 15 | 25.238 | KV453080.1 | 2512501 | 15-scf00327 | 15 |
| AX-158160084 | 15 | 25.238 | KV453080.1 | 2512950 | 15-scf00327 | 15 |
| AX-158160085 | 15 | 25.238 | KV453080.1 | 2514053 | 15-scf00327 | 15 |
| AX-158160088 | 15 | 25.238 | KV453080.1 | 2516172 | 15-scf00327 | 15 |
| AX-158160089 | 15 | 25.238 | KV453080.1 | 2516575 | 15-scf00327 | 15 |
| AX-158160096 | 15 | 25.238 | KV453080.1 | 2533163 | 15-scf00327 | 15 |
| AX-158160098 | 15 | 25.238 | KV453080.1 | 2542228 | 15-scf00327 | 15 |
| AX-158160106 | 15 | 25.238 | KV453080.1 | 2572125 | 15-scf00327 | 15 |
| AX-158160120 | 15 | 25.238 | KV453080.1 | 2599748 | 15-scf00327 | 15 |
| AX-158160121 | 15 | 25.238 | KV453080.1 | 2602075 | 15-scf00327 | 15 |
| AX-158160124 | 15 | 25.238 | KV453080.1 | 2609128 | 15-scf00327 | 15 |
| AX-158160125 | 15 | 25.238 | KV453080.1 | 2610664 | 15-scf00327 | 15 |
| AX-158160126 | 15 | 25.238 | KV453080.1 | 2613906 | 15-scf00327 | 15 |
| AX-158160129 | 15 | 25.238 | KV453080.1 | 2626134 | 15-scf00327 | 15 |
| AX-158160130 | 15 | 25.238 | KV453080.1 | 2627015 | 15-scf00327 | 15 |
| AX-158160131 | 15 | 25.238 | KV453080.1 | 2629201 | 15-scf00327 | 15 |
| AX-158160135 | 15 | 25.238 | KV453080.1 | 2635617 | 15-scf00327 | 15 |
| AX-158160138 | 15 | 25.238 | KV453080.1 | 2643767 | 15-scf00327 | 15 |
| AX-158160140 | 15 | 25.238 | KV453080.1 | 2645705 | 15-scf00327 | 15 |
| AX-158412895 | 15 | 25.238 | KV453080.1 | 2660357 | 15-scf00327 | 15 |
| AX-158160142 | 15 | 25.238 | KV453080.1 | 2661068 | 15-scf00327 | 15 |

|              |    |        |            |         |             |    |
|--------------|----|--------|------------|---------|-------------|----|
| AX-158160143 | 15 | 25.238 | KV453080.1 | 2661462 | 15-scf00327 | 15 |
| AX-158160145 | 15 | 25.238 | KV453080.1 | 2663651 | 15-scf00327 | 15 |
| AX-158160146 | 15 | 25.238 | KV453080.1 | 2664344 | 15-scf00327 | 15 |
| AX-158160147 | 15 | 25.238 | KV453080.1 | 2666172 | 15-scf00327 | 15 |
| AX-157744774 | 15 | 25.238 | KV453080.1 | 2668075 | 15-scf00327 | 15 |
| AX-157718759 | 15 | 25.238 | KV453080.1 | 2670020 | 15-scf00327 | 15 |
| AX-158160156 | 15 | 25.238 | KV453080.1 | 2702499 | 15-scf00327 | 15 |
| AX-158160157 | 15 | 25.238 | KV453080.1 | 2702867 | 15-scf00327 | 15 |
| AX-157772207 | 15 | 25.238 | KV453080.1 | 2752634 | 15-scf00327 | 15 |
| AX-158160174 | 15 | 25.238 | KV453080.1 | 2788015 | 15-scf00327 | 15 |
| AX-158160175 | 15 | 25.238 | KV453080.1 | 2789413 | 15-scf00327 | 15 |
| AX-158160176 | 15 | 25.238 | KV453080.1 | 2791176 | 15-scf00327 | 15 |
| AX-158160177 | 15 | 25.238 | KV453080.1 | 2792962 | 15-scf00327 | 15 |
| AX-158160178 | 15 | 25.238 | KV453080.1 | 2793384 | 15-scf00327 | 15 |
| AX-158160179 | 15 | 25.238 | KV453080.1 | 2804452 | 15-scf00327 | 15 |
| AX-158160180 | 15 | 25.238 | KV453080.1 | 2805709 | 15-scf00327 | 15 |
| AX-158160184 | 15 | 25.238 | KV453080.1 | 2810368 | 15-scf00327 | 15 |
| AX-158160185 | 15 | 25.238 | KV453080.1 | 2810912 | 15-scf00327 | 15 |
| AX-158160186 | 15 | 25.238 | KV453080.1 | 2812226 | 15-scf00327 | 15 |
| AX-158160189 | 15 | 25.238 | KV453080.1 | 2818002 | 15-scf00327 | 15 |
| AX-158160190 | 15 | 25.238 | KV453080.1 | 2820965 | 15-scf00327 | 15 |
| AX-158160192 | 15 | 25.238 | KV453080.1 | 2830977 | 15-scf00327 | 15 |
| AX-158160193 | 15 | 25.238 | KV453080.1 | 2843445 | 15-scf00327 | 15 |
| AX-158160197 | 15 | 25.238 | KV453080.1 | 2859949 | 15-scf00327 | 15 |
| AX-158160200 | 15 | 25.238 | KV453080.1 | 2868214 | 15-scf00327 | 15 |
| AX-158160204 | 15 | 25.238 | KV453080.1 | 2876664 | 15-scf00327 | 15 |
| AX-158160209 | 15 | 25.238 | KV453080.1 | 2890679 | 15-scf00327 | 15 |
| AX-158160221 | 15 | 25.238 | KV453080.1 | 2915107 | 15-scf00327 | 15 |
| AX-158160249 | 15 | 25.238 | KV453080.1 | 2967916 | 15-scf00327 | 15 |
| AX-158412904 | 15 | 25.238 | KV453080.1 | 3002691 | 15-scf00327 | 15 |
| AX-158160283 | 15 | 25.238 | KV453080.1 | 3019482 | 15-scf00327 | 15 |
| AX-158160286 | 15 | 25.238 | KV453080.1 | 3023590 | 15-scf00327 | 15 |
| AX-158160290 | 15 | 25.238 | KV453080.1 | 3033282 | 15-scf00327 | 15 |
| AX-158160303 | 15 | 25.238 | KV453080.1 | 3080698 | 15-scf00327 | 15 |
| AX-157716528 | 15 | 25.238 | KV453080.1 | 3098379 | 15-scf00327 | 15 |
| AX-158160317 | 15 | 25.238 | KV453080.1 | 3121883 | 15-scf00327 | 15 |
| AX-157833628 | 15 | 25.238 | KV453080.1 | 3133877 | 15-scf00327 | 15 |
| AX-158160357 | 15 | 25.238 | KV453080.1 | 3237502 | 15-scf00327 | 15 |
| AX-158160571 | 15 | 25.238 | KV453080.1 | 4212380 | 15-scf00327 | 15 |
| AX-158160630 | 15 | 25.238 | KV453080.1 | 4489411 | 15-scf00327 | 15 |
| AX-158160672 | 15 | 25.238 | KV453080.1 | 4687360 | 15-scf00327 | 15 |
| AX-157743551 | 15 | 25.238 | KV453080.1 | 4857348 | 15-scf00327 | 15 |
| AX-157833703 | 15 | 25.238 | KV453080.1 | 4860147 | 15-scf00327 | 15 |
| AX-158160728 | 15 | 25.238 | KV453080.1 | 4883463 | 15-scf00327 | 15 |
| AX-157833717 | 15 | 25.238 | KV453080.1 | 4999244 | 15-scf00327 | 15 |
| AX-158160787 | 15 | 25.238 | KV453080.1 | 5077688 | 15-scf00327 | 15 |
| AX-158160800 | 15 | 25.238 | KV453080.1 | 5124498 | 15-scf00327 | 15 |
| AX-158160801 | 15 | 25.238 | KV453080.1 | 5125278 | 15-scf00327 | 15 |
| AX-158160802 | 15 | 25.238 | KV453080.1 | 5125741 | 15-scf00327 | 15 |
| AX-158160812 | 15 | 25.238 | KV453080.1 | 5136234 | 15-scf00327 | 15 |
| AX-158160819 | 15 | 25.238 | KV453080.1 | 5154520 | 15-scf00327 | 15 |

|              |    |        |            |         |             |    |
|--------------|----|--------|------------|---------|-------------|----|
| AX-158160894 | 15 | 25.238 | KV453080.1 | 5347563 | 15-scf00327 | 15 |
| AX-157716797 | 15 | 25.238 | KV453080.1 | 5362330 | 15-scf00327 | 15 |
| AX-158160911 | 15 | 25.238 | KV453080.1 | 5368791 | 15-scf00327 | 15 |
| AX-157833738 | 15 | 25.238 | KV453080.1 | 5462912 | 15-scf00327 | 15 |
| AX-157723131 | 15 | 25.238 | KV453080.1 | 5470077 | 15-scf00327 | 15 |
| AX-158160969 | 15 | 25.238 | KV453080.1 | 5489254 | 15-scf00327 | 15 |
| AX-158161002 | 15 | 25.238 | KV453080.1 | 5545828 | 15-scf00327 | 15 |
| AX-158161020 | 15 | 25.238 | KV453080.1 | 5567978 | 15-scf00327 | 15 |
| AX-158161041 | 15 | 25.238 | KV453080.1 | 5619196 | 15-scf00327 | 15 |
| AX-158161051 | 15 | 25.238 | KV453080.1 | 5640568 | 15-scf00327 | 15 |
| AX-158161062 | 15 | 25.238 | KV453080.1 | 5663899 | 15-scf00327 | 15 |
| AX-158161066 | 15 | 25.238 | KV453080.1 | 5672096 | 15-scf00327 | 15 |
| AX-157713415 | 15 | 25.238 | KV453080.1 | 5706928 | 15-scf00327 | 15 |
| AX-158161095 | 15 | 25.238 | KV453080.1 | 5750318 | 15-scf00327 | 15 |
| AX-158161126 | 15 | 25.238 | KV453080.1 | 5814383 | 15-scf00327 | 15 |
| AX-158161154 | 15 | 25.238 | KV453080.1 | 5865678 | 15-scf00327 | 15 |
| AX-158161187 | 15 | 25.238 | KV453080.1 | 5947020 | 15-scf00327 | 15 |
| AX-158161206 | 15 | 25.238 | KV453080.1 | 5987186 | 15-scf00327 | 15 |
| AX-157754183 | 15 | 25.238 | KV453080.1 | 5993631 | 15-scf00327 | 15 |
| AX-157833792 | 15 | 25.238 | KV453080.1 | 6005924 | 15-scf00327 | 15 |
| AX-158161210 | 15 | 25.238 | KV453080.1 | 6006426 | 15-scf00327 | 15 |
| AX-158161272 | 15 | 25.238 | KV453080.1 | 6131932 | 15-scf00327 | 15 |
| AX-158161390 | 15 | 25.238 | KV453080.1 | 6456371 | 15-scf00327 | 15 |
| AX-158161657 | 15 | 25.238 | KV453080.1 | 7089119 | 15-scf00327 | 15 |
| AX-158161731 | 15 | 25.238 | KV453080.1 | 7292500 | 15-scf00327 | 15 |
| AX-157833864 | 15 | 25.238 | KV453080.1 | 7295290 | 15-scf00327 | 15 |
| AX-157744730 | 15 | 25.238 | KV453080.1 | 7296380 | 15-scf00327 | 15 |
| AX-158161795 | 15 | 25.238 | KV453080.1 | 7463286 | 15-scf00327 | 15 |
| AX-158161796 | 15 | 25.238 | KV453080.1 | 7463787 | 15-scf00327 | 15 |
| AX-158161799 | 15 | 25.238 | KV453080.1 | 7471606 | 15-scf00327 | 15 |
| AX-158161831 | 15 | 25.238 | KV453080.1 | 7522193 | 15-scf00327 | 15 |
| AX-158161832 | 15 | 25.238 | KV453080.1 | 7528017 | 15-scf00327 | 15 |
| AX-158162224 | 15 | 25.238 | KV453080.1 | 8108574 | 15-scf00327 | 15 |
| AX-157833292 | 15 | 25.456 | KV453078.1 | 1362535 | 15-scf00323 | 15 |
| AX-158158194 | 15 | 25.456 | KV453078.1 | 1857941 | 15-scf00323 | 15 |
| AX-158158199 | 15 | 25.456 | KV453078.1 | 1863594 | 15-scf00323 | 15 |
| AX-157886585 | 15 | 25.456 | KV453078.1 | 2026245 | 15-scf00323 | 15 |
| AX-157744921 | 15 | 25.456 | KV453078.1 | 2072467 | 15-scf00323 | 15 |
| AX-158158594 | 15 | 25.456 | KV453078.1 | 2435421 | 15-scf00323 | 15 |
| AX-158158607 | 15 | 25.456 | KV453078.1 | 2447477 | 15-scf00323 | 15 |
| AX-158158627 | 15 | 25.456 | KV453078.1 | 2491460 | 15-scf00323 | 15 |
| AX-157833383 | 15 | 25.456 | KV453078.1 | 2600217 | 15-scf00323 | 15 |
| AX-158158858 | 15 | 25.456 | KV453080.1 | 27151   | 15-scf00327 | 15 |
| AX-157743786 | 15 | 25.456 | KV453080.1 | 1908577 | 15-scf00327 | 15 |
| AX-158159883 | 15 | 25.456 | KV453080.1 | 1926524 | 15-scf00327 | 15 |
| AX-158159884 | 15 | 25.456 | KV453080.1 | 1931248 | 15-scf00327 | 15 |
| AX-158159897 | 15 | 25.456 | KV453080.1 | 1949209 | 15-scf00327 | 15 |
| AX-157757871 | 15 | 25.456 | KV453080.1 | 1958761 | 15-scf00327 | 15 |
| AX-157755907 | 15 | 25.456 | KV453080.1 | 1966025 | 15-scf00327 | 15 |
| AX-158159936 | 15 | 25.456 | KV453080.1 | 2069834 | 15-scf00327 | 15 |
| AX-158160154 | 15 | 25.456 | KV453080.1 | 2699883 | 15-scf00327 | 15 |

|              |    |        |            |         |             |    |
|--------------|----|--------|------------|---------|-------------|----|
| AX-158160155 | 15 | 25.456 | KV453080.1 | 2700972 | 15-scf00327 | 15 |
| AX-158160187 | 15 | 25.456 | KV453080.1 | 2813228 | 15-scf00327 | 15 |
| AX-158160191 | 15 | 25.456 | KV453080.1 | 2822780 | 15-scf00327 | 15 |
| AX-158160198 | 15 | 25.456 | KV453080.1 | 2860457 | 15-scf00327 | 15 |
| AX-158160211 | 15 | 25.456 | KV453080.1 | 2894813 | 15-scf00327 | 15 |
| AX-158160216 | 15 | 25.456 | KV453080.1 | 2907988 | 15-scf00327 | 15 |
| AX-157833617 | 15 | 25.456 | KV453080.1 | 2912850 | 15-scf00327 | 15 |
| AX-158160220 | 15 | 25.456 | KV453080.1 | 2913420 | 15-scf00327 | 15 |
| AX-158160227 | 15 | 25.456 | KV453080.1 | 2927297 | 15-scf00327 | 15 |
| AX-157833618 | 15 | 25.456 | KV453080.1 | 2934914 | 15-scf00327 | 15 |
| AX-158160234 | 15 | 25.456 | KV453080.1 | 2943701 | 15-scf00327 | 15 |
| AX-158160235 | 15 | 25.456 | KV453080.1 | 2944125 | 15-scf00327 | 15 |
| AX-158160240 | 15 | 25.456 | KV453080.1 | 2951942 | 15-scf00327 | 15 |
| AX-158380468 | 15 | 25.456 | KV453080.1 | 2958221 | 15-scf00327 | 15 |
| AX-158160247 | 15 | 25.456 | KV453080.1 | 2965984 | 15-scf00327 | 15 |
| AX-158160248 | 15 | 25.456 | KV453080.1 | 2967158 | 15-scf00327 | 15 |
| AX-158160253 | 15 | 25.456 | KV453080.1 | 2974807 | 15-scf00327 | 15 |
| AX-158160254 | 15 | 25.456 | KV453080.1 | 2975295 | 15-scf00327 | 15 |
| AX-158160255 | 15 | 25.456 | KV453080.1 | 2976618 | 15-scf00327 | 15 |
| AX-158160256 | 15 | 25.456 | KV453080.1 | 2977195 | 15-scf00327 | 15 |
| AX-158160257 | 15 | 25.456 | KV453080.1 | 2978244 | 15-scf00327 | 15 |
| AX-158160258 | 15 | 25.456 | KV453080.1 | 2979214 | 15-scf00327 | 15 |
| AX-158160261 | 15 | 25.456 | KV453080.1 | 2982971 | 15-scf00327 | 15 |
| AX-158160262 | 15 | 25.456 | KV453080.1 | 2984637 | 15-scf00327 | 15 |
| AX-158160266 | 15 | 25.456 | KV453080.1 | 2987643 | 15-scf00327 | 15 |
| AX-158160267 | 15 | 25.456 | KV453080.1 | 2989558 | 15-scf00327 | 15 |
| AX-158160270 | 15 | 25.456 | KV453080.1 | 2998868 | 15-scf00327 | 15 |
| AX-157858342 | 15 | 25.456 | KV453080.1 | 3008718 | 15-scf00327 | 15 |
| AX-158160278 | 15 | 25.456 | KV453080.1 | 3015942 | 15-scf00327 | 15 |
| AX-157720958 | 15 | 25.456 | KV453080.1 | 3016892 | 15-scf00327 | 15 |
| AX-158160281 | 15 | 25.456 | KV453080.1 | 3017202 | 15-scf00327 | 15 |
| AX-157742595 | 15 | 25.456 | KV453080.1 | 3017349 | 15-scf00327 | 15 |
| AX-157833620 | 15 | 25.456 | KV453080.1 | 3018187 | 15-scf00327 | 15 |
| AX-158160282 | 15 | 25.456 | KV453080.1 | 3018962 | 15-scf00327 | 15 |
| AX-158160284 | 15 | 25.456 | KV453080.1 | 3022146 | 15-scf00327 | 15 |
| AX-157707575 | 15 | 25.456 | KV453080.1 | 3027702 | 15-scf00327 | 15 |
| AX-158160292 | 15 | 25.456 | KV453080.1 | 3042457 | 15-scf00327 | 15 |
| AX-157744413 | 15 | 25.456 | KV453080.1 | 3053172 | 15-scf00327 | 15 |
| AX-158160297 | 15 | 25.456 | KV453080.1 | 3056111 | 15-scf00327 | 15 |
| AX-157753213 | 15 | 25.456 | KV453080.1 | 3058354 | 15-scf00327 | 15 |
| AX-158160315 | 15 | 25.456 | KV453080.1 | 3121101 | 15-scf00327 | 15 |
| AX-158160320 | 15 | 25.456 | KV453080.1 | 3131125 | 15-scf00327 | 15 |
| AX-158160484 | 15 | 25.456 | KV453080.1 | 3819664 | 15-scf00327 | 15 |
| AX-158160806 | 15 | 25.456 | KV453080.1 | 5130414 | 15-scf00327 | 15 |
| AX-158160807 | 15 | 25.456 | KV453080.1 | 5130989 | 15-scf00327 | 15 |
| AX-158161099 | 15 | 25.456 | KV453080.1 | 5758801 | 15-scf00327 | 15 |
| AX-158161104 | 15 | 25.456 | KV453080.1 | 5774104 | 15-scf00327 | 15 |
| AX-158161110 | 15 | 25.456 | KV453080.1 | 5788021 | 15-scf00327 | 15 |
| AX-158161819 | 15 | 25.456 | KV453080.1 | 7503623 | 15-scf00327 | 15 |
| AX-158161820 | 15 | 25.456 | KV453080.1 | 7503860 | 15-scf00327 | 15 |
| AX-157712351 | 15 | 25.545 | KV453080.1 | 3051724 | 15-scf00327 | 15 |

|              |    |        |            |         |             |    |
|--------------|----|--------|------------|---------|-------------|----|
| AX-158158338 | 15 | 25.602 | KV453078.1 | 2049339 | 15-scf00323 | 15 |
| AX-158158631 | 15 | 25.602 | KV453078.1 | 2504801 | 15-scf00323 | 15 |
| AX-158159695 | 15 | 25.602 | KV453080.1 | 1513418 | 15-scf00327 | 15 |
| AX-157748912 | 15 | 25.602 | KV453080.1 | 1886164 | 15-scf00327 | 15 |
| AX-158159896 | 15 | 25.602 | KV453080.1 | 1947173 | 15-scf00327 | 15 |
| AX-158159908 | 15 | 25.602 | KV453080.1 | 1995323 | 15-scf00327 | 15 |
| AX-158159912 | 15 | 25.602 | KV453080.1 | 2008804 | 15-scf00327 | 15 |
| AX-158160111 | 15 | 25.602 | KV453080.1 | 2587849 | 15-scf00327 | 15 |
| AX-157741429 | 15 | 25.602 | KV453080.1 | 3096569 | 15-scf00327 | 15 |
| AX-158160396 | 15 | 25.602 | KV453080.1 | 3421143 | 15-scf00327 | 15 |
| AX-158160410 | 15 | 25.602 | KV453080.1 | 3459229 | 15-scf00327 | 15 |
| AX-158160411 | 15 | 25.602 | KV453080.1 | 3460351 | 15-scf00327 | 15 |
| AX-158160431 | 15 | 25.602 | KV453080.1 | 3564758 | 15-scf00327 | 15 |
| AX-158160432 | 15 | 25.602 | KV453080.1 | 3565666 | 15-scf00327 | 15 |
| AX-158160436 | 15 | 25.602 | KV453080.1 | 3587850 | 15-scf00327 | 15 |
| AX-158160478 | 15 | 25.602 | KV453080.1 | 3786215 | 15-scf00327 | 15 |
| AX-158160480 | 15 | 25.602 | KV453080.1 | 3793864 | 15-scf00327 | 15 |
| AX-157693971 | 15 | 25.602 | KV453080.1 | 3860986 | 15-scf00327 | 15 |
| AX-158160492 | 15 | 25.602 | KV453080.1 | 3867294 | 15-scf00327 | 15 |
| AX-158160510 | 15 | 25.602 | KV453080.1 | 3940212 | 15-scf00327 | 15 |
| AX-158160513 | 15 | 25.602 | KV453080.1 | 3952783 | 15-scf00327 | 15 |
| AX-158160696 | 15 | 25.602 | KV453080.1 | 4770873 | 15-scf00327 | 15 |
| AX-158160736 | 15 | 25.602 | KV453080.1 | 4898527 | 15-scf00327 | 15 |
| AX-157886601 | 15 | 25.674 | KV453078.1 | 2826253 | 15-scf00323 | 15 |
| AX-158158906 | 15 | 25.674 | KV453080.1 | 115334  | 15-scf00327 | 15 |
| AX-157833424 | 15 | 25.674 | KV453080.1 | 172618  | 15-scf00327 | 15 |
| AX-158159162 | 15 | 25.674 | KV453080.1 | 590966  | 15-scf00327 | 15 |
| AX-157718472 | 15 | 25.674 | KV453080.1 | 871059  | 15-scf00327 | 15 |
| AX-158159498 | 15 | 25.674 | KV453080.1 | 1204362 | 15-scf00327 | 15 |
| AX-158159585 | 15 | 25.674 | KV453080.1 | 1334183 | 15-scf00327 | 15 |
| AX-157878468 | 15 | 25.674 | KV453080.1 | 1363112 | 15-scf00327 | 15 |
| AX-158159686 | 15 | 25.674 | KV453080.1 | 1500882 | 15-scf00327 | 15 |
| AX-158159727 | 15 | 25.674 | KV453080.1 | 1578496 | 15-scf00327 | 15 |
| AX-158159744 | 15 | 25.674 | KV453080.1 | 1619594 | 15-scf00327 | 15 |
| AX-157833560 | 15 | 25.674 | KV453080.1 | 1620254 | 15-scf00327 | 15 |
| AX-158159749 | 15 | 25.674 | KV453080.1 | 1630459 | 15-scf00327 | 15 |
| AX-158159750 | 15 | 25.674 | KV453080.1 | 1630723 | 15-scf00327 | 15 |
| AX-158159784 | 15 | 25.674 | KV453080.1 | 1688614 | 15-scf00327 | 15 |
| AX-158159793 | 15 | 25.674 | KV453080.1 | 1701357 | 15-scf00327 | 15 |
| AX-158159797 | 15 | 25.674 | KV453080.1 | 1709517 | 15-scf00327 | 15 |
| AX-158159799 | 15 | 25.674 | KV453080.1 | 1711288 | 15-scf00327 | 15 |
| AX-158159807 | 15 | 25.674 | KV453080.1 | 1734229 | 15-scf00327 | 15 |
| AX-157833570 | 15 | 25.674 | KV453080.1 | 1779365 | 15-scf00327 | 15 |
| AX-158159825 | 15 | 25.674 | KV453080.1 | 1780331 | 15-scf00327 | 15 |
| AX-158159850 | 15 | 25.674 | KV453080.1 | 1837323 | 15-scf00327 | 15 |
| AX-158159880 | 15 | 25.674 | KV453080.1 | 1922195 | 15-scf00327 | 15 |
| AX-158159885 | 15 | 25.674 | KV453080.1 | 1932255 | 15-scf00327 | 15 |
| AX-158159886 | 15 | 25.674 | KV453080.1 | 1933122 | 15-scf00327 | 15 |
| AX-158159887 | 15 | 25.674 | KV453080.1 | 1934114 | 15-scf00327 | 15 |
| AX-157833580 | 15 | 25.674 | KV453080.1 | 1935796 | 15-scf00327 | 15 |
| AX-158159889 | 15 | 25.674 | KV453080.1 | 1935862 | 15-scf00327 | 15 |

|              |    |        |            |         |             |    |
|--------------|----|--------|------------|---------|-------------|----|
| AX-158159891 | 15 | 25.674 | KV453080.1 | 1937541 | 15-scf00327 | 15 |
| AX-158159892 | 15 | 25.674 | KV453080.1 | 1938212 | 15-scf00327 | 15 |
| AX-157750381 | 15 | 25.674 | KV453080.1 | 1979757 | 15-scf00327 | 15 |
| AX-157833590 | 15 | 25.674 | KV453080.1 | 2051792 | 15-scf00327 | 15 |
| AX-157833593 | 15 | 25.674 | KV453080.1 | 2064212 | 15-scf00327 | 15 |
| AX-157878472 | 15 | 25.674 | KV453080.1 | 2102220 | 15-scf00327 | 15 |
| AX-158159964 | 15 | 25.674 | KV453080.1 | 2169814 | 15-scf00327 | 15 |
| AX-158160047 | 15 | 25.674 | KV453080.1 | 2460477 | 15-scf00327 | 15 |
| AX-158160057 | 15 | 25.674 | KV453080.1 | 2472687 | 15-scf00327 | 15 |
| AX-158160110 | 15 | 25.674 | KV453080.1 | 2580114 | 15-scf00327 | 15 |
| AX-158160119 | 15 | 25.674 | KV453080.1 | 2597389 | 15-scf00327 | 15 |
| AX-157833614 | 15 | 25.674 | KV453080.1 | 2631576 | 15-scf00327 | 15 |
| AX-158160139 | 15 | 25.674 | KV453080.1 | 2644223 | 15-scf00327 | 15 |
| AX-158160141 | 15 | 25.674 | KV453080.1 | 2653416 | 15-scf00327 | 15 |
| AX-158160161 | 15 | 25.674 | KV453080.1 | 2734165 | 15-scf00327 | 15 |
| AX-158160230 | 15 | 25.674 | KV453080.1 | 2931578 | 15-scf00327 | 15 |
| AX-158160239 | 15 | 25.674 | KV453080.1 | 2951012 | 15-scf00327 | 15 |
| AX-157833619 | 15 | 25.674 | KV453080.1 | 2956528 | 15-scf00327 | 15 |
| AX-158160244 | 15 | 25.674 | KV453080.1 | 2959768 | 15-scf00327 | 15 |
| AX-157752116 | 15 | 25.674 | KV453080.1 | 3070549 | 15-scf00327 | 15 |
| AX-158160299 | 15 | 25.674 | KV453080.1 | 3073042 | 15-scf00327 | 15 |
| AX-158160300 | 15 | 25.674 | KV453080.1 | 3075254 | 15-scf00327 | 15 |
| AX-158160310 | 15 | 25.674 | KV453080.1 | 3114885 | 15-scf00327 | 15 |
| AX-158160325 | 15 | 25.674 | KV453080.1 | 3145985 | 15-scf00327 | 15 |
| AX-157833629 | 15 | 25.674 | KV453080.1 | 3150225 | 15-scf00327 | 15 |
| AX-158160329 | 15 | 25.674 | KV453080.1 | 3154476 | 15-scf00327 | 15 |
| AX-158160330 | 15 | 25.674 | KV453080.1 | 3154775 | 15-scf00327 | 15 |
| AX-158160335 | 15 | 25.674 | KV453080.1 | 3166360 | 15-scf00327 | 15 |
| AX-158160336 | 15 | 25.674 | KV453080.1 | 3168839 | 15-scf00327 | 15 |
| AX-158160339 | 15 | 25.674 | KV453080.1 | 3174760 | 15-scf00327 | 15 |
| AX-158160340 | 15 | 25.674 | KV453080.1 | 3175402 | 15-scf00327 | 15 |
| AX-158160344 | 15 | 25.674 | KV453080.1 | 3200976 | 15-scf00327 | 15 |
| AX-158160346 | 15 | 25.674 | KV453080.1 | 3205515 | 15-scf00327 | 15 |
| AX-158160349 | 15 | 25.674 | KV453080.1 | 3220929 | 15-scf00327 | 15 |
| AX-158160350 | 15 | 25.674 | KV453080.1 | 3221693 | 15-scf00327 | 15 |
| AX-158160354 | 15 | 25.674 | KV453080.1 | 3230322 | 15-scf00327 | 15 |
| AX-157749650 | 15 | 25.674 | KV453080.1 | 3263071 | 15-scf00327 | 15 |
| AX-157722381 | 15 | 25.674 | KV453080.1 | 3276676 | 15-scf00327 | 15 |
| AX-158160367 | 15 | 25.674 | KV453080.1 | 3279559 | 15-scf00327 | 15 |
| AX-158160371 | 15 | 25.674 | KV453080.1 | 3287543 | 15-scf00327 | 15 |
| AX-158160375 | 15 | 25.674 | KV453080.1 | 3295178 | 15-scf00327 | 15 |
| AX-157771299 | 15 | 25.674 | KV453080.1 | 3397171 | 15-scf00327 | 15 |
| AX-157714417 | 15 | 25.674 | KV453080.1 | 3399151 | 15-scf00327 | 15 |
| AX-158160393 | 15 | 25.674 | KV453080.1 | 3402402 | 15-scf00327 | 15 |
| AX-158160408 | 15 | 25.674 | KV453080.1 | 3444773 | 15-scf00327 | 15 |
| AX-158160412 | 15 | 25.674 | KV453080.1 | 3465769 | 15-scf00327 | 15 |
| AX-158160420 | 15 | 25.674 | KV453080.1 | 3524205 | 15-scf00327 | 15 |
| AX-158160442 | 15 | 25.674 | KV453080.1 | 3603533 | 15-scf00327 | 15 |
| AX-158160444 | 15 | 25.674 | KV453080.1 | 3605936 | 15-scf00327 | 15 |
| AX-158160455 | 15 | 25.674 | KV453080.1 | 3669202 | 15-scf00327 | 15 |
| AX-158160459 | 15 | 25.674 | KV453080.1 | 3680260 | 15-scf00327 | 15 |



|              |    |        |            |         |             |    |
|--------------|----|--------|------------|---------|-------------|----|
| AX-157752820 | 15 | 25.674 | KV453080.1 | 3705305 | 15-scf00327 | 15 |
| AX-158160487 | 15 | 25.674 | KV453080.1 | 3822495 | 15-scf00327 | 15 |
| AX-158160496 | 15 | 25.674 | KV453080.1 | 3888074 | 15-scf00327 | 15 |
| AX-158160514 | 15 | 25.674 | KV453080.1 | 3955638 | 15-scf00327 | 15 |
| AX-158160518 | 15 | 25.674 | KV453080.1 | 3994431 | 15-scf00327 | 15 |
| AX-158160522 | 15 | 25.674 | KV453080.1 | 4039883 | 15-scf00327 | 15 |
| AX-157744471 | 15 | 25.674 | KV453080.1 | 4065605 | 15-scf00327 | 15 |
| AX-158160531 | 15 | 25.674 | KV453080.1 | 4078217 | 15-scf00327 | 15 |
| AX-158160533 | 15 | 25.674 | KV453080.1 | 4090762 | 15-scf00327 | 15 |
| AX-157716300 | 15 | 25.674 | KV453080.1 | 4100779 | 15-scf00327 | 15 |
| AX-157833672 | 15 | 25.674 | KV453080.1 | 4118474 | 15-scf00327 | 15 |
| AX-158160544 | 15 | 25.674 | KV453080.1 | 4129743 | 15-scf00327 | 15 |
| AX-157773291 | 15 | 25.674 | KV453080.1 | 4155967 | 15-scf00327 | 15 |
| AX-158160560 | 15 | 25.674 | KV453080.1 | 4184197 | 15-scf00327 | 15 |
| AX-158160565 | 15 | 25.674 | KV453080.1 | 4194636 | 15-scf00327 | 15 |
| AX-158160568 | 15 | 25.674 | KV453080.1 | 4202764 | 15-scf00327 | 15 |
| AX-158160570 | 15 | 25.674 | KV453080.1 | 4205763 | 15-scf00327 | 15 |
| AX-158160576 | 15 | 25.674 | KV453080.1 | 4238152 | 15-scf00327 | 15 |
| AX-158160581 | 15 | 25.674 | KV453080.1 | 4254957 | 15-scf00327 | 15 |
| AX-158380472 | 15 | 25.674 | KV453080.1 | 4264348 | 15-scf00327 | 15 |
| AX-158160589 | 15 | 25.674 | KV453080.1 | 4290761 | 15-scf00327 | 15 |
| AX-158160592 | 15 | 25.674 | KV453080.1 | 4304965 | 15-scf00327 | 15 |
| AX-158160600 | 15 | 25.674 | KV453080.1 | 4325237 | 15-scf00327 | 15 |
| AX-158160605 | 15 | 25.674 | KV453080.1 | 4356697 | 15-scf00327 | 15 |
| AX-158160610 | 15 | 25.674 | KV453080.1 | 4378627 | 15-scf00327 | 15 |
| AX-158160614 | 15 | 25.674 | KV453080.1 | 4408493 | 15-scf00327 | 15 |
| AX-157886613 | 15 | 25.674 | KV453080.1 | 4410766 | 15-scf00327 | 15 |
| AX-158160615 | 15 | 25.674 | KV453080.1 | 4412921 | 15-scf00327 | 15 |
| AX-157744521 | 15 | 25.674 | KV453080.1 | 4437896 | 15-scf00327 | 15 |
| AX-158160621 | 15 | 25.674 | KV453080.1 | 4445500 | 15-scf00327 | 15 |
| AX-157755310 | 15 | 25.674 | KV453080.1 | 4476500 | 15-scf00327 | 15 |
| AX-158412942 | 15 | 25.674 | KV453080.1 | 4481483 | 15-scf00327 | 15 |
| AX-157858347 | 15 | 25.674 | KV453080.1 | 4531403 | 15-scf00327 | 15 |
| AX-158160637 | 15 | 25.674 | KV453080.1 | 4534466 | 15-scf00327 | 15 |
| AX-158160644 | 15 | 25.674 | KV453080.1 | 4556898 | 15-scf00327 | 15 |
| AX-158160646 | 15 | 25.674 | KV453080.1 | 4559997 | 15-scf00327 | 15 |
| AX-158160651 | 15 | 25.674 | KV453080.1 | 4570474 | 15-scf00327 | 15 |
| AX-158160655 | 15 | 25.674 | KV453080.1 | 4599883 | 15-scf00327 | 15 |
| AX-158160661 | 15 | 25.674 | KV453080.1 | 4629083 | 15-scf00327 | 15 |
| AX-157725765 | 15 | 25.674 | KV453080.1 | 4647369 | 15-scf00327 | 15 |
| AX-157833691 | 15 | 25.674 | KV453080.1 | 4647981 | 15-scf00327 | 15 |
| AX-157715755 | 15 | 25.674 | KV453080.1 | 4655579 | 15-scf00327 | 15 |
| AX-158160668 | 15 | 25.674 | KV453080.1 | 4663591 | 15-scf00327 | 15 |
| AX-157747878 | 15 | 25.674 | KV453080.1 | 4664324 | 15-scf00327 | 15 |
| AX-157753968 | 15 | 25.674 | KV453080.1 | 4666806 | 15-scf00327 | 15 |
| AX-158160669 | 15 | 25.674 | KV453080.1 | 4668380 | 15-scf00327 | 15 |
| AX-158160676 | 15 | 25.674 | KV453080.1 | 4694452 | 15-scf00327 | 15 |
| AX-158160681 | 15 | 25.674 | KV453080.1 | 4716705 | 15-scf00327 | 15 |
| AX-158160683 | 15 | 25.674 | KV453080.1 | 4725087 | 15-scf00327 | 15 |
| AX-158160684 | 15 | 25.674 | KV453080.1 | 4725840 | 15-scf00327 | 15 |
| AX-157713653 | 15 | 25.674 | KV453080.1 | 4727746 | 15-scf00327 | 15 |

|              |    |        |            |         |             |    |
|--------------|----|--------|------------|---------|-------------|----|
| AX-158160691 | 15 | 25.674 | KV453080.1 | 4751109 | 15-scf00327 | 15 |
| AX-158160694 | 15 | 25.674 | KV453080.1 | 4767660 | 15-scf00327 | 15 |
| AX-158160695 | 15 | 25.674 | KV453080.1 | 4768378 | 15-scf00327 | 15 |
| AX-157833699 | 15 | 25.674 | KV453080.1 | 4769124 | 15-scf00327 | 15 |
| AX-158160698 | 15 | 25.674 | KV453080.1 | 4778265 | 15-scf00327 | 15 |
| AX-158160699 | 15 | 25.674 | KV453080.1 | 4797397 | 15-scf00327 | 15 |
| AX-158160705 | 15 | 25.674 | KV453080.1 | 4824935 | 15-scf00327 | 15 |
| AX-158160717 | 15 | 25.674 | KV453080.1 | 4853742 | 15-scf00327 | 15 |
| AX-158160722 | 15 | 25.674 | KV453080.1 | 4876166 | 15-scf00327 | 15 |
| AX-158160730 | 15 | 25.674 | KV453080.1 | 4888591 | 15-scf00327 | 15 |
| AX-158160733 | 15 | 25.674 | KV453080.1 | 4891441 | 15-scf00327 | 15 |
| AX-157748670 | 15 | 25.674 | KV453080.1 | 4899023 | 15-scf00327 | 15 |
| AX-157717361 | 15 | 25.674 | KV453080.1 | 4904576 | 15-scf00327 | 15 |
| AX-158160742 | 15 | 25.674 | KV453080.1 | 4912421 | 15-scf00327 | 15 |
| AX-157745875 | 15 | 25.674 | KV453080.1 | 4915035 | 15-scf00327 | 15 |
| AX-158160750 | 15 | 25.674 | KV453080.1 | 4932476 | 15-scf00327 | 15 |
| AX-158160756 | 15 | 25.674 | KV453080.1 | 4941307 | 15-scf00327 | 15 |
| AX-158380473 | 15 | 25.674 | KV453080.1 | 4960249 | 15-scf00327 | 15 |
| AX-157739757 | 15 | 25.674 | KV453080.1 | 4960298 | 15-scf00327 | 15 |
| AX-157833713 | 15 | 25.674 | KV453080.1 | 4962634 | 15-scf00327 | 15 |
| AX-158160765 | 15 | 25.674 | KV453080.1 | 4995409 | 15-scf00327 | 15 |
| AX-157721095 | 15 | 25.674 | KV453080.1 | 5028933 | 15-scf00327 | 15 |
| AX-158160779 | 15 | 25.674 | KV453080.1 | 5040806 | 15-scf00327 | 15 |
| AX-158160780 | 15 | 25.674 | KV453080.1 | 5041969 | 15-scf00327 | 15 |
| AX-157833723 | 15 | 25.674 | KV453080.1 | 5075750 | 15-scf00327 | 15 |
| AX-158160791 | 15 | 25.674 | KV453080.1 | 5083363 | 15-scf00327 | 15 |
| AX-157713964 | 15 | 25.674 | KV453080.1 | 5094238 | 15-scf00327 | 15 |
| AX-158160797 | 15 | 25.674 | KV453080.1 | 5110908 | 15-scf00327 | 15 |
| AX-158160810 | 15 | 25.674 | KV453080.1 | 5132860 | 15-scf00327 | 15 |
| AX-158160811 | 15 | 25.674 | KV453080.1 | 5133242 | 15-scf00327 | 15 |
| AX-158160825 | 15 | 25.674 | KV453080.1 | 5180577 | 15-scf00327 | 15 |
| AX-158160830 | 15 | 25.674 | KV453080.1 | 5197459 | 15-scf00327 | 15 |
| AX-157833725 | 15 | 25.674 | KV453080.1 | 5247987 | 15-scf00327 | 15 |
| AX-158160852 | 15 | 25.674 | KV453080.1 | 5255333 | 15-scf00327 | 15 |
| AX-157745604 | 15 | 25.674 | KV453080.1 | 5284166 | 15-scf00327 | 15 |
| AX-157748137 | 15 | 25.674 | KV453080.1 | 5284850 | 15-scf00327 | 15 |
| AX-157717666 | 15 | 25.674 | KV453080.1 | 5292470 | 15-scf00327 | 15 |
| AX-158160861 | 15 | 25.674 | KV453080.1 | 5304137 | 15-scf00327 | 15 |
| AX-158160863 | 15 | 25.674 | KV453080.1 | 5310833 | 15-scf00327 | 15 |
| AX-158160886 | 15 | 25.674 | KV453080.1 | 5338808 | 15-scf00327 | 15 |
| AX-158160892 | 15 | 25.674 | KV453080.1 | 5345071 | 15-scf00327 | 15 |
| AX-158385698 | 15 | 25.674 | KV453080.1 | 5348386 | 15-scf00327 | 15 |
| AX-158160895 | 15 | 25.674 | KV453080.1 | 5349012 | 15-scf00327 | 15 |
| AX-158160898 | 15 | 25.674 | KV453080.1 | 5354164 | 15-scf00327 | 15 |
| AX-157703860 | 15 | 25.674 | KV453080.1 | 5381442 | 15-scf00327 | 15 |
| AX-157833733 | 15 | 25.674 | KV453080.1 | 5387898 | 15-scf00327 | 15 |
| AX-158160919 | 15 | 25.674 | KV453080.1 | 5388845 | 15-scf00327 | 15 |
| AX-158160920 | 15 | 25.674 | KV453080.1 | 5389124 | 15-scf00327 | 15 |
| AX-158160921 | 15 | 25.674 | KV453080.1 | 5389735 | 15-scf00327 | 15 |
| AX-158160924 | 15 | 25.674 | KV453080.1 | 5391799 | 15-scf00327 | 15 |
| AX-157833734 | 15 | 25.674 | KV453080.1 | 5392284 | 15-scf00327 | 15 |

|              |    |        |            |         |             |    |
|--------------|----|--------|------------|---------|-------------|----|
| AX-158160925 | 15 | 25.674 | KV453080.1 | 5392501 | 15-scf00327 | 15 |
| AX-158160928 | 15 | 25.674 | KV453080.1 | 5395404 | 15-scf00327 | 15 |
| AX-158160929 | 15 | 25.674 | KV453080.1 | 5400538 | 15-scf00327 | 15 |
| AX-158160933 | 15 | 25.674 | KV453080.1 | 5408317 | 15-scf00327 | 15 |
| AX-158160936 | 15 | 25.674 | KV453080.1 | 5412025 | 15-scf00327 | 15 |
| AX-158160941 | 15 | 25.674 | KV453080.1 | 5421661 | 15-scf00327 | 15 |
| AX-158160942 | 15 | 25.674 | KV453080.1 | 5422895 | 15-scf00327 | 15 |
| AX-158160945 | 15 | 25.674 | KV453080.1 | 5424963 | 15-scf00327 | 15 |
| AX-157718787 | 15 | 25.674 | KV453080.1 | 5475752 | 15-scf00327 | 15 |
| AX-158412973 | 15 | 25.674 | KV453080.1 | 5543593 | 15-scf00327 | 15 |
| AX-158161011 | 15 | 25.674 | KV453080.1 | 5555888 | 15-scf00327 | 15 |
| AX-158161058 | 15 | 25.674 | KV453080.1 | 5659300 | 15-scf00327 | 15 |
| AX-158161064 | 15 | 25.674 | KV453080.1 | 5664878 | 15-scf00327 | 15 |
| AX-158161076 | 15 | 25.674 | KV453080.1 | 5699931 | 15-scf00327 | 15 |
| AX-157833764 | 15 | 25.674 | KV453080.1 | 5716461 | 15-scf00327 | 15 |
| AX-158161086 | 15 | 25.674 | KV453080.1 | 5722498 | 15-scf00327 | 15 |
| AX-158161087 | 15 | 25.674 | KV453080.1 | 5723653 | 15-scf00327 | 15 |
| AX-158161100 | 15 | 25.674 | KV453080.1 | 5759952 | 15-scf00327 | 15 |
| AX-158161157 | 15 | 25.674 | KV453080.1 | 5871187 | 15-scf00327 | 15 |
| AX-157833777 | 15 | 25.674 | KV453080.1 | 5889634 | 15-scf00327 | 15 |
| AX-157833782 | 15 | 25.674 | KV453080.1 | 5919586 | 15-scf00327 | 15 |
| AX-157704298 | 15 | 25.674 | KV453080.1 | 5932623 | 15-scf00327 | 15 |
| AX-158161178 | 15 | 25.674 | KV453080.1 | 5934006 | 15-scf00327 | 15 |
| AX-158161181 | 15 | 25.674 | KV453080.1 | 5940876 | 15-scf00327 | 15 |
| AX-157743576 | 15 | 25.674 | KV453080.1 | 5966883 | 15-scf00327 | 15 |
| AX-158161199 | 15 | 25.674 | KV453080.1 | 5968779 | 15-scf00327 | 15 |
| AX-157886621 | 15 | 25.674 | KV453080.1 | 6012979 | 15-scf00327 | 15 |
| AX-158161244 | 15 | 25.674 | KV453080.1 | 6077624 | 15-scf00327 | 15 |
| AX-158161274 | 15 | 25.674 | KV453080.1 | 6135294 | 15-scf00327 | 15 |
| AX-158161292 | 15 | 25.674 | KV453080.1 | 6165851 | 15-scf00327 | 15 |
| AX-158161348 | 15 | 25.674 | KV453080.1 | 6272981 | 15-scf00327 | 15 |
| AX-158161351 | 15 | 25.674 | KV453080.1 | 6281506 | 15-scf00327 | 15 |
| AX-158161379 | 15 | 25.674 | KV453080.1 | 6381418 | 15-scf00327 | 15 |
| AX-158161386 | 15 | 25.674 | KV453080.1 | 6446482 | 15-scf00327 | 15 |
| AX-157878489 | 15 | 25.674 | KV453080.1 | 6451566 | 15-scf00327 | 15 |
| AX-158161389 | 15 | 25.674 | KV453080.1 | 6455785 | 15-scf00327 | 15 |
| AX-158161391 | 15 | 25.674 | KV453080.1 | 6456748 | 15-scf00327 | 15 |
| AX-158161392 | 15 | 25.674 | KV453080.1 | 6459361 | 15-scf00327 | 15 |
| AX-158161397 | 15 | 25.674 | KV453080.1 | 6470570 | 15-scf00327 | 15 |
| AX-158161703 | 15 | 25.674 | KV453080.1 | 7220066 | 15-scf00327 | 15 |
| AX-158162121 | 15 | 25.674 | KV453080.1 | 7935451 | 15-scf00327 | 15 |
| AX-157701666 | 15 | 25.675 | KV453080.1 | 234695  | 15-scf00327 | 15 |
| AX-158412841 | 15 | 25.675 | KV453080.1 | 283956  | 15-scf00327 | 15 |
| AX-158160934 | 15 | 25.675 | KV453080.1 | 5408874 | 15-scf00327 | 15 |
| AX-158385699 | 15 | 25.675 | KV453080.1 | 5415850 | 15-scf00327 | 15 |
| AX-158160938 | 15 | 25.698 | KV453080.1 | 5418248 | 15-scf00327 | 15 |
| AX-158160903 | 15 | 25.733 | KV453080.1 | 5360462 | 15-scf00327 | 15 |
| AX-158160906 | 15 | 25.733 | KV453080.1 | 5362588 | 15-scf00327 | 15 |
| AX-158160963 | 15 | 25.733 | KV453080.1 | 5462421 | 15-scf00327 | 15 |
| AX-158161014 | 15 | 25.733 | KV453080.1 | 5562603 | 15-scf00327 | 15 |
| AX-158161017 | 15 | 25.733 | KV453080.1 | 5565322 | 15-scf00327 | 15 |

|              |    |        |            |         |             |    |
|--------------|----|--------|------------|---------|-------------|----|
| AX-157758161 | 15 | 25.733 | KV453080.1 | 5610977 | 15-scf00327 | 15 |
| AX-157833754 | 15 | 25.733 | KV453080.1 | 5636902 | 15-scf00327 | 15 |
| AX-158161059 | 15 | 25.733 | KV453080.1 | 5661095 | 15-scf00327 | 15 |
| AX-158160973 | 15 | 25.746 | KV453080.1 | 5501908 | 15-scf00327 | 15 |
| AX-158161432 | 15 | 25.746 | KV453080.1 | 6557531 | 15-scf00327 | 15 |
| AX-158161503 | 15 | 25.746 | KV453080.1 | 6682407 | 15-scf00327 | 15 |
| AX-158160982 | 15 | 25.767 | KV453080.1 | 5519046 | 15-scf00327 | 15 |
| AX-158160997 | 15 | 25.777 | KV453080.1 | 5538130 | 15-scf00327 | 15 |
| AX-158160999 | 15 | 25.786 | KV453080.1 | 5539856 | 15-scf00327 | 15 |
| AX-158161001 | 15 | 25.811 | KV453080.1 | 5544737 | 15-scf00327 | 15 |
| AX-157752532 | 15 | 25.839 | KV453080.1 | 5547450 | 15-scf00327 | 15 |
| AX-158160153 | 15 | 25.864 | KV453080.1 | 2698992 | 15-scf00327 | 15 |
| AX-158161003 | 15 | 25.864 | KV453080.1 | 5547815 | 15-scf00327 | 15 |
| AX-158160309 | 15 | 25.882 | KV453080.1 | 3111544 | 15-scf00327 | 15 |
| AX-158160430 | 15 | 25.882 | KV453080.1 | 3563047 | 15-scf00327 | 15 |
| AX-158160508 | 15 | 25.882 | KV453080.1 | 3936110 | 15-scf00327 | 15 |
| AX-158160511 | 15 | 25.882 | KV453080.1 | 3943547 | 15-scf00327 | 15 |
| AX-157714561 | 15 | 25.882 | KV453080.1 | 5639283 | 15-scf00327 | 15 |
| AX-158161050 | 15 | 25.882 | KV453080.1 | 5639939 | 15-scf00327 | 15 |
| AX-158161072 | 15 | 25.882 | KV453080.1 | 5694162 | 15-scf00327 | 15 |
| AX-158161074 | 15 | 25.882 | KV453080.1 | 5697084 | 15-scf00327 | 15 |
| AX-158161077 | 15 | 25.882 | KV453080.1 | 5700254 | 15-scf00327 | 15 |
| AX-157833760 | 15 | 25.882 | KV453080.1 | 5702330 | 15-scf00327 | 15 |
| AX-158161078 | 15 | 25.882 | KV453080.1 | 5703393 | 15-scf00327 | 15 |
| AX-158161079 | 15 | 25.882 | KV453080.1 | 5706463 | 15-scf00327 | 15 |
| AX-158161080 | 15 | 25.882 | KV453080.1 | 5707250 | 15-scf00327 | 15 |
| AX-158161081 | 15 | 25.882 | KV453080.1 | 5711267 | 15-scf00327 | 15 |
| AX-158161083 | 15 | 25.882 | KV453080.1 | 5714485 | 15-scf00327 | 15 |
| AX-157833763 | 15 | 25.882 | KV453080.1 | 5715150 | 15-scf00327 | 15 |
| AX-158161084 | 15 | 25.882 | KV453080.1 | 5719089 | 15-scf00327 | 15 |
| AX-158161085 | 15 | 25.882 | KV453080.1 | 5720641 | 15-scf00327 | 15 |
| AX-157755949 | 15 | 25.882 | KV453080.1 | 5740430 | 15-scf00327 | 15 |
| AX-157833768 | 15 | 25.882 | KV453080.1 | 5743005 | 15-scf00327 | 15 |
| AX-158161097 | 15 | 25.882 | KV453080.1 | 5753921 | 15-scf00327 | 15 |
| AX-157715243 | 15 | 25.882 | KV453080.1 | 5754694 | 15-scf00327 | 15 |
| AX-157717094 | 15 | 25.882 | KV453080.1 | 5755749 | 15-scf00327 | 15 |
| AX-158161098 | 15 | 25.882 | KV453080.1 | 5757197 | 15-scf00327 | 15 |
| AX-158158383 | 15 | 26.002 | KV453078.1 | 2107275 | 15-scf00323 | 15 |
| AX-158158909 | 15 | 26.002 | KV453080.1 | 127522  | 15-scf00327 | 15 |
| AX-157833428 | 15 | 26.002 | KV453080.1 | 228127  | 15-scf00327 | 15 |
| AX-158158969 | 15 | 26.002 | KV453080.1 | 280478  | 15-scf00327 | 15 |
| AX-157754454 | 15 | 26.002 | KV453080.1 | 590899  | 15-scf00327 | 15 |
| AX-158159718 | 15 | 26.002 | KV453080.1 | 1557131 | 15-scf00327 | 15 |
| AX-158159722 | 15 | 26.002 | KV453080.1 | 1568494 | 15-scf00327 | 15 |
| AX-157833559 | 15 | 26.002 | KV453080.1 | 1590982 | 15-scf00327 | 15 |
| AX-158159731 | 15 | 26.002 | KV453080.1 | 1591065 | 15-scf00327 | 15 |
| AX-158159740 | 15 | 26.002 | KV453080.1 | 1617291 | 15-scf00327 | 15 |
| AX-158159757 | 15 | 26.002 | KV453080.1 | 1645832 | 15-scf00327 | 15 |
| AX-158159783 | 15 | 26.002 | KV453080.1 | 1687447 | 15-scf00327 | 15 |
| AX-158159785 | 15 | 26.002 | KV453080.1 | 1689666 | 15-scf00327 | 15 |
| AX-158159791 | 15 | 26.002 | KV453080.1 | 1695866 | 15-scf00327 | 15 |

|              |    |        |            |         |             |    |
|--------------|----|--------|------------|---------|-------------|----|
| AX-157833565 | 15 | 26.002 | KV453080.1 | 1696357 | 15-scf00327 | 15 |
| AX-158159808 | 15 | 26.002 | KV453080.1 | 1738867 | 15-scf00327 | 15 |
| AX-158159854 | 15 | 26.002 | KV453080.1 | 1846381 | 15-scf00327 | 15 |
| AX-158159893 | 15 | 26.002 | KV453080.1 | 1938937 | 15-scf00327 | 15 |
| AX-157833595 | 15 | 26.002 | KV453080.1 | 2074026 | 15-scf00327 | 15 |
| AX-157833597 | 15 | 26.002 | KV453080.1 | 2125094 | 15-scf00327 | 15 |
| AX-158160081 | 15 | 26.002 | KV453080.1 | 2507961 | 15-scf00327 | 15 |
| AX-158160132 | 15 | 26.002 | KV453080.1 | 2630941 | 15-scf00327 | 15 |
| AX-158160136 | 15 | 26.002 | KV453080.1 | 2636237 | 15-scf00327 | 15 |
| AX-158160212 | 15 | 26.002 | KV453080.1 | 2899171 | 15-scf00327 | 15 |
| AX-158160217 | 15 | 26.002 | KV453080.1 | 2909127 | 15-scf00327 | 15 |
| AX-158160287 | 15 | 26.002 | KV453080.1 | 3028315 | 15-scf00327 | 15 |
| AX-158422971 | 15 | 26.002 | KV453080.1 | 3179141 | 15-scf00327 | 15 |
| AX-158160499 | 15 | 26.002 | KV453080.1 | 3898962 | 15-scf00327 | 15 |
| AX-158160652 | 15 | 26.002 | KV453080.1 | 4574939 | 15-scf00327 | 15 |
| AX-158160701 | 15 | 26.002 | KV453080.1 | 4801146 | 15-scf00327 | 15 |
| AX-157858350 | 15 | 26.002 | KV453080.1 | 4834442 | 15-scf00327 | 15 |
| AX-158160794 | 15 | 26.002 | KV453080.1 | 5091193 | 15-scf00327 | 15 |
| AX-158160848 | 15 | 26.002 | KV453080.1 | 5248578 | 15-scf00327 | 15 |
| AX-158160854 | 15 | 26.002 | KV453080.1 | 5265516 | 15-scf00327 | 15 |
| AX-158161019 | 15 | 26.002 | KV453080.1 | 5567193 | 15-scf00327 | 15 |
| AX-158161067 | 15 | 26.002 | KV453080.1 | 5672386 | 15-scf00327 | 15 |
| AX-157833762 | 15 | 26.002 | KV453080.1 | 5706196 | 15-scf00327 | 15 |
| AX-158161088 | 15 | 26.002 | KV453080.1 | 5726452 | 15-scf00327 | 15 |
| AX-157833767 | 15 | 26.002 | KV453080.1 | 5741188 | 15-scf00327 | 15 |
| AX-158161101 | 15 | 26.002 | KV453080.1 | 5760799 | 15-scf00327 | 15 |
| AX-158161114 | 15 | 26.002 | KV453080.1 | 5803010 | 15-scf00327 | 15 |
| AX-158161115 | 15 | 26.002 | KV453080.1 | 5803530 | 15-scf00327 | 15 |
| AX-158161117 | 15 | 26.002 | KV453080.1 | 5805606 | 15-scf00327 | 15 |
| AX-158161120 | 15 | 26.002 | KV453080.1 | 5807199 | 15-scf00327 | 15 |
| AX-158161123 | 15 | 26.002 | KV453080.1 | 5810930 | 15-scf00327 | 15 |
| AX-158161124 | 15 | 26.002 | KV453080.1 | 5811399 | 15-scf00327 | 15 |
| AX-157833772 | 15 | 26.002 | KV453080.1 | 5811982 | 15-scf00327 | 15 |
| AX-158161125 | 15 | 26.002 | KV453080.1 | 5812688 | 15-scf00327 | 15 |
| AX-158161128 | 15 | 26.002 | KV453080.1 | 5817636 | 15-scf00327 | 15 |
| AX-157724369 | 15 | 26.002 | KV453080.1 | 5818448 | 15-scf00327 | 15 |
| AX-158161129 | 15 | 26.002 | KV453080.1 | 5823183 | 15-scf00327 | 15 |
| AX-157833774 | 15 | 26.002 | KV453080.1 | 5826054 | 15-scf00327 | 15 |
| AX-157833775 | 15 | 26.002 | KV453080.1 | 5828729 | 15-scf00327 | 15 |
| AX-158161132 | 15 | 26.002 | KV453080.1 | 5831912 | 15-scf00327 | 15 |
| AX-158161133 | 15 | 26.002 | KV453080.1 | 5834183 | 15-scf00327 | 15 |
| AX-158161134 | 15 | 26.002 | KV453080.1 | 5838632 | 15-scf00327 | 15 |
| AX-158161143 | 15 | 26.002 | KV453080.1 | 5848148 | 15-scf00327 | 15 |
| AX-158161145 | 15 | 26.002 | KV453080.1 | 5853878 | 15-scf00327 | 15 |
| AX-158161149 | 15 | 26.002 | KV453080.1 | 5860704 | 15-scf00327 | 15 |
| AX-158161152 | 15 | 26.002 | KV453080.1 | 5862463 | 15-scf00327 | 15 |
| AX-158161161 | 15 | 26.002 | KV453080.1 | 5874355 | 15-scf00327 | 15 |
| AX-157833783 | 15 | 26.002 | KV453080.1 | 5921125 | 15-scf00327 | 15 |
| AX-157858366 | 15 | 26.002 | KV453080.1 | 5933729 | 15-scf00327 | 15 |
| AX-157833784 | 15 | 26.002 | KV453080.1 | 5933909 | 15-scf00327 | 15 |
| AX-158161179 | 15 | 26.002 | KV453080.1 | 5936252 | 15-scf00327 | 15 |

|              |    |        |            |         |             |    |
|--------------|----|--------|------------|---------|-------------|----|
| AX-158161180 | 15 | 26.002 | KV453080.1 | 5937189 | 15-scf00327 | 15 |
| AX-158161188 | 15 | 26.002 | KV453080.1 | 5948431 | 15-scf00327 | 15 |
| AX-158161196 | 15 | 26.002 | KV453080.1 | 5967171 | 15-scf00327 | 15 |
| AX-158161216 | 15 | 26.002 | KV453080.1 | 6020763 | 15-scf00327 | 15 |
| AX-158161217 | 15 | 26.002 | KV453080.1 | 6022519 | 15-scf00327 | 15 |
| AX-158161220 | 15 | 26.002 | KV453080.1 | 6032903 | 15-scf00327 | 15 |
| AX-157712459 | 15 | 26.002 | KV453080.1 | 6048376 | 15-scf00327 | 15 |
| AX-158161230 | 15 | 26.002 | KV453080.1 | 6055490 | 15-scf00327 | 15 |
| AX-157833797 | 15 | 26.002 | KV453080.1 | 6057671 | 15-scf00327 | 15 |
| AX-158161234 | 15 | 26.002 | KV453080.1 | 6066958 | 15-scf00327 | 15 |
| AX-158161259 | 15 | 26.002 | KV453080.1 | 6099617 | 15-scf00327 | 15 |
| AX-158161261 | 15 | 26.002 | KV453080.1 | 6105325 | 15-scf00327 | 15 |
| AX-158161269 | 15 | 26.002 | KV453080.1 | 6128377 | 15-scf00327 | 15 |
| AX-158161277 | 15 | 26.002 | KV453080.1 | 6139608 | 15-scf00327 | 15 |
| AX-158161278 | 15 | 26.002 | KV453080.1 | 6141636 | 15-scf00327 | 15 |
| AX-158161279 | 15 | 26.002 | KV453080.1 | 6142433 | 15-scf00327 | 15 |
| AX-158161280 | 15 | 26.002 | KV453080.1 | 6143110 | 15-scf00327 | 15 |
| AX-158161281 | 15 | 26.002 | KV453080.1 | 6145909 | 15-scf00327 | 15 |
| AX-157833798 | 15 | 26.002 | KV453080.1 | 6148780 | 15-scf00327 | 15 |
| AX-158161283 | 15 | 26.002 | KV453080.1 | 6150378 | 15-scf00327 | 15 |
| AX-158161285 | 15 | 26.002 | KV453080.1 | 6152075 | 15-scf00327 | 15 |
| AX-158161286 | 15 | 26.002 | KV453080.1 | 6155036 | 15-scf00327 | 15 |
| AX-158161291 | 15 | 26.002 | KV453080.1 | 6161606 | 15-scf00327 | 15 |
| AX-157858369 | 15 | 26.002 | KV453080.1 | 6162130 | 15-scf00327 | 15 |
| AX-158161297 | 15 | 26.002 | KV453080.1 | 6172564 | 15-scf00327 | 15 |
| AX-158161299 | 15 | 26.002 | KV453080.1 | 6175069 | 15-scf00327 | 15 |
| AX-158161300 | 15 | 26.002 | KV453080.1 | 6176639 | 15-scf00327 | 15 |
| AX-158161301 | 15 | 26.002 | KV453080.1 | 6177762 | 15-scf00327 | 15 |
| AX-158161303 | 15 | 26.002 | KV453080.1 | 6186064 | 15-scf00327 | 15 |
| AX-157754905 | 15 | 26.002 | KV453080.1 | 6189603 | 15-scf00327 | 15 |
| AX-158161306 | 15 | 26.002 | KV453080.1 | 6198569 | 15-scf00327 | 15 |
| AX-158161317 | 15 | 26.002 | KV453080.1 | 6235299 | 15-scf00327 | 15 |
| AX-158161320 | 15 | 26.002 | KV453080.1 | 6239341 | 15-scf00327 | 15 |
| AX-158161321 | 15 | 26.002 | KV453080.1 | 6240384 | 15-scf00327 | 15 |
| AX-158161322 | 15 | 26.002 | KV453080.1 | 6241064 | 15-scf00327 | 15 |
| AX-158161324 | 15 | 26.002 | KV453080.1 | 6242720 | 15-scf00327 | 15 |
| AX-158161329 | 15 | 26.002 | KV453080.1 | 6249214 | 15-scf00327 | 15 |
| AX-158161334 | 15 | 26.002 | KV453080.1 | 6254287 | 15-scf00327 | 15 |
| AX-158161349 | 15 | 26.002 | KV453080.1 | 6275071 | 15-scf00327 | 15 |
| AX-158161350 | 15 | 26.002 | KV453080.1 | 6281110 | 15-scf00327 | 15 |
| AX-158161357 | 15 | 26.002 | KV453080.1 | 6293476 | 15-scf00327 | 15 |
| AX-157833812 | 15 | 26.002 | KV453080.1 | 6401881 | 15-scf00327 | 15 |
| AX-158161385 | 15 | 26.002 | KV453080.1 | 6445058 | 15-scf00327 | 15 |
| AX-158161387 | 15 | 26.002 | KV453080.1 | 6449558 | 15-scf00327 | 15 |
| AX-158161388 | 15 | 26.002 | KV453080.1 | 6451225 | 15-scf00327 | 15 |
| AX-157833815 | 15 | 26.002 | KV453080.1 | 6452180 | 15-scf00327 | 15 |
| AX-157833816 | 15 | 26.002 | KV453080.1 | 6452952 | 15-scf00327 | 15 |
| AX-158161395 | 15 | 26.002 | KV453080.1 | 6466333 | 15-scf00327 | 15 |
| AX-158412999 | 15 | 26.002 | KV453080.1 | 6469939 | 15-scf00327 | 15 |
| AX-158161399 | 15 | 26.002 | KV453080.1 | 6476490 | 15-scf00327 | 15 |
| AX-158161403 | 15 | 26.002 | KV453080.1 | 6502475 | 15-scf00327 | 15 |

|              |    |        |            |         |             |    |
|--------------|----|--------|------------|---------|-------------|----|
| AX-158161405 | 15 | 26.002 | KV453080.1 | 6512816 | 15-scf00327 | 15 |
| AX-158161406 | 15 | 26.002 | KV453080.1 | 6513248 | 15-scf00327 | 15 |
| AX-158161407 | 15 | 26.002 | KV453080.1 | 6514498 | 15-scf00327 | 15 |
| AX-158161408 | 15 | 26.002 | KV453080.1 | 6515513 | 15-scf00327 | 15 |
| AX-158161409 | 15 | 26.002 | KV453080.1 | 6516112 | 15-scf00327 | 15 |
| AX-158161410 | 15 | 26.002 | KV453080.1 | 6516845 | 15-scf00327 | 15 |
| AX-158161425 | 15 | 26.002 | KV453080.1 | 6548313 | 15-scf00327 | 15 |
| AX-158161441 | 15 | 26.002 | KV453080.1 | 6583602 | 15-scf00327 | 15 |
| AX-158161508 | 15 | 26.002 | KV453080.1 | 6693473 | 15-scf00327 | 15 |
| AX-158161560 | 15 | 26.002 | KV453080.1 | 6798468 | 15-scf00327 | 15 |
| AX-157833849 | 15 | 26.002 | KV453080.1 | 6960426 | 15-scf00327 | 15 |
| AX-158161636 | 15 | 26.002 | KV453080.1 | 6979339 | 15-scf00327 | 15 |
| AX-157833850 | 15 | 26.002 | KV453080.1 | 6979704 | 15-scf00327 | 15 |
| AX-157833853 | 15 | 26.002 | KV453080.1 | 7006711 | 15-scf00327 | 15 |
| AX-158161638 | 15 | 26.002 | KV453080.1 | 7029369 | 15-scf00327 | 15 |
| AX-158161639 | 15 | 26.002 | KV453080.1 | 7036030 | 15-scf00327 | 15 |
| AX-158161640 | 15 | 26.002 | KV453080.1 | 7037312 | 15-scf00327 | 15 |
| AX-158161641 | 15 | 26.002 | KV453080.1 | 7039183 | 15-scf00327 | 15 |
| AX-158161642 | 15 | 26.002 | KV453080.1 | 7046189 | 15-scf00327 | 15 |
| AX-158161650 | 15 | 26.002 | KV453080.1 | 7070714 | 15-scf00327 | 15 |
| AX-158161665 | 15 | 26.002 | KV453080.1 | 7105452 | 15-scf00327 | 15 |
| AX-158161666 | 15 | 26.002 | KV453080.1 | 7107568 | 15-scf00327 | 15 |
| AX-158161690 | 15 | 26.002 | KV453080.1 | 7188602 | 15-scf00327 | 15 |
| AX-157871872 | 15 | 26.002 | KV453080.1 | 7284088 | 15-scf00327 | 15 |
| AX-157871873 | 15 | 26.002 | KV453080.1 | 7311029 | 15-scf00327 | 15 |
| AX-158161747 | 15 | 26.002 | KV453080.1 | 7352987 | 15-scf00327 | 15 |
| AX-158413015 | 15 | 26.002 | KV453080.1 | 7368483 | 15-scf00327 | 15 |
| AX-158161765 | 15 | 26.002 | KV453080.1 | 7388135 | 15-scf00327 | 15 |
| AX-157715007 | 15 | 26.002 | KV453080.1 | 7395447 | 15-scf00327 | 15 |
| AX-158161773 | 15 | 26.002 | KV453080.1 | 7410849 | 15-scf00327 | 15 |
| AX-158413018 | 15 | 26.002 | KV453080.1 | 7412050 | 15-scf00327 | 15 |
| AX-158161784 | 15 | 26.002 | KV453080.1 | 7437698 | 15-scf00327 | 15 |
| AX-158161791 | 15 | 26.002 | KV453080.1 | 7450231 | 15-scf00327 | 15 |
| AX-158161798 | 15 | 26.002 | KV453080.1 | 7467810 | 15-scf00327 | 15 |
| AX-158161810 | 15 | 26.002 | KV453080.1 | 7494183 | 15-scf00327 | 15 |
| AX-157833877 | 15 | 26.002 | KV453080.1 | 7499332 | 15-scf00327 | 15 |
| AX-158161813 | 15 | 26.002 | KV453080.1 | 7499621 | 15-scf00327 | 15 |
| AX-158161814 | 15 | 26.002 | KV453080.1 | 7500477 | 15-scf00327 | 15 |
| AX-158161815 | 15 | 26.002 | KV453080.1 | 7500754 | 15-scf00327 | 15 |
| AX-158161821 | 15 | 26.002 | KV453080.1 | 7510704 | 15-scf00327 | 15 |
| AX-158161891 | 15 | 26.002 | KV453080.1 | 7641835 | 15-scf00327 | 15 |
| AX-158161931 | 15 | 26.002 | KV453080.1 | 7683197 | 15-scf00327 | 15 |
| AX-158161947 | 15 | 26.002 | KV453080.1 | 7699841 | 15-scf00327 | 15 |
| AX-157720650 | 15 | 26.002 | KV453080.1 | 7723916 | 15-scf00327 | 15 |
| AX-158162046 | 15 | 26.002 | KV453080.1 | 7826075 | 15-scf00327 | 15 |
| AX-158162063 | 15 | 26.002 | KV453080.1 | 7855512 | 15-scf00327 | 15 |
| AX-158162134 | 15 | 26.002 | KV453080.1 | 7952905 | 15-scf00327 | 15 |
| AX-158161424 | 15 | 26.112 | KV453080.1 | 6546876 | 15-scf00327 | 15 |
| AX-158157966 | 15 | 26.221 | KV453078.1 | 1489176 | 15-scf00323 | 15 |
| AX-158159994 | 15 | 26.221 | KV453080.1 | 2288371 | 15-scf00327 | 15 |
| AX-158160939 | 15 | 26.221 | KV453080.1 | 5419401 | 15-scf00327 | 15 |

|              |    |        |            |         |             |    |
|--------------|----|--------|------------|---------|-------------|----|
| AX-157743926 | 15 | 26.221 | KV453080.1 | 5738032 | 15-scf00327 | 15 |
| AX-158161121 | 15 | 26.221 | KV453080.1 | 5808510 | 15-scf00327 | 15 |
| AX-158161122 | 15 | 26.221 | KV453080.1 | 5809111 | 15-scf00327 | 15 |
| AX-158161163 | 15 | 26.221 | KV453080.1 | 5878619 | 15-scf00327 | 15 |
| AX-158161185 | 15 | 26.221 | KV453080.1 | 5945829 | 15-scf00327 | 15 |
| AX-158161213 | 15 | 26.221 | KV453080.1 | 6016413 | 15-scf00327 | 15 |
| AX-158161221 | 15 | 26.221 | KV453080.1 | 6033263 | 15-scf00327 | 15 |
| AX-158161326 | 15 | 26.221 | KV453080.1 | 6246654 | 15-scf00327 | 15 |
| AX-158161333 | 15 | 26.221 | KV453080.1 | 6252956 | 15-scf00327 | 15 |
| AX-158161338 | 15 | 26.221 | KV453080.1 | 6260231 | 15-scf00327 | 15 |
| AX-158161341 | 15 | 26.221 | KV453080.1 | 6263111 | 15-scf00327 | 15 |
| AX-158161352 | 15 | 26.221 | KV453080.1 | 6284688 | 15-scf00327 | 15 |
| AX-157833821 | 15 | 26.221 | KV453080.1 | 6566295 | 15-scf00327 | 15 |
| AX-158161437 | 15 | 26.221 | KV453080.1 | 6573918 | 15-scf00327 | 15 |
| AX-158161444 | 15 | 26.221 | KV453080.1 | 6586293 | 15-scf00327 | 15 |
| AX-158161447 | 15 | 26.221 | KV453080.1 | 6592235 | 15-scf00327 | 15 |
| AX-158161448 | 15 | 26.221 | KV453080.1 | 6596130 | 15-scf00327 | 15 |
| AX-158161462 | 15 | 26.221 | KV453080.1 | 6614805 | 15-scf00327 | 15 |
| AX-158161470 | 15 | 26.221 | KV453080.1 | 6630472 | 15-scf00327 | 15 |
| AX-158385707 | 15 | 26.221 | KV453080.1 | 6637356 | 15-scf00327 | 15 |
| AX-158161479 | 15 | 26.221 | KV453080.1 | 6650096 | 15-scf00327 | 15 |
| AX-158161482 | 15 | 26.221 | KV453080.1 | 6654002 | 15-scf00327 | 15 |
| AX-157858374 | 15 | 26.221 | KV453080.1 | 6657540 | 15-scf00327 | 15 |
| AX-158161489 | 15 | 26.221 | KV453080.1 | 6661733 | 15-scf00327 | 15 |
| AX-158161490 | 15 | 26.221 | KV453080.1 | 6662127 | 15-scf00327 | 15 |
| AX-157858375 | 15 | 26.221 | KV453080.1 | 6662692 | 15-scf00327 | 15 |
| AX-158161505 | 15 | 26.221 | KV453080.1 | 6684353 | 15-scf00327 | 15 |
| AX-158161511 | 15 | 26.221 | KV453080.1 | 6705655 | 15-scf00327 | 15 |
| AX-158161513 | 15 | 26.221 | KV453080.1 | 6708355 | 15-scf00327 | 15 |
| AX-158161515 | 15 | 26.221 | KV453080.1 | 6711979 | 15-scf00327 | 15 |
| AX-158161521 | 15 | 26.221 | KV453080.1 | 6719246 | 15-scf00327 | 15 |
| AX-158161523 | 15 | 26.221 | KV453080.1 | 6720531 | 15-scf00327 | 15 |
| AX-158161524 | 15 | 26.221 | KV453080.1 | 6721230 | 15-scf00327 | 15 |
| AX-157833834 | 15 | 26.221 | KV453080.1 | 6758970 | 15-scf00327 | 15 |
| AX-157866560 | 15 | 26.221 | KV453080.1 | 6772771 | 15-scf00327 | 15 |
| AX-158161547 | 15 | 26.221 | KV453080.1 | 6779343 | 15-scf00327 | 15 |
| AX-157747052 | 15 | 26.221 | KV453080.1 | 6787370 | 15-scf00327 | 15 |
| AX-157833835 | 15 | 26.221 | KV453080.1 | 6787548 | 15-scf00327 | 15 |
| AX-158161553 | 15 | 26.221 | KV453080.1 | 6787912 | 15-scf00327 | 15 |
| AX-158161557 | 15 | 26.221 | KV453080.1 | 6791814 | 15-scf00327 | 15 |
| AX-158161576 | 15 | 26.221 | KV453080.1 | 6821772 | 15-scf00327 | 15 |
| AX-158161647 | 15 | 26.221 | KV453080.1 | 7055279 | 15-scf00327 | 15 |
| AX-158161701 | 15 | 26.221 | KV453080.1 | 7214947 | 15-scf00327 | 15 |
| AX-158161706 | 15 | 26.221 | KV453080.1 | 7233549 | 15-scf00327 | 15 |
| AX-158161707 | 15 | 26.221 | KV453080.1 | 7234654 | 15-scf00327 | 15 |
| AX-157833857 | 15 | 26.221 | KV453080.1 | 7241479 | 15-scf00327 | 15 |
| AX-158161739 | 15 | 26.221 | KV453080.1 | 7337777 | 15-scf00327 | 15 |
| AX-158161768 | 15 | 26.221 | KV453080.1 | 7400262 | 15-scf00327 | 15 |
| AX-158161774 | 15 | 26.221 | KV453080.1 | 7414196 | 15-scf00327 | 15 |
| AX-157833873 | 15 | 26.221 | KV453080.1 | 7453017 | 15-scf00327 | 15 |
| AX-157715139 | 15 | 26.221 | KV453080.1 | 7459571 | 15-scf00327 | 15 |



|              |    |        |            |         |             |    |
|--------------|----|--------|------------|---------|-------------|----|
| AX-158161805 | 15 | 26.221 | KV453080.1 | 7482675 | 15-scf00327 | 15 |
| AX-158161890 | 15 | 26.221 | KV453080.1 | 7641470 | 15-scf00327 | 15 |
| AX-158162034 | 15 | 26.221 | KV453080.1 | 7810585 | 15-scf00327 | 15 |
| AX-158162070 | 15 | 26.221 | KV453080.1 | 7862780 | 15-scf00327 | 15 |
| AX-158162215 | 15 | 26.221 | KV453080.1 | 8085494 | 15-scf00327 | 15 |
| AX-158159528 | 15 | 26.33  | KV453080.1 | 1257242 | 15-scf00327 | 15 |
| AX-158161147 | 15 | 26.33  | KV453080.1 | 5855256 | 15-scf00327 | 15 |
| AX-158380476 | 15 | 26.33  | KV453080.1 | 6024464 | 15-scf00327 | 15 |
| AX-158161263 | 15 | 26.33  | KV453080.1 | 6107756 | 15-scf00327 | 15 |
| AX-158161296 | 15 | 26.33  | KV453080.1 | 6172252 | 15-scf00327 | 15 |
| AX-158161323 | 15 | 26.33  | KV453080.1 | 6241541 | 15-scf00327 | 15 |
| AX-158161325 | 15 | 26.33  | KV453080.1 | 6244870 | 15-scf00327 | 15 |
| AX-158161327 | 15 | 26.33  | KV453080.1 | 6247524 | 15-scf00327 | 15 |
| AX-158161328 | 15 | 26.33  | KV453080.1 | 6247848 | 15-scf00327 | 15 |
| AX-158161330 | 15 | 26.33  | KV453080.1 | 6249662 | 15-scf00327 | 15 |
| AX-158161331 | 15 | 26.33  | KV453080.1 | 6250396 | 15-scf00327 | 15 |
| AX-158161335 | 15 | 26.33  | KV453080.1 | 6255672 | 15-scf00327 | 15 |
| AX-158161337 | 15 | 26.33  | KV453080.1 | 6259577 | 15-scf00327 | 15 |
| AX-158161340 | 15 | 26.33  | KV453080.1 | 6262652 | 15-scf00327 | 15 |
| AX-158161345 | 15 | 26.33  | KV453080.1 | 6266699 | 15-scf00327 | 15 |
| AX-158161378 | 15 | 26.33  | KV453080.1 | 6379853 | 15-scf00327 | 15 |
| AX-158161381 | 15 | 26.33  | KV453080.1 | 6387731 | 15-scf00327 | 15 |
| AX-157722458 | 15 | 26.33  | KV453080.1 | 6436791 | 15-scf00327 | 15 |
| AX-158161384 | 15 | 26.33  | KV453080.1 | 6436851 | 15-scf00327 | 15 |
| AX-158161396 | 15 | 26.33  | KV453080.1 | 6468219 | 15-scf00327 | 15 |
| AX-158380477 | 15 | 26.33  | KV453080.1 | 6468445 | 15-scf00327 | 15 |
| AX-157833817 | 15 | 26.33  | KV453080.1 | 6519020 | 15-scf00327 | 15 |
| AX-158161423 | 15 | 26.33  | KV453080.1 | 6544929 | 15-scf00327 | 15 |
| AX-158161487 | 15 | 26.33  | KV453080.1 | 6659536 | 15-scf00327 | 15 |
| AX-158161488 | 15 | 26.33  | KV453080.1 | 6661046 | 15-scf00327 | 15 |
| AX-158161491 | 15 | 26.33  | KV453080.1 | 6662546 | 15-scf00327 | 15 |
| AX-158161493 | 15 | 26.33  | KV453080.1 | 6666657 | 15-scf00327 | 15 |
| AX-157833829 | 15 | 26.33  | KV453080.1 | 6692200 | 15-scf00327 | 15 |
| AX-158161512 | 15 | 26.33  | KV453080.1 | 6708092 | 15-scf00327 | 15 |
| AX-158161514 | 15 | 26.33  | KV453080.1 | 6711611 | 15-scf00327 | 15 |
| AX-158161519 | 15 | 26.33  | KV453080.1 | 6716443 | 15-scf00327 | 15 |
| AX-158161549 | 15 | 26.33  | KV453080.1 | 6783982 | 15-scf00327 | 15 |
| AX-158161554 | 15 | 26.33  | KV453080.1 | 6788976 | 15-scf00327 | 15 |
| AX-158161555 | 15 | 26.33  | KV453080.1 | 6789347 | 15-scf00327 | 15 |
| AX-158161556 | 15 | 26.33  | KV453080.1 | 6791305 | 15-scf00327 | 15 |
| AX-158161558 | 15 | 26.33  | KV453080.1 | 6792839 | 15-scf00327 | 15 |
| AX-158161559 | 15 | 26.33  | KV453080.1 | 6797276 | 15-scf00327 | 15 |
| AX-157833837 | 15 | 26.33  | KV453080.1 | 6798050 | 15-scf00327 | 15 |
| AX-157749633 | 15 | 26.33  | KV453080.1 | 6829657 | 15-scf00327 | 15 |
| AX-157714839 | 15 | 26.33  | KV453080.1 | 6830289 | 15-scf00327 | 15 |
| AX-158161588 | 15 | 26.33  | KV453080.1 | 6833086 | 15-scf00327 | 15 |
| AX-158161590 | 15 | 26.33  | KV453080.1 | 6835642 | 15-scf00327 | 15 |
| AX-157833845 | 15 | 26.33  | KV453080.1 | 6839095 | 15-scf00327 | 15 |
| AX-158161595 | 15 | 26.33  | KV453080.1 | 6843413 | 15-scf00327 | 15 |
| AX-158161596 | 15 | 26.33  | KV453080.1 | 6845685 | 15-scf00327 | 15 |
| AX-158161625 | 15 | 26.33  | KV453080.1 | 6921512 | 15-scf00327 | 15 |

|              |    |       |            |         |             |    |
|--------------|----|-------|------------|---------|-------------|----|
| AX-158161627 | 15 | 26.33 | KV453080.1 | 6925366 | 15-scf00327 | 15 |
| AX-158161628 | 15 | 26.33 | KV453080.1 | 6933731 | 15-scf00327 | 15 |
| AX-158161635 | 15 | 26.33 | KV453080.1 | 6978799 | 15-scf00327 | 15 |
| AX-158161668 | 15 | 26.33 | KV453080.1 | 7116006 | 15-scf00327 | 15 |
| AX-158161670 | 15 | 26.33 | KV453080.1 | 7116977 | 15-scf00327 | 15 |
| AX-157708693 | 15 | 26.33 | KV453080.1 | 7134245 | 15-scf00327 | 15 |
| AX-158161673 | 15 | 26.33 | KV453080.1 | 7137038 | 15-scf00327 | 15 |
| AX-158161675 | 15 | 26.33 | KV453080.1 | 7138654 | 15-scf00327 | 15 |
| AX-158161677 | 15 | 26.33 | KV453080.1 | 7144094 | 15-scf00327 | 15 |
| AX-158161681 | 15 | 26.33 | KV453080.1 | 7158068 | 15-scf00327 | 15 |
| AX-158161683 | 15 | 26.33 | KV453080.1 | 7170644 | 15-scf00327 | 15 |
| AX-158161684 | 15 | 26.33 | KV453080.1 | 7174793 | 15-scf00327 | 15 |
| AX-158161685 | 15 | 26.33 | KV453080.1 | 7178767 | 15-scf00327 | 15 |
| AX-158161688 | 15 | 26.33 | KV453080.1 | 7183995 | 15-scf00327 | 15 |
| AX-158161691 | 15 | 26.33 | KV453080.1 | 7196424 | 15-scf00327 | 15 |
| AX-158161692 | 15 | 26.33 | KV453080.1 | 7200721 | 15-scf00327 | 15 |
| AX-158161693 | 15 | 26.33 | KV453080.1 | 7201465 | 15-scf00327 | 15 |
| AX-158161694 | 15 | 26.33 | KV453080.1 | 7202360 | 15-scf00327 | 15 |
| AX-158161695 | 15 | 26.33 | KV453080.1 | 7203673 | 15-scf00327 | 15 |
| AX-158161696 | 15 | 26.33 | KV453080.1 | 7205208 | 15-scf00327 | 15 |
| AX-158161699 | 15 | 26.33 | KV453080.1 | 7206776 | 15-scf00327 | 15 |
| AX-158161700 | 15 | 26.33 | KV453080.1 | 7212914 | 15-scf00327 | 15 |
| AX-157745819 | 15 | 26.33 | KV453080.1 | 7241072 | 15-scf00327 | 15 |
| AX-158161711 | 15 | 26.33 | KV453080.1 | 7243140 | 15-scf00327 | 15 |
| AX-158161712 | 15 | 26.33 | KV453080.1 | 7245988 | 15-scf00327 | 15 |
| AX-158161713 | 15 | 26.33 | KV453080.1 | 7249297 | 15-scf00327 | 15 |
| AX-158161714 | 15 | 26.33 | KV453080.1 | 7252558 | 15-scf00327 | 15 |
| AX-158161716 | 15 | 26.33 | KV453080.1 | 7256370 | 15-scf00327 | 15 |
| AX-158161717 | 15 | 26.33 | KV453080.1 | 7257788 | 15-scf00327 | 15 |
| AX-157833858 | 15 | 26.33 | KV453080.1 | 7259489 | 15-scf00327 | 15 |
| AX-157833860 | 15 | 26.33 | KV453080.1 | 7260657 | 15-scf00327 | 15 |
| AX-158161718 | 15 | 26.33 | KV453080.1 | 7266667 | 15-scf00327 | 15 |
| AX-158161719 | 15 | 26.33 | KV453080.1 | 7267818 | 15-scf00327 | 15 |
| AX-158161721 | 15 | 26.33 | KV453080.1 | 7271072 | 15-scf00327 | 15 |
| AX-158161722 | 15 | 26.33 | KV453080.1 | 7271414 | 15-scf00327 | 15 |
| AX-158161724 | 15 | 26.33 | KV453080.1 | 7272906 | 15-scf00327 | 15 |
| AX-158161725 | 15 | 26.33 | KV453080.1 | 7273399 | 15-scf00327 | 15 |
| AX-157833863 | 15 | 26.33 | KV453080.1 | 7276878 | 15-scf00327 | 15 |
| AX-158161728 | 15 | 26.33 | KV453080.1 | 7281245 | 15-scf00327 | 15 |
| AX-158161729 | 15 | 26.33 | KV453080.1 | 7284729 | 15-scf00327 | 15 |
| AX-158161735 | 15 | 26.33 | KV453080.1 | 7309017 | 15-scf00327 | 15 |
| AX-158161738 | 15 | 26.33 | KV453080.1 | 7335836 | 15-scf00327 | 15 |
| AX-158161746 | 15 | 26.33 | KV453080.1 | 7351959 | 15-scf00327 | 15 |
| AX-158161751 | 15 | 26.33 | KV453080.1 | 7363129 | 15-scf00327 | 15 |
| AX-158161756 | 15 | 26.33 | KV453080.1 | 7367270 | 15-scf00327 | 15 |
| AX-158161757 | 15 | 26.33 | KV453080.1 | 7372226 | 15-scf00327 | 15 |
| AX-158161758 | 15 | 26.33 | KV453080.1 | 7372427 | 15-scf00327 | 15 |
| AX-158161763 | 15 | 26.33 | KV453080.1 | 7383519 | 15-scf00327 | 15 |
| AX-158161770 | 15 | 26.33 | KV453080.1 | 7405730 | 15-scf00327 | 15 |
| AX-158161778 | 15 | 26.33 | KV453080.1 | 7426900 | 15-scf00327 | 15 |
| AX-158161779 | 15 | 26.33 | KV453080.1 | 7429595 | 15-scf00327 | 15 |

|              |    |        |            |         |             |    |
|--------------|----|--------|------------|---------|-------------|----|
| AX-158161781 | 15 | 26.33  | KV453080.1 | 7433135 | 15-scf00327 | 15 |
| AX-158161782 | 15 | 26.33  | KV453080.1 | 7433247 | 15-scf00327 | 15 |
| AX-158161787 | 15 | 26.33  | KV453080.1 | 7444606 | 15-scf00327 | 15 |
| AX-158161790 | 15 | 26.33  | KV453080.1 | 7449010 | 15-scf00327 | 15 |
| AX-157833872 | 15 | 26.33  | KV453080.1 | 7450693 | 15-scf00327 | 15 |
| AX-158161792 | 15 | 26.33  | KV453080.1 | 7452308 | 15-scf00327 | 15 |
| AX-158161793 | 15 | 26.33  | KV453080.1 | 7455335 | 15-scf00327 | 15 |
| AX-157833874 | 15 | 26.33  | KV453080.1 | 7460489 | 15-scf00327 | 15 |
| AX-158161807 | 15 | 26.33  | KV453080.1 | 7486686 | 15-scf00327 | 15 |
| AX-158161808 | 15 | 26.33  | KV453080.1 | 7487225 | 15-scf00327 | 15 |
| AX-158417865 | 15 | 26.33  | KV453080.1 | 7492801 | 15-scf00327 | 15 |
| AX-157833876 | 15 | 26.33  | KV453080.1 | 7495161 | 15-scf00327 | 15 |
| AX-157886626 | 15 | 26.33  | KV453080.1 | 7495637 | 15-scf00327 | 15 |
| AX-158161811 | 15 | 26.33  | KV453080.1 | 7496234 | 15-scf00327 | 15 |
| AX-158161816 | 15 | 26.33  | KV453080.1 | 7501092 | 15-scf00327 | 15 |
| AX-158161818 | 15 | 26.33  | KV453080.1 | 7502950 | 15-scf00327 | 15 |
| AX-158161822 | 15 | 26.33  | KV453080.1 | 7511343 | 15-scf00327 | 15 |
| AX-158161823 | 15 | 26.33  | KV453080.1 | 7511809 | 15-scf00327 | 15 |
| AX-158413022 | 15 | 26.33  | KV453080.1 | 7512680 | 15-scf00327 | 15 |
| AX-158161824 | 15 | 26.33  | KV453080.1 | 7512757 | 15-scf00327 | 15 |
| AX-158161825 | 15 | 26.33  | KV453080.1 | 7513185 | 15-scf00327 | 15 |
| AX-158161838 | 15 | 26.33  | KV453080.1 | 7537830 | 15-scf00327 | 15 |
| AX-158161840 | 15 | 26.33  | KV453080.1 | 7539249 | 15-scf00327 | 15 |
| AX-157833882 | 15 | 26.33  | KV453080.1 | 7539562 | 15-scf00327 | 15 |
| AX-158161843 | 15 | 26.33  | KV453080.1 | 7550753 | 15-scf00327 | 15 |
| AX-158161867 | 15 | 26.33  | KV453080.1 | 7597939 | 15-scf00327 | 15 |
| AX-157833888 | 15 | 26.33  | KV453080.1 | 7598048 | 15-scf00327 | 15 |
| AX-157772286 | 15 | 26.33  | KV453080.1 | 7622899 | 15-scf00327 | 15 |
| AX-158161883 | 15 | 26.33  | KV453080.1 | 7630650 | 15-scf00327 | 15 |
| AX-157738329 | 15 | 26.33  | KV453080.1 | 7682259 | 15-scf00327 | 15 |
| AX-158161935 | 15 | 26.33  | KV453080.1 | 7685982 | 15-scf00327 | 15 |
| AX-158161946 | 15 | 26.33  | KV453080.1 | 7699373 | 15-scf00327 | 15 |
| AX-158161969 | 15 | 26.33  | KV453080.1 | 7730998 | 15-scf00327 | 15 |
| AX-157757863 | 15 | 26.33  | KV453080.1 | 7807427 | 15-scf00327 | 15 |
| AX-158162071 | 15 | 26.33  | KV453080.1 | 7863682 | 15-scf00327 | 15 |
| AX-158162078 | 15 | 26.33  | KV453080.1 | 7874201 | 15-scf00327 | 15 |
| AX-158162174 | 15 | 26.33  | KV453080.1 | 8005509 | 15-scf00327 | 15 |
| AX-158162219 | 15 | 26.33  | KV453080.1 | 8089450 | 15-scf00327 | 15 |
| AX-158162223 | 15 | 26.33  | KV453080.1 | 8096712 | 15-scf00327 | 15 |
| AX-158162303 | 15 | 26.33  | KV453080.1 | 8235108 | 15-scf00327 | 15 |
| AX-157714493 | 15 | 26.439 | KV453080.1 | 624165  | 15-scf00327 | 15 |
| AX-158159378 | 15 | 26.439 | KV453080.1 | 960407  | 15-scf00327 | 15 |
| AX-158159846 | 15 | 26.439 | KV453080.1 | 1828299 | 15-scf00327 | 15 |
| AX-158159857 | 15 | 26.439 | KV453080.1 | 1849075 | 15-scf00327 | 15 |
| AX-158161090 | 15 | 26.439 | KV453080.1 | 5730992 | 15-scf00327 | 15 |
| AX-157833776 | 15 | 26.439 | KV453080.1 | 5846724 | 15-scf00327 | 15 |
| AX-158161146 | 15 | 26.439 | KV453080.1 | 5854160 | 15-scf00327 | 15 |
| AX-157713745 | 15 | 26.439 | KV453080.1 | 5897519 | 15-scf00327 | 15 |
| AX-158161245 | 15 | 26.439 | KV453080.1 | 6078365 | 15-scf00327 | 15 |
| AX-158161249 | 15 | 26.439 | KV453080.1 | 6081521 | 15-scf00327 | 15 |
| AX-158161265 | 15 | 26.439 | KV453080.1 | 6114217 | 15-scf00327 | 15 |

|              |    |        |            |         |             |    |
|--------------|----|--------|------------|---------|-------------|----|
| AX-158161268 | 15 | 26.439 | KV453080.1 | 6123600 | 15-scf00327 | 15 |
| AX-158161271 | 15 | 26.439 | KV453080.1 | 6131063 | 15-scf00327 | 15 |
| AX-158412993 | 15 | 26.439 | KV453080.1 | 6131820 | 15-scf00327 | 15 |
| AX-158161420 | 15 | 26.439 | KV453080.1 | 6532028 | 15-scf00327 | 15 |
| AX-157833820 | 15 | 26.439 | KV453080.1 | 6537466 | 15-scf00327 | 15 |
| AX-158161469 | 15 | 26.439 | KV453080.1 | 6629351 | 15-scf00327 | 15 |
| AX-158161474 | 15 | 26.439 | KV453080.1 | 6638806 | 15-scf00327 | 15 |
| AX-158161480 | 15 | 26.439 | KV453080.1 | 6650605 | 15-scf00327 | 15 |
| AX-158161494 | 15 | 26.439 | KV453080.1 | 6669630 | 15-scf00327 | 15 |
| AX-158161497 | 15 | 26.439 | KV453080.1 | 6674010 | 15-scf00327 | 15 |
| AX-158161500 | 15 | 26.439 | KV453080.1 | 6677656 | 15-scf00327 | 15 |
| AX-158161510 | 15 | 26.439 | KV453080.1 | 6699247 | 15-scf00327 | 15 |
| AX-158161522 | 15 | 26.439 | KV453080.1 | 6719826 | 15-scf00327 | 15 |
| AX-157753116 | 15 | 26.439 | KV453080.1 | 6836843 | 15-scf00327 | 15 |
| AX-158161594 | 15 | 26.439 | KV453080.1 | 6842616 | 15-scf00327 | 15 |
| AX-158161723 | 15 | 26.439 | KV453080.1 | 7272361 | 15-scf00327 | 15 |
| AX-158161730 | 15 | 26.439 | KV453080.1 | 7287020 | 15-scf00327 | 15 |
| AX-158161741 | 15 | 26.439 | KV453080.1 | 7340692 | 15-scf00327 | 15 |
| AX-158161812 | 15 | 26.439 | KV453080.1 | 7498336 | 15-scf00327 | 15 |
| AX-158161842 | 15 | 26.439 | KV453080.1 | 7545300 | 15-scf00327 | 15 |
| AX-157744613 | 15 | 26.439 | KV453080.1 | 7561592 | 15-scf00327 | 15 |
| AX-158161851 | 15 | 26.439 | KV453080.1 | 7562361 | 15-scf00327 | 15 |
| AX-157738400 | 15 | 26.439 | KV453080.1 | 7583016 | 15-scf00327 | 15 |
| AX-158161862 | 15 | 26.439 | KV453080.1 | 7593145 | 15-scf00327 | 15 |
| AX-158161864 | 15 | 26.439 | KV453080.1 | 7595214 | 15-scf00327 | 15 |
| AX-158161871 | 15 | 26.439 | KV453080.1 | 7609177 | 15-scf00327 | 15 |
| AX-158161875 | 15 | 26.439 | KV453080.1 | 7616545 | 15-scf00327 | 15 |
| AX-158161880 | 15 | 26.439 | KV453080.1 | 7623645 | 15-scf00327 | 15 |
| AX-158161881 | 15 | 26.439 | KV453080.1 | 7626320 | 15-scf00327 | 15 |
| AX-158161884 | 15 | 26.439 | KV453080.1 | 7631846 | 15-scf00327 | 15 |
| AX-158161887 | 15 | 26.439 | KV453080.1 | 7639614 | 15-scf00327 | 15 |
| AX-158161888 | 15 | 26.439 | KV453080.1 | 7640083 | 15-scf00327 | 15 |
| AX-158161889 | 15 | 26.439 | KV453080.1 | 7641009 | 15-scf00327 | 15 |
| AX-158161892 | 15 | 26.439 | KV453080.1 | 7644055 | 15-scf00327 | 15 |
| AX-158161894 | 15 | 26.439 | KV453080.1 | 7645196 | 15-scf00327 | 15 |
| AX-158161895 | 15 | 26.439 | KV453080.1 | 7645738 | 15-scf00327 | 15 |
| AX-158161896 | 15 | 26.439 | KV453080.1 | 7648370 | 15-scf00327 | 15 |
| AX-158161897 | 15 | 26.439 | KV453080.1 | 7648817 | 15-scf00327 | 15 |
| AX-158161900 | 15 | 26.439 | KV453080.1 | 7650302 | 15-scf00327 | 15 |
| AX-158161901 | 15 | 26.439 | KV453080.1 | 7651175 | 15-scf00327 | 15 |
| AX-158161902 | 15 | 26.439 | KV453080.1 | 7654234 | 15-scf00327 | 15 |
| AX-158161904 | 15 | 26.439 | KV453080.1 | 7656123 | 15-scf00327 | 15 |
| AX-158161905 | 15 | 26.439 | KV453080.1 | 7656514 | 15-scf00327 | 15 |
| AX-158161906 | 15 | 26.439 | KV453080.1 | 7658043 | 15-scf00327 | 15 |
| AX-158161907 | 15 | 26.439 | KV453080.1 | 7658266 | 15-scf00327 | 15 |
| AX-158161909 | 15 | 26.439 | KV453080.1 | 7659990 | 15-scf00327 | 15 |
| AX-158161910 | 15 | 26.439 | KV453080.1 | 7660518 | 15-scf00327 | 15 |
| AX-158161913 | 15 | 26.439 | KV453080.1 | 7662357 | 15-scf00327 | 15 |
| AX-158161916 | 15 | 26.439 | KV453080.1 | 7664175 | 15-scf00327 | 15 |
| AX-158161917 | 15 | 26.439 | KV453080.1 | 7664691 | 15-scf00327 | 15 |
| AX-158161919 | 15 | 26.439 | KV453080.1 | 7667026 | 15-scf00327 | 15 |

|              |    |        |            |         |             |    |
|--------------|----|--------|------------|---------|-------------|----|
| AX-158413027 | 15 | 26.439 | KV453080.1 | 7667155 | 15-scf00327 | 15 |
| AX-158413028 | 15 | 26.439 | KV453080.1 | 7667450 | 15-scf00327 | 15 |
| AX-158161921 | 15 | 26.439 | KV453080.1 | 7669371 | 15-scf00327 | 15 |
| AX-158161922 | 15 | 26.439 | KV453080.1 | 7670393 | 15-scf00327 | 15 |
| AX-158161923 | 15 | 26.439 | KV453080.1 | 7673224 | 15-scf00327 | 15 |
| AX-158161924 | 15 | 26.439 | KV453080.1 | 7673815 | 15-scf00327 | 15 |
| AX-158161927 | 15 | 26.439 | KV453080.1 | 7677852 | 15-scf00327 | 15 |
| AX-158162015 | 15 | 26.439 | KV453080.1 | 7789419 | 15-scf00327 | 15 |
| AX-158162032 | 15 | 26.439 | KV453080.1 | 7806596 | 15-scf00327 | 15 |
| AX-158162100 | 15 | 26.439 | KV453080.1 | 7902675 | 15-scf00327 | 15 |
| AX-158161942 | 15 | 26.44  | KV453080.1 | 7697612 | 15-scf00327 | 15 |
| AX-158161950 | 15 | 26.519 | KV453080.1 | 7702889 | 15-scf00327 | 15 |
| AX-158161951 | 15 | 26.519 | KV453080.1 | 7703057 | 15-scf00327 | 15 |
| AX-158161952 | 15 | 26.519 | KV453080.1 | 7703589 | 15-scf00327 | 15 |
| AX-158161953 | 15 | 26.519 | KV453080.1 | 7704065 | 15-scf00327 | 15 |
| AX-158161954 | 15 | 26.519 | KV453080.1 | 7704725 | 15-scf00327 | 15 |
| AX-158161955 | 15 | 26.607 | KV453080.1 | 7708021 | 15-scf00327 | 15 |
| AX-158161961 | 15 | 26.711 | KV453080.1 | 7715108 | 15-scf00327 | 15 |
| AX-158161962 | 15 | 26.712 | KV453080.1 | 7717072 | 15-scf00327 | 15 |
| AX-157727948 | 15 | 26.712 | KV453080.1 | 7735551 | 15-scf00327 | 15 |
| AX-158159719 | 15 | 26.713 | KV453080.1 | 1561429 | 15-scf00327 | 15 |
| AX-158159759 | 15 | 26.713 | KV453080.1 | 1646925 | 15-scf00327 | 15 |
| AX-158159761 | 15 | 26.713 | KV453080.1 | 1651658 | 15-scf00327 | 15 |
| AX-157886611 | 15 | 26.713 | KV453080.1 | 2943840 | 15-scf00327 | 15 |
| AX-158161207 | 15 | 26.713 | KV453080.1 | 5988314 | 15-scf00327 | 15 |
| AX-158161502 | 15 | 26.713 | KV453080.1 | 6680961 | 15-scf00327 | 15 |
| AX-157833851 | 15 | 26.713 | KV453080.1 | 6989691 | 15-scf00327 | 15 |
| AX-158161876 | 15 | 26.713 | KV453080.1 | 7617755 | 15-scf00327 | 15 |
| AX-158161963 | 15 | 26.713 | KV453080.1 | 7721167 | 15-scf00327 | 15 |
| AX-157833890 | 15 | 26.713 | KV453080.1 | 7722320 | 15-scf00327 | 15 |
| AX-158161970 | 15 | 26.713 | KV453080.1 | 7732038 | 15-scf00327 | 15 |
| AX-158161971 | 15 | 26.713 | KV453080.1 | 7732411 | 15-scf00327 | 15 |
| AX-158161973 | 15 | 26.713 | KV453080.1 | 7733558 | 15-scf00327 | 15 |
| AX-157833891 | 15 | 26.713 | KV453080.1 | 7735786 | 15-scf00327 | 15 |
| AX-158161974 | 15 | 26.713 | KV453080.1 | 7736449 | 15-scf00327 | 15 |
| AX-158161975 | 15 | 26.713 | KV453080.1 | 7737853 | 15-scf00327 | 15 |
| AX-158161976 | 15 | 26.713 | KV453080.1 | 7738632 | 15-scf00327 | 15 |
| AX-158161978 | 15 | 26.713 | KV453080.1 | 7739373 | 15-scf00327 | 15 |
| AX-158161979 | 15 | 26.713 | KV453080.1 | 7741674 | 15-scf00327 | 15 |
| AX-158161981 | 15 | 26.713 | KV453080.1 | 7742383 | 15-scf00327 | 15 |
| AX-158161982 | 15 | 26.713 | KV453080.1 | 7742718 | 15-scf00327 | 15 |
| AX-157871887 | 15 | 26.713 | KV453080.1 | 7743031 | 15-scf00327 | 15 |
| AX-157833892 | 15 | 26.713 | KV453080.1 | 7743362 | 15-scf00327 | 15 |
| AX-157722221 | 15 | 26.713 | KV453080.1 | 7743994 | 15-scf00327 | 15 |
| AX-157871888 | 15 | 26.713 | KV453080.1 | 7745221 | 15-scf00327 | 15 |
| AX-158161983 | 15 | 26.713 | KV453080.1 | 7749105 | 15-scf00327 | 15 |
| AX-157858377 | 15 | 26.713 | KV453080.1 | 7752654 | 15-scf00327 | 15 |
| AX-158161985 | 15 | 26.713 | KV453080.1 | 7753227 | 15-scf00327 | 15 |
| AX-158161986 | 15 | 26.713 | KV453080.1 | 7753920 | 15-scf00327 | 15 |
| AX-157743213 | 15 | 26.713 | KV453080.1 | 7754082 | 15-scf00327 | 15 |
| AX-158161989 | 15 | 26.713 | KV453080.1 | 7757299 | 15-scf00327 | 15 |

|              |    |        |            |         |             |    |
|--------------|----|--------|------------|---------|-------------|----|
| AX-158161991 | 15 | 26.713 | KV453080.1 | 7759301 | 15-scf00327 | 15 |
| AX-158161992 | 15 | 26.713 | KV453080.1 | 7759683 | 15-scf00327 | 15 |
| AX-157858378 | 15 | 26.713 | KV453080.1 | 7759940 | 15-scf00327 | 15 |
| AX-158161993 | 15 | 26.713 | KV453080.1 | 7760155 | 15-scf00327 | 15 |
| AX-158161994 | 15 | 26.713 | KV453080.1 | 7760499 | 15-scf00327 | 15 |
| AX-158161996 | 15 | 26.713 | KV453080.1 | 7764085 | 15-scf00327 | 15 |
| AX-158161997 | 15 | 26.713 | KV453080.1 | 7766927 | 15-scf00327 | 15 |
| AX-157858379 | 15 | 26.713 | KV453080.1 | 7768819 | 15-scf00327 | 15 |
| AX-158162001 | 15 | 26.713 | KV453080.1 | 7770215 | 15-scf00327 | 15 |
| AX-158162003 | 15 | 26.713 | KV453080.1 | 7775338 | 15-scf00327 | 15 |
| AX-158162005 | 15 | 26.713 | KV453080.1 | 7776128 | 15-scf00327 | 15 |
| AX-158162006 | 15 | 26.713 | KV453080.1 | 7779045 | 15-scf00327 | 15 |
| AX-158162008 | 15 | 26.713 | KV453080.1 | 7779924 | 15-scf00327 | 15 |
| AX-157871889 | 15 | 26.713 | KV453080.1 | 7780760 | 15-scf00327 | 15 |
| AX-157697815 | 15 | 26.713 | KV453080.1 | 7787853 | 15-scf00327 | 15 |
| AX-158162013 | 15 | 26.713 | KV453080.1 | 7788637 | 15-scf00327 | 15 |
| AX-158393361 | 15 | 26.713 | KV453080.1 | 7792154 | 15-scf00327 | 15 |
| AX-158162018 | 15 | 26.713 | KV453080.1 | 7793622 | 15-scf00327 | 15 |
| AX-157704142 | 15 | 26.713 | KV453080.1 | 7796732 | 15-scf00327 | 15 |
| AX-158162026 | 15 | 26.713 | KV453080.1 | 7803208 | 15-scf00327 | 15 |
| AX-158162027 | 15 | 26.713 | KV453080.1 | 7803577 | 15-scf00327 | 15 |
| AX-157886632 | 15 | 26.713 | KV453080.1 | 8009025 | 15-scf00327 | 15 |
| AX-158161446 | 15 | 26.849 | KV453080.1 | 6590896 | 15-scf00327 | 15 |
| AX-158161449 | 15 | 26.849 | KV453080.1 | 6597861 | 15-scf00327 | 15 |
| AX-158161450 | 15 | 26.849 | KV453080.1 | 6598425 | 15-scf00327 | 15 |
| AX-158161626 | 15 | 26.849 | KV453080.1 | 6924336 | 15-scf00327 | 15 |
| AX-158161775 | 15 | 26.849 | KV453080.1 | 7416519 | 15-scf00327 | 15 |
| AX-158413020 | 15 | 26.849 | KV453080.1 | 7417500 | 15-scf00327 | 15 |
| AX-158161800 | 15 | 26.849 | KV453080.1 | 7472948 | 15-scf00327 | 15 |
| AX-158161804 | 15 | 26.849 | KV453080.1 | 7477659 | 15-scf00327 | 15 |
| AX-158161879 | 15 | 26.849 | KV453080.1 | 7622027 | 15-scf00327 | 15 |
| AX-158161914 | 15 | 26.849 | KV453080.1 | 7663095 | 15-scf00327 | 15 |
| AX-158161936 | 15 | 26.849 | KV453080.1 | 7688143 | 15-scf00327 | 15 |
| AX-158161964 | 15 | 26.849 | KV453080.1 | 7726099 | 15-scf00327 | 15 |
| AX-158161967 | 15 | 26.849 | KV453080.1 | 7729400 | 15-scf00327 | 15 |
| AX-157750023 | 15 | 26.849 | KV453080.1 | 7753565 | 15-scf00327 | 15 |
| AX-158162004 | 15 | 26.849 | KV453080.1 | 7775649 | 15-scf00327 | 15 |
| AX-158162020 | 15 | 26.849 | KV453080.1 | 7798688 | 15-scf00327 | 15 |
| AX-158162035 | 15 | 26.849 | KV453080.1 | 7812188 | 15-scf00327 | 15 |
| AX-158162037 | 15 | 26.849 | KV453080.1 | 7815924 | 15-scf00327 | 15 |
| AX-157754300 | 15 | 26.849 | KV453080.1 | 7816504 | 15-scf00327 | 15 |
| AX-158162044 | 15 | 26.849 | KV453080.1 | 7823180 | 15-scf00327 | 15 |
| AX-158162045 | 15 | 26.849 | KV453080.1 | 7824091 | 15-scf00327 | 15 |
| AX-157742546 | 15 | 26.849 | KV453080.1 | 7833566 | 15-scf00327 | 15 |
| AX-158162053 | 15 | 26.849 | KV453080.1 | 7836421 | 15-scf00327 | 15 |
| AX-157833897 | 15 | 26.849 | KV453080.1 | 7838181 | 15-scf00327 | 15 |
| AX-158162058 | 15 | 26.849 | KV453080.1 | 7848339 | 15-scf00327 | 15 |
| AX-158162062 | 15 | 26.849 | KV453080.1 | 7852742 | 15-scf00327 | 15 |
| AX-158162066 | 15 | 26.849 | KV453080.1 | 7860012 | 15-scf00327 | 15 |
| AX-157886630 | 15 | 26.849 | KV453080.1 | 7861295 | 15-scf00327 | 15 |
| AX-158162067 | 15 | 26.849 | KV453080.1 | 7861347 | 15-scf00327 | 15 |

|              |    |        |            |         |             |    |
|--------------|----|--------|------------|---------|-------------|----|
| AX-158162068 | 15 | 26.849 | KV453080.1 | 7861961 | 15-scf00327 | 15 |
| AX-158162069 | 15 | 26.849 | KV453080.1 | 7862601 | 15-scf00327 | 15 |
| AX-158162077 | 15 | 26.849 | KV453080.1 | 7872395 | 15-scf00327 | 15 |
| AX-158408964 | 15 | 26.849 | KV453080.1 | 7874709 | 15-scf00327 | 15 |
| AX-158162079 | 15 | 26.849 | KV453080.1 | 7875349 | 15-scf00327 | 15 |
| AX-158162080 | 15 | 26.849 | KV453080.1 | 7877122 | 15-scf00327 | 15 |
| AX-158162083 | 15 | 26.849 | KV453080.1 | 7880403 | 15-scf00327 | 15 |
| AX-158162087 | 15 | 26.849 | KV453080.1 | 7885115 | 15-scf00327 | 15 |
| AX-158162139 | 15 | 26.849 | KV453080.1 | 7957304 | 15-scf00327 | 15 |
| AX-158162153 | 15 | 26.849 | KV453080.1 | 7979623 | 15-scf00327 | 15 |
| AX-158162169 | 15 | 26.849 | KV453080.1 | 8002602 | 15-scf00327 | 15 |
| AX-158385717 | 15 | 26.849 | KV453080.1 | 8007997 | 15-scf00327 | 15 |
| AX-157723637 | 15 | 26.849 | KV453080.1 | 8010512 | 15-scf00327 | 15 |
| AX-158162196 | 15 | 26.849 | KV453080.1 | 8050224 | 15-scf00327 | 15 |
| AX-158162242 | 15 | 26.849 | KV453080.1 | 8134079 | 15-scf00327 | 15 |
| AX-157740255 | 15 | 26.849 | KV453080.1 | 8164794 | 15-scf00327 | 15 |
| AX-158159344 | 15 | 26.986 | KV453080.1 | 892533  | 15-scf00327 | 15 |
| AX-158159504 | 15 | 26.986 | KV453080.1 | 1220216 | 15-scf00327 | 15 |
| AX-158159510 | 15 | 26.986 | KV453080.1 | 1229159 | 15-scf00327 | 15 |
| AX-157751348 | 15 | 26.986 | KV453080.1 | 1232901 | 15-scf00327 | 15 |
| AX-157772372 | 15 | 26.986 | KV453080.1 | 1611396 | 15-scf00327 | 15 |
| AX-158159742 | 15 | 26.986 | KV453080.1 | 1618838 | 15-scf00327 | 15 |
| AX-157745277 | 15 | 26.986 | KV453080.1 | 1634111 | 15-scf00327 | 15 |
| AX-158159822 | 15 | 26.986 | KV453080.1 | 1765116 | 15-scf00327 | 15 |
| AX-158160060 | 15 | 26.986 | KV453080.1 | 2486573 | 15-scf00327 | 15 |
| AX-158161069 | 15 | 26.986 | KV453080.1 | 5682782 | 15-scf00327 | 15 |
| AX-158161459 | 15 | 26.986 | KV453080.1 | 6610443 | 15-scf00327 | 15 |
| AX-158161518 | 15 | 26.986 | KV453080.1 | 6715953 | 15-scf00327 | 15 |
| AX-157833830 | 15 | 26.986 | KV453080.1 | 6733912 | 15-scf00327 | 15 |
| AX-158161736 | 15 | 26.986 | KV453080.1 | 7311671 | 15-scf00327 | 15 |
| AX-158161744 | 15 | 26.986 | KV453080.1 | 7346027 | 15-scf00327 | 15 |
| AX-158161745 | 15 | 26.986 | KV453080.1 | 7348480 | 15-scf00327 | 15 |
| AX-158413017 | 15 | 26.986 | KV453080.1 | 7411950 | 15-scf00327 | 15 |
| AX-158161841 | 15 | 26.986 | KV453080.1 | 7541021 | 15-scf00327 | 15 |
| AX-158161915 | 15 | 26.986 | KV453080.1 | 7663777 | 15-scf00327 | 15 |
| AX-157833893 | 15 | 26.986 | KV453080.1 | 7747948 | 15-scf00327 | 15 |
| AX-158161984 | 15 | 26.986 | KV453080.1 | 7751212 | 15-scf00327 | 15 |
| AX-158162010 | 15 | 26.986 | KV453080.1 | 7784015 | 15-scf00327 | 15 |
| AX-158162038 | 15 | 26.986 | KV453080.1 | 7817015 | 15-scf00327 | 15 |
| AX-157833895 | 15 | 26.986 | KV453080.1 | 7834553 | 15-scf00327 | 15 |
| AX-158162059 | 15 | 26.986 | KV453080.1 | 7849007 | 15-scf00327 | 15 |
| AX-158162085 | 15 | 26.986 | KV453080.1 | 7883402 | 15-scf00327 | 15 |
| AX-158162089 | 15 | 26.986 | KV453080.1 | 7886369 | 15-scf00327 | 15 |
| AX-158162090 | 15 | 26.986 | KV453080.1 | 7886961 | 15-scf00327 | 15 |
| AX-158162092 | 15 | 26.986 | KV453080.1 | 7888005 | 15-scf00327 | 15 |
| AX-158162093 | 15 | 26.986 | KV453080.1 | 7888522 | 15-scf00327 | 15 |
| AX-158162095 | 15 | 26.986 | KV453080.1 | 7890748 | 15-scf00327 | 15 |
| AX-158162096 | 15 | 26.986 | KV453080.1 | 7891167 | 15-scf00327 | 15 |
| AX-158162097 | 15 | 26.986 | KV453080.1 | 7894099 | 15-scf00327 | 15 |
| AX-158413037 | 15 | 26.986 | KV453080.1 | 7903538 | 15-scf00327 | 15 |
| AX-157833899 | 15 | 26.986 | KV453080.1 | 7903883 | 15-scf00327 | 15 |

|              |    |        |            |         |             |    |
|--------------|----|--------|------------|---------|-------------|----|
| AX-158162101 | 15 | 26.986 | KV453080.1 | 7906437 | 15-scf00327 | 15 |
| AX-157833900 | 15 | 26.986 | KV453080.1 | 7913839 | 15-scf00327 | 15 |
| AX-158162112 | 15 | 26.986 | KV453080.1 | 7919576 | 15-scf00327 | 15 |
| AX-158162114 | 15 | 26.986 | KV453080.1 | 7924236 | 15-scf00327 | 15 |
| AX-158162115 | 15 | 26.986 | KV453080.1 | 7924941 | 15-scf00327 | 15 |
| AX-158162118 | 15 | 26.986 | KV453080.1 | 7932697 | 15-scf00327 | 15 |
| AX-158162124 | 15 | 26.986 | KV453080.1 | 7940789 | 15-scf00327 | 15 |
| AX-158162127 | 15 | 26.986 | KV453080.1 | 7947319 | 15-scf00327 | 15 |
| AX-158380480 | 15 | 26.986 | KV453080.1 | 7947974 | 15-scf00327 | 15 |
| AX-158162130 | 15 | 26.986 | KV453080.1 | 7949407 | 15-scf00327 | 15 |
| AX-158162131 | 15 | 26.986 | KV453080.1 | 7949816 | 15-scf00327 | 15 |
| AX-157742815 | 15 | 26.986 | KV453080.1 | 7952540 | 15-scf00327 | 15 |
| AX-158162136 | 15 | 26.986 | KV453080.1 | 7954129 | 15-scf00327 | 15 |
| AX-158162179 | 15 | 26.986 | KV453080.1 | 8013243 | 15-scf00327 | 15 |
| AX-158162217 | 15 | 26.986 | KV453080.1 | 8086610 | 15-scf00327 | 15 |
| AX-157886634 | 15 | 26.986 | KV453080.1 | 8133871 | 15-scf00327 | 15 |
| AX-157858380 | 15 | 26.986 | KV453080.1 | 8154362 | 15-scf00327 | 15 |
| AX-158162140 | 15 | 27.041 | KV453080.1 | 7958382 | 15-scf00327 | 15 |
| AX-158162142 | 15 | 27.041 | KV453080.1 | 7960760 | 15-scf00327 | 15 |
| AX-157724625 | 15 | 27.095 | KV453080.1 | 7960145 | 15-scf00327 | 15 |
| AX-158162143 | 15 | 27.095 | KV453080.1 | 7961210 | 15-scf00327 | 15 |
| AX-158162146 | 15 | 27.095 | KV453080.1 | 7965471 | 15-scf00327 | 15 |
| AX-158161144 | 15 | 27.204 | KV453080.1 | 5851055 | 15-scf00327 | 15 |
| AX-158161442 | 15 | 27.204 | KV453080.1 | 6584265 | 15-scf00327 | 15 |
| AX-158161452 | 15 | 27.204 | KV453080.1 | 6599950 | 15-scf00327 | 15 |
| AX-158161454 | 15 | 27.204 | KV453080.1 | 6603127 | 15-scf00327 | 15 |
| AX-158161456 | 15 | 27.204 | KV453080.1 | 6607201 | 15-scf00327 | 15 |
| AX-158161463 | 15 | 27.204 | KV453080.1 | 6617648 | 15-scf00327 | 15 |
| AX-158161486 | 15 | 27.204 | KV453080.1 | 6657120 | 15-scf00327 | 15 |
| AX-158161492 | 15 | 27.204 | KV453080.1 | 6665380 | 15-scf00327 | 15 |
| AX-158161526 | 15 | 27.204 | KV453080.1 | 6730127 | 15-scf00327 | 15 |
| AX-158161527 | 15 | 27.204 | KV453080.1 | 6730475 | 15-scf00327 | 15 |
| AX-158161541 | 15 | 27.204 | KV453080.1 | 6769513 | 15-scf00327 | 15 |
| AX-158161543 | 15 | 27.204 | KV453080.1 | 6773640 | 15-scf00327 | 15 |
| AX-158161544 | 15 | 27.204 | KV453080.1 | 6774997 | 15-scf00327 | 15 |
| AX-158161545 | 15 | 27.204 | KV453080.1 | 6775447 | 15-scf00327 | 15 |
| AX-158161546 | 15 | 27.204 | KV453080.1 | 6777766 | 15-scf00327 | 15 |
| AX-157833836 | 15 | 27.204 | KV453080.1 | 6795900 | 15-scf00327 | 15 |
| AX-158161593 | 15 | 27.204 | KV453080.1 | 6841610 | 15-scf00327 | 15 |
| AX-157833852 | 15 | 27.204 | KV453080.1 | 6997465 | 15-scf00327 | 15 |
| AX-158161637 | 15 | 27.204 | KV453080.1 | 6999336 | 15-scf00327 | 15 |
| AX-157717345 | 15 | 27.204 | KV453080.1 | 7052401 | 15-scf00327 | 15 |
| AX-157833855 | 15 | 27.204 | KV453080.1 | 7052877 | 15-scf00327 | 15 |
| AX-158161733 | 15 | 27.204 | KV453080.1 | 7297424 | 15-scf00327 | 15 |
| AX-157833866 | 15 | 27.204 | KV453080.1 | 7334582 | 15-scf00327 | 15 |
| AX-158161740 | 15 | 27.204 | KV453080.1 | 7338227 | 15-scf00327 | 15 |
| AX-158161748 | 15 | 27.204 | KV453080.1 | 7355260 | 15-scf00327 | 15 |
| AX-158161749 | 15 | 27.204 | KV453080.1 | 7359217 | 15-scf00327 | 15 |
| AX-158161853 | 15 | 27.204 | KV453080.1 | 7569162 | 15-scf00327 | 15 |
| AX-157871881 | 15 | 27.204 | KV453080.1 | 7573918 | 15-scf00327 | 15 |
| AX-157871882 | 15 | 27.204 | KV453080.1 | 7578140 | 15-scf00327 | 15 |



|              |    |        |            |         |             |    |
|--------------|----|--------|------------|---------|-------------|----|
| AX-158161855 | 15 | 27.204 | KV453080.1 | 7579026 | 15-scf00327 | 15 |
| AX-158161882 | 15 | 27.204 | KV453080.1 | 7629640 | 15-scf00327 | 15 |
| AX-158161960 | 15 | 27.204 | KV453080.1 | 7714606 | 15-scf00327 | 15 |
| AX-158161998 | 15 | 27.204 | KV453080.1 | 7768408 | 15-scf00327 | 15 |
| AX-158162007 | 15 | 27.204 | KV453080.1 | 7779657 | 15-scf00327 | 15 |
| AX-158162024 | 15 | 27.204 | KV453080.1 | 7801594 | 15-scf00327 | 15 |
| AX-158162060 | 15 | 27.204 | KV453080.1 | 7849874 | 15-scf00327 | 15 |
| AX-158162106 | 15 | 27.204 | KV453080.1 | 7912977 | 15-scf00327 | 15 |
| AX-158162116 | 15 | 27.204 | KV453080.1 | 7929414 | 15-scf00327 | 15 |
| AX-158162120 | 15 | 27.204 | KV453080.1 | 7934408 | 15-scf00327 | 15 |
| AX-158162126 | 15 | 27.204 | KV453080.1 | 7944903 | 15-scf00327 | 15 |
| AX-158162132 | 15 | 27.204 | KV453080.1 | 7950679 | 15-scf00327 | 15 |
| AX-158162137 | 15 | 27.204 | KV453080.1 | 7955040 | 15-scf00327 | 15 |
| AX-158162149 | 15 | 27.204 | KV453080.1 | 7969427 | 15-scf00327 | 15 |
| AX-158162150 | 15 | 27.204 | KV453080.1 | 7973883 | 15-scf00327 | 15 |
| AX-157738558 | 15 | 27.204 | KV453080.1 | 7976997 | 15-scf00327 | 15 |
| AX-157833903 | 15 | 27.204 | KV453080.1 | 7977564 | 15-scf00327 | 15 |
| AX-157833904 | 15 | 27.204 | KV453080.1 | 7978786 | 15-scf00327 | 15 |
| AX-158162152 | 15 | 27.204 | KV453080.1 | 7979065 | 15-scf00327 | 15 |
| AX-157871891 | 15 | 27.204 | KV453080.1 | 7981765 | 15-scf00327 | 15 |
| AX-158162154 | 15 | 27.204 | KV453080.1 | 7982137 | 15-scf00327 | 15 |
| AX-158162155 | 15 | 27.204 | KV453080.1 | 7982427 | 15-scf00327 | 15 |
| AX-158162156 | 15 | 27.204 | KV453080.1 | 7984589 | 15-scf00327 | 15 |
| AX-158162158 | 15 | 27.204 | KV453080.1 | 7988133 | 15-scf00327 | 15 |
| AX-158162159 | 15 | 27.204 | KV453080.1 | 7989557 | 15-scf00327 | 15 |
| AX-158162161 | 15 | 27.204 | KV453080.1 | 7991652 | 15-scf00327 | 15 |
| AX-158162163 | 15 | 27.204 | KV453080.1 | 7992478 | 15-scf00327 | 15 |
| AX-158162164 | 15 | 27.204 | KV453080.1 | 7993146 | 15-scf00327 | 15 |
| AX-158393362 | 15 | 27.204 | KV453080.1 | 7999495 | 15-scf00327 | 15 |
| AX-158162167 | 15 | 27.204 | KV453080.1 | 7999836 | 15-scf00327 | 15 |
| AX-158162168 | 15 | 27.204 | KV453080.1 | 8000272 | 15-scf00327 | 15 |
| AX-157886631 | 15 | 27.204 | KV453080.1 | 8000539 | 15-scf00327 | 15 |
| AX-158162176 | 15 | 27.204 | KV453080.1 | 8007873 | 15-scf00327 | 15 |
| AX-158162182 | 15 | 27.204 | KV453080.1 | 8022097 | 15-scf00327 | 15 |
| AX-157833907 | 15 | 27.204 | KV453080.1 | 8029491 | 15-scf00327 | 15 |
| AX-158162187 | 15 | 27.204 | KV453080.1 | 8030308 | 15-scf00327 | 15 |
| AX-158162214 | 15 | 27.204 | KV453080.1 | 8083169 | 15-scf00327 | 15 |
| AX-158162225 | 15 | 27.204 | KV453080.1 | 8111056 | 15-scf00327 | 15 |
| AX-158162257 | 15 | 27.204 | KV453080.1 | 8160598 | 15-scf00327 | 15 |
| AX-158162165 | 15 | 27.211 | KV453080.1 | 7994364 | 15-scf00327 | 15 |
| AX-158162166 | 15 | 27.218 | KV453080.1 | 7995684 | 15-scf00327 | 15 |
| AX-158162178 | 15 | 27.218 | KV453080.1 | 8013067 | 15-scf00327 | 15 |
| AX-158162175 | 15 | 27.239 | KV453080.1 | 8007023 | 15-scf00327 | 15 |
| AX-158162184 | 15 | 27.264 | KV453080.1 | 8027049 | 15-scf00327 | 15 |
| AX-158162022 | 15 | 27.288 | KV453080.1 | 7800503 | 15-scf00327 | 15 |
| AX-157833906 | 15 | 27.288 | KV453080.1 | 8027464 | 15-scf00327 | 15 |
| AX-158160274 | 15 | 27.313 | KV453080.1 | 3008853 | 15-scf00327 | 15 |
| AX-158161672 | 15 | 27.313 | KV453080.1 | 7135610 | 15-scf00327 | 15 |
| AX-158161678 | 15 | 27.313 | KV453080.1 | 7148336 | 15-scf00327 | 15 |
| AX-158161686 | 15 | 27.313 | KV453080.1 | 7179229 | 15-scf00327 | 15 |
| AX-158161698 | 15 | 27.313 | KV453080.1 | 7206067 | 15-scf00327 | 15 |

|              |    |        |            |         |             |    |
|--------------|----|--------|------------|---------|-------------|----|
| AX-158161702 | 15 | 27.313 | KV453080.1 | 7215899 | 15-scf00327 | 15 |
| AX-158393363 | 15 | 27.313 | KV453080.1 | 8024467 | 15-scf00327 | 15 |
| AX-157715589 | 15 | 27.313 | KV453080.1 | 8029025 | 15-scf00327 | 15 |
| AX-158162186 | 15 | 27.313 | KV453080.1 | 8029383 | 15-scf00327 | 15 |
| AX-158162190 | 15 | 27.313 | KV453080.1 | 8041151 | 15-scf00327 | 15 |
| AX-158162192 | 15 | 27.313 | KV453080.1 | 8043501 | 15-scf00327 | 15 |
| AX-158162194 | 15 | 27.313 | KV453080.1 | 8045390 | 15-scf00327 | 15 |
| AX-158162197 | 15 | 27.313 | KV453080.1 | 8054051 | 15-scf00327 | 15 |
| AX-158162201 | 15 | 27.313 | KV453080.1 | 8059111 | 15-scf00327 | 15 |
| AX-158162203 | 15 | 27.313 | KV453080.1 | 8060244 | 15-scf00327 | 15 |
| AX-158162204 | 15 | 27.313 | KV453080.1 | 8060848 | 15-scf00327 | 15 |
| AX-157719177 | 15 | 27.313 | KV453080.1 | 8069517 | 15-scf00327 | 15 |
| AX-158162211 | 15 | 27.313 | KV453080.1 | 8077241 | 15-scf00327 | 15 |
| AX-158162213 | 15 | 27.313 | KV453080.1 | 8082137 | 15-scf00327 | 15 |
| AX-158162216 | 15 | 27.313 | KV453080.1 | 8085748 | 15-scf00327 | 15 |
| AX-158162218 | 15 | 27.313 | KV453080.1 | 8088020 | 15-scf00327 | 15 |
| AX-158162227 | 15 | 27.313 | KV453080.1 | 8115729 | 15-scf00327 | 15 |
| AX-158162235 | 15 | 27.313 | KV453080.1 | 8124196 | 15-scf00327 | 15 |
| AX-158162238 | 15 | 27.313 | KV453080.1 | 8125869 | 15-scf00327 | 15 |
| AX-158162241 | 15 | 27.313 | KV453080.1 | 8133622 | 15-scf00327 | 15 |
| AX-158162246 | 15 | 27.313 | KV453080.1 | 8136335 | 15-scf00327 | 15 |
| AX-158162247 | 15 | 27.313 | KV453080.1 | 8138777 | 15-scf00327 | 15 |
| AX-158162250 | 15 | 27.313 | KV453080.1 | 8142185 | 15-scf00327 | 15 |
| AX-158162251 | 15 | 27.313 | KV453080.1 | 8143115 | 15-scf00327 | 15 |
| AX-158162119 | 15 | 27.423 | KV453080.1 | 7933275 | 15-scf00327 | 15 |
| AX-158162228 | 15 | 27.423 | KV453080.1 | 8119460 | 15-scf00327 | 15 |
| AX-158162231 | 15 | 27.423 | KV453080.1 | 8120313 | 15-scf00327 | 15 |
| AX-158162240 | 15 | 27.423 | KV453080.1 | 8130033 | 15-scf00327 | 15 |
| AX-157771585 | 15 | 27.423 | KV453080.1 | 8144918 | 15-scf00327 | 15 |
| AX-158162252 | 15 | 27.423 | KV453080.1 | 8147084 | 15-scf00327 | 15 |
| AX-158162258 | 15 | 27.423 | KV453080.1 | 8161117 | 15-scf00327 | 15 |
| AX-158162259 | 15 | 27.423 | KV453080.1 | 8170238 | 15-scf00327 | 15 |
| AX-158162260 | 15 | 27.641 | KV453080.1 | 8171273 | 15-scf00327 | 15 |
| AX-158380481 | 15 | 27.641 | KV453080.1 | 8175053 | 15-scf00327 | 15 |
| AX-158162265 | 15 | 27.641 | KV453080.1 | 8175237 | 15-scf00327 | 15 |
| AX-157833914 | 15 | 27.641 | KV453080.1 | 8177010 | 15-scf00327 | 15 |
| AX-158162267 | 15 | 27.641 | KV453080.1 | 8177746 | 15-scf00327 | 15 |
| AX-158162268 | 15 | 27.641 | KV453080.1 | 8179088 | 15-scf00327 | 15 |
| AX-158162269 | 15 | 27.641 | KV453080.1 | 8180570 | 15-scf00327 | 15 |
| AX-158162271 | 15 | 27.641 | KV453080.1 | 8182104 | 15-scf00327 | 15 |
| AX-158162272 | 15 | 27.641 | KV453080.1 | 8184081 | 15-scf00327 | 15 |
| AX-158162273 | 15 | 27.641 | KV453080.1 | 8186417 | 15-scf00327 | 15 |
| AX-158162275 | 15 | 27.641 | KV453080.1 | 8188783 | 15-scf00327 | 15 |
| AX-158162276 | 15 | 27.641 | KV453080.1 | 8189363 | 15-scf00327 | 15 |
| AX-158162280 | 15 | 27.641 | KV453080.1 | 8191597 | 15-scf00327 | 15 |
| AX-158385719 | 15 | 27.641 | KV453080.1 | 8215195 | 15-scf00327 | 15 |
| AX-158162282 | 15 | 27.852 | KV453080.1 | 8194684 | 15-scf00327 | 15 |
| AX-158162283 | 15 | 27.852 | KV453080.1 | 8196004 | 15-scf00327 | 15 |
| AX-158162285 | 15 | 27.852 | KV453080.1 | 8198581 | 15-scf00327 | 15 |
| AX-158162290 | 15 | 27.852 | KV453080.1 | 8211600 | 15-scf00327 | 15 |
| AX-158162306 | 15 | 27.852 | KV453080.1 | 8241977 | 15-scf00327 | 15 |

|              |    |        |             |         |             |    |
|--------------|----|--------|-------------|---------|-------------|----|
| AX-158162291 | 15 | 27.866 | KV453080.1  | 8212464 | 15-scf00327 | 15 |
| AX-158162292 | 15 | 27.873 | KV453080.1  | 8212729 | 15-scf00327 | 15 |
| AX-158162295 | 15 | 28.146 | KV453080.1  | 8216858 | 15-scf00327 | 15 |
| AX-158162296 | 15 | 28.146 | KV453080.1  | 8218051 | 15-scf00327 | 15 |
| AX-158162297 | 15 | 28.146 | KV453080.1  | 8220309 | 15-scf00327 | 15 |
| AX-158162298 | 15 | 28.146 | KV453080.1  | 8220882 | 15-scf00327 | 15 |
| AX-157747450 | 15 | 28.303 | KV453080.1  | 8221347 | 15-scf00327 | 15 |
| AX-158162308 | 15 | 28.402 | KV453080.1  | 8246886 | 15-scf00327 | 15 |
| AX-157707442 | 15 | 28.402 | 3ML01034300 | 332     | scf09970_1  | UN |
| AX-157713378 | 15 | 28.404 | KV453080.1  | 8246285 | 15-scf00327 | 15 |
| AX-158162311 | 15 | 28.404 | KV453080.1  | 8252699 | 15-scf00327 | 15 |
| AX-157833915 | 15 | 28.406 | KV453080.1  | 8255596 | 15-scf00327 | 15 |
| AX-158162317 | 15 | 28.406 | KV453080.1  | 8263253 | 15-scf00327 | 15 |
| AX-158162318 | 15 | 28.406 | KV453080.1  | 8264371 | 15-scf00327 | 15 |
| AX-158162323 | 15 | 28.406 | KV453080.1  | 8270841 | 15-scf00327 | 15 |
| AX-158162326 | 15 | 28.407 | KV453080.1  | 8275444 | 15-scf00327 | 15 |
| AX-158162624 | 15 | 28.407 | KV453080.1  | 8711585 | 15-scf00327 | 15 |
| AX-158162330 | 15 | 28.408 | KV453080.1  | 8281403 | 15-scf00327 | 15 |
| AX-158162331 | 15 | 28.408 | KV453080.1  | 8282291 | 15-scf00327 | 15 |
| AX-158162332 | 15 | 28.41  | KV453080.1  | 8285382 | 15-scf00327 | 15 |
| AX-158162960 | 15 | 28.41  | KV453080.1  | 9126590 | 15-scf00327 | 15 |
| AX-158163043 | 15 | 28.41  | KV453080.1  | 9234453 | 15-scf00327 | 15 |
| AX-158163063 | 15 | 28.41  | KV453080.1  | 9268986 | 15-scf00327 | 15 |
| AX-158163077 | 15 | 28.41  | KV453080.1  | 9285990 | 15-scf00327 | 15 |
| AX-158163105 | 15 | 28.41  | KV453080.1  | 9323146 | 15-scf00327 | 15 |
| AX-158163109 | 15 | 28.41  | KV453080.1  | 9327936 | 15-scf00327 | 15 |
| AX-158162335 | 15 | 28.665 | KV453080.1  | 8291129 | 15-scf00327 | 15 |
| AX-157833917 | 15 | 28.843 | KV453080.1  | 8298542 | 15-scf00327 | 15 |
| AX-158162336 | 15 | 28.844 | KV453080.1  | 8295351 | 15-scf00327 | 15 |
| AX-157833918 | 15 | 28.844 | KV453080.1  | 8301711 | 15-scf00327 | 15 |
| AX-157751690 | 15 | 28.844 | KV453080.1  | 8316716 | 15-scf00327 | 15 |
| AX-157833920 | 15 | 28.844 | KV453080.1  | 8317025 | 15-scf00327 | 15 |
| AX-158162344 | 15 | 28.844 | KV453080.1  | 8320151 | 15-scf00327 | 15 |
| AX-157717542 | 15 | 28.844 | KV453080.1  | 8323401 | 15-scf00327 | 15 |
| AX-158162365 | 15 | 28.844 | KV453080.1  | 8349977 | 15-scf00327 | 15 |
| AX-157866565 | 15 | 28.844 | KV453080.1  | 8398201 | 15-scf00327 | 15 |
| AX-158162347 | 15 | 29.062 | KV453080.1  | 8328887 | 15-scf00327 | 15 |
| AX-158162350 | 15 | 29.062 | KV453080.1  | 8331969 | 15-scf00327 | 15 |
| AX-158162352 | 15 | 29.062 | KV453080.1  | 8333479 | 15-scf00327 | 15 |
| AX-157770832 | 15 | 29.062 | KV453080.1  | 8334106 | 15-scf00327 | 15 |
| AX-158162356 | 15 | 29.062 | KV453080.1  | 8341891 | 15-scf00327 | 15 |
| AX-158162357 | 15 | 29.062 | KV453080.1  | 8342614 | 15-scf00327 | 15 |
| AX-158162360 | 15 | 29.062 | KV453080.1  | 8345528 | 15-scf00327 | 15 |
| AX-158162370 | 15 | 29.062 | KV453080.1  | 8354100 | 15-scf00327 | 15 |
| AX-158162371 | 15 | 29.062 | KV453080.1  | 8355196 | 15-scf00327 | 15 |
| AX-158162374 | 15 | 29.062 | KV453080.1  | 8361095 | 15-scf00327 | 15 |
| AX-158162380 | 15 | 29.062 | KV453080.1  | 8365631 | 15-scf00327 | 15 |
| AX-158162396 | 15 | 29.062 | KV453080.1  | 8383171 | 15-scf00327 | 15 |
| AX-158162400 | 15 | 29.062 | KV453080.1  | 8385836 | 15-scf00327 | 15 |
| AX-157886636 | 15 | 29.062 | KV453080.1  | 8388589 | 15-scf00327 | 15 |
| AX-158162403 | 15 | 29.062 | KV453080.1  | 8391784 | 15-scf00327 | 15 |

|              |    |        |            |         |             |    |
|--------------|----|--------|------------|---------|-------------|----|
| AX-158162406 | 15 | 29.062 | KV453080.1 | 8392726 | 15-scf00327 | 15 |
| AX-158162419 | 15 | 29.062 | KV453080.1 | 8408689 | 15-scf00327 | 15 |
| AX-158162432 | 15 | 29.062 | KV453080.1 | 8436273 | 15-scf00327 | 15 |
| AX-158162434 | 15 | 29.062 | KV453080.1 | 8438525 | 15-scf00327 | 15 |
| AX-158162438 | 15 | 29.062 | KV453080.1 | 8450360 | 15-scf00327 | 15 |
| AX-158162439 | 15 | 29.062 | KV453080.1 | 8450933 | 15-scf00327 | 15 |
| AX-158162441 | 15 | 29.062 | KV453080.1 | 8454495 | 15-scf00327 | 15 |
| AX-158162498 | 15 | 29.062 | KV453080.1 | 8528487 | 15-scf00327 | 15 |
| AX-158162515 | 15 | 29.062 | KV453080.1 | 8566246 | 15-scf00327 | 15 |
| AX-158162570 | 15 | 29.062 | KV453080.1 | 8642033 | 15-scf00327 | 15 |
| AX-158162587 | 15 | 29.062 | KV453080.1 | 8667779 | 15-scf00327 | 15 |
| AX-158162433 | 15 | 29.167 | KV453080.1 | 8437315 | 15-scf00327 | 15 |
| AX-158162300 | 15 | 29.281 | KV453080.1 | 8223915 | 15-scf00327 | 15 |
| AX-157716079 | 15 | 29.281 | KV453080.1 | 8295515 | 15-scf00327 | 15 |
| AX-158162342 | 15 | 29.281 | KV453080.1 | 8304467 | 15-scf00327 | 15 |
| AX-157758095 | 15 | 29.281 | KV453080.1 | 8322057 | 15-scf00327 | 15 |
| AX-158162351 | 15 | 29.281 | KV453080.1 | 8333094 | 15-scf00327 | 15 |
| AX-158162363 | 15 | 29.281 | KV453080.1 | 8347653 | 15-scf00327 | 15 |
| AX-158162399 | 15 | 29.281 | KV453080.1 | 8385565 | 15-scf00327 | 15 |
| AX-158162408 | 15 | 29.281 | KV453080.1 | 8395217 | 15-scf00327 | 15 |
| AX-158162411 | 15 | 29.281 | KV453080.1 | 8397232 | 15-scf00327 | 15 |
| AX-158162427 | 15 | 29.281 | KV453080.1 | 8426119 | 15-scf00327 | 15 |
| AX-158162430 | 15 | 29.281 | KV453080.1 | 8434069 | 15-scf00327 | 15 |
| AX-157833925 | 15 | 29.281 | KV453080.1 | 8446615 | 15-scf00327 | 15 |
| AX-158162445 | 15 | 29.281 | KV453080.1 | 8459100 | 15-scf00327 | 15 |
| AX-157750457 | 15 | 29.281 | KV453080.1 | 8465828 | 15-scf00327 | 15 |
| AX-158162449 | 15 | 29.281 | KV453080.1 | 8466041 | 15-scf00327 | 15 |
| AX-158162450 | 15 | 29.281 | KV453080.1 | 8466447 | 15-scf00327 | 15 |
| AX-157833927 | 15 | 29.281 | KV453080.1 | 8467466 | 15-scf00327 | 15 |
| AX-157755406 | 15 | 29.281 | KV453080.1 | 8470128 | 15-scf00327 | 15 |
| AX-158162454 | 15 | 29.281 | KV453080.1 | 8473639 | 15-scf00327 | 15 |
| AX-158162456 | 15 | 29.281 | KV453080.1 | 8474585 | 15-scf00327 | 15 |
| AX-158162460 | 15 | 29.281 | KV453080.1 | 8480302 | 15-scf00327 | 15 |
| AX-158162485 | 15 | 29.281 | KV453080.1 | 8512292 | 15-scf00327 | 15 |
| AX-158162504 | 15 | 29.281 | KV453080.1 | 8546653 | 15-scf00327 | 15 |
| AX-158162538 | 15 | 29.281 | KV453080.1 | 8604346 | 15-scf00327 | 15 |
| AX-158162596 | 15 | 29.281 | KV453080.1 | 8678700 | 15-scf00327 | 15 |
| AX-157833937 | 15 | 29.281 | KV453080.1 | 8688254 | 15-scf00327 | 15 |
| AX-158162636 | 15 | 29.281 | KV453080.1 | 8727728 | 15-scf00327 | 15 |
| AX-158162659 | 15 | 29.281 | KV453080.1 | 8758652 | 15-scf00327 | 15 |
| AX-158162853 | 15 | 29.281 | KV453080.1 | 8988263 | 15-scf00327 | 15 |
| AX-157746370 | 15 | 29.281 | KV453080.1 | 9059155 | 15-scf00327 | 15 |
| AX-157834006 | 15 | 29.281 | KV453080.1 | 9457677 | 15-scf00327 | 15 |
| AX-158162461 | 15 | 29.322 | KV453080.1 | 8482689 | 15-scf00327 | 15 |
| AX-157745028 | 15 | 29.339 | KV453080.1 | 8483880 | 15-scf00327 | 15 |
| AX-158162474 | 15 | 29.359 | KV453080.1 | 8495521 | 15-scf00327 | 15 |
| AX-158162313 | 15 | 29.39  | KV453080.1 | 8254886 | 15-scf00327 | 15 |
| AX-158162320 | 15 | 29.39  | KV453080.1 | 8267890 | 15-scf00327 | 15 |
| AX-158162327 | 15 | 29.39  | KV453080.1 | 8276566 | 15-scf00327 | 15 |
| AX-157743034 | 15 | 29.39  | KV453080.1 | 8284768 | 15-scf00327 | 15 |
| AX-158162333 | 15 | 29.39  | KV453080.1 | 8287375 | 15-scf00327 | 15 |

|              |    |       |            |         |             |    |
|--------------|----|-------|------------|---------|-------------|----|
| AX-158162345 | 15 | 29.39 | KV453080.1 | 8327032 | 15-scf00327 | 15 |
| AX-158162372 | 15 | 29.39 | KV453080.1 | 8356278 | 15-scf00327 | 15 |
| AX-158162376 | 15 | 29.39 | KV453080.1 | 8362463 | 15-scf00327 | 15 |
| AX-158162388 | 15 | 29.39 | KV453080.1 | 8376760 | 15-scf00327 | 15 |
| AX-158162401 | 15 | 29.39 | KV453080.1 | 8389305 | 15-scf00327 | 15 |
| AX-158162428 | 15 | 29.39 | KV453080.1 | 8427051 | 15-scf00327 | 15 |
| AX-158162436 | 15 | 29.39 | KV453080.1 | 8445131 | 15-scf00327 | 15 |
| AX-158162444 | 15 | 29.39 | KV453080.1 | 8458077 | 15-scf00327 | 15 |
| AX-158162473 | 15 | 29.39 | KV453080.1 | 8494376 | 15-scf00327 | 15 |
| AX-158162477 | 15 | 29.39 | KV453080.1 | 8499511 | 15-scf00327 | 15 |
| AX-158380483 | 15 | 29.39 | KV453080.1 | 8521968 | 15-scf00327 | 15 |
| AX-158162495 | 15 | 29.39 | KV453080.1 | 8526635 | 15-scf00327 | 15 |
| AX-158162496 | 15 | 29.39 | KV453080.1 | 8527562 | 15-scf00327 | 15 |
| AX-158162499 | 15 | 29.39 | KV453080.1 | 8531774 | 15-scf00327 | 15 |
| AX-157833934 | 15 | 29.39 | KV453080.1 | 8534071 | 15-scf00327 | 15 |
| AX-157833935 | 15 | 29.39 | KV453080.1 | 8538975 | 15-scf00327 | 15 |
| AX-158162509 | 15 | 29.39 | KV453080.1 | 8556440 | 15-scf00327 | 15 |
| AX-158162510 | 15 | 29.39 | KV453080.1 | 8556803 | 15-scf00327 | 15 |
| AX-158162511 | 15 | 29.39 | KV453080.1 | 8557264 | 15-scf00327 | 15 |
| AX-158162520 | 15 | 29.39 | KV453080.1 | 8573971 | 15-scf00327 | 15 |
| AX-158385722 | 15 | 29.39 | KV453080.1 | 8578338 | 15-scf00327 | 15 |
| AX-158162526 | 15 | 29.39 | KV453080.1 | 8584189 | 15-scf00327 | 15 |
| AX-158162530 | 15 | 29.39 | KV453080.1 | 8590185 | 15-scf00327 | 15 |
| AX-158162532 | 15 | 29.39 | KV453080.1 | 8592999 | 15-scf00327 | 15 |
| AX-158162541 | 15 | 29.39 | KV453080.1 | 8607550 | 15-scf00327 | 15 |
| AX-158162550 | 15 | 29.39 | KV453080.1 | 8622463 | 15-scf00327 | 15 |
| AX-158162552 | 15 | 29.39 | KV453080.1 | 8623297 | 15-scf00327 | 15 |
| AX-158162560 | 15 | 29.39 | KV453080.1 | 8629150 | 15-scf00327 | 15 |
| AX-158162566 | 15 | 29.39 | KV453080.1 | 8636329 | 15-scf00327 | 15 |
| AX-158162567 | 15 | 29.39 | KV453080.1 | 8637514 | 15-scf00327 | 15 |
| AX-158162569 | 15 | 29.39 | KV453080.1 | 8639771 | 15-scf00327 | 15 |
| AX-158162584 | 15 | 29.39 | KV453080.1 | 8663830 | 15-scf00327 | 15 |
| AX-158162586 | 15 | 29.39 | KV453080.1 | 8666191 | 15-scf00327 | 15 |
| AX-157740365 | 15 | 29.39 | KV453080.1 | 8666688 | 15-scf00327 | 15 |
| AX-158162594 | 15 | 29.39 | KV453080.1 | 8676878 | 15-scf00327 | 15 |
| AX-158162600 | 15 | 29.39 | KV453080.1 | 8683581 | 15-scf00327 | 15 |
| AX-158162606 | 15 | 29.39 | KV453080.1 | 8692092 | 15-scf00327 | 15 |
| AX-158162609 | 15 | 29.39 | KV453080.1 | 8696236 | 15-scf00327 | 15 |
| AX-158162614 | 15 | 29.39 | KV453080.1 | 8699601 | 15-scf00327 | 15 |
| AX-158162615 | 15 | 29.39 | KV453080.1 | 8700074 | 15-scf00327 | 15 |
| AX-158162616 | 15 | 29.39 | KV453080.1 | 8701044 | 15-scf00327 | 15 |
| AX-158162618 | 15 | 29.39 | KV453080.1 | 8704905 | 15-scf00327 | 15 |
| AX-157718893 | 15 | 29.39 | KV453080.1 | 8707179 | 15-scf00327 | 15 |
| AX-158162628 | 15 | 29.39 | KV453080.1 | 8721155 | 15-scf00327 | 15 |
| AX-158162630 | 15 | 29.39 | KV453080.1 | 8722459 | 15-scf00327 | 15 |
| AX-157833939 | 15 | 29.39 | KV453080.1 | 8723073 | 15-scf00327 | 15 |
| AX-158162643 | 15 | 29.39 | KV453080.1 | 8733692 | 15-scf00327 | 15 |
| AX-158162674 | 15 | 29.39 | KV453080.1 | 8777610 | 15-scf00327 | 15 |
| AX-158162676 | 15 | 29.39 | KV453080.1 | 8780423 | 15-scf00327 | 15 |
| AX-158162690 | 15 | 29.39 | KV453080.1 | 8798196 | 15-scf00327 | 15 |
| AX-158162709 | 15 | 29.39 | KV453080.1 | 8822348 | 15-scf00327 | 15 |

|              |    |        |            |         |             |    |
|--------------|----|--------|------------|---------|-------------|----|
| AX-158162760 | 15 | 29.39  | KV453080.1 | 8875815 | 15-scf00327 | 15 |
| AX-158162463 | 15 | 29.465 | KV453080.1 | 8483460 | 15-scf00327 | 15 |
| AX-158162622 | 15 | 29.465 | KV453080.1 | 8709479 | 15-scf00327 | 15 |
| AX-158162497 | 15 | 29.609 | KV453080.1 | 8528077 | 15-scf00327 | 15 |
| AX-158162591 | 15 | 29.609 | KV453080.1 | 8673124 | 15-scf00327 | 15 |
| AX-158162602 | 15 | 29.609 | KV453080.1 | 8686791 | 15-scf00327 | 15 |
| AX-158162604 | 15 | 29.609 | KV453080.1 | 8688991 | 15-scf00327 | 15 |
| AX-158162610 | 15 | 29.609 | KV453080.1 | 8696849 | 15-scf00327 | 15 |
| AX-158162617 | 15 | 29.609 | KV453080.1 | 8702001 | 15-scf00327 | 15 |
| AX-158162625 | 15 | 29.609 | KV453080.1 | 8716385 | 15-scf00327 | 15 |
| AX-158162631 | 15 | 29.609 | KV453080.1 | 8723691 | 15-scf00327 | 15 |
| AX-158162633 | 15 | 29.609 | KV453080.1 | 8725419 | 15-scf00327 | 15 |
| AX-158162634 | 15 | 29.609 | KV453080.1 | 8725982 | 15-scf00327 | 15 |
| AX-158162635 | 15 | 29.609 | KV453080.1 | 8726711 | 15-scf00327 | 15 |
| AX-158162646 | 15 | 29.609 | KV453080.1 | 8737838 | 15-scf00327 | 15 |
| AX-158162647 | 15 | 29.609 | KV453080.1 | 8738830 | 15-scf00327 | 15 |
| AX-158162648 | 15 | 29.609 | KV453080.1 | 8741579 | 15-scf00327 | 15 |
| AX-158162650 | 15 | 29.609 | KV453080.1 | 8744169 | 15-scf00327 | 15 |
| AX-158162651 | 15 | 29.609 | KV453080.1 | 8745735 | 15-scf00327 | 15 |
| AX-157775289 | 15 | 29.609 | KV453080.1 | 8749327 | 15-scf00327 | 15 |
| AX-158162663 | 15 | 29.609 | KV453080.1 | 8765683 | 15-scf00327 | 15 |
| AX-158162664 | 15 | 29.609 | KV453080.1 | 8767462 | 15-scf00327 | 15 |
| AX-158162665 | 15 | 29.609 | KV453080.1 | 8769238 | 15-scf00327 | 15 |
| AX-158162669 | 15 | 29.609 | KV453080.1 | 8773280 | 15-scf00327 | 15 |
| AX-158162672 | 15 | 29.609 | KV453080.1 | 8776295 | 15-scf00327 | 15 |
| AX-158162673 | 15 | 29.609 | KV453080.1 | 8777194 | 15-scf00327 | 15 |
| AX-158162677 | 15 | 29.609 | KV453080.1 | 8784460 | 15-scf00327 | 15 |
| AX-158162680 | 15 | 29.609 | KV453080.1 | 8787397 | 15-scf00327 | 15 |
| AX-158162681 | 15 | 29.609 | KV453080.1 | 8788440 | 15-scf00327 | 15 |
| AX-158162682 | 15 | 29.609 | KV453080.1 | 8790625 | 15-scf00327 | 15 |
| AX-158162684 | 15 | 29.609 | KV453080.1 | 8791632 | 15-scf00327 | 15 |
| AX-158162685 | 15 | 29.609 | KV453080.1 | 8793097 | 15-scf00327 | 15 |
| AX-158162688 | 15 | 29.609 | KV453080.1 | 8795156 | 15-scf00327 | 15 |
| AX-158162702 | 15 | 29.609 | KV453080.1 | 8818286 | 15-scf00327 | 15 |
| AX-157886645 | 15 | 29.609 | KV453080.1 | 8950691 | 15-scf00327 | 15 |
| AX-158162828 | 15 | 29.609 | KV453080.1 | 8952563 | 15-scf00327 | 15 |
| AX-158162854 | 15 | 29.609 | KV453080.1 | 8989086 | 15-scf00327 | 15 |
| AX-158162873 | 15 | 29.609 | KV453080.1 | 9006840 | 15-scf00327 | 15 |
| AX-157747436 | 15 | 29.609 | KV453080.1 | 9357123 | 15-scf00327 | 15 |
| AX-158163138 | 15 | 29.609 | KV453080.1 | 9359820 | 15-scf00327 | 15 |
| AX-158393382 | 15 | 29.609 | KV453080.1 | 9368140 | 15-scf00327 | 15 |
| AX-158163149 | 15 | 29.609 | KV453080.1 | 9369530 | 15-scf00327 | 15 |
| AX-158162556 | 15 | 29.629 | KV453080.1 | 8625170 | 15-scf00327 | 15 |
| AX-158162655 | 15 | 29.629 | KV453080.1 | 8755391 | 15-scf00327 | 15 |
| AX-158162687 | 15 | 29.629 | KV453080.1 | 8794298 | 15-scf00327 | 15 |
| AX-157833944 | 15 | 29.629 | KV453080.1 | 8826458 | 15-scf00327 | 15 |
| AX-158162736 | 15 | 29.629 | KV453080.1 | 8855219 | 15-scf00327 | 15 |
| AX-158162776 | 15 | 29.629 | KV453080.1 | 8893510 | 15-scf00327 | 15 |
| AX-158413045 | 15 | 29.656 | KV453080.1 | 8795908 | 15-scf00327 | 15 |
| AX-158162302 | 15 | 29.685 | KV453080.1 | 8233495 | 15-scf00327 | 15 |
| AX-157833926 | 15 | 29.685 | KV453080.1 | 8449852 | 15-scf00327 | 15 |

|              |    |        |            |         |             |    |
|--------------|----|--------|------------|---------|-------------|----|
| AX-158162701 | 15 | 29.685 | KV453080.1 | 8817865 | 15-scf00327 | 15 |
| AX-158162706 | 15 | 29.685 | KV453080.1 | 8820945 | 15-scf00327 | 15 |
| AX-158162753 | 15 | 29.685 | KV453080.1 | 8867229 | 15-scf00327 | 15 |
| AX-157727179 | 15 | 29.685 | KV453080.1 | 9130182 | 15-scf00327 | 15 |
| AX-158162965 | 15 | 29.685 | KV453080.1 | 9130320 | 15-scf00327 | 15 |
| AX-157722990 | 15 | 29.685 | KV453080.1 | 9374790 | 15-scf00327 | 15 |
| AX-157834007 | 15 | 29.685 | KV453080.1 | 9457726 | 15-scf00327 | 15 |
| AX-158163222 | 15 | 29.685 | KV453080.1 | 9474085 | 15-scf00327 | 15 |
| AX-157834010 | 15 | 29.685 | KV453080.1 | 9474830 | 15-scf00327 | 15 |
| AX-158163369 | 15 | 29.685 | KV453080.1 | 9685396 | 15-scf00327 | 15 |
| AX-157833943 | 15 | 29.72  | KV453080.1 | 8818521 | 15-scf00327 | 15 |
| AX-158162717 | 15 | 29.754 | KV453080.1 | 8831454 | 15-scf00327 | 15 |
| AX-158162738 | 15 | 30.046 | KV453080.1 | 8856659 | 15-scf00327 | 15 |
| AX-158380484 | 15 | 30.046 | KV453080.1 | 8857324 | 15-scf00327 | 15 |
| AX-158162740 | 15 | 30.046 | KV453080.1 | 8857375 | 15-scf00327 | 15 |
| AX-158162741 | 15 | 30.046 | KV453080.1 | 8857789 | 15-scf00327 | 15 |
| AX-158162743 | 15 | 30.046 | KV453080.1 | 8858828 | 15-scf00327 | 15 |
| AX-158162747 | 15 | 30.046 | KV453080.1 | 8863570 | 15-scf00327 | 15 |
| AX-158162750 | 15 | 30.046 | KV453080.1 | 8865167 | 15-scf00327 | 15 |
| AX-158162766 | 15 | 30.046 | KV453080.1 | 8886775 | 15-scf00327 | 15 |
| AX-158162767 | 15 | 30.046 | KV453080.1 | 8887806 | 15-scf00327 | 15 |
| AX-158162778 | 15 | 30.046 | KV453080.1 | 8894469 | 15-scf00327 | 15 |
| AX-158162800 | 15 | 30.046 | KV453080.1 | 8916766 | 15-scf00327 | 15 |
| AX-158162802 | 15 | 30.046 | KV453080.1 | 8918699 | 15-scf00327 | 15 |
| AX-158162997 | 15 | 30.046 | KV453080.1 | 9168447 | 15-scf00327 | 15 |
| AX-158163150 | 15 | 30.046 | KV453080.1 | 9370090 | 15-scf00327 | 15 |
| AX-157833996 | 15 | 30.046 | KV453080.1 | 9371315 | 15-scf00327 | 15 |
| AX-157833938 | 15 | 30.076 | KV453080.1 | 8711540 | 15-scf00327 | 15 |
| AX-158162626 | 15 | 30.076 | KV453080.1 | 8718022 | 15-scf00327 | 15 |
| AX-158162768 | 15 | 30.076 | KV453080.1 | 8888112 | 15-scf00327 | 15 |
| AX-158162946 | 15 | 30.076 | KV453080.1 | 9112331 | 15-scf00327 | 15 |
| AX-158162963 | 15 | 30.076 | KV453080.1 | 9128651 | 15-scf00327 | 15 |
| AX-157743684 | 15 | 30.076 | KV453080.1 | 9239565 | 15-scf00327 | 15 |
| AX-157866572 | 15 | 30.076 | KV453080.1 | 9279550 | 15-scf00327 | 15 |
| AX-157746135 | 15 | 30.076 | KV453080.1 | 9451670 | 15-scf00327 | 15 |
| AX-158163298 | 15 | 30.076 | KV453080.1 | 9579477 | 15-scf00327 | 15 |
| AX-158163307 | 15 | 30.076 | KV453080.1 | 9590048 | 15-scf00327 | 15 |
| AX-158163321 | 15 | 30.076 | KV453080.1 | 9609483 | 15-scf00327 | 15 |
| AX-158162627 | 15 | 30.125 | KV453080.1 | 8719865 | 15-scf00327 | 15 |
| AX-158162715 | 15 | 30.125 | KV453080.1 | 8830046 | 15-scf00327 | 15 |
| AX-158162751 | 15 | 30.125 | KV453080.1 | 8866608 | 15-scf00327 | 15 |
| AX-158162769 | 15 | 30.125 | KV453080.1 | 8889310 | 15-scf00327 | 15 |
| AX-158162771 | 15 | 30.125 | KV453080.1 | 8890169 | 15-scf00327 | 15 |
| AX-158162782 | 15 | 30.125 | KV453080.1 | 8897056 | 15-scf00327 | 15 |
| AX-158162809 | 15 | 30.125 | KV453080.1 | 8929082 | 15-scf00327 | 15 |
| AX-158162811 | 15 | 30.125 | KV453080.1 | 8929723 | 15-scf00327 | 15 |
| AX-158162704 | 15 | 30.181 | KV453080.1 | 8819798 | 15-scf00327 | 15 |
| AX-158162756 | 15 | 30.181 | KV453080.1 | 8869213 | 15-scf00327 | 15 |
| AX-158162757 | 15 | 30.181 | KV453080.1 | 8869490 | 15-scf00327 | 15 |
| AX-157748999 | 15 | 30.181 | KV453080.1 | 8889904 | 15-scf00327 | 15 |
| AX-158162779 | 15 | 30.181 | KV453080.1 | 8894685 | 15-scf00327 | 15 |

|              |    |        |            |         |             |    |
|--------------|----|--------|------------|---------|-------------|----|
| AX-158161453 | 15 | 30.264 | KV453080.1 | 6600328 | 15-scf00327 | 15 |
| AX-157833824 | 15 | 30.264 | KV453080.1 | 6602623 | 15-scf00327 | 15 |
| AX-158161457 | 15 | 30.264 | KV453080.1 | 6609228 | 15-scf00327 | 15 |
| AX-158161460 | 15 | 30.264 | KV453080.1 | 6611354 | 15-scf00327 | 15 |
| AX-158162094 | 15 | 30.264 | KV453080.1 | 7889552 | 15-scf00327 | 15 |
| AX-158162314 | 15 | 30.264 | KV453080.1 | 8257163 | 15-scf00327 | 15 |
| AX-157754850 | 15 | 30.264 | KV453080.1 | 8504657 | 15-scf00327 | 15 |
| AX-158162675 | 15 | 30.264 | KV453080.1 | 8779283 | 15-scf00327 | 15 |
| AX-158162754 | 15 | 30.264 | KV453080.1 | 8868627 | 15-scf00327 | 15 |
| AX-158162781 | 15 | 30.264 | KV453080.1 | 8895703 | 15-scf00327 | 15 |
| AX-158162784 | 15 | 30.264 | KV453080.1 | 8898664 | 15-scf00327 | 15 |
| AX-158162785 | 15 | 30.264 | KV453080.1 | 8900902 | 15-scf00327 | 15 |
| AX-158162787 | 15 | 30.264 | KV453080.1 | 8901899 | 15-scf00327 | 15 |
| AX-158162788 | 15 | 30.264 | KV453080.1 | 8902665 | 15-scf00327 | 15 |
| AX-157727466 | 15 | 30.264 | KV453080.1 | 8909173 | 15-scf00327 | 15 |
| AX-158162796 | 15 | 30.264 | KV453080.1 | 8910296 | 15-scf00327 | 15 |
| AX-157833949 | 15 | 30.264 | KV453080.1 | 8917625 | 15-scf00327 | 15 |
| AX-158162801 | 15 | 30.264 | KV453080.1 | 8917998 | 15-scf00327 | 15 |
| AX-158162803 | 15 | 30.264 | KV453080.1 | 8922227 | 15-scf00327 | 15 |
| AX-158162812 | 15 | 30.264 | KV453080.1 | 8931374 | 15-scf00327 | 15 |
| AX-158162813 | 15 | 30.264 | KV453080.1 | 8934278 | 15-scf00327 | 15 |
| AX-158162814 | 15 | 30.264 | KV453080.1 | 8934716 | 15-scf00327 | 15 |
| AX-158162820 | 15 | 30.264 | KV453080.1 | 8941434 | 15-scf00327 | 15 |
| AX-158162829 | 15 | 30.264 | KV453080.1 | 8952828 | 15-scf00327 | 15 |
| AX-157886646 | 15 | 30.264 | KV453080.1 | 8958529 | 15-scf00327 | 15 |
| AX-158162894 | 15 | 30.264 | KV453080.1 | 9038159 | 15-scf00327 | 15 |
| AX-158162914 | 15 | 30.264 | KV453080.1 | 9081964 | 15-scf00327 | 15 |
| AX-158163218 | 15 | 30.264 | KV453080.1 | 9468629 | 15-scf00327 | 15 |
| AX-158162786 | 15 | 30.482 | KV453080.1 | 8901706 | 15-scf00327 | 15 |
| AX-158162834 | 15 | 30.482 | KV453080.1 | 8958918 | 15-scf00327 | 15 |
| AX-157722555 | 15 | 30.482 | KV453080.1 | 8961400 | 15-scf00327 | 15 |
| AX-157833955 | 15 | 30.482 | KV453080.1 | 9026850 | 15-scf00327 | 15 |
| AX-158162349 | 15 | 30.483 | KV453080.1 | 8330192 | 15-scf00327 | 15 |
| AX-158162379 | 15 | 30.483 | KV453080.1 | 8364629 | 15-scf00327 | 15 |
| AX-158162393 | 15 | 30.483 | KV453080.1 | 8381019 | 15-scf00327 | 15 |
| AX-157722965 | 15 | 30.483 | KV453080.1 | 8428930 | 15-scf00327 | 15 |
| AX-158162465 | 15 | 30.483 | KV453080.1 | 8487117 | 15-scf00327 | 15 |
| AX-158162480 | 15 | 30.483 | KV453080.1 | 8505037 | 15-scf00327 | 15 |
| AX-158162517 | 15 | 30.483 | KV453080.1 | 8568177 | 15-scf00327 | 15 |
| AX-158162607 | 15 | 30.483 | KV453080.1 | 8692857 | 15-scf00327 | 15 |
| AX-158393376 | 15 | 30.483 | KV453080.1 | 8817652 | 15-scf00327 | 15 |
| AX-157709505 | 15 | 30.483 | KV453080.1 | 8845740 | 15-scf00327 | 15 |
| AX-158162765 | 15 | 30.483 | KV453080.1 | 8884709 | 15-scf00327 | 15 |
| AX-157833948 | 15 | 30.483 | KV453080.1 | 8906392 | 15-scf00327 | 15 |
| AX-158162826 | 15 | 30.483 | KV453080.1 | 8948249 | 15-scf00327 | 15 |
| AX-158413048 | 15 | 30.483 | KV453080.1 | 8954457 | 15-scf00327 | 15 |
| AX-158162833 | 15 | 30.483 | KV453080.1 | 8958260 | 15-scf00327 | 15 |
| AX-158162836 | 15 | 30.483 | KV453080.1 | 8961459 | 15-scf00327 | 15 |
| AX-158162837 | 15 | 30.483 | KV453080.1 | 8962756 | 15-scf00327 | 15 |
| AX-158162838 | 15 | 30.483 | KV453080.1 | 8963513 | 15-scf00327 | 15 |
| AX-158162839 | 15 | 30.483 | KV453080.1 | 8967956 | 15-scf00327 | 15 |



|              |    |        |            |         |             |    |
|--------------|----|--------|------------|---------|-------------|----|
| AX-157727938 | 15 | 30.483 | KV453080.1 | 8968000 | 15-scf00327 | 15 |
| AX-158162840 | 15 | 30.483 | KV453080.1 | 8970017 | 15-scf00327 | 15 |
| AX-158162842 | 15 | 30.483 | KV453080.1 | 8970783 | 15-scf00327 | 15 |
| AX-158162847 | 15 | 30.483 | KV453080.1 | 8982120 | 15-scf00327 | 15 |
| AX-158162848 | 15 | 30.483 | KV453080.1 | 8983567 | 15-scf00327 | 15 |
| AX-158413049 | 15 | 30.483 | KV453080.1 | 8984862 | 15-scf00327 | 15 |
| AX-158162851 | 15 | 30.483 | KV453080.1 | 8986679 | 15-scf00327 | 15 |
| AX-158162855 | 15 | 30.483 | KV453080.1 | 8989835 | 15-scf00327 | 15 |
| AX-158162856 | 15 | 30.483 | KV453080.1 | 8990147 | 15-scf00327 | 15 |
| AX-158162857 | 15 | 30.483 | KV453080.1 | 8990941 | 15-scf00327 | 15 |
| AX-158162859 | 15 | 30.483 | KV453080.1 | 8992653 | 15-scf00327 | 15 |
| AX-158162863 | 15 | 30.483 | KV453080.1 | 8995711 | 15-scf00327 | 15 |
| AX-158162864 | 15 | 30.483 | KV453080.1 | 8996788 | 15-scf00327 | 15 |
| AX-158162865 | 15 | 30.483 | KV453080.1 | 8999876 | 15-scf00327 | 15 |
| AX-158162867 | 15 | 30.483 | KV453080.1 | 9001868 | 15-scf00327 | 15 |
| AX-158162868 | 15 | 30.483 | KV453080.1 | 9002935 | 15-scf00327 | 15 |
| AX-158162869 | 15 | 30.483 | KV453080.1 | 9003545 | 15-scf00327 | 15 |
| AX-158162870 | 15 | 30.483 | KV453080.1 | 9005122 | 15-scf00327 | 15 |
| AX-158162871 | 15 | 30.483 | KV453080.1 | 9005908 | 15-scf00327 | 15 |
| AX-158162872 | 15 | 30.483 | KV453080.1 | 9006306 | 15-scf00327 | 15 |
| AX-158162875 | 15 | 30.483 | KV453080.1 | 9010010 | 15-scf00327 | 15 |
| AX-158162877 | 15 | 30.483 | KV453080.1 | 9011110 | 15-scf00327 | 15 |
| AX-158162878 | 15 | 30.483 | KV453080.1 | 9011498 | 15-scf00327 | 15 |
| AX-158162880 | 15 | 30.483 | KV453080.1 | 9015064 | 15-scf00327 | 15 |
| AX-158162881 | 15 | 30.483 | KV453080.1 | 9015398 | 15-scf00327 | 15 |
| AX-157833956 | 15 | 30.483 | KV453080.1 | 9027908 | 15-scf00327 | 15 |
| AX-158162885 | 15 | 30.483 | KV453080.1 | 9027986 | 15-scf00327 | 15 |
| AX-158162887 | 15 | 30.483 | KV453080.1 | 9029970 | 15-scf00327 | 15 |
| AX-158162889 | 15 | 30.483 | KV453080.1 | 9031128 | 15-scf00327 | 15 |
| AX-157833957 | 15 | 30.483 | KV453080.1 | 9031350 | 15-scf00327 | 15 |
| AX-158162891 | 15 | 30.483 | KV453080.1 | 9034142 | 15-scf00327 | 15 |
| AX-158162893 | 15 | 30.483 | KV453080.1 | 9036996 | 15-scf00327 | 15 |
| AX-158162895 | 15 | 30.483 | KV453080.1 | 9040374 | 15-scf00327 | 15 |
| AX-157726939 | 15 | 30.483 | KV453080.1 | 9040678 | 15-scf00327 | 15 |
| AX-158162897 | 15 | 30.483 | KV453080.1 | 9043866 | 15-scf00327 | 15 |
| AX-158162901 | 15 | 30.483 | KV453080.1 | 9052169 | 15-scf00327 | 15 |
| AX-158162907 | 15 | 30.483 | KV453080.1 | 9058902 | 15-scf00327 | 15 |
| AX-158162909 | 15 | 30.483 | KV453080.1 | 9067665 | 15-scf00327 | 15 |
| AX-158162911 | 15 | 30.483 | KV453080.1 | 9072638 | 15-scf00327 | 15 |
| AX-158162918 | 15 | 30.483 | KV453080.1 | 9086702 | 15-scf00327 | 15 |
| AX-158162929 | 15 | 30.483 | KV453080.1 | 9095277 | 15-scf00327 | 15 |
| AX-158162931 | 15 | 30.483 | KV453080.1 | 9097294 | 15-scf00327 | 15 |
| AX-158162933 | 15 | 30.483 | KV453080.1 | 9098226 | 15-scf00327 | 15 |
| AX-158162937 | 15 | 30.483 | KV453080.1 | 9099903 | 15-scf00327 | 15 |
| AX-158162944 | 15 | 30.483 | KV453080.1 | 9109797 | 15-scf00327 | 15 |
| AX-158162945 | 15 | 30.483 | KV453080.1 | 9111986 | 15-scf00327 | 15 |
| AX-157772888 | 15 | 30.483 | KV453080.1 | 9116674 | 15-scf00327 | 15 |
| AX-157709293 | 15 | 30.483 | KV453080.1 | 9122532 | 15-scf00327 | 15 |
| AX-158162959 | 15 | 30.483 | KV453080.1 | 9125184 | 15-scf00327 | 15 |
| AX-158162974 | 15 | 30.483 | KV453080.1 | 9138144 | 15-scf00327 | 15 |
| AX-158162975 | 15 | 30.483 | KV453080.1 | 9139651 | 15-scf00327 | 15 |

|              |    |        |            |         |             |    |
|--------------|----|--------|------------|---------|-------------|----|
| AX-158162977 | 15 | 30.483 | KV453080.1 | 9141309 | 15-scf00327 | 15 |
| AX-157718191 | 15 | 30.483 | KV453080.1 | 9142544 | 15-scf00327 | 15 |
| AX-158162979 | 15 | 30.483 | KV453080.1 | 9143625 | 15-scf00327 | 15 |
| AX-158413052 | 15 | 30.483 | KV453080.1 | 9143700 | 15-scf00327 | 15 |
| AX-158162981 | 15 | 30.483 | KV453080.1 | 9145261 | 15-scf00327 | 15 |
| AX-158162982 | 15 | 30.483 | KV453080.1 | 9146565 | 15-scf00327 | 15 |
| AX-157833969 | 15 | 30.483 | KV453080.1 | 9150657 | 15-scf00327 | 15 |
| AX-158162983 | 15 | 30.483 | KV453080.1 | 9151191 | 15-scf00327 | 15 |
| AX-157833970 | 15 | 30.483 | KV453080.1 | 9152042 | 15-scf00327 | 15 |
| AX-158162984 | 15 | 30.483 | KV453080.1 | 9152898 | 15-scf00327 | 15 |
| AX-157833972 | 15 | 30.483 | KV453080.1 | 9154288 | 15-scf00327 | 15 |
| AX-157871899 | 15 | 30.483 | KV453080.1 | 9155894 | 15-scf00327 | 15 |
| AX-158162985 | 15 | 30.483 | KV453080.1 | 9156495 | 15-scf00327 | 15 |
| AX-158162986 | 15 | 30.483 | KV453080.1 | 9157731 | 15-scf00327 | 15 |
| AX-158162987 | 15 | 30.483 | KV453080.1 | 9159102 | 15-scf00327 | 15 |
| AX-157871900 | 15 | 30.483 | KV453080.1 | 9159343 | 15-scf00327 | 15 |
| AX-158162988 | 15 | 30.483 | KV453080.1 | 9159580 | 15-scf00327 | 15 |
| AX-158162989 | 15 | 30.483 | KV453080.1 | 9162292 | 15-scf00327 | 15 |
| AX-158162990 | 15 | 30.483 | KV453080.1 | 9162502 | 15-scf00327 | 15 |
| AX-158162991 | 15 | 30.483 | KV453080.1 | 9162795 | 15-scf00327 | 15 |
| AX-157833973 | 15 | 30.483 | KV453080.1 | 9163298 | 15-scf00327 | 15 |
| AX-157737083 | 15 | 30.483 | KV453080.1 | 9163383 | 15-scf00327 | 15 |
| AX-158162992 | 15 | 30.483 | KV453080.1 | 9163774 | 15-scf00327 | 15 |
| AX-158162993 | 15 | 30.483 | KV453080.1 | 9166035 | 15-scf00327 | 15 |
| AX-158162994 | 15 | 30.483 | KV453080.1 | 9166270 | 15-scf00327 | 15 |
| AX-158162998 | 15 | 30.483 | KV453080.1 | 9168746 | 15-scf00327 | 15 |
| AX-158163000 | 15 | 30.483 | KV453080.1 | 9169747 | 15-scf00327 | 15 |
| AX-158163003 | 15 | 30.483 | KV453080.1 | 9171933 | 15-scf00327 | 15 |
| AX-157833974 | 15 | 30.483 | KV453080.1 | 9172512 | 15-scf00327 | 15 |
| AX-157833975 | 15 | 30.483 | KV453080.1 | 9172981 | 15-scf00327 | 15 |
| AX-158163004 | 15 | 30.483 | KV453080.1 | 9174172 | 15-scf00327 | 15 |
| AX-158163005 | 15 | 30.483 | KV453080.1 | 9174668 | 15-scf00327 | 15 |
| AX-158163006 | 15 | 30.483 | KV453080.1 | 9175877 | 15-scf00327 | 15 |
| AX-158163007 | 15 | 30.483 | KV453080.1 | 9176350 | 15-scf00327 | 15 |
| AX-157871901 | 15 | 30.483 | KV453080.1 | 9176948 | 15-scf00327 | 15 |
| AX-158163008 | 15 | 30.483 | KV453080.1 | 9177187 | 15-scf00327 | 15 |
| AX-158163009 | 15 | 30.483 | KV453080.1 | 9179523 | 15-scf00327 | 15 |
| AX-158163010 | 15 | 30.483 | KV453080.1 | 9180336 | 15-scf00327 | 15 |
| AX-158163011 | 15 | 30.483 | KV453080.1 | 9180660 | 15-scf00327 | 15 |
| AX-158163012 | 15 | 30.483 | KV453080.1 | 9181106 | 15-scf00327 | 15 |
| AX-158163013 | 15 | 30.483 | KV453080.1 | 9183364 | 15-scf00327 | 15 |
| AX-158163015 | 15 | 30.483 | KV453080.1 | 9185747 | 15-scf00327 | 15 |
| AX-158163016 | 15 | 30.483 | KV453080.1 | 9187701 | 15-scf00327 | 15 |
| AX-158163017 | 15 | 30.483 | KV453080.1 | 9188147 | 15-scf00327 | 15 |
| AX-158163018 | 15 | 30.483 | KV453080.1 | 9190174 | 15-scf00327 | 15 |
| AX-158163020 | 15 | 30.483 | KV453080.1 | 9192729 | 15-scf00327 | 15 |
| AX-158393379 | 15 | 30.483 | KV453080.1 | 9194162 | 15-scf00327 | 15 |
| AX-158163022 | 15 | 30.483 | KV453080.1 | 9197402 | 15-scf00327 | 15 |
| AX-158163023 | 15 | 30.483 | KV453080.1 | 9198649 | 15-scf00327 | 15 |
| AX-157833977 | 15 | 30.483 | KV453080.1 | 9198870 | 15-scf00327 | 15 |
| AX-158413053 | 15 | 30.483 | KV453080.1 | 9199324 | 15-scf00327 | 15 |

|              |    |        |            |         |             |    |
|--------------|----|--------|------------|---------|-------------|----|
| AX-158413054 | 15 | 30.483 | KV453080.1 | 9199605 | 15-scf00327 | 15 |
| AX-158163024 | 15 | 30.483 | KV453080.1 | 9199718 | 15-scf00327 | 15 |
| AX-157833978 | 15 | 30.483 | KV453080.1 | 9200540 | 15-scf00327 | 15 |
| AX-157871902 | 15 | 30.483 | KV453080.1 | 9205462 | 15-scf00327 | 15 |
| AX-157833979 | 15 | 30.483 | KV453080.1 | 9211178 | 15-scf00327 | 15 |
| AX-157871903 | 15 | 30.483 | KV453080.1 | 9211500 | 15-scf00327 | 15 |
| AX-158163029 | 15 | 30.483 | KV453080.1 | 9213038 | 15-scf00327 | 15 |
| AX-158163030 | 15 | 30.483 | KV453080.1 | 9213837 | 15-scf00327 | 15 |
| AX-158163033 | 15 | 30.483 | KV453080.1 | 9219446 | 15-scf00327 | 15 |
| AX-158163034 | 15 | 30.483 | KV453080.1 | 9220752 | 15-scf00327 | 15 |
| AX-158163035 | 15 | 30.483 | KV453080.1 | 9221120 | 15-scf00327 | 15 |
| AX-158163036 | 15 | 30.483 | KV453080.1 | 9222904 | 15-scf00327 | 15 |
| AX-158163039 | 15 | 30.483 | KV453080.1 | 9224748 | 15-scf00327 | 15 |
| AX-158163040 | 15 | 30.483 | KV453080.1 | 9227857 | 15-scf00327 | 15 |
| AX-158163041 | 15 | 30.483 | KV453080.1 | 9229054 | 15-scf00327 | 15 |
| AX-158163042 | 15 | 30.483 | KV453080.1 | 9232897 | 15-scf00327 | 15 |
| AX-158393381 | 15 | 30.483 | KV453080.1 | 9238088 | 15-scf00327 | 15 |
| AX-158163046 | 15 | 30.483 | KV453080.1 | 9241492 | 15-scf00327 | 15 |
| AX-157754783 | 15 | 30.483 | KV453080.1 | 9247798 | 15-scf00327 | 15 |
| AX-157833981 | 15 | 30.483 | KV453080.1 | 9250157 | 15-scf00327 | 15 |
| AX-158163048 | 15 | 30.483 | KV453080.1 | 9252152 | 15-scf00327 | 15 |
| AX-158163051 | 15 | 30.483 | KV453080.1 | 9254467 | 15-scf00327 | 15 |
| AX-158163052 | 15 | 30.483 | KV453080.1 | 9254899 | 15-scf00327 | 15 |
| AX-158163053 | 15 | 30.483 | KV453080.1 | 9255556 | 15-scf00327 | 15 |
| AX-158163055 | 15 | 30.483 | KV453080.1 | 9260483 | 15-scf00327 | 15 |
| AX-158163056 | 15 | 30.483 | KV453080.1 | 9261185 | 15-scf00327 | 15 |
| AX-158163057 | 15 | 30.483 | KV453080.1 | 9261873 | 15-scf00327 | 15 |
| AX-158163058 | 15 | 30.483 | KV453080.1 | 9262473 | 15-scf00327 | 15 |
| AX-158413056 | 15 | 30.483 | KV453080.1 | 9264756 | 15-scf00327 | 15 |
| AX-158163059 | 15 | 30.483 | KV453080.1 | 9265688 | 15-scf00327 | 15 |
| AX-157754760 | 15 | 30.483 | KV453080.1 | 9266065 | 15-scf00327 | 15 |
| AX-158163061 | 15 | 30.483 | KV453080.1 | 9266758 | 15-scf00327 | 15 |
| AX-158163064 | 15 | 30.483 | KV453080.1 | 9270687 | 15-scf00327 | 15 |
| AX-158163067 | 15 | 30.483 | KV453080.1 | 9274547 | 15-scf00327 | 15 |
| AX-158163068 | 15 | 30.483 | KV453080.1 | 9276268 | 15-scf00327 | 15 |
| AX-158163069 | 15 | 30.483 | KV453080.1 | 9276884 | 15-scf00327 | 15 |
| AX-158163070 | 15 | 30.483 | KV453080.1 | 9278589 | 15-scf00327 | 15 |
| AX-158163071 | 15 | 30.483 | KV453080.1 | 9279127 | 15-scf00327 | 15 |
| AX-158163072 | 15 | 30.483 | KV453080.1 | 9279806 | 15-scf00327 | 15 |
| AX-158163075 | 15 | 30.483 | KV453080.1 | 9283251 | 15-scf00327 | 15 |
| AX-157714693 | 15 | 30.483 | KV453080.1 | 9284087 | 15-scf00327 | 15 |
| AX-157771456 | 15 | 30.483 | KV453080.1 | 9284544 | 15-scf00327 | 15 |
| AX-158163080 | 15 | 30.483 | KV453080.1 | 9291270 | 15-scf00327 | 15 |
| AX-157833983 | 15 | 30.483 | KV453080.1 | 9292428 | 15-scf00327 | 15 |
| AX-157833984 | 15 | 30.483 | KV453080.1 | 9295780 | 15-scf00327 | 15 |
| AX-158163082 | 15 | 30.483 | KV453080.1 | 9296513 | 15-scf00327 | 15 |
| AX-157833985 | 15 | 30.483 | KV453080.1 | 9297296 | 15-scf00327 | 15 |
| AX-158163083 | 15 | 30.483 | KV453080.1 | 9299380 | 15-scf00327 | 15 |
| AX-157833987 | 15 | 30.483 | KV453080.1 | 9299642 | 15-scf00327 | 15 |
| AX-158163084 | 15 | 30.483 | KV453080.1 | 9300549 | 15-scf00327 | 15 |
| AX-158163085 | 15 | 30.483 | KV453080.1 | 9301431 | 15-scf00327 | 15 |

|              |    |        |            |         |             |    |
|--------------|----|--------|------------|---------|-------------|----|
| AX-157833988 | 15 | 30.483 | KV453080.1 | 9301913 | 15-scf00327 | 15 |
| AX-157833989 | 15 | 30.483 | KV453080.1 | 9303900 | 15-scf00327 | 15 |
| AX-158163090 | 15 | 30.483 | KV453080.1 | 9309983 | 15-scf00327 | 15 |
| AX-158163092 | 15 | 30.483 | KV453080.1 | 9312692 | 15-scf00327 | 15 |
| AX-158163093 | 15 | 30.483 | KV453080.1 | 9312962 | 15-scf00327 | 15 |
| AX-157833990 | 15 | 30.483 | KV453080.1 | 9313684 | 15-scf00327 | 15 |
| AX-158163094 | 15 | 30.483 | KV453080.1 | 9314083 | 15-scf00327 | 15 |
| AX-158163098 | 15 | 30.483 | KV453080.1 | 9316713 | 15-scf00327 | 15 |
| AX-158163101 | 15 | 30.483 | KV453080.1 | 9319443 | 15-scf00327 | 15 |
| AX-158163106 | 15 | 30.483 | KV453080.1 | 9324197 | 15-scf00327 | 15 |
| AX-158163107 | 15 | 30.483 | KV453080.1 | 9325038 | 15-scf00327 | 15 |
| AX-158163108 | 15 | 30.483 | KV453080.1 | 9327328 | 15-scf00327 | 15 |
| AX-158163110 | 15 | 30.483 | KV453080.1 | 9329200 | 15-scf00327 | 15 |
| AX-158163113 | 15 | 30.483 | KV453080.1 | 9331170 | 15-scf00327 | 15 |
| AX-158163114 | 15 | 30.483 | KV453080.1 | 9331823 | 15-scf00327 | 15 |
| AX-158163116 | 15 | 30.483 | KV453080.1 | 9334502 | 15-scf00327 | 15 |
| AX-158163118 | 15 | 30.483 | KV453080.1 | 9336544 | 15-scf00327 | 15 |
| AX-158163119 | 15 | 30.483 | KV453080.1 | 9336987 | 15-scf00327 | 15 |
| AX-158163120 | 15 | 30.483 | KV453080.1 | 9337289 | 15-scf00327 | 15 |
| AX-158413060 | 15 | 30.483 | KV453080.1 | 9337818 | 15-scf00327 | 15 |
| AX-158163121 | 15 | 30.483 | KV453080.1 | 9338392 | 15-scf00327 | 15 |
| AX-158163122 | 15 | 30.483 | KV453080.1 | 9339847 | 15-scf00327 | 15 |
| AX-158163124 | 15 | 30.483 | KV453080.1 | 9342916 | 15-scf00327 | 15 |
| AX-158163125 | 15 | 30.483 | KV453080.1 | 9345550 | 15-scf00327 | 15 |
| AX-157744631 | 15 | 30.483 | KV453080.1 | 9346170 | 15-scf00327 | 15 |
| AX-157833992 | 15 | 30.483 | KV453080.1 | 9347353 | 15-scf00327 | 15 |
| AX-157833993 | 15 | 30.483 | KV453080.1 | 9347701 | 15-scf00327 | 15 |
| AX-158163127 | 15 | 30.483 | KV453080.1 | 9348141 | 15-scf00327 | 15 |
| AX-158163128 | 15 | 30.483 | KV453080.1 | 9348687 | 15-scf00327 | 15 |
| AX-158163129 | 15 | 30.483 | KV453080.1 | 9349753 | 15-scf00327 | 15 |
| AX-158163131 | 15 | 30.483 | KV453080.1 | 9350742 | 15-scf00327 | 15 |
| AX-158163133 | 15 | 30.483 | KV453080.1 | 9352398 | 15-scf00327 | 15 |
| AX-158163139 | 15 | 30.483 | KV453080.1 | 9360758 | 15-scf00327 | 15 |
| AX-158163141 | 15 | 30.483 | KV453080.1 | 9362643 | 15-scf00327 | 15 |
| AX-158163143 | 15 | 30.483 | KV453080.1 | 9363999 | 15-scf00327 | 15 |
| AX-158163144 | 15 | 30.483 | KV453080.1 | 9364838 | 15-scf00327 | 15 |
| AX-157752865 | 15 | 30.483 | KV453080.1 | 9365395 | 15-scf00327 | 15 |
| AX-158163148 | 15 | 30.483 | KV453080.1 | 9369376 | 15-scf00327 | 15 |
| AX-158163152 | 15 | 30.483 | KV453080.1 | 9378187 | 15-scf00327 | 15 |
| AX-158163153 | 15 | 30.483 | KV453080.1 | 9378629 | 15-scf00327 | 15 |
| AX-158163154 | 15 | 30.483 | KV453080.1 | 9380495 | 15-scf00327 | 15 |
| AX-158163156 | 15 | 30.483 | KV453080.1 | 9381458 | 15-scf00327 | 15 |
| AX-157833998 | 15 | 30.483 | KV453080.1 | 9381989 | 15-scf00327 | 15 |
| AX-158163157 | 15 | 30.483 | KV453080.1 | 9387199 | 15-scf00327 | 15 |
| AX-158163158 | 15 | 30.483 | KV453080.1 | 9389120 | 15-scf00327 | 15 |
| AX-158163160 | 15 | 30.483 | KV453080.1 | 9390186 | 15-scf00327 | 15 |
| AX-158163166 | 15 | 30.483 | KV453080.1 | 9394450 | 15-scf00327 | 15 |
| AX-157871906 | 15 | 30.483 | KV453080.1 | 9397924 | 15-scf00327 | 15 |
| AX-158163168 | 15 | 30.483 | KV453080.1 | 9400642 | 15-scf00327 | 15 |
| AX-158163169 | 15 | 30.483 | KV453080.1 | 9403324 | 15-scf00327 | 15 |
| AX-158163171 | 15 | 30.483 | KV453080.1 | 9405269 | 15-scf00327 | 15 |

|              |    |        |            |         |             |    |
|--------------|----|--------|------------|---------|-------------|----|
| AX-157725036 | 15 | 30.483 | KV453080.1 | 9406391 | 15-scf00327 | 15 |
| AX-158163172 | 15 | 30.483 | KV453080.1 | 9407723 | 15-scf00327 | 15 |
| AX-158163173 | 15 | 30.483 | KV453080.1 | 9408691 | 15-scf00327 | 15 |
| AX-158163174 | 15 | 30.483 | KV453080.1 | 9409078 | 15-scf00327 | 15 |
| AX-158163175 | 15 | 30.483 | KV453080.1 | 9409583 | 15-scf00327 | 15 |
| AX-158163176 | 15 | 30.483 | KV453080.1 | 9414579 | 15-scf00327 | 15 |
| AX-158163177 | 15 | 30.483 | KV453080.1 | 9414809 | 15-scf00327 | 15 |
| AX-158163178 | 15 | 30.483 | KV453080.1 | 9415326 | 15-scf00327 | 15 |
| AX-157833999 | 15 | 30.483 | KV453080.1 | 9415876 | 15-scf00327 | 15 |
| AX-158163179 | 15 | 30.483 | KV453080.1 | 9416196 | 15-scf00327 | 15 |
| AX-158163180 | 15 | 30.483 | KV453080.1 | 9416476 | 15-scf00327 | 15 |
| AX-157834000 | 15 | 30.483 | KV453080.1 | 9422114 | 15-scf00327 | 15 |
| AX-158163184 | 15 | 30.483 | KV453080.1 | 9422532 | 15-scf00327 | 15 |
| AX-158163185 | 15 | 30.483 | KV453080.1 | 9423859 | 15-scf00327 | 15 |
| AX-158163186 | 15 | 30.483 | KV453080.1 | 9424245 | 15-scf00327 | 15 |
| AX-158163187 | 15 | 30.483 | KV453080.1 | 9425072 | 15-scf00327 | 15 |
| AX-157834001 | 15 | 30.483 | KV453080.1 | 9427592 | 15-scf00327 | 15 |
| AX-158163190 | 15 | 30.483 | KV453080.1 | 9428472 | 15-scf00327 | 15 |
| AX-157834002 | 15 | 30.483 | KV453080.1 | 9428566 | 15-scf00327 | 15 |
| AX-157749351 | 15 | 30.483 | KV453080.1 | 9428977 | 15-scf00327 | 15 |
| AX-157834003 | 15 | 30.483 | KV453080.1 | 9429024 | 15-scf00327 | 15 |
| AX-158163191 | 15 | 30.483 | KV453080.1 | 9429468 | 15-scf00327 | 15 |
| AX-157746712 | 15 | 30.483 | KV453080.1 | 9432965 | 15-scf00327 | 15 |
| AX-158163194 | 15 | 30.483 | KV453080.1 | 9433362 | 15-scf00327 | 15 |
| AX-158163206 | 15 | 30.483 | KV453080.1 | 9450365 | 15-scf00327 | 15 |
| AX-158163207 | 15 | 30.483 | KV453080.1 | 9450588 | 15-scf00327 | 15 |
| AX-158163209 | 15 | 30.483 | KV453080.1 | 9453597 | 15-scf00327 | 15 |
| AX-158163213 | 15 | 30.483 | KV453080.1 | 9460888 | 15-scf00327 | 15 |
| AX-158163216 | 15 | 30.483 | KV453080.1 | 9465564 | 15-scf00327 | 15 |
| AX-157834008 | 15 | 30.483 | KV453080.1 | 9469272 | 15-scf00327 | 15 |
| AX-158163220 | 15 | 30.483 | KV453080.1 | 9471808 | 15-scf00327 | 15 |
| AX-158163232 | 15 | 30.483 | KV453080.1 | 9489945 | 15-scf00327 | 15 |
| AX-157871907 | 15 | 30.483 | KV453080.1 | 9492226 | 15-scf00327 | 15 |
| AX-158163267 | 15 | 30.483 | KV453080.1 | 9532127 | 15-scf00327 | 15 |
| AX-157712218 | 15 | 30.483 | KV453080.1 | 9555280 | 15-scf00327 | 15 |
| AX-157725994 | 15 | 30.483 | KV453080.1 | 9559303 | 15-scf00327 | 15 |
| AX-158163308 | 15 | 30.483 | KV453080.1 | 9590112 | 15-scf00327 | 15 |
| AX-158163322 | 15 | 30.483 | KV453080.1 | 9609769 | 15-scf00327 | 15 |
| AX-158163326 | 15 | 30.483 | KV453080.1 | 9616787 | 15-scf00327 | 15 |
| AX-158163352 | 15 | 30.483 | KV453080.1 | 9663632 | 15-scf00327 | 15 |
| AX-158163367 | 15 | 30.483 | KV453080.1 | 9684206 | 15-scf00327 | 15 |
| AX-158162783 | 15 | 30.592 | KV453080.1 | 8898201 | 15-scf00327 | 15 |
| AX-158162879 | 15 | 30.592 | KV453080.1 | 9013758 | 15-scf00327 | 15 |
| AX-158163037 | 15 | 30.592 | KV453080.1 | 9223263 | 15-scf00327 | 15 |
| AX-158163189 | 15 | 30.592 | KV453080.1 | 9427630 | 15-scf00327 | 15 |
| AX-158163195 | 15 | 30.592 | KV453080.1 | 9437082 | 15-scf00327 | 15 |
| AX-158163219 | 15 | 30.592 | KV453080.1 | 9469946 | 15-scf00327 | 15 |
| AX-158163224 | 15 | 30.592 | KV453080.1 | 9476860 | 15-scf00327 | 15 |
| AX-158163226 | 15 | 30.592 | KV453080.1 | 9478454 | 15-scf00327 | 15 |
| AX-158163228 | 15 | 30.592 | KV453080.1 | 9480686 | 15-scf00327 | 15 |
| AX-157886647 | 15 | 30.592 | KV453080.1 | 9489014 | 15-scf00327 | 15 |

|              |    |        |            |         |             |    |
|--------------|----|--------|------------|---------|-------------|----|
| AX-158163234 | 15 | 30.592 | KV453080.1 | 9490886 | 15-scf00327 | 15 |
| AX-158163246 | 15 | 30.592 | KV453080.1 | 9508745 | 15-scf00327 | 15 |
| AX-158163248 | 15 | 30.592 | KV453080.1 | 9512295 | 15-scf00327 | 15 |
| AX-158163250 | 15 | 30.592 | KV453080.1 | 9514963 | 15-scf00327 | 15 |
| AX-158163251 | 15 | 30.592 | KV453080.1 | 9516370 | 15-scf00327 | 15 |
| AX-158163252 | 15 | 30.592 | KV453080.1 | 9517080 | 15-scf00327 | 15 |
| AX-158163253 | 15 | 30.592 | KV453080.1 | 9517471 | 15-scf00327 | 15 |
| AX-158163259 | 15 | 30.592 | KV453080.1 | 9523234 | 15-scf00327 | 15 |
| AX-157834011 | 15 | 30.592 | KV453080.1 | 9529129 | 15-scf00327 | 15 |
| AX-158163265 | 15 | 30.592 | KV453080.1 | 9531093 | 15-scf00327 | 15 |
| AX-158163268 | 15 | 30.592 | KV453080.1 | 9532493 | 15-scf00327 | 15 |
| AX-158163270 | 15 | 30.592 | KV453080.1 | 9535124 | 15-scf00327 | 15 |
| AX-157866573 | 15 | 30.592 | KV453080.1 | 9535721 | 15-scf00327 | 15 |
| AX-158163272 | 15 | 30.592 | KV453080.1 | 9536193 | 15-scf00327 | 15 |
| AX-158163276 | 15 | 30.592 | KV453080.1 | 9538803 | 15-scf00327 | 15 |
| AX-157714683 | 15 | 30.592 | KV453080.1 | 9551641 | 15-scf00327 | 15 |
| AX-158163349 | 15 | 30.592 | KV453080.1 | 9660723 | 15-scf00327 | 15 |
| AX-158163278 | 15 | 30.624 | KV453080.1 | 9541319 | 15-scf00327 | 15 |
| AX-158163279 | 15 | 30.639 | KV453080.1 | 9544409 | 15-scf00327 | 15 |
| AX-158163280 | 15 | 30.654 | KV453080.1 | 9545871 | 15-scf00327 | 15 |
| AX-158162902 | 15 | 30.681 | KV453080.1 | 9053024 | 15-scf00327 | 15 |
| AX-158162908 | 15 | 30.681 | KV453080.1 | 9062725 | 15-scf00327 | 15 |
| AX-158163197 | 15 | 30.681 | KV453080.1 | 9443428 | 15-scf00327 | 15 |
| AX-158163238 | 15 | 30.681 | KV453080.1 | 9495464 | 15-scf00327 | 15 |
| AX-157858384 | 15 | 30.681 | KV453080.1 | 9562819 | 15-scf00327 | 15 |
| AX-157714327 | 15 | 30.681 | KV453080.1 | 9565357 | 15-scf00327 | 15 |
| AX-157886648 | 15 | 30.681 | KV453080.1 | 9610004 | 15-scf00327 | 15 |
| AX-158163332 | 15 | 30.681 | KV453080.1 | 9626794 | 15-scf00327 | 15 |
| AX-157695526 | 15 | 30.681 | FI884277.1 | 194     | 15-scf00327 | UN |
| AX-157747930 | 15 | 30.701 | KV453080.1 | 9117383 | 15-scf00327 | 15 |
| AX-158162953 | 15 | 30.701 | KV453080.1 | 9117983 | 15-scf00327 | 15 |
| AX-158162956 | 15 | 30.701 | KV453080.1 | 9122009 | 15-scf00327 | 15 |
| AX-158162964 | 15 | 30.701 | KV453080.1 | 9129896 | 15-scf00327 | 15 |
| AX-158163021 | 15 | 30.701 | KV453080.1 | 9195132 | 15-scf00327 | 15 |
| AX-158163027 | 15 | 30.701 | KV453080.1 | 9201858 | 15-scf00327 | 15 |
| AX-158163031 | 15 | 30.701 | KV453080.1 | 9216760 | 15-scf00327 | 15 |
| AX-158393380 | 15 | 30.701 | KV453080.1 | 9221378 | 15-scf00327 | 15 |
| AX-158163054 | 15 | 30.701 | KV453080.1 | 9257444 | 15-scf00327 | 15 |
| AX-158163066 | 15 | 30.701 | KV453080.1 | 9273692 | 15-scf00327 | 15 |
| AX-158163081 | 15 | 30.701 | KV453080.1 | 9295499 | 15-scf00327 | 15 |
| AX-158163087 | 15 | 30.701 | KV453080.1 | 9304964 | 15-scf00327 | 15 |
| AX-158163088 | 15 | 30.701 | KV453080.1 | 9306649 | 15-scf00327 | 15 |
| AX-158163089 | 15 | 30.701 | KV453080.1 | 9308344 | 15-scf00327 | 15 |
| AX-157744145 | 15 | 30.701 | KV453080.1 | 9308692 | 15-scf00327 | 15 |
| AX-157833991 | 15 | 30.701 | KV453080.1 | 9328902 | 15-scf00327 | 15 |
| AX-158163111 | 15 | 30.701 | KV453080.1 | 9329507 | 15-scf00327 | 15 |
| AX-158163123 | 15 | 30.701 | KV453080.1 | 9341580 | 15-scf00327 | 15 |
| AX-158163126 | 15 | 30.701 | KV453080.1 | 9346670 | 15-scf00327 | 15 |
| AX-157833994 | 15 | 30.701 | KV453080.1 | 9348601 | 15-scf00327 | 15 |
| AX-158163146 | 15 | 30.701 | KV453080.1 | 9367521 | 15-scf00327 | 15 |
| AX-158163210 | 15 | 30.701 | KV453080.1 | 9455546 | 15-scf00327 | 15 |

|              |    |        |             |         |             |    |
|--------------|----|--------|-------------|---------|-------------|----|
| AX-158163235 | 15 | 30.701 | KV453080.1  | 9492946 | 15-scf00327 | 15 |
| AX-158380487 | 15 | 30.701 | KV453080.1  | 9566941 | 15-scf00327 | 15 |
| AX-158163293 | 15 | 30.701 | KV453080.1  | 9573518 | 15-scf00327 | 15 |
| AX-158163297 | 15 | 30.701 | KV453080.1  | 9579248 | 15-scf00327 | 15 |
| AX-158163300 | 15 | 30.701 | KV453080.1  | 9580524 | 15-scf00327 | 15 |
| AX-158163301 | 15 | 30.701 | KV453080.1  | 9580746 | 15-scf00327 | 15 |
| AX-158163302 | 15 | 30.701 | KV453080.1  | 9581955 | 15-scf00327 | 15 |
| AX-158163315 | 15 | 30.701 | KV453080.1  | 9598416 | 15-scf00327 | 15 |
| AX-158163317 | 15 | 30.701 | KV453080.1  | 9604274 | 15-scf00327 | 15 |
| AX-158163319 | 15 | 30.701 | KV453080.1  | 9605664 | 15-scf00327 | 15 |
| AX-158163325 | 15 | 30.701 | KV453080.1  | 9616393 | 15-scf00327 | 15 |
| AX-158163328 | 15 | 30.701 | KV453080.1  | 9619171 | 15-scf00327 | 15 |
| AX-158163336 | 15 | 30.701 | KV453080.1  | 9631248 | 15-scf00327 | 15 |
| AX-157707345 | 15 | 30.701 | 3ML01034056 | 205     | scf09726_1  | UN |
| AX-158162744 | 15 | 30.919 | KV453080.1  | 8859193 | 15-scf00327 | 15 |
| AX-158162759 | 15 | 30.919 | KV453080.1  | 8872175 | 15-scf00327 | 15 |
| AX-158162832 | 15 | 30.919 | KV453080.1  | 8956389 | 15-scf00327 | 15 |
| AX-158162866 | 15 | 30.919 | KV453080.1  | 9001363 | 15-scf00327 | 15 |
| AX-158162883 | 15 | 30.919 | KV453080.1  | 9025480 | 15-scf00327 | 15 |
| AX-158162896 | 15 | 30.919 | KV453080.1  | 9041238 | 15-scf00327 | 15 |
| AX-158163159 | 15 | 30.919 | KV453080.1  | 9389473 | 15-scf00327 | 15 |
| AX-158163162 | 15 | 30.919 | KV453080.1  | 9391088 | 15-scf00327 | 15 |
| AX-157834004 | 15 | 30.919 | KV453080.1  | 9442061 | 15-scf00327 | 15 |
| AX-158163201 | 15 | 30.919 | KV453080.1  | 9445576 | 15-scf00327 | 15 |
| AX-158163215 | 15 | 30.919 | KV453080.1  | 9464802 | 15-scf00327 | 15 |
| AX-157742593 | 15 | 30.919 | KV453080.1  | 9465866 | 15-scf00327 | 15 |
| AX-158163223 | 15 | 30.919 | KV453080.1  | 9475975 | 15-scf00327 | 15 |
| AX-158163233 | 15 | 30.919 | KV453080.1  | 9490289 | 15-scf00327 | 15 |
| AX-158163242 | 15 | 30.919 | KV453080.1  | 9502446 | 15-scf00327 | 15 |
| AX-157722352 | 15 | 30.919 | KV453080.1  | 9505137 | 15-scf00327 | 15 |
| AX-158163281 | 15 | 30.919 | KV453080.1  | 9546843 | 15-scf00327 | 15 |
| AX-158163335 | 15 | 30.919 | KV453080.1  | 9630690 | 15-scf00327 | 15 |
| AX-157701544 | 15 | 30.919 | KV453080.1  | 9645192 | 15-scf00327 | 15 |
| AX-158163344 | 15 | 30.919 | KV453080.1  | 9650731 | 15-scf00327 | 15 |
| AX-158163345 | 15 | 30.919 | KV453080.1  | 9652968 | 15-scf00327 | 15 |
| AX-157755762 | 15 | 30.919 | KV453080.1  | 9654171 | 15-scf00327 | 15 |
| AX-158163347 | 15 | 30.919 | KV453080.1  | 9658916 | 15-scf00327 | 15 |
| AX-158163350 | 15 | 30.919 | KV453080.1  | 9662187 | 15-scf00327 | 15 |
| AX-158163351 | 15 | 30.919 | KV453080.1  | 9663240 | 15-scf00327 | 15 |
| AX-158163353 | 15 | 30.919 | KV453080.1  | 9664453 | 15-scf00327 | 15 |
| AX-158393383 | 15 | 30.919 | KV453080.1  | 9665101 | 15-scf00327 | 15 |
| AX-158163355 | 15 | 30.919 | KV453080.1  | 9668261 | 15-scf00327 | 15 |
| AX-158163379 | 15 | 30.919 | KV453080.1  | 9694448 | 15-scf00327 | 15 |
| AX-158163388 | 15 | 30.919 | KV453080.1  | 9708385 | 15-scf00327 | 15 |
| AX-158163397 | 15 | 30.919 | KV453080.1  | 9724718 | 15-scf00327 | 15 |
| AX-157833965 | 15 | 31.029 | KV453080.1  | 9071295 | 15-scf00327 | 15 |
| AX-158163362 | 15 | 31.029 | KV453080.1  | 9676565 | 15-scf00327 | 15 |
| AX-158163363 | 15 | 31.029 | KV453080.1  | 9677488 | 15-scf00327 | 15 |
| AX-158163368 | 15 | 31.029 | KV453080.1  | 9684457 | 15-scf00327 | 15 |
| AX-158163371 | 15 | 31.029 | KV453080.1  | 9687908 | 15-scf00327 | 15 |
| AX-158163372 | 15 | 31.029 | KV453080.1  | 9688969 | 15-scf00327 | 15 |

|              |    |        |            |         |             |    |
|--------------|----|--------|------------|---------|-------------|----|
| AX-158163377 | 15 | 31.029 | KV453080.1 | 9693373 | 15-scf00327 | 15 |
| AX-158163380 | 15 | 31.029 | KV453080.1 | 9695476 | 15-scf00327 | 15 |
| AX-158163135 | 15 | 31.247 | KV453080.1 | 9357924 | 15-scf00327 | 15 |
| AX-158163334 | 15 | 31.247 | KV453080.1 | 9629887 | 15-scf00327 | 15 |
| AX-157739804 | 15 | 31.247 | KV453080.1 | 9698642 | 15-scf00327 | 15 |
| AX-158163383 | 15 | 31.247 | KV453080.1 | 9699842 | 15-scf00327 | 15 |
| AX-158163384 | 15 | 31.247 | KV453080.1 | 9702702 | 15-scf00327 | 15 |
| AX-158163385 | 15 | 31.247 | KV453080.1 | 9703897 | 15-scf00327 | 15 |
| AX-158163386 | 15 | 31.247 | KV453080.1 | 9704527 | 15-scf00327 | 15 |
| AX-158163387 | 15 | 31.247 | KV453080.1 | 9706478 | 15-scf00327 | 15 |
| AX-158163409 | 15 | 31.247 | KV453080.1 | 9744221 | 15-scf00327 | 15 |
| AX-158163389 | 15 | 31.673 | KV453080.1 | 9711956 | 15-scf00327 | 15 |
| AX-158163392 | 15 | 31.678 | KV453080.1 | 9717949 | 15-scf00327 | 15 |
| AX-158163410 | 15 | 31.678 | KV453080.1 | 9746048 | 15-scf00327 | 15 |
| AX-158163399 | 15 | 31.684 | KV453080.1 | 9730598 | 15-scf00327 | 15 |
| AX-158163401 | 15 | 31.684 | KV453080.1 | 9732431 | 15-scf00327 | 15 |
| AX-158163404 | 15 | 31.684 | KV453080.1 | 9736789 | 15-scf00327 | 15 |
| AX-158163406 | 15 | 31.684 | KV453080.1 | 9738135 | 15-scf00327 | 15 |
| AX-157742884 | 15 | 31.684 | KV453080.1 | 9739250 | 15-scf00327 | 15 |
| AX-158163407 | 15 | 31.684 | KV453080.1 | 9740482 | 15-scf00327 | 15 |
| AX-158163408 | 15 | 31.684 | KV453080.1 | 9742323 | 15-scf00327 | 15 |
| AX-158163432 | 15 | 31.684 | KV453080.1 | 9773227 | 15-scf00327 | 15 |
| AX-158163416 | 15 | 31.902 | KV453080.1 | 9753709 | 15-scf00327 | 15 |
| AX-158163420 | 15 | 31.902 | KV453080.1 | 9757769 | 15-scf00327 | 15 |
| AX-158163422 | 15 | 31.902 | KV453080.1 | 9759109 | 15-scf00327 | 15 |
| AX-158163424 | 15 | 31.902 | KV453080.1 | 9761108 | 15-scf00327 | 15 |
| AX-158163426 | 15 | 31.902 | KV453080.1 | 9763138 | 15-scf00327 | 15 |
| AX-158163427 | 15 | 31.902 | KV453080.1 | 9765633 | 15-scf00327 | 15 |
| AX-158163428 | 15 | 31.902 | KV453080.1 | 9768465 | 15-scf00327 | 15 |
| AX-158163429 | 15 | 32.23  | KV453080.1 | 9771451 | 15-scf00327 | 15 |
| AX-158163430 | 15 | 32.23  | KV453080.1 | 9772080 | 15-scf00327 | 15 |
| AX-158163431 | 15 | 32.23  | KV453080.1 | 9772538 | 15-scf00327 | 15 |
| AX-158163434 | 15 | 32.23  | KV453080.1 | 9776196 | 15-scf00327 | 15 |
| AX-158163436 | 15 | 32.23  | KV453080.1 | 9780190 | 15-scf00327 | 15 |
| AX-158163438 | 15 | 32.23  | KV453080.1 | 9781984 | 15-scf00327 | 15 |
| AX-158163435 | 15 | 32.312 | KV453080.1 | 9777216 | 15-scf00327 | 15 |
| AX-158163437 | 15 | 32.391 | KV453080.1 | 9781367 | 15-scf00327 | 15 |
| AX-158163441 | 15 | 32.448 | KV453080.1 | 9786161 | 15-scf00327 | 15 |
| AX-158163443 | 15 | 32.667 | KV453080.1 | 9788520 | 15-scf00327 | 15 |
| AX-158163445 | 15 | 32.667 | KV453080.1 | 9790847 | 15-scf00327 | 15 |
| AX-158163446 | 15 | 32.667 | KV453080.1 | 9791436 | 15-scf00327 | 15 |
| AX-158163448 | 15 | 32.667 | KV453080.1 | 9798753 | 15-scf00327 | 15 |
| AX-158163452 | 15 | 32.667 | KV453080.1 | 9805580 | 15-scf00327 | 15 |
| AX-158163451 | 15 | 33.101 | KV453080.1 | 9804034 | 15-scf00327 | 15 |
| AX-158163463 | 15 | 33.102 | KV453080.1 | 9827551 | 15-scf00327 | 15 |
| AX-158163464 | 15 | 33.105 | KV453080.1 | 9828697 | 15-scf00327 | 15 |
| AX-158163465 | 15 | 33.105 | KV453080.1 | 9829717 | 15-scf00327 | 15 |
| AX-158163467 | 15 | 33.105 | KV453080.1 | 9831691 | 15-scf00327 | 15 |
| AX-158163470 | 15 | 33.16  | KV453080.1 | 9841149 | 15-scf00327 | 15 |
| AX-158163472 | 15 | 33.214 | KV453080.1 | 9842782 | 15-scf00327 | 15 |
| AX-158163473 | 15 | 33.215 | KV453080.1 | 9845937 | 15-scf00327 | 15 |



|              |    |        |            |          |             |    |
|--------------|----|--------|------------|----------|-------------|----|
| AX-158163475 | 15 | 33.378 | KV453080.1 | 9850056  | 15-scf00327 | 15 |
| AX-158163477 | 15 | 33.378 | KV453080.1 | 9853201  | 15-scf00327 | 15 |
| AX-158163478 | 15 | 33.402 | KV453080.1 | 9854268  | 15-scf00327 | 15 |
| AX-158163480 | 15 | 33.449 | KV453080.1 | 9857738  | 15-scf00327 | 15 |
| AX-157727550 | 15 | 33.495 | KV453080.1 | 9858319  | 15-scf00327 | 15 |
| AX-158163418 | 15 | 33.542 | KV453080.1 | 9756205  | 15-scf00327 | 15 |
| AX-158163479 | 15 | 33.542 | KV453080.1 | 9856333  | 15-scf00327 | 15 |
| AX-158163481 | 15 | 33.542 | KV453080.1 | 9859280  | 15-scf00327 | 15 |
| AX-158163483 | 15 | 33.542 | KV453080.1 | 9862535  | 15-scf00327 | 15 |
| AX-158163485 | 15 | 33.542 | KV453080.1 | 9863323  | 15-scf00327 | 15 |
| AX-157772968 | 15 | 33.542 | KV453080.1 | 9863514  | 15-scf00327 | 15 |
| AX-158163488 | 15 | 33.542 | KV453080.1 | 9869383  | 15-scf00327 | 15 |
| AX-158163491 | 15 | 33.542 | KV453080.1 | 9871647  | 15-scf00327 | 15 |
| AX-157738618 | 15 | 33.542 | KV453080.1 | 9872128  | 15-scf00327 | 15 |
| AX-158163493 | 15 | 33.542 | KV453080.1 | 9874171  | 15-scf00327 | 15 |
| AX-158163494 | 15 | 33.542 | KV453080.1 | 9874622  | 15-scf00327 | 15 |
| AX-158163498 | 15 | 33.543 | KV453080.1 | 9882330  | 15-scf00327 | 15 |
| AX-158163499 | 15 | 33.625 | KV453080.1 | 9882909  | 15-scf00327 | 15 |
| AX-157834016 | 15 | 33.87  | KV453080.1 | 9886740  | 15-scf00327 | 15 |
| AX-158163501 | 15 | 33.912 | KV453080.1 | 9887368  | 15-scf00327 | 15 |
| AX-157757877 | 15 | 33.954 | KV453080.1 | 9889966  | 15-scf00327 | 15 |
| AX-158163503 | 15 | 33.979 | KV453080.1 | 9892532  | 15-scf00327 | 15 |
| AX-158163504 | 15 | 33.979 | KV453080.1 | 9897343  | 15-scf00327 | 15 |
| AX-158163506 | 15 | 33.979 | KV453080.1 | 9898097  | 15-scf00327 | 15 |
| AX-158163507 | 15 | 33.979 | KV453080.1 | 9899376  | 15-scf00327 | 15 |
| AX-158163508 | 15 | 33.979 | KV453080.1 | 9900203  | 15-scf00327 | 15 |
| AX-158163509 | 15 | 34.041 | KV453080.1 | 9902070  | 15-scf00327 | 15 |
| AX-158163513 | 15 | 34.089 | KV453080.1 | 9914802  | 15-scf00327 | 15 |
| AX-158163514 | 15 | 34.089 | KV453080.1 | 9915934  | 15-scf00327 | 15 |
| AX-158163521 | 15 | 34.089 | KV453080.1 | 9923833  | 15-scf00327 | 15 |
| AX-158163524 | 15 | 34.089 | KV453080.1 | 9927250  | 15-scf00327 | 15 |
| AX-158163530 | 15 | 34.415 | KV453080.1 | 9935578  | 15-scf00327 | 15 |
| AX-158163531 | 15 | 34.416 | KV453080.1 | 9941384  | 15-scf00327 | 15 |
| AX-157725940 | 15 | 34.416 | KV453080.1 | 9943920  | 15-scf00327 | 15 |
| AX-158163550 | 15 | 34.416 | KV453080.1 | 9971660  | 15-scf00327 | 15 |
| AX-158163806 | 15 | 34.416 | KV453080.1 | 10332992 | 15-scf00327 | 15 |
| AX-158163534 | 15 | 34.456 | KV453080.1 | 9947448  | 15-scf00327 | 15 |
| AX-158163538 | 15 | 34.492 | KV453080.1 | 9955966  | 15-scf00327 | 15 |
| AX-158163522 | 15 | 34.525 | KV453080.1 | 9924957  | 15-scf00327 | 15 |
| AX-158163539 | 15 | 34.525 | KV453080.1 | 9957410  | 15-scf00327 | 15 |
| AX-158163543 | 15 | 34.525 | KV453080.1 | 9963521  | 15-scf00327 | 15 |
| AX-158163544 | 15 | 34.525 | KV453080.1 | 9964355  | 15-scf00327 | 15 |
| AX-158163546 | 15 | 34.525 | KV453080.1 | 9967419  | 15-scf00327 | 15 |
| AX-158163547 | 15 | 34.525 | KV453080.1 | 9968028  | 15-scf00327 | 15 |
| AX-158163553 | 15 | 34.525 | KV453080.1 | 9973144  | 15-scf00327 | 15 |
| AX-158163555 | 15 | 34.525 | KV453080.1 | 9976361  | 15-scf00327 | 15 |
| AX-158163559 | 15 | 34.525 | KV453080.1 | 9980322  | 15-scf00327 | 15 |
| AX-158163561 | 15 | 34.525 | KV453080.1 | 9983609  | 15-scf00327 | 15 |
| AX-158163563 | 15 | 34.525 | KV453080.1 | 9984601  | 15-scf00327 | 15 |
| AX-158163569 | 15 | 34.525 | KV453080.1 | 9991725  | 15-scf00327 | 15 |
| AX-158163570 | 15 | 34.525 | KV453080.1 | 9992043  | 15-scf00327 | 15 |

|              |    |        |            |          |             |    |
|--------------|----|--------|------------|----------|-------------|----|
| AX-158163574 | 15 | 34.525 | KV453080.1 | 9996359  | 15-scf00327 | 15 |
| AX-158163578 | 15 | 34.525 | KV453080.1 | 9999095  | 15-scf00327 | 15 |
| AX-158163579 | 15 | 34.525 | KV453080.1 | 9999976  | 15-scf00327 | 15 |
| AX-158413075 | 15 | 34.525 | KV453080.1 | 10001006 | 15-scf00327 | 15 |
| AX-158163582 | 15 | 34.525 | KV453080.1 | 10003737 | 15-scf00327 | 15 |
| AX-158163584 | 15 | 34.525 | KV453080.1 | 10005636 | 15-scf00327 | 15 |
| AX-158163586 | 15 | 34.525 | KV453080.1 | 10008422 | 15-scf00327 | 15 |
| AX-158163587 | 15 | 34.525 | KV453080.1 | 10010282 | 15-scf00327 | 15 |
| AX-158163588 | 15 | 34.525 | KV453080.1 | 10011538 | 15-scf00327 | 15 |
| AX-158163594 | 15 | 34.525 | KV453080.1 | 10019118 | 15-scf00327 | 15 |
| AX-158163599 | 15 | 34.525 | KV453080.1 | 10023906 | 15-scf00327 | 15 |
| AX-158163600 | 15 | 34.525 | KV453080.1 | 10024770 | 15-scf00327 | 15 |
| AX-158163601 | 15 | 34.525 | KV453080.1 | 10025187 | 15-scf00327 | 15 |
| AX-158163603 | 15 | 34.525 | KV453080.1 | 10027220 | 15-scf00327 | 15 |
| AX-157878521 | 15 | 34.525 | KV453080.1 | 10027735 | 15-scf00327 | 15 |
| AX-158163604 | 15 | 34.525 | KV453080.1 | 10028820 | 15-scf00327 | 15 |
| AX-158163606 | 15 | 34.525 | KV453080.1 | 10035143 | 15-scf00327 | 15 |
| AX-158163616 | 15 | 34.525 | KV453080.1 | 10047150 | 15-scf00327 | 15 |
| AX-158163619 | 15 | 34.525 | KV453080.1 | 10048968 | 15-scf00327 | 15 |
| AX-157698402 | 15 | 34.525 | KV453080.1 | 10056093 | 15-scf00327 | 15 |
| AX-158163629 | 15 | 34.525 | KV453080.1 | 10060526 | 15-scf00327 | 15 |
| AX-157754602 | 15 | 34.525 | KV453080.1 | 10061314 | 15-scf00327 | 15 |
| AX-158163631 | 15 | 34.525 | KV453080.1 | 10061483 | 15-scf00327 | 15 |
| AX-158163633 | 15 | 34.525 | KV453080.1 | 10063830 | 15-scf00327 | 15 |
| AX-158163634 | 15 | 34.525 | KV453080.1 | 10064304 | 15-scf00327 | 15 |
| AX-158163639 | 15 | 34.525 | KV453080.1 | 10076699 | 15-scf00327 | 15 |
| AX-157751986 | 15 | 34.525 | KV453080.1 | 10093589 | 15-scf00327 | 15 |
| AX-158163651 | 15 | 34.525 | KV453080.1 | 10103012 | 15-scf00327 | 15 |
| AX-157746452 | 15 | 34.525 | KV453080.1 | 10104116 | 15-scf00327 | 15 |
| AX-158163677 | 15 | 34.525 | KV453080.1 | 10126587 | 15-scf00327 | 15 |
| AX-157775684 | 15 | 34.525 | KV453080.1 | 10127031 | 15-scf00327 | 15 |
| AX-157834032 | 15 | 34.525 | KV453080.1 | 10172753 | 15-scf00327 | 15 |
| AX-157756761 | 15 | 34.525 | KV453080.1 | 10183467 | 15-scf00327 | 15 |
| AX-158163704 | 15 | 34.525 | KV453080.1 | 10188499 | 15-scf00327 | 15 |
| AX-158163641 | 15 | 34.635 | KV453080.1 | 10082390 | 15-scf00327 | 15 |
| AX-157834021 | 15 | 34.635 | KV453080.1 | 10090147 | 15-scf00327 | 15 |
| AX-158163646 | 15 | 34.635 | KV453080.1 | 10091016 | 15-scf00327 | 15 |
| AX-157834023 | 15 | 34.635 | KV453080.1 | 10092687 | 15-scf00327 | 15 |
| AX-158409003 | 15 | 34.744 | KV453080.1 | 9894097  | 15-scf00327 | 15 |
| AX-158163528 | 15 | 34.744 | KV453080.1 | 9934316  | 15-scf00327 | 15 |
| AX-158163532 | 15 | 34.744 | KV453080.1 | 9942975  | 15-scf00327 | 15 |
| AX-158163541 | 15 | 34.744 | KV453080.1 | 9960354  | 15-scf00327 | 15 |
| AX-158163549 | 15 | 34.744 | KV453080.1 | 9971157  | 15-scf00327 | 15 |
| AX-157757112 | 15 | 34.744 | KV453080.1 | 9984530  | 15-scf00327 | 15 |
| AX-157758331 | 15 | 34.744 | KV453080.1 | 9986498  | 15-scf00327 | 15 |
| AX-158385729 | 15 | 34.744 | KV453080.1 | 10038867 | 15-scf00327 | 15 |
| AX-158163617 | 15 | 34.744 | KV453080.1 | 10047941 | 15-scf00327 | 15 |
| AX-158163622 | 15 | 34.744 | KV453080.1 | 10050615 | 15-scf00327 | 15 |
| AX-158163630 | 15 | 34.744 | KV453080.1 | 10060787 | 15-scf00327 | 15 |
| AX-157834020 | 15 | 34.744 | KV453080.1 | 10081137 | 15-scf00327 | 15 |
| AX-158163640 | 15 | 34.744 | KV453080.1 | 10081504 | 15-scf00327 | 15 |

|              |    |        |            |          |             |    |
|--------------|----|--------|------------|----------|-------------|----|
| AX-158413079 | 15 | 34.744 | KV453080.1 | 10088362 | 15-scf00327 | 15 |
| AX-157746589 | 15 | 34.744 | KV453080.1 | 10102215 | 15-scf00327 | 15 |
| AX-158163652 | 15 | 34.744 | KV453080.1 | 10103871 | 15-scf00327 | 15 |
| AX-157834025 | 15 | 34.744 | KV453080.1 | 10106182 | 15-scf00327 | 15 |
| AX-158163654 | 15 | 34.744 | KV453080.1 | 10108686 | 15-scf00327 | 15 |
| AX-157834027 | 15 | 34.744 | KV453080.1 | 10109226 | 15-scf00327 | 15 |
| AX-158163656 | 15 | 34.744 | KV453080.1 | 10111458 | 15-scf00327 | 15 |
| AX-158163661 | 15 | 34.744 | KV453080.1 | 10116633 | 15-scf00327 | 15 |
| AX-158163663 | 15 | 34.744 | KV453080.1 | 10117961 | 15-scf00327 | 15 |
| AX-158163669 | 15 | 34.744 | KV453080.1 | 10122137 | 15-scf00327 | 15 |
| AX-158163670 | 15 | 34.744 | KV453080.1 | 10122666 | 15-scf00327 | 15 |
| AX-158163671 | 15 | 34.744 | KV453080.1 | 10123068 | 15-scf00327 | 15 |
| AX-158163672 | 15 | 34.744 | KV453080.1 | 10123778 | 15-scf00327 | 15 |
| AX-158163676 | 15 | 34.744 | KV453080.1 | 10126164 | 15-scf00327 | 15 |
| AX-158163678 | 15 | 34.744 | KV453080.1 | 10128451 | 15-scf00327 | 15 |
| AX-158163680 | 15 | 34.744 | KV453080.1 | 10130035 | 15-scf00327 | 15 |
| AX-158409006 | 15 | 34.744 | KV453080.1 | 10131222 | 15-scf00327 | 15 |
| AX-158163684 | 15 | 34.744 | KV453080.1 | 10133784 | 15-scf00327 | 15 |
| AX-158163693 | 15 | 34.744 | KV453080.1 | 10143332 | 15-scf00327 | 15 |
| AX-158163695 | 15 | 34.744 | KV453080.1 | 10147715 | 15-scf00327 | 15 |
| AX-158163700 | 15 | 34.744 | KV453080.1 | 10173695 | 15-scf00327 | 15 |
| AX-157878524 | 15 | 34.744 | KV453080.1 | 10185954 | 15-scf00327 | 15 |
| AX-158163703 | 15 | 34.744 | KV453080.1 | 10187306 | 15-scf00327 | 15 |
| AX-158163706 | 15 | 34.744 | KV453080.1 | 10190701 | 15-scf00327 | 15 |
| AX-157754299 | 15 | 34.744 | KV453080.1 | 10202258 | 15-scf00327 | 15 |
| AX-158163711 | 15 | 34.744 | KV453080.1 | 10207586 | 15-scf00327 | 15 |
| AX-158163714 | 15 | 34.744 | KV453080.1 | 10211949 | 15-scf00327 | 15 |
| AX-158163756 | 15 | 34.744 | KV453080.1 | 10284639 | 15-scf00327 | 15 |
| AX-158164032 | 15 | 34.744 | KV453080.1 | 10752162 | 15-scf00327 | 15 |
| AX-157747954 | 15 | 34.853 | KV453080.1 | 10212911 | 15-scf00327 | 15 |
| AX-157773585 | 15 | 34.898 | KV453080.1 | 10154982 | 15-scf00327 | 15 |
| AX-157834030 | 15 | 34.898 | KV453080.1 | 10155042 | 15-scf00327 | 15 |
| AX-158163697 | 15 | 34.898 | KV453080.1 | 10155307 | 15-scf00327 | 15 |
| AX-157834040 | 15 | 34.898 | KV453080.1 | 10217659 | 15-scf00327 | 15 |
| AX-158163725 | 15 | 34.962 | KV453080.1 | 10227060 | 15-scf00327 | 15 |
| AX-157834042 | 15 | 34.987 | KV453080.1 | 10236622 | 15-scf00327 | 15 |
| AX-158163729 | 15 | 34.987 | KV453080.1 | 10239292 | 15-scf00327 | 15 |
| AX-157834043 | 15 | 35.014 | KV453080.1 | 10241540 | 15-scf00327 | 15 |
| AX-158163731 | 15 | 35.044 | KV453080.1 | 10242333 | 15-scf00327 | 15 |
| AX-158393389 | 15 | 35.044 | KV453080.1 | 10554692 | 15-scf00327 | 15 |
| AX-158163974 | 15 | 35.044 | KV453080.1 | 10632971 | 15-scf00327 | 15 |
| AX-158163977 | 15 | 35.044 | KV453080.1 | 10637459 | 15-scf00327 | 15 |
| AX-158163482 | 15 | 35.072 | KV453080.1 | 9860927  | 15-scf00327 | 15 |
| AX-158163487 | 15 | 35.072 | KV453080.1 | 9868347  | 15-scf00327 | 15 |
| AX-158163517 | 15 | 35.072 | KV453080.1 | 9918523  | 15-scf00327 | 15 |
| AX-158163557 | 15 | 35.072 | KV453080.1 | 9977732  | 15-scf00327 | 15 |
| AX-158163705 | 15 | 35.072 | KV453080.1 | 10188938 | 15-scf00327 | 15 |
| AX-158413082 | 15 | 35.072 | KV453080.1 | 10201271 | 15-scf00327 | 15 |
| AX-158163723 | 15 | 35.072 | KV453080.1 | 10226627 | 15-scf00327 | 15 |
| AX-158163733 | 15 | 35.072 | KV453080.1 | 10248126 | 15-scf00327 | 15 |
| AX-158409007 | 15 | 35.072 | KV453080.1 | 10250256 | 15-scf00327 | 15 |

|              |    |        |            |          |             |    |
|--------------|----|--------|------------|----------|-------------|----|
| AX-158163737 | 15 | 35.072 | KV453080.1 | 10253382 | 15-scf00327 | 15 |
| AX-158163738 | 15 | 35.072 | KV453080.1 | 10254045 | 15-scf00327 | 15 |
| AX-158163764 | 15 | 35.072 | KV453080.1 | 10292262 | 15-scf00327 | 15 |
| AX-158163658 | 15 | 35.29  | KV453080.1 | 10113042 | 15-scf00327 | 15 |
| AX-158163662 | 15 | 35.29  | KV453080.1 | 10117329 | 15-scf00327 | 15 |
| AX-158163739 | 15 | 35.29  | KV453080.1 | 10258021 | 15-scf00327 | 15 |
| AX-157752434 | 15 | 35.29  | KV453080.1 | 10258799 | 15-scf00327 | 15 |
| AX-158163740 | 15 | 35.29  | KV453080.1 | 10259390 | 15-scf00327 | 15 |
| AX-158163741 | 15 | 35.29  | KV453080.1 | 10259626 | 15-scf00327 | 15 |
| AX-158163746 | 15 | 35.29  | KV453080.1 | 10269796 | 15-scf00327 | 15 |
| AX-158163747 | 15 | 35.29  | KV453080.1 | 10272135 | 15-scf00327 | 15 |
| AX-158163749 | 15 | 35.29  | KV453080.1 | 10273829 | 15-scf00327 | 15 |
| AX-158380490 | 15 | 35.29  | KV453080.1 | 10274253 | 15-scf00327 | 15 |
| AX-157747032 | 15 | 35.29  | KV453080.1 | 10277124 | 15-scf00327 | 15 |
| AX-158163750 | 15 | 35.29  | KV453080.1 | 10278967 | 15-scf00327 | 15 |
| AX-158163751 | 15 | 35.29  | KV453080.1 | 10279619 | 15-scf00327 | 15 |
| AX-158163753 | 15 | 35.29  | KV453080.1 | 10282108 | 15-scf00327 | 15 |
| AX-158163759 | 15 | 35.29  | KV453080.1 | 10288275 | 15-scf00327 | 15 |
| AX-158163760 | 15 | 35.29  | KV453080.1 | 10288429 | 15-scf00327 | 15 |
| AX-158163763 | 15 | 35.29  | KV453080.1 | 10291952 | 15-scf00327 | 15 |
| AX-157713536 | 15 | 35.29  | KV453080.1 | 10305348 | 15-scf00327 | 15 |
| AX-158163775 | 15 | 35.29  | KV453080.1 | 10306121 | 15-scf00327 | 15 |
| AX-158163776 | 15 | 35.29  | KV453080.1 | 10306715 | 15-scf00327 | 15 |
| AX-158163777 | 15 | 35.29  | KV453080.1 | 10309271 | 15-scf00327 | 15 |
| AX-158163778 | 15 | 35.29  | KV453080.1 | 10310316 | 15-scf00327 | 15 |
| AX-158163779 | 15 | 35.29  | KV453080.1 | 10311314 | 15-scf00327 | 15 |
| AX-158163781 | 15 | 35.29  | KV453080.1 | 10313192 | 15-scf00327 | 15 |
| AX-158163782 | 15 | 35.29  | KV453080.1 | 10314359 | 15-scf00327 | 15 |
| AX-158163784 | 15 | 35.29  | KV453080.1 | 10316108 | 15-scf00327 | 15 |
| AX-158163787 | 15 | 35.29  | KV453080.1 | 10317578 | 15-scf00327 | 15 |
| AX-157755927 | 15 | 35.29  | KV453080.1 | 10318749 | 15-scf00327 | 15 |
| AX-157834049 | 15 | 35.29  | KV453080.1 | 10321938 | 15-scf00327 | 15 |
| AX-158163791 | 15 | 35.29  | KV453080.1 | 10322277 | 15-scf00327 | 15 |
| AX-158163792 | 15 | 35.29  | KV453080.1 | 10322504 | 15-scf00327 | 15 |
| AX-158163793 | 15 | 35.29  | KV453080.1 | 10322749 | 15-scf00327 | 15 |
| AX-158163796 | 15 | 35.29  | KV453080.1 | 10325301 | 15-scf00327 | 15 |
| AX-158163797 | 15 | 35.29  | KV453080.1 | 10326338 | 15-scf00327 | 15 |
| AX-158163799 | 15 | 35.29  | KV453080.1 | 10327718 | 15-scf00327 | 15 |
| AX-158163801 | 15 | 35.29  | KV453080.1 | 10329126 | 15-scf00327 | 15 |
| AX-158163804 | 15 | 35.29  | KV453080.1 | 10331373 | 15-scf00327 | 15 |
| AX-158163805 | 15 | 35.29  | KV453080.1 | 10332496 | 15-scf00327 | 15 |
| AX-158163807 | 15 | 35.29  | KV453080.1 | 10334504 | 15-scf00327 | 15 |
| AX-158163809 | 15 | 35.29  | KV453080.1 | 10335769 | 15-scf00327 | 15 |
| AX-158163853 | 15 | 35.29  | KV453080.1 | 10402199 | 15-scf00327 | 15 |
| AX-158163551 | 15 | 35.508 | KV453080.1 | 9972297  | 15-scf00327 | 15 |
| AX-158163811 | 15 | 35.508 | KV453080.1 | 10340305 | 15-scf00327 | 15 |
| AX-158163812 | 15 | 35.508 | KV453080.1 | 10341207 | 15-scf00327 | 15 |
| AX-157748240 | 15 | 35.508 | KV453080.1 | 10343607 | 15-scf00327 | 15 |
| AX-157715910 | 15 | 35.508 | KV453080.1 | 10344159 | 15-scf00327 | 15 |
| AX-158163815 | 15 | 35.508 | KV453080.1 | 10349016 | 15-scf00327 | 15 |
| AX-158163817 | 15 | 35.508 | KV453080.1 | 10352975 | 15-scf00327 | 15 |

|              |    |        |            |          |             |    |
|--------------|----|--------|------------|----------|-------------|----|
| AX-158163822 | 15 | 35.508 | KV453080.1 | 10358777 | 15-scf00327 | 15 |
| AX-157834055 | 15 | 35.508 | KV453080.1 | 10364055 | 15-scf00327 | 15 |
| AX-158163827 | 15 | 35.508 | KV453080.1 | 10371920 | 15-scf00327 | 15 |
| AX-158163833 | 15 | 35.508 | KV453080.1 | 10374556 | 15-scf00327 | 15 |
| AX-158163850 | 15 | 35.508 | KV453080.1 | 10394099 | 15-scf00327 | 15 |
| AX-157711252 | 15 | 35.508 | KV453080.1 | 10395590 | 15-scf00327 | 15 |
| AX-158393387 | 15 | 35.508 | KV453080.1 | 10401874 | 15-scf00327 | 15 |
| AX-158163856 | 15 | 35.508 | KV453080.1 | 10407304 | 15-scf00327 | 15 |
| AX-158163858 | 15 | 35.508 | KV453080.1 | 10410185 | 15-scf00327 | 15 |
| AX-158163866 | 15 | 35.508 | KV453080.1 | 10421542 | 15-scf00327 | 15 |
| AX-158163895 | 15 | 35.508 | KV453080.1 | 10461887 | 15-scf00327 | 15 |
| AX-157703924 | 15 | 35.508 | KV453080.1 | 10462153 | 15-scf00327 | 15 |
| AX-157866581 | 15 | 35.508 | KV453080.1 | 10463863 | 15-scf00327 | 15 |
| AX-158163896 | 15 | 35.508 | KV453080.1 | 10464128 | 15-scf00327 | 15 |
| AX-158163916 | 15 | 35.508 | KV453080.1 | 10493620 | 15-scf00327 | 15 |
| AX-158164055 | 15 | 35.508 | KV453080.1 | 10790850 | 15-scf00327 | 15 |
| AX-157834077 | 15 | 35.508 | KV453080.1 | 10815029 | 15-scf00327 | 15 |
| AX-158163862 | 15 | 35.544 | KV453080.1 | 10413798 | 15-scf00327 | 15 |
| AX-157834058 | 15 | 35.573 | KV453080.1 | 10415923 | 15-scf00327 | 15 |
| AX-158163536 | 15 | 35.618 | KV453080.1 | 9949875  | 15-scf00327 | 15 |
| AX-157746887 | 15 | 35.618 | KV453080.1 | 10344722 | 15-scf00327 | 15 |
| AX-158163816 | 15 | 35.618 | KV453080.1 | 10349592 | 15-scf00327 | 15 |
| AX-158163825 | 15 | 35.618 | KV453080.1 | 10369126 | 15-scf00327 | 15 |
| AX-158163828 | 15 | 35.618 | KV453080.1 | 10372214 | 15-scf00327 | 15 |
| AX-157716573 | 15 | 35.618 | KV453080.1 | 10373402 | 15-scf00327 | 15 |
| AX-158163832 | 15 | 35.618 | KV453080.1 | 10373451 | 15-scf00327 | 15 |
| AX-157834056 | 15 | 35.618 | KV453080.1 | 10377789 | 15-scf00327 | 15 |
| AX-156541658 | 15 | 35.618 | KV453080.1 | 10405974 | 15-scf00327 | 15 |
| AX-158163855 | 15 | 35.618 | KV453080.1 | 10406605 | 15-scf00327 | 15 |
| AX-158163865 | 15 | 35.618 | KV453080.1 | 10419033 | 15-scf00327 | 15 |
| AX-157772859 | 15 | 35.618 | KV453080.1 | 10419535 | 15-scf00327 | 15 |
| AX-158163867 | 15 | 35.618 | KV453080.1 | 10422879 | 15-scf00327 | 15 |
| AX-158163868 | 15 | 35.618 | KV453080.1 | 10422994 | 15-scf00327 | 15 |
| AX-158163870 | 15 | 35.618 | KV453080.1 | 10425678 | 15-scf00327 | 15 |
| AX-158163871 | 15 | 35.618 | KV453080.1 | 10427073 | 15-scf00327 | 15 |
| AX-158163872 | 15 | 35.618 | KV453080.1 | 10427320 | 15-scf00327 | 15 |
| AX-157719469 | 15 | 35.618 | KV453080.1 | 10427967 | 15-scf00327 | 15 |
| AX-158163874 | 15 | 35.618 | KV453080.1 | 10428197 | 15-scf00327 | 15 |
| AX-158163876 | 15 | 35.618 | KV453080.1 | 10432158 | 15-scf00327 | 15 |
| AX-158163877 | 15 | 35.618 | KV453080.1 | 10433828 | 15-scf00327 | 15 |
| AX-158163878 | 15 | 35.618 | KV453080.1 | 10435768 | 15-scf00327 | 15 |
| AX-157757151 | 15 | 35.618 | KV453080.1 | 10449471 | 15-scf00327 | 15 |
| AX-157744888 | 15 | 35.618 | KV453080.1 | 10449898 | 15-scf00327 | 15 |
| AX-158163892 | 15 | 35.618 | KV453080.1 | 10456492 | 15-scf00327 | 15 |
| AX-158163894 | 15 | 35.618 | KV453080.1 | 10461546 | 15-scf00327 | 15 |
| AX-158163901 | 15 | 35.618 | KV453080.1 | 10470685 | 15-scf00327 | 15 |
| AX-157744892 | 15 | 35.618 | KV453080.1 | 10481837 | 15-scf00327 | 15 |
| AX-158163920 | 15 | 35.618 | KV453080.1 | 10504636 | 15-scf00327 | 15 |
| AX-157752231 | 15 | 35.618 | KV453080.1 | 10518733 | 15-scf00327 | 15 |
| AX-157878534 | 15 | 35.618 | KV453080.1 | 10521425 | 15-scf00327 | 15 |
| AX-157719749 | 15 | 35.618 | KV453080.1 | 10613162 | 15-scf00327 | 15 |

|              |    |        |            |          |             |    |
|--------------|----|--------|------------|----------|-------------|----|
| AX-157886653 | 15 | 35.618 | KV453080.1 | 10615297 | 15-scf00327 | 15 |
| AX-157886654 | 15 | 35.618 | KV453080.1 | 10617955 | 15-scf00327 | 15 |
| AX-158163923 | 15 | 35.65  | KV453080.1 | 10528323 | 15-scf00327 | 15 |
| AX-158163935 | 15 | 35.684 | KV453080.1 | 10547782 | 15-scf00327 | 15 |
| AX-158163880 | 15 | 35.727 | KV453080.1 | 10439647 | 15-scf00327 | 15 |
| AX-158163915 | 15 | 35.727 | KV453080.1 | 10493060 | 15-scf00327 | 15 |
| AX-157749605 | 15 | 35.727 | KV453080.1 | 10501122 | 15-scf00327 | 15 |
| AX-158163932 | 15 | 35.727 | KV453080.1 | 10541497 | 15-scf00327 | 15 |
| AX-158163934 | 15 | 35.727 | KV453080.1 | 10546661 | 15-scf00327 | 15 |
| AX-158163937 | 15 | 35.727 | KV453080.1 | 10550478 | 15-scf00327 | 15 |
| AX-158163947 | 15 | 35.727 | KV453080.1 | 10584738 | 15-scf00327 | 15 |
| AX-158163949 | 15 | 35.727 | KV453080.1 | 10589277 | 15-scf00327 | 15 |
| AX-158163950 | 15 | 35.727 | KV453080.1 | 10592221 | 15-scf00327 | 15 |
| AX-157750088 | 15 | 35.727 | KV453080.1 | 10595011 | 15-scf00327 | 15 |
| AX-158163952 | 15 | 35.727 | KV453080.1 | 10598151 | 15-scf00327 | 15 |
| AX-158163953 | 15 | 35.727 | KV453080.1 | 10598758 | 15-scf00327 | 15 |
| AX-158163955 | 15 | 35.727 | KV453080.1 | 10601071 | 15-scf00327 | 15 |
| AX-158163956 | 15 | 35.727 | KV453080.1 | 10602051 | 15-scf00327 | 15 |
| AX-158163958 | 15 | 35.727 | KV453080.1 | 10605196 | 15-scf00327 | 15 |
| AX-158163963 | 15 | 35.727 | KV453080.1 | 10616675 | 15-scf00327 | 15 |
| AX-158163965 | 15 | 35.727 | KV453080.1 | 10619241 | 15-scf00327 | 15 |
| AX-158393391 | 15 | 35.727 | KV453080.1 | 10621953 | 15-scf00327 | 15 |
| AX-158163967 | 15 | 35.727 | KV453080.1 | 10622063 | 15-scf00327 | 15 |
| AX-157858388 | 15 | 35.727 | KV453080.1 | 10622384 | 15-scf00327 | 15 |
| AX-158163968 | 15 | 35.727 | KV453080.1 | 10622548 | 15-scf00327 | 15 |
| AX-158163999 | 15 | 35.727 | KV453080.1 | 10675943 | 15-scf00327 | 15 |
| AX-158164009 | 15 | 35.727 | KV453080.1 | 10693562 | 15-scf00327 | 15 |
| AX-158164155 | 15 | 35.727 | KV453080.1 | 10967652 | 15-scf00327 | 15 |
| AX-158393395 | 15 | 35.727 | KV453080.1 | 10981523 | 15-scf00327 | 15 |
| AX-158163973 | 15 | 35.729 | KV453080.1 | 10632081 | 15-scf00327 | 15 |
| AX-157858389 | 15 | 35.729 | KV453080.1 | 10632517 | 15-scf00327 | 15 |
| AX-158163979 | 15 | 35.729 | KV453080.1 | 10642475 | 15-scf00327 | 15 |
| AX-158163970 | 15 | 35.979 | KV453080.1 | 10626852 | 15-scf00327 | 15 |
| AX-158163984 | 15 | 35.979 | KV453080.1 | 10649887 | 15-scf00327 | 15 |
| AX-158163636 | 15 | 36.056 | KV453080.1 | 10067591 | 15-scf00327 | 15 |
| AX-158163649 | 15 | 36.056 | KV453080.1 | 10097026 | 15-scf00327 | 15 |
| AX-157834053 | 15 | 36.056 | KV453080.1 | 10344258 | 15-scf00327 | 15 |
| AX-158163824 | 15 | 36.056 | KV453080.1 | 10361633 | 15-scf00327 | 15 |
| AX-158163860 | 15 | 36.056 | KV453080.1 | 10412182 | 15-scf00327 | 15 |
| AX-158163881 | 15 | 36.056 | KV453080.1 | 10444542 | 15-scf00327 | 15 |
| AX-157748749 | 15 | 36.056 | KV453080.1 | 10452977 | 15-scf00327 | 15 |
| AX-158163889 | 15 | 36.056 | KV453080.1 | 10454905 | 15-scf00327 | 15 |
| AX-158163891 | 15 | 36.056 | KV453080.1 | 10455662 | 15-scf00327 | 15 |
| AX-157772584 | 15 | 36.056 | KV453080.1 | 10473302 | 15-scf00327 | 15 |
| AX-158163907 | 15 | 36.056 | KV453080.1 | 10478092 | 15-scf00327 | 15 |
| AX-158163918 | 15 | 36.056 | KV453080.1 | 10502476 | 15-scf00327 | 15 |
| AX-157871914 | 15 | 36.056 | KV453080.1 | 10516605 | 15-scf00327 | 15 |
| AX-158163927 | 15 | 36.056 | KV453080.1 | 10534257 | 15-scf00327 | 15 |
| AX-157834067 | 15 | 36.056 | KV453080.1 | 10554891 | 15-scf00327 | 15 |
| AX-158163938 | 15 | 36.056 | KV453080.1 | 10555401 | 15-scf00327 | 15 |
| AX-157878535 | 15 | 36.056 | KV453080.1 | 10563827 | 15-scf00327 | 15 |

|              |    |        |            |          |             |    |
|--------------|----|--------|------------|----------|-------------|----|
| AX-158163946 | 15 | 36.056 | KV453080.1 | 10583311 | 15-scf00327 | 15 |
| AX-157727379 | 15 | 36.056 | KV453080.1 | 10595391 | 15-scf00327 | 15 |
| AX-157698655 | 15 | 36.056 | KV453080.1 | 10655485 | 15-scf00327 | 15 |
| AX-158163989 | 15 | 36.056 | KV453080.1 | 10656059 | 15-scf00327 | 15 |
| AX-157834068 | 15 | 36.056 | KV453080.1 | 10656843 | 15-scf00327 | 15 |
| AX-158163990 | 15 | 36.056 | KV453080.1 | 10660427 | 15-scf00327 | 15 |
| AX-158163992 | 15 | 36.056 | KV453080.1 | 10662930 | 15-scf00327 | 15 |
| AX-158163993 | 15 | 36.056 | KV453080.1 | 10663374 | 15-scf00327 | 15 |
| AX-158163994 | 15 | 36.056 | KV453080.1 | 10664007 | 15-scf00327 | 15 |
| AX-158163995 | 15 | 36.056 | KV453080.1 | 10668992 | 15-scf00327 | 15 |
| AX-158164001 | 15 | 36.056 | KV453080.1 | 10681861 | 15-scf00327 | 15 |
| AX-158164002 | 15 | 36.056 | KV453080.1 | 10685337 | 15-scf00327 | 15 |
| AX-158164003 | 15 | 36.056 | KV453080.1 | 10686442 | 15-scf00327 | 15 |
| AX-158164004 | 15 | 36.056 | KV453080.1 | 10687968 | 15-scf00327 | 15 |
| AX-158164041 | 15 | 36.056 | KV453080.1 | 10771231 | 15-scf00327 | 15 |
| AX-157834076 | 15 | 36.056 | KV453080.1 | 10810623 | 15-scf00327 | 15 |
| AX-158164079 | 15 | 36.056 | KV453080.1 | 10831493 | 15-scf00327 | 15 |
| AX-158164083 | 15 | 36.056 | KV453080.1 | 10841498 | 15-scf00327 | 15 |
| AX-158163888 | 15 | 36.164 | KV453080.1 | 10454680 | 15-scf00327 | 15 |
| AX-158163890 | 15 | 36.164 | KV453080.1 | 10455343 | 15-scf00327 | 15 |
| AX-158413086 | 15 | 36.164 | KV453080.1 | 10468121 | 15-scf00327 | 15 |
| AX-158163910 | 15 | 36.164 | KV453080.1 | 10479804 | 15-scf00327 | 15 |
| AX-158163914 | 15 | 36.164 | KV453080.1 | 10491533 | 15-scf00327 | 15 |
| AX-158163929 | 15 | 36.164 | KV453080.1 | 10537181 | 15-scf00327 | 15 |
| AX-158163931 | 15 | 36.164 | KV453080.1 | 10539137 | 15-scf00327 | 15 |
| AX-158163996 | 15 | 36.164 | KV453080.1 | 10670168 | 15-scf00327 | 15 |
| AX-158164007 | 15 | 36.164 | KV453080.1 | 10690298 | 15-scf00327 | 15 |
| AX-158164012 | 15 | 36.164 | KV453080.1 | 10709257 | 15-scf00327 | 15 |
| AX-158164014 | 15 | 36.164 | KV453080.1 | 10710509 | 15-scf00327 | 15 |
| AX-158164015 | 15 | 36.164 | KV453080.1 | 10713419 | 15-scf00327 | 15 |
| AX-158164016 | 15 | 36.164 | KV453080.1 | 10714749 | 15-scf00327 | 15 |
| AX-158164017 | 15 | 36.164 | KV453080.1 | 10716454 | 15-scf00327 | 15 |
| AX-158164018 | 15 | 36.164 | KV453080.1 | 10718347 | 15-scf00327 | 15 |
| AX-158164033 | 15 | 36.164 | KV453080.1 | 10755089 | 15-scf00327 | 15 |
| AX-158164021 | 15 | 36.382 | KV453080.1 | 10723745 | 15-scf00327 | 15 |
| AX-158413091 | 15 | 36.382 | KV453080.1 | 10730363 | 15-scf00327 | 15 |
| AX-158164023 | 15 | 36.382 | KV453080.1 | 10732937 | 15-scf00327 | 15 |
| AX-158393392 | 15 | 36.492 | KV453080.1 | 10740589 | 15-scf00327 | 15 |
| AX-158164026 | 15 | 36.492 | KV453080.1 | 10742561 | 15-scf00327 | 15 |
| AX-158164028 | 15 | 36.492 | KV453080.1 | 10744672 | 15-scf00327 | 15 |
| AX-158164034 | 15 | 36.533 | KV453080.1 | 10756453 | 15-scf00327 | 15 |
| AX-158164035 | 15 | 36.577 | KV453080.1 | 10757046 | 15-scf00327 | 15 |
| AX-158164037 | 15 | 36.601 | KV453080.1 | 10763036 | 15-scf00327 | 15 |
| AX-158164040 | 15 | 36.622 | KV453080.1 | 10769984 | 15-scf00327 | 15 |
| AX-158164049 | 15 | 36.819 | KV453080.1 | 10785889 | 15-scf00327 | 15 |
| AX-158164050 | 15 | 36.819 | KV453080.1 | 10786084 | 15-scf00327 | 15 |
| AX-157741424 | 15 | 36.819 | KV453080.1 | 10786730 | 15-scf00327 | 15 |
| AX-158164051 | 15 | 36.819 | KV453080.1 | 10787316 | 15-scf00327 | 15 |
| AX-158164052 | 15 | 36.819 | KV453080.1 | 10788136 | 15-scf00327 | 15 |
| AX-158164053 | 15 | 36.819 | KV453080.1 | 10788725 | 15-scf00327 | 15 |
| AX-158164056 | 15 | 36.819 | KV453080.1 | 10795240 | 15-scf00327 | 15 |

|              |    |        |            |          |             |    |
|--------------|----|--------|------------|----------|-------------|----|
| AX-158164058 | 15 | 36.819 | KV453080.1 | 10800003 | 15-scf00327 | 15 |
| AX-157878539 | 15 | 36.819 | KV453080.1 | 10802059 | 15-scf00327 | 15 |
| AX-158164060 | 15 | 36.819 | KV453080.1 | 10802487 | 15-scf00327 | 15 |
| AX-158164062 | 15 | 36.819 | KV453080.1 | 10804691 | 15-scf00327 | 15 |
| AX-158164066 | 15 | 36.819 | KV453080.1 | 10807281 | 15-scf00327 | 15 |
| AX-157834080 | 15 | 36.819 | KV453080.1 | 10827810 | 15-scf00327 | 15 |
| AX-157834085 | 15 | 36.819 | KV453080.1 | 10877205 | 15-scf00327 | 15 |
| AX-158164080 | 15 | 36.928 | KV453080.1 | 10835016 | 15-scf00327 | 15 |
| AX-158164085 | 15 | 36.928 | KV453080.1 | 10843605 | 15-scf00327 | 15 |
| AX-158164088 | 15 | 36.928 | KV453080.1 | 10844986 | 15-scf00327 | 15 |
| AX-158164090 | 15 | 36.929 | KV453080.1 | 10846871 | 15-scf00327 | 15 |
| AX-158164097 | 15 | 37.074 | KV453080.1 | 10858660 | 15-scf00327 | 15 |
| AX-158163830 | 15 | 37.2   | KV453080.1 | 10372860 | 15-scf00327 | 15 |
| AX-157834084 | 15 | 37.2   | KV453080.1 | 10865346 | 15-scf00327 | 15 |
| AX-158164105 | 15 | 37.2   | KV453080.1 | 10872117 | 15-scf00327 | 15 |
| AX-158164109 | 15 | 37.2   | KV453080.1 | 10879899 | 15-scf00327 | 15 |
| AX-157834086 | 15 | 37.2   | KV453080.1 | 10881305 | 15-scf00327 | 15 |
| AX-157720850 | 15 | 37.2   | KV453080.1 | 10915101 | 15-scf00327 | 15 |
| AX-158164231 | 15 | 37.2   | KV453080.1 | 11080669 | 15-scf00327 | 15 |
| AX-158164250 | 15 | 37.2   | KV453080.1 | 11103467 | 15-scf00327 | 15 |
| AX-158164251 | 15 | 37.2   | KV453080.1 | 11104229 | 15-scf00327 | 15 |
| AX-158164252 | 15 | 37.2   | KV453080.1 | 11107806 | 15-scf00327 | 15 |
| AX-157723982 | 15 | 37.2   | KV453080.1 | 11130942 | 15-scf00327 | 15 |
| AX-158164117 | 15 | 37.292 | KV453080.1 | 10889605 | 15-scf00327 | 15 |
| AX-157834087 | 15 | 37.292 | KV453080.1 | 10890108 | 15-scf00327 | 15 |
| AX-158163515 | 15 | 37.431 | KV453080.1 | 9916467  | 15-scf00327 | 15 |
| AX-158164123 | 15 | 37.431 | KV453080.1 | 10899187 | 15-scf00327 | 15 |
| AX-158163998 | 15 | 37.475 | KV453080.1 | 10674480 | 15-scf00327 | 15 |
| AX-158164112 | 15 | 37.475 | KV453080.1 | 10885953 | 15-scf00327 | 15 |
| AX-158164114 | 15 | 37.475 | KV453080.1 | 10887217 | 15-scf00327 | 15 |
| AX-157834090 | 15 | 37.475 | KV453080.1 | 10913245 | 15-scf00327 | 15 |
| AX-157714176 | 15 | 37.475 | KV453080.1 | 10915514 | 15-scf00327 | 15 |
| AX-158164129 | 15 | 37.475 | KV453080.1 | 10921072 | 15-scf00327 | 15 |
| AX-158164132 | 15 | 37.475 | KV453080.1 | 10924790 | 15-scf00327 | 15 |
| AX-157834093 | 15 | 37.475 | KV453080.1 | 10939729 | 15-scf00327 | 15 |
| AX-158164145 | 15 | 37.475 | KV453080.1 | 10943267 | 15-scf00327 | 15 |
| AX-157717842 | 15 | 37.475 | KV453080.1 | 10950287 | 15-scf00327 | 15 |
| AX-158164228 | 15 | 37.475 | KV453080.1 | 11076279 | 15-scf00327 | 15 |
| AX-158164152 | 15 | 37.561 | KV453080.1 | 10962436 | 15-scf00327 | 15 |
| AX-157834091 | 15 | 37.656 | KV453080.1 | 10917486 | 15-scf00327 | 15 |
| AX-158164154 | 15 | 37.656 | KV453080.1 | 10966774 | 15-scf00327 | 15 |
| AX-158164156 | 15 | 37.656 | KV453080.1 | 10969399 | 15-scf00327 | 15 |
| AX-158164160 | 15 | 37.749 | KV453080.1 | 10979339 | 15-scf00327 | 15 |
| AX-158164166 | 15 | 37.749 | KV453080.1 | 10983332 | 15-scf00327 | 15 |
| AX-158164167 | 15 | 37.749 | KV453080.1 | 10984713 | 15-scf00327 | 15 |
| AX-158164168 | 15 | 37.749 | KV453080.1 | 10985451 | 15-scf00327 | 15 |
| AX-158164214 | 15 | 37.749 | KV453080.1 | 11056158 | 15-scf00327 | 15 |
| AX-158164221 | 15 | 37.749 | KV453080.1 | 11064334 | 15-scf00327 | 15 |
| AX-158164180 | 15 | 37.887 | KV453080.1 | 11004314 | 15-scf00327 | 15 |
| AX-158164192 | 15 | 38.015 | KV453080.1 | 11017273 | 15-scf00327 | 15 |
| AX-158164206 | 15 | 38.015 | KV453080.1 | 11040864 | 15-scf00327 | 15 |



|              |    |        |            |          |             |    |
|--------------|----|--------|------------|----------|-------------|----|
| AX-158164151 | 15 | 38.019 | KV453080.1 | 10961833 | 15-scf00327 | 15 |
| AX-158164158 | 15 | 38.019 | KV453080.1 | 10973527 | 15-scf00327 | 15 |
| AX-158164159 | 15 | 38.019 | KV453080.1 | 10975254 | 15-scf00327 | 15 |
| AX-158164194 | 15 | 38.019 | KV453080.1 | 11022902 | 15-scf00327 | 15 |
| AX-158164199 | 15 | 38.019 | KV453080.1 | 11035349 | 15-scf00327 | 15 |
| AX-158164202 | 15 | 38.019 | KV453080.1 | 11038701 | 15-scf00327 | 15 |
| AX-158164203 | 15 | 38.019 | KV453080.1 | 11038981 | 15-scf00327 | 15 |
| AX-157773231 | 15 | 38.019 | KV453080.1 | 11039038 | 15-scf00327 | 15 |
| AX-158164204 | 15 | 38.019 | KV453080.1 | 11039222 | 15-scf00327 | 15 |
| AX-158164245 | 15 | 38.019 | KV453080.1 | 11099763 | 15-scf00327 | 15 |
| AX-157834083 | 15 | 38.022 | KV453080.1 | 10861055 | 15-scf00327 | 15 |
| AX-158164101 | 15 | 38.022 | KV453080.1 | 10866685 | 15-scf00327 | 15 |
| AX-158164153 | 15 | 38.022 | KV453080.1 | 10962739 | 15-scf00327 | 15 |
| AX-157714078 | 15 | 38.022 | KV453080.1 | 10981953 | 15-scf00327 | 15 |
| AX-158164165 | 15 | 38.022 | KV453080.1 | 10982741 | 15-scf00327 | 15 |
| AX-158164169 | 15 | 38.022 | KV453080.1 | 10986456 | 15-scf00327 | 15 |
| AX-158164198 | 15 | 38.022 | KV453080.1 | 11034039 | 15-scf00327 | 15 |
| AX-158164208 | 15 | 38.022 | KV453080.1 | 11044292 | 15-scf00327 | 15 |
| AX-158164209 | 15 | 38.022 | KV453080.1 | 11045059 | 15-scf00327 | 15 |
| AX-158164210 | 15 | 38.022 | KV453080.1 | 11048719 | 15-scf00327 | 15 |
| AX-158164211 | 15 | 38.022 | KV453080.1 | 11050749 | 15-scf00327 | 15 |
| AX-158164212 | 15 | 38.022 | KV453080.1 | 11052122 | 15-scf00327 | 15 |
| AX-158164213 | 15 | 38.022 | KV453080.1 | 11053537 | 15-scf00327 | 15 |
| AX-158164224 | 15 | 38.022 | KV453080.1 | 11069272 | 15-scf00327 | 15 |
| AX-158164229 | 15 | 38.022 | KV453080.1 | 11076766 | 15-scf00327 | 15 |
| AX-157834100 | 15 | 38.022 | KV453080.1 | 11084767 | 15-scf00327 | 15 |
| AX-158164234 | 15 | 38.022 | KV453080.1 | 11085833 | 15-scf00327 | 15 |
| AX-158164239 | 15 | 38.022 | KV453080.1 | 11091336 | 15-scf00327 | 15 |
| AX-158164247 | 15 | 38.022 | KV453080.1 | 11101435 | 15-scf00327 | 15 |
| AX-158164249 | 15 | 38.022 | KV453080.1 | 11102383 | 15-scf00327 | 15 |
| AX-157718084 | 15 | 38.022 | KV453080.1 | 11106194 | 15-scf00327 | 15 |
| AX-157717217 | 15 | 38.022 | KV453080.1 | 11107205 | 15-scf00327 | 15 |
| AX-158164253 | 15 | 38.022 | KV453080.1 | 11108524 | 15-scf00327 | 15 |
| AX-158164254 | 15 | 38.022 | KV453080.1 | 11109082 | 15-scf00327 | 15 |
| AX-158164256 | 15 | 38.022 | KV453080.1 | 11115486 | 15-scf00327 | 15 |
| AX-158164271 | 15 | 38.24  | KV453080.1 | 11138022 | 15-scf00327 | 15 |
| AX-158164291 | 15 | 38.24  | KV453080.1 | 11167345 | 15-scf00327 | 15 |
| AX-158164296 | 15 | 38.24  | KV453080.1 | 11170668 | 15-scf00327 | 15 |
| AX-157748544 | 15 | 38.24  | KV453080.1 | 11172843 | 15-scf00327 | 15 |
| AX-158164309 | 15 | 38.24  | KV453080.1 | 11192104 | 15-scf00327 | 15 |
| AX-158164310 | 15 | 38.24  | KV453080.1 | 11193231 | 15-scf00327 | 15 |
| AX-158164317 | 15 | 38.24  | KV453080.1 | 11204382 | 15-scf00327 | 15 |
| AX-158164318 | 15 | 38.24  | KV453080.1 | 11205077 | 15-scf00327 | 15 |
| AX-158164322 | 15 | 38.24  | KV453080.1 | 11209545 | 15-scf00327 | 15 |
| AX-158385745 | 15 | 38.24  | KV453080.1 | 11244747 | 15-scf00327 | 15 |
| AX-158164336 | 15 | 38.32  | KV453080.1 | 11229381 | 15-scf00327 | 15 |
| AX-158164355 | 15 | 38.32  | KV453080.1 | 11255852 | 15-scf00327 | 15 |
| AX-158164337 | 15 | 38.349 | KV453080.1 | 11229986 | 15-scf00327 | 15 |
| AX-158164340 | 15 | 38.349 | KV453080.1 | 11232832 | 15-scf00327 | 15 |
| AX-158164341 | 15 | 38.349 | KV453080.1 | 11234425 | 15-scf00327 | 15 |
| AX-158164343 | 15 | 38.349 | KV453080.1 | 11235616 | 15-scf00327 | 15 |

|              |    |        |            |          |               |    |
|--------------|----|--------|------------|----------|---------------|----|
| AX-158164345 | 15 | 38.349 | KV453080.1 | 11236996 | 15-scf00327   | 15 |
| AX-158393398 | 15 | 38.349 | KV453080.1 | 11238517 | 15-scf00327   | 15 |
| AX-158164346 | 15 | 38.349 | KV453080.1 | 11239313 | 15-scf00327   | 15 |
| AX-158164347 | 15 | 38.349 | KV453080.1 | 11240077 | 15-scf00327   | 15 |
| AX-158164348 | 15 | 38.349 | KV453080.1 | 11240546 | 15-scf00327   | 15 |
| AX-158164353 | 15 | 38.349 | KV453080.1 | 11246508 | 15-scf00327   | 15 |
| AX-158164358 | 15 | 38.392 | KV453080.1 | 11263080 | 15-scf00327   | 15 |
| AX-158164360 | 15 | 38.459 | KV453080.1 | 11263881 | 15-scf00327   | 15 |
| AX-158164361 | 15 | 38.459 | KV453080.1 | 11264102 | 15-scf00327   | 15 |
| AX-158164364 | 15 | 38.459 | KV453080.1 | 11265611 | 15-scf00327   | 15 |
| AX-157834109 | 15 | 38.459 | KV453080.1 | 11266804 | 15-scf00327   | 15 |
| AX-157770962 | 15 | 38.459 | KV453080.1 | 11288228 | 15-scf00327   | 15 |
| AX-158164366 | 15 | 38.48  | KV453080.1 | 11267414 | 15-scf00327   | 15 |
| AX-158164367 | 15 | 38.509 | KV453080.1 | 11270147 | 15-scf00327   | 15 |
| AX-158164369 | 15 | 38.534 | KV453080.1 | 11271124 | 15-scf00327   | 15 |
| AX-158164372 | 15 | 38.544 | KV453080.1 | 11274536 | 15-scf00327   | 15 |
| AX-158380493 | 15 | 38.562 | KV453080.1 | 10910299 | 15-scf00327   | 15 |
| AX-158164264 | 15 | 38.562 | KV453080.1 | 11130397 | 15-scf00327   | 15 |
| AX-158164290 | 15 | 38.562 | KV453080.1 | 11164761 | 15-scf00327   | 15 |
| AX-158164313 | 15 | 38.562 | KV453080.1 | 11199815 | 15-scf00327   | 15 |
| AX-157834110 | 15 | 38.562 | KV453080.1 | 11277960 | 15-scf00327   | 15 |
| AX-158164383 | 15 | 38.568 | KV453080.1 | 11286666 | 15-scf00327   | 15 |
| AX-158164387 | 15 | 38.568 | KV453080.1 | 11292677 | 15-scf00327   | 15 |
| AX-158164131 | 15 | 38.677 | KV453080.1 | 10922279 | 15-scf00327   | 15 |
| AX-158164356 | 15 | 38.677 | KV453080.1 | 11259645 | 15-scf00327   | 15 |
| AX-157866587 | 15 | 38.677 | KV453080.1 | 11261044 | 15-scf00327   | 15 |
| AX-158164363 | 15 | 38.677 | KV453080.1 | 11265327 | 15-scf00327   | 15 |
| AX-158164385 | 15 | 38.677 | KV453080.1 | 11290622 | 15-scf00327   | 15 |
| AX-158164388 | 15 | 38.677 | KV453080.1 | 11295013 | 15-scf00327   | 15 |
| AX-157834114 | 15 | 38.677 | KV453080.1 | 11295570 | 15-scf00327   | 15 |
| AX-158164389 | 15 | 38.677 | KV453080.1 | 11296307 | 15-scf00327   | 15 |
| AX-158164392 | 15 | 38.677 | KV453080.1 | 11298973 | 15-scf00327   | 15 |
| AX-158164393 | 15 | 38.677 | KV453080.1 | 11299561 | 15-scf00327   | 15 |
| AX-158413099 | 15 | 38.677 | KV453080.1 | 11299954 | 15-scf00327   | 15 |
| AX-158164394 | 15 | 38.677 | KV453080.1 | 11301623 | 15-scf00327   | 15 |
| AX-158164396 | 15 | 38.677 | KV453080.1 | 11302731 | 15-scf00327   | 15 |
| AX-158164399 | 15 | 38.677 | KV453080.1 | 11307207 | 15-scf00327   | 15 |
| AX-158164400 | 15 | 38.677 | KV453080.1 | 11307726 | 15-scf00327   | 15 |
| AX-158164401 | 15 | 38.677 | KV453080.1 | 11308209 | 15-scf00327   | 15 |
| AX-157834115 | 15 | 38.677 | KV453080.1 | 11309054 | 15-scf00327   | 15 |
| AX-158164403 | 15 | 38.677 | KV453080.1 | 11309627 | 15-scf00327   | 15 |
| AX-157834116 | 15 | 38.677 | KV453080.1 | 11310804 | 15-scf00327   | 15 |
| AX-157699454 | 15 | 38.677 | FI877618.1 | 779      | ORI212 lctalu | UN |
| AX-158393394 | 15 | 38.786 | KV453080.1 | 10974233 | 15-scf00327   | 15 |
| AX-157834099 | 15 | 38.786 | KV453080.1 | 11022653 | 15-scf00327   | 15 |
| AX-158164195 | 15 | 38.786 | KV453080.1 | 11027793 | 15-scf00327   | 15 |
| AX-158164384 | 15 | 38.786 | KV453080.1 | 11289796 | 15-scf00327   | 15 |
| AX-157724701 | 15 | 38.786 | KV453080.1 | 11300483 | 15-scf00327   | 15 |
| AX-158164406 | 15 | 38.786 | KV453080.1 | 11315050 | 15-scf00327   | 15 |
| AX-158164407 | 15 | 38.786 | KV453080.1 | 11315498 | 15-scf00327   | 15 |
| AX-157744566 | 15 | 38.786 | KV453080.1 | 11317142 | 15-scf00327   | 15 |

|              |    |        |            |          |             |    |
|--------------|----|--------|------------|----------|-------------|----|
| AX-158164410 | 15 | 38.786 | KV453080.1 | 11319975 | 15-scf00327 | 15 |
| AX-157747359 | 15 | 38.786 | KV453080.1 | 11325567 | 15-scf00327 | 15 |
| AX-157772495 | 15 | 38.786 | KV453080.1 | 11329374 | 15-scf00327 | 15 |
| AX-158164417 | 15 | 38.786 | KV453080.1 | 11331924 | 15-scf00327 | 15 |
| AX-158164418 | 15 | 38.786 | KV453080.1 | 11332642 | 15-scf00327 | 15 |
| AX-158164419 | 15 | 38.786 | KV453080.1 | 11332740 | 15-scf00327 | 15 |
| AX-158164422 | 15 | 38.786 | KV453080.1 | 11338011 | 15-scf00327 | 15 |
| AX-157689994 | 15 | 38.786 |            | 186      | scf19595    | UN |
| AX-158164421 | 15 | 38.792 | KV453080.1 | 11335113 | 15-scf00327 | 15 |
| AX-158164425 | 15 | 38.792 | KV453080.1 | 11341171 | 15-scf00327 | 15 |
| AX-157741395 | 15 | 38.792 | KV453080.1 | 11344708 | 15-scf00327 | 15 |
| AX-158164431 | 15 | 39.06  | KV453080.1 | 11356025 | 15-scf00327 | 15 |
| AX-157727919 | 15 | 39.06  | KV453080.1 | 11357589 | 15-scf00327 | 15 |
| AX-158163875 | 15 | 39.061 | KV453080.1 | 10431196 | 15-scf00327 | 15 |
| AX-158163925 | 15 | 39.061 | KV453080.1 | 10531798 | 15-scf00327 | 15 |
| AX-158164232 | 15 | 39.061 | KV453080.1 | 11083144 | 15-scf00327 | 15 |
| AX-157713514 | 15 | 39.061 | KV453080.1 | 11113913 | 15-scf00327 | 15 |
| AX-158164286 | 15 | 39.061 | KV453080.1 | 11161725 | 15-scf00327 | 15 |
| AX-158164304 | 15 | 39.061 | KV453080.1 | 11185536 | 15-scf00327 | 15 |
| AX-158164374 | 15 | 39.061 | KV453080.1 | 11276570 | 15-scf00327 | 15 |
| AX-158164395 | 15 | 39.061 | KV453080.1 | 11301718 | 15-scf00327 | 15 |
| AX-158164413 | 15 | 39.061 | KV453080.1 | 11324298 | 15-scf00327 | 15 |
| AX-158164414 | 15 | 39.061 | KV453080.1 | 11324649 | 15-scf00327 | 15 |
| AX-158164435 | 15 | 39.061 | KV453080.1 | 11360403 | 15-scf00327 | 15 |
| AX-157834122 | 15 | 39.061 | KV453080.1 | 11360619 | 15-scf00327 | 15 |
| AX-158164450 | 15 | 39.061 | KV453080.1 | 11384058 | 15-scf00327 | 15 |
| AX-158164456 | 15 | 39.061 | KV453080.1 | 11394863 | 15-scf00327 | 15 |
| AX-157834123 | 15 | 39.326 | KV453080.1 | 11360973 | 15-scf00327 | 15 |
| AX-158164438 | 15 | 39.326 | KV453080.1 | 11363385 | 15-scf00327 | 15 |
| AX-157746971 | 15 | 39.342 | KV453080.1 | 11371361 | 15-scf00327 | 15 |
| AX-158164442 | 15 | 39.465 | KV453080.1 | 11371813 | 15-scf00327 | 15 |
| AX-157834134 | 15 | 39.465 | KV453080.1 | 11419112 | 15-scf00327 | 15 |
| AX-158164469 | 15 | 39.465 | KV453080.1 | 11427980 | 15-scf00327 | 15 |
| AX-158164524 | 15 | 39.465 | KV453080.1 | 11531264 | 15-scf00327 | 15 |
| AX-157716439 | 15 | 39.552 | KV453080.1 | 11394333 | 15-scf00327 | 15 |
| AX-157834129 | 15 | 39.552 | KV453080.1 | 11395662 | 15-scf00327 | 15 |
| AX-158380495 | 15 | 39.552 | KV453080.1 | 11396599 | 15-scf00327 | 15 |
| AX-158164457 | 15 | 39.552 | KV453080.1 | 11396714 | 15-scf00327 | 15 |
| AX-158413100 | 15 | 39.555 | KV453080.1 | 11397696 | 15-scf00327 | 15 |
| AX-158164505 | 15 | 39.555 | KV453080.1 | 11492963 | 15-scf00327 | 15 |
| AX-158164465 | 15 | 39.559 | KV453080.1 | 11412103 | 15-scf00327 | 15 |
| AX-157713102 | 15 | 39.559 | KV453080.1 | 11412935 | 15-scf00327 | 15 |
| AX-157834137 | 15 | 40.006 | KV453080.1 | 11442919 | 15-scf00327 | 15 |
| AX-158164444 | 15 | 40.009 | KV453080.1 | 11373526 | 15-scf00327 | 15 |
| AX-157834133 | 15 | 40.009 | KV453080.1 | 11416866 | 15-scf00327 | 15 |
| AX-158164476 | 15 | 40.009 | KV453080.1 | 11444966 | 15-scf00327 | 15 |
| AX-158164488 | 15 | 40.009 | KV453080.1 | 11470177 | 15-scf00327 | 15 |
| AX-157834141 | 15 | 40.009 | KV453080.1 | 11472893 | 15-scf00327 | 15 |
| AX-158164493 | 15 | 40.009 | KV453080.1 | 11478122 | 15-scf00327 | 15 |
| AX-158164500 | 15 | 40.009 | KV453080.1 | 11485499 | 15-scf00327 | 15 |
| AX-158164518 | 15 | 40.009 | KV453080.1 | 11514992 | 15-scf00327 | 15 |

|              |    |        |            |          |             |    |
|--------------|----|--------|------------|----------|-------------|----|
| AX-158164523 | 15 | 40.009 | KV453080.1 | 11528275 | 15-scf00327 | 15 |
| AX-158164568 | 15 | 40.009 | KV453080.1 | 11617592 | 15-scf00327 | 15 |
| AX-158164594 | 15 | 40.009 | KV453080.1 | 11685259 | 15-scf00327 | 15 |
| AX-158164750 | 15 | 40.009 | KV453080.1 | 11918238 | 15-scf00327 | 15 |
| AX-158164471 | 15 | 40.162 | KV453080.1 | 11431747 | 15-scf00327 | 15 |
| AX-158164473 | 15 | 40.162 | KV453080.1 | 11438018 | 15-scf00327 | 15 |
| AX-158164478 | 15 | 40.162 | KV453080.1 | 11449345 | 15-scf00327 | 15 |
| AX-157759148 | 15 | 40.162 | KV453080.1 | 11468461 | 15-scf00327 | 15 |
| AX-158164511 | 15 | 40.162 | KV453080.1 | 11498579 | 15-scf00327 | 15 |
| AX-158164525 | 15 | 40.162 | KV453080.1 | 11537637 | 15-scf00327 | 15 |
| AX-158164526 | 15 | 40.162 | KV453080.1 | 11538263 | 15-scf00327 | 15 |
| AX-158164540 | 15 | 40.162 | KV453080.1 | 11570509 | 15-scf00327 | 15 |
| AX-158164543 | 15 | 40.162 | KV453080.1 | 11572074 | 15-scf00327 | 15 |
| AX-158164546 | 15 | 40.162 | KV453080.1 | 11577698 | 15-scf00327 | 15 |
| AX-158164550 | 15 | 40.162 | KV453080.1 | 11585214 | 15-scf00327 | 15 |
| AX-157871918 | 15 | 40.162 | KV453080.1 | 11588029 | 15-scf00327 | 15 |
| AX-158164553 | 15 | 40.162 | KV453080.1 | 11589565 | 15-scf00327 | 15 |
| AX-158164556 | 15 | 40.162 | KV453080.1 | 11592156 | 15-scf00327 | 15 |
| AX-157713955 | 15 | 40.162 | KV453080.1 | 11603547 | 15-scf00327 | 15 |
| AX-158164576 | 15 | 40.162 | KV453080.1 | 11630096 | 15-scf00327 | 15 |
| AX-158164592 | 15 | 40.162 | KV453080.1 | 11682522 | 15-scf00327 | 15 |
| AX-158164762 | 15 | 40.162 | KV453080.1 | 11958719 | 15-scf00327 | 15 |
| AX-158164765 | 15 | 40.162 | KV453080.1 | 11960860 | 15-scf00327 | 15 |
| AX-158164564 | 15 | 40.217 | KV453080.1 | 11608448 | 15-scf00327 | 15 |
| AX-158164575 | 15 | 40.265 | KV453080.1 | 11628194 | 15-scf00327 | 15 |
| AX-158164609 | 15 | 40.314 | KV453080.1 | 11702394 | 15-scf00327 | 15 |
| AX-158164623 | 15 | 40.466 | KV453080.1 | 11722685 | 15-scf00327 | 15 |
| AX-158164624 | 15 | 40.466 | KV453080.1 | 11723359 | 15-scf00327 | 15 |
| AX-158164635 | 15 | 40.466 | KV453080.1 | 11737740 | 15-scf00327 | 15 |
| AX-158164637 | 15 | 40.466 | KV453080.1 | 11741383 | 15-scf00327 | 15 |
| AX-158164638 | 15 | 40.466 | KV453080.1 | 11742888 | 15-scf00327 | 15 |
| AX-158164654 | 15 | 40.466 | KV453080.1 | 11767193 | 15-scf00327 | 15 |
| AX-158164655 | 15 | 40.466 | KV453080.1 | 11767550 | 15-scf00327 | 15 |
| AX-158164660 | 15 | 40.466 | KV453080.1 | 11775177 | 15-scf00327 | 15 |
| AX-157749595 | 15 | 40.466 | KV453080.1 | 11779346 | 15-scf00327 | 15 |
| AX-158164667 | 15 | 40.466 | KV453080.1 | 11784936 | 15-scf00327 | 15 |
| AX-158164675 | 15 | 40.466 | KV453080.1 | 11799034 | 15-scf00327 | 15 |
| AX-158164697 | 15 | 40.466 | KV453080.1 | 11831414 | 15-scf00327 | 15 |
| AX-158164702 | 15 | 40.466 | KV453080.1 | 11838207 | 15-scf00327 | 15 |
| AX-158164707 | 15 | 40.466 | KV453080.1 | 11841524 | 15-scf00327 | 15 |
| AX-158164710 | 15 | 40.466 | KV453080.1 | 11845308 | 15-scf00327 | 15 |
| AX-158164711 | 15 | 40.466 | KV453080.1 | 11846185 | 15-scf00327 | 15 |
| AX-158164796 | 15 | 40.466 | KV453080.1 | 12006357 | 15-scf00327 | 15 |
| AX-158164882 | 15 | 40.466 | KV453080.1 | 12101701 | 15-scf00327 | 15 |
| AX-158164930 | 15 | 40.466 | KV453080.1 | 12173237 | 15-scf00327 | 15 |
| AX-158165199 | 15 | 40.466 | KV453080.1 | 12504052 | 15-scf00327 | 15 |
| AX-158164547 | 15 | 40.545 | KV453080.1 | 11581252 | 15-scf00327 | 15 |
| AX-157834154 | 15 | 40.545 | KV453080.1 | 11640390 | 15-scf00327 | 15 |
| AX-158164583 | 15 | 40.545 | KV453080.1 | 11660924 | 15-scf00327 | 15 |
| AX-158164585 | 15 | 40.545 | KV453080.1 | 11670099 | 15-scf00327 | 15 |
| AX-158164586 | 15 | 40.545 | KV453080.1 | 11670732 | 15-scf00327 | 15 |

|              |    |        |            |          |             |    |
|--------------|----|--------|------------|----------|-------------|----|
| AX-158164629 | 15 | 40.545 | KV453080.1 | 11727961 | 15-scf00327 | 15 |
| AX-158164641 | 15 | 40.545 | KV453080.1 | 11744287 | 15-scf00327 | 15 |
| AX-158164648 | 15 | 40.545 | KV453080.1 | 11755412 | 15-scf00327 | 15 |
| AX-158164663 | 15 | 40.545 | KV453080.1 | 11777529 | 15-scf00327 | 15 |
| AX-158409039 | 15 | 40.545 | KV453080.1 | 11794413 | 15-scf00327 | 15 |
| AX-158413111 | 15 | 40.545 | KV453080.1 | 11794791 | 15-scf00327 | 15 |
| AX-158164688 | 15 | 40.545 | KV453080.1 | 11820115 | 15-scf00327 | 15 |
| AX-158385752 | 15 | 40.545 | KV453080.1 | 11847293 | 15-scf00327 | 15 |
| AX-158164772 | 15 | 40.545 | KV453080.1 | 11972802 | 15-scf00327 | 15 |
| AX-158164773 | 15 | 40.545 | KV453080.1 | 11973328 | 15-scf00327 | 15 |
| AX-158164774 | 15 | 40.545 | KV453080.1 | 11973987 | 15-scf00327 | 15 |
| AX-158164816 | 15 | 40.545 | KV453080.1 | 12025894 | 15-scf00327 | 15 |
| AX-158164835 | 15 | 40.545 | KV453080.1 | 12045801 | 15-scf00327 | 15 |
| AX-158164531 | 15 | 40.619 | KV453080.1 | 11553135 | 15-scf00327 | 15 |
| AX-158164695 | 15 | 40.619 | KV453080.1 | 11828189 | 15-scf00327 | 15 |
| AX-158164715 | 15 | 40.619 | KV453080.1 | 11851958 | 15-scf00327 | 15 |
| AX-158164725 | 15 | 40.619 | KV453080.1 | 11865770 | 15-scf00327 | 15 |
| AX-158164726 | 15 | 40.619 | KV453080.1 | 11867115 | 15-scf00327 | 15 |
| AX-158164727 | 15 | 40.619 | KV453080.1 | 11867510 | 15-scf00327 | 15 |
| AX-157834167 | 15 | 40.619 | KV453080.1 | 11868798 | 15-scf00327 | 15 |
| AX-158164731 | 15 | 40.619 | KV453080.1 | 11870680 | 15-scf00327 | 15 |
| AX-158164749 | 15 | 40.619 | KV453080.1 | 11917650 | 15-scf00327 | 15 |
| AX-157858394 | 15 | 40.619 | KV453080.1 | 11966937 | 15-scf00327 | 15 |
| AX-158164813 | 15 | 40.619 | KV453080.1 | 12022645 | 15-scf00327 | 15 |
| AX-158164651 | 15 | 40.771 | KV453080.1 | 11764772 | 15-scf00327 | 15 |
| AX-158164812 | 15 | 40.771 | KV453080.1 | 12020589 | 15-scf00327 | 15 |
| AX-158164822 | 15 | 40.771 | KV453080.1 | 12030368 | 15-scf00327 | 15 |
| AX-158164824 | 15 | 40.771 | KV453080.1 | 12032698 | 15-scf00327 | 15 |
| AX-158164826 | 15 | 40.771 | KV453080.1 | 12036835 | 15-scf00327 | 15 |
| AX-158164833 | 15 | 40.771 | KV453080.1 | 12044326 | 15-scf00327 | 15 |
| AX-158164834 | 15 | 40.771 | KV453080.1 | 12045038 | 15-scf00327 | 15 |
| AX-158164841 | 15 | 40.771 | KV453080.1 | 12055264 | 15-scf00327 | 15 |
| AX-158164861 | 15 | 40.771 | KV453080.1 | 12076647 | 15-scf00327 | 15 |
| AX-158164896 | 15 | 40.771 | KV453080.1 | 12123663 | 15-scf00327 | 15 |
| AX-157752923 | 15 | 40.771 | KV453080.1 | 12127160 | 15-scf00327 | 15 |
| AX-158164908 | 15 | 40.771 | KV453080.1 | 12149076 | 15-scf00327 | 15 |
| AX-158164974 | 15 | 40.771 | KV453080.1 | 12240026 | 15-scf00327 | 15 |
| AX-158164975 | 15 | 40.771 | KV453080.1 | 12240533 | 15-scf00327 | 15 |
| AX-157693612 | 15 | 40.771 | KV453080.1 | 12241920 | 15-scf00327 | 15 |
| AX-158165160 | 15 | 40.771 | KV453080.1 | 12460514 | 15-scf00327 | 15 |
| AX-158164911 | 15 | 41.075 | KV453080.1 | 12152105 | 15-scf00327 | 15 |
| AX-158164956 | 15 | 41.075 | KV453080.1 | 12213272 | 15-scf00327 | 15 |
| AX-157834184 | 15 | 41.075 | KV453080.1 | 12218913 | 15-scf00327 | 15 |
| AX-158380496 | 15 | 41.076 | KV453080.1 | 11702690 | 15-scf00327 | 15 |
| AX-158164628 | 15 | 41.076 | KV453080.1 | 11726638 | 15-scf00327 | 15 |
| AX-157834163 | 15 | 41.076 | KV453080.1 | 11788492 | 15-scf00327 | 15 |
| AX-157759018 | 15 | 41.076 | KV453080.1 | 11864358 | 15-scf00327 | 15 |
| AX-158164724 | 15 | 41.076 | KV453080.1 | 11865392 | 15-scf00327 | 15 |
| AX-157834168 | 15 | 41.076 | KV453080.1 | 11869404 | 15-scf00327 | 15 |
| AX-157834169 | 15 | 41.076 | KV453080.1 | 11876316 | 15-scf00327 | 15 |
| AX-158164737 | 15 | 41.076 | KV453080.1 | 11882592 | 15-scf00327 | 15 |

|              |    |        |            |          |             |    |
|--------------|----|--------|------------|----------|-------------|----|
| AX-158164742 | 15 | 41.076 | KV453080.1 | 11904520 | 15-scf00327 | 15 |
| AX-158164744 | 15 | 41.076 | KV453080.1 | 11906166 | 15-scf00327 | 15 |
| AX-158164745 | 15 | 41.076 | KV453080.1 | 11907537 | 15-scf00327 | 15 |
| AX-158164748 | 15 | 41.076 | KV453080.1 | 11914016 | 15-scf00327 | 15 |
| AX-158164753 | 15 | 41.076 | KV453080.1 | 11928521 | 15-scf00327 | 15 |
| AX-158164754 | 15 | 41.076 | KV453080.1 | 11941777 | 15-scf00327 | 15 |
| AX-158164755 | 15 | 41.076 | KV453080.1 | 11944195 | 15-scf00327 | 15 |
| AX-158164759 | 15 | 41.076 | KV453080.1 | 11954044 | 15-scf00327 | 15 |
| AX-158164760 | 15 | 41.076 | KV453080.1 | 11955059 | 15-scf00327 | 15 |
| AX-158164827 | 15 | 41.076 | KV453080.1 | 12037529 | 15-scf00327 | 15 |
| AX-158164837 | 15 | 41.076 | KV453080.1 | 12048464 | 15-scf00327 | 15 |
| AX-158164842 | 15 | 41.076 | KV453080.1 | 12056156 | 15-scf00327 | 15 |
| AX-158164848 | 15 | 41.076 | KV453080.1 | 12062304 | 15-scf00327 | 15 |
| AX-158164852 | 15 | 41.076 | KV453080.1 | 12069337 | 15-scf00327 | 15 |
| AX-158164924 | 15 | 41.076 | KV453080.1 | 12167790 | 15-scf00327 | 15 |
| AX-158164927 | 15 | 41.076 | KV453080.1 | 12169791 | 15-scf00327 | 15 |
| AX-157715087 | 15 | 41.076 | KV453080.1 | 12174429 | 15-scf00327 | 15 |
| AX-158164932 | 15 | 41.076 | KV453080.1 | 12176406 | 15-scf00327 | 15 |
| AX-158164936 | 15 | 41.076 | KV453080.1 | 12183071 | 15-scf00327 | 15 |
| AX-158164938 | 15 | 41.076 | KV453080.1 | 12185200 | 15-scf00327 | 15 |
| AX-158164943 | 15 | 41.076 | KV453080.1 | 12192209 | 15-scf00327 | 15 |
| AX-158164946 | 15 | 41.076 | KV453080.1 | 12194839 | 15-scf00327 | 15 |
| AX-158164952 | 15 | 41.076 | KV453080.1 | 12207011 | 15-scf00327 | 15 |
| AX-158164953 | 15 | 41.076 | KV453080.1 | 12211618 | 15-scf00327 | 15 |
| AX-158164954 | 15 | 41.076 | KV453080.1 | 12211914 | 15-scf00327 | 15 |
| AX-158164959 | 15 | 41.076 | KV453080.1 | 12218393 | 15-scf00327 | 15 |
| AX-158165098 | 15 | 41.076 | KV453080.1 | 12381337 | 15-scf00327 | 15 |
| AX-158165121 | 15 | 41.076 | KV453080.1 | 12405848 | 15-scf00327 | 15 |
| AX-158165133 | 15 | 41.076 | KV453080.1 | 12422598 | 15-scf00327 | 15 |
| AX-158164712 | 15 | 41.15  | KV453080.1 | 11846676 | 15-scf00327 | 15 |
| AX-158164907 | 15 | 41.15  | KV453080.1 | 12146720 | 15-scf00327 | 15 |
| AX-158164920 | 15 | 41.15  | KV453080.1 | 12164085 | 15-scf00327 | 15 |
| AX-158164972 | 15 | 41.15  | KV453080.1 | 12238434 | 15-scf00327 | 15 |
| AX-158164995 | 15 | 41.15  | KV453080.1 | 12266413 | 15-scf00327 | 15 |
| AX-158165002 | 15 | 41.15  | KV453080.1 | 12271578 | 15-scf00327 | 15 |
| AX-158165008 | 15 | 41.15  | KV453080.1 | 12276639 | 15-scf00327 | 15 |
| AX-158164844 | 15 | 41.228 | KV453080.1 | 12057015 | 15-scf00327 | 15 |
| AX-158164893 | 15 | 41.228 | KV453080.1 | 12120888 | 15-scf00327 | 15 |
| AX-158385753 | 15 | 41.228 | KV453080.1 | 12122586 | 15-scf00327 | 15 |
| AX-158164905 | 15 | 41.228 | KV453080.1 | 12143698 | 15-scf00327 | 15 |
| AX-158164914 | 15 | 41.228 | KV453080.1 | 12155123 | 15-scf00327 | 15 |
| AX-158164929 | 15 | 41.228 | KV453080.1 | 12172324 | 15-scf00327 | 15 |
| AX-158164967 | 15 | 41.228 | KV453080.1 | 12225684 | 15-scf00327 | 15 |
| AX-157834186 | 15 | 41.228 | KV453080.1 | 12243700 | 15-scf00327 | 15 |
| AX-158164979 | 15 | 41.228 | KV453080.1 | 12244230 | 15-scf00327 | 15 |
| AX-157834187 | 15 | 41.228 | KV453080.1 | 12247649 | 15-scf00327 | 15 |
| AX-158164983 | 15 | 41.228 | KV453080.1 | 12249182 | 15-scf00327 | 15 |
| AX-158164991 | 15 | 41.228 | KV453080.1 | 12259349 | 15-scf00327 | 15 |
| AX-158164994 | 15 | 41.228 | KV453080.1 | 12265939 | 15-scf00327 | 15 |
| AX-158164997 | 15 | 41.228 | KV453080.1 | 12267902 | 15-scf00327 | 15 |
| AX-158165004 | 15 | 41.228 | KV453080.1 | 12272964 | 15-scf00327 | 15 |

|              |    |        |            |          |             |    |
|--------------|----|--------|------------|----------|-------------|----|
| AX-158165081 | 15 | 41.228 | KV453080.1 | 12359525 | 15-scf00327 | 15 |
| AX-158164965 | 15 | 41.372 | KV453080.1 | 12223053 | 15-scf00327 | 15 |
| AX-158165000 | 15 | 41.372 | KV453080.1 | 12269729 | 15-scf00327 | 15 |
| AX-158385756 | 15 | 41.372 | KV453080.1 | 12284783 | 15-scf00327 | 15 |
| AX-158165031 | 15 | 41.372 | KV453080.1 | 12307673 | 15-scf00327 | 15 |
| AX-158165095 | 15 | 41.372 | KV453080.1 | 12380037 | 15-scf00327 | 15 |
| AX-158165097 | 15 | 41.372 | KV453080.1 | 12380743 | 15-scf00327 | 15 |
| AX-158165112 | 15 | 41.372 | KV453080.1 | 12396315 | 15-scf00327 | 15 |
| AX-158165021 | 15 | 41.498 | KV453080.1 | 12292648 | 15-scf00327 | 15 |
| AX-158165022 | 15 | 41.498 | KV453080.1 | 12293254 | 15-scf00327 | 15 |
| AX-158165039 | 15 | 41.498 | KV453080.1 | 12317973 | 15-scf00327 | 15 |
| AX-158165042 | 15 | 41.498 | KV453080.1 | 12319219 | 15-scf00327 | 15 |
| AX-158165048 | 15 | 41.498 | KV453080.1 | 12333324 | 15-scf00327 | 15 |
| AX-158165078 | 15 | 41.498 | KV453080.1 | 12357627 | 15-scf00327 | 15 |
| AX-157714339 | 15 | 41.767 | KV453080.1 | 12353859 | 15-scf00327 | 15 |
| AX-158165127 | 15 | 41.959 | KV453080.1 | 12412812 | 15-scf00327 | 15 |
| AX-158165139 | 15 | 41.975 | KV453080.1 | 12436631 | 15-scf00327 | 15 |
| AX-158165167 | 15 | 41.975 | KV453080.1 | 12468238 | 15-scf00327 | 15 |
| AX-158165085 | 15 | 41.976 | KV453080.1 | 12367456 | 15-scf00327 | 15 |
| AX-158165132 | 15 | 41.976 | KV453080.1 | 12421860 | 15-scf00327 | 15 |
| AX-157834201 | 15 | 41.976 | KV453080.1 | 12447375 | 15-scf00327 | 15 |
| AX-158165149 | 15 | 41.976 | KV453080.1 | 12447836 | 15-scf00327 | 15 |
| AX-158165151 | 15 | 41.976 | KV453080.1 | 12449890 | 15-scf00327 | 15 |
| AX-158165164 | 15 | 41.976 | KV453080.1 | 12466494 | 15-scf00327 | 15 |
| AX-158165172 | 15 | 41.976 | KV453080.1 | 12473836 | 15-scf00327 | 15 |
| AX-158165101 | 15 | 41.991 | KV453080.1 | 12384378 | 15-scf00327 | 15 |
| AX-158165157 | 15 | 41.991 | KV453080.1 | 12459276 | 15-scf00327 | 15 |
| AX-158165165 | 15 | 41.991 | KV453080.1 | 12467344 | 15-scf00327 | 15 |
| AX-158165168 | 15 | 41.991 | KV453080.1 | 12469366 | 15-scf00327 | 15 |
| AX-158165173 | 15 | 41.991 | KV453080.1 | 12474839 | 15-scf00327 | 15 |
| AX-158165176 | 15 | 41.991 | KV453080.1 | 12477091 | 15-scf00327 | 15 |
| AX-158165178 | 15 | 41.991 | KV453080.1 | 12480447 | 15-scf00327 | 15 |
| AX-158165096 | 15 | 41.994 | KV453080.1 | 12380540 | 15-scf00327 | 15 |
| AX-158165183 | 15 | 41.994 | KV453080.1 | 12484263 | 15-scf00327 | 15 |
| AX-158165185 | 15 | 41.994 | KV453080.1 | 12485219 | 15-scf00327 | 15 |
| AX-158165187 | 15 | 41.995 | KV453080.1 | 12487567 | 15-scf00327 | 15 |
| AX-158164897 | 15 | 42.019 | KV453080.1 | 12128663 | 15-scf00327 | 15 |
| AX-158165188 | 15 | 42.019 | KV453080.1 | 12490195 | 15-scf00327 | 15 |
| AX-158164828 | 15 | 42.212 | KV453080.1 | 12037663 | 15-scf00327 | 15 |
| AX-158164970 | 15 | 42.212 | KV453080.1 | 12232131 | 15-scf00327 | 15 |
| AX-158165006 | 15 | 42.212 | KV453080.1 | 12275770 | 15-scf00327 | 15 |
| AX-158165007 | 15 | 42.212 | KV453080.1 | 12276233 | 15-scf00327 | 15 |
| AX-158165009 | 15 | 42.212 | KV453080.1 | 12277305 | 15-scf00327 | 15 |
| AX-158165023 | 15 | 42.212 | KV453080.1 | 12296717 | 15-scf00327 | 15 |
| AX-158165029 | 15 | 42.212 | KV453080.1 | 12303065 | 15-scf00327 | 15 |
| AX-158165032 | 15 | 42.212 | KV453080.1 | 12308938 | 15-scf00327 | 15 |
| AX-157834193 | 15 | 42.212 | KV453080.1 | 12324992 | 15-scf00327 | 15 |
| AX-158165047 | 15 | 42.212 | KV453080.1 | 12332473 | 15-scf00327 | 15 |
| AX-158165050 | 15 | 42.212 | KV453080.1 | 12335479 | 15-scf00327 | 15 |
| AX-158165084 | 15 | 42.212 | KV453080.1 | 12362636 | 15-scf00327 | 15 |
| AX-157886666 | 15 | 42.212 | KV453080.1 | 12369716 | 15-scf00327 | 15 |

|              |    |        |            |          |             |    |
|--------------|----|--------|------------|----------|-------------|----|
| AX-158165094 | 15 | 42.212 | KV453080.1 | 12379258 | 15-scf00327 | 15 |
| AX-157774864 | 15 | 42.212 | KV453080.1 | 12393573 | 15-scf00327 | 15 |
| AX-157834197 | 15 | 42.212 | KV453080.1 | 12395413 | 15-scf00327 | 15 |
| AX-158165113 | 15 | 42.212 | KV453080.1 | 12396830 | 15-scf00327 | 15 |
| AX-158165114 | 15 | 42.212 | KV453080.1 | 12397593 | 15-scf00327 | 15 |
| AX-158165129 | 15 | 42.212 | KV453080.1 | 12417474 | 15-scf00327 | 15 |
| AX-158393402 | 15 | 42.212 | KV453080.1 | 12449608 | 15-scf00327 | 15 |
| AX-157834202 | 15 | 42.212 | KV453080.1 | 12449786 | 15-scf00327 | 15 |
| AX-158165152 | 15 | 42.212 | KV453080.1 | 12450775 | 15-scf00327 | 15 |
| AX-157878581 | 15 | 42.212 | KV453080.1 | 12473146 | 15-scf00327 | 15 |
| AX-158165174 | 15 | 42.212 | KV453080.1 | 12475234 | 15-scf00327 | 15 |
| AX-158165175 | 15 | 42.212 | KV453080.1 | 12476741 | 15-scf00327 | 15 |
| AX-158165195 | 15 | 42.212 | KV453080.1 | 12499278 | 15-scf00327 | 15 |
| AX-158165205 | 15 | 42.907 | KV453080.1 | 12515535 | 15-scf00327 | 15 |
| AX-157858396 | 15 | 42.907 | KV453080.1 | 12517546 | 15-scf00327 | 15 |
| AX-158165211 | 15 | 42.907 | KV453080.1 | 12525440 | 15-scf00327 | 15 |
| AX-158165212 | 15 | 42.907 | KV453080.1 | 12526133 | 15-scf00327 | 15 |
| AX-158165214 | 15 | 42.934 | KV453080.1 | 12529756 | 15-scf00327 | 15 |
| AX-158165216 | 15 | 43.11  | KV453080.1 | 12531468 | 15-scf00327 | 15 |
| AX-158165217 | 15 | 43.11  | KV453080.1 | 12533460 | 15-scf00327 | 15 |
| AX-158385759 | 15 | 43.111 | KV453080.1 | 12535204 | 15-scf00327 | 15 |
| AX-158165224 | 15 | 43.271 | KV453080.1 | 12550181 | 15-scf00327 | 15 |
| AX-158165234 | 15 | 43.51  | KV453080.1 | 12561303 | 15-scf00327 | 15 |
| AX-158165235 | 15 | 43.514 | KV453080.1 | 12561860 | 15-scf00327 | 15 |
| AX-158165236 | 15 | 43.517 | KV453080.1 | 12564951 | 15-scf00327 | 15 |
| AX-158165237 | 15 | 43.517 | KV453080.1 | 12565944 | 15-scf00327 | 15 |
| AX-158165238 | 15 | 43.517 | KV453080.1 | 12566944 | 15-scf00327 | 15 |
| AX-157886667 | 15 | 43.669 | KV453080.1 | 12556078 | 15-scf00327 | 15 |
| AX-158165233 | 15 | 43.669 | KV453080.1 | 12560116 | 15-scf00327 | 15 |
| AX-158165245 | 15 | 43.669 | KV453080.1 | 12576318 | 15-scf00327 | 15 |
| AX-157721352 | 15 | 43.669 | KV453080.1 | 12576709 | 15-scf00327 | 15 |
| AX-158165246 | 15 | 43.669 | KV453080.1 | 12577453 | 15-scf00327 | 15 |
| AX-158165247 | 15 | 43.691 | KV453080.1 | 12578153 | 15-scf00327 | 15 |
| AX-157722919 | 15 | 43.821 | KV453080.1 | 12546536 | 15-scf00327 | 15 |
| AX-158165222 | 15 | 43.821 | KV453080.1 | 12546757 | 15-scf00327 | 15 |
| AX-158165226 | 15 | 43.821 | KV453080.1 | 12552957 | 15-scf00327 | 15 |
| AX-157886668 | 15 | 43.821 | KV453080.1 | 12571353 | 15-scf00327 | 15 |
| AX-158165243 | 15 | 43.821 | KV453080.1 | 12573436 | 15-scf00327 | 15 |
| AX-158165250 | 15 | 43.821 | KV453080.1 | 12584691 | 15-scf00327 | 15 |
| AX-158165251 | 15 | 43.821 | KV453080.1 | 12586212 | 15-scf00327 | 15 |
| AX-158165254 | 15 | 43.821 | KV453080.1 | 12588701 | 15-scf00327 | 15 |
| AX-158165256 | 15 | 43.821 | KV453080.1 | 12591959 | 15-scf00327 | 15 |
| AX-158165257 | 15 | 43.821 | KV453080.1 | 12592514 | 15-scf00327 | 15 |
| AX-158165258 | 15 | 43.857 | KV453080.1 | 12593122 | 15-scf00327 | 15 |
| AX-158165264 | 15 | 44.054 | KV453080.1 | 12604209 | 15-scf00327 | 15 |
| AX-158165265 | 15 | 44.054 | KV453080.1 | 12605699 | 15-scf00327 | 15 |
| AX-158165269 | 15 | 44.268 | KV453080.1 | 12609010 | 15-scf00327 | 15 |
| AX-158165270 | 15 | 44.273 | KV453080.1 | 12613595 | 15-scf00327 | 15 |
| AX-158165249 | 15 | 44.277 | KV453080.1 | 12580761 | 15-scf00327 | 15 |
| AX-158165271 | 15 | 44.277 | KV453080.1 | 12614367 | 15-scf00327 | 15 |
| AX-158165274 | 15 | 44.582 | KV453080.1 | 12617390 | 15-scf00327 | 15 |



|              |    |        |            |          |             |    |
|--------------|----|--------|------------|----------|-------------|----|
| AX-158165277 | 15 | 44.582 | KV453080.1 | 12621011 | 15-scf00327 | 15 |
| AX-158165282 | 15 | 44.582 | KV453080.1 | 12625979 | 15-scf00327 | 15 |
| AX-158165331 | 15 | 44.582 | KV453080.1 | 12723966 | 15-scf00327 | 15 |
| AX-158165292 | 15 | 44.887 | KV453080.1 | 12643493 | 15-scf00327 | 15 |
| AX-158165293 | 15 | 44.887 | KV453080.1 | 12644284 | 15-scf00327 | 15 |
| AX-157886669 | 15 | 44.887 | KV453080.1 | 12644544 | 15-scf00327 | 15 |
| AX-158165294 | 15 | 44.893 | KV453080.1 | 12645419 | 15-scf00327 | 15 |
| AX-157726275 | 15 | 45.343 | KV453080.1 | 12658451 | 15-scf00327 | 15 |
| AX-157710879 | 15 | 45.343 | KV453080.1 | 12660140 | 15-scf00327 | 15 |
| AX-158165300 | 15 | 45.343 | KV453080.1 | 12661655 | 15-scf00327 | 15 |
| AX-158165301 | 15 | 45.343 | KV453080.1 | 12663956 | 15-scf00327 | 15 |
| AX-158165267 | 15 | 45.495 | KV453080.1 | 12606830 | 15-scf00327 | 15 |
| AX-157834208 | 15 | 45.495 | KV453080.1 | 12672821 | 15-scf00327 | 15 |
| AX-158165303 | 15 | 45.495 | KV453080.1 | 12674646 | 15-scf00327 | 15 |
| AX-158165312 | 15 | 45.495 | KV453080.1 | 12683467 | 15-scf00327 | 15 |
| AX-158380501 | 15 | 45.496 | KV453080.1 | 12652630 | 15-scf00327 | 15 |
| AX-158165313 | 15 | 45.496 | KV453080.1 | 12685524 | 15-scf00327 | 15 |
| AX-157834210 | 15 | 45.496 | KV453080.1 | 12693176 | 15-scf00327 | 15 |
| AX-157744868 | 15 | 45.496 | KV453080.1 | 12732771 | 15-scf00327 | 15 |
| AX-158165307 | 15 | 45.878 | KV453080.1 | 12676932 | 15-scf00327 | 15 |
| AX-158165314 | 15 | 45.878 | KV453080.1 | 12686929 | 15-scf00327 | 15 |
| AX-158165324 | 15 | 45.878 | KV453080.1 | 12708108 | 15-scf00327 | 15 |
| AX-157834211 | 15 | 45.878 | KV453080.1 | 12710957 | 15-scf00327 | 15 |
| AX-157743464 | 15 | 45.878 | KV453080.1 | 12711360 | 15-scf00327 | 15 |
| AX-158165327 | 15 | 45.878 | KV453080.1 | 12716145 | 15-scf00327 | 15 |
| AX-157795552 | 15 | 45.878 | KV453080.1 | 12718567 | 15-scf00327 | 15 |
| AX-157834213 | 15 | 45.878 | KV453080.1 | 12730595 | 15-scf00327 | 15 |
| AX-158417915 | 15 | 45.878 | KV453080.1 | 12731201 | 15-scf00327 | 15 |
| AX-158165330 | 15 | 45.88  | KV453080.1 | 12723068 | 15-scf00327 | 15 |
| AX-157711108 | 15 | 45.881 | KV453080.1 | 12729026 | 15-scf00327 | 15 |
| AX-158165341 | 15 | 46.076 | KV453080.1 | 12744545 | 15-scf00327 | 15 |
| AX-158165352 | 15 | 46.076 | KV453080.1 | 12755958 | 15-scf00327 | 15 |
| AX-158165360 | 15 | 46.076 | KV453080.1 | 12767733 | 15-scf00327 | 15 |
| AX-158165417 | 15 | 46.076 | KV453080.1 | 12837950 | 15-scf00327 | 15 |
| AX-158165356 | 15 | 46.218 | KV453080.1 | 12761126 | 15-scf00327 | 15 |
| AX-158165359 | 15 | 46.221 | KV453080.1 | 12766759 | 15-scf00327 | 15 |
| AX-158165361 | 15 | 46.221 | KV453080.1 | 12769156 | 15-scf00327 | 15 |
| AX-157738391 | 15 | 46.223 | KV453080.1 | 12697741 | 15-scf00327 | 15 |
| AX-157834217 | 15 | 46.223 | KV453080.1 | 12752175 | 15-scf00327 | 15 |
| AX-158165362 | 15 | 46.223 | KV453080.1 | 12769701 | 15-scf00327 | 15 |
| AX-158165405 | 15 | 46.223 | KV453080.1 | 12827071 | 15-scf00327 | 15 |
| AX-157717561 | 15 | 46.232 | KV453080.1 | 12740320 | 15-scf00327 | 15 |
| AX-157715899 | 15 | 46.232 | KV453080.1 | 12742053 | 15-scf00327 | 15 |
| AX-158165358 | 15 | 46.232 | KV453080.1 | 12766013 | 15-scf00327 | 15 |
| AX-157834219 | 15 | 46.232 | KV453080.1 | 12777256 | 15-scf00327 | 15 |
| AX-158165400 | 15 | 46.232 | KV453080.1 | 12823039 | 15-scf00327 | 15 |
| AX-158165473 | 15 | 46.232 | KV453080.1 | 12918569 | 15-scf00327 | 15 |
| AX-158165369 | 15 | 46.242 | KV453080.1 | 12783104 | 15-scf00327 | 15 |
| AX-158165371 | 15 | 46.242 | KV453080.1 | 12784410 | 15-scf00327 | 15 |
| AX-158165377 | 15 | 46.245 | KV453080.1 | 12792153 | 15-scf00327 | 15 |
| AX-158165378 | 15 | 46.257 | KV453080.1 | 12793605 | 15-scf00327 | 15 |

|              |    |        |            |          |             |    |
|--------------|----|--------|------------|----------|-------------|----|
| AX-158165381 | 15 | 46.257 | KV453080.1 | 12803286 | 15-scf00327 | 15 |
| AX-158165383 | 15 | 46.257 | KV453080.1 | 12804123 | 15-scf00327 | 15 |
| AX-158165394 | 15 | 46.257 | KV453080.1 | 12819704 | 15-scf00327 | 15 |
| AX-158165399 | 15 | 46.257 | KV453080.1 | 12822966 | 15-scf00327 | 15 |
| AX-158165402 | 15 | 46.257 | KV453080.1 | 12823998 | 15-scf00327 | 15 |
| AX-157714544 | 15 | 46.257 | KV453080.1 | 12925207 | 15-scf00327 | 15 |
| AX-158165412 | 15 | 46.632 | KV453080.1 | 12832329 | 15-scf00327 | 15 |
| AX-158165427 | 15 | 46.635 | KV453080.1 | 12852905 | 15-scf00327 | 15 |
| AX-158165420 | 15 | 46.765 | KV453080.1 | 12844334 | 15-scf00327 | 15 |
| AX-158165423 | 15 | 46.765 | KV453080.1 | 12847825 | 15-scf00327 | 15 |
| AX-158165428 | 15 | 46.765 | KV453080.1 | 12854172 | 15-scf00327 | 15 |
| AX-158165432 | 15 | 46.765 | KV453080.1 | 12858624 | 15-scf00327 | 15 |
| AX-158165434 | 15 | 46.765 | KV453080.1 | 12861815 | 15-scf00327 | 15 |
| AX-158165437 | 15 | 46.765 | KV453080.1 | 12868601 | 15-scf00327 | 15 |
| AX-157772917 | 15 | 46.765 | KV453080.1 | 12877389 | 15-scf00327 | 15 |
| AX-157750758 | 15 | 46.765 | KV453080.1 | 12918133 | 15-scf00327 | 15 |
| AX-158165480 | 15 | 46.765 | KV453080.1 | 12934619 | 15-scf00327 | 15 |
| AX-158165440 | 15 | 47.018 | KV453080.1 | 12873916 | 15-scf00327 | 15 |
| AX-158165444 | 15 | 47.018 | KV453080.1 | 12882332 | 15-scf00327 | 15 |
| AX-158165445 | 15 | 47.018 | KV453080.1 | 12882971 | 15-scf00327 | 15 |
| AX-158165447 | 15 | 47.018 | KV453080.1 | 12886801 | 15-scf00327 | 15 |
| AX-157858399 | 15 | 47.018 | KV453080.1 | 12886958 | 15-scf00327 | 15 |
| AX-158165449 | 15 | 47.018 | KV453080.1 | 12888184 | 15-scf00327 | 15 |
| AX-158165450 | 15 | 47.018 | KV453080.1 | 12889155 | 15-scf00327 | 15 |
| AX-158165454 | 15 | 47.018 | KV453080.1 | 12893144 | 15-scf00327 | 15 |
| AX-158165455 | 15 | 47.018 | KV453080.1 | 12894001 | 15-scf00327 | 15 |
| AX-157834225 | 15 | 47.018 | KV453080.1 | 12897585 | 15-scf00327 | 15 |
| AX-158165460 | 15 | 47.018 | KV453080.1 | 12900737 | 15-scf00327 | 15 |
| AX-158165492 | 15 | 47.018 | KV453080.1 | 12954260 | 15-scf00327 | 15 |
| AX-158165464 | 15 | 47.171 | KV453080.1 | 12904599 | 15-scf00327 | 15 |
| AX-158165465 | 15 | 47.171 | KV453080.1 | 12906401 | 15-scf00327 | 15 |
| AX-158165471 | 15 | 47.171 | KV453080.1 | 12913249 | 15-scf00327 | 15 |
| AX-157756843 | 15 | 47.248 | KV453080.1 | 12834226 | 15-scf00327 | 15 |
| AX-158165424 | 15 | 47.248 | KV453080.1 | 12849711 | 15-scf00327 | 15 |
| AX-157741483 | 15 | 47.248 | KV453080.1 | 12910134 | 15-scf00327 | 15 |
| AX-158165476 | 15 | 47.248 | KV453080.1 | 12930234 | 15-scf00327 | 15 |
| AX-157745168 | 15 | 47.323 | KV453080.1 | 12763768 | 15-scf00327 | 15 |
| AX-158165448 | 15 | 47.323 | KV453080.1 | 12887579 | 15-scf00327 | 15 |
| AX-158165452 | 15 | 47.323 | KV453080.1 | 12891100 | 15-scf00327 | 15 |
| AX-157752011 | 15 | 47.323 | KV453080.1 | 12902224 | 15-scf00327 | 15 |
| AX-157746715 | 15 | 47.323 | KV453080.1 | 12907072 | 15-scf00327 | 15 |
| AX-158165477 | 15 | 47.323 | KV453080.1 | 12930895 | 15-scf00327 | 15 |
| AX-158165479 | 15 | 47.323 | KV453080.1 | 12934115 | 15-scf00327 | 15 |
| AX-158165483 | 15 | 47.78  | KV453080.1 | 12944876 | 15-scf00327 | 15 |
| AX-158165495 | 15 | 47.78  | KV453080.1 | 12957636 | 15-scf00327 | 15 |
| AX-158165498 | 15 | 47.78  | KV453080.1 | 12961300 | 15-scf00327 | 15 |
| AX-158165499 | 15 | 47.78  | KV453080.1 | 12961699 | 15-scf00327 | 15 |
| AX-158165500 | 15 | 47.78  | KV453080.1 | 12962946 | 15-scf00327 | 15 |
| AX-157878585 | 15 | 47.78  | KV453080.1 | 12963116 | 15-scf00327 | 15 |
| AX-158165502 | 15 | 47.78  | KV453080.1 | 12963907 | 15-scf00327 | 15 |
| AX-158165503 | 15 | 47.78  | KV453080.1 | 12964570 | 15-scf00327 | 15 |

|              |    |        |            |          |             |    |
|--------------|----|--------|------------|----------|-------------|----|
| AX-157834232 | 15 | 47.78  | KV453080.1 | 12968869 | 15-scf00327 | 15 |
| AX-158165510 | 15 | 47.78  | KV453080.1 | 12976245 | 15-scf00327 | 15 |
| AX-158165513 | 15 | 47.78  | KV453080.1 | 12980081 | 15-scf00327 | 15 |
| AX-157834234 | 15 | 47.78  | KV453080.1 | 12982036 | 15-scf00327 | 15 |
| AX-158165515 | 15 | 47.78  | KV453080.1 | 12982134 | 15-scf00327 | 15 |
| AX-158165526 | 15 | 47.78  | KV453080.1 | 12997819 | 15-scf00327 | 15 |
| AX-158165529 | 15 | 47.78  | KV453080.1 | 12999586 | 15-scf00327 | 15 |
| AX-157834235 | 15 | 47.836 | KV453080.1 | 12993794 | 15-scf00327 | 15 |
| AX-158165522 | 15 | 47.895 | KV453080.1 | 12994834 | 15-scf00327 | 15 |
| AX-158165524 | 15 | 47.933 | KV453080.1 | 12996783 | 15-scf00327 | 15 |
| AX-158165527 | 15 | 47.933 | KV453080.1 | 12998360 | 15-scf00327 | 15 |
| AX-158165528 | 15 | 47.933 | KV453080.1 | 12999150 | 15-scf00327 | 15 |
| AX-158165530 | 15 | 47.933 | KV453080.1 | 12999990 | 15-scf00327 | 15 |
| AX-158165534 | 15 | 47.933 | KV453080.1 | 13012129 | 15-scf00327 | 15 |
| AX-157834240 | 15 | 48.021 | KV453080.1 | 13020146 | 15-scf00327 | 15 |
| AX-157713710 | 15 | 48.085 | KV453080.1 | 12989349 | 15-scf00327 | 15 |
| AX-158165545 | 15 | 48.085 | KV453080.1 | 13036254 | 15-scf00327 | 15 |
| AX-157748373 | 15 | 48.085 | KV453080.1 | 13081202 | 15-scf00327 | 15 |
| AX-158165585 | 15 | 48.085 | KV453080.1 | 13088717 | 15-scf00327 | 15 |
| AX-157747443 | 15 | 48.237 | KV453080.1 | 13042874 | 15-scf00327 | 15 |
| AX-158165552 | 15 | 48.237 | KV453080.1 | 13045847 | 15-scf00327 | 15 |
| AX-157717632 | 15 | 48.237 | KV453080.1 | 13049583 | 15-scf00327 | 15 |
| AX-158165558 | 15 | 48.237 | KV453080.1 | 13052326 | 15-scf00327 | 15 |
| AX-158165560 | 15 | 48.237 | KV453080.1 | 13053344 | 15-scf00327 | 15 |
| AX-158165566 | 15 | 48.237 | KV453080.1 | 13058434 | 15-scf00327 | 15 |
| AX-158165572 | 15 | 48.237 | KV453080.1 | 13068779 | 15-scf00327 | 15 |
| AX-158165573 | 15 | 48.237 | KV453080.1 | 13072166 | 15-scf00327 | 15 |
| AX-158165579 | 15 | 48.237 | KV453080.1 | 13078923 | 15-scf00327 | 15 |
| AX-158165599 | 15 | 48.237 | KV453080.1 | 13114221 | 15-scf00327 | 15 |
| AX-157834247 | 15 | 48.237 | KV453080.1 | 13115522 | 15-scf00327 | 15 |
| AX-158165584 | 15 | 48.238 | KV453080.1 | 13088047 | 15-scf00327 | 15 |
| AX-158165601 | 15 | 48.54  | KV453080.1 | 13119987 | 15-scf00327 | 15 |
| AX-158165602 | 15 | 48.541 | KV453080.1 | 13121762 | 15-scf00327 | 15 |
| AX-158165604 | 15 | 48.541 | KV453080.1 | 13123607 | 15-scf00327 | 15 |
| AX-158165606 | 15 | 48.692 | KV453080.1 | 13128692 | 15-scf00327 | 15 |
| AX-158165611 | 15 | 48.692 | KV453080.1 | 13135182 | 15-scf00327 | 15 |
| AX-158165612 | 15 | 48.692 | KV453080.1 | 13136715 | 15-scf00327 | 15 |
| AX-158165613 | 15 | 48.692 | KV453080.1 | 13138783 | 15-scf00327 | 15 |
| AX-158165614 | 15 | 48.692 | KV453080.1 | 13138982 | 15-scf00327 | 15 |
| AX-158165615 | 15 | 48.692 | KV453080.1 | 13139961 | 15-scf00327 | 15 |
| AX-158165618 | 15 | 48.692 | KV453080.1 | 13143618 | 15-scf00327 | 15 |
| AX-158165620 | 15 | 48.692 | KV453080.1 | 13144977 | 15-scf00327 | 15 |
| AX-158165623 | 15 | 48.692 | KV453080.1 | 13148119 | 15-scf00327 | 15 |
| AX-157719825 | 15 | 48.692 | KV453080.1 | 13148999 | 15-scf00327 | 15 |
| AX-158165624 | 15 | 48.692 | KV453080.1 | 13149563 | 15-scf00327 | 15 |
| AX-158165564 | 15 | 48.844 | KV453080.1 | 13055678 | 15-scf00327 | 15 |
| AX-158165598 | 15 | 48.844 | KV453080.1 | 13113687 | 15-scf00327 | 15 |
| AX-157775378 | 15 | 48.844 | KV453080.1 | 13140854 | 15-scf00327 | 15 |
| AX-158165631 | 15 | 48.844 | KV453080.1 | 13162155 | 15-scf00327 | 15 |
| AX-158165637 | 15 | 48.844 | KV453080.1 | 13168560 | 15-scf00327 | 15 |
| AX-157708421 | 15 | 48.844 | KV453080.1 | 13168832 | 15-scf00327 | 15 |

|              |    |        |            |          |             |    |
|--------------|----|--------|------------|----------|-------------|----|
| AX-158165638 | 15 | 48.844 | KV453080.1 | 13169176 | 15-scf00327 | 15 |
| AX-158165642 | 15 | 48.844 | KV453080.1 | 13176803 | 15-scf00327 | 15 |
| AX-158165646 | 15 | 48.844 | KV453080.1 | 13181914 | 15-scf00327 | 15 |
| AX-158165668 | 15 | 48.844 | KV453080.1 | 13219768 | 15-scf00327 | 15 |
| AX-158165673 | 15 | 48.844 | KV453080.1 | 13225641 | 15-scf00327 | 15 |
| AX-158165644 | 15 | 48.912 | KV453080.1 | 13180393 | 15-scf00327 | 15 |
| AX-158165540 | 15 | 48.996 | KV453080.1 | 13020853 | 15-scf00327 | 15 |
| AX-157834250 | 15 | 48.996 | KV453080.1 | 13124618 | 15-scf00327 | 15 |
| AX-158165608 | 15 | 48.996 | KV453080.1 | 13129829 | 15-scf00327 | 15 |
| AX-158165653 | 15 | 48.996 | KV453080.1 | 13188116 | 15-scf00327 | 15 |
| AX-158165661 | 15 | 48.996 | KV453080.1 | 13205567 | 15-scf00327 | 15 |
| AX-158165662 | 15 | 48.996 | KV453080.1 | 13208933 | 15-scf00327 | 15 |
| AX-158165663 | 15 | 48.996 | KV453080.1 | 13211556 | 15-scf00327 | 15 |
| AX-158165665 | 15 | 48.996 | KV453080.1 | 13213215 | 15-scf00327 | 15 |
| AX-158165674 | 15 | 48.996 | KV453080.1 | 13227524 | 15-scf00327 | 15 |
| AX-158165675 | 15 | 48.996 | KV453080.1 | 13229493 | 15-scf00327 | 15 |
| AX-157834255 | 15 | 48.996 | KV453080.1 | 13255393 | 15-scf00327 | 15 |
| AX-158165676 | 15 | 48.999 | KV453080.1 | 13231115 | 15-scf00327 | 15 |
| AX-157746779 | 15 | 48.999 | KV453080.1 | 13345470 | 15-scf00327 | 15 |
| AX-158165681 | 15 | 49.297 | KV453080.1 | 13240282 | 15-scf00327 | 15 |
| AX-158165685 | 15 | 49.3   | KV453080.1 | 13246508 | 15-scf00327 | 15 |
| AX-158165697 | 15 | 49.3   | KV453080.1 | 13263529 | 15-scf00327 | 15 |
| AX-157886674 | 15 | 49.3   | KV453080.1 | 13267270 | 15-scf00327 | 15 |
| AX-158413128 | 15 | 49.3   | KV453080.1 | 13274217 | 15-scf00327 | 15 |
| AX-158165686 | 15 | 49.314 | KV453080.1 | 13247858 | 15-scf00327 | 15 |
| AX-158165700 | 15 | 49.314 | KV453080.1 | 13269386 | 15-scf00327 | 15 |
| AX-158165701 | 15 | 49.314 | KV453080.1 | 13275322 | 15-scf00327 | 15 |
| AX-158165708 | 15 | 49.314 | KV453080.1 | 13285998 | 15-scf00327 | 15 |
| AX-158165709 | 15 | 49.314 | KV453080.1 | 13287068 | 15-scf00327 | 15 |
| AX-158165716 | 15 | 49.314 | KV453080.1 | 13293256 | 15-scf00327 | 15 |
| AX-158165719 | 15 | 49.314 | KV453080.1 | 13296477 | 15-scf00327 | 15 |
| AX-158380505 | 15 | 49.314 | KV453080.1 | 13334685 | 15-scf00327 | 15 |
| AX-157834257 | 15 | 49.793 | KV453080.1 | 13299383 | 15-scf00327 | 15 |
| AX-158165734 | 15 | 49.807 | KV453080.1 | 13315836 | 15-scf00327 | 15 |
| AX-157834262 | 15 | 49.807 | KV453080.1 | 13357313 | 15-scf00327 | 15 |
| AX-158165727 | 15 | 50.06  | KV453080.1 | 13305702 | 15-scf00327 | 15 |
| AX-157834260 | 15 | 50.06  | KV453080.1 | 13345177 | 15-scf00327 | 15 |
| AX-158165756 | 15 | 50.06  | KV453080.1 | 13350459 | 15-scf00327 | 15 |
| AX-157743870 | 15 | 50.06  | KV453080.1 | 13352354 | 15-scf00327 | 15 |
| AX-158165759 | 15 | 50.06  | KV453080.1 | 13355833 | 15-scf00327 | 15 |
| AX-158165765 | 15 | 50.06  | KV453080.1 | 13361592 | 15-scf00327 | 15 |
| AX-158165766 | 15 | 50.06  | KV453080.1 | 13362109 | 15-scf00327 | 15 |
| AX-158165769 | 15 | 50.06  | KV453080.1 | 13364184 | 15-scf00327 | 15 |
| AX-158165649 | 15 | 50.106 | KV453080.1 | 13186269 | 15-scf00327 | 15 |
| AX-158165785 | 15 | 50.106 | KV453080.1 | 13376136 | 15-scf00327 | 15 |
| AX-158165792 | 15 | 50.106 | KV453080.1 | 13384946 | 15-scf00327 | 15 |
| AX-158165793 | 15 | 50.106 | KV453080.1 | 13385540 | 15-scf00327 | 15 |
| AX-158165788 | 15 | 50.163 | KV453080.1 | 13377793 | 15-scf00327 | 15 |
| AX-158165789 | 15 | 50.163 | KV453080.1 | 13382649 | 15-scf00327 | 15 |
| AX-158165800 | 15 | 50.212 | KV453080.1 | 13396292 | 15-scf00327 | 15 |
| AX-157834266 | 15 | 50.311 | KV453080.1 | 13398307 | 15-scf00327 | 15 |

|              |    |        |            |          |             |    |
|--------------|----|--------|------------|----------|-------------|----|
| AX-158165803 | 15 | 50.311 | KV453080.1 | 13404484 | 15-scf00327 | 15 |
| AX-157834269 | 15 | 50.311 | KV453080.1 | 13407395 | 15-scf00327 | 15 |
| AX-158165738 | 15 | 50.414 | KV453080.1 | 13320121 | 15-scf00327 | 15 |
| AX-158165750 | 15 | 50.414 | KV453080.1 | 13332742 | 15-scf00327 | 15 |
| AX-158165770 | 15 | 50.414 | KV453080.1 | 13364389 | 15-scf00327 | 15 |
| AX-158165787 | 15 | 50.414 | KV453080.1 | 13377174 | 15-scf00327 | 15 |
| AX-157750620 | 15 | 50.414 | KV453080.1 | 13379526 | 15-scf00327 | 15 |
| AX-157834268 | 15 | 50.414 | KV453080.1 | 13404805 | 15-scf00327 | 15 |
| AX-157754020 | 15 | 50.414 | KV453080.1 | 13414979 | 15-scf00327 | 15 |
| AX-158165811 | 15 | 50.414 | KV453080.1 | 13416106 | 15-scf00327 | 15 |
| AX-158165816 | 15 | 50.414 | KV453080.1 | 13421521 | 15-scf00327 | 15 |
| AX-158380506 | 15 | 50.414 | KV453080.1 | 13437140 | 15-scf00327 | 15 |
| AX-158165819 | 15 | 50.517 | KV453080.1 | 13424649 | 15-scf00327 | 15 |
| AX-157721105 | 15 | 50.669 | KV453080.1 | 13435714 | 15-scf00327 | 15 |
| AX-158165829 | 15 | 50.669 | KV453080.1 | 13436754 | 15-scf00327 | 15 |
| AX-157720468 | 15 | 50.673 | KV453080.1 | 13442578 | 15-scf00327 | 15 |
| AX-157725815 | 15 | 51.123 | KV453080.1 | 13454273 | 15-scf00327 | 15 |
| AX-158165841 | 15 | 51.127 | KV453080.1 | 13459304 | 15-scf00327 | 15 |
| AX-158165842 | 15 | 51.127 | KV453080.1 | 13459569 | 15-scf00327 | 15 |
| AX-158165843 | 15 | 51.127 | KV453080.1 | 13460563 | 15-scf00327 | 15 |
| AX-158165845 | 15 | 51.127 | KV453080.1 | 13462730 | 15-scf00327 | 15 |
| AX-157746560 | 15 | 51.127 | KV453080.1 | 13464961 | 15-scf00327 | 15 |
| AX-158165848 | 15 | 51.127 | KV453080.1 | 13475403 | 15-scf00327 | 15 |
| AX-158165851 | 15 | 51.127 | KV453080.1 | 13479954 | 15-scf00327 | 15 |
| AX-157858403 | 15 | 51.127 | KV453080.1 | 13480010 | 15-scf00327 | 15 |
| AX-158165854 | 15 | 52.028 | KV453080.1 | 13486836 | 15-scf00327 | 15 |
| AX-158165855 | 15 | 52.037 | KV453080.1 | 13487521 | 15-scf00327 | 15 |
| AX-158165861 | 15 | 52.189 | KV453080.1 | 13496749 | 15-scf00327 | 15 |
| AX-157713424 | 15 | 52.198 | KV453080.1 | 13508440 | 15-scf00327 | 15 |
| AX-158165868 | 15 | 52.636 | KV453080.1 | 13518066 | 15-scf00327 | 15 |
| AX-157771496 | 15 | 52.644 | KV453080.1 | 13521206 | 15-scf00327 | 15 |
| AX-158165873 | 15 | 52.644 | KV453080.1 | 13524445 | 15-scf00327 | 15 |
| AX-158165879 | 15 | 53.093 | KV453080.1 | 13531885 | 15-scf00327 | 15 |
| AX-157834291 | 15 | 53.093 | KV453080.1 | 13532161 | 15-scf00327 | 15 |
| AX-158165881 | 15 | 53.093 | KV453080.1 | 13534826 | 15-scf00327 | 15 |
| AX-157774839 | 15 | 53.093 | KV453080.1 | 13552985 | 15-scf00327 | 15 |
| AX-157745500 | 15 | 53.093 | KV453080.1 | 13579060 | 15-scf00327 | 15 |
| AX-158165885 | 15 | 53.1   | KV453080.1 | 13536112 | 15-scf00327 | 15 |
| AX-158165893 | 15 | 53.117 | KV453080.1 | 13541537 | 15-scf00327 | 15 |
| AX-158165901 | 15 | 53.117 | KV453080.1 | 13545690 | 15-scf00327 | 15 |
| AX-157834292 | 15 | 53.262 | KV453080.1 | 13535829 | 15-scf00327 | 15 |
| AX-158165916 | 15 | 53.262 | KV453080.1 | 13577568 | 15-scf00327 | 15 |
| AX-157834300 | 15 | 53.398 | KV453080.1 | 13571267 | 15-scf00327 | 15 |
| AX-158165917 | 15 | 53.398 | KV453080.1 | 13579925 | 15-scf00327 | 15 |
| AX-158165919 | 15 | 53.398 | KV453080.1 | 13582045 | 15-scf00327 | 15 |
| AX-158165925 | 15 | 53.398 | KV453080.1 | 13591272 | 15-scf00327 | 15 |
| AX-158165926 | 15 | 53.493 | KV453080.1 | 13593429 | 15-scf00327 | 15 |
| AX-157714626 | 15 | 53.796 | KV453080.1 | 13609372 | 15-scf00327 | 15 |
| AX-158165939 | 15 | 53.856 | KV453080.1 | 13610669 | 15-scf00327 | 15 |
| AX-158165940 | 15 | 53.856 | KV453080.1 | 13610865 | 15-scf00327 | 15 |
| AX-158165965 | 15 | 54.279 | KV453080.1 | 13650356 | 15-scf00327 | 15 |

|              |    |        |            |          |             |    |
|--------------|----|--------|------------|----------|-------------|----|
| AX-158165979 | 15 | 54.279 | KV453080.1 | 13671138 | 15-scf00327 | 15 |
| AX-158165980 | 15 | 54.279 | KV453080.1 | 13679090 | 15-scf00327 | 15 |
| AX-158165983 | 15 | 54.279 | KV453080.1 | 13684161 | 15-scf00327 | 15 |
| AX-158165986 | 15 | 54.279 | KV453080.1 | 13687698 | 15-scf00327 | 15 |
| AX-158165989 | 15 | 54.279 | KV453080.1 | 13691116 | 15-scf00327 | 15 |
| AX-157745479 | 15 | 54.279 | KV453080.1 | 13692518 | 15-scf00327 | 15 |
| AX-158166023 | 15 | 54.279 | KV453080.1 | 13748514 | 15-scf00327 | 15 |
| AX-158166095 | 15 | 54.279 | KV453080.1 | 13842540 | 15-scf00327 | 15 |
| AX-158165996 | 15 | 54.334 | KV453080.1 | 13701112 | 15-scf00327 | 15 |
| AX-157858405 | 15 | 54.388 | KV453080.1 | 13619610 | 15-scf00327 | 15 |
| AX-157834313 | 15 | 54.388 | KV453080.1 | 13689259 | 15-scf00327 | 15 |
| AX-158165992 | 15 | 54.388 | KV453080.1 | 13697182 | 15-scf00327 | 15 |
| AX-158166001 | 15 | 54.388 | KV453080.1 | 13706245 | 15-scf00327 | 15 |
| AX-158166017 | 15 | 54.388 | KV453080.1 | 13732119 | 15-scf00327 | 15 |
| AX-158166058 | 15 | 54.388 | KV453080.1 | 13792122 | 15-scf00327 | 15 |
| AX-158166078 | 15 | 54.388 | KV453080.1 | 13817758 | 15-scf00327 | 15 |
| AX-158166022 | 15 | 54.461 | KV453080.1 | 13745765 | 15-scf00327 | 15 |
| AX-158166029 | 15 | 54.461 | KV453080.1 | 13755631 | 15-scf00327 | 15 |
| AX-158166030 | 15 | 54.461 | KV453080.1 | 13756379 | 15-scf00327 | 15 |
| AX-158166032 | 15 | 54.461 | KV453080.1 | 13757885 | 15-scf00327 | 15 |
| AX-158166053 | 15 | 54.461 | KV453080.1 | 13787292 | 15-scf00327 | 15 |
| AX-158166087 | 15 | 54.461 | KV453080.1 | 13833066 | 15-scf00327 | 15 |
| AX-158166106 | 15 | 54.461 | KV453080.1 | 13860108 | 15-scf00327 | 15 |
| AX-157834309 | 15 | 54.522 | KV453080.1 | 13676828 | 15-scf00327 | 15 |
| AX-158165981 | 15 | 54.522 | KV453080.1 | 13679580 | 15-scf00327 | 15 |
| AX-158165988 | 15 | 54.522 | KV453080.1 | 13688824 | 15-scf00327 | 15 |
| AX-157834316 | 15 | 54.522 | KV453080.1 | 13726454 | 15-scf00327 | 15 |
| AX-158166040 | 15 | 54.522 | KV453080.1 | 13772436 | 15-scf00327 | 15 |
| AX-158166041 | 15 | 54.591 | KV453080.1 | 13774972 | 15-scf00327 | 15 |
| AX-158165999 | 15 | 54.657 | KV453080.1 | 13704289 | 15-scf00327 | 15 |
| AX-158166047 | 15 | 54.657 | KV453080.1 | 13782651 | 15-scf00327 | 15 |
| AX-158165945 | 15 | 54.716 | KV453080.1 | 13619060 | 15-scf00327 | 15 |
| AX-157834303 | 15 | 54.716 | KV453080.1 | 13633331 | 15-scf00327 | 15 |
| AX-158165960 | 15 | 54.716 | KV453080.1 | 13641060 | 15-scf00327 | 15 |
| AX-158165982 | 15 | 54.716 | KV453080.1 | 13680269 | 15-scf00327 | 15 |
| AX-158165984 | 15 | 54.716 | KV453080.1 | 13686108 | 15-scf00327 | 15 |
| AX-158165987 | 15 | 54.716 | KV453080.1 | 13688312 | 15-scf00327 | 15 |
| AX-158165998 | 15 | 54.716 | KV453080.1 | 13703343 | 15-scf00327 | 15 |
| AX-158166002 | 15 | 54.716 | KV453080.1 | 13706700 | 15-scf00327 | 15 |
| AX-158166005 | 15 | 54.716 | KV453080.1 | 13708964 | 15-scf00327 | 15 |
| AX-157834314 | 15 | 54.716 | KV453080.1 | 13711440 | 15-scf00327 | 15 |
| AX-158166006 | 15 | 54.716 | KV453080.1 | 13711848 | 15-scf00327 | 15 |
| AX-158166009 | 15 | 54.716 | KV453080.1 | 13713274 | 15-scf00327 | 15 |
| AX-157742402 | 15 | 54.716 | KV453080.1 | 13714410 | 15-scf00327 | 15 |
| AX-158166012 | 15 | 54.716 | KV453080.1 | 13720125 | 15-scf00327 | 15 |
| AX-158166015 | 15 | 54.716 | KV453080.1 | 13727412 | 15-scf00327 | 15 |
| AX-158166026 | 15 | 54.716 | KV453080.1 | 13752535 | 15-scf00327 | 15 |
| AX-158166031 | 15 | 54.716 | KV453080.1 | 13756967 | 15-scf00327 | 15 |
| AX-157722744 | 15 | 54.716 | KV453080.1 | 13757192 | 15-scf00327 | 15 |
| AX-157834319 | 15 | 54.716 | KV453080.1 | 13766085 | 15-scf00327 | 15 |
| AX-158166037 | 15 | 54.716 | KV453080.1 | 13770406 | 15-scf00327 | 15 |

|              |    |        |            |          |             |    |
|--------------|----|--------|------------|----------|-------------|----|
| AX-158166039 | 15 | 54.716 | KV453080.1 | 13771851 | 15-scf00327 | 15 |
| AX-157699452 | 15 | 54.716 | KV453080.1 | 13776068 | 15-scf00327 | 15 |
| AX-158166049 | 15 | 54.716 | KV453080.1 | 13784979 | 15-scf00327 | 15 |
| AX-158166054 | 15 | 54.716 | KV453080.1 | 13787483 | 15-scf00327 | 15 |
| AX-157834320 | 15 | 54.716 | KV453080.1 | 13789106 | 15-scf00327 | 15 |
| AX-158166055 | 15 | 54.716 | KV453080.1 | 13790665 | 15-scf00327 | 15 |
| AX-158166060 | 15 | 54.716 | KV453080.1 | 13793464 | 15-scf00327 | 15 |
| AX-158166061 | 15 | 54.716 | KV453080.1 | 13795323 | 15-scf00327 | 15 |
| AX-158166062 | 15 | 54.716 | KV453080.1 | 13797319 | 15-scf00327 | 15 |
| AX-158166063 | 15 | 54.716 | KV453080.1 | 13797744 | 15-scf00327 | 15 |
| AX-158166065 | 15 | 54.716 | KV453080.1 | 13801053 | 15-scf00327 | 15 |
| AX-157756385 | 15 | 54.716 | KV453080.1 | 13802344 | 15-scf00327 | 15 |
| AX-158166066 | 15 | 54.716 | KV453080.1 | 13802836 | 15-scf00327 | 15 |
| AX-157719787 | 15 | 54.716 | KV453080.1 | 13803817 | 15-scf00327 | 15 |
| AX-158166072 | 15 | 54.716 | KV453080.1 | 13808667 | 15-scf00327 | 15 |
| AX-157834322 | 15 | 54.716 | KV453080.1 | 13811714 | 15-scf00327 | 15 |
| AX-158166076 | 15 | 54.716 | KV453080.1 | 13816051 | 15-scf00327 | 15 |
| AX-158166077 | 15 | 54.716 | KV453080.1 | 13816300 | 15-scf00327 | 15 |
| AX-157746993 | 15 | 54.716 | KV453080.1 | 13818667 | 15-scf00327 | 15 |
| AX-157752131 | 15 | 54.716 | KV453080.1 | 13822531 | 15-scf00327 | 15 |
| AX-158166080 | 15 | 54.716 | KV453080.1 | 13822804 | 15-scf00327 | 15 |
| AX-157834323 | 15 | 54.716 | KV453080.1 | 13824517 | 15-scf00327 | 15 |
| AX-158166082 | 15 | 54.716 | KV453080.1 | 13825511 | 15-scf00327 | 15 |
| AX-158166083 | 15 | 54.716 | KV453080.1 | 13829699 | 15-scf00327 | 15 |
| AX-158166084 | 15 | 54.716 | KV453080.1 | 13830031 | 15-scf00327 | 15 |
| AX-158166088 | 15 | 54.716 | KV453080.1 | 13834509 | 15-scf00327 | 15 |
| AX-158166091 | 15 | 54.716 | KV453080.1 | 13838177 | 15-scf00327 | 15 |
| AX-157747857 | 15 | 54.716 | KV453080.1 | 13838402 | 15-scf00327 | 15 |
| AX-157750741 | 15 | 54.716 | KV453080.1 | 13839218 | 15-scf00327 | 15 |
| AX-158166092 | 15 | 54.716 | KV453080.1 | 13839903 | 15-scf00327 | 15 |
| AX-157834325 | 15 | 54.716 | KV453080.1 | 13846403 | 15-scf00327 | 15 |
| AX-158166098 | 15 | 54.716 | KV453080.1 | 13846879 | 15-scf00327 | 15 |
| AX-158166099 | 15 | 54.716 | KV453080.1 | 13849308 | 15-scf00327 | 15 |
| AX-158166102 | 15 | 54.716 | KV453080.1 | 13851053 | 15-scf00327 | 15 |
| AX-157834326 | 15 | 54.716 | KV453080.1 | 13852207 | 15-scf00327 | 15 |
| AX-157834327 | 15 | 54.716 | KV453080.1 | 13855308 | 15-scf00327 | 15 |
| AX-158166105 | 15 | 54.716 | KV453080.1 | 13858270 | 15-scf00327 | 15 |
| AX-158166108 | 15 | 54.716 | KV453080.1 | 13860678 | 15-scf00327 | 15 |
| AX-158166109 | 15 | 54.716 | KV453080.1 | 13861501 | 15-scf00327 | 15 |
| AX-158166110 | 15 | 54.716 | KV453080.1 | 13861850 | 15-scf00327 | 15 |
| AX-157871931 | 15 | 54.716 | KV453080.1 | 13863266 | 15-scf00327 | 15 |
| AX-158166112 | 15 | 54.716 | KV453080.1 | 13863949 | 15-scf00327 | 15 |
| AX-158166113 | 15 | 54.716 | KV453080.1 | 13867940 | 15-scf00327 | 15 |
| AX-158166114 | 15 | 54.716 | KV453080.1 | 13868371 | 15-scf00327 | 15 |
| AX-157719111 | 15 | 54.716 | KV453080.1 | 13876762 | 15-scf00327 | 15 |
| AX-158393410 | 15 | 54.716 | KV453080.1 | 13878127 | 15-scf00327 | 15 |
| AX-157834330 | 15 | 54.716 | KV453080.1 | 13878369 | 15-scf00327 | 15 |
| AX-158166121 | 15 | 54.716 | KV453080.1 | 13881973 | 15-scf00327 | 15 |
| AX-158166122 | 15 | 54.716 | KV453080.1 | 13883528 | 15-scf00327 | 15 |
| AX-158166127 | 15 | 54.716 | KV453080.1 | 13889085 | 15-scf00327 | 15 |
| AX-158166128 | 15 | 54.716 | KV453080.1 | 13890905 | 15-scf00327 | 15 |

|              |    |        |            |          |             |    |
|--------------|----|--------|------------|----------|-------------|----|
| AX-158166129 | 15 | 54.716 | KV453080.1 | 13891386 | 15-scf00327 | 15 |
| AX-157729700 | 15 | 54.716 | KV453080.1 | 13892819 | 15-scf00327 | 15 |
| AX-158166132 | 15 | 54.716 | KV453080.1 | 13895337 | 15-scf00327 | 15 |
| AX-158166135 | 15 | 54.716 | KV453080.1 | 13900135 | 15-scf00327 | 15 |
| AX-157834333 | 15 | 54.716 | KV453080.1 | 13903851 | 15-scf00327 | 15 |
| AX-157834335 | 15 | 54.716 | KV453080.1 | 13908974 | 15-scf00327 | 15 |
| AX-158166145 | 15 | 54.716 | KV453080.1 | 13921227 | 15-scf00327 | 15 |
| AX-158166153 | 15 | 54.716 | KV453080.1 | 13931914 | 15-scf00327 | 15 |
| AX-158166162 | 15 | 54.716 | KV453080.1 | 13946580 | 15-scf00327 | 15 |
| AX-158166231 | 15 | 54.716 | KV453080.1 | 14043793 | 15-scf00327 | 15 |
| AX-158380509 | 15 | 54.717 | KV453080.1 | 13707914 | 15-scf00327 | 15 |
| AX-157748176 | 15 | 54.717 | KV453080.1 | 13716068 | 15-scf00327 | 15 |
| AX-158166133 | 15 | 54.717 | KV453080.1 | 13897957 | 15-scf00327 | 15 |
| AX-157834340 | 15 | 54.717 | KV453080.1 | 13953757 | 15-scf00327 | 15 |
| AX-157834334 | 15 | 54.879 | KV453080.1 | 13907246 | 15-scf00327 | 15 |
| AX-158166140 | 15 | 54.879 | KV453080.1 | 13912532 | 15-scf00327 | 15 |
| AX-158166149 | 15 | 54.879 | KV453080.1 | 13925728 | 15-scf00327 | 15 |
| AX-158166150 | 15 | 54.879 | KV453080.1 | 13927456 | 15-scf00327 | 15 |
| AX-158166151 | 15 | 54.961 | KV453080.1 | 13927926 | 15-scf00327 | 15 |
| AX-158166163 | 15 | 55.043 | KV453080.1 | 13948118 | 15-scf00327 | 15 |
| AX-157752568 | 15 | 55.044 | KV453080.1 | 13904168 | 15-scf00327 | 15 |
| AX-158166138 | 15 | 55.044 | KV453080.1 | 13907702 | 15-scf00327 | 15 |
| AX-158166155 | 15 | 55.044 | KV453080.1 | 13936220 | 15-scf00327 | 15 |
| AX-158166160 | 15 | 55.044 | KV453080.1 | 13943525 | 15-scf00327 | 15 |
| AX-157755563 | 15 | 55.044 | KV453080.1 | 13951265 | 15-scf00327 | 15 |
| AX-158166165 | 15 | 55.044 | KV453080.1 | 13960931 | 15-scf00327 | 15 |
| AX-158166166 | 15 | 55.044 | KV453080.1 | 13961911 | 15-scf00327 | 15 |
| AX-158166167 | 15 | 55.044 | KV453080.1 | 13963387 | 15-scf00327 | 15 |
| AX-158166168 | 15 | 55.044 | KV453080.1 | 13965346 | 15-scf00327 | 15 |
| AX-158166169 | 15 | 55.044 | KV453080.1 | 13965716 | 15-scf00327 | 15 |
| AX-158166172 | 15 | 55.044 | KV453080.1 | 13969490 | 15-scf00327 | 15 |
| AX-158166173 | 15 | 55.044 | KV453080.1 | 13970156 | 15-scf00327 | 15 |
| AX-158166175 | 15 | 55.044 | KV453080.1 | 13971203 | 15-scf00327 | 15 |
| AX-157752396 | 15 | 55.044 | KV453080.1 | 13971896 | 15-scf00327 | 15 |
| AX-158166177 | 15 | 55.044 | KV453080.1 | 13975296 | 15-scf00327 | 15 |
| AX-158166180 | 15 | 55.044 | KV453080.1 | 13981195 | 15-scf00327 | 15 |
| AX-158166182 | 15 | 55.044 | KV453080.1 | 13981959 | 15-scf00327 | 15 |
| AX-158166184 | 15 | 55.044 | KV453080.1 | 13983470 | 15-scf00327 | 15 |
| AX-158166185 | 15 | 55.044 | KV453080.1 | 13987952 | 15-scf00327 | 15 |
| AX-158166188 | 15 | 55.044 | KV453080.1 | 13990665 | 15-scf00327 | 15 |
| AX-158166189 | 15 | 55.044 | KV453080.1 | 13991302 | 15-scf00327 | 15 |
| AX-158166190 | 15 | 55.044 | KV453080.1 | 13991704 | 15-scf00327 | 15 |
| AX-158166221 | 15 | 55.044 | KV453080.1 | 14029509 | 15-scf00327 | 15 |
| AX-158166038 | 15 | 55.096 | KV453080.1 | 13771489 | 15-scf00327 | 15 |
| AX-158166057 | 15 | 55.096 | KV453080.1 | 13792026 | 15-scf00327 | 15 |
| AX-157721534 | 15 | 55.096 | KV453080.1 | 13908164 | 15-scf00327 | 15 |
| AX-158166192 | 15 | 55.096 | KV453080.1 | 13992615 | 15-scf00327 | 15 |
| AX-158166193 | 15 | 55.096 | KV453080.1 | 13993589 | 15-scf00327 | 15 |
| AX-158166225 | 15 | 55.096 | KV453080.1 | 14035590 | 15-scf00327 | 15 |
| AX-157834305 | 15 | 55.153 | KV453080.1 | 13658390 | 15-scf00327 | 15 |
| AX-158166194 | 15 | 55.153 | KV453080.1 | 13994446 | 15-scf00327 | 15 |



|              |    |        |             |          |             |    |
|--------------|----|--------|-------------|----------|-------------|----|
| AX-158166195 | 15 | 55.153 | KV453080.1  | 13995151 | 15-scf00327 | 15 |
| AX-158166196 | 15 | 55.153 | KV453080.1  | 13995926 | 15-scf00327 | 15 |
| AX-158166197 | 15 | 55.153 | KV453080.1  | 13996439 | 15-scf00327 | 15 |
| AX-158166202 | 15 | 55.371 | KV453080.1  | 14000605 | 15-scf00327 | 15 |
| AX-158166204 | 15 | 55.371 | KV453080.1  | 14004213 | 15-scf00327 | 15 |
| AX-158166207 | 15 | 55.371 | KV453080.1  | 14007397 | 15-scf00327 | 15 |
| AX-158166208 | 15 | 55.371 | KV453080.1  | 14008920 | 15-scf00327 | 15 |
| AX-158166210 | 15 | 55.371 | KV453080.1  | 14010451 | 15-scf00327 | 15 |
| AX-158166216 | 15 | 55.371 | KV453080.1  | 14021378 | 15-scf00327 | 15 |
| AX-157834337 | 15 | 55.59  | KV453080.1  | 13913576 | 15-scf00327 | 15 |
| AX-158166219 | 15 | 55.59  | KV453080.1  | 14024761 | 15-scf00327 | 15 |
| AX-158166223 | 15 | 55.59  | KV453080.1  | 14034342 | 15-scf00327 | 15 |
| AX-158166226 | 15 | 55.59  | KV453080.1  | 14037175 | 15-scf00327 | 15 |
| AX-158166228 | 15 | 55.59  | KV453080.1  | 14039734 | 15-scf00327 | 15 |
| AX-158166229 | 15 | 55.59  | KV453080.1  | 14041273 | 15-scf00327 | 15 |
| AX-158166239 | 15 | 55.59  | KV453080.1  | 14051970 | 15-scf00327 | 15 |
| AX-158166520 | 15 | 55.59  | KV453080.1  | 14459726 | 15-scf00327 | 15 |
| AX-157705236 | 15 | 55.59  | 3ML01029146 | 333      | scf04766_1  | UN |
| AX-158166235 | 15 | 55.687 | KV453080.1  | 14047226 | 15-scf00327 | 15 |
| AX-158166240 | 15 | 55.875 | KV453080.1  | 14052539 | 15-scf00327 | 15 |
| AX-158166241 | 15 | 55.875 | KV453080.1  | 14056157 | 15-scf00327 | 15 |
| AX-158166238 | 15 | 56.062 | KV453080.1  | 14050020 | 15-scf00327 | 15 |
| AX-157750345 | 15 | 56.062 | KV453080.1  | 14057670 | 15-scf00327 | 15 |
| AX-158166243 | 15 | 56.062 | KV453080.1  | 14059106 | 15-scf00327 | 15 |
| AX-158166246 | 15 | 56.062 | KV453080.1  | 14063073 | 15-scf00327 | 15 |
| AX-158166247 | 15 | 56.062 | KV453080.1  | 14064700 | 15-scf00327 | 15 |
| AX-158166248 | 15 | 56.062 | KV453080.1  | 14065490 | 15-scf00327 | 15 |
| AX-158166249 | 15 | 56.062 | KV453080.1  | 14066326 | 15-scf00327 | 15 |
| AX-158166251 | 15 | 56.062 | KV453080.1  | 14068858 | 15-scf00327 | 15 |
| AX-158166252 | 15 | 56.062 | KV453080.1  | 14071478 | 15-scf00327 | 15 |
| AX-158166254 | 15 | 56.062 | KV453080.1  | 14072717 | 15-scf00327 | 15 |
| AX-158166259 | 15 | 56.197 | KV453080.1  | 14079039 | 15-scf00327 | 15 |
| AX-158385776 | 15 | 56.197 | KV453080.1  | 14079567 | 15-scf00327 | 15 |
| AX-158166256 | 15 | 56.465 | KV453080.1  | 14074477 | 15-scf00327 | 15 |
| AX-158166260 | 15 | 56.465 | KV453080.1  | 14079910 | 15-scf00327 | 15 |
| AX-158166275 | 15 | 56.465 | KV453080.1  | 14108538 | 15-scf00327 | 15 |
| AX-158166276 | 15 | 56.465 | KV453080.1  | 14110523 | 15-scf00327 | 15 |
| AX-158166277 | 15 | 56.465 | KV453080.1  | 14111161 | 15-scf00327 | 15 |
| AX-158166278 | 15 | 56.465 | KV453080.1  | 14111899 | 15-scf00327 | 15 |
| AX-158166279 | 15 | 56.465 | KV453080.1  | 14112540 | 15-scf00327 | 15 |
| AX-158166280 | 15 | 56.465 | KV453080.1  | 14114653 | 15-scf00327 | 15 |
| AX-158166281 | 15 | 56.465 | KV453080.1  | 14115195 | 15-scf00327 | 15 |
| AX-157743971 | 15 | 56.465 | KV453080.1  | 14124227 | 15-scf00327 | 15 |
| AX-158393412 | 15 | 56.465 | KV453080.1  | 14128087 | 15-scf00327 | 15 |
| AX-158166286 | 15 | 56.465 | KV453080.1  | 14130265 | 15-scf00327 | 15 |
| AX-158166290 | 15 | 56.465 | KV453080.1  | 14136405 | 15-scf00327 | 15 |
| AX-158166296 | 15 | 56.465 | KV453080.1  | 14142950 | 15-scf00327 | 15 |
| AX-158166297 | 15 | 56.465 | KV453080.1  | 14143545 | 15-scf00327 | 15 |
| AX-158166303 | 15 | 56.465 | KV453080.1  | 14148827 | 15-scf00327 | 15 |
| AX-158166304 | 15 | 56.465 | KV453080.1  | 14149265 | 15-scf00327 | 15 |
| AX-158166313 | 15 | 56.465 | KV453080.1  | 14154852 | 15-scf00327 | 15 |

|               |    |        |            |          |             |    |
|---------------|----|--------|------------|----------|-------------|----|
| AX-157834343  | 15 | 56.465 | KV453080.1 | 14165231 | 15-scf00327 | 15 |
| AX-157757754  | 15 | 56.465 | KV453080.1 | 14193979 | 15-scf00327 | 15 |
| AX-158166371  | 15 | 56.465 | KV453080.1 | 14238513 | 15-scf00327 | 15 |
| AX-158166457  | 15 | 56.465 | KV453080.1 | 14365290 | 15-scf00327 | 15 |
| AX-158166557  | 15 | 56.465 | KV453080.1 | 14531181 | 15-scf00327 | 15 |
| AX-158166673  | 15 | 56.465 | KV453080.1 | 14705436 | 15-scf00327 | 15 |
| AX-1581666915 | 15 | 56.465 | KV453080.1 | 15061863 | 15-scf00327 | 15 |
| AX-1581666973 | 15 | 56.465 | KV453080.1 | 15157598 | 15-scf00327 | 15 |
| AX-158166298  | 15 | 56.493 | KV453080.1 | 14144780 | 15-scf00327 | 15 |
| AX-158166306  | 15 | 56.513 | KV453080.1 | 14151057 | 15-scf00327 | 15 |
| AX-158166312  | 15 | 56.542 | KV453080.1 | 14153489 | 15-scf00327 | 15 |
| AX-158166244  | 15 | 56.574 | KV453080.1 | 14060031 | 15-scf00327 | 15 |
| AX-158166289  | 15 | 56.574 | KV453080.1 | 14135027 | 15-scf00327 | 15 |
| AX-157834344  | 15 | 56.574 | KV453080.1 | 14165754 | 15-scf00327 | 15 |
| AX-158166320  | 15 | 56.574 | KV453080.1 | 14167618 | 15-scf00327 | 15 |
| AX-157834347  | 15 | 56.574 | KV453080.1 | 14168102 | 15-scf00327 | 15 |
| AX-158166322  | 15 | 56.574 | KV453080.1 | 14170297 | 15-scf00327 | 15 |
| AX-158166299  | 15 | 56.633 | KV453080.1 | 14146326 | 15-scf00327 | 15 |
| AX-157722473  | 15 | 56.633 | KV453080.1 | 14159524 | 15-scf00327 | 15 |
| AX-157834349  | 15 | 56.633 | KV453080.1 | 14172135 | 15-scf00327 | 15 |
| AX-158166329  | 15 | 56.633 | KV453080.1 | 14179212 | 15-scf00327 | 15 |
| AX-157722592  | 15 | 56.633 | KV453080.1 | 14180952 | 15-scf00327 | 15 |
| AX-158166416  | 15 | 56.633 | KV453080.1 | 14301553 | 15-scf00327 | 15 |
| AX-158166478  | 15 | 56.633 | KV453080.1 | 14397073 | 15-scf00327 | 15 |
| AX-157739983  | 15 | 56.633 | KV453080.1 | 14438138 | 15-scf00327 | 15 |
| AX-158166325  | 15 | 56.683 | KV453080.1 | 14176549 | 15-scf00327 | 15 |
| AX-158166326  | 15 | 56.683 | KV453080.1 | 14177208 | 15-scf00327 | 15 |
| AX-158166330  | 15 | 56.747 | KV453080.1 | 14182396 | 15-scf00327 | 15 |
| AX-157871932  | 15 | 56.793 | KV453080.1 | 14180832 | 15-scf00327 | 15 |
| AX-158380512  | 15 | 56.793 | KV453080.1 | 14184688 | 15-scf00327 | 15 |
| AX-158166331  | 15 | 56.793 | KV453080.1 | 14184753 | 15-scf00327 | 15 |
| AX-158166332  | 15 | 56.793 | KV453080.1 | 14185348 | 15-scf00327 | 15 |
| AX-158166333  | 15 | 56.793 | KV453080.1 | 14187490 | 15-scf00327 | 15 |
| AX-157757435  | 15 | 56.793 | KV453080.1 | 14239698 | 15-scf00327 | 15 |
| AX-158166343  | 15 | 56.922 | KV453080.1 | 14206137 | 15-scf00327 | 15 |
| AX-158166344  | 15 | 56.922 | KV453080.1 | 14207163 | 15-scf00327 | 15 |
| AX-158166347  | 15 | 56.922 | KV453080.1 | 14210652 | 15-scf00327 | 15 |
| AX-157710542  | 15 | 56.922 | KV453080.1 | 14219222 | 15-scf00327 | 15 |
| AX-158166346  | 15 | 57.011 | KV453080.1 | 14209806 | 15-scf00327 | 15 |
| AX-157717235  | 15 | 57.011 | KV453080.1 | 14212194 | 15-scf00327 | 15 |
| AX-158166349  | 15 | 57.011 | KV453080.1 | 14214206 | 15-scf00327 | 15 |
| AX-157756096  | 15 | 57.011 | KV453080.1 | 14215530 | 15-scf00327 | 15 |
| AX-158166351  | 15 | 57.011 | KV453080.1 | 14216326 | 15-scf00327 | 15 |
| AX-158166352  | 15 | 57.011 | KV453080.1 | 14218137 | 15-scf00327 | 15 |
| AX-158166355  | 15 | 57.011 | KV453080.1 | 14224360 | 15-scf00327 | 15 |
| AX-158166357  | 15 | 57.011 | KV453080.1 | 14226958 | 15-scf00327 | 15 |
| AX-158166360  | 15 | 57.011 | KV453080.1 | 14228726 | 15-scf00327 | 15 |
| AX-158166363  | 15 | 57.011 | KV453080.1 | 14231575 | 15-scf00327 | 15 |
| AX-158166364  | 15 | 57.011 | KV453080.1 | 14232379 | 15-scf00327 | 15 |
| AX-158166365  | 15 | 57.011 | KV453080.1 | 14233418 | 15-scf00327 | 15 |
| AX-158166369  | 15 | 57.011 | KV453080.1 | 14237493 | 15-scf00327 | 15 |

|              |    |        |            |          |             |    |
|--------------|----|--------|------------|----------|-------------|----|
| AX-158166372 | 15 | 57.011 | KV453080.1 | 14244569 | 15-scf00327 | 15 |
| AX-158166373 | 15 | 57.011 | KV453080.1 | 14245574 | 15-scf00327 | 15 |
| AX-158166374 | 15 | 57.011 | KV453080.1 | 14246341 | 15-scf00327 | 15 |
| AX-158166379 | 15 | 57.011 | KV453080.1 | 14252628 | 15-scf00327 | 15 |
| AX-158166381 | 15 | 57.011 | KV453080.1 | 14254461 | 15-scf00327 | 15 |
| AX-158166400 | 15 | 57.011 | KV453080.1 | 14280958 | 15-scf00327 | 15 |
| AX-158166401 | 15 | 57.011 | KV453080.1 | 14282750 | 15-scf00327 | 15 |
| AX-158166404 | 15 | 57.011 | KV453080.1 | 14284824 | 15-scf00327 | 15 |
| AX-158166406 | 15 | 57.011 | KV453080.1 | 14286782 | 15-scf00327 | 15 |
| AX-158166384 | 15 | 57.102 | KV453080.1 | 14257481 | 15-scf00327 | 15 |
| AX-158166391 | 15 | 57.102 | KV453080.1 | 14270346 | 15-scf00327 | 15 |
| AX-158166529 | 15 | 57.102 | KV453080.1 | 14480599 | 15-scf00327 | 15 |
| AX-158166618 | 15 | 57.102 | KV453080.1 | 14623905 | 15-scf00327 | 15 |
| AX-157753525 | 15 | 57.21  | KV453080.1 | 14283712 | 15-scf00327 | 15 |
| AX-158166212 | 15 | 57.449 | KV453080.1 | 14011988 | 15-scf00327 | 15 |
| AX-158166354 | 15 | 57.449 | KV453080.1 | 14222541 | 15-scf00327 | 15 |
| AX-158166366 | 15 | 57.449 | KV453080.1 | 14234257 | 15-scf00327 | 15 |
| AX-158166395 | 15 | 57.449 | KV453080.1 | 14275763 | 15-scf00327 | 15 |
| AX-158166405 | 15 | 57.449 | KV453080.1 | 14285261 | 15-scf00327 | 15 |
| AX-158166407 | 15 | 57.449 | KV453080.1 | 14287377 | 15-scf00327 | 15 |
| AX-158166408 | 15 | 57.449 | KV453080.1 | 14290733 | 15-scf00327 | 15 |
| AX-158166409 | 15 | 57.449 | KV453080.1 | 14293214 | 15-scf00327 | 15 |
| AX-157834369 | 15 | 57.449 | KV453080.1 | 14407926 | 15-scf00327 | 15 |
| AX-158393414 | 15 | 57.776 | KV453080.1 | 14294616 | 15-scf00327 | 15 |
| AX-158166419 | 15 | 57.776 | KV453080.1 | 14306713 | 15-scf00327 | 15 |
| AX-158166421 | 15 | 57.776 | KV453080.1 | 14309929 | 15-scf00327 | 15 |
| AX-158166426 | 15 | 57.776 | KV453080.1 | 14317972 | 15-scf00327 | 15 |
| AX-157775395 | 15 | 57.776 | KV453080.1 | 14356269 | 15-scf00327 | 15 |
| AX-157750791 | 15 | 57.776 | KV453080.1 | 14356958 | 15-scf00327 | 15 |
| AX-158166427 | 15 | 57.885 | KV453080.1 | 14319257 | 15-scf00327 | 15 |
| AX-158166428 | 15 | 57.885 | KV453080.1 | 14320334 | 15-scf00327 | 15 |
| AX-158166430 | 15 | 57.885 | KV453080.1 | 14322904 | 15-scf00327 | 15 |
| AX-158166432 | 15 | 57.885 | KV453080.1 | 14324364 | 15-scf00327 | 15 |
| AX-158166433 | 15 | 57.885 | KV453080.1 | 14325209 | 15-scf00327 | 15 |
| AX-158166368 | 15 | 57.995 | KV453080.1 | 14236741 | 15-scf00327 | 15 |
| AX-158166370 | 15 | 57.995 | KV453080.1 | 14238139 | 15-scf00327 | 15 |
| AX-158166390 | 15 | 57.995 | KV453080.1 | 14268719 | 15-scf00327 | 15 |
| AX-157715428 | 15 | 57.995 | KV453080.1 | 14316956 | 15-scf00327 | 15 |
| AX-157834355 | 15 | 57.995 | KV453080.1 | 14330466 | 15-scf00327 | 15 |
| AX-157751313 | 15 | 57.995 | KV453080.1 | 14333743 | 15-scf00327 | 15 |
| AX-158166436 | 15 | 57.995 | KV453080.1 | 14337994 | 15-scf00327 | 15 |
| AX-157834356 | 15 | 57.995 | KV453080.1 | 14340986 | 15-scf00327 | 15 |
| AX-158166445 | 15 | 57.995 | KV453080.1 | 14347361 | 15-scf00327 | 15 |
| AX-158166446 | 15 | 57.995 | KV453080.1 | 14347732 | 15-scf00327 | 15 |
| AX-158166448 | 15 | 57.995 | KV453080.1 | 14349112 | 15-scf00327 | 15 |
| AX-158380513 | 15 | 57.995 | KV453080.1 | 14352803 | 15-scf00327 | 15 |
| AX-158166451 | 15 | 57.995 | KV453080.1 | 14353910 | 15-scf00327 | 15 |
| AX-158393415 | 15 | 57.995 | KV453080.1 | 14358231 | 15-scf00327 | 15 |
| AX-158166455 | 15 | 57.995 | KV453080.1 | 14359666 | 15-scf00327 | 15 |
| AX-157834357 | 15 | 57.995 | KV453080.1 | 14363157 | 15-scf00327 | 15 |
| AX-158166459 | 15 | 57.995 | KV453080.1 | 14366591 | 15-scf00327 | 15 |

|              |    |        |            |          |             |    |
|--------------|----|--------|------------|----------|-------------|----|
| AX-157834359 | 15 | 57.995 | KV453080.1 | 14367159 | 15-scf00327 | 15 |
| AX-158166460 | 15 | 57.995 | KV453080.1 | 14368096 | 15-scf00327 | 15 |
| AX-157747997 | 15 | 57.995 | KV453080.1 | 14368362 | 15-scf00327 | 15 |
| AX-157756706 | 15 | 57.995 | KV453080.1 | 14375373 | 15-scf00327 | 15 |
| AX-157834361 | 15 | 57.995 | KV453080.1 | 14378241 | 15-scf00327 | 15 |
| AX-158166465 | 15 | 57.995 | KV453080.1 | 14378843 | 15-scf00327 | 15 |
| AX-158166471 | 15 | 57.995 | KV453080.1 | 14385983 | 15-scf00327 | 15 |
| AX-158166472 | 15 | 57.995 | KV453080.1 | 14388763 | 15-scf00327 | 15 |
| AX-158166475 | 15 | 57.995 | KV453080.1 | 14392439 | 15-scf00327 | 15 |
| AX-157754077 | 15 | 57.995 | KV453080.1 | 14396039 | 15-scf00327 | 15 |
| AX-158166480 | 15 | 57.995 | KV453080.1 | 14402550 | 15-scf00327 | 15 |
| AX-157717713 | 15 | 57.995 | KV453080.1 | 14404700 | 15-scf00327 | 15 |
| AX-158166482 | 15 | 57.995 | KV453080.1 | 14405874 | 15-scf00327 | 15 |
| AX-157714968 | 15 | 57.995 | KV453080.1 | 14411428 | 15-scf00327 | 15 |
| AX-158166487 | 15 | 57.995 | KV453080.1 | 14413841 | 15-scf00327 | 15 |
| AX-157716249 | 15 | 57.997 | KV453080.1 | 14410029 | 15-scf00327 | 15 |
| AX-158166443 | 15 | 57.998 | KV453080.1 | 14346452 | 15-scf00327 | 15 |
| AX-158166486 | 15 | 57.998 | KV453080.1 | 14413346 | 15-scf00327 | 15 |
| AX-157834360 | 15 | 57.999 | KV453080.1 | 14371428 | 15-scf00327 | 15 |
| AX-158166464 | 15 | 57.999 | KV453080.1 | 14377540 | 15-scf00327 | 15 |
| AX-158166491 | 15 | 57.999 | KV453080.1 | 14416654 | 15-scf00327 | 15 |
| AX-158166493 | 15 | 58.309 | KV453080.1 | 14418228 | 15-scf00327 | 15 |
| AX-158166494 | 15 | 58.31  | KV453080.1 | 14419269 | 15-scf00327 | 15 |
| AX-158166496 | 15 | 58.379 | KV453080.1 | 14420988 | 15-scf00327 | 15 |
| AX-157834373 | 15 | 58.695 | KV453080.1 | 14426471 | 15-scf00327 | 15 |
| AX-158380514 | 15 | 58.695 | KV453080.1 | 14432845 | 15-scf00327 | 15 |
| AX-157724097 | 15 | 58.695 | KV453080.1 | 14434366 | 15-scf00327 | 15 |
| AX-158166504 | 15 | 58.695 | KV453080.1 | 14435472 | 15-scf00327 | 15 |
| AX-157757545 | 15 | 58.695 | KV453080.1 | 14437562 | 15-scf00327 | 15 |
| AX-158166506 | 15 | 58.695 | KV453080.1 | 14438020 | 15-scf00327 | 15 |
| AX-158166511 | 15 | 58.695 | KV453080.1 | 14449854 | 15-scf00327 | 15 |
| AX-158166510 | 15 | 58.869 | KV453080.1 | 14449589 | 15-scf00327 | 15 |
| AX-158166513 | 15 | 58.869 | KV453080.1 | 14452155 | 15-scf00327 | 15 |
| AX-158166514 | 15 | 58.87  | KV453080.1 | 14453009 | 15-scf00327 | 15 |
| AX-158166515 | 15 | 58.87  | KV453080.1 | 14453346 | 15-scf00327 | 15 |
| AX-158166518 | 15 | 58.87  | KV453080.1 | 14455113 | 15-scf00327 | 15 |
| AX-157834377 | 15 | 58.87  | KV453080.1 | 14459530 | 15-scf00327 | 15 |
| AX-158166522 | 15 | 58.929 | KV453080.1 | 14465537 | 15-scf00327 | 15 |
| AX-158166462 | 15 | 58.979 | KV453080.1 | 14376421 | 15-scf00327 | 15 |
| AX-158166523 | 15 | 58.979 | KV453080.1 | 14466275 | 15-scf00327 | 15 |
| AX-158166525 | 15 | 58.979 | KV453080.1 | 14471428 | 15-scf00327 | 15 |
| AX-158166526 | 15 | 58.979 | KV453080.1 | 14472663 | 15-scf00327 | 15 |
| AX-158166531 | 15 | 59.377 | KV453080.1 | 14488860 | 15-scf00327 | 15 |
| AX-158166532 | 15 | 59.714 | KV453080.1 | 14489925 | 15-scf00327 | 15 |
| AX-157871934 | 15 | 59.745 | KV453080.1 | 14351182 | 15-scf00327 | 15 |
| AX-157834364 | 15 | 59.745 | KV453080.1 | 14398718 | 15-scf00327 | 15 |
| AX-157834378 | 15 | 59.745 | KV453080.1 | 14493200 | 15-scf00327 | 15 |
| AX-157834380 | 15 | 59.745 | KV453080.1 | 14495946 | 15-scf00327 | 15 |
| AX-158166535 | 15 | 59.745 | KV453080.1 | 14498915 | 15-scf00327 | 15 |
| AX-158166536 | 15 | 59.745 | KV453080.1 | 14502087 | 15-scf00327 | 15 |
| AX-158166539 | 15 | 59.745 | KV453080.1 | 14507187 | 15-scf00327 | 15 |

|              |    |        |            |          |             |    |
|--------------|----|--------|------------|----------|-------------|----|
| AX-157834381 | 15 | 59.745 | KV453080.1 | 14508123 | 15-scf00327 | 15 |
| AX-157740659 | 15 | 59.745 | KV453080.1 | 14508547 | 15-scf00327 | 15 |
| AX-157834382 | 15 | 59.745 | KV453080.1 | 14509010 | 15-scf00327 | 15 |
| AX-158166545 | 15 | 59.775 | KV453080.1 | 14519174 | 15-scf00327 | 15 |
| AX-157886682 | 15 | 59.854 | KV453080.1 | 14458650 | 15-scf00327 | 15 |
| AX-158166538 | 15 | 59.854 | KV453080.1 | 14506777 | 15-scf00327 | 15 |
| AX-158166546 | 15 | 59.854 | KV453080.1 | 14519926 | 15-scf00327 | 15 |
| AX-158166547 | 15 | 59.854 | KV453080.1 | 14520392 | 15-scf00327 | 15 |
| AX-158166548 | 15 | 59.854 | KV453080.1 | 14522104 | 15-scf00327 | 15 |
| AX-158166553 | 15 | 59.854 | KV453080.1 | 14527214 | 15-scf00327 | 15 |
| AX-158166555 | 15 | 59.854 | KV453080.1 | 14530357 | 15-scf00327 | 15 |
| AX-158166556 | 15 | 59.908 | KV453080.1 | 14530823 | 15-scf00327 | 15 |
| AX-158166483 | 15 | 59.964 | KV453080.1 | 14406823 | 15-scf00327 | 15 |
| AX-158166558 | 15 | 59.964 | KV453080.1 | 14531560 | 15-scf00327 | 15 |
| AX-158166560 | 15 | 59.964 | KV453080.1 | 14532612 | 15-scf00327 | 15 |
| AX-158166562 | 15 | 59.964 | KV453080.1 | 14539370 | 15-scf00327 | 15 |
| AX-158166567 | 15 | 60.237 | KV453080.1 | 14545718 | 15-scf00327 | 15 |
| AX-158166569 | 15 | 60.237 | KV453080.1 | 14550867 | 15-scf00327 | 15 |
| AX-157756903 | 15 | 60.237 | KV453080.1 | 14552864 | 15-scf00327 | 15 |
| AX-158166571 | 15 | 60.237 | KV453080.1 | 14554562 | 15-scf00327 | 15 |
| AX-158166572 | 15 | 60.37  | KV453080.1 | 14555703 | 15-scf00327 | 15 |
| AX-158166579 | 15 | 60.511 | KV453080.1 | 14558880 | 15-scf00327 | 15 |
| AX-158166583 | 15 | 60.511 | KV453080.1 | 14566743 | 15-scf00327 | 15 |
| AX-158166585 | 15 | 60.537 | KV453080.1 | 14570172 | 15-scf00327 | 15 |
| AX-158166586 | 15 | 60.62  | KV453080.1 | 14572207 | 15-scf00327 | 15 |
| AX-158166589 | 15 | 60.62  | KV453080.1 | 14575514 | 15-scf00327 | 15 |
| AX-158166591 | 15 | 60.62  | KV453080.1 | 14581340 | 15-scf00327 | 15 |
| AX-158166597 | 15 | 60.693 | KV453080.1 | 14586850 | 15-scf00327 | 15 |
| AX-157834389 | 15 | 60.693 | KV453080.1 | 14612533 | 15-scf00327 | 15 |
| AX-158166596 | 15 | 60.755 | KV453080.1 | 14585189 | 15-scf00327 | 15 |
| AX-158166600 | 15 | 60.755 | KV453080.1 | 14596580 | 15-scf00327 | 15 |
| AX-158166601 | 15 | 60.8   | KV453080.1 | 14596848 | 15-scf00327 | 15 |
| AX-158166602 | 15 | 60.839 | KV453080.1 | 14597845 | 15-scf00327 | 15 |
| AX-158166604 | 15 | 60.839 | KV453080.1 | 14602188 | 15-scf00327 | 15 |
| AX-158166605 | 15 | 60.839 | KV453080.1 | 14603207 | 15-scf00327 | 15 |
| AX-158166606 | 15 | 60.839 | KV453080.1 | 14603756 | 15-scf00327 | 15 |
| AX-157858411 | 15 | 60.839 | KV453080.1 | 14613185 | 15-scf00327 | 15 |
| AX-158166613 | 15 | 60.839 | KV453080.1 | 14614104 | 15-scf00327 | 15 |
| AX-157834390 | 15 | 60.839 | KV453080.1 | 14614323 | 15-scf00327 | 15 |
| AX-158166614 | 15 | 60.839 | KV453080.1 | 14615606 | 15-scf00327 | 15 |
| AX-158166628 | 15 | 60.839 | KV453080.1 | 14645802 | 15-scf00327 | 15 |
| AX-158166689 | 15 | 60.839 | KV453080.1 | 14728872 | 15-scf00327 | 15 |
| AX-158166592 | 15 | 60.948 | KV453080.1 | 14581969 | 15-scf00327 | 15 |
| AX-158166621 | 15 | 60.948 | KV453080.1 | 14629811 | 15-scf00327 | 15 |
| AX-158166622 | 15 | 60.948 | KV453080.1 | 14630548 | 15-scf00327 | 15 |
| AX-157834397 | 15 | 60.948 | KV453080.1 | 14636788 | 15-scf00327 | 15 |
| AX-157719488 | 15 | 60.948 | KV453080.1 | 14638381 | 15-scf00327 | 15 |
| AX-158166623 | 15 | 60.948 | KV453080.1 | 14639271 | 15-scf00327 | 15 |
| AX-157743602 | 15 | 60.948 | KV453080.1 | 14642230 | 15-scf00327 | 15 |
| AX-158166630 | 15 | 61.127 | KV453080.1 | 14650939 | 15-scf00327 | 15 |
| AX-158166634 | 15 | 61.277 | KV453080.1 | 14654671 | 15-scf00327 | 15 |

|              |    |        |            |          |             |    |
|--------------|----|--------|------------|----------|-------------|----|
| AX-158166637 | 15 | 61.442 | KV453080.1 | 14658396 | 15-scf00327 | 15 |
| AX-158417937 | 15 | 61.442 | KV453080.1 | 14660912 | 15-scf00327 | 15 |
| AX-158166530 | 15 | 61.606 | KV453080.1 | 14484624 | 15-scf00327 | 15 |
| AX-158166580 | 15 | 61.606 | KV453080.1 | 14559818 | 15-scf00327 | 15 |
| AX-158166638 | 15 | 61.606 | KV453080.1 | 14658938 | 15-scf00327 | 15 |
| AX-157697745 | 15 | 61.606 | KV453080.1 | 14663532 | 15-scf00327 | 15 |
| AX-158166640 | 15 | 61.606 | KV453080.1 | 14663794 | 15-scf00327 | 15 |
| AX-158166642 | 15 | 61.606 | KV453080.1 | 14668503 | 15-scf00327 | 15 |
| AX-158413147 | 15 | 61.606 | KV453080.1 | 14668877 | 15-scf00327 | 15 |
| AX-158166643 | 15 | 61.606 | KV453080.1 | 14669909 | 15-scf00327 | 15 |
| AX-158166645 | 15 | 61.606 | KV453080.1 | 14673231 | 15-scf00327 | 15 |
| AX-158166647 | 15 | 61.606 | KV453080.1 | 14674605 | 15-scf00327 | 15 |
| AX-157866602 | 15 | 61.606 | KV453080.1 | 14674985 | 15-scf00327 | 15 |
| AX-158166648 | 15 | 61.606 | KV453080.1 | 14675198 | 15-scf00327 | 15 |
| AX-158166652 | 15 | 61.606 | KV453080.1 | 14676929 | 15-scf00327 | 15 |
| AX-157834399 | 15 | 61.606 | KV453080.1 | 14677207 | 15-scf00327 | 15 |
| AX-158166660 | 15 | 61.606 | KV453080.1 | 14691452 | 15-scf00327 | 15 |
| AX-158166665 | 15 | 61.606 | KV453080.1 | 14695205 | 15-scf00327 | 15 |
| AX-158166918 | 15 | 61.606 | KV453080.1 | 15064480 | 15-scf00327 | 15 |
| AX-157721035 | 15 | 62.043 | KV453080.1 | 14694464 | 15-scf00327 | 15 |
| AX-158166666 | 15 | 62.043 | KV453080.1 | 14695503 | 15-scf00327 | 15 |
| AX-158166670 | 15 | 62.043 | KV453080.1 | 14700015 | 15-scf00327 | 15 |
| AX-158166671 | 15 | 62.055 | KV453080.1 | 14700932 | 15-scf00327 | 15 |
| AX-158166675 | 15 | 62.073 | KV453080.1 | 14707447 | 15-scf00327 | 15 |
| AX-157834400 | 15 | 62.152 | KV453080.1 | 14709646 | 15-scf00327 | 15 |
| AX-157834401 | 15 | 62.152 | KV453080.1 | 14710326 | 15-scf00327 | 15 |
| AX-158380515 | 15 | 62.371 | KV453080.1 | 14665421 | 15-scf00327 | 15 |
| AX-158166653 | 15 | 62.371 | KV453080.1 | 14681726 | 15-scf00327 | 15 |
| AX-158166668 | 15 | 62.371 | KV453080.1 | 14697601 | 15-scf00327 | 15 |
| AX-157834402 | 15 | 62.371 | KV453080.1 | 14713974 | 15-scf00327 | 15 |
| AX-158166679 | 15 | 62.371 | KV453080.1 | 14714414 | 15-scf00327 | 15 |
| AX-158166682 | 15 | 62.371 | KV453080.1 | 14718292 | 15-scf00327 | 15 |
| AX-158166684 | 15 | 62.536 | KV453080.1 | 14723992 | 15-scf00327 | 15 |
| AX-158166686 | 15 | 62.536 | KV453080.1 | 14725963 | 15-scf00327 | 15 |
| AX-158166695 | 15 | 62.536 | KV453080.1 | 14737938 | 15-scf00327 | 15 |
| AX-157773137 | 15 | 62.59  | KV453080.1 | 14726986 | 15-scf00327 | 15 |
| AX-157725044 | 15 | 62.59  | KV453080.1 | 14763597 | 15-scf00327 | 15 |
| AX-158166657 | 15 | 62.696 | KV453080.1 | 14686380 | 15-scf00327 | 15 |
| AX-158166699 | 15 | 62.696 | KV453080.1 | 14740633 | 15-scf00327 | 15 |
| AX-158166708 | 15 | 62.696 | KV453080.1 | 14747984 | 15-scf00327 | 15 |
| AX-158166700 | 15 | 62.697 | KV453080.1 | 14740830 | 15-scf00327 | 15 |
| AX-158166706 | 15 | 62.697 | KV453080.1 | 14745462 | 15-scf00327 | 15 |
| AX-158166821 | 15 | 62.697 | KV453080.1 | 14911302 | 15-scf00327 | 15 |
| AX-158166713 | 15 | 62.698 | KV453080.1 | 14754189 | 15-scf00327 | 15 |
| AX-158166683 | 15 | 62.699 | KV453080.1 | 14723371 | 15-scf00327 | 15 |
| AX-157749160 | 15 | 62.699 | KV453080.1 | 14735235 | 15-scf00327 | 15 |
| AX-158166703 | 15 | 62.699 | KV453080.1 | 14742252 | 15-scf00327 | 15 |
| AX-158166704 | 15 | 62.699 | KV453080.1 | 14743428 | 15-scf00327 | 15 |
| AX-158166707 | 15 | 62.699 | KV453080.1 | 14745930 | 15-scf00327 | 15 |
| AX-157748756 | 15 | 62.699 | KV453080.1 | 14759705 | 15-scf00327 | 15 |
| AX-158166716 | 15 | 62.699 | KV453080.1 | 14760975 | 15-scf00327 | 15 |

|              |    |        |            |          |             |    |
|--------------|----|--------|------------|----------|-------------|----|
| AX-158166717 | 15 | 62.699 | KV453080.1 | 14761951 | 15-scf00327 | 15 |
| AX-158166718 | 15 | 62.699 | KV453080.1 | 14762713 | 15-scf00327 | 15 |
| AX-158166720 | 15 | 62.699 | KV453080.1 | 14763757 | 15-scf00327 | 15 |
| AX-157871936 | 15 | 62.699 | KV453080.1 | 14764855 | 15-scf00327 | 15 |
| AX-158166724 | 15 | 62.699 | KV453080.1 | 14769362 | 15-scf00327 | 15 |
| AX-158166725 | 15 | 62.699 | KV453080.1 | 14770961 | 15-scf00327 | 15 |
| AX-158166727 | 15 | 62.699 | KV453080.1 | 14772374 | 15-scf00327 | 15 |
| AX-158166731 | 15 | 62.699 | KV453080.1 | 14777843 | 15-scf00327 | 15 |
| AX-158166748 | 15 | 62.699 | KV453080.1 | 14803672 | 15-scf00327 | 15 |
| AX-158166752 | 15 | 62.699 | KV453080.1 | 14808820 | 15-scf00327 | 15 |
| AX-158166755 | 15 | 62.699 | KV453080.1 | 14812343 | 15-scf00327 | 15 |
| AX-158166756 | 15 | 62.699 | KV453080.1 | 14813473 | 15-scf00327 | 15 |
| AX-158166757 | 15 | 62.699 | KV453080.1 | 14815193 | 15-scf00327 | 15 |
| AX-158166764 | 15 | 62.699 | KV453080.1 | 14824926 | 15-scf00327 | 15 |
| AX-158166733 | 15 | 62.785 | KV453080.1 | 14784259 | 15-scf00327 | 15 |
| AX-158166738 | 15 | 62.879 | KV453080.1 | 14790633 | 15-scf00327 | 15 |
| AX-158166749 | 15 | 62.967 | KV453080.1 | 14806600 | 15-scf00327 | 15 |
| AX-158166758 | 15 | 63.027 | KV453080.1 | 14816038 | 15-scf00327 | 15 |
| AX-158166761 | 15 | 63.027 | KV453080.1 | 14818483 | 15-scf00327 | 15 |
| AX-158166762 | 15 | 63.027 | KV453080.1 | 14819912 | 15-scf00327 | 15 |
| AX-157858413 | 15 | 63.027 | KV453080.1 | 14820885 | 15-scf00327 | 15 |
| AX-158166763 | 15 | 63.027 | KV453080.1 | 14823711 | 15-scf00327 | 15 |
| AX-157834410 | 15 | 63.027 | KV453080.1 | 14826287 | 15-scf00327 | 15 |
| AX-157834411 | 15 | 63.027 | KV453080.1 | 14827642 | 15-scf00327 | 15 |
| AX-158166775 | 15 | 63.027 | KV453080.1 | 14841876 | 15-scf00327 | 15 |
| AX-157758968 | 15 | 63.174 | KV453080.1 | 14033659 | 15-scf00327 | 15 |
| AX-158166769 | 15 | 63.174 | KV453080.1 | 14836846 | 15-scf00327 | 15 |
| AX-157753162 | 15 | 63.174 | KV453080.1 | 14837511 | 15-scf00327 | 15 |
| AX-158166770 | 15 | 63.174 | KV453080.1 | 14838053 | 15-scf00327 | 15 |
| AX-158166771 | 15 | 63.174 | KV453080.1 | 14838314 | 15-scf00327 | 15 |
| AX-158166736 | 15 | 63.451 | KV453080.1 | 14787582 | 15-scf00327 | 15 |
| AX-158166772 | 15 | 63.451 | KV453080.1 | 14839146 | 15-scf00327 | 15 |
| AX-158166777 | 15 | 63.455 | KV453080.1 | 14842758 | 15-scf00327 | 15 |
| AX-158166784 | 15 | 63.459 | KV453080.1 | 14859251 | 15-scf00327 | 15 |
| AX-158166282 | 15 | 63.463 | KV453080.1 | 14115947 | 15-scf00327 | 15 |
| AX-158166410 | 15 | 63.463 | KV453080.1 | 14294074 | 15-scf00327 | 15 |
| AX-157871933 | 15 | 63.463 | KV453080.1 | 14299687 | 15-scf00327 | 15 |
| AX-158166439 | 15 | 63.463 | KV453080.1 | 14341771 | 15-scf00327 | 15 |
| AX-158166441 | 15 | 63.463 | KV453080.1 | 14343349 | 15-scf00327 | 15 |
| AX-158393416 | 15 | 63.463 | KV453080.1 | 14381971 | 15-scf00327 | 15 |
| AX-158166479 | 15 | 63.463 | KV453080.1 | 14399316 | 15-scf00327 | 15 |
| AX-157743559 | 15 | 63.463 | KV453080.1 | 14521148 | 15-scf00327 | 15 |
| AX-158166550 | 15 | 63.463 | KV453080.1 | 14523452 | 15-scf00327 | 15 |
| AX-158166561 | 15 | 63.463 | KV453080.1 | 14534752 | 15-scf00327 | 15 |
| AX-158166667 | 15 | 63.463 | KV453080.1 | 14696842 | 15-scf00327 | 15 |
| AX-158166690 | 15 | 63.463 | KV453080.1 | 14729302 | 15-scf00327 | 15 |
| AX-158385781 | 15 | 63.463 | KV453080.1 | 14730506 | 15-scf00327 | 15 |
| AX-158166698 | 15 | 63.463 | KV453080.1 | 14739814 | 15-scf00327 | 15 |
| AX-158166737 | 15 | 63.463 | KV453080.1 | 14788037 | 15-scf00327 | 15 |
| AX-158166742 | 15 | 63.463 | KV453080.1 | 14795280 | 15-scf00327 | 15 |
| AX-158166743 | 15 | 63.463 | KV453080.1 | 14797222 | 15-scf00327 | 15 |

|              |    |        |            |          |             |    |
|--------------|----|--------|------------|----------|-------------|----|
| AX-157743463 | 15 | 63.463 | KV453080.1 | 14836982 | 15-scf00327 | 15 |
| AX-157724505 | 15 | 63.463 | KV453080.1 | 14844420 | 15-scf00327 | 15 |
| AX-158166782 | 15 | 63.463 | KV453080.1 | 14857958 | 15-scf00327 | 15 |
| AX-158166786 | 15 | 63.463 | KV453080.1 | 14860496 | 15-scf00327 | 15 |
| AX-157834413 | 15 | 63.463 | KV453080.1 | 14862281 | 15-scf00327 | 15 |
| AX-158166787 | 15 | 63.463 | KV453080.1 | 14863291 | 15-scf00327 | 15 |
| AX-158166788 | 15 | 63.463 | KV453080.1 | 14864043 | 15-scf00327 | 15 |
| AX-158413153 | 15 | 63.463 | KV453080.1 | 14865678 | 15-scf00327 | 15 |
| AX-158166792 | 15 | 63.463 | KV453080.1 | 14870594 | 15-scf00327 | 15 |
| AX-158166793 | 15 | 63.463 | KV453080.1 | 14871745 | 15-scf00327 | 15 |
| AX-158166795 | 15 | 63.463 | KV453080.1 | 14874114 | 15-scf00327 | 15 |
| AX-158166802 | 15 | 63.463 | KV453080.1 | 14886092 | 15-scf00327 | 15 |
| AX-158166810 | 15 | 63.463 | KV453080.1 | 14899315 | 15-scf00327 | 15 |
| AX-158166830 | 15 | 63.463 | KV453080.1 | 14929752 | 15-scf00327 | 15 |
| AX-158166847 | 15 | 63.463 | KV453080.1 | 14949062 | 15-scf00327 | 15 |
| AX-158166936 | 15 | 63.463 | KV453080.1 | 15091253 | 15-scf00327 | 15 |
| AX-158166964 | 15 | 63.463 | KV453080.1 | 15143347 | 15-scf00327 | 15 |
| AX-158166575 | 15 | 63.682 | KV453080.1 | 14556957 | 15-scf00327 | 15 |
| AX-158166649 | 15 | 63.682 | KV453080.1 | 14675471 | 15-scf00327 | 15 |
| AX-158166656 | 15 | 63.682 | KV453080.1 | 14685134 | 15-scf00327 | 15 |
| AX-158166796 | 15 | 63.682 | KV453080.1 | 14875134 | 15-scf00327 | 15 |
| AX-158166797 | 15 | 63.682 | KV453080.1 | 14876369 | 15-scf00327 | 15 |
| AX-158166798 | 15 | 63.682 | KV453080.1 | 14877488 | 15-scf00327 | 15 |
| AX-158166799 | 15 | 63.682 | KV453080.1 | 14878046 | 15-scf00327 | 15 |
| AX-158166800 | 15 | 63.682 | KV453080.1 | 14878402 | 15-scf00327 | 15 |
| AX-158166801 | 15 | 63.682 | KV453080.1 | 14884711 | 15-scf00327 | 15 |
| AX-157774298 | 15 | 63.682 | KV453080.1 | 14885438 | 15-scf00327 | 15 |
| AX-158166803 | 15 | 63.682 | KV453080.1 | 14886626 | 15-scf00327 | 15 |
| AX-158166804 | 15 | 63.682 | KV453080.1 | 14890213 | 15-scf00327 | 15 |
| AX-158166807 | 15 | 63.682 | KV453080.1 | 14896008 | 15-scf00327 | 15 |
| AX-158166809 | 15 | 63.682 | KV453080.1 | 14898742 | 15-scf00327 | 15 |
| AX-158166811 | 15 | 63.682 | KV453080.1 | 14900024 | 15-scf00327 | 15 |
| AX-158166812 | 15 | 63.682 | KV453080.1 | 14901695 | 15-scf00327 | 15 |
| AX-158166816 | 15 | 63.682 | KV453080.1 | 14906403 | 15-scf00327 | 15 |
| AX-158393419 | 15 | 63.682 | KV453080.1 | 14906753 | 15-scf00327 | 15 |
| AX-158166819 | 15 | 63.682 | KV453080.1 | 14908286 | 15-scf00327 | 15 |
| AX-158166823 | 15 | 63.682 | KV453080.1 | 14916600 | 15-scf00327 | 15 |
| AX-157858414 | 15 | 63.682 | KV453080.1 | 14917005 | 15-scf00327 | 15 |
| AX-157709264 | 15 | 63.682 | KV453080.1 | 14950088 | 15-scf00327 | 15 |
| AX-158166824 | 15 | 63.741 | KV453080.1 | 14918240 | 15-scf00327 | 15 |
| AX-157756009 | 15 | 63.791 | KV453080.1 | 14922685 | 15-scf00327 | 15 |
| AX-158166827 | 15 | 63.82  | KV453080.1 | 14926550 | 15-scf00327 | 15 |
| AX-157834348 | 15 | 63.9   | KV453080.1 | 14171335 | 15-scf00327 | 15 |
| AX-158166429 | 15 | 63.9   | KV453080.1 | 14321690 | 15-scf00327 | 15 |
| AX-158166829 | 15 | 63.9   | KV453080.1 | 14929054 | 15-scf00327 | 15 |
| AX-157834414 | 15 | 63.9   | KV453080.1 | 14929193 | 15-scf00327 | 15 |
| AX-158166831 | 15 | 63.9   | KV453080.1 | 14931297 | 15-scf00327 | 15 |
| AX-158166832 | 15 | 63.9   | KV453080.1 | 14932534 | 15-scf00327 | 15 |
| AX-158166833 | 15 | 63.9   | KV453080.1 | 14935739 | 15-scf00327 | 15 |
| AX-158166838 | 15 | 63.9   | KV453080.1 | 14940181 | 15-scf00327 | 15 |
| AX-157739823 | 15 | 63.9   | KV453080.1 | 14940767 | 15-scf00327 | 15 |



|              |    |        |            |          |             |    |
|--------------|----|--------|------------|----------|-------------|----|
| AX-158166840 | 15 | 63.9   | KV453080.1 | 14942801 | 15-scf00327 | 15 |
| AX-158166841 | 15 | 63.9   | KV453080.1 | 14943679 | 15-scf00327 | 15 |
| AX-158166846 | 15 | 63.9   | KV453080.1 | 14948331 | 15-scf00327 | 15 |
| AX-158166848 | 15 | 63.9   | KV453080.1 | 14949463 | 15-scf00327 | 15 |
| AX-158166856 | 15 | 63.9   | KV453080.1 | 14966021 | 15-scf00327 | 15 |
| AX-157757022 | 15 | 63.9   | KV453080.1 | 15015564 | 15-scf00327 | 15 |
| AX-158166925 | 15 | 63.9   | KV453080.1 | 15076180 | 15-scf00327 | 15 |
| AX-158166721 | 15 | 64.119 | KV453080.1 | 14765734 | 15-scf00327 | 15 |
| AX-158166808 | 15 | 64.119 | KV453080.1 | 14897706 | 15-scf00327 | 15 |
| AX-158166854 | 15 | 64.119 | KV453080.1 | 14962760 | 15-scf00327 | 15 |
| AX-158166859 | 15 | 64.119 | KV453080.1 | 14968455 | 15-scf00327 | 15 |
| AX-158166860 | 15 | 64.119 | KV453080.1 | 14969890 | 15-scf00327 | 15 |
| AX-158166861 | 15 | 64.119 | KV453080.1 | 14972721 | 15-scf00327 | 15 |
| AX-158166865 | 15 | 64.12  | KV453080.1 | 14977429 | 15-scf00327 | 15 |
| AX-158166867 | 15 | 64.12  | KV453080.1 | 14980306 | 15-scf00327 | 15 |
| AX-158166909 | 15 | 64.12  | KV453080.1 | 15055463 | 15-scf00327 | 15 |
| AX-158166942 | 15 | 64.12  | KV453080.1 | 15100506 | 15-scf00327 | 15 |
| AX-158166868 | 15 | 64.553 | KV453080.1 | 14986490 | 15-scf00327 | 15 |
| AX-158413150 | 15 | 64.555 | KV453080.1 | 14813098 | 15-scf00327 | 15 |
| AX-158166843 | 15 | 64.555 | KV453080.1 | 14945330 | 15-scf00327 | 15 |
| AX-158166872 | 15 | 64.555 | KV453080.1 | 14995505 | 15-scf00327 | 15 |
| AX-158166873 | 15 | 64.555 | KV453080.1 | 14997265 | 15-scf00327 | 15 |
| AX-158166876 | 15 | 64.555 | KV453080.1 | 15004805 | 15-scf00327 | 15 |
| AX-158166879 | 15 | 64.555 | KV453080.1 | 15006808 | 15-scf00327 | 15 |
| AX-157745725 | 15 | 64.555 | KV453080.1 | 15007786 | 15-scf00327 | 15 |
| AX-157718931 | 15 | 64.555 | KV453080.1 | 15014612 | 15-scf00327 | 15 |
| AX-157768439 | 15 | 64.555 | KV453080.1 | 15014938 | 15-scf00327 | 15 |
| AX-158166883 | 15 | 64.555 | KV453080.1 | 15018487 | 15-scf00327 | 15 |
| AX-158166886 | 15 | 64.555 | KV453080.1 | 15024734 | 15-scf00327 | 15 |
| AX-158166890 | 15 | 64.555 | KV453080.1 | 15027335 | 15-scf00327 | 15 |
| AX-158166891 | 15 | 64.555 | KV453080.1 | 15030111 | 15-scf00327 | 15 |
| AX-158166892 | 15 | 64.555 | KV453080.1 | 15031560 | 15-scf00327 | 15 |
| AX-158166893 | 15 | 64.555 | KV453080.1 | 15034186 | 15-scf00327 | 15 |
| AX-158166901 | 15 | 64.555 | KV453080.1 | 15044007 | 15-scf00327 | 15 |
| AX-158166903 | 15 | 64.555 | KV453080.1 | 15045255 | 15-scf00327 | 15 |
| AX-158166894 | 15 | 64.586 | KV453080.1 | 15036882 | 15-scf00327 | 15 |
| AX-158166896 | 15 | 64.586 | KV453080.1 | 15038856 | 15-scf00327 | 15 |
| AX-158166907 | 15 | 64.586 | KV453080.1 | 15050734 | 15-scf00327 | 15 |
| AX-158166895 | 15 | 64.638 | KV453080.1 | 15037588 | 15-scf00327 | 15 |
| AX-158166897 | 15 | 64.665 | KV453080.1 | 15039199 | 15-scf00327 | 15 |
| AX-158166904 | 15 | 64.665 | KV453080.1 | 15046450 | 15-scf00327 | 15 |
| AX-158166906 | 15 | 64.665 | KV453080.1 | 15049437 | 15-scf00327 | 15 |
| AX-158166935 | 15 | 64.665 | KV453080.1 | 15088927 | 15-scf00327 | 15 |
| AX-158166908 | 15 | 64.666 | KV453080.1 | 15052102 | 15-scf00327 | 15 |
| AX-158166424 | 15 | 64.991 | KV453080.1 | 14315449 | 15-scf00327 | 15 |
| AX-158166434 | 15 | 64.991 | KV453080.1 | 14327146 | 15-scf00327 | 15 |
| AX-158166837 | 15 | 64.991 | KV453080.1 | 14938722 | 15-scf00327 | 15 |
| AX-158166916 | 15 | 64.991 | KV453080.1 | 15062393 | 15-scf00327 | 15 |
| AX-158166924 | 15 | 64.991 | KV453080.1 | 15073310 | 15-scf00327 | 15 |
| AX-158166926 | 15 | 64.991 | KV453080.1 | 15076562 | 15-scf00327 | 15 |
| AX-158166927 | 15 | 64.992 | KV453080.1 | 15079744 | 15-scf00327 | 15 |

|              |    |        |            |          |             |    |
|--------------|----|--------|------------|----------|-------------|----|
| AX-158393420 | 15 | 64.993 | KV453080.1 | 15011450 | 15-scf00327 | 15 |
| AX-158166930 | 15 | 64.993 | KV453080.1 | 15084901 | 15-scf00327 | 15 |
| AX-158166938 | 15 | 64.993 | KV453080.1 | 15094346 | 15-scf00327 | 15 |
| AX-158166941 | 15 | 64.993 | KV453080.1 | 15097665 | 15-scf00327 | 15 |
| AX-158166945 | 15 | 64.993 | KV453080.1 | 15104713 | 15-scf00327 | 15 |
| AX-158166946 | 15 | 64.993 | KV453080.1 | 15107269 | 15-scf00327 | 15 |
| AX-158166947 | 15 | 64.999 | KV453080.1 | 15109653 | 15-scf00327 | 15 |
| AX-158166527 | 15 | 65.539 | KV453080.1 | 14473613 | 15-scf00327 | 15 |
| AX-158166551 | 15 | 65.539 | KV453080.1 | 14524022 | 15-scf00327 | 15 |
| AX-158166584 | 15 | 65.539 | KV453080.1 | 14567987 | 15-scf00327 | 15 |
| AX-157834386 | 15 | 65.539 | KV453080.1 | 14606218 | 15-scf00327 | 15 |
| AX-158166641 | 15 | 65.539 | KV453080.1 | 14666694 | 15-scf00327 | 15 |
| AX-158166664 | 15 | 65.539 | KV453080.1 | 14693898 | 15-scf00327 | 15 |
| AX-158413149 | 15 | 65.539 | KV453080.1 | 14758926 | 15-scf00327 | 15 |
| AX-158166828 | 15 | 65.539 | KV453080.1 | 14927277 | 15-scf00327 | 15 |
| AX-158166870 | 15 | 65.539 | KV453080.1 | 14993014 | 15-scf00327 | 15 |
| AX-158166887 | 15 | 65.539 | KV453080.1 | 15026047 | 15-scf00327 | 15 |
| AX-158166912 | 15 | 65.539 | KV453080.1 | 15057337 | 15-scf00327 | 15 |
| AX-158166928 | 15 | 65.539 | KV453080.1 | 15080200 | 15-scf00327 | 15 |
| AX-158166929 | 15 | 65.539 | KV453080.1 | 15083456 | 15-scf00327 | 15 |
| AX-158166944 | 15 | 65.539 | KV453080.1 | 15102836 | 15-scf00327 | 15 |
| AX-158166948 | 15 | 65.539 | KV453080.1 | 15111209 | 15-scf00327 | 15 |
| AX-158166949 | 15 | 65.539 | KV453080.1 | 15116235 | 15-scf00327 | 15 |
| AX-158166952 | 15 | 65.539 | KV453080.1 | 15120810 | 15-scf00327 | 15 |
| AX-158166954 | 15 | 65.539 | KV453080.1 | 15122119 | 15-scf00327 | 15 |
| AX-158166955 | 15 | 65.539 | KV453080.1 | 15122989 | 15-scf00327 | 15 |
| AX-158166962 | 15 | 65.539 | KV453080.1 | 15139234 | 15-scf00327 | 15 |
| AX-157716077 | 15 | 65.661 | KV453080.1 | 15035119 | 15-scf00327 | 15 |
| AX-157738413 | 15 | 65.661 | KV453080.1 | 15086116 | 15-scf00327 | 15 |
| AX-158166958 | 15 | 65.661 | KV453080.1 | 15131781 | 15-scf00327 | 15 |
| AX-158166959 | 15 | 65.661 | KV453080.1 | 15132756 | 15-scf00327 | 15 |
| AX-158166966 | 15 | 65.664 | KV453080.1 | 15145497 | 15-scf00327 | 15 |
| AX-158166967 | 15 | 65.67  | KV453080.1 | 15146263 | 15-scf00327 | 15 |
| AX-158166968 | 15 | 66.125 | KV453080.1 | 15148068 | 15-scf00327 | 15 |
| AX-157742925 | 15 | 66.683 | KV453080.1 | 15151149 | 15-scf00327 | 15 |
| AX-158166971 | 15 | 66.691 | KV453080.1 | 15153516 | 15-scf00327 | 15 |
| AX-158166976 | 15 | 66.691 | KV453080.1 | 15159879 | 15-scf00327 | 15 |
| AX-158166977 | 15 | 66.691 | KV453080.1 | 15160270 | 15-scf00327 | 15 |
| AX-157724822 | 15 | 66.729 | KV453080.1 | 15157071 | 15-scf00327 | 15 |
| AX-158166981 | 15 | 66.772 | KV453080.1 | 15163683 | 15-scf00327 | 15 |
| AX-158166982 | 15 | 66.788 | KV453080.1 | 15167385 | 15-scf00327 | 15 |
| AX-158166983 | 15 | 66.789 | KV453080.1 | 15168223 | 15-scf00327 | 15 |
| AX-158166989 | 15 | 67.184 | KV453080.1 | 15174529 | 15-scf00327 | 15 |
| AX-158166990 | 15 | 67.184 | KV453080.1 | 15175270 | 15-scf00327 | 15 |
| AX-158166994 | 15 | 67.185 | KV453080.1 | 15178881 | 15-scf00327 | 15 |
| AX-158166995 | 15 | 67.185 | KV453080.1 | 15180085 | 15-scf00327 | 15 |
| AX-158380518 | 15 | 67.185 | KV453080.1 | 15181133 | 15-scf00327 | 15 |
| AX-158413157 | 15 | 67.289 | KV453080.1 | 15184338 | 15-scf00327 | 15 |
| AX-158166998 | 15 | 67.289 | KV453080.1 | 15185795 | 15-scf00327 | 15 |
| AX-158167000 | 15 | 67.289 | KV453080.1 | 15187413 | 15-scf00327 | 15 |
| AX-158167001 | 15 | 67.289 | KV453080.1 | 15187854 | 15-scf00327 | 15 |

|              |    |        |            |          |             |    |
|--------------|----|--------|------------|----------|-------------|----|
| AX-158167006 | 15 | 67.58  | KV453080.1 | 15193991 | 15-scf00327 | 15 |
| AX-158167020 | 15 | 67.799 | KV453080.1 | 15210279 | 15-scf00327 | 15 |
| AX-158167043 | 15 | 68.608 | KV453080.1 | 15234139 | 15-scf00327 | 15 |
| AX-158417948 | 15 | 68.621 | KV453080.1 | 15235440 | 15-scf00327 | 15 |
| AX-158167047 | 15 | 68.622 | KV453080.1 | 15237459 | 15-scf00327 | 15 |
| AX-158167049 | 15 | 68.899 | KV453080.1 | 15238917 | 15-scf00327 | 15 |
| AX-158167054 | 15 | 68.903 | KV453080.1 | 15245065 | 15-scf00327 | 15 |
| AX-158167056 | 15 | 68.903 | KV453080.1 | 15247134 | 15-scf00327 | 15 |
| AX-158167059 | 15 | 68.903 | KV453080.1 | 15250187 | 15-scf00327 | 15 |
| AX-158167064 | 15 | 68.903 | KV453080.1 | 15254396 | 15-scf00327 | 15 |
| AX-158167066 | 15 | 68.923 | KV453080.1 | 15258652 | 15-scf00327 | 15 |
| AX-158167071 | 15 | 69.368 | KV453080.1 | 15269792 | 15-scf00327 | 15 |
| AX-158167073 | 15 | 69.582 | KV453080.1 | 15275800 | 15-scf00327 | 15 |
| AX-158167075 | 15 | 69.591 | KV453080.1 | 15278019 | 15-scf00327 | 15 |
| AX-158167077 | 15 | 69.597 | KV453080.1 | 15280820 | 15-scf00327 | 15 |
| AX-158167078 | 15 | 69.597 | KV453080.1 | 15281612 | 15-scf00327 | 15 |
| AX-158167079 | 15 | 69.597 | KV453080.1 | 15284177 | 15-scf00327 | 15 |
| AX-158167080 | 15 | 69.602 | KV453080.1 | 15287625 | 15-scf00327 | 15 |
| AX-158167081 | 15 | 69.882 | KV453080.1 | 15288695 | 15-scf00327 | 15 |
| AX-158167082 | 15 | 69.882 | KV453080.1 | 15290966 | 15-scf00327 | 15 |
| AX-158167052 | 15 | 70.029 | KV453080.1 | 15242598 | 15-scf00327 | 15 |
| AX-158167084 | 15 | 70.029 | KV453080.1 | 15296573 | 15-scf00327 | 15 |
| AX-158167085 | 15 | 70.029 | KV453080.1 | 15298087 | 15-scf00327 | 15 |
| AX-158167086 | 15 | 70.029 | KV453080.1 | 15299012 | 15-scf00327 | 15 |
| AX-158167087 | 15 | 70.029 | KV453080.1 | 15300126 | 15-scf00327 | 15 |
| AX-158167089 | 15 | 70.037 | KV453080.1 | 15301590 | 15-scf00327 | 15 |
| AX-158167088 | 15 | 70.044 | KV453080.1 | 15300812 | 15-scf00327 | 15 |
| AX-158167094 | 15 | 70.044 | KV453080.1 | 15308406 | 15-scf00327 | 15 |
| AX-158167096 | 15 | 70.186 | KV453080.1 | 15310848 | 15-scf00327 | 15 |
| AX-157718141 | 15 | 70.351 | KV453080.1 | 15313072 | 15-scf00327 | 15 |
| AX-158167100 | 15 | 70.667 | KV453080.1 | 15314388 | 15-scf00327 | 15 |
| AX-158167101 | 15 | 70.674 | KV453080.1 | 15316682 | 15-scf00327 | 15 |
| AX-158167083 | 15 | 70.682 | KV453080.1 | 15295894 | 15-scf00327 | 15 |
| AX-158167102 | 15 | 70.682 | KV453080.1 | 15317812 | 15-scf00327 | 15 |
| AX-158167098 | 15 | 70.687 | KV453080.1 | 15312182 | 15-scf00327 | 15 |
| AX-158167103 | 15 | 70.687 | KV453080.1 | 15319419 | 15-scf00327 | 15 |
| AX-158167105 | 15 | 70.687 | KV453080.1 | 15323389 | 15-scf00327 | 15 |
| AX-158167106 | 15 | 70.687 | KV453080.1 | 15325625 | 15-scf00327 | 15 |
| AX-157723180 | 15 | 70.687 | KV453080.1 | 15329142 | 15-scf00327 | 15 |
| AX-158167108 | 15 | 70.687 | KV453080.1 | 15329824 | 15-scf00327 | 15 |
| AX-158167109 | 15 | 70.687 | KV453080.1 | 15331022 | 15-scf00327 | 15 |
| AX-158167110 | 15 | 70.687 | KV453080.1 | 15332101 | 15-scf00327 | 15 |
| AX-157775090 | 15 | 70.687 | KV453080.1 | 15335551 | 15-scf00327 | 15 |
| AX-158167116 | 15 | 70.687 | KV453080.1 | 15344839 | 15-scf00327 | 15 |
| AX-158167117 | 15 | 71.12  | KV453080.1 | 15346719 | 15-scf00327 | 15 |
| AX-157741696 | 15 | 71.124 | KV453080.1 | 15350205 | 15-scf00327 | 15 |
| AX-158167121 | 15 | 71.124 | KV453080.1 | 15351963 | 15-scf00327 | 15 |
| AX-157738920 | 15 | 71.124 | KV453080.1 | 15352348 | 15-scf00327 | 15 |
| AX-158167123 | 15 | 71.124 | KV453080.1 | 15353867 | 15-scf00327 | 15 |
| AX-158380519 | 15 | 71.124 | KV453080.1 | 15356122 | 15-scf00327 | 15 |
| AX-158167127 | 15 | 71.124 | KV453080.1 | 15358823 | 15-scf00327 | 15 |

|              |    |        |            |          |             |    |
|--------------|----|--------|------------|----------|-------------|----|
| AX-158167131 | 15 | 71.557 | KV453080.1 | 15368005 | 15-scf00327 | 15 |
| AX-158167132 | 15 | 71.816 | KV453080.1 | 15368786 | 15-scf00327 | 15 |
| AX-157886689 | 15 | 71.938 | KV453080.1 | 15375105 | 15-scf00327 | 15 |
| AX-158167134 | 15 | 71.94  | KV453080.1 | 15375792 | 15-scf00327 | 15 |
| AX-158167135 | 15 | 72.268 | KV453080.1 | 15376764 | 15-scf00327 | 15 |
| AX-158167142 | 15 | 72.349 | KV453080.1 | 15386393 | 15-scf00327 | 15 |
| AX-158167144 | 15 | 72.349 | KV453080.1 | 15390924 | 15-scf00327 | 15 |
| AX-158167148 | 15 | 72.415 | KV453080.1 | 15400652 | 15-scf00327 | 15 |
| AX-158167154 | 15 | 72.786 | KV453080.1 | 15407308 | 15-scf00327 | 15 |
| AX-158167157 | 15 | 73.058 | KV453080.1 | 15410948 | 15-scf00327 | 15 |
| AX-158167159 | 15 | 73.104 | KV453080.1 | 15411935 | 15-scf00327 | 15 |
| AX-158167160 | 15 | 73.109 | KV453080.1 | 15413397 | 15-scf00327 | 15 |
| AX-157722995 | 15 | 73.32  | KV453080.1 | 15420270 | 15-scf00327 | 15 |
| AX-158167163 | 15 | 73.32  | KV453080.1 | 15421297 | 15-scf00327 | 15 |
| AX-158167165 | 15 | 73.32  | KV453080.1 | 15422825 | 15-scf00327 | 15 |
| AX-158167166 | 15 | 73.32  | KV453080.1 | 15425577 | 15-scf00327 | 15 |
| AX-158167174 | 15 | 73.43  | KV453080.1 | 15439751 | 15-scf00327 | 15 |
| AX-158167175 | 15 | 73.43  | KV453080.1 | 15440256 | 15-scf00327 | 15 |
| AX-158167176 | 15 | 73.432 | KV453080.1 | 15440745 | 15-scf00327 | 15 |
| AX-158413165 | 15 | 73.434 | KV453080.1 | 15444039 | 15-scf00327 | 15 |
| AX-158167181 | 15 | 73.439 | KV453080.1 | 15447487 | 15-scf00327 | 15 |
| AX-158393423 | 15 | 73.439 | KV453080.1 | 15456240 | 15-scf00327 | 15 |
| AX-158167162 | 15 | 73.442 | KV453080.1 | 15418790 | 15-scf00327 | 15 |
| AX-158167182 | 15 | 73.442 | KV453080.1 | 15448216 | 15-scf00327 | 15 |
| AX-157738594 | 15 | 73.444 | KV453080.1 | 15450417 | 15-scf00327 | 15 |
| AX-158167186 | 15 | 73.467 | KV453080.1 | 15454152 | 15-scf00327 | 15 |
| AX-158167187 | 15 | 73.51  | KV453080.1 | 15454555 | 15-scf00327 | 15 |
| AX-158167179 | 15 | 73.555 | KV453080.1 | 15444761 | 15-scf00327 | 15 |
| AX-158167188 | 15 | 73.555 | KV453080.1 | 15456310 | 15-scf00327 | 15 |
| AX-158167189 | 15 | 73.555 | KV453080.1 | 15458315 | 15-scf00327 | 15 |
| AX-158167190 | 15 | 73.855 | KV453080.1 | 15461227 | 15-scf00327 | 15 |
| AX-158167167 | 15 | 73.902 | KV453080.1 | 15426421 | 15-scf00327 | 15 |
| AX-158167193 | 15 | 73.902 | KV453080.1 | 15469681 | 15-scf00327 | 15 |
| AX-158167196 | 15 | 73.902 | KV453080.1 | 15473210 | 15-scf00327 | 15 |
| AX-158167201 | 15 | 73.902 | KV453080.1 | 15478110 | 15-scf00327 | 15 |
| AX-157758022 | 15 | 74.179 | KV453080.1 | 15474620 | 15-scf00327 | 15 |
| AX-158167202 | 15 | 74.195 | KV453080.1 | 15480143 | 15-scf00327 | 15 |
| AX-158167203 | 15 | 74.196 | KV453080.1 | 15480929 | 15-scf00327 | 15 |
| AX-158167204 | 15 | 74.196 | KV453080.1 | 15482154 | 15-scf00327 | 15 |
| AX-158167205 | 15 | 74.196 | KV453080.1 | 15482868 | 15-scf00327 | 15 |
| AX-158167207 | 15 | 74.391 | KV453080.1 | 15484344 | 15-scf00327 | 15 |
| AX-158167208 | 15 | 74.391 | KV453080.1 | 15486657 | 15-scf00327 | 15 |
| AX-158167210 | 15 | 74.391 | KV453080.1 | 15488307 | 15-scf00327 | 15 |
| AX-158167211 | 15 | 74.439 | KV453080.1 | 15490883 | 15-scf00327 | 15 |
| AX-158167237 | 15 | 74.851 | KV453080.1 | 15521404 | 15-scf00327 | 15 |
| AX-158167238 | 15 | 74.851 | KV453080.1 | 15522473 | 15-scf00327 | 15 |
| AX-158167239 | 15 | 74.851 | KV453080.1 | 15522754 | 15-scf00327 | 15 |
| AX-158167243 | 15 | 74.96  | KV453080.1 | 15527864 | 15-scf00327 | 15 |
| AX-158167244 | 15 | 74.96  | KV453080.1 | 15528755 | 15-scf00327 | 15 |
| AX-158167245 | 15 | 74.96  | KV453080.1 | 15528984 | 15-scf00327 | 15 |
| AX-158167248 | 15 | 74.96  | KV453080.1 | 15534639 | 15-scf00327 | 15 |

|              |    |        |            |          |             |    |
|--------------|----|--------|------------|----------|-------------|----|
| AX-158167250 | 15 | 74.96  | KV453080.1 | 15537135 | 15-scf00327 | 15 |
| AX-157751751 | 15 | 74.96  | KV453080.1 | 15540370 | 15-scf00327 | 15 |
| AX-158167253 | 15 | 74.96  | KV453080.1 | 15541012 | 15-scf00327 | 15 |
| AX-158167255 | 15 | 74.96  | KV453080.1 | 15543083 | 15-scf00327 | 15 |
| AX-157744198 | 15 | 75.156 | KV453080.1 | 15549097 | 15-scf00327 | 15 |
| AX-157721943 | 15 | 75.352 | KV453080.1 | 15535839 | 15-scf00327 | 15 |
| AX-158167261 | 15 | 75.352 | KV453080.1 | 15555947 | 15-scf00327 | 15 |
| AX-158167262 | 15 | 75.352 | KV453080.1 | 15557377 | 15-scf00327 | 15 |
| AX-158167265 | 15 | 75.352 | KV453080.1 | 15559190 | 15-scf00327 | 15 |
| AX-157866608 | 15 | 75.352 | KV453080.1 | 15559544 | 15-scf00327 | 15 |
| AX-158167269 | 15 | 75.498 | KV453080.1 | 15564498 | 15-scf00327 | 15 |
| AX-158167270 | 15 | 75.498 | KV453080.1 | 15565035 | 15-scf00327 | 15 |
| AX-158167289 | 15 | 75.498 | KV453080.1 | 15582637 | 15-scf00327 | 15 |
| AX-158167258 | 15 | 75.636 | KV453080.1 | 15550472 | 15-scf00327 | 15 |
| AX-158167259 | 15 | 75.636 | KV453080.1 | 15553790 | 15-scf00327 | 15 |
| AX-158167263 | 15 | 75.636 | KV453080.1 | 15558062 | 15-scf00327 | 15 |
| AX-158167272 | 15 | 75.636 | KV453080.1 | 15565821 | 15-scf00327 | 15 |
| AX-158167274 | 15 | 75.636 | KV453080.1 | 15567470 | 15-scf00327 | 15 |
| AX-158167276 | 15 | 75.636 | KV453080.1 | 15567885 | 15-scf00327 | 15 |
| AX-157834421 | 15 | 75.636 | KV453080.1 | 15576412 | 15-scf00327 | 15 |
| AX-158167291 | 15 | 75.636 | KV453080.1 | 15584996 | 15-scf00327 | 15 |
| AX-158167295 | 15 | 75.636 | KV453080.1 | 15589149 | 15-scf00327 | 15 |
| AX-158167297 | 15 | 75.636 | KV453080.1 | 15592545 | 15-scf00327 | 15 |
| AX-157750450 | 15 | 75.636 | KV453080.1 | 15594655 | 15-scf00327 | 15 |
| AX-157834425 | 15 | 75.636 | KV453080.1 | 15600331 | 15-scf00327 | 15 |
| AX-157834428 | 15 | 75.636 | KV453080.1 | 15603149 | 15-scf00327 | 15 |
| AX-157772326 | 15 | 75.636 | KV453080.1 | 15605597 | 15-scf00327 | 15 |
| AX-158167308 | 15 | 75.636 | KV453080.1 | 15613077 | 15-scf00327 | 15 |
| AX-157747861 | 15 | 75.636 | KV453080.1 | 15614911 | 15-scf00327 | 15 |
| AX-157866609 | 15 | 75.636 | KV453080.1 | 15621763 | 15-scf00327 | 15 |
| AX-157747374 | 15 | 75.636 | KV453080.1 | 15623675 | 15-scf00327 | 15 |
| AX-158167312 | 15 | 75.636 | KV453080.1 | 15624181 | 15-scf00327 | 15 |
| AX-157713316 | 15 | 75.636 | KV453080.1 | 15627151 | 15-scf00327 | 15 |
| AX-158167315 | 15 | 75.636 | KV453080.1 | 15630785 | 15-scf00327 | 15 |
| AX-158167320 | 15 | 75.636 | KV453080.1 | 15636857 | 15-scf00327 | 15 |
| AX-158167316 | 15 | 75.658 | KV453080.1 | 15632950 | 15-scf00327 | 15 |
| AX-158167317 | 15 | 75.821 | KV453080.1 | 15633327 | 15-scf00327 | 15 |
| AX-158167241 | 15 | 75.836 | KV453080.1 | 15524952 | 15-scf00327 | 15 |
| AX-158167280 | 15 | 75.836 | KV453080.1 | 15570016 | 15-scf00327 | 15 |
| AX-158167293 | 15 | 75.836 | KV453080.1 | 15587471 | 15-scf00327 | 15 |
| AX-158167296 | 15 | 75.836 | KV453080.1 | 15589500 | 15-scf00327 | 15 |
| AX-157834427 | 15 | 75.836 | KV453080.1 | 15602405 | 15-scf00327 | 15 |
| AX-158167314 | 15 | 75.836 | KV453080.1 | 15626996 | 15-scf00327 | 15 |
| AX-157834434 | 15 | 75.836 | KV453080.1 | 15635800 | 15-scf00327 | 15 |
| AX-158167322 | 15 | 75.836 | KV453080.1 | 15641486 | 15-scf00327 | 15 |
| AX-158167323 | 15 | 75.836 | KV453080.1 | 15643940 | 15-scf00327 | 15 |
| AX-158167327 | 15 | 75.836 | KV453080.1 | 15648295 | 15-scf00327 | 15 |
| AX-158167328 | 15 | 75.836 | KV453080.1 | 15649148 | 15-scf00327 | 15 |
| AX-158167329 | 15 | 75.836 | KV453080.1 | 15649623 | 15-scf00327 | 15 |
| AX-158167331 | 15 | 75.836 | KV453080.1 | 15651461 | 15-scf00327 | 15 |
| AX-158167335 | 15 | 75.836 | KV453080.1 | 15660215 | 15-scf00327 | 15 |

|              |    |        |            |          |             |    |
|--------------|----|--------|------------|----------|-------------|----|
| AX-158167336 | 15 | 75.836 | KV453080.1 | 15661008 | 15-scf00327 | 15 |
| AX-158167395 | 15 | 75.836 | KV453080.1 | 15750256 | 15-scf00327 | 15 |
| AX-158167333 | 15 | 76.127 | KV453080.1 | 15654269 | 15-scf00327 | 15 |
| AX-158167337 | 15 | 76.127 | KV453080.1 | 15663338 | 15-scf00327 | 15 |
| AX-158167339 | 15 | 76.273 | KV453080.1 | 15664442 | 15-scf00327 | 15 |
| AX-157720007 | 15 | 76.273 | KV453080.1 | 15667468 | 15-scf00327 | 15 |
| AX-158167340 | 15 | 76.273 | KV453080.1 | 15669244 | 15-scf00327 | 15 |
| AX-157738340 | 15 | 76.385 | KV453080.1 | 15672249 | 15-scf00327 | 15 |
| AX-158393424 | 15 | 76.387 | KV453080.1 | 15672757 | 15-scf00327 | 15 |
| AX-158167356 | 15 | 76.826 | KV453080.1 | 15697364 | 15-scf00327 | 15 |
| AX-158167380 | 15 | 76.826 | KV453080.1 | 15732436 | 15-scf00327 | 15 |
| AX-158167437 | 15 | 76.826 | KV453080.1 | 15810102 | 15-scf00327 | 15 |
| AX-158167470 | 15 | 76.826 | KV453080.1 | 15867135 | 15-scf00327 | 15 |
| AX-158167358 | 15 | 76.83  | KV453080.1 | 15698422 | 15-scf00327 | 15 |
| AX-158167362 | 15 | 76.83  | KV453080.1 | 15703626 | 15-scf00327 | 15 |
| AX-158167365 | 15 | 76.83  | KV453080.1 | 15709623 | 15-scf00327 | 15 |
| AX-158167366 | 15 | 76.83  | KV453080.1 | 15710299 | 15-scf00327 | 15 |
| AX-157745406 | 15 | 76.83  | KV453080.1 | 15712934 | 15-scf00327 | 15 |
| AX-157834436 | 15 | 76.83  | KV453080.1 | 15713338 | 15-scf00327 | 15 |
| AX-158167373 | 15 | 76.83  | KV453080.1 | 15720120 | 15-scf00327 | 15 |
| AX-158167282 | 15 | 76.88  | KV453080.1 | 15571453 | 15-scf00327 | 15 |
| AX-158167306 | 15 | 76.88  | KV453080.1 | 15607776 | 15-scf00327 | 15 |
| AX-158167307 | 15 | 76.88  | KV453080.1 | 15609750 | 15-scf00327 | 15 |
| AX-158167387 | 15 | 76.88  | KV453080.1 | 15739069 | 15-scf00327 | 15 |
| AX-157743001 | 15 | 76.88  | KV453080.1 | 15780369 | 15-scf00327 | 15 |
| AX-158167389 | 15 | 76.924 | KV453080.1 | 15741622 | 15-scf00327 | 15 |
| AX-158167375 | 15 | 76.963 | KV453080.1 | 15723441 | 15-scf00327 | 15 |
| AX-158167394 | 15 | 76.963 | KV453080.1 | 15747866 | 15-scf00327 | 15 |
| AX-158167410 | 15 | 76.995 | KV453080.1 | 15769400 | 15-scf00327 | 15 |
| AX-158413176 | 15 | 77.039 | KV453080.1 | 15773127 | 15-scf00327 | 15 |
| AX-158413177 | 15 | 77.039 | KV453080.1 | 15773281 | 15-scf00327 | 15 |
| AX-158167411 | 15 | 77.09  | KV453080.1 | 15774528 | 15-scf00327 | 15 |
| AX-158167413 | 15 | 77.133 | KV453080.1 | 15775756 | 15-scf00327 | 15 |
| AX-158167414 | 15 | 77.148 | KV453080.1 | 15776312 | 15-scf00327 | 15 |
| AX-158167416 | 15 | 77.148 | KV453080.1 | 15777775 | 15-scf00327 | 15 |
| AX-158167418 | 15 | 77.257 | KV453080.1 | 15778770 | 15-scf00327 | 15 |
| AX-158167421 | 15 | 77.803 | KV453080.1 | 15785420 | 15-scf00327 | 15 |
| AX-158167360 | 15 | 77.804 | KV453080.1 | 15699311 | 15-scf00327 | 15 |
| AX-157834444 | 15 | 77.804 | KV453080.1 | 15789482 | 15-scf00327 | 15 |
| AX-158167425 | 15 | 77.804 | KV453080.1 | 15790096 | 15-scf00327 | 15 |
| AX-158167427 | 15 | 77.804 | KV453080.1 | 15792025 | 15-scf00327 | 15 |
| AX-157834446 | 15 | 77.804 | KV453080.1 | 15796320 | 15-scf00327 | 15 |
| AX-158167430 | 15 | 77.804 | KV453080.1 | 15799639 | 15-scf00327 | 15 |
| AX-157834448 | 15 | 77.804 | KV453080.1 | 15802455 | 15-scf00327 | 15 |
| AX-158167439 | 15 | 77.804 | KV453080.1 | 15816287 | 15-scf00327 | 15 |
| AX-157714506 | 15 | 77.804 | KV453080.1 | 15816902 | 15-scf00327 | 15 |
| AX-158167440 | 15 | 77.913 | KV453080.1 | 15821149 | 15-scf00327 | 15 |
| AX-158167444 | 15 | 77.913 | KV453080.1 | 15824282 | 15-scf00327 | 15 |
| AX-158167447 | 15 | 77.913 | KV453080.1 | 15827131 | 15-scf00327 | 15 |
| AX-157718155 | 15 | 77.967 | KV453080.1 | 15828871 | 15-scf00327 | 15 |
| AX-158167429 | 15 | 78.022 | KV453080.1 | 15794353 | 15-scf00327 | 15 |

|              |    |        |            |          |             |    |
|--------------|----|--------|------------|----------|-------------|----|
| AX-157834445 | 15 | 78.022 | KV453080.1 | 15794665 | 15-scf00327 | 15 |
| AX-157746734 | 15 | 78.022 | KV453080.1 | 15798006 | 15-scf00327 | 15 |
| AX-158167445 | 15 | 78.022 | KV453080.1 | 15824739 | 15-scf00327 | 15 |
| AX-157714193 | 15 | 78.022 | KV453080.1 | 15835209 | 15-scf00327 | 15 |
| AX-158167451 | 15 | 78.022 | KV453080.1 | 15837767 | 15-scf00327 | 15 |
| AX-158167453 | 15 | 78.022 | KV453080.1 | 15838739 | 15-scf00327 | 15 |
| AX-158167454 | 15 | 78.022 | KV453080.1 | 15840231 | 15-scf00327 | 15 |
| AX-158167455 | 15 | 78.022 | KV453080.1 | 15842491 | 15-scf00327 | 15 |
| AX-158167456 | 15 | 78.022 | KV453080.1 | 15848088 | 15-scf00327 | 15 |
| AX-158167457 | 15 | 78.022 | KV453080.1 | 15849106 | 15-scf00327 | 15 |
| AX-158167463 | 15 | 78.022 | KV453080.1 | 15862673 | 15-scf00327 | 15 |
| AX-158167465 | 15 | 78.022 | KV453080.1 | 15863623 | 15-scf00327 | 15 |
| AX-157708895 | 15 | 78.022 | KV453080.1 | 15864588 | 15-scf00327 | 15 |
| AX-158167468 | 15 | 78.022 | KV453080.1 | 15865878 | 15-scf00327 | 15 |
| AX-158167475 | 15 | 78.022 | KV453080.1 | 15871266 | 15-scf00327 | 15 |
| AX-158167477 | 15 | 78.022 | KV453080.1 | 15875979 | 15-scf00327 | 15 |
| AX-158167472 | 15 | 78.22  | KV453080.1 | 15868494 | 15-scf00327 | 15 |
| AX-158167482 | 15 | 78.22  | KV453080.1 | 15882147 | 15-scf00327 | 15 |
| AX-158167487 | 15 | 78.413 | KV453080.1 | 15891964 | 15-scf00327 | 15 |
| AX-158167489 | 15 | 78.416 | KV453080.1 | 15895236 | 15-scf00327 | 15 |
| AX-157720883 | 15 | 78.5   | KV453080.1 | 15901309 | 15-scf00327 | 15 |
| AX-157744049 | 15 | 78.679 | KV453080.1 | 15903373 | 15-scf00327 | 15 |
| AX-158167494 | 15 | 78.679 | KV453080.1 | 15905123 | 15-scf00327 | 15 |
| AX-158167484 | 15 | 79.225 | KV453080.1 | 15886438 | 15-scf00327 | 15 |
| AX-158167485 | 15 | 79.225 | KV453080.1 | 15887882 | 15-scf00327 | 15 |
| AX-158167495 | 15 | 79.225 | KV453080.1 | 15910239 | 15-scf00327 | 15 |
| AX-157834455 | 15 | 79.225 | KV453080.1 | 15910837 | 15-scf00327 | 15 |
| AX-157745293 | 15 | 79.225 | KV453080.1 | 15911087 | 15-scf00327 | 15 |
| AX-158167497 | 15 | 79.225 | KV453080.1 | 15913502 | 15-scf00327 | 15 |
| AX-158167498 | 15 | 79.225 | KV453080.1 | 15916040 | 15-scf00327 | 15 |
| AX-158167499 | 15 | 79.225 | KV453080.1 | 15917240 | 15-scf00327 | 15 |
| AX-157713103 | 15 | 79.225 | KV453080.1 | 15918294 | 15-scf00327 | 15 |
| AX-158167502 | 15 | 79.225 | KV453080.1 | 15922942 | 15-scf00327 | 15 |
| AX-158167503 | 15 | 79.225 | KV453080.1 | 15923470 | 15-scf00327 | 15 |
| AX-158167508 | 15 | 79.225 | KV453080.1 | 15928421 | 15-scf00327 | 15 |
| AX-158167509 | 15 | 79.225 | KV453080.1 | 15928981 | 15-scf00327 | 15 |
| AX-158167510 | 15 | 79.225 | KV453080.1 | 15929548 | 15-scf00327 | 15 |
| AX-157834457 | 15 | 79.225 | KV453080.1 | 15931764 | 15-scf00327 | 15 |
| AX-158167513 | 15 | 79.225 | KV453080.1 | 15935347 | 15-scf00327 | 15 |
| AX-158167515 | 15 | 79.225 | KV453080.1 | 15938391 | 15-scf00327 | 15 |
| AX-158167518 | 15 | 79.225 | KV453080.1 | 15942371 | 15-scf00327 | 15 |
| AX-157694867 | 15 | 79.225 | KV453080.1 | 15947544 | 15-scf00327 | 15 |
| AX-158167519 | 15 | 79.225 | KV453080.1 | 15948190 | 15-scf00327 | 15 |
| AX-157834460 | 15 | 79.225 | KV453080.1 | 15949986 | 15-scf00327 | 15 |
| AX-158167521 | 15 | 79.225 | KV453080.1 | 15954984 | 15-scf00327 | 15 |
| AX-158167522 | 15 | 79.225 | KV453080.1 | 15956827 | 15-scf00327 | 15 |
| AX-157720218 | 15 | 79.225 | KV453080.1 | 15961848 | 15-scf00327 | 15 |
| AX-158167527 | 15 | 79.225 | KV453080.1 | 15968971 | 15-scf00327 | 15 |
| AX-158167528 | 15 | 79.225 | KV453080.1 | 15969311 | 15-scf00327 | 15 |
| AX-158167530 | 15 | 79.225 | KV453080.1 | 15978230 | 15-scf00327 | 15 |
| AX-158167531 | 15 | 79.225 | KV453080.1 | 15978619 | 15-scf00327 | 15 |

|              |    |        |            |          |             |    |
|--------------|----|--------|------------|----------|-------------|----|
| AX-158380525 | 15 | 79.225 | KV453080.1 | 15979201 | 15-scf00327 | 15 |
| AX-157834462 | 15 | 79.225 | KV453080.1 | 15979666 | 15-scf00327 | 15 |
| AX-158167534 | 15 | 79.225 | KV453080.1 | 15982483 | 15-scf00327 | 15 |
| AX-158167535 | 15 | 79.225 | KV453080.1 | 15984907 | 15-scf00327 | 15 |
| AX-158167542 | 15 | 79.225 | KV453080.1 | 15992722 | 15-scf00327 | 15 |
| AX-158413180 | 15 | 79.334 | KV453080.1 | 15934195 | 15-scf00327 | 15 |
| AX-158167529 | 15 | 79.334 | KV453080.1 | 15975138 | 15-scf00327 | 15 |
| AX-158167536 | 15 | 79.334 | KV453080.1 | 15986737 | 15-scf00327 | 15 |
| AX-158167537 | 15 | 79.334 | KV453080.1 | 15987340 | 15-scf00327 | 15 |
| AX-158167538 | 15 | 79.334 | KV453080.1 | 15988405 | 15-scf00327 | 15 |
| AX-158167543 | 15 | 79.334 | KV453080.1 | 15993045 | 15-scf00327 | 15 |
| AX-157753410 | 15 | 79.334 | KV453080.1 | 15994735 | 15-scf00327 | 15 |
| AX-158167546 | 15 | 79.334 | KV453080.1 | 15997180 | 15-scf00327 | 15 |
| AX-158167547 | 15 | 79.334 | KV453080.1 | 15997760 | 15-scf00327 | 15 |
| AX-158167548 | 15 | 79.334 | KV453080.1 | 15999493 | 15-scf00327 | 15 |
| AX-158167549 | 15 | 79.334 | KV453080.1 | 16000273 | 15-scf00327 | 15 |
| AX-158167550 | 15 | 79.334 | KV453080.1 | 16002598 | 15-scf00327 | 15 |
| AX-157752240 | 15 | 79.334 | KV453080.1 | 16005022 | 15-scf00327 | 15 |
| AX-158167560 | 15 | 79.334 | KV453080.1 | 16018162 | 15-scf00327 | 15 |
| AX-158167563 | 15 | 79.334 | KV453080.1 | 16023672 | 15-scf00327 | 15 |
| AX-158167565 | 15 | 79.685 | KV453080.1 | 16029836 | 15-scf00327 | 15 |
| AX-158167566 | 15 | 79.698 | KV453080.1 | 16030320 | 15-scf00327 | 15 |
| AX-158167567 | 15 | 79.916 | KV453080.1 | 16033248 | 15-scf00327 | 15 |
| AX-158167568 | 15 | 79.928 | KV453080.1 | 16034371 | 15-scf00327 | 15 |
| AX-157724622 | 15 | 79.935 | KV453080.1 | 16036896 | 15-scf00327 | 15 |
| AX-158167570 | 15 | 80.178 | KV453080.1 | 16038137 | 15-scf00327 | 15 |
| AX-158167572 | 15 | 80.178 | KV453080.1 | 16042708 | 15-scf00327 | 15 |
| AX-157739485 | 15 | 80.409 | KV453080.1 | 16041158 | 15-scf00327 | 15 |
| AX-158167576 | 15 | 80.43  | KV453080.1 | 16049845 | 15-scf00327 | 15 |
| AX-157742628 | 15 | 80.43  | KV453080.1 | 16050380 | 15-scf00327 | 15 |
| AX-158167580 | 15 | 80.43  | KV453080.1 | 16056484 | 15-scf00327 | 15 |
| AX-158167582 | 15 | 80.913 | KV453080.1 | 16059598 | 15-scf00327 | 15 |
| AX-158167585 | 15 | 80.913 | KV453080.1 | 16070574 | 15-scf00327 | 15 |
| AX-158167586 | 15 | 80.913 | KV453080.1 | 16072399 | 15-scf00327 | 15 |
| AX-158167588 | 15 | 80.913 | KV453080.1 | 16073706 | 15-scf00327 | 15 |
| AX-158167581 | 15 | 81.029 | KV453080.1 | 16057931 | 15-scf00327 | 15 |
| AX-158167591 | 15 | 81.029 | KV453080.1 | 16076596 | 15-scf00327 | 15 |
| AX-158167592 | 15 | 81.029 | KV453080.1 | 16078236 | 15-scf00327 | 15 |
| AX-158167597 | 15 | 81.029 | KV453080.1 | 16081731 | 15-scf00327 | 15 |
| AX-158167602 | 15 | 81.029 | KV453080.1 | 16089242 | 15-scf00327 | 15 |
| AX-158167595 | 15 | 81.114 | KV453080.1 | 16080146 | 15-scf00327 | 15 |
| AX-158167596 | 15 | 81.173 | KV453080.1 | 16081130 | 15-scf00327 | 15 |
| AX-157773017 | 15 | 81.226 | KV453080.1 | 16083197 | 15-scf00327 | 15 |
| AX-158167598 | 15 | 81.226 | KV453080.1 | 16083872 | 15-scf00327 | 15 |
| AX-158167600 | 15 | 81.226 | KV453080.1 | 16086747 | 15-scf00327 | 15 |
| AX-157858419 | 15 | 81.226 | KV453080.1 | 16095711 | 15-scf00327 | 15 |
| AX-158167609 | 15 | 81.375 | KV453080.1 | 16098951 | 15-scf00327 | 15 |
| AX-158167610 | 15 | 81.523 | KV453080.1 | 16099712 | 15-scf00327 | 15 |
| AX-158167612 | 15 | 81.523 | KV453080.1 | 16101945 | 15-scf00327 | 15 |
| AX-158167613 | 15 | 81.523 | KV453080.1 | 16102612 | 15-scf00327 | 15 |
| AX-158167618 | 15 | 81.523 | KV453080.1 | 16108291 | 15-scf00327 | 15 |



|              |    |        |             |          |             |    |
|--------------|----|--------|-------------|----------|-------------|----|
| AX-158167619 | 15 | 81.523 | KV453080.1  | 16109304 | 15-scf00327 | 15 |
| AX-157705991 | 15 | 81.523 | 3ML01031380 | 163      | scf06992_1  | UN |
| AX-158167601 | 15 | 81.524 | KV453080.1  | 16087547 | 15-scf00327 | 15 |
| AX-158167603 | 15 | 81.524 | KV453080.1  | 16089871 | 15-scf00327 | 15 |
| AX-158167620 | 15 | 81.524 | KV453080.1  | 16110460 | 15-scf00327 | 15 |
| AX-158380526 | 15 | 81.524 | KV453080.1  | 16111143 | 15-scf00327 | 15 |
| AX-158167621 | 15 | 81.524 | KV453080.1  | 16111727 | 15-scf00327 | 15 |
| AX-158167629 | 15 | 81.524 | KV453080.1  | 16120905 | 15-scf00327 | 15 |
| AX-157721771 | 15 | 81.524 | KV453080.1  | 16123332 | 15-scf00327 | 15 |
| AX-158167624 | 15 | 81.525 | KV453080.1  | 16115948 | 15-scf00327 | 15 |
| AX-158167626 | 15 | 81.601 | KV453080.1  | 16117157 | 15-scf00327 | 15 |
| AX-158167628 | 15 | 81.673 | KV453080.1  | 16119417 | 15-scf00327 | 15 |
| AX-158167634 | 15 | 81.852 | KV453080.1  | 16127524 | 15-scf00327 | 15 |
| AX-158167636 | 15 | 81.922 | KV453080.1  | 16130797 | 15-scf00327 | 15 |
| AX-158167637 | 15 | 81.922 | KV453080.1  | 16133126 | 15-scf00327 | 15 |
| AX-158167642 | 15 | 81.922 | KV453080.1  | 16145425 | 15-scf00327 | 15 |
| AX-158167647 | 15 | 81.922 | KV453080.1  | 16148845 | 15-scf00327 | 15 |
| AX-157746333 | 15 | 81.922 | KV453080.1  | 16161444 | 15-scf00327 | 15 |
| AX-158167648 | 15 | 81.924 | KV453080.1  | 16152416 | 15-scf00327 | 15 |
| AX-158167649 | 15 | 81.93  | KV453080.1  | 16153492 | 15-scf00327 | 15 |
| AX-158167635 | 15 | 81.936 | KV453080.1  | 16130332 | 15-scf00327 | 15 |
| AX-158167654 | 15 | 81.936 | KV453080.1  | 16159360 | 15-scf00327 | 15 |
| AX-158167662 | 15 | 82.377 | KV453080.1  | 16168629 | 15-scf00327 | 15 |
| AX-158167663 | 15 | 82.611 | KV453080.1  | 16169592 | 15-scf00327 | 15 |
| AX-158167683 | 15 | 82.845 | KV453080.1  | 16214316 | 15-scf00327 | 15 |
| AX-158167684 | 15 | 82.879 | KV453080.1  | 16214938 | 15-scf00327 | 15 |
| AX-158167688 | 15 | 82.879 | KV453080.1  | 16219360 | 15-scf00327 | 15 |
| AX-157687277 | 15 | 82.879 | KV453494.1  | 12349    | scf00839    | UN |
| AX-157886697 | 15 | 83.22  | KV453080.1  | 16215210 | 15-scf00327 | 15 |
| AX-158167686 | 15 | 83.43  | KV453080.1  | 16218829 | 15-scf00327 | 15 |
| AX-158167694 | 15 | 83.434 | KV453082.1  | 2591     | 15-scf00329 | 15 |
| AX-158420954 | 15 | 83.434 | KV453494.1  | 944      | scf00839    | UN |
| AX-157687276 | 15 | 83.434 | KV453494.1  | 8984     | scf00839    | UN |
| AX-158167691 | 15 | 83.575 | KV453080.1  | 16220841 | 15-scf00327 | 15 |
| AX-157720228 | 15 | 83.575 | KV453082.1  | 3206     | 15-scf00329 | 15 |
| AX-158167696 | 15 | 83.575 | KV453082.1  | 4928     | 15-scf00329 | 15 |
| AX-158167697 | 15 | 83.575 | KV453082.1  | 6790     | 15-scf00329 | 15 |
| AX-157886698 | 15 | 83.575 | KV453082.1  | 7488     | 15-scf00329 | 15 |
| AX-158167706 | 15 | 84.18  | KV453082.1  | 18758    | 15-scf00329 | 15 |
| AX-158167718 | 15 | 84.193 | KV453082.1  | 41258    | 15-scf00329 | 15 |
| AX-158167711 | 15 | 84.24  | KV453082.1  | 32825    | 15-scf00329 | 15 |
| AX-158167723 | 15 | 84.24  | KV453082.1  | 49005    | 15-scf00329 | 15 |
| AX-158167725 | 15 | 84.24  | KV453082.1  | 50256    | 15-scf00329 | 15 |
| AX-158167726 | 15 | 84.24  | KV453082.1  | 51086    | 15-scf00329 | 15 |
| AX-158167728 | 15 | 84.302 | KV453082.1  | 52916    | 15-scf00329 | 15 |
| AX-158167664 | 15 | 84.376 | KV453080.1  | 16170148 | 15-scf00327 | 15 |
| AX-158167731 | 15 | 84.376 | KV453082.1  | 56425    | 15-scf00329 | 15 |
| AX-158413182 | 15 | 84.447 | KV453082.1  | 64329    | 15-scf00329 | 15 |
| AX-158413183 | 15 | 84.447 | KV453082.1  | 64899    | 15-scf00329 | 15 |
| AX-158413184 | 15 | 84.456 | KV453082.1  | 65075    | 15-scf00329 | 15 |
| AX-158167733 | 15 | 84.512 | KV453082.1  | 68450    | 15-scf00329 | 15 |

|              |    |        |            |        |             |    |
|--------------|----|--------|------------|--------|-------------|----|
| AX-158167742 | 15 | 84.766 | KV453082.1 | 93390  | 15-scf00329 | 15 |
| AX-158167744 | 15 | 84.766 | KV453082.1 | 94630  | 15-scf00329 | 15 |
| AX-158167745 | 15 | 84.978 | KV453082.1 | 95991  | 15-scf00329 | 15 |
| AX-158167746 | 15 | 84.978 | KV453082.1 | 97011  | 15-scf00329 | 15 |
| AX-158167749 | 15 | 84.978 | KV453082.1 | 99472  | 15-scf00329 | 15 |
| AX-158167750 | 15 | 84.978 | KV453082.1 | 100133 | 15-scf00329 | 15 |
| AX-158167755 | 15 | 85.298 | KV453082.1 | 110630 | 15-scf00329 | 15 |
| AX-158167758 | 15 | 85.298 | KV453082.1 | 115001 | 15-scf00329 | 15 |
| AX-158167760 | 15 | 85.299 | KV453082.1 | 118002 | 15-scf00329 | 15 |
| AX-158167765 | 15 | 85.61  | KV453082.1 | 126778 | 15-scf00329 | 15 |
| AX-158167766 | 15 | 85.61  | KV453082.1 | 128945 | 15-scf00329 | 15 |
| AX-158167767 | 15 | 85.61  | KV453082.1 | 129386 | 15-scf00329 | 15 |
| AX-158167770 | 15 | 85.889 | KV453082.1 | 131729 | 15-scf00329 | 15 |
| AX-158167771 | 15 | 86.291 | KV453082.1 | 133989 | 15-scf00329 | 15 |
| AX-157720214 | 15 | 86.291 | KV453082.1 | 134342 | 15-scf00329 | 15 |
| AX-158167772 | 15 | 86.291 | KV453082.1 | 134786 | 15-scf00329 | 15 |
| AX-157714153 | 15 | 86.763 | KV453082.1 | 172757 | 15-scf00329 | 15 |
| AX-158167797 | 15 | 86.8   | KV453082.1 | 186613 | 15-scf00329 | 15 |
| AX-157723196 | 15 | 86.805 | KV453082.1 | 188820 | 15-scf00329 | 15 |
| AX-157708003 | 15 | 86.806 | KV453082.1 | 189014 | 15-scf00329 | 15 |
| AX-158167799 | 15 | 86.806 | KV453082.1 | 191818 | 15-scf00329 | 15 |
| AX-157773116 | 15 | 87.302 | KV453082.1 | 175375 | 15-scf00329 | 15 |
| AX-158167813 | 15 | 87.302 | KV453082.1 | 206042 | 15-scf00329 | 15 |
| AX-157834467 | 15 | 87.302 | KV453082.1 | 206093 | 15-scf00329 | 15 |
| AX-157716702 | 15 | 87.55  | KV453082.1 | 218002 | 15-scf00329 | 15 |
| AX-158167818 | 15 | 87.55  | KV453082.1 | 218592 | 15-scf00329 | 15 |
| AX-158167820 | 15 | 87.708 | KV453082.1 | 222627 | 15-scf00329 | 15 |
| AX-158167886 | 15 | 87.708 | KV453082.1 | 319552 | 15-scf00329 | 15 |
| AX-158167821 | 15 | 87.787 | KV453082.1 | 224724 | 15-scf00329 | 15 |
| AX-157834469 | 15 | 87.787 | KV453082.1 | 224903 | 15-scf00329 | 15 |
| AX-158167824 | 15 | 87.787 | KV453082.1 | 233262 | 15-scf00329 | 15 |
| AX-157886702 | 15 | 87.787 | KV453082.1 | 234178 | 15-scf00329 | 15 |
| AX-158167828 | 15 | 87.787 | KV453082.1 | 236458 | 15-scf00329 | 15 |
| AX-158167905 | 15 | 87.787 | KV453082.1 | 339249 | 15-scf00329 | 15 |
| AX-158167944 | 15 | 87.787 | KV453082.1 | 390664 | 15-scf00329 | 15 |
| AX-158167849 | 15 | 87.911 | KV453082.1 | 267148 | 15-scf00329 | 15 |
| AX-158167851 | 15 | 88.041 | KV453082.1 | 274066 | 15-scf00329 | 15 |
| AX-158167855 | 15 | 88.223 | KV453082.1 | 280708 | 15-scf00329 | 15 |
| AX-158167865 | 15 | 88.223 | KV453082.1 | 292264 | 15-scf00329 | 15 |
| AX-157746112 | 15 | 88.223 | KV453082.1 | 293974 | 15-scf00329 | 15 |
| AX-158167871 | 15 | 88.223 | KV453082.1 | 304002 | 15-scf00329 | 15 |
| AX-158167875 | 15 | 88.223 | KV453082.1 | 308335 | 15-scf00329 | 15 |
| AX-158167877 | 15 | 88.223 | KV453082.1 | 309480 | 15-scf00329 | 15 |
| AX-158167880 | 15 | 88.223 | KV453082.1 | 313629 | 15-scf00329 | 15 |
| AX-158413191 | 15 | 88.223 | KV453082.1 | 314914 | 15-scf00329 | 15 |
| AX-158167881 | 15 | 88.223 | KV453082.1 | 315065 | 15-scf00329 | 15 |
| AX-158167888 | 15 | 88.223 | KV453082.1 | 321491 | 15-scf00329 | 15 |
| AX-157721461 | 15 | 88.223 | KV453082.1 | 329326 | 15-scf00329 | 15 |
| AX-158167895 | 15 | 88.223 | KV453082.1 | 329745 | 15-scf00329 | 15 |
| AX-158167900 | 15 | 88.223 | KV453082.1 | 333180 | 15-scf00329 | 15 |
| AX-157714134 | 15 | 88.223 | KV453082.1 | 354458 | 15-scf00329 | 15 |

|              |    |        |            |        |             |    |
|--------------|----|--------|------------|--------|-------------|----|
| AX-157744720 | 15 | 88.223 | KV453082.1 | 484643 | 15-scf00329 | 15 |
| AX-158168028 | 15 | 88.223 | KV453082.1 | 528537 | 15-scf00329 | 15 |
| AX-158167887 | 15 | 88.234 | KV453082.1 | 320380 | 15-scf00329 | 15 |
| AX-157713371 | 15 | 88.262 | KV453082.1 | 323941 | 15-scf00329 | 15 |
| AX-158167901 | 15 | 88.302 | KV453082.1 | 334513 | 15-scf00329 | 15 |
| AX-157753681 | 15 | 88.344 | KV453082.1 | 330053 | 15-scf00329 | 15 |
| AX-158167903 | 15 | 88.344 | KV453082.1 | 335897 | 15-scf00329 | 15 |
| AX-158167862 | 15 | 88.376 | KV453082.1 | 287207 | 15-scf00329 | 15 |
| AX-158167890 | 15 | 88.376 | KV453082.1 | 323155 | 15-scf00329 | 15 |
| AX-158167892 | 15 | 88.376 | KV453082.1 | 327789 | 15-scf00329 | 15 |
| AX-158167896 | 15 | 88.376 | KV453082.1 | 330093 | 15-scf00329 | 15 |
| AX-158167898 | 15 | 88.376 | KV453082.1 | 331587 | 15-scf00329 | 15 |
| AX-158167904 | 15 | 88.376 | KV453082.1 | 337472 | 15-scf00329 | 15 |
| AX-157834471 | 15 | 88.376 | KV453082.1 | 338045 | 15-scf00329 | 15 |
| AX-157834472 | 15 | 88.376 | KV453082.1 | 343647 | 15-scf00329 | 15 |
| AX-158167911 | 15 | 88.376 | KV453082.1 | 351355 | 15-scf00329 | 15 |
| AX-158167914 | 15 | 88.376 | KV453082.1 | 356055 | 15-scf00329 | 15 |
| AX-157770954 | 15 | 88.376 | KV453082.1 | 364288 | 15-scf00329 | 15 |
| AX-158167910 | 15 | 88.455 | KV453082.1 | 348716 | 15-scf00329 | 15 |
| AX-158167929 | 15 | 88.455 | KV453082.1 | 378394 | 15-scf00329 | 15 |
| AX-158167931 | 15 | 88.455 | KV453082.1 | 380193 | 15-scf00329 | 15 |
| AX-158168025 | 15 | 88.455 | KV453082.1 | 523909 | 15-scf00329 | 15 |
| AX-157866614 | 15 | 88.529 | KV453082.1 | 367333 | 15-scf00329 | 15 |
| AX-158167922 | 15 | 88.529 | KV453082.1 | 367574 | 15-scf00329 | 15 |
| AX-158167930 | 15 | 88.529 | KV453082.1 | 378574 | 15-scf00329 | 15 |
| AX-158167932 | 15 | 88.529 | KV453082.1 | 380389 | 15-scf00329 | 15 |
| AX-158167934 | 15 | 88.529 | KV453082.1 | 382416 | 15-scf00329 | 15 |
| AX-158167937 | 15 | 88.529 | KV453082.1 | 384290 | 15-scf00329 | 15 |
| AX-157834479 | 15 | 88.529 | KV453082.1 | 385862 | 15-scf00329 | 15 |
| AX-158167939 | 15 | 88.529 | KV453082.1 | 386095 | 15-scf00329 | 15 |
| AX-158167941 | 15 | 88.529 | KV453082.1 | 387012 | 15-scf00329 | 15 |
| AX-158167949 | 15 | 88.785 | KV453082.1 | 397062 | 15-scf00329 | 15 |
| AX-158167951 | 15 | 88.785 | KV453082.1 | 402961 | 15-scf00329 | 15 |
| AX-158167953 | 15 | 89.04  | KV453082.1 | 404392 | 15-scf00329 | 15 |
| AX-157751978 | 15 | 89.041 | KV453082.1 | 404809 | 15-scf00329 | 15 |
| AX-158167955 | 15 | 89.296 | KV453082.1 | 406558 | 15-scf00329 | 15 |
| AX-158167956 | 15 | 89.296 | KV453082.1 | 408109 | 15-scf00329 | 15 |
| AX-158167964 | 15 | 89.296 | KV453082.1 | 415983 | 15-scf00329 | 15 |
| AX-158167971 | 15 | 89.515 | KV453082.1 | 428493 | 15-scf00329 | 15 |
| AX-158167977 | 15 | 89.515 | KV453082.1 | 435509 | 15-scf00329 | 15 |
| AX-158167978 | 15 | 89.515 | KV453082.1 | 438282 | 15-scf00329 | 15 |
| AX-158167981 | 15 | 89.537 | KV453082.1 | 444857 | 15-scf00329 | 15 |
| AX-158167864 | 15 | 89.538 | KV453082.1 | 291285 | 15-scf00329 | 15 |
| AX-158167935 | 15 | 89.538 | KV453082.1 | 382585 | 15-scf00329 | 15 |
| AX-158167970 | 15 | 89.538 | KV453082.1 | 423790 | 15-scf00329 | 15 |
| AX-158167982 | 15 | 89.538 | KV453082.1 | 445800 | 15-scf00329 | 15 |
| AX-158167985 | 15 | 89.538 | KV453082.1 | 449131 | 15-scf00329 | 15 |
| AX-158167987 | 15 | 89.538 | KV453082.1 | 450554 | 15-scf00329 | 15 |
| AX-158167979 | 15 | 89.803 | KV453082.1 | 439826 | 15-scf00329 | 15 |
| AX-158167988 | 15 | 89.803 | KV453082.1 | 451371 | 15-scf00329 | 15 |
| AX-158167990 | 15 | 89.803 | KV453082.1 | 460436 | 15-scf00329 | 15 |

|              |    |        |            |        |             |    |
|--------------|----|--------|------------|--------|-------------|----|
| AX-157834482 | 15 | 89.803 | KV453082.1 | 460778 | 15-scf00329 | 15 |
| AX-158167991 | 15 | 89.803 | KV453082.1 | 465588 | 15-scf00329 | 15 |
| AX-157772149 | 15 | 89.803 | KV453082.1 | 466590 | 15-scf00329 | 15 |
| AX-158167995 | 15 | 89.803 | KV453082.1 | 477370 | 15-scf00329 | 15 |
| AX-158168000 | 15 | 89.803 | KV453082.1 | 485208 | 15-scf00329 | 15 |
| AX-158168001 | 15 | 89.803 | KV453082.1 | 486711 | 15-scf00329 | 15 |
| AX-158168003 | 15 | 89.803 | KV453082.1 | 488636 | 15-scf00329 | 15 |
| AX-158168008 | 15 | 89.803 | KV453082.1 | 497360 | 15-scf00329 | 15 |
| AX-157744836 | 15 | 89.941 | KV453082.1 | 502107 | 15-scf00329 | 15 |
| AX-157772685 | 15 | 90.137 | KV453082.1 | 505901 | 15-scf00329 | 15 |
| AX-158168016 | 15 | 90.343 | KV453082.1 | 508348 | 15-scf00329 | 15 |
| AX-158168024 | 15 | 90.348 | KV453082.1 | 523315 | 15-scf00329 | 15 |
| AX-158168029 | 15 | 90.353 | KV453082.1 | 529137 | 15-scf00329 | 15 |
| AX-158168032 | 15 | 90.353 | KV453082.1 | 532425 | 15-scf00329 | 15 |
| AX-158168027 | 15 | 90.46  | KV453082.1 | 525334 | 15-scf00329 | 15 |
| AX-158168030 | 15 | 90.46  | KV453082.1 | 530908 | 15-scf00329 | 15 |
| AX-158168031 | 15 | 90.46  | KV453082.1 | 531736 | 15-scf00329 | 15 |
| AX-158168033 | 15 | 90.46  | KV453082.1 | 533537 | 15-scf00329 | 15 |
| AX-158168034 | 15 | 90.46  | KV453082.1 | 534850 | 15-scf00329 | 15 |
| AX-158168036 | 15 | 90.679 | KV453082.1 | 536079 | 15-scf00329 | 15 |
| AX-158168038 | 15 | 90.679 | KV453082.1 | 537375 | 15-scf00329 | 15 |
| AX-157755281 | 15 | 90.679 | KV453082.1 | 540192 | 15-scf00329 | 15 |
| AX-158168040 | 15 | 90.679 | KV453082.1 | 541247 | 15-scf00329 | 15 |
| AX-158168041 | 15 | 90.679 | KV453082.1 | 542203 | 15-scf00329 | 15 |
| AX-158168043 | 15 | 90.679 | KV453082.1 | 544679 | 15-scf00329 | 15 |
| AX-158168045 | 15 | 90.679 | KV453082.1 | 548086 | 15-scf00329 | 15 |
| AX-158168048 | 15 | 90.679 | KV453082.1 | 555648 | 15-scf00329 | 15 |
| AX-158168049 | 15 | 90.679 | KV453082.1 | 556922 | 15-scf00329 | 15 |
| AX-158168050 | 15 | 90.679 | KV453082.1 | 557528 | 15-scf00329 | 15 |
| AX-158168051 | 15 | 90.679 | KV453082.1 | 558488 | 15-scf00329 | 15 |
| AX-158168053 | 15 | 90.679 | KV453082.1 | 559663 | 15-scf00329 | 15 |
| AX-158168054 | 15 | 90.679 | KV453082.1 | 560061 | 15-scf00329 | 15 |
| AX-158168056 | 15 | 90.679 | KV453082.1 | 562163 | 15-scf00329 | 15 |
| AX-158168057 | 15 | 90.679 | KV453082.1 | 563272 | 15-scf00329 | 15 |
| AX-158168069 | 15 | 90.679 | KV453082.1 | 583066 | 15-scf00329 | 15 |
| AX-158168076 | 15 | 90.679 | KV453082.1 | 588824 | 15-scf00329 | 15 |
| AX-158168058 | 15 | 91.109 | KV453082.1 | 564481 | 15-scf00329 | 15 |
| AX-158168154 | 15 | 91.109 | KV453086.1 | 5489   | 15-scf00332 | 15 |
| AX-158168162 | 15 | 91.109 | KV453086.1 | 21117  | 15-scf00332 | 15 |
| AX-157886710 | 15 | 91.109 | KV453086.1 | 134526 | 15-scf00332 | 15 |
| AX-158168265 | 15 | 91.109 | KV453086.1 | 246864 | 15-scf00332 | 15 |
| AX-158168063 | 15 | 91.116 | KV453082.1 | 574834 | 15-scf00329 | 15 |
| AX-158168064 | 15 | 91.116 | KV453082.1 | 576197 | 15-scf00329 | 15 |
| AX-158168066 | 15 | 91.116 | KV453082.1 | 578904 | 15-scf00329 | 15 |
| AX-158168067 | 15 | 91.116 | KV453082.1 | 579897 | 15-scf00329 | 15 |
| AX-158385809 | 15 | 91.116 | KV453082.1 | 580325 | 15-scf00329 | 15 |
| AX-158168068 | 15 | 91.116 | KV453082.1 | 580521 | 15-scf00329 | 15 |
| AX-158168082 | 15 | 91.116 | KV453082.1 | 594920 | 15-scf00329 | 15 |
| AX-158168085 | 15 | 91.116 | KV453082.1 | 598390 | 15-scf00329 | 15 |
| AX-158168101 | 15 | 91.116 | KV453082.1 | 621003 | 15-scf00329 | 15 |
| AX-158168074 | 15 | 91.13  | KV453082.1 | 587567 | 15-scf00329 | 15 |

|              |    |        |            |        |             |    |
|--------------|----|--------|------------|--------|-------------|----|
| AX-157714470 | 15 | 91.13  | KV453082.1 | 623245 | 15-scf00329 | 15 |
| AX-158168075 | 15 | 91.153 | KV453082.1 | 588228 | 15-scf00329 | 15 |
| AX-158168084 | 15 | 91.164 | KV453082.1 | 596851 | 15-scf00329 | 15 |
| AX-157751237 | 15 | 91.185 | KV453082.1 | 596987 | 15-scf00329 | 15 |
| AX-158168086 | 15 | 91.205 | KV453082.1 | 599282 | 15-scf00329 | 15 |
| AX-158168089 | 15 | 91.224 | KV453082.1 | 604018 | 15-scf00329 | 15 |
| AX-158168092 | 15 | 91.224 | KV453082.1 | 610354 | 15-scf00329 | 15 |
| AX-158168093 | 15 | 91.224 | KV453082.1 | 610973 | 15-scf00329 | 15 |
| AX-158168097 | 15 | 91.334 | KV453082.1 | 618328 | 15-scf00329 | 15 |
| AX-157715404 | 15 | 91.334 | KV453082.1 | 619577 | 15-scf00329 | 15 |
| AX-157834487 | 15 | 91.334 | KV453082.1 | 619722 | 15-scf00329 | 15 |
| AX-158168099 | 15 | 91.334 | KV453082.1 | 620374 | 15-scf00329 | 15 |
| AX-158168100 | 15 | 91.334 | KV453082.1 | 620719 | 15-scf00329 | 15 |
| AX-158168103 | 15 | 91.334 | KV453082.1 | 621704 | 15-scf00329 | 15 |
| AX-158168107 | 15 | 91.367 | KV453082.1 | 631782 | 15-scf00329 | 15 |
| AX-158168108 | 15 | 91.453 | KV453082.1 | 633456 | 15-scf00329 | 15 |
| AX-158168109 | 15 | 91.553 | KV453082.1 | 638130 | 15-scf00329 | 15 |
| AX-158168110 | 15 | 91.662 | KV453082.1 | 639687 | 15-scf00329 | 15 |
| AX-158168112 | 15 | 91.662 | KV453082.1 | 643378 | 15-scf00329 | 15 |
| AX-158168116 | 15 | 91.662 | KV453082.1 | 651587 | 15-scf00329 | 15 |
| AX-157727453 | 15 | 91.662 | KV453082.1 | 653266 | 15-scf00329 | 15 |
| AX-157739013 | 15 | 91.662 | KV453082.1 | 656248 | 15-scf00329 | 15 |
| AX-158168117 | 15 | 91.662 | KV453082.1 | 658542 | 15-scf00329 | 15 |
| AX-158168119 | 15 | 91.662 | KV453082.1 | 660148 | 15-scf00329 | 15 |
| AX-157834493 | 15 | 91.662 | KV453082.1 | 669403 | 15-scf00329 | 15 |
| AX-158168132 | 15 | 91.662 | KV453082.1 | 720919 | 15-scf00329 | 15 |
| AX-158168133 | 15 | 91.662 | KV453082.1 | 723607 | 15-scf00329 | 15 |
| AX-157683827 | 15 | 91.662 | KV453083.1 | 19971  | 15-scf00330 | 15 |
| AX-158168134 | 15 | 91.663 | KV453082.1 | 729748 | 15-scf00329 | 15 |
| AX-157721182 | 15 | 91.99  | KV453082.1 | 731600 | 15-scf00329 | 15 |
| AX-158168136 | 15 | 91.99  | KV453082.1 | 731753 | 15-scf00329 | 15 |
| AX-158168137 | 15 | 91.99  | KV453082.1 | 734083 | 15-scf00329 | 15 |
| AX-158168138 | 15 | 91.99  | KV453082.1 | 734349 | 15-scf00329 | 15 |
| AX-157719509 | 15 | 91.99  | KV453082.1 | 740657 | 15-scf00329 | 15 |
| AX-158168140 | 15 | 91.99  | KV453082.1 | 741511 | 15-scf00329 | 15 |
| AX-158168141 | 15 | 91.99  | KV453082.1 | 744473 | 15-scf00329 | 15 |
| AX-157834498 | 15 | 91.99  | KV453082.1 | 746216 | 15-scf00329 | 15 |
| AX-158168144 | 15 | 91.99  | KV453082.1 | 750989 | 15-scf00329 | 15 |
| AX-158168149 | 15 | 91.99  | KV453082.1 | 760834 | 15-scf00329 | 15 |
| AX-158168150 | 15 | 91.99  | KV453082.1 | 761533 | 15-scf00329 | 15 |
| AX-157683816 | 15 | 91.99  | KV453083.1 | 4649   | 15-scf00330 | 15 |
| AX-157683826 | 15 | 91.99  | KV453083.1 | 17083  | 15-scf00330 | 15 |
| AX-157683829 | 15 | 91.99  | KV453083.1 | 22241  | 15-scf00330 | 15 |
| AX-157683833 | 15 | 91.99  | KV453083.1 | 36137  | 15-scf00330 | 15 |
| AX-157683836 | 15 | 91.99  | KV453083.1 | 41835  | 15-scf00330 | 15 |
| AX-157683838 | 15 | 91.99  | KV453083.1 | 43994  | 15-scf00330 | 15 |
| AX-158168242 | 15 | 91.99  | KV453086.1 | 197509 | 15-scf00332 | 15 |
| AX-157683822 | 15 | 92.099 | KV453083.1 | 9922   | 15-scf00330 | 15 |
| AX-157680256 | 15 | 92.099 | KV453085.1 | 2846   | 15-scf00331 | 15 |
| AX-157683841 | 15 | 92.099 | KV453085.1 | 3503   | 15-scf00331 | 15 |
| AX-157681617 | 15 | 92.099 | KV453085.1 | 3769   | 15-scf00331 | 15 |

|              |    |        |            |        |             |    |
|--------------|----|--------|------------|--------|-------------|----|
| AX-157683842 | 15 | 92.099 | KV453085.1 | 4985   | 15-scf00331 | 15 |
| AX-158168153 | 15 | 92.099 | KV453086.1 | 3454   | 15-scf00332 | 15 |
| AX-158168165 | 15 | 92.099 | KV453086.1 | 26394  | 15-scf00332 | 15 |
| AX-157871947 | 15 | 92.099 | KV453086.1 | 122261 | 15-scf00332 | 15 |
| AX-157834532 | 15 | 92.099 | KV453088.1 | 197206 | 15-scf00333 | 15 |
| AX-158168409 | 15 | 92.099 | KV453088.1 | 240359 | 15-scf00333 | 15 |
| AX-158168167 | 15 | 92.208 | KV453086.1 | 32450  | 15-scf00332 | 15 |
| AX-158168173 | 15 | 92.208 | KV453086.1 | 40473  | 15-scf00332 | 15 |
| AX-158168176 | 15 | 92.208 | KV453086.1 | 46332  | 15-scf00332 | 15 |
| AX-157834500 | 15 | 92.208 | KV453086.1 | 48871  | 15-scf00332 | 15 |
| AX-157834501 | 15 | 92.208 | KV453086.1 | 49822  | 15-scf00332 | 15 |
| AX-158168180 | 15 | 92.208 | KV453086.1 | 50121  | 15-scf00332 | 15 |
| AX-157834502 | 15 | 92.208 | KV453086.1 | 51660  | 15-scf00332 | 15 |
| AX-157834504 | 15 | 92.208 | KV453086.1 | 53777  | 15-scf00332 | 15 |
| AX-158168181 | 15 | 92.208 | KV453086.1 | 54917  | 15-scf00332 | 15 |
| AX-158168182 | 15 | 92.208 | KV453086.1 | 56631  | 15-scf00332 | 15 |
| AX-157858424 | 15 | 92.208 | KV453086.1 | 56911  | 15-scf00332 | 15 |
| AX-157858425 | 15 | 92.208 | KV453086.1 | 60580  | 15-scf00332 | 15 |
| AX-158168183 | 15 | 92.208 | KV453086.1 | 61706  | 15-scf00332 | 15 |
| AX-158168185 | 15 | 92.208 | KV453086.1 | 64088  | 15-scf00332 | 15 |
| AX-158168191 | 15 | 92.208 | KV453086.1 | 82578  | 15-scf00332 | 15 |
| AX-158168194 | 15 | 92.208 | KV453086.1 | 86392  | 15-scf00332 | 15 |
| AX-158168195 | 15 | 92.208 | KV453086.1 | 87025  | 15-scf00332 | 15 |
| AX-158168199 | 15 | 92.208 | KV453086.1 | 90163  | 15-scf00332 | 15 |
| AX-157834505 | 15 | 92.236 | KV453086.1 | 97654  | 15-scf00332 | 15 |
| AX-158168203 | 15 | 92.267 | KV453086.1 | 98511  | 15-scf00332 | 15 |
| AX-158413202 | 15 | 92.283 | KV453086.1 | 100493 | 15-scf00332 | 15 |
| AX-158168208 | 15 | 92.318 | KV453086.1 | 113692 | 15-scf00332 | 15 |
| AX-158168186 | 15 | 92.427 | KV453086.1 | 65658  | 15-scf00332 | 15 |
| AX-157724499 | 15 | 92.427 | KV453086.1 | 131022 | 15-scf00332 | 15 |
| AX-157754864 | 15 | 92.427 | KV453086.1 | 134073 | 15-scf00332 | 15 |
| AX-158168219 | 15 | 92.427 | KV453086.1 | 155276 | 15-scf00332 | 15 |
| AX-158168222 | 15 | 92.427 | KV453086.1 | 159545 | 15-scf00332 | 15 |
| AX-157834510 | 15 | 92.427 | KV453086.1 | 161291 | 15-scf00332 | 15 |
| AX-158168226 | 15 | 92.427 | KV453086.1 | 162186 | 15-scf00332 | 15 |
| AX-158168229 | 15 | 92.427 | KV453086.1 | 173294 | 15-scf00332 | 15 |
| AX-158168232 | 15 | 92.427 | KV453086.1 | 179437 | 15-scf00332 | 15 |
| AX-157742964 | 15 | 92.427 | KV453086.1 | 187005 | 15-scf00332 | 15 |
| AX-157727368 | 15 | 92.427 | KV453086.1 | 189948 | 15-scf00332 | 15 |
| AX-158168236 | 15 | 92.427 | KV453086.1 | 190083 | 15-scf00332 | 15 |
| AX-158168237 | 15 | 92.427 | KV453086.1 | 191736 | 15-scf00332 | 15 |
| AX-158168248 | 15 | 92.427 | KV453086.1 | 208949 | 15-scf00332 | 15 |
| AX-157726127 | 15 | 92.427 | KV453086.1 | 210267 | 15-scf00332 | 15 |
| AX-158168250 | 15 | 92.427 | KV453086.1 | 210827 | 15-scf00332 | 15 |
| AX-158168251 | 15 | 92.44  | KV453086.1 | 211502 | 15-scf00332 | 15 |
| AX-158168256 | 15 | 92.464 | KV453086.1 | 222990 | 15-scf00332 | 15 |
| AX-158168259 | 15 | 92.481 | KV453086.1 | 225440 | 15-scf00332 | 15 |
| AX-157772609 | 15 | 92.497 | KV453082.1 | 644389 | 15-scf00329 | 15 |
| AX-157722570 | 15 | 92.497 | KV453082.1 | 685485 | 15-scf00329 | 15 |
| AX-158168161 | 15 | 92.497 | KV453086.1 | 20221  | 15-scf00332 | 15 |
| AX-158168177 | 15 | 92.497 | KV453086.1 | 47183  | 15-scf00332 | 15 |

|              |    |        |            |        |             |    |
|--------------|----|--------|------------|--------|-------------|----|
| AX-158168198 | 15 | 92.497 | KV453086.1 | 89604  | 15-scf00332 | 15 |
| AX-158168212 | 15 | 92.497 | KV453086.1 | 131980 | 15-scf00332 | 15 |
| AX-157757368 | 15 | 92.497 | KV453086.1 | 211882 | 15-scf00332 | 15 |
| AX-158168263 | 15 | 92.497 | KV453086.1 | 244120 | 15-scf00332 | 15 |
| AX-158168268 | 15 | 92.497 | KV453086.1 | 257077 | 15-scf00332 | 15 |
| AX-158168270 | 15 | 92.497 | KV453086.1 | 258360 | 15-scf00332 | 15 |
| AX-157774326 | 15 | 92.497 | KV453086.1 | 275476 | 15-scf00332 | 15 |
| AX-158168288 | 15 | 92.497 | KV453086.1 | 296897 | 15-scf00332 | 15 |
| AX-158168324 | 15 | 92.497 | KV453088.1 | 13571  | 15-scf00333 | 15 |
| AX-158168399 | 15 | 92.497 | KV453088.1 | 192469 | 15-scf00333 | 15 |
| AX-157687721 | 15 | 92.497 | KV453087.1 | 5074   | 15-scf00984 | 15 |
| AX-157689826 | 15 | 92.497 | KV453084.1 | 532    | 15-scf08728 | 15 |
| AX-158168273 | 15 | 92.507 | KV453086.1 | 264985 | 15-scf00332 | 15 |
| AX-157834519 | 15 | 92.522 | KV453086.1 | 270061 | 15-scf00332 | 15 |
| AX-158168091 | 15 | 92.536 | KV453082.1 | 606131 | 15-scf00329 | 15 |
| AX-157683815 | 15 | 92.536 | KV453083.1 | 4291   | 15-scf00330 | 15 |
| AX-158168184 | 15 | 92.536 | KV453086.1 | 62058  | 15-scf00332 | 15 |
| AX-157707760 | 15 | 92.536 | KV453086.1 | 66107  | 15-scf00332 | 15 |
| AX-157871946 | 15 | 92.536 | KV453086.1 | 91132  | 15-scf00332 | 15 |
| AX-157834509 | 15 | 92.536 | KV453086.1 | 114805 | 15-scf00332 | 15 |
| AX-157834512 | 15 | 92.536 | KV453086.1 | 165679 | 15-scf00332 | 15 |
| AX-158168266 | 15 | 92.536 | KV453086.1 | 247743 | 15-scf00332 | 15 |
| AX-158168277 | 15 | 92.536 | KV453086.1 | 278316 | 15-scf00332 | 15 |
| AX-158423011 | 15 | 92.536 | KV453086.1 | 280726 | 15-scf00332 | 15 |
| AX-158168280 | 15 | 92.536 | KV453086.1 | 281806 | 15-scf00332 | 15 |
| AX-158168281 | 15 | 92.536 | KV453086.1 | 286396 | 15-scf00332 | 15 |
| AX-157747191 | 15 | 92.536 | KV453086.1 | 293680 | 15-scf00332 | 15 |
| AX-158168299 | 15 | 92.536 | KV453086.1 | 312548 | 15-scf00332 | 15 |
| AX-157755799 | 15 | 92.536 | KV453086.1 | 322679 | 15-scf00332 | 15 |
| AX-158168322 | 15 | 92.536 | KV453088.1 | 11140  | 15-scf00333 | 15 |
| AX-158168340 | 15 | 92.536 | KV453088.1 | 32980  | 15-scf00333 | 15 |
| AX-158168391 | 15 | 92.536 | KV453088.1 | 163560 | 15-scf00333 | 15 |
| AX-158168407 | 15 | 92.536 | KV453088.1 | 231510 | 15-scf00333 | 15 |
| AX-158168408 | 15 | 92.536 | KV453088.1 | 233489 | 15-scf00333 | 15 |
| AX-158168283 | 15 | 92.593 | KV453086.1 | 287646 | 15-scf00332 | 15 |
| AX-158168300 | 15 | 92.645 | KV453086.1 | 314314 | 15-scf00332 | 15 |
| AX-157689923 | 15 | 92.645 |            | 96     | scf13309    | UN |
| AX-158168308 | 15 | 92.679 | KV453086.1 | 321910 | 15-scf00332 | 15 |
| AX-158168095 | 15 | 92.755 | KV453082.1 | 614220 | 15-scf00329 | 15 |
| AX-158168146 | 15 | 92.755 | KV453082.1 | 757674 | 15-scf00329 | 15 |
| AX-158168188 | 15 | 92.755 | KV453086.1 | 70385  | 15-scf00332 | 15 |
| AX-158168209 | 15 | 92.755 | KV453086.1 | 115698 | 15-scf00332 | 15 |
| AX-158168223 | 15 | 92.755 | KV453086.1 | 160087 | 15-scf00332 | 15 |
| AX-158168240 | 15 | 92.755 | KV453086.1 | 193825 | 15-scf00332 | 15 |
| AX-157723346 | 15 | 92.755 | KV453086.1 | 232491 | 15-scf00332 | 15 |
| AX-158168274 | 15 | 92.755 | KV453086.1 | 265441 | 15-scf00332 | 15 |
| AX-157750465 | 15 | 92.755 | KV453086.1 | 289802 | 15-scf00332 | 15 |
| AX-158168289 | 15 | 92.755 | KV453086.1 | 297761 | 15-scf00332 | 15 |
| AX-158168293 | 15 | 92.755 | KV453086.1 | 304343 | 15-scf00332 | 15 |
| AX-158168301 | 15 | 92.755 | KV453086.1 | 314750 | 15-scf00332 | 15 |
| AX-158168304 | 15 | 92.755 | KV453086.1 | 320222 | 15-scf00332 | 15 |

|              |    |        |            |        |             |    |
|--------------|----|--------|------------|--------|-------------|----|
| AX-157834523 | 15 | 92.755 | KV453086.1 | 323414 | 15-scf00332 | 15 |
| AX-158168311 | 15 | 92.755 | KV453086.1 | 324915 | 15-scf00332 | 15 |
| AX-158168314 | 15 | 92.755 | KV453086.1 | 330833 | 15-scf00332 | 15 |
| AX-158168321 | 15 | 92.755 | KV453088.1 | 8956   | 15-scf00333 | 15 |
| AX-158168323 | 15 | 92.755 | KV453088.1 | 13248  | 15-scf00333 | 15 |
| AX-158168327 | 15 | 92.755 | KV453088.1 | 15279  | 15-scf00333 | 15 |
| AX-158168329 | 15 | 92.755 | KV453088.1 | 16838  | 15-scf00333 | 15 |
| AX-158168331 | 15 | 92.755 | KV453088.1 | 22101  | 15-scf00333 | 15 |
| AX-157834525 | 15 | 92.755 | KV453088.1 | 23323  | 15-scf00333 | 15 |
| AX-157871948 | 15 | 92.755 | KV453088.1 | 24370  | 15-scf00333 | 15 |
| AX-158168332 | 15 | 92.755 | KV453088.1 | 25320  | 15-scf00333 | 15 |
| AX-158168333 | 15 | 92.755 | KV453088.1 | 27134  | 15-scf00333 | 15 |
| AX-158168334 | 15 | 92.755 | KV453088.1 | 27988  | 15-scf00333 | 15 |
| AX-158168335 | 15 | 92.755 | KV453088.1 | 29188  | 15-scf00333 | 15 |
| AX-158168336 | 15 | 92.755 | KV453088.1 | 29397  | 15-scf00333 | 15 |
| AX-158168342 | 15 | 92.755 | KV453088.1 | 35709  | 15-scf00333 | 15 |
| AX-157751941 | 15 | 92.755 | KV453088.1 | 47906  | 15-scf00333 | 15 |
| AX-158168344 | 15 | 92.755 | KV453088.1 | 49725  | 15-scf00333 | 15 |
| AX-158168348 | 15 | 92.755 | KV453088.1 | 64998  | 15-scf00333 | 15 |
| AX-158168349 | 15 | 92.755 | KV453088.1 | 65518  | 15-scf00333 | 15 |
| AX-158168354 | 15 | 92.755 | KV453088.1 | 75746  | 15-scf00333 | 15 |
| AX-158168356 | 15 | 92.755 | KV453088.1 | 77222  | 15-scf00333 | 15 |
| AX-158168359 | 15 | 92.755 | KV453088.1 | 83043  | 15-scf00333 | 15 |
| AX-158168360 | 15 | 92.755 | KV453088.1 | 84124  | 15-scf00333 | 15 |
| AX-158168362 | 15 | 92.755 | KV453088.1 | 89604  | 15-scf00333 | 15 |
| AX-158168363 | 15 | 92.755 | KV453088.1 | 90823  | 15-scf00333 | 15 |
| AX-158168364 | 15 | 92.755 | KV453088.1 | 91417  | 15-scf00333 | 15 |
| AX-157750892 | 15 | 92.755 | KV453088.1 | 94481  | 15-scf00333 | 15 |
| AX-158168367 | 15 | 92.755 | KV453088.1 | 96975  | 15-scf00333 | 15 |
| AX-158168368 | 15 | 92.755 | KV453088.1 | 101410 | 15-scf00333 | 15 |
| AX-157834528 | 15 | 92.755 | KV453088.1 | 105265 | 15-scf00333 | 15 |
| AX-157716521 | 15 | 92.755 | KV453088.1 | 107021 | 15-scf00333 | 15 |
| AX-158168371 | 15 | 92.755 | KV453088.1 | 108828 | 15-scf00333 | 15 |
| AX-157713690 | 15 | 92.755 | KV453088.1 | 109853 | 15-scf00333 | 15 |
| AX-158168374 | 15 | 92.755 | KV453088.1 | 127769 | 15-scf00333 | 15 |
| AX-158168375 | 15 | 92.755 | KV453088.1 | 128068 | 15-scf00333 | 15 |
| AX-158168380 | 15 | 92.755 | KV453088.1 | 144180 | 15-scf00333 | 15 |
| AX-158168390 | 15 | 92.755 | KV453088.1 | 162748 | 15-scf00333 | 15 |
| AX-158168392 | 15 | 92.755 | KV453088.1 | 165916 | 15-scf00333 | 15 |
| AX-157717688 | 15 | 92.755 | KV453088.1 | 190213 | 15-scf00333 | 15 |
| AX-158168400 | 15 | 92.755 | KV453088.1 | 194349 | 15-scf00333 | 15 |
| AX-158168401 | 15 | 92.755 | KV453088.1 | 196816 | 15-scf00333 | 15 |
| AX-158168404 | 15 | 92.755 | KV453088.1 | 207414 | 15-scf00333 | 15 |
| AX-157687720 | 15 | 92.755 | KV453087.1 | 4602   | 15-scf00984 | 15 |
| AX-157687723 | 15 | 92.755 | KV453087.1 | 6109   | 15-scf00984 | 15 |
| AX-158168413 | 16 | 0      | KV452961.1 | 4777   | 9-scf00334  | 9  |
| AX-158168414 | 16 | 0      | KV452961.1 | 5697   | 9-scf00334  | 9  |
| AX-158168415 | 16 | 0      | KV452961.1 | 7103   | 9-scf00334  | 9  |
| AX-158168416 | 16 | 0      | KV452961.1 | 7916   | 9-scf00334  | 9  |
| AX-158168417 | 16 | 0      | KV452961.1 | 8674   | 9-scf00334  | 9  |
| AX-157834533 | 16 | 0      | KV452961.1 | 9665   | 9-scf00334  | 9  |



|              |    |       |             |        |            |    |
|--------------|----|-------|-------------|--------|------------|----|
| AX-158168419 | 16 | 0     | KV452961.1  | 11780  | 9-scf00334 | 9  |
| AX-158168420 | 16 | 0     | KV452961.1  | 12796  | 9-scf00334 | 9  |
| AX-158168422 | 16 | 0     | KV452961.1  | 14259  | 9-scf00334 | 9  |
| AX-157713851 | 16 | 0     | KV452961.1  | 23633  | 9-scf00334 | 9  |
| AX-158380529 | 16 | 0     | KV452961.1  | 25546  | 9-scf00334 | 9  |
| AX-157715388 | 16 | 0     | KV452961.1  | 25605  | 9-scf00334 | 9  |
| AX-158168429 | 16 | 0     | KV452961.1  | 25713  | 9-scf00334 | 9  |
| AX-157834537 | 16 | 0     | KV452961.1  | 34402  | 9-scf00334 | 9  |
| AX-158168455 | 16 | 0     | KV452961.1  | 68279  | 9-scf00334 | 9  |
| AX-157709322 | 16 | 0     | KV452961.1  | 93978  | 9-scf00334 | 9  |
| AX-158168473 | 16 | 0     | KV452961.1  | 95261  | 9-scf00334 | 9  |
| AX-158168482 | 16 | 0     | KV452961.1  | 103503 | 9-scf00334 | 9  |
| AX-158168498 | 16 | 0     | KV452961.1  | 118238 | 9-scf00334 | 9  |
| AX-158168507 | 16 | 0     | KV452961.1  | 136677 | 9-scf00334 | 9  |
| AX-157721764 | 16 | 0     | KV452961.1  | 143504 | 9-scf00334 | 9  |
| AX-158168514 | 16 | 0     | KV452961.1  | 143921 | 9-scf00334 | 9  |
| AX-157878655 | 16 | 0     | KV452961.1  | 164708 | 9-scf00334 | 9  |
| AX-158168535 | 16 | 0     | KV452961.1  | 165287 | 9-scf00334 | 9  |
| AX-158168537 | 16 | 0     | KV452961.1  | 168353 | 9-scf00334 | 9  |
| AX-158385817 | 16 | 0     | KV452961.1  | 171304 | 9-scf00334 | 9  |
| AX-158168545 | 16 | 0     | KV452961.1  | 175102 | 9-scf00334 | 9  |
| AX-158168547 | 16 | 0     | KV452961.1  | 177384 | 9-scf00334 | 9  |
| AX-158168559 | 16 | 0     | KV452961.1  | 189701 | 9-scf00334 | 9  |
| AX-158168563 | 16 | 0     | KV452961.1  | 192739 | 9-scf00334 | 9  |
| AX-158168566 | 16 | 0     | KV452961.1  | 196374 | 9-scf00334 | 9  |
| AX-158168567 | 16 | 0     | KV452961.1  | 197031 | 9-scf00334 | 9  |
| AX-158168570 | 16 | 0     | KV452961.1  | 199740 | 9-scf00334 | 9  |
| AX-158168571 | 16 | 0     | KV452961.1  | 200435 | 9-scf00334 | 9  |
| AX-158168572 | 16 | 0     | KV452961.1  | 201021 | 9-scf00334 | 9  |
| AX-158168573 | 16 | 0     | KV452961.1  | 201576 | 9-scf00334 | 9  |
| AX-158168575 | 16 | 0     | KV452961.1  | 202388 | 9-scf00334 | 9  |
| AX-158168757 | 16 | 0     | KV452961.1  | 475621 | 9-scf00334 | 9  |
| AX-158413218 | 16 | 0.053 | KV452961.1  | 214597 | 9-scf00334 | 9  |
| AX-158168762 | 16 | 0.053 | KV452961.1  | 482867 | 9-scf00334 | 9  |
| AX-158168541 | 16 | 0.071 | KV452961.1  | 172169 | 9-scf00334 | 9  |
| AX-158168585 | 16 | 0.071 | KV452961.1  | 214730 | 9-scf00334 | 9  |
| AX-157756708 | 16 | 0.071 | KV452961.1  | 227836 | 9-scf00334 | 9  |
| AX-158168601 | 16 | 0.11  | KV452961.1  | 231360 | 9-scf00334 | 9  |
| AX-158168608 | 16 | 0.11  | KV452961.1  | 240120 | 9-scf00334 | 9  |
| AX-157774307 | 16 | 0.11  | KV452961.1  | 241026 | 9-scf00334 | 9  |
| AX-158168615 | 16 | 0.11  | KV452961.1  | 248436 | 9-scf00334 | 9  |
| AX-158168667 | 16 | 0.11  | KV452961.1  | 332034 | 9-scf00334 | 9  |
| AX-157706329 | 16 | 0.11  | 3ML01032073 | 465    | scf07686_1 | UN |
| AX-158168461 | 16 | 0.219 | KV452961.1  | 78482  | 9-scf00334 | 9  |
| AX-158168470 | 16 | 0.219 | KV452961.1  | 88291  | 9-scf00334 | 9  |
| AX-158168483 | 16 | 0.219 | KV452961.1  | 105589 | 9-scf00334 | 9  |
| AX-158168556 | 16 | 0.219 | KV452961.1  | 184631 | 9-scf00334 | 9  |
| AX-158168561 | 16 | 0.219 | KV452961.1  | 191566 | 9-scf00334 | 9  |
| AX-158168576 | 16 | 0.219 | KV452961.1  | 203215 | 9-scf00334 | 9  |
| AX-158168577 | 16 | 0.219 | KV452961.1  | 203562 | 9-scf00334 | 9  |
| AX-158168581 | 16 | 0.219 | KV452961.1  | 207483 | 9-scf00334 | 9  |

|              |    |       |            |        |            |   |
|--------------|----|-------|------------|--------|------------|---|
| AX-158168588 | 16 | 0.219 | KV452961.1 | 216608 | 9-scf00334 | 9 |
| AX-158168594 | 16 | 0.219 | KV452961.1 | 221327 | 9-scf00334 | 9 |
| AX-158168595 | 16 | 0.219 | KV452961.1 | 221864 | 9-scf00334 | 9 |
| AX-158168598 | 16 | 0.219 | KV452961.1 | 229003 | 9-scf00334 | 9 |
| AX-158168604 | 16 | 0.219 | KV452961.1 | 233831 | 9-scf00334 | 9 |
| AX-158168614 | 16 | 0.219 | KV452961.1 | 247568 | 9-scf00334 | 9 |
| AX-158168617 | 16 | 0.219 | KV452961.1 | 250772 | 9-scf00334 | 9 |
| AX-158168620 | 16 | 0.219 | KV452961.1 | 253056 | 9-scf00334 | 9 |
| AX-158168621 | 16 | 0.219 | KV452961.1 | 255028 | 9-scf00334 | 9 |
| AX-158168622 | 16 | 0.219 | KV452961.1 | 255834 | 9-scf00334 | 9 |
| AX-158168623 | 16 | 0.219 | KV452961.1 | 256651 | 9-scf00334 | 9 |
| AX-158168625 | 16 | 0.219 | KV452961.1 | 262296 | 9-scf00334 | 9 |
| AX-158168626 | 16 | 0.219 | KV452961.1 | 262800 | 9-scf00334 | 9 |
| AX-157834551 | 16 | 0.219 | KV452961.1 | 265469 | 9-scf00334 | 9 |
| AX-158168629 | 16 | 0.219 | KV452961.1 | 267848 | 9-scf00334 | 9 |
| AX-158168631 | 16 | 0.219 | KV452961.1 | 270289 | 9-scf00334 | 9 |
| AX-158168632 | 16 | 0.219 | KV452961.1 | 271324 | 9-scf00334 | 9 |
| AX-158168633 | 16 | 0.219 | KV452961.1 | 273274 | 9-scf00334 | 9 |
| AX-158168634 | 16 | 0.219 | KV452961.1 | 274016 | 9-scf00334 | 9 |
| AX-158168638 | 16 | 0.219 | KV452961.1 | 278457 | 9-scf00334 | 9 |
| AX-158168640 | 16 | 0.219 | KV452961.1 | 281421 | 9-scf00334 | 9 |
| AX-158168641 | 16 | 0.219 | KV452961.1 | 281851 | 9-scf00334 | 9 |
| AX-158168642 | 16 | 0.219 | KV452961.1 | 283616 | 9-scf00334 | 9 |
| AX-158168646 | 16 | 0.219 | KV452961.1 | 292065 | 9-scf00334 | 9 |
| AX-158168648 | 16 | 0.219 | KV452961.1 | 294651 | 9-scf00334 | 9 |
| AX-158168650 | 16 | 0.219 | KV452961.1 | 295505 | 9-scf00334 | 9 |
| AX-158168653 | 16 | 0.219 | KV452961.1 | 300405 | 9-scf00334 | 9 |
| AX-158168655 | 16 | 0.219 | KV452961.1 | 303531 | 9-scf00334 | 9 |
| AX-158168657 | 16 | 0.219 | KV452961.1 | 307426 | 9-scf00334 | 9 |
| AX-157834552 | 16 | 0.219 | KV452961.1 | 308129 | 9-scf00334 | 9 |
| AX-158168659 | 16 | 0.219 | KV452961.1 | 309361 | 9-scf00334 | 9 |
| AX-158168661 | 16 | 0.219 | KV452961.1 | 311178 | 9-scf00334 | 9 |
| AX-158168662 | 16 | 0.219 | KV452961.1 | 312724 | 9-scf00334 | 9 |
| AX-157715888 | 16 | 0.219 | KV452961.1 | 313532 | 9-scf00334 | 9 |
| AX-157752324 | 16 | 0.219 | KV452961.1 | 314589 | 9-scf00334 | 9 |
| AX-157834554 | 16 | 0.219 | KV452961.1 | 325076 | 9-scf00334 | 9 |
| AX-158168666 | 16 | 0.219 | KV452961.1 | 331259 | 9-scf00334 | 9 |
| AX-157834555 | 16 | 0.219 | KV452961.1 | 333209 | 9-scf00334 | 9 |
| AX-158168668 | 16 | 0.219 | KV452961.1 | 336578 | 9-scf00334 | 9 |
| AX-158168671 | 16 | 0.219 | KV452961.1 | 341475 | 9-scf00334 | 9 |
| AX-157763097 | 16 | 0.219 | KV452961.1 | 350921 | 9-scf00334 | 9 |
| AX-158168675 | 16 | 0.219 | KV452961.1 | 351592 | 9-scf00334 | 9 |
| AX-157748316 | 16 | 0.219 | KV452961.1 | 353315 | 9-scf00334 | 9 |
| AX-158168677 | 16 | 0.219 | KV452961.1 | 357321 | 9-scf00334 | 9 |
| AX-158168678 | 16 | 0.219 | KV452961.1 | 358852 | 9-scf00334 | 9 |
| AX-158168681 | 16 | 0.219 | KV452961.1 | 361564 | 9-scf00334 | 9 |
| AX-158168683 | 16 | 0.219 | KV452961.1 | 365840 | 9-scf00334 | 9 |
| AX-157717077 | 16 | 0.219 | KV452961.1 | 369921 | 9-scf00334 | 9 |
| AX-158168685 | 16 | 0.219 | KV452961.1 | 373087 | 9-scf00334 | 9 |
| AX-158168686 | 16 | 0.219 | KV452961.1 | 374059 | 9-scf00334 | 9 |
| AX-158168689 | 16 | 0.219 | KV452961.1 | 384928 | 9-scf00334 | 9 |

|              |    |       |             |        |            |    |
|--------------|----|-------|-------------|--------|------------|----|
| AX-157834561 | 16 | 0.219 | KV452961.1  | 386571 | 9-scf00334 | 9  |
| AX-158168691 | 16 | 0.219 | KV452961.1  | 389512 | 9-scf00334 | 9  |
| AX-158168692 | 16 | 0.219 | KV452961.1  | 393269 | 9-scf00334 | 9  |
| AX-158168693 | 16 | 0.219 | KV452961.1  | 393958 | 9-scf00334 | 9  |
| AX-158168703 | 16 | 0.219 | KV452961.1  | 410183 | 9-scf00334 | 9  |
| AX-158168704 | 16 | 0.219 | KV452961.1  | 411756 | 9-scf00334 | 9  |
| AX-157715150 | 16 | 0.219 | KV452961.1  | 415375 | 9-scf00334 | 9  |
| AX-158168708 | 16 | 0.219 | KV452961.1  | 418792 | 9-scf00334 | 9  |
| AX-158168711 | 16 | 0.219 | KV452961.1  | 422888 | 9-scf00334 | 9  |
| AX-158168714 | 16 | 0.219 | KV452961.1  | 425199 | 9-scf00334 | 9  |
| AX-158168715 | 16 | 0.219 | KV452961.1  | 425636 | 9-scf00334 | 9  |
| AX-158168717 | 16 | 0.219 | KV452961.1  | 430439 | 9-scf00334 | 9  |
| AX-157834562 | 16 | 0.219 | KV452961.1  | 434316 | 9-scf00334 | 9  |
| AX-158168720 | 16 | 0.219 | KV452961.1  | 434937 | 9-scf00334 | 9  |
| AX-158168722 | 16 | 0.219 | KV452961.1  | 438040 | 9-scf00334 | 9  |
| AX-158168725 | 16 | 0.219 | KV452961.1  | 441226 | 9-scf00334 | 9  |
| AX-158168727 | 16 | 0.219 | KV452961.1  | 445228 | 9-scf00334 | 9  |
| AX-158168740 | 16 | 0.219 | KV452961.1  | 457631 | 9-scf00334 | 9  |
| AX-158168741 | 16 | 0.219 | KV452961.1  | 457753 | 9-scf00334 | 9  |
| AX-157834565 | 16 | 0.219 | KV452961.1  | 462540 | 9-scf00334 | 9  |
| AX-157834568 | 16 | 0.219 | KV452961.1  | 481561 | 9-scf00334 | 9  |
| AX-158168769 | 16 | 0.219 | KV452961.1  | 493842 | 9-scf00334 | 9  |
| AX-157834569 | 16 | 0.219 | KV452961.1  | 495932 | 9-scf00334 | 9  |
| AX-158168771 | 16 | 0.219 | KV452961.1  | 501738 | 9-scf00334 | 9  |
| AX-157834573 | 16 | 0.219 | KV452961.1  | 516779 | 9-scf00334 | 9  |
| AX-157747031 | 16 | 0.219 | KV452961.1  | 517599 | 9-scf00334 | 9  |
| AX-157717456 | 16 | 0.219 | KV452961.1  | 524735 | 9-scf00334 | 9  |
| AX-158168786 | 16 | 0.219 | KV452961.1  | 529366 | 9-scf00334 | 9  |
| AX-158168789 | 16 | 0.219 | KV452961.1  | 532326 | 9-scf00334 | 9  |
| AX-158168798 | 16 | 0.219 | KV452961.1  | 545609 | 9-scf00334 | 9  |
| AX-158168804 | 16 | 0.219 | KV452961.1  | 554827 | 9-scf00334 | 9  |
| AX-158168823 | 16 | 0.219 | KV452961.1  | 577137 | 9-scf00334 | 9  |
| AX-158168838 | 16 | 0.219 | KV452961.1  | 600026 | 9-scf00334 | 9  |
| AX-158168847 | 16 | 0.219 | KV452961.1  | 615628 | 9-scf00334 | 9  |
| AX-158168854 | 16 | 0.219 | KV452961.1  | 621494 | 9-scf00334 | 9  |
| AX-157706949 | 16 | 0.219 | 3ML01033207 | 288    | scf08847_1 | UN |
| AX-158168746 | 16 | 0.269 | KV452961.1  | 465720 | 9-scf00334 | 9  |
| AX-157834556 | 16 | 0.328 | KV452961.1  | 334217 | 9-scf00334 | 9  |
| AX-158168695 | 16 | 0.328 | KV452961.1  | 395911 | 9-scf00334 | 9  |
| AX-158168728 | 16 | 0.328 | KV452961.1  | 446361 | 9-scf00334 | 9  |
| AX-158168749 | 16 | 0.328 | KV452961.1  | 468701 | 9-scf00334 | 9  |
| AX-158168750 | 16 | 0.328 | KV452961.1  | 469507 | 9-scf00334 | 9  |
| AX-158168752 | 16 | 0.328 | KV452961.1  | 470765 | 9-scf00334 | 9  |
| AX-158168755 | 16 | 0.328 | KV452961.1  | 471688 | 9-scf00334 | 9  |
| AX-158168756 | 16 | 0.328 | KV452961.1  | 472027 | 9-scf00334 | 9  |
| AX-157834566 | 16 | 0.328 | KV452961.1  | 473937 | 9-scf00334 | 9  |
| AX-157773453 | 16 | 0.328 | KV452961.1  | 474559 | 9-scf00334 | 9  |
| AX-158168761 | 16 | 0.328 | KV452961.1  | 481907 | 9-scf00334 | 9  |
| AX-158168763 | 16 | 0.328 | KV452961.1  | 483213 | 9-scf00334 | 9  |
| AX-158168764 | 16 | 0.328 | KV452961.1  | 484025 | 9-scf00334 | 9  |
| AX-158168767 | 16 | 0.328 | KV452961.1  | 489410 | 9-scf00334 | 9  |

|              |    |       |            |        |            |   |
|--------------|----|-------|------------|--------|------------|---|
| AX-157715852 | 16 | 0.328 | KV452961.1 | 493628 | 9-scf00334 | 9 |
| AX-158168772 | 16 | 0.328 | KV452961.1 | 503791 | 9-scf00334 | 9 |
| AX-158168773 | 16 | 0.328 | KV452961.1 | 504497 | 9-scf00334 | 9 |
| AX-158168782 | 16 | 0.328 | KV452961.1 | 522301 | 9-scf00334 | 9 |
| AX-158168785 | 16 | 0.328 | KV452961.1 | 528915 | 9-scf00334 | 9 |
| AX-157834574 | 16 | 0.328 | KV452961.1 | 531027 | 9-scf00334 | 9 |
| AX-158168788 | 16 | 0.328 | KV452961.1 | 531593 | 9-scf00334 | 9 |
| AX-157834575 | 16 | 0.328 | KV452961.1 | 531884 | 9-scf00334 | 9 |
| AX-158168791 | 16 | 0.328 | KV452961.1 | 534308 | 9-scf00334 | 9 |
| AX-158168609 | 16 | 0.437 | KV452961.1 | 243192 | 9-scf00334 | 9 |
| AX-158168682 | 16 | 0.437 | KV452961.1 | 364154 | 9-scf00334 | 9 |
| AX-158168742 | 16 | 0.437 | KV452961.1 | 462191 | 9-scf00334 | 9 |
| AX-157834576 | 16 | 0.437 | KV452961.1 | 536253 | 9-scf00334 | 9 |
| AX-157834577 | 16 | 0.437 | KV452961.1 | 538065 | 9-scf00334 | 9 |
| AX-157834578 | 16 | 0.437 | KV452961.1 | 538932 | 9-scf00334 | 9 |
| AX-157757915 | 16 | 0.437 | KV452961.1 | 544443 | 9-scf00334 | 9 |
| AX-158168797 | 16 | 0.437 | KV452961.1 | 544535 | 9-scf00334 | 9 |
| AX-157740328 | 16 | 0.437 | KV452961.1 | 546844 | 9-scf00334 | 9 |
| AX-158168802 | 16 | 0.437 | KV452961.1 | 552707 | 9-scf00334 | 9 |
| AX-158168819 | 16 | 0.437 | KV452961.1 | 572986 | 9-scf00334 | 9 |
| AX-157740810 | 16 | 0.486 | KV452961.1 | 571390 | 9-scf00334 | 9 |
| AX-158168584 | 16 | 0.558 | KV452961.1 | 211724 | 9-scf00334 | 9 |
| AX-158168820 | 16 | 0.558 | KV452961.1 | 574433 | 9-scf00334 | 9 |
| AX-158168855 | 16 | 0.558 | KV452961.1 | 621809 | 9-scf00334 | 9 |
| AX-158168873 | 16 | 0.558 | KV452961.1 | 640471 | 9-scf00334 | 9 |
| AX-158168423 | 16 | 0.656 | KV452961.1 | 15213  | 9-scf00334 | 9 |
| AX-157748060 | 16 | 0.656 | KV452961.1 | 18950  | 9-scf00334 | 9 |
| AX-157834534 | 16 | 0.656 | KV452961.1 | 20561  | 9-scf00334 | 9 |
| AX-158168428 | 16 | 0.656 | KV452961.1 | 23957  | 9-scf00334 | 9 |
| AX-158168430 | 16 | 0.656 | KV452961.1 | 26606  | 9-scf00334 | 9 |
| AX-158168485 | 16 | 0.656 | KV452961.1 | 108783 | 9-scf00334 | 9 |
| AX-157756560 | 16 | 0.656 | KV452961.1 | 506378 | 9-scf00334 | 9 |
| AX-157834579 | 16 | 0.656 | KV452961.1 | 577656 | 9-scf00334 | 9 |
| AX-158168825 | 16 | 0.656 | KV452961.1 | 580776 | 9-scf00334 | 9 |
| AX-157834580 | 16 | 0.656 | KV452961.1 | 588229 | 9-scf00334 | 9 |
| AX-158168833 | 16 | 0.656 | KV452961.1 | 590015 | 9-scf00334 | 9 |
| AX-157744076 | 16 | 0.656 | KV452961.1 | 591210 | 9-scf00334 | 9 |
| AX-158168765 | 16 | 0.765 | KV452961.1 | 484930 | 9-scf00334 | 9 |
| AX-158168836 | 16 | 0.765 | KV452961.1 | 597869 | 9-scf00334 | 9 |
| AX-158168837 | 16 | 0.765 | KV452961.1 | 598529 | 9-scf00334 | 9 |
| AX-158380533 | 16 | 0.765 | KV452961.1 | 602842 | 9-scf00334 | 9 |
| AX-158168840 | 16 | 0.765 | KV452961.1 | 603495 | 9-scf00334 | 9 |
| AX-158168841 | 16 | 0.765 | KV452961.1 | 606696 | 9-scf00334 | 9 |
| AX-158168843 | 16 | 0.765 | KV452961.1 | 610518 | 9-scf00334 | 9 |
| AX-158168856 | 16 | 0.984 | KV452961.1 | 623400 | 9-scf00334 | 9 |
| AX-158168859 | 16 | 1.093 | KV452961.1 | 625715 | 9-scf00334 | 9 |
| AX-158168862 | 16 | 1.093 | KV452961.1 | 627782 | 9-scf00334 | 9 |
| AX-158168865 | 16 | 1.148 | KV452961.1 | 630315 | 9-scf00334 | 9 |
| AX-158413226 | 16 | 1.202 | KV452961.1 | 631493 | 9-scf00334 | 9 |
| AX-158168876 | 16 | 1.202 | KV452961.1 | 642199 | 9-scf00334 | 9 |
| AX-157834586 | 16 | 1.202 | KV452961.1 | 642623 | 9-scf00334 | 9 |

|              |    |       |            |        |            |   |
|--------------|----|-------|------------|--------|------------|---|
| AX-158168880 | 16 | 1.202 | KV452961.1 | 646165 | 9-scf00334 | 9 |
| AX-158168884 | 16 | 1.202 | KV452961.1 | 647637 | 9-scf00334 | 9 |
| AX-158168902 | 16 | 1.202 | KV452961.1 | 666063 | 9-scf00334 | 9 |
| AX-157858435 | 16 | 1.202 | KV452961.1 | 676423 | 9-scf00334 | 9 |
| AX-158168881 | 16 | 1.312 | KV452961.1 | 646379 | 9-scf00334 | 9 |
| AX-158168882 | 16 | 1.312 | KV452961.1 | 646834 | 9-scf00334 | 9 |
| AX-158168883 | 16 | 1.312 | KV452961.1 | 647345 | 9-scf00334 | 9 |
| AX-158168885 | 16 | 1.312 | KV452961.1 | 647910 | 9-scf00334 | 9 |
| AX-158168888 | 16 | 1.374 | KV452961.1 | 650369 | 9-scf00334 | 9 |
| AX-157744506 | 16 | 1.421 | KV452961.1 | 652442 | 9-scf00334 | 9 |
| AX-158168892 | 16 | 1.421 | KV452961.1 | 652612 | 9-scf00334 | 9 |
| AX-158168645 | 16 | 1.449 | KV452961.1 | 286449 | 9-scf00334 | 9 |
| AX-158168896 | 16 | 1.449 | KV452961.1 | 658556 | 9-scf00334 | 9 |
| AX-158168947 | 16 | 1.449 | KV452961.1 | 725712 | 9-scf00334 | 9 |
| AX-158168948 | 16 | 1.449 | KV452961.1 | 726945 | 9-scf00334 | 9 |
| AX-158168899 | 16 | 1.478 | KV452961.1 | 662988 | 9-scf00334 | 9 |
| AX-158168900 | 16 | 1.504 | KV452961.1 | 663851 | 9-scf00334 | 9 |
| AX-157834553 | 16 | 1.53  | KV452961.1 | 316264 | 9-scf00334 | 9 |
| AX-158380532 | 16 | 1.53  | KV452961.1 | 473689 | 9-scf00334 | 9 |
| AX-158168901 | 16 | 1.53  | KV452961.1 | 664893 | 9-scf00334 | 9 |
| AX-158168903 | 16 | 1.53  | KV452961.1 | 667341 | 9-scf00334 | 9 |
| AX-158168904 | 16 | 1.53  | KV452961.1 | 667738 | 9-scf00334 | 9 |
| AX-158168905 | 16 | 1.53  | KV452961.1 | 668364 | 9-scf00334 | 9 |
| AX-158385825 | 16 | 1.53  | KV452961.1 | 676677 | 9-scf00334 | 9 |
| AX-158168913 | 16 | 1.53  | KV452961.1 | 682250 | 9-scf00334 | 9 |
| AX-158168912 | 16 | 1.531 | KV452961.1 | 681554 | 9-scf00334 | 9 |
| AX-158168940 | 16 | 1.531 | KV452961.1 | 717259 | 9-scf00334 | 9 |
| AX-158168870 | 16 | 1.532 | KV452961.1 | 636337 | 9-scf00334 | 9 |
| AX-157727957 | 16 | 1.532 | KV452961.1 | 673860 | 9-scf00334 | 9 |
| AX-158168916 | 16 | 1.532 | KV452961.1 | 684336 | 9-scf00334 | 9 |
| AX-158168929 | 16 | 1.532 | KV452961.1 | 701341 | 9-scf00334 | 9 |
| AX-158168921 | 16 | 1.533 | KV452961.1 | 692897 | 9-scf00334 | 9 |
| AX-158168910 | 16 | 1.534 | KV452961.1 | 679879 | 9-scf00334 | 9 |
| AX-158168915 | 16 | 1.534 | KV452961.1 | 683274 | 9-scf00334 | 9 |
| AX-158168922 | 16 | 1.534 | KV452961.1 | 694987 | 9-scf00334 | 9 |
| AX-157718055 | 16 | 1.534 | KV452961.1 | 695961 | 9-scf00334 | 9 |
| AX-157721204 | 16 | 1.534 | KV452961.1 | 698652 | 9-scf00334 | 9 |
| AX-158168928 | 16 | 1.534 | KV452961.1 | 700591 | 9-scf00334 | 9 |
| AX-158168932 | 16 | 1.534 | KV452961.1 | 702966 | 9-scf00334 | 9 |
| AX-157740039 | 16 | 1.681 | KV452961.1 | 703543 | 9-scf00334 | 9 |
| AX-158168935 | 16 | 1.681 | KV452961.1 | 709703 | 9-scf00334 | 9 |
| AX-158168939 | 16 | 1.681 | KV452961.1 | 716617 | 9-scf00334 | 9 |
| AX-158168941 | 16 | 1.681 | KV452961.1 | 717836 | 9-scf00334 | 9 |
| AX-158168944 | 16 | 1.835 | KV452961.1 | 721781 | 9-scf00334 | 9 |
| AX-158168945 | 16 | 1.835 | KV452961.1 | 723544 | 9-scf00334 | 9 |
| AX-158168950 | 16 | 2.142 | KV452961.1 | 730893 | 9-scf00334 | 9 |
| AX-158168951 | 16 | 2.143 | KV452961.1 | 732395 | 9-scf00334 | 9 |
| AX-158168953 | 16 | 2.295 | KV452961.1 | 734297 | 9-scf00334 | 9 |
| AX-158168917 | 16 | 2.296 | KV452961.1 | 686556 | 9-scf00334 | 9 |
| AX-158168954 | 16 | 2.296 | KV452961.1 | 734544 | 9-scf00334 | 9 |
| AX-158168955 | 16 | 2.296 | KV452961.1 | 735266 | 9-scf00334 | 9 |

|              |    |       |            |        |            |   |
|--------------|----|-------|------------|--------|------------|---|
| AX-157744656 | 16 | 2.296 | KV452961.1 | 739274 | 9-scf00334 | 9 |
| AX-158168958 | 16 | 2.296 | KV452961.1 | 742273 | 9-scf00334 | 9 |
| AX-157886713 | 16 | 2.296 | KV452961.1 | 745322 | 9-scf00334 | 9 |
| AX-157726882 | 16 | 2.296 | KV452961.1 | 747442 | 9-scf00334 | 9 |
| AX-158168960 | 16 | 2.296 | KV452961.1 | 748056 | 9-scf00334 | 9 |
| AX-158168962 | 16 | 2.296 | KV452961.1 | 750110 | 9-scf00334 | 9 |
| AX-158168963 | 16 | 2.296 | KV452961.1 | 750922 | 9-scf00334 | 9 |
| AX-158168965 | 16 | 2.296 | KV452961.1 | 753507 | 9-scf00334 | 9 |
| AX-158168969 | 16 | 2.296 | KV452961.1 | 759965 | 9-scf00334 | 9 |
| AX-158168970 | 16 | 2.296 | KV452961.1 | 760807 | 9-scf00334 | 9 |
| AX-158168973 | 16 | 2.296 | KV452961.1 | 764853 | 9-scf00334 | 9 |
| AX-158168975 | 16 | 2.296 | KV452961.1 | 766434 | 9-scf00334 | 9 |
| AX-158168977 | 16 | 2.296 | KV452961.1 | 768719 | 9-scf00334 | 9 |
| AX-158168978 | 16 | 2.296 | KV452961.1 | 769371 | 9-scf00334 | 9 |
| AX-158168981 | 16 | 2.296 | KV452961.1 | 771155 | 9-scf00334 | 9 |
| AX-158168984 | 16 | 2.296 | KV452961.1 | 774026 | 9-scf00334 | 9 |
| AX-158168986 | 16 | 2.296 | KV452961.1 | 778954 | 9-scf00334 | 9 |
| AX-157722043 | 16 | 2.296 | KV452961.1 | 786421 | 9-scf00334 | 9 |
| AX-158168990 | 16 | 2.296 | KV452961.1 | 787051 | 9-scf00334 | 9 |
| AX-158168991 | 16 | 2.296 | KV452961.1 | 788323 | 9-scf00334 | 9 |
| AX-158168995 | 16 | 2.296 | KV452961.1 | 790631 | 9-scf00334 | 9 |
| AX-157695904 | 16 | 2.296 | KV452961.1 | 948290 | 9-scf00334 | 9 |
| AX-158168996 | 16 | 2.623 | KV452961.1 | 791214 | 9-scf00334 | 9 |
| AX-158168997 | 16 | 2.623 | KV452961.1 | 791812 | 9-scf00334 | 9 |
| AX-158168998 | 16 | 2.623 | KV452961.1 | 792355 | 9-scf00334 | 9 |
| AX-158168999 | 16 | 2.623 | KV452961.1 | 793076 | 9-scf00334 | 9 |
| AX-158169000 | 16 | 2.623 | KV452961.1 | 795076 | 9-scf00334 | 9 |
| AX-158169001 | 16 | 2.623 | KV452961.1 | 795919 | 9-scf00334 | 9 |
| AX-157772467 | 16 | 2.623 | KV452961.1 | 796851 | 9-scf00334 | 9 |
| AX-158169003 | 16 | 2.649 | KV452961.1 | 800337 | 9-scf00334 | 9 |
| AX-158169004 | 16 | 2.659 | KV452961.1 | 800653 | 9-scf00334 | 9 |
| AX-158169005 | 16 | 2.682 | KV452961.1 | 802677 | 9-scf00334 | 9 |
| AX-158169007 | 16 | 2.733 | KV452961.1 | 805615 | 9-scf00334 | 9 |
| AX-158169011 | 16 | 2.842 | KV452961.1 | 809607 | 9-scf00334 | 9 |
| AX-158169012 | 16 | 2.909 | KV452961.1 | 813815 | 9-scf00334 | 9 |
| AX-158169055 | 16 | 2.909 | KV452961.1 | 859846 | 9-scf00334 | 9 |
| AX-158169014 | 16 | 2.951 | KV452961.1 | 817132 | 9-scf00334 | 9 |
| AX-158169016 | 16 | 2.951 | KV452961.1 | 818148 | 9-scf00334 | 9 |
| AX-158169017 | 16 | 2.951 | KV452961.1 | 818950 | 9-scf00334 | 9 |
| AX-158169018 | 16 | 2.951 | KV452961.1 | 819478 | 9-scf00334 | 9 |
| AX-158169019 | 16 | 2.951 | KV452961.1 | 820749 | 9-scf00334 | 9 |
| AX-158169020 | 16 | 2.951 | KV452961.1 | 822880 | 9-scf00334 | 9 |
| AX-157756746 | 16 | 2.951 | KV452961.1 | 825696 | 9-scf00334 | 9 |
| AX-158169023 | 16 | 2.951 | KV452961.1 | 827903 | 9-scf00334 | 9 |
| AX-158169024 | 16 | 2.951 | KV452961.1 | 829675 | 9-scf00334 | 9 |
| AX-158169025 | 16 | 2.951 | KV452961.1 | 830029 | 9-scf00334 | 9 |
| AX-158169026 | 16 | 2.951 | KV452961.1 | 832697 | 9-scf00334 | 9 |
| AX-158169029 | 16 | 2.951 | KV452961.1 | 834668 | 9-scf00334 | 9 |
| AX-158169030 | 16 | 2.951 | KV452961.1 | 835162 | 9-scf00334 | 9 |
| AX-158169035 | 16 | 2.951 | KV452961.1 | 839257 | 9-scf00334 | 9 |
| AX-158169037 | 16 | 3.006 | KV452961.1 | 840349 | 9-scf00334 | 9 |

|              |    |       |            |         |            |   |
|--------------|----|-------|------------|---------|------------|---|
| AX-158169039 | 16 | 3.061 | KV452961.1 | 843130  | 9-scf00334 | 9 |
| AX-158169041 | 16 | 3.061 | KV452961.1 | 845111  | 9-scf00334 | 9 |
| AX-158169045 | 16 | 3.061 | KV452961.1 | 850379  | 9-scf00334 | 9 |
| AX-158169046 | 16 | 3.061 | KV452961.1 | 851115  | 9-scf00334 | 9 |
| AX-158169049 | 16 | 3.061 | KV452961.1 | 853665  | 9-scf00334 | 9 |
| AX-158169050 | 16 | 3.061 | KV452961.1 | 854956  | 9-scf00334 | 9 |
| AX-158169052 | 16 | 3.061 | KV452961.1 | 856014  | 9-scf00334 | 9 |
| AX-158169053 | 16 | 3.083 | KV452961.1 | 857408  | 9-scf00334 | 9 |
| AX-158169061 | 16 | 3.119 | KV452961.1 | 869351  | 9-scf00334 | 9 |
| AX-158169062 | 16 | 3.137 | KV452961.1 | 870304  | 9-scf00334 | 9 |
| AX-158169054 | 16 | 3.17  | KV452961.1 | 858542  | 9-scf00334 | 9 |
| AX-158169064 | 16 | 3.17  | KV452961.1 | 871310  | 9-scf00334 | 9 |
| AX-158169065 | 16 | 3.17  | KV452961.1 | 872090  | 9-scf00334 | 9 |
| AX-158413230 | 16 | 3.389 | KV452961.1 | 883850  | 9-scf00334 | 9 |
| AX-158169070 | 16 | 3.389 | KV452961.1 | 884969  | 9-scf00334 | 9 |
| AX-158169072 | 16 | 3.553 | KV452961.1 | 889002  | 9-scf00334 | 9 |
| AX-158169075 | 16 | 3.716 | KV452961.1 | 894174  | 9-scf00334 | 9 |
| AX-158169076 | 16 | 3.716 | KV452961.1 | 895025  | 9-scf00334 | 9 |
| AX-158169082 | 16 | 3.716 | KV452961.1 | 903240  | 9-scf00334 | 9 |
| AX-158169083 | 16 | 3.716 | KV452961.1 | 905611  | 9-scf00334 | 9 |
| AX-158169090 | 16 | 3.716 | KV452961.1 | 913035  | 9-scf00334 | 9 |
| AX-158169093 | 16 | 3.716 | KV452961.1 | 918582  | 9-scf00334 | 9 |
| AX-158169098 | 16 | 3.716 | KV452961.1 | 925770  | 9-scf00334 | 9 |
| AX-157718855 | 16 | 3.716 | KV452961.1 | 930966  | 9-scf00334 | 9 |
| AX-158169106 | 16 | 3.716 | KV452961.1 | 935675  | 9-scf00334 | 9 |
| AX-158169114 | 16 | 3.716 | KV452961.1 | 944858  | 9-scf00334 | 9 |
| AX-158169115 | 16 | 3.716 | KV452961.1 | 945699  | 9-scf00334 | 9 |
| AX-158169099 | 16 | 3.717 | KV452961.1 | 926401  | 9-scf00334 | 9 |
| AX-158169101 | 16 | 3.717 | KV452961.1 | 928103  | 9-scf00334 | 9 |
| AX-158169102 | 16 | 3.717 | KV452961.1 | 929556  | 9-scf00334 | 9 |
| AX-158169103 | 16 | 3.717 | KV452961.1 | 931358  | 9-scf00334 | 9 |
| AX-158169127 | 16 | 3.717 | KV452961.1 | 964677  | 9-scf00334 | 9 |
| AX-158169140 | 16 | 3.717 | KV452961.1 | 984994  | 9-scf00334 | 9 |
| AX-158169170 | 16 | 3.717 | KV452961.1 | 1022672 | 9-scf00334 | 9 |
| AX-158169081 | 16 | 3.774 | KV452961.1 | 898222  | 9-scf00334 | 9 |
| AX-158169104 | 16 | 3.774 | KV452961.1 | 932091  | 9-scf00334 | 9 |
| AX-158169089 | 16 | 3.826 | KV452961.1 | 912642  | 9-scf00334 | 9 |
| AX-157834589 | 16 | 3.826 | KV452961.1 | 941017  | 9-scf00334 | 9 |
| AX-158169118 | 16 | 3.882 | KV452961.1 | 949197  | 9-scf00334 | 9 |
| AX-158169119 | 16 | 3.935 | KV452961.1 | 950967  | 9-scf00334 | 9 |
| AX-158380536 | 16 | 3.935 | KV452961.1 | 952200  | 9-scf00334 | 9 |
| AX-158169121 | 16 | 3.935 | KV452961.1 | 952607  | 9-scf00334 | 9 |
| AX-158169122 | 16 | 3.935 | KV452961.1 | 957684  | 9-scf00334 | 9 |
| AX-158169123 | 16 | 3.935 | KV452961.1 | 958530  | 9-scf00334 | 9 |
| AX-158169125 | 16 | 3.935 | KV452961.1 | 962800  | 9-scf00334 | 9 |
| AX-158169130 | 16 | 3.935 | KV452961.1 | 968849  | 9-scf00334 | 9 |
| AX-158169132 | 16 | 4.197 | KV452961.1 | 973082  | 9-scf00334 | 9 |
| AX-158169133 | 16 | 4.198 | KV452961.1 | 974139  | 9-scf00334 | 9 |
| AX-158169134 | 16 | 4.198 | KV452961.1 | 975548  | 9-scf00334 | 9 |
| AX-158169135 | 16 | 4.198 | KV452961.1 | 977112  | 9-scf00334 | 9 |
| AX-158169136 | 16 | 4.198 | KV452961.1 | 979266  | 9-scf00334 | 9 |

|              |    |       |            |         |            |   |
|--------------|----|-------|------------|---------|------------|---|
| AX-158169056 | 16 | 4.31  | KV452961.1 | 860725  | 9-scf00334 | 9 |
| AX-157773680 | 16 | 4.31  | KV452961.1 | 981222  | 9-scf00334 | 9 |
| AX-157710035 | 16 | 4.31  | KV452961.1 | 994501  | 9-scf00334 | 9 |
| AX-158169040 | 16 | 4.387 | KV452961.1 | 843826  | 9-scf00334 | 9 |
| AX-158385827 | 16 | 4.387 | KV452961.1 | 877735  | 9-scf00334 | 9 |
| AX-158169069 | 16 | 4.387 | KV452961.1 | 883765  | 9-scf00334 | 9 |
| AX-158169073 | 16 | 4.387 | KV452961.1 | 890787  | 9-scf00334 | 9 |
| AX-158169087 | 16 | 4.387 | KV452961.1 | 908943  | 9-scf00334 | 9 |
| AX-158169095 | 16 | 4.387 | KV452961.1 | 919684  | 9-scf00334 | 9 |
| AX-158169139 | 16 | 4.387 | KV452961.1 | 984092  | 9-scf00334 | 9 |
| AX-158169142 | 16 | 4.387 | KV452961.1 | 986256  | 9-scf00334 | 9 |
| AX-158169154 | 16 | 4.387 | KV452961.1 | 1001466 | 9-scf00334 | 9 |
| AX-158169145 | 16 | 4.461 | KV452961.1 | 989022  | 9-scf00334 | 9 |
| AX-158169150 | 16 | 4.461 | KV452961.1 | 995338  | 9-scf00334 | 9 |
| AX-158385829 | 16 | 4.461 | KV452961.1 | 1003720 | 9-scf00334 | 9 |
| AX-157715327 | 16 | 4.469 | KV452961.1 | 983785  | 9-scf00334 | 9 |
| AX-158169146 | 16 | 4.469 | KV452961.1 | 993505  | 9-scf00334 | 9 |
| AX-158169157 | 16 | 4.469 | KV452961.1 | 1006472 | 9-scf00334 | 9 |
| AX-158169158 | 16 | 4.485 | KV452961.1 | 1008535 | 9-scf00334 | 9 |
| AX-158169161 | 16 | 4.495 | KV452961.1 | 1010424 | 9-scf00334 | 9 |
| AX-158169160 | 16 | 4.771 | KV452961.1 | 1009516 | 9-scf00334 | 9 |
| AX-158169163 | 16 | 4.771 | KV452961.1 | 1013018 | 9-scf00334 | 9 |
| AX-158169169 | 16 | 4.771 | KV452961.1 | 1021578 | 9-scf00334 | 9 |
| AX-157773686 | 16 | 4.771 | KV452961.1 | 1114686 | 9-scf00334 | 9 |
| AX-157721658 | 16 | 4.772 | KV452961.1 | 1024550 | 9-scf00334 | 9 |
| AX-157727311 | 16 | 4.772 | KV452961.1 | 1034149 | 9-scf00334 | 9 |
| AX-158169173 | 16 | 4.919 | KV452961.1 | 1029283 | 9-scf00334 | 9 |
| AX-158169182 | 16 | 4.919 | KV452961.1 | 1040334 | 9-scf00334 | 9 |
| AX-158169189 | 16 | 4.919 | KV452961.1 | 1045400 | 9-scf00334 | 9 |
| AX-158169194 | 16 | 4.919 | KV452961.1 | 1049179 | 9-scf00334 | 9 |
| AX-158169198 | 16 | 4.919 | KV452961.1 | 1053250 | 9-scf00334 | 9 |
| AX-158169199 | 16 | 4.919 | KV452961.1 | 1055098 | 9-scf00334 | 9 |
| AX-158169200 | 16 | 4.919 | KV452961.1 | 1056142 | 9-scf00334 | 9 |
| AX-158169203 | 16 | 4.919 | KV452961.1 | 1066303 | 9-scf00334 | 9 |
| AX-158169204 | 16 | 4.919 | KV452961.1 | 1067249 | 9-scf00334 | 9 |
| AX-158169206 | 16 | 4.919 | KV452961.1 | 1072629 | 9-scf00334 | 9 |
| AX-158169209 | 16 | 4.919 | KV452961.1 | 1080659 | 9-scf00334 | 9 |
| AX-158169210 | 16 | 4.919 | KV452961.1 | 1081163 | 9-scf00334 | 9 |
| AX-157744432 | 16 | 4.919 | KV452961.1 | 1118422 | 9-scf00334 | 9 |
| AX-157834591 | 16 | 4.92  | KV452961.1 | 1089644 | 9-scf00334 | 9 |
| AX-157834595 | 16 | 5.246 | KV452961.1 | 1111912 | 9-scf00334 | 9 |
| AX-158169151 | 16 | 5.247 | KV452961.1 | 996684  | 9-scf00334 | 9 |
| AX-158393437 | 16 | 5.247 | KV452961.1 | 1015834 | 9-scf00334 | 9 |
| AX-158169188 | 16 | 5.247 | KV452961.1 | 1045042 | 9-scf00334 | 9 |
| AX-157724081 | 16 | 5.247 | KV452961.1 | 1057396 | 9-scf00334 | 9 |
| AX-158169223 | 16 | 5.247 | KV452961.1 | 1115611 | 9-scf00334 | 9 |
| AX-157834596 | 16 | 5.247 | KV452961.1 | 1117324 | 9-scf00334 | 9 |
| AX-157834597 | 16 | 5.247 | KV452961.1 | 1121802 | 9-scf00334 | 9 |
| AX-157834598 | 16 | 5.247 | KV452961.1 | 1122148 | 9-scf00334 | 9 |
| AX-158169225 | 16 | 5.247 | KV452961.1 | 1126651 | 9-scf00334 | 9 |
| AX-157743726 | 16 | 5.247 | KV452961.1 | 1133437 | 9-scf00334 | 9 |



|              |    |       |            |         |                |    |
|--------------|----|-------|------------|---------|----------------|----|
| AX-158169229 | 16 | 5.247 | KV452961.1 | 1134117 | 9-scf00334     | 9  |
| AX-158169231 | 16 | 5.247 | KV452961.1 | 1136845 | 9-scf00334     | 9  |
| AX-158169233 | 16 | 5.247 | KV452961.1 | 1138578 | 9-scf00334     | 9  |
| AX-158380537 | 16 | 5.247 | KV452961.1 | 1139065 | 9-scf00334     | 9  |
| AX-158169234 | 16 | 5.247 | KV452961.1 | 1139286 | 9-scf00334     | 9  |
| AX-158169236 | 16 | 5.465 | KV452961.1 | 1141573 | 9-scf00334     | 9  |
| AX-158169239 | 16 | 5.465 | KV452961.1 | 1145702 | 9-scf00334     | 9  |
| AX-158169243 | 16 | 5.465 | KV452961.1 | 1150670 | 9-scf00334     | 9  |
| AX-158169246 | 16 | 5.465 | KV452961.1 | 1153990 | 9-scf00334     | 9  |
| AX-158169247 | 16 | 5.465 | KV452961.1 | 1155127 | 9-scf00334     | 9  |
| AX-157834601 | 16 | 5.465 | KV452961.1 | 1159660 | 9-scf00334     | 9  |
| AX-158169251 | 16 | 5.465 | KV452961.1 | 1159728 | 9-scf00334     | 9  |
| AX-158169254 | 16 | 5.465 | KV452961.1 | 1165529 | 9-scf00334     | 9  |
| AX-158169255 | 16 | 5.465 | KV452961.1 | 1169232 | 9-scf00334     | 9  |
| AX-158169256 | 16 | 5.465 | KV452961.1 | 1171152 | 9-scf00334     | 9  |
| AX-158169259 | 16 | 5.465 | KV452961.1 | 1173153 | 9-scf00334     | 9  |
| AX-158169263 | 16 | 5.465 | KV452961.1 | 1175290 | 9-scf00334     | 9  |
| AX-158169271 | 16 | 5.465 | KV452961.1 | 1180695 | 9-scf00334     | 9  |
| AX-158169272 | 16 | 5.465 | KV452961.1 | 1180898 | 9-scf00334     | 9  |
| AX-157726695 | 16 | 5.465 | KV452961.1 | 1182047 | 9-scf00334     | 9  |
| AX-158169273 | 16 | 5.465 | KV452961.1 | 1184347 | 9-scf00334     | 9  |
| AX-158169275 | 16 | 5.465 | KV452961.1 | 1186172 | 9-scf00334     | 9  |
| AX-158169276 | 16 | 5.465 | KV452961.1 | 1186836 | 9-scf00334     | 9  |
| AX-158385833 | 16 | 5.465 | KV452961.1 | 1200517 | 9-scf00334     | 9  |
| AX-157834604 | 16 | 5.465 | KV452961.1 | 1207662 | 9-scf00334     | 9  |
| AX-158169296 | 16 | 5.465 | KV452961.1 | 1207706 | 9-scf00334     | 9  |
| AX-158169314 | 16 | 5.465 | KV452961.1 | 1234941 | 9-scf00334     | 9  |
| AX-158169323 | 16 | 5.465 | KV452961.1 | 1248757 | 9-scf00334     | 9  |
| AX-157697483 | 16 | 5.465 | FI865289.1 | 162     | IORI212 lctalu | UN |
| AX-158169282 | 16 | 5.683 | KV452961.1 | 1191397 | 9-scf00334     | 9  |
| AX-158169283 | 16 | 5.683 | KV452961.1 | 1192112 | 9-scf00334     | 9  |
| AX-157739832 | 16 | 5.683 | KV452961.1 | 1194739 | 9-scf00334     | 9  |
| AX-158169286 | 16 | 5.683 | KV452961.1 | 1196091 | 9-scf00334     | 9  |
| AX-158169288 | 16 | 5.683 | KV452961.1 | 1197792 | 9-scf00334     | 9  |
| AX-158169289 | 16 | 5.683 | KV452961.1 | 1201254 | 9-scf00334     | 9  |
| AX-158169293 | 16 | 5.683 | KV452961.1 | 1204492 | 9-scf00334     | 9  |
| AX-158169295 | 16 | 5.683 | KV452961.1 | 1207207 | 9-scf00334     | 9  |
| AX-158169302 | 16 | 5.902 | KV452961.1 | 1220436 | 9-scf00334     | 9  |
| AX-158169307 | 16 | 5.902 | KV452961.1 | 1228744 | 9-scf00334     | 9  |
| AX-158169309 | 16 | 5.902 | KV452961.1 | 1231457 | 9-scf00334     | 9  |
| AX-157753030 | 16 | 5.902 | KV452961.1 | 1232794 | 9-scf00334     | 9  |
| AX-157770025 | 16 | 5.902 | KV452961.1 | 1233266 | 9-scf00334     | 9  |
| AX-158169312 | 16 | 5.902 | KV452961.1 | 1233507 | 9-scf00334     | 9  |
| AX-158169315 | 16 | 5.902 | KV452961.1 | 1238127 | 9-scf00334     | 9  |
| AX-157834606 | 16 | 5.902 | KV452961.1 | 1239993 | 9-scf00334     | 9  |
| AX-157741175 | 16 | 5.902 | KV452961.1 | 1240814 | 9-scf00334     | 9  |
| AX-158169318 | 16 | 5.902 | KV452961.1 | 1243233 | 9-scf00334     | 9  |
| AX-158169322 | 16 | 6.042 | KV452961.1 | 1246777 | 9-scf00334     | 9  |
| AX-158423017 | 16 | 6.043 | KV452961.1 | 1256630 | 9-scf00334     | 9  |
| AX-158169325 | 16 | 6.408 | KV452961.1 | 1257166 | 9-scf00334     | 9  |
| AX-158169343 | 16 | 6.566 | KV452961.1 | 1281622 | 9-scf00334     | 9  |

|              |    |       |            |         |            |   |
|--------------|----|-------|------------|---------|------------|---|
| AX-158169349 | 16 | 7.073 | KV452961.1 | 1288080 | 9-scf00334 | 9 |
| AX-158169350 | 16 | 7.074 | KV452961.1 | 1288922 | 9-scf00334 | 9 |
| AX-158169352 | 16 | 7.135 | KV452961.1 | 1290474 | 9-scf00334 | 9 |
| AX-158169355 | 16 | 7.214 | KV452961.1 | 1293151 | 9-scf00334 | 9 |
| AX-158169356 | 16 | 7.437 | KV452961.1 | 1294947 | 9-scf00334 | 9 |
| AX-158169357 | 16 | 7.437 | KV452961.1 | 1295319 | 9-scf00334 | 9 |
| AX-158169359 | 16 | 7.437 | KV452961.1 | 1297144 | 9-scf00334 | 9 |
| AX-158169360 | 16 | 7.437 | KV452961.1 | 1298058 | 9-scf00334 | 9 |
| AX-157725125 | 16 | 7.443 | KV452961.1 | 1302694 | 9-scf00334 | 9 |
| AX-158169398 | 16 | 7.443 | KV452961.1 | 1351761 | 9-scf00334 | 9 |
| AX-158169363 | 16 | 7.448 | KV452961.1 | 1303386 | 9-scf00334 | 9 |
| AX-157834610 | 16 | 7.452 | KV452961.1 | 1303478 | 9-scf00334 | 9 |
| AX-158169364 | 16 | 7.452 | KV452961.1 | 1303904 | 9-scf00334 | 9 |
| AX-158169365 | 16 | 7.453 | KV452961.1 | 1304731 | 9-scf00334 | 9 |
| AX-158169367 | 16 | 7.515 | KV452961.1 | 1307863 | 9-scf00334 | 9 |
| AX-158169369 | 16 | 7.601 | KV452961.1 | 1311653 | 9-scf00334 | 9 |
| AX-158169409 | 16 | 7.601 | KV452961.1 | 1369648 | 9-scf00334 | 9 |
| AX-158169374 | 16 | 7.768 | KV452961.1 | 1317146 | 9-scf00334 | 9 |
| AX-157775595 | 16 | 7.768 | KV452961.1 | 1323778 | 9-scf00334 | 9 |
| AX-158380539 | 16 | 7.768 | KV452961.1 | 1323875 | 9-scf00334 | 9 |
| AX-158169376 | 16 | 7.768 | KV452961.1 | 1324230 | 9-scf00334 | 9 |
| AX-158169377 | 16 | 7.768 | KV452961.1 | 1325699 | 9-scf00334 | 9 |
| AX-158169379 | 16 | 7.768 | KV452961.1 | 1327145 | 9-scf00334 | 9 |
| AX-158169380 | 16 | 7.768 | KV452961.1 | 1334416 | 9-scf00334 | 9 |
| AX-158169362 | 16 | 7.877 | KV452961.1 | 1301063 | 9-scf00334 | 9 |
| AX-157834612 | 16 | 7.877 | KV452961.1 | 1329419 | 9-scf00334 | 9 |
| AX-157751051 | 16 | 7.877 | KV452961.1 | 1330491 | 9-scf00334 | 9 |
| AX-158169381 | 16 | 7.877 | KV452961.1 | 1335391 | 9-scf00334 | 9 |
| AX-158169383 | 16 | 7.938 | KV452961.1 | 1337650 | 9-scf00334 | 9 |
| AX-158169384 | 16 | 7.987 | KV452961.1 | 1338440 | 9-scf00334 | 9 |
| AX-158169385 | 16 | 8.026 | KV452961.1 | 1339543 | 9-scf00334 | 9 |
| AX-157738761 | 16 | 8.052 | KV452961.1 | 1340673 | 9-scf00334 | 9 |
| AX-158169388 | 16 | 8.096 | KV452961.1 | 1343366 | 9-scf00334 | 9 |
| AX-158169390 | 16 | 8.096 | KV452961.1 | 1345390 | 9-scf00334 | 9 |
| AX-158169392 | 16 | 8.096 | KV452961.1 | 1346877 | 9-scf00334 | 9 |
| AX-158169393 | 16 | 8.096 | KV452961.1 | 1347315 | 9-scf00334 | 9 |
| AX-158169394 | 16 | 8.099 | KV452961.1 | 1347530 | 9-scf00334 | 9 |
| AX-157834614 | 16 | 8.103 | KV452961.1 | 1353146 | 9-scf00334 | 9 |
| AX-157713204 | 16 | 8.229 | KV452961.1 | 1353195 | 9-scf00334 | 9 |
| AX-158169402 | 16 | 8.456 | KV452961.1 | 1356235 | 9-scf00334 | 9 |
| AX-157834615 | 16 | 8.507 | KV452961.1 | 1360991 | 9-scf00334 | 9 |
| AX-158169407 | 16 | 8.561 | KV452961.1 | 1364729 | 9-scf00334 | 9 |
| AX-158169415 | 16 | 8.688 | KV452961.1 | 1379070 | 9-scf00334 | 9 |
| AX-158169418 | 16 | 9.184 | KV452961.1 | 1384994 | 9-scf00334 | 9 |
| AX-158169419 | 16 | 9.191 | KV452961.1 | 1387376 | 9-scf00334 | 9 |
| AX-158169420 | 16 | 9.191 | KV452961.1 | 1388361 | 9-scf00334 | 9 |
| AX-158169422 | 16 | 9.191 | KV452961.1 | 1389045 | 9-scf00334 | 9 |
| AX-158169424 | 16 | 9.191 | KV452961.1 | 1390756 | 9-scf00334 | 9 |
| AX-158169426 | 16 | 9.191 | KV452961.1 | 1393359 | 9-scf00334 | 9 |
| AX-158169429 | 16 | 9.191 | KV452961.1 | 1395663 | 9-scf00334 | 9 |
| AX-158169430 | 16 | 9.191 | KV452961.1 | 1396099 | 9-scf00334 | 9 |

|              |    |        |             |         |            |    |
|--------------|----|--------|-------------|---------|------------|----|
| AX-158169431 | 16 | 9.191  | KV452961.1  | 1397672 | 9-scf00334 | 9  |
| AX-158169432 | 16 | 9.191  | KV452961.1  | 1398207 | 9-scf00334 | 9  |
| AX-158169433 | 16 | 9.191  | KV452961.1  | 1398694 | 9-scf00334 | 9  |
| AX-158169434 | 16 | 9.191  | KV452961.1  | 1399187 | 9-scf00334 | 9  |
| AX-158169436 | 16 | 9.191  | KV452961.1  | 1401378 | 9-scf00334 | 9  |
| AX-158169438 | 16 | 9.191  | KV452961.1  | 1403205 | 9-scf00334 | 9  |
| AX-158169439 | 16 | 9.191  | KV452961.1  | 1405024 | 9-scf00334 | 9  |
| AX-157706403 | 16 | 9.191  | 3ML01032193 | 343     | scf07809_1 | UN |
| AX-158169441 | 16 | 9.3    | KV452961.1  | 1407485 | 9-scf00334 | 9  |
| AX-158169443 | 16 | 9.3    | KV452961.1  | 1409528 | 9-scf00334 | 9  |
| AX-158169445 | 16 | 9.3    | KV452961.1  | 1410481 | 9-scf00334 | 9  |
| AX-158169446 | 16 | 9.3    | KV452961.1  | 1411923 | 9-scf00334 | 9  |
| AX-158169451 | 16 | 9.3    | KV452961.1  | 1420009 | 9-scf00334 | 9  |
| AX-158169453 | 16 | 9.43   | KV452961.1  | 1421583 | 9-scf00334 | 9  |
| AX-158169454 | 16 | 9.43   | KV452961.1  | 1421994 | 9-scf00334 | 9  |
| AX-158169455 | 16 | 9.43   | KV452961.1  | 1422901 | 9-scf00334 | 9  |
| AX-158169456 | 16 | 9.43   | KV452961.1  | 1424578 | 9-scf00334 | 9  |
| AX-157739607 | 16 | 9.43   | KV452961.1  | 1426175 | 9-scf00334 | 9  |
| AX-158169459 | 16 | 9.43   | KV452961.1  | 1427751 | 9-scf00334 | 9  |
| AX-158169460 | 16 | 9.43   | KV452961.1  | 1427854 | 9-scf00334 | 9  |
| AX-158169462 | 16 | 9.43   | KV452961.1  | 1430930 | 9-scf00334 | 9  |
| AX-158169464 | 16 | 9.43   | KV452961.1  | 1435508 | 9-scf00334 | 9  |
| AX-158169465 | 16 | 9.985  | KV452961.1  | 1436222 | 9-scf00334 | 9  |
| AX-157773713 | 16 | 10.013 | KV452961.1  | 1441107 | 9-scf00334 | 9  |
| AX-157834622 | 16 | 10.013 | KV452961.1  | 1448391 | 9-scf00334 | 9  |
| AX-158169474 | 16 | 10.228 | KV452961.1  | 1451883 | 9-scf00334 | 9  |
| AX-158169475 | 16 | 10.228 | KV452961.1  | 1452952 | 9-scf00334 | 9  |
| AX-158169478 | 16 | 10.229 | KV452961.1  | 1454998 | 9-scf00334 | 9  |
| AX-158169481 | 16 | 10.486 | KV452961.1  | 1463272 | 9-scf00334 | 9  |
| AX-158169484 | 16 | 10.502 | KV452961.1  | 1467306 | 9-scf00334 | 9  |
| AX-158169485 | 16 | 10.502 | KV452961.1  | 1468765 | 9-scf00334 | 9  |
| AX-157744995 | 16 | 10.502 | KV452961.1  | 1470411 | 9-scf00334 | 9  |
| AX-157721354 | 16 | 10.502 | KV452961.1  | 1475977 | 9-scf00334 | 9  |
| AX-158169494 | 16 | 10.502 | KV452961.1  | 1485731 | 9-scf00334 | 9  |
| AX-158169500 | 16 | 10.502 | KV452961.1  | 1495860 | 9-scf00334 | 9  |
| AX-157759020 | 16 | 10.502 | KV452961.1  | 1497968 | 9-scf00334 | 9  |
| AX-157834625 | 16 | 10.502 | KV452961.1  | 1498547 | 9-scf00334 | 9  |
| AX-158169488 | 16 | 10.514 | KV452961.1  | 1472655 | 9-scf00334 | 9  |
| AX-158169491 | 16 | 10.611 | KV452961.1  | 1477701 | 9-scf00334 | 9  |
| AX-157772431 | 16 | 10.611 | KV452961.1  | 1479677 | 9-scf00334 | 9  |
| AX-158380540 | 16 | 10.611 | KV452961.1  | 1479876 | 9-scf00334 | 9  |
| AX-158169493 | 16 | 10.611 | KV452961.1  | 1482011 | 9-scf00334 | 9  |
| AX-158169495 | 16 | 10.611 | KV452961.1  | 1486470 | 9-scf00334 | 9  |
| AX-158169496 | 16 | 10.611 | KV452961.1  | 1486937 | 9-scf00334 | 9  |
| AX-157834624 | 16 | 10.611 | KV452961.1  | 1488979 | 9-scf00334 | 9  |
| AX-158169503 | 16 | 10.611 | KV452961.1  | 1499342 | 9-scf00334 | 9  |
| AX-158169504 | 16 | 10.611 | KV452961.1  | 1501752 | 9-scf00334 | 9  |
| AX-157743178 | 16 | 10.829 | KV452961.1  | 1397870 | 9-scf00334 | 9  |
| AX-158169489 | 16 | 10.829 | KV452961.1  | 1472964 | 9-scf00334 | 9  |
| AX-158169490 | 16 | 10.829 | KV452961.1  | 1473279 | 9-scf00334 | 9  |
| AX-158169499 | 16 | 10.829 | KV452961.1  | 1493620 | 9-scf00334 | 9  |

|              |    |        |            |         |            |   |
|--------------|----|--------|------------|---------|------------|---|
| AX-158169505 | 16 | 10.829 | KV452961.1 | 1502275 | 9-scf00334 | 9 |
| AX-158169506 | 16 | 10.829 | KV452961.1 | 1502810 | 9-scf00334 | 9 |
| AX-158169538 | 16 | 10.829 | KV452961.1 | 1547787 | 9-scf00334 | 9 |
| AX-158169492 | 16 | 10.83  | KV452961.1 | 1478902 | 9-scf00334 | 9 |
| AX-158169509 | 16 | 10.83  | KV452961.1 | 1507981 | 9-scf00334 | 9 |
| AX-158169510 | 16 | 10.83  | KV452961.1 | 1508070 | 9-scf00334 | 9 |
| AX-158169511 | 16 | 10.83  | KV452961.1 | 1508288 | 9-scf00334 | 9 |
| AX-157720717 | 16 | 10.83  | KV452961.1 | 1509798 | 9-scf00334 | 9 |
| AX-157741016 | 16 | 10.83  | KV452961.1 | 1511665 | 9-scf00334 | 9 |
| AX-158169513 | 16 | 10.83  | KV452961.1 | 1513212 | 9-scf00334 | 9 |
| AX-158169514 | 16 | 10.83  | KV452961.1 | 1513505 | 9-scf00334 | 9 |
| AX-158169515 | 16 | 10.83  | KV452961.1 | 1515053 | 9-scf00334 | 9 |
| AX-157866627 | 16 | 10.83  | KV452961.1 | 1516833 | 9-scf00334 | 9 |
| AX-157721695 | 16 | 10.83  | KV452961.1 | 1517086 | 9-scf00334 | 9 |
| AX-157834626 | 16 | 10.83  | KV452961.1 | 1520143 | 9-scf00334 | 9 |
| AX-158169519 | 16 | 10.83  | KV452961.1 | 1523015 | 9-scf00334 | 9 |
| AX-158169520 | 16 | 10.83  | KV452961.1 | 1523773 | 9-scf00334 | 9 |
| AX-158169525 | 16 | 10.83  | KV452961.1 | 1530364 | 9-scf00334 | 9 |
| AX-158169528 | 16 | 10.83  | KV452961.1 | 1534719 | 9-scf00334 | 9 |
| AX-158169529 | 16 | 10.83  | KV452961.1 | 1535583 | 9-scf00334 | 9 |
| AX-158169530 | 16 | 10.83  | KV452961.1 | 1536885 | 9-scf00334 | 9 |
| AX-158169532 | 16 | 10.83  | KV452961.1 | 1537413 | 9-scf00334 | 9 |
| AX-157748672 | 16 | 10.83  | KV452961.1 | 1539597 | 9-scf00334 | 9 |
| AX-158169533 | 16 | 11.048 | KV452961.1 | 1539025 | 9-scf00334 | 9 |
| AX-157858439 | 16 | 11.048 | KV452961.1 | 1544429 | 9-scf00334 | 9 |
| AX-158169536 | 16 | 11.048 | KV452961.1 | 1546320 | 9-scf00334 | 9 |
| AX-158169537 | 16 | 11.048 | KV452961.1 | 1546836 | 9-scf00334 | 9 |
| AX-158169539 | 16 | 11.048 | KV452961.1 | 1548724 | 9-scf00334 | 9 |
| AX-157878670 | 16 | 11.048 | KV452961.1 | 1550284 | 9-scf00334 | 9 |
| AX-157834629 | 16 | 11.048 | KV452961.1 | 1551392 | 9-scf00334 | 9 |
| AX-158169542 | 16 | 11.443 | KV452961.1 | 1552995 | 9-scf00334 | 9 |
| AX-158169551 | 16 | 11.443 | KV452961.1 | 1566972 | 9-scf00334 | 9 |
| AX-158169546 | 16 | 11.444 | KV452961.1 | 1558038 | 9-scf00334 | 9 |
| AX-157834630 | 16 | 11.445 | KV452961.1 | 1559086 | 9-scf00334 | 9 |
| AX-157740116 | 16 | 11.446 | KV452961.1 | 1559687 | 9-scf00334 | 9 |
| AX-158169547 | 16 | 11.447 | KV452961.1 | 1562107 | 9-scf00334 | 9 |
| AX-158169548 | 16 | 11.447 | KV452961.1 | 1564469 | 9-scf00334 | 9 |
| AX-157720194 | 16 | 11.447 | KV452961.1 | 1568612 | 9-scf00334 | 9 |
| AX-158169550 | 16 | 11.531 | KV452961.1 | 1566524 | 9-scf00334 | 9 |
| AX-157754519 | 16 | 11.531 | KV452961.1 | 1569384 | 9-scf00334 | 9 |
| AX-157834633 | 16 | 11.531 | KV452961.1 | 1569469 | 9-scf00334 | 9 |
| AX-157834634 | 16 | 11.645 | KV452961.1 | 1571168 | 9-scf00334 | 9 |
| AX-157744761 | 16 | 11.645 | KV452961.1 | 1573212 | 9-scf00334 | 9 |
| AX-158169553 | 16 | 11.778 | KV452961.1 | 1575377 | 9-scf00334 | 9 |
| AX-158169556 | 16 | 11.778 | KV452961.1 | 1578443 | 9-scf00334 | 9 |
| AX-157726005 | 16 | 11.84  | KV452961.1 | 1572384 | 9-scf00334 | 9 |
| AX-157726399 | 16 | 11.84  | KV452961.1 | 1577210 | 9-scf00334 | 9 |
| AX-158169557 | 16 | 11.84  | KV452961.1 | 1578790 | 9-scf00334 | 9 |
| AX-158169558 | 16 | 12.031 | KV452961.1 | 1580845 | 9-scf00334 | 9 |
| AX-158169559 | 16 | 12.031 | KV452961.1 | 1581140 | 9-scf00334 | 9 |
| AX-158169561 | 16 | 12.031 | KV452961.1 | 1581900 | 9-scf00334 | 9 |

|              |    |        |            |         |            |   |
|--------------|----|--------|------------|---------|------------|---|
| AX-158169564 | 16 | 12.079 | KV452961.1 | 1583735 | 9-scf00334 | 9 |
| AX-157834635 | 16 | 12.128 | KV452961.1 | 1571750 | 9-scf00334 | 9 |
| AX-158169565 | 16 | 12.128 | KV452961.1 | 1584001 | 9-scf00334 | 9 |
| AX-158169566 | 16 | 12.128 | KV452961.1 | 1584723 | 9-scf00334 | 9 |
| AX-158169567 | 16 | 12.392 | KV452961.1 | 1589846 | 9-scf00334 | 9 |
| AX-158169571 | 16 | 12.58  | KV452961.1 | 1601981 | 9-scf00334 | 9 |
| AX-158169572 | 16 | 12.849 | KV452961.1 | 1604015 | 9-scf00334 | 9 |
| AX-158169574 | 16 | 12.849 | KV452961.1 | 1607660 | 9-scf00334 | 9 |
| AX-158169575 | 16 | 12.85  | KV452961.1 | 1609368 | 9-scf00334 | 9 |
| AX-157834637 | 16 | 13.454 | KV452961.1 | 1617715 | 9-scf00334 | 9 |
| AX-158169579 | 16 | 13.454 | KV452961.1 | 1620513 | 9-scf00334 | 9 |
| AX-158169580 | 16 | 13.454 | KV452961.1 | 1620936 | 9-scf00334 | 9 |
| AX-158169585 | 16 | 13.454 | KV452961.1 | 1625227 | 9-scf00334 | 9 |
| AX-158169586 | 16 | 13.454 | KV452961.1 | 1626400 | 9-scf00334 | 9 |
| AX-158169588 | 16 | 13.454 | KV452961.1 | 1629205 | 9-scf00334 | 9 |
| AX-158169590 | 16 | 13.454 | KV452961.1 | 1632418 | 9-scf00334 | 9 |
| AX-158169573 | 16 | 13.567 | KV452961.1 | 1605028 | 9-scf00334 | 9 |
| AX-158169578 | 16 | 13.567 | KV452961.1 | 1620024 | 9-scf00334 | 9 |
| AX-158169594 | 16 | 13.567 | KV452961.1 | 1640574 | 9-scf00334 | 9 |
| AX-158169595 | 16 | 13.672 | KV452961.1 | 1641193 | 9-scf00334 | 9 |
| AX-158169596 | 16 | 13.674 | KV452961.1 | 1641828 | 9-scf00334 | 9 |
| AX-158169604 | 16 | 13.674 | KV452961.1 | 1665938 | 9-scf00334 | 9 |
| AX-158169592 | 16 | 13.819 | KV452961.1 | 1636134 | 9-scf00334 | 9 |
| AX-158169599 | 16 | 13.819 | KV452961.1 | 1649985 | 9-scf00334 | 9 |
| AX-158169600 | 16 | 13.819 | KV452961.1 | 1651881 | 9-scf00334 | 9 |
| AX-157742637 | 16 | 13.819 | KV452961.1 | 1656513 | 9-scf00334 | 9 |
| AX-157834639 | 16 | 13.819 | KV452961.1 | 1663351 | 9-scf00334 | 9 |
| AX-157750903 | 16 | 13.819 | KV452961.1 | 1663551 | 9-scf00334 | 9 |
| AX-157724284 | 16 | 13.819 | KV452961.1 | 1665160 | 9-scf00334 | 9 |
| AX-157710686 | 16 | 13.819 | KV452961.1 | 1668507 | 9-scf00334 | 9 |
| AX-158169605 | 16 | 13.819 | KV452961.1 | 1670045 | 9-scf00334 | 9 |
| AX-158169606 | 16 | 14.11  | KV452961.1 | 1674523 | 9-scf00334 | 9 |
| AX-158169607 | 16 | 14.11  | KV452961.1 | 1675806 | 9-scf00334 | 9 |
| AX-158169608 | 16 | 14.11  | KV452961.1 | 1679011 | 9-scf00334 | 9 |
| AX-158169609 | 16 | 14.11  | KV452961.1 | 1680213 | 9-scf00334 | 9 |
| AX-158169610 | 16 | 14.11  | KV452961.1 | 1681176 | 9-scf00334 | 9 |
| AX-158380542 | 16 | 14.219 | KV452961.1 | 1682542 | 9-scf00334 | 9 |
| AX-158169611 | 16 | 14.219 | KV452961.1 | 1683512 | 9-scf00334 | 9 |
| AX-157750769 | 16 | 14.219 | KV452961.1 | 1693551 | 9-scf00334 | 9 |
| AX-157725524 | 16 | 14.219 | KV452961.1 | 1694317 | 9-scf00334 | 9 |
| AX-158169613 | 16 | 14.219 | KV452961.1 | 1694760 | 9-scf00334 | 9 |
| AX-158169615 | 16 | 14.219 | KV452961.1 | 1697242 | 9-scf00334 | 9 |
| AX-158169616 | 16 | 14.219 | KV452961.1 | 1698495 | 9-scf00334 | 9 |
| AX-158169617 | 16 | 14.219 | KV452961.1 | 1700809 | 9-scf00334 | 9 |
| AX-158413250 | 16 | 14.219 | KV452961.1 | 1705654 | 9-scf00334 | 9 |
| AX-158169621 | 16 | 14.223 | KV452961.1 | 1707856 | 9-scf00334 | 9 |
| AX-158169622 | 16 | 14.225 | KV452961.1 | 1708712 | 9-scf00334 | 9 |
| AX-158169623 | 16 | 14.268 | KV452961.1 | 1709663 | 9-scf00334 | 9 |
| AX-158169624 | 16 | 14.346 | KV452961.1 | 1710092 | 9-scf00334 | 9 |
| AX-157775912 | 16 | 14.346 | KV452961.1 | 1713989 | 9-scf00334 | 9 |
| AX-157710869 | 16 | 14.346 | KV452961.1 | 1714484 | 9-scf00334 | 9 |

|              |    |        |            |         |            |   |
|--------------|----|--------|------------|---------|------------|---|
| AX-158169627 | 16 | 14.383 | KV452961.1 | 1715956 | 9-scf00334 | 9 |
| AX-157725001 | 16 | 14.383 | KV452961.1 | 1716815 | 9-scf00334 | 9 |
| AX-158169628 | 16 | 14.42  | KV452961.1 | 1717665 | 9-scf00334 | 9 |
| AX-158169629 | 16 | 14.777 | KV452961.1 | 1720422 | 9-scf00334 | 9 |
| AX-158169630 | 16 | 14.969 | KV452961.1 | 1720819 | 9-scf00334 | 9 |
| AX-158169631 | 16 | 14.986 | KV452961.1 | 1721552 | 9-scf00334 | 9 |
| AX-157886725 | 16 | 14.986 | KV452961.1 | 1723386 | 9-scf00334 | 9 |
| AX-158169635 | 16 | 14.986 | KV452961.1 | 1728069 | 9-scf00334 | 9 |
| AX-158169640 | 16 | 14.986 | KV452961.1 | 1736887 | 9-scf00334 | 9 |
| AX-158169641 | 16 | 14.986 | KV452961.1 | 1741079 | 9-scf00334 | 9 |
| AX-158169636 | 16 | 15.142 | KV452961.1 | 1732058 | 9-scf00334 | 9 |
| AX-158169638 | 16 | 15.315 | KV452961.1 | 1734024 | 9-scf00334 | 9 |
| AX-158169639 | 16 | 15.315 | KV452961.1 | 1734792 | 9-scf00334 | 9 |
| AX-158169642 | 16 | 15.424 | KV452961.1 | 1742245 | 9-scf00334 | 9 |
| AX-158169644 | 16 | 15.424 | KV452961.1 | 1747885 | 9-scf00334 | 9 |
| AX-158169648 | 16 | 15.67  | KV452961.1 | 1751320 | 9-scf00334 | 9 |
| AX-158169649 | 16 | 15.67  | KV452961.1 | 1752040 | 9-scf00334 | 9 |
| AX-158169650 | 16 | 15.67  | KV452961.1 | 1752974 | 9-scf00334 | 9 |
| AX-158169652 | 16 | 15.67  | KV452961.1 | 1755574 | 9-scf00334 | 9 |
| AX-158169655 | 16 | 15.916 | KV452961.1 | 1762049 | 9-scf00334 | 9 |
| AX-158169656 | 16 | 16.162 | KV452961.1 | 1763033 | 9-scf00334 | 9 |
| AX-158169658 | 16 | 16.162 | KV452961.1 | 1766500 | 9-scf00334 | 9 |
| AX-158169659 | 16 | 16.162 | KV452961.1 | 1766898 | 9-scf00334 | 9 |
| AX-158169661 | 16 | 16.408 | KV452961.1 | 1769646 | 9-scf00334 | 9 |
| AX-158393444 | 16 | 16.408 | KV452961.1 | 1772833 | 9-scf00334 | 9 |
| AX-158169666 | 16 | 16.408 | KV452961.1 | 1775521 | 9-scf00334 | 9 |
| AX-158169668 | 16 | 16.408 | KV452961.1 | 1776931 | 9-scf00334 | 9 |
| AX-158169670 | 16 | 16.627 | KV452961.1 | 1778330 | 9-scf00334 | 9 |
| AX-158169674 | 16 | 16.627 | KV452961.1 | 1785476 | 9-scf00334 | 9 |
| AX-158169678 | 16 | 16.627 | KV452961.1 | 1788245 | 9-scf00334 | 9 |
| AX-158169681 | 16 | 16.754 | KV452961.1 | 1790052 | 9-scf00334 | 9 |
| AX-158169671 | 16 | 16.845 | KV452961.1 | 1779878 | 9-scf00334 | 9 |
| AX-158169677 | 16 | 16.845 | KV452961.1 | 1787858 | 9-scf00334 | 9 |
| AX-158169682 | 16 | 16.845 | KV452961.1 | 1791013 | 9-scf00334 | 9 |
| AX-158169683 | 16 | 16.845 | KV452961.1 | 1791483 | 9-scf00334 | 9 |
| AX-158169684 | 16 | 16.845 | KV452961.1 | 1795228 | 9-scf00334 | 9 |
| AX-157886728 | 16 | 16.845 | KV452961.1 | 1797268 | 9-scf00334 | 9 |
| AX-158169686 | 16 | 17.101 | KV452961.1 | 1802233 | 9-scf00334 | 9 |
| AX-157753150 | 16 | 17.101 | KV452961.1 | 1803711 | 9-scf00334 | 9 |
| AX-157723142 | 16 | 17.228 | KV452961.1 | 1805074 | 9-scf00334 | 9 |
| AX-158169689 | 16 | 17.228 | KV452961.1 | 1807920 | 9-scf00334 | 9 |
| AX-158169690 | 16 | 17.228 | KV452961.1 | 1809996 | 9-scf00334 | 9 |
| AX-158385842 | 16 | 17.611 | KV452961.1 | 1815205 | 9-scf00334 | 9 |
| AX-158169695 | 16 | 17.611 | KV452961.1 | 1818247 | 9-scf00334 | 9 |
| AX-158169697 | 16 | 17.611 | KV452961.1 | 1819245 | 9-scf00334 | 9 |
| AX-158169696 | 16 | 17.72  | KV452961.1 | 1818802 | 9-scf00334 | 9 |
| AX-158169702 | 16 | 17.72  | KV452961.1 | 1825082 | 9-scf00334 | 9 |
| AX-158169708 | 16 | 17.72  | KV452961.1 | 1832979 | 9-scf00334 | 9 |
| AX-158169717 | 16 | 17.72  | KV452961.1 | 1846572 | 9-scf00334 | 9 |
| AX-158169718 | 16 | 17.72  | KV452961.1 | 1847113 | 9-scf00334 | 9 |
| AX-158169761 | 16 | 17.72  | KV452961.1 | 1907269 | 9-scf00334 | 9 |

|              |    |        |             |         |            |    |
|--------------|----|--------|-------------|---------|------------|----|
| AX-157720845 | 16 | 17.829 | KV452961.1  | 1836785 | 9-scf00334 | 9  |
| AX-158169709 | 16 | 17.83  | KV452961.1  | 1837831 | 9-scf00334 | 9  |
| AX-158169711 | 16 | 17.83  | KV452961.1  | 1839717 | 9-scf00334 | 9  |
| AX-158169715 | 16 | 17.83  | KV452961.1  | 1844014 | 9-scf00334 | 9  |
| AX-158169720 | 16 | 17.83  | KV452961.1  | 1848250 | 9-scf00334 | 9  |
| AX-158169700 | 16 | 17.878 | KV452961.1  | 1822370 | 9-scf00334 | 9  |
| AX-158169716 | 16 | 17.878 | KV452961.1  | 1844996 | 9-scf00334 | 9  |
| AX-158169721 | 16 | 18.026 | KV452961.1  | 1848631 | 9-scf00334 | 9  |
| AX-158169722 | 16 | 18.026 | KV452961.1  | 1849014 | 9-scf00334 | 9  |
| AX-158169723 | 16 | 18.026 | KV452961.1  | 1849711 | 9-scf00334 | 9  |
| AX-157758790 | 16 | 18.026 | KV452961.1  | 1850243 | 9-scf00334 | 9  |
| AX-158169724 | 16 | 18.072 | KV452961.1  | 1850626 | 9-scf00334 | 9  |
| AX-158169726 | 16 | 18.477 | KV452961.1  | 1856650 | 9-scf00334 | 9  |
| AX-158169727 | 16 | 18.485 | KV452961.1  | 1857521 | 9-scf00334 | 9  |
| AX-158169728 | 16 | 18.488 | KV452961.1  | 1858331 | 9-scf00334 | 9  |
| AX-158169729 | 16 | 18.613 | KV452961.1  | 1859483 | 9-scf00334 | 9  |
| AX-158169732 | 16 | 18.613 | KV452961.1  | 1860821 | 9-scf00334 | 9  |
| AX-157878674 | 16 | 18.613 | KV452961.1  | 1862248 | 9-scf00334 | 9  |
| AX-158169734 | 16 | 18.613 | KV452961.1  | 1864960 | 9-scf00334 | 9  |
| AX-158169737 | 16 | 18.613 | KV452961.1  | 1869217 | 9-scf00334 | 9  |
| AX-158169741 | 16 | 18.613 | KV452961.1  | 1874213 | 9-scf00334 | 9  |
| AX-158169739 | 16 | 18.836 | KV452961.1  | 1872093 | 9-scf00334 | 9  |
| AX-158380544 | 16 | 18.836 | KV452961.1  | 1873739 | 9-scf00334 | 9  |
| AX-158169745 | 16 | 19.236 | KV452961.1  | 1881863 | 9-scf00334 | 9  |
| AX-158169743 | 16 | 19.479 | KV452961.1  | 1880036 | 9-scf00334 | 9  |
| AX-158169746 | 16 | 19.479 | KV452961.1  | 1885692 | 9-scf00334 | 9  |
| AX-158169748 | 16 | 20.132 | KV452961.1  | 1890780 | 9-scf00334 | 9  |
| AX-157707318 | 16 | 20.369 | 3ML01033996 | 444     | scf09666_1 | UN |
| AX-158169751 | 16 | 20.391 | KV452961.1  | 1897166 | 9-scf00334 | 9  |
| AX-158169752 | 16 | 20.414 | KV452961.1  | 1898029 | 9-scf00334 | 9  |
| AX-158169757 | 16 | 20.415 | KV452961.1  | 1903154 | 9-scf00334 | 9  |
| AX-158169762 | 16 | 20.429 | KV452961.1  | 1912662 | 9-scf00334 | 9  |
| AX-158169768 | 16 | 21.193 | KV452961.1  | 1917903 | 9-scf00334 | 9  |
| AX-158169771 | 16 | 21.197 | KV452961.1  | 1921446 | 9-scf00334 | 9  |
| AX-158169773 | 16 | 21.197 | KV452961.1  | 1927817 | 9-scf00334 | 9  |
| AX-157878675 | 16 | 21.346 | KV452961.1  | 1929570 | 9-scf00334 | 9  |
| AX-158169780 | 16 | 21.558 | KV452961.1  | 1940501 | 9-scf00334 | 9  |
| AX-158169783 | 16 | 22.076 | KV452961.1  | 1946371 | 9-scf00334 | 9  |
| AX-157750501 | 16 | 22.089 | KV452961.1  | 1949778 | 9-scf00334 | 9  |
| AX-158169785 | 16 | 22.089 | KV452961.1  | 1950915 | 9-scf00334 | 9  |
| AX-158169788 | 16 | 22.089 | KV452961.1  | 1954752 | 9-scf00334 | 9  |
| AX-158169789 | 16 | 22.089 | KV452961.1  | 1956006 | 9-scf00334 | 9  |
| AX-158169790 | 16 | 22.213 | KV452961.1  | 1959782 | 9-scf00334 | 9  |
| AX-157858444 | 16 | 22.219 | KV452961.1  | 1960541 | 9-scf00334 | 9  |
| AX-158169791 | 16 | 22.219 | KV452961.1  | 1960706 | 9-scf00334 | 9  |
| AX-158169800 | 16 | 23.078 | KV452961.1  | 1983633 | 9-scf00334 | 9  |
| AX-158393447 | 16 | 23.078 | KV452961.1  | 1983947 | 9-scf00334 | 9  |
| AX-157716935 | 16 | 23.215 | KV452961.1  | 1988180 | 9-scf00334 | 9  |
| AX-158169803 | 16 | 23.233 | KV452961.1  | 1990358 | 9-scf00334 | 9  |
| AX-158169794 | 16 | 23.252 | KV452961.1  | 1971580 | 9-scf00334 | 9  |
| AX-158169796 | 16 | 23.252 | KV452961.1  | 1974512 | 9-scf00334 | 9  |

|              |    |        |             |         |            |    |
|--------------|----|--------|-------------|---------|------------|----|
| AX-157751165 | 16 | 23.252 | KV452961.1  | 1995805 | 9-scf00334 | 9  |
| AX-158169808 | 16 | 23.252 | KV452961.1  | 1997285 | 9-scf00334 | 9  |
| AX-158169809 | 16 | 23.252 | KV452961.1  | 1998734 | 9-scf00334 | 9  |
| AX-158169810 | 16 | 23.252 | KV452961.1  | 1999727 | 9-scf00334 | 9  |
| AX-158169812 | 16 | 23.252 | KV452961.1  | 2002232 | 9-scf00334 | 9  |
| AX-158169815 | 16 | 23.406 | KV452961.1  | 2005641 | 9-scf00334 | 9  |
| AX-158169798 | 16 | 23.467 | KV452961.1  | 1978856 | 9-scf00334 | 9  |
| AX-158169816 | 16 | 23.467 | KV452961.1  | 2006181 | 9-scf00334 | 9  |
| AX-158169818 | 16 | 23.467 | KV452961.1  | 2009463 | 9-scf00334 | 9  |
| AX-157834654 | 16 | 23.467 | KV452961.1  | 2098921 | 9-scf00334 | 9  |
| AX-158169817 | 16 | 23.56  | KV452961.1  | 2008368 | 9-scf00334 | 9  |
| AX-158169822 | 16 | 23.56  | KV452961.1  | 2018508 | 9-scf00334 | 9  |
| AX-158169823 | 16 | 23.56  | KV452961.1  | 2019256 | 9-scf00334 | 9  |
| AX-158169824 | 16 | 23.56  | KV452961.1  | 2020170 | 9-scf00334 | 9  |
| AX-158169826 | 16 | 23.56  | KV452961.1  | 2022437 | 9-scf00334 | 9  |
| AX-157834643 | 16 | 23.56  | KV452961.1  | 2027390 | 9-scf00334 | 9  |
| AX-157834646 | 16 | 23.56  | KV452961.1  | 2030995 | 9-scf00334 | 9  |
| AX-157714706 | 16 | 23.601 | KV452961.1  | 2020906 | 9-scf00334 | 9  |
| AX-157834645 | 16 | 23.601 | KV452961.1  | 2030106 | 9-scf00334 | 9  |
| AX-158380545 | 16 | 23.601 | KV452961.1  | 2044682 | 9-scf00334 | 9  |
| AX-158169776 | 16 | 23.644 | KV452961.1  | 1930532 | 9-scf00334 | 9  |
| AX-157871956 | 16 | 23.644 | KV452961.1  | 2020837 | 9-scf00334 | 9  |
| AX-158169831 | 16 | 23.644 | KV452961.1  | 2034569 | 9-scf00334 | 9  |
| AX-158169840 | 16 | 23.644 | KV452961.1  | 2055359 | 9-scf00334 | 9  |
| AX-157706159 | 16 | 23.644 | 3ML01031735 | 152     | scf07355_1 | UN |
| AX-157834647 | 16 | 23.713 | KV452961.1  | 2035386 | 9-scf00334 | 9  |
| AX-157749322 | 16 | 23.834 | KV452961.1  | 2048130 | 9-scf00334 | 9  |
| AX-158169839 | 16 | 23.834 | KV452961.1  | 2054758 | 9-scf00334 | 9  |
| AX-158169865 | 16 | 23.834 | KV452961.1  | 2087771 | 9-scf00334 | 9  |
| AX-158169835 | 16 | 23.836 | KV452961.1  | 2051233 | 9-scf00334 | 9  |
| AX-158169845 | 16 | 23.836 | KV452961.1  | 2064021 | 9-scf00334 | 9  |
| AX-158169842 | 16 | 24.027 | KV452961.1  | 2058574 | 9-scf00334 | 9  |
| AX-157834649 | 16 | 24.027 | KV452961.1  | 2059003 | 9-scf00334 | 9  |
| AX-157834642 | 16 | 24.186 | KV452961.1  | 2024164 | 9-scf00334 | 9  |
| AX-158169844 | 16 | 24.186 | KV452961.1  | 2060082 | 9-scf00334 | 9  |
| AX-157886729 | 16 | 24.186 | KV452961.1  | 2064594 | 9-scf00334 | 9  |
| AX-158169846 | 16 | 24.186 | KV452961.1  | 2064633 | 9-scf00334 | 9  |
| AX-158169848 | 16 | 24.186 | KV452961.1  | 2068055 | 9-scf00334 | 9  |
| AX-158169849 | 16 | 24.186 | KV452961.1  | 2068996 | 9-scf00334 | 9  |
| AX-158169852 | 16 | 24.186 | KV452961.1  | 2072007 | 9-scf00334 | 9  |
| AX-158169853 | 16 | 24.186 | KV452961.1  | 2074735 | 9-scf00334 | 9  |
| AX-158169855 | 16 | 24.186 | KV452961.1  | 2076882 | 9-scf00334 | 9  |
| AX-158169858 | 16 | 24.186 | KV452961.1  | 2081990 | 9-scf00334 | 9  |
| AX-158169859 | 16 | 24.186 | KV452961.1  | 2083163 | 9-scf00334 | 9  |
| AX-158169861 | 16 | 24.186 | KV452961.1  | 2084264 | 9-scf00334 | 9  |
| AX-158169864 | 16 | 24.186 | KV452961.1  | 2087280 | 9-scf00334 | 9  |
| AX-158169884 | 16 | 24.186 | KV452961.1  | 2117326 | 9-scf00334 | 9  |
| AX-158169867 | 16 | 24.19  | KV452961.1  | 2093778 | 9-scf00334 | 9  |
| AX-158169871 | 16 | 24.618 | KV452961.1  | 2097360 | 9-scf00334 | 9  |
| AX-158169874 | 16 | 24.623 | KV452961.1  | 2100470 | 9-scf00334 | 9  |
| AX-158169875 | 16 | 24.623 | KV452961.1  | 2100852 | 9-scf00334 | 9  |



|              |    |        |            |         |            |   |
|--------------|----|--------|------------|---------|------------|---|
| AX-158169877 | 16 | 24.623 | KV452961.1 | 2101555 | 9-scf00334 | 9 |
| AX-157871958 | 16 | 24.623 | KV452961.1 | 2104714 | 9-scf00334 | 9 |
| AX-157866630 | 16 | 24.623 | KV452961.1 | 2105061 | 9-scf00334 | 9 |
| AX-158169879 | 16 | 24.841 | KV452961.1 | 2109602 | 9-scf00334 | 9 |
| AX-157834656 | 16 | 24.841 | KV452961.1 | 2110658 | 9-scf00334 | 9 |
| AX-158169880 | 16 | 24.841 | KV452961.1 | 2111056 | 9-scf00334 | 9 |
| AX-158169881 | 16 | 24.841 | KV452961.1 | 2112715 | 9-scf00334 | 9 |
| AX-158169882 | 16 | 24.841 | KV452961.1 | 2115540 | 9-scf00334 | 9 |
| AX-157757481 | 16 | 24.895 | KV452961.1 | 2116217 | 9-scf00334 | 9 |
| AX-158169883 | 16 | 24.953 | KV452961.1 | 2116749 | 9-scf00334 | 9 |
| AX-158169885 | 16 | 24.978 | KV452961.1 | 2119345 | 9-scf00334 | 9 |
| AX-158169887 | 16 | 25.146 | KV452961.1 | 2124749 | 9-scf00334 | 9 |
| AX-157719070 | 16 | 25.146 | KV452961.1 | 2192617 | 9-scf00334 | 9 |
| AX-157834660 | 16 | 25.388 | KV452961.1 | 2133293 | 9-scf00334 | 9 |
| AX-158169893 | 16 | 25.388 | KV452961.1 | 2134655 | 9-scf00334 | 9 |
| AX-157708397 | 16 | 25.388 | KV452961.1 | 2136827 | 9-scf00334 | 9 |
| AX-158169894 | 16 | 25.388 | KV452961.1 | 2139290 | 9-scf00334 | 9 |
| AX-158169895 | 16 | 25.388 | KV452961.1 | 2140080 | 9-scf00334 | 9 |
| AX-157834661 | 16 | 25.388 | KV452961.1 | 2140330 | 9-scf00334 | 9 |
| AX-158169897 | 16 | 25.388 | KV452961.1 | 2144002 | 9-scf00334 | 9 |
| AX-158169898 | 16 | 25.388 | KV452961.1 | 2146291 | 9-scf00334 | 9 |
| AX-158169901 | 16 | 25.388 | KV452961.1 | 2149656 | 9-scf00334 | 9 |
| AX-158169902 | 16 | 25.388 | KV452961.1 | 2151325 | 9-scf00334 | 9 |
| AX-157715940 | 16 | 25.388 | KV452961.1 | 2152270 | 9-scf00334 | 9 |
| AX-157834663 | 16 | 25.388 | KV452961.1 | 2152340 | 9-scf00334 | 9 |
| AX-158380546 | 16 | 25.388 | KV452961.1 | 2157944 | 9-scf00334 | 9 |
| AX-158169909 | 16 | 25.388 | KV452961.1 | 2160236 | 9-scf00334 | 9 |
| AX-158169925 | 16 | 25.388 | KV452961.1 | 2179188 | 9-scf00334 | 9 |
| AX-158169908 | 16 | 25.447 | KV452961.1 | 2159163 | 9-scf00334 | 9 |
| AX-158169911 | 16 | 25.497 | KV452961.1 | 2164552 | 9-scf00334 | 9 |
| AX-158169913 | 16 | 25.497 | KV452961.1 | 2166947 | 9-scf00334 | 9 |
| AX-157748799 | 16 | 25.497 | KV452961.1 | 2167393 | 9-scf00334 | 9 |
| AX-158169914 | 16 | 25.497 | KV452961.1 | 2168241 | 9-scf00334 | 9 |
| AX-158169915 | 16 | 25.497 | KV452961.1 | 2168712 | 9-scf00334 | 9 |
| AX-158169919 | 16 | 25.497 | KV452961.1 | 2174382 | 9-scf00334 | 9 |
| AX-158169920 | 16 | 25.497 | KV452961.1 | 2175866 | 9-scf00334 | 9 |
| AX-158169921 | 16 | 25.497 | KV452961.1 | 2176322 | 9-scf00334 | 9 |
| AX-158169922 | 16 | 25.497 | KV452961.1 | 2176775 | 9-scf00334 | 9 |
| AX-158169926 | 16 | 25.497 | KV452961.1 | 2180629 | 9-scf00334 | 9 |
| AX-157719810 | 16 | 25.497 | KV452961.1 | 2186130 | 9-scf00334 | 9 |
| AX-158169931 | 16 | 25.497 | KV452961.1 | 2190736 | 9-scf00334 | 9 |
| AX-158169933 | 16 | 25.497 | KV452961.1 | 2194149 | 9-scf00334 | 9 |
| AX-158169934 | 16 | 25.497 | KV452961.1 | 2194246 | 9-scf00334 | 9 |
| AX-157772688 | 16 | 25.497 | KV452961.1 | 2211264 | 9-scf00334 | 9 |
| AX-158169935 | 16 | 25.68  | KV452961.1 | 2194829 | 9-scf00334 | 9 |
| AX-158169938 | 16 | 25.68  | KV452961.1 | 2197217 | 9-scf00334 | 9 |
| AX-158169939 | 16 | 25.862 | KV452961.1 | 2198268 | 9-scf00334 | 9 |
| AX-158169940 | 16 | 25.862 | KV452961.1 | 2198914 | 9-scf00334 | 9 |
| AX-158169941 | 16 | 26.044 | KV452961.1 | 2199352 | 9-scf00334 | 9 |
| AX-158169944 | 16 | 26.044 | KV452961.1 | 2202049 | 9-scf00334 | 9 |
| AX-158169946 | 16 | 26.044 | KV452961.1 | 2204910 | 9-scf00334 | 9 |

|              |    |        |             |         |            |    |
|--------------|----|--------|-------------|---------|------------|----|
| AX-158169948 | 16 | 26.044 | KV452961.1  | 2206479 | 9-scf00334 | 9  |
| AX-158169949 | 16 | 26.044 | KV452961.1  | 2207494 | 9-scf00334 | 9  |
| AX-158169950 | 16 | 26.044 | KV452961.1  | 2208089 | 9-scf00334 | 9  |
| AX-158169951 | 16 | 26.044 | KV452961.1  | 2210045 | 9-scf00334 | 9  |
| AX-158169952 | 16 | 26.044 | KV452961.1  | 2211196 | 9-scf00334 | 9  |
| AX-158169955 | 16 | 26.481 | KV452961.1  | 2221066 | 9-scf00334 | 9  |
| AX-157866632 | 16 | 26.481 | KV452961.1  | 2222477 | 9-scf00334 | 9  |
| AX-158169957 | 16 | 26.481 | KV452961.1  | 2224023 | 9-scf00334 | 9  |
| AX-157750805 | 16 | 26.481 | KV452961.1  | 2225182 | 9-scf00334 | 9  |
| AX-157723767 | 16 | 26.481 | KV452961.1  | 2242485 | 9-scf00334 | 9  |
| AX-158169959 | 16 | 26.651 | KV452961.1  | 2229300 | 9-scf00334 | 9  |
| AX-158413259 | 16 | 26.651 | KV452961.1  | 2234140 | 9-scf00334 | 9  |
| AX-157724998 | 16 | 27.1   | KV452961.1  | 2234458 | 9-scf00334 | 9  |
| AX-157754665 | 16 | 27.101 | KV452961.1  | 2236805 | 9-scf00334 | 9  |
| AX-157743897 | 16 | 27.15  | KV452961.1  | 2240778 | 9-scf00334 | 9  |
| AX-158169962 | 16 | 27.15  | KV452961.1  | 2241135 | 9-scf00334 | 9  |
| AX-158169964 | 16 | 27.15  | KV452961.1  | 2244247 | 9-scf00334 | 9  |
| AX-157834666 | 16 | 27.15  | KV452961.1  | 2246184 | 9-scf00334 | 9  |
| AX-158169965 | 16 | 27.15  | KV452961.1  | 2246256 | 9-scf00334 | 9  |
| AX-157748848 | 16 | 27.15  | KV452961.1  | 2247077 | 9-scf00334 | 9  |
| AX-158393449 | 16 | 27.15  | KV452961.1  | 2247686 | 9-scf00334 | 9  |
| AX-157706245 | 16 | 27.563 | 3ML01031892 | 446     | scf07514_1 | UN |
| AX-158169963 | 16 | 27.574 | KV452961.1  | 2243224 | 9-scf00334 | 9  |
| AX-157740796 | 16 | 27.574 | KV452961.1  | 2257592 | 9-scf00334 | 9  |
| AX-158169973 | 16 | 27.574 | KV452961.1  | 2262794 | 9-scf00334 | 9  |
| AX-158169976 | 16 | 27.574 | KV452961.1  | 2266300 | 9-scf00334 | 9  |
| AX-158169977 | 16 | 27.574 | KV452961.1  | 2266827 | 9-scf00334 | 9  |
| AX-158169978 | 16 | 27.574 | KV452961.1  | 2268592 | 9-scf00334 | 9  |
| AX-158169979 | 16 | 27.574 | KV452961.1  | 2269228 | 9-scf00334 | 9  |
| AX-158169981 | 16 | 27.574 | KV452961.1  | 2270640 | 9-scf00334 | 9  |
| AX-158169982 | 16 | 27.739 | KV452961.1  | 2271149 | 9-scf00334 | 9  |
| AX-157858448 | 16 | 27.739 | KV452961.1  | 2273907 | 9-scf00334 | 9  |
| AX-158169985 | 16 | 27.899 | KV452961.1  | 2275384 | 9-scf00334 | 9  |
| AX-158169987 | 16 | 27.899 | KV452961.1  | 2277378 | 9-scf00334 | 9  |
| AX-157725797 | 16 | 27.899 | KV452961.1  | 2336652 | 9-scf00334 | 9  |
| AX-158170030 | 16 | 27.899 | KV452961.1  | 2337635 | 9-scf00334 | 9  |
| AX-158169990 | 16 | 27.9   | KV452961.1  | 2284860 | 9-scf00334 | 9  |
| AX-158169991 | 16 | 27.9   | KV452961.1  | 2286065 | 9-scf00334 | 9  |
| AX-158169995 | 16 | 27.901 | KV452961.1  | 2289009 | 9-scf00334 | 9  |
| AX-157834669 | 16 | 27.901 | KV452961.1  | 2289319 | 9-scf00334 | 9  |
| AX-158169996 | 16 | 27.927 | KV452961.1  | 2289497 | 9-scf00334 | 9  |
| AX-158169998 | 16 | 27.956 | KV452961.1  | 2291499 | 9-scf00334 | 9  |
| AX-158169999 | 16 | 27.956 | KV452961.1  | 2292102 | 9-scf00334 | 9  |
| AX-158413261 | 16 | 27.956 | KV452961.1  | 2302480 | 9-scf00334 | 9  |
| AX-158169997 | 16 | 28.011 | KV452961.1  | 2290644 | 9-scf00334 | 9  |
| AX-157726286 | 16 | 28.011 | KV452961.1  | 2293432 | 9-scf00334 | 9  |
| AX-157834671 | 16 | 28.011 | KV452961.1  | 2294078 | 9-scf00334 | 9  |
| AX-158170002 | 16 | 28.011 | KV452961.1  | 2299236 | 9-scf00334 | 9  |
| AX-158170003 | 16 | 28.011 | KV452961.1  | 2300485 | 9-scf00334 | 9  |
| AX-158170005 | 16 | 28.011 | KV452961.1  | 2302252 | 9-scf00334 | 9  |
| AX-157721505 | 16 | 28.011 | KV452961.1  | 2306037 | 9-scf00334 | 9  |

|              |    |        |            |         |            |   |
|--------------|----|--------|------------|---------|------------|---|
| AX-158170007 | 16 | 28.011 | KV452961.1 | 2306463 | 9-scf00334 | 9 |
| AX-158170008 | 16 | 28.011 | KV452961.1 | 2306831 | 9-scf00334 | 9 |
| AX-158170010 | 16 | 28.011 | KV452961.1 | 2308067 | 9-scf00334 | 9 |
| AX-158170013 | 16 | 28.011 | KV452961.1 | 2311063 | 9-scf00334 | 9 |
| AX-158170014 | 16 | 28.011 | KV452961.1 | 2311797 | 9-scf00334 | 9 |
| AX-157741935 | 16 | 28.011 | KV452961.1 | 2313216 | 9-scf00334 | 9 |
| AX-158170017 | 16 | 28.011 | KV452961.1 | 2315794 | 9-scf00334 | 9 |
| AX-157773570 | 16 | 28.011 | KV452961.1 | 2316665 | 9-scf00334 | 9 |
| AX-158170018 | 16 | 28.267 | KV452961.1 | 2318152 | 9-scf00334 | 9 |
| AX-157834673 | 16 | 28.267 | KV452961.1 | 2323305 | 9-scf00334 | 9 |
| AX-158170020 | 16 | 28.267 | KV452961.1 | 2325102 | 9-scf00334 | 9 |
| AX-158170021 | 16 | 28.267 | KV452961.1 | 2325366 | 9-scf00334 | 9 |
| AX-158170024 | 16 | 28.267 | KV452961.1 | 2328720 | 9-scf00334 | 9 |
| AX-158170026 | 16 | 28.439 | KV452961.1 | 2330832 | 9-scf00334 | 9 |
| AX-158170032 | 16 | 28.439 | KV452961.1 | 2342076 | 9-scf00334 | 9 |
| AX-158170033 | 16 | 28.439 | KV452961.1 | 2345314 | 9-scf00334 | 9 |
| AX-158170051 | 16 | 28.439 | KV452961.1 | 2368630 | 9-scf00334 | 9 |
| AX-158170004 | 16 | 28.757 | KV452961.1 | 2300868 | 9-scf00334 | 9 |
| AX-158170036 | 16 | 28.757 | KV452961.1 | 2347690 | 9-scf00334 | 9 |
| AX-158170040 | 16 | 28.774 | KV452961.1 | 2354548 | 9-scf00334 | 9 |
| AX-158170043 | 16 | 28.775 | KV452961.1 | 2357815 | 9-scf00334 | 9 |
| AX-158385846 | 16 | 28.776 | KV452961.1 | 2358132 | 9-scf00334 | 9 |
| AX-158170045 | 16 | 28.776 | KV452961.1 | 2359084 | 9-scf00334 | 9 |
| AX-158170046 | 16 | 28.776 | KV452961.1 | 2359925 | 9-scf00334 | 9 |
| AX-158170047 | 16 | 28.776 | KV452961.1 | 2361260 | 9-scf00334 | 9 |
| AX-158170048 | 16 | 28.792 | KV452961.1 | 2361976 | 9-scf00334 | 9 |
| AX-157878679 | 16 | 28.818 | KV452961.1 | 2363063 | 9-scf00334 | 9 |
| AX-158170049 | 16 | 28.846 | KV452961.1 | 2366836 | 9-scf00334 | 9 |
| AX-157771820 | 16 | 28.866 | KV452961.1 | 2337111 | 9-scf00334 | 9 |
| AX-158170054 | 16 | 28.866 | KV452961.1 | 2371583 | 9-scf00334 | 9 |
| AX-158170055 | 16 | 28.885 | KV452961.1 | 2371960 | 9-scf00334 | 9 |
| AX-158170056 | 16 | 28.885 | KV452961.1 | 2374996 | 9-scf00334 | 9 |
| AX-158170057 | 16 | 28.885 | KV452961.1 | 2375412 | 9-scf00334 | 9 |
| AX-158170058 | 16 | 28.885 | KV452961.1 | 2376155 | 9-scf00334 | 9 |
| AX-158170080 | 16 | 28.885 | KV452961.1 | 2402349 | 9-scf00334 | 9 |
| AX-158170088 | 16 | 28.885 | KV452961.1 | 2412617 | 9-scf00334 | 9 |
| AX-158170061 | 16 | 28.89  | KV452961.1 | 2381730 | 9-scf00334 | 9 |
| AX-157866633 | 16 | 29.273 | KV452961.1 | 2384553 | 9-scf00334 | 9 |
| AX-158170064 | 16 | 29.276 | KV452961.1 | 2385920 | 9-scf00334 | 9 |
| AX-158170072 | 16 | 29.276 | KV452961.1 | 2393591 | 9-scf00334 | 9 |
| AX-158170066 | 16 | 29.279 | KV452961.1 | 2388305 | 9-scf00334 | 9 |
| AX-158170071 | 16 | 29.279 | KV452961.1 | 2392791 | 9-scf00334 | 9 |
| AX-158170073 | 16 | 29.279 | KV452961.1 | 2394415 | 9-scf00334 | 9 |
| AX-157742417 | 16 | 29.444 | KV452961.1 | 2399824 | 9-scf00334 | 9 |
| AX-158170079 | 16 | 29.62  | KV452961.1 | 2400804 | 9-scf00334 | 9 |
| AX-158170084 | 16 | 29.62  | KV452961.1 | 2407727 | 9-scf00334 | 9 |
| AX-157834675 | 16 | 29.62  | KV452961.1 | 2410083 | 9-scf00334 | 9 |
| AX-158170086 | 16 | 29.62  | KV452961.1 | 2410209 | 9-scf00334 | 9 |
| AX-158170087 | 16 | 29.62  | KV452961.1 | 2411539 | 9-scf00334 | 9 |
| AX-158170089 | 16 | 29.62  | KV452961.1 | 2413668 | 9-scf00334 | 9 |
| AX-158170093 | 16 | 29.752 | KV452961.1 | 2417315 | 9-scf00334 | 9 |

|              |    |        |            |         |            |   |
|--------------|----|--------|------------|---------|------------|---|
| AX-158170094 | 16 | 29.759 | KV452961.1 | 2418655 | 9-scf00334 | 9 |
| AX-158170095 | 16 | 29.759 | KV452961.1 | 2421895 | 9-scf00334 | 9 |
| AX-158170096 | 16 | 29.759 | KV452961.1 | 2422209 | 9-scf00334 | 9 |
| AX-158170092 | 16 | 30.086 | KV452961.1 | 2415807 | 9-scf00334 | 9 |
| AX-158170097 | 16 | 30.086 | KV452961.1 | 2427349 | 9-scf00334 | 9 |
| AX-158170098 | 16 | 30.087 | KV452961.1 | 2427856 | 9-scf00334 | 9 |
| AX-158170099 | 16 | 30.087 | KV452961.1 | 2428583 | 9-scf00334 | 9 |
| AX-158170100 | 16 | 30.087 | KV452961.1 | 2429231 | 9-scf00334 | 9 |
| AX-157834676 | 16 | 30.087 | KV452961.1 | 2433460 | 9-scf00334 | 9 |
| AX-157751073 | 16 | 30.087 | KV452961.1 | 2434271 | 9-scf00334 | 9 |
| AX-158170104 | 16 | 30.087 | KV452961.1 | 2441676 | 9-scf00334 | 9 |
| AX-157738796 | 16 | 30.087 | KV452961.1 | 2451502 | 9-scf00334 | 9 |
| AX-158170110 | 16 | 30.087 | KV452961.1 | 2456434 | 9-scf00334 | 9 |
| AX-158170113 | 16 | 30.087 | KV452961.1 | 2459842 | 9-scf00334 | 9 |
| AX-158170111 | 16 | 30.277 | KV452961.1 | 2458691 | 9-scf00334 | 9 |
| AX-158170112 | 16 | 30.277 | KV452961.1 | 2459238 | 9-scf00334 | 9 |
| AX-157719242 | 16 | 30.288 | KV452961.1 | 2467128 | 9-scf00334 | 9 |
| AX-157752295 | 16 | 30.864 | KV452961.1 | 2474535 | 9-scf00334 | 9 |
| AX-158170117 | 16 | 30.867 | KV452961.1 | 2476457 | 9-scf00334 | 9 |
| AX-158170118 | 16 | 30.867 | KV452961.1 | 2477198 | 9-scf00334 | 9 |
| AX-158170119 | 16 | 30.867 | KV452961.1 | 2477695 | 9-scf00334 | 9 |
| AX-158170122 | 16 | 31.143 | KV452961.1 | 2480918 | 9-scf00334 | 9 |
| AX-157721469 | 16 | 31.143 | KV452961.1 | 2481450 | 9-scf00334 | 9 |
| AX-157886735 | 16 | 31.212 | KV452961.1 | 2485735 | 9-scf00334 | 9 |
| AX-158170121 | 16 | 31.246 | KV452961.1 | 2480803 | 9-scf00334 | 9 |
| AX-158170123 | 16 | 31.246 | KV452961.1 | 2486207 | 9-scf00334 | 9 |
| AX-158170124 | 16 | 31.325 | KV452961.1 | 2486811 | 9-scf00334 | 9 |
| AX-158170125 | 16 | 31.327 | KV452961.1 | 2487880 | 9-scf00334 | 9 |
| AX-158170126 | 16 | 31.403 | KV452961.1 | 2490041 | 9-scf00334 | 9 |
| AX-157721411 | 16 | 31.564 | KV452961.1 | 2490571 | 9-scf00334 | 9 |
| AX-158170127 | 16 | 31.719 | KV452961.1 | 2491542 | 9-scf00334 | 9 |
| AX-158170130 | 16 | 31.723 | KV452961.1 | 2495698 | 9-scf00334 | 9 |
| AX-158170133 | 16 | 31.723 | KV452961.1 | 2497616 | 9-scf00334 | 9 |
| AX-158170132 | 16 | 31.728 | KV452961.1 | 2497205 | 9-scf00334 | 9 |
| AX-158170134 | 16 | 31.728 | KV452961.1 | 2498200 | 9-scf00334 | 9 |
| AX-158170135 | 16 | 31.837 | KV452961.1 | 2500315 | 9-scf00334 | 9 |
| AX-158170136 | 16 | 31.837 | KV452961.1 | 2501379 | 9-scf00334 | 9 |
| AX-157701278 | 16 | 31.894 | KV452961.1 | 2502727 | 9-scf00334 | 9 |
| AX-158170138 | 16 | 32.019 | KV452961.1 | 2508018 | 9-scf00334 | 9 |
| AX-158170140 | 16 | 32.02  | KV452961.1 | 2509491 | 9-scf00334 | 9 |
| AX-158170141 | 16 | 32.21  | KV452961.1 | 2510186 | 9-scf00334 | 9 |
| AX-158170143 | 16 | 32.21  | KV452961.1 | 2513433 | 9-scf00334 | 9 |
| AX-157715984 | 16 | 32.383 | KV452961.1 | 2512947 | 9-scf00334 | 9 |
| AX-158170159 | 16 | 32.383 | KV452961.1 | 2539190 | 9-scf00334 | 9 |
| AX-157871960 | 16 | 32.384 | KV452961.1 | 2520385 | 9-scf00334 | 9 |
| AX-157775250 | 16 | 32.384 | KV452961.1 | 2521090 | 9-scf00334 | 9 |
| AX-158170150 | 16 | 32.442 | KV452961.1 | 2526024 | 9-scf00334 | 9 |
| AX-158409148 | 16 | 32.442 | KV452961.1 | 2555826 | 9-scf00334 | 9 |
| AX-158170151 | 16 | 32.506 | KV452961.1 | 2526516 | 9-scf00334 | 9 |
| AX-158170152 | 16 | 32.506 | KV452961.1 | 2527763 | 9-scf00334 | 9 |
| AX-158170153 | 16 | 32.506 | KV452961.1 | 2528431 | 9-scf00334 | 9 |

|              |    |        |            |         |            |   |
|--------------|----|--------|------------|---------|------------|---|
| AX-158170154 | 16 | 32.719 | KV452961.1 | 2530383 | 9-scf00334 | 9 |
| AX-158170156 | 16 | 32.719 | KV452961.1 | 2534138 | 9-scf00334 | 9 |
| AX-158170157 | 16 | 32.719 | KV452961.1 | 2534725 | 9-scf00334 | 9 |
| AX-158170160 | 16 | 32.719 | KV452961.1 | 2539599 | 9-scf00334 | 9 |
| AX-158170162 | 16 | 32.719 | KV452961.1 | 2542877 | 9-scf00334 | 9 |
| AX-157834678 | 16 | 32.719 | KV452961.1 | 2570633 | 9-scf00334 | 9 |
| AX-158170166 | 16 | 32.794 | KV452961.1 | 2548968 | 9-scf00334 | 9 |
| AX-158170167 | 16 | 32.942 | KV452961.1 | 2550723 | 9-scf00334 | 9 |
| AX-158170169 | 16 | 33.399 | KV452961.1 | 2558965 | 9-scf00334 | 9 |
| AX-158170170 | 16 | 33.586 | KV452961.1 | 2560494 | 9-scf00334 | 9 |
| AX-158170172 | 16 | 33.586 | KV452961.1 | 2563633 | 9-scf00334 | 9 |
| AX-158170176 | 16 | 33.586 | KV452961.1 | 2566280 | 9-scf00334 | 9 |
| AX-158170177 | 16 | 33.588 | KV452961.1 | 2567205 | 9-scf00334 | 9 |
| AX-157886737 | 16 | 33.588 | KV452961.1 | 2567291 | 9-scf00334 | 9 |
| AX-158170178 | 16 | 33.59  | KV452961.1 | 2569487 | 9-scf00334 | 9 |
| AX-158170116 | 16 | 33.879 | KV452961.1 | 2467749 | 9-scf00334 | 9 |
| AX-158393451 | 16 | 33.879 | KV452961.1 | 2514065 | 9-scf00334 | 9 |
| AX-158170180 | 16 | 33.879 | KV452961.1 | 2571177 | 9-scf00334 | 9 |
| AX-157752769 | 16 | 33.879 | KV452961.1 | 2576524 | 9-scf00334 | 9 |
| AX-158170185 | 16 | 34.025 | KV452961.1 | 2578735 | 9-scf00334 | 9 |
| AX-158170186 | 16 | 34.025 | KV452961.1 | 2580245 | 9-scf00334 | 9 |
| AX-158170188 | 16 | 34.189 | KV452961.1 | 2583460 | 9-scf00334 | 9 |
| AX-158170190 | 16 | 34.278 | KV452961.1 | 2587437 | 9-scf00334 | 9 |
| AX-158170193 | 16 | 34.353 | KV452961.1 | 2589848 | 9-scf00334 | 9 |
| AX-158170194 | 16 | 34.353 | KV452961.1 | 2590389 | 9-scf00334 | 9 |
| AX-158170197 | 16 | 34.353 | KV452961.1 | 2592313 | 9-scf00334 | 9 |
| AX-157718108 | 16 | 34.353 | KV452961.1 | 2603085 | 9-scf00334 | 9 |
| AX-157750910 | 16 | 34.353 | KV452961.1 | 2604358 | 9-scf00334 | 9 |
| AX-158170201 | 16 | 34.353 | KV452961.1 | 2604803 | 9-scf00334 | 9 |
| AX-157720383 | 16 | 34.353 | KV452961.1 | 2607749 | 9-scf00334 | 9 |
| AX-158170204 | 16 | 34.353 | KV452961.1 | 2608262 | 9-scf00334 | 9 |
| AX-158170205 | 16 | 34.353 | KV452961.1 | 2609189 | 9-scf00334 | 9 |
| AX-158170207 | 16 | 34.353 | KV452961.1 | 2611004 | 9-scf00334 | 9 |
| AX-158170209 | 16 | 34.353 | KV452961.1 | 2613182 | 9-scf00334 | 9 |
| AX-157866637 | 16 | 34.353 | KV452961.1 | 2614657 | 9-scf00334 | 9 |
| AX-157834680 | 16 | 34.353 | KV452961.1 | 2616832 | 9-scf00334 | 9 |
| AX-158170216 | 16 | 34.353 | KV452961.1 | 2620950 | 9-scf00334 | 9 |
| AX-158170211 | 16 | 34.413 | KV452961.1 | 2617950 | 9-scf00334 | 9 |
| AX-158170218 | 16 | 34.463 | KV452961.1 | 2623416 | 9-scf00334 | 9 |
| AX-158170220 | 16 | 34.463 | KV452961.1 | 2625451 | 9-scf00334 | 9 |
| AX-158170222 | 16 | 34.463 | KV452961.1 | 2626617 | 9-scf00334 | 9 |
| AX-157886738 | 16 | 34.463 | KV452961.1 | 2628199 | 9-scf00334 | 9 |
| AX-158170224 | 16 | 34.463 | KV452961.1 | 2628510 | 9-scf00334 | 9 |
| AX-158170225 | 16 | 34.463 | KV452961.1 | 2629198 | 9-scf00334 | 9 |
| AX-158170227 | 16 | 34.463 | KV452961.1 | 2630473 | 9-scf00334 | 9 |
| AX-158170226 | 16 | 34.572 | KV452961.1 | 2630008 | 9-scf00334 | 9 |
| AX-158170228 | 16 | 34.572 | KV452961.1 | 2632132 | 9-scf00334 | 9 |
| AX-158170229 | 16 | 34.572 | KV452961.1 | 2634120 | 9-scf00334 | 9 |
| AX-157740940 | 16 | 34.572 | KV452961.1 | 2635064 | 9-scf00334 | 9 |
| AX-158170230 | 16 | 34.572 | KV452961.1 | 2636073 | 9-scf00334 | 9 |
| AX-157858449 | 16 | 34.572 | KV452961.1 | 2637539 | 9-scf00334 | 9 |

|              |    |        |             |         |            |    |
|--------------|----|--------|-------------|---------|------------|----|
| AX-158170233 | 16 | 34.9   | KV452961.1  | 2639120 | 9-scf00334 | 9  |
| AX-158170234 | 16 | 34.9   | KV452961.1  | 2639889 | 9-scf00334 | 9  |
| AX-157834681 | 16 | 34.9   | KV452961.1  | 2649891 | 9-scf00334 | 9  |
| AX-158170238 | 16 | 34.9   | KV452961.1  | 2651837 | 9-scf00334 | 9  |
| AX-158170239 | 16 | 34.9   | KV452961.1  | 2652173 | 9-scf00334 | 9  |
| AX-158170240 | 16 | 34.9   | KV452961.1  | 2652360 | 9-scf00334 | 9  |
| AX-158170241 | 16 | 34.9   | KV452961.1  | 2653694 | 9-scf00334 | 9  |
| AX-158170242 | 16 | 34.9   | KV452961.1  | 2657602 | 9-scf00334 | 9  |
| AX-158170243 | 16 | 34.9   | KV452961.1  | 2661995 | 9-scf00334 | 9  |
| AX-158170249 | 16 | 35.265 | KV452961.1  | 2679225 | 9-scf00334 | 9  |
| AX-158170250 | 16 | 35.265 | KV452961.1  | 2684134 | 9-scf00334 | 9  |
| AX-158170253 | 16 | 35.267 | KV452961.1  | 2688357 | 9-scf00334 | 9  |
| AX-158170254 | 16 | 35.628 | KV452961.1  | 2689763 | 9-scf00334 | 9  |
| AX-157707349 | 16 | 35.628 | 3ML01034159 | 395     | scf09830_1 | UN |
| AX-158170256 | 16 | 35.635 | KV452961.1  | 2694124 | 9-scf00334 | 9  |
| AX-158380551 | 16 | 35.635 | KV452961.1  | 2695464 | 9-scf00334 | 9  |
| AX-158170257 | 16 | 35.635 | KV452961.1  | 2697531 | 9-scf00334 | 9  |
| AX-158170258 | 16 | 35.635 | KV452961.1  | 2699055 | 9-scf00334 | 9  |
| AX-158170259 | 16 | 35.635 | KV452961.1  | 2700246 | 9-scf00334 | 9  |
| AX-158170261 | 16 | 35.635 | KV452961.1  | 2702890 | 9-scf00334 | 9  |
| AX-157720954 | 16 | 35.907 | KV452961.1  | 2699665 | 9-scf00334 | 9  |
| AX-158170263 | 16 | 35.907 | KV452961.1  | 2704664 | 9-scf00334 | 9  |
| AX-157744104 | 16 | 35.913 | KV452961.1  | 2706107 | 9-scf00334 | 9  |
| AX-158170266 | 16 | 36.463 | KV452961.1  | 2711089 | 9-scf00334 | 9  |
| AX-157834683 | 16 | 36.475 | KV452961.1  | 2711313 | 9-scf00334 | 9  |
| AX-158170264 | 16 | 36.485 | KV452961.1  | 2708233 | 9-scf00334 | 9  |
| AX-158170267 | 16 | 36.485 | KV452961.1  | 2711866 | 9-scf00334 | 9  |
| AX-158170269 | 16 | 36.485 | KV452961.1  | 2713774 | 9-scf00334 | 9  |
| AX-157834685 | 16 | 36.485 | KV452961.1  | 2716737 | 9-scf00334 | 9  |
| AX-158170270 | 16 | 36.485 | KV452961.1  | 2717586 | 9-scf00334 | 9  |
| AX-158170271 | 16 | 36.485 | KV452961.1  | 2719935 | 9-scf00334 | 9  |
| AX-157834687 | 16 | 36.485 | KV452961.1  | 2720144 | 9-scf00334 | 9  |
| AX-158170273 | 16 | 36.485 | KV452961.1  | 2723989 | 9-scf00334 | 9  |
| AX-158170274 | 16 | 36.485 | KV452961.1  | 2728427 | 9-scf00334 | 9  |
| AX-158170275 | 16 | 36.485 | KV452961.1  | 2729158 | 9-scf00334 | 9  |
| AX-158170282 | 16 | 36.485 | KV452961.1  | 2737277 | 9-scf00334 | 9  |
| AX-158170350 | 16 | 36.485 | KV452961.1  | 2844624 | 9-scf00334 | 9  |
| AX-158170284 | 16 | 36.654 | KV452961.1  | 2739572 | 9-scf00334 | 9  |
| AX-157742734 | 16 | 36.654 | KV452961.1  | 2918037 | 9-scf00334 | 9  |
| AX-157773698 | 16 | 36.943 | KV452961.1  | 2750700 | 9-scf00334 | 9  |
| AX-158170293 | 16 | 36.943 | KV452961.1  | 2753857 | 9-scf00334 | 9  |
| AX-158170281 | 16 | 37.072 | KV452961.1  | 2736395 | 9-scf00334 | 9  |
| AX-158170296 | 16 | 37.072 | KV452961.1  | 2759527 | 9-scf00334 | 9  |
| AX-158170278 | 16 | 37.092 | KV452961.1  | 2731997 | 9-scf00334 | 9  |
| AX-158170280 | 16 | 37.092 | KV452961.1  | 2735700 | 9-scf00334 | 9  |
| AX-157727846 | 16 | 37.092 | KV452961.1  | 2744545 | 9-scf00334 | 9  |
| AX-157756435 | 16 | 37.092 | KV452961.1  | 2758173 | 9-scf00334 | 9  |
| AX-158170297 | 16 | 37.092 | KV452961.1  | 2759787 | 9-scf00334 | 9  |
| AX-158170298 | 16 | 37.092 | KV452961.1  | 2760688 | 9-scf00334 | 9  |
| AX-158170299 | 16 | 37.092 | KV452961.1  | 2761909 | 9-scf00334 | 9  |
| AX-158170302 | 16 | 37.092 | KV452961.1  | 2768699 | 9-scf00334 | 9  |

|              |    |        |            |         |            |   |
|--------------|----|--------|------------|---------|------------|---|
| AX-158170303 | 16 | 37.092 | KV452961.1 | 2769823 | 9-scf00334 | 9 |
| AX-158380552 | 16 | 37.092 | KV452961.1 | 2771588 | 9-scf00334 | 9 |
| AX-158170306 | 16 | 37.092 | KV452961.1 | 2774545 | 9-scf00334 | 9 |
| AX-158170308 | 16 | 37.092 | KV452961.1 | 2776533 | 9-scf00334 | 9 |
| AX-158170330 | 16 | 37.092 | KV452961.1 | 2810320 | 9-scf00334 | 9 |
| AX-157721220 | 16 | 37.153 | KV452961.1 | 2777201 | 9-scf00334 | 9 |
| AX-158170277 | 16 | 37.201 | KV452961.1 | 2731012 | 9-scf00334 | 9 |
| AX-158170310 | 16 | 37.201 | KV452961.1 | 2780320 | 9-scf00334 | 9 |
| AX-158170311 | 16 | 37.201 | KV452961.1 | 2780531 | 9-scf00334 | 9 |
| AX-158170312 | 16 | 37.201 | KV452961.1 | 2782868 | 9-scf00334 | 9 |
| AX-158170314 | 16 | 37.201 | KV452961.1 | 2785817 | 9-scf00334 | 9 |
| AX-158170316 | 16 | 37.42  | KV452961.1 | 2789564 | 9-scf00334 | 9 |
| AX-158170317 | 16 | 37.42  | KV452961.1 | 2789933 | 9-scf00334 | 9 |
| AX-158170321 | 16 | 37.42  | KV452961.1 | 2796868 | 9-scf00334 | 9 |
| AX-158170323 | 16 | 37.42  | KV452961.1 | 2798283 | 9-scf00334 | 9 |
| AX-158170324 | 16 | 37.42  | KV452961.1 | 2801392 | 9-scf00334 | 9 |
| AX-158170325 | 16 | 37.42  | KV452961.1 | 2802342 | 9-scf00334 | 9 |
| AX-157771944 | 16 | 37.42  | KV452961.1 | 2803443 | 9-scf00334 | 9 |
| AX-158170334 | 16 | 37.42  | KV452961.1 | 2816042 | 9-scf00334 | 9 |
| AX-158170335 | 16 | 37.42  | KV452961.1 | 2816843 | 9-scf00334 | 9 |
| AX-158170315 | 16 | 37.747 | KV452961.1 | 2789204 | 9-scf00334 | 9 |
| AX-158170322 | 16 | 37.747 | KV452961.1 | 2797526 | 9-scf00334 | 9 |
| AX-157834689 | 16 | 37.747 | KV452961.1 | 2809465 | 9-scf00334 | 9 |
| AX-158170337 | 16 | 37.747 | KV452961.1 | 2821443 | 9-scf00334 | 9 |
| AX-158170338 | 16 | 37.747 | KV452961.1 | 2823795 | 9-scf00334 | 9 |
| AX-158170339 | 16 | 37.747 | KV452961.1 | 2824961 | 9-scf00334 | 9 |
| AX-158170340 | 16 | 37.747 | KV452961.1 | 2827235 | 9-scf00334 | 9 |
| AX-158170343 | 16 | 37.747 | KV452961.1 | 2830815 | 9-scf00334 | 9 |
| AX-158170344 | 16 | 37.747 | KV452961.1 | 2831212 | 9-scf00334 | 9 |
| AX-158385850 | 16 | 37.747 | KV452961.1 | 2833782 | 9-scf00334 | 9 |
| AX-158170345 | 16 | 37.747 | KV452961.1 | 2834596 | 9-scf00334 | 9 |
| AX-157834690 | 16 | 37.747 | KV452961.1 | 2839141 | 9-scf00334 | 9 |
| AX-157834691 | 16 | 37.747 | KV452961.1 | 2853746 | 9-scf00334 | 9 |
| AX-158170357 | 16 | 37.747 | KV452961.1 | 2863529 | 9-scf00334 | 9 |
| AX-157834693 | 16 | 37.747 | KV452961.1 | 2904804 | 9-scf00334 | 9 |
| AX-158170390 | 16 | 37.747 | KV452961.1 | 2913069 | 9-scf00334 | 9 |
| AX-157723593 | 16 | 37.832 | KV452961.1 | 2849262 | 9-scf00334 | 9 |
| AX-158170353 | 16 | 37.832 | KV452961.1 | 2849355 | 9-scf00334 | 9 |
| AX-158170354 | 16 | 37.912 | KV452961.1 | 2851073 | 9-scf00334 | 9 |
| AX-157756618 | 16 | 37.912 | KV452961.1 | 2853686 | 9-scf00334 | 9 |
| AX-157834692 | 16 | 38.074 | KV452961.1 | 2856180 | 9-scf00334 | 9 |
| AX-158170356 | 16 | 38.075 | KV452961.1 | 2862626 | 9-scf00334 | 9 |
| AX-157752757 | 16 | 38.075 | KV452961.1 | 2863428 | 9-scf00334 | 9 |
| AX-158170360 | 16 | 38.075 | KV452961.1 | 2866265 | 9-scf00334 | 9 |
| AX-158170364 | 16 | 38.075 | KV452961.1 | 2876611 | 9-scf00334 | 9 |
| AX-158170365 | 16 | 38.075 | KV452961.1 | 2878017 | 9-scf00334 | 9 |
| AX-158170366 | 16 | 38.075 | KV452961.1 | 2878584 | 9-scf00334 | 9 |
| AX-158170367 | 16 | 38.075 | KV452961.1 | 2879487 | 9-scf00334 | 9 |
| AX-158170368 | 16 | 38.075 | KV452961.1 | 2880091 | 9-scf00334 | 9 |
| AX-158170369 | 16 | 38.075 | KV452961.1 | 2881696 | 9-scf00334 | 9 |
| AX-157834697 | 16 | 38.075 | KV452961.1 | 2913218 | 9-scf00334 | 9 |

|              |    |        |            |         |            |   |
|--------------|----|--------|------------|---------|------------|---|
| AX-157834707 | 16 | 38.075 | KV452961.1 | 2966412 | 9-scf00334 | 9 |
| AX-157866641 | 16 | 38.076 | KV452961.1 | 2855000 | 9-scf00334 | 9 |
| AX-158170370 | 16 | 38.076 | KV452961.1 | 2882413 | 9-scf00334 | 9 |
| AX-158170371 | 16 | 38.076 | KV452961.1 | 2883220 | 9-scf00334 | 9 |
| AX-158170372 | 16 | 38.076 | KV452961.1 | 2885828 | 9-scf00334 | 9 |
| AX-158170374 | 16 | 38.076 | KV452961.1 | 2887564 | 9-scf00334 | 9 |
| AX-158170376 | 16 | 38.076 | KV452961.1 | 2891149 | 9-scf00334 | 9 |
| AX-158170378 | 16 | 38.076 | KV452961.1 | 2894559 | 9-scf00334 | 9 |
| AX-158170380 | 16 | 38.076 | KV452961.1 | 2896298 | 9-scf00334 | 9 |
| AX-158170381 | 16 | 38.076 | KV452961.1 | 2897903 | 9-scf00334 | 9 |
| AX-158170341 | 16 | 38.231 | KV452961.1 | 2828510 | 9-scf00334 | 9 |
| AX-158170347 | 16 | 38.231 | KV452961.1 | 2837808 | 9-scf00334 | 9 |
| AX-158170384 | 16 | 38.231 | KV452961.1 | 2902484 | 9-scf00334 | 9 |
| AX-157834695 | 16 | 38.231 | KV452961.1 | 2909785 | 9-scf00334 | 9 |
| AX-158170386 | 16 | 38.403 | KV452961.1 | 2905583 | 9-scf00334 | 9 |
| AX-157713508 | 16 | 38.475 | KV452961.1 | 2905625 | 9-scf00334 | 9 |
| AX-158170383 | 16 | 38.512 | KV452961.1 | 2899170 | 9-scf00334 | 9 |
| AX-158170387 | 16 | 38.512 | KV452961.1 | 2908390 | 9-scf00334 | 9 |
| AX-157834696 | 16 | 38.512 | KV452961.1 | 2910704 | 9-scf00334 | 9 |
| AX-157871964 | 16 | 38.839 | KV452961.1 | 2855647 | 9-scf00334 | 9 |
| AX-158170377 | 16 | 38.839 | KV452961.1 | 2892004 | 9-scf00334 | 9 |
| AX-157834698 | 16 | 38.839 | KV452961.1 | 2917936 | 9-scf00334 | 9 |
| AX-157858450 | 16 | 38.839 | KV452961.1 | 2926859 | 9-scf00334 | 9 |
| AX-157703102 | 16 | 38.839 | KV452961.1 | 2929057 | 9-scf00334 | 9 |
| AX-157703103 | 16 | 38.839 | KV452961.1 | 2929266 | 9-scf00334 | 9 |
| AX-158170385 | 16 | 38.84  | KV452961.1 | 2903846 | 9-scf00334 | 9 |
| AX-158170400 | 16 | 38.84  | KV452961.1 | 2929835 | 9-scf00334 | 9 |
| AX-158170401 | 16 | 38.84  | KV452961.1 | 2930820 | 9-scf00334 | 9 |
| AX-157834701 | 16 | 38.84  | KV452961.1 | 2932120 | 9-scf00334 | 9 |
| AX-158170403 | 16 | 38.84  | KV452961.1 | 2935633 | 9-scf00334 | 9 |
| AX-157715962 | 16 | 38.84  | KV452961.1 | 2936887 | 9-scf00334 | 9 |
| AX-157721565 | 16 | 38.84  | KV452961.1 | 2938246 | 9-scf00334 | 9 |
| AX-158170408 | 16 | 38.84  | KV452961.1 | 2942651 | 9-scf00334 | 9 |
| AX-158170411 | 16 | 38.84  | KV452961.1 | 2946497 | 9-scf00334 | 9 |
| AX-158170413 | 16 | 38.84  | KV452961.1 | 2947546 | 9-scf00334 | 9 |
| AX-158170415 | 16 | 38.84  | KV452961.1 | 2950094 | 9-scf00334 | 9 |
| AX-157698445 | 16 | 38.84  | KV452961.1 | 2950209 | 9-scf00334 | 9 |
| AX-158413271 | 16 | 38.84  | KV452961.1 | 2950311 | 9-scf00334 | 9 |
| AX-157739423 | 16 | 38.84  | KV452961.1 | 2950505 | 9-scf00334 | 9 |
| AX-158170416 | 16 | 38.84  | KV452961.1 | 2951593 | 9-scf00334 | 9 |
| AX-158170419 | 16 | 38.965 | KV452961.1 | 2958638 | 9-scf00334 | 9 |
| AX-157834705 | 16 | 39.058 | KV452961.1 | 2962105 | 9-scf00334 | 9 |
| AX-158170421 | 16 | 39.058 | KV452961.1 | 2963281 | 9-scf00334 | 9 |
| AX-157749531 | 16 | 39.058 | KV452961.1 | 2965112 | 9-scf00334 | 9 |
| AX-157834706 | 16 | 39.058 | KV452961.1 | 2965906 | 9-scf00334 | 9 |
| AX-158170425 | 16 | 39.058 | KV452961.1 | 2966064 | 9-scf00334 | 9 |
| AX-158170427 | 16 | 39.277 | KV452961.1 | 2971542 | 9-scf00334 | 9 |
| AX-158170428 | 16 | 39.277 | KV452961.1 | 2971813 | 9-scf00334 | 9 |
| AX-158170429 | 16 | 39.277 | KV452961.1 | 2972480 | 9-scf00334 | 9 |
| AX-158170430 | 16 | 39.277 | KV452961.1 | 2973692 | 9-scf00334 | 9 |
| AX-157720384 | 16 | 39.277 | KV452961.1 | 2975569 | 9-scf00334 | 9 |



|              |    |        |            |         |            |   |
|--------------|----|--------|------------|---------|------------|---|
| AX-158170431 | 16 | 39.277 | KV452961.1 | 2976165 | 9-scf00334 | 9 |
| AX-158170432 | 16 | 39.277 | KV452961.1 | 2979342 | 9-scf00334 | 9 |
| AX-157834709 | 16 | 39.277 | KV452961.1 | 2981119 | 9-scf00334 | 9 |
| AX-158170433 | 16 | 39.277 | KV452961.1 | 2981188 | 9-scf00334 | 9 |
| AX-158170434 | 16 | 39.277 | KV452961.1 | 2983332 | 9-scf00334 | 9 |
| AX-157741484 | 16 | 39.277 | KV452961.1 | 2994291 | 9-scf00334 | 9 |
| AX-158170435 | 16 | 39.488 | KV452961.1 | 2984909 | 9-scf00334 | 9 |
| AX-158170438 | 16 | 39.488 | KV452961.1 | 2989331 | 9-scf00334 | 9 |
| AX-158170442 | 16 | 39.488 | KV452961.1 | 3000599 | 9-scf00334 | 9 |
| AX-157721631 | 16 | 39.488 | KV452961.1 | 3025864 | 9-scf00334 | 9 |
| AX-158170443 | 16 | 39.501 | KV452961.1 | 3001259 | 9-scf00334 | 9 |
| AX-158170444 | 16 | 39.501 | KV452961.1 | 3002123 | 9-scf00334 | 9 |
| AX-158170445 | 16 | 39.501 | KV452961.1 | 3003129 | 9-scf00334 | 9 |
| AX-158170446 | 16 | 39.501 | KV452961.1 | 3003624 | 9-scf00334 | 9 |
| AX-157878688 | 16 | 39.74  | KV452961.1 | 3003994 | 9-scf00334 | 9 |
| AX-158170447 | 16 | 39.74  | KV452961.1 | 3006179 | 9-scf00334 | 9 |
| AX-157745678 | 16 | 39.74  | KV452961.1 | 3010565 | 9-scf00334 | 9 |
| AX-158170450 | 16 | 39.74  | KV452961.1 | 3012741 | 9-scf00334 | 9 |
| AX-158170452 | 16 | 39.74  | KV452961.1 | 3015666 | 9-scf00334 | 9 |
| AX-158170453 | 16 | 39.74  | KV452961.1 | 3016566 | 9-scf00334 | 9 |
| AX-157719300 | 16 | 39.74  | KV452961.1 | 3017198 | 9-scf00334 | 9 |
| AX-158170454 | 16 | 39.74  | KV452961.1 | 3022818 | 9-scf00334 | 9 |
| AX-157834712 | 16 | 39.889 | KV452961.1 | 3021267 | 9-scf00334 | 9 |
| AX-158170456 | 16 | 39.889 | KV452961.1 | 3024431 | 9-scf00334 | 9 |
| AX-158170464 | 16 | 39.889 | KV452961.1 | 3041442 | 9-scf00334 | 9 |
| AX-158170460 | 16 | 39.89  | KV452961.1 | 3031949 | 9-scf00334 | 9 |
| AX-157834713 | 16 | 39.979 | KV452961.1 | 3037356 | 9-scf00334 | 9 |
| AX-158170463 | 16 | 40.183 | KV452961.1 | 3038988 | 9-scf00334 | 9 |
| AX-157747307 | 16 | 40.183 | KV452961.1 | 3040920 | 9-scf00334 | 9 |
| AX-157834714 | 16 | 40.183 | KV452961.1 | 3043656 | 9-scf00334 | 9 |
| AX-157886742 | 16 | 40.183 | KV452961.1 | 3043840 | 9-scf00334 | 9 |
| AX-157834715 | 16 | 40.183 | KV452961.1 | 3046030 | 9-scf00334 | 9 |
| AX-158170528 | 16 | 40.183 | KV452961.1 | 3191292 | 9-scf00334 | 9 |
| AX-158170538 | 16 | 40.183 | KV452961.1 | 3198585 | 9-scf00334 | 9 |
| AX-157834718 | 16 | 40.313 | KV452961.1 | 3048793 | 9-scf00334 | 9 |
| AX-158170466 | 16 | 40.48  | KV452961.1 | 3044105 | 9-scf00334 | 9 |
| AX-158170470 | 16 | 40.48  | KV452961.1 | 3050702 | 9-scf00334 | 9 |
| AX-158170473 | 16 | 40.48  | KV452961.1 | 3055667 | 9-scf00334 | 9 |
| AX-158170474 | 16 | 40.48  | KV452961.1 | 3055785 | 9-scf00334 | 9 |
| AX-158170476 | 16 | 40.48  | KV452961.1 | 3058306 | 9-scf00334 | 9 |
| AX-158385852 | 16 | 40.48  | KV452961.1 | 3062206 | 9-scf00334 | 9 |
| AX-158170480 | 16 | 40.48  | KV452961.1 | 3065182 | 9-scf00334 | 9 |
| AX-158170482 | 16 | 40.48  | KV452961.1 | 3067767 | 9-scf00334 | 9 |
| AX-158421286 | 16 | 40.48  | KV452961.1 | 3068799 | 9-scf00334 | 9 |
| AX-157834720 | 16 | 40.48  | KV452961.1 | 3073184 | 9-scf00334 | 9 |
| AX-158170484 | 16 | 40.48  | KV452961.1 | 3076145 | 9-scf00334 | 9 |
| AX-158170485 | 16 | 40.48  | KV452961.1 | 3076565 | 9-scf00334 | 9 |
| AX-158170486 | 16 | 40.48  | KV452961.1 | 3078324 | 9-scf00334 | 9 |
| AX-157834722 | 16 | 40.48  | KV452961.1 | 3082585 | 9-scf00334 | 9 |
| AX-157764992 | 16 | 40.48  | KV452961.1 | 3084167 | 9-scf00334 | 9 |
| AX-158170492 | 16 | 40.48  | KV452961.1 | 3098088 | 9-scf00334 | 9 |

|              |    |        |            |         |            |   |
|--------------|----|--------|------------|---------|------------|---|
| AX-158170493 | 16 | 40.48  | KV452961.1 | 3099042 | 9-scf00334 | 9 |
| AX-158170496 | 16 | 40.48  | KV452961.1 | 3119887 | 9-scf00334 | 9 |
| AX-157745041 | 16 | 40.48  | KV452961.1 | 3187865 | 9-scf00334 | 9 |
| AX-158170587 | 16 | 40.48  | KV452961.1 | 3260056 | 9-scf00334 | 9 |
| AX-158170497 | 16 | 40.49  | KV452961.1 | 3121040 | 9-scf00334 | 9 |
| AX-158170498 | 16 | 40.499 | KV452961.1 | 3124917 | 9-scf00334 | 9 |
| AX-158170499 | 16 | 40.507 | KV452961.1 | 3125583 | 9-scf00334 | 9 |
| AX-158170501 | 16 | 40.532 | KV452961.1 | 3133014 | 9-scf00334 | 9 |
| AX-158170507 | 16 | 40.559 | KV452961.1 | 3148208 | 9-scf00334 | 9 |
| AX-158170467 | 16 | 40.589 | KV452961.1 | 3044687 | 9-scf00334 | 9 |
| AX-158170477 | 16 | 40.589 | KV452961.1 | 3060036 | 9-scf00334 | 9 |
| AX-157753468 | 16 | 40.589 | KV452961.1 | 3072087 | 9-scf00334 | 9 |
| AX-157834721 | 16 | 40.589 | KV452961.1 | 3080189 | 9-scf00334 | 9 |
| AX-158413275 | 16 | 40.589 | KV452961.1 | 3080449 | 9-scf00334 | 9 |
| AX-158170487 | 16 | 40.589 | KV452961.1 | 3082438 | 9-scf00334 | 9 |
| AX-157757317 | 16 | 40.589 | KV452961.1 | 3135185 | 9-scf00334 | 9 |
| AX-157834724 | 16 | 40.589 | KV452961.1 | 3135581 | 9-scf00334 | 9 |
| AX-158170503 | 16 | 40.589 | KV452961.1 | 3136939 | 9-scf00334 | 9 |
| AX-158170510 | 16 | 40.589 | KV452961.1 | 3152247 | 9-scf00334 | 9 |
| AX-157755622 | 16 | 40.589 | KV452961.1 | 3164915 | 9-scf00334 | 9 |
| AX-158170515 | 16 | 40.589 | KV452961.1 | 3166229 | 9-scf00334 | 9 |
| AX-158170517 | 16 | 40.589 | KV452961.1 | 3173700 | 9-scf00334 | 9 |
| AX-158170519 | 16 | 40.589 | KV452961.1 | 3174996 | 9-scf00334 | 9 |
| AX-158170520 | 16 | 40.589 | KV452961.1 | 3175281 | 9-scf00334 | 9 |
| AX-157750752 | 16 | 40.589 | KV452961.1 | 3183879 | 9-scf00334 | 9 |
| AX-158170525 | 16 | 40.589 | KV452961.1 | 3188321 | 9-scf00334 | 9 |
| AX-157714272 | 16 | 40.589 | KV452961.1 | 3189454 | 9-scf00334 | 9 |
| AX-158170529 | 16 | 40.589 | KV452961.1 | 3191968 | 9-scf00334 | 9 |
| AX-158170532 | 16 | 40.589 | KV452961.1 | 3194065 | 9-scf00334 | 9 |
| AX-158170533 | 16 | 40.589 | KV452961.1 | 3194491 | 9-scf00334 | 9 |
| AX-158170534 | 16 | 40.589 | KV452961.1 | 3194874 | 9-scf00334 | 9 |
| AX-158170535 | 16 | 40.589 | KV452961.1 | 3195299 | 9-scf00334 | 9 |
| AX-158170536 | 16 | 40.589 | KV452961.1 | 3195475 | 9-scf00334 | 9 |
| AX-158170537 | 16 | 40.589 | KV452961.1 | 3196155 | 9-scf00334 | 9 |
| AX-158170542 | 16 | 40.589 | KV452961.1 | 3201762 | 9-scf00334 | 9 |
| AX-158170543 | 16 | 40.589 | KV452961.1 | 3203338 | 9-scf00334 | 9 |
| AX-158170545 | 16 | 40.589 | KV452961.1 | 3205541 | 9-scf00334 | 9 |
| AX-158170546 | 16 | 40.589 | KV452961.1 | 3206419 | 9-scf00334 | 9 |
| AX-158170551 | 16 | 40.589 | KV452961.1 | 3212236 | 9-scf00334 | 9 |
| AX-158170552 | 16 | 40.589 | KV452961.1 | 3212772 | 9-scf00334 | 9 |
| AX-157744944 | 16 | 40.589 | KV452961.1 | 3215470 | 9-scf00334 | 9 |
| AX-158170555 | 16 | 40.589 | KV452961.1 | 3215910 | 9-scf00334 | 9 |
| AX-157871966 | 16 | 40.589 | KV452961.1 | 3217879 | 9-scf00334 | 9 |
| AX-158170556 | 16 | 40.589 | KV452961.1 | 3217992 | 9-scf00334 | 9 |
| AX-158409160 | 16 | 40.589 | KV452961.1 | 3219926 | 9-scf00334 | 9 |
| AX-157886743 | 16 | 40.589 | KV452961.1 | 3220507 | 9-scf00334 | 9 |
| AX-157716046 | 16 | 40.589 | KV452961.1 | 3223225 | 9-scf00334 | 9 |
| AX-158170562 | 16 | 40.589 | KV452961.1 | 3227622 | 9-scf00334 | 9 |
| AX-158170564 | 16 | 40.589 | KV452961.1 | 3229959 | 9-scf00334 | 9 |
| AX-158170568 | 16 | 40.589 | KV452961.1 | 3234491 | 9-scf00334 | 9 |
| AX-158170569 | 16 | 40.589 | KV452961.1 | 3234635 | 9-scf00334 | 9 |

|              |    |        |             |         |            |    |
|--------------|----|--------|-------------|---------|------------|----|
| AX-157718722 | 16 | 40.589 | KV452961.1  | 3235223 | 9-scf00334 | 9  |
| AX-158170570 | 16 | 40.589 | KV452961.1  | 3235726 | 9-scf00334 | 9  |
| AX-158170571 | 16 | 40.589 | KV452961.1  | 3237791 | 9-scf00334 | 9  |
| AX-157834729 | 16 | 40.589 | KV452961.1  | 3239154 | 9-scf00334 | 9  |
| AX-158170574 | 16 | 40.589 | KV452961.1  | 3242675 | 9-scf00334 | 9  |
| AX-158170576 | 16 | 40.589 | KV452961.1  | 3244707 | 9-scf00334 | 9  |
| AX-157720995 | 16 | 40.589 | KV452961.1  | 3245126 | 9-scf00334 | 9  |
| AX-158170579 | 16 | 40.589 | KV452961.1  | 3247295 | 9-scf00334 | 9  |
| AX-158170580 | 16 | 40.589 | KV452961.1  | 3248425 | 9-scf00334 | 9  |
| AX-158170581 | 16 | 40.589 | KV452961.1  | 3251474 | 9-scf00334 | 9  |
| AX-157755402 | 16 | 40.589 | KV452961.1  | 3259872 | 9-scf00334 | 9  |
| AX-158170591 | 16 | 40.589 | KV452961.1  | 3263849 | 9-scf00334 | 9  |
| AX-158170603 | 16 | 40.589 | KV452961.1  | 3280796 | 9-scf00334 | 9  |
| AX-158170623 | 16 | 40.589 | KV452961.1  | 3316023 | 9-scf00334 | 9  |
| AX-158170656 | 16 | 40.589 | KV452961.1  | 3353314 | 9-scf00334 | 9  |
| AX-157744227 | 16 | 40.589 | KV452964.1  | 94132   | 9-scf00337 | 9  |
| AX-158170584 | 16 | 40.808 | KV452961.1  | 3256295 | 9-scf00334 | 9  |
| AX-157834731 | 16 | 40.808 | KV452961.1  | 3262307 | 9-scf00334 | 9  |
| AX-157716890 | 16 | 40.808 | KV452961.1  | 3264255 | 9-scf00334 | 9  |
| AX-158170593 | 16 | 40.808 | KV452961.1  | 3265949 | 9-scf00334 | 9  |
| AX-158170597 | 16 | 40.808 | KV452961.1  | 3269856 | 9-scf00334 | 9  |
| AX-157834735 | 16 | 40.808 | KV452961.1  | 3289328 | 9-scf00334 | 9  |
| AX-157878696 | 16 | 40.808 | KV452961.1  | 3365126 | 9-scf00334 | 9  |
| AX-157834736 | 16 | 40.808 | KV452961.1  | 3369137 | 9-scf00334 | 9  |
| AX-157834732 | 16 | 40.917 | KV452961.1  | 3266680 | 9-scf00334 | 9  |
| AX-158170599 | 16 | 40.917 | KV452961.1  | 3271576 | 9-scf00334 | 9  |
| AX-158170600 | 16 | 40.917 | KV452961.1  | 3276062 | 9-scf00334 | 9  |
| AX-157834734 | 16 | 40.917 | KV452961.1  | 3277666 | 9-scf00334 | 9  |
| AX-158170608 | 16 | 40.917 | KV452961.1  | 3287173 | 9-scf00334 | 9  |
| AX-157701752 | 16 | 40.917 | KV452961.1  | 3289926 | 9-scf00334 | 9  |
| AX-158170610 | 16 | 40.917 | KV452961.1  | 3294181 | 9-scf00334 | 9  |
| AX-157738752 | 16 | 40.917 | KV452961.1  | 3296059 | 9-scf00334 | 9  |
| AX-158170612 | 16 | 40.917 | KV452961.1  | 3298532 | 9-scf00334 | 9  |
| AX-158170613 | 16 | 40.917 | KV452961.1  | 3301758 | 9-scf00334 | 9  |
| AX-158170614 | 16 | 40.917 | KV452961.1  | 3302769 | 9-scf00334 | 9  |
| AX-158170615 | 16 | 40.917 | KV452961.1  | 3304153 | 9-scf00334 | 9  |
| AX-158170618 | 16 | 40.917 | KV452961.1  | 3308860 | 9-scf00334 | 9  |
| AX-158170616 | 16 | 40.965 | KV452961.1  | 3305875 | 9-scf00334 | 9  |
| AX-158170617 | 16 | 41.026 | KV452961.1  | 3306411 | 9-scf00334 | 9  |
| AX-158170620 | 16 | 41.026 | KV452961.1  | 3312243 | 9-scf00334 | 9  |
| AX-158170621 | 16 | 41.026 | KV452961.1  | 3312741 | 9-scf00334 | 9  |
| AX-157753156 | 16 | 41.026 | KV452961.1  | 3313122 | 9-scf00334 | 9  |
| AX-158170628 | 16 | 41.026 | KV452961.1  | 3320722 | 9-scf00334 | 9  |
| AX-157705156 | 16 | 41.026 | 3ML01028812 | 677     | scf04426_1 | UN |
| AX-158170625 | 16 | 41.245 | KV452961.1  | 3318804 | 9-scf00334 | 9  |
| AX-158170627 | 16 | 41.245 | KV452961.1  | 3320093 | 9-scf00334 | 9  |
| AX-158170631 | 16 | 41.245 | KV452961.1  | 3323573 | 9-scf00334 | 9  |
| AX-158170632 | 16 | 41.245 | KV452961.1  | 3325383 | 9-scf00334 | 9  |
| AX-158170636 | 16 | 41.245 | KV452961.1  | 3334737 | 9-scf00334 | 9  |
| AX-158380557 | 16 | 41.245 | KV452961.1  | 3336232 | 9-scf00334 | 9  |
| AX-158170641 | 16 | 41.245 | KV452961.1  | 3337354 | 9-scf00334 | 9  |

|              |    |        |            |         |            |   |
|--------------|----|--------|------------|---------|------------|---|
| AX-157740621 | 16 | 41.354 | KV452961.1 | 3281056 | 9-scf00334 | 9 |
| AX-157743345 | 16 | 41.354 | KV452961.1 | 3292710 | 9-scf00334 | 9 |
| AX-158170626 | 16 | 41.354 | KV452961.1 | 3319586 | 9-scf00334 | 9 |
| AX-158170633 | 16 | 41.354 | KV452961.1 | 3326768 | 9-scf00334 | 9 |
| AX-158170642 | 16 | 41.354 | KV452961.1 | 3338857 | 9-scf00334 | 9 |
| AX-158170643 | 16 | 41.354 | KV452961.1 | 3339309 | 9-scf00334 | 9 |
| AX-158170645 | 16 | 41.354 | KV452961.1 | 3341341 | 9-scf00334 | 9 |
| AX-158413283 | 16 | 41.354 | KV452961.1 | 3341559 | 9-scf00334 | 9 |
| AX-158170646 | 16 | 41.354 | KV452961.1 | 3342609 | 9-scf00334 | 9 |
| AX-158170649 | 16 | 41.354 | KV452961.1 | 3345702 | 9-scf00334 | 9 |
| AX-158170650 | 16 | 41.354 | KV452961.1 | 3346856 | 9-scf00334 | 9 |
| AX-157727430 | 16 | 41.354 | KV452961.1 | 3347032 | 9-scf00334 | 9 |
| AX-158170651 | 16 | 41.354 | KV452961.1 | 3347922 | 9-scf00334 | 9 |
| AX-158170655 | 16 | 41.354 | KV452961.1 | 3352915 | 9-scf00334 | 9 |
| AX-158170657 | 16 | 41.354 | KV452961.1 | 3353970 | 9-scf00334 | 9 |
| AX-158170658 | 16 | 41.354 | KV452961.1 | 3354387 | 9-scf00334 | 9 |
| AX-158170659 | 16 | 41.354 | KV452961.1 | 3355992 | 9-scf00334 | 9 |
| AX-158170660 | 16 | 41.354 | KV452961.1 | 3356646 | 9-scf00334 | 9 |
| AX-158170661 | 16 | 41.354 | KV452961.1 | 3357999 | 9-scf00334 | 9 |
| AX-158170662 | 16 | 41.354 | KV452961.1 | 3359179 | 9-scf00334 | 9 |
| AX-158170665 | 16 | 41.354 | KV452961.1 | 3362526 | 9-scf00334 | 9 |
| AX-158170667 | 16 | 41.354 | KV452961.1 | 3363635 | 9-scf00334 | 9 |
| AX-158413278 | 16 | 41.539 | KV452961.1 | 3110285 | 9-scf00334 | 9 |
| AX-157751565 | 16 | 41.539 | KV452961.1 | 3330143 | 9-scf00334 | 9 |
| AX-158170670 | 16 | 41.539 | KV452961.1 | 3367799 | 9-scf00334 | 9 |
| AX-158170671 | 16 | 41.539 | KV452961.1 | 3368179 | 9-scf00334 | 9 |
| AX-158170672 | 16 | 41.539 | KV452961.1 | 3369212 | 9-scf00334 | 9 |
| AX-158170674 | 16 | 41.539 | KV452961.1 | 3371499 | 9-scf00334 | 9 |
| AX-158170681 | 16 | 41.617 | KV452961.1 | 3378858 | 9-scf00334 | 9 |
| AX-158170682 | 16 | 41.867 | KV452961.1 | 3380657 | 9-scf00334 | 9 |
| AX-158170684 | 16 | 41.874 | KV452961.1 | 3382802 | 9-scf00334 | 9 |
| AX-158170685 | 16 | 41.951 | KV452961.1 | 3383556 | 9-scf00334 | 9 |
| AX-158170686 | 16 | 42.009 | KV452961.1 | 3386476 | 9-scf00334 | 9 |
| AX-158170689 | 16 | 42.009 | KV452961.1 | 3390999 | 9-scf00334 | 9 |
| AX-158170690 | 16 | 42.01  | KV452961.1 | 3391735 | 9-scf00334 | 9 |
| AX-158170691 | 16 | 42.01  | KV452961.1 | 3392287 | 9-scf00334 | 9 |
| AX-158170694 | 16 | 42.173 | KV452961.1 | 3395847 | 9-scf00334 | 9 |
| AX-158385856 | 16 | 42.173 | KV452961.1 | 3395911 | 9-scf00334 | 9 |
| AX-157757033 | 16 | 42.229 | KV452961.1 | 3405146 | 9-scf00334 | 9 |
| AX-158170697 | 16 | 42.337 | KV452961.1 | 3405574 | 9-scf00334 | 9 |
| AX-158170698 | 16 | 42.337 | KV452961.1 | 3407210 | 9-scf00334 | 9 |
| AX-158170699 | 16 | 42.337 | KV452961.1 | 3407891 | 9-scf00334 | 9 |
| AX-158170701 | 16 | 42.338 | KV452961.1 | 3409790 | 9-scf00334 | 9 |
| AX-158170703 | 16 | 42.407 | KV452961.1 | 3413164 | 9-scf00334 | 9 |
| AX-158170705 | 16 | 42.407 | KV452961.1 | 3416761 | 9-scf00334 | 9 |
| AX-158170707 | 16 | 42.556 | KV452961.1 | 3419508 | 9-scf00334 | 9 |
| AX-157716620 | 16 | 42.556 | KV452961.1 | 3419932 | 9-scf00334 | 9 |
| AX-158170708 | 16 | 42.556 | KV452961.1 | 3422308 | 9-scf00334 | 9 |
| AX-158170709 | 16 | 42.556 | KV452961.1 | 3422621 | 9-scf00334 | 9 |
| AX-158170712 | 16 | 42.556 | KV452961.1 | 3424841 | 9-scf00334 | 9 |
| AX-158170714 | 16 | 42.72  | KV452961.1 | 3429926 | 9-scf00334 | 9 |

|              |    |        |            |          |            |   |
|--------------|----|--------|------------|----------|------------|---|
| AX-158170715 | 16 | 42.72  | KV452961.1 | 3436352  | 9-scf00334 | 9 |
| AX-158170720 | 16 | 42.72  | KV452961.1 | 3443734  | 9-scf00334 | 9 |
| AX-158170710 | 16 | 42.884 | KV452961.1 | 3423970  | 9-scf00334 | 9 |
| AX-158170716 | 16 | 42.884 | KV452961.1 | 3437565  | 9-scf00334 | 9 |
| AX-158170717 | 16 | 42.884 | KV452961.1 | 3438661  | 9-scf00334 | 9 |
| AX-158170718 | 16 | 42.884 | KV452961.1 | 3442323  | 9-scf00334 | 9 |
| AX-158170719 | 16 | 42.884 | KV452961.1 | 3443242  | 9-scf00334 | 9 |
| AX-158170721 | 16 | 42.884 | KV452961.1 | 3444211  | 9-scf00334 | 9 |
| AX-158170724 | 16 | 43.124 | KV452961.1 | 3447710  | 9-scf00334 | 9 |
| AX-158170725 | 16 | 43.343 | KV452961.1 | 3451408  | 9-scf00334 | 9 |
| AX-158170729 | 16 | 44.046 | KV452961.1 | 3460650  | 9-scf00334 | 9 |
| AX-158170731 | 16 | 44.088 | KV452961.1 | 3462026  | 9-scf00334 | 9 |
| AX-158170732 | 16 | 44.088 | KV452961.1 | 3462743  | 9-scf00334 | 9 |
| AX-158170733 | 16 | 44.091 | KV452961.1 | 3463566  | 9-scf00334 | 9 |
| AX-158170736 | 16 | 44.094 | KV452961.1 | 3465312  | 9-scf00334 | 9 |
| AX-157771340 | 16 | 44.098 | KV452961.1 | 3466105  | 9-scf00334 | 9 |
| AX-158170738 | 16 | 44.098 | KV452961.1 | 3467957  | 9-scf00334 | 9 |
| AX-158170734 | 16 | 44.525 | KV452961.1 | 3464044  | 9-scf00334 | 9 |
| AX-158170765 | 16 | 44.525 | KV452961.1 | 3492945  | 9-scf00334 | 9 |
| AX-158170767 | 16 | 44.525 | KV452961.1 | 3495601  | 9-scf00334 | 9 |
| AX-158170769 | 16 | 44.525 | KV452961.1 | 3497840  | 9-scf00334 | 9 |
| AX-158170770 | 16 | 44.525 | KV452961.1 | 3498157  | 9-scf00334 | 9 |
| AX-158170771 | 16 | 44.525 | KV452961.1 | 3498481  | 9-scf00334 | 9 |
| AX-158170774 | 16 | 44.525 | KV452961.1 | 3500983  | 9-scf00334 | 9 |
| AX-157775022 | 16 | 44.525 | KV452961.1 | 3502335  | 9-scf00334 | 9 |
| AX-158170776 | 16 | 44.525 | KV452961.1 | 3503670  | 9-scf00334 | 9 |
| AX-158170777 | 16 | 44.525 | KV452961.1 | 3507223  | 9-scf00334 | 9 |
| AX-158170783 | 16 | 44.525 | KV452961.1 | 3512020  | 9-scf00334 | 9 |
| AX-158170791 | 16 | 44.525 | KV452961.1 | 3518498  | 9-scf00334 | 9 |
| AX-158170792 | 16 | 44.525 | KV452961.1 | 3519349  | 9-scf00334 | 9 |
| AX-158170794 | 16 | 44.525 | KV452961.1 | 3521866  | 9-scf00334 | 9 |
| AX-158170795 | 16 | 44.634 | KV452961.1 | 3522424  | 9-scf00334 | 9 |
| AX-158170796 | 16 | 44.634 | KV452961.1 | 3524490  | 9-scf00334 | 9 |
| AX-157683854 | 16 | 44.634 | KV452963.1 | 29564    | 9-scf00335 | 9 |
| AX-158170766 | 16 | 44.907 | KV452961.1 | 3493338  | 9-scf00334 | 9 |
| AX-158170799 | 16 | 44.907 | KV452961.1 | 3526057  | 9-scf00334 | 9 |
| AX-158170801 | 16 | 44.907 | KV452961.1 | 3527718  | 9-scf00334 | 9 |
| AX-157757568 | 16 | 44.907 | KV452961.1 | 3528602  | 9-scf00334 | 9 |
| AX-157715845 | 16 | 44.907 | KV452964.1 | 169679   | 9-scf00337 | 9 |
| AX-157878710 | 16 | 44.907 | KV452964.1 | 224401   | 9-scf00337 | 9 |
| AX-157834831 | 16 | 44.907 | KV452964.1 | 255102   | 9-scf00337 | 9 |
| AX-158172396 | 16 | 44.907 | KV452969.1 | 873396   | 9-scf00340 | 9 |
| AX-158176686 | 16 | 44.907 | KV452969.1 | 7674914  | 9-scf00340 | 9 |
| AX-157755410 | 16 | 44.907 | KV452969.1 | 8918367  | 9-scf00340 | 9 |
| AX-157835734 | 16 | 44.907 | KV452969.1 | 14578927 | 9-scf00340 | 9 |
| AX-158181846 | 16 | 44.907 | KV452969.1 | 14624383 | 9-scf00340 | 9 |
| AX-158182230 | 16 | 44.907 | KV452969.1 | 15077827 | 9-scf00340 | 9 |
| AX-158171184 | 16 | 44.907 | KV452965.1 | 945687   | 9-scf00608 | 9 |
| AX-158171172 | 16 | 44.907 | KV452965.1 | 966872   | 9-scf00608 | 9 |
| AX-157834781 | 16 | 44.907 | KV452965.1 | 1193550  | 9-scf00608 | 9 |
| AX-158170804 | 16 | 45.18  | KV452961.1 | 3534931  | 9-scf00334 | 9 |

|              |    |        |             |          |            |    |
|--------------|----|--------|-------------|----------|------------|----|
| AX-158170813 | 16 | 45.18  | KV452961.1  | 3552655  | 9-scf00334 | 9  |
| AX-158170814 | 16 | 45.18  | KV452961.1  | 3554199  | 9-scf00334 | 9  |
| AX-158170817 | 16 | 45.18  | KV452961.1  | 3559753  | 9-scf00334 | 9  |
| AX-158170828 | 16 | 45.18  | KV452961.1  | 3574633  | 9-scf00334 | 9  |
| AX-158170830 | 16 | 45.18  | KV452961.1  | 3580221  | 9-scf00334 | 9  |
| AX-158170837 | 16 | 45.18  | KV452961.1  | 3590854  | 9-scf00334 | 9  |
| AX-157741689 | 16 | 45.18  | KV452964.1  | 127666   | 9-scf00337 | 9  |
| AX-157834827 | 16 | 45.18  | KV452964.1  | 164167   | 9-scf00337 | 9  |
| AX-158170831 | 16 | 45.22  | KV452961.1  | 3582077  | 9-scf00334 | 9  |
| AX-158170842 | 16 | 45.22  | KV452961.1  | 3594454  | 9-scf00334 | 9  |
| AX-158170863 | 16 | 45.22  | KV452961.1  | 3624430  | 9-scf00334 | 9  |
| AX-158170885 | 16 | 45.22  | KV452961.1  | 3647591  | 9-scf00334 | 9  |
| AX-158171773 | 16 | 45.22  | KV452964.1  | 100589   | 9-scf00337 | 9  |
| AX-158171875 | 16 | 45.22  | KV452964.1  | 288632   | 9-scf00337 | 9  |
| AX-158170835 | 16 | 45.289 | KV452961.1  | 3588835  | 9-scf00334 | 9  |
| AX-158170836 | 16 | 45.289 | KV452961.1  | 3589635  | 9-scf00334 | 9  |
| AX-158170838 | 16 | 45.289 | KV452961.1  | 3591843  | 9-scf00334 | 9  |
| AX-158170844 | 16 | 45.289 | KV452961.1  | 3597425  | 9-scf00334 | 9  |
| AX-158170845 | 16 | 45.289 | KV452961.1  | 3598067  | 9-scf00334 | 9  |
| AX-158170847 | 16 | 45.289 | KV452961.1  | 3599125  | 9-scf00334 | 9  |
| AX-158170851 | 16 | 45.289 | KV452961.1  | 3601744  | 9-scf00334 | 9  |
| AX-158170852 | 16 | 45.289 | KV452961.1  | 3603433  | 9-scf00334 | 9  |
| AX-158170853 | 16 | 45.289 | KV452961.1  | 3608135  | 9-scf00334 | 9  |
| AX-158171774 | 16 | 45.289 | KV452964.1  | 101186   | 9-scf00337 | 9  |
| AX-158172801 | 16 | 45.289 | KV452969.1  | 1980207  | 9-scf00340 | 9  |
| AX-158181070 | 16 | 45.289 | KV452969.1  | 13363713 | 9-scf00340 | 9  |
| AX-157722242 | 16 | 45.402 | KV452961.1  | 3619614  | 9-scf00334 | 9  |
| AX-158170860 | 16 | 45.402 | KV452961.1  | 3622550  | 9-scf00334 | 9  |
| AX-158170865 | 16 | 45.402 | KV452961.1  | 3626569  | 9-scf00334 | 9  |
| AX-158170868 | 16 | 45.402 | KV452961.1  | 3628945  | 9-scf00334 | 9  |
| AX-158170874 | 16 | 45.402 | KV452961.1  | 3633672  | 9-scf00334 | 9  |
| AX-158170879 | 16 | 45.402 | KV452961.1  | 3640421  | 9-scf00334 | 9  |
| AX-157746770 | 16 | 45.402 | KV452961.1  | 3642359  | 9-scf00334 | 9  |
| AX-158171702 | 16 | 45.402 | KV452964.1  | 7472     | 9-scf00337 | 9  |
| AX-158171940 | 16 | 45.402 | KV452966.1  | 89190    | 9-scf00338 | 9  |
| AX-158170984 | 16 | 45.402 | KV452965.1  | 1289387  | 9-scf00608 | 9  |
| AX-157716577 | 16 | 45.402 | KV452965.1  | 1318349  | 9-scf00608 | 9  |
| AX-157689604 | 16 | 45.402 | 3ML01030791 | 263      | scf06393_1 | UN |
| AX-158170886 | 16 | 45.41  | KV452961.1  | 3648272  | 9-scf00334 | 9  |
| AX-157680170 | 16 | 47.001 | KV452963.1  | 3760     | 9-scf00335 | 9  |
| AX-157683846 | 16 | 47.001 | KV452963.1  | 4261     | 9-scf00335 | 9  |
| AX-157687520 | 16 | 47.001 | KV452962.1  | 8678     | 9-scf00914 | 9  |
| AX-157689963 | 16 | 47.001 |             | 293      | scf16573   | UN |
| AX-158170786 | 16 | 47.212 | KV452961.1  | 3514250  | 9-scf00334 | 9  |
| AX-157680196 | 16 | 47.212 | KV452963.1  | 21487    | 9-scf00335 | 9  |
| AX-158170780 | 16 | 47.368 | KV452961.1  | 3509401  | 9-scf00334 | 9  |
| AX-158170784 | 16 | 47.368 | KV452961.1  | 3513312  | 9-scf00334 | 9  |
| AX-157683859 | 16 | 47.368 | KV452963.1  | 36707    | 9-scf00335 | 9  |
| AX-157683863 | 16 | 47.368 | KV452963.1  | 39582    | 9-scf00335 | 9  |
| AX-158176366 | 16 | 47.368 | KV452969.1  | 7298224  | 9-scf00340 | 9  |
| AX-158176675 | 16 | 47.368 | KV452969.1  | 7660587  | 9-scf00340 | 9  |

|              |    |        |            |         |            |   |
|--------------|----|--------|------------|---------|------------|---|
| AX-157683855 | 16 | 47.379 | KV452963.1 | 30169   | 9-scf00335 | 9 |
| AX-157683865 | 16 | 47.379 | KV452963.1 | 40609   | 9-scf00335 | 9 |
| AX-158171705 | 16 | 49.333 | KV452964.1 | 12501   | 9-scf00337 | 9 |
| AX-157750784 | 16 | 49.333 | KV452966.1 | 102726  | 9-scf00338 | 9 |
| AX-158171706 | 16 | 49.335 | KV452964.1 | 13588   | 9-scf00337 | 9 |
| AX-158171708 | 16 | 49.335 | KV452964.1 | 22843   | 9-scf00337 | 9 |
| AX-158171712 | 16 | 49.335 | KV452964.1 | 27989   | 9-scf00337 | 9 |
| AX-157834819 | 16 | 49.335 | KV452964.1 | 35354   | 9-scf00337 | 9 |
| AX-158171720 | 16 | 49.335 | KV452964.1 | 42439   | 9-scf00337 | 9 |
| AX-158171730 | 16 | 49.335 | KV452964.1 | 53942   | 9-scf00337 | 9 |
| AX-158171739 | 16 | 49.335 | KV452964.1 | 62465   | 9-scf00337 | 9 |
| AX-158171740 | 16 | 49.335 | KV452964.1 | 62984   | 9-scf00337 | 9 |
| AX-158171790 | 16 | 49.335 | KV452964.1 | 125366  | 9-scf00337 | 9 |
| AX-158171802 | 16 | 49.335 | KV452964.1 | 150393  | 9-scf00337 | 9 |
| AX-157858517 | 16 | 49.335 | KV452966.1 | 72095   | 9-scf00338 | 9 |
| AX-158172020 | 16 | 49.335 | KV452969.1 | 124723  | 9-scf00340 | 9 |
| AX-158172037 | 16 | 49.335 | KV452969.1 | 193164  | 9-scf00340 | 9 |
| AX-158172045 | 16 | 49.335 | KV452969.1 | 219310  | 9-scf00340 | 9 |
| AX-158172346 | 16 | 49.335 | KV452969.1 | 796588  | 9-scf00340 | 9 |
| AX-158172395 | 16 | 49.335 | KV452969.1 | 872075  | 9-scf00340 | 9 |
| AX-158172489 | 16 | 49.335 | KV452969.1 | 993733  | 9-scf00340 | 9 |
| AX-158172555 | 16 | 49.335 | KV452969.1 | 1171162 | 9-scf00340 | 9 |
| AX-158172569 | 16 | 49.335 | KV452969.1 | 1188441 | 9-scf00340 | 9 |
| AX-158172580 | 16 | 49.335 | KV452969.1 | 1204997 | 9-scf00340 | 9 |
| AX-158172581 | 16 | 49.335 | KV452969.1 | 1205384 | 9-scf00340 | 9 |
| AX-158423033 | 16 | 49.335 | KV452969.1 | 1629012 | 9-scf00340 | 9 |
| AX-158423035 | 16 | 49.335 | KV452969.1 | 1761090 | 9-scf00340 | 9 |
| AX-157834911 | 16 | 49.335 | KV452969.1 | 2021108 | 9-scf00340 | 9 |
| AX-158172826 | 16 | 49.335 | KV452969.1 | 2082253 | 9-scf00340 | 9 |
| AX-158172844 | 16 | 49.335 | KV452969.1 | 2139796 | 9-scf00340 | 9 |
| AX-158172845 | 16 | 49.335 | KV452969.1 | 2140077 | 9-scf00340 | 9 |
| AX-158172932 | 16 | 49.335 | KV452969.1 | 2306119 | 9-scf00340 | 9 |
| AX-158385865 | 16 | 49.335 | KV452965.1 | 659103  | 9-scf00608 | 9 |
| AX-158171264 | 16 | 49.335 | KV452965.1 | 770276  | 9-scf00608 | 9 |
| AX-158171189 | 16 | 49.335 | KV452965.1 | 927676  | 9-scf00608 | 9 |
| AX-158171132 | 16 | 49.335 | KV452965.1 | 1053895 | 9-scf00608 | 9 |
| AX-157752225 | 16 | 49.335 | KV452965.1 | 1074016 | 9-scf00608 | 9 |
| AX-158171079 | 16 | 49.335 | KV452965.1 | 1129860 | 9-scf00608 | 9 |
| AX-157756544 | 16 | 49.346 | KV452964.1 | 68732   | 9-scf00337 | 9 |
| AX-158171745 | 16 | 49.355 | KV452964.1 | 70785   | 9-scf00337 | 9 |
| AX-158171772 | 16 | 49.355 | KV452964.1 | 99888   | 9-scf00337 | 9 |
| AX-157707616 | 16 | 49.355 | KV452966.1 | 174169  | 9-scf00338 | 9 |
| AX-158171969 | 16 | 49.355 | KV452966.1 | 174719  | 9-scf00338 | 9 |
| AX-158171973 | 16 | 49.355 | KV452966.1 | 181752  | 9-scf00338 | 9 |
| AX-158173054 | 16 | 49.355 | KV452969.1 | 2539169 | 9-scf00340 | 9 |
| AX-158173087 | 16 | 49.355 | KV452969.1 | 2578813 | 9-scf00340 | 9 |
| AX-158173130 | 16 | 49.355 | KV452969.1 | 2644078 | 9-scf00340 | 9 |
| AX-158175644 | 16 | 49.355 | KV452969.1 | 6376320 | 9-scf00340 | 9 |
| AX-157723579 | 16 | 49.355 | KV452969.1 | 6543625 | 9-scf00340 | 9 |
| AX-158176268 | 16 | 49.355 | KV452969.1 | 7176732 | 9-scf00340 | 9 |
| AX-157748944 | 16 | 49.355 | KV452969.1 | 7184008 | 9-scf00340 | 9 |

|              |    |        |            |          |            |   |
|--------------|----|--------|------------|----------|------------|---|
| AX-158176406 | 16 | 49.355 | KV452969.1 | 7333467  | 9-scf00340 | 9 |
| AX-157835248 | 16 | 49.355 | KV452969.1 | 8025156  | 9-scf00340 | 9 |
| AX-158177059 | 16 | 49.355 | KV452969.1 | 8150873  | 9-scf00340 | 9 |
| AX-157858631 | 16 | 49.355 | KV452969.1 | 8278209  | 9-scf00340 | 9 |
| AX-157723081 | 16 | 49.355 | KV452969.1 | 9035295  | 9-scf00340 | 9 |
| AX-157835334 | 16 | 49.355 | KV452969.1 | 9036057  | 9-scf00340 | 9 |
| AX-158179585 | 16 | 49.355 | KV452969.1 | 11533777 | 9-scf00340 | 9 |
| AX-158171111 | 16 | 49.355 | KV452965.1 | 1091915  | 9-scf00608 | 9 |
| AX-158171746 | 16 | 49.374 | KV452964.1 | 71161    | 9-scf00337 | 9 |
| AX-158171748 | 16 | 49.412 | KV452964.1 | 72665    | 9-scf00337 | 9 |
| AX-158171741 | 16 | 49.444 | KV452964.1 | 64698    | 9-scf00337 | 9 |
| AX-158171749 | 16 | 49.444 | KV452964.1 | 73402    | 9-scf00337 | 9 |
| AX-158171750 | 16 | 49.444 | KV452964.1 | 73871    | 9-scf00337 | 9 |
| AX-158171752 | 16 | 49.498 | KV452964.1 | 76803    | 9-scf00337 | 9 |
| AX-157708487 | 16 | 49.554 | KV452961.1 | 3587837  | 9-scf00334 | 9 |
| AX-158170843 | 16 | 49.554 | KV452961.1 | 3595997  | 9-scf00334 | 9 |
| AX-158170846 | 16 | 49.554 | KV452961.1 | 3598670  | 9-scf00334 | 9 |
| AX-158170848 | 16 | 49.554 | KV452961.1 | 3599921  | 9-scf00334 | 9 |
| AX-158170867 | 16 | 49.554 | KV452961.1 | 3628388  | 9-scf00334 | 9 |
| AX-157754758 | 16 | 49.554 | KV452961.1 | 3641889  | 9-scf00334 | 9 |
| AX-158170883 | 16 | 49.554 | KV452961.1 | 3646102  | 9-scf00334 | 9 |
| AX-157683851 | 16 | 49.554 | KV452963.1 | 20009    | 9-scf00335 | 9 |
| AX-157744096 | 16 | 49.554 | KV452964.1 | 41545    | 9-scf00337 | 9 |
| AX-158171723 | 16 | 49.554 | KV452964.1 | 45197    | 9-scf00337 | 9 |
| AX-158171724 | 16 | 49.554 | KV452964.1 | 45839    | 9-scf00337 | 9 |
| AX-158171731 | 16 | 49.554 | KV452964.1 | 54714    | 9-scf00337 | 9 |
| AX-158171754 | 16 | 49.554 | KV452964.1 | 79007    | 9-scf00337 | 9 |
| AX-158171755 | 16 | 49.554 | KV452964.1 | 79916    | 9-scf00337 | 9 |
| AX-158385868 | 16 | 49.554 | KV452964.1 | 80040    | 9-scf00337 | 9 |
| AX-158171756 | 16 | 49.554 | KV452964.1 | 81083    | 9-scf00337 | 9 |
| AX-158171764 | 16 | 49.554 | KV452964.1 | 91678    | 9-scf00337 | 9 |
| AX-158171766 | 16 | 49.554 | KV452964.1 | 93480    | 9-scf00337 | 9 |
| AX-157834821 | 16 | 49.554 | KV452964.1 | 93741    | 9-scf00337 | 9 |
| AX-158171767 | 16 | 49.554 | KV452964.1 | 94612    | 9-scf00337 | 9 |
| AX-158171768 | 16 | 49.554 | KV452964.1 | 95211    | 9-scf00337 | 9 |
| AX-158171769 | 16 | 49.554 | KV452964.1 | 95771    | 9-scf00337 | 9 |
| AX-158171770 | 16 | 49.554 | KV452964.1 | 96219    | 9-scf00337 | 9 |
| AX-158171771 | 16 | 49.554 | KV452964.1 | 98697    | 9-scf00337 | 9 |
| AX-158171775 | 16 | 49.554 | KV452964.1 | 103354   | 9-scf00337 | 9 |
| AX-158171777 | 16 | 49.554 | KV452964.1 | 105282   | 9-scf00337 | 9 |
| AX-158171780 | 16 | 49.554 | KV452964.1 | 109835   | 9-scf00337 | 9 |
| AX-157834822 | 16 | 49.554 | KV452964.1 | 111580   | 9-scf00337 | 9 |
| AX-158171782 | 16 | 49.554 | KV452964.1 | 113049   | 9-scf00337 | 9 |
| AX-158171786 | 16 | 49.554 | KV452964.1 | 119534   | 9-scf00337 | 9 |
| AX-158171789 | 16 | 49.554 | KV452964.1 | 124468   | 9-scf00337 | 9 |
| AX-157834823 | 16 | 49.554 | KV452964.1 | 125105   | 9-scf00337 | 9 |
| AX-157834824 | 16 | 49.554 | KV452964.1 | 125146   | 9-scf00337 | 9 |
| AX-158171792 | 16 | 49.554 | KV452964.1 | 127150   | 9-scf00337 | 9 |
| AX-158171793 | 16 | 49.554 | KV452964.1 | 129019   | 9-scf00337 | 9 |
| AX-158171794 | 16 | 49.554 | KV452964.1 | 131095   | 9-scf00337 | 9 |
| AX-158171797 | 16 | 49.554 | KV452964.1 | 135606   | 9-scf00337 | 9 |



|              |    |        |            |         |            |   |
|--------------|----|--------|------------|---------|------------|---|
| AX-158171798 | 16 | 49.554 | KV452964.1 | 135975  | 9-scf00337 | 9 |
| AX-158171800 | 16 | 49.554 | KV452964.1 | 148119  | 9-scf00337 | 9 |
| AX-158171811 | 16 | 49.554 | KV452964.1 | 174489  | 9-scf00337 | 9 |
| AX-158171816 | 16 | 49.554 | KV452964.1 | 185832  | 9-scf00337 | 9 |
| AX-158171818 | 16 | 49.554 | KV452964.1 | 186525  | 9-scf00337 | 9 |
| AX-158171832 | 16 | 49.554 | KV452964.1 | 216832  | 9-scf00337 | 9 |
| AX-158171833 | 16 | 49.554 | KV452964.1 | 218255  | 9-scf00337 | 9 |
| AX-158171835 | 16 | 49.554 | KV452964.1 | 219865  | 9-scf00337 | 9 |
| AX-157748046 | 16 | 49.554 | KV452964.1 | 258018  | 9-scf00337 | 9 |
| AX-158171860 | 16 | 49.554 | KV452964.1 | 270050  | 9-scf00337 | 9 |
| AX-158171883 | 16 | 49.554 | KV452966.1 | 2148    | 9-scf00338 | 9 |
| AX-158171887 | 16 | 49.554 | KV452966.1 | 5416    | 9-scf00338 | 9 |
| AX-158171889 | 16 | 49.554 | KV452966.1 | 7267    | 9-scf00338 | 9 |
| AX-157834838 | 16 | 49.554 | KV452966.1 | 8123    | 9-scf00338 | 9 |
| AX-157834839 | 16 | 49.554 | KV452966.1 | 8703    | 9-scf00338 | 9 |
| AX-158171897 | 16 | 49.554 | KV452966.1 | 24726   | 9-scf00338 | 9 |
| AX-158171942 | 16 | 49.554 | KV452966.1 | 90957   | 9-scf00338 | 9 |
| AX-158171946 | 16 | 49.554 | KV452966.1 | 104010  | 9-scf00338 | 9 |
| AX-157713876 | 16 | 49.554 | KV452966.1 | 104412  | 9-scf00338 | 9 |
| AX-157709545 | 16 | 49.554 | KV452966.1 | 157481  | 9-scf00338 | 9 |
| AX-158171986 | 16 | 49.554 | KV452969.1 | 19367   | 9-scf00340 | 9 |
| AX-158172041 | 16 | 49.554 | KV452969.1 | 207672  | 9-scf00340 | 9 |
| AX-157834857 | 16 | 49.554 | KV452969.1 | 225844  | 9-scf00340 | 9 |
| AX-158172069 | 16 | 49.554 | KV452969.1 | 306042  | 9-scf00340 | 9 |
| AX-158172089 | 16 | 49.554 | KV452969.1 | 370783  | 9-scf00340 | 9 |
| AX-158172126 | 16 | 49.554 | KV452969.1 | 478177  | 9-scf00340 | 9 |
| AX-157834862 | 16 | 49.554 | KV452969.1 | 523727  | 9-scf00340 | 9 |
| AX-158172173 | 16 | 49.554 | KV452969.1 | 572182  | 9-scf00340 | 9 |
| AX-158172448 | 16 | 49.554 | KV452969.1 | 935934  | 9-scf00340 | 9 |
| AX-158172483 | 16 | 49.554 | KV452969.1 | 986066  | 9-scf00340 | 9 |
| AX-157718008 | 16 | 49.554 | KV452969.1 | 1181807 | 9-scf00340 | 9 |
| AX-158172586 | 16 | 49.554 | KV452969.1 | 1220206 | 9-scf00340 | 9 |
| AX-158172588 | 16 | 49.554 | KV452969.1 | 1225488 | 9-scf00340 | 9 |
| AX-158172656 | 16 | 49.554 | KV452969.1 | 1412762 | 9-scf00340 | 9 |
| AX-158172657 | 16 | 49.554 | KV452969.1 | 1415122 | 9-scf00340 | 9 |
| AX-158413332 | 16 | 49.554 | KV452969.1 | 1426898 | 9-scf00340 | 9 |
| AX-158172755 | 16 | 49.554 | KV452969.1 | 1857841 | 9-scf00340 | 9 |
| AX-158172763 | 16 | 49.554 | KV452969.1 | 1890293 | 9-scf00340 | 9 |
| AX-158172765 | 16 | 49.554 | KV452969.1 | 1901091 | 9-scf00340 | 9 |
| AX-158172766 | 16 | 49.554 | KV452969.1 | 1901882 | 9-scf00340 | 9 |
| AX-158172770 | 16 | 49.554 | KV452969.1 | 1912294 | 9-scf00340 | 9 |
| AX-158172777 | 16 | 49.554 | KV452969.1 | 1927439 | 9-scf00340 | 9 |
| AX-158172778 | 16 | 49.554 | KV452969.1 | 1929800 | 9-scf00340 | 9 |
| AX-158172781 | 16 | 49.554 | KV452969.1 | 1941954 | 9-scf00340 | 9 |
| AX-158172787 | 16 | 49.554 | KV452969.1 | 1950614 | 9-scf00340 | 9 |
| AX-158172788 | 16 | 49.554 | KV452969.1 | 1951645 | 9-scf00340 | 9 |
| AX-158172792 | 16 | 49.554 | KV452969.1 | 1959555 | 9-scf00340 | 9 |
| AX-158172795 | 16 | 49.554 | KV452969.1 | 1971130 | 9-scf00340 | 9 |
| AX-158172796 | 16 | 49.554 | KV452969.1 | 1971581 | 9-scf00340 | 9 |
| AX-158172799 | 16 | 49.554 | KV452969.1 | 1977315 | 9-scf00340 | 9 |
| AX-158172808 | 16 | 49.554 | KV452969.1 | 1987429 | 9-scf00340 | 9 |

|              |    |        |            |         |            |   |
|--------------|----|--------|------------|---------|------------|---|
| AX-157752328 | 16 | 49.554 | KV452969.1 | 1996395 | 9-scf00340 | 9 |
| AX-157714770 | 16 | 49.554 | KV452969.1 | 2009375 | 9-scf00340 | 9 |
| AX-158172941 | 16 | 49.554 | KV452969.1 | 2317782 | 9-scf00340 | 9 |
| AX-158172944 | 16 | 49.554 | KV452969.1 | 2325775 | 9-scf00340 | 9 |
| AX-158172973 | 16 | 49.554 | KV452969.1 | 2380203 | 9-scf00340 | 9 |
| AX-157834936 | 16 | 49.554 | KV452969.1 | 2600939 | 9-scf00340 | 9 |
| AX-157713037 | 16 | 49.554 | KV452969.1 | 2613573 | 9-scf00340 | 9 |
| AX-157872009 | 16 | 49.554 | KV452969.1 | 2630119 | 9-scf00340 | 9 |
| AX-158173368 | 16 | 49.554 | KV452969.1 | 2969968 | 9-scf00340 | 9 |
| AX-157878746 | 16 | 49.554 | KV452969.1 | 3053060 | 9-scf00340 | 9 |
| AX-157773030 | 16 | 49.554 | KV452969.1 | 3053397 | 9-scf00340 | 9 |
| AX-158173451 | 16 | 49.554 | KV452969.1 | 3053487 | 9-scf00340 | 9 |
| AX-158173642 | 16 | 49.554 | KV452969.1 | 3312699 | 9-scf00340 | 9 |
| AX-157709334 | 16 | 49.554 | KV452969.1 | 5098058 | 9-scf00340 | 9 |
| AX-157835061 | 16 | 49.554 | KV452969.1 | 5224248 | 9-scf00340 | 9 |
| AX-158175140 | 16 | 49.554 | KV452969.1 | 5299642 | 9-scf00340 | 9 |
| AX-158175156 | 16 | 49.554 | KV452969.1 | 5331504 | 9-scf00340 | 9 |
| AX-158175239 | 16 | 49.554 | KV452969.1 | 5426348 | 9-scf00340 | 9 |
| AX-158175240 | 16 | 49.554 | KV452969.1 | 5427365 | 9-scf00340 | 9 |
| AX-158175244 | 16 | 49.554 | KV452969.1 | 5432293 | 9-scf00340 | 9 |
| AX-158175254 | 16 | 49.554 | KV452969.1 | 5441717 | 9-scf00340 | 9 |
| AX-158175325 | 16 | 49.554 | KV452969.1 | 5540445 | 9-scf00340 | 9 |
| AX-158175513 | 16 | 49.554 | KV452969.1 | 6215514 | 9-scf00340 | 9 |
| AX-158175657 | 16 | 49.554 | KV452969.1 | 6387442 | 9-scf00340 | 9 |
| AX-158175666 | 16 | 49.554 | KV452969.1 | 6395890 | 9-scf00340 | 9 |
| AX-158175692 | 16 | 49.554 | KV452969.1 | 6434408 | 9-scf00340 | 9 |
| AX-158176001 | 16 | 49.554 | KV452969.1 | 6789781 | 9-scf00340 | 9 |
| AX-158176124 | 16 | 49.554 | KV452969.1 | 6984169 | 9-scf00340 | 9 |
| AX-158176200 | 16 | 49.554 | KV452969.1 | 7104052 | 9-scf00340 | 9 |
| AX-158176269 | 16 | 49.554 | KV452969.1 | 7177036 | 9-scf00340 | 9 |
| AX-158176271 | 16 | 49.554 | KV452969.1 | 7178637 | 9-scf00340 | 9 |
| AX-158176275 | 16 | 49.554 | KV452969.1 | 7180807 | 9-scf00340 | 9 |
| AX-158176278 | 16 | 49.554 | KV452969.1 | 7185965 | 9-scf00340 | 9 |
| AX-158176279 | 16 | 49.554 | KV452969.1 | 7186908 | 9-scf00340 | 9 |
| AX-158176280 | 16 | 49.554 | KV452969.1 | 7187321 | 9-scf00340 | 9 |
| AX-158176283 | 16 | 49.554 | KV452969.1 | 7189391 | 9-scf00340 | 9 |
| AX-158176285 | 16 | 49.554 | KV452969.1 | 7193082 | 9-scf00340 | 9 |
| AX-157835174 | 16 | 49.554 | KV452969.1 | 7200085 | 9-scf00340 | 9 |
| AX-158176291 | 16 | 49.554 | KV452969.1 | 7201139 | 9-scf00340 | 9 |
| AX-158176293 | 16 | 49.554 | KV452969.1 | 7201953 | 9-scf00340 | 9 |
| AX-157835177 | 16 | 49.554 | KV452969.1 | 7208892 | 9-scf00340 | 9 |
| AX-157835178 | 16 | 49.554 | KV452969.1 | 7210360 | 9-scf00340 | 9 |
| AX-158176298 | 16 | 49.554 | KV452969.1 | 7210418 | 9-scf00340 | 9 |
| AX-158176300 | 16 | 49.554 | KV452969.1 | 7211823 | 9-scf00340 | 9 |
| AX-158176302 | 16 | 49.554 | KV452969.1 | 7212927 | 9-scf00340 | 9 |
| AX-158176308 | 16 | 49.554 | KV452969.1 | 7219624 | 9-scf00340 | 9 |
| AX-158176311 | 16 | 49.554 | KV452969.1 | 7222162 | 9-scf00340 | 9 |
| AX-158176316 | 16 | 49.554 | KV452969.1 | 7227537 | 9-scf00340 | 9 |
| AX-158176317 | 16 | 49.554 | KV452969.1 | 7230969 | 9-scf00340 | 9 |
| AX-158176319 | 16 | 49.554 | KV452969.1 | 7233444 | 9-scf00340 | 9 |
| AX-158176320 | 16 | 49.554 | KV452969.1 | 7233646 | 9-scf00340 | 9 |

|              |    |        |            |         |            |   |
|--------------|----|--------|------------|---------|------------|---|
| AX-158176323 | 16 | 49.554 | KV452969.1 | 7237357 | 9-scf00340 | 9 |
| AX-158176330 | 16 | 49.554 | KV452969.1 | 7257742 | 9-scf00340 | 9 |
| AX-158176334 | 16 | 49.554 | KV452969.1 | 7262628 | 9-scf00340 | 9 |
| AX-158176335 | 16 | 49.554 | KV452969.1 | 7264536 | 9-scf00340 | 9 |
| AX-158176336 | 16 | 49.554 | KV452969.1 | 7267103 | 9-scf00340 | 9 |
| AX-158176337 | 16 | 49.554 | KV452969.1 | 7268649 | 9-scf00340 | 9 |
| AX-158176338 | 16 | 49.554 | KV452969.1 | 7269086 | 9-scf00340 | 9 |
| AX-157835181 | 16 | 49.554 | KV452969.1 | 7275045 | 9-scf00340 | 9 |
| AX-158176345 | 16 | 49.554 | KV452969.1 | 7280408 | 9-scf00340 | 9 |
| AX-158176348 | 16 | 49.554 | KV452969.1 | 7282020 | 9-scf00340 | 9 |
| AX-158176354 | 16 | 49.554 | KV452969.1 | 7285839 | 9-scf00340 | 9 |
| AX-158176355 | 16 | 49.554 | KV452969.1 | 7287294 | 9-scf00340 | 9 |
| AX-158176356 | 16 | 49.554 | KV452969.1 | 7290257 | 9-scf00340 | 9 |
| AX-158176357 | 16 | 49.554 | KV452969.1 | 7290496 | 9-scf00340 | 9 |
| AX-158176360 | 16 | 49.554 | KV452969.1 | 7292781 | 9-scf00340 | 9 |
| AX-158176367 | 16 | 49.554 | KV452969.1 | 7298617 | 9-scf00340 | 9 |
| AX-158176368 | 16 | 49.554 | KV452969.1 | 7298830 | 9-scf00340 | 9 |
| AX-158176372 | 16 | 49.554 | KV452969.1 | 7304219 | 9-scf00340 | 9 |
| AX-158176375 | 16 | 49.554 | KV452969.1 | 7305199 | 9-scf00340 | 9 |
| AX-158409286 | 16 | 49.554 | KV452969.1 | 7305430 | 9-scf00340 | 9 |
| AX-158176377 | 16 | 49.554 | KV452969.1 | 7306484 | 9-scf00340 | 9 |
| AX-158176378 | 16 | 49.554 | KV452969.1 | 7306733 | 9-scf00340 | 9 |
| AX-158176379 | 16 | 49.554 | KV452969.1 | 7307329 | 9-scf00340 | 9 |
| AX-158176382 | 16 | 49.554 | KV452969.1 | 7309060 | 9-scf00340 | 9 |
| AX-158176383 | 16 | 49.554 | KV452969.1 | 7310362 | 9-scf00340 | 9 |
| AX-158176384 | 16 | 49.554 | KV452969.1 | 7310875 | 9-scf00340 | 9 |
| AX-158176386 | 16 | 49.554 | KV452969.1 | 7313842 | 9-scf00340 | 9 |
| AX-158176389 | 16 | 49.554 | KV452969.1 | 7316728 | 9-scf00340 | 9 |
| AX-158176392 | 16 | 49.554 | KV452969.1 | 7319769 | 9-scf00340 | 9 |
| AX-158176393 | 16 | 49.554 | KV452969.1 | 7320658 | 9-scf00340 | 9 |
| AX-158176395 | 16 | 49.554 | KV452969.1 | 7323221 | 9-scf00340 | 9 |
| AX-158176402 | 16 | 49.554 | KV452969.1 | 7329233 | 9-scf00340 | 9 |
| AX-158176405 | 16 | 49.554 | KV452969.1 | 7333102 | 9-scf00340 | 9 |
| AX-158176407 | 16 | 49.554 | KV452969.1 | 7333869 | 9-scf00340 | 9 |
| AX-158176411 | 16 | 49.554 | KV452969.1 | 7339261 | 9-scf00340 | 9 |
| AX-158176412 | 16 | 49.554 | KV452969.1 | 7340260 | 9-scf00340 | 9 |
| AX-158176415 | 16 | 49.554 | KV452969.1 | 7342498 | 9-scf00340 | 9 |
| AX-158176416 | 16 | 49.554 | KV452969.1 | 7343787 | 9-scf00340 | 9 |
| AX-158176422 | 16 | 49.554 | KV452969.1 | 7351848 | 9-scf00340 | 9 |
| AX-158176423 | 16 | 49.554 | KV452969.1 | 7352954 | 9-scf00340 | 9 |
| AX-158176424 | 16 | 49.554 | KV452969.1 | 7353775 | 9-scf00340 | 9 |
| AX-157835187 | 16 | 49.554 | KV452969.1 | 7354288 | 9-scf00340 | 9 |
| AX-158176425 | 16 | 49.554 | KV452969.1 | 7354815 | 9-scf00340 | 9 |
| AX-158176428 | 16 | 49.554 | KV452969.1 | 7358895 | 9-scf00340 | 9 |
| AX-157835188 | 16 | 49.554 | KV452969.1 | 7359817 | 9-scf00340 | 9 |
| AX-158176435 | 16 | 49.554 | KV452969.1 | 7364293 | 9-scf00340 | 9 |
| AX-158176436 | 16 | 49.554 | KV452969.1 | 7365104 | 9-scf00340 | 9 |
| AX-158176437 | 16 | 49.554 | KV452969.1 | 7366203 | 9-scf00340 | 9 |
| AX-158176438 | 16 | 49.554 | KV452969.1 | 7367868 | 9-scf00340 | 9 |
| AX-158176441 | 16 | 49.554 | KV452969.1 | 7370819 | 9-scf00340 | 9 |
| AX-158176443 | 16 | 49.554 | KV452969.1 | 7372548 | 9-scf00340 | 9 |

|              |    |        |            |         |            |   |
|--------------|----|--------|------------|---------|------------|---|
| AX-158176444 | 16 | 49.554 | KV452969.1 | 7373703 | 9-scf00340 | 9 |
| AX-158176446 | 16 | 49.554 | KV452969.1 | 7375092 | 9-scf00340 | 9 |
| AX-157835190 | 16 | 49.554 | KV452969.1 | 7376450 | 9-scf00340 | 9 |
| AX-158176449 | 16 | 49.554 | KV452969.1 | 7379122 | 9-scf00340 | 9 |
| AX-158176450 | 16 | 49.554 | KV452969.1 | 7380464 | 9-scf00340 | 9 |
| AX-158176451 | 16 | 49.554 | KV452969.1 | 7381332 | 9-scf00340 | 9 |
| AX-158176456 | 16 | 49.554 | KV452969.1 | 7390467 | 9-scf00340 | 9 |
| AX-158176459 | 16 | 49.554 | KV452969.1 | 7393024 | 9-scf00340 | 9 |
| AX-158176461 | 16 | 49.554 | KV452969.1 | 7395721 | 9-scf00340 | 9 |
| AX-158176462 | 16 | 49.554 | KV452969.1 | 7397106 | 9-scf00340 | 9 |
| AX-158176463 | 16 | 49.554 | KV452969.1 | 7398145 | 9-scf00340 | 9 |
| AX-158176464 | 16 | 49.554 | KV452969.1 | 7398563 | 9-scf00340 | 9 |
| AX-157720756 | 16 | 49.554 | KV452969.1 | 7434892 | 9-scf00340 | 9 |
| AX-158176567 | 16 | 49.554 | KV452969.1 | 7514873 | 9-scf00340 | 9 |
| AX-157749514 | 16 | 49.554 | KV452969.1 | 7747293 | 9-scf00340 | 9 |
| AX-158176762 | 16 | 49.554 | KV452969.1 | 7772033 | 9-scf00340 | 9 |
| AX-158176812 | 16 | 49.554 | KV452969.1 | 7844478 | 9-scf00340 | 9 |
| AX-158176813 | 16 | 49.554 | KV452969.1 | 7845001 | 9-scf00340 | 9 |
| AX-158176857 | 16 | 49.554 | KV452969.1 | 7891471 | 9-scf00340 | 9 |
| AX-158177061 | 16 | 49.554 | KV452969.1 | 8151900 | 9-scf00340 | 9 |
| AX-158177083 | 16 | 49.554 | KV452969.1 | 8194987 | 9-scf00340 | 9 |
| AX-157835261 | 16 | 49.554 | KV452969.1 | 8203058 | 9-scf00340 | 9 |
| AX-157858630 | 16 | 49.554 | KV452969.1 | 8219251 | 9-scf00340 | 9 |
| AX-158177099 | 16 | 49.554 | KV452969.1 | 8228169 | 9-scf00340 | 9 |
| AX-158177118 | 16 | 49.554 | KV452969.1 | 8247227 | 9-scf00340 | 9 |
| AX-158177120 | 16 | 49.554 | KV452969.1 | 8249175 | 9-scf00340 | 9 |
| AX-157709052 | 16 | 49.554 | KV452969.1 | 8253125 | 9-scf00340 | 9 |
| AX-158177124 | 16 | 49.554 | KV452969.1 | 8257071 | 9-scf00340 | 9 |
| AX-158177130 | 16 | 49.554 | KV452969.1 | 8264531 | 9-scf00340 | 9 |
| AX-158177131 | 16 | 49.554 | KV452969.1 | 8264907 | 9-scf00340 | 9 |
| AX-158177133 | 16 | 49.554 | KV452969.1 | 8266674 | 9-scf00340 | 9 |
| AX-158177134 | 16 | 49.554 | KV452969.1 | 8267393 | 9-scf00340 | 9 |
| AX-158177136 | 16 | 49.554 | KV452969.1 | 8269783 | 9-scf00340 | 9 |
| AX-158177142 | 16 | 49.554 | KV452969.1 | 8275413 | 9-scf00340 | 9 |
| AX-158177145 | 16 | 49.554 | KV452969.1 | 8278554 | 9-scf00340 | 9 |
| AX-158177148 | 16 | 49.554 | KV452969.1 | 8280818 | 9-scf00340 | 9 |
| AX-157858632 | 16 | 49.554 | KV452969.1 | 8281051 | 9-scf00340 | 9 |
| AX-158177150 | 16 | 49.554 | KV452969.1 | 8282181 | 9-scf00340 | 9 |
| AX-157742404 | 16 | 49.554 | KV452969.1 | 8285973 | 9-scf00340 | 9 |
| AX-157835267 | 16 | 49.554 | KV452969.1 | 8289227 | 9-scf00340 | 9 |
| AX-158177159 | 16 | 49.554 | KV452969.1 | 8292625 | 9-scf00340 | 9 |
| AX-158177162 | 16 | 49.554 | KV452969.1 | 8294559 | 9-scf00340 | 9 |
| AX-158177163 | 16 | 49.554 | KV452969.1 | 8295851 | 9-scf00340 | 9 |
| AX-157708247 | 16 | 49.554 | KV452969.1 | 8296544 | 9-scf00340 | 9 |
| AX-158177164 | 16 | 49.554 | KV452969.1 | 8300258 | 9-scf00340 | 9 |
| AX-158177165 | 16 | 49.554 | KV452969.1 | 8300469 | 9-scf00340 | 9 |
| AX-158177166 | 16 | 49.554 | KV452969.1 | 8301476 | 9-scf00340 | 9 |
| AX-157858633 | 16 | 49.554 | KV452969.1 | 8302184 | 9-scf00340 | 9 |
| AX-158177171 | 16 | 49.554 | KV452969.1 | 8307741 | 9-scf00340 | 9 |
| AX-157835269 | 16 | 49.554 | KV452969.1 | 8309192 | 9-scf00340 | 9 |
| AX-158177174 | 16 | 49.554 | KV452969.1 | 8310464 | 9-scf00340 | 9 |

|              |    |        |            |          |            |   |
|--------------|----|--------|------------|----------|------------|---|
| AX-157835314 | 16 | 49.554 | KV452969.1 | 8719776  | 9-scf00340 | 9 |
| AX-158177663 | 16 | 49.554 | KV452969.1 | 9042082  | 9-scf00340 | 9 |
| AX-158177761 | 16 | 49.554 | KV452969.1 | 9196195  | 9-scf00340 | 9 |
| AX-158177964 | 16 | 49.554 | KV452969.1 | 9443024  | 9-scf00340 | 9 |
| AX-158178100 | 16 | 49.554 | KV452969.1 | 9591801  | 9-scf00340 | 9 |
| AX-158178146 | 16 | 49.554 | KV452969.1 | 9661029  | 9-scf00340 | 9 |
| AX-158178156 | 16 | 49.554 | KV452969.1 | 9670190  | 9-scf00340 | 9 |
| AX-157757788 | 16 | 49.554 | KV452969.1 | 9767221  | 9-scf00340 | 9 |
| AX-157886795 | 16 | 49.554 | KV452969.1 | 10284021 | 9-scf00340 | 9 |
| AX-158409325 | 16 | 49.554 | KV452969.1 | 10285273 | 9-scf00340 | 9 |
| AX-158178728 | 16 | 49.554 | KV452969.1 | 10402381 | 9-scf00340 | 9 |
| AX-158178761 | 16 | 49.554 | KV452969.1 | 10436916 | 9-scf00340 | 9 |
| AX-158178789 | 16 | 49.554 | KV452969.1 | 10473534 | 9-scf00340 | 9 |
| AX-157878826 | 16 | 49.554 | KV452969.1 | 10480125 | 9-scf00340 | 9 |
| AX-158178825 | 16 | 49.554 | KV452969.1 | 10552861 | 9-scf00340 | 9 |
| AX-158393528 | 16 | 49.554 | KV452969.1 | 10565030 | 9-scf00340 | 9 |
| AX-158178913 | 16 | 49.554 | KV452969.1 | 10684158 | 9-scf00340 | 9 |
| AX-158178914 | 16 | 49.554 | KV452969.1 | 10686079 | 9-scf00340 | 9 |
| AX-158178915 | 16 | 49.554 | KV452969.1 | 10686765 | 9-scf00340 | 9 |
| AX-158178916 | 16 | 49.554 | KV452969.1 | 10686966 | 9-scf00340 | 9 |
| AX-158178923 | 16 | 49.554 | KV452969.1 | 10690900 | 9-scf00340 | 9 |
| AX-158179124 | 16 | 49.554 | KV452969.1 | 10944795 | 9-scf00340 | 9 |
| AX-158179157 | 16 | 49.554 | KV452969.1 | 10993450 | 9-scf00340 | 9 |
| AX-158179220 | 16 | 49.554 | KV452969.1 | 11071873 | 9-scf00340 | 9 |
| AX-158179234 | 16 | 49.554 | KV452969.1 | 11084361 | 9-scf00340 | 9 |
| AX-158179249 | 16 | 49.554 | KV452969.1 | 11101888 | 9-scf00340 | 9 |
| AX-158179421 | 16 | 49.554 | KV452969.1 | 11297507 | 9-scf00340 | 9 |
| AX-158179456 | 16 | 49.554 | KV452969.1 | 11365638 | 9-scf00340 | 9 |
| AX-158179554 | 16 | 49.554 | KV452969.1 | 11490597 | 9-scf00340 | 9 |
| AX-158179619 | 16 | 49.554 | KV452969.1 | 11565416 | 9-scf00340 | 9 |
| AX-158179949 | 16 | 49.554 | KV452969.1 | 12028057 | 9-scf00340 | 9 |
| AX-158180014 | 16 | 49.554 | KV452969.1 | 12164858 | 9-scf00340 | 9 |
| AX-158180025 | 16 | 49.554 | KV452969.1 | 12176631 | 9-scf00340 | 9 |
| AX-157878847 | 16 | 49.554 | KV452969.1 | 13009618 | 9-scf00340 | 9 |
| AX-158385945 | 16 | 49.554 | KV452969.1 | 13081142 | 9-scf00340 | 9 |
| AX-157835647 | 16 | 49.554 | KV452969.1 | 13089774 | 9-scf00340 | 9 |
| AX-158413598 | 16 | 49.554 | KV452969.1 | 13111762 | 9-scf00340 | 9 |
| AX-158180906 | 16 | 49.554 | KV452969.1 | 13146067 | 9-scf00340 | 9 |
| AX-157858793 | 16 | 49.554 | KV452969.1 | 13146226 | 9-scf00340 | 9 |
| AX-158180936 | 16 | 49.554 | KV452969.1 | 13185796 | 9-scf00340 | 9 |
| AX-157878855 | 16 | 49.554 | KV452969.1 | 13221929 | 9-scf00340 | 9 |
| AX-158180979 | 16 | 49.554 | KV452969.1 | 13223448 | 9-scf00340 | 9 |
| AX-158181006 | 16 | 49.554 | KV452969.1 | 13262344 | 9-scf00340 | 9 |
| AX-157886808 | 16 | 49.554 | KV452969.1 | 13267407 | 9-scf00340 | 9 |
| AX-158181071 | 16 | 49.554 | KV452969.1 | 13364125 | 9-scf00340 | 9 |
| AX-158181113 | 16 | 49.554 | KV452969.1 | 13435902 | 9-scf00340 | 9 |
| AX-157886809 | 16 | 49.554 | KV452969.1 | 13459703 | 9-scf00340 | 9 |
| AX-158181134 | 16 | 49.554 | KV452969.1 | 13486119 | 9-scf00340 | 9 |
| AX-158181139 | 16 | 49.554 | KV452969.1 | 13497551 | 9-scf00340 | 9 |
| AX-158181148 | 16 | 49.554 | KV452969.1 | 13526042 | 9-scf00340 | 9 |
| AX-158181154 | 16 | 49.554 | KV452969.1 | 13542137 | 9-scf00340 | 9 |

|              |    |        |            |          |            |   |
|--------------|----|--------|------------|----------|------------|---|
| AX-158181159 | 16 | 49.554 | KV452969.1 | 13559506 | 9-scf00340 | 9 |
| AX-157723331 | 16 | 49.554 | KV452969.1 | 13709162 | 9-scf00340 | 9 |
| AX-158181221 | 16 | 49.554 | KV452969.1 | 13730249 | 9-scf00340 | 9 |
| AX-158181239 | 16 | 49.554 | KV452969.1 | 13757049 | 9-scf00340 | 9 |
| AX-158181279 | 16 | 49.554 | KV452969.1 | 13819328 | 9-scf00340 | 9 |
| AX-158181280 | 16 | 49.554 | KV452969.1 | 13819547 | 9-scf00340 | 9 |
| AX-158181281 | 16 | 49.554 | KV452969.1 | 13819961 | 9-scf00340 | 9 |
| AX-158181282 | 16 | 49.554 | KV452969.1 | 13820884 | 9-scf00340 | 9 |
| AX-158181347 | 16 | 49.554 | KV452969.1 | 13917312 | 9-scf00340 | 9 |
| AX-158181350 | 16 | 49.554 | KV452969.1 | 13920915 | 9-scf00340 | 9 |
| AX-157835692 | 16 | 49.554 | KV452969.1 | 13933614 | 9-scf00340 | 9 |
| AX-158181357 | 16 | 49.554 | KV452969.1 | 13936917 | 9-scf00340 | 9 |
| AX-157886811 | 16 | 49.554 | KV452969.1 | 13954879 | 9-scf00340 | 9 |
| AX-158181368 | 16 | 49.554 | KV452969.1 | 13968890 | 9-scf00340 | 9 |
| AX-158181394 | 16 | 49.554 | KV452969.1 | 14002718 | 9-scf00340 | 9 |
| AX-158181508 | 16 | 49.554 | KV452969.1 | 14159424 | 9-scf00340 | 9 |
| AX-158181509 | 16 | 49.554 | KV452969.1 | 14160492 | 9-scf00340 | 9 |
| AX-157718341 | 16 | 49.554 | KV452969.1 | 14369831 | 9-scf00340 | 9 |
| AX-158181768 | 16 | 49.554 | KV452969.1 | 14528999 | 9-scf00340 | 9 |
| AX-158181772 | 16 | 49.554 | KV452969.1 | 14537032 | 9-scf00340 | 9 |
| AX-158181775 | 16 | 49.554 | KV452969.1 | 14542289 | 9-scf00340 | 9 |
| AX-158181888 | 16 | 49.554 | KV452969.1 | 14671722 | 9-scf00340 | 9 |
| AX-158182198 | 16 | 49.554 | KV452969.1 | 15030310 | 9-scf00340 | 9 |
| AX-157878886 | 16 | 49.554 | KV452969.1 | 15035862 | 9-scf00340 | 9 |
| AX-158182263 | 16 | 49.554 | KV452969.1 | 15138317 | 9-scf00340 | 9 |
| AX-158182264 | 16 | 49.554 | KV452969.1 | 15138412 | 9-scf00340 | 9 |
| AX-158182266 | 16 | 49.554 | KV452969.1 | 15140496 | 9-scf00340 | 9 |
| AX-158182267 | 16 | 49.554 | KV452969.1 | 15141009 | 9-scf00340 | 9 |
| AX-158182306 | 16 | 49.554 | KV452969.1 | 15206791 | 9-scf00340 | 9 |
| AX-158182342 | 16 | 49.554 | KV452969.1 | 15249914 | 9-scf00340 | 9 |
| AX-158182349 | 16 | 49.554 | KV452969.1 | 15260868 | 9-scf00340 | 9 |
| AX-157835784 | 16 | 49.554 | KV452969.1 | 15261097 | 9-scf00340 | 9 |
| AX-157772845 | 16 | 49.554 | KV452969.1 | 15263052 | 9-scf00340 | 9 |
| AX-158182350 | 16 | 49.554 | KV452969.1 | 15264044 | 9-scf00340 | 9 |
| AX-157710147 | 16 | 49.554 | KV452969.1 | 15267694 | 9-scf00340 | 9 |
| AX-157744829 | 16 | 49.554 | KV452969.1 | 15280157 | 9-scf00340 | 9 |
| AX-158182459 | 16 | 49.554 | KV452969.1 | 15430870 | 9-scf00340 | 9 |
| AX-157835809 | 16 | 49.554 | KV452969.1 | 15465522 | 9-scf00340 | 9 |
| AX-158182563 | 16 | 49.554 | KV452969.1 | 15554463 | 9-scf00340 | 9 |
| AX-158182605 | 16 | 49.554 | KV452969.1 | 15604114 | 9-scf00340 | 9 |
| AX-158182620 | 16 | 49.554 | KV452969.1 | 15625270 | 9-scf00340 | 9 |
| AX-157835816 | 16 | 49.554 | KV452969.1 | 15650544 | 9-scf00340 | 9 |
| AX-157774067 | 16 | 49.554 | KV452965.1 | 375181   | 9-scf00608 | 9 |
| AX-158171283 | 16 | 49.554 | KV452965.1 | 741134   | 9-scf00608 | 9 |
| AX-158171231 | 16 | 49.554 | KV452965.1 | 823193   | 9-scf00608 | 9 |
| AX-158171227 | 16 | 49.554 | KV452965.1 | 829136   | 9-scf00608 | 9 |
| AX-158171216 | 16 | 49.554 | KV452965.1 | 851469   | 9-scf00608 | 9 |
| AX-158171212 | 16 | 49.554 | KV452965.1 | 855781   | 9-scf00608 | 9 |
| AX-158171149 | 16 | 49.554 | KV452965.1 | 1013224  | 9-scf00608 | 9 |
| AX-158171110 | 16 | 49.554 | KV452965.1 | 1094646  | 9-scf00608 | 9 |
| AX-158171047 | 16 | 49.554 | KV452965.1 | 1165044  | 9-scf00608 | 9 |

|              |    |        |             |         |            |    |
|--------------|----|--------|-------------|---------|------------|----|
| AX-158171046 | 16 | 49.554 | KV452965.1  | 1165328 | 9-scf00608 | 9  |
| AX-158170938 | 16 | 49.554 | KV452965.1  | 1506440 | 9-scf00608 | 9  |
| AX-158170931 | 16 | 49.554 | KV452965.1  | 1600800 | 9-scf00608 | 9  |
| AX-158170922 | 16 | 49.554 | KV452965.1  | 1659547 | 9-scf00608 | 9  |
| AX-158170908 | 16 | 49.554 | KV452965.1  | 1752043 | 9-scf00608 | 9  |
| AX-158170904 | 16 | 49.554 | KV452965.1  | 1774328 | 9-scf00608 | 9  |
| AX-158170901 | 16 | 49.554 | KV452965.1  | 1800689 | 9-scf00608 | 9  |
| AX-158170898 | 16 | 49.554 | KV452965.1  | 1829620 | 9-scf00608 | 9  |
| AX-157687651 | 16 | 49.554 | 3ML01025093 | 604     | scf00961_1 | UN |
| AX-158170892 | 16 | 49.663 | KV452961.1  | 3656584 | 9-scf00334 | 9  |
| AX-158171804 | 16 | 49.663 | KV452964.1  | 157926  | 9-scf00337 | 9  |
| AX-158171805 | 16 | 49.663 | KV452964.1  | 159516  | 9-scf00337 | 9  |
| AX-158171806 | 16 | 49.663 | KV452964.1  | 160568  | 9-scf00337 | 9  |
| AX-157834826 | 16 | 49.663 | KV452964.1  | 161051  | 9-scf00337 | 9  |
| AX-158171808 | 16 | 49.663 | KV452964.1  | 163223  | 9-scf00337 | 9  |
| AX-158171817 | 16 | 49.663 | KV452964.1  | 186141  | 9-scf00337 | 9  |
| AX-158171819 | 16 | 49.663 | KV452964.1  | 190933  | 9-scf00337 | 9  |
| AX-158171820 | 16 | 49.711 | KV452964.1  | 197701  | 9-scf00337 | 9  |
| AX-158171821 | 16 | 49.711 | KV452964.1  | 198465  | 9-scf00337 | 9  |
| AX-157834836 | 16 | 49.711 | KV452964.1  | 270884  | 9-scf00337 | 9  |
| AX-157878709 | 16 | 49.761 | KV452964.1  | 198029  | 9-scf00337 | 9  |
| AX-157834727 | 16 | 49.772 | KV452961.1  | 3210965 | 9-scf00334 | 9  |
| AX-158170787 | 16 | 49.772 | KV452961.1  | 3515233 | 9-scf00334 | 9  |
| AX-158170806 | 16 | 49.772 | KV452961.1  | 3537713 | 9-scf00334 | 9  |
| AX-157709922 | 16 | 49.772 | KV452961.1  | 3595730 | 9-scf00334 | 9  |
| AX-158170858 | 16 | 49.772 | KV452961.1  | 3615620 | 9-scf00334 | 9  |
| AX-158170862 | 16 | 49.772 | KV452961.1  | 3623978 | 9-scf00334 | 9  |
| AX-158170881 | 16 | 49.772 | KV452961.1  | 3643749 | 9-scf00334 | 9  |
| AX-158170884 | 16 | 49.772 | KV452961.1  | 3646785 | 9-scf00334 | 9  |
| AX-158170889 | 16 | 49.772 | KV452961.1  | 3650326 | 9-scf00334 | 9  |
| AX-157707872 | 16 | 49.772 | KV452964.1  | 88070   | 9-scf00337 | 9  |
| AX-158171760 | 16 | 49.772 | KV452964.1  | 88663   | 9-scf00337 | 9  |
| AX-158171765 | 16 | 49.772 | KV452964.1  | 93092   | 9-scf00337 | 9  |
| AX-158171807 | 16 | 49.772 | KV452964.1  | 162984  | 9-scf00337 | 9  |
| AX-158171810 | 16 | 49.772 | KV452964.1  | 165771  | 9-scf00337 | 9  |
| AX-158171812 | 16 | 49.772 | KV452964.1  | 182868  | 9-scf00337 | 9  |
| AX-158171813 | 16 | 49.772 | KV452964.1  | 183906  | 9-scf00337 | 9  |
| AX-157754899 | 16 | 49.772 | KV452964.1  | 197025  | 9-scf00337 | 9  |
| AX-158171823 | 16 | 49.772 | KV452964.1  | 201260  | 9-scf00337 | 9  |
| AX-158171825 | 16 | 49.772 | KV452964.1  | 203627  | 9-scf00337 | 9  |
| AX-158171836 | 16 | 49.772 | KV452964.1  | 220524  | 9-scf00337 | 9  |
| AX-158171838 | 16 | 49.772 | KV452964.1  | 224087  | 9-scf00337 | 9  |
| AX-158171840 | 16 | 49.772 | KV452964.1  | 225249  | 9-scf00337 | 9  |
| AX-157710949 | 16 | 49.772 | KV452964.1  | 226700  | 9-scf00337 | 9  |
| AX-157710699 | 16 | 49.772 | KV452964.1  | 227537  | 9-scf00337 | 9  |
| AX-158171841 | 16 | 49.772 | KV452964.1  | 229015  | 9-scf00337 | 9  |
| AX-158171844 | 16 | 49.772 | KV452964.1  | 234817  | 9-scf00337 | 9  |
| AX-158171845 | 16 | 49.772 | KV452964.1  | 236177  | 9-scf00337 | 9  |
| AX-158171847 | 16 | 49.772 | KV452964.1  | 240912  | 9-scf00337 | 9  |
| AX-157834830 | 16 | 49.772 | KV452964.1  | 242219  | 9-scf00337 | 9  |
| AX-158171848 | 16 | 49.772 | KV452964.1  | 242995  | 9-scf00337 | 9  |

|              |    |        |             |          |            |    |
|--------------|----|--------|-------------|----------|------------|----|
| AX-157834832 | 16 | 49.772 | KV452964.1  | 255660   | 9-scf00337 | 9  |
| AX-157717492 | 16 | 49.772 | KV452964.1  | 256278   | 9-scf00337 | 9  |
| AX-158171854 | 16 | 49.772 | KV452964.1  | 259327   | 9-scf00337 | 9  |
| AX-157834834 | 16 | 49.772 | KV452964.1  | 264140   | 9-scf00337 | 9  |
| AX-158171856 | 16 | 49.772 | KV452964.1  | 264607   | 9-scf00337 | 9  |
| AX-158171858 | 16 | 49.772 | KV452964.1  | 268295   | 9-scf00337 | 9  |
| AX-158171859 | 16 | 49.772 | KV452964.1  | 268672   | 9-scf00337 | 9  |
| AX-157775753 | 16 | 49.772 | KV452964.1  | 268742   | 9-scf00337 | 9  |
| AX-158171861 | 16 | 49.772 | KV452964.1  | 270659   | 9-scf00337 | 9  |
| AX-158171863 | 16 | 49.772 | KV452964.1  | 273413   | 9-scf00337 | 9  |
| AX-158171868 | 16 | 49.772 | KV452964.1  | 277453   | 9-scf00337 | 9  |
| AX-158171869 | 16 | 49.772 | KV452964.1  | 280933   | 9-scf00337 | 9  |
| AX-158171870 | 16 | 49.772 | KV452964.1  | 281211   | 9-scf00337 | 9  |
| AX-157751974 | 16 | 49.772 | KV452964.1  | 287711   | 9-scf00337 | 9  |
| AX-158171876 | 16 | 49.772 | KV452964.1  | 289608   | 9-scf00337 | 9  |
| AX-158171880 | 16 | 49.772 | KV452964.1  | 294688   | 9-scf00337 | 9  |
| AX-158171881 | 16 | 49.772 | KV452964.1  | 296187   | 9-scf00337 | 9  |
| AX-158171882 | 16 | 49.772 | KV452964.1  | 296669   | 9-scf00337 | 9  |
| AX-157754624 | 16 | 49.772 | KV452969.1  | 993259   | 9-scf00340 | 9  |
| AX-158172674 | 16 | 49.772 | KV452969.1  | 1455788  | 9-scf00340 | 9  |
| AX-158172807 | 16 | 49.772 | KV452969.1  | 1986496  | 9-scf00340 | 9  |
| AX-157878743 | 16 | 49.772 | KV452969.1  | 2849029  | 9-scf00340 | 9  |
| AX-158385928 | 16 | 49.772 | KV452969.1  | 10273017 | 9-scf00340 | 9  |
| AX-158171247 | 16 | 49.772 | KV452965.1  | 811725   | 9-scf00608 | 9  |
| AX-158171112 | 16 | 49.772 | KV452965.1  | 1089049  | 9-scf00608 | 9  |
| AX-157687654 | 16 | 49.772 | 3ML01025093 | 2368     | scf00961_1 | UN |
| AX-157687655 | 16 | 49.772 | 3ML01025093 | 3036     | scf00961_1 | UN |
| AX-157687660 | 16 | 49.772 | 3ML01025093 | 8671     | scf00961_1 | UN |
| AX-158170932 | 16 | 49.777 | KV452965.1  | 1556301  | 9-scf00608 | 9  |
| AX-158171733 | 16 | 49.781 | KV452964.1  | 58437    | 9-scf00337 | 9  |
| AX-158171779 | 16 | 49.781 | KV452964.1  | 108686   | 9-scf00337 | 9  |
| AX-158171971 | 16 | 49.781 | KV452966.1  | 181176   | 9-scf00338 | 9  |
| AX-158172441 | 16 | 49.781 | KV452969.1  | 923672   | 9-scf00340 | 9  |
| AX-157834896 | 16 | 49.781 | KV452969.1  | 1097768  | 9-scf00340 | 9  |
| AX-158172695 | 16 | 49.781 | KV452969.1  | 1486662  | 9-scf00340 | 9  |
| AX-158172703 | 16 | 49.781 | KV452969.1  | 1522915  | 9-scf00340 | 9  |
| AX-157835155 | 16 | 49.781 | KV452969.1  | 7020465  | 9-scf00340 | 9  |
| AX-158176401 | 16 | 49.781 | KV452969.1  | 7327840  | 9-scf00340 | 9  |
| AX-158171491 | 16 | 49.781 | KV452965.1  | 462576   | 9-scf00608 | 9  |
| AX-158171130 | 16 | 49.781 | KV452965.1  | 1054779  | 9-scf00608 | 9  |
| AX-158171077 | 16 | 49.781 | KV452965.1  | 1131535  | 9-scf00608 | 9  |
| AX-158170967 | 16 | 49.781 | KV452965.1  | 1375886  | 9-scf00608 | 9  |
| AX-158170963 | 16 | 49.781 | KV452965.1  | 1401713  | 9-scf00608 | 9  |
| AX-158170962 | 16 | 49.781 | KV452965.1  | 1407795  | 9-scf00608 | 9  |
| AX-158170900 | 16 | 49.781 | KV452965.1  | 1802046  | 9-scf00608 | 9  |
| AX-158170878 | 16 | 49.791 | KV452961.1  | 3638377  | 9-scf00334 | 9  |
| AX-157707985 | 16 | 49.791 | KV452964.1  | 225633   | 9-scf00337 | 9  |
| AX-157710950 | 16 | 49.791 | KV452964.1  | 226793   | 9-scf00337 | 9  |
| AX-158171843 | 16 | 49.791 | KV452964.1  | 231720   | 9-scf00337 | 9  |
| AX-158170996 | 16 | 49.791 | KV452965.1  | 1239935  | 9-scf00608 | 9  |
| AX-157687656 | 16 | 49.791 | 3ML01025093 | 3575     | scf00961_1 | UN |



|              |    |        |             |         |            |    |
|--------------|----|--------|-------------|---------|------------|----|
| AX-157681016 | 16 | 49.791 | 3ML01025093 | 3830    | scf00961_1 | UN |
| AX-157687657 | 16 | 49.791 | 3ML01025093 | 4542    | scf00961_1 | UN |
| AX-158171921 | 16 | 50.272 | KV452966.1  | 60556   | 9-scf00338 | 9  |
| AX-158171952 | 16 | 50.272 | KV452966.1  | 124510  | 9-scf00338 | 9  |
| AX-158172662 | 16 | 50.272 | KV452969.1  | 1430312 | 9-scf00340 | 9  |
| AX-158172829 | 16 | 50.272 | KV452969.1  | 2093665 | 9-scf00340 | 9  |
| AX-158172834 | 16 | 50.272 | KV452969.1  | 2112346 | 9-scf00340 | 9  |
| AX-157743663 | 16 | 50.272 | KV452969.1  | 2203958 | 9-scf00340 | 9  |
| AX-158172874 | 16 | 50.272 | KV452969.1  | 2214540 | 9-scf00340 | 9  |
| AX-158172892 | 16 | 50.272 | KV452969.1  | 2257149 | 9-scf00340 | 9  |
| AX-158171146 | 16 | 50.272 | KV452965.1  | 1024446 | 9-scf00608 | 9  |
| AX-158171105 | 16 | 50.272 | KV452965.1  | 1101871 | 9-scf00608 | 9  |
| AX-158171104 | 16 | 50.272 | KV452965.1  | 1103395 | 9-scf00608 | 9  |
| AX-158171082 | 16 | 50.272 | KV452965.1  | 1128192 | 9-scf00608 | 9  |
| AX-158171078 | 16 | 50.272 | KV452965.1  | 1130286 | 9-scf00608 | 9  |
| AX-158171076 | 16 | 50.272 | KV452965.1  | 1131788 | 9-scf00608 | 9  |
| AX-158171075 | 16 | 50.272 | KV452965.1  | 1132487 | 9-scf00608 | 9  |
| AX-158171073 | 16 | 50.272 | KV452965.1  | 1133764 | 9-scf00608 | 9  |
| AX-157705185 | 16 | 50.272 | KV452965.1  | 1138763 | 9-scf00608 | 9  |
| AX-158171065 | 16 | 50.272 | KV452965.1  | 1143336 | 9-scf00608 | 9  |
| AX-158171063 | 16 | 50.272 | KV452965.1  | 1145054 | 9-scf00608 | 9  |
| AX-157726636 | 16 | 50.272 | KV452965.1  | 1148155 | 9-scf00608 | 9  |
| AX-158403891 | 16 | 50.272 | KV452965.1  | 1149163 | 9-scf00608 | 9  |
| AX-158171057 | 16 | 50.272 | KV452965.1  | 1153637 | 9-scf00608 | 9  |
| AX-158171051 | 16 | 50.272 | KV452965.1  | 1160471 | 9-scf00608 | 9  |
| AX-158171048 | 16 | 50.272 | KV452965.1  | 1164817 | 9-scf00608 | 9  |
| AX-157718274 | 16 | 50.272 | KV452965.1  | 1166016 | 9-scf00608 | 9  |
| AX-158171042 | 16 | 50.272 | KV452965.1  | 1173720 | 9-scf00608 | 9  |
| AX-158409179 | 16 | 50.272 | KV452965.1  | 1176021 | 9-scf00608 | 9  |
| AX-158171039 | 16 | 50.272 | KV452965.1  | 1176247 | 9-scf00608 | 9  |
| AX-158171032 | 16 | 50.272 | KV452965.1  | 1179465 | 9-scf00608 | 9  |
| AX-157746711 | 16 | 50.272 | KV452965.1  | 1198160 | 9-scf00608 | 9  |
| AX-158170945 | 16 | 50.272 | KV452965.1  | 1473984 | 9-scf00608 | 9  |
| AX-158170937 | 16 | 50.272 | KV452965.1  | 1514538 | 9-scf00608 | 9  |
| AX-158170934 | 16 | 50.272 | KV452965.1  | 1545531 | 9-scf00608 | 9  |
| AX-157713329 | 16 | 50.353 | KV452966.1  | 8467    | 9-scf00338 | 9  |
| AX-158171944 | 16 | 50.353 | KV452966.1  | 98798   | 9-scf00338 | 9  |
| AX-158172609 | 16 | 50.353 | KV452969.1  | 1290620 | 9-scf00340 | 9  |
| AX-158172800 | 16 | 50.353 | KV452969.1  | 1979041 | 9-scf00340 | 9  |
| AX-158171421 | 16 | 50.353 | KV452965.1  | 574112  | 9-scf00608 | 9  |
| AX-158171387 | 16 | 50.353 | KV452965.1  | 611868  | 9-scf00608 | 9  |
| AX-158171259 | 16 | 50.353 | KV452965.1  | 780526  | 9-scf00608 | 9  |
| AX-158171246 | 16 | 50.353 | KV452965.1  | 812141  | 9-scf00608 | 9  |
| AX-158171133 | 16 | 50.353 | KV452965.1  | 1050986 | 9-scf00608 | 9  |
| AX-158171114 | 16 | 50.353 | KV452965.1  | 1078155 | 9-scf00608 | 9  |
| AX-158171109 | 16 | 50.353 | KV452965.1  | 1094939 | 9-scf00608 | 9  |
| AX-158171016 | 16 | 50.353 | KV452965.1  | 1194144 | 9-scf00608 | 9  |
| AX-158170998 | 16 | 50.353 | KV452965.1  | 1233610 | 9-scf00608 | 9  |
| AX-158170829 | 16 | 50.426 | KV452961.1  | 3575569 | 9-scf00334 | 9  |
| AX-157834828 | 16 | 50.426 | KV452964.1  | 186474  | 9-scf00337 | 9  |
| AX-157721495 | 16 | 50.426 | KV452966.1  | 99815   | 9-scf00338 | 9  |

|              |    |        |            |          |            |   |
|--------------|----|--------|------------|----------|------------|---|
| AX-158172746 | 16 | 50.426 | KV452969.1 | 1772197  | 9-scf00340 | 9 |
| AX-158172780 | 16 | 50.426 | KV452969.1 | 1937096  | 9-scf00340 | 9 |
| AX-158173040 | 16 | 50.426 | KV452969.1 | 2519731  | 9-scf00340 | 9 |
| AX-158171566 | 16 | 50.426 | KV452965.1 | 352461   | 9-scf00608 | 9 |
| AX-158171127 | 16 | 50.426 | KV452965.1 | 1057114  | 9-scf00608 | 9 |
| AX-158171126 | 16 | 50.426 | KV452965.1 | 1057718  | 9-scf00608 | 9 |
| AX-158171115 | 16 | 50.426 | KV452965.1 | 1071935  | 9-scf00608 | 9 |
| AX-158171711 | 16 | 50.427 | KV452964.1 | 24621    | 9-scf00337 | 9 |
| AX-158171719 | 16 | 50.427 | KV452964.1 | 39622    | 9-scf00337 | 9 |
| AX-157834833 | 16 | 50.427 | KV452964.1 | 258266   | 9-scf00337 | 9 |
| AX-158176374 | 16 | 50.427 | KV452969.1 | 7305009  | 9-scf00340 | 9 |
| AX-158177038 | 16 | 50.427 | KV452969.1 | 8131927  | 9-scf00340 | 9 |
| AX-158177040 | 16 | 50.427 | KV452969.1 | 8133463  | 9-scf00340 | 9 |
| AX-158177044 | 16 | 50.427 | KV452969.1 | 8135930  | 9-scf00340 | 9 |
| AX-157771659 | 16 | 50.427 | KV452969.1 | 10484328 | 9-scf00340 | 9 |
| AX-158171152 | 16 | 50.427 | KV452965.1 | 1006625  | 9-scf00608 | 9 |
| AX-158171144 | 16 | 50.427 | KV452965.1 | 1027086  | 9-scf00608 | 9 |
| AX-158171129 | 16 | 50.427 | KV452965.1 | 1056016  | 9-scf00608 | 9 |
| AX-158171160 | 16 | 50.428 | KV452965.1 | 985499   | 9-scf00608 | 9 |
| AX-158170513 | 16 | 50.429 | KV452961.1 | 3154402  | 9-scf00334 | 9 |
| AX-158170683 | 16 | 50.429 | KV452961.1 | 3381028  | 9-scf00334 | 9 |
| AX-158170832 | 16 | 50.429 | KV452961.1 | 3582913  | 9-scf00334 | 9 |
| AX-158170882 | 16 | 50.429 | KV452961.1 | 3644792  | 9-scf00334 | 9 |
| AX-158171700 | 16 | 50.429 | KV452964.1 | 280      | 9-scf00337 | 9 |
| AX-158171716 | 16 | 50.429 | KV452964.1 | 36073    | 9-scf00337 | 9 |
| AX-158171732 | 16 | 50.429 | KV452964.1 | 57969    | 9-scf00337 | 9 |
| AX-158171781 | 16 | 50.429 | KV452964.1 | 111896   | 9-scf00337 | 9 |
| AX-158171892 | 16 | 50.429 | KV452966.1 | 16502    | 9-scf00338 | 9 |
| AX-158171895 | 16 | 50.429 | KV452966.1 | 21627    | 9-scf00338 | 9 |
| AX-157715061 | 16 | 50.429 | KV452966.1 | 24060    | 9-scf00338 | 9 |
| AX-157834840 | 16 | 50.429 | KV452966.1 | 24275    | 9-scf00338 | 9 |
| AX-158171899 | 16 | 50.429 | KV452966.1 | 29853    | 9-scf00338 | 9 |
| AX-158171901 | 16 | 50.429 | KV452966.1 | 30574    | 9-scf00338 | 9 |
| AX-158171902 | 16 | 50.429 | KV452966.1 | 30916    | 9-scf00338 | 9 |
| AX-158171905 | 16 | 50.429 | KV452966.1 | 33173    | 9-scf00338 | 9 |
| AX-158171907 | 16 | 50.429 | KV452966.1 | 35817    | 9-scf00338 | 9 |
| AX-157834842 | 16 | 50.429 | KV452966.1 | 37982    | 9-scf00338 | 9 |
| AX-158171908 | 16 | 50.429 | KV452966.1 | 38598    | 9-scf00338 | 9 |
| AX-158171910 | 16 | 50.429 | KV452966.1 | 40861    | 9-scf00338 | 9 |
| AX-158171912 | 16 | 50.429 | KV452966.1 | 41455    | 9-scf00338 | 9 |
| AX-158171917 | 16 | 50.429 | KV452966.1 | 47617    | 9-scf00338 | 9 |
| AX-158171919 | 16 | 50.429 | KV452966.1 | 49470    | 9-scf00338 | 9 |
| AX-158171937 | 16 | 50.429 | KV452966.1 | 84829    | 9-scf00338 | 9 |
| AX-158171945 | 16 | 50.429 | KV452966.1 | 103508   | 9-scf00338 | 9 |
| AX-158380560 | 16 | 50.429 | KV452966.1 | 124573   | 9-scf00338 | 9 |
| AX-158171953 | 16 | 50.429 | KV452966.1 | 124950   | 9-scf00338 | 9 |
| AX-158172000 | 16 | 50.429 | KV452969.1 | 39476    | 9-scf00340 | 9 |
| AX-157724976 | 16 | 50.429 | KV452969.1 | 77492    | 9-scf00340 | 9 |
| AX-158172013 | 16 | 50.429 | KV452969.1 | 98811    | 9-scf00340 | 9 |
| AX-158172015 | 16 | 50.429 | KV452969.1 | 102989   | 9-scf00340 | 9 |
| AX-157743650 | 16 | 50.429 | KV452969.1 | 167799   | 9-scf00340 | 9 |

|              |    |        |            |        |            |   |
|--------------|----|--------|------------|--------|------------|---|
| AX-157834856 | 16 | 50.429 | KV452969.1 | 198167 | 9-scf00340 | 9 |
| AX-158172039 | 16 | 50.429 | KV452969.1 | 205569 | 9-scf00340 | 9 |
| AX-158172052 | 16 | 50.429 | KV452969.1 | 248005 | 9-scf00340 | 9 |
| AX-158172058 | 16 | 50.429 | KV452969.1 | 270263 | 9-scf00340 | 9 |
| AX-157878721 | 16 | 50.429 | KV452969.1 | 322297 | 9-scf00340 | 9 |
| AX-158172088 | 16 | 50.429 | KV452969.1 | 365072 | 9-scf00340 | 9 |
| AX-158172100 | 16 | 50.429 | KV452969.1 | 402857 | 9-scf00340 | 9 |
| AX-158172106 | 16 | 50.429 | KV452969.1 | 420138 | 9-scf00340 | 9 |
| AX-158172113 | 16 | 50.429 | KV452969.1 | 438075 | 9-scf00340 | 9 |
| AX-158172124 | 16 | 50.429 | KV452969.1 | 471238 | 9-scf00340 | 9 |
| AX-158172125 | 16 | 50.429 | KV452969.1 | 477203 | 9-scf00340 | 9 |
| AX-157746319 | 16 | 50.429 | KV452969.1 | 484828 | 9-scf00340 | 9 |
| AX-157834861 | 16 | 50.429 | KV452969.1 | 500167 | 9-scf00340 | 9 |
| AX-158172139 | 16 | 50.429 | KV452969.1 | 518357 | 9-scf00340 | 9 |
| AX-158172152 | 16 | 50.429 | KV452969.1 | 550395 | 9-scf00340 | 9 |
| AX-158172291 | 16 | 50.429 | KV452969.1 | 741345 | 9-scf00340 | 9 |
| AX-158172294 | 16 | 50.429 | KV452969.1 | 746733 | 9-scf00340 | 9 |
| AX-158172295 | 16 | 50.429 | KV452969.1 | 748347 | 9-scf00340 | 9 |
| AX-158172298 | 16 | 50.429 | KV452969.1 | 753482 | 9-scf00340 | 9 |
| AX-157723366 | 16 | 50.429 | KV452969.1 | 753897 | 9-scf00340 | 9 |
| AX-158172301 | 16 | 50.429 | KV452969.1 | 755182 | 9-scf00340 | 9 |
| AX-158172304 | 16 | 50.429 | KV452969.1 | 756814 | 9-scf00340 | 9 |
| AX-158172306 | 16 | 50.429 | KV452969.1 | 757224 | 9-scf00340 | 9 |
| AX-158172307 | 16 | 50.429 | KV452969.1 | 757514 | 9-scf00340 | 9 |
| AX-158172308 | 16 | 50.429 | KV452969.1 | 758806 | 9-scf00340 | 9 |
| AX-158172309 | 16 | 50.429 | KV452969.1 | 759059 | 9-scf00340 | 9 |
| AX-158172311 | 16 | 50.429 | KV452969.1 | 760271 | 9-scf00340 | 9 |
| AX-158385873 | 16 | 50.429 | KV452969.1 | 761510 | 9-scf00340 | 9 |
| AX-158172314 | 16 | 50.429 | KV452969.1 | 764748 | 9-scf00340 | 9 |
| AX-157725883 | 16 | 50.429 | KV452969.1 | 765172 | 9-scf00340 | 9 |
| AX-158172316 | 16 | 50.429 | KV452969.1 | 766062 | 9-scf00340 | 9 |
| AX-158172317 | 16 | 50.429 | KV452969.1 | 766528 | 9-scf00340 | 9 |
| AX-158393480 | 16 | 50.429 | KV452969.1 | 767824 | 9-scf00340 | 9 |
| AX-158172321 | 16 | 50.429 | KV452969.1 | 769278 | 9-scf00340 | 9 |
| AX-158172323 | 16 | 50.429 | KV452969.1 | 771207 | 9-scf00340 | 9 |
| AX-158172324 | 16 | 50.429 | KV452969.1 | 773230 | 9-scf00340 | 9 |
| AX-158172327 | 16 | 50.429 | KV452969.1 | 775836 | 9-scf00340 | 9 |
| AX-158172328 | 16 | 50.429 | KV452969.1 | 776482 | 9-scf00340 | 9 |
| AX-158172330 | 16 | 50.429 | KV452969.1 | 778877 | 9-scf00340 | 9 |
| AX-158172331 | 16 | 50.429 | KV452969.1 | 779923 | 9-scf00340 | 9 |
| AX-158172336 | 16 | 50.429 | KV452969.1 | 787787 | 9-scf00340 | 9 |
| AX-158172337 | 16 | 50.429 | KV452969.1 | 788286 | 9-scf00340 | 9 |
| AX-157858531 | 16 | 50.429 | KV452969.1 | 790826 | 9-scf00340 | 9 |
| AX-158172342 | 16 | 50.429 | KV452969.1 | 794404 | 9-scf00340 | 9 |
| AX-158172345 | 16 | 50.429 | KV452969.1 | 796405 | 9-scf00340 | 9 |
| AX-158172347 | 16 | 50.429 | KV452969.1 | 797498 | 9-scf00340 | 9 |
| AX-158413327 | 16 | 50.429 | KV452969.1 | 800494 | 9-scf00340 | 9 |
| AX-158172352 | 16 | 50.429 | KV452969.1 | 808576 | 9-scf00340 | 9 |
| AX-158172353 | 16 | 50.429 | KV452969.1 | 809781 | 9-scf00340 | 9 |
| AX-158172354 | 16 | 50.429 | KV452969.1 | 811077 | 9-scf00340 | 9 |
| AX-158172355 | 16 | 50.429 | KV452969.1 | 811433 | 9-scf00340 | 9 |

|              |    |        |            |        |            |   |
|--------------|----|--------|------------|--------|------------|---|
| AX-157858533 | 16 | 50.429 | KV452969.1 | 813267 | 9-scf00340 | 9 |
| AX-158172359 | 16 | 50.429 | KV452969.1 | 814465 | 9-scf00340 | 9 |
| AX-158172360 | 16 | 50.429 | KV452969.1 | 815019 | 9-scf00340 | 9 |
| AX-158172361 | 16 | 50.429 | KV452969.1 | 816179 | 9-scf00340 | 9 |
| AX-158172362 | 16 | 50.429 | KV452969.1 | 822533 | 9-scf00340 | 9 |
| AX-158172364 | 16 | 50.429 | KV452969.1 | 823933 | 9-scf00340 | 9 |
| AX-158172366 | 16 | 50.429 | KV452969.1 | 826213 | 9-scf00340 | 9 |
| AX-158172368 | 16 | 50.429 | KV452969.1 | 828232 | 9-scf00340 | 9 |
| AX-157858534 | 16 | 50.429 | KV452969.1 | 829095 | 9-scf00340 | 9 |
| AX-158172372 | 16 | 50.429 | KV452969.1 | 834732 | 9-scf00340 | 9 |
| AX-158172375 | 16 | 50.429 | KV452969.1 | 836973 | 9-scf00340 | 9 |
| AX-158172376 | 16 | 50.429 | KV452969.1 | 844938 | 9-scf00340 | 9 |
| AX-158172377 | 16 | 50.429 | KV452969.1 | 845823 | 9-scf00340 | 9 |
| AX-157755527 | 16 | 50.429 | KV452969.1 | 848835 | 9-scf00340 | 9 |
| AX-158172381 | 16 | 50.429 | KV452969.1 | 849786 | 9-scf00340 | 9 |
| AX-158172382 | 16 | 50.429 | KV452969.1 | 850636 | 9-scf00340 | 9 |
| AX-158172384 | 16 | 50.429 | KV452969.1 | 853652 | 9-scf00340 | 9 |
| AX-158172387 | 16 | 50.429 | KV452969.1 | 858697 | 9-scf00340 | 9 |
| AX-158172388 | 16 | 50.429 | KV452969.1 | 859129 | 9-scf00340 | 9 |
| AX-158172389 | 16 | 50.429 | KV452969.1 | 859921 | 9-scf00340 | 9 |
| AX-158172390 | 16 | 50.429 | KV452969.1 | 860895 | 9-scf00340 | 9 |
| AX-157858535 | 16 | 50.429 | KV452969.1 | 862432 | 9-scf00340 | 9 |
| AX-157741158 | 16 | 50.429 | KV452969.1 | 867348 | 9-scf00340 | 9 |
| AX-157871997 | 16 | 50.429 | KV452969.1 | 867678 | 9-scf00340 | 9 |
| AX-158172392 | 16 | 50.429 | KV452969.1 | 868397 | 9-scf00340 | 9 |
| AX-157871998 | 16 | 50.429 | KV452969.1 | 871080 | 9-scf00340 | 9 |
| AX-157866657 | 16 | 50.429 | KV452969.1 | 874025 | 9-scf00340 | 9 |
| AX-157871999 | 16 | 50.429 | KV452969.1 | 874275 | 9-scf00340 | 9 |
| AX-158172399 | 16 | 50.429 | KV452969.1 | 878058 | 9-scf00340 | 9 |
| AX-158172400 | 16 | 50.429 | KV452969.1 | 878579 | 9-scf00340 | 9 |
| AX-158172402 | 16 | 50.429 | KV452969.1 | 881860 | 9-scf00340 | 9 |
| AX-158172405 | 16 | 50.429 | KV452969.1 | 885826 | 9-scf00340 | 9 |
| AX-158172406 | 16 | 50.429 | KV452969.1 | 886762 | 9-scf00340 | 9 |
| AX-158172413 | 16 | 50.429 | KV452969.1 | 894066 | 9-scf00340 | 9 |
| AX-157757126 | 16 | 50.429 | KV452969.1 | 897020 | 9-scf00340 | 9 |
| AX-158172415 | 16 | 50.429 | KV452969.1 | 897997 | 9-scf00340 | 9 |
| AX-158172416 | 16 | 50.429 | KV452969.1 | 899102 | 9-scf00340 | 9 |
| AX-158172417 | 16 | 50.429 | KV452969.1 | 899842 | 9-scf00340 | 9 |
| AX-157858536 | 16 | 50.429 | KV452969.1 | 903257 | 9-scf00340 | 9 |
| AX-158393483 | 16 | 50.429 | KV452969.1 | 903565 | 9-scf00340 | 9 |
| AX-158172419 | 16 | 50.429 | KV452969.1 | 904007 | 9-scf00340 | 9 |
| AX-158172420 | 16 | 50.429 | KV452969.1 | 904860 | 9-scf00340 | 9 |
| AX-158172421 | 16 | 50.429 | KV452969.1 | 905464 | 9-scf00340 | 9 |
| AX-158393484 | 16 | 50.429 | KV452969.1 | 909442 | 9-scf00340 | 9 |
| AX-158172426 | 16 | 50.429 | KV452969.1 | 910065 | 9-scf00340 | 9 |
| AX-157770754 | 16 | 50.429 | KV452969.1 | 910565 | 9-scf00340 | 9 |
| AX-158172429 | 16 | 50.429 | KV452969.1 | 913101 | 9-scf00340 | 9 |
| AX-157718446 | 16 | 50.429 | KV452969.1 | 915499 | 9-scf00340 | 9 |
| AX-157886763 | 16 | 50.429 | KV452969.1 | 915853 | 9-scf00340 | 9 |
| AX-158172432 | 16 | 50.429 | KV452969.1 | 916085 | 9-scf00340 | 9 |
| AX-158172434 | 16 | 50.429 | KV452969.1 | 918141 | 9-scf00340 | 9 |

|              |    |        |            |          |            |   |
|--------------|----|--------|------------|----------|------------|---|
| AX-158380562 | 16 | 50.429 | KV452969.1 | 921154   | 9-scf00340 | 9 |
| AX-158172473 | 16 | 50.429 | KV452969.1 | 964634   | 9-scf00340 | 9 |
| AX-158172480 | 16 | 50.429 | KV452969.1 | 975517   | 9-scf00340 | 9 |
| AX-158172504 | 16 | 50.429 | KV452969.1 | 1033229  | 9-scf00340 | 9 |
| AX-158172537 | 16 | 50.429 | KV452969.1 | 1116080  | 9-scf00340 | 9 |
| AX-157834898 | 16 | 50.429 | KV452969.1 | 1123752  | 9-scf00340 | 9 |
| AX-158393485 | 16 | 50.429 | KV452969.1 | 1162279  | 9-scf00340 | 9 |
| AX-158172594 | 16 | 50.429 | KV452969.1 | 1236713  | 9-scf00340 | 9 |
| AX-158172598 | 16 | 50.429 | KV452969.1 | 1246084  | 9-scf00340 | 9 |
| AX-158172616 | 16 | 50.429 | KV452969.1 | 1297979  | 9-scf00340 | 9 |
| AX-158172618 | 16 | 50.429 | KV452969.1 | 1301945  | 9-scf00340 | 9 |
| AX-158172620 | 16 | 50.429 | KV452969.1 | 1303428  | 9-scf00340 | 9 |
| AX-158172621 | 16 | 50.429 | KV452969.1 | 1305047  | 9-scf00340 | 9 |
| AX-158172624 | 16 | 50.429 | KV452969.1 | 1316256  | 9-scf00340 | 9 |
| AX-158172649 | 16 | 50.429 | KV452969.1 | 1385064  | 9-scf00340 | 9 |
| AX-158172659 | 16 | 50.429 | KV452969.1 | 1417345  | 9-scf00340 | 9 |
| AX-158172715 | 16 | 50.429 | KV452969.1 | 1577088  | 9-scf00340 | 9 |
| AX-158172723 | 16 | 50.429 | KV452969.1 | 1600491  | 9-scf00340 | 9 |
| AX-158172739 | 16 | 50.429 | KV452969.1 | 1723277  | 9-scf00340 | 9 |
| AX-158172814 | 16 | 50.429 | KV452969.1 | 2022969  | 9-scf00340 | 9 |
| AX-158172815 | 16 | 50.429 | KV452969.1 | 2024598  | 9-scf00340 | 9 |
| AX-157725206 | 16 | 50.429 | KV452969.1 | 2048904  | 9-scf00340 | 9 |
| AX-158172823 | 16 | 50.429 | KV452969.1 | 2064852  | 9-scf00340 | 9 |
| AX-158172828 | 16 | 50.429 | KV452969.1 | 2090927  | 9-scf00340 | 9 |
| AX-158172836 | 16 | 50.429 | KV452969.1 | 2124261  | 9-scf00340 | 9 |
| AX-158172853 | 16 | 50.429 | KV452969.1 | 2166976  | 9-scf00340 | 9 |
| AX-158172937 | 16 | 50.429 | KV452969.1 | 2314323  | 9-scf00340 | 9 |
| AX-158175340 | 16 | 50.429 | KV452969.1 | 5607811  | 9-scf00340 | 9 |
| AX-158176439 | 16 | 50.429 | KV452969.1 | 7368538  | 9-scf00340 | 9 |
| AX-157835268 | 16 | 50.429 | KV452969.1 | 8304464  | 9-scf00340 | 9 |
| AX-158179003 | 16 | 50.429 | KV452969.1 | 10767835 | 9-scf00340 | 9 |
| AX-158377463 | 16 | 50.429 | KV452965.1 | 9543     | 9-scf00608 | 9 |
| AX-158377466 | 16 | 50.429 | KV452965.1 | 28470    | 9-scf00608 | 9 |
| AX-158377478 | 16 | 50.429 | KV452965.1 | 48420    | 9-scf00608 | 9 |
| AX-158377483 | 16 | 50.429 | KV452965.1 | 64116    | 9-scf00608 | 9 |
| AX-157748694 | 16 | 50.429 | KV452965.1 | 108900   | 9-scf00608 | 9 |
| AX-158377515 | 16 | 50.429 | KV452965.1 | 121817   | 9-scf00608 | 9 |
| AX-158377517 | 16 | 50.429 | KV452965.1 | 123149   | 9-scf00608 | 9 |
| AX-157680712 | 16 | 50.429 | KV452965.1 | 172884   | 9-scf00608 | 9 |
| AX-158171676 | 16 | 50.429 | KV452965.1 | 216522   | 9-scf00608 | 9 |
| AX-157739389 | 16 | 50.429 | KV452965.1 | 236479   | 9-scf00608 | 9 |
| AX-158171642 | 16 | 50.429 | KV452965.1 | 273753   | 9-scf00608 | 9 |
| AX-158171640 | 16 | 50.429 | KV452965.1 | 274405   | 9-scf00608 | 9 |
| AX-158171608 | 16 | 50.429 | KV452965.1 | 305564   | 9-scf00608 | 9 |
| AX-158171604 | 16 | 50.429 | KV452965.1 | 309891   | 9-scf00608 | 9 |
| AX-157727882 | 16 | 50.429 | KV452965.1 | 314149   | 9-scf00608 | 9 |
| AX-158171594 | 16 | 50.429 | KV452965.1 | 323326   | 9-scf00608 | 9 |
| AX-158171583 | 16 | 50.429 | KV452965.1 | 331568   | 9-scf00608 | 9 |
| AX-157742177 | 16 | 50.429 | KV452965.1 | 338700   | 9-scf00608 | 9 |
| AX-158171554 | 16 | 50.429 | KV452965.1 | 367503   | 9-scf00608 | 9 |
| AX-157744931 | 16 | 50.429 | KV452965.1 | 396790   | 9-scf00608 | 9 |

|              |    |        |            |        |            |   |
|--------------|----|--------|------------|--------|------------|---|
| AX-158171536 | 16 | 50.429 | KV452965.1 | 399076 | 9-scf00608 | 9 |
| AX-158171531 | 16 | 50.429 | KV452965.1 | 404938 | 9-scf00608 | 9 |
| AX-158171527 | 16 | 50.429 | KV452965.1 | 409280 | 9-scf00608 | 9 |
| AX-158171523 | 16 | 50.429 | KV452965.1 | 413543 | 9-scf00608 | 9 |
| AX-158171515 | 16 | 50.429 | KV452965.1 | 424036 | 9-scf00608 | 9 |
| AX-158171510 | 16 | 50.429 | KV452965.1 | 427639 | 9-scf00608 | 9 |
| AX-157754301 | 16 | 50.429 | KV452965.1 | 433784 | 9-scf00608 | 9 |
| AX-158171504 | 16 | 50.429 | KV452965.1 | 436371 | 9-scf00608 | 9 |
| AX-158171495 | 16 | 50.429 | KV452965.1 | 451079 | 9-scf00608 | 9 |
| AX-158171445 | 16 | 50.429 | KV452965.1 | 526236 | 9-scf00608 | 9 |
| AX-158385867 | 16 | 50.429 | KV452965.1 | 587011 | 9-scf00608 | 9 |
| AX-158171399 | 16 | 50.429 | KV452965.1 | 600826 | 9-scf00608 | 9 |
| AX-158171380 | 16 | 50.429 | KV452965.1 | 621602 | 9-scf00608 | 9 |
| AX-158171379 | 16 | 50.429 | KV452965.1 | 622237 | 9-scf00608 | 9 |
| AX-158171348 | 16 | 50.429 | KV452965.1 | 657045 | 9-scf00608 | 9 |
| AX-158171347 | 16 | 50.429 | KV452965.1 | 659249 | 9-scf00608 | 9 |
| AX-158171345 | 16 | 50.429 | KV452965.1 | 660792 | 9-scf00608 | 9 |
| AX-157725426 | 16 | 50.429 | KV452965.1 | 669918 | 9-scf00608 | 9 |
| AX-158171337 | 16 | 50.429 | KV452965.1 | 673535 | 9-scf00608 | 9 |
| AX-158171329 | 16 | 50.429 | KV452965.1 | 683993 | 9-scf00608 | 9 |
| AX-158171326 | 16 | 50.429 | KV452965.1 | 685517 | 9-scf00608 | 9 |
| AX-158171323 | 16 | 50.429 | KV452965.1 | 687437 | 9-scf00608 | 9 |
| AX-158171321 | 16 | 50.429 | KV452965.1 | 689258 | 9-scf00608 | 9 |
| AX-158171320 | 16 | 50.429 | KV452965.1 | 693557 | 9-scf00608 | 9 |
| AX-158171313 | 16 | 50.429 | KV452965.1 | 704146 | 9-scf00608 | 9 |
| AX-158171308 | 16 | 50.429 | KV452965.1 | 708840 | 9-scf00608 | 9 |
| AX-158171306 | 16 | 50.429 | KV452965.1 | 711643 | 9-scf00608 | 9 |
| AX-158171305 | 16 | 50.429 | KV452965.1 | 711714 | 9-scf00608 | 9 |
| AX-158171303 | 16 | 50.429 | KV452965.1 | 713350 | 9-scf00608 | 9 |
| AX-158171302 | 16 | 50.429 | KV452965.1 | 714090 | 9-scf00608 | 9 |
| AX-158171301 | 16 | 50.429 | KV452965.1 | 716059 | 9-scf00608 | 9 |
| AX-158171300 | 16 | 50.429 | KV452965.1 | 717046 | 9-scf00608 | 9 |
| AX-158171298 | 16 | 50.429 | KV452965.1 | 718681 | 9-scf00608 | 9 |
| AX-157726324 | 16 | 50.429 | KV452965.1 | 724247 | 9-scf00608 | 9 |
| AX-158171290 | 16 | 50.429 | KV452965.1 | 727763 | 9-scf00608 | 9 |
| AX-158171282 | 16 | 50.429 | KV452965.1 | 743093 | 9-scf00608 | 9 |
| AX-158171281 | 16 | 50.429 | KV452965.1 | 744084 | 9-scf00608 | 9 |
| AX-158171280 | 16 | 50.429 | KV452965.1 | 744494 | 9-scf00608 | 9 |
| AX-158171277 | 16 | 50.429 | KV452965.1 | 747374 | 9-scf00608 | 9 |
| AX-158171276 | 16 | 50.429 | KV452965.1 | 747891 | 9-scf00608 | 9 |
| AX-158171275 | 16 | 50.429 | KV452965.1 | 748397 | 9-scf00608 | 9 |
| AX-158171272 | 16 | 50.429 | KV452965.1 | 754374 | 9-scf00608 | 9 |
| AX-157724986 | 16 | 50.429 | KV452965.1 | 809905 | 9-scf00608 | 9 |
| AX-158171243 | 16 | 50.429 | KV452965.1 | 814977 | 9-scf00608 | 9 |
| AX-158171242 | 16 | 50.429 | KV452965.1 | 816184 | 9-scf00608 | 9 |
| AX-158171241 | 16 | 50.429 | KV452965.1 | 817252 | 9-scf00608 | 9 |
| AX-158171239 | 16 | 50.429 | KV452965.1 | 818160 | 9-scf00608 | 9 |
| AX-158171236 | 16 | 50.429 | KV452965.1 | 819606 | 9-scf00608 | 9 |
| AX-158171230 | 16 | 50.429 | KV452965.1 | 824050 | 9-scf00608 | 9 |
| AX-158417990 | 16 | 50.429 | KV452965.1 | 826502 | 9-scf00608 | 9 |
| AX-158171228 | 16 | 50.429 | KV452965.1 | 828069 | 9-scf00608 | 9 |

|              |    |        |            |         |            |    |
|--------------|----|--------|------------|---------|------------|----|
| AX-158171225 | 16 | 50.429 | KV452965.1 | 830502  | 9-scf00608 | 9  |
| AX-158171224 | 16 | 50.429 | KV452965.1 | 832254  | 9-scf00608 | 9  |
| AX-157858508 | 16 | 50.429 | KV452965.1 | 832520  | 9-scf00608 | 9  |
| AX-158171223 | 16 | 50.429 | KV452965.1 | 833631  | 9-scf00608 | 9  |
| AX-158171220 | 16 | 50.429 | KV452965.1 | 838631  | 9-scf00608 | 9  |
| AX-158171219 | 16 | 50.429 | KV452965.1 | 842328  | 9-scf00608 | 9  |
| AX-158171218 | 16 | 50.429 | KV452965.1 | 846925  | 9-scf00608 | 9  |
| AX-158171217 | 16 | 50.429 | KV452965.1 | 851100  | 9-scf00608 | 9  |
| AX-158171215 | 16 | 50.429 | KV452965.1 | 851984  | 9-scf00608 | 9  |
| AX-158171214 | 16 | 50.429 | KV452965.1 | 852841  | 9-scf00608 | 9  |
| AX-158171211 | 16 | 50.429 | KV452965.1 | 856145  | 9-scf00608 | 9  |
| AX-158171210 | 16 | 50.429 | KV452965.1 | 858598  | 9-scf00608 | 9  |
| AX-158171208 | 16 | 50.429 | KV452965.1 | 862838  | 9-scf00608 | 9  |
| AX-158171207 | 16 | 50.429 | KV452965.1 | 866513  | 9-scf00608 | 9  |
| AX-158171206 | 16 | 50.429 | KV452965.1 | 876181  | 9-scf00608 | 9  |
| AX-158171205 | 16 | 50.429 | KV452965.1 | 879841  | 9-scf00608 | 9  |
| AX-157858507 | 16 | 50.429 | KV452965.1 | 880021  | 9-scf00608 | 9  |
| AX-157719039 | 16 | 50.429 | KV452965.1 | 883037  | 9-scf00608 | 9  |
| AX-158171202 | 16 | 50.429 | KV452965.1 | 893932  | 9-scf00608 | 9  |
| AX-158171201 | 16 | 50.429 | KV452965.1 | 896825  | 9-scf00608 | 9  |
| AX-158171199 | 16 | 50.429 | KV452965.1 | 899617  | 9-scf00608 | 9  |
| AX-157717407 | 16 | 50.429 | KV452965.1 | 903381  | 9-scf00608 | 9  |
| AX-158171197 | 16 | 50.429 | KV452965.1 | 906512  | 9-scf00608 | 9  |
| AX-158171192 | 16 | 50.429 | KV452965.1 | 916291  | 9-scf00608 | 9  |
| AX-157858506 | 16 | 50.429 | KV452965.1 | 918982  | 9-scf00608 | 9  |
| AX-157749464 | 16 | 50.429 | KV452965.1 | 922772  | 9-scf00608 | 9  |
| AX-158171188 | 16 | 50.429 | KV452965.1 | 929510  | 9-scf00608 | 9  |
| AX-158171187 | 16 | 50.429 | KV452965.1 | 932615  | 9-scf00608 | 9  |
| AX-158171186 | 16 | 50.429 | KV452965.1 | 933705  | 9-scf00608 | 9  |
| AX-158171180 | 16 | 50.429 | KV452965.1 | 950963  | 9-scf00608 | 9  |
| AX-158171175 | 16 | 50.429 | KV452965.1 | 958083  | 9-scf00608 | 9  |
| AX-158171162 | 16 | 50.429 | KV452965.1 | 984398  | 9-scf00608 | 9  |
| AX-157858504 | 16 | 50.429 | KV452965.1 | 987396  | 9-scf00608 | 9  |
| AX-158171140 | 16 | 50.429 | KV452965.1 | 1041865 | 9-scf00608 | 9  |
| AX-158171102 | 16 | 50.429 | KV452965.1 | 1109204 | 9-scf00608 | 9  |
| AX-158171050 | 16 | 50.429 | KV452965.1 | 1162012 | 9-scf00608 | 9  |
| AX-158378111 | 16 | 50.429 | KV452967.1 | 39959   | 9-scf00672 | 9  |
| AX-157686186 | 16 | 50.429 | KV453387.1 | 25749   | scf00677   | UN |
| AX-158171743 | 16 | 50.591 | KV452964.1 | 65794   | 9-scf00337 | 9  |
| AX-158171884 | 16 | 50.591 | KV452966.1 | 2670    | 9-scf00338 | 9  |
| AX-157834841 | 16 | 50.591 | KV452966.1 | 26980   | 9-scf00338 | 9  |
| AX-158172468 | 16 | 50.591 | KV452969.1 | 960054  | 9-scf00340 | 9  |
| AX-158172472 | 16 | 50.591 | KV452969.1 | 963631  | 9-scf00340 | 9  |
| AX-158172474 | 16 | 50.591 | KV452969.1 | 965517  | 9-scf00340 | 9  |
| AX-158172475 | 16 | 50.591 | KV452969.1 | 965922  | 9-scf00340 | 9  |
| AX-158172476 | 16 | 50.591 | KV452969.1 | 966715  | 9-scf00340 | 9  |
| AX-158172631 | 16 | 50.591 | KV452969.1 | 1329233 | 9-scf00340 | 9  |
| AX-157878731 | 16 | 50.591 | KV452969.1 | 1358465 | 9-scf00340 | 9  |
| AX-158172651 | 16 | 50.591 | KV452969.1 | 1389090 | 9-scf00340 | 9  |
| AX-158172652 | 16 | 50.591 | KV452969.1 | 1393232 | 9-scf00340 | 9  |
| AX-158172887 | 16 | 50.591 | KV452969.1 | 2250375 | 9-scf00340 | 9  |

|              |    |        |            |         |            |   |
|--------------|----|--------|------------|---------|------------|---|
| AX-158171168 | 16 | 50.591 | KV452965.1 | 972898  | 9-scf00608 | 9 |
| AX-158171136 | 16 | 50.591 | KV452965.1 | 1048638 | 9-scf00608 | 9 |
| AX-158171121 | 16 | 50.591 | KV452965.1 | 1062784 | 9-scf00608 | 9 |
| AX-158171707 | 16 | 50.648 | KV452964.1 | 17077   | 9-scf00337 | 9 |
| AX-157751446 | 16 | 50.648 | KV452964.1 | 28588   | 9-scf00337 | 9 |
| AX-158171714 | 16 | 50.648 | KV452964.1 | 32006   | 9-scf00337 | 9 |
| AX-158171717 | 16 | 50.648 | KV452964.1 | 37034   | 9-scf00337 | 9 |
| AX-158171722 | 16 | 50.648 | KV452964.1 | 43723   | 9-scf00337 | 9 |
| AX-158171888 | 16 | 50.648 | KV452966.1 | 6507    | 9-scf00338 | 9 |
| AX-158171893 | 16 | 50.648 | KV452966.1 | 18764   | 9-scf00338 | 9 |
| AX-158171894 | 16 | 50.648 | KV452966.1 | 19858   | 9-scf00338 | 9 |
| AX-158171898 | 16 | 50.648 | KV452966.1 | 28956   | 9-scf00338 | 9 |
| AX-158171900 | 16 | 50.648 | KV452966.1 | 30134   | 9-scf00338 | 9 |
| AX-158171911 | 16 | 50.648 | KV452966.1 | 41101   | 9-scf00338 | 9 |
| AX-158171918 | 16 | 50.648 | KV452966.1 | 48534   | 9-scf00338 | 9 |
| AX-158171928 | 16 | 50.648 | KV452966.1 | 73670   | 9-scf00338 | 9 |
| AX-158171933 | 16 | 50.648 | KV452966.1 | 79767   | 9-scf00338 | 9 |
| AX-158171934 | 16 | 50.648 | KV452966.1 | 80241   | 9-scf00338 | 9 |
| AX-158171936 | 16 | 50.648 | KV452966.1 | 84182   | 9-scf00338 | 9 |
| AX-157713479 | 16 | 50.648 | KV452966.1 | 94082   | 9-scf00338 | 9 |
| AX-157834844 | 16 | 50.648 | KV452966.1 | 95434   | 9-scf00338 | 9 |
| AX-157834845 | 16 | 50.648 | KV452966.1 | 98340   | 9-scf00338 | 9 |
| AX-158171947 | 16 | 50.648 | KV452966.1 | 105750  | 9-scf00338 | 9 |
| AX-158171948 | 16 | 50.648 | KV452966.1 | 106888  | 9-scf00338 | 9 |
| AX-158171950 | 16 | 50.648 | KV452966.1 | 109289  | 9-scf00338 | 9 |
| AX-157834846 | 16 | 50.648 | KV452966.1 | 110174  | 9-scf00338 | 9 |
| AX-158171951 | 16 | 50.648 | KV452966.1 | 117175  | 9-scf00338 | 9 |
| AX-158172290 | 16 | 50.648 | KV452969.1 | 739854  | 9-scf00340 | 9 |
| AX-158172293 | 16 | 50.648 | KV452969.1 | 746049  | 9-scf00340 | 9 |
| AX-158172296 | 16 | 50.648 | KV452969.1 | 750392  | 9-scf00340 | 9 |
| AX-158172300 | 16 | 50.648 | KV452969.1 | 754931  | 9-scf00340 | 9 |
| AX-158172312 | 16 | 50.648 | KV452969.1 | 762003  | 9-scf00340 | 9 |
| AX-158172318 | 16 | 50.648 | KV452969.1 | 766971  | 9-scf00340 | 9 |
| AX-158172356 | 16 | 50.648 | KV452969.1 | 812792  | 9-scf00340 | 9 |
| AX-158172358 | 16 | 50.648 | KV452969.1 | 813996  | 9-scf00340 | 9 |
| AX-158172378 | 16 | 50.648 | KV452969.1 | 846185  | 9-scf00340 | 9 |
| AX-158172467 | 16 | 50.648 | KV452969.1 | 959001  | 9-scf00340 | 9 |
| AX-158172605 | 16 | 50.648 | KV452969.1 | 1282287 | 9-scf00340 | 9 |
| AX-158172606 | 16 | 50.648 | KV452969.1 | 1283597 | 9-scf00340 | 9 |
| AX-157878732 | 16 | 50.648 | KV452969.1 | 1378666 | 9-scf00340 | 9 |
| AX-158172658 | 16 | 50.648 | KV452969.1 | 1415672 | 9-scf00340 | 9 |
| AX-158172676 | 16 | 50.648 | KV452969.1 | 1460262 | 9-scf00340 | 9 |
| AX-158172688 | 16 | 50.648 | KV452969.1 | 1475565 | 9-scf00340 | 9 |
| AX-158172690 | 16 | 50.648 | KV452969.1 | 1478665 | 9-scf00340 | 9 |
| AX-158172691 | 16 | 50.648 | KV452969.1 | 1479534 | 9-scf00340 | 9 |
| AX-158172692 | 16 | 50.648 | KV452969.1 | 1481880 | 9-scf00340 | 9 |
| AX-158172696 | 16 | 50.648 | KV452969.1 | 1487229 | 9-scf00340 | 9 |
| AX-158172699 | 16 | 50.648 | KV452969.1 | 1489033 | 9-scf00340 | 9 |
| AX-158172700 | 16 | 50.648 | KV452969.1 | 1491582 | 9-scf00340 | 9 |
| AX-158172702 | 16 | 50.648 | KV452969.1 | 1497270 | 9-scf00340 | 9 |
| AX-157759047 | 16 | 50.648 | KV452969.1 | 1526167 | 9-scf00340 | 9 |



|              |    |        |            |         |            |   |
|--------------|----|--------|------------|---------|------------|---|
| AX-158172717 | 16 | 50.648 | KV452969.1 | 1580926 | 9-scf00340 | 9 |
| AX-158172732 | 16 | 50.648 | KV452969.1 | 1661834 | 9-scf00340 | 9 |
| AX-158172832 | 16 | 50.648 | KV452969.1 | 2099871 | 9-scf00340 | 9 |
| AX-157752712 | 16 | 50.648 | KV452965.1 | 379050  | 9-scf00608 | 9 |
| AX-158171263 | 16 | 50.648 | KV452965.1 | 770777  | 9-scf00608 | 9 |
| AX-157756127 | 16 | 50.648 | KV452965.1 | 848341  | 9-scf00608 | 9 |
| AX-158171161 | 16 | 50.648 | KV452965.1 | 984971  | 9-scf00608 | 9 |
| AX-158171134 | 16 | 50.648 | KV452965.1 | 1050003 | 9-scf00608 | 9 |
| AX-158171124 | 16 | 50.648 | KV452965.1 | 1059630 | 9-scf00608 | 9 |
| AX-158171709 | 16 | 50.749 | KV452964.1 | 23447   | 9-scf00337 | 9 |
| AX-158172098 | 16 | 50.866 | KV452969.1 | 398921  | 9-scf00340 | 9 |
| AX-158172132 | 16 | 50.866 | KV452969.1 | 490402  | 9-scf00340 | 9 |
| AX-158172177 | 16 | 50.866 | KV452969.1 | 579264  | 9-scf00340 | 9 |
| AX-158172232 | 16 | 50.866 | KV452969.1 | 660936  | 9-scf00340 | 9 |
| AX-157834871 | 16 | 50.866 | KV452969.1 | 660978  | 9-scf00340 | 9 |
| AX-158172288 | 16 | 50.866 | KV452969.1 | 739325  | 9-scf00340 | 9 |
| AX-158172292 | 16 | 50.866 | KV452969.1 | 742145  | 9-scf00340 | 9 |
| AX-158393481 | 16 | 50.866 | KV452969.1 | 777809  | 9-scf00340 | 9 |
| AX-158393482 | 16 | 50.866 | KV452969.1 | 797331  | 9-scf00340 | 9 |
| AX-158172391 | 16 | 50.866 | KV452969.1 | 866291  | 9-scf00340 | 9 |
| AX-158172394 | 16 | 50.866 | KV452969.1 | 871274  | 9-scf00340 | 9 |
| AX-158172401 | 16 | 50.866 | KV452969.1 | 879842  | 9-scf00340 | 9 |
| AX-158172404 | 16 | 50.866 | KV452969.1 | 884841  | 9-scf00340 | 9 |
| AX-158172410 | 16 | 50.866 | KV452969.1 | 891955  | 9-scf00340 | 9 |
| AX-157886762 | 16 | 50.866 | KV452969.1 | 901863  | 9-scf00340 | 9 |
| AX-158172430 | 16 | 50.866 | KV452969.1 | 913630  | 9-scf00340 | 9 |
| AX-157719836 | 16 | 50.866 | KV452965.1 | 670417  | 9-scf00608 | 9 |
| AX-158172443 | 16 | 50.88  | KV452969.1 | 927852  | 9-scf00340 | 9 |
| AX-158172470 | 16 | 50.907 | KV452969.1 | 962442  | 9-scf00340 | 9 |
| AX-158172486 | 16 | 50.939 | KV452969.1 | 989428  | 9-scf00340 | 9 |
| AX-158172510 | 16 | 50.939 | KV452969.1 | 1044460 | 9-scf00340 | 9 |
| AX-157886765 | 16 | 50.939 | KV452969.1 | 1045264 | 9-scf00340 | 9 |
| AX-158172425 | 16 | 50.976 | KV452969.1 | 907894  | 9-scf00340 | 9 |
| AX-158172428 | 16 | 50.976 | KV452969.1 | 911869  | 9-scf00340 | 9 |
| AX-158172431 | 16 | 50.976 | KV452969.1 | 914614  | 9-scf00340 | 9 |
| AX-158172536 | 16 | 50.976 | KV452969.1 | 1111334 | 9-scf00340 | 9 |
| AX-158172539 | 16 | 50.976 | KV452969.1 | 1120817 | 9-scf00340 | 9 |
| AX-158172540 | 16 | 50.976 | KV452969.1 | 1121677 | 9-scf00340 | 9 |
| AX-158172541 | 16 | 50.976 | KV452969.1 | 1121999 | 9-scf00340 | 9 |
| AX-158172542 | 16 | 50.976 | KV452969.1 | 1122321 | 9-scf00340 | 9 |
| AX-157834899 | 16 | 50.976 | KV452969.1 | 1128730 | 9-scf00340 | 9 |
| AX-158172543 | 16 | 50.976 | KV452969.1 | 1138185 | 9-scf00340 | 9 |
| AX-157834900 | 16 | 50.976 | KV452969.1 | 1162590 | 9-scf00340 | 9 |
| AX-158172545 | 16 | 50.976 | KV452969.1 | 1162986 | 9-scf00340 | 9 |
| AX-158172547 | 16 | 50.976 | KV452969.1 | 1164731 | 9-scf00340 | 9 |
| AX-158172551 | 16 | 50.976 | KV452969.1 | 1167726 | 9-scf00340 | 9 |
| AX-158172554 | 16 | 50.976 | KV452969.1 | 1170865 | 9-scf00340 | 9 |
| AX-158172557 | 16 | 50.976 | KV452969.1 | 1174313 | 9-scf00340 | 9 |
| AX-157858541 | 16 | 50.976 | KV452969.1 | 1176961 | 9-scf00340 | 9 |
| AX-158172558 | 16 | 50.976 | KV452969.1 | 1177147 | 9-scf00340 | 9 |
| AX-158172564 | 16 | 50.976 | KV452969.1 | 1181008 | 9-scf00340 | 9 |

|              |    |        |            |         |            |   |
|--------------|----|--------|------------|---------|------------|---|
| AX-158172565 | 16 | 50.976 | KV452969.1 | 1183323 | 9-scf00340 | 9 |
| AX-157834902 | 16 | 50.976 | KV452969.1 | 1185829 | 9-scf00340 | 9 |
| AX-158172571 | 16 | 50.976 | KV452969.1 | 1190511 | 9-scf00340 | 9 |
| AX-158172582 | 16 | 50.976 | KV452969.1 | 1207906 | 9-scf00340 | 9 |
| AX-158172584 | 16 | 50.976 | KV452969.1 | 1210141 | 9-scf00340 | 9 |
| AX-158172592 | 16 | 50.976 | KV452969.1 | 1232833 | 9-scf00340 | 9 |
| AX-158413330 | 16 | 50.976 | KV452969.1 | 1238125 | 9-scf00340 | 9 |
| AX-158172595 | 16 | 50.976 | KV452969.1 | 1242479 | 9-scf00340 | 9 |
| AX-158172596 | 16 | 50.976 | KV452969.1 | 1243033 | 9-scf00340 | 9 |
| AX-158172608 | 16 | 50.976 | KV452969.1 | 1289683 | 9-scf00340 | 9 |
| AX-158172610 | 16 | 50.976 | KV452969.1 | 1291128 | 9-scf00340 | 9 |
| AX-158172611 | 16 | 50.976 | KV452969.1 | 1291538 | 9-scf00340 | 9 |
| AX-158172612 | 16 | 50.976 | KV452969.1 | 1292265 | 9-scf00340 | 9 |
| AX-158172613 | 16 | 50.976 | KV452969.1 | 1292994 | 9-scf00340 | 9 |
| AX-158172614 | 16 | 50.976 | KV452969.1 | 1294383 | 9-scf00340 | 9 |
| AX-158172622 | 16 | 50.976 | KV452969.1 | 1308307 | 9-scf00340 | 9 |
| AX-158172642 | 16 | 50.976 | KV452969.1 | 1361351 | 9-scf00340 | 9 |
| AX-158172644 | 16 | 50.976 | KV452969.1 | 1370137 | 9-scf00340 | 9 |
| AX-158172650 | 16 | 50.976 | KV452969.1 | 1387306 | 9-scf00340 | 9 |
| AX-158172678 | 16 | 50.976 | KV452969.1 | 1464166 | 9-scf00340 | 9 |
| AX-158172679 | 16 | 50.976 | KV452969.1 | 1464745 | 9-scf00340 | 9 |
| AX-158172680 | 16 | 50.976 | KV452969.1 | 1465192 | 9-scf00340 | 9 |
| AX-158172681 | 16 | 50.976 | KV452969.1 | 1465728 | 9-scf00340 | 9 |
| AX-158172682 | 16 | 50.976 | KV452969.1 | 1466223 | 9-scf00340 | 9 |
| AX-158172683 | 16 | 50.976 | KV452969.1 | 1466799 | 9-scf00340 | 9 |
| AX-158172684 | 16 | 50.976 | KV452969.1 | 1470795 | 9-scf00340 | 9 |
| AX-158172685 | 16 | 50.976 | KV452969.1 | 1472722 | 9-scf00340 | 9 |
| AX-158172686 | 16 | 50.976 | KV452969.1 | 1473759 | 9-scf00340 | 9 |
| AX-158172687 | 16 | 50.976 | KV452969.1 | 1474147 | 9-scf00340 | 9 |
| AX-158172689 | 16 | 50.976 | KV452969.1 | 1475852 | 9-scf00340 | 9 |
| AX-158172697 | 16 | 50.976 | KV452969.1 | 1487554 | 9-scf00340 | 9 |
| AX-157748113 | 16 | 50.976 | KV452969.1 | 1510666 | 9-scf00340 | 9 |
| AX-158413333 | 16 | 50.976 | KV452969.1 | 1515887 | 9-scf00340 | 9 |
| AX-158172705 | 16 | 50.976 | KV452969.1 | 1532109 | 9-scf00340 | 9 |
| AX-158172710 | 16 | 50.976 | KV452969.1 | 1556626 | 9-scf00340 | 9 |
| AX-158172714 | 16 | 50.976 | KV452969.1 | 1572096 | 9-scf00340 | 9 |
| AX-158172721 | 16 | 50.976 | KV452969.1 | 1593720 | 9-scf00340 | 9 |
| AX-158172725 | 16 | 50.976 | KV452969.1 | 1620331 | 9-scf00340 | 9 |
| AX-158172726 | 16 | 50.976 | KV452969.1 | 1626157 | 9-scf00340 | 9 |
| AX-158172729 | 16 | 50.976 | KV452969.1 | 1642705 | 9-scf00340 | 9 |
| AX-158172733 | 16 | 50.976 | KV452969.1 | 1679141 | 9-scf00340 | 9 |
| AX-158413337 | 16 | 50.976 | KV452969.1 | 1736074 | 9-scf00340 | 9 |
| AX-157858545 | 16 | 50.976 | KV452969.1 | 1888662 | 9-scf00340 | 9 |
| AX-158172775 | 16 | 50.976 | KV452969.1 | 1925491 | 9-scf00340 | 9 |
| AX-157858546 | 16 | 50.976 | KV452969.1 | 1978831 | 9-scf00340 | 9 |
| AX-158172805 | 16 | 50.976 | KV452969.1 | 1983319 | 9-scf00340 | 9 |
| AX-158172806 | 16 | 50.976 | KV452969.1 | 1985843 | 9-scf00340 | 9 |
| AX-157834910 | 16 | 50.976 | KV452969.1 | 2012790 | 9-scf00340 | 9 |
| AX-158172811 | 16 | 50.976 | KV452969.1 | 2013745 | 9-scf00340 | 9 |
| AX-158172825 | 16 | 50.976 | KV452969.1 | 2078368 | 9-scf00340 | 9 |
| AX-157834913 | 16 | 50.976 | KV452969.1 | 2090122 | 9-scf00340 | 9 |

|              |    |        |            |         |            |   |
|--------------|----|--------|------------|---------|------------|---|
| AX-157834914 | 16 | 50.976 | KV452969.1 | 2093417 | 9-scf00340 | 9 |
| AX-158172831 | 16 | 50.976 | KV452969.1 | 2098904 | 9-scf00340 | 9 |
| AX-158172837 | 16 | 50.976 | KV452969.1 | 2127319 | 9-scf00340 | 9 |
| AX-158172838 | 16 | 50.976 | KV452969.1 | 2131764 | 9-scf00340 | 9 |
| AX-158172839 | 16 | 50.976 | KV452969.1 | 2131981 | 9-scf00340 | 9 |
| AX-158172840 | 16 | 50.976 | KV452969.1 | 2132655 | 9-scf00340 | 9 |
| AX-158172841 | 16 | 50.976 | KV452969.1 | 2132866 | 9-scf00340 | 9 |
| AX-157775224 | 16 | 50.976 | KV452969.1 | 2139312 | 9-scf00340 | 9 |
| AX-158172846 | 16 | 50.976 | KV452969.1 | 2149949 | 9-scf00340 | 9 |
| AX-158172851 | 16 | 50.976 | KV452969.1 | 2164377 | 9-scf00340 | 9 |
| AX-158172852 | 16 | 50.976 | KV452969.1 | 2166436 | 9-scf00340 | 9 |
| AX-158172854 | 16 | 50.976 | KV452969.1 | 2167797 | 9-scf00340 | 9 |
| AX-158172855 | 16 | 50.976 | KV452969.1 | 2169395 | 9-scf00340 | 9 |
| AX-158172856 | 16 | 50.976 | KV452969.1 | 2173455 | 9-scf00340 | 9 |
| AX-158172857 | 16 | 50.976 | KV452969.1 | 2175337 | 9-scf00340 | 9 |
| AX-158172859 | 16 | 50.976 | KV452969.1 | 2179430 | 9-scf00340 | 9 |
| AX-158172866 | 16 | 50.976 | KV452969.1 | 2199221 | 9-scf00340 | 9 |
| AX-158172867 | 16 | 50.976 | KV452969.1 | 2201086 | 9-scf00340 | 9 |
| AX-158172868 | 16 | 50.976 | KV452969.1 | 2201675 | 9-scf00340 | 9 |
| AX-158172879 | 16 | 50.976 | KV452969.1 | 2222873 | 9-scf00340 | 9 |
| AX-158172950 | 16 | 50.976 | KV452969.1 | 2349756 | 9-scf00340 | 9 |
| AX-158172965 | 16 | 50.976 | KV452969.1 | 2370221 | 9-scf00340 | 9 |
| AX-158171296 | 16 | 50.976 | KV452965.1 | 720733  | 9-scf00608 | 9 |
| AX-158171248 | 16 | 50.976 | KV452965.1 | 807668  | 9-scf00608 | 9 |
| AX-157834785 | 16 | 50.976 | KV452965.1 | 905148  | 9-scf00608 | 9 |
| AX-158171190 | 16 | 50.976 | KV452965.1 | 927242  | 9-scf00608 | 9 |
| AX-158171135 | 16 | 50.976 | KV452965.1 | 1049601 | 9-scf00608 | 9 |
| AX-158172706 | 16 | 51.194 | KV452969.1 | 1535545 | 9-scf00340 | 9 |
| AX-158172708 | 16 | 51.194 | KV452969.1 | 1543671 | 9-scf00340 | 9 |
| AX-158172709 | 16 | 51.194 | KV452969.1 | 1544162 | 9-scf00340 | 9 |
| AX-158172869 | 16 | 51.194 | KV452969.1 | 2203685 | 9-scf00340 | 9 |
| AX-158172870 | 16 | 51.194 | KV452969.1 | 2208403 | 9-scf00340 | 9 |
| AX-158172871 | 16 | 51.194 | KV452969.1 | 2208769 | 9-scf00340 | 9 |
| AX-158172872 | 16 | 51.194 | KV452969.1 | 2209166 | 9-scf00340 | 9 |
| AX-158172882 | 16 | 51.194 | KV452969.1 | 2237095 | 9-scf00340 | 9 |
| AX-158172886 | 16 | 51.194 | KV452969.1 | 2247562 | 9-scf00340 | 9 |
| AX-158172888 | 16 | 51.194 | KV452969.1 | 2255025 | 9-scf00340 | 9 |
| AX-158172889 | 16 | 51.194 | KV452969.1 | 2255384 | 9-scf00340 | 9 |
| AX-157834916 | 16 | 51.194 | KV452969.1 | 2261461 | 9-scf00340 | 9 |
| AX-158172897 | 16 | 51.194 | KV452969.1 | 2270450 | 9-scf00340 | 9 |
| AX-157744292 | 16 | 51.194 | KV452969.1 | 2272615 | 9-scf00340 | 9 |
| AX-158172900 | 16 | 51.194 | KV452969.1 | 2274586 | 9-scf00340 | 9 |
| AX-158172901 | 16 | 51.194 | KV452969.1 | 2275114 | 9-scf00340 | 9 |
| AX-158172905 | 16 | 51.245 | KV452969.1 | 2278388 | 9-scf00340 | 9 |
| AX-158172935 | 16 | 51.245 | KV452969.1 | 2308824 | 9-scf00340 | 9 |
| AX-158172914 | 16 | 51.303 | KV452969.1 | 2291394 | 9-scf00340 | 9 |
| AX-158172915 | 16 | 51.303 | KV452969.1 | 2291921 | 9-scf00340 | 9 |
| AX-157834918 | 16 | 51.303 | KV452969.1 | 2294756 | 9-scf00340 | 9 |
| AX-158172919 | 16 | 51.303 | KV452969.1 | 2297243 | 9-scf00340 | 9 |
| AX-158172922 | 16 | 51.303 | KV452969.1 | 2298927 | 9-scf00340 | 9 |
| AX-158172925 | 16 | 51.303 | KV452969.1 | 2302719 | 9-scf00340 | 9 |

|              |    |        |             |          |            |    |
|--------------|----|--------|-------------|----------|------------|----|
| AX-157834920 | 16 | 51.303 | KV452969.1  | 2308069  | 9-scf00340 | 9  |
| AX-158172936 | 16 | 51.303 | KV452969.1  | 2313944  | 9-scf00340 | 9  |
| AX-158172945 | 16 | 51.303 | KV452969.1  | 2326284  | 9-scf00340 | 9  |
| AX-158172947 | 16 | 51.303 | KV452969.1  | 2339377  | 9-scf00340 | 9  |
| AX-157834922 | 16 | 51.374 | KV452969.1  | 2333847  | 9-scf00340 | 9  |
| AX-158172949 | 16 | 51.412 | KV452969.1  | 2343781  | 9-scf00340 | 9  |
| AX-157745388 | 16 | 51.412 | KV452969.1  | 2345634  | 9-scf00340 | 9  |
| AX-158172952 | 16 | 51.412 | KV452969.1  | 2352028  | 9-scf00340 | 9  |
| AX-158171968 | 16 | 51.522 | KV452966.1  | 165954   | 9-scf00338 | 9  |
| AX-158172409 | 16 | 51.522 | KV452969.1  | 888733   | 9-scf00340 | 9  |
| AX-158172956 | 16 | 51.522 | KV452969.1  | 2356653  | 9-scf00340 | 9  |
| AX-158172957 | 16 | 51.522 | KV452969.1  | 2357557  | 9-scf00340 | 9  |
| AX-158172960 | 16 | 51.522 | KV452969.1  | 2359423  | 9-scf00340 | 9  |
| AX-158172962 | 16 | 51.522 | KV452969.1  | 2362419  | 9-scf00340 | 9  |
| AX-158172966 | 16 | 51.522 | KV452969.1  | 2374053  | 9-scf00340 | 9  |
| AX-158172967 | 16 | 51.522 | KV452969.1  | 2374297  | 9-scf00340 | 9  |
| AX-158172969 | 16 | 51.522 | KV452969.1  | 2376641  | 9-scf00340 | 9  |
| AX-157834928 | 16 | 51.522 | KV452969.1  | 2382841  | 9-scf00340 | 9  |
| AX-158172975 | 16 | 51.522 | KV452969.1  | 2386441  | 9-scf00340 | 9  |
| AX-157834930 | 16 | 51.522 | KV452969.1  | 2388034  | 9-scf00340 | 9  |
| AX-158172976 | 16 | 51.522 | KV452969.1  | 2388787  | 9-scf00340 | 9  |
| AX-157886767 | 16 | 51.522 | KV452969.1  | 2389440  | 9-scf00340 | 9  |
| AX-158172977 | 16 | 51.522 | KV452969.1  | 2389517  | 9-scf00340 | 9  |
| AX-158172978 | 16 | 51.522 | KV452969.1  | 2391233  | 9-scf00340 | 9  |
| AX-158172979 | 16 | 51.522 | KV452969.1  | 2391654  | 9-scf00340 | 9  |
| AX-158172990 | 16 | 51.522 | KV452969.1  | 2418992  | 9-scf00340 | 9  |
| AX-158172999 | 16 | 51.522 | KV452969.1  | 2435020  | 9-scf00340 | 9  |
| AX-158173000 | 16 | 51.522 | KV452969.1  | 2436206  | 9-scf00340 | 9  |
| AX-157878736 | 16 | 51.522 | KV452969.1  | 2436378  | 9-scf00340 | 9  |
| AX-158173005 | 16 | 51.522 | KV452969.1  | 2442833  | 9-scf00340 | 9  |
| AX-157723788 | 16 | 51.522 | KV452969.1  | 9039081  | 9-scf00340 | 9  |
| AX-158178849 | 16 | 51.522 | KV452969.1  | 10584948 | 9-scf00340 | 9  |
| AX-157835434 | 16 | 51.522 | KV452969.1  | 10586392 | 9-scf00340 | 9  |
| AX-158180636 | 16 | 51.522 | KV452969.1  | 12832347 | 9-scf00340 | 9  |
| AX-158181086 | 16 | 51.522 | KV452969.1  | 13381467 | 9-scf00340 | 9  |
| AX-158181774 | 16 | 51.522 | KV452969.1  | 14540700 | 9-scf00340 | 9  |
| AX-158182045 | 16 | 51.522 | KV452969.1  | 14823732 | 9-scf00340 | 9  |
| AX-158170990 | 16 | 51.522 | KV452965.1  | 1258888  | 9-scf00608 | 9  |
| AX-157687658 | 16 | 51.522 | 3ML01025093 | 5316     | scf00961_1 | UN |
| AX-158172983 | 16 | 51.556 | KV452969.1  | 2400212  | 9-scf00340 | 9  |
| AX-158176747 | 16 | 51.556 | KV452969.1  | 7741414  | 9-scf00340 | 9  |
| AX-158176859 | 16 | 51.556 | KV452969.1  | 7893221  | 9-scf00340 | 9  |
| AX-158172507 | 16 | 51.586 | KV452969.1  | 1037772  | 9-scf00340 | 9  |
| AX-158172638 | 16 | 51.586 | KV452969.1  | 1340969  | 9-scf00340 | 9  |
| AX-158172639 | 16 | 51.586 | KV452969.1  | 1349443  | 9-scf00340 | 9  |
| AX-158172640 | 16 | 51.586 | KV452969.1  | 1351382  | 9-scf00340 | 9  |
| AX-158172654 | 16 | 51.586 | KV452969.1  | 1397453  | 9-scf00340 | 9  |
| AX-158172984 | 16 | 51.586 | KV452969.1  | 2401390  | 9-scf00340 | 9  |
| AX-158172987 | 16 | 51.631 | KV452969.1  | 2413691  | 9-scf00340 | 9  |
| AX-158172992 | 16 | 51.631 | KV452969.1  | 2426524  | 9-scf00340 | 9  |
| AX-158172996 | 16 | 51.631 | KV452969.1  | 2431434  | 9-scf00340 | 9  |

|              |    |        |             |          |            |    |
|--------------|----|--------|-------------|----------|------------|----|
| AX-158173001 | 16 | 51.631 | KV452969.1  | 2436876  | 9-scf00340 | 9  |
| AX-158173355 | 16 | 51.631 | KV452969.1  | 2964547  | 9-scf00340 | 9  |
| AX-158176294 | 16 | 51.631 | KV452969.1  | 7203476  | 9-scf00340 | 9  |
| AX-157765474 | 16 | 51.631 | KV452969.1  | 7209765  | 9-scf00340 | 9  |
| AX-158172970 | 16 | 51.676 | KV452969.1  | 2377830  | 9-scf00340 | 9  |
| AX-158173002 | 16 | 51.676 | KV452969.1  | 2437714  | 9-scf00340 | 9  |
| AX-158173003 | 16 | 51.676 | KV452969.1  | 2438709  | 9-scf00340 | 9  |
| AX-158173004 | 16 | 51.716 | KV452969.1  | 2439752  | 9-scf00340 | 9  |
| AX-158173008 | 16 | 51.74  | KV452969.1  | 2445421  | 9-scf00340 | 9  |
| AX-158173009 | 16 | 51.74  | KV452969.1  | 2447220  | 9-scf00340 | 9  |
| AX-158173010 | 16 | 51.74  | KV452969.1  | 2447945  | 9-scf00340 | 9  |
| AX-158173012 | 16 | 51.818 | KV452969.1  | 2450364  | 9-scf00340 | 9  |
| AX-158170987 | 16 | 51.818 | KV452965.1  | 1272533  | 9-scf00608 | 9  |
| AX-158173016 | 16 | 51.884 | KV452969.1  | 2454541  | 9-scf00340 | 9  |
| AX-158173018 | 16 | 52.241 | KV452969.1  | 2464915  | 9-scf00340 | 9  |
| AX-158173023 | 16 | 52.753 | KV452969.1  | 2477034  | 9-scf00340 | 9  |
| AX-158172812 | 16 | 52.764 | KV452969.1  | 2014052  | 9-scf00340 | 9  |
| AX-157773458 | 16 | 52.764 | KV452969.1  | 2478062  | 9-scf00340 | 9  |
| AX-157719489 | 16 | 53.445 | KV452969.1  | 2488653  | 9-scf00340 | 9  |
| AX-158173033 | 16 | 54.503 | KV452969.1  | 2506889  | 9-scf00340 | 9  |
| AX-157722795 | 16 | 54.503 | KV452969.1  | 2508907  | 9-scf00340 | 9  |
| AX-158173037 | 16 | 54.524 | KV452969.1  | 2509409  | 9-scf00340 | 9  |
| AX-158173039 | 16 | 55.159 | KV452969.1  | 2517181  | 9-scf00340 | 9  |
| AX-157886768 | 16 | 55.159 | KV452969.1  | 2518202  | 9-scf00340 | 9  |
| AX-158173042 | 16 | 55.16  | KV452969.1  | 2524940  | 9-scf00340 | 9  |
| AX-158173044 | 16 | 55.166 | KV452969.1  | 2528076  | 9-scf00340 | 9  |
| AX-158173045 | 16 | 55.291 | KV452969.1  | 2528653  | 9-scf00340 | 9  |
| AX-158173047 | 16 | 55.291 | KV452969.1  | 2530663  | 9-scf00340 | 9  |
| AX-158173052 | 16 | 55.494 | KV452969.1  | 2538046  | 9-scf00340 | 9  |
| AX-158173055 | 16 | 55.494 | KV452969.1  | 2539580  | 9-scf00340 | 9  |
| AX-158176301 | 16 | 55.494 | KV452969.1  | 7212264  | 9-scf00340 | 9  |
| AX-158173058 | 16 | 55.802 | KV452969.1  | 2542644  | 9-scf00340 | 9  |
| AX-158173060 | 16 | 55.816 | KV452969.1  | 2544971  | 9-scf00340 | 9  |
| AX-157834933 | 16 | 55.816 | KV452969.1  | 2545705  | 9-scf00340 | 9  |
| AX-158173062 | 16 | 55.926 | KV452969.1  | 2547430  | 9-scf00340 | 9  |
| AX-158173063 | 16 | 55.926 | KV452969.1  | 2548025  | 9-scf00340 | 9  |
| AX-158173065 | 16 | 55.926 | KV452969.1  | 2549114  | 9-scf00340 | 9  |
| AX-158173088 | 16 | 55.926 | KV452969.1  | 2579420  | 9-scf00340 | 9  |
| AX-158173064 | 16 | 55.951 | KV452969.1  | 2548231  | 9-scf00340 | 9  |
| AX-157707298 | 16 | 55.951 | 3ML01033947 | 359      | scf09616_1 | UN |
| AX-158173068 | 16 | 55.976 | KV452969.1  | 2552822  | 9-scf00340 | 9  |
| AX-158173085 | 16 | 55.976 | KV452969.1  | 2574224  | 9-scf00340 | 9  |
| AX-158173105 | 16 | 55.976 | KV452969.1  | 2607832  | 9-scf00340 | 9  |
| AX-157834940 | 16 | 55.976 | KV452969.1  | 2668794  | 9-scf00340 | 9  |
| AX-158173069 | 16 | 56     | KV452969.1  | 2553190  | 9-scf00340 | 9  |
| AX-158173070 | 16 | 56     | KV452969.1  | 2555217  | 9-scf00340 | 9  |
| AX-158176362 | 16 | 56     | KV452969.1  | 7295353  | 9-scf00340 | 9  |
| AX-157715159 | 16 | 56     | KV452969.1  | 11492642 | 9-scf00340 | 9  |
| AX-158173071 | 16 | 56.016 | KV452969.1  | 2555456  | 9-scf00340 | 9  |
| AX-158173074 | 16 | 56.035 | KV452969.1  | 2556725  | 9-scf00340 | 9  |
| AX-158173076 | 16 | 56.088 | KV452969.1  | 2559117  | 9-scf00340 | 9  |

|              |    |        |            |         |            |   |
|--------------|----|--------|------------|---------|------------|---|
| AX-158173066 | 16 | 56.144 | KV452969.1 | 2550615 | 9-scf00340 | 9 |
| AX-158173077 | 16 | 56.144 | KV452969.1 | 2564641 | 9-scf00340 | 9 |
| AX-158173081 | 16 | 56.144 | KV452969.1 | 2568135 | 9-scf00340 | 9 |
| AX-157886770 | 16 | 56.144 | KV452969.1 | 2572708 | 9-scf00340 | 9 |
| AX-157720589 | 16 | 56.144 | KV452969.1 | 2575523 | 9-scf00340 | 9 |
| AX-158173086 | 16 | 56.144 | KV452969.1 | 2576600 | 9-scf00340 | 9 |
| AX-157758350 | 16 | 56.144 | KV452969.1 | 2580012 | 9-scf00340 | 9 |
| AX-157774175 | 16 | 56.144 | KV452969.1 | 2583501 | 9-scf00340 | 9 |
| AX-157834934 | 16 | 56.253 | KV452969.1 | 2585752 | 9-scf00340 | 9 |
| AX-158173090 | 16 | 56.253 | KV452969.1 | 2586522 | 9-scf00340 | 9 |
| AX-158173092 | 16 | 56.253 | KV452969.1 | 2590810 | 9-scf00340 | 9 |
| AX-158173093 | 16 | 56.253 | KV452969.1 | 2591035 | 9-scf00340 | 9 |
| AX-157756303 | 16 | 56.253 | KV452969.1 | 2591729 | 9-scf00340 | 9 |
| AX-158173094 | 16 | 56.253 | KV452969.1 | 2593303 | 9-scf00340 | 9 |
| AX-158173095 | 16 | 56.472 | KV452969.1 | 2594129 | 9-scf00340 | 9 |
| AX-158173097 | 16 | 56.472 | KV452969.1 | 2594954 | 9-scf00340 | 9 |
| AX-158173098 | 16 | 56.472 | KV452969.1 | 2596581 | 9-scf00340 | 9 |
| AX-157834937 | 16 | 56.472 | KV452969.1 | 2602918 | 9-scf00340 | 9 |
| AX-158173103 | 16 | 56.472 | KV452969.1 | 2603349 | 9-scf00340 | 9 |
| AX-158173104 | 16 | 56.472 | KV452969.1 | 2603882 | 9-scf00340 | 9 |
| AX-157771850 | 16 | 56.472 | KV452969.1 | 2612815 | 9-scf00340 | 9 |
| AX-158173118 | 16 | 56.472 | KV452969.1 | 2631286 | 9-scf00340 | 9 |
| AX-158173073 | 16 | 56.494 | KV452969.1 | 2556364 | 9-scf00340 | 9 |
| AX-157834935 | 16 | 56.494 | KV452969.1 | 2591909 | 9-scf00340 | 9 |
| AX-157834938 | 16 | 56.494 | KV452969.1 | 2605129 | 9-scf00340 | 9 |
| AX-158173107 | 16 | 56.494 | KV452969.1 | 2609351 | 9-scf00340 | 9 |
| AX-158173111 | 16 | 56.494 | KV452969.1 | 2613399 | 9-scf00340 | 9 |
| AX-158173140 | 16 | 56.494 | KV452969.1 | 2655191 | 9-scf00340 | 9 |
| AX-158173156 | 16 | 56.494 | KV452969.1 | 2677171 | 9-scf00340 | 9 |
| AX-158173170 | 16 | 56.494 | KV452969.1 | 2704286 | 9-scf00340 | 9 |
| AX-158385879 | 16 | 56.494 | KV452969.1 | 2706074 | 9-scf00340 | 9 |
| AX-157886772 | 16 | 56.494 | KV452969.1 | 2715105 | 9-scf00340 | 9 |
| AX-158173108 | 16 | 56.538 | KV452969.1 | 2610047 | 9-scf00340 | 9 |
| AX-158173109 | 16 | 56.581 | KV452969.1 | 2610485 | 9-scf00340 | 9 |
| AX-158173110 | 16 | 56.581 | KV452969.1 | 2611909 | 9-scf00340 | 9 |
| AX-158173112 | 16 | 56.693 | KV452969.1 | 2615111 | 9-scf00340 | 9 |
| AX-157834939 | 16 | 56.693 | KV452969.1 | 2615637 | 9-scf00340 | 9 |
| AX-158173082 | 16 | 56.799 | KV452969.1 | 2570044 | 9-scf00340 | 9 |
| AX-158173114 | 16 | 56.799 | KV452969.1 | 2618611 | 9-scf00340 | 9 |
| AX-158173115 | 16 | 56.799 | KV452969.1 | 2622811 | 9-scf00340 | 9 |
| AX-157749110 | 16 | 56.799 | KV452969.1 | 2632228 | 9-scf00340 | 9 |
| AX-158173121 | 16 | 56.799 | KV452969.1 | 2633904 | 9-scf00340 | 9 |
| AX-158173125 | 16 | 56.799 | KV452969.1 | 2641735 | 9-scf00340 | 9 |
| AX-158173127 | 16 | 56.799 | KV452969.1 | 2642836 | 9-scf00340 | 9 |
| AX-158173134 | 16 | 56.799 | KV452969.1 | 2647922 | 9-scf00340 | 9 |
| AX-158173135 | 16 | 56.799 | KV452969.1 | 2649446 | 9-scf00340 | 9 |
| AX-158173136 | 16 | 56.799 | KV452969.1 | 2649742 | 9-scf00340 | 9 |
| AX-157722129 | 16 | 56.799 | KV452969.1 | 2651488 | 9-scf00340 | 9 |
| AX-158173138 | 16 | 56.799 | KV452969.1 | 2653581 | 9-scf00340 | 9 |
| AX-158173139 | 16 | 56.799 | KV452969.1 | 2654385 | 9-scf00340 | 9 |
| AX-158173143 | 16 | 56.799 | KV452969.1 | 2658562 | 9-scf00340 | 9 |

|              |    |        |            |         |            |   |
|--------------|----|--------|------------|---------|------------|---|
| AX-158173149 | 16 | 56.799 | KV452969.1 | 2667468 | 9-scf00340 | 9 |
| AX-158173150 | 16 | 56.799 | KV452969.1 | 2668351 | 9-scf00340 | 9 |
| AX-158173151 | 16 | 56.799 | KV452969.1 | 2670397 | 9-scf00340 | 9 |
| AX-158173154 | 16 | 56.799 | KV452969.1 | 2674458 | 9-scf00340 | 9 |
| AX-158173158 | 16 | 56.799 | KV452969.1 | 2680262 | 9-scf00340 | 9 |
| AX-158173159 | 16 | 56.799 | KV452969.1 | 2681134 | 9-scf00340 | 9 |
| AX-157748665 | 16 | 56.799 | KV452969.1 | 2682419 | 9-scf00340 | 9 |
| AX-157834941 | 16 | 56.799 | KV452969.1 | 2683553 | 9-scf00340 | 9 |
| AX-157834942 | 16 | 56.799 | KV452969.1 | 2684849 | 9-scf00340 | 9 |
| AX-157834943 | 16 | 56.799 | KV452969.1 | 2684959 | 9-scf00340 | 9 |
| AX-158173161 | 16 | 56.799 | KV452969.1 | 2687646 | 9-scf00340 | 9 |
| AX-157715022 | 16 | 56.799 | KV452969.1 | 2688269 | 9-scf00340 | 9 |
| AX-158173162 | 16 | 56.799 | KV452969.1 | 2690556 | 9-scf00340 | 9 |
| AX-158173164 | 16 | 56.799 | KV452969.1 | 2697075 | 9-scf00340 | 9 |
| AX-158173165 | 16 | 56.799 | KV452969.1 | 2699682 | 9-scf00340 | 9 |
| AX-158173167 | 16 | 56.799 | KV452969.1 | 2701230 | 9-scf00340 | 9 |
| AX-158173168 | 16 | 56.799 | KV452969.1 | 2701842 | 9-scf00340 | 9 |
| AX-158173169 | 16 | 56.799 | KV452969.1 | 2703044 | 9-scf00340 | 9 |
| AX-158173172 | 16 | 56.799 | KV452969.1 | 2705313 | 9-scf00340 | 9 |
| AX-157834944 | 16 | 56.799 | KV452969.1 | 2706214 | 9-scf00340 | 9 |
| AX-158173174 | 16 | 56.799 | KV452969.1 | 2707090 | 9-scf00340 | 9 |
| AX-158173175 | 16 | 56.799 | KV452969.1 | 2710842 | 9-scf00340 | 9 |
| AX-158173176 | 16 | 56.799 | KV452969.1 | 2712062 | 9-scf00340 | 9 |
| AX-158413352 | 16 | 56.799 | KV452969.1 | 2712962 | 9-scf00340 | 9 |
| AX-157834945 | 16 | 56.799 | KV452969.1 | 2716354 | 9-scf00340 | 9 |
| AX-158173671 | 16 | 56.799 | KV452969.1 | 3354806 | 9-scf00340 | 9 |
| AX-158173916 | 16 | 56.799 | KV452969.1 | 3821183 | 9-scf00340 | 9 |
| AX-158174075 | 16 | 56.799 | KV452969.1 | 4048605 | 9-scf00340 | 9 |
| AX-158174088 | 16 | 56.799 | KV452969.1 | 4058519 | 9-scf00340 | 9 |
| AX-158174096 | 16 | 56.799 | KV452969.1 | 4069255 | 9-scf00340 | 9 |
| AX-158423050 | 16 | 56.799 | KV452969.1 | 4354146 | 9-scf00340 | 9 |
| AX-158174387 | 16 | 56.799 | KV452969.1 | 4365103 | 9-scf00340 | 9 |
| AX-158174418 | 16 | 56.799 | KV452969.1 | 4402916 | 9-scf00340 | 9 |
| AX-158174437 | 16 | 56.799 | KV452969.1 | 4428571 | 9-scf00340 | 9 |
| AX-158174456 | 16 | 56.799 | KV452969.1 | 4445529 | 9-scf00340 | 9 |
| AX-158174519 | 16 | 56.799 | KV452969.1 | 4516397 | 9-scf00340 | 9 |
| AX-158174573 | 16 | 56.799 | KV452969.1 | 4588419 | 9-scf00340 | 9 |
| AX-158174632 | 16 | 56.799 | KV452969.1 | 4656885 | 9-scf00340 | 9 |
| AX-157866675 | 16 | 56.799 | KV452969.1 | 4871383 | 9-scf00340 | 9 |
| AX-158174980 | 16 | 56.799 | KV452969.1 | 5063628 | 9-scf00340 | 9 |
| AX-158175015 | 16 | 56.799 | KV452969.1 | 5102336 | 9-scf00340 | 9 |
| AX-157743243 | 16 | 56.799 | KV452969.1 | 5152920 | 9-scf00340 | 9 |
| AX-158176303 | 16 | 56.799 | KV452969.1 | 7213586 | 9-scf00340 | 9 |
| AX-158176630 | 16 | 56.799 | KV452969.1 | 7595684 | 9-scf00340 | 9 |
| AX-158177042 | 16 | 56.799 | KV452969.1 | 8134697 | 9-scf00340 | 9 |
| AX-157834947 | 16 | 56.907 | KV452969.1 | 2727785 | 9-scf00340 | 9 |
| AX-157739577 | 16 | 56.907 | KV452969.1 | 2727987 | 9-scf00340 | 9 |
| AX-158173406 | 16 | 56.907 | KV452969.1 | 2997339 | 9-scf00340 | 9 |
| AX-157715346 | 16 | 56.907 | KV452969.1 | 3373651 | 9-scf00340 | 9 |
| AX-158173756 | 16 | 56.907 | KV452969.1 | 3544876 | 9-scf00340 | 9 |
| AX-157716993 | 16 | 56.907 | KV452969.1 | 3942195 | 9-scf00340 | 9 |

|              |    |        |            |          |            |   |
|--------------|----|--------|------------|----------|------------|---|
| AX-158174000 | 16 | 56.907 | KV452969.1 | 3964062  | 9-scf00340 | 9 |
| AX-158174021 | 16 | 56.907 | KV452969.1 | 3993309  | 9-scf00340 | 9 |
| AX-158174024 | 16 | 56.907 | KV452969.1 | 3994917  | 9-scf00340 | 9 |
| AX-158174038 | 16 | 56.907 | KV452969.1 | 4009288  | 9-scf00340 | 9 |
| AX-157739930 | 16 | 56.907 | KV452969.1 | 4410319  | 9-scf00340 | 9 |
| AX-158174512 | 16 | 56.907 | KV452969.1 | 4510361  | 9-scf00340 | 9 |
| AX-158174551 | 16 | 56.907 | KV452969.1 | 4557217  | 9-scf00340 | 9 |
| AX-157835032 | 16 | 56.907 | KV452969.1 | 4562930  | 9-scf00340 | 9 |
| AX-158174597 | 16 | 56.907 | KV452969.1 | 4609146  | 9-scf00340 | 9 |
| AX-158174675 | 16 | 56.907 | KV452969.1 | 4693670  | 9-scf00340 | 9 |
| AX-158174688 | 16 | 56.907 | KV452969.1 | 4702856  | 9-scf00340 | 9 |
| AX-157835045 | 16 | 56.907 | KV452969.1 | 4747091  | 9-scf00340 | 9 |
| AX-158174883 | 16 | 56.907 | KV452969.1 | 4927732  | 9-scf00340 | 9 |
| AX-158174885 | 16 | 56.907 | KV452969.1 | 4931607  | 9-scf00340 | 9 |
| AX-158174918 | 16 | 56.907 | KV452969.1 | 4964416  | 9-scf00340 | 9 |
| AX-158413431 | 16 | 56.907 | KV452969.1 | 4969817  | 9-scf00340 | 9 |
| AX-158174923 | 16 | 56.907 | KV452969.1 | 4973745  | 9-scf00340 | 9 |
| AX-158174926 | 16 | 56.907 | KV452969.1 | 4975829  | 9-scf00340 | 9 |
| AX-158174936 | 16 | 56.907 | KV452969.1 | 4992918  | 9-scf00340 | 9 |
| AX-157835054 | 16 | 56.907 | KV452969.1 | 5181972  | 9-scf00340 | 9 |
| AX-158175573 | 16 | 56.907 | KV452969.1 | 6282823  | 9-scf00340 | 9 |
| AX-158176712 | 16 | 56.907 | KV452969.1 | 7700619  | 9-scf00340 | 9 |
| AX-158176830 | 16 | 56.907 | KV452969.1 | 7861593  | 9-scf00340 | 9 |
| AX-158418057 | 16 | 56.907 | KV452969.1 | 7933163  | 9-scf00340 | 9 |
| AX-158177341 | 16 | 56.907 | KV452969.1 | 8491718  | 9-scf00340 | 9 |
| AX-158179413 | 16 | 56.907 | KV452969.1 | 11289563 | 9-scf00340 | 9 |
| AX-158173184 | 16 | 57.018 | KV452969.1 | 2739736  | 9-scf00340 | 9 |
| AX-158173187 | 16 | 57.018 | KV452969.1 | 2745253  | 9-scf00340 | 9 |
| AX-158173188 | 16 | 57.018 | KV452969.1 | 2745642  | 9-scf00340 | 9 |
| AX-158173190 | 16 | 57.018 | KV452969.1 | 2746115  | 9-scf00340 | 9 |
| AX-158173191 | 16 | 57.018 | KV452969.1 | 2748469  | 9-scf00340 | 9 |
| AX-158173199 | 16 | 57.018 | KV452969.1 | 2763683  | 9-scf00340 | 9 |
| AX-158173204 | 16 | 57.018 | KV452969.1 | 2785051  | 9-scf00340 | 9 |
| AX-158173208 | 16 | 57.018 | KV452969.1 | 2788851  | 9-scf00340 | 9 |
| AX-158173332 | 16 | 57.018 | KV452969.1 | 2936362  | 9-scf00340 | 9 |
| AX-158173211 | 16 | 57.038 | KV452969.1 | 2796789  | 9-scf00340 | 9 |
| AX-158173216 | 16 | 57.127 | KV452969.1 | 2808173  | 9-scf00340 | 9 |
| AX-158175013 | 16 | 57.127 | KV452969.1 | 5099860  | 9-scf00340 | 9 |
| AX-157834952 | 16 | 57.152 | KV452969.1 | 2808837  | 9-scf00340 | 9 |
| AX-158173223 | 16 | 57.176 | KV452969.1 | 2815840  | 9-scf00340 | 9 |
| AX-158173226 | 16 | 57.199 | KV452969.1 | 2821441  | 9-scf00340 | 9 |
| AX-158174536 | 16 | 57.199 | KV452969.1 | 4537970  | 9-scf00340 | 9 |
| AX-158173227 | 16 | 57.218 | KV452969.1 | 2822854  | 9-scf00340 | 9 |
| AX-158173099 | 16 | 57.236 | KV452969.1 | 2597690  | 9-scf00340 | 9 |
| AX-157834949 | 16 | 57.236 | KV452969.1 | 2789571  | 9-scf00340 | 9 |
| AX-157834950 | 16 | 57.236 | KV452969.1 | 2795174  | 9-scf00340 | 9 |
| AX-157834951 | 16 | 57.236 | KV452969.1 | 2798985  | 9-scf00340 | 9 |
| AX-157774612 | 16 | 57.236 | KV452969.1 | 2810512  | 9-scf00340 | 9 |
| AX-157773406 | 16 | 57.236 | KV452969.1 | 2815420  | 9-scf00340 | 9 |
| AX-158173235 | 16 | 57.236 | KV452969.1 | 2830865  | 9-scf00340 | 9 |
| AX-158173237 | 16 | 57.236 | KV452969.1 | 2833842  | 9-scf00340 | 9 |



|              |    |        |            |         |            |   |
|--------------|----|--------|------------|---------|------------|---|
| AX-158173242 | 16 | 57.236 | KV452969.1 | 2840950 | 9-scf00340 | 9 |
| AX-158413357 | 16 | 57.236 | KV452969.1 | 2843772 | 9-scf00340 | 9 |
| AX-158173244 | 16 | 57.236 | KV452969.1 | 2844980 | 9-scf00340 | 9 |
| AX-157770658 | 16 | 57.236 | KV452969.1 | 2851927 | 9-scf00340 | 9 |
| AX-158173256 | 16 | 57.236 | KV452969.1 | 2859405 | 9-scf00340 | 9 |
| AX-158173257 | 16 | 57.236 | KV452969.1 | 2860568 | 9-scf00340 | 9 |
| AX-157834953 | 16 | 57.236 | KV452969.1 | 2862867 | 9-scf00340 | 9 |
| AX-158413359 | 16 | 57.236 | KV452969.1 | 2870963 | 9-scf00340 | 9 |
| AX-158173265 | 16 | 57.236 | KV452969.1 | 2872781 | 9-scf00340 | 9 |
| AX-157757196 | 16 | 57.236 | KV452969.1 | 2882395 | 9-scf00340 | 9 |
| AX-158173273 | 16 | 57.236 | KV452969.1 | 2883009 | 9-scf00340 | 9 |
| AX-158173284 | 16 | 57.236 | KV452969.1 | 2891807 | 9-scf00340 | 9 |
| AX-158173292 | 16 | 57.236 | KV452969.1 | 2898264 | 9-scf00340 | 9 |
| AX-158173293 | 16 | 57.236 | KV452969.1 | 2900563 | 9-scf00340 | 9 |
| AX-158413361 | 16 | 57.236 | KV452969.1 | 2900916 | 9-scf00340 | 9 |
| AX-158173294 | 16 | 57.236 | KV452969.1 | 2902122 | 9-scf00340 | 9 |
| AX-158173298 | 16 | 57.236 | KV452969.1 | 2905041 | 9-scf00340 | 9 |
| AX-158173300 | 16 | 57.236 | KV452969.1 | 2907316 | 9-scf00340 | 9 |
| AX-158173301 | 16 | 57.236 | KV452969.1 | 2907551 | 9-scf00340 | 9 |
| AX-158173303 | 16 | 57.236 | KV452969.1 | 2908783 | 9-scf00340 | 9 |
| AX-158173305 | 16 | 57.236 | KV452969.1 | 2910123 | 9-scf00340 | 9 |
| AX-158173311 | 16 | 57.236 | KV452969.1 | 2916142 | 9-scf00340 | 9 |
| AX-157753905 | 16 | 57.236 | KV452969.1 | 2917274 | 9-scf00340 | 9 |
| AX-158173318 | 16 | 57.236 | KV452969.1 | 2922831 | 9-scf00340 | 9 |
| AX-158173322 | 16 | 57.236 | KV452969.1 | 2926257 | 9-scf00340 | 9 |
| AX-158173323 | 16 | 57.236 | KV452969.1 | 2926932 | 9-scf00340 | 9 |
| AX-158173327 | 16 | 57.236 | KV452969.1 | 2931219 | 9-scf00340 | 9 |
| AX-158173328 | 16 | 57.236 | KV452969.1 | 2932258 | 9-scf00340 | 9 |
| AX-158173329 | 16 | 57.236 | KV452969.1 | 2933351 | 9-scf00340 | 9 |
| AX-158173331 | 16 | 57.236 | KV452969.1 | 2935372 | 9-scf00340 | 9 |
| AX-158173333 | 16 | 57.236 | KV452969.1 | 2937566 | 9-scf00340 | 9 |
| AX-158173340 | 16 | 57.236 | KV452969.1 | 2951468 | 9-scf00340 | 9 |
| AX-158173342 | 16 | 57.236 | KV452969.1 | 2952636 | 9-scf00340 | 9 |
| AX-158173343 | 16 | 57.236 | KV452969.1 | 2953201 | 9-scf00340 | 9 |
| AX-158173344 | 16 | 57.236 | KV452969.1 | 2954525 | 9-scf00340 | 9 |
| AX-158173346 | 16 | 57.236 | KV452969.1 | 2955508 | 9-scf00340 | 9 |
| AX-158173347 | 16 | 57.236 | KV452969.1 | 2956273 | 9-scf00340 | 9 |
| AX-158173349 | 16 | 57.236 | KV452969.1 | 2957838 | 9-scf00340 | 9 |
| AX-158173352 | 16 | 57.236 | KV452969.1 | 2960647 | 9-scf00340 | 9 |
| AX-158173366 | 16 | 57.236 | KV452969.1 | 2969073 | 9-scf00340 | 9 |
| AX-157866667 | 16 | 57.236 | KV452969.1 | 3040605 | 9-scf00340 | 9 |
| AX-158173452 | 16 | 57.236 | KV452969.1 | 3056287 | 9-scf00340 | 9 |
| AX-158173506 | 16 | 57.236 | KV452969.1 | 3139717 | 9-scf00340 | 9 |
| AX-158173521 | 16 | 57.236 | KV452969.1 | 3153889 | 9-scf00340 | 9 |
| AX-157752090 | 16 | 57.236 | KV452969.1 | 3164776 | 9-scf00340 | 9 |
| AX-158173596 | 16 | 57.236 | KV452969.1 | 3238594 | 9-scf00340 | 9 |
| AX-158173713 | 16 | 57.236 | KV452969.1 | 3458022 | 9-scf00340 | 9 |
| AX-157834998 | 16 | 57.236 | KV452969.1 | 4091674 | 9-scf00340 | 9 |
| AX-158174326 | 16 | 57.236 | KV452969.1 | 4302163 | 9-scf00340 | 9 |
| AX-158175105 | 16 | 57.236 | KV452969.1 | 5248535 | 9-scf00340 | 9 |
| AX-158175215 | 16 | 57.236 | KV452969.1 | 5395428 | 9-scf00340 | 9 |

|              |    |        |            |          |            |   |
|--------------|----|--------|------------|----------|------------|---|
| AX-158175478 | 16 | 57.236 | KV452969.1 | 6183976  | 9-scf00340 | 9 |
| AX-158175507 | 16 | 57.236 | KV452969.1 | 6209271  | 9-scf00340 | 9 |
| AX-157835106 | 16 | 57.236 | KV452969.1 | 6271324  | 9-scf00340 | 9 |
| AX-158175605 | 16 | 57.236 | KV452969.1 | 6329313  | 9-scf00340 | 9 |
| AX-158175971 | 16 | 57.236 | KV452969.1 | 6760973  | 9-scf00340 | 9 |
| AX-158176289 | 16 | 57.236 | KV452969.1 | 7198981  | 9-scf00340 | 9 |
| AX-158176290 | 16 | 57.236 | KV452969.1 | 7200517  | 9-scf00340 | 9 |
| AX-158176297 | 16 | 57.236 | KV452969.1 | 7208767  | 9-scf00340 | 9 |
| AX-158176315 | 16 | 57.236 | KV452969.1 | 7226998  | 9-scf00340 | 9 |
| AX-158176442 | 16 | 57.236 | KV452969.1 | 7371142  | 9-scf00340 | 9 |
| AX-157872028 | 16 | 57.236 | KV452969.1 | 7649310  | 9-scf00340 | 9 |
| AX-158176771 | 16 | 57.236 | KV452969.1 | 7781230  | 9-scf00340 | 9 |
| AX-158177058 | 16 | 57.236 | KV452969.1 | 8150397  | 9-scf00340 | 9 |
| AX-158177135 | 16 | 57.236 | KV452969.1 | 8268120  | 9-scf00340 | 9 |
| AX-157725397 | 16 | 57.236 | KV452969.1 | 8929886  | 9-scf00340 | 9 |
| AX-158177985 | 16 | 57.236 | KV452969.1 | 9460289  | 9-scf00340 | 9 |
| AX-157886794 | 16 | 57.236 | KV452969.1 | 10179293 | 9-scf00340 | 9 |
| AX-158178563 | 16 | 57.236 | KV452969.1 | 10200384 | 9-scf00340 | 9 |
| AX-158178919 | 16 | 57.236 | KV452969.1 | 10688656 | 9-scf00340 | 9 |
| AX-157713580 | 16 | 57.236 | KV452969.1 | 11173330 | 9-scf00340 | 9 |
| AX-158179407 | 16 | 57.236 | KV452969.1 | 11274988 | 9-scf00340 | 9 |
| AX-158179423 | 16 | 57.236 | KV452969.1 | 11300382 | 9-scf00340 | 9 |
| AX-158179429 | 16 | 57.236 | KV452969.1 | 11309334 | 9-scf00340 | 9 |
| AX-158179438 | 16 | 57.236 | KV452969.1 | 11335415 | 9-scf00340 | 9 |
| AX-157748018 | 16 | 57.236 | KV452969.1 | 11336505 | 9-scf00340 | 9 |
| AX-157835508 | 16 | 57.236 | KV452969.1 | 11392052 | 9-scf00340 | 9 |
| AX-158179477 | 16 | 57.236 | KV452969.1 | 11393276 | 9-scf00340 | 9 |
| AX-158180827 | 16 | 57.236 | KV452969.1 | 13045231 | 9-scf00340 | 9 |
| AX-158181034 | 16 | 57.236 | KV452969.1 | 13314726 | 9-scf00340 | 9 |
| AX-157858796 | 16 | 57.236 | KV452969.1 | 13320919 | 9-scf00340 | 9 |
| AX-157718072 | 16 | 57.236 | KV452969.1 | 13935518 | 9-scf00340 | 9 |
| AX-158181494 | 16 | 57.236 | KV452969.1 | 14142856 | 9-scf00340 | 9 |
| AX-158181649 | 16 | 57.236 | KV452969.1 | 14351381 | 9-scf00340 | 9 |
| AX-158182225 | 16 | 57.236 | KV452969.1 | 15069413 | 9-scf00340 | 9 |
| AX-158385961 | 16 | 57.236 | KV452969.1 | 15076359 | 9-scf00340 | 9 |
| AX-158182241 | 16 | 57.236 | KV452969.1 | 15098101 | 9-scf00340 | 9 |
| AX-157741920 | 16 | 57.236 | KV452969.1 | 15173669 | 9-scf00340 | 9 |
| AX-158182305 | 16 | 57.236 | KV452969.1 | 15205464 | 9-scf00340 | 9 |
| AX-158182371 | 16 | 57.236 | KV452969.1 | 15301905 | 9-scf00340 | 9 |
| AX-158380611 | 16 | 57.236 | KV452969.1 | 15480301 | 9-scf00340 | 9 |
| AX-158182674 | 16 | 57.236 | KV452969.1 | 15697310 | 9-scf00340 | 9 |
| AX-158182679 | 16 | 57.236 | KV452969.1 | 15703094 | 9-scf00340 | 9 |
| AX-158182682 | 16 | 57.236 | KV452969.1 | 15706752 | 9-scf00340 | 9 |
| AX-158173249 | 16 | 57.346 | KV452969.1 | 2852911  | 9-scf00340 | 9 |
| AX-158173363 | 16 | 57.346 | KV452969.1 | 2967681  | 9-scf00340 | 9 |
| AX-158173365 | 16 | 57.346 | KV452969.1 | 2968534  | 9-scf00340 | 9 |
| AX-158173369 | 16 | 57.346 | KV452969.1 | 2971038  | 9-scf00340 | 9 |
| AX-158173373 | 16 | 57.346 | KV452969.1 | 2973463  | 9-scf00340 | 9 |
| AX-158173381 | 16 | 57.346 | KV452969.1 | 2979996  | 9-scf00340 | 9 |
| AX-158173410 | 16 | 57.346 | KV452969.1 | 3001801  | 9-scf00340 | 9 |
| AX-158173413 | 16 | 57.346 | KV452969.1 | 3004567  | 9-scf00340 | 9 |

|              |    |        |            |         |            |   |
|--------------|----|--------|------------|---------|------------|---|
| AX-157719957 | 16 | 57.346 | KV452969.1 | 3036232 | 9-scf00340 | 9 |
| AX-157750629 | 16 | 57.346 | KV452969.1 | 3062588 | 9-scf00340 | 9 |
| AX-158173461 | 16 | 57.346 | KV452969.1 | 3063236 | 9-scf00340 | 9 |
| AX-158173465 | 16 | 57.346 | KV452969.1 | 3069570 | 9-scf00340 | 9 |
| AX-158173466 | 16 | 57.346 | KV452969.1 | 3070979 | 9-scf00340 | 9 |
| AX-158173469 | 16 | 57.346 | KV452969.1 | 3075000 | 9-scf00340 | 9 |
| AX-157743601 | 16 | 57.346 | KV452969.1 | 3077156 | 9-scf00340 | 9 |
| AX-158173481 | 16 | 57.346 | KV452969.1 | 3091403 | 9-scf00340 | 9 |
| AX-158173505 | 16 | 57.346 | KV452969.1 | 3138860 | 9-scf00340 | 9 |
| AX-158173507 | 16 | 57.346 | KV452969.1 | 3140014 | 9-scf00340 | 9 |
| AX-157834964 | 16 | 57.346 | KV452969.1 | 3143317 | 9-scf00340 | 9 |
| AX-158173512 | 16 | 57.346 | KV452969.1 | 3143853 | 9-scf00340 | 9 |
| AX-158173513 | 16 | 57.346 | KV452969.1 | 3144230 | 9-scf00340 | 9 |
| AX-158173515 | 16 | 57.346 | KV452969.1 | 3150089 | 9-scf00340 | 9 |
| AX-158173526 | 16 | 57.346 | KV452969.1 | 3164222 | 9-scf00340 | 9 |
| AX-158173644 | 16 | 57.346 | KV452969.1 | 3315339 | 9-scf00340 | 9 |
| AX-158176097 | 16 | 57.346 | KV452969.1 | 6905311 | 9-scf00340 | 9 |
| AX-158176533 | 16 | 57.346 | KV452969.1 | 7480355 | 9-scf00340 | 9 |
| AX-158176542 | 16 | 57.346 | KV452969.1 | 7487542 | 9-scf00340 | 9 |
| AX-158173415 | 16 | 57.564 | KV452969.1 | 3006235 | 9-scf00340 | 9 |
| AX-158173450 | 16 | 57.564 | KV452969.1 | 3051460 | 9-scf00340 | 9 |
| AX-158173454 | 16 | 57.564 | KV452969.1 | 3058017 | 9-scf00340 | 9 |
| AX-158173471 | 16 | 57.564 | KV452969.1 | 3079878 | 9-scf00340 | 9 |
| AX-158173503 | 16 | 57.564 | KV452969.1 | 3134773 | 9-scf00340 | 9 |
| AX-158173509 | 16 | 57.564 | KV452969.1 | 3142169 | 9-scf00340 | 9 |
| AX-158173532 | 16 | 57.564 | KV452969.1 | 3169482 | 9-scf00340 | 9 |
| AX-158173551 | 16 | 57.564 | KV452969.1 | 3191289 | 9-scf00340 | 9 |
| AX-158173559 | 16 | 57.564 | KV452969.1 | 3200007 | 9-scf00340 | 9 |
| AX-158173564 | 16 | 57.564 | KV452969.1 | 3208224 | 9-scf00340 | 9 |
| AX-157775506 | 16 | 57.564 | KV452969.1 | 3211277 | 9-scf00340 | 9 |
| AX-157796082 | 16 | 57.564 | KV452969.1 | 3215613 | 9-scf00340 | 9 |
| AX-158173572 | 16 | 57.564 | KV452969.1 | 3216052 | 9-scf00340 | 9 |
| AX-158173576 | 16 | 57.564 | KV452969.1 | 3219676 | 9-scf00340 | 9 |
| AX-158173577 | 16 | 57.564 | KV452969.1 | 3219992 | 9-scf00340 | 9 |
| AX-158173581 | 16 | 57.564 | KV452969.1 | 3223553 | 9-scf00340 | 9 |
| AX-158173582 | 16 | 57.564 | KV452969.1 | 3224011 | 9-scf00340 | 9 |
| AX-158173587 | 16 | 57.564 | KV452969.1 | 3231108 | 9-scf00340 | 9 |
| AX-158173595 | 16 | 57.564 | KV452969.1 | 3238213 | 9-scf00340 | 9 |
| AX-157834967 | 16 | 57.564 | KV452969.1 | 3238819 | 9-scf00340 | 9 |
| AX-158173597 | 16 | 57.564 | KV452969.1 | 3239602 | 9-scf00340 | 9 |
| AX-157878751 | 16 | 57.564 | KV452969.1 | 3241971 | 9-scf00340 | 9 |
| AX-157715220 | 16 | 57.564 | KV452969.1 | 3243764 | 9-scf00340 | 9 |
| AX-158173606 | 16 | 57.564 | KV452969.1 | 3250252 | 9-scf00340 | 9 |
| AX-158173607 | 16 | 57.564 | KV452969.1 | 3250393 | 9-scf00340 | 9 |
| AX-157738459 | 16 | 57.564 | KV452969.1 | 3269550 | 9-scf00340 | 9 |
| AX-158173625 | 16 | 57.564 | KV452969.1 | 3281874 | 9-scf00340 | 9 |
| AX-157878756 | 16 | 57.564 | KV452969.1 | 3290337 | 9-scf00340 | 9 |
| AX-158173637 | 16 | 57.564 | KV452969.1 | 3301440 | 9-scf00340 | 9 |
| AX-158413377 | 16 | 57.564 | KV452969.1 | 3302570 | 9-scf00340 | 9 |
| AX-157834970 | 16 | 57.564 | KV452969.1 | 3304220 | 9-scf00340 | 9 |
| AX-157834971 | 16 | 57.564 | KV452969.1 | 3304451 | 9-scf00340 | 9 |

|              |    |        |            |         |            |   |
|--------------|----|--------|------------|---------|------------|---|
| AX-157834976 | 16 | 57.564 | KV452969.1 | 3315687 | 9-scf00340 | 9 |
| AX-158173649 | 16 | 57.564 | KV452969.1 | 3320607 | 9-scf00340 | 9 |
| AX-158173701 | 16 | 57.564 | KV452969.1 | 3422660 | 9-scf00340 | 9 |
| AX-158393491 | 16 | 57.564 | KV452969.1 | 3499256 | 9-scf00340 | 9 |
| AX-158173732 | 16 | 57.564 | KV452969.1 | 3502748 | 9-scf00340 | 9 |
| AX-158173751 | 16 | 57.564 | KV452969.1 | 3534172 | 9-scf00340 | 9 |
| AX-158173770 | 16 | 57.564 | KV452969.1 | 3571909 | 9-scf00340 | 9 |
| AX-158173772 | 16 | 57.564 | KV452969.1 | 3574367 | 9-scf00340 | 9 |
| AX-158173780 | 16 | 57.564 | KV452969.1 | 3595805 | 9-scf00340 | 9 |
| AX-157878758 | 16 | 57.564 | KV452969.1 | 3608059 | 9-scf00340 | 9 |
| AX-158173804 | 16 | 57.564 | KV452969.1 | 3631238 | 9-scf00340 | 9 |
| AX-158174009 | 16 | 57.564 | KV452969.1 | 3977360 | 9-scf00340 | 9 |
| AX-158174047 | 16 | 57.564 | KV452969.1 | 4014548 | 9-scf00340 | 9 |
| AX-158174136 | 16 | 57.564 | KV452969.1 | 4113293 | 9-scf00340 | 9 |
| AX-157717811 | 16 | 57.564 | KV452969.1 | 4199920 | 9-scf00340 | 9 |
| AX-158174245 | 16 | 57.564 | KV452969.1 | 4214229 | 9-scf00340 | 9 |
| AX-158174260 | 16 | 57.564 | KV452969.1 | 4230703 | 9-scf00340 | 9 |
| AX-158174271 | 16 | 57.564 | KV452969.1 | 4237089 | 9-scf00340 | 9 |
| AX-157742702 | 16 | 57.564 | KV452969.1 | 4243764 | 9-scf00340 | 9 |
| AX-158174320 | 16 | 57.564 | KV452969.1 | 4295723 | 9-scf00340 | 9 |
| AX-158174323 | 16 | 57.564 | KV452969.1 | 4299219 | 9-scf00340 | 9 |
| AX-158174331 | 16 | 57.564 | KV452969.1 | 4305241 | 9-scf00340 | 9 |
| AX-157751168 | 16 | 57.564 | KV452969.1 | 4368475 | 9-scf00340 | 9 |
| AX-157835021 | 16 | 57.564 | KV452969.1 | 4460199 | 9-scf00340 | 9 |
| AX-157726834 | 16 | 57.564 | KV452969.1 | 4512216 | 9-scf00340 | 9 |
| AX-158174518 | 16 | 57.564 | KV452969.1 | 4515856 | 9-scf00340 | 9 |
| AX-158174520 | 16 | 57.564 | KV452969.1 | 4517057 | 9-scf00340 | 9 |
| AX-158174523 | 16 | 57.564 | KV452969.1 | 4521826 | 9-scf00340 | 9 |
| AX-158174897 | 16 | 57.564 | KV452969.1 | 4944806 | 9-scf00340 | 9 |
| AX-158174941 | 16 | 57.564 | KV452969.1 | 4997232 | 9-scf00340 | 9 |
| AX-158174945 | 16 | 57.564 | KV452969.1 | 5002172 | 9-scf00340 | 9 |
| AX-158174966 | 16 | 57.564 | KV452969.1 | 5044160 | 9-scf00340 | 9 |
| AX-158174968 | 16 | 57.564 | KV452969.1 | 5046757 | 9-scf00340 | 9 |
| AX-158174978 | 16 | 57.564 | KV452969.1 | 5058967 | 9-scf00340 | 9 |
| AX-158175004 | 16 | 57.564 | KV452969.1 | 5088943 | 9-scf00340 | 9 |
| AX-158418047 | 16 | 57.564 | KV452969.1 | 5119474 | 9-scf00340 | 9 |
| AX-157834973 | 16 | 57.673 | KV452969.1 | 3311525 | 9-scf00340 | 9 |
| AX-157834974 | 16 | 57.673 | KV452969.1 | 3314750 | 9-scf00340 | 9 |
| AX-158173648 | 16 | 57.673 | KV452969.1 | 3319369 | 9-scf00340 | 9 |
| AX-158173650 | 16 | 57.673 | KV452969.1 | 3321159 | 9-scf00340 | 9 |
| AX-158173652 | 16 | 57.673 | KV452969.1 | 3323864 | 9-scf00340 | 9 |
| AX-158173653 | 16 | 57.673 | KV452969.1 | 3327794 | 9-scf00340 | 9 |
| AX-158173662 | 16 | 57.673 | KV452969.1 | 3340193 | 9-scf00340 | 9 |
| AX-158173189 | 16 | 57.782 | KV452969.1 | 2745726 | 9-scf00340 | 9 |
| AX-158173330 | 16 | 57.782 | KV452969.1 | 2934305 | 9-scf00340 | 9 |
| AX-158173359 | 16 | 57.782 | KV452969.1 | 2966194 | 9-scf00340 | 9 |
| AX-158173360 | 16 | 57.782 | KV452969.1 | 2966442 | 9-scf00340 | 9 |
| AX-158173392 | 16 | 57.782 | KV452969.1 | 2987036 | 9-scf00340 | 9 |
| AX-158173496 | 16 | 57.782 | KV452969.1 | 3128250 | 9-scf00340 | 9 |
| AX-158173668 | 16 | 57.782 | KV452969.1 | 3350884 | 9-scf00340 | 9 |
| AX-158413379 | 16 | 57.782 | KV452969.1 | 3364085 | 9-scf00340 | 9 |

|              |    |        |            |         |            |   |
|--------------|----|--------|------------|---------|------------|---|
| AX-157708879 | 16 | 57.782 | KV452969.1 | 3421360 | 9-scf00340 | 9 |
| AX-158173706 | 16 | 57.782 | KV452969.1 | 3436897 | 9-scf00340 | 9 |
| AX-158423041 | 16 | 57.782 | KV452969.1 | 3453083 | 9-scf00340 | 9 |
| AX-158173718 | 16 | 57.782 | KV452969.1 | 3463169 | 9-scf00340 | 9 |
| AX-157754983 | 16 | 57.782 | KV452969.1 | 3482601 | 9-scf00340 | 9 |
| AX-158173724 | 16 | 57.782 | KV452969.1 | 3484159 | 9-scf00340 | 9 |
| AX-158173725 | 16 | 57.782 | KV452969.1 | 3485368 | 9-scf00340 | 9 |
| AX-158173728 | 16 | 57.782 | KV452969.1 | 3491286 | 9-scf00340 | 9 |
| AX-158173735 | 16 | 57.782 | KV452969.1 | 3511937 | 9-scf00340 | 9 |
| AX-158173737 | 16 | 57.782 | KV452969.1 | 3512822 | 9-scf00340 | 9 |
| AX-158173741 | 16 | 57.782 | KV452969.1 | 3517434 | 9-scf00340 | 9 |
| AX-158173742 | 16 | 57.782 | KV452969.1 | 3519599 | 9-scf00340 | 9 |
| AX-158173752 | 16 | 57.782 | KV452969.1 | 3539152 | 9-scf00340 | 9 |
| AX-158173754 | 16 | 57.782 | KV452969.1 | 3542146 | 9-scf00340 | 9 |
| AX-158173755 | 16 | 57.782 | KV452969.1 | 3542862 | 9-scf00340 | 9 |
| AX-158173759 | 16 | 57.782 | KV452969.1 | 3548470 | 9-scf00340 | 9 |
| AX-158173764 | 16 | 57.782 | KV452969.1 | 3556665 | 9-scf00340 | 9 |
| AX-158173782 | 16 | 57.782 | KV452969.1 | 3603355 | 9-scf00340 | 9 |
| AX-158173801 | 16 | 57.782 | KV452969.1 | 3629646 | 9-scf00340 | 9 |
| AX-158173811 | 16 | 57.782 | KV452969.1 | 3642311 | 9-scf00340 | 9 |
| AX-158173815 | 16 | 57.782 | KV452969.1 | 3647801 | 9-scf00340 | 9 |
| AX-158173821 | 16 | 57.782 | KV452969.1 | 3658483 | 9-scf00340 | 9 |
| AX-157858565 | 16 | 57.782 | KV452969.1 | 3659837 | 9-scf00340 | 9 |
| AX-158173822 | 16 | 57.782 | KV452969.1 | 3660049 | 9-scf00340 | 9 |
| AX-158173823 | 16 | 57.782 | KV452969.1 | 3660484 | 9-scf00340 | 9 |
| AX-158413397 | 16 | 57.782 | KV452969.1 | 3664708 | 9-scf00340 | 9 |
| AX-157718223 | 16 | 57.782 | KV452969.1 | 3672814 | 9-scf00340 | 9 |
| AX-158173829 | 16 | 57.782 | KV452969.1 | 3680991 | 9-scf00340 | 9 |
| AX-158173830 | 16 | 57.782 | KV452969.1 | 3681727 | 9-scf00340 | 9 |
| AX-158173832 | 16 | 57.782 | KV452969.1 | 3683838 | 9-scf00340 | 9 |
| AX-157834985 | 16 | 57.782 | KV452969.1 | 3689608 | 9-scf00340 | 9 |
| AX-158173835 | 16 | 57.782 | KV452969.1 | 3689812 | 9-scf00340 | 9 |
| AX-158173836 | 16 | 57.782 | KV452969.1 | 3690124 | 9-scf00340 | 9 |
| AX-158173838 | 16 | 57.782 | KV452969.1 | 3694252 | 9-scf00340 | 9 |
| AX-158173840 | 16 | 57.782 | KV452969.1 | 3695832 | 9-scf00340 | 9 |
| AX-158173849 | 16 | 57.782 | KV452969.1 | 3710071 | 9-scf00340 | 9 |
| AX-157748952 | 16 | 57.782 | KV452969.1 | 3711224 | 9-scf00340 | 9 |
| AX-158173850 | 16 | 57.782 | KV452969.1 | 3712073 | 9-scf00340 | 9 |
| AX-157723376 | 16 | 57.782 | KV452969.1 | 3770292 | 9-scf00340 | 9 |
| AX-158173895 | 16 | 57.782 | KV452969.1 | 3778692 | 9-scf00340 | 9 |
| AX-158173910 | 16 | 57.782 | KV452969.1 | 3807594 | 9-scf00340 | 9 |
| AX-158173922 | 16 | 57.782 | KV452969.1 | 3826329 | 9-scf00340 | 9 |
| AX-158173931 | 16 | 57.782 | KV452969.1 | 3835526 | 9-scf00340 | 9 |
| AX-158173940 | 16 | 57.782 | KV452969.1 | 3856097 | 9-scf00340 | 9 |
| AX-158173953 | 16 | 57.782 | KV452969.1 | 3881315 | 9-scf00340 | 9 |
| AX-158173960 | 16 | 57.782 | KV452969.1 | 3896551 | 9-scf00340 | 9 |
| AX-158173965 | 16 | 57.782 | KV452969.1 | 3901656 | 9-scf00340 | 9 |
| AX-157725171 | 16 | 57.782 | KV452969.1 | 3908193 | 9-scf00340 | 9 |
| AX-158173971 | 16 | 57.782 | KV452969.1 | 3912407 | 9-scf00340 | 9 |
| AX-158173972 | 16 | 57.782 | KV452969.1 | 3914162 | 9-scf00340 | 9 |
| AX-158173973 | 16 | 57.782 | KV452969.1 | 3916979 | 9-scf00340 | 9 |

|              |    |        |            |         |            |   |
|--------------|----|--------|------------|---------|------------|---|
| AX-157834986 | 16 | 57.782 | KV452969.1 | 3919288 | 9-scf00340 | 9 |
| AX-158173980 | 16 | 57.782 | KV452969.1 | 3926664 | 9-scf00340 | 9 |
| AX-158173983 | 16 | 57.782 | KV452969.1 | 3934888 | 9-scf00340 | 9 |
| AX-158173985 | 16 | 57.782 | KV452969.1 | 3938375 | 9-scf00340 | 9 |
| AX-158173988 | 16 | 57.782 | KV452969.1 | 3945317 | 9-scf00340 | 9 |
| AX-157708848 | 16 | 57.782 | KV452969.1 | 3947700 | 9-scf00340 | 9 |
| AX-158174012 | 16 | 57.782 | KV452969.1 | 3981883 | 9-scf00340 | 9 |
| AX-158174036 | 16 | 57.782 | KV452969.1 | 4008197 | 9-scf00340 | 9 |
| AX-158174040 | 16 | 57.782 | KV452969.1 | 4010784 | 9-scf00340 | 9 |
| AX-158174042 | 16 | 57.782 | KV452969.1 | 4011561 | 9-scf00340 | 9 |
| AX-158174043 | 16 | 57.782 | KV452969.1 | 4012267 | 9-scf00340 | 9 |
| AX-158174044 | 16 | 57.782 | KV452969.1 | 4012673 | 9-scf00340 | 9 |
| AX-158174045 | 16 | 57.782 | KV452969.1 | 4012952 | 9-scf00340 | 9 |
| AX-158174062 | 16 | 57.782 | KV452969.1 | 4032016 | 9-scf00340 | 9 |
| AX-158174064 | 16 | 57.782 | KV452969.1 | 4033609 | 9-scf00340 | 9 |
| AX-157747228 | 16 | 57.782 | KV452969.1 | 4038631 | 9-scf00340 | 9 |
| AX-158174072 | 16 | 57.782 | KV452969.1 | 4043976 | 9-scf00340 | 9 |
| AX-158174076 | 16 | 57.782 | KV452969.1 | 4049642 | 9-scf00340 | 9 |
| AX-158174092 | 16 | 57.782 | KV452969.1 | 4064013 | 9-scf00340 | 9 |
| AX-157866672 | 16 | 57.782 | KV452969.1 | 4066256 | 9-scf00340 | 9 |
| AX-157744401 | 16 | 57.782 | KV452969.1 | 4067100 | 9-scf00340 | 9 |
| AX-158174099 | 16 | 57.782 | KV452969.1 | 4078564 | 9-scf00340 | 9 |
| AX-158174100 | 16 | 57.782 | KV452969.1 | 4079261 | 9-scf00340 | 9 |
| AX-158174102 | 16 | 57.782 | KV452969.1 | 4079897 | 9-scf00340 | 9 |
| AX-157834997 | 16 | 57.782 | KV452969.1 | 4086420 | 9-scf00340 | 9 |
| AX-158174109 | 16 | 57.782 | KV452969.1 | 4088260 | 9-scf00340 | 9 |
| AX-158174177 | 16 | 57.782 | KV452969.1 | 4155342 | 9-scf00340 | 9 |
| AX-158174182 | 16 | 57.782 | KV452969.1 | 4159993 | 9-scf00340 | 9 |
| AX-158174220 | 16 | 57.782 | KV452969.1 | 4189907 | 9-scf00340 | 9 |
| AX-158174227 | 16 | 57.782 | KV452969.1 | 4196200 | 9-scf00340 | 9 |
| AX-157835009 | 16 | 57.782 | KV452969.1 | 4196937 | 9-scf00340 | 9 |
| AX-158174229 | 16 | 57.782 | KV452969.1 | 4197898 | 9-scf00340 | 9 |
| AX-158174233 | 16 | 57.782 | KV452969.1 | 4204256 | 9-scf00340 | 9 |
| AX-158174236 | 16 | 57.782 | KV452969.1 | 4206597 | 9-scf00340 | 9 |
| AX-158174237 | 16 | 57.782 | KV452969.1 | 4207126 | 9-scf00340 | 9 |
| AX-158174238 | 16 | 57.782 | KV452969.1 | 4207623 | 9-scf00340 | 9 |
| AX-158174239 | 16 | 57.782 | KV452969.1 | 4208265 | 9-scf00340 | 9 |
| AX-157750192 | 16 | 57.782 | KV452969.1 | 4212163 | 9-scf00340 | 9 |
| AX-157775539 | 16 | 57.782 | KV452969.1 | 4212851 | 9-scf00340 | 9 |
| AX-158174247 | 16 | 57.782 | KV452969.1 | 4215432 | 9-scf00340 | 9 |
| AX-158174250 | 16 | 57.782 | KV452969.1 | 4219178 | 9-scf00340 | 9 |
| AX-157835010 | 16 | 57.782 | KV452969.1 | 4228122 | 9-scf00340 | 9 |
| AX-158174276 | 16 | 57.782 | KV452969.1 | 4245645 | 9-scf00340 | 9 |
| AX-158174281 | 16 | 57.782 | KV452969.1 | 4249582 | 9-scf00340 | 9 |
| AX-157872017 | 16 | 57.782 | KV452969.1 | 4291775 | 9-scf00340 | 9 |
| AX-158174328 | 16 | 57.782 | KV452969.1 | 4302813 | 9-scf00340 | 9 |
| AX-158174329 | 16 | 57.782 | KV452969.1 | 4303790 | 9-scf00340 | 9 |
| AX-158174333 | 16 | 57.782 | KV452969.1 | 4306437 | 9-scf00340 | 9 |
| AX-158174361 | 16 | 57.782 | KV452969.1 | 4340968 | 9-scf00340 | 9 |
| AX-158174390 | 16 | 57.782 | KV452969.1 | 4367506 | 9-scf00340 | 9 |
| AX-158174401 | 16 | 57.782 | KV452969.1 | 4384000 | 9-scf00340 | 9 |

|              |    |        |            |         |            |   |
|--------------|----|--------|------------|---------|------------|---|
| AX-158174404 | 16 | 57.782 | KV452969.1 | 4388154 | 9-scf00340 | 9 |
| AX-158174424 | 16 | 57.782 | KV452969.1 | 4409105 | 9-scf00340 | 9 |
| AX-158174430 | 16 | 57.782 | KV452969.1 | 4419119 | 9-scf00340 | 9 |
| AX-158174432 | 16 | 57.782 | KV452969.1 | 4421603 | 9-scf00340 | 9 |
| AX-158174454 | 16 | 57.782 | KV452969.1 | 4443654 | 9-scf00340 | 9 |
| AX-157716204 | 16 | 57.782 | KV452969.1 | 4445726 | 9-scf00340 | 9 |
| AX-158174460 | 16 | 57.782 | KV452969.1 | 4452457 | 9-scf00340 | 9 |
| AX-158174463 | 16 | 57.782 | KV452969.1 | 4454778 | 9-scf00340 | 9 |
| AX-158174464 | 16 | 57.782 | KV452969.1 | 4454929 | 9-scf00340 | 9 |
| AX-158174467 | 16 | 57.782 | KV452969.1 | 4456941 | 9-scf00340 | 9 |
| AX-158423051 | 16 | 57.782 | KV452969.1 | 4481127 | 9-scf00340 | 9 |
| AX-158174500 | 16 | 57.782 | KV452969.1 | 4500048 | 9-scf00340 | 9 |
| AX-158174502 | 16 | 57.782 | KV452969.1 | 4501034 | 9-scf00340 | 9 |
| AX-158174505 | 16 | 57.782 | KV452969.1 | 4504133 | 9-scf00340 | 9 |
| AX-158174510 | 16 | 57.782 | KV452969.1 | 4509075 | 9-scf00340 | 9 |
| AX-158174517 | 16 | 57.782 | KV452969.1 | 4514637 | 9-scf00340 | 9 |
| AX-158174539 | 16 | 57.782 | KV452969.1 | 4541515 | 9-scf00340 | 9 |
| AX-158174543 | 16 | 57.782 | KV452969.1 | 4543868 | 9-scf00340 | 9 |
| AX-158174544 | 16 | 57.782 | KV452969.1 | 4544804 | 9-scf00340 | 9 |
| AX-157754460 | 16 | 57.782 | KV452969.1 | 4546334 | 9-scf00340 | 9 |
| AX-157835029 | 16 | 57.782 | KV452969.1 | 4554158 | 9-scf00340 | 9 |
| AX-157835031 | 16 | 57.782 | KV452969.1 | 4559373 | 9-scf00340 | 9 |
| AX-158174667 | 16 | 57.782 | KV452969.1 | 4688111 | 9-scf00340 | 9 |
| AX-158174676 | 16 | 57.782 | KV452969.1 | 4694170 | 9-scf00340 | 9 |
| AX-158174677 | 16 | 57.782 | KV452969.1 | 4694882 | 9-scf00340 | 9 |
| AX-158174678 | 16 | 57.782 | KV452969.1 | 4695249 | 9-scf00340 | 9 |
| AX-158174680 | 16 | 57.782 | KV452969.1 | 4697187 | 9-scf00340 | 9 |
| AX-158174683 | 16 | 57.782 | KV452969.1 | 4699455 | 9-scf00340 | 9 |
| AX-158174685 | 16 | 57.782 | KV452969.1 | 4700354 | 9-scf00340 | 9 |
| AX-158174686 | 16 | 57.782 | KV452969.1 | 4701326 | 9-scf00340 | 9 |
| AX-158174687 | 16 | 57.782 | KV452969.1 | 4701608 | 9-scf00340 | 9 |
| AX-157764721 | 16 | 57.782 | KV452969.1 | 4709865 | 9-scf00340 | 9 |
| AX-158174695 | 16 | 57.782 | KV452969.1 | 4710396 | 9-scf00340 | 9 |
| AX-158174697 | 16 | 57.782 | KV452969.1 | 4711883 | 9-scf00340 | 9 |
| AX-158174702 | 16 | 57.782 | KV452969.1 | 4715659 | 9-scf00340 | 9 |
| AX-158174703 | 16 | 57.782 | KV452969.1 | 4717132 | 9-scf00340 | 9 |
| AX-158174704 | 16 | 57.782 | KV452969.1 | 4717971 | 9-scf00340 | 9 |
| AX-157835042 | 16 | 57.782 | KV452969.1 | 4733806 | 9-scf00340 | 9 |
| AX-158174863 | 16 | 57.782 | KV452969.1 | 4907393 | 9-scf00340 | 9 |
| AX-158174864 | 16 | 57.782 | KV452969.1 | 4908601 | 9-scf00340 | 9 |
| AX-158174875 | 16 | 57.782 | KV452969.1 | 4921656 | 9-scf00340 | 9 |
| AX-158385897 | 16 | 57.782 | KV452969.1 | 4937849 | 9-scf00340 | 9 |
| AX-158174899 | 16 | 57.782 | KV452969.1 | 4946198 | 9-scf00340 | 9 |
| AX-158174911 | 16 | 57.782 | KV452969.1 | 4957021 | 9-scf00340 | 9 |
| AX-158174912 | 16 | 57.782 | KV452969.1 | 4957704 | 9-scf00340 | 9 |
| AX-158174913 | 16 | 57.782 | KV452969.1 | 4958247 | 9-scf00340 | 9 |
| AX-158174917 | 16 | 57.782 | KV452969.1 | 4963844 | 9-scf00340 | 9 |
| AX-158174921 | 16 | 57.782 | KV452969.1 | 4967869 | 9-scf00340 | 9 |
| AX-158174929 | 16 | 57.782 | KV452969.1 | 4982180 | 9-scf00340 | 9 |
| AX-158174930 | 16 | 57.782 | KV452969.1 | 4983953 | 9-scf00340 | 9 |
| AX-157757306 | 16 | 57.782 | KV452969.1 | 4985759 | 9-scf00340 | 9 |

|              |    |        |             |          |                |    |
|--------------|----|--------|-------------|----------|----------------|----|
| AX-157886781 | 16 | 57.782 | KV452969.1  | 4985856  | 9-scf00340     | 9  |
| AX-158174932 | 16 | 57.782 | KV452969.1  | 4986822  | 9-scf00340     | 9  |
| AX-158174933 | 16 | 57.782 | KV452969.1  | 4988388  | 9-scf00340     | 9  |
| AX-158174937 | 16 | 57.782 | KV452969.1  | 4994004  | 9-scf00340     | 9  |
| AX-158174939 | 16 | 57.782 | KV452969.1  | 4995870  | 9-scf00340     | 9  |
| AX-158174940 | 16 | 57.782 | KV452969.1  | 4996412  | 9-scf00340     | 9  |
| AX-158174954 | 16 | 57.782 | KV452969.1  | 5020542  | 9-scf00340     | 9  |
| AX-158174955 | 16 | 57.782 | KV452969.1  | 5025664  | 9-scf00340     | 9  |
| AX-158175223 | 16 | 57.782 | KV452969.1  | 5404694  | 9-scf00340     | 9  |
| AX-158177117 | 16 | 57.782 | KV452969.1  | 8245496  | 9-scf00340     | 9  |
| AX-157703095 | 16 | 57.782 | DX096252.1  | 400      | IORI212 lctalu | UN |
| AX-157705325 | 16 | 57.782 | 3ML01029410 | 231      | scf05031_1     | UN |
| AX-157705848 | 16 | 57.782 | 3ML01031041 | 526      | scf06646_1     | UN |
| AX-158174366 | 16 | 57.892 | KV452969.1  | 4347641  | 9-scf00340     | 9  |
| AX-158174959 | 16 | 57.892 | KV452969.1  | 5035073  | 9-scf00340     | 9  |
| AX-158174960 | 16 | 57.892 | KV452969.1  | 5036686  | 9-scf00340     | 9  |
| AX-158174963 | 16 | 57.892 | KV452969.1  | 5040764  | 9-scf00340     | 9  |
| AX-158174964 | 16 | 57.892 | KV452969.1  | 5042186  | 9-scf00340     | 9  |
| AX-158174973 | 16 | 57.892 | KV452969.1  | 5053322  | 9-scf00340     | 9  |
| AX-158174967 | 16 | 57.921 | KV452969.1  | 5046315  | 9-scf00340     | 9  |
| AX-158174976 | 16 | 57.953 | KV452969.1  | 5056844  | 9-scf00340     | 9  |
| AX-158173354 | 16 | 57.978 | KV452969.1  | 2964280  | 9-scf00340     | 9  |
| AX-158173520 | 16 | 57.978 | KV452969.1  | 3153600  | 9-scf00340     | 9  |
| AX-158174962 | 16 | 57.978 | KV452969.1  | 5040377  | 9-scf00340     | 9  |
| AX-158174985 | 16 | 57.978 | KV452969.1  | 5070490  | 9-scf00340     | 9  |
| AX-158178918 | 16 | 57.978 | KV452969.1  | 10688132 | 9-scf00340     | 9  |
| AX-158174970 | 16 | 58.001 | KV452969.1  | 5050489  | 9-scf00340     | 9  |
| AX-158175010 | 16 | 58.001 | KV452969.1  | 5097906  | 9-scf00340     | 9  |
| AX-157750908 | 16 | 58.001 | KV452969.1  | 5100590  | 9-scf00340     | 9  |
| AX-157722701 | 16 | 58.001 | KV452969.1  | 5117056  | 9-scf00340     | 9  |
| AX-158175024 | 16 | 58.001 | KV452969.1  | 5119651  | 9-scf00340     | 9  |
| AX-158175028 | 16 | 58.001 | KV452969.1  | 5126052  | 9-scf00340     | 9  |
| AX-158175032 | 16 | 58.001 | KV452969.1  | 5130333  | 9-scf00340     | 9  |
| AX-158175034 | 16 | 58.001 | KV452969.1  | 5132009  | 9-scf00340     | 9  |
| AX-158175048 | 16 | 58.001 | KV452969.1  | 5148230  | 9-scf00340     | 9  |
| AX-158175047 | 16 | 58.11  | KV452969.1  | 5147719  | 9-scf00340     | 9  |
| AX-158413434 | 16 | 58.11  | KV452969.1  | 5149653  | 9-scf00340     | 9  |
| AX-158175051 | 16 | 58.11  | KV452969.1  | 5150722  | 9-scf00340     | 9  |
| AX-158175057 | 16 | 58.11  | KV452969.1  | 5161671  | 9-scf00340     | 9  |
| AX-158175076 | 16 | 58.11  | KV452969.1  | 5204199  | 9-scf00340     | 9  |
| AX-158175100 | 16 | 58.11  | KV452969.1  | 5244688  | 9-scf00340     | 9  |
| AX-158175058 | 16 | 58.163 | KV452969.1  | 5164191  | 9-scf00340     | 9  |
| AX-158175059 | 16 | 58.219 | KV452969.1  | 5165752  | 9-scf00340     | 9  |
| AX-158175061 | 16 | 58.219 | KV452969.1  | 5168246  | 9-scf00340     | 9  |
| AX-158175062 | 16 | 58.219 | KV452969.1  | 5168752  | 9-scf00340     | 9  |
| AX-158175063 | 16 | 58.219 | KV452969.1  | 5169359  | 9-scf00340     | 9  |
| AX-158175064 | 16 | 58.219 | KV452969.1  | 5169614  | 9-scf00340     | 9  |
| AX-158175065 | 16 | 58.219 | KV452969.1  | 5170866  | 9-scf00340     | 9  |
| AX-158413362 | 16 | 58.221 | KV452969.1  | 2901374  | 9-scf00340     | 9  |
| AX-158175068 | 16 | 58.221 | KV452969.1  | 5181591  | 9-scf00340     | 9  |
| AX-158175480 | 16 | 58.221 | KV452969.1  | 6186190  | 9-scf00340     | 9  |



|              |    |        |            |          |            |   |
|--------------|----|--------|------------|----------|------------|---|
| AX-157835055 | 16 | 58.222 | KV452969.1 | 5188806  | 9-scf00340 | 9 |
| AX-158175072 | 16 | 58.222 | KV452969.1 | 5192650  | 9-scf00340 | 9 |
| AX-157835056 | 16 | 58.222 | KV452969.1 | 5192955  | 9-scf00340 | 9 |
| AX-158175073 | 16 | 58.222 | KV452969.1 | 5193168  | 9-scf00340 | 9 |
| AX-157835057 | 16 | 58.223 | KV452969.1 | 5193406  | 9-scf00340 | 9 |
| AX-158175075 | 16 | 58.224 | KV452969.1 | 5198956  | 9-scf00340 | 9 |
| AX-157772915 | 16 | 58.224 | KV452969.1 | 5200483  | 9-scf00340 | 9 |
| AX-157696342 | 16 | 58.224 | KV452969.1 | 5202965  | 9-scf00340 | 9 |
| AX-158175054 | 16 | 58.381 | KV452969.1 | 5157373  | 9-scf00340 | 9 |
| AX-158393499 | 16 | 58.381 | KV452969.1 | 5172476  | 9-scf00340 | 9 |
| AX-157835059 | 16 | 58.381 | KV452969.1 | 5212778  | 9-scf00340 | 9 |
| AX-157743097 | 16 | 58.381 | KV452969.1 | 5214142  | 9-scf00340 | 9 |
| AX-158175087 | 16 | 58.381 | KV452969.1 | 5221170  | 9-scf00340 | 9 |
| AX-158175088 | 16 | 58.381 | KV452969.1 | 5223449  | 9-scf00340 | 9 |
| AX-158175089 | 16 | 58.381 | KV452969.1 | 5226434  | 9-scf00340 | 9 |
| AX-158175090 | 16 | 58.381 | KV452969.1 | 5227720  | 9-scf00340 | 9 |
| AX-157835063 | 16 | 58.381 | KV452969.1 | 5235614  | 9-scf00340 | 9 |
| AX-157745337 | 16 | 58.381 | KV452969.1 | 5238605  | 9-scf00340 | 9 |
| AX-158175101 | 16 | 58.381 | KV452969.1 | 5245237  | 9-scf00340 | 9 |
| AX-158175102 | 16 | 58.381 | KV452969.1 | 5245941  | 9-scf00340 | 9 |
| AX-157835064 | 16 | 58.381 | KV452969.1 | 5247089  | 9-scf00340 | 9 |
| AX-158175103 | 16 | 58.381 | KV452969.1 | 5247197  | 9-scf00340 | 9 |
| AX-158175104 | 16 | 58.381 | KV452969.1 | 5247593  | 9-scf00340 | 9 |
| AX-158175127 | 16 | 58.381 | KV452969.1 | 5288393  | 9-scf00340 | 9 |
| AX-157835069 | 16 | 58.381 | KV452969.1 | 5294999  | 9-scf00340 | 9 |
| AX-158175490 | 16 | 58.381 | KV452969.1 | 6192353  | 9-scf00340 | 9 |
| AX-158175496 | 16 | 58.381 | KV452969.1 | 6196204  | 9-scf00340 | 9 |
| AX-158175664 | 16 | 58.381 | KV452969.1 | 6395222  | 9-scf00340 | 9 |
| AX-158176491 | 16 | 58.381 | KV452969.1 | 7425917  | 9-scf00340 | 9 |
| AX-158176509 | 16 | 58.381 | KV452969.1 | 7447420  | 9-scf00340 | 9 |
| AX-158176790 | 16 | 58.381 | KV452969.1 | 7808308  | 9-scf00340 | 9 |
| AX-157773863 | 16 | 58.381 | KV452969.1 | 7947670  | 9-scf00340 | 9 |
| AX-158176922 | 16 | 58.381 | KV452969.1 | 7976444  | 9-scf00340 | 9 |
| AX-158176952 | 16 | 58.381 | KV452969.1 | 8017218  | 9-scf00340 | 9 |
| AX-158177122 | 16 | 58.381 | KV452969.1 | 8250164  | 9-scf00340 | 9 |
| AX-158177156 | 16 | 58.381 | KV452969.1 | 8288054  | 9-scf00340 | 9 |
| AX-158179455 | 16 | 58.381 | KV452969.1 | 11364937 | 9-scf00340 | 9 |
| AX-157719417 | 16 | 58.547 | KV452969.1 | 5261821  | 9-scf00340 | 9 |
| AX-157835065 | 16 | 58.547 | KV452969.1 | 5261981  | 9-scf00340 | 9 |
| AX-158175110 | 16 | 58.57  | KV452969.1 | 5264259  | 9-scf00340 | 9 |
| AX-157835066 | 16 | 58.602 | KV452969.1 | 5267478  | 9-scf00340 | 9 |
| AX-158175135 | 16 | 58.602 | KV452969.1 | 5294916  | 9-scf00340 | 9 |
| AX-158175171 | 16 | 58.602 | KV452969.1 | 5349147  | 9-scf00340 | 9 |
| AX-158175488 | 16 | 58.602 | KV452969.1 | 6191793  | 9-scf00340 | 9 |
| AX-158175584 | 16 | 58.602 | KV452969.1 | 6294806  | 9-scf00340 | 9 |
| AX-158175675 | 16 | 58.602 | KV452969.1 | 6403434  | 9-scf00340 | 9 |
| AX-158176240 | 16 | 58.602 | KV452969.1 | 7147868  | 9-scf00340 | 9 |
| AX-158176714 | 16 | 58.602 | KV452969.1 | 7704963  | 9-scf00340 | 9 |
| AX-158176730 | 16 | 58.602 | KV452969.1 | 7727173  | 9-scf00340 | 9 |
| AX-157835234 | 16 | 58.602 | KV452969.1 | 7973799  | 9-scf00340 | 9 |
| AX-157835250 | 16 | 58.602 | KV452969.1 | 8066713  | 9-scf00340 | 9 |

|              |    |        |            |         |            |   |
|--------------|----|--------|------------|---------|------------|---|
| AX-157754772 | 16 | 58.602 | KV452969.1 | 8672797 | 9-scf00340 | 9 |
| AX-158175115 | 16 | 58.655 | KV452969.1 | 5271482 | 9-scf00340 | 9 |
| AX-158175118 | 16 | 58.656 | KV452969.1 | 5273522 | 9-scf00340 | 9 |
| AX-157773748 | 16 | 58.658 | KV452969.1 | 5276728 | 9-scf00340 | 9 |
| AX-157745546 | 16 | 58.658 | KV452969.1 | 5277178 | 9-scf00340 | 9 |
| AX-158175120 | 16 | 58.802 | KV452969.1 | 5279532 | 9-scf00340 | 9 |
| AX-157741004 | 16 | 59.094 | KV452969.1 | 5288266 | 9-scf00340 | 9 |
| AX-158175130 | 16 | 59.094 | KV452969.1 | 5290490 | 9-scf00340 | 9 |
| AX-158175134 | 16 | 59.094 | KV452969.1 | 5294016 | 9-scf00340 | 9 |
| AX-158175136 | 16 | 59.094 | KV452969.1 | 5295770 | 9-scf00340 | 9 |
| AX-158175137 | 16 | 59.094 | KV452969.1 | 5296593 | 9-scf00340 | 9 |
| AX-158175141 | 16 | 59.094 | KV452969.1 | 5301303 | 9-scf00340 | 9 |
| AX-157713116 | 16 | 59.094 | KV452969.1 | 5303732 | 9-scf00340 | 9 |
| AX-158175143 | 16 | 59.094 | KV452969.1 | 5306229 | 9-scf00340 | 9 |
| AX-158175138 | 16 | 59.203 | KV452969.1 | 5298114 | 9-scf00340 | 9 |
| AX-157835071 | 16 | 59.203 | KV452969.1 | 5308803 | 9-scf00340 | 9 |
| AX-157835073 | 16 | 59.203 | KV452969.1 | 5313817 | 9-scf00340 | 9 |
| AX-158175147 | 16 | 59.203 | KV452969.1 | 5316149 | 9-scf00340 | 9 |
| AX-158175148 | 16 | 59.203 | KV452969.1 | 5317474 | 9-scf00340 | 9 |
| AX-158175149 | 16 | 59.203 | KV452969.1 | 5318320 | 9-scf00340 | 9 |
| AX-157835074 | 16 | 59.203 | KV452969.1 | 5321809 | 9-scf00340 | 9 |
| AX-157743986 | 16 | 59.203 | KV452969.1 | 5322511 | 9-scf00340 | 9 |
| AX-157747704 | 16 | 59.203 | KV452969.1 | 5324115 | 9-scf00340 | 9 |
| AX-158175153 | 16 | 59.203 | KV452969.1 | 5326623 | 9-scf00340 | 9 |
| AX-158413436 | 16 | 59.203 | KV452969.1 | 5328465 | 9-scf00340 | 9 |
| AX-158175157 | 16 | 59.203 | KV452969.1 | 5331761 | 9-scf00340 | 9 |
| AX-157757013 | 16 | 59.203 | KV452969.1 | 5334080 | 9-scf00340 | 9 |
| AX-158175159 | 16 | 59.203 | KV452969.1 | 5336083 | 9-scf00340 | 9 |
| AX-158175161 | 16 | 59.203 | KV452969.1 | 5337347 | 9-scf00340 | 9 |
| AX-158175165 | 16 | 59.203 | KV452969.1 | 5343497 | 9-scf00340 | 9 |
| AX-158175166 | 16 | 59.203 | KV452969.1 | 5343900 | 9-scf00340 | 9 |
| AX-157835152 | 16 | 59.203 | KV452969.1 | 6974820 | 9-scf00340 | 9 |
| AX-158176195 | 16 | 59.203 | KV452969.1 | 7090617 | 9-scf00340 | 9 |
| AX-158176863 | 16 | 59.203 | KV452969.1 | 7896550 | 9-scf00340 | 9 |
| AX-158177091 | 16 | 59.203 | KV452969.1 | 8214813 | 9-scf00340 | 9 |
| AX-157758919 | 16 | 59.312 | KV452969.1 | 5266651 | 9-scf00340 | 9 |
| AX-157835067 | 16 | 59.312 | KV452969.1 | 5274202 | 9-scf00340 | 9 |
| AX-158175139 | 16 | 59.312 | KV452969.1 | 5298545 | 9-scf00340 | 9 |
| AX-158380577 | 16 | 59.312 | KV452969.1 | 5359353 | 9-scf00340 | 9 |
| AX-158175179 | 16 | 59.312 | KV452969.1 | 5360702 | 9-scf00340 | 9 |
| AX-158175183 | 16 | 59.312 | KV452969.1 | 5363352 | 9-scf00340 | 9 |
| AX-158175190 | 16 | 59.312 | KV452969.1 | 5371373 | 9-scf00340 | 9 |
| AX-158175197 | 16 | 59.312 | KV452969.1 | 5377321 | 9-scf00340 | 9 |
| AX-158175201 | 16 | 59.312 | KV452969.1 | 5381891 | 9-scf00340 | 9 |
| AX-158175202 | 16 | 59.312 | KV452969.1 | 5382514 | 9-scf00340 | 9 |
| AX-158175204 | 16 | 59.312 | KV452969.1 | 5384328 | 9-scf00340 | 9 |
| AX-158175209 | 16 | 59.312 | KV452969.1 | 5388176 | 9-scf00340 | 9 |
| AX-158175212 | 16 | 59.312 | KV452969.1 | 5391238 | 9-scf00340 | 9 |
| AX-158175213 | 16 | 59.312 | KV452969.1 | 5392335 | 9-scf00340 | 9 |
| AX-157750746 | 16 | 59.312 | KV452969.1 | 5392970 | 9-scf00340 | 9 |
| AX-158175214 | 16 | 59.312 | KV452969.1 | 5394859 | 9-scf00340 | 9 |

|              |    |        |             |         |            |    |
|--------------|----|--------|-------------|---------|------------|----|
| AX-158175227 | 16 | 59.312 | KV452969.1  | 5411627 | 9-scf00340 | 9  |
| AX-158175526 | 16 | 59.312 | KV452969.1  | 6223806 | 9-scf00340 | 9  |
| AX-158175600 | 16 | 59.312 | KV452969.1  | 6324581 | 9-scf00340 | 9  |
| AX-158175649 | 16 | 59.312 | KV452969.1  | 6380235 | 9-scf00340 | 9  |
| AX-158176225 | 16 | 59.312 | KV452969.1  | 7133824 | 9-scf00340 | 9  |
| AX-158176295 | 16 | 59.312 | KV452969.1  | 7203703 | 9-scf00340 | 9  |
| AX-158176529 | 16 | 59.312 | KV452969.1  | 7476260 | 9-scf00340 | 9  |
| AX-157835227 | 16 | 59.312 | KV452969.1  | 7889449 | 9-scf00340 | 9  |
| AX-157706739 | 16 | 59.312 | 3ML01032833 | 529     | scf08464_1 | UN |
| AX-158175221 | 16 | 59.346 | KV452969.1  | 5401209 | 9-scf00340 | 9  |
| AX-158175273 | 16 | 59.346 | KV452969.1  | 5469834 | 9-scf00340 | 9  |
| AX-158175225 | 16 | 59.384 | KV452969.1  | 5409547 | 9-scf00340 | 9  |
| AX-158175181 | 16 | 59.422 | KV452969.1  | 5362126 | 9-scf00340 | 9  |
| AX-158175196 | 16 | 59.422 | KV452969.1  | 5376357 | 9-scf00340 | 9  |
| AX-158175198 | 16 | 59.422 | KV452969.1  | 5378320 | 9-scf00340 | 9  |
| AX-158175203 | 16 | 59.422 | KV452969.1  | 5383569 | 9-scf00340 | 9  |
| AX-158175230 | 16 | 59.422 | KV452969.1  | 5414888 | 9-scf00340 | 9  |
| AX-158175237 | 16 | 59.422 | KV452969.1  | 5422632 | 9-scf00340 | 9  |
| AX-157701856 | 16 | 59.422 | KV452969.1  | 5425787 | 9-scf00340 | 9  |
| AX-158175243 | 16 | 59.422 | KV452969.1  | 5431700 | 9-scf00340 | 9  |
| AX-158175245 | 16 | 59.422 | KV452969.1  | 5432818 | 9-scf00340 | 9  |
| AX-158175246 | 16 | 59.422 | KV452969.1  | 5434645 | 9-scf00340 | 9  |
| AX-158175248 | 16 | 59.422 | KV452969.1  | 5435606 | 9-scf00340 | 9  |
| AX-158175249 | 16 | 59.422 | KV452969.1  | 5436360 | 9-scf00340 | 9  |
| AX-158175250 | 16 | 59.422 | KV452969.1  | 5437172 | 9-scf00340 | 9  |
| AX-157835077 | 16 | 59.422 | KV452969.1  | 5439880 | 9-scf00340 | 9  |
| AX-157713419 | 16 | 59.422 | KV452969.1  | 5456046 | 9-scf00340 | 9  |
| AX-157835082 | 16 | 59.422 | KV452969.1  | 5457738 | 9-scf00340 | 9  |
| AX-158175265 | 16 | 59.422 | KV452969.1  | 5458461 | 9-scf00340 | 9  |
| AX-158175372 | 16 | 59.422 | KV452969.1  | 5699019 | 9-scf00340 | 9  |
| AX-158175414 | 16 | 59.422 | KV452969.1  | 5911230 | 9-scf00340 | 9  |
| AX-158175425 | 16 | 59.422 | KV452969.1  | 5992714 | 9-scf00340 | 9  |
| AX-157858614 | 16 | 59.422 | KV452969.1  | 6000605 | 9-scf00340 | 9  |
| AX-158175566 | 16 | 59.422 | KV452969.1  | 6279694 | 9-scf00340 | 9  |
| AX-158175572 | 16 | 59.422 | KV452969.1  | 6281887 | 9-scf00340 | 9  |
| AX-158175608 | 16 | 59.422 | KV452969.1  | 6331363 | 9-scf00340 | 9  |
| AX-158175629 | 16 | 59.422 | KV452969.1  | 6352091 | 9-scf00340 | 9  |
| AX-158175660 | 16 | 59.422 | KV452969.1  | 6390507 | 9-scf00340 | 9  |
| AX-158175665 | 16 | 59.422 | KV452969.1  | 6395554 | 9-scf00340 | 9  |
| AX-158175711 | 16 | 59.422 | KV452969.1  | 6449924 | 9-scf00340 | 9  |
| AX-158176114 | 16 | 59.422 | KV452969.1  | 6958405 | 9-scf00340 | 9  |
| AX-158176351 | 16 | 59.422 | KV452969.1  | 7284440 | 9-scf00340 | 9  |
| AX-158176709 | 16 | 59.422 | KV452969.1  | 7696814 | 9-scf00340 | 9  |
| AX-158177071 | 16 | 59.422 | KV452969.1  | 8164610 | 9-scf00340 | 9  |
| AX-157835259 | 16 | 59.422 | KV452969.1  | 8180499 | 9-scf00340 | 9  |
| AX-158177086 | 16 | 59.422 | KV452969.1  | 8197194 | 9-scf00340 | 9  |
| AX-158177187 | 16 | 59.422 | KV452969.1  | 8324320 | 9-scf00340 | 9  |
| AX-158175167 | 16 | 59.531 | KV452969.1  | 5344390 | 9-scf00340 | 9  |
| AX-157751293 | 16 | 59.531 | KV452969.1  | 5347260 | 9-scf00340 | 9  |
| AX-158175178 | 16 | 59.531 | KV452969.1  | 5360181 | 9-scf00340 | 9  |
| AX-158175184 | 16 | 59.531 | KV452969.1  | 5364760 | 9-scf00340 | 9  |

|              |    |        |            |         |            |   |
|--------------|----|--------|------------|---------|------------|---|
| AX-158175186 | 16 | 59.531 | KV452969.1 | 5365944 | 9-scf00340 | 9 |
| AX-158175195 | 16 | 59.531 | KV452969.1 | 5375572 | 9-scf00340 | 9 |
| AX-158175219 | 16 | 59.531 | KV452969.1 | 5399852 | 9-scf00340 | 9 |
| AX-157741950 | 16 | 59.531 | KV452969.1 | 5409409 | 9-scf00340 | 9 |
| AX-158175238 | 16 | 59.531 | KV452969.1 | 5425332 | 9-scf00340 | 9 |
| AX-158175256 | 16 | 59.531 | KV452969.1 | 5447083 | 9-scf00340 | 9 |
| AX-158175257 | 16 | 59.531 | KV452969.1 | 5447874 | 9-scf00340 | 9 |
| AX-157835080 | 16 | 59.531 | KV452969.1 | 5451921 | 9-scf00340 | 9 |
| AX-158175260 | 16 | 59.531 | KV452969.1 | 5453425 | 9-scf00340 | 9 |
| AX-157835081 | 16 | 59.531 | KV452969.1 | 5456194 | 9-scf00340 | 9 |
| AX-158175264 | 16 | 59.531 | KV452969.1 | 5458039 | 9-scf00340 | 9 |
| AX-157858612 | 16 | 59.531 | KV452969.1 | 5464270 | 9-scf00340 | 9 |
| AX-158175267 | 16 | 59.531 | KV452969.1 | 5465417 | 9-scf00340 | 9 |
| AX-157727181 | 16 | 59.531 | KV452969.1 | 5473519 | 9-scf00340 | 9 |
| AX-157747440 | 16 | 59.531 | KV452969.1 | 5484400 | 9-scf00340 | 9 |
| AX-158175295 | 16 | 59.531 | KV452969.1 | 5494877 | 9-scf00340 | 9 |
| AX-158175313 | 16 | 59.531 | KV452969.1 | 5506936 | 9-scf00340 | 9 |
| AX-157714997 | 16 | 59.531 | KV452969.1 | 5508561 | 9-scf00340 | 9 |
| AX-158175316 | 16 | 59.531 | KV452969.1 | 5513159 | 9-scf00340 | 9 |
| AX-157878772 | 16 | 59.531 | KV452969.1 | 5516495 | 9-scf00340 | 9 |
| AX-158175318 | 16 | 59.531 | KV452969.1 | 5518640 | 9-scf00340 | 9 |
| AX-158175322 | 16 | 59.531 | KV452969.1 | 5528226 | 9-scf00340 | 9 |
| AX-158175324 | 16 | 59.531 | KV452969.1 | 5531558 | 9-scf00340 | 9 |
| AX-158175330 | 16 | 59.531 | KV452969.1 | 5551605 | 9-scf00340 | 9 |
| AX-158418050 | 16 | 59.531 | KV452969.1 | 5552694 | 9-scf00340 | 9 |
| AX-158175331 | 16 | 59.531 | KV452969.1 | 5556091 | 9-scf00340 | 9 |
| AX-158175332 | 16 | 59.531 | KV452969.1 | 5561609 | 9-scf00340 | 9 |
| AX-157756614 | 16 | 59.531 | KV452969.1 | 5578395 | 9-scf00340 | 9 |
| AX-158175336 | 16 | 59.531 | KV452969.1 | 5588558 | 9-scf00340 | 9 |
| AX-158175356 | 16 | 59.531 | KV452969.1 | 5659228 | 9-scf00340 | 9 |
| AX-158423056 | 16 | 59.531 | KV452969.1 | 5670196 | 9-scf00340 | 9 |
| AX-158175364 | 16 | 59.531 | KV452969.1 | 5682312 | 9-scf00340 | 9 |
| AX-158175421 | 16 | 59.531 | KV452969.1 | 5975442 | 9-scf00340 | 9 |
| AX-158175444 | 16 | 59.531 | KV452969.1 | 6102970 | 9-scf00340 | 9 |
| AX-158175451 | 16 | 59.531 | KV452969.1 | 6135183 | 9-scf00340 | 9 |
| AX-158175452 | 16 | 59.531 | KV452969.1 | 6136369 | 9-scf00340 | 9 |
| AX-158175453 | 16 | 59.531 | KV452969.1 | 6138566 | 9-scf00340 | 9 |
| AX-157753432 | 16 | 59.531 | KV452969.1 | 6142405 | 9-scf00340 | 9 |
| AX-158175485 | 16 | 59.531 | KV452969.1 | 6189334 | 9-scf00340 | 9 |
| AX-158175489 | 16 | 59.531 | KV452969.1 | 6192020 | 9-scf00340 | 9 |
| AX-158175493 | 16 | 59.531 | KV452969.1 | 6194608 | 9-scf00340 | 9 |
| AX-158175495 | 16 | 59.531 | KV452969.1 | 6195812 | 9-scf00340 | 9 |
| AX-158175498 | 16 | 59.531 | KV452969.1 | 6197676 | 9-scf00340 | 9 |
| AX-158175500 | 16 | 59.531 | KV452969.1 | 6199564 | 9-scf00340 | 9 |
| AX-158175512 | 16 | 59.531 | KV452969.1 | 6214939 | 9-scf00340 | 9 |
| AX-157835093 | 16 | 59.531 | KV452969.1 | 6216114 | 9-scf00340 | 9 |
| AX-158175517 | 16 | 59.531 | KV452969.1 | 6217071 | 9-scf00340 | 9 |
| AX-158175520 | 16 | 59.531 | KV452969.1 | 6221594 | 9-scf00340 | 9 |
| AX-158175521 | 16 | 59.531 | KV452969.1 | 6221799 | 9-scf00340 | 9 |
| AX-158175522 | 16 | 59.531 | KV452969.1 | 6222274 | 9-scf00340 | 9 |
| AX-158175525 | 16 | 59.531 | KV452969.1 | 6223313 | 9-scf00340 | 9 |

|              |    |        |            |          |            |   |
|--------------|----|--------|------------|----------|------------|---|
| AX-158175527 | 16 | 59.531 | KV452969.1 | 6223974  | 9-scf00340 | 9 |
| AX-158175528 | 16 | 59.531 | KV452969.1 | 6225724  | 9-scf00340 | 9 |
| AX-158175532 | 16 | 59.531 | KV452969.1 | 6228228  | 9-scf00340 | 9 |
| AX-158175533 | 16 | 59.531 | KV452969.1 | 6228586  | 9-scf00340 | 9 |
| AX-158175548 | 16 | 59.531 | KV452969.1 | 6249374  | 9-scf00340 | 9 |
| AX-158175562 | 16 | 59.531 | KV452969.1 | 6276349  | 9-scf00340 | 9 |
| AX-158175564 | 16 | 59.531 | KV452969.1 | 6279085  | 9-scf00340 | 9 |
| AX-158175565 | 16 | 59.531 | KV452969.1 | 6279361  | 9-scf00340 | 9 |
| AX-158175567 | 16 | 59.531 | KV452969.1 | 6279994  | 9-scf00340 | 9 |
| AX-158175568 | 16 | 59.531 | KV452969.1 | 6280236  | 9-scf00340 | 9 |
| AX-157773751 | 16 | 59.531 | KV452969.1 | 6280953  | 9-scf00340 | 9 |
| AX-158175580 | 16 | 59.531 | KV452969.1 | 6291379  | 9-scf00340 | 9 |
| AX-158175581 | 16 | 59.531 | KV452969.1 | 6292048  | 9-scf00340 | 9 |
| AX-158175583 | 16 | 59.531 | KV452969.1 | 6294105  | 9-scf00340 | 9 |
| AX-158175586 | 16 | 59.531 | KV452969.1 | 6297651  | 9-scf00340 | 9 |
| AX-158175588 | 16 | 59.531 | KV452969.1 | 6300190  | 9-scf00340 | 9 |
| AX-158175591 | 16 | 59.531 | KV452969.1 | 6304619  | 9-scf00340 | 9 |
| AX-158175593 | 16 | 59.531 | KV452969.1 | 6309245  | 9-scf00340 | 9 |
| AX-158413448 | 16 | 59.531 | KV452969.1 | 6310250  | 9-scf00340 | 9 |
| AX-158175594 | 16 | 59.531 | KV452969.1 | 6311298  | 9-scf00340 | 9 |
| AX-157723332 | 16 | 59.531 | KV452969.1 | 6312525  | 9-scf00340 | 9 |
| AX-158175606 | 16 | 59.531 | KV452969.1 | 6329752  | 9-scf00340 | 9 |
| AX-158175613 | 16 | 59.531 | KV452969.1 | 6339450  | 9-scf00340 | 9 |
| AX-158175614 | 16 | 59.531 | KV452969.1 | 6340489  | 9-scf00340 | 9 |
| AX-158175615 | 16 | 59.531 | KV452969.1 | 6340921  | 9-scf00340 | 9 |
| AX-158175618 | 16 | 59.531 | KV452969.1 | 6342280  | 9-scf00340 | 9 |
| AX-158175627 | 16 | 59.531 | KV452969.1 | 6348710  | 9-scf00340 | 9 |
| AX-158175630 | 16 | 59.531 | KV452969.1 | 6353588  | 9-scf00340 | 9 |
| AX-158175650 | 16 | 59.531 | KV452969.1 | 6380708  | 9-scf00340 | 9 |
| AX-157739185 | 16 | 59.531 | KV452969.1 | 6401558  | 9-scf00340 | 9 |
| AX-158175679 | 16 | 59.531 | KV452969.1 | 6405578  | 9-scf00340 | 9 |
| AX-158175683 | 16 | 59.531 | KV452969.1 | 6420710  | 9-scf00340 | 9 |
| AX-158175718 | 16 | 59.531 | KV452969.1 | 6461291  | 9-scf00340 | 9 |
| AX-158175879 | 16 | 59.531 | KV452969.1 | 6665608  | 9-scf00340 | 9 |
| AX-158176013 | 16 | 59.531 | KV452969.1 | 6799857  | 9-scf00340 | 9 |
| AX-158176098 | 16 | 59.531 | KV452969.1 | 6910474  | 9-scf00340 | 9 |
| AX-158176754 | 16 | 59.531 | KV452969.1 | 7752449  | 9-scf00340 | 9 |
| AX-158177015 | 16 | 59.531 | KV452969.1 | 8101725  | 9-scf00340 | 9 |
| AX-158177039 | 16 | 59.531 | KV452969.1 | 8132368  | 9-scf00340 | 9 |
| AX-157835473 | 16 | 59.531 | KV452969.1 | 11059418 | 9-scf00340 | 9 |
| AX-158179268 | 16 | 59.531 | KV452969.1 | 11118707 | 9-scf00340 | 9 |
| AX-158403679 | 16 | 59.531 | KV452969.1 | 15548039 | 9-scf00340 | 9 |
| AX-157713110 | 16 | 59.64  | KV452969.1 | 6373068  | 9-scf00340 | 9 |
| AX-158175651 | 16 | 59.64  | KV452969.1 | 6381031  | 9-scf00340 | 9 |
| AX-158175652 | 16 | 59.64  | KV452969.1 | 6383740  | 9-scf00340 | 9 |
| AX-158175653 | 16 | 59.64  | KV452969.1 | 6384389  | 9-scf00340 | 9 |
| AX-158175659 | 16 | 59.64  | KV452969.1 | 6389829  | 9-scf00340 | 9 |
| AX-158175662 | 16 | 59.64  | KV452969.1 | 6393424  | 9-scf00340 | 9 |
| AX-158175669 | 16 | 59.64  | KV452969.1 | 6397862  | 9-scf00340 | 9 |
| AX-158175671 | 16 | 59.64  | KV452969.1 | 6399471  | 9-scf00340 | 9 |
| AX-157835116 | 16 | 59.64  | KV452969.1 | 6465273  | 9-scf00340 | 9 |

|              |    |        |            |         |            |   |
|--------------|----|--------|------------|---------|------------|---|
| AX-158175760 | 16 | 59.64  | KV452969.1 | 6522904 | 9-scf00340 | 9 |
| AX-158176116 | 16 | 59.64  | KV452969.1 | 6965991 | 9-scf00340 | 9 |
| AX-158176181 | 16 | 59.64  | KV452969.1 | 7072856 | 9-scf00340 | 9 |
| AX-158176197 | 16 | 59.64  | KV452969.1 | 7092864 | 9-scf00340 | 9 |
| AX-158176331 | 16 | 59.64  | KV452969.1 | 7258471 | 9-scf00340 | 9 |
| AX-158176381 | 16 | 59.64  | KV452969.1 | 7308016 | 9-scf00340 | 9 |
| AX-158176658 | 16 | 59.64  | KV452969.1 | 7641939 | 9-scf00340 | 9 |
| AX-158172752 | 16 | 59.749 | KV452969.1 | 1808562 | 9-scf00340 | 9 |
| AX-157744359 | 16 | 59.749 | KV452969.1 | 2941278 | 9-scf00340 | 9 |
| AX-158175002 | 16 | 59.749 | KV452969.1 | 5086485 | 9-scf00340 | 9 |
| AX-158175066 | 16 | 59.749 | KV452969.1 | 5172967 | 9-scf00340 | 9 |
| AX-158175092 | 16 | 59.749 | KV452969.1 | 5230598 | 9-scf00340 | 9 |
| AX-157717128 | 16 | 59.749 | KV452969.1 | 5255268 | 9-scf00340 | 9 |
| AX-157835072 | 16 | 59.749 | KV452969.1 | 5309548 | 9-scf00340 | 9 |
| AX-158175162 | 16 | 59.749 | KV452969.1 | 5337788 | 9-scf00340 | 9 |
| AX-158175163 | 16 | 59.749 | KV452969.1 | 5338928 | 9-scf00340 | 9 |
| AX-158175168 | 16 | 59.749 | KV452969.1 | 5345657 | 9-scf00340 | 9 |
| AX-158175229 | 16 | 59.749 | KV452969.1 | 5413178 | 9-scf00340 | 9 |
| AX-158175231 | 16 | 59.749 | KV452969.1 | 5415325 | 9-scf00340 | 9 |
| AX-158175305 | 16 | 59.749 | KV452969.1 | 5500888 | 9-scf00340 | 9 |
| AX-158175311 | 16 | 59.749 | KV452969.1 | 5505515 | 9-scf00340 | 9 |
| AX-158175366 | 16 | 59.749 | KV452969.1 | 5689104 | 9-scf00340 | 9 |
| AX-158175455 | 16 | 59.749 | KV452969.1 | 6154683 | 9-scf00340 | 9 |
| AX-158175472 | 16 | 59.749 | KV452969.1 | 6179763 | 9-scf00340 | 9 |
| AX-158175535 | 16 | 59.749 | KV452969.1 | 6229050 | 9-scf00340 | 9 |
| AX-158175542 | 16 | 59.749 | KV452969.1 | 6238250 | 9-scf00340 | 9 |
| AX-158175635 | 16 | 59.749 | KV452969.1 | 6359567 | 9-scf00340 | 9 |
| AX-158175648 | 16 | 59.749 | KV452969.1 | 6380064 | 9-scf00340 | 9 |
| AX-158175661 | 16 | 59.749 | KV452969.1 | 6392890 | 9-scf00340 | 9 |
| AX-158175674 | 16 | 59.749 | KV452969.1 | 6403034 | 9-scf00340 | 9 |
| AX-158175684 | 16 | 59.749 | KV452969.1 | 6423072 | 9-scf00340 | 9 |
| AX-158175689 | 16 | 59.749 | KV452969.1 | 6430642 | 9-scf00340 | 9 |
| AX-158175691 | 16 | 59.749 | KV452969.1 | 6433888 | 9-scf00340 | 9 |
| AX-157739763 | 16 | 59.749 | KV452969.1 | 6436352 | 9-scf00340 | 9 |
| AX-158413452 | 16 | 59.749 | KV452969.1 | 6437502 | 9-scf00340 | 9 |
| AX-158175695 | 16 | 59.749 | KV452969.1 | 6438274 | 9-scf00340 | 9 |
| AX-157720087 | 16 | 59.749 | KV452969.1 | 6439801 | 9-scf00340 | 9 |
| AX-158175696 | 16 | 59.749 | KV452969.1 | 6440396 | 9-scf00340 | 9 |
| AX-158175697 | 16 | 59.749 | KV452969.1 | 6441177 | 9-scf00340 | 9 |
| AX-158175698 | 16 | 59.749 | KV452969.1 | 6442898 | 9-scf00340 | 9 |
| AX-158175701 | 16 | 59.749 | KV452969.1 | 6444614 | 9-scf00340 | 9 |
| AX-158175703 | 16 | 59.749 | KV452969.1 | 6445541 | 9-scf00340 | 9 |
| AX-158175704 | 16 | 59.749 | KV452969.1 | 6446205 | 9-scf00340 | 9 |
| AX-158380579 | 16 | 59.749 | KV452969.1 | 6446469 | 9-scf00340 | 9 |
| AX-158175705 | 16 | 59.749 | KV452969.1 | 6446925 | 9-scf00340 | 9 |
| AX-158175706 | 16 | 59.749 | KV452969.1 | 6447643 | 9-scf00340 | 9 |
| AX-158175707 | 16 | 59.749 | KV452969.1 | 6447750 | 9-scf00340 | 9 |
| AX-158175708 | 16 | 59.749 | KV452969.1 | 6448442 | 9-scf00340 | 9 |
| AX-158175709 | 16 | 59.749 | KV452969.1 | 6448685 | 9-scf00340 | 9 |
| AX-158175710 | 16 | 59.749 | KV452969.1 | 6449137 | 9-scf00340 | 9 |
| AX-158175712 | 16 | 59.749 | KV452969.1 | 6454553 | 9-scf00340 | 9 |

|              |    |        |            |         |            |   |
|--------------|----|--------|------------|---------|------------|---|
| AX-158175715 | 16 | 59.749 | KV452969.1 | 6457407 | 9-scf00340 | 9 |
| AX-157835115 | 16 | 59.749 | KV452969.1 | 6462097 | 9-scf00340 | 9 |
| AX-158175720 | 16 | 59.749 | KV452969.1 | 6463006 | 9-scf00340 | 9 |
| AX-157716921 | 16 | 59.749 | KV452969.1 | 6469086 | 9-scf00340 | 9 |
| AX-158175724 | 16 | 59.749 | KV452969.1 | 6469479 | 9-scf00340 | 9 |
| AX-158175727 | 16 | 59.749 | KV452969.1 | 6472136 | 9-scf00340 | 9 |
| AX-158175730 | 16 | 59.749 | KV452969.1 | 6474307 | 9-scf00340 | 9 |
| AX-157716033 | 16 | 59.749 | KV452969.1 | 6474852 | 9-scf00340 | 9 |
| AX-158175731 | 16 | 59.749 | KV452969.1 | 6476026 | 9-scf00340 | 9 |
| AX-158175733 | 16 | 59.749 | KV452969.1 | 6483035 | 9-scf00340 | 9 |
| AX-158175734 | 16 | 59.749 | KV452969.1 | 6483909 | 9-scf00340 | 9 |
| AX-157748415 | 16 | 59.749 | KV452969.1 | 6485336 | 9-scf00340 | 9 |
| AX-157748736 | 16 | 59.749 | KV452969.1 | 6486422 | 9-scf00340 | 9 |
| AX-157835118 | 16 | 59.749 | KV452969.1 | 6486787 | 9-scf00340 | 9 |
| AX-157744397 | 16 | 59.749 | KV452969.1 | 6487410 | 9-scf00340 | 9 |
| AX-157858620 | 16 | 59.749 | KV452969.1 | 6489404 | 9-scf00340 | 9 |
| AX-158175737 | 16 | 59.749 | KV452969.1 | 6491272 | 9-scf00340 | 9 |
| AX-158175738 | 16 | 59.749 | KV452969.1 | 6492323 | 9-scf00340 | 9 |
| AX-158175747 | 16 | 59.749 | KV452969.1 | 6508679 | 9-scf00340 | 9 |
| AX-158175748 | 16 | 59.749 | KV452969.1 | 6509786 | 9-scf00340 | 9 |
| AX-158175749 | 16 | 59.749 | KV452969.1 | 6510232 | 9-scf00340 | 9 |
| AX-158175750 | 16 | 59.749 | KV452969.1 | 6510879 | 9-scf00340 | 9 |
| AX-158175751 | 16 | 59.749 | KV452969.1 | 6511634 | 9-scf00340 | 9 |
| AX-157835121 | 16 | 59.749 | KV452969.1 | 6512410 | 9-scf00340 | 9 |
| AX-158175752 | 16 | 59.749 | KV452969.1 | 6513093 | 9-scf00340 | 9 |
| AX-158175753 | 16 | 59.749 | KV452969.1 | 6513724 | 9-scf00340 | 9 |
| AX-158175754 | 16 | 59.749 | KV452969.1 | 6515483 | 9-scf00340 | 9 |
| AX-158175756 | 16 | 59.749 | KV452969.1 | 6517631 | 9-scf00340 | 9 |
| AX-158175757 | 16 | 59.749 | KV452969.1 | 6518093 | 9-scf00340 | 9 |
| AX-158175758 | 16 | 59.749 | KV452969.1 | 6519000 | 9-scf00340 | 9 |
| AX-157835122 | 16 | 59.749 | KV452969.1 | 6521909 | 9-scf00340 | 9 |
| AX-158175761 | 16 | 59.749 | KV452969.1 | 6524166 | 9-scf00340 | 9 |
| AX-158175762 | 16 | 59.749 | KV452969.1 | 6526067 | 9-scf00340 | 9 |
| AX-158175763 | 16 | 59.749 | KV452969.1 | 6528193 | 9-scf00340 | 9 |
| AX-158175766 | 16 | 59.749 | KV452969.1 | 6534001 | 9-scf00340 | 9 |
| AX-157701306 | 16 | 59.749 | KV452969.1 | 6536433 | 9-scf00340 | 9 |
| AX-158175769 | 16 | 59.749 | KV452969.1 | 6536531 | 9-scf00340 | 9 |
| AX-158175775 | 16 | 59.749 | KV452969.1 | 6552067 | 9-scf00340 | 9 |
| AX-157835125 | 16 | 59.749 | KV452969.1 | 6552737 | 9-scf00340 | 9 |
| AX-157835126 | 16 | 59.749 | KV452969.1 | 6553470 | 9-scf00340 | 9 |
| AX-158175776 | 16 | 59.749 | KV452969.1 | 6555349 | 9-scf00340 | 9 |
| AX-158175777 | 16 | 59.749 | KV452969.1 | 6557464 | 9-scf00340 | 9 |
| AX-157835128 | 16 | 59.749 | KV452969.1 | 6558223 | 9-scf00340 | 9 |
| AX-158175778 | 16 | 59.749 | KV452969.1 | 6559402 | 9-scf00340 | 9 |
| AX-158175779 | 16 | 59.749 | KV452969.1 | 6560020 | 9-scf00340 | 9 |
| AX-157835129 | 16 | 59.749 | KV452969.1 | 6560580 | 9-scf00340 | 9 |
| AX-158175780 | 16 | 59.749 | KV452969.1 | 6560707 | 9-scf00340 | 9 |
| AX-158175781 | 16 | 59.749 | KV452969.1 | 6563336 | 9-scf00340 | 9 |
| AX-158175782 | 16 | 59.749 | KV452969.1 | 6564185 | 9-scf00340 | 9 |
| AX-158175786 | 16 | 59.749 | KV452969.1 | 6570041 | 9-scf00340 | 9 |
| AX-158175787 | 16 | 59.749 | KV452969.1 | 6570791 | 9-scf00340 | 9 |

|              |    |        |            |         |            |   |
|--------------|----|--------|------------|---------|------------|---|
| AX-158175793 | 16 | 59.749 | KV452969.1 | 6575498 | 9-scf00340 | 9 |
| AX-158175794 | 16 | 59.749 | KV452969.1 | 6575874 | 9-scf00340 | 9 |
| AX-158175796 | 16 | 59.749 | KV452969.1 | 6577594 | 9-scf00340 | 9 |
| AX-158175797 | 16 | 59.749 | KV452969.1 | 6578023 | 9-scf00340 | 9 |
| AX-158175798 | 16 | 59.749 | KV452969.1 | 6578953 | 9-scf00340 | 9 |
| AX-158175799 | 16 | 59.749 | KV452969.1 | 6580408 | 9-scf00340 | 9 |
| AX-158175800 | 16 | 59.749 | KV452969.1 | 6581222 | 9-scf00340 | 9 |
| AX-158175803 | 16 | 59.749 | KV452969.1 | 6585063 | 9-scf00340 | 9 |
| AX-158175804 | 16 | 59.749 | KV452969.1 | 6585720 | 9-scf00340 | 9 |
| AX-157727137 | 16 | 59.749 | KV452969.1 | 6586292 | 9-scf00340 | 9 |
| AX-158175805 | 16 | 59.749 | KV452969.1 | 6586656 | 9-scf00340 | 9 |
| AX-158175807 | 16 | 59.749 | KV452969.1 | 6588934 | 9-scf00340 | 9 |
| AX-158175808 | 16 | 59.749 | KV452969.1 | 6589678 | 9-scf00340 | 9 |
| AX-158175812 | 16 | 59.749 | KV452969.1 | 6595359 | 9-scf00340 | 9 |
| AX-158175813 | 16 | 59.749 | KV452969.1 | 6596027 | 9-scf00340 | 9 |
| AX-158175815 | 16 | 59.749 | KV452969.1 | 6597352 | 9-scf00340 | 9 |
| AX-158175816 | 16 | 59.749 | KV452969.1 | 6598783 | 9-scf00340 | 9 |
| AX-158175817 | 16 | 59.749 | KV452969.1 | 6599945 | 9-scf00340 | 9 |
| AX-158175818 | 16 | 59.749 | KV452969.1 | 6600558 | 9-scf00340 | 9 |
| AX-158175819 | 16 | 59.749 | KV452969.1 | 6601202 | 9-scf00340 | 9 |
| AX-157835131 | 16 | 59.749 | KV452969.1 | 6601815 | 9-scf00340 | 9 |
| AX-158175820 | 16 | 59.749 | KV452969.1 | 6602566 | 9-scf00340 | 9 |
| AX-158175821 | 16 | 59.749 | KV452969.1 | 6603822 | 9-scf00340 | 9 |
| AX-158175822 | 16 | 59.749 | KV452969.1 | 6604522 | 9-scf00340 | 9 |
| AX-157835132 | 16 | 59.749 | KV452969.1 | 6604910 | 9-scf00340 | 9 |
| AX-158175823 | 16 | 59.749 | KV452969.1 | 6605178 | 9-scf00340 | 9 |
| AX-158175824 | 16 | 59.749 | KV452969.1 | 6605905 | 9-scf00340 | 9 |
| AX-158175825 | 16 | 59.749 | KV452969.1 | 6607804 | 9-scf00340 | 9 |
| AX-157835133 | 16 | 59.749 | KV452969.1 | 6608470 | 9-scf00340 | 9 |
| AX-158175831 | 16 | 59.749 | KV452969.1 | 6614610 | 9-scf00340 | 9 |
| AX-158175847 | 16 | 59.749 | KV452969.1 | 6631382 | 9-scf00340 | 9 |
| AX-157716987 | 16 | 59.749 | KV452969.1 | 6632445 | 9-scf00340 | 9 |
| AX-158175851 | 16 | 59.749 | KV452969.1 | 6635480 | 9-scf00340 | 9 |
| AX-158175852 | 16 | 59.749 | KV452969.1 | 6636350 | 9-scf00340 | 9 |
| AX-158175860 | 16 | 59.749 | KV452969.1 | 6644008 | 9-scf00340 | 9 |
| AX-158175863 | 16 | 59.749 | KV452969.1 | 6646113 | 9-scf00340 | 9 |
| AX-158175864 | 16 | 59.749 | KV452969.1 | 6646719 | 9-scf00340 | 9 |
| AX-158175868 | 16 | 59.749 | KV452969.1 | 6650640 | 9-scf00340 | 9 |
| AX-158175878 | 16 | 59.749 | KV452969.1 | 6664287 | 9-scf00340 | 9 |
| AX-158175889 | 16 | 59.749 | KV452969.1 | 6676840 | 9-scf00340 | 9 |
| AX-158175908 | 16 | 59.749 | KV452969.1 | 6693769 | 9-scf00340 | 9 |
| AX-157835140 | 16 | 59.749 | KV452969.1 | 6706134 | 9-scf00340 | 9 |
| AX-158175930 | 16 | 59.749 | KV452969.1 | 6717229 | 9-scf00340 | 9 |
| AX-158175973 | 16 | 59.749 | KV452969.1 | 6766216 | 9-scf00340 | 9 |
| AX-157835142 | 16 | 59.749 | KV452969.1 | 6801856 | 9-scf00340 | 9 |
| AX-157757095 | 16 | 59.749 | KV452969.1 | 6814091 | 9-scf00340 | 9 |
| AX-158176033 | 16 | 59.749 | KV452969.1 | 6817882 | 9-scf00340 | 9 |
| AX-158176046 | 16 | 59.749 | KV452969.1 | 6834545 | 9-scf00340 | 9 |
| AX-158176056 | 16 | 59.749 | KV452969.1 | 6854340 | 9-scf00340 | 9 |
| AX-158176060 | 16 | 59.749 | KV452969.1 | 6860571 | 9-scf00340 | 9 |
| AX-158176089 | 16 | 59.749 | KV452969.1 | 6887175 | 9-scf00340 | 9 |



|              |    |        |            |         |            |   |
|--------------|----|--------|------------|---------|------------|---|
| AX-158176091 | 16 | 59.749 | KV452969.1 | 6890084 | 9-scf00340 | 9 |
| AX-158176095 | 16 | 59.749 | KV452969.1 | 6902046 | 9-scf00340 | 9 |
| AX-158176096 | 16 | 59.749 | KV452969.1 | 6903009 | 9-scf00340 | 9 |
| AX-157835148 | 16 | 59.749 | KV452969.1 | 6919488 | 9-scf00340 | 9 |
| AX-157835149 | 16 | 59.749 | KV452969.1 | 6921837 | 9-scf00340 | 9 |
| AX-158176103 | 16 | 59.749 | KV452969.1 | 6925592 | 9-scf00340 | 9 |
| AX-158176104 | 16 | 59.749 | KV452969.1 | 6928417 | 9-scf00340 | 9 |
| AX-158176105 | 16 | 59.749 | KV452969.1 | 6932254 | 9-scf00340 | 9 |
| AX-157872024 | 16 | 59.749 | KV452969.1 | 6939785 | 9-scf00340 | 9 |
| AX-157835150 | 16 | 59.749 | KV452969.1 | 6951343 | 9-scf00340 | 9 |
| AX-158176113 | 16 | 59.749 | KV452969.1 | 6953965 | 9-scf00340 | 9 |
| AX-157872025 | 16 | 59.749 | KV452969.1 | 6972800 | 9-scf00340 | 9 |
| AX-157835153 | 16 | 59.749 | KV452969.1 | 6977098 | 9-scf00340 | 9 |
| AX-157756468 | 16 | 59.749 | KV452969.1 | 6977937 | 9-scf00340 | 9 |
| AX-158176122 | 16 | 59.749 | KV452969.1 | 6979101 | 9-scf00340 | 9 |
| AX-158176123 | 16 | 59.749 | KV452969.1 | 6980643 | 9-scf00340 | 9 |
| AX-158176126 | 16 | 59.749 | KV452969.1 | 6989349 | 9-scf00340 | 9 |
| AX-158176128 | 16 | 59.749 | KV452969.1 | 6993006 | 9-scf00340 | 9 |
| AX-158176129 | 16 | 59.749 | KV452969.1 | 6999875 | 9-scf00340 | 9 |
| AX-158176132 | 16 | 59.749 | KV452969.1 | 7006043 | 9-scf00340 | 9 |
| AX-158176137 | 16 | 59.749 | KV452969.1 | 7011890 | 9-scf00340 | 9 |
| AX-157835154 | 16 | 59.749 | KV452969.1 | 7019931 | 9-scf00340 | 9 |
| AX-158176144 | 16 | 59.749 | KV452969.1 | 7023889 | 9-scf00340 | 9 |
| AX-158176146 | 16 | 59.749 | KV452969.1 | 7027993 | 9-scf00340 | 9 |
| AX-158176147 | 16 | 59.749 | KV452969.1 | 7028416 | 9-scf00340 | 9 |
| AX-158176149 | 16 | 59.749 | KV452969.1 | 7029004 | 9-scf00340 | 9 |
| AX-158176152 | 16 | 59.749 | KV452969.1 | 7036633 | 9-scf00340 | 9 |
| AX-158176157 | 16 | 59.749 | KV452969.1 | 7041383 | 9-scf00340 | 9 |
| AX-157710533 | 16 | 59.749 | KV452969.1 | 7070658 | 9-scf00340 | 9 |
| AX-158176196 | 16 | 59.749 | KV452969.1 | 7091248 | 9-scf00340 | 9 |
| AX-158176218 | 16 | 59.749 | KV452969.1 | 7130696 | 9-scf00340 | 9 |
| AX-158176226 | 16 | 59.749 | KV452969.1 | 7134054 | 9-scf00340 | 9 |
| AX-158176228 | 16 | 59.749 | KV452969.1 | 7135300 | 9-scf00340 | 9 |
| AX-157718883 | 16 | 59.749 | KV452969.1 | 7135681 | 9-scf00340 | 9 |
| AX-157835165 | 16 | 59.749 | KV452969.1 | 7136370 | 9-scf00340 | 9 |
| AX-158176261 | 16 | 59.749 | KV452969.1 | 7164190 | 9-scf00340 | 9 |
| AX-158176262 | 16 | 59.749 | KV452969.1 | 7165040 | 9-scf00340 | 9 |
| AX-158176287 | 16 | 59.749 | KV452969.1 | 7198037 | 9-scf00340 | 9 |
| AX-158176292 | 16 | 59.749 | KV452969.1 | 7201762 | 9-scf00340 | 9 |
| AX-158176322 | 16 | 59.749 | KV452969.1 | 7236058 | 9-scf00340 | 9 |
| AX-158413465 | 16 | 59.749 | KV452969.1 | 7252643 | 9-scf00340 | 9 |
| AX-158176327 | 16 | 59.749 | KV452969.1 | 7253598 | 9-scf00340 | 9 |
| AX-158176329 | 16 | 59.749 | KV452969.1 | 7257053 | 9-scf00340 | 9 |
| AX-158176339 | 16 | 59.749 | KV452969.1 | 7269677 | 9-scf00340 | 9 |
| AX-158176346 | 16 | 59.749 | KV452969.1 | 7280733 | 9-scf00340 | 9 |
| AX-157749940 | 16 | 59.749 | KV452969.1 | 7281730 | 9-scf00340 | 9 |
| AX-157835183 | 16 | 59.749 | KV452969.1 | 7320521 | 9-scf00340 | 9 |
| AX-158176404 | 16 | 59.749 | KV452969.1 | 7332110 | 9-scf00340 | 9 |
| AX-157726899 | 16 | 59.749 | KV452969.1 | 7424872 | 9-scf00340 | 9 |
| AX-157707906 | 16 | 59.749 | KV452969.1 | 7473613 | 9-scf00340 | 9 |
| AX-158176561 | 16 | 59.749 | KV452969.1 | 7507081 | 9-scf00340 | 9 |

|              |    |        |            |          |                |    |
|--------------|----|--------|------------|----------|----------------|----|
| AX-157743323 | 16 | 59.749 | KV452969.1 | 7541610  | 9-scf00340     | 9  |
| AX-158176628 | 16 | 59.749 | KV452969.1 | 7594321  | 9-scf00340     | 9  |
| AX-157757326 | 16 | 59.749 | KV452969.1 | 7636232  | 9-scf00340     | 9  |
| AX-158176684 | 16 | 59.749 | KV452969.1 | 7671874  | 9-scf00340     | 9  |
| AX-158176721 | 16 | 59.749 | KV452969.1 | 7712831  | 9-scf00340     | 9  |
| AX-158176783 | 16 | 59.749 | KV452969.1 | 7793824  | 9-scf00340     | 9  |
| AX-158176855 | 16 | 59.749 | KV452969.1 | 7888952  | 9-scf00340     | 9  |
| AX-158176861 | 16 | 59.749 | KV452969.1 | 7894985  | 9-scf00340     | 9  |
| AX-158385914 | 16 | 59.749 | KV452969.1 | 7995676  | 9-scf00340     | 9  |
| AX-158177066 | 16 | 59.749 | KV452969.1 | 8155763  | 9-scf00340     | 9  |
| AX-158177353 | 16 | 59.749 | KV452969.1 | 8500919  | 9-scf00340     | 9  |
| AX-158178040 | 16 | 59.749 | KV452969.1 | 9514911  | 9-scf00340     | 9  |
| AX-157716611 | 16 | 59.749 | KV452969.1 | 9561621  | 9-scf00340     | 9  |
| AX-158178786 | 16 | 59.749 | KV452969.1 | 10470054 | 9-scf00340     | 9  |
| AX-158178844 | 16 | 59.749 | KV452969.1 | 10576040 | 9-scf00340     | 9  |
| AX-158178924 | 16 | 59.749 | KV452969.1 | 10691332 | 9-scf00340     | 9  |
| AX-158178973 | 16 | 59.749 | KV452969.1 | 10739745 | 9-scf00340     | 9  |
| AX-158178974 | 16 | 59.749 | KV452969.1 | 10740162 | 9-scf00340     | 9  |
| AX-158179037 | 16 | 59.749 | KV452969.1 | 10815381 | 9-scf00340     | 9  |
| AX-158179040 | 16 | 59.749 | KV452969.1 | 10817055 | 9-scf00340     | 9  |
| AX-157835466 | 16 | 59.749 | KV452969.1 | 10927955 | 9-scf00340     | 9  |
| AX-158179209 | 16 | 59.749 | KV452969.1 | 11059068 | 9-scf00340     | 9  |
| AX-157748730 | 16 | 59.749 | KV452969.1 | 11133813 | 9-scf00340     | 9  |
| AX-158179394 | 16 | 59.749 | KV452969.1 | 11252236 | 9-scf00340     | 9  |
| AX-157835496 | 16 | 59.749 | KV452969.1 | 11252459 | 9-scf00340     | 9  |
| AX-158180115 | 16 | 59.749 | KV452969.1 | 12277294 | 9-scf00340     | 9  |
| AX-157702049 | 16 | 59.749 | DX089499.1 | 86       | 10R1212 lctalk | UN |
| AX-158176169 | 16 | 59.778 | KV452969.1 | 7052401  | 9-scf00340     | 9  |
| AX-158170833 | 16 | 59.858 | KV452961.1 | 3584005  | 9-scf00334     | 9  |
| AX-158171904 | 16 | 59.858 | KV452966.1 | 32087    | 9-scf00338     | 9  |
| AX-158171965 | 16 | 59.858 | KV452966.1 | 153682   | 9-scf00338     | 9  |
| AX-158172444 | 16 | 59.858 | KV452969.1 | 928816   | 9-scf00340     | 9  |
| AX-158172446 | 16 | 59.858 | KV452969.1 | 933174   | 9-scf00340     | 9  |
| AX-158172793 | 16 | 59.858 | KV452969.1 | 1962849  | 9-scf00340     | 9  |
| AX-158173056 | 16 | 59.858 | KV452969.1 | 2540638  | 9-scf00340     | 9  |
| AX-158173282 | 16 | 59.858 | KV452969.1 | 2889505  | 9-scf00340     | 9  |
| AX-158173334 | 16 | 59.858 | KV452969.1 | 2939179  | 9-scf00340     | 9  |
| AX-158175686 | 16 | 59.858 | KV452969.1 | 6425796  | 9-scf00340     | 9  |
| AX-158175716 | 16 | 59.858 | KV452969.1 | 6458447  | 9-scf00340     | 9  |
| AX-158175717 | 16 | 59.858 | KV452969.1 | 6461032  | 9-scf00340     | 9  |
| AX-158175735 | 16 | 59.858 | KV452969.1 | 6488393  | 9-scf00340     | 9  |
| AX-158175755 | 16 | 59.858 | KV452969.1 | 6515799  | 9-scf00340     | 9  |
| AX-157750418 | 16 | 59.858 | KV452969.1 | 6521317  | 9-scf00340     | 9  |
| AX-158175765 | 16 | 59.858 | KV452969.1 | 6530721  | 9-scf00340     | 9  |
| AX-157717050 | 16 | 59.858 | KV452969.1 | 6537371  | 9-scf00340     | 9  |
| AX-158175785 | 16 | 59.858 | KV452969.1 | 6569383  | 9-scf00340     | 9  |
| AX-158175969 | 16 | 59.858 | KV452969.1 | 6759458  | 9-scf00340     | 9  |
| AX-158176173 | 16 | 59.858 | KV452969.1 | 7058107  | 9-scf00340     | 9  |
| AX-158176174 | 16 | 59.858 | KV452969.1 | 7060000  | 9-scf00340     | 9  |
| AX-158176175 | 16 | 59.858 | KV452969.1 | 7060745  | 9-scf00340     | 9  |
| AX-157747534 | 16 | 59.858 | KV452969.1 | 7071764  | 9-scf00340     | 9  |

|              |    |        |            |         |            |   |
|--------------|----|--------|------------|---------|------------|---|
| AX-158380581 | 16 | 59.858 | KV452969.1 | 7071903 | 9-scf00340 | 9 |
| AX-157835157 | 16 | 59.858 | KV452969.1 | 7082393 | 9-scf00340 | 9 |
| AX-158176192 | 16 | 59.858 | KV452969.1 | 7087318 | 9-scf00340 | 9 |
| AX-158176193 | 16 | 59.858 | KV452969.1 | 7089000 | 9-scf00340 | 9 |
| AX-158176194 | 16 | 59.858 | KV452969.1 | 7089411 | 9-scf00340 | 9 |
| AX-157835158 | 16 | 59.858 | KV452969.1 | 7097343 | 9-scf00340 | 9 |
| AX-157741074 | 16 | 59.858 | KV452969.1 | 7098150 | 9-scf00340 | 9 |
| AX-157743751 | 16 | 59.858 | KV452969.1 | 7100205 | 9-scf00340 | 9 |
| AX-158176199 | 16 | 59.858 | KV452969.1 | 7103602 | 9-scf00340 | 9 |
| AX-158176204 | 16 | 59.858 | KV452969.1 | 7109273 | 9-scf00340 | 9 |
| AX-158176205 | 16 | 59.858 | KV452969.1 | 7111668 | 9-scf00340 | 9 |
| AX-157751741 | 16 | 59.858 | KV452969.1 | 7114430 | 9-scf00340 | 9 |
| AX-157835162 | 16 | 59.858 | KV452969.1 | 7117569 | 9-scf00340 | 9 |
| AX-158176212 | 16 | 59.858 | KV452969.1 | 7122674 | 9-scf00340 | 9 |
| AX-158176213 | 16 | 59.858 | KV452969.1 | 7123575 | 9-scf00340 | 9 |
| AX-158176217 | 16 | 59.858 | KV452969.1 | 7126023 | 9-scf00340 | 9 |
| AX-157835163 | 16 | 59.858 | KV452969.1 | 7127491 | 9-scf00340 | 9 |
| AX-157835164 | 16 | 59.858 | KV452969.1 | 7128692 | 9-scf00340 | 9 |
| AX-158176222 | 16 | 59.858 | KV452969.1 | 7131791 | 9-scf00340 | 9 |
| AX-158176229 | 16 | 59.858 | KV452969.1 | 7138086 | 9-scf00340 | 9 |
| AX-158176263 | 16 | 59.858 | KV452969.1 | 7166537 | 9-scf00340 | 9 |
| AX-158176264 | 16 | 59.858 | KV452969.1 | 7167632 | 9-scf00340 | 9 |
| AX-158176265 | 16 | 59.858 | KV452969.1 | 7168010 | 9-scf00340 | 9 |
| AX-158176267 | 16 | 59.858 | KV452969.1 | 7171861 | 9-scf00340 | 9 |
| AX-157835171 | 16 | 59.858 | KV452969.1 | 7182161 | 9-scf00340 | 9 |
| AX-157835172 | 16 | 59.858 | KV452969.1 | 7183136 | 9-scf00340 | 9 |
| AX-157835173 | 16 | 59.858 | KV452969.1 | 7184467 | 9-scf00340 | 9 |
| AX-158176281 | 16 | 59.858 | KV452969.1 | 7188078 | 9-scf00340 | 9 |
| AX-158176288 | 16 | 59.858 | KV452969.1 | 7198603 | 9-scf00340 | 9 |
| AX-158176318 | 16 | 59.858 | KV452969.1 | 7231391 | 9-scf00340 | 9 |
| AX-158176325 | 16 | 59.858 | KV452969.1 | 7239513 | 9-scf00340 | 9 |
| AX-158176328 | 16 | 59.858 | KV452969.1 | 7254591 | 9-scf00340 | 9 |
| AX-158176340 | 16 | 59.858 | KV452969.1 | 7270449 | 9-scf00340 | 9 |
| AX-158176341 | 16 | 59.858 | KV452969.1 | 7275558 | 9-scf00340 | 9 |
| AX-158176342 | 16 | 59.858 | KV452969.1 | 7277965 | 9-scf00340 | 9 |
| AX-158176349 | 16 | 59.858 | KV452969.1 | 7282805 | 9-scf00340 | 9 |
| AX-158176352 | 16 | 59.858 | KV452969.1 | 7284650 | 9-scf00340 | 9 |
| AX-158176353 | 16 | 59.858 | KV452969.1 | 7285665 | 9-scf00340 | 9 |
| AX-157835182 | 16 | 59.858 | KV452969.1 | 7291176 | 9-scf00340 | 9 |
| AX-158176359 | 16 | 59.858 | KV452969.1 | 7292503 | 9-scf00340 | 9 |
| AX-158176365 | 16 | 59.858 | KV452969.1 | 7297338 | 9-scf00340 | 9 |
| AX-158176369 | 16 | 59.858 | KV452969.1 | 7299433 | 9-scf00340 | 9 |
| AX-158176373 | 16 | 59.858 | KV452969.1 | 7304535 | 9-scf00340 | 9 |
| AX-158418052 | 16 | 59.858 | KV452969.1 | 7305631 | 9-scf00340 | 9 |
| AX-157775282 | 16 | 59.858 | KV452969.1 | 7322920 | 9-scf00340 | 9 |
| AX-158176396 | 16 | 59.858 | KV452969.1 | 7324499 | 9-scf00340 | 9 |
| AX-158176398 | 16 | 59.858 | KV452969.1 | 7325773 | 9-scf00340 | 9 |
| AX-158176399 | 16 | 59.858 | KV452969.1 | 7326681 | 9-scf00340 | 9 |
| AX-158176400 | 16 | 59.858 | KV452969.1 | 7327212 | 9-scf00340 | 9 |
| AX-158176403 | 16 | 59.858 | KV452969.1 | 7330791 | 9-scf00340 | 9 |
| AX-158176408 | 16 | 59.858 | KV452969.1 | 7335179 | 9-scf00340 | 9 |

|              |    |        |            |         |            |   |
|--------------|----|--------|------------|---------|------------|---|
| AX-158176409 | 16 | 59.858 | KV452969.1 | 7337532 | 9-scf00340 | 9 |
| AX-158176410 | 16 | 59.858 | KV452969.1 | 7338809 | 9-scf00340 | 9 |
| AX-158176413 | 16 | 59.858 | KV452969.1 | 7341299 | 9-scf00340 | 9 |
| AX-157726089 | 16 | 59.858 | KV452969.1 | 7348263 | 9-scf00340 | 9 |
| AX-158176420 | 16 | 59.858 | KV452969.1 | 7348732 | 9-scf00340 | 9 |
| AX-158176427 | 16 | 59.858 | KV452969.1 | 7358453 | 9-scf00340 | 9 |
| AX-158176429 | 16 | 59.858 | KV452969.1 | 7359656 | 9-scf00340 | 9 |
| AX-158176431 | 16 | 59.858 | KV452969.1 | 7361509 | 9-scf00340 | 9 |
| AX-158176432 | 16 | 59.858 | KV452969.1 | 7361829 | 9-scf00340 | 9 |
| AX-158176433 | 16 | 59.858 | KV452969.1 | 7362912 | 9-scf00340 | 9 |
| AX-158176440 | 16 | 59.858 | KV452969.1 | 7369502 | 9-scf00340 | 9 |
| AX-157835189 | 16 | 59.858 | KV452969.1 | 7376040 | 9-scf00340 | 9 |
| AX-158409296 | 16 | 59.858 | KV452969.1 | 7391957 | 9-scf00340 | 9 |
| AX-157756837 | 16 | 59.858 | KV452969.1 | 7393568 | 9-scf00340 | 9 |
| AX-158176474 | 16 | 59.858 | KV452969.1 | 7407010 | 9-scf00340 | 9 |
| AX-158176476 | 16 | 59.858 | KV452969.1 | 7408936 | 9-scf00340 | 9 |
| AX-158176480 | 16 | 59.858 | KV452969.1 | 7412900 | 9-scf00340 | 9 |
| AX-158176484 | 16 | 59.858 | KV452969.1 | 7419914 | 9-scf00340 | 9 |
| AX-158176485 | 16 | 59.858 | KV452969.1 | 7420442 | 9-scf00340 | 9 |
| AX-158176495 | 16 | 59.858 | KV452969.1 | 7429685 | 9-scf00340 | 9 |
| AX-158176502 | 16 | 59.858 | KV452969.1 | 7441447 | 9-scf00340 | 9 |
| AX-158176503 | 16 | 59.858 | KV452969.1 | 7442065 | 9-scf00340 | 9 |
| AX-158176505 | 16 | 59.858 | KV452969.1 | 7443963 | 9-scf00340 | 9 |
| AX-158176510 | 16 | 59.858 | KV452969.1 | 7448367 | 9-scf00340 | 9 |
| AX-157719003 | 16 | 59.858 | KV452969.1 | 7449537 | 9-scf00340 | 9 |
| AX-158176523 | 16 | 59.858 | KV452969.1 | 7469184 | 9-scf00340 | 9 |
| AX-158176549 | 16 | 59.858 | KV452969.1 | 7496166 | 9-scf00340 | 9 |
| AX-158176554 | 16 | 59.858 | KV452969.1 | 7502078 | 9-scf00340 | 9 |
| AX-158176555 | 16 | 59.858 | KV452969.1 | 7503506 | 9-scf00340 | 9 |
| AX-158176556 | 16 | 59.858 | KV452969.1 | 7504142 | 9-scf00340 | 9 |
| AX-158176557 | 16 | 59.858 | KV452969.1 | 7504633 | 9-scf00340 | 9 |
| AX-158176558 | 16 | 59.858 | KV452969.1 | 7505071 | 9-scf00340 | 9 |
| AX-158176562 | 16 | 59.858 | KV452969.1 | 7509420 | 9-scf00340 | 9 |
| AX-158176565 | 16 | 59.858 | KV452969.1 | 7513266 | 9-scf00340 | 9 |
| AX-158176576 | 16 | 59.858 | KV452969.1 | 7525838 | 9-scf00340 | 9 |
| AX-157743089 | 16 | 59.858 | KV452969.1 | 7526899 | 9-scf00340 | 9 |
| AX-158176583 | 16 | 59.858 | KV452969.1 | 7534393 | 9-scf00340 | 9 |
| AX-158176586 | 16 | 59.858 | KV452969.1 | 7535958 | 9-scf00340 | 9 |
| AX-158176589 | 16 | 59.858 | KV452969.1 | 7538518 | 9-scf00340 | 9 |
| AX-158176655 | 16 | 59.858 | KV452969.1 | 7638232 | 9-scf00340 | 9 |
| AX-158176674 | 16 | 59.858 | KV452969.1 | 7659215 | 9-scf00340 | 9 |
| AX-158176710 | 16 | 59.858 | KV452969.1 | 7698541 | 9-scf00340 | 9 |
| AX-158176738 | 16 | 59.858 | KV452969.1 | 7730896 | 9-scf00340 | 9 |
| AX-158176744 | 16 | 59.858 | KV452969.1 | 7739139 | 9-scf00340 | 9 |
| AX-158176753 | 16 | 59.858 | KV452969.1 | 7750429 | 9-scf00340 | 9 |
| AX-158176798 | 16 | 59.858 | KV452969.1 | 7822756 | 9-scf00340 | 9 |
| AX-158176895 | 16 | 59.858 | KV452969.1 | 7942940 | 9-scf00340 | 9 |
| AX-158176915 | 16 | 59.858 | KV452969.1 | 7964861 | 9-scf00340 | 9 |
| AX-158176936 | 16 | 59.858 | KV452969.1 | 7997977 | 9-scf00340 | 9 |
| AX-158177012 | 16 | 59.858 | KV452969.1 | 8097806 | 9-scf00340 | 9 |
| AX-158177037 | 16 | 59.858 | KV452969.1 | 8131430 | 9-scf00340 | 9 |

|              |    |        |             |          |                |    |
|--------------|----|--------|-------------|----------|----------------|----|
| AX-158177069 | 16 | 59.858 | KV452969.1  | 8160967  | 9-scf00340     | 9  |
| AX-157739329 | 16 | 59.858 | KV452969.1  | 8167805  | 9-scf00340     | 9  |
| AX-158177112 | 16 | 59.858 | KV452969.1  | 8240484  | 9-scf00340     | 9  |
| AX-158177151 | 16 | 59.858 | KV452969.1  | 8282450  | 9-scf00340     | 9  |
| AX-158177172 | 16 | 59.858 | KV452969.1  | 8308284  | 9-scf00340     | 9  |
| AX-158177258 | 16 | 59.858 | KV452969.1  | 8399265  | 9-scf00340     | 9  |
| AX-158177259 | 16 | 59.858 | KV452969.1  | 8399406  | 9-scf00340     | 9  |
| AX-158177982 | 16 | 59.858 | KV452969.1  | 9457782  | 9-scf00340     | 9  |
| AX-157878843 | 16 | 59.858 | KV452969.1  | 12437493 | 9-scf00340     | 9  |
| AX-158180312 | 16 | 59.858 | KV452969.1  | 12487141 | 9-scf00340     | 9  |
| AX-158180341 | 16 | 59.858 | KV452969.1  | 12514139 | 9-scf00340     | 9  |
| AX-157835664 | 16 | 59.858 | KV452969.1  | 13252262 | 9-scf00340     | 9  |
| AX-158181194 | 16 | 59.858 | KV452969.1  | 13646075 | 9-scf00340     | 9  |
| AX-158181570 | 16 | 59.858 | KV452969.1  | 14248953 | 9-scf00340     | 9  |
| AX-158413627 | 16 | 59.858 | KV452969.1  | 15226505 | 9-scf00340     | 9  |
| AX-157739797 | 16 | 59.858 | KV452969.1  | 15710582 | 9-scf00340     | 9  |
| AX-158171267 | 16 | 59.858 | KV452965.1  | 764586   | 9-scf00608     | 9  |
| AX-158171164 | 16 | 59.858 | KV452965.1  | 982254   | 9-scf00608     | 9  |
| AX-157703021 | 16 | 59.858 | DX095825.1  | 388      | IORI212 lctalu | UN |
| AX-157688854 | 16 | 59.858 | 3ML01027254 | 1186     | scf02860_1     | UN |
| AX-157709774 | 16 | 59.858 |             | 111      | scf16462       | UN |
| AX-157835053 | 16 | 59.967 | KV452969.1  | 5179477  | 9-scf00340     | 9  |
| AX-158175091 | 16 | 59.967 | KV452969.1  | 5229780  | 9-scf00340     | 9  |
| AX-158380576 | 16 | 59.967 | KV452969.1  | 5242221  | 9-scf00340     | 9  |
| AX-158175193 | 16 | 59.967 | KV452969.1  | 5373173  | 9-scf00340     | 9  |
| AX-158175207 | 16 | 59.967 | KV452969.1  | 5386622  | 9-scf00340     | 9  |
| AX-157835075 | 16 | 59.967 | KV452969.1  | 5409789  | 9-scf00340     | 9  |
| AX-158175550 | 16 | 59.967 | KV452969.1  | 6254164  | 9-scf00340     | 9  |
| AX-158385911 | 16 | 59.967 | KV452969.1  | 6371739  | 9-scf00340     | 9  |
| AX-158175726 | 16 | 59.967 | KV452969.1  | 6471518  | 9-scf00340     | 9  |
| AX-157835120 | 16 | 59.967 | KV452969.1  | 6509067  | 9-scf00340     | 9  |
| AX-158175788 | 16 | 59.967 | KV452969.1  | 6571779  | 9-scf00340     | 9  |
| AX-158175792 | 16 | 59.967 | KV452969.1  | 6574548  | 9-scf00340     | 9  |
| AX-158175854 | 16 | 59.967 | KV452969.1  | 6638267  | 9-scf00340     | 9  |
| AX-158175939 | 16 | 59.967 | KV452969.1  | 6728655  | 9-scf00340     | 9  |
| AX-158176019 | 16 | 59.967 | KV452969.1  | 6804017  | 9-scf00340     | 9  |
| AX-158176028 | 16 | 59.967 | KV452969.1  | 6810161  | 9-scf00340     | 9  |
| AX-157754042 | 16 | 59.967 | KV452969.1  | 7006161  | 9-scf00340     | 9  |
| AX-158176201 | 16 | 59.967 | KV452969.1  | 7105098  | 9-scf00340     | 9  |
| AX-157835170 | 16 | 59.967 | KV452969.1  | 7171431  | 9-scf00340     | 9  |
| AX-158176270 | 16 | 59.967 | KV452969.1  | 7177775  | 9-scf00340     | 9  |
| AX-157835176 | 16 | 59.967 | KV452969.1  | 7205358  | 9-scf00340     | 9  |
| AX-158176526 | 16 | 59.967 | KV452969.1  | 7471978  | 9-scf00340     | 9  |
| AX-158176527 | 16 | 59.967 | KV452969.1  | 7474938  | 9-scf00340     | 9  |
| AX-158176596 | 16 | 59.967 | KV452969.1  | 7547327  | 9-scf00340     | 9  |
| AX-158176611 | 16 | 59.967 | KV452969.1  | 7571363  | 9-scf00340     | 9  |
| AX-158176614 | 16 | 59.967 | KV452969.1  | 7574068  | 9-scf00340     | 9  |
| AX-158176629 | 16 | 59.967 | KV452969.1  | 7595420  | 9-scf00340     | 9  |
| AX-158176631 | 16 | 59.967 | KV452969.1  | 7596653  | 9-scf00340     | 9  |
| AX-158176647 | 16 | 59.967 | KV452969.1  | 7624155  | 9-scf00340     | 9  |
| AX-158176649 | 16 | 59.967 | KV452969.1  | 7626642  | 9-scf00340     | 9  |

|              |    |        |            |         |            |   |
|--------------|----|--------|------------|---------|------------|---|
| AX-158176651 | 16 | 59.967 | KV452969.1 | 7630411 | 9-scf00340 | 9 |
| AX-157769394 | 16 | 59.967 | KV452969.1 | 7634407 | 9-scf00340 | 9 |
| AX-158176654 | 16 | 59.967 | KV452969.1 | 7637477 | 9-scf00340 | 9 |
| AX-158176656 | 16 | 59.967 | KV452969.1 | 7639119 | 9-scf00340 | 9 |
| AX-158176657 | 16 | 59.967 | KV452969.1 | 7639721 | 9-scf00340 | 9 |
| AX-158176662 | 16 | 59.967 | KV452969.1 | 7646543 | 9-scf00340 | 9 |
| AX-158176663 | 16 | 59.967 | KV452969.1 | 7649828 | 9-scf00340 | 9 |
| AX-158176664 | 16 | 59.967 | KV452969.1 | 7651003 | 9-scf00340 | 9 |
| AX-158176669 | 16 | 59.967 | KV452969.1 | 7655905 | 9-scf00340 | 9 |
| AX-158176671 | 16 | 59.967 | KV452969.1 | 7656744 | 9-scf00340 | 9 |
| AX-158176672 | 16 | 59.967 | KV452969.1 | 7658019 | 9-scf00340 | 9 |
| AX-158176676 | 16 | 59.967 | KV452969.1 | 7661307 | 9-scf00340 | 9 |
| AX-158176677 | 16 | 59.967 | KV452969.1 | 7662014 | 9-scf00340 | 9 |
| AX-158176680 | 16 | 59.967 | KV452969.1 | 7665187 | 9-scf00340 | 9 |
| AX-157835203 | 16 | 59.967 | KV452969.1 | 7665730 | 9-scf00340 | 9 |
| AX-158176681 | 16 | 59.967 | KV452969.1 | 7666061 | 9-scf00340 | 9 |
| AX-158409297 | 16 | 59.967 | KV452969.1 | 7666906 | 9-scf00340 | 9 |
| AX-158176685 | 16 | 59.967 | KV452969.1 | 7673755 | 9-scf00340 | 9 |
| AX-158176691 | 16 | 59.967 | KV452969.1 | 7678801 | 9-scf00340 | 9 |
| AX-157835205 | 16 | 59.967 | KV452969.1 | 7681096 | 9-scf00340 | 9 |
| AX-158176693 | 16 | 59.967 | KV452969.1 | 7681334 | 9-scf00340 | 9 |
| AX-158176694 | 16 | 59.967 | KV452969.1 | 7682032 | 9-scf00340 | 9 |
| AX-157715612 | 16 | 59.967 | KV452969.1 | 7683711 | 9-scf00340 | 9 |
| AX-158176696 | 16 | 59.967 | KV452969.1 | 7684318 | 9-scf00340 | 9 |
| AX-157835206 | 16 | 59.967 | KV452969.1 | 7684428 | 9-scf00340 | 9 |
| AX-158176697 | 16 | 59.967 | KV452969.1 | 7684743 | 9-scf00340 | 9 |
| AX-157835207 | 16 | 59.967 | KV452969.1 | 7684895 | 9-scf00340 | 9 |
| AX-158176698 | 16 | 59.967 | KV452969.1 | 7685402 | 9-scf00340 | 9 |
| AX-157872029 | 16 | 59.967 | KV452969.1 | 7688748 | 9-scf00340 | 9 |
| AX-158176702 | 16 | 59.967 | KV452969.1 | 7689079 | 9-scf00340 | 9 |
| AX-158176703 | 16 | 59.967 | KV452969.1 | 7690889 | 9-scf00340 | 9 |
| AX-158176704 | 16 | 59.967 | KV452969.1 | 7691157 | 9-scf00340 | 9 |
| AX-157835208 | 16 | 59.967 | KV452969.1 | 7691392 | 9-scf00340 | 9 |
| AX-157835209 | 16 | 59.967 | KV452969.1 | 7693825 | 9-scf00340 | 9 |
| AX-158176705 | 16 | 59.967 | KV452969.1 | 7694706 | 9-scf00340 | 9 |
| AX-158176706 | 16 | 59.967 | KV452969.1 | 7695400 | 9-scf00340 | 9 |
| AX-158176707 | 16 | 59.967 | KV452969.1 | 7695728 | 9-scf00340 | 9 |
| AX-158176711 | 16 | 59.967 | KV452969.1 | 7699911 | 9-scf00340 | 9 |
| AX-158176715 | 16 | 59.967 | KV452969.1 | 7707084 | 9-scf00340 | 9 |
| AX-158176716 | 16 | 59.967 | KV452969.1 | 7708140 | 9-scf00340 | 9 |
| AX-158176717 | 16 | 59.967 | KV452969.1 | 7710179 | 9-scf00340 | 9 |
| AX-158176718 | 16 | 59.967 | KV452969.1 | 7711121 | 9-scf00340 | 9 |
| AX-158176719 | 16 | 59.967 | KV452969.1 | 7711711 | 9-scf00340 | 9 |
| AX-158176720 | 16 | 59.967 | KV452969.1 | 7712510 | 9-scf00340 | 9 |
| AX-158176722 | 16 | 59.967 | KV452969.1 | 7713183 | 9-scf00340 | 9 |
| AX-158176727 | 16 | 59.967 | KV452969.1 | 7723315 | 9-scf00340 | 9 |
| AX-158176729 | 16 | 59.967 | KV452969.1 | 7725420 | 9-scf00340 | 9 |
| AX-157743532 | 16 | 59.967 | KV452969.1 | 7725896 | 9-scf00340 | 9 |
| AX-158176731 | 16 | 59.967 | KV452969.1 | 7727831 | 9-scf00340 | 9 |
| AX-158176734 | 16 | 59.967 | KV452969.1 | 7729354 | 9-scf00340 | 9 |
| AX-158176736 | 16 | 59.967 | KV452969.1 | 7730430 | 9-scf00340 | 9 |

|              |    |        |            |         |            |   |
|--------------|----|--------|------------|---------|------------|---|
| AX-158176737 | 16 | 59.967 | KV452969.1 | 7730669 | 9-scf00340 | 9 |
| AX-157716748 | 16 | 59.967 | KV452969.1 | 7732459 | 9-scf00340 | 9 |
| AX-158176739 | 16 | 59.967 | KV452969.1 | 7734844 | 9-scf00340 | 9 |
| AX-158176740 | 16 | 59.967 | KV452969.1 | 7735398 | 9-scf00340 | 9 |
| AX-158176746 | 16 | 59.967 | KV452969.1 | 7739542 | 9-scf00340 | 9 |
| AX-158176748 | 16 | 59.967 | KV452969.1 | 7742165 | 9-scf00340 | 9 |
| AX-158176750 | 16 | 59.967 | KV452969.1 | 7745395 | 9-scf00340 | 9 |
| AX-158176751 | 16 | 59.967 | KV452969.1 | 7746532 | 9-scf00340 | 9 |
| AX-157835215 | 16 | 59.967 | KV452969.1 | 7749527 | 9-scf00340 | 9 |
| AX-157835218 | 16 | 59.967 | KV452969.1 | 7766339 | 9-scf00340 | 9 |
| AX-158176764 | 16 | 59.967 | KV452969.1 | 7773866 | 9-scf00340 | 9 |
| AX-157715855 | 16 | 59.967 | KV452969.1 | 7774928 | 9-scf00340 | 9 |
| AX-158176767 | 16 | 59.967 | KV452969.1 | 7777341 | 9-scf00340 | 9 |
| AX-158176768 | 16 | 59.967 | KV452969.1 | 7778789 | 9-scf00340 | 9 |
| AX-158176769 | 16 | 59.967 | KV452969.1 | 7779059 | 9-scf00340 | 9 |
| AX-157835220 | 16 | 59.967 | KV452969.1 | 7780769 | 9-scf00340 | 9 |
| AX-158176774 | 16 | 59.967 | KV452969.1 | 7782783 | 9-scf00340 | 9 |
| AX-158176775 | 16 | 59.967 | KV452969.1 | 7785389 | 9-scf00340 | 9 |
| AX-158176778 | 16 | 59.967 | KV452969.1 | 7786948 | 9-scf00340 | 9 |
| AX-158176779 | 16 | 59.967 | KV452969.1 | 7787650 | 9-scf00340 | 9 |
| AX-158176780 | 16 | 59.967 | KV452969.1 | 7788087 | 9-scf00340 | 9 |
| AX-158176781 | 16 | 59.967 | KV452969.1 | 7788484 | 9-scf00340 | 9 |
| AX-158176784 | 16 | 59.967 | KV452969.1 | 7794876 | 9-scf00340 | 9 |
| AX-158176786 | 16 | 59.967 | KV452969.1 | 7798192 | 9-scf00340 | 9 |
| AX-158176789 | 16 | 59.967 | KV452969.1 | 7806714 | 9-scf00340 | 9 |
| AX-158176791 | 16 | 59.967 | KV452969.1 | 7809790 | 9-scf00340 | 9 |
| AX-158176792 | 16 | 59.967 | KV452969.1 | 7810454 | 9-scf00340 | 9 |
| AX-157835223 | 16 | 59.967 | KV452969.1 | 7811560 | 9-scf00340 | 9 |
| AX-158176794 | 16 | 59.967 | KV452969.1 | 7811654 | 9-scf00340 | 9 |
| AX-158176795 | 16 | 59.967 | KV452969.1 | 7813592 | 9-scf00340 | 9 |
| AX-157835224 | 16 | 59.967 | KV452969.1 | 7814355 | 9-scf00340 | 9 |
| AX-157713629 | 16 | 59.967 | KV452969.1 | 7815360 | 9-scf00340 | 9 |
| AX-157747166 | 16 | 59.967 | KV452969.1 | 7822462 | 9-scf00340 | 9 |
| AX-158176799 | 16 | 59.967 | KV452969.1 | 7823311 | 9-scf00340 | 9 |
| AX-158176800 | 16 | 59.967 | KV452969.1 | 7826464 | 9-scf00340 | 9 |
| AX-158176801 | 16 | 59.967 | KV452969.1 | 7827084 | 9-scf00340 | 9 |
| AX-158176802 | 16 | 59.967 | KV452969.1 | 7827926 | 9-scf00340 | 9 |
| AX-158176803 | 16 | 59.967 | KV452969.1 | 7828405 | 9-scf00340 | 9 |
| AX-157715748 | 16 | 59.967 | KV452969.1 | 7831111 | 9-scf00340 | 9 |
| AX-158176807 | 16 | 59.967 | KV452969.1 | 7831634 | 9-scf00340 | 9 |
| AX-158176824 | 16 | 59.967 | KV452969.1 | 7855077 | 9-scf00340 | 9 |
| AX-158176828 | 16 | 59.967 | KV452969.1 | 7857968 | 9-scf00340 | 9 |
| AX-158176842 | 16 | 59.967 | KV452969.1 | 7878063 | 9-scf00340 | 9 |
| AX-158176912 | 16 | 59.967 | KV452969.1 | 7960570 | 9-scf00340 | 9 |
| AX-158176925 | 16 | 59.967 | KV452969.1 | 7980776 | 9-scf00340 | 9 |
| AX-158176930 | 16 | 59.967 | KV452969.1 | 7990295 | 9-scf00340 | 9 |
| AX-158176963 | 16 | 59.967 | KV452969.1 | 8031292 | 9-scf00340 | 9 |
| AX-158176972 | 16 | 59.967 | KV452969.1 | 8039314 | 9-scf00340 | 9 |
| AX-158176989 | 16 | 59.967 | KV452969.1 | 8059992 | 9-scf00340 | 9 |
| AX-158176993 | 16 | 59.967 | KV452969.1 | 8061108 | 9-scf00340 | 9 |
| AX-158177001 | 16 | 59.967 | KV452969.1 | 8071279 | 9-scf00340 | 9 |

|              |    |        |            |          |            |   |
|--------------|----|--------|------------|----------|------------|---|
| AX-158177062 | 16 | 59.967 | KV452969.1 | 8152382  | 9-scf00340 | 9 |
| AX-158177076 | 16 | 59.967 | KV452969.1 | 8181627  | 9-scf00340 | 9 |
| AX-157753421 | 16 | 59.967 | KV452969.1 | 8198901  | 9-scf00340 | 9 |
| AX-158413486 | 16 | 59.967 | KV452969.1 | 8207523  | 9-scf00340 | 9 |
| AX-158413487 | 16 | 59.967 | KV452969.1 | 8208089  | 9-scf00340 | 9 |
| AX-157872035 | 16 | 59.967 | KV452969.1 | 8218056  | 9-scf00340 | 9 |
| AX-157771291 | 16 | 59.967 | KV452969.1 | 8230198  | 9-scf00340 | 9 |
| AX-158177102 | 16 | 59.967 | KV452969.1 | 8230315  | 9-scf00340 | 9 |
| AX-158177103 | 16 | 59.967 | KV452969.1 | 8230677  | 9-scf00340 | 9 |
| AX-158177105 | 16 | 59.967 | KV452969.1 | 8231957  | 9-scf00340 | 9 |
| AX-158177113 | 16 | 59.967 | KV452969.1 | 8241638  | 9-scf00340 | 9 |
| AX-158177116 | 16 | 59.967 | KV452969.1 | 8244845  | 9-scf00340 | 9 |
| AX-158177192 | 16 | 59.967 | KV452969.1 | 8327484  | 9-scf00340 | 9 |
| AX-157726946 | 16 | 59.967 | KV452969.1 | 8338714  | 9-scf00340 | 9 |
| AX-158177203 | 16 | 59.967 | KV452969.1 | 8338998  | 9-scf00340 | 9 |
| AX-158177204 | 16 | 59.967 | KV452969.1 | 8339292  | 9-scf00340 | 9 |
| AX-158177206 | 16 | 59.967 | KV452969.1 | 8341857  | 9-scf00340 | 9 |
| AX-158177209 | 16 | 59.967 | KV452969.1 | 8345382  | 9-scf00340 | 9 |
| AX-158177211 | 16 | 59.967 | KV452969.1 | 8346087  | 9-scf00340 | 9 |
| AX-158177214 | 16 | 59.967 | KV452969.1 | 8347983  | 9-scf00340 | 9 |
| AX-158177215 | 16 | 59.967 | KV452969.1 | 8349009  | 9-scf00340 | 9 |
| AX-158177216 | 16 | 59.967 | KV452969.1 | 8349506  | 9-scf00340 | 9 |
| AX-158177277 | 16 | 59.967 | KV452969.1 | 8416758  | 9-scf00340 | 9 |
| AX-158177318 | 16 | 59.967 | KV452969.1 | 8457006  | 9-scf00340 | 9 |
| AX-158177324 | 16 | 59.967 | KV452969.1 | 8462253  | 9-scf00340 | 9 |
| AX-158177332 | 16 | 59.967 | KV452969.1 | 8480022  | 9-scf00340 | 9 |
| AX-158177354 | 16 | 59.967 | KV452969.1 | 8502980  | 9-scf00340 | 9 |
| AX-157835283 | 16 | 59.967 | KV452969.1 | 8503630  | 9-scf00340 | 9 |
| AX-158177377 | 16 | 59.967 | KV452969.1 | 8536777  | 9-scf00340 | 9 |
| AX-157835365 | 16 | 59.967 | KV452969.1 | 9384219  | 9-scf00340 | 9 |
| AX-157835368 | 16 | 59.967 | KV452969.1 | 9393511  | 9-scf00340 | 9 |
| AX-158178236 | 16 | 59.967 | KV452969.1 | 9745910  | 9-scf00340 | 9 |
| AX-158178361 | 16 | 59.967 | KV452969.1 | 9869362  | 9-scf00340 | 9 |
| AX-158178362 | 16 | 59.967 | KV452969.1 | 9869827  | 9-scf00340 | 9 |
| AX-158179194 | 16 | 59.967 | KV452969.1 | 11034609 | 9-scf00340 | 9 |
| AX-158179470 | 16 | 59.967 | KV452969.1 | 11385802 | 9-scf00340 | 9 |
| AX-158179667 | 16 | 59.967 | KV452969.1 | 11644526 | 9-scf00340 | 9 |
| AX-157721751 | 16 | 59.967 | KV452969.1 | 11716408 | 9-scf00340 | 9 |
| AX-158181197 | 16 | 59.967 | KV452969.1 | 13660659 | 9-scf00340 | 9 |
| AX-157725617 | 16 | 60.186 | KV452969.1 | 7849903  | 9-scf00340 | 9 |
| AX-158176817 | 16 | 60.186 | KV452969.1 | 7850552  | 9-scf00340 | 9 |
| AX-158176820 | 16 | 60.186 | KV452969.1 | 7852814  | 9-scf00340 | 9 |
| AX-158176825 | 16 | 60.186 | KV452969.1 | 7855694  | 9-scf00340 | 9 |
| AX-158176832 | 16 | 60.186 | KV452969.1 | 7865967  | 9-scf00340 | 9 |
| AX-158176834 | 16 | 60.186 | KV452969.1 | 7866845  | 9-scf00340 | 9 |
| AX-158176884 | 16 | 60.186 | KV452969.1 | 7925684  | 9-scf00340 | 9 |
| AX-158177016 | 16 | 60.186 | KV452969.1 | 8102132  | 9-scf00340 | 9 |
| AX-158177649 | 16 | 60.186 | KV452969.1 | 9013291  | 9-scf00340 | 9 |
| AX-158170726 | 16 | 60.295 | KV452961.1 | 3451869  | 9-scf00334 | 9 |
| AX-158170800 | 16 | 60.295 | KV452961.1 | 3526625  | 9-scf00334 | 9 |
| AX-158170849 | 16 | 60.295 | KV452961.1 | 3600916  | 9-scf00334 | 9 |



|              |    |        |            |         |            |   |
|--------------|----|--------|------------|---------|------------|---|
| AX-157726304 | 16 | 60.295 | KV452961.1 | 3629922 | 9-scf00334 | 9 |
| AX-157683849 | 16 | 60.295 | KV452963.1 | 14104   | 9-scf00335 | 9 |
| AX-157683858 | 16 | 60.295 | KV452963.1 | 36129   | 9-scf00335 | 9 |
| AX-158171726 | 16 | 60.295 | KV452964.1 | 48448   | 9-scf00337 | 9 |
| AX-158171751 | 16 | 60.295 | KV452964.1 | 74497   | 9-scf00337 | 9 |
| AX-158171795 | 16 | 60.295 | KV452964.1 | 132867  | 9-scf00337 | 9 |
| AX-158171801 | 16 | 60.295 | KV452964.1 | 148678  | 9-scf00337 | 9 |
| AX-158171926 | 16 | 60.295 | KV452966.1 | 70138   | 9-scf00338 | 9 |
| AX-157834850 | 16 | 60.295 | KV452966.1 | 177180  | 9-scf00338 | 9 |
| AX-157746247 | 16 | 60.295 | KV452969.1 | 1183679 | 9-scf00340 | 9 |
| AX-158172593 | 16 | 60.295 | KV452969.1 | 1235272 | 9-scf00340 | 9 |
| AX-158172637 | 16 | 60.295 | KV452969.1 | 1337530 | 9-scf00340 | 9 |
| AX-158172760 | 16 | 60.295 | KV452969.1 | 1879353 | 9-scf00340 | 9 |
| AX-158172776 | 16 | 60.295 | KV452969.1 | 1926410 | 9-scf00340 | 9 |
| AX-158172779 | 16 | 60.295 | KV452969.1 | 1931996 | 9-scf00340 | 9 |
| AX-158172809 | 16 | 60.295 | KV452969.1 | 1997002 | 9-scf00340 | 9 |
| AX-158172880 | 16 | 60.295 | KV452969.1 | 2232494 | 9-scf00340 | 9 |
| AX-158172926 | 16 | 60.295 | KV452969.1 | 2303236 | 9-scf00340 | 9 |
| AX-158172986 | 16 | 60.295 | KV452969.1 | 2411101 | 9-scf00340 | 9 |
| AX-157741275 | 16 | 60.295 | KV452969.1 | 2464434 | 9-scf00340 | 9 |
| AX-158173026 | 16 | 60.295 | KV452969.1 | 2491862 | 9-scf00340 | 9 |
| AX-157747792 | 16 | 60.295 | KV452969.1 | 2659499 | 9-scf00340 | 9 |
| AX-157748773 | 16 | 60.295 | KV452969.1 | 5175059 | 9-scf00340 | 9 |
| AX-158175114 | 16 | 60.295 | KV452969.1 | 5270631 | 9-scf00340 | 9 |
| AX-158175744 | 16 | 60.295 | KV452969.1 | 6501991 | 9-scf00340 | 9 |
| AX-158176108 | 16 | 60.295 | KV452969.1 | 6944141 | 9-scf00340 | 9 |
| AX-158176139 | 16 | 60.295 | KV452969.1 | 7014349 | 9-scf00340 | 9 |
| AX-158176179 | 16 | 60.295 | KV452969.1 | 7070031 | 9-scf00340 | 9 |
| AX-158176282 | 16 | 60.295 | KV452969.1 | 7188821 | 9-scf00340 | 9 |
| AX-157835179 | 16 | 60.295 | KV452969.1 | 7210856 | 9-scf00340 | 9 |
| AX-158176304 | 16 | 60.295 | KV452969.1 | 7215583 | 9-scf00340 | 9 |
| AX-158176370 | 16 | 60.295 | KV452969.1 | 7302054 | 9-scf00340 | 9 |
| AX-157835184 | 16 | 60.295 | KV452969.1 | 7324431 | 9-scf00340 | 9 |
| AX-158176417 | 16 | 60.295 | KV452969.1 | 7344396 | 9-scf00340 | 9 |
| AX-158176421 | 16 | 60.295 | KV452969.1 | 7350369 | 9-scf00340 | 9 |
| AX-157720838 | 16 | 60.295 | KV452969.1 | 7353398 | 9-scf00340 | 9 |
| AX-158176445 | 16 | 60.295 | KV452969.1 | 7374685 | 9-scf00340 | 9 |
| AX-158176454 | 16 | 60.295 | KV452969.1 | 7387680 | 9-scf00340 | 9 |
| AX-158176460 | 16 | 60.295 | KV452969.1 | 7395107 | 9-scf00340 | 9 |
| AX-158176473 | 16 | 60.295 | KV452969.1 | 7406013 | 9-scf00340 | 9 |
| AX-158176482 | 16 | 60.295 | KV452969.1 | 7414394 | 9-scf00340 | 9 |
| AX-158176487 | 16 | 60.295 | KV452969.1 | 7422612 | 9-scf00340 | 9 |
| AX-158176492 | 16 | 60.295 | KV452969.1 | 7426698 | 9-scf00340 | 9 |
| AX-158176493 | 16 | 60.295 | KV452969.1 | 7427120 | 9-scf00340 | 9 |
| AX-158176496 | 16 | 60.295 | KV452969.1 | 7430107 | 9-scf00340 | 9 |
| AX-158413471 | 16 | 60.295 | KV452969.1 | 7432625 | 9-scf00340 | 9 |
| AX-158176504 | 16 | 60.295 | KV452969.1 | 7443416 | 9-scf00340 | 9 |
| AX-158413474 | 16 | 60.295 | KV452969.1 | 7444200 | 9-scf00340 | 9 |
| AX-158176517 | 16 | 60.295 | KV452969.1 | 7463148 | 9-scf00340 | 9 |
| AX-158176522 | 16 | 60.295 | KV452969.1 | 7468786 | 9-scf00340 | 9 |
| AX-158176535 | 16 | 60.295 | KV452969.1 | 7481393 | 9-scf00340 | 9 |

|              |    |        |            |         |            |   |
|--------------|----|--------|------------|---------|------------|---|
| AX-158176536 | 16 | 60.295 | KV452969.1 | 7482321 | 9-scf00340 | 9 |
| AX-158176539 | 16 | 60.295 | KV452969.1 | 7485187 | 9-scf00340 | 9 |
| AX-157754852 | 16 | 60.295 | KV452969.1 | 7494620 | 9-scf00340 | 9 |
| AX-157718974 | 16 | 60.295 | KV452969.1 | 7502780 | 9-scf00340 | 9 |
| AX-158176572 | 16 | 60.295 | KV452969.1 | 7520542 | 9-scf00340 | 9 |
| AX-158176579 | 16 | 60.295 | KV452969.1 | 7528799 | 9-scf00340 | 9 |
| AX-158176587 | 16 | 60.295 | KV452969.1 | 7536414 | 9-scf00340 | 9 |
| AX-157835192 | 16 | 60.295 | KV452969.1 | 7538847 | 9-scf00340 | 9 |
| AX-158176604 | 16 | 60.295 | KV452969.1 | 7555775 | 9-scf00340 | 9 |
| AX-157835198 | 16 | 60.295 | KV452969.1 | 7577899 | 9-scf00340 | 9 |
| AX-158176616 | 16 | 60.295 | KV452969.1 | 7578064 | 9-scf00340 | 9 |
| AX-157835200 | 16 | 60.295 | KV452969.1 | 7578552 | 9-scf00340 | 9 |
| AX-158176619 | 16 | 60.295 | KV452969.1 | 7582063 | 9-scf00340 | 9 |
| AX-158176635 | 16 | 60.295 | KV452969.1 | 7602501 | 9-scf00340 | 9 |
| AX-158176689 | 16 | 60.295 | KV452969.1 | 7676169 | 9-scf00340 | 9 |
| AX-158176833 | 16 | 60.295 | KV452969.1 | 7866299 | 9-scf00340 | 9 |
| AX-158176839 | 16 | 60.295 | KV452969.1 | 7874065 | 9-scf00340 | 9 |
| AX-158176840 | 16 | 60.295 | KV452969.1 | 7875255 | 9-scf00340 | 9 |
| AX-158176843 | 16 | 60.295 | KV452969.1 | 7879522 | 9-scf00340 | 9 |
| AX-158176845 | 16 | 60.295 | KV452969.1 | 7881650 | 9-scf00340 | 9 |
| AX-158176848 | 16 | 60.295 | KV452969.1 | 7882705 | 9-scf00340 | 9 |
| AX-158176849 | 16 | 60.295 | KV452969.1 | 7883101 | 9-scf00340 | 9 |
| AX-158176862 | 16 | 60.295 | KV452969.1 | 7895819 | 9-scf00340 | 9 |
| AX-158176864 | 16 | 60.295 | KV452969.1 | 7898275 | 9-scf00340 | 9 |
| AX-158413480 | 16 | 60.295 | KV452969.1 | 7899152 | 9-scf00340 | 9 |
| AX-158176866 | 16 | 60.295 | KV452969.1 | 7903161 | 9-scf00340 | 9 |
| AX-158176869 | 16 | 60.295 | KV452969.1 | 7908285 | 9-scf00340 | 9 |
| AX-157835229 | 16 | 60.295 | KV452969.1 | 7909232 | 9-scf00340 | 9 |
| AX-157835231 | 16 | 60.295 | KV452969.1 | 7913924 | 9-scf00340 | 9 |
| AX-158176877 | 16 | 60.295 | KV452969.1 | 7916380 | 9-scf00340 | 9 |
| AX-158176878 | 16 | 60.295 | KV452969.1 | 7918381 | 9-scf00340 | 9 |
| AX-158176879 | 16 | 60.295 | KV452969.1 | 7918764 | 9-scf00340 | 9 |
| AX-158176883 | 16 | 60.295 | KV452969.1 | 7924649 | 9-scf00340 | 9 |
| AX-157835232 | 16 | 60.295 | KV452969.1 | 7940217 | 9-scf00340 | 9 |
| AX-157718082 | 16 | 60.295 | KV452969.1 | 7940858 | 9-scf00340 | 9 |
| AX-158176894 | 16 | 60.295 | KV452969.1 | 7942503 | 9-scf00340 | 9 |
| AX-158176901 | 16 | 60.295 | KV452969.1 | 7948138 | 9-scf00340 | 9 |
| AX-158176902 | 16 | 60.295 | KV452969.1 | 7951137 | 9-scf00340 | 9 |
| AX-158176903 | 16 | 60.295 | KV452969.1 | 7954176 | 9-scf00340 | 9 |
| AX-157886788 | 16 | 60.295 | KV452969.1 | 7954862 | 9-scf00340 | 9 |
| AX-158176906 | 16 | 60.295 | KV452969.1 | 7956048 | 9-scf00340 | 9 |
| AX-158176908 | 16 | 60.295 | KV452969.1 | 7957031 | 9-scf00340 | 9 |
| AX-158176910 | 16 | 60.295 | KV452969.1 | 7957971 | 9-scf00340 | 9 |
| AX-158176911 | 16 | 60.295 | KV452969.1 | 7959132 | 9-scf00340 | 9 |
| AX-158176913 | 16 | 60.295 | KV452969.1 | 7963143 | 9-scf00340 | 9 |
| AX-158176916 | 16 | 60.295 | KV452969.1 | 7965156 | 9-scf00340 | 9 |
| AX-157755334 | 16 | 60.295 | KV452969.1 | 7965416 | 9-scf00340 | 9 |
| AX-158176917 | 16 | 60.295 | KV452969.1 | 7966665 | 9-scf00340 | 9 |
| AX-157746824 | 16 | 60.295 | KV452969.1 | 7967048 | 9-scf00340 | 9 |
| AX-158176918 | 16 | 60.295 | KV452969.1 | 7970901 | 9-scf00340 | 9 |
| AX-158176923 | 16 | 60.295 | KV452969.1 | 7977663 | 9-scf00340 | 9 |

|              |    |        |            |         |            |   |
|--------------|----|--------|------------|---------|------------|---|
| AX-157835235 | 16 | 60.295 | KV452969.1 | 7978968 | 9-scf00340 | 9 |
| AX-158176929 | 16 | 60.295 | KV452969.1 | 7988058 | 9-scf00340 | 9 |
| AX-157835239 | 16 | 60.295 | KV452969.1 | 7988441 | 9-scf00340 | 9 |
| AX-157718576 | 16 | 60.295 | KV452969.1 | 7989486 | 9-scf00340 | 9 |
| AX-158176932 | 16 | 60.295 | KV452969.1 | 7991735 | 9-scf00340 | 9 |
| AX-158176935 | 16 | 60.295 | KV452969.1 | 7995329 | 9-scf00340 | 9 |
| AX-158176938 | 16 | 60.295 | KV452969.1 | 7999229 | 9-scf00340 | 9 |
| AX-158176941 | 16 | 60.295 | KV452969.1 | 8006142 | 9-scf00340 | 9 |
| AX-158176942 | 16 | 60.295 | KV452969.1 | 8007494 | 9-scf00340 | 9 |
| AX-158176943 | 16 | 60.295 | KV452969.1 | 8007923 | 9-scf00340 | 9 |
| AX-158176944 | 16 | 60.295 | KV452969.1 | 8008172 | 9-scf00340 | 9 |
| AX-157835243 | 16 | 60.295 | KV452969.1 | 8009235 | 9-scf00340 | 9 |
| AX-158176945 | 16 | 60.295 | KV452969.1 | 8009917 | 9-scf00340 | 9 |
| AX-158176948 | 16 | 60.295 | KV452969.1 | 8013460 | 9-scf00340 | 9 |
| AX-157835247 | 16 | 60.295 | KV452969.1 | 8024371 | 9-scf00340 | 9 |
| AX-158176959 | 16 | 60.295 | KV452969.1 | 8025825 | 9-scf00340 | 9 |
| AX-158176960 | 16 | 60.295 | KV452969.1 | 8026718 | 9-scf00340 | 9 |
| AX-158176961 | 16 | 60.295 | KV452969.1 | 8029030 | 9-scf00340 | 9 |
| AX-157835249 | 16 | 60.295 | KV452969.1 | 8029705 | 9-scf00340 | 9 |
| AX-158176962 | 16 | 60.295 | KV452969.1 | 8029946 | 9-scf00340 | 9 |
| AX-158176967 | 16 | 60.295 | KV452969.1 | 8033672 | 9-scf00340 | 9 |
| AX-158176968 | 16 | 60.295 | KV452969.1 | 8034058 | 9-scf00340 | 9 |
| AX-158176976 | 16 | 60.295 | KV452969.1 | 8042771 | 9-scf00340 | 9 |
| AX-158176977 | 16 | 60.295 | KV452969.1 | 8043856 | 9-scf00340 | 9 |
| AX-158176978 | 16 | 60.295 | KV452969.1 | 8044501 | 9-scf00340 | 9 |
| AX-158176979 | 16 | 60.295 | KV452969.1 | 8045237 | 9-scf00340 | 9 |
| AX-158176980 | 16 | 60.295 | KV452969.1 | 8049059 | 9-scf00340 | 9 |
| AX-158176982 | 16 | 60.295 | KV452969.1 | 8051572 | 9-scf00340 | 9 |
| AX-158176983 | 16 | 60.295 | KV452969.1 | 8052199 | 9-scf00340 | 9 |
| AX-158176987 | 16 | 60.295 | KV452969.1 | 8058090 | 9-scf00340 | 9 |
| AX-158176988 | 16 | 60.295 | KV452969.1 | 8059263 | 9-scf00340 | 9 |
| AX-158176995 | 16 | 60.295 | KV452969.1 | 8062916 | 9-scf00340 | 9 |
| AX-157758901 | 16 | 60.295 | KV452969.1 | 8063512 | 9-scf00340 | 9 |
| AX-157866686 | 16 | 60.295 | KV452969.1 | 8063974 | 9-scf00340 | 9 |
| AX-158176997 | 16 | 60.295 | KV452969.1 | 8065788 | 9-scf00340 | 9 |
| AX-158177000 | 16 | 60.295 | KV452969.1 | 8068163 | 9-scf00340 | 9 |
| AX-158177007 | 16 | 60.295 | KV452969.1 | 8086973 | 9-scf00340 | 9 |
| AX-158177009 | 16 | 60.295 | KV452969.1 | 8094437 | 9-scf00340 | 9 |
| AX-158177019 | 16 | 60.295 | KV452969.1 | 8108696 | 9-scf00340 | 9 |
| AX-158177021 | 16 | 60.295 | KV452969.1 | 8114826 | 9-scf00340 | 9 |
| AX-158177022 | 16 | 60.295 | KV452969.1 | 8115437 | 9-scf00340 | 9 |
| AX-158177045 | 16 | 60.295 | KV452969.1 | 8136868 | 9-scf00340 | 9 |
| AX-158177048 | 16 | 60.295 | KV452969.1 | 8140728 | 9-scf00340 | 9 |
| AX-158177049 | 16 | 60.295 | KV452969.1 | 8141252 | 9-scf00340 | 9 |
| AX-158177052 | 16 | 60.295 | KV452969.1 | 8144274 | 9-scf00340 | 9 |
| AX-158177055 | 16 | 60.295 | KV452969.1 | 8146188 | 9-scf00340 | 9 |
| AX-158177090 | 16 | 60.295 | KV452969.1 | 8213446 | 9-scf00340 | 9 |
| AX-157866688 | 16 | 60.295 | KV452969.1 | 8217231 | 9-scf00340 | 9 |
| AX-158177137 | 16 | 60.295 | KV452969.1 | 8270161 | 9-scf00340 | 9 |
| AX-158413491 | 16 | 60.295 | KV452969.1 | 8463784 | 9-scf00340 | 9 |
| AX-158177398 | 16 | 60.295 | KV452969.1 | 8561580 | 9-scf00340 | 9 |

|              |    |        |            |          |            |   |
|--------------|----|--------|------------|----------|------------|---|
| AX-158177415 | 16 | 60.295 | KV452969.1 | 8580586  | 9-scf00340 | 9 |
| AX-158177428 | 16 | 60.295 | KV452969.1 | 8596494  | 9-scf00340 | 9 |
| AX-157835295 | 16 | 60.295 | KV452969.1 | 8602843  | 9-scf00340 | 9 |
| AX-158177607 | 16 | 60.295 | KV452969.1 | 8908888  | 9-scf00340 | 9 |
| AX-157835325 | 16 | 60.295 | KV452969.1 | 8917015  | 9-scf00340 | 9 |
| AX-157758109 | 16 | 60.295 | KV452969.1 | 9464349  | 9-scf00340 | 9 |
| AX-158178009 | 16 | 60.295 | KV452969.1 | 9485401  | 9-scf00340 | 9 |
| AX-158178225 | 16 | 60.295 | KV452969.1 | 9733649  | 9-scf00340 | 9 |
| AX-158178355 | 16 | 60.295 | KV452969.1 | 9864676  | 9-scf00340 | 9 |
| AX-158178455 | 16 | 60.295 | KV452969.1 | 10056099 | 9-scf00340 | 9 |
| AX-158178483 | 16 | 60.295 | KV452969.1 | 10101621 | 9-scf00340 | 9 |
| AX-157741867 | 16 | 60.295 | KV452969.1 | 10222794 | 9-scf00340 | 9 |
| AX-158178693 | 16 | 60.295 | KV452969.1 | 10365305 | 9-scf00340 | 9 |
| AX-158178877 | 16 | 60.295 | KV452969.1 | 10631871 | 9-scf00340 | 9 |
| AX-157835453 | 16 | 60.295 | KV452969.1 | 10799237 | 9-scf00340 | 9 |
| AX-158179138 | 16 | 60.295 | KV452969.1 | 10962726 | 9-scf00340 | 9 |
| AX-158179176 | 16 | 60.295 | KV452969.1 | 11016951 | 9-scf00340 | 9 |
| AX-158413563 | 16 | 60.295 | KV452969.1 | 11526652 | 9-scf00340 | 9 |
| AX-158179577 | 16 | 60.295 | KV452969.1 | 11527111 | 9-scf00340 | 9 |
| AX-158179660 | 16 | 60.295 | KV452969.1 | 11624430 | 9-scf00340 | 9 |
| AX-158180544 | 16 | 60.295 | KV452969.1 | 12706993 | 9-scf00340 | 9 |
| AX-157741676 | 16 | 60.295 | KV452969.1 | 12707374 | 9-scf00340 | 9 |
| AX-158180841 | 16 | 60.295 | KV452969.1 | 13060756 | 9-scf00340 | 9 |
| AX-158180985 | 16 | 60.295 | KV452969.1 | 13229691 | 9-scf00340 | 9 |
| AX-158181003 | 16 | 60.295 | KV452969.1 | 13255817 | 9-scf00340 | 9 |
| AX-157718730 | 16 | 60.295 | KV452969.1 | 13268954 | 9-scf00340 | 9 |
| AX-158385951 | 16 | 60.295 | KV452969.1 | 13501914 | 9-scf00340 | 9 |
| AX-157835682 | 16 | 60.295 | KV452969.1 | 13508457 | 9-scf00340 | 9 |
| AX-158181323 | 16 | 60.295 | KV452969.1 | 13872620 | 9-scf00340 | 9 |
| AX-157878872 | 16 | 60.295 | KV452969.1 | 14232389 | 9-scf00340 | 9 |
| AX-158181769 | 16 | 60.295 | KV452969.1 | 14529673 | 9-scf00340 | 9 |
| AX-158181770 | 16 | 60.295 | KV452969.1 | 14534512 | 9-scf00340 | 9 |
| AX-158181800 | 16 | 60.295 | KV452969.1 | 14583637 | 9-scf00340 | 9 |
| AX-158181968 | 16 | 60.295 | KV452969.1 | 14743204 | 9-scf00340 | 9 |
| AX-158182367 | 16 | 60.295 | KV452969.1 | 15296018 | 9-scf00340 | 9 |
| AX-158182614 | 16 | 60.295 | KV452969.1 | 15620688 | 9-scf00340 | 9 |
| AX-158182621 | 16 | 60.295 | KV452969.1 | 15626151 | 9-scf00340 | 9 |
| AX-157754083 | 16 | 60.295 | KV452965.1 | 615389   | 9-scf00608 | 9 |
| AX-158171339 | 16 | 60.295 | KV452965.1 | 668823   | 9-scf00608 | 9 |
| AX-157719468 | 16 | 60.295 | KV452965.1 | 683425   | 9-scf00608 | 9 |
| AX-158171142 | 16 | 60.295 | KV452965.1 | 1031623  | 9-scf00608 | 9 |
| AX-158171141 | 16 | 60.295 | KV452965.1 | 1032400  | 9-scf00608 | 9 |
| AX-158171138 | 16 | 60.295 | KV452965.1 | 1046347  | 9-scf00608 | 9 |
| AX-158176837 | 16 | 60.404 | KV452969.1 | 7871238  | 9-scf00340 | 9 |
| AX-158176850 | 16 | 60.404 | KV452969.1 | 7883389  | 9-scf00340 | 9 |
| AX-158176881 | 16 | 60.404 | KV452969.1 | 7920428  | 9-scf00340 | 9 |
| AX-158176892 | 16 | 60.404 | KV452969.1 | 7941404  | 9-scf00340 | 9 |
| AX-158176896 | 16 | 60.404 | KV452969.1 | 7943186  | 9-scf00340 | 9 |
| AX-158176928 | 16 | 60.404 | KV452969.1 | 7987238  | 9-scf00340 | 9 |
| AX-158176939 | 16 | 60.404 | KV452969.1 | 8000339  | 9-scf00340 | 9 |
| AX-158176970 | 16 | 60.404 | KV452969.1 | 8036834  | 9-scf00340 | 9 |

|              |    |        |             |          |            |    |
|--------------|----|--------|-------------|----------|------------|----|
| AX-158176985 | 16 | 60.404 | KV452969.1  | 8053451  | 9-scf00340 | 9  |
| AX-157835252 | 16 | 60.404 | KV452969.1  | 8073628  | 9-scf00340 | 9  |
| AX-157726309 | 16 | 60.404 | KV452969.1  | 8075563  | 9-scf00340 | 9  |
| AX-157835253 | 16 | 60.404 | KV452969.1  | 8076323  | 9-scf00340 | 9  |
| AX-158177005 | 16 | 60.404 | KV452969.1  | 8081644  | 9-scf00340 | 9  |
| AX-158177054 | 16 | 60.404 | KV452969.1  | 8145568  | 9-scf00340 | 9  |
| AX-158177002 | 16 | 60.477 | KV452969.1  | 8076866  | 9-scf00340 | 9  |
| AX-158177006 | 16 | 60.552 | KV452969.1  | 8084464  | 9-scf00340 | 9  |
| AX-158177013 | 16 | 60.623 | KV452969.1  | 8100342  | 9-scf00340 | 9  |
| AX-158177014 | 16 | 60.623 | KV452969.1  | 8101083  | 9-scf00340 | 9  |
| AX-157858628 | 16 | 60.623 | KV452969.1  | 8102168  | 9-scf00340 | 9  |
| AX-157858629 | 16 | 60.623 | KV452969.1  | 8102208  | 9-scf00340 | 9  |
| AX-158177018 | 16 | 60.623 | KV452969.1  | 8104089  | 9-scf00340 | 9  |
| AX-158177020 | 16 | 60.623 | KV452969.1  | 8112100  | 9-scf00340 | 9  |
| AX-158385916 | 16 | 60.623 | KV452969.1  | 8112273  | 9-scf00340 | 9  |
| AX-158177024 | 16 | 60.623 | KV452969.1  | 8117298  | 9-scf00340 | 9  |
| AX-158177030 | 16 | 60.623 | KV452969.1  | 8125841  | 9-scf00340 | 9  |
| AX-158177033 | 16 | 60.623 | KV452969.1  | 8128001  | 9-scf00340 | 9  |
| AX-158177035 | 16 | 60.623 | KV452969.1  | 8130200  | 9-scf00340 | 9  |
| AX-158177036 | 16 | 60.623 | KV452969.1  | 8130571  | 9-scf00340 | 9  |
| AX-157835361 | 16 | 60.623 | KV452969.1  | 9351889  | 9-scf00340 | 9  |
| AX-158177993 | 16 | 60.623 | KV452969.1  | 9469012  | 9-scf00340 | 9  |
| AX-158177995 | 16 | 60.623 | KV452969.1  | 9470663  | 9-scf00340 | 9  |
| AX-158180510 | 16 | 60.623 | KV452969.1  | 12665386 | 9-scf00340 | 9  |
| AX-158176844 | 16 | 60.628 | KV452969.1  | 7881261  | 9-scf00340 | 9  |
| AX-158177034 | 16 | 60.628 | KV452969.1  | 8129111  | 9-scf00340 | 9  |
| AX-158177041 | 16 | 60.628 | KV452969.1  | 8134126  | 9-scf00340 | 9  |
| AX-158177043 | 16 | 60.628 | KV452969.1  | 8135379  | 9-scf00340 | 9  |
| AX-158177050 | 16 | 60.628 | KV452969.1  | 8143011  | 9-scf00340 | 9  |
| AX-158177075 | 16 | 60.628 | KV452969.1  | 8179362  | 9-scf00340 | 9  |
| AX-158177597 | 16 | 60.628 | KV452969.1  | 8891752  | 9-scf00340 | 9  |
| AX-158177598 | 16 | 60.628 | KV452969.1  | 8892161  | 9-scf00340 | 9  |
| AX-158177932 | 16 | 60.628 | KV452969.1  | 9397845  | 9-scf00340 | 9  |
| AX-157707046 | 16 | 60.628 | 3ML01033394 | 287      | scf09041_1 | UN |
| AX-158177051 | 16 | 60.633 | KV452969.1  | 8143502  | 9-scf00340 | 9  |
| AX-158177053 | 16 | 60.638 | KV452969.1  | 8145029  | 9-scf00340 | 9  |
| AX-158177070 | 16 | 60.645 | KV452969.1  | 8163937  | 9-scf00340 | 9  |
| AX-157796281 | 16 | 60.669 | KV452969.1  | 8182038  | 9-scf00340 | 9  |
| AX-158175176 | 16 | 60.732 | KV452969.1  | 5358198  | 9-scf00340 | 9  |
| AX-158175187 | 16 | 60.732 | KV452969.1  | 5369191  | 9-scf00340 | 9  |
| AX-158175454 | 16 | 60.732 | KV452969.1  | 6152280  | 9-scf00340 | 9  |
| AX-157715921 | 16 | 60.732 | KV452969.1  | 7179125  | 9-scf00340 | 9  |
| AX-158176617 | 16 | 60.732 | KV452969.1  | 7578962  | 9-scf00340 | 9  |
| AX-158176622 | 16 | 60.732 | KV452969.1  | 7583178  | 9-scf00340 | 9  |
| AX-158176665 | 16 | 60.732 | KV452969.1  | 7651775  | 9-scf00340 | 9  |
| AX-158176687 | 16 | 60.732 | KV452969.1  | 7674958  | 9-scf00340 | 9  |
| AX-157835212 | 16 | 60.732 | KV452969.1  | 7715046  | 9-scf00340 | 9  |
| AX-158176808 | 16 | 60.732 | KV452969.1  | 7834323  | 9-scf00340 | 9  |
| AX-158176865 | 16 | 60.732 | KV452969.1  | 7901111  | 9-scf00340 | 9  |
| AX-158176868 | 16 | 60.732 | KV452969.1  | 7906658  | 9-scf00340 | 9  |
| AX-157835233 | 16 | 60.732 | KV452969.1  | 7940548  | 9-scf00340 | 9  |

|              |    |        |            |         |            |   |
|--------------|----|--------|------------|---------|------------|---|
| AX-158176919 | 16 | 60.732 | KV452969.1 | 7971844 | 9-scf00340 | 9 |
| AX-158176924 | 16 | 60.732 | KV452969.1 | 7979976 | 9-scf00340 | 9 |
| AX-158176991 | 16 | 60.732 | KV452969.1 | 8060453 | 9-scf00340 | 9 |
| AX-157773091 | 16 | 60.732 | KV452969.1 | 8138439 | 9-scf00340 | 9 |
| AX-158177063 | 16 | 60.732 | KV452969.1 | 8152966 | 9-scf00340 | 9 |
| AX-158177077 | 16 | 60.732 | KV452969.1 | 8183910 | 9-scf00340 | 9 |
| AX-158177078 | 16 | 60.732 | KV452969.1 | 8185119 | 9-scf00340 | 9 |
| AX-158177079 | 16 | 60.732 | KV452969.1 | 8185476 | 9-scf00340 | 9 |
| AX-157835260 | 16 | 60.732 | KV452969.1 | 8185936 | 9-scf00340 | 9 |
| AX-157733916 | 16 | 60.732 | KV452969.1 | 8186186 | 9-scf00340 | 9 |
| AX-158177081 | 16 | 60.732 | KV452969.1 | 8187765 | 9-scf00340 | 9 |
| AX-158177082 | 16 | 60.732 | KV452969.1 | 8193897 | 9-scf00340 | 9 |
| AX-158177084 | 16 | 60.732 | KV452969.1 | 8195634 | 9-scf00340 | 9 |
| AX-158177085 | 16 | 60.732 | KV452969.1 | 8196332 | 9-scf00340 | 9 |
| AX-158177092 | 16 | 60.732 | KV452969.1 | 8215363 | 9-scf00340 | 9 |
| AX-158177093 | 16 | 60.732 | KV452969.1 | 8215605 | 9-scf00340 | 9 |
| AX-158177094 | 16 | 60.732 | KV452969.1 | 8218603 | 9-scf00340 | 9 |
| AX-158177095 | 16 | 60.732 | KV452969.1 | 8218976 | 9-scf00340 | 9 |
| AX-158177100 | 16 | 60.732 | KV452969.1 | 8228821 | 9-scf00340 | 9 |
| AX-158177101 | 16 | 60.732 | KV452969.1 | 8229113 | 9-scf00340 | 9 |
| AX-157722928 | 16 | 60.732 | KV452969.1 | 8229264 | 9-scf00340 | 9 |
| AX-158177106 | 16 | 60.732 | KV452969.1 | 8232630 | 9-scf00340 | 9 |
| AX-158177115 | 16 | 60.732 | KV452969.1 | 8244440 | 9-scf00340 | 9 |
| AX-157835265 | 16 | 60.732 | KV452969.1 | 8251947 | 9-scf00340 | 9 |
| AX-157835266 | 16 | 60.732 | KV452969.1 | 8258583 | 9-scf00340 | 9 |
| AX-158177144 | 16 | 60.732 | KV452969.1 | 8278036 | 9-scf00340 | 9 |
| AX-158177149 | 16 | 60.732 | KV452969.1 | 8281557 | 9-scf00340 | 9 |
| AX-158177157 | 16 | 60.732 | KV452969.1 | 8290037 | 9-scf00340 | 9 |
| AX-158177167 | 16 | 60.732 | KV452969.1 | 8303953 | 9-scf00340 | 9 |
| AX-158177170 | 16 | 60.732 | KV452969.1 | 8306624 | 9-scf00340 | 9 |
| AX-158177175 | 16 | 60.732 | KV452969.1 | 8311476 | 9-scf00340 | 9 |
| AX-158177176 | 16 | 60.732 | KV452969.1 | 8313807 | 9-scf00340 | 9 |
| AX-158413489 | 16 | 60.732 | KV452969.1 | 8315014 | 9-scf00340 | 9 |
| AX-158177178 | 16 | 60.732 | KV452969.1 | 8316017 | 9-scf00340 | 9 |
| AX-158177179 | 16 | 60.732 | KV452969.1 | 8316811 | 9-scf00340 | 9 |
| AX-158177180 | 16 | 60.732 | KV452969.1 | 8317249 | 9-scf00340 | 9 |
| AX-158177181 | 16 | 60.732 | KV452969.1 | 8318104 | 9-scf00340 | 9 |
| AX-158177183 | 16 | 60.732 | KV452969.1 | 8320279 | 9-scf00340 | 9 |
| AX-158177184 | 16 | 60.732 | KV452969.1 | 8322167 | 9-scf00340 | 9 |
| AX-158177186 | 16 | 60.732 | KV452969.1 | 8323783 | 9-scf00340 | 9 |
| AX-158177188 | 16 | 60.732 | KV452969.1 | 8324755 | 9-scf00340 | 9 |
| AX-158177189 | 16 | 60.732 | KV452969.1 | 8325150 | 9-scf00340 | 9 |
| AX-158177190 | 16 | 60.732 | KV452969.1 | 8325797 | 9-scf00340 | 9 |
| AX-158177191 | 16 | 60.732 | KV452969.1 | 8327131 | 9-scf00340 | 9 |
| AX-158177193 | 16 | 60.732 | KV452969.1 | 8328958 | 9-scf00340 | 9 |
| AX-158177194 | 16 | 60.732 | KV452969.1 | 8329967 | 9-scf00340 | 9 |
| AX-157696852 | 16 | 60.732 | KV452969.1 | 8330419 | 9-scf00340 | 9 |
| AX-158177197 | 16 | 60.732 | KV452969.1 | 8333323 | 9-scf00340 | 9 |
| AX-158177202 | 16 | 60.732 | KV452969.1 | 8337769 | 9-scf00340 | 9 |
| AX-158177207 | 16 | 60.732 | KV452969.1 | 8344042 | 9-scf00340 | 9 |
| AX-158177208 | 16 | 60.732 | KV452969.1 | 8344348 | 9-scf00340 | 9 |

|              |    |        |             |          |            |    |
|--------------|----|--------|-------------|----------|------------|----|
| AX-158177239 | 16 | 60.732 | KV452969.1  | 8373202  | 9-scf00340 | 9  |
| AX-157835273 | 16 | 60.732 | KV452969.1  | 8381539  | 9-scf00340 | 9  |
| AX-157715179 | 16 | 60.732 | KV452969.1  | 8387959  | 9-scf00340 | 9  |
| AX-158177319 | 16 | 60.732 | KV452969.1  | 8457224  | 9-scf00340 | 9  |
| AX-158177328 | 16 | 60.732 | KV452969.1  | 8470941  | 9-scf00340 | 9  |
| AX-158177338 | 16 | 60.732 | KV452969.1  | 8485566  | 9-scf00340 | 9  |
| AX-157715104 | 16 | 60.732 | KV452969.1  | 8488373  | 9-scf00340 | 9  |
| AX-157739503 | 16 | 60.732 | KV452969.1  | 8501238  | 9-scf00340 | 9  |
| AX-157835286 | 16 | 60.732 | KV452969.1  | 8530300  | 9-scf00340 | 9  |
| AX-158177375 | 16 | 60.732 | KV452969.1  | 8536148  | 9-scf00340 | 9  |
| AX-157747658 | 16 | 60.732 | KV452969.1  | 8602684  | 9-scf00340 | 9  |
| AX-158177452 | 16 | 60.732 | KV452969.1  | 8636589  | 9-scf00340 | 9  |
| AX-158177641 | 16 | 60.732 | KV452969.1  | 8993510  | 9-scf00340 | 9  |
| AX-158177682 | 16 | 60.732 | KV452969.1  | 9082992  | 9-scf00340 | 9  |
| AX-158177714 | 16 | 60.732 | KV452969.1  | 9126318  | 9-scf00340 | 9  |
| AX-158177760 | 16 | 60.732 | KV452969.1  | 9194202  | 9-scf00340 | 9  |
| AX-158177795 | 16 | 60.732 | KV452969.1  | 9236152  | 9-scf00340 | 9  |
| AX-158177797 | 16 | 60.732 | KV452969.1  | 9238268  | 9-scf00340 | 9  |
| AX-157835349 | 16 | 60.732 | KV452969.1  | 9238958  | 9-scf00340 | 9  |
| AX-158177923 | 16 | 60.732 | KV452969.1  | 9391485  | 9-scf00340 | 9  |
| AX-158178398 | 16 | 60.732 | KV452969.1  | 9958681  | 9-scf00340 | 9  |
| AX-158178522 | 16 | 60.732 | KV452969.1  | 10142486 | 9-scf00340 | 9  |
| AX-158178543 | 16 | 60.732 | KV452969.1  | 10169710 | 9-scf00340 | 9  |
| AX-158178727 | 16 | 60.732 | KV452969.1  | 10401862 | 9-scf00340 | 9  |
| AX-158178733 | 16 | 60.732 | KV452969.1  | 10406204 | 9-scf00340 | 9  |
| AX-156463210 | 16 | 60.732 | KV452969.1  | 10769290 | 9-scf00340 | 9  |
| AX-158179058 | 16 | 60.732 | KV452969.1  | 10834406 | 9-scf00340 | 9  |
| AX-157688810 | 16 | 60.732 | 3ML01027116 | 846      | scf02719_1 | UN |
| AX-157706217 | 16 | 60.732 | 3ML01031843 | 379      | scf07464_1 | UN |
| AX-157706218 | 16 | 60.732 | 3ML01031843 | 429      | scf07464_1 | UN |
| AX-157835197 | 16 | 60.95  | KV452969.1  | 7565293  | 9-scf00340 | 9  |
| AX-158176640 | 16 | 60.95  | KV452969.1  | 7611769  | 9-scf00340 | 9  |
| AX-158176956 | 16 | 60.95  | KV452969.1  | 8021313  | 9-scf00340 | 9  |
| AX-158176965 | 16 | 60.95  | KV452969.1  | 8032861  | 9-scf00340 | 9  |
| AX-157725121 | 16 | 60.95  | KV452969.1  | 8212673  | 9-scf00340 | 9  |
| AX-158177146 | 16 | 60.95  | KV452969.1  | 8279695  | 9-scf00340 | 9  |
| AX-158177456 | 16 | 60.95  | KV452969.1  | 8645322  | 9-scf00340 | 9  |
| AX-157835300 | 16 | 60.95  | KV452969.1  | 8646426  | 9-scf00340 | 9  |
| AX-158413496 | 16 | 60.95  | KV452969.1  | 8648949  | 9-scf00340 | 9  |
| AX-157835301 | 16 | 60.95  | KV452969.1  | 8649620  | 9-scf00340 | 9  |
| AX-157748375 | 16 | 60.95  | KV452969.1  | 8649793  | 9-scf00340 | 9  |
| AX-158177498 | 16 | 60.95  | KV452969.1  | 8709109  | 9-scf00340 | 9  |
| AX-158177499 | 16 | 60.95  | KV452969.1  | 8709719  | 9-scf00340 | 9  |
| AX-157835311 | 16 | 60.95  | KV452969.1  | 8710526  | 9-scf00340 | 9  |
| AX-157835312 | 16 | 60.95  | KV452969.1  | 8710900  | 9-scf00340 | 9  |
| AX-158177500 | 16 | 60.95  | KV452969.1  | 8711246  | 9-scf00340 | 9  |
| AX-158177501 | 16 | 60.95  | KV452969.1  | 8711625  | 9-scf00340 | 9  |
| AX-158177505 | 16 | 60.95  | KV452969.1  | 8713911  | 9-scf00340 | 9  |
| AX-157757621 | 16 | 60.95  | KV452969.1  | 8713969  | 9-scf00340 | 9  |
| AX-158177506 | 16 | 60.95  | KV452969.1  | 8714989  | 9-scf00340 | 9  |
| AX-157757357 | 16 | 60.95  | KV452969.1  | 8718141  | 9-scf00340 | 9  |

|              |    |       |            |         |            |   |
|--------------|----|-------|------------|---------|------------|---|
| AX-158177514 | 16 | 60.95 | KV452969.1 | 8741429 | 9-scf00340 | 9 |
| AX-157727386 | 16 | 60.95 | KV452969.1 | 8760324 | 9-scf00340 | 9 |
| AX-158177522 | 16 | 60.95 | KV452969.1 | 8760746 | 9-scf00340 | 9 |
| AX-158177544 | 16 | 60.95 | KV452969.1 | 8794322 | 9-scf00340 | 9 |
| AX-158177545 | 16 | 60.95 | KV452969.1 | 8796643 | 9-scf00340 | 9 |
| AX-157750524 | 16 | 60.95 | KV452969.1 | 8801429 | 9-scf00340 | 9 |
| AX-157725347 | 16 | 60.95 | KV452969.1 | 8808280 | 9-scf00340 | 9 |
| AX-158177580 | 16 | 60.95 | KV452969.1 | 8866191 | 9-scf00340 | 9 |
| AX-158177585 | 16 | 60.95 | KV452969.1 | 8873067 | 9-scf00340 | 9 |
| AX-158177617 | 16 | 60.95 | KV452969.1 | 8938354 | 9-scf00340 | 9 |
| AX-158177619 | 16 | 60.95 | KV452969.1 | 8941052 | 9-scf00340 | 9 |
| AX-158177623 | 16 | 60.95 | KV452969.1 | 8945819 | 9-scf00340 | 9 |
| AX-158177630 | 16 | 60.95 | KV452969.1 | 8965908 | 9-scf00340 | 9 |
| AX-158177650 | 16 | 60.95 | KV452969.1 | 9013717 | 9-scf00340 | 9 |
| AX-158177652 | 16 | 60.95 | KV452969.1 | 9020163 | 9-scf00340 | 9 |
| AX-158177667 | 16 | 60.95 | KV452969.1 | 9053761 | 9-scf00340 | 9 |
| AX-158177673 | 16 | 60.95 | KV452969.1 | 9067134 | 9-scf00340 | 9 |
| AX-158177700 | 16 | 60.95 | KV452969.1 | 9112515 | 9-scf00340 | 9 |
| AX-158177731 | 16 | 60.95 | KV452969.1 | 9141794 | 9-scf00340 | 9 |
| AX-158177750 | 16 | 60.95 | KV452969.1 | 9166076 | 9-scf00340 | 9 |
| AX-157835343 | 16 | 60.95 | KV452969.1 | 9179508 | 9-scf00340 | 9 |
| AX-158177755 | 16 | 60.95 | KV452969.1 | 9182210 | 9-scf00340 | 9 |
| AX-157835344 | 16 | 60.95 | KV452969.1 | 9182431 | 9-scf00340 | 9 |
| AX-157723412 | 16 | 60.95 | KV452969.1 | 9184922 | 9-scf00340 | 9 |
| AX-158177756 | 16 | 60.95 | KV452969.1 | 9185320 | 9-scf00340 | 9 |
| AX-158177757 | 16 | 60.95 | KV452969.1 | 9187049 | 9-scf00340 | 9 |
| AX-158177758 | 16 | 60.95 | KV452969.1 | 9187254 | 9-scf00340 | 9 |
| AX-158177763 | 16 | 60.95 | KV452969.1 | 9201853 | 9-scf00340 | 9 |
| AX-157835345 | 16 | 60.95 | KV452969.1 | 9202578 | 9-scf00340 | 9 |
| AX-158177779 | 16 | 60.95 | KV452969.1 | 9216012 | 9-scf00340 | 9 |
| AX-157835347 | 16 | 60.95 | KV452969.1 | 9217329 | 9-scf00340 | 9 |
| AX-157866693 | 16 | 60.95 | KV452969.1 | 9219518 | 9-scf00340 | 9 |
| AX-158177782 | 16 | 60.95 | KV452969.1 | 9220020 | 9-scf00340 | 9 |
| AX-158177783 | 16 | 60.95 | KV452969.1 | 9220877 | 9-scf00340 | 9 |
| AX-157772438 | 16 | 60.95 | KV452969.1 | 9230310 | 9-scf00340 | 9 |
| AX-158177798 | 16 | 60.95 | KV452969.1 | 9238427 | 9-scf00340 | 9 |
| AX-158177799 | 16 | 60.95 | KV452969.1 | 9240199 | 9-scf00340 | 9 |
| AX-158177800 | 16 | 60.95 | KV452969.1 | 9241646 | 9-scf00340 | 9 |
| AX-157835350 | 16 | 60.95 | KV452969.1 | 9241795 | 9-scf00340 | 9 |
| AX-158177801 | 16 | 60.95 | KV452969.1 | 9243087 | 9-scf00340 | 9 |
| AX-157738966 | 16 | 60.95 | KV452969.1 | 9245023 | 9-scf00340 | 9 |
| AX-157718175 | 16 | 60.95 | KV452969.1 | 9254856 | 9-scf00340 | 9 |
| AX-157714132 | 16 | 60.95 | KV452969.1 | 9266400 | 9-scf00340 | 9 |
| AX-158177817 | 16 | 60.95 | KV452969.1 | 9272321 | 9-scf00340 | 9 |
| AX-157754052 | 16 | 60.95 | KV452969.1 | 9275336 | 9-scf00340 | 9 |
| AX-158177825 | 16 | 60.95 | KV452969.1 | 9278273 | 9-scf00340 | 9 |
| AX-157744111 | 16 | 60.95 | KV452969.1 | 9396634 | 9-scf00340 | 9 |
| AX-158177929 | 16 | 60.95 | KV452969.1 | 9396856 | 9-scf00340 | 9 |
| AX-158178006 | 16 | 60.95 | KV452969.1 | 9481962 | 9-scf00340 | 9 |
| AX-158178015 | 16 | 60.95 | KV452969.1 | 9489784 | 9-scf00340 | 9 |
| AX-158178130 | 16 | 60.95 | KV452969.1 | 9645210 | 9-scf00340 | 9 |



|              |    |       |            |          |            |   |
|--------------|----|-------|------------|----------|------------|---|
| AX-158178673 | 16 | 60.95 | KV452969.1 | 10336869 | 9-scf00340 | 9 |
| AX-158178759 | 16 | 60.95 | KV452969.1 | 10434841 | 9-scf00340 | 9 |
| AX-157716133 | 16 | 60.95 | KV452969.1 | 12303339 | 9-scf00340 | 9 |
| AX-157835587 | 16 | 60.95 | KV452969.1 | 12323082 | 9-scf00340 | 9 |
| AX-158180808 | 16 | 60.95 | KV452969.1 | 13020210 | 9-scf00340 | 9 |
| AX-158180828 | 16 | 60.95 | KV452969.1 | 13045653 | 9-scf00340 | 9 |
| AX-158180882 | 16 | 60.95 | KV452969.1 | 13113708 | 9-scf00340 | 9 |
| AX-158181004 | 16 | 60.95 | KV452969.1 | 13260489 | 9-scf00340 | 9 |
| AX-158181027 | 16 | 60.95 | KV452969.1 | 13301772 | 9-scf00340 | 9 |
| AX-158181080 | 16 | 60.95 | KV452969.1 | 13374470 | 9-scf00340 | 9 |
| AX-158181087 | 16 | 60.95 | KV452969.1 | 13383157 | 9-scf00340 | 9 |
| AX-158181123 | 16 | 60.95 | KV452969.1 | 13462227 | 9-scf00340 | 9 |
| AX-157835685 | 16 | 60.95 | KV452969.1 | 13566272 | 9-scf00340 | 9 |
| AX-157878861 | 16 | 60.95 | KV452969.1 | 13606319 | 9-scf00340 | 9 |
| AX-157835694 | 16 | 60.95 | KV452969.1 | 13954399 | 9-scf00340 | 9 |
| AX-158176387 | 16 | 61.06 | KV452969.1 | 7314216  | 9-scf00340 | 9 |
| AX-158176578 | 16 | 61.06 | KV452969.1 | 7528081  | 9-scf00340 | 9 |
| AX-157835262 | 16 | 61.06 | KV452969.1 | 8217598  | 9-scf00340 | 9 |
| AX-158177119 | 16 | 61.06 | KV452969.1 | 8248127  | 9-scf00340 | 9 |
| AX-158177125 | 16 | 61.06 | KV452969.1 | 8258663  | 9-scf00340 | 9 |
| AX-158177126 | 16 | 61.06 | KV452969.1 | 8259642  | 9-scf00340 | 9 |
| AX-157708246 | 16 | 61.06 | KV452969.1 | 8296640  | 9-scf00340 | 9 |
| AX-157878796 | 16 | 61.06 | KV452969.1 | 8308937  | 9-scf00340 | 9 |
| AX-158177729 | 16 | 61.06 | KV452969.1 | 9139022  | 9-scf00340 | 9 |
| AX-158418063 | 16 | 61.06 | KV452969.1 | 9139643  | 9-scf00340 | 9 |
| AX-158177740 | 16 | 61.06 | KV452969.1 | 9152921  | 9-scf00340 | 9 |
| AX-158177827 | 16 | 61.06 | KV452969.1 | 9281135  | 9-scf00340 | 9 |
| AX-157752511 | 16 | 61.06 | KV452969.1 | 9298025  | 9-scf00340 | 9 |
| AX-158177850 | 16 | 61.06 | KV452969.1 | 9303397  | 9-scf00340 | 9 |
| AX-158177860 | 16 | 61.06 | KV452969.1 | 9314041  | 9-scf00340 | 9 |
| AX-158177861 | 16 | 61.06 | KV452969.1 | 9316391  | 9-scf00340 | 9 |
| AX-157699372 | 16 | 61.06 | KV452969.1 | 9329199  | 9-scf00340 | 9 |
| AX-158177885 | 16 | 61.06 | KV452969.1 | 9350380  | 9-scf00340 | 9 |
| AX-158177886 | 16 | 61.06 | KV452969.1 | 9351171  | 9-scf00340 | 9 |
| AX-157702120 | 16 | 61.06 | KV452969.1 | 9368599  | 9-scf00340 | 9 |
| AX-157835363 | 16 | 61.06 | KV452969.1 | 9369587  | 9-scf00340 | 9 |
| AX-157749871 | 16 | 61.06 | KV452969.1 | 9372021  | 9-scf00340 | 9 |
| AX-157886793 | 16 | 61.06 | KV452969.1 | 9372710  | 9-scf00340 | 9 |
| AX-158177903 | 16 | 61.06 | KV452969.1 | 9372875  | 9-scf00340 | 9 |
| AX-158177904 | 16 | 61.06 | KV452969.1 | 9373869  | 9-scf00340 | 9 |
| AX-158380588 | 16 | 61.06 | KV452969.1 | 9374545  | 9-scf00340 | 9 |
| AX-157742757 | 16 | 61.06 | KV452969.1 | 9374640  | 9-scf00340 | 9 |
| AX-158177907 | 16 | 61.06 | KV452969.1 | 9376737  | 9-scf00340 | 9 |
| AX-157835364 | 16 | 61.06 | KV452969.1 | 9376996  | 9-scf00340 | 9 |
| AX-158177910 | 16 | 61.06 | KV452969.1 | 9379178  | 9-scf00340 | 9 |
| AX-158177911 | 16 | 61.06 | KV452969.1 | 9379539  | 9-scf00340 | 9 |
| AX-158177912 | 16 | 61.06 | KV452969.1 | 9380832  | 9-scf00340 | 9 |
| AX-158177916 | 16 | 61.06 | KV452969.1 | 9385338  | 9-scf00340 | 9 |
| AX-158177917 | 16 | 61.06 | KV452969.1 | 9387681  | 9-scf00340 | 9 |
| AX-158177922 | 16 | 61.06 | KV452969.1 | 9390801  | 9-scf00340 | 9 |
| AX-158177924 | 16 | 61.06 | KV452969.1 | 9391861  | 9-scf00340 | 9 |

|              |    |        |            |          |            |   |
|--------------|----|--------|------------|----------|------------|---|
| AX-158177926 | 16 | 61.06  | KV452969.1 | 9394091  | 9-scf00340 | 9 |
| AX-158177931 | 16 | 61.06  | KV452969.1 | 9397577  | 9-scf00340 | 9 |
| AX-158177934 | 16 | 61.06  | KV452969.1 | 9398780  | 9-scf00340 | 9 |
| AX-158177944 | 16 | 61.06  | KV452969.1 | 9416295  | 9-scf00340 | 9 |
| AX-157835371 | 16 | 61.06  | KV452969.1 | 9416676  | 9-scf00340 | 9 |
| AX-158177956 | 16 | 61.06  | KV452969.1 | 9428922  | 9-scf00340 | 9 |
| AX-157715793 | 16 | 61.06  | KV452969.1 | 9431195  | 9-scf00340 | 9 |
| AX-158177965 | 16 | 61.06  | KV452969.1 | 9443380  | 9-scf00340 | 9 |
| AX-158177969 | 16 | 61.06  | KV452969.1 | 9447074  | 9-scf00340 | 9 |
| AX-158177970 | 16 | 61.06  | KV452969.1 | 9449511  | 9-scf00340 | 9 |
| AX-157775565 | 16 | 61.06  | KV452969.1 | 9457346  | 9-scf00340 | 9 |
| AX-158177983 | 16 | 61.06  | KV452969.1 | 9458021  | 9-scf00340 | 9 |
| AX-157708325 | 16 | 61.06  | KV452969.1 | 9468410  | 9-scf00340 | 9 |
| AX-158177992 | 16 | 61.06  | KV452969.1 | 9468717  | 9-scf00340 | 9 |
| AX-158177996 | 16 | 61.06  | KV452969.1 | 9474166  | 9-scf00340 | 9 |
| AX-158178016 | 16 | 61.06  | KV452969.1 | 9490560  | 9-scf00340 | 9 |
| AX-157835382 | 16 | 61.06  | KV452969.1 | 9491120  | 9-scf00340 | 9 |
| AX-158423070 | 16 | 61.06  | KV452969.1 | 9501586  | 9-scf00340 | 9 |
| AX-158178025 | 16 | 61.06  | KV452969.1 | 9502844  | 9-scf00340 | 9 |
| AX-158178029 | 16 | 61.06  | KV452969.1 | 9506126  | 9-scf00340 | 9 |
| AX-158178036 | 16 | 61.06  | KV452969.1 | 9512217  | 9-scf00340 | 9 |
| AX-157758085 | 16 | 61.06  | KV452969.1 | 9519240  | 9-scf00340 | 9 |
| AX-158178513 | 16 | 61.06  | KV452969.1 | 10137045 | 9-scf00340 | 9 |
| AX-157835414 | 16 | 61.06  | KV452969.1 | 10140202 | 9-scf00340 | 9 |
| AX-158178694 | 16 | 61.06  | KV452969.1 | 10366752 | 9-scf00340 | 9 |
| AX-158178695 | 16 | 61.06  | KV452969.1 | 10367363 | 9-scf00340 | 9 |
| AX-158178747 | 16 | 61.06  | KV452969.1 | 10419610 | 9-scf00340 | 9 |
| AX-158178749 | 16 | 61.06  | KV452969.1 | 10421808 | 9-scf00340 | 9 |
| AX-158178778 | 16 | 61.06  | KV452969.1 | 10459281 | 9-scf00340 | 9 |
| AX-158178856 | 16 | 61.06  | KV452969.1 | 10591503 | 9-scf00340 | 9 |
| AX-158178857 | 16 | 61.06  | KV452969.1 | 10593185 | 9-scf00340 | 9 |
| AX-158178903 | 16 | 61.06  | KV452969.1 | 10657842 | 9-scf00340 | 9 |
| AX-158179059 | 16 | 61.06  | KV452969.1 | 10834912 | 9-scf00340 | 9 |
| AX-158179074 | 16 | 61.06  | KV452969.1 | 10851628 | 9-scf00340 | 9 |
| AX-158179075 | 16 | 61.06  | KV452969.1 | 10852742 | 9-scf00340 | 9 |
| AX-158179135 | 16 | 61.06  | KV452969.1 | 10957283 | 9-scf00340 | 9 |
| AX-158179137 | 16 | 61.06  | KV452969.1 | 10961175 | 9-scf00340 | 9 |
| AX-158178049 | 16 | 61.107 | KV452969.1 | 9522775  | 9-scf00340 | 9 |
| AX-158178050 | 16 | 61.124 | KV452969.1 | 9523043  | 9-scf00340 | 9 |
| AX-158178054 | 16 | 61.148 | KV452969.1 | 9526183  | 9-scf00340 | 9 |
| AX-158172762 | 16 | 61.169 | KV452969.1 | 1886088  | 9-scf00340 | 9 |
| AX-158176390 | 16 | 61.169 | KV452969.1 | 7316958  | 9-scf00340 | 9 |
| AX-158177108 | 16 | 61.169 | KV452969.1 | 8235070  | 9-scf00340 | 9 |
| AX-158177141 | 16 | 61.169 | KV452969.1 | 8273531  | 9-scf00340 | 9 |
| AX-158177147 | 16 | 61.169 | KV452969.1 | 8280177  | 9-scf00340 | 9 |
| AX-158177458 | 16 | 61.169 | KV452969.1 | 8648328  | 9-scf00340 | 9 |
| AX-158177599 | 16 | 61.169 | KV452969.1 | 8893756  | 9-scf00340 | 9 |
| AX-158177656 | 16 | 61.169 | KV452969.1 | 9030616  | 9-scf00340 | 9 |
| AX-158177701 | 16 | 61.169 | KV452969.1 | 9113922  | 9-scf00340 | 9 |
| AX-158177732 | 16 | 61.169 | KV452969.1 | 9142495  | 9-scf00340 | 9 |
| AX-158177764 | 16 | 61.169 | KV452969.1 | 9202076  | 9-scf00340 | 9 |

|              |    |        |            |         |            |   |
|--------------|----|--------|------------|---------|------------|---|
| AX-158177765 | 16 | 61.169 | KV452969.1 | 9203511 | 9-scf00340 | 9 |
| AX-158177836 | 16 | 61.169 | KV452969.1 | 9290671 | 9-scf00340 | 9 |
| AX-158413511 | 16 | 61.169 | KV452969.1 | 9292647 | 9-scf00340 | 9 |
| AX-158177843 | 16 | 61.169 | KV452969.1 | 9296996 | 9-scf00340 | 9 |
| AX-158177873 | 16 | 61.169 | KV452969.1 | 9330757 | 9-scf00340 | 9 |
| AX-158177879 | 16 | 61.169 | KV452969.1 | 9340158 | 9-scf00340 | 9 |
| AX-158177881 | 16 | 61.169 | KV452969.1 | 9344013 | 9-scf00340 | 9 |
| AX-158177899 | 16 | 61.169 | KV452969.1 | 9365047 | 9-scf00340 | 9 |
| AX-158177948 | 16 | 61.169 | KV452969.1 | 9420659 | 9-scf00340 | 9 |
| AX-157835375 | 16 | 61.169 | KV452969.1 | 9421769 | 9-scf00340 | 9 |
| AX-158177953 | 16 | 61.169 | KV452969.1 | 9423782 | 9-scf00340 | 9 |
| AX-158177957 | 16 | 61.169 | KV452969.1 | 9431501 | 9-scf00340 | 9 |
| AX-158177988 | 16 | 61.169 | KV452969.1 | 9464046 | 9-scf00340 | 9 |
| AX-158178003 | 16 | 61.169 | KV452969.1 | 9479472 | 9-scf00340 | 9 |
| AX-157744726 | 16 | 61.169 | KV452969.1 | 9484005 | 9-scf00340 | 9 |
| AX-158178028 | 16 | 61.169 | KV452969.1 | 9505714 | 9-scf00340 | 9 |
| AX-158178042 | 16 | 61.169 | KV452969.1 | 9516072 | 9-scf00340 | 9 |
| AX-158178062 | 16 | 61.169 | KV452969.1 | 9537474 | 9-scf00340 | 9 |
| AX-157743341 | 16 | 61.169 | KV452969.1 | 9537917 | 9-scf00340 | 9 |
| AX-157835387 | 16 | 61.169 | KV452969.1 | 9562929 | 9-scf00340 | 9 |
| AX-158178089 | 16 | 61.169 | KV452969.1 | 9571146 | 9-scf00340 | 9 |
| AX-158178093 | 16 | 61.169 | KV452969.1 | 9575969 | 9-scf00340 | 9 |
| AX-158178097 | 16 | 61.169 | KV452969.1 | 9586690 | 9-scf00340 | 9 |
| AX-158178106 | 16 | 61.169 | KV452969.1 | 9606203 | 9-scf00340 | 9 |
| AX-158178107 | 16 | 61.169 | KV452969.1 | 9611698 | 9-scf00340 | 9 |
| AX-158178115 | 16 | 61.169 | KV452969.1 | 9620985 | 9-scf00340 | 9 |
| AX-158178117 | 16 | 61.169 | KV452969.1 | 9623517 | 9-scf00340 | 9 |
| AX-157726499 | 16 | 61.169 | KV452969.1 | 9635020 | 9-scf00340 | 9 |
| AX-157872043 | 16 | 61.169 | KV452969.1 | 9637773 | 9-scf00340 | 9 |
| AX-158178133 | 16 | 61.169 | KV452969.1 | 9647815 | 9-scf00340 | 9 |
| AX-158178195 | 16 | 61.169 | KV452969.1 | 9709199 | 9-scf00340 | 9 |
| AX-158178199 | 16 | 61.169 | KV452969.1 | 9712421 | 9-scf00340 | 9 |
| AX-158178202 | 16 | 61.169 | KV452969.1 | 9714285 | 9-scf00340 | 9 |
| AX-158178204 | 16 | 61.169 | KV452969.1 | 9716117 | 9-scf00340 | 9 |
| AX-158178239 | 16 | 61.169 | KV452969.1 | 9747645 | 9-scf00340 | 9 |
| AX-158178241 | 16 | 61.169 | KV452969.1 | 9749678 | 9-scf00340 | 9 |
| AX-158178243 | 16 | 61.169 | KV452969.1 | 9751649 | 9-scf00340 | 9 |
| AX-158178254 | 16 | 61.169 | KV452969.1 | 9760329 | 9-scf00340 | 9 |
| AX-158178256 | 16 | 61.169 | KV452969.1 | 9762342 | 9-scf00340 | 9 |
| AX-158178263 | 16 | 61.169 | KV452969.1 | 9768768 | 9-scf00340 | 9 |
| AX-158178266 | 16 | 61.169 | KV452969.1 | 9771337 | 9-scf00340 | 9 |
| AX-158178274 | 16 | 61.169 | KV452969.1 | 9777176 | 9-scf00340 | 9 |
| AX-158178277 | 16 | 61.169 | KV452969.1 | 9778850 | 9-scf00340 | 9 |
| AX-158178300 | 16 | 61.169 | KV452969.1 | 9800489 | 9-scf00340 | 9 |
| AX-158178329 | 16 | 61.169 | KV452969.1 | 9830151 | 9-scf00340 | 9 |
| AX-158178341 | 16 | 61.169 | KV452969.1 | 9847358 | 9-scf00340 | 9 |
| AX-158178344 | 16 | 61.169 | KV452969.1 | 9850675 | 9-scf00340 | 9 |
| AX-158178347 | 16 | 61.169 | KV452969.1 | 9852693 | 9-scf00340 | 9 |
| AX-158178348 | 16 | 61.169 | KV452969.1 | 9853143 | 9-scf00340 | 9 |
| AX-158178352 | 16 | 61.169 | KV452969.1 | 9862778 | 9-scf00340 | 9 |
| AX-158178354 | 16 | 61.169 | KV452969.1 | 9864230 | 9-scf00340 | 9 |

|              |    |        |            |          |            |   |
|--------------|----|--------|------------|----------|------------|---|
| AX-158178385 | 16 | 61.169 | KV452969.1 | 9911517  | 9-scf00340 | 9 |
| AX-157866696 | 16 | 61.169 | KV452969.1 | 9943626  | 9-scf00340 | 9 |
| AX-157719581 | 16 | 61.169 | KV452969.1 | 9949862  | 9-scf00340 | 9 |
| AX-157713910 | 16 | 61.169 | KV452969.1 | 9961772  | 9-scf00340 | 9 |
| AX-158178407 | 16 | 61.169 | KV452969.1 | 9970053  | 9-scf00340 | 9 |
| AX-158178414 | 16 | 61.169 | KV452969.1 | 9990172  | 9-scf00340 | 9 |
| AX-158178446 | 16 | 61.169 | KV452969.1 | 10042654 | 9-scf00340 | 9 |
| AX-158178448 | 16 | 61.169 | KV452969.1 | 10048446 | 9-scf00340 | 9 |
| AX-158178449 | 16 | 61.169 | KV452969.1 | 10050371 | 9-scf00340 | 9 |
| AX-158178452 | 16 | 61.169 | KV452969.1 | 10052905 | 9-scf00340 | 9 |
| AX-158178453 | 16 | 61.169 | KV452969.1 | 10053388 | 9-scf00340 | 9 |
| AX-158178454 | 16 | 61.169 | KV452969.1 | 10054523 | 9-scf00340 | 9 |
| AX-158178457 | 16 | 61.169 | KV452969.1 | 10058390 | 9-scf00340 | 9 |
| AX-158178460 | 16 | 61.169 | KV452969.1 | 10059724 | 9-scf00340 | 9 |
| AX-158178462 | 16 | 61.169 | KV452969.1 | 10062579 | 9-scf00340 | 9 |
| AX-157772030 | 16 | 61.169 | KV452969.1 | 10063228 | 9-scf00340 | 9 |
| AX-158178463 | 16 | 61.169 | KV452969.1 | 10063695 | 9-scf00340 | 9 |
| AX-158178464 | 16 | 61.169 | KV452969.1 | 10064278 | 9-scf00340 | 9 |
| AX-158178466 | 16 | 61.169 | KV452969.1 | 10065080 | 9-scf00340 | 9 |
| AX-158178467 | 16 | 61.169 | KV452969.1 | 10065464 | 9-scf00340 | 9 |
| AX-158178470 | 16 | 61.169 | KV452969.1 | 10069858 | 9-scf00340 | 9 |
| AX-157755996 | 16 | 61.169 | KV452969.1 | 10070363 | 9-scf00340 | 9 |
| AX-158178480 | 16 | 61.169 | KV452969.1 | 10091386 | 9-scf00340 | 9 |
| AX-158178502 | 16 | 61.169 | KV452969.1 | 10127614 | 9-scf00340 | 9 |
| AX-158178503 | 16 | 61.169 | KV452969.1 | 10128046 | 9-scf00340 | 9 |
| AX-158178504 | 16 | 61.169 | KV452969.1 | 10128278 | 9-scf00340 | 9 |
| AX-157878818 | 16 | 61.169 | KV452969.1 | 10132153 | 9-scf00340 | 9 |
| AX-158178526 | 16 | 61.169 | KV452969.1 | 10145810 | 9-scf00340 | 9 |
| AX-158178531 | 16 | 61.169 | KV452969.1 | 10150624 | 9-scf00340 | 9 |
| AX-158178537 | 16 | 61.169 | KV452969.1 | 10161241 | 9-scf00340 | 9 |
| AX-157835415 | 16 | 61.169 | KV452969.1 | 10163419 | 9-scf00340 | 9 |
| AX-157835416 | 16 | 61.169 | KV452969.1 | 10163893 | 9-scf00340 | 9 |
| AX-158178547 | 16 | 61.169 | KV452969.1 | 10176317 | 9-scf00340 | 9 |
| AX-157743437 | 16 | 61.169 | KV452969.1 | 10191206 | 9-scf00340 | 9 |
| AX-158178559 | 16 | 61.169 | KV452969.1 | 10196992 | 9-scf00340 | 9 |
| AX-158178560 | 16 | 61.169 | KV452969.1 | 10198056 | 9-scf00340 | 9 |
| AX-158178580 | 16 | 61.169 | KV452969.1 | 10221253 | 9-scf00340 | 9 |
| AX-158178587 | 16 | 61.169 | KV452969.1 | 10226721 | 9-scf00340 | 9 |
| AX-158178592 | 16 | 61.169 | KV452969.1 | 10231667 | 9-scf00340 | 9 |
| AX-157724433 | 16 | 61.169 | KV452969.1 | 10234707 | 9-scf00340 | 9 |
| AX-158178597 | 16 | 61.169 | KV452969.1 | 10236581 | 9-scf00340 | 9 |
| AX-158178598 | 16 | 61.169 | KV452969.1 | 10238031 | 9-scf00340 | 9 |
| AX-158178615 | 16 | 61.169 | KV452969.1 | 10257865 | 9-scf00340 | 9 |
| AX-157752908 | 16 | 61.169 | KV452969.1 | 10270243 | 9-scf00340 | 9 |
| AX-158178631 | 16 | 61.169 | KV452969.1 | 10280548 | 9-scf00340 | 9 |
| AX-158178632 | 16 | 61.169 | KV452969.1 | 10280725 | 9-scf00340 | 9 |
| AX-158178634 | 16 | 61.169 | KV452969.1 | 10282446 | 9-scf00340 | 9 |
| AX-158178659 | 16 | 61.169 | KV452969.1 | 10318855 | 9-scf00340 | 9 |
| AX-158178661 | 16 | 61.169 | KV452969.1 | 10320406 | 9-scf00340 | 9 |
| AX-158178681 | 16 | 61.169 | KV452969.1 | 10345259 | 9-scf00340 | 9 |
| AX-158178683 | 16 | 61.169 | KV452969.1 | 10349909 | 9-scf00340 | 9 |

|              |    |        |            |          |            |   |
|--------------|----|--------|------------|----------|------------|---|
| AX-158178705 | 16 | 61.169 | KV452969.1 | 10377884 | 9-scf00340 | 9 |
| AX-158178724 | 16 | 61.169 | KV452969.1 | 10398654 | 9-scf00340 | 9 |
| AX-158178726 | 16 | 61.169 | KV452969.1 | 10401260 | 9-scf00340 | 9 |
| AX-158178730 | 16 | 61.169 | KV452969.1 | 10403113 | 9-scf00340 | 9 |
| AX-158178737 | 16 | 61.169 | KV452969.1 | 10410514 | 9-scf00340 | 9 |
| AX-158178743 | 16 | 61.169 | KV452969.1 | 10416975 | 9-scf00340 | 9 |
| AX-158178746 | 16 | 61.169 | KV452969.1 | 10418891 | 9-scf00340 | 9 |
| AX-158178765 | 16 | 61.169 | KV452969.1 | 10446412 | 9-scf00340 | 9 |
| AX-158178771 | 16 | 61.169 | KV452969.1 | 10452554 | 9-scf00340 | 9 |
| AX-158178773 | 16 | 61.169 | KV452969.1 | 10454098 | 9-scf00340 | 9 |
| AX-158178779 | 16 | 61.169 | KV452969.1 | 10460714 | 9-scf00340 | 9 |
| AX-158178784 | 16 | 61.169 | KV452969.1 | 10465200 | 9-scf00340 | 9 |
| AX-158178792 | 16 | 61.169 | KV452969.1 | 10483132 | 9-scf00340 | 9 |
| AX-158409333 | 16 | 61.169 | KV452969.1 | 10483650 | 9-scf00340 | 9 |
| AX-158178797 | 16 | 61.169 | KV452969.1 | 10500630 | 9-scf00340 | 9 |
| AX-157741729 | 16 | 61.169 | KV452969.1 | 10524147 | 9-scf00340 | 9 |
| AX-157744443 | 16 | 61.169 | KV452969.1 | 10525991 | 9-scf00340 | 9 |
| AX-158178812 | 16 | 61.169 | KV452969.1 | 10535226 | 9-scf00340 | 9 |
| AX-158178815 | 16 | 61.169 | KV452969.1 | 10539038 | 9-scf00340 | 9 |
| AX-158178823 | 16 | 61.169 | KV452969.1 | 10550937 | 9-scf00340 | 9 |
| AX-158178824 | 16 | 61.169 | KV452969.1 | 10552144 | 9-scf00340 | 9 |
| AX-158178826 | 16 | 61.169 | KV452969.1 | 10557759 | 9-scf00340 | 9 |
| AX-157835427 | 16 | 61.169 | KV452969.1 | 10558901 | 9-scf00340 | 9 |
| AX-158178833 | 16 | 61.169 | KV452969.1 | 10564815 | 9-scf00340 | 9 |
| AX-158178834 | 16 | 61.169 | KV452969.1 | 10565436 | 9-scf00340 | 9 |
| AX-157835431 | 16 | 61.169 | KV452969.1 | 10574098 | 9-scf00340 | 9 |
| AX-158178843 | 16 | 61.169 | KV452969.1 | 10574636 | 9-scf00340 | 9 |
| AX-158178853 | 16 | 61.169 | KV452969.1 | 10590382 | 9-scf00340 | 9 |
| AX-158178864 | 16 | 61.169 | KV452969.1 | 10610810 | 9-scf00340 | 9 |
| AX-158178865 | 16 | 61.169 | KV452969.1 | 10612286 | 9-scf00340 | 9 |
| AX-157774683 | 16 | 61.169 | KV452969.1 | 10613098 | 9-scf00340 | 9 |
| AX-157758304 | 16 | 61.169 | KV452969.1 | 10613459 | 9-scf00340 | 9 |
| AX-158178867 | 16 | 61.169 | KV452969.1 | 10614607 | 9-scf00340 | 9 |
| AX-157835438 | 16 | 61.169 | KV452969.1 | 10615178 | 9-scf00340 | 9 |
| AX-157872047 | 16 | 61.169 | KV452969.1 | 10615548 | 9-scf00340 | 9 |
| AX-157835439 | 16 | 61.169 | KV452969.1 | 10615930 | 9-scf00340 | 9 |
| AX-157835440 | 16 | 61.169 | KV452969.1 | 10617325 | 9-scf00340 | 9 |
| AX-157835442 | 16 | 61.169 | KV452969.1 | 10625187 | 9-scf00340 | 9 |
| AX-158178880 | 16 | 61.169 | KV452969.1 | 10634870 | 9-scf00340 | 9 |
| AX-158178881 | 16 | 61.169 | KV452969.1 | 10635488 | 9-scf00340 | 9 |
| AX-158393529 | 16 | 61.169 | KV452969.1 | 10635753 | 9-scf00340 | 9 |
| AX-158178882 | 16 | 61.169 | KV452969.1 | 10637400 | 9-scf00340 | 9 |
| AX-158178884 | 16 | 61.169 | KV452969.1 | 10639991 | 9-scf00340 | 9 |
| AX-158178894 | 16 | 61.169 | KV452969.1 | 10649948 | 9-scf00340 | 9 |
| AX-158178895 | 16 | 61.169 | KV452969.1 | 10650354 | 9-scf00340 | 9 |
| AX-158178897 | 16 | 61.169 | KV452969.1 | 10653556 | 9-scf00340 | 9 |
| AX-158178899 | 16 | 61.169 | KV452969.1 | 10655052 | 9-scf00340 | 9 |
| AX-158178900 | 16 | 61.169 | KV452969.1 | 10655908 | 9-scf00340 | 9 |
| AX-158178901 | 16 | 61.169 | KV452969.1 | 10656741 | 9-scf00340 | 9 |
| AX-158178902 | 16 | 61.169 | KV452969.1 | 10657141 | 9-scf00340 | 9 |
| AX-158178904 | 16 | 61.169 | KV452969.1 | 10659057 | 9-scf00340 | 9 |

|              |    |        |            |          |            |   |
|--------------|----|--------|------------|----------|------------|---|
| AX-157835445 | 16 | 61.169 | KV452969.1 | 10662368 | 9-scf00340 | 9 |
| AX-158178907 | 16 | 61.169 | KV452969.1 | 10674272 | 9-scf00340 | 9 |
| AX-158178909 | 16 | 61.169 | KV452969.1 | 10679932 | 9-scf00340 | 9 |
| AX-158178941 | 16 | 61.169 | KV452969.1 | 10708842 | 9-scf00340 | 9 |
| AX-158178957 | 16 | 61.169 | KV452969.1 | 10727011 | 9-scf00340 | 9 |
| AX-158178992 | 16 | 61.169 | KV452969.1 | 10755793 | 9-scf00340 | 9 |
| AX-158178997 | 16 | 61.169 | KV452969.1 | 10758526 | 9-scf00340 | 9 |
| AX-157835452 | 16 | 61.169 | KV452969.1 | 10762341 | 9-scf00340 | 9 |
| AX-158179014 | 16 | 61.169 | KV452969.1 | 10780243 | 9-scf00340 | 9 |
| AX-158179015 | 16 | 61.169 | KV452969.1 | 10785613 | 9-scf00340 | 9 |
| AX-158179034 | 16 | 61.169 | KV452969.1 | 10811482 | 9-scf00340 | 9 |
| AX-157702369 | 16 | 61.169 | KV452969.1 | 10812438 | 9-scf00340 | 9 |
| AX-158179045 | 16 | 61.169 | KV452969.1 | 10820809 | 9-scf00340 | 9 |
| AX-158179049 | 16 | 61.169 | KV452969.1 | 10825048 | 9-scf00340 | 9 |
| AX-158179060 | 16 | 61.169 | KV452969.1 | 10835353 | 9-scf00340 | 9 |
| AX-158179061 | 16 | 61.169 | KV452969.1 | 10835917 | 9-scf00340 | 9 |
| AX-158179062 | 16 | 61.169 | KV452969.1 | 10836256 | 9-scf00340 | 9 |
| AX-157835463 | 16 | 61.169 | KV452969.1 | 10886416 | 9-scf00340 | 9 |
| AX-158179096 | 16 | 61.169 | KV452969.1 | 10891941 | 9-scf00340 | 9 |
| AX-158179097 | 16 | 61.169 | KV452969.1 | 10892487 | 9-scf00340 | 9 |
| AX-158179098 | 16 | 61.169 | KV452969.1 | 10892959 | 9-scf00340 | 9 |
| AX-158179100 | 16 | 61.169 | KV452969.1 | 10896177 | 9-scf00340 | 9 |
| AX-158385935 | 16 | 61.169 | KV452969.1 | 10896342 | 9-scf00340 | 9 |
| AX-158179106 | 16 | 61.169 | KV452969.1 | 10916800 | 9-scf00340 | 9 |
| AX-158179107 | 16 | 61.169 | KV452969.1 | 10917571 | 9-scf00340 | 9 |
| AX-158179108 | 16 | 61.169 | KV452969.1 | 10918591 | 9-scf00340 | 9 |
| AX-158179109 | 16 | 61.169 | KV452969.1 | 10919783 | 9-scf00340 | 9 |
| AX-158179110 | 16 | 61.169 | KV452969.1 | 10920761 | 9-scf00340 | 9 |
| AX-158179111 | 16 | 61.169 | KV452969.1 | 10921864 | 9-scf00340 | 9 |
| AX-158179114 | 16 | 61.169 | KV452969.1 | 10923835 | 9-scf00340 | 9 |
| AX-158179115 | 16 | 61.169 | KV452969.1 | 10924316 | 9-scf00340 | 9 |
| AX-157835465 | 16 | 61.169 | KV452969.1 | 10925815 | 9-scf00340 | 9 |
| AX-158380594 | 16 | 61.169 | KV452969.1 | 10926895 | 9-scf00340 | 9 |
| AX-158179117 | 16 | 61.169 | KV452969.1 | 10932699 | 9-scf00340 | 9 |
| AX-158179125 | 16 | 61.169 | KV452969.1 | 10945584 | 9-scf00340 | 9 |
| AX-157835467 | 16 | 61.169 | KV452969.1 | 10945660 | 9-scf00340 | 9 |
| AX-158179128 | 16 | 61.169 | KV452969.1 | 10946938 | 9-scf00340 | 9 |
| AX-158179129 | 16 | 61.169 | KV452969.1 | 10947316 | 9-scf00340 | 9 |
| AX-158179130 | 16 | 61.169 | KV452969.1 | 10948334 | 9-scf00340 | 9 |
| AX-158179131 | 16 | 61.169 | KV452969.1 | 10949333 | 9-scf00340 | 9 |
| AX-158179134 | 16 | 61.169 | KV452969.1 | 10956249 | 9-scf00340 | 9 |
| AX-158179136 | 16 | 61.169 | KV452969.1 | 10958272 | 9-scf00340 | 9 |
| AX-158179140 | 16 | 61.169 | KV452969.1 | 10966188 | 9-scf00340 | 9 |
| AX-158179144 | 16 | 61.169 | KV452969.1 | 10968291 | 9-scf00340 | 9 |
| AX-158179145 | 16 | 61.169 | KV452969.1 | 10969298 | 9-scf00340 | 9 |
| AX-158179159 | 16 | 61.169 | KV452969.1 | 10998582 | 9-scf00340 | 9 |
| AX-158179187 | 16 | 61.169 | KV452969.1 | 11029579 | 9-scf00340 | 9 |
| AX-158179223 | 16 | 61.169 | KV452969.1 | 11077512 | 9-scf00340 | 9 |
| AX-158179230 | 16 | 61.169 | KV452969.1 | 11081620 | 9-scf00340 | 9 |
| AX-158179231 | 16 | 61.169 | KV452969.1 | 11081937 | 9-scf00340 | 9 |
| AX-157835477 | 16 | 61.169 | KV452969.1 | 11083897 | 9-scf00340 | 9 |

|              |    |        |             |          |               |    |
|--------------|----|--------|-------------|----------|---------------|----|
| AX-157756702 | 16 | 61.169 | KV452969.1  | 11086298 | 9-scf00340    | 9  |
| AX-158179243 | 16 | 61.169 | KV452969.1  | 11092368 | 9-scf00340    | 9  |
| AX-157744159 | 16 | 61.169 | KV452969.1  | 11097070 | 9-scf00340    | 9  |
| AX-158179246 | 16 | 61.169 | KV452969.1  | 11097782 | 9-scf00340    | 9  |
| AX-158179248 | 16 | 61.169 | KV452969.1  | 11100560 | 9-scf00340    | 9  |
| AX-158179256 | 16 | 61.169 | KV452969.1  | 11107815 | 9-scf00340    | 9  |
| AX-158179267 | 16 | 61.169 | KV452969.1  | 11118127 | 9-scf00340    | 9  |
| AX-158179299 | 16 | 61.169 | KV452969.1  | 11153764 | 9-scf00340    | 9  |
| AX-158179324 | 16 | 61.169 | KV452969.1  | 11190740 | 9-scf00340    | 9  |
| AX-158179326 | 16 | 61.169 | KV452969.1  | 11191637 | 9-scf00340    | 9  |
| AX-158179392 | 16 | 61.169 | KV452969.1  | 11250764 | 9-scf00340    | 9  |
| AX-158179393 | 16 | 61.169 | KV452969.1  | 11251841 | 9-scf00340    | 9  |
| AX-158179436 | 16 | 61.169 | KV452969.1  | 11325777 | 9-scf00340    | 9  |
| AX-158179437 | 16 | 61.169 | KV452969.1  | 11328842 | 9-scf00340    | 9  |
| AX-157835501 | 16 | 61.169 | KV452969.1  | 11347022 | 9-scf00340    | 9  |
| AX-158179511 | 16 | 61.169 | KV452969.1  | 11431246 | 9-scf00340    | 9  |
| AX-158179546 | 16 | 61.169 | KV452969.1  | 11478557 | 9-scf00340    | 9  |
| AX-158179551 | 16 | 61.169 | KV452969.1  | 11482090 | 9-scf00340    | 9  |
| AX-158179609 | 16 | 61.169 | KV452969.1  | 11555473 | 9-scf00340    | 9  |
| AX-157835574 | 16 | 61.169 | KV452969.1  | 11941005 | 9-scf00340    | 9  |
| AX-158179920 | 16 | 61.169 | KV452969.1  | 11992278 | 9-scf00340    | 9  |
| AX-158180150 | 16 | 61.169 | KV452969.1  | 12312380 | 9-scf00340    | 9  |
| AX-158180162 | 16 | 61.169 | KV452969.1  | 12323288 | 9-scf00340    | 9  |
| AX-158180387 | 16 | 61.169 | KV452969.1  | 12559507 | 9-scf00340    | 9  |
| AX-158180527 | 16 | 61.169 | KV452969.1  | 12691950 | 9-scf00340    | 9  |
| AX-158180541 | 16 | 61.169 | KV452969.1  | 12703217 | 9-scf00340    | 9  |
| AX-158180550 | 16 | 61.169 | KV452969.1  | 12714901 | 9-scf00340    | 9  |
| AX-158180553 | 16 | 61.169 | KV452969.1  | 12716819 | 9-scf00340    | 9  |
| AX-158180554 | 16 | 61.169 | KV452969.1  | 12717236 | 9-scf00340    | 9  |
| AX-158180559 | 16 | 61.169 | KV452969.1  | 12724909 | 9-scf00340    | 9  |
| AX-158180561 | 16 | 61.169 | KV452969.1  | 12726341 | 9-scf00340    | 9  |
| AX-157835627 | 16 | 61.169 | KV452969.1  | 12964384 | 9-scf00340    | 9  |
| AX-158180791 | 16 | 61.169 | KV452969.1  | 13000083 | 9-scf00340    | 9  |
| AX-158180851 | 16 | 61.169 | KV452969.1  | 13071318 | 9-scf00340    | 9  |
| AX-158180881 | 16 | 61.169 | KV452969.1  | 13113121 | 9-scf00340    | 9  |
| AX-158180896 | 16 | 61.169 | KV452969.1  | 13130377 | 9-scf00340    | 9  |
| AX-158180916 | 16 | 61.169 | KV452969.1  | 13158238 | 9-scf00340    | 9  |
| AX-158180920 | 16 | 61.169 | KV452969.1  | 13165813 | 9-scf00340    | 9  |
| AX-158180922 | 16 | 61.169 | KV452969.1  | 13172670 | 9-scf00340    | 9  |
| AX-158180957 | 16 | 61.169 | KV452969.1  | 13206210 | 9-scf00340    | 9  |
| AX-158181026 | 16 | 61.169 | KV452969.1  | 13299279 | 9-scf00340    | 9  |
| AX-157835677 | 16 | 61.169 | KV452969.1  | 13378407 | 9-scf00340    | 9  |
| AX-158181175 | 16 | 61.169 | KV452969.1  | 13604744 | 9-scf00340    | 9  |
| AX-158181176 | 16 | 61.169 | KV452969.1  | 13606394 | 9-scf00340    | 9  |
| AX-158181191 | 16 | 61.169 | KV452969.1  | 13640915 | 9-scf00340    | 9  |
| AX-158181299 | 16 | 61.169 | KV452969.1  | 13846017 | 9-scf00340    | 9  |
| AX-158181319 | 16 | 61.169 | KV452969.1  | 13868857 | 9-scf00340    | 9  |
| AX-158393580 | 16 | 61.169 | KV452969.1  | 19956338 | 9-scf00340    | 9  |
| AX-158171007 | 16 | 61.169 | KV452965.1  | 1206467  | 9-scf00608    | 9  |
| AX-157701103 | 16 | 61.169 | FI863607.1  | 87       | ORI212 lctalu | UN |
| AX-157704533 | 16 | 61.169 | 3ML01026456 | 967      | scf02052_1    | UN |

|              |    |        |             |          |            |    |
|--------------|----|--------|-------------|----------|------------|----|
| AX-157704532 | 16 | 61.169 | 3ML01026456 | 1757     | scf02052_1 | UN |
| AX-158179164 | 16 | 61.225 | KV452969.1  | 11004532 | 9-scf00340 | 9  |
| AX-157835317 | 16 | 61.278 | KV452969.1  | 8775173  | 9-scf00340 | 9  |
| AX-158413506 | 16 | 61.278 | KV452969.1  | 9157839  | 9-scf00340 | 9  |
| AX-158177746 | 16 | 61.278 | KV452969.1  | 9160232  | 9-scf00340 | 9  |
| AX-158177749 | 16 | 61.278 | KV452969.1  | 9165539  | 9-scf00340 | 9  |
| AX-158177803 | 16 | 61.278 | KV452969.1  | 9246044  | 9-scf00340 | 9  |
| AX-158178335 | 16 | 61.278 | KV452969.1  | 9836221  | 9-scf00340 | 9  |
| AX-157835411 | 16 | 61.278 | KV452969.1  | 10120800 | 9-scf00340 | 9  |
| AX-158178578 | 16 | 61.278 | KV452969.1  | 10217781 | 9-scf00340 | 9  |
| AX-158178628 | 16 | 61.278 | KV452969.1  | 10278335 | 9-scf00340 | 9  |
| AX-158178729 | 16 | 61.278 | KV452969.1  | 10402751 | 9-scf00340 | 9  |
| AX-158178791 | 16 | 61.278 | KV452969.1  | 10479726 | 9-scf00340 | 9  |
| AX-158178793 | 16 | 61.278 | KV452969.1  | 10493974 | 9-scf00340 | 9  |
| AX-158178827 | 16 | 61.278 | KV452969.1  | 10557994 | 9-scf00340 | 9  |
| AX-158179029 | 16 | 61.278 | KV452969.1  | 10807727 | 9-scf00340 | 9  |
| AX-158179162 | 16 | 61.278 | KV452969.1  | 11003647 | 9-scf00340 | 9  |
| AX-158179165 | 16 | 61.278 | KV452969.1  | 11005250 | 9-scf00340 | 9  |
| AX-158179167 | 16 | 61.278 | KV452969.1  | 11008983 | 9-scf00340 | 9  |
| AX-158179170 | 16 | 61.278 | KV452969.1  | 11011632 | 9-scf00340 | 9  |
| AX-158179172 | 16 | 61.278 | KV452969.1  | 11013440 | 9-scf00340 | 9  |
| AX-158179173 | 16 | 61.278 | KV452969.1  | 11014166 | 9-scf00340 | 9  |
| AX-158179174 | 16 | 61.278 | KV452969.1  | 11015174 | 9-scf00340 | 9  |
| AX-158179183 | 16 | 61.278 | KV452969.1  | 11022588 | 9-scf00340 | 9  |
| AX-158413546 | 16 | 61.278 | KV452969.1  | 11025900 | 9-scf00340 | 9  |
| AX-158413552 | 16 | 61.278 | KV452969.1  | 11027463 | 9-scf00340 | 9  |
| AX-158179193 | 16 | 61.278 | KV452969.1  | 11033811 | 9-scf00340 | 9  |
| AX-158179198 | 16 | 61.278 | KV452969.1  | 11042460 | 9-scf00340 | 9  |
| AX-157835470 | 16 | 61.278 | KV452969.1  | 11043997 | 9-scf00340 | 9  |
| AX-157835472 | 16 | 61.278 | KV452969.1  | 11049743 | 9-scf00340 | 9  |
| AX-157773130 | 16 | 61.278 | KV452969.1  | 11050770 | 9-scf00340 | 9  |
| AX-157886798 | 16 | 61.278 | KV452969.1  | 11051043 | 9-scf00340 | 9  |
| AX-158179202 | 16 | 61.278 | KV452969.1  | 11055165 | 9-scf00340 | 9  |
| AX-158179219 | 16 | 61.278 | KV452969.1  | 11071070 | 9-scf00340 | 9  |
| AX-158413554 | 16 | 61.278 | KV452969.1  | 11072386 | 9-scf00340 | 9  |
| AX-158179233 | 16 | 61.278 | KV452969.1  | 11083594 | 9-scf00340 | 9  |
| AX-158179247 | 16 | 61.278 | KV452969.1  | 11100087 | 9-scf00340 | 9  |
| AX-158179255 | 16 | 61.278 | KV452969.1  | 11107441 | 9-scf00340 | 9  |
| AX-157835484 | 16 | 61.278 | KV452969.1  | 11129272 | 9-scf00340 | 9  |
| AX-157742887 | 16 | 61.278 | KV452969.1  | 11131463 | 9-scf00340 | 9  |
| AX-158179300 | 16 | 61.278 | KV452969.1  | 11154497 | 9-scf00340 | 9  |
| AX-158179301 | 16 | 61.278 | KV452969.1  | 11155161 | 9-scf00340 | 9  |
| AX-158179310 | 16 | 61.278 | KV452969.1  | 11160423 | 9-scf00340 | 9  |
| AX-157835489 | 16 | 61.278 | KV452969.1  | 11170142 | 9-scf00340 | 9  |
| AX-157713101 | 16 | 61.278 | KV452969.1  | 11177629 | 9-scf00340 | 9  |
| AX-158179317 | 16 | 61.278 | KV452969.1  | 11179377 | 9-scf00340 | 9  |
| AX-158179319 | 16 | 61.278 | KV452969.1  | 11182082 | 9-scf00340 | 9  |
| AX-157835493 | 16 | 61.278 | KV452969.1  | 11188885 | 9-scf00340 | 9  |
| AX-158179323 | 16 | 61.278 | KV452969.1  | 11189876 | 9-scf00340 | 9  |
| AX-157835519 | 16 | 61.278 | KV452969.1  | 11476435 | 9-scf00340 | 9  |
| AX-158179548 | 16 | 61.278 | KV452969.1  | 11479563 | 9-scf00340 | 9  |



|              |    |        |            |          |            |   |
|--------------|----|--------|------------|----------|------------|---|
| AX-158179555 | 16 | 61.278 | KV452969.1 | 11490988 | 9-scf00340 | 9 |
| AX-157755372 | 16 | 61.278 | KV452969.1 | 11491166 | 9-scf00340 | 9 |
| AX-158179562 | 16 | 61.278 | KV452969.1 | 11504274 | 9-scf00340 | 9 |
| AX-158179672 | 16 | 61.278 | KV452969.1 | 11653258 | 9-scf00340 | 9 |
| AX-158179936 | 16 | 61.278 | KV452969.1 | 12012315 | 9-scf00340 | 9 |
| AX-158180134 | 16 | 61.278 | KV452969.1 | 12293421 | 9-scf00340 | 9 |
| AX-158180539 | 16 | 61.278 | KV452969.1 | 12702143 | 9-scf00340 | 9 |
| AX-158180546 | 16 | 61.278 | KV452969.1 | 12712150 | 9-scf00340 | 9 |
| AX-158180552 | 16 | 61.278 | KV452969.1 | 12715721 | 9-scf00340 | 9 |
| AX-158180556 | 16 | 61.278 | KV452969.1 | 12717918 | 9-scf00340 | 9 |
| AX-158180557 | 16 | 61.278 | KV452969.1 | 12719816 | 9-scf00340 | 9 |
| AX-158180628 | 16 | 61.278 | KV452969.1 | 12823280 | 9-scf00340 | 9 |
| AX-158180805 | 16 | 61.278 | KV452969.1 | 13016392 | 9-scf00340 | 9 |
| AX-158180812 | 16 | 61.278 | KV452969.1 | 13025713 | 9-scf00340 | 9 |
| AX-157835645 | 16 | 61.278 | KV452969.1 | 13067848 | 9-scf00340 | 9 |
| AX-158180862 | 16 | 61.278 | KV452969.1 | 13087285 | 9-scf00340 | 9 |
| AX-158180914 | 16 | 61.278 | KV452969.1 | 13156540 | 9-scf00340 | 9 |
| AX-158180942 | 16 | 61.278 | KV452969.1 | 13193953 | 9-scf00340 | 9 |
| AX-158180943 | 16 | 61.278 | KV452969.1 | 13194166 | 9-scf00340 | 9 |
| AX-158181096 | 16 | 61.278 | KV452969.1 | 13401694 | 9-scf00340 | 9 |
| AX-158181119 | 16 | 61.278 | KV452969.1 | 13450915 | 9-scf00340 | 9 |
| AX-158181182 | 16 | 61.278 | KV452969.1 | 13613492 | 9-scf00340 | 9 |
| AX-158181200 | 16 | 61.278 | KV452969.1 | 13674645 | 9-scf00340 | 9 |
| AX-157835490 | 16 | 61.389 | KV452969.1 | 11171944 | 9-scf00340 | 9 |
| AX-157747826 | 16 | 61.497 | KV452969.1 | 9259374  | 9-scf00340 | 9 |
| AX-158178532 | 16 | 61.497 | KV452969.1 | 10151723 | 9-scf00340 | 9 |
| AX-158178545 | 16 | 61.497 | KV452969.1 | 10172143 | 9-scf00340 | 9 |
| AX-157697889 | 16 | 61.497 | KV452969.1 | 10195746 | 9-scf00340 | 9 |
| AX-157719412 | 16 | 61.497 | KV452969.1 | 10467647 | 9-scf00340 | 9 |
| AX-158178802 | 16 | 61.497 | KV452969.1 | 10521358 | 9-scf00340 | 9 |
| AX-158178803 | 16 | 61.497 | KV452969.1 | 10522322 | 9-scf00340 | 9 |
| AX-158178912 | 16 | 61.497 | KV452969.1 | 10682208 | 9-scf00340 | 9 |
| AX-158178922 | 16 | 61.497 | KV452969.1 | 10690178 | 9-scf00340 | 9 |
| AX-157835468 | 16 | 61.497 | KV452969.1 | 10972736 | 9-scf00340 | 9 |
| AX-158413547 | 16 | 61.497 | KV452969.1 | 11025936 | 9-scf00340 | 9 |
| AX-158179242 | 16 | 61.497 | KV452969.1 | 11091802 | 9-scf00340 | 9 |
| AX-158179311 | 16 | 61.497 | KV452969.1 | 11161208 | 9-scf00340 | 9 |
| AX-158179356 | 16 | 61.497 | KV452969.1 | 11220256 | 9-scf00340 | 9 |
| AX-158179357 | 16 | 61.497 | KV452969.1 | 11220786 | 9-scf00340 | 9 |
| AX-158179359 | 16 | 61.497 | KV452969.1 | 11222948 | 9-scf00340 | 9 |
| AX-158179384 | 16 | 61.497 | KV452969.1 | 11244668 | 9-scf00340 | 9 |
| AX-158179399 | 16 | 61.497 | KV452969.1 | 11258974 | 9-scf00340 | 9 |
| AX-158179401 | 16 | 61.497 | KV452969.1 | 11259972 | 9-scf00340 | 9 |
| AX-158179405 | 16 | 61.497 | KV452969.1 | 11272487 | 9-scf00340 | 9 |
| AX-158179406 | 16 | 61.497 | KV452969.1 | 11273738 | 9-scf00340 | 9 |
| AX-158380595 | 16 | 61.497 | KV452969.1 | 11296303 | 9-scf00340 | 9 |
| AX-158179420 | 16 | 61.497 | KV452969.1 | 11296419 | 9-scf00340 | 9 |
| AX-157754900 | 16 | 61.497 | KV452969.1 | 11302149 | 9-scf00340 | 9 |
| AX-158179427 | 16 | 61.497 | KV452969.1 | 11307635 | 9-scf00340 | 9 |
| AX-158179428 | 16 | 61.497 | KV452969.1 | 11308453 | 9-scf00340 | 9 |
| AX-158179430 | 16 | 61.497 | KV452969.1 | 11311185 | 9-scf00340 | 9 |

|              |    |        |            |          |            |   |
|--------------|----|--------|------------|----------|------------|---|
| AX-157835499 | 16 | 61.497 | KV452969.1 | 11312191 | 9-scf00340 | 9 |
| AX-157722505 | 16 | 61.497 | KV452969.1 | 11314992 | 9-scf00340 | 9 |
| AX-158179435 | 16 | 61.497 | KV452969.1 | 11323491 | 9-scf00340 | 9 |
| AX-158179442 | 16 | 61.497 | KV452969.1 | 11348513 | 9-scf00340 | 9 |
| AX-158179443 | 16 | 61.497 | KV452969.1 | 11349784 | 9-scf00340 | 9 |
| AX-157835504 | 16 | 61.497 | KV452969.1 | 11368037 | 9-scf00340 | 9 |
| AX-157835505 | 16 | 61.497 | KV452969.1 | 11368091 | 9-scf00340 | 9 |
| AX-158179466 | 16 | 61.497 | KV452969.1 | 11380179 | 9-scf00340 | 9 |
| AX-158179467 | 16 | 61.497 | KV452969.1 | 11381304 | 9-scf00340 | 9 |
| AX-158179476 | 16 | 61.497 | KV452969.1 | 11392848 | 9-scf00340 | 9 |
| AX-158179494 | 16 | 61.497 | KV452969.1 | 11411932 | 9-scf00340 | 9 |
| AX-157771652 | 16 | 61.497 | KV452969.1 | 11422209 | 9-scf00340 | 9 |
| AX-158179504 | 16 | 61.497 | KV452969.1 | 11424405 | 9-scf00340 | 9 |
| AX-158179508 | 16 | 61.497 | KV452969.1 | 11428172 | 9-scf00340 | 9 |
| AX-157835514 | 16 | 61.497 | KV452969.1 | 11435884 | 9-scf00340 | 9 |
| AX-157835516 | 16 | 61.497 | KV452969.1 | 11440309 | 9-scf00340 | 9 |
| AX-158179524 | 16 | 61.497 | KV452969.1 | 11444136 | 9-scf00340 | 9 |
| AX-158179533 | 16 | 61.497 | KV452969.1 | 11453347 | 9-scf00340 | 9 |
| AX-157835517 | 16 | 61.497 | KV452969.1 | 11454152 | 9-scf00340 | 9 |
| AX-158179534 | 16 | 61.497 | KV452969.1 | 11454510 | 9-scf00340 | 9 |
| AX-158179536 | 16 | 61.497 | KV452969.1 | 11455923 | 9-scf00340 | 9 |
| AX-158380596 | 16 | 61.497 | KV452969.1 | 11456111 | 9-scf00340 | 9 |
| AX-158179537 | 16 | 61.497 | KV452969.1 | 11456223 | 9-scf00340 | 9 |
| AX-158179543 | 16 | 61.497 | KV452969.1 | 11473472 | 9-scf00340 | 9 |
| AX-157746159 | 16 | 61.497 | KV452969.1 | 11473731 | 9-scf00340 | 9 |
| AX-158179547 | 16 | 61.497 | KV452969.1 | 11478976 | 9-scf00340 | 9 |
| AX-158179594 | 16 | 61.497 | KV452969.1 | 11542691 | 9-scf00340 | 9 |
| AX-157740900 | 16 | 61.497 | KV452969.1 | 11543778 | 9-scf00340 | 9 |
| AX-158179607 | 16 | 61.497 | KV452969.1 | 11552817 | 9-scf00340 | 9 |
| AX-158179608 | 16 | 61.497 | KV452969.1 | 11554935 | 9-scf00340 | 9 |
| AX-158179611 | 16 | 61.497 | KV452969.1 | 11556597 | 9-scf00340 | 9 |
| AX-158179612 | 16 | 61.497 | KV452969.1 | 11557982 | 9-scf00340 | 9 |
| AX-158179615 | 16 | 61.497 | KV452969.1 | 11561040 | 9-scf00340 | 9 |
| AX-158179618 | 16 | 61.497 | KV452969.1 | 11564732 | 9-scf00340 | 9 |
| AX-158179620 | 16 | 61.497 | KV452969.1 | 11567447 | 9-scf00340 | 9 |
| AX-158179883 | 16 | 61.497 | KV452969.1 | 11951713 | 9-scf00340 | 9 |
| AX-158179950 | 16 | 61.497 | KV452969.1 | 12028526 | 9-scf00340 | 9 |
| AX-158181110 | 16 | 61.497 | KV452969.1 | 13422141 | 9-scf00340 | 9 |
| AX-158181135 | 16 | 61.497 | KV452969.1 | 13488422 | 9-scf00340 | 9 |
| AX-158181174 | 16 | 61.497 | KV452969.1 | 13603212 | 9-scf00340 | 9 |
| AX-158181316 | 16 | 61.497 | KV452969.1 | 13867160 | 9-scf00340 | 9 |
| AX-158181336 | 16 | 61.497 | KV452969.1 | 13894345 | 9-scf00340 | 9 |
| AX-158181337 | 16 | 61.497 | KV452969.1 | 13895423 | 9-scf00340 | 9 |
| AX-158177096 | 16 | 61.518 | KV452969.1 | 8219742  | 9-scf00340 | 9 |
| AX-158177379 | 16 | 61.518 | KV452969.1 | 8538409  | 9-scf00340 | 9 |
| AX-158177503 | 16 | 61.518 | KV452969.1 | 8712593  | 9-scf00340 | 9 |
| AX-158177512 | 16 | 61.518 | KV452969.1 | 8738961  | 9-scf00340 | 9 |
| AX-157752654 | 16 | 61.518 | KV452969.1 | 8746556  | 9-scf00340 | 9 |
| AX-158177518 | 16 | 61.518 | KV452969.1 | 8749508  | 9-scf00340 | 9 |
| AX-157886799 | 16 | 61.518 | KV452969.1 | 11234962 | 9-scf00340 | 9 |
| AX-157835498 | 16 | 61.518 | KV452969.1 | 11286604 | 9-scf00340 | 9 |

|              |    |        |            |          |            |   |
|--------------|----|--------|------------|----------|------------|---|
| AX-158179530 | 16 | 61.518 | KV452969.1 | 11449838 | 9-scf00340 | 9 |
| AX-158179624 | 16 | 61.518 | KV452969.1 | 11572342 | 9-scf00340 | 9 |
| AX-158179625 | 16 | 61.518 | KV452969.1 | 11572887 | 9-scf00340 | 9 |
| AX-158179627 | 16 | 61.518 | KV452969.1 | 11573785 | 9-scf00340 | 9 |
| AX-158179628 | 16 | 61.518 | KV452969.1 | 11574498 | 9-scf00340 | 9 |
| AX-157835579 | 16 | 61.518 | KV452969.1 | 12052488 | 9-scf00340 | 9 |
| AX-158180521 | 16 | 61.518 | KV452969.1 | 12685462 | 9-scf00340 | 9 |
| AX-158180523 | 16 | 61.518 | KV452969.1 | 12686838 | 9-scf00340 | 9 |
| AX-158180526 | 16 | 61.518 | KV452969.1 | 12691365 | 9-scf00340 | 9 |
| AX-158180528 | 16 | 61.518 | KV452969.1 | 12692483 | 9-scf00340 | 9 |
| AX-158180547 | 16 | 61.518 | KV452969.1 | 12713016 | 9-scf00340 | 9 |
| AX-158180549 | 16 | 61.518 | KV452969.1 | 12713887 | 9-scf00340 | 9 |
| AX-158180892 | 16 | 61.518 | KV452969.1 | 13125485 | 9-scf00340 | 9 |
| AX-158180925 | 16 | 61.518 | KV452969.1 | 13174214 | 9-scf00340 | 9 |
| AX-158181504 | 16 | 61.518 | KV452969.1 | 14155236 | 9-scf00340 | 9 |
| AX-158179629 | 16 | 61.543 | KV452969.1 | 11574927 | 9-scf00340 | 9 |
| AX-158179630 | 16 | 61.543 | KV452969.1 | 11575403 | 9-scf00340 | 9 |
| AX-158179631 | 16 | 61.558 | KV452969.1 | 11578277 | 9-scf00340 | 9 |
| AX-158177127 | 16 | 61.606 | KV452969.1 | 8260303  | 9-scf00340 | 9 |
| AX-158177634 | 16 | 61.606 | KV452969.1 | 8977753  | 9-scf00340 | 9 |
| AX-158177636 | 16 | 61.606 | KV452969.1 | 8983049  | 9-scf00340 | 9 |
| AX-158177643 | 16 | 61.606 | KV452969.1 | 8996074  | 9-scf00340 | 9 |
| AX-157835332 | 16 | 61.606 | KV452969.1 | 9027473  | 9-scf00340 | 9 |
| AX-158177657 | 16 | 61.606 | KV452969.1 | 9030909  | 9-scf00340 | 9 |
| AX-158177658 | 16 | 61.606 | KV452969.1 | 9032770  | 9-scf00340 | 9 |
| AX-158177691 | 16 | 61.606 | KV452969.1 | 9101295  | 9-scf00340 | 9 |
| AX-158177694 | 16 | 61.606 | KV452969.1 | 9108574  | 9-scf00340 | 9 |
| AX-158177862 | 16 | 61.606 | KV452969.1 | 9319469  | 9-scf00340 | 9 |
| AX-157835377 | 16 | 61.606 | KV452969.1 | 9424420  | 9-scf00340 | 9 |
| AX-158178349 | 16 | 61.606 | KV452969.1 | 9854328  | 9-scf00340 | 9 |
| AX-157724094 | 16 | 61.606 | KV452969.1 | 9894267  | 9-scf00340 | 9 |
| AX-158178441 | 16 | 61.606 | KV452969.1 | 10027689 | 9-scf00340 | 9 |
| AX-158178495 | 16 | 61.606 | KV452969.1 | 10116478 | 9-scf00340 | 9 |
| AX-158178611 | 16 | 61.606 | KV452969.1 | 10253456 | 9-scf00340 | 9 |
| AX-158178752 | 16 | 61.606 | KV452969.1 | 10425873 | 9-scf00340 | 9 |
| AX-158178767 | 16 | 61.606 | KV452969.1 | 10448715 | 9-scf00340 | 9 |
| AX-158179016 | 16 | 61.606 | KV452969.1 | 10786074 | 9-scf00340 | 9 |
| AX-157757492 | 16 | 61.606 | KV452969.1 | 10832049 | 9-scf00340 | 9 |
| AX-158179056 | 16 | 61.606 | KV452969.1 | 10832130 | 9-scf00340 | 9 |
| AX-157866698 | 16 | 61.606 | KV452969.1 | 10838768 | 9-scf00340 | 9 |
| AX-158179067 | 16 | 61.606 | KV452969.1 | 10841901 | 9-scf00340 | 9 |
| AX-158179072 | 16 | 61.606 | KV452969.1 | 10850548 | 9-scf00340 | 9 |
| AX-158179132 | 16 | 61.606 | KV452969.1 | 10949870 | 9-scf00340 | 9 |
| AX-158179142 | 16 | 61.606 | KV452969.1 | 10967237 | 9-scf00340 | 9 |
| AX-157741417 | 16 | 61.606 | KV452969.1 | 10983737 | 9-scf00340 | 9 |
| AX-158179285 | 16 | 61.606 | KV452969.1 | 11136396 | 9-scf00340 | 9 |
| AX-158179287 | 16 | 61.606 | KV452969.1 | 11140394 | 9-scf00340 | 9 |
| AX-158179386 | 16 | 61.606 | KV452969.1 | 11245213 | 9-scf00340 | 9 |
| AX-157835497 | 16 | 61.606 | KV452969.1 | 11257582 | 9-scf00340 | 9 |
| AX-157835511 | 16 | 61.606 | KV452969.1 | 11394585 | 9-scf00340 | 9 |
| AX-158179539 | 16 | 61.606 | KV452969.1 | 11458854 | 9-scf00340 | 9 |

|              |    |        |            |          |            |   |
|--------------|----|--------|------------|----------|------------|---|
| AX-158179556 | 16 | 61.606 | KV452969.1 | 11495709 | 9-scf00340 | 9 |
| AX-157835520 | 16 | 61.606 | KV452969.1 | 11497141 | 9-scf00340 | 9 |
| AX-158179622 | 16 | 61.606 | KV452969.1 | 11571195 | 9-scf00340 | 9 |
| AX-158179626 | 16 | 61.606 | KV452969.1 | 11573256 | 9-scf00340 | 9 |
| AX-158179632 | 16 | 61.606 | KV452969.1 | 11579049 | 9-scf00340 | 9 |
| AX-158179637 | 16 | 61.606 | KV452969.1 | 11585036 | 9-scf00340 | 9 |
| AX-158179639 | 16 | 61.606 | KV452969.1 | 11587535 | 9-scf00340 | 9 |
| AX-158179641 | 16 | 61.606 | KV452969.1 | 11588921 | 9-scf00340 | 9 |
| AX-158179642 | 16 | 61.606 | KV452969.1 | 11589468 | 9-scf00340 | 9 |
| AX-158179644 | 16 | 61.606 | KV452969.1 | 11590907 | 9-scf00340 | 9 |
| AX-158179645 | 16 | 61.606 | KV452969.1 | 11592711 | 9-scf00340 | 9 |
| AX-158179646 | 16 | 61.606 | KV452969.1 | 11600862 | 9-scf00340 | 9 |
| AX-158179647 | 16 | 61.606 | KV452969.1 | 11602718 | 9-scf00340 | 9 |
| AX-158179648 | 16 | 61.606 | KV452969.1 | 11605577 | 9-scf00340 | 9 |
| AX-157723621 | 16 | 61.606 | KV452969.1 | 11606859 | 9-scf00340 | 9 |
| AX-157835528 | 16 | 61.606 | KV452969.1 | 11613847 | 9-scf00340 | 9 |
| AX-158179655 | 16 | 61.606 | KV452969.1 | 11614645 | 9-scf00340 | 9 |
| AX-157835529 | 16 | 61.606 | KV452969.1 | 11614948 | 9-scf00340 | 9 |
| AX-158179656 | 16 | 61.606 | KV452969.1 | 11617464 | 9-scf00340 | 9 |
| AX-158179663 | 16 | 61.606 | KV452969.1 | 11640739 | 9-scf00340 | 9 |
| AX-158179665 | 16 | 61.606 | KV452969.1 | 11643088 | 9-scf00340 | 9 |
| AX-158179670 | 16 | 61.606 | KV452969.1 | 11652624 | 9-scf00340 | 9 |
| AX-158179671 | 16 | 61.606 | KV452969.1 | 11652940 | 9-scf00340 | 9 |
| AX-158179673 | 16 | 61.606 | KV452969.1 | 11653608 | 9-scf00340 | 9 |
| AX-158179674 | 16 | 61.606 | KV452969.1 | 11653987 | 9-scf00340 | 9 |
| AX-157835532 | 16 | 61.606 | KV452969.1 | 11668893 | 9-scf00340 | 9 |
| AX-157713199 | 16 | 61.606 | KV452969.1 | 11671352 | 9-scf00340 | 9 |
| AX-157774006 | 16 | 61.606 | KV452969.1 | 11672446 | 9-scf00340 | 9 |
| AX-158179683 | 16 | 61.606 | KV452969.1 | 11676239 | 9-scf00340 | 9 |
| AX-158179684 | 16 | 61.606 | KV452969.1 | 11679309 | 9-scf00340 | 9 |
| AX-158179685 | 16 | 61.606 | KV452969.1 | 11681000 | 9-scf00340 | 9 |
| AX-158179686 | 16 | 61.606 | KV452969.1 | 11683201 | 9-scf00340 | 9 |
| AX-157835534 | 16 | 61.606 | KV452969.1 | 11683833 | 9-scf00340 | 9 |
| AX-157735758 | 16 | 61.606 | KV452969.1 | 11683888 | 9-scf00340 | 9 |
| AX-158179687 | 16 | 61.606 | KV452969.1 | 11691965 | 9-scf00340 | 9 |
| AX-158179688 | 16 | 61.606 | KV452969.1 | 11695751 | 9-scf00340 | 9 |
| AX-158179689 | 16 | 61.606 | KV452969.1 | 11696204 | 9-scf00340 | 9 |
| AX-158179696 | 16 | 61.606 | KV452969.1 | 11710216 | 9-scf00340 | 9 |
| AX-157757258 | 16 | 61.606 | KV452969.1 | 11720290 | 9-scf00340 | 9 |
| AX-157744578 | 16 | 61.606 | KV452969.1 | 11743933 | 9-scf00340 | 9 |
| AX-158179725 | 16 | 61.606 | KV452969.1 | 11762707 | 9-scf00340 | 9 |
| AX-158179729 | 16 | 61.606 | KV452969.1 | 11766536 | 9-scf00340 | 9 |
| AX-158179742 | 16 | 61.606 | KV452969.1 | 11786110 | 9-scf00340 | 9 |
| AX-158179743 | 16 | 61.606 | KV452969.1 | 11787165 | 9-scf00340 | 9 |
| AX-158179744 | 16 | 61.606 | KV452969.1 | 11787933 | 9-scf00340 | 9 |
| AX-157725400 | 16 | 61.606 | KV452969.1 | 11796812 | 9-scf00340 | 9 |
| AX-158179775 | 16 | 61.606 | KV452969.1 | 11829178 | 9-scf00340 | 9 |
| AX-158179778 | 16 | 61.606 | KV452969.1 | 11830650 | 9-scf00340 | 9 |
| AX-157835560 | 16 | 61.606 | KV452969.1 | 11833249 | 9-scf00340 | 9 |
| AX-158179789 | 16 | 61.606 | KV452969.1 | 11839618 | 9-scf00340 | 9 |
| AX-158179799 | 16 | 61.606 | KV452969.1 | 11848189 | 9-scf00340 | 9 |

|              |    |        |            |          |            |   |
|--------------|----|--------|------------|----------|------------|---|
| AX-158179802 | 16 | 61.606 | KV452969.1 | 11849872 | 9-scf00340 | 9 |
| AX-158179807 | 16 | 61.606 | KV452969.1 | 11857085 | 9-scf00340 | 9 |
| AX-158179825 | 16 | 61.606 | KV452969.1 | 11871963 | 9-scf00340 | 9 |
| AX-158179829 | 16 | 61.606 | KV452969.1 | 11873481 | 9-scf00340 | 9 |
| AX-157718903 | 16 | 61.606 | KV452969.1 | 11892337 | 9-scf00340 | 9 |
| AX-157717253 | 16 | 61.606 | KV452969.1 | 11892670 | 9-scf00340 | 9 |
| AX-158179859 | 16 | 61.606 | KV452969.1 | 11903670 | 9-scf00340 | 9 |
| AX-158179870 | 16 | 61.606 | KV452969.1 | 11911425 | 9-scf00340 | 9 |
| AX-158179872 | 16 | 61.606 | KV452969.1 | 11913682 | 9-scf00340 | 9 |
| AX-157698063 | 16 | 61.606 | KV452969.1 | 11919889 | 9-scf00340 | 9 |
| AX-158179877 | 16 | 61.606 | KV452969.1 | 11933654 | 9-scf00340 | 9 |
| AX-158179882 | 16 | 61.606 | KV452969.1 | 11949976 | 9-scf00340 | 9 |
| AX-157725346 | 16 | 61.606 | KV452969.1 | 11972693 | 9-scf00340 | 9 |
| AX-158179907 | 16 | 61.606 | KV452969.1 | 11976358 | 9-scf00340 | 9 |
| AX-158179908 | 16 | 61.606 | KV452969.1 | 11977589 | 9-scf00340 | 9 |
| AX-157714262 | 16 | 61.606 | KV452969.1 | 11981182 | 9-scf00340 | 9 |
| AX-158179921 | 16 | 61.606 | KV452969.1 | 11992611 | 9-scf00340 | 9 |
| AX-158179930 | 16 | 61.606 | KV452969.1 | 12001323 | 9-scf00340 | 9 |
| AX-158179933 | 16 | 61.606 | KV452969.1 | 12007411 | 9-scf00340 | 9 |
| AX-158179934 | 16 | 61.606 | KV452969.1 | 12010434 | 9-scf00340 | 9 |
| AX-157835578 | 16 | 61.606 | KV452969.1 | 12025404 | 9-scf00340 | 9 |
| AX-158179951 | 16 | 61.606 | KV452969.1 | 12029055 | 9-scf00340 | 9 |
| AX-157739902 | 16 | 61.606 | KV452969.1 | 12035866 | 9-scf00340 | 9 |
| AX-158179955 | 16 | 61.606 | KV452969.1 | 12037604 | 9-scf00340 | 9 |
| AX-158179957 | 16 | 61.606 | KV452969.1 | 12041886 | 9-scf00340 | 9 |
| AX-158179958 | 16 | 61.606 | KV452969.1 | 12043312 | 9-scf00340 | 9 |
| AX-158179967 | 16 | 61.606 | KV452969.1 | 12064074 | 9-scf00340 | 9 |
| AX-158179986 | 16 | 61.606 | KV452969.1 | 12110135 | 9-scf00340 | 9 |
| AX-158179993 | 16 | 61.606 | KV452969.1 | 12126365 | 9-scf00340 | 9 |
| AX-158180051 | 16 | 61.606 | KV452969.1 | 12211014 | 9-scf00340 | 9 |
| AX-158180052 | 16 | 61.606 | KV452969.1 | 12211695 | 9-scf00340 | 9 |
| AX-158180098 | 16 | 61.606 | KV452969.1 | 12260267 | 9-scf00340 | 9 |
| AX-158180101 | 16 | 61.606 | KV452969.1 | 12262837 | 9-scf00340 | 9 |
| AX-158180122 | 16 | 61.606 | KV452969.1 | 12284706 | 9-scf00340 | 9 |
| AX-157835584 | 16 | 61.606 | KV452969.1 | 12305239 | 9-scf00340 | 9 |
| AX-158180311 | 16 | 61.606 | KV452969.1 | 12485889 | 9-scf00340 | 9 |
| AX-157886803 | 16 | 61.606 | KV452969.1 | 12528529 | 9-scf00340 | 9 |
| AX-158180373 | 16 | 61.606 | KV452969.1 | 12544628 | 9-scf00340 | 9 |
| AX-157886804 | 16 | 61.606 | KV452969.1 | 12546604 | 9-scf00340 | 9 |
| AX-158180405 | 16 | 61.606 | KV452969.1 | 12570801 | 9-scf00340 | 9 |
| AX-158180416 | 16 | 61.606 | KV452969.1 | 12581091 | 9-scf00340 | 9 |
| AX-157886806 | 16 | 61.606 | KV452969.1 | 12591973 | 9-scf00340 | 9 |
| AX-158180480 | 16 | 61.606 | KV452969.1 | 12636078 | 9-scf00340 | 9 |
| AX-158180505 | 16 | 61.606 | KV452969.1 | 12661496 | 9-scf00340 | 9 |
| AX-158180507 | 16 | 61.606 | KV452969.1 | 12663082 | 9-scf00340 | 9 |
| AX-158180509 | 16 | 61.606 | KV452969.1 | 12664350 | 9-scf00340 | 9 |
| AX-158180568 | 16 | 61.606 | KV452969.1 | 12737842 | 9-scf00340 | 9 |
| AX-157835614 | 16 | 61.606 | KV452969.1 | 12764565 | 9-scf00340 | 9 |
| AX-158180593 | 16 | 61.606 | KV452969.1 | 12775514 | 9-scf00340 | 9 |
| AX-158180594 | 16 | 61.606 | KV452969.1 | 12775736 | 9-scf00340 | 9 |
| AX-157835616 | 16 | 61.606 | KV452969.1 | 12776478 | 9-scf00340 | 9 |

|              |    |        |            |          |            |   |
|--------------|----|--------|------------|----------|------------|---|
| AX-158180643 | 16 | 61.606 | KV452969.1 | 12838821 | 9-scf00340 | 9 |
| AX-158180692 | 16 | 61.606 | KV452969.1 | 12875571 | 9-scf00340 | 9 |
| AX-158180704 | 16 | 61.606 | KV452969.1 | 12890912 | 9-scf00340 | 9 |
| AX-157740162 | 16 | 61.606 | KV452969.1 | 12906133 | 9-scf00340 | 9 |
| AX-158180726 | 16 | 61.606 | KV452969.1 | 12914199 | 9-scf00340 | 9 |
| AX-157758096 | 16 | 61.606 | KV452969.1 | 13071727 | 9-scf00340 | 9 |
| AX-158180876 | 16 | 61.606 | KV452969.1 | 13109672 | 9-scf00340 | 9 |
| AX-157878853 | 16 | 61.606 | KV452969.1 | 13131386 | 9-scf00340 | 9 |
| AX-158180917 | 16 | 61.606 | KV452969.1 | 13158723 | 9-scf00340 | 9 |
| AX-158180929 | 16 | 61.606 | KV452969.1 | 13178992 | 9-scf00340 | 9 |
| AX-158180998 | 16 | 61.606 | KV452969.1 | 13244079 | 9-scf00340 | 9 |
| AX-158181011 | 16 | 61.606 | KV452969.1 | 13274832 | 9-scf00340 | 9 |
| AX-158181020 | 16 | 61.606 | KV452969.1 | 13292859 | 9-scf00340 | 9 |
| AX-158181033 | 16 | 61.606 | KV452969.1 | 13314077 | 9-scf00340 | 9 |
| AX-158181056 | 16 | 61.606 | KV452969.1 | 13340812 | 9-scf00340 | 9 |
| AX-158181136 | 16 | 61.606 | KV452969.1 | 13488914 | 9-scf00340 | 9 |
| AX-158181151 | 16 | 61.606 | KV452969.1 | 13532845 | 9-scf00340 | 9 |
| AX-158181172 | 16 | 61.606 | KV452969.1 | 13598577 | 9-scf00340 | 9 |
| AX-158181183 | 16 | 61.606 | KV452969.1 | 13616969 | 9-scf00340 | 9 |
| AX-158181258 | 16 | 61.606 | KV452969.1 | 13793441 | 9-scf00340 | 9 |
| AX-158179962 | 16 | 61.664 | KV452969.1 | 12052227 | 9-scf00340 | 9 |
| AX-158176574 | 16 | 61.715 | KV452969.1 | 7522129  | 9-scf00340 | 9 |
| AX-158178162 | 16 | 61.715 | KV452969.1 | 9677948  | 9-scf00340 | 9 |
| AX-158178390 | 16 | 61.715 | KV452969.1 | 9939107  | 9-scf00340 | 9 |
| AX-158178505 | 16 | 61.715 | KV452969.1 | 10128530 | 9-scf00340 | 9 |
| AX-158178688 | 16 | 61.715 | KV452969.1 | 10353667 | 9-scf00340 | 9 |
| AX-158179152 | 16 | 61.715 | KV452969.1 | 10977853 | 9-scf00340 | 9 |
| AX-158179338 | 16 | 61.715 | KV452969.1 | 11206906 | 9-scf00340 | 9 |
| AX-157835533 | 16 | 61.715 | KV452969.1 | 11681343 | 9-scf00340 | 9 |
| AX-158179824 | 16 | 61.715 | KV452969.1 | 11871646 | 9-scf00340 | 9 |
| AX-158179826 | 16 | 61.715 | KV452969.1 | 11872188 | 9-scf00340 | 9 |
| AX-158179868 | 16 | 61.715 | KV452969.1 | 11910607 | 9-scf00340 | 9 |
| AX-157693782 | 16 | 61.715 | KV452969.1 | 11946020 | 9-scf00340 | 9 |
| AX-157835580 | 16 | 61.715 | KV452969.1 | 12057060 | 9-scf00340 | 9 |
| AX-158179969 | 16 | 61.715 | KV452969.1 | 12070723 | 9-scf00340 | 9 |
| AX-158179970 | 16 | 61.715 | KV452969.1 | 12072502 | 9-scf00340 | 9 |
| AX-158179971 | 16 | 61.715 | KV452969.1 | 12072777 | 9-scf00340 | 9 |
| AX-158179978 | 16 | 61.715 | KV452969.1 | 12088823 | 9-scf00340 | 9 |
| AX-158179984 | 16 | 61.715 | KV452969.1 | 12108172 | 9-scf00340 | 9 |
| AX-158180006 | 16 | 61.715 | KV452969.1 | 12157125 | 9-scf00340 | 9 |
| AX-158180015 | 16 | 61.715 | KV452969.1 | 12165537 | 9-scf00340 | 9 |
| AX-158180081 | 16 | 61.715 | KV452969.1 | 12242025 | 9-scf00340 | 9 |
| AX-157752770 | 16 | 61.715 | KV452969.1 | 12280012 | 9-scf00340 | 9 |
| AX-158180143 | 16 | 61.715 | KV452969.1 | 12300004 | 9-scf00340 | 9 |
| AX-158180148 | 16 | 61.715 | KV452969.1 | 12307402 | 9-scf00340 | 9 |
| AX-158180149 | 16 | 61.715 | KV452969.1 | 12311020 | 9-scf00340 | 9 |
| AX-157835585 | 16 | 61.715 | KV452969.1 | 12312588 | 9-scf00340 | 9 |
| AX-157771075 | 16 | 61.715 | KV452969.1 | 12313107 | 9-scf00340 | 9 |
| AX-157719687 | 16 | 61.715 | KV452969.1 | 12315444 | 9-scf00340 | 9 |
| AX-158180155 | 16 | 61.715 | KV452969.1 | 12315913 | 9-scf00340 | 9 |
| AX-157835586 | 16 | 61.715 | KV452969.1 | 12318593 | 9-scf00340 | 9 |

|              |    |        |            |          |            |   |
|--------------|----|--------|------------|----------|------------|---|
| AX-158180156 | 16 | 61.715 | KV452969.1 | 12319521 | 9-scf00340 | 9 |
| AX-157725919 | 16 | 61.715 | KV452969.1 | 12321993 | 9-scf00340 | 9 |
| AX-158180165 | 16 | 61.715 | KV452969.1 | 12325820 | 9-scf00340 | 9 |
| AX-158413581 | 16 | 61.715 | KV452969.1 | 12330725 | 9-scf00340 | 9 |
| AX-158180169 | 16 | 61.715 | KV452969.1 | 12336171 | 9-scf00340 | 9 |
| AX-158180209 | 16 | 61.715 | KV452969.1 | 12375901 | 9-scf00340 | 9 |
| AX-158180234 | 16 | 61.715 | KV452969.1 | 12403174 | 9-scf00340 | 9 |
| AX-158180235 | 16 | 61.715 | KV452969.1 | 12405135 | 9-scf00340 | 9 |
| AX-158180430 | 16 | 61.715 | KV452969.1 | 12590001 | 9-scf00340 | 9 |
| AX-158180431 | 16 | 61.715 | KV452969.1 | 12590427 | 9-scf00340 | 9 |
| AX-158180435 | 16 | 61.715 | KV452969.1 | 12592611 | 9-scf00340 | 9 |
| AX-158180444 | 16 | 61.715 | KV452969.1 | 12602543 | 9-scf00340 | 9 |
| AX-157771363 | 16 | 61.715 | KV452969.1 | 12624537 | 9-scf00340 | 9 |
| AX-158180469 | 16 | 61.715 | KV452969.1 | 12625619 | 9-scf00340 | 9 |
| AX-158180470 | 16 | 61.715 | KV452969.1 | 12626090 | 9-scf00340 | 9 |
| AX-157764065 | 16 | 61.715 | KV452969.1 | 12626587 | 9-scf00340 | 9 |
| AX-158180471 | 16 | 61.715 | KV452969.1 | 12626851 | 9-scf00340 | 9 |
| AX-158180491 | 16 | 61.715 | KV452969.1 | 12647257 | 9-scf00340 | 9 |
| AX-158180492 | 16 | 61.715 | KV452969.1 | 12648032 | 9-scf00340 | 9 |
| AX-158180494 | 16 | 61.715 | KV452969.1 | 12650911 | 9-scf00340 | 9 |
| AX-158180495 | 16 | 61.715 | KV452969.1 | 12653386 | 9-scf00340 | 9 |
| AX-158180496 | 16 | 61.715 | KV452969.1 | 12654551 | 9-scf00340 | 9 |
| AX-158180497 | 16 | 61.715 | KV452969.1 | 12654823 | 9-scf00340 | 9 |
| AX-158180498 | 16 | 61.715 | KV452969.1 | 12655377 | 9-scf00340 | 9 |
| AX-158180499 | 16 | 61.715 | KV452969.1 | 12655967 | 9-scf00340 | 9 |
| AX-157752870 | 16 | 61.715 | KV452969.1 | 12678895 | 9-scf00340 | 9 |
| AX-158180517 | 16 | 61.715 | KV452969.1 | 12681538 | 9-scf00340 | 9 |
| AX-158180519 | 16 | 61.715 | KV452969.1 | 12684513 | 9-scf00340 | 9 |
| AX-157724405 | 16 | 61.715 | KV452969.1 | 12694594 | 9-scf00340 | 9 |
| AX-158180530 | 16 | 61.715 | KV452969.1 | 12695264 | 9-scf00340 | 9 |
| AX-158180531 | 16 | 61.715 | KV452969.1 | 12697025 | 9-scf00340 | 9 |
| AX-158180535 | 16 | 61.715 | KV452969.1 | 12699268 | 9-scf00340 | 9 |
| AX-158180537 | 16 | 61.715 | KV452969.1 | 12699897 | 9-scf00340 | 9 |
| AX-158180538 | 16 | 61.715 | KV452969.1 | 12701044 | 9-scf00340 | 9 |
| AX-158180540 | 16 | 61.715 | KV452969.1 | 12702357 | 9-scf00340 | 9 |
| AX-158180542 | 16 | 61.715 | KV452969.1 | 12705409 | 9-scf00340 | 9 |
| AX-158180548 | 16 | 61.715 | KV452969.1 | 12713342 | 9-scf00340 | 9 |
| AX-158180555 | 16 | 61.715 | KV452969.1 | 12717350 | 9-scf00340 | 9 |
| AX-158180560 | 16 | 61.715 | KV452969.1 | 12725345 | 9-scf00340 | 9 |
| AX-158180563 | 16 | 61.715 | KV452969.1 | 12731276 | 9-scf00340 | 9 |
| AX-158393545 | 16 | 61.715 | KV452969.1 | 12739592 | 9-scf00340 | 9 |
| AX-158180576 | 16 | 61.715 | KV452969.1 | 12749677 | 9-scf00340 | 9 |
| AX-157720478 | 16 | 61.715 | KV452969.1 | 12761201 | 9-scf00340 | 9 |
| AX-158180585 | 16 | 61.715 | KV452969.1 | 12764155 | 9-scf00340 | 9 |
| AX-157713234 | 16 | 61.715 | KV452969.1 | 12765148 | 9-scf00340 | 9 |
| AX-158180619 | 16 | 61.715 | KV452969.1 | 12808290 | 9-scf00340 | 9 |
| AX-157835621 | 16 | 61.715 | KV452969.1 | 12819525 | 9-scf00340 | 9 |
| AX-157835622 | 16 | 61.715 | KV452969.1 | 12825636 | 9-scf00340 | 9 |
| AX-158180676 | 16 | 61.715 | KV452969.1 | 12859038 | 9-scf00340 | 9 |
| AX-158180677 | 16 | 61.715 | KV452969.1 | 12859917 | 9-scf00340 | 9 |
| AX-158180678 | 16 | 61.715 | KV452969.1 | 12860440 | 9-scf00340 | 9 |

|              |    |        |            |          |            |   |
|--------------|----|--------|------------|----------|------------|---|
| AX-158180681 | 16 | 61.715 | KV452969.1 | 12861940 | 9-scf00340 | 9 |
| AX-158180695 | 16 | 61.715 | KV452969.1 | 12881281 | 9-scf00340 | 9 |
| AX-158413594 | 16 | 61.715 | KV452969.1 | 12890307 | 9-scf00340 | 9 |
| AX-158180720 | 16 | 61.715 | KV452969.1 | 12904984 | 9-scf00340 | 9 |
| AX-158180721 | 16 | 61.715 | KV452969.1 | 12907007 | 9-scf00340 | 9 |
| AX-158180725 | 16 | 61.715 | KV452969.1 | 12913101 | 9-scf00340 | 9 |
| AX-158180727 | 16 | 61.715 | KV452969.1 | 12914773 | 9-scf00340 | 9 |
| AX-157772229 | 16 | 61.715 | KV452969.1 | 12917017 | 9-scf00340 | 9 |
| AX-158180731 | 16 | 61.715 | KV452969.1 | 12921551 | 9-scf00340 | 9 |
| AX-158180732 | 16 | 61.715 | KV452969.1 | 12922201 | 9-scf00340 | 9 |
| AX-158180742 | 16 | 61.715 | KV452969.1 | 12941598 | 9-scf00340 | 9 |
| AX-158180743 | 16 | 61.715 | KV452969.1 | 12943594 | 9-scf00340 | 9 |
| AX-158180746 | 16 | 61.715 | KV452969.1 | 12945807 | 9-scf00340 | 9 |
| AX-158180747 | 16 | 61.715 | KV452969.1 | 12946267 | 9-scf00340 | 9 |
| AX-158180748 | 16 | 61.715 | KV452969.1 | 12947836 | 9-scf00340 | 9 |
| AX-158180749 | 16 | 61.715 | KV452969.1 | 12950589 | 9-scf00340 | 9 |
| AX-158180750 | 16 | 61.715 | KV452969.1 | 12950846 | 9-scf00340 | 9 |
| AX-158180751 | 16 | 61.715 | KV452969.1 | 12951754 | 9-scf00340 | 9 |
| AX-158180752 | 16 | 61.715 | KV452969.1 | 12952574 | 9-scf00340 | 9 |
| AX-158180756 | 16 | 61.715 | KV452969.1 | 12956534 | 9-scf00340 | 9 |
| AX-158180758 | 16 | 61.715 | KV452969.1 | 12960447 | 9-scf00340 | 9 |
| AX-158180761 | 16 | 61.715 | KV452969.1 | 12962383 | 9-scf00340 | 9 |
| AX-158180762 | 16 | 61.715 | KV452969.1 | 12963239 | 9-scf00340 | 9 |
| AX-158180765 | 16 | 61.715 | KV452969.1 | 12966964 | 9-scf00340 | 9 |
| AX-157835629 | 16 | 61.715 | KV452969.1 | 12976685 | 9-scf00340 | 9 |
| AX-158180767 | 16 | 61.715 | KV452969.1 | 12978586 | 9-scf00340 | 9 |
| AX-158180775 | 16 | 61.715 | KV452969.1 | 12985832 | 9-scf00340 | 9 |
| AX-158180776 | 16 | 61.715 | KV452969.1 | 12986985 | 9-scf00340 | 9 |
| AX-157835630 | 16 | 61.715 | KV452969.1 | 12987899 | 9-scf00340 | 9 |
| AX-158180777 | 16 | 61.715 | KV452969.1 | 12988269 | 9-scf00340 | 9 |
| AX-158180780 | 16 | 61.715 | KV452969.1 | 12992813 | 9-scf00340 | 9 |
| AX-158180781 | 16 | 61.715 | KV452969.1 | 12993396 | 9-scf00340 | 9 |
| AX-158180782 | 16 | 61.715 | KV452969.1 | 12993864 | 9-scf00340 | 9 |
| AX-158180786 | 16 | 61.715 | KV452969.1 | 12997652 | 9-scf00340 | 9 |
| AX-158180787 | 16 | 61.715 | KV452969.1 | 12998152 | 9-scf00340 | 9 |
| AX-158180793 | 16 | 61.715 | KV452969.1 | 13001415 | 9-scf00340 | 9 |
| AX-158180796 | 16 | 61.715 | KV452969.1 | 13006062 | 9-scf00340 | 9 |
| AX-158180797 | 16 | 61.715 | KV452969.1 | 13006873 | 9-scf00340 | 9 |
| AX-158180799 | 16 | 61.715 | KV452969.1 | 13009186 | 9-scf00340 | 9 |
| AX-158180804 | 16 | 61.715 | KV452969.1 | 13015935 | 9-scf00340 | 9 |
| AX-157835634 | 16 | 61.715 | KV452969.1 | 13024446 | 9-scf00340 | 9 |
| AX-158180813 | 16 | 61.715 | KV452969.1 | 13028217 | 9-scf00340 | 9 |
| AX-157835636 | 16 | 61.715 | KV452969.1 | 13030322 | 9-scf00340 | 9 |
| AX-158180831 | 16 | 61.715 | KV452969.1 | 13050678 | 9-scf00340 | 9 |
| AX-158180832 | 16 | 61.715 | KV452969.1 | 13051438 | 9-scf00340 | 9 |
| AX-158180836 | 16 | 61.715 | KV452969.1 | 13054392 | 9-scf00340 | 9 |
| AX-158180884 | 16 | 61.715 | KV452969.1 | 13115738 | 9-scf00340 | 9 |
| AX-158180899 | 16 | 61.715 | KV452969.1 | 13136672 | 9-scf00340 | 9 |
| AX-158180938 | 16 | 61.715 | KV452969.1 | 13187492 | 9-scf00340 | 9 |
| AX-158180977 | 16 | 61.715 | KV452969.1 | 13221028 | 9-scf00340 | 9 |
| AX-157835674 | 16 | 61.715 | KV452969.1 | 13305620 | 9-scf00340 | 9 |



|              |    |        |            |          |            |   |
|--------------|----|--------|------------|----------|------------|---|
| AX-158181066 | 16 | 61.715 | KV452969.1 | 13353159 | 9-scf00340 | 9 |
| AX-158181609 | 16 | 61.715 | KV452969.1 | 14311264 | 9-scf00340 | 9 |
| AX-158182122 | 16 | 61.715 | KV452969.1 | 14930498 | 9-scf00340 | 9 |
| AX-158182582 | 16 | 61.715 | KV452969.1 | 15578164 | 9-scf00340 | 9 |
| AX-158180745 | 16 | 61.75  | KV452969.1 | 12944661 | 9-scf00340 | 9 |
| AX-158180759 | 16 | 61.79  | KV452969.1 | 12961016 | 9-scf00340 | 9 |
| AX-158177697 | 16 | 61.824 | KV452969.1 | 9110310  | 9-scf00340 | 9 |
| AX-158177845 | 16 | 61.824 | KV452969.1 | 9298898  | 9-scf00340 | 9 |
| AX-158177847 | 16 | 61.824 | KV452969.1 | 9300092  | 9-scf00340 | 9 |
| AX-158177880 | 16 | 61.824 | KV452969.1 | 9343563  | 9-scf00340 | 9 |
| AX-157835378 | 16 | 61.824 | KV452969.1 | 9432981  | 9-scf00340 | 9 |
| AX-157775246 | 16 | 61.824 | KV452969.1 | 9433457  | 9-scf00340 | 9 |
| AX-158178389 | 16 | 61.824 | KV452969.1 | 9936753  | 9-scf00340 | 9 |
| AX-157758418 | 16 | 61.824 | KV452969.1 | 10450352 | 9-scf00340 | 9 |
| AX-158179447 | 16 | 61.824 | KV452969.1 | 11356557 | 9-scf00340 | 9 |
| AX-158179521 | 16 | 61.824 | KV452969.1 | 11441435 | 9-scf00340 | 9 |
| AX-158179544 | 16 | 61.824 | KV452969.1 | 11474401 | 9-scf00340 | 9 |
| AX-158179658 | 16 | 61.824 | KV452969.1 | 11619986 | 9-scf00340 | 9 |
| AX-158179982 | 16 | 61.824 | KV452969.1 | 12104647 | 9-scf00340 | 9 |
| AX-158179995 | 16 | 61.824 | KV452969.1 | 12129542 | 9-scf00340 | 9 |
| AX-158180012 | 16 | 61.824 | KV452969.1 | 12163824 | 9-scf00340 | 9 |
| AX-158180045 | 16 | 61.824 | KV452969.1 | 12204909 | 9-scf00340 | 9 |
| AX-158180076 | 16 | 61.824 | KV452969.1 | 12235890 | 9-scf00340 | 9 |
| AX-158413580 | 16 | 61.824 | KV452969.1 | 12328456 | 9-scf00340 | 9 |
| AX-157746926 | 16 | 61.824 | KV452969.1 | 12776748 | 9-scf00340 | 9 |
| AX-157713300 | 16 | 61.824 | KV452969.1 | 12820340 | 9-scf00340 | 9 |
| AX-158180728 | 16 | 61.824 | KV452969.1 | 12918753 | 9-scf00340 | 9 |
| AX-158180729 | 16 | 61.824 | KV452969.1 | 12920527 | 9-scf00340 | 9 |
| AX-158180738 | 16 | 61.824 | KV452969.1 | 12937313 | 9-scf00340 | 9 |
| AX-158180739 | 16 | 61.824 | KV452969.1 | 12938831 | 9-scf00340 | 9 |
| AX-158180740 | 16 | 61.824 | KV452969.1 | 12939231 | 9-scf00340 | 9 |
| AX-158180754 | 16 | 61.824 | KV452969.1 | 12955741 | 9-scf00340 | 9 |
| AX-158180760 | 16 | 61.824 | KV452969.1 | 12961476 | 9-scf00340 | 9 |
| AX-158180763 | 16 | 61.824 | KV452969.1 | 12964294 | 9-scf00340 | 9 |
| AX-157748529 | 16 | 61.824 | KV452969.1 | 12965797 | 9-scf00340 | 9 |
| AX-157835628 | 16 | 61.824 | KV452969.1 | 12966382 | 9-scf00340 | 9 |
| AX-158180764 | 16 | 61.824 | KV452969.1 | 12966638 | 9-scf00340 | 9 |
| AX-158180769 | 16 | 61.824 | KV452969.1 | 12981146 | 9-scf00340 | 9 |
| AX-158180771 | 16 | 61.824 | KV452969.1 | 12983056 | 9-scf00340 | 9 |
| AX-158180772 | 16 | 61.824 | KV452969.1 | 12984017 | 9-scf00340 | 9 |
| AX-158180778 | 16 | 61.824 | KV452969.1 | 12991238 | 9-scf00340 | 9 |
| AX-158180779 | 16 | 61.824 | KV452969.1 | 12992332 | 9-scf00340 | 9 |
| AX-158180783 | 16 | 61.824 | KV452969.1 | 12995113 | 9-scf00340 | 9 |
| AX-158180784 | 16 | 61.824 | KV452969.1 | 12996334 | 9-scf00340 | 9 |
| AX-157835632 | 16 | 61.824 | KV452969.1 | 12996850 | 9-scf00340 | 9 |
| AX-157835633 | 16 | 61.824 | KV452969.1 | 12997767 | 9-scf00340 | 9 |
| AX-158180788 | 16 | 61.824 | KV452969.1 | 12998465 | 9-scf00340 | 9 |
| AX-158180790 | 16 | 61.824 | KV452969.1 | 12999650 | 9-scf00340 | 9 |
| AX-157757239 | 16 | 61.824 | KV452969.1 | 13001012 | 9-scf00340 | 9 |
| AX-157872064 | 16 | 61.824 | KV452969.1 | 13002071 | 9-scf00340 | 9 |
| AX-157700785 | 16 | 61.824 | KV452969.1 | 13005725 | 9-scf00340 | 9 |

|              |    |        |            |          |            |   |
|--------------|----|--------|------------|----------|------------|---|
| AX-158180798 | 16 | 61.824 | KV452969.1 | 13008155 | 9-scf00340 | 9 |
| AX-158180800 | 16 | 61.824 | KV452969.1 | 13010253 | 9-scf00340 | 9 |
| AX-158180801 | 16 | 61.824 | KV452969.1 | 13011252 | 9-scf00340 | 9 |
| AX-158180802 | 16 | 61.824 | KV452969.1 | 13013074 | 9-scf00340 | 9 |
| AX-158180803 | 16 | 61.824 | KV452969.1 | 13014580 | 9-scf00340 | 9 |
| AX-158180807 | 16 | 61.824 | KV452969.1 | 13019761 | 9-scf00340 | 9 |
| AX-158180809 | 16 | 61.824 | KV452969.1 | 13020480 | 9-scf00340 | 9 |
| AX-157872065 | 16 | 61.824 | KV452969.1 | 13022282 | 9-scf00340 | 9 |
| AX-157866705 | 16 | 61.824 | KV452969.1 | 13026474 | 9-scf00340 | 9 |
| AX-158180815 | 16 | 61.824 | KV452969.1 | 13030831 | 9-scf00340 | 9 |
| AX-158180816 | 16 | 61.824 | KV452969.1 | 13032435 | 9-scf00340 | 9 |
| AX-158180817 | 16 | 61.824 | KV452969.1 | 13035384 | 9-scf00340 | 9 |
| AX-158180818 | 16 | 61.824 | KV452969.1 | 13036022 | 9-scf00340 | 9 |
| AX-157715559 | 16 | 61.824 | KV452969.1 | 13037482 | 9-scf00340 | 9 |
| AX-157835638 | 16 | 61.824 | KV452969.1 | 13037723 | 9-scf00340 | 9 |
| AX-158180819 | 16 | 61.824 | KV452969.1 | 13039935 | 9-scf00340 | 9 |
| AX-158180820 | 16 | 61.824 | KV452969.1 | 13040341 | 9-scf00340 | 9 |
| AX-158180823 | 16 | 61.824 | KV452969.1 | 13042571 | 9-scf00340 | 9 |
| AX-158180830 | 16 | 61.824 | KV452969.1 | 13049942 | 9-scf00340 | 9 |
| AX-158180833 | 16 | 61.824 | KV452969.1 | 13052125 | 9-scf00340 | 9 |
| AX-158180834 | 16 | 61.824 | KV452969.1 | 13052841 | 9-scf00340 | 9 |
| AX-157724960 | 16 | 61.824 | KV452969.1 | 13053691 | 9-scf00340 | 9 |
| AX-158180837 | 16 | 61.824 | KV452969.1 | 13055243 | 9-scf00340 | 9 |
| AX-157835642 | 16 | 61.824 | KV452969.1 | 13056116 | 9-scf00340 | 9 |
| AX-157835643 | 16 | 61.824 | KV452969.1 | 13057719 | 9-scf00340 | 9 |
| AX-157835644 | 16 | 61.824 | KV452969.1 | 13060072 | 9-scf00340 | 9 |
| AX-157835646 | 16 | 61.824 | KV452969.1 | 13069881 | 9-scf00340 | 9 |
| AX-157762222 | 16 | 61.824 | KV452969.1 | 13070682 | 9-scf00340 | 9 |
| AX-158180854 | 16 | 61.824 | KV452969.1 | 13079532 | 9-scf00340 | 9 |
| AX-158180855 | 16 | 61.824 | KV452969.1 | 13081732 | 9-scf00340 | 9 |
| AX-158180856 | 16 | 61.824 | KV452969.1 | 13082755 | 9-scf00340 | 9 |
| AX-158180857 | 16 | 61.824 | KV452969.1 | 13083345 | 9-scf00340 | 9 |
| AX-158180859 | 16 | 61.824 | KV452969.1 | 13085720 | 9-scf00340 | 9 |
| AX-158393547 | 16 | 61.824 | KV452969.1 | 13088093 | 9-scf00340 | 9 |
| AX-157835648 | 16 | 61.824 | KV452969.1 | 13091558 | 9-scf00340 | 9 |
| AX-158180865 | 16 | 61.824 | KV452969.1 | 13091682 | 9-scf00340 | 9 |
| AX-158180867 | 16 | 61.824 | KV452969.1 | 13093010 | 9-scf00340 | 9 |
| AX-158180873 | 16 | 61.824 | KV452969.1 | 13098719 | 9-scf00340 | 9 |
| AX-157878851 | 16 | 61.824 | KV452969.1 | 13100055 | 9-scf00340 | 9 |
| AX-157835650 | 16 | 61.824 | KV452969.1 | 13103439 | 9-scf00340 | 9 |
| AX-157835651 | 16 | 61.824 | KV452969.1 | 13105290 | 9-scf00340 | 9 |
| AX-157835652 | 16 | 61.824 | KV452969.1 | 13106747 | 9-scf00340 | 9 |
| AX-157760132 | 16 | 61.824 | KV452969.1 | 13107241 | 9-scf00340 | 9 |
| AX-157835653 | 16 | 61.824 | KV452969.1 | 13107456 | 9-scf00340 | 9 |
| AX-158180877 | 16 | 61.824 | KV452969.1 | 13110461 | 9-scf00340 | 9 |
| AX-157738530 | 16 | 61.824 | KV452969.1 | 13119776 | 9-scf00340 | 9 |
| AX-158180894 | 16 | 61.824 | KV452969.1 | 13128604 | 9-scf00340 | 9 |
| AX-158180895 | 16 | 61.824 | KV452969.1 | 13129056 | 9-scf00340 | 9 |
| AX-158180897 | 16 | 61.824 | KV452969.1 | 13133951 | 9-scf00340 | 9 |
| AX-158413599 | 16 | 61.824 | KV452969.1 | 13134074 | 9-scf00340 | 9 |
| AX-158180898 | 16 | 61.824 | KV452969.1 | 13135365 | 9-scf00340 | 9 |

|              |    |        |            |          |            |   |
|--------------|----|--------|------------|----------|------------|---|
| AX-157697763 | 16 | 61.824 | KV452969.1 | 13138987 | 9-scf00340 | 9 |
| AX-158180901 | 16 | 61.824 | KV452969.1 | 13139504 | 9-scf00340 | 9 |
| AX-158413600 | 16 | 61.824 | KV452969.1 | 13139726 | 9-scf00340 | 9 |
| AX-157695234 | 16 | 61.824 | KV452969.1 | 13142505 | 9-scf00340 | 9 |
| AX-158180903 | 16 | 61.824 | KV452969.1 | 13142973 | 9-scf00340 | 9 |
| AX-157886807 | 16 | 61.824 | KV452969.1 | 13146457 | 9-scf00340 | 9 |
| AX-158180907 | 16 | 61.824 | KV452969.1 | 13146698 | 9-scf00340 | 9 |
| AX-158380602 | 16 | 61.824 | KV452969.1 | 13154083 | 9-scf00340 | 9 |
| AX-158180915 | 16 | 61.824 | KV452969.1 | 13157119 | 9-scf00340 | 9 |
| AX-158180918 | 16 | 61.824 | KV452969.1 | 13162089 | 9-scf00340 | 9 |
| AX-158180923 | 16 | 61.824 | KV452969.1 | 13173327 | 9-scf00340 | 9 |
| AX-158180928 | 16 | 61.824 | KV452969.1 | 13178930 | 9-scf00340 | 9 |
| AX-158180930 | 16 | 61.824 | KV452969.1 | 13179491 | 9-scf00340 | 9 |
| AX-157835657 | 16 | 61.824 | KV452969.1 | 13180632 | 9-scf00340 | 9 |
| AX-158180931 | 16 | 61.824 | KV452969.1 | 13181231 | 9-scf00340 | 9 |
| AX-158180932 | 16 | 61.824 | KV452969.1 | 13182126 | 9-scf00340 | 9 |
| AX-158180933 | 16 | 61.824 | KV452969.1 | 13182520 | 9-scf00340 | 9 |
| AX-158180934 | 16 | 61.824 | KV452969.1 | 13183688 | 9-scf00340 | 9 |
| AX-158180935 | 16 | 61.824 | KV452969.1 | 13184843 | 9-scf00340 | 9 |
| AX-157740367 | 16 | 61.824 | KV452969.1 | 13184958 | 9-scf00340 | 9 |
| AX-158180937 | 16 | 61.824 | KV452969.1 | 13186328 | 9-scf00340 | 9 |
| AX-158180939 | 16 | 61.824 | KV452969.1 | 13189019 | 9-scf00340 | 9 |
| AX-158180941 | 16 | 61.824 | KV452969.1 | 13192824 | 9-scf00340 | 9 |
| AX-158180944 | 16 | 61.824 | KV452969.1 | 13194443 | 9-scf00340 | 9 |
| AX-158180947 | 16 | 61.824 | KV452969.1 | 13196108 | 9-scf00340 | 9 |
| AX-158180949 | 16 | 61.824 | KV452969.1 | 13198049 | 9-scf00340 | 9 |
| AX-158180961 | 16 | 61.824 | KV452969.1 | 13208163 | 9-scf00340 | 9 |
| AX-158180964 | 16 | 61.824 | KV452969.1 | 13209938 | 9-scf00340 | 9 |
| AX-158180965 | 16 | 61.824 | KV452969.1 | 13210433 | 9-scf00340 | 9 |
| AX-158180969 | 16 | 61.824 | KV452969.1 | 13212389 | 9-scf00340 | 9 |
| AX-158180970 | 16 | 61.824 | KV452969.1 | 13214010 | 9-scf00340 | 9 |
| AX-158180973 | 16 | 61.824 | KV452969.1 | 13215904 | 9-scf00340 | 9 |
| AX-158180986 | 16 | 61.824 | KV452969.1 | 13230581 | 9-scf00340 | 9 |
| AX-158180995 | 16 | 61.824 | KV452969.1 | 13243020 | 9-scf00340 | 9 |
| AX-158181000 | 16 | 61.824 | KV452969.1 | 13249574 | 9-scf00340 | 9 |
| AX-157835665 | 16 | 61.824 | KV452969.1 | 13252691 | 9-scf00340 | 9 |
| AX-158181015 | 16 | 61.824 | KV452969.1 | 13279910 | 9-scf00340 | 9 |
| AX-158181362 | 16 | 61.824 | KV452969.1 | 13955036 | 9-scf00340 | 9 |
| AX-158182546 | 16 | 61.824 | KV452969.1 | 15528359 | 9-scf00340 | 9 |
| AX-157745207 | 16 | 61.826 | KV452969.1 | 13217322 | 9-scf00340 | 9 |
| AX-158180974 | 16 | 61.828 | KV452969.1 | 13219751 | 9-scf00340 | 9 |
| AX-158180976 | 16 | 61.831 | KV452969.1 | 13220381 | 9-scf00340 | 9 |
| AX-158180989 | 16 | 61.834 | KV452969.1 | 13235697 | 9-scf00340 | 9 |
| AX-158178847 | 16 | 61.838 | KV452969.1 | 10581254 | 9-scf00340 | 9 |
| AX-157835660 | 16 | 61.838 | KV452969.1 | 13235942 | 9-scf00340 | 9 |
| AX-158180994 | 16 | 61.843 | KV452969.1 | 13242579 | 9-scf00340 | 9 |
| AX-158180924 | 16 | 61.953 | KV452969.1 | 13173903 | 9-scf00340 | 9 |
| AX-158181001 | 16 | 61.953 | KV452969.1 | 13252606 | 9-scf00340 | 9 |
| AX-158181012 | 16 | 61.953 | KV452969.1 | 13276214 | 9-scf00340 | 9 |
| AX-158181013 | 16 | 61.953 | KV452969.1 | 13276406 | 9-scf00340 | 9 |
| AX-158181014 | 16 | 61.953 | KV452969.1 | 13277858 | 9-scf00340 | 9 |

|              |    |        |            |          |                |    |
|--------------|----|--------|------------|----------|----------------|----|
| AX-158181399 | 16 | 61.953 | KV452969.1 | 14017822 | 9-scf00340     | 9  |
| AX-158181016 | 16 | 62.087 | KV452969.1 | 13288837 | 9-scf00340     | 9  |
| AX-158181021 | 16 | 62.222 | KV452969.1 | 13293225 | 9-scf00340     | 9  |
| AX-158181024 | 16 | 62.444 | KV452969.1 | 13295739 | 9-scf00340     | 9  |
| AX-157771909 | 16 | 62.45  | KV452969.1 | 8174910  | 9-scf00340     | 9  |
| AX-158177587 | 16 | 62.45  | KV452969.1 | 8875502  | 9-scf00340     | 9  |
| AX-157715804 | 16 | 62.45  | KV452969.1 | 9171255  | 9-scf00340     | 9  |
| AX-158178030 | 16 | 62.45  | KV452969.1 | 9506666  | 9-scf00340     | 9  |
| AX-158178058 | 16 | 62.45  | KV452969.1 | 9527649  | 9-scf00340     | 9  |
| AX-158380592 | 16 | 62.45  | KV452969.1 | 10380893 | 9-scf00340     | 9  |
| AX-158179018 | 16 | 62.45  | KV452969.1 | 10791113 | 9-scf00340     | 9  |
| AX-157835671 | 16 | 62.45  | KV452969.1 | 13295955 | 9-scf00340     | 9  |
| AX-158181090 | 16 | 62.45  | KV452969.1 | 13386530 | 9-scf00340     | 9  |
| AX-157711087 | 16 | 62.45  | FI858434.1 | 83       | IORI212 lctalu | UN |
| AX-157835675 | 16 | 62.456 | KV452969.1 | 13308222 | 9-scf00340     | 9  |
| AX-158181029 | 16 | 62.46  | KV452969.1 | 13308327 | 9-scf00340     | 9  |
| AX-157752553 | 16 | 62.46  | KV452969.1 | 13368325 | 9-scf00340     | 9  |
| AX-158181030 | 16 | 62.468 | KV452969.1 | 13310101 | 9-scf00340     | 9  |
| AX-158178276 | 16 | 62.48  | KV452969.1 | 9778457  | 9-scf00340     | 9  |
| AX-158180997 | 16 | 62.48  | KV452969.1 | 13243436 | 9-scf00340     | 9  |
| AX-158181044 | 16 | 62.48  | KV452969.1 | 13327519 | 9-scf00340     | 9  |
| AX-158181047 | 16 | 62.48  | KV452969.1 | 13331424 | 9-scf00340     | 9  |
| AX-158181055 | 16 | 62.48  | KV452969.1 | 13339234 | 9-scf00340     | 9  |
| AX-158181059 | 16 | 62.48  | KV452969.1 | 13344341 | 9-scf00340     | 9  |
| AX-158181060 | 16 | 62.48  | KV452969.1 | 13346246 | 9-scf00340     | 9  |
| AX-158181065 | 16 | 62.48  | KV452969.1 | 13351928 | 9-scf00340     | 9  |
| AX-158181074 | 16 | 62.48  | KV452969.1 | 13365712 | 9-scf00340     | 9  |
| AX-158181082 | 16 | 62.48  | KV452969.1 | 13378230 | 9-scf00340     | 9  |
| AX-158181089 | 16 | 62.48  | KV452969.1 | 13385807 | 9-scf00340     | 9  |
| AX-158181305 | 16 | 62.48  | KV452969.1 | 13854607 | 9-scf00340     | 9  |
| AX-158178788 | 16 | 62.589 | KV452969.1 | 10472500 | 9-scf00340     | 9  |
| AX-158178795 | 16 | 62.589 | KV452969.1 | 10496108 | 9-scf00340     | 9  |
| AX-158179221 | 16 | 62.589 | KV452969.1 | 11073369 | 9-scf00340     | 9  |
| AX-158179321 | 16 | 62.589 | KV452969.1 | 11185978 | 9-scf00340     | 9  |
| AX-158179322 | 16 | 62.589 | KV452969.1 | 11188093 | 9-scf00340     | 9  |
| AX-157835570 | 16 | 62.589 | KV452969.1 | 11887185 | 9-scf00340     | 9  |
| AX-158179944 | 16 | 62.589 | KV452969.1 | 12024011 | 9-scf00340     | 9  |
| AX-158180638 | 16 | 62.589 | KV452969.1 | 12835243 | 9-scf00340     | 9  |
| AX-158181009 | 16 | 62.589 | KV452969.1 | 13266974 | 9-scf00340     | 9  |
| AX-158181018 | 16 | 62.589 | KV452969.1 | 13291483 | 9-scf00340     | 9  |
| AX-158181041 | 16 | 62.589 | KV452969.1 | 13325199 | 9-scf00340     | 9  |
| AX-158181097 | 16 | 62.589 | KV452969.1 | 13403150 | 9-scf00340     | 9  |
| AX-158181101 | 16 | 62.589 | KV452969.1 | 13406973 | 9-scf00340     | 9  |
| AX-158181102 | 16 | 62.589 | KV452969.1 | 13407920 | 9-scf00340     | 9  |
| AX-158181105 | 16 | 62.589 | KV452969.1 | 13413068 | 9-scf00340     | 9  |
| AX-158181109 | 16 | 62.589 | KV452969.1 | 13420347 | 9-scf00340     | 9  |
| AX-158181112 | 16 | 62.589 | KV452969.1 | 13427361 | 9-scf00340     | 9  |
| AX-157835678 | 16 | 62.589 | KV452969.1 | 13433095 | 9-scf00340     | 9  |
| AX-157866706 | 16 | 62.589 | KV452969.1 | 13439372 | 9-scf00340     | 9  |
| AX-158181115 | 16 | 62.589 | KV452969.1 | 13440203 | 9-scf00340     | 9  |
| AX-158181116 | 16 | 62.589 | KV452969.1 | 13442551 | 9-scf00340     | 9  |

|              |    |        |            |          |            |    |
|--------------|----|--------|------------|----------|------------|----|
| AX-158181117 | 16 | 62.589 | KV452969.1 | 13447673 | 9-scf00340 | 9  |
| AX-157835680 | 16 | 62.589 | KV452969.1 | 13455148 | 9-scf00340 | 9  |
| AX-158181120 | 16 | 62.589 | KV452969.1 | 13458039 | 9-scf00340 | 9  |
| AX-158181121 | 16 | 62.589 | KV452969.1 | 13458646 | 9-scf00340 | 9  |
| AX-158181122 | 16 | 62.589 | KV452969.1 | 13460985 | 9-scf00340 | 9  |
| AX-158181124 | 16 | 62.589 | KV452969.1 | 13462802 | 9-scf00340 | 9  |
| AX-158181125 | 16 | 62.589 | KV452969.1 | 13463804 | 9-scf00340 | 9  |
| AX-158181128 | 16 | 62.589 | KV452969.1 | 13466510 | 9-scf00340 | 9  |
| AX-158181131 | 16 | 62.589 | KV452969.1 | 13477054 | 9-scf00340 | 9  |
| AX-158181163 | 16 | 62.589 | KV452969.1 | 13566873 | 9-scf00340 | 9  |
| AX-158181231 | 16 | 62.589 | KV452969.1 | 13744847 | 9-scf00340 | 9  |
| AX-158181232 | 16 | 62.589 | KV452969.1 | 13745102 | 9-scf00340 | 9  |
| AX-157738502 | 16 | 62.589 | KV452969.1 | 13746949 | 9-scf00340 | 9  |
| AX-158181251 | 16 | 62.589 | KV452969.1 | 13788902 | 9-scf00340 | 9  |
| AX-158181252 | 16 | 62.589 | KV452969.1 | 13789123 | 9-scf00340 | 9  |
| AX-158181254 | 16 | 62.589 | KV452969.1 | 13789694 | 9-scf00340 | 9  |
| AX-158181277 | 16 | 62.589 | KV452969.1 | 13816915 | 9-scf00340 | 9  |
| AX-158181278 | 16 | 62.589 | KV452969.1 | 13817148 | 9-scf00340 | 9  |
| AX-158181320 | 16 | 62.589 | KV452969.1 | 13869617 | 9-scf00340 | 9  |
| AX-158181381 | 16 | 62.589 | KV452969.1 | 13985805 | 9-scf00340 | 9  |
| AX-158181514 | 16 | 62.589 | KV452969.1 | 14165384 | 9-scf00340 | 9  |
| AX-157704635 | 16 | 62.589 | KV453818.1 | 134      | scf02444   | UN |
| AX-157704636 | 16 | 62.589 | KV453818.1 | 1443     | scf02444   | UN |
| AX-158178751 | 16 | 62.698 | KV452969.1 | 10424221 | 9-scf00340 | 9  |
| AX-157835430 | 16 | 62.698 | KV452969.1 | 10568248 | 9-scf00340 | 9  |
| AX-157835441 | 16 | 62.698 | KV452969.1 | 10621024 | 9-scf00340 | 9  |
| AX-158178893 | 16 | 62.698 | KV452969.1 | 10648761 | 9-scf00340 | 9  |
| AX-158179431 | 16 | 62.698 | KV452969.1 | 11315472 | 9-scf00340 | 9  |
| AX-157739186 | 16 | 62.698 | KV452969.1 | 12923794 | 9-scf00340 | 9  |
| AX-158180886 | 16 | 62.698 | KV452969.1 | 13118550 | 9-scf00340 | 9  |
| AX-157863605 | 16 | 62.698 | KV452969.1 | 13471210 | 9-scf00340 | 9  |
| AX-158181146 | 16 | 62.698 | KV452969.1 | 13524061 | 9-scf00340 | 9  |
| AX-158181158 | 16 | 62.698 | KV452969.1 | 13558798 | 9-scf00340 | 9  |
| AX-158181167 | 16 | 62.698 | KV452969.1 | 13582787 | 9-scf00340 | 9  |
| AX-158181173 | 16 | 62.698 | KV452969.1 | 13601740 | 9-scf00340 | 9  |
| AX-158181177 | 16 | 62.698 | KV452969.1 | 13607413 | 9-scf00340 | 9  |
| AX-158181178 | 16 | 62.698 | KV452969.1 | 13607944 | 9-scf00340 | 9  |
| AX-158181179 | 16 | 62.698 | KV452969.1 | 13609317 | 9-scf00340 | 9  |
| AX-158181207 | 16 | 62.698 | KV452969.1 | 13695324 | 9-scf00340 | 9  |
| AX-157704825 | 16 | 62.698 | KV452969.1 | 13748417 | 9-scf00340 | 9  |
| AX-158421102 | 16 | 62.698 | KV452969.1 | 13748531 | 9-scf00340 | 9  |
| AX-158181268 | 16 | 62.698 | KV452969.1 | 13808643 | 9-scf00340 | 9  |
| AX-158181273 | 16 | 62.698 | KV452969.1 | 13814566 | 9-scf00340 | 9  |
| AX-157754060 | 16 | 62.698 | KV452969.1 | 13814633 | 9-scf00340 | 9  |
| AX-158181365 | 16 | 62.698 | KV452969.1 | 13961934 | 9-scf00340 | 9  |
| AX-158393550 | 16 | 62.708 | KV452969.1 | 13642518 | 9-scf00340 | 9  |
| AX-158181407 | 16 | 62.708 | KV452969.1 | 14027848 | 9-scf00340 | 9  |
| AX-157878863 | 16 | 62.759 | KV452969.1 | 13694830 | 9-scf00340 | 9  |
| AX-157747163 | 16 | 62.759 | KV452969.1 | 13758110 | 9-scf00340 | 9  |
| AX-158177768 | 16 | 62.808 | KV452969.1 | 9207198  | 9-scf00340 | 9  |
| AX-158179375 | 16 | 62.808 | KV452969.1 | 11236290 | 9-scf00340 | 9  |

|              |    |        |            |          |            |   |
|--------------|----|--------|------------|----------|------------|---|
| AX-158179439 | 16 | 62.808 | KV452969.1 | 11342343 | 9-scf00340 | 9 |
| AX-158179444 | 16 | 62.808 | KV452969.1 | 11350557 | 9-scf00340 | 9 |
| AX-158179480 | 16 | 62.808 | KV452969.1 | 11396215 | 9-scf00340 | 9 |
| AX-157835512 | 16 | 62.808 | KV452969.1 | 11396480 | 9-scf00340 | 9 |
| AX-158179482 | 16 | 62.808 | KV452969.1 | 11398493 | 9-scf00340 | 9 |
| AX-158179526 | 16 | 62.808 | KV452969.1 | 11444841 | 9-scf00340 | 9 |
| AX-158179527 | 16 | 62.808 | KV452969.1 | 11445924 | 9-scf00340 | 9 |
| AX-158179561 | 16 | 62.808 | KV452969.1 | 11503143 | 9-scf00340 | 9 |
| AX-158181170 | 16 | 62.808 | KV452969.1 | 13593274 | 9-scf00340 | 9 |
| AX-158181205 | 16 | 62.808 | KV452969.1 | 13691738 | 9-scf00340 | 9 |
| AX-158181208 | 16 | 62.808 | KV452969.1 | 13702620 | 9-scf00340 | 9 |
| AX-158181209 | 16 | 62.808 | KV452969.1 | 13712754 | 9-scf00340 | 9 |
| AX-158181210 | 16 | 62.808 | KV452969.1 | 13713716 | 9-scf00340 | 9 |
| AX-157714133 | 16 | 62.808 | KV452969.1 | 13741618 | 9-scf00340 | 9 |
| AX-158181228 | 16 | 62.808 | KV452969.1 | 13742199 | 9-scf00340 | 9 |
| AX-158181229 | 16 | 62.808 | KV452969.1 | 13742770 | 9-scf00340 | 9 |
| AX-158413605 | 16 | 62.808 | KV452969.1 | 13743176 | 9-scf00340 | 9 |
| AX-158181230 | 16 | 62.808 | KV452969.1 | 13744640 | 9-scf00340 | 9 |
| AX-158181234 | 16 | 62.808 | KV452969.1 | 13749679 | 9-scf00340 | 9 |
| AX-158181235 | 16 | 62.808 | KV452969.1 | 13750421 | 9-scf00340 | 9 |
| AX-158181238 | 16 | 62.808 | KV452969.1 | 13754163 | 9-scf00340 | 9 |
| AX-157835689 | 16 | 62.808 | KV452969.1 | 13754273 | 9-scf00340 | 9 |
| AX-158181240 | 16 | 62.808 | KV452969.1 | 13759439 | 9-scf00340 | 9 |
| AX-158181243 | 16 | 62.808 | KV452969.1 | 13767922 | 9-scf00340 | 9 |
| AX-158413606 | 16 | 62.808 | KV452969.1 | 13770692 | 9-scf00340 | 9 |
| AX-158181245 | 16 | 62.808 | KV452969.1 | 13770965 | 9-scf00340 | 9 |
| AX-158181255 | 16 | 62.808 | KV452969.1 | 13790770 | 9-scf00340 | 9 |
| AX-158181256 | 16 | 62.808 | KV452969.1 | 13791763 | 9-scf00340 | 9 |
| AX-158181259 | 16 | 62.808 | KV452969.1 | 13794144 | 9-scf00340 | 9 |
| AX-157740256 | 16 | 62.808 | KV452969.1 | 13794534 | 9-scf00340 | 9 |
| AX-158181261 | 16 | 62.808 | KV452969.1 | 13801490 | 9-scf00340 | 9 |
| AX-158181262 | 16 | 62.808 | KV452969.1 | 13801801 | 9-scf00340 | 9 |
| AX-158181263 | 16 | 62.808 | KV452969.1 | 13802527 | 9-scf00340 | 9 |
| AX-157723535 | 16 | 62.808 | KV452969.1 | 13803573 | 9-scf00340 | 9 |
| AX-158181264 | 16 | 62.808 | KV452969.1 | 13803877 | 9-scf00340 | 9 |
| AX-158181265 | 16 | 62.808 | KV452969.1 | 13805318 | 9-scf00340 | 9 |
| AX-158181266 | 16 | 62.808 | KV452969.1 | 13807104 | 9-scf00340 | 9 |
| AX-158181270 | 16 | 62.808 | KV452969.1 | 13813040 | 9-scf00340 | 9 |
| AX-158181271 | 16 | 62.808 | KV452969.1 | 13813367 | 9-scf00340 | 9 |
| AX-158181275 | 16 | 62.83  | KV452969.1 | 13815158 | 9-scf00340 | 9 |
| AX-157872070 | 16 | 62.83  | KV452969.1 | 13997403 | 9-scf00340 | 9 |
| AX-158181250 | 16 | 62.853 | KV452969.1 | 13786912 | 9-scf00340 | 9 |
| AX-158181307 | 16 | 62.853 | KV452969.1 | 13856224 | 9-scf00340 | 9 |
| AX-158181308 | 16 | 62.872 | KV452969.1 | 13857378 | 9-scf00340 | 9 |
| AX-158181309 | 16 | 62.891 | KV452969.1 | 13859159 | 9-scf00340 | 9 |
| AX-158181285 | 16 | 62.917 | KV452969.1 | 13823822 | 9-scf00340 | 9 |
| AX-158181317 | 16 | 62.917 | KV452969.1 | 13868002 | 9-scf00340 | 9 |
| AX-158181318 | 16 | 62.917 | KV452969.1 | 13868392 | 9-scf00340 | 9 |
| AX-158181321 | 16 | 62.917 | KV452969.1 | 13870291 | 9-scf00340 | 9 |
| AX-157743023 | 16 | 62.917 | KV452969.1 | 13874195 | 9-scf00340 | 9 |
| AX-158181330 | 16 | 62.917 | KV452969.1 | 13881071 | 9-scf00340 | 9 |

|              |    |        |            |          |            |   |
|--------------|----|--------|------------|----------|------------|---|
| AX-157872069 | 16 | 62.917 | KV452969.1 | 13890969 | 9-scf00340 | 9 |
| AX-158181354 | 16 | 62.917 | KV452969.1 | 13928122 | 9-scf00340 | 9 |
| AX-158181356 | 16 | 62.917 | KV452969.1 | 13933757 | 9-scf00340 | 9 |
| AX-158181361 | 16 | 62.917 | KV452969.1 | 13941785 | 9-scf00340 | 9 |
| AX-158181372 | 16 | 62.917 | KV452969.1 | 13975644 | 9-scf00340 | 9 |
| AX-158181383 | 16 | 62.917 | KV452969.1 | 13990722 | 9-scf00340 | 9 |
| AX-158181386 | 16 | 62.917 | KV452969.1 | 13995197 | 9-scf00340 | 9 |
| AX-158181387 | 16 | 62.917 | KV452969.1 | 13995400 | 9-scf00340 | 9 |
| AX-157835713 | 16 | 62.917 | KV452969.1 | 14201777 | 9-scf00340 | 9 |
| AX-158178742 | 16 | 62.948 | KV452969.1 | 10413604 | 9-scf00340 | 9 |
| AX-157835482 | 16 | 62.948 | KV452969.1 | 11094857 | 9-scf00340 | 9 |
| AX-158179266 | 16 | 62.948 | KV452969.1 | 11117811 | 9-scf00340 | 9 |
| AX-157835485 | 16 | 62.948 | KV452969.1 | 11134439 | 9-scf00340 | 9 |
| AX-158179434 | 16 | 62.948 | KV452969.1 | 11322730 | 9-scf00340 | 9 |
| AX-158179515 | 16 | 62.948 | KV452969.1 | 11434912 | 9-scf00340 | 9 |
| AX-158180853 | 16 | 62.948 | KV452969.1 | 13077278 | 9-scf00340 | 9 |
| AX-158180880 | 16 | 62.948 | KV452969.1 | 13112700 | 9-scf00340 | 9 |
| AX-157835693 | 16 | 62.948 | KV452969.1 | 13954065 | 9-scf00340 | 9 |
| AX-158181367 | 16 | 62.976 | KV452969.1 | 13967122 | 9-scf00340 | 9 |
| AX-157835695 | 16 | 63.002 | KV452969.1 | 13976424 | 9-scf00340 | 9 |
| AX-158181398 | 16 | 63.002 | KV452969.1 | 14017064 | 9-scf00340 | 9 |
| AX-158172764 | 16 | 63.026 | KV452969.1 | 1891389  | 9-scf00340 | 9 |
| AX-157700905 | 16 | 63.026 | KV452969.1 | 9923929  | 9-scf00340 | 9 |
| AX-158181379 | 16 | 63.026 | KV452969.1 | 13984741 | 9-scf00340 | 9 |
| AX-158181384 | 16 | 63.026 | KV452969.1 | 13992370 | 9-scf00340 | 9 |
| AX-158181385 | 16 | 63.026 | KV452969.1 | 13993432 | 9-scf00340 | 9 |
| AX-157835696 | 16 | 63.026 | KV452969.1 | 13993875 | 9-scf00340 | 9 |
| AX-157744488 | 16 | 63.026 | KV452969.1 | 13996181 | 9-scf00340 | 9 |
| AX-158181388 | 16 | 63.026 | KV452969.1 | 13996276 | 9-scf00340 | 9 |
| AX-157835697 | 16 | 63.026 | KV452969.1 | 14004314 | 9-scf00340 | 9 |
| AX-157835698 | 16 | 63.026 | KV452969.1 | 14006031 | 9-scf00340 | 9 |
| AX-157835699 | 16 | 63.026 | KV452969.1 | 14006465 | 9-scf00340 | 9 |
| AX-158183076 | 16 | 63.026 | KV452969.1 | 16234948 | 9-scf00340 | 9 |
| AX-158181400 | 16 | 63.135 | KV452969.1 | 14018078 | 9-scf00340 | 9 |
| AX-158181402 | 16 | 63.135 | KV452969.1 | 14019761 | 9-scf00340 | 9 |
| AX-158181403 | 16 | 63.135 | KV452969.1 | 14020155 | 9-scf00340 | 9 |
| AX-158181404 | 16 | 63.203 | KV452969.1 | 14021896 | 9-scf00340 | 9 |
| AX-158181420 | 16 | 63.203 | KV452969.1 | 14042835 | 9-scf00340 | 9 |
| AX-158172768 | 16 | 63.245 | KV452969.1 | 1906908  | 9-scf00340 | 9 |
| AX-157704316 | 16 | 63.245 | KV452969.1 | 14029181 | 9-scf00340 | 9 |
| AX-157835700 | 16 | 63.245 | KV452969.1 | 14029754 | 9-scf00340 | 9 |
| AX-158181411 | 16 | 63.245 | KV452969.1 | 14033772 | 9-scf00340 | 9 |
| AX-157835702 | 16 | 63.245 | KV452969.1 | 14034867 | 9-scf00340 | 9 |
| AX-158181413 | 16 | 63.245 | KV452969.1 | 14035742 | 9-scf00340 | 9 |
| AX-158181472 | 16 | 63.245 | KV452969.1 | 14110674 | 9-scf00340 | 9 |
| AX-158181550 | 16 | 63.245 | KV452969.1 | 14224411 | 9-scf00340 | 9 |
| AX-158181338 | 16 | 63.318 | KV452969.1 | 13895911 | 9-scf00340 | 9 |
| AX-158181418 | 16 | 63.318 | KV452969.1 | 14041652 | 9-scf00340 | 9 |
| AX-158181425 | 16 | 63.354 | KV452969.1 | 14050623 | 9-scf00340 | 9 |
| AX-158181426 | 16 | 63.354 | KV452969.1 | 14050963 | 9-scf00340 | 9 |
| AX-158181427 | 16 | 63.354 | KV452969.1 | 14053397 | 9-scf00340 | 9 |

|              |    |        |            |          |            |   |
|--------------|----|--------|------------|----------|------------|---|
| AX-157835703 | 16 | 63.354 | KV452969.1 | 14053867 | 9-scf00340 | 9 |
| AX-158181430 | 16 | 63.354 | KV452969.1 | 14056711 | 9-scf00340 | 9 |
| AX-158181432 | 16 | 63.354 | KV452969.1 | 14061445 | 9-scf00340 | 9 |
| AX-158181434 | 16 | 63.354 | KV452969.1 | 14062486 | 9-scf00340 | 9 |
| AX-158181435 | 16 | 63.354 | KV452969.1 | 14066663 | 9-scf00340 | 9 |
| AX-158181443 | 16 | 63.354 | KV452969.1 | 14074330 | 9-scf00340 | 9 |
| AX-158181454 | 16 | 63.354 | KV452969.1 | 14087895 | 9-scf00340 | 9 |
| AX-158181470 | 16 | 63.354 | KV452969.1 | 14107493 | 9-scf00340 | 9 |
| AX-158409385 | 16 | 63.401 | KV452969.1 | 14068638 | 9-scf00340 | 9 |
| AX-158413613 | 16 | 63.448 | KV452969.1 | 14068786 | 9-scf00340 | 9 |
| AX-158181438 | 16 | 63.448 | KV452969.1 | 14069922 | 9-scf00340 | 9 |
| AX-158413604 | 16 | 63.463 | KV452969.1 | 13576502 | 9-scf00340 | 9 |
| AX-158181441 | 16 | 63.463 | KV452969.1 | 14073339 | 9-scf00340 | 9 |
| AX-158181445 | 16 | 63.463 | KV452969.1 | 14075813 | 9-scf00340 | 9 |
| AX-158181449 | 16 | 63.463 | KV452969.1 | 14081823 | 9-scf00340 | 9 |
| AX-157723589 | 16 | 63.463 | KV452969.1 | 14100694 | 9-scf00340 | 9 |
| AX-158181473 | 16 | 63.463 | KV452969.1 | 14111505 | 9-scf00340 | 9 |
| AX-158181475 | 16 | 63.463 | KV452969.1 | 14113211 | 9-scf00340 | 9 |
| AX-158181551 | 16 | 63.463 | KV452969.1 | 14227462 | 9-scf00340 | 9 |
| AX-158181423 | 16 | 63.682 | KV452969.1 | 14046380 | 9-scf00340 | 9 |
| AX-158181455 | 16 | 63.682 | KV452969.1 | 14088847 | 9-scf00340 | 9 |
| AX-158181466 | 16 | 63.682 | KV452969.1 | 14102154 | 9-scf00340 | 9 |
| AX-158181477 | 16 | 63.682 | KV452969.1 | 14117749 | 9-scf00340 | 9 |
| AX-158181479 | 16 | 63.682 | KV452969.1 | 14119229 | 9-scf00340 | 9 |
| AX-158181482 | 16 | 63.682 | KV452969.1 | 14123261 | 9-scf00340 | 9 |
| AX-157835707 | 16 | 63.682 | KV452969.1 | 14124555 | 9-scf00340 | 9 |
| AX-157835708 | 16 | 63.682 | KV452969.1 | 14126787 | 9-scf00340 | 9 |
| AX-157726623 | 16 | 63.682 | KV452969.1 | 14127305 | 9-scf00340 | 9 |
| AX-158181486 | 16 | 63.682 | KV452969.1 | 14131976 | 9-scf00340 | 9 |
| AX-158181490 | 16 | 63.682 | KV452969.1 | 14136421 | 9-scf00340 | 9 |
| AX-158181497 | 16 | 63.682 | KV452969.1 | 14147846 | 9-scf00340 | 9 |
| AX-158181501 | 16 | 63.682 | KV452969.1 | 14151017 | 9-scf00340 | 9 |
| AX-158181502 | 16 | 63.682 | KV452969.1 | 14152000 | 9-scf00340 | 9 |
| AX-158181506 | 16 | 63.682 | KV452969.1 | 14157800 | 9-scf00340 | 9 |
| AX-158181510 | 16 | 63.682 | KV452969.1 | 14161154 | 9-scf00340 | 9 |
| AX-158181517 | 16 | 63.682 | KV452969.1 | 14171800 | 9-scf00340 | 9 |
| AX-158181518 | 16 | 63.682 | KV452969.1 | 14174634 | 9-scf00340 | 9 |
| AX-157835711 | 16 | 63.722 | KV452969.1 | 14154309 | 9-scf00340 | 9 |
| AX-158181512 | 16 | 63.769 | KV452969.1 | 14163160 | 9-scf00340 | 9 |
| AX-158181557 | 16 | 63.769 | KV452969.1 | 14235020 | 9-scf00340 | 9 |
| AX-157835710 | 16 | 63.773 | KV452969.1 | 14151620 | 9-scf00340 | 9 |
| AX-158181530 | 16 | 63.773 | KV452969.1 | 14189538 | 9-scf00340 | 9 |
| AX-158181543 | 16 | 63.773 | KV452969.1 | 14212233 | 9-scf00340 | 9 |
| AX-158181569 | 16 | 63.773 | KV452969.1 | 14247924 | 9-scf00340 | 9 |
| AX-158181531 | 16 | 63.782 | KV452969.1 | 14190062 | 9-scf00340 | 9 |
| AX-158181535 | 16 | 63.791 | KV452969.1 | 14196206 | 9-scf00340 | 9 |
| AX-157746239 | 16 | 63.837 | KV452969.1 | 14207775 | 9-scf00340 | 9 |
| AX-158181539 | 16 | 63.887 | KV452969.1 | 14208635 | 9-scf00340 | 9 |
| AX-158181544 | 16 | 63.887 | KV452969.1 | 14214728 | 9-scf00340 | 9 |
| AX-158181542 | 16 | 63.946 | KV452969.1 | 14211388 | 9-scf00340 | 9 |
| AX-158181545 | 16 | 64.009 | KV452969.1 | 14216643 | 9-scf00340 | 9 |



|              |    |        |            |          |            |   |
|--------------|----|--------|------------|----------|------------|---|
| AX-158181546 | 16 | 64.012 | KV452969.1 | 14218037 | 9-scf00340 | 9 |
| AX-158181415 | 16 | 64.111 | KV452969.1 | 14036722 | 9-scf00340 | 9 |
| AX-158181548 | 16 | 64.111 | KV452969.1 | 14221521 | 9-scf00340 | 9 |
| AX-158181549 | 16 | 64.184 | KV452969.1 | 14222453 | 9-scf00340 | 9 |
| AX-158181558 | 16 | 64.275 | KV452969.1 | 14235431 | 9-scf00340 | 9 |
| AX-157774696 | 16 | 64.635 | KV452969.1 | 14251966 | 9-scf00340 | 9 |
| AX-158181573 | 16 | 64.651 | KV452969.1 | 14253984 | 9-scf00340 | 9 |
| AX-158181575 | 16 | 64.665 | KV452969.1 | 14255229 | 9-scf00340 | 9 |
| AX-157749072 | 16 | 64.811 | KV452969.1 | 14223156 | 9-scf00340 | 9 |
| AX-158181576 | 16 | 64.811 | KV452969.1 | 14258733 | 9-scf00340 | 9 |
| AX-158413615 | 16 | 65.102 | KV452969.1 | 14268461 | 9-scf00340 | 9 |
| AX-157872072 | 16 | 65.16  | KV452969.1 | 14275858 | 9-scf00340 | 9 |
| AX-158181586 | 16 | 65.212 | KV452969.1 | 14280801 | 9-scf00340 | 9 |
| AX-158181587 | 16 | 65.212 | KV452969.1 | 14281434 | 9-scf00340 | 9 |
| AX-158181588 | 16 | 65.212 | KV452969.1 | 14282456 | 9-scf00340 | 9 |
| AX-158181590 | 16 | 65.212 | KV452969.1 | 14286047 | 9-scf00340 | 9 |
| AX-158181591 | 16 | 65.212 | KV452969.1 | 14287017 | 9-scf00340 | 9 |
| AX-158181593 | 16 | 65.309 | KV452969.1 | 14289202 | 9-scf00340 | 9 |
| AX-158181656 | 16 | 65.309 | KV452969.1 | 14367286 | 9-scf00340 | 9 |
| AX-157872078 | 16 | 65.309 | KV452969.1 | 15232846 | 9-scf00340 | 9 |
| AX-158181595 | 16 | 65.417 | KV452969.1 | 14291952 | 9-scf00340 | 9 |
| AX-157741142 | 16 | 65.443 | KV452969.1 | 14293490 | 9-scf00340 | 9 |
| AX-157719047 | 16 | 65.443 | KV452969.1 | 14300355 | 9-scf00340 | 9 |
| AX-158181632 | 16 | 65.443 | KV452969.1 | 14334650 | 9-scf00340 | 9 |
| AX-158181655 | 16 | 65.443 | KV452969.1 | 14362742 | 9-scf00340 | 9 |
| AX-158182341 | 16 | 65.443 | KV452969.1 | 15249767 | 9-scf00340 | 9 |
| AX-158380563 | 16 | 65.648 | KV452969.1 | 1993417  | 9-scf00340 | 9 |
| AX-158173078 | 16 | 65.648 | KV452969.1 | 2565355  | 9-scf00340 | 9 |
| AX-157858553 | 16 | 65.648 | KV452969.1 | 2590348  | 9-scf00340 | 9 |
| AX-158173254 | 16 | 65.648 | KV452969.1 | 2858072  | 9-scf00340 | 9 |
| AX-158173280 | 16 | 65.648 | KV452969.1 | 2888718  | 9-scf00340 | 9 |
| AX-158173285 | 16 | 65.648 | KV452969.1 | 2892749  | 9-scf00340 | 9 |
| AX-158173286 | 16 | 65.648 | KV452969.1 | 2893401  | 9-scf00340 | 9 |
| AX-158418022 | 16 | 65.648 | KV452969.1 | 2901412  | 9-scf00340 | 9 |
| AX-158173295 | 16 | 65.648 | KV452969.1 | 2903310  | 9-scf00340 | 9 |
| AX-158173296 | 16 | 65.648 | KV452969.1 | 2903799  | 9-scf00340 | 9 |
| AX-158173297 | 16 | 65.648 | KV452969.1 | 2904172  | 9-scf00340 | 9 |
| AX-158173302 | 16 | 65.648 | KV452969.1 | 2908124  | 9-scf00340 | 9 |
| AX-158173304 | 16 | 65.648 | KV452969.1 | 2909880  | 9-scf00340 | 9 |
| AX-158173307 | 16 | 65.648 | KV452969.1 | 2912172  | 9-scf00340 | 9 |
| AX-158173314 | 16 | 65.648 | KV452969.1 | 2919649  | 9-scf00340 | 9 |
| AX-158173317 | 16 | 65.648 | KV452969.1 | 2921408  | 9-scf00340 | 9 |
| AX-157771475 | 16 | 65.648 | KV452969.1 | 2943249  | 9-scf00340 | 9 |
| AX-157886774 | 16 | 65.648 | KV452969.1 | 3072721  | 9-scf00340 | 9 |
| AX-158175070 | 16 | 65.648 | KV452969.1 | 5189942  | 9-scf00340 | 9 |
| AX-157744067 | 16 | 65.648 | KV452969.1 | 5249837  | 9-scf00340 | 9 |
| AX-158175188 | 16 | 65.648 | KV452969.1 | 5369441  | 9-scf00340 | 9 |
| AX-157835076 | 16 | 65.648 | KV452969.1 | 5430872  | 9-scf00340 | 9 |
| AX-157858616 | 16 | 65.648 | KV452969.1 | 6159148  | 9-scf00340 | 9 |
| AX-158175459 | 16 | 65.648 | KV452969.1 | 6162410  | 9-scf00340 | 9 |
| AX-158175460 | 16 | 65.648 | KV452969.1 | 6163805  | 9-scf00340 | 9 |

|              |    |        |            |         |            |   |
|--------------|----|--------|------------|---------|------------|---|
| AX-158175462 | 16 | 65.648 | KV452969.1 | 6165394 | 9-scf00340 | 9 |
| AX-158175463 | 16 | 65.648 | KV452969.1 | 6166877 | 9-scf00340 | 9 |
| AX-158413443 | 16 | 65.648 | KV452969.1 | 6167004 | 9-scf00340 | 9 |
| AX-158175464 | 16 | 65.648 | KV452969.1 | 6168457 | 9-scf00340 | 9 |
| AX-158175465 | 16 | 65.648 | KV452969.1 | 6170262 | 9-scf00340 | 9 |
| AX-158175468 | 16 | 65.648 | KV452969.1 | 6175459 | 9-scf00340 | 9 |
| AX-158175470 | 16 | 65.648 | KV452969.1 | 6177674 | 9-scf00340 | 9 |
| AX-158175471 | 16 | 65.648 | KV452969.1 | 6178212 | 9-scf00340 | 9 |
| AX-158175476 | 16 | 65.648 | KV452969.1 | 6181902 | 9-scf00340 | 9 |
| AX-158175477 | 16 | 65.648 | KV452969.1 | 6182329 | 9-scf00340 | 9 |
| AX-158175482 | 16 | 65.648 | KV452969.1 | 6187754 | 9-scf00340 | 9 |
| AX-158175483 | 16 | 65.648 | KV452969.1 | 6188098 | 9-scf00340 | 9 |
| AX-158175484 | 16 | 65.648 | KV452969.1 | 6189037 | 9-scf00340 | 9 |
| AX-158175486 | 16 | 65.648 | KV452969.1 | 6190896 | 9-scf00340 | 9 |
| AX-158175494 | 16 | 65.648 | KV452969.1 | 6195409 | 9-scf00340 | 9 |
| AX-158175497 | 16 | 65.648 | KV452969.1 | 6197040 | 9-scf00340 | 9 |
| AX-158175499 | 16 | 65.648 | KV452969.1 | 6198212 | 9-scf00340 | 9 |
| AX-158175501 | 16 | 65.648 | KV452969.1 | 6200509 | 9-scf00340 | 9 |
| AX-158175502 | 16 | 65.648 | KV452969.1 | 6201261 | 9-scf00340 | 9 |
| AX-158175503 | 16 | 65.648 | KV452969.1 | 6202061 | 9-scf00340 | 9 |
| AX-157740911 | 16 | 65.648 | KV452969.1 | 6206011 | 9-scf00340 | 9 |
| AX-157835090 | 16 | 65.648 | KV452969.1 | 6211338 | 9-scf00340 | 9 |
| AX-157835092 | 16 | 65.648 | KV452969.1 | 6212095 | 9-scf00340 | 9 |
| AX-158175511 | 16 | 65.648 | KV452969.1 | 6212948 | 9-scf00340 | 9 |
| AX-158175514 | 16 | 65.648 | KV452969.1 | 6215903 | 9-scf00340 | 9 |
| AX-158175518 | 16 | 65.648 | KV452969.1 | 6218085 | 9-scf00340 | 9 |
| AX-158175519 | 16 | 65.648 | KV452969.1 | 6218275 | 9-scf00340 | 9 |
| AX-158175523 | 16 | 65.648 | KV452969.1 | 6222878 | 9-scf00340 | 9 |
| AX-158175524 | 16 | 65.648 | KV452969.1 | 6222971 | 9-scf00340 | 9 |
| AX-158175530 | 16 | 65.648 | KV452969.1 | 6227409 | 9-scf00340 | 9 |
| AX-158175531 | 16 | 65.648 | KV452969.1 | 6227948 | 9-scf00340 | 9 |
| AX-158175536 | 16 | 65.648 | KV452969.1 | 6229867 | 9-scf00340 | 9 |
| AX-158175537 | 16 | 65.648 | KV452969.1 | 6231941 | 9-scf00340 | 9 |
| AX-158175539 | 16 | 65.648 | KV452969.1 | 6233743 | 9-scf00340 | 9 |
| AX-158175540 | 16 | 65.648 | KV452969.1 | 6235504 | 9-scf00340 | 9 |
| AX-158175541 | 16 | 65.648 | KV452969.1 | 6236523 | 9-scf00340 | 9 |
| AX-158175543 | 16 | 65.648 | KV452969.1 | 6239821 | 9-scf00340 | 9 |
| AX-158175544 | 16 | 65.648 | KV452969.1 | 6240834 | 9-scf00340 | 9 |
| AX-158175545 | 16 | 65.648 | KV452969.1 | 6241430 | 9-scf00340 | 9 |
| AX-158175546 | 16 | 65.648 | KV452969.1 | 6242310 | 9-scf00340 | 9 |
| AX-157835100 | 16 | 65.648 | KV452969.1 | 6257686 | 9-scf00340 | 9 |
| AX-157835101 | 16 | 65.648 | KV452969.1 | 6258278 | 9-scf00340 | 9 |
| AX-158175553 | 16 | 65.648 | KV452969.1 | 6258548 | 9-scf00340 | 9 |
| AX-158175554 | 16 | 65.648 | KV452969.1 | 6259688 | 9-scf00340 | 9 |
| AX-157835103 | 16 | 65.648 | KV452969.1 | 6260457 | 9-scf00340 | 9 |
| AX-158175555 | 16 | 65.648 | KV452969.1 | 6260759 | 9-scf00340 | 9 |
| AX-157835104 | 16 | 65.648 | KV452969.1 | 6261492 | 9-scf00340 | 9 |
| AX-157835105 | 16 | 65.648 | KV452969.1 | 6266912 | 9-scf00340 | 9 |
| AX-158175557 | 16 | 65.648 | KV452969.1 | 6269443 | 9-scf00340 | 9 |
| AX-158175563 | 16 | 65.648 | KV452969.1 | 6278710 | 9-scf00340 | 9 |
| AX-158175571 | 16 | 65.648 | KV452969.1 | 6281664 | 9-scf00340 | 9 |

|              |    |        |            |          |            |   |
|--------------|----|--------|------------|----------|------------|---|
| AX-158175574 | 16 | 65.648 | KV452969.1 | 6284896  | 9-scf00340 | 9 |
| AX-158175575 | 16 | 65.648 | KV452969.1 | 6285088  | 9-scf00340 | 9 |
| AX-158175579 | 16 | 65.648 | KV452969.1 | 6289253  | 9-scf00340 | 9 |
| AX-158175582 | 16 | 65.648 | KV452969.1 | 6293651  | 9-scf00340 | 9 |
| AX-158175585 | 16 | 65.648 | KV452969.1 | 6295567  | 9-scf00340 | 9 |
| AX-158175589 | 16 | 65.648 | KV452969.1 | 6302234  | 9-scf00340 | 9 |
| AX-158175590 | 16 | 65.648 | KV452969.1 | 6304322  | 9-scf00340 | 9 |
| AX-158175623 | 16 | 65.648 | KV452969.1 | 6346615  | 9-scf00340 | 9 |
| AX-158175784 | 16 | 65.648 | KV452969.1 | 6567202  | 9-scf00340 | 9 |
| AX-158175916 | 16 | 65.648 | KV452969.1 | 6701156  | 9-scf00340 | 9 |
| AX-158175952 | 16 | 65.648 | KV452969.1 | 6743448  | 9-scf00340 | 9 |
| AX-158175956 | 16 | 65.648 | KV452969.1 | 6749071  | 9-scf00340 | 9 |
| AX-158175960 | 16 | 65.648 | KV452969.1 | 6752030  | 9-scf00340 | 9 |
| AX-158175961 | 16 | 65.648 | KV452969.1 | 6752737  | 9-scf00340 | 9 |
| AX-158175970 | 16 | 65.648 | KV452969.1 | 6760096  | 9-scf00340 | 9 |
| AX-157774147 | 16 | 65.648 | KV452969.1 | 6763341  | 9-scf00340 | 9 |
| AX-158175984 | 16 | 65.648 | KV452969.1 | 6776617  | 9-scf00340 | 9 |
| AX-158176038 | 16 | 65.648 | KV452969.1 | 6823960  | 9-scf00340 | 9 |
| AX-158176042 | 16 | 65.648 | KV452969.1 | 6827824  | 9-scf00340 | 9 |
| AX-158176286 | 16 | 65.648 | KV452969.1 | 7197498  | 9-scf00340 | 9 |
| AX-157835175 | 16 | 65.648 | KV452969.1 | 7205228  | 9-scf00340 | 9 |
| AX-158176419 | 16 | 65.648 | KV452969.1 | 7347600  | 9-scf00340 | 9 |
| AX-157757684 | 16 | 65.648 | KV452969.1 | 7468331  | 9-scf00340 | 9 |
| AX-158176524 | 16 | 65.648 | KV452969.1 | 7470137  | 9-scf00340 | 9 |
| AX-158176531 | 16 | 65.648 | KV452969.1 | 7478262  | 9-scf00340 | 9 |
| AX-158176532 | 16 | 65.648 | KV452969.1 | 7478523  | 9-scf00340 | 9 |
| AX-158176551 | 16 | 65.648 | KV452969.1 | 7498057  | 9-scf00340 | 9 |
| AX-158176552 | 16 | 65.648 | KV452969.1 | 7499728  | 9-scf00340 | 9 |
| AX-158176566 | 16 | 65.648 | KV452969.1 | 7513929  | 9-scf00340 | 9 |
| AX-158176573 | 16 | 65.648 | KV452969.1 | 7521216  | 9-scf00340 | 9 |
| AX-158176590 | 16 | 65.648 | KV452969.1 | 7540283  | 9-scf00340 | 9 |
| AX-157717254 | 16 | 65.648 | KV452969.1 | 7575294  | 9-scf00340 | 9 |
| AX-157713688 | 16 | 65.648 | KV452969.1 | 7638660  | 9-scf00340 | 9 |
| AX-158176660 | 16 | 65.648 | KV452969.1 | 7645447  | 9-scf00340 | 9 |
| AX-158176670 | 16 | 65.648 | KV452969.1 | 7656327  | 9-scf00340 | 9 |
| AX-158176752 | 16 | 65.648 | KV452969.1 | 7749109  | 9-scf00340 | 9 |
| AX-158176765 | 16 | 65.648 | KV452969.1 | 7774973  | 9-scf00340 | 9 |
| AX-158176766 | 16 | 65.648 | KV452969.1 | 7775267  | 9-scf00340 | 9 |
| AX-158177068 | 16 | 65.648 | KV452969.1 | 8160212  | 9-scf00340 | 9 |
| AX-158177072 | 16 | 65.648 | KV452969.1 | 8166139  | 9-scf00340 | 9 |
| AX-158177855 | 16 | 65.648 | KV452969.1 | 9308580  | 9-scf00340 | 9 |
| AX-158177986 | 16 | 65.648 | KV452969.1 | 9460667  | 9-scf00340 | 9 |
| AX-158178879 | 16 | 65.648 | KV452969.1 | 10633458 | 9-scf00340 | 9 |
| AX-158178888 | 16 | 65.648 | KV452969.1 | 10642585 | 9-scf00340 | 9 |
| AX-158179975 | 16 | 65.648 | KV452969.1 | 12085700 | 9-scf00340 | 9 |
| AX-158181607 | 16 | 65.648 | KV452969.1 | 14308971 | 9-scf00340 | 9 |
| AX-158181608 | 16 | 65.648 | KV452969.1 | 14309847 | 9-scf00340 | 9 |
| AX-158181610 | 16 | 65.648 | KV452969.1 | 14312847 | 9-scf00340 | 9 |
| AX-158181612 | 16 | 65.648 | KV452969.1 | 14314316 | 9-scf00340 | 9 |
| AX-158181613 | 16 | 65.648 | KV452969.1 | 14315969 | 9-scf00340 | 9 |
| AX-158181617 | 16 | 65.648 | KV452969.1 | 14319942 | 9-scf00340 | 9 |

|              |    |        |            |          |            |   |
|--------------|----|--------|------------|----------|------------|---|
| AX-158181619 | 16 | 65.648 | KV452969.1 | 14322709 | 9-scf00340 | 9 |
| AX-158181620 | 16 | 65.648 | KV452969.1 | 14323388 | 9-scf00340 | 9 |
| AX-158181621 | 16 | 65.648 | KV452969.1 | 14325281 | 9-scf00340 | 9 |
| AX-158181623 | 16 | 65.648 | KV452969.1 | 14325833 | 9-scf00340 | 9 |
| AX-158181624 | 16 | 65.648 | KV452969.1 | 14325895 | 9-scf00340 | 9 |
| AX-158181626 | 16 | 65.648 | KV452969.1 | 14327527 | 9-scf00340 | 9 |
| AX-158181628 | 16 | 65.648 | KV452969.1 | 14328436 | 9-scf00340 | 9 |
| AX-158181629 | 16 | 65.648 | KV452969.1 | 14329980 | 9-scf00340 | 9 |
| AX-158181630 | 16 | 65.648 | KV452969.1 | 14331347 | 9-scf00340 | 9 |
| AX-158181633 | 16 | 65.648 | KV452969.1 | 14335220 | 9-scf00340 | 9 |
| AX-158181637 | 16 | 65.648 | KV452969.1 | 14340597 | 9-scf00340 | 9 |
| AX-158181638 | 16 | 65.648 | KV452969.1 | 14341882 | 9-scf00340 | 9 |
| AX-158181639 | 16 | 65.648 | KV452969.1 | 14342860 | 9-scf00340 | 9 |
| AX-158181640 | 16 | 65.648 | KV452969.1 | 14343772 | 9-scf00340 | 9 |
| AX-158181641 | 16 | 65.648 | KV452969.1 | 14345124 | 9-scf00340 | 9 |
| AX-158181642 | 16 | 65.648 | KV452969.1 | 14345519 | 9-scf00340 | 9 |
| AX-158181646 | 16 | 65.648 | KV452969.1 | 14348556 | 9-scf00340 | 9 |
| AX-158181651 | 16 | 65.648 | KV452969.1 | 14356600 | 9-scf00340 | 9 |
| AX-158181653 | 16 | 65.648 | KV452969.1 | 14359972 | 9-scf00340 | 9 |
| AX-158181658 | 16 | 65.648 | KV452969.1 | 14369242 | 9-scf00340 | 9 |
| AX-158181659 | 16 | 65.648 | KV452969.1 | 14369671 | 9-scf00340 | 9 |
| AX-157744434 | 16 | 65.648 | KV452969.1 | 14378503 | 9-scf00340 | 9 |
| AX-158181663 | 16 | 65.648 | KV452969.1 | 14380020 | 9-scf00340 | 9 |
| AX-158181664 | 16 | 65.648 | KV452969.1 | 14380530 | 9-scf00340 | 9 |
| AX-157878874 | 16 | 65.648 | KV452969.1 | 14380826 | 9-scf00340 | 9 |
| AX-158181665 | 16 | 65.648 | KV452969.1 | 14382107 | 9-scf00340 | 9 |
| AX-158181671 | 16 | 65.648 | KV452969.1 | 14391201 | 9-scf00340 | 9 |
| AX-158181680 | 16 | 65.648 | KV452969.1 | 14400047 | 9-scf00340 | 9 |
| AX-158181681 | 16 | 65.648 | KV452969.1 | 14400778 | 9-scf00340 | 9 |
| AX-158181682 | 16 | 65.648 | KV452969.1 | 14402259 | 9-scf00340 | 9 |
| AX-158181683 | 16 | 65.648 | KV452969.1 | 14403170 | 9-scf00340 | 9 |
| AX-158181685 | 16 | 65.648 | KV452969.1 | 14406536 | 9-scf00340 | 9 |
| AX-158181688 | 16 | 65.648 | KV452969.1 | 14410249 | 9-scf00340 | 9 |
| AX-158181690 | 16 | 65.648 | KV452969.1 | 14412407 | 9-scf00340 | 9 |
| AX-158181691 | 16 | 65.648 | KV452969.1 | 14413505 | 9-scf00340 | 9 |
| AX-158181692 | 16 | 65.648 | KV452969.1 | 14413748 | 9-scf00340 | 9 |
| AX-157835725 | 16 | 65.648 | KV452969.1 | 14415225 | 9-scf00340 | 9 |
| AX-158181694 | 16 | 65.648 | KV452969.1 | 14418328 | 9-scf00340 | 9 |
| AX-157835726 | 16 | 65.648 | KV452969.1 | 14418477 | 9-scf00340 | 9 |
| AX-158181697 | 16 | 65.648 | KV452969.1 | 14422267 | 9-scf00340 | 9 |
| AX-158181698 | 16 | 65.648 | KV452969.1 | 14423300 | 9-scf00340 | 9 |
| AX-158181706 | 16 | 65.648 | KV452969.1 | 14430691 | 9-scf00340 | 9 |
| AX-158181736 | 16 | 65.648 | KV452969.1 | 14474625 | 9-scf00340 | 9 |
| AX-158181934 | 16 | 65.648 | KV452969.1 | 14709923 | 9-scf00340 | 9 |
| AX-157835749 | 16 | 65.648 | KV452969.1 | 14784716 | 9-scf00340 | 9 |
| AX-157835750 | 16 | 65.648 | KV452969.1 | 14785433 | 9-scf00340 | 9 |
| AX-157716951 | 16 | 65.648 | KV452969.1 | 14786180 | 9-scf00340 | 9 |
| AX-158182040 | 16 | 65.648 | KV452969.1 | 14818624 | 9-scf00340 | 9 |
| AX-158182080 | 16 | 65.648 | KV452969.1 | 14881716 | 9-scf00340 | 9 |
| AX-158182082 | 16 | 65.648 | KV452969.1 | 14882938 | 9-scf00340 | 9 |
| AX-158182085 | 16 | 65.648 | KV452969.1 | 14885139 | 9-scf00340 | 9 |

|              |    |        |             |          |            |    |
|--------------|----|--------|-------------|----------|------------|----|
| AX-158182086 | 16 | 65.648 | KV452969.1  | 14885279 | 9-scf00340 | 9  |
| AX-158182089 | 16 | 65.648 | KV452969.1  | 14887833 | 9-scf00340 | 9  |
| AX-158182123 | 16 | 65.648 | KV452969.1  | 14934086 | 9-scf00340 | 9  |
| AX-157886815 | 16 | 65.648 | KV452969.1  | 15049845 | 9-scf00340 | 9  |
| AX-158182316 | 16 | 65.648 | KV452969.1  | 15215762 | 9-scf00340 | 9  |
| AX-157835778 | 16 | 65.648 | KV452969.1  | 15242102 | 9-scf00340 | 9  |
| AX-158413634 | 16 | 65.648 | KV452969.1  | 15439779 | 9-scf00340 | 9  |
| AX-158182562 | 16 | 65.648 | KV452969.1  | 15554076 | 9-scf00340 | 9  |
| AX-158182591 | 16 | 65.648 | KV452969.1  | 15588219 | 9-scf00340 | 9  |
| AX-158182626 | 16 | 65.648 | KV452969.1  | 15632586 | 9-scf00340 | 9  |
| AX-157706863 | 16 | 65.648 | 3ML01033049 | 223      | scf08686_1 | UN |
| AX-158181708 | 16 | 65.758 | KV452969.1  | 14432282 | 9-scf00340 | 9  |
| AX-157835729 | 16 | 65.758 | KV452969.1  | 14433185 | 9-scf00340 | 9  |
| AX-158182688 | 16 | 65.758 | KV452969.1  | 15717745 | 9-scf00340 | 9  |
| AX-158175504 | 16 | 65.867 | KV452969.1  | 6204042  | 9-scf00340 | 9  |
| AX-157835691 | 16 | 65.867 | KV452969.1  | 13898241 | 9-scf00340 | 9  |
| AX-158418128 | 16 | 65.867 | KV452969.1  | 14273774 | 9-scf00340 | 9  |
| AX-158181622 | 16 | 65.867 | KV452969.1  | 14325343 | 9-scf00340 | 9  |
| AX-158181647 | 16 | 65.867 | KV452969.1  | 14349550 | 9-scf00340 | 9  |
| AX-157835719 | 16 | 65.867 | KV452969.1  | 14381663 | 9-scf00340 | 9  |
| AX-158181666 | 16 | 65.867 | KV452969.1  | 14383260 | 9-scf00340 | 9  |
| AX-158181719 | 16 | 65.867 | KV452969.1  | 14447423 | 9-scf00340 | 9  |
| AX-157872075 | 16 | 65.867 | KV452969.1  | 14452885 | 9-scf00340 | 9  |
| AX-157835730 | 16 | 65.867 | KV452969.1  | 14453287 | 9-scf00340 | 9  |
| AX-158181729 | 16 | 65.867 | KV452969.1  | 14462173 | 9-scf00340 | 9  |
| AX-158181733 | 16 | 65.867 | KV452969.1  | 14469466 | 9-scf00340 | 9  |
| AX-158181735 | 16 | 65.867 | KV452969.1  | 14470549 | 9-scf00340 | 9  |
| AX-158409411 | 16 | 65.867 | KV452969.1  | 14474770 | 9-scf00340 | 9  |
| AX-158413618 | 16 | 65.867 | KV452969.1  | 14475162 | 9-scf00340 | 9  |
| AX-158181749 | 16 | 65.867 | KV452969.1  | 14498727 | 9-scf00340 | 9  |
| AX-158181757 | 16 | 65.867 | KV452969.1  | 14518233 | 9-scf00340 | 9  |
| AX-158181758 | 16 | 65.867 | KV452969.1  | 14519821 | 9-scf00340 | 9  |
| AX-158181762 | 16 | 65.867 | KV452969.1  | 14523220 | 9-scf00340 | 9  |
| AX-158181763 | 16 | 65.867 | KV452969.1  | 14524144 | 9-scf00340 | 9  |
| AX-158181764 | 16 | 65.867 | KV452969.1  | 14524901 | 9-scf00340 | 9  |
| AX-158181765 | 16 | 65.867 | KV452969.1  | 14525590 | 9-scf00340 | 9  |
| AX-158181767 | 16 | 65.867 | KV452969.1  | 14528478 | 9-scf00340 | 9  |
| AX-158181795 | 16 | 65.867 | KV452969.1  | 14578406 | 9-scf00340 | 9  |
| AX-158181799 | 16 | 65.867 | KV452969.1  | 14582797 | 9-scf00340 | 9  |
| AX-158181814 | 16 | 65.867 | KV452969.1  | 14596939 | 9-scf00340 | 9  |
| AX-158181816 | 16 | 65.867 | KV452969.1  | 14597822 | 9-scf00340 | 9  |
| AX-158181828 | 16 | 65.867 | KV452969.1  | 14607320 | 9-scf00340 | 9  |
| AX-158181831 | 16 | 65.867 | KV452969.1  | 14612483 | 9-scf00340 | 9  |
| AX-158393557 | 16 | 65.867 | KV452969.1  | 14612852 | 9-scf00340 | 9  |
| AX-158181837 | 16 | 65.867 | KV452969.1  | 14617264 | 9-scf00340 | 9  |
| AX-157719494 | 16 | 65.867 | KV452969.1  | 14649243 | 9-scf00340 | 9  |
| AX-157753708 | 16 | 65.867 | KV452969.1  | 14652191 | 9-scf00340 | 9  |
| AX-158181874 | 16 | 65.867 | KV452969.1  | 14660524 | 9-scf00340 | 9  |
| AX-158181877 | 16 | 65.867 | KV452969.1  | 14663498 | 9-scf00340 | 9  |
| AX-157835740 | 16 | 65.867 | KV452969.1  | 14663746 | 9-scf00340 | 9  |
| AX-157708873 | 16 | 65.867 | KV452969.1  | 14665317 | 9-scf00340 | 9  |

|              |    |        |            |          |            |   |
|--------------|----|--------|------------|----------|------------|---|
| AX-158181881 | 16 | 65.867 | KV452969.1 | 14665707 | 9-scf00340 | 9 |
| AX-158181882 | 16 | 65.867 | KV452969.1 | 14667927 | 9-scf00340 | 9 |
| AX-158181884 | 16 | 65.867 | KV452969.1 | 14669105 | 9-scf00340 | 9 |
| AX-158181887 | 16 | 65.867 | KV452969.1 | 14671333 | 9-scf00340 | 9 |
| AX-158181889 | 16 | 65.867 | KV452969.1 | 14672268 | 9-scf00340 | 9 |
| AX-158181895 | 16 | 65.867 | KV452969.1 | 14676677 | 9-scf00340 | 9 |
| AX-158181896 | 16 | 65.867 | KV452969.1 | 14677985 | 9-scf00340 | 9 |
| AX-158181898 | 16 | 65.867 | KV452969.1 | 14679904 | 9-scf00340 | 9 |
| AX-158181899 | 16 | 65.867 | KV452969.1 | 14680596 | 9-scf00340 | 9 |
| AX-158181900 | 16 | 65.867 | KV452969.1 | 14681168 | 9-scf00340 | 9 |
| AX-158181901 | 16 | 65.867 | KV452969.1 | 14681631 | 9-scf00340 | 9 |
| AX-158181902 | 16 | 65.867 | KV452969.1 | 14683023 | 9-scf00340 | 9 |
| AX-158181903 | 16 | 65.867 | KV452969.1 | 14683436 | 9-scf00340 | 9 |
| AX-158181904 | 16 | 65.867 | KV452969.1 | 14683980 | 9-scf00340 | 9 |
| AX-158181905 | 16 | 65.867 | KV452969.1 | 14684891 | 9-scf00340 | 9 |
| AX-157835742 | 16 | 65.867 | KV452969.1 | 14688474 | 9-scf00340 | 9 |
| AX-158181913 | 16 | 65.867 | KV452969.1 | 14690673 | 9-scf00340 | 9 |
| AX-157835744 | 16 | 65.867 | KV452969.1 | 14697333 | 9-scf00340 | 9 |
| AX-157835745 | 16 | 65.867 | KV452969.1 | 14699891 | 9-scf00340 | 9 |
| AX-158181926 | 16 | 65.867 | KV452969.1 | 14702219 | 9-scf00340 | 9 |
| AX-158181928 | 16 | 65.867 | KV452969.1 | 14703855 | 9-scf00340 | 9 |
| AX-158181930 | 16 | 65.867 | KV452969.1 | 14706571 | 9-scf00340 | 9 |
| AX-158181931 | 16 | 65.867 | KV452969.1 | 14707316 | 9-scf00340 | 9 |
| AX-158181966 | 16 | 65.867 | KV452969.1 | 14741873 | 9-scf00340 | 9 |
| AX-158181971 | 16 | 65.867 | KV452969.1 | 14746934 | 9-scf00340 | 9 |
| AX-158181975 | 16 | 65.867 | KV452969.1 | 14748955 | 9-scf00340 | 9 |
| AX-158181982 | 16 | 65.867 | KV452969.1 | 14757168 | 9-scf00340 | 9 |
| AX-158181983 | 16 | 65.867 | KV452969.1 | 14757895 | 9-scf00340 | 9 |
| AX-158181984 | 16 | 65.867 | KV452969.1 | 14758718 | 9-scf00340 | 9 |
| AX-158181991 | 16 | 65.867 | KV452969.1 | 14764035 | 9-scf00340 | 9 |
| AX-158181999 | 16 | 65.867 | KV452969.1 | 14771700 | 9-scf00340 | 9 |
| AX-158182009 | 16 | 65.867 | KV452969.1 | 14783704 | 9-scf00340 | 9 |
| AX-157748103 | 16 | 65.867 | KV452969.1 | 14791958 | 9-scf00340 | 9 |
| AX-158182087 | 16 | 65.867 | KV452969.1 | 14886251 | 9-scf00340 | 9 |
| AX-158182134 | 16 | 65.867 | KV452969.1 | 14949781 | 9-scf00340 | 9 |
| AX-158182147 | 16 | 65.867 | KV452969.1 | 14974827 | 9-scf00340 | 9 |
| AX-158182150 | 16 | 65.867 | KV452969.1 | 14976987 | 9-scf00340 | 9 |
| AX-158182218 | 16 | 65.867 | KV452969.1 | 15060390 | 9-scf00340 | 9 |
| AX-158182244 | 16 | 65.867 | KV452969.1 | 15105192 | 9-scf00340 | 9 |
| AX-158182281 | 16 | 65.867 | KV452969.1 | 15168090 | 9-scf00340 | 9 |
| AX-158182282 | 16 | 65.867 | KV452969.1 | 15168541 | 9-scf00340 | 9 |
| AX-158182286 | 16 | 65.867 | KV452969.1 | 15173504 | 9-scf00340 | 9 |
| AX-157835771 | 16 | 65.867 | KV452969.1 | 15178502 | 9-scf00340 | 9 |
| AX-157835777 | 16 | 65.867 | KV452969.1 | 15236444 | 9-scf00340 | 9 |
| AX-157835780 | 16 | 65.867 | KV452969.1 | 15248165 | 9-scf00340 | 9 |
| AX-158182347 | 16 | 65.867 | KV452969.1 | 15258055 | 9-scf00340 | 9 |
| AX-158182378 | 16 | 65.867 | KV452969.1 | 15309259 | 9-scf00340 | 9 |
| AX-157835802 | 16 | 65.867 | KV452969.1 | 15368667 | 9-scf00340 | 9 |
| AX-158182406 | 16 | 65.867 | KV452969.1 | 15370191 | 9-scf00340 | 9 |
| AX-158182413 | 16 | 65.867 | KV452969.1 | 15374966 | 9-scf00340 | 9 |
| AX-158182417 | 16 | 65.867 | KV452969.1 | 15382192 | 9-scf00340 | 9 |

|              |    |        |             |          |            |    |
|--------------|----|--------|-------------|----------|------------|----|
| AX-158182430 | 16 | 65.867 | KV452969.1  | 15405491 | 9-scf00340 | 9  |
| AX-158182502 | 16 | 65.867 | KV452969.1  | 15479677 | 9-scf00340 | 9  |
| AX-158182521 | 16 | 65.867 | KV452969.1  | 15498039 | 9-scf00340 | 9  |
| AX-157723837 | 16 | 65.867 | KV452969.1  | 15498703 | 9-scf00340 | 9  |
| AX-158182538 | 16 | 65.867 | KV452969.1  | 15519388 | 9-scf00340 | 9  |
| AX-157775304 | 16 | 65.867 | KV452969.1  | 15525282 | 9-scf00340 | 9  |
| AX-158182550 | 16 | 65.867 | KV452969.1  | 15532748 | 9-scf00340 | 9  |
| AX-158182559 | 16 | 65.867 | KV452969.1  | 15547316 | 9-scf00340 | 9  |
| AX-158182569 | 16 | 65.867 | KV452969.1  | 15560396 | 9-scf00340 | 9  |
| AX-158182581 | 16 | 65.867 | KV452969.1  | 15577111 | 9-scf00340 | 9  |
| AX-158182583 | 16 | 65.867 | KV452969.1  | 15580226 | 9-scf00340 | 9  |
| AX-158418134 | 16 | 65.867 | KV452969.1  | 15586615 | 9-scf00340 | 9  |
| AX-158182602 | 16 | 65.867 | KV452969.1  | 15600456 | 9-scf00340 | 9  |
| AX-158182603 | 16 | 65.867 | KV452969.1  | 15601555 | 9-scf00340 | 9  |
| AX-158182625 | 16 | 65.867 | KV452969.1  | 15630003 | 9-scf00340 | 9  |
| AX-158182636 | 16 | 65.867 | KV452969.1  | 15641837 | 9-scf00340 | 9  |
| AX-157722612 | 16 | 65.867 | KV452969.1  | 15686723 | 9-scf00340 | 9  |
| AX-158182669 | 16 | 65.867 | KV452969.1  | 15693770 | 9-scf00340 | 9  |
| AX-157835817 | 16 | 65.867 | KV452969.1  | 15707909 | 9-scf00340 | 9  |
| AX-158182707 | 16 | 65.867 | KV452969.1  | 15739068 | 9-scf00340 | 9  |
| AX-158182711 | 16 | 65.867 | KV452969.1  | 15744557 | 9-scf00340 | 9  |
| AX-157756254 | 16 | 65.867 | KV452969.1  | 15745899 | 9-scf00340 | 9  |
| AX-158182781 | 16 | 65.867 | KV452969.1  | 15843721 | 9-scf00340 | 9  |
| AX-157773486 | 16 | 65.867 | KV452969.1  | 15880544 | 9-scf00340 | 9  |
| AX-157746737 | 16 | 65.867 | KV452969.1  | 15885643 | 9-scf00340 | 9  |
| AX-158182812 | 16 | 65.867 | KV452969.1  | 15889073 | 9-scf00340 | 9  |
| AX-158182817 | 16 | 65.867 | KV452969.1  | 15894195 | 9-scf00340 | 9  |
| AX-158183313 | 16 | 65.867 | KV452969.1  | 16670055 | 9-scf00340 | 9  |
| AX-157706868 | 16 | 65.867 | 3ML01033057 | 243      | scf08694_1 | UN |
| AX-157707418 | 16 | 65.867 | 3ML01034246 | 430      | scf09916_1 | UN |
| AX-158182001 | 16 | 65.892 | KV452969.1  | 14772306 | 9-scf00340 | 9  |
| AX-158182004 | 16 | 65.918 | KV452969.1  | 14775395 | 9-scf00340 | 9  |
| AX-158182485 | 16 | 65.918 | KV452969.1  | 15465054 | 9-scf00340 | 9  |
| AX-157719612 | 16 | 65.929 | KV452969.1  | 14778897 | 9-scf00340 | 9  |
| AX-157835728 | 16 | 65.947 | KV452969.1  | 14428892 | 9-scf00340 | 9  |
| AX-158181720 | 16 | 65.947 | KV452969.1  | 14448749 | 9-scf00340 | 9  |
| AX-158181909 | 16 | 65.947 | KV452969.1  | 14687851 | 9-scf00340 | 9  |
| AX-158181910 | 16 | 65.947 | KV452969.1  | 14688878 | 9-scf00340 | 9  |
| AX-158181912 | 16 | 65.947 | KV452969.1  | 14689850 | 9-scf00340 | 9  |
| AX-158181921 | 16 | 65.947 | KV452969.1  | 14697958 | 9-scf00340 | 9  |
| AX-158181922 | 16 | 65.947 | KV452969.1  | 14699027 | 9-scf00340 | 9  |
| AX-158181925 | 16 | 65.947 | KV452969.1  | 14701509 | 9-scf00340 | 9  |
| AX-158181933 | 16 | 65.947 | KV452969.1  | 14709176 | 9-scf00340 | 9  |
| AX-158181940 | 16 | 65.947 | KV452969.1  | 14716119 | 9-scf00340 | 9  |
| AX-158181943 | 16 | 65.947 | KV452969.1  | 14719108 | 9-scf00340 | 9  |
| AX-158181946 | 16 | 65.947 | KV452969.1  | 14724317 | 9-scf00340 | 9  |
| AX-158181948 | 16 | 65.947 | KV452969.1  | 14725294 | 9-scf00340 | 9  |
| AX-157835746 | 16 | 65.947 | KV452969.1  | 14726040 | 9-scf00340 | 9  |
| AX-158181949 | 16 | 65.947 | KV452969.1  | 14726765 | 9-scf00340 | 9  |
| AX-158181950 | 16 | 65.947 | KV452969.1  | 14727126 | 9-scf00340 | 9  |
| AX-158181951 | 16 | 65.947 | KV452969.1  | 14727401 | 9-scf00340 | 9  |

|              |    |        |             |          |            |    |
|--------------|----|--------|-------------|----------|------------|----|
| AX-157835747 | 16 | 65.947 | KV452969.1  | 14729972 | 9-scf00340 | 9  |
| AX-157835748 | 16 | 65.947 | KV452969.1  | 14733305 | 9-scf00340 | 9  |
| AX-157713825 | 16 | 65.947 | KV452969.1  | 14733351 | 9-scf00340 | 9  |
| AX-158181956 | 16 | 65.947 | KV452969.1  | 14733684 | 9-scf00340 | 9  |
| AX-158181957 | 16 | 65.947 | KV452969.1  | 14734029 | 9-scf00340 | 9  |
| AX-158181959 | 16 | 65.947 | KV452969.1  | 14735910 | 9-scf00340 | 9  |
| AX-158181960 | 16 | 65.947 | KV452969.1  | 14736693 | 9-scf00340 | 9  |
| AX-158181961 | 16 | 65.947 | KV452969.1  | 14737131 | 9-scf00340 | 9  |
| AX-158181962 | 16 | 65.947 | KV452969.1  | 14737707 | 9-scf00340 | 9  |
| AX-157708960 | 16 | 65.947 | KV452969.1  | 14738271 | 9-scf00340 | 9  |
| AX-158181964 | 16 | 65.947 | KV452969.1  | 14738967 | 9-scf00340 | 9  |
| AX-158181965 | 16 | 65.947 | KV452969.1  | 14740742 | 9-scf00340 | 9  |
| AX-158181969 | 16 | 65.947 | KV452969.1  | 14743687 | 9-scf00340 | 9  |
| AX-158181972 | 16 | 65.947 | KV452969.1  | 14747416 | 9-scf00340 | 9  |
| AX-158181973 | 16 | 65.947 | KV452969.1  | 14748253 | 9-scf00340 | 9  |
| AX-158182011 | 16 | 65.947 | KV452969.1  | 14787925 | 9-scf00340 | 9  |
| AX-158182017 | 16 | 65.947 | KV452969.1  | 14792355 | 9-scf00340 | 9  |
| AX-158182275 | 16 | 65.947 | KV452969.1  | 15153364 | 9-scf00340 | 9  |
| AX-158182548 | 16 | 65.947 | KV452969.1  | 15530308 | 9-scf00340 | 9  |
| AX-157707121 | 16 | 65.947 | 3ML01033852 | 193      | scf09518_1 | UN |
| AX-158181759 | 16 | 65.976 | KV452969.1  | 14520407 | 9-scf00340 | 9  |
| AX-158181836 | 16 | 65.976 | KV452969.1  | 14616199 | 9-scf00340 | 9  |
| AX-158182018 | 16 | 65.976 | KV452969.1  | 14793609 | 9-scf00340 | 9  |
| AX-158182019 | 16 | 65.976 | KV452969.1  | 14794046 | 9-scf00340 | 9  |
| AX-157835755 | 16 | 65.976 | KV452969.1  | 14819054 | 9-scf00340 | 9  |
| AX-158182043 | 16 | 65.976 | KV452969.1  | 14822306 | 9-scf00340 | 9  |
| AX-158182048 | 16 | 65.976 | KV452969.1  | 14835492 | 9-scf00340 | 9  |
| AX-158182162 | 16 | 65.976 | KV452969.1  | 14989991 | 9-scf00340 | 9  |
| AX-157699120 | 16 | 65.976 | KV452969.1  | 15258936 | 9-scf00340 | 9  |
| AX-157835785 | 16 | 65.976 | KV452969.1  | 15265555 | 9-scf00340 | 9  |
| AX-158182441 | 16 | 65.976 | KV452969.1  | 15415326 | 9-scf00340 | 9  |
| AX-158182497 | 16 | 65.976 | KV452969.1  | 15475196 | 9-scf00340 | 9  |
| AX-158182557 | 16 | 65.976 | KV452969.1  | 15543206 | 9-scf00340 | 9  |
| AX-158182664 | 16 | 65.976 | KV452969.1  | 15687570 | 9-scf00340 | 9  |
| AX-158413636 | 16 | 65.976 | KV452969.1  | 15694580 | 9-scf00340 | 9  |
| AX-158182696 | 16 | 65.976 | KV452969.1  | 15725350 | 9-scf00340 | 9  |
| AX-158182762 | 16 | 65.976 | KV452969.1  | 15812789 | 9-scf00340 | 9  |
| AX-157835837 | 16 | 65.976 | KV452969.1  | 15844699 | 9-scf00340 | 9  |
| AX-158182821 | 16 | 65.976 | KV452969.1  | 15896459 | 9-scf00340 | 9  |
| AX-158182825 | 16 | 65.976 | KV452969.1  | 15901325 | 9-scf00340 | 9  |
| AX-158182067 | 16 | 65.982 | KV452969.1  | 14860930 | 9-scf00340 | 9  |
| AX-158182068 | 16 | 65.982 | KV452969.1  | 14861604 | 9-scf00340 | 9  |
| AX-158182127 | 16 | 65.982 | KV452969.1  | 14938988 | 9-scf00340 | 9  |
| AX-158182276 | 16 | 65.982 | KV452969.1  | 15154445 | 9-scf00340 | 9  |
| AX-158182375 | 16 | 65.982 | KV452969.1  | 15306302 | 9-scf00340 | 9  |
| AX-158182689 | 16 | 65.982 | KV452969.1  | 15719032 | 9-scf00340 | 9  |
| AX-158182069 | 16 | 65.985 | KV452969.1  | 14863033 | 9-scf00340 | 9  |
| AX-158182083 | 16 | 65.994 | KV452969.1  | 14883341 | 9-scf00340 | 9  |
| AX-158182108 | 16 | 66.002 | KV452969.1  | 14914068 | 9-scf00340 | 9  |
| AX-158182114 | 16 | 66.01  | KV452969.1  | 14921541 | 9-scf00340 | 9  |
| AX-158181614 | 16 | 66.014 | KV452969.1  | 14316799 | 9-scf00340 | 9  |



|              |    |        |            |          |            |   |
|--------------|----|--------|------------|----------|------------|---|
| AX-158181636 | 16 | 66.014 | KV452969.1 | 14338950 | 9-scf00340 | 9 |
| AX-157835715 | 16 | 66.014 | KV452969.1 | 14366855 | 9-scf00340 | 9 |
| AX-158182121 | 16 | 66.014 | KV452969.1 | 14929722 | 9-scf00340 | 9 |
| AX-157775852 | 16 | 66.014 | KV452969.1 | 14929966 | 9-scf00340 | 9 |
| AX-158182197 | 16 | 66.014 | KV452969.1 | 15029922 | 9-scf00340 | 9 |
| AX-158182296 | 16 | 66.014 | KV452969.1 | 15196188 | 9-scf00340 | 9 |
| AX-157745213 | 16 | 66.014 | KV452969.1 | 15255830 | 9-scf00340 | 9 |
| AX-158182348 | 16 | 66.014 | KV452969.1 | 15260429 | 9-scf00340 | 9 |
| AX-158182455 | 16 | 66.014 | KV452969.1 | 15425681 | 9-scf00340 | 9 |
| AX-158182549 | 16 | 66.014 | KV452969.1 | 15530840 | 9-scf00340 | 9 |
| AX-158182574 | 16 | 66.014 | KV452969.1 | 15563532 | 9-scf00340 | 9 |
| AX-158182634 | 16 | 66.014 | KV452969.1 | 15640324 | 9-scf00340 | 9 |
| AX-157886821 | 16 | 66.014 | KV452969.1 | 15697479 | 9-scf00340 | 9 |
| AX-158181416 | 16 | 66.017 | KV452969.1 | 14037000 | 9-scf00340 | 9 |
| AX-158182131 | 16 | 66.017 | KV452969.1 | 14942566 | 9-scf00340 | 9 |
| AX-158182136 | 16 | 66.017 | KV452969.1 | 14952683 | 9-scf00340 | 9 |
| AX-158182138 | 16 | 66.017 | KV452969.1 | 14954216 | 9-scf00340 | 9 |
| AX-158182490 | 16 | 66.017 | KV452969.1 | 15469221 | 9-scf00340 | 9 |
| AX-158182645 | 16 | 66.017 | KV452969.1 | 15655782 | 9-scf00340 | 9 |
| AX-158182713 | 16 | 66.017 | KV452969.1 | 15745717 | 9-scf00340 | 9 |
| AX-158184116 | 16 | 66.017 | KV452969.1 | 17800250 | 9-scf00340 | 9 |
| AX-158184172 | 16 | 66.017 | KV452969.1 | 17893376 | 9-scf00340 | 9 |
| AX-157835739 | 16 | 66.019 | KV452969.1 | 14648710 | 9-scf00340 | 9 |
| AX-158182141 | 16 | 66.019 | KV452969.1 | 14957937 | 9-scf00340 | 9 |
| AX-158182191 | 16 | 66.019 | KV452969.1 | 15025015 | 9-scf00340 | 9 |
| AX-158182196 | 16 | 66.019 | KV452969.1 | 15027598 | 9-scf00340 | 9 |
| AX-158393566 | 16 | 66.019 | KV452969.1 | 15048832 | 9-scf00340 | 9 |
| AX-158182209 | 16 | 66.019 | KV452969.1 | 15049294 | 9-scf00340 | 9 |
| AX-158182314 | 16 | 66.019 | KV452969.1 | 15214678 | 9-scf00340 | 9 |
| AX-158182315 | 16 | 66.019 | KV452969.1 | 15215027 | 9-scf00340 | 9 |
| AX-158182665 | 16 | 66.019 | KV452969.1 | 15689734 | 9-scf00340 | 9 |
| AX-158182142 | 16 | 66.021 | KV452969.1 | 14958542 | 9-scf00340 | 9 |
| AX-158413464 | 16 | 66.024 | KV452969.1 | 7214271  | 9-scf00340 | 9 |
| AX-158182143 | 16 | 66.024 | KV452969.1 | 14961785 | 9-scf00340 | 9 |
| AX-158182152 | 16 | 66.024 | KV452969.1 | 14978305 | 9-scf00340 | 9 |
| AX-158182195 | 16 | 66.024 | KV452969.1 | 15027153 | 9-scf00340 | 9 |
| AX-158182210 | 16 | 66.024 | KV452969.1 | 15050739 | 9-scf00340 | 9 |
| AX-158182214 | 16 | 66.024 | KV452969.1 | 15054771 | 9-scf00340 | 9 |
| AX-158182407 | 16 | 66.024 | KV452969.1 | 15370586 | 9-scf00340 | 9 |
| AX-158182466 | 16 | 66.024 | KV452969.1 | 15438406 | 9-scf00340 | 9 |
| AX-158182166 | 16 | 66.029 | KV452969.1 | 14996199 | 9-scf00340 | 9 |
| AX-157695609 | 16 | 66.034 | KV452969.1 | 14998783 | 9-scf00340 | 9 |
| AX-158182169 | 16 | 66.038 | KV452969.1 | 15001513 | 9-scf00340 | 9 |
| AX-158182170 | 16 | 66.043 | KV452969.1 | 15001624 | 9-scf00340 | 9 |
| AX-158182318 | 16 | 66.043 | KV452969.1 | 15218543 | 9-scf00340 | 9 |
| AX-158182332 | 16 | 66.043 | KV452969.1 | 15236731 | 9-scf00340 | 9 |
| AX-158182357 | 16 | 66.043 | KV452969.1 | 15275488 | 9-scf00340 | 9 |
| AX-158182180 | 16 | 66.053 | KV452969.1 | 15009997 | 9-scf00340 | 9 |
| AX-158182181 | 16 | 66.053 | KV452969.1 | 15012219 | 9-scf00340 | 9 |
| AX-157719422 | 16 | 66.053 | KV452969.1 | 15155224 | 9-scf00340 | 9 |
| AX-158182184 | 16 | 66.062 | KV452969.1 | 15014818 | 9-scf00340 | 9 |

|              |    |        |            |          |            |   |
|--------------|----|--------|------------|----------|------------|---|
| AX-158182279 | 16 | 66.062 | KV452969.1 | 15164928 | 9-scf00340 | 9 |
| AX-158182294 | 16 | 66.062 | KV452969.1 | 15194635 | 9-scf00340 | 9 |
| AX-158418138 | 16 | 66.062 | KV452969.1 | 15792070 | 9-scf00340 | 9 |
| AX-158182194 | 16 | 66.066 | KV452969.1 | 15026746 | 9-scf00340 | 9 |
| AX-158182199 | 16 | 66.076 | KV452969.1 | 15034419 | 9-scf00340 | 9 |
| AX-158181734 | 16 | 66.085 | KV452969.1 | 14469713 | 9-scf00340 | 9 |
| AX-158181830 | 16 | 66.085 | KV452969.1 | 14609487 | 9-scf00340 | 9 |
| AX-158181876 | 16 | 66.085 | KV452969.1 | 14662971 | 9-scf00340 | 9 |
| AX-158181906 | 16 | 66.085 | KV452969.1 | 14685314 | 9-scf00340 | 9 |
| AX-158181908 | 16 | 66.085 | KV452969.1 | 14687090 | 9-scf00340 | 9 |
| AX-158182099 | 16 | 66.085 | KV452969.1 | 14905111 | 9-scf00340 | 9 |
| AX-157753248 | 16 | 66.085 | KV452969.1 | 14975158 | 9-scf00340 | 9 |
| AX-158182174 | 16 | 66.085 | KV452969.1 | 15004493 | 9-scf00340 | 9 |
| AX-158182200 | 16 | 66.085 | KV452969.1 | 15036906 | 9-scf00340 | 9 |
| AX-158182201 | 16 | 66.085 | KV452969.1 | 15038546 | 9-scf00340 | 9 |
| AX-158182203 | 16 | 66.085 | KV452969.1 | 15044862 | 9-scf00340 | 9 |
| AX-158182206 | 16 | 66.085 | KV452969.1 | 15046953 | 9-scf00340 | 9 |
| AX-158182207 | 16 | 66.085 | KV452969.1 | 15047317 | 9-scf00340 | 9 |
| AX-158182208 | 16 | 66.085 | KV452969.1 | 15048490 | 9-scf00340 | 9 |
| AX-158182212 | 16 | 66.085 | KV452969.1 | 15053014 | 9-scf00340 | 9 |
| AX-158182213 | 16 | 66.085 | KV452969.1 | 15053995 | 9-scf00340 | 9 |
| AX-158182243 | 16 | 66.085 | KV452969.1 | 15102402 | 9-scf00340 | 9 |
| AX-158182246 | 16 | 66.085 | KV452969.1 | 15108212 | 9-scf00340 | 9 |
| AX-158182247 | 16 | 66.085 | KV452969.1 | 15111210 | 9-scf00340 | 9 |
| AX-158182250 | 16 | 66.085 | KV452969.1 | 15120282 | 9-scf00340 | 9 |
| AX-158182253 | 16 | 66.085 | KV452969.1 | 15122882 | 9-scf00340 | 9 |
| AX-157746153 | 16 | 66.085 | KV452969.1 | 15134259 | 9-scf00340 | 9 |
| AX-158182265 | 16 | 66.085 | KV452969.1 | 15139079 | 9-scf00340 | 9 |
| AX-158182274 | 16 | 66.085 | KV452969.1 | 15152785 | 9-scf00340 | 9 |
| AX-158182289 | 16 | 66.085 | KV452969.1 | 15187322 | 9-scf00340 | 9 |
| AX-158182304 | 16 | 66.085 | KV452969.1 | 15204285 | 9-scf00340 | 9 |
| AX-157835779 | 16 | 66.085 | KV452969.1 | 15244118 | 9-scf00340 | 9 |
| AX-158182363 | 16 | 66.085 | KV452969.1 | 15284404 | 9-scf00340 | 9 |
| AX-158182382 | 16 | 66.085 | KV452969.1 | 15312914 | 9-scf00340 | 9 |
| AX-158182421 | 16 | 66.085 | KV452969.1 | 15399283 | 9-scf00340 | 9 |
| AX-158182519 | 16 | 66.085 | KV452969.1 | 15495782 | 9-scf00340 | 9 |
| AX-157835815 | 16 | 66.085 | KV452969.1 | 15573473 | 9-scf00340 | 9 |
| AX-158182600 | 16 | 66.085 | KV452969.1 | 15598580 | 9-scf00340 | 9 |
| AX-158182662 | 16 | 66.085 | KV452969.1 | 15684185 | 9-scf00340 | 9 |
| AX-158380613 | 16 | 66.085 | KV452969.1 | 15767043 | 9-scf00340 | 9 |
| AX-158182830 | 16 | 66.085 | KV452969.1 | 15906767 | 9-scf00340 | 9 |
| AX-158182876 | 16 | 66.085 | KV452969.1 | 15961872 | 9-scf00340 | 9 |
| AX-158182901 | 16 | 66.085 | KV452969.1 | 15998866 | 9-scf00340 | 9 |
| AX-157752265 | 16 | 66.085 | KV452969.1 | 16013912 | 9-scf00340 | 9 |
| AX-158182950 | 16 | 66.085 | KV452969.1 | 16051445 | 9-scf00340 | 9 |
| AX-157835770 | 16 | 66.121 | KV452969.1 | 15157963 | 9-scf00340 | 9 |
| AX-158380609 | 16 | 66.16  | KV452969.1 | 15164271 | 9-scf00340 | 9 |
| AX-158181776 | 16 | 66.195 | KV452969.1 | 14547200 | 9-scf00340 | 9 |
| AX-158181777 | 16 | 66.195 | KV452969.1 | 14549406 | 9-scf00340 | 9 |
| AX-157835741 | 16 | 66.195 | KV452969.1 | 14682380 | 9-scf00340 | 9 |
| AX-158181939 | 16 | 66.195 | KV452969.1 | 14715646 | 9-scf00340 | 9 |

|              |    |        |            |          |            |   |
|--------------|----|--------|------------|----------|------------|---|
| AX-157835757 | 16 | 66.195 | KV452969.1 | 14843454 | 9-scf00340 | 9 |
| AX-158182111 | 16 | 66.195 | KV452969.1 | 14917318 | 9-scf00340 | 9 |
| AX-157746877 | 16 | 66.195 | KV452969.1 | 14917743 | 9-scf00340 | 9 |
| AX-157835764 | 16 | 66.195 | KV452969.1 | 14924680 | 9-scf00340 | 9 |
| AX-158182130 | 16 | 66.195 | KV452969.1 | 14942101 | 9-scf00340 | 9 |
| AX-158182229 | 16 | 66.195 | KV452969.1 | 15075403 | 9-scf00340 | 9 |
| AX-158182238 | 16 | 66.195 | KV452969.1 | 15090653 | 9-scf00340 | 9 |
| AX-158413625 | 16 | 66.195 | KV452969.1 | 15164606 | 9-scf00340 | 9 |
| AX-157756606 | 16 | 66.195 | KV452969.1 | 15167560 | 9-scf00340 | 9 |
| AX-158182280 | 16 | 66.195 | KV452969.1 | 15167655 | 9-scf00340 | 9 |
| AX-158182283 | 16 | 66.195 | KV452969.1 | 15170074 | 9-scf00340 | 9 |
| AX-158182297 | 16 | 66.195 | KV452969.1 | 15197291 | 9-scf00340 | 9 |
| AX-158182310 | 16 | 66.195 | KV452969.1 | 15211062 | 9-scf00340 | 9 |
| AX-157747118 | 16 | 66.195 | KV452969.1 | 15211639 | 9-scf00340 | 9 |
| AX-157835782 | 16 | 66.195 | KV452969.1 | 15252188 | 9-scf00340 | 9 |
| AX-158182383 | 16 | 66.195 | KV452969.1 | 15313823 | 9-scf00340 | 9 |
| AX-158182385 | 16 | 66.195 | KV452969.1 | 15314893 | 9-scf00340 | 9 |
| AX-158182478 | 16 | 66.195 | KV452969.1 | 15453922 | 9-scf00340 | 9 |
| AX-158182492 | 16 | 66.195 | KV452969.1 | 15470632 | 9-scf00340 | 9 |
| AX-158182513 | 16 | 66.195 | KV452969.1 | 15490596 | 9-scf00340 | 9 |
| AX-158182628 | 16 | 66.195 | KV452969.1 | 15633705 | 9-scf00340 | 9 |
| AX-158182742 | 16 | 66.195 | KV452969.1 | 15793787 | 9-scf00340 | 9 |
| AX-157740958 | 16 | 66.304 | KV452969.1 | 14430447 | 9-scf00340 | 9 |
| AX-158181885 | 16 | 66.304 | KV452969.1 | 14670163 | 9-scf00340 | 9 |
| AX-158182270 | 16 | 66.304 | KV452969.1 | 15145314 | 9-scf00340 | 9 |
| AX-158182278 | 16 | 66.304 | KV452969.1 | 15163223 | 9-scf00340 | 9 |
| AX-157835774 | 16 | 66.304 | KV452969.1 | 15201298 | 9-scf00340 | 9 |
| AX-158182320 | 16 | 66.304 | KV452969.1 | 15221113 | 9-scf00340 | 9 |
| AX-158182321 | 16 | 66.304 | KV452969.1 | 15221705 | 9-scf00340 | 9 |
| AX-158182323 | 16 | 66.304 | KV452969.1 | 15222189 | 9-scf00340 | 9 |
| AX-157872077 | 16 | 66.304 | KV452969.1 | 15231229 | 9-scf00340 | 9 |
| AX-158182326 | 16 | 66.304 | KV452969.1 | 15232515 | 9-scf00340 | 9 |
| AX-158182329 | 16 | 66.304 | KV452969.1 | 15234834 | 9-scf00340 | 9 |
| AX-158182330 | 16 | 66.304 | KV452969.1 | 15235157 | 9-scf00340 | 9 |
| AX-158413628 | 16 | 66.304 | KV452969.1 | 15245620 | 9-scf00340 | 9 |
| AX-158182346 | 16 | 66.304 | KV452969.1 | 15256130 | 9-scf00340 | 9 |
| AX-158182354 | 16 | 66.304 | KV452969.1 | 15269129 | 9-scf00340 | 9 |
| AX-158182356 | 16 | 66.304 | KV452969.1 | 15275001 | 9-scf00340 | 9 |
| AX-158182360 | 16 | 66.304 | KV452969.1 | 15277644 | 9-scf00340 | 9 |
| AX-158182365 | 16 | 66.304 | KV452969.1 | 15289971 | 9-scf00340 | 9 |
| AX-158182366 | 16 | 66.304 | KV452969.1 | 15290919 | 9-scf00340 | 9 |
| AX-157835789 | 16 | 66.304 | KV452969.1 | 15291319 | 9-scf00340 | 9 |
| AX-157835790 | 16 | 66.304 | KV452969.1 | 15291559 | 9-scf00340 | 9 |
| AX-158182369 | 16 | 66.304 | KV452969.1 | 15298785 | 9-scf00340 | 9 |
| AX-158182370 | 16 | 66.304 | KV452969.1 | 15300031 | 9-scf00340 | 9 |
| AX-158182373 | 16 | 66.304 | KV452969.1 | 15303058 | 9-scf00340 | 9 |
| AX-157835796 | 16 | 66.304 | KV452969.1 | 15307739 | 9-scf00340 | 9 |
| AX-158182381 | 16 | 66.304 | KV452969.1 | 15312360 | 9-scf00340 | 9 |
| AX-158182384 | 16 | 66.304 | KV452969.1 | 15314695 | 9-scf00340 | 9 |
| AX-157741179 | 16 | 66.304 | KV452969.1 | 15315100 | 9-scf00340 | 9 |
| AX-158182386 | 16 | 66.304 | KV452969.1 | 15315261 | 9-scf00340 | 9 |

|              |    |        |            |          |            |   |
|--------------|----|--------|------------|----------|------------|---|
| AX-158182387 | 16 | 66.304 | KV452969.1 | 15316965 | 9-scf00340 | 9 |
| AX-158182391 | 16 | 66.304 | KV452969.1 | 15323784 | 9-scf00340 | 9 |
| AX-157835799 | 16 | 66.304 | KV452969.1 | 15363981 | 9-scf00340 | 9 |
| AX-158182401 | 16 | 66.304 | KV452969.1 | 15365101 | 9-scf00340 | 9 |
| AX-158182402 | 16 | 66.304 | KV452969.1 | 15366651 | 9-scf00340 | 9 |
| AX-158413631 | 16 | 66.304 | KV452969.1 | 15371180 | 9-scf00340 | 9 |
| AX-158182409 | 16 | 66.304 | KV452969.1 | 15371548 | 9-scf00340 | 9 |
| AX-157724194 | 16 | 66.304 | KV452969.1 | 15372009 | 9-scf00340 | 9 |
| AX-158182483 | 16 | 66.304 | KV452969.1 | 15460733 | 9-scf00340 | 9 |
| AX-158182518 | 16 | 66.304 | KV452969.1 | 15493725 | 9-scf00340 | 9 |
| AX-158182531 | 16 | 66.304 | KV452969.1 | 15510389 | 9-scf00340 | 9 |
| AX-158182537 | 16 | 66.304 | KV452969.1 | 15517953 | 9-scf00340 | 9 |
| AX-158182624 | 16 | 66.304 | KV452969.1 | 15628909 | 9-scf00340 | 9 |
| AX-158182635 | 16 | 66.304 | KV452969.1 | 15640914 | 9-scf00340 | 9 |
| AX-158182766 | 16 | 66.304 | KV452969.1 | 15817785 | 9-scf00340 | 9 |
| AX-158182405 | 16 | 66.346 | KV452969.1 | 15369371 | 9-scf00340 | 9 |
| AX-158182410 | 16 | 66.376 | KV452969.1 | 15372366 | 9-scf00340 | 9 |
| AX-158182495 | 16 | 66.376 | KV452969.1 | 15473138 | 9-scf00340 | 9 |
| AX-158182609 | 16 | 66.376 | KV452969.1 | 15614513 | 9-scf00340 | 9 |
| AX-158182425 | 16 | 66.399 | KV452969.1 | 15402638 | 9-scf00340 | 9 |
| AX-158182462 | 16 | 66.399 | KV452969.1 | 15434795 | 9-scf00340 | 9 |
| AX-157741124 | 16 | 66.413 | KV452969.1 | 14453333 | 9-scf00340 | 9 |
| AX-158181755 | 16 | 66.413 | KV452969.1 | 14515575 | 9-scf00340 | 9 |
| AX-157725255 | 16 | 66.413 | KV452969.1 | 14710572 | 9-scf00340 | 9 |
| AX-157835760 | 16 | 66.413 | KV452969.1 | 14892069 | 9-scf00340 | 9 |
| AX-158182104 | 16 | 66.413 | KV452969.1 | 14910418 | 9-scf00340 | 9 |
| AX-158182116 | 16 | 66.413 | KV452969.1 | 14925558 | 9-scf00340 | 9 |
| AX-158182185 | 16 | 66.413 | KV452969.1 | 15016406 | 9-scf00340 | 9 |
| AX-158182187 | 16 | 66.413 | KV452969.1 | 15017757 | 9-scf00340 | 9 |
| AX-158182237 | 16 | 66.413 | KV452969.1 | 15089643 | 9-scf00340 | 9 |
| AX-158182260 | 16 | 66.413 | KV452969.1 | 15129731 | 9-scf00340 | 9 |
| AX-157835772 | 16 | 66.413 | KV452969.1 | 15183795 | 9-scf00340 | 9 |
| AX-158182309 | 16 | 66.413 | KV452969.1 | 15208619 | 9-scf00340 | 9 |
| AX-157774579 | 16 | 66.413 | KV452969.1 | 15286298 | 9-scf00340 | 9 |
| AX-157755823 | 16 | 66.413 | KV452969.1 | 15446937 | 9-scf00340 | 9 |
| AX-158182468 | 16 | 66.413 | KV452969.1 | 15447413 | 9-scf00340 | 9 |
| AX-158182469 | 16 | 66.413 | KV452969.1 | 15447985 | 9-scf00340 | 9 |
| AX-158182473 | 16 | 66.413 | KV452969.1 | 15450251 | 9-scf00340 | 9 |
| AX-158182475 | 16 | 66.413 | KV452969.1 | 15451381 | 9-scf00340 | 9 |
| AX-157754404 | 16 | 66.413 | KV452969.1 | 15462547 | 9-scf00340 | 9 |
| AX-158182486 | 16 | 66.413 | KV452969.1 | 15465727 | 9-scf00340 | 9 |
| AX-158182489 | 16 | 66.413 | KV452969.1 | 15467674 | 9-scf00340 | 9 |
| AX-158182491 | 16 | 66.413 | KV452969.1 | 15469994 | 9-scf00340 | 9 |
| AX-158182493 | 16 | 66.413 | KV452969.1 | 15471337 | 9-scf00340 | 9 |
| AX-158182498 | 16 | 66.413 | KV452969.1 | 15475996 | 9-scf00340 | 9 |
| AX-158182499 | 16 | 66.413 | KV452969.1 | 15476869 | 9-scf00340 | 9 |
| AX-158182510 | 16 | 66.413 | KV452969.1 | 15486841 | 9-scf00340 | 9 |
| AX-158182511 | 16 | 66.413 | KV452969.1 | 15487973 | 9-scf00340 | 9 |
| AX-158182512 | 16 | 66.413 | KV452969.1 | 15489703 | 9-scf00340 | 9 |
| AX-157727511 | 16 | 66.413 | KV452969.1 | 15490744 | 9-scf00340 | 9 |
| AX-158182516 | 16 | 66.413 | KV452969.1 | 15492019 | 9-scf00340 | 9 |

|              |    |        |            |          |            |   |
|--------------|----|--------|------------|----------|------------|---|
| AX-158182517 | 16 | 66.413 | KV452969.1 | 15492808 | 9-scf00340 | 9 |
| AX-158182520 | 16 | 66.413 | KV452969.1 | 15497253 | 9-scf00340 | 9 |
| AX-158182523 | 16 | 66.413 | KV452969.1 | 15500521 | 9-scf00340 | 9 |
| AX-158182526 | 16 | 66.413 | KV452969.1 | 15503746 | 9-scf00340 | 9 |
| AX-158182527 | 16 | 66.413 | KV452969.1 | 15505116 | 9-scf00340 | 9 |
| AX-158182528 | 16 | 66.413 | KV452969.1 | 15508622 | 9-scf00340 | 9 |
| AX-158182530 | 16 | 66.413 | KV452969.1 | 15509949 | 9-scf00340 | 9 |
| AX-158182539 | 16 | 66.413 | KV452969.1 | 15520358 | 9-scf00340 | 9 |
| AX-158182541 | 16 | 66.413 | KV452969.1 | 15522046 | 9-scf00340 | 9 |
| AX-158182547 | 16 | 66.413 | KV452969.1 | 15529123 | 9-scf00340 | 9 |
| AX-157748101 | 16 | 66.413 | KV452969.1 | 15531534 | 9-scf00340 | 9 |
| AX-158182551 | 16 | 66.413 | KV452969.1 | 15535912 | 9-scf00340 | 9 |
| AX-158182552 | 16 | 66.413 | KV452969.1 | 15536883 | 9-scf00340 | 9 |
| AX-158182553 | 16 | 66.413 | KV452969.1 | 15537971 | 9-scf00340 | 9 |
| AX-158182554 | 16 | 66.413 | KV452969.1 | 15539386 | 9-scf00340 | 9 |
| AX-157699637 | 16 | 66.413 | KV452969.1 | 15569487 | 9-scf00340 | 9 |
| AX-158182585 | 16 | 66.413 | KV452969.1 | 15581674 | 9-scf00340 | 9 |
| AX-158182594 | 16 | 66.413 | KV452969.1 | 15590815 | 9-scf00340 | 9 |
| AX-158182597 | 16 | 66.413 | KV452969.1 | 15594699 | 9-scf00340 | 9 |
| AX-158182601 | 16 | 66.413 | KV452969.1 | 15600253 | 9-scf00340 | 9 |
| AX-158182604 | 16 | 66.413 | KV452969.1 | 15602508 | 9-scf00340 | 9 |
| AX-158182606 | 16 | 66.413 | KV452969.1 | 15610064 | 9-scf00340 | 9 |
| AX-158182607 | 16 | 66.413 | KV452969.1 | 15610238 | 9-scf00340 | 9 |
| AX-158182653 | 16 | 66.413 | KV452969.1 | 15667218 | 9-scf00340 | 9 |
| AX-158182655 | 16 | 66.413 | KV452969.1 | 15668406 | 9-scf00340 | 9 |
| AX-158182708 | 16 | 66.413 | KV452969.1 | 15741287 | 9-scf00340 | 9 |
| AX-158182746 | 16 | 66.413 | KV452969.1 | 15797602 | 9-scf00340 | 9 |
| AX-157835839 | 16 | 66.413 | KV452969.1 | 15884538 | 9-scf00340 | 9 |
| AX-158182906 | 16 | 66.413 | KV452969.1 | 16006189 | 9-scf00340 | 9 |
| AX-158421706 | 16 | 66.427 | KV452969.1 | 15548847 | 9-scf00340 | 9 |
| AX-158182565 | 16 | 66.444 | KV452969.1 | 15555490 | 9-scf00340 | 9 |
| AX-158182610 | 16 | 66.46  | KV452969.1 | 15616997 | 9-scf00340 | 9 |
| AX-158393567 | 16 | 66.491 | KV452969.1 | 15619909 | 9-scf00340 | 9 |
| AX-158182566 | 16 | 66.522 | KV452969.1 | 15556067 | 9-scf00340 | 9 |
| AX-158182627 | 16 | 66.522 | KV452969.1 | 15633203 | 9-scf00340 | 9 |
| AX-158182631 | 16 | 66.522 | KV452969.1 | 15636490 | 9-scf00340 | 9 |
| AX-158182638 | 16 | 66.522 | KV452969.1 | 15643178 | 9-scf00340 | 9 |
| AX-158183036 | 16 | 66.522 | KV452969.1 | 16159088 | 9-scf00340 | 9 |
| AX-158423089 | 16 | 66.522 | KV452969.1 | 16832921 | 9-scf00340 | 9 |
| AX-158182588 | 16 | 66.523 | KV452969.1 | 15584120 | 9-scf00340 | 9 |
| AX-158182641 | 16 | 66.686 | KV452969.1 | 15651578 | 9-scf00340 | 9 |
| AX-158181742 | 16 | 66.85  | KV452969.1 | 14488097 | 9-scf00340 | 9 |
| AX-158181778 | 16 | 66.85  | KV452969.1 | 14554524 | 9-scf00340 | 9 |
| AX-158182613 | 16 | 66.85  | KV452969.1 | 15620313 | 9-scf00340 | 9 |
| AX-158182659 | 16 | 66.85  | KV452969.1 | 15679127 | 9-scf00340 | 9 |
| AX-158182660 | 16 | 66.85  | KV452969.1 | 15680873 | 9-scf00340 | 9 |
| AX-158182667 | 16 | 66.85  | KV452969.1 | 15692418 | 9-scf00340 | 9 |
| AX-158182668 | 16 | 66.85  | KV452969.1 | 15693012 | 9-scf00340 | 9 |
| AX-158182672 | 16 | 66.85  | KV452969.1 | 15696629 | 9-scf00340 | 9 |
| AX-158182675 | 16 | 66.85  | KV452969.1 | 15699360 | 9-scf00340 | 9 |
| AX-158182691 | 16 | 66.85  | KV452969.1 | 15721340 | 9-scf00340 | 9 |

|              |    |        |            |          |            |   |
|--------------|----|--------|------------|----------|------------|---|
| AX-158182692 | 16 | 66.85  | KV452969.1 | 15721775 | 9-scf00340 | 9 |
| AX-158182695 | 16 | 66.85  | KV452969.1 | 15725162 | 9-scf00340 | 9 |
| AX-158182703 | 16 | 66.85  | KV452969.1 | 15732612 | 9-scf00340 | 9 |
| AX-157858808 | 16 | 66.85  | KV452969.1 | 15742182 | 9-scf00340 | 9 |
| AX-158182760 | 16 | 66.85  | KV452969.1 | 15811368 | 9-scf00340 | 9 |
| AX-158183576 | 16 | 66.85  | KV452969.1 | 17159760 | 9-scf00340 | 9 |
| AX-158182699 | 16 | 66.959 | KV452969.1 | 15728576 | 9-scf00340 | 9 |
| AX-158182706 | 16 | 66.983 | KV452969.1 | 15738824 | 9-scf00340 | 9 |
| AX-158182702 | 16 | 67.069 | KV452969.1 | 15732132 | 9-scf00340 | 9 |
| AX-158182716 | 16 | 67.069 | KV452969.1 | 15748678 | 9-scf00340 | 9 |
| AX-158182717 | 16 | 67.069 | KV452969.1 | 15749154 | 9-scf00340 | 9 |
| AX-158182718 | 16 | 67.069 | KV452969.1 | 15751031 | 9-scf00340 | 9 |
| AX-158182721 | 16 | 67.069 | KV452969.1 | 15753071 | 9-scf00340 | 9 |
| AX-158182723 | 16 | 67.069 | KV452969.1 | 15753582 | 9-scf00340 | 9 |
| AX-158182724 | 16 | 67.069 | KV452969.1 | 15753976 | 9-scf00340 | 9 |
| AX-158182725 | 16 | 67.103 | KV452969.1 | 15754728 | 9-scf00340 | 9 |
| AX-158182726 | 16 | 67.125 | KV452969.1 | 15755117 | 9-scf00340 | 9 |
| AX-158182727 | 16 | 67.131 | KV452969.1 | 15755945 | 9-scf00340 | 9 |
| AX-158182731 | 16 | 67.145 | KV452969.1 | 15761014 | 9-scf00340 | 9 |
| AX-158182732 | 16 | 67.161 | KV452969.1 | 15763086 | 9-scf00340 | 9 |
| AX-158182079 | 16 | 67.178 | KV452969.1 | 14878777 | 9-scf00340 | 9 |
| AX-158182115 | 16 | 67.178 | KV452969.1 | 14924260 | 9-scf00340 | 9 |
| AX-158182248 | 16 | 67.178 | KV452969.1 | 15111576 | 9-scf00340 | 9 |
| AX-157835786 | 16 | 67.178 | KV452969.1 | 15279324 | 9-scf00340 | 9 |
| AX-158182556 | 16 | 67.178 | KV452969.1 | 15541634 | 9-scf00340 | 9 |
| AX-158182666 | 16 | 67.178 | KV452969.1 | 15691450 | 9-scf00340 | 9 |
| AX-158182728 | 16 | 67.178 | KV452969.1 | 15756553 | 9-scf00340 | 9 |
| AX-157878897 | 16 | 67.178 | KV452969.1 | 15763382 | 9-scf00340 | 9 |
| AX-157835818 | 16 | 67.178 | KV452969.1 | 15773249 | 9-scf00340 | 9 |
| AX-158182736 | 16 | 67.178 | KV452969.1 | 15782165 | 9-scf00340 | 9 |
| AX-157721931 | 16 | 67.178 | KV452969.1 | 15792224 | 9-scf00340 | 9 |
| AX-158182743 | 16 | 67.178 | KV452969.1 | 15794647 | 9-scf00340 | 9 |
| AX-157835829 | 16 | 67.178 | KV452969.1 | 15821742 | 9-scf00340 | 9 |
| AX-158385971 | 16 | 67.178 | KV452969.1 | 15822002 | 9-scf00340 | 9 |
| AX-158182752 | 16 | 67.315 | KV452969.1 | 15802144 | 9-scf00340 | 9 |
| AX-158182479 | 16 | 67.452 | KV452969.1 | 15454407 | 9-scf00340 | 9 |
| AX-158182748 | 16 | 67.452 | KV452969.1 | 15798991 | 9-scf00340 | 9 |
| AX-158182751 | 16 | 67.452 | KV452969.1 | 15801478 | 9-scf00340 | 9 |
| AX-157714580 | 16 | 67.452 | KV452969.1 | 15802568 | 9-scf00340 | 9 |
| AX-158182753 | 16 | 67.452 | KV452969.1 | 15803185 | 9-scf00340 | 9 |
| AX-158182755 | 16 | 67.452 | KV452969.1 | 15804489 | 9-scf00340 | 9 |
| AX-157835823 | 16 | 67.452 | KV452969.1 | 15805852 | 9-scf00340 | 9 |
| AX-158182763 | 16 | 67.452 | KV452969.1 | 15815847 | 9-scf00340 | 9 |
| AX-157835825 | 16 | 67.452 | KV452969.1 | 15815933 | 9-scf00340 | 9 |
| AX-158182764 | 16 | 67.452 | KV452969.1 | 15816638 | 9-scf00340 | 9 |
| AX-157835826 | 16 | 67.452 | KV452969.1 | 15818616 | 9-scf00340 | 9 |
| AX-157835828 | 16 | 67.452 | KV452969.1 | 15821378 | 9-scf00340 | 9 |
| AX-157741742 | 16 | 67.452 | KV452969.1 | 15823997 | 9-scf00340 | 9 |
| AX-157835833 | 16 | 67.452 | KV452969.1 | 15826626 | 9-scf00340 | 9 |
| AX-158182774 | 16 | 67.452 | KV452969.1 | 15832237 | 9-scf00340 | 9 |
| AX-158182776 | 16 | 67.452 | KV452969.1 | 15834218 | 9-scf00340 | 9 |

|              |    |        |            |          |            |   |
|--------------|----|--------|------------|----------|------------|---|
| AX-158182777 | 16 | 67.452 | KV452969.1 | 15835063 | 9-scf00340 | 9 |
| AX-158182779 | 16 | 67.452 | KV452969.1 | 15836006 | 9-scf00340 | 9 |
| AX-158182780 | 16 | 67.452 | KV452969.1 | 15837668 | 9-scf00340 | 9 |
| AX-157858811 | 16 | 67.452 | KV452969.1 | 15861213 | 9-scf00340 | 9 |
| AX-158413642 | 16 | 67.452 | KV452969.1 | 15884402 | 9-scf00340 | 9 |
| AX-158182813 | 16 | 67.452 | KV452969.1 | 15890008 | 9-scf00340 | 9 |
| AX-157835840 | 16 | 67.452 | KV452969.1 | 15893290 | 9-scf00340 | 9 |
| AX-157858812 | 16 | 67.452 | KV452969.1 | 15898507 | 9-scf00340 | 9 |
| AX-158182852 | 16 | 67.452 | KV452969.1 | 15931928 | 9-scf00340 | 9 |
| AX-157750241 | 16 | 67.452 | KV452969.1 | 15935648 | 9-scf00340 | 9 |
| AX-158182924 | 16 | 67.452 | KV452969.1 | 16023133 | 9-scf00340 | 9 |
| AX-158182958 | 16 | 67.452 | KV452969.1 | 16065700 | 9-scf00340 | 9 |
| AX-158182775 | 16 | 67.473 | KV452969.1 | 15833777 | 9-scf00340 | 9 |
| AX-157716885 | 16 | 67.473 | KV452969.1 | 15842335 | 9-scf00340 | 9 |
| AX-157835743 | 16 | 67.588 | KV452969.1 | 14692608 | 9-scf00340 | 9 |
| AX-158380608 | 16 | 67.588 | KV452969.1 | 14717616 | 9-scf00340 | 9 |
| AX-158181942 | 16 | 67.588 | KV452969.1 | 14717852 | 9-scf00340 | 9 |
| AX-158181945 | 16 | 67.588 | KV452969.1 | 14722419 | 9-scf00340 | 9 |
| AX-158182032 | 16 | 67.588 | KV452969.1 | 14809573 | 9-scf00340 | 9 |
| AX-158182301 | 16 | 67.588 | KV452969.1 | 15200203 | 9-scf00340 | 9 |
| AX-158182345 | 16 | 67.588 | KV452969.1 | 15254532 | 9-scf00340 | 9 |
| AX-158380610 | 16 | 67.588 | KV452969.1 | 15333189 | 9-scf00340 | 9 |
| AX-158182500 | 16 | 67.588 | KV452969.1 | 15477670 | 9-scf00340 | 9 |
| AX-158182651 | 16 | 67.588 | KV452969.1 | 15661654 | 9-scf00340 | 9 |
| AX-158182749 | 16 | 67.588 | KV452969.1 | 15800510 | 9-scf00340 | 9 |
| AX-157835822 | 16 | 67.588 | KV452969.1 | 15804948 | 9-scf00340 | 9 |
| AX-158182772 | 16 | 67.588 | KV452969.1 | 15826579 | 9-scf00340 | 9 |
| AX-158182778 | 16 | 67.588 | KV452969.1 | 15835669 | 9-scf00340 | 9 |
| AX-157715897 | 16 | 67.588 | KV452969.1 | 15850707 | 9-scf00340 | 9 |
| AX-158182786 | 16 | 67.588 | KV452969.1 | 15856757 | 9-scf00340 | 9 |
| AX-158182789 | 16 | 67.588 | KV452969.1 | 15859200 | 9-scf00340 | 9 |
| AX-158182791 | 16 | 67.588 | KV452969.1 | 15861092 | 9-scf00340 | 9 |
| AX-158182814 | 16 | 67.588 | KV452969.1 | 15891582 | 9-scf00340 | 9 |
| AX-158182816 | 16 | 67.588 | KV452969.1 | 15893052 | 9-scf00340 | 9 |
| AX-158380614 | 16 | 67.588 | KV452969.1 | 15893500 | 9-scf00340 | 9 |
| AX-158182818 | 16 | 67.588 | KV452969.1 | 15894710 | 9-scf00340 | 9 |
| AX-158182824 | 16 | 67.588 | KV452969.1 | 15898344 | 9-scf00340 | 9 |
| AX-158182826 | 16 | 67.588 | KV452969.1 | 15902041 | 9-scf00340 | 9 |
| AX-158182844 | 16 | 67.588 | KV452969.1 | 15922632 | 9-scf00340 | 9 |
| AX-158182862 | 16 | 67.588 | KV452969.1 | 15941322 | 9-scf00340 | 9 |
| AX-158182864 | 16 | 67.588 | KV452969.1 | 15942064 | 9-scf00340 | 9 |
| AX-158182889 | 16 | 67.588 | KV452969.1 | 15983270 | 9-scf00340 | 9 |
| AX-158182912 | 16 | 67.588 | KV452969.1 | 16010725 | 9-scf00340 | 9 |
| AX-158182995 | 16 | 67.588 | KV452969.1 | 16102102 | 9-scf00340 | 9 |
| AX-158182869 | 16 | 67.655 | KV452969.1 | 15946283 | 9-scf00340 | 9 |
| AX-158182810 | 16 | 67.725 | KV452969.1 | 15887487 | 9-scf00340 | 9 |
| AX-158182842 | 16 | 67.725 | KV452969.1 | 15921300 | 9-scf00340 | 9 |
| AX-158182867 | 16 | 67.725 | KV452969.1 | 15945612 | 9-scf00340 | 9 |
| AX-158182870 | 16 | 67.725 | KV452969.1 | 15946916 | 9-scf00340 | 9 |
| AX-158182871 | 16 | 67.725 | KV452969.1 | 15953068 | 9-scf00340 | 9 |
| AX-158182880 | 16 | 67.725 | KV452969.1 | 15968594 | 9-scf00340 | 9 |

|              |    |        |            |          |            |   |
|--------------|----|--------|------------|----------|------------|---|
| AX-158182882 | 16 | 67.725 | KV452969.1 | 15971899 | 9-scf00340 | 9 |
| AX-157835845 | 16 | 67.725 | KV452969.1 | 15971964 | 9-scf00340 | 9 |
| AX-158182883 | 16 | 67.725 | KV452969.1 | 15973769 | 9-scf00340 | 9 |
| AX-158182884 | 16 | 67.725 | KV452969.1 | 15976310 | 9-scf00340 | 9 |
| AX-158182885 | 16 | 67.725 | KV452969.1 | 15979817 | 9-scf00340 | 9 |
| AX-158182887 | 16 | 67.725 | KV452969.1 | 15981675 | 9-scf00340 | 9 |
| AX-157774541 | 16 | 67.725 | KV452969.1 | 15982059 | 9-scf00340 | 9 |
| AX-158182888 | 16 | 67.725 | KV452969.1 | 15982590 | 9-scf00340 | 9 |
| AX-158182890 | 16 | 67.725 | KV452969.1 | 15985439 | 9-scf00340 | 9 |
| AX-158182894 | 16 | 67.725 | KV452969.1 | 15990242 | 9-scf00340 | 9 |
| AX-158182898 | 16 | 67.725 | KV452969.1 | 15997564 | 9-scf00340 | 9 |
| AX-158182904 | 16 | 67.725 | KV452969.1 | 16003503 | 9-scf00340 | 9 |
| AX-158182905 | 16 | 67.725 | KV452969.1 | 16005388 | 9-scf00340 | 9 |
| AX-158182907 | 16 | 67.725 | KV452969.1 | 16006624 | 9-scf00340 | 9 |
| AX-158182909 | 16 | 67.725 | KV452969.1 | 16007369 | 9-scf00340 | 9 |
| AX-158182914 | 16 | 67.725 | KV452969.1 | 16012001 | 9-scf00340 | 9 |
| AX-158182920 | 16 | 67.725 | KV452969.1 | 16020028 | 9-scf00340 | 9 |
| AX-158182921 | 16 | 67.725 | KV452969.1 | 16020648 | 9-scf00340 | 9 |
| AX-158182943 | 16 | 67.725 | KV452969.1 | 16044787 | 9-scf00340 | 9 |
| AX-158182971 | 16 | 67.725 | KV452969.1 | 16077832 | 9-scf00340 | 9 |
| AX-158182982 | 16 | 67.725 | KV452969.1 | 16087311 | 9-scf00340 | 9 |
| AX-158183016 | 16 | 67.725 | KV452969.1 | 16131859 | 9-scf00340 | 9 |
| AX-157835850 | 16 | 67.725 | KV452969.1 | 16145209 | 9-scf00340 | 9 |
| AX-158183107 | 16 | 67.725 | KV452969.1 | 16276437 | 9-scf00340 | 9 |
| AX-157713394 | 16 | 67.725 | KV452969.1 | 16336795 | 9-scf00340 | 9 |
| AX-158183173 | 16 | 67.725 | KV452969.1 | 16378631 | 9-scf00340 | 9 |
| AX-158413652 | 16 | 67.725 | KV452969.1 | 16393033 | 9-scf00340 | 9 |
| AX-158183201 | 16 | 67.725 | KV452969.1 | 16437408 | 9-scf00340 | 9 |
| AX-157753436 | 16 | 67.725 | KV452969.1 | 16446601 | 9-scf00340 | 9 |
| AX-158183208 | 16 | 67.725 | KV452969.1 | 16453169 | 9-scf00340 | 9 |
| AX-158413653 | 16 | 67.725 | KV452969.1 | 16453862 | 9-scf00340 | 9 |
| AX-157724181 | 16 | 67.725 | KV452969.1 | 16747477 | 9-scf00340 | 9 |
| AX-157726474 | 16 | 67.725 | KV452969.1 | 17404321 | 9-scf00340 | 9 |
| AX-157722923 | 16 | 67.725 | KV452969.1 | 17428179 | 9-scf00340 | 9 |
| AX-157835907 | 16 | 67.725 | KV452969.1 | 17433726 | 9-scf00340 | 9 |
| AX-158183835 | 16 | 67.725 | KV452969.1 | 17435572 | 9-scf00340 | 9 |
| AX-158183844 | 16 | 67.725 | KV452969.1 | 17443502 | 9-scf00340 | 9 |
| AX-158413687 | 16 | 67.725 | KV452969.1 | 17578999 | 9-scf00340 | 9 |
| AX-158182910 | 16 | 67.797 | KV452969.1 | 16007833 | 9-scf00340 | 9 |
| AX-158182745 | 16 | 67.834 | KV452969.1 | 15797100 | 9-scf00340 | 9 |
| AX-158182899 | 16 | 67.834 | KV452969.1 | 15997867 | 9-scf00340 | 9 |
| AX-158182922 | 16 | 67.834 | KV452969.1 | 16021090 | 9-scf00340 | 9 |
| AX-158182928 | 16 | 67.834 | KV452969.1 | 16029879 | 9-scf00340 | 9 |
| AX-158182930 | 16 | 67.834 | KV452969.1 | 16031160 | 9-scf00340 | 9 |
| AX-158182931 | 16 | 67.834 | KV452969.1 | 16032723 | 9-scf00340 | 9 |
| AX-158182933 | 16 | 67.834 | KV452969.1 | 16033913 | 9-scf00340 | 9 |
| AX-158182935 | 16 | 67.834 | KV452969.1 | 16035891 | 9-scf00340 | 9 |
| AX-158182937 | 16 | 67.834 | KV452969.1 | 16038359 | 9-scf00340 | 9 |
| AX-158182938 | 16 | 67.834 | KV452969.1 | 16039798 | 9-scf00340 | 9 |
| AX-157757912 | 16 | 67.834 | KV452969.1 | 16042467 | 9-scf00340 | 9 |
| AX-158182939 | 16 | 67.834 | KV452969.1 | 16042994 | 9-scf00340 | 9 |



|              |    |        |            |          |            |   |
|--------------|----|--------|------------|----------|------------|---|
| AX-158182944 | 16 | 67.834 | KV452969.1 | 16045750 | 9-scf00340 | 9 |
| AX-158182946 | 16 | 67.834 | KV452969.1 | 16046784 | 9-scf00340 | 9 |
| AX-158182948 | 16 | 67.834 | KV452969.1 | 16049310 | 9-scf00340 | 9 |
| AX-158182949 | 16 | 67.834 | KV452969.1 | 16050125 | 9-scf00340 | 9 |
| AX-157835846 | 16 | 67.834 | KV452969.1 | 16056714 | 9-scf00340 | 9 |
| AX-158182954 | 16 | 67.834 | KV452969.1 | 16059117 | 9-scf00340 | 9 |
| AX-158182956 | 16 | 67.834 | KV452969.1 | 16061518 | 9-scf00340 | 9 |
| AX-157835847 | 16 | 67.834 | KV452969.1 | 16062471 | 9-scf00340 | 9 |
| AX-158182959 | 16 | 67.834 | KV452969.1 | 16066743 | 9-scf00340 | 9 |
| AX-158182960 | 16 | 67.834 | KV452969.1 | 16068436 | 9-scf00340 | 9 |
| AX-158182961 | 16 | 67.834 | KV452969.1 | 16070645 | 9-scf00340 | 9 |
| AX-158182965 | 16 | 67.834 | KV452969.1 | 16073612 | 9-scf00340 | 9 |
| AX-158182966 | 16 | 67.834 | KV452969.1 | 16074302 | 9-scf00340 | 9 |
| AX-158182967 | 16 | 67.834 | KV452969.1 | 16074904 | 9-scf00340 | 9 |
| AX-158182972 | 16 | 67.834 | KV452969.1 | 16078401 | 9-scf00340 | 9 |
| AX-158182976 | 16 | 67.834 | KV452969.1 | 16081958 | 9-scf00340 | 9 |
| AX-158184206 | 16 | 67.834 | KV452969.1 | 17941721 | 9-scf00340 | 9 |
| AX-158182970 | 16 | 67.835 | KV452969.1 | 16077274 | 9-scf00340 | 9 |
| AX-158182974 | 16 | 67.984 | KV452969.1 | 16080807 | 9-scf00340 | 9 |
| AX-158182977 | 16 | 68.095 | KV452969.1 | 16083639 | 9-scf00340 | 9 |
| AX-157835897 | 16 | 68.095 | KV452969.1 | 16723116 | 9-scf00340 | 9 |
| AX-158182980 | 16 | 68.162 | KV452969.1 | 16086161 | 9-scf00340 | 9 |
| AX-158182986 | 16 | 68.162 | KV452969.1 | 16091918 | 9-scf00340 | 9 |
| AX-158182989 | 16 | 68.162 | KV452969.1 | 16094986 | 9-scf00340 | 9 |
| AX-157886825 | 16 | 68.162 | KV452969.1 | 16095797 | 9-scf00340 | 9 |
| AX-158182993 | 16 | 68.162 | KV452969.1 | 16100515 | 9-scf00340 | 9 |
| AX-158182997 | 16 | 68.162 | KV452969.1 | 16104420 | 9-scf00340 | 9 |
| AX-157694778 | 16 | 68.162 | KV452969.1 | 16112987 | 9-scf00340 | 9 |
| AX-157725736 | 16 | 68.162 | KV452969.1 | 16114289 | 9-scf00340 | 9 |
| AX-158183000 | 16 | 68.237 | KV452969.1 | 16114715 | 9-scf00340 | 9 |
| AX-158183008 | 16 | 68.271 | KV452969.1 | 16118830 | 9-scf00340 | 9 |
| AX-157878902 | 16 | 68.271 | KV452969.1 | 16121333 | 9-scf00340 | 9 |
| AX-157746973 | 16 | 68.271 | KV452969.1 | 16122864 | 9-scf00340 | 9 |
| AX-158183011 | 16 | 68.271 | KV452969.1 | 16126773 | 9-scf00340 | 9 |
| AX-158183015 | 16 | 68.271 | KV452969.1 | 16131371 | 9-scf00340 | 9 |
| AX-158183018 | 16 | 68.271 | KV452969.1 | 16133224 | 9-scf00340 | 9 |
| AX-158183020 | 16 | 68.271 | KV452969.1 | 16135528 | 9-scf00340 | 9 |
| AX-158183021 | 16 | 68.271 | KV452969.1 | 16136391 | 9-scf00340 | 9 |
| AX-158183024 | 16 | 68.271 | KV452969.1 | 16138396 | 9-scf00340 | 9 |
| AX-158183025 | 16 | 68.312 | KV452969.1 | 16141031 | 9-scf00340 | 9 |
| AX-158183026 | 16 | 68.354 | KV452969.1 | 16141890 | 9-scf00340 | 9 |
| AX-158183032 | 16 | 68.38  | KV452969.1 | 16155381 | 9-scf00340 | 9 |
| AX-158182964 | 16 | 68.449 | KV452969.1 | 16072856 | 9-scf00340 | 9 |
| AX-158182983 | 16 | 68.449 | KV452969.1 | 16088649 | 9-scf00340 | 9 |
| AX-158183039 | 16 | 68.449 | KV452969.1 | 16167902 | 9-scf00340 | 9 |
| AX-158380616 | 16 | 68.449 | KV452969.1 | 16169605 | 9-scf00340 | 9 |
| AX-158183049 | 16 | 68.449 | KV452969.1 | 16186344 | 9-scf00340 | 9 |
| AX-158183061 | 16 | 68.449 | KV452969.1 | 16207292 | 9-scf00340 | 9 |
| AX-158184102 | 16 | 68.449 | KV452969.1 | 17757982 | 9-scf00340 | 9 |
| AX-158182857 | 16 | 68.49  | KV452969.1 | 15936267 | 9-scf00340 | 9 |
| AX-158182975 | 16 | 68.49  | KV452969.1 | 16081450 | 9-scf00340 | 9 |

|              |    |       |            |          |            |   |
|--------------|----|-------|------------|----------|------------|---|
| AX-158182991 | 16 | 68.49 | KV452969.1 | 16096962 | 9-scf00340 | 9 |
| AX-158183004 | 16 | 68.49 | KV452969.1 | 16117428 | 9-scf00340 | 9 |
| AX-158183010 | 16 | 68.49 | KV452969.1 | 16120817 | 9-scf00340 | 9 |
| AX-157872082 | 16 | 68.49 | KV452969.1 | 16146308 | 9-scf00340 | 9 |
| AX-158183028 | 16 | 68.49 | KV452969.1 | 16147248 | 9-scf00340 | 9 |
| AX-158183034 | 16 | 68.49 | KV452969.1 | 16157502 | 9-scf00340 | 9 |
| AX-158183040 | 16 | 68.49 | KV452969.1 | 16169839 | 9-scf00340 | 9 |
| AX-158183045 | 16 | 68.49 | KV452969.1 | 16178972 | 9-scf00340 | 9 |
| AX-158183047 | 16 | 68.49 | KV452969.1 | 16182760 | 9-scf00340 | 9 |
| AX-157835858 | 16 | 68.49 | KV452969.1 | 16188657 | 9-scf00340 | 9 |
| AX-158183052 | 16 | 68.49 | KV452969.1 | 16191369 | 9-scf00340 | 9 |
| AX-158183053 | 16 | 68.49 | KV452969.1 | 16192038 | 9-scf00340 | 9 |
| AX-158183055 | 16 | 68.49 | KV452969.1 | 16192977 | 9-scf00340 | 9 |
| AX-157835859 | 16 | 68.49 | KV452969.1 | 16196688 | 9-scf00340 | 9 |
| AX-157715192 | 16 | 68.49 | KV452969.1 | 16201142 | 9-scf00340 | 9 |
| AX-157835861 | 16 | 68.49 | KV452969.1 | 16202362 | 9-scf00340 | 9 |
| AX-158183060 | 16 | 68.49 | KV452969.1 | 16205386 | 9-scf00340 | 9 |
| AX-157835862 | 16 | 68.49 | KV452969.1 | 16208960 | 9-scf00340 | 9 |
| AX-158183063 | 16 | 68.49 | KV452969.1 | 16211103 | 9-scf00340 | 9 |
| AX-158183065 | 16 | 68.49 | KV452969.1 | 16213603 | 9-scf00340 | 9 |
| AX-158183066 | 16 | 68.49 | KV452969.1 | 16214670 | 9-scf00340 | 9 |
| AX-157835866 | 16 | 68.49 | KV452969.1 | 16222924 | 9-scf00340 | 9 |
| AX-158183070 | 16 | 68.49 | KV452969.1 | 16228611 | 9-scf00340 | 9 |
| AX-157772544 | 16 | 68.49 | KV452969.1 | 16232904 | 9-scf00340 | 9 |
| AX-158183081 | 16 | 68.49 | KV452969.1 | 16240911 | 9-scf00340 | 9 |
| AX-158183082 | 16 | 68.49 | KV452969.1 | 16242963 | 9-scf00340 | 9 |
| AX-158183087 | 16 | 68.49 | KV452969.1 | 16249556 | 9-scf00340 | 9 |
| AX-158183095 | 16 | 68.49 | KV452969.1 | 16259818 | 9-scf00340 | 9 |
| AX-158183096 | 16 | 68.49 | KV452969.1 | 16260530 | 9-scf00340 | 9 |
| AX-157775400 | 16 | 68.49 | KV452969.1 | 16264221 | 9-scf00340 | 9 |
| AX-157716095 | 16 | 68.49 | KV452969.1 | 16269861 | 9-scf00340 | 9 |
| AX-157835874 | 16 | 68.49 | KV452969.1 | 16270181 | 9-scf00340 | 9 |
| AX-158183105 | 16 | 68.49 | KV452969.1 | 16270498 | 9-scf00340 | 9 |
| AX-158183106 | 16 | 68.49 | KV452969.1 | 16272121 | 9-scf00340 | 9 |
| AX-158183109 | 16 | 68.49 | KV452969.1 | 16281244 | 9-scf00340 | 9 |
| AX-158183110 | 16 | 68.49 | KV452969.1 | 16282811 | 9-scf00340 | 9 |
| AX-158183112 | 16 | 68.49 | KV452969.1 | 16284889 | 9-scf00340 | 9 |
| AX-158183113 | 16 | 68.49 | KV452969.1 | 16285377 | 9-scf00340 | 9 |
| AX-158183117 | 16 | 68.49 | KV452969.1 | 16291550 | 9-scf00340 | 9 |
| AX-158183127 | 16 | 68.49 | KV452969.1 | 16299739 | 9-scf00340 | 9 |
| AX-158183244 | 16 | 68.49 | KV452969.1 | 16526064 | 9-scf00340 | 9 |
| AX-158183282 | 16 | 68.49 | KV452969.1 | 16607204 | 9-scf00340 | 9 |
| AX-158183340 | 16 | 68.49 | KV452969.1 | 16732553 | 9-scf00340 | 9 |
| AX-158183385 | 16 | 68.49 | KV452969.1 | 16832251 | 9-scf00340 | 9 |
| AX-157726298 | 16 | 68.49 | KV452969.1 | 16988876 | 9-scf00340 | 9 |
| AX-158183442 | 16 | 68.49 | KV452969.1 | 17027984 | 9-scf00340 | 9 |
| AX-158183846 | 16 | 68.49 | KV452969.1 | 17452015 | 9-scf00340 | 9 |
| AX-158183848 | 16 | 68.49 | KV452969.1 | 17459368 | 9-scf00340 | 9 |
| AX-158183898 | 16 | 68.49 | KV452969.1 | 17508421 | 9-scf00340 | 9 |
| AX-158183899 | 16 | 68.49 | KV452969.1 | 17508837 | 9-scf00340 | 9 |
| AX-158183900 | 16 | 68.49 | KV452969.1 | 17510047 | 9-scf00340 | 9 |

|              |    |        |            |          |                |    |
|--------------|----|--------|------------|----------|----------------|----|
| AX-158184095 | 16 | 68.49  | KV452969.1 | 17748456 | 9-scf00340     | 9  |
| AX-157701189 | 16 | 68.49  | DX083718.1 | 374      | 4ORI212 lctali | UN |
| AX-158182996 | 16 | 68.817 | KV452969.1 | 16103300 | 9-scf00340     | 9  |
| AX-157835848 | 16 | 68.817 | KV452969.1 | 16115761 | 9-scf00340     | 9  |
| AX-157835851 | 16 | 68.817 | KV452969.1 | 16146086 | 9-scf00340     | 9  |
| AX-157835856 | 16 | 68.817 | KV452969.1 | 16167682 | 9-scf00340     | 9  |
| AX-157835857 | 16 | 68.817 | KV452969.1 | 16169521 | 9-scf00340     | 9  |
| AX-158183057 | 16 | 68.817 | KV452969.1 | 16199089 | 9-scf00340     | 9  |
| AX-158183062 | 16 | 68.817 | KV452969.1 | 16207448 | 9-scf00340     | 9  |
| AX-158183077 | 16 | 68.817 | KV452969.1 | 16235375 | 9-scf00340     | 9  |
| AX-158183083 | 16 | 68.817 | KV452969.1 | 16243350 | 9-scf00340     | 9  |
| AX-157749911 | 16 | 68.817 | KV452969.1 | 16281979 | 9-scf00340     | 9  |
| AX-158183118 | 16 | 68.817 | KV452969.1 | 16291908 | 9-scf00340     | 9  |
| AX-158183119 | 16 | 68.817 | KV452969.1 | 16293392 | 9-scf00340     | 9  |
| AX-158183120 | 16 | 68.817 | KV452969.1 | 16293870 | 9-scf00340     | 9  |
| AX-158183128 | 16 | 68.817 | KV452969.1 | 16302246 | 9-scf00340     | 9  |
| AX-158183129 | 16 | 68.817 | KV452969.1 | 16302753 | 9-scf00340     | 9  |
| AX-157835876 | 16 | 68.817 | KV452969.1 | 16303161 | 9-scf00340     | 9  |
| AX-158183131 | 16 | 68.817 | KV452969.1 | 16305650 | 9-scf00340     | 9  |
| AX-158183132 | 16 | 68.817 | KV452969.1 | 16306789 | 9-scf00340     | 9  |
| AX-158183133 | 16 | 68.817 | KV452969.1 | 16307204 | 9-scf00340     | 9  |
| AX-157878906 | 16 | 68.817 | KV452969.1 | 16307504 | 9-scf00340     | 9  |
| AX-157878907 | 16 | 68.817 | KV452969.1 | 16310808 | 9-scf00340     | 9  |
| AX-158183143 | 16 | 68.817 | KV452969.1 | 16322528 | 9-scf00340     | 9  |
| AX-158183145 | 16 | 68.817 | KV452969.1 | 16323862 | 9-scf00340     | 9  |
| AX-158183150 | 16 | 68.817 | KV452969.1 | 16331323 | 9-scf00340     | 9  |
| AX-158183157 | 16 | 68.817 | KV452969.1 | 16343739 | 9-scf00340     | 9  |
| AX-157835879 | 16 | 68.817 | KV452969.1 | 16348981 | 9-scf00340     | 9  |
| AX-158183161 | 16 | 68.817 | KV452969.1 | 16354650 | 9-scf00340     | 9  |
| AX-157835880 | 16 | 68.817 | KV452969.1 | 16363191 | 9-scf00340     | 9  |
| AX-157835884 | 16 | 68.817 | KV452969.1 | 16366745 | 9-scf00340     | 9  |
| AX-158183163 | 16 | 68.817 | KV452969.1 | 16368772 | 9-scf00340     | 9  |
| AX-158183167 | 16 | 68.817 | KV452969.1 | 16374232 | 9-scf00340     | 9  |
| AX-158183168 | 16 | 68.817 | KV452969.1 | 16374914 | 9-scf00340     | 9  |
| AX-158183169 | 16 | 68.817 | KV452969.1 | 16375691 | 9-scf00340     | 9  |
| AX-158183171 | 16 | 68.817 | KV452969.1 | 16377629 | 9-scf00340     | 9  |
| AX-158183172 | 16 | 68.817 | KV452969.1 | 16378201 | 9-scf00340     | 9  |
| AX-158183176 | 16 | 68.817 | KV452969.1 | 16381213 | 9-scf00340     | 9  |
| AX-157835885 | 16 | 68.817 | KV452969.1 | 16384064 | 9-scf00340     | 9  |
| AX-158183180 | 16 | 68.817 | KV452969.1 | 16391540 | 9-scf00340     | 9  |
| AX-158183182 | 16 | 68.817 | KV452969.1 | 16397773 | 9-scf00340     | 9  |
| AX-158183183 | 16 | 68.817 | KV452969.1 | 16399368 | 9-scf00340     | 9  |
| AX-158183184 | 16 | 68.817 | KV452969.1 | 16403562 | 9-scf00340     | 9  |
| AX-158183187 | 16 | 68.817 | KV452969.1 | 16407092 | 9-scf00340     | 9  |
| AX-157835890 | 16 | 68.817 | KV452969.1 | 16411777 | 9-scf00340     | 9  |
| AX-157715062 | 16 | 68.817 | KV452969.1 | 16412532 | 9-scf00340     | 9  |
| AX-158380617 | 16 | 68.817 | KV452969.1 | 16419932 | 9-scf00340     | 9  |
| AX-158183193 | 16 | 68.817 | KV452969.1 | 16421176 | 9-scf00340     | 9  |
| AX-158183194 | 16 | 68.817 | KV452969.1 | 16421907 | 9-scf00340     | 9  |
| AX-158183206 | 16 | 68.817 | KV452969.1 | 16447509 | 9-scf00340     | 9  |
| AX-157835894 | 16 | 68.817 | KV452969.1 | 16449096 | 9-scf00340     | 9  |

|              |    |        |            |          |            |   |
|--------------|----|--------|------------|----------|------------|---|
| AX-158183207 | 16 | 68.817 | KV452969.1 | 16449615 | 9-scf00340 | 9 |
| AX-158183226 | 16 | 68.817 | KV452969.1 | 16490005 | 9-scf00340 | 9 |
| AX-158183228 | 16 | 68.817 | KV452969.1 | 16493259 | 9-scf00340 | 9 |
| AX-157749424 | 16 | 68.817 | KV452969.1 | 16514891 | 9-scf00340 | 9 |
| AX-157758487 | 16 | 68.817 | KV452969.1 | 16526708 | 9-scf00340 | 9 |
| AX-158183250 | 16 | 68.817 | KV452969.1 | 16538318 | 9-scf00340 | 9 |
| AX-158183251 | 16 | 68.817 | KV452969.1 | 16540436 | 9-scf00340 | 9 |
| AX-158183254 | 16 | 68.817 | KV452969.1 | 16548247 | 9-scf00340 | 9 |
| AX-158183258 | 16 | 68.817 | KV452969.1 | 16558471 | 9-scf00340 | 9 |
| AX-158183259 | 16 | 68.817 | KV452969.1 | 16559096 | 9-scf00340 | 9 |
| AX-158183266 | 16 | 68.817 | KV452969.1 | 16567382 | 9-scf00340 | 9 |
| AX-158183273 | 16 | 68.817 | KV452969.1 | 16586048 | 9-scf00340 | 9 |
| AX-158183274 | 16 | 68.817 | KV452969.1 | 16588238 | 9-scf00340 | 9 |
| AX-158183285 | 16 | 68.817 | KV452969.1 | 16612534 | 9-scf00340 | 9 |
| AX-157758391 | 16 | 68.817 | KV452969.1 | 16613829 | 9-scf00340 | 9 |
| AX-158183289 | 16 | 68.817 | KV452969.1 | 16617381 | 9-scf00340 | 9 |
| AX-158183304 | 16 | 68.817 | KV452969.1 | 16648195 | 9-scf00340 | 9 |
| AX-158183306 | 16 | 68.817 | KV452969.1 | 16655608 | 9-scf00340 | 9 |
| AX-158183326 | 16 | 68.817 | KV452969.1 | 16702837 | 9-scf00340 | 9 |
| AX-158183328 | 16 | 68.817 | KV452969.1 | 16705370 | 9-scf00340 | 9 |
| AX-158183330 | 16 | 68.817 | KV452969.1 | 16714288 | 9-scf00340 | 9 |
| AX-158183332 | 16 | 68.817 | KV452969.1 | 16725526 | 9-scf00340 | 9 |
| AX-158183334 | 16 | 68.817 | KV452969.1 | 16727455 | 9-scf00340 | 9 |
| AX-158183336 | 16 | 68.817 | KV452969.1 | 16728238 | 9-scf00340 | 9 |
| AX-158183341 | 16 | 68.817 | KV452969.1 | 16734449 | 9-scf00340 | 9 |
| AX-158183342 | 16 | 68.817 | KV452969.1 | 16735322 | 9-scf00340 | 9 |
| AX-158183343 | 16 | 68.817 | KV452969.1 | 16738147 | 9-scf00340 | 9 |
| AX-158183344 | 16 | 68.817 | KV452969.1 | 16738540 | 9-scf00340 | 9 |
| AX-158183350 | 16 | 68.817 | KV452969.1 | 16757234 | 9-scf00340 | 9 |
| AX-158183351 | 16 | 68.817 | KV452969.1 | 16757977 | 9-scf00340 | 9 |
| AX-158183353 | 16 | 68.817 | KV452969.1 | 16761936 | 9-scf00340 | 9 |
| AX-158183354 | 16 | 68.817 | KV452969.1 | 16764219 | 9-scf00340 | 9 |
| AX-158183358 | 16 | 68.817 | KV452969.1 | 16772540 | 9-scf00340 | 9 |
| AX-158183361 | 16 | 68.817 | KV452969.1 | 16776634 | 9-scf00340 | 9 |
| AX-158183364 | 16 | 68.817 | KV452969.1 | 16780829 | 9-scf00340 | 9 |
| AX-157758045 | 16 | 68.817 | KV452969.1 | 16783692 | 9-scf00340 | 9 |
| AX-158183368 | 16 | 68.817 | KV452969.1 | 16786757 | 9-scf00340 | 9 |
| AX-158183370 | 16 | 68.817 | KV452969.1 | 16793238 | 9-scf00340 | 9 |
| AX-158183371 | 16 | 68.817 | KV452969.1 | 16798240 | 9-scf00340 | 9 |
| AX-158183373 | 16 | 68.817 | KV452969.1 | 16802351 | 9-scf00340 | 9 |
| AX-158183374 | 16 | 68.817 | KV452969.1 | 16805744 | 9-scf00340 | 9 |
| AX-158183375 | 16 | 68.817 | KV452969.1 | 16806503 | 9-scf00340 | 9 |
| AX-158183378 | 16 | 68.817 | KV452969.1 | 16820701 | 9-scf00340 | 9 |
| AX-158183379 | 16 | 68.817 | KV452969.1 | 16821949 | 9-scf00340 | 9 |
| AX-158183380 | 16 | 68.817 | KV452969.1 | 16822538 | 9-scf00340 | 9 |
| AX-158183387 | 16 | 68.817 | KV452969.1 | 16849428 | 9-scf00340 | 9 |
| AX-158183388 | 16 | 68.817 | KV452969.1 | 16851307 | 9-scf00340 | 9 |
| AX-158183393 | 16 | 68.817 | KV452969.1 | 16865016 | 9-scf00340 | 9 |
| AX-158183394 | 16 | 68.817 | KV452969.1 | 16866648 | 9-scf00340 | 9 |
| AX-158183395 | 16 | 68.817 | KV452969.1 | 16867920 | 9-scf00340 | 9 |
| AX-158183400 | 16 | 68.817 | KV452969.1 | 16883328 | 9-scf00340 | 9 |

|              |    |        |            |          |            |   |
|--------------|----|--------|------------|----------|------------|---|
| AX-158183402 | 16 | 68.817 | KV452969.1 | 16884626 | 9-scf00340 | 9 |
| AX-158183404 | 16 | 68.817 | KV452969.1 | 16886465 | 9-scf00340 | 9 |
| AX-158183406 | 16 | 68.817 | KV452969.1 | 16891150 | 9-scf00340 | 9 |
| AX-157722107 | 16 | 68.817 | KV452969.1 | 16902236 | 9-scf00340 | 9 |
| AX-158183436 | 16 | 68.817 | KV452969.1 | 17000394 | 9-scf00340 | 9 |
| AX-157835902 | 16 | 68.817 | KV452969.1 | 17001700 | 9-scf00340 | 9 |
| AX-158380618 | 16 | 68.817 | KV452969.1 | 17009589 | 9-scf00340 | 9 |
| AX-158183443 | 16 | 68.817 | KV452969.1 | 17036382 | 9-scf00340 | 9 |
| AX-158183450 | 16 | 68.817 | KV452969.1 | 17048013 | 9-scf00340 | 9 |
| AX-158183457 | 16 | 68.817 | KV452969.1 | 17053628 | 9-scf00340 | 9 |
| AX-158183514 | 16 | 68.817 | KV452969.1 | 17104154 | 9-scf00340 | 9 |
| AX-158183517 | 16 | 68.817 | KV452969.1 | 17105845 | 9-scf00340 | 9 |
| AX-157751975 | 16 | 68.817 | KV452969.1 | 17115196 | 9-scf00340 | 9 |
| AX-157878914 | 16 | 68.817 | KV452969.1 | 17150125 | 9-scf00340 | 9 |
| AX-158183658 | 16 | 68.817 | KV452969.1 | 17253538 | 9-scf00340 | 9 |
| AX-157755551 | 16 | 68.817 | KV452969.1 | 17278240 | 9-scf00340 | 9 |
| AX-158183948 | 16 | 68.817 | KV452969.1 | 17562529 | 9-scf00340 | 9 |
| AX-158413686 | 16 | 68.817 | KV452969.1 | 17571171 | 9-scf00340 | 9 |
| AX-158183961 | 16 | 68.817 | KV452969.1 | 17577180 | 9-scf00340 | 9 |
| AX-158183962 | 16 | 68.817 | KV452969.1 | 17577969 | 9-scf00340 | 9 |
| AX-158183964 | 16 | 68.817 | KV452969.1 | 17579496 | 9-scf00340 | 9 |
| AX-158183965 | 16 | 68.817 | KV452969.1 | 17580499 | 9-scf00340 | 9 |
| AX-158183966 | 16 | 68.817 | KV452969.1 | 17581096 | 9-scf00340 | 9 |
| AX-158183967 | 16 | 68.817 | KV452969.1 | 17581455 | 9-scf00340 | 9 |
| AX-157835909 | 16 | 68.817 | KV452969.1 | 17593926 | 9-scf00340 | 9 |
| AX-157835910 | 16 | 68.817 | KV452969.1 | 17598888 | 9-scf00340 | 9 |
| AX-158183978 | 16 | 68.817 | KV452969.1 | 17599814 | 9-scf00340 | 9 |
| AX-158184003 | 16 | 68.817 | KV452969.1 | 17629002 | 9-scf00340 | 9 |
| AX-158184048 | 16 | 68.817 | KV452969.1 | 17677286 | 9-scf00340 | 9 |
| AX-158184056 | 16 | 68.817 | KV452969.1 | 17683355 | 9-scf00340 | 9 |
| AX-158184058 | 16 | 68.817 | KV452969.1 | 17686872 | 9-scf00340 | 9 |
| AX-158184059 | 16 | 68.817 | KV452969.1 | 17687210 | 9-scf00340 | 9 |
| AX-158184065 | 16 | 68.817 | KV452969.1 | 17695808 | 9-scf00340 | 9 |
| AX-158184075 | 16 | 68.817 | KV452969.1 | 17703161 | 9-scf00340 | 9 |
| AX-158184101 | 16 | 68.817 | KV452969.1 | 17756620 | 9-scf00340 | 9 |
| AX-157750725 | 16 | 68.817 | KV452969.1 | 17865918 | 9-scf00340 | 9 |
| AX-158184157 | 16 | 68.817 | KV452969.1 | 17869366 | 9-scf00340 | 9 |
| AX-158184197 | 16 | 68.817 | KV452969.1 | 17930474 | 9-scf00340 | 9 |
| AX-158183006 | 16 | 68.834 | KV452969.1 | 16118167 | 9-scf00340 | 9 |
| AX-158183012 | 16 | 68.834 | KV452969.1 | 16128800 | 9-scf00340 | 9 |
| AX-158183253 | 16 | 68.834 | KV452969.1 | 16546424 | 9-scf00340 | 9 |
| AX-158183255 | 16 | 68.834 | KV452969.1 | 16550354 | 9-scf00340 | 9 |
| AX-158183260 | 16 | 68.834 | KV452969.1 | 16559531 | 9-scf00340 | 9 |
| AX-158183263 | 16 | 68.834 | KV452969.1 | 16562040 | 9-scf00340 | 9 |
| AX-158183296 | 16 | 68.834 | KV452969.1 | 16636614 | 9-scf00340 | 9 |
| AX-158183312 | 16 | 68.834 | KV452969.1 | 16669523 | 9-scf00340 | 9 |
| AX-158183316 | 16 | 68.834 | KV452969.1 | 16680278 | 9-scf00340 | 9 |
| AX-157710660 | 16 | 68.834 | KV452969.1 | 17150518 | 9-scf00340 | 9 |
| AX-158183569 | 16 | 68.834 | KV452969.1 | 17155489 | 9-scf00340 | 9 |
| AX-158184165 | 16 | 68.834 | KV452969.1 | 17878424 | 9-scf00340 | 9 |
| AX-158183567 | 16 | 68.85  | KV452969.1 | 17152341 | 9-scf00340 | 9 |

|              |    |        |            |          |            |   |
|--------------|----|--------|------------|----------|------------|---|
| AX-158183084 | 16 | 68.869 | KV452969.1 | 16243817 | 9-scf00340 | 9 |
| AX-158183122 | 16 | 68.869 | KV452969.1 | 16294917 | 9-scf00340 | 9 |
| AX-157733385 | 16 | 68.869 | KV452969.1 | 16312422 | 9-scf00340 | 9 |
| AX-158183628 | 16 | 68.869 | KV452969.1 | 17220766 | 9-scf00340 | 9 |
| AX-158183751 | 16 | 68.881 | KV452969.1 | 17349143 | 9-scf00340 | 9 |
| AX-157771484 | 16 | 68.894 | KV452969.1 | 17370122 | 9-scf00340 | 9 |
| AX-157716065 | 16 | 68.907 | KV452969.1 | 17067378 | 9-scf00340 | 9 |
| AX-158183480 | 16 | 68.907 | KV452969.1 | 17071715 | 9-scf00340 | 9 |
| AX-158183489 | 16 | 68.907 | KV452969.1 | 17080401 | 9-scf00340 | 9 |
| AX-158183491 | 16 | 68.907 | KV452969.1 | 17081379 | 9-scf00340 | 9 |
| AX-158183865 | 16 | 68.907 | KV452969.1 | 17476932 | 9-scf00340 | 9 |
| AX-158183868 | 16 | 68.907 | KV452969.1 | 17478757 | 9-scf00340 | 9 |
| AX-158183927 | 16 | 68.907 | KV452969.1 | 17541813 | 9-scf00340 | 9 |
| AX-158183936 | 16 | 68.907 | KV452969.1 | 17547038 | 9-scf00340 | 9 |
| AX-158183937 | 16 | 68.907 | KV452969.1 | 17548098 | 9-scf00340 | 9 |
| AX-158183878 | 16 | 68.914 | KV452969.1 | 17491826 | 9-scf00340 | 9 |
| AX-158183882 | 16 | 68.919 | KV452969.1 | 17493782 | 9-scf00340 | 9 |
| AX-158182414 | 16 | 68.926 | KV452969.1 | 15378113 | 9-scf00340 | 9 |
| AX-157835868 | 16 | 68.926 | KV452969.1 | 16225557 | 9-scf00340 | 9 |
| AX-158183071 | 16 | 68.926 | KV452969.1 | 16229359 | 9-scf00340 | 9 |
| AX-158183090 | 16 | 68.926 | KV452969.1 | 16251171 | 9-scf00340 | 9 |
| AX-158183092 | 16 | 68.926 | KV452969.1 | 16254702 | 9-scf00340 | 9 |
| AX-158183094 | 16 | 68.926 | KV452969.1 | 16259009 | 9-scf00340 | 9 |
| AX-158183101 | 16 | 68.926 | KV452969.1 | 16265865 | 9-scf00340 | 9 |
| AX-158183265 | 16 | 68.926 | KV452969.1 | 16566381 | 9-scf00340 | 9 |
| AX-158183283 | 16 | 68.926 | KV452969.1 | 16611162 | 9-scf00340 | 9 |
| AX-158183294 | 16 | 68.926 | KV452969.1 | 16632178 | 9-scf00340 | 9 |
| AX-158183295 | 16 | 68.926 | KV452969.1 | 16634425 | 9-scf00340 | 9 |
| AX-158183322 | 16 | 68.926 | KV452969.1 | 16692386 | 9-scf00340 | 9 |
| AX-158385984 | 16 | 68.926 | KV452969.1 | 16698467 | 9-scf00340 | 9 |
| AX-157719606 | 16 | 68.926 | KV452969.1 | 16701795 | 9-scf00340 | 9 |
| AX-157726642 | 16 | 68.926 | KV452969.1 | 16707324 | 9-scf00340 | 9 |
| AX-158183329 | 16 | 68.926 | KV452969.1 | 16710990 | 9-scf00340 | 9 |
| AX-157754239 | 16 | 68.926 | KV452969.1 | 17010139 | 9-scf00340 | 9 |
| AX-158183753 | 16 | 68.926 | KV452969.1 | 17350366 | 9-scf00340 | 9 |
| AX-158183884 | 16 | 68.926 | KV452969.1 | 17495301 | 9-scf00340 | 9 |
| AX-158183896 | 16 | 68.926 | KV452969.1 | 17507077 | 9-scf00340 | 9 |
| AX-158183908 | 16 | 68.926 | KV452969.1 | 17522462 | 9-scf00340 | 9 |
| AX-157886831 | 16 | 68.926 | KV452969.1 | 17535076 | 9-scf00340 | 9 |
| AX-158183920 | 16 | 68.926 | KV452969.1 | 17535648 | 9-scf00340 | 9 |
| AX-158183922 | 16 | 68.926 | KV452969.1 | 17537668 | 9-scf00340 | 9 |
| AX-158183944 | 16 | 68.926 | KV452969.1 | 17553823 | 9-scf00340 | 9 |
| AX-157724951 | 16 | 68.926 | KV452969.1 | 17555018 | 9-scf00340 | 9 |
| AX-158183953 | 16 | 68.926 | KV452969.1 | 17568003 | 9-scf00340 | 9 |
| AX-158183971 | 16 | 68.926 | KV452969.1 | 17590145 | 9-scf00340 | 9 |
| AX-158183973 | 16 | 68.926 | KV452969.1 | 17591003 | 9-scf00340 | 9 |
| AX-158183981 | 16 | 68.926 | KV452969.1 | 17603439 | 9-scf00340 | 9 |
| AX-158183983 | 16 | 68.926 | KV452969.1 | 17604442 | 9-scf00340 | 9 |
| AX-157878918 | 16 | 68.926 | KV452969.1 | 17782646 | 9-scf00340 | 9 |
| AX-158184132 | 16 | 68.926 | KV452969.1 | 17817892 | 9-scf00340 | 9 |
| AX-157749654 | 16 | 68.926 | KV452969.1 | 18053005 | 9-scf00340 | 9 |

|              |    |        |             |          |                |    |
|--------------|----|--------|-------------|----------|----------------|----|
| AX-157698923 | 16 | 68.926 | FI889358.1  | 276      | 10RI212 lctalk | UN |
| AX-157689722 | 16 | 68.926 | 3ML01031655 | 552      | scf07273_1     | UN |
| AX-158183993 | 16 | 68.977 | KV452969.1  | 17613412 | 9-scf00340     | 9  |
| AX-157835912 | 16 | 68.977 | KV452969.1  | 17619591 | 9-scf00340     | 9  |
| AX-157742206 | 16 | 69.036 | KV452969.1  | 16019702 | 9-scf00340     | 9  |
| AX-157835852 | 16 | 69.036 | KV452969.1  | 16148180 | 9-scf00340     | 9  |
| AX-158183078 | 16 | 69.036 | KV452969.1  | 16238303 | 9-scf00340     | 9  |
| AX-158183102 | 16 | 69.036 | KV452969.1  | 16267293 | 9-scf00340     | 9  |
| AX-158183151 | 16 | 69.036 | KV452969.1  | 16331534 | 9-scf00340     | 9  |
| AX-158183225 | 16 | 69.036 | KV452969.1  | 16488936 | 9-scf00340     | 9  |
| AX-158183592 | 16 | 69.036 | KV452969.1  | 17177420 | 9-scf00340     | 9  |
| AX-158183722 | 16 | 69.036 | KV452969.1  | 17315282 | 9-scf00340     | 9  |
| AX-157886830 | 16 | 69.036 | KV452969.1  | 17344708 | 9-scf00340     | 9  |
| AX-158409492 | 16 | 69.036 | KV452969.1  | 17608894 | 9-scf00340     | 9  |
| AX-158183989 | 16 | 69.036 | KV452969.1  | 17609617 | 9-scf00340     | 9  |
| AX-157742354 | 16 | 69.036 | KV452969.1  | 17609836 | 9-scf00340     | 9  |
| AX-158183990 | 16 | 69.036 | KV452969.1  | 17609988 | 9-scf00340     | 9  |
| AX-158183994 | 16 | 69.036 | KV452969.1  | 17613679 | 9-scf00340     | 9  |
| AX-158183996 | 16 | 69.036 | KV452969.1  | 17616268 | 9-scf00340     | 9  |
| AX-157835913 | 16 | 69.036 | KV452969.1  | 17626774 | 9-scf00340     | 9  |
| AX-158184001 | 16 | 69.036 | KV452969.1  | 17628040 | 9-scf00340     | 9  |
| AX-158184002 | 16 | 69.036 | KV452969.1  | 17628166 | 9-scf00340     | 9  |
| AX-158184004 | 16 | 69.036 | KV452969.1  | 17630432 | 9-scf00340     | 9  |
| AX-158184006 | 16 | 69.036 | KV452969.1  | 17631249 | 9-scf00340     | 9  |
| AX-158184009 | 16 | 69.036 | KV452969.1  | 17634984 | 9-scf00340     | 9  |
| AX-158184010 | 16 | 69.036 | KV452969.1  | 17635892 | 9-scf00340     | 9  |
| AX-158184012 | 16 | 69.036 | KV452969.1  | 17638975 | 9-scf00340     | 9  |
| AX-158184014 | 16 | 69.036 | KV452969.1  | 17639861 | 9-scf00340     | 9  |
| AX-158184015 | 16 | 69.036 | KV452969.1  | 17641292 | 9-scf00340     | 9  |
| AX-158184020 | 16 | 69.036 | KV452969.1  | 17647224 | 9-scf00340     | 9  |
| AX-158184021 | 16 | 69.036 | KV452969.1  | 17647638 | 9-scf00340     | 9  |
| AX-158184022 | 16 | 69.036 | KV452969.1  | 17648060 | 9-scf00340     | 9  |
| AX-158184023 | 16 | 69.036 | KV452969.1  | 17651889 | 9-scf00340     | 9  |
| AX-158184025 | 16 | 69.036 | KV452969.1  | 17655925 | 9-scf00340     | 9  |
| AX-158184026 | 16 | 69.036 | KV452969.1  | 17657593 | 9-scf00340     | 9  |
| AX-158413689 | 16 | 69.036 | KV452969.1  | 17658084 | 9-scf00340     | 9  |
| AX-158184031 | 16 | 69.036 | KV452969.1  | 17663075 | 9-scf00340     | 9  |
| AX-158184032 | 16 | 69.036 | KV452969.1  | 17663602 | 9-scf00340     | 9  |
| AX-158184034 | 16 | 69.036 | KV452969.1  | 17664952 | 9-scf00340     | 9  |
| AX-158184036 | 16 | 69.036 | KV452969.1  | 17667030 | 9-scf00340     | 9  |
| AX-158184037 | 16 | 69.036 | KV452969.1  | 17668277 | 9-scf00340     | 9  |
| AX-158184038 | 16 | 69.036 | KV452969.1  | 17668883 | 9-scf00340     | 9  |
| AX-157835914 | 16 | 69.036 | KV452969.1  | 17669938 | 9-scf00340     | 9  |
| AX-158184040 | 16 | 69.036 | KV452969.1  | 17671926 | 9-scf00340     | 9  |
| AX-158184041 | 16 | 69.036 | KV452969.1  | 17672851 | 9-scf00340     | 9  |
| AX-158184042 | 16 | 69.036 | KV452969.1  | 17673970 | 9-scf00340     | 9  |
| AX-158184045 | 16 | 69.036 | KV452969.1  | 17676135 | 9-scf00340     | 9  |
| AX-158184046 | 16 | 69.036 | KV452969.1  | 17676529 | 9-scf00340     | 9  |
| AX-158184047 | 16 | 69.036 | KV452969.1  | 17676891 | 9-scf00340     | 9  |
| AX-158184050 | 16 | 69.036 | KV452969.1  | 17677802 | 9-scf00340     | 9  |
| AX-158184051 | 16 | 69.036 | KV452969.1  | 17678399 | 9-scf00340     | 9  |

|              |    |        |            |          |            |   |
|--------------|----|--------|------------|----------|------------|---|
| AX-158184054 | 16 | 69.036 | KV452969.1 | 17680453 | 9-scf00340 | 9 |
| AX-158184055 | 16 | 69.036 | KV452969.1 | 17682095 | 9-scf00340 | 9 |
| AX-158184057 | 16 | 69.036 | KV452969.1 | 17683825 | 9-scf00340 | 9 |
| AX-158184060 | 16 | 69.036 | KV452969.1 | 17689496 | 9-scf00340 | 9 |
| AX-157866737 | 16 | 69.036 | KV452969.1 | 17691908 | 9-scf00340 | 9 |
| AX-158184063 | 16 | 69.036 | KV452969.1 | 17694093 | 9-scf00340 | 9 |
| AX-158184064 | 16 | 69.036 | KV452969.1 | 17695562 | 9-scf00340 | 9 |
| AX-158184070 | 16 | 69.036 | KV452969.1 | 17699123 | 9-scf00340 | 9 |
| AX-158184071 | 16 | 69.036 | KV452969.1 | 17699741 | 9-scf00340 | 9 |
| AX-158184077 | 16 | 69.036 | KV452969.1 | 17705732 | 9-scf00340 | 9 |
| AX-158184082 | 16 | 69.036 | KV452969.1 | 17712371 | 9-scf00340 | 9 |
| AX-158184083 | 16 | 69.036 | KV452969.1 | 17713308 | 9-scf00340 | 9 |
| AX-158184088 | 16 | 69.036 | KV452969.1 | 17727447 | 9-scf00340 | 9 |
| AX-158184089 | 16 | 69.036 | KV452969.1 | 17731144 | 9-scf00340 | 9 |
| AX-158184090 | 16 | 69.036 | KV452969.1 | 17737641 | 9-scf00340 | 9 |
| AX-158184091 | 16 | 69.036 | KV452969.1 | 17738586 | 9-scf00340 | 9 |
| AX-157753771 | 16 | 69.036 | KV452969.1 | 17746724 | 9-scf00340 | 9 |
| AX-158184093 | 16 | 69.036 | KV452969.1 | 17747562 | 9-scf00340 | 9 |
| AX-157709715 | 16 | 69.036 | KV452969.1 | 17749217 | 9-scf00340 | 9 |
| AX-158184098 | 16 | 69.036 | KV452969.1 | 17750801 | 9-scf00340 | 9 |
| AX-158184099 | 16 | 69.036 | KV452969.1 | 17751529 | 9-scf00340 | 9 |
| AX-158184100 | 16 | 69.036 | KV452969.1 | 17753718 | 9-scf00340 | 9 |
| AX-157719962 | 16 | 69.036 | KV452969.1 | 17755001 | 9-scf00340 | 9 |
| AX-158184108 | 16 | 69.036 | KV452969.1 | 17775885 | 9-scf00340 | 9 |
| AX-158184113 | 16 | 69.036 | KV452969.1 | 17793296 | 9-scf00340 | 9 |
| AX-157835917 | 16 | 69.036 | KV452969.1 | 17793649 | 9-scf00340 | 9 |
| AX-158184114 | 16 | 69.036 | KV452969.1 | 17795051 | 9-scf00340 | 9 |
| AX-158184115 | 16 | 69.036 | KV452969.1 | 17795900 | 9-scf00340 | 9 |
| AX-157835918 | 16 | 69.036 | KV452969.1 | 17796670 | 9-scf00340 | 9 |
| AX-157835919 | 16 | 69.036 | KV452969.1 | 17797045 | 9-scf00340 | 9 |
| AX-158413692 | 16 | 69.036 | KV452969.1 | 17799602 | 9-scf00340 | 9 |
| AX-158184120 | 16 | 69.036 | KV452969.1 | 17804423 | 9-scf00340 | 9 |
| AX-158184124 | 16 | 69.036 | KV452969.1 | 17808963 | 9-scf00340 | 9 |
| AX-158184125 | 16 | 69.036 | KV452969.1 | 17811170 | 9-scf00340 | 9 |
| AX-158184126 | 16 | 69.036 | KV452969.1 | 17811670 | 9-scf00340 | 9 |
| AX-157697434 | 16 | 69.036 | KV452969.1 | 17816386 | 9-scf00340 | 9 |
| AX-157835921 | 16 | 69.036 | KV452969.1 | 17824396 | 9-scf00340 | 9 |
| AX-158184135 | 16 | 69.036 | KV452969.1 | 17824977 | 9-scf00340 | 9 |
| AX-158184137 | 16 | 69.036 | KV452969.1 | 17825496 | 9-scf00340 | 9 |
| AX-158184140 | 16 | 69.036 | KV452969.1 | 17832085 | 9-scf00340 | 9 |
| AX-158184143 | 16 | 69.036 | KV452969.1 | 17837173 | 9-scf00340 | 9 |
| AX-158184145 | 16 | 69.036 | KV452969.1 | 17843012 | 9-scf00340 | 9 |
| AX-158184147 | 16 | 69.036 | KV452969.1 | 17844146 | 9-scf00340 | 9 |
| AX-158184155 | 16 | 69.036 | KV452969.1 | 17866691 | 9-scf00340 | 9 |
| AX-158184156 | 16 | 69.036 | KV452969.1 | 17868617 | 9-scf00340 | 9 |
| AX-158184159 | 16 | 69.036 | KV452969.1 | 17874176 | 9-scf00340 | 9 |
| AX-158184160 | 16 | 69.036 | KV452969.1 | 17874534 | 9-scf00340 | 9 |
| AX-158184161 | 16 | 69.036 | KV452969.1 | 17875075 | 9-scf00340 | 9 |
| AX-158184167 | 16 | 69.036 | KV452969.1 | 17880488 | 9-scf00340 | 9 |
| AX-158184176 | 16 | 69.036 | KV452969.1 | 17899325 | 9-scf00340 | 9 |
| AX-158184177 | 16 | 69.036 | KV452969.1 | 17900834 | 9-scf00340 | 9 |



|              |    |        |            |          |            |   |
|--------------|----|--------|------------|----------|------------|---|
| AX-157718170 | 16 | 69.036 | KV452969.1 | 17902689 | 9-scf00340 | 9 |
| AX-158184179 | 16 | 69.036 | KV452969.1 | 17902940 | 9-scf00340 | 9 |
| AX-158184181 | 16 | 69.036 | KV452969.1 | 17904525 | 9-scf00340 | 9 |
| AX-158184183 | 16 | 69.036 | KV452969.1 | 17907808 | 9-scf00340 | 9 |
| AX-158184184 | 16 | 69.036 | KV452969.1 | 17908305 | 9-scf00340 | 9 |
| AX-157835928 | 16 | 69.036 | KV452969.1 | 17916182 | 9-scf00340 | 9 |
| AX-158184190 | 16 | 69.036 | KV452969.1 | 17917655 | 9-scf00340 | 9 |
| AX-158184191 | 16 | 69.036 | KV452969.1 | 17922008 | 9-scf00340 | 9 |
| AX-158184192 | 16 | 69.036 | KV452969.1 | 17922518 | 9-scf00340 | 9 |
| AX-158184194 | 16 | 69.036 | KV452969.1 | 17923997 | 9-scf00340 | 9 |
| AX-158184198 | 16 | 69.036 | KV452969.1 | 17931010 | 9-scf00340 | 9 |
| AX-158184207 | 16 | 69.036 | KV452969.1 | 17942033 | 9-scf00340 | 9 |
| AX-157718685 | 16 | 69.036 | KV452969.1 | 17985356 | 9-scf00340 | 9 |
| AX-158184252 | 16 | 69.036 | KV452969.1 | 18013457 | 9-scf00340 | 9 |
| AX-158183002 | 16 | 69.254 | KV452969.1 | 16116775 | 9-scf00340 | 9 |
| AX-157722067 | 16 | 69.254 | KV452969.1 | 17455975 | 9-scf00340 | 9 |
| AX-158183892 | 16 | 69.254 | KV452969.1 | 17501883 | 9-scf00340 | 9 |
| AX-158380619 | 16 | 69.254 | KV452969.1 | 17589319 | 9-scf00340 | 9 |
| AX-158184017 | 16 | 69.254 | KV452969.1 | 17645142 | 9-scf00340 | 9 |
| AX-158184018 | 16 | 69.254 | KV452969.1 | 17645531 | 9-scf00340 | 9 |
| AX-158184024 | 16 | 69.254 | KV452969.1 | 17655451 | 9-scf00340 | 9 |
| AX-158184096 | 16 | 69.254 | KV452969.1 | 17748910 | 9-scf00340 | 9 |
| AX-158184153 | 16 | 69.254 | KV452969.1 | 17856095 | 9-scf00340 | 9 |
| AX-158184204 | 16 | 69.254 | KV452969.1 | 17938519 | 9-scf00340 | 9 |
| AX-158184230 | 16 | 69.254 | KV452969.1 | 17986608 | 9-scf00340 | 9 |
| AX-158184246 | 16 | 69.254 | KV452969.1 | 18007062 | 9-scf00340 | 9 |
| AX-158184309 | 16 | 69.254 | KV452969.1 | 18096344 | 9-scf00340 | 9 |
| AX-158413696 | 16 | 69.254 | KV452969.1 | 18103382 | 9-scf00340 | 9 |
| AX-158184351 | 16 | 69.254 | KV452969.1 | 18162401 | 9-scf00340 | 9 |
| AX-158184205 | 16 | 69.304 | KV452969.1 | 17939593 | 9-scf00340 | 9 |
| AX-158184238 | 16 | 69.304 | KV452969.1 | 17996725 | 9-scf00340 | 9 |
| AX-158184210 | 16 | 69.327 | KV452969.1 | 17944675 | 9-scf00340 | 9 |
| AX-158179313 | 16 | 69.363 | KV452969.1 | 11163503 | 9-scf00340 | 9 |
| AX-158181078 | 16 | 69.363 | KV452969.1 | 13371341 | 9-scf00340 | 9 |
| AX-158181241 | 16 | 69.363 | KV452969.1 | 13760485 | 9-scf00340 | 9 |
| AX-158181242 | 16 | 69.363 | KV452969.1 | 13764275 | 9-scf00340 | 9 |
| AX-158183219 | 16 | 69.363 | KV452969.1 | 16477426 | 9-scf00340 | 9 |
| AX-158183309 | 16 | 69.363 | KV452969.1 | 16660800 | 9-scf00340 | 9 |
| AX-158183427 | 16 | 69.363 | KV452969.1 | 16974567 | 9-scf00340 | 9 |
| AX-158183532 | 16 | 69.363 | KV452969.1 | 17115291 | 9-scf00340 | 9 |
| AX-157756236 | 16 | 69.363 | KV452969.1 | 17203828 | 9-scf00340 | 9 |
| AX-157835905 | 16 | 69.363 | KV452969.1 | 17228506 | 9-scf00340 | 9 |
| AX-158183873 | 16 | 69.363 | KV452969.1 | 17486311 | 9-scf00340 | 9 |
| AX-158183999 | 16 | 69.363 | KV452969.1 | 17619909 | 9-scf00340 | 9 |
| AX-157886832 | 16 | 69.363 | KV452969.1 | 17645061 | 9-scf00340 | 9 |
| AX-157757590 | 16 | 69.363 | KV452969.1 | 17739762 | 9-scf00340 | 9 |
| AX-158184201 | 16 | 69.363 | KV452969.1 | 17934570 | 9-scf00340 | 9 |
| AX-158184202 | 16 | 69.363 | KV452969.1 | 17936739 | 9-scf00340 | 9 |
| AX-158184211 | 16 | 69.363 | KV452969.1 | 17945665 | 9-scf00340 | 9 |
| AX-158184213 | 16 | 69.363 | KV452969.1 | 17951423 | 9-scf00340 | 9 |
| AX-157835932 | 16 | 69.363 | KV452969.1 | 17953115 | 9-scf00340 | 9 |

|              |    |        |            |          |                |    |
|--------------|----|--------|------------|----------|----------------|----|
| AX-158184215 | 16 | 69.363 | KV452969.1 | 17958554 | 9-scf00340     | 9  |
| AX-158184220 | 16 | 69.363 | KV452969.1 | 17967505 | 9-scf00340     | 9  |
| AX-158184222 | 16 | 69.363 | KV452969.1 | 17971967 | 9-scf00340     | 9  |
| AX-158184223 | 16 | 69.363 | KV452969.1 | 17973673 | 9-scf00340     | 9  |
| AX-157835933 | 16 | 69.363 | KV452969.1 | 17976509 | 9-scf00340     | 9  |
| AX-158184227 | 16 | 69.363 | KV452969.1 | 17981464 | 9-scf00340     | 9  |
| AX-157724641 | 16 | 69.363 | KV452969.1 | 17981932 | 9-scf00340     | 9  |
| AX-158184229 | 16 | 69.363 | KV452969.1 | 17983592 | 9-scf00340     | 9  |
| AX-157703707 | 16 | 69.363 | DX100080.1 | 272      | IORI212 lctalu | UN |
| AX-158183337 | 16 | 69.582 | KV452969.1 | 16730339 | 9-scf00340     | 9  |
| AX-158184214 | 16 | 69.582 | KV452969.1 | 17953939 | 9-scf00340     | 9  |
| AX-158184231 | 16 | 69.582 | KV452969.1 | 17989394 | 9-scf00340     | 9  |
| AX-158184236 | 16 | 69.582 | KV452969.1 | 17994099 | 9-scf00340     | 9  |
| AX-158184237 | 16 | 69.582 | KV452969.1 | 17995499 | 9-scf00340     | 9  |
| AX-158184239 | 16 | 69.582 | KV452969.1 | 17997233 | 9-scf00340     | 9  |
| AX-158184240 | 16 | 69.582 | KV452969.1 | 17997712 | 9-scf00340     | 9  |
| AX-158184242 | 16 | 69.582 | KV452969.1 | 17999302 | 9-scf00340     | 9  |
| AX-158184243 | 16 | 69.582 | KV452969.1 | 18000189 | 9-scf00340     | 9  |
| AX-157866738 | 16 | 69.582 | KV452969.1 | 18001334 | 9-scf00340     | 9  |
| AX-158184244 | 16 | 69.582 | KV452969.1 | 18002328 | 9-scf00340     | 9  |
| AX-157835934 | 16 | 69.582 | KV452969.1 | 18004305 | 9-scf00340     | 9  |
| AX-158184245 | 16 | 69.582 | KV452969.1 | 18004446 | 9-scf00340     | 9  |
| AX-158184266 | 16 | 69.582 | KV452969.1 | 18025857 | 9-scf00340     | 9  |
| AX-158184255 | 16 | 69.798 | KV452969.1 | 18015248 | 9-scf00340     | 9  |
| AX-158184259 | 16 | 69.798 | KV452969.1 | 18018003 | 9-scf00340     | 9  |
| AX-158184260 | 16 | 69.799 | KV452969.1 | 18020110 | 9-scf00340     | 9  |
| AX-158184262 | 16 | 69.8   | KV452969.1 | 18023376 | 9-scf00340     | 9  |
| AX-157699676 | 16 | 69.801 | KV452969.1 | 18025761 | 9-scf00340     | 9  |
| AX-158184272 | 16 | 69.946 | KV452969.1 | 18033212 | 9-scf00340     | 9  |
| AX-158184273 | 16 | 69.946 | KV452969.1 | 18034109 | 9-scf00340     | 9  |
| AX-158184275 | 16 | 69.946 | KV452969.1 | 18036482 | 9-scf00340     | 9  |
| AX-158184290 | 16 | 69.946 | KV452969.1 | 18060965 | 9-scf00340     | 9  |
| AX-158184277 | 16 | 69.947 | KV452969.1 | 18037175 | 9-scf00340     | 9  |
| AX-158184271 | 16 | 70.237 | KV452969.1 | 18032178 | 9-scf00340     | 9  |
| AX-157835938 | 16 | 70.237 | KV452969.1 | 18039798 | 9-scf00340     | 9  |
| AX-157835939 | 16 | 70.237 | KV452969.1 | 18040073 | 9-scf00340     | 9  |
| AX-158184280 | 16 | 70.237 | KV452969.1 | 18043132 | 9-scf00340     | 9  |
| AX-157724851 | 16 | 70.237 | KV452969.1 | 18044616 | 9-scf00340     | 9  |
| AX-158184283 | 16 | 70.237 | KV452969.1 | 18047866 | 9-scf00340     | 9  |
| AX-157751100 | 16 | 70.237 | KV452969.1 | 18050153 | 9-scf00340     | 9  |
| AX-158184292 | 16 | 70.674 | KV452969.1 | 18063101 | 9-scf00340     | 9  |
| AX-157771136 | 16 | 70.674 | KV452969.1 | 18064828 | 9-scf00340     | 9  |
| AX-158184294 | 16 | 70.674 | KV452969.1 | 18066922 | 9-scf00340     | 9  |
| AX-158184305 | 16 | 70.674 | KV452969.1 | 18089663 | 9-scf00340     | 9  |
| AX-158184307 | 16 | 70.674 | KV452969.1 | 18095140 | 9-scf00340     | 9  |
| AX-158184310 | 16 | 70.814 | KV452969.1 | 18097191 | 9-scf00340     | 9  |
| AX-158184311 | 16 | 70.892 | KV452969.1 | 18099411 | 9-scf00340     | 9  |
| AX-157835942 | 16 | 70.892 | KV452969.1 | 18102529 | 9-scf00340     | 9  |
| AX-158184317 | 16 | 70.892 | KV452969.1 | 18107604 | 9-scf00340     | 9  |
| AX-158184318 | 16 | 70.892 | KV452969.1 | 18108130 | 9-scf00340     | 9  |
| AX-157858819 | 16 | 70.892 | KV452969.1 | 18108789 | 9-scf00340     | 9  |

|              |    |        |            |          |                |    |
|--------------|----|--------|------------|----------|----------------|----|
| AX-157835944 | 16 | 70.892 | KV452969.1 | 18110760 | 9-scf00340     | 9  |
| AX-158184320 | 16 | 70.892 | KV452969.1 | 18110838 | 9-scf00340     | 9  |
| AX-157835873 | 16 | 71.111 | KV452969.1 | 16266609 | 9-scf00340     | 9  |
| AX-157835900 | 16 | 71.111 | KV452969.1 | 16844681 | 9-scf00340     | 9  |
| AX-157755678 | 16 | 71.111 | KV452969.1 | 17731499 | 9-scf00340     | 9  |
| AX-158184094 | 16 | 71.111 | KV452969.1 | 17748066 | 9-scf00340     | 9  |
| AX-157878922 | 16 | 71.111 | KV452969.1 | 17867926 | 9-scf00340     | 9  |
| AX-158184173 | 16 | 71.111 | KV452969.1 | 17894693 | 9-scf00340     | 9  |
| AX-158184316 | 16 | 71.111 | KV452969.1 | 18106549 | 9-scf00340     | 9  |
| AX-158184321 | 16 | 71.111 | KV452969.1 | 18114756 | 9-scf00340     | 9  |
| AX-157715769 | 16 | 71.111 | KV452969.1 | 18115130 | 9-scf00340     | 9  |
| AX-158184322 | 16 | 71.111 | KV452969.1 | 18115897 | 9-scf00340     | 9  |
| AX-158184323 | 16 | 71.111 | KV452969.1 | 18117686 | 9-scf00340     | 9  |
| AX-158184326 | 16 | 71.111 | KV452969.1 | 18120076 | 9-scf00340     | 9  |
| AX-158184329 | 16 | 71.111 | KV452969.1 | 18125078 | 9-scf00340     | 9  |
| AX-158184331 | 16 | 71.111 | KV452969.1 | 18129682 | 9-scf00340     | 9  |
| AX-158184333 | 16 | 71.111 | KV452969.1 | 18130433 | 9-scf00340     | 9  |
| AX-158184335 | 16 | 71.111 | KV452969.1 | 18132013 | 9-scf00340     | 9  |
| AX-158184337 | 16 | 71.111 | KV452969.1 | 18132801 | 9-scf00340     | 9  |
| AX-157745323 | 16 | 71.111 | KV452969.1 | 18133992 | 9-scf00340     | 9  |
| AX-157878931 | 16 | 71.111 | KV452969.1 | 18155442 | 9-scf00340     | 9  |
| AX-157698172 | 16 | 71.111 | FI886546.1 | 576      | IORI212 Ictalt | UN |
| AX-158184338 | 16 | 71.365 | KV452969.1 | 18134931 | 9-scf00340     | 9  |
| AX-158184343 | 16 | 71.878 | KV452969.1 | 18151201 | 9-scf00340     | 9  |
| AX-158184344 | 16 | 71.878 | KV452969.1 | 18152142 | 9-scf00340     | 9  |
| AX-157835949 | 16 | 71.878 | KV452969.1 | 18154085 | 9-scf00340     | 9  |
| AX-158184347 | 16 | 71.882 | KV452969.1 | 18157945 | 9-scf00340     | 9  |
| AX-158184349 | 16 | 71.882 | KV452969.1 | 18160479 | 9-scf00340     | 9  |
| AX-158184350 | 16 | 72.016 | KV452969.1 | 18161710 | 9-scf00340     | 9  |
| AX-158184353 | 16 | 72.195 | KV452969.1 | 18165423 | 9-scf00340     | 9  |
| AX-158184358 | 16 | 72.195 | KV452969.1 | 18170706 | 9-scf00340     | 9  |
| AX-158184359 | 16 | 72.195 | KV452969.1 | 18172263 | 9-scf00340     | 9  |
| AX-158418157 | 16 | 72.195 | KV452969.1 | 18183084 | 9-scf00340     | 9  |
| AX-157835951 | 16 | 72.384 | KV452969.1 | 18173579 | 9-scf00340     | 9  |
| AX-158386010 | 16 | 72.387 | KV452969.1 | 18178372 | 9-scf00340     | 9  |
| AX-157717636 | 16 | 72.387 | KV452969.1 | 18179952 | 9-scf00340     | 9  |
| AX-158184362 | 16 | 72.387 | KV452969.1 | 18180415 | 9-scf00340     | 9  |
| AX-158184364 | 16 | 72.387 | KV452969.1 | 18181440 | 9-scf00340     | 9  |
| AX-158184373 | 16 | 72.387 | KV452969.1 | 18199364 | 9-scf00340     | 9  |
| AX-158184383 | 16 | 72.387 | KV452969.1 | 18210519 | 9-scf00340     | 9  |
| AX-158184368 | 16 | 72.66  | KV452969.1 | 18185288 | 9-scf00340     | 9  |
| AX-158184369 | 16 | 72.66  | KV452969.1 | 18185686 | 9-scf00340     | 9  |
| AX-158184370 | 16 | 72.66  | KV452969.1 | 18187361 | 9-scf00340     | 9  |
| AX-158413697 | 16 | 72.66  | KV452969.1 | 18194689 | 9-scf00340     | 9  |
| AX-158413700 | 16 | 72.66  | KV452969.1 | 18197439 | 9-scf00340     | 9  |
| AX-158184355 | 16 | 72.676 | KV452969.1 | 18167028 | 9-scf00340     | 9  |
| AX-157758614 | 16 | 72.676 | KV452969.1 | 18179505 | 9-scf00340     | 9  |
| AX-158184365 | 16 | 72.676 | KV452969.1 | 18181989 | 9-scf00340     | 9  |
| AX-158184372 | 16 | 72.676 | KV452969.1 | 18192003 | 9-scf00340     | 9  |
| AX-158413699 | 16 | 72.676 | KV452969.1 | 18196339 | 9-scf00340     | 9  |
| AX-158184374 | 16 | 72.676 | KV452969.1 | 18199921 | 9-scf00340     | 9  |

|              |    |        |            |          |            |   |
|--------------|----|--------|------------|----------|------------|---|
| AX-158184375 | 16 | 72.676 | KV452969.1 | 18200577 | 9-scf00340 | 9 |
| AX-158184376 | 16 | 72.676 | KV452969.1 | 18204579 | 9-scf00340 | 9 |
| AX-158184378 | 16 | 72.676 | KV452969.1 | 18206347 | 9-scf00340 | 9 |
| AX-158184380 | 16 | 72.676 | KV452969.1 | 18208142 | 9-scf00340 | 9 |
| AX-158184382 | 16 | 73.357 | KV452969.1 | 18209922 | 9-scf00340 | 9 |
| AX-158184367 | 16 | 73.371 | KV452969.1 | 18184687 | 9-scf00340 | 9 |
| AX-158184384 | 16 | 73.371 | KV452969.1 | 18211246 | 9-scf00340 | 9 |
| AX-157835955 | 16 | 75.459 | KV452969.1 | 18264748 | 9-scf00340 | 9 |
| AX-157835956 | 16 | 75.459 | KV452969.1 | 18267794 | 9-scf00340 | 9 |
| AX-158184475 | 16 | 75.459 | KV452969.1 | 18357557 | 9-scf00340 | 9 |
| AX-158184479 | 16 | 75.459 | KV452969.1 | 18367653 | 9-scf00340 | 9 |
| AX-158184509 | 16 | 75.459 | KV452969.1 | 18399309 | 9-scf00340 | 9 |
| AX-158184524 | 16 | 75.459 | KV452969.1 | 18421715 | 9-scf00340 | 9 |
| AX-158184426 | 16 | 75.526 | KV452969.1 | 18276512 | 9-scf00340 | 9 |
| AX-157835957 | 16 | 75.555 | KV452969.1 | 18278071 | 9-scf00340 | 9 |
| AX-157835958 | 16 | 75.592 | KV452969.1 | 18282249 | 9-scf00340 | 9 |
| AX-158184431 | 16 | 75.725 | KV452969.1 | 18283821 | 9-scf00340 | 9 |
| AX-158184433 | 16 | 75.725 | KV452969.1 | 18287537 | 9-scf00340 | 9 |
| AX-158184435 | 16 | 75.725 | KV452969.1 | 18290391 | 9-scf00340 | 9 |
| AX-158184436 | 16 | 75.725 | KV452969.1 | 18290923 | 9-scf00340 | 9 |
| AX-158184437 | 16 | 75.772 | KV452969.1 | 18291978 | 9-scf00340 | 9 |
| AX-158184438 | 16 | 75.835 | KV452969.1 | 18293228 | 9-scf00340 | 9 |
| AX-158184439 | 16 | 75.835 | KV452969.1 | 18294604 | 9-scf00340 | 9 |
| AX-158184441 | 16 | 75.835 | KV452969.1 | 18298459 | 9-scf00340 | 9 |
| AX-158184445 | 16 | 75.835 | KV452969.1 | 18302711 | 9-scf00340 | 9 |
| AX-158184452 | 16 | 75.835 | KV452969.1 | 18315829 | 9-scf00340 | 9 |
| AX-158184455 | 16 | 75.835 | KV452969.1 | 18319401 | 9-scf00340 | 9 |
| AX-158184449 | 16 | 75.875 | KV452969.1 | 18312539 | 9-scf00340 | 9 |
| AX-158184450 | 16 | 75.902 | KV452969.1 | 18314194 | 9-scf00340 | 9 |
| AX-158184451 | 16 | 75.928 | KV452969.1 | 18314953 | 9-scf00340 | 9 |
| AX-158184444 | 16 | 75.944 | KV452969.1 | 18301118 | 9-scf00340 | 9 |
| AX-158184453 | 16 | 75.944 | KV452969.1 | 18316743 | 9-scf00340 | 9 |
| AX-157886841 | 16 | 75.944 | KV452969.1 | 18318317 | 9-scf00340 | 9 |
| AX-157835959 | 16 | 76.162 | KV452969.1 | 18291311 | 9-scf00340 | 9 |
| AX-158184458 | 16 | 76.162 | KV452969.1 | 18325469 | 9-scf00340 | 9 |
| AX-158184463 | 16 | 76.162 | KV452969.1 | 18339247 | 9-scf00340 | 9 |
| AX-157858821 | 16 | 76.162 | KV452969.1 | 18340922 | 9-scf00340 | 9 |
| AX-158184466 | 16 | 76.162 | KV452969.1 | 18341691 | 9-scf00340 | 9 |
| AX-158184467 | 16 | 76.162 | KV452969.1 | 18341806 | 9-scf00340 | 9 |
| AX-158184468 | 16 | 76.162 | KV452969.1 | 18342859 | 9-scf00340 | 9 |
| AX-158184470 | 16 | 76.162 | KV452969.1 | 18348541 | 9-scf00340 | 9 |
| AX-158184472 | 16 | 76.162 | KV452969.1 | 18353010 | 9-scf00340 | 9 |
| AX-158184473 | 16 | 76.162 | KV452969.1 | 18354115 | 9-scf00340 | 9 |
| AX-157726393 | 16 | 76.162 | KV452969.1 | 18359168 | 9-scf00340 | 9 |
| AX-158184476 | 16 | 76.162 | KV452969.1 | 18361884 | 9-scf00340 | 9 |
| AX-157721946 | 16 | 76.162 | KV452969.1 | 18362910 | 9-scf00340 | 9 |
| AX-158184477 | 16 | 76.162 | KV452969.1 | 18363554 | 9-scf00340 | 9 |
| AX-158184478 | 16 | 76.162 | KV452969.1 | 18365521 | 9-scf00340 | 9 |
| AX-158184480 | 16 | 76.162 | KV452969.1 | 18369075 | 9-scf00340 | 9 |
| AX-158184481 | 16 | 76.162 | KV452969.1 | 18369675 | 9-scf00340 | 9 |
| AX-158184483 | 16 | 76.162 | KV452969.1 | 18372804 | 9-scf00340 | 9 |

|              |    |        |            |          |            |   |
|--------------|----|--------|------------|----------|------------|---|
| AX-158184484 | 16 | 76.162 | KV452969.1 | 18373281 | 9-scf00340 | 9 |
| AX-158184485 | 16 | 76.162 | KV452969.1 | 18373865 | 9-scf00340 | 9 |
| AX-158184486 | 16 | 76.162 | KV452969.1 | 18374346 | 9-scf00340 | 9 |
| AX-157722024 | 16 | 76.162 | KV452969.1 | 18374545 | 9-scf00340 | 9 |
| AX-158184487 | 16 | 76.162 | KV452969.1 | 18375567 | 9-scf00340 | 9 |
| AX-158184488 | 16 | 76.162 | KV452969.1 | 18376174 | 9-scf00340 | 9 |
| AX-158184489 | 16 | 76.162 | KV452969.1 | 18376882 | 9-scf00340 | 9 |
| AX-158184490 | 16 | 76.162 | KV452969.1 | 18377237 | 9-scf00340 | 9 |
| AX-158184511 | 16 | 76.162 | KV452969.1 | 18405840 | 9-scf00340 | 9 |
| AX-157835968 | 16 | 76.162 | KV452969.1 | 18420525 | 9-scf00340 | 9 |
| AX-157835970 | 16 | 76.162 | KV452969.1 | 18420804 | 9-scf00340 | 9 |
| AX-157835971 | 16 | 76.162 | KV452969.1 | 18427906 | 9-scf00340 | 9 |
| AX-158184527 | 16 | 76.162 | KV452969.1 | 18428435 | 9-scf00340 | 9 |
| AX-158184550 | 16 | 76.162 | KV452969.1 | 18466123 | 9-scf00340 | 9 |
| AX-158184563 | 16 | 76.162 | KV452969.1 | 18493349 | 9-scf00340 | 9 |
| AX-158184607 | 16 | 76.162 | KV452969.1 | 18544147 | 9-scf00340 | 9 |
| AX-158184616 | 16 | 76.162 | KV452969.1 | 18561334 | 9-scf00340 | 9 |
| AX-158184493 | 16 | 76.198 | KV452969.1 | 18379770 | 9-scf00340 | 9 |
| AX-158184496 | 16 | 76.208 | KV452969.1 | 18382410 | 9-scf00340 | 9 |
| AX-158184500 | 16 | 76.208 | KV452969.1 | 18386109 | 9-scf00340 | 9 |
| AX-158184461 | 16 | 76.272 | KV452969.1 | 18333483 | 9-scf00340 | 9 |
| AX-157715326 | 16 | 76.272 | KV452969.1 | 18346070 | 9-scf00340 | 9 |
| AX-158184471 | 16 | 76.272 | KV452969.1 | 18352156 | 9-scf00340 | 9 |
| AX-158184498 | 16 | 76.272 | KV452969.1 | 18384937 | 9-scf00340 | 9 |
| AX-158184499 | 16 | 76.272 | KV452969.1 | 18385908 | 9-scf00340 | 9 |
| AX-158184503 | 16 | 76.272 | KV452969.1 | 18389623 | 9-scf00340 | 9 |
| AX-157715379 | 16 | 76.272 | KV452969.1 | 18390269 | 9-scf00340 | 9 |
| AX-158184508 | 16 | 76.272 | KV452969.1 | 18397375 | 9-scf00340 | 9 |
| AX-158184512 | 16 | 76.272 | KV452969.1 | 18406371 | 9-scf00340 | 9 |
| AX-158184514 | 16 | 76.272 | KV452969.1 | 18407896 | 9-scf00340 | 9 |
| AX-157741762 | 16 | 76.272 | KV452969.1 | 18409003 | 9-scf00340 | 9 |
| AX-158184516 | 16 | 76.272 | KV452969.1 | 18409650 | 9-scf00340 | 9 |
| AX-158184517 | 16 | 76.272 | KV452969.1 | 18409993 | 9-scf00340 | 9 |
| AX-158184519 | 16 | 76.272 | KV452969.1 | 18412705 | 9-scf00340 | 9 |
| AX-158380623 | 16 | 76.272 | KV452969.1 | 18417499 | 9-scf00340 | 9 |
| AX-157835969 | 16 | 76.315 | KV452969.1 | 18420744 | 9-scf00340 | 9 |
| AX-158184530 | 16 | 76.315 | KV452969.1 | 18430547 | 9-scf00340 | 9 |
| AX-158184356 | 16 | 76.381 | KV452969.1 | 18167711 | 9-scf00340 | 9 |
| AX-158184525 | 16 | 76.381 | KV452969.1 | 18423199 | 9-scf00340 | 9 |
| AX-157835972 | 16 | 76.381 | KV452969.1 | 18428642 | 9-scf00340 | 9 |
| AX-158184529 | 16 | 76.381 | KV452969.1 | 18429735 | 9-scf00340 | 9 |
| AX-158184536 | 16 | 76.381 | KV452969.1 | 18441013 | 9-scf00340 | 9 |
| AX-158184537 | 16 | 76.381 | KV452969.1 | 18441597 | 9-scf00340 | 9 |
| AX-158184538 | 16 | 76.381 | KV452969.1 | 18441689 | 9-scf00340 | 9 |
| AX-158184540 | 16 | 76.381 | KV452969.1 | 18447700 | 9-scf00340 | 9 |
| AX-157835979 | 16 | 76.381 | KV452969.1 | 18483416 | 9-scf00340 | 9 |
| AX-158184566 | 16 | 76.381 | KV452969.1 | 18497500 | 9-scf00340 | 9 |
| AX-158184447 | 16 | 76.599 | KV452969.1 | 18304504 | 9-scf00340 | 9 |
| AX-158184531 | 16 | 76.599 | KV452969.1 | 18434681 | 9-scf00340 | 9 |
| AX-158184542 | 16 | 76.599 | KV452969.1 | 18458045 | 9-scf00340 | 9 |
| AX-158184543 | 16 | 76.599 | KV452969.1 | 18458787 | 9-scf00340 | 9 |

|              |    |        |            |          |            |   |
|--------------|----|--------|------------|----------|------------|---|
| AX-157755179 | 16 | 76.599 | KV452969.1 | 18458974 | 9-scf00340 | 9 |
| AX-157835975 | 16 | 76.599 | KV452969.1 | 18459806 | 9-scf00340 | 9 |
| AX-157835976 | 16 | 76.599 | KV452969.1 | 18460278 | 9-scf00340 | 9 |
| AX-158184545 | 16 | 76.599 | KV452969.1 | 18460802 | 9-scf00340 | 9 |
| AX-158184546 | 16 | 76.599 | KV452969.1 | 18461190 | 9-scf00340 | 9 |
| AX-158184548 | 16 | 76.599 | KV452969.1 | 18463640 | 9-scf00340 | 9 |
| AX-157752092 | 16 | 76.599 | KV452969.1 | 18467767 | 9-scf00340 | 9 |
| AX-157835978 | 16 | 76.599 | KV452969.1 | 18471360 | 9-scf00340 | 9 |
| AX-157866741 | 16 | 76.599 | KV452969.1 | 18486299 | 9-scf00340 | 9 |
| AX-158184559 | 16 | 76.599 | KV452969.1 | 18490435 | 9-scf00340 | 9 |
| AX-158184561 | 16 | 76.599 | KV452969.1 | 18492818 | 9-scf00340 | 9 |
| AX-158184562 | 16 | 76.599 | KV452969.1 | 18493029 | 9-scf00340 | 9 |
| AX-158184564 | 16 | 76.599 | KV452969.1 | 18494879 | 9-scf00340 | 9 |
| AX-157835980 | 16 | 76.599 | KV452969.1 | 18496001 | 9-scf00340 | 9 |
| AX-157835981 | 16 | 76.599 | KV452969.1 | 18501110 | 9-scf00340 | 9 |
| AX-157696862 | 16 | 76.599 | KV452969.1 | 18502408 | 9-scf00340 | 9 |
| AX-158184570 | 16 | 76.599 | KV452969.1 | 18503547 | 9-scf00340 | 9 |
| AX-158184571 | 16 | 76.599 | KV452969.1 | 18504339 | 9-scf00340 | 9 |
| AX-158184572 | 16 | 76.599 | KV452969.1 | 18504623 | 9-scf00340 | 9 |
| AX-158184575 | 16 | 76.599 | KV452969.1 | 18505916 | 9-scf00340 | 9 |
| AX-157715544 | 16 | 76.599 | KV452969.1 | 18506014 | 9-scf00340 | 9 |
| AX-157759055 | 16 | 76.599 | KV452969.1 | 18506117 | 9-scf00340 | 9 |
| AX-158184578 | 16 | 76.599 | KV452969.1 | 18508831 | 9-scf00340 | 9 |
| AX-158184580 | 16 | 76.599 | KV452969.1 | 18511567 | 9-scf00340 | 9 |
| AX-157715758 | 16 | 76.599 | KV452969.1 | 18519882 | 9-scf00340 | 9 |
| AX-158184627 | 16 | 76.599 | KV452969.1 | 18583258 | 9-scf00340 | 9 |
| AX-157835984 | 16 | 76.818 | KV452969.1 | 18525327 | 9-scf00340 | 9 |
| AX-158184590 | 16 | 77.037 | KV452969.1 | 18530185 | 9-scf00340 | 9 |
| AX-158184592 | 16 | 77.037 | KV452969.1 | 18533096 | 9-scf00340 | 9 |
| AX-158184594 | 16 | 77.037 | KV452969.1 | 18534012 | 9-scf00340 | 9 |
| AX-158184595 | 16 | 77.037 | KV452969.1 | 18534611 | 9-scf00340 | 9 |
| AX-158184597 | 16 | 77.037 | KV452969.1 | 18535443 | 9-scf00340 | 9 |
| AX-158184600 | 16 | 77.037 | KV452969.1 | 18540290 | 9-scf00340 | 9 |
| AX-158184601 | 16 | 77.037 | KV452969.1 | 18541696 | 9-scf00340 | 9 |
| AX-158184602 | 16 | 77.037 | KV452969.1 | 18541961 | 9-scf00340 | 9 |
| AX-158184606 | 16 | 77.037 | KV452969.1 | 18543766 | 9-scf00340 | 9 |
| AX-158184609 | 16 | 77.364 | KV452969.1 | 18550666 | 9-scf00340 | 9 |
| AX-158184610 | 16 | 77.364 | KV452969.1 | 18552032 | 9-scf00340 | 9 |
| AX-158184613 | 16 | 77.364 | KV452969.1 | 18558606 | 9-scf00340 | 9 |
| AX-157835985 | 16 | 77.364 | KV452969.1 | 18560625 | 9-scf00340 | 9 |
| AX-158184615 | 16 | 77.364 | KV452969.1 | 18560979 | 9-scf00340 | 9 |
| AX-158184617 | 16 | 77.364 | KV452969.1 | 18563877 | 9-scf00340 | 9 |
| AX-158184618 | 16 | 77.364 | KV452969.1 | 18567678 | 9-scf00340 | 9 |
| AX-157835987 | 16 | 77.364 | KV452969.1 | 18568884 | 9-scf00340 | 9 |
| AX-157835989 | 16 | 77.364 | KV452969.1 | 18572214 | 9-scf00340 | 9 |
| AX-158184620 | 16 | 77.364 | KV452969.1 | 18572602 | 9-scf00340 | 9 |
| AX-157835990 | 16 | 77.364 | KV452969.1 | 18573514 | 9-scf00340 | 9 |
| AX-158184621 | 16 | 77.364 | KV452969.1 | 18574284 | 9-scf00340 | 9 |
| AX-158184623 | 16 | 77.364 | KV452969.1 | 18578483 | 9-scf00340 | 9 |
| AX-158184625 | 16 | 77.364 | KV452969.1 | 18580349 | 9-scf00340 | 9 |
| AX-158184626 | 16 | 77.364 | KV452969.1 | 18581943 | 9-scf00340 | 9 |

|              |    |        |            |          |            |   |
|--------------|----|--------|------------|----------|------------|---|
| AX-158184628 | 16 | 77.364 | KV452969.1 | 18584264 | 9-scf00340 | 9 |
| AX-157858823 | 16 | 77.364 | KV452969.1 | 18586586 | 9-scf00340 | 9 |
| AX-158184641 | 16 | 77.364 | KV452969.1 | 18601772 | 9-scf00340 | 9 |
| AX-158184647 | 16 | 77.364 | KV452969.1 | 18609654 | 9-scf00340 | 9 |
| AX-158184707 | 16 | 77.364 | KV452969.1 | 18691386 | 9-scf00340 | 9 |
| AX-157835995 | 16 | 77.364 | KV452969.1 | 18696248 | 9-scf00340 | 9 |
| AX-158184719 | 16 | 77.364 | KV452969.1 | 18714844 | 9-scf00340 | 9 |
| AX-158184603 | 16 | 77.473 | KV452969.1 | 18542672 | 9-scf00340 | 9 |
| AX-157878935 | 16 | 77.473 | KV452969.1 | 18563022 | 9-scf00340 | 9 |
| AX-158184630 | 16 | 77.473 | KV452969.1 | 18588485 | 9-scf00340 | 9 |
| AX-158184632 | 16 | 77.473 | KV452969.1 | 18589475 | 9-scf00340 | 9 |
| AX-158184634 | 16 | 77.473 | KV452969.1 | 18594280 | 9-scf00340 | 9 |
| AX-158184636 | 16 | 77.473 | KV452969.1 | 18595789 | 9-scf00340 | 9 |
| AX-157746754 | 16 | 77.473 | KV452969.1 | 18599200 | 9-scf00340 | 9 |
| AX-158184638 | 16 | 77.473 | KV452969.1 | 18600221 | 9-scf00340 | 9 |
| AX-158184643 | 16 | 77.473 | KV452969.1 | 18606391 | 9-scf00340 | 9 |
| AX-158184644 | 16 | 77.473 | KV452969.1 | 18607315 | 9-scf00340 | 9 |
| AX-157835992 | 16 | 77.473 | KV452969.1 | 18607528 | 9-scf00340 | 9 |
| AX-158184646 | 16 | 77.473 | KV452969.1 | 18609032 | 9-scf00340 | 9 |
| AX-158184649 | 16 | 77.473 | KV452969.1 | 18612538 | 9-scf00340 | 9 |
| AX-158184650 | 16 | 77.473 | KV452969.1 | 18613732 | 9-scf00340 | 9 |
| AX-157722441 | 16 | 77.473 | KV452969.1 | 18615512 | 9-scf00340 | 9 |
| AX-158184652 | 16 | 77.473 | KV452969.1 | 18621300 | 9-scf00340 | 9 |
| AX-157744570 | 16 | 77.473 | KV452969.1 | 18627406 | 9-scf00340 | 9 |
| AX-158184664 | 16 | 77.473 | KV452969.1 | 18641742 | 9-scf00340 | 9 |
| AX-157754765 | 16 | 77.473 | KV452969.1 | 18664544 | 9-scf00340 | 9 |
| AX-157835993 | 16 | 77.633 | KV452969.1 | 18628689 | 9-scf00340 | 9 |
| AX-157756650 | 16 | 77.801 | KV452969.1 | 18628972 | 9-scf00340 | 9 |
| AX-158184660 | 16 | 77.801 | KV452969.1 | 18635507 | 9-scf00340 | 9 |
| AX-158184661 | 16 | 77.801 | KV452969.1 | 18635757 | 9-scf00340 | 9 |
| AX-158184662 | 16 | 77.801 | KV452969.1 | 18635958 | 9-scf00340 | 9 |
| AX-158184668 | 16 | 77.801 | KV452969.1 | 18645190 | 9-scf00340 | 9 |
| AX-158184675 | 16 | 77.801 | KV452969.1 | 18649214 | 9-scf00340 | 9 |
| AX-158184677 | 16 | 77.801 | KV452969.1 | 18651352 | 9-scf00340 | 9 |
| AX-158184678 | 16 | 77.801 | KV452969.1 | 18652144 | 9-scf00340 | 9 |
| AX-157878936 | 16 | 77.801 | KV452969.1 | 18652566 | 9-scf00340 | 9 |
| AX-158184679 | 16 | 77.801 | KV452969.1 | 18653802 | 9-scf00340 | 9 |
| AX-157748226 | 16 | 77.801 | KV452969.1 | 18654188 | 9-scf00340 | 9 |
| AX-158184681 | 16 | 77.801 | KV452969.1 | 18655030 | 9-scf00340 | 9 |
| AX-158184682 | 16 | 77.801 | KV452969.1 | 18657258 | 9-scf00340 | 9 |
| AX-158184683 | 16 | 77.801 | KV452969.1 | 18658811 | 9-scf00340 | 9 |
| AX-158184685 | 16 | 77.801 | KV452969.1 | 18661604 | 9-scf00340 | 9 |
| AX-157772424 | 16 | 77.801 | KV452969.1 | 18663573 | 9-scf00340 | 9 |
| AX-158380624 | 16 | 77.801 | KV452969.1 | 18665116 | 9-scf00340 | 9 |
| AX-158184687 | 16 | 77.801 | KV452969.1 | 18665737 | 9-scf00340 | 9 |
| AX-158184695 | 16 | 77.801 | KV452969.1 | 18674566 | 9-scf00340 | 9 |
| AX-158184697 | 16 | 77.801 | KV452969.1 | 18677940 | 9-scf00340 | 9 |
| AX-158184699 | 16 | 77.801 | KV452969.1 | 18683096 | 9-scf00340 | 9 |
| AX-158184689 | 16 | 77.848 | KV452969.1 | 18667660 | 9-scf00340 | 9 |
| AX-157750915 | 16 | 77.867 | KV452969.1 | 18668875 | 9-scf00340 | 9 |
| AX-158184690 | 16 | 77.911 | KV452969.1 | 18669941 | 9-scf00340 | 9 |

|              |    |        |            |          |            |   |
|--------------|----|--------|------------|----------|------------|---|
| AX-158184692 | 16 | 77.911 | KV452969.1 | 18672056 | 9-scf00340 | 9 |
| AX-158184694 | 16 | 77.911 | KV452969.1 | 18673513 | 9-scf00340 | 9 |
| AX-158184738 | 16 | 77.911 | KV452969.1 | 18734456 | 9-scf00340 | 9 |
| AX-158184696 | 16 | 77.984 | KV452969.1 | 18677496 | 9-scf00340 | 9 |
| AX-157738669 | 16 | 78.02  | KV452969.1 | 18679340 | 9-scf00340 | 9 |
| AX-158184704 | 16 | 78.129 | KV452969.1 | 18687364 | 9-scf00340 | 9 |
| AX-158184705 | 16 | 78.129 | KV452969.1 | 18688685 | 9-scf00340 | 9 |
| AX-158184708 | 16 | 78.129 | KV452969.1 | 18695557 | 9-scf00340 | 9 |
| AX-158184709 | 16 | 78.129 | KV452969.1 | 18697286 | 9-scf00340 | 9 |
| AX-158184713 | 16 | 78.129 | KV452969.1 | 18704889 | 9-scf00340 | 9 |
| AX-158184714 | 16 | 78.129 | KV452969.1 | 18705359 | 9-scf00340 | 9 |
| AX-157836002 | 16 | 78.129 | KV452969.1 | 18714394 | 9-scf00340 | 9 |
| AX-158184721 | 16 | 78.129 | KV452969.1 | 18716571 | 9-scf00340 | 9 |
| AX-158184723 | 16 | 78.129 | KV452969.1 | 18717641 | 9-scf00340 | 9 |
| AX-158184728 | 16 | 78.129 | KV452969.1 | 18722458 | 9-scf00340 | 9 |
| AX-157745137 | 16 | 78.129 | KV452969.1 | 18770484 | 9-scf00340 | 9 |
| AX-158184792 | 16 | 78.129 | KV452969.1 | 18808359 | 9-scf00340 | 9 |
| AX-158184730 | 16 | 78.169 | KV452969.1 | 18723860 | 9-scf00340 | 9 |
| AX-158184706 | 16 | 78.186 | KV452969.1 | 18690514 | 9-scf00340 | 9 |
| AX-157836003 | 16 | 78.186 | KV452969.1 | 18715430 | 9-scf00340 | 9 |
| AX-158184726 | 16 | 78.186 | KV452969.1 | 18721770 | 9-scf00340 | 9 |
| AX-158184734 | 16 | 78.186 | KV452969.1 | 18730106 | 9-scf00340 | 9 |
| AX-158184744 | 16 | 78.186 | KV452969.1 | 18740633 | 9-scf00340 | 9 |
| AX-158184737 | 16 | 78.216 | KV452969.1 | 18733837 | 9-scf00340 | 9 |
| AX-158184747 | 16 | 78.216 | KV452969.1 | 18742932 | 9-scf00340 | 9 |
| AX-158184715 | 16 | 78.238 | KV452969.1 | 18706222 | 9-scf00340 | 9 |
| AX-158184740 | 16 | 78.238 | KV452969.1 | 18735874 | 9-scf00340 | 9 |
| AX-157748027 | 16 | 78.238 | KV452969.1 | 18736238 | 9-scf00340 | 9 |
| AX-158184741 | 16 | 78.238 | KV452969.1 | 18737304 | 9-scf00340 | 9 |
| AX-158184742 | 16 | 78.238 | KV452969.1 | 18739525 | 9-scf00340 | 9 |
| AX-157743653 | 16 | 78.238 | KV452969.1 | 18740331 | 9-scf00340 | 9 |
| AX-158184745 | 16 | 78.238 | KV452969.1 | 18741786 | 9-scf00340 | 9 |
| AX-158184749 | 16 | 78.347 | KV452969.1 | 18743694 | 9-scf00340 | 9 |
| AX-158184750 | 16 | 78.347 | KV452969.1 | 18744343 | 9-scf00340 | 9 |
| AX-158184751 | 16 | 78.347 | KV452969.1 | 18744879 | 9-scf00340 | 9 |
| AX-158184752 | 16 | 78.347 | KV452969.1 | 18745322 | 9-scf00340 | 9 |
| AX-158184753 | 16 | 78.347 | KV452969.1 | 18745617 | 9-scf00340 | 9 |
| AX-158184754 | 16 | 78.347 | KV452969.1 | 18746559 | 9-scf00340 | 9 |
| AX-158184755 | 16 | 78.347 | KV452969.1 | 18746698 | 9-scf00340 | 9 |
| AX-158184765 | 16 | 78.347 | KV452969.1 | 18765206 | 9-scf00340 | 9 |
| AX-157836005 | 16 | 78.348 | KV452969.1 | 18751119 | 9-scf00340 | 9 |
| AX-158184764 | 16 | 78.348 | KV452969.1 | 18763692 | 9-scf00340 | 9 |
| AX-158184766 | 16 | 78.566 | KV452969.1 | 18767143 | 9-scf00340 | 9 |
| AX-157836008 | 16 | 78.566 | KV452969.1 | 18773263 | 9-scf00340 | 9 |
| AX-158184773 | 16 | 78.588 | KV452969.1 | 18777007 | 9-scf00340 | 9 |
| AX-157744452 | 16 | 78.786 | KV452969.1 | 18644766 | 9-scf00340 | 9 |
| AX-158184775 | 16 | 78.786 | KV452969.1 | 18780818 | 9-scf00340 | 9 |
| AX-157726392 | 16 | 78.786 | KV452969.1 | 18781292 | 9-scf00340 | 9 |
| AX-157775925 | 16 | 78.786 | KV452969.1 | 18784330 | 9-scf00340 | 9 |
| AX-158184654 | 16 | 78.871 | KV452969.1 | 18629591 | 9-scf00340 | 9 |
| AX-157835999 | 16 | 78.871 | KV452969.1 | 18704144 | 9-scf00340 | 9 |



|              |    |        |            |          |            |   |
|--------------|----|--------|------------|----------|------------|---|
| AX-157836010 | 16 | 78.871 | KV452969.1 | 18786527 | 9-scf00340 | 9 |
| AX-158184779 | 16 | 78.943 | KV452969.1 | 18787444 | 9-scf00340 | 9 |
| AX-158184777 | 16 | 78.963 | KV452969.1 | 18785738 | 9-scf00340 | 9 |
| AX-158184780 | 16 | 78.963 | KV452969.1 | 18789757 | 9-scf00340 | 9 |
| AX-158184781 | 16 | 79.067 | KV452969.1 | 18792637 | 9-scf00340 | 9 |
| AX-157755796 | 16 | 79.067 | KV452969.1 | 18801530 | 9-scf00340 | 9 |
| AX-158184786 | 16 | 79.231 | KV452969.1 | 18800715 | 9-scf00340 | 9 |
| AX-158184789 | 16 | 79.331 | KV452969.1 | 18804440 | 9-scf00340 | 9 |
| AX-158184791 | 16 | 79.334 | KV452969.1 | 18808068 | 9-scf00340 | 9 |
| AX-158184794 | 16 | 79.334 | KV452969.1 | 18809731 | 9-scf00340 | 9 |
| AX-158184797 | 16 | 79.334 | KV452969.1 | 18812282 | 9-scf00340 | 9 |
| AX-158184798 | 16 | 79.768 | KV452969.1 | 18812923 | 9-scf00340 | 9 |
| AX-158184799 | 16 | 79.77  | KV452969.1 | 18816005 | 9-scf00340 | 9 |
| AX-158184800 | 16 | 79.77  | KV452969.1 | 18817281 | 9-scf00340 | 9 |
| AX-158184802 | 16 | 79.77  | KV452969.1 | 18818388 | 9-scf00340 | 9 |
| AX-158184803 | 16 | 79.77  | KV452969.1 | 18819218 | 9-scf00340 | 9 |
| AX-158184804 | 16 | 79.77  | KV452969.1 | 18819592 | 9-scf00340 | 9 |
| AX-158184805 | 16 | 79.879 | KV452969.1 | 18820615 | 9-scf00340 | 9 |
| AX-157858825 | 16 | 79.879 | KV452969.1 | 18825036 | 9-scf00340 | 9 |
| AX-158184809 | 16 | 79.886 | KV452969.1 | 18825124 | 9-scf00340 | 9 |
| AX-157721554 | 16 | 79.895 | KV452969.1 | 18827130 | 9-scf00340 | 9 |
| AX-157752853 | 16 | 79.895 | KV452969.1 | 18830862 | 9-scf00340 | 9 |
| AX-158184848 | 16 | 79.895 | KV452969.1 | 18883394 | 9-scf00340 | 9 |
| AX-158184879 | 16 | 79.895 | KV452969.1 | 18926404 | 9-scf00340 | 9 |
| AX-157726231 | 16 | 79.9   | KV452969.1 | 18830072 | 9-scf00340 | 9 |
| AX-157722868 | 16 | 79.901 | KV452969.1 | 18833865 | 9-scf00340 | 9 |
| AX-158184810 | 16 | 80.032 | KV452969.1 | 18826438 | 9-scf00340 | 9 |
| AX-157836013 | 16 | 80.032 | KV452969.1 | 18836869 | 9-scf00340 | 9 |
| AX-158184815 | 16 | 80.032 | KV452969.1 | 18837788 | 9-scf00340 | 9 |
| AX-158184816 | 16 | 80.032 | KV452969.1 | 18838712 | 9-scf00340 | 9 |
| AX-157836014 | 16 | 80.032 | KV452969.1 | 18839755 | 9-scf00340 | 9 |
| AX-157836015 | 16 | 80.032 | KV452969.1 | 18840802 | 9-scf00340 | 9 |
| AX-157836016 | 16 | 80.032 | KV452969.1 | 18841266 | 9-scf00340 | 9 |
| AX-158184817 | 16 | 80.032 | KV452969.1 | 18843621 | 9-scf00340 | 9 |
| AX-158184818 | 16 | 80.032 | KV452969.1 | 18845681 | 9-scf00340 | 9 |
| AX-158184823 | 16 | 80.032 | KV452969.1 | 18853806 | 9-scf00340 | 9 |
| AX-158184824 | 16 | 80.032 | KV452969.1 | 18854145 | 9-scf00340 | 9 |
| AX-158184830 | 16 | 80.032 | KV452969.1 | 18859033 | 9-scf00340 | 9 |
| AX-158184836 | 16 | 80.032 | KV452969.1 | 18867315 | 9-scf00340 | 9 |
| AX-157722383 | 16 | 80.032 | KV452969.1 | 18874348 | 9-scf00340 | 9 |
| AX-158184846 | 16 | 80.032 | KV452969.1 | 18882722 | 9-scf00340 | 9 |
| AX-158184814 | 16 | 80.207 | KV452969.1 | 18836166 | 9-scf00340 | 9 |
| AX-158184819 | 16 | 80.207 | KV452969.1 | 18846978 | 9-scf00340 | 9 |
| AX-158184821 | 16 | 80.207 | KV452969.1 | 18848322 | 9-scf00340 | 9 |
| AX-158184822 | 16 | 80.207 | KV452969.1 | 18848405 | 9-scf00340 | 9 |
| AX-157858826 | 16 | 80.207 | KV452969.1 | 18848905 | 9-scf00340 | 9 |
| AX-157723143 | 16 | 80.207 | KV452969.1 | 18851261 | 9-scf00340 | 9 |
| AX-157724595 | 16 | 80.207 | KV452969.1 | 18854316 | 9-scf00340 | 9 |
| AX-158184825 | 16 | 80.207 | KV452969.1 | 18854462 | 9-scf00340 | 9 |
| AX-158184826 | 16 | 80.316 | KV452969.1 | 18856763 | 9-scf00340 | 9 |
| AX-158184829 | 16 | 80.316 | KV452969.1 | 18858160 | 9-scf00340 | 9 |

|              |    |        |            |          |            |   |
|--------------|----|--------|------------|----------|------------|---|
| AX-158184832 | 16 | 80.316 | KV452969.1 | 18861464 | 9-scf00340 | 9 |
| AX-158184834 | 16 | 80.316 | KV452969.1 | 18864169 | 9-scf00340 | 9 |
| AX-158184837 | 16 | 80.316 | KV452969.1 | 18868316 | 9-scf00340 | 9 |
| AX-158184838 | 16 | 80.316 | KV452969.1 | 18868841 | 9-scf00340 | 9 |
| AX-157774670 | 16 | 80.316 | KV452969.1 | 18869207 | 9-scf00340 | 9 |
| AX-158184844 | 16 | 80.316 | KV452969.1 | 18880183 | 9-scf00340 | 9 |
| AX-158184845 | 16 | 80.316 | KV452969.1 | 18881844 | 9-scf00340 | 9 |
| AX-158184847 | 16 | 80.316 | KV452969.1 | 18883054 | 9-scf00340 | 9 |
| AX-157739826 | 16 | 80.316 | KV452969.1 | 18884225 | 9-scf00340 | 9 |
| AX-158184850 | 16 | 80.316 | KV452969.1 | 18885254 | 9-scf00340 | 9 |
| AX-158184853 | 16 | 80.316 | KV452969.1 | 18887483 | 9-scf00340 | 9 |
| AX-158184858 | 16 | 80.316 | KV452969.1 | 18894825 | 9-scf00340 | 9 |
| AX-158184862 | 16 | 80.316 | KV452969.1 | 18897828 | 9-scf00340 | 9 |
| AX-158184828 | 16 | 80.425 | KV452969.1 | 18857560 | 9-scf00340 | 9 |
| AX-158184849 | 16 | 80.425 | KV452969.1 | 18884796 | 9-scf00340 | 9 |
| AX-158184854 | 16 | 80.425 | KV452969.1 | 18888833 | 9-scf00340 | 9 |
| AX-157710932 | 16 | 80.425 | KV452969.1 | 18893226 | 9-scf00340 | 9 |
| AX-158184857 | 16 | 80.425 | KV452969.1 | 18893342 | 9-scf00340 | 9 |
| AX-158184859 | 16 | 80.644 | KV452969.1 | 18896218 | 9-scf00340 | 9 |
| AX-158184861 | 16 | 80.644 | KV452969.1 | 18897118 | 9-scf00340 | 9 |
| AX-158184864 | 16 | 80.644 | KV452969.1 | 18899869 | 9-scf00340 | 9 |
| AX-158184865 | 16 | 80.907 | KV452969.1 | 18906302 | 9-scf00340 | 9 |
| AX-157740601 | 16 | 80.914 | KV452969.1 | 18906764 | 9-scf00340 | 9 |
| AX-158184867 | 16 | 81.088 | KV452969.1 | 18906899 | 9-scf00340 | 9 |
| AX-158184870 | 16 | 81.088 | KV452969.1 | 18912552 | 9-scf00340 | 9 |
| AX-158184871 | 16 | 81.088 | KV452969.1 | 18914184 | 9-scf00340 | 9 |
| AX-157836020 | 16 | 81.088 | KV452969.1 | 18916025 | 9-scf00340 | 9 |
| AX-158184878 | 16 | 81.088 | KV452969.1 | 18924284 | 9-scf00340 | 9 |
| AX-157872097 | 16 | 81.088 | KV452969.1 | 18927637 | 9-scf00340 | 9 |
| AX-158184882 | 16 | 81.088 | KV452969.1 | 18934339 | 9-scf00340 | 9 |
| AX-157758311 | 16 | 81.468 | KV452969.1 | 18926646 | 9-scf00340 | 9 |
| AX-157836021 | 16 | 81.822 | KV452969.1 | 18942162 | 9-scf00340 | 9 |
| AX-157836022 | 16 | 81.828 | KV452969.1 | 18947098 | 9-scf00340 | 9 |
| AX-158184888 | 16 | 81.828 | KV452969.1 | 18949447 | 9-scf00340 | 9 |
| AX-158184890 | 16 | 81.828 | KV452969.1 | 18953432 | 9-scf00340 | 9 |
| AX-158184892 | 16 | 81.828 | KV452969.1 | 18954306 | 9-scf00340 | 9 |
| AX-158184895 | 16 | 82.026 | KV452969.1 | 18960798 | 9-scf00340 | 9 |
| AX-158184894 | 16 | 82.127 | KV452969.1 | 18958764 | 9-scf00340 | 9 |
| AX-157836025 | 16 | 82.127 | KV452969.1 | 18961759 | 9-scf00340 | 9 |
| AX-158184896 | 16 | 82.35  | KV452969.1 | 18962891 | 9-scf00340 | 9 |
| AX-158184897 | 16 | 82.422 | KV452969.1 | 18964632 | 9-scf00340 | 9 |
| AX-158184900 | 16 | 82.618 | KV452969.1 | 18967231 | 9-scf00340 | 9 |
| AX-158184901 | 16 | 82.618 | KV452969.1 | 18968508 | 9-scf00340 | 9 |
| AX-157718993 | 16 | 82.618 | KV452969.1 | 18973094 | 9-scf00340 | 9 |
| AX-158184903 | 16 | 82.618 | KV452969.1 | 18974696 | 9-scf00340 | 9 |
| AX-158184905 | 16 | 82.692 | KV452969.1 | 18976057 | 9-scf00340 | 9 |
| AX-157725893 | 16 | 82.782 | KV452969.1 | 18980471 | 9-scf00340 | 9 |
| AX-158184907 | 16 | 82.782 | KV452969.1 | 18981908 | 9-scf00340 | 9 |
| AX-158184910 | 16 | 82.831 | KV452969.1 | 18989553 | 9-scf00340 | 9 |
| AX-157758682 | 16 | 82.831 | KV452969.1 | 18991849 | 9-scf00340 | 9 |
| AX-158184957 | 16 | 82.831 | KV452969.1 | 19056534 | 9-scf00340 | 9 |

|              |    |        |            |          |            |   |
|--------------|----|--------|------------|----------|------------|---|
| AX-158185056 | 16 | 82.831 | KV452969.1 | 19182022 | 9-scf00340 | 9 |
| AX-158184904 | 16 | 82.946 | KV452969.1 | 18975687 | 9-scf00340 | 9 |
| AX-158184914 | 16 | 82.946 | KV452969.1 | 18994643 | 9-scf00340 | 9 |
| AX-157720735 | 16 | 82.946 | KV452969.1 | 18995573 | 9-scf00340 | 9 |
| AX-158184916 | 16 | 82.946 | KV452969.1 | 18997197 | 9-scf00340 | 9 |
| AX-158184917 | 16 | 82.946 | KV452969.1 | 18998430 | 9-scf00340 | 9 |
| AX-158184919 | 16 | 82.946 | KV452969.1 | 19000835 | 9-scf00340 | 9 |
| AX-158184922 | 16 | 82.946 | KV452969.1 | 19003673 | 9-scf00340 | 9 |
| AX-157836027 | 16 | 82.946 | KV452969.1 | 19011117 | 9-scf00340 | 9 |
| AX-157743610 | 16 | 82.946 | KV452969.1 | 19017545 | 9-scf00340 | 9 |
| AX-158184924 | 16 | 83.055 | KV452969.1 | 19004930 | 9-scf00340 | 9 |
| AX-158423096 | 16 | 83.055 | KV452969.1 | 19006864 | 9-scf00340 | 9 |
| AX-158184931 | 16 | 83.055 | KV452969.1 | 19019535 | 9-scf00340 | 9 |
| AX-158184928 | 16 | 83.179 | KV452969.1 | 19011050 | 9-scf00340 | 9 |
| AX-158184936 | 16 | 83.274 | KV452969.1 | 19025935 | 9-scf00340 | 9 |
| AX-158184937 | 16 | 83.274 | KV452969.1 | 19026209 | 9-scf00340 | 9 |
| AX-158184939 | 16 | 83.274 | KV452969.1 | 19027260 | 9-scf00340 | 9 |
| AX-158184941 | 16 | 83.274 | KV452969.1 | 19029817 | 9-scf00340 | 9 |
| AX-158184942 | 16 | 83.274 | KV452969.1 | 19030494 | 9-scf00340 | 9 |
| AX-158184943 | 16 | 83.274 | KV452969.1 | 19030719 | 9-scf00340 | 9 |
| AX-158184948 | 16 | 83.274 | KV452969.1 | 19035278 | 9-scf00340 | 9 |
| AX-158185057 | 16 | 83.274 | KV452969.1 | 19182635 | 9-scf00340 | 9 |
| AX-158185067 | 16 | 83.274 | KV452969.1 | 19195994 | 9-scf00340 | 9 |
| AX-157836029 | 16 | 83.336 | KV452969.1 | 19028333 | 9-scf00340 | 9 |
| AX-158184950 | 16 | 83.336 | KV452969.1 | 19036783 | 9-scf00340 | 9 |
| AX-158184925 | 16 | 83.383 | KV452969.1 | 19007241 | 9-scf00340 | 9 |
| AX-158184926 | 16 | 83.383 | KV452969.1 | 19007700 | 9-scf00340 | 9 |
| AX-157878940 | 16 | 83.383 | KV452969.1 | 19010531 | 9-scf00340 | 9 |
| AX-157836030 | 16 | 83.383 | KV452969.1 | 19031191 | 9-scf00340 | 9 |
| AX-158184949 | 16 | 83.383 | KV452969.1 | 19035679 | 9-scf00340 | 9 |
| AX-158184952 | 16 | 83.383 | KV452969.1 | 19039595 | 9-scf00340 | 9 |
| AX-157836031 | 16 | 83.383 | KV452969.1 | 19040409 | 9-scf00340 | 9 |
| AX-157721339 | 16 | 83.383 | KV452969.1 | 19041242 | 9-scf00340 | 9 |
| AX-158184955 | 16 | 83.383 | KV452969.1 | 19053536 | 9-scf00340 | 9 |
| AX-158184959 | 16 | 83.383 | KV452969.1 | 19061762 | 9-scf00340 | 9 |
| AX-157836033 | 16 | 83.383 | KV452969.1 | 19064616 | 9-scf00340 | 9 |
| AX-157752660 | 16 | 83.383 | KV452969.1 | 19064993 | 9-scf00340 | 9 |
| AX-157872099 | 16 | 83.383 | KV452969.1 | 19068750 | 9-scf00340 | 9 |
| AX-157727528 | 16 | 83.383 | KV452969.1 | 19069589 | 9-scf00340 | 9 |
| AX-158184963 | 16 | 83.383 | KV452969.1 | 19069815 | 9-scf00340 | 9 |
| AX-158184966 | 16 | 83.383 | KV452969.1 | 19075127 | 9-scf00340 | 9 |
| AX-158184967 | 16 | 83.383 | KV452969.1 | 19076100 | 9-scf00340 | 9 |
| AX-158184971 | 16 | 83.383 | KV452969.1 | 19078773 | 9-scf00340 | 9 |
| AX-158184977 | 16 | 83.383 | KV452969.1 | 19086510 | 9-scf00340 | 9 |
| AX-158184990 | 16 | 83.383 | KV452969.1 | 19096466 | 9-scf00340 | 9 |
| AX-158184968 | 16 | 83.417 | KV452969.1 | 19077043 | 9-scf00340 | 9 |
| AX-158184970 | 16 | 83.448 | KV452969.1 | 19078166 | 9-scf00340 | 9 |
| AX-158184980 | 16 | 83.448 | KV452969.1 | 19089681 | 9-scf00340 | 9 |
| AX-158184972 | 16 | 83.469 | KV452969.1 | 19081638 | 9-scf00340 | 9 |
| AX-158184938 | 16 | 83.493 | KV452969.1 | 19026332 | 9-scf00340 | 9 |
| AX-158184975 | 16 | 83.493 | KV452969.1 | 19085166 | 9-scf00340 | 9 |

|              |    |        |            |          |            |   |
|--------------|----|--------|------------|----------|------------|---|
| AX-158184976 | 16 | 83.493 | KV452969.1 | 19086008 | 9-scf00340 | 9 |
| AX-158184991 | 16 | 83.493 | KV452969.1 | 19096694 | 9-scf00340 | 9 |
| AX-158184998 | 16 | 83.493 | KV452969.1 | 19103036 | 9-scf00340 | 9 |
| AX-157702917 | 16 | 83.571 | KV452969.1 | 19002820 | 9-scf00340 | 9 |
| AX-158185087 | 16 | 83.571 | KV452969.1 | 19223694 | 9-scf00340 | 9 |
| AX-158185002 | 16 | 83.602 | KV452969.1 | 19108064 | 9-scf00340 | 9 |
| AX-158185007 | 16 | 83.602 | KV452969.1 | 19114506 | 9-scf00340 | 9 |
| AX-158185008 | 16 | 83.606 | KV452969.1 | 19116096 | 9-scf00340 | 9 |
| AX-158185010 | 16 | 83.612 | KV452969.1 | 19119429 | 9-scf00340 | 9 |
| AX-158185011 | 16 | 83.736 | KV452969.1 | 19120080 | 9-scf00340 | 9 |
| AX-158185017 | 16 | 83.816 | KV452969.1 | 19127797 | 9-scf00340 | 9 |
| AX-158184965 | 16 | 83.894 | KV452969.1 | 19071664 | 9-scf00340 | 9 |
| AX-158184983 | 16 | 83.894 | KV452969.1 | 19091631 | 9-scf00340 | 9 |
| AX-158184997 | 16 | 83.894 | KV452969.1 | 19102505 | 9-scf00340 | 9 |
| AX-157724579 | 16 | 83.894 | KV452969.1 | 19111539 | 9-scf00340 | 9 |
| AX-157739392 | 16 | 83.894 | KV452969.1 | 19129691 | 9-scf00340 | 9 |
| AX-158185019 | 16 | 83.894 | KV452969.1 | 19130749 | 9-scf00340 | 9 |
| AX-158185036 | 16 | 83.894 | KV452969.1 | 19149459 | 9-scf00340 | 9 |
| AX-158185039 | 16 | 83.894 | KV452969.1 | 19158561 | 9-scf00340 | 9 |
| AX-157720378 | 16 | 83.894 | KV452969.1 | 19159197 | 9-scf00340 | 9 |
| AX-158184981 | 16 | 83.953 | KV452969.1 | 19090069 | 9-scf00340 | 9 |
| AX-157878942 | 16 | 83.953 | KV452969.1 | 19112050 | 9-scf00340 | 9 |
| AX-158185009 | 16 | 83.953 | KV452969.1 | 19118411 | 9-scf00340 | 9 |
| AX-158185022 | 16 | 83.953 | KV452969.1 | 19133443 | 9-scf00340 | 9 |
| AX-158185025 | 16 | 84.011 | KV452969.1 | 19135745 | 9-scf00340 | 9 |
| AX-158185029 | 16 | 84.149 | KV452969.1 | 19138979 | 9-scf00340 | 9 |
| AX-158185032 | 16 | 84.149 | KV452969.1 | 19143963 | 9-scf00340 | 9 |
| AX-158185033 | 16 | 84.149 | KV452969.1 | 19146177 | 9-scf00340 | 9 |
| AX-158185034 | 16 | 84.149 | KV452969.1 | 19147355 | 9-scf00340 | 9 |
| AX-158185035 | 16 | 84.149 | KV452969.1 | 19148841 | 9-scf00340 | 9 |
| AX-157739633 | 16 | 84.149 | KV452969.1 | 19161605 | 9-scf00340 | 9 |
| AX-158185050 | 16 | 84.149 | KV452969.1 | 19172698 | 9-scf00340 | 9 |
| AX-158185069 | 16 | 84.149 | KV452969.1 | 19197000 | 9-scf00340 | 9 |
| AX-158185099 | 16 | 84.149 | KV452969.1 | 19248016 | 9-scf00340 | 9 |
| AX-158185040 | 16 | 84.168 | KV452969.1 | 19161050 | 9-scf00340 | 9 |
| AX-158185042 | 16 | 84.168 | KV452969.1 | 19164588 | 9-scf00340 | 9 |
| AX-158185095 | 16 | 84.168 | KV452969.1 | 19232671 | 9-scf00340 | 9 |
| AX-158185097 | 16 | 84.168 | KV452969.1 | 19243111 | 9-scf00340 | 9 |
| AX-158185102 | 16 | 84.168 | KV452969.1 | 19255344 | 9-scf00340 | 9 |
| AX-158380627 | 16 | 84.171 | KV452969.1 | 19164403 | 9-scf00340 | 9 |
| AX-158185045 | 16 | 84.179 | KV452969.1 | 19167219 | 9-scf00340 | 9 |
| AX-158185054 | 16 | 84.202 | KV452969.1 | 19177807 | 9-scf00340 | 9 |
| AX-157747134 | 16 | 84.224 | KV452969.1 | 19179887 | 9-scf00340 | 9 |
| AX-157836038 | 16 | 84.244 | KV452969.1 | 19180728 | 9-scf00340 | 9 |
| AX-158184935 | 16 | 84.258 | KV452969.1 | 19025110 | 9-scf00340 | 9 |
| AX-158184996 | 16 | 84.258 | KV452969.1 | 19102384 | 9-scf00340 | 9 |
| AX-158185031 | 16 | 84.258 | KV452969.1 | 19142197 | 9-scf00340 | 9 |
| AX-157836034 | 16 | 84.258 | KV452969.1 | 19146681 | 9-scf00340 | 9 |
| AX-158185041 | 16 | 84.258 | KV452969.1 | 19163678 | 9-scf00340 | 9 |
| AX-158185044 | 16 | 84.258 | KV452969.1 | 19165852 | 9-scf00340 | 9 |
| AX-158185047 | 16 | 84.258 | KV452969.1 | 19169860 | 9-scf00340 | 9 |

|              |    |        |            |          |            |   |
|--------------|----|--------|------------|----------|------------|---|
| AX-158185048 | 16 | 84.258 | KV452969.1 | 19170720 | 9-scf00340 | 9 |
| AX-157836037 | 16 | 84.258 | KV452969.1 | 19179143 | 9-scf00340 | 9 |
| AX-158185058 | 16 | 84.258 | KV452969.1 | 19183947 | 9-scf00340 | 9 |
| AX-157858828 | 16 | 84.258 | KV452969.1 | 19184164 | 9-scf00340 | 9 |
| AX-158185061 | 16 | 84.258 | KV452969.1 | 19187427 | 9-scf00340 | 9 |
| AX-158185062 | 16 | 84.258 | KV452969.1 | 19188408 | 9-scf00340 | 9 |
| AX-157771912 | 16 | 84.258 | KV452969.1 | 19188693 | 9-scf00340 | 9 |
| AX-157753831 | 16 | 84.258 | KV452969.1 | 19189914 | 9-scf00340 | 9 |
| AX-158185066 | 16 | 84.258 | KV452969.1 | 19193442 | 9-scf00340 | 9 |
| AX-157741473 | 16 | 84.258 | KV452969.1 | 19195007 | 9-scf00340 | 9 |
| AX-158185070 | 16 | 84.258 | KV452969.1 | 19198402 | 9-scf00340 | 9 |
| AX-158185071 | 16 | 84.258 | KV452969.1 | 19201217 | 9-scf00340 | 9 |
| AX-157836040 | 16 | 84.258 | KV452969.1 | 19202489 | 9-scf00340 | 9 |
| AX-158185073 | 16 | 84.258 | KV452969.1 | 19204002 | 9-scf00340 | 9 |
| AX-158185077 | 16 | 84.258 | KV452969.1 | 19208342 | 9-scf00340 | 9 |
| AX-158185079 | 16 | 84.258 | KV452969.1 | 19215288 | 9-scf00340 | 9 |
| AX-158185080 | 16 | 84.258 | KV452969.1 | 19215964 | 9-scf00340 | 9 |
| AX-158185081 | 16 | 84.258 | KV452969.1 | 19216573 | 9-scf00340 | 9 |
| AX-158185082 | 16 | 84.258 | KV452969.1 | 19218029 | 9-scf00340 | 9 |
| AX-157836042 | 16 | 84.258 | KV452969.1 | 19218572 | 9-scf00340 | 9 |
| AX-158185083 | 16 | 84.258 | KV452969.1 | 19218635 | 9-scf00340 | 9 |
| AX-158185085 | 16 | 84.258 | KV452969.1 | 19220259 | 9-scf00340 | 9 |
| AX-158185086 | 16 | 84.258 | KV452969.1 | 19220999 | 9-scf00340 | 9 |
| AX-157739745 | 16 | 84.258 | KV452969.1 | 19222999 | 9-scf00340 | 9 |
| AX-158185092 | 16 | 84.258 | KV452969.1 | 19229578 | 9-scf00340 | 9 |
| AX-158185094 | 16 | 84.258 | KV452969.1 | 19231337 | 9-scf00340 | 9 |
| AX-158185059 | 16 | 84.271 | KV452969.1 | 19185768 | 9-scf00340 | 9 |
| AX-158380628 | 16 | 84.271 | KV452969.1 | 19240038 | 9-scf00340 | 9 |
| AX-157745059 | 16 | 84.518 | KV452969.1 | 19247585 | 9-scf00340 | 9 |
| AX-158185100 | 16 | 84.518 | KV452969.1 | 19249197 | 9-scf00340 | 9 |
| AX-158185108 | 16 | 84.717 | KV452969.1 | 19266678 | 9-scf00340 | 9 |
| AX-158185014 | 16 | 84.912 | KV452969.1 | 19123117 | 9-scf00340 | 9 |
| AX-158185051 | 16 | 84.912 | KV452969.1 | 19173021 | 9-scf00340 | 9 |
| AX-158185109 | 16 | 84.912 | KV452969.1 | 19267188 | 9-scf00340 | 9 |
| AX-158185110 | 16 | 84.913 | KV452969.1 | 19271577 | 9-scf00340 | 9 |
| AX-158185115 | 16 | 84.914 | KV452969.1 | 19277391 | 9-scf00340 | 9 |
| AX-158185119 | 16 | 84.914 | KV452969.1 | 19283056 | 9-scf00340 | 9 |
| AX-157743254 | 16 | 84.914 | KV452969.1 | 19290055 | 9-scf00340 | 9 |
| AX-157836045 | 16 | 84.914 | KV452969.1 | 19290643 | 9-scf00340 | 9 |
| AX-158185122 | 16 | 84.914 | KV452969.1 | 19291847 | 9-scf00340 | 9 |
| AX-158185125 | 16 | 84.914 | KV452969.1 | 19295561 | 9-scf00340 | 9 |
| AX-158185126 | 16 | 84.914 | KV452969.1 | 19297060 | 9-scf00340 | 9 |
| AX-158185128 | 16 | 84.914 | KV452969.1 | 19302764 | 9-scf00340 | 9 |
| AX-157836047 | 16 | 84.914 | KV452969.1 | 19303096 | 9-scf00340 | 9 |
| AX-158185130 | 16 | 84.914 | KV452969.1 | 19305523 | 9-scf00340 | 9 |
| AX-158185131 | 16 | 84.914 | KV452969.1 | 19307376 | 9-scf00340 | 9 |
| AX-158185133 | 16 | 84.914 | KV452969.1 | 19310150 | 9-scf00340 | 9 |
| AX-158185134 | 16 | 84.914 | KV452969.1 | 19310297 | 9-scf00340 | 9 |
| AX-158185135 | 16 | 84.914 | KV452969.1 | 19311159 | 9-scf00340 | 9 |
| AX-158185138 | 16 | 85.033 | KV452969.1 | 19316291 | 9-scf00340 | 9 |
| AX-157708407 | 16 | 85.242 | KV452969.1 | 19317467 | 9-scf00340 | 9 |

|              |    |        |            |          |            |   |
|--------------|----|--------|------------|----------|------------|---|
| AX-158185139 | 16 | 85.242 | KV452969.1 | 19318067 | 9-scf00340 | 9 |
| AX-158185142 | 16 | 85.246 | KV452969.1 | 19324958 | 9-scf00340 | 9 |
| AX-157836049 | 16 | 85.251 | KV452969.1 | 19325016 | 9-scf00340 | 9 |
| AX-158185158 | 16 | 85.251 | KV452969.1 | 19351557 | 9-scf00340 | 9 |
| AX-158185169 | 16 | 85.251 | KV452969.1 | 19365807 | 9-scf00340 | 9 |
| AX-157725904 | 16 | 85.251 | KV452969.1 | 19375865 | 9-scf00340 | 9 |
| AX-158185146 | 16 | 85.374 | KV452969.1 | 19330281 | 9-scf00340 | 9 |
| AX-157709628 | 16 | 85.607 | KV452969.1 | 19333469 | 9-scf00340 | 9 |
| AX-158185148 | 16 | 85.841 | KV452969.1 | 19334627 | 9-scf00340 | 9 |
| AX-158185150 | 16 | 85.894 | KV452969.1 | 19336156 | 9-scf00340 | 9 |
| AX-158185152 | 16 | 85.952 | KV452969.1 | 19345725 | 9-scf00340 | 9 |
| AX-158185153 | 16 | 86.008 | KV452969.1 | 19347468 | 9-scf00340 | 9 |
| AX-158185154 | 16 | 86.008 | KV452969.1 | 19349549 | 9-scf00340 | 9 |
| AX-158185155 | 16 | 86.008 | KV452969.1 | 19350485 | 9-scf00340 | 9 |
| AX-158185157 | 16 | 86.008 | KV452969.1 | 19351411 | 9-scf00340 | 9 |
| AX-158185160 | 16 | 86.008 | KV452969.1 | 19357892 | 9-scf00340 | 9 |
| AX-157886848 | 16 | 86.008 | KV452969.1 | 19358307 | 9-scf00340 | 9 |
| AX-158185161 | 16 | 86.008 | KV452969.1 | 19358686 | 9-scf00340 | 9 |
| AX-158185162 | 16 | 86.008 | KV452969.1 | 19360087 | 9-scf00340 | 9 |
| AX-158185164 | 16 | 86.008 | KV452969.1 | 19361338 | 9-scf00340 | 9 |
| AX-158185165 | 16 | 86.008 | KV452969.1 | 19361830 | 9-scf00340 | 9 |
| AX-158185166 | 16 | 86.008 | KV452969.1 | 19362827 | 9-scf00340 | 9 |
| AX-157886849 | 16 | 86.008 | KV452969.1 | 19364034 | 9-scf00340 | 9 |
| AX-157714878 | 16 | 86.008 | KV452969.1 | 19377854 | 9-scf00340 | 9 |
| AX-158185168 | 16 | 86.111 | KV452969.1 | 19364753 | 9-scf00340 | 9 |
| AX-158185170 | 16 | 86.227 | KV452969.1 | 19366340 | 9-scf00340 | 9 |
| AX-158185172 | 16 | 86.227 | KV452969.1 | 19367974 | 9-scf00340 | 9 |
| AX-158185178 | 16 | 86.227 | KV452969.1 | 19373544 | 9-scf00340 | 9 |
| AX-158185179 | 16 | 86.227 | KV452969.1 | 19373848 | 9-scf00340 | 9 |
| AX-158185180 | 16 | 86.258 | KV452969.1 | 19374870 | 9-scf00340 | 9 |
| AX-158185181 | 16 | 86.276 | KV452969.1 | 19376778 | 9-scf00340 | 9 |
| AX-157754188 | 16 | 86.276 | KV452969.1 | 19384635 | 9-scf00340 | 9 |
| AX-158185183 | 16 | 86.337 | KV452969.1 | 19380519 | 9-scf00340 | 9 |
| AX-158185184 | 16 | 86.337 | KV452969.1 | 19382000 | 9-scf00340 | 9 |
| AX-158185187 | 16 | 86.348 | KV452969.1 | 19387630 | 9-scf00340 | 9 |
| AX-157836051 | 16 | 86.348 | KV452969.1 | 19388054 | 9-scf00340 | 9 |
| AX-158185190 | 16 | 86.553 | KV452969.1 | 19391075 | 9-scf00340 | 9 |
| AX-157752347 | 16 | 86.553 | KV452969.1 | 19397154 | 9-scf00340 | 9 |
| AX-158185193 | 16 | 86.553 | KV452969.1 | 19399684 | 9-scf00340 | 9 |
| AX-158185205 | 16 | 86.553 | KV452969.1 | 19413241 | 9-scf00340 | 9 |
| AX-157756829 | 16 | 87.185 | KV452969.1 | 19419317 | 9-scf00340 | 9 |
| AX-158185207 | 16 | 87.209 | KV452969.1 | 19420899 | 9-scf00340 | 9 |
| AX-158185209 | 16 | 87.211 | KV452969.1 | 19423803 | 9-scf00340 | 9 |
| AX-158185210 | 16 | 87.211 | KV452969.1 | 19424500 | 9-scf00340 | 9 |
| AX-158185213 | 16 | 87.211 | KV452969.1 | 19433050 | 9-scf00340 | 9 |
| AX-158185229 | 16 | 87.211 | KV452969.1 | 19459451 | 9-scf00340 | 9 |
| AX-158185216 | 16 | 87.268 | KV452969.1 | 19438526 | 9-scf00340 | 9 |
| AX-157704230 | 16 | 87.706 | KV452969.1 | 19433795 | 9-scf00340 | 9 |
| AX-158185220 | 16 | 87.706 | KV452969.1 | 19443448 | 9-scf00340 | 9 |
| AX-158185221 | 16 | 87.706 | KV452969.1 | 19445271 | 9-scf00340 | 9 |
| AX-158185222 | 16 | 87.706 | KV452969.1 | 19446500 | 9-scf00340 | 9 |

|              |    |        |            |          |            |   |
|--------------|----|--------|------------|----------|------------|---|
| AX-158185223 | 16 | 87.706 | KV452969.1 | 19447843 | 9-scf00340 | 9 |
| AX-158185225 | 16 | 87.706 | KV452969.1 | 19449193 | 9-scf00340 | 9 |
| AX-158185226 | 16 | 87.706 | KV452969.1 | 19449434 | 9-scf00340 | 9 |
| AX-158185228 | 16 | 87.706 | KV452969.1 | 19458031 | 9-scf00340 | 9 |
| AX-157866746 | 16 | 87.706 | KV452969.1 | 19458294 | 9-scf00340 | 9 |
| AX-158185234 | 16 | 87.706 | KV452969.1 | 19471797 | 9-scf00340 | 9 |
| AX-158185237 | 16 | 87.706 | KV452969.1 | 19477176 | 9-scf00340 | 9 |
| AX-158185259 | 16 | 87.706 | KV452969.1 | 19510106 | 9-scf00340 | 9 |
| AX-157740207 | 16 | 87.706 | KV452969.1 | 19527829 | 9-scf00340 | 9 |
| AX-158185230 | 16 | 87.812 | KV452969.1 | 19464486 | 9-scf00340 | 9 |
| AX-158185233 | 16 | 87.812 | KV452969.1 | 19467263 | 9-scf00340 | 9 |
| AX-158185285 | 16 | 87.812 | KV452969.1 | 19545330 | 9-scf00340 | 9 |
| AX-158185231 | 16 | 88.09  | KV452969.1 | 19465319 | 9-scf00340 | 9 |
| AX-158185194 | 16 | 88.115 | KV452969.1 | 19400174 | 9-scf00340 | 9 |
| AX-157742958 | 16 | 88.115 | KV452969.1 | 19467701 | 9-scf00340 | 9 |
| AX-158185236 | 16 | 88.115 | KV452969.1 | 19474464 | 9-scf00340 | 9 |
| AX-158185238 | 16 | 88.21  | KV452969.1 | 19477741 | 9-scf00340 | 9 |
| AX-157836058 | 16 | 88.28  | KV452969.1 | 19490463 | 9-scf00340 | 9 |
| AX-158185246 | 16 | 88.28  | KV452969.1 | 19493039 | 9-scf00340 | 9 |
| AX-157836059 | 16 | 88.28  | KV452969.1 | 19493487 | 9-scf00340 | 9 |
| AX-158185249 | 16 | 88.28  | KV452969.1 | 19495507 | 9-scf00340 | 9 |
| AX-158185250 | 16 | 88.281 | KV452969.1 | 19498502 | 9-scf00340 | 9 |
| AX-158185252 | 16 | 88.305 | KV452969.1 | 19500450 | 9-scf00340 | 9 |
| AX-157710905 | 16 | 88.322 | KV452969.1 | 19503804 | 9-scf00340 | 9 |
| AX-158185257 | 16 | 88.347 | KV452969.1 | 19506371 | 9-scf00340 | 9 |
| AX-157836060 | 16 | 88.347 | KV452969.1 | 19514228 | 9-scf00340 | 9 |
| AX-157720417 | 16 | 88.347 | KV452969.1 | 19515402 | 9-scf00340 | 9 |
| AX-158185264 | 16 | 88.632 | KV452969.1 | 19516870 | 9-scf00340 | 9 |
| AX-158185266 | 16 | 88.632 | KV452969.1 | 19521093 | 9-scf00340 | 9 |
| AX-158185268 | 16 | 88.632 | KV452969.1 | 19525112 | 9-scf00340 | 9 |
| AX-158185270 | 16 | 88.632 | KV452969.1 | 19528323 | 9-scf00340 | 9 |
| AX-158185272 | 16 | 88.632 | KV452969.1 | 19529407 | 9-scf00340 | 9 |
| AX-158185274 | 16 | 88.632 | KV452969.1 | 19531032 | 9-scf00340 | 9 |
| AX-158185279 | 16 | 88.632 | KV452969.1 | 19535420 | 9-scf00340 | 9 |
| AX-158185283 | 16 | 88.632 | KV452969.1 | 19538133 | 9-scf00340 | 9 |
| AX-158185291 | 16 | 88.632 | KV452969.1 | 19550642 | 9-scf00340 | 9 |
| AX-157866748 | 16 | 88.632 | KV452969.1 | 19552948 | 9-scf00340 | 9 |
| AX-158185294 | 16 | 88.632 | KV452969.1 | 19553242 | 9-scf00340 | 9 |
| AX-157708739 | 16 | 88.632 | KV452969.1 | 20309954 | 9-scf00340 | 9 |
| AX-158185284 | 16 | 88.633 | KV452969.1 | 19540531 | 9-scf00340 | 9 |
| AX-158185289 | 16 | 88.633 | KV452969.1 | 19548239 | 9-scf00340 | 9 |
| AX-158185287 | 16 | 88.634 | KV452969.1 | 19546798 | 9-scf00340 | 9 |
| AX-158185288 | 16 | 88.634 | KV452969.1 | 19547919 | 9-scf00340 | 9 |
| AX-158185292 | 16 | 88.634 | KV452969.1 | 19551615 | 9-scf00340 | 9 |
| AX-158185297 | 16 | 88.635 | KV452969.1 | 19554594 | 9-scf00340 | 9 |
| AX-158185300 | 16 | 88.749 | KV452969.1 | 19557017 | 9-scf00340 | 9 |
| AX-158185317 | 16 | 88.749 | KV452969.1 | 19587207 | 9-scf00340 | 9 |
| AX-157878950 | 16 | 88.799 | KV452969.1 | 19558990 | 9-scf00340 | 9 |
| AX-157713092 | 16 | 89.124 | KV452969.1 | 19565915 | 9-scf00340 | 9 |
| AX-157836068 | 16 | 89.127 | KV452969.1 | 19582139 | 9-scf00340 | 9 |
| AX-158185311 | 16 | 89.132 | KV452969.1 | 19583100 | 9-scf00340 | 9 |

|              |    |        |             |          |            |    |
|--------------|----|--------|-------------|----------|------------|----|
| AX-158185313 | 16 | 89.132 | KV452969.1  | 19584354 | 9-scf00340 | 9  |
| AX-158185315 | 16 | 89.132 | KV452969.1  | 19586553 | 9-scf00340 | 9  |
| AX-158185318 | 16 | 89.132 | KV452969.1  | 19588522 | 9-scf00340 | 9  |
| AX-158185319 | 16 | 89.132 | KV452969.1  | 19589191 | 9-scf00340 | 9  |
| AX-158185321 | 16 | 89.132 | KV452969.1  | 19591002 | 9-scf00340 | 9  |
| AX-157858831 | 16 | 89.132 | KV452969.1  | 19591038 | 9-scf00340 | 9  |
| AX-158185322 | 16 | 89.132 | KV452969.1  | 19591748 | 9-scf00340 | 9  |
| AX-157836069 | 16 | 89.132 | KV452969.1  | 19591820 | 9-scf00340 | 9  |
| AX-158185325 | 16 | 89.257 | KV452969.1  | 19600805 | 9-scf00340 | 9  |
| AX-158185332 | 16 | 89.507 | KV452969.1  | 19694280 | 9-scf00340 | 9  |
| AX-157727880 | 16 | 89.507 | KV452969.1  | 19694926 | 9-scf00340 | 9  |
| AX-158185333 | 16 | 89.507 | KV452969.1  | 19696973 | 9-scf00340 | 9  |
| AX-157836071 | 16 | 89.507 | KV452969.1  | 19698207 | 9-scf00340 | 9  |
| AX-158185334 | 16 | 89.507 | KV452969.1  | 19698492 | 9-scf00340 | 9  |
| AX-158185336 | 16 | 89.507 | KV452969.1  | 19703852 | 9-scf00340 | 9  |
| AX-157716380 | 16 | 89.507 | KV452969.1  | 19705372 | 9-scf00340 | 9  |
| AX-158185373 | 16 | 89.507 | KV452969.1  | 19754201 | 9-scf00340 | 9  |
| AX-157836072 | 16 | 89.616 | KV452969.1  | 19707333 | 9-scf00340 | 9  |
| AX-158185339 | 16 | 89.616 | KV452969.1  | 19710607 | 9-scf00340 | 9  |
| AX-158185340 | 16 | 89.616 | KV452969.1  | 19712321 | 9-scf00340 | 9  |
| AX-158185341 | 16 | 89.616 | KV452969.1  | 19713463 | 9-scf00340 | 9  |
| AX-158185342 | 16 | 89.635 | KV452969.1  | 19714541 | 9-scf00340 | 9  |
| AX-157836073 | 16 | 89.654 | KV452969.1  | 19716400 | 9-scf00340 | 9  |
| AX-158185347 | 16 | 89.677 | KV452969.1  | 19719349 | 9-scf00340 | 9  |
| AX-157775906 | 16 | 89.702 | KV452969.1  | 19721841 | 9-scf00340 | 9  |
| AX-158185349 | 16 | 89.725 | KV452969.1  | 19725801 | 9-scf00340 | 9  |
| AX-158185350 | 16 | 89.725 | KV452969.1  | 19726450 | 9-scf00340 | 9  |
| AX-157836075 | 16 | 89.725 | KV452969.1  | 19733940 | 9-scf00340 | 9  |
| AX-158185358 | 16 | 89.725 | KV452969.1  | 19737806 | 9-scf00340 | 9  |
| AX-157688204 | 16 | 89.725 | 3ML01025746 | 3112     | scf01367_1 | UN |
| AX-158185359 | 16 | 89.761 | KV452969.1  | 19739080 | 9-scf00340 | 9  |
| AX-158185365 | 16 | 89.807 | KV452969.1  | 19746042 | 9-scf00340 | 9  |
| AX-158185366 | 16 | 89.861 | KV452969.1  | 19746634 | 9-scf00340 | 9  |
| AX-158185368 | 16 | 89.896 | KV452969.1  | 19748103 | 9-scf00340 | 9  |
| AX-157836074 | 16 | 89.944 | KV452969.1  | 19723842 | 9-scf00340 | 9  |
| AX-158185364 | 16 | 89.944 | KV452969.1  | 19745381 | 9-scf00340 | 9  |
| AX-158185367 | 16 | 89.944 | KV452969.1  | 19747288 | 9-scf00340 | 9  |
| AX-158185369 | 16 | 89.944 | KV452969.1  | 19751308 | 9-scf00340 | 9  |
| AX-158185371 | 16 | 89.944 | KV452969.1  | 19752449 | 9-scf00340 | 9  |
| AX-157754695 | 16 | 89.944 | KV452969.1  | 19753306 | 9-scf00340 | 9  |
| AX-157773153 | 16 | 89.944 | KV452969.1  | 19756930 | 9-scf00340 | 9  |
| AX-158185381 | 16 | 89.944 | KV452969.1  | 19772562 | 9-scf00340 | 9  |
| AX-158185384 | 16 | 89.944 | KV452969.1  | 19775969 | 9-scf00340 | 9  |
| AX-158185376 | 16 | 90.242 | KV452969.1  | 19760509 | 9-scf00340 | 9  |
| AX-158185379 | 16 | 90.242 | KV452969.1  | 19768634 | 9-scf00340 | 9  |
| AX-157750718 | 16 | 90.242 | KV452969.1  | 19776575 | 9-scf00340 | 9  |
| AX-158185406 | 16 | 90.242 | KV452969.1  | 19820947 | 9-scf00340 | 9  |
| AX-158185383 | 16 | 90.247 | KV452969.1  | 19774003 | 9-scf00340 | 9  |
| AX-157755216 | 16 | 90.303 | KV452969.1  | 19784287 | 9-scf00340 | 9  |
| AX-158185387 | 16 | 90.351 | KV452969.1  | 19786943 | 9-scf00340 | 9  |
| AX-158185389 | 16 | 90.352 | KV452969.1  | 19791077 | 9-scf00340 | 9  |



|              |    |        |            |          |            |   |
|--------------|----|--------|------------|----------|------------|---|
| AX-157752564 | 16 | 90.429 | KV452969.1 | 19799397 | 9-scf00340 | 9 |
| AX-158185397 | 16 | 90.797 | KV452969.1 | 19805262 | 9-scf00340 | 9 |
| AX-157749760 | 16 | 90.797 | KV452969.1 | 19808299 | 9-scf00340 | 9 |
| AX-158185400 | 16 | 90.928 | KV452969.1 | 19811595 | 9-scf00340 | 9 |
| AX-158185401 | 16 | 90.928 | KV452969.1 | 19812956 | 9-scf00340 | 9 |
| AX-158185403 | 16 | 90.928 | KV452969.1 | 19819487 | 9-scf00340 | 9 |
| AX-158185407 | 16 | 90.928 | KV452969.1 | 19821350 | 9-scf00340 | 9 |
| AX-158185408 | 16 | 90.928 | KV452969.1 | 19821910 | 9-scf00340 | 9 |
| AX-158185409 | 16 | 90.928 | KV452969.1 | 19823976 | 9-scf00340 | 9 |
| AX-158185412 | 16 | 90.928 | KV452969.1 | 19826083 | 9-scf00340 | 9 |
| AX-158185413 | 16 | 90.928 | KV452969.1 | 19826362 | 9-scf00340 | 9 |
| AX-158185414 | 16 | 90.928 | KV452969.1 | 19829388 | 9-scf00340 | 9 |
| AX-157757743 | 16 | 90.928 | KV452969.1 | 19840229 | 9-scf00340 | 9 |
| AX-158185421 | 16 | 90.928 | KV452969.1 | 19842106 | 9-scf00340 | 9 |
| AX-157836077 | 16 | 90.928 | KV452969.1 | 19842967 | 9-scf00340 | 9 |
| AX-157742529 | 16 | 90.928 | KV452969.1 | 19860881 | 9-scf00340 | 9 |
| AX-158185848 | 16 | 90.928 | KV452969.1 | 20490420 | 9-scf00340 | 9 |
| AX-158185427 | 16 | 90.977 | KV452969.1 | 19852216 | 9-scf00340 | 9 |
| AX-158185352 | 16 | 91.037 | KV452969.1 | 19729628 | 9-scf00340 | 9 |
| AX-158185363 | 16 | 91.037 | KV452969.1 | 19743662 | 9-scf00340 | 9 |
| AX-158185390 | 16 | 91.037 | KV452969.1 | 19792937 | 9-scf00340 | 9 |
| AX-158185402 | 16 | 91.037 | KV452969.1 | 19814327 | 9-scf00340 | 9 |
| AX-158185422 | 16 | 91.037 | KV452969.1 | 19843840 | 9-scf00340 | 9 |
| AX-158185428 | 16 | 91.037 | KV452969.1 | 19852305 | 9-scf00340 | 9 |
| AX-158185430 | 16 | 91.037 | KV452969.1 | 19859665 | 9-scf00340 | 9 |
| AX-158185433 | 16 | 91.037 | KV452969.1 | 19864723 | 9-scf00340 | 9 |
| AX-158185436 | 16 | 91.037 | KV452969.1 | 19866216 | 9-scf00340 | 9 |
| AX-158185439 | 16 | 91.037 | KV452969.1 | 19868740 | 9-scf00340 | 9 |
| AX-158185442 | 16 | 91.037 | KV452969.1 | 19872531 | 9-scf00340 | 9 |
| AX-158185445 | 16 | 91.037 | KV452969.1 | 19879095 | 9-scf00340 | 9 |
| AX-157836079 | 16 | 91.037 | KV452969.1 | 19879227 | 9-scf00340 | 9 |
| AX-158185446 | 16 | 91.037 | KV452969.1 | 19879658 | 9-scf00340 | 9 |
| AX-157836081 | 16 | 91.037 | KV452969.1 | 19886972 | 9-scf00340 | 9 |
| AX-158185452 | 16 | 91.037 | KV452969.1 | 19893340 | 9-scf00340 | 9 |
| AX-157717516 | 16 | 91.037 | KV452969.1 | 19902634 | 9-scf00340 | 9 |
| AX-158185462 | 16 | 91.037 | KV452969.1 | 19905376 | 9-scf00340 | 9 |
| AX-158185466 | 16 | 91.037 | KV452969.1 | 19910239 | 9-scf00340 | 9 |
| AX-158185467 | 16 | 91.037 | KV452969.1 | 19911005 | 9-scf00340 | 9 |
| AX-158185472 | 16 | 91.037 | KV452969.1 | 19917539 | 9-scf00340 | 9 |
| AX-158185595 | 16 | 91.037 | KV452969.1 | 20059037 | 9-scf00340 | 9 |
| AX-158185602 | 16 | 91.037 | KV452969.1 | 20072147 | 9-scf00340 | 9 |
| AX-158185603 | 16 | 91.037 | KV452969.1 | 20077783 | 9-scf00340 | 9 |
| AX-158185720 | 16 | 91.037 | KV452969.1 | 20309748 | 9-scf00340 | 9 |
| AX-158185470 | 16 | 91.086 | KV452969.1 | 19915403 | 9-scf00340 | 9 |
| AX-158185425 | 16 | 91.12  | KV452969.1 | 19849581 | 9-scf00340 | 9 |
| AX-157757193 | 16 | 91.12  | KV452969.1 | 19915768 | 9-scf00340 | 9 |
| AX-157836070 | 16 | 91.146 | KV452969.1 | 19697128 | 9-scf00340 | 9 |
| AX-157746657 | 16 | 91.146 | KV452969.1 | 19707126 | 9-scf00340 | 9 |
| AX-158185355 | 16 | 91.146 | KV452969.1 | 19731582 | 9-scf00340 | 9 |
| AX-157886857 | 16 | 91.146 | KV452969.1 | 19739980 | 9-scf00340 | 9 |
| AX-157723774 | 16 | 91.146 | KV452969.1 | 19757870 | 9-scf00340 | 9 |

|              |    |        |            |          |            |   |
|--------------|----|--------|------------|----------|------------|---|
| AX-157723592 | 16 | 91.146 | KV452969.1 | 19765005 | 9-scf00340 | 9 |
| AX-158185411 | 16 | 91.146 | KV452969.1 | 19825625 | 9-scf00340 | 9 |
| AX-157872103 | 16 | 91.146 | KV452969.1 | 19901764 | 9-scf00340 | 9 |
| AX-158185463 | 16 | 91.146 | KV452969.1 | 19906698 | 9-scf00340 | 9 |
| AX-158185468 | 16 | 91.146 | KV452969.1 | 19913917 | 9-scf00340 | 9 |
| AX-157858834 | 16 | 91.146 | KV452969.1 | 19916164 | 9-scf00340 | 9 |
| AX-158185475 | 16 | 91.146 | KV452969.1 | 19923341 | 9-scf00340 | 9 |
| AX-158185476 | 16 | 91.146 | KV452969.1 | 19923961 | 9-scf00340 | 9 |
| AX-157836084 | 16 | 91.146 | KV452969.1 | 19927190 | 9-scf00340 | 9 |
| AX-158185479 | 16 | 91.146 | KV452969.1 | 19927737 | 9-scf00340 | 9 |
| AX-158185481 | 16 | 91.146 | KV452969.1 | 19929024 | 9-scf00340 | 9 |
| AX-158185483 | 16 | 91.146 | KV452969.1 | 19930949 | 9-scf00340 | 9 |
| AX-158185484 | 16 | 91.146 | KV452969.1 | 19932873 | 9-scf00340 | 9 |
| AX-158185488 | 16 | 91.146 | KV452969.1 | 19935945 | 9-scf00340 | 9 |
| AX-158185491 | 16 | 91.146 | KV452969.1 | 19937689 | 9-scf00340 | 9 |
| AX-158185492 | 16 | 91.146 | KV452969.1 | 19938491 | 9-scf00340 | 9 |
| AX-158185493 | 16 | 91.146 | KV452969.1 | 19939154 | 9-scf00340 | 9 |
| AX-158185494 | 16 | 91.146 | KV452969.1 | 19939378 | 9-scf00340 | 9 |
| AX-157722651 | 16 | 91.146 | KV452969.1 | 19941472 | 9-scf00340 | 9 |
| AX-158185496 | 16 | 91.146 | KV452969.1 | 19942079 | 9-scf00340 | 9 |
| AX-158413720 | 16 | 91.146 | KV452969.1 | 19943820 | 9-scf00340 | 9 |
| AX-158185497 | 16 | 91.146 | KV452969.1 | 19943894 | 9-scf00340 | 9 |
| AX-158185501 | 16 | 91.146 | KV452969.1 | 19947299 | 9-scf00340 | 9 |
| AX-158185502 | 16 | 91.146 | KV452969.1 | 19947462 | 9-scf00340 | 9 |
| AX-158185503 | 16 | 91.146 | KV452969.1 | 19949021 | 9-scf00340 | 9 |
| AX-157836085 | 16 | 91.146 | KV452969.1 | 19949902 | 9-scf00340 | 9 |
| AX-158185505 | 16 | 91.146 | KV452969.1 | 19951879 | 9-scf00340 | 9 |
| AX-158185508 | 16 | 91.146 | KV452969.1 | 19954881 | 9-scf00340 | 9 |
| AX-157836086 | 16 | 91.146 | KV452969.1 | 19955031 | 9-scf00340 | 9 |
| AX-158185509 | 16 | 91.146 | KV452969.1 | 19955669 | 9-scf00340 | 9 |
| AX-158185512 | 16 | 91.146 | KV452969.1 | 19959081 | 9-scf00340 | 9 |
| AX-158185514 | 16 | 91.146 | KV452969.1 | 19960692 | 9-scf00340 | 9 |
| AX-158185600 | 16 | 91.146 | KV452969.1 | 20067890 | 9-scf00340 | 9 |
| AX-158185702 | 16 | 91.146 | KV452969.1 | 20270654 | 9-scf00340 | 9 |
| AX-157878960 | 16 | 91.146 | KV452969.1 | 20273159 | 9-scf00340 | 9 |
| AX-158185423 | 16 | 91.364 | KV452969.1 | 19845208 | 9-scf00340 | 9 |
| AX-158185443 | 16 | 91.364 | KV452969.1 | 19872953 | 9-scf00340 | 9 |
| AX-158185489 | 16 | 91.364 | KV452969.1 | 19936299 | 9-scf00340 | 9 |
| AX-158185524 | 16 | 91.364 | KV452969.1 | 19970305 | 9-scf00340 | 9 |
| AX-158380633 | 16 | 91.364 | KV452969.1 | 19971833 | 9-scf00340 | 9 |
| AX-158185527 | 16 | 91.364 | KV452969.1 | 19971891 | 9-scf00340 | 9 |
| AX-158185528 | 16 | 91.364 | KV452969.1 | 19973666 | 9-scf00340 | 9 |
| AX-158185530 | 16 | 91.364 | KV452969.1 | 19974675 | 9-scf00340 | 9 |
| AX-158185531 | 16 | 91.364 | KV452969.1 | 19975334 | 9-scf00340 | 9 |
| AX-158185533 | 16 | 91.364 | KV452969.1 | 19977262 | 9-scf00340 | 9 |
| AX-158185534 | 16 | 91.364 | KV452969.1 | 19977735 | 9-scf00340 | 9 |
| AX-158185535 | 16 | 91.364 | KV452969.1 | 19978203 | 9-scf00340 | 9 |
| AX-158185542 | 16 | 91.364 | KV452969.1 | 19982724 | 9-scf00340 | 9 |
| AX-158185546 | 16 | 91.364 | KV452969.1 | 19986275 | 9-scf00340 | 9 |
| AX-157771504 | 16 | 91.364 | KV452969.1 | 19987958 | 9-scf00340 | 9 |
| AX-158185548 | 16 | 91.364 | KV452969.1 | 19988586 | 9-scf00340 | 9 |

|              |    |        |            |          |            |   |
|--------------|----|--------|------------|----------|------------|---|
| AX-158185549 | 16 | 91.364 | KV452969.1 | 19989508 | 9-scf00340 | 9 |
| AX-158185555 | 16 | 91.364 | KV452969.1 | 19999936 | 9-scf00340 | 9 |
| AX-158185556 | 16 | 91.364 | KV452969.1 | 20000634 | 9-scf00340 | 9 |
| AX-157878956 | 16 | 91.364 | KV452969.1 | 20007119 | 9-scf00340 | 9 |
| AX-158185561 | 16 | 91.364 | KV452969.1 | 20007902 | 9-scf00340 | 9 |
| AX-158185562 | 16 | 91.364 | KV452969.1 | 20009659 | 9-scf00340 | 9 |
| AX-158185566 | 16 | 91.364 | KV452969.1 | 20014548 | 9-scf00340 | 9 |
| AX-158185567 | 16 | 91.364 | KV452969.1 | 20015286 | 9-scf00340 | 9 |
| AX-158185569 | 16 | 91.364 | KV452969.1 | 20018582 | 9-scf00340 | 9 |
| AX-158185571 | 16 | 91.364 | KV452969.1 | 20020651 | 9-scf00340 | 9 |
| AX-158185572 | 16 | 91.364 | KV452969.1 | 20021556 | 9-scf00340 | 9 |
| AX-158393581 | 16 | 91.364 | KV452969.1 | 20025557 | 9-scf00340 | 9 |
| AX-158185576 | 16 | 91.364 | KV452969.1 | 20029936 | 9-scf00340 | 9 |
| AX-158185581 | 16 | 91.364 | KV452969.1 | 20037365 | 9-scf00340 | 9 |
| AX-157713887 | 16 | 91.364 | KV452969.1 | 20040473 | 9-scf00340 | 9 |
| AX-158185584 | 16 | 91.364 | KV452969.1 | 20044954 | 9-scf00340 | 9 |
| AX-158185585 | 16 | 91.364 | KV452969.1 | 20045816 | 9-scf00340 | 9 |
| AX-158185588 | 16 | 91.364 | KV452969.1 | 20050943 | 9-scf00340 | 9 |
| AX-158185589 | 16 | 91.364 | KV452969.1 | 20051716 | 9-scf00340 | 9 |
| AX-158185590 | 16 | 91.364 | KV452969.1 | 20053664 | 9-scf00340 | 9 |
| AX-158185593 | 16 | 91.364 | KV452969.1 | 20057590 | 9-scf00340 | 9 |
| AX-158185596 | 16 | 91.364 | KV452969.1 | 20060565 | 9-scf00340 | 9 |
| AX-158185598 | 16 | 91.364 | KV452969.1 | 20064387 | 9-scf00340 | 9 |
| AX-157836088 | 16 | 91.364 | KV452969.1 | 20064791 | 9-scf00340 | 9 |
| AX-157836089 | 16 | 91.364 | KV452969.1 | 20065250 | 9-scf00340 | 9 |
| AX-157836092 | 16 | 91.364 | KV452969.1 | 20071246 | 9-scf00340 | 9 |
| AX-157748988 | 16 | 91.364 | KV452969.1 | 20073571 | 9-scf00340 | 9 |
| AX-157774543 | 16 | 91.364 | KV452969.1 | 20074361 | 9-scf00340 | 9 |
| AX-158185604 | 16 | 91.364 | KV452969.1 | 20079415 | 9-scf00340 | 9 |
| AX-158185609 | 16 | 91.364 | KV452969.1 | 20085190 | 9-scf00340 | 9 |
| AX-157836095 | 16 | 91.364 | KV452969.1 | 20088702 | 9-scf00340 | 9 |
| AX-158380634 | 16 | 91.364 | KV452969.1 | 20089624 | 9-scf00340 | 9 |
| AX-158185616 | 16 | 91.364 | KV452969.1 | 20095356 | 9-scf00340 | 9 |
| AX-157742739 | 16 | 91.364 | KV452969.1 | 20096361 | 9-scf00340 | 9 |
| AX-158185620 | 16 | 91.364 | KV452969.1 | 20098608 | 9-scf00340 | 9 |
| AX-158185621 | 16 | 91.364 | KV452969.1 | 20098872 | 9-scf00340 | 9 |
| AX-158185623 | 16 | 91.364 | KV452969.1 | 20101335 | 9-scf00340 | 9 |
| AX-158185625 | 16 | 91.364 | KV452969.1 | 20102674 | 9-scf00340 | 9 |
| AX-157741733 | 16 | 91.364 | KV452969.1 | 20102863 | 9-scf00340 | 9 |
| AX-158185626 | 16 | 91.364 | KV452969.1 | 20104730 | 9-scf00340 | 9 |
| AX-158185627 | 16 | 91.364 | KV452969.1 | 20105886 | 9-scf00340 | 9 |
| AX-157836096 | 16 | 91.364 | KV452969.1 | 20106835 | 9-scf00340 | 9 |
| AX-158185631 | 16 | 91.364 | KV452969.1 | 20113784 | 9-scf00340 | 9 |
| AX-158185634 | 16 | 91.364 | KV452969.1 | 20117382 | 9-scf00340 | 9 |
| AX-158185635 | 16 | 91.364 | KV452969.1 | 20118575 | 9-scf00340 | 9 |
| AX-158185640 | 16 | 91.364 | KV452969.1 | 20126832 | 9-scf00340 | 9 |
| AX-158185641 | 16 | 91.364 | KV452969.1 | 20127115 | 9-scf00340 | 9 |
| AX-158185643 | 16 | 91.364 | KV452969.1 | 20130028 | 9-scf00340 | 9 |
| AX-158185644 | 16 | 91.364 | KV452969.1 | 20130221 | 9-scf00340 | 9 |
| AX-157836102 | 16 | 91.364 | KV452969.1 | 20130465 | 9-scf00340 | 9 |
| AX-158185645 | 16 | 91.364 | KV452969.1 | 20131480 | 9-scf00340 | 9 |

|              |    |        |             |          |            |    |
|--------------|----|--------|-------------|----------|------------|----|
| AX-158185646 | 16 | 91.364 | KV452969.1  | 20132866 | 9-scf00340 | 9  |
| AX-158185647 | 16 | 91.364 | KV452969.1  | 20133246 | 9-scf00340 | 9  |
| AX-158185648 | 16 | 91.364 | KV452969.1  | 20133689 | 9-scf00340 | 9  |
| AX-158185649 | 16 | 91.364 | KV452969.1  | 20134082 | 9-scf00340 | 9  |
| AX-158185651 | 16 | 91.364 | KV452969.1  | 20140616 | 9-scf00340 | 9  |
| AX-158185653 | 16 | 91.364 | KV452969.1  | 20142207 | 9-scf00340 | 9  |
| AX-158185677 | 16 | 91.364 | KV452969.1  | 20214501 | 9-scf00340 | 9  |
| AX-158185678 | 16 | 91.364 | KV452969.1  | 20217838 | 9-scf00340 | 9  |
| AX-158185693 | 16 | 91.364 | KV452969.1  | 20243095 | 9-scf00340 | 9  |
| AX-158185694 | 16 | 91.364 | KV452969.1  | 20243895 | 9-scf00340 | 9  |
| AX-158185698 | 16 | 91.364 | KV452969.1  | 20254308 | 9-scf00340 | 9  |
| AX-158185703 | 16 | 91.364 | KV452969.1  | 20271556 | 9-scf00340 | 9  |
| AX-158185705 | 16 | 91.364 | KV452969.1  | 20274348 | 9-scf00340 | 9  |
| AX-158185718 | 16 | 91.364 | KV452969.1  | 20306257 | 9-scf00340 | 9  |
| AX-158185729 | 16 | 91.364 | KV452969.1  | 20337976 | 9-scf00340 | 9  |
| AX-157738287 | 16 | 91.364 | KV452969.1  | 20341223 | 9-scf00340 | 9  |
| AX-158185732 | 16 | 91.364 | KV452969.1  | 20346917 | 9-scf00340 | 9  |
| AX-158185735 | 16 | 91.364 | KV452969.1  | 20351825 | 9-scf00340 | 9  |
| AX-158185736 | 16 | 91.364 | KV452969.1  | 20352209 | 9-scf00340 | 9  |
| AX-158185738 | 16 | 91.364 | KV452969.1  | 20354014 | 9-scf00340 | 9  |
| AX-158185740 | 16 | 91.364 | KV452969.1  | 20355509 | 9-scf00340 | 9  |
| AX-158185753 | 16 | 91.364 | KV452969.1  | 20368131 | 9-scf00340 | 9  |
| AX-158185786 | 16 | 91.364 | KV452969.1  | 20412498 | 9-scf00340 | 9  |
| AX-157688942 | 16 | 91.364 | 3ML01027560 | 1185     | scf03166_1 | UN |
| AX-157707107 | 16 | 91.364 | 3ML01033520 | 377      | scf09174_1 | UN |
| AX-158185745 | 16 | 91.583 | KV452969.1  | 20359680 | 9-scf00340 | 9  |
| AX-158185746 | 16 | 91.583 | KV452969.1  | 20360174 | 9-scf00340 | 9  |
| AX-158185748 | 16 | 91.583 | KV452969.1  | 20361335 | 9-scf00340 | 9  |
| AX-157721860 | 16 | 91.583 | KV452969.1  | 20361407 | 9-scf00340 | 9  |
| AX-158185749 | 16 | 91.583 | KV452969.1  | 20362493 | 9-scf00340 | 9  |
| AX-158185750 | 16 | 91.583 | KV452969.1  | 20362773 | 9-scf00340 | 9  |
| AX-158185751 | 16 | 91.583 | KV452969.1  | 20365831 | 9-scf00340 | 9  |
| AX-158185752 | 16 | 91.583 | KV452969.1  | 20367042 | 9-scf00340 | 9  |
| AX-158185754 | 16 | 91.583 | KV452969.1  | 20368388 | 9-scf00340 | 9  |
| AX-158185756 | 16 | 91.583 | KV452969.1  | 20370466 | 9-scf00340 | 9  |
| AX-157774753 | 16 | 91.583 | KV452969.1  | 20372499 | 9-scf00340 | 9  |
| AX-158413731 | 16 | 91.583 | KV452969.1  | 20372892 | 9-scf00340 | 9  |
| AX-158185758 | 16 | 91.583 | KV452969.1  | 20373859 | 9-scf00340 | 9  |
| AX-158185762 | 16 | 91.583 | KV452969.1  | 20376510 | 9-scf00340 | 9  |
| AX-158185763 | 16 | 91.583 | KV452969.1  | 20378466 | 9-scf00340 | 9  |
| AX-158185764 | 16 | 91.583 | KV452969.1  | 20379875 | 9-scf00340 | 9  |
| AX-158185765 | 16 | 91.583 | KV452969.1  | 20380349 | 9-scf00340 | 9  |
| AX-158185769 | 16 | 91.583 | KV452969.1  | 20383028 | 9-scf00340 | 9  |
| AX-157746961 | 16 | 91.583 | KV452969.1  | 20408971 | 9-scf00340 | 9  |
| AX-158185798 | 16 | 91.583 | KV452969.1  | 20427432 | 9-scf00340 | 9  |
| AX-158185799 | 16 | 91.583 | KV452969.1  | 20428893 | 9-scf00340 | 9  |
| AX-157696988 | 16 | 91.583 | KV452969.1  | 20432561 | 9-scf00340 | 9  |
| AX-158185831 | 16 | 91.583 | KV452969.1  | 20469631 | 9-scf00340 | 9  |
| AX-158185854 | 16 | 91.583 | KV452969.1  | 20501509 | 9-scf00340 | 9  |
| AX-158185899 | 16 | 91.583 | KV452969.1  | 20559979 | 9-scf00340 | 9  |
| AX-158185906 | 16 | 91.583 | KV452969.1  | 20567382 | 9-scf00340 | 9  |

|              |    |        |             |          |            |    |
|--------------|----|--------|-------------|----------|------------|----|
| AX-157706287 | 16 | 91.583 | 3ML01031990 | 157      | scf07607_1 | UN |
| AX-158185770 | 16 | 91.632 | KV452969.1  | 20383995 | 9-scf00340 | 9  |
| AX-158185775 | 16 | 91.789 | KV452969.1  | 20389566 | 9-scf00340 | 9  |
| AX-158409528 | 16 | 91.814 | KV452969.1  | 20395925 | 9-scf00340 | 9  |
| AX-158185779 | 16 | 91.814 | KV452969.1  | 20398435 | 9-scf00340 | 9  |
| AX-157836115 | 16 | 91.814 | KV452969.1  | 20399525 | 9-scf00340 | 9  |
| AX-157721735 | 16 | 91.925 | KV452969.1  | 20399591 | 9-scf00340 | 9  |
| AX-158185808 | 16 | 91.925 | KV452969.1  | 20439908 | 9-scf00340 | 9  |
| AX-158185773 | 16 | 92.02  | KV452969.1  | 20388300 | 9-scf00340 | 9  |
| AX-157858838 | 16 | 92.02  | KV452969.1  | 20401482 | 9-scf00340 | 9  |
| AX-158185780 | 16 | 92.02  | KV452969.1  | 20402629 | 9-scf00340 | 9  |
| AX-157836116 | 16 | 92.02  | KV452969.1  | 20403152 | 9-scf00340 | 9  |
| AX-158185782 | 16 | 92.02  | KV452969.1  | 20408858 | 9-scf00340 | 9  |
| AX-157836117 | 16 | 92.02  | KV452969.1  | 20409093 | 9-scf00340 | 9  |
| AX-158185784 | 16 | 92.02  | KV452969.1  | 20410398 | 9-scf00340 | 9  |
| AX-158185789 | 16 | 92.02  | KV452969.1  | 20418563 | 9-scf00340 | 9  |
| AX-158185792 | 16 | 92.02  | KV452969.1  | 20420801 | 9-scf00340 | 9  |
| AX-158185793 | 16 | 92.02  | KV452969.1  | 20421597 | 9-scf00340 | 9  |
| AX-158185794 | 16 | 92.02  | KV452969.1  | 20423813 | 9-scf00340 | 9  |
| AX-157756838 | 16 | 92.02  | KV452969.1  | 20425932 | 9-scf00340 | 9  |
| AX-158185797 | 16 | 92.02  | KV452969.1  | 20426683 | 9-scf00340 | 9  |
| AX-158185800 | 16 | 92.02  | KV452969.1  | 20429953 | 9-scf00340 | 9  |
| AX-158185804 | 16 | 92.02  | KV452969.1  | 20434706 | 9-scf00340 | 9  |
| AX-158185805 | 16 | 92.02  | KV452969.1  | 20436231 | 9-scf00340 | 9  |
| AX-158185807 | 16 | 92.02  | KV452969.1  | 20439471 | 9-scf00340 | 9  |
| AX-158185813 | 16 | 92.02  | KV452969.1  | 20449107 | 9-scf00340 | 9  |
| AX-157721297 | 16 | 92.02  | KV452969.1  | 20450345 | 9-scf00340 | 9  |
| AX-157866754 | 16 | 92.02  | KV452969.1  | 20488876 | 9-scf00340 | 9  |
| AX-158185806 | 16 | 92.156 | KV452969.1  | 20437966 | 9-scf00340 | 9  |
| AX-158185810 | 16 | 92.24  | KV452969.1  | 20442582 | 9-scf00340 | 9  |
| AX-158185814 | 16 | 92.24  | KV452969.1  | 20449582 | 9-scf00340 | 9  |
| AX-158185815 | 16 | 92.24  | KV452969.1  | 20450868 | 9-scf00340 | 9  |
| AX-157886861 | 16 | 92.24  | KV452969.1  | 20453262 | 9-scf00340 | 9  |
| AX-158185818 | 16 | 92.24  | KV452969.1  | 20454884 | 9-scf00340 | 9  |
| AX-158185821 | 16 | 92.34  | KV452969.1  | 20460546 | 9-scf00340 | 9  |
| AX-157886850 | 16 | 92.437 | KV452969.1  | 19573427 | 9-scf00340 | 9  |
| AX-158185360 | 16 | 92.437 | KV452969.1  | 19739863 | 9-scf00340 | 9  |
| AX-158185781 | 16 | 92.437 | KV452969.1  | 20403971 | 9-scf00340 | 9  |
| AX-158185817 | 16 | 92.437 | KV452969.1  | 20454069 | 9-scf00340 | 9  |
| AX-158185822 | 16 | 92.437 | KV452969.1  | 20461090 | 9-scf00340 | 9  |
| AX-157836120 | 16 | 92.521 | KV452969.1  | 20467132 | 9-scf00340 | 9  |
| AX-158185819 | 16 | 92.567 | KV452969.1  | 20455908 | 9-scf00340 | 9  |
| AX-158185827 | 16 | 92.567 | KV452969.1  | 20467838 | 9-scf00340 | 9  |
| AX-158185830 | 16 | 92.567 | KV452969.1  | 20468731 | 9-scf00340 | 9  |
| AX-158380636 | 16 | 92.567 | KV452969.1  | 20473279 | 9-scf00340 | 9  |
| AX-158185837 | 16 | 92.567 | KV452969.1  | 20476940 | 9-scf00340 | 9  |
| AX-158185839 | 16 | 92.567 | KV452969.1  | 20479394 | 9-scf00340 | 9  |
| AX-158185840 | 16 | 92.567 | KV452969.1  | 20481397 | 9-scf00340 | 9  |
| AX-158386028 | 16 | 92.567 | KV452969.1  | 20482620 | 9-scf00340 | 9  |
| AX-158185841 | 16 | 92.567 | KV452969.1  | 20483063 | 9-scf00340 | 9  |
| AX-158185842 | 16 | 92.567 | KV452969.1  | 20483981 | 9-scf00340 | 9  |

|              |    |        |            |          |            |   |
|--------------|----|--------|------------|----------|------------|---|
| AX-158185844 | 16 | 92.567 | KV452969.1 | 20487069 | 9-scf00340 | 9 |
| AX-158185850 | 16 | 92.567 | KV452969.1 | 20495914 | 9-scf00340 | 9 |
| AX-157836122 | 16 | 92.567 | KV452969.1 | 20498048 | 9-scf00340 | 9 |
| AX-158185852 | 16 | 92.567 | KV452969.1 | 20498240 | 9-scf00340 | 9 |
| AX-158185855 | 16 | 92.567 | KV452969.1 | 20501930 | 9-scf00340 | 9 |
| AX-158185856 | 16 | 92.567 | KV452969.1 | 20502544 | 9-scf00340 | 9 |
| AX-158185857 | 16 | 92.567 | KV452969.1 | 20502991 | 9-scf00340 | 9 |
| AX-158185858 | 16 | 92.614 | KV452969.1 | 20503997 | 9-scf00340 | 9 |
| AX-157721787 | 16 | 92.676 | KV452969.1 | 20505846 | 9-scf00340 | 9 |
| AX-158185862 | 16 | 92.895 | KV452969.1 | 20509604 | 9-scf00340 | 9 |
| AX-157755361 | 16 | 93.114 | KV452969.1 | 20511915 | 9-scf00340 | 9 |
| AX-158185868 | 16 | 93.114 | KV452969.1 | 20518482 | 9-scf00340 | 9 |
| AX-158185873 | 16 | 93.114 | KV452969.1 | 20523399 | 9-scf00340 | 9 |
| AX-158185874 | 16 | 93.114 | KV452969.1 | 20524326 | 9-scf00340 | 9 |
| AX-158185875 | 16 | 93.114 | KV452969.1 | 20525834 | 9-scf00340 | 9 |
| AX-158185877 | 16 | 93.114 | KV452969.1 | 20529209 | 9-scf00340 | 9 |
| AX-158185878 | 16 | 93.114 | KV452969.1 | 20532540 | 9-scf00340 | 9 |
| AX-158185883 | 16 | 93.114 | KV452969.1 | 20540315 | 9-scf00340 | 9 |
| AX-157836126 | 16 | 93.114 | KV452969.1 | 20540659 | 9-scf00340 | 9 |
| AX-158185884 | 16 | 93.114 | KV452969.1 | 20540944 | 9-scf00340 | 9 |
| AX-158185885 | 16 | 93.114 | KV452969.1 | 20542937 | 9-scf00340 | 9 |
| AX-158185886 | 16 | 93.168 | KV452969.1 | 20543562 | 9-scf00340 | 9 |
| AX-158185888 | 16 | 93.224 | KV452969.1 | 20546880 | 9-scf00340 | 9 |
| AX-158185889 | 16 | 93.224 | KV452969.1 | 20547990 | 9-scf00340 | 9 |
| AX-158185890 | 16 | 93.224 | KV452969.1 | 20549339 | 9-scf00340 | 9 |
| AX-158185892 | 16 | 93.224 | KV452969.1 | 20554893 | 9-scf00340 | 9 |
| AX-158185894 | 16 | 93.224 | KV452969.1 | 20556244 | 9-scf00340 | 9 |
| AX-158185895 | 16 | 93.224 | KV452969.1 | 20556744 | 9-scf00340 | 9 |
| AX-158185896 | 16 | 93.224 | KV452969.1 | 20557288 | 9-scf00340 | 9 |
| AX-158185898 | 16 | 93.225 | KV452969.1 | 20558808 | 9-scf00340 | 9 |
| AX-158185901 | 16 | 93.413 | KV452969.1 | 20563177 | 9-scf00340 | 9 |
| AX-158185903 | 16 | 93.413 | KV452969.1 | 20564955 | 9-scf00340 | 9 |
| AX-158185904 | 16 | 93.419 | KV452969.1 | 20566161 | 9-scf00340 | 9 |
| AX-158185911 | 16 | 93.905 | KV452969.1 | 20575222 | 9-scf00340 | 9 |
| AX-157858840 | 16 | 93.905 | KV452969.1 | 20578654 | 9-scf00340 | 9 |
| AX-157724055 | 16 | 94.073 | KV452969.1 | 20579912 | 9-scf00340 | 9 |
| AX-158185912 | 16 | 94.073 | KV452969.1 | 20580076 | 9-scf00340 | 9 |
| AX-158185913 | 16 | 94.073 | KV452969.1 | 20583036 | 9-scf00340 | 9 |
| AX-158185915 | 16 | 94.256 | KV452969.1 | 20585741 | 9-scf00340 | 9 |
| AX-158185916 | 16 | 94.279 | KV452969.1 | 20586497 | 9-scf00340 | 9 |
| AX-158185917 | 16 | 94.863 | KV452969.1 | 20588763 | 9-scf00340 | 9 |
| AX-158185920 | 16 | 94.864 | KV452969.1 | 20593236 | 9-scf00340 | 9 |
| AX-157724526 | 16 | 94.864 | KV452969.1 | 20594328 | 9-scf00340 | 9 |
| AX-158185922 | 16 | 94.864 | KV452969.1 | 20595475 | 9-scf00340 | 9 |
| AX-158185923 | 16 | 94.865 | KV452969.1 | 20596872 | 9-scf00340 | 9 |
| AX-158185926 | 16 | 95.153 | KV452969.1 | 20601430 | 9-scf00340 | 9 |
| AX-158185927 | 16 | 95.153 | KV452969.1 | 20603566 | 9-scf00340 | 9 |
| AX-157886864 | 16 | 95.153 | KV452969.1 | 20604215 | 9-scf00340 | 9 |
| AX-158185958 | 16 | 95.153 | KV452969.1 | 20645091 | 9-scf00340 | 9 |
| AX-158185988 | 16 | 95.153 | KV452969.1 | 20689055 | 9-scf00340 | 9 |
| AX-157751927 | 16 | 95.154 | KV452969.1 | 20606306 | 9-scf00340 | 9 |

|              |    |        |            |          |            |   |
|--------------|----|--------|------------|----------|------------|---|
| AX-158185930 | 16 | 95.154 | KV452969.1 | 20608564 | 9-scf00340 | 9 |
| AX-157772650 | 16 | 95.308 | KV452969.1 | 20612239 | 9-scf00340 | 9 |
| AX-158185934 | 16 | 95.312 | KV452969.1 | 20613367 | 9-scf00340 | 9 |
| AX-158185935 | 16 | 95.739 | KV452969.1 | 20614312 | 9-scf00340 | 9 |
| AX-158185936 | 16 | 95.739 | KV452969.1 | 20616294 | 9-scf00340 | 9 |
| AX-158185937 | 16 | 95.739 | KV452969.1 | 20616767 | 9-scf00340 | 9 |
| AX-158185938 | 16 | 95.739 | KV452969.1 | 20618015 | 9-scf00340 | 9 |
| AX-158185940 | 16 | 95.739 | KV452969.1 | 20618865 | 9-scf00340 | 9 |
| AX-157724694 | 16 | 95.739 | KV452969.1 | 20622497 | 9-scf00340 | 9 |
| AX-158185942 | 16 | 95.739 | KV452969.1 | 20623707 | 9-scf00340 | 9 |
| AX-158185945 | 16 | 95.739 | KV452969.1 | 20625628 | 9-scf00340 | 9 |
| AX-158185949 | 16 | 95.739 | KV452969.1 | 20630664 | 9-scf00340 | 9 |
| AX-158185952 | 16 | 95.739 | KV452969.1 | 20634634 | 9-scf00340 | 9 |
| AX-158185946 | 16 | 95.847 | KV452969.1 | 20627869 | 9-scf00340 | 9 |
| AX-157773364 | 16 | 96.285 | KV452969.1 | 20641781 | 9-scf00340 | 9 |
| AX-157743458 | 16 | 96.285 | KV452969.1 | 20683793 | 9-scf00340 | 9 |
| AX-158185959 | 16 | 96.325 | KV452969.1 | 20646451 | 9-scf00340 | 9 |
| AX-158185962 | 16 | 96.395 | KV452969.1 | 20649296 | 9-scf00340 | 9 |
| AX-158185963 | 16 | 96.395 | KV452969.1 | 20650483 | 9-scf00340 | 9 |
| AX-158185966 | 16 | 96.395 | KV452969.1 | 20654381 | 9-scf00340 | 9 |
| AX-158185968 | 16 | 96.395 | KV452969.1 | 20655512 | 9-scf00340 | 9 |
| AX-158185970 | 16 | 96.395 | KV452969.1 | 20657632 | 9-scf00340 | 9 |
| AX-157886865 | 16 | 96.395 | KV452969.1 | 20660653 | 9-scf00340 | 9 |
| AX-158185976 | 16 | 96.395 | KV452969.1 | 20664690 | 9-scf00340 | 9 |
| AX-158185980 | 16 | 96.395 | KV452969.1 | 20674502 | 9-scf00340 | 9 |
| AX-157713792 | 16 | 96.395 | KV452969.1 | 20680550 | 9-scf00340 | 9 |
| AX-158185978 | 16 | 96.404 | KV452969.1 | 20666433 | 9-scf00340 | 9 |
| AX-158185982 | 16 | 96.695 | KV452969.1 | 20677857 | 9-scf00340 | 9 |
| AX-158185994 | 16 | 96.991 | KV452969.1 | 20697827 | 9-scf00340 | 9 |
| AX-158185996 | 16 | 97.596 | KV452969.1 | 20701475 | 9-scf00340 | 9 |
| AX-158186012 | 16 | 97.596 | KV452969.1 | 20722307 | 9-scf00340 | 9 |
| AX-158185997 | 16 | 97.601 | KV452969.1 | 20707833 | 9-scf00340 | 9 |
| AX-158186002 | 16 | 97.601 | KV452969.1 | 20713643 | 9-scf00340 | 9 |
| AX-158186003 | 16 | 97.601 | KV452969.1 | 20714482 | 9-scf00340 | 9 |
| AX-158186005 | 16 | 97.601 | KV452969.1 | 20715267 | 9-scf00340 | 9 |
| AX-158186007 | 16 | 97.601 | KV452969.1 | 20718841 | 9-scf00340 | 9 |
| AX-158186010 | 16 | 97.601 | KV452969.1 | 20721289 | 9-scf00340 | 9 |
| AX-158186015 | 16 | 97.601 | KV452969.1 | 20727374 | 9-scf00340 | 9 |
| AX-158186017 | 16 | 97.601 | KV452969.1 | 20730672 | 9-scf00340 | 9 |
| AX-157866756 | 16 | 97.601 | KV452969.1 | 20734190 | 9-scf00340 | 9 |
| AX-158186019 | 16 | 97.601 | KV452969.1 | 20734535 | 9-scf00340 | 9 |
| AX-158186034 | 16 | 97.601 | KV452969.1 | 20747501 | 9-scf00340 | 9 |
| AX-158186024 | 16 | 97.892 | KV452969.1 | 20739713 | 9-scf00340 | 9 |
| AX-158186025 | 16 | 97.892 | KV452969.1 | 20740179 | 9-scf00340 | 9 |
| AX-158186029 | 16 | 97.892 | KV452969.1 | 20743212 | 9-scf00340 | 9 |
| AX-158186033 | 16 | 97.892 | KV452969.1 | 20745237 | 9-scf00340 | 9 |
| AX-158186038 | 16 | 97.892 | KV452969.1 | 20750839 | 9-scf00340 | 9 |
| AX-158186039 | 16 | 97.995 | KV452969.1 | 20751631 | 9-scf00340 | 9 |
| AX-158186042 | 16 | 98.037 | KV452969.1 | 20754834 | 9-scf00340 | 9 |
| AX-157886867 | 16 | 98.038 | KV452969.1 | 20758911 | 9-scf00340 | 9 |
| AX-158186046 | 16 | 98.038 | KV452969.1 | 20760774 | 9-scf00340 | 9 |

|              |    |        |             |          |            |    |
|--------------|----|--------|-------------|----------|------------|----|
| AX-158186047 | 16 | 98.038 | KV452969.1  | 20761189 | 9-scf00340 | 9  |
| AX-158186048 | 16 | 98.038 | KV452969.1  | 20761417 | 9-scf00340 | 9  |
| AX-158186050 | 16 | 98.038 | KV452969.1  | 20761954 | 9-scf00340 | 9  |
| AX-157771057 | 16 | 98.045 | KV452969.1  | 20762428 | 9-scf00340 | 9  |
| AX-158186053 | 16 | 98.181 | KV452969.1  | 20765121 | 9-scf00340 | 9  |
| AX-158186054 | 16 | 98.215 | KV452969.1  | 20766028 | 9-scf00340 | 9  |
| AX-158186056 | 16 | 98.251 | KV452969.1  | 20766707 | 9-scf00340 | 9  |
| AX-158186057 | 16 | 98.29  | KV452969.1  | 20769935 | 9-scf00340 | 9  |
| AX-158186052 | 16 | 98.328 | KV452969.1  | 20765005 | 9-scf00340 | 9  |
| AX-158186060 | 16 | 98.328 | KV452969.1  | 20771246 | 9-scf00340 | 9  |
| AX-158186067 | 16 | 98.328 | KV452969.1  | 20775658 | 9-scf00340 | 9  |
| AX-158186070 | 16 | 98.328 | KV452969.1  | 20778894 | 9-scf00340 | 9  |
| AX-157886866 | 16 | 98.475 | KV452969.1  | 20735304 | 9-scf00340 | 9  |
| AX-158186065 | 16 | 98.475 | KV452969.1  | 20775112 | 9-scf00340 | 9  |
| AX-158186068 | 16 | 98.475 | KV452969.1  | 20776835 | 9-scf00340 | 9  |
| AX-158186069 | 16 | 98.475 | KV452969.1  | 20778529 | 9-scf00340 | 9  |
| AX-158186074 | 16 | 98.475 | KV452969.1  | 20781939 | 9-scf00340 | 9  |
| AX-158186075 | 16 | 98.475 | KV452969.1  | 20783522 | 9-scf00340 | 9  |
| AX-158186076 | 16 | 98.475 | KV452969.1  | 20783860 | 9-scf00340 | 9  |
| AX-157886868 | 16 | 98.475 | KV452969.1  | 20785952 | 9-scf00340 | 9  |
| AX-158186078 | 16 | 98.475 | KV452969.1  | 20787797 | 9-scf00340 | 9  |
| AX-158186079 | 16 | 98.475 | KV452969.1  | 20789275 | 9-scf00340 | 9  |
| AX-158186080 | 16 | 98.475 | KV452969.1  | 20791088 | 9-scf00340 | 9  |
| AX-158186087 | 16 | 98.475 | KV452969.1  | 20801940 | 9-scf00340 | 9  |
| AX-158186089 | 16 | 98.475 | KV452969.1  | 20806887 | 9-scf00340 | 9  |
| AX-158186101 | 16 | 98.475 | KV452969.1  | 20820046 | 9-scf00340 | 9  |
| AX-158186109 | 16 | 98.475 | KV452969.1  | 20830129 | 9-scf00340 | 9  |
| AX-158186081 | 16 | 98.484 | KV452969.1  | 20791492 | 9-scf00340 | 9  |
| AX-157743288 | 16 | 98.494 | KV452969.1  | 20794723 | 9-scf00340 | 9  |
| AX-157878977 | 16 | 98.497 | KV452969.1  | 20743581 | 9-scf00340 | 9  |
| AX-158186044 | 16 | 98.497 | KV452969.1  | 20757243 | 9-scf00340 | 9  |
| AX-157878978 | 16 | 98.497 | KV452969.1  | 20764148 | 9-scf00340 | 9  |
| AX-158186083 | 16 | 98.497 | KV452969.1  | 20795163 | 9-scf00340 | 9  |
| AX-157740504 | 16 | 98.497 | KV452969.1  | 20801523 | 9-scf00340 | 9  |
| AX-158186088 | 16 | 98.497 | KV452969.1  | 20802897 | 9-scf00340 | 9  |
| AX-158186091 | 16 | 98.497 | KV452969.1  | 20808708 | 9-scf00340 | 9  |
| AX-158186099 | 16 | 98.497 | KV452969.1  | 20818728 | 9-scf00340 | 9  |
| AX-158186102 | 16 | 98.497 | KV452969.1  | 20821206 | 9-scf00340 | 9  |
| AX-158186115 | 16 | 98.497 | KV452969.1  | 20834906 | 9-scf00340 | 9  |
| AX-158186140 | 16 | 98.497 | KV452969.1  | 20869068 | 9-scf00340 | 9  |
| AX-158186142 | 16 | 98.497 | KV452969.1  | 20871692 | 9-scf00340 | 9  |
| AX-157878980 | 16 | 98.497 | KV452969.1  | 20897916 | 9-scf00340 | 9  |
| AX-158186084 | 16 | 98.583 | KV452969.1  | 20798896 | 9-scf00340 | 9  |
| AX-158186086 | 16 | 98.799 | KV452969.1  | 20800078 | 9-scf00340 | 9  |
| AX-157706434 | 16 | 98.799 | 3ML01032232 | 166      | scf07848_1 | UN |
| AX-157723037 | 16 | 98.95  | KV452969.1  | 20802437 | 9-scf00340 | 9  |
| AX-158186092 | 16 | 99.126 | KV452969.1  | 20811685 | 9-scf00340 | 9  |
| AX-158186093 | 16 | 99.126 | KV452969.1  | 20811929 | 9-scf00340 | 9  |
| AX-158186096 | 16 | 99.132 | KV452969.1  | 20817665 | 9-scf00340 | 9  |
| AX-158186098 | 16 | 99.132 | KV452969.1  | 20818219 | 9-scf00340 | 9  |
| AX-158186104 | 16 | 99.132 | KV452969.1  | 20825519 | 9-scf00340 | 9  |



|              |    |         |            |          |               |    |
|--------------|----|---------|------------|----------|---------------|----|
| AX-158186105 | 16 | 99.132  | KV452969.1 | 20826390 | 9-scf00340    | 9  |
| AX-158186106 | 16 | 99.132  | KV452969.1 | 20827301 | 9-scf00340    | 9  |
| AX-158186114 | 16 | 99.132  | KV452969.1 | 20834464 | 9-scf00340    | 9  |
| AX-158186116 | 16 | 99.132  | KV452969.1 | 20836192 | 9-scf00340    | 9  |
| AX-158186117 | 16 | 99.132  | KV452969.1 | 20837155 | 9-scf00340    | 9  |
| AX-157775732 | 16 | 99.132  | KV452969.1 | 20841584 | 9-scf00340    | 9  |
| AX-158186120 | 16 | 99.132  | KV452969.1 | 20843977 | 9-scf00340    | 9  |
| AX-157771755 | 16 | 99.314  | KV452969.1 | 20844895 | 9-scf00340    | 9  |
| AX-158186125 | 16 | 99.314  | KV452969.1 | 20851345 | 9-scf00340    | 9  |
| AX-157878979 | 16 | 99.314  | KV452969.1 | 20852116 | 9-scf00340    | 9  |
| AX-158186129 | 16 | 99.314  | KV452969.1 | 20855699 | 9-scf00340    | 9  |
| AX-158186122 | 16 | 99.315  | KV452969.1 | 20846446 | 9-scf00340    | 9  |
| AX-158186128 | 16 | 99.315  | KV452969.1 | 20855010 | 9-scf00340    | 9  |
| AX-157836132 | 16 | 99.315  | KV452969.1 | 20855973 | 9-scf00340    | 9  |
| AX-158186133 | 16 | 99.676  | KV452969.1 | 20859309 | 9-scf00340    | 9  |
| AX-158186130 | 16 | 99.678  | KV452969.1 | 20856633 | 9-scf00340    | 9  |
| AX-158186134 | 16 | 99.678  | KV452969.1 | 20861900 | 9-scf00340    | 9  |
| AX-158186136 | 16 | 99.678  | KV452969.1 | 20862725 | 9-scf00340    | 9  |
| AX-157758546 | 16 | 99.678  | KV452969.1 | 20864620 | 9-scf00340    | 9  |
| AX-158186141 | 16 | 99.678  | KV452969.1 | 20869363 | 9-scf00340    | 9  |
| AX-157755366 | 16 | 99.678  | KV452969.1 | 20870889 | 9-scf00340    | 9  |
| AX-157775472 | 16 | 99.678  | KV452969.1 | 20872083 | 9-scf00340    | 9  |
| AX-158186143 | 16 | 99.678  | KV452969.1 | 20872850 | 9-scf00340    | 9  |
| AX-158186145 | 16 | 99.678  | KV452969.1 | 20875606 | 9-scf00340    | 9  |
| AX-158186146 | 16 | 99.678  | KV452969.1 | 20875839 | 9-scf00340    | 9  |
| AX-157747152 | 16 | 99.678  | KV452969.1 | 20876055 | 9-scf00340    | 9  |
| AX-158186150 | 16 | 99.678  | KV452969.1 | 20879025 | 9-scf00340    | 9  |
| AX-158186149 | 16 | 99.713  | KV452969.1 | 20878763 | 9-scf00340    | 9  |
| AX-158186151 | 16 | 99.747  | KV452969.1 | 20881565 | 9-scf00340    | 9  |
| AX-158413737 | 16 | 99.787  | KV452969.1 | 20882662 | 9-scf00340    | 9  |
| AX-157836133 | 16 | 99.787  | KV452969.1 | 20883610 | 9-scf00340    | 9  |
| AX-158186153 | 16 | 99.787  | KV452969.1 | 20884882 | 9-scf00340    | 9  |
| AX-157744581 | 16 | 99.787  | KV452969.1 | 20887314 | 9-scf00340    | 9  |
| AX-158186154 | 16 | 99.787  | KV452969.1 | 20887922 | 9-scf00340    | 9  |
| AX-157720217 | 16 | 99.787  | KV452969.1 | 20889829 | 9-scf00340    | 9  |
| AX-158186157 | 16 | 99.787  | KV452969.1 | 20892608 | 9-scf00340    | 9  |
| AX-157836134 | 16 | 99.797  | KV452969.1 | 20887545 | 9-scf00340    | 9  |
| AX-157713730 | 16 | 99.821  | KV452969.1 | 20888317 | 9-scf00340    | 9  |
| AX-158186155 | 16 | 99.844  | KV452969.1 | 20890716 | 9-scf00340    | 9  |
| AX-158186156 | 16 | 99.862  | KV452969.1 | 20890997 | 9-scf00340    | 9  |
| AX-158186158 | 16 | 99.876  | KV452969.1 | 20892816 | 9-scf00340    | 9  |
| AX-158186172 | 16 | 99.876  | KV452969.1 | 20921676 | 9-scf00340    | 9  |
| AX-158380638 | 16 | 99.896  | KV452969.1 | 20897873 | 9-scf00340    | 9  |
| AX-158186160 | 16 | 99.953  | KV452969.1 | 20899763 | 9-scf00340    | 9  |
| AX-157858842 | 16 | 100.006 | KV452969.1 | 20864704 | 9-scf00340    | 9  |
| AX-158413739 | 16 | 100.006 | KV452969.1 | 20903113 | 9-scf00340    | 9  |
| AX-157858845 | 16 | 100.006 | KV452969.1 | 20907335 | 9-scf00340    | 9  |
| AX-158186165 | 16 | 100.006 | KV452969.1 | 20909525 | 9-scf00340    | 9  |
| AX-158186166 | 16 | 100.006 | KV452969.1 | 20910028 | 9-scf00340    | 9  |
| AX-157699560 | 16 | 100.006 | FI873790.1 | 77       | ORI212 lctalu | UN |
| AX-157715704 | 16 | 100.029 | KV452969.1 | 20910771 | 9-scf00340    | 9  |

|              |    |         |            |          |            |   |
|--------------|----|---------|------------|----------|------------|---|
| AX-158186167 | 16 | 100.057 | KV452969.1 | 20911518 | 9-scf00340 | 9 |
| AX-157747580 | 16 | 100.078 | KV452969.1 | 20912536 | 9-scf00340 | 9 |
| AX-158186170 | 16 | 100.078 | KV452969.1 | 20917710 | 9-scf00340 | 9 |
| AX-158186189 | 16 | 100.078 | KV452969.1 | 20961591 | 9-scf00340 | 9 |
| AX-158186199 | 16 | 100.078 | KV452969.1 | 20978248 | 9-scf00340 | 9 |
| AX-157713802 | 16 | 100.115 | KV452969.1 | 20917021 | 9-scf00340 | 9 |
| AX-158186174 | 16 | 100.117 | KV452969.1 | 20923564 | 9-scf00340 | 9 |
| AX-157719504 | 16 | 100.266 | KV452969.1 | 20926579 | 9-scf00340 | 9 |
| AX-157751286 | 16 | 100.267 | KV452969.1 | 20928657 | 9-scf00340 | 9 |
| AX-157721080 | 16 | 100.267 | KV452969.1 | 20938459 | 9-scf00340 | 9 |
| AX-157836144 | 16 | 100.267 | KV452969.1 | 20945063 | 9-scf00340 | 9 |
| AX-157836138 | 16 | 100.282 | KV452969.1 | 20931822 | 9-scf00340 | 9 |
| AX-158186176 | 16 | 100.868 | KV452969.1 | 20937974 | 9-scf00340 | 9 |
| AX-158186177 | 16 | 100.88  | KV452969.1 | 20938960 | 9-scf00340 | 9 |
| AX-158186179 | 16 | 100.88  | KV452969.1 | 20943784 | 9-scf00340 | 9 |
| AX-158186182 | 16 | 100.88  | KV452969.1 | 20952926 | 9-scf00340 | 9 |
| AX-157836145 | 16 | 100.88  | KV452969.1 | 20953898 | 9-scf00340 | 9 |
| AX-158186188 | 16 | 100.88  | KV452969.1 | 20960725 | 9-scf00340 | 9 |
| AX-158186190 | 16 | 100.88  | KV452969.1 | 20962569 | 9-scf00340 | 9 |
| AX-157836146 | 16 | 100.88  | KV452969.1 | 20962643 | 9-scf00340 | 9 |
| AX-157771658 | 16 | 100.88  | KV452969.1 | 20963108 | 9-scf00340 | 9 |
| AX-158186191 | 16 | 100.88  | KV452969.1 | 20963676 | 9-scf00340 | 9 |
| AX-158186192 | 16 | 100.88  | KV452969.1 | 20964713 | 9-scf00340 | 9 |
| AX-157715056 | 16 | 100.88  | KV452969.1 | 20967382 | 9-scf00340 | 9 |
| AX-157771614 | 16 | 100.88  | KV452969.1 | 20969074 | 9-scf00340 | 9 |
| AX-157836149 | 16 | 100.88  | KV452969.1 | 20969404 | 9-scf00340 | 9 |
| AX-158186193 | 16 | 100.88  | KV452969.1 | 20969728 | 9-scf00340 | 9 |
| AX-158186196 | 16 | 100.88  | KV452969.1 | 20973478 | 9-scf00340 | 9 |
| AX-158186197 | 16 | 100.88  | KV452969.1 | 20973705 | 9-scf00340 | 9 |
| AX-158186198 | 16 | 100.88  | KV452969.1 | 20975927 | 9-scf00340 | 9 |
| AX-158186200 | 16 | 100.88  | KV452969.1 | 20980680 | 9-scf00340 | 9 |
| AX-158186201 | 16 | 100.88  | KV452969.1 | 20981144 | 9-scf00340 | 9 |
| AX-157836151 | 16 | 100.88  | KV452969.1 | 20981236 | 9-scf00340 | 9 |
| AX-158186203 | 16 | 100.88  | KV452969.1 | 20981994 | 9-scf00340 | 9 |
| AX-158186204 | 16 | 100.88  | KV452969.1 | 20989600 | 9-scf00340 | 9 |
| AX-158186209 | 16 | 100.88  | KV452969.1 | 20995168 | 9-scf00340 | 9 |
| AX-157858846 | 16 | 101.017 | KV452969.1 | 20982282 | 9-scf00340 | 9 |
| AX-158186206 | 16 | 101.017 | KV452969.1 | 20992445 | 9-scf00340 | 9 |
| AX-158186207 | 16 | 101.017 | KV452969.1 | 20993099 | 9-scf00340 | 9 |
| AX-158186212 | 16 | 101.423 | KV452969.1 | 21004263 | 9-scf00340 | 9 |
| AX-158186213 | 16 | 101.426 | KV452969.1 | 21004719 | 9-scf00340 | 9 |
| AX-158186216 | 16 | 101.426 | KV452969.1 | 21006121 | 9-scf00340 | 9 |
| AX-158186218 | 16 | 101.535 | KV452969.1 | 21008330 | 9-scf00340 | 9 |
| AX-158380639 | 16 | 101.535 | KV452969.1 | 21009059 | 9-scf00340 | 9 |
| AX-158186220 | 16 | 101.535 | KV452969.1 | 21010908 | 9-scf00340 | 9 |
| AX-158186222 | 16 | 101.535 | KV452969.1 | 21014472 | 9-scf00340 | 9 |
| AX-158186223 | 16 | 101.535 | KV452969.1 | 21015004 | 9-scf00340 | 9 |
| AX-158186224 | 16 | 101.535 | KV452969.1 | 21015392 | 9-scf00340 | 9 |
| AX-157878983 | 16 | 101.535 | KV452969.1 | 21016147 | 9-scf00340 | 9 |
| AX-158186228 | 16 | 101.535 | KV452969.1 | 21018694 | 9-scf00340 | 9 |
| AX-158186229 | 16 | 101.535 | KV452969.1 | 21019051 | 9-scf00340 | 9 |

|              |    |         |             |          |                 |    |
|--------------|----|---------|-------------|----------|-----------------|----|
| AX-157719471 | 16 | 101.645 | KV452969.1  | 21021292 | 9-scf00340      | 9  |
| AX-158186231 | 16 | 101.645 | KV452969.1  | 21022907 | 9-scf00340      | 9  |
| AX-158186232 | 16 | 101.645 | KV452969.1  | 21025033 | 9-scf00340      | 9  |
| AX-158186233 | 16 | 101.645 | KV452969.1  | 21028957 | 9-scf00340      | 9  |
| AX-158186236 | 16 | 101.645 | KV452969.1  | 21030852 | 9-scf00340      | 9  |
| AX-158186247 | 16 | 101.645 | KV452969.1  | 21041488 | 9-scf00340      | 9  |
| AX-158186239 | 16 | 101.863 | KV452969.1  | 21033909 | 9-scf00340      | 9  |
| AX-158186241 | 16 | 101.863 | KV452969.1  | 21036870 | 9-scf00340      | 9  |
| AX-158186242 | 16 | 101.863 | KV452969.1  | 21037109 | 9-scf00340      | 9  |
| AX-158186248 | 16 | 101.926 | KV452969.1  | 21041846 | 9-scf00340      | 9  |
| AX-158186249 | 16 | 102.082 | KV452969.1  | 21042273 | 9-scf00340      | 9  |
| AX-158186250 | 16 | 102.082 | KV452969.1  | 21043047 | 9-scf00340      | 9  |
| AX-158186252 | 16 | 102.082 | KV452969.1  | 21047414 | 9-scf00340      | 9  |
| AX-158186253 | 16 | 102.082 | KV452969.1  | 21048142 | 9-scf00340      | 9  |
| AX-158186266 | 16 | 102.082 | KV452969.1  | 21065098 | 9-scf00340      | 9  |
| AX-157706232 | 16 | 102.083 | 3ML01031869 | 114      | scf07490_1      | UN |
| AX-158186260 | 16 | 102.44  | KV452969.1  | 21059471 | 9-scf00340      | 9  |
| AX-158186268 | 16 | 102.44  | KV452969.1  | 21065923 | 9-scf00340      | 9  |
| AX-158186269 | 16 | 102.614 | KV452969.1  | 21067180 | 9-scf00340      | 9  |
| AX-158186270 | 16 | 102.619 | KV452969.1  | 21067916 | 9-scf00340      | 9  |
| AX-157723644 | 16 | 102.619 | KV452969.1  | 21071735 | 9-scf00340      | 9  |
| AX-157725152 | 16 | 102.673 | KV452969.1  | 21050827 | 9-scf00340      | 9  |
| AX-158186271 | 16 | 102.673 | KV452969.1  | 21073246 | 9-scf00340      | 9  |
| AX-157697317 | 16 | 102.673 | FI897511.1  | 275      | -TORI212 lctalk | UN |
| AX-158186273 | 16 | 102.682 | KV452969.1  | 21075476 | 9-scf00340      | 9  |
| AX-158186274 | 16 | 103.16  | KV452969.1  | 21076666 | 9-scf00340      | 9  |
| AX-158186275 | 16 | 103.175 | KV452969.1  | 21077388 | 9-scf00340      | 9  |
| AX-158186277 | 16 | 103.175 | KV452969.1  | 21078952 | 9-scf00340      | 9  |
| AX-157836152 | 16 | 103.175 | KV452969.1  | 21083755 | 9-scf00340      | 9  |
| AX-158186280 | 16 | 103.175 | KV452969.1  | 21085274 | 9-scf00340      | 9  |
| AX-157710705 | 16 | 103.503 | KV452969.1  | 21096979 | 9-scf00340      | 9  |
| AX-157721800 | 16 | 103.503 | KV452969.1  | 21097079 | 9-scf00340      | 9  |
| AX-157858847 | 16 | 103.722 | KV452969.1  | 21081379 | 9-scf00340      | 9  |
| AX-158186293 | 16 | 103.722 | KV452969.1  | 21106905 | 9-scf00340      | 9  |
| AX-158186294 | 16 | 103.722 | KV452969.1  | 21107528 | 9-scf00340      | 9  |
| AX-158186295 | 16 | 103.722 | KV452969.1  | 21107939 | 9-scf00340      | 9  |
| AX-158186296 | 16 | 103.722 | KV452969.1  | 21108424 | 9-scf00340      | 9  |
| AX-157713034 | 16 | 103.722 | KV452969.1  | 21109480 | 9-scf00340      | 9  |
| AX-158186297 | 16 | 103.722 | KV452969.1  | 21110648 | 9-scf00340      | 9  |
| AX-158186298 | 16 | 103.722 | KV452969.1  | 21111150 | 9-scf00340      | 9  |
| AX-158186301 | 16 | 103.722 | KV452969.1  | 21114665 | 9-scf00340      | 9  |
| AX-158186304 | 16 | 103.722 | KV452969.1  | 21117399 | 9-scf00340      | 9  |
| AX-158186305 | 16 | 103.781 | KV452969.1  | 21118239 | 9-scf00340      | 9  |
| AX-158186307 | 16 | 103.835 | KV452969.1  | 21120960 | 9-scf00340      | 9  |
| AX-157836154 | 16 | 103.887 | KV452969.1  | 21124002 | 9-scf00340      | 9  |
| AX-158186311 | 16 | 103.887 | KV452969.1  | 21124096 | 9-scf00340      | 9  |
| AX-158186313 | 16 | 104.049 | KV452969.1  | 21127851 | 9-scf00340      | 9  |
| AX-157836155 | 16 | 104.05  | KV452969.1  | 21128103 | 9-scf00340      | 9  |
| AX-158186315 | 16 | 104.05  | KV452969.1  | 21130987 | 9-scf00340      | 9  |
| AX-158186318 | 16 | 104.05  | KV452969.1  | 21134799 | 9-scf00340      | 9  |
| AX-158186320 | 16 | 104.05  | KV452969.1  | 21139215 | 9-scf00340      | 9  |

|              |    |         |            |          |            |   |
|--------------|----|---------|------------|----------|------------|---|
| AX-158186321 | 16 | 104.05  | KV452969.1 | 21140164 | 9-scf00340 | 9 |
| AX-158186326 | 16 | 104.05  | KV452969.1 | 21147616 | 9-scf00340 | 9 |
| AX-157836162 | 16 | 104.214 | KV452969.1 | 21153286 | 9-scf00340 | 9 |
| AX-158186333 | 16 | 104.214 | KV452969.1 | 21156292 | 9-scf00340 | 9 |
| AX-158186336 | 16 | 104.214 | KV452969.1 | 21159222 | 9-scf00340 | 9 |
| AX-157719532 | 16 | 104.214 | KV452969.1 | 21161111 | 9-scf00340 | 9 |
| AX-157717952 | 16 | 104.378 | KV452969.1 | 21150301 | 9-scf00340 | 9 |
| AX-157836161 | 16 | 104.378 | KV452969.1 | 21152971 | 9-scf00340 | 9 |
| AX-157886874 | 16 | 104.378 | KV452969.1 | 21156327 | 9-scf00340 | 9 |
| AX-158186338 | 16 | 104.378 | KV452969.1 | 21161570 | 9-scf00340 | 9 |
| AX-157742332 | 16 | 104.378 | KV452969.1 | 21165506 | 9-scf00340 | 9 |
| AX-157753858 | 16 | 104.378 | KV452969.1 | 21166082 | 9-scf00340 | 9 |
| AX-157754718 | 16 | 104.378 | KV452969.1 | 21166972 | 9-scf00340 | 9 |
| AX-158186344 | 16 | 104.378 | KV452969.1 | 21169146 | 9-scf00340 | 9 |
| AX-158186345 | 16 | 104.378 | KV452969.1 | 21173000 | 9-scf00340 | 9 |
| AX-157836167 | 16 | 104.378 | KV452969.1 | 21173364 | 9-scf00340 | 9 |
| AX-157836168 | 16 | 104.378 | KV452969.1 | 21177139 | 9-scf00340 | 9 |
| AX-158186347 | 16 | 104.378 | KV452969.1 | 21179423 | 9-scf00340 | 9 |
| AX-158186348 | 16 | 104.378 | KV452969.1 | 21179832 | 9-scf00340 | 9 |
| AX-157746658 | 16 | 104.378 | KV452969.1 | 21179986 | 9-scf00340 | 9 |
| AX-158186349 | 16 | 104.378 | KV452969.1 | 21183097 | 9-scf00340 | 9 |
| AX-158186350 | 16 | 104.378 | KV452969.1 | 21183747 | 9-scf00340 | 9 |
| AX-158186351 | 16 | 104.378 | KV452969.1 | 21184928 | 9-scf00340 | 9 |
| AX-158186352 | 16 | 104.378 | KV452969.1 | 21186808 | 9-scf00340 | 9 |
| AX-158186354 | 16 | 104.378 | KV452969.1 | 21188961 | 9-scf00340 | 9 |
| AX-158186355 | 16 | 104.378 | KV452969.1 | 21191993 | 9-scf00340 | 9 |
| AX-158186357 | 16 | 104.378 | KV452969.1 | 21193372 | 9-scf00340 | 9 |
| AX-158186358 | 16 | 104.378 | KV452969.1 | 21200054 | 9-scf00340 | 9 |
| AX-158186364 | 16 | 104.378 | KV452969.1 | 21212596 | 9-scf00340 | 9 |
| AX-158186365 | 16 | 104.808 | KV452969.1 | 21213772 | 9-scf00340 | 9 |
| AX-158186366 | 16 | 104.813 | KV452969.1 | 21216851 | 9-scf00340 | 9 |
| AX-158186368 | 16 | 104.813 | KV452969.1 | 21217521 | 9-scf00340 | 9 |
| AX-158393585 | 16 | 105.27  | KV452969.1 | 21225216 | 9-scf00340 | 9 |
| AX-158186371 | 16 | 105.352 | KV452969.1 | 21227785 | 9-scf00340 | 9 |
| AX-158186374 | 16 | 105.453 | KV452969.1 | 21235400 | 9-scf00340 | 9 |
| AX-157836174 | 16 | 105.798 | KV452969.1 | 21239403 | 9-scf00340 | 9 |
| AX-157754653 | 16 | 105.802 | KV452969.1 | 21244198 | 9-scf00340 | 9 |
| AX-158186379 | 16 | 105.802 | KV452969.1 | 21251432 | 9-scf00340 | 9 |
| AX-158186380 | 16 | 105.802 | KV452969.1 | 21252473 | 9-scf00340 | 9 |
| AX-157714341 | 16 | 105.802 | KV452969.1 | 21253594 | 9-scf00340 | 9 |
| AX-157774454 | 16 | 105.802 | KV452969.1 | 21254971 | 9-scf00340 | 9 |
| AX-158186381 | 16 | 105.802 | KV452969.1 | 21256417 | 9-scf00340 | 9 |
| AX-158186382 | 16 | 105.802 | KV452969.1 | 21258091 | 9-scf00340 | 9 |
| AX-158186395 | 16 | 105.802 | KV452969.1 | 21280134 | 9-scf00340 | 9 |
| AX-158186385 | 16 | 106.012 | KV452969.1 | 21260803 | 9-scf00340 | 9 |
| AX-157836178 | 16 | 106.012 | KV452969.1 | 21261013 | 9-scf00340 | 9 |
| AX-157715447 | 16 | 106.012 | KV452969.1 | 21261884 | 9-scf00340 | 9 |
| AX-157836179 | 16 | 106.013 | KV452969.1 | 21262557 | 9-scf00340 | 9 |
| AX-158186375 | 16 | 106.029 | KV452969.1 | 21238544 | 9-scf00340 | 9 |
| AX-158186383 | 16 | 106.029 | KV452969.1 | 21258601 | 9-scf00340 | 9 |
| AX-158186389 | 16 | 106.029 | KV452969.1 | 21267687 | 9-scf00340 | 9 |

|              |    |         |            |          |            |   |
|--------------|----|---------|------------|----------|------------|---|
| AX-158186393 | 16 | 106.029 | KV452969.1 | 21273986 | 9-scf00340 | 9 |
| AX-158186394 | 16 | 106.029 | KV452969.1 | 21279455 | 9-scf00340 | 9 |
| AX-158186397 | 16 | 106.029 | KV452969.1 | 21281103 | 9-scf00340 | 9 |
| AX-157836170 | 16 | 106.23  | KV452969.1 | 21207983 | 9-scf00340 | 9 |
| AX-158186387 | 16 | 106.23  | KV452969.1 | 21266030 | 9-scf00340 | 9 |
| AX-158186388 | 16 | 106.23  | KV452969.1 | 21266833 | 9-scf00340 | 9 |
| AX-158186398 | 16 | 106.23  | KV452969.1 | 21286583 | 9-scf00340 | 9 |
| AX-158186399 | 16 | 106.23  | KV452969.1 | 21286945 | 9-scf00340 | 9 |
| AX-158186403 | 16 | 106.23  | KV452969.1 | 21295181 | 9-scf00340 | 9 |
| AX-157773442 | 16 | 106.482 | KV452969.1 | 21297457 | 9-scf00340 | 9 |
| AX-158186406 | 16 | 106.743 | KV452969.1 | 21299114 | 9-scf00340 | 9 |
| AX-158186404 | 16 | 106.744 | KV452969.1 | 21295551 | 9-scf00340 | 9 |
| AX-158186405 | 16 | 106.744 | KV452969.1 | 21296584 | 9-scf00340 | 9 |
| AX-158186407 | 16 | 106.744 | KV452969.1 | 21301240 | 9-scf00340 | 9 |
| AX-158380641 | 16 | 106.744 | KV452969.1 | 21302433 | 9-scf00340 | 9 |
| AX-158186411 | 16 | 106.916 | KV452969.1 | 21304674 | 9-scf00340 | 9 |
| AX-158186412 | 16 | 107.027 | KV452969.1 | 21306468 | 9-scf00340 | 9 |
| AX-158186413 | 16 | 107.027 | KV452969.1 | 21314747 | 9-scf00340 | 9 |
| AX-158186414 | 16 | 107.027 | KV452969.1 | 21317516 | 9-scf00340 | 9 |
| AX-158186416 | 16 | 107.027 | KV452969.1 | 21319419 | 9-scf00340 | 9 |
| AX-158186417 | 16 | 107.027 | KV452969.1 | 21320040 | 9-scf00340 | 9 |
| AX-158186425 | 16 | 107.027 | KV452969.1 | 21330952 | 9-scf00340 | 9 |
| AX-157739191 | 16 | 107.565 | KV452969.1 | 21335811 | 9-scf00340 | 9 |
| AX-157741328 | 16 | 107.566 | KV452969.1 | 21338595 | 9-scf00340 | 9 |
| AX-158186430 | 16 | 107.566 | KV452969.1 | 21339773 | 9-scf00340 | 9 |
| AX-158186433 | 16 | 107.57  | KV452969.1 | 21348401 | 9-scf00340 | 9 |
| AX-158186434 | 16 | 107.57  | KV452969.1 | 21349902 | 9-scf00340 | 9 |
| AX-158186435 | 16 | 107.706 | KV452969.1 | 21351104 | 9-scf00340 | 9 |
| AX-158186440 | 16 | 107.706 | KV452969.1 | 21356416 | 9-scf00340 | 9 |
| AX-158413745 | 16 | 107.844 | KV452969.1 | 21350998 | 9-scf00340 | 9 |
| AX-158186436 | 16 | 107.844 | KV452969.1 | 21351870 | 9-scf00340 | 9 |
| AX-158186437 | 16 | 107.844 | KV452969.1 | 21353520 | 9-scf00340 | 9 |
| AX-157725576 | 16 | 107.844 | KV452969.1 | 21355291 | 9-scf00340 | 9 |
| AX-158186444 | 16 | 108.416 | KV452969.1 | 21363059 | 9-scf00340 | 9 |
| AX-158186446 | 16 | 108.416 | KV452969.1 | 21365248 | 9-scf00340 | 9 |
| AX-158186449 | 16 | 108.416 | KV452969.1 | 21373241 | 9-scf00340 | 9 |
| AX-157878991 | 16 | 108.43  | KV452969.1 | 21373929 | 9-scf00340 | 9 |
| AX-158186441 | 16 | 108.439 | KV452969.1 | 21357926 | 9-scf00340 | 9 |
| AX-158186450 | 16 | 108.439 | KV452969.1 | 21374908 | 9-scf00340 | 9 |
| AX-158186467 | 16 | 108.439 | KV452969.1 | 21404804 | 9-scf00340 | 9 |
| AX-158186469 | 16 | 108.439 | KV452969.1 | 21408095 | 9-scf00340 | 9 |
| AX-158186452 | 16 | 108.487 | KV452969.1 | 21382667 | 9-scf00340 | 9 |
| AX-158186453 | 16 | 109.294 | KV452969.1 | 21384973 | 9-scf00340 | 9 |
| AX-158186458 | 16 | 109.294 | KV452969.1 | 21392656 | 9-scf00340 | 9 |
| AX-158186459 | 16 | 109.402 | KV452969.1 | 21393398 | 9-scf00340 | 9 |
| AX-158186461 | 16 | 109.402 | KV452969.1 | 21394631 | 9-scf00340 | 9 |
| AX-158380642 | 16 | 109.402 | KV452969.1 | 21401972 | 9-scf00340 | 9 |
| AX-158186468 | 16 | 109.403 | KV452969.1 | 21406077 | 9-scf00340 | 9 |
| AX-158186474 | 16 | 110.641 | KV452969.1 | 21413711 | 9-scf00340 | 9 |
| AX-158186478 | 16 | 110.942 | KV452969.1 | 21417137 | 9-scf00340 | 9 |
| AX-158186479 | 16 | 110.942 | KV452969.1 | 21419125 | 9-scf00340 | 9 |

|              |    |         |            |          |            |   |
|--------------|----|---------|------------|----------|------------|---|
| AX-158186498 | 16 | 110.942 | KV452969.1 | 21445190 | 9-scf00340 | 9 |
| AX-157858855 | 16 | 110.942 | KV452969.1 | 21487199 | 9-scf00340 | 9 |
| AX-158186547 | 16 | 110.942 | KV452969.1 | 21532277 | 9-scf00340 | 9 |
| AX-158186482 | 16 | 110.951 | KV452969.1 | 21422612 | 9-scf00340 | 9 |
| AX-158186483 | 16 | 110.975 | KV452969.1 | 21423739 | 9-scf00340 | 9 |
| AX-158186485 | 16 | 111     | KV452969.1 | 21425866 | 9-scf00340 | 9 |
| AX-158386037 | 16 | 111.172 | KV452969.1 | 21431973 | 9-scf00340 | 9 |
| AX-158186490 | 16 | 111.453 | KV452969.1 | 21435209 | 9-scf00340 | 9 |
| AX-158186492 | 16 | 111.453 | KV452969.1 | 21436732 | 9-scf00340 | 9 |
| AX-158186501 | 16 | 111.453 | KV452969.1 | 21449125 | 9-scf00340 | 9 |
| AX-158186527 | 16 | 111.453 | KV452969.1 | 21491441 | 9-scf00340 | 9 |
| AX-158186536 | 16 | 111.453 | KV452969.1 | 21512050 | 9-scf00340 | 9 |
| AX-158186499 | 16 | 111.46  | KV452969.1 | 21445896 | 9-scf00340 | 9 |
| AX-158186500 | 16 | 111.468 | KV452969.1 | 21448150 | 9-scf00340 | 9 |
| AX-158186507 | 16 | 111.478 | KV452969.1 | 21454982 | 9-scf00340 | 9 |
| AX-158186533 | 16 | 111.478 | KV452969.1 | 21508541 | 9-scf00340 | 9 |
| AX-158186455 | 16 | 111.488 | KV452969.1 | 21388348 | 9-scf00340 | 9 |
| AX-157754413 | 16 | 111.488 | KV452969.1 | 21464490 | 9-scf00340 | 9 |
| AX-157727292 | 16 | 111.488 | KV452969.1 | 21466346 | 9-scf00340 | 9 |
| AX-158186515 | 16 | 111.488 | KV452969.1 | 21468282 | 9-scf00340 | 9 |
| AX-158186516 | 16 | 111.488 | KV452969.1 | 21469362 | 9-scf00340 | 9 |
| AX-158186522 | 16 | 111.488 | KV452969.1 | 21481009 | 9-scf00340 | 9 |
| AX-157772360 | 16 | 111.488 | KV452969.1 | 21487832 | 9-scf00340 | 9 |
| AX-158186552 | 16 | 111.488 | KV452969.1 | 21539867 | 9-scf00340 | 9 |
| AX-158186582 | 16 | 111.488 | KV452969.1 | 21580913 | 9-scf00340 | 9 |
| AX-158186754 | 16 | 111.488 | KV452969.1 | 21941286 | 9-scf00340 | 9 |
| AX-158186481 | 16 | 111.489 | KV452969.1 | 21420347 | 9-scf00340 | 9 |
| AX-158418185 | 16 | 111.489 | KV452969.1 | 21431348 | 9-scf00340 | 9 |
| AX-158186506 | 16 | 111.489 | KV452969.1 | 21453975 | 9-scf00340 | 9 |
| AX-158186526 | 16 | 111.489 | KV452969.1 | 21489894 | 9-scf00340 | 9 |
| AX-157754863 | 16 | 111.489 | KV452969.1 | 21491084 | 9-scf00340 | 9 |
| AX-158186528 | 16 | 111.489 | KV452969.1 | 21492813 | 9-scf00340 | 9 |
| AX-157836182 | 16 | 111.489 | KV452969.1 | 21500574 | 9-scf00340 | 9 |
| AX-158186531 | 16 | 111.489 | KV452969.1 | 21501205 | 9-scf00340 | 9 |
| AX-158186532 | 16 | 111.489 | KV452969.1 | 21503486 | 9-scf00340 | 9 |
| AX-157727931 | 16 | 111.489 | KV452969.1 | 21504754 | 9-scf00340 | 9 |
| AX-158186535 | 16 | 111.489 | KV452969.1 | 21510173 | 9-scf00340 | 9 |
| AX-157720216 | 16 | 111.489 | KV452969.1 | 21518800 | 9-scf00340 | 9 |
| AX-158186548 | 16 | 111.489 | KV452969.1 | 21532929 | 9-scf00340 | 9 |
| AX-158186553 | 16 | 111.489 | KV452969.1 | 21542498 | 9-scf00340 | 9 |
| AX-158380646 | 16 | 111.489 | KV452969.1 | 21891262 | 9-scf00340 | 9 |
| AX-158413748 | 16 | 111.659 | KV452969.1 | 21517000 | 9-scf00340 | 9 |
| AX-157836183 | 16 | 111.659 | KV452969.1 | 21517370 | 9-scf00340 | 9 |
| AX-158186542 | 16 | 111.659 | KV452969.1 | 21524526 | 9-scf00340 | 9 |
| AX-158186549 | 16 | 111.829 | KV452969.1 | 21534087 | 9-scf00340 | 9 |
| AX-158413749 | 16 | 111.891 | KV452969.1 | 21535086 | 9-scf00340 | 9 |
| AX-157741471 | 16 | 112.003 | KV452969.1 | 21535447 | 9-scf00340 | 9 |
| AX-157724471 | 16 | 112.003 | KV452969.1 | 21538092 | 9-scf00340 | 9 |
| AX-157754660 | 16 | 112.18  | KV452969.1 | 21551315 | 9-scf00340 | 9 |
| AX-158380643 | 16 | 112.18  | KV452969.1 | 21551913 | 9-scf00340 | 9 |
| AX-158186561 | 16 | 112.18  | KV452969.1 | 21554349 | 9-scf00340 | 9 |

|              |    |        |            |          |            |   |
|--------------|----|--------|------------|----------|------------|---|
| AX-157754954 | 16 | 112.18 | KV452969.1 | 21555440 | 9-scf00340 | 9 |
| AX-158186563 | 16 | 112.18 | KV452969.1 | 21558726 | 9-scf00340 | 9 |
| AX-158186564 | 16 | 112.18 | KV452969.1 | 21559369 | 9-scf00340 | 9 |
| AX-158186567 | 16 | 112.18 | KV452969.1 | 21561642 | 9-scf00340 | 9 |
| AX-158186568 | 16 | 112.18 | KV452969.1 | 21562250 | 9-scf00340 | 9 |
| AX-158186569 | 16 | 112.18 | KV452969.1 | 21562954 | 9-scf00340 | 9 |
| AX-158186573 | 16 | 112.18 | KV452969.1 | 21567011 | 9-scf00340 | 9 |
| AX-157694678 | 16 | 112.18 | KV452969.1 | 21567469 | 9-scf00340 | 9 |
| AX-158186577 | 16 | 112.18 | KV452969.1 | 21573205 | 9-scf00340 | 9 |
| AX-158186581 | 16 | 112.18 | KV452969.1 | 21578439 | 9-scf00340 | 9 |
| AX-158186585 | 16 | 112.18 | KV452969.1 | 21582835 | 9-scf00340 | 9 |
| AX-158186608 | 16 | 112.18 | KV452969.1 | 21620695 | 9-scf00340 | 9 |
| AX-158186610 | 16 | 112.18 | KV452969.1 | 21623831 | 9-scf00340 | 9 |
| AX-158186612 | 16 | 112.18 | KV452969.1 | 21626275 | 9-scf00340 | 9 |
| AX-158186614 | 16 | 112.18 | KV452969.1 | 21627609 | 9-scf00340 | 9 |
| AX-158186615 | 16 | 112.18 | KV452969.1 | 21628547 | 9-scf00340 | 9 |
| AX-158186617 | 16 | 112.18 | KV452969.1 | 21631202 | 9-scf00340 | 9 |
| AX-158186619 | 16 | 112.18 | KV452969.1 | 21633135 | 9-scf00340 | 9 |
| AX-158186620 | 16 | 112.18 | KV452969.1 | 21633664 | 9-scf00340 | 9 |
| AX-158186621 | 16 | 112.18 | KV452969.1 | 21634768 | 9-scf00340 | 9 |
| AX-158186622 | 16 | 112.18 | KV452969.1 | 21635430 | 9-scf00340 | 9 |
| AX-158423099 | 16 | 112.18 | KV452969.1 | 21646336 | 9-scf00340 | 9 |
| AX-158186627 | 16 | 112.18 | KV452969.1 | 21648635 | 9-scf00340 | 9 |
| AX-158186628 | 16 | 112.18 | KV452969.1 | 21651349 | 9-scf00340 | 9 |
| AX-158186629 | 16 | 112.18 | KV452969.1 | 21651945 | 9-scf00340 | 9 |
| AX-158186630 | 16 | 112.18 | KV452969.1 | 21656693 | 9-scf00340 | 9 |
| AX-158186632 | 16 | 112.18 | KV452969.1 | 21662308 | 9-scf00340 | 9 |
| AX-158186633 | 16 | 112.18 | KV452969.1 | 21664366 | 9-scf00340 | 9 |
| AX-158186635 | 16 | 112.18 | KV452969.1 | 21668305 | 9-scf00340 | 9 |
| AX-158186636 | 16 | 112.18 | KV452969.1 | 21672152 | 9-scf00340 | 9 |
| AX-158413763 | 16 | 112.18 | KV452969.1 | 21673611 | 9-scf00340 | 9 |
| AX-158186637 | 16 | 112.18 | KV452969.1 | 21674562 | 9-scf00340 | 9 |
| AX-158186638 | 16 | 112.18 | KV452969.1 | 21679154 | 9-scf00340 | 9 |
| AX-158186639 | 16 | 112.18 | KV452969.1 | 21684412 | 9-scf00340 | 9 |
| AX-158186643 | 16 | 112.18 | KV452969.1 | 21695568 | 9-scf00340 | 9 |
| AX-158186645 | 16 | 112.18 | KV452969.1 | 21698399 | 9-scf00340 | 9 |
| AX-158186646 | 16 | 112.18 | KV452969.1 | 21703973 | 9-scf00340 | 9 |
| AX-158186647 | 16 | 112.18 | KV452969.1 | 21706430 | 9-scf00340 | 9 |
| AX-158186649 | 16 | 112.18 | KV452969.1 | 21707335 | 9-scf00340 | 9 |
| AX-158186650 | 16 | 112.18 | KV452969.1 | 21708095 | 9-scf00340 | 9 |
| AX-158380644 | 16 | 112.18 | KV452969.1 | 21708207 | 9-scf00340 | 9 |
| AX-158186652 | 16 | 112.18 | KV452969.1 | 21709052 | 9-scf00340 | 9 |
| AX-158186656 | 16 | 112.18 | KV452969.1 | 21714306 | 9-scf00340 | 9 |
| AX-158186658 | 16 | 112.18 | KV452969.1 | 21715584 | 9-scf00340 | 9 |
| AX-158186659 | 16 | 112.18 | KV452969.1 | 21716162 | 9-scf00340 | 9 |
| AX-157718385 | 16 | 112.18 | KV452969.1 | 21720509 | 9-scf00340 | 9 |
| AX-158413769 | 16 | 112.18 | KV452969.1 | 21728906 | 9-scf00340 | 9 |
| AX-158186667 | 16 | 112.18 | KV452969.1 | 21737300 | 9-scf00340 | 9 |
| AX-158186668 | 16 | 112.18 | KV452969.1 | 21740099 | 9-scf00340 | 9 |
| AX-158186671 | 16 | 112.18 | KV452969.1 | 21745437 | 9-scf00340 | 9 |
| AX-158186672 | 16 | 112.18 | KV452969.1 | 21747189 | 9-scf00340 | 9 |

|              |    |         |            |          |            |   |
|--------------|----|---------|------------|----------|------------|---|
| AX-158186674 | 16 | 112.18  | KV452969.1 | 21753194 | 9-scf00340 | 9 |
| AX-158186675 | 16 | 112.18  | KV452969.1 | 21755252 | 9-scf00340 | 9 |
| AX-158186676 | 16 | 112.18  | KV452969.1 | 21756800 | 9-scf00340 | 9 |
| AX-158186684 | 16 | 112.18  | KV452969.1 | 21778109 | 9-scf00340 | 9 |
| AX-158413775 | 16 | 112.18  | KV452969.1 | 21784589 | 9-scf00340 | 9 |
| AX-158186688 | 16 | 112.18  | KV452969.1 | 21785103 | 9-scf00340 | 9 |
| AX-158186689 | 16 | 112.18  | KV452969.1 | 21787837 | 9-scf00340 | 9 |
| AX-158186690 | 16 | 112.18  | KV452969.1 | 21788532 | 9-scf00340 | 9 |
| AX-158186697 | 16 | 112.18  | KV452969.1 | 21811376 | 9-scf00340 | 9 |
| AX-158186705 | 16 | 112.18  | KV452969.1 | 21827953 | 9-scf00340 | 9 |
| AX-158186709 | 16 | 112.18  | KV452969.1 | 21836320 | 9-scf00340 | 9 |
| AX-157858857 | 16 | 112.18  | KV452969.1 | 21876831 | 9-scf00340 | 9 |
| AX-158186730 | 16 | 112.18  | KV452969.1 | 21905100 | 9-scf00340 | 9 |
| AX-158186735 | 16 | 112.18  | KV452969.1 | 21909660 | 9-scf00340 | 9 |
| AX-157872122 | 16 | 112.18  | KV452969.1 | 21916265 | 9-scf00340 | 9 |
| AX-158186747 | 16 | 112.18  | KV452969.1 | 21928534 | 9-scf00340 | 9 |
| AX-158186749 | 16 | 112.18  | KV452969.1 | 21930364 | 9-scf00340 | 9 |
| AX-157836194 | 16 | 112.18  | KV452969.1 | 21952339 | 9-scf00340 | 9 |
| AX-157836195 | 16 | 112.18  | KV452969.1 | 21956320 | 9-scf00340 | 9 |
| AX-158186707 | 16 | 112.204 | KV452969.1 | 21829432 | 9-scf00340 | 9 |
| AX-158186708 | 16 | 112.204 | KV452969.1 | 21831584 | 9-scf00340 | 9 |
| AX-158186712 | 16 | 112.204 | KV452969.1 | 21840772 | 9-scf00340 | 9 |
| AX-158186748 | 16 | 112.204 | KV452969.1 | 21929322 | 9-scf00340 | 9 |
| AX-158186710 | 16 | 112.225 | KV452969.1 | 21838215 | 9-scf00340 | 9 |
| AX-158186626 | 16 | 112.247 | KV452969.1 | 21646926 | 9-scf00340 | 9 |
| AX-158186715 | 16 | 112.266 | KV452969.1 | 21851970 | 9-scf00340 | 9 |
| AX-158186722 | 16 | 112.283 | KV452969.1 | 21890045 | 9-scf00340 | 9 |
| AX-158186558 | 16 | 112.285 | KV452969.1 | 21551818 | 9-scf00340 | 9 |
| AX-158186562 | 16 | 112.285 | KV452969.1 | 21555898 | 9-scf00340 | 9 |
| AX-158186565 | 16 | 112.285 | KV452969.1 | 21560808 | 9-scf00340 | 9 |
| AX-158186566 | 16 | 112.285 | KV452969.1 | 21561227 | 9-scf00340 | 9 |
| AX-158186575 | 16 | 112.285 | KV452969.1 | 21571674 | 9-scf00340 | 9 |
| AX-158186704 | 16 | 112.285 | KV452969.1 | 21824697 | 9-scf00340 | 9 |
| AX-158186733 | 16 | 112.285 | KV452969.1 | 21908195 | 9-scf00340 | 9 |
| AX-158186758 | 16 | 112.285 | KV452969.1 | 21955863 | 9-scf00340 | 9 |
| AX-158186739 | 16 | 112.289 | KV452969.1 | 21915349 | 9-scf00340 | 9 |
| AX-158186741 | 16 | 112.289 | KV452969.1 | 21918482 | 9-scf00340 | 9 |
| AX-158186743 | 16 | 112.289 | KV452969.1 | 21926056 | 9-scf00340 | 9 |
| AX-158186744 | 16 | 112.289 | KV452969.1 | 21926407 | 9-scf00340 | 9 |
| AX-157703335 | 16 | 112.289 | KV452969.1 | 21951744 | 9-scf00340 | 9 |
| AX-158186540 | 16 | 112.507 | KV452969.1 | 21521619 | 9-scf00340 | 9 |
| AX-158186571 | 16 | 112.507 | KV452969.1 | 21564172 | 9-scf00340 | 9 |
| AX-158186580 | 16 | 112.507 | KV452969.1 | 21577857 | 9-scf00340 | 9 |
| AX-158413755 | 16 | 112.507 | KV452969.1 | 21617745 | 9-scf00340 | 9 |
| AX-158413764 | 16 | 112.507 | KV452969.1 | 21716641 | 9-scf00340 | 9 |
| AX-157742477 | 16 | 112.507 | KV452969.1 | 21762491 | 9-scf00340 | 9 |
| AX-158186713 | 16 | 112.507 | KV452969.1 | 21842116 | 9-scf00340 | 9 |
| AX-157755536 | 16 | 112.507 | KV452969.1 | 21955117 | 9-scf00340 | 9 |
| AX-158186761 | 16 | 112.507 | KV452969.1 | 21959421 | 9-scf00340 | 9 |
| AX-158186766 | 16 | 112.507 | KV452969.1 | 21965792 | 9-scf00340 | 9 |
| AX-158186769 | 16 | 112.507 | KV452969.1 | 21970393 | 9-scf00340 | 9 |



|              |    |         |            |          |            |   |
|--------------|----|---------|------------|----------|------------|---|
| AX-157727426 | 16 | 112.507 | KV452969.1 | 21971102 | 9-scf00340 | 9 |
| AX-158186770 | 16 | 112.507 | KV452969.1 | 21974054 | 9-scf00340 | 9 |
| AX-158186771 | 16 | 112.507 | KV452969.1 | 21975409 | 9-scf00340 | 9 |
| AX-158186772 | 16 | 112.507 | KV452969.1 | 21975880 | 9-scf00340 | 9 |
| AX-158186774 | 16 | 112.507 | KV452969.1 | 21979319 | 9-scf00340 | 9 |
| AX-158186780 | 16 | 112.507 | KV452969.1 | 21986103 | 9-scf00340 | 9 |
| AX-157836196 | 16 | 112.507 | KV452969.1 | 21987397 | 9-scf00340 | 9 |
| AX-157725862 | 16 | 112.507 | KV452969.1 | 21992390 | 9-scf00340 | 9 |
| AX-158186784 | 16 | 112.507 | KV452969.1 | 21993197 | 9-scf00340 | 9 |
| AX-158186785 | 16 | 112.507 | KV452969.1 | 21993691 | 9-scf00340 | 9 |
| AX-158186788 | 16 | 112.507 | KV452969.1 | 22003756 | 9-scf00340 | 9 |
| AX-158186802 | 16 | 112.507 | KV452969.1 | 22026775 | 9-scf00340 | 9 |
| AX-158186824 | 16 | 112.507 | KV452969.1 | 22072649 | 9-scf00340 | 9 |
| AX-158186782 | 16 | 112.76  | KV452969.1 | 21990864 | 9-scf00340 | 9 |
| AX-158186798 | 16 | 112.76  | KV452969.1 | 22021281 | 9-scf00340 | 9 |
| AX-158186801 | 16 | 112.76  | KV452969.1 | 22025536 | 9-scf00340 | 9 |
| AX-158186803 | 16 | 112.76  | KV452969.1 | 22027554 | 9-scf00340 | 9 |
| AX-157836197 | 16 | 112.804 | KV452969.1 | 22047069 | 9-scf00340 | 9 |
| AX-158186812 | 16 | 112.9   | KV452969.1 | 22049396 | 9-scf00340 | 9 |
| AX-158186736 | 16 | 112.901 | KV452969.1 | 21910277 | 9-scf00340 | 9 |
| AX-158186778 | 16 | 112.901 | KV452969.1 | 21984043 | 9-scf00340 | 9 |
| AX-157714469 | 16 | 112.901 | KV452969.1 | 21989280 | 9-scf00340 | 9 |
| AX-157836198 | 16 | 112.901 | KV452969.1 | 22049940 | 9-scf00340 | 9 |
| AX-158186816 | 16 | 112.901 | KV452969.1 | 22060241 | 9-scf00340 | 9 |
| AX-158186825 | 16 | 112.901 | KV452969.1 | 22073715 | 9-scf00340 | 9 |
| AX-157836202 | 16 | 112.901 | KV452969.1 | 22122218 | 9-scf00340 | 9 |
| AX-158186820 | 16 | 112.902 | KV452969.1 | 22069611 | 9-scf00340 | 9 |
| AX-158186821 | 16 | 112.903 | KV452969.1 | 22070216 | 9-scf00340 | 9 |
| AX-158186828 | 16 | 113.27  | KV452969.1 | 22084978 | 9-scf00340 | 9 |
| AX-157858858 | 16 | 113.274 | KV452969.1 | 22050551 | 9-scf00340 | 9 |
| AX-157718976 | 16 | 113.274 | KV452969.1 | 22078023 | 9-scf00340 | 9 |
| AX-158186831 | 16 | 113.274 | KV452969.1 | 22093590 | 9-scf00340 | 9 |
| AX-157836201 | 16 | 113.274 | KV452969.1 | 22094714 | 9-scf00340 | 9 |
| AX-158186834 | 16 | 113.274 | KV452969.1 | 22096778 | 9-scf00340 | 9 |
| AX-158186835 | 16 | 113.274 | KV452969.1 | 22098826 | 9-scf00340 | 9 |
| AX-158186837 | 16 | 113.274 | KV452969.1 | 22100633 | 9-scf00340 | 9 |
| AX-158186838 | 16 | 113.274 | KV452969.1 | 22101285 | 9-scf00340 | 9 |
| AX-158186892 | 16 | 113.274 | KV452969.1 | 22181941 | 9-scf00340 | 9 |
| AX-158186897 | 16 | 113.274 | KV452969.1 | 22192138 | 9-scf00340 | 9 |
| AX-157796824 | 16 | 113.274 | KV452969.1 | 22225712 | 9-scf00340 | 9 |
| AX-158186841 | 16 | 113.275 | KV452969.1 | 22108222 | 9-scf00340 | 9 |
| AX-157746149 | 16 | 113.276 | KV452969.1 | 22112586 | 9-scf00340 | 9 |
| AX-158186845 | 16 | 113.278 | KV452969.1 | 22114569 | 9-scf00340 | 9 |
| AX-158186854 | 16 | 113.279 | KV452969.1 | 22128094 | 9-scf00340 | 9 |
| AX-158186857 | 16 | 113.708 | KV452969.1 | 22131749 | 9-scf00340 | 9 |
| AX-158186872 | 16 | 113.708 | KV452969.1 | 22154190 | 9-scf00340 | 9 |
| AX-157747259 | 16 | 113.71  | KV452969.1 | 22106864 | 9-scf00340 | 9 |
| AX-158186852 | 16 | 113.71  | KV452969.1 | 22126363 | 9-scf00340 | 9 |
| AX-157836203 | 16 | 113.71  | KV452969.1 | 22127935 | 9-scf00340 | 9 |
| AX-158186858 | 16 | 113.71  | KV452969.1 | 22132490 | 9-scf00340 | 9 |
| AX-158186859 | 16 | 113.71  | KV452969.1 | 22133340 | 9-scf00340 | 9 |

|              |    |         |            |          |            |    |
|--------------|----|---------|------------|----------|------------|----|
| AX-158186866 | 16 | 113.71  | KV452969.1 | 22138605 | 9-scf00340 | 9  |
| AX-158186869 | 16 | 113.711 | KV452969.1 | 22142149 | 9-scf00340 | 9  |
| AX-157836204 | 16 | 113.711 | KV452969.1 | 22155145 | 9-scf00340 | 9  |
| AX-157836205 | 16 | 113.984 | KV452969.1 | 22159667 | 9-scf00340 | 9  |
| AX-157836206 | 16 | 113.984 | KV452969.1 | 22160186 | 9-scf00340 | 9  |
| AX-158186873 | 16 | 113.984 | KV452969.1 | 22160783 | 9-scf00340 | 9  |
| AX-158186874 | 16 | 113.984 | KV452969.1 | 22162250 | 9-scf00340 | 9  |
| AX-158186888 | 16 | 113.984 | KV452969.1 | 22176495 | 9-scf00340 | 9  |
| AX-158186893 | 16 | 113.984 | KV452969.1 | 22182780 | 9-scf00340 | 9  |
| AX-158186915 | 16 | 113.984 | KV452969.1 | 22217210 | 9-scf00340 | 9  |
| AX-157886888 | 16 | 113.984 | KV452969.1 | 22226724 | 9-scf00340 | 9  |
| AX-158186879 | 16 | 114.12  | KV452969.1 | 22169887 | 9-scf00340 | 9  |
| AX-158186880 | 16 | 114.12  | KV452969.1 | 22170569 | 9-scf00340 | 9  |
| AX-158186881 | 16 | 114.12  | KV452969.1 | 22171030 | 9-scf00340 | 9  |
| AX-157836209 | 16 | 114.12  | KV452969.1 | 22177513 | 9-scf00340 | 9  |
| AX-158186895 | 16 | 114.12  | KV452969.1 | 22189496 | 9-scf00340 | 9  |
| AX-158186896 | 16 | 114.257 | KV452969.1 | 22191331 | 9-scf00340 | 9  |
| AX-158186900 | 16 | 114.257 | KV452969.1 | 22198471 | 9-scf00340 | 9  |
| AX-158186901 | 16 | 114.257 | KV452969.1 | 22200204 | 9-scf00340 | 9  |
| AX-158186905 | 16 | 114.257 | KV452969.1 | 22203337 | 9-scf00340 | 9  |
| AX-157872124 | 16 | 114.257 | KV452969.1 | 22204629 | 9-scf00340 | 9  |
| AX-158186906 | 16 | 114.448 | KV452969.1 | 22205794 | 9-scf00340 | 9  |
| AX-158186907 | 16 | 114.448 | KV452969.1 | 22207513 | 9-scf00340 | 9  |
| AX-157727937 | 16 | 114.448 | KV452969.1 | 22208179 | 9-scf00340 | 9  |
| AX-158186908 | 16 | 114.448 | KV452969.1 | 22208826 | 9-scf00340 | 9  |
| AX-157707709 | 16 | 114.448 | KV452969.1 | 22209013 | 9-scf00340 | 9  |
| AX-157689954 | 16 | 114.464 |            | 245      | scf15770   | UN |
| AX-158186919 | 16 | 115.009 | KV452969.1 | 22221320 | 9-scf00340 | 9  |
| AX-157836216 | 16 | 115.009 | KV452969.1 | 22242784 | 9-scf00340 | 9  |
| AX-158186951 | 16 | 115.009 | KV452969.1 | 22268097 | 9-scf00340 | 9  |
| AX-157872127 | 16 | 115.009 | KV452969.1 | 22272153 | 9-scf00340 | 9  |
| AX-158187025 | 16 | 115.009 | KV452969.1 | 22363222 | 9-scf00340 | 9  |
| AX-158186800 | 16 | 115.022 | KV452969.1 | 22024511 | 9-scf00340 | 9  |
| AX-158186827 | 16 | 115.022 | KV452969.1 | 22083457 | 9-scf00340 | 9  |
| AX-158186925 | 16 | 115.022 | KV452969.1 | 22228771 | 9-scf00340 | 9  |
| AX-158186926 | 16 | 115.022 | KV452969.1 | 22230409 | 9-scf00340 | 9  |
| AX-157872125 | 16 | 115.022 | KV452969.1 | 22233196 | 9-scf00340 | 9  |
| AX-158186929 | 16 | 115.022 | KV452969.1 | 22233504 | 9-scf00340 | 9  |
| AX-158186934 | 16 | 115.022 | KV452969.1 | 22242465 | 9-scf00340 | 9  |
| AX-158186937 | 16 | 115.022 | KV452969.1 | 22248626 | 9-scf00340 | 9  |
| AX-158186938 | 16 | 115.022 | KV452969.1 | 22249643 | 9-scf00340 | 9  |
| AX-157836217 | 16 | 115.022 | KV452969.1 | 22257701 | 9-scf00340 | 9  |
| AX-158186941 | 16 | 115.022 | KV452969.1 | 22258211 | 9-scf00340 | 9  |
| AX-158186946 | 16 | 115.022 | KV452969.1 | 22260794 | 9-scf00340 | 9  |
| AX-158186947 | 16 | 115.022 | KV452969.1 | 22265591 | 9-scf00340 | 9  |
| AX-158186948 | 16 | 115.022 | KV452969.1 | 22265890 | 9-scf00340 | 9  |
| AX-158186949 | 16 | 115.022 | KV452969.1 | 22266570 | 9-scf00340 | 9  |
| AX-158186952 | 16 | 115.131 | KV452969.1 | 22268661 | 9-scf00340 | 9  |
| AX-158186957 | 16 | 115.131 | KV452969.1 | 22276861 | 9-scf00340 | 9  |
| AX-158186959 | 16 | 115.131 | KV452969.1 | 22277154 | 9-scf00340 | 9  |
| AX-158186960 | 16 | 115.131 | KV452969.1 | 22283092 | 9-scf00340 | 9  |

|              |    |         |             |          |            |    |
|--------------|----|---------|-------------|----------|------------|----|
| AX-158186962 | 16 | 115.131 | KV452969.1  | 22284344 | 9-scf00340 | 9  |
| AX-158186966 | 16 | 115.131 | KV452969.1  | 22289920 | 9-scf00340 | 9  |
| AX-158186982 | 16 | 115.131 | KV452969.1  | 22309444 | 9-scf00340 | 9  |
| AX-157836219 | 16 | 115.293 | KV452969.1  | 22287380 | 9-scf00340 | 9  |
| AX-158186968 | 16 | 115.425 | KV452969.1  | 22291710 | 9-scf00340 | 9  |
| AX-158186971 | 16 | 115.499 | KV452969.1  | 22296478 | 9-scf00340 | 9  |
| AX-158186974 | 16 | 115.561 | KV452969.1  | 22298343 | 9-scf00340 | 9  |
| AX-158186979 | 16 | 115.561 | KV452969.1  | 22304336 | 9-scf00340 | 9  |
| AX-158186993 | 16 | 115.561 | KV452969.1  | 22322524 | 9-scf00340 | 9  |
| AX-158187023 | 16 | 115.561 | KV452969.1  | 22359094 | 9-scf00340 | 9  |
| AX-157866766 | 16 | 115.57  | KV452969.1  | 22299601 | 9-scf00340 | 9  |
| AX-157872129 | 16 | 115.57  | KV452969.1  | 22302506 | 9-scf00340 | 9  |
| AX-157682136 | 16 | 115.57  |             | 142      | scf20490   | UN |
| AX-158186984 | 16 | 115.851 | KV452969.1  | 22310527 | 9-scf00340 | 9  |
| AX-158186987 | 16 | 116.117 | KV452969.1  | 22315823 | 9-scf00340 | 9  |
| AX-158186997 | 16 | 116.117 | KV452969.1  | 22325062 | 9-scf00340 | 9  |
| AX-158187000 | 16 | 116.391 | KV452969.1  | 22328640 | 9-scf00340 | 9  |
| AX-158187008 | 16 | 116.665 | KV452969.1  | 22343424 | 9-scf00340 | 9  |
| AX-158187009 | 16 | 116.665 | KV452969.1  | 22344056 | 9-scf00340 | 9  |
| AX-158187011 | 16 | 116.665 | KV452969.1  | 22345967 | 9-scf00340 | 9  |
| AX-158187012 | 16 | 116.665 | KV452969.1  | 22347603 | 9-scf00340 | 9  |
| AX-158187015 | 16 | 116.666 | KV452969.1  | 22352100 | 9-scf00340 | 9  |
| AX-158187019 | 16 | 116.677 | KV452969.1  | 22355013 | 9-scf00340 | 9  |
| AX-158187024 | 16 | 116.677 | KV452969.1  | 22362688 | 9-scf00340 | 9  |
| AX-158187032 | 16 | 117.305 | KV452969.1  | 22371287 | 9-scf00340 | 9  |
| AX-158187036 | 16 | 117.32  | KV452969.1  | 22375502 | 9-scf00340 | 9  |
| AX-158187038 | 16 | 117.32  | KV452969.1  | 22377484 | 9-scf00340 | 9  |
| AX-158187039 | 16 | 117.32  | KV452969.1  | 22378171 | 9-scf00340 | 9  |
| AX-158187042 | 16 | 117.32  | KV452969.1  | 22380989 | 9-scf00340 | 9  |
| AX-158187044 | 16 | 117.32  | KV452969.1  | 22383849 | 9-scf00340 | 9  |
| AX-158187055 | 16 | 117.32  | KV452969.1  | 22400846 | 9-scf00340 | 9  |
| AX-158187045 | 16 | 117.344 | KV452969.1  | 22385158 | 9-scf00340 | 9  |
| AX-158187047 | 16 | 117.36  | KV452969.1  | 22387541 | 9-scf00340 | 9  |
| AX-157751183 | 16 | 117.376 | KV452969.1  | 22388087 | 9-scf00340 | 9  |
| AX-158187049 | 16 | 117.402 | KV452969.1  | 22391757 | 9-scf00340 | 9  |
| AX-158187051 | 16 | 117.429 | KV452969.1  | 22396578 | 9-scf00340 | 9  |
| AX-157740198 | 16 | 117.429 | KV452969.1  | 22396973 | 9-scf00340 | 9  |
| AX-158187052 | 16 | 117.429 | KV452969.1  | 22397861 | 9-scf00340 | 9  |
| AX-158187054 | 16 | 117.429 | KV452969.1  | 22400395 | 9-scf00340 | 9  |
| AX-158386048 | 16 | 117.495 | KV452969.1  | 22405503 | 9-scf00340 | 9  |
| AX-158187059 | 16 | 117.648 | KV452969.1  | 22405788 | 9-scf00340 | 9  |
| AX-158187060 | 16 | 117.648 | KV452969.1  | 22408381 | 9-scf00340 | 9  |
| AX-158187061 | 16 | 117.648 | KV452969.1  | 22414610 | 9-scf00340 | 9  |
| AX-158187062 | 16 | 117.648 | KV452969.1  | 22416266 | 9-scf00340 | 9  |
| AX-158187063 | 16 | 117.649 | KV452969.1  | 22417517 | 9-scf00340 | 9  |
| AX-158187064 | 16 | 117.715 | KV452969.1  | 22417921 | 9-scf00340 | 9  |
| AX-158187056 | 16 | 117.814 | KV452969.1  | 22402016 | 9-scf00340 | 9  |
| AX-158187057 | 16 | 117.814 | KV452969.1  | 22403894 | 9-scf00340 | 9  |
| AX-158187066 | 16 | 117.814 | KV452969.1  | 22419152 | 9-scf00340 | 9  |
| AX-157886890 | 16 | 117.814 | KV452969.1  | 22421191 | 9-scf00340 | 9  |
| AX-157688678 | 16 | 117.814 | 3ML01026725 | 743      | scf02325_1 | UN |

|              |    |         |            |          |            |   |
|--------------|----|---------|------------|----------|------------|---|
| AX-157724190 | 16 | 117.853 | KV452969.1 | 22448569 | 9-scf00340 | 9 |
| AX-158187098 | 16 | 117.853 | KV452969.1 | 22468026 | 9-scf00340 | 9 |
| AX-157710284 | 16 | 117.853 | KV452969.1 | 22501251 | 9-scf00340 | 9 |
| AX-158187240 | 16 | 117.853 | KV452970.1 | 92487    | 9-scf00343 | 9 |
| AX-158187289 | 16 | 117.853 | KV452973.1 | 40386    | 9-scf00344 | 9 |
| AX-158187077 | 16 | 117.96  | KV452969.1 | 22444702 | 9-scf00340 | 9 |
| AX-157720827 | 16 | 117.96  | KV452969.1 | 22446342 | 9-scf00340 | 9 |
| AX-158187080 | 16 | 118.342 | KV452969.1 | 22446910 | 9-scf00340 | 9 |
| AX-157866767 | 16 | 118.424 | KV452969.1 | 22453417 | 9-scf00340 | 9 |
| AX-158187086 | 16 | 118.522 | KV452969.1 | 22453805 | 9-scf00340 | 9 |
| AX-158187088 | 16 | 118.523 | KV452969.1 | 22456929 | 9-scf00340 | 9 |
| AX-158187089 | 16 | 118.523 | KV452969.1 | 22457227 | 9-scf00340 | 9 |
| AX-158187091 | 16 | 118.523 | KV452969.1 | 22457649 | 9-scf00340 | 9 |
| AX-157768783 | 16 | 118.523 | KV452969.1 | 22461505 | 9-scf00340 | 9 |
| AX-158187092 | 16 | 118.542 | KV452969.1 | 22458391 | 9-scf00340 | 9 |
| AX-158187094 | 16 | 118.694 | KV452969.1 | 22459101 | 9-scf00340 | 9 |
| AX-158187095 | 16 | 118.697 | KV452969.1 | 22460364 | 9-scf00340 | 9 |
| AX-158187096 | 16 | 119.009 | KV452969.1 | 22463778 | 9-scf00340 | 9 |
| AX-158187112 | 16 | 119.009 | KV452969.1 | 22494828 | 9-scf00340 | 9 |
| AX-158187107 | 16 | 119.325 | KV452969.1 | 22488621 | 9-scf00340 | 9 |
| AX-158187099 | 16 | 119.344 | KV452969.1 | 22470841 | 9-scf00340 | 9 |
| AX-158187105 | 16 | 119.344 | KV452969.1 | 22486778 | 9-scf00340 | 9 |
| AX-157836222 | 16 | 119.344 | KV452969.1 | 22489328 | 9-scf00340 | 9 |
| AX-158187110 | 16 | 119.344 | KV452969.1 | 22492008 | 9-scf00340 | 9 |
| AX-158187111 | 16 | 119.344 | KV452969.1 | 22493744 | 9-scf00340 | 9 |
| AX-158187109 | 16 | 119.645 | KV452969.1 | 22490201 | 9-scf00340 | 9 |
| AX-158187113 | 16 | 119.663 | KV452969.1 | 22496014 | 9-scf00340 | 9 |
| AX-158187115 | 16 | 119.804 | KV452969.1 | 22502675 | 9-scf00340 | 9 |
| AX-158187117 | 16 | 119.947 | KV452969.1 | 22505598 | 9-scf00340 | 9 |
| AX-158187116 | 16 | 119.948 | KV452969.1 | 22504294 | 9-scf00340 | 9 |
| AX-158187118 | 16 | 119.948 | KV452969.1 | 22505912 | 9-scf00340 | 9 |
| AX-158187119 | 16 | 120.275 | KV452969.1 | 22507074 | 9-scf00340 | 9 |
| AX-158187120 | 16 | 120.276 | KV452969.1 | 22509174 | 9-scf00340 | 9 |
| AX-158187124 | 16 | 120.276 | KV452969.1 | 22518208 | 9-scf00340 | 9 |
| AX-158187125 | 16 | 120.276 | KV452969.1 | 22519078 | 9-scf00340 | 9 |
| AX-158187127 | 16 | 120.276 | KV452969.1 | 22520382 | 9-scf00340 | 9 |
| AX-158187128 | 16 | 120.276 | KV452969.1 | 22521394 | 9-scf00340 | 9 |
| AX-158187131 | 16 | 120.276 | KV452969.1 | 22523455 | 9-scf00340 | 9 |
| AX-158187132 | 16 | 120.276 | KV452969.1 | 22524241 | 9-scf00340 | 9 |
| AX-158187134 | 16 | 120.276 | KV452969.1 | 22527050 | 9-scf00340 | 9 |
| AX-158187136 | 16 | 120.276 | KV452969.1 | 22531364 | 9-scf00340 | 9 |
| AX-158187137 | 16 | 120.276 | KV452969.1 | 22533628 | 9-scf00340 | 9 |
| AX-157752117 | 16 | 120.276 | KV452969.1 | 22536163 | 9-scf00340 | 9 |
| AX-158187138 | 16 | 120.276 | KV452969.1 | 22536540 | 9-scf00340 | 9 |
| AX-157718932 | 16 | 120.276 | KV452969.1 | 22538618 | 9-scf00340 | 9 |
| AX-158187140 | 16 | 120.276 | KV452969.1 | 22540943 | 9-scf00340 | 9 |
| AX-158187142 | 16 | 120.276 | KV452969.1 | 22545453 | 9-scf00340 | 9 |
| AX-158187143 | 16 | 120.276 | KV452969.1 | 22545821 | 9-scf00340 | 9 |
| AX-157757860 | 16 | 120.276 | KV452969.1 | 22547666 | 9-scf00340 | 9 |
| AX-158187144 | 16 | 120.276 | KV452969.1 | 22547727 | 9-scf00340 | 9 |
| AX-157836224 | 16 | 120.276 | KV452969.1 | 22552736 | 9-scf00340 | 9 |

|              |    |         |             |          |            |    |
|--------------|----|---------|-------------|----------|------------|----|
| AX-158187146 | 16 | 120.276 | KV452969.1  | 22552983 | 9-scf00340 | 9  |
| AX-158187147 | 16 | 120.276 | KV452969.1  | 22554837 | 9-scf00340 | 9  |
| AX-158187150 | 16 | 120.276 | KV452969.1  | 22558437 | 9-scf00340 | 9  |
| AX-158187152 | 16 | 120.276 | KV452969.1  | 22560136 | 9-scf00340 | 9  |
| AX-158187155 | 16 | 120.276 | KV452969.1  | 22563023 | 9-scf00340 | 9  |
| AX-158187157 | 16 | 120.276 | KV452969.1  | 22568655 | 9-scf00340 | 9  |
| AX-157836225 | 16 | 120.276 | KV452969.1  | 22570465 | 9-scf00340 | 9  |
| AX-158187163 | 16 | 120.276 | KV452969.1  | 22575595 | 9-scf00340 | 9  |
| AX-158187170 | 16 | 120.276 | KV452969.1  | 22581056 | 9-scf00340 | 9  |
| AX-158187172 | 16 | 120.276 | KV452969.1  | 22583526 | 9-scf00340 | 9  |
| AX-158187173 | 16 | 120.276 | KV452969.1  | 22584985 | 9-scf00340 | 9  |
| AX-158187174 | 16 | 120.276 | KV452969.1  | 22585548 | 9-scf00340 | 9  |
| AX-158187176 | 16 | 120.276 | KV452969.1  | 22588335 | 9-scf00340 | 9  |
| AX-158187219 | 16 | 120.276 | KV452970.1  | 60719    | 9-scf00343 | 9  |
| AX-158187221 | 16 | 120.276 | KV452970.1  | 63270    | 9-scf00343 | 9  |
| AX-157687593 | 16 | 120.276 | KV453560.1  | 2372     | scf00941   | UN |
| AX-157704499 | 16 | 120.276 | 3ML01026325 | 609      | scf01920_1 | UN |
| AX-158187178 | 16 | 121.477 | KV452970.1  | 2211     | 9-scf00343 | 9  |
| AX-158187181 | 16 | 121.477 | KV452970.1  | 4161     | 9-scf00343 | 9  |
| AX-158187184 | 16 | 121.477 | KV452970.1  | 11406    | 9-scf00343 | 9  |
| AX-158187187 | 16 | 121.477 | KV452970.1  | 14887    | 9-scf00343 | 9  |
| AX-158187189 | 16 | 121.477 | KV452970.1  | 16071    | 9-scf00343 | 9  |
| AX-158187191 | 16 | 121.477 | KV452970.1  | 17608    | 9-scf00343 | 9  |
| AX-158187194 | 16 | 121.477 | KV452970.1  | 21547    | 9-scf00343 | 9  |
| AX-158187195 | 16 | 121.477 | KV452970.1  | 24612    | 9-scf00343 | 9  |
| AX-158187196 | 16 | 121.477 | KV452970.1  | 27082    | 9-scf00343 | 9  |
| AX-158187197 | 16 | 121.477 | KV452970.1  | 30027    | 9-scf00343 | 9  |
| AX-158187198 | 16 | 121.477 | KV452970.1  | 31640    | 9-scf00343 | 9  |
| AX-158187199 | 16 | 121.477 | KV452970.1  | 32191    | 9-scf00343 | 9  |
| AX-158187200 | 16 | 121.477 | KV452970.1  | 32397    | 9-scf00343 | 9  |
| AX-158187202 | 16 | 121.477 | KV452970.1  | 33190    | 9-scf00343 | 9  |
| AX-157886892 | 16 | 121.477 | KV452970.1  | 35243    | 9-scf00343 | 9  |
| AX-158187203 | 16 | 121.477 | KV452970.1  | 40986    | 9-scf00343 | 9  |
| AX-158187204 | 16 | 121.477 | KV452970.1  | 43719    | 9-scf00343 | 9  |
| AX-158187205 | 16 | 121.477 | KV452970.1  | 46284    | 9-scf00343 | 9  |
| AX-158187206 | 16 | 121.477 | KV452970.1  | 48141    | 9-scf00343 | 9  |
| AX-157751479 | 16 | 121.477 | KV452970.1  | 62546    | 9-scf00343 | 9  |
| AX-158187237 | 16 | 121.477 | KV452970.1  | 88735    | 9-scf00343 | 9  |
| AX-158187267 | 16 | 121.477 | KV452973.1  | 15606    | 9-scf00344 | 9  |
| AX-157680118 | 16 | 121.477 | KV452971.1  | 4091     | 9-scf00345 | 9  |
| AX-157683876 | 16 | 121.477 | KV452971.1  | 10480    | 9-scf00345 | 9  |
| AX-158187208 | 16 | 121.513 | KV452970.1  | 49333    | 9-scf00343 | 9  |
| AX-158187179 | 16 | 121.541 | KV452970.1  | 2860     | 9-scf00343 | 9  |
| AX-158187210 | 16 | 121.541 | KV452970.1  | 51803    | 9-scf00343 | 9  |
| AX-158187220 | 16 | 121.541 | KV452970.1  | 62697    | 9-scf00343 | 9  |
| AX-157680056 | 16 | 121.541 | KV452971.1  | 5469     | 9-scf00345 | 9  |
| AX-158187212 | 16 | 121.586 | KV452970.1  | 53268    | 9-scf00343 | 9  |
| AX-158187213 | 16 | 121.586 | KV452970.1  | 56603    | 9-scf00343 | 9  |
| AX-158187215 | 16 | 121.586 | KV452970.1  | 58771    | 9-scf00343 | 9  |
| AX-158187216 | 16 | 121.586 | KV452970.1  | 58836    | 9-scf00343 | 9  |
| AX-158187121 | 16 | 121.913 | KV452969.1  | 22510229 | 9-scf00340 | 9  |

|              |    |         |             |          |            |    |
|--------------|----|---------|-------------|----------|------------|----|
| AX-158187164 | 16 | 121.913 | KV452969.1  | 22576320 | 9-scf00340 | 9  |
| AX-158187222 | 16 | 121.913 | KV452970.1  | 63729    | 9-scf00343 | 9  |
| AX-158187224 | 16 | 121.913 | KV452970.1  | 66092    | 9-scf00343 | 9  |
| AX-158187225 | 16 | 121.913 | KV452970.1  | 66312    | 9-scf00343 | 9  |
| AX-157836227 | 16 | 121.913 | KV452970.1  | 70846    | 9-scf00343 | 9  |
| AX-158187229 | 16 | 121.914 | KV452970.1  | 76975    | 9-scf00343 | 9  |
| AX-158187230 | 16 | 121.914 | KV452970.1  | 77298    | 9-scf00343 | 9  |
| AX-157713624 | 16 | 121.914 | KV452970.1  | 80675    | 9-scf00343 | 9  |
| AX-158187233 | 16 | 121.914 | KV452970.1  | 81371    | 9-scf00343 | 9  |
| AX-158187234 | 16 | 121.914 | KV452970.1  | 81670    | 9-scf00343 | 9  |
| AX-158187235 | 16 | 121.914 | KV452970.1  | 83090    | 9-scf00343 | 9  |
| AX-158187236 | 16 | 121.914 | KV452970.1  | 84278    | 9-scf00343 | 9  |
| AX-158187242 | 16 | 121.981 | KV452970.1  | 100413   | 9-scf00343 | 9  |
| AX-158413790 | 16 | 122.106 | KV452970.1  | 115016   | 9-scf00343 | 9  |
| AX-158187249 | 16 | 122.121 | KV452970.1  | 144939   | 9-scf00343 | 9  |
| AX-157683872 | 16 | 122.679 | KV452971.1  | 2202     | 9-scf00345 | 9  |
| AX-157683873 | 16 | 122.679 | KV452971.1  | 5814     | 9-scf00345 | 9  |
| AX-157704699 | 16 | 122.679 | 3ML01027074 | 1120     | scf02677_1 | UN |
| AX-158187158 | 16 | 122.68  | KV452969.1  | 22569787 | 9-scf00340 | 9  |
| AX-157683871 | 16 | 122.68  | KV452971.1  | 1604     | 9-scf00345 | 9  |
| AX-157710285 | 16 | 122.68  | KV452971.1  | 7761     | 9-scf00345 | 9  |
| AX-157710286 | 16 | 122.68  | KV452971.1  | 7872     | 9-scf00345 | 9  |
| AX-157683874 | 16 | 122.68  | KV452971.1  | 8153     | 9-scf00345 | 9  |
| AX-157680088 | 16 | 122.68  | KV452971.1  | 12543    | 9-scf00345 | 9  |
| AX-158187259 | 16 | 122.898 | KV452973.1  | 5785     | 9-scf00344 | 9  |
| AX-158187261 | 16 | 122.898 | KV452973.1  | 10509    | 9-scf00344 | 9  |
| AX-158187262 | 16 | 122.898 | KV452973.1  | 10896    | 9-scf00344 | 9  |
| AX-158187265 | 16 | 122.898 | KV452973.1  | 14118    | 9-scf00344 | 9  |
| AX-158187266 | 16 | 122.898 | KV452973.1  | 14948    | 9-scf00344 | 9  |
| AX-158187268 | 16 | 122.898 | KV452973.1  | 17277    | 9-scf00344 | 9  |
| AX-158187284 | 16 | 122.898 | KV452973.1  | 34517    | 9-scf00344 | 9  |
| AX-158187312 | 16 | 122.898 | KV452973.1  | 71959    | 9-scf00344 | 9  |
| AX-158187336 | 16 | 122.898 | KV452973.1  | 109508   | 9-scf00344 | 9  |
| AX-157706926 | 16 | 122.898 | 3ML01033168 | 73       | scf08808_1 | UN |
| AX-158187276 | 16 | 122.912 | KV452973.1  | 26659    | 9-scf00344 | 9  |
| AX-158187285 | 16 | 122.957 | KV452973.1  | 37423    | 9-scf00344 | 9  |
| AX-158187271 | 16 | 123.007 | KV452973.1  | 20254    | 9-scf00344 | 9  |
| AX-157757816 | 16 | 123.007 | KV452973.1  | 37845    | 9-scf00344 | 9  |
| AX-158187286 | 16 | 123.007 | KV452973.1  | 38735    | 9-scf00344 | 9  |
| AX-158187287 | 16 | 123.007 | KV452973.1  | 39308    | 9-scf00344 | 9  |
| AX-158187291 | 16 | 123.007 | KV452973.1  | 45403    | 9-scf00344 | 9  |
| AX-158187295 | 16 | 123.007 | KV452973.1  | 48820    | 9-scf00344 | 9  |
| AX-158187296 | 16 | 123.007 | KV452973.1  | 49208    | 9-scf00344 | 9  |
| AX-158187298 | 16 | 123.007 | KV452973.1  | 53253    | 9-scf00344 | 9  |
| AX-158187302 | 16 | 123.007 | KV452973.1  | 56976    | 9-scf00344 | 9  |
| AX-157723353 | 16 | 123.007 | KV452973.1  | 57672    | 9-scf00344 | 9  |
| AX-158187308 | 16 | 123.007 | KV452973.1  | 66015    | 9-scf00344 | 9  |
| AX-158187310 | 16 | 123.007 | KV452973.1  | 68906    | 9-scf00344 | 9  |
| AX-158187314 | 16 | 123.007 | KV452973.1  | 73615    | 9-scf00344 | 9  |
| AX-158187315 | 16 | 123.007 | KV452973.1  | 74065    | 9-scf00344 | 9  |
| AX-157741877 | 16 | 123.007 | KV452973.1  | 77092    | 9-scf00344 | 9  |

|              |    |         |             |        |            |    |
|--------------|----|---------|-------------|--------|------------|----|
| AX-158187317 | 16 | 123.007 | KV452973.1  | 77935  | 9-scf00344 | 9  |
| AX-158187327 | 16 | 123.007 | KV452973.1  | 95695  | 9-scf00344 | 9  |
| AX-157688881 | 16 | 123.007 | 3ML01027342 | 307    | scf02948_1 | UN |
| AX-158187307 | 16 | 123.06  | KV452973.1  | 62002  | 9-scf00344 | 9  |
| AX-158187313 | 16 | 123.06  | KV452973.1  | 73181  | 9-scf00344 | 9  |
| AX-158187318 | 16 | 123.06  | KV452973.1  | 81707  | 9-scf00344 | 9  |
| AX-158187319 | 16 | 123.117 | KV452973.1  | 81941  | 9-scf00344 | 9  |
| AX-158187321 | 16 | 123.117 | KV452973.1  | 88107  | 9-scf00344 | 9  |
| AX-158187324 | 16 | 123.136 | KV452973.1  | 92276  | 9-scf00344 | 9  |
| AX-158187326 | 16 | 123.173 | KV452973.1  | 95203  | 9-scf00344 | 9  |
| AX-157836231 | 16 | 123.226 | KV452973.1  | 96512  | 9-scf00344 | 9  |
| AX-158187330 | 16 | 123.226 | KV452973.1  | 100387 | 9-scf00344 | 9  |
| AX-158187331 | 16 | 123.226 | KV452973.1  | 100650 | 9-scf00344 | 9  |
| AX-158187323 | 16 | 123.256 | KV452973.1  | 91025  | 9-scf00344 | 9  |
| AX-157717459 | 16 | 123.256 | KV452973.1  | 103057 | 9-scf00344 | 9  |
| AX-157836233 | 16 | 123.272 | KV452973.1  | 103767 | 9-scf00344 | 9  |
| AX-158187338 | 16 | 123.304 | KV452973.1  | 116377 | 9-scf00344 | 9  |
| AX-157756266 | 16 | 123.335 | KV452973.1  | 125063 | 9-scf00344 | 9  |
| AX-158187342 | 16 | 123.335 | KV452973.1  | 125332 | 9-scf00344 | 9  |
| AX-158187344 | 16 | 123.335 | KV452973.1  | 130904 | 9-scf00344 | 9  |
| AX-158187346 | 16 | 123.335 | KV452973.1  | 133542 | 9-scf00344 | 9  |
| AX-158187345 | 16 | 123.379 | KV452973.1  | 132768 | 9-scf00344 | 9  |
| AX-157836237 | 16 | 123.404 | KV452973.1  | 136724 | 9-scf00344 | 9  |
| AX-158187272 | 16 | 123.444 | KV452973.1  | 20603  | 9-scf00344 | 9  |
| AX-158187274 | 16 | 123.444 | KV452973.1  | 24300  | 9-scf00344 | 9  |
| AX-158187278 | 16 | 123.444 | KV452973.1  | 28449  | 9-scf00344 | 9  |
| AX-158187281 | 16 | 123.444 | KV452973.1  | 30889  | 9-scf00344 | 9  |
| AX-158187320 | 16 | 123.444 | KV452973.1  | 87595  | 9-scf00344 | 9  |
| AX-158187347 | 16 | 123.444 | KV452973.1  | 135829 | 9-scf00344 | 9  |
| AX-158187349 | 16 | 123.444 | KV452973.1  | 137421 | 9-scf00344 | 9  |
| AX-158187350 | 16 | 123.444 | KV452973.1  | 137627 | 9-scf00344 | 9  |
| AX-158187352 | 16 | 123.444 | KV452973.1  | 138126 | 9-scf00344 | 9  |
| AX-158187354 | 16 | 123.444 | KV452973.1  | 141493 | 9-scf00344 | 9  |
| AX-158187355 | 16 | 123.444 | KV452973.1  | 142109 | 9-scf00344 | 9  |
| AX-158187380 | 16 | 123.444 | KV452973.1  | 175285 | 9-scf00344 | 9  |
| AX-158187432 | 16 | 123.444 | KV452972.1  | 68245  | 9-scf00346 | 9  |
| AX-158187304 | 16 | 123.663 | KV452973.1  | 58770  | 9-scf00344 | 9  |
| AX-158187351 | 16 | 123.663 | KV452973.1  | 137912 | 9-scf00344 | 9  |
| AX-157746988 | 16 | 123.663 | KV452973.1  | 139279 | 9-scf00344 | 9  |
| AX-158187357 | 16 | 123.663 | KV452973.1  | 145273 | 9-scf00344 | 9  |
| AX-158187359 | 16 | 123.663 | KV452973.1  | 146450 | 9-scf00344 | 9  |
| AX-158187365 | 16 | 123.663 | KV452973.1  | 151479 | 9-scf00344 | 9  |
| AX-158187366 | 16 | 123.663 | KV452973.1  | 152069 | 9-scf00344 | 9  |
| AX-158187367 | 16 | 123.663 | KV452973.1  | 152543 | 9-scf00344 | 9  |
| AX-158187369 | 16 | 123.663 | KV452973.1  | 153275 | 9-scf00344 | 9  |
| AX-157739931 | 16 | 123.663 | KV452973.1  | 158472 | 9-scf00344 | 9  |
| AX-157771109 | 16 | 123.663 | KV452973.1  | 166692 | 9-scf00344 | 9  |
| AX-158187375 | 16 | 123.663 | KV452973.1  | 167059 | 9-scf00344 | 9  |
| AX-158187377 | 16 | 123.663 | KV452973.1  | 171001 | 9-scf00344 | 9  |
| AX-157836241 | 16 | 123.663 | KV452973.1  | 174679 | 9-scf00344 | 9  |
| AX-158187381 | 16 | 123.663 | KV452973.1  | 178720 | 9-scf00344 | 9  |

|              |    |         |             |        |            |    |
|--------------|----|---------|-------------|--------|------------|----|
| AX-158187383 | 16 | 123.663 | KV452973.1  | 182962 | 9-scf00344 | 9  |
| AX-158187384 | 16 | 123.663 | KV452973.1  | 184429 | 9-scf00344 | 9  |
| AX-158187387 | 16 | 123.663 | KV452973.1  | 187450 | 9-scf00344 | 9  |
| AX-158187390 | 16 | 123.663 | KV452973.1  | 194699 | 9-scf00344 | 9  |
| AX-158187402 | 16 | 123.663 | KV452972.1  | 7713   | 9-scf00346 | 9  |
| AX-158187403 | 16 | 123.663 | KV452972.1  | 8759   | 9-scf00346 | 9  |
| AX-158187407 | 16 | 123.663 | KV452972.1  | 15920  | 9-scf00346 | 9  |
| AX-158187408 | 16 | 123.663 | KV452972.1  | 16355  | 9-scf00346 | 9  |
| AX-157836230 | 16 | 123.772 | KV452973.1  | 91419  | 9-scf00344 | 9  |
| AX-158187391 | 16 | 123.772 | KV452973.1  | 195834 | 9-scf00344 | 9  |
| AX-157872131 | 16 | 123.772 | KV452973.1  | 200077 | 9-scf00344 | 9  |
| AX-158187404 | 16 | 123.772 | KV452972.1  | 9458   | 9-scf00346 | 9  |
| AX-158187405 | 16 | 123.772 | KV452972.1  | 11023  | 9-scf00346 | 9  |
| AX-157743815 | 16 | 123.99  | KV452973.1  | 110033 | 9-scf00344 | 9  |
| AX-158187413 | 16 | 123.99  | KV452972.1  | 27467  | 9-scf00346 | 9  |
| AX-158187415 | 16 | 123.99  | KV452972.1  | 28470  | 9-scf00346 | 9  |
| AX-158187417 | 16 | 123.99  | KV452972.1  | 37431  | 9-scf00346 | 9  |
| AX-157689745 | 16 | 123.99  | 3ML01031835 | 432    | scf07456_1 | UN |
| AX-158187418 | 16 | 124.099 | KV452972.1  | 38526  | 9-scf00346 | 9  |
| AX-157716661 | 16 | 124.119 | KV452972.1  | 52187  | 9-scf00346 | 9  |
| AX-157886896 | 16 | 124.136 | KV452972.1  | 54483  | 9-scf00346 | 9  |
| AX-158187427 | 16 | 124.161 | KV452972.1  | 59779  | 9-scf00346 | 9  |
| AX-158187431 | 16 | 124.185 | KV452972.1  | 67785  | 9-scf00346 | 9  |
| AX-158187433 | 16 | 124.209 | KV452972.1  | 68897  | 9-scf00346 | 9  |
| AX-158187434 | 16 | 124.209 | KV452972.1  | 70539  | 9-scf00346 | 9  |
| AX-157858864 | 16 | 124.209 | KV452972.1  | 71274  | 9-scf00346 | 9  |
| AX-158187435 | 16 | 124.209 | KV452972.1  | 71673  | 9-scf00346 | 9  |
| AX-158187436 | 16 | 124.209 | KV452972.1  | 72436  | 9-scf00346 | 9  |
| AX-158187443 | 16 | 124.318 | KV452972.1  | 78017  | 9-scf00346 | 9  |
| AX-158187444 | 16 | 124.318 | KV452972.1  | 78983  | 9-scf00346 | 9  |
| AX-158187451 | 16 | 124.318 | KV452972.1  | 91157  | 9-scf00346 | 9  |
| AX-158187452 | 16 | 124.318 | KV452972.1  | 92686  | 9-scf00346 | 9  |
| AX-158187453 | 16 | 124.318 | KV452972.1  | 93487  | 9-scf00346 | 9  |
| AX-158187456 | 16 | 124.318 | KV452972.1  | 95459  | 9-scf00346 | 9  |
| AX-158187457 | 16 | 124.318 | KV452972.1  | 99100  | 9-scf00346 | 9  |
| AX-158187458 | 16 | 124.318 | KV452972.1  | 99536  | 9-scf00346 | 9  |
| AX-157836246 | 16 | 124.318 | KV452972.1  | 114098 | 9-scf00346 | 9  |
| AX-158187474 | 16 | 124.318 | KV452972.1  | 126813 | 9-scf00346 | 9  |
| AX-158187462 | 16 | 124.49  | KV452972.1  | 105421 | 9-scf00346 | 9  |
| AX-158187463 | 16 | 124.536 | KV452972.1  | 105870 | 9-scf00346 | 9  |
| AX-158187465 | 16 | 124.536 | KV452972.1  | 107137 | 9-scf00346 | 9  |
| AX-158187466 | 16 | 124.536 | KV452972.1  | 113688 | 9-scf00346 | 9  |
| AX-158187467 | 16 | 124.536 | KV452972.1  | 114136 | 9-scf00346 | 9  |
| AX-157746420 | 16 | 124.536 | KV452972.1  | 115585 | 9-scf00346 | 9  |
| AX-157836247 | 16 | 124.536 | KV452972.1  | 116798 | 9-scf00346 | 9  |
| AX-157748186 | 16 | 124.536 | KV452972.1  | 117802 | 9-scf00346 | 9  |
| AX-158187468 | 16 | 124.536 | KV452972.1  | 118525 | 9-scf00346 | 9  |
| AX-158187471 | 16 | 124.536 | KV452972.1  | 126126 | 9-scf00346 | 9  |
| AX-158187472 | 16 | 124.536 | KV452972.1  | 126388 | 9-scf00346 | 9  |
| AX-157714283 | 16 | 124.536 | KV452972.1  | 128364 | 9-scf00346 | 9  |
| AX-158187475 | 16 | 124.536 | KV452972.1  | 129929 | 9-scf00346 | 9  |



|              |    |         |            |        |            |   |
|--------------|----|---------|------------|--------|------------|---|
| AX-158187476 | 16 | 124.536 | KV452972.1 | 130642 | 9-scf00346 | 9 |
| AX-158187477 | 16 | 124.536 | KV452972.1 | 131254 | 9-scf00346 | 9 |
| AX-158187480 | 16 | 124.536 | KV452972.1 | 133800 | 9-scf00346 | 9 |
| AX-157707593 | 16 | 124.536 | KV452972.1 | 134748 | 9-scf00346 | 9 |
| AX-158187481 | 16 | 124.536 | KV452972.1 | 135183 | 9-scf00346 | 9 |
| AX-157872132 | 16 | 124.536 | KV452972.1 | 135792 | 9-scf00346 | 9 |
| AX-158187483 | 16 | 124.536 | KV452972.1 | 136225 | 9-scf00346 | 9 |
| AX-158187495 | 16 | 124.536 | KV452972.1 | 154969 | 9-scf00346 | 9 |
| AX-158187511 | 16 | 124.536 | KV452972.1 | 194669 | 9-scf00346 | 9 |
| AX-157796846 | 16 | 124.645 | KV452972.1 | 139514 | 9-scf00346 | 9 |
| AX-158187488 | 16 | 124.645 | KV452972.1 | 141191 | 9-scf00346 | 9 |
| AX-157724413 | 16 | 124.645 | KV452972.1 | 149318 | 9-scf00346 | 9 |
| AX-158187491 | 16 | 124.645 | KV452972.1 | 149790 | 9-scf00346 | 9 |
| AX-158187492 | 16 | 124.645 | KV452972.1 | 150167 | 9-scf00346 | 9 |
| AX-158187493 | 16 | 124.645 | KV452972.1 | 150852 | 9-scf00346 | 9 |
| AX-157739182 | 16 | 124.646 | KV452972.1 | 162638 | 9-scf00346 | 9 |
| AX-158187498 | 16 | 124.799 | KV452972.1 | 164322 | 9-scf00346 | 9 |
| AX-158187502 | 16 | 124.799 | KV452972.1 | 167169 | 9-scf00346 | 9 |
| AX-157751309 | 16 | 124.799 | KV452972.1 | 178933 | 9-scf00346 | 9 |
| AX-157772851 | 16 | 124.799 | KV452972.1 | 181016 | 9-scf00346 | 9 |
| AX-158187506 | 16 | 124.799 | KV452972.1 | 184608 | 9-scf00346 | 9 |
| AX-158187507 | 16 | 124.799 | KV452972.1 | 185908 | 9-scf00346 | 9 |
| AX-158187508 | 16 | 124.799 | KV452972.1 | 186485 | 9-scf00346 | 9 |
| AX-158187479 | 16 | 124.962 | KV452972.1 | 133198 | 9-scf00346 | 9 |
| AX-158187484 | 16 | 124.962 | KV452972.1 | 137626 | 9-scf00346 | 9 |
| AX-157752257 | 16 | 124.962 | KV452972.1 | 198859 | 9-scf00346 | 9 |
| AX-158187392 | 16 | 125.021 | KV452973.1 | 196668 | 9-scf00344 | 9 |
| AX-157745840 | 16 | 125.021 | KV452972.1 | 202041 | 9-scf00346 | 9 |
| AX-158187518 | 16 | 125.021 | KV452972.1 | 209439 | 9-scf00346 | 9 |
| AX-157836259 | 16 | 125.021 | KV452972.1 | 210523 | 9-scf00346 | 9 |
| AX-158187522 | 16 | 125.021 | KV452972.1 | 217593 | 9-scf00346 | 9 |
| AX-158187554 | 16 | 125.021 | KV452972.1 | 267280 | 9-scf00346 | 9 |
| AX-158187533 | 16 | 125.021 | KV452972.1 | 292399 | 9-scf00346 | 9 |
| AX-158187762 | 16 | 125.021 | KV452974.1 | 71965  | 9-scf00349 | 9 |
| AX-158187515 | 16 | 125.022 | KV452972.1 | 203472 | 9-scf00346 | 9 |
| AX-158187516 | 16 | 125.022 | KV452972.1 | 205329 | 9-scf00346 | 9 |
| AX-158187517 | 16 | 125.022 | KV452972.1 | 207707 | 9-scf00346 | 9 |
| AX-157836258 | 16 | 125.022 | KV452972.1 | 209559 | 9-scf00346 | 9 |
| AX-158187520 | 16 | 125.022 | KV452972.1 | 212624 | 9-scf00346 | 9 |
| AX-157746234 | 16 | 125.022 | KV452972.1 | 216541 | 9-scf00346 | 9 |
| AX-157710236 | 16 | 125.022 | KV452972.1 | 247469 | 9-scf00346 | 9 |
| AX-158187545 | 16 | 125.022 | KV452972.1 | 280530 | 9-scf00346 | 9 |
| AX-158187528 | 16 | 125.022 | KV452972.1 | 298909 | 9-scf00346 | 9 |
| AX-158187640 | 16 | 125.301 | KV452973.1 | 319910 | 9-scf00344 | 9 |
| AX-158187706 | 16 | 125.301 | KV452973.1 | 399432 | 9-scf00344 | 9 |
| AX-158187513 | 16 | 125.301 | KV452972.1 | 197929 | 9-scf00346 | 9 |
| AX-158187558 | 16 | 125.301 | KV452972.1 | 255015 | 9-scf00346 | 9 |
| AX-158187550 | 16 | 125.301 | KV452972.1 | 274919 | 9-scf00346 | 9 |
| AX-158187548 | 16 | 125.301 | KV452972.1 | 277711 | 9-scf00346 | 9 |
| AX-158187546 | 16 | 125.301 | KV452972.1 | 279257 | 9-scf00346 | 9 |
| AX-158187544 | 16 | 125.301 | KV452972.1 | 281831 | 9-scf00346 | 9 |

|              |    |         |            |        |            |   |
|--------------|----|---------|------------|--------|------------|---|
| AX-157836261 | 16 | 125.301 | KV452972.1 | 282678 | 9-scf00346 | 9 |
| AX-158187540 | 16 | 125.301 | KV452972.1 | 285727 | 9-scf00346 | 9 |
| AX-158187537 | 16 | 125.301 | KV452972.1 | 288546 | 9-scf00346 | 9 |
| AX-158187536 | 16 | 125.301 | KV452972.1 | 289217 | 9-scf00346 | 9 |
| AX-158187535 | 16 | 125.301 | KV452972.1 | 289391 | 9-scf00346 | 9 |
| AX-158187525 | 16 | 125.301 | KV452972.1 | 305001 | 9-scf00346 | 9 |
| AX-157720571 | 16 | 125.301 | KV452972.1 | 306569 | 9-scf00346 | 9 |
| AX-158187808 | 16 | 125.301 | KV452974.1 | 179185 | 9-scf00349 | 9 |
| AX-158187837 | 16 | 125.301 | KV452976.1 | 42932  | 9-scf00350 | 9 |
| AX-157836262 | 16 | 125.324 | KV452973.1 | 236392 | 9-scf00344 | 9 |
| AX-158187599 | 16 | 125.324 | KV452973.1 | 241814 | 9-scf00344 | 9 |
| AX-158187600 | 16 | 125.324 | KV452973.1 | 243095 | 9-scf00344 | 9 |
| AX-158187555 | 16 | 125.324 | KV452972.1 | 259130 | 9-scf00346 | 9 |
| AX-158187553 | 16 | 125.324 | KV452972.1 | 269380 | 9-scf00346 | 9 |
| AX-158187531 | 16 | 125.324 | KV452972.1 | 294718 | 9-scf00346 | 9 |
| AX-158187519 | 16 | 125.41  | KV452972.1 | 211828 | 9-scf00346 | 9 |
| AX-158187568 | 16 | 125.41  | KV452972.1 | 226223 | 9-scf00346 | 9 |
| AX-158187567 | 16 | 125.41  | KV452972.1 | 227686 | 9-scf00346 | 9 |
| AX-158187557 | 16 | 125.41  | KV452972.1 | 255326 | 9-scf00346 | 9 |
| AX-158187556 | 16 | 125.41  | KV452972.1 | 258523 | 9-scf00346 | 9 |
| AX-157757643 | 16 | 125.41  | KV452972.1 | 265209 | 9-scf00346 | 9 |
| AX-158187580 | 16 | 125.519 | KV452973.1 | 206231 | 9-scf00344 | 9 |
| AX-158187586 | 16 | 125.561 | KV452973.1 | 221509 | 9-scf00344 | 9 |
| AX-158187529 | 16 | 125.561 | KV452972.1 | 297120 | 9-scf00346 | 9 |
| AX-157755324 | 16 | 125.572 | KV452973.1 | 223076 | 9-scf00344 | 9 |
| AX-158187551 | 16 | 125.572 | KV452972.1 | 274486 | 9-scf00346 | 9 |
| AX-158187589 | 16 | 125.628 | KV452973.1 | 224670 | 9-scf00344 | 9 |
| AX-158393593 | 16 | 125.628 | KV452973.1 | 225353 | 9-scf00344 | 9 |
| AX-157742537 | 16 | 125.628 | KV452973.1 | 228496 | 9-scf00344 | 9 |
| AX-158187592 | 16 | 125.628 | KV452973.1 | 230907 | 9-scf00344 | 9 |
| AX-158187596 | 16 | 125.628 | KV452973.1 | 237375 | 9-scf00344 | 9 |
| AX-158187597 | 16 | 125.661 | KV452973.1 | 239541 | 9-scf00344 | 9 |
| AX-158187598 | 16 | 125.694 | KV452973.1 | 239903 | 9-scf00344 | 9 |
| AX-158187601 | 16 | 125.738 | KV452973.1 | 243255 | 9-scf00344 | 9 |
| AX-158187602 | 16 | 125.738 | KV452973.1 | 245135 | 9-scf00344 | 9 |
| AX-158187606 | 16 | 125.738 | KV452973.1 | 253141 | 9-scf00344 | 9 |
| AX-158187607 | 16 | 125.738 | KV452973.1 | 262119 | 9-scf00344 | 9 |
| AX-158187394 | 16 | 125.794 | KV452973.1 | 200119 | 9-scf00344 | 9 |
| AX-158187609 | 16 | 125.794 | KV452973.1 | 264949 | 9-scf00344 | 9 |
| AX-157858868 | 16 | 125.794 | KV452973.1 | 269010 | 9-scf00344 | 9 |
| AX-158187613 | 16 | 125.794 | KV452973.1 | 275931 | 9-scf00344 | 9 |
| AX-158187647 | 16 | 125.794 | KV452973.1 | 329987 | 9-scf00344 | 9 |
| AX-158187696 | 16 | 125.794 | KV452973.1 | 389415 | 9-scf00344 | 9 |
| AX-158187703 | 16 | 125.794 | KV452973.1 | 397291 | 9-scf00344 | 9 |
| AX-157773819 | 16 | 125.847 | KV452973.1 | 273066 | 9-scf00344 | 9 |
| AX-158187612 | 16 | 125.847 | KV452973.1 | 273953 | 9-scf00344 | 9 |
| AX-158187615 | 16 | 125.847 | KV452973.1 | 277829 | 9-scf00344 | 9 |
| AX-158187619 | 16 | 125.863 | KV452973.1 | 281427 | 9-scf00344 | 9 |
| AX-158187629 | 16 | 125.863 | KV452973.1 | 298084 | 9-scf00344 | 9 |
| AX-158187806 | 16 | 125.863 | KV452974.1 | 174905 | 9-scf00349 | 9 |
| AX-158187624 | 16 | 125.866 | KV452973.1 | 290052 | 9-scf00344 | 9 |

|              |    |         |            |        |            |   |
|--------------|----|---------|------------|--------|------------|---|
| AX-157749763 | 16 | 125.885 | KV452973.1 | 302690 | 9-scf00344 | 9 |
| AX-157836264 | 16 | 125.904 | KV452973.1 | 284781 | 9-scf00344 | 9 |
| AX-158187625 | 16 | 125.904 | KV452973.1 | 290733 | 9-scf00344 | 9 |
| AX-158187634 | 16 | 125.904 | KV452973.1 | 304623 | 9-scf00344 | 9 |
| AX-158187637 | 16 | 125.904 | KV452973.1 | 315031 | 9-scf00344 | 9 |
| AX-157723157 | 16 | 125.904 | KV452973.1 | 335604 | 9-scf00344 | 9 |
| AX-157747266 | 16 | 125.904 | KV452973.1 | 343686 | 9-scf00344 | 9 |
| AX-158187699 | 16 | 125.904 | KV452973.1 | 391822 | 9-scf00344 | 9 |
| AX-158386059 | 16 | 125.904 | KV452973.1 | 396483 | 9-scf00344 | 9 |
| AX-157752563 | 16 | 125.904 | KV452973.1 | 396845 | 9-scf00344 | 9 |
| AX-158187850 | 16 | 125.904 | KV452976.1 | 60030  | 9-scf00350 | 9 |
| AX-157757273 | 16 | 125.919 | KV452973.1 | 315956 | 9-scf00344 | 9 |
| AX-158187639 | 16 | 125.94  | KV452973.1 | 316761 | 9-scf00344 | 9 |
| AX-158187616 | 16 | 125.956 | KV452973.1 | 278399 | 9-scf00344 | 9 |
| AX-157836263 | 16 | 125.956 | KV452973.1 | 280065 | 9-scf00344 | 9 |
| AX-158187627 | 16 | 125.956 | KV452973.1 | 292160 | 9-scf00344 | 9 |
| AX-157836266 | 16 | 125.956 | KV452973.1 | 320255 | 9-scf00344 | 9 |
| AX-157879022 | 16 | 125.956 | KV452973.1 | 322655 | 9-scf00344 | 9 |
| AX-157836268 | 16 | 125.956 | KV452973.1 | 328162 | 9-scf00344 | 9 |
| AX-158187645 | 16 | 125.956 | KV452973.1 | 328871 | 9-scf00344 | 9 |
| AX-158187646 | 16 | 125.956 | KV452973.1 | 329589 | 9-scf00344 | 9 |
| AX-158187648 | 16 | 125.956 | KV452973.1 | 330477 | 9-scf00344 | 9 |
| AX-158187649 | 16 | 125.956 | KV452973.1 | 333205 | 9-scf00344 | 9 |
| AX-158187650 | 16 | 125.956 | KV452973.1 | 333919 | 9-scf00344 | 9 |
| AX-158187652 | 16 | 125.956 | KV452973.1 | 336551 | 9-scf00344 | 9 |
| AX-158187653 | 16 | 125.956 | KV452973.1 | 337085 | 9-scf00344 | 9 |
| AX-158187657 | 16 | 125.956 | KV452973.1 | 343308 | 9-scf00344 | 9 |
| AX-158187658 | 16 | 125.956 | KV452973.1 | 344297 | 9-scf00344 | 9 |
| AX-158187660 | 16 | 125.956 | KV452973.1 | 345866 | 9-scf00344 | 9 |
| AX-158187662 | 16 | 125.956 | KV452973.1 | 346395 | 9-scf00344 | 9 |
| AX-158187669 | 16 | 125.956 | KV452973.1 | 355536 | 9-scf00344 | 9 |
| AX-158187680 | 16 | 125.956 | KV452973.1 | 363506 | 9-scf00344 | 9 |
| AX-158187681 | 16 | 125.956 | KV452973.1 | 365386 | 9-scf00344 | 9 |
| AX-157836269 | 16 | 125.956 | KV452973.1 | 367518 | 9-scf00344 | 9 |
| AX-158187683 | 16 | 125.956 | KV452973.1 | 367562 | 9-scf00344 | 9 |
| AX-158187684 | 16 | 125.956 | KV452973.1 | 367669 | 9-scf00344 | 9 |
| AX-158187685 | 16 | 125.956 | KV452973.1 | 368527 | 9-scf00344 | 9 |
| AX-158187686 | 16 | 125.956 | KV452973.1 | 371880 | 9-scf00344 | 9 |
| AX-158187687 | 16 | 125.956 | KV452973.1 | 372458 | 9-scf00344 | 9 |
| AX-158187688 | 16 | 125.956 | KV452973.1 | 381853 | 9-scf00344 | 9 |
| AX-158187690 | 16 | 125.956 | KV452973.1 | 382546 | 9-scf00344 | 9 |
| AX-158187693 | 16 | 125.956 | KV452973.1 | 384779 | 9-scf00344 | 9 |
| AX-157836271 | 16 | 125.956 | KV452973.1 | 385515 | 9-scf00344 | 9 |
| AX-158187694 | 16 | 125.956 | KV452973.1 | 386124 | 9-scf00344 | 9 |
| AX-157872134 | 16 | 125.956 | KV452973.1 | 387562 | 9-scf00344 | 9 |
| AX-158187697 | 16 | 125.956 | KV452973.1 | 390355 | 9-scf00344 | 9 |
| AX-158187700 | 16 | 125.956 | KV452973.1 | 392207 | 9-scf00344 | 9 |
| AX-158187702 | 16 | 125.956 | KV452973.1 | 395633 | 9-scf00344 | 9 |
| AX-158187707 | 16 | 125.956 | KV452973.1 | 400359 | 9-scf00344 | 9 |
| AX-158187723 | 16 | 125.956 | KV452973.1 | 431138 | 9-scf00344 | 9 |
| AX-158187734 | 16 | 125.956 | KV452974.1 | 7990   | 9-scf00349 | 9 |

|              |    |         |            |        |            |   |
|--------------|----|---------|------------|--------|------------|---|
| AX-158187735 | 16 | 125.956 | KV452974.1 | 9744   | 9-scf00349 | 9 |
| AX-158187741 | 16 | 125.956 | KV452974.1 | 22340  | 9-scf00349 | 9 |
| AX-158187756 | 16 | 125.956 | KV452974.1 | 59932  | 9-scf00349 | 9 |
| AX-158393597 | 16 | 125.956 | KV452974.1 | 64623  | 9-scf00349 | 9 |
| AX-158187805 | 16 | 125.956 | KV452974.1 | 172611 | 9-scf00349 | 9 |
| AX-158187846 | 16 | 125.956 | KV452976.1 | 57729  | 9-scf00350 | 9 |
| AX-158187863 | 16 | 125.956 | KV452976.1 | 82422  | 9-scf00350 | 9 |
| AX-158187887 | 16 | 125.956 | KV452976.1 | 119808 | 9-scf00350 | 9 |
| AX-158187899 | 16 | 125.956 | KV452976.1 | 137465 | 9-scf00350 | 9 |
| AX-158187912 | 16 | 125.956 | KV452976.1 | 154917 | 9-scf00350 | 9 |
| AX-157683893 | 16 | 125.956 | KV452975.1 | 17895  | 9-scf00351 | 9 |
| AX-158187708 | 16 | 125.997 | KV452973.1 | 400956 | 9-scf00344 | 9 |
| AX-158187709 | 16 | 126.032 | KV452973.1 | 401715 | 9-scf00344 | 9 |
| AX-158386060 | 16 | 126.057 | KV452973.1 | 403537 | 9-scf00344 | 9 |
| AX-158187710 | 16 | 126.057 | KV452973.1 | 403770 | 9-scf00344 | 9 |
| AX-158187711 | 16 | 126.057 | KV452973.1 | 404383 | 9-scf00344 | 9 |
| AX-157836273 | 16 | 126.057 | KV452973.1 | 418051 | 9-scf00344 | 9 |
| AX-157836274 | 16 | 126.065 | KV452973.1 | 418146 | 9-scf00344 | 9 |
| AX-158187714 | 16 | 126.065 | KV452973.1 | 422337 | 9-scf00344 | 9 |
| AX-158187717 | 16 | 126.065 | KV452973.1 | 424929 | 9-scf00344 | 9 |
| AX-157836276 | 16 | 126.065 | KV452973.1 | 432229 | 9-scf00344 | 9 |
| AX-158187725 | 16 | 126.065 | KV452973.1 | 438515 | 9-scf00344 | 9 |
| AX-158187726 | 16 | 126.114 | KV452973.1 | 443758 | 9-scf00344 | 9 |
| AX-157836280 | 16 | 126.114 | KV452974.1 | 134941 | 9-scf00349 | 9 |
| AX-158187736 | 16 | 126.175 | KV452974.1 | 10222  | 9-scf00349 | 9 |
| AX-158187737 | 16 | 126.175 | KV452974.1 | 11661  | 9-scf00349 | 9 |
| AX-158187744 | 16 | 126.175 | KV452974.1 | 27659  | 9-scf00349 | 9 |
| AX-158187748 | 16 | 126.175 | KV452974.1 | 41253  | 9-scf00349 | 9 |
| AX-158187749 | 16 | 126.175 | KV452974.1 | 45852  | 9-scf00349 | 9 |
| AX-158187750 | 16 | 126.175 | KV452974.1 | 49946  | 9-scf00349 | 9 |
| AX-158187753 | 16 | 126.175 | KV452974.1 | 55550  | 9-scf00349 | 9 |
| AX-158187755 | 16 | 126.175 | KV452974.1 | 59094  | 9-scf00349 | 9 |
| AX-157722034 | 16 | 126.175 | KV452974.1 | 63490  | 9-scf00349 | 9 |
| AX-158393596 | 16 | 126.175 | KV452974.1 | 63877  | 9-scf00349 | 9 |
| AX-158187758 | 16 | 126.175 | KV452974.1 | 64536  | 9-scf00349 | 9 |
| AX-158187760 | 16 | 126.175 | KV452974.1 | 67824  | 9-scf00349 | 9 |
| AX-157858870 | 16 | 126.175 | KV452974.1 | 76012  | 9-scf00349 | 9 |
| AX-158187766 | 16 | 126.175 | KV452974.1 | 77235  | 9-scf00349 | 9 |
| AX-158187776 | 16 | 126.175 | KV452974.1 | 87603  | 9-scf00349 | 9 |
| AX-158187777 | 16 | 126.175 | KV452974.1 | 88183  | 9-scf00349 | 9 |
| AX-158187788 | 16 | 126.175 | KV452974.1 | 134897 | 9-scf00349 | 9 |
| AX-157683887 | 16 | 126.175 | KV452975.1 | 11302  | 9-scf00351 | 9 |
| AX-157683888 | 16 | 126.175 | KV452975.1 | 14857  | 9-scf00351 | 9 |
| AX-157683889 | 16 | 126.175 | KV452975.1 | 15550  | 9-scf00351 | 9 |
| AX-157720955 | 16 | 126.205 | KV452974.1 | 80797  | 9-scf00349 | 9 |
| AX-157771178 | 16 | 126.236 | KV452974.1 | 82033  | 9-scf00349 | 9 |
| AX-158187786 | 16 | 126.236 | KV452974.1 | 121056 | 9-scf00349 | 9 |
| AX-158187881 | 16 | 126.236 | KV452976.1 | 108580 | 9-scf00350 | 9 |
| AX-157715594 | 16 | 126.255 | KV452973.1 | 406306 | 9-scf00344 | 9 |
| AX-158187720 | 16 | 126.255 | KV452973.1 | 428498 | 9-scf00344 | 9 |
| AX-158187783 | 16 | 126.255 | KV452974.1 | 118909 | 9-scf00349 | 9 |

|              |    |         |            |        |            |   |
|--------------|----|---------|------------|--------|------------|---|
| AX-158187667 | 16 | 126.262 | KV452973.1 | 354694 | 9-scf00344 | 9 |
| AX-158187772 | 16 | 126.262 | KV452974.1 | 83658  | 9-scf00349 | 9 |
| AX-158187789 | 16 | 126.262 | KV452974.1 | 136107 | 9-scf00349 | 9 |
| AX-158187594 | 16 | 126.284 | KV452973.1 | 232210 | 9-scf00344 | 9 |
| AX-157886897 | 16 | 126.284 | KV452974.1 | 13103  | 9-scf00349 | 9 |
| AX-158187745 | 16 | 126.284 | KV452974.1 | 39127  | 9-scf00349 | 9 |
| AX-158187746 | 16 | 126.284 | KV452974.1 | 39660  | 9-scf00349 | 9 |
| AX-158187779 | 16 | 126.284 | KV452974.1 | 107574 | 9-scf00349 | 9 |
| AX-158187790 | 16 | 126.284 | KV452974.1 | 137104 | 9-scf00349 | 9 |
| AX-158187791 | 16 | 126.284 | KV452974.1 | 141972 | 9-scf00349 | 9 |
| AX-158187793 | 16 | 126.284 | KV452974.1 | 146820 | 9-scf00349 | 9 |
| AX-158187796 | 16 | 126.284 | KV452974.1 | 155489 | 9-scf00349 | 9 |
| AX-158187797 | 16 | 126.284 | KV452974.1 | 155965 | 9-scf00349 | 9 |
| AX-158187798 | 16 | 126.284 | KV452974.1 | 157957 | 9-scf00349 | 9 |
| AX-157836284 | 16 | 126.284 | KV452974.1 | 160172 | 9-scf00349 | 9 |
| AX-157863621 | 16 | 126.284 | KV452974.1 | 164925 | 9-scf00349 | 9 |
| AX-158187801 | 16 | 126.284 | KV452974.1 | 166261 | 9-scf00349 | 9 |
| AX-157858871 | 16 | 126.284 | KV452974.1 | 168422 | 9-scf00349 | 9 |
| AX-157836285 | 16 | 126.284 | KV452974.1 | 183862 | 9-scf00349 | 9 |
| AX-157836286 | 16 | 126.284 | KV452974.1 | 185872 | 9-scf00349 | 9 |
| AX-158187810 | 16 | 126.284 | KV452974.1 | 191643 | 9-scf00349 | 9 |
| AX-158187811 | 16 | 126.284 | KV452974.1 | 191908 | 9-scf00349 | 9 |
| AX-157758828 | 16 | 126.284 | KV452974.1 | 192736 | 9-scf00349 | 9 |
| AX-158187814 | 16 | 126.284 | KV452974.1 | 197229 | 9-scf00349 | 9 |
| AX-158187819 | 16 | 126.284 | KV452976.1 | 1420   | 9-scf00350 | 9 |
| AX-158187820 | 16 | 126.284 | KV452976.1 | 2196   | 9-scf00350 | 9 |
| AX-158187821 | 16 | 126.284 | KV452976.1 | 2924   | 9-scf00350 | 9 |
| AX-158187823 | 16 | 126.284 | KV452976.1 | 3979   | 9-scf00350 | 9 |
| AX-158187824 | 16 | 126.284 | KV452976.1 | 5424   | 9-scf00350 | 9 |
| AX-157836289 | 16 | 126.284 | KV452976.1 | 15456  | 9-scf00350 | 9 |
| AX-158187830 | 16 | 126.284 | KV452976.1 | 16370  | 9-scf00350 | 9 |
| AX-157836290 | 16 | 126.284 | KV452976.1 | 16626  | 9-scf00350 | 9 |
| AX-158187833 | 16 | 126.284 | KV452976.1 | 33632  | 9-scf00350 | 9 |
| AX-158187838 | 16 | 126.284 | KV452976.1 | 45026  | 9-scf00350 | 9 |
| AX-158187839 | 16 | 126.284 | KV452976.1 | 45523  | 9-scf00350 | 9 |
| AX-158187843 | 16 | 126.284 | KV452976.1 | 51746  | 9-scf00350 | 9 |
| AX-158187851 | 16 | 126.284 | KV452976.1 | 60417  | 9-scf00350 | 9 |
| AX-158187854 | 16 | 126.284 | KV452976.1 | 67005  | 9-scf00350 | 9 |
| AX-158187857 | 16 | 126.284 | KV452976.1 | 72121  | 9-scf00350 | 9 |
| AX-158187866 | 16 | 126.284 | KV452976.1 | 85977  | 9-scf00350 | 9 |
| AX-158187936 | 16 | 126.284 | KV452976.1 | 200108 | 9-scf00350 | 9 |
| AX-157683891 | 16 | 126.284 | KV452975.1 | 16652  | 9-scf00351 | 9 |
| AX-158187849 | 16 | 126.35  | KV452976.1 | 59637  | 9-scf00350 | 9 |
| AX-158187853 | 16 | 126.393 | KV452976.1 | 66347  | 9-scf00350 | 9 |
| AX-158187856 | 16 | 126.393 | KV452976.1 | 68246  | 9-scf00350 | 9 |
| AX-157886902 | 16 | 126.393 | KV452976.1 | 79295  | 9-scf00350 | 9 |
| AX-158187861 | 16 | 126.393 | KV452976.1 | 80662  | 9-scf00350 | 9 |
| AX-158187864 | 16 | 126.393 | KV452976.1 | 82997  | 9-scf00350 | 9 |
| AX-158187865 | 16 | 126.393 | KV452976.1 | 83408  | 9-scf00350 | 9 |
| AX-158187867 | 16 | 126.393 | KV452976.1 | 90898  | 9-scf00350 | 9 |
| AX-158187871 | 16 | 126.393 | KV452976.1 | 92810  | 9-scf00350 | 9 |

|              |    |         |            |        |            |   |
|--------------|----|---------|------------|--------|------------|---|
| AX-158187900 | 16 | 126.393 | KV452976.1 | 141125 | 9-scf00350 | 9 |
| AX-158187903 | 16 | 126.393 | KV452976.1 | 145202 | 9-scf00350 | 9 |
| AX-158187907 | 16 | 126.393 | KV452976.1 | 149130 | 9-scf00350 | 9 |
| AX-158187924 | 16 | 126.393 | KV452976.1 | 176298 | 9-scf00350 | 9 |
| AX-158187935 | 16 | 126.393 | KV452976.1 | 196495 | 9-scf00350 | 9 |
| AX-158187939 | 16 | 126.393 | KV452976.1 | 213089 | 9-scf00350 | 9 |
| AX-158187943 | 16 | 126.393 | KV452976.1 | 221583 | 9-scf00350 | 9 |
| AX-158187946 | 16 | 126.393 | KV452976.1 | 225861 | 9-scf00350 | 9 |
| AX-158187872 | 16 | 126.422 | KV452976.1 | 93361  | 9-scf00350 | 9 |
| AX-158187888 | 16 | 126.422 | KV452976.1 | 124072 | 9-scf00350 | 9 |
| AX-158187889 | 16 | 126.422 | KV452976.1 | 125007 | 9-scf00350 | 9 |
| AX-158187896 | 16 | 126.422 | KV452976.1 | 134903 | 9-scf00350 | 9 |
| AX-158187898 | 16 | 126.422 | KV452976.1 | 137065 | 9-scf00350 | 9 |
| AX-158187621 | 16 | 126.445 | KV452973.1 | 286307 | 9-scf00344 | 9 |
| AX-157751893 | 16 | 126.445 | KV452976.1 | 100787 | 9-scf00350 | 9 |
| AX-158187910 | 16 | 126.445 | KV452976.1 | 153237 | 9-scf00350 | 9 |
| AX-158187914 | 16 | 126.445 | KV452976.1 | 158992 | 9-scf00350 | 9 |
| AX-158187922 | 16 | 126.445 | KV452976.1 | 173206 | 9-scf00350 | 9 |
| AX-158187923 | 16 | 126.445 | KV452976.1 | 174305 | 9-scf00350 | 9 |
| AX-158187938 | 16 | 126.445 | KV452976.1 | 211604 | 9-scf00350 | 9 |
| AX-157746534 | 16 | 126.457 | KV452974.1 | 117458 | 9-scf00349 | 9 |
| AX-158187879 | 16 | 126.457 | KV452976.1 | 106087 | 9-scf00350 | 9 |
| AX-158187880 | 16 | 126.48  | KV452976.1 | 107547 | 9-scf00350 | 9 |
| AX-158187674 | 16 | 126.502 | KV452973.1 | 359165 | 9-scf00344 | 9 |
| AX-158187892 | 16 | 126.502 | KV452976.1 | 128058 | 9-scf00350 | 9 |
| AX-158187893 | 16 | 126.502 | KV452976.1 | 132304 | 9-scf00350 | 9 |
| AX-158187904 | 16 | 126.502 | KV452976.1 | 145562 | 9-scf00350 | 9 |
| AX-158187906 | 16 | 126.502 | KV452976.1 | 146651 | 9-scf00350 | 9 |
| AX-158187908 | 16 | 126.502 | KV452976.1 | 150012 | 9-scf00350 | 9 |
| AX-158187909 | 16 | 126.502 | KV452976.1 | 152565 | 9-scf00350 | 9 |
| AX-158187913 | 16 | 126.502 | KV452976.1 | 158581 | 9-scf00350 | 9 |
| AX-158187917 | 16 | 126.502 | KV452976.1 | 162378 | 9-scf00350 | 9 |
| AX-157756430 | 16 | 126.502 | KV452976.1 | 165238 | 9-scf00350 | 9 |
| AX-158187918 | 16 | 126.502 | KV452976.1 | 166633 | 9-scf00350 | 9 |
| AX-158187920 | 16 | 126.502 | KV452976.1 | 168703 | 9-scf00350 | 9 |
| AX-158187921 | 16 | 126.502 | KV452976.1 | 170474 | 9-scf00350 | 9 |
| AX-158187926 | 16 | 126.502 | KV452976.1 | 178978 | 9-scf00350 | 9 |
| AX-158187928 | 16 | 126.502 | KV452976.1 | 180977 | 9-scf00350 | 9 |
| AX-158187929 | 16 | 126.502 | KV452976.1 | 182561 | 9-scf00350 | 9 |
| AX-158187930 | 16 | 126.502 | KV452976.1 | 183878 | 9-scf00350 | 9 |
| AX-157756844 | 16 | 126.502 | KV452976.1 | 190822 | 9-scf00350 | 9 |
| AX-157836296 | 16 | 126.502 | KV452976.1 | 210651 | 9-scf00350 | 9 |
| AX-157836297 | 16 | 126.502 | KV452976.1 | 211199 | 9-scf00350 | 9 |
| AX-157725470 | 16 | 126.502 | KV452976.1 | 215967 | 9-scf00350 | 9 |
| AX-157836298 | 16 | 126.502 | KV452976.1 | 217757 | 9-scf00350 | 9 |
| AX-158187944 | 16 | 126.502 | KV452976.1 | 224632 | 9-scf00350 | 9 |
| AX-158187947 | 16 | 126.502 | KV452976.1 | 229054 | 9-scf00350 | 9 |
| AX-157836300 | 16 | 126.502 | KV452976.1 | 235634 | 9-scf00350 | 9 |
| AX-158187952 | 16 | 126.502 | KV452976.1 | 241790 | 9-scf00350 | 9 |
| AX-158187953 | 16 | 126.502 | KV452976.1 | 246447 | 9-scf00350 | 9 |
| AX-158187955 | 16 | 126.502 | KV452976.1 | 247117 | 9-scf00350 | 9 |

|              |    |         |            |        |            |   |
|--------------|----|---------|------------|--------|------------|---|
| AX-158187874 | 16 | 126.503 | KV452976.1 | 95990  | 9-scf00350 | 9 |
| AX-158187931 | 16 | 126.503 | KV452976.1 | 186585 | 9-scf00350 | 9 |
| AX-158187933 | 16 | 126.503 | KV452976.1 | 194474 | 9-scf00350 | 9 |
| AX-158187937 | 16 | 126.503 | KV452976.1 | 209196 | 9-scf00350 | 9 |
| AX-158187890 | 16 | 126.838 | KV452976.1 | 125399 | 9-scf00350 | 9 |
| AX-158188223 | 17 | 0       | KV452884.1 | 327220 | 6-scf00352 | 6 |
| AX-157714886 | 17 | 0       | KV452884.1 | 354369 | 6-scf00352 | 6 |
| AX-158188250 | 17 | 0       | KV452884.1 | 356405 | 6-scf00352 | 6 |
| AX-158188253 | 17 | 0       | KV452884.1 | 359475 | 6-scf00352 | 6 |
| AX-158188269 | 17 | 0       | KV452884.1 | 390448 | 6-scf00352 | 6 |
| AX-158188504 | 17 | 0       | KV452884.1 | 717265 | 6-scf00352 | 6 |
| AX-157836305 | 17 | 0.006   | KV452884.1 | 11506  | 6-scf00352 | 6 |
| AX-158187967 | 17 | 0.006   | KV452884.1 | 14788  | 6-scf00352 | 6 |
| AX-158187970 | 17 | 0.006   | KV452884.1 | 23643  | 6-scf00352 | 6 |
| AX-158187981 | 17 | 0.006   | KV452884.1 | 37577  | 6-scf00352 | 6 |
| AX-158187984 | 17 | 0.006   | KV452884.1 | 40210  | 6-scf00352 | 6 |
| AX-157710220 | 17 | 0.006   | KV452884.1 | 41237  | 6-scf00352 | 6 |
| AX-158187994 | 17 | 0.006   | KV452884.1 | 49062  | 6-scf00352 | 6 |
| AX-157741790 | 17 | 0.006   | KV452884.1 | 64987  | 6-scf00352 | 6 |
| AX-158188007 | 17 | 0.006   | KV452884.1 | 65992  | 6-scf00352 | 6 |
| AX-157725482 | 17 | 0.006   | KV452884.1 | 80004  | 6-scf00352 | 6 |
| AX-158188022 | 17 | 0.006   | KV452884.1 | 82068  | 6-scf00352 | 6 |
| AX-158188032 | 17 | 0.006   | KV452884.1 | 91650  | 6-scf00352 | 6 |
| AX-158188037 | 17 | 0.006   | KV452884.1 | 95140  | 6-scf00352 | 6 |
| AX-158188052 | 17 | 0.006   | KV452884.1 | 113482 | 6-scf00352 | 6 |
| AX-158188063 | 17 | 0.006   | KV452884.1 | 125542 | 6-scf00352 | 6 |
| AX-158188064 | 17 | 0.006   | KV452884.1 | 126372 | 6-scf00352 | 6 |
| AX-158188066 | 17 | 0.006   | KV452884.1 | 133039 | 6-scf00352 | 6 |
| AX-158188082 | 17 | 0.006   | KV452884.1 | 150153 | 6-scf00352 | 6 |
| AX-158188102 | 17 | 0.006   | KV452884.1 | 176133 | 6-scf00352 | 6 |
| AX-157710594 | 17 | 0.006   | KV452884.1 | 179182 | 6-scf00352 | 6 |
| AX-158188112 | 17 | 0.006   | KV452884.1 | 183898 | 6-scf00352 | 6 |
| AX-158188118 | 17 | 0.006   | KV452884.1 | 188276 | 6-scf00352 | 6 |
| AX-158188120 | 17 | 0.006   | KV452884.1 | 191812 | 6-scf00352 | 6 |
| AX-158188131 | 17 | 0.006   | KV452884.1 | 201599 | 6-scf00352 | 6 |
| AX-158188139 | 17 | 0.006   | KV452884.1 | 210772 | 6-scf00352 | 6 |
| AX-158188146 | 17 | 0.006   | KV452884.1 | 217084 | 6-scf00352 | 6 |
| AX-158188147 | 17 | 0.006   | KV452884.1 | 218123 | 6-scf00352 | 6 |
| AX-158188150 | 17 | 0.006   | KV452884.1 | 222181 | 6-scf00352 | 6 |
| AX-158188153 | 17 | 0.006   | KV452884.1 | 227214 | 6-scf00352 | 6 |
| AX-158188158 | 17 | 0.006   | KV452884.1 | 232644 | 6-scf00352 | 6 |
| AX-157755727 | 17 | 0.006   | KV452884.1 | 242442 | 6-scf00352 | 6 |
| AX-158188165 | 17 | 0.006   | KV452884.1 | 243584 | 6-scf00352 | 6 |
| AX-158188168 | 17 | 0.006   | KV452884.1 | 246986 | 6-scf00352 | 6 |
| AX-158188170 | 17 | 0.006   | KV452884.1 | 255928 | 6-scf00352 | 6 |
| AX-157739287 | 17 | 0.006   | KV452884.1 | 257394 | 6-scf00352 | 6 |
| AX-158188172 | 17 | 0.006   | KV452884.1 | 262092 | 6-scf00352 | 6 |
| AX-158188179 | 17 | 0.006   | KV452884.1 | 271135 | 6-scf00352 | 6 |
| AX-158188184 | 17 | 0.006   | KV452884.1 | 276531 | 6-scf00352 | 6 |
| AX-158188191 | 17 | 0.006   | KV452884.1 | 287561 | 6-scf00352 | 6 |
| AX-158188200 | 17 | 0.006   | KV452884.1 | 295355 | 6-scf00352 | 6 |

|              |    |       |             |        |            |    |
|--------------|----|-------|-------------|--------|------------|----|
| AX-158188214 | 17 | 0.006 | KV452884.1  | 312945 | 6-scf00352 | 6  |
| AX-158188221 | 17 | 0.006 | KV452884.1  | 323063 | 6-scf00352 | 6  |
| AX-157710500 | 17 | 0.006 | KV452884.1  | 325138 | 6-scf00352 | 6  |
| AX-158188258 | 17 | 0.006 | KV452884.1  | 364234 | 6-scf00352 | 6  |
| AX-157836326 | 17 | 0.006 | KV452884.1  | 379007 | 6-scf00352 | 6  |
| AX-158188265 | 17 | 0.006 | KV452884.1  | 383101 | 6-scf00352 | 6  |
| AX-157836327 | 17 | 0.006 | KV452884.1  | 384203 | 6-scf00352 | 6  |
| AX-158188266 | 17 | 0.006 | KV452884.1  | 385064 | 6-scf00352 | 6  |
| AX-158188275 | 17 | 0.006 | KV452884.1  | 393106 | 6-scf00352 | 6  |
| AX-158188281 | 17 | 0.006 | KV452884.1  | 398513 | 6-scf00352 | 6  |
| AX-158188282 | 17 | 0.006 | KV452884.1  | 399675 | 6-scf00352 | 6  |
| AX-157836332 | 17 | 0.006 | KV452884.1  | 399710 | 6-scf00352 | 6  |
| AX-158188287 | 17 | 0.006 | KV452884.1  | 408624 | 6-scf00352 | 6  |
| AX-158188289 | 17 | 0.006 | KV452884.1  | 411638 | 6-scf00352 | 6  |
| AX-158188293 | 17 | 0.006 | KV452884.1  | 415682 | 6-scf00352 | 6  |
| AX-158188296 | 17 | 0.006 | KV452884.1  | 419546 | 6-scf00352 | 6  |
| AX-158188297 | 17 | 0.006 | KV452884.1  | 421250 | 6-scf00352 | 6  |
| AX-158188298 | 17 | 0.006 | KV452884.1  | 429078 | 6-scf00352 | 6  |
| AX-158188305 | 17 | 0.006 | KV452884.1  | 439701 | 6-scf00352 | 6  |
| AX-158188308 | 17 | 0.006 | KV452884.1  | 444604 | 6-scf00352 | 6  |
| AX-158188309 | 17 | 0.006 | KV452884.1  | 445053 | 6-scf00352 | 6  |
| AX-158188310 | 17 | 0.006 | KV452884.1  | 450937 | 6-scf00352 | 6  |
| AX-158188315 | 17 | 0.006 | KV452884.1  | 460837 | 6-scf00352 | 6  |
| AX-158188316 | 17 | 0.006 | KV452884.1  | 463172 | 6-scf00352 | 6  |
| AX-158188318 | 17 | 0.006 | KV452884.1  | 463732 | 6-scf00352 | 6  |
| AX-158188321 | 17 | 0.006 | KV452884.1  | 467815 | 6-scf00352 | 6  |
| AX-158188323 | 17 | 0.006 | KV452884.1  | 471674 | 6-scf00352 | 6  |
| AX-158188324 | 17 | 0.006 | KV452884.1  | 471953 | 6-scf00352 | 6  |
| AX-157836333 | 17 | 0.006 | KV452884.1  | 476183 | 6-scf00352 | 6  |
| AX-157836335 | 17 | 0.006 | KV452884.1  | 476793 | 6-scf00352 | 6  |
| AX-157740677 | 17 | 0.006 | KV452884.1  | 488748 | 6-scf00352 | 6  |
| AX-158188335 | 17 | 0.006 | KV452884.1  | 488816 | 6-scf00352 | 6  |
| AX-158188342 | 17 | 0.006 | KV452884.1  | 503482 | 6-scf00352 | 6  |
| AX-158188371 | 17 | 0.006 | KV452884.1  | 532057 | 6-scf00352 | 6  |
| AX-158188397 | 17 | 0.006 | KV452884.1  | 567100 | 6-scf00352 | 6  |
| AX-158188399 | 17 | 0.006 | KV452884.1  | 568734 | 6-scf00352 | 6  |
| AX-158188410 | 17 | 0.006 | KV452884.1  | 580461 | 6-scf00352 | 6  |
| AX-158188469 | 17 | 0.006 | KV452884.1  | 673265 | 6-scf00352 | 6  |
| AX-158188474 | 17 | 0.006 | KV452884.1  | 679354 | 6-scf00352 | 6  |
| AX-158188528 | 17 | 0.006 | KV452884.1  | 764281 | 6-scf00352 | 6  |
| AX-157705554 | 17 | 0.006 | 3ML01030215 | 579    | scf05808_1 | UN |
| AX-157689564 | 17 | 0.006 | 3ML01030537 | 519    | scf06137_1 | UN |
| AX-157707489 | 17 | 0.006 | 3ML01034391 | 193    | scf10065_1 | UN |
| AX-158188175 | 17 | 0.115 | KV452884.1  | 264635 | 6-scf00352 | 6  |
| AX-158188242 | 17 | 0.115 | KV452884.1  | 347707 | 6-scf00352 | 6  |
| AX-157879034 | 17 | 0.115 | KV452884.1  | 401853 | 6-scf00352 | 6  |
| AX-158188331 | 17 | 0.115 | KV452884.1  | 483112 | 6-scf00352 | 6  |
| AX-158188338 | 17 | 0.115 | KV452884.1  | 493297 | 6-scf00352 | 6  |
| AX-158188348 | 17 | 0.115 | KV452884.1  | 508182 | 6-scf00352 | 6  |
| AX-158188355 | 17 | 0.115 | KV452884.1  | 514170 | 6-scf00352 | 6  |
| AX-158188357 | 17 | 0.115 | KV452884.1  | 515431 | 6-scf00352 | 6  |



|              |    |       |             |        |            |    |
|--------------|----|-------|-------------|--------|------------|----|
| AX-158188358 | 17 | 0.115 | KV452884.1  | 516694 | 6-scf00352 | 6  |
| AX-158188359 | 17 | 0.115 | KV452884.1  | 517253 | 6-scf00352 | 6  |
| AX-158188360 | 17 | 0.115 | KV452884.1  | 518084 | 6-scf00352 | 6  |
| AX-158188361 | 17 | 0.115 | KV452884.1  | 519533 | 6-scf00352 | 6  |
| AX-157836337 | 17 | 0.115 | KV452884.1  | 520887 | 6-scf00352 | 6  |
| AX-158188363 | 17 | 0.115 | KV452884.1  | 521080 | 6-scf00352 | 6  |
| AX-158188365 | 17 | 0.115 | KV452884.1  | 523480 | 6-scf00352 | 6  |
| AX-158188369 | 17 | 0.115 | KV452884.1  | 528936 | 6-scf00352 | 6  |
| AX-158188370 | 17 | 0.115 | KV452884.1  | 531263 | 6-scf00352 | 6  |
| AX-158188374 | 17 | 0.115 | KV452884.1  | 538854 | 6-scf00352 | 6  |
| AX-158188377 | 17 | 0.115 | KV452884.1  | 542192 | 6-scf00352 | 6  |
| AX-158188380 | 17 | 0.115 | KV452884.1  | 544419 | 6-scf00352 | 6  |
| AX-158188383 | 17 | 0.115 | KV452884.1  | 547951 | 6-scf00352 | 6  |
| AX-158380653 | 17 | 0.115 | KV452884.1  | 549414 | 6-scf00352 | 6  |
| AX-158188384 | 17 | 0.115 | KV452884.1  | 550574 | 6-scf00352 | 6  |
| AX-158188385 | 17 | 0.115 | KV452884.1  | 551556 | 6-scf00352 | 6  |
| AX-158188386 | 17 | 0.115 | KV452884.1  | 552192 | 6-scf00352 | 6  |
| AX-158188388 | 17 | 0.115 | KV452884.1  | 553474 | 6-scf00352 | 6  |
| AX-158188390 | 17 | 0.115 | KV452884.1  | 554496 | 6-scf00352 | 6  |
| AX-158188392 | 17 | 0.115 | KV452884.1  | 557965 | 6-scf00352 | 6  |
| AX-158188404 | 17 | 0.115 | KV452884.1  | 575869 | 6-scf00352 | 6  |
| AX-158188408 | 17 | 0.115 | KV452884.1  | 579130 | 6-scf00352 | 6  |
| AX-158188409 | 17 | 0.115 | KV452884.1  | 579508 | 6-scf00352 | 6  |
| AX-158188532 | 17 | 0.115 | KV452884.1  | 766581 | 6-scf00352 | 6  |
| AX-158188546 | 17 | 0.115 | KV452884.1  | 779285 | 6-scf00352 | 6  |
| AX-157705677 | 17 | 0.115 | 3ML01030581 | 793    | scf06182_1 | UN |
| AX-158188403 | 17 | 0.159 | KV452884.1  | 573409 | 6-scf00352 | 6  |
| AX-157771666 | 17 | 0.159 | KV452884.1  | 786267 | 6-scf00352 | 6  |
| AX-158188291 | 17 | 0.18  | KV452884.1  | 413434 | 6-scf00352 | 6  |
| AX-158188320 | 17 | 0.18  | KV452884.1  | 464888 | 6-scf00352 | 6  |
| AX-158188405 | 17 | 0.18  | KV452884.1  | 576629 | 6-scf00352 | 6  |
| AX-158188416 | 17 | 0.18  | KV452884.1  | 592846 | 6-scf00352 | 6  |
| AX-158188421 | 17 | 0.18  | KV452884.1  | 599365 | 6-scf00352 | 6  |
| AX-158188447 | 17 | 0.18  | KV452884.1  | 633640 | 6-scf00352 | 6  |
| AX-158188482 | 17 | 0.18  | KV452884.1  | 691834 | 6-scf00352 | 6  |
| AX-158188497 | 17 | 0.18  | KV452884.1  | 708179 | 6-scf00352 | 6  |
| AX-158188124 | 17 | 0.224 | KV452884.1  | 196358 | 6-scf00352 | 6  |
| AX-158188268 | 17 | 0.224 | KV452884.1  | 390146 | 6-scf00352 | 6  |
| AX-157748023 | 17 | 0.224 | KV452884.1  | 393669 | 6-scf00352 | 6  |
| AX-158188278 | 17 | 0.224 | KV452884.1  | 396817 | 6-scf00352 | 6  |
| AX-157836330 | 17 | 0.224 | KV452884.1  | 397126 | 6-scf00352 | 6  |
| AX-158188290 | 17 | 0.224 | KV452884.1  | 412008 | 6-scf00352 | 6  |
| AX-157720249 | 17 | 0.224 | KV452884.1  | 415156 | 6-scf00352 | 6  |
| AX-158188322 | 17 | 0.224 | KV452884.1  | 469574 | 6-scf00352 | 6  |
| AX-158188343 | 17 | 0.224 | KV452884.1  | 504612 | 6-scf00352 | 6  |
| AX-158188353 | 17 | 0.224 | KV452884.1  | 511631 | 6-scf00352 | 6  |
| AX-158188378 | 17 | 0.224 | KV452884.1  | 542848 | 6-scf00352 | 6  |
| AX-158188381 | 17 | 0.224 | KV452884.1  | 544637 | 6-scf00352 | 6  |
| AX-158188422 | 17 | 0.224 | KV452884.1  | 600299 | 6-scf00352 | 6  |
| AX-158188424 | 17 | 0.224 | KV452884.1  | 604607 | 6-scf00352 | 6  |
| AX-158188427 | 17 | 0.224 | KV452884.1  | 607527 | 6-scf00352 | 6  |

|              |    |       |            |        |            |   |
|--------------|----|-------|------------|--------|------------|---|
| AX-158188428 | 17 | 0.224 | KV452884.1 | 609947 | 6-scf00352 | 6 |
| AX-157858876 | 17 | 0.224 | KV452884.1 | 614117 | 6-scf00352 | 6 |
| AX-158188431 | 17 | 0.224 | KV452884.1 | 615176 | 6-scf00352 | 6 |
| AX-158188432 | 17 | 0.224 | KV452884.1 | 616091 | 6-scf00352 | 6 |
| AX-157750031 | 17 | 0.224 | KV452884.1 | 617233 | 6-scf00352 | 6 |
| AX-158188433 | 17 | 0.224 | KV452884.1 | 620132 | 6-scf00352 | 6 |
| AX-158188435 | 17 | 0.224 | KV452884.1 | 621594 | 6-scf00352 | 6 |
| AX-158188438 | 17 | 0.224 | KV452884.1 | 624999 | 6-scf00352 | 6 |
| AX-158188439 | 17 | 0.224 | KV452884.1 | 625461 | 6-scf00352 | 6 |
| AX-158188442 | 17 | 0.224 | KV452884.1 | 628430 | 6-scf00352 | 6 |
| AX-158188443 | 17 | 0.224 | KV452884.1 | 629533 | 6-scf00352 | 6 |
| AX-158188444 | 17 | 0.224 | KV452884.1 | 630654 | 6-scf00352 | 6 |
| AX-158188445 | 17 | 0.224 | KV452884.1 | 631780 | 6-scf00352 | 6 |
| AX-158188448 | 17 | 0.224 | KV452884.1 | 633935 | 6-scf00352 | 6 |
| AX-158188451 | 17 | 0.224 | KV452884.1 | 640329 | 6-scf00352 | 6 |
| AX-158188455 | 17 | 0.224 | KV452884.1 | 654184 | 6-scf00352 | 6 |
| AX-158188457 | 17 | 0.224 | KV452884.1 | 655807 | 6-scf00352 | 6 |
| AX-158188458 | 17 | 0.224 | KV452884.1 | 657224 | 6-scf00352 | 6 |
| AX-158188459 | 17 | 0.224 | KV452884.1 | 657826 | 6-scf00352 | 6 |
| AX-158413824 | 17 | 0.224 | KV452884.1 | 663979 | 6-scf00352 | 6 |
| AX-157740919 | 17 | 0.224 | KV452884.1 | 665148 | 6-scf00352 | 6 |
| AX-158188466 | 17 | 0.224 | KV452884.1 | 670642 | 6-scf00352 | 6 |
| AX-158188473 | 17 | 0.224 | KV452884.1 | 678488 | 6-scf00352 | 6 |
| AX-158188475 | 17 | 0.224 | KV452884.1 | 681802 | 6-scf00352 | 6 |
| AX-157742697 | 17 | 0.224 | KV452884.1 | 682663 | 6-scf00352 | 6 |
| AX-157772086 | 17 | 0.224 | KV452884.1 | 683300 | 6-scf00352 | 6 |
| AX-158188476 | 17 | 0.224 | KV452884.1 | 684853 | 6-scf00352 | 6 |
| AX-158188478 | 17 | 0.224 | KV452884.1 | 686700 | 6-scf00352 | 6 |
| AX-158188480 | 17 | 0.224 | KV452884.1 | 689170 | 6-scf00352 | 6 |
| AX-158188481 | 17 | 0.224 | KV452884.1 | 690685 | 6-scf00352 | 6 |
| AX-158188484 | 17 | 0.224 | KV452884.1 | 694917 | 6-scf00352 | 6 |
| AX-158188486 | 17 | 0.224 | KV452884.1 | 696759 | 6-scf00352 | 6 |
| AX-158188487 | 17 | 0.224 | KV452884.1 | 697843 | 6-scf00352 | 6 |
| AX-158188488 | 17 | 0.224 | KV452884.1 | 700235 | 6-scf00352 | 6 |
| AX-158188489 | 17 | 0.224 | KV452884.1 | 700454 | 6-scf00352 | 6 |
| AX-158188492 | 17 | 0.224 | KV452884.1 | 702924 | 6-scf00352 | 6 |
| AX-157886915 | 17 | 0.224 | KV452884.1 | 703291 | 6-scf00352 | 6 |
| AX-158188493 | 17 | 0.224 | KV452884.1 | 703566 | 6-scf00352 | 6 |
| AX-158188495 | 17 | 0.224 | KV452884.1 | 705793 | 6-scf00352 | 6 |
| AX-158188501 | 17 | 0.224 | KV452884.1 | 712474 | 6-scf00352 | 6 |
| AX-158188502 | 17 | 0.224 | KV452884.1 | 713884 | 6-scf00352 | 6 |
| AX-158188507 | 17 | 0.224 | KV452884.1 | 728843 | 6-scf00352 | 6 |
| AX-158188508 | 17 | 0.224 | KV452884.1 | 732501 | 6-scf00352 | 6 |
| AX-157836344 | 17 | 0.224 | KV452884.1 | 733739 | 6-scf00352 | 6 |
| AX-158188510 | 17 | 0.224 | KV452884.1 | 740747 | 6-scf00352 | 6 |
| AX-157755235 | 17 | 0.224 | KV452884.1 | 741522 | 6-scf00352 | 6 |
| AX-158188511 | 17 | 0.224 | KV452884.1 | 743546 | 6-scf00352 | 6 |
| AX-158188512 | 17 | 0.224 | KV452884.1 | 743862 | 6-scf00352 | 6 |
| AX-158188513 | 17 | 0.224 | KV452884.1 | 746024 | 6-scf00352 | 6 |
| AX-158188514 | 17 | 0.224 | KV452884.1 | 746640 | 6-scf00352 | 6 |
| AX-158188515 | 17 | 0.224 | KV452884.1 | 750084 | 6-scf00352 | 6 |

|              |    |       |             |        |            |    |
|--------------|----|-------|-------------|--------|------------|----|
| AX-158188518 | 17 | 0.224 | KV452884.1  | 751801 | 6-scf00352 | 6  |
| AX-157717188 | 17 | 0.224 | KV452884.1  | 752987 | 6-scf00352 | 6  |
| AX-158188520 | 17 | 0.224 | KV452884.1  | 753509 | 6-scf00352 | 6  |
| AX-158188521 | 17 | 0.224 | KV452884.1  | 754225 | 6-scf00352 | 6  |
| AX-158188525 | 17 | 0.224 | KV452884.1  | 761824 | 6-scf00352 | 6  |
| AX-158188527 | 17 | 0.224 | KV452884.1  | 763012 | 6-scf00352 | 6  |
| AX-158188531 | 17 | 0.224 | KV452884.1  | 765834 | 6-scf00352 | 6  |
| AX-158188533 | 17 | 0.224 | KV452884.1  | 768324 | 6-scf00352 | 6  |
| AX-157836347 | 17 | 0.224 | KV452884.1  | 768845 | 6-scf00352 | 6  |
| AX-158188537 | 17 | 0.224 | KV452884.1  | 770923 | 6-scf00352 | 6  |
| AX-158188550 | 17 | 0.224 | KV452884.1  | 784637 | 6-scf00352 | 6  |
| AX-158380655 | 17 | 0.224 | KV452884.1  | 784871 | 6-scf00352 | 6  |
| AX-157858877 | 17 | 0.224 | KV452884.1  | 788912 | 6-scf00352 | 6  |
| AX-157756991 | 17 | 0.224 | KV452884.1  | 796111 | 6-scf00352 | 6  |
| AX-158188576 | 17 | 0.224 | KV452884.1  | 815123 | 6-scf00352 | 6  |
| AX-158188589 | 17 | 0.224 | KV452884.1  | 837671 | 6-scf00352 | 6  |
| AX-157705676 | 17 | 0.224 | 3ML01030581 | 681    | scf06182_1 | UN |
| AX-158188542 | 17 | 0.334 | KV452884.1  | 775492 | 6-scf00352 | 6  |
| AX-158188543 | 17 | 0.334 | KV452884.1  | 775836 | 6-scf00352 | 6  |
| AX-157745608 | 17 | 0.334 | KV452884.1  | 776829 | 6-scf00352 | 6  |
| AX-158188544 | 17 | 0.334 | KV452884.1  | 777022 | 6-scf00352 | 6  |
| AX-157773558 | 17 | 0.334 | KV452884.1  | 778559 | 6-scf00352 | 6  |
| AX-158188545 | 17 | 0.334 | KV452884.1  | 778714 | 6-scf00352 | 6  |
| AX-158188535 | 17 | 0.661 | KV452884.1  | 770011 | 6-scf00352 | 6  |
| AX-158188553 | 17 | 0.661 | KV452884.1  | 786442 | 6-scf00352 | 6  |
| AX-157731079 | 17 | 0.661 | KV452884.1  | 787027 | 6-scf00352 | 6  |
| AX-158188557 | 17 | 0.661 | KV452884.1  | 792983 | 6-scf00352 | 6  |
| AX-158188558 | 17 | 0.661 | KV452884.1  | 793509 | 6-scf00352 | 6  |
| AX-158188559 | 17 | 0.661 | KV452884.1  | 793795 | 6-scf00352 | 6  |
| AX-158188560 | 17 | 0.661 | KV452884.1  | 795195 | 6-scf00352 | 6  |
| AX-158188562 | 17 | 0.661 | KV452884.1  | 797727 | 6-scf00352 | 6  |
| AX-158188563 | 17 | 0.661 | KV452884.1  | 805159 | 6-scf00352 | 6  |
| AX-158188564 | 17 | 0.661 | KV452884.1  | 806768 | 6-scf00352 | 6  |
| AX-157746707 | 17 | 0.661 | KV452884.1  | 810236 | 6-scf00352 | 6  |
| AX-158188568 | 17 | 0.661 | KV452884.1  | 810903 | 6-scf00352 | 6  |
| AX-158188571 | 17 | 0.661 | KV452884.1  | 811999 | 6-scf00352 | 6  |
| AX-158188573 | 17 | 0.661 | KV452884.1  | 813129 | 6-scf00352 | 6  |
| AX-158188574 | 17 | 0.661 | KV452884.1  | 813496 | 6-scf00352 | 6  |
| AX-157836348 | 17 | 0.661 | KV452884.1  | 813720 | 6-scf00352 | 6  |
| AX-157747039 | 17 | 0.661 | KV452884.1  | 814472 | 6-scf00352 | 6  |
| AX-158188577 | 17 | 0.661 | KV452884.1  | 815526 | 6-scf00352 | 6  |
| AX-158188580 | 17 | 0.661 | KV452884.1  | 818991 | 6-scf00352 | 6  |
| AX-158188581 | 17 | 0.661 | KV452884.1  | 819390 | 6-scf00352 | 6  |
| AX-158188582 | 17 | 0.661 | KV452884.1  | 821454 | 6-scf00352 | 6  |
| AX-158188583 | 17 | 0.661 | KV452884.1  | 821835 | 6-scf00352 | 6  |
| AX-158188587 | 17 | 0.661 | KV452884.1  | 832182 | 6-scf00352 | 6  |
| AX-158188594 | 17 | 0.661 | KV452884.1  | 848755 | 6-scf00352 | 6  |
| AX-158188596 | 17 | 0.661 | KV452884.1  | 852257 | 6-scf00352 | 6  |
| AX-158188584 | 17 | 0.719 | KV452884.1  | 825986 | 6-scf00352 | 6  |
| AX-157747624 | 17 | 0.74  | KV452884.1  | 829840 | 6-scf00352 | 6  |
| AX-157749669 | 17 | 0.77  | KV452884.1  | 843011 | 6-scf00352 | 6  |

|              |    |       |            |        |            |   |
|--------------|----|-------|------------|--------|------------|---|
| AX-158188602 | 17 | 0.77  | KV452884.1 | 858279 | 6-scf00352 | 6 |
| AX-158188605 | 17 | 0.77  | KV452884.1 | 866240 | 6-scf00352 | 6 |
| AX-158188556 | 17 | 0.856 | KV452884.1 | 791699 | 6-scf00352 | 6 |
| AX-158188607 | 17 | 0.856 | KV452884.1 | 872627 | 6-scf00352 | 6 |
| AX-158188609 | 17 | 0.887 | KV452884.1 | 874580 | 6-scf00352 | 6 |
| AX-158188625 | 17 | 0.887 | KV452884.1 | 893835 | 6-scf00352 | 6 |
| AX-158188690 | 17 | 0.887 | KV452884.1 | 971870 | 6-scf00352 | 6 |
| AX-158188612 | 17 | 0.989 | KV452884.1 | 879902 | 6-scf00352 | 6 |
| AX-158188613 | 17 | 0.989 | KV452884.1 | 882367 | 6-scf00352 | 6 |
| AX-158188615 | 17 | 0.989 | KV452884.1 | 884075 | 6-scf00352 | 6 |
| AX-158188618 | 17 | 0.989 | KV452884.1 | 885504 | 6-scf00352 | 6 |
| AX-158188621 | 17 | 0.989 | KV452884.1 | 889526 | 6-scf00352 | 6 |
| AX-157886919 | 17 | 0.989 | KV452884.1 | 976361 | 6-scf00352 | 6 |
| AX-157858873 | 17 | 1.037 | KV452884.1 | 125208 | 6-scf00352 | 6 |
| AX-158188077 | 17 | 1.037 | KV452884.1 | 145470 | 6-scf00352 | 6 |
| AX-157836319 | 17 | 1.037 | KV452884.1 | 147050 | 6-scf00352 | 6 |
| AX-158188373 | 17 | 1.037 | KV452884.1 | 536605 | 6-scf00352 | 6 |
| AX-158188430 | 17 | 1.037 | KV452884.1 | 613273 | 6-scf00352 | 6 |
| AX-158188586 | 17 | 1.037 | KV452884.1 | 830472 | 6-scf00352 | 6 |
| AX-158188628 | 17 | 1.037 | KV452884.1 | 897078 | 6-scf00352 | 6 |
| AX-158188631 | 17 | 1.037 | KV452884.1 | 898686 | 6-scf00352 | 6 |
| AX-158188630 | 17 | 1.067 | KV452884.1 | 897803 | 6-scf00352 | 6 |
| AX-158188611 | 17 | 1.098 | KV452884.1 | 879093 | 6-scf00352 | 6 |
| AX-158188626 | 17 | 1.098 | KV452884.1 | 895399 | 6-scf00352 | 6 |
| AX-158188629 | 17 | 1.098 | KV452884.1 | 897601 | 6-scf00352 | 6 |
| AX-158188632 | 17 | 1.098 | KV452884.1 | 899365 | 6-scf00352 | 6 |
| AX-158188635 | 17 | 1.098 | KV452884.1 | 902927 | 6-scf00352 | 6 |
| AX-158188636 | 17 | 1.098 | KV452884.1 | 903852 | 6-scf00352 | 6 |
| AX-158188637 | 17 | 1.098 | KV452884.1 | 904997 | 6-scf00352 | 6 |
| AX-158188638 | 17 | 1.143 | KV452884.1 | 905829 | 6-scf00352 | 6 |
| AX-158188337 | 17 | 1.167 | KV452884.1 | 491139 | 6-scf00352 | 6 |
| AX-158188364 | 17 | 1.167 | KV452884.1 | 522856 | 6-scf00352 | 6 |
| AX-157872138 | 17 | 1.167 | KV452884.1 | 676071 | 6-scf00352 | 6 |
| AX-158188503 | 17 | 1.167 | KV452884.1 | 714977 | 6-scf00352 | 6 |
| AX-158188547 | 17 | 1.167 | KV452884.1 | 779516 | 6-scf00352 | 6 |
| AX-158188610 | 17 | 1.167 | KV452884.1 | 874914 | 6-scf00352 | 6 |
| AX-158188642 | 17 | 1.167 | KV452884.1 | 910134 | 6-scf00352 | 6 |
| AX-158188664 | 17 | 1.167 | KV452884.1 | 934610 | 6-scf00352 | 6 |
| AX-158188666 | 17 | 1.167 | KV452884.1 | 935870 | 6-scf00352 | 6 |
| AX-157836352 | 17 | 1.207 | KV452884.1 | 833429 | 6-scf00352 | 6 |
| AX-158188640 | 17 | 1.207 | KV452884.1 | 908271 | 6-scf00352 | 6 |
| AX-158188643 | 17 | 1.207 | KV452884.1 | 910971 | 6-scf00352 | 6 |
| AX-158188644 | 17 | 1.207 | KV452884.1 | 911582 | 6-scf00352 | 6 |
| AX-158188646 | 17 | 1.207 | KV452884.1 | 912614 | 6-scf00352 | 6 |
| AX-158188648 | 17 | 1.207 | KV452884.1 | 914662 | 6-scf00352 | 6 |
| AX-157719045 | 17 | 1.207 | KV452884.1 | 915150 | 6-scf00352 | 6 |
| AX-158188650 | 17 | 1.207 | KV452884.1 | 917926 | 6-scf00352 | 6 |
| AX-158188651 | 17 | 1.207 | KV452884.1 | 918700 | 6-scf00352 | 6 |
| AX-158188652 | 17 | 1.207 | KV452884.1 | 919754 | 6-scf00352 | 6 |
| AX-158188655 | 17 | 1.207 | KV452884.1 | 924276 | 6-scf00352 | 6 |
| AX-158188656 | 17 | 1.207 | KV452884.1 | 924705 | 6-scf00352 | 6 |

|              |    |       |            |         |            |   |
|--------------|----|-------|------------|---------|------------|---|
| AX-158188658 | 17 | 1.207 | KV452884.1 | 927647  | 6-scf00352 | 6 |
| AX-158188659 | 17 | 1.207 | KV452884.1 | 929067  | 6-scf00352 | 6 |
| AX-158188660 | 17 | 1.207 | KV452884.1 | 930557  | 6-scf00352 | 6 |
| AX-158188665 | 17 | 1.207 | KV452884.1 | 935404  | 6-scf00352 | 6 |
| AX-158188667 | 17 | 1.207 | KV452884.1 | 936616  | 6-scf00352 | 6 |
| AX-158188670 | 17 | 1.207 | KV452884.1 | 939021  | 6-scf00352 | 6 |
| AX-158188672 | 17 | 1.207 | KV452884.1 | 940855  | 6-scf00352 | 6 |
| AX-157723280 | 17 | 1.317 | KV452884.1 | 943485  | 6-scf00352 | 6 |
| AX-157719299 | 17 | 1.388 | KV452884.1 | 943977  | 6-scf00352 | 6 |
| AX-158188678 | 17 | 1.466 | KV452884.1 | 949487  | 6-scf00352 | 6 |
| AX-158188679 | 17 | 1.466 | KV452884.1 | 952307  | 6-scf00352 | 6 |
| AX-158188680 | 17 | 1.536 | KV452884.1 | 954148  | 6-scf00352 | 6 |
| AX-158188682 | 17 | 1.536 | KV452884.1 | 955373  | 6-scf00352 | 6 |
| AX-157718949 | 17 | 1.536 | KV452884.1 | 982862  | 6-scf00352 | 6 |
| AX-158188695 | 17 | 1.754 | KV452884.1 | 982021  | 6-scf00352 | 6 |
| AX-158188699 | 17 | 1.754 | KV452884.1 | 985621  | 6-scf00352 | 6 |
| AX-158188704 | 17 | 1.754 | KV452884.1 | 992662  | 6-scf00352 | 6 |
| AX-158188706 | 17 | 1.754 | KV452884.1 | 995543  | 6-scf00352 | 6 |
| AX-158188707 | 17 | 1.754 | KV452884.1 | 995862  | 6-scf00352 | 6 |
| AX-158188709 | 17 | 1.754 | KV452884.1 | 996893  | 6-scf00352 | 6 |
| AX-158188711 | 17 | 1.754 | KV452884.1 | 1002954 | 6-scf00352 | 6 |
| AX-158188713 | 17 | 1.754 | KV452884.1 | 1005052 | 6-scf00352 | 6 |
| AX-158188716 | 17 | 1.754 | KV452884.1 | 1010130 | 6-scf00352 | 6 |
| AX-158188717 | 17 | 1.754 | KV452884.1 | 1010538 | 6-scf00352 | 6 |
| AX-158188718 | 17 | 1.754 | KV452884.1 | 1011630 | 6-scf00352 | 6 |
| AX-158188720 | 17 | 1.754 | KV452884.1 | 1013254 | 6-scf00352 | 6 |
| AX-158188724 | 17 | 1.863 | KV452884.1 | 1022472 | 6-scf00352 | 6 |
| AX-158188727 | 17 | 1.863 | KV452884.1 | 1025068 | 6-scf00352 | 6 |
| AX-158188730 | 17 | 1.863 | KV452884.1 | 1027949 | 6-scf00352 | 6 |
| AX-158188733 | 17 | 1.863 | KV452884.1 | 1029852 | 6-scf00352 | 6 |
| AX-158413826 | 17 | 1.863 | KV452884.1 | 1032022 | 6-scf00352 | 6 |
| AX-158413827 | 17 | 1.863 | KV452884.1 | 1032058 | 6-scf00352 | 6 |
| AX-158188735 | 17 | 1.863 | KV452884.1 | 1032901 | 6-scf00352 | 6 |
| AX-158188736 | 17 | 1.863 | KV452884.1 | 1033518 | 6-scf00352 | 6 |
| AX-158188737 | 17 | 1.863 | KV452884.1 | 1034872 | 6-scf00352 | 6 |
| AX-158188739 | 17 | 1.863 | KV452884.1 | 1035577 | 6-scf00352 | 6 |
| AX-158188740 | 17 | 1.863 | KV452884.1 | 1036287 | 6-scf00352 | 6 |
| AX-158188743 | 17 | 1.863 | KV452884.1 | 1038627 | 6-scf00352 | 6 |
| AX-157836359 | 17 | 1.863 | KV452884.1 | 1039021 | 6-scf00352 | 6 |
| AX-157748393 | 17 | 1.863 | KV452884.1 | 1042535 | 6-scf00352 | 6 |
| AX-157836362 | 17 | 1.863 | KV452884.1 | 1046703 | 6-scf00352 | 6 |
| AX-158188748 | 17 | 1.863 | KV452884.1 | 1047423 | 6-scf00352 | 6 |
| AX-158188830 | 17 | 1.863 | KV452884.1 | 1169886 | 6-scf00352 | 6 |
| AX-157836363 | 17 | 1.973 | KV452884.1 | 1050281 | 6-scf00352 | 6 |
| AX-158188749 | 17 | 1.973 | KV452884.1 | 1052124 | 6-scf00352 | 6 |
| AX-158188715 | 17 | 2.082 | KV452884.1 | 1006708 | 6-scf00352 | 6 |
| AX-158188728 | 17 | 2.082 | KV452884.1 | 1026169 | 6-scf00352 | 6 |
| AX-157836364 | 17 | 2.082 | KV452884.1 | 1052364 | 6-scf00352 | 6 |
| AX-158188750 | 17 | 2.082 | KV452884.1 | 1052602 | 6-scf00352 | 6 |
| AX-157836365 | 17 | 2.082 | KV452884.1 | 1054407 | 6-scf00352 | 6 |
| AX-157753737 | 17 | 2.082 | KV452884.1 | 1058890 | 6-scf00352 | 6 |

|              |    |       |            |         |            |   |
|--------------|----|-------|------------|---------|------------|---|
| AX-158188755 | 17 | 2.082 | KV452884.1 | 1059932 | 6-scf00352 | 6 |
| AX-158393599 | 17 | 2.082 | KV452884.1 | 1060899 | 6-scf00352 | 6 |
| AX-158188757 | 17 | 2.082 | KV452884.1 | 1064610 | 6-scf00352 | 6 |
| AX-157742026 | 17 | 2.082 | KV452884.1 | 1068777 | 6-scf00352 | 6 |
| AX-157866782 | 17 | 2.082 | KV452884.1 | 1069327 | 6-scf00352 | 6 |
| AX-157836367 | 17 | 2.082 | KV452884.1 | 1069534 | 6-scf00352 | 6 |
| AX-157836368 | 17 | 2.082 | KV452884.1 | 1070048 | 6-scf00352 | 6 |
| AX-158188760 | 17 | 2.082 | KV452884.1 | 1070355 | 6-scf00352 | 6 |
| AX-157836369 | 17 | 2.082 | KV452884.1 | 1071809 | 6-scf00352 | 6 |
| AX-157872141 | 17 | 2.082 | KV452884.1 | 1072636 | 6-scf00352 | 6 |
| AX-158188762 | 17 | 2.082 | KV452884.1 | 1072951 | 6-scf00352 | 6 |
| AX-158188763 | 17 | 2.082 | KV452884.1 | 1073450 | 6-scf00352 | 6 |
| AX-157836370 | 17 | 2.082 | KV452884.1 | 1075828 | 6-scf00352 | 6 |
| AX-158188767 | 17 | 2.082 | KV452884.1 | 1076210 | 6-scf00352 | 6 |
| AX-157773867 | 17 | 2.082 | KV452884.1 | 1076801 | 6-scf00352 | 6 |
| AX-158188768 | 17 | 2.082 | KV452884.1 | 1077380 | 6-scf00352 | 6 |
| AX-158188769 | 17 | 2.082 | KV452884.1 | 1078130 | 6-scf00352 | 6 |
| AX-158413829 | 17 | 2.082 | KV452884.1 | 1079046 | 6-scf00352 | 6 |
| AX-158413832 | 17 | 2.082 | KV452884.1 | 1080199 | 6-scf00352 | 6 |
| AX-158188765 | 17 | 2.191 | KV452884.1 | 1074170 | 6-scf00352 | 6 |
| AX-157754461 | 17 | 2.191 | KV452884.1 | 1087896 | 6-scf00352 | 6 |
| AX-157715672 | 17 | 2.191 | KV452884.1 | 1089873 | 6-scf00352 | 6 |
| AX-158188775 | 17 | 2.191 | KV452884.1 | 1091427 | 6-scf00352 | 6 |
| AX-158188777 | 17 | 2.191 | KV452884.1 | 1093154 | 6-scf00352 | 6 |
| AX-158188784 | 17 | 2.191 | KV452884.1 | 1096830 | 6-scf00352 | 6 |
| AX-158188785 | 17 | 2.191 | KV452884.1 | 1099930 | 6-scf00352 | 6 |
| AX-158188786 | 17 | 2.191 | KV452884.1 | 1100542 | 6-scf00352 | 6 |
| AX-158188788 | 17 | 2.191 | KV452884.1 | 1103532 | 6-scf00352 | 6 |
| AX-158188789 | 17 | 2.191 | KV452884.1 | 1104292 | 6-scf00352 | 6 |
| AX-157741868 | 17 | 2.25  | KV452884.1 | 1108429 | 6-scf00352 | 6 |
| AX-158188793 | 17 | 2.3   | KV452884.1 | 1109343 | 6-scf00352 | 6 |
| AX-158188795 | 17 | 2.3   | KV452884.1 | 1111224 | 6-scf00352 | 6 |
| AX-158188796 | 17 | 2.464 | KV452884.1 | 1115693 | 6-scf00352 | 6 |
| AX-158188798 | 17 | 2.464 | KV452884.1 | 1118296 | 6-scf00352 | 6 |
| AX-158380658 | 17 | 2.502 | KV452884.1 | 1121227 | 6-scf00352 | 6 |
| AX-157722761 | 17 | 2.54  | KV452884.1 | 1121553 | 6-scf00352 | 6 |
| AX-158188801 | 17 | 2.583 | KV452884.1 | 1125411 | 6-scf00352 | 6 |
| AX-158188802 | 17 | 2.628 | KV452884.1 | 1126964 | 6-scf00352 | 6 |
| AX-158188803 | 17 | 2.628 | KV452884.1 | 1129837 | 6-scf00352 | 6 |
| AX-158188804 | 17 | 2.628 | KV452884.1 | 1130502 | 6-scf00352 | 6 |
| AX-157836372 | 17 | 2.628 | KV452884.1 | 1131227 | 6-scf00352 | 6 |
| AX-158188805 | 17 | 2.628 | KV452884.1 | 1132023 | 6-scf00352 | 6 |
| AX-158188806 | 17 | 2.628 | KV452884.1 | 1133310 | 6-scf00352 | 6 |
| AX-158188809 | 17 | 2.628 | KV452884.1 | 1139373 | 6-scf00352 | 6 |
| AX-158188811 | 17 | 2.628 | KV452884.1 | 1142047 | 6-scf00352 | 6 |
| AX-157720913 | 17 | 2.658 | KV452884.1 | 1143760 | 6-scf00352 | 6 |
| AX-158413834 | 17 | 2.734 | KV452884.1 | 1147527 | 6-scf00352 | 6 |
| AX-158188815 | 17 | 2.786 | KV452884.1 | 1151788 | 6-scf00352 | 6 |
| AX-158188816 | 17 | 2.847 | KV452884.1 | 1152260 | 6-scf00352 | 6 |
| AX-158188819 | 17 | 2.847 | KV452884.1 | 1154688 | 6-scf00352 | 6 |
| AX-157836378 | 17 | 2.847 | KV452884.1 | 1155385 | 6-scf00352 | 6 |

|              |    |       |            |         |            |   |
|--------------|----|-------|------------|---------|------------|---|
| AX-158188820 | 17 | 2.847 | KV452884.1 | 1155960 | 6-scf00352 | 6 |
| AX-157747960 | 17 | 2.847 | KV452884.1 | 1158587 | 6-scf00352 | 6 |
| AX-158188807 | 17 | 2.956 | KV452884.1 | 1135435 | 6-scf00352 | 6 |
| AX-157774749 | 17 | 2.956 | KV452884.1 | 1145561 | 6-scf00352 | 6 |
| AX-157836379 | 17 | 2.956 | KV452884.1 | 1160965 | 6-scf00352 | 6 |
| AX-158188826 | 17 | 2.956 | KV452884.1 | 1163026 | 6-scf00352 | 6 |
| AX-158188848 | 17 | 2.956 | KV452884.1 | 1207198 | 6-scf00352 | 6 |
| AX-157836385 | 17 | 2.956 | KV452884.1 | 1229375 | 6-scf00352 | 6 |
| AX-157836380 | 17 | 2.959 | KV452884.1 | 1168143 | 6-scf00352 | 6 |
| AX-158188831 | 17 | 2.963 | KV452884.1 | 1170437 | 6-scf00352 | 6 |
| AX-158188833 | 17 | 2.966 | KV452884.1 | 1173105 | 6-scf00352 | 6 |
| AX-157886922 | 17 | 2.972 | KV452884.1 | 1173571 | 6-scf00352 | 6 |
| AX-157836381 | 17 | 2.978 | KV452884.1 | 1168571 | 6-scf00352 | 6 |
| AX-157720613 | 17 | 2.978 | KV452884.1 | 1173638 | 6-scf00352 | 6 |
| AX-158188847 | 17 | 2.978 | KV452884.1 | 1206767 | 6-scf00352 | 6 |
| AX-157748255 | 17 | 2.983 | KV452884.1 | 1174256 | 6-scf00352 | 6 |
| AX-158188850 | 17 | 2.983 | KV452884.1 | 1208963 | 6-scf00352 | 6 |
| AX-158188947 | 17 | 2.983 | KV452884.1 | 1341144 | 6-scf00352 | 6 |
| AX-158188834 | 17 | 3.034 | KV452884.1 | 1176462 | 6-scf00352 | 6 |
| AX-158188835 | 17 | 3.083 | KV452884.1 | 1177533 | 6-scf00352 | 6 |
| AX-157701689 | 17 | 3.137 | KV452884.1 | 1182069 | 6-scf00352 | 6 |
| AX-158188842 | 17 | 3.137 | KV452884.1 | 1193939 | 6-scf00352 | 6 |
| AX-158188829 | 17 | 3.194 | KV452884.1 | 1165728 | 6-scf00352 | 6 |
| AX-158188838 | 17 | 3.194 | KV452884.1 | 1190671 | 6-scf00352 | 6 |
| AX-158188839 | 17 | 3.194 | KV452884.1 | 1192260 | 6-scf00352 | 6 |
| AX-158188840 | 17 | 3.194 | KV452884.1 | 1192523 | 6-scf00352 | 6 |
| AX-158188841 | 17 | 3.194 | KV452884.1 | 1193038 | 6-scf00352 | 6 |
| AX-158188843 | 17 | 3.194 | KV452884.1 | 1195135 | 6-scf00352 | 6 |
| AX-158188844 | 17 | 3.194 | KV452884.1 | 1196162 | 6-scf00352 | 6 |
| AX-158188845 | 17 | 3.194 | KV452884.1 | 1200082 | 6-scf00352 | 6 |
| AX-157719940 | 17 | 3.194 | KV452884.1 | 1202287 | 6-scf00352 | 6 |
| AX-157836382 | 17 | 3.194 | KV452884.1 | 1210071 | 6-scf00352 | 6 |
| AX-158188825 | 17 | 3.436 | KV452884.1 | 1162755 | 6-scf00352 | 6 |
| AX-157720465 | 17 | 3.436 | KV452884.1 | 1205299 | 6-scf00352 | 6 |
| AX-158188851 | 17 | 3.436 | KV452884.1 | 1211866 | 6-scf00352 | 6 |
| AX-158188856 | 17 | 3.436 | KV452884.1 | 1219854 | 6-scf00352 | 6 |
| AX-158188858 | 17 | 3.436 | KV452884.1 | 1222166 | 6-scf00352 | 6 |
| AX-158188860 | 17 | 3.436 | KV452884.1 | 1224442 | 6-scf00352 | 6 |
| AX-158188862 | 17 | 3.436 | KV452884.1 | 1227659 | 6-scf00352 | 6 |
| AX-157836384 | 17 | 3.436 | KV452884.1 | 1228592 | 6-scf00352 | 6 |
| AX-158188865 | 17 | 3.436 | KV452884.1 | 1233604 | 6-scf00352 | 6 |
| AX-158188866 | 17 | 3.436 | KV452884.1 | 1237226 | 6-scf00352 | 6 |
| AX-158188867 | 17 | 3.436 | KV452884.1 | 1237834 | 6-scf00352 | 6 |
| AX-157746487 | 17 | 3.436 | KV452884.1 | 1238343 | 6-scf00352 | 6 |
| AX-158188873 | 17 | 3.436 | KV452884.1 | 1245231 | 6-scf00352 | 6 |
| AX-157836388 | 17 | 3.436 | KV452884.1 | 1254655 | 6-scf00352 | 6 |
| AX-158188879 | 17 | 3.436 | KV452884.1 | 1257093 | 6-scf00352 | 6 |
| AX-158188882 | 17 | 3.436 | KV452884.1 | 1261450 | 6-scf00352 | 6 |
| AX-158386072 | 17 | 3.436 | KV452884.1 | 1261517 | 6-scf00352 | 6 |
| AX-158188884 | 17 | 3.436 | KV452884.1 | 1262820 | 6-scf00352 | 6 |
| AX-158188890 | 17 | 3.436 | KV452884.1 | 1267363 | 6-scf00352 | 6 |

|              |    |       |             |         |            |    |
|--------------|----|-------|-------------|---------|------------|----|
| AX-158188892 | 17 | 3.436 | KV452884.1  | 1269114 | 6-scf00352 | 6  |
| AX-158188899 | 17 | 3.436 | KV452884.1  | 1277216 | 6-scf00352 | 6  |
| AX-158380659 | 17 | 3.436 | KV452884.1  | 1282633 | 6-scf00352 | 6  |
| AX-158188904 | 17 | 3.436 | KV452884.1  | 1282865 | 6-scf00352 | 6  |
| AX-158188905 | 17 | 3.436 | KV452884.1  | 1285054 | 6-scf00352 | 6  |
| AX-158188907 | 17 | 3.436 | KV452884.1  | 1288383 | 6-scf00352 | 6  |
| AX-158188908 | 17 | 3.436 | KV452884.1  | 1288789 | 6-scf00352 | 6  |
| AX-158188909 | 17 | 3.436 | KV452884.1  | 1290715 | 6-scf00352 | 6  |
| AX-158188914 | 17 | 3.436 | KV452884.1  | 1294209 | 6-scf00352 | 6  |
| AX-158188922 | 17 | 3.436 | KV452884.1  | 1302679 | 6-scf00352 | 6  |
| AX-158188921 | 17 | 3.677 | KV452884.1  | 1302171 | 6-scf00352 | 6  |
| AX-157879046 | 17 | 3.677 | KV452884.1  | 1304651 | 6-scf00352 | 6  |
| AX-158188925 | 17 | 3.677 | KV452884.1  | 1306703 | 6-scf00352 | 6  |
| AX-157710423 | 17 | 3.798 | KV452884.1  | 1203503 | 6-scf00352 | 6  |
| AX-158188871 | 17 | 3.798 | KV452884.1  | 1241106 | 6-scf00352 | 6  |
| AX-158188931 | 17 | 3.798 | KV452884.1  | 1315711 | 6-scf00352 | 6  |
| AX-158188936 | 17 | 3.798 | KV452884.1  | 1319675 | 6-scf00352 | 6  |
| AX-158188940 | 17 | 3.871 | KV452884.1  | 1334208 | 6-scf00352 | 6  |
| AX-158188941 | 17 | 3.919 | KV452884.1  | 1334731 | 6-scf00352 | 6  |
| AX-158188942 | 17 | 4.032 | KV452884.1  | 1336366 | 6-scf00352 | 6  |
| AX-158188701 | 17 | 4.148 | KV452884.1  | 986880  | 6-scf00352 | 6  |
| AX-158188808 | 17 | 4.148 | KV452884.1  | 1138003 | 6-scf00352 | 6  |
| AX-158188894 | 17 | 4.148 | KV452884.1  | 1271063 | 6-scf00352 | 6  |
| AX-158188928 | 17 | 4.148 | KV452884.1  | 1309788 | 6-scf00352 | 6  |
| AX-158188945 | 17 | 4.148 | KV452884.1  | 1338311 | 6-scf00352 | 6  |
| AX-158188948 | 17 | 4.148 | KV452884.1  | 1342916 | 6-scf00352 | 6  |
| AX-158188953 | 17 | 4.148 | KV452884.1  | 1351491 | 6-scf00352 | 6  |
| AX-158188950 | 17 | 4.159 | KV452884.1  | 1345455 | 6-scf00352 | 6  |
| AX-158188891 | 17 | 4.268 | KV452884.1  | 1267897 | 6-scf00352 | 6  |
| AX-157836390 | 17 | 4.268 | KV452884.1  | 1295397 | 6-scf00352 | 6  |
| AX-158188956 | 17 | 4.268 | KV452884.1  | 1355566 | 6-scf00352 | 6  |
| AX-158188960 | 17 | 4.268 | KV452884.1  | 1364162 | 6-scf00352 | 6  |
| AX-158188963 | 17 | 4.268 | KV452884.1  | 1366270 | 6-scf00352 | 6  |
| AX-157706564 | 17 | 4.268 | 3ML01032466 | 565     | scf08087_1 | UN |
| AX-158188964 | 17 | 4.308 | KV452884.1  | 1367327 | 6-scf00352 | 6  |
| AX-158188965 | 17 | 4.342 | KV452884.1  | 1368028 | 6-scf00352 | 6  |
| AX-158188952 | 17 | 4.377 | KV452884.1  | 1351104 | 6-scf00352 | 6  |
| AX-158188966 | 17 | 4.377 | KV452884.1  | 1368865 | 6-scf00352 | 6  |
| AX-158188968 | 17 | 4.487 | KV452884.1  | 1372691 | 6-scf00352 | 6  |
| AX-158413840 | 17 | 4.538 | KV452884.1  | 1377039 | 6-scf00352 | 6  |
| AX-158188971 | 17 | 4.62  | KV452884.1  | 1379588 | 6-scf00352 | 6  |
| AX-158188972 | 17 | 4.706 | KV452884.1  | 1381480 | 6-scf00352 | 6  |
| AX-158188973 | 17 | 4.706 | KV452884.1  | 1383378 | 6-scf00352 | 6  |
| AX-158188911 | 17 | 4.759 | KV452884.1  | 1292963 | 6-scf00352 | 6  |
| AX-158188976 | 17 | 4.759 | KV452884.1  | 1387848 | 6-scf00352 | 6  |
| AX-158188977 | 17 | 4.763 | KV452884.1  | 1387927 | 6-scf00352 | 6  |
| AX-158188979 | 17 | 4.815 | KV452884.1  | 1393424 | 6-scf00352 | 6  |
| AX-157858881 | 17 | 4.815 | KV452884.1  | 1395468 | 6-scf00352 | 6  |
| AX-157724200 | 17 | 4.815 | KV452884.1  | 1396340 | 6-scf00352 | 6  |
| AX-158188981 | 17 | 4.924 | KV452884.1  | 1401106 | 6-scf00352 | 6  |
| AX-158188983 | 17 | 4.938 | KV452884.1  | 1402819 | 6-scf00352 | 6  |



|              |    |       |            |         |            |   |
|--------------|----|-------|------------|---------|------------|---|
| AX-158188984 | 17 | 4.965 | KV452884.1 | 1403985 | 6-scf00352 | 6 |
| AX-158188985 | 17 | 4.965 | KV452884.1 | 1404607 | 6-scf00352 | 6 |
| AX-158188986 | 17 | 4.99  | KV452884.1 | 1405065 | 6-scf00352 | 6 |
| AX-158188987 | 17 | 5.006 | KV452884.1 | 1405610 | 6-scf00352 | 6 |
| AX-158188975 | 17 | 5.034 | KV452884.1 | 1386607 | 6-scf00352 | 6 |
| AX-158188988 | 17 | 5.034 | KV452884.1 | 1406057 | 6-scf00352 | 6 |
| AX-158188991 | 17 | 5.034 | KV452884.1 | 1411921 | 6-scf00352 | 6 |
| AX-158188993 | 17 | 5.034 | KV452884.1 | 1413129 | 6-scf00352 | 6 |
| AX-158188996 | 17 | 5.034 | KV452884.1 | 1416710 | 6-scf00352 | 6 |
| AX-158189002 | 17 | 5.034 | KV452884.1 | 1426583 | 6-scf00352 | 6 |
| AX-158189004 | 17 | 5.034 | KV452884.1 | 1429004 | 6-scf00352 | 6 |
| AX-158188998 | 17 | 5.068 | KV452884.1 | 1418759 | 6-scf00352 | 6 |
| AX-158188999 | 17 | 5.108 | KV452884.1 | 1420009 | 6-scf00352 | 6 |
| AX-158189001 | 17 | 5.143 | KV452884.1 | 1424133 | 6-scf00352 | 6 |
| AX-157836394 | 17 | 5.252 | KV452884.1 | 1425613 | 6-scf00352 | 6 |
| AX-157743516 | 17 | 5.252 | KV452884.1 | 1425657 | 6-scf00352 | 6 |
| AX-157836395 | 17 | 5.252 | KV452884.1 | 1426076 | 6-scf00352 | 6 |
| AX-158189003 | 17 | 5.252 | KV452884.1 | 1428778 | 6-scf00352 | 6 |
| AX-158189005 | 17 | 5.252 | KV452884.1 | 1431340 | 6-scf00352 | 6 |
| AX-158189006 | 17 | 5.362 | KV452884.1 | 1432928 | 6-scf00352 | 6 |
| AX-157836396 | 17 | 5.362 | KV452884.1 | 1437444 | 6-scf00352 | 6 |
| AX-158413841 | 17 | 5.362 | KV452884.1 | 1441674 | 6-scf00352 | 6 |
| AX-158189009 | 17 | 5.362 | KV452884.1 | 1442302 | 6-scf00352 | 6 |
| AX-158189011 | 17 | 5.58  | KV452884.1 | 1445375 | 6-scf00352 | 6 |
| AX-157836399 | 17 | 5.58  | KV452884.1 | 1446032 | 6-scf00352 | 6 |
| AX-158189013 | 17 | 5.58  | KV452884.1 | 1448127 | 6-scf00352 | 6 |
| AX-157836401 | 17 | 5.58  | KV452884.1 | 1448466 | 6-scf00352 | 6 |
| AX-158189014 | 17 | 5.58  | KV452884.1 | 1450817 | 6-scf00352 | 6 |
| AX-158189018 | 17 | 5.58  | KV452884.1 | 1452771 | 6-scf00352 | 6 |
| AX-158189019 | 17 | 5.58  | KV452884.1 | 1456277 | 6-scf00352 | 6 |
| AX-158189021 | 17 | 5.58  | KV452884.1 | 1458890 | 6-scf00352 | 6 |
| AX-158378987 | 17 | 5.62  | KV452884.1 | 1461424 | 6-scf00352 | 6 |
| AX-158189022 | 17 | 5.689 | KV452884.1 | 1460818 | 6-scf00352 | 6 |
| AX-158189024 | 17 | 5.689 | KV452884.1 | 1463923 | 6-scf00352 | 6 |
| AX-157836404 | 17 | 5.689 | KV452884.1 | 1464497 | 6-scf00352 | 6 |
| AX-157737494 | 17 | 5.689 | KV452884.1 | 1464791 | 6-scf00352 | 6 |
| AX-158189028 | 17 | 5.689 | KV452884.1 | 1467660 | 6-scf00352 | 6 |
| AX-158189029 | 17 | 5.689 | KV452884.1 | 1468692 | 6-scf00352 | 6 |
| AX-157715294 | 17 | 5.689 | KV452884.1 | 1471445 | 6-scf00352 | 6 |
| AX-157743540 | 17 | 5.689 | KV452884.1 | 1474251 | 6-scf00352 | 6 |
| AX-157771017 | 17 | 5.689 | KV452884.1 | 1478770 | 6-scf00352 | 6 |
| AX-158189038 | 17 | 5.689 | KV452884.1 | 1482881 | 6-scf00352 | 6 |
| AX-158189062 | 17 | 5.689 | KV452884.1 | 1522784 | 6-scf00352 | 6 |
| AX-158189000 | 17 | 5.752 | KV452884.1 | 1423434 | 6-scf00352 | 6 |
| AX-158189010 | 17 | 5.752 | KV452884.1 | 1442718 | 6-scf00352 | 6 |
| AX-158378988 | 17 | 5.752 | KV452884.1 | 1468467 | 6-scf00352 | 6 |
| AX-158189040 | 17 | 5.752 | KV452884.1 | 1487247 | 6-scf00352 | 6 |
| AX-158189042 | 17 | 5.836 | KV452884.1 | 1489911 | 6-scf00352 | 6 |
| AX-158189043 | 17 | 5.982 | KV452884.1 | 1491516 | 6-scf00352 | 6 |
| AX-158189044 | 17 | 5.982 | KV452884.1 | 1493758 | 6-scf00352 | 6 |
| AX-157735649 | 17 | 5.982 | KV452884.1 | 1494138 | 6-scf00352 | 6 |

|              |    |       |            |         |            |   |
|--------------|----|-------|------------|---------|------------|---|
| AX-157836405 | 17 | 5.982 | KV452884.1 | 1497256 | 6-scf00352 | 6 |
| AX-157836406 | 17 | 5.982 | KV452884.1 | 1498201 | 6-scf00352 | 6 |
| AX-158189045 | 17 | 6.123 | KV452884.1 | 1501191 | 6-scf00352 | 6 |
| AX-158189030 | 17 | 6.127 | KV452884.1 | 1472315 | 6-scf00352 | 6 |
| AX-158189046 | 17 | 6.127 | KV452884.1 | 1501507 | 6-scf00352 | 6 |
| AX-157836409 | 17 | 6.127 | KV452884.1 | 1505587 | 6-scf00352 | 6 |
| AX-158189048 | 17 | 6.127 | KV452884.1 | 1507464 | 6-scf00352 | 6 |
| AX-157836410 | 17 | 6.127 | KV452884.1 | 1507640 | 6-scf00352 | 6 |
| AX-158189066 | 17 | 6.127 | KV452884.1 | 1527561 | 6-scf00352 | 6 |
| AX-158189051 | 17 | 6.203 | KV452884.1 | 1512382 | 6-scf00352 | 6 |
| AX-158189047 | 17 | 6.236 | KV452884.1 | 1503441 | 6-scf00352 | 6 |
| AX-158189052 | 17 | 6.236 | KV452884.1 | 1512761 | 6-scf00352 | 6 |
| AX-157836412 | 17 | 6.236 | KV452884.1 | 1513216 | 6-scf00352 | 6 |
| AX-158189053 | 17 | 6.236 | KV452884.1 | 1514298 | 6-scf00352 | 6 |
| AX-158189054 | 17 | 6.236 | KV452884.1 | 1514718 | 6-scf00352 | 6 |
| AX-158189055 | 17 | 6.236 | KV452884.1 | 1516214 | 6-scf00352 | 6 |
| AX-158189058 | 17 | 6.236 | KV452884.1 | 1518491 | 6-scf00352 | 6 |
| AX-158189059 | 17 | 6.236 | KV452884.1 | 1519555 | 6-scf00352 | 6 |
| AX-158189060 | 17 | 6.236 | KV452884.1 | 1520607 | 6-scf00352 | 6 |
| AX-158189063 | 17 | 6.236 | KV452884.1 | 1523225 | 6-scf00352 | 6 |
| AX-157879048 | 17 | 6.236 | KV452884.1 | 1523438 | 6-scf00352 | 6 |
| AX-158189064 | 17 | 6.282 | KV452884.1 | 1524004 | 6-scf00352 | 6 |
| AX-157858882 | 17 | 6.301 | KV452884.1 | 1526450 | 6-scf00352 | 6 |
| AX-158189068 | 17 | 6.346 | KV452884.1 | 1531510 | 6-scf00352 | 6 |
| AX-157836408 | 17 | 6.564 | KV452884.1 | 1500466 | 6-scf00352 | 6 |
| AX-157774702 | 17 | 6.564 | KV452884.1 | 1542778 | 6-scf00352 | 6 |
| AX-158189076 | 17 | 6.564 | KV452884.1 | 1545875 | 6-scf00352 | 6 |
| AX-158189077 | 17 | 6.564 | KV452884.1 | 1546359 | 6-scf00352 | 6 |
| AX-157746847 | 17 | 6.564 | KV452884.1 | 1548355 | 6-scf00352 | 6 |
| AX-158189079 | 17 | 6.564 | KV452884.1 | 1548986 | 6-scf00352 | 6 |
| AX-158378989 | 17 | 6.564 | KV452884.1 | 1554371 | 6-scf00352 | 6 |
| AX-158189082 | 17 | 6.564 | KV452884.1 | 1555043 | 6-scf00352 | 6 |
| AX-157836416 | 17 | 6.564 | KV452884.1 | 1556422 | 6-scf00352 | 6 |
| AX-158189087 | 17 | 6.564 | KV452884.1 | 1562152 | 6-scf00352 | 6 |
| AX-157755667 | 17 | 6.564 | KV452884.1 | 1564632 | 6-scf00352 | 6 |
| AX-158189092 | 17 | 6.564 | KV452884.1 | 1579466 | 6-scf00352 | 6 |
| AX-158189103 | 17 | 6.564 | KV452884.1 | 1594706 | 6-scf00352 | 6 |
| AX-158189118 | 17 | 6.564 | KV452884.1 | 1608362 | 6-scf00352 | 6 |
| AX-158189088 | 17 | 6.634 | KV452884.1 | 1564206 | 6-scf00352 | 6 |
| AX-158189081 | 17 | 6.673 | KV452884.1 | 1549699 | 6-scf00352 | 6 |
| AX-157836418 | 17 | 6.673 | KV452884.1 | 1564550 | 6-scf00352 | 6 |
| AX-158189089 | 17 | 6.673 | KV452884.1 | 1569617 | 6-scf00352 | 6 |
| AX-158189091 | 17 | 6.673 | KV452884.1 | 1576032 | 6-scf00352 | 6 |
| AX-158189093 | 17 | 6.673 | KV452884.1 | 1579844 | 6-scf00352 | 6 |
| AX-158189094 | 17 | 6.673 | KV452884.1 | 1582182 | 6-scf00352 | 6 |
| AX-158189097 | 17 | 6.825 | KV452884.1 | 1583925 | 6-scf00352 | 6 |
| AX-158189099 | 17 | 7.001 | KV452884.1 | 1585989 | 6-scf00352 | 6 |
| AX-158189100 | 17 | 7.001 | KV452884.1 | 1588222 | 6-scf00352 | 6 |
| AX-157757056 | 17 | 7.001 | KV452884.1 | 1596521 | 6-scf00352 | 6 |
| AX-157741415 | 17 | 7.001 | KV452884.1 | 1676296 | 6-scf00352 | 6 |
| AX-158189108 | 17 | 7.054 | KV452884.1 | 1599747 | 6-scf00352 | 6 |

|              |    |       |            |         |            |   |
|--------------|----|-------|------------|---------|------------|---|
| AX-158189109 | 17 | 7.111 | KV452884.1 | 1600415 | 6-scf00352 | 6 |
| AX-158189111 | 17 | 7.129 | KV452884.1 | 1602028 | 6-scf00352 | 6 |
| AX-158189121 | 17 | 7.129 | KV452884.1 | 1610859 | 6-scf00352 | 6 |
| AX-158189112 | 17 | 7.135 | KV452884.1 | 1603061 | 6-scf00352 | 6 |
| AX-158189115 | 17 | 7.146 | KV452884.1 | 1604948 | 6-scf00352 | 6 |
| AX-158189116 | 17 | 7.175 | KV452884.1 | 1606032 | 6-scf00352 | 6 |
| AX-158189106 | 17 | 7.194 | KV452884.1 | 1598809 | 6-scf00352 | 6 |
| AX-158189122 | 17 | 7.194 | KV452884.1 | 1612771 | 6-scf00352 | 6 |
| AX-158189123 | 17 | 7.212 | KV452884.1 | 1614339 | 6-scf00352 | 6 |
| AX-158189145 | 17 | 7.212 | KV452884.1 | 1643801 | 6-scf00352 | 6 |
| AX-158189124 | 17 | 7.22  | KV452884.1 | 1615892 | 6-scf00352 | 6 |
| AX-158189125 | 17 | 7.22  | KV452884.1 | 1619006 | 6-scf00352 | 6 |
| AX-158189126 | 17 | 7.22  | KV452884.1 | 1620164 | 6-scf00352 | 6 |
| AX-158189128 | 17 | 7.274 | KV452884.1 | 1621012 | 6-scf00352 | 6 |
| AX-157754926 | 17 | 7.329 | KV452884.1 | 1616691 | 6-scf00352 | 6 |
| AX-158189129 | 17 | 7.329 | KV452884.1 | 1623428 | 6-scf00352 | 6 |
| AX-158189132 | 17 | 7.329 | KV452884.1 | 1626006 | 6-scf00352 | 6 |
| AX-158189133 | 17 | 7.329 | KV452884.1 | 1626580 | 6-scf00352 | 6 |
| AX-158189134 | 17 | 7.329 | KV452884.1 | 1626939 | 6-scf00352 | 6 |
| AX-158189136 | 17 | 7.438 | KV452884.1 | 1628628 | 6-scf00352 | 6 |
| AX-158189142 | 17 | 7.439 | KV452884.1 | 1639893 | 6-scf00352 | 6 |
| AX-158189144 | 17 | 7.602 | KV452884.1 | 1643133 | 6-scf00352 | 6 |
| AX-158189148 | 17 | 7.602 | KV452884.1 | 1647134 | 6-scf00352 | 6 |
| AX-158189149 | 17 | 7.602 | KV452884.1 | 1647506 | 6-scf00352 | 6 |
| AX-157721638 | 17 | 7.602 | KV452884.1 | 1648172 | 6-scf00352 | 6 |
| AX-158380660 | 17 | 7.602 | KV452884.1 | 1674533 | 6-scf00352 | 6 |
| AX-158189150 | 17 | 7.766 | KV452884.1 | 1650321 | 6-scf00352 | 6 |
| AX-158189154 | 17 | 7.766 | KV452884.1 | 1657695 | 6-scf00352 | 6 |
| AX-157858883 | 17 | 7.766 | KV452884.1 | 1658431 | 6-scf00352 | 6 |
| AX-158189155 | 17 | 7.793 | KV452884.1 | 1658799 | 6-scf00352 | 6 |
| AX-158189157 | 17 | 7.817 | KV452884.1 | 1661487 | 6-scf00352 | 6 |
| AX-157722622 | 17 | 7.823 | KV452884.1 | 1664051 | 6-scf00352 | 6 |
| AX-158189162 | 17 | 7.823 | KV452884.1 | 1668147 | 6-scf00352 | 6 |
| AX-158189166 | 17 | 7.848 | KV452884.1 | 1681051 | 6-scf00352 | 6 |
| AX-158189169 | 17 | 7.876 | KV452884.1 | 1682918 | 6-scf00352 | 6 |
| AX-158189170 | 17 | 8.094 | KV452884.1 | 1683566 | 6-scf00352 | 6 |
| AX-158189172 | 17 | 8.204 | KV452884.1 | 1686040 | 6-scf00352 | 6 |
| AX-158189174 | 17 | 8.204 | KV452884.1 | 1687376 | 6-scf00352 | 6 |
| AX-158189175 | 17 | 8.204 | KV452884.1 | 1688511 | 6-scf00352 | 6 |
| AX-158189177 | 17 | 8.204 | KV452884.1 | 1691244 | 6-scf00352 | 6 |
| AX-158189178 | 17 | 8.204 | KV452884.1 | 1692241 | 6-scf00352 | 6 |
| AX-158189181 | 17 | 8.204 | KV452884.1 | 1696410 | 6-scf00352 | 6 |
| AX-158189188 | 17 | 8.204 | KV452884.1 | 1706437 | 6-scf00352 | 6 |
| AX-158189209 | 17 | 8.204 | KV452884.1 | 1731634 | 6-scf00352 | 6 |
| AX-158189185 | 17 | 8.205 | KV452884.1 | 1698732 | 6-scf00352 | 6 |
| AX-157771307 | 17 | 8.205 | KV452884.1 | 1700926 | 6-scf00352 | 6 |
| AX-157836424 | 17 | 8.205 | KV452884.1 | 1702548 | 6-scf00352 | 6 |
| AX-158189176 | 17 | 8.532 | KV452884.1 | 1689625 | 6-scf00352 | 6 |
| AX-158189190 | 17 | 8.532 | KV452884.1 | 1709682 | 6-scf00352 | 6 |
| AX-158189192 | 17 | 8.532 | KV452884.1 | 1710879 | 6-scf00352 | 6 |
| AX-158189195 | 17 | 8.532 | KV452884.1 | 1714068 | 6-scf00352 | 6 |

|              |    |        |            |         |            |   |
|--------------|----|--------|------------|---------|------------|---|
| AX-158189196 | 17 | 8.532  | KV452884.1 | 1714460 | 6-scf00352 | 6 |
| AX-158189215 | 17 | 8.532  | KV452884.1 | 1737027 | 6-scf00352 | 6 |
| AX-157836425 | 17 | 8.58   | KV452884.1 | 1704626 | 6-scf00352 | 6 |
| AX-158189198 | 17 | 8.58   | KV452884.1 | 1717776 | 6-scf00352 | 6 |
| AX-158189200 | 17 | 8.641  | KV452884.1 | 1719136 | 6-scf00352 | 6 |
| AX-158189203 | 17 | 8.641  | KV452884.1 | 1721625 | 6-scf00352 | 6 |
| AX-158189204 | 17 | 8.641  | KV452884.1 | 1722234 | 6-scf00352 | 6 |
| AX-158189206 | 17 | 8.641  | KV452884.1 | 1726004 | 6-scf00352 | 6 |
| AX-158189214 | 17 | 8.641  | KV452884.1 | 1736365 | 6-scf00352 | 6 |
| AX-158189207 | 17 | 8.647  | KV452884.1 | 1727362 | 6-scf00352 | 6 |
| AX-158189210 | 17 | 8.654  | KV452884.1 | 1732676 | 6-scf00352 | 6 |
| AX-158189213 | 17 | 8.774  | KV452884.1 | 1735340 | 6-scf00352 | 6 |
| AX-158189225 | 17 | 8.878  | KV452884.1 | 1748303 | 6-scf00352 | 6 |
| AX-157725446 | 17 | 9.187  | KV452884.1 | 1753701 | 6-scf00352 | 6 |
| AX-158189227 | 17 | 9.187  | KV452884.1 | 1754211 | 6-scf00352 | 6 |
| AX-158189228 | 17 | 9.187  | KV452884.1 | 1755240 | 6-scf00352 | 6 |
| AX-158189229 | 17 | 9.187  | KV452884.1 | 1756382 | 6-scf00352 | 6 |
| AX-158189230 | 17 | 9.187  | KV452884.1 | 1758096 | 6-scf00352 | 6 |
| AX-157772648 | 17 | 9.187  | KV452884.1 | 1759060 | 6-scf00352 | 6 |
| AX-158189231 | 17 | 9.187  | KV452884.1 | 1759428 | 6-scf00352 | 6 |
| AX-158189232 | 17 | 9.187  | KV452884.1 | 1760540 | 6-scf00352 | 6 |
| AX-158189241 | 17 | 9.187  | KV452884.1 | 1782095 | 6-scf00352 | 6 |
| AX-158189233 | 17 | 9.199  | KV452884.1 | 1761122 | 6-scf00352 | 6 |
| AX-157836427 | 17 | 9.494  | KV452884.1 | 1764470 | 6-scf00352 | 6 |
| AX-158380661 | 17 | 9.7    | KV452884.1 | 1773271 | 6-scf00352 | 6 |
| AX-158189238 | 17 | 9.809  | KV452884.1 | 1773419 | 6-scf00352 | 6 |
| AX-157700107 | 17 | 9.809  | KV452884.1 | 1774716 | 6-scf00352 | 6 |
| AX-158189239 | 17 | 9.809  | KV452884.1 | 1777454 | 6-scf00352 | 6 |
| AX-157754369 | 17 | 9.809  | KV452884.1 | 1777821 | 6-scf00352 | 6 |
| AX-158189240 | 17 | 9.934  | KV452884.1 | 1781588 | 6-scf00352 | 6 |
| AX-158189242 | 17 | 10.1   | KV452884.1 | 1782727 | 6-scf00352 | 6 |
| AX-157727245 | 17 | 10.122 | KV452884.1 | 1784051 | 6-scf00352 | 6 |
| AX-158189245 | 17 | 10.281 | KV452884.1 | 1784674 | 6-scf00352 | 6 |
| AX-158189247 | 17 | 10.281 | KV452884.1 | 1787093 | 6-scf00352 | 6 |
| AX-158189250 | 17 | 10.281 | KV452884.1 | 1788480 | 6-scf00352 | 6 |
| AX-158189251 | 17 | 10.281 | KV452884.1 | 1790028 | 6-scf00352 | 6 |
| AX-158189258 | 17 | 10.306 | KV452884.1 | 1804199 | 6-scf00352 | 6 |
| AX-157707856 | 17 | 10.319 | KV452884.1 | 1806926 | 6-scf00352 | 6 |
| AX-158189273 | 17 | 10.319 | KV452884.1 | 1828876 | 6-scf00352 | 6 |
| AX-158189261 | 17 | 10.347 | KV452884.1 | 1809860 | 6-scf00352 | 6 |
| AX-158189262 | 17 | 10.374 | KV452884.1 | 1811004 | 6-scf00352 | 6 |
| AX-158189248 | 17 | 10.391 | KV452884.1 | 1787792 | 6-scf00352 | 6 |
| AX-158189264 | 17 | 10.391 | KV452884.1 | 1812014 | 6-scf00352 | 6 |
| AX-158189265 | 17 | 10.391 | KV452884.1 | 1813810 | 6-scf00352 | 6 |
| AX-157836429 | 17 | 10.391 | KV452884.1 | 1814507 | 6-scf00352 | 6 |
| AX-158189266 | 17 | 10.391 | KV452884.1 | 1816665 | 6-scf00352 | 6 |
| AX-157836431 | 17 | 10.391 | KV452884.1 | 1817641 | 6-scf00352 | 6 |
| AX-158189267 | 17 | 10.391 | KV452884.1 | 1817952 | 6-scf00352 | 6 |
| AX-158189268 | 17 | 10.391 | KV452884.1 | 1819966 | 6-scf00352 | 6 |
| AX-157836432 | 17 | 10.391 | KV452884.1 | 1820354 | 6-scf00352 | 6 |
| AX-158189269 | 17 | 10.391 | KV452884.1 | 1822686 | 6-scf00352 | 6 |

|              |    |        |            |         |            |   |
|--------------|----|--------|------------|---------|------------|---|
| AX-158189270 | 17 | 10.391 | KV452884.1 | 1823454 | 6-scf00352 | 6 |
| AX-158189272 | 17 | 10.391 | KV452884.1 | 1827839 | 6-scf00352 | 6 |
| AX-158189278 | 17 | 10.391 | KV452884.1 | 1834763 | 6-scf00352 | 6 |
| AX-158189285 | 17 | 10.8   | KV452884.1 | 1840205 | 6-scf00352 | 6 |
| AX-158189286 | 17 | 10.8   | KV452884.1 | 1840628 | 6-scf00352 | 6 |
| AX-158189289 | 17 | 10.861 | KV452884.1 | 1843497 | 6-scf00352 | 6 |
| AX-157743014 | 17 | 10.937 | KV452884.1 | 1848753 | 6-scf00352 | 6 |
| AX-158189297 | 17 | 10.937 | KV452884.1 | 1852768 | 6-scf00352 | 6 |
| AX-157836433 | 17 | 10.937 | KV452884.1 | 1853658 | 6-scf00352 | 6 |
| AX-158189299 | 17 | 10.937 | KV452884.1 | 1856405 | 6-scf00352 | 6 |
| AX-158189300 | 17 | 10.937 | KV452884.1 | 1856843 | 6-scf00352 | 6 |
| AX-158189301 | 17 | 10.937 | KV452884.1 | 1857092 | 6-scf00352 | 6 |
| AX-158189302 | 17 | 10.937 | KV452884.1 | 1857856 | 6-scf00352 | 6 |
| AX-157836435 | 17 | 10.937 | KV452884.1 | 1865255 | 6-scf00352 | 6 |
| AX-158189305 | 17 | 10.937 | KV452884.1 | 1865809 | 6-scf00352 | 6 |
| AX-158189309 | 17 | 10.937 | KV452884.1 | 1871248 | 6-scf00352 | 6 |
| AX-158189283 | 17 | 11.155 | KV452884.1 | 1838158 | 6-scf00352 | 6 |
| AX-158189287 | 17 | 11.155 | KV452884.1 | 1841161 | 6-scf00352 | 6 |
| AX-158189303 | 17 | 11.155 | KV452884.1 | 1859706 | 6-scf00352 | 6 |
| AX-158189310 | 17 | 11.155 | KV452884.1 | 1872508 | 6-scf00352 | 6 |
| AX-157836436 | 17 | 11.155 | KV452884.1 | 1873194 | 6-scf00352 | 6 |
| AX-158189312 | 17 | 11.155 | KV452884.1 | 1873850 | 6-scf00352 | 6 |
| AX-158189315 | 17 | 11.155 | KV452884.1 | 1878325 | 6-scf00352 | 6 |
| AX-157836439 | 17 | 11.155 | KV452884.1 | 1878590 | 6-scf00352 | 6 |
| AX-157738354 | 17 | 11.155 | KV452884.1 | 1879356 | 6-scf00352 | 6 |
| AX-158189316 | 17 | 11.155 | KV452884.1 | 1879814 | 6-scf00352 | 6 |
| AX-157721789 | 17 | 11.155 | KV452884.1 | 1881332 | 6-scf00352 | 6 |
| AX-157836440 | 17 | 11.155 | KV452884.1 | 1883417 | 6-scf00352 | 6 |
| AX-158189320 | 17 | 11.155 | KV452884.1 | 1884960 | 6-scf00352 | 6 |
| AX-158189322 | 17 | 11.155 | KV452884.1 | 1889131 | 6-scf00352 | 6 |
| AX-158189323 | 17 | 11.155 | KV452884.1 | 1890308 | 6-scf00352 | 6 |
| AX-158189324 | 17 | 11.155 | KV452884.1 | 1890910 | 6-scf00352 | 6 |
| AX-158189326 | 17 | 11.155 | KV452884.1 | 1894091 | 6-scf00352 | 6 |
| AX-157714954 | 17 | 11.155 | KV452884.1 | 1896799 | 6-scf00352 | 6 |
| AX-157751091 | 17 | 11.155 | KV452884.1 | 1897934 | 6-scf00352 | 6 |
| AX-158189357 | 17 | 11.155 | KV452884.1 | 1924138 | 6-scf00352 | 6 |
| AX-158189330 | 17 | 11.602 | KV452884.1 | 1899752 | 6-scf00352 | 6 |
| AX-158189332 | 17 | 11.784 | KV452884.1 | 1900345 | 6-scf00352 | 6 |
| AX-158189333 | 17 | 11.799 | KV452884.1 | 1901721 | 6-scf00352 | 6 |
| AX-158189338 | 17 | 11.799 | KV452884.1 | 1906565 | 6-scf00352 | 6 |
| AX-158189368 | 17 | 11.799 | KV452884.1 | 1935324 | 6-scf00352 | 6 |
| AX-158189340 | 17 | 11.812 | KV452884.1 | 1907306 | 6-scf00352 | 6 |
| AX-158189341 | 17 | 11.812 | KV452884.1 | 1907610 | 6-scf00352 | 6 |
| AX-158189344 | 17 | 11.812 | KV452884.1 | 1911076 | 6-scf00352 | 6 |
| AX-157740560 | 17 | 11.812 | KV452884.1 | 1911140 | 6-scf00352 | 6 |
| AX-158189354 | 17 | 11.812 | KV452884.1 | 1921899 | 6-scf00352 | 6 |
| AX-158189346 | 17 | 11.921 | KV452884.1 | 1913196 | 6-scf00352 | 6 |
| AX-157879051 | 17 | 11.921 | KV452884.1 | 1919007 | 6-scf00352 | 6 |
| AX-157741163 | 17 | 11.921 | KV452884.1 | 1919746 | 6-scf00352 | 6 |
| AX-158189352 | 17 | 11.95  | KV452884.1 | 1920775 | 6-scf00352 | 6 |
| AX-158189358 | 17 | 11.95  | KV452884.1 | 1924365 | 6-scf00352 | 6 |

|              |    |        |            |         |            |   |
|--------------|----|--------|------------|---------|------------|---|
| AX-158189365 | 17 | 11.95  | KV452884.1 | 1934030 | 6-scf00352 | 6 |
| AX-158189355 | 17 | 12.03  | KV452884.1 | 1922653 | 6-scf00352 | 6 |
| AX-158189356 | 17 | 12.03  | KV452884.1 | 1923473 | 6-scf00352 | 6 |
| AX-158189362 | 17 | 12.032 | KV452884.1 | 1931342 | 6-scf00352 | 6 |
| AX-158189366 | 17 | 12.035 | KV452884.1 | 1934512 | 6-scf00352 | 6 |
| AX-158189280 | 17 | 12.037 | KV452884.1 | 1836862 | 6-scf00352 | 6 |
| AX-158189343 | 17 | 12.037 | KV452884.1 | 1909068 | 6-scf00352 | 6 |
| AX-158189367 | 17 | 12.037 | KV452884.1 | 1934970 | 6-scf00352 | 6 |
| AX-158189398 | 17 | 12.037 | KV452884.1 | 1980809 | 6-scf00352 | 6 |
| AX-158189369 | 17 | 12.174 | KV452884.1 | 1937465 | 6-scf00352 | 6 |
| AX-158189371 | 17 | 12.226 | KV452884.1 | 1939440 | 6-scf00352 | 6 |
| AX-158189374 | 17 | 12.226 | KV452884.1 | 1942158 | 6-scf00352 | 6 |
| AX-157866788 | 17 | 12.273 | KV452884.1 | 1941472 | 6-scf00352 | 6 |
| AX-158189375 | 17 | 12.321 | KV452884.1 | 1944001 | 6-scf00352 | 6 |
| AX-158189378 | 17 | 12.467 | KV452884.1 | 1947637 | 6-scf00352 | 6 |
| AX-158189379 | 17 | 12.511 | KV452884.1 | 1948814 | 6-scf00352 | 6 |
| AX-157836443 | 17 | 12.903 | KV452884.1 | 1952885 | 6-scf00352 | 6 |
| AX-158189382 | 17 | 12.903 | KV452884.1 | 1960315 | 6-scf00352 | 6 |
| AX-158189380 | 17 | 12.905 | KV452884.1 | 1958291 | 6-scf00352 | 6 |
| AX-158189381 | 17 | 12.907 | KV452884.1 | 1959876 | 6-scf00352 | 6 |
| AX-157753348 | 17 | 12.907 | KV452884.1 | 1961832 | 6-scf00352 | 6 |
| AX-158189383 | 17 | 13.067 | KV452884.1 | 1961509 | 6-scf00352 | 6 |
| AX-157836444 | 17 | 13.067 | KV452884.1 | 1962738 | 6-scf00352 | 6 |
| AX-158189385 | 17 | 13.067 | KV452884.1 | 1965528 | 6-scf00352 | 6 |
| AX-158189388 | 17 | 13.233 | KV452884.1 | 1968227 | 6-scf00352 | 6 |
| AX-157836445 | 17 | 13.233 | KV452884.1 | 1968914 | 6-scf00352 | 6 |
| AX-158189389 | 17 | 13.233 | KV452884.1 | 1969269 | 6-scf00352 | 6 |
| AX-158189390 | 17 | 13.233 | KV452884.1 | 1972811 | 6-scf00352 | 6 |
| AX-158189392 | 17 | 13.233 | KV452884.1 | 1975813 | 6-scf00352 | 6 |
| AX-158189393 | 17 | 13.233 | KV452884.1 | 1976817 | 6-scf00352 | 6 |
| AX-158189394 | 17 | 13.233 | KV452884.1 | 1977340 | 6-scf00352 | 6 |
| AX-157773259 | 17 | 13.233 | KV452884.1 | 1978578 | 6-scf00352 | 6 |
| AX-158380662 | 17 | 13.287 | KV452884.1 | 1976921 | 6-scf00352 | 6 |
| AX-158189395 | 17 | 13.287 | KV452884.1 | 1979196 | 6-scf00352 | 6 |
| AX-157743780 | 17 | 13.342 | KV452884.1 | 1949319 | 6-scf00352 | 6 |
| AX-157771084 | 17 | 13.342 | KV452884.1 | 1959681 | 6-scf00352 | 6 |
| AX-158189399 | 17 | 13.342 | KV452884.1 | 1983482 | 6-scf00352 | 6 |
| AX-158189401 | 17 | 13.342 | KV452884.1 | 1984608 | 6-scf00352 | 6 |
| AX-158189403 | 17 | 13.342 | KV452884.1 | 1985903 | 6-scf00352 | 6 |
| AX-158189404 | 17 | 13.342 | KV452884.1 | 1986344 | 6-scf00352 | 6 |
| AX-157872146 | 17 | 13.342 | KV452884.1 | 1990098 | 6-scf00352 | 6 |
| AX-158189407 | 17 | 13.342 | KV452884.1 | 1990963 | 6-scf00352 | 6 |
| AX-158189408 | 17 | 13.342 | KV452884.1 | 1991579 | 6-scf00352 | 6 |
| AX-158189409 | 17 | 13.342 | KV452884.1 | 1993905 | 6-scf00352 | 6 |
| AX-157713155 | 17 | 13.342 | KV452884.1 | 1995859 | 6-scf00352 | 6 |
| AX-157718836 | 17 | 13.342 | KV452884.1 | 2018934 | 6-scf00352 | 6 |
| AX-158189412 | 17 | 13.458 | KV452884.1 | 2000471 | 6-scf00352 | 6 |
| AX-157742503 | 17 | 13.56  | KV452884.1 | 2001695 | 6-scf00352 | 6 |
| AX-158189415 | 17 | 13.56  | KV452884.1 | 2004624 | 6-scf00352 | 6 |
| AX-158189418 | 17 | 13.56  | KV452884.1 | 2009543 | 6-scf00352 | 6 |
| AX-157836449 | 17 | 13.56  | KV452884.1 | 2013602 | 6-scf00352 | 6 |

|              |    |        |            |         |            |   |
|--------------|----|--------|------------|---------|------------|---|
| AX-157866791 | 17 | 13.633 | KV452884.1 | 2020729 | 6-scf00352 | 6 |
| AX-158189422 | 17 | 13.779 | KV452884.1 | 2022203 | 6-scf00352 | 6 |
| AX-158189413 | 17 | 13.998 | KV452884.1 | 2001907 | 6-scf00352 | 6 |
| AX-158189424 | 17 | 13.998 | KV452884.1 | 2024825 | 6-scf00352 | 6 |
| AX-157746793 | 17 | 13.998 | KV452884.1 | 2031757 | 6-scf00352 | 6 |
| AX-157719233 | 17 | 13.998 | KV452884.1 | 2032867 | 6-scf00352 | 6 |
| AX-158189431 | 17 | 13.998 | KV452884.1 | 2036123 | 6-scf00352 | 6 |
| AX-158189432 | 17 | 13.998 | KV452884.1 | 2039888 | 6-scf00352 | 6 |
| AX-158189444 | 17 | 14.544 | KV452884.1 | 2056519 | 6-scf00352 | 6 |
| AX-158189446 | 17 | 14.544 | KV452884.1 | 2064296 | 6-scf00352 | 6 |
| AX-158189449 | 17 | 14.544 | KV452884.1 | 2069191 | 6-scf00352 | 6 |
| AX-158413856 | 17 | 14.544 | KV452884.1 | 2069667 | 6-scf00352 | 6 |
| AX-158413857 | 17 | 14.544 | KV452884.1 | 2070739 | 6-scf00352 | 6 |
| AX-158189452 | 17 | 14.544 | KV452884.1 | 2071115 | 6-scf00352 | 6 |
| AX-158189453 | 17 | 14.568 | KV452884.1 | 2072345 | 6-scf00352 | 6 |
| AX-158189456 | 17 | 14.654 | KV452884.1 | 2075401 | 6-scf00352 | 6 |
| AX-157863626 | 17 | 14.805 | KV452884.1 | 2076896 | 6-scf00352 | 6 |
| AX-158189457 | 17 | 14.872 | KV452884.1 | 2080407 | 6-scf00352 | 6 |
| AX-158189458 | 17 | 14.872 | KV452884.1 | 2080944 | 6-scf00352 | 6 |
| AX-158189461 | 17 | 14.872 | KV452884.1 | 2082712 | 6-scf00352 | 6 |
| AX-158189462 | 17 | 14.872 | KV452884.1 | 2085828 | 6-scf00352 | 6 |
| AX-158189463 | 17 | 14.872 | KV452884.1 | 2086920 | 6-scf00352 | 6 |
| AX-158189465 | 17 | 14.872 | KV452884.1 | 2088385 | 6-scf00352 | 6 |
| AX-158189466 | 17 | 14.872 | KV452884.1 | 2089271 | 6-scf00352 | 6 |
| AX-158189467 | 17 | 14.872 | KV452884.1 | 2090213 | 6-scf00352 | 6 |
| AX-158189469 | 17 | 14.929 | KV452884.1 | 2094676 | 6-scf00352 | 6 |
| AX-158189468 | 17 | 14.982 | KV452884.1 | 2092398 | 6-scf00352 | 6 |
| AX-158189470 | 17 | 14.982 | KV452884.1 | 2096237 | 6-scf00352 | 6 |
| AX-157745104 | 17 | 14.982 | KV452884.1 | 2101927 | 6-scf00352 | 6 |
| AX-158189474 | 17 | 14.982 | KV452884.1 | 2106097 | 6-scf00352 | 6 |
| AX-158189476 | 17 | 14.982 | KV452884.1 | 2108564 | 6-scf00352 | 6 |
| AX-158189530 | 17 | 14.982 | KV452884.1 | 2161743 | 6-scf00352 | 6 |
| AX-158189433 | 17 | 15.2   | KV452884.1 | 2040806 | 6-scf00352 | 6 |
| AX-158189473 | 17 | 15.2   | KV452884.1 | 2103955 | 6-scf00352 | 6 |
| AX-158189477 | 17 | 15.2   | KV452884.1 | 2110046 | 6-scf00352 | 6 |
| AX-158189479 | 17 | 15.2   | KV452884.1 | 2112179 | 6-scf00352 | 6 |
| AX-158189480 | 17 | 15.2   | KV452884.1 | 2112765 | 6-scf00352 | 6 |
| AX-158189485 | 17 | 15.2   | KV452884.1 | 2116394 | 6-scf00352 | 6 |
| AX-158189487 | 17 | 15.2   | KV452884.1 | 2117404 | 6-scf00352 | 6 |
| AX-158189490 | 17 | 15.2   | KV452884.1 | 2119813 | 6-scf00352 | 6 |
| AX-158189491 | 17 | 15.2   | KV452884.1 | 2120895 | 6-scf00352 | 6 |
| AX-158189494 | 17 | 15.2   | KV452884.1 | 2123157 | 6-scf00352 | 6 |
| AX-158189507 | 17 | 15.2   | KV452884.1 | 2136160 | 6-scf00352 | 6 |
| AX-158189561 | 17 | 15.2   | KV452884.1 | 2195285 | 6-scf00352 | 6 |
| AX-158380663 | 17 | 15.309 | KV452884.1 | 2113053 | 6-scf00352 | 6 |
| AX-158189493 | 17 | 15.309 | KV452884.1 | 2122402 | 6-scf00352 | 6 |
| AX-158189496 | 17 | 15.309 | KV452884.1 | 2124607 | 6-scf00352 | 6 |
| AX-158189498 | 17 | 15.309 | KV452884.1 | 2125672 | 6-scf00352 | 6 |
| AX-158189500 | 17 | 15.309 | KV452884.1 | 2129122 | 6-scf00352 | 6 |
| AX-158189501 | 17 | 15.309 | KV452884.1 | 2130490 | 6-scf00352 | 6 |
| AX-158189443 | 17 | 15.527 | KV452884.1 | 2054845 | 6-scf00352 | 6 |

|              |    |        |            |         |            |   |
|--------------|----|--------|------------|---------|------------|---|
| AX-158189497 | 17 | 15.527 | KV452884.1 | 2125253 | 6-scf00352 | 6 |
| AX-158189502 | 17 | 15.527 | KV452884.1 | 2132017 | 6-scf00352 | 6 |
| AX-158189503 | 17 | 15.527 | KV452884.1 | 2132833 | 6-scf00352 | 6 |
| AX-158189504 | 17 | 15.527 | KV452884.1 | 2133596 | 6-scf00352 | 6 |
| AX-158189506 | 17 | 15.527 | KV452884.1 | 2135687 | 6-scf00352 | 6 |
| AX-158189508 | 17 | 15.527 | KV452884.1 | 2137439 | 6-scf00352 | 6 |
| AX-158189509 | 17 | 15.527 | KV452884.1 | 2138867 | 6-scf00352 | 6 |
| AX-158189510 | 17 | 15.527 | KV452884.1 | 2140183 | 6-scf00352 | 6 |
| AX-158189512 | 17 | 15.527 | KV452884.1 | 2142886 | 6-scf00352 | 6 |
| AX-158189514 | 17 | 15.527 | KV452884.1 | 2145222 | 6-scf00352 | 6 |
| AX-158189515 | 17 | 15.527 | KV452884.1 | 2145815 | 6-scf00352 | 6 |
| AX-158189517 | 17 | 15.527 | KV452884.1 | 2149266 | 6-scf00352 | 6 |
| AX-158418210 | 17 | 15.527 | KV452884.1 | 2149778 | 6-scf00352 | 6 |
| AX-158189518 | 17 | 15.527 | KV452884.1 | 2150274 | 6-scf00352 | 6 |
| AX-158189519 | 17 | 15.527 | KV452884.1 | 2150834 | 6-scf00352 | 6 |
| AX-158189520 | 17 | 15.527 | KV452884.1 | 2151856 | 6-scf00352 | 6 |
| AX-158189521 | 17 | 15.527 | KV452884.1 | 2152360 | 6-scf00352 | 6 |
| AX-158189523 | 17 | 15.527 | KV452884.1 | 2152892 | 6-scf00352 | 6 |
| AX-158413862 | 17 | 15.527 | KV452884.1 | 2154600 | 6-scf00352 | 6 |
| AX-158189524 | 17 | 15.527 | KV452884.1 | 2155274 | 6-scf00352 | 6 |
| AX-158189527 | 17 | 15.527 | KV452884.1 | 2158772 | 6-scf00352 | 6 |
| AX-158189529 | 17 | 15.527 | KV452884.1 | 2160103 | 6-scf00352 | 6 |
| AX-158189536 | 17 | 15.527 | KV452884.1 | 2173769 | 6-scf00352 | 6 |
| AX-158189539 | 17 | 15.527 | KV452884.1 | 2175256 | 6-scf00352 | 6 |
| AX-158189537 | 17 | 15.58  | KV452884.1 | 2174018 | 6-scf00352 | 6 |
| AX-158189538 | 17 | 15.624 | KV452884.1 | 2174488 | 6-scf00352 | 6 |
| AX-158189540 | 17 | 15.635 | KV452884.1 | 2176037 | 6-scf00352 | 6 |
| AX-158189541 | 17 | 15.637 | KV452884.1 | 2176529 | 6-scf00352 | 6 |
| AX-158189544 | 17 | 15.963 | KV452884.1 | 2180209 | 6-scf00352 | 6 |
| AX-157836453 | 17 | 15.963 | KV452884.1 | 2206596 | 6-scf00352 | 6 |
| AX-158189547 | 17 | 15.964 | KV452884.1 | 2184555 | 6-scf00352 | 6 |
| AX-158189543 | 17 | 15.965 | KV452884.1 | 2179816 | 6-scf00352 | 6 |
| AX-158189548 | 17 | 15.965 | KV452884.1 | 2185545 | 6-scf00352 | 6 |
| AX-158189550 | 17 | 15.965 | KV452884.1 | 2187041 | 6-scf00352 | 6 |
| AX-158189551 | 17 | 15.965 | KV452884.1 | 2188461 | 6-scf00352 | 6 |
| AX-158189552 | 17 | 15.965 | KV452884.1 | 2188906 | 6-scf00352 | 6 |
| AX-158189556 | 17 | 16.183 | KV452884.1 | 2192259 | 6-scf00352 | 6 |
| AX-158189558 | 17 | 16.183 | KV452884.1 | 2192735 | 6-scf00352 | 6 |
| AX-158189559 | 17 | 16.183 | KV452884.1 | 2192972 | 6-scf00352 | 6 |
| AX-158189560 | 17 | 16.183 | KV452884.1 | 2195025 | 6-scf00352 | 6 |
| AX-158189562 | 17 | 16.183 | KV452884.1 | 2197959 | 6-scf00352 | 6 |
| AX-158380664 | 17 | 16.183 | KV452884.1 | 2201498 | 6-scf00352 | 6 |
| AX-158189564 | 17 | 16.183 | KV452884.1 | 2202938 | 6-scf00352 | 6 |
| AX-158189565 | 17 | 16.183 | KV452884.1 | 2203836 | 6-scf00352 | 6 |
| AX-158189566 | 17 | 16.292 | KV452884.1 | 2206377 | 6-scf00352 | 6 |
| AX-157745757 | 17 | 16.511 | KV452884.1 | 2207835 | 6-scf00352 | 6 |
| AX-158189572 | 17 | 16.511 | KV452884.1 | 2214899 | 6-scf00352 | 6 |
| AX-158189573 | 17 | 16.511 | KV452884.1 | 2215946 | 6-scf00352 | 6 |
| AX-158189574 | 17 | 16.511 | KV452884.1 | 2217284 | 6-scf00352 | 6 |
| AX-158189575 | 17 | 16.511 | KV452884.1 | 2221159 | 6-scf00352 | 6 |
| AX-158189557 | 17 | 16.61  | KV452884.1 | 2192475 | 6-scf00352 | 6 |



|              |    |        |            |         |            |   |
|--------------|----|--------|------------|---------|------------|---|
| AX-158189577 | 17 | 16.61  | KV452884.1 | 2222223 | 6-scf00352 | 6 |
| AX-158189579 | 17 | 16.838 | KV452884.1 | 2223397 | 6-scf00352 | 6 |
| AX-158189581 | 17 | 16.838 | KV452884.1 | 2226433 | 6-scf00352 | 6 |
| AX-157739249 | 17 | 16.838 | KV452884.1 | 2226708 | 6-scf00352 | 6 |
| AX-158189599 | 17 | 16.838 | KV452884.1 | 2245375 | 6-scf00352 | 6 |
| AX-158189583 | 17 | 16.839 | KV452884.1 | 2227873 | 6-scf00352 | 6 |
| AX-158189593 | 17 | 16.839 | KV452884.1 | 2239054 | 6-scf00352 | 6 |
| AX-158189594 | 17 | 16.84  | KV452884.1 | 2239742 | 6-scf00352 | 6 |
| AX-158189595 | 17 | 16.84  | KV452884.1 | 2241327 | 6-scf00352 | 6 |
| AX-158189578 | 17 | 17.13  | KV452884.1 | 2222931 | 6-scf00352 | 6 |
| AX-158386080 | 17 | 17.13  | KV452884.1 | 2234773 | 6-scf00352 | 6 |
| AX-158189596 | 17 | 17.13  | KV452884.1 | 2243298 | 6-scf00352 | 6 |
| AX-158189600 | 17 | 17.13  | KV452884.1 | 2246194 | 6-scf00352 | 6 |
| AX-158189603 | 17 | 17.13  | KV452884.1 | 2248867 | 6-scf00352 | 6 |
| AX-158189605 | 17 | 17.13  | KV452884.1 | 2250479 | 6-scf00352 | 6 |
| AX-158189607 | 17 | 17.13  | KV452884.1 | 2256613 | 6-scf00352 | 6 |
| AX-157721194 | 17 | 17.13  | KV452884.1 | 2258685 | 6-scf00352 | 6 |
| AX-157836458 | 17 | 17.13  | KV452884.1 | 2259062 | 6-scf00352 | 6 |
| AX-158189609 | 17 | 17.13  | KV452884.1 | 2259212 | 6-scf00352 | 6 |
| AX-158189610 | 17 | 17.13  | KV452884.1 | 2261621 | 6-scf00352 | 6 |
| AX-158189613 | 17 | 17.13  | KV452884.1 | 2264113 | 6-scf00352 | 6 |
| AX-158189615 | 17 | 17.13  | KV452884.1 | 2265722 | 6-scf00352 | 6 |
| AX-158189617 | 17 | 17.276 | KV452884.1 | 2268157 | 6-scf00352 | 6 |
| AX-158189618 | 17 | 17.276 | KV452884.1 | 2268690 | 6-scf00352 | 6 |
| AX-158189621 | 17 | 17.3   | KV452884.1 | 2271315 | 6-scf00352 | 6 |
| AX-158189623 | 17 | 17.386 | KV452884.1 | 2274296 | 6-scf00352 | 6 |
| AX-158189626 | 17 | 17.386 | KV452884.1 | 2276481 | 6-scf00352 | 6 |
| AX-157836459 | 17 | 17.386 | KV452884.1 | 2278559 | 6-scf00352 | 6 |
| AX-158189628 | 17 | 17.386 | KV452884.1 | 2283545 | 6-scf00352 | 6 |
| AX-157722624 | 17 | 17.526 | KV452884.1 | 2283509 | 6-scf00352 | 6 |
| AX-157775820 | 17 | 17.604 | KV452884.1 | 2279339 | 6-scf00352 | 6 |
| AX-157836463 | 17 | 17.604 | KV452884.1 | 2284144 | 6-scf00352 | 6 |
| AX-157836464 | 17 | 17.604 | KV452884.1 | 2284768 | 6-scf00352 | 6 |
| AX-158189629 | 17 | 17.604 | KV452884.1 | 2285291 | 6-scf00352 | 6 |
| AX-158189630 | 17 | 17.604 | KV452884.1 | 2285845 | 6-scf00352 | 6 |
| AX-158189632 | 17 | 17.604 | KV452884.1 | 2288506 | 6-scf00352 | 6 |
| AX-158189633 | 17 | 17.604 | KV452884.1 | 2290835 | 6-scf00352 | 6 |
| AX-158189635 | 17 | 17.604 | KV452884.1 | 2292851 | 6-scf00352 | 6 |
| AX-158189636 | 17 | 17.604 | KV452884.1 | 2294548 | 6-scf00352 | 6 |
| AX-158189638 | 17 | 17.604 | KV452884.1 | 2297005 | 6-scf00352 | 6 |
| AX-158189639 | 17 | 17.604 | KV452884.1 | 2297792 | 6-scf00352 | 6 |
| AX-158189641 | 17 | 17.604 | KV452884.1 | 2298639 | 6-scf00352 | 6 |
| AX-158189642 | 17 | 17.604 | KV452884.1 | 2299141 | 6-scf00352 | 6 |
| AX-158189645 | 17 | 17.823 | KV452884.1 | 2301518 | 6-scf00352 | 6 |
| AX-158189646 | 17 | 17.857 | KV452884.1 | 2302197 | 6-scf00352 | 6 |
| AX-158189648 | 17 | 17.892 | KV452884.1 | 2302761 | 6-scf00352 | 6 |
| AX-158189649 | 17 | 17.933 | KV452884.1 | 2303841 | 6-scf00352 | 6 |
| AX-157836465 | 17 | 17.933 | KV452884.1 | 2305889 | 6-scf00352 | 6 |
| AX-157836461 | 17 | 18.131 | KV452884.1 | 2281977 | 6-scf00352 | 6 |
| AX-158189656 | 17 | 18.131 | KV452884.1 | 2309521 | 6-scf00352 | 6 |
| AX-158189660 | 17 | 18.131 | KV452884.1 | 2311689 | 6-scf00352 | 6 |

|              |    |        |             |         |            |    |
|--------------|----|--------|-------------|---------|------------|----|
| AX-158189662 | 17 | 18.131 | KV452884.1  | 2312577 | 6-scf00352 | 6  |
| AX-158189666 | 17 | 18.296 | KV452884.1  | 2316596 | 6-scf00352 | 6  |
| AX-158189670 | 17 | 18.478 | KV452884.1  | 2319267 | 6-scf00352 | 6  |
| AX-158189667 | 17 | 18.479 | KV452884.1  | 2317016 | 6-scf00352 | 6  |
| AX-158189668 | 17 | 18.479 | KV452884.1  | 2318141 | 6-scf00352 | 6  |
| AX-158189674 | 17 | 18.479 | KV452884.1  | 2323763 | 6-scf00352 | 6  |
| AX-157747369 | 17 | 18.479 | KV452884.1  | 2325457 | 6-scf00352 | 6  |
| AX-158189677 | 17 | 18.479 | KV452884.1  | 2329365 | 6-scf00352 | 6  |
| AX-157718634 | 17 | 18.479 | KV452884.1  | 2335035 | 6-scf00352 | 6  |
| AX-157774102 | 17 | 18.479 | KV452884.1  | 2339167 | 6-scf00352 | 6  |
| AX-158189683 | 17 | 18.479 | KV452884.1  | 2340618 | 6-scf00352 | 6  |
| AX-158189688 | 17 | 18.479 | KV452884.1  | 2352313 | 6-scf00352 | 6  |
| AX-157705961 | 17 | 18.479 | 3ML01031320 | 644     | scf06929_1 | UN |
| AX-158189672 | 17 | 18.806 | KV452884.1  | 2321188 | 6-scf00352 | 6  |
| AX-158189686 | 17 | 18.806 | KV452884.1  | 2345925 | 6-scf00352 | 6  |
| AX-158189687 | 17 | 18.806 | KV452884.1  | 2347835 | 6-scf00352 | 6  |
| AX-157836467 | 17 | 18.806 | KV452884.1  | 2348373 | 6-scf00352 | 6  |
| AX-157836468 | 17 | 18.806 | KV452884.1  | 2349425 | 6-scf00352 | 6  |
| AX-157716726 | 17 | 18.806 | KV452884.1  | 2351494 | 6-scf00352 | 6  |
| AX-157747524 | 17 | 18.81  | KV452884.1  | 2352780 | 6-scf00352 | 6  |
| AX-158189705 | 17 | 18.81  | KV452884.1  | 2378180 | 6-scf00352 | 6  |
| AX-158189690 | 17 | 19.238 | KV452884.1  | 2358897 | 6-scf00352 | 6  |
| AX-158189691 | 17 | 19.242 | KV452884.1  | 2361203 | 6-scf00352 | 6  |
| AX-158189692 | 17 | 19.242 | KV452884.1  | 2362049 | 6-scf00352 | 6  |
| AX-158189693 | 17 | 19.244 | KV452884.1  | 2363266 | 6-scf00352 | 6  |
| AX-157726837 | 17 | 19.465 | KV452884.1  | 2364460 | 6-scf00352 | 6  |
| AX-158189696 | 17 | 19.676 | KV452884.1  | 2370210 | 6-scf00352 | 6  |
| AX-158189713 | 17 | 19.676 | KV452884.1  | 2396102 | 6-scf00352 | 6  |
| AX-158189697 | 17 | 19.678 | KV452884.1  | 2370611 | 6-scf00352 | 6  |
| AX-158189699 | 17 | 19.681 | KV452884.1  | 2373737 | 6-scf00352 | 6  |
| AX-158189702 | 17 | 19.823 | KV452884.1  | 2376272 | 6-scf00352 | 6  |
| AX-158189707 | 17 | 19.823 | KV452884.1  | 2385897 | 6-scf00352 | 6  |
| AX-158189709 | 17 | 19.852 | KV452884.1  | 2390164 | 6-scf00352 | 6  |
| AX-158189710 | 17 | 19.876 | KV452884.1  | 2391458 | 6-scf00352 | 6  |
| AX-158189711 | 17 | 19.912 | KV452884.1  | 2392645 | 6-scf00352 | 6  |
| AX-158189717 | 17 | 19.965 | KV452884.1  | 2401973 | 6-scf00352 | 6  |
| AX-158189718 | 17 | 19.965 | KV452884.1  | 2403085 | 6-scf00352 | 6  |
| AX-158189719 | 17 | 19.965 | KV452884.1  | 2404272 | 6-scf00352 | 6  |
| AX-157858886 | 17 | 19.965 | KV452884.1  | 2410300 | 6-scf00352 | 6  |
| AX-158393605 | 17 | 20.152 | KV452884.1  | 2410690 | 6-scf00352 | 6  |
| AX-158189725 | 17 | 20.152 | KV452884.1  | 2411401 | 6-scf00352 | 6  |
| AX-158189727 | 17 | 20.152 | KV452884.1  | 2415772 | 6-scf00352 | 6  |
| AX-158189730 | 17 | 20.153 | KV452884.1  | 2417716 | 6-scf00352 | 6  |
| AX-158189714 | 17 | 20.156 | KV452884.1  | 2399865 | 6-scf00352 | 6  |
| AX-158189726 | 17 | 20.156 | KV452884.1  | 2412548 | 6-scf00352 | 6  |
| AX-158189731 | 17 | 20.156 | KV452884.1  | 2418747 | 6-scf00352 | 6  |
| AX-158189733 | 17 | 20.555 | KV452884.1  | 2419543 | 6-scf00352 | 6  |
| AX-157750906 | 17 | 20.555 | KV452884.1  | 2422826 | 6-scf00352 | 6  |
| AX-158189737 | 17 | 20.555 | KV452884.1  | 2425128 | 6-scf00352 | 6  |
| AX-158189738 | 17 | 20.557 | KV452884.1  | 2425678 | 6-scf00352 | 6  |
| AX-158189741 | 17 | 20.559 | KV452884.1  | 2428802 | 6-scf00352 | 6  |

|              |    |        |            |         |            |   |
|--------------|----|--------|------------|---------|------------|---|
| AX-158189743 | 17 | 20.773 | KV452884.1 | 2432670 | 6-scf00352 | 6 |
| AX-158189740 | 17 | 20.782 | KV452884.1 | 2427691 | 6-scf00352 | 6 |
| AX-158189744 | 17 | 20.782 | KV452884.1 | 2434601 | 6-scf00352 | 6 |
| AX-158189750 | 17 | 20.782 | KV452884.1 | 2444224 | 6-scf00352 | 6 |
| AX-158189745 | 17 | 20.987 | KV452884.1 | 2436136 | 6-scf00352 | 6 |
| AX-158189747 | 17 | 20.991 | KV452884.1 | 2438403 | 6-scf00352 | 6 |
| AX-158189748 | 17 | 21.43  | KV452884.1 | 2441654 | 6-scf00352 | 6 |
| AX-158189749 | 17 | 21.43  | KV452884.1 | 2442848 | 6-scf00352 | 6 |
| AX-158189752 | 17 | 21.43  | KV452884.1 | 2447291 | 6-scf00352 | 6 |
| AX-158189753 | 17 | 21.43  | KV452884.1 | 2448926 | 6-scf00352 | 6 |
| AX-157772612 | 17 | 21.746 | KV452884.1 | 2451347 | 6-scf00352 | 6 |
| AX-158189754 | 17 | 21.746 | KV452884.1 | 2451898 | 6-scf00352 | 6 |
| AX-158189755 | 17 | 21.782 | KV452884.1 | 2456921 | 6-scf00352 | 6 |
| AX-158189758 | 17 | 21.782 | KV452884.1 | 2461137 | 6-scf00352 | 6 |
| AX-158189770 | 17 | 21.782 | KV452884.1 | 2474593 | 6-scf00352 | 6 |
| AX-158189759 | 17 | 21.941 | KV452884.1 | 2461762 | 6-scf00352 | 6 |
| AX-158189762 | 17 | 22.086 | KV452884.1 | 2464139 | 6-scf00352 | 6 |
| AX-158189764 | 17 | 22.086 | KV452884.1 | 2466926 | 6-scf00352 | 6 |
| AX-157727456 | 17 | 22.086 | KV452884.1 | 2468164 | 6-scf00352 | 6 |
| AX-158189766 | 17 | 22.086 | KV452884.1 | 2472160 | 6-scf00352 | 6 |
| AX-158189767 | 17 | 22.086 | KV452884.1 | 2472812 | 6-scf00352 | 6 |
| AX-158189768 | 17 | 22.086 | KV452884.1 | 2473502 | 6-scf00352 | 6 |
| AX-158189773 | 17 | 22.086 | KV452884.1 | 2478131 | 6-scf00352 | 6 |
| AX-157739818 | 17 | 22.086 | KV452884.1 | 2482128 | 6-scf00352 | 6 |
| AX-158189777 | 17 | 22.086 | KV452884.1 | 2484879 | 6-scf00352 | 6 |
| AX-158189781 | 17 | 22.086 | KV452884.1 | 2490290 | 6-scf00352 | 6 |
| AX-158189786 | 17 | 22.086 | KV452884.1 | 2494467 | 6-scf00352 | 6 |
| AX-158189769 | 17 | 22.142 | KV452884.1 | 2474462 | 6-scf00352 | 6 |
| AX-157836470 | 17 | 22.142 | KV452884.1 | 2479780 | 6-scf00352 | 6 |
| AX-158189778 | 17 | 22.195 | KV452884.1 | 2486029 | 6-scf00352 | 6 |
| AX-158189789 | 17 | 22.195 | KV452884.1 | 2498146 | 6-scf00352 | 6 |
| AX-158189792 | 17 | 22.195 | KV452884.1 | 2501387 | 6-scf00352 | 6 |
| AX-158189800 | 17 | 22.336 | KV452884.1 | 2508313 | 6-scf00352 | 6 |
| AX-158189805 | 17 | 22.415 | KV452884.1 | 2511666 | 6-scf00352 | 6 |
| AX-158189806 | 17 | 22.415 | KV452884.1 | 2513946 | 6-scf00352 | 6 |
| AX-158189808 | 17 | 22.415 | KV452884.1 | 2520574 | 6-scf00352 | 6 |
| AX-157739616 | 17 | 22.415 | KV452884.1 | 2520745 | 6-scf00352 | 6 |
| AX-158189812 | 17 | 22.415 | KV452884.1 | 2523745 | 6-scf00352 | 6 |
| AX-158189810 | 17 | 22.63  | KV452884.1 | 2522385 | 6-scf00352 | 6 |
| AX-158189815 | 17 | 22.632 | KV452884.1 | 2526121 | 6-scf00352 | 6 |
| AX-158189816 | 17 | 22.632 | KV452884.1 | 2526778 | 6-scf00352 | 6 |
| AX-158189817 | 17 | 22.632 | KV452884.1 | 2527569 | 6-scf00352 | 6 |
| AX-157836472 | 17 | 22.632 | KV452884.1 | 2527760 | 6-scf00352 | 6 |
| AX-158189820 | 17 | 22.632 | KV452884.1 | 2531237 | 6-scf00352 | 6 |
| AX-158189826 | 17 | 22.742 | KV452884.1 | 2538979 | 6-scf00352 | 6 |
| AX-158189828 | 17 | 22.742 | KV452884.1 | 2542752 | 6-scf00352 | 6 |
| AX-158189829 | 17 | 22.742 | KV452884.1 | 2543308 | 6-scf00352 | 6 |
| AX-157743225 | 17 | 22.742 | KV452884.1 | 2543583 | 6-scf00352 | 6 |
| AX-158189830 | 17 | 22.742 | KV452884.1 | 2545720 | 6-scf00352 | 6 |
| AX-158189834 | 17 | 22.742 | KV452884.1 | 2552264 | 6-scf00352 | 6 |
| AX-158189839 | 17 | 22.742 | KV452884.1 | 2556563 | 6-scf00352 | 6 |

|              |    |        |            |         |            |   |
|--------------|----|--------|------------|---------|------------|---|
| AX-158189851 | 17 | 22.742 | KV452884.1 | 2572097 | 6-scf00352 | 6 |
| AX-158189840 | 17 | 22.743 | KV452884.1 | 2558430 | 6-scf00352 | 6 |
| AX-157739520 | 17 | 22.965 | KV452884.1 | 2559961 | 6-scf00352 | 6 |
| AX-158189841 | 17 | 22.965 | KV452884.1 | 2560755 | 6-scf00352 | 6 |
| AX-158189843 | 17 | 22.972 | KV452884.1 | 2562185 | 6-scf00352 | 6 |
| AX-158189849 | 17 | 22.972 | KV452884.1 | 2569567 | 6-scf00352 | 6 |
| AX-157757691 | 17 | 22.972 | KV452884.1 | 2583047 | 6-scf00352 | 6 |
| AX-158189846 | 17 | 22.979 | KV452884.1 | 2566262 | 6-scf00352 | 6 |
| AX-158189852 | 17 | 23.382 | KV452884.1 | 2575931 | 6-scf00352 | 6 |
| AX-158413889 | 17 | 23.382 | KV452884.1 | 2580033 | 6-scf00352 | 6 |
| AX-158189853 | 17 | 23.429 | KV452884.1 | 2578720 | 6-scf00352 | 6 |
| AX-158413890 | 17 | 23.531 | KV452884.1 | 2580539 | 6-scf00352 | 6 |
| AX-158393606 | 17 | 23.632 | KV452884.1 | 2535413 | 6-scf00352 | 6 |
| AX-158189823 | 17 | 23.632 | KV452884.1 | 2537151 | 6-scf00352 | 6 |
| AX-158189836 | 17 | 23.632 | KV452884.1 | 2554936 | 6-scf00352 | 6 |
| AX-158189854 | 17 | 23.632 | KV452884.1 | 2583579 | 6-scf00352 | 6 |
| AX-158189858 | 17 | 23.632 | KV452884.1 | 2588464 | 6-scf00352 | 6 |
| AX-158189864 | 17 | 23.632 | KV452884.1 | 2593609 | 6-scf00352 | 6 |
| AX-158189869 | 17 | 23.632 | KV452884.1 | 2597712 | 6-scf00352 | 6 |
| AX-158189856 | 17 | 23.731 | KV452884.1 | 2585093 | 6-scf00352 | 6 |
| AX-158189863 | 17 | 23.731 | KV452884.1 | 2592062 | 6-scf00352 | 6 |
| AX-158189867 | 17 | 23.732 | KV452884.1 | 2595564 | 6-scf00352 | 6 |
| AX-157886931 | 17 | 24.022 | KV452884.1 | 2598713 | 6-scf00352 | 6 |
| AX-158189894 | 17 | 24.04  | KV452884.1 | 2626551 | 6-scf00352 | 6 |
| AX-158189895 | 17 | 24.04  | KV452884.1 | 2627178 | 6-scf00352 | 6 |
| AX-158189903 | 17 | 24.493 | KV452884.1 | 2639176 | 6-scf00352 | 6 |
| AX-158189906 | 17 | 24.493 | KV452884.1 | 2644628 | 6-scf00352 | 6 |
| AX-158189908 | 17 | 24.493 | KV452884.1 | 2645663 | 6-scf00352 | 6 |
| AX-158189909 | 17 | 24.493 | KV452884.1 | 2646799 | 6-scf00352 | 6 |
| AX-158189911 | 17 | 24.493 | KV452884.1 | 2652350 | 6-scf00352 | 6 |
| AX-158189912 | 17 | 24.493 | KV452884.1 | 2653753 | 6-scf00352 | 6 |
| AX-158189920 | 17 | 24.493 | KV452884.1 | 2660795 | 6-scf00352 | 6 |
| AX-158189913 | 17 | 24.665 | KV452884.1 | 2654182 | 6-scf00352 | 6 |
| AX-158189914 | 17 | 24.753 | KV452884.1 | 2654576 | 6-scf00352 | 6 |
| AX-158189915 | 17 | 24.837 | KV452884.1 | 2655033 | 6-scf00352 | 6 |
| AX-158189922 | 17 | 24.837 | KV452884.1 | 2664822 | 6-scf00352 | 6 |
| AX-158380667 | 17 | 24.934 | KV452884.1 | 2640367 | 6-scf00352 | 6 |
| AX-158189904 | 17 | 24.934 | KV452884.1 | 2641235 | 6-scf00352 | 6 |
| AX-158189923 | 17 | 24.934 | KV452884.1 | 2665583 | 6-scf00352 | 6 |
| AX-158189924 | 17 | 24.934 | KV452884.1 | 2666086 | 6-scf00352 | 6 |
| AX-157750221 | 17 | 24.934 | KV452884.1 | 2668126 | 6-scf00352 | 6 |
| AX-158189929 | 17 | 24.934 | KV452884.1 | 2671337 | 6-scf00352 | 6 |
| AX-158189988 | 17 | 24.934 | KV452884.1 | 2745617 | 6-scf00352 | 6 |
| AX-158189931 | 17 | 25.153 | KV452884.1 | 2674301 | 6-scf00352 | 6 |
| AX-158189934 | 17 | 25.286 | KV452884.1 | 2676612 | 6-scf00352 | 6 |
| AX-158189939 | 17 | 25.286 | KV452884.1 | 2685544 | 6-scf00352 | 6 |
| AX-158189941 | 17 | 25.286 | KV452884.1 | 2687278 | 6-scf00352 | 6 |
| AX-157708260 | 17 | 25.286 | KV452884.1 | 2690085 | 6-scf00352 | 6 |
| AX-158189945 | 17 | 25.286 | KV452884.1 | 2690275 | 6-scf00352 | 6 |
| AX-158189946 | 17 | 25.286 | KV452884.1 | 2690735 | 6-scf00352 | 6 |
| AX-158189947 | 17 | 25.286 | KV452884.1 | 2691314 | 6-scf00352 | 6 |

|              |    |        |            |         |            |   |
|--------------|----|--------|------------|---------|------------|---|
| AX-158189948 | 17 | 25.286 | KV452884.1 | 2693184 | 6-scf00352 | 6 |
| AX-158189951 | 17 | 25.393 | KV452884.1 | 2698677 | 6-scf00352 | 6 |
| AX-158189954 | 17 | 25.457 | KV452884.1 | 2700376 | 6-scf00352 | 6 |
| AX-158189955 | 17 | 25.572 | KV452884.1 | 2700923 | 6-scf00352 | 6 |
| AX-158380668 | 17 | 25.572 | KV452884.1 | 2701507 | 6-scf00352 | 6 |
| AX-158189956 | 17 | 25.572 | KV452884.1 | 2701658 | 6-scf00352 | 6 |
| AX-158189957 | 17 | 25.572 | KV452884.1 | 2703181 | 6-scf00352 | 6 |
| AX-158189958 | 17 | 25.572 | KV452884.1 | 2703724 | 6-scf00352 | 6 |
| AX-158189959 | 17 | 25.665 | KV452884.1 | 2704546 | 6-scf00352 | 6 |
| AX-157771225 | 17 | 25.756 | KV452884.1 | 2706920 | 6-scf00352 | 6 |
| AX-158189963 | 17 | 25.917 | KV452884.1 | 2708884 | 6-scf00352 | 6 |
| AX-158189966 | 17 | 25.917 | KV452884.1 | 2713480 | 6-scf00352 | 6 |
| AX-157740605 | 17 | 26.185 | KV452884.1 | 2714832 | 6-scf00352 | 6 |
| AX-158189968 | 17 | 26.452 | KV452884.1 | 2720589 | 6-scf00352 | 6 |
| AX-158189969 | 17 | 26.452 | KV452884.1 | 2721316 | 6-scf00352 | 6 |
| AX-158189970 | 17 | 26.452 | KV452884.1 | 2721847 | 6-scf00352 | 6 |
| AX-158189971 | 17 | 26.452 | KV452884.1 | 2722407 | 6-scf00352 | 6 |
| AX-158189967 | 17 | 26.485 | KV452884.1 | 2715433 | 6-scf00352 | 6 |
| AX-158413893 | 17 | 26.485 | KV452884.1 | 2724278 | 6-scf00352 | 6 |
| AX-158189973 | 17 | 26.485 | KV452884.1 | 2725302 | 6-scf00352 | 6 |
| AX-158189976 | 17 | 26.95  | KV452884.1 | 2727879 | 6-scf00352 | 6 |
| AX-157717392 | 17 | 26.95  | KV452884.1 | 2735513 | 6-scf00352 | 6 |
| AX-158189983 | 17 | 26.95  | KV452884.1 | 2737195 | 6-scf00352 | 6 |
| AX-158189984 | 17 | 27.121 | KV452884.1 | 2741127 | 6-scf00352 | 6 |
| AX-158189985 | 17 | 27.121 | KV452884.1 | 2743166 | 6-scf00352 | 6 |
| AX-158189986 | 17 | 27.149 | KV452884.1 | 2744398 | 6-scf00352 | 6 |
| AX-158189990 | 17 | 27.195 | KV452884.1 | 2747562 | 6-scf00352 | 6 |
| AX-158189964 | 17 | 27.23  | KV452884.1 | 2710405 | 6-scf00352 | 6 |
| AX-158189991 | 17 | 27.23  | KV452884.1 | 2748973 | 6-scf00352 | 6 |
| AX-158189992 | 17 | 27.23  | KV452884.1 | 2749530 | 6-scf00352 | 6 |
| AX-158189993 | 17 | 27.23  | KV452884.1 | 2749760 | 6-scf00352 | 6 |
| AX-157866793 | 17 | 27.558 | KV452884.1 | 2750495 | 6-scf00352 | 6 |
| AX-158189997 | 17 | 27.558 | KV452884.1 | 2754106 | 6-scf00352 | 6 |
| AX-158189998 | 17 | 27.558 | KV452884.1 | 2754362 | 6-scf00352 | 6 |
| AX-158189999 | 17 | 27.558 | KV452884.1 | 2755925 | 6-scf00352 | 6 |
| AX-157836475 | 17 | 27.57  | KV452884.1 | 2758569 | 6-scf00352 | 6 |
| AX-158189995 | 17 | 27.592 | KV452884.1 | 2751739 | 6-scf00352 | 6 |
| AX-157836478 | 17 | 27.592 | KV452884.1 | 2760743 | 6-scf00352 | 6 |
| AX-158386087 | 17 | 27.621 | KV452884.1 | 2763193 | 6-scf00352 | 6 |
| AX-158190003 | 17 | 27.667 | KV452884.1 | 2763582 | 6-scf00352 | 6 |
| AX-158190004 | 17 | 27.69  | KV452884.1 | 2765727 | 6-scf00352 | 6 |
| AX-157836476 | 17 | 27.776 | KV452884.1 | 2758989 | 6-scf00352 | 6 |
| AX-158190002 | 17 | 27.776 | KV452884.1 | 2762733 | 6-scf00352 | 6 |
| AX-158190005 | 17 | 27.776 | KV452884.1 | 2766345 | 6-scf00352 | 6 |
| AX-158190006 | 17 | 27.776 | KV452884.1 | 2767000 | 6-scf00352 | 6 |
| AX-157714723 | 17 | 27.776 | KV452884.1 | 2768842 | 6-scf00352 | 6 |
| AX-158190008 | 17 | 27.776 | KV452884.1 | 2769695 | 6-scf00352 | 6 |
| AX-158190009 | 17 | 27.776 | KV452884.1 | 2770535 | 6-scf00352 | 6 |
| AX-158190014 | 17 | 27.776 | KV452884.1 | 2775667 | 6-scf00352 | 6 |
| AX-158190054 | 17 | 27.776 | KV452884.1 | 2835167 | 6-scf00352 | 6 |
| AX-158190060 | 17 | 27.776 | KV452884.1 | 2841122 | 6-scf00352 | 6 |

|              |    |        |            |         |            |   |
|--------------|----|--------|------------|---------|------------|---|
| AX-157836489 | 17 | 27.776 | KV452884.1 | 2860624 | 6-scf00352 | 6 |
| AX-158190088 | 17 | 27.776 | KV452884.1 | 2875664 | 6-scf00352 | 6 |
| AX-158190096 | 17 | 27.776 | KV452884.1 | 2888900 | 6-scf00352 | 6 |
| AX-158190115 | 17 | 27.776 | KV452884.1 | 2919782 | 6-scf00352 | 6 |
| AX-158190135 | 17 | 27.776 | KV452884.1 | 2949761 | 6-scf00352 | 6 |
| AX-157836479 | 17 | 27.995 | KV452884.1 | 2762581 | 6-scf00352 | 6 |
| AX-158190015 | 17 | 27.995 | KV452884.1 | 2780325 | 6-scf00352 | 6 |
| AX-158190016 | 17 | 27.995 | KV452884.1 | 2781036 | 6-scf00352 | 6 |
| AX-157758533 | 17 | 27.995 | KV452884.1 | 2781952 | 6-scf00352 | 6 |
| AX-158190020 | 17 | 27.995 | KV452884.1 | 2785355 | 6-scf00352 | 6 |
| AX-158190023 | 17 | 27.995 | KV452884.1 | 2790710 | 6-scf00352 | 6 |
| AX-158190024 | 17 | 27.995 | KV452884.1 | 2791061 | 6-scf00352 | 6 |
| AX-157836481 | 17 | 27.995 | KV452884.1 | 2792256 | 6-scf00352 | 6 |
| AX-158190026 | 17 | 28.213 | KV452884.1 | 2795549 | 6-scf00352 | 6 |
| AX-158380669 | 17 | 28.213 | KV452884.1 | 2803034 | 6-scf00352 | 6 |
| AX-158190032 | 17 | 28.213 | KV452884.1 | 2803112 | 6-scf00352 | 6 |
| AX-158190033 | 17 | 28.213 | KV452884.1 | 2804316 | 6-scf00352 | 6 |
| AX-158190034 | 17 | 28.213 | KV452884.1 | 2804896 | 6-scf00352 | 6 |
| AX-158418214 | 17 | 28.213 | KV452884.1 | 2806270 | 6-scf00352 | 6 |
| AX-157836482 | 17 | 28.288 | KV452884.1 | 2808567 | 6-scf00352 | 6 |
| AX-158393607 | 17 | 28.36  | KV452884.1 | 2810007 | 6-scf00352 | 6 |
| AX-158190072 | 17 | 28.36  | KV452884.1 | 2852387 | 6-scf00352 | 6 |
| AX-158190037 | 17 | 28.431 | KV452884.1 | 2810234 | 6-scf00352 | 6 |
| AX-158190039 | 17 | 28.431 | KV452884.1 | 2812618 | 6-scf00352 | 6 |
| AX-157836483 | 17 | 28.431 | KV452884.1 | 2813255 | 6-scf00352 | 6 |
| AX-158190041 | 17 | 28.431 | KV452884.1 | 2816474 | 6-scf00352 | 6 |
| AX-158190043 | 17 | 28.431 | KV452884.1 | 2818099 | 6-scf00352 | 6 |
| AX-158190046 | 17 | 28.431 | KV452884.1 | 2821370 | 6-scf00352 | 6 |
| AX-158190049 | 17 | 28.431 | KV452884.1 | 2826102 | 6-scf00352 | 6 |
| AX-157836484 | 17 | 28.431 | KV452884.1 | 2827052 | 6-scf00352 | 6 |
| AX-158190051 | 17 | 28.431 | KV452884.1 | 2831451 | 6-scf00352 | 6 |
| AX-158190053 | 17 | 28.431 | KV452884.1 | 2834626 | 6-scf00352 | 6 |
| AX-157836486 | 17 | 28.431 | KV452884.1 | 2838305 | 6-scf00352 | 6 |
| AX-157725447 | 17 | 28.431 | KV452884.1 | 2839103 | 6-scf00352 | 6 |
| AX-157879057 | 17 | 28.432 | KV452884.1 | 2795062 | 6-scf00352 | 6 |
| AX-158190058 | 17 | 28.432 | KV452884.1 | 2839869 | 6-scf00352 | 6 |
| AX-158190062 | 17 | 28.748 | KV452884.1 | 2842417 | 6-scf00352 | 6 |
| AX-158190063 | 17 | 28.748 | KV452884.1 | 2842845 | 6-scf00352 | 6 |
| AX-158190069 | 17 | 28.748 | KV452884.1 | 2848796 | 6-scf00352 | 6 |
| AX-158190071 | 17 | 28.748 | KV452884.1 | 2850117 | 6-scf00352 | 6 |
| AX-158190083 | 17 | 28.748 | KV452884.1 | 2865678 | 6-scf00352 | 6 |
| AX-158190070 | 17 | 28.749 | KV452884.1 | 2849851 | 6-scf00352 | 6 |
| AX-157836487 | 17 | 28.749 | KV452884.1 | 2851862 | 6-scf00352 | 6 |
| AX-158190076 | 17 | 28.749 | KV452884.1 | 2855096 | 6-scf00352 | 6 |
| AX-157836488 | 17 | 28.78  | KV452884.1 | 2856592 | 6-scf00352 | 6 |
| AX-158190080 | 17 | 28.78  | KV452884.1 | 2858598 | 6-scf00352 | 6 |
| AX-158190084 | 17 | 28.917 | KV452884.1 | 2866076 | 6-scf00352 | 6 |
| AX-157796986 | 17 | 28.985 | KV452884.1 | 2871233 | 6-scf00352 | 6 |
| AX-157836490 | 17 | 29.087 | KV452884.1 | 2869726 | 6-scf00352 | 6 |
| AX-157720203 | 17 | 29.087 | KV452884.1 | 2873516 | 6-scf00352 | 6 |
| AX-158190087 | 17 | 29.087 | KV452884.1 | 2874573 | 6-scf00352 | 6 |

|              |    |        |            |         |            |    |
|--------------|----|--------|------------|---------|------------|----|
| AX-157715760 | 17 | 29.087 | KV452884.1 | 2883467 | 6-scf00352 | 6  |
| AX-157738516 | 17 | 29.087 | KV452884.1 | 2884591 | 6-scf00352 | 6  |
| AX-158190093 | 17 | 29.087 | KV452884.1 | 2885338 | 6-scf00352 | 6  |
| AX-157836492 | 17 | 29.087 | KV452884.1 | 2886046 | 6-scf00352 | 6  |
| AX-158190094 | 17 | 29.087 | KV452884.1 | 2886092 | 6-scf00352 | 6  |
| AX-157836493 | 17 | 29.224 | KV452884.1 | 2887663 | 6-scf00352 | 6  |
| AX-158190095 | 17 | 29.224 | KV452884.1 | 2887741 | 6-scf00352 | 6  |
| AX-158190097 | 17 | 29.224 | KV452884.1 | 2890353 | 6-scf00352 | 6  |
| AX-157749803 | 17 | 29.224 | KV452884.1 | 2891020 | 6-scf00352 | 6  |
| AX-158190098 | 17 | 29.224 | KV452884.1 | 2892920 | 6-scf00352 | 6  |
| AX-158190099 | 17 | 29.224 | KV452884.1 | 2893394 | 6-scf00352 | 6  |
| AX-157739935 | 17 | 29.224 | KV452884.1 | 2897101 | 6-scf00352 | 6  |
| AX-158190108 | 17 | 29.224 | KV452884.1 | 2909722 | 6-scf00352 | 6  |
| AX-158190109 | 17 | 29.224 | KV452884.1 | 2912954 | 6-scf00352 | 6  |
| AX-158190100 | 17 | 29.362 | KV452884.1 | 2894033 | 6-scf00352 | 6  |
| AX-157717265 | 17 | 29.621 | KV452884.1 | 2900905 | 6-scf00352 | 6  |
| AX-157836494 | 17 | 29.621 | KV452884.1 | 2902355 | 6-scf00352 | 6  |
| AX-157836495 | 17 | 29.624 | KV452884.1 | 2903171 | 6-scf00352 | 6  |
| AX-158190112 | 17 | 29.626 | KV452884.1 | 2917751 | 6-scf00352 | 6  |
| AX-158190113 | 17 | 29.626 | KV452884.1 | 2918052 | 6-scf00352 | 6  |
| AX-157697943 | 17 | 29.779 | FI886442.1 | 200     | 6-scf00352 | UN |
| AX-158190120 | 17 | 30.074 | KV452884.1 | 2929843 | 6-scf00352 | 6  |
| AX-157743879 | 17 | 30.181 | KV452884.1 | 2905083 | 6-scf00352 | 6  |
| AX-158190114 | 17 | 30.181 | KV452884.1 | 2919459 | 6-scf00352 | 6  |
| AX-158190121 | 17 | 30.181 | KV452884.1 | 2930152 | 6-scf00352 | 6  |
| AX-158190123 | 17 | 30.181 | KV452884.1 | 2932724 | 6-scf00352 | 6  |
| AX-158190124 | 17 | 30.181 | KV452884.1 | 2933310 | 6-scf00352 | 6  |
| AX-158190126 | 17 | 30.181 | KV452884.1 | 2934423 | 6-scf00352 | 6  |
| AX-158190130 | 17 | 30.227 | KV452884.1 | 2938698 | 6-scf00352 | 6  |
| AX-158190128 | 17 | 30.29  | KV452884.1 | 2937119 | 6-scf00352 | 6  |
| AX-158413902 | 17 | 30.29  | KV452884.1 | 2948154 | 6-scf00352 | 6  |
| AX-157740188 | 17 | 30.29  | KV452884.1 | 2949242 | 6-scf00352 | 6  |
| AX-158190136 | 17 | 30.29  | KV452884.1 | 2951429 | 6-scf00352 | 6  |
| AX-158190137 | 17 | 30.29  | KV452884.1 | 2955237 | 6-scf00352 | 6  |
| AX-158190138 | 17 | 30.29  | KV452884.1 | 2957813 | 6-scf00352 | 6  |
| AX-158190139 | 17 | 30.466 | KV452884.1 | 2958507 | 6-scf00352 | 6  |
| AX-158190127 | 17 | 30.618 | KV452884.1 | 2934832 | 6-scf00352 | 6  |
| AX-158190140 | 17 | 30.618 | KV452884.1 | 2958921 | 6-scf00352 | 6  |
| AX-158190141 | 17 | 30.618 | KV452884.1 | 2962635 | 6-scf00352 | 6  |
| AX-158409651 | 17 | 30.618 | KV452884.1 | 2971430 | 6-scf00352 | 6  |
| AX-158190146 | 17 | 30.618 | KV452884.1 | 2975752 | 6-scf00352 | 6  |
| AX-158190148 | 17 | 30.618 | KV452884.1 | 2976835 | 6-scf00352 | 6  |
| AX-158190150 | 17 | 30.618 | KV452884.1 | 2978681 | 6-scf00352 | 6  |
| AX-158380670 | 17 | 30.618 | KV452884.1 | 2978725 | 6-scf00352 | 6  |
| AX-158190153 | 17 | 30.618 | KV452884.1 | 2980936 | 6-scf00352 | 6  |
| AX-158190160 | 17 | 30.618 | KV452884.1 | 2993825 | 6-scf00352 | 6  |
| AX-157696981 | 17 | 30.618 | KV452884.1 | 2995280 | 6-scf00352 | 6  |
| AX-158190161 | 17 | 30.618 | KV452884.1 | 3000700 | 6-scf00352 | 6  |
| AX-158190170 | 17 | 30.618 | KV452884.1 | 3011089 | 6-scf00352 | 6  |
| AX-158190342 | 17 | 30.618 | KV452884.1 | 3214533 | 6-scf00352 | 6  |
| AX-157740765 | 17 | 30.618 | KV452884.1 | 3309148 | 6-scf00352 | 6  |

|              |    |        |             |         |            |    |
|--------------|----|--------|-------------|---------|------------|----|
| AX-157836531 | 17 | 30.618 | KV452884.1  | 3412519 | 6-scf00352 | 6  |
| AX-157705152 | 17 | 30.618 | 3ML01028799 | 994     | scf04413_1 | UN |
| AX-158190119 | 17 | 30.946 | KV452884.1  | 2927879 | 6-scf00352 | 6  |
| AX-158190168 | 17 | 30.946 | KV452884.1  | 3009223 | 6-scf00352 | 6  |
| AX-158190177 | 17 | 30.946 | KV452884.1  | 3016955 | 6-scf00352 | 6  |
| AX-158190180 | 17 | 30.946 | KV452884.1  | 3019575 | 6-scf00352 | 6  |
| AX-158190182 | 17 | 30.946 | KV452884.1  | 3021600 | 6-scf00352 | 6  |
| AX-157866795 | 17 | 30.946 | KV452884.1  | 3022282 | 6-scf00352 | 6  |
| AX-158190184 | 17 | 30.946 | KV452884.1  | 3024175 | 6-scf00352 | 6  |
| AX-158190186 | 17 | 30.946 | KV452884.1  | 3024666 | 6-scf00352 | 6  |
| AX-157727193 | 17 | 30.946 | KV452884.1  | 3031207 | 6-scf00352 | 6  |
| AX-158190194 | 17 | 30.946 | KV452884.1  | 3031927 | 6-scf00352 | 6  |
| AX-158190196 | 17 | 30.946 | KV452884.1  | 3034712 | 6-scf00352 | 6  |
| AX-157836506 | 17 | 30.946 | KV452884.1  | 3035991 | 6-scf00352 | 6  |
| AX-157721797 | 17 | 30.946 | KV452884.1  | 3036172 | 6-scf00352 | 6  |
| AX-157772793 | 17 | 30.946 | KV452884.1  | 3043166 | 6-scf00352 | 6  |
| AX-157693447 | 17 | 30.946 | KV452884.1  | 3049006 | 6-scf00352 | 6  |
| AX-158190208 | 17 | 30.946 | KV452884.1  | 3051768 | 6-scf00352 | 6  |
| AX-158190210 | 17 | 30.946 | KV452884.1  | 3054463 | 6-scf00352 | 6  |
| AX-158190217 | 17 | 30.946 | KV452884.1  | 3058967 | 6-scf00352 | 6  |
| AX-158190215 | 17 | 30.995 | KV452884.1  | 3057702 | 6-scf00352 | 6  |
| AX-157836507 | 17 | 31.055 | KV452884.1  | 3067874 | 6-scf00352 | 6  |
| AX-158190223 | 17 | 31.055 | KV452884.1  | 3068474 | 6-scf00352 | 6  |
| AX-158190225 | 17 | 31.055 | KV452884.1  | 3072074 | 6-scf00352 | 6  |
| AX-158190189 | 17 | 31.164 | KV452884.1  | 3026853 | 6-scf00352 | 6  |
| AX-158190226 | 17 | 31.164 | KV452884.1  | 3075421 | 6-scf00352 | 6  |
| AX-158190227 | 17 | 31.164 | KV452884.1  | 3076114 | 6-scf00352 | 6  |
| AX-158413904 | 17 | 31.164 | KV452884.1  | 3079638 | 6-scf00352 | 6  |
| AX-158190231 | 17 | 31.164 | KV452884.1  | 3085773 | 6-scf00352 | 6  |
| AX-158190232 | 17 | 31.164 | KV452884.1  | 3087019 | 6-scf00352 | 6  |
| AX-158190234 | 17 | 31.164 | KV452884.1  | 3088854 | 6-scf00352 | 6  |
| AX-158190235 | 17 | 31.164 | KV452884.1  | 3089565 | 6-scf00352 | 6  |
| AX-158190236 | 17 | 31.164 | KV452884.1  | 3090231 | 6-scf00352 | 6  |
| AX-158190244 | 17 | 31.164 | KV452884.1  | 3096347 | 6-scf00352 | 6  |
| AX-158190271 | 17 | 31.164 | KV452884.1  | 3126014 | 6-scf00352 | 6  |
| AX-158190176 | 17 | 31.191 | KV452884.1  | 3015966 | 6-scf00352 | 6  |
| AX-157879059 | 17 | 31.191 | KV452884.1  | 3100757 | 6-scf00352 | 6  |
| AX-158190207 | 17 | 31.273 | KV452884.1  | 3050809 | 6-scf00352 | 6  |
| AX-157836509 | 17 | 31.273 | KV452884.1  | 3100434 | 6-scf00352 | 6  |
| AX-158190256 | 17 | 31.273 | KV452884.1  | 3108998 | 6-scf00352 | 6  |
| AX-158190258 | 17 | 31.273 | KV452884.1  | 3110935 | 6-scf00352 | 6  |
| AX-158190261 | 17 | 31.273 | KV452884.1  | 3117203 | 6-scf00352 | 6  |
| AX-158190267 | 17 | 31.273 | KV452884.1  | 3122224 | 6-scf00352 | 6  |
| AX-158190268 | 17 | 31.273 | KV452884.1  | 3123301 | 6-scf00352 | 6  |
| AX-158190272 | 17 | 31.273 | KV452884.1  | 3126661 | 6-scf00352 | 6  |
| AX-158190273 | 17 | 31.273 | KV452884.1  | 3128020 | 6-scf00352 | 6  |
| AX-158190281 | 17 | 31.273 | KV452884.1  | 3139585 | 6-scf00352 | 6  |
| AX-157836512 | 17 | 31.273 | KV452884.1  | 3141290 | 6-scf00352 | 6  |
| AX-158190283 | 17 | 31.273 | KV452884.1  | 3144619 | 6-scf00352 | 6  |
| AX-158190286 | 17 | 31.273 | KV452884.1  | 3147073 | 6-scf00352 | 6  |
| AX-158190287 | 17 | 31.273 | KV452884.1  | 3156524 | 6-scf00352 | 6  |



|              |    |        |            |         |            |   |
|--------------|----|--------|------------|---------|------------|---|
| AX-158380671 | 17 | 31.273 | KV452884.1 | 3160021 | 6-scf00352 | 6 |
| AX-158190289 | 17 | 31.273 | KV452884.1 | 3160151 | 6-scf00352 | 6 |
| AX-158190291 | 17 | 31.273 | KV452884.1 | 3162943 | 6-scf00352 | 6 |
| AX-157720480 | 17 | 31.273 | KV452884.1 | 3164041 | 6-scf00352 | 6 |
| AX-158190296 | 17 | 31.273 | KV452884.1 | 3171690 | 6-scf00352 | 6 |
| AX-158190298 | 17 | 31.273 | KV452884.1 | 3172572 | 6-scf00352 | 6 |
| AX-158190301 | 17 | 31.273 | KV452884.1 | 3176468 | 6-scf00352 | 6 |
| AX-158190303 | 17 | 31.273 | KV452884.1 | 3178007 | 6-scf00352 | 6 |
| AX-158190305 | 17 | 31.273 | KV452884.1 | 3183063 | 6-scf00352 | 6 |
| AX-158413909 | 17 | 31.273 | KV452884.1 | 3183836 | 6-scf00352 | 6 |
| AX-158190308 | 17 | 31.273 | KV452884.1 | 3186203 | 6-scf00352 | 6 |
| AX-158190310 | 17 | 31.273 | KV452884.1 | 3188798 | 6-scf00352 | 6 |
| AX-157756980 | 17 | 31.273 | KV452884.1 | 3189790 | 6-scf00352 | 6 |
| AX-158190313 | 17 | 31.273 | KV452884.1 | 3192254 | 6-scf00352 | 6 |
| AX-158190315 | 17 | 31.273 | KV452884.1 | 3193858 | 6-scf00352 | 6 |
| AX-158190316 | 17 | 31.273 | KV452884.1 | 3194224 | 6-scf00352 | 6 |
| AX-158190324 | 17 | 31.273 | KV452884.1 | 3202450 | 6-scf00352 | 6 |
| AX-158190326 | 17 | 31.273 | KV452884.1 | 3203083 | 6-scf00352 | 6 |
| AX-158190327 | 17 | 31.273 | KV452884.1 | 3203229 | 6-scf00352 | 6 |
| AX-158190332 | 17 | 31.273 | KV452884.1 | 3206004 | 6-scf00352 | 6 |
| AX-158190333 | 17 | 31.273 | KV452884.1 | 3206609 | 6-scf00352 | 6 |
| AX-158190334 | 17 | 31.273 | KV452884.1 | 3207243 | 6-scf00352 | 6 |
| AX-158190338 | 17 | 31.273 | KV452884.1 | 3211875 | 6-scf00352 | 6 |
| AX-158190344 | 17 | 31.273 | KV452884.1 | 3217380 | 6-scf00352 | 6 |
| AX-158190346 | 17 | 31.273 | KV452884.1 | 3219731 | 6-scf00352 | 6 |
| AX-158190348 | 17 | 31.273 | KV452884.1 | 3221552 | 6-scf00352 | 6 |
| AX-158190355 | 17 | 31.273 | KV452884.1 | 3231331 | 6-scf00352 | 6 |
| AX-158190358 | 17 | 31.273 | KV452884.1 | 3266213 | 6-scf00352 | 6 |
| AX-158190373 | 17 | 31.273 | KV452884.1 | 3285614 | 6-scf00352 | 6 |
| AX-158190382 | 17 | 31.273 | KV452884.1 | 3293176 | 6-scf00352 | 6 |
| AX-158190394 | 17 | 31.273 | KV452884.1 | 3305139 | 6-scf00352 | 6 |
| AX-158190397 | 17 | 31.273 | KV452884.1 | 3312793 | 6-scf00352 | 6 |
| AX-158190400 | 17 | 31.273 | KV452884.1 | 3315567 | 6-scf00352 | 6 |
| AX-158190402 | 17 | 31.273 | KV452884.1 | 3316921 | 6-scf00352 | 6 |
| AX-158190405 | 17 | 31.273 | KV452884.1 | 3321540 | 6-scf00352 | 6 |
| AX-158190406 | 17 | 31.273 | KV452884.1 | 3321785 | 6-scf00352 | 6 |
| AX-158190335 | 17 | 31.297 | KV452884.1 | 3207658 | 6-scf00352 | 6 |
| AX-157879060 | 17 | 31.336 | KV452884.1 | 3210871 | 6-scf00352 | 6 |
| AX-157773948 | 17 | 31.383 | KV452884.1 | 3181522 | 6-scf00352 | 6 |
| AX-158190340 | 17 | 31.383 | KV452884.1 | 3212758 | 6-scf00352 | 6 |
| AX-158190341 | 17 | 31.383 | KV452884.1 | 3213463 | 6-scf00352 | 6 |
| AX-158393609 | 17 | 31.383 | KV452884.1 | 3224948 | 6-scf00352 | 6 |
| AX-158190352 | 17 | 31.383 | KV452884.1 | 3227685 | 6-scf00352 | 6 |
| AX-158190353 | 17 | 31.383 | KV452884.1 | 3228069 | 6-scf00352 | 6 |
| AX-158413913 | 17 | 31.383 | KV452884.1 | 3228779 | 6-scf00352 | 6 |
| AX-157722100 | 17 | 31.383 | KV452884.1 | 3233269 | 6-scf00352 | 6 |
| AX-157836516 | 17 | 31.383 | KV452884.1 | 3233443 | 6-scf00352 | 6 |
| AX-157738879 | 17 | 31.383 | KV452884.1 | 3234362 | 6-scf00352 | 6 |
| AX-158190399 | 17 | 31.383 | KV452884.1 | 3315140 | 6-scf00352 | 6 |
| AX-158190466 | 17 | 31.383 | KV452884.1 | 3412932 | 6-scf00352 | 6 |
| AX-158190357 | 17 | 31.406 | KV452884.1 | 3265746 | 6-scf00352 | 6 |

|              |    |        |             |         |            |    |
|--------------|----|--------|-------------|---------|------------|----|
| AX-157886935 | 17 | 31.432 | KV452884.1  | 3276102 | 6-scf00352 | 6  |
| AX-158190363 | 17 | 31.462 | KV452884.1  | 3276815 | 6-scf00352 | 6  |
| AX-158418215 | 17 | 31.481 | KV452884.1  | 3142638 | 6-scf00352 | 6  |
| AX-157836518 | 17 | 31.481 | KV452884.1  | 3270250 | 6-scf00352 | 6  |
| AX-158190366 | 17 | 31.481 | KV452884.1  | 3280524 | 6-scf00352 | 6  |
| AX-158190280 | 17 | 31.492 | KV452884.1  | 3139384 | 6-scf00352 | 6  |
| AX-158190282 | 17 | 31.492 | KV452884.1  | 3142156 | 6-scf00352 | 6  |
| AX-158190285 | 17 | 31.492 | KV452884.1  | 3146101 | 6-scf00352 | 6  |
| AX-158190297 | 17 | 31.492 | KV452884.1  | 3172129 | 6-scf00352 | 6  |
| AX-158190300 | 17 | 31.492 | KV452884.1  | 3175256 | 6-scf00352 | 6  |
| AX-158190362 | 17 | 31.492 | KV452884.1  | 3276143 | 6-scf00352 | 6  |
| AX-158190371 | 17 | 31.492 | KV452884.1  | 3284650 | 6-scf00352 | 6  |
| AX-158190380 | 17 | 31.492 | KV452884.1  | 3292385 | 6-scf00352 | 6  |
| AX-158190383 | 17 | 31.492 | KV452884.1  | 3296094 | 6-scf00352 | 6  |
| AX-158190384 | 17 | 31.492 | KV452884.1  | 3296736 | 6-scf00352 | 6  |
| AX-158190388 | 17 | 31.492 | KV452884.1  | 3299033 | 6-scf00352 | 6  |
| AX-157872152 | 17 | 31.492 | KV452884.1  | 3299944 | 6-scf00352 | 6  |
| AX-158190389 | 17 | 31.492 | KV452884.1  | 3300950 | 6-scf00352 | 6  |
| AX-158190390 | 17 | 31.492 | KV452884.1  | 3301958 | 6-scf00352 | 6  |
| AX-158190392 | 17 | 31.492 | KV452884.1  | 3302578 | 6-scf00352 | 6  |
| AX-158418216 | 17 | 31.492 | KV452884.1  | 3304861 | 6-scf00352 | 6  |
| AX-158190396 | 17 | 31.492 | KV452884.1  | 3308600 | 6-scf00352 | 6  |
| AX-158190398 | 17 | 31.492 | KV452884.1  | 3313053 | 6-scf00352 | 6  |
| AX-157705289 | 17 | 31.492 | 3ML01029307 | 915     | scf04928_1 | UN |
| AX-158190403 | 17 | 31.548 | KV452884.1  | 3317269 | 6-scf00352 | 6  |
| AX-158190213 | 17 | 31.601 | KV452884.1  | 3056887 | 6-scf00352 | 6  |
| AX-158190246 | 17 | 31.601 | KV452884.1  | 3101021 | 6-scf00352 | 6  |
| AX-157836510 | 17 | 31.601 | KV452884.1  | 3103002 | 6-scf00352 | 6  |
| AX-158190339 | 17 | 31.601 | KV452884.1  | 3212396 | 6-scf00352 | 6  |
| AX-158190343 | 17 | 31.601 | KV452884.1  | 3215622 | 6-scf00352 | 6  |
| AX-158190347 | 17 | 31.601 | KV452884.1  | 3220763 | 6-scf00352 | 6  |
| AX-157719696 | 17 | 31.601 | KV452884.1  | 3310141 | 6-scf00352 | 6  |
| AX-158190409 | 17 | 31.601 | KV452884.1  | 3325745 | 6-scf00352 | 6  |
| AX-158190411 | 17 | 31.601 | KV452884.1  | 3332818 | 6-scf00352 | 6  |
| AX-158190412 | 17 | 31.601 | KV452884.1  | 3334660 | 6-scf00352 | 6  |
| AX-157749272 | 17 | 31.601 | KV452884.1  | 3365501 | 6-scf00352 | 6  |
| AX-158190457 | 17 | 31.601 | KV452884.1  | 3390388 | 6-scf00352 | 6  |
| AX-158409656 | 17 | 31.601 | KV452884.1  | 3431346 | 6-scf00352 | 6  |
| AX-158190482 | 17 | 31.601 | KV452884.1  | 3438061 | 6-scf00352 | 6  |
| AX-158190558 | 17 | 31.601 | KV452884.1  | 3536070 | 6-scf00352 | 6  |
| AX-158190659 | 17 | 31.601 | KV452884.1  | 3721071 | 6-scf00352 | 6  |
| AX-158190414 | 17 | 31.71  | KV452884.1  | 3337877 | 6-scf00352 | 6  |
| AX-158190416 | 17 | 31.71  | KV452884.1  | 3341138 | 6-scf00352 | 6  |
| AX-157750789 | 17 | 31.71  | KV452884.1  | 3341599 | 6-scf00352 | 6  |
| AX-158190420 | 17 | 31.71  | KV452884.1  | 3345457 | 6-scf00352 | 6  |
| AX-157836522 | 17 | 31.71  | KV452884.1  | 3348583 | 6-scf00352 | 6  |
| AX-158190422 | 17 | 31.71  | KV452884.1  | 3349658 | 6-scf00352 | 6  |
| AX-158190424 | 17 | 31.71  | KV452884.1  | 3350456 | 6-scf00352 | 6  |
| AX-158190425 | 17 | 31.71  | KV452884.1  | 3350991 | 6-scf00352 | 6  |
| AX-158190426 | 17 | 31.71  | KV452884.1  | 3351848 | 6-scf00352 | 6  |
| AX-158190427 | 17 | 31.71  | KV452884.1  | 3352111 | 6-scf00352 | 6  |

|              |    |        |            |         |            |   |
|--------------|----|--------|------------|---------|------------|---|
| AX-158190428 | 17 | 31.71  | KV452884.1 | 3352361 | 6-scf00352 | 6 |
| AX-158190436 | 17 | 31.71  | KV452884.1 | 3363463 | 6-scf00352 | 6 |
| AX-157836525 | 17 | 31.71  | KV452884.1 | 3369199 | 6-scf00352 | 6 |
| AX-158190440 | 17 | 31.71  | KV452884.1 | 3372965 | 6-scf00352 | 6 |
| AX-158190441 | 17 | 31.71  | KV452884.1 | 3373146 | 6-scf00352 | 6 |
| AX-158190446 | 17 | 31.71  | KV452884.1 | 3378265 | 6-scf00352 | 6 |
| AX-158190447 | 17 | 31.71  | KV452884.1 | 3379569 | 6-scf00352 | 6 |
| AX-158190448 | 17 | 31.71  | KV452884.1 | 3380309 | 6-scf00352 | 6 |
| AX-158190449 | 17 | 31.71  | KV452884.1 | 3380670 | 6-scf00352 | 6 |
| AX-157836526 | 17 | 31.71  | KV452884.1 | 3380771 | 6-scf00352 | 6 |
| AX-158190451 | 17 | 31.71  | KV452884.1 | 3381275 | 6-scf00352 | 6 |
| AX-158190452 | 17 | 31.71  | KV452884.1 | 3381739 | 6-scf00352 | 6 |
| AX-158190454 | 17 | 31.71  | KV452884.1 | 3383178 | 6-scf00352 | 6 |
| AX-157836527 | 17 | 31.71  | KV452884.1 | 3387135 | 6-scf00352 | 6 |
| AX-158190456 | 17 | 31.71  | KV452884.1 | 3388349 | 6-scf00352 | 6 |
| AX-158190458 | 17 | 31.71  | KV452884.1 | 3392564 | 6-scf00352 | 6 |
| AX-158190464 | 17 | 31.71  | KV452884.1 | 3408493 | 6-scf00352 | 6 |
| AX-158190465 | 17 | 31.71  | KV452884.1 | 3410206 | 6-scf00352 | 6 |
| AX-157836530 | 17 | 31.71  | KV452884.1 | 3410581 | 6-scf00352 | 6 |
| AX-158190467 | 17 | 31.71  | KV452884.1 | 3413292 | 6-scf00352 | 6 |
| AX-158190468 | 17 | 31.71  | KV452884.1 | 3414090 | 6-scf00352 | 6 |
| AX-158190472 | 17 | 31.71  | KV452884.1 | 3418216 | 6-scf00352 | 6 |
| AX-157739723 | 17 | 31.71  | KV452884.1 | 3420432 | 6-scf00352 | 6 |
| AX-158190475 | 17 | 31.71  | KV452884.1 | 3424542 | 6-scf00352 | 6 |
| AX-157720399 | 17 | 31.71  | KV452884.1 | 3447382 | 6-scf00352 | 6 |
| AX-157751938 | 17 | 31.71  | KV452884.1 | 3691773 | 6-scf00352 | 6 |
| AX-158190431 | 17 | 31.819 | KV452884.1 | 3355689 | 6-scf00352 | 6 |
| AX-157836524 | 17 | 31.819 | KV452884.1 | 3359510 | 6-scf00352 | 6 |
| AX-158190477 | 17 | 31.819 | KV452884.1 | 3426686 | 6-scf00352 | 6 |
| AX-157747072 | 17 | 31.819 | KV452884.1 | 3427866 | 6-scf00352 | 6 |
| AX-157774211 | 17 | 31.819 | KV452884.1 | 3428906 | 6-scf00352 | 6 |
| AX-157836533 | 17 | 31.819 | KV452884.1 | 3434030 | 6-scf00352 | 6 |
| AX-157872151 | 17 | 31.983 | KV452884.1 | 3295516 | 6-scf00352 | 6 |
| AX-158190485 | 17 | 31.983 | KV452884.1 | 3441311 | 6-scf00352 | 6 |
| AX-158190493 | 17 | 31.983 | KV452884.1 | 3451129 | 6-scf00352 | 6 |
| AX-157713906 | 17 | 31.983 | KV452884.1 | 3453855 | 6-scf00352 | 6 |
| AX-158413919 | 17 | 31.983 | KV452884.1 | 3454478 | 6-scf00352 | 6 |
| AX-157836535 | 17 | 32.226 | KV452884.1 | 3453987 | 6-scf00352 | 6 |
| AX-158190132 | 17 | 32.476 | KV452884.1 | 2943835 | 6-scf00352 | 6 |
| AX-158190237 | 17 | 32.476 | KV452884.1 | 3090492 | 6-scf00352 | 6 |
| AX-158190247 | 17 | 32.476 | KV452884.1 | 3101429 | 6-scf00352 | 6 |
| AX-158190274 | 17 | 32.476 | KV452884.1 | 3128438 | 6-scf00352 | 6 |
| AX-158190517 | 17 | 32.476 | KV452884.1 | 3480328 | 6-scf00352 | 6 |
| AX-158190518 | 17 | 32.476 | KV452884.1 | 3482439 | 6-scf00352 | 6 |
| AX-158190523 | 17 | 32.476 | KV452884.1 | 3487663 | 6-scf00352 | 6 |
| AX-158190530 | 17 | 32.476 | KV452884.1 | 3495690 | 6-scf00352 | 6 |
| AX-158190536 | 17 | 32.476 | KV452884.1 | 3502794 | 6-scf00352 | 6 |
| AX-158413920 | 17 | 32.476 | KV452884.1 | 3518940 | 6-scf00352 | 6 |
| AX-158190545 | 17 | 32.476 | KV452884.1 | 3524713 | 6-scf00352 | 6 |
| AX-158190546 | 17 | 32.476 | KV452884.1 | 3525460 | 6-scf00352 | 6 |
| AX-158190548 | 17 | 32.476 | KV452884.1 | 3527701 | 6-scf00352 | 6 |

|              |    |        |            |         |            |   |
|--------------|----|--------|------------|---------|------------|---|
| AX-158190552 | 17 | 32.476 | KV452884.1 | 3530201 | 6-scf00352 | 6 |
| AX-157836538 | 17 | 32.476 | KV452884.1 | 3531005 | 6-scf00352 | 6 |
| AX-157836539 | 17 | 32.476 | KV452884.1 | 3534829 | 6-scf00352 | 6 |
| AX-158190563 | 17 | 32.476 | KV452884.1 | 3543756 | 6-scf00352 | 6 |
| AX-158190566 | 17 | 32.476 | KV452884.1 | 3554830 | 6-scf00352 | 6 |
| AX-158190567 | 17 | 32.476 | KV452884.1 | 3555246 | 6-scf00352 | 6 |
| AX-158190591 | 17 | 32.476 | KV452884.1 | 3601671 | 6-scf00352 | 6 |
| AX-158190592 | 17 | 32.476 | KV452884.1 | 3602177 | 6-scf00352 | 6 |
| AX-158190639 | 17 | 32.476 | KV452884.1 | 3680131 | 6-scf00352 | 6 |
| AX-158190679 | 17 | 32.476 | KV452884.1 | 3748922 | 6-scf00352 | 6 |
| AX-158190722 | 17 | 32.476 | KV452884.1 | 3881421 | 6-scf00352 | 6 |
| AX-157753415 | 17 | 32.476 | KV452884.1 | 4070752 | 6-scf00352 | 6 |
| AX-158190876 | 17 | 32.476 | KV452884.1 | 4177280 | 6-scf00352 | 6 |
| AX-158190571 | 17 | 32.481 | KV452884.1 | 3561309 | 6-scf00352 | 6 |
| AX-158190590 | 17 | 32.493 | KV452884.1 | 3601021 | 6-scf00352 | 6 |
| AX-158190609 | 17 | 32.505 | KV452884.1 | 3624857 | 6-scf00352 | 6 |
| AX-158190540 | 17 | 32.517 | KV452884.1 | 3509752 | 6-scf00352 | 6 |
| AX-158190541 | 17 | 32.517 | KV452884.1 | 3510728 | 6-scf00352 | 6 |
| AX-158190549 | 17 | 32.517 | KV452884.1 | 3528390 | 6-scf00352 | 6 |
| AX-158190551 | 17 | 32.517 | KV452884.1 | 3529440 | 6-scf00352 | 6 |
| AX-158190556 | 17 | 32.517 | KV452884.1 | 3534947 | 6-scf00352 | 6 |
| AX-158190614 | 17 | 32.517 | KV452884.1 | 3633824 | 6-scf00352 | 6 |
| AX-157753404 | 17 | 32.517 | KV452884.1 | 3799547 | 6-scf00352 | 6 |
| AX-158190718 | 17 | 32.517 | KV452884.1 | 3857580 | 6-scf00352 | 6 |
| AX-158190615 | 17 | 32.528 | KV452884.1 | 3635935 | 6-scf00352 | 6 |
| AX-158190618 | 17 | 32.537 | KV452884.1 | 3642490 | 6-scf00352 | 6 |
| AX-157758137 | 17 | 32.537 | KV452884.1 | 3642842 | 6-scf00352 | 6 |
| AX-158190620 | 17 | 32.543 | KV452884.1 | 3647184 | 6-scf00352 | 6 |
| AX-158190628 | 17 | 32.551 | KV452884.1 | 3655623 | 6-scf00352 | 6 |
| AX-158190574 | 17 | 32.558 | KV452884.1 | 3565739 | 6-scf00352 | 6 |
| AX-158190630 | 17 | 32.558 | KV452884.1 | 3657053 | 6-scf00352 | 6 |
| AX-158190633 | 17 | 32.571 | KV452884.1 | 3666093 | 6-scf00352 | 6 |
| AX-158190646 | 17 | 32.571 | KV452884.1 | 3701103 | 6-scf00352 | 6 |
| AX-158190375 | 17 | 32.585 | KV452884.1 | 3286739 | 6-scf00352 | 6 |
| AX-158190537 | 17 | 32.585 | KV452884.1 | 3502931 | 6-scf00352 | 6 |
| AX-158190655 | 17 | 32.585 | KV452884.1 | 3714519 | 6-scf00352 | 6 |
| AX-158190656 | 17 | 32.585 | KV452884.1 | 3717563 | 6-scf00352 | 6 |
| AX-158190661 | 17 | 32.585 | KV452884.1 | 3727725 | 6-scf00352 | 6 |
| AX-158190664 | 17 | 32.585 | KV452884.1 | 3732094 | 6-scf00352 | 6 |
| AX-158190667 | 17 | 32.585 | KV452884.1 | 3734434 | 6-scf00352 | 6 |
| AX-158190670 | 17 | 32.585 | KV452884.1 | 3738250 | 6-scf00352 | 6 |
| AX-158190672 | 17 | 32.585 | KV452884.1 | 3742983 | 6-scf00352 | 6 |
| AX-158190682 | 17 | 32.585 | KV452884.1 | 3755177 | 6-scf00352 | 6 |
| AX-157755348 | 17 | 32.775 | KV452884.1 | 3768702 | 6-scf00352 | 6 |
| AX-158190572 | 17 | 32.912 | KV452884.1 | 3561888 | 6-scf00352 | 6 |
| AX-158190616 | 17 | 32.912 | KV452884.1 | 3637392 | 6-scf00352 | 6 |
| AX-158190691 | 17 | 32.912 | KV452884.1 | 3795235 | 6-scf00352 | 6 |
| AX-158190868 | 17 | 32.912 | KV452884.1 | 4166653 | 6-scf00352 | 6 |
| AX-158190622 | 17 | 32.913 | KV452884.1 | 3651183 | 6-scf00352 | 6 |
| AX-158190651 | 17 | 32.913 | KV452884.1 | 3708508 | 6-scf00352 | 6 |
| AX-158190673 | 17 | 32.913 | KV452884.1 | 3743688 | 6-scf00352 | 6 |

|              |    |        |            |         |            |   |
|--------------|----|--------|------------|---------|------------|---|
| AX-158190698 | 17 | 32.913 | KV452884.1 | 3805124 | 6-scf00352 | 6 |
| AX-158190703 | 17 | 32.913 | KV452884.1 | 3822126 | 6-scf00352 | 6 |
| AX-157879066 | 17 | 32.913 | KV452884.1 | 3824238 | 6-scf00352 | 6 |
| AX-158380673 | 17 | 32.913 | KV452884.1 | 3832279 | 6-scf00352 | 6 |
| AX-158190707 | 17 | 32.913 | KV452884.1 | 3836878 | 6-scf00352 | 6 |
| AX-158190711 | 17 | 32.913 | KV452884.1 | 3844496 | 6-scf00352 | 6 |
| AX-158190713 | 17 | 32.913 | KV452884.1 | 3848320 | 6-scf00352 | 6 |
| AX-158190714 | 17 | 32.913 | KV452884.1 | 3850035 | 6-scf00352 | 6 |
| AX-158190720 | 17 | 32.913 | KV452884.1 | 3874207 | 6-scf00352 | 6 |
| AX-158190732 | 17 | 32.913 | KV452884.1 | 3896428 | 6-scf00352 | 6 |
| AX-158190733 | 17 | 32.913 | KV452884.1 | 3897903 | 6-scf00352 | 6 |
| AX-157753999 | 17 | 32.913 | KV452884.1 | 3916247 | 6-scf00352 | 6 |
| AX-158190740 | 17 | 32.913 | KV452884.1 | 3919546 | 6-scf00352 | 6 |
| AX-158190742 | 17 | 32.913 | KV452884.1 | 3922051 | 6-scf00352 | 6 |
| AX-158190891 | 17 | 32.913 | KV452884.1 | 4203526 | 6-scf00352 | 6 |
| AX-158190926 | 17 | 32.913 | KV452884.1 | 4254639 | 6-scf00352 | 6 |
| AX-158190953 | 17 | 32.913 | KV452884.1 | 4313740 | 6-scf00352 | 6 |
| AX-158191011 | 17 | 32.913 | KV452884.1 | 4408346 | 6-scf00352 | 6 |
| AX-158190748 | 17 | 32.966 | KV452884.1 | 3937414 | 6-scf00352 | 6 |
| AX-158190164 | 17 | 33.022 | KV452884.1 | 3004642 | 6-scf00352 | 6 |
| AX-158190220 | 17 | 33.022 | KV452884.1 | 3063545 | 6-scf00352 | 6 |
| AX-158190423 | 17 | 33.022 | KV452884.1 | 3350005 | 6-scf00352 | 6 |
| AX-158190432 | 17 | 33.022 | KV452884.1 | 3357057 | 6-scf00352 | 6 |
| AX-158190434 | 17 | 33.022 | KV452884.1 | 3360728 | 6-scf00352 | 6 |
| AX-158190497 | 17 | 33.022 | KV452884.1 | 3456657 | 6-scf00352 | 6 |
| AX-158190516 | 17 | 33.022 | KV452884.1 | 3479880 | 6-scf00352 | 6 |
| AX-158190524 | 17 | 33.022 | KV452884.1 | 3487893 | 6-scf00352 | 6 |
| AX-158190534 | 17 | 33.022 | KV452884.1 | 3502018 | 6-scf00352 | 6 |
| AX-157756219 | 17 | 33.022 | KV452884.1 | 3508730 | 6-scf00352 | 6 |
| AX-158413921 | 17 | 33.022 | KV452884.1 | 3519045 | 6-scf00352 | 6 |
| AX-158190564 | 17 | 33.022 | KV452884.1 | 3552191 | 6-scf00352 | 6 |
| AX-158190598 | 17 | 33.022 | KV452884.1 | 3610017 | 6-scf00352 | 6 |
| AX-158190600 | 17 | 33.022 | KV452884.1 | 3613113 | 6-scf00352 | 6 |
| AX-158190619 | 17 | 33.022 | KV452884.1 | 3645978 | 6-scf00352 | 6 |
| AX-158190624 | 17 | 33.022 | KV452884.1 | 3652410 | 6-scf00352 | 6 |
| AX-157720189 | 17 | 33.022 | KV452884.1 | 3679497 | 6-scf00352 | 6 |
| AX-158190645 | 17 | 33.022 | KV452884.1 | 3699348 | 6-scf00352 | 6 |
| AX-157836542 | 17 | 33.022 | KV452884.1 | 3702830 | 6-scf00352 | 6 |
| AX-158190650 | 17 | 33.022 | KV452884.1 | 3707592 | 6-scf00352 | 6 |
| AX-158190654 | 17 | 33.022 | KV452884.1 | 3713935 | 6-scf00352 | 6 |
| AX-158190658 | 17 | 33.022 | KV452884.1 | 3720326 | 6-scf00352 | 6 |
| AX-158190668 | 17 | 33.022 | KV452884.1 | 3736190 | 6-scf00352 | 6 |
| AX-157744663 | 17 | 33.022 | KV452884.1 | 3752091 | 6-scf00352 | 6 |
| AX-158190726 | 17 | 33.022 | KV452884.1 | 3885188 | 6-scf00352 | 6 |
| AX-158190750 | 17 | 33.022 | KV452884.1 | 3939996 | 6-scf00352 | 6 |
| AX-158190751 | 17 | 33.022 | KV452884.1 | 3940979 | 6-scf00352 | 6 |
| AX-158190755 | 17 | 33.022 | KV452884.1 | 3949305 | 6-scf00352 | 6 |
| AX-158190756 | 17 | 33.022 | KV452884.1 | 3950912 | 6-scf00352 | 6 |
| AX-158190761 | 17 | 33.022 | KV452884.1 | 3963247 | 6-scf00352 | 6 |
| AX-158190762 | 17 | 33.022 | KV452884.1 | 3963931 | 6-scf00352 | 6 |
| AX-158190765 | 17 | 33.022 | KV452884.1 | 3968602 | 6-scf00352 | 6 |

|              |    |        |            |         |            |   |
|--------------|----|--------|------------|---------|------------|---|
| AX-158190773 | 17 | 33.022 | KV452884.1 | 3983285 | 6-scf00352 | 6 |
| AX-158190774 | 17 | 33.022 | KV452884.1 | 3988130 | 6-scf00352 | 6 |
| AX-157858897 | 17 | 33.022 | KV452884.1 | 3999796 | 6-scf00352 | 6 |
| AX-158190784 | 17 | 33.022 | KV452884.1 | 4020573 | 6-scf00352 | 6 |
| AX-158190789 | 17 | 33.022 | KV452884.1 | 4030736 | 6-scf00352 | 6 |
| AX-158190791 | 17 | 33.022 | KV452884.1 | 4035538 | 6-scf00352 | 6 |
| AX-158190800 | 17 | 33.022 | KV452884.1 | 4051226 | 6-scf00352 | 6 |
| AX-158190805 | 17 | 33.022 | KV452884.1 | 4056148 | 6-scf00352 | 6 |
| AX-158190806 | 17 | 33.022 | KV452884.1 | 4059149 | 6-scf00352 | 6 |
| AX-158190807 | 17 | 33.022 | KV452884.1 | 4060920 | 6-scf00352 | 6 |
| AX-158190810 | 17 | 33.022 | KV452884.1 | 4067386 | 6-scf00352 | 6 |
| AX-158190811 | 17 | 33.022 | KV452884.1 | 4068657 | 6-scf00352 | 6 |
| AX-158190814 | 17 | 33.022 | KV452884.1 | 4075035 | 6-scf00352 | 6 |
| AX-158190816 | 17 | 33.022 | KV452884.1 | 4079427 | 6-scf00352 | 6 |
| AX-158190817 | 17 | 33.022 | KV452884.1 | 4080517 | 6-scf00352 | 6 |
| AX-158190818 | 17 | 33.022 | KV452884.1 | 4081078 | 6-scf00352 | 6 |
| AX-157836546 | 17 | 33.022 | KV452884.1 | 4083722 | 6-scf00352 | 6 |
| AX-158190819 | 17 | 33.022 | KV452884.1 | 4087012 | 6-scf00352 | 6 |
| AX-158190823 | 17 | 33.022 | KV452884.1 | 4099636 | 6-scf00352 | 6 |
| AX-158190826 | 17 | 33.022 | KV452884.1 | 4106856 | 6-scf00352 | 6 |
| AX-158190827 | 17 | 33.022 | KV452884.1 | 4109323 | 6-scf00352 | 6 |
| AX-158190829 | 17 | 33.022 | KV452884.1 | 4110792 | 6-scf00352 | 6 |
| AX-158190832 | 17 | 33.022 | KV452884.1 | 4112745 | 6-scf00352 | 6 |
| AX-157718134 | 17 | 33.022 | KV452884.1 | 4113492 | 6-scf00352 | 6 |
| AX-158190833 | 17 | 33.022 | KV452884.1 | 4116607 | 6-scf00352 | 6 |
| AX-158190834 | 17 | 33.022 | KV452884.1 | 4117716 | 6-scf00352 | 6 |
| AX-158190838 | 17 | 33.022 | KV452884.1 | 4123245 | 6-scf00352 | 6 |
| AX-158190840 | 17 | 33.022 | KV452884.1 | 4124805 | 6-scf00352 | 6 |
| AX-158190842 | 17 | 33.022 | KV452884.1 | 4130102 | 6-scf00352 | 6 |
| AX-158190844 | 17 | 33.022 | KV452884.1 | 4131380 | 6-scf00352 | 6 |
| AX-158190846 | 17 | 33.022 | KV452884.1 | 4133738 | 6-scf00352 | 6 |
| AX-158190847 | 17 | 33.022 | KV452884.1 | 4134178 | 6-scf00352 | 6 |
| AX-158190849 | 17 | 33.022 | KV452884.1 | 4138099 | 6-scf00352 | 6 |
| AX-158190851 | 17 | 33.022 | KV452884.1 | 4139259 | 6-scf00352 | 6 |
| AX-157713716 | 17 | 33.022 | KV452884.1 | 4142711 | 6-scf00352 | 6 |
| AX-158190852 | 17 | 33.022 | KV452884.1 | 4142818 | 6-scf00352 | 6 |
| AX-158190855 | 17 | 33.022 | KV452884.1 | 4148000 | 6-scf00352 | 6 |
| AX-158190859 | 17 | 33.022 | KV452884.1 | 4153137 | 6-scf00352 | 6 |
| AX-158190867 | 17 | 33.022 | KV452884.1 | 4166033 | 6-scf00352 | 6 |
| AX-158190870 | 17 | 33.022 | KV452884.1 | 4168479 | 6-scf00352 | 6 |
| AX-158190872 | 17 | 33.022 | KV452884.1 | 4170033 | 6-scf00352 | 6 |
| AX-158190874 | 17 | 33.022 | KV452884.1 | 4171598 | 6-scf00352 | 6 |
| AX-158190875 | 17 | 33.022 | KV452884.1 | 4173128 | 6-scf00352 | 6 |
| AX-158190877 | 17 | 33.022 | KV452884.1 | 4177486 | 6-scf00352 | 6 |
| AX-158380674 | 17 | 33.022 | KV452884.1 | 4177554 | 6-scf00352 | 6 |
| AX-158190879 | 17 | 33.022 | KV452884.1 | 4178912 | 6-scf00352 | 6 |
| AX-157836548 | 17 | 33.022 | KV452884.1 | 4180099 | 6-scf00352 | 6 |
| AX-158190897 | 17 | 33.022 | KV452884.1 | 4208920 | 6-scf00352 | 6 |
| AX-158190958 | 17 | 33.022 | KV452884.1 | 4323591 | 6-scf00352 | 6 |
| AX-158190968 | 17 | 33.022 | KV452884.1 | 4341671 | 6-scf00352 | 6 |
| AX-157709381 | 17 | 33.022 | KV452884.1 | 4369253 | 6-scf00352 | 6 |

|              |    |        |             |         |            |    |
|--------------|----|--------|-------------|---------|------------|----|
| AX-157749164 | 17 | 33.022 | KV452884.1  | 4389153 | 6-scf00352 | 6  |
| AX-158191009 | 17 | 33.022 | KV452884.1  | 4406371 | 6-scf00352 | 6  |
| AX-158191018 | 17 | 33.022 | KV452884.1  | 4417771 | 6-scf00352 | 6  |
| AX-157706766 | 17 | 33.022 | 3ML01032872 | 108     | scf08503_1 | UN |
| AX-158190599 | 17 | 33.132 | KV452884.1  | 3612830 | 6-scf00352 | 6  |
| AX-158190647 | 17 | 33.132 | KV452884.1  | 3702761 | 6-scf00352 | 6  |
| AX-157723817 | 17 | 33.132 | KV452884.1  | 3720065 | 6-scf00352 | 6  |
| AX-157702756 | 17 | 33.132 | KV452884.1  | 3747896 | 6-scf00352 | 6  |
| AX-158190690 | 17 | 33.132 | KV452884.1  | 3793727 | 6-scf00352 | 6  |
| AX-158190754 | 17 | 33.132 | KV452884.1  | 3948377 | 6-scf00352 | 6  |
| AX-158190783 | 17 | 33.132 | KV452884.1  | 4017365 | 6-scf00352 | 6  |
| AX-158190835 | 17 | 33.132 | KV452884.1  | 4118846 | 6-scf00352 | 6  |
| AX-158190848 | 17 | 33.132 | KV452884.1  | 4137602 | 6-scf00352 | 6  |
| AX-158190861 | 17 | 33.132 | KV452884.1  | 4155271 | 6-scf00352 | 6  |
| AX-158190863 | 17 | 33.132 | KV452884.1  | 4157104 | 6-scf00352 | 6  |
| AX-158190880 | 17 | 33.132 | KV452884.1  | 4182533 | 6-scf00352 | 6  |
| AX-158190881 | 17 | 33.132 | KV452884.1  | 4184663 | 6-scf00352 | 6  |
| AX-158190884 | 17 | 33.132 | KV452884.1  | 4188030 | 6-scf00352 | 6  |
| AX-158190885 | 17 | 33.132 | KV452884.1  | 4189375 | 6-scf00352 | 6  |
| AX-157771952 | 17 | 33.132 | KV452884.1  | 4195692 | 6-scf00352 | 6  |
| AX-157836550 | 17 | 33.132 | KV452884.1  | 4202560 | 6-scf00352 | 6  |
| AX-158190892 | 17 | 33.132 | KV452884.1  | 4203868 | 6-scf00352 | 6  |
| AX-158190893 | 17 | 33.132 | KV452884.1  | 4204367 | 6-scf00352 | 6  |
| AX-158190896 | 17 | 33.132 | KV452884.1  | 4208382 | 6-scf00352 | 6  |
| AX-158190899 | 17 | 33.132 | KV452884.1  | 4214633 | 6-scf00352 | 6  |
| AX-158190901 | 17 | 33.132 | KV452884.1  | 4217281 | 6-scf00352 | 6  |
| AX-158190904 | 17 | 33.132 | KV452884.1  | 4219146 | 6-scf00352 | 6  |
| AX-157706545 | 17 | 33.132 | 3ML01032426 | 231     | scf08046_1 | UN |
| AX-158190903 | 17 | 33.172 | KV452884.1  | 4218691 | 6-scf00352 | 6  |
| AX-158190542 | 17 | 33.241 | KV452884.1  | 3512514 | 6-scf00352 | 6  |
| AX-158190716 | 17 | 33.241 | KV452884.1  | 3853676 | 6-scf00352 | 6  |
| AX-158190831 | 17 | 33.241 | KV452884.1  | 4112201 | 6-scf00352 | 6  |
| AX-158190911 | 17 | 33.241 | KV452884.1  | 4231799 | 6-scf00352 | 6  |
| AX-158190914 | 17 | 33.241 | KV452884.1  | 4235789 | 6-scf00352 | 6  |
| AX-158190917 | 17 | 33.241 | KV452884.1  | 4238687 | 6-scf00352 | 6  |
| AX-158190918 | 17 | 33.241 | KV452884.1  | 4238982 | 6-scf00352 | 6  |
| AX-158190928 | 17 | 33.241 | KV452884.1  | 4263057 | 6-scf00352 | 6  |
| AX-158190929 | 17 | 33.241 | KV452884.1  | 4263698 | 6-scf00352 | 6  |
| AX-158413930 | 17 | 33.241 | KV452884.1  | 4264572 | 6-scf00352 | 6  |
| AX-158190930 | 17 | 33.241 | KV452884.1  | 4264984 | 6-scf00352 | 6  |
| AX-158190931 | 17 | 33.241 | KV452884.1  | 4266421 | 6-scf00352 | 6  |
| AX-158190933 | 17 | 33.241 | KV452884.1  | 4269556 | 6-scf00352 | 6  |
| AX-158190934 | 17 | 33.241 | KV452884.1  | 4270368 | 6-scf00352 | 6  |
| AX-158190935 | 17 | 33.241 | KV452884.1  | 4270991 | 6-scf00352 | 6  |
| AX-157772032 | 17 | 33.241 | KV452884.1  | 4272628 | 6-scf00352 | 6  |
| AX-158190943 | 17 | 33.296 | KV452884.1  | 4299950 | 6-scf00352 | 6  |
| AX-158190910 | 17 | 33.35  | KV452884.1  | 4231185 | 6-scf00352 | 6  |
| AX-158190944 | 17 | 33.35  | KV452884.1  | 4301455 | 6-scf00352 | 6  |
| AX-158190945 | 17 | 33.35  | KV452884.1  | 4308382 | 6-scf00352 | 6  |
| AX-158190949 | 17 | 33.35  | KV452884.1  | 4311214 | 6-scf00352 | 6  |
| AX-158190957 | 17 | 33.35  | KV452884.1  | 4320688 | 6-scf00352 | 6  |

|              |    |        |             |         |            |    |
|--------------|----|--------|-------------|---------|------------|----|
| AX-158190959 | 17 | 33.35  | KV452884.1  | 4330319 | 6-scf00352 | 6  |
| AX-158190985 | 17 | 33.35  | KV452884.1  | 4368183 | 6-scf00352 | 6  |
| AX-158190961 | 17 | 33.366 | KV452884.1  | 4332047 | 6-scf00352 | 6  |
| AX-158190962 | 17 | 33.366 | KV452884.1  | 4334285 | 6-scf00352 | 6  |
| AX-158190952 | 17 | 33.382 | KV452884.1  | 4313480 | 6-scf00352 | 6  |
| AX-158190963 | 17 | 33.382 | KV452884.1  | 4335408 | 6-scf00352 | 6  |
| AX-158190951 | 17 | 33.404 | KV452884.1  | 4312471 | 6-scf00352 | 6  |
| AX-158190960 | 17 | 33.404 | KV452884.1  | 4331684 | 6-scf00352 | 6  |
| AX-158190965 | 17 | 33.404 | KV452884.1  | 4338262 | 6-scf00352 | 6  |
| AX-158190966 | 17 | 33.427 | KV452884.1  | 4339017 | 6-scf00352 | 6  |
| AX-158190553 | 17 | 33.459 | KV452884.1  | 3530566 | 6-scf00352 | 6  |
| AX-158190701 | 17 | 33.459 | KV452884.1  | 3813554 | 6-scf00352 | 6  |
| AX-158393614 | 17 | 33.459 | KV452884.1  | 3854445 | 6-scf00352 | 6  |
| AX-158190717 | 17 | 33.459 | KV452884.1  | 3855067 | 6-scf00352 | 6  |
| AX-158190736 | 17 | 33.459 | KV452884.1  | 3906079 | 6-scf00352 | 6  |
| AX-158190775 | 17 | 33.459 | KV452884.1  | 3988589 | 6-scf00352 | 6  |
| AX-158190787 | 17 | 33.459 | KV452884.1  | 4025427 | 6-scf00352 | 6  |
| AX-158190801 | 17 | 33.459 | KV452884.1  | 4051723 | 6-scf00352 | 6  |
| AX-158190828 | 17 | 33.459 | KV452884.1  | 4110010 | 6-scf00352 | 6  |
| AX-158190919 | 17 | 33.459 | KV452884.1  | 4240199 | 6-scf00352 | 6  |
| AX-158190954 | 17 | 33.459 | KV452884.1  | 4317140 | 6-scf00352 | 6  |
| AX-158190976 | 17 | 33.459 | KV452884.1  | 4353895 | 6-scf00352 | 6  |
| AX-158190981 | 17 | 33.459 | KV452884.1  | 4363073 | 6-scf00352 | 6  |
| AX-158190987 | 17 | 33.459 | KV452884.1  | 4369916 | 6-scf00352 | 6  |
| AX-158190991 | 17 | 33.459 | KV452884.1  | 4374920 | 6-scf00352 | 6  |
| AX-158190992 | 17 | 33.459 | KV452884.1  | 4376275 | 6-scf00352 | 6  |
| AX-158190993 | 17 | 33.459 | KV452884.1  | 4378073 | 6-scf00352 | 6  |
| AX-158190995 | 17 | 33.459 | KV452884.1  | 4379042 | 6-scf00352 | 6  |
| AX-158191000 | 17 | 33.459 | KV452884.1  | 4385695 | 6-scf00352 | 6  |
| AX-158191002 | 17 | 33.459 | KV452884.1  | 4386572 | 6-scf00352 | 6  |
| AX-158191006 | 17 | 33.459 | KV452884.1  | 4396038 | 6-scf00352 | 6  |
| AX-157744375 | 17 | 33.459 | KV452884.1  | 4396401 | 6-scf00352 | 6  |
| AX-157717152 | 17 | 33.459 | KV452884.1  | 4397724 | 6-scf00352 | 6  |
| AX-157716141 | 17 | 33.459 | KV452884.1  | 4402577 | 6-scf00352 | 6  |
| AX-158191017 | 17 | 33.459 | KV452884.1  | 4416872 | 6-scf00352 | 6  |
| AX-157688273 | 17 | 33.459 | 3ML01025832 | 505     | scf01444_1 | UN |
| AX-158191019 | 17 | 34.045 | KV452884.1  | 4424003 | 6-scf00352 | 6  |
| AX-158191022 | 17 | 34.045 | KV452884.1  | 4427225 | 6-scf00352 | 6  |
| AX-158191023 | 17 | 34.058 | KV452884.1  | 4431218 | 6-scf00352 | 6  |
| AX-158191024 | 17 | 34.059 | KV452884.1  | 4432360 | 6-scf00352 | 6  |
| AX-157738941 | 17 | 34.059 | KV452884.1  | 4435406 | 6-scf00352 | 6  |
| AX-158191027 | 17 | 34.059 | KV452884.1  | 4439396 | 6-scf00352 | 6  |
| AX-158191028 | 17 | 34.508 | KV452884.1  | 4441113 | 6-scf00352 | 6  |
| AX-158191029 | 17 | 34.508 | KV452884.1  | 4441644 | 6-scf00352 | 6  |
| AX-158191030 | 17 | 34.508 | KV452884.1  | 4442122 | 6-scf00352 | 6  |
| AX-158386100 | 17 | 34.675 | KV452884.1  | 4460659 | 6-scf00352 | 6  |
| AX-158191041 | 17 | 34.675 | KV452884.1  | 4472237 | 6-scf00352 | 6  |
| AX-157836556 | 17 | 34.733 | KV452884.1  | 4460969 | 6-scf00352 | 6  |
| AX-158191037 | 17 | 34.93  | KV452884.1  | 4462468 | 6-scf00352 | 6  |
| AX-157836557 | 17 | 34.932 | KV452884.1  | 4463070 | 6-scf00352 | 6  |
| AX-157716838 | 17 | 34.934 | KV452884.1  | 4463278 | 6-scf00352 | 6  |



|              |    |        |            |         |            |   |
|--------------|----|--------|------------|---------|------------|---|
| AX-157836559 | 17 | 35.209 | KV452884.1 | 4472790 | 6-scf00352 | 6 |
| AX-157720255 | 17 | 35.209 | KV452884.1 | 4473162 | 6-scf00352 | 6 |
| AX-158191042 | 17 | 35.209 | KV452884.1 | 4473407 | 6-scf00352 | 6 |
| AX-158191044 | 17 | 35.755 | KV452884.1 | 4475715 | 6-scf00352 | 6 |
| AX-158191045 | 17 | 35.755 | KV452884.1 | 4476359 | 6-scf00352 | 6 |
| AX-158191046 | 17 | 35.755 | KV452884.1 | 4477021 | 6-scf00352 | 6 |
| AX-158191047 | 17 | 35.755 | KV452884.1 | 4478911 | 6-scf00352 | 6 |
| AX-158191048 | 17 | 35.755 | KV452884.1 | 4480006 | 6-scf00352 | 6 |
| AX-158191049 | 17 | 35.77  | KV452884.1 | 4482068 | 6-scf00352 | 6 |
| AX-158191052 | 17 | 35.785 | KV452884.1 | 4484135 | 6-scf00352 | 6 |
| AX-157723127 | 17 | 35.93  | KV452884.1 | 4486653 | 6-scf00352 | 6 |
| AX-158191056 | 17 | 36.289 | KV452884.1 | 4493466 | 6-scf00352 | 6 |
| AX-158191063 | 17 | 36.6   | KV452884.1 | 4505210 | 6-scf00352 | 6 |
| AX-158191065 | 17 | 36.609 | KV452884.1 | 4512234 | 6-scf00352 | 6 |
| AX-158191071 | 17 | 36.646 | KV452884.1 | 4519248 | 6-scf00352 | 6 |
| AX-158191072 | 17 | 36.695 | KV452884.1 | 4521983 | 6-scf00352 | 6 |
| AX-157836562 | 17 | 36.744 | KV452884.1 | 4524310 | 6-scf00352 | 6 |
| AX-158191074 | 17 | 36.785 | KV452884.1 | 4525528 | 6-scf00352 | 6 |
| AX-158191062 | 17 | 36.96  | KV452884.1 | 4504117 | 6-scf00352 | 6 |
| AX-158191076 | 17 | 36.96  | KV452884.1 | 4529309 | 6-scf00352 | 6 |
| AX-158191079 | 17 | 36.96  | KV452884.1 | 4531661 | 6-scf00352 | 6 |
| AX-158191089 | 17 | 36.96  | KV452884.1 | 4540133 | 6-scf00352 | 6 |
| AX-158191078 | 17 | 36.961 | KV452884.1 | 4531098 | 6-scf00352 | 6 |
| AX-158191080 | 17 | 36.961 | KV452884.1 | 4532130 | 6-scf00352 | 6 |
| AX-158191083 | 17 | 36.961 | KV452884.1 | 4533668 | 6-scf00352 | 6 |
| AX-158191085 | 17 | 36.961 | KV452884.1 | 4534956 | 6-scf00352 | 6 |
| AX-158191088 | 17 | 36.961 | KV452884.1 | 4537879 | 6-scf00352 | 6 |
| AX-157758652 | 17 | 36.961 | KV452884.1 | 4554609 | 6-scf00352 | 6 |
| AX-158191090 | 17 | 36.987 | KV452884.1 | 4541976 | 6-scf00352 | 6 |
| AX-158191092 | 17 | 37.012 | KV452884.1 | 4544465 | 6-scf00352 | 6 |
| AX-158191093 | 17 | 37.012 | KV452884.1 | 4545465 | 6-scf00352 | 6 |
| AX-158191096 | 17 | 37.103 | KV452884.1 | 4548658 | 6-scf00352 | 6 |
| AX-157715321 | 17 | 37.179 | KV452884.1 | 4556855 | 6-scf00352 | 6 |
| AX-158191100 | 17 | 37.179 | KV452884.1 | 4557416 | 6-scf00352 | 6 |
| AX-158191101 | 17 | 37.179 | KV452884.1 | 4560642 | 6-scf00352 | 6 |
| AX-158191103 | 17 | 37.199 | KV452884.1 | 4564273 | 6-scf00352 | 6 |
| AX-158191107 | 17 | 37.199 | KV452884.1 | 4569416 | 6-scf00352 | 6 |
| AX-158191110 | 17 | 37.215 | KV452884.1 | 4570836 | 6-scf00352 | 6 |
| AX-158191111 | 17 | 37.566 | KV452884.1 | 4571365 | 6-scf00352 | 6 |
| AX-158380675 | 17 | 37.569 | KV452884.1 | 4505852 | 6-scf00352 | 6 |
| AX-158191112 | 17 | 37.569 | KV452884.1 | 4571666 | 6-scf00352 | 6 |
| AX-158191113 | 17 | 37.569 | KV452884.1 | 4573308 | 6-scf00352 | 6 |
| AX-157743980 | 17 | 37.702 | KV452884.1 | 4531514 | 6-scf00352 | 6 |
| AX-158191091 | 17 | 37.702 | KV452884.1 | 4543674 | 6-scf00352 | 6 |
| AX-158191109 | 17 | 37.702 | KV452884.1 | 4570232 | 6-scf00352 | 6 |
| AX-157836567 | 17 | 37.702 | KV452884.1 | 4576217 | 6-scf00352 | 6 |
| AX-158191114 | 17 | 37.702 | KV452884.1 | 4576462 | 6-scf00352 | 6 |
| AX-158191115 | 17 | 37.702 | KV452884.1 | 4576840 | 6-scf00352 | 6 |
| AX-158191116 | 17 | 37.702 | KV452884.1 | 4577673 | 6-scf00352 | 6 |
| AX-157774627 | 17 | 37.702 | KV452884.1 | 4580618 | 6-scf00352 | 6 |
| AX-157771479 | 17 | 37.702 | KV452884.1 | 4583773 | 6-scf00352 | 6 |

|              |    |        |             |         |            |    |
|--------------|----|--------|-------------|---------|------------|----|
| AX-158191120 | 17 | 37.702 | KV452884.1  | 4584519 | 6-scf00352 | 6  |
| AX-158191125 | 17 | 37.702 | KV452884.1  | 4594658 | 6-scf00352 | 6  |
| AX-158191122 | 17 | 37.835 | KV452884.1  | 4591677 | 6-scf00352 | 6  |
| AX-158191126 | 17 | 37.835 | KV452884.1  | 4595070 | 6-scf00352 | 6  |
| AX-158191130 | 17 | 37.849 | KV452884.1  | 4599711 | 6-scf00352 | 6  |
| AX-158423120 | 17 | 38.049 | KV452884.1  | 4608190 | 6-scf00352 | 6  |
| AX-158191134 | 17 | 38.491 | KV452884.1  | 4610282 | 6-scf00352 | 6  |
| AX-158191137 | 17 | 38.491 | KV452884.1  | 4614109 | 6-scf00352 | 6  |
| AX-158191138 | 17 | 38.491 | KV452884.1  | 4616601 | 6-scf00352 | 6  |
| AX-158191142 | 17 | 38.491 | KV452884.1  | 4620072 | 6-scf00352 | 6  |
| AX-158191143 | 17 | 38.491 | KV452884.1  | 4621356 | 6-scf00352 | 6  |
| AX-158191145 | 17 | 38.491 | KV452884.1  | 4623145 | 6-scf00352 | 6  |
| AX-158191146 | 17 | 38.491 | KV452884.1  | 4623735 | 6-scf00352 | 6  |
| AX-158191148 | 17 | 38.491 | KV452884.1  | 4624775 | 6-scf00352 | 6  |
| AX-157706367 | 17 | 38.491 | 3ML01032140 | 496     | scf07753_1 | UN |
| AX-158191057 | 17 | 38.493 | KV452884.1  | 4494374 | 6-scf00352 | 6  |
| AX-158191064 | 17 | 38.493 | KV452884.1  | 4506111 | 6-scf00352 | 6  |
| AX-158191084 | 17 | 38.493 | KV452884.1  | 4534237 | 6-scf00352 | 6  |
| AX-158191086 | 17 | 38.493 | KV452884.1  | 4536470 | 6-scf00352 | 6  |
| AX-157713756 | 17 | 38.493 | KV452884.1  | 4547665 | 6-scf00352 | 6  |
| AX-158191152 | 17 | 38.493 | KV452884.1  | 4628059 | 6-scf00352 | 6  |
| AX-158191153 | 17 | 38.493 | KV452884.1  | 4629597 | 6-scf00352 | 6  |
| AX-158191147 | 17 | 38.662 | KV452884.1  | 4624517 | 6-scf00352 | 6  |
| AX-158386101 | 17 | 38.662 | KV452884.1  | 4628795 | 6-scf00352 | 6  |
| AX-158191156 | 17 | 38.797 | KV452884.1  | 4637337 | 6-scf00352 | 6  |
| AX-158191158 | 17 | 38.797 | KV452884.1  | 4638989 | 6-scf00352 | 6  |
| AX-158191159 | 17 | 38.797 | KV452884.1  | 4639722 | 6-scf00352 | 6  |
| AX-158191161 | 17 | 38.797 | KV452884.1  | 4645132 | 6-scf00352 | 6  |
| AX-158191163 | 17 | 38.951 | KV452884.1  | 4646353 | 6-scf00352 | 6  |
| AX-158191165 | 17 | 39.257 | KV452884.1  | 4650771 | 6-scf00352 | 6  |
| AX-158191168 | 17 | 39.257 | KV452884.1  | 4652955 | 6-scf00352 | 6  |
| AX-158191169 | 17 | 39.257 | KV452884.1  | 4653573 | 6-scf00352 | 6  |
| AX-158191170 | 17 | 39.257 | KV452884.1  | 4654799 | 6-scf00352 | 6  |
| AX-158191171 | 17 | 39.257 | KV452884.1  | 4656308 | 6-scf00352 | 6  |
| AX-158191172 | 17 | 39.257 | KV452884.1  | 4656733 | 6-scf00352 | 6  |
| AX-158191173 | 17 | 39.335 | KV452884.1  | 4657178 | 6-scf00352 | 6  |
| AX-158191175 | 17 | 39.366 | KV452884.1  | 4660473 | 6-scf00352 | 6  |
| AX-158191176 | 17 | 39.366 | KV452884.1  | 4661641 | 6-scf00352 | 6  |
| AX-157772857 | 17 | 39.512 | KV452884.1  | 4672169 | 6-scf00352 | 6  |
| AX-157738308 | 17 | 39.8   | KV452884.1  | 4677141 | 6-scf00352 | 6  |
| AX-158191189 | 17 | 39.8   | KV452884.1  | 4682286 | 6-scf00352 | 6  |
| AX-157836572 | 17 | 39.807 | KV452884.1  | 4681185 | 6-scf00352 | 6  |
| AX-157751814 | 17 | 39.807 | KV452884.1  | 4686562 | 6-scf00352 | 6  |
| AX-158191192 | 17 | 39.807 | KV452884.1  | 4686877 | 6-scf00352 | 6  |
| AX-158191198 | 17 | 39.807 | KV452884.1  | 4695579 | 6-scf00352 | 6  |
| AX-157738375 | 17 | 40.022 | KV452884.1  | 4681463 | 6-scf00352 | 6  |
| AX-158191193 | 17 | 40.022 | KV452884.1  | 4687168 | 6-scf00352 | 6  |
| AX-158191195 | 17 | 40.022 | KV452884.1  | 4689859 | 6-scf00352 | 6  |
| AX-158191197 | 17 | 40.022 | KV452884.1  | 4691288 | 6-scf00352 | 6  |
| AX-157749808 | 17 | 40.022 | KV452884.1  | 4694939 | 6-scf00352 | 6  |
| AX-157741752 | 17 | 40.022 | KV452884.1  | 4697013 | 6-scf00352 | 6  |

|              |    |        |            |         |            |   |
|--------------|----|--------|------------|---------|------------|---|
| AX-158191200 | 17 | 40.022 | KV452884.1 | 4698303 | 6-scf00352 | 6 |
| AX-158191204 | 17 | 40.022 | KV452884.1 | 4701187 | 6-scf00352 | 6 |
| AX-158191205 | 17 | 40.022 | KV452884.1 | 4701430 | 6-scf00352 | 6 |
| AX-158191166 | 17 | 40.131 | KV452884.1 | 4652015 | 6-scf00352 | 6 |
| AX-158191208 | 17 | 40.131 | KV452884.1 | 4705668 | 6-scf00352 | 6 |
| AX-157879075 | 17 | 40.131 | KV452884.1 | 4706552 | 6-scf00352 | 6 |
| AX-158191211 | 17 | 40.131 | KV452884.1 | 4708086 | 6-scf00352 | 6 |
| AX-158191212 | 17 | 40.131 | KV452884.1 | 4709178 | 6-scf00352 | 6 |
| AX-158191214 | 17 | 40.131 | KV452884.1 | 4712509 | 6-scf00352 | 6 |
| AX-158191223 | 17 | 40.131 | KV452884.1 | 4723193 | 6-scf00352 | 6 |
| AX-158191226 | 17 | 40.131 | KV452884.1 | 4729677 | 6-scf00352 | 6 |
| AX-158191218 | 17 | 40.169 | KV452884.1 | 4718145 | 6-scf00352 | 6 |
| AX-158191219 | 17 | 40.259 | KV452884.1 | 4719242 | 6-scf00352 | 6 |
| AX-158191225 | 17 | 40.418 | KV452884.1 | 4728970 | 6-scf00352 | 6 |
| AX-158191228 | 17 | 40.418 | KV452884.1 | 4730842 | 6-scf00352 | 6 |
| AX-158191229 | 17 | 40.418 | KV452884.1 | 4732824 | 6-scf00352 | 6 |
| AX-158191216 | 17 | 40.896 | KV452884.1 | 4715757 | 6-scf00352 | 6 |
| AX-158191231 | 17 | 40.896 | KV452884.1 | 4735874 | 6-scf00352 | 6 |
| AX-158191232 | 17 | 40.896 | KV452884.1 | 4739347 | 6-scf00352 | 6 |
| AX-158191234 | 17 | 40.896 | KV452884.1 | 4742155 | 6-scf00352 | 6 |
| AX-158191236 | 17 | 40.896 | KV452884.1 | 4743488 | 6-scf00352 | 6 |
| AX-158191238 | 17 | 40.896 | KV452884.1 | 4747213 | 6-scf00352 | 6 |
| AX-157836578 | 17 | 40.896 | KV452884.1 | 4748170 | 6-scf00352 | 6 |
| AX-158191241 | 17 | 40.896 | KV452884.1 | 4750962 | 6-scf00352 | 6 |
| AX-158191242 | 17 | 40.896 | KV452884.1 | 4751771 | 6-scf00352 | 6 |
| AX-158191272 | 17 | 40.896 | KV452884.1 | 4792744 | 6-scf00352 | 6 |
| AX-158191280 | 17 | 40.896 | KV452884.1 | 4805765 | 6-scf00352 | 6 |
| AX-158191240 | 17 | 41.067 | KV452884.1 | 4749128 | 6-scf00352 | 6 |
| AX-157743799 | 17 | 41.067 | KV452884.1 | 4749833 | 6-scf00352 | 6 |
| AX-158191244 | 17 | 41.067 | KV452884.1 | 4755397 | 6-scf00352 | 6 |
| AX-158191246 | 17 | 41.067 | KV452884.1 | 4758808 | 6-scf00352 | 6 |
| AX-158191254 | 17 | 41.069 | KV452884.1 | 4765961 | 6-scf00352 | 6 |
| AX-157836581 | 17 | 41.199 | KV452884.1 | 4766017 | 6-scf00352 | 6 |
| AX-158191257 | 17 | 41.319 | KV452884.1 | 4767716 | 6-scf00352 | 6 |
| AX-157720966 | 17 | 41.369 | KV452884.1 | 4769817 | 6-scf00352 | 6 |
| AX-157713907 | 17 | 41.506 | KV452884.1 | 4804599 | 6-scf00352 | 6 |
| AX-158191281 | 17 | 41.506 | KV452884.1 | 4806294 | 6-scf00352 | 6 |
| AX-158191286 | 17 | 41.811 | KV452884.1 | 4815529 | 6-scf00352 | 6 |
| AX-158191287 | 17 | 41.812 | KV452884.1 | 4815976 | 6-scf00352 | 6 |
| AX-158191290 | 17 | 41.812 | KV452884.1 | 4819800 | 6-scf00352 | 6 |
| AX-158191291 | 17 | 41.812 | KV452884.1 | 4820857 | 6-scf00352 | 6 |
| AX-158191306 | 17 | 41.812 | KV452884.1 | 4843688 | 6-scf00352 | 6 |
| AX-158191292 | 17 | 41.814 | KV452884.1 | 4824552 | 6-scf00352 | 6 |
| AX-158191300 | 17 | 41.814 | KV452884.1 | 4835773 | 6-scf00352 | 6 |
| AX-157836586 | 17 | 42.31  | KV452884.1 | 4831330 | 6-scf00352 | 6 |
| AX-157836587 | 17 | 42.314 | KV452884.1 | 4832567 | 6-scf00352 | 6 |
| AX-158191304 | 17 | 42.314 | KV452884.1 | 4841944 | 6-scf00352 | 6 |
| AX-158191293 | 17 | 42.318 | KV452884.1 | 4826826 | 6-scf00352 | 6 |
| AX-158191295 | 17 | 42.318 | KV452884.1 | 4830373 | 6-scf00352 | 6 |
| AX-158191297 | 17 | 42.318 | KV452884.1 | 4831880 | 6-scf00352 | 6 |
| AX-157879081 | 17 | 42.318 | KV452884.1 | 4834229 | 6-scf00352 | 6 |

|              |    |        |            |         |            |   |
|--------------|----|--------|------------|---------|------------|---|
| AX-158191299 | 17 | 42.318 | KV452884.1 | 4835385 | 6-scf00352 | 6 |
| AX-158191302 | 17 | 42.318 | KV452884.1 | 4839747 | 6-scf00352 | 6 |
| AX-158380679 | 17 | 42.318 | KV452884.1 | 4841452 | 6-scf00352 | 6 |
| AX-158191308 | 17 | 42.318 | KV452884.1 | 4848324 | 6-scf00352 | 6 |
| AX-158191310 | 17 | 42.318 | KV452884.1 | 4850589 | 6-scf00352 | 6 |
| AX-157858900 | 17 | 42.318 | KV452884.1 | 4851012 | 6-scf00352 | 6 |
| AX-158191312 | 17 | 42.318 | KV452884.1 | 4851987 | 6-scf00352 | 6 |
| AX-158191313 | 17 | 42.318 | KV452884.1 | 4852423 | 6-scf00352 | 6 |
| AX-158191314 | 17 | 42.318 | KV452884.1 | 4854318 | 6-scf00352 | 6 |
| AX-157836589 | 17 | 42.389 | KV452884.1 | 4854358 | 6-scf00352 | 6 |
| AX-158191317 | 17 | 42.469 | KV452884.1 | 4859410 | 6-scf00352 | 6 |
| AX-158191319 | 17 | 42.469 | KV452884.1 | 4861531 | 6-scf00352 | 6 |
| AX-158191321 | 17 | 42.469 | KV452884.1 | 4863909 | 6-scf00352 | 6 |
| AX-158191325 | 17 | 42.716 | KV452884.1 | 4869288 | 6-scf00352 | 6 |
| AX-158191326 | 17 | 42.716 | KV452884.1 | 4871713 | 6-scf00352 | 6 |
| AX-158191327 | 17 | 42.716 | KV452884.1 | 4872424 | 6-scf00352 | 6 |
| AX-158191330 | 17 | 42.859 | KV452884.1 | 4874190 | 6-scf00352 | 6 |
| AX-158191333 | 17 | 42.86  | KV452884.1 | 4878376 | 6-scf00352 | 6 |
| AX-157836591 | 17 | 42.861 | KV452884.1 | 4878587 | 6-scf00352 | 6 |
| AX-158191338 | 17 | 42.861 | KV452884.1 | 4883639 | 6-scf00352 | 6 |
| AX-157716158 | 17 | 42.862 | KV452884.1 | 4885134 | 6-scf00352 | 6 |
| AX-158191323 | 17 | 42.863 | KV452884.1 | 4867008 | 6-scf00352 | 6 |
| AX-158191328 | 17 | 42.863 | KV452884.1 | 4872937 | 6-scf00352 | 6 |
| AX-158191340 | 17 | 42.863 | KV452884.1 | 4889064 | 6-scf00352 | 6 |
| AX-158191341 | 17 | 42.864 | KV452884.1 | 4890044 | 6-scf00352 | 6 |
| AX-157720290 | 17 | 42.865 | KV452884.1 | 4892207 | 6-scf00352 | 6 |
| AX-158191344 | 17 | 42.94  | KV452884.1 | 4893706 | 6-scf00352 | 6 |
| AX-158191347 | 17 | 43.079 | KV452884.1 | 4901322 | 6-scf00352 | 6 |
| AX-158191348 | 17 | 43.079 | KV452884.1 | 4902122 | 6-scf00352 | 6 |
| AX-158191350 | 17 | 43.083 | KV452884.1 | 4903929 | 6-scf00352 | 6 |
| AX-157714559 | 17 | 43.086 | KV452884.1 | 4887886 | 6-scf00352 | 6 |
| AX-157755237 | 17 | 43.086 | KV452884.1 | 4905054 | 6-scf00352 | 6 |
| AX-158191352 | 17 | 43.411 | KV452884.1 | 4908009 | 6-scf00352 | 6 |
| AX-158191353 | 17 | 43.411 | KV452884.1 | 4908593 | 6-scf00352 | 6 |
| AX-158191355 | 17 | 43.411 | KV452884.1 | 4912785 | 6-scf00352 | 6 |
| AX-158191356 | 17 | 43.411 | KV452884.1 | 4913615 | 6-scf00352 | 6 |
| AX-158191357 | 17 | 43.411 | KV452884.1 | 4915362 | 6-scf00352 | 6 |
| AX-158191360 | 17 | 43.411 | KV452884.1 | 4919592 | 6-scf00352 | 6 |
| AX-158191391 | 17 | 43.411 | KV452884.1 | 4955620 | 6-scf00352 | 6 |
| AX-158191398 | 17 | 43.411 | KV452884.1 | 4967742 | 6-scf00352 | 6 |
| AX-158191507 | 17 | 43.411 | KV452884.1 | 5100902 | 6-scf00352 | 6 |
| AX-158191510 | 17 | 43.411 | KV452884.1 | 5108026 | 6-scf00352 | 6 |
| AX-158191515 | 17 | 43.411 | KV452884.1 | 5115189 | 6-scf00352 | 6 |
| AX-158191361 | 17 | 43.52  | KV452884.1 | 4923659 | 6-scf00352 | 6 |
| AX-157716657 | 17 | 43.586 | KV452884.1 | 4924686 | 6-scf00352 | 6 |
| AX-158380680 | 17 | 43.586 | KV452884.1 | 4936686 | 6-scf00352 | 6 |
| AX-158191349 | 17 | 43.629 | KV452884.1 | 4902903 | 6-scf00352 | 6 |
| AX-158191364 | 17 | 43.629 | KV452884.1 | 4931172 | 6-scf00352 | 6 |
| AX-158191365 | 17 | 43.629 | KV452884.1 | 4931578 | 6-scf00352 | 6 |
| AX-158191367 | 17 | 43.629 | KV452884.1 | 4933592 | 6-scf00352 | 6 |
| AX-158191369 | 17 | 43.629 | KV452884.1 | 4934496 | 6-scf00352 | 6 |

|              |    |        |            |         |            |   |
|--------------|----|--------|------------|---------|------------|---|
| AX-158191372 | 17 | 43.639 | KV452884.1 | 4937325 | 6-scf00352 | 6 |
| AX-158191373 | 17 | 43.654 | KV452884.1 | 4938016 | 6-scf00352 | 6 |
| AX-158191379 | 17 | 43.718 | KV452884.1 | 4946095 | 6-scf00352 | 6 |
| AX-158191381 | 17 | 43.738 | KV452884.1 | 4947582 | 6-scf00352 | 6 |
| AX-157748879 | 17 | 43.738 | KV452884.1 | 4953372 | 6-scf00352 | 6 |
| AX-158191389 | 17 | 43.738 | KV452884.1 | 4953891 | 6-scf00352 | 6 |
| AX-157755177 | 17 | 43.738 | KV452884.1 | 4959647 | 6-scf00352 | 6 |
| AX-158191384 | 17 | 43.756 | KV452884.1 | 4948906 | 6-scf00352 | 6 |
| AX-158191396 | 17 | 43.756 | KV452884.1 | 4962978 | 6-scf00352 | 6 |
| AX-158191405 | 17 | 43.782 | KV452884.1 | 4977226 | 6-scf00352 | 6 |
| AX-158191406 | 17 | 43.812 | KV452884.1 | 4980310 | 6-scf00352 | 6 |
| AX-158191408 | 17 | 43.848 | KV452884.1 | 4981485 | 6-scf00352 | 6 |
| AX-158191410 | 17 | 43.848 | KV452884.1 | 4982482 | 6-scf00352 | 6 |
| AX-158191382 | 17 | 43.871 | KV452884.1 | 4948056 | 6-scf00352 | 6 |
| AX-158191411 | 17 | 43.871 | KV452884.1 | 4982941 | 6-scf00352 | 6 |
| AX-158191457 | 17 | 43.871 | KV452884.1 | 5045550 | 6-scf00352 | 6 |
| AX-158191467 | 17 | 43.871 | KV452884.1 | 5053810 | 6-scf00352 | 6 |
| AX-158191468 | 17 | 43.871 | KV452884.1 | 5055305 | 6-scf00352 | 6 |
| AX-158191472 | 17 | 43.871 | KV452884.1 | 5058861 | 6-scf00352 | 6 |
| AX-157836606 | 17 | 43.871 | KV452884.1 | 5072587 | 6-scf00352 | 6 |
| AX-158191416 | 17 | 43.894 | KV452884.1 | 4989957 | 6-scf00352 | 6 |
| AX-158191417 | 17 | 43.901 | KV452884.1 | 4990371 | 6-scf00352 | 6 |
| AX-158191283 | 17 | 43.928 | KV452884.1 | 4811324 | 6-scf00352 | 6 |
| AX-158191385 | 17 | 43.928 | KV452884.1 | 4949625 | 6-scf00352 | 6 |
| AX-158191418 | 17 | 43.928 | KV452884.1 | 4990729 | 6-scf00352 | 6 |
| AX-157858903 | 17 | 43.928 | KV452884.1 | 5241040 | 6-scf00352 | 6 |
| AX-158191612 | 17 | 43.928 | KV452884.1 | 5253786 | 6-scf00352 | 6 |
| AX-158191653 | 17 | 43.928 | KV452884.1 | 5301326 | 6-scf00352 | 6 |
| AX-157725174 | 17 | 43.928 | KV452884.1 | 5346095 | 6-scf00352 | 6 |
| AX-158191685 | 17 | 43.928 | KV452884.1 | 5350842 | 6-scf00352 | 6 |
| AX-158191428 | 17 | 43.957 | KV452884.1 | 4998903 | 6-scf00352 | 6 |
| AX-158191430 | 17 | 43.957 | KV452884.1 | 4999898 | 6-scf00352 | 6 |
| AX-158191434 | 17 | 43.957 | KV452884.1 | 5005397 | 6-scf00352 | 6 |
| AX-158191435 | 17 | 43.957 | KV452884.1 | 5006182 | 6-scf00352 | 6 |
| AX-158191462 | 17 | 43.957 | KV452884.1 | 5050010 | 6-scf00352 | 6 |
| AX-158191503 | 17 | 43.957 | KV452884.1 | 5097848 | 6-scf00352 | 6 |
| AX-158191452 | 17 | 44.039 | KV452884.1 | 5036613 | 6-scf00352 | 6 |
| AX-157714864 | 17 | 44.039 | KV452884.1 | 5161866 | 6-scf00352 | 6 |
| AX-158191366 | 17 | 44.066 | KV452884.1 | 4932306 | 6-scf00352 | 6 |
| AX-158191387 | 17 | 44.066 | KV452884.1 | 4951571 | 6-scf00352 | 6 |
| AX-158191392 | 17 | 44.066 | KV452884.1 | 4956401 | 6-scf00352 | 6 |
| AX-158191436 | 17 | 44.066 | KV452884.1 | 5007751 | 6-scf00352 | 6 |
| AX-157836600 | 17 | 44.066 | KV452884.1 | 5037411 | 6-scf00352 | 6 |
| AX-157836601 | 17 | 44.066 | KV452884.1 | 5037908 | 6-scf00352 | 6 |
| AX-157836602 | 17 | 44.066 | KV452884.1 | 5039126 | 6-scf00352 | 6 |
| AX-157836604 | 17 | 44.066 | KV452884.1 | 5042030 | 6-scf00352 | 6 |
| AX-158191458 | 17 | 44.066 | KV452884.1 | 5046043 | 6-scf00352 | 6 |
| AX-157745682 | 17 | 44.066 | KV452884.1 | 5046104 | 6-scf00352 | 6 |
| AX-158191464 | 17 | 44.066 | KV452884.1 | 5051363 | 6-scf00352 | 6 |
| AX-157836605 | 17 | 44.066 | KV452884.1 | 5053337 | 6-scf00352 | 6 |
| AX-158191474 | 17 | 44.066 | KV452884.1 | 5062149 | 6-scf00352 | 6 |

|              |    |        |            |         |            |   |
|--------------|----|--------|------------|---------|------------|---|
| AX-158380681 | 17 | 44.066 | KV452884.1 | 5063700 | 6-scf00352 | 6 |
| AX-157774228 | 17 | 44.066 | KV452884.1 | 5073788 | 6-scf00352 | 6 |
| AX-158191485 | 17 | 44.066 | KV452884.1 | 5074013 | 6-scf00352 | 6 |
| AX-158191486 | 17 | 44.066 | KV452884.1 | 5076293 | 6-scf00352 | 6 |
| AX-158191487 | 17 | 44.066 | KV452884.1 | 5077660 | 6-scf00352 | 6 |
| AX-157774527 | 17 | 44.066 | KV452884.1 | 5081578 | 6-scf00352 | 6 |
| AX-157858901 | 17 | 44.066 | KV452884.1 | 5085286 | 6-scf00352 | 6 |
| AX-158191491 | 17 | 44.066 | KV452884.1 | 5085990 | 6-scf00352 | 6 |
| AX-157836608 | 17 | 44.066 | KV452884.1 | 5086466 | 6-scf00352 | 6 |
| AX-158191492 | 17 | 44.066 | KV452884.1 | 5086772 | 6-scf00352 | 6 |
| AX-158191501 | 17 | 44.066 | KV452884.1 | 5096617 | 6-scf00352 | 6 |
| AX-158191502 | 17 | 44.066 | KV452884.1 | 5097221 | 6-scf00352 | 6 |
| AX-158191506 | 17 | 44.066 | KV452884.1 | 5099953 | 6-scf00352 | 6 |
| AX-157836609 | 17 | 44.066 | KV452884.1 | 5105726 | 6-scf00352 | 6 |
| AX-158191511 | 17 | 44.066 | KV452884.1 | 5108413 | 6-scf00352 | 6 |
| AX-157836610 | 17 | 44.066 | KV452884.1 | 5108835 | 6-scf00352 | 6 |
| AX-158191512 | 17 | 44.066 | KV452884.1 | 5110060 | 6-scf00352 | 6 |
| AX-157836611 | 17 | 44.066 | KV452884.1 | 5113153 | 6-scf00352 | 6 |
| AX-158191516 | 17 | 44.066 | KV452884.1 | 5115609 | 6-scf00352 | 6 |
| AX-158191518 | 17 | 44.066 | KV452884.1 | 5116276 | 6-scf00352 | 6 |
| AX-158191519 | 17 | 44.066 | KV452884.1 | 5118660 | 6-scf00352 | 6 |
| AX-158191520 | 17 | 44.066 | KV452884.1 | 5118783 | 6-scf00352 | 6 |
| AX-158191521 | 17 | 44.066 | KV452884.1 | 5119881 | 6-scf00352 | 6 |
| AX-158191526 | 17 | 44.066 | KV452884.1 | 5126835 | 6-scf00352 | 6 |
| AX-158413945 | 17 | 44.066 | KV452884.1 | 5129382 | 6-scf00352 | 6 |
| AX-158191528 | 17 | 44.066 | KV452884.1 | 5129557 | 6-scf00352 | 6 |
| AX-158191600 | 17 | 44.066 | KV452884.1 | 5245585 | 6-scf00352 | 6 |
| AX-158191608 | 17 | 44.066 | KV452884.1 | 5252381 | 6-scf00352 | 6 |
| AX-158191642 | 17 | 44.066 | KV452884.1 | 5291091 | 6-scf00352 | 6 |
| AX-158191828 | 17 | 44.066 | KV452884.1 | 5544526 | 6-scf00352 | 6 |
| AX-158393621 | 17 | 44.066 | KV452884.1 | 5546610 | 6-scf00352 | 6 |
| AX-158191334 | 17 | 44.175 | KV452884.1 | 4879301 | 6-scf00352 | 6 |
| AX-158191345 | 17 | 44.175 | KV452884.1 | 4895733 | 6-scf00352 | 6 |
| AX-157747268 | 17 | 44.175 | KV452884.1 | 4898778 | 6-scf00352 | 6 |
| AX-158191533 | 17 | 44.175 | KV452884.1 | 5151580 | 6-scf00352 | 6 |
| AX-157836619 | 17 | 44.175 | KV452884.1 | 5152690 | 6-scf00352 | 6 |
| AX-158191534 | 17 | 44.175 | KV452884.1 | 5153135 | 6-scf00352 | 6 |
| AX-158191536 | 17 | 44.175 | KV452884.1 | 5154077 | 6-scf00352 | 6 |
| AX-158191537 | 17 | 44.175 | KV452884.1 | 5154598 | 6-scf00352 | 6 |
| AX-158191539 | 17 | 44.175 | KV452884.1 | 5156164 | 6-scf00352 | 6 |
| AX-158191540 | 17 | 44.175 | KV452884.1 | 5156898 | 6-scf00352 | 6 |
| AX-158191541 | 17 | 44.175 | KV452884.1 | 5157549 | 6-scf00352 | 6 |
| AX-158191542 | 17 | 44.175 | KV452884.1 | 5158620 | 6-scf00352 | 6 |
| AX-158191543 | 17 | 44.175 | KV452884.1 | 5160101 | 6-scf00352 | 6 |
| AX-158191544 | 17 | 44.175 | KV452884.1 | 5160605 | 6-scf00352 | 6 |
| AX-158191548 | 17 | 44.175 | KV452884.1 | 5162631 | 6-scf00352 | 6 |
| AX-158191549 | 17 | 44.175 | KV452884.1 | 5162987 | 6-scf00352 | 6 |
| AX-158191550 | 17 | 44.175 | KV452884.1 | 5163498 | 6-scf00352 | 6 |
| AX-157739830 | 17 | 44.175 | KV452884.1 | 5166479 | 6-scf00352 | 6 |
| AX-158191553 | 17 | 44.175 | KV452884.1 | 5166721 | 6-scf00352 | 6 |
| AX-158191554 | 17 | 44.175 | KV452884.1 | 5167077 | 6-scf00352 | 6 |

|              |    |        |            |         |            |   |
|--------------|----|--------|------------|---------|------------|---|
| AX-158191555 | 17 | 44.175 | KV452884.1 | 5167667 | 6-scf00352 | 6 |
| AX-158191556 | 17 | 44.175 | KV452884.1 | 5168377 | 6-scf00352 | 6 |
| AX-158413946 | 17 | 44.175 | KV452884.1 | 5171207 | 6-scf00352 | 6 |
| AX-157836620 | 17 | 44.175 | KV452884.1 | 5172222 | 6-scf00352 | 6 |
| AX-158191558 | 17 | 44.175 | KV452884.1 | 5173413 | 6-scf00352 | 6 |
| AX-158191560 | 17 | 44.175 | KV452884.1 | 5174493 | 6-scf00352 | 6 |
| AX-158191562 | 17 | 44.175 | KV452884.1 | 5176202 | 6-scf00352 | 6 |
| AX-158191567 | 17 | 44.175 | KV452884.1 | 5178968 | 6-scf00352 | 6 |
| AX-158191568 | 17 | 44.175 | KV452884.1 | 5180702 | 6-scf00352 | 6 |
| AX-158191570 | 17 | 44.175 | KV452884.1 | 5181483 | 6-scf00352 | 6 |
| AX-157858902 | 17 | 44.175 | KV452884.1 | 5183452 | 6-scf00352 | 6 |
| AX-158191572 | 17 | 44.175 | KV452884.1 | 5185918 | 6-scf00352 | 6 |
| AX-158191573 | 17 | 44.175 | KV452884.1 | 5186174 | 6-scf00352 | 6 |
| AX-158191574 | 17 | 44.175 | KV452884.1 | 5187168 | 6-scf00352 | 6 |
| AX-157797075 | 17 | 44.175 | KV452884.1 | 5189678 | 6-scf00352 | 6 |
| AX-158191576 | 17 | 44.175 | KV452884.1 | 5192824 | 6-scf00352 | 6 |
| AX-158191580 | 17 | 44.175 | KV452884.1 | 5204368 | 6-scf00352 | 6 |
| AX-158191581 | 17 | 44.175 | KV452884.1 | 5205131 | 6-scf00352 | 6 |
| AX-157879092 | 17 | 44.175 | KV452884.1 | 5441589 | 6-scf00352 | 6 |
| AX-158191797 | 17 | 44.175 | KV452884.1 | 5497164 | 6-scf00352 | 6 |
| AX-158191815 | 17 | 44.175 | KV452884.1 | 5527042 | 6-scf00352 | 6 |
| AX-157836621 | 17 | 44.191 | KV452884.1 | 5189723 | 6-scf00352 | 6 |
| AX-158191469 | 17 | 44.211 | KV452884.1 | 5057087 | 6-scf00352 | 6 |
| AX-158191513 | 17 | 44.211 | KV452884.1 | 5111730 | 6-scf00352 | 6 |
| AX-158191546 | 17 | 44.211 | KV452884.1 | 5161963 | 6-scf00352 | 6 |
| AX-158191585 | 17 | 44.211 | KV452884.1 | 5212101 | 6-scf00352 | 6 |
| AX-158191587 | 17 | 44.285 | KV452884.1 | 5214036 | 6-scf00352 | 6 |
| AX-157836624 | 17 | 44.285 | KV452884.1 | 5217772 | 6-scf00352 | 6 |
| AX-158191588 | 17 | 44.285 | KV452884.1 | 5218735 | 6-scf00352 | 6 |
| AX-158191591 | 17 | 44.285 | KV452884.1 | 5222317 | 6-scf00352 | 6 |
| AX-158191595 | 17 | 44.285 | KV452884.1 | 5229482 | 6-scf00352 | 6 |
| AX-158191596 | 17 | 44.285 | KV452884.1 | 5229993 | 6-scf00352 | 6 |
| AX-158191602 | 17 | 44.285 | KV452884.1 | 5247675 | 6-scf00352 | 6 |
| AX-158191603 | 17 | 44.285 | KV452884.1 | 5247895 | 6-scf00352 | 6 |
| AX-158191607 | 17 | 44.285 | KV452884.1 | 5250454 | 6-scf00352 | 6 |
| AX-158191613 | 17 | 44.285 | KV452884.1 | 5255494 | 6-scf00352 | 6 |
| AX-157723677 | 17 | 44.285 | KV452884.1 | 5256004 | 6-scf00352 | 6 |
| AX-158191616 | 17 | 44.285 | KV452884.1 | 5262019 | 6-scf00352 | 6 |
| AX-157746835 | 17 | 44.285 | KV452884.1 | 5263215 | 6-scf00352 | 6 |
| AX-158191621 | 17 | 44.285 | KV452884.1 | 5268506 | 6-scf00352 | 6 |
| AX-158191623 | 17 | 44.285 | KV452884.1 | 5269832 | 6-scf00352 | 6 |
| AX-158191627 | 17 | 44.285 | KV452884.1 | 5276819 | 6-scf00352 | 6 |
| AX-157836629 | 17 | 44.285 | KV452884.1 | 5281040 | 6-scf00352 | 6 |
| AX-157836630 | 17 | 44.285 | KV452884.1 | 5285606 | 6-scf00352 | 6 |
| AX-158191636 | 17 | 44.285 | KV452884.1 | 5286835 | 6-scf00352 | 6 |
| AX-158191637 | 17 | 44.285 | KV452884.1 | 5287154 | 6-scf00352 | 6 |
| AX-158191638 | 17 | 44.285 | KV452884.1 | 5288119 | 6-scf00352 | 6 |
| AX-158191639 | 17 | 44.285 | KV452884.1 | 5289097 | 6-scf00352 | 6 |
| AX-157886945 | 17 | 44.285 | KV452884.1 | 5291938 | 6-scf00352 | 6 |
| AX-158191644 | 17 | 44.285 | KV452884.1 | 5293166 | 6-scf00352 | 6 |
| AX-158191645 | 17 | 44.285 | KV452884.1 | 5294465 | 6-scf00352 | 6 |

|              |    |        |            |         |            |   |
|--------------|----|--------|------------|---------|------------|---|
| AX-158191646 | 17 | 44.285 | KV452884.1 | 5295004 | 6-scf00352 | 6 |
| AX-158191647 | 17 | 44.285 | KV452884.1 | 5296390 | 6-scf00352 | 6 |
| AX-158191650 | 17 | 44.285 | KV452884.1 | 5298178 | 6-scf00352 | 6 |
| AX-157743454 | 17 | 44.285 | KV452884.1 | 5298220 | 6-scf00352 | 6 |
| AX-158191651 | 17 | 44.285 | KV452884.1 | 5298624 | 6-scf00352 | 6 |
| AX-158191660 | 17 | 44.285 | KV452884.1 | 5316520 | 6-scf00352 | 6 |
| AX-158191665 | 17 | 44.285 | KV452884.1 | 5322096 | 6-scf00352 | 6 |
| AX-157836633 | 17 | 44.285 | KV452884.1 | 5322599 | 6-scf00352 | 6 |
| AX-158418227 | 17 | 44.285 | KV452884.1 | 5323925 | 6-scf00352 | 6 |
| AX-158413950 | 17 | 44.285 | KV452884.1 | 5324736 | 6-scf00352 | 6 |
| AX-158191671 | 17 | 44.285 | KV452884.1 | 5329682 | 6-scf00352 | 6 |
| AX-158191672 | 17 | 44.285 | KV452884.1 | 5331592 | 6-scf00352 | 6 |
| AX-158191674 | 17 | 44.285 | KV452884.1 | 5334023 | 6-scf00352 | 6 |
| AX-158191675 | 17 | 44.285 | KV452884.1 | 5334804 | 6-scf00352 | 6 |
| AX-158413955 | 17 | 44.285 | KV452884.1 | 5343626 | 6-scf00352 | 6 |
| AX-158191682 | 17 | 44.285 | KV452884.1 | 5345704 | 6-scf00352 | 6 |
| AX-157836636 | 17 | 44.285 | KV452884.1 | 5356398 | 6-scf00352 | 6 |
| AX-158191690 | 17 | 44.285 | KV452884.1 | 5365224 | 6-scf00352 | 6 |
| AX-158191691 | 17 | 44.285 | KV452884.1 | 5366739 | 6-scf00352 | 6 |
| AX-158191692 | 17 | 44.285 | KV452884.1 | 5367167 | 6-scf00352 | 6 |
| AX-158191702 | 17 | 44.285 | KV452884.1 | 5379471 | 6-scf00352 | 6 |
| AX-158191767 | 17 | 44.285 | KV452884.1 | 5457792 | 6-scf00352 | 6 |
| AX-158191413 | 17 | 44.503 | KV452884.1 | 4985576 | 6-scf00352 | 6 |
| AX-158191466 | 17 | 44.503 | KV452884.1 | 5053014 | 6-scf00352 | 6 |
| AX-158191584 | 17 | 44.503 | KV452884.1 | 5211083 | 6-scf00352 | 6 |
| AX-158191597 | 17 | 44.503 | KV452884.1 | 5238479 | 6-scf00352 | 6 |
| AX-158191614 | 17 | 44.503 | KV452884.1 | 5258330 | 6-scf00352 | 6 |
| AX-158191619 | 17 | 44.503 | KV452884.1 | 5267101 | 6-scf00352 | 6 |
| AX-157858904 | 17 | 44.503 | KV452884.1 | 5318982 | 6-scf00352 | 6 |
| AX-158191697 | 17 | 44.503 | KV452884.1 | 5372792 | 6-scf00352 | 6 |
| AX-158191698 | 17 | 44.503 | KV452884.1 | 5373083 | 6-scf00352 | 6 |
| AX-158191700 | 17 | 44.503 | KV452884.1 | 5374602 | 6-scf00352 | 6 |
| AX-157879088 | 17 | 44.503 | KV452884.1 | 5376192 | 6-scf00352 | 6 |
| AX-158191701 | 17 | 44.503 | KV452884.1 | 5376479 | 6-scf00352 | 6 |
| AX-157879089 | 17 | 44.503 | KV452884.1 | 5378065 | 6-scf00352 | 6 |
| AX-157836638 | 17 | 44.503 | KV452884.1 | 5380840 | 6-scf00352 | 6 |
| AX-158191704 | 17 | 44.503 | KV452884.1 | 5383743 | 6-scf00352 | 6 |
| AX-158191706 | 17 | 44.503 | KV452884.1 | 5386370 | 6-scf00352 | 6 |
| AX-158191707 | 17 | 44.503 | KV452884.1 | 5386815 | 6-scf00352 | 6 |
| AX-158191710 | 17 | 44.503 | KV452884.1 | 5392241 | 6-scf00352 | 6 |
| AX-158191712 | 17 | 44.503 | KV452884.1 | 5397310 | 6-scf00352 | 6 |
| AX-158191713 | 17 | 44.503 | KV452884.1 | 5397700 | 6-scf00352 | 6 |
| AX-157836639 | 17 | 44.503 | KV452884.1 | 5405395 | 6-scf00352 | 6 |
| AX-157746595 | 17 | 44.503 | KV452884.1 | 5405757 | 6-scf00352 | 6 |
| AX-157836640 | 17 | 44.503 | KV452884.1 | 5411394 | 6-scf00352 | 6 |
| AX-158191722 | 17 | 44.503 | KV452884.1 | 5413372 | 6-scf00352 | 6 |
| AX-157708683 | 17 | 44.503 | KV452884.1 | 5417620 | 6-scf00352 | 6 |
| AX-158191735 | 17 | 44.503 | KV452884.1 | 5426662 | 6-scf00352 | 6 |
| AX-158191740 | 17 | 44.503 | KV452884.1 | 5431554 | 6-scf00352 | 6 |
| AX-157863634 | 17 | 44.503 | KV452884.1 | 5438728 | 6-scf00352 | 6 |
| AX-158191758 | 17 | 44.503 | KV452884.1 | 5448818 | 6-scf00352 | 6 |



|              |    |        |            |         |            |   |
|--------------|----|--------|------------|---------|------------|---|
| AX-158191771 | 17 | 44.503 | KV452884.1 | 5463276 | 6-scf00352 | 6 |
| AX-158191772 | 17 | 44.503 | KV452884.1 | 5463508 | 6-scf00352 | 6 |
| AX-158191774 | 17 | 44.503 | KV452884.1 | 5467394 | 6-scf00352 | 6 |
| AX-157753592 | 17 | 44.503 | KV452884.1 | 5471894 | 6-scf00352 | 6 |
| AX-158191776 | 17 | 44.503 | KV452884.1 | 5473535 | 6-scf00352 | 6 |
| AX-158191779 | 17 | 44.503 | KV452884.1 | 5477379 | 6-scf00352 | 6 |
| AX-158191784 | 17 | 44.503 | KV452884.1 | 5484842 | 6-scf00352 | 6 |
| AX-158191785 | 17 | 44.503 | KV452884.1 | 5485223 | 6-scf00352 | 6 |
| AX-158191786 | 17 | 44.503 | KV452884.1 | 5485462 | 6-scf00352 | 6 |
| AX-158191789 | 17 | 44.503 | KV452884.1 | 5489635 | 6-scf00352 | 6 |
| AX-157756059 | 17 | 44.503 | KV452884.1 | 5490511 | 6-scf00352 | 6 |
| AX-157836643 | 17 | 44.503 | KV452884.1 | 5490676 | 6-scf00352 | 6 |
| AX-158191791 | 17 | 44.503 | KV452884.1 | 5491447 | 6-scf00352 | 6 |
| AX-158191795 | 17 | 44.503 | KV452884.1 | 5495698 | 6-scf00352 | 6 |
| AX-158191796 | 17 | 44.503 | KV452884.1 | 5496909 | 6-scf00352 | 6 |
| AX-157836644 | 17 | 44.503 | KV452884.1 | 5513059 | 6-scf00352 | 6 |
| AX-158191807 | 17 | 44.503 | KV452884.1 | 5513769 | 6-scf00352 | 6 |
| AX-157836645 | 17 | 44.503 | KV452884.1 | 5514330 | 6-scf00352 | 6 |
| AX-158191808 | 17 | 44.503 | KV452884.1 | 5515232 | 6-scf00352 | 6 |
| AX-158418231 | 17 | 44.503 | KV452884.1 | 5516266 | 6-scf00352 | 6 |
| AX-158191811 | 17 | 44.503 | KV452884.1 | 5517983 | 6-scf00352 | 6 |
| AX-157836646 | 17 | 44.503 | KV452884.1 | 5519492 | 6-scf00352 | 6 |
| AX-157836647 | 17 | 44.503 | KV452884.1 | 5520762 | 6-scf00352 | 6 |
| AX-157746391 | 17 | 44.503 | KV452884.1 | 5523937 | 6-scf00352 | 6 |
| AX-158191813 | 17 | 44.503 | KV452884.1 | 5524600 | 6-scf00352 | 6 |
| AX-158191814 | 17 | 44.503 | KV452884.1 | 5525775 | 6-scf00352 | 6 |
| AX-158191820 | 17 | 44.503 | KV452884.1 | 5535666 | 6-scf00352 | 6 |
| AX-158191821 | 17 | 44.503 | KV452884.1 | 5536322 | 6-scf00352 | 6 |
| AX-158191822 | 17 | 44.503 | KV452884.1 | 5536731 | 6-scf00352 | 6 |
| AX-158191824 | 17 | 44.503 | KV452884.1 | 5537995 | 6-scf00352 | 6 |
| AX-157714206 | 17 | 44.503 | KV452884.1 | 5538173 | 6-scf00352 | 6 |
| AX-158191825 | 17 | 44.503 | KV452884.1 | 5540573 | 6-scf00352 | 6 |
| AX-158191826 | 17 | 44.503 | KV452884.1 | 5540826 | 6-scf00352 | 6 |
| AX-158191832 | 17 | 44.503 | KV452884.1 | 5550990 | 6-scf00352 | 6 |
| AX-158191836 | 17 | 44.503 | KV452884.1 | 5558207 | 6-scf00352 | 6 |
| AX-158191837 | 17 | 44.503 | KV452884.1 | 5559095 | 6-scf00352 | 6 |
| AX-158191851 | 17 | 44.503 | KV452884.1 | 5578969 | 6-scf00352 | 6 |
| AX-157771316 | 17 | 44.503 | KV452884.1 | 5601387 | 6-scf00352 | 6 |
| AX-157879095 | 17 | 44.503 | KV452884.1 | 5607047 | 6-scf00352 | 6 |
| AX-158191872 | 17 | 44.503 | KV452884.1 | 5610624 | 6-scf00352 | 6 |
| AX-158191838 | 17 | 44.514 | KV452884.1 | 5560390 | 6-scf00352 | 6 |
| AX-157836635 | 17 | 44.522 | KV452884.1 | 5342281 | 6-scf00352 | 6 |
| AX-158191726 | 17 | 44.522 | KV452884.1 | 5416185 | 6-scf00352 | 6 |
| AX-158191839 | 17 | 44.522 | KV452884.1 | 5562449 | 6-scf00352 | 6 |
| AX-158191842 | 17 | 44.543 | KV452884.1 | 5564513 | 6-scf00352 | 6 |
| AX-157836651 | 17 | 44.562 | KV452884.1 | 5564943 | 6-scf00352 | 6 |
| AX-158191850 | 17 | 44.589 | KV452884.1 | 5578494 | 6-scf00352 | 6 |
| AX-158191590 | 17 | 44.612 | KV452884.1 | 5221415 | 6-scf00352 | 6 |
| AX-158191594 | 17 | 44.612 | KV452884.1 | 5226378 | 6-scf00352 | 6 |
| AX-157836625 | 17 | 44.612 | KV452884.1 | 5258565 | 6-scf00352 | 6 |
| AX-158191649 | 17 | 44.612 | KV452884.1 | 5297569 | 6-scf00352 | 6 |

|              |    |        |            |         |            |   |
|--------------|----|--------|------------|---------|------------|---|
| AX-158413948 | 17 | 44.612 | KV452884.1 | 5303344 | 6-scf00352 | 6 |
| AX-158191657 | 17 | 44.612 | KV452884.1 | 5308216 | 6-scf00352 | 6 |
| AX-157718206 | 17 | 44.612 | KV452884.1 | 5328107 | 6-scf00352 | 6 |
| AX-158413953 | 17 | 44.612 | KV452884.1 | 5338361 | 6-scf00352 | 6 |
| AX-158413954 | 17 | 44.612 | KV452884.1 | 5338497 | 6-scf00352 | 6 |
| AX-158191677 | 17 | 44.612 | KV452884.1 | 5339204 | 6-scf00352 | 6 |
| AX-158191717 | 17 | 44.612 | KV452884.1 | 5403467 | 6-scf00352 | 6 |
| AX-158191718 | 17 | 44.612 | KV452884.1 | 5404848 | 6-scf00352 | 6 |
| AX-158191732 | 17 | 44.612 | KV452884.1 | 5425153 | 6-scf00352 | 6 |
| AX-158191733 | 17 | 44.612 | KV452884.1 | 5425450 | 6-scf00352 | 6 |
| AX-158191737 | 17 | 44.612 | KV452884.1 | 5427598 | 6-scf00352 | 6 |
| AX-158191743 | 17 | 44.612 | KV452884.1 | 5434354 | 6-scf00352 | 6 |
| AX-158191744 | 17 | 44.612 | KV452884.1 | 5435875 | 6-scf00352 | 6 |
| AX-158191747 | 17 | 44.612 | KV452884.1 | 5437313 | 6-scf00352 | 6 |
| AX-158191749 | 17 | 44.612 | KV452884.1 | 5438026 | 6-scf00352 | 6 |
| AX-157872163 | 17 | 44.612 | KV452884.1 | 5489176 | 6-scf00352 | 6 |
| AX-158191847 | 17 | 44.612 | KV452884.1 | 5574904 | 6-scf00352 | 6 |
| AX-158191852 | 17 | 44.612 | KV452884.1 | 5581460 | 6-scf00352 | 6 |
| AX-158191855 | 17 | 44.612 | KV452884.1 | 5590102 | 6-scf00352 | 6 |
| AX-158191856 | 17 | 44.612 | KV452884.1 | 5591595 | 6-scf00352 | 6 |
| AX-158191858 | 17 | 44.612 | KV452884.1 | 5594480 | 6-scf00352 | 6 |
| AX-158191863 | 17 | 44.612 | KV452884.1 | 5597544 | 6-scf00352 | 6 |
| AX-157836652 | 17 | 44.612 | KV452884.1 | 5599052 | 6-scf00352 | 6 |
| AX-158191867 | 17 | 44.612 | KV452884.1 | 5605564 | 6-scf00352 | 6 |
| AX-158191873 | 17 | 44.612 | KV452884.1 | 5611558 | 6-scf00352 | 6 |
| AX-158191874 | 17 | 44.612 | KV452884.1 | 5612814 | 6-scf00352 | 6 |
| AX-158191875 | 17 | 44.612 | KV452884.1 | 5613099 | 6-scf00352 | 6 |
| AX-158191876 | 17 | 44.612 | KV452884.1 | 5614783 | 6-scf00352 | 6 |
| AX-158191878 | 17 | 44.612 | KV452884.1 | 5617740 | 6-scf00352 | 6 |
| AX-158191880 | 17 | 44.612 | KV452884.1 | 5619838 | 6-scf00352 | 6 |
| AX-158191881 | 17 | 44.612 | KV452884.1 | 5623101 | 6-scf00352 | 6 |
| AX-158413961 | 17 | 44.612 | KV452884.1 | 5626219 | 6-scf00352 | 6 |
| AX-158191885 | 17 | 44.612 | KV452884.1 | 5628635 | 6-scf00352 | 6 |
| AX-157836656 | 17 | 44.612 | KV452884.1 | 5630779 | 6-scf00352 | 6 |
| AX-157743476 | 17 | 44.612 | KV452884.1 | 5631668 | 6-scf00352 | 6 |
| AX-158191889 | 17 | 44.612 | KV452884.1 | 5634994 | 6-scf00352 | 6 |
| AX-158191891 | 17 | 44.612 | KV452884.1 | 5636728 | 6-scf00352 | 6 |
| AX-158191892 | 17 | 44.612 | KV452884.1 | 5637259 | 6-scf00352 | 6 |
| AX-158191895 | 17 | 44.74  | KV452884.1 | 5638533 | 6-scf00352 | 6 |
| AX-158191708 | 17 | 44.821 | KV452884.1 | 5387728 | 6-scf00352 | 6 |
| AX-157836642 | 17 | 44.821 | KV452884.1 | 5447653 | 6-scf00352 | 6 |
| AX-157723791 | 17 | 44.821 | KV452884.1 | 5639660 | 6-scf00352 | 6 |
| AX-158191896 | 17 | 44.821 | KV452884.1 | 5639913 | 6-scf00352 | 6 |
| AX-158191897 | 17 | 44.821 | KV452884.1 | 5640312 | 6-scf00352 | 6 |
| AX-158191898 | 17 | 44.821 | KV452884.1 | 5640990 | 6-scf00352 | 6 |
| AX-158409681 | 17 | 44.821 | KV452884.1 | 5641393 | 6-scf00352 | 6 |
| AX-158191912 | 17 | 44.821 | KV452884.1 | 5657877 | 6-scf00352 | 6 |
| AX-158191859 | 17 | 44.841 | KV452884.1 | 5595058 | 6-scf00352 | 6 |
| AX-157836658 | 17 | 44.841 | KV452884.1 | 5649219 | 6-scf00352 | 6 |
| AX-158191903 | 17 | 44.841 | KV452884.1 | 5650562 | 6-scf00352 | 6 |
| AX-158191906 | 17 | 44.841 | KV452884.1 | 5653768 | 6-scf00352 | 6 |

|              |    |        |            |         |            |   |
|--------------|----|--------|------------|---------|------------|---|
| AX-158191907 | 17 | 44.841 | KV452884.1 | 5654175 | 6-scf00352 | 6 |
| AX-158191913 | 17 | 44.841 | KV452884.1 | 5658531 | 6-scf00352 | 6 |
| AX-158191914 | 17 | 44.841 | KV452884.1 | 5660112 | 6-scf00352 | 6 |
| AX-158191918 | 17 | 44.959 | KV452884.1 | 5664752 | 6-scf00352 | 6 |
| AX-158191854 | 17 | 45.049 | KV452884.1 | 5589292 | 6-scf00352 | 6 |
| AX-157872166 | 17 | 45.049 | KV452884.1 | 5679130 | 6-scf00352 | 6 |
| AX-158191929 | 17 | 45.049 | KV452884.1 | 5679590 | 6-scf00352 | 6 |
| AX-158191930 | 17 | 45.049 | KV452884.1 | 5680088 | 6-scf00352 | 6 |
| AX-157721825 | 17 | 45.049 | KV452884.1 | 5684927 | 6-scf00352 | 6 |
| AX-158191933 | 17 | 45.049 | KV452884.1 | 5685753 | 6-scf00352 | 6 |
| AX-158191937 | 17 | 45.049 | KV452884.1 | 5691558 | 6-scf00352 | 6 |
| AX-158191942 | 17 | 45.049 | KV452884.1 | 5696350 | 6-scf00352 | 6 |
| AX-158191943 | 17 | 45.049 | KV452884.1 | 5696719 | 6-scf00352 | 6 |
| AX-158191950 | 17 | 45.049 | KV452884.1 | 5707708 | 6-scf00352 | 6 |
| AX-157879098 | 17 | 45.049 | KV452884.1 | 5714091 | 6-scf00352 | 6 |
| AX-158191953 | 17 | 45.049 | KV452884.1 | 5714143 | 6-scf00352 | 6 |
| AX-158413962 | 17 | 45.049 | KV452884.1 | 5715312 | 6-scf00352 | 6 |
| AX-158191956 | 17 | 45.049 | KV452884.1 | 5717314 | 6-scf00352 | 6 |
| AX-158192102 | 17 | 45.049 | KV452884.1 | 5898510 | 6-scf00352 | 6 |
| AX-157886950 | 17 | 45.049 | KV452884.1 | 5913312 | 6-scf00352 | 6 |
| AX-158191955 | 17 | 45.268 | KV452884.1 | 5716553 | 6-scf00352 | 6 |
| AX-158191957 | 17 | 45.268 | KV452884.1 | 5718418 | 6-scf00352 | 6 |
| AX-158191958 | 17 | 45.268 | KV452884.1 | 5719134 | 6-scf00352 | 6 |
| AX-158191959 | 17 | 45.268 | KV452884.1 | 5720014 | 6-scf00352 | 6 |
| AX-158191961 | 17 | 45.268 | KV452884.1 | 5721903 | 6-scf00352 | 6 |
| AX-158191963 | 17 | 45.268 | KV452884.1 | 5723667 | 6-scf00352 | 6 |
| AX-158191964 | 17 | 45.268 | KV452884.1 | 5725548 | 6-scf00352 | 6 |
| AX-158191968 | 17 | 45.268 | KV452884.1 | 5727330 | 6-scf00352 | 6 |
| AX-158191969 | 17 | 45.268 | KV452884.1 | 5730378 | 6-scf00352 | 6 |
| AX-158191970 | 17 | 45.268 | KV452884.1 | 5731458 | 6-scf00352 | 6 |
| AX-157741561 | 17 | 45.268 | KV452884.1 | 5734465 | 6-scf00352 | 6 |
| AX-157836665 | 17 | 45.268 | KV452884.1 | 5741518 | 6-scf00352 | 6 |
| AX-158191973 | 17 | 45.268 | KV452884.1 | 5741980 | 6-scf00352 | 6 |
| AX-158191976 | 17 | 45.268 | KV452884.1 | 5745739 | 6-scf00352 | 6 |
| AX-158191979 | 17 | 45.268 | KV452884.1 | 5748480 | 6-scf00352 | 6 |
| AX-158191987 | 17 | 45.268 | KV452884.1 | 5755758 | 6-scf00352 | 6 |
| AX-158191989 | 17 | 45.268 | KV452884.1 | 5756806 | 6-scf00352 | 6 |
| AX-157773198 | 17 | 45.268 | KV452884.1 | 5778857 | 6-scf00352 | 6 |
| AX-157751589 | 17 | 45.268 | KV452884.1 | 5822525 | 6-scf00352 | 6 |
| AX-158192112 | 17 | 45.268 | KV452884.1 | 5911886 | 6-scf00352 | 6 |
| AX-158191986 | 17 | 45.31  | KV452884.1 | 5754198 | 6-scf00352 | 6 |
| AX-158191992 | 17 | 45.342 | KV452884.1 | 5760254 | 6-scf00352 | 6 |
| AX-158191678 | 17 | 45.377 | KV452884.1 | 5339536 | 6-scf00352 | 6 |
| AX-158191719 | 17 | 45.377 | KV452884.1 | 5405810 | 6-scf00352 | 6 |
| AX-158191800 | 17 | 45.377 | KV452884.1 | 5501766 | 6-scf00352 | 6 |
| AX-157836659 | 17 | 45.377 | KV452884.1 | 5676614 | 6-scf00352 | 6 |
| AX-158191932 | 17 | 45.377 | KV452884.1 | 5683677 | 6-scf00352 | 6 |
| AX-157836661 | 17 | 45.377 | KV452884.1 | 5697386 | 6-scf00352 | 6 |
| AX-158191960 | 17 | 45.377 | KV452884.1 | 5720623 | 6-scf00352 | 6 |
| AX-158191972 | 17 | 45.377 | KV452884.1 | 5737891 | 6-scf00352 | 6 |
| AX-158191977 | 17 | 45.377 | KV452884.1 | 5747708 | 6-scf00352 | 6 |

|              |    |        |            |         |            |   |
|--------------|----|--------|------------|---------|------------|---|
| AX-158191995 | 17 | 45.377 | KV452884.1 | 5761479 | 6-scf00352 | 6 |
| AX-158191996 | 17 | 45.377 | KV452884.1 | 5761751 | 6-scf00352 | 6 |
| AX-158192000 | 17 | 45.377 | KV452884.1 | 5765474 | 6-scf00352 | 6 |
| AX-157836668 | 17 | 45.377 | KV452884.1 | 5765713 | 6-scf00352 | 6 |
| AX-158192001 | 17 | 45.377 | KV452884.1 | 5766232 | 6-scf00352 | 6 |
| AX-158192002 | 17 | 45.377 | KV452884.1 | 5766682 | 6-scf00352 | 6 |
| AX-158192004 | 17 | 45.377 | KV452884.1 | 5775166 | 6-scf00352 | 6 |
| AX-157697842 | 17 | 45.377 | KV452884.1 | 5779053 | 6-scf00352 | 6 |
| AX-158192007 | 17 | 45.377 | KV452884.1 | 5781388 | 6-scf00352 | 6 |
| AX-158192008 | 17 | 45.377 | KV452884.1 | 5782414 | 6-scf00352 | 6 |
| AX-158192012 | 17 | 45.377 | KV452884.1 | 5787871 | 6-scf00352 | 6 |
| AX-158192014 | 17 | 45.377 | KV452884.1 | 5790011 | 6-scf00352 | 6 |
| AX-158192021 | 17 | 45.377 | KV452884.1 | 5795509 | 6-scf00352 | 6 |
| AX-158192028 | 17 | 45.377 | KV452884.1 | 5805951 | 6-scf00352 | 6 |
| AX-158192033 | 17 | 45.377 | KV452884.1 | 5809766 | 6-scf00352 | 6 |
| AX-158192034 | 17 | 45.377 | KV452884.1 | 5811133 | 6-scf00352 | 6 |
| AX-158192035 | 17 | 45.377 | KV452884.1 | 5812200 | 6-scf00352 | 6 |
| AX-158192036 | 17 | 45.377 | KV452884.1 | 5812435 | 6-scf00352 | 6 |
| AX-158192037 | 17 | 45.377 | KV452884.1 | 5812985 | 6-scf00352 | 6 |
| AX-158192038 | 17 | 45.377 | KV452884.1 | 5813661 | 6-scf00352 | 6 |
| AX-158192041 | 17 | 45.377 | KV452884.1 | 5817712 | 6-scf00352 | 6 |
| AX-158192042 | 17 | 45.377 | KV452884.1 | 5818480 | 6-scf00352 | 6 |
| AX-158192043 | 17 | 45.377 | KV452884.1 | 5819010 | 6-scf00352 | 6 |
| AX-158192055 | 17 | 45.377 | KV452884.1 | 5841348 | 6-scf00352 | 6 |
| AX-157772511 | 17 | 45.377 | KV452884.1 | 5841639 | 6-scf00352 | 6 |
| AX-158192066 | 17 | 45.377 | KV452884.1 | 5854185 | 6-scf00352 | 6 |
| AX-158192081 | 17 | 45.377 | KV452884.1 | 5868998 | 6-scf00352 | 6 |
| AX-158192088 | 17 | 45.377 | KV452884.1 | 5878101 | 6-scf00352 | 6 |
| AX-158192092 | 17 | 45.377 | KV452884.1 | 5882361 | 6-scf00352 | 6 |
| AX-158192094 | 17 | 45.377 | KV452884.1 | 5885403 | 6-scf00352 | 6 |
| AX-158192100 | 17 | 45.377 | KV452884.1 | 5894977 | 6-scf00352 | 6 |
| AX-158192109 | 17 | 45.377 | KV452884.1 | 5908681 | 6-scf00352 | 6 |
| AX-158192136 | 17 | 45.377 | KV452884.1 | 5955794 | 6-scf00352 | 6 |
| AX-158191844 | 17 | 45.486 | KV452884.1 | 5572161 | 6-scf00352 | 6 |
| AX-158191922 | 17 | 45.486 | KV452884.1 | 5672555 | 6-scf00352 | 6 |
| AX-158191944 | 17 | 45.486 | KV452884.1 | 5701783 | 6-scf00352 | 6 |
| AX-158191971 | 17 | 45.486 | KV452884.1 | 5733260 | 6-scf00352 | 6 |
| AX-157836664 | 17 | 45.486 | KV452884.1 | 5740311 | 6-scf00352 | 6 |
| AX-157836666 | 17 | 45.486 | KV452884.1 | 5741801 | 6-scf00352 | 6 |
| AX-158413963 | 17 | 45.486 | KV452884.1 | 5751688 | 6-scf00352 | 6 |
| AX-158191991 | 17 | 45.486 | KV452884.1 | 5759447 | 6-scf00352 | 6 |
| AX-158192011 | 17 | 45.486 | KV452884.1 | 5787201 | 6-scf00352 | 6 |
| AX-158192057 | 17 | 45.486 | KV452884.1 | 5843166 | 6-scf00352 | 6 |
| AX-158192060 | 17 | 45.486 | KV452884.1 | 5848754 | 6-scf00352 | 6 |
| AX-158192065 | 17 | 45.486 | KV452884.1 | 5852923 | 6-scf00352 | 6 |
| AX-158192070 | 17 | 45.486 | KV452884.1 | 5856326 | 6-scf00352 | 6 |
| AX-158192074 | 17 | 45.486 | KV452884.1 | 5863192 | 6-scf00352 | 6 |
| AX-158192075 | 17 | 45.486 | KV452884.1 | 5864370 | 6-scf00352 | 6 |
| AX-158192076 | 17 | 45.486 | KV452884.1 | 5864806 | 6-scf00352 | 6 |
| AX-158192079 | 17 | 45.486 | KV452884.1 | 5868262 | 6-scf00352 | 6 |
| AX-158386103 | 17 | 45.486 | KV452884.1 | 5868686 | 6-scf00352 | 6 |

|              |    |        |             |         |            |    |
|--------------|----|--------|-------------|---------|------------|----|
| AX-158192082 | 17 | 45.486 | KV452884.1  | 5870390 | 6-scf00352 | 6  |
| AX-158192083 | 17 | 45.486 | KV452884.1  | 5870692 | 6-scf00352 | 6  |
| AX-158192084 | 17 | 45.486 | KV452884.1  | 5872665 | 6-scf00352 | 6  |
| AX-158192113 | 17 | 45.486 | KV452884.1  | 5916887 | 6-scf00352 | 6  |
| AX-158192114 | 17 | 45.486 | KV452884.1  | 5917251 | 6-scf00352 | 6  |
| AX-157755104 | 17 | 45.486 | KV452884.1  | 5922827 | 6-scf00352 | 6  |
| AX-158192121 | 17 | 45.486 | KV452884.1  | 5931246 | 6-scf00352 | 6  |
| AX-158192122 | 17 | 45.486 | KV452884.1  | 5931988 | 6-scf00352 | 6  |
| AX-158192150 | 17 | 45.486 | KV452884.1  | 5973325 | 6-scf00352 | 6  |
| AX-158191916 | 17 | 45.595 | KV452884.1  | 5663748 | 6-scf00352 | 6  |
| AX-158191939 | 17 | 45.595 | KV452884.1  | 5692541 | 6-scf00352 | 6  |
| AX-158191990 | 17 | 45.595 | KV452884.1  | 5757918 | 6-scf00352 | 6  |
| AX-158192029 | 17 | 45.595 | KV452884.1  | 5806421 | 6-scf00352 | 6  |
| AX-158192040 | 17 | 45.595 | KV452884.1  | 5817246 | 6-scf00352 | 6  |
| AX-158192090 | 17 | 45.595 | KV452884.1  | 5880985 | 6-scf00352 | 6  |
| AX-157716446 | 17 | 45.595 | KV452884.1  | 5881779 | 6-scf00352 | 6  |
| AX-158192095 | 17 | 45.595 | KV452884.1  | 5885739 | 6-scf00352 | 6  |
| AX-158192101 | 17 | 45.595 | KV452884.1  | 5896172 | 6-scf00352 | 6  |
| AX-158192104 | 17 | 45.595 | KV452884.1  | 5899497 | 6-scf00352 | 6  |
| AX-158192108 | 17 | 45.595 | KV452884.1  | 5906640 | 6-scf00352 | 6  |
| AX-158192110 | 17 | 45.595 | KV452884.1  | 5910738 | 6-scf00352 | 6  |
| AX-158192115 | 17 | 45.595 | KV452884.1  | 5918237 | 6-scf00352 | 6  |
| AX-158192117 | 17 | 45.595 | KV452884.1  | 5924573 | 6-scf00352 | 6  |
| AX-158192132 | 17 | 45.595 | KV452884.1  | 5949227 | 6-scf00352 | 6  |
| AX-158192157 | 17 | 45.595 | KV452884.1  | 5979298 | 6-scf00352 | 6  |
| AX-158192166 | 17 | 45.595 | KV452884.1  | 5989249 | 6-scf00352 | 6  |
| AX-158192186 | 17 | 45.595 | KV452884.1  | 6012637 | 6-scf00352 | 6  |
| AX-158192118 | 17 | 45.623 | KV452884.1  | 5926596 | 6-scf00352 | 6  |
| AX-157706792 | 17 | 45.623 | 3ML01032920 | 233     | scf08551_1 | UN |
| AX-158192120 | 17 | 45.648 | KV452884.1  | 5927930 | 6-scf00352 | 6  |
| AX-158191962 | 17 | 45.659 | KV452884.1  | 5723082 | 6-scf00352 | 6  |
| AX-158192125 | 17 | 45.659 | KV452884.1  | 5934855 | 6-scf00352 | 6  |
| AX-158192016 | 17 | 45.684 | KV452884.1  | 5792698 | 6-scf00352 | 6  |
| AX-158192054 | 17 | 45.684 | KV452884.1  | 5840579 | 6-scf00352 | 6  |
| AX-158192116 | 17 | 45.684 | KV452884.1  | 5918605 | 6-scf00352 | 6  |
| AX-158413965 | 17 | 45.684 | KV452884.1  | 5936005 | 6-scf00352 | 6  |
| AX-158192127 | 17 | 45.704 | KV452884.1  | 5939673 | 6-scf00352 | 6  |
| AX-157886948 | 17 | 45.747 | KV452884.1  | 5794403 | 6-scf00352 | 6  |
| AX-158192019 | 17 | 45.747 | KV452884.1  | 5794458 | 6-scf00352 | 6  |
| AX-158192023 | 17 | 45.747 | KV452884.1  | 5797316 | 6-scf00352 | 6  |
| AX-158192128 | 17 | 45.747 | KV452884.1  | 5941346 | 6-scf00352 | 6  |
| AX-157836660 | 17 | 45.791 | KV452884.1  | 5687178 | 6-scf00352 | 6  |
| AX-158192022 | 17 | 45.791 | KV452884.1  | 5796886 | 6-scf00352 | 6  |
| AX-158192129 | 17 | 45.791 | KV452884.1  | 5942168 | 6-scf00352 | 6  |
| AX-158192159 | 17 | 45.791 | KV452884.1  | 5980138 | 6-scf00352 | 6  |
| AX-158192167 | 17 | 45.791 | KV452884.1  | 5990266 | 6-scf00352 | 6  |
| AX-157755915 | 17 | 45.851 | KV452884.1  | 5951070 | 6-scf00352 | 6  |
| AX-158192134 | 17 | 45.851 | KV452884.1  | 5954266 | 6-scf00352 | 6  |
| AX-158192135 | 17 | 45.851 | KV452884.1  | 5954670 | 6-scf00352 | 6  |
| AX-158192138 | 17 | 45.997 | KV452884.1  | 5960025 | 6-scf00352 | 6  |
| AX-158192139 | 17 | 45.997 | KV452884.1  | 5961546 | 6-scf00352 | 6  |

|              |    |        |            |         |            |   |
|--------------|----|--------|------------|---------|------------|---|
| AX-158192140 | 17 | 45.997 | KV452884.1 | 5962239 | 6-scf00352 | 6 |
| AX-157719663 | 17 | 46.035 | KV452884.1 | 5963465 | 6-scf00352 | 6 |
| AX-158192145 | 17 | 46.139 | KV452884.1 | 5968904 | 6-scf00352 | 6 |
| AX-158192142 | 17 | 46.142 | KV452884.1 | 5966899 | 6-scf00352 | 6 |
| AX-158192146 | 17 | 46.142 | KV452884.1 | 5969110 | 6-scf00352 | 6 |
| AX-158192149 | 17 | 46.142 | KV452884.1 | 5972742 | 6-scf00352 | 6 |
| AX-157697561 | 17 | 46.142 | KV452884.1 | 5991176 | 6-scf00352 | 6 |
| AX-158192168 | 17 | 46.142 | KV452884.1 | 5994360 | 6-scf00352 | 6 |
| AX-158192172 | 17 | 46.142 | KV452884.1 | 5998333 | 6-scf00352 | 6 |
| AX-158192174 | 17 | 46.142 | KV452884.1 | 6000135 | 6-scf00352 | 6 |
| AX-158192175 | 17 | 46.142 | KV452884.1 | 6001814 | 6-scf00352 | 6 |
| AX-158192178 | 17 | 46.142 | KV452884.1 | 6004861 | 6-scf00352 | 6 |
| AX-158192179 | 17 | 46.142 | KV452884.1 | 6006135 | 6-scf00352 | 6 |
| AX-158192192 | 17 | 46.142 | KV452884.1 | 6021129 | 6-scf00352 | 6 |
| AX-158192195 | 17 | 46.142 | KV452884.1 | 6024090 | 6-scf00352 | 6 |
| AX-158413971 | 17 | 46.142 | KV452884.1 | 6036204 | 6-scf00352 | 6 |
| AX-158192203 | 17 | 46.142 | KV452884.1 | 6036967 | 6-scf00352 | 6 |
| AX-158192181 | 17 | 46.197 | KV452884.1 | 6009076 | 6-scf00352 | 6 |
| AX-158192148 | 17 | 46.251 | KV452884.1 | 5972107 | 6-scf00352 | 6 |
| AX-158192155 | 17 | 46.251 | KV452884.1 | 5977430 | 6-scf00352 | 6 |
| AX-158192184 | 17 | 46.251 | KV452884.1 | 6010977 | 6-scf00352 | 6 |
| AX-158192185 | 17 | 46.251 | KV452884.1 | 6012165 | 6-scf00352 | 6 |
| AX-158192187 | 17 | 46.251 | KV452884.1 | 6013139 | 6-scf00352 | 6 |
| AX-157715607 | 17 | 46.251 | KV452884.1 | 6018543 | 6-scf00352 | 6 |
| AX-158192191 | 17 | 46.251 | KV452884.1 | 6020428 | 6-scf00352 | 6 |
| AX-158423122 | 17 | 46.251 | KV452884.1 | 6023036 | 6-scf00352 | 6 |
| AX-158192194 | 17 | 46.251 | KV452884.1 | 6023652 | 6-scf00352 | 6 |
| AX-158192197 | 17 | 46.251 | KV452884.1 | 6025476 | 6-scf00352 | 6 |
| AX-157753895 | 17 | 46.251 | KV452884.1 | 6037743 | 6-scf00352 | 6 |
| AX-158192170 | 17 | 46.299 | KV452884.1 | 5997065 | 6-scf00352 | 6 |
| AX-158192198 | 17 | 46.299 | KV452884.1 | 6030521 | 6-scf00352 | 6 |
| AX-158192189 | 17 | 46.35  | KV452884.1 | 6017268 | 6-scf00352 | 6 |
| AX-158192200 | 17 | 46.35  | KV452884.1 | 6032467 | 6-scf00352 | 6 |
| AX-158192207 | 17 | 46.388 | KV452884.1 | 6042510 | 6-scf00352 | 6 |
| AX-158192208 | 17 | 46.388 | KV452884.1 | 6042981 | 6-scf00352 | 6 |
| AX-158192209 | 17 | 46.388 | KV452884.1 | 6043377 | 6-scf00352 | 6 |
| AX-158192211 | 17 | 46.392 | KV452884.1 | 6045074 | 6-scf00352 | 6 |
| AX-158192214 | 17 | 46.396 | KV452884.1 | 6047178 | 6-scf00352 | 6 |
| AX-158192222 | 17 | 46.399 | KV452884.1 | 6056130 | 6-scf00352 | 6 |
| AX-158192229 | 17 | 46.589 | KV452884.1 | 6063519 | 6-scf00352 | 6 |
| AX-158192230 | 17 | 46.791 | KV452884.1 | 6064076 | 6-scf00352 | 6 |
| AX-158192234 | 17 | 46.797 | KV452884.1 | 6068994 | 6-scf00352 | 6 |
| AX-158192237 | 17 | 46.797 | KV452884.1 | 6071659 | 6-scf00352 | 6 |
| AX-157771139 | 17 | 46.797 | KV452884.1 | 6073062 | 6-scf00352 | 6 |
| AX-158192238 | 17 | 46.797 | KV452884.1 | 6073699 | 6-scf00352 | 6 |
| AX-158192240 | 17 | 46.797 | KV452884.1 | 6074193 | 6-scf00352 | 6 |
| AX-158192243 | 17 | 46.797 | KV452884.1 | 6077315 | 6-scf00352 | 6 |
| AX-158192245 | 17 | 46.797 | KV452884.1 | 6079630 | 6-scf00352 | 6 |
| AX-158192247 | 17 | 46.797 | KV452884.1 | 6083729 | 6-scf00352 | 6 |
| AX-158192264 | 17 | 46.797 | KV452884.1 | 6104932 | 6-scf00352 | 6 |
| AX-158192274 | 17 | 46.797 | KV452884.1 | 6114574 | 6-scf00352 | 6 |

|              |    |        |            |         |            |   |
|--------------|----|--------|------------|---------|------------|---|
| AX-158192251 | 17 | 46.856 | KV452884.1 | 6087023 | 6-scf00352 | 6 |
| AX-157866804 | 17 | 46.907 | KV452884.1 | 6086549 | 6-scf00352 | 6 |
| AX-158192252 | 17 | 46.907 | KV452884.1 | 6088841 | 6-scf00352 | 6 |
| AX-158192254 | 17 | 46.907 | KV452884.1 | 6091351 | 6-scf00352 | 6 |
| AX-158192255 | 17 | 46.907 | KV452884.1 | 6091770 | 6-scf00352 | 6 |
| AX-157758313 | 17 | 46.907 | KV452884.1 | 6094883 | 6-scf00352 | 6 |
| AX-158192256 | 17 | 46.907 | KV452884.1 | 6096070 | 6-scf00352 | 6 |
| AX-158192260 | 17 | 46.907 | KV452884.1 | 6099379 | 6-scf00352 | 6 |
| AX-158192263 | 17 | 47.016 | KV452884.1 | 6104689 | 6-scf00352 | 6 |
| AX-158192239 | 17 | 47.046 | KV452884.1 | 6073847 | 6-scf00352 | 6 |
| AX-158192248 | 17 | 47.046 | KV452884.1 | 6085371 | 6-scf00352 | 6 |
| AX-158192266 | 17 | 47.046 | KV452884.1 | 6106354 | 6-scf00352 | 6 |
| AX-158192272 | 17 | 47.046 | KV452884.1 | 6113651 | 6-scf00352 | 6 |
| AX-158192273 | 17 | 47.046 | KV452884.1 | 6114036 | 6-scf00352 | 6 |
| AX-157720118 | 17 | 47.074 | KV452884.1 | 6083978 | 6-scf00352 | 6 |
| AX-158192282 | 17 | 47.074 | KV452884.1 | 6120742 | 6-scf00352 | 6 |
| AX-158192259 | 17 | 47.125 | KV452884.1 | 6099055 | 6-scf00352 | 6 |
| AX-158192284 | 17 | 47.125 | KV452884.1 | 6121429 | 6-scf00352 | 6 |
| AX-158192287 | 17 | 47.125 | KV452884.1 | 6123450 | 6-scf00352 | 6 |
| AX-158192288 | 17 | 47.125 | KV452884.1 | 6123853 | 6-scf00352 | 6 |
| AX-158192290 | 17 | 47.125 | KV452884.1 | 6127110 | 6-scf00352 | 6 |
| AX-158192293 | 17 | 47.125 | KV452884.1 | 6129136 | 6-scf00352 | 6 |
| AX-157879105 | 17 | 47.125 | KV452884.1 | 6129606 | 6-scf00352 | 6 |
| AX-158192295 | 17 | 47.125 | KV452884.1 | 6133393 | 6-scf00352 | 6 |
| AX-158192328 | 17 | 47.125 | KV452884.1 | 6182010 | 6-scf00352 | 6 |
| AX-158192297 | 17 | 47.162 | KV452884.1 | 6134986 | 6-scf00352 | 6 |
| AX-158192298 | 17 | 47.201 | KV452884.1 | 6135431 | 6-scf00352 | 6 |
| AX-158192301 | 17 | 47.235 | KV452884.1 | 6142476 | 6-scf00352 | 6 |
| AX-158192303 | 17 | 47.302 | KV452884.1 | 6145035 | 6-scf00352 | 6 |
| AX-158192304 | 17 | 47.344 | KV452884.1 | 6145823 | 6-scf00352 | 6 |
| AX-158192306 | 17 | 47.344 | KV452884.1 | 6148880 | 6-scf00352 | 6 |
| AX-157742216 | 17 | 47.562 | KV452884.1 | 6099589 | 6-scf00352 | 6 |
| AX-158192308 | 17 | 47.562 | KV452884.1 | 6150639 | 6-scf00352 | 6 |
| AX-158192312 | 17 | 47.562 | KV452884.1 | 6154884 | 6-scf00352 | 6 |
| AX-158192315 | 17 | 47.562 | KV452884.1 | 6157894 | 6-scf00352 | 6 |
| AX-158192318 | 17 | 47.562 | KV452884.1 | 6163200 | 6-scf00352 | 6 |
| AX-158192320 | 17 | 47.562 | KV452884.1 | 6165473 | 6-scf00352 | 6 |
| AX-158192321 | 17 | 47.562 | KV452884.1 | 6166850 | 6-scf00352 | 6 |
| AX-158192322 | 17 | 47.562 | KV452884.1 | 6170444 | 6-scf00352 | 6 |
| AX-158192324 | 17 | 47.562 | KV452884.1 | 6173856 | 6-scf00352 | 6 |
| AX-157752108 | 17 | 47.562 | KV452884.1 | 6181303 | 6-scf00352 | 6 |
| AX-158192270 | 17 | 47.563 | KV452884.1 | 6111105 | 6-scf00352 | 6 |
| AX-158192278 | 17 | 47.563 | KV452884.1 | 6118115 | 6-scf00352 | 6 |
| AX-158192279 | 17 | 47.563 | KV452884.1 | 6118550 | 6-scf00352 | 6 |
| AX-158192280 | 17 | 47.563 | KV452884.1 | 6119968 | 6-scf00352 | 6 |
| AX-158192302 | 17 | 47.563 | KV452884.1 | 6143059 | 6-scf00352 | 6 |
| AX-158409690 | 17 | 47.563 | KV452884.1 | 6186456 | 6-scf00352 | 6 |
| AX-158192330 | 17 | 47.563 | KV452884.1 | 6186897 | 6-scf00352 | 6 |
| AX-158192331 | 17 | 47.563 | KV452884.1 | 6187358 | 6-scf00352 | 6 |
| AX-158192333 | 17 | 47.563 | KV452884.1 | 6188571 | 6-scf00352 | 6 |
| AX-158192383 | 17 | 47.563 | KV452884.1 | 6251790 | 6-scf00352 | 6 |

|              |    |        |             |         |            |    |
|--------------|----|--------|-------------|---------|------------|----|
| AX-158192384 | 17 | 47.563 | KV452884.1  | 6254064 | 6-scf00352 | 6  |
| AX-158393623 | 17 | 47.565 | KV452884.1  | 6189205 | 6-scf00352 | 6  |
| AX-158192343 | 17 | 47.779 | KV452884.1  | 6198883 | 6-scf00352 | 6  |
| AX-158192347 | 17 | 47.779 | KV452884.1  | 6206528 | 6-scf00352 | 6  |
| AX-158192349 | 17 | 47.779 | KV452884.1  | 6208882 | 6-scf00352 | 6  |
| AX-157707049 | 17 | 47.779 | 3ML01033401 | 61      | scf09050_1 | UN |
| AX-158192342 | 17 | 47.999 | KV452884.1  | 6198506 | 6-scf00352 | 6  |
| AX-157836673 | 17 | 47.999 | KV452884.1  | 6210769 | 6-scf00352 | 6  |
| AX-158192351 | 17 | 47.999 | KV452884.1  | 6212424 | 6-scf00352 | 6  |
| AX-158192352 | 17 | 47.999 | KV452884.1  | 6213365 | 6-scf00352 | 6  |
| AX-158192354 | 17 | 47.999 | KV452884.1  | 6215090 | 6-scf00352 | 6  |
| AX-158192355 | 17 | 47.999 | KV452884.1  | 6216501 | 6-scf00352 | 6  |
| AX-158192358 | 17 | 47.999 | KV452884.1  | 6218657 | 6-scf00352 | 6  |
| AX-157757608 | 17 | 47.999 | KV452884.1  | 6219728 | 6-scf00352 | 6  |
| AX-158192361 | 17 | 47.999 | KV452884.1  | 6223339 | 6-scf00352 | 6  |
| AX-158386106 | 17 | 47.999 | KV452884.1  | 6224061 | 6-scf00352 | 6  |
| AX-157714460 | 17 | 47.999 | KV452884.1  | 6225060 | 6-scf00352 | 6  |
| AX-158192362 | 17 | 47.999 | KV452884.1  | 6225689 | 6-scf00352 | 6  |
| AX-158192363 | 17 | 47.999 | KV452884.1  | 6226619 | 6-scf00352 | 6  |
| AX-158192366 | 17 | 47.999 | KV452884.1  | 6228873 | 6-scf00352 | 6  |
| AX-158192367 | 17 | 47.999 | KV452884.1  | 6229640 | 6-scf00352 | 6  |
| AX-158192371 | 17 | 47.999 | KV452884.1  | 6231913 | 6-scf00352 | 6  |
| AX-158192375 | 17 | 47.999 | KV452884.1  | 6241006 | 6-scf00352 | 6  |
| AX-158192438 | 17 | 47.999 | KV452884.1  | 6319272 | 6-scf00352 | 6  |
| AX-158192380 | 17 | 48.077 | KV452884.1  | 6245652 | 6-scf00352 | 6  |
| AX-158192385 | 17 | 48.148 | KV452884.1  | 6255317 | 6-scf00352 | 6  |
| AX-158192244 | 17 | 48.218 | KV452884.1  | 6078246 | 6-scf00352 | 6  |
| AX-157713429 | 17 | 48.218 | KV452884.1  | 6140015 | 6-scf00352 | 6  |
| AX-158192344 | 17 | 48.218 | KV452884.1  | 6199741 | 6-scf00352 | 6  |
| AX-158192345 | 17 | 48.218 | KV452884.1  | 6202115 | 6-scf00352 | 6  |
| AX-158192364 | 17 | 48.218 | KV452884.1  | 6227303 | 6-scf00352 | 6  |
| AX-158192369 | 17 | 48.218 | KV452884.1  | 6231083 | 6-scf00352 | 6  |
| AX-158192376 | 17 | 48.218 | KV452884.1  | 6241838 | 6-scf00352 | 6  |
| AX-158192381 | 17 | 48.218 | KV452884.1  | 6250318 | 6-scf00352 | 6  |
| AX-158192386 | 17 | 48.218 | KV452884.1  | 6256473 | 6-scf00352 | 6  |
| AX-158192387 | 17 | 48.218 | KV452884.1  | 6258219 | 6-scf00352 | 6  |
| AX-158192388 | 17 | 48.218 | KV452884.1  | 6259194 | 6-scf00352 | 6  |
| AX-157719275 | 17 | 48.218 | KV452884.1  | 6259272 | 6-scf00352 | 6  |
| AX-158192390 | 17 | 48.218 | KV452884.1  | 6260023 | 6-scf00352 | 6  |
| AX-157738918 | 17 | 48.218 | KV452884.1  | 6261494 | 6-scf00352 | 6  |
| AX-158192393 | 17 | 48.218 | KV452884.1  | 6263398 | 6-scf00352 | 6  |
| AX-158192396 | 17 | 48.218 | KV452884.1  | 6265825 | 6-scf00352 | 6  |
| AX-158192399 | 17 | 48.218 | KV452884.1  | 6269087 | 6-scf00352 | 6  |
| AX-158192395 | 17 | 48.382 | KV452884.1  | 6265607 | 6-scf00352 | 6  |
| AX-158192397 | 17 | 48.382 | KV452884.1  | 6267506 | 6-scf00352 | 6  |
| AX-158192398 | 17 | 48.382 | KV452884.1  | 6267924 | 6-scf00352 | 6  |
| AX-158192401 | 17 | 48.467 | KV452884.1  | 6271725 | 6-scf00352 | 6  |
| AX-158192405 | 17 | 48.546 | KV452884.1  | 6275131 | 6-scf00352 | 6  |
| AX-157836677 | 17 | 48.546 | KV452884.1  | 6276439 | 6-scf00352 | 6  |
| AX-158192409 | 17 | 48.546 | KV452884.1  | 6283411 | 6-scf00352 | 6  |
| AX-157706255 | 17 | 48.546 | 3ML01031903 | 534     | scf07526_1 | UN |



|              |    |        |            |         |            |   |
|--------------|----|--------|------------|---------|------------|---|
| AX-158192400 | 17 | 48.682 | KV452884.1 | 6269946 | 6-scf00352 | 6 |
| AX-157714619 | 17 | 48.682 | KV452884.1 | 6280799 | 6-scf00352 | 6 |
| AX-158192412 | 17 | 48.682 | KV452884.1 | 6285588 | 6-scf00352 | 6 |
| AX-158192414 | 17 | 48.682 | KV452884.1 | 6286306 | 6-scf00352 | 6 |
| AX-158192415 | 17 | 48.682 | KV452884.1 | 6287479 | 6-scf00352 | 6 |
| AX-158192416 | 17 | 48.682 | KV452884.1 | 6289126 | 6-scf00352 | 6 |
| AX-158192418 | 17 | 48.682 | KV452884.1 | 6290528 | 6-scf00352 | 6 |
| AX-157879107 | 17 | 48.682 | KV452884.1 | 6295572 | 6-scf00352 | 6 |
| AX-158192420 | 17 | 48.682 | KV452884.1 | 6296720 | 6-scf00352 | 6 |
| AX-157836678 | 17 | 48.682 | KV452884.1 | 6299606 | 6-scf00352 | 6 |
| AX-158192424 | 17 | 48.682 | KV452884.1 | 6303149 | 6-scf00352 | 6 |
| AX-157886953 | 17 | 48.682 | KV452884.1 | 6311568 | 6-scf00352 | 6 |
| AX-158192496 | 17 | 48.682 | KV452884.1 | 6384563 | 6-scf00352 | 6 |
| AX-158192525 | 17 | 48.682 | KV452884.1 | 6431530 | 6-scf00352 | 6 |
| AX-158192587 | 17 | 48.682 | KV452884.1 | 6522548 | 6-scf00352 | 6 |
| AX-158192422 | 17 | 48.759 | KV452884.1 | 6301310 | 6-scf00352 | 6 |
| AX-158192429 | 17 | 48.759 | KV452884.1 | 6305622 | 6-scf00352 | 6 |
| AX-158192442 | 17 | 48.759 | KV452884.1 | 6326257 | 6-scf00352 | 6 |
| AX-158192443 | 17 | 48.759 | KV452884.1 | 6327338 | 6-scf00352 | 6 |
| AX-158192445 | 17 | 48.759 | KV452884.1 | 6328857 | 6-scf00352 | 6 |
| AX-157836707 | 17 | 48.759 | KV452884.1 | 6623776 | 6-scf00352 | 6 |
| AX-158192440 | 17 | 48.819 | KV452884.1 | 6324760 | 6-scf00352 | 6 |
| AX-158192450 | 17 | 48.872 | KV452884.1 | 6334284 | 6-scf00352 | 6 |
| AX-157836680 | 17 | 48.955 | KV452884.1 | 6313020 | 6-scf00352 | 6 |
| AX-158192436 | 17 | 48.955 | KV452884.1 | 6314886 | 6-scf00352 | 6 |
| AX-157836681 | 17 | 48.955 | KV452884.1 | 6317753 | 6-scf00352 | 6 |
| AX-158192437 | 17 | 48.955 | KV452884.1 | 6318825 | 6-scf00352 | 6 |
| AX-158192452 | 17 | 48.955 | KV452884.1 | 6336318 | 6-scf00352 | 6 |
| AX-158192462 | 17 | 48.955 | KV452884.1 | 6347519 | 6-scf00352 | 6 |
| AX-158192463 | 17 | 48.955 | KV452884.1 | 6347964 | 6-scf00352 | 6 |
| AX-158192469 | 17 | 48.955 | KV452884.1 | 6353343 | 6-scf00352 | 6 |
| AX-158192471 | 17 | 48.955 | KV452884.1 | 6354248 | 6-scf00352 | 6 |
| AX-158192475 | 17 | 48.955 | KV452884.1 | 6358754 | 6-scf00352 | 6 |
| AX-157836683 | 17 | 48.955 | KV452884.1 | 6367150 | 6-scf00352 | 6 |
| AX-158192480 | 17 | 48.955 | KV452884.1 | 6369658 | 6-scf00352 | 6 |
| AX-158192508 | 17 | 48.955 | KV452884.1 | 6400248 | 6-scf00352 | 6 |
| AX-158192509 | 17 | 48.955 | KV452884.1 | 6403992 | 6-scf00352 | 6 |
| AX-158192609 | 17 | 48.955 | KV452884.1 | 6550350 | 6-scf00352 | 6 |
| AX-158192486 | 17 | 49.015 | KV452884.1 | 6375525 | 6-scf00352 | 6 |
| AX-158192458 | 17 | 49.092 | KV452884.1 | 6343025 | 6-scf00352 | 6 |
| AX-158192459 | 17 | 49.092 | KV452884.1 | 6345207 | 6-scf00352 | 6 |
| AX-157707588 | 17 | 49.092 | KV452884.1 | 6362529 | 6-scf00352 | 6 |
| AX-158192477 | 17 | 49.092 | KV452884.1 | 6365927 | 6-scf00352 | 6 |
| AX-158192490 | 17 | 49.092 | KV452884.1 | 6378445 | 6-scf00352 | 6 |
| AX-158192493 | 17 | 49.092 | KV452884.1 | 6382654 | 6-scf00352 | 6 |
| AX-158192494 | 17 | 49.092 | KV452884.1 | 6383117 | 6-scf00352 | 6 |
| AX-158413975 | 17 | 49.092 | KV452884.1 | 6383431 | 6-scf00352 | 6 |
| AX-158192495 | 17 | 49.092 | KV452884.1 | 6384050 | 6-scf00352 | 6 |
| AX-158192498 | 17 | 49.092 | KV452884.1 | 6385525 | 6-scf00352 | 6 |
| AX-158192499 | 17 | 49.092 | KV452884.1 | 6386297 | 6-scf00352 | 6 |
| AX-158192501 | 17 | 49.092 | KV452884.1 | 6392473 | 6-scf00352 | 6 |

|              |    |        |            |         |            |   |
|--------------|----|--------|------------|---------|------------|---|
| AX-158192505 | 17 | 49.092 | KV452884.1 | 6396716 | 6-scf00352 | 6 |
| AX-158192511 | 17 | 49.092 | KV452884.1 | 6407684 | 6-scf00352 | 6 |
| AX-158192512 | 17 | 49.136 | KV452884.1 | 6408781 | 6-scf00352 | 6 |
| AX-158192513 | 17 | 49.178 | KV452884.1 | 6409695 | 6-scf00352 | 6 |
| AX-158192460 | 17 | 49.201 | KV452884.1 | 6346497 | 6-scf00352 | 6 |
| AX-157836686 | 17 | 49.201 | KV452884.1 | 6420051 | 6-scf00352 | 6 |
| AX-158192517 | 17 | 49.201 | KV452884.1 | 6422077 | 6-scf00352 | 6 |
| AX-157836688 | 17 | 49.201 | KV452884.1 | 6423989 | 6-scf00352 | 6 |
| AX-158192521 | 17 | 49.257 | KV452884.1 | 6427822 | 6-scf00352 | 6 |
| AX-158192524 | 17 | 49.31  | KV452884.1 | 6431246 | 6-scf00352 | 6 |
| AX-157836692 | 17 | 49.31  | KV452884.1 | 6478042 | 6-scf00352 | 6 |
| AX-158192527 | 17 | 49.347 | KV452884.1 | 6436486 | 6-scf00352 | 6 |
| AX-158192532 | 17 | 49.388 | KV452884.1 | 6446411 | 6-scf00352 | 6 |
| AX-158192534 | 17 | 49.388 | KV452884.1 | 6450947 | 6-scf00352 | 6 |
| AX-158192557 | 17 | 49.388 | KV452884.1 | 6489038 | 6-scf00352 | 6 |
| AX-158192472 | 17 | 49.42  | KV452884.1 | 6354741 | 6-scf00352 | 6 |
| AX-158192488 | 17 | 49.42  | KV452884.1 | 6377430 | 6-scf00352 | 6 |
| AX-158192489 | 17 | 49.42  | KV452884.1 | 6377939 | 6-scf00352 | 6 |
| AX-158192491 | 17 | 49.42  | KV452884.1 | 6379100 | 6-scf00352 | 6 |
| AX-157716410 | 17 | 49.42  | KV452884.1 | 6402339 | 6-scf00352 | 6 |
| AX-158192514 | 17 | 49.42  | KV452884.1 | 6415038 | 6-scf00352 | 6 |
| AX-157721706 | 17 | 49.42  | KV452884.1 | 6451093 | 6-scf00352 | 6 |
| AX-158192536 | 17 | 49.42  | KV452884.1 | 6452778 | 6-scf00352 | 6 |
| AX-158192537 | 17 | 49.42  | KV452884.1 | 6454131 | 6-scf00352 | 6 |
| AX-158192540 | 17 | 49.42  | KV452884.1 | 6457186 | 6-scf00352 | 6 |
| AX-158192542 | 17 | 49.42  | KV452884.1 | 6459181 | 6-scf00352 | 6 |
| AX-158192543 | 17 | 49.42  | KV452884.1 | 6467816 | 6-scf00352 | 6 |
| AX-157738631 | 17 | 49.42  | KV452884.1 | 6468223 | 6-scf00352 | 6 |
| AX-158192548 | 17 | 49.42  | KV452884.1 | 6477548 | 6-scf00352 | 6 |
| AX-158380687 | 17 | 49.42  | KV452884.1 | 6478370 | 6-scf00352 | 6 |
| AX-158192550 | 17 | 49.42  | KV452884.1 | 6479030 | 6-scf00352 | 6 |
| AX-158192552 | 17 | 49.42  | KV452884.1 | 6482657 | 6-scf00352 | 6 |
| AX-158192554 | 17 | 49.42  | KV452884.1 | 6484230 | 6-scf00352 | 6 |
| AX-158192555 | 17 | 49.42  | KV452884.1 | 6486506 | 6-scf00352 | 6 |
| AX-158192556 | 17 | 49.42  | KV452884.1 | 6488661 | 6-scf00352 | 6 |
| AX-158192558 | 17 | 49.42  | KV452884.1 | 6489888 | 6-scf00352 | 6 |
| AX-158192559 | 17 | 49.42  | KV452884.1 | 6491201 | 6-scf00352 | 6 |
| AX-158192592 | 17 | 49.42  | KV452884.1 | 6528380 | 6-scf00352 | 6 |
| AX-158192561 | 17 | 49.456 | KV452884.1 | 6495300 | 6-scf00352 | 6 |
| AX-158192563 | 17 | 49.491 | KV452884.1 | 6496605 | 6-scf00352 | 6 |
| AX-158192531 | 17 | 49.529 | KV452884.1 | 6443275 | 6-scf00352 | 6 |
| AX-158192565 | 17 | 49.529 | KV452884.1 | 6498317 | 6-scf00352 | 6 |
| AX-158192567 | 17 | 49.529 | KV452884.1 | 6499369 | 6-scf00352 | 6 |
| AX-158192571 | 17 | 49.529 | KV452884.1 | 6506458 | 6-scf00352 | 6 |
| AX-157710031 | 17 | 49.529 | KV452884.1 | 6511701 | 6-scf00352 | 6 |
| AX-157710032 | 17 | 49.529 | KV452884.1 | 6511921 | 6-scf00352 | 6 |
| AX-158192601 | 17 | 49.529 | KV452884.1 | 6544656 | 6-scf00352 | 6 |
| AX-158192581 | 17 | 49.551 | KV452884.1 | 6516917 | 6-scf00352 | 6 |
| AX-158192582 | 17 | 49.57  | KV452884.1 | 6518088 | 6-scf00352 | 6 |
| AX-158192585 | 17 | 49.594 | KV452884.1 | 6520398 | 6-scf00352 | 6 |
| AX-158192478 | 17 | 49.617 | KV452884.1 | 6366786 | 6-scf00352 | 6 |

|              |    |        |            |         |            |   |
|--------------|----|--------|------------|---------|------------|---|
| AX-157755731 | 17 | 49.617 | KV452884.1 | 6388751 | 6-scf00352 | 6 |
| AX-158192586 | 17 | 49.617 | KV452884.1 | 6521086 | 6-scf00352 | 6 |
| AX-158192560 | 17 | 49.638 | KV452884.1 | 6494121 | 6-scf00352 | 6 |
| AX-158192562 | 17 | 49.638 | KV452884.1 | 6496040 | 6-scf00352 | 6 |
| AX-158192589 | 17 | 49.638 | KV452884.1 | 6524348 | 6-scf00352 | 6 |
| AX-158192591 | 17 | 49.638 | KV452884.1 | 6527126 | 6-scf00352 | 6 |
| AX-158192596 | 17 | 49.676 | KV452884.1 | 6531397 | 6-scf00352 | 6 |
| AX-157836698 | 17 | 49.676 | KV452884.1 | 6535727 | 6-scf00352 | 6 |
| AX-158192629 | 17 | 49.676 | KV452884.1 | 6593870 | 6-scf00352 | 6 |
| AX-158192631 | 17 | 49.676 | KV452884.1 | 6596726 | 6-scf00352 | 6 |
| AX-158192595 | 17 | 49.747 | KV452884.1 | 6530887 | 6-scf00352 | 6 |
| AX-157836701 | 17 | 49.747 | KV452884.1 | 6541648 | 6-scf00352 | 6 |
| AX-158192600 | 17 | 49.747 | KV452884.1 | 6542409 | 6-scf00352 | 6 |
| AX-157836702 | 17 | 49.747 | KV452884.1 | 6555583 | 6-scf00352 | 6 |
| AX-158192613 | 17 | 49.747 | KV452884.1 | 6561805 | 6-scf00352 | 6 |
| AX-157726189 | 17 | 49.747 | KV452884.1 | 6566908 | 6-scf00352 | 6 |
| AX-157836703 | 17 | 49.747 | KV452884.1 | 6569427 | 6-scf00352 | 6 |
| AX-158192615 | 17 | 49.747 | KV452884.1 | 6570215 | 6-scf00352 | 6 |
| AX-158192616 | 17 | 49.747 | KV452884.1 | 6570446 | 6-scf00352 | 6 |
| AX-158192620 | 17 | 49.747 | KV452884.1 | 6579350 | 6-scf00352 | 6 |
| AX-157749640 | 17 | 49.747 | KV452884.1 | 6579625 | 6-scf00352 | 6 |
| AX-158192623 | 17 | 49.747 | KV452884.1 | 6585987 | 6-scf00352 | 6 |
| AX-158192625 | 17 | 49.747 | KV452884.1 | 6586997 | 6-scf00352 | 6 |
| AX-158192626 | 17 | 49.747 | KV452884.1 | 6587377 | 6-scf00352 | 6 |
| AX-158192628 | 17 | 49.747 | KV452884.1 | 6592638 | 6-scf00352 | 6 |
| AX-157836705 | 17 | 49.747 | KV452884.1 | 6596553 | 6-scf00352 | 6 |
| AX-158192634 | 17 | 49.747 | KV452884.1 | 6600279 | 6-scf00352 | 6 |
| AX-158192635 | 17 | 49.747 | KV452884.1 | 6602971 | 6-scf00352 | 6 |
| AX-158192642 | 17 | 49.747 | KV452884.1 | 6609490 | 6-scf00352 | 6 |
| AX-158192645 | 17 | 49.747 | KV452884.1 | 6612053 | 6-scf00352 | 6 |
| AX-158192646 | 17 | 49.747 | KV452884.1 | 6612917 | 6-scf00352 | 6 |
| AX-158192647 | 17 | 49.747 | KV452884.1 | 6613354 | 6-scf00352 | 6 |
| AX-158192649 | 17 | 49.747 | KV452884.1 | 6614754 | 6-scf00352 | 6 |
| AX-158192651 | 17 | 49.747 | KV452884.1 | 6620151 | 6-scf00352 | 6 |
| AX-158192656 | 17 | 49.747 | KV452884.1 | 6628567 | 6-scf00352 | 6 |
| AX-157836709 | 17 | 49.747 | KV452884.1 | 6631175 | 6-scf00352 | 6 |
| AX-158192712 | 17 | 49.747 | KV452884.1 | 6697404 | 6-scf00352 | 6 |
| AX-158192721 | 17 | 49.747 | KV452884.1 | 6712274 | 6-scf00352 | 6 |
| AX-157748759 | 17 | 49.747 | KV452884.1 | 6797740 | 6-scf00352 | 6 |
| AX-158192811 | 17 | 49.747 | KV452884.1 | 6820924 | 6-scf00352 | 6 |
| AX-158192820 | 17 | 49.747 | KV452884.1 | 6830521 | 6-scf00352 | 6 |
| AX-158192824 | 17 | 49.747 | KV452884.1 | 6835467 | 6-scf00352 | 6 |
| AX-158192855 | 17 | 49.747 | KV452884.1 | 6869791 | 6-scf00352 | 6 |
| AX-158192606 | 17 | 49.966 | KV452884.1 | 6549067 | 6-scf00352 | 6 |
| AX-158192614 | 17 | 49.966 | KV452884.1 | 6564590 | 6-scf00352 | 6 |
| AX-157714503 | 17 | 49.966 | KV452884.1 | 6569210 | 6-scf00352 | 6 |
| AX-157836706 | 17 | 49.966 | KV452884.1 | 6619537 | 6-scf00352 | 6 |
| AX-158192658 | 17 | 49.966 | KV452884.1 | 6632525 | 6-scf00352 | 6 |
| AX-158192659 | 17 | 49.966 | KV452884.1 | 6634029 | 6-scf00352 | 6 |
| AX-158192663 | 17 | 49.966 | KV452884.1 | 6637702 | 6-scf00352 | 6 |
| AX-158192699 | 17 | 49.966 | KV452884.1 | 6684320 | 6-scf00352 | 6 |

|              |    |        |            |         |            |   |
|--------------|----|--------|------------|---------|------------|---|
| AX-158192700 | 17 | 49.966 | KV452884.1 | 6684712 | 6-scf00352 | 6 |
| AX-158192701 | 17 | 49.966 | KV452884.1 | 6685107 | 6-scf00352 | 6 |
| AX-158192704 | 17 | 49.966 | KV452884.1 | 6691715 | 6-scf00352 | 6 |
| AX-158192708 | 17 | 49.966 | KV452884.1 | 6695059 | 6-scf00352 | 6 |
| AX-158192711 | 17 | 49.966 | KV452884.1 | 6696930 | 6-scf00352 | 6 |
| AX-158192713 | 17 | 49.966 | KV452884.1 | 6697828 | 6-scf00352 | 6 |
| AX-158192715 | 17 | 49.966 | KV452884.1 | 6701380 | 6-scf00352 | 6 |
| AX-158192754 | 17 | 49.966 | KV452884.1 | 6755108 | 6-scf00352 | 6 |
| AX-158192774 | 17 | 49.966 | KV452884.1 | 6779940 | 6-scf00352 | 6 |
| AX-157836720 | 17 | 49.966 | KV452884.1 | 6869215 | 6-scf00352 | 6 |
| AX-158192859 | 17 | 49.966 | KV452884.1 | 6874011 | 6-scf00352 | 6 |
| AX-158192866 | 17 | 49.966 | KV452884.1 | 6888221 | 6-scf00352 | 6 |
| AX-158192723 | 17 | 49.989 | KV452884.1 | 6714759 | 6-scf00352 | 6 |
| AX-158192728 | 17 | 50.018 | KV452884.1 | 6719596 | 6-scf00352 | 6 |
| AX-158192633 | 17 | 50.049 | KV452884.1 | 6599491 | 6-scf00352 | 6 |
| AX-158192717 | 17 | 50.049 | KV452884.1 | 6706361 | 6-scf00352 | 6 |
| AX-158192722 | 17 | 50.049 | KV452884.1 | 6712997 | 6-scf00352 | 6 |
| AX-158192731 | 17 | 50.049 | KV452884.1 | 6722656 | 6-scf00352 | 6 |
| AX-158192822 | 17 | 50.049 | KV452884.1 | 6834747 | 6-scf00352 | 6 |
| AX-158192823 | 17 | 50.049 | KV452884.1 | 6835224 | 6-scf00352 | 6 |
| AX-158192430 | 17 | 50.075 | KV452884.1 | 6306449 | 6-scf00352 | 6 |
| AX-158192541 | 17 | 50.075 | KV452884.1 | 6457801 | 6-scf00352 | 6 |
| AX-158192593 | 17 | 50.075 | KV452884.1 | 6530043 | 6-scf00352 | 6 |
| AX-158192597 | 17 | 50.075 | KV452884.1 | 6534096 | 6-scf00352 | 6 |
| AX-158192598 | 17 | 50.075 | KV452884.1 | 6535385 | 6-scf00352 | 6 |
| AX-157836699 | 17 | 50.075 | KV452884.1 | 6538585 | 6-scf00352 | 6 |
| AX-158192612 | 17 | 50.075 | KV452884.1 | 6556223 | 6-scf00352 | 6 |
| AX-158192627 | 17 | 50.075 | KV452884.1 | 6589596 | 6-scf00352 | 6 |
| AX-158192630 | 17 | 50.075 | KV452884.1 | 6596222 | 6-scf00352 | 6 |
| AX-158192636 | 17 | 50.075 | KV452884.1 | 6603738 | 6-scf00352 | 6 |
| AX-158192680 | 17 | 50.075 | KV452884.1 | 6661640 | 6-scf00352 | 6 |
| AX-158192703 | 17 | 50.075 | KV452884.1 | 6689891 | 6-scf00352 | 6 |
| AX-158192705 | 17 | 50.075 | KV452884.1 | 6692565 | 6-scf00352 | 6 |
| AX-157718912 | 17 | 50.075 | KV452884.1 | 6711611 | 6-scf00352 | 6 |
| AX-158192727 | 17 | 50.075 | KV452884.1 | 6719128 | 6-scf00352 | 6 |
| AX-158192737 | 17 | 50.075 | KV452884.1 | 6732150 | 6-scf00352 | 6 |
| AX-158192738 | 17 | 50.075 | KV452884.1 | 6733722 | 6-scf00352 | 6 |
| AX-157727273 | 17 | 50.075 | KV452884.1 | 6734130 | 6-scf00352 | 6 |
| AX-158192739 | 17 | 50.075 | KV452884.1 | 6735654 | 6-scf00352 | 6 |
| AX-158192743 | 17 | 50.075 | KV452884.1 | 6739436 | 6-scf00352 | 6 |
| AX-158192747 | 17 | 50.075 | KV452884.1 | 6749652 | 6-scf00352 | 6 |
| AX-158192748 | 17 | 50.075 | KV452884.1 | 6749916 | 6-scf00352 | 6 |
| AX-158192749 | 17 | 50.075 | KV452884.1 | 6750596 | 6-scf00352 | 6 |
| AX-158192751 | 17 | 50.075 | KV452884.1 | 6751712 | 6-scf00352 | 6 |
| AX-158192752 | 17 | 50.075 | KV452884.1 | 6752538 | 6-scf00352 | 6 |
| AX-158192755 | 17 | 50.075 | KV452884.1 | 6755585 | 6-scf00352 | 6 |
| AX-158192756 | 17 | 50.075 | KV452884.1 | 6755976 | 6-scf00352 | 6 |
| AX-158192757 | 17 | 50.075 | KV452884.1 | 6756806 | 6-scf00352 | 6 |
| AX-158192759 | 17 | 50.075 | KV452884.1 | 6760961 | 6-scf00352 | 6 |
| AX-158192764 | 17 | 50.075 | KV452884.1 | 6767491 | 6-scf00352 | 6 |
| AX-158192765 | 17 | 50.075 | KV452884.1 | 6768772 | 6-scf00352 | 6 |

|              |    |        |            |         |            |   |
|--------------|----|--------|------------|---------|------------|---|
| AX-158192769 | 17 | 50.075 | KV452884.1 | 6774274 | 6-scf00352 | 6 |
| AX-158192771 | 17 | 50.075 | KV452884.1 | 6777713 | 6-scf00352 | 6 |
| AX-158192775 | 17 | 50.075 | KV452884.1 | 6780569 | 6-scf00352 | 6 |
| AX-158192776 | 17 | 50.075 | KV452884.1 | 6781984 | 6-scf00352 | 6 |
| AX-158192783 | 17 | 50.075 | KV452884.1 | 6788481 | 6-scf00352 | 6 |
| AX-158192785 | 17 | 50.075 | KV452884.1 | 6789416 | 6-scf00352 | 6 |
| AX-158192787 | 17 | 50.075 | KV452884.1 | 6789965 | 6-scf00352 | 6 |
| AX-158192788 | 17 | 50.075 | KV452884.1 | 6792171 | 6-scf00352 | 6 |
| AX-158192790 | 17 | 50.075 | KV452884.1 | 6793502 | 6-scf00352 | 6 |
| AX-158192791 | 17 | 50.075 | KV452884.1 | 6795425 | 6-scf00352 | 6 |
| AX-158192794 | 17 | 50.075 | KV452884.1 | 6799379 | 6-scf00352 | 6 |
| AX-158192796 | 17 | 50.075 | KV452884.1 | 6801328 | 6-scf00352 | 6 |
| AX-158192797 | 17 | 50.075 | KV452884.1 | 6802860 | 6-scf00352 | 6 |
| AX-157866812 | 17 | 50.075 | KV452884.1 | 6804990 | 6-scf00352 | 6 |
| AX-157836713 | 17 | 50.075 | KV452884.1 | 6809637 | 6-scf00352 | 6 |
| AX-158192801 | 17 | 50.075 | KV452884.1 | 6812072 | 6-scf00352 | 6 |
| AX-157751088 | 17 | 50.075 | KV452884.1 | 6813963 | 6-scf00352 | 6 |
| AX-158192805 | 17 | 50.075 | KV452884.1 | 6814374 | 6-scf00352 | 6 |
| AX-158192806 | 17 | 50.075 | KV452884.1 | 6815766 | 6-scf00352 | 6 |
| AX-158192807 | 17 | 50.075 | KV452884.1 | 6816542 | 6-scf00352 | 6 |
| AX-158192808 | 17 | 50.075 | KV452884.1 | 6817231 | 6-scf00352 | 6 |
| AX-158192809 | 17 | 50.075 | KV452884.1 | 6818544 | 6-scf00352 | 6 |
| AX-158192810 | 17 | 50.075 | KV452884.1 | 6819376 | 6-scf00352 | 6 |
| AX-158192812 | 17 | 50.075 | KV452884.1 | 6821711 | 6-scf00352 | 6 |
| AX-158192813 | 17 | 50.075 | KV452884.1 | 6822045 | 6-scf00352 | 6 |
| AX-158192816 | 17 | 50.075 | KV452884.1 | 6826991 | 6-scf00352 | 6 |
| AX-158192817 | 17 | 50.075 | KV452884.1 | 6827366 | 6-scf00352 | 6 |
| AX-157836714 | 17 | 50.075 | KV452884.1 | 6829684 | 6-scf00352 | 6 |
| AX-158192821 | 17 | 50.075 | KV452884.1 | 6833401 | 6-scf00352 | 6 |
| AX-158192825 | 17 | 50.075 | KV452884.1 | 6835845 | 6-scf00352 | 6 |
| AX-158192829 | 17 | 50.075 | KV452884.1 | 6841638 | 6-scf00352 | 6 |
| AX-158192830 | 17 | 50.075 | KV452884.1 | 6842176 | 6-scf00352 | 6 |
| AX-158192831 | 17 | 50.075 | KV452884.1 | 6842374 | 6-scf00352 | 6 |
| AX-158192832 | 17 | 50.075 | KV452884.1 | 6843090 | 6-scf00352 | 6 |
| AX-157836716 | 17 | 50.075 | KV452884.1 | 6843369 | 6-scf00352 | 6 |
| AX-157836717 | 17 | 50.075 | KV452884.1 | 6845165 | 6-scf00352 | 6 |
| AX-158192836 | 17 | 50.075 | KV452884.1 | 6848008 | 6-scf00352 | 6 |
| AX-158192838 | 17 | 50.075 | KV452884.1 | 6849806 | 6-scf00352 | 6 |
| AX-158192840 | 17 | 50.075 | KV452884.1 | 6851232 | 6-scf00352 | 6 |
| AX-158192843 | 17 | 50.075 | KV452884.1 | 6854030 | 6-scf00352 | 6 |
| AX-158192846 | 17 | 50.075 | KV452884.1 | 6855881 | 6-scf00352 | 6 |
| AX-158192858 | 17 | 50.075 | KV452884.1 | 6872097 | 6-scf00352 | 6 |
| AX-158192860 | 17 | 50.075 | KV452884.1 | 6875475 | 6-scf00352 | 6 |
| AX-158192709 | 17 | 50.087 | KV452884.1 | 6695632 | 6-scf00352 | 6 |
| AX-158192761 | 17 | 50.087 | KV452884.1 | 6764182 | 6-scf00352 | 6 |
| AX-158192818 | 17 | 50.087 | KV452884.1 | 6828276 | 6-scf00352 | 6 |
| AX-158192835 | 17 | 50.087 | KV452884.1 | 6847334 | 6-scf00352 | 6 |
| AX-158192837 | 17 | 50.117 | KV452884.1 | 6848385 | 6-scf00352 | 6 |
| AX-158192842 | 17 | 50.15  | KV452884.1 | 6853227 | 6-scf00352 | 6 |
| AX-158192566 | 17 | 50.184 | KV452884.1 | 6498943 | 6-scf00352 | 6 |
| AX-157836695 | 17 | 50.184 | KV452884.1 | 6515405 | 6-scf00352 | 6 |

|              |    |        |            |         |            |   |
|--------------|----|--------|------------|---------|------------|---|
| AX-158192580 | 17 | 50.184 | KV452884.1 | 6516228 | 6-scf00352 | 6 |
| AX-158192714 | 17 | 50.184 | KV452884.1 | 6698676 | 6-scf00352 | 6 |
| AX-158192826 | 17 | 50.184 | KV452884.1 | 6836581 | 6-scf00352 | 6 |
| AX-158192844 | 17 | 50.184 | KV452884.1 | 6854405 | 6-scf00352 | 6 |
| AX-158192862 | 17 | 50.33  | KV452884.1 | 6876691 | 6-scf00352 | 6 |
| AX-158192870 | 17 | 50.621 | KV452884.1 | 6899659 | 6-scf00352 | 6 |
| AX-157836723 | 17 | 50.621 | KV452884.1 | 6902739 | 6-scf00352 | 6 |
| AX-157836726 | 17 | 50.621 | KV452884.1 | 6907551 | 6-scf00352 | 6 |
| AX-157836729 | 17 | 50.621 | KV452884.1 | 6913508 | 6-scf00352 | 6 |
| AX-158192876 | 17 | 50.621 | KV452884.1 | 6916151 | 6-scf00352 | 6 |
| AX-158192877 | 17 | 50.621 | KV452884.1 | 6918624 | 6-scf00352 | 6 |
| AX-158192883 | 17 | 50.621 | KV452884.1 | 6925227 | 6-scf00352 | 6 |
| AX-158192884 | 17 | 50.621 | KV452884.1 | 6925723 | 6-scf00352 | 6 |
| AX-158192885 | 17 | 50.621 | KV452884.1 | 6926469 | 6-scf00352 | 6 |
| AX-157836730 | 17 | 50.621 | KV452884.1 | 6927973 | 6-scf00352 | 6 |
| AX-157744756 | 17 | 50.621 | KV452884.1 | 6929166 | 6-scf00352 | 6 |
| AX-158192887 | 17 | 50.621 | KV452884.1 | 6929534 | 6-scf00352 | 6 |
| AX-158192890 | 17 | 50.621 | KV452884.1 | 6935294 | 6-scf00352 | 6 |
| AX-157746055 | 17 | 50.621 | KV452884.1 | 6936248 | 6-scf00352 | 6 |
| AX-158192891 | 17 | 50.621 | KV452884.1 | 6936302 | 6-scf00352 | 6 |
| AX-158192898 | 17 | 50.621 | KV452884.1 | 6944566 | 6-scf00352 | 6 |
| AX-158192902 | 17 | 50.621 | KV452884.1 | 6949385 | 6-scf00352 | 6 |
| AX-158192905 | 17 | 50.621 | KV452884.1 | 6951286 | 6-scf00352 | 6 |
| AX-158192732 | 17 | 50.731 | KV452884.1 | 6723563 | 6-scf00352 | 6 |
| AX-158192778 | 17 | 50.731 | KV452884.1 | 6783471 | 6-scf00352 | 6 |
| AX-157738729 | 17 | 50.731 | KV452884.1 | 6785101 | 6-scf00352 | 6 |
| AX-158192833 | 17 | 50.731 | KV452884.1 | 6844597 | 6-scf00352 | 6 |
| AX-158192896 | 17 | 50.731 | KV452884.1 | 6942539 | 6-scf00352 | 6 |
| AX-158192897 | 17 | 50.731 | KV452884.1 | 6943835 | 6-scf00352 | 6 |
| AX-158192900 | 17 | 50.731 | KV452884.1 | 6948476 | 6-scf00352 | 6 |
| AX-158192903 | 17 | 50.731 | KV452884.1 | 6950120 | 6-scf00352 | 6 |
| AX-158192908 | 17 | 50.731 | KV452884.1 | 6955705 | 6-scf00352 | 6 |
| AX-158192910 | 17 | 50.731 | KV452884.1 | 6957122 | 6-scf00352 | 6 |
| AX-157722237 | 17 | 50.731 | KV452884.1 | 6975643 | 6-scf00352 | 6 |
| AX-158192921 | 17 | 50.731 | KV452884.1 | 6976868 | 6-scf00352 | 6 |
| AX-158192923 | 17 | 50.731 | KV452884.1 | 6979185 | 6-scf00352 | 6 |
| AX-158192927 | 17 | 50.731 | KV452884.1 | 6985876 | 6-scf00352 | 6 |
| AX-158192931 | 17 | 50.731 | KV452884.1 | 6989572 | 6-scf00352 | 6 |
| AX-158192932 | 17 | 50.731 | KV452884.1 | 6990507 | 6-scf00352 | 6 |
| AX-158192934 | 17 | 50.731 | KV452884.1 | 6993489 | 6-scf00352 | 6 |
| AX-158192937 | 17 | 50.731 | KV452884.1 | 6994841 | 6-scf00352 | 6 |
| AX-158192938 | 17 | 50.731 | KV452884.1 | 6995401 | 6-scf00352 | 6 |
| AX-158192939 | 17 | 50.731 | KV452884.1 | 6995828 | 6-scf00352 | 6 |
| AX-158192940 | 17 | 50.731 | KV452884.1 | 6997744 | 6-scf00352 | 6 |
| AX-158192944 | 17 | 50.731 | KV452884.1 | 7001344 | 6-scf00352 | 6 |
| AX-158192945 | 17 | 50.731 | KV452884.1 | 7002709 | 6-scf00352 | 6 |
| AX-157836733 | 17 | 50.731 | KV452884.1 | 7004513 | 6-scf00352 | 6 |
| AX-158192949 | 17 | 50.731 | KV452884.1 | 7009321 | 6-scf00352 | 6 |
| AX-158192952 | 17 | 50.731 | KV452884.1 | 7013548 | 6-scf00352 | 6 |
| AX-158192967 | 17 | 50.731 | KV452884.1 | 7027019 | 6-scf00352 | 6 |
| AX-158192974 | 17 | 50.731 | KV452884.1 | 7034809 | 6-scf00352 | 6 |

|              |    |        |            |         |            |   |
|--------------|----|--------|------------|---------|------------|---|
| AX-158192983 | 17 | 50.731 | KV452884.1 | 7044675 | 6-scf00352 | 6 |
| AX-158192992 | 17 | 50.731 | KV452884.1 | 7050802 | 6-scf00352 | 6 |
| AX-158192995 | 17 | 50.731 | KV452884.1 | 7055191 | 6-scf00352 | 6 |
| AX-158193005 | 17 | 50.731 | KV452884.1 | 7064805 | 6-scf00352 | 6 |
| AX-158193013 | 17 | 50.731 | KV452884.1 | 7069466 | 6-scf00352 | 6 |
| AX-157836734 | 17 | 50.731 | KV452884.1 | 7071411 | 6-scf00352 | 6 |
| AX-158193017 | 17 | 50.731 | KV452884.1 | 7077352 | 6-scf00352 | 6 |
| AX-158193018 | 17 | 50.731 | KV452884.1 | 7077847 | 6-scf00352 | 6 |
| AX-157757564 | 17 | 50.731 | KV452884.1 | 7078699 | 6-scf00352 | 6 |
| AX-158193022 | 17 | 50.731 | KV452884.1 | 7082987 | 6-scf00352 | 6 |
| AX-157723268 | 17 | 50.731 | KV452884.1 | 7084270 | 6-scf00352 | 6 |
| AX-158193029 | 17 | 50.731 | KV452884.1 | 7091961 | 6-scf00352 | 6 |
| AX-158193030 | 17 | 50.731 | KV452884.1 | 7092425 | 6-scf00352 | 6 |
| AX-158193041 | 17 | 50.731 | KV452884.1 | 7107120 | 6-scf00352 | 6 |
| AX-158193048 | 17 | 50.731 | KV452884.1 | 7122066 | 6-scf00352 | 6 |
| AX-158193051 | 17 | 50.731 | KV452884.1 | 7129425 | 6-scf00352 | 6 |
| AX-158193057 | 17 | 50.731 | KV452884.1 | 7138471 | 6-scf00352 | 6 |
| AX-158193058 | 17 | 50.731 | KV452884.1 | 7139693 | 6-scf00352 | 6 |
| AX-158193062 | 17 | 50.731 | KV452884.1 | 7142155 | 6-scf00352 | 6 |
| AX-158193064 | 17 | 50.731 | KV452884.1 | 7144822 | 6-scf00352 | 6 |
| AX-158193086 | 17 | 50.731 | KV452884.1 | 7172805 | 6-scf00352 | 6 |
| AX-158193094 | 17 | 50.731 | KV452884.1 | 7181841 | 6-scf00352 | 6 |
| AX-157836738 | 17 | 50.731 | KV452884.1 | 7182092 | 6-scf00352 | 6 |
| AX-157740310 | 17 | 50.731 | KV452884.1 | 7184304 | 6-scf00352 | 6 |
| AX-158418244 | 17 | 50.731 | KV452884.1 | 7185259 | 6-scf00352 | 6 |
| AX-158193097 | 17 | 50.731 | KV452884.1 | 7186889 | 6-scf00352 | 6 |
| AX-158193100 | 17 | 50.731 | KV452884.1 | 7190358 | 6-scf00352 | 6 |
| AX-158193101 | 17 | 50.731 | KV452884.1 | 7190651 | 6-scf00352 | 6 |
| AX-158193102 | 17 | 50.731 | KV452884.1 | 7191769 | 6-scf00352 | 6 |
| AX-158193104 | 17 | 50.731 | KV452884.1 | 7195706 | 6-scf00352 | 6 |
| AX-158193109 | 17 | 50.731 | KV452884.1 | 7199563 | 6-scf00352 | 6 |
| AX-158193111 | 17 | 50.731 | KV452884.1 | 7201591 | 6-scf00352 | 6 |
| AX-157836744 | 17 | 50.731 | KV452884.1 | 7204442 | 6-scf00352 | 6 |
| AX-158193112 | 17 | 50.731 | KV452884.1 | 7205595 | 6-scf00352 | 6 |
| AX-158193118 | 17 | 50.731 | KV452884.1 | 7211564 | 6-scf00352 | 6 |
| AX-158193120 | 17 | 50.731 | KV452884.1 | 7213593 | 6-scf00352 | 6 |
| AX-158193123 | 17 | 50.731 | KV452884.1 | 7220898 | 6-scf00352 | 6 |
| AX-158193126 | 17 | 50.731 | KV452884.1 | 7222986 | 6-scf00352 | 6 |
| AX-158386111 | 17 | 50.731 | KV452884.1 | 7231822 | 6-scf00352 | 6 |
| AX-157836745 | 17 | 50.731 | KV452884.1 | 7236364 | 6-scf00352 | 6 |
| AX-158193135 | 17 | 50.731 | KV452884.1 | 7236767 | 6-scf00352 | 6 |
| AX-158193137 | 17 | 50.731 | KV452884.1 | 7237814 | 6-scf00352 | 6 |
| AX-158193138 | 17 | 50.731 | KV452884.1 | 7238027 | 6-scf00352 | 6 |
| AX-158193140 | 17 | 50.731 | KV452884.1 | 7238993 | 6-scf00352 | 6 |
| AX-158193141 | 17 | 50.731 | KV452884.1 | 7239562 | 6-scf00352 | 6 |
| AX-158193142 | 17 | 50.731 | KV452884.1 | 7240233 | 6-scf00352 | 6 |
| AX-158193143 | 17 | 50.731 | KV452884.1 | 7240899 | 6-scf00352 | 6 |
| AX-158193144 | 17 | 50.731 | KV452884.1 | 7241581 | 6-scf00352 | 6 |
| AX-158193146 | 17 | 50.731 | KV452884.1 | 7242747 | 6-scf00352 | 6 |
| AX-158193147 | 17 | 50.731 | KV452884.1 | 7243388 | 6-scf00352 | 6 |
| AX-158193152 | 17 | 50.731 | KV452884.1 | 7252704 | 6-scf00352 | 6 |

|              |    |        |            |         |            |   |
|--------------|----|--------|------------|---------|------------|---|
| AX-158193153 | 17 | 50.731 | KV452884.1 | 7255305 | 6-scf00352 | 6 |
| AX-158193154 | 17 | 50.731 | KV452884.1 | 7255853 | 6-scf00352 | 6 |
| AX-158193172 | 17 | 50.731 | KV452884.1 | 7272554 | 6-scf00352 | 6 |
| AX-158193179 | 17 | 50.731 | KV452884.1 | 7276186 | 6-scf00352 | 6 |
| AX-158193181 | 17 | 50.731 | KV452884.1 | 7278940 | 6-scf00352 | 6 |
| AX-158193187 | 17 | 50.731 | KV452884.1 | 7286087 | 6-scf00352 | 6 |
| AX-158193188 | 17 | 50.731 | KV452884.1 | 7286590 | 6-scf00352 | 6 |
| AX-158193194 | 17 | 50.731 | KV452884.1 | 7291697 | 6-scf00352 | 6 |
| AX-158193196 | 17 | 50.731 | KV452884.1 | 7292439 | 6-scf00352 | 6 |
| AX-158193199 | 17 | 50.731 | KV452884.1 | 7297874 | 6-scf00352 | 6 |
| AX-158193200 | 17 | 50.731 | KV452884.1 | 7300923 | 6-scf00352 | 6 |
| AX-158193202 | 17 | 50.731 | KV452884.1 | 7301401 | 6-scf00352 | 6 |
| AX-158193203 | 17 | 50.731 | KV452884.1 | 7302225 | 6-scf00352 | 6 |
| AX-157836752 | 17 | 50.731 | KV452884.1 | 7303949 | 6-scf00352 | 6 |
| AX-158193205 | 17 | 50.731 | KV452884.1 | 7303984 | 6-scf00352 | 6 |
| AX-157836754 | 17 | 50.731 | KV452884.1 | 7307511 | 6-scf00352 | 6 |
| AX-158193211 | 17 | 50.731 | KV452884.1 | 7309145 | 6-scf00352 | 6 |
| AX-158193219 | 17 | 50.731 | KV452884.1 | 7321492 | 6-scf00352 | 6 |
| AX-157726641 | 17 | 50.731 | KV452884.1 | 7335715 | 6-scf00352 | 6 |
| AX-158193228 | 17 | 50.731 | KV452884.1 | 7337328 | 6-scf00352 | 6 |
| AX-157836756 | 17 | 50.731 | KV452884.1 | 7347467 | 6-scf00352 | 6 |
| AX-157836757 | 17 | 50.731 | KV452884.1 | 7347675 | 6-scf00352 | 6 |
| AX-158193258 | 17 | 50.731 | KV452884.1 | 7368849 | 6-scf00352 | 6 |
| AX-158193262 | 17 | 50.731 | KV452884.1 | 7370720 | 6-scf00352 | 6 |
| AX-158193298 | 17 | 50.731 | KV452884.1 | 7401156 | 6-scf00352 | 6 |
| AX-158193309 | 17 | 50.731 | KV452884.1 | 7409836 | 6-scf00352 | 6 |
| AX-157836767 | 17 | 50.731 | KV452884.1 | 7458844 | 6-scf00352 | 6 |
| AX-158193378 | 17 | 50.731 | KV452884.1 | 7485734 | 6-scf00352 | 6 |
| AX-158193385 | 17 | 50.731 | KV452884.1 | 7493653 | 6-scf00352 | 6 |
| AX-158193421 | 17 | 50.731 | KV452884.1 | 7532511 | 6-scf00352 | 6 |
| AX-158193428 | 17 | 50.731 | KV452884.1 | 7537543 | 6-scf00352 | 6 |
| AX-158193440 | 17 | 50.731 | KV452884.1 | 7549004 | 6-scf00352 | 6 |
| AX-158193464 | 17 | 50.731 | KV452884.1 | 7568826 | 6-scf00352 | 6 |
| AX-158193480 | 17 | 50.731 | KV452884.1 | 7580509 | 6-scf00352 | 6 |
| AX-158193564 | 17 | 50.731 | KV452884.1 | 7670231 | 6-scf00352 | 6 |
| AX-158193571 | 17 | 50.731 | KV452884.1 | 7675912 | 6-scf00352 | 6 |
| AX-158193589 | 17 | 50.731 | KV452884.1 | 7690382 | 6-scf00352 | 6 |
| AX-158193593 | 17 | 50.731 | KV452884.1 | 7693750 | 6-scf00352 | 6 |
| AX-158193602 | 17 | 50.731 | KV452884.1 | 7703137 | 6-scf00352 | 6 |
| AX-158193610 | 17 | 50.731 | KV452884.1 | 7708005 | 6-scf00352 | 6 |
| AX-158193644 | 17 | 50.731 | KV452884.1 | 7731076 | 6-scf00352 | 6 |
| AX-158193649 | 17 | 50.731 | KV452884.1 | 7734406 | 6-scf00352 | 6 |
| AX-158193650 | 17 | 50.731 | KV452884.1 | 7734800 | 6-scf00352 | 6 |
| AX-158193656 | 17 | 50.731 | KV452884.1 | 7739519 | 6-scf00352 | 6 |
| AX-158193676 | 17 | 50.731 | KV452884.1 | 7756272 | 6-scf00352 | 6 |
| AX-158193684 | 17 | 50.731 | KV452884.1 | 7762828 | 6-scf00352 | 6 |
| AX-158193687 | 17 | 50.731 | KV452884.1 | 7764092 | 6-scf00352 | 6 |
| AX-158193695 | 17 | 50.731 | KV452884.1 | 7769949 | 6-scf00352 | 6 |
| AX-157836779 | 17 | 50.731 | KV452884.1 | 7777496 | 6-scf00352 | 6 |
| AX-157836784 | 17 | 50.731 | KV452884.1 | 7782598 | 6-scf00352 | 6 |
| AX-158193735 | 17 | 50.731 | KV452884.1 | 7823945 | 6-scf00352 | 6 |



|              |    |        |            |         |            |   |
|--------------|----|--------|------------|---------|------------|---|
| AX-158386118 | 17 | 50.731 | KV452884.1 | 7836873 | 6-scf00352 | 6 |
| AX-158193748 | 17 | 50.731 | KV452884.1 | 7845693 | 6-scf00352 | 6 |
| AX-157836789 | 17 | 50.731 | KV452884.1 | 7848971 | 6-scf00352 | 6 |
| AX-158193769 | 17 | 50.731 | KV452884.1 | 7871000 | 6-scf00352 | 6 |
| AX-158193776 | 17 | 50.731 | KV452884.1 | 7879286 | 6-scf00352 | 6 |
| AX-158193784 | 17 | 50.731 | KV452884.1 | 7890609 | 6-scf00352 | 6 |
| AX-158386127 | 17 | 50.731 | KV452884.1 | 7891075 | 6-scf00352 | 6 |
| AX-158193785 | 17 | 50.731 | KV452884.1 | 7891525 | 6-scf00352 | 6 |
| AX-158386128 | 17 | 50.731 | KV452884.1 | 7892183 | 6-scf00352 | 6 |
| AX-158193786 | 17 | 50.731 | KV452884.1 | 7893525 | 6-scf00352 | 6 |
| AX-158193789 | 17 | 50.731 | KV452884.1 | 7896934 | 6-scf00352 | 6 |
| AX-158386130 | 17 | 50.731 | KV452884.1 | 7897746 | 6-scf00352 | 6 |
| AX-157866824 | 17 | 50.731 | KV452884.1 | 7899088 | 6-scf00352 | 6 |
| AX-157866825 | 17 | 50.731 | KV452884.1 | 7901621 | 6-scf00352 | 6 |
| AX-157836792 | 17 | 50.731 | KV452884.1 | 7905010 | 6-scf00352 | 6 |
| AX-157836793 | 17 | 50.731 | KV452884.1 | 7907027 | 6-scf00352 | 6 |
| AX-157866826 | 17 | 50.731 | KV452884.1 | 7907842 | 6-scf00352 | 6 |
| AX-158193791 | 17 | 50.731 | KV452884.1 | 7910431 | 6-scf00352 | 6 |
| AX-158193792 | 17 | 50.731 | KV452884.1 | 7912080 | 6-scf00352 | 6 |
| AX-158193851 | 17 | 50.731 | KV452884.1 | 7973765 | 6-scf00352 | 6 |
| AX-158193854 | 17 | 50.731 | KV452884.1 | 7987310 | 6-scf00352 | 6 |
| AX-158193856 | 17 | 50.731 | KV452884.1 | 7989132 | 6-scf00352 | 6 |
| AX-158193864 | 17 | 50.731 | KV452884.1 | 8005118 | 6-scf00352 | 6 |
| AX-158193878 | 17 | 50.731 | KV452884.1 | 8021480 | 6-scf00352 | 6 |
| AX-158193880 | 17 | 50.731 | KV452884.1 | 8025143 | 6-scf00352 | 6 |
| AX-158193884 | 17 | 50.731 | KV452884.1 | 8029848 | 6-scf00352 | 6 |
| AX-158193888 | 17 | 50.731 | KV452884.1 | 8034119 | 6-scf00352 | 6 |
| AX-158193889 | 17 | 50.731 | KV452884.1 | 8035255 | 6-scf00352 | 6 |
| AX-158193890 | 17 | 50.731 | KV452884.1 | 8035851 | 6-scf00352 | 6 |
| AX-158193891 | 17 | 50.731 | KV452884.1 | 8039898 | 6-scf00352 | 6 |
| AX-158193938 | 17 | 50.731 | KV452884.1 | 8102417 | 6-scf00352 | 6 |
| AX-158193976 | 17 | 50.731 | KV452884.1 | 8148855 | 6-scf00352 | 6 |
| AX-158193157 | 17 | 50.745 | KV452884.1 | 7257586 | 6-scf00352 | 6 |
| AX-158193159 | 17 | 50.779 | KV452884.1 | 7259965 | 6-scf00352 | 6 |
| AX-158193161 | 17 | 50.84  | KV452884.1 | 7261801 | 6-scf00352 | 6 |
| AX-158193162 | 17 | 50.84  | KV452884.1 | 7262173 | 6-scf00352 | 6 |
| AX-158193169 | 17 | 50.84  | KV452884.1 | 7266826 | 6-scf00352 | 6 |
| AX-158192746 | 17 | 50.949 | KV452884.1 | 6743620 | 6-scf00352 | 6 |
| AX-158192847 | 17 | 50.949 | KV452884.1 | 6860359 | 6-scf00352 | 6 |
| AX-157836724 | 17 | 50.949 | KV452884.1 | 6903533 | 6-scf00352 | 6 |
| AX-158192892 | 17 | 50.949 | KV452884.1 | 6936543 | 6-scf00352 | 6 |
| AX-158192893 | 17 | 50.949 | KV452884.1 | 6939074 | 6-scf00352 | 6 |
| AX-158192894 | 17 | 50.949 | KV452884.1 | 6941775 | 6-scf00352 | 6 |
| AX-157693718 | 17 | 50.949 | KV452884.1 | 6941953 | 6-scf00352 | 6 |
| AX-158192895 | 17 | 50.949 | KV452884.1 | 6942086 | 6-scf00352 | 6 |
| AX-158192899 | 17 | 50.949 | KV452884.1 | 6945625 | 6-scf00352 | 6 |
| AX-157836732 | 17 | 50.949 | KV452884.1 | 6970275 | 6-scf00352 | 6 |
| AX-158192924 | 17 | 50.949 | KV452884.1 | 6981649 | 6-scf00352 | 6 |
| AX-158192926 | 17 | 50.949 | KV452884.1 | 6983963 | 6-scf00352 | 6 |
| AX-158192933 | 17 | 50.949 | KV452884.1 | 6992399 | 6-scf00352 | 6 |
| AX-158192935 | 17 | 50.949 | KV452884.1 | 6993854 | 6-scf00352 | 6 |

|              |    |        |            |         |            |   |
|--------------|----|--------|------------|---------|------------|---|
| AX-158192948 | 17 | 50.949 | KV452884.1 | 7006598 | 6-scf00352 | 6 |
| AX-158192961 | 17 | 50.949 | KV452884.1 | 7021454 | 6-scf00352 | 6 |
| AX-158192964 | 17 | 50.949 | KV452884.1 | 7024174 | 6-scf00352 | 6 |
| AX-158192968 | 17 | 50.949 | KV452884.1 | 7027491 | 6-scf00352 | 6 |
| AX-158192979 | 17 | 50.949 | KV452884.1 | 7041925 | 6-scf00352 | 6 |
| AX-158192987 | 17 | 50.949 | KV452884.1 | 7047918 | 6-scf00352 | 6 |
| AX-158192988 | 17 | 50.949 | KV452884.1 | 7048396 | 6-scf00352 | 6 |
| AX-158192989 | 17 | 50.949 | KV452884.1 | 7048625 | 6-scf00352 | 6 |
| AX-158193010 | 17 | 50.949 | KV452884.1 | 7067621 | 6-scf00352 | 6 |
| AX-158193011 | 17 | 50.949 | KV452884.1 | 7068304 | 6-scf00352 | 6 |
| AX-157740815 | 17 | 50.949 | KV452884.1 | 7094854 | 6-scf00352 | 6 |
| AX-158193034 | 17 | 50.949 | KV452884.1 | 7100480 | 6-scf00352 | 6 |
| AX-158193037 | 17 | 50.949 | KV452884.1 | 7102934 | 6-scf00352 | 6 |
| AX-158193065 | 17 | 50.949 | KV452884.1 | 7145723 | 6-scf00352 | 6 |
| AX-158193074 | 17 | 50.949 | KV452884.1 | 7155284 | 6-scf00352 | 6 |
| AX-158193090 | 17 | 50.949 | KV452884.1 | 7177043 | 6-scf00352 | 6 |
| AX-157836736 | 17 | 50.949 | KV452884.1 | 7177528 | 6-scf00352 | 6 |
| AX-157836737 | 17 | 50.949 | KV452884.1 | 7177758 | 6-scf00352 | 6 |
| AX-158193108 | 17 | 50.949 | KV452884.1 | 7198547 | 6-scf00352 | 6 |
| AX-158193116 | 17 | 50.949 | KV452884.1 | 7209941 | 6-scf00352 | 6 |
| AX-158193119 | 17 | 50.949 | KV452884.1 | 7212294 | 6-scf00352 | 6 |
| AX-158193122 | 17 | 50.949 | KV452884.1 | 7217119 | 6-scf00352 | 6 |
| AX-157886959 | 17 | 50.949 | KV452884.1 | 7233646 | 6-scf00352 | 6 |
| AX-158193145 | 17 | 50.949 | KV452884.1 | 7242365 | 6-scf00352 | 6 |
| AX-158193148 | 17 | 50.949 | KV452884.1 | 7245475 | 6-scf00352 | 6 |
| AX-157696136 | 17 | 50.949 | KV452884.1 | 7245777 | 6-scf00352 | 6 |
| AX-157836746 | 17 | 50.949 | KV452884.1 | 7247681 | 6-scf00352 | 6 |
| AX-158193164 | 17 | 50.949 | KV452884.1 | 7263828 | 6-scf00352 | 6 |
| AX-158193166 | 17 | 50.949 | KV452884.1 | 7264933 | 6-scf00352 | 6 |
| AX-158193167 | 17 | 50.949 | KV452884.1 | 7265580 | 6-scf00352 | 6 |
| AX-158193175 | 17 | 50.949 | KV452884.1 | 7274834 | 6-scf00352 | 6 |
| AX-158193176 | 17 | 50.949 | KV452884.1 | 7275231 | 6-scf00352 | 6 |
| AX-158193178 | 17 | 50.949 | KV452884.1 | 7275789 | 6-scf00352 | 6 |
| AX-158193180 | 17 | 50.949 | KV452884.1 | 7276661 | 6-scf00352 | 6 |
| AX-158193192 | 17 | 50.949 | KV452884.1 | 7289711 | 6-scf00352 | 6 |
| AX-157751804 | 17 | 50.949 | KV452884.1 | 7295916 | 6-scf00352 | 6 |
| AX-158193198 | 17 | 50.949 | KV452884.1 | 7297607 | 6-scf00352 | 6 |
| AX-157725006 | 17 | 50.949 | KV452884.1 | 7299531 | 6-scf00352 | 6 |
| AX-158193201 | 17 | 50.949 | KV452884.1 | 7301131 | 6-scf00352 | 6 |
| AX-158193204 | 17 | 50.949 | KV452884.1 | 7303073 | 6-scf00352 | 6 |
| AX-158193206 | 17 | 50.949 | KV452884.1 | 7304505 | 6-scf00352 | 6 |
| AX-158193208 | 17 | 50.949 | KV452884.1 | 7306173 | 6-scf00352 | 6 |
| AX-158193209 | 17 | 50.949 | KV452884.1 | 7307078 | 6-scf00352 | 6 |
| AX-158193210 | 17 | 50.949 | KV452884.1 | 7308296 | 6-scf00352 | 6 |
| AX-157739435 | 17 | 50.949 | KV452884.1 | 7310583 | 6-scf00352 | 6 |
| AX-158193213 | 17 | 50.949 | KV452884.1 | 7310706 | 6-scf00352 | 6 |
| AX-158193216 | 17 | 50.949 | KV452884.1 | 7315850 | 6-scf00352 | 6 |
| AX-157836755 | 17 | 50.949 | KV452884.1 | 7316323 | 6-scf00352 | 6 |
| AX-158193217 | 17 | 50.949 | KV452884.1 | 7316951 | 6-scf00352 | 6 |
| AX-157717469 | 17 | 50.949 | KV452884.1 | 7318272 | 6-scf00352 | 6 |
| AX-158418248 | 17 | 50.949 | KV452884.1 | 7326084 | 6-scf00352 | 6 |

|              |    |        |            |         |            |   |
|--------------|----|--------|------------|---------|------------|---|
| AX-158193222 | 17 | 50.949 | KV452884.1 | 7332237 | 6-scf00352 | 6 |
| AX-158193224 | 17 | 50.949 | KV452884.1 | 7333337 | 6-scf00352 | 6 |
| AX-158193225 | 17 | 50.949 | KV452884.1 | 7334063 | 6-scf00352 | 6 |
| AX-157740281 | 17 | 50.949 | KV452884.1 | 7338104 | 6-scf00352 | 6 |
| AX-158193230 | 17 | 50.949 | KV452884.1 | 7341977 | 6-scf00352 | 6 |
| AX-158193239 | 17 | 50.949 | KV452884.1 | 7350385 | 6-scf00352 | 6 |
| AX-157836759 | 17 | 50.949 | KV452884.1 | 7358581 | 6-scf00352 | 6 |
| AX-157836760 | 17 | 50.949 | KV452884.1 | 7361738 | 6-scf00352 | 6 |
| AX-158193257 | 17 | 50.949 | KV452884.1 | 7368307 | 6-scf00352 | 6 |
| AX-158193271 | 17 | 50.949 | KV452884.1 | 7375213 | 6-scf00352 | 6 |
| AX-158193272 | 17 | 50.949 | KV452884.1 | 7376008 | 6-scf00352 | 6 |
| AX-158193275 | 17 | 50.949 | KV452884.1 | 7380116 | 6-scf00352 | 6 |
| AX-158193276 | 17 | 50.949 | KV452884.1 | 7380599 | 6-scf00352 | 6 |
| AX-158193279 | 17 | 50.949 | KV452884.1 | 7383270 | 6-scf00352 | 6 |
| AX-158193283 | 17 | 50.949 | KV452884.1 | 7386877 | 6-scf00352 | 6 |
| AX-158193306 | 17 | 50.949 | KV452884.1 | 7407568 | 6-scf00352 | 6 |
| AX-158193319 | 17 | 50.949 | KV452884.1 | 7419471 | 6-scf00352 | 6 |
| AX-158193320 | 17 | 50.949 | KV452884.1 | 7420347 | 6-scf00352 | 6 |
| AX-158193338 | 17 | 50.949 | KV452884.1 | 7442609 | 6-scf00352 | 6 |
| AX-158193342 | 17 | 50.949 | KV452884.1 | 7445396 | 6-scf00352 | 6 |
| AX-157721776 | 17 | 50.949 | KV452884.1 | 7452766 | 6-scf00352 | 6 |
| AX-158193353 | 17 | 50.949 | KV452884.1 | 7458408 | 6-scf00352 | 6 |
| AX-158193357 | 17 | 50.949 | KV452884.1 | 7466968 | 6-scf00352 | 6 |
| AX-158193366 | 17 | 50.949 | KV452884.1 | 7472878 | 6-scf00352 | 6 |
| AX-158193376 | 17 | 50.949 | KV452884.1 | 7484354 | 6-scf00352 | 6 |
| AX-158193382 | 17 | 50.949 | KV452884.1 | 7490618 | 6-scf00352 | 6 |
| AX-157758261 | 17 | 50.949 | KV452884.1 | 7502186 | 6-scf00352 | 6 |
| AX-158423125 | 17 | 50.949 | KV452884.1 | 7505448 | 6-scf00352 | 6 |
| AX-158193395 | 17 | 50.949 | KV452884.1 | 7506006 | 6-scf00352 | 6 |
| AX-158193411 | 17 | 50.949 | KV452884.1 | 7523933 | 6-scf00352 | 6 |
| AX-158193416 | 17 | 50.949 | KV452884.1 | 7530081 | 6-scf00352 | 6 |
| AX-158193432 | 17 | 50.949 | KV452884.1 | 7542088 | 6-scf00352 | 6 |
| AX-158193433 | 17 | 50.949 | KV452884.1 | 7542633 | 6-scf00352 | 6 |
| AX-158193436 | 17 | 50.949 | KV452884.1 | 7545540 | 6-scf00352 | 6 |
| AX-158193441 | 17 | 50.949 | KV452884.1 | 7549815 | 6-scf00352 | 6 |
| AX-158193445 | 17 | 50.949 | KV452884.1 | 7555464 | 6-scf00352 | 6 |
| AX-158193447 | 17 | 50.949 | KV452884.1 | 7556310 | 6-scf00352 | 6 |
| AX-158193451 | 17 | 50.949 | KV452884.1 | 7558205 | 6-scf00352 | 6 |
| AX-158413995 | 17 | 50.949 | KV452884.1 | 7559244 | 6-scf00352 | 6 |
| AX-158193455 | 17 | 50.949 | KV452884.1 | 7561392 | 6-scf00352 | 6 |
| AX-158193458 | 17 | 50.949 | KV452884.1 | 7563963 | 6-scf00352 | 6 |
| AX-158193461 | 17 | 50.949 | KV452884.1 | 7567189 | 6-scf00352 | 6 |
| AX-158193465 | 17 | 50.949 | KV452884.1 | 7569648 | 6-scf00352 | 6 |
| AX-158193468 | 17 | 50.949 | KV452884.1 | 7572221 | 6-scf00352 | 6 |
| AX-158193470 | 17 | 50.949 | KV452884.1 | 7573411 | 6-scf00352 | 6 |
| AX-158193475 | 17 | 50.949 | KV452884.1 | 7577123 | 6-scf00352 | 6 |
| AX-158193478 | 17 | 50.949 | KV452884.1 | 7578654 | 6-scf00352 | 6 |
| AX-158193489 | 17 | 50.949 | KV452884.1 | 7588634 | 6-scf00352 | 6 |
| AX-158193492 | 17 | 50.949 | KV452884.1 | 7594049 | 6-scf00352 | 6 |
| AX-158193502 | 17 | 50.949 | KV452884.1 | 7604240 | 6-scf00352 | 6 |
| AX-158193506 | 17 | 50.949 | KV452884.1 | 7608645 | 6-scf00352 | 6 |

|              |    |        |            |         |            |   |
|--------------|----|--------|------------|---------|------------|---|
| AX-158193507 | 17 | 50.949 | KV452884.1 | 7611875 | 6-scf00352 | 6 |
| AX-157886960 | 17 | 50.949 | KV452884.1 | 7618494 | 6-scf00352 | 6 |
| AX-158193515 | 17 | 50.949 | KV452884.1 | 7619942 | 6-scf00352 | 6 |
| AX-158193531 | 17 | 50.949 | KV452884.1 | 7638271 | 6-scf00352 | 6 |
| AX-158193535 | 17 | 50.949 | KV452884.1 | 7643334 | 6-scf00352 | 6 |
| AX-158193542 | 17 | 50.949 | KV452884.1 | 7652228 | 6-scf00352 | 6 |
| AX-158193544 | 17 | 50.949 | KV452884.1 | 7654712 | 6-scf00352 | 6 |
| AX-158193549 | 17 | 50.949 | KV452884.1 | 7658128 | 6-scf00352 | 6 |
| AX-158193556 | 17 | 50.949 | KV452884.1 | 7663860 | 6-scf00352 | 6 |
| AX-158193558 | 17 | 50.949 | KV452884.1 | 7665568 | 6-scf00352 | 6 |
| AX-158193561 | 17 | 50.949 | KV452884.1 | 7668050 | 6-scf00352 | 6 |
| AX-158193562 | 17 | 50.949 | KV452884.1 | 7668735 | 6-scf00352 | 6 |
| AX-158193563 | 17 | 50.949 | KV452884.1 | 7669646 | 6-scf00352 | 6 |
| AX-158193568 | 17 | 50.949 | KV452884.1 | 7673451 | 6-scf00352 | 6 |
| AX-158193574 | 17 | 50.949 | KV452884.1 | 7679379 | 6-scf00352 | 6 |
| AX-158193578 | 17 | 50.949 | KV452884.1 | 7681722 | 6-scf00352 | 6 |
| AX-158193584 | 17 | 50.949 | KV452884.1 | 7685695 | 6-scf00352 | 6 |
| AX-158193588 | 17 | 50.949 | KV452884.1 | 7689254 | 6-scf00352 | 6 |
| AX-158193590 | 17 | 50.949 | KV452884.1 | 7691366 | 6-scf00352 | 6 |
| AX-158193603 | 17 | 50.949 | KV452884.1 | 7703566 | 6-scf00352 | 6 |
| AX-157753475 | 17 | 50.949 | KV452884.1 | 7710217 | 6-scf00352 | 6 |
| AX-158193630 | 17 | 50.949 | KV452884.1 | 7722939 | 6-scf00352 | 6 |
| AX-158193631 | 17 | 50.949 | KV452884.1 | 7723214 | 6-scf00352 | 6 |
| AX-157836772 | 17 | 50.949 | KV452884.1 | 7730444 | 6-scf00352 | 6 |
| AX-158193648 | 17 | 50.949 | KV452884.1 | 7733210 | 6-scf00352 | 6 |
| AX-158193655 | 17 | 50.949 | KV452884.1 | 7737346 | 6-scf00352 | 6 |
| AX-158193667 | 17 | 50.949 | KV452884.1 | 7748028 | 6-scf00352 | 6 |
| AX-158193668 | 17 | 50.949 | KV452884.1 | 7748981 | 6-scf00352 | 6 |
| AX-158193670 | 17 | 50.949 | KV452884.1 | 7750253 | 6-scf00352 | 6 |
| AX-158193672 | 17 | 50.949 | KV452884.1 | 7752804 | 6-scf00352 | 6 |
| AX-158193673 | 17 | 50.949 | KV452884.1 | 7753732 | 6-scf00352 | 6 |
| AX-158193679 | 17 | 50.949 | KV452884.1 | 7757614 | 6-scf00352 | 6 |
| AX-157755828 | 17 | 50.949 | KV452884.1 | 7758999 | 6-scf00352 | 6 |
| AX-157836775 | 17 | 50.949 | KV452884.1 | 7759197 | 6-scf00352 | 6 |
| AX-158193681 | 17 | 50.949 | KV452884.1 | 7759709 | 6-scf00352 | 6 |
| AX-158193685 | 17 | 50.949 | KV452884.1 | 7763370 | 6-scf00352 | 6 |
| AX-158193692 | 17 | 50.949 | KV452884.1 | 7767011 | 6-scf00352 | 6 |
| AX-158193693 | 17 | 50.949 | KV452884.1 | 7767889 | 6-scf00352 | 6 |
| AX-158193694 | 17 | 50.949 | KV452884.1 | 7769128 | 6-scf00352 | 6 |
| AX-157866817 | 17 | 50.949 | KV452884.1 | 7770323 | 6-scf00352 | 6 |
| AX-158193706 | 17 | 50.949 | KV452884.1 | 7786887 | 6-scf00352 | 6 |
| AX-158380691 | 17 | 50.949 | KV452884.1 | 7789026 | 6-scf00352 | 6 |
| AX-158193710 | 17 | 50.949 | KV452884.1 | 7790287 | 6-scf00352 | 6 |
| AX-158193712 | 17 | 50.949 | KV452884.1 | 7795706 | 6-scf00352 | 6 |
| AX-158193714 | 17 | 50.949 | KV452884.1 | 7796733 | 6-scf00352 | 6 |
| AX-158193715 | 17 | 50.949 | KV452884.1 | 7798397 | 6-scf00352 | 6 |
| AX-158193719 | 17 | 50.949 | KV452884.1 | 7802684 | 6-scf00352 | 6 |
| AX-158193731 | 17 | 50.949 | KV452884.1 | 7818711 | 6-scf00352 | 6 |
| AX-158193733 | 17 | 50.949 | KV452884.1 | 7822976 | 6-scf00352 | 6 |
| AX-158193734 | 17 | 50.949 | KV452884.1 | 7823480 | 6-scf00352 | 6 |
| AX-157836788 | 17 | 50.949 | KV452884.1 | 7828735 | 6-scf00352 | 6 |

|              |    |        |             |          |            |    |
|--------------|----|--------|-------------|----------|------------|----|
| AX-158193739 | 17 | 50.949 | KV452884.1  | 7830046  | 6-scf00352 | 6  |
| AX-158193749 | 17 | 50.949 | KV452884.1  | 7846640  | 6-scf00352 | 6  |
| AX-158193751 | 17 | 50.949 | KV452884.1  | 7848506  | 6-scf00352 | 6  |
| AX-158193755 | 17 | 50.949 | KV452884.1  | 7855455  | 6-scf00352 | 6  |
| AX-158193766 | 17 | 50.949 | KV452884.1  | 7868443  | 6-scf00352 | 6  |
| AX-158386129 | 17 | 50.949 | KV452884.1  | 7894869  | 6-scf00352 | 6  |
| AX-158193795 | 17 | 50.949 | KV452884.1  | 7914079  | 6-scf00352 | 6  |
| AX-158193808 | 17 | 50.949 | KV452884.1  | 7930477  | 6-scf00352 | 6  |
| AX-158193809 | 17 | 50.949 | KV452884.1  | 7930668  | 6-scf00352 | 6  |
| AX-157746048 | 17 | 50.949 | KV452884.1  | 7930949  | 6-scf00352 | 6  |
| AX-158193812 | 17 | 50.949 | KV452884.1  | 7932746  | 6-scf00352 | 6  |
| AX-158193815 | 17 | 50.949 | KV452884.1  | 7936141  | 6-scf00352 | 6  |
| AX-157836796 | 17 | 50.949 | KV452884.1  | 7940828  | 6-scf00352 | 6  |
| AX-158193842 | 17 | 50.949 | KV452884.1  | 7964473  | 6-scf00352 | 6  |
| AX-158193845 | 17 | 50.949 | KV452884.1  | 7967097  | 6-scf00352 | 6  |
| AX-157715701 | 17 | 50.949 | KV452884.1  | 7969789  | 6-scf00352 | 6  |
| AX-158193849 | 17 | 50.949 | KV452884.1  | 7971055  | 6-scf00352 | 6  |
| AX-158193850 | 17 | 50.949 | KV452884.1  | 7973076  | 6-scf00352 | 6  |
| AX-157836798 | 17 | 50.949 | KV452884.1  | 7985825  | 6-scf00352 | 6  |
| AX-158193870 | 17 | 50.949 | KV452884.1  | 8010218  | 6-scf00352 | 6  |
| AX-158193871 | 17 | 50.949 | KV452884.1  | 8010635  | 6-scf00352 | 6  |
| AX-158193874 | 17 | 50.949 | KV452884.1  | 8014138  | 6-scf00352 | 6  |
| AX-158193882 | 17 | 50.949 | KV452884.1  | 8028134  | 6-scf00352 | 6  |
| AX-158193883 | 17 | 50.949 | KV452884.1  | 8028598  | 6-scf00352 | 6  |
| AX-158193892 | 17 | 50.949 | KV452884.1  | 8040633  | 6-scf00352 | 6  |
| AX-158193901 | 17 | 50.949 | KV452884.1  | 8052021  | 6-scf00352 | 6  |
| AX-158193905 | 17 | 50.949 | KV452884.1  | 8063362  | 6-scf00352 | 6  |
| AX-158193906 | 17 | 50.949 | KV452884.1  | 8064102  | 6-scf00352 | 6  |
| AX-158193919 | 17 | 50.949 | KV452884.1  | 8084335  | 6-scf00352 | 6  |
| AX-158193953 | 17 | 50.949 | KV452884.1  | 8119785  | 6-scf00352 | 6  |
| AX-158193961 | 17 | 50.949 | KV452884.1  | 8128170  | 6-scf00352 | 6  |
| AX-158193975 | 17 | 50.949 | KV452884.1  | 8148639  | 6-scf00352 | 6  |
| AX-157879122 | 17 | 50.949 | KV452884.1  | 8166446  | 6-scf00352 | 6  |
| AX-158194004 | 17 | 50.949 | KV452884.1  | 8188297  | 6-scf00352 | 6  |
| AX-158194017 | 17 | 50.949 | KV452884.1  | 8203218  | 6-scf00352 | 6  |
| AX-157753927 | 17 | 50.949 | KV452884.1  | 8250984  | 6-scf00352 | 6  |
| AX-158194067 | 17 | 50.949 | KV452884.1  | 8262932  | 6-scf00352 | 6  |
| AX-157836817 | 17 | 50.949 | KV452884.1  | 8265160  | 6-scf00352 | 6  |
| AX-158194079 | 17 | 50.949 | KV452884.1  | 8284562  | 6-scf00352 | 6  |
| AX-158194080 | 17 | 50.949 | KV452884.1  | 8284957  | 6-scf00352 | 6  |
| AX-158194092 | 17 | 50.949 | KV452884.1  | 8305554  | 6-scf00352 | 6  |
| AX-158194111 | 17 | 50.949 | KV452884.1  | 8337844  | 6-scf00352 | 6  |
| AX-158194220 | 17 | 50.949 | KV452884.1  | 8489822  | 6-scf00352 | 6  |
| AX-158195248 | 17 | 50.949 | KV452884.1  | 10126660 | 6-scf00352 | 6  |
| AX-157706010 | 17 | 50.949 | 3ML01031423 | 599      | scf07036_1 | UN |
| AX-158193831 | 17 | 50.957 | KV452884.1  | 7952201  | 6-scf00352 | 6  |
| AX-158193947 | 17 | 50.957 | KV452884.1  | 8109772  | 6-scf00352 | 6  |
| AX-157702923 | 17 | 50.961 | KV452884.1  | 6968267  | 6-scf00352 | 6  |
| AX-158192963 | 17 | 50.961 | KV452884.1  | 7022802  | 6-scf00352 | 6  |
| AX-158193036 | 17 | 50.961 | KV452884.1  | 7101789  | 6-scf00352 | 6  |
| AX-158193232 | 17 | 50.961 | KV452884.1  | 7343473  | 6-scf00352 | 6  |

|              |    |        |            |         |            |   |
|--------------|----|--------|------------|---------|------------|---|
| AX-158193235 | 17 | 50.961 | KV452884.1 | 7345454 | 6-scf00352 | 6 |
| AX-158193236 | 17 | 50.961 | KV452884.1 | 7346758 | 6-scf00352 | 6 |
| AX-158193237 | 17 | 50.961 | KV452884.1 | 7348433 | 6-scf00352 | 6 |
| AX-158193238 | 17 | 50.961 | KV452884.1 | 7348887 | 6-scf00352 | 6 |
| AX-157836758 | 17 | 50.961 | KV452884.1 | 7350876 | 6-scf00352 | 6 |
| AX-158193244 | 17 | 50.961 | KV452884.1 | 7353603 | 6-scf00352 | 6 |
| AX-158193245 | 17 | 50.961 | KV452884.1 | 7354802 | 6-scf00352 | 6 |
| AX-158193250 | 17 | 50.961 | KV452884.1 | 7359707 | 6-scf00352 | 6 |
| AX-158193252 | 17 | 50.961 | KV452884.1 | 7364855 | 6-scf00352 | 6 |
| AX-158193254 | 17 | 50.961 | KV452884.1 | 7366019 | 6-scf00352 | 6 |
| AX-157836761 | 17 | 50.961 | KV452884.1 | 7367645 | 6-scf00352 | 6 |
| AX-158193260 | 17 | 50.961 | KV452884.1 | 7369249 | 6-scf00352 | 6 |
| AX-158193261 | 17 | 50.961 | KV452884.1 | 7369802 | 6-scf00352 | 6 |
| AX-158193264 | 17 | 50.961 | KV452884.1 | 7372021 | 6-scf00352 | 6 |
| AX-158193265 | 17 | 50.961 | KV452884.1 | 7372755 | 6-scf00352 | 6 |
| AX-158193266 | 17 | 50.961 | KV452884.1 | 7372974 | 6-scf00352 | 6 |
| AX-158193267 | 17 | 50.961 | KV452884.1 | 7373306 | 6-scf00352 | 6 |
| AX-158193268 | 17 | 50.961 | KV452884.1 | 7373754 | 6-scf00352 | 6 |
| AX-158193269 | 17 | 50.961 | KV452884.1 | 7373947 | 6-scf00352 | 6 |
| AX-158193270 | 17 | 50.961 | KV452884.1 | 7374530 | 6-scf00352 | 6 |
| AX-158193277 | 17 | 50.961 | KV452884.1 | 7380812 | 6-scf00352 | 6 |
| AX-158193282 | 17 | 50.961 | KV452884.1 | 7386433 | 6-scf00352 | 6 |
| AX-157709303 | 17 | 50.961 | KV452884.1 | 7388578 | 6-scf00352 | 6 |
| AX-158193285 | 17 | 50.961 | KV452884.1 | 7389330 | 6-scf00352 | 6 |
| AX-158386115 | 17 | 50.961 | KV452884.1 | 7389525 | 6-scf00352 | 6 |
| AX-158193286 | 17 | 50.961 | KV452884.1 | 7390842 | 6-scf00352 | 6 |
| AX-158193287 | 17 | 50.961 | KV452884.1 | 7391506 | 6-scf00352 | 6 |
| AX-158193290 | 17 | 50.961 | KV452884.1 | 7393192 | 6-scf00352 | 6 |
| AX-158193292 | 17 | 50.961 | KV452884.1 | 7394734 | 6-scf00352 | 6 |
| AX-158193295 | 17 | 50.961 | KV452884.1 | 7398788 | 6-scf00352 | 6 |
| AX-158193296 | 17 | 50.961 | KV452884.1 | 7399951 | 6-scf00352 | 6 |
| AX-158193297 | 17 | 50.961 | KV452884.1 | 7400342 | 6-scf00352 | 6 |
| AX-158193299 | 17 | 50.961 | KV452884.1 | 7401871 | 6-scf00352 | 6 |
| AX-158193300 | 17 | 50.961 | KV452884.1 | 7402666 | 6-scf00352 | 6 |
| AX-158193302 | 17 | 50.961 | KV452884.1 | 7405019 | 6-scf00352 | 6 |
| AX-158193303 | 17 | 50.961 | KV452884.1 | 7405432 | 6-scf00352 | 6 |
| AX-158193304 | 17 | 50.961 | KV452884.1 | 7405877 | 6-scf00352 | 6 |
| AX-158193305 | 17 | 50.961 | KV452884.1 | 7406525 | 6-scf00352 | 6 |
| AX-158193307 | 17 | 50.961 | KV452884.1 | 7408408 | 6-scf00352 | 6 |
| AX-158409705 | 17 | 50.961 | KV452884.1 | 7411268 | 6-scf00352 | 6 |
| AX-158193312 | 17 | 50.961 | KV452884.1 | 7412246 | 6-scf00352 | 6 |
| AX-158193313 | 17 | 50.961 | KV452884.1 | 7412803 | 6-scf00352 | 6 |
| AX-158193314 | 17 | 50.961 | KV452884.1 | 7413557 | 6-scf00352 | 6 |
| AX-158193317 | 17 | 50.961 | KV452884.1 | 7417272 | 6-scf00352 | 6 |
| AX-158193321 | 17 | 50.961 | KV452884.1 | 7422531 | 6-scf00352 | 6 |
| AX-158193323 | 17 | 50.961 | KV452884.1 | 7424217 | 6-scf00352 | 6 |
| AX-158193324 | 17 | 50.961 | KV452884.1 | 7428007 | 6-scf00352 | 6 |
| AX-158193326 | 17 | 50.961 | KV452884.1 | 7430398 | 6-scf00352 | 6 |
| AX-158193328 | 17 | 50.961 | KV452884.1 | 7431897 | 6-scf00352 | 6 |
| AX-158193329 | 17 | 50.961 | KV452884.1 | 7436522 | 6-scf00352 | 6 |
| AX-158193330 | 17 | 50.961 | KV452884.1 | 7439765 | 6-scf00352 | 6 |

|              |    |        |            |         |            |   |
|--------------|----|--------|------------|---------|------------|---|
| AX-158193331 | 17 | 50.961 | KV452884.1 | 7440056 | 6-scf00352 | 6 |
| AX-158193332 | 17 | 50.961 | KV452884.1 | 7440201 | 6-scf00352 | 6 |
| AX-158193333 | 17 | 50.961 | KV452884.1 | 7440539 | 6-scf00352 | 6 |
| AX-158193334 | 17 | 50.961 | KV452884.1 | 7440736 | 6-scf00352 | 6 |
| AX-158193335 | 17 | 50.961 | KV452884.1 | 7441113 | 6-scf00352 | 6 |
| AX-158193336 | 17 | 50.961 | KV452884.1 | 7441830 | 6-scf00352 | 6 |
| AX-158193337 | 17 | 50.961 | KV452884.1 | 7442200 | 6-scf00352 | 6 |
| AX-158193339 | 17 | 50.961 | KV452884.1 | 7442817 | 6-scf00352 | 6 |
| AX-158193340 | 17 | 50.961 | KV452884.1 | 7444313 | 6-scf00352 | 6 |
| AX-158193341 | 17 | 50.961 | KV452884.1 | 7444831 | 6-scf00352 | 6 |
| AX-158193343 | 17 | 50.961 | KV452884.1 | 7446461 | 6-scf00352 | 6 |
| AX-157731649 | 17 | 50.961 | KV452884.1 | 7447864 | 6-scf00352 | 6 |
| AX-158193344 | 17 | 50.961 | KV452884.1 | 7448465 | 6-scf00352 | 6 |
| AX-157718467 | 17 | 50.961 | KV452884.1 | 7453467 | 6-scf00352 | 6 |
| AX-158193352 | 17 | 50.961 | KV452884.1 | 7456640 | 6-scf00352 | 6 |
| AX-158193354 | 17 | 50.961 | KV452884.1 | 7460029 | 6-scf00352 | 6 |
| AX-158193355 | 17 | 50.961 | KV452884.1 | 7461690 | 6-scf00352 | 6 |
| AX-158193356 | 17 | 50.961 | KV452884.1 | 7462329 | 6-scf00352 | 6 |
| AX-158193358 | 17 | 50.961 | KV452884.1 | 7467612 | 6-scf00352 | 6 |
| AX-158193361 | 17 | 50.961 | KV452884.1 | 7470381 | 6-scf00352 | 6 |
| AX-158193362 | 17 | 50.961 | KV452884.1 | 7470948 | 6-scf00352 | 6 |
| AX-158193367 | 17 | 50.961 | KV452884.1 | 7473251 | 6-scf00352 | 6 |
| AX-158193369 | 17 | 50.961 | KV452884.1 | 7474522 | 6-scf00352 | 6 |
| AX-158193372 | 17 | 50.961 | KV452884.1 | 7477615 | 6-scf00352 | 6 |
| AX-158193374 | 17 | 50.961 | KV452884.1 | 7481416 | 6-scf00352 | 6 |
| AX-158193375 | 17 | 50.961 | KV452884.1 | 7483770 | 6-scf00352 | 6 |
| AX-158193377 | 17 | 50.961 | KV452884.1 | 7484936 | 6-scf00352 | 6 |
| AX-158193380 | 17 | 50.961 | KV452884.1 | 7488086 | 6-scf00352 | 6 |
| AX-158193384 | 17 | 50.961 | KV452884.1 | 7492575 | 6-scf00352 | 6 |
| AX-158193386 | 17 | 50.961 | KV452884.1 | 7495494 | 6-scf00352 | 6 |
| AX-158193387 | 17 | 50.961 | KV452884.1 | 7496573 | 6-scf00352 | 6 |
| AX-158193388 | 17 | 50.961 | KV452884.1 | 7496949 | 6-scf00352 | 6 |
| AX-158193389 | 17 | 50.961 | KV452884.1 | 7497373 | 6-scf00352 | 6 |
| AX-158193392 | 17 | 50.961 | KV452884.1 | 7499922 | 6-scf00352 | 6 |
| AX-158193393 | 17 | 50.961 | KV452884.1 | 7500424 | 6-scf00352 | 6 |
| AX-158193394 | 17 | 50.961 | KV452884.1 | 7500965 | 6-scf00352 | 6 |
| AX-158413992 | 17 | 50.961 | KV452884.1 | 7504543 | 6-scf00352 | 6 |
| AX-158193396 | 17 | 50.961 | KV452884.1 | 7508529 | 6-scf00352 | 6 |
| AX-158193399 | 17 | 50.961 | KV452884.1 | 7511085 | 6-scf00352 | 6 |
| AX-158193401 | 17 | 50.961 | KV452884.1 | 7513647 | 6-scf00352 | 6 |
| AX-158193403 | 17 | 50.961 | KV452884.1 | 7515259 | 6-scf00352 | 6 |
| AX-158193404 | 17 | 50.961 | KV452884.1 | 7515553 | 6-scf00352 | 6 |
| AX-158193408 | 17 | 50.961 | KV452884.1 | 7519691 | 6-scf00352 | 6 |
| AX-158193410 | 17 | 50.961 | KV452884.1 | 7523199 | 6-scf00352 | 6 |
| AX-158193412 | 17 | 50.961 | KV452884.1 | 7524646 | 6-scf00352 | 6 |
| AX-158193417 | 17 | 50.961 | KV452884.1 | 7530182 | 6-scf00352 | 6 |
| AX-158193419 | 17 | 50.961 | KV452884.1 | 7531209 | 6-scf00352 | 6 |
| AX-158193420 | 17 | 50.961 | KV452884.1 | 7532059 | 6-scf00352 | 6 |
| AX-158193423 | 17 | 50.961 | KV452884.1 | 7533661 | 6-scf00352 | 6 |
| AX-158193426 | 17 | 50.961 | KV452884.1 | 7535982 | 6-scf00352 | 6 |
| AX-158193429 | 17 | 50.961 | KV452884.1 | 7538701 | 6-scf00352 | 6 |

|              |    |        |            |         |            |   |
|--------------|----|--------|------------|---------|------------|---|
| AX-158193430 | 17 | 50.961 | KV452884.1 | 7539840 | 6-scf00352 | 6 |
| AX-158193431 | 17 | 50.961 | KV452884.1 | 7541317 | 6-scf00352 | 6 |
| AX-158193434 | 17 | 50.961 | KV452884.1 | 7543144 | 6-scf00352 | 6 |
| AX-158193438 | 17 | 50.961 | KV452884.1 | 7547291 | 6-scf00352 | 6 |
| AX-158193442 | 17 | 50.961 | KV452884.1 | 7550624 | 6-scf00352 | 6 |
| AX-158193443 | 17 | 50.961 | KV452884.1 | 7551914 | 6-scf00352 | 6 |
| AX-158193444 | 17 | 50.961 | KV452884.1 | 7553773 | 6-scf00352 | 6 |
| AX-158193446 | 17 | 50.961 | KV452884.1 | 7555843 | 6-scf00352 | 6 |
| AX-158193448 | 17 | 50.961 | KV452884.1 | 7556850 | 6-scf00352 | 6 |
| AX-157707990 | 17 | 50.961 | KV452884.1 | 7557822 | 6-scf00352 | 6 |
| AX-158193450 | 17 | 50.961 | KV452884.1 | 7558124 | 6-scf00352 | 6 |
| AX-158193453 | 17 | 50.961 | KV452884.1 | 7559735 | 6-scf00352 | 6 |
| AX-158193459 | 17 | 50.961 | KV452884.1 | 7564632 | 6-scf00352 | 6 |
| AX-158193460 | 17 | 50.961 | KV452884.1 | 7565726 | 6-scf00352 | 6 |
| AX-158193462 | 17 | 50.961 | KV452884.1 | 7567853 | 6-scf00352 | 6 |
| AX-158193466 | 17 | 50.961 | KV452884.1 | 7570256 | 6-scf00352 | 6 |
| AX-158193467 | 17 | 50.961 | KV452884.1 | 7571486 | 6-scf00352 | 6 |
| AX-158193469 | 17 | 50.961 | KV452884.1 | 7572963 | 6-scf00352 | 6 |
| AX-158193471 | 17 | 50.961 | KV452884.1 | 7573820 | 6-scf00352 | 6 |
| AX-158193473 | 17 | 50.961 | KV452884.1 | 7575421 | 6-scf00352 | 6 |
| AX-158193476 | 17 | 50.961 | KV452884.1 | 7577453 | 6-scf00352 | 6 |
| AX-158193482 | 17 | 50.961 | KV452884.1 | 7582262 | 6-scf00352 | 6 |
| AX-158193483 | 17 | 50.961 | KV452884.1 | 7582997 | 6-scf00352 | 6 |
| AX-158193485 | 17 | 50.961 | KV452884.1 | 7585775 | 6-scf00352 | 6 |
| AX-158193486 | 17 | 50.961 | KV452884.1 | 7586260 | 6-scf00352 | 6 |
| AX-158193487 | 17 | 50.961 | KV452884.1 | 7586731 | 6-scf00352 | 6 |
| AX-158193490 | 17 | 50.961 | KV452884.1 | 7589385 | 6-scf00352 | 6 |
| AX-158413996 | 17 | 50.961 | KV452884.1 | 7591076 | 6-scf00352 | 6 |
| AX-158193491 | 17 | 50.961 | KV452884.1 | 7592805 | 6-scf00352 | 6 |
| AX-158193493 | 17 | 50.961 | KV452884.1 | 7595722 | 6-scf00352 | 6 |
| AX-158193494 | 17 | 50.961 | KV452884.1 | 7596274 | 6-scf00352 | 6 |
| AX-158193495 | 17 | 50.961 | KV452884.1 | 7596702 | 6-scf00352 | 6 |
| AX-158193496 | 17 | 50.961 | KV452884.1 | 7599669 | 6-scf00352 | 6 |
| AX-158193497 | 17 | 50.961 | KV452884.1 | 7600474 | 6-scf00352 | 6 |
| AX-158193498 | 17 | 50.961 | KV452884.1 | 7600733 | 6-scf00352 | 6 |
| AX-158193499 | 17 | 50.961 | KV452884.1 | 7601547 | 6-scf00352 | 6 |
| AX-158193503 | 17 | 50.961 | KV452884.1 | 7605965 | 6-scf00352 | 6 |
| AX-158193508 | 17 | 50.961 | KV452884.1 | 7612456 | 6-scf00352 | 6 |
| AX-158193509 | 17 | 50.961 | KV452884.1 | 7614498 | 6-scf00352 | 6 |
| AX-158193511 | 17 | 50.961 | KV452884.1 | 7616900 | 6-scf00352 | 6 |
| AX-158413998 | 17 | 50.961 | KV452884.1 | 7617227 | 6-scf00352 | 6 |
| AX-158193513 | 17 | 50.961 | KV452884.1 | 7618385 | 6-scf00352 | 6 |
| AX-158193516 | 17 | 50.961 | KV452884.1 | 7620327 | 6-scf00352 | 6 |
| AX-158193517 | 17 | 50.961 | KV452884.1 | 7621679 | 6-scf00352 | 6 |
| AX-158193519 | 17 | 50.961 | KV452884.1 | 7622913 | 6-scf00352 | 6 |
| AX-158193520 | 17 | 50.961 | KV452884.1 | 7623775 | 6-scf00352 | 6 |
| AX-158193521 | 17 | 50.961 | KV452884.1 | 7625200 | 6-scf00352 | 6 |
| AX-158193522 | 17 | 50.961 | KV452884.1 | 7625945 | 6-scf00352 | 6 |
| AX-158193525 | 17 | 50.961 | KV452884.1 | 7629964 | 6-scf00352 | 6 |
| AX-157836768 | 17 | 50.961 | KV452884.1 | 7630786 | 6-scf00352 | 6 |
| AX-158193527 | 17 | 50.961 | KV452884.1 | 7631119 | 6-scf00352 | 6 |



|              |    |        |            |         |            |   |
|--------------|----|--------|------------|---------|------------|---|
| AX-158193528 | 17 | 50.961 | KV452884.1 | 7634623 | 6-scf00352 | 6 |
| AX-158193529 | 17 | 50.961 | KV452884.1 | 7635260 | 6-scf00352 | 6 |
| AX-158193532 | 17 | 50.961 | KV452884.1 | 7639155 | 6-scf00352 | 6 |
| AX-158193537 | 17 | 50.961 | KV452884.1 | 7645365 | 6-scf00352 | 6 |
| AX-158193538 | 17 | 50.961 | KV452884.1 | 7647075 | 6-scf00352 | 6 |
| AX-158193539 | 17 | 50.961 | KV452884.1 | 7650471 | 6-scf00352 | 6 |
| AX-158193540 | 17 | 50.961 | KV452884.1 | 7650824 | 6-scf00352 | 6 |
| AX-158193541 | 17 | 50.961 | KV452884.1 | 7651572 | 6-scf00352 | 6 |
| AX-158193543 | 17 | 50.961 | KV452884.1 | 7652897 | 6-scf00352 | 6 |
| AX-158193546 | 17 | 50.961 | KV452884.1 | 7656237 | 6-scf00352 | 6 |
| AX-158193550 | 17 | 50.961 | KV452884.1 | 7658742 | 6-scf00352 | 6 |
| AX-158193551 | 17 | 50.961 | KV452884.1 | 7659469 | 6-scf00352 | 6 |
| AX-158193552 | 17 | 50.961 | KV452884.1 | 7659537 | 6-scf00352 | 6 |
| AX-158193566 | 17 | 50.961 | KV452884.1 | 7671825 | 6-scf00352 | 6 |
| AX-158193569 | 17 | 50.961 | KV452884.1 | 7674210 | 6-scf00352 | 6 |
| AX-158193570 | 17 | 50.961 | KV452884.1 | 7675506 | 6-scf00352 | 6 |
| AX-157704103 | 17 | 50.961 | KV452884.1 | 7677159 | 6-scf00352 | 6 |
| AX-158193573 | 17 | 50.961 | KV452884.1 | 7677160 | 6-scf00352 | 6 |
| AX-158193576 | 17 | 50.961 | KV452884.1 | 7680481 | 6-scf00352 | 6 |
| AX-158193577 | 17 | 50.961 | KV452884.1 | 7681067 | 6-scf00352 | 6 |
| AX-158193579 | 17 | 50.961 | KV452884.1 | 7682285 | 6-scf00352 | 6 |
| AX-158193580 | 17 | 50.961 | KV452884.1 | 7682903 | 6-scf00352 | 6 |
| AX-158193581 | 17 | 50.961 | KV452884.1 | 7683719 | 6-scf00352 | 6 |
| AX-158193582 | 17 | 50.961 | KV452884.1 | 7684418 | 6-scf00352 | 6 |
| AX-158193583 | 17 | 50.961 | KV452884.1 | 7684964 | 6-scf00352 | 6 |
| AX-158193585 | 17 | 50.961 | KV452884.1 | 7686132 | 6-scf00352 | 6 |
| AX-157836770 | 17 | 50.961 | KV452884.1 | 7691643 | 6-scf00352 | 6 |
| AX-158193595 | 17 | 50.961 | KV452884.1 | 7695285 | 6-scf00352 | 6 |
| AX-158193598 | 17 | 50.961 | KV452884.1 | 7697230 | 6-scf00352 | 6 |
| AX-158193599 | 17 | 50.961 | KV452884.1 | 7698071 | 6-scf00352 | 6 |
| AX-158193600 | 17 | 50.961 | KV452884.1 | 7699672 | 6-scf00352 | 6 |
| AX-158193604 | 17 | 50.961 | KV452884.1 | 7704792 | 6-scf00352 | 6 |
| AX-158193609 | 17 | 50.961 | KV452884.1 | 7707652 | 6-scf00352 | 6 |
| AX-158193612 | 17 | 50.961 | KV452884.1 | 7709366 | 6-scf00352 | 6 |
| AX-158193615 | 17 | 50.961 | KV452884.1 | 7711481 | 6-scf00352 | 6 |
| AX-158193617 | 17 | 50.961 | KV452884.1 | 7712849 | 6-scf00352 | 6 |
| AX-158193618 | 17 | 50.961 | KV452884.1 | 7713090 | 6-scf00352 | 6 |
| AX-157703989 | 17 | 50.961 | KV452884.1 | 7713865 | 6-scf00352 | 6 |
| AX-158193622 | 17 | 50.961 | KV452884.1 | 7714940 | 6-scf00352 | 6 |
| AX-158193623 | 17 | 50.961 | KV452884.1 | 7715172 | 6-scf00352 | 6 |
| AX-157836771 | 17 | 50.961 | KV452884.1 | 7716312 | 6-scf00352 | 6 |
| AX-158193624 | 17 | 50.961 | KV452884.1 | 7717190 | 6-scf00352 | 6 |
| AX-158193625 | 17 | 50.961 | KV452884.1 | 7718721 | 6-scf00352 | 6 |
| AX-158193626 | 17 | 50.961 | KV452884.1 | 7719225 | 6-scf00352 | 6 |
| AX-158193627 | 17 | 50.961 | KV452884.1 | 7720265 | 6-scf00352 | 6 |
| AX-158414002 | 17 | 50.961 | KV452884.1 | 7720439 | 6-scf00352 | 6 |
| AX-158193628 | 17 | 50.961 | KV452884.1 | 7720907 | 6-scf00352 | 6 |
| AX-158193629 | 17 | 50.961 | KV452884.1 | 7722623 | 6-scf00352 | 6 |
| AX-158193632 | 17 | 50.961 | KV452884.1 | 7723801 | 6-scf00352 | 6 |
| AX-158193633 | 17 | 50.961 | KV452884.1 | 7724080 | 6-scf00352 | 6 |
| AX-158193638 | 17 | 50.961 | KV452884.1 | 7727789 | 6-scf00352 | 6 |

|              |    |        |            |         |            |   |
|--------------|----|--------|------------|---------|------------|---|
| AX-158193640 | 17 | 50.961 | KV452884.1 | 7728750 | 6-scf00352 | 6 |
| AX-158193641 | 17 | 50.961 | KV452884.1 | 7729094 | 6-scf00352 | 6 |
| AX-158193642 | 17 | 50.961 | KV452884.1 | 7729499 | 6-scf00352 | 6 |
| AX-157836773 | 17 | 50.961 | KV452884.1 | 7730803 | 6-scf00352 | 6 |
| AX-158193646 | 17 | 50.961 | KV452884.1 | 7732454 | 6-scf00352 | 6 |
| AX-158193647 | 17 | 50.961 | KV452884.1 | 7732755 | 6-scf00352 | 6 |
| AX-158193652 | 17 | 50.961 | KV452884.1 | 7736044 | 6-scf00352 | 6 |
| AX-158193654 | 17 | 50.961 | KV452884.1 | 7736812 | 6-scf00352 | 6 |
| AX-158193657 | 17 | 50.961 | KV452884.1 | 7741069 | 6-scf00352 | 6 |
| AX-158193660 | 17 | 50.961 | KV452884.1 | 7744709 | 6-scf00352 | 6 |
| AX-158193662 | 17 | 50.961 | KV452884.1 | 7745459 | 6-scf00352 | 6 |
| AX-158193665 | 17 | 50.961 | KV452884.1 | 7747198 | 6-scf00352 | 6 |
| AX-158193666 | 17 | 50.961 | KV452884.1 | 7747645 | 6-scf00352 | 6 |
| AX-158386116 | 17 | 50.961 | KV452884.1 | 7749203 | 6-scf00352 | 6 |
| AX-158193669 | 17 | 50.961 | KV452884.1 | 7749872 | 6-scf00352 | 6 |
| AX-158193674 | 17 | 50.961 | KV452884.1 | 7754683 | 6-scf00352 | 6 |
| AX-158193675 | 17 | 50.961 | KV452884.1 | 7755718 | 6-scf00352 | 6 |
| AX-157836774 | 17 | 50.961 | KV452884.1 | 7758733 | 6-scf00352 | 6 |
| AX-158193683 | 17 | 50.961 | KV452884.1 | 7762401 | 6-scf00352 | 6 |
| AX-158193688 | 17 | 50.961 | KV452884.1 | 7764522 | 6-scf00352 | 6 |
| AX-158193689 | 17 | 50.961 | KV452884.1 | 7764747 | 6-scf00352 | 6 |
| AX-158193691 | 17 | 50.961 | KV452884.1 | 7766181 | 6-scf00352 | 6 |
| AX-158193697 | 17 | 50.961 | KV452884.1 | 7772373 | 6-scf00352 | 6 |
| AX-158193698 | 17 | 50.961 | KV452884.1 | 7772704 | 6-scf00352 | 6 |
| AX-158193699 | 17 | 50.961 | KV452884.1 | 7774081 | 6-scf00352 | 6 |
| AX-158193701 | 17 | 50.961 | KV452884.1 | 7776783 | 6-scf00352 | 6 |
| AX-158193702 | 17 | 50.961 | KV452884.1 | 7777186 | 6-scf00352 | 6 |
| AX-157836780 | 17 | 50.961 | KV452884.1 | 7777726 | 6-scf00352 | 6 |
| AX-158193703 | 17 | 50.961 | KV452884.1 | 7781265 | 6-scf00352 | 6 |
| AX-157866818 | 17 | 50.961 | KV452884.1 | 7781810 | 6-scf00352 | 6 |
| AX-157836781 | 17 | 50.961 | KV452884.1 | 7782115 | 6-scf00352 | 6 |
| AX-157836782 | 17 | 50.961 | KV452884.1 | 7782391 | 6-scf00352 | 6 |
| AX-158193704 | 17 | 50.961 | KV452884.1 | 7782443 | 6-scf00352 | 6 |
| AX-158193711 | 17 | 50.961 | KV452884.1 | 7792872 | 6-scf00352 | 6 |
| AX-157866820 | 17 | 50.961 | KV452884.1 | 7794170 | 6-scf00352 | 6 |
| AX-158193713 | 17 | 50.961 | KV452884.1 | 7796497 | 6-scf00352 | 6 |
| AX-158193716 | 17 | 50.961 | KV452884.1 | 7799989 | 6-scf00352 | 6 |
| AX-158193718 | 17 | 50.961 | KV452884.1 | 7801392 | 6-scf00352 | 6 |
| AX-158193720 | 17 | 50.961 | KV452884.1 | 7809383 | 6-scf00352 | 6 |
| AX-158193721 | 17 | 50.961 | KV452884.1 | 7810484 | 6-scf00352 | 6 |
| AX-158193722 | 17 | 50.961 | KV452884.1 | 7810809 | 6-scf00352 | 6 |
| AX-158193723 | 17 | 50.961 | KV452884.1 | 7813345 | 6-scf00352 | 6 |
| AX-158193724 | 17 | 50.961 | KV452884.1 | 7814083 | 6-scf00352 | 6 |
| AX-157866821 | 17 | 50.961 | KV452884.1 | 7814503 | 6-scf00352 | 6 |
| AX-158193726 | 17 | 50.961 | KV452884.1 | 7816036 | 6-scf00352 | 6 |
| AX-158193729 | 17 | 50.961 | KV452884.1 | 7817077 | 6-scf00352 | 6 |
| AX-158193730 | 17 | 50.961 | KV452884.1 | 7817375 | 6-scf00352 | 6 |
| AX-158193737 | 17 | 50.961 | KV452884.1 | 7825774 | 6-scf00352 | 6 |
| AX-158193740 | 17 | 50.961 | KV452884.1 | 7835220 | 6-scf00352 | 6 |
| AX-158193741 | 17 | 50.961 | KV452884.1 | 7838315 | 6-scf00352 | 6 |
| AX-158193746 | 17 | 50.961 | KV452884.1 | 7843188 | 6-scf00352 | 6 |

|              |    |        |             |         |            |    |
|--------------|----|--------|-------------|---------|------------|----|
| AX-158193747 | 17 | 50.961 | KV452884.1  | 7844482 | 6-scf00352 | 6  |
| AX-158386120 | 17 | 50.961 | KV452884.1  | 7853101 | 6-scf00352 | 6  |
| AX-158193754 | 17 | 50.961 | KV452884.1  | 7854025 | 6-scf00352 | 6  |
| AX-158386121 | 17 | 50.961 | KV452884.1  | 7856436 | 6-scf00352 | 6  |
| AX-158193758 | 17 | 50.961 | KV452884.1  | 7858395 | 6-scf00352 | 6  |
| AX-158386122 | 17 | 50.961 | KV452884.1  | 7858549 | 6-scf00352 | 6  |
| AX-157749367 | 17 | 50.961 | KV452884.1  | 7861479 | 6-scf00352 | 6  |
| AX-158193762 | 17 | 50.961 | KV452884.1  | 7862340 | 6-scf00352 | 6  |
| AX-158386123 | 17 | 50.961 | KV452884.1  | 7866151 | 6-scf00352 | 6  |
| AX-158193765 | 17 | 50.961 | KV452884.1  | 7867364 | 6-scf00352 | 6  |
| AX-158386124 | 17 | 50.961 | KV452884.1  | 7870783 | 6-scf00352 | 6  |
| AX-158193770 | 17 | 50.961 | KV452884.1  | 7871458 | 6-scf00352 | 6  |
| AX-158193772 | 17 | 50.961 | KV452884.1  | 7873869 | 6-scf00352 | 6  |
| AX-158193773 | 17 | 50.961 | KV452884.1  | 7874155 | 6-scf00352 | 6  |
| AX-157836790 | 17 | 50.961 | KV452884.1  | 7875003 | 6-scf00352 | 6  |
| AX-158193775 | 17 | 50.961 | KV452884.1  | 7878318 | 6-scf00352 | 6  |
| AX-158386125 | 17 | 50.961 | KV452884.1  | 7879595 | 6-scf00352 | 6  |
| AX-158193778 | 17 | 50.961 | KV452884.1  | 7881522 | 6-scf00352 | 6  |
| AX-158193780 | 17 | 50.961 | KV452884.1  | 7884578 | 6-scf00352 | 6  |
| AX-158386126 | 17 | 50.961 | KV452884.1  | 7885237 | 6-scf00352 | 6  |
| AX-158193844 | 17 | 50.961 | KV452884.1  | 7966233 | 6-scf00352 | 6  |
| AX-158193920 | 17 | 50.961 | KV452884.1  | 8086398 | 6-scf00352 | 6  |
| AX-158193950 | 17 | 50.961 | KV452884.1  | 8117166 | 6-scf00352 | 6  |
| AX-157689729 | 17 | 50.961 | 3ML01031686 | 131     | scf07305_1 | UN |
| AX-157689730 | 17 | 50.961 | 3ML01031686 | 420     | scf07305_1 | UN |
| AX-157689731 | 17 | 50.961 | 3ML01031686 | 531     | scf07305_1 | UN |
| AX-158193032 | 17 | 50.966 | KV452884.1  | 7096818 | 6-scf00352 | 6  |
| AX-158193847 | 17 | 50.966 | KV452884.1  | 7968063 | 6-scf00352 | 6  |
| AX-158193113 | 17 | 50.971 | KV452884.1  | 7207737 | 6-scf00352 | 6  |
| AX-158193115 | 17 | 50.971 | KV452884.1  | 7209519 | 6-scf00352 | 6  |
| AX-158193117 | 17 | 50.971 | KV452884.1  | 7211049 | 6-scf00352 | 6  |
| AX-158193185 | 17 | 50.971 | KV452884.1  | 7285093 | 6-scf00352 | 6  |
| AX-158193855 | 17 | 50.971 | KV452884.1  | 7988193 | 6-scf00352 | 6  |
| AX-157879120 | 17 | 50.971 | KV452884.1  | 8101104 | 6-scf00352 | 6  |
| AX-158193940 | 17 | 50.971 | KV452884.1  | 8104694 | 6-scf00352 | 6  |
| AX-158192798 | 17 | 50.976 | KV452884.1  | 6805552 | 6-scf00352 | 6  |
| AX-158192943 | 17 | 50.976 | KV452884.1  | 7000490 | 6-scf00352 | 6  |
| AX-158193059 | 17 | 50.976 | KV452884.1  | 7140221 | 6-scf00352 | 6  |
| AX-158193060 | 17 | 50.976 | KV452884.1  | 7141308 | 6-scf00352 | 6  |
| AX-158193061 | 17 | 50.976 | KV452884.1  | 7141696 | 6-scf00352 | 6  |
| AX-158193069 | 17 | 50.976 | KV452884.1  | 7149308 | 6-scf00352 | 6  |
| AX-158193073 | 17 | 50.976 | KV452884.1  | 7154457 | 6-scf00352 | 6  |
| AX-158193079 | 17 | 50.976 | KV452884.1  | 7164513 | 6-scf00352 | 6  |
| AX-158193081 | 17 | 50.976 | KV452884.1  | 7167526 | 6-scf00352 | 6  |
| AX-158193082 | 17 | 50.976 | KV452884.1  | 7168008 | 6-scf00352 | 6  |
| AX-158193083 | 17 | 50.976 | KV452884.1  | 7170396 | 6-scf00352 | 6  |
| AX-158193085 | 17 | 50.976 | KV452884.1  | 7171335 | 6-scf00352 | 6  |
| AX-158386110 | 17 | 50.976 | KV452884.1  | 7172750 | 6-scf00352 | 6  |
| AX-158193087 | 17 | 50.976 | KV452884.1  | 7174389 | 6-scf00352 | 6  |
| AX-158193093 | 17 | 50.976 | KV452884.1  | 7179498 | 6-scf00352 | 6  |
| AX-157866814 | 17 | 50.976 | KV452884.1  | 7181058 | 6-scf00352 | 6  |

|              |    |        |            |         |            |   |
|--------------|----|--------|------------|---------|------------|---|
| AX-157836739 | 17 | 50.976 | KV452884.1 | 7182142 | 6-scf00352 | 6 |
| AX-158193852 | 17 | 50.976 | KV452884.1 | 7985085 | 6-scf00352 | 6 |
| AX-158193858 | 17 | 50.976 | KV452884.1 | 7991980 | 6-scf00352 | 6 |
| AX-157836799 | 17 | 50.976 | KV452884.1 | 7992757 | 6-scf00352 | 6 |
| AX-158193859 | 17 | 50.976 | KV452884.1 | 7993210 | 6-scf00352 | 6 |
| AX-158193862 | 17 | 50.976 | KV452884.1 | 8001466 | 6-scf00352 | 6 |
| AX-158193863 | 17 | 50.976 | KV452884.1 | 8002597 | 6-scf00352 | 6 |
| AX-158193866 | 17 | 50.976 | KV452884.1 | 8006784 | 6-scf00352 | 6 |
| AX-158193867 | 17 | 50.976 | KV452884.1 | 8007218 | 6-scf00352 | 6 |
| AX-158193868 | 17 | 50.976 | KV452884.1 | 8008757 | 6-scf00352 | 6 |
| AX-158193877 | 17 | 50.976 | KV452884.1 | 8020576 | 6-scf00352 | 6 |
| AX-158193879 | 17 | 50.976 | KV452884.1 | 8023081 | 6-scf00352 | 6 |
| AX-158193909 | 17 | 50.976 | KV452884.1 | 8074468 | 6-scf00352 | 6 |
| AX-158193946 | 17 | 50.976 | KV452884.1 | 8109155 | 6-scf00352 | 6 |
| AX-158193960 | 17 | 50.976 | KV452884.1 | 8126988 | 6-scf00352 | 6 |
| AX-158413989 | 17 | 50.98  | KV452884.1 | 6951239 | 6-scf00352 | 6 |
| AX-157836803 | 17 | 50.98  | KV452884.1 | 8045827 | 6-scf00352 | 6 |
| AX-158193895 | 17 | 50.98  | KV452884.1 | 8046942 | 6-scf00352 | 6 |
| AX-158193896 | 17 | 50.98  | KV452884.1 | 8048423 | 6-scf00352 | 6 |
| AX-158193897 | 17 | 50.98  | KV452884.1 | 8049372 | 6-scf00352 | 6 |
| AX-158193907 | 17 | 50.98  | KV452884.1 | 8071711 | 6-scf00352 | 6 |
| AX-158194158 | 17 | 50.98  | KV452884.1 | 8404844 | 6-scf00352 | 6 |
| AX-158194212 | 17 | 50.98  | KV452884.1 | 8479765 | 6-scf00352 | 6 |
| AX-157836804 | 17 | 50.987 | KV452884.1 | 8054603 | 6-scf00352 | 6 |
| AX-158193869 | 17 | 50.994 | KV452884.1 | 8009521 | 6-scf00352 | 6 |
| AX-157836805 | 17 | 50.994 | KV452884.1 | 8058927 | 6-scf00352 | 6 |
| AX-158193903 | 17 | 51.003 | KV452884.1 | 8061384 | 6-scf00352 | 6 |
| AX-158193914 | 17 | 51.022 | KV452884.1 | 8078954 | 6-scf00352 | 6 |
| AX-158193917 | 17 | 51.028 | KV452884.1 | 8082858 | 6-scf00352 | 6 |
| AX-158192941 | 17 | 51.041 | KV452884.1 | 6998369 | 6-scf00352 | 6 |
| AX-157836806 | 17 | 51.041 | KV452884.1 | 8094968 | 6-scf00352 | 6 |
| AX-158193930 | 17 | 51.046 | KV452884.1 | 8097067 | 6-scf00352 | 6 |
| AX-158192637 | 17 | 51.058 | KV452884.1 | 6604554 | 6-scf00352 | 6 |
| AX-158192920 | 17 | 51.058 | KV452884.1 | 6974384 | 6-scf00352 | 6 |
| AX-158192922 | 17 | 51.058 | KV452884.1 | 6977891 | 6-scf00352 | 6 |
| AX-158193016 | 17 | 51.058 | KV452884.1 | 7076716 | 6-scf00352 | 6 |
| AX-158193221 | 17 | 51.058 | KV452884.1 | 7330534 | 6-scf00352 | 6 |
| AX-158193233 | 17 | 51.058 | KV452884.1 | 7343847 | 6-scf00352 | 6 |
| AX-158193240 | 17 | 51.058 | KV452884.1 | 7350792 | 6-scf00352 | 6 |
| AX-158193242 | 17 | 51.058 | KV452884.1 | 7351765 | 6-scf00352 | 6 |
| AX-158193243 | 17 | 51.058 | KV452884.1 | 7352277 | 6-scf00352 | 6 |
| AX-158193253 | 17 | 51.058 | KV452884.1 | 7365606 | 6-scf00352 | 6 |
| AX-158193255 | 17 | 51.058 | KV452884.1 | 7366772 | 6-scf00352 | 6 |
| AX-158193284 | 17 | 51.058 | KV452884.1 | 7387491 | 6-scf00352 | 6 |
| AX-157836764 | 17 | 51.058 | KV452884.1 | 7394423 | 6-scf00352 | 6 |
| AX-158193293 | 17 | 51.058 | KV452884.1 | 7396547 | 6-scf00352 | 6 |
| AX-158193308 | 17 | 51.058 | KV452884.1 | 7409405 | 6-scf00352 | 6 |
| AX-158193325 | 17 | 51.058 | KV452884.1 | 7429445 | 6-scf00352 | 6 |
| AX-158193345 | 17 | 51.058 | KV452884.1 | 7448752 | 6-scf00352 | 6 |
| AX-158193346 | 17 | 51.058 | KV452884.1 | 7451753 | 6-scf00352 | 6 |
| AX-158193360 | 17 | 51.058 | KV452884.1 | 7469414 | 6-scf00352 | 6 |

|              |    |        |            |         |            |   |
|--------------|----|--------|------------|---------|------------|---|
| AX-158193383 | 17 | 51.058 | KV452884.1 | 7491337 | 6-scf00352 | 6 |
| AX-158193407 | 17 | 51.058 | KV452884.1 | 7519235 | 6-scf00352 | 6 |
| AX-158193413 | 17 | 51.058 | KV452884.1 | 7525112 | 6-scf00352 | 6 |
| AX-158193452 | 17 | 51.058 | KV452884.1 | 7558798 | 6-scf00352 | 6 |
| AX-158193500 | 17 | 51.058 | KV452884.1 | 7601925 | 6-scf00352 | 6 |
| AX-158193526 | 17 | 51.058 | KV452884.1 | 7630506 | 6-scf00352 | 6 |
| AX-157753636 | 17 | 51.058 | KV452884.1 | 7632098 | 6-scf00352 | 6 |
| AX-158193533 | 17 | 51.058 | KV452884.1 | 7642021 | 6-scf00352 | 6 |
| AX-158193545 | 17 | 51.058 | KV452884.1 | 7655493 | 6-scf00352 | 6 |
| AX-158193591 | 17 | 51.058 | KV452884.1 | 7691896 | 6-scf00352 | 6 |
| AX-158193597 | 17 | 51.058 | KV452884.1 | 7696760 | 6-scf00352 | 6 |
| AX-158193613 | 17 | 51.058 | KV452884.1 | 7709746 | 6-scf00352 | 6 |
| AX-158193621 | 17 | 51.058 | KV452884.1 | 7714556 | 6-scf00352 | 6 |
| AX-158193637 | 17 | 51.058 | KV452884.1 | 7726653 | 6-scf00352 | 6 |
| AX-158193653 | 17 | 51.058 | KV452884.1 | 7736257 | 6-scf00352 | 6 |
| AX-158193661 | 17 | 51.058 | KV452884.1 | 7744948 | 6-scf00352 | 6 |
| AX-158193663 | 17 | 51.058 | KV452884.1 | 7746117 | 6-scf00352 | 6 |
| AX-158193680 | 17 | 51.058 | KV452884.1 | 7758777 | 6-scf00352 | 6 |
| AX-158193696 | 17 | 51.058 | KV452884.1 | 7771807 | 6-scf00352 | 6 |
| AX-157866819 | 17 | 51.058 | KV452884.1 | 7793717 | 6-scf00352 | 6 |
| AX-158193717 | 17 | 51.058 | KV452884.1 | 7800876 | 6-scf00352 | 6 |
| AX-158386119 | 17 | 51.058 | KV452884.1 | 7847343 | 6-scf00352 | 6 |
| AX-158193779 | 17 | 51.058 | KV452884.1 | 7882046 | 6-scf00352 | 6 |
| AX-158193782 | 17 | 51.058 | KV452884.1 | 7885844 | 6-scf00352 | 6 |
| AX-157748272 | 17 | 51.058 | KV452884.1 | 8012050 | 6-scf00352 | 6 |
| AX-158193873 | 17 | 51.058 | KV452884.1 | 8012691 | 6-scf00352 | 6 |
| AX-158193875 | 17 | 51.058 | KV452884.1 | 8018748 | 6-scf00352 | 6 |
| AX-158193881 | 17 | 51.058 | KV452884.1 | 8028080 | 6-scf00352 | 6 |
| AX-158193934 | 17 | 51.058 | KV452884.1 | 8099910 | 6-scf00352 | 6 |
| AX-158193935 | 17 | 51.058 | KV452884.1 | 8100841 | 6-scf00352 | 6 |
| AX-157716286 | 17 | 51.058 | KV452884.1 | 8101205 | 6-scf00352 | 6 |
| AX-158193936 | 17 | 51.058 | KV452884.1 | 8101568 | 6-scf00352 | 6 |
| AX-158193948 | 17 | 51.058 | KV452884.1 | 8113937 | 6-scf00352 | 6 |
| AX-158193954 | 17 | 51.058 | KV452884.1 | 8120744 | 6-scf00352 | 6 |
| AX-158193955 | 17 | 51.058 | KV452884.1 | 8121636 | 6-scf00352 | 6 |
| AX-157773211 | 17 | 51.058 | KV452884.1 | 8121809 | 6-scf00352 | 6 |
| AX-157725951 | 17 | 51.058 | KV452884.1 | 8126857 | 6-scf00352 | 6 |
| AX-157711417 | 17 | 51.058 | KV452884.1 | 8274450 | 6-scf00352 | 6 |
| AX-158193727 | 17 | 51.168 | KV452884.1 | 7816487 | 6-scf00352 | 6 |
| AX-158193788 | 17 | 51.168 | KV452884.1 | 7894639 | 6-scf00352 | 6 |
| AX-158193963 | 17 | 51.168 | KV452884.1 | 8132681 | 6-scf00352 | 6 |
| AX-158193965 | 17 | 51.168 | KV452884.1 | 8134402 | 6-scf00352 | 6 |
| AX-157743694 | 17 | 51.168 | KV452884.1 | 8134945 | 6-scf00352 | 6 |
| AX-158193968 | 17 | 51.168 | KV452884.1 | 8141871 | 6-scf00352 | 6 |
| AX-158193971 | 17 | 51.168 | KV452884.1 | 8144153 | 6-scf00352 | 6 |
| AX-158193972 | 17 | 51.168 | KV452884.1 | 8144769 | 6-scf00352 | 6 |
| AX-158193974 | 17 | 51.168 | KV452884.1 | 8147435 | 6-scf00352 | 6 |
| AX-158193978 | 17 | 51.168 | KV452884.1 | 8153441 | 6-scf00352 | 6 |
| AX-157886961 | 17 | 51.168 | KV452884.1 | 8164219 | 6-scf00352 | 6 |
| AX-158193983 | 17 | 51.168 | KV452884.1 | 8168403 | 6-scf00352 | 6 |
| AX-158193984 | 17 | 51.168 | KV452884.1 | 8168939 | 6-scf00352 | 6 |

|              |    |        |            |         |            |   |
|--------------|----|--------|------------|---------|------------|---|
| AX-158193985 | 17 | 51.168 | KV452884.1 | 8170209 | 6-scf00352 | 6 |
| AX-158193986 | 17 | 51.168 | KV452884.1 | 8171007 | 6-scf00352 | 6 |
| AX-158192966 | 17 | 51.386 | KV452884.1 | 7026339 | 6-scf00352 | 6 |
| AX-157866827 | 17 | 51.386 | KV452884.1 | 7909029 | 6-scf00352 | 6 |
| AX-158193899 | 17 | 51.386 | KV452884.1 | 8051258 | 6-scf00352 | 6 |
| AX-158193900 | 17 | 51.386 | KV452884.1 | 8051767 | 6-scf00352 | 6 |
| AX-158193927 | 17 | 51.386 | KV452884.1 | 8095363 | 6-scf00352 | 6 |
| AX-158193939 | 17 | 51.386 | KV452884.1 | 8102953 | 6-scf00352 | 6 |
| AX-158193990 | 17 | 51.386 | KV452884.1 | 8174881 | 6-scf00352 | 6 |
| AX-158193993 | 17 | 51.386 | KV452884.1 | 8178840 | 6-scf00352 | 6 |
| AX-158193994 | 17 | 51.386 | KV452884.1 | 8179944 | 6-scf00352 | 6 |
| AX-158193997 | 17 | 51.386 | KV452884.1 | 8183577 | 6-scf00352 | 6 |
| AX-157836813 | 17 | 51.386 | KV452884.1 | 8184011 | 6-scf00352 | 6 |
| AX-158193998 | 17 | 51.386 | KV452884.1 | 8184333 | 6-scf00352 | 6 |
| AX-158193999 | 17 | 51.386 | KV452884.1 | 8184689 | 6-scf00352 | 6 |
| AX-158194000 | 17 | 51.386 | KV452884.1 | 8185247 | 6-scf00352 | 6 |
| AX-158194001 | 17 | 51.386 | KV452884.1 | 8185888 | 6-scf00352 | 6 |
| AX-158194002 | 17 | 51.386 | KV452884.1 | 8187022 | 6-scf00352 | 6 |
| AX-158194008 | 17 | 51.386 | KV452884.1 | 8193476 | 6-scf00352 | 6 |
| AX-158194006 | 17 | 51.387 | KV452884.1 | 8191953 | 6-scf00352 | 6 |
| AX-158194007 | 17 | 51.387 | KV452884.1 | 8192758 | 6-scf00352 | 6 |
| AX-158194010 | 17 | 51.388 | KV452884.1 | 8196332 | 6-scf00352 | 6 |
| AX-158194012 | 17 | 51.389 | KV452884.1 | 8197622 | 6-scf00352 | 6 |
| AX-158194015 | 17 | 51.726 | KV452884.1 | 8200561 | 6-scf00352 | 6 |
| AX-158194020 | 17 | 52.15  | KV452884.1 | 8210077 | 6-scf00352 | 6 |
| AX-157836728 | 17 | 52.151 | KV452884.1 | 6909588 | 6-scf00352 | 6 |
| AX-158192879 | 17 | 52.151 | KV452884.1 | 6920029 | 6-scf00352 | 6 |
| AX-157715751 | 17 | 52.151 | KV452884.1 | 6931432 | 6-scf00352 | 6 |
| AX-158192901 | 17 | 52.151 | KV452884.1 | 6948772 | 6-scf00352 | 6 |
| AX-158192909 | 17 | 52.151 | KV452884.1 | 6956490 | 6-scf00352 | 6 |
| AX-158192953 | 17 | 52.151 | KV452884.1 | 7014793 | 6-scf00352 | 6 |
| AX-158193124 | 17 | 52.151 | KV452884.1 | 7221785 | 6-scf00352 | 6 |
| AX-158193131 | 17 | 52.151 | KV452884.1 | 7230061 | 6-scf00352 | 6 |
| AX-158193136 | 17 | 52.151 | KV452884.1 | 7237209 | 6-scf00352 | 6 |
| AX-158193139 | 17 | 52.151 | KV452884.1 | 7238421 | 6-scf00352 | 6 |
| AX-158193149 | 17 | 52.151 | KV452884.1 | 7246009 | 6-scf00352 | 6 |
| AX-157836747 | 17 | 52.151 | KV452884.1 | 7247892 | 6-scf00352 | 6 |
| AX-158193174 | 17 | 52.151 | KV452884.1 | 7274174 | 6-scf00352 | 6 |
| AX-158380689 | 17 | 52.151 | KV452884.1 | 7278769 | 6-scf00352 | 6 |
| AX-158193790 | 17 | 52.151 | KV452884.1 | 7906465 | 6-scf00352 | 6 |
| AX-158193813 | 17 | 52.151 | KV452884.1 | 7934238 | 6-scf00352 | 6 |
| AX-158194029 | 17 | 52.151 | KV452884.1 | 8219923 | 6-scf00352 | 6 |
| AX-158194030 | 17 | 52.151 | KV452884.1 | 8220684 | 6-scf00352 | 6 |
| AX-158194031 | 17 | 52.151 | KV452884.1 | 8221081 | 6-scf00352 | 6 |
| AX-157702772 | 17 | 52.151 | KV452884.1 | 8225018 | 6-scf00352 | 6 |
| AX-158194037 | 17 | 52.151 | KV452884.1 | 8226630 | 6-scf00352 | 6 |
| AX-158194038 | 17 | 52.151 | KV452884.1 | 8227161 | 6-scf00352 | 6 |
| AX-158194039 | 17 | 52.151 | KV452884.1 | 8228422 | 6-scf00352 | 6 |
| AX-157731011 | 17 | 52.151 | KV452884.1 | 8240267 | 6-scf00352 | 6 |
| AX-157836815 | 17 | 52.151 | KV452884.1 | 8240800 | 6-scf00352 | 6 |
| AX-158194045 | 17 | 52.151 | KV452884.1 | 8242931 | 6-scf00352 | 6 |

|              |    |        |            |         |            |   |
|--------------|----|--------|------------|---------|------------|---|
| AX-158194046 | 17 | 52.151 | KV452884.1 | 8244378 | 6-scf00352 | 6 |
| AX-158194049 | 17 | 52.151 | KV452884.1 | 8247629 | 6-scf00352 | 6 |
| AX-157879124 | 17 | 52.151 | KV452884.1 | 8247670 | 6-scf00352 | 6 |
| AX-158194050 | 17 | 52.151 | KV452884.1 | 8248130 | 6-scf00352 | 6 |
| AX-158194063 | 17 | 52.151 | KV452884.1 | 8258471 | 6-scf00352 | 6 |
| AX-157836816 | 17 | 52.151 | KV452884.1 | 8258834 | 6-scf00352 | 6 |
| AX-158194064 | 17 | 52.151 | KV452884.1 | 8259278 | 6-scf00352 | 6 |
| AX-157774450 | 17 | 52.151 | KV452884.1 | 8260332 | 6-scf00352 | 6 |
| AX-158194065 | 17 | 52.151 | KV452884.1 | 8260416 | 6-scf00352 | 6 |
| AX-158194071 | 17 | 52.151 | KV452884.1 | 8267612 | 6-scf00352 | 6 |
| AX-158194072 | 17 | 52.151 | KV452884.1 | 8269400 | 6-scf00352 | 6 |
| AX-158194073 | 17 | 52.151 | KV452884.1 | 8269945 | 6-scf00352 | 6 |
| AX-157836818 | 17 | 52.151 | KV452884.1 | 8277199 | 6-scf00352 | 6 |
| AX-158194075 | 17 | 52.151 | KV452884.1 | 8277457 | 6-scf00352 | 6 |
| AX-158194077 | 17 | 52.151 | KV452884.1 | 8280237 | 6-scf00352 | 6 |
| AX-158194081 | 17 | 52.151 | KV452884.1 | 8288805 | 6-scf00352 | 6 |
| AX-158194084 | 17 | 52.151 | KV452884.1 | 8290900 | 6-scf00352 | 6 |
| AX-158194086 | 17 | 52.151 | KV452884.1 | 8296333 | 6-scf00352 | 6 |
| AX-158194088 | 17 | 52.151 | KV452884.1 | 8298258 | 6-scf00352 | 6 |
| AX-158194094 | 17 | 52.151 | KV452884.1 | 8307520 | 6-scf00352 | 6 |
| AX-158194097 | 17 | 52.151 | KV452884.1 | 8311518 | 6-scf00352 | 6 |
| AX-158194098 | 17 | 52.151 | KV452884.1 | 8313631 | 6-scf00352 | 6 |
| AX-158194099 | 17 | 52.151 | KV452884.1 | 8314766 | 6-scf00352 | 6 |
| AX-157879125 | 17 | 52.151 | KV452884.1 | 8321581 | 6-scf00352 | 6 |
| AX-158414010 | 17 | 52.151 | KV452884.1 | 8374474 | 6-scf00352 | 6 |
| AX-158194157 | 17 | 52.151 | KV452884.1 | 8403058 | 6-scf00352 | 6 |
| AX-158194166 | 17 | 52.151 | KV452884.1 | 8415712 | 6-scf00352 | 6 |
| AX-157836827 | 17 | 52.151 | KV452884.1 | 8488994 | 6-scf00352 | 6 |
| AX-157755682 | 17 | 52.151 | KV452884.1 | 8719721 | 6-scf00352 | 6 |
| AX-157747270 | 17 | 52.151 | KV452884.1 | 9073801 | 6-scf00352 | 6 |
| AX-158202139 | 17 | 52.151 | KV452892.1 | 14369   | 6-scf00360 | 6 |
| AX-157723745 | 17 | 52.26  | KV452884.1 | 8208800 | 6-scf00352 | 6 |
| AX-158194033 | 17 | 52.26  | KV452884.1 | 8222286 | 6-scf00352 | 6 |
| AX-157713112 | 17 | 52.26  | KV452884.1 | 8283853 | 6-scf00352 | 6 |
| AX-158194108 | 17 | 52.26  | KV452884.1 | 8329116 | 6-scf00352 | 6 |
| AX-158194109 | 17 | 52.26  | KV452884.1 | 8332751 | 6-scf00352 | 6 |
| AX-158194110 | 17 | 52.26  | KV452884.1 | 8336345 | 6-scf00352 | 6 |
| AX-157836822 | 17 | 52.26  | KV452884.1 | 8336746 | 6-scf00352 | 6 |
| AX-158194114 | 17 | 52.26  | KV452884.1 | 8344217 | 6-scf00352 | 6 |
| AX-158194115 | 17 | 52.26  | KV452884.1 | 8346326 | 6-scf00352 | 6 |
| AX-157836824 | 17 | 52.26  | KV452884.1 | 8346790 | 6-scf00352 | 6 |
| AX-158194116 | 17 | 52.26  | KV452884.1 | 8347062 | 6-scf00352 | 6 |
| AX-158194122 | 17 | 52.26  | KV452884.1 | 8358808 | 6-scf00352 | 6 |
| AX-158194123 | 17 | 52.26  | KV452884.1 | 8359549 | 6-scf00352 | 6 |
| AX-158194124 | 17 | 52.26  | KV452884.1 | 8360028 | 6-scf00352 | 6 |
| AX-158194127 | 17 | 52.26  | KV452884.1 | 8361404 | 6-scf00352 | 6 |
| AX-158194128 | 17 | 52.26  | KV452884.1 | 8361856 | 6-scf00352 | 6 |
| AX-158194135 | 17 | 52.26  | KV452884.1 | 8371838 | 6-scf00352 | 6 |
| AX-158194136 | 17 | 52.26  | KV452884.1 | 8372963 | 6-scf00352 | 6 |
| AX-158194139 | 17 | 52.26  | KV452884.1 | 8379062 | 6-scf00352 | 6 |
| AX-157754694 | 17 | 52.26  | KV452884.1 | 8740145 | 6-scf00352 | 6 |

|              |    |       |            |         |            |   |
|--------------|----|-------|------------|---------|------------|---|
| AX-158193095 | 17 | 52.37 | KV452884.1 | 7183604 | 6-scf00352 | 6 |
| AX-158194023 | 17 | 52.37 | KV452884.1 | 8212500 | 6-scf00352 | 6 |
| AX-158194028 | 17 | 52.37 | KV452884.1 | 8219136 | 6-scf00352 | 6 |
| AX-158194048 | 17 | 52.37 | KV452884.1 | 8246564 | 6-scf00352 | 6 |
| AX-158194085 | 17 | 52.37 | KV452884.1 | 8292727 | 6-scf00352 | 6 |
| AX-158194106 | 17 | 52.37 | KV452884.1 | 8328195 | 6-scf00352 | 6 |
| AX-158194107 | 17 | 52.37 | KV452884.1 | 8328660 | 6-scf00352 | 6 |
| AX-157716792 | 17 | 52.37 | KV452884.1 | 8346919 | 6-scf00352 | 6 |
| AX-158194121 | 17 | 52.37 | KV452884.1 | 8354959 | 6-scf00352 | 6 |
| AX-157749856 | 17 | 52.37 | KV452884.1 | 8368935 | 6-scf00352 | 6 |
| AX-158194134 | 17 | 52.37 | KV452884.1 | 8371329 | 6-scf00352 | 6 |
| AX-158386131 | 17 | 52.37 | KV452884.1 | 8373870 | 6-scf00352 | 6 |
| AX-158194138 | 17 | 52.37 | KV452884.1 | 8378613 | 6-scf00352 | 6 |
| AX-158194143 | 17 | 52.37 | KV452884.1 | 8383640 | 6-scf00352 | 6 |
| AX-158194144 | 17 | 52.37 | KV452884.1 | 8384241 | 6-scf00352 | 6 |
| AX-158194147 | 17 | 52.37 | KV452884.1 | 8389239 | 6-scf00352 | 6 |
| AX-158194148 | 17 | 52.37 | KV452884.1 | 8389808 | 6-scf00352 | 6 |
| AX-158194149 | 17 | 52.37 | KV452884.1 | 8391097 | 6-scf00352 | 6 |
| AX-158194150 | 17 | 52.37 | KV452884.1 | 8391902 | 6-scf00352 | 6 |
| AX-158194151 | 17 | 52.37 | KV452884.1 | 8393260 | 6-scf00352 | 6 |
| AX-158194155 | 17 | 52.37 | KV452884.1 | 8401799 | 6-scf00352 | 6 |
| AX-158194160 | 17 | 52.37 | KV452884.1 | 8408145 | 6-scf00352 | 6 |
| AX-158194162 | 17 | 52.37 | KV452884.1 | 8410093 | 6-scf00352 | 6 |
| AX-158414012 | 17 | 52.37 | KV452884.1 | 8410880 | 6-scf00352 | 6 |
| AX-158194163 | 17 | 52.37 | KV452884.1 | 8412861 | 6-scf00352 | 6 |
| AX-158194164 | 17 | 52.37 | KV452884.1 | 8413272 | 6-scf00352 | 6 |
| AX-158194167 | 17 | 52.37 | KV452884.1 | 8416901 | 6-scf00352 | 6 |
| AX-158194168 | 17 | 52.37 | KV452884.1 | 8418365 | 6-scf00352 | 6 |
| AX-158194172 | 17 | 52.37 | KV452884.1 | 8425408 | 6-scf00352 | 6 |
| AX-158194173 | 17 | 52.37 | KV452884.1 | 8426093 | 6-scf00352 | 6 |
| AX-158194174 | 17 | 52.37 | KV452884.1 | 8426474 | 6-scf00352 | 6 |
| AX-158418254 | 17 | 52.37 | KV452884.1 | 8427301 | 6-scf00352 | 6 |
| AX-158194177 | 17 | 52.37 | KV452884.1 | 8430159 | 6-scf00352 | 6 |
| AX-158194178 | 17 | 52.37 | KV452884.1 | 8430861 | 6-scf00352 | 6 |
| AX-158194180 | 17 | 52.37 | KV452884.1 | 8432704 | 6-scf00352 | 6 |
| AX-158386133 | 17 | 52.37 | KV452884.1 | 8433335 | 6-scf00352 | 6 |
| AX-158194181 | 17 | 52.37 | KV452884.1 | 8434406 | 6-scf00352 | 6 |
| AX-158194182 | 17 | 52.37 | KV452884.1 | 8435395 | 6-scf00352 | 6 |
| AX-158194183 | 17 | 52.37 | KV452884.1 | 8435974 | 6-scf00352 | 6 |
| AX-158194184 | 17 | 52.37 | KV452884.1 | 8436433 | 6-scf00352 | 6 |
| AX-158194185 | 17 | 52.37 | KV452884.1 | 8437163 | 6-scf00352 | 6 |
| AX-158194186 | 17 | 52.37 | KV452884.1 | 8437684 | 6-scf00352 | 6 |
| AX-158194187 | 17 | 52.37 | KV452884.1 | 8438803 | 6-scf00352 | 6 |
| AX-158194188 | 17 | 52.37 | KV452884.1 | 8440309 | 6-scf00352 | 6 |
| AX-158194191 | 17 | 52.37 | KV452884.1 | 8446702 | 6-scf00352 | 6 |
| AX-158194194 | 17 | 52.37 | KV452884.1 | 8451569 | 6-scf00352 | 6 |
| AX-158194195 | 17 | 52.37 | KV452884.1 | 8452280 | 6-scf00352 | 6 |
| AX-158194196 | 17 | 52.37 | KV452884.1 | 8453517 | 6-scf00352 | 6 |
| AX-158194210 | 17 | 52.37 | KV452884.1 | 8474908 | 6-scf00352 | 6 |
| AX-158194211 | 17 | 52.37 | KV452884.1 | 8476957 | 6-scf00352 | 6 |
| AX-158194213 | 17 | 52.37 | KV452884.1 | 8481847 | 6-scf00352 | 6 |



|              |    |       |            |         |            |   |
|--------------|----|-------|------------|---------|------------|---|
| AX-158194214 | 17 | 52.37 | KV452884.1 | 8482672 | 6-scf00352 | 6 |
| AX-158194216 | 17 | 52.37 | KV452884.1 | 8484765 | 6-scf00352 | 6 |
| AX-157836826 | 17 | 52.37 | KV452884.1 | 8488563 | 6-scf00352 | 6 |
| AX-157738855 | 17 | 52.37 | KV452884.1 | 8489134 | 6-scf00352 | 6 |
| AX-158194223 | 17 | 52.37 | KV452884.1 | 8491026 | 6-scf00352 | 6 |
| AX-157836828 | 17 | 52.37 | KV452884.1 | 8495915 | 6-scf00352 | 6 |
| AX-157836829 | 17 | 52.37 | KV452884.1 | 8505972 | 6-scf00352 | 6 |
| AX-158194228 | 17 | 52.37 | KV452884.1 | 8508472 | 6-scf00352 | 6 |
| AX-158194229 | 17 | 52.37 | KV452884.1 | 8510933 | 6-scf00352 | 6 |
| AX-157758009 | 17 | 52.37 | KV452884.1 | 8511506 | 6-scf00352 | 6 |
| AX-158194230 | 17 | 52.37 | KV452884.1 | 8512344 | 6-scf00352 | 6 |
| AX-158194231 | 17 | 52.37 | KV452884.1 | 8513615 | 6-scf00352 | 6 |
| AX-158194232 | 17 | 52.37 | KV452884.1 | 8514323 | 6-scf00352 | 6 |
| AX-158194237 | 17 | 52.37 | KV452884.1 | 8525611 | 6-scf00352 | 6 |
| AX-158194238 | 17 | 52.37 | KV452884.1 | 8526225 | 6-scf00352 | 6 |
| AX-158194240 | 17 | 52.37 | KV452884.1 | 8526862 | 6-scf00352 | 6 |
| AX-158194241 | 17 | 52.37 | KV452884.1 | 8527497 | 6-scf00352 | 6 |
| AX-158194243 | 17 | 52.37 | KV452884.1 | 8528466 | 6-scf00352 | 6 |
| AX-158194244 | 17 | 52.37 | KV452884.1 | 8530903 | 6-scf00352 | 6 |
| AX-158194246 | 17 | 52.37 | KV452884.1 | 8533752 | 6-scf00352 | 6 |
| AX-157747903 | 17 | 52.37 | KV452884.1 | 8543359 | 6-scf00352 | 6 |
| AX-158194255 | 17 | 52.37 | KV452884.1 | 8547950 | 6-scf00352 | 6 |
| AX-158194256 | 17 | 52.37 | KV452884.1 | 8550775 | 6-scf00352 | 6 |
| AX-158194260 | 17 | 52.37 | KV452884.1 | 8559821 | 6-scf00352 | 6 |
| AX-158194262 | 17 | 52.37 | KV452884.1 | 8562598 | 6-scf00352 | 6 |
| AX-158194263 | 17 | 52.37 | KV452884.1 | 8563023 | 6-scf00352 | 6 |
| AX-158418256 | 17 | 52.37 | KV452884.1 | 8565800 | 6-scf00352 | 6 |
| AX-158194266 | 17 | 52.37 | KV452884.1 | 8572517 | 6-scf00352 | 6 |
| AX-158194272 | 17 | 52.37 | KV452884.1 | 8587956 | 6-scf00352 | 6 |
| AX-158194281 | 17 | 52.37 | KV452884.1 | 8611798 | 6-scf00352 | 6 |
| AX-158194282 | 17 | 52.37 | KV452884.1 | 8615744 | 6-scf00352 | 6 |
| AX-158194283 | 17 | 52.37 | KV452884.1 | 8616326 | 6-scf00352 | 6 |
| AX-157836830 | 17 | 52.37 | KV452884.1 | 8616814 | 6-scf00352 | 6 |
| AX-158194284 | 17 | 52.37 | KV452884.1 | 8617344 | 6-scf00352 | 6 |
| AX-158194285 | 17 | 52.37 | KV452884.1 | 8618840 | 6-scf00352 | 6 |
| AX-157866830 | 17 | 52.37 | KV452884.1 | 8619685 | 6-scf00352 | 6 |
| AX-158194286 | 17 | 52.37 | KV452884.1 | 8620072 | 6-scf00352 | 6 |
| AX-158194288 | 17 | 52.37 | KV452884.1 | 8621482 | 6-scf00352 | 6 |
| AX-158194289 | 17 | 52.37 | KV452884.1 | 8621922 | 6-scf00352 | 6 |
| AX-157753685 | 17 | 52.37 | KV452884.1 | 8622175 | 6-scf00352 | 6 |
| AX-158194290 | 17 | 52.37 | KV452884.1 | 8622314 | 6-scf00352 | 6 |
| AX-158194291 | 17 | 52.37 | KV452884.1 | 8622560 | 6-scf00352 | 6 |
| AX-158194292 | 17 | 52.37 | KV452884.1 | 8624433 | 6-scf00352 | 6 |
| AX-158194293 | 17 | 52.37 | KV452884.1 | 8625687 | 6-scf00352 | 6 |
| AX-158194297 | 17 | 52.37 | KV452884.1 | 8628735 | 6-scf00352 | 6 |
| AX-157836831 | 17 | 52.37 | KV452884.1 | 8629112 | 6-scf00352 | 6 |
| AX-158194298 | 17 | 52.37 | KV452884.1 | 8629758 | 6-scf00352 | 6 |
| AX-157726266 | 17 | 52.37 | KV452884.1 | 8633397 | 6-scf00352 | 6 |
| AX-158194300 | 17 | 52.37 | KV452884.1 | 8634944 | 6-scf00352 | 6 |
| AX-158194305 | 17 | 52.37 | KV452884.1 | 8648246 | 6-scf00352 | 6 |
| AX-157774013 | 17 | 52.37 | KV452884.1 | 8649795 | 6-scf00352 | 6 |

|              |    |        |             |          |            |    |
|--------------|----|--------|-------------|----------|------------|----|
| AX-158194316 | 17 | 52.37  | KV452884.1  | 8662172  | 6-scf00352 | 6  |
| AX-158194319 | 17 | 52.37  | KV452884.1  | 8663864  | 6-scf00352 | 6  |
| AX-158194324 | 17 | 52.37  | KV452884.1  | 8669149  | 6-scf00352 | 6  |
| AX-158194330 | 17 | 52.37  | KV452884.1  | 8674131  | 6-scf00352 | 6  |
| AX-157749491 | 17 | 52.37  | KV452884.1  | 8679164  | 6-scf00352 | 6  |
| AX-158414020 | 17 | 52.37  | KV452884.1  | 8680180  | 6-scf00352 | 6  |
| AX-158414023 | 17 | 52.37  | KV452884.1  | 8691714  | 6-scf00352 | 6  |
| AX-158414024 | 17 | 52.37  | KV452884.1  | 8691795  | 6-scf00352 | 6  |
| AX-158194342 | 17 | 52.37  | KV452884.1  | 8696136  | 6-scf00352 | 6  |
| AX-158194343 | 17 | 52.37  | KV452884.1  | 8696900  | 6-scf00352 | 6  |
| AX-158194344 | 17 | 52.37  | KV452884.1  | 8697326  | 6-scf00352 | 6  |
| AX-158194345 | 17 | 52.37  | KV452884.1  | 8698562  | 6-scf00352 | 6  |
| AX-158194349 | 17 | 52.37  | KV452884.1  | 8703289  | 6-scf00352 | 6  |
| AX-158194350 | 17 | 52.37  | KV452884.1  | 8717452  | 6-scf00352 | 6  |
| AX-158194351 | 17 | 52.37  | KV452884.1  | 8718644  | 6-scf00352 | 6  |
| AX-157772898 | 17 | 52.37  | KV452884.1  | 8730180  | 6-scf00352 | 6  |
| AX-157773239 | 17 | 52.37  | KV452884.1  | 8735445  | 6-scf00352 | 6  |
| AX-158194356 | 17 | 52.37  | KV452884.1  | 8736505  | 6-scf00352 | 6  |
| AX-157720538 | 17 | 52.37  | KV452884.1  | 8739082  | 6-scf00352 | 6  |
| AX-158194362 | 17 | 52.37  | KV452884.1  | 8742012  | 6-scf00352 | 6  |
| AX-158194363 | 17 | 52.37  | KV452884.1  | 8743432  | 6-scf00352 | 6  |
| AX-157836835 | 17 | 52.37  | KV452884.1  | 8748447  | 6-scf00352 | 6  |
| AX-158194370 | 17 | 52.37  | KV452884.1  | 8751491  | 6-scf00352 | 6  |
| AX-158194373 | 17 | 52.37  | KV452884.1  | 8756233  | 6-scf00352 | 6  |
| AX-158194374 | 17 | 52.37  | KV452884.1  | 8758950  | 6-scf00352 | 6  |
| AX-158194376 | 17 | 52.37  | KV452884.1  | 8763217  | 6-scf00352 | 6  |
| AX-158194377 | 17 | 52.37  | KV452884.1  | 8765465  | 6-scf00352 | 6  |
| AX-158194379 | 17 | 52.37  | KV452884.1  | 8766808  | 6-scf00352 | 6  |
| AX-157836838 | 17 | 52.37  | KV452884.1  | 8773816  | 6-scf00352 | 6  |
| AX-157836839 | 17 | 52.37  | KV452884.1  | 8775519  | 6-scf00352 | 6  |
| AX-158194387 | 17 | 52.37  | KV452884.1  | 8780047  | 6-scf00352 | 6  |
| AX-158194388 | 17 | 52.37  | KV452884.1  | 8781039  | 6-scf00352 | 6  |
| AX-158194389 | 17 | 52.37  | KV452884.1  | 8781825  | 6-scf00352 | 6  |
| AX-157753657 | 17 | 52.37  | KV452884.1  | 8783171  | 6-scf00352 | 6  |
| AX-158194399 | 17 | 52.37  | KV452884.1  | 8797436  | 6-scf00352 | 6  |
| AX-158194407 | 17 | 52.37  | KV452884.1  | 8808369  | 6-scf00352 | 6  |
| AX-158194415 | 17 | 52.37  | KV452884.1  | 8821268  | 6-scf00352 | 6  |
| AX-158194417 | 17 | 52.37  | KV452884.1  | 8823591  | 6-scf00352 | 6  |
| AX-158194420 | 17 | 52.37  | KV452884.1  | 8832579  | 6-scf00352 | 6  |
| AX-158194434 | 17 | 52.37  | KV452884.1  | 8852089  | 6-scf00352 | 6  |
| AX-158194442 | 17 | 52.37  | KV452884.1  | 8862711  | 6-scf00352 | 6  |
| AX-158194443 | 17 | 52.37  | KV452884.1  | 8863098  | 6-scf00352 | 6  |
| AX-158386161 | 17 | 52.37  | KV452884.1  | 14583840 | 6-scf00352 | 6  |
| AX-158199226 | 17 | 52.37  | KV452886.1  | 891252   | 6-scf00354 | 6  |
| AX-158200781 | 17 | 52.37  | KV452891.1  | 708279   | 6-scf00356 | 6  |
| AX-157705349 | 17 | 52.37  | 3ML01029462 | 940      | scf05085_1 | UN |
| AX-158194392 | 17 | 52.588 | KV452884.1  | 8787348  | 6-scf00352 | 6  |
| AX-158194393 | 17 | 52.588 | KV452884.1  | 8790217  | 6-scf00352 | 6  |
| AX-158194394 | 17 | 52.588 | KV452884.1  | 8791098  | 6-scf00352 | 6  |
| AX-158414026 | 17 | 52.588 | KV452884.1  | 8791991  | 6-scf00352 | 6  |
| AX-158194396 | 17 | 52.588 | KV452884.1  | 8795192  | 6-scf00352 | 6  |

|              |    |        |            |          |            |   |
|--------------|----|--------|------------|----------|------------|---|
| AX-158194397 | 17 | 52.588 | KV452884.1 | 8795793  | 6-scf00352 | 6 |
| AX-158194398 | 17 | 52.588 | KV452884.1 | 8796416  | 6-scf00352 | 6 |
| AX-158194410 | 17 | 52.588 | KV452884.1 | 8815457  | 6-scf00352 | 6 |
| AX-157746635 | 17 | 52.588 | KV452884.1 | 8816786  | 6-scf00352 | 6 |
| AX-158194416 | 17 | 52.588 | KV452884.1 | 8822111  | 6-scf00352 | 6 |
| AX-158194400 | 17 | 52.589 | KV452884.1 | 8797908  | 6-scf00352 | 6 |
| AX-158194405 | 17 | 52.59  | KV452884.1 | 8806244  | 6-scf00352 | 6 |
| AX-158194427 | 17 | 52.996 | KV452884.1 | 8846048  | 6-scf00352 | 6 |
| AX-158194430 | 17 | 52.997 | KV452884.1 | 8849299  | 6-scf00352 | 6 |
| AX-157714498 | 17 | 53.134 | KV452884.1 | 8853780  | 6-scf00352 | 6 |
| AX-158194439 | 17 | 53.134 | KV452884.1 | 8856729  | 6-scf00352 | 6 |
| AX-157719771 | 17 | 53.134 | KV452884.1 | 8857474  | 6-scf00352 | 6 |
| AX-157886962 | 17 | 53.134 | KV452884.1 | 8858019  | 6-scf00352 | 6 |
| AX-157751674 | 17 | 53.134 | KV452884.1 | 8859381  | 6-scf00352 | 6 |
| AX-158194441 | 17 | 53.134 | KV452884.1 | 8861516  | 6-scf00352 | 6 |
| AX-158194444 | 17 | 53.134 | KV452884.1 | 8864499  | 6-scf00352 | 6 |
| AX-158194452 | 17 | 53.189 | KV452884.1 | 8873012  | 6-scf00352 | 6 |
| AX-158194455 | 17 | 53.243 | KV452884.1 | 8877277  | 6-scf00352 | 6 |
| AX-158194459 | 17 | 53.243 | KV452884.1 | 8879770  | 6-scf00352 | 6 |
| AX-158194460 | 17 | 53.243 | KV452884.1 | 8881070  | 6-scf00352 | 6 |
| AX-158194461 | 17 | 53.243 | KV452884.1 | 8882235  | 6-scf00352 | 6 |
| AX-157754033 | 17 | 53.243 | KV452884.1 | 8883657  | 6-scf00352 | 6 |
| AX-158194462 | 17 | 53.243 | KV452884.1 | 8884047  | 6-scf00352 | 6 |
| AX-158194469 | 17 | 53.243 | KV452884.1 | 8890453  | 6-scf00352 | 6 |
| AX-158194528 | 17 | 53.243 | KV452884.1 | 8962215  | 6-scf00352 | 6 |
| AX-158194481 | 17 | 53.357 | KV452884.1 | 8903416  | 6-scf00352 | 6 |
| AX-158194477 | 17 | 53.462 | KV452884.1 | 8898347  | 6-scf00352 | 6 |
| AX-158194482 | 17 | 53.462 | KV452884.1 | 8903972  | 6-scf00352 | 6 |
| AX-157836845 | 17 | 53.462 | KV452884.1 | 8905792  | 6-scf00352 | 6 |
| AX-157836847 | 17 | 53.462 | KV452884.1 | 8908596  | 6-scf00352 | 6 |
| AX-158194486 | 17 | 53.462 | KV452884.1 | 8911193  | 6-scf00352 | 6 |
| AX-158194487 | 17 | 53.462 | KV452884.1 | 8913657  | 6-scf00352 | 6 |
| AX-157836849 | 17 | 53.462 | KV452884.1 | 8916561  | 6-scf00352 | 6 |
| AX-158194491 | 17 | 53.462 | KV452884.1 | 8919462  | 6-scf00352 | 6 |
| AX-158194492 | 17 | 53.462 | KV452884.1 | 8922144  | 6-scf00352 | 6 |
| AX-158194587 | 17 | 53.462 | KV452884.1 | 9061237  | 6-scf00352 | 6 |
| AX-158194601 | 17 | 53.462 | KV452884.1 | 9081885  | 6-scf00352 | 6 |
| AX-158194800 | 17 | 53.462 | KV452884.1 | 9364955  | 6-scf00352 | 6 |
| AX-158414059 | 17 | 53.462 | KV452884.1 | 9641965  | 6-scf00352 | 6 |
| AX-158194954 | 17 | 53.462 | KV452884.1 | 9654238  | 6-scf00352 | 6 |
| AX-158195113 | 17 | 53.462 | KV452884.1 | 9937314  | 6-scf00352 | 6 |
| AX-158195119 | 17 | 53.462 | KV452884.1 | 9941240  | 6-scf00352 | 6 |
| AX-158195361 | 17 | 53.462 | KV452884.1 | 10294422 | 6-scf00352 | 6 |
| AX-158195527 | 17 | 53.462 | KV452884.1 | 10596240 | 6-scf00352 | 6 |
| AX-158195533 | 17 | 53.462 | KV452884.1 | 10612243 | 6-scf00352 | 6 |
| AX-158195534 | 17 | 53.462 | KV452884.1 | 10612960 | 6-scf00352 | 6 |
| AX-158195693 | 17 | 53.462 | KV452884.1 | 10802384 | 6-scf00352 | 6 |
| AX-158194225 | 17 | 53.68  | KV452884.1 | 8501382  | 6-scf00352 | 6 |
| AX-157723390 | 17 | 53.68  | KV452884.1 | 8920387  | 6-scf00352 | 6 |
| AX-158194503 | 17 | 53.68  | KV452884.1 | 8935532  | 6-scf00352 | 6 |
| AX-158194505 | 17 | 53.68  | KV452884.1 | 8936607  | 6-scf00352 | 6 |

|              |    |        |            |         |            |   |
|--------------|----|--------|------------|---------|------------|---|
| AX-158194506 | 17 | 53.68  | KV452884.1 | 8937353 | 6-scf00352 | 6 |
| AX-158194514 | 17 | 53.68  | KV452884.1 | 8944804 | 6-scf00352 | 6 |
| AX-158194518 | 17 | 53.68  | KV452884.1 | 8948671 | 6-scf00352 | 6 |
| AX-158194520 | 17 | 53.68  | KV452884.1 | 8949801 | 6-scf00352 | 6 |
| AX-158194521 | 17 | 53.68  | KV452884.1 | 8950793 | 6-scf00352 | 6 |
| AX-158194522 | 17 | 53.68  | KV452884.1 | 8951752 | 6-scf00352 | 6 |
| AX-158194665 | 17 | 53.68  | KV452884.1 | 9183202 | 6-scf00352 | 6 |
| AX-158194791 | 17 | 53.68  | KV452884.1 | 9341885 | 6-scf00352 | 6 |
| AX-158194893 | 17 | 53.68  | KV452884.1 | 9563406 | 6-scf00352 | 6 |
| AX-158194530 | 17 | 53.789 | KV452884.1 | 8963211 | 6-scf00352 | 6 |
| AX-158194531 | 17 | 53.789 | KV452884.1 | 8970711 | 6-scf00352 | 6 |
| AX-157836854 | 17 | 53.789 | KV452884.1 | 8973987 | 6-scf00352 | 6 |
| AX-158194536 | 17 | 53.789 | KV452884.1 | 8976751 | 6-scf00352 | 6 |
| AX-157743692 | 17 | 53.789 | KV452884.1 | 8977485 | 6-scf00352 | 6 |
| AX-158414031 | 17 | 53.789 | KV452884.1 | 8986788 | 6-scf00352 | 6 |
| AX-157748821 | 17 | 53.789 | KV452884.1 | 8994664 | 6-scf00352 | 6 |
| AX-158194542 | 17 | 53.789 | KV452884.1 | 8996939 | 6-scf00352 | 6 |
| AX-158194545 | 17 | 53.789 | KV452884.1 | 9000806 | 6-scf00352 | 6 |
| AX-158194548 | 17 | 53.789 | KV452884.1 | 9004637 | 6-scf00352 | 6 |
| AX-158194550 | 17 | 53.789 | KV452884.1 | 9007323 | 6-scf00352 | 6 |
| AX-158194551 | 17 | 53.789 | KV452884.1 | 9007828 | 6-scf00352 | 6 |
| AX-158194553 | 17 | 53.789 | KV452884.1 | 9008943 | 6-scf00352 | 6 |
| AX-157836858 | 17 | 53.789 | KV452884.1 | 9013016 | 6-scf00352 | 6 |
| AX-158194557 | 17 | 53.789 | KV452884.1 | 9014458 | 6-scf00352 | 6 |
| AX-158194560 | 17 | 53.789 | KV452884.1 | 9016593 | 6-scf00352 | 6 |
| AX-158194561 | 17 | 53.789 | KV452884.1 | 9020835 | 6-scf00352 | 6 |
| AX-158194562 | 17 | 53.789 | KV452884.1 | 9021897 | 6-scf00352 | 6 |
| AX-157836860 | 17 | 53.789 | KV452884.1 | 9026218 | 6-scf00352 | 6 |
| AX-157836867 | 17 | 53.789 | KV452884.1 | 9055722 | 6-scf00352 | 6 |
| AX-158194627 | 17 | 53.789 | KV452884.1 | 9108392 | 6-scf00352 | 6 |
| AX-158194659 | 17 | 53.789 | KV452884.1 | 9172335 | 6-scf00352 | 6 |
| AX-157702803 | 17 | 53.789 | KV452884.1 | 9173769 | 6-scf00352 | 6 |
| AX-158194663 | 17 | 53.789 | KV452884.1 | 9178416 | 6-scf00352 | 6 |
| AX-157836887 | 17 | 53.789 | KV452884.1 | 9270676 | 6-scf00352 | 6 |
| AX-158414036 | 17 | 53.789 | KV452884.1 | 9325037 | 6-scf00352 | 6 |
| AX-158194782 | 17 | 53.789 | KV452884.1 | 9329893 | 6-scf00352 | 6 |
| AX-158194785 | 17 | 53.789 | KV452884.1 | 9333429 | 6-scf00352 | 6 |
| AX-157836859 | 17 | 53.799 | KV452884.1 | 9025418 | 6-scf00352 | 6 |
| AX-158194600 | 17 | 53.799 | KV452884.1 | 9081347 | 6-scf00352 | 6 |
| AX-158194689 | 17 | 53.799 | KV452884.1 | 9209660 | 6-scf00352 | 6 |
| AX-158194690 | 17 | 53.799 | KV452884.1 | 9209860 | 6-scf00352 | 6 |
| AX-158194709 | 17 | 53.799 | KV452884.1 | 9236408 | 6-scf00352 | 6 |
| AX-158194532 | 17 | 53.807 | KV452884.1 | 8972568 | 6-scf00352 | 6 |
| AX-158194571 | 17 | 53.807 | KV452884.1 | 9034852 | 6-scf00352 | 6 |
| AX-158194564 | 17 | 53.814 | KV452884.1 | 9024910 | 6-scf00352 | 6 |
| AX-157836861 | 17 | 53.814 | KV452884.1 | 9034906 | 6-scf00352 | 6 |
| AX-157771629 | 17 | 53.814 | KV452884.1 | 9064957 | 6-scf00352 | 6 |
| AX-157748072 | 17 | 53.814 | KV452884.1 | 9230214 | 6-scf00352 | 6 |
| AX-158194706 | 17 | 53.814 | KV452884.1 | 9232576 | 6-scf00352 | 6 |
| AX-158194581 | 17 | 53.828 | KV452884.1 | 9052032 | 6-scf00352 | 6 |
| AX-157836864 | 17 | 53.839 | KV452884.1 | 9054515 | 6-scf00352 | 6 |

|              |    |        |            |         |            |   |
|--------------|----|--------|------------|---------|------------|---|
| AX-158194592 | 17 | 53.839 | KV452884.1 | 9067873 | 6-scf00352 | 6 |
| AX-157836865 | 17 | 53.846 | KV452884.1 | 9054735 | 6-scf00352 | 6 |
| AX-157879135 | 17 | 53.859 | KV452884.1 | 9059030 | 6-scf00352 | 6 |
| AX-157836868 | 17 | 53.866 | KV452884.1 | 9067159 | 6-scf00352 | 6 |
| AX-158194596 | 17 | 53.878 | KV452884.1 | 9071692 | 6-scf00352 | 6 |
| AX-157774617 | 17 | 53.878 | KV452884.1 | 9154975 | 6-scf00352 | 6 |
| AX-158194649 | 17 | 53.878 | KV452884.1 | 9156994 | 6-scf00352 | 6 |
| AX-157858922 | 17 | 53.878 | KV452884.1 | 9598820 | 6-scf00352 | 6 |
| AX-158194597 | 17 | 53.888 | KV452884.1 | 9072056 | 6-scf00352 | 6 |
| AX-158193044 | 17 | 53.898 | KV452884.1 | 7114051 | 6-scf00352 | 6 |
| AX-158193049 | 17 | 53.898 | KV452884.1 | 7124748 | 6-scf00352 | 6 |
| AX-158193053 | 17 | 53.898 | KV452884.1 | 7132078 | 6-scf00352 | 6 |
| AX-158193098 | 17 | 53.898 | KV452884.1 | 7187482 | 6-scf00352 | 6 |
| AX-158193231 | 17 | 53.898 | KV452884.1 | 7342772 | 6-scf00352 | 6 |
| AX-158193816 | 17 | 53.898 | KV452884.1 | 7936389 | 6-scf00352 | 6 |
| AX-158193825 | 17 | 53.898 | KV452884.1 | 7947765 | 6-scf00352 | 6 |
| AX-158193826 | 17 | 53.898 | KV452884.1 | 7947972 | 6-scf00352 | 6 |
| AX-158193827 | 17 | 53.898 | KV452884.1 | 7950245 | 6-scf00352 | 6 |
| AX-158193828 | 17 | 53.898 | KV452884.1 | 7950447 | 6-scf00352 | 6 |
| AX-158194042 | 17 | 53.898 | KV452884.1 | 8234826 | 6-scf00352 | 6 |
| AX-158194233 | 17 | 53.898 | KV452884.1 | 8516362 | 6-scf00352 | 6 |
| AX-158194249 | 17 | 53.898 | KV452884.1 | 8536270 | 6-scf00352 | 6 |
| AX-158194320 | 17 | 53.898 | KV452884.1 | 8664862 | 6-scf00352 | 6 |
| AX-158194421 | 17 | 53.898 | KV452884.1 | 8834035 | 6-scf00352 | 6 |
| AX-158194474 | 17 | 53.898 | KV452884.1 | 8893797 | 6-scf00352 | 6 |
| AX-158194504 | 17 | 53.898 | KV452884.1 | 8936038 | 6-scf00352 | 6 |
| AX-158194515 | 17 | 53.898 | KV452884.1 | 8945364 | 6-scf00352 | 6 |
| AX-158194537 | 17 | 53.898 | KV452884.1 | 8978105 | 6-scf00352 | 6 |
| AX-158194549 | 17 | 53.898 | KV452884.1 | 9006299 | 6-scf00352 | 6 |
| AX-158194566 | 17 | 53.898 | KV452884.1 | 9026639 | 6-scf00352 | 6 |
| AX-158194568 | 17 | 53.898 | KV452884.1 | 9027219 | 6-scf00352 | 6 |
| AX-158194572 | 17 | 53.898 | KV452884.1 | 9035570 | 6-scf00352 | 6 |
| AX-158414033 | 17 | 53.898 | KV452884.1 | 9049465 | 6-scf00352 | 6 |
| AX-157836862 | 17 | 53.898 | KV452884.1 | 9051409 | 6-scf00352 | 6 |
| AX-158194589 | 17 | 53.898 | KV452884.1 | 9063103 | 6-scf00352 | 6 |
| AX-158194598 | 17 | 53.898 | KV452884.1 | 9072777 | 6-scf00352 | 6 |
| AX-157714030 | 17 | 53.898 | KV452884.1 | 9078744 | 6-scf00352 | 6 |
| AX-157726461 | 17 | 53.898 | KV452884.1 | 9079358 | 6-scf00352 | 6 |
| AX-158194605 | 17 | 53.898 | KV452884.1 | 9086816 | 6-scf00352 | 6 |
| AX-158194607 | 17 | 53.898 | KV452884.1 | 9087226 | 6-scf00352 | 6 |
| AX-158194610 | 17 | 53.898 | KV452884.1 | 9090004 | 6-scf00352 | 6 |
| AX-158194611 | 17 | 53.898 | KV452884.1 | 9090403 | 6-scf00352 | 6 |
| AX-158194612 | 17 | 53.898 | KV452884.1 | 9091055 | 6-scf00352 | 6 |
| AX-158194614 | 17 | 53.898 | KV452884.1 | 9092271 | 6-scf00352 | 6 |
| AX-158194617 | 17 | 53.898 | KV452884.1 | 9094892 | 6-scf00352 | 6 |
| AX-157764978 | 17 | 53.898 | KV452884.1 | 9095335 | 6-scf00352 | 6 |
| AX-158194620 | 17 | 53.898 | KV452884.1 | 9096858 | 6-scf00352 | 6 |
| AX-158194621 | 17 | 53.898 | KV452884.1 | 9097398 | 6-scf00352 | 6 |
| AX-157836874 | 17 | 53.898 | KV452884.1 | 9097663 | 6-scf00352 | 6 |
| AX-158414034 | 17 | 53.898 | KV452884.1 | 9097721 | 6-scf00352 | 6 |
| AX-157836875 | 17 | 53.898 | KV452884.1 | 9105650 | 6-scf00352 | 6 |

|              |    |        |            |         |            |   |
|--------------|----|--------|------------|---------|------------|---|
| AX-158194626 | 17 | 53.898 | KV452884.1 | 9107800 | 6-scf00352 | 6 |
| AX-157858917 | 17 | 53.898 | KV452884.1 | 9113044 | 6-scf00352 | 6 |
| AX-158194629 | 17 | 53.898 | KV452884.1 | 9113567 | 6-scf00352 | 6 |
| AX-158194631 | 17 | 53.898 | KV452884.1 | 9114208 | 6-scf00352 | 6 |
| AX-157741910 | 17 | 53.898 | KV452884.1 | 9114816 | 6-scf00352 | 6 |
| AX-158194635 | 17 | 53.898 | KV452884.1 | 9123484 | 6-scf00352 | 6 |
| AX-158194638 | 17 | 53.898 | KV452884.1 | 9126166 | 6-scf00352 | 6 |
| AX-158194639 | 17 | 53.898 | KV452884.1 | 9130164 | 6-scf00352 | 6 |
| AX-158194640 | 17 | 53.898 | KV452884.1 | 9131884 | 6-scf00352 | 6 |
| AX-157713998 | 17 | 53.898 | KV452884.1 | 9137873 | 6-scf00352 | 6 |
| AX-157745278 | 17 | 53.898 | KV452884.1 | 9146606 | 6-scf00352 | 6 |
| AX-158194647 | 17 | 53.898 | KV452884.1 | 9155416 | 6-scf00352 | 6 |
| AX-158194648 | 17 | 53.898 | KV452884.1 | 9156437 | 6-scf00352 | 6 |
| AX-157773003 | 17 | 53.898 | KV452884.1 | 9158735 | 6-scf00352 | 6 |
| AX-158194650 | 17 | 53.898 | KV452884.1 | 9159783 | 6-scf00352 | 6 |
| AX-158194651 | 17 | 53.898 | KV452884.1 | 9162604 | 6-scf00352 | 6 |
| AX-157710694 | 17 | 53.898 | KV452884.1 | 9173065 | 6-scf00352 | 6 |
| AX-158194670 | 17 | 53.898 | KV452884.1 | 9191535 | 6-scf00352 | 6 |
| AX-158194672 | 17 | 53.898 | KV452884.1 | 9192939 | 6-scf00352 | 6 |
| AX-158194673 | 17 | 53.898 | KV452884.1 | 9193369 | 6-scf00352 | 6 |
| AX-158194674 | 17 | 53.898 | KV452884.1 | 9193924 | 6-scf00352 | 6 |
| AX-157836879 | 17 | 53.898 | KV452884.1 | 9194924 | 6-scf00352 | 6 |
| AX-158194677 | 17 | 53.898 | KV452884.1 | 9200091 | 6-scf00352 | 6 |
| AX-158194680 | 17 | 53.898 | KV452884.1 | 9202295 | 6-scf00352 | 6 |
| AX-158194682 | 17 | 53.898 | KV452884.1 | 9205324 | 6-scf00352 | 6 |
| AX-158194684 | 17 | 53.898 | KV452884.1 | 9206215 | 6-scf00352 | 6 |
| AX-158194685 | 17 | 53.898 | KV452884.1 | 9206535 | 6-scf00352 | 6 |
| AX-158194686 | 17 | 53.898 | KV452884.1 | 9206968 | 6-scf00352 | 6 |
| AX-158194687 | 17 | 53.898 | KV452884.1 | 9207200 | 6-scf00352 | 6 |
| AX-157699653 | 17 | 53.898 | KV452884.1 | 9207783 | 6-scf00352 | 6 |
| AX-157744554 | 17 | 53.898 | KV452884.1 | 9208986 | 6-scf00352 | 6 |
| AX-158194691 | 17 | 53.898 | KV452884.1 | 9212480 | 6-scf00352 | 6 |
| AX-158194694 | 17 | 53.898 | KV452884.1 | 9216921 | 6-scf00352 | 6 |
| AX-158194695 | 17 | 53.898 | KV452884.1 | 9217100 | 6-scf00352 | 6 |
| AX-158194696 | 17 | 53.898 | KV452884.1 | 9217588 | 6-scf00352 | 6 |
| AX-157836880 | 17 | 53.898 | KV452884.1 | 9219204 | 6-scf00352 | 6 |
| AX-157836881 | 17 | 53.898 | KV452884.1 | 9219674 | 6-scf00352 | 6 |
| AX-158194701 | 17 | 53.898 | KV452884.1 | 9221659 | 6-scf00352 | 6 |
| AX-158194704 | 17 | 53.898 | KV452884.1 | 9231146 | 6-scf00352 | 6 |
| AX-158194708 | 17 | 53.898 | KV452884.1 | 9235672 | 6-scf00352 | 6 |
| AX-157836883 | 17 | 53.898 | KV452884.1 | 9236690 | 6-scf00352 | 6 |
| AX-158194711 | 17 | 53.898 | KV452884.1 | 9238120 | 6-scf00352 | 6 |
| AX-158194712 | 17 | 53.898 | KV452884.1 | 9238602 | 6-scf00352 | 6 |
| AX-158194714 | 17 | 53.898 | KV452884.1 | 9240465 | 6-scf00352 | 6 |
| AX-158194715 | 17 | 53.898 | KV452884.1 | 9241243 | 6-scf00352 | 6 |
| AX-158194716 | 17 | 53.898 | KV452884.1 | 9241479 | 6-scf00352 | 6 |
| AX-157719439 | 17 | 53.898 | KV452884.1 | 9241953 | 6-scf00352 | 6 |
| AX-158194717 | 17 | 53.898 | KV452884.1 | 9242511 | 6-scf00352 | 6 |
| AX-158194718 | 17 | 53.898 | KV452884.1 | 9242941 | 6-scf00352 | 6 |
| AX-158194722 | 17 | 53.898 | KV452884.1 | 9250432 | 6-scf00352 | 6 |
| AX-158194723 | 17 | 53.898 | KV452884.1 | 9252089 | 6-scf00352 | 6 |

|              |    |        |            |         |            |   |
|--------------|----|--------|------------|---------|------------|---|
| AX-158194724 | 17 | 53.898 | KV452884.1 | 9252945 | 6-scf00352 | 6 |
| AX-158194727 | 17 | 53.898 | KV452884.1 | 9256228 | 6-scf00352 | 6 |
| AX-157836884 | 17 | 53.898 | KV452884.1 | 9256390 | 6-scf00352 | 6 |
| AX-158194728 | 17 | 53.898 | KV452884.1 | 9258811 | 6-scf00352 | 6 |
| AX-158194729 | 17 | 53.898 | KV452884.1 | 9260836 | 6-scf00352 | 6 |
| AX-158194730 | 17 | 53.898 | KV452884.1 | 9263577 | 6-scf00352 | 6 |
| AX-157836885 | 17 | 53.898 | KV452884.1 | 9266587 | 6-scf00352 | 6 |
| AX-158194733 | 17 | 53.898 | KV452884.1 | 9268303 | 6-scf00352 | 6 |
| AX-157858918 | 17 | 53.898 | KV452884.1 | 9268581 | 6-scf00352 | 6 |
| AX-158194734 | 17 | 53.898 | KV452884.1 | 9269344 | 6-scf00352 | 6 |
| AX-157836888 | 17 | 53.898 | KV452884.1 | 9272107 | 6-scf00352 | 6 |
| AX-158194736 | 17 | 53.898 | KV452884.1 | 9272697 | 6-scf00352 | 6 |
| AX-158194737 | 17 | 53.898 | KV452884.1 | 9273073 | 6-scf00352 | 6 |
| AX-157836890 | 17 | 53.898 | KV452884.1 | 9280003 | 6-scf00352 | 6 |
| AX-158194741 | 17 | 53.898 | KV452884.1 | 9283456 | 6-scf00352 | 6 |
| AX-158194742 | 17 | 53.898 | KV452884.1 | 9283660 | 6-scf00352 | 6 |
| AX-158194745 | 17 | 53.898 | KV452884.1 | 9285953 | 6-scf00352 | 6 |
| AX-158194749 | 17 | 53.898 | KV452884.1 | 9289447 | 6-scf00352 | 6 |
| AX-158194750 | 17 | 53.898 | KV452884.1 | 9290633 | 6-scf00352 | 6 |
| AX-158194753 | 17 | 53.898 | KV452884.1 | 9294534 | 6-scf00352 | 6 |
| AX-158194756 | 17 | 53.898 | KV452884.1 | 9298164 | 6-scf00352 | 6 |
| AX-157836892 | 17 | 53.898 | KV452884.1 | 9298364 | 6-scf00352 | 6 |
| AX-157693294 | 17 | 53.898 | KV452884.1 | 9299840 | 6-scf00352 | 6 |
| AX-158194758 | 17 | 53.898 | KV452884.1 | 9300706 | 6-scf00352 | 6 |
| AX-158194759 | 17 | 53.898 | KV452884.1 | 9301521 | 6-scf00352 | 6 |
| AX-158194760 | 17 | 53.898 | KV452884.1 | 9302027 | 6-scf00352 | 6 |
| AX-158194761 | 17 | 53.898 | KV452884.1 | 9304657 | 6-scf00352 | 6 |
| AX-158194762 | 17 | 53.898 | KV452884.1 | 9306154 | 6-scf00352 | 6 |
| AX-158194764 | 17 | 53.898 | KV452884.1 | 9311335 | 6-scf00352 | 6 |
| AX-158194765 | 17 | 53.898 | KV452884.1 | 9312434 | 6-scf00352 | 6 |
| AX-158194768 | 17 | 53.898 | KV452884.1 | 9314499 | 6-scf00352 | 6 |
| AX-158194770 | 17 | 53.898 | KV452884.1 | 9315828 | 6-scf00352 | 6 |
| AX-158194771 | 17 | 53.898 | KV452884.1 | 9316637 | 6-scf00352 | 6 |
| AX-158194772 | 17 | 53.898 | KV452884.1 | 9317616 | 6-scf00352 | 6 |
| AX-158194773 | 17 | 53.898 | KV452884.1 | 9318294 | 6-scf00352 | 6 |
| AX-158194774 | 17 | 53.898 | KV452884.1 | 9321797 | 6-scf00352 | 6 |
| AX-158194804 | 17 | 53.898 | KV452884.1 | 9386454 | 6-scf00352 | 6 |
| AX-157726842 | 17 | 53.898 | KV452884.1 | 9393798 | 6-scf00352 | 6 |
| AX-158194808 | 17 | 53.898 | KV452884.1 | 9396555 | 6-scf00352 | 6 |
| AX-158194826 | 17 | 53.898 | KV452884.1 | 9413795 | 6-scf00352 | 6 |
| AX-158194840 | 17 | 53.898 | KV452884.1 | 9427774 | 6-scf00352 | 6 |
| AX-157696272 | 17 | 53.898 | KV452884.1 | 9469544 | 6-scf00352 | 6 |
| AX-158194856 | 17 | 53.898 | KV452884.1 | 9476126 | 6-scf00352 | 6 |
| AX-158194859 | 17 | 53.898 | KV452884.1 | 9484501 | 6-scf00352 | 6 |
| AX-158194874 | 17 | 53.898 | KV452884.1 | 9525644 | 6-scf00352 | 6 |
| AX-158194876 | 17 | 53.898 | KV452884.1 | 9528814 | 6-scf00352 | 6 |
| AX-158194880 | 17 | 53.898 | KV452884.1 | 9540348 | 6-scf00352 | 6 |
| AX-158194881 | 17 | 53.898 | KV452884.1 | 9542383 | 6-scf00352 | 6 |
| AX-158194882 | 17 | 53.898 | KV452884.1 | 9544527 | 6-scf00352 | 6 |
| AX-158194919 | 17 | 53.898 | KV452884.1 | 9595688 | 6-scf00352 | 6 |
| AX-158194923 | 17 | 53.898 | KV452884.1 | 9602120 | 6-scf00352 | 6 |

|              |    |        |             |          |            |    |
|--------------|----|--------|-------------|----------|------------|----|
| AX-158194931 | 17 | 53.898 | KV452884.1  | 9618235  | 6-scf00352 | 6  |
| AX-157708429 | 17 | 53.898 | KV452884.1  | 9678181  | 6-scf00352 | 6  |
| AX-158195043 | 17 | 53.898 | KV452884.1  | 9810640  | 6-scf00352 | 6  |
| AX-158195058 | 17 | 53.898 | KV452884.1  | 9832148  | 6-scf00352 | 6  |
| AX-157836917 | 17 | 53.898 | KV452884.1  | 9904145  | 6-scf00352 | 6  |
| AX-158195109 | 17 | 53.898 | KV452884.1  | 9929116  | 6-scf00352 | 6  |
| AX-158195134 | 17 | 53.898 | KV452884.1  | 9955798  | 6-scf00352 | 6  |
| AX-158195168 | 17 | 53.898 | KV452884.1  | 9996698  | 6-scf00352 | 6  |
| AX-157886968 | 17 | 53.898 | KV452884.1  | 10168176 | 6-scf00352 | 6  |
| AX-157886969 | 17 | 53.898 | KV452884.1  | 10168909 | 6-scf00352 | 6  |
| AX-158195283 | 17 | 53.898 | KV452884.1  | 10178371 | 6-scf00352 | 6  |
| AX-157725075 | 17 | 53.898 | KV452884.1  | 10191533 | 6-scf00352 | 6  |
| AX-157753074 | 17 | 53.898 | KV452884.1  | 10275806 | 6-scf00352 | 6  |
| AX-158195367 | 17 | 53.898 | KV452884.1  | 10307845 | 6-scf00352 | 6  |
| AX-158195370 | 17 | 53.898 | KV452884.1  | 10317715 | 6-scf00352 | 6  |
| AX-158195375 | 17 | 53.898 | KV452884.1  | 10328755 | 6-scf00352 | 6  |
| AX-157836976 | 17 | 53.898 | KV452884.1  | 10754882 | 6-scf00352 | 6  |
| AX-158195655 | 17 | 53.898 | KV452884.1  | 10755299 | 6-scf00352 | 6  |
| AX-158195895 | 17 | 53.898 | KV452884.1  | 11007894 | 6-scf00352 | 6  |
| AX-158196149 | 17 | 53.898 | KV452884.1  | 11360002 | 6-scf00352 | 6  |
| AX-157706252 | 17 | 53.898 | 3ML01031896 | 38       | scf07518_1 | UN |
| AX-158194888 | 17 | 54.117 | KV452884.1  | 9559054  | 6-scf00352 | 6  |
| AX-158194891 | 17 | 54.117 | KV452884.1  | 9562257  | 6-scf00352 | 6  |
| AX-158194909 | 17 | 54.117 | KV452884.1  | 9581222  | 6-scf00352 | 6  |
| AX-158194910 | 17 | 54.117 | KV452884.1  | 9581635  | 6-scf00352 | 6  |
| AX-158194924 | 17 | 54.117 | KV452884.1  | 9604583  | 6-scf00352 | 6  |
| AX-158194926 | 17 | 54.117 | KV452884.1  | 9611848  | 6-scf00352 | 6  |
| AX-158194928 | 17 | 54.117 | KV452884.1  | 9615323  | 6-scf00352 | 6  |
| AX-158194929 | 17 | 54.117 | KV452884.1  | 9616996  | 6-scf00352 | 6  |
| AX-158194930 | 17 | 54.117 | KV452884.1  | 9617799  | 6-scf00352 | 6  |
| AX-158194932 | 17 | 54.117 | KV452884.1  | 9619181  | 6-scf00352 | 6  |
| AX-158194933 | 17 | 54.117 | KV452884.1  | 9621080  | 6-scf00352 | 6  |
| AX-158386139 | 17 | 54.117 | KV452884.1  | 9624612  | 6-scf00352 | 6  |
| AX-158194938 | 17 | 54.117 | KV452884.1  | 9626941  | 6-scf00352 | 6  |
| AX-158194941 | 17 | 54.117 | KV452884.1  | 9633444  | 6-scf00352 | 6  |
| AX-158194942 | 17 | 54.117 | KV452884.1  | 9634814  | 6-scf00352 | 6  |
| AX-157836894 | 17 | 54.117 | KV452884.1  | 9635411  | 6-scf00352 | 6  |
| AX-158414060 | 17 | 54.117 | KV452884.1  | 9642402  | 6-scf00352 | 6  |
| AX-158194964 | 17 | 54.117 | KV452884.1  | 9665155  | 6-scf00352 | 6  |
| AX-158194968 | 17 | 54.117 | KV452884.1  | 9668645  | 6-scf00352 | 6  |
| AX-158194970 | 17 | 54.117 | KV452884.1  | 9670842  | 6-scf00352 | 6  |
| AX-158194974 | 17 | 54.117 | KV452884.1  | 9674363  | 6-scf00352 | 6  |
| AX-158194976 | 17 | 54.117 | KV452884.1  | 9675800  | 6-scf00352 | 6  |
| AX-157858924 | 17 | 54.117 | KV452884.1  | 9681074  | 6-scf00352 | 6  |
| AX-158194979 | 17 | 54.117 | KV452884.1  | 9683757  | 6-scf00352 | 6  |
| AX-158194980 | 17 | 54.117 | KV452884.1  | 9685043  | 6-scf00352 | 6  |
| AX-158194983 | 17 | 54.335 | KV452884.1  | 9688000  | 6-scf00352 | 6  |
| AX-157836897 | 17 | 54.335 | KV452884.1  | 9689266  | 6-scf00352 | 6  |
| AX-158194984 | 17 | 54.335 | KV452884.1  | 9689599  | 6-scf00352 | 6  |
| AX-158194985 | 17 | 54.335 | KV452884.1  | 9690458  | 6-scf00352 | 6  |
| AX-158194988 | 17 | 54.335 | KV452884.1  | 9694516  | 6-scf00352 | 6  |



|              |    |        |            |          |            |   |
|--------------|----|--------|------------|----------|------------|---|
| AX-158194990 | 17 | 54.335 | KV452884.1 | 9696319  | 6-scf00352 | 6 |
| AX-158194992 | 17 | 54.335 | KV452884.1 | 9697547  | 6-scf00352 | 6 |
| AX-158386140 | 17 | 54.335 | KV452884.1 | 9703390  | 6-scf00352 | 6 |
| AX-158194997 | 17 | 54.335 | KV452884.1 | 9705167  | 6-scf00352 | 6 |
| AX-157836903 | 17 | 54.335 | KV452884.1 | 9708011  | 6-scf00352 | 6 |
| AX-158194465 | 17 | 54.553 | KV452884.1 | 8885987  | 6-scf00352 | 6 |
| AX-157836855 | 17 | 54.553 | KV452884.1 | 8981297  | 6-scf00352 | 6 |
| AX-158194565 | 17 | 54.553 | KV452884.1 | 9025820  | 6-scf00352 | 6 |
| AX-158194801 | 17 | 54.553 | KV452884.1 | 9372313  | 6-scf00352 | 6 |
| AX-158194877 | 17 | 54.553 | KV452884.1 | 9529315  | 6-scf00352 | 6 |
| AX-158194982 | 17 | 54.553 | KV452884.1 | 9686518  | 6-scf00352 | 6 |
| AX-158194999 | 17 | 54.553 | KV452884.1 | 9708370  | 6-scf00352 | 6 |
| AX-157836906 | 17 | 54.553 | KV452884.1 | 9730131  | 6-scf00352 | 6 |
| AX-158195012 | 17 | 54.553 | KV452884.1 | 9731102  | 6-scf00352 | 6 |
| AX-157836909 | 17 | 54.553 | KV452884.1 | 9734398  | 6-scf00352 | 6 |
| AX-158195023 | 17 | 54.553 | KV452884.1 | 9767780  | 6-scf00352 | 6 |
| AX-157836913 | 17 | 54.553 | KV452884.1 | 9768652  | 6-scf00352 | 6 |
| AX-158195024 | 17 | 54.553 | KV452884.1 | 9769242  | 6-scf00352 | 6 |
| AX-157866835 | 17 | 54.553 | KV452884.1 | 9769835  | 6-scf00352 | 6 |
| AX-158195027 | 17 | 54.553 | KV452884.1 | 9773508  | 6-scf00352 | 6 |
| AX-158195030 | 17 | 54.553 | KV452884.1 | 9777082  | 6-scf00352 | 6 |
| AX-157748464 | 17 | 54.553 | KV452884.1 | 9777944  | 6-scf00352 | 6 |
| AX-157836914 | 17 | 54.553 | KV452884.1 | 9778828  | 6-scf00352 | 6 |
| AX-158195032 | 17 | 54.553 | KV452884.1 | 9781338  | 6-scf00352 | 6 |
| AX-158195033 | 17 | 54.553 | KV452884.1 | 9782191  | 6-scf00352 | 6 |
| AX-158195037 | 17 | 54.553 | KV452884.1 | 9788438  | 6-scf00352 | 6 |
| AX-158195039 | 17 | 54.553 | KV452884.1 | 9793566  | 6-scf00352 | 6 |
| AX-158418262 | 17 | 54.553 | KV452884.1 | 9794504  | 6-scf00352 | 6 |
| AX-158195042 | 17 | 54.553 | KV452884.1 | 9804267  | 6-scf00352 | 6 |
| AX-157836915 | 17 | 54.553 | KV452884.1 | 9804863  | 6-scf00352 | 6 |
| AX-158195066 | 17 | 54.553 | KV452884.1 | 9856468  | 6-scf00352 | 6 |
| AX-158195079 | 17 | 54.553 | KV452884.1 | 9878244  | 6-scf00352 | 6 |
| AX-158195093 | 17 | 54.553 | KV452884.1 | 9897890  | 6-scf00352 | 6 |
| AX-157745806 | 17 | 54.553 | KV452884.1 | 10058483 | 6-scf00352 | 6 |
| AX-158195310 | 17 | 54.553 | KV452884.1 | 10208471 | 6-scf00352 | 6 |
| AX-157703781 | 17 | 54.553 | KV452884.1 | 10335582 | 6-scf00352 | 6 |
| AX-158195382 | 17 | 54.553 | KV452884.1 | 10337486 | 6-scf00352 | 6 |
| AX-158195384 | 17 | 54.553 | KV452884.1 | 10340928 | 6-scf00352 | 6 |
| AX-158195385 | 17 | 54.553 | KV452884.1 | 10341862 | 6-scf00352 | 6 |
| AX-158195387 | 17 | 54.553 | KV452884.1 | 10343844 | 6-scf00352 | 6 |
| AX-158393641 | 17 | 54.553 | KV452884.1 | 10351226 | 6-scf00352 | 6 |
| AX-157872191 | 17 | 54.553 | KV452884.1 | 10391197 | 6-scf00352 | 6 |
| AX-158195425 | 17 | 54.553 | KV452884.1 | 10418141 | 6-scf00352 | 6 |
| AX-158195430 | 17 | 54.553 | KV452884.1 | 10431010 | 6-scf00352 | 6 |
| AX-158195432 | 17 | 54.553 | KV452884.1 | 10436817 | 6-scf00352 | 6 |
| AX-157858927 | 17 | 54.553 | KV452884.1 | 10445694 | 6-scf00352 | 6 |
| AX-158195477 | 17 | 54.553 | KV452884.1 | 10499971 | 6-scf00352 | 6 |
| AX-158195485 | 17 | 54.553 | KV452884.1 | 10519547 | 6-scf00352 | 6 |
| AX-158195543 | 17 | 54.553 | KV452884.1 | 10635452 | 6-scf00352 | 6 |
| AX-158196388 | 17 | 54.553 | KV452884.1 | 11779653 | 6-scf00352 | 6 |
| AX-157713703 | 17 | 54.553 | KV452884.1 | 11926954 | 6-scf00352 | 6 |

|              |    |        |            |          |            |    |
|--------------|----|--------|------------|----------|------------|----|
| AX-158196894 | 17 | 54.553 | KV452884.1 | 12649137 | 6-scf00352 | 6  |
| AX-158197032 | 17 | 54.553 | KV452884.1 | 12816912 | 6-scf00352 | 6  |
| AX-158197474 | 17 | 54.553 | KV452884.1 | 14721511 | 6-scf00352 | 6  |
| AX-158198184 | 17 | 54.553 | KV452884.1 | 15931868 | 6-scf00352 | 6  |
| AX-158198233 | 17 | 54.553 | KV452884.1 | 15985747 | 6-scf00352 | 6  |
| AX-158198261 | 17 | 54.553 | KV452884.1 | 16025892 | 6-scf00352 | 6  |
| AX-157837349 | 17 | 54.553 | KV452886.1 | 595609   | 6-scf00354 | 6  |
| AX-157745051 | 17 | 54.553 | KV452886.1 | 693013   | 6-scf00354 | 6  |
| AX-158199004 | 17 | 54.553 | KV452886.1 | 1265358  | 6-scf00354 | 6  |
| AX-158409835 | 17 | 54.553 | KV452887.1 | 367256   | 6-scf00355 | 6  |
| AX-158200094 | 17 | 54.553 | KV452887.1 | 1045144  | 6-scf00355 | 6  |
| AX-157750793 | 17 | 54.553 | KV452887.1 | 1264777  | 6-scf00355 | 6  |
| AX-158201740 | 17 | 54.553 | KV452891.1 | 2767432  | 6-scf00356 | 6  |
| AX-158378459 | 17 | 54.553 | KV453357.1 | 239433   | scf00578   | UN |
| AX-158195020 | 17 | 54.663 | KV452884.1 | 9755855  | 6-scf00352 | 6  |
| AX-158195021 | 17 | 54.663 | KV452884.1 | 9757491  | 6-scf00352 | 6  |
| AX-158195022 | 17 | 54.663 | KV452884.1 | 9762308  | 6-scf00352 | 6  |
| AX-158195031 | 17 | 54.663 | KV452884.1 | 9780043  | 6-scf00352 | 6  |
| AX-158414068 | 17 | 54.663 | KV452884.1 | 9816921  | 6-scf00352 | 6  |
| AX-158195046 | 17 | 54.663 | KV452884.1 | 9817904  | 6-scf00352 | 6  |
| AX-158195051 | 17 | 54.663 | KV452884.1 | 9822871  | 6-scf00352 | 6  |
| AX-158195052 | 17 | 54.663 | KV452884.1 | 9824004  | 6-scf00352 | 6  |
| AX-158195053 | 17 | 54.663 | KV452884.1 | 9825584  | 6-scf00352 | 6  |
| AX-158195059 | 17 | 54.663 | KV452884.1 | 9832664  | 6-scf00352 | 6  |
| AX-158195104 | 17 | 54.663 | KV452884.1 | 9915232  | 6-scf00352 | 6  |
| AX-158195061 | 17 | 54.772 | KV452884.1 | 9836983  | 6-scf00352 | 6  |
| AX-158195063 | 17 | 54.772 | KV452884.1 | 9839564  | 6-scf00352 | 6  |
| AX-157858925 | 17 | 54.772 | KV452884.1 | 9841571  | 6-scf00352 | 6  |
| AX-157858926 | 17 | 54.772 | KV452884.1 | 9847151  | 6-scf00352 | 6  |
| AX-158195064 | 17 | 54.772 | KV452884.1 | 9851455  | 6-scf00352 | 6  |
| AX-158195072 | 17 | 54.772 | KV452884.1 | 9865415  | 6-scf00352 | 6  |
| AX-158195127 | 17 | 54.772 | KV452884.1 | 9949024  | 6-scf00352 | 6  |
| AX-158195071 | 17 | 54.775 | KV452884.1 | 9863288  | 6-scf00352 | 6  |
| AX-158195076 | 17 | 54.917 | KV452884.1 | 9875714  | 6-scf00352 | 6  |
| AX-158195082 | 17 | 55.063 | KV452884.1 | 9882567  | 6-scf00352 | 6  |
| AX-158195084 | 17 | 55.063 | KV452884.1 | 9885163  | 6-scf00352 | 6  |
| AX-158195088 | 17 | 55.063 | KV452884.1 | 9891612  | 6-scf00352 | 6  |
| AX-158195089 | 17 | 55.063 | KV452884.1 | 9894171  | 6-scf00352 | 6  |
| AX-158195090 | 17 | 55.063 | KV452884.1 | 9894446  | 6-scf00352 | 6  |
| AX-158195091 | 17 | 55.063 | KV452884.1 | 9895216  | 6-scf00352 | 6  |
| AX-157872180 | 17 | 55.063 | KV452884.1 | 9895583  | 6-scf00352 | 6  |
| AX-157750130 | 17 | 55.063 | KV452884.1 | 9907604  | 6-scf00352 | 6  |
| AX-157836863 | 17 | 55.139 | KV452884.1 | 9053395  | 6-scf00352 | 6  |
| AX-158380695 | 17 | 55.139 | KV452884.1 | 9069500  | 6-scf00352 | 6  |
| AX-157836870 | 17 | 55.139 | KV452884.1 | 9069567  | 6-scf00352 | 6  |
| AX-158195098 | 17 | 55.139 | KV452884.1 | 9910498  | 6-scf00352 | 6  |
| AX-157743916 | 17 | 55.139 | KV452884.1 | 9928735  | 6-scf00352 | 6  |
| AX-158194554 | 17 | 55.209 | KV452884.1 | 9011641  | 6-scf00352 | 6  |
| AX-158194767 | 17 | 55.209 | KV452884.1 | 9313928  | 6-scf00352 | 6  |
| AX-158195018 | 17 | 55.209 | KV452884.1 | 9751457  | 6-scf00352 | 6  |
| AX-158195103 | 17 | 55.209 | KV452884.1 | 9914339  | 6-scf00352 | 6  |

|              |    |        |            |          |            |   |
|--------------|----|--------|------------|----------|------------|---|
| AX-157836920 | 17 | 55.209 | KV452884.1 | 9931351  | 6-scf00352 | 6 |
| AX-158195110 | 17 | 55.209 | KV452884.1 | 9931460  | 6-scf00352 | 6 |
| AX-157836921 | 17 | 55.209 | KV452884.1 | 9931719  | 6-scf00352 | 6 |
| AX-158195111 | 17 | 55.209 | KV452884.1 | 9934129  | 6-scf00352 | 6 |
| AX-158195122 | 17 | 55.209 | KV452884.1 | 9944191  | 6-scf00352 | 6 |
| AX-158195123 | 17 | 55.209 | KV452884.1 | 9945108  | 6-scf00352 | 6 |
| AX-158195133 | 17 | 55.209 | KV452884.1 | 9955510  | 6-scf00352 | 6 |
| AX-158195135 | 17 | 55.209 | KV452884.1 | 9956366  | 6-scf00352 | 6 |
| AX-158195136 | 17 | 55.209 | KV452884.1 | 9956566  | 6-scf00352 | 6 |
| AX-158195140 | 17 | 55.209 | KV452884.1 | 9959046  | 6-scf00352 | 6 |
| AX-158195149 | 17 | 55.209 | KV452884.1 | 9968136  | 6-scf00352 | 6 |
| AX-158195150 | 17 | 55.209 | KV452884.1 | 9969639  | 6-scf00352 | 6 |
| AX-158195151 | 17 | 55.209 | KV452884.1 | 9970333  | 6-scf00352 | 6 |
| AX-158195154 | 17 | 55.209 | KV452884.1 | 9975377  | 6-scf00352 | 6 |
| AX-157757725 | 17 | 55.428 | KV452884.1 | 8398824  | 6-scf00352 | 6 |
| AX-157836850 | 17 | 55.428 | KV452884.1 | 8919074  | 6-scf00352 | 6 |
| AX-158194583 | 17 | 55.428 | KV452884.1 | 9055094  | 6-scf00352 | 6 |
| AX-158194595 | 17 | 55.428 | KV452884.1 | 9069040  | 6-scf00352 | 6 |
| AX-157836886 | 17 | 55.428 | KV452884.1 | 9270542  | 6-scf00352 | 6 |
| AX-157886964 | 17 | 55.428 | KV452884.1 | 9323892  | 6-scf00352 | 6 |
| AX-158194822 | 17 | 55.428 | KV452884.1 | 9410880  | 6-scf00352 | 6 |
| AX-158393632 | 17 | 55.428 | KV452884.1 | 9559811  | 6-scf00352 | 6 |
| AX-158194896 | 17 | 55.428 | KV452884.1 | 9566216  | 6-scf00352 | 6 |
| AX-158194903 | 17 | 55.428 | KV452884.1 | 9571996  | 6-scf00352 | 6 |
| AX-158194904 | 17 | 55.428 | KV452884.1 | 9572516  | 6-scf00352 | 6 |
| AX-158194911 | 17 | 55.428 | KV452884.1 | 9583999  | 6-scf00352 | 6 |
| AX-158194912 | 17 | 55.428 | KV452884.1 | 9585066  | 6-scf00352 | 6 |
| AX-158194913 | 17 | 55.428 | KV452884.1 | 9585563  | 6-scf00352 | 6 |
| AX-158194915 | 17 | 55.428 | KV452884.1 | 9588516  | 6-scf00352 | 6 |
| AX-158194917 | 17 | 55.428 | KV452884.1 | 9590826  | 6-scf00352 | 6 |
| AX-158194946 | 17 | 55.428 | KV452884.1 | 9643615  | 6-scf00352 | 6 |
| AX-158194998 | 17 | 55.428 | KV452884.1 | 9705788  | 6-scf00352 | 6 |
| AX-158195014 | 17 | 55.428 | KV452884.1 | 9732308  | 6-scf00352 | 6 |
| AX-158195026 | 17 | 55.428 | KV452884.1 | 9773135  | 6-scf00352 | 6 |
| AX-158195158 | 17 | 55.428 | KV452884.1 | 9984404  | 6-scf00352 | 6 |
| AX-157836929 | 17 | 55.428 | KV452884.1 | 9985966  | 6-scf00352 | 6 |
| AX-158393635 | 17 | 55.428 | KV452884.1 | 9989811  | 6-scf00352 | 6 |
| AX-158195163 | 17 | 55.428 | KV452884.1 | 9991308  | 6-scf00352 | 6 |
| AX-158195164 | 17 | 55.428 | KV452884.1 | 9991746  | 6-scf00352 | 6 |
| AX-158195167 | 17 | 55.428 | KV452884.1 | 9995000  | 6-scf00352 | 6 |
| AX-158195170 | 17 | 55.428 | KV452884.1 | 9999494  | 6-scf00352 | 6 |
| AX-157774694 | 17 | 55.428 | KV452884.1 | 10003594 | 6-scf00352 | 6 |
| AX-158195178 | 17 | 55.428 | KV452884.1 | 10003776 | 6-scf00352 | 6 |
| AX-158195179 | 17 | 55.428 | KV452884.1 | 10004239 | 6-scf00352 | 6 |
| AX-157715992 | 17 | 55.428 | KV452884.1 | 10005321 | 6-scf00352 | 6 |
| AX-157836931 | 17 | 55.428 | KV452884.1 | 10008269 | 6-scf00352 | 6 |
| AX-158195180 | 17 | 55.428 | KV452884.1 | 10011455 | 6-scf00352 | 6 |
| AX-157836932 | 17 | 55.428 | KV452884.1 | 10011936 | 6-scf00352 | 6 |
| AX-157836936 | 17 | 55.428 | KV452884.1 | 10020664 | 6-scf00352 | 6 |
| AX-158195184 | 17 | 55.428 | KV452884.1 | 10021055 | 6-scf00352 | 6 |
| AX-158195188 | 17 | 55.428 | KV452884.1 | 10030555 | 6-scf00352 | 6 |

|              |    |        |            |          |            |   |
|--------------|----|--------|------------|----------|------------|---|
| AX-158195189 | 17 | 55.428 | KV452884.1 | 10037612 | 6-scf00352 | 6 |
| AX-158195194 | 17 | 55.428 | KV452884.1 | 10044125 | 6-scf00352 | 6 |
| AX-158195200 | 17 | 55.428 | KV452884.1 | 10049919 | 6-scf00352 | 6 |
| AX-158195202 | 17 | 55.428 | KV452884.1 | 10052352 | 6-scf00352 | 6 |
| AX-158195207 | 17 | 55.428 | KV452884.1 | 10055318 | 6-scf00352 | 6 |
| AX-158195212 | 17 | 55.428 | KV452884.1 | 10058081 | 6-scf00352 | 6 |
| AX-158195216 | 17 | 55.428 | KV452884.1 | 10062630 | 6-scf00352 | 6 |
| AX-157836937 | 17 | 55.428 | KV452884.1 | 10063674 | 6-scf00352 | 6 |
| AX-157836938 | 17 | 55.428 | KV452884.1 | 10065813 | 6-scf00352 | 6 |
| AX-158195217 | 17 | 55.428 | KV452884.1 | 10065917 | 6-scf00352 | 6 |
| AX-157836939 | 17 | 55.428 | KV452884.1 | 10069918 | 6-scf00352 | 6 |
| AX-158195220 | 17 | 55.428 | KV452884.1 | 10071970 | 6-scf00352 | 6 |
| AX-158195221 | 17 | 55.428 | KV452884.1 | 10072516 | 6-scf00352 | 6 |
| AX-158195223 | 17 | 55.428 | KV452884.1 | 10074695 | 6-scf00352 | 6 |
| AX-158195224 | 17 | 55.428 | KV452884.1 | 10076348 | 6-scf00352 | 6 |
| AX-158195225 | 17 | 55.428 | KV452884.1 | 10077842 | 6-scf00352 | 6 |
| AX-158195228 | 17 | 55.428 | KV452884.1 | 10082572 | 6-scf00352 | 6 |
| AX-158195231 | 17 | 55.428 | KV452884.1 | 10083513 | 6-scf00352 | 6 |
| AX-158195232 | 17 | 55.428 | KV452884.1 | 10083775 | 6-scf00352 | 6 |
| AX-157836941 | 17 | 55.428 | KV452884.1 | 10084759 | 6-scf00352 | 6 |
| AX-157866837 | 17 | 55.428 | KV452884.1 | 10086197 | 6-scf00352 | 6 |
| AX-158195234 | 17 | 55.428 | KV452884.1 | 10086653 | 6-scf00352 | 6 |
| AX-158195235 | 17 | 55.428 | KV452884.1 | 10087245 | 6-scf00352 | 6 |
| AX-158195237 | 17 | 55.428 | KV452884.1 | 10092543 | 6-scf00352 | 6 |
| AX-158195240 | 17 | 55.428 | KV452884.1 | 10107594 | 6-scf00352 | 6 |
| AX-158195241 | 17 | 55.428 | KV452884.1 | 10109248 | 6-scf00352 | 6 |
| AX-157709836 | 17 | 55.428 | KV452884.1 | 10110826 | 6-scf00352 | 6 |
| AX-157743177 | 17 | 55.428 | KV452884.1 | 10111411 | 6-scf00352 | 6 |
| AX-158195242 | 17 | 55.428 | KV452884.1 | 10115237 | 6-scf00352 | 6 |
| AX-158195245 | 17 | 55.428 | KV452884.1 | 10119855 | 6-scf00352 | 6 |
| AX-158195250 | 17 | 55.428 | KV452884.1 | 10129936 | 6-scf00352 | 6 |
| AX-158195251 | 17 | 55.428 | KV452884.1 | 10131469 | 6-scf00352 | 6 |
| AX-158195256 | 17 | 55.428 | KV452884.1 | 10136401 | 6-scf00352 | 6 |
| AX-158195257 | 17 | 55.428 | KV452884.1 | 10137681 | 6-scf00352 | 6 |
| AX-158195261 | 17 | 55.428 | KV452884.1 | 10158148 | 6-scf00352 | 6 |
| AX-158195262 | 17 | 55.428 | KV452884.1 | 10158682 | 6-scf00352 | 6 |
| AX-158195264 | 17 | 55.428 | KV452884.1 | 10160048 | 6-scf00352 | 6 |
| AX-158195267 | 17 | 55.428 | KV452884.1 | 10162493 | 6-scf00352 | 6 |
| AX-158195268 | 17 | 55.428 | KV452884.1 | 10163798 | 6-scf00352 | 6 |
| AX-158195274 | 17 | 55.428 | KV452884.1 | 10167492 | 6-scf00352 | 6 |
| AX-158195276 | 17 | 55.428 | KV452884.1 | 10168689 | 6-scf00352 | 6 |
| AX-158195277 | 17 | 55.428 | KV452884.1 | 10169429 | 6-scf00352 | 6 |
| AX-158195280 | 17 | 55.428 | KV452884.1 | 10172789 | 6-scf00352 | 6 |
| AX-158195281 | 17 | 55.428 | KV452884.1 | 10176109 | 6-scf00352 | 6 |
| AX-158195286 | 17 | 55.428 | KV452884.1 | 10182859 | 6-scf00352 | 6 |
| AX-158195288 | 17 | 55.428 | KV452884.1 | 10183503 | 6-scf00352 | 6 |
| AX-158195292 | 17 | 55.428 | KV452884.1 | 10187313 | 6-scf00352 | 6 |
| AX-158195293 | 17 | 55.428 | KV452884.1 | 10187721 | 6-scf00352 | 6 |
| AX-158195295 | 17 | 55.428 | KV452884.1 | 10189564 | 6-scf00352 | 6 |
| AX-158195298 | 17 | 55.428 | KV452884.1 | 10190780 | 6-scf00352 | 6 |
| AX-157836947 | 17 | 55.428 | KV452884.1 | 10191634 | 6-scf00352 | 6 |

|              |    |        |            |          |            |   |
|--------------|----|--------|------------|----------|------------|---|
| AX-158195299 | 17 | 55.428 | KV452884.1 | 10192382 | 6-scf00352 | 6 |
| AX-158195303 | 17 | 55.428 | KV452884.1 | 10196919 | 6-scf00352 | 6 |
| AX-158195307 | 17 | 55.428 | KV452884.1 | 10205789 | 6-scf00352 | 6 |
| AX-158195308 | 17 | 55.428 | KV452884.1 | 10206678 | 6-scf00352 | 6 |
| AX-158195309 | 17 | 55.428 | KV452884.1 | 10207702 | 6-scf00352 | 6 |
| AX-158393639 | 17 | 55.428 | KV452884.1 | 10213741 | 6-scf00352 | 6 |
| AX-158195313 | 17 | 55.428 | KV452884.1 | 10214794 | 6-scf00352 | 6 |
| AX-157836948 | 17 | 55.428 | KV452884.1 | 10215729 | 6-scf00352 | 6 |
| AX-158195314 | 17 | 55.428 | KV452884.1 | 10218101 | 6-scf00352 | 6 |
| AX-158195317 | 17 | 55.428 | KV452884.1 | 10225574 | 6-scf00352 | 6 |
| AX-158195320 | 17 | 55.428 | KV452884.1 | 10228798 | 6-scf00352 | 6 |
| AX-158195321 | 17 | 55.428 | KV452884.1 | 10230054 | 6-scf00352 | 6 |
| AX-158195328 | 17 | 55.428 | KV452884.1 | 10240569 | 6-scf00352 | 6 |
| AX-158195329 | 17 | 55.428 | KV452884.1 | 10240971 | 6-scf00352 | 6 |
| AX-157750707 | 17 | 55.428 | KV452884.1 | 10242036 | 6-scf00352 | 6 |
| AX-158195332 | 17 | 55.428 | KV452884.1 | 10243159 | 6-scf00352 | 6 |
| AX-158195334 | 17 | 55.428 | KV452884.1 | 10247005 | 6-scf00352 | 6 |
| AX-157886970 | 17 | 55.428 | KV452884.1 | 10247746 | 6-scf00352 | 6 |
| AX-158195337 | 17 | 55.428 | KV452884.1 | 10251503 | 6-scf00352 | 6 |
| AX-157836950 | 17 | 55.428 | KV452884.1 | 10253464 | 6-scf00352 | 6 |
| AX-158195339 | 17 | 55.428 | KV452884.1 | 10253584 | 6-scf00352 | 6 |
| AX-157836952 | 17 | 55.428 | KV452884.1 | 10258236 | 6-scf00352 | 6 |
| AX-157836953 | 17 | 55.428 | KV452884.1 | 10258364 | 6-scf00352 | 6 |
| AX-158195341 | 17 | 55.428 | KV452884.1 | 10259873 | 6-scf00352 | 6 |
| AX-158195343 | 17 | 55.428 | KV452884.1 | 10265061 | 6-scf00352 | 6 |
| AX-158195344 | 17 | 55.428 | KV452884.1 | 10265777 | 6-scf00352 | 6 |
| AX-158195345 | 17 | 55.428 | KV452884.1 | 10266033 | 6-scf00352 | 6 |
| AX-158195351 | 17 | 55.428 | KV452884.1 | 10277653 | 6-scf00352 | 6 |
| AX-158195352 | 17 | 55.428 | KV452884.1 | 10280795 | 6-scf00352 | 6 |
| AX-158195358 | 17 | 55.428 | KV452884.1 | 10291753 | 6-scf00352 | 6 |
| AX-158195360 | 17 | 55.428 | KV452884.1 | 10294066 | 6-scf00352 | 6 |
| AX-157725705 | 17 | 55.428 | KV452884.1 | 10305314 | 6-scf00352 | 6 |
| AX-158195368 | 17 | 55.428 | KV452884.1 | 10308167 | 6-scf00352 | 6 |
| AX-157755058 | 17 | 55.428 | KV452884.1 | 10309214 | 6-scf00352 | 6 |
| AX-157722343 | 17 | 55.428 | KV452884.1 | 10309777 | 6-scf00352 | 6 |
| AX-158195369 | 17 | 55.428 | KV452884.1 | 10310041 | 6-scf00352 | 6 |
| AX-157757764 | 17 | 55.428 | KV452884.1 | 10330718 | 6-scf00352 | 6 |
| AX-158195378 | 17 | 55.428 | KV452884.1 | 10330798 | 6-scf00352 | 6 |
| AX-158195381 | 17 | 55.428 | KV452884.1 | 10333904 | 6-scf00352 | 6 |
| AX-158195383 | 17 | 55.428 | KV452884.1 | 10338000 | 6-scf00352 | 6 |
| AX-158195386 | 17 | 55.428 | KV452884.1 | 10342333 | 6-scf00352 | 6 |
| AX-158195388 | 17 | 55.428 | KV452884.1 | 10344758 | 6-scf00352 | 6 |
| AX-158386144 | 17 | 55.428 | KV452884.1 | 10345448 | 6-scf00352 | 6 |
| AX-157771786 | 17 | 55.428 | KV452884.1 | 10351277 | 6-scf00352 | 6 |
| AX-158195394 | 17 | 55.428 | KV452884.1 | 10353959 | 6-scf00352 | 6 |
| AX-158195399 | 17 | 55.428 | KV452884.1 | 10360804 | 6-scf00352 | 6 |
| AX-158195400 | 17 | 55.428 | KV452884.1 | 10362124 | 6-scf00352 | 6 |
| AX-158195402 | 17 | 55.428 | KV452884.1 | 10365013 | 6-scf00352 | 6 |
| AX-158393642 | 17 | 55.428 | KV452884.1 | 10366668 | 6-scf00352 | 6 |
| AX-158195403 | 17 | 55.428 | KV452884.1 | 10367837 | 6-scf00352 | 6 |
| AX-158195404 | 17 | 55.428 | KV452884.1 | 10367909 | 6-scf00352 | 6 |

|              |    |        |            |          |            |   |
|--------------|----|--------|------------|----------|------------|---|
| AX-158195407 | 17 | 55.428 | KV452884.1 | 10374842 | 6-scf00352 | 6 |
| AX-158195408 | 17 | 55.428 | KV452884.1 | 10375141 | 6-scf00352 | 6 |
| AX-158195409 | 17 | 55.428 | KV452884.1 | 10375755 | 6-scf00352 | 6 |
| AX-158195412 | 17 | 55.428 | KV452884.1 | 10377765 | 6-scf00352 | 6 |
| AX-158195414 | 17 | 55.428 | KV452884.1 | 10381804 | 6-scf00352 | 6 |
| AX-158195420 | 17 | 55.428 | KV452884.1 | 10404527 | 6-scf00352 | 6 |
| AX-158195421 | 17 | 55.428 | KV452884.1 | 10404960 | 6-scf00352 | 6 |
| AX-158195422 | 17 | 55.428 | KV452884.1 | 10405164 | 6-scf00352 | 6 |
| AX-158195423 | 17 | 55.428 | KV452884.1 | 10406882 | 6-scf00352 | 6 |
| AX-157836956 | 17 | 55.428 | KV452884.1 | 10414176 | 6-scf00352 | 6 |
| AX-158195424 | 17 | 55.428 | KV452884.1 | 10416164 | 6-scf00352 | 6 |
| AX-158195427 | 17 | 55.428 | KV452884.1 | 10425389 | 6-scf00352 | 6 |
| AX-158195428 | 17 | 55.428 | KV452884.1 | 10426186 | 6-scf00352 | 6 |
| AX-157836961 | 17 | 55.428 | KV452884.1 | 10437595 | 6-scf00352 | 6 |
| AX-157836962 | 17 | 55.428 | KV452884.1 | 10439022 | 6-scf00352 | 6 |
| AX-158195440 | 17 | 55.428 | KV452884.1 | 10446011 | 6-scf00352 | 6 |
| AX-157836965 | 17 | 55.428 | KV452884.1 | 10446302 | 6-scf00352 | 6 |
| AX-158195441 | 17 | 55.428 | KV452884.1 | 10447418 | 6-scf00352 | 6 |
| AX-158195442 | 17 | 55.428 | KV452884.1 | 10447996 | 6-scf00352 | 6 |
| AX-158195445 | 17 | 55.428 | KV452884.1 | 10456806 | 6-scf00352 | 6 |
| AX-158195446 | 17 | 55.428 | KV452884.1 | 10458101 | 6-scf00352 | 6 |
| AX-158195449 | 17 | 55.428 | KV452884.1 | 10463713 | 6-scf00352 | 6 |
| AX-158195453 | 17 | 55.428 | KV452884.1 | 10466277 | 6-scf00352 | 6 |
| AX-157836967 | 17 | 55.428 | KV452884.1 | 10471379 | 6-scf00352 | 6 |
| AX-158195459 | 17 | 55.428 | KV452884.1 | 10474368 | 6-scf00352 | 6 |
| AX-158195460 | 17 | 55.428 | KV452884.1 | 10475323 | 6-scf00352 | 6 |
| AX-158393644 | 17 | 55.428 | KV452884.1 | 10478144 | 6-scf00352 | 6 |
| AX-158195462 | 17 | 55.428 | KV452884.1 | 10478934 | 6-scf00352 | 6 |
| AX-158380699 | 17 | 55.428 | KV452884.1 | 10479805 | 6-scf00352 | 6 |
| AX-158195465 | 17 | 55.428 | KV452884.1 | 10482253 | 6-scf00352 | 6 |
| AX-158195466 | 17 | 55.428 | KV452884.1 | 10483217 | 6-scf00352 | 6 |
| AX-157836968 | 17 | 55.428 | KV452884.1 | 10486217 | 6-scf00352 | 6 |
| AX-158195469 | 17 | 55.428 | KV452884.1 | 10489212 | 6-scf00352 | 6 |
| AX-158195473 | 17 | 55.428 | KV452884.1 | 10496032 | 6-scf00352 | 6 |
| AX-158195474 | 17 | 55.428 | KV452884.1 | 10496750 | 6-scf00352 | 6 |
| AX-158195476 | 17 | 55.428 | KV452884.1 | 10498550 | 6-scf00352 | 6 |
| AX-157872193 | 17 | 55.428 | KV452884.1 | 10499277 | 6-scf00352 | 6 |
| AX-157702156 | 17 | 55.428 | KV452884.1 | 10506184 | 6-scf00352 | 6 |
| AX-158195481 | 17 | 55.428 | KV452884.1 | 10507560 | 6-scf00352 | 6 |
| AX-158195496 | 17 | 55.428 | KV452884.1 | 10534755 | 6-scf00352 | 6 |
| AX-158195498 | 17 | 55.428 | KV452884.1 | 10536446 | 6-scf00352 | 6 |
| AX-158195500 | 17 | 55.428 | KV452884.1 | 10543501 | 6-scf00352 | 6 |
| AX-158195501 | 17 | 55.428 | KV452884.1 | 10546320 | 6-scf00352 | 6 |
| AX-158195502 | 17 | 55.428 | KV452884.1 | 10548300 | 6-scf00352 | 6 |
| AX-158393645 | 17 | 55.428 | KV452884.1 | 10562372 | 6-scf00352 | 6 |
| AX-158195507 | 17 | 55.428 | KV452884.1 | 10563893 | 6-scf00352 | 6 |
| AX-158195508 | 17 | 55.428 | KV452884.1 | 10564627 | 6-scf00352 | 6 |
| AX-158195509 | 17 | 55.428 | KV452884.1 | 10566414 | 6-scf00352 | 6 |
| AX-158195515 | 17 | 55.428 | KV452884.1 | 10580241 | 6-scf00352 | 6 |
| AX-158195518 | 17 | 55.428 | KV452884.1 | 10583372 | 6-scf00352 | 6 |
| AX-158195521 | 17 | 55.428 | KV452884.1 | 10590102 | 6-scf00352 | 6 |

|              |    |        |            |          |            |   |
|--------------|----|--------|------------|----------|------------|---|
| AX-158195524 | 17 | 55.428 | KV452884.1 | 10593533 | 6-scf00352 | 6 |
| AX-158195536 | 17 | 55.428 | KV452884.1 | 10616478 | 6-scf00352 | 6 |
| AX-158195537 | 17 | 55.428 | KV452884.1 | 10617340 | 6-scf00352 | 6 |
| AX-158393652 | 17 | 55.428 | KV452884.1 | 10621835 | 6-scf00352 | 6 |
| AX-157836969 | 17 | 55.428 | KV452884.1 | 10632499 | 6-scf00352 | 6 |
| AX-157872196 | 17 | 55.428 | KV452884.1 | 10632981 | 6-scf00352 | 6 |
| AX-158195541 | 17 | 55.428 | KV452884.1 | 10634629 | 6-scf00352 | 6 |
| AX-158195542 | 17 | 55.428 | KV452884.1 | 10634919 | 6-scf00352 | 6 |
| AX-158195545 | 17 | 55.428 | KV452884.1 | 10638677 | 6-scf00352 | 6 |
| AX-158195546 | 17 | 55.428 | KV452884.1 | 10638919 | 6-scf00352 | 6 |
| AX-157872197 | 17 | 55.428 | KV452884.1 | 10640165 | 6-scf00352 | 6 |
| AX-158195549 | 17 | 55.428 | KV452884.1 | 10640707 | 6-scf00352 | 6 |
| AX-158195551 | 17 | 55.428 | KV452884.1 | 10641256 | 6-scf00352 | 6 |
| AX-158195552 | 17 | 55.428 | KV452884.1 | 10641761 | 6-scf00352 | 6 |
| AX-157872198 | 17 | 55.428 | KV452884.1 | 10645163 | 6-scf00352 | 6 |
| AX-157858928 | 17 | 55.428 | KV452884.1 | 10651730 | 6-scf00352 | 6 |
| AX-158195561 | 17 | 55.428 | KV452884.1 | 10652755 | 6-scf00352 | 6 |
| AX-158195562 | 17 | 55.428 | KV452884.1 | 10655744 | 6-scf00352 | 6 |
| AX-158195565 | 17 | 55.428 | KV452884.1 | 10657177 | 6-scf00352 | 6 |
| AX-158195566 | 17 | 55.428 | KV452884.1 | 10657574 | 6-scf00352 | 6 |
| AX-158195567 | 17 | 55.428 | KV452884.1 | 10660179 | 6-scf00352 | 6 |
| AX-158195568 | 17 | 55.428 | KV452884.1 | 10660760 | 6-scf00352 | 6 |
| AX-158195570 | 17 | 55.428 | KV452884.1 | 10661812 | 6-scf00352 | 6 |
| AX-158195571 | 17 | 55.428 | KV452884.1 | 10663059 | 6-scf00352 | 6 |
| AX-158195573 | 17 | 55.428 | KV452884.1 | 10665534 | 6-scf00352 | 6 |
| AX-158195574 | 17 | 55.428 | KV452884.1 | 10666994 | 6-scf00352 | 6 |
| AX-158195577 | 17 | 55.428 | KV452884.1 | 10669619 | 6-scf00352 | 6 |
| AX-158195578 | 17 | 55.428 | KV452884.1 | 10672232 | 6-scf00352 | 6 |
| AX-158195580 | 17 | 55.428 | KV452884.1 | 10673183 | 6-scf00352 | 6 |
| AX-157836971 | 17 | 55.428 | KV452884.1 | 10675661 | 6-scf00352 | 6 |
| AX-158195582 | 17 | 55.428 | KV452884.1 | 10676574 | 6-scf00352 | 6 |
| AX-158195583 | 17 | 55.428 | KV452884.1 | 10677172 | 6-scf00352 | 6 |
| AX-158195586 | 17 | 55.428 | KV452884.1 | 10679474 | 6-scf00352 | 6 |
| AX-158195588 | 17 | 55.428 | KV452884.1 | 10680475 | 6-scf00352 | 6 |
| AX-158195592 | 17 | 55.428 | KV452884.1 | 10687209 | 6-scf00352 | 6 |
| AX-158195593 | 17 | 55.428 | KV452884.1 | 10688181 | 6-scf00352 | 6 |
| AX-158393653 | 17 | 55.428 | KV452884.1 | 10690627 | 6-scf00352 | 6 |
| AX-157836973 | 17 | 55.428 | KV452884.1 | 10690909 | 6-scf00352 | 6 |
| AX-158195596 | 17 | 55.428 | KV452884.1 | 10691089 | 6-scf00352 | 6 |
| AX-158195597 | 17 | 55.428 | KV452884.1 | 10691977 | 6-scf00352 | 6 |
| AX-158195604 | 17 | 55.428 | KV452884.1 | 10697668 | 6-scf00352 | 6 |
| AX-158195608 | 17 | 55.428 | KV452884.1 | 10701016 | 6-scf00352 | 6 |
| AX-158195609 | 17 | 55.428 | KV452884.1 | 10702214 | 6-scf00352 | 6 |
| AX-158195610 | 17 | 55.428 | KV452884.1 | 10703100 | 6-scf00352 | 6 |
| AX-158195612 | 17 | 55.428 | KV452884.1 | 10703813 | 6-scf00352 | 6 |
| AX-158195613 | 17 | 55.428 | KV452884.1 | 10705609 | 6-scf00352 | 6 |
| AX-158195615 | 17 | 55.428 | KV452884.1 | 10707962 | 6-scf00352 | 6 |
| AX-158195621 | 17 | 55.428 | KV452884.1 | 10710991 | 6-scf00352 | 6 |
| AX-158195633 | 17 | 55.428 | KV452884.1 | 10729353 | 6-scf00352 | 6 |
| AX-158195635 | 17 | 55.428 | KV452884.1 | 10732198 | 6-scf00352 | 6 |
| AX-158414077 | 17 | 55.428 | KV452884.1 | 10742091 | 6-scf00352 | 6 |

|              |    |        |            |          |            |   |
|--------------|----|--------|------------|----------|------------|---|
| AX-158195644 | 17 | 55.428 | KV452884.1 | 10742296 | 6-scf00352 | 6 |
| AX-158195645 | 17 | 55.428 | KV452884.1 | 10742536 | 6-scf00352 | 6 |
| AX-158195647 | 17 | 55.428 | KV452884.1 | 10743891 | 6-scf00352 | 6 |
| AX-158195650 | 17 | 55.428 | KV452884.1 | 10749317 | 6-scf00352 | 6 |
| AX-158195654 | 17 | 55.428 | KV452884.1 | 10754653 | 6-scf00352 | 6 |
| AX-158195661 | 17 | 55.428 | KV452884.1 | 10763969 | 6-scf00352 | 6 |
| AX-158195663 | 17 | 55.428 | KV452884.1 | 10765263 | 6-scf00352 | 6 |
| AX-158195664 | 17 | 55.428 | KV452884.1 | 10766059 | 6-scf00352 | 6 |
| AX-158195667 | 17 | 55.428 | KV452884.1 | 10770235 | 6-scf00352 | 6 |
| AX-158195669 | 17 | 55.428 | KV452884.1 | 10777594 | 6-scf00352 | 6 |
| AX-158195670 | 17 | 55.428 | KV452884.1 | 10777979 | 6-scf00352 | 6 |
| AX-158195671 | 17 | 55.428 | KV452884.1 | 10779571 | 6-scf00352 | 6 |
| AX-158195672 | 17 | 55.428 | KV452884.1 | 10780298 | 6-scf00352 | 6 |
| AX-158195673 | 17 | 55.428 | KV452884.1 | 10781184 | 6-scf00352 | 6 |
| AX-158195681 | 17 | 55.428 | KV452884.1 | 10790022 | 6-scf00352 | 6 |
| AX-158195685 | 17 | 55.428 | KV452884.1 | 10793247 | 6-scf00352 | 6 |
| AX-158195686 | 17 | 55.428 | KV452884.1 | 10793487 | 6-scf00352 | 6 |
| AX-158195687 | 17 | 55.428 | KV452884.1 | 10794377 | 6-scf00352 | 6 |
| AX-158195689 | 17 | 55.428 | KV452884.1 | 10797413 | 6-scf00352 | 6 |
| AX-158195690 | 17 | 55.428 | KV452884.1 | 10798168 | 6-scf00352 | 6 |
| AX-158195696 | 17 | 55.428 | KV452884.1 | 10804552 | 6-scf00352 | 6 |
| AX-158195699 | 17 | 55.428 | KV452884.1 | 10806520 | 6-scf00352 | 6 |
| AX-158195701 | 17 | 55.428 | KV452884.1 | 10807328 | 6-scf00352 | 6 |
| AX-158195703 | 17 | 55.428 | KV452884.1 | 10809827 | 6-scf00352 | 6 |
| AX-158195714 | 17 | 55.428 | KV452884.1 | 10820128 | 6-scf00352 | 6 |
| AX-158195751 | 17 | 55.428 | KV452884.1 | 10845227 | 6-scf00352 | 6 |
| AX-158195781 | 17 | 55.428 | KV452884.1 | 10878809 | 6-scf00352 | 6 |
| AX-158195790 | 17 | 55.428 | KV452884.1 | 10888900 | 6-scf00352 | 6 |
| AX-158195848 | 17 | 55.428 | KV452884.1 | 10949795 | 6-scf00352 | 6 |
| AX-158195931 | 17 | 55.428 | KV452884.1 | 11052806 | 6-scf00352 | 6 |
| AX-158195954 | 17 | 55.428 | KV452884.1 | 11079854 | 6-scf00352 | 6 |
| AX-158195960 | 17 | 55.428 | KV452884.1 | 11087172 | 6-scf00352 | 6 |
| AX-158195964 | 17 | 55.428 | KV452884.1 | 11092981 | 6-scf00352 | 6 |
| AX-158195993 | 17 | 55.428 | KV452884.1 | 11121126 | 6-scf00352 | 6 |
| AX-158196006 | 17 | 55.428 | KV452884.1 | 11135122 | 6-scf00352 | 6 |
| AX-157751740 | 17 | 55.428 | KV452884.1 | 11140469 | 6-scf00352 | 6 |
| AX-158196014 | 17 | 55.428 | KV452884.1 | 11146850 | 6-scf00352 | 6 |
| AX-158196015 | 17 | 55.428 | KV452884.1 | 11147557 | 6-scf00352 | 6 |
| AX-157872212 | 17 | 55.428 | KV452884.1 | 11178433 | 6-scf00352 | 6 |
| AX-158196039 | 17 | 55.428 | KV452884.1 | 11178925 | 6-scf00352 | 6 |
| AX-158196040 | 17 | 55.428 | KV452884.1 | 11180294 | 6-scf00352 | 6 |
| AX-158196041 | 17 | 55.428 | KV452884.1 | 11181560 | 6-scf00352 | 6 |
| AX-157872216 | 17 | 55.428 | KV452884.1 | 11192989 | 6-scf00352 | 6 |
| AX-158196057 | 17 | 55.428 | KV452884.1 | 11193754 | 6-scf00352 | 6 |
| AX-158196061 | 17 | 55.428 | KV452884.1 | 11195956 | 6-scf00352 | 6 |
| AX-157710239 | 17 | 55.428 | KV452884.1 | 11233745 | 6-scf00352 | 6 |
| AX-158196087 | 17 | 55.428 | KV452884.1 | 11236832 | 6-scf00352 | 6 |
| AX-158196089 | 17 | 55.428 | KV452884.1 | 11242571 | 6-scf00352 | 6 |
| AX-157858931 | 17 | 55.428 | KV452884.1 | 11242779 | 6-scf00352 | 6 |
| AX-158414086 | 17 | 55.428 | KV452884.1 | 11247680 | 6-scf00352 | 6 |
| AX-158196102 | 17 | 55.428 | KV452884.1 | 11261628 | 6-scf00352 | 6 |



|              |    |        |            |          |            |   |
|--------------|----|--------|------------|----------|------------|---|
| AX-158196103 | 17 | 55.428 | KV452884.1 | 11268263 | 6-scf00352 | 6 |
| AX-158196108 | 17 | 55.428 | KV452884.1 | 11279352 | 6-scf00352 | 6 |
| AX-158409762 | 17 | 55.428 | KV452884.1 | 11290764 | 6-scf00352 | 6 |
| AX-158196119 | 17 | 55.428 | KV452884.1 | 11304575 | 6-scf00352 | 6 |
| AX-158196122 | 17 | 55.428 | KV452884.1 | 11316614 | 6-scf00352 | 6 |
| AX-158196124 | 17 | 55.428 | KV452884.1 | 11322533 | 6-scf00352 | 6 |
| AX-158196127 | 17 | 55.428 | KV452884.1 | 11324477 | 6-scf00352 | 6 |
| AX-158196145 | 17 | 55.428 | KV452884.1 | 11353128 | 6-scf00352 | 6 |
| AX-158196150 | 17 | 55.428 | KV452884.1 | 11361458 | 6-scf00352 | 6 |
| AX-158196170 | 17 | 55.428 | KV452884.1 | 11430199 | 6-scf00352 | 6 |
| AX-158196196 | 17 | 55.428 | KV452884.1 | 11480322 | 6-scf00352 | 6 |
| AX-158196215 | 17 | 55.428 | KV452884.1 | 11525034 | 6-scf00352 | 6 |
| AX-158196222 | 17 | 55.428 | KV452884.1 | 11536480 | 6-scf00352 | 6 |
| AX-158196224 | 17 | 55.428 | KV452884.1 | 11539729 | 6-scf00352 | 6 |
| AX-158196226 | 17 | 55.428 | KV452884.1 | 11544207 | 6-scf00352 | 6 |
| AX-158196239 | 17 | 55.428 | KV452884.1 | 11555306 | 6-scf00352 | 6 |
| AX-158196264 | 17 | 55.428 | KV452884.1 | 11590431 | 6-scf00352 | 6 |
| AX-158196573 | 17 | 55.428 | KV452884.1 | 12044545 | 6-scf00352 | 6 |
| AX-158196613 | 17 | 55.428 | KV452884.1 | 12166640 | 6-scf00352 | 6 |
| AX-158196615 | 17 | 55.428 | KV452884.1 | 12171127 | 6-scf00352 | 6 |
| AX-158196861 | 17 | 55.428 | KV452884.1 | 12596712 | 6-scf00352 | 6 |
| AX-158199379 | 17 | 55.428 | KV452886.1 | 656428   | 6-scf00354 | 6 |
| AX-158200326 | 17 | 55.428 | KV452887.1 | 1537842  | 6-scf00355 | 6 |
| AX-158201982 | 17 | 55.428 | KV452887.1 | 2647209  | 6-scf00355 | 6 |
| AX-158200723 | 17 | 55.428 | KV452891.1 | 636535   | 6-scf00356 | 6 |
| AX-158200800 | 17 | 55.428 | KV452891.1 | 730374   | 6-scf00356 | 6 |
| AX-158201536 | 17 | 55.428 | KV452891.1 | 2450737  | 6-scf00356 | 6 |
| AX-157879133 | 17 | 55.537 | KV452884.1 | 8882989  | 6-scf00352 | 6 |
| AX-157836872 | 17 | 55.537 | KV452884.1 | 9073083  | 6-scf00352 | 6 |
| AX-158194637 | 17 | 55.537 | KV452884.1 | 9125709  | 6-scf00352 | 6 |
| AX-158194693 | 17 | 55.537 | KV452884.1 | 9214517  | 6-scf00352 | 6 |
| AX-158194851 | 17 | 55.537 | KV452884.1 | 9449905  | 6-scf00352 | 6 |
| AX-158194906 | 17 | 55.537 | KV452884.1 | 9574784  | 6-scf00352 | 6 |
| AX-158195095 | 17 | 55.537 | KV452884.1 | 9903497  | 6-scf00352 | 6 |
| AX-158195131 | 17 | 55.537 | KV452884.1 | 9953585  | 6-scf00352 | 6 |
| AX-158195196 | 17 | 55.537 | KV452884.1 | 10045566 | 6-scf00352 | 6 |
| AX-158195198 | 17 | 55.537 | KV452884.1 | 10046816 | 6-scf00352 | 6 |
| AX-158195204 | 17 | 55.537 | KV452884.1 | 10053877 | 6-scf00352 | 6 |
| AX-157742267 | 17 | 55.537 | KV452884.1 | 10208317 | 6-scf00352 | 6 |
| AX-157866839 | 17 | 55.537 | KV452884.1 | 10412817 | 6-scf00352 | 6 |
| AX-158195429 | 17 | 55.537 | KV452884.1 | 10428982 | 6-scf00352 | 6 |
| AX-157836960 | 17 | 55.537 | KV452884.1 | 10429890 | 6-scf00352 | 6 |
| AX-158195490 | 17 | 55.537 | KV452884.1 | 10523916 | 6-scf00352 | 6 |
| AX-158195594 | 17 | 55.537 | KV452884.1 | 10689035 | 6-scf00352 | 6 |
| AX-158195595 | 17 | 55.537 | KV452884.1 | 10689677 | 6-scf00352 | 6 |
| AX-158195598 | 17 | 55.537 | KV452884.1 | 10692538 | 6-scf00352 | 6 |
| AX-157738663 | 17 | 55.537 | KV452884.1 | 10692656 | 6-scf00352 | 6 |
| AX-158195606 | 17 | 55.537 | KV452884.1 | 10698526 | 6-scf00352 | 6 |
| AX-158195607 | 17 | 55.537 | KV452884.1 | 10699519 | 6-scf00352 | 6 |
| AX-158195625 | 17 | 55.537 | KV452884.1 | 10716145 | 6-scf00352 | 6 |
| AX-158195626 | 17 | 55.537 | KV452884.1 | 10716775 | 6-scf00352 | 6 |

|              |    |        |             |          |            |    |
|--------------|----|--------|-------------|----------|------------|----|
| AX-158195627 | 17 | 55.537 | KV452884.1  | 10717980 | 6-scf00352 | 6  |
| AX-158195629 | 17 | 55.537 | KV452884.1  | 10721888 | 6-scf00352 | 6  |
| AX-158195630 | 17 | 55.537 | KV452884.1  | 10722859 | 6-scf00352 | 6  |
| AX-158195632 | 17 | 55.537 | KV452884.1  | 10728102 | 6-scf00352 | 6  |
| AX-158195634 | 17 | 55.537 | KV452884.1  | 10731593 | 6-scf00352 | 6  |
| AX-158195636 | 17 | 55.537 | KV452884.1  | 10732449 | 6-scf00352 | 6  |
| AX-158195637 | 17 | 55.537 | KV452884.1  | 10734635 | 6-scf00352 | 6  |
| AX-158195646 | 17 | 55.537 | KV452884.1  | 10743010 | 6-scf00352 | 6  |
| AX-158195660 | 17 | 55.537 | KV452884.1  | 10761949 | 6-scf00352 | 6  |
| AX-158195680 | 17 | 55.537 | KV452884.1  | 10789325 | 6-scf00352 | 6  |
| AX-158195682 | 17 | 55.537 | KV452884.1  | 10791837 | 6-scf00352 | 6  |
| AX-158195684 | 17 | 55.537 | KV452884.1  | 10792810 | 6-scf00352 | 6  |
| AX-158195688 | 17 | 55.537 | KV452884.1  | 10795019 | 6-scf00352 | 6  |
| AX-158195691 | 17 | 55.537 | KV452884.1  | 10798919 | 6-scf00352 | 6  |
| AX-158195717 | 17 | 55.537 | KV452884.1  | 10820881 | 6-scf00352 | 6  |
| AX-158195730 | 17 | 55.537 | KV452884.1  | 10831349 | 6-scf00352 | 6  |
| AX-158195735 | 17 | 55.537 | KV452884.1  | 10834957 | 6-scf00352 | 6  |
| AX-158195736 | 17 | 55.537 | KV452884.1  | 10835343 | 6-scf00352 | 6  |
| AX-158195750 | 17 | 55.537 | KV452884.1  | 10844806 | 6-scf00352 | 6  |
| AX-158195762 | 17 | 55.537 | KV452884.1  | 10857253 | 6-scf00352 | 6  |
| AX-158195766 | 17 | 55.537 | KV452884.1  | 10861223 | 6-scf00352 | 6  |
| AX-157756232 | 17 | 55.537 | KV452884.1  | 10897285 | 6-scf00352 | 6  |
| AX-158195813 | 17 | 55.537 | KV452884.1  | 10912824 | 6-scf00352 | 6  |
| AX-158195814 | 17 | 55.537 | KV452884.1  | 10913336 | 6-scf00352 | 6  |
| AX-158195819 | 17 | 55.537 | KV452884.1  | 10915568 | 6-scf00352 | 6  |
| AX-158195836 | 17 | 55.537 | KV452884.1  | 10938079 | 6-scf00352 | 6  |
| AX-158195838 | 17 | 55.537 | KV452884.1  | 10940043 | 6-scf00352 | 6  |
| AX-158195846 | 17 | 55.537 | KV452884.1  | 10947422 | 6-scf00352 | 6  |
| AX-158195849 | 17 | 55.537 | KV452884.1  | 10951008 | 6-scf00352 | 6  |
| AX-157858930 | 17 | 55.537 | KV452884.1  | 11001993 | 6-scf00352 | 6  |
| AX-158195948 | 17 | 55.537 | KV452884.1  | 11073014 | 6-scf00352 | 6  |
| AX-158196008 | 17 | 55.537 | KV452884.1  | 11137987 | 6-scf00352 | 6  |
| AX-158196147 | 17 | 55.537 | KV452884.1  | 11357163 | 6-scf00352 | 6  |
| AX-157837115 | 17 | 55.537 | KV452884.1  | 12644174 | 6-scf00352 | 6  |
| AX-158197009 | 17 | 55.537 | KV452884.1  | 12794323 | 6-scf00352 | 6  |
| AX-157722510 | 17 | 55.537 | KV452884.1  | 16714525 | 6-scf00352 | 6  |
| AX-158200693 | 17 | 55.537 | KV452891.1  | 599420   | 6-scf00356 | 6  |
| AX-157706306 | 17 | 55.537 | 3ML01032023 | 212      | scf07640_1 | UN |
| AX-157706307 | 17 | 55.537 | 3ML01032023 | 439      | scf07640_1 | UN |
| AX-158195856 | 17 | 55.547 | KV452884.1  | 10958564 | 6-scf00352 | 6  |
| AX-158195728 | 17 | 55.556 | KV452884.1  | 10829920 | 6-scf00352 | 6  |
| AX-158195731 | 17 | 55.556 | KV452884.1  | 10832263 | 6-scf00352 | 6  |
| AX-158195741 | 17 | 55.556 | KV452884.1  | 10840056 | 6-scf00352 | 6  |
| AX-157754987 | 17 | 55.556 | KV452884.1  | 10858608 | 6-scf00352 | 6  |
| AX-158195795 | 17 | 55.556 | KV452884.1  | 10891767 | 6-scf00352 | 6  |
| AX-158195830 | 17 | 55.556 | KV452884.1  | 10927818 | 6-scf00352 | 6  |
| AX-158195851 | 17 | 55.556 | KV452884.1  | 10952551 | 6-scf00352 | 6  |
| AX-158195859 | 17 | 55.556 | KV452884.1  | 10962389 | 6-scf00352 | 6  |
| AX-157836983 | 17 | 55.556 | KV452884.1  | 10972505 | 6-scf00352 | 6  |
| AX-158195886 | 17 | 55.556 | KV452884.1  | 11001093 | 6-scf00352 | 6  |
| AX-157872202 | 17 | 55.556 | KV452884.1  | 11010657 | 6-scf00352 | 6  |

|              |    |        |            |          |            |   |
|--------------|----|--------|------------|----------|------------|---|
| AX-157836992 | 17 | 55.556 | KV452884.1 | 11014962 | 6-scf00352 | 6 |
| AX-157836993 | 17 | 55.556 | KV452884.1 | 11016486 | 6-scf00352 | 6 |
| AX-158195885 | 17 | 55.568 | KV452884.1 | 11000149 | 6-scf00352 | 6 |
| AX-158195904 | 17 | 55.581 | KV452884.1 | 11018474 | 6-scf00352 | 6 |
| AX-158195906 | 17 | 55.594 | KV452884.1 | 11024479 | 6-scf00352 | 6 |
| AX-158195915 | 17 | 55.608 | KV452884.1 | 11033259 | 6-scf00352 | 6 |
| AX-158414081 | 17 | 55.626 | KV452884.1 | 11047092 | 6-scf00352 | 6 |
| AX-158194447 | 17 | 55.646 | KV452884.1 | 8868812  | 6-scf00352 | 6 |
| AX-158195029 | 17 | 55.646 | KV452884.1 | 9776210  | 6-scf00352 | 6 |
| AX-157836943 | 17 | 55.646 | KV452884.1 | 10121114 | 6-scf00352 | 6 |
| AX-157836949 | 17 | 55.646 | KV452884.1 | 10220294 | 6-scf00352 | 6 |
| AX-157886971 | 17 | 55.646 | KV452884.1 | 10365731 | 6-scf00352 | 6 |
| AX-157836957 | 17 | 55.646 | KV452884.1 | 10416541 | 6-scf00352 | 6 |
| AX-158195435 | 17 | 55.646 | KV452884.1 | 10440712 | 6-scf00352 | 6 |
| AX-157836970 | 17 | 55.646 | KV452884.1 | 10645871 | 6-scf00352 | 6 |
| AX-158195675 | 17 | 55.646 | KV452884.1 | 10782079 | 6-scf00352 | 6 |
| AX-157703628 | 17 | 55.646 | KV452884.1 | 10818329 | 6-scf00352 | 6 |
| AX-158195725 | 17 | 55.646 | KV452884.1 | 10826737 | 6-scf00352 | 6 |
| AX-158195737 | 17 | 55.646 | KV452884.1 | 10836351 | 6-scf00352 | 6 |
| AX-158195738 | 17 | 55.646 | KV452884.1 | 10836893 | 6-scf00352 | 6 |
| AX-158195745 | 17 | 55.646 | KV452884.1 | 10841375 | 6-scf00352 | 6 |
| AX-158195749 | 17 | 55.646 | KV452884.1 | 10844440 | 6-scf00352 | 6 |
| AX-158195760 | 17 | 55.646 | KV452884.1 | 10854186 | 6-scf00352 | 6 |
| AX-158195764 | 17 | 55.646 | KV452884.1 | 10860155 | 6-scf00352 | 6 |
| AX-158195770 | 17 | 55.646 | KV452884.1 | 10866182 | 6-scf00352 | 6 |
| AX-158195777 | 17 | 55.646 | KV452884.1 | 10872554 | 6-scf00352 | 6 |
| AX-158414080 | 17 | 55.646 | KV452884.1 | 10875359 | 6-scf00352 | 6 |
| AX-158195782 | 17 | 55.646 | KV452884.1 | 10879859 | 6-scf00352 | 6 |
| AX-158195784 | 17 | 55.646 | KV452884.1 | 10883776 | 6-scf00352 | 6 |
| AX-158195789 | 17 | 55.646 | KV452884.1 | 10886953 | 6-scf00352 | 6 |
| AX-158195794 | 17 | 55.646 | KV452884.1 | 10891399 | 6-scf00352 | 6 |
| AX-158195810 | 17 | 55.646 | KV452884.1 | 10909903 | 6-scf00352 | 6 |
| AX-158195824 | 17 | 55.646 | KV452884.1 | 10921435 | 6-scf00352 | 6 |
| AX-158195853 | 17 | 55.646 | KV452884.1 | 10955601 | 6-scf00352 | 6 |
| AX-158195860 | 17 | 55.646 | KV452884.1 | 10966933 | 6-scf00352 | 6 |
| AX-158195864 | 17 | 55.646 | KV452884.1 | 10974704 | 6-scf00352 | 6 |
| AX-158195868 | 17 | 55.646 | KV452884.1 | 10979811 | 6-scf00352 | 6 |
| AX-157836985 | 17 | 55.646 | KV452884.1 | 10981876 | 6-scf00352 | 6 |
| AX-158195871 | 17 | 55.646 | KV452884.1 | 10982669 | 6-scf00352 | 6 |
| AX-158195872 | 17 | 55.646 | KV452884.1 | 10983012 | 6-scf00352 | 6 |
| AX-158195879 | 17 | 55.646 | KV452884.1 | 10990157 | 6-scf00352 | 6 |
| AX-158195888 | 17 | 55.646 | KV452884.1 | 11002929 | 6-scf00352 | 6 |
| AX-158195890 | 17 | 55.646 | KV452884.1 | 11004553 | 6-scf00352 | 6 |
| AX-158195893 | 17 | 55.646 | KV452884.1 | 11006340 | 6-scf00352 | 6 |
| AX-157797396 | 17 | 55.646 | KV452884.1 | 11014663 | 6-scf00352 | 6 |
| AX-158195908 | 17 | 55.646 | KV452884.1 | 11027076 | 6-scf00352 | 6 |
| AX-158195910 | 17 | 55.646 | KV452884.1 | 11028975 | 6-scf00352 | 6 |
| AX-158195912 | 17 | 55.646 | KV452884.1 | 11030674 | 6-scf00352 | 6 |
| AX-157773053 | 17 | 55.646 | KV452884.1 | 11047581 | 6-scf00352 | 6 |
| AX-158195929 | 17 | 55.646 | KV452884.1 | 11049789 | 6-scf00352 | 6 |
| AX-158195939 | 17 | 55.646 | KV452884.1 | 11062103 | 6-scf00352 | 6 |

|              |    |        |            |          |            |   |
|--------------|----|--------|------------|----------|------------|---|
| AX-158195944 | 17 | 55.646 | KV452884.1 | 11068898 | 6-scf00352 | 6 |
| AX-157837001 | 17 | 55.646 | KV452884.1 | 11075091 | 6-scf00352 | 6 |
| AX-158195965 | 17 | 55.646 | KV452884.1 | 11093581 | 6-scf00352 | 6 |
| AX-158195971 | 17 | 55.646 | KV452884.1 | 11097774 | 6-scf00352 | 6 |
| AX-158195977 | 17 | 55.646 | KV452884.1 | 11107263 | 6-scf00352 | 6 |
| AX-158195984 | 17 | 55.646 | KV452884.1 | 11114591 | 6-scf00352 | 6 |
| AX-158195988 | 17 | 55.646 | KV452884.1 | 11116981 | 6-scf00352 | 6 |
| AX-158195990 | 17 | 55.646 | KV452884.1 | 11119448 | 6-scf00352 | 6 |
| AX-157872208 | 17 | 55.646 | KV452884.1 | 11121628 | 6-scf00352 | 6 |
| AX-158196000 | 17 | 55.646 | KV452884.1 | 11131223 | 6-scf00352 | 6 |
| AX-158196001 | 17 | 55.646 | KV452884.1 | 11131651 | 6-scf00352 | 6 |
| AX-158196010 | 17 | 55.646 | KV452884.1 | 11140715 | 6-scf00352 | 6 |
| AX-158196033 | 17 | 55.646 | KV452884.1 | 11172085 | 6-scf00352 | 6 |
| AX-158196042 | 17 | 55.646 | KV452884.1 | 11181827 | 6-scf00352 | 6 |
| AX-158196043 | 17 | 55.646 | KV452884.1 | 11182132 | 6-scf00352 | 6 |
| AX-157837014 | 17 | 55.646 | KV452884.1 | 11296351 | 6-scf00352 | 6 |
| AX-158196240 | 17 | 55.646 | KV452884.1 | 11562590 | 6-scf00352 | 6 |
| AX-158196241 | 17 | 55.646 | KV452884.1 | 11562908 | 6-scf00352 | 6 |
| AX-158196245 | 17 | 55.646 | KV452884.1 | 11568374 | 6-scf00352 | 6 |
| AX-158196251 | 17 | 55.646 | KV452884.1 | 11576290 | 6-scf00352 | 6 |
| AX-158196533 | 17 | 55.646 | KV452884.1 | 11952068 | 6-scf00352 | 6 |
| AX-158196678 | 17 | 55.646 | KV452884.1 | 12356425 | 6-scf00352 | 6 |
| AX-158196716 | 17 | 55.646 | KV452884.1 | 12422345 | 6-scf00352 | 6 |
| AX-158196895 | 17 | 55.646 | KV452884.1 | 12651446 | 6-scf00352 | 6 |
| AX-158418284 | 17 | 55.667 | KV452884.1 | 11183188 | 6-scf00352 | 6 |
| AX-158196086 | 17 | 55.688 | KV452884.1 | 11235146 | 6-scf00352 | 6 |
| AX-158196106 | 17 | 55.712 | KV452884.1 | 11274401 | 6-scf00352 | 6 |
| AX-158196107 | 17 | 55.726 | KV452884.1 | 11276140 | 6-scf00352 | 6 |
| AX-158196109 | 17 | 55.739 | KV452884.1 | 11281920 | 6-scf00352 | 6 |
| AX-158195553 | 17 | 55.75  | KV452884.1 | 10642642 | 6-scf00352 | 6 |
| AX-158195919 | 17 | 55.75  | KV452884.1 | 11036862 | 6-scf00352 | 6 |
| AX-158196120 | 17 | 55.75  | KV452884.1 | 11313902 | 6-scf00352 | 6 |
| AX-158195203 | 17 | 55.755 | KV452884.1 | 10053370 | 6-scf00352 | 6 |
| AX-158195471 | 17 | 55.755 | KV452884.1 | 10493801 | 6-scf00352 | 6 |
| AX-158414091 | 17 | 55.755 | KV452884.1 | 11291437 | 6-scf00352 | 6 |
| AX-158196123 | 17 | 55.755 | KV452884.1 | 11318870 | 6-scf00352 | 6 |
| AX-158196126 | 17 | 55.755 | KV452884.1 | 11324069 | 6-scf00352 | 6 |
| AX-158196229 | 17 | 55.755 | KV452884.1 | 11547025 | 6-scf00352 | 6 |
| AX-158194573 | 17 | 55.865 | KV452884.1 | 9036616  | 6-scf00352 | 6 |
| AX-158194578 | 17 | 55.865 | KV452884.1 | 9047223  | 6-scf00352 | 6 |
| AX-158194660 | 17 | 55.865 | KV452884.1 | 9173344  | 6-scf00352 | 6 |
| AX-158194769 | 17 | 55.865 | KV452884.1 | 9315223  | 6-scf00352 | 6 |
| AX-158195296 | 17 | 55.865 | KV452884.1 | 10189893 | 6-scf00352 | 6 |
| AX-158195349 | 17 | 55.865 | KV452884.1 | 10271102 | 6-scf00352 | 6 |
| AX-158195505 | 17 | 55.865 | KV452884.1 | 10558371 | 6-scf00352 | 6 |
| AX-158195640 | 17 | 55.865 | KV452884.1 | 10739548 | 6-scf00352 | 6 |
| AX-157836975 | 17 | 55.865 | KV452884.1 | 10746985 | 6-scf00352 | 6 |
| AX-158195940 | 17 | 55.865 | KV452884.1 | 11063164 | 6-scf00352 | 6 |
| AX-158196037 | 17 | 55.865 | KV452884.1 | 11176650 | 6-scf00352 | 6 |
| AX-158196090 | 17 | 55.865 | KV452884.1 | 11242989 | 6-scf00352 | 6 |
| AX-157837016 | 17 | 55.865 | KV452884.1 | 11339423 | 6-scf00352 | 6 |

|              |    |        |            |          |            |   |
|--------------|----|--------|------------|----------|------------|---|
| AX-158196139 | 17 | 55.865 | KV452884.1 | 11343977 | 6-scf00352 | 6 |
| AX-158196141 | 17 | 55.865 | KV452884.1 | 11346033 | 6-scf00352 | 6 |
| AX-158196142 | 17 | 55.865 | KV452884.1 | 11346676 | 6-scf00352 | 6 |
| AX-158196143 | 17 | 55.865 | KV452884.1 | 11349360 | 6-scf00352 | 6 |
| AX-157837018 | 17 | 55.865 | KV452884.1 | 11351193 | 6-scf00352 | 6 |
| AX-158196148 | 17 | 55.865 | KV452884.1 | 11359332 | 6-scf00352 | 6 |
| AX-158196154 | 17 | 55.865 | KV452884.1 | 11372853 | 6-scf00352 | 6 |
| AX-157858932 | 17 | 55.865 | KV452884.1 | 11396927 | 6-scf00352 | 6 |
| AX-158196160 | 17 | 55.865 | KV452884.1 | 11403594 | 6-scf00352 | 6 |
| AX-158196161 | 17 | 55.865 | KV452884.1 | 11407502 | 6-scf00352 | 6 |
| AX-158196162 | 17 | 55.865 | KV452884.1 | 11408280 | 6-scf00352 | 6 |
| AX-157858933 | 17 | 55.865 | KV452884.1 | 11421493 | 6-scf00352 | 6 |
| AX-158196184 | 17 | 55.865 | KV452884.1 | 11462341 | 6-scf00352 | 6 |
| AX-158196192 | 17 | 55.865 | KV452884.1 | 11476317 | 6-scf00352 | 6 |
| AX-158196194 | 17 | 55.865 | KV452884.1 | 11478662 | 6-scf00352 | 6 |
| AX-158196199 | 17 | 55.865 | KV452884.1 | 11486447 | 6-scf00352 | 6 |
| AX-158196200 | 17 | 55.865 | KV452884.1 | 11488253 | 6-scf00352 | 6 |
| AX-158196205 | 17 | 55.865 | KV452884.1 | 11501185 | 6-scf00352 | 6 |
| AX-158196214 | 17 | 55.865 | KV452884.1 | 11524546 | 6-scf00352 | 6 |
| AX-158196216 | 17 | 55.865 | KV452884.1 | 11527070 | 6-scf00352 | 6 |
| AX-158196217 | 17 | 55.865 | KV452884.1 | 11527916 | 6-scf00352 | 6 |
| AX-158196221 | 17 | 55.865 | KV452884.1 | 11534745 | 6-scf00352 | 6 |
| AX-157720701 | 17 | 55.865 | KV452884.1 | 11537495 | 6-scf00352 | 6 |
| AX-158196502 | 17 | 55.865 | KV452884.1 | 11919597 | 6-scf00352 | 6 |
| AX-158196608 | 17 | 55.865 | KV452884.1 | 12128930 | 6-scf00352 | 6 |
| AX-158196725 | 17 | 55.865 | KV452884.1 | 12434129 | 6-scf00352 | 6 |
| AX-158194480 | 17 | 56.192 | KV452884.1 | 8903211  | 6-scf00352 | 6 |
| AX-158195331 | 17 | 56.192 | KV452884.1 | 10242162 | 6-scf00352 | 6 |
| AX-158195705 | 17 | 56.192 | KV452884.1 | 10811366 | 6-scf00352 | 6 |
| AX-158195706 | 17 | 56.192 | KV452884.1 | 10811839 | 6-scf00352 | 6 |
| AX-158195710 | 17 | 56.192 | KV452884.1 | 10816804 | 6-scf00352 | 6 |
| AX-158195712 | 17 | 56.192 | KV452884.1 | 10818924 | 6-scf00352 | 6 |
| AX-158195713 | 17 | 56.192 | KV452884.1 | 10819874 | 6-scf00352 | 6 |
| AX-158195715 | 17 | 56.192 | KV452884.1 | 10820273 | 6-scf00352 | 6 |
| AX-158195716 | 17 | 56.192 | KV452884.1 | 10820646 | 6-scf00352 | 6 |
| AX-158195719 | 17 | 56.192 | KV452884.1 | 10823203 | 6-scf00352 | 6 |
| AX-158195720 | 17 | 56.192 | KV452884.1 | 10823780 | 6-scf00352 | 6 |
| AX-158195721 | 17 | 56.192 | KV452884.1 | 10824452 | 6-scf00352 | 6 |
| AX-158195723 | 17 | 56.192 | KV452884.1 | 10826126 | 6-scf00352 | 6 |
| AX-158195724 | 17 | 56.192 | KV452884.1 | 10826472 | 6-scf00352 | 6 |
| AX-158195726 | 17 | 56.192 | KV452884.1 | 10827587 | 6-scf00352 | 6 |
| AX-158195727 | 17 | 56.192 | KV452884.1 | 10827935 | 6-scf00352 | 6 |
| AX-157836980 | 17 | 56.192 | KV452884.1 | 10828601 | 6-scf00352 | 6 |
| AX-158195729 | 17 | 56.192 | KV452884.1 | 10831009 | 6-scf00352 | 6 |
| AX-158195732 | 17 | 56.192 | KV452884.1 | 10832942 | 6-scf00352 | 6 |
| AX-158195733 | 17 | 56.192 | KV452884.1 | 10834455 | 6-scf00352 | 6 |
| AX-158195734 | 17 | 56.192 | KV452884.1 | 10834677 | 6-scf00352 | 6 |
| AX-158195742 | 17 | 56.192 | KV452884.1 | 10840428 | 6-scf00352 | 6 |
| AX-158195743 | 17 | 56.192 | KV452884.1 | 10840631 | 6-scf00352 | 6 |
| AX-158195744 | 17 | 56.192 | KV452884.1 | 10840901 | 6-scf00352 | 6 |
| AX-158195746 | 17 | 56.192 | KV452884.1 | 10841654 | 6-scf00352 | 6 |

|              |    |        |            |          |            |   |
|--------------|----|--------|------------|----------|------------|---|
| AX-158195747 | 17 | 56.192 | KV452884.1 | 10842683 | 6-scf00352 | 6 |
| AX-158195754 | 17 | 56.192 | KV452884.1 | 10847294 | 6-scf00352 | 6 |
| AX-158195756 | 17 | 56.192 | KV452884.1 | 10848358 | 6-scf00352 | 6 |
| AX-158195757 | 17 | 56.192 | KV452884.1 | 10848627 | 6-scf00352 | 6 |
| AX-158195758 | 17 | 56.192 | KV452884.1 | 10849659 | 6-scf00352 | 6 |
| AX-158195759 | 17 | 56.192 | KV452884.1 | 10851991 | 6-scf00352 | 6 |
| AX-158393655 | 17 | 56.192 | KV452884.1 | 10854924 | 6-scf00352 | 6 |
| AX-158195761 | 17 | 56.192 | KV452884.1 | 10855141 | 6-scf00352 | 6 |
| AX-157836981 | 17 | 56.192 | KV452884.1 | 10855176 | 6-scf00352 | 6 |
| AX-157836982 | 17 | 56.192 | KV452884.1 | 10855408 | 6-scf00352 | 6 |
| AX-158195765 | 17 | 56.192 | KV452884.1 | 10860593 | 6-scf00352 | 6 |
| AX-157702509 | 17 | 56.192 | KV452884.1 | 10862196 | 6-scf00352 | 6 |
| AX-158195767 | 17 | 56.192 | KV452884.1 | 10864302 | 6-scf00352 | 6 |
| AX-158195768 | 17 | 56.192 | KV452884.1 | 10864653 | 6-scf00352 | 6 |
| AX-158195769 | 17 | 56.192 | KV452884.1 | 10865088 | 6-scf00352 | 6 |
| AX-158393656 | 17 | 56.192 | KV452884.1 | 10866527 | 6-scf00352 | 6 |
| AX-158195772 | 17 | 56.192 | KV452884.1 | 10868251 | 6-scf00352 | 6 |
| AX-158195773 | 17 | 56.192 | KV452884.1 | 10868869 | 6-scf00352 | 6 |
| AX-158195774 | 17 | 56.192 | KV452884.1 | 10869055 | 6-scf00352 | 6 |
| AX-158195776 | 17 | 56.192 | KV452884.1 | 10871829 | 6-scf00352 | 6 |
| AX-158195778 | 17 | 56.192 | KV452884.1 | 10876047 | 6-scf00352 | 6 |
| AX-158195779 | 17 | 56.192 | KV452884.1 | 10876406 | 6-scf00352 | 6 |
| AX-158393658 | 17 | 56.192 | KV452884.1 | 10878989 | 6-scf00352 | 6 |
| AX-158195785 | 17 | 56.192 | KV452884.1 | 10884159 | 6-scf00352 | 6 |
| AX-158195786 | 17 | 56.192 | KV452884.1 | 10885291 | 6-scf00352 | 6 |
| AX-158195787 | 17 | 56.192 | KV452884.1 | 10885931 | 6-scf00352 | 6 |
| AX-158195788 | 17 | 56.192 | KV452884.1 | 10886616 | 6-scf00352 | 6 |
| AX-158195791 | 17 | 56.192 | KV452884.1 | 10889276 | 6-scf00352 | 6 |
| AX-158195792 | 17 | 56.192 | KV452884.1 | 10890315 | 6-scf00352 | 6 |
| AX-158195796 | 17 | 56.192 | KV452884.1 | 10892409 | 6-scf00352 | 6 |
| AX-158195798 | 17 | 56.192 | KV452884.1 | 10894068 | 6-scf00352 | 6 |
| AX-158195799 | 17 | 56.192 | KV452884.1 | 10894345 | 6-scf00352 | 6 |
| AX-158195801 | 17 | 56.192 | KV452884.1 | 10896491 | 6-scf00352 | 6 |
| AX-158195802 | 17 | 56.192 | KV452884.1 | 10898054 | 6-scf00352 | 6 |
| AX-158195803 | 17 | 56.192 | KV452884.1 | 10902704 | 6-scf00352 | 6 |
| AX-158393659 | 17 | 56.192 | KV452884.1 | 10902805 | 6-scf00352 | 6 |
| AX-158195804 | 17 | 56.192 | KV452884.1 | 10903370 | 6-scf00352 | 6 |
| AX-158195806 | 17 | 56.192 | KV452884.1 | 10905968 | 6-scf00352 | 6 |
| AX-158195807 | 17 | 56.192 | KV452884.1 | 10908275 | 6-scf00352 | 6 |
| AX-158195808 | 17 | 56.192 | KV452884.1 | 10909052 | 6-scf00352 | 6 |
| AX-158195809 | 17 | 56.192 | KV452884.1 | 10909499 | 6-scf00352 | 6 |
| AX-158195811 | 17 | 56.192 | KV452884.1 | 10910624 | 6-scf00352 | 6 |
| AX-158393660 | 17 | 56.192 | KV452884.1 | 10913013 | 6-scf00352 | 6 |
| AX-158195816 | 17 | 56.192 | KV452884.1 | 10914299 | 6-scf00352 | 6 |
| AX-158195817 | 17 | 56.192 | KV452884.1 | 10914890 | 6-scf00352 | 6 |
| AX-158393661 | 17 | 56.192 | KV452884.1 | 10915130 | 6-scf00352 | 6 |
| AX-158195821 | 17 | 56.192 | KV452884.1 | 10917778 | 6-scf00352 | 6 |
| AX-158195822 | 17 | 56.192 | KV452884.1 | 10919164 | 6-scf00352 | 6 |
| AX-158195825 | 17 | 56.192 | KV452884.1 | 10921797 | 6-scf00352 | 6 |
| AX-158195826 | 17 | 56.192 | KV452884.1 | 10922795 | 6-scf00352 | 6 |
| AX-158195827 | 17 | 56.192 | KV452884.1 | 10924027 | 6-scf00352 | 6 |

|              |    |        |            |          |            |   |
|--------------|----|--------|------------|----------|------------|---|
| AX-158195828 | 17 | 56.192 | KV452884.1 | 10925769 | 6-scf00352 | 6 |
| AX-158195829 | 17 | 56.192 | KV452884.1 | 10926319 | 6-scf00352 | 6 |
| AX-158393662 | 17 | 56.192 | KV452884.1 | 10929165 | 6-scf00352 | 6 |
| AX-158195832 | 17 | 56.192 | KV452884.1 | 10930257 | 6-scf00352 | 6 |
| AX-158393663 | 17 | 56.192 | KV452884.1 | 10931636 | 6-scf00352 | 6 |
| AX-158195835 | 17 | 56.192 | KV452884.1 | 10932579 | 6-scf00352 | 6 |
| AX-158195837 | 17 | 56.192 | KV452884.1 | 10939110 | 6-scf00352 | 6 |
| AX-158195839 | 17 | 56.192 | KV452884.1 | 10941504 | 6-scf00352 | 6 |
| AX-158195840 | 17 | 56.192 | KV452884.1 | 10942079 | 6-scf00352 | 6 |
| AX-158195841 | 17 | 56.192 | KV452884.1 | 10943583 | 6-scf00352 | 6 |
| AX-158195842 | 17 | 56.192 | KV452884.1 | 10944676 | 6-scf00352 | 6 |
| AX-158195844 | 17 | 56.192 | KV452884.1 | 10945871 | 6-scf00352 | 6 |
| AX-158195845 | 17 | 56.192 | KV452884.1 | 10947041 | 6-scf00352 | 6 |
| AX-158195847 | 17 | 56.192 | KV452884.1 | 10948985 | 6-scf00352 | 6 |
| AX-158195850 | 17 | 56.192 | KV452884.1 | 10951530 | 6-scf00352 | 6 |
| AX-158195852 | 17 | 56.192 | KV452884.1 | 10953563 | 6-scf00352 | 6 |
| AX-158195854 | 17 | 56.192 | KV452884.1 | 10956845 | 6-scf00352 | 6 |
| AX-158195855 | 17 | 56.192 | KV452884.1 | 10957995 | 6-scf00352 | 6 |
| AX-158195857 | 17 | 56.192 | KV452884.1 | 10961379 | 6-scf00352 | 6 |
| AX-158195858 | 17 | 56.192 | KV452884.1 | 10961646 | 6-scf00352 | 6 |
| AX-157872200 | 17 | 56.192 | KV452884.1 | 10964185 | 6-scf00352 | 6 |
| AX-158195861 | 17 | 56.192 | KV452884.1 | 10967078 | 6-scf00352 | 6 |
| AX-158195862 | 17 | 56.192 | KV452884.1 | 10973479 | 6-scf00352 | 6 |
| AX-158195863 | 17 | 56.192 | KV452884.1 | 10973958 | 6-scf00352 | 6 |
| AX-157836984 | 17 | 56.192 | KV452884.1 | 10977486 | 6-scf00352 | 6 |
| AX-158195865 | 17 | 56.192 | KV452884.1 | 10977955 | 6-scf00352 | 6 |
| AX-158195866 | 17 | 56.192 | KV452884.1 | 10978413 | 6-scf00352 | 6 |
| AX-158195867 | 17 | 56.192 | KV452884.1 | 10979315 | 6-scf00352 | 6 |
| AX-158195869 | 17 | 56.192 | KV452884.1 | 10981216 | 6-scf00352 | 6 |
| AX-158195870 | 17 | 56.192 | KV452884.1 | 10982080 | 6-scf00352 | 6 |
| AX-158195873 | 17 | 56.192 | KV452884.1 | 10983290 | 6-scf00352 | 6 |
| AX-157836986 | 17 | 56.192 | KV452884.1 | 10983485 | 6-scf00352 | 6 |
| AX-158195874 | 17 | 56.192 | KV452884.1 | 10984212 | 6-scf00352 | 6 |
| AX-157836987 | 17 | 56.192 | KV452884.1 | 10984671 | 6-scf00352 | 6 |
| AX-158195876 | 17 | 56.192 | KV452884.1 | 10986074 | 6-scf00352 | 6 |
| AX-158195878 | 17 | 56.192 | KV452884.1 | 10989036 | 6-scf00352 | 6 |
| AX-158195880 | 17 | 56.192 | KV452884.1 | 10990547 | 6-scf00352 | 6 |
| AX-158418281 | 17 | 56.192 | KV452884.1 | 10991675 | 6-scf00352 | 6 |
| AX-158195882 | 17 | 56.192 | KV452884.1 | 10996675 | 6-scf00352 | 6 |
| AX-157836988 | 17 | 56.192 | KV452884.1 | 10998621 | 6-scf00352 | 6 |
| AX-158195883 | 17 | 56.192 | KV452884.1 | 10998739 | 6-scf00352 | 6 |
| AX-157872201 | 17 | 56.192 | KV452884.1 | 11000675 | 6-scf00352 | 6 |
| AX-158195887 | 17 | 56.192 | KV452884.1 | 11002464 | 6-scf00352 | 6 |
| AX-158195889 | 17 | 56.192 | KV452884.1 | 11004276 | 6-scf00352 | 6 |
| AX-158195891 | 17 | 56.192 | KV452884.1 | 11005404 | 6-scf00352 | 6 |
| AX-158195892 | 17 | 56.192 | KV452884.1 | 11006031 | 6-scf00352 | 6 |
| AX-157836990 | 17 | 56.192 | KV452884.1 | 11009134 | 6-scf00352 | 6 |
| AX-158195896 | 17 | 56.192 | KV452884.1 | 11009701 | 6-scf00352 | 6 |
| AX-157836991 | 17 | 56.192 | KV452884.1 | 11009904 | 6-scf00352 | 6 |
| AX-158195897 | 17 | 56.192 | KV452884.1 | 11012051 | 6-scf00352 | 6 |
| AX-158195898 | 17 | 56.192 | KV452884.1 | 11012451 | 6-scf00352 | 6 |

|              |    |        |            |          |            |   |
|--------------|----|--------|------------|----------|------------|---|
| AX-158195899 | 17 | 56.192 | KV452884.1 | 11013181 | 6-scf00352 | 6 |
| AX-158195900 | 17 | 56.192 | KV452884.1 | 11014033 | 6-scf00352 | 6 |
| AX-158195901 | 17 | 56.192 | KV452884.1 | 11015430 | 6-scf00352 | 6 |
| AX-158195902 | 17 | 56.192 | KV452884.1 | 11016130 | 6-scf00352 | 6 |
| AX-157836994 | 17 | 56.192 | KV452884.1 | 11017451 | 6-scf00352 | 6 |
| AX-158195903 | 17 | 56.192 | KV452884.1 | 11017928 | 6-scf00352 | 6 |
| AX-157836995 | 17 | 56.192 | KV452884.1 | 11019239 | 6-scf00352 | 6 |
| AX-158195905 | 17 | 56.192 | KV452884.1 | 11024106 | 6-scf00352 | 6 |
| AX-158195909 | 17 | 56.192 | KV452884.1 | 11028410 | 6-scf00352 | 6 |
| AX-158195911 | 17 | 56.192 | KV452884.1 | 11029571 | 6-scf00352 | 6 |
| AX-158195913 | 17 | 56.192 | KV452884.1 | 11031054 | 6-scf00352 | 6 |
| AX-158195914 | 17 | 56.192 | KV452884.1 | 11031293 | 6-scf00352 | 6 |
| AX-158195916 | 17 | 56.192 | KV452884.1 | 11033708 | 6-scf00352 | 6 |
| AX-158195918 | 17 | 56.192 | KV452884.1 | 11036059 | 6-scf00352 | 6 |
| AX-158195920 | 17 | 56.192 | KV452884.1 | 11037562 | 6-scf00352 | 6 |
| AX-158195921 | 17 | 56.192 | KV452884.1 | 11039352 | 6-scf00352 | 6 |
| AX-158196185 | 17 | 56.192 | KV452884.1 | 11465926 | 6-scf00352 | 6 |
| AX-158196258 | 17 | 56.192 | KV452884.1 | 11587890 | 6-scf00352 | 6 |
| AX-158196259 | 17 | 56.192 | KV452884.1 | 11588102 | 6-scf00352 | 6 |
| AX-158196266 | 17 | 56.192 | KV452884.1 | 11593832 | 6-scf00352 | 6 |
| AX-158196267 | 17 | 56.192 | KV452884.1 | 11598826 | 6-scf00352 | 6 |
| AX-157837034 | 17 | 56.192 | KV452884.1 | 11602253 | 6-scf00352 | 6 |
| AX-158393678 | 17 | 56.192 | KV452884.1 | 11610032 | 6-scf00352 | 6 |
| AX-157754374 | 17 | 56.192 | KV452884.1 | 11612275 | 6-scf00352 | 6 |
| AX-158196280 | 17 | 56.192 | KV452884.1 | 11618456 | 6-scf00352 | 6 |
| AX-158380703 | 17 | 56.192 | KV452884.1 | 11630718 | 6-scf00352 | 6 |
| AX-158196291 | 17 | 56.192 | KV452884.1 | 11632011 | 6-scf00352 | 6 |
| AX-158196292 | 17 | 56.192 | KV452884.1 | 11633421 | 6-scf00352 | 6 |
| AX-158196295 | 17 | 56.192 | KV452884.1 | 11637015 | 6-scf00352 | 6 |
| AX-157837036 | 17 | 56.192 | KV452884.1 | 11638424 | 6-scf00352 | 6 |
| AX-158196297 | 17 | 56.192 | KV452884.1 | 11640080 | 6-scf00352 | 6 |
| AX-158196300 | 17 | 56.192 | KV452884.1 | 11643275 | 6-scf00352 | 6 |
| AX-157837039 | 17 | 56.192 | KV452884.1 | 11646037 | 6-scf00352 | 6 |
| AX-158196303 | 17 | 56.192 | KV452884.1 | 11646552 | 6-scf00352 | 6 |
| AX-158196304 | 17 | 56.192 | KV452884.1 | 11647285 | 6-scf00352 | 6 |
| AX-158196310 | 17 | 56.192 | KV452884.1 | 11658839 | 6-scf00352 | 6 |
| AX-158196314 | 17 | 56.192 | KV452884.1 | 11667462 | 6-scf00352 | 6 |
| AX-158196315 | 17 | 56.192 | KV452884.1 | 11668678 | 6-scf00352 | 6 |
| AX-158196320 | 17 | 56.192 | KV452884.1 | 11676267 | 6-scf00352 | 6 |
| AX-158196324 | 17 | 56.192 | KV452884.1 | 11683505 | 6-scf00352 | 6 |
| AX-158196332 | 17 | 56.192 | KV452884.1 | 11699573 | 6-scf00352 | 6 |
| AX-157837042 | 17 | 56.192 | KV452884.1 | 11707403 | 6-scf00352 | 6 |
| AX-157837043 | 17 | 56.192 | KV452884.1 | 11707811 | 6-scf00352 | 6 |
| AX-158196336 | 17 | 56.192 | KV452884.1 | 11710349 | 6-scf00352 | 6 |
| AX-158196337 | 17 | 56.192 | KV452884.1 | 11711819 | 6-scf00352 | 6 |
| AX-157858939 | 17 | 56.192 | KV452884.1 | 11714400 | 6-scf00352 | 6 |
| AX-158196338 | 17 | 56.192 | KV452884.1 | 11714878 | 6-scf00352 | 6 |
| AX-158196339 | 17 | 56.192 | KV452884.1 | 11716381 | 6-scf00352 | 6 |
| AX-157837045 | 17 | 56.192 | KV452884.1 | 11719247 | 6-scf00352 | 6 |
| AX-157837046 | 17 | 56.192 | KV452884.1 | 11720204 | 6-scf00352 | 6 |
| AX-158196341 | 17 | 56.192 | KV452884.1 | 11720714 | 6-scf00352 | 6 |



|              |    |        |            |          |            |   |
|--------------|----|--------|------------|----------|------------|---|
| AX-158196342 | 17 | 56.192 | KV452884.1 | 11722112 | 6-scf00352 | 6 |
| AX-158196343 | 17 | 56.192 | KV452884.1 | 11722829 | 6-scf00352 | 6 |
| AX-158196344 | 17 | 56.192 | KV452884.1 | 11724794 | 6-scf00352 | 6 |
| AX-158196345 | 17 | 56.192 | KV452884.1 | 11726100 | 6-scf00352 | 6 |
| AX-157837048 | 17 | 56.192 | KV452884.1 | 11733320 | 6-scf00352 | 6 |
| AX-158196353 | 17 | 56.192 | KV452884.1 | 11736774 | 6-scf00352 | 6 |
| AX-158196354 | 17 | 56.192 | KV452884.1 | 11737306 | 6-scf00352 | 6 |
| AX-158196355 | 17 | 56.192 | KV452884.1 | 11738097 | 6-scf00352 | 6 |
| AX-158196356 | 17 | 56.192 | KV452884.1 | 11740717 | 6-scf00352 | 6 |
| AX-158196358 | 17 | 56.192 | KV452884.1 | 11742323 | 6-scf00352 | 6 |
| AX-158196360 | 17 | 56.192 | KV452884.1 | 11744896 | 6-scf00352 | 6 |
| AX-158196361 | 17 | 56.192 | KV452884.1 | 11745873 | 6-scf00352 | 6 |
| AX-158196364 | 17 | 56.192 | KV452884.1 | 11747819 | 6-scf00352 | 6 |
| AX-158196367 | 17 | 56.192 | KV452884.1 | 11754935 | 6-scf00352 | 6 |
| AX-158196369 | 17 | 56.192 | KV452884.1 | 11757883 | 6-scf00352 | 6 |
| AX-158196370 | 17 | 56.192 | KV452884.1 | 11758602 | 6-scf00352 | 6 |
| AX-157872230 | 17 | 56.192 | KV452884.1 | 11759688 | 6-scf00352 | 6 |
| AX-157701764 | 17 | 56.192 | KV452884.1 | 11760563 | 6-scf00352 | 6 |
| AX-158196376 | 17 | 56.192 | KV452884.1 | 11762109 | 6-scf00352 | 6 |
| AX-158196380 | 17 | 56.192 | KV452884.1 | 11767373 | 6-scf00352 | 6 |
| AX-157837049 | 17 | 56.192 | KV452884.1 | 11769156 | 6-scf00352 | 6 |
| AX-158196389 | 17 | 56.192 | KV452884.1 | 11780176 | 6-scf00352 | 6 |
| AX-158196390 | 17 | 56.192 | KV452884.1 | 11781262 | 6-scf00352 | 6 |
| AX-158196392 | 17 | 56.192 | KV452884.1 | 11782766 | 6-scf00352 | 6 |
| AX-158196394 | 17 | 56.192 | KV452884.1 | 11784753 | 6-scf00352 | 6 |
| AX-158196396 | 17 | 56.192 | KV452884.1 | 11785973 | 6-scf00352 | 6 |
| AX-158196397 | 17 | 56.192 | KV452884.1 | 11786818 | 6-scf00352 | 6 |
| AX-158196398 | 17 | 56.192 | KV452884.1 | 11788173 | 6-scf00352 | 6 |
| AX-158196400 | 17 | 56.192 | KV452884.1 | 11791020 | 6-scf00352 | 6 |
| AX-157757786 | 17 | 56.192 | KV452884.1 | 11792576 | 6-scf00352 | 6 |
| AX-158386149 | 17 | 56.192 | KV452884.1 | 11797378 | 6-scf00352 | 6 |
| AX-158196405 | 17 | 56.192 | KV452884.1 | 11798711 | 6-scf00352 | 6 |
| AX-158196406 | 17 | 56.192 | KV452884.1 | 11799803 | 6-scf00352 | 6 |
| AX-158196409 | 17 | 56.192 | KV452884.1 | 11805581 | 6-scf00352 | 6 |
| AX-157773938 | 17 | 56.192 | KV452884.1 | 11807075 | 6-scf00352 | 6 |
| AX-158196413 | 17 | 56.192 | KV452884.1 | 11810555 | 6-scf00352 | 6 |
| AX-158196415 | 17 | 56.192 | KV452884.1 | 11817109 | 6-scf00352 | 6 |
| AX-158196447 | 17 | 56.192 | KV452884.1 | 11845876 | 6-scf00352 | 6 |
| AX-158196450 | 17 | 56.192 | KV452884.1 | 11847733 | 6-scf00352 | 6 |
| AX-158196453 | 17 | 56.192 | KV452884.1 | 11853820 | 6-scf00352 | 6 |
| AX-158196459 | 17 | 56.192 | KV452884.1 | 11868424 | 6-scf00352 | 6 |
| AX-158196465 | 17 | 56.192 | KV452884.1 | 11879185 | 6-scf00352 | 6 |
| AX-158196471 | 17 | 56.192 | KV452884.1 | 11884888 | 6-scf00352 | 6 |
| AX-157708248 | 17 | 56.192 | KV452884.1 | 11891583 | 6-scf00352 | 6 |
| AX-158196579 | 17 | 56.192 | KV452884.1 | 12060599 | 6-scf00352 | 6 |
| AX-158196586 | 17 | 56.192 | KV452884.1 | 12079031 | 6-scf00352 | 6 |
| AX-158196590 | 17 | 56.192 | KV452884.1 | 12098960 | 6-scf00352 | 6 |
| AX-158196616 | 17 | 56.192 | KV452884.1 | 12173120 | 6-scf00352 | 6 |
| AX-158196629 | 17 | 56.192 | KV452884.1 | 12237896 | 6-scf00352 | 6 |
| AX-158196642 | 17 | 56.192 | KV452884.1 | 12267366 | 6-scf00352 | 6 |
| AX-157745438 | 17 | 56.192 | KV452884.1 | 12270450 | 6-scf00352 | 6 |

|              |    |        |             |          |            |    |
|--------------|----|--------|-------------|----------|------------|----|
| AX-158196644 | 17 | 56.192 | KV452884.1  | 12270861 | 6-scf00352 | 6  |
| AX-158196650 | 17 | 56.192 | KV452884.1  | 12282042 | 6-scf00352 | 6  |
| AX-157741381 | 17 | 56.192 | KV452884.1  | 12283026 | 6-scf00352 | 6  |
| AX-158196651 | 17 | 56.192 | KV452884.1  | 12283410 | 6-scf00352 | 6  |
| AX-158196653 | 17 | 56.192 | KV452884.1  | 12283933 | 6-scf00352 | 6  |
| AX-158196659 | 17 | 56.192 | KV452884.1  | 12286336 | 6-scf00352 | 6  |
| AX-158196660 | 17 | 56.192 | KV452884.1  | 12288456 | 6-scf00352 | 6  |
| AX-158196667 | 17 | 56.192 | KV452884.1  | 12310554 | 6-scf00352 | 6  |
| AX-157837067 | 17 | 56.192 | KV452884.1  | 12332946 | 6-scf00352 | 6  |
| AX-158196675 | 17 | 56.192 | KV452884.1  | 12354805 | 6-scf00352 | 6  |
| AX-157837084 | 17 | 56.192 | KV452884.1  | 12379503 | 6-scf00352 | 6  |
| AX-158196690 | 17 | 56.192 | KV452884.1  | 12389993 | 6-scf00352 | 6  |
| AX-158196692 | 17 | 56.192 | KV452884.1  | 12391201 | 6-scf00352 | 6  |
| AX-157837090 | 17 | 56.192 | KV452884.1  | 12413919 | 6-scf00352 | 6  |
| AX-157837091 | 17 | 56.192 | KV452884.1  | 12415036 | 6-scf00352 | 6  |
| AX-158196733 | 17 | 56.192 | KV452884.1  | 12446827 | 6-scf00352 | 6  |
| AX-158196746 | 17 | 56.192 | KV452884.1  | 12457429 | 6-scf00352 | 6  |
| AX-158196774 | 17 | 56.192 | KV452884.1  | 12481107 | 6-scf00352 | 6  |
| AX-157722070 | 17 | 56.192 | KV452884.1  | 12481702 | 6-scf00352 | 6  |
| AX-158196776 | 17 | 56.192 | KV452884.1  | 12482590 | 6-scf00352 | 6  |
| AX-158196799 | 17 | 56.192 | KV452884.1  | 12508071 | 6-scf00352 | 6  |
| AX-158196800 | 17 | 56.192 | KV452884.1  | 12508510 | 6-scf00352 | 6  |
| AX-158196822 | 17 | 56.192 | KV452884.1  | 12528179 | 6-scf00352 | 6  |
| AX-158198244 | 17 | 56.192 | KV452884.1  | 16000187 | 6-scf00352 | 6  |
| AX-158200211 | 17 | 56.192 | KV452887.1  | 1223916  | 6-scf00355 | 6  |
| AX-157726897 | 17 | 56.192 | KV452891.1  | 2595017  | 6-scf00356 | 6  |
| AX-157705412 | 17 | 56.192 | 3ML01029712 | 102      | scf05334_1 | UN |
| AX-157705413 | 17 | 56.192 | 3ML01029712 | 718      | scf05334_1 | UN |
| AX-157705414 | 17 | 56.192 | 3ML01029712 | 790      | scf05334_1 | UN |
| AX-157706809 | 17 | 56.192 | 3ML01032959 | 107      | scf08591_1 | UN |
| AX-157706810 | 17 | 56.192 | 3ML01032959 | 439      | scf08591_1 | UN |
| AX-158196468 | 17 | 56.248 | KV452884.1  | 11882408 | 6-scf00352 | 6  |
| AX-158195539 | 17 | 56.301 | KV452884.1  | 10628462 | 6-scf00352 | 6  |
| AX-158196035 | 17 | 56.301 | KV452884.1  | 11175725 | 6-scf00352 | 6  |
| AX-158196083 | 17 | 56.301 | KV452884.1  | 11228911 | 6-scf00352 | 6  |
| AX-158414098 | 17 | 56.301 | KV452884.1  | 11599860 | 6-scf00352 | 6  |
| AX-158196268 | 17 | 56.301 | KV452884.1  | 11602112 | 6-scf00352 | 6  |
| AX-157837033 | 17 | 56.301 | KV452884.1  | 11602158 | 6-scf00352 | 6  |
| AX-158393677 | 17 | 56.301 | KV452884.1  | 11605481 | 6-scf00352 | 6  |
| AX-158196270 | 17 | 56.301 | KV452884.1  | 11605967 | 6-scf00352 | 6  |
| AX-158196276 | 17 | 56.301 | KV452884.1  | 11613635 | 6-scf00352 | 6  |
| AX-158196277 | 17 | 56.301 | KV452884.1  | 11614171 | 6-scf00352 | 6  |
| AX-158196278 | 17 | 56.301 | KV452884.1  | 11614663 | 6-scf00352 | 6  |
| AX-157872227 | 17 | 56.301 | KV452884.1  | 11616874 | 6-scf00352 | 6  |
| AX-158196279 | 17 | 56.301 | KV452884.1  | 11618247 | 6-scf00352 | 6  |
| AX-158196281 | 17 | 56.301 | KV452884.1  | 11619318 | 6-scf00352 | 6  |
| AX-158196282 | 17 | 56.301 | KV452884.1  | 11620069 | 6-scf00352 | 6  |
| AX-158196283 | 17 | 56.301 | KV452884.1  | 11621874 | 6-scf00352 | 6  |
| AX-158196285 | 17 | 56.301 | KV452884.1  | 11625668 | 6-scf00352 | 6  |
| AX-158196287 | 17 | 56.301 | KV452884.1  | 11626186 | 6-scf00352 | 6  |
| AX-158196294 | 17 | 56.301 | KV452884.1  | 11635188 | 6-scf00352 | 6  |

|              |    |        |            |          |            |   |
|--------------|----|--------|------------|----------|------------|---|
| AX-158196296 | 17 | 56.301 | KV452884.1 | 11639125 | 6-scf00352 | 6 |
| AX-158196298 | 17 | 56.301 | KV452884.1 | 11642492 | 6-scf00352 | 6 |
| AX-158196299 | 17 | 56.301 | KV452884.1 | 11642700 | 6-scf00352 | 6 |
| AX-158196302 | 17 | 56.301 | KV452884.1 | 11644408 | 6-scf00352 | 6 |
| AX-157837038 | 17 | 56.301 | KV452884.1 | 11645585 | 6-scf00352 | 6 |
| AX-158196323 | 17 | 56.301 | KV452884.1 | 11679482 | 6-scf00352 | 6 |
| AX-157716102 | 17 | 56.301 | KV452884.1 | 11708111 | 6-scf00352 | 6 |
| AX-158196347 | 17 | 56.301 | KV452884.1 | 11727772 | 6-scf00352 | 6 |
| AX-158196348 | 17 | 56.301 | KV452884.1 | 11728634 | 6-scf00352 | 6 |
| AX-158196375 | 17 | 56.301 | KV452884.1 | 11761813 | 6-scf00352 | 6 |
| AX-158196382 | 17 | 56.301 | KV452884.1 | 11769799 | 6-scf00352 | 6 |
| AX-158196386 | 17 | 56.301 | KV452884.1 | 11777815 | 6-scf00352 | 6 |
| AX-158196401 | 17 | 56.301 | KV452884.1 | 11791942 | 6-scf00352 | 6 |
| AX-158196402 | 17 | 56.301 | KV452884.1 | 11792829 | 6-scf00352 | 6 |
| AX-158196416 | 17 | 56.301 | KV452884.1 | 11818068 | 6-scf00352 | 6 |
| AX-158196417 | 17 | 56.301 | KV452884.1 | 11818414 | 6-scf00352 | 6 |
| AX-158196419 | 17 | 56.301 | KV452884.1 | 11820743 | 6-scf00352 | 6 |
| AX-157745387 | 17 | 56.301 | KV452884.1 | 11832685 | 6-scf00352 | 6 |
| AX-158196451 | 17 | 56.301 | KV452884.1 | 11849120 | 6-scf00352 | 6 |
| AX-158196455 | 17 | 56.301 | KV452884.1 | 11860874 | 6-scf00352 | 6 |
| AX-158196457 | 17 | 56.301 | KV452884.1 | 11864484 | 6-scf00352 | 6 |
| AX-158196458 | 17 | 56.301 | KV452884.1 | 11865411 | 6-scf00352 | 6 |
| AX-158196467 | 17 | 56.301 | KV452884.1 | 11881680 | 6-scf00352 | 6 |
| AX-158196469 | 17 | 56.301 | KV452884.1 | 11883498 | 6-scf00352 | 6 |
| AX-158196470 | 17 | 56.301 | KV452884.1 | 11884230 | 6-scf00352 | 6 |
| AX-158196472 | 17 | 56.301 | KV452884.1 | 11885301 | 6-scf00352 | 6 |
| AX-158196473 | 17 | 56.301 | KV452884.1 | 11885714 | 6-scf00352 | 6 |
| AX-158196476 | 17 | 56.301 | KV452884.1 | 11889390 | 6-scf00352 | 6 |
| AX-158196477 | 17 | 56.301 | KV452884.1 | 11891659 | 6-scf00352 | 6 |
| AX-158196478 | 17 | 56.301 | KV452884.1 | 11892845 | 6-scf00352 | 6 |
| AX-158196479 | 17 | 56.301 | KV452884.1 | 11895191 | 6-scf00352 | 6 |
| AX-158196480 | 17 | 56.301 | KV452884.1 | 11895384 | 6-scf00352 | 6 |
| AX-157837058 | 17 | 56.301 | KV452884.1 | 11895803 | 6-scf00352 | 6 |
| AX-158196481 | 17 | 56.301 | KV452884.1 | 11895922 | 6-scf00352 | 6 |
| AX-158196482 | 17 | 56.301 | KV452884.1 | 11897135 | 6-scf00352 | 6 |
| AX-158196483 | 17 | 56.301 | KV452884.1 | 11898669 | 6-scf00352 | 6 |
| AX-158196484 | 17 | 56.301 | KV452884.1 | 11898914 | 6-scf00352 | 6 |
| AX-158196485 | 17 | 56.301 | KV452884.1 | 11900038 | 6-scf00352 | 6 |
| AX-158196486 | 17 | 56.301 | KV452884.1 | 11901830 | 6-scf00352 | 6 |
| AX-158196488 | 17 | 56.301 | KV452884.1 | 11902569 | 6-scf00352 | 6 |
| AX-157837059 | 17 | 56.301 | KV452884.1 | 11904202 | 6-scf00352 | 6 |
| AX-158196491 | 17 | 56.301 | KV452884.1 | 11905734 | 6-scf00352 | 6 |
| AX-158196492 | 17 | 56.301 | KV452884.1 | 11909267 | 6-scf00352 | 6 |
| AX-158196493 | 17 | 56.301 | KV452884.1 | 11909760 | 6-scf00352 | 6 |
| AX-158196494 | 17 | 56.301 | KV452884.1 | 11911770 | 6-scf00352 | 6 |
| AX-158196496 | 17 | 56.301 | KV452884.1 | 11912840 | 6-scf00352 | 6 |
| AX-158196497 | 17 | 56.301 | KV452884.1 | 11914033 | 6-scf00352 | 6 |
| AX-158196499 | 17 | 56.301 | KV452884.1 | 11916691 | 6-scf00352 | 6 |
| AX-158196500 | 17 | 56.301 | KV452884.1 | 11918362 | 6-scf00352 | 6 |
| AX-158196501 | 17 | 56.301 | KV452884.1 | 11919148 | 6-scf00352 | 6 |
| AX-158196506 | 17 | 56.301 | KV452884.1 | 11925037 | 6-scf00352 | 6 |

|              |    |        |            |          |            |   |
|--------------|----|--------|------------|----------|------------|---|
| AX-158196507 | 17 | 56.301 | KV452884.1 | 11926443 | 6-scf00352 | 6 |
| AX-158196508 | 17 | 56.301 | KV452884.1 | 11926670 | 6-scf00352 | 6 |
| AX-157707824 | 17 | 56.301 | KV452884.1 | 11927332 | 6-scf00352 | 6 |
| AX-158196512 | 17 | 56.301 | KV452884.1 | 11935778 | 6-scf00352 | 6 |
| AX-158196513 | 17 | 56.301 | KV452884.1 | 11936192 | 6-scf00352 | 6 |
| AX-158196514 | 17 | 56.301 | KV452884.1 | 11936714 | 6-scf00352 | 6 |
| AX-158196515 | 17 | 56.301 | KV452884.1 | 11937226 | 6-scf00352 | 6 |
| AX-158196517 | 17 | 56.301 | KV452884.1 | 11939299 | 6-scf00352 | 6 |
| AX-158196518 | 17 | 56.301 | KV452884.1 | 11939498 | 6-scf00352 | 6 |
| AX-158196524 | 17 | 56.301 | KV452884.1 | 11942955 | 6-scf00352 | 6 |
| AX-158196525 | 17 | 56.301 | KV452884.1 | 11943462 | 6-scf00352 | 6 |
| AX-158196527 | 17 | 56.301 | KV452884.1 | 11943934 | 6-scf00352 | 6 |
| AX-158196528 | 17 | 56.301 | KV452884.1 | 11945083 | 6-scf00352 | 6 |
| AX-158196530 | 17 | 56.301 | KV452884.1 | 11949760 | 6-scf00352 | 6 |
| AX-158196534 | 17 | 56.301 | KV452884.1 | 11953105 | 6-scf00352 | 6 |
| AX-158196536 | 17 | 56.301 | KV452884.1 | 11954772 | 6-scf00352 | 6 |
| AX-158196537 | 17 | 56.301 | KV452884.1 | 11955126 | 6-scf00352 | 6 |
| AX-158196538 | 17 | 56.301 | KV452884.1 | 11956647 | 6-scf00352 | 6 |
| AX-158196539 | 17 | 56.301 | KV452884.1 | 11957638 | 6-scf00352 | 6 |
| AX-158196543 | 17 | 56.301 | KV452884.1 | 11961726 | 6-scf00352 | 6 |
| AX-158196544 | 17 | 56.301 | KV452884.1 | 11962366 | 6-scf00352 | 6 |
| AX-158196545 | 17 | 56.301 | KV452884.1 | 11962593 | 6-scf00352 | 6 |
| AX-158196546 | 17 | 56.301 | KV452884.1 | 11963175 | 6-scf00352 | 6 |
| AX-158196547 | 17 | 56.301 | KV452884.1 | 11963600 | 6-scf00352 | 6 |
| AX-158196548 | 17 | 56.301 | KV452884.1 | 11964167 | 6-scf00352 | 6 |
| AX-157837062 | 17 | 56.301 | KV452884.1 | 11966839 | 6-scf00352 | 6 |
| AX-158196549 | 17 | 56.301 | KV452884.1 | 11967312 | 6-scf00352 | 6 |
| AX-158196550 | 17 | 56.301 | KV452884.1 | 11967745 | 6-scf00352 | 6 |
| AX-158196551 | 17 | 56.301 | KV452884.1 | 11969142 | 6-scf00352 | 6 |
| AX-158196552 | 17 | 56.301 | KV452884.1 | 11970241 | 6-scf00352 | 6 |
| AX-158196555 | 17 | 56.301 | KV452884.1 | 11971618 | 6-scf00352 | 6 |
| AX-157837063 | 17 | 56.301 | KV452884.1 | 11973110 | 6-scf00352 | 6 |
| AX-158414100 | 17 | 56.301 | KV452884.1 | 11974808 | 6-scf00352 | 6 |
| AX-158196556 | 17 | 56.301 | KV452884.1 | 11974960 | 6-scf00352 | 6 |
| AX-158196557 | 17 | 56.301 | KV452884.1 | 11976611 | 6-scf00352 | 6 |
| AX-158196558 | 17 | 56.301 | KV452884.1 | 11980049 | 6-scf00352 | 6 |
| AX-158196559 | 17 | 56.301 | KV452884.1 | 11980606 | 6-scf00352 | 6 |
| AX-157837064 | 17 | 56.301 | KV452884.1 | 11981391 | 6-scf00352 | 6 |
| AX-158196560 | 17 | 56.301 | KV452884.1 | 11983920 | 6-scf00352 | 6 |
| AX-157837065 | 17 | 56.301 | KV452884.1 | 11989212 | 6-scf00352 | 6 |
| AX-158196563 | 17 | 56.301 | KV452884.1 | 12001634 | 6-scf00352 | 6 |
| AX-158196564 | 17 | 56.301 | KV452884.1 | 12002039 | 6-scf00352 | 6 |
| AX-158196578 | 17 | 56.301 | KV452884.1 | 12060057 | 6-scf00352 | 6 |
| AX-158196582 | 17 | 56.301 | KV452884.1 | 12065699 | 6-scf00352 | 6 |
| AX-158196584 | 17 | 56.301 | KV452884.1 | 12068694 | 6-scf00352 | 6 |
| AX-158196585 | 17 | 56.301 | KV452884.1 | 12077610 | 6-scf00352 | 6 |
| AX-157837066 | 17 | 56.301 | KV452884.1 | 12090400 | 6-scf00352 | 6 |
| AX-158196618 | 17 | 56.301 | KV452884.1 | 12179868 | 6-scf00352 | 6 |
| AX-158196622 | 17 | 56.301 | KV452884.1 | 12198999 | 6-scf00352 | 6 |
| AX-158196624 | 17 | 56.301 | KV452884.1 | 12208974 | 6-scf00352 | 6 |
| AX-158196627 | 17 | 56.301 | KV452884.1 | 12222577 | 6-scf00352 | 6 |

|              |    |        |            |          |            |   |
|--------------|----|--------|------------|----------|------------|---|
| AX-158196637 | 17 | 56.301 | KV452884.1 | 12253349 | 6-scf00352 | 6 |
| AX-158196643 | 17 | 56.301 | KV452884.1 | 12268983 | 6-scf00352 | 6 |
| AX-158196646 | 17 | 56.301 | KV452884.1 | 12277888 | 6-scf00352 | 6 |
| AX-158196647 | 17 | 56.301 | KV452884.1 | 12279087 | 6-scf00352 | 6 |
| AX-158196648 | 17 | 56.301 | KV452884.1 | 12279317 | 6-scf00352 | 6 |
| AX-157725000 | 17 | 56.301 | KV452884.1 | 12282101 | 6-scf00352 | 6 |
| AX-158196652 | 17 | 56.301 | KV452884.1 | 12283575 | 6-scf00352 | 6 |
| AX-158196661 | 17 | 56.301 | KV452884.1 | 12292279 | 6-scf00352 | 6 |
| AX-158196668 | 17 | 56.301 | KV452884.1 | 12325947 | 6-scf00352 | 6 |
| AX-158196670 | 17 | 56.301 | KV452884.1 | 12338970 | 6-scf00352 | 6 |
| AX-158196686 | 17 | 56.301 | KV452884.1 | 12375999 | 6-scf00352 | 6 |
| AX-158196688 | 17 | 56.301 | KV452884.1 | 12377980 | 6-scf00352 | 6 |
| AX-158196695 | 17 | 56.301 | KV452884.1 | 12396133 | 6-scf00352 | 6 |
| AX-158196703 | 17 | 56.301 | KV452884.1 | 12406410 | 6-scf00352 | 6 |
| AX-158196704 | 17 | 56.301 | KV452884.1 | 12407737 | 6-scf00352 | 6 |
| AX-158196705 | 17 | 56.301 | KV452884.1 | 12408188 | 6-scf00352 | 6 |
| AX-158196706 | 17 | 56.301 | KV452884.1 | 12411224 | 6-scf00352 | 6 |
| AX-158196707 | 17 | 56.301 | KV452884.1 | 12411801 | 6-scf00352 | 6 |
| AX-158196710 | 17 | 56.301 | KV452884.1 | 12414528 | 6-scf00352 | 6 |
| AX-158196711 | 17 | 56.301 | KV452884.1 | 12415448 | 6-scf00352 | 6 |
| AX-157837092 | 17 | 56.301 | KV452884.1 | 12415680 | 6-scf00352 | 6 |
| AX-158196713 | 17 | 56.301 | KV452884.1 | 12419215 | 6-scf00352 | 6 |
| AX-158196714 | 17 | 56.301 | KV452884.1 | 12420010 | 6-scf00352 | 6 |
| AX-158196715 | 17 | 56.301 | KV452884.1 | 12421412 | 6-scf00352 | 6 |
| AX-158196718 | 17 | 56.301 | KV452884.1 | 12430319 | 6-scf00352 | 6 |
| AX-158196719 | 17 | 56.301 | KV452884.1 | 12430655 | 6-scf00352 | 6 |
| AX-158196720 | 17 | 56.301 | KV452884.1 | 12430934 | 6-scf00352 | 6 |
| AX-157837095 | 17 | 56.301 | KV452884.1 | 12431412 | 6-scf00352 | 6 |
| AX-158196721 | 17 | 56.301 | KV452884.1 | 12431882 | 6-scf00352 | 6 |
| AX-158196722 | 17 | 56.301 | KV452884.1 | 12432212 | 6-scf00352 | 6 |
| AX-158196724 | 17 | 56.301 | KV452884.1 | 12432947 | 6-scf00352 | 6 |
| AX-158196726 | 17 | 56.301 | KV452884.1 | 12435081 | 6-scf00352 | 6 |
| AX-157837096 | 17 | 56.301 | KV452884.1 | 12435859 | 6-scf00352 | 6 |
| AX-158196727 | 17 | 56.301 | KV452884.1 | 12436464 | 6-scf00352 | 6 |
| AX-158196728 | 17 | 56.301 | KV452884.1 | 12437419 | 6-scf00352 | 6 |
| AX-158196729 | 17 | 56.301 | KV452884.1 | 12439114 | 6-scf00352 | 6 |
| AX-158196730 | 17 | 56.301 | KV452884.1 | 12441629 | 6-scf00352 | 6 |
| AX-158196731 | 17 | 56.301 | KV452884.1 | 12442256 | 6-scf00352 | 6 |
| AX-158196732 | 17 | 56.301 | KV452884.1 | 12442769 | 6-scf00352 | 6 |
| AX-157837097 | 17 | 56.301 | KV452884.1 | 12443357 | 6-scf00352 | 6 |
| AX-157837098 | 17 | 56.301 | KV452884.1 | 12444292 | 6-scf00352 | 6 |
| AX-158196734 | 17 | 56.301 | KV452884.1 | 12448103 | 6-scf00352 | 6 |
| AX-158196735 | 17 | 56.301 | KV452884.1 | 12448539 | 6-scf00352 | 6 |
| AX-158196737 | 17 | 56.301 | KV452884.1 | 12450168 | 6-scf00352 | 6 |
| AX-158196738 | 17 | 56.301 | KV452884.1 | 12451769 | 6-scf00352 | 6 |
| AX-158196739 | 17 | 56.301 | KV452884.1 | 12452975 | 6-scf00352 | 6 |
| AX-158196740 | 17 | 56.301 | KV452884.1 | 12453201 | 6-scf00352 | 6 |
| AX-158196741 | 17 | 56.301 | KV452884.1 | 12453941 | 6-scf00352 | 6 |
| AX-158196742 | 17 | 56.301 | KV452884.1 | 12454521 | 6-scf00352 | 6 |
| AX-158196743 | 17 | 56.301 | KV452884.1 | 12454925 | 6-scf00352 | 6 |
| AX-158196744 | 17 | 56.301 | KV452884.1 | 12456595 | 6-scf00352 | 6 |

|              |    |        |            |          |            |   |
|--------------|----|--------|------------|----------|------------|---|
| AX-158196747 | 17 | 56.301 | KV452884.1 | 12458710 | 6-scf00352 | 6 |
| AX-158196748 | 17 | 56.301 | KV452884.1 | 12460148 | 6-scf00352 | 6 |
| AX-157837099 | 17 | 56.301 | KV452884.1 | 12461020 | 6-scf00352 | 6 |
| AX-158196749 | 17 | 56.301 | KV452884.1 | 12461943 | 6-scf00352 | 6 |
| AX-158196750 | 17 | 56.301 | KV452884.1 | 12462671 | 6-scf00352 | 6 |
| AX-158196751 | 17 | 56.301 | KV452884.1 | 12463750 | 6-scf00352 | 6 |
| AX-157721890 | 17 | 56.301 | KV452884.1 | 12465972 | 6-scf00352 | 6 |
| AX-158196754 | 17 | 56.301 | KV452884.1 | 12466201 | 6-scf00352 | 6 |
| AX-158196756 | 17 | 56.301 | KV452884.1 | 12467149 | 6-scf00352 | 6 |
| AX-158196757 | 17 | 56.301 | KV452884.1 | 12467803 | 6-scf00352 | 6 |
| AX-157726351 | 17 | 56.301 | KV452884.1 | 12468065 | 6-scf00352 | 6 |
| AX-158196758 | 17 | 56.301 | KV452884.1 | 12469580 | 6-scf00352 | 6 |
| AX-158196759 | 17 | 56.301 | KV452884.1 | 12470675 | 6-scf00352 | 6 |
| AX-158196760 | 17 | 56.301 | KV452884.1 | 12471481 | 6-scf00352 | 6 |
| AX-158196761 | 17 | 56.301 | KV452884.1 | 12471780 | 6-scf00352 | 6 |
| AX-158196762 | 17 | 56.301 | KV452884.1 | 12471984 | 6-scf00352 | 6 |
| AX-157755790 | 17 | 56.301 | KV452884.1 | 12472059 | 6-scf00352 | 6 |
| AX-158196763 | 17 | 56.301 | KV452884.1 | 12472324 | 6-scf00352 | 6 |
| AX-158196766 | 17 | 56.301 | KV452884.1 | 12473531 | 6-scf00352 | 6 |
| AX-157837102 | 17 | 56.301 | KV452884.1 | 12474159 | 6-scf00352 | 6 |
| AX-157837103 | 17 | 56.301 | KV452884.1 | 12474852 | 6-scf00352 | 6 |
| AX-158196767 | 17 | 56.301 | KV452884.1 | 12475679 | 6-scf00352 | 6 |
| AX-158196768 | 17 | 56.301 | KV452884.1 | 12476789 | 6-scf00352 | 6 |
| AX-158196769 | 17 | 56.301 | KV452884.1 | 12477323 | 6-scf00352 | 6 |
| AX-158196771 | 17 | 56.301 | KV452884.1 | 12478910 | 6-scf00352 | 6 |
| AX-158196772 | 17 | 56.301 | KV452884.1 | 12479636 | 6-scf00352 | 6 |
| AX-158196773 | 17 | 56.301 | KV452884.1 | 12480659 | 6-scf00352 | 6 |
| AX-158196775 | 17 | 56.301 | KV452884.1 | 12482190 | 6-scf00352 | 6 |
| AX-158196777 | 17 | 56.301 | KV452884.1 | 12484920 | 6-scf00352 | 6 |
| AX-158196778 | 17 | 56.301 | KV452884.1 | 12487249 | 6-scf00352 | 6 |
| AX-158196781 | 17 | 56.301 | KV452884.1 | 12489240 | 6-scf00352 | 6 |
| AX-158196785 | 17 | 56.301 | KV452884.1 | 12492916 | 6-scf00352 | 6 |
| AX-158196786 | 17 | 56.301 | KV452884.1 | 12494169 | 6-scf00352 | 6 |
| AX-158196787 | 17 | 56.301 | KV452884.1 | 12494738 | 6-scf00352 | 6 |
| AX-158196788 | 17 | 56.301 | KV452884.1 | 12495455 | 6-scf00352 | 6 |
| AX-158196789 | 17 | 56.301 | KV452884.1 | 12497087 | 6-scf00352 | 6 |
| AX-158196790 | 17 | 56.301 | KV452884.1 | 12499240 | 6-scf00352 | 6 |
| AX-158196791 | 17 | 56.301 | KV452884.1 | 12501512 | 6-scf00352 | 6 |
| AX-158196792 | 17 | 56.301 | KV452884.1 | 12502075 | 6-scf00352 | 6 |
| AX-158196794 | 17 | 56.301 | KV452884.1 | 12504124 | 6-scf00352 | 6 |
| AX-157707696 | 17 | 56.301 | KV452884.1 | 12504576 | 6-scf00352 | 6 |
| AX-158196798 | 17 | 56.301 | KV452884.1 | 12507645 | 6-scf00352 | 6 |
| AX-158196802 | 17 | 56.301 | KV452884.1 | 12509843 | 6-scf00352 | 6 |
| AX-158196803 | 17 | 56.301 | KV452884.1 | 12510514 | 6-scf00352 | 6 |
| AX-158196805 | 17 | 56.301 | KV452884.1 | 12511738 | 6-scf00352 | 6 |
| AX-158196806 | 17 | 56.301 | KV452884.1 | 12512067 | 6-scf00352 | 6 |
| AX-158196807 | 17 | 56.301 | KV452884.1 | 12512961 | 6-scf00352 | 6 |
| AX-158196808 | 17 | 56.301 | KV452884.1 | 12517390 | 6-scf00352 | 6 |
| AX-158196811 | 17 | 56.301 | KV452884.1 | 12519993 | 6-scf00352 | 6 |
| AX-158196812 | 17 | 56.301 | KV452884.1 | 12520668 | 6-scf00352 | 6 |
| AX-158196813 | 17 | 56.301 | KV452884.1 | 12521428 | 6-scf00352 | 6 |

|              |    |        |             |          |            |    |
|--------------|----|--------|-------------|----------|------------|----|
| AX-158196818 | 17 | 56.301 | KV452884.1  | 12526120 | 6-scf00352 | 6  |
| AX-158196819 | 17 | 56.301 | KV452884.1  | 12526534 | 6-scf00352 | 6  |
| AX-158196820 | 17 | 56.301 | KV452884.1  | 12527272 | 6-scf00352 | 6  |
| AX-158196823 | 17 | 56.301 | KV452884.1  | 12528786 | 6-scf00352 | 6  |
| AX-158196824 | 17 | 56.301 | KV452884.1  | 12529585 | 6-scf00352 | 6  |
| AX-158196826 | 17 | 56.301 | KV452884.1  | 12531480 | 6-scf00352 | 6  |
| AX-158196827 | 17 | 56.301 | KV452884.1  | 12534537 | 6-scf00352 | 6  |
| AX-158196829 | 17 | 56.301 | KV452884.1  | 12535515 | 6-scf00352 | 6  |
| AX-158196830 | 17 | 56.301 | KV452884.1  | 12535985 | 6-scf00352 | 6  |
| AX-158196836 | 17 | 56.301 | KV452884.1  | 12542189 | 6-scf00352 | 6  |
| AX-158196837 | 17 | 56.301 | KV452884.1  | 12544410 | 6-scf00352 | 6  |
| AX-157837104 | 17 | 56.301 | KV452884.1  | 12546011 | 6-scf00352 | 6  |
| AX-158196838 | 17 | 56.301 | KV452884.1  | 12546958 | 6-scf00352 | 6  |
| AX-158196840 | 17 | 56.301 | KV452884.1  | 12548276 | 6-scf00352 | 6  |
| AX-158196841 | 17 | 56.301 | KV452884.1  | 12548811 | 6-scf00352 | 6  |
| AX-158196842 | 17 | 56.301 | KV452884.1  | 12549425 | 6-scf00352 | 6  |
| AX-157837105 | 17 | 56.301 | KV452884.1  | 12551586 | 6-scf00352 | 6  |
| AX-158196843 | 17 | 56.301 | KV452884.1  | 12551939 | 6-scf00352 | 6  |
| AX-157863656 | 17 | 56.301 | KV452884.1  | 12712404 | 6-scf00352 | 6  |
| AX-157706697 | 17 | 56.301 | 3ML01032750 | 212      | scf08379_1 | UN |
| AX-158194052 | 17 | 56.411 | KV452884.1  | 8249297  | 6-scf00352 | 6  |
| AX-158194569 | 17 | 56.411 | KV452884.1  | 9029185  | 6-scf00352 | 6  |
| AX-158194656 | 17 | 56.411 | KV452884.1  | 9166983  | 6-scf00352 | 6  |
| AX-158194664 | 17 | 56.411 | KV452884.1  | 9179433  | 6-scf00352 | 6  |
| AX-157739584 | 17 | 56.411 | KV452884.1  | 9605611  | 6-scf00352 | 6  |
| AX-158195266 | 17 | 56.411 | KV452884.1  | 10161912 | 6-scf00352 | 6  |
| AX-158195448 | 17 | 56.411 | KV452884.1  | 10461493 | 6-scf00352 | 6  |
| AX-158195488 | 17 | 56.411 | KV452884.1  | 10522923 | 6-scf00352 | 6  |
| AX-158393647 | 17 | 56.411 | KV452884.1  | 10574675 | 6-scf00352 | 6  |
| AX-158195820 | 17 | 56.411 | KV452884.1  | 10917325 | 6-scf00352 | 6  |
| AX-158195922 | 17 | 56.411 | KV452884.1  | 11040252 | 6-scf00352 | 6  |
| AX-158195923 | 17 | 56.411 | KV452884.1  | 11040414 | 6-scf00352 | 6  |
| AX-158195924 | 17 | 56.411 | KV452884.1  | 11040815 | 6-scf00352 | 6  |
| AX-157836996 | 17 | 56.411 | KV452884.1  | 11041181 | 6-scf00352 | 6  |
| AX-158195925 | 17 | 56.411 | KV452884.1  | 11041879 | 6-scf00352 | 6  |
| AX-158195926 | 17 | 56.411 | KV452884.1  | 11042610 | 6-scf00352 | 6  |
| AX-157836997 | 17 | 56.411 | KV452884.1  | 11046073 | 6-scf00352 | 6  |
| AX-157836998 | 17 | 56.411 | KV452884.1  | 11046388 | 6-scf00352 | 6  |
| AX-158195928 | 17 | 56.411 | KV452884.1  | 11048293 | 6-scf00352 | 6  |
| AX-158195930 | 17 | 56.411 | KV452884.1  | 11050254 | 6-scf00352 | 6  |
| AX-158195935 | 17 | 56.411 | KV452884.1  | 11057096 | 6-scf00352 | 6  |
| AX-158195938 | 17 | 56.411 | KV452884.1  | 11061825 | 6-scf00352 | 6  |
| AX-158195941 | 17 | 56.411 | KV452884.1  | 11064576 | 6-scf00352 | 6  |
| AX-158195943 | 17 | 56.411 | KV452884.1  | 11068052 | 6-scf00352 | 6  |
| AX-157872203 | 17 | 56.411 | KV452884.1  | 11069210 | 6-scf00352 | 6  |
| AX-158195945 | 17 | 56.411 | KV452884.1  | 11069644 | 6-scf00352 | 6  |
| AX-157872204 | 17 | 56.411 | KV452884.1  | 11069863 | 6-scf00352 | 6  |
| AX-158195949 | 17 | 56.411 | KV452884.1  | 11076010 | 6-scf00352 | 6  |
| AX-158195950 | 17 | 56.411 | KV452884.1  | 11077807 | 6-scf00352 | 6  |
| AX-158195951 | 17 | 56.411 | KV452884.1  | 11078074 | 6-scf00352 | 6  |
| AX-158195953 | 17 | 56.411 | KV452884.1  | 11079524 | 6-scf00352 | 6  |

|              |    |        |            |          |            |   |
|--------------|----|--------|------------|----------|------------|---|
| AX-158195955 | 17 | 56.411 | KV452884.1 | 11080662 | 6-scf00352 | 6 |
| AX-158195956 | 17 | 56.411 | KV452884.1 | 11081070 | 6-scf00352 | 6 |
| AX-158195974 | 17 | 56.411 | KV452884.1 | 11102489 | 6-scf00352 | 6 |
| AX-158195980 | 17 | 56.411 | KV452884.1 | 11110561 | 6-scf00352 | 6 |
| AX-158195981 | 17 | 56.411 | KV452884.1 | 11111088 | 6-scf00352 | 6 |
| AX-158195985 | 17 | 56.411 | KV452884.1 | 11115518 | 6-scf00352 | 6 |
| AX-158195986 | 17 | 56.411 | KV452884.1 | 11115926 | 6-scf00352 | 6 |
| AX-158195994 | 17 | 56.411 | KV452884.1 | 11122456 | 6-scf00352 | 6 |
| AX-158195996 | 17 | 56.411 | KV452884.1 | 11123736 | 6-scf00352 | 6 |
| AX-158393664 | 17 | 56.411 | KV452884.1 | 11126500 | 6-scf00352 | 6 |
| AX-158195997 | 17 | 56.411 | KV452884.1 | 11126980 | 6-scf00352 | 6 |
| AX-158195998 | 17 | 56.411 | KV452884.1 | 11127554 | 6-scf00352 | 6 |
| AX-158414083 | 17 | 56.411 | KV452884.1 | 11127657 | 6-scf00352 | 6 |
| AX-158196003 | 17 | 56.411 | KV452884.1 | 11133168 | 6-scf00352 | 6 |
| AX-158196012 | 17 | 56.411 | KV452884.1 | 11142543 | 6-scf00352 | 6 |
| AX-158196013 | 17 | 56.411 | KV452884.1 | 11144741 | 6-scf00352 | 6 |
| AX-158196016 | 17 | 56.411 | KV452884.1 | 11148853 | 6-scf00352 | 6 |
| AX-158196019 | 17 | 56.411 | KV452884.1 | 11151080 | 6-scf00352 | 6 |
| AX-157837004 | 17 | 56.411 | KV452884.1 | 11153266 | 6-scf00352 | 6 |
| AX-158196020 | 17 | 56.411 | KV452884.1 | 11154040 | 6-scf00352 | 6 |
| AX-158196021 | 17 | 56.411 | KV452884.1 | 11154336 | 6-scf00352 | 6 |
| AX-158414084 | 17 | 56.411 | KV452884.1 | 11154424 | 6-scf00352 | 6 |
| AX-157837005 | 17 | 56.411 | KV452884.1 | 11155953 | 6-scf00352 | 6 |
| AX-158196024 | 17 | 56.411 | KV452884.1 | 11158414 | 6-scf00352 | 6 |
| AX-158196026 | 17 | 56.411 | KV452884.1 | 11165912 | 6-scf00352 | 6 |
| AX-158196027 | 17 | 56.411 | KV452884.1 | 11166486 | 6-scf00352 | 6 |
| AX-158196028 | 17 | 56.411 | KV452884.1 | 11166987 | 6-scf00352 | 6 |
| AX-158196029 | 17 | 56.411 | KV452884.1 | 11167541 | 6-scf00352 | 6 |
| AX-157837006 | 17 | 56.411 | KV452884.1 | 11168476 | 6-scf00352 | 6 |
| AX-158196030 | 17 | 56.411 | KV452884.1 | 11169140 | 6-scf00352 | 6 |
| AX-158196031 | 17 | 56.411 | KV452884.1 | 11170794 | 6-scf00352 | 6 |
| AX-158196034 | 17 | 56.411 | KV452884.1 | 11172868 | 6-scf00352 | 6 |
| AX-158196036 | 17 | 56.411 | KV452884.1 | 11176323 | 6-scf00352 | 6 |
| AX-158196038 | 17 | 56.411 | KV452884.1 | 11176952 | 6-scf00352 | 6 |
| AX-157872210 | 17 | 56.411 | KV452884.1 | 11177721 | 6-scf00352 | 6 |
| AX-158196044 | 17 | 56.411 | KV452884.1 | 11182606 | 6-scf00352 | 6 |
| AX-158196045 | 17 | 56.411 | KV452884.1 | 11182699 | 6-scf00352 | 6 |
| AX-158414085 | 17 | 56.411 | KV452884.1 | 11183136 | 6-scf00352 | 6 |
| AX-158196048 | 17 | 56.411 | KV452884.1 | 11186003 | 6-scf00352 | 6 |
| AX-158196049 | 17 | 56.411 | KV452884.1 | 11186881 | 6-scf00352 | 6 |
| AX-158196050 | 17 | 56.411 | KV452884.1 | 11187338 | 6-scf00352 | 6 |
| AX-158196053 | 17 | 56.411 | KV452884.1 | 11189698 | 6-scf00352 | 6 |
| AX-158196054 | 17 | 56.411 | KV452884.1 | 11190104 | 6-scf00352 | 6 |
| AX-158196055 | 17 | 56.411 | KV452884.1 | 11190282 | 6-scf00352 | 6 |
| AX-158196056 | 17 | 56.411 | KV452884.1 | 11192697 | 6-scf00352 | 6 |
| AX-158196060 | 17 | 56.411 | KV452884.1 | 11195695 | 6-scf00352 | 6 |
| AX-158196062 | 17 | 56.411 | KV452884.1 | 11197093 | 6-scf00352 | 6 |
| AX-158196065 | 17 | 56.411 | KV452884.1 | 11199108 | 6-scf00352 | 6 |
| AX-157872217 | 17 | 56.411 | KV452884.1 | 11199962 | 6-scf00352 | 6 |
| AX-158196067 | 17 | 56.411 | KV452884.1 | 11204791 | 6-scf00352 | 6 |
| AX-158196069 | 17 | 56.411 | KV452884.1 | 11206488 | 6-scf00352 | 6 |



|              |    |        |            |          |            |   |
|--------------|----|--------|------------|----------|------------|---|
| AX-158196070 | 17 | 56.411 | KV452884.1 | 11209832 | 6-scf00352 | 6 |
| AX-158196071 | 17 | 56.411 | KV452884.1 | 11211354 | 6-scf00352 | 6 |
| AX-158196072 | 17 | 56.411 | KV452884.1 | 11212627 | 6-scf00352 | 6 |
| AX-158196074 | 17 | 56.411 | KV452884.1 | 11214631 | 6-scf00352 | 6 |
| AX-158196077 | 17 | 56.411 | KV452884.1 | 11220425 | 6-scf00352 | 6 |
| AX-158196078 | 17 | 56.411 | KV452884.1 | 11221096 | 6-scf00352 | 6 |
| AX-158196079 | 17 | 56.411 | KV452884.1 | 11221345 | 6-scf00352 | 6 |
| AX-158196080 | 17 | 56.411 | KV452884.1 | 11221828 | 6-scf00352 | 6 |
| AX-158196081 | 17 | 56.411 | KV452884.1 | 11223193 | 6-scf00352 | 6 |
| AX-157872220 | 17 | 56.411 | KV452884.1 | 11227248 | 6-scf00352 | 6 |
| AX-158196084 | 17 | 56.411 | KV452884.1 | 11231008 | 6-scf00352 | 6 |
| AX-157837007 | 17 | 56.411 | KV452884.1 | 11232389 | 6-scf00352 | 6 |
| AX-158196093 | 17 | 56.411 | KV452884.1 | 11248711 | 6-scf00352 | 6 |
| AX-158196096 | 17 | 56.411 | KV452884.1 | 11253690 | 6-scf00352 | 6 |
| AX-157837009 | 17 | 56.411 | KV452884.1 | 11253840 | 6-scf00352 | 6 |
| AX-158196098 | 17 | 56.411 | KV452884.1 | 11257244 | 6-scf00352 | 6 |
| AX-158196099 | 17 | 56.411 | KV452884.1 | 11258097 | 6-scf00352 | 6 |
| AX-158414087 | 17 | 56.411 | KV452884.1 | 11263382 | 6-scf00352 | 6 |
| AX-158414088 | 17 | 56.411 | KV452884.1 | 11263960 | 6-scf00352 | 6 |
| AX-158414089 | 17 | 56.411 | KV452884.1 | 11263998 | 6-scf00352 | 6 |
| AX-158393665 | 17 | 56.411 | KV452884.1 | 11267215 | 6-scf00352 | 6 |
| AX-158393666 | 17 | 56.411 | KV452884.1 | 11270832 | 6-scf00352 | 6 |
| AX-158196105 | 17 | 56.411 | KV452884.1 | 11273672 | 6-scf00352 | 6 |
| AX-157872221 | 17 | 56.411 | KV452884.1 | 11276338 | 6-scf00352 | 6 |
| AX-158196110 | 17 | 56.411 | KV452884.1 | 11282596 | 6-scf00352 | 6 |
| AX-158196112 | 17 | 56.411 | KV452884.1 | 11287175 | 6-scf00352 | 6 |
| AX-158196113 | 17 | 56.411 | KV452884.1 | 11291970 | 6-scf00352 | 6 |
| AX-158196114 | 17 | 56.411 | KV452884.1 | 11293697 | 6-scf00352 | 6 |
| AX-158196115 | 17 | 56.411 | KV452884.1 | 11294449 | 6-scf00352 | 6 |
| AX-158196189 | 17 | 56.411 | KV452884.1 | 11472414 | 6-scf00352 | 6 |
| AX-158196190 | 17 | 56.411 | KV452884.1 | 11473643 | 6-scf00352 | 6 |
| AX-158196191 | 17 | 56.411 | KV452884.1 | 11475593 | 6-scf00352 | 6 |
| AX-158196193 | 17 | 56.411 | KV452884.1 | 11476622 | 6-scf00352 | 6 |
| AX-158393674 | 17 | 56.411 | KV452884.1 | 11478128 | 6-scf00352 | 6 |
| AX-157837025 | 17 | 56.411 | KV452884.1 | 11482946 | 6-scf00352 | 6 |
| AX-157858934 | 17 | 56.411 | KV452884.1 | 11483743 | 6-scf00352 | 6 |
| AX-157858935 | 17 | 56.411 | KV452884.1 | 11484541 | 6-scf00352 | 6 |
| AX-158196201 | 17 | 56.411 | KV452884.1 | 11489563 | 6-scf00352 | 6 |
| AX-157837026 | 17 | 56.411 | KV452884.1 | 11500021 | 6-scf00352 | 6 |
| AX-157837027 | 17 | 56.411 | KV452884.1 | 11504392 | 6-scf00352 | 6 |
| AX-157837029 | 17 | 56.411 | KV452884.1 | 11505659 | 6-scf00352 | 6 |
| AX-158196208 | 17 | 56.411 | KV452884.1 | 11511661 | 6-scf00352 | 6 |
| AX-158393675 | 17 | 56.411 | KV452884.1 | 11514283 | 6-scf00352 | 6 |
| AX-158196212 | 17 | 56.411 | KV452884.1 | 11520897 | 6-scf00352 | 6 |
| AX-158196218 | 17 | 56.411 | KV452884.1 | 11529578 | 6-scf00352 | 6 |
| AX-158196219 | 17 | 56.411 | KV452884.1 | 11531158 | 6-scf00352 | 6 |
| AX-158196220 | 17 | 56.411 | KV452884.1 | 11532863 | 6-scf00352 | 6 |
| AX-158196223 | 17 | 56.411 | KV452884.1 | 11537780 | 6-scf00352 | 6 |
| AX-158196233 | 17 | 56.411 | KV452884.1 | 11550124 | 6-scf00352 | 6 |
| AX-158196234 | 17 | 56.411 | KV452884.1 | 11551127 | 6-scf00352 | 6 |
| AX-158196237 | 17 | 56.411 | KV452884.1 | 11554189 | 6-scf00352 | 6 |

|              |    |        |             |          |            |    |
|--------------|----|--------|-------------|----------|------------|----|
| AX-158196243 | 17 | 56.411 | KV452884.1  | 11565781 | 6-scf00352 | 6  |
| AX-158196244 | 17 | 56.411 | KV452884.1  | 11566715 | 6-scf00352 | 6  |
| AX-158196246 | 17 | 56.411 | KV452884.1  | 11569616 | 6-scf00352 | 6  |
| AX-158196247 | 17 | 56.411 | KV452884.1  | 11572315 | 6-scf00352 | 6  |
| AX-158196250 | 17 | 56.411 | KV452884.1  | 11575876 | 6-scf00352 | 6  |
| AX-158393676 | 17 | 56.411 | KV452884.1  | 11581214 | 6-scf00352 | 6  |
| AX-158196254 | 17 | 56.411 | KV452884.1  | 11582834 | 6-scf00352 | 6  |
| AX-158196257 | 17 | 56.411 | KV452884.1  | 11585956 | 6-scf00352 | 6  |
| AX-158196699 | 17 | 56.411 | KV452884.1  | 12398671 | 6-scf00352 | 6  |
| AX-158196702 | 17 | 56.411 | KV452884.1  | 12404754 | 6-scf00352 | 6  |
| AX-158196845 | 17 | 56.411 | KV452884.1  | 12557606 | 6-scf00352 | 6  |
| AX-158196850 | 17 | 56.411 | KV452884.1  | 12573800 | 6-scf00352 | 6  |
| AX-158196855 | 17 | 56.411 | KV452884.1  | 12584893 | 6-scf00352 | 6  |
| AX-158196856 | 17 | 56.411 | KV452884.1  | 12586053 | 6-scf00352 | 6  |
| AX-158196858 | 17 | 56.411 | KV452884.1  | 12589211 | 6-scf00352 | 6  |
| AX-157837107 | 17 | 56.411 | KV452884.1  | 12596448 | 6-scf00352 | 6  |
| AX-158196866 | 17 | 56.411 | KV452884.1  | 12609182 | 6-scf00352 | 6  |
| AX-157837109 | 17 | 56.411 | KV452884.1  | 12609806 | 6-scf00352 | 6  |
| AX-158196871 | 17 | 56.411 | KV452884.1  | 12621890 | 6-scf00352 | 6  |
| AX-157837111 | 17 | 56.411 | KV452884.1  | 12622286 | 6-scf00352 | 6  |
| AX-158196873 | 17 | 56.411 | KV452884.1  | 12623882 | 6-scf00352 | 6  |
| AX-158196874 | 17 | 56.411 | KV452884.1  | 12624520 | 6-scf00352 | 6  |
| AX-158196875 | 17 | 56.411 | KV452884.1  | 12624995 | 6-scf00352 | 6  |
| AX-158196876 | 17 | 56.411 | KV452884.1  | 12625373 | 6-scf00352 | 6  |
| AX-158196877 | 17 | 56.411 | KV452884.1  | 12626811 | 6-scf00352 | 6  |
| AX-158196879 | 17 | 56.411 | KV452884.1  | 12629769 | 6-scf00352 | 6  |
| AX-158196880 | 17 | 56.411 | KV452884.1  | 12630142 | 6-scf00352 | 6  |
| AX-157858940 | 17 | 56.411 | KV452884.1  | 12632128 | 6-scf00352 | 6  |
| AX-158196882 | 17 | 56.411 | KV452884.1  | 12634579 | 6-scf00352 | 6  |
| AX-158196883 | 17 | 56.411 | KV452884.1  | 12634994 | 6-scf00352 | 6  |
| AX-157837113 | 17 | 56.411 | KV452884.1  | 12636191 | 6-scf00352 | 6  |
| AX-158196886 | 17 | 56.411 | KV452884.1  | 12642705 | 6-scf00352 | 6  |
| AX-158196891 | 17 | 56.411 | KV452884.1  | 12645934 | 6-scf00352 | 6  |
| AX-158196896 | 17 | 56.411 | KV452884.1  | 12652517 | 6-scf00352 | 6  |
| AX-158196898 | 17 | 56.411 | KV452884.1  | 12655556 | 6-scf00352 | 6  |
| AX-158196901 | 17 | 56.411 | KV452884.1  | 12656979 | 6-scf00352 | 6  |
| AX-158196907 | 17 | 56.411 | KV452884.1  | 12664451 | 6-scf00352 | 6  |
| AX-158196908 | 17 | 56.411 | KV452884.1  | 12664802 | 6-scf00352 | 6  |
| AX-158196912 | 17 | 56.411 | KV452884.1  | 12667337 | 6-scf00352 | 6  |
| AX-156875954 | 17 | 56.411 | KV452884.1  | 12668375 | 6-scf00352 | 6  |
| AX-158196913 | 17 | 56.411 | KV452884.1  | 12669294 | 6-scf00352 | 6  |
| AX-158196936 | 17 | 56.411 | KV452884.1  | 12701071 | 6-scf00352 | 6  |
| AX-158196938 | 17 | 56.411 | KV452884.1  | 12703311 | 6-scf00352 | 6  |
| AX-158196963 | 17 | 56.411 | KV452884.1  | 12730311 | 6-scf00352 | 6  |
| AX-158196968 | 17 | 56.411 | KV452884.1  | 12735107 | 6-scf00352 | 6  |
| AX-157879165 | 17 | 56.411 | KV452884.1  | 12744887 | 6-scf00352 | 6  |
| AX-158196984 | 17 | 56.411 | KV452884.1  | 12761709 | 6-scf00352 | 6  |
| AX-158196997 | 17 | 56.411 | KV452884.1  | 12779918 | 6-scf00352 | 6  |
| AX-158197026 | 17 | 56.411 | KV452884.1  | 12810962 | 6-scf00352 | 6  |
| AX-157706290 | 17 | 56.411 | 3ML01031992 | 313      | scf07609_1 | UN |
| AX-158196903 | 17 | 56.433 | KV452884.1  | 12658689 | 6-scf00352 | 6  |

|              |    |        |            |          |            |    |
|--------------|----|--------|------------|----------|------------|----|
| AX-158393671 | 17 | 56.453 | KV452884.1 | 11372335 | 6-scf00352 | 6  |
| AX-158196905 | 17 | 56.453 | KV452884.1 | 12660767 | 6-scf00352 | 6  |
| AX-158196269 | 17 | 56.465 | KV452884.1 | 11603208 | 6-scf00352 | 6  |
| AX-158196274 | 17 | 56.465 | KV452884.1 | 11611976 | 6-scf00352 | 6  |
| AX-158196870 | 17 | 56.465 | KV452884.1 | 12615815 | 6-scf00352 | 6  |
| AX-157886984 | 17 | 56.465 | KV452884.1 | 12625745 | 6-scf00352 | 6  |
| AX-158196915 | 17 | 56.465 | KV452884.1 | 12670851 | 6-scf00352 | 6  |
| AX-158196916 | 17 | 56.465 | KV452884.1 | 12671688 | 6-scf00352 | 6  |
| AX-158196932 | 17 | 56.465 | KV452884.1 | 12696190 | 6-scf00352 | 6  |
| AX-158196934 | 17 | 56.465 | KV452884.1 | 12698280 | 6-scf00352 | 6  |
| AX-158418289 | 17 | 56.465 | KV452884.1 | 12698643 | 6-scf00352 | 6  |
| AX-158414113 | 17 | 56.465 | KV452884.1 | 12742832 | 6-scf00352 | 6  |
| AX-158196921 | 17 | 56.481 | KV452884.1 | 12679002 | 6-scf00352 | 6  |
| AX-158386152 | 17 | 56.481 | KV452884.1 | 12778195 | 6-scf00352 | 6  |
| AX-158196923 | 17 | 56.5   | KV452884.1 | 12682831 | 6-scf00352 | 6  |
| AX-157858942 | 17 | 56.52  | KV452884.1 | 12686542 | 6-scf00352 | 6  |
| AX-158196928 | 17 | 56.52  | KV452884.1 | 12687031 | 6-scf00352 | 6  |
| AX-158196929 | 17 | 56.52  | KV452884.1 | 12687273 | 6-scf00352 | 6  |
| AX-158196973 | 17 | 56.52  | KV452884.1 | 12745618 | 6-scf00352 | 6  |
| AX-158196919 | 17 | 56.741 | KV452884.1 | 12675062 | 6-scf00352 | 6  |
| AX-158196978 | 17 | 56.741 | KV452884.1 | 12751752 | 6-scf00352 | 6  |
| AX-157836848 | 17 | 56.848 | KV452884.1 | 8913392  | 6-scf00352 | 6  |
| AX-158195067 | 17 | 56.848 | KV452884.1 | 9856956  | 6-scf00352 | 6  |
| AX-158195075 | 17 | 56.848 | KV452884.1 | 9874094  | 6-scf00352 | 6  |
| AX-158393681 | 17 | 56.848 | KV452884.1 | 12757128 | 6-scf00352 | 6  |
| AX-157709313 | 17 | 56.848 | KV452884.1 | 12759397 | 6-scf00352 | 6  |
| AX-157708296 | 17 | 56.848 | KV452884.1 | 12759620 | 6-scf00352 | 6  |
| AX-158197877 | 17 | 56.848 | KV452884.1 | 15384747 | 6-scf00352 | 6  |
| AX-157837257 | 17 | 56.848 | KV452884.1 | 16046088 | 6-scf00352 | 6  |
| AX-158200101 | 17 | 56.848 | KV452887.1 | 1056583  | 6-scf00355 | 6  |
| AX-158202126 | 17 | 56.848 | KV452892.1 | 1668     | 6-scf00360 | 6  |
| AX-157708297 | 17 | 56.848 |            | 356      | scf12179   | UN |
| AX-158196256 | 17 | 56.885 | KV452884.1 | 11584414 | 6-scf00352 | 6  |
| AX-158196521 | 17 | 56.885 | KV452884.1 | 11941714 | 6-scf00352 | 6  |
| AX-158196570 | 17 | 56.885 | KV452884.1 | 12030583 | 6-scf00352 | 6  |
| AX-158196577 | 17 | 56.885 | KV452884.1 | 12051392 | 6-scf00352 | 6  |
| AX-158196981 | 17 | 56.885 | KV452884.1 | 12755114 | 6-scf00352 | 6  |
| AX-157886986 | 17 | 56.885 | KV452884.1 | 12763202 | 6-scf00352 | 6  |
| AX-158196990 | 17 | 56.918 | KV452884.1 | 12772916 | 6-scf00352 | 6  |
| AX-158196993 | 17 | 56.957 | KV452884.1 | 12776192 | 6-scf00352 | 6  |
| AX-157709265 | 17 | 57.066 | KV452884.1 | 12787526 | 6-scf00352 | 6  |
| AX-158197004 | 17 | 57.066 | KV452884.1 | 12788796 | 6-scf00352 | 6  |
| AX-158197005 | 17 | 57.066 | KV452884.1 | 12790029 | 6-scf00352 | 6  |
| AX-157837124 | 17 | 57.066 | KV452884.1 | 12791441 | 6-scf00352 | 6  |
| AX-158197008 | 17 | 57.066 | KV452884.1 | 12792857 | 6-scf00352 | 6  |
| AX-157837125 | 17 | 57.066 | KV452884.1 | 12794221 | 6-scf00352 | 6  |
| AX-158197011 | 17 | 57.176 | KV452884.1 | 12795413 | 6-scf00352 | 6  |
| AX-158197012 | 17 | 57.176 | KV452884.1 | 12796237 | 6-scf00352 | 6  |
| AX-158197018 | 17 | 57.176 | KV452884.1 | 12804231 | 6-scf00352 | 6  |
| AX-158197020 | 17 | 57.176 | KV452884.1 | 12806557 | 6-scf00352 | 6  |
| AX-158197022 | 17 | 57.393 | KV452884.1 | 12807383 | 6-scf00352 | 6  |

|              |    |        |            |          |            |   |
|--------------|----|--------|------------|----------|------------|---|
| AX-158197039 | 17 | 57.393 | KV452884.1 | 12826586 | 6-scf00352 | 6 |
| AX-158197042 | 17 | 57.395 | KV452884.1 | 12829770 | 6-scf00352 | 6 |
| AX-158197043 | 17 | 57.395 | KV452884.1 | 12830798 | 6-scf00352 | 6 |
| AX-158197044 | 17 | 57.617 | KV452884.1 | 12831861 | 6-scf00352 | 6 |
| AX-158197045 | 17 | 57.617 | KV452884.1 | 12832865 | 6-scf00352 | 6 |
| AX-158197050 | 17 | 57.825 | KV452884.1 | 12840571 | 6-scf00352 | 6 |
| AX-158197051 | 17 | 57.826 | KV452884.1 | 12841341 | 6-scf00352 | 6 |
| AX-158197052 | 17 | 57.834 | KV452884.1 | 12842619 | 6-scf00352 | 6 |
| AX-158197053 | 17 | 58.008 | KV452884.1 | 12843036 | 6-scf00352 | 6 |
| AX-158197058 | 17 | 58.159 | KV452884.1 | 12853251 | 6-scf00352 | 6 |
| AX-157775196 | 17 | 58.159 | KV452884.1 | 12859060 | 6-scf00352 | 6 |
| AX-158197061 | 17 | 58.159 | KV452884.1 | 12859161 | 6-scf00352 | 6 |
| AX-158197062 | 17 | 58.159 | KV452884.1 | 12860193 | 6-scf00352 | 6 |
| AX-158197063 | 17 | 58.159 | KV452884.1 | 12860564 | 6-scf00352 | 6 |
| AX-158201432 | 17 | 58.159 | KV452891.1 | 2321343  | 6-scf00356 | 6 |
| AX-158197065 | 17 | 58.486 | KV452884.1 | 12862132 | 6-scf00352 | 6 |
| AX-157715143 | 17 | 58.486 | KV452884.1 | 12865370 | 6-scf00352 | 6 |
| AX-157715634 | 17 | 58.487 | KV452884.1 | 12865862 | 6-scf00352 | 6 |
| AX-158197071 | 17 | 58.487 | KV452884.1 | 12867004 | 6-scf00352 | 6 |
| AX-158197078 | 17 | 58.487 | KV452884.1 | 12875120 | 6-scf00352 | 6 |
| AX-158197088 | 17 | 58.487 | KV452884.1 | 12887773 | 6-scf00352 | 6 |
| AX-158197089 | 17 | 58.487 | KV452884.1 | 12889112 | 6-scf00352 | 6 |
| AX-158197090 | 17 | 58.487 | KV452884.1 | 12889918 | 6-scf00352 | 6 |
| AX-158197092 | 17 | 58.487 | KV452884.1 | 12892931 | 6-scf00352 | 6 |
| AX-158197094 | 17 | 58.487 | KV452884.1 | 12895473 | 6-scf00352 | 6 |
| AX-158197157 | 17 | 58.487 | KV452884.1 | 13038866 | 6-scf00352 | 6 |
| AX-158197487 | 17 | 58.487 | KV452884.1 | 14774413 | 6-scf00352 | 6 |
| AX-157745304 | 17 | 58.487 | KV452884.1 | 15052692 | 6-scf00352 | 6 |
| AX-158197073 | 17 | 58.54  | KV452884.1 | 12870846 | 6-scf00352 | 6 |
| AX-158197069 | 17 | 58.596 | KV452884.1 | 12864789 | 6-scf00352 | 6 |
| AX-158197082 | 17 | 58.596 | KV452884.1 | 12882283 | 6-scf00352 | 6 |
| AX-158197084 | 17 | 58.596 | KV452884.1 | 12883531 | 6-scf00352 | 6 |
| AX-157739220 | 17 | 58.596 | KV452884.1 | 12902059 | 6-scf00352 | 6 |
| AX-158197102 | 17 | 58.596 | KV452884.1 | 12906719 | 6-scf00352 | 6 |
| AX-157837135 | 17 | 58.596 | KV452884.1 | 12910879 | 6-scf00352 | 6 |
| AX-158197104 | 17 | 58.596 | KV452884.1 | 12913713 | 6-scf00352 | 6 |
| AX-158197107 | 17 | 58.596 | KV452884.1 | 12917173 | 6-scf00352 | 6 |
| AX-158197091 | 17 | 58.705 | KV452884.1 | 12892061 | 6-scf00352 | 6 |
| AX-158197110 | 17 | 58.705 | KV452884.1 | 12920617 | 6-scf00352 | 6 |
| AX-158197114 | 17 | 58.705 | KV452884.1 | 12929191 | 6-scf00352 | 6 |
| AX-158197116 | 17 | 58.705 | KV452884.1 | 12947928 | 6-scf00352 | 6 |
| AX-158197117 | 17 | 58.705 | KV452884.1 | 12959982 | 6-scf00352 | 6 |
| AX-158197118 | 17 | 58.705 | KV452884.1 | 12961576 | 6-scf00352 | 6 |
| AX-157714294 | 17 | 58.705 | KV452884.1 | 12973061 | 6-scf00352 | 6 |
| AX-157747990 | 17 | 58.705 | KV452884.1 | 12979063 | 6-scf00352 | 6 |
| AX-158197125 | 17 | 58.705 | KV452884.1 | 12983426 | 6-scf00352 | 6 |
| AX-158197126 | 17 | 58.705 | KV452884.1 | 12984932 | 6-scf00352 | 6 |
| AX-157771908 | 17 | 58.705 | KV452884.1 | 12995284 | 6-scf00352 | 6 |
| AX-158197134 | 17 | 58.705 | KV452884.1 | 12996874 | 6-scf00352 | 6 |
| AX-158197137 | 17 | 58.705 | KV452884.1 | 13001731 | 6-scf00352 | 6 |
| AX-157758712 | 17 | 58.705 | KV452884.1 | 13004694 | 6-scf00352 | 6 |

|              |    |        |            |          |            |   |
|--------------|----|--------|------------|----------|------------|---|
| AX-158197140 | 17 | 58.705 | KV452884.1 | 13008361 | 6-scf00352 | 6 |
| AX-158197141 | 17 | 58.705 | KV452884.1 | 13008706 | 6-scf00352 | 6 |
| AX-158197142 | 17 | 58.705 | KV452884.1 | 13010808 | 6-scf00352 | 6 |
| AX-158197143 | 17 | 58.705 | KV452884.1 | 13012213 | 6-scf00352 | 6 |
| AX-158197144 | 17 | 58.705 | KV452884.1 | 13013636 | 6-scf00352 | 6 |
| AX-158197145 | 17 | 58.705 | KV452884.1 | 13014891 | 6-scf00352 | 6 |
| AX-158197146 | 17 | 58.705 | KV452884.1 | 13017112 | 6-scf00352 | 6 |
| AX-158197148 | 17 | 58.705 | KV452884.1 | 13020036 | 6-scf00352 | 6 |
| AX-158197149 | 17 | 58.705 | KV452884.1 | 13022387 | 6-scf00352 | 6 |
| AX-158197151 | 17 | 58.705 | KV452884.1 | 13027662 | 6-scf00352 | 6 |
| AX-158197152 | 17 | 58.705 | KV452884.1 | 13030307 | 6-scf00352 | 6 |
| AX-158197153 | 17 | 58.705 | KV452884.1 | 13032179 | 6-scf00352 | 6 |
| AX-158197156 | 17 | 58.705 | KV452884.1 | 13038349 | 6-scf00352 | 6 |
| AX-158197158 | 17 | 58.705 | KV452884.1 | 13039372 | 6-scf00352 | 6 |
| AX-158197159 | 17 | 58.705 | KV452884.1 | 13040603 | 6-scf00352 | 6 |
| AX-158197163 | 17 | 58.705 | KV452884.1 | 13043774 | 6-scf00352 | 6 |
| AX-158197164 | 17 | 58.705 | KV452884.1 | 13045130 | 6-scf00352 | 6 |
| AX-158380707 | 17 | 58.705 | KV452884.1 | 13045179 | 6-scf00352 | 6 |
| AX-157837142 | 17 | 58.705 | KV452884.1 | 13045898 | 6-scf00352 | 6 |
| AX-158197165 | 17 | 58.705 | KV452884.1 | 13046077 | 6-scf00352 | 6 |
| AX-158197167 | 17 | 58.705 | KV452884.1 | 13049839 | 6-scf00352 | 6 |
| AX-158197168 | 17 | 58.705 | KV452884.1 | 13051216 | 6-scf00352 | 6 |
| AX-157837146 | 17 | 58.705 | KV452884.1 | 13053326 | 6-scf00352 | 6 |
| AX-158197170 | 17 | 58.705 | KV452884.1 | 13054083 | 6-scf00352 | 6 |
| AX-158197176 | 17 | 58.705 | KV452884.1 | 13068209 | 6-scf00352 | 6 |
| AX-158197181 | 17 | 58.705 | KV452884.1 | 13082781 | 6-scf00352 | 6 |
| AX-158197203 | 17 | 58.705 | KV452884.1 | 13124918 | 6-scf00352 | 6 |
| AX-158197269 | 17 | 58.705 | KV452884.1 | 13296826 | 6-scf00352 | 6 |
| AX-157837154 | 17 | 58.705 | KV452884.1 | 13298089 | 6-scf00352 | 6 |
| AX-158197272 | 17 | 58.705 | KV452884.1 | 13305916 | 6-scf00352 | 6 |
| AX-158197273 | 17 | 58.705 | KV452884.1 | 13311087 | 6-scf00352 | 6 |
| AX-158197276 | 17 | 58.705 | KV452884.1 | 13319610 | 6-scf00352 | 6 |
| AX-158197313 | 17 | 58.705 | KV452884.1 | 13479769 | 6-scf00352 | 6 |
| AX-158197414 | 17 | 58.705 | KV452884.1 | 14469996 | 6-scf00352 | 6 |
| AX-157797616 | 17 | 58.705 | KV452884.1 | 14668938 | 6-scf00352 | 6 |
| AX-158197516 | 17 | 58.705 | KV452884.1 | 14840542 | 6-scf00352 | 6 |
| AX-158197550 | 17 | 58.705 | KV452884.1 | 14905042 | 6-scf00352 | 6 |
| AX-158197579 | 17 | 58.705 | KV452884.1 | 14957233 | 6-scf00352 | 6 |
| AX-158197111 | 17 | 58.732 | KV452884.1 | 12921587 | 6-scf00352 | 6 |
| AX-157837147 | 17 | 58.732 | KV452884.1 | 13056388 | 6-scf00352 | 6 |
| AX-158197120 | 17 | 58.755 | KV452884.1 | 12966204 | 6-scf00352 | 6 |
| AX-158197154 | 17 | 58.755 | KV452884.1 | 13033067 | 6-scf00352 | 6 |
| AX-158197172 | 17 | 58.755 | KV452884.1 | 13061584 | 6-scf00352 | 6 |
| AX-158197175 | 17 | 58.755 | KV452884.1 | 13066322 | 6-scf00352 | 6 |
| AX-157879195 | 17 | 58.755 | KV452884.1 | 15851119 | 6-scf00352 | 6 |
| AX-158198176 | 17 | 58.755 | KV452884.1 | 15907465 | 6-scf00352 | 6 |
| AX-158198917 | 17 | 58.755 | KV452884.1 | 16908854 | 6-scf00352 | 6 |
| AX-158197182 | 17 | 58.814 | KV452884.1 | 13086320 | 6-scf00352 | 6 |
| AX-158197211 | 17 | 58.924 | KV452884.1 | 13134731 | 6-scf00352 | 6 |
| AX-158197227 | 17 | 58.924 | KV452884.1 | 13176673 | 6-scf00352 | 6 |
| AX-158197275 | 17 | 58.978 | KV452884.1 | 13318160 | 6-scf00352 | 6 |

|              |    |        |            |          |            |   |
|--------------|----|--------|------------|----------|------------|---|
| AX-157797548 | 17 | 59.033 | KV452884.1 | 13046005 | 6-scf00352 | 6 |
| AX-158197183 | 17 | 59.033 | KV452884.1 | 13087815 | 6-scf00352 | 6 |
| AX-158197191 | 17 | 59.033 | KV452884.1 | 13097073 | 6-scf00352 | 6 |
| AX-158197195 | 17 | 59.033 | KV452884.1 | 13112516 | 6-scf00352 | 6 |
| AX-158197196 | 17 | 59.033 | KV452884.1 | 13113208 | 6-scf00352 | 6 |
| AX-158197198 | 17 | 59.033 | KV452884.1 | 13116595 | 6-scf00352 | 6 |
| AX-158197199 | 17 | 59.033 | KV452884.1 | 13120210 | 6-scf00352 | 6 |
| AX-158197207 | 17 | 59.033 | KV452884.1 | 13129104 | 6-scf00352 | 6 |
| AX-157713490 | 17 | 59.033 | KV452884.1 | 13142311 | 6-scf00352 | 6 |
| AX-158197214 | 17 | 59.033 | KV452884.1 | 13142819 | 6-scf00352 | 6 |
| AX-157754913 | 17 | 59.033 | KV452884.1 | 13168239 | 6-scf00352 | 6 |
| AX-158197236 | 17 | 59.033 | KV452884.1 | 13210167 | 6-scf00352 | 6 |
| AX-158197241 | 17 | 59.033 | KV452884.1 | 13223839 | 6-scf00352 | 6 |
| AX-158197243 | 17 | 59.033 | KV452884.1 | 13225964 | 6-scf00352 | 6 |
| AX-158197244 | 17 | 59.033 | KV452884.1 | 13240200 | 6-scf00352 | 6 |
| AX-157858945 | 17 | 59.033 | KV452884.1 | 13242831 | 6-scf00352 | 6 |
| AX-158197247 | 17 | 59.033 | KV452884.1 | 13243799 | 6-scf00352 | 6 |
| AX-157872235 | 17 | 59.033 | KV452884.1 | 13244033 | 6-scf00352 | 6 |
| AX-158197248 | 17 | 59.033 | KV452884.1 | 13244643 | 6-scf00352 | 6 |
| AX-158197251 | 17 | 59.033 | KV452884.1 | 13251391 | 6-scf00352 | 6 |
| AX-157837151 | 17 | 59.033 | KV452884.1 | 13253574 | 6-scf00352 | 6 |
| AX-157837152 | 17 | 59.033 | KV452884.1 | 13254453 | 6-scf00352 | 6 |
| AX-158393693 | 17 | 59.033 | KV452884.1 | 13258366 | 6-scf00352 | 6 |
| AX-158197260 | 17 | 59.033 | KV452884.1 | 13259188 | 6-scf00352 | 6 |
| AX-157722712 | 17 | 59.033 | KV452884.1 | 13260264 | 6-scf00352 | 6 |
| AX-158197262 | 17 | 59.033 | KV452884.1 | 13265034 | 6-scf00352 | 6 |
| AX-158197263 | 17 | 59.033 | KV452884.1 | 13275420 | 6-scf00352 | 6 |
| AX-158197264 | 17 | 59.033 | KV452884.1 | 13283462 | 6-scf00352 | 6 |
| AX-158197265 | 17 | 59.033 | KV452884.1 | 13284026 | 6-scf00352 | 6 |
| AX-157709889 | 17 | 59.033 | KV452884.1 | 13285735 | 6-scf00352 | 6 |
| AX-158197266 | 17 | 59.033 | KV452884.1 | 13288207 | 6-scf00352 | 6 |
| AX-158197267 | 17 | 59.033 | KV452884.1 | 13293649 | 6-scf00352 | 6 |
| AX-158197268 | 17 | 59.033 | KV452884.1 | 13295071 | 6-scf00352 | 6 |
| AX-158197270 | 17 | 59.033 | KV452884.1 | 13297501 | 6-scf00352 | 6 |
| AX-157837155 | 17 | 59.033 | KV452884.1 | 13303344 | 6-scf00352 | 6 |
| AX-158197278 | 17 | 59.033 | KV452884.1 | 13323726 | 6-scf00352 | 6 |
| AX-158197283 | 17 | 59.033 | KV452884.1 | 13334918 | 6-scf00352 | 6 |
| AX-157720563 | 17 | 59.033 | KV452884.1 | 13336174 | 6-scf00352 | 6 |
| AX-158197284 | 17 | 59.033 | KV452884.1 | 13341054 | 6-scf00352 | 6 |
| AX-157866854 | 17 | 59.033 | KV452884.1 | 13351609 | 6-scf00352 | 6 |
| AX-157722998 | 17 | 59.033 | KV452884.1 | 13356260 | 6-scf00352 | 6 |
| AX-158197285 | 17 | 59.033 | KV452884.1 | 13358203 | 6-scf00352 | 6 |
| AX-157837158 | 17 | 59.033 | KV452884.1 | 13378892 | 6-scf00352 | 6 |
| AX-158197287 | 17 | 59.033 | KV452884.1 | 13382502 | 6-scf00352 | 6 |
| AX-157858946 | 17 | 59.033 | KV452884.1 | 13383748 | 6-scf00352 | 6 |
| AX-158197289 | 17 | 59.033 | KV452884.1 | 13393526 | 6-scf00352 | 6 |
| AX-158197290 | 17 | 59.033 | KV452884.1 | 13396927 | 6-scf00352 | 6 |
| AX-158197298 | 17 | 59.033 | KV452884.1 | 13430654 | 6-scf00352 | 6 |
| AX-158197301 | 17 | 59.033 | KV452884.1 | 13437946 | 6-scf00352 | 6 |
| AX-158197302 | 17 | 59.033 | KV452884.1 | 13439367 | 6-scf00352 | 6 |
| AX-158197304 | 17 | 59.033 | KV452884.1 | 13442272 | 6-scf00352 | 6 |

|              |    |        |            |          |            |   |
|--------------|----|--------|------------|----------|------------|---|
| AX-158393694 | 17 | 59.033 | KV452884.1 | 13442769 | 6-scf00352 | 6 |
| AX-158197305 | 17 | 59.033 | KV452884.1 | 13444281 | 6-scf00352 | 6 |
| AX-158197306 | 17 | 59.033 | KV452884.1 | 13446634 | 6-scf00352 | 6 |
| AX-158197308 | 17 | 59.033 | KV452884.1 | 13449066 | 6-scf00352 | 6 |
| AX-158197309 | 17 | 59.033 | KV452884.1 | 13457644 | 6-scf00352 | 6 |
| AX-158197310 | 17 | 59.033 | KV452884.1 | 13459409 | 6-scf00352 | 6 |
| AX-158197311 | 17 | 59.033 | KV452884.1 | 13463285 | 6-scf00352 | 6 |
| AX-158414122 | 17 | 59.033 | KV452884.1 | 13470362 | 6-scf00352 | 6 |
| AX-158197314 | 17 | 59.033 | KV452884.1 | 13484949 | 6-scf00352 | 6 |
| AX-158197315 | 17 | 59.033 | KV452884.1 | 13485347 | 6-scf00352 | 6 |
| AX-158197317 | 17 | 59.033 | KV452884.1 | 13492855 | 6-scf00352 | 6 |
| AX-158197318 | 17 | 59.033 | KV452884.1 | 13500207 | 6-scf00352 | 6 |
| AX-157752574 | 17 | 59.033 | KV452884.1 | 13508783 | 6-scf00352 | 6 |
| AX-158197321 | 17 | 59.033 | KV452884.1 | 13525631 | 6-scf00352 | 6 |
| AX-158197322 | 17 | 59.033 | KV452884.1 | 13529383 | 6-scf00352 | 6 |
| AX-158197324 | 17 | 59.033 | KV452884.1 | 13536305 | 6-scf00352 | 6 |
| AX-158197325 | 17 | 59.033 | KV452884.1 | 13538966 | 6-scf00352 | 6 |
| AX-157753644 | 17 | 59.033 | KV452884.1 | 13543931 | 6-scf00352 | 6 |
| AX-157758495 | 17 | 59.033 | KV452884.1 | 13546067 | 6-scf00352 | 6 |
| AX-158197328 | 17 | 59.033 | KV452884.1 | 13567906 | 6-scf00352 | 6 |
| AX-158197331 | 17 | 59.033 | KV452884.1 | 13584562 | 6-scf00352 | 6 |
| AX-158197333 | 17 | 59.033 | KV452884.1 | 13598585 | 6-scf00352 | 6 |
| AX-158197334 | 17 | 59.033 | KV452884.1 | 13604367 | 6-scf00352 | 6 |
| AX-158197336 | 17 | 59.033 | KV452884.1 | 13607338 | 6-scf00352 | 6 |
| AX-158197337 | 17 | 59.033 | KV452884.1 | 13607757 | 6-scf00352 | 6 |
| AX-158197338 | 17 | 59.033 | KV452884.1 | 13608655 | 6-scf00352 | 6 |
| AX-158197339 | 17 | 59.033 | KV452884.1 | 13610510 | 6-scf00352 | 6 |
| AX-158197342 | 17 | 59.033 | KV452884.1 | 13613965 | 6-scf00352 | 6 |
| AX-158197343 | 17 | 59.033 | KV452884.1 | 13616476 | 6-scf00352 | 6 |
| AX-158197344 | 17 | 59.033 | KV452884.1 | 13619526 | 6-scf00352 | 6 |
| AX-158197345 | 17 | 59.033 | KV452884.1 | 13619928 | 6-scf00352 | 6 |
| AX-158197347 | 17 | 59.033 | KV452884.1 | 13623128 | 6-scf00352 | 6 |
| AX-158197353 | 17 | 59.033 | KV452884.1 | 13675385 | 6-scf00352 | 6 |
| AX-157723672 | 17 | 59.033 | KV452884.1 | 13756513 | 6-scf00352 | 6 |
| AX-158197363 | 17 | 59.033 | KV452884.1 | 13769140 | 6-scf00352 | 6 |
| AX-158197368 | 17 | 59.033 | KV452884.1 | 13802334 | 6-scf00352 | 6 |
| AX-158197377 | 17 | 59.033 | KV452884.1 | 14019340 | 6-scf00352 | 6 |
| AX-158197378 | 17 | 59.033 | KV452884.1 | 14032338 | 6-scf00352 | 6 |
| AX-158197379 | 17 | 59.033 | KV452884.1 | 14038546 | 6-scf00352 | 6 |
| AX-158197385 | 17 | 59.033 | KV452884.1 | 14114288 | 6-scf00352 | 6 |
| AX-158197392 | 17 | 59.033 | KV452884.1 | 14182850 | 6-scf00352 | 6 |
| AX-158197400 | 17 | 59.033 | KV452884.1 | 14271269 | 6-scf00352 | 6 |
| AX-158197403 | 17 | 59.033 | KV452884.1 | 14345912 | 6-scf00352 | 6 |
| AX-158197406 | 17 | 59.033 | KV452884.1 | 14389340 | 6-scf00352 | 6 |
| AX-158197407 | 17 | 59.033 | KV452884.1 | 14391146 | 6-scf00352 | 6 |
| AX-158197409 | 17 | 59.033 | KV452884.1 | 14447429 | 6-scf00352 | 6 |
| AX-158197420 | 17 | 59.033 | KV452884.1 | 14499985 | 6-scf00352 | 6 |
| AX-158197425 | 17 | 59.033 | KV452884.1 | 14510859 | 6-scf00352 | 6 |
| AX-158197431 | 17 | 59.033 | KV452884.1 | 14526635 | 6-scf00352 | 6 |
| AX-158197439 | 17 | 59.033 | KV452884.1 | 14555765 | 6-scf00352 | 6 |
| AX-157731446 | 17 | 59.033 | KV452884.1 | 14647544 | 6-scf00352 | 6 |

|              |    |        |             |          |            |    |
|--------------|----|--------|-------------|----------|------------|----|
| AX-157837162 | 17 | 59.033 | KV452884.1  | 14688962 | 6-scf00352 | 6  |
| AX-157745639 | 17 | 59.033 | KV452884.1  | 14695443 | 6-scf00352 | 6  |
| AX-158197471 | 17 | 59.033 | KV452884.1  | 14711510 | 6-scf00352 | 6  |
| AX-158197498 | 17 | 59.033 | KV452884.1  | 14814759 | 6-scf00352 | 6  |
| AX-158197508 | 17 | 59.033 | KV452884.1  | 14828714 | 6-scf00352 | 6  |
| AX-158197514 | 17 | 59.033 | KV452884.1  | 14837120 | 6-scf00352 | 6  |
| AX-158197515 | 17 | 59.033 | KV452884.1  | 14837615 | 6-scf00352 | 6  |
| AX-158197521 | 17 | 59.033 | KV452884.1  | 14844883 | 6-scf00352 | 6  |
| AX-158197528 | 17 | 59.033 | KV452884.1  | 14860648 | 6-scf00352 | 6  |
| AX-158197540 | 17 | 59.033 | KV452884.1  | 14887463 | 6-scf00352 | 6  |
| AX-158197542 | 17 | 59.033 | KV452884.1  | 14894291 | 6-scf00352 | 6  |
| AX-157837167 | 17 | 59.033 | KV452884.1  | 14900457 | 6-scf00352 | 6  |
| AX-157720180 | 17 | 59.033 | KV452884.1  | 14901370 | 6-scf00352 | 6  |
| AX-158197555 | 17 | 59.033 | KV452884.1  | 14913237 | 6-scf00352 | 6  |
| AX-158197559 | 17 | 59.033 | KV452884.1  | 14924784 | 6-scf00352 | 6  |
| AX-158197561 | 17 | 59.033 | KV452884.1  | 14926615 | 6-scf00352 | 6  |
| AX-158197647 | 17 | 59.033 | KV452884.1  | 15077324 | 6-scf00352 | 6  |
| AX-157707333 | 17 | 59.033 | 3ML01034030 | 117      | scf09700_1 | UN |
| AX-158197352 | 17 | 59.064 | KV452884.1  | 13650996 | 6-scf00352 | 6  |
| AX-158197383 | 17 | 59.11  | KV452884.1  | 14056214 | 6-scf00352 | 6  |
| AX-158197119 | 17 | 59.142 | KV452884.1  | 12962411 | 6-scf00352 | 6  |
| AX-158197330 | 17 | 59.142 | KV452884.1  | 13576742 | 6-scf00352 | 6  |
| AX-158197335 | 17 | 59.142 | KV452884.1  | 13605705 | 6-scf00352 | 6  |
| AX-158197340 | 17 | 59.142 | KV452884.1  | 13611617 | 6-scf00352 | 6  |
| AX-158197341 | 17 | 59.142 | KV452884.1  | 13612272 | 6-scf00352 | 6  |
| AX-158197346 | 17 | 59.142 | KV452884.1  | 13620778 | 6-scf00352 | 6  |
| AX-158197351 | 17 | 59.142 | KV452884.1  | 13648959 | 6-scf00352 | 6  |
| AX-158197354 | 17 | 59.142 | KV452884.1  | 13701040 | 6-scf00352 | 6  |
| AX-158197355 | 17 | 59.142 | KV452884.1  | 13708506 | 6-scf00352 | 6  |
| AX-158197360 | 17 | 59.142 | KV452884.1  | 13760389 | 6-scf00352 | 6  |
| AX-158197364 | 17 | 59.142 | KV452884.1  | 13769424 | 6-scf00352 | 6  |
| AX-158197384 | 17 | 59.142 | KV452884.1  | 14056716 | 6-scf00352 | 6  |
| AX-157726148 | 17 | 59.142 | KV452884.1  | 14073368 | 6-scf00352 | 6  |
| AX-158197387 | 17 | 59.142 | KV452884.1  | 14146029 | 6-scf00352 | 6  |
| AX-158197399 | 17 | 59.142 | KV452884.1  | 14246322 | 6-scf00352 | 6  |
| AX-158197404 | 17 | 59.142 | KV452884.1  | 14359983 | 6-scf00352 | 6  |
| AX-158197411 | 17 | 59.142 | KV452884.1  | 14454147 | 6-scf00352 | 6  |
| AX-158197412 | 17 | 59.142 | KV452884.1  | 14462776 | 6-scf00352 | 6  |
| AX-158197424 | 17 | 59.142 | KV452884.1  | 14509622 | 6-scf00352 | 6  |
| AX-158197434 | 17 | 59.142 | KV452884.1  | 14539730 | 6-scf00352 | 6  |
| AX-158197435 | 17 | 59.142 | KV452884.1  | 14543476 | 6-scf00352 | 6  |
| AX-157757316 | 17 | 59.142 | KV452884.1  | 14551530 | 6-scf00352 | 6  |
| AX-158197440 | 17 | 59.142 | KV452884.1  | 14562902 | 6-scf00352 | 6  |
| AX-158197441 | 17 | 59.142 | KV452884.1  | 14566806 | 6-scf00352 | 6  |
| AX-158197443 | 17 | 59.142 | KV452884.1  | 14579963 | 6-scf00352 | 6  |
| AX-158197446 | 17 | 59.142 | KV452884.1  | 14585648 | 6-scf00352 | 6  |
| AX-158197449 | 17 | 59.142 | KV452884.1  | 14595794 | 6-scf00352 | 6  |
| AX-158197451 | 17 | 59.142 | KV452884.1  | 14600029 | 6-scf00352 | 6  |
| AX-158197453 | 17 | 59.142 | KV452884.1  | 14601027 | 6-scf00352 | 6  |
| AX-158197455 | 17 | 59.142 | KV452884.1  | 14603844 | 6-scf00352 | 6  |
| AX-158197456 | 17 | 59.142 | KV452884.1  | 14605292 | 6-scf00352 | 6  |



|              |    |        |            |          |            |   |
|--------------|----|--------|------------|----------|------------|---|
| AX-157858948 | 17 | 59.142 | KV452884.1 | 14680261 | 6-scf00352 | 6 |
| AX-157837161 | 17 | 59.142 | KV452884.1 | 14687083 | 6-scf00352 | 6 |
| AX-158197477 | 17 | 59.142 | KV452884.1 | 14734107 | 6-scf00352 | 6 |
| AX-158197489 | 17 | 59.142 | KV452884.1 | 14779884 | 6-scf00352 | 6 |
| AX-158197499 | 17 | 59.142 | KV452884.1 | 14815813 | 6-scf00352 | 6 |
| AX-157716438 | 17 | 59.142 | KV452884.1 | 14816246 | 6-scf00352 | 6 |
| AX-158197500 | 17 | 59.142 | KV452884.1 | 14819468 | 6-scf00352 | 6 |
| AX-157749576 | 17 | 59.142 | KV452884.1 | 14833327 | 6-scf00352 | 6 |
| AX-158197535 | 17 | 59.142 | KV452884.1 | 14884931 | 6-scf00352 | 6 |
| AX-158197536 | 17 | 59.142 | KV452884.1 | 14885154 | 6-scf00352 | 6 |
| AX-158197612 | 17 | 59.142 | KV452884.1 | 15014046 | 6-scf00352 | 6 |
| AX-158197618 | 17 | 59.142 | KV452884.1 | 15023800 | 6-scf00352 | 6 |
| AX-157837503 | 17 | 59.142 | KV452891.1 | 2423822  | 6-scf00356 | 6 |
| AX-158197507 | 17 | 59.162 | KV452884.1 | 14828224 | 6-scf00352 | 6 |
| AX-158197511 | 17 | 59.162 | KV452884.1 | 14834033 | 6-scf00352 | 6 |
| AX-158197527 | 17 | 59.162 | KV452884.1 | 14858821 | 6-scf00352 | 6 |
| AX-157837166 | 17 | 59.162 | KV452884.1 | 14885318 | 6-scf00352 | 6 |
| AX-158197512 | 17 | 59.193 | KV452884.1 | 14835577 | 6-scf00352 | 6 |
| AX-158197526 | 17 | 59.224 | KV452884.1 | 14857202 | 6-scf00352 | 6 |
| AX-158194347 | 17 | 59.229 | KV452884.1 | 8702499  | 6-scf00352 | 6 |
| AX-158194369 | 17 | 59.229 | KV452884.1 | 8750855  | 6-scf00352 | 6 |
| AX-158194371 | 17 | 59.229 | KV452884.1 | 8752339  | 6-scf00352 | 6 |
| AX-158194414 | 17 | 59.229 | KV452884.1 | 8819858  | 6-scf00352 | 6 |
| AX-158194509 | 17 | 59.229 | KV452884.1 | 8941249  | 6-scf00352 | 6 |
| AX-158194519 | 17 | 59.229 | KV452884.1 | 8949451  | 6-scf00352 | 6 |
| AX-157836852 | 17 | 59.229 | KV452884.1 | 8963613  | 6-scf00352 | 6 |
| AX-157715752 | 17 | 59.229 | KV452884.1 | 8964569  | 6-scf00352 | 6 |
| AX-158194624 | 17 | 59.229 | KV452884.1 | 9103144  | 6-scf00352 | 6 |
| AX-158194636 | 17 | 59.229 | KV452884.1 | 9125111  | 6-scf00352 | 6 |
| AX-158194645 | 17 | 59.229 | KV452884.1 | 9144017  | 6-scf00352 | 6 |
| AX-157750318 | 17 | 59.229 | KV452884.1 | 9723272  | 6-scf00352 | 6 |
| AX-158195009 | 17 | 59.229 | KV452884.1 | 9728253  | 6-scf00352 | 6 |
| AX-158195166 | 17 | 59.229 | KV452884.1 | 9993957  | 6-scf00352 | 6 |
| AX-158195169 | 17 | 59.229 | KV452884.1 | 9999093  | 6-scf00352 | 6 |
| AX-157717944 | 17 | 59.229 | KV452884.1 | 10001767 | 6-scf00352 | 6 |
| AX-158195530 | 17 | 59.229 | KV452884.1 | 10605336 | 6-scf00352 | 6 |
| AX-158195641 | 17 | 59.229 | KV452884.1 | 10739872 | 6-scf00352 | 6 |
| AX-157713087 | 17 | 59.229 | KV452884.1 | 10740387 | 6-scf00352 | 6 |
| AX-158195652 | 17 | 59.229 | KV452884.1 | 10750764 | 6-scf00352 | 6 |
| AX-158195676 | 17 | 59.229 | KV452884.1 | 10783487 | 6-scf00352 | 6 |
| AX-158195708 | 17 | 59.229 | KV452884.1 | 10815115 | 6-scf00352 | 6 |
| AX-158195740 | 17 | 59.229 | KV452884.1 | 10839355 | 6-scf00352 | 6 |
| AX-158195748 | 17 | 59.229 | KV452884.1 | 10842973 | 6-scf00352 | 6 |
| AX-157751802 | 17 | 59.229 | KV452884.1 | 10957416 | 6-scf00352 | 6 |
| AX-157743776 | 17 | 59.229 | KV452884.1 | 11333112 | 6-scf00352 | 6 |
| AX-158414095 | 17 | 59.229 | KV452884.1 | 11390869 | 6-scf00352 | 6 |
| AX-158196301 | 17 | 59.229 | KV452884.1 | 11643799 | 6-scf00352 | 6 |
| AX-158196316 | 17 | 59.229 | KV452884.1 | 11669637 | 6-scf00352 | 6 |
| AX-158196317 | 17 | 59.229 | KV452884.1 | 11670151 | 6-scf00352 | 6 |
| AX-157837040 | 17 | 59.229 | KV452884.1 | 11670215 | 6-scf00352 | 6 |
| AX-158196379 | 17 | 59.229 | KV452884.1 | 11766883 | 6-scf00352 | 6 |

|              |    |        |            |          |            |   |
|--------------|----|--------|------------|----------|------------|---|
| AX-158196444 | 17 | 59.229 | KV452884.1 | 11845001 | 6-scf00352 | 6 |
| AX-158196475 | 17 | 59.229 | KV452884.1 | 11889155 | 6-scf00352 | 6 |
| AX-158196522 | 17 | 59.229 | KV452884.1 | 11942224 | 6-scf00352 | 6 |
| AX-158196665 | 17 | 59.229 | KV452884.1 | 12303033 | 6-scf00352 | 6 |
| AX-157837086 | 17 | 59.229 | KV452884.1 | 12384373 | 6-scf00352 | 6 |
| AX-157837116 | 17 | 59.229 | KV452884.1 | 12700167 | 6-scf00352 | 6 |
| AX-158196941 | 17 | 59.229 | KV452884.1 | 12709188 | 6-scf00352 | 6 |
| AX-158196970 | 17 | 59.229 | KV452884.1 | 12737496 | 6-scf00352 | 6 |
| AX-158197003 | 17 | 59.229 | KV452884.1 | 12787319 | 6-scf00352 | 6 |
| AX-157755751 | 17 | 59.229 | KV452884.1 | 13010709 | 6-scf00352 | 6 |
| AX-157837139 | 17 | 59.229 | KV452884.1 | 13015774 | 6-scf00352 | 6 |
| AX-157837140 | 17 | 59.229 | KV452884.1 | 13024852 | 6-scf00352 | 6 |
| AX-158414136 | 17 | 59.229 | KV452884.1 | 14065569 | 6-scf00352 | 6 |
| AX-157727434 | 17 | 59.229 | KV452884.1 | 14715664 | 6-scf00352 | 6 |
| AX-158197481 | 17 | 59.229 | KV452884.1 | 14758940 | 6-scf00352 | 6 |
| AX-158197496 | 17 | 59.229 | KV452884.1 | 14801718 | 6-scf00352 | 6 |
| AX-158197532 | 17 | 59.229 | KV452884.1 | 14876388 | 6-scf00352 | 6 |
| AX-157837172 | 17 | 59.229 | KV452884.1 | 14981262 | 6-scf00352 | 6 |
| AX-158197657 | 17 | 59.229 | KV452884.1 | 15091294 | 6-scf00352 | 6 |
| AX-158197663 | 17 | 59.229 | KV452884.1 | 15102634 | 6-scf00352 | 6 |
| AX-158197721 | 17 | 59.229 | KV452884.1 | 15179015 | 6-scf00352 | 6 |
| AX-158197756 | 17 | 59.229 | KV452884.1 | 15215152 | 6-scf00352 | 6 |
| AX-158197764 | 17 | 59.229 | KV452884.1 | 15229948 | 6-scf00352 | 6 |
| AX-158197770 | 17 | 59.229 | KV452884.1 | 15237527 | 6-scf00352 | 6 |
| AX-158197779 | 17 | 59.229 | KV452884.1 | 15254148 | 6-scf00352 | 6 |
| AX-157837201 | 17 | 59.229 | KV452884.1 | 15353634 | 6-scf00352 | 6 |
| AX-158197858 | 17 | 59.229 | KV452884.1 | 15356493 | 6-scf00352 | 6 |
| AX-158198085 | 17 | 59.229 | KV452884.1 | 15791264 | 6-scf00352 | 6 |
| AX-157837243 | 17 | 59.229 | KV452884.1 | 15812320 | 6-scf00352 | 6 |
| AX-158198132 | 17 | 59.229 | KV452884.1 | 15851658 | 6-scf00352 | 6 |
| AX-158198154 | 17 | 59.229 | KV452884.1 | 15877082 | 6-scf00352 | 6 |
| AX-158198315 | 17 | 59.229 | KV452884.1 | 16096100 | 6-scf00352 | 6 |
| AX-158199385 | 17 | 59.229 | KV452886.1 | 647264   | 6-scf00354 | 6 |
| AX-158199381 | 17 | 59.229 | KV452886.1 | 655506   | 6-scf00354 | 6 |
| AX-158199380 | 17 | 59.229 | KV452886.1 | 655945   | 6-scf00354 | 6 |
| AX-158199339 | 17 | 59.229 | KV452886.1 | 716813   | 6-scf00354 | 6 |
| AX-158199211 | 17 | 59.229 | KV452886.1 | 909429   | 6-scf00354 | 6 |
| AX-157879204 | 17 | 59.229 | KV452886.1 | 1221708  | 6-scf00354 | 6 |
| AX-158386203 | 17 | 59.229 | KV452887.1 | 719832   | 6-scf00355 | 6 |
| AX-157837369 | 17 | 59.229 | KV452887.1 | 802535   | 6-scf00355 | 6 |
| AX-158200055 | 17 | 59.229 | KV452887.1 | 989157   | 6-scf00355 | 6 |
| AX-158200067 | 17 | 59.229 | KV452887.1 | 1012676  | 6-scf00355 | 6 |
| AX-158200241 | 17 | 59.229 | KV452887.1 | 1293517  | 6-scf00355 | 6 |
| AX-158200255 | 17 | 59.229 | KV452887.1 | 1310867  | 6-scf00355 | 6 |
| AX-158386214 | 17 | 59.229 | KV452887.1 | 1335658  | 6-scf00355 | 6 |
| AX-157887012 | 17 | 59.229 | KV452887.1 | 1431775  | 6-scf00355 | 6 |
| AX-158200426 | 17 | 59.229 | KV452887.1 | 1744554  | 6-scf00355 | 6 |
| AX-158200595 | 17 | 59.229 | KV452891.1 | 288770   | 6-scf00356 | 6 |
| AX-158200601 | 17 | 59.229 | KV452891.1 | 322157   | 6-scf00356 | 6 |
| AX-158200652 | 17 | 59.229 | KV452891.1 | 460585   | 6-scf00356 | 6 |
| AX-158200653 | 17 | 59.229 | KV452891.1 | 462887   | 6-scf00356 | 6 |

|              |    |        |            |          |            |    |
|--------------|----|--------|------------|----------|------------|----|
| AX-158200658 | 17 | 59.229 | KV452891.1 | 468416   | 6-scf00356 | 6  |
| AX-157753226 | 17 | 59.229 | KV452891.1 | 619935   | 6-scf00356 | 6  |
| AX-158200768 | 17 | 59.229 | KV452891.1 | 689506   | 6-scf00356 | 6  |
| AX-158200784 | 17 | 59.229 | KV452891.1 | 712796   | 6-scf00356 | 6  |
| AX-158200923 | 17 | 59.229 | KV452891.1 | 895026   | 6-scf00356 | 6  |
| AX-158201456 | 17 | 59.229 | KV452891.1 | 2351042  | 6-scf00356 | 6  |
| AX-158393895 | 17 | 59.229 | KV452891.1 | 2423786  | 6-scf00356 | 6  |
| AX-157837504 | 17 | 59.229 | KV452891.1 | 2423859  | 6-scf00356 | 6  |
| AX-158201518 | 17 | 59.229 | KV452891.1 | 2430366  | 6-scf00356 | 6  |
| AX-158201539 | 17 | 59.229 | KV452891.1 | 2459362  | 6-scf00356 | 6  |
| AX-158201674 | 17 | 59.229 | KV452891.1 | 2675938  | 6-scf00356 | 6  |
| AX-158201721 | 17 | 59.229 | KV452891.1 | 2743735  | 6-scf00356 | 6  |
| AX-158386237 | 17 | 59.229 | KV452891.1 | 2754198  | 6-scf00356 | 6  |
| AX-158201752 | 17 | 59.229 | KV452891.1 | 2782238  | 6-scf00356 | 6  |
| AX-158202011 | 17 | 59.229 | KV452888.1 | 194147   | 6-scf00358 | 6  |
| AX-158378598 | 17 | 59.229 | KV453357.1 | 44797    | scf00578   | UN |
| AX-158378599 | 17 | 59.229 | KV453357.1 | 46951    | scf00578   | UN |
| AX-158378603 | 17 | 59.229 | KV453357.1 | 50879    | scf00578   | UN |
| AX-158378666 | 17 | 59.229 | KV453357.1 | 239524   | scf00578   | UN |
| AX-158378471 | 17 | 59.229 | KV453357.1 | 263044   | scf00578   | UN |
| AX-158378474 | 17 | 59.229 | KV453357.1 | 264546   | scf00578   | UN |
| AX-157837165 | 17 | 59.252 | KV452884.1 | 14882525 | 6-scf00352 | 6  |
| AX-158197533 | 17 | 59.252 | KV452884.1 | 14883661 | 6-scf00352 | 6  |
| AX-158197534 | 17 | 59.252 | KV452884.1 | 14884358 | 6-scf00352 | 6  |
| AX-158380709 | 17 | 59.295 | KV452884.1 | 14885027 | 6-scf00352 | 6  |
| AX-158197538 | 17 | 59.337 | KV452884.1 | 14886391 | 6-scf00352 | 6  |
| AX-158197548 | 17 | 59.361 | KV452884.1 | 14898319 | 6-scf00352 | 6  |
| AX-158197553 | 17 | 59.47  | KV452884.1 | 14911136 | 6-scf00352 | 6  |
| AX-158197565 | 17 | 59.47  | KV452884.1 | 14933877 | 6-scf00352 | 6  |
| AX-158197577 | 17 | 59.47  | KV452884.1 | 14956376 | 6-scf00352 | 6  |
| AX-158197578 | 17 | 59.47  | KV452884.1 | 14956613 | 6-scf00352 | 6  |
| AX-158195662 | 17 | 59.579 | KV452884.1 | 10764978 | 6-scf00352 | 6  |
| AX-158197056 | 17 | 59.579 | KV452884.1 | 12846741 | 6-scf00352 | 6  |
| AX-157740155 | 17 | 59.579 | KV452884.1 | 14970476 | 6-scf00352 | 6  |
| AX-157750254 | 17 | 59.579 | KV452884.1 | 14971383 | 6-scf00352 | 6  |
| AX-158197589 | 17 | 59.579 | KV452884.1 | 14977644 | 6-scf00352 | 6  |
| AX-158197590 | 17 | 59.579 | KV452884.1 | 14979303 | 6-scf00352 | 6  |
| AX-158197594 | 17 | 59.579 | KV452884.1 | 14988066 | 6-scf00352 | 6  |
| AX-158197597 | 17 | 59.579 | KV452884.1 | 14991176 | 6-scf00352 | 6  |
| AX-157725150 | 17 | 59.579 | KV452884.1 | 15011787 | 6-scf00352 | 6  |
| AX-158197611 | 17 | 59.579 | KV452884.1 | 15013348 | 6-scf00352 | 6  |
| AX-157837178 | 17 | 59.579 | KV452884.1 | 15039849 | 6-scf00352 | 6  |
| AX-158197710 | 17 | 59.579 | KV452884.1 | 15162705 | 6-scf00352 | 6  |
| AX-157837186 | 17 | 59.579 | KV452884.1 | 15222152 | 6-scf00352 | 6  |
| AX-158197574 | 17 | 59.689 | KV452884.1 | 14951308 | 6-scf00352 | 6  |
| AX-158197601 | 17 | 59.689 | KV452884.1 | 14999113 | 6-scf00352 | 6  |
| AX-158197602 | 17 | 59.689 | KV452884.1 | 14999637 | 6-scf00352 | 6  |
| AX-158197603 | 17 | 59.689 | KV452884.1 | 15002233 | 6-scf00352 | 6  |
| AX-158197606 | 17 | 59.689 | KV452884.1 | 15006004 | 6-scf00352 | 6  |
| AX-158197610 | 17 | 59.689 | KV452884.1 | 15012941 | 6-scf00352 | 6  |
| AX-158197619 | 17 | 59.703 | KV452884.1 | 15024030 | 6-scf00352 | 6  |

|              |    |        |            |          |            |   |
|--------------|----|--------|------------|----------|------------|---|
| AX-158197190 | 17 | 59.714 | KV452884.1 | 13096428 | 6-scf00352 | 6 |
| AX-158197467 | 17 | 59.714 | KV452884.1 | 14688441 | 6-scf00352 | 6 |
| AX-157837163 | 17 | 59.714 | KV452884.1 | 14701491 | 6-scf00352 | 6 |
| AX-157746421 | 17 | 59.714 | KV452884.1 | 14703343 | 6-scf00352 | 6 |
| AX-157837170 | 17 | 59.714 | KV452884.1 | 14974774 | 6-scf00352 | 6 |
| AX-158197617 | 17 | 59.714 | KV452884.1 | 15021840 | 6-scf00352 | 6 |
| AX-157837176 | 17 | 59.714 | KV452884.1 | 15025917 | 6-scf00352 | 6 |
| AX-157745944 | 17 | 59.714 | KV452884.1 | 15026847 | 6-scf00352 | 6 |
| AX-158197587 | 17 | 59.735 | KV452884.1 | 14970604 | 6-scf00352 | 6 |
| AX-158197620 | 17 | 59.735 | KV452884.1 | 15031031 | 6-scf00352 | 6 |
| AX-158197630 | 17 | 59.735 | KV452884.1 | 15049244 | 6-scf00352 | 6 |
| AX-157837180 | 17 | 59.735 | KV452884.1 | 15052431 | 6-scf00352 | 6 |
| AX-158197664 | 17 | 59.735 | KV452884.1 | 15103387 | 6-scf00352 | 6 |
| AX-158197621 | 17 | 59.757 | KV452884.1 | 15033723 | 6-scf00352 | 6 |
| AX-158197654 | 17 | 59.757 | KV452884.1 | 15088248 | 6-scf00352 | 6 |
| AX-157719485 | 17 | 59.774 | KV452884.1 | 11101772 | 6-scf00352 | 6 |
| AX-158197624 | 17 | 59.774 | KV452884.1 | 15042680 | 6-scf00352 | 6 |
| AX-158200644 | 17 | 59.774 | KV452891.1 | 442751   | 6-scf00356 | 6 |
| AX-157718878 | 17 | 59.798 | KV452884.1 | 8470565  | 6-scf00352 | 6 |
| AX-158195114 | 17 | 59.798 | KV452884.1 | 9938189  | 6-scf00352 | 6 |
| AX-158195190 | 17 | 59.798 | KV452884.1 | 10038859 | 6-scf00352 | 6 |
| AX-158195470 | 17 | 59.798 | KV452884.1 | 10491032 | 6-scf00352 | 6 |
| AX-157872192 | 17 | 59.798 | KV452884.1 | 10497330 | 6-scf00352 | 6 |
| AX-158195495 | 17 | 59.798 | KV452884.1 | 10530688 | 6-scf00352 | 6 |
| AX-158195499 | 17 | 59.798 | KV452884.1 | 10537508 | 6-scf00352 | 6 |
| AX-158414076 | 17 | 59.798 | KV452884.1 | 10560390 | 6-scf00352 | 6 |
| AX-158393646 | 17 | 59.798 | KV452884.1 | 10568960 | 6-scf00352 | 6 |
| AX-158195513 | 17 | 59.798 | KV452884.1 | 10574173 | 6-scf00352 | 6 |
| AX-158393648 | 17 | 59.798 | KV452884.1 | 10580331 | 6-scf00352 | 6 |
| AX-158393649 | 17 | 59.798 | KV452884.1 | 10586105 | 6-scf00352 | 6 |
| AX-158195522 | 17 | 59.798 | KV452884.1 | 10591791 | 6-scf00352 | 6 |
| AX-158195523 | 17 | 59.798 | KV452884.1 | 10592255 | 6-scf00352 | 6 |
| AX-158393650 | 17 | 59.798 | KV452884.1 | 10592405 | 6-scf00352 | 6 |
| AX-158195525 | 17 | 59.798 | KV452884.1 | 10593978 | 6-scf00352 | 6 |
| AX-158195529 | 17 | 59.798 | KV452884.1 | 10599482 | 6-scf00352 | 6 |
| AX-158195531 | 17 | 59.798 | KV452884.1 | 10607330 | 6-scf00352 | 6 |
| AX-158195532 | 17 | 59.798 | KV452884.1 | 10611520 | 6-scf00352 | 6 |
| AX-158393651 | 17 | 59.798 | KV452884.1 | 10615688 | 6-scf00352 | 6 |
| AX-158195538 | 17 | 59.798 | KV452884.1 | 10619827 | 6-scf00352 | 6 |
| AX-158195548 | 17 | 59.798 | KV452884.1 | 10639835 | 6-scf00352 | 6 |
| AX-157872199 | 17 | 59.798 | KV452884.1 | 10647307 | 6-scf00352 | 6 |
| AX-158195556 | 17 | 59.798 | KV452884.1 | 10647739 | 6-scf00352 | 6 |
| AX-158195558 | 17 | 59.798 | KV452884.1 | 10649430 | 6-scf00352 | 6 |
| AX-157866841 | 17 | 59.798 | KV452884.1 | 10655976 | 6-scf00352 | 6 |
| AX-158195622 | 17 | 59.798 | KV452884.1 | 10712090 | 6-scf00352 | 6 |
| AX-158195665 | 17 | 59.798 | KV452884.1 | 10766660 | 6-scf00352 | 6 |
| AX-158195666 | 17 | 59.798 | KV452884.1 | 10768889 | 6-scf00352 | 6 |
| AX-158195674 | 17 | 59.798 | KV452884.1 | 10781269 | 6-scf00352 | 6 |
| AX-158195697 | 17 | 59.798 | KV452884.1 | 10805451 | 6-scf00352 | 6 |
| AX-158195702 | 17 | 59.798 | KV452884.1 | 10808643 | 6-scf00352 | 6 |
| AX-158195933 | 17 | 59.798 | KV452884.1 | 11054404 | 6-scf00352 | 6 |

|              |    |        |            |          |            |   |
|--------------|----|--------|------------|----------|------------|---|
| AX-158195962 | 17 | 59.798 | KV452884.1 | 11088806 | 6-scf00352 | 6 |
| AX-158195973 | 17 | 59.798 | KV452884.1 | 11102269 | 6-scf00352 | 6 |
| AX-157872209 | 17 | 59.798 | KV452884.1 | 11148141 | 6-scf00352 | 6 |
| AX-158196023 | 17 | 59.798 | KV452884.1 | 11155917 | 6-scf00352 | 6 |
| AX-158196047 | 17 | 59.798 | KV452884.1 | 11185553 | 6-scf00352 | 6 |
| AX-158196063 | 17 | 59.798 | KV452884.1 | 11197315 | 6-scf00352 | 6 |
| AX-158196092 | 17 | 59.798 | KV452884.1 | 11247780 | 6-scf00352 | 6 |
| AX-157712918 | 17 | 59.798 | KV452884.1 | 11283984 | 6-scf00352 | 6 |
| AX-157837013 | 17 | 59.798 | KV452884.1 | 11289686 | 6-scf00352 | 6 |
| AX-157726172 | 17 | 59.798 | KV452884.1 | 11380768 | 6-scf00352 | 6 |
| AX-157858937 | 17 | 59.798 | KV452884.1 | 11557454 | 6-scf00352 | 6 |
| AX-158196305 | 17 | 59.798 | KV452884.1 | 11651225 | 6-scf00352 | 6 |
| AX-158196306 | 17 | 59.798 | KV452884.1 | 11653196 | 6-scf00352 | 6 |
| AX-158196309 | 17 | 59.798 | KV452884.1 | 11657361 | 6-scf00352 | 6 |
| AX-158196311 | 17 | 59.798 | KV452884.1 | 11659170 | 6-scf00352 | 6 |
| AX-158196313 | 17 | 59.798 | KV452884.1 | 11666749 | 6-scf00352 | 6 |
| AX-158196373 | 17 | 59.798 | KV452884.1 | 11761098 | 6-scf00352 | 6 |
| AX-158196374 | 17 | 59.798 | KV452884.1 | 11761571 | 6-scf00352 | 6 |
| AX-157866847 | 17 | 59.798 | KV452884.1 | 11766417 | 6-scf00352 | 6 |
| AX-158196399 | 17 | 59.798 | KV452884.1 | 11788866 | 6-scf00352 | 6 |
| AX-158196461 | 17 | 59.798 | KV452884.1 | 11870667 | 6-scf00352 | 6 |
| AX-157837054 | 17 | 59.798 | KV452884.1 | 11871105 | 6-scf00352 | 6 |
| AX-158196462 | 17 | 59.798 | KV452884.1 | 11871252 | 6-scf00352 | 6 |
| AX-157837061 | 17 | 59.798 | KV452884.1 | 11946781 | 6-scf00352 | 6 |
| AX-158196562 | 17 | 59.798 | KV452884.1 | 11998757 | 6-scf00352 | 6 |
| AX-157741840 | 17 | 59.798 | KV452884.1 | 12008884 | 6-scf00352 | 6 |
| AX-158414104 | 17 | 59.798 | KV452884.1 | 12026666 | 6-scf00352 | 6 |
| AX-158196712 | 17 | 59.798 | KV452884.1 | 12416057 | 6-scf00352 | 6 |
| AX-158196809 | 17 | 59.798 | KV452884.1 | 12518444 | 6-scf00352 | 6 |
| AX-158196815 | 17 | 59.798 | KV452884.1 | 12522507 | 6-scf00352 | 6 |
| AX-158196816 | 17 | 59.798 | KV452884.1 | 12523613 | 6-scf00352 | 6 |
| AX-158196817 | 17 | 59.798 | KV452884.1 | 12524934 | 6-scf00352 | 6 |
| AX-158196828 | 17 | 59.798 | KV452884.1 | 12535124 | 6-scf00352 | 6 |
| AX-158196831 | 17 | 59.798 | KV452884.1 | 12536428 | 6-scf00352 | 6 |
| AX-158196833 | 17 | 59.798 | KV452884.1 | 12537811 | 6-scf00352 | 6 |
| AX-158196834 | 17 | 59.798 | KV452884.1 | 12538469 | 6-scf00352 | 6 |
| AX-158196835 | 17 | 59.798 | KV452884.1 | 12541733 | 6-scf00352 | 6 |
| AX-158196844 | 17 | 59.798 | KV452884.1 | 12553279 | 6-scf00352 | 6 |
| AX-158197616 | 17 | 59.798 | KV452884.1 | 15020426 | 6-scf00352 | 6 |
| AX-158197625 | 17 | 59.798 | KV452884.1 | 15043040 | 6-scf00352 | 6 |
| AX-158197626 | 17 | 59.798 | KV452884.1 | 15044621 | 6-scf00352 | 6 |
| AX-158197633 | 17 | 59.798 | KV452884.1 | 15051192 | 6-scf00352 | 6 |
| AX-158197636 | 17 | 59.798 | KV452884.1 | 15057663 | 6-scf00352 | 6 |
| AX-157837181 | 17 | 59.798 | KV452884.1 | 15059872 | 6-scf00352 | 6 |
| AX-158197637 | 17 | 59.798 | KV452884.1 | 15060267 | 6-scf00352 | 6 |
| AX-158197639 | 17 | 59.798 | KV452884.1 | 15062828 | 6-scf00352 | 6 |
| AX-158197643 | 17 | 59.798 | KV452884.1 | 15067660 | 6-scf00352 | 6 |
| AX-158197646 | 17 | 59.798 | KV452884.1 | 15072005 | 6-scf00352 | 6 |
| AX-158197652 | 17 | 59.798 | KV452884.1 | 15085306 | 6-scf00352 | 6 |
| AX-158197655 | 17 | 59.798 | KV452884.1 | 15089327 | 6-scf00352 | 6 |
| AX-158197656 | 17 | 59.798 | KV452884.1 | 15090215 | 6-scf00352 | 6 |

|              |    |        |            |          |            |   |
|--------------|----|--------|------------|----------|------------|---|
| AX-158197658 | 17 | 59.798 | KV452884.1 | 15095028 | 6-scf00352 | 6 |
| AX-158197665 | 17 | 59.962 | KV452884.1 | 15105366 | 6-scf00352 | 6 |
| AX-158197666 | 17 | 59.962 | KV452884.1 | 15106135 | 6-scf00352 | 6 |
| AX-157755784 | 17 | 60.126 | KV452884.1 | 15109417 | 6-scf00352 | 6 |
| AX-158197668 | 17 | 60.126 | KV452884.1 | 15110469 | 6-scf00352 | 6 |
| AX-158197675 | 17 | 60.126 | KV452884.1 | 15117245 | 6-scf00352 | 6 |
| AX-158197679 | 17 | 60.126 | KV452884.1 | 15122188 | 6-scf00352 | 6 |
| AX-158197681 | 17 | 60.126 | KV452884.1 | 15124007 | 6-scf00352 | 6 |
| AX-157837183 | 17 | 60.126 | KV452884.1 | 15125576 | 6-scf00352 | 6 |
| AX-158197695 | 17 | 60.283 | KV452884.1 | 15140720 | 6-scf00352 | 6 |
| AX-157707851 | 17 | 60.454 | KV452884.1 | 14967191 | 6-scf00352 | 6 |
| AX-158197700 | 17 | 60.454 | KV452884.1 | 15147104 | 6-scf00352 | 6 |
| AX-158197701 | 17 | 60.454 | KV452884.1 | 15147840 | 6-scf00352 | 6 |
| AX-158197702 | 17 | 60.454 | KV452884.1 | 15148076 | 6-scf00352 | 6 |
| AX-158197718 | 17 | 60.454 | KV452884.1 | 15169619 | 6-scf00352 | 6 |
| AX-158197754 | 17 | 60.454 | KV452884.1 | 15211534 | 6-scf00352 | 6 |
| AX-158197768 | 17 | 60.454 | KV452884.1 | 15234543 | 6-scf00352 | 6 |
| AX-158197775 | 17 | 60.454 | KV452884.1 | 15250312 | 6-scf00352 | 6 |
| AX-158197705 | 17 | 60.563 | KV452884.1 | 15154492 | 6-scf00352 | 6 |
| AX-158197706 | 17 | 60.563 | KV452884.1 | 15156985 | 6-scf00352 | 6 |
| AX-158197711 | 17 | 60.563 | KV452884.1 | 15163817 | 6-scf00352 | 6 |
| AX-158197715 | 17 | 60.563 | KV452884.1 | 15167227 | 6-scf00352 | 6 |
| AX-158197722 | 17 | 60.563 | KV452884.1 | 15181296 | 6-scf00352 | 6 |
| AX-158197725 | 17 | 60.563 | KV452884.1 | 15183608 | 6-scf00352 | 6 |
| AX-158197728 | 17 | 60.563 | KV452884.1 | 15186352 | 6-scf00352 | 6 |
| AX-158197731 | 17 | 60.588 | KV452884.1 | 15189774 | 6-scf00352 | 6 |
| AX-158197732 | 17 | 60.625 | KV452884.1 | 15189992 | 6-scf00352 | 6 |
| AX-158197735 | 17 | 60.65  | KV452884.1 | 15196508 | 6-scf00352 | 6 |
| AX-158197737 | 17 | 60.673 | KV452884.1 | 15196989 | 6-scf00352 | 6 |
| AX-158197738 | 17 | 60.673 | KV452884.1 | 15197631 | 6-scf00352 | 6 |
| AX-158197757 | 17 | 60.673 | KV452884.1 | 15216045 | 6-scf00352 | 6 |
| AX-158197713 | 17 | 60.785 | KV452884.1 | 15166255 | 6-scf00352 | 6 |
| AX-158197741 | 17 | 60.785 | KV452884.1 | 15200629 | 6-scf00352 | 6 |
| AX-158197744 | 17 | 60.891 | KV452884.1 | 15201863 | 6-scf00352 | 6 |
| AX-158197753 | 17 | 60.891 | KV452884.1 | 15211295 | 6-scf00352 | 6 |
| AX-158197684 | 17 | 61.003 | KV452884.1 | 15128299 | 6-scf00352 | 6 |
| AX-158197720 | 17 | 61.003 | KV452884.1 | 15176139 | 6-scf00352 | 6 |
| AX-158197723 | 17 | 61.003 | KV452884.1 | 15181663 | 6-scf00352 | 6 |
| AX-158197747 | 17 | 61.003 | KV452884.1 | 15204508 | 6-scf00352 | 6 |
| AX-157743856 | 17 | 61.003 | KV452884.1 | 15220311 | 6-scf00352 | 6 |
| AX-158197760 | 17 | 61.003 | KV452884.1 | 15223665 | 6-scf00352 | 6 |
| AX-157837185 | 17 | 61.11  | KV452884.1 | 15221626 | 6-scf00352 | 6 |
| AX-158197762 | 17 | 61.11  | KV452884.1 | 15226902 | 6-scf00352 | 6 |
| AX-158197766 | 17 | 61.11  | KV452884.1 | 15232520 | 6-scf00352 | 6 |
| AX-158197767 | 17 | 61.11  | KV452884.1 | 15233140 | 6-scf00352 | 6 |
| AX-157837187 | 17 | 61.11  | KV452884.1 | 15233539 | 6-scf00352 | 6 |
| AX-157837188 | 17 | 61.11  | KV452884.1 | 15233719 | 6-scf00352 | 6 |
| AX-158197769 | 17 | 61.11  | KV452884.1 | 15235843 | 6-scf00352 | 6 |
| AX-158197759 | 17 | 61.22  | KV452884.1 | 15218611 | 6-scf00352 | 6 |
| AX-158197772 | 17 | 61.22  | KV452884.1 | 15244853 | 6-scf00352 | 6 |
| AX-158197773 | 17 | 61.22  | KV452884.1 | 15245891 | 6-scf00352 | 6 |

|              |    |        |            |          |            |   |
|--------------|----|--------|------------|----------|------------|---|
| AX-158197774 | 17 | 61.22  | KV452884.1 | 15248615 | 6-scf00352 | 6 |
| AX-158197780 | 17 | 61.548 | KV452884.1 | 15257817 | 6-scf00352 | 6 |
| AX-158197781 | 17 | 61.548 | KV452884.1 | 15259110 | 6-scf00352 | 6 |
| AX-157837191 | 17 | 61.682 | KV452884.1 | 15265111 | 6-scf00352 | 6 |
| AX-158197786 | 17 | 61.682 | KV452884.1 | 15265209 | 6-scf00352 | 6 |
| AX-158197787 | 17 | 61.682 | KV452884.1 | 15267083 | 6-scf00352 | 6 |
| AX-158197824 | 17 | 62.171 | KV452884.1 | 15307948 | 6-scf00352 | 6 |
| AX-158197825 | 17 | 62.206 | KV452884.1 | 15309116 | 6-scf00352 | 6 |
| AX-158197826 | 17 | 62.206 | KV452884.1 | 15311668 | 6-scf00352 | 6 |
| AX-158197827 | 17 | 62.206 | KV452884.1 | 15312966 | 6-scf00352 | 6 |
| AX-157713452 | 17 | 62.316 | KV452884.1 | 15313891 | 6-scf00352 | 6 |
| AX-157837200 | 17 | 62.316 | KV452884.1 | 15315139 | 6-scf00352 | 6 |
| AX-158200641 | 17 | 62.316 | KV452891.1 | 439999   | 6-scf00356 | 6 |
| AX-157837192 | 17 | 62.536 | KV452884.1 | 15267879 | 6-scf00352 | 6 |
| AX-158197831 | 17 | 62.536 | KV452884.1 | 15318850 | 6-scf00352 | 6 |
| AX-158197834 | 17 | 62.536 | KV452884.1 | 15326313 | 6-scf00352 | 6 |
| AX-158198023 | 17 | 62.536 | KV452884.1 | 15642818 | 6-scf00352 | 6 |
| AX-158198060 | 17 | 62.536 | KV452884.1 | 15726696 | 6-scf00352 | 6 |
| AX-157837233 | 17 | 62.536 | KV452884.1 | 15727125 | 6-scf00352 | 6 |
| AX-158197835 | 17 | 62.588 | KV452884.1 | 15329091 | 6-scf00352 | 6 |
| AX-158197836 | 17 | 62.645 | KV452884.1 | 15329646 | 6-scf00352 | 6 |
| AX-158197839 | 17 | 62.645 | KV452884.1 | 15336502 | 6-scf00352 | 6 |
| AX-158197840 | 17 | 62.645 | KV452884.1 | 15337605 | 6-scf00352 | 6 |
| AX-158197842 | 17 | 62.645 | KV452884.1 | 15338800 | 6-scf00352 | 6 |
| AX-157770987 | 17 | 62.645 | KV452884.1 | 15341994 | 6-scf00352 | 6 |
| AX-157879186 | 17 | 62.645 | KV452884.1 | 15343804 | 6-scf00352 | 6 |
| AX-158197846 | 17 | 62.645 | KV452884.1 | 15344440 | 6-scf00352 | 6 |
| AX-158197936 | 17 | 62.645 | KV452884.1 | 15460968 | 6-scf00352 | 6 |
| AX-157837220 | 17 | 62.645 | KV452884.1 | 15626443 | 6-scf00352 | 6 |
| AX-158198083 | 17 | 62.645 | KV452884.1 | 15788776 | 6-scf00352 | 6 |
| AX-158200708 | 17 | 62.645 | KV452891.1 | 615336   | 6-scf00356 | 6 |
| AX-157858985 | 17 | 62.645 | KV452891.1 | 620113   | 6-scf00356 | 6 |
| AX-157708656 | 17 | 62.645 | KV452891.1 | 633603   | 6-scf00356 | 6 |
| AX-158200806 | 17 | 62.645 | KV452891.1 | 734956   | 6-scf00356 | 6 |
| AX-158197850 | 17 | 62.662 | KV452884.1 | 15348076 | 6-scf00352 | 6 |
| AX-158197854 | 17 | 62.694 | KV452884.1 | 15352513 | 6-scf00352 | 6 |
| AX-158414154 | 17 | 62.694 | KV452884.1 | 15604631 | 6-scf00352 | 6 |
| AX-158198001 | 17 | 62.694 | KV452884.1 | 15610925 | 6-scf00352 | 6 |
| AX-158197860 | 17 | 62.725 | KV452884.1 | 15358007 | 6-scf00352 | 6 |
| AX-158197862 | 17 | 62.754 | KV452884.1 | 15359869 | 6-scf00352 | 6 |
| AX-158197863 | 17 | 62.754 | KV452884.1 | 15360864 | 6-scf00352 | 6 |
| AX-158197865 | 17 | 62.754 | KV452884.1 | 15362873 | 6-scf00352 | 6 |
| AX-158197868 | 17 | 62.754 | KV452884.1 | 15367252 | 6-scf00352 | 6 |
| AX-158197869 | 17 | 62.754 | KV452884.1 | 15367885 | 6-scf00352 | 6 |
| AX-158393701 | 17 | 62.772 | KV452884.1 | 15368021 | 6-scf00352 | 6 |
| AX-158197871 | 17 | 62.82  | KV452884.1 | 15371365 | 6-scf00352 | 6 |
| AX-158197872 | 17 | 62.864 | KV452884.1 | 15373962 | 6-scf00352 | 6 |
| AX-158197873 | 17 | 62.89  | KV452884.1 | 15376790 | 6-scf00352 | 6 |
| AX-158197874 | 17 | 62.918 | KV452884.1 | 15379699 | 6-scf00352 | 6 |
| AX-158197876 | 17 | 62.95  | KV452884.1 | 15383765 | 6-scf00352 | 6 |
| AX-158194334 | 17 | 62.973 | KV452884.1 | 8686931  | 6-scf00352 | 6 |

|              |    |        |            |          |            |    |
|--------------|----|--------|------------|----------|------------|----|
| AX-158194878 | 17 | 62.973 | KV452884.1 | 9531161  | 6-scf00352 | 6  |
| AX-158197173 | 17 | 62.973 | KV452884.1 | 13063897 | 6-scf00352 | 6  |
| AX-158197560 | 17 | 62.973 | KV452884.1 | 14925603 | 6-scf00352 | 6  |
| AX-158197789 | 17 | 62.973 | KV452884.1 | 15269070 | 6-scf00352 | 6  |
| AX-158197875 | 17 | 62.973 | KV452884.1 | 15382119 | 6-scf00352 | 6  |
| AX-158197878 | 17 | 62.973 | KV452884.1 | 15385280 | 6-scf00352 | 6  |
| AX-158197879 | 17 | 62.973 | KV452884.1 | 15386323 | 6-scf00352 | 6  |
| AX-158197880 | 17 | 62.973 | KV452884.1 | 15386969 | 6-scf00352 | 6  |
| AX-158197882 | 17 | 62.973 | KV452884.1 | 15389967 | 6-scf00352 | 6  |
| AX-158197888 | 17 | 62.973 | KV452884.1 | 15398602 | 6-scf00352 | 6  |
| AX-158197892 | 17 | 62.973 | KV452884.1 | 15406642 | 6-scf00352 | 6  |
| AX-158197894 | 17 | 62.973 | KV452884.1 | 15407892 | 6-scf00352 | 6  |
| AX-158197896 | 17 | 62.973 | KV452884.1 | 15409255 | 6-scf00352 | 6  |
| AX-158197937 | 17 | 62.973 | KV452884.1 | 15463558 | 6-scf00352 | 6  |
| AX-158414148 | 17 | 62.973 | KV452884.1 | 15524191 | 6-scf00352 | 6  |
| AX-158198210 | 17 | 62.973 | KV452884.1 | 15964890 | 6-scf00352 | 6  |
| AX-158200400 | 17 | 62.973 | KV452887.1 | 1659945  | 6-scf00355 | 6  |
| AX-158378531 | 17 | 62.973 | KV453357.1 | 333053   | scf00578   | UN |
| AX-158197889 | 17 | 62.987 | KV452884.1 | 15399293 | 6-scf00352 | 6  |
| AX-158197893 | 17 | 62.987 | KV452884.1 | 15407324 | 6-scf00352 | 6  |
| AX-158197902 | 17 | 62.987 | KV452884.1 | 15419397 | 6-scf00352 | 6  |
| AX-158197947 | 17 | 62.987 | KV452884.1 | 15484626 | 6-scf00352 | 6  |
| AX-157879190 | 17 | 62.987 | KV452884.1 | 15504515 | 6-scf00352 | 6  |
| AX-158197960 | 17 | 62.987 | KV452884.1 | 15506550 | 6-scf00352 | 6  |
| AX-157711744 | 17 | 62.987 | KV452884.1 | 15551154 | 6-scf00352 | 6  |
| AX-157837203 | 17 | 63.02  | KV452884.1 | 15411890 | 6-scf00352 | 6  |
| AX-158197900 | 17 | 63.05  | KV452884.1 | 15414945 | 6-scf00352 | 6  |
| AX-158197821 | 17 | 63.082 | KV452884.1 | 15306126 | 6-scf00352 | 6  |
| AX-158197830 | 17 | 63.082 | KV452884.1 | 15317444 | 6-scf00352 | 6  |
| AX-158197844 | 17 | 63.082 | KV452884.1 | 15341017 | 6-scf00352 | 6  |
| AX-157837202 | 17 | 63.082 | KV452884.1 | 15377669 | 6-scf00352 | 6  |
| AX-158197914 | 17 | 63.082 | KV452884.1 | 15438261 | 6-scf00352 | 6  |
| AX-158197916 | 17 | 63.082 | KV452884.1 | 15441370 | 6-scf00352 | 6  |
| AX-158197917 | 17 | 63.082 | KV452884.1 | 15441824 | 6-scf00352 | 6  |
| AX-158197918 | 17 | 63.082 | KV452884.1 | 15443094 | 6-scf00352 | 6  |
| AX-158197923 | 17 | 63.082 | KV452884.1 | 15446603 | 6-scf00352 | 6  |
| AX-158197929 | 17 | 63.082 | KV452884.1 | 15454937 | 6-scf00352 | 6  |
| AX-158197931 | 17 | 63.082 | KV452884.1 | 15456952 | 6-scf00352 | 6  |
| AX-158197932 | 17 | 63.082 | KV452884.1 | 15457344 | 6-scf00352 | 6  |
| AX-157837204 | 17 | 63.082 | KV452884.1 | 15457833 | 6-scf00352 | 6  |
| AX-158197933 | 17 | 63.082 | KV452884.1 | 15458422 | 6-scf00352 | 6  |
| AX-157837207 | 17 | 63.082 | KV452884.1 | 15462557 | 6-scf00352 | 6  |
| AX-158197938 | 17 | 63.082 | KV452884.1 | 15464801 | 6-scf00352 | 6  |
| AX-157837208 | 17 | 63.082 | KV452884.1 | 15465526 | 6-scf00352 | 6  |
| AX-158197942 | 17 | 63.082 | KV452884.1 | 15473908 | 6-scf00352 | 6  |
| AX-158380711 | 17 | 63.082 | KV452884.1 | 15616019 | 6-scf00352 | 6  |
| AX-158198012 | 17 | 63.082 | KV452884.1 | 15625692 | 6-scf00352 | 6  |
| AX-157837234 | 17 | 63.082 | KV452884.1 | 15727471 | 6-scf00352 | 6  |
| AX-157872240 | 17 | 63.082 | KV452884.1 | 15807275 | 6-scf00352 | 6  |
| AX-158197945 | 17 | 63.301 | KV452884.1 | 15483632 | 6-scf00352 | 6  |
| AX-157757673 | 17 | 63.301 | KV452884.1 | 15491224 | 6-scf00352 | 6  |



|              |    |        |            |          |            |   |
|--------------|----|--------|------------|----------|------------|---|
| AX-157725879 | 17 | 63.301 | KV452884.1 | 15493537 | 6-scf00352 | 6 |
| AX-157837210 | 17 | 63.301 | KV452884.1 | 15513361 | 6-scf00352 | 6 |
| AX-158197963 | 17 | 63.301 | KV452884.1 | 15515799 | 6-scf00352 | 6 |
| AX-158197959 | 17 | 63.331 | KV452884.1 | 15504722 | 6-scf00352 | 6 |
| AX-157715157 | 17 | 63.41  | KV452884.1 | 15512945 | 6-scf00352 | 6 |
| AX-158197962 | 17 | 63.41  | KV452884.1 | 15514827 | 6-scf00352 | 6 |
| AX-157837211 | 17 | 63.463 | KV452884.1 | 15517410 | 6-scf00352 | 6 |
| AX-158197966 | 17 | 63.488 | KV452884.1 | 15518932 | 6-scf00352 | 6 |
| AX-158196662 | 17 | 63.519 | KV452884.1 | 12294194 | 6-scf00352 | 6 |
| AX-158197845 | 17 | 63.519 | KV452884.1 | 15342939 | 6-scf00352 | 6 |
| AX-157709040 | 17 | 63.519 | KV452884.1 | 15361198 | 6-scf00352 | 6 |
| AX-158197870 | 17 | 63.519 | KV452884.1 | 15369282 | 6-scf00352 | 6 |
| AX-158197930 | 17 | 63.519 | KV452884.1 | 15456525 | 6-scf00352 | 6 |
| AX-158197964 | 17 | 63.519 | KV452884.1 | 15516219 | 6-scf00352 | 6 |
| AX-158197981 | 17 | 63.519 | KV452884.1 | 15547019 | 6-scf00352 | 6 |
| AX-157746211 | 17 | 63.519 | KV452884.1 | 15547404 | 6-scf00352 | 6 |
| AX-158197982 | 17 | 63.519 | KV452884.1 | 15548055 | 6-scf00352 | 6 |
| AX-157837215 | 17 | 63.519 | KV452884.1 | 15550403 | 6-scf00352 | 6 |
| AX-158414151 | 17 | 63.519 | KV452884.1 | 15556791 | 6-scf00352 | 6 |
| AX-158393702 | 17 | 63.519 | KV452884.1 | 15558650 | 6-scf00352 | 6 |
| AX-158197985 | 17 | 63.519 | KV452884.1 | 15560030 | 6-scf00352 | 6 |
| AX-157837216 | 17 | 63.519 | KV452884.1 | 15587629 | 6-scf00352 | 6 |
| AX-158197993 | 17 | 63.519 | KV452884.1 | 15591679 | 6-scf00352 | 6 |
| AX-158197994 | 17 | 63.519 | KV452884.1 | 15592684 | 6-scf00352 | 6 |
| AX-157837218 | 17 | 63.519 | KV452884.1 | 15594039 | 6-scf00352 | 6 |
| AX-158197996 | 17 | 63.519 | KV452884.1 | 15596283 | 6-scf00352 | 6 |
| AX-158197998 | 17 | 63.519 | KV452884.1 | 15600674 | 6-scf00352 | 6 |
| AX-158198007 | 17 | 63.519 | KV452884.1 | 15618288 | 6-scf00352 | 6 |
| AX-158198009 | 17 | 63.519 | KV452884.1 | 15620280 | 6-scf00352 | 6 |
| AX-158198010 | 17 | 63.519 | KV452884.1 | 15621605 | 6-scf00352 | 6 |
| AX-158198013 | 17 | 63.519 | KV452884.1 | 15628229 | 6-scf00352 | 6 |
| AX-157837221 | 17 | 63.519 | KV452884.1 | 15628443 | 6-scf00352 | 6 |
| AX-158414155 | 17 | 63.519 | KV452884.1 | 15630961 | 6-scf00352 | 6 |
| AX-158198019 | 17 | 63.519 | KV452884.1 | 15634664 | 6-scf00352 | 6 |
| AX-158198025 | 17 | 63.519 | KV452884.1 | 15647443 | 6-scf00352 | 6 |
| AX-158198026 | 17 | 63.519 | KV452884.1 | 15648793 | 6-scf00352 | 6 |
| AX-158198027 | 17 | 63.519 | KV452884.1 | 15649878 | 6-scf00352 | 6 |
| AX-158198033 | 17 | 63.519 | KV452884.1 | 15668523 | 6-scf00352 | 6 |
| AX-158198034 | 17 | 63.519 | KV452884.1 | 15671602 | 6-scf00352 | 6 |
| AX-158198035 | 17 | 63.519 | KV452884.1 | 15674579 | 6-scf00352 | 6 |
| AX-158198037 | 17 | 63.519 | KV452884.1 | 15679032 | 6-scf00352 | 6 |
| AX-158414157 | 17 | 63.519 | KV452884.1 | 15679413 | 6-scf00352 | 6 |
| AX-158198038 | 17 | 63.519 | KV452884.1 | 15684905 | 6-scf00352 | 6 |
| AX-157740201 | 17 | 63.519 | KV452884.1 | 15687387 | 6-scf00352 | 6 |
| AX-157837226 | 17 | 63.519 | KV452884.1 | 15691876 | 6-scf00352 | 6 |
| AX-158198042 | 17 | 63.519 | KV452884.1 | 15692744 | 6-scf00352 | 6 |
| AX-158198044 | 17 | 63.519 | KV452884.1 | 15695733 | 6-scf00352 | 6 |
| AX-158198045 | 17 | 63.519 | KV452884.1 | 15699320 | 6-scf00352 | 6 |
| AX-158198048 | 17 | 63.519 | KV452884.1 | 15702691 | 6-scf00352 | 6 |
| AX-158198052 | 17 | 63.519 | KV452884.1 | 15707286 | 6-scf00352 | 6 |
| AX-158198053 | 17 | 63.519 | KV452884.1 | 15707869 | 6-scf00352 | 6 |

|              |    |        |            |          |            |   |
|--------------|----|--------|------------|----------|------------|---|
| AX-157757976 | 17 | 63.519 | KV452884.1 | 15719234 | 6-scf00352 | 6 |
| AX-157837231 | 17 | 63.519 | KV452884.1 | 15719806 | 6-scf00352 | 6 |
| AX-158198058 | 17 | 63.519 | KV452884.1 | 15722104 | 6-scf00352 | 6 |
| AX-157714585 | 17 | 63.519 | KV452884.1 | 15736134 | 6-scf00352 | 6 |
| AX-158198063 | 17 | 63.519 | KV452884.1 | 15736960 | 6-scf00352 | 6 |
| AX-158198065 | 17 | 63.519 | KV452884.1 | 15739063 | 6-scf00352 | 6 |
| AX-158198078 | 17 | 63.519 | KV452884.1 | 15782293 | 6-scf00352 | 6 |
| AX-158198080 | 17 | 63.519 | KV452884.1 | 15785219 | 6-scf00352 | 6 |
| AX-158198081 | 17 | 63.519 | KV452884.1 | 15786823 | 6-scf00352 | 6 |
| AX-157747671 | 17 | 63.519 | KV452884.1 | 15787689 | 6-scf00352 | 6 |
| AX-158198082 | 17 | 63.519 | KV452884.1 | 15788031 | 6-scf00352 | 6 |
| AX-158198086 | 17 | 63.519 | KV452884.1 | 15793851 | 6-scf00352 | 6 |
| AX-158198088 | 17 | 63.519 | KV452884.1 | 15796054 | 6-scf00352 | 6 |
| AX-157744239 | 17 | 63.519 | KV452884.1 | 15798730 | 6-scf00352 | 6 |
| AX-158198090 | 17 | 63.519 | KV452884.1 | 15801383 | 6-scf00352 | 6 |
| AX-157837241 | 17 | 63.519 | KV452884.1 | 15803778 | 6-scf00352 | 6 |
| AX-158198091 | 17 | 63.519 | KV452884.1 | 15803827 | 6-scf00352 | 6 |
| AX-157744219 | 17 | 63.519 | KV452884.1 | 15808973 | 6-scf00352 | 6 |
| AX-158198095 | 17 | 63.519 | KV452884.1 | 15809428 | 6-scf00352 | 6 |
| AX-158197992 | 17 | 63.774 | KV452884.1 | 15591391 | 6-scf00352 | 6 |
| AX-157755580 | 17 | 63.774 | KV452884.1 | 15640602 | 6-scf00352 | 6 |
| AX-158198111 | 17 | 63.774 | KV452884.1 | 15826612 | 6-scf00352 | 6 |
| AX-158198116 | 17 | 63.774 | KV452884.1 | 15831778 | 6-scf00352 | 6 |
| AX-158198117 | 17 | 63.774 | KV452884.1 | 15834036 | 6-scf00352 | 6 |
| AX-158198118 | 17 | 63.774 | KV452884.1 | 15834268 | 6-scf00352 | 6 |
| AX-158198124 | 17 | 63.774 | KV452884.1 | 15839458 | 6-scf00352 | 6 |
| AX-158198140 | 17 | 63.774 | KV452884.1 | 15860382 | 6-scf00352 | 6 |
| AX-158198141 | 17 | 63.774 | KV452884.1 | 15861087 | 6-scf00352 | 6 |
| AX-158198142 | 17 | 63.774 | KV452884.1 | 15862374 | 6-scf00352 | 6 |
| AX-158198159 | 17 | 63.774 | KV452884.1 | 15881586 | 6-scf00352 | 6 |
| AX-158198008 | 17 | 63.796 | KV452884.1 | 15619712 | 6-scf00352 | 6 |
| AX-158198138 | 17 | 63.796 | KV452884.1 | 15856995 | 6-scf00352 | 6 |
| AX-158198144 | 17 | 63.796 | KV452884.1 | 15863774 | 6-scf00352 | 6 |
| AX-158198149 | 17 | 63.796 | KV452884.1 | 15870927 | 6-scf00352 | 6 |
| AX-158198150 | 17 | 63.82  | KV452884.1 | 15871442 | 6-scf00352 | 6 |
| AX-158198151 | 17 | 63.847 | KV452884.1 | 15873176 | 6-scf00352 | 6 |
| AX-158197967 | 17 | 63.873 | KV452884.1 | 15519309 | 6-scf00352 | 6 |
| AX-158198115 | 17 | 63.873 | KV452884.1 | 15830991 | 6-scf00352 | 6 |
| AX-158198125 | 17 | 63.873 | KV452884.1 | 15839919 | 6-scf00352 | 6 |
| AX-158198127 | 17 | 63.873 | KV452884.1 | 15845668 | 6-scf00352 | 6 |
| AX-158198136 | 17 | 63.873 | KV452884.1 | 15855463 | 6-scf00352 | 6 |
| AX-158198145 | 17 | 63.873 | KV452884.1 | 15864506 | 6-scf00352 | 6 |
| AX-158198152 | 17 | 63.873 | KV452884.1 | 15875633 | 6-scf00352 | 6 |
| AX-158198157 | 17 | 63.873 | KV452884.1 | 15879831 | 6-scf00352 | 6 |
| AX-158198218 | 17 | 63.873 | KV452884.1 | 15973410 | 6-scf00352 | 6 |
| AX-158198161 | 17 | 63.902 | KV452884.1 | 15882772 | 6-scf00352 | 6 |
| AX-158198163 | 17 | 63.902 | KV452884.1 | 15886440 | 6-scf00352 | 6 |
| AX-158198175 | 17 | 63.902 | KV452884.1 | 15905905 | 6-scf00352 | 6 |
| AX-158198229 | 17 | 63.902 | KV452884.1 | 15983906 | 6-scf00352 | 6 |
| AX-157837244 | 17 | 63.904 | KV452884.1 | 15872041 | 6-scf00352 | 6 |
| AX-157738546 | 17 | 63.904 | KV452884.1 | 15888682 | 6-scf00352 | 6 |

|              |    |        |            |          |            |    |
|--------------|----|--------|------------|----------|------------|----|
| AX-158198333 | 17 | 63.904 | KV452884.1 | 16118056 | 6-scf00352 | 6  |
| AX-158198442 | 17 | 63.904 | KV452884.1 | 16325131 | 6-scf00352 | 6  |
| AX-158198895 | 17 | 63.904 | KV452884.1 | 16880349 | 6-scf00352 | 6  |
| AX-158198168 | 17 | 64.285 | KV452884.1 | 15894349 | 6-scf00352 | 6  |
| AX-157716022 | 17 | 64.285 | KV452884.1 | 15894425 | 6-scf00352 | 6  |
| AX-158198171 | 17 | 64.285 | KV452884.1 | 15897961 | 6-scf00352 | 6  |
| AX-157775513 | 17 | 64.285 | KV452884.1 | 15898524 | 6-scf00352 | 6  |
| AX-158198173 | 17 | 64.285 | KV452884.1 | 15902673 | 6-scf00352 | 6  |
| AX-157714187 | 17 | 64.285 | KV452884.1 | 15902801 | 6-scf00352 | 6  |
| AX-158198174 | 17 | 64.286 | KV452884.1 | 15904175 | 6-scf00352 | 6  |
| AX-158198188 | 17 | 64.613 | KV452884.1 | 15933745 | 6-scf00352 | 6  |
| AX-158198194 | 17 | 64.613 | KV452884.1 | 15939410 | 6-scf00352 | 6  |
| AX-158198200 | 17 | 64.613 | KV452884.1 | 15946833 | 6-scf00352 | 6  |
| AX-158198205 | 17 | 64.613 | KV452884.1 | 15954976 | 6-scf00352 | 6  |
| AX-158198158 | 17 | 64.673 | KV452884.1 | 15881226 | 6-scf00352 | 6  |
| AX-157837249 | 17 | 64.673 | KV452884.1 | 15957398 | 6-scf00352 | 6  |
| AX-158196133 | 17 | 64.831 | KV452884.1 | 11335701 | 6-scf00352 | 6  |
| AX-158198143 | 17 | 64.831 | KV452884.1 | 15863451 | 6-scf00352 | 6  |
| AX-158198167 | 17 | 64.831 | KV452884.1 | 15891298 | 6-scf00352 | 6  |
| AX-157837250 | 17 | 64.831 | KV452884.1 | 15959277 | 6-scf00352 | 6  |
| AX-158198207 | 17 | 64.831 | KV452884.1 | 15960365 | 6-scf00352 | 6  |
| AX-158198209 | 17 | 64.831 | KV452884.1 | 15963497 | 6-scf00352 | 6  |
| AX-158380713 | 17 | 64.831 | KV452884.1 | 15964499 | 6-scf00352 | 6  |
| AX-157774203 | 17 | 64.831 | KV452884.1 | 15965371 | 6-scf00352 | 6  |
| AX-158200751 | 17 | 64.831 | KV452891.1 | 667646   | 6-scf00356 | 6  |
| AX-158200796 | 17 | 64.831 | KV452891.1 | 726028   | 6-scf00356 | 6  |
| AX-158194381 | 17 | 64.84  | KV452884.1 | 8770697  | 6-scf00352 | 6  |
| AX-158198212 | 17 | 64.84  | KV452884.1 | 15967389 | 6-scf00352 | 6  |
| AX-158194995 | 17 | 64.88  | KV452884.1 | 9702976  | 6-scf00352 | 6  |
| AX-158197708 | 17 | 64.88  | KV452884.1 | 15160847 | 6-scf00352 | 6  |
| AX-158198213 | 17 | 64.88  | KV452884.1 | 15968751 | 6-scf00352 | 6  |
| AX-158200081 | 17 | 64.88  | KV452887.1 | 1028129  | 6-scf00355 | 6  |
| AX-158198214 | 17 | 64.909 | KV452884.1 | 15969274 | 6-scf00352 | 6  |
| AX-158198222 | 17 | 64.909 | KV452884.1 | 15978210 | 6-scf00352 | 6  |
| AX-158198296 | 17 | 64.909 | KV452884.1 | 16077172 | 6-scf00352 | 6  |
| AX-158198372 | 17 | 64.909 | KV452884.1 | 16174703 | 6-scf00352 | 6  |
| AX-158378441 | 17 | 64.909 | KV453357.1 | 209757   | scf00578   | UN |
| AX-158198110 | 17 | 64.94  | KV452884.1 | 15826172 | 6-scf00352 | 6  |
| AX-158198112 | 17 | 64.94  | KV452884.1 | 15827528 | 6-scf00352 | 6  |
| AX-158198191 | 17 | 64.94  | KV452884.1 | 15936139 | 6-scf00352 | 6  |
| AX-157714121 | 17 | 64.94  | KV452884.1 | 15973835 | 6-scf00352 | 6  |
| AX-157837251 | 17 | 64.94  | KV452884.1 | 15976328 | 6-scf00352 | 6  |
| AX-157837252 | 17 | 64.94  | KV452884.1 | 15977365 | 6-scf00352 | 6  |
| AX-158198221 | 17 | 64.94  | KV452884.1 | 15977493 | 6-scf00352 | 6  |
| AX-158198227 | 17 | 64.94  | KV452884.1 | 15982043 | 6-scf00352 | 6  |
| AX-158198228 | 17 | 64.94  | KV452884.1 | 15982507 | 6-scf00352 | 6  |
| AX-158198238 | 17 | 64.94  | KV452884.1 | 15992961 | 6-scf00352 | 6  |
| AX-158418315 | 17 | 64.941 | KV452884.1 | 15993345 | 6-scf00352 | 6  |
| AX-158198241 | 17 | 64.941 | KV452884.1 | 15996138 | 6-scf00352 | 6  |
| AX-158198246 | 17 | 65.026 | KV452884.1 | 16000976 | 6-scf00352 | 6  |
| AX-158198247 | 17 | 65.026 | KV452884.1 | 16001477 | 6-scf00352 | 6  |

|              |    |        |            |          |            |    |
|--------------|----|--------|------------|----------|------------|----|
| AX-158199724 | 17 | 65.026 | KV452887.1 | 492313   | 6-scf00355 | 6  |
| AX-158199732 | 17 | 65.026 | KV452887.1 | 507465   | 6-scf00355 | 6  |
| AX-158199741 | 17 | 65.026 | KV452887.1 | 519039   | 6-scf00355 | 6  |
| AX-158199757 | 17 | 65.026 | KV452887.1 | 542026   | 6-scf00355 | 6  |
| AX-158199797 | 17 | 65.026 | KV452887.1 | 594600   | 6-scf00355 | 6  |
| AX-158199822 | 17 | 65.026 | KV452887.1 | 631275   | 6-scf00355 | 6  |
| AX-158378405 | 17 | 65.026 | KV453357.1 | 163939   | scf00578   | UN |
| AX-158378568 | 17 | 65.026 | KV453357.1 | 367874   | scf00578   | UN |
| AX-158198250 | 17 | 65.105 | KV452884.1 | 16006308 | 6-scf00352 | 6  |
| AX-157721584 | 17 | 65.105 | KV452884.1 | 16012794 | 6-scf00352 | 6  |
| AX-158198257 | 17 | 65.194 | KV452884.1 | 16018777 | 6-scf00352 | 6  |
| AX-157747005 | 17 | 65.268 | KV452884.1 | 16030743 | 6-scf00352 | 6  |
| AX-158198264 | 17 | 65.275 | KV452884.1 | 16032342 | 6-scf00352 | 6  |
| AX-158198269 | 17 | 65.284 | KV452884.1 | 16042970 | 6-scf00352 | 6  |
| AX-158198270 | 17 | 65.323 | KV452884.1 | 16043678 | 6-scf00352 | 6  |
| AX-158198273 | 17 | 65.337 | KV452884.1 | 16047943 | 6-scf00352 | 6  |
| AX-157872188 | 17 | 65.378 | KV452884.1 | 10250565 | 6-scf00352 | 6  |
| AX-158198049 | 17 | 65.378 | KV452884.1 | 15703472 | 6-scf00352 | 6  |
| AX-158198180 | 17 | 65.378 | KV452884.1 | 15920967 | 6-scf00352 | 6  |
| AX-158198201 | 17 | 65.378 | KV452884.1 | 15947902 | 6-scf00352 | 6  |
| AX-158198243 | 17 | 65.378 | KV452884.1 | 15998213 | 6-scf00352 | 6  |
| AX-158198245 | 17 | 65.378 | KV452884.1 | 16000570 | 6-scf00352 | 6  |
| AX-157837255 | 17 | 65.378 | KV452884.1 | 16032431 | 6-scf00352 | 6  |
| AX-158198274 | 17 | 65.378 | KV452884.1 | 16049841 | 6-scf00352 | 6  |
| AX-158198275 | 17 | 65.378 | KV452884.1 | 16050922 | 6-scf00352 | 6  |
| AX-158198278 | 17 | 65.378 | KV452884.1 | 16053621 | 6-scf00352 | 6  |
| AX-158198281 | 17 | 65.378 | KV452884.1 | 16056393 | 6-scf00352 | 6  |
| AX-158198284 | 17 | 65.378 | KV452884.1 | 16057952 | 6-scf00352 | 6  |
| AX-157872244 | 17 | 65.378 | KV452884.1 | 16061185 | 6-scf00352 | 6  |
| AX-158198289 | 17 | 65.378 | KV452884.1 | 16061915 | 6-scf00352 | 6  |
| AX-158198305 | 17 | 65.378 | KV452884.1 | 16083316 | 6-scf00352 | 6  |
| AX-157710843 | 17 | 65.378 | KV452884.1 | 16089955 | 6-scf00352 | 6  |
| AX-158198311 | 17 | 65.378 | KV452884.1 | 16090888 | 6-scf00352 | 6  |
| AX-158198312 | 17 | 65.378 | KV452884.1 | 16092193 | 6-scf00352 | 6  |
| AX-158198314 | 17 | 65.378 | KV452884.1 | 16095349 | 6-scf00352 | 6  |
| AX-158198316 | 17 | 65.378 | KV452884.1 | 16096402 | 6-scf00352 | 6  |
| AX-157837259 | 17 | 65.378 | KV452884.1 | 16096504 | 6-scf00352 | 6  |
| AX-158198317 | 17 | 65.378 | KV452884.1 | 16098604 | 6-scf00352 | 6  |
| AX-158198318 | 17 | 65.378 | KV452884.1 | 16099224 | 6-scf00352 | 6  |
| AX-158198319 | 17 | 65.378 | KV452884.1 | 16099753 | 6-scf00352 | 6  |
| AX-158198320 | 17 | 65.378 | KV452884.1 | 16100467 | 6-scf00352 | 6  |
| AX-158198329 | 17 | 65.378 | KV452884.1 | 16111716 | 6-scf00352 | 6  |
| AX-158198344 | 17 | 65.378 | KV452884.1 | 16130155 | 6-scf00352 | 6  |
| AX-158198346 | 17 | 65.378 | KV452884.1 | 16131689 | 6-scf00352 | 6  |
| AX-158198351 | 17 | 65.378 | KV452884.1 | 16137192 | 6-scf00352 | 6  |
| AX-158198352 | 17 | 65.378 | KV452884.1 | 16137708 | 6-scf00352 | 6  |
| AX-158198358 | 17 | 65.378 | KV452884.1 | 16158905 | 6-scf00352 | 6  |
| AX-158198360 | 17 | 65.378 | KV452884.1 | 16161070 | 6-scf00352 | 6  |
| AX-158198362 | 17 | 65.378 | KV452884.1 | 16161884 | 6-scf00352 | 6  |
| AX-158198363 | 17 | 65.378 | KV452884.1 | 16162523 | 6-scf00352 | 6  |
| AX-157719357 | 17 | 65.378 | KV452884.1 | 16224645 | 6-scf00352 | 6  |

|              |    |        |            |          |            |   |
|--------------|----|--------|------------|----------|------------|---|
| AX-158198393 | 17 | 65.378 | KV452884.1 | 16236437 | 6-scf00352 | 6 |
| AX-158198394 | 17 | 65.378 | KV452884.1 | 16237092 | 6-scf00352 | 6 |
| AX-157837263 | 17 | 65.378 | KV452884.1 | 16238157 | 6-scf00352 | 6 |
| AX-158198396 | 17 | 65.378 | KV452884.1 | 16238505 | 6-scf00352 | 6 |
| AX-158198397 | 17 | 65.378 | KV452884.1 | 16238936 | 6-scf00352 | 6 |
| AX-157837264 | 17 | 65.378 | KV452884.1 | 16239788 | 6-scf00352 | 6 |
| AX-157797711 | 17 | 65.378 | KV452884.1 | 16243930 | 6-scf00352 | 6 |
| AX-158198400 | 17 | 65.378 | KV452884.1 | 16245393 | 6-scf00352 | 6 |
| AX-157772099 | 17 | 65.378 | KV452884.1 | 16259495 | 6-scf00352 | 6 |
| AX-158198406 | 17 | 65.378 | KV452884.1 | 16260460 | 6-scf00352 | 6 |
| AX-158198407 | 17 | 65.378 | KV452884.1 | 16261089 | 6-scf00352 | 6 |
| AX-157718391 | 17 | 65.378 | KV452884.1 | 16261600 | 6-scf00352 | 6 |
| AX-158198411 | 17 | 65.378 | KV452884.1 | 16267851 | 6-scf00352 | 6 |
| AX-158198434 | 17 | 65.378 | KV452884.1 | 16317568 | 6-scf00352 | 6 |
| AX-158198438 | 17 | 65.378 | KV452884.1 | 16319729 | 6-scf00352 | 6 |
| AX-158380715 | 17 | 65.378 | KV452884.1 | 16327112 | 6-scf00352 | 6 |
| AX-157739083 | 17 | 65.378 | KV452884.1 | 16348159 | 6-scf00352 | 6 |
| AX-158198460 | 17 | 65.378 | KV452884.1 | 16352691 | 6-scf00352 | 6 |
| AX-158198476 | 17 | 65.378 | KV452884.1 | 16382155 | 6-scf00352 | 6 |
| AX-157837279 | 17 | 65.378 | KV452884.1 | 16399213 | 6-scf00352 | 6 |
| AX-158198616 | 17 | 65.378 | KV452884.1 | 16543510 | 6-scf00352 | 6 |
| AX-158198691 | 17 | 65.378 | KV452884.1 | 16631994 | 6-scf00352 | 6 |
| AX-158198695 | 17 | 65.378 | KV452884.1 | 16636068 | 6-scf00352 | 6 |
| AX-158409820 | 17 | 65.378 | KV452884.1 | 16637144 | 6-scf00352 | 6 |
| AX-158198743 | 17 | 65.378 | KV452884.1 | 16702873 | 6-scf00352 | 6 |
| AX-158198748 | 17 | 65.378 | KV452884.1 | 16712518 | 6-scf00352 | 6 |
| AX-158198774 | 17 | 65.378 | KV452884.1 | 16733524 | 6-scf00352 | 6 |
| AX-158198779 | 17 | 65.378 | KV452884.1 | 16740177 | 6-scf00352 | 6 |
| AX-157837300 | 17 | 65.378 | KV452884.1 | 16745166 | 6-scf00352 | 6 |
| AX-158386188 | 17 | 65.378 | KV452884.1 | 16749178 | 6-scf00352 | 6 |
| AX-157837301 | 17 | 65.378 | KV452884.1 | 16749321 | 6-scf00352 | 6 |
| AX-158198786 | 17 | 65.378 | KV452884.1 | 16751181 | 6-scf00352 | 6 |
| AX-158198822 | 17 | 65.378 | KV452884.1 | 16798896 | 6-scf00352 | 6 |
| AX-157752624 | 17 | 65.378 | KV452884.1 | 16862484 | 6-scf00352 | 6 |
| AX-158198876 | 17 | 65.378 | KV452884.1 | 16863169 | 6-scf00352 | 6 |
| AX-158198877 | 17 | 65.378 | KV452884.1 | 16863687 | 6-scf00352 | 6 |
| AX-158198899 | 17 | 65.378 | KV452884.1 | 16885266 | 6-scf00352 | 6 |
| AX-157752922 | 17 | 65.378 | KV452884.1 | 16894378 | 6-scf00352 | 6 |
| AX-158198934 | 17 | 65.378 | KV452884.1 | 16932088 | 6-scf00352 | 6 |
| AX-158198936 | 17 | 65.378 | KV452884.1 | 16936337 | 6-scf00352 | 6 |
| AX-158198954 | 17 | 65.378 | KV452884.1 | 16950584 | 6-scf00352 | 6 |
| AX-158198966 | 17 | 65.378 | KV452884.1 | 16966459 | 6-scf00352 | 6 |
| AX-157837315 | 17 | 65.378 | KV452884.1 | 16987459 | 6-scf00352 | 6 |
| AX-158198990 | 17 | 65.378 | KV452884.1 | 16994068 | 6-scf00352 | 6 |
| AX-158199539 | 17 | 65.378 | KV452886.1 | 2907     | 6-scf00354 | 6 |
| AX-158386194 | 17 | 65.378 | KV452886.1 | 60139    | 6-scf00354 | 6 |
| AX-158199335 | 17 | 65.378 | KV452886.1 | 719476   | 6-scf00354 | 6 |
| AX-158199148 | 17 | 65.378 | KV452886.1 | 999267   | 6-scf00354 | 6 |
| AX-157756326 | 17 | 65.378 | KV452886.1 | 1044365  | 6-scf00354 | 6 |
| AX-158199028 | 17 | 65.378 | KV452886.1 | 1232565  | 6-scf00354 | 6 |
| AX-157879203 | 17 | 65.378 | KV452886.1 | 1253686  | 6-scf00354 | 6 |

|              |    |        |            |          |            |    |
|--------------|----|--------|------------|----------|------------|----|
| AX-158393754 | 17 | 65.378 | KV452886.1 | 1269725  | 6-scf00354 | 6  |
| AX-157683908 | 17 | 65.378 | KV452886.1 | 1311589  | 6-scf00354 | 6  |
| AX-157680715 | 17 | 65.378 | KV452886.1 | 1312207  | 6-scf00354 | 6  |
| AX-158199635 | 17 | 65.378 | KV452887.1 | 332705   | 6-scf00355 | 6  |
| AX-158199843 | 17 | 65.378 | KV452887.1 | 683313   | 6-scf00355 | 6  |
| AX-158199890 | 17 | 65.378 | KV452887.1 | 753666   | 6-scf00355 | 6  |
| AX-158200802 | 17 | 65.378 | KV452891.1 | 731173   | 6-scf00356 | 6  |
| AX-158378488 | 17 | 65.378 | KV453357.1 | 282      | scf00578   | UN |
| AX-158378681 | 17 | 65.378 | KV453357.1 | 722      | scf00578   | UN |
| AX-158378679 | 17 | 65.378 | KV453357.1 | 51615    | scf00578   | UN |
| AX-158378604 | 17 | 65.378 | KV453357.1 | 51655    | scf00578   | UN |
| AX-158378610 | 17 | 65.378 | KV453357.1 | 57425    | scf00578   | UN |
| AX-158378613 | 17 | 65.378 | KV453357.1 | 61570    | scf00578   | UN |
| AX-158378615 | 17 | 65.378 | KV453357.1 | 65232    | scf00578   | UN |
| AX-158378617 | 17 | 65.378 | KV453357.1 | 68487    | scf00578   | UN |
| AX-158378618 | 17 | 65.378 | KV453357.1 | 68845    | scf00578   | UN |
| AX-158378619 | 17 | 65.378 | KV453357.1 | 69586    | scf00578   | UN |
| AX-158378622 | 17 | 65.378 | KV453357.1 | 72573    | scf00578   | UN |
| AX-158378402 | 17 | 65.378 | KV453357.1 | 156709   | scf00578   | UN |
| AX-158378651 | 17 | 65.378 | KV453357.1 | 174248   | scf00578   | UN |
| AX-158378432 | 17 | 65.378 | KV453357.1 | 202977   | scf00578   | UN |
| AX-158378463 | 17 | 65.378 | KV453357.1 | 247705   | scf00578   | UN |
| AX-158378470 | 17 | 65.378 | KV453357.1 | 260904   | scf00578   | UN |
| AX-158378497 | 17 | 65.378 | KV453357.1 | 293900   | scf00578   | UN |
| AX-158378504 | 17 | 65.378 | KV453357.1 | 301606   | scf00578   | UN |
| AX-158378512 | 17 | 65.378 | KV453357.1 | 307165   | scf00578   | UN |
| AX-158378532 | 17 | 65.378 | KV453357.1 | 334188   | scf00578   | UN |
| AX-158378559 | 17 | 65.378 | KV453357.1 | 362001   | scf00578   | UN |
| AX-158378567 | 17 | 65.378 | KV453357.1 | 366896   | scf00578   | UN |
| AX-158378569 | 17 | 65.378 | KV453357.1 | 368987   | scf00578   | UN |
| AX-158378589 | 17 | 65.378 | KV453357.1 | 395094   | scf00578   | UN |
| AX-158198964 | 17 | 65.406 | KV452884.1 | 16964824 | 6-scf00352 | 6  |
| AX-158198989 | 17 | 65.438 | KV452884.1 | 16993506 | 6-scf00352 | 6  |
| AX-157837295 | 17 | 65.47  | KV452884.1 | 16638675 | 6-scf00352 | 6  |
| AX-158198782 | 17 | 65.47  | KV452884.1 | 16745742 | 6-scf00352 | 6  |
| AX-158393743 | 17 | 65.47  | KV452884.1 | 16753850 | 6-scf00352 | 6  |
| AX-158198998 | 17 | 65.47  | KV452886.1 | 1276758  | 6-scf00354 | 6  |
| AX-158420524 | 17 | 65.47  | KV453357.1 | 95629    | scf00578   | UN |
| AX-157837325 | 17 | 65.487 | KV452886.1 | 1123100  | 6-scf00354 | 6  |
| AX-158199085 | 17 | 65.487 | KV452886.1 | 1123258  | 6-scf00354 | 6  |
| AX-158199039 | 17 | 65.487 | KV452886.1 | 1215154  | 6-scf00354 | 6  |
| AX-158199019 | 17 | 65.487 | KV452886.1 | 1246761  | 6-scf00354 | 6  |
| AX-157683899 | 17 | 65.487 | KV452886.1 | 1294815  | 6-scf00354 | 6  |
| AX-157683900 | 17 | 65.487 | KV452886.1 | 1295801  | 6-scf00354 | 6  |
| AX-157683903 | 17 | 65.487 | KV452886.1 | 1298066  | 6-scf00354 | 6  |
| AX-157680718 | 17 | 65.487 | KV452886.1 | 1318267  | 6-scf00354 | 6  |
| AX-157683909 | 17 | 65.487 | KV452886.1 | 1318609  | 6-scf00354 | 6  |
| AX-158199815 | 17 | 65.487 | KV452887.1 | 616146   | 6-scf00355 | 6  |
| AX-158199854 | 17 | 65.487 | KV452887.1 | 709434   | 6-scf00355 | 6  |
| AX-158414221 | 17 | 65.487 | KV452887.1 | 934590   | 6-scf00355 | 6  |
| AX-158200023 | 17 | 65.487 | KV452887.1 | 951728   | 6-scf00355 | 6  |

|              |    |        |            |          |            |    |
|--------------|----|--------|------------|----------|------------|----|
| AX-158200050 | 17 | 65.487 | KV452887.1 | 983330   | 6-scf00355 | 6  |
| AX-157750618 | 17 | 65.531 | KV452884.1 | 16342676 | 6-scf00352 | 6  |
| AX-157680719 | 17 | 65.531 | KV452886.1 | 1320474  | 6-scf00354 | 6  |
| AX-158198349 | 17 | 65.596 | KV452884.1 | 16135041 | 6-scf00352 | 6  |
| AX-158198365 | 17 | 65.596 | KV452884.1 | 16164202 | 6-scf00352 | 6  |
| AX-158198368 | 17 | 65.596 | KV452884.1 | 16168778 | 6-scf00352 | 6  |
| AX-158198422 | 17 | 65.596 | KV452884.1 | 16288176 | 6-scf00352 | 6  |
| AX-158198448 | 17 | 65.596 | KV452884.1 | 16331489 | 6-scf00352 | 6  |
| AX-158198627 | 17 | 65.596 | KV452884.1 | 16557255 | 6-scf00352 | 6  |
| AX-158198634 | 17 | 65.596 | KV452884.1 | 16568348 | 6-scf00352 | 6  |
| AX-157837290 | 17 | 65.596 | KV452884.1 | 16568836 | 6-scf00352 | 6  |
| AX-158198680 | 17 | 65.596 | KV452884.1 | 16619854 | 6-scf00352 | 6  |
| AX-157837298 | 17 | 65.596 | KV452884.1 | 16702445 | 6-scf00352 | 6  |
| AX-158198756 | 17 | 65.596 | KV452884.1 | 16719982 | 6-scf00352 | 6  |
| AX-158198905 | 17 | 65.596 | KV452884.1 | 16888987 | 6-scf00352 | 6  |
| AX-158199014 | 17 | 65.596 | KV452886.1 | 1254905  | 6-scf00354 | 6  |
| AX-157683896 | 17 | 65.596 | KV452886.1 | 1289402  | 6-scf00354 | 6  |
| AX-158199954 | 17 | 65.596 | KV452887.1 | 833138   | 6-scf00355 | 6  |
| AX-157837375 | 17 | 65.596 | KV452887.1 | 856761   | 6-scf00355 | 6  |
| AX-158378392 | 17 | 65.596 | KV453357.1 | 1353     | scf00578   | UN |
| AX-158378632 | 17 | 65.596 | KV453357.1 | 87150    | scf00578   | UN |
| AX-158378633 | 17 | 65.596 | KV453357.1 | 88473    | scf00578   | UN |
| AX-158378451 | 17 | 65.596 | KV453357.1 | 226542   | scf00578   | UN |
| AX-158378455 | 17 | 65.596 | KV453357.1 | 232634   | scf00578   | UN |
| AX-158378668 | 17 | 65.596 | KV453357.1 | 262568   | scf00578   | UN |
| AX-158420530 | 17 | 65.596 | KV453357.1 | 267371   | scf00578   | UN |
| AX-158378486 | 17 | 65.596 | KV453357.1 | 281323   | scf00578   | UN |
| AX-158378518 | 17 | 65.596 | KV453357.1 | 314959   | scf00578   | UN |
| AX-158378583 | 17 | 65.596 | KV453357.1 | 384165   | scf00578   | UN |
| AX-158414094 | 17 | 65.705 | KV452884.1 | 11390774 | 6-scf00352 | 6  |
| AX-158414165 | 17 | 65.705 | KV452884.1 | 16051187 | 6-scf00352 | 6  |
| AX-158198282 | 17 | 65.705 | KV452884.1 | 16057206 | 6-scf00352 | 6  |
| AX-158198340 | 17 | 65.705 | KV452884.1 | 16125671 | 6-scf00352 | 6  |
| AX-157858959 | 17 | 65.705 | KV452884.1 | 16159821 | 6-scf00352 | 6  |
| AX-157858960 | 17 | 65.705 | KV452884.1 | 16160596 | 6-scf00352 | 6  |
| AX-158198364 | 17 | 65.705 | KV452884.1 | 16163088 | 6-scf00352 | 6  |
| AX-158198619 | 17 | 65.705 | KV452884.1 | 16547456 | 6-scf00352 | 6  |
| AX-158198689 | 17 | 65.705 | KV452884.1 | 16626582 | 6-scf00352 | 6  |
| AX-158198776 | 17 | 65.705 | KV452884.1 | 16736507 | 6-scf00352 | 6  |
| AX-158199140 | 17 | 65.705 | KV452886.1 | 1011405  | 6-scf00354 | 6  |
| AX-157698081 | 17 | 65.705 | KV452886.1 | 1144851  | 6-scf00354 | 6  |
| AX-158199017 | 17 | 65.705 | KV452886.1 | 1249417  | 6-scf00354 | 6  |
| AX-158199016 | 17 | 65.705 | KV452886.1 | 1253169  | 6-scf00354 | 6  |
| AX-158199015 | 17 | 65.705 | KV452886.1 | 1253956  | 6-scf00354 | 6  |
| AX-158199013 | 17 | 65.705 | KV452886.1 | 1255366  | 6-scf00354 | 6  |
| AX-157752571 | 17 | 65.705 | KV452886.1 | 1261643  | 6-scf00354 | 6  |
| AX-157756754 | 17 | 65.705 | KV452886.1 | 1264724  | 6-scf00354 | 6  |
| AX-157879202 | 17 | 65.705 | KV452886.1 | 1284631  | 6-scf00354 | 6  |
| AX-157683914 | 17 | 65.705 | KV452886.1 | 1325425  | 6-scf00354 | 6  |
| AX-157683915 | 17 | 65.705 | KV452886.1 | 1327113  | 6-scf00354 | 6  |
| AX-157683916 | 17 | 65.705 | KV452886.1 | 1327571  | 6-scf00354 | 6  |

|              |    |        |            |          |            |    |
|--------------|----|--------|------------|----------|------------|----|
| AX-157683917 | 17 | 65.705 | KV452886.1 | 1328155  | 6-scf00354 | 6  |
| AX-157683918 | 17 | 65.705 | KV452886.1 | 1328768  | 6-scf00354 | 6  |
| AX-157683919 | 17 | 65.705 | KV452886.1 | 1329542  | 6-scf00354 | 6  |
| AX-158199963 | 17 | 65.705 | KV452887.1 | 854627   | 6-scf00355 | 6  |
| AX-158378395 | 17 | 65.705 | KV453357.1 | 142099   | scf00578   | UN |
| AX-158378492 | 17 | 65.705 | KV453357.1 | 287954   | scf00578   | UN |
| AX-158378514 | 17 | 65.705 | KV453357.1 | 311697   | scf00578   | UN |
| AX-158378669 | 17 | 65.705 | KV453357.1 | 318463   | scf00578   | UN |
| AX-158378551 | 17 | 65.705 | KV453357.1 | 351932   | scf00578   | UN |
| AX-158378556 | 17 | 65.705 | KV453357.1 | 359718   | scf00578   | UN |
| AX-158194426 | 17 | 65.814 | KV452884.1 | 8843094  | 6-scf00352 | 6  |
| AX-158194838 | 17 | 65.814 | KV452884.1 | 9426470  | 6-scf00352 | 6  |
| AX-158196134 | 17 | 65.814 | KV452884.1 | 11335951 | 6-scf00352 | 6  |
| AX-158197187 | 17 | 65.814 | KV452884.1 | 13094688 | 6-scf00352 | 6  |
| AX-158197798 | 17 | 65.814 | KV452884.1 | 15279563 | 6-scf00352 | 6  |
| AX-157837228 | 17 | 65.814 | KV452884.1 | 15694958 | 6-scf00352 | 6  |
| AX-157837229 | 17 | 65.814 | KV452884.1 | 15695311 | 6-scf00352 | 6  |
| AX-158198046 | 17 | 65.814 | KV452884.1 | 15699772 | 6-scf00352 | 6  |
| AX-158198128 | 17 | 65.814 | KV452884.1 | 15845849 | 6-scf00352 | 6  |
| AX-157721718 | 17 | 65.814 | KV452884.1 | 15848519 | 6-scf00352 | 6  |
| AX-158198147 | 17 | 65.814 | KV452884.1 | 15866585 | 6-scf00352 | 6  |
| AX-158198259 | 17 | 65.814 | KV452884.1 | 16020918 | 6-scf00352 | 6  |
| AX-158386179 | 17 | 65.814 | KV452884.1 | 16100009 | 6-scf00352 | 6  |
| AX-158198342 | 17 | 65.814 | KV452884.1 | 16128147 | 6-scf00352 | 6  |
| AX-157837277 | 17 | 65.814 | KV452884.1 | 16348351 | 6-scf00352 | 6  |
| AX-158198599 | 17 | 65.814 | KV452884.1 | 16526235 | 6-scf00352 | 6  |
| AX-158198710 | 17 | 65.814 | KV452884.1 | 16657665 | 6-scf00352 | 6  |
| AX-158198737 | 17 | 65.814 | KV452884.1 | 16694585 | 6-scf00352 | 6  |
| AX-158199534 | 17 | 65.814 | KV452886.1 | 10369    | 6-scf00354 | 6  |
| AX-158199533 | 17 | 65.814 | KV452886.1 | 12432    | 6-scf00354 | 6  |
| AX-158199530 | 17 | 65.814 | KV452886.1 | 22618    | 6-scf00354 | 6  |
| AX-158199524 | 17 | 65.814 | KV452886.1 | 30638    | 6-scf00354 | 6  |
| AX-158199523 | 17 | 65.814 | KV452886.1 | 34152    | 6-scf00354 | 6  |
| AX-158199522 | 17 | 65.814 | KV452886.1 | 35125    | 6-scf00354 | 6  |
| AX-158199516 | 17 | 65.814 | KV452886.1 | 53986    | 6-scf00354 | 6  |
| AX-158199514 | 17 | 65.814 | KV452886.1 | 56931    | 6-scf00354 | 6  |
| AX-158199511 | 17 | 65.814 | KV452886.1 | 66974    | 6-scf00354 | 6  |
| AX-158199510 | 17 | 65.814 | KV452886.1 | 67595    | 6-scf00354 | 6  |
| AX-158199507 | 17 | 65.814 | KV452886.1 | 75877    | 6-scf00354 | 6  |
| AX-158199502 | 17 | 65.814 | KV452886.1 | 100519   | 6-scf00354 | 6  |
| AX-158199501 | 17 | 65.814 | KV452886.1 | 101669   | 6-scf00354 | 6  |
| AX-158199498 | 17 | 65.814 | KV452886.1 | 115178   | 6-scf00354 | 6  |
| AX-158199497 | 17 | 65.814 | KV452886.1 | 119354   | 6-scf00354 | 6  |
| AX-158199496 | 17 | 65.814 | KV452886.1 | 119849   | 6-scf00354 | 6  |
| AX-158199494 | 17 | 65.814 | KV452886.1 | 164680   | 6-scf00354 | 6  |
| AX-158199490 | 17 | 65.814 | KV452886.1 | 188431   | 6-scf00354 | 6  |
| AX-158414212 | 17 | 65.814 | KV452886.1 | 192290   | 6-scf00354 | 6  |
| AX-158199489 | 17 | 65.814 | KV452886.1 | 196441   | 6-scf00354 | 6  |
| AX-158199483 | 17 | 65.814 | KV452886.1 | 218457   | 6-scf00354 | 6  |
| AX-158414211 | 17 | 65.814 | KV452886.1 | 220004   | 6-scf00354 | 6  |
| AX-157751537 | 17 | 65.814 | KV452886.1 | 223476   | 6-scf00354 | 6  |



|              |    |        |            |        |            |   |
|--------------|----|--------|------------|--------|------------|---|
| AX-158199480 | 17 | 65.814 | KV452886.1 | 226207 | 6-scf00354 | 6 |
| AX-158199479 | 17 | 65.814 | KV452886.1 | 226759 | 6-scf00354 | 6 |
| AX-158199476 | 17 | 65.814 | KV452886.1 | 231523 | 6-scf00354 | 6 |
| AX-158199473 | 17 | 65.814 | KV452886.1 | 240669 | 6-scf00354 | 6 |
| AX-158199472 | 17 | 65.814 | KV452886.1 | 251275 | 6-scf00354 | 6 |
| AX-158199470 | 17 | 65.814 | KV452886.1 | 264904 | 6-scf00354 | 6 |
| AX-158199466 | 17 | 65.814 | KV452886.1 | 287690 | 6-scf00354 | 6 |
| AX-158199465 | 17 | 65.814 | KV452886.1 | 288993 | 6-scf00354 | 6 |
| AX-158199458 | 17 | 65.814 | KV452886.1 | 310294 | 6-scf00354 | 6 |
| AX-158199455 | 17 | 65.814 | KV452886.1 | 319742 | 6-scf00354 | 6 |
| AX-158199452 | 17 | 65.814 | KV452886.1 | 326601 | 6-scf00354 | 6 |
| AX-158199449 | 17 | 65.814 | KV452886.1 | 348617 | 6-scf00354 | 6 |
| AX-157837351 | 17 | 65.814 | KV452886.1 | 349784 | 6-scf00354 | 6 |
| AX-158199448 | 17 | 65.814 | KV452886.1 | 356270 | 6-scf00354 | 6 |
| AX-158199446 | 17 | 65.814 | KV452886.1 | 373358 | 6-scf00354 | 6 |
| AX-158199445 | 17 | 65.814 | KV452886.1 | 375810 | 6-scf00354 | 6 |
| AX-158199444 | 17 | 65.814 | KV452886.1 | 380768 | 6-scf00354 | 6 |
| AX-158199443 | 17 | 65.814 | KV452886.1 | 383780 | 6-scf00354 | 6 |
| AX-158199442 | 17 | 65.814 | KV452886.1 | 393282 | 6-scf00354 | 6 |
| AX-158199441 | 17 | 65.814 | KV452886.1 | 394680 | 6-scf00354 | 6 |
| AX-158199440 | 17 | 65.814 | KV452886.1 | 401672 | 6-scf00354 | 6 |
| AX-157724231 | 17 | 65.814 | KV452886.1 | 408456 | 6-scf00354 | 6 |
| AX-158199439 | 17 | 65.814 | KV452886.1 | 412628 | 6-scf00354 | 6 |
| AX-158199438 | 17 | 65.814 | KV452886.1 | 415493 | 6-scf00354 | 6 |
| AX-158199437 | 17 | 65.814 | KV452886.1 | 422640 | 6-scf00354 | 6 |
| AX-158199436 | 17 | 65.814 | KV452886.1 | 423486 | 6-scf00354 | 6 |
| AX-158199435 | 17 | 65.814 | KV452886.1 | 424720 | 6-scf00354 | 6 |
| AX-158199434 | 17 | 65.814 | KV452886.1 | 427775 | 6-scf00354 | 6 |
| AX-158199433 | 17 | 65.814 | KV452886.1 | 428436 | 6-scf00354 | 6 |
| AX-158199432 | 17 | 65.814 | KV452886.1 | 436385 | 6-scf00354 | 6 |
| AX-158199430 | 17 | 65.814 | KV452886.1 | 439782 | 6-scf00354 | 6 |
| AX-158199429 | 17 | 65.814 | KV452886.1 | 441893 | 6-scf00354 | 6 |
| AX-158199428 | 17 | 65.814 | KV452886.1 | 443706 | 6-scf00354 | 6 |
| AX-158199426 | 17 | 65.814 | KV452886.1 | 459132 | 6-scf00354 | 6 |
| AX-158199425 | 17 | 65.814 | KV452886.1 | 460721 | 6-scf00354 | 6 |
| AX-158199424 | 17 | 65.814 | KV452886.1 | 462166 | 6-scf00354 | 6 |
| AX-158199422 | 17 | 65.814 | KV452886.1 | 465777 | 6-scf00354 | 6 |
| AX-158199420 | 17 | 65.814 | KV452886.1 | 481182 | 6-scf00354 | 6 |
| AX-158199418 | 17 | 65.814 | KV452886.1 | 486008 | 6-scf00354 | 6 |
| AX-158199417 | 17 | 65.814 | KV452886.1 | 490836 | 6-scf00354 | 6 |
| AX-158199416 | 17 | 65.814 | KV452886.1 | 491652 | 6-scf00354 | 6 |
| AX-158199415 | 17 | 65.814 | KV452886.1 | 492607 | 6-scf00354 | 6 |
| AX-158199414 | 17 | 65.814 | KV452886.1 | 493379 | 6-scf00354 | 6 |
| AX-157696388 | 17 | 65.814 | KV452886.1 | 498228 | 6-scf00354 | 6 |
| AX-158199413 | 17 | 65.814 | KV452886.1 | 509912 | 6-scf00354 | 6 |
| AX-158199412 | 17 | 65.814 | KV452886.1 | 514284 | 6-scf00354 | 6 |
| AX-158199411 | 17 | 65.814 | KV452886.1 | 517466 | 6-scf00354 | 6 |
| AX-158199410 | 17 | 65.814 | KV452886.1 | 521341 | 6-scf00354 | 6 |
| AX-158199408 | 17 | 65.814 | KV452886.1 | 555748 | 6-scf00354 | 6 |
| AX-157872259 | 17 | 65.814 | KV452886.1 | 571397 | 6-scf00354 | 6 |
| AX-158199402 | 17 | 65.814 | KV452886.1 | 582099 | 6-scf00354 | 6 |

|              |    |        |            |         |            |   |
|--------------|----|--------|------------|---------|------------|---|
| AX-158199400 | 17 | 65.814 | KV452886.1 | 585811  | 6-scf00354 | 6 |
| AX-157837348 | 17 | 65.814 | KV452886.1 | 600138  | 6-scf00354 | 6 |
| AX-158199395 | 17 | 65.814 | KV452886.1 | 609746  | 6-scf00354 | 6 |
| AX-157837347 | 17 | 65.814 | KV452886.1 | 614614  | 6-scf00354 | 6 |
| AX-157837344 | 17 | 65.814 | KV452886.1 | 642880  | 6-scf00354 | 6 |
| AX-157748115 | 17 | 65.814 | KV452886.1 | 649696  | 6-scf00354 | 6 |
| AX-157719501 | 17 | 65.814 | KV452886.1 | 650599  | 6-scf00354 | 6 |
| AX-157837340 | 17 | 65.814 | KV452886.1 | 667193  | 6-scf00354 | 6 |
| AX-158199373 | 17 | 65.814 | KV452886.1 | 667843  | 6-scf00354 | 6 |
| AX-158199363 | 17 | 65.814 | KV452886.1 | 678111  | 6-scf00354 | 6 |
| AX-158199357 | 17 | 65.814 | KV452886.1 | 690947  | 6-scf00354 | 6 |
| AX-158199313 | 17 | 65.814 | KV452886.1 | 749722  | 6-scf00354 | 6 |
| AX-158199302 | 17 | 65.814 | KV452886.1 | 789668  | 6-scf00354 | 6 |
| AX-158199295 | 17 | 65.814 | KV452886.1 | 799817  | 6-scf00354 | 6 |
| AX-158199270 | 17 | 65.814 | KV452886.1 | 843873  | 6-scf00354 | 6 |
| AX-158199220 | 17 | 65.814 | KV452886.1 | 898159  | 6-scf00354 | 6 |
| AX-157726744 | 17 | 65.814 | KV452886.1 | 903449  | 6-scf00354 | 6 |
| AX-158199215 | 17 | 65.814 | KV452886.1 | 904150  | 6-scf00354 | 6 |
| AX-158199209 | 17 | 65.814 | KV452886.1 | 911942  | 6-scf00354 | 6 |
| AX-158199204 | 17 | 65.814 | KV452886.1 | 919588  | 6-scf00354 | 6 |
| AX-158199202 | 17 | 65.814 | KV452886.1 | 922398  | 6-scf00354 | 6 |
| AX-158199195 | 17 | 65.814 | KV452886.1 | 930460  | 6-scf00354 | 6 |
| AX-158199193 | 17 | 65.814 | KV452886.1 | 934119  | 6-scf00354 | 6 |
| AX-158199189 | 17 | 65.814 | KV452886.1 | 942603  | 6-scf00354 | 6 |
| AX-158199188 | 17 | 65.814 | KV452886.1 | 943016  | 6-scf00354 | 6 |
| AX-158414197 | 17 | 65.814 | KV452886.1 | 969105  | 6-scf00354 | 6 |
| AX-158199162 | 17 | 65.814 | KV452886.1 | 970496  | 6-scf00354 | 6 |
| AX-158199154 | 17 | 65.814 | KV452886.1 | 985294  | 6-scf00354 | 6 |
| AX-158199153 | 17 | 65.814 | KV452886.1 | 985580  | 6-scf00354 | 6 |
| AX-158199152 | 17 | 65.814 | KV452886.1 | 992034  | 6-scf00354 | 6 |
| AX-158199150 | 17 | 65.814 | KV452886.1 | 994868  | 6-scf00354 | 6 |
| AX-158199149 | 17 | 65.814 | KV452886.1 | 998903  | 6-scf00354 | 6 |
| AX-158199147 | 17 | 65.814 | KV452886.1 | 1001121 | 6-scf00354 | 6 |
| AX-158199146 | 17 | 65.814 | KV452886.1 | 1001354 | 6-scf00354 | 6 |
| AX-158199145 | 17 | 65.814 | KV452886.1 | 1002222 | 6-scf00354 | 6 |
| AX-158199142 | 17 | 65.814 | KV452886.1 | 1005958 | 6-scf00354 | 6 |
| AX-158199139 | 17 | 65.814 | KV452886.1 | 1013364 | 6-scf00354 | 6 |
| AX-157754957 | 17 | 65.814 | KV452886.1 | 1024180 | 6-scf00354 | 6 |
| AX-158199135 | 17 | 65.814 | KV452886.1 | 1028382 | 6-scf00354 | 6 |
| AX-158199134 | 17 | 65.814 | KV452886.1 | 1030394 | 6-scf00354 | 6 |
| AX-157837328 | 17 | 65.814 | KV452886.1 | 1030674 | 6-scf00354 | 6 |
| AX-158199133 | 17 | 65.814 | KV452886.1 | 1030792 | 6-scf00354 | 6 |
| AX-158199126 | 17 | 65.814 | KV452886.1 | 1047472 | 6-scf00354 | 6 |
| AX-158199124 | 17 | 65.814 | KV452886.1 | 1055619 | 6-scf00354 | 6 |
| AX-158199118 | 17 | 65.814 | KV452886.1 | 1065189 | 6-scf00354 | 6 |
| AX-158199111 | 17 | 65.814 | KV452886.1 | 1084803 | 6-scf00354 | 6 |
| AX-157713404 | 17 | 65.814 | KV452886.1 | 1087785 | 6-scf00354 | 6 |
| AX-158199108 | 17 | 65.814 | KV452886.1 | 1089641 | 6-scf00354 | 6 |
| AX-157755802 | 17 | 65.814 | KV452886.1 | 1100206 | 6-scf00354 | 6 |
| AX-158199100 | 17 | 65.814 | KV452886.1 | 1103791 | 6-scf00354 | 6 |
| AX-158199097 | 17 | 65.814 | KV452886.1 | 1112553 | 6-scf00354 | 6 |

|              |    |        |            |         |            |   |
|--------------|----|--------|------------|---------|------------|---|
| AX-158199095 | 17 | 65.814 | KV452886.1 | 1113271 | 6-scf00354 | 6 |
| AX-158199094 | 17 | 65.814 | KV452886.1 | 1113872 | 6-scf00354 | 6 |
| AX-157775281 | 17 | 65.814 | KV452886.1 | 1115657 | 6-scf00354 | 6 |
| AX-157837324 | 17 | 65.814 | KV452886.1 | 1130956 | 6-scf00354 | 6 |
| AX-158199081 | 17 | 65.814 | KV452886.1 | 1132449 | 6-scf00354 | 6 |
| AX-158199079 | 17 | 65.814 | KV452886.1 | 1134375 | 6-scf00354 | 6 |
| AX-158199077 | 17 | 65.814 | KV452886.1 | 1136428 | 6-scf00354 | 6 |
| AX-158199074 | 17 | 65.814 | KV452886.1 | 1141290 | 6-scf00354 | 6 |
| AX-157718453 | 17 | 65.814 | KV452886.1 | 1144763 | 6-scf00354 | 6 |
| AX-158199069 | 17 | 65.814 | KV452886.1 | 1145503 | 6-scf00354 | 6 |
| AX-158199067 | 17 | 65.814 | KV452886.1 | 1146629 | 6-scf00354 | 6 |
| AX-158199065 | 17 | 65.814 | KV452886.1 | 1147545 | 6-scf00354 | 6 |
| AX-158199064 | 17 | 65.814 | KV452886.1 | 1148491 | 6-scf00354 | 6 |
| AX-158199055 | 17 | 65.814 | KV452886.1 | 1167183 | 6-scf00354 | 6 |
| AX-158199049 | 17 | 65.814 | KV452886.1 | 1185178 | 6-scf00354 | 6 |
| AX-158199046 | 17 | 65.814 | KV452886.1 | 1191263 | 6-scf00354 | 6 |
| AX-157837321 | 17 | 65.814 | KV452886.1 | 1198392 | 6-scf00354 | 6 |
| AX-157837320 | 17 | 65.814 | KV452886.1 | 1199520 | 6-scf00354 | 6 |
| AX-157837318 | 17 | 65.814 | KV452886.1 | 1200030 | 6-scf00354 | 6 |
| AX-158199043 | 17 | 65.814 | KV452886.1 | 1200737 | 6-scf00354 | 6 |
| AX-157837316 | 17 | 65.814 | KV452886.1 | 1204646 | 6-scf00354 | 6 |
| AX-158199041 | 17 | 65.814 | KV452886.1 | 1205204 | 6-scf00354 | 6 |
| AX-158199038 | 17 | 65.814 | KV452886.1 | 1215509 | 6-scf00354 | 6 |
| AX-158199037 | 17 | 65.814 | KV452886.1 | 1217615 | 6-scf00354 | 6 |
| AX-158199031 | 17 | 65.814 | KV452886.1 | 1228685 | 6-scf00354 | 6 |
| AX-158199026 | 17 | 65.814 | KV452886.1 | 1236726 | 6-scf00354 | 6 |
| AX-158198994 | 17 | 65.814 | KV452886.1 | 1283369 | 6-scf00354 | 6 |
| AX-158198993 | 17 | 65.814 | KV452886.1 | 1287733 | 6-scf00354 | 6 |
| AX-157683902 | 17 | 65.814 | KV452886.1 | 1296912 | 6-scf00354 | 6 |
| AX-158199550 | 17 | 65.814 | KV452887.1 | 23218   | 6-scf00355 | 6 |
| AX-158199552 | 17 | 65.814 | KV452887.1 | 25736   | 6-scf00355 | 6 |
| AX-158199556 | 17 | 65.814 | KV452887.1 | 36767   | 6-scf00355 | 6 |
| AX-158199559 | 17 | 65.814 | KV452887.1 | 46931   | 6-scf00355 | 6 |
| AX-158199560 | 17 | 65.814 | KV452887.1 | 54077   | 6-scf00355 | 6 |
| AX-158199567 | 17 | 65.814 | KV452887.1 | 73730   | 6-scf00355 | 6 |
| AX-158199571 | 17 | 65.814 | KV452887.1 | 78510   | 6-scf00355 | 6 |
| AX-158199576 | 17 | 65.814 | KV452887.1 | 89892   | 6-scf00355 | 6 |
| AX-158199578 | 17 | 65.814 | KV452887.1 | 94812   | 6-scf00355 | 6 |
| AX-158199579 | 17 | 65.814 | KV452887.1 | 95321   | 6-scf00355 | 6 |
| AX-158199580 | 17 | 65.814 | KV452887.1 | 99734   | 6-scf00355 | 6 |
| AX-158199583 | 17 | 65.814 | KV452887.1 | 120255  | 6-scf00355 | 6 |
| AX-158199584 | 17 | 65.814 | KV452887.1 | 121501  | 6-scf00355 | 6 |
| AX-158199586 | 17 | 65.814 | KV452887.1 | 126173  | 6-scf00355 | 6 |
| AX-158199588 | 17 | 65.814 | KV452887.1 | 135089  | 6-scf00355 | 6 |
| AX-158199591 | 17 | 65.814 | KV452887.1 | 160741  | 6-scf00355 | 6 |
| AX-158199600 | 17 | 65.814 | KV452887.1 | 207034  | 6-scf00355 | 6 |
| AX-158199607 | 17 | 65.814 | KV452887.1 | 229016  | 6-scf00355 | 6 |
| AX-158409832 | 17 | 65.814 | KV452887.1 | 240748  | 6-scf00355 | 6 |
| AX-157708682 | 17 | 65.814 | KV452887.1 | 274130  | 6-scf00355 | 6 |
| AX-158199616 | 17 | 65.814 | KV452887.1 | 279108  | 6-scf00355 | 6 |
| AX-158199619 | 17 | 65.814 | KV452887.1 | 283173  | 6-scf00355 | 6 |

|              |    |        |            |        |            |   |
|--------------|----|--------|------------|--------|------------|---|
| AX-158199625 | 17 | 65.814 | KV452887.1 | 304819 | 6-scf00355 | 6 |
| AX-158199626 | 17 | 65.814 | KV452887.1 | 306573 | 6-scf00355 | 6 |
| AX-158199629 | 17 | 65.814 | KV452887.1 | 313245 | 6-scf00355 | 6 |
| AX-158199632 | 17 | 65.814 | KV452887.1 | 323649 | 6-scf00355 | 6 |
| AX-158199633 | 17 | 65.814 | KV452887.1 | 328731 | 6-scf00355 | 6 |
| AX-158199636 | 17 | 65.814 | KV452887.1 | 334492 | 6-scf00355 | 6 |
| AX-158199637 | 17 | 65.814 | KV452887.1 | 335256 | 6-scf00355 | 6 |
| AX-158199638 | 17 | 65.814 | KV452887.1 | 337709 | 6-scf00355 | 6 |
| AX-158199639 | 17 | 65.814 | KV452887.1 | 340509 | 6-scf00355 | 6 |
| AX-158199642 | 17 | 65.814 | KV452887.1 | 351327 | 6-scf00355 | 6 |
| AX-158199643 | 17 | 65.814 | KV452887.1 | 351690 | 6-scf00355 | 6 |
| AX-158199644 | 17 | 65.814 | KV452887.1 | 353409 | 6-scf00355 | 6 |
| AX-158199645 | 17 | 65.814 | KV452887.1 | 357412 | 6-scf00355 | 6 |
| AX-158199646 | 17 | 65.814 | KV452887.1 | 357859 | 6-scf00355 | 6 |
| AX-158199647 | 17 | 65.814 | KV452887.1 | 360758 | 6-scf00355 | 6 |
| AX-158199648 | 17 | 65.814 | KV452887.1 | 363630 | 6-scf00355 | 6 |
| AX-158199649 | 17 | 65.814 | KV452887.1 | 365123 | 6-scf00355 | 6 |
| AX-158199651 | 17 | 65.814 | KV452887.1 | 366982 | 6-scf00355 | 6 |
| AX-158199652 | 17 | 65.814 | KV452887.1 | 367447 | 6-scf00355 | 6 |
| AX-158199653 | 17 | 65.814 | KV452887.1 | 372403 | 6-scf00355 | 6 |
| AX-158199654 | 17 | 65.814 | KV452887.1 | 374742 | 6-scf00355 | 6 |
| AX-158199655 | 17 | 65.814 | KV452887.1 | 379910 | 6-scf00355 | 6 |
| AX-158199657 | 17 | 65.814 | KV452887.1 | 388246 | 6-scf00355 | 6 |
| AX-158199659 | 17 | 65.814 | KV452887.1 | 393495 | 6-scf00355 | 6 |
| AX-158199660 | 17 | 65.814 | KV452887.1 | 397075 | 6-scf00355 | 6 |
| AX-158199663 | 17 | 65.814 | KV452887.1 | 399918 | 6-scf00355 | 6 |
| AX-158199664 | 17 | 65.814 | KV452887.1 | 400405 | 6-scf00355 | 6 |
| AX-158199665 | 17 | 65.814 | KV452887.1 | 402959 | 6-scf00355 | 6 |
| AX-158199666 | 17 | 65.814 | KV452887.1 | 403922 | 6-scf00355 | 6 |
| AX-158199667 | 17 | 65.814 | KV452887.1 | 406099 | 6-scf00355 | 6 |
| AX-158199678 | 17 | 65.814 | KV452887.1 | 426673 | 6-scf00355 | 6 |
| AX-158199681 | 17 | 65.814 | KV452887.1 | 434559 | 6-scf00355 | 6 |
| AX-158199682 | 17 | 65.814 | KV452887.1 | 436696 | 6-scf00355 | 6 |
| AX-158199684 | 17 | 65.814 | KV452887.1 | 443895 | 6-scf00355 | 6 |
| AX-158199685 | 17 | 65.814 | KV452887.1 | 444338 | 6-scf00355 | 6 |
| AX-158199686 | 17 | 65.814 | KV452887.1 | 444830 | 6-scf00355 | 6 |
| AX-157749246 | 17 | 65.814 | KV452887.1 | 460419 | 6-scf00355 | 6 |
| AX-158199699 | 17 | 65.814 | KV452887.1 | 467726 | 6-scf00355 | 6 |
| AX-158199712 | 17 | 65.814 | KV452887.1 | 480450 | 6-scf00355 | 6 |
| AX-158199714 | 17 | 65.814 | KV452887.1 | 482870 | 6-scf00355 | 6 |
| AX-157755916 | 17 | 65.814 | KV452887.1 | 489191 | 6-scf00355 | 6 |
| AX-158199723 | 17 | 65.814 | KV452887.1 | 491960 | 6-scf00355 | 6 |
| AX-158199727 | 17 | 65.814 | KV452887.1 | 495254 | 6-scf00355 | 6 |
| AX-158199729 | 17 | 65.814 | KV452887.1 | 501618 | 6-scf00355 | 6 |
| AX-158199734 | 17 | 65.814 | KV452887.1 | 508410 | 6-scf00355 | 6 |
| AX-158199735 | 17 | 65.814 | KV452887.1 | 509122 | 6-scf00355 | 6 |
| AX-158199739 | 17 | 65.814 | KV452887.1 | 515276 | 6-scf00355 | 6 |
| AX-158199740 | 17 | 65.814 | KV452887.1 | 517465 | 6-scf00355 | 6 |
| AX-158199743 | 17 | 65.814 | KV452887.1 | 521066 | 6-scf00355 | 6 |
| AX-158199748 | 17 | 65.814 | KV452887.1 | 525870 | 6-scf00355 | 6 |
| AX-158199749 | 17 | 65.814 | KV452887.1 | 527193 | 6-scf00355 | 6 |

|              |    |        |            |         |            |   |
|--------------|----|--------|------------|---------|------------|---|
| AX-158199751 | 17 | 65.814 | KV452887.1 | 532841  | 6-scf00355 | 6 |
| AX-158199753 | 17 | 65.814 | KV452887.1 | 536895  | 6-scf00355 | 6 |
| AX-158199755 | 17 | 65.814 | KV452887.1 | 539815  | 6-scf00355 | 6 |
| AX-158199756 | 17 | 65.814 | KV452887.1 | 540222  | 6-scf00355 | 6 |
| AX-158199759 | 17 | 65.814 | KV452887.1 | 544263  | 6-scf00355 | 6 |
| AX-158199761 | 17 | 65.814 | KV452887.1 | 554381  | 6-scf00355 | 6 |
| AX-158199763 | 17 | 65.814 | KV452887.1 | 555698  | 6-scf00355 | 6 |
| AX-158199776 | 17 | 65.814 | KV452887.1 | 567785  | 6-scf00355 | 6 |
| AX-158199784 | 17 | 65.814 | KV452887.1 | 582211  | 6-scf00355 | 6 |
| AX-158199788 | 17 | 65.814 | KV452887.1 | 586987  | 6-scf00355 | 6 |
| AX-158199800 | 17 | 65.814 | KV452887.1 | 597257  | 6-scf00355 | 6 |
| AX-157755202 | 17 | 65.814 | KV452887.1 | 597482  | 6-scf00355 | 6 |
| AX-158199809 | 17 | 65.814 | KV452887.1 | 606780  | 6-scf00355 | 6 |
| AX-158199813 | 17 | 65.814 | KV452887.1 | 614380  | 6-scf00355 | 6 |
| AX-158386199 | 17 | 65.814 | KV452887.1 | 618415  | 6-scf00355 | 6 |
| AX-158199817 | 17 | 65.814 | KV452887.1 | 620572  | 6-scf00355 | 6 |
| AX-158199825 | 17 | 65.814 | KV452887.1 | 637490  | 6-scf00355 | 6 |
| AX-157709018 | 17 | 65.814 | KV452887.1 | 638009  | 6-scf00355 | 6 |
| AX-158199826 | 17 | 65.814 | KV452887.1 | 638461  | 6-scf00355 | 6 |
| AX-158199829 | 17 | 65.814 | KV452887.1 | 644397  | 6-scf00355 | 6 |
| AX-157837355 | 17 | 65.814 | KV452887.1 | 653622  | 6-scf00355 | 6 |
| AX-158199840 | 17 | 65.814 | KV452887.1 | 668232  | 6-scf00355 | 6 |
| AX-157743271 | 17 | 65.814 | KV452887.1 | 682313  | 6-scf00355 | 6 |
| AX-158199845 | 17 | 65.814 | KV452887.1 | 689668  | 6-scf00355 | 6 |
| AX-158199847 | 17 | 65.814 | KV452887.1 | 691481  | 6-scf00355 | 6 |
| AX-157757049 | 17 | 65.814 | KV452887.1 | 695220  | 6-scf00355 | 6 |
| AX-158199848 | 17 | 65.814 | KV452887.1 | 698104  | 6-scf00355 | 6 |
| AX-158199852 | 17 | 65.814 | KV452887.1 | 707706  | 6-scf00355 | 6 |
| AX-158199853 | 17 | 65.814 | KV452887.1 | 707932  | 6-scf00355 | 6 |
| AX-158199865 | 17 | 65.814 | KV452887.1 | 721798  | 6-scf00355 | 6 |
| AX-158199866 | 17 | 65.814 | KV452887.1 | 723576  | 6-scf00355 | 6 |
| AX-157773219 | 17 | 65.814 | KV452887.1 | 724293  | 6-scf00355 | 6 |
| AX-158199872 | 17 | 65.814 | KV452887.1 | 731329  | 6-scf00355 | 6 |
| AX-158199873 | 17 | 65.814 | KV452887.1 | 731974  | 6-scf00355 | 6 |
| AX-158199875 | 17 | 65.814 | KV452887.1 | 735907  | 6-scf00355 | 6 |
| AX-158199880 | 17 | 65.814 | KV452887.1 | 741224  | 6-scf00355 | 6 |
| AX-158199881 | 17 | 65.814 | KV452887.1 | 741645  | 6-scf00355 | 6 |
| AX-157714591 | 17 | 65.814 | KV452887.1 | 753201  | 6-scf00355 | 6 |
| AX-158199893 | 17 | 65.814 | KV452887.1 | 756996  | 6-scf00355 | 6 |
| AX-158199894 | 17 | 65.814 | KV452887.1 | 758990  | 6-scf00355 | 6 |
| AX-158199895 | 17 | 65.814 | KV452887.1 | 759230  | 6-scf00355 | 6 |
| AX-158199923 | 17 | 65.814 | KV452887.1 | 797510  | 6-scf00355 | 6 |
| AX-157837373 | 17 | 65.814 | KV452887.1 | 822335  | 6-scf00355 | 6 |
| AX-158199965 | 17 | 65.814 | KV452887.1 | 856069  | 6-scf00355 | 6 |
| AX-158199972 | 17 | 65.814 | KV452887.1 | 873953  | 6-scf00355 | 6 |
| AX-158199973 | 17 | 65.814 | KV452887.1 | 874540  | 6-scf00355 | 6 |
| AX-158199984 | 17 | 65.814 | KV452887.1 | 893485  | 6-scf00355 | 6 |
| AX-157837382 | 17 | 65.814 | KV452887.1 | 895126  | 6-scf00355 | 6 |
| AX-158200047 | 17 | 65.814 | KV452887.1 | 981162  | 6-scf00355 | 6 |
| AX-158200053 | 17 | 65.814 | KV452887.1 | 986993  | 6-scf00355 | 6 |
| AX-158200083 | 17 | 65.814 | KV452887.1 | 1030500 | 6-scf00355 | 6 |

|              |    |        |             |         |            |    |
|--------------|----|--------|-------------|---------|------------|----|
| AX-158200254 | 17 | 65.814 | KV452887.1  | 1310231 | 6-scf00355 | 6  |
| AX-158200568 | 17 | 65.814 | KV452891.1  | 85817   | 6-scf00356 | 6  |
| AX-158200591 | 17 | 65.814 | KV452891.1  | 275132  | 6-scf00356 | 6  |
| AX-158200657 | 17 | 65.814 | KV452891.1  | 466642  | 6-scf00356 | 6  |
| AX-157717286 | 17 | 65.814 | KV452891.1  | 1035603 | 6-scf00356 | 6  |
| AX-158201105 | 17 | 65.814 | KV452891.1  | 1669645 | 6-scf00356 | 6  |
| AX-158201224 | 17 | 65.814 | KV452891.1  | 1938127 | 6-scf00356 | 6  |
| AX-158201415 | 17 | 65.814 | KV452891.1  | 2299779 | 6-scf00356 | 6  |
| AX-158378391 | 17 | 65.814 | KV453357.1  | 132383  | scf00578   | UN |
| AX-158378473 | 17 | 65.814 | KV453357.1  | 264119  | scf00578   | UN |
| AX-158378516 | 17 | 65.814 | KV453357.1  | 312898  | scf00578   | UN |
| AX-158378541 | 17 | 65.814 | KV453357.1  | 342152  | scf00578   | UN |
| AX-158378672 | 17 | 65.814 | KV453357.1  | 351370  | scf00578   | UN |
| AX-158378675 | 17 | 65.814 | KV453357.1  | 379076  | scf00578   | UN |
| AX-158378588 | 17 | 65.814 | KV453357.1  | 392680  | scf00578   | UN |
| AX-157704504 | 17 | 65.814 | 3ML01026362 | 570     | scf01957_1 | UN |
| AX-157704916 | 17 | 65.814 | 3ML01027929 | 1226    | scf03537_1 | UN |
| AX-157837334 | 17 | 65.924 | KV452886.1  | 720447  | 6-scf00354 | 6  |
| AX-158199317 | 17 | 65.924 | KV452886.1  | 742587  | 6-scf00354 | 6  |
| AX-158199098 | 17 | 65.924 | KV452886.1  | 1106434 | 6-scf00354 | 6  |
| AX-157683901 | 17 | 65.924 | KV452886.1  | 1296139 | 6-scf00354 | 6  |
| AX-158199808 | 17 | 65.924 | KV452887.1  | 605706  | 6-scf00355 | 6  |
| AX-158199897 | 17 | 65.924 | KV452887.1  | 762979  | 6-scf00355 | 6  |
| AX-157747556 | 17 | 65.924 | KV452887.1  | 764195  | 6-scf00355 | 6  |
| AX-158199903 | 17 | 65.924 | KV452887.1  | 767805  | 6-scf00355 | 6  |
| AX-158199904 | 17 | 65.924 | KV452887.1  | 768151  | 6-scf00355 | 6  |
| AX-158199909 | 17 | 65.924 | KV452887.1  | 774032  | 6-scf00355 | 6  |
| AX-158199910 | 17 | 65.924 | KV452887.1  | 774824  | 6-scf00355 | 6  |
| AX-157837363 | 17 | 65.924 | KV452887.1  | 777240  | 6-scf00355 | 6  |
| AX-158199917 | 17 | 65.924 | KV452887.1  | 786648  | 6-scf00355 | 6  |
| AX-157837366 | 17 | 65.924 | KV452887.1  | 787826  | 6-scf00355 | 6  |
| AX-158199920 | 17 | 65.924 | KV452887.1  | 791134  | 6-scf00355 | 6  |
| AX-158199921 | 17 | 65.924 | KV452887.1  | 792384  | 6-scf00355 | 6  |
| AX-158199922 | 17 | 65.924 | KV452887.1  | 794982  | 6-scf00355 | 6  |
| AX-157749644 | 17 | 65.924 | KV452887.1  | 796901  | 6-scf00355 | 6  |
| AX-157837367 | 17 | 65.924 | KV452887.1  | 797571  | 6-scf00355 | 6  |
| AX-157837368 | 17 | 65.924 | KV452887.1  | 797808  | 6-scf00355 | 6  |
| AX-158199924 | 17 | 65.924 | KV452887.1  | 798986  | 6-scf00355 | 6  |
| AX-157751960 | 17 | 65.924 | KV452887.1  | 803975  | 6-scf00355 | 6  |
| AX-157739541 | 17 | 65.924 | KV452887.1  | 811770  | 6-scf00355 | 6  |
| AX-158199930 | 17 | 65.924 | KV452887.1  | 811867  | 6-scf00355 | 6  |
| AX-158199931 | 17 | 65.924 | KV452887.1  | 814297  | 6-scf00355 | 6  |
| AX-158199933 | 17 | 65.924 | KV452887.1  | 815888  | 6-scf00355 | 6  |
| AX-158199938 | 17 | 65.924 | KV452887.1  | 818948  | 6-scf00355 | 6  |
| AX-158199939 | 17 | 65.924 | KV452887.1  | 819251  | 6-scf00355 | 6  |
| AX-158199940 | 17 | 65.924 | KV452887.1  | 819512  | 6-scf00355 | 6  |
| AX-158199941 | 17 | 65.924 | KV452887.1  | 820567  | 6-scf00355 | 6  |
| AX-158199953 | 17 | 65.924 | KV452887.1  | 832888  | 6-scf00355 | 6  |
| AX-158199956 | 17 | 65.924 | KV452887.1  | 837157  | 6-scf00355 | 6  |
| AX-157713284 | 17 | 65.924 | KV452887.1  | 852338  | 6-scf00355 | 6  |
| AX-158199966 | 17 | 65.924 | KV452887.1  | 859381  | 6-scf00355 | 6  |

|              |    |        |            |          |            |    |
|--------------|----|--------|------------|----------|------------|----|
| AX-158199986 | 17 | 65.924 | KV452887.1 | 895020   | 6-scf00355 | 6  |
| AX-158386204 | 17 | 65.924 | KV452887.1 | 910015   | 6-scf00355 | 6  |
| AX-158378411 | 17 | 65.924 | KV453357.1 | 172201   | scf00578   | UN |
| AX-158378483 | 17 | 65.924 | KV453357.1 | 274353   | scf00578   | UN |
| AX-158199926 | 17 | 66.114 | KV452887.1 | 802141   | 6-scf00355 | 6  |
| AX-158199927 | 17 | 66.114 | KV452887.1 | 808350   | 6-scf00355 | 6  |
| AX-158199932 | 17 | 66.114 | KV452887.1 | 814909   | 6-scf00355 | 6  |
| AX-158199958 | 17 | 66.114 | KV452887.1 | 843227   | 6-scf00355 | 6  |
| AX-158199960 | 17 | 66.114 | KV452887.1 | 848203   | 6-scf00355 | 6  |
| AX-158200409 | 17 | 66.114 | KV452887.1 | 1675810  | 6-scf00355 | 6  |
| AX-158201501 | 17 | 66.114 | KV452891.1 | 2410746  | 6-scf00356 | 6  |
| AX-157837376 | 17 | 66.297 | KV452887.1 | 862237   | 6-scf00355 | 6  |
| AX-158199969 | 17 | 66.47  | KV452887.1 | 870847   | 6-scf00355 | 6  |
| AX-158199447 | 17 | 66.471 | KV452886.1 | 371830   | 6-scf00354 | 6  |
| AX-158199297 | 17 | 66.471 | KV452886.1 | 799038   | 6-scf00354 | 6  |
| AX-158199007 | 17 | 66.471 | KV452886.1 | 1260795  | 6-scf00354 | 6  |
| AX-158199553 | 17 | 66.471 | KV452887.1 | 26994    | 6-scf00355 | 6  |
| AX-158199563 | 17 | 66.471 | KV452887.1 | 64548    | 6-scf00355 | 6  |
| AX-157858976 | 17 | 66.471 | KV452887.1 | 72063    | 6-scf00355 | 6  |
| AX-158199592 | 17 | 66.471 | KV452887.1 | 163894   | 6-scf00355 | 6  |
| AX-158414215 | 17 | 66.471 | KV452887.1 | 205833   | 6-scf00355 | 6  |
| AX-158199818 | 17 | 66.471 | KV452887.1 | 620984   | 6-scf00355 | 6  |
| AX-158199971 | 17 | 66.471 | KV452887.1 | 873402   | 6-scf00355 | 6  |
| AX-158199975 | 17 | 66.471 | KV452887.1 | 882989   | 6-scf00355 | 6  |
| AX-158199978 | 17 | 66.471 | KV452887.1 | 887259   | 6-scf00355 | 6  |
| AX-157837379 | 17 | 66.471 | KV452887.1 | 887737   | 6-scf00355 | 6  |
| AX-158199979 | 17 | 66.471 | KV452887.1 | 888167   | 6-scf00355 | 6  |
| AX-158199981 | 17 | 66.471 | KV452887.1 | 890383   | 6-scf00355 | 6  |
| AX-158199982 | 17 | 66.471 | KV452887.1 | 890972   | 6-scf00355 | 6  |
| AX-158199991 | 17 | 66.471 | KV452887.1 | 912147   | 6-scf00355 | 6  |
| AX-158199992 | 17 | 66.471 | KV452887.1 | 913077   | 6-scf00355 | 6  |
| AX-158199993 | 17 | 66.471 | KV452887.1 | 913817   | 6-scf00355 | 6  |
| AX-157858979 | 17 | 66.471 | KV452887.1 | 917403   | 6-scf00355 | 6  |
| AX-158199998 | 17 | 66.471 | KV452887.1 | 919031   | 6-scf00355 | 6  |
| AX-158199997 | 17 | 66.52  | KV452887.1 | 917802   | 6-scf00355 | 6  |
| AX-158199999 | 17 | 66.58  | KV452887.1 | 922398   | 6-scf00355 | 6  |
| AX-158200000 | 17 | 66.58  | KV452887.1 | 922973   | 6-scf00355 | 6  |
| AX-158200002 | 17 | 66.58  | KV452887.1 | 925633   | 6-scf00355 | 6  |
| AX-158200003 | 17 | 66.623 | KV452887.1 | 926642   | 6-scf00355 | 6  |
| AX-158194295 | 17 | 66.659 | KV452884.1 | 8627349  | 6-scf00352 | 6  |
| AX-158194428 | 17 | 66.659 | KV452884.1 | 8846753  | 6-scf00352 | 6  |
| AX-157836873 | 17 | 66.659 | KV452884.1 | 9084722  | 6-scf00352 | 6  |
| AX-158198265 | 17 | 66.659 | KV452884.1 | 16032849 | 6-scf00352 | 6  |
| AX-158199076 | 17 | 66.659 | KV452886.1 | 1138122  | 6-scf00354 | 6  |
| AX-157744722 | 17 | 66.659 | KV452887.1 | 876563   | 6-scf00355 | 6  |
| AX-158200012 | 17 | 66.659 | KV452887.1 | 936024   | 6-scf00355 | 6  |
| AX-158200302 | 17 | 66.659 | KV452887.1 | 1449146  | 6-scf00355 | 6  |
| AX-158200643 | 17 | 66.659 | KV452891.1 | 442227   | 6-scf00356 | 6  |
| AX-158200648 | 17 | 66.659 | KV452891.1 | 446521   | 6-scf00356 | 6  |
| AX-158200649 | 17 | 66.659 | KV452891.1 | 451285   | 6-scf00356 | 6  |
| AX-158195416 | 17 | 66.689 | KV452884.1 | 10391429 | 6-scf00352 | 6  |

|              |    |        |            |          |            |    |
|--------------|----|--------|------------|----------|------------|----|
| AX-157879181 | 17 | 66.689 | KV452884.1 | 14991273 | 6-scf00352 | 6  |
| AX-157693924 | 17 | 66.689 | KV452886.1 | 560135   | 6-scf00354 | 6  |
| AX-158199277 | 17 | 66.689 | KV452886.1 | 824216   | 6-scf00354 | 6  |
| AX-158200017 | 17 | 66.689 | KV452887.1 | 942338   | 6-scf00355 | 6  |
| AX-158200020 | 17 | 66.689 | KV452887.1 | 945300   | 6-scf00355 | 6  |
| AX-158200021 | 17 | 66.689 | KV452887.1 | 947059   | 6-scf00355 | 6  |
| AX-158200027 | 17 | 66.689 | KV452887.1 | 959502   | 6-scf00355 | 6  |
| AX-158200029 | 17 | 66.689 | KV452887.1 | 962603   | 6-scf00355 | 6  |
| AX-158200031 | 17 | 66.689 | KV452887.1 | 965978   | 6-scf00355 | 6  |
| AX-158200032 | 17 | 66.689 | KV452887.1 | 966403   | 6-scf00355 | 6  |
| AX-158200033 | 17 | 66.689 | KV452887.1 | 967787   | 6-scf00355 | 6  |
| AX-158200036 | 17 | 66.689 | KV452887.1 | 970514   | 6-scf00355 | 6  |
| AX-158200038 | 17 | 66.689 | KV452887.1 | 972209   | 6-scf00355 | 6  |
| AX-158200039 | 17 | 66.689 | KV452887.1 | 973059   | 6-scf00355 | 6  |
| AX-158200040 | 17 | 66.689 | KV452887.1 | 973589   | 6-scf00355 | 6  |
| AX-158200041 | 17 | 66.689 | KV452887.1 | 974433   | 6-scf00355 | 6  |
| AX-158200044 | 17 | 66.689 | KV452887.1 | 977574   | 6-scf00355 | 6  |
| AX-158200045 | 17 | 66.689 | KV452887.1 | 979433   | 6-scf00355 | 6  |
| AX-158200048 | 17 | 66.689 | KV452887.1 | 981476   | 6-scf00355 | 6  |
| AX-158200051 | 17 | 66.689 | KV452887.1 | 985025   | 6-scf00355 | 6  |
| AX-158200052 | 17 | 66.689 | KV452887.1 | 986036   | 6-scf00355 | 6  |
| AX-158200065 | 17 | 66.689 | KV452887.1 | 1009617  | 6-scf00355 | 6  |
| AX-158200072 | 17 | 66.689 | KV452887.1 | 1019982  | 6-scf00355 | 6  |
| AX-158200073 | 17 | 66.689 | KV452887.1 | 1020441  | 6-scf00355 | 6  |
| AX-157701149 | 17 | 66.689 | KV452887.1 | 1031511  | 6-scf00355 | 6  |
| AX-158200085 | 17 | 66.689 | KV452887.1 | 1034294  | 6-scf00355 | 6  |
| AX-158200087 | 17 | 66.689 | KV452887.1 | 1036693  | 6-scf00355 | 6  |
| AX-157837385 | 17 | 66.689 | KV452887.1 | 1117722  | 6-scf00355 | 6  |
| AX-157702320 | 17 | 66.689 | DX091190.1 | 276      | 6-scf00355 | UN |
| AX-158378592 | 17 | 66.689 | KV453357.1 | 397606   | 6-scf00578 | UN |
| AX-158199144 | 17 | 66.907 | KV452886.1 | 1003655  | 6-scf00354 | 6  |
| AX-158199143 | 17 | 66.907 | KV452886.1 | 1004039  | 6-scf00354 | 6  |
| AX-158200043 | 17 | 66.907 | KV452887.1 | 975981   | 6-scf00355 | 6  |
| AX-158200063 | 17 | 66.907 | KV452887.1 | 1002270  | 6-scf00355 | 6  |
| AX-158200069 | 17 | 66.907 | KV452887.1 | 1015127  | 6-scf00355 | 6  |
| AX-158200071 | 17 | 66.907 | KV452887.1 | 1016115  | 6-scf00355 | 6  |
| AX-158200079 | 17 | 66.907 | KV452887.1 | 1027108  | 6-scf00355 | 6  |
| AX-158200082 | 17 | 66.907 | KV452887.1 | 1029675  | 6-scf00355 | 6  |
| AX-158200084 | 17 | 66.907 | KV452887.1 | 1031322  | 6-scf00355 | 6  |
| AX-158200091 | 17 | 66.907 | KV452887.1 | 1040685  | 6-scf00355 | 6  |
| AX-158200092 | 17 | 66.907 | KV452887.1 | 1041486  | 6-scf00355 | 6  |
| AX-158200093 | 17 | 66.907 | KV452887.1 | 1042501  | 6-scf00355 | 6  |
| AX-158200099 | 17 | 66.907 | KV452887.1 | 1053087  | 6-scf00355 | 6  |
| AX-158200106 | 17 | 66.907 | KV452887.1 | 1067179  | 6-scf00355 | 6  |
| AX-158200107 | 17 | 66.907 | KV452887.1 | 1069750  | 6-scf00355 | 6  |
| AX-158200108 | 17 | 66.907 | KV452887.1 | 1070211  | 6-scf00355 | 6  |
| AX-158200110 | 17 | 66.942 | KV452887.1 | 1074081  | 6-scf00355 | 6  |
| AX-158200113 | 17 | 66.978 | KV452887.1 | 1077969  | 6-scf00355 | 6  |
| AX-158200115 | 17 | 67.017 | KV452887.1 | 1079804  | 6-scf00355 | 6  |
| AX-158200116 | 17 | 67.017 | KV452887.1 | 1080734  | 6-scf00355 | 6  |
| AX-158200117 | 17 | 67.017 | KV452887.1 | 1081113  | 6-scf00355 | 6  |



|              |    |        |             |          |            |    |
|--------------|----|--------|-------------|----------|------------|----|
| AX-158200123 | 17 | 67.086 | KV452887.1  | 1094539  | 6-scf00355 | 6  |
| AX-158200125 | 17 | 67.173 | KV452887.1  | 1096149  | 6-scf00355 | 6  |
| AX-158200129 | 17 | 67.239 | KV452887.1  | 1106932  | 6-scf00355 | 6  |
| AX-158200130 | 17 | 67.345 | KV452887.1  | 1108061  | 6-scf00355 | 6  |
| AX-158200068 | 17 | 67.454 | KV452887.1  | 1013484  | 6-scf00355 | 6  |
| AX-158200098 | 17 | 67.454 | KV452887.1  | 1052209  | 6-scf00355 | 6  |
| AX-158200104 | 17 | 67.454 | KV452887.1  | 1065027  | 6-scf00355 | 6  |
| AX-157837387 | 17 | 67.454 | KV452887.1  | 1119532  | 6-scf00355 | 6  |
| AX-157748524 | 17 | 67.454 | KV452887.1  | 1120472  | 6-scf00355 | 6  |
| AX-158200139 | 17 | 67.454 | KV452887.1  | 1124431  | 6-scf00355 | 6  |
| AX-157739235 | 17 | 67.454 | KV452887.1  | 1124919  | 6-scf00355 | 6  |
| AX-158393801 | 17 | 67.454 | KV452887.1  | 1126355  | 6-scf00355 | 6  |
| AX-158200046 | 17 | 67.455 | KV452887.1  | 980039   | 6-scf00355 | 6  |
| AX-157837388 | 17 | 67.455 | KV452887.1  | 1126770  | 6-scf00355 | 6  |
| AX-158200141 | 17 | 67.726 | KV452887.1  | 1127782  | 6-scf00355 | 6  |
| AX-158200143 | 17 | 67.726 | KV452887.1  | 1129548  | 6-scf00355 | 6  |
| AX-158194425 | 17 | 68     | KV452884.1  | 8842639  | 6-scf00352 | 6  |
| AX-158196519 | 17 | 68     | KV452884.1  | 11941101 | 6-scf00352 | 6  |
| AX-157837246 | 17 | 68     | KV452884.1  | 15903655 | 6-scf00352 | 6  |
| AX-158199347 | 17 | 68     | KV452886.1  | 703062   | 6-scf00354 | 6  |
| AX-157887008 | 17 | 68     | KV452887.1  | 1134307  | 6-scf00355 | 6  |
| AX-158200152 | 17 | 68     | KV452887.1  | 1144556  | 6-scf00355 | 6  |
| AX-158200153 | 17 | 68     | KV452887.1  | 1145066  | 6-scf00355 | 6  |
| AX-158200154 | 17 | 68     | KV452887.1  | 1145716  | 6-scf00355 | 6  |
| AX-158200156 | 17 | 68     | KV452887.1  | 1148568  | 6-scf00355 | 6  |
| AX-158200162 | 17 | 68     | KV452887.1  | 1154789  | 6-scf00355 | 6  |
| AX-157837391 | 17 | 68     | KV452887.1  | 1156826  | 6-scf00355 | 6  |
| AX-158200903 | 17 | 68     | KV452891.1  | 869276   | 6-scf00356 | 6  |
| AX-157707160 | 17 | 68     | 3ML01033623 | 207      | scf09282_1 | UN |
| AX-158200164 | 17 | 68.11  | KV452887.1  | 1160314  | 6-scf00355 | 6  |
| AX-158200174 | 17 | 68.11  | KV452887.1  | 1174582  | 6-scf00355 | 6  |
| AX-158200175 | 17 | 68.11  | KV452887.1  | 1175232  | 6-scf00355 | 6  |
| AX-158200176 | 17 | 68.11  | KV452887.1  | 1175928  | 6-scf00355 | 6  |
| AX-158200177 | 17 | 68.11  | KV452887.1  | 1177161  | 6-scf00355 | 6  |
| AX-158200180 | 17 | 68.11  | KV452887.1  | 1182163  | 6-scf00355 | 6  |
| AX-157722710 | 17 | 68.11  | KV452887.1  | 1194612  | 6-scf00355 | 6  |
| AX-157837395 | 17 | 68.11  | KV452887.1  | 1194871  | 6-scf00355 | 6  |
| AX-158200187 | 17 | 68.11  | KV452887.1  | 1198699  | 6-scf00355 | 6  |
| AX-158200189 | 17 | 68.11  | KV452887.1  | 1199639  | 6-scf00355 | 6  |
| AX-158200212 | 17 | 68.11  | KV452887.1  | 1224309  | 6-scf00355 | 6  |
| AX-158200214 | 17 | 68.11  | KV452887.1  | 1225820  | 6-scf00355 | 6  |
| AX-158200221 | 17 | 68.11  | KV452887.1  | 1262510  | 6-scf00355 | 6  |
| AX-158200181 | 17 | 68.219 | KV452887.1  | 1188261  | 6-scf00355 | 6  |
| AX-158200195 | 17 | 68.219 | KV452887.1  | 1209299  | 6-scf00355 | 6  |
| AX-158200196 | 17 | 68.219 | KV452887.1  | 1210811  | 6-scf00355 | 6  |
| AX-158414224 | 17 | 68.219 | KV452887.1  | 1212275  | 6-scf00355 | 6  |
| AX-158200228 | 17 | 68.219 | KV452887.1  | 1270169  | 6-scf00355 | 6  |
| AX-158200965 | 17 | 68.219 | KV452891.1  | 975139   | 6-scf00356 | 6  |
| AX-158200201 | 17 | 68.273 | KV452887.1  | 1216890  | 6-scf00355 | 6  |
| AX-158200208 | 17 | 68.328 | KV452887.1  | 1221487  | 6-scf00355 | 6  |
| AX-158200213 | 17 | 68.329 | KV452887.1  | 1225430  | 6-scf00355 | 6  |

|              |    |        |            |          |            |   |
|--------------|----|--------|------------|----------|------------|---|
| AX-158200215 | 17 | 68.33  | KV452887.1 | 1234393  | 6-scf00355 | 6 |
| AX-158200218 | 17 | 68.403 | KV452887.1 | 1249884  | 6-scf00355 | 6 |
| AX-157837401 | 17 | 68.403 | KV452887.1 | 1271373  | 6-scf00355 | 6 |
| AX-157887009 | 17 | 68.474 | KV452887.1 | 1253313  | 6-scf00355 | 6 |
| AX-158200231 | 17 | 68.765 | KV452887.1 | 1273829  | 6-scf00355 | 6 |
| AX-158393802 | 17 | 68.765 | KV452887.1 | 1277028  | 6-scf00355 | 6 |
| AX-158200235 | 17 | 68.765 | KV452887.1 | 1277963  | 6-scf00355 | 6 |
| AX-157726467 | 17 | 68.765 | KV452887.1 | 1280895  | 6-scf00355 | 6 |
| AX-158195704 | 17 | 68.875 | KV452884.1 | 10810909 | 6-scf00352 | 6 |
| AX-158200238 | 17 | 68.875 | KV452887.1 | 1285492  | 6-scf00355 | 6 |
| AX-158200206 | 17 | 68.984 | KV452887.1 | 1218953  | 6-scf00355 | 6 |
| AX-158200243 | 17 | 68.984 | KV452887.1 | 1300496  | 6-scf00355 | 6 |
| AX-158200244 | 17 | 68.984 | KV452887.1 | 1301060  | 6-scf00355 | 6 |
| AX-158200249 | 17 | 68.984 | KV452887.1 | 1305476  | 6-scf00355 | 6 |
| AX-158200251 | 17 | 68.984 | KV452887.1 | 1307992  | 6-scf00355 | 6 |
| AX-158201462 | 17 | 68.984 | KV452891.1 | 2358911  | 6-scf00356 | 6 |
| AX-158200252 | 17 | 69.036 | KV452887.1 | 1308670  | 6-scf00355 | 6 |
| AX-158200253 | 17 | 69.084 | KV452887.1 | 1309590  | 6-scf00355 | 6 |
| AX-158200257 | 17 | 69.097 | KV452887.1 | 1315344  | 6-scf00355 | 6 |
| AX-158200260 | 17 | 69.148 | KV452887.1 | 1318891  | 6-scf00355 | 6 |
| AX-158200209 | 17 | 69.203 | KV452887.1 | 1222582  | 6-scf00355 | 6 |
| AX-158200261 | 17 | 69.203 | KV452887.1 | 1319771  | 6-scf00355 | 6 |
| AX-158200413 | 17 | 69.203 | KV452887.1 | 1689666  | 6-scf00355 | 6 |
| AX-158200630 | 17 | 69.203 | KV452891.1 | 431084   | 6-scf00356 | 6 |
| AX-158200928 | 17 | 69.203 | KV452891.1 | 901602   | 6-scf00356 | 6 |
| AX-158200955 | 17 | 69.203 | KV452891.1 | 949538   | 6-scf00356 | 6 |
| AX-158201033 | 17 | 69.203 | KV452891.1 | 1271230  | 6-scf00356 | 6 |
| AX-158201039 | 17 | 69.203 | KV452891.1 | 1354296  | 6-scf00356 | 6 |
| AX-158201125 | 17 | 69.203 | KV452891.1 | 1705906  | 6-scf00356 | 6 |
| AX-158201231 | 17 | 69.203 | KV452891.1 | 1993110  | 6-scf00356 | 6 |
| AX-158201232 | 17 | 69.203 | KV452891.1 | 1993314  | 6-scf00356 | 6 |
| AX-158201234 | 17 | 69.203 | KV452891.1 | 1996103  | 6-scf00356 | 6 |
| AX-158201298 | 17 | 69.203 | KV452891.1 | 2137749  | 6-scf00356 | 6 |
| AX-157837396 | 17 | 69.232 | KV452887.1 | 1195367  | 6-scf00355 | 6 |
| AX-158200204 | 17 | 69.232 | KV452887.1 | 1218317  | 6-scf00355 | 6 |
| AX-158200240 | 17 | 69.232 | KV452887.1 | 1292461  | 6-scf00355 | 6 |
| AX-158200266 | 17 | 69.232 | KV452887.1 | 1329587  | 6-scf00355 | 6 |
| AX-158200267 | 17 | 69.272 | KV452887.1 | 1332652  | 6-scf00355 | 6 |
| AX-158194488 | 17 | 69.312 | KV452884.1 | 8914006  | 6-scf00352 | 6 |
| AX-158196387 | 17 | 69.312 | KV452884.1 | 11779198 | 6-scf00352 | 6 |
| AX-158418313 | 17 | 69.312 | KV452884.1 | 15823983 | 6-scf00352 | 6 |
| AX-158198108 | 17 | 69.312 | KV452884.1 | 15824095 | 6-scf00352 | 6 |
| AX-158199892 | 17 | 69.312 | KV452887.1 | 754873   | 6-scf00355 | 6 |
| AX-158200086 | 17 | 69.312 | KV452887.1 | 1035685  | 6-scf00355 | 6 |
| AX-158200277 | 17 | 69.312 | KV452887.1 | 1346331  | 6-scf00355 | 6 |
| AX-158200278 | 17 | 69.312 | KV452887.1 | 1348387  | 6-scf00355 | 6 |
| AX-157746506 | 17 | 69.312 | KV452887.1 | 1366039  | 6-scf00355 | 6 |
| AX-158200401 | 17 | 69.312 | KV452887.1 | 1660486  | 6-scf00355 | 6 |
| AX-158200402 | 17 | 69.312 | KV452887.1 | 1662183  | 6-scf00355 | 6 |
| AX-157837488 | 17 | 69.312 | KV452891.1 | 2022076  | 6-scf00356 | 6 |
| AX-158200279 | 17 | 69.37  | KV452887.1 | 1349271  | 6-scf00355 | 6 |

|              |    |        |            |          |            |   |
|--------------|----|--------|------------|----------|------------|---|
| AX-158200688 | 17 | 69.37  | KV452891.1 | 591665   | 6-scf00356 | 6 |
| AX-158200712 | 17 | 69.37  | KV452891.1 | 620663   | 6-scf00356 | 6 |
| AX-157685434 | 17 | 69.37  | KV452885.1 | 106058   | 6-scf00617 | 6 |
| AX-158200157 | 17 | 69.421 | KV452887.1 | 1151105  | 6-scf00355 | 6 |
| AX-158200197 | 17 | 69.421 | KV452887.1 | 1212389  | 6-scf00355 | 6 |
| AX-158200202 | 17 | 69.421 | KV452887.1 | 1217326  | 6-scf00355 | 6 |
| AX-158200203 | 17 | 69.421 | KV452887.1 | 1217909  | 6-scf00355 | 6 |
| AX-157837397 | 17 | 69.421 | KV452887.1 | 1228591  | 6-scf00355 | 6 |
| AX-157837400 | 17 | 69.421 | KV452887.1 | 1245162  | 6-scf00355 | 6 |
| AX-158200283 | 17 | 69.421 | KV452887.1 | 1376518  | 6-scf00355 | 6 |
| AX-158200285 | 17 | 69.421 | KV452887.1 | 1381983  | 6-scf00355 | 6 |
| AX-158200288 | 17 | 69.421 | KV452887.1 | 1392856  | 6-scf00355 | 6 |
| AX-157866865 | 17 | 69.421 | KV452887.1 | 1395291  | 6-scf00355 | 6 |
| AX-158200538 | 17 | 69.421 | KV452887.1 | 2393513  | 6-scf00355 | 6 |
| AX-158201977 | 17 | 69.421 | KV452887.1 | 2680410  | 6-scf00355 | 6 |
| AX-158201948 | 17 | 69.421 | KV452887.1 | 2953529  | 6-scf00355 | 6 |
| AX-158201935 | 17 | 69.421 | KV452887.1 | 3064287  | 6-scf00355 | 6 |
| AX-157724895 | 17 | 69.421 | KV452891.1 | 1977425  | 6-scf00356 | 6 |
| AX-158201230 | 17 | 69.421 | KV452891.1 | 1981032  | 6-scf00356 | 6 |
| AX-158201280 | 17 | 69.421 | KV452891.1 | 2101462  | 6-scf00356 | 6 |
| AX-158201282 | 17 | 69.421 | KV452891.1 | 2104468  | 6-scf00356 | 6 |
| AX-157837491 | 17 | 69.421 | KV452891.1 | 2119606  | 6-scf00356 | 6 |
| AX-157702912 | 17 | 69.421 | KV452891.1 | 2119921  | 6-scf00356 | 6 |
| AX-157837492 | 17 | 69.421 | KV452891.1 | 2120557  | 6-scf00356 | 6 |
| AX-158201307 | 17 | 69.421 | KV452891.1 | 2151966  | 6-scf00356 | 6 |
| AX-158201311 | 17 | 69.421 | KV452891.1 | 2156609  | 6-scf00356 | 6 |
| AX-158201316 | 17 | 69.421 | KV452891.1 | 2160844  | 6-scf00356 | 6 |
| AX-158201319 | 17 | 69.421 | KV452891.1 | 2166814  | 6-scf00356 | 6 |
| AX-158201343 | 17 | 69.421 | KV452891.1 | 2202160  | 6-scf00356 | 6 |
| AX-158201355 | 17 | 69.421 | KV452891.1 | 2213445  | 6-scf00356 | 6 |
| AX-158201394 | 17 | 69.421 | KV452891.1 | 2261020  | 6-scf00356 | 6 |
| AX-158201398 | 17 | 69.421 | KV452891.1 | 2266486  | 6-scf00356 | 6 |
| AX-158414260 | 17 | 69.421 | KV452891.1 | 2272318  | 6-scf00356 | 6 |
| AX-158201409 | 17 | 69.421 | KV452891.1 | 2282405  | 6-scf00356 | 6 |
| AX-158201418 | 17 | 69.421 | KV452891.1 | 2305469  | 6-scf00356 | 6 |
| AX-158201426 | 17 | 69.421 | KV452891.1 | 2315833  | 6-scf00356 | 6 |
| AX-158202055 | 17 | 69.421 | KV452888.1 | 465487   | 6-scf00358 | 6 |
| AX-157859003 | 17 | 69.421 | KV452889.1 | 49245    | 6-scf00359 | 6 |
| AX-157837085 | 17 | 69.53  | KV452884.1 | 12379628 | 6-scf00352 | 6 |
| AX-157772832 | 17 | 69.53  | KV452884.1 | 12893458 | 6-scf00352 | 6 |
| AX-158414164 | 17 | 69.53  | KV452884.1 | 16028318 | 6-scf00352 | 6 |
| AX-157837256 | 17 | 69.53  | KV452884.1 | 16032468 | 6-scf00352 | 6 |
| AX-158198762 | 17 | 69.53  | KV452884.1 | 16724270 | 6-scf00352 | 6 |
| AX-158199310 | 17 | 69.53  | KV452886.1 | 769999   | 6-scf00354 | 6 |
| AX-157773093 | 17 | 69.53  | KV452886.1 | 1035107  | 6-scf00354 | 6 |
| AX-158199860 | 17 | 69.53  | KV452887.1 | 714310   | 6-scf00355 | 6 |
| AX-157837383 | 17 | 69.53  | KV452887.1 | 904689   | 6-scf00355 | 6 |
| AX-158200095 | 17 | 69.53  | KV452887.1 | 1046362  | 6-scf00355 | 6 |
| AX-158200132 | 17 | 69.53  | KV452887.1 | 1110264  | 6-scf00355 | 6 |
| AX-158200194 | 17 | 69.53  | KV452887.1 | 1208857  | 6-scf00355 | 6 |
| AX-158200290 | 17 | 69.53  | KV452887.1 | 1403573  | 6-scf00355 | 6 |

|              |    |        |            |          |            |    |
|--------------|----|--------|------------|----------|------------|----|
| AX-158200291 | 17 | 69.53  | KV452887.1 | 1404601  | 6-scf00355 | 6  |
| AX-158200293 | 17 | 69.53  | KV452887.1 | 1407499  | 6-scf00355 | 6  |
| AX-158200296 | 17 | 69.53  | KV452887.1 | 1439155  | 6-scf00355 | 6  |
| AX-158200300 | 17 | 69.53  | KV452887.1 | 1444159  | 6-scf00355 | 6  |
| AX-158200333 | 17 | 69.53  | KV452887.1 | 1555691  | 6-scf00355 | 6  |
| AX-158200541 | 17 | 69.53  | KV452887.1 | 2402932  | 6-scf00355 | 6  |
| AX-158200560 | 17 | 69.53  | KV452891.1 | 11040    | 6-scf00356 | 6  |
| AX-158200599 | 17 | 69.53  | KV452891.1 | 317448   | 6-scf00356 | 6  |
| AX-158201259 | 17 | 69.53  | KV452891.1 | 2051620  | 6-scf00356 | 6  |
| AX-158201288 | 17 | 69.53  | KV452891.1 | 2126354  | 6-scf00356 | 6  |
| AX-158201414 | 17 | 69.53  | KV452891.1 | 2296849  | 6-scf00356 | 6  |
| AX-158414263 | 17 | 69.53  | KV452891.1 | 2383115  | 6-scf00356 | 6  |
| AX-158201616 | 17 | 69.53  | KV452891.1 | 2564274  | 6-scf00356 | 6  |
| AX-158414275 | 17 | 69.53  | KV452891.1 | 2626825  | 6-scf00356 | 6  |
| AX-158201793 | 17 | 69.53  | KV452891.1 | 2833037  | 6-scf00356 | 6  |
| AX-158201794 | 17 | 69.53  | KV452891.1 | 2833977  | 6-scf00356 | 6  |
| AX-157685265 | 17 | 69.53  | KV452890.1 | 44966    | 6-scf00606 | 6  |
| AX-158378461 | 17 | 69.53  | KV453357.1 | 245954   | scf00578   | UN |
| AX-158378550 | 17 | 69.53  | KV453357.1 | 350363   | scf00578   | UN |
| AX-158194268 | 17 | 69.542 | KV452884.1 | 8576902  | 6-scf00352 | 6  |
| AX-158194789 | 17 | 69.542 | KV452884.1 | 9335976  | 6-scf00352 | 6  |
| AX-158194793 | 17 | 69.542 | KV452884.1 | 9346875  | 6-scf00352 | 6  |
| AX-158195300 | 17 | 69.542 | KV452884.1 | 10193327 | 6-scf00352 | 6  |
| AX-158195572 | 17 | 69.542 | KV452884.1 | 10663410 | 6-scf00352 | 6  |
| AX-158196349 | 17 | 69.542 | KV452884.1 | 11729065 | 6-scf00352 | 6  |
| AX-158196383 | 17 | 69.542 | KV452884.1 | 11772250 | 6-scf00352 | 6  |
| AX-157697555 | 17 | 69.542 | KV452884.1 | 11849888 | 6-scf00352 | 6  |
| AX-157837078 | 17 | 69.542 | KV452884.1 | 12373142 | 6-scf00352 | 6  |
| AX-158196685 | 17 | 69.542 | KV452884.1 | 12375283 | 6-scf00352 | 6  |
| AX-158196911 | 17 | 69.542 | KV452884.1 | 12666747 | 6-scf00352 | 6  |
| AX-158197015 | 17 | 69.542 | KV452884.1 | 12799525 | 6-scf00352 | 6  |
| AX-158197417 | 17 | 69.542 | KV452884.1 | 14483558 | 6-scf00352 | 6  |
| AX-158197429 | 17 | 69.542 | KV452884.1 | 14521082 | 6-scf00352 | 6  |
| AX-158197432 | 17 | 69.542 | KV452884.1 | 14531609 | 6-scf00352 | 6  |
| AX-158197583 | 17 | 69.542 | KV452884.1 | 14963696 | 6-scf00352 | 6  |
| AX-158197951 | 17 | 69.542 | KV452884.1 | 15489708 | 6-scf00352 | 6  |
| AX-158198032 | 17 | 69.542 | KV452884.1 | 15666955 | 6-scf00352 | 6  |
| AX-158198089 | 17 | 69.542 | KV452884.1 | 15800272 | 6-scf00352 | 6  |
| AX-157774677 | 17 | 69.542 | KV452884.1 | 15997543 | 6-scf00352 | 6  |
| AX-157837253 | 17 | 69.542 | KV452884.1 | 16026628 | 6-scf00352 | 6  |
| AX-158199336 | 17 | 69.542 | KV452886.1 | 719020   | 6-scf00354 | 6  |
| AX-158199331 | 17 | 69.542 | KV452886.1 | 729261   | 6-scf00354 | 6  |
| AX-158199267 | 17 | 69.542 | KV452886.1 | 845731   | 6-scf00354 | 6  |
| AX-158200064 | 17 | 69.542 | KV452887.1 | 1002983  | 6-scf00355 | 6  |
| AX-157837386 | 17 | 69.542 | KV452887.1 | 1118425  | 6-scf00355 | 6  |
| AX-157714625 | 17 | 69.542 | KV452887.1 | 1483565  | 6-scf00355 | 6  |
| AX-158200640 | 17 | 69.542 | KV452891.1 | 439685   | 6-scf00356 | 6  |
| AX-158200694 | 17 | 69.542 | KV452891.1 | 599721   | 6-scf00356 | 6  |
| AX-158200804 | 17 | 69.542 | KV452891.1 | 732173   | 6-scf00356 | 6  |
| AX-158201411 | 17 | 69.542 | KV452891.1 | 2295355  | 6-scf00356 | 6  |
| AX-158201425 | 17 | 69.542 | KV452891.1 | 2315082  | 6-scf00356 | 6  |

|              |    |        |            |          |            |    |
|--------------|----|--------|------------|----------|------------|----|
| AX-158201506 | 17 | 69.542 | KV452891.1 | 2415836  | 6-scf00356 | 6  |
| AX-158201549 | 17 | 69.542 | KV452891.1 | 2471088  | 6-scf00356 | 6  |
| AX-158201588 | 17 | 69.542 | KV452891.1 | 2530757  | 6-scf00356 | 6  |
| AX-158201783 | 17 | 69.542 | KV452891.1 | 2816691  | 6-scf00356 | 6  |
| AX-158378595 | 17 | 69.542 | KV453357.1 | 41844    | scf00578   | UN |
| AX-158200311 | 17 | 69.556 | KV452887.1 | 1491912  | 6-scf00355 | 6  |
| AX-158196657 | 17 | 69.57  | KV452884.1 | 12285138 | 6-scf00352 | 6  |
| AX-158197501 | 17 | 69.57  | KV452884.1 | 14820436 | 6-scf00352 | 6  |
| AX-158197642 | 17 | 69.57  | KV452884.1 | 15067204 | 6-scf00352 | 6  |
| AX-158197895 | 17 | 69.57  | KV452884.1 | 15408628 | 6-scf00352 | 6  |
| AX-158197921 | 17 | 69.57  | KV452884.1 | 15444845 | 6-scf00352 | 6  |
| AX-158198254 | 17 | 69.57  | KV452884.1 | 16013926 | 6-scf00352 | 6  |
| AX-158200227 | 17 | 69.57  | KV452887.1 | 1268804  | 6-scf00355 | 6  |
| AX-158200234 | 17 | 69.57  | KV452887.1 | 1277202  | 6-scf00355 | 6  |
| AX-158200237 | 17 | 69.57  | KV452887.1 | 1284126  | 6-scf00355 | 6  |
| AX-157837408 | 17 | 69.57  | KV452887.1 | 1470405  | 6-scf00355 | 6  |
| AX-158200313 | 17 | 69.57  | KV452887.1 | 1495877  | 6-scf00355 | 6  |
| AX-158200314 | 17 | 69.57  | KV452887.1 | 1497161  | 6-scf00355 | 6  |
| AX-158200315 | 17 | 69.57  | KV452887.1 | 1497876  | 6-scf00355 | 6  |
| AX-158200316 | 17 | 69.57  | KV452887.1 | 1500468  | 6-scf00355 | 6  |
| AX-158200319 | 17 | 69.57  | KV452887.1 | 1511290  | 6-scf00355 | 6  |
| AX-158200559 | 17 | 69.57  | KV452891.1 | 923      | 6-scf00356 | 6  |
| AX-158200561 | 17 | 69.57  | KV452891.1 | 48342    | 6-scf00356 | 6  |
| AX-158200565 | 17 | 69.57  | KV452891.1 | 81524    | 6-scf00356 | 6  |
| AX-158200567 | 17 | 69.57  | KV452891.1 | 85456    | 6-scf00356 | 6  |
| AX-158200569 | 17 | 69.57  | KV452891.1 | 95925    | 6-scf00356 | 6  |
| AX-158200570 | 17 | 69.57  | KV452891.1 | 97880    | 6-scf00356 | 6  |
| AX-158200577 | 17 | 69.57  | KV452891.1 | 131920   | 6-scf00356 | 6  |
| AX-158200578 | 17 | 69.57  | KV452891.1 | 142412   | 6-scf00356 | 6  |
| AX-158200580 | 17 | 69.57  | KV452891.1 | 147259   | 6-scf00356 | 6  |
| AX-158200581 | 17 | 69.57  | KV452891.1 | 155653   | 6-scf00356 | 6  |
| AX-158200583 | 17 | 69.57  | KV452891.1 | 163917   | 6-scf00356 | 6  |
| AX-158200584 | 17 | 69.57  | KV452891.1 | 167726   | 6-scf00356 | 6  |
| AX-158200587 | 17 | 69.57  | KV452891.1 | 196501   | 6-scf00356 | 6  |
| AX-158200589 | 17 | 69.57  | KV452891.1 | 254833   | 6-scf00356 | 6  |
| AX-158200590 | 17 | 69.57  | KV452891.1 | 261604   | 6-scf00356 | 6  |
| AX-158200592 | 17 | 69.57  | KV452891.1 | 276906   | 6-scf00356 | 6  |
| AX-158200593 | 17 | 69.57  | KV452891.1 | 279990   | 6-scf00356 | 6  |
| AX-157837427 | 17 | 69.57  | KV452891.1 | 417798   | 6-scf00356 | 6  |
| AX-158200633 | 17 | 69.57  | KV452891.1 | 434768   | 6-scf00356 | 6  |
| AX-157718040 | 17 | 69.57  | KV452891.1 | 435564   | 6-scf00356 | 6  |
| AX-158200637 | 17 | 69.57  | KV452891.1 | 438108   | 6-scf00356 | 6  |
| AX-158200638 | 17 | 69.57  | KV452891.1 | 438328   | 6-scf00356 | 6  |
| AX-158200645 | 17 | 69.57  | KV452891.1 | 443106   | 6-scf00356 | 6  |
| AX-158200647 | 17 | 69.57  | KV452891.1 | 444311   | 6-scf00356 | 6  |
| AX-158200651 | 17 | 69.57  | KV452891.1 | 459678   | 6-scf00356 | 6  |
| AX-158200663 | 17 | 69.57  | KV452891.1 | 484991   | 6-scf00356 | 6  |
| AX-158200818 | 17 | 69.57  | KV452891.1 | 755862   | 6-scf00356 | 6  |
| AX-158200940 | 17 | 69.57  | KV452891.1 | 922689   | 6-scf00356 | 6  |
| AX-158201321 | 17 | 69.57  | KV452891.1 | 2170033  | 6-scf00356 | 6  |
| AX-158201322 | 17 | 69.57  | KV452891.1 | 2171414  | 6-scf00356 | 6  |

|              |    |        |             |          |            |    |
|--------------|----|--------|-------------|----------|------------|----|
| AX-158201323 | 17 | 69.57  | KV452891.1  | 2171871  | 6-scf00356 | 6  |
| AX-158201326 | 17 | 69.57  | KV452891.1  | 2174858  | 6-scf00356 | 6  |
| AX-158201327 | 17 | 69.57  | KV452891.1  | 2175722  | 6-scf00356 | 6  |
| AX-157837497 | 17 | 69.57  | KV452891.1  | 2206036  | 6-scf00356 | 6  |
| AX-158201402 | 17 | 69.57  | KV452891.1  | 2271135  | 6-scf00356 | 6  |
| AX-157685267 | 17 | 69.57  | KV452890.1  | 82611    | 6-scf00606 | 6  |
| AX-157685268 | 17 | 69.57  | KV452890.1  | 91123    | 6-scf00606 | 6  |
| AX-157685275 | 17 | 69.57  | KV452890.1  | 155679   | 6-scf00606 | 6  |
| AX-157685276 | 17 | 69.57  | KV452890.1  | 166406   | 6-scf00606 | 6  |
| AX-157704954 | 17 | 69.57  | 3ML01028076 | 1042     | scf03681_1 | UN |
| AX-158200323 | 17 | 69.591 | KV452887.1  | 1532110  | 6-scf00355 | 6  |
| AX-158194175 | 17 | 69.64  | KV452884.1  | 8428975  | 6-scf00352 | 6  |
| AX-158194308 | 17 | 69.64  | KV452884.1  | 8649982  | 6-scf00352 | 6  |
| AX-158196439 | 17 | 69.64  | KV452884.1  | 11840436 | 6-scf00352 | 6  |
| AX-158197648 | 17 | 69.64  | KV452884.1  | 15078551 | 6-scf00352 | 6  |
| AX-158197988 | 17 | 69.64  | KV452884.1  | 15580993 | 6-scf00352 | 6  |
| AX-158198061 | 17 | 69.64  | KV452884.1  | 15730805 | 6-scf00352 | 6  |
| AX-158200155 | 17 | 69.64  | KV452887.1  | 1146252  | 6-scf00355 | 6  |
| AX-158200178 | 17 | 69.64  | KV452887.1  | 1178433  | 6-scf00355 | 6  |
| AX-158200198 | 17 | 69.64  | KV452887.1  | 1213136  | 6-scf00355 | 6  |
| AX-157837409 | 17 | 69.64  | KV452887.1  | 1471410  | 6-scf00355 | 6  |
| AX-157837410 | 17 | 69.64  | KV452887.1  | 1481171  | 6-scf00355 | 6  |
| AX-158200306 | 17 | 69.64  | KV452887.1  | 1483431  | 6-scf00355 | 6  |
| AX-158200307 | 17 | 69.64  | KV452887.1  | 1484351  | 6-scf00355 | 6  |
| AX-158200308 | 17 | 69.64  | KV452887.1  | 1489368  | 6-scf00355 | 6  |
| AX-158200325 | 17 | 69.64  | KV452887.1  | 1535536  | 6-scf00355 | 6  |
| AX-158200369 | 17 | 69.64  | KV452887.1  | 1607211  | 6-scf00355 | 6  |
| AX-158200370 | 17 | 69.64  | KV452887.1  | 1607846  | 6-scf00355 | 6  |
| AX-158200371 | 17 | 69.64  | KV452887.1  | 1608706  | 6-scf00355 | 6  |
| AX-158200372 | 17 | 69.64  | KV452887.1  | 1610237  | 6-scf00355 | 6  |
| AX-158200374 | 17 | 69.64  | KV452887.1  | 1614283  | 6-scf00355 | 6  |
| AX-158200377 | 17 | 69.64  | KV452887.1  | 1617875  | 6-scf00355 | 6  |
| AX-158200380 | 17 | 69.64  | KV452887.1  | 1622775  | 6-scf00355 | 6  |
| AX-158200381 | 17 | 69.64  | KV452887.1  | 1623157  | 6-scf00355 | 6  |
| AX-158200383 | 17 | 69.64  | KV452887.1  | 1630048  | 6-scf00355 | 6  |
| AX-157837415 | 17 | 69.64  | KV452887.1  | 1633924  | 6-scf00355 | 6  |
| AX-158200384 | 17 | 69.64  | KV452887.1  | 1636716  | 6-scf00355 | 6  |
| AX-158200385 | 17 | 69.64  | KV452887.1  | 1637257  | 6-scf00355 | 6  |
| AX-158200388 | 17 | 69.64  | KV452887.1  | 1638903  | 6-scf00355 | 6  |
| AX-158200394 | 17 | 69.64  | KV452887.1  | 1649564  | 6-scf00355 | 6  |
| AX-158200395 | 17 | 69.64  | KV452887.1  | 1649946  | 6-scf00355 | 6  |
| AX-158200406 | 17 | 69.64  | KV452887.1  | 1671078  | 6-scf00355 | 6  |
| AX-158200407 | 17 | 69.64  | KV452887.1  | 1674453  | 6-scf00355 | 6  |
| AX-158200415 | 17 | 69.64  | KV452887.1  | 1703846  | 6-scf00355 | 6  |
| AX-158200416 | 17 | 69.64  | KV452887.1  | 1706267  | 6-scf00355 | 6  |
| AX-158200427 | 17 | 69.64  | KV452887.1  | 1745621  | 6-scf00355 | 6  |
| AX-158200430 | 17 | 69.64  | KV452887.1  | 1751933  | 6-scf00355 | 6  |
| AX-158200432 | 17 | 69.64  | KV452887.1  | 1766152  | 6-scf00355 | 6  |
| AX-158200442 | 17 | 69.64  | KV452887.1  | 1803534  | 6-scf00355 | 6  |
| AX-158200445 | 17 | 69.64  | KV452887.1  | 1806678  | 6-scf00355 | 6  |
| AX-158200446 | 17 | 69.64  | KV452887.1  | 1808076  | 6-scf00355 | 6  |

|              |    |       |            |         |            |   |
|--------------|----|-------|------------|---------|------------|---|
| AX-158200447 | 17 | 69.64 | KV452887.1 | 1810068 | 6-scf00355 | 6 |
| AX-158200449 | 17 | 69.64 | KV452887.1 | 1813369 | 6-scf00355 | 6 |
| AX-158200450 | 17 | 69.64 | KV452887.1 | 1816515 | 6-scf00355 | 6 |
| AX-158200454 | 17 | 69.64 | KV452887.1 | 1836150 | 6-scf00355 | 6 |
| AX-158200463 | 17 | 69.64 | KV452887.1 | 1859407 | 6-scf00355 | 6 |
| AX-158200464 | 17 | 69.64 | KV452887.1 | 1873628 | 6-scf00355 | 6 |
| AX-158200465 | 17 | 69.64 | KV452887.1 | 1908489 | 6-scf00355 | 6 |
| AX-158200466 | 17 | 69.64 | KV452887.1 | 1911163 | 6-scf00355 | 6 |
| AX-158200467 | 17 | 69.64 | KV452887.1 | 1914607 | 6-scf00355 | 6 |
| AX-158200469 | 17 | 69.64 | KV452887.1 | 1947637 | 6-scf00355 | 6 |
| AX-158200473 | 17 | 69.64 | KV452887.1 | 1977155 | 6-scf00355 | 6 |
| AX-158200474 | 17 | 69.64 | KV452887.1 | 1992695 | 6-scf00355 | 6 |
| AX-158200476 | 17 | 69.64 | KV452887.1 | 1996296 | 6-scf00355 | 6 |
| AX-158200484 | 17 | 69.64 | KV452887.1 | 2065039 | 6-scf00355 | 6 |
| AX-158200486 | 17 | 69.64 | KV452887.1 | 2075101 | 6-scf00355 | 6 |
| AX-158200487 | 17 | 69.64 | KV452887.1 | 2075680 | 6-scf00355 | 6 |
| AX-158200488 | 17 | 69.64 | KV452887.1 | 2076726 | 6-scf00355 | 6 |
| AX-158200489 | 17 | 69.64 | KV452887.1 | 2092407 | 6-scf00355 | 6 |
| AX-158200494 | 17 | 69.64 | KV452887.1 | 2105267 | 6-scf00355 | 6 |
| AX-158200498 | 17 | 69.64 | KV452887.1 | 2115428 | 6-scf00355 | 6 |
| AX-158200499 | 17 | 69.64 | KV452887.1 | 2119895 | 6-scf00355 | 6 |
| AX-158200504 | 17 | 69.64 | KV452887.1 | 2135970 | 6-scf00355 | 6 |
| AX-158200508 | 17 | 69.64 | KV452887.1 | 2149554 | 6-scf00355 | 6 |
| AX-158200509 | 17 | 69.64 | KV452887.1 | 2154688 | 6-scf00355 | 6 |
| AX-158200514 | 17 | 69.64 | KV452887.1 | 2199189 | 6-scf00355 | 6 |
| AX-158200515 | 17 | 69.64 | KV452887.1 | 2201825 | 6-scf00355 | 6 |
| AX-158200521 | 17 | 69.64 | KV452887.1 | 2256100 | 6-scf00355 | 6 |
| AX-158200522 | 17 | 69.64 | KV452887.1 | 2257991 | 6-scf00355 | 6 |
| AX-158200523 | 17 | 69.64 | KV452887.1 | 2261828 | 6-scf00355 | 6 |
| AX-158200551 | 17 | 69.64 | KV452887.1 | 2499889 | 6-scf00355 | 6 |
| AX-158201985 | 17 | 69.64 | KV452887.1 | 2621615 | 6-scf00355 | 6 |
| AX-157750367 | 17 | 69.64 | KV452887.1 | 2652553 | 6-scf00355 | 6 |
| AX-158201978 | 17 | 69.64 | KV452887.1 | 2677227 | 6-scf00355 | 6 |
| AX-158201971 | 17 | 69.64 | KV452887.1 | 2757891 | 6-scf00355 | 6 |
| AX-158201969 | 17 | 69.64 | KV452887.1 | 2793712 | 6-scf00355 | 6 |
| AX-158201967 | 17 | 69.64 | KV452887.1 | 2806495 | 6-scf00355 | 6 |
| AX-158201951 | 17 | 69.64 | KV452887.1 | 2944213 | 6-scf00355 | 6 |
| AX-158201946 | 17 | 69.64 | KV452887.1 | 2965050 | 6-scf00355 | 6 |
| AX-158201944 | 17 | 69.64 | KV452887.1 | 2972515 | 6-scf00355 | 6 |
| AX-158201941 | 17 | 69.64 | KV452887.1 | 3024626 | 6-scf00355 | 6 |
| AX-158201936 | 17 | 69.64 | KV452887.1 | 3057003 | 6-scf00355 | 6 |
| AX-158201930 | 17 | 69.64 | KV452887.1 | 3115976 | 6-scf00355 | 6 |
| AX-158201926 | 17 | 69.64 | KV452887.1 | 3161721 | 6-scf00355 | 6 |
| AX-158201923 | 17 | 69.64 | KV452887.1 | 3180062 | 6-scf00355 | 6 |
| AX-157747867 | 17 | 69.64 | KV452887.1 | 3203283 | 6-scf00355 | 6 |
| AX-158201913 | 17 | 69.64 | KV452887.1 | 3303584 | 6-scf00355 | 6 |
| AX-158201908 | 17 | 69.64 | KV452887.1 | 3335191 | 6-scf00355 | 6 |
| AX-158201901 | 17 | 69.64 | KV452887.1 | 3417198 | 6-scf00355 | 6 |
| AX-158201898 | 17 | 69.64 | KV452887.1 | 3434936 | 6-scf00355 | 6 |
| AX-158200572 | 17 | 69.64 | KV452891.1 | 99756   | 6-scf00356 | 6 |
| AX-158200582 | 17 | 69.64 | KV452891.1 | 163437  | 6-scf00356 | 6 |

|              |    |       |            |         |            |   |
|--------------|----|-------|------------|---------|------------|---|
| AX-158200609 | 17 | 69.64 | KV452891.1 | 347030  | 6-scf00356 | 6 |
| AX-158200612 | 17 | 69.64 | KV452891.1 | 359070  | 6-scf00356 | 6 |
| AX-158200614 | 17 | 69.64 | KV452891.1 | 363454  | 6-scf00356 | 6 |
| AX-157837426 | 17 | 69.64 | KV452891.1 | 417585  | 6-scf00356 | 6 |
| AX-158200629 | 17 | 69.64 | KV452891.1 | 425159  | 6-scf00356 | 6 |
| AX-158200631 | 17 | 69.64 | KV452891.1 | 431542  | 6-scf00356 | 6 |
| AX-158200634 | 17 | 69.64 | KV452891.1 | 435940  | 6-scf00356 | 6 |
| AX-158200639 | 17 | 69.64 | KV452891.1 | 439283  | 6-scf00356 | 6 |
| AX-158200659 | 17 | 69.64 | KV452891.1 | 476570  | 6-scf00356 | 6 |
| AX-158200666 | 17 | 69.64 | KV452891.1 | 492284  | 6-scf00356 | 6 |
| AX-158200668 | 17 | 69.64 | KV452891.1 | 510078  | 6-scf00356 | 6 |
| AX-158200675 | 17 | 69.64 | KV452891.1 | 534106  | 6-scf00356 | 6 |
| AX-158200679 | 17 | 69.64 | KV452891.1 | 557433  | 6-scf00356 | 6 |
| AX-158200682 | 17 | 69.64 | KV452891.1 | 578874  | 6-scf00356 | 6 |
| AX-158200684 | 17 | 69.64 | KV452891.1 | 584175  | 6-scf00356 | 6 |
| AX-158200695 | 17 | 69.64 | KV452891.1 | 599855  | 6-scf00356 | 6 |
| AX-158200702 | 17 | 69.64 | KV452891.1 | 608335  | 6-scf00356 | 6 |
| AX-158200710 | 17 | 69.64 | KV452891.1 | 618867  | 6-scf00356 | 6 |
| AX-158200726 | 17 | 69.64 | KV452891.1 | 640985  | 6-scf00356 | 6 |
| AX-158200742 | 17 | 69.64 | KV452891.1 | 659743  | 6-scf00356 | 6 |
| AX-158200755 | 17 | 69.64 | KV452891.1 | 676921  | 6-scf00356 | 6 |
| AX-158200758 | 17 | 69.64 | KV452891.1 | 682629  | 6-scf00356 | 6 |
| AX-158200792 | 17 | 69.64 | KV452891.1 | 723191  | 6-scf00356 | 6 |
| AX-158200801 | 17 | 69.64 | KV452891.1 | 730780  | 6-scf00356 | 6 |
| AX-158200805 | 17 | 69.64 | KV452891.1 | 733626  | 6-scf00356 | 6 |
| AX-157837440 | 17 | 69.64 | KV452891.1 | 773859  | 6-scf00356 | 6 |
| AX-157739879 | 17 | 69.64 | KV452891.1 | 776613  | 6-scf00356 | 6 |
| AX-158200826 | 17 | 69.64 | KV452891.1 | 777008  | 6-scf00356 | 6 |
| AX-157746267 | 17 | 69.64 | KV452891.1 | 778907  | 6-scf00356 | 6 |
| AX-158200829 | 17 | 69.64 | KV452891.1 | 781191  | 6-scf00356 | 6 |
| AX-158200841 | 17 | 69.64 | KV452891.1 | 795980  | 6-scf00356 | 6 |
| AX-158200843 | 17 | 69.64 | KV452891.1 | 797373  | 6-scf00356 | 6 |
| AX-158200847 | 17 | 69.64 | KV452891.1 | 802530  | 6-scf00356 | 6 |
| AX-158200848 | 17 | 69.64 | KV452891.1 | 805021  | 6-scf00356 | 6 |
| AX-158200874 | 17 | 69.64 | KV452891.1 | 838469  | 6-scf00356 | 6 |
| AX-158200900 | 17 | 69.64 | KV452891.1 | 866174  | 6-scf00356 | 6 |
| AX-158200901 | 17 | 69.64 | KV452891.1 | 867189  | 6-scf00356 | 6 |
| AX-158200921 | 17 | 69.64 | KV452891.1 | 891084  | 6-scf00356 | 6 |
| AX-158200929 | 17 | 69.64 | KV452891.1 | 904848  | 6-scf00356 | 6 |
| AX-158200931 | 17 | 69.64 | KV452891.1 | 907161  | 6-scf00356 | 6 |
| AX-158200937 | 17 | 69.64 | KV452891.1 | 915525  | 6-scf00356 | 6 |
| AX-158200961 | 17 | 69.64 | KV452891.1 | 963600  | 6-scf00356 | 6 |
| AX-157879241 | 17 | 69.64 | KV452891.1 | 969232  | 6-scf00356 | 6 |
| AX-157754958 | 17 | 69.64 | KV452891.1 | 1041116 | 6-scf00356 | 6 |
| AX-158201011 | 17 | 69.64 | KV452891.1 | 1082797 | 6-scf00356 | 6 |
| AX-158201017 | 17 | 69.64 | KV452891.1 | 1090259 | 6-scf00356 | 6 |
| AX-157837458 | 17 | 69.64 | KV452891.1 | 1277503 | 6-scf00356 | 6 |
| AX-158201034 | 17 | 69.64 | KV452891.1 | 1295390 | 6-scf00356 | 6 |
| AX-158201036 | 17 | 69.64 | KV452891.1 | 1324067 | 6-scf00356 | 6 |
| AX-158201042 | 17 | 69.64 | KV452891.1 | 1404908 | 6-scf00356 | 6 |
| AX-158201045 | 17 | 69.64 | KV452891.1 | 1452446 | 6-scf00356 | 6 |



|              |    |       |            |         |            |   |
|--------------|----|-------|------------|---------|------------|---|
| AX-158201055 | 17 | 69.64 | KV452891.1 | 1523996 | 6-scf00356 | 6 |
| AX-158201056 | 17 | 69.64 | KV452891.1 | 1528222 | 6-scf00356 | 6 |
| AX-158201149 | 17 | 69.64 | KV452891.1 | 1755728 | 6-scf00356 | 6 |
| AX-157858988 | 17 | 69.64 | KV452891.1 | 1757490 | 6-scf00356 | 6 |
| AX-158201158 | 17 | 69.64 | KV452891.1 | 1775620 | 6-scf00356 | 6 |
| AX-158201181 | 17 | 69.64 | KV452891.1 | 1840226 | 6-scf00356 | 6 |
| AX-157746514 | 17 | 69.64 | KV452891.1 | 1841868 | 6-scf00356 | 6 |
| AX-157837480 | 17 | 69.64 | KV452891.1 | 1848464 | 6-scf00356 | 6 |
| AX-158414252 | 17 | 69.64 | KV452891.1 | 1848736 | 6-scf00356 | 6 |
| AX-158201185 | 17 | 69.64 | KV452891.1 | 1851066 | 6-scf00356 | 6 |
| AX-158201186 | 17 | 69.64 | KV452891.1 | 1853842 | 6-scf00356 | 6 |
| AX-158201189 | 17 | 69.64 | KV452891.1 | 1859877 | 6-scf00356 | 6 |
| AX-158414253 | 17 | 69.64 | KV452891.1 | 1889396 | 6-scf00356 | 6 |
| AX-158201215 | 17 | 69.64 | KV452891.1 | 1907471 | 6-scf00356 | 6 |
| AX-157837485 | 17 | 69.64 | KV452891.1 | 1987949 | 6-scf00356 | 6 |
| AX-158201233 | 17 | 69.64 | KV452891.1 | 1994699 | 6-scf00356 | 6 |
| AX-157837486 | 17 | 69.64 | KV452891.1 | 1999820 | 6-scf00356 | 6 |
| AX-157773724 | 17 | 69.64 | KV452891.1 | 2020750 | 6-scf00356 | 6 |
| AX-158201244 | 17 | 69.64 | KV452891.1 | 2022726 | 6-scf00356 | 6 |
| AX-158201246 | 17 | 69.64 | KV452891.1 | 2024715 | 6-scf00356 | 6 |
| AX-158201248 | 17 | 69.64 | KV452891.1 | 2026562 | 6-scf00356 | 6 |
| AX-158201250 | 17 | 69.64 | KV452891.1 | 2028513 | 6-scf00356 | 6 |
| AX-158201251 | 17 | 69.64 | KV452891.1 | 2030031 | 6-scf00356 | 6 |
| AX-158201253 | 17 | 69.64 | KV452891.1 | 2031780 | 6-scf00356 | 6 |
| AX-157740183 | 17 | 69.64 | KV452891.1 | 2033371 | 6-scf00356 | 6 |
| AX-157753131 | 17 | 69.64 | KV452891.1 | 2052690 | 6-scf00356 | 6 |
| AX-158201269 | 17 | 69.64 | KV452891.1 | 2079936 | 6-scf00356 | 6 |
| AX-157771639 | 17 | 69.64 | KV452891.1 | 2090008 | 6-scf00356 | 6 |
| AX-158201271 | 17 | 69.64 | KV452891.1 | 2091969 | 6-scf00356 | 6 |
| AX-157774591 | 17 | 69.64 | KV452891.1 | 2096021 | 6-scf00356 | 6 |
| AX-158201276 | 17 | 69.64 | KV452891.1 | 2097834 | 6-scf00356 | 6 |
| AX-158201278 | 17 | 69.64 | KV452891.1 | 2100283 | 6-scf00356 | 6 |
| AX-158201287 | 17 | 69.64 | KV452891.1 | 2122257 | 6-scf00356 | 6 |
| AX-158201293 | 17 | 69.64 | KV452891.1 | 2130400 | 6-scf00356 | 6 |
| AX-158201294 | 17 | 69.64 | KV452891.1 | 2131106 | 6-scf00356 | 6 |
| AX-158201313 | 17 | 69.64 | KV452891.1 | 2158507 | 6-scf00356 | 6 |
| AX-158201330 | 17 | 69.64 | KV452891.1 | 2179686 | 6-scf00356 | 6 |
| AX-157727169 | 17 | 69.64 | KV452891.1 | 2189044 | 6-scf00356 | 6 |
| AX-158201352 | 17 | 69.64 | KV452891.1 | 2212157 | 6-scf00356 | 6 |
| AX-158414259 | 17 | 69.64 | KV452891.1 | 2227047 | 6-scf00356 | 6 |
| AX-158201381 | 17 | 69.64 | KV452891.1 | 2246330 | 6-scf00356 | 6 |
| AX-158201384 | 17 | 69.64 | KV452891.1 | 2248404 | 6-scf00356 | 6 |
| AX-158201386 | 17 | 69.64 | KV452891.1 | 2249725 | 6-scf00356 | 6 |
| AX-158201511 | 17 | 69.64 | KV452891.1 | 2419292 | 6-scf00356 | 6 |
| AX-158201784 | 17 | 69.64 | KV452891.1 | 2817234 | 6-scf00356 | 6 |
| AX-157720944 | 17 | 69.64 | KV452891.1 | 2943430 | 6-scf00356 | 6 |
| AX-158201988 | 17 | 69.64 | KV452888.1 | 7337    | 6-scf00358 | 6 |
| AX-158201990 | 17 | 69.64 | KV452888.1 | 16357   | 6-scf00358 | 6 |
| AX-158201996 | 17 | 69.64 | KV452888.1 | 38536   | 6-scf00358 | 6 |
| AX-158201997 | 17 | 69.64 | KV452888.1 | 39417   | 6-scf00358 | 6 |
| AX-158202001 | 17 | 69.64 | KV452888.1 | 118493  | 6-scf00358 | 6 |

|              |    |       |            |        |            |   |
|--------------|----|-------|------------|--------|------------|---|
| AX-158202003 | 17 | 69.64 | KV452888.1 | 124819 | 6-scf00358 | 6 |
| AX-158202004 | 17 | 69.64 | KV452888.1 | 127390 | 6-scf00358 | 6 |
| AX-158202008 | 17 | 69.64 | KV452888.1 | 182221 | 6-scf00358 | 6 |
| AX-158202015 | 17 | 69.64 | KV452888.1 | 210334 | 6-scf00358 | 6 |
| AX-158202022 | 17 | 69.64 | KV452888.1 | 268669 | 6-scf00358 | 6 |
| AX-158202025 | 17 | 69.64 | KV452888.1 | 286629 | 6-scf00358 | 6 |
| AX-158202030 | 17 | 69.64 | KV452888.1 | 306332 | 6-scf00358 | 6 |
| AX-158202033 | 17 | 69.64 | KV452888.1 | 345002 | 6-scf00358 | 6 |
| AX-157837529 | 17 | 69.64 | KV452888.1 | 433173 | 6-scf00358 | 6 |
| AX-158202046 | 17 | 69.64 | KV452888.1 | 443194 | 6-scf00358 | 6 |
| AX-158202048 | 17 | 69.64 | KV452888.1 | 445809 | 6-scf00358 | 6 |
| AX-158202049 | 17 | 69.64 | KV452888.1 | 448561 | 6-scf00358 | 6 |
| AX-158202052 | 17 | 69.64 | KV452888.1 | 452046 | 6-scf00358 | 6 |
| AX-158202056 | 17 | 69.64 | KV452888.1 | 468144 | 6-scf00358 | 6 |
| AX-158202058 | 17 | 69.64 | KV452889.1 | 21270  | 6-scf00359 | 6 |
| AX-158202060 | 17 | 69.64 | KV452889.1 | 37066  | 6-scf00359 | 6 |
| AX-158202062 | 17 | 69.64 | KV452889.1 | 39782  | 6-scf00359 | 6 |
| AX-158202067 | 17 | 69.64 | KV452889.1 | 46748  | 6-scf00359 | 6 |
| AX-158202072 | 17 | 69.64 | KV452889.1 | 79399  | 6-scf00359 | 6 |
| AX-158202074 | 17 | 69.64 | KV452889.1 | 113989 | 6-scf00359 | 6 |
| AX-157717624 | 17 | 69.64 | KV452889.1 | 120007 | 6-scf00359 | 6 |
| AX-158202076 | 17 | 69.64 | KV452889.1 | 137140 | 6-scf00359 | 6 |
| AX-158202083 | 17 | 69.64 | KV452889.1 | 188765 | 6-scf00359 | 6 |
| AX-158202086 | 17 | 69.64 | KV452889.1 | 214879 | 6-scf00359 | 6 |
| AX-158202087 | 17 | 69.64 | KV452889.1 | 221744 | 6-scf00359 | 6 |
| AX-158202088 | 17 | 69.64 | KV452889.1 | 223430 | 6-scf00359 | 6 |
| AX-158202089 | 17 | 69.64 | KV452889.1 | 224669 | 6-scf00359 | 6 |
| AX-158202090 | 17 | 69.64 | KV452889.1 | 225170 | 6-scf00359 | 6 |
| AX-158202091 | 17 | 69.64 | KV452889.1 | 225695 | 6-scf00359 | 6 |
| AX-158202092 | 17 | 69.64 | KV452889.1 | 226269 | 6-scf00359 | 6 |
| AX-158202093 | 17 | 69.64 | KV452889.1 | 230747 | 6-scf00359 | 6 |
| AX-158202094 | 17 | 69.64 | KV452889.1 | 231432 | 6-scf00359 | 6 |
| AX-157837532 | 17 | 69.64 | KV452889.1 | 233059 | 6-scf00359 | 6 |
| AX-158202095 | 17 | 69.64 | KV452889.1 | 234004 | 6-scf00359 | 6 |
| AX-157837533 | 17 | 69.64 | KV452889.1 | 235353 | 6-scf00359 | 6 |
| AX-158202096 | 17 | 69.64 | KV452889.1 | 236945 | 6-scf00359 | 6 |
| AX-158202097 | 17 | 69.64 | KV452889.1 | 237406 | 6-scf00359 | 6 |
| AX-158202098 | 17 | 69.64 | KV452889.1 | 239236 | 6-scf00359 | 6 |
| AX-158202099 | 17 | 69.64 | KV452889.1 | 241198 | 6-scf00359 | 6 |
| AX-158202100 | 17 | 69.64 | KV452889.1 | 242021 | 6-scf00359 | 6 |
| AX-158202101 | 17 | 69.64 | KV452889.1 | 245219 | 6-scf00359 | 6 |
| AX-158202102 | 17 | 69.64 | KV452889.1 | 253386 | 6-scf00359 | 6 |
| AX-157715575 | 17 | 69.64 | KV452889.1 | 254400 | 6-scf00359 | 6 |
| AX-157837534 | 17 | 69.64 | KV452889.1 | 261267 | 6-scf00359 | 6 |
| AX-158202103 | 17 | 69.64 | KV452889.1 | 262888 | 6-scf00359 | 6 |
| AX-158202104 | 17 | 69.64 | KV452889.1 | 268387 | 6-scf00359 | 6 |
| AX-158202105 | 17 | 69.64 | KV452889.1 | 275640 | 6-scf00359 | 6 |
| AX-158202106 | 17 | 69.64 | KV452889.1 | 275935 | 6-scf00359 | 6 |
| AX-157714051 | 17 | 69.64 | KV452889.1 | 279279 | 6-scf00359 | 6 |
| AX-158202107 | 17 | 69.64 | KV452889.1 | 280351 | 6-scf00359 | 6 |
| AX-158202108 | 17 | 69.64 | KV452889.1 | 285423 | 6-scf00359 | 6 |

|              |    |        |            |          |            |    |
|--------------|----|--------|------------|----------|------------|----|
| AX-158202109 | 17 | 69.64  | KV452889.1 | 285819   | 6-scf00359 | 6  |
| AX-158202110 | 17 | 69.64  | KV452889.1 | 286259   | 6-scf00359 | 6  |
| AX-158202111 | 17 | 69.64  | KV452889.1 | 304045   | 6-scf00359 | 6  |
| AX-158202115 | 17 | 69.64  | KV452889.1 | 335319   | 6-scf00359 | 6  |
| AX-158202116 | 17 | 69.64  | KV452889.1 | 340587   | 6-scf00359 | 6  |
| AX-158202120 | 17 | 69.64  | KV452889.1 | 407381   | 6-scf00359 | 6  |
| AX-158202124 | 17 | 69.64  | KV452889.1 | 464304   | 6-scf00359 | 6  |
| AX-157685144 | 17 | 69.64  | KV452889.1 | 494327   | 6-scf00359 | 6  |
| AX-157685147 | 17 | 69.64  | KV452889.1 | 514015   | 6-scf00359 | 6  |
| AX-157685148 | 17 | 69.64  | KV452889.1 | 534308   | 6-scf00359 | 6  |
| AX-157685158 | 17 | 69.64  | KV452889.1 | 717597   | 6-scf00359 | 6  |
| AX-158378620 | 17 | 69.64  | KV453357.1 | 70416    | scf00578   | UN |
| AX-158378430 | 17 | 69.64  | KV453357.1 | 198803   | scf00578   | UN |
| AX-157685222 | 17 | 69.64  | KV453363.1 | 49670    | scf00599   | UN |
| AX-157686108 | 17 | 69.64  | KV453372.1 | 127728   | scf00638   | UN |
| AX-158196131 | 17 | 69.749 | KV452884.1 | 11335129 | 6-scf00352 | 6  |
| AX-158200276 | 17 | 69.749 | KV452887.1 | 1346079  | 6-scf00355 | 6  |
| AX-157718112 | 17 | 69.749 | KV452887.1 | 1501889  | 6-scf00355 | 6  |
| AX-158200716 | 17 | 69.749 | KV452891.1 | 625191   | 6-scf00356 | 6  |
| AX-158200771 | 17 | 69.749 | KV452891.1 | 693767   | 6-scf00356 | 6  |
| AX-158200795 | 17 | 69.749 | KV452891.1 | 725395   | 6-scf00356 | 6  |
| AX-158393809 | 17 | 69.749 | KV452891.1 | 863408   | 6-scf00356 | 6  |
| AX-158200898 | 17 | 69.749 | KV452891.1 | 864513   | 6-scf00356 | 6  |
| AX-158386223 | 17 | 69.749 | KV452891.1 | 1127129  | 6-scf00356 | 6  |
| AX-158201046 | 17 | 69.749 | KV452891.1 | 1483072  | 6-scf00356 | 6  |
| AX-158201050 | 17 | 69.749 | KV452891.1 | 1506382  | 6-scf00356 | 6  |
| AX-158201098 | 17 | 69.749 | KV452891.1 | 1654691  | 6-scf00356 | 6  |
| AX-157727133 | 17 | 69.749 | KV452891.1 | 1661492  | 6-scf00356 | 6  |
| AX-158201106 | 17 | 69.749 | KV452891.1 | 1670261  | 6-scf00356 | 6  |
| AX-157837479 | 17 | 69.749 | KV452891.1 | 1841485  | 6-scf00356 | 6  |
| AX-158201184 | 17 | 69.749 | KV452891.1 | 1850611  | 6-scf00356 | 6  |
| AX-157726739 | 17 | 69.749 | KV452891.1 | 1851929  | 6-scf00356 | 6  |
| AX-158201191 | 17 | 69.749 | KV452891.1 | 1864577  | 6-scf00356 | 6  |
| AX-158201272 | 17 | 69.749 | KV452891.1 | 2093634  | 6-scf00356 | 6  |
| AX-157724756 | 17 | 69.749 | KV452891.1 | 2121845  | 6-scf00356 | 6  |
| AX-158201305 | 17 | 69.749 | KV452891.1 | 2149598  | 6-scf00356 | 6  |
| AX-158201318 | 17 | 69.749 | KV452891.1 | 2164924  | 6-scf00356 | 6  |
| AX-158201324 | 17 | 69.749 | KV452891.1 | 2172039  | 6-scf00356 | 6  |
| AX-158201329 | 17 | 69.749 | KV452891.1 | 2177698  | 6-scf00356 | 6  |
| AX-158201332 | 17 | 69.749 | KV452891.1 | 2184647  | 6-scf00356 | 6  |
| AX-157757569 | 17 | 69.749 | KV452891.1 | 2187199  | 6-scf00356 | 6  |
| AX-158201336 | 17 | 69.749 | KV452891.1 | 2188659  | 6-scf00356 | 6  |
| AX-158201339 | 17 | 69.749 | KV452891.1 | 2195310  | 6-scf00356 | 6  |
| AX-158201341 | 17 | 69.749 | KV452891.1 | 2198783  | 6-scf00356 | 6  |
| AX-157837496 | 17 | 69.749 | KV452891.1 | 2204431  | 6-scf00356 | 6  |
| AX-158201346 | 17 | 69.749 | KV452891.1 | 2205166  | 6-scf00356 | 6  |
| AX-157837498 | 17 | 69.749 | KV452891.1 | 2206887  | 6-scf00356 | 6  |
| AX-157837499 | 17 | 69.749 | KV452891.1 | 2207032  | 6-scf00356 | 6  |
| AX-158201347 | 17 | 69.749 | KV452891.1 | 2207237  | 6-scf00356 | 6  |
| AX-158201349 | 17 | 69.749 | KV452891.1 | 2210180  | 6-scf00356 | 6  |
| AX-158201350 | 17 | 69.749 | KV452891.1 | 2210683  | 6-scf00356 | 6  |

|              |    |        |             |         |            |    |
|--------------|----|--------|-------------|---------|------------|----|
| AX-158201365 | 17 | 69.749 | KV452891.1  | 2220551 | 6-scf00356 | 6  |
| AX-158201369 | 17 | 69.749 | KV452891.1  | 2225697 | 6-scf00356 | 6  |
| AX-158201484 | 17 | 69.749 | KV452891.1  | 2386695 | 6-scf00356 | 6  |
| AX-157837526 | 17 | 69.749 | KV452888.1  | 417853  | 6-scf00358 | 6  |
| AX-157837528 | 17 | 69.749 | KV452888.1  | 423222  | 6-scf00358 | 6  |
| AX-158202040 | 17 | 69.749 | KV452888.1  | 430209  | 6-scf00358 | 6  |
| AX-158202041 | 17 | 69.749 | KV452888.1  | 431609  | 6-scf00358 | 6  |
| AX-158202045 | 17 | 69.749 | KV452888.1  | 441946  | 6-scf00358 | 6  |
| AX-158202050 | 17 | 69.749 | KV452888.1  | 448777  | 6-scf00358 | 6  |
| AX-158202051 | 17 | 69.749 | KV452888.1  | 450033  | 6-scf00358 | 6  |
| AX-157706826 | 17 | 69.749 | 3ML01032987 | 161     | scf08620_1 | UN |
| AX-158194382 | 17 | 69.858 | KV452884.1  | 8772251 | 6-scf00352 | 6  |
| AX-157837323 | 17 | 69.858 | KV452886.1  | 1177460 | 6-scf00354 | 6  |
| AX-158199051 | 17 | 69.858 | KV452886.1  | 1178178 | 6-scf00354 | 6  |
| AX-158199050 | 17 | 69.858 | KV452886.1  | 1181477 | 6-scf00354 | 6  |
| AX-158199831 | 17 | 69.858 | KV452887.1  | 645201  | 6-scf00355 | 6  |
| AX-158199833 | 17 | 69.858 | KV452887.1  | 649489  | 6-scf00355 | 6  |
| AX-158199838 | 17 | 69.858 | KV452887.1  | 665054  | 6-scf00355 | 6  |
| AX-158199839 | 17 | 69.858 | KV452887.1  | 665277  | 6-scf00355 | 6  |
| AX-158199936 | 17 | 69.858 | KV452887.1  | 817866  | 6-scf00355 | 6  |
| AX-158200030 | 17 | 69.858 | KV452887.1  | 963759  | 6-scf00355 | 6  |
| AX-158200042 | 17 | 69.858 | KV452887.1  | 975330  | 6-scf00355 | 6  |
| AX-157722390 | 17 | 69.858 | KV452887.1  | 1494843 | 6-scf00355 | 6  |
| AX-158200405 | 17 | 69.858 | KV452887.1  | 1669843 | 6-scf00355 | 6  |
| AX-158201243 | 17 | 69.858 | KV452891.1  | 2019513 | 6-scf00356 | 6  |
| AX-158201255 | 17 | 69.858 | KV452891.1  | 2039903 | 6-scf00356 | 6  |
| AX-157709306 | 17 | 69.858 | KV452891.1  | 2040065 | 6-scf00356 | 6  |
| AX-158201342 | 17 | 69.858 | KV452891.1  | 2201243 | 6-scf00356 | 6  |
| AX-158201348 | 17 | 69.858 | KV452891.1  | 2209417 | 6-scf00356 | 6  |
| AX-158201361 | 17 | 69.858 | KV452891.1  | 2217253 | 6-scf00356 | 6  |
| AX-158201367 | 17 | 69.858 | KV452891.1  | 2222993 | 6-scf00356 | 6  |
| AX-158201373 | 17 | 69.858 | KV452891.1  | 2234968 | 6-scf00356 | 6  |
| AX-158201375 | 17 | 69.858 | KV452891.1  | 2235968 | 6-scf00356 | 6  |
| AX-158201377 | 17 | 69.858 | KV452891.1  | 2236837 | 6-scf00356 | 6  |
| AX-158201396 | 17 | 69.858 | KV452891.1  | 2264187 | 6-scf00356 | 6  |
| AX-158201397 | 17 | 69.858 | KV452891.1  | 2265074 | 6-scf00356 | 6  |
| AX-158201401 | 17 | 69.858 | KV452891.1  | 2270729 | 6-scf00356 | 6  |
| AX-158201403 | 17 | 69.858 | KV452891.1  | 2273042 | 6-scf00356 | 6  |
| AX-158201407 | 17 | 69.858 | KV452891.1  | 2281441 | 6-scf00356 | 6  |
| AX-158201408 | 17 | 69.858 | KV452891.1  | 2281939 | 6-scf00356 | 6  |
| AX-157837500 | 17 | 69.858 | KV452891.1  | 2286856 | 6-scf00356 | 6  |
| AX-157716195 | 17 | 69.858 | KV452891.1  | 2287478 | 6-scf00356 | 6  |
| AX-157773681 | 17 | 69.858 | KV452891.1  | 2288257 | 6-scf00356 | 6  |
| AX-158201412 | 17 | 69.858 | KV452891.1  | 2295728 | 6-scf00356 | 6  |
| AX-157758722 | 17 | 69.858 | KV452891.1  | 2344431 | 6-scf00356 | 6  |
| AX-158201460 | 17 | 69.858 | KV452891.1  | 2356571 | 6-scf00356 | 6  |
| AX-158201463 | 17 | 69.858 | KV452891.1  | 2361920 | 6-scf00356 | 6  |
| AX-158201466 | 17 | 69.858 | KV452891.1  | 2368130 | 6-scf00356 | 6  |
| AX-158201474 | 17 | 69.858 | KV452891.1  | 2376344 | 6-scf00356 | 6  |
| AX-157706186 | 17 | 69.858 | 3ML01031784 | 282     | scf07405_1 | UN |
| AX-157704955 | 17 | 69.884 | 3ML01028076 | 617     | scf03681_1 | UN |

|              |    |        |             |         |            |    |
|--------------|----|--------|-------------|---------|------------|----|
| AX-158201419 | 17 | 69.918 | KV452891.1  | 2308564 | 6-scf00356 | 6  |
| AX-157748788 | 17 | 69.942 | KV452891.1  | 2323214 | 6-scf00356 | 6  |
| AX-158200229 | 17 | 69.967 | KV452887.1  | 1272897 | 6-scf00355 | 6  |
| AX-158200263 | 17 | 69.967 | KV452887.1  | 1320933 | 6-scf00355 | 6  |
| AX-158201368 | 17 | 69.967 | KV452891.1  | 2224768 | 6-scf00356 | 6  |
| AX-158201372 | 17 | 69.967 | KV452891.1  | 2233020 | 6-scf00356 | 6  |
| AX-157721963 | 17 | 69.967 | KV452891.1  | 2266109 | 6-scf00356 | 6  |
| AX-158201429 | 17 | 69.967 | KV452891.1  | 2317769 | 6-scf00356 | 6  |
| AX-157887022 | 17 | 69.967 | KV452891.1  | 2320028 | 6-scf00356 | 6  |
| AX-158201434 | 17 | 69.967 | KV452891.1  | 2322840 | 6-scf00356 | 6  |
| AX-158414261 | 17 | 69.967 | KV452891.1  | 2327072 | 6-scf00356 | 6  |
| AX-158201443 | 17 | 69.967 | KV452891.1  | 2334198 | 6-scf00356 | 6  |
| AX-158201444 | 17 | 69.967 | KV452891.1  | 2335515 | 6-scf00356 | 6  |
| AX-158201450 | 17 | 69.967 | KV452891.1  | 2344284 | 6-scf00356 | 6  |
| AX-158201452 | 17 | 69.967 | KV452891.1  | 2347726 | 6-scf00356 | 6  |
| AX-158201455 | 17 | 69.967 | KV452891.1  | 2350804 | 6-scf00356 | 6  |
| AX-158201461 | 17 | 69.967 | KV452891.1  | 2357706 | 6-scf00356 | 6  |
| AX-157746819 | 17 | 69.967 | KV452891.1  | 2360978 | 6-scf00356 | 6  |
| AX-158201464 | 17 | 69.967 | KV452891.1  | 2365658 | 6-scf00356 | 6  |
| AX-158201468 | 17 | 69.967 | KV452891.1  | 2370208 | 6-scf00356 | 6  |
| AX-157718925 | 17 | 69.967 | KV452891.1  | 2373760 | 6-scf00356 | 6  |
| AX-158201477 | 17 | 69.967 | KV452891.1  | 2380234 | 6-scf00356 | 6  |
| AX-158201478 | 17 | 69.967 | KV452891.1  | 2380640 | 6-scf00356 | 6  |
| AX-158201481 | 17 | 69.967 | KV452891.1  | 2384460 | 6-scf00356 | 6  |
| AX-158201304 | 17 | 70.134 | KV452891.1  | 2148265 | 6-scf00356 | 6  |
| AX-158201482 | 17 | 70.134 | KV452891.1  | 2385317 | 6-scf00356 | 6  |
| AX-157742540 | 17 | 70.134 | KV452891.1  | 2471743 | 6-scf00356 | 6  |
| AX-157706483 | 17 | 70.134 | 3ML01032316 | 488     | scf07932_1 | UN |
| AX-158201487 | 17 | 70.296 | KV452891.1  | 2394129 | 6-scf00356 | 6  |
| AX-157683898 | 17 | 70.478 | KV452886.1  | 1292509 | 6-scf00354 | 6  |
| AX-158201490 | 17 | 70.478 | KV452891.1  | 2396767 | 6-scf00356 | 6  |
| AX-157756155 | 17 | 70.478 | KV452891.1  | 2398528 | 6-scf00356 | 6  |
| AX-158201492 | 17 | 70.478 | KV452891.1  | 2400917 | 6-scf00356 | 6  |
| AX-158201494 | 17 | 70.478 | KV452891.1  | 2404394 | 6-scf00356 | 6  |
| AX-158201495 | 17 | 70.479 | KV452891.1  | 2405976 | 6-scf00356 | 6  |
| AX-158201500 | 17 | 70.569 | KV452891.1  | 2409524 | 6-scf00356 | 6  |
| AX-158200028 | 17 | 70.841 | KV452887.1  | 961756  | 6-scf00355 | 6  |
| AX-158201510 | 17 | 70.841 | KV452891.1  | 2418626 | 6-scf00356 | 6  |
| AX-158200299 | 17 | 70.842 | KV452887.1  | 1442911 | 6-scf00355 | 6  |
| AX-158200615 | 17 | 70.842 | KV452891.1  | 368325  | 6-scf00356 | 6  |
| AX-158200656 | 17 | 70.842 | KV452891.1  | 465946  | 6-scf00356 | 6  |
| AX-158201256 | 17 | 70.842 | KV452891.1  | 2040331 | 6-scf00356 | 6  |
| AX-158201517 | 17 | 70.842 | KV452891.1  | 2428503 | 6-scf00356 | 6  |
| AX-157837505 | 17 | 70.842 | KV452891.1  | 2428885 | 6-scf00356 | 6  |
| AX-158201519 | 17 | 70.842 | KV452891.1  | 2432482 | 6-scf00356 | 6  |
| AX-157700715 | 17 | 70.842 | KV452891.1  | 2432836 | 6-scf00356 | 6  |
| AX-158201520 | 17 | 70.842 | KV452891.1  | 2433822 | 6-scf00356 | 6  |
| AX-158201521 | 17 | 70.842 | KV452891.1  | 2434390 | 6-scf00356 | 6  |
| AX-158201522 | 17 | 70.842 | KV452891.1  | 2436346 | 6-scf00356 | 6  |
| AX-158201524 | 17 | 70.842 | KV452891.1  | 2437791 | 6-scf00356 | 6  |
| AX-158201525 | 17 | 70.842 | KV452891.1  | 2437984 | 6-scf00356 | 6  |

|              |    |        |            |          |            |   |
|--------------|----|--------|------------|----------|------------|---|
| AX-158201526 | 17 | 70.842 | KV452891.1 | 2439187  | 6-scf00356 | 6 |
| AX-158201533 | 17 | 70.842 | KV452891.1 | 2447110  | 6-scf00356 | 6 |
| AX-158201535 | 17 | 70.842 | KV452891.1 | 2449302  | 6-scf00356 | 6 |
| AX-157773986 | 17 | 70.842 | KV452891.1 | 2717816  | 6-scf00356 | 6 |
| AX-157685277 | 17 | 70.842 | KV452890.1 | 167423   | 6-scf00606 | 6 |
| AX-158201514 | 17 | 70.87  | KV452891.1 | 2423442  | 6-scf00356 | 6 |
| AX-157837506 | 17 | 70.87  | KV452891.1 | 2457482  | 6-scf00356 | 6 |
| AX-158201560 | 17 | 70.87  | KV452891.1 | 2488966  | 6-scf00356 | 6 |
| AX-158201633 | 17 | 70.87  | KV452891.1 | 2587884  | 6-scf00356 | 6 |
| AX-158202192 | 17 | 70.87  | KV452892.1 | 68995    | 6-scf00360 | 6 |
| AX-158201541 | 17 | 70.912 | KV452891.1 | 2461592  | 6-scf00356 | 6 |
| AX-158199970 | 17 | 70.927 | KV452887.1 | 871752   | 6-scf00355 | 6 |
| AX-158201544 | 17 | 70.927 | KV452891.1 | 2465636  | 6-scf00356 | 6 |
| AX-158201546 | 17 | 70.951 | KV452891.1 | 2468589  | 6-scf00356 | 6 |
| AX-158201547 | 17 | 70.951 | KV452891.1 | 2469302  | 6-scf00356 | 6 |
| AX-158201554 | 17 | 70.951 | KV452891.1 | 2485771  | 6-scf00356 | 6 |
| AX-158201557 | 17 | 70.951 | KV452891.1 | 2487344  | 6-scf00356 | 6 |
| AX-158201565 | 17 | 70.951 | KV452891.1 | 2498099  | 6-scf00356 | 6 |
| AX-158201567 | 17 | 70.951 | KV452891.1 | 2500907  | 6-scf00356 | 6 |
| AX-158201568 | 17 | 70.951 | KV452891.1 | 2501948  | 6-scf00356 | 6 |
| AX-157858994 | 17 | 70.951 | KV452891.1 | 2502060  | 6-scf00356 | 6 |
| AX-158201569 | 17 | 70.951 | KV452891.1 | 2503537  | 6-scf00356 | 6 |
| AX-157837509 | 17 | 70.951 | KV452891.1 | 2514213  | 6-scf00356 | 6 |
| AX-158201573 | 17 | 70.951 | KV452891.1 | 2516082  | 6-scf00356 | 6 |
| AX-158201589 | 17 | 70.951 | KV452891.1 | 2533065  | 6-scf00356 | 6 |
| AX-158201621 | 17 | 70.951 | KV452891.1 | 2568608  | 6-scf00356 | 6 |
| AX-158201718 | 17 | 70.951 | KV452891.1 | 2740548  | 6-scf00356 | 6 |
| AX-158201790 | 17 | 70.951 | KV452891.1 | 2829939  | 6-scf00356 | 6 |
| AX-158201807 | 17 | 70.951 | KV452891.1 | 2847304  | 6-scf00356 | 6 |
| AX-158201580 | 17 | 71     | KV452891.1 | 2524913  | 6-scf00356 | 6 |
| AX-158201583 | 17 | 71.05  | KV452891.1 | 2528057  | 6-scf00356 | 6 |
| AX-158194508 | 17 | 71.17  | KV452884.1 | 8940950  | 6-scf00352 | 6 |
| AX-157713256 | 17 | 71.17  | KV452884.1 | 9102213  | 6-scf00352 | 6 |
| AX-158196403 | 17 | 71.17  | KV452884.1 | 11794327 | 6-scf00352 | 6 |
| AX-158196630 | 17 | 71.17  | KV452884.1 | 12240361 | 6-scf00352 | 6 |
| AX-157837076 | 17 | 71.17  | KV452884.1 | 12372210 | 6-scf00352 | 6 |
| AX-157837079 | 17 | 71.17  | KV452884.1 | 12375208 | 6-scf00352 | 6 |
| AX-158196687 | 17 | 71.17  | KV452884.1 | 12377037 | 6-scf00352 | 6 |
| AX-157837082 | 17 | 71.17  | KV452884.1 | 12377713 | 6-scf00352 | 6 |
| AX-157837083 | 17 | 71.17  | KV452884.1 | 12378061 | 6-scf00352 | 6 |
| AX-158196689 | 17 | 71.17  | KV452884.1 | 12378493 | 6-scf00352 | 6 |
| AX-158197694 | 17 | 71.17  | KV452884.1 | 15138896 | 6-scf00352 | 6 |
| AX-158197978 | 17 | 71.17  | KV452884.1 | 15543423 | 6-scf00352 | 6 |
| AX-158198189 | 17 | 71.17  | KV452884.1 | 15934242 | 6-scf00352 | 6 |
| AX-158199834 | 17 | 71.17  | KV452887.1 | 658408   | 6-scf00355 | 6 |
| AX-157879217 | 17 | 71.17  | KV452887.1 | 1171607  | 6-scf00355 | 6 |
| AX-158200282 | 17 | 71.17  | KV452887.1 | 1362068  | 6-scf00355 | 6 |
| AX-157837414 | 17 | 71.17  | KV452887.1 | 1631851  | 6-scf00355 | 6 |
| AX-158200655 | 17 | 71.17  | KV452891.1 | 465232   | 6-scf00356 | 6 |
| AX-157755530 | 17 | 71.17  | KV452891.1 | 2020088  | 6-scf00356 | 6 |
| AX-158201328 | 17 | 71.17  | KV452891.1 | 2176490  | 6-scf00356 | 6 |

|              |    |        |            |         |               |    |
|--------------|----|--------|------------|---------|---------------|----|
| AX-158201528 | 17 | 71.17  | KV452891.1 | 2443250 | 6-scf00356    | 6  |
| AX-158201532 | 17 | 71.17  | KV452891.1 | 2446711 | 6-scf00356    | 6  |
| AX-157837507 | 17 | 71.17  | KV452891.1 | 2478931 | 6-scf00356    | 6  |
| AX-158201584 | 17 | 71.17  | KV452891.1 | 2528775 | 6-scf00356    | 6  |
| AX-158201585 | 17 | 71.17  | KV452891.1 | 2529357 | 6-scf00356    | 6  |
| AX-158201586 | 17 | 71.17  | KV452891.1 | 2529805 | 6-scf00356    | 6  |
| AX-158201590 | 17 | 71.17  | KV452891.1 | 2534986 | 6-scf00356    | 6  |
| AX-158201594 | 17 | 71.17  | KV452891.1 | 2540073 | 6-scf00356    | 6  |
| AX-158201597 | 17 | 71.17  | KV452891.1 | 2542584 | 6-scf00356    | 6  |
| AX-158201600 | 17 | 71.17  | KV452891.1 | 2544716 | 6-scf00356    | 6  |
| AX-158201601 | 17 | 71.17  | KV452891.1 | 2546264 | 6-scf00356    | 6  |
| AX-158414266 | 17 | 71.17  | KV452891.1 | 2546571 | 6-scf00356    | 6  |
| AX-158201603 | 17 | 71.17  | KV452891.1 | 2547547 | 6-scf00356    | 6  |
| AX-157774550 | 17 | 71.17  | KV452891.1 | 2552074 | 6-scf00356    | 6  |
| AX-158201606 | 17 | 71.17  | KV452891.1 | 2552917 | 6-scf00356    | 6  |
| AX-158201607 | 17 | 71.17  | KV452891.1 | 2553705 | 6-scf00356    | 6  |
| AX-158201610 | 17 | 71.17  | KV452891.1 | 2557043 | 6-scf00356    | 6  |
| AX-157754671 | 17 | 71.17  | KV452891.1 | 2574421 | 6-scf00356    | 6  |
| AX-158201627 | 17 | 71.17  | KV452891.1 | 2581082 | 6-scf00356    | 6  |
| AX-157837510 | 17 | 71.17  | KV452891.1 | 2584576 | 6-scf00356    | 6  |
| AX-158201636 | 17 | 71.17  | KV452891.1 | 2589539 | 6-scf00356    | 6  |
| AX-158414271 | 17 | 71.17  | KV452891.1 | 2596775 | 6-scf00356    | 6  |
| AX-158201640 | 17 | 71.17  | KV452891.1 | 2597053 | 6-scf00356    | 6  |
| AX-158414272 | 17 | 71.17  | KV452891.1 | 2597990 | 6-scf00356    | 6  |
| AX-158414273 | 17 | 71.17  | KV452891.1 | 2599243 | 6-scf00356    | 6  |
| AX-158414274 | 17 | 71.17  | KV452891.1 | 2599306 | 6-scf00356    | 6  |
| AX-158201644 | 17 | 71.17  | KV452891.1 | 2603928 | 6-scf00356    | 6  |
| AX-158393898 | 17 | 71.17  | KV452891.1 | 2615369 | 6-scf00356    | 6  |
| AX-158201650 | 17 | 71.17  | KV452891.1 | 2621108 | 6-scf00356    | 6  |
| AX-158201655 | 17 | 71.17  | KV452891.1 | 2638023 | 6-scf00356    | 6  |
| AX-158201656 | 17 | 71.17  | KV452891.1 | 2640818 | 6-scf00356    | 6  |
| AX-158201657 | 17 | 71.17  | KV452891.1 | 2643746 | 6-scf00356    | 6  |
| AX-158201666 | 17 | 71.17  | KV452891.1 | 2665310 | 6-scf00356    | 6  |
| AX-158201669 | 17 | 71.17  | KV452891.1 | 2669229 | 6-scf00356    | 6  |
| AX-158201670 | 17 | 71.17  | KV452891.1 | 2671055 | 6-scf00356    | 6  |
| AX-158201685 | 17 | 71.17  | KV452891.1 | 2699953 | 6-scf00356    | 6  |
| AX-158201687 | 17 | 71.17  | KV452891.1 | 2702718 | 6-scf00356    | 6  |
| AX-158201688 | 17 | 71.17  | KV452891.1 | 2703215 | 6-scf00356    | 6  |
| AX-158201691 | 17 | 71.17  | KV452891.1 | 2706573 | 6-scf00356    | 6  |
| AX-158201694 | 17 | 71.17  | KV452891.1 | 2709902 | 6-scf00356    | 6  |
| AX-158201698 | 17 | 71.17  | KV452891.1 | 2718276 | 6-scf00356    | 6  |
| AX-158201712 | 17 | 71.17  | KV452891.1 | 2735332 | 6-scf00356    | 6  |
| AX-158201713 | 17 | 71.17  | KV452891.1 | 2735795 | 6-scf00356    | 6  |
| AX-158201719 | 17 | 71.17  | KV452891.1 | 2741147 | 6-scf00356    | 6  |
| AX-158201760 | 17 | 71.17  | KV452891.1 | 2790605 | 6-scf00356    | 6  |
| AX-158201787 | 17 | 71.17  | KV452891.1 | 2822275 | 6-scf00356    | 6  |
| AX-158201792 | 17 | 71.17  | KV452891.1 | 2831356 | 6-scf00356    | 6  |
| AX-157751012 | 17 | 71.17  | KV452891.1 | 2840861 | 6-scf00356    | 6  |
| AX-157697867 | 17 | 71.17  | FI877258.1 | 119     | ORI212 lctalu | UN |
| AX-157685754 | 17 | 71.17  | KV453372.1 | 8879    | scf00638      | UN |
| AX-158201668 | 17 | 71.224 | KV452891.1 | 2666989 | 6-scf00356    | 6  |

|              |    |        |            |          |            |   |
|--------------|----|--------|------------|----------|------------|---|
| AX-158409739 | 17 | 71.279 | KV452884.1 | 9428824  | 6-scf00352 | 6 |
| AX-158194852 | 17 | 71.279 | KV452884.1 | 9451833  | 6-scf00352 | 6 |
| AX-158194948 | 17 | 71.279 | KV452884.1 | 9646214  | 6-scf00352 | 6 |
| AX-158194973 | 17 | 71.279 | KV452884.1 | 9673446  | 6-scf00352 | 6 |
| AX-158195305 | 17 | 71.279 | KV452884.1 | 10201367 | 6-scf00352 | 6 |
| AX-158195651 | 17 | 71.279 | KV452884.1 | 10750155 | 6-scf00352 | 6 |
| AX-157872223 | 17 | 71.279 | KV452884.1 | 11325345 | 6-scf00352 | 6 |
| AX-157837019 | 17 | 71.279 | KV452884.1 | 11376098 | 6-scf00352 | 6 |
| AX-158196511 | 17 | 71.279 | KV452884.1 | 11935342 | 6-scf00352 | 6 |
| AX-157886982 | 17 | 71.279 | KV452884.1 | 12345635 | 6-scf00352 | 6 |
| AX-157837068 | 17 | 71.279 | KV452884.1 | 12347071 | 6-scf00352 | 6 |
| AX-158197072 | 17 | 71.279 | KV452884.1 | 12869950 | 6-scf00352 | 6 |
| AX-158197074 | 17 | 71.279 | KV452884.1 | 12871014 | 6-scf00352 | 6 |
| AX-158199837 | 17 | 71.279 | KV452887.1 | 664664   | 6-scf00355 | 6 |
| AX-157735103 | 17 | 71.279 | KV452887.1 | 1228898  | 6-scf00355 | 6 |
| AX-158200429 | 17 | 71.279 | KV452887.1 | 1747837  | 6-scf00355 | 6 |
| AX-158200431 | 17 | 71.279 | KV452887.1 | 1756813  | 6-scf00355 | 6 |
| AX-158200433 | 17 | 71.279 | KV452887.1 | 1773744  | 6-scf00355 | 6 |
| AX-158200479 | 17 | 71.279 | KV452887.1 | 2000519  | 6-scf00355 | 6 |
| AX-158200491 | 17 | 71.279 | KV452887.1 | 2097018  | 6-scf00355 | 6 |
| AX-158201906 | 17 | 71.279 | KV452887.1 | 3348204  | 6-scf00355 | 6 |
| AX-158200646 | 17 | 71.279 | KV452891.1 | 443954   | 6-scf00356 | 6 |
| AX-158200727 | 17 | 71.279 | KV452891.1 | 642725   | 6-scf00356 | 6 |
| AX-157837433 | 17 | 71.279 | KV452891.1 | 696238   | 6-scf00356 | 6 |
| AX-158200830 | 17 | 71.279 | KV452891.1 | 783573   | 6-scf00356 | 6 |
| AX-158393807 | 17 | 71.279 | KV452891.1 | 812353   | 6-scf00356 | 6 |
| AX-158201028 | 17 | 71.279 | KV452891.1 | 1152161  | 6-scf00356 | 6 |
| AX-158201032 | 17 | 71.279 | KV452891.1 | 1253448  | 6-scf00356 | 6 |
| AX-157837461 | 17 | 71.279 | KV452891.1 | 1349744  | 6-scf00356 | 6 |
| AX-158201041 | 17 | 71.279 | KV452891.1 | 1371903  | 6-scf00356 | 6 |
| AX-158201047 | 17 | 71.279 | KV452891.1 | 1488078  | 6-scf00356 | 6 |
| AX-158201051 | 17 | 71.279 | KV452891.1 | 1508162  | 6-scf00356 | 6 |
| AX-158201057 | 17 | 71.279 | KV452891.1 | 1531790  | 6-scf00356 | 6 |
| AX-158201059 | 17 | 71.279 | KV452891.1 | 1536915  | 6-scf00356 | 6 |
| AX-157858987 | 17 | 71.279 | KV452891.1 | 1606109  | 6-scf00356 | 6 |
| AX-158201099 | 17 | 71.279 | KV452891.1 | 1657316  | 6-scf00356 | 6 |
| AX-158201100 | 17 | 71.279 | KV452891.1 | 1659144  | 6-scf00356 | 6 |
| AX-158201101 | 17 | 71.279 | KV452891.1 | 1660873  | 6-scf00356 | 6 |
| AX-158201124 | 17 | 71.279 | KV452891.1 | 1704694  | 6-scf00356 | 6 |
| AX-158201157 | 17 | 71.279 | KV452891.1 | 1773765  | 6-scf00356 | 6 |
| AX-158201160 | 17 | 71.279 | KV452891.1 | 1777484  | 6-scf00356 | 6 |
| AX-157753500 | 17 | 71.279 | KV452891.1 | 2477478  | 6-scf00356 | 6 |
| AX-158201593 | 17 | 71.279 | KV452891.1 | 2539162  | 6-scf00356 | 6 |
| AX-158201632 | 17 | 71.279 | KV452891.1 | 2586986  | 6-scf00356 | 6 |
| AX-158201634 | 17 | 71.279 | KV452891.1 | 2588636  | 6-scf00356 | 6 |
| AX-158201635 | 17 | 71.279 | KV452891.1 | 2589161  | 6-scf00356 | 6 |
| AX-158201637 | 17 | 71.279 | KV452891.1 | 2591271  | 6-scf00356 | 6 |
| AX-158201643 | 17 | 71.279 | KV452891.1 | 2599819  | 6-scf00356 | 6 |
| AX-157747129 | 17 | 71.279 | KV452891.1 | 2679957  | 6-scf00356 | 6 |
| AX-157837513 | 17 | 71.279 | KV452891.1 | 2680900  | 6-scf00356 | 6 |
| AX-158201680 | 17 | 71.279 | KV452891.1 | 2695716  | 6-scf00356 | 6 |



|              |    |        |             |          |            |    |
|--------------|----|--------|-------------|----------|------------|----|
| AX-158201681 | 17 | 71.279 | KV452891.1  | 2697395  | 6-scf00356 | 6  |
| AX-158201695 | 17 | 71.279 | KV452891.1  | 2710578  | 6-scf00356 | 6  |
| AX-158201696 | 17 | 71.279 | KV452891.1  | 2711405  | 6-scf00356 | 6  |
| AX-158201701 | 17 | 71.279 | KV452891.1  | 2720319  | 6-scf00356 | 6  |
| AX-158201707 | 17 | 71.279 | KV452891.1  | 2729547  | 6-scf00356 | 6  |
| AX-158201722 | 17 | 71.279 | KV452891.1  | 2746115  | 6-scf00356 | 6  |
| AX-158201732 | 17 | 71.279 | KV452891.1  | 2761719  | 6-scf00356 | 6  |
| AX-158201736 | 17 | 71.279 | KV452891.1  | 2765052  | 6-scf00356 | 6  |
| AX-158201738 | 17 | 71.279 | KV452891.1  | 2766249  | 6-scf00356 | 6  |
| AX-157738708 | 17 | 71.279 | KV452891.1  | 2771193  | 6-scf00356 | 6  |
| AX-158201745 | 17 | 71.279 | KV452891.1  | 2773903  | 6-scf00356 | 6  |
| AX-158201746 | 17 | 71.279 | KV452891.1  | 2774553  | 6-scf00356 | 6  |
| AX-158201754 | 17 | 71.279 | KV452891.1  | 2784346  | 6-scf00356 | 6  |
| AX-158201755 | 17 | 71.279 | KV452891.1  | 2785134  | 6-scf00356 | 6  |
| AX-158201757 | 17 | 71.279 | KV452891.1  | 2787880  | 6-scf00356 | 6  |
| AX-158201758 | 17 | 71.279 | KV452891.1  | 2788376  | 6-scf00356 | 6  |
| AX-158201770 | 17 | 71.279 | KV452891.1  | 2800428  | 6-scf00356 | 6  |
| AX-158201773 | 17 | 71.279 | KV452891.1  | 2805042  | 6-scf00356 | 6  |
| AX-158201776 | 17 | 71.279 | KV452891.1  | 2808709  | 6-scf00356 | 6  |
| AX-158201777 | 17 | 71.279 | KV452891.1  | 2809056  | 6-scf00356 | 6  |
| AX-158201785 | 17 | 71.279 | KV452891.1  | 2817910  | 6-scf00356 | 6  |
| AX-157749830 | 17 | 71.279 | KV452891.1  | 2825085  | 6-scf00356 | 6  |
| AX-158201795 | 17 | 71.279 | KV452891.1  | 2835031  | 6-scf00356 | 6  |
| AX-158201805 | 17 | 71.279 | KV452891.1  | 2845692  | 6-scf00356 | 6  |
| AX-158201806 | 17 | 71.279 | KV452891.1  | 2846608  | 6-scf00356 | 6  |
| AX-157745941 | 17 | 71.279 | KV452891.1  | 2922119  | 6-scf00356 | 6  |
| AX-158201877 | 17 | 71.279 | KV452891.1  | 2936277  | 6-scf00356 | 6  |
| AX-158202147 | 17 | 71.279 | KV452892.1  | 22064    | 6-scf00360 | 6  |
| AX-157720887 | 17 | 71.337 | KV452891.1  | 2848253  | 6-scf00356 | 6  |
| AX-158414270 | 17 | 71.389 | KV452891.1  | 2560899  | 6-scf00356 | 6  |
| AX-157837516 | 17 | 71.389 | KV452891.1  | 2712916  | 6-scf00356 | 6  |
| AX-158201763 | 17 | 71.389 | KV452891.1  | 2792101  | 6-scf00356 | 6  |
| AX-157722328 | 17 | 71.389 | KV452891.1  | 2854004  | 6-scf00356 | 6  |
| AX-158201813 | 17 | 71.389 | KV452891.1  | 2857381  | 6-scf00356 | 6  |
| AX-158201814 | 17 | 71.389 | KV452891.1  | 2858941  | 6-scf00356 | 6  |
| AX-158201815 | 17 | 71.389 | KV452891.1  | 2859391  | 6-scf00356 | 6  |
| AX-158201816 | 17 | 71.389 | KV452891.1  | 2859765  | 6-scf00356 | 6  |
| AX-158201817 | 17 | 71.389 | KV452891.1  | 2860118  | 6-scf00356 | 6  |
| AX-158201819 | 17 | 71.389 | KV452891.1  | 2862258  | 6-scf00356 | 6  |
| AX-157706879 | 17 | 71.389 | 3ML01033082 | 210      | scf08719_1 | UN |
| AX-158201826 | 17 | 71.498 | KV452891.1  | 2877876  | 6-scf00356 | 6  |
| AX-157756101 | 17 | 71.539 | KV452891.1  | 2879917  | 6-scf00356 | 6  |
| AX-158201828 | 17 | 71.558 | KV452891.1  | 2881401  | 6-scf00356 | 6  |
| AX-158201835 | 17 | 71.579 | KV452891.1  | 2887368  | 6-scf00356 | 6  |
| AX-158194306 | 17 | 71.594 | KV452884.1  | 8648801  | 6-scf00352 | 6  |
| AX-158198325 | 17 | 71.594 | KV452884.1  | 16108385 | 6-scf00352 | 6  |
| AX-158201476 | 17 | 71.594 | KV452891.1  | 2379821  | 6-scf00356 | 6  |
| AX-158201774 | 17 | 71.594 | KV452891.1  | 2806601  | 6-scf00356 | 6  |
| AX-158201779 | 17 | 71.594 | KV452891.1  | 2810855  | 6-scf00356 | 6  |
| AX-158201831 | 17 | 71.594 | KV452891.1  | 2884378  | 6-scf00356 | 6  |
| AX-158201836 | 17 | 71.594 | KV452891.1  | 2887665  | 6-scf00356 | 6  |

|              |    |        |            |         |            |   |
|--------------|----|--------|------------|---------|------------|---|
| AX-158201842 | 17 | 71.594 | KV452891.1 | 2894421 | 6-scf00356 | 6 |
| AX-158202159 | 17 | 71.594 | KV452892.1 | 33624   | 6-scf00360 | 6 |
| AX-158202181 | 17 | 71.594 | KV452892.1 | 55471   | 6-scf00360 | 6 |
| AX-158202247 | 17 | 71.594 | KV452892.1 | 141219  | 6-scf00360 | 6 |
| AX-158202258 | 17 | 71.594 | KV452892.1 | 153901  | 6-scf00360 | 6 |
| AX-158202290 | 17 | 71.594 | KV452892.1 | 201384  | 6-scf00360 | 6 |
| AX-158202294 | 17 | 71.594 | KV452892.1 | 210968  | 6-scf00360 | 6 |
| AX-157740776 | 17 | 71.594 | KV452892.1 | 288624  | 6-scf00360 | 6 |
| AX-157837548 | 17 | 71.594 | KV452892.1 | 293501  | 6-scf00360 | 6 |
| AX-158202358 | 17 | 71.594 | KV452892.1 | 324605  | 6-scf00360 | 6 |
| AX-157837555 | 17 | 71.594 | KV452892.1 | 354610  | 6-scf00360 | 6 |
| AX-158202402 | 17 | 71.594 | KV452892.1 | 392057  | 6-scf00360 | 6 |
| AX-158202422 | 17 | 71.594 | KV452892.1 | 437757  | 6-scf00360 | 6 |
| AX-158202438 | 17 | 71.594 | KV452892.1 | 463927  | 6-scf00360 | 6 |
| AX-158202459 | 17 | 71.594 | KV452892.1 | 508514  | 6-scf00360 | 6 |
| AX-158202460 | 17 | 71.594 | KV452892.1 | 508835  | 6-scf00360 | 6 |
| AX-158202479 | 17 | 71.594 | KV452892.1 | 535399  | 6-scf00360 | 6 |
| AX-158202504 | 17 | 71.594 | KV452892.1 | 614537  | 6-scf00360 | 6 |
| AX-157837604 | 17 | 71.594 | KV452892.1 | 875343  | 6-scf00360 | 6 |
| AX-158201830 | 17 | 71.607 | KV452891.1 | 2883269 | 6-scf00356 | 6 |
| AX-158201844 | 17 | 71.607 | KV452891.1 | 2900463 | 6-scf00356 | 6 |
| AX-158201845 | 17 | 71.607 | KV452891.1 | 2903099 | 6-scf00356 | 6 |
| AX-158201850 | 17 | 71.607 | KV452891.1 | 2906347 | 6-scf00356 | 6 |
| AX-158201853 | 17 | 71.607 | KV452891.1 | 2909809 | 6-scf00356 | 6 |
| AX-158201856 | 17 | 71.607 | KV452891.1 | 2911744 | 6-scf00356 | 6 |
| AX-158201857 | 17 | 71.607 | KV452891.1 | 2912104 | 6-scf00356 | 6 |
| AX-158201858 | 17 | 71.607 | KV452891.1 | 2912540 | 6-scf00356 | 6 |
| AX-157741195 | 17 | 71.607 | KV452891.1 | 2914011 | 6-scf00356 | 6 |
| AX-158201860 | 17 | 71.607 | KV452891.1 | 2916312 | 6-scf00356 | 6 |
| AX-158201864 | 17 | 71.607 | KV452891.1 | 2918905 | 6-scf00356 | 6 |
| AX-158201867 | 17 | 71.607 | KV452891.1 | 2923384 | 6-scf00356 | 6 |
| AX-158201881 | 17 | 71.607 | KV452891.1 | 2940077 | 6-scf00356 | 6 |
| AX-158201884 | 17 | 71.607 | KV452891.1 | 2942531 | 6-scf00356 | 6 |
| AX-158201872 | 17 | 71.65  | KV452891.1 | 2929453 | 6-scf00356 | 6 |
| AX-158201873 | 17 | 71.672 | KV452891.1 | 2930015 | 6-scf00356 | 6 |
| AX-158201883 | 17 | 71.688 | KV452891.1 | 2941670 | 6-scf00356 | 6 |
| AX-158201885 | 17 | 71.707 | KV452891.1 | 2943971 | 6-scf00356 | 6 |
| AX-158201890 | 17 | 71.716 | KV452891.1 | 2949031 | 6-scf00356 | 6 |
| AX-158200006 | 17 | 71.778 | KV452887.1 | 928690  | 6-scf00355 | 6 |
| AX-158201515 | 17 | 71.778 | KV452891.1 | 2423714 | 6-scf00356 | 6 |
| AX-158414267 | 17 | 71.778 | KV452891.1 | 2546711 | 6-scf00356 | 6 |
| AX-158201671 | 17 | 71.778 | KV452891.1 | 2673259 | 6-scf00356 | 6 |
| AX-158201699 | 17 | 71.778 | KV452891.1 | 2719003 | 6-scf00356 | 6 |
| AX-158201735 | 17 | 71.778 | KV452891.1 | 2764559 | 6-scf00356 | 6 |
| AX-158201852 | 17 | 71.778 | KV452891.1 | 2908384 | 6-scf00356 | 6 |
| AX-158201866 | 17 | 71.778 | KV452891.1 | 2921015 | 6-scf00356 | 6 |
| AX-158201891 | 17 | 71.778 | KV452891.1 | 2949794 | 6-scf00356 | 6 |
| AX-157685151 | 17 | 71.778 | KV452889.1 | 629148  | 6-scf00359 | 6 |
| AX-158202209 | 17 | 71.778 | KV452892.1 | 81770   | 6-scf00360 | 6 |
| AX-158202450 | 17 | 71.778 | KV452892.1 | 495982  | 6-scf00360 | 6 |
| AX-158201894 | 17 | 71.824 | KV452891.1 | 2955357 | 6-scf00356 | 6 |

|              |    |        |            |         |            |   |
|--------------|----|--------|------------|---------|------------|---|
| AX-157837390 | 17 | 71.871 | KV452887.1 | 1129838 | 6-scf00355 | 6 |
| AX-158201389 | 17 | 71.871 | KV452891.1 | 2252936 | 6-scf00356 | 6 |
| AX-158201527 | 17 | 71.871 | KV452891.1 | 2441733 | 6-scf00356 | 6 |
| AX-158201663 | 17 | 71.871 | KV452891.1 | 2648217 | 6-scf00356 | 6 |
| AX-158201762 | 17 | 71.871 | KV452891.1 | 2791501 | 6-scf00356 | 6 |
| AX-158201768 | 17 | 71.871 | KV452891.1 | 2798703 | 6-scf00356 | 6 |
| AX-158201871 | 17 | 71.871 | KV452891.1 | 2928205 | 6-scf00356 | 6 |
| AX-158202127 | 17 | 71.871 | KV452892.1 | 1859    | 6-scf00360 | 6 |
| AX-158201823 | 17 | 71.935 | KV452891.1 | 2867421 | 6-scf00356 | 6 |
| AX-158202134 | 17 | 71.935 | KV452892.1 | 11165   | 6-scf00360 | 6 |
| AX-158202142 | 17 | 71.935 | KV452892.1 | 18649   | 6-scf00360 | 6 |
| AX-158202148 | 17 | 71.935 | KV452892.1 | 22979   | 6-scf00360 | 6 |
| AX-158202457 | 17 | 71.935 | KV452892.1 | 504907  | 6-scf00360 | 6 |
| AX-158202522 | 17 | 71.935 | KV452892.1 | 641537  | 6-scf00360 | 6 |
| AX-158202166 | 17 | 72.371 | KV452892.1 | 42776   | 6-scf00360 | 6 |
| AX-157837508 | 17 | 72.372 | KV452891.1 | 2489675 | 6-scf00356 | 6 |
| AX-158201875 | 17 | 72.372 | KV452891.1 | 2932567 | 6-scf00356 | 6 |
| AX-158202154 | 17 | 72.372 | KV452892.1 | 29515   | 6-scf00360 | 6 |
| AX-158202168 | 17 | 72.372 | KV452892.1 | 44382   | 6-scf00360 | 6 |
| AX-157879287 | 17 | 72.372 | KV452892.1 | 45951   | 6-scf00360 | 6 |
| AX-158202171 | 17 | 72.372 | KV452892.1 | 47437   | 6-scf00360 | 6 |
| AX-158202173 | 17 | 72.372 | KV452892.1 | 50385   | 6-scf00360 | 6 |
| AX-158202174 | 17 | 72.372 | KV452892.1 | 50846   | 6-scf00360 | 6 |
| AX-158202176 | 17 | 72.372 | KV452892.1 | 52327   | 6-scf00360 | 6 |
| AX-158202177 | 17 | 72.372 | KV452892.1 | 52878   | 6-scf00360 | 6 |
| AX-158202178 | 17 | 72.372 | KV452892.1 | 53878   | 6-scf00360 | 6 |
| AX-158202190 | 17 | 72.372 | KV452892.1 | 66974   | 6-scf00360 | 6 |
| AX-158202198 | 17 | 72.372 | KV452892.1 | 74400   | 6-scf00360 | 6 |
| AX-158202205 | 17 | 72.372 | KV452892.1 | 79169   | 6-scf00360 | 6 |
| AX-158202210 | 17 | 72.372 | KV452892.1 | 82509   | 6-scf00360 | 6 |
| AX-158202261 | 17 | 72.372 | KV452892.1 | 157303  | 6-scf00360 | 6 |
| AX-158202268 | 17 | 72.372 | KV452892.1 | 169329  | 6-scf00360 | 6 |
| AX-158393903 | 17 | 72.372 | KV452892.1 | 261836  | 6-scf00360 | 6 |
| AX-158202360 | 17 | 72.372 | KV452892.1 | 330336  | 6-scf00360 | 6 |
| AX-158202364 | 17 | 72.372 | KV452892.1 | 334047  | 6-scf00360 | 6 |
| AX-158202374 | 17 | 72.372 | KV452892.1 | 353522  | 6-scf00360 | 6 |
| AX-158202387 | 17 | 72.372 | KV452892.1 | 370783  | 6-scf00360 | 6 |
| AX-158202179 | 17 | 72.464 | KV452892.1 | 54814   | 6-scf00360 | 6 |
| AX-158202187 | 17 | 72.5   | KV452892.1 | 63198   | 6-scf00360 | 6 |
| AX-158202157 | 17 | 72.59  | KV452892.1 | 32259   | 6-scf00360 | 6 |
| AX-158202164 | 17 | 72.59  | KV452892.1 | 40596   | 6-scf00360 | 6 |
| AX-158202189 | 17 | 72.59  | KV452892.1 | 65512   | 6-scf00360 | 6 |
| AX-158202191 | 17 | 72.59  | KV452892.1 | 68161   | 6-scf00360 | 6 |
| AX-158202197 | 17 | 72.59  | KV452892.1 | 73757   | 6-scf00360 | 6 |
| AX-158202199 | 17 | 72.59  | KV452892.1 | 74878   | 6-scf00360 | 6 |
| AX-158202200 | 17 | 72.59  | KV452892.1 | 75402   | 6-scf00360 | 6 |
| AX-158202201 | 17 | 72.59  | KV452892.1 | 76529   | 6-scf00360 | 6 |
| AX-158202202 | 17 | 72.59  | KV452892.1 | 76654   | 6-scf00360 | 6 |
| AX-158202203 | 17 | 72.59  | KV452892.1 | 76938   | 6-scf00360 | 6 |
| AX-158202206 | 17 | 72.808 | KV452892.1 | 79597   | 6-scf00360 | 6 |
| AX-158202213 | 17 | 72.808 | KV452892.1 | 86400   | 6-scf00360 | 6 |

|              |    |        |            |        |            |   |
|--------------|----|--------|------------|--------|------------|---|
| AX-157714037 | 17 | 72.808 | KV452892.1 | 87631  | 6-scf00360 | 6 |
| AX-158202215 | 17 | 72.808 | KV452892.1 | 90277  | 6-scf00360 | 6 |
| AX-158202216 | 17 | 72.808 | KV452892.1 | 90667  | 6-scf00360 | 6 |
| AX-158202218 | 17 | 72.808 | KV452892.1 | 92016  | 6-scf00360 | 6 |
| AX-158202518 | 17 | 72.808 | KV452892.1 | 637726 | 6-scf00360 | 6 |
| AX-158202207 | 17 | 72.868 | KV452892.1 | 80923  | 6-scf00360 | 6 |
| AX-158202220 | 17 | 72.868 | KV452892.1 | 95728  | 6-scf00360 | 6 |
| AX-158202444 | 17 | 72.868 | KV452892.1 | 479909 | 6-scf00360 | 6 |
| AX-158202208 | 17 | 72.918 | KV452892.1 | 81681  | 6-scf00360 | 6 |
| AX-158202214 | 17 | 72.918 | KV452892.1 | 89634  | 6-scf00360 | 6 |
| AX-158202224 | 17 | 72.918 | KV452892.1 | 101181 | 6-scf00360 | 6 |
| AX-158202225 | 17 | 72.918 | KV452892.1 | 102024 | 6-scf00360 | 6 |
| AX-158202226 | 17 | 72.918 | KV452892.1 | 102637 | 6-scf00360 | 6 |
| AX-158202227 | 17 | 72.918 | KV452892.1 | 103481 | 6-scf00360 | 6 |
| AX-158202229 | 17 | 72.918 | KV452892.1 | 105750 | 6-scf00360 | 6 |
| AX-158202230 | 17 | 72.918 | KV452892.1 | 106037 | 6-scf00360 | 6 |
| AX-158386241 | 17 | 72.918 | KV452892.1 | 107897 | 6-scf00360 | 6 |
| AX-158202231 | 17 | 72.963 | KV452892.1 | 108845 | 6-scf00360 | 6 |
| AX-158202232 | 17 | 73.016 | KV452892.1 | 109645 | 6-scf00360 | 6 |
| AX-158202233 | 17 | 73.021 | KV452892.1 | 110322 | 6-scf00360 | 6 |
| AX-157879288 | 17 | 73.027 | KV452892.1 | 113755 | 6-scf00360 | 6 |
| AX-157837537 | 17 | 73.027 | KV452892.1 | 119407 | 6-scf00360 | 6 |
| AX-158202236 | 17 | 73.136 | KV452892.1 | 115164 | 6-scf00360 | 6 |
| AX-157773050 | 17 | 73.136 | KV452892.1 | 124215 | 6-scf00360 | 6 |
| AX-157751704 | 17 | 73.136 | KV452892.1 | 128174 | 6-scf00360 | 6 |
| AX-158202244 | 17 | 73.245 | KV452892.1 | 136312 | 6-scf00360 | 6 |
| AX-157887030 | 17 | 73.245 | KV452892.1 | 144635 | 6-scf00360 | 6 |
| AX-157774542 | 17 | 73.245 | KV452892.1 | 145006 | 6-scf00360 | 6 |
| AX-158202250 | 17 | 73.245 | KV452892.1 | 146785 | 6-scf00360 | 6 |
| AX-158202251 | 17 | 73.245 | KV452892.1 | 147540 | 6-scf00360 | 6 |
| AX-158202252 | 17 | 73.245 | KV452892.1 | 147836 | 6-scf00360 | 6 |
| AX-158202257 | 17 | 73.245 | KV452892.1 | 153430 | 6-scf00360 | 6 |
| AX-157753412 | 17 | 73.3   | KV452892.1 | 151215 | 6-scf00360 | 6 |
| AX-157751776 | 17 | 73.3   | KV452892.1 | 246264 | 6-scf00360 | 6 |
| AX-158202180 | 17 | 73.355 | KV452892.1 | 55295  | 6-scf00360 | 6 |
| AX-158202238 | 17 | 73.355 | KV452892.1 | 121358 | 6-scf00360 | 6 |
| AX-157887031 | 17 | 73.355 | KV452892.1 | 161591 | 6-scf00360 | 6 |
| AX-158202272 | 17 | 73.355 | KV452892.1 | 176869 | 6-scf00360 | 6 |
| AX-158202273 | 17 | 73.355 | KV452892.1 | 177818 | 6-scf00360 | 6 |
| AX-158202275 | 17 | 73.355 | KV452892.1 | 180508 | 6-scf00360 | 6 |
| AX-158202278 | 17 | 73.355 | KV452892.1 | 187936 | 6-scf00360 | 6 |
| AX-158202280 | 17 | 73.355 | KV452892.1 | 189352 | 6-scf00360 | 6 |
| AX-158202281 | 17 | 73.355 | KV452892.1 | 191128 | 6-scf00360 | 6 |
| AX-158202283 | 17 | 73.355 | KV452892.1 | 191607 | 6-scf00360 | 6 |
| AX-158202284 | 17 | 73.355 | KV452892.1 | 192666 | 6-scf00360 | 6 |
| AX-158202291 | 17 | 73.355 | KV452892.1 | 203628 | 6-scf00360 | 6 |
| AX-158202296 | 17 | 73.355 | KV452892.1 | 213390 | 6-scf00360 | 6 |
| AX-158202299 | 17 | 73.355 | KV452892.1 | 215483 | 6-scf00360 | 6 |
| AX-157887032 | 17 | 73.355 | KV452892.1 | 215963 | 6-scf00360 | 6 |
| AX-157756032 | 17 | 73.355 | KV452892.1 | 225096 | 6-scf00360 | 6 |
| AX-158202301 | 17 | 73.355 | KV452892.1 | 226132 | 6-scf00360 | 6 |

|              |    |        |            |          |            |   |
|--------------|----|--------|------------|----------|------------|---|
| AX-158202304 | 17 | 73.355 | KV452892.1 | 232510   | 6-scf00360 | 6 |
| AX-158202305 | 17 | 73.355 | KV452892.1 | 233465   | 6-scf00360 | 6 |
| AX-157758906 | 17 | 73.355 | KV452892.1 | 234346   | 6-scf00360 | 6 |
| AX-158202309 | 17 | 73.355 | KV452892.1 | 239436   | 6-scf00360 | 6 |
| AX-157719639 | 17 | 73.355 | KV452892.1 | 243333   | 6-scf00360 | 6 |
| AX-157837542 | 17 | 73.355 | KV452892.1 | 247443   | 6-scf00360 | 6 |
| AX-157872300 | 17 | 73.355 | KV452892.1 | 254509   | 6-scf00360 | 6 |
| AX-158202318 | 17 | 73.355 | KV452892.1 | 255064   | 6-scf00360 | 6 |
| AX-158202321 | 17 | 73.355 | KV452892.1 | 257386   | 6-scf00360 | 6 |
| AX-158378991 | 17 | 73.355 | KV452892.1 | 261638   | 6-scf00360 | 6 |
| AX-157837543 | 17 | 73.355 | KV452892.1 | 262223   | 6-scf00360 | 6 |
| AX-158202334 | 17 | 73.355 | KV452892.1 | 280425   | 6-scf00360 | 6 |
| AX-158202336 | 17 | 73.355 | KV452892.1 | 283182   | 6-scf00360 | 6 |
| AX-157837544 | 17 | 73.355 | KV452892.1 | 283788   | 6-scf00360 | 6 |
| AX-158202338 | 17 | 73.355 | KV452892.1 | 286090   | 6-scf00360 | 6 |
| AX-157859012 | 17 | 73.355 | KV452892.1 | 286579   | 6-scf00360 | 6 |
| AX-157837545 | 17 | 73.355 | KV452892.1 | 286901   | 6-scf00360 | 6 |
| AX-158202339 | 17 | 73.355 | KV452892.1 | 287359   | 6-scf00360 | 6 |
| AX-158202346 | 17 | 73.355 | KV452892.1 | 297617   | 6-scf00360 | 6 |
| AX-157837549 | 17 | 73.355 | KV452892.1 | 298173   | 6-scf00360 | 6 |
| AX-158202351 | 17 | 73.355 | KV452892.1 | 313340   | 6-scf00360 | 6 |
| AX-158202390 | 17 | 73.355 | KV452892.1 | 376269   | 6-scf00360 | 6 |
| AX-158202392 | 17 | 73.355 | KV452892.1 | 377668   | 6-scf00360 | 6 |
| AX-158202397 | 17 | 73.355 | KV452892.1 | 383464   | 6-scf00360 | 6 |
| AX-158202398 | 17 | 73.355 | KV452892.1 | 383785   | 6-scf00360 | 6 |
| AX-158202401 | 17 | 73.355 | KV452892.1 | 387902   | 6-scf00360 | 6 |
| AX-157703198 | 17 | 73.355 | KV452892.1 | 414725   | 6-scf00360 | 6 |
| AX-158202417 | 17 | 73.355 | KV452892.1 | 423756   | 6-scf00360 | 6 |
| AX-158202426 | 17 | 73.355 | KV452892.1 | 445014   | 6-scf00360 | 6 |
| AX-158378995 | 17 | 73.355 | KV452892.1 | 448021   | 6-scf00360 | 6 |
| AX-158202434 | 17 | 73.355 | KV452892.1 | 461496   | 6-scf00360 | 6 |
| AX-158202439 | 17 | 73.355 | KV452892.1 | 466026   | 6-scf00360 | 6 |
| AX-157859016 | 17 | 73.355 | KV452892.1 | 470922   | 6-scf00360 | 6 |
| AX-158202448 | 17 | 73.355 | KV452892.1 | 488238   | 6-scf00360 | 6 |
| AX-158202455 | 17 | 73.355 | KV452892.1 | 501045   | 6-scf00360 | 6 |
| AX-158202474 | 17 | 73.355 | KV452892.1 | 531002   | 6-scf00360 | 6 |
| AX-158202490 | 17 | 73.355 | KV452892.1 | 562982   | 6-scf00360 | 6 |
| AX-158202512 | 17 | 73.355 | KV452892.1 | 632035   | 6-scf00360 | 6 |
| AX-158202539 | 17 | 73.355 | KV452892.1 | 669866   | 6-scf00360 | 6 |
| AX-158202540 | 17 | 73.355 | KV452892.1 | 670577   | 6-scf00360 | 6 |
| AX-158202547 | 17 | 73.355 | KV452892.1 | 689482   | 6-scf00360 | 6 |
| AX-158202554 | 17 | 73.355 | KV452892.1 | 706237   | 6-scf00360 | 6 |
| AX-158202558 | 17 | 73.355 | KV452892.1 | 722463   | 6-scf00360 | 6 |
| AX-158202650 | 17 | 73.355 | KV452892.1 | 845456   | 6-scf00360 | 6 |
| AX-158196611 | 17 | 73.464 | KV452884.1 | 12160799 | 6-scf00352 | 6 |
| AX-157837069 | 17 | 73.464 | KV452884.1 | 12347328 | 6-scf00352 | 6 |
| AX-158200610 | 17 | 73.464 | KV452891.1 | 354886   | 6-scf00356 | 6 |
| AX-158202241 | 17 | 73.464 | KV452892.1 | 126529   | 6-scf00360 | 6 |
| AX-158202265 | 17 | 73.464 | KV452892.1 | 165795   | 6-scf00360 | 6 |
| AX-158202298 | 17 | 73.464 | KV452892.1 | 215104   | 6-scf00360 | 6 |
| AX-158202308 | 17 | 73.464 | KV452892.1 | 238614   | 6-scf00360 | 6 |

|              |    |        |            |        |            |   |
|--------------|----|--------|------------|--------|------------|---|
| AX-158202312 | 17 | 73.464 | KV452892.1 | 244501 | 6-scf00360 | 6 |
| AX-158202322 | 17 | 73.464 | KV452892.1 | 257755 | 6-scf00360 | 6 |
| AX-158202326 | 17 | 73.464 | KV452892.1 | 263856 | 6-scf00360 | 6 |
| AX-158202327 | 17 | 73.464 | KV452892.1 | 264553 | 6-scf00360 | 6 |
| AX-158202330 | 17 | 73.464 | KV452892.1 | 270208 | 6-scf00360 | 6 |
| AX-157859013 | 17 | 73.464 | KV452892.1 | 295835 | 6-scf00360 | 6 |
| AX-158202347 | 17 | 73.464 | KV452892.1 | 304180 | 6-scf00360 | 6 |
| AX-158202352 | 17 | 73.464 | KV452892.1 | 314740 | 6-scf00360 | 6 |
| AX-158202359 | 17 | 73.464 | KV452892.1 | 326520 | 6-scf00360 | 6 |
| AX-158202361 | 17 | 73.464 | KV452892.1 | 330953 | 6-scf00360 | 6 |
| AX-158202363 | 17 | 73.464 | KV452892.1 | 332880 | 6-scf00360 | 6 |
| AX-157837553 | 17 | 73.464 | KV452892.1 | 333916 | 6-scf00360 | 6 |
| AX-158202365 | 17 | 73.464 | KV452892.1 | 334152 | 6-scf00360 | 6 |
| AX-158202366 | 17 | 73.464 | KV452892.1 | 335148 | 6-scf00360 | 6 |
| AX-158202367 | 17 | 73.464 | KV452892.1 | 336147 | 6-scf00360 | 6 |
| AX-157879296 | 17 | 73.464 | KV452892.1 | 336209 | 6-scf00360 | 6 |
| AX-158202368 | 17 | 73.464 | KV452892.1 | 337216 | 6-scf00360 | 6 |
| AX-158202370 | 17 | 73.464 | KV452892.1 | 345686 | 6-scf00360 | 6 |
| AX-158202382 | 17 | 73.464 | KV452892.1 | 362920 | 6-scf00360 | 6 |
| AX-157879298 | 17 | 73.464 | KV452892.1 | 367105 | 6-scf00360 | 6 |
| AX-158202384 | 17 | 73.464 | KV452892.1 | 368124 | 6-scf00360 | 6 |
| AX-158409873 | 17 | 73.464 | KV452892.1 | 368629 | 6-scf00360 | 6 |
| AX-158378994 | 17 | 73.464 | KV452892.1 | 369682 | 6-scf00360 | 6 |
| AX-157774732 | 17 | 73.464 | KV452892.1 | 370959 | 6-scf00360 | 6 |
| AX-158202394 | 17 | 73.464 | KV452892.1 | 379448 | 6-scf00360 | 6 |
| AX-158202400 | 17 | 73.464 | KV452892.1 | 386661 | 6-scf00360 | 6 |
| AX-158202404 | 17 | 73.464 | KV452892.1 | 394941 | 6-scf00360 | 6 |
| AX-158202405 | 17 | 73.464 | KV452892.1 | 395823 | 6-scf00360 | 6 |
| AX-157746575 | 17 | 73.464 | KV452892.1 | 398313 | 6-scf00360 | 6 |
| AX-157837557 | 17 | 73.464 | KV452892.1 | 399191 | 6-scf00360 | 6 |
| AX-158202408 | 17 | 73.464 | KV452892.1 | 404407 | 6-scf00360 | 6 |
| AX-158202410 | 17 | 73.464 | KV452892.1 | 408041 | 6-scf00360 | 6 |
| AX-158202415 | 17 | 73.464 | KV452892.1 | 416917 | 6-scf00360 | 6 |
| AX-158202416 | 17 | 73.464 | KV452892.1 | 418384 | 6-scf00360 | 6 |
| AX-158202421 | 17 | 73.464 | KV452892.1 | 434754 | 6-scf00360 | 6 |
| AX-157746354 | 17 | 73.464 | KV452892.1 | 436304 | 6-scf00360 | 6 |
| AX-158202430 | 17 | 73.464 | KV452892.1 | 455098 | 6-scf00360 | 6 |
| AX-158202431 | 17 | 73.464 | KV452892.1 | 456429 | 6-scf00360 | 6 |
| AX-158202437 | 17 | 73.464 | KV452892.1 | 463306 | 6-scf00360 | 6 |
| AX-157837560 | 17 | 73.464 | KV452892.1 | 468418 | 6-scf00360 | 6 |
| AX-158202445 | 17 | 73.464 | KV452892.1 | 480304 | 6-scf00360 | 6 |
| AX-158202464 | 17 | 73.464 | KV452892.1 | 514877 | 6-scf00360 | 6 |
| AX-157720675 | 17 | 73.464 | KV452892.1 | 550962 | 6-scf00360 | 6 |
| AX-157716474 | 17 | 73.464 | KV452892.1 | 593040 | 6-scf00360 | 6 |
| AX-158202506 | 17 | 73.464 | KV452892.1 | 616623 | 6-scf00360 | 6 |
| AX-158202509 | 17 | 73.464 | KV452892.1 | 623623 | 6-scf00360 | 6 |
| AX-158202520 | 17 | 73.464 | KV452892.1 | 639574 | 6-scf00360 | 6 |
| AX-158202527 | 17 | 73.464 | KV452892.1 | 649934 | 6-scf00360 | 6 |
| AX-158202531 | 17 | 73.464 | KV452892.1 | 654911 | 6-scf00360 | 6 |
| AX-158202532 | 17 | 73.464 | KV452892.1 | 657300 | 6-scf00360 | 6 |
| AX-158202533 | 17 | 73.464 | KV452892.1 | 658200 | 6-scf00360 | 6 |

|              |    |        |            |         |            |   |
|--------------|----|--------|------------|---------|------------|---|
| AX-158202597 | 17 | 73.464 | KV452892.1 | 767538  | 6-scf00360 | 6 |
| AX-158202626 | 17 | 73.464 | KV452892.1 | 803811  | 6-scf00360 | 6 |
| AX-158202763 | 17 | 73.464 | KV452892.1 | 1003179 | 6-scf00360 | 6 |
| AX-157686597 | 17 | 73.464 | KV452885.1 | 145623  | 6-scf00617 | 6 |
| AX-158202310 | 17 | 73.573 | KV452892.1 | 240696  | 6-scf00360 | 6 |
| AX-158202323 | 17 | 73.573 | KV452892.1 | 260559  | 6-scf00360 | 6 |
| AX-157709191 | 17 | 73.573 | KV452892.1 | 275216  | 6-scf00360 | 6 |
| AX-158202357 | 17 | 73.573 | KV452892.1 | 323089  | 6-scf00360 | 6 |
| AX-158202375 | 17 | 73.573 | KV452892.1 | 353704  | 6-scf00360 | 6 |
| AX-158202377 | 17 | 73.573 | KV452892.1 | 356157  | 6-scf00360 | 6 |
| AX-158202393 | 17 | 73.573 | KV452892.1 | 378252  | 6-scf00360 | 6 |
| AX-157773983 | 17 | 73.573 | KV452892.1 | 402162  | 6-scf00360 | 6 |
| AX-157715309 | 17 | 73.573 | KV452892.1 | 413703  | 6-scf00360 | 6 |
| AX-157837558 | 17 | 73.573 | KV452892.1 | 440250  | 6-scf00360 | 6 |
| AX-158202433 | 17 | 73.573 | KV452892.1 | 458348  | 6-scf00360 | 6 |
| AX-158202441 | 17 | 73.573 | KV452892.1 | 469919  | 6-scf00360 | 6 |
| AX-158202443 | 17 | 73.573 | KV452892.1 | 478671  | 6-scf00360 | 6 |
| AX-158202454 | 17 | 73.573 | KV452892.1 | 500513  | 6-scf00360 | 6 |
| AX-158202456 | 17 | 73.573 | KV452892.1 | 502468  | 6-scf00360 | 6 |
| AX-158378996 | 17 | 73.573 | KV452892.1 | 512368  | 6-scf00360 | 6 |
| AX-158202462 | 17 | 73.573 | KV452892.1 | 513110  | 6-scf00360 | 6 |
| AX-158202466 | 17 | 73.573 | KV452892.1 | 516096  | 6-scf00360 | 6 |
| AX-158202467 | 17 | 73.573 | KV452892.1 | 521071  | 6-scf00360 | 6 |
| AX-157837562 | 17 | 73.573 | KV452892.1 | 543864  | 6-scf00360 | 6 |
| AX-157837563 | 17 | 73.573 | KV452892.1 | 545170  | 6-scf00360 | 6 |
| AX-157837564 | 17 | 73.573 | KV452892.1 | 545639  | 6-scf00360 | 6 |
| AX-157837565 | 17 | 73.573 | KV452892.1 | 545718  | 6-scf00360 | 6 |
| AX-157837566 | 17 | 73.573 | KV452892.1 | 546033  | 6-scf00360 | 6 |
| AX-157749234 | 17 | 73.573 | KV452892.1 | 548501  | 6-scf00360 | 6 |
| AX-158202484 | 17 | 73.573 | KV452892.1 | 550176  | 6-scf00360 | 6 |
| AX-158202486 | 17 | 73.573 | KV452892.1 | 553475  | 6-scf00360 | 6 |
| AX-157837567 | 17 | 73.573 | KV452892.1 | 554238  | 6-scf00360 | 6 |
| AX-157837568 | 17 | 73.573 | KV452892.1 | 554532  | 6-scf00360 | 6 |
| AX-158202487 | 17 | 73.573 | KV452892.1 | 554831  | 6-scf00360 | 6 |
| AX-158202488 | 17 | 73.573 | KV452892.1 | 558282  | 6-scf00360 | 6 |
| AX-157726382 | 17 | 73.573 | KV452892.1 | 559721  | 6-scf00360 | 6 |
| AX-157751175 | 17 | 73.573 | KV452892.1 | 561583  | 6-scf00360 | 6 |
| AX-157750636 | 17 | 73.573 | KV452892.1 | 580179  | 6-scf00360 | 6 |
| AX-158202496 | 17 | 73.573 | KV452892.1 | 580837  | 6-scf00360 | 6 |
| AX-158202507 | 17 | 73.573 | KV452892.1 | 616736  | 6-scf00360 | 6 |
| AX-158202514 | 17 | 73.573 | KV452892.1 | 633225  | 6-scf00360 | 6 |
| AX-158202515 | 17 | 73.573 | KV452892.1 | 633545  | 6-scf00360 | 6 |
| AX-157837574 | 17 | 73.573 | KV452892.1 | 633995  | 6-scf00360 | 6 |
| AX-158202516 | 17 | 73.573 | KV452892.1 | 634471  | 6-scf00360 | 6 |
| AX-158414302 | 17 | 73.573 | KV452892.1 | 636511  | 6-scf00360 | 6 |
| AX-158202521 | 17 | 73.573 | KV452892.1 | 640516  | 6-scf00360 | 6 |
| AX-158202537 | 17 | 73.573 | KV452892.1 | 667180  | 6-scf00360 | 6 |
| AX-158202538 | 17 | 73.573 | KV452892.1 | 667939  | 6-scf00360 | 6 |
| AX-158202553 | 17 | 73.573 | KV452892.1 | 704992  | 6-scf00360 | 6 |
| AX-158202753 | 17 | 73.573 | KV452892.1 | 994736  | 6-scf00360 | 6 |
| AX-158202529 | 17 | 73.73  | KV452892.1 | 653412  | 6-scf00360 | 6 |

|              |    |        |            |        |            |   |
|--------------|----|--------|------------|--------|------------|---|
| AX-158202253 | 17 | 73.782 | KV452892.1 | 148567 | 6-scf00360 | 6 |
| AX-157723939 | 17 | 73.782 | KV452892.1 | 161821 | 6-scf00360 | 6 |
| AX-158202505 | 17 | 73.782 | KV452892.1 | 615500 | 6-scf00360 | 6 |
| AX-157756283 | 17 | 73.782 | KV452892.1 | 624827 | 6-scf00360 | 6 |
| AX-158202535 | 17 | 73.782 | KV452892.1 | 666223 | 6-scf00360 | 6 |
| AX-158202536 | 17 | 73.782 | KV452892.1 | 666589 | 6-scf00360 | 6 |
| AX-158202545 | 17 | 73.782 | KV452892.1 | 679330 | 6-scf00360 | 6 |
| AX-157755637 | 17 | 73.798 | KV452892.1 | 679848 | 6-scf00360 | 6 |
| AX-158202550 | 17 | 73.798 | KV452892.1 | 694128 | 6-scf00360 | 6 |
| AX-158202551 | 17 | 73.798 | KV452892.1 | 695049 | 6-scf00360 | 6 |
| AX-157726811 | 17 | 73.798 | KV452892.1 | 698547 | 6-scf00360 | 6 |
| AX-158202407 | 17 | 74.119 | KV452892.1 | 402467 | 6-scf00360 | 6 |
| AX-158202568 | 17 | 74.119 | KV452892.1 | 733464 | 6-scf00360 | 6 |
| AX-157837580 | 17 | 74.119 | KV452892.1 | 734275 | 6-scf00360 | 6 |
| AX-158202570 | 17 | 74.119 | KV452892.1 | 734599 | 6-scf00360 | 6 |
| AX-157837581 | 17 | 74.119 | KV452892.1 | 734812 | 6-scf00360 | 6 |
| AX-158202571 | 17 | 74.119 | KV452892.1 | 735484 | 6-scf00360 | 6 |
| AX-158202577 | 17 | 74.119 | KV452892.1 | 741869 | 6-scf00360 | 6 |
| AX-157837585 | 17 | 74.119 | KV452892.1 | 742189 | 6-scf00360 | 6 |
| AX-158202578 | 17 | 74.119 | KV452892.1 | 743516 | 6-scf00360 | 6 |
| AX-158202580 | 17 | 74.119 | KV452892.1 | 746056 | 6-scf00360 | 6 |
| AX-158202583 | 17 | 74.119 | KV452892.1 | 748874 | 6-scf00360 | 6 |
| AX-158202584 | 17 | 74.119 | KV452892.1 | 749459 | 6-scf00360 | 6 |
| AX-158202585 | 17 | 74.119 | KV452892.1 | 751035 | 6-scf00360 | 6 |
| AX-157837586 | 17 | 74.119 | KV452892.1 | 751364 | 6-scf00360 | 6 |
| AX-158202586 | 17 | 74.119 | KV452892.1 | 752954 | 6-scf00360 | 6 |
| AX-157837587 | 17 | 74.119 | KV452892.1 | 757346 | 6-scf00360 | 6 |
| AX-158202588 | 17 | 74.119 | KV452892.1 | 758717 | 6-scf00360 | 6 |
| AX-158202590 | 17 | 74.119 | KV452892.1 | 759254 | 6-scf00360 | 6 |
| AX-157756773 | 17 | 74.119 | KV452892.1 | 759527 | 6-scf00360 | 6 |
| AX-157837588 | 17 | 74.119 | KV452892.1 | 759881 | 6-scf00360 | 6 |
| AX-158202591 | 17 | 74.119 | KV452892.1 | 760140 | 6-scf00360 | 6 |
| AX-157837589 | 17 | 74.119 | KV452892.1 | 763732 | 6-scf00360 | 6 |
| AX-158202594 | 17 | 74.119 | KV452892.1 | 765421 | 6-scf00360 | 6 |
| AX-157837591 | 17 | 74.119 | KV452892.1 | 766144 | 6-scf00360 | 6 |
| AX-158202632 | 17 | 74.119 | KV452892.1 | 813204 | 6-scf00360 | 6 |
| AX-157837599 | 17 | 74.119 | KV452892.1 | 813912 | 6-scf00360 | 6 |
| AX-157837601 | 17 | 74.119 | KV452892.1 | 836003 | 6-scf00360 | 6 |
| AX-157837592 | 17 | 74.133 | KV452892.1 | 774820 | 6-scf00360 | 6 |
| AX-157738971 | 17 | 74.133 | KV452892.1 | 774888 | 6-scf00360 | 6 |
| AX-158202639 | 17 | 74.133 | KV452892.1 | 829457 | 6-scf00360 | 6 |
| AX-158202604 | 17 | 74.143 | KV452892.1 | 776813 | 6-scf00360 | 6 |
| AX-158202608 | 17 | 74.143 | KV452892.1 | 780734 | 6-scf00360 | 6 |
| AX-158202612 | 17 | 74.143 | KV452892.1 | 785107 | 6-scf00360 | 6 |
| AX-158202613 | 17 | 74.143 | KV452892.1 | 785361 | 6-scf00360 | 6 |
| AX-158202614 | 17 | 74.143 | KV452892.1 | 786070 | 6-scf00360 | 6 |
| AX-158202589 | 17 | 74.155 | KV452892.1 | 758943 | 6-scf00360 | 6 |
| AX-158202607 | 17 | 74.155 | KV452892.1 | 778375 | 6-scf00360 | 6 |
| AX-158202610 | 17 | 74.155 | KV452892.1 | 781555 | 6-scf00360 | 6 |
| AX-158202609 | 17 | 74.169 | KV452892.1 | 780944 | 6-scf00360 | 6 |
| AX-158202611 | 17 | 74.185 | KV452892.1 | 782493 | 6-scf00360 | 6 |



|              |    |        |            |        |            |   |
|--------------|----|--------|------------|--------|------------|---|
| AX-157734087 | 17 | 74.2   | KV452892.1 | 783528 | 6-scf00360 | 6 |
| AX-157742493 | 17 | 74.214 | KV452892.1 | 787055 | 6-scf00360 | 6 |
| AX-158202587 | 17 | 74.228 | KV452892.1 | 754402 | 6-scf00360 | 6 |
| AX-158202592 | 17 | 74.228 | KV452892.1 | 760999 | 6-scf00360 | 6 |
| AX-157741193 | 17 | 74.228 | KV452892.1 | 765546 | 6-scf00360 | 6 |
| AX-158202618 | 17 | 74.228 | KV452892.1 | 789895 | 6-scf00360 | 6 |
| AX-158202621 | 17 | 74.228 | KV452892.1 | 792778 | 6-scf00360 | 6 |
| AX-157837594 | 17 | 74.228 | KV452892.1 | 794749 | 6-scf00360 | 6 |
| AX-157713845 | 17 | 74.228 | KV452892.1 | 796507 | 6-scf00360 | 6 |
| AX-158202631 | 17 | 74.228 | KV452892.1 | 811173 | 6-scf00360 | 6 |
| AX-157837596 | 17 | 74.228 | KV452892.1 | 811619 | 6-scf00360 | 6 |
| AX-157837598 | 17 | 74.228 | KV452892.1 | 813267 | 6-scf00360 | 6 |
| AX-157837600 | 17 | 74.228 | KV452892.1 | 824294 | 6-scf00360 | 6 |
| AX-158202637 | 17 | 74.228 | KV452892.1 | 824734 | 6-scf00360 | 6 |
| AX-157837602 | 17 | 74.228 | KV452892.1 | 836824 | 6-scf00360 | 6 |
| AX-158202645 | 17 | 74.228 | KV452892.1 | 840033 | 6-scf00360 | 6 |
| AX-158202669 | 17 | 74.228 | KV452892.1 | 891968 | 6-scf00360 | 6 |
| AX-158202676 | 17 | 74.228 | KV452892.1 | 905805 | 6-scf00360 | 6 |
| AX-158202649 | 17 | 74.515 | KV452892.1 | 843748 | 6-scf00360 | 6 |
| AX-158202654 | 17 | 74.515 | KV452892.1 | 863596 | 6-scf00360 | 6 |
| AX-157714316 | 17 | 74.515 | KV452892.1 | 864435 | 6-scf00360 | 6 |
| AX-158202657 | 17 | 74.515 | KV452892.1 | 871438 | 6-scf00360 | 6 |
| AX-157723309 | 17 | 74.684 | KV452892.1 | 899171 | 6-scf00360 | 6 |
| AX-158202673 | 17 | 75.103 | KV452892.1 | 898744 | 6-scf00360 | 6 |
| AX-158202678 | 17 | 75.103 | KV452892.1 | 907910 | 6-scf00360 | 6 |
| AX-158202681 | 17 | 75.103 | KV452892.1 | 910208 | 6-scf00360 | 6 |
| AX-157746065 | 17 | 75.103 | KV452892.1 | 911708 | 6-scf00360 | 6 |
| AX-158202682 | 17 | 75.103 | KV452892.1 | 916826 | 6-scf00360 | 6 |
| AX-158202687 | 17 | 75.103 | KV452892.1 | 924641 | 6-scf00360 | 6 |
| AX-158202689 | 17 | 75.103 | KV452892.1 | 928268 | 6-scf00360 | 6 |
| AX-158202690 | 17 | 75.103 | KV452892.1 | 928771 | 6-scf00360 | 6 |
| AX-157751297 | 17 | 75.103 | KV452892.1 | 930929 | 6-scf00360 | 6 |
| AX-158202709 | 17 | 75.103 | KV452892.1 | 949812 | 6-scf00360 | 6 |
| AX-158202685 | 17 | 75.276 | KV452892.1 | 923846 | 6-scf00360 | 6 |
| AX-158202692 | 17 | 75.276 | KV452892.1 | 931373 | 6-scf00360 | 6 |
| AX-158202707 | 17 | 75.276 | KV452892.1 | 947429 | 6-scf00360 | 6 |
| AX-158202697 | 17 | 75.466 | KV452892.1 | 937463 | 6-scf00360 | 6 |
| AX-158202701 | 17 | 75.467 | KV452892.1 | 942166 | 6-scf00360 | 6 |
| AX-158202704 | 17 | 75.467 | KV452892.1 | 945932 | 6-scf00360 | 6 |
| AX-158202706 | 17 | 75.467 | KV452892.1 | 946831 | 6-scf00360 | 6 |
| AX-158202700 | 17 | 75.496 | KV452892.1 | 940575 | 6-scf00360 | 6 |
| AX-158202702 | 17 | 75.496 | KV452892.1 | 943786 | 6-scf00360 | 6 |
| AX-158202710 | 17 | 75.496 | KV452892.1 | 950602 | 6-scf00360 | 6 |
| AX-158202715 | 17 | 75.552 | KV452892.1 | 956708 | 6-scf00360 | 6 |
| AX-158202699 | 17 | 75.649 | KV452892.1 | 939952 | 6-scf00360 | 6 |
| AX-158202713 | 17 | 75.649 | KV452892.1 | 954328 | 6-scf00360 | 6 |
| AX-158202719 | 17 | 75.649 | KV452892.1 | 960138 | 6-scf00360 | 6 |
| AX-158202728 | 17 | 75.649 | KV452892.1 | 971305 | 6-scf00360 | 6 |
| AX-158202729 | 17 | 75.649 | KV452892.1 | 971777 | 6-scf00360 | 6 |
| AX-158202733 | 17 | 75.649 | KV452892.1 | 978174 | 6-scf00360 | 6 |
| AX-158202734 | 17 | 75.649 | KV452892.1 | 979142 | 6-scf00360 | 6 |

|              |    |        |            |         |            |   |
|--------------|----|--------|------------|---------|------------|---|
| AX-158202736 | 17 | 75.649 | KV452892.1 | 981291  | 6-scf00360 | 6 |
| AX-158202739 | 17 | 75.649 | KV452892.1 | 983923  | 6-scf00360 | 6 |
| AX-158202740 | 17 | 75.649 | KV452892.1 | 985723  | 6-scf00360 | 6 |
| AX-158202741 | 17 | 75.649 | KV452892.1 | 988039  | 6-scf00360 | 6 |
| AX-158202742 | 17 | 75.649 | KV452892.1 | 988278  | 6-scf00360 | 6 |
| AX-158202743 | 17 | 75.649 | KV452892.1 | 988548  | 6-scf00360 | 6 |
| AX-158202744 | 17 | 75.649 | KV452892.1 | 989261  | 6-scf00360 | 6 |
| AX-158202745 | 17 | 75.735 | KV452892.1 | 989758  | 6-scf00360 | 6 |
| AX-158202759 | 17 | 75.788 | KV452892.1 | 1000604 | 6-scf00360 | 6 |
| AX-158202760 | 17 | 75.868 | KV452892.1 | 1001205 | 6-scf00360 | 6 |
| AX-158202761 | 17 | 75.868 | KV452892.1 | 1001518 | 6-scf00360 | 6 |
| AX-158202762 | 17 | 75.868 | KV452892.1 | 1002661 | 6-scf00360 | 6 |
| AX-157753344 | 17 | 75.868 | KV452892.1 | 1010324 | 6-scf00360 | 6 |
| AX-158202773 | 17 | 75.868 | KV452892.1 | 1012136 | 6-scf00360 | 6 |
| AX-158202774 | 17 | 75.868 | KV452892.1 | 1013360 | 6-scf00360 | 6 |
| AX-158202784 | 17 | 75.868 | KV452892.1 | 1025080 | 6-scf00360 | 6 |
| AX-158202792 | 17 | 75.868 | KV452892.1 | 1030250 | 6-scf00360 | 6 |
| AX-158202778 | 17 | 75.899 | KV452892.1 | 1019253 | 6-scf00360 | 6 |
| AX-158202779 | 17 | 75.928 | KV452892.1 | 1020212 | 6-scf00360 | 6 |
| AX-157872305 | 17 | 75.946 | KV452892.1 | 1023940 | 6-scf00360 | 6 |
| AX-158202737 | 17 | 75.977 | KV452892.1 | 982039  | 6-scf00360 | 6 |
| AX-158202776 | 17 | 75.977 | KV452892.1 | 1017559 | 6-scf00360 | 6 |
| AX-158202786 | 17 | 75.977 | KV452892.1 | 1026081 | 6-scf00360 | 6 |
| AX-158202790 | 17 | 75.977 | KV452892.1 | 1029185 | 6-scf00360 | 6 |
| AX-157758845 | 17 | 75.977 | KV452892.1 | 1031173 | 6-scf00360 | 6 |
| AX-158202811 | 17 | 75.977 | KV452892.1 | 1056505 | 6-scf00360 | 6 |
| AX-157770667 | 17 | 75.982 | KV452892.1 | 1031937 | 6-scf00360 | 6 |
| AX-157726725 | 17 | 76.06  | KV452892.1 | 1036123 | 6-scf00360 | 6 |
| AX-158202622 | 17 | 76.242 | KV452892.1 | 794419  | 6-scf00360 | 6 |
| AX-157879302 | 17 | 76.242 | KV452892.1 | 821853  | 6-scf00360 | 6 |
| AX-158202671 | 17 | 76.242 | KV452892.1 | 896173  | 6-scf00360 | 6 |
| AX-158386252 | 17 | 76.242 | KV452892.1 | 910155  | 6-scf00360 | 6 |
| AX-158202730 | 17 | 76.242 | KV452892.1 | 973509  | 6-scf00360 | 6 |
| AX-158202749 | 17 | 76.242 | KV452892.1 | 992100  | 6-scf00360 | 6 |
| AX-158202752 | 17 | 76.242 | KV452892.1 | 994495  | 6-scf00360 | 6 |
| AX-157866881 | 17 | 76.242 | KV452892.1 | 1027414 | 6-scf00360 | 6 |
| AX-158202798 | 17 | 76.242 | KV452892.1 | 1038300 | 6-scf00360 | 6 |
| AX-157694290 | 17 | 76.242 | KV452892.1 | 1043902 | 6-scf00360 | 6 |
| AX-157696697 | 17 | 76.242 | KV452892.1 | 1044388 | 6-scf00360 | 6 |
| AX-158202803 | 17 | 76.242 | KV452892.1 | 1049075 | 6-scf00360 | 6 |
| AX-157872307 | 17 | 76.242 | KV452892.1 | 1074167 | 6-scf00360 | 6 |
| AX-158202805 | 17 | 76.601 | KV452892.1 | 1051792 | 6-scf00360 | 6 |
| AX-158202808 | 17 | 76.617 | KV452892.1 | 1054560 | 6-scf00360 | 6 |
| AX-157837610 | 17 | 76.719 | KV452892.1 | 1054610 | 6-scf00360 | 6 |
| AX-158202809 | 17 | 76.775 | KV452892.1 | 1055208 | 6-scf00360 | 6 |
| AX-158202812 | 17 | 76.851 | KV452892.1 | 1059021 | 6-scf00360 | 6 |
| AX-158202814 | 17 | 76.852 | KV452892.1 | 1061615 | 6-scf00360 | 6 |
| AX-158202629 | 17 | 76.853 | KV452892.1 | 806372  | 6-scf00360 | 6 |
| AX-158202670 | 17 | 76.853 | KV452892.1 | 893807  | 6-scf00360 | 6 |
| AX-158202714 | 17 | 76.853 | KV452892.1 | 955502  | 6-scf00360 | 6 |
| AX-158202815 | 17 | 76.853 | KV452892.1 | 1064936 | 6-scf00360 | 6 |

|              |    |        |            |         |               |    |
|--------------|----|--------|------------|---------|---------------|----|
| AX-158202818 | 17 | 77.179 | KV452892.1 | 1070620 | 6-scf00360    | 6  |
| AX-158202819 | 17 | 77.179 | KV452892.1 | 1071271 | 6-scf00360    | 6  |
| AX-158202820 | 17 | 77.18  | KV452892.1 | 1071819 | 6-scf00360    | 6  |
| AX-158202821 | 17 | 77.18  | KV452892.1 | 1072054 | 6-scf00360    | 6  |
| AX-158202824 | 17 | 77.293 | KV452892.1 | 1078689 | 6-scf00360    | 6  |
| AX-158202825 | 17 | 77.471 | KV452892.1 | 1079168 | 6-scf00360    | 6  |
| AX-158202830 | 17 | 77.471 | KV452892.1 | 1082104 | 6-scf00360    | 6  |
| AX-158202832 | 17 | 77.471 | KV452892.1 | 1082781 | 6-scf00360    | 6  |
| AX-158202840 | 17 | 77.471 | KV452892.1 | 1096194 | 6-scf00360    | 6  |
| AX-158202817 | 17 | 77.617 | KV452892.1 | 1069039 | 6-scf00360    | 6  |
| AX-158202842 | 17 | 77.617 | KV452892.1 | 1098001 | 6-scf00360    | 6  |
| AX-158202843 | 17 | 77.617 | KV452892.1 | 1099190 | 6-scf00360    | 6  |
| AX-158202844 | 17 | 77.617 | KV452892.1 | 1100336 | 6-scf00360    | 6  |
| AX-158202845 | 17 | 77.617 | KV452892.1 | 1101925 | 6-scf00360    | 6  |
| AX-158202850 | 17 | 77.617 | KV452892.1 | 1107137 | 6-scf00360    | 6  |
| AX-158202851 | 17 | 77.617 | KV452892.1 | 1107518 | 6-scf00360    | 6  |
| AX-158202852 | 17 | 77.617 | KV452892.1 | 1109512 | 6-scf00360    | 6  |
| AX-157771689 | 17 | 77.617 | KV452892.1 | 1110341 | 6-scf00360    | 6  |
| AX-158202854 | 17 | 77.617 | KV452892.1 | 1111872 | 6-scf00360    | 6  |
| AX-158202858 | 17 | 77.617 | KV452892.1 | 1115363 | 6-scf00360    | 6  |
| AX-158202862 | 17 | 77.617 | KV452892.1 | 1121018 | 6-scf00360    | 6  |
| AX-158202863 | 17 | 77.617 | KV452892.1 | 1121423 | 6-scf00360    | 6  |
| AX-158202864 | 17 | 77.617 | KV452892.1 | 1123162 | 6-scf00360    | 6  |
| AX-157719546 | 17 | 77.617 | KV452892.1 | 1127638 | 6-scf00360    | 6  |
| AX-157696174 | 17 | 77.617 | FI875884.1 | 576     | ORI212 lctalu | UN |
| AX-158202866 | 17 | 77.621 | KV452892.1 | 1128301 | 6-scf00360    | 6  |
| AX-158202867 | 17 | 77.71  | KV452892.1 | 1129412 | 6-scf00360    | 6  |
| AX-158202869 | 17 | 77.793 | KV452892.1 | 1133322 | 6-scf00360    | 6  |
| AX-158202870 | 17 | 77.879 | KV452892.1 | 1133826 | 6-scf00360    | 6  |
| AX-157714720 | 17 | 78.01  | KV452892.1 | 1143345 | 6-scf00360    | 6  |
| AX-157837611 | 17 | 78.01  | KV452892.1 | 1143650 | 6-scf00360    | 6  |
| AX-158202879 | 17 | 78.01  | KV452892.1 | 1145025 | 6-scf00360    | 6  |
| AX-158202882 | 17 | 78.01  | KV452892.1 | 1147609 | 6-scf00360    | 6  |
| AX-158202889 | 17 | 78.01  | KV452892.1 | 1156191 | 6-scf00360    | 6  |
| AX-158202890 | 17 | 78.01  | KV452892.1 | 1158206 | 6-scf00360    | 6  |
| AX-158202831 | 17 | 78.078 | KV452892.1 | 1082403 | 6-scf00360    | 6  |
| AX-158202891 | 17 | 78.078 | KV452892.1 | 1158713 | 6-scf00360    | 6  |
| AX-158202892 | 17 | 78.141 | KV452892.1 | 1159435 | 6-scf00360    | 6  |
| AX-158380720 | 17 | 78.141 | KV452892.1 | 1160024 | 6-scf00360    | 6  |
| AX-158202893 | 17 | 78.141 | KV452892.1 | 1160154 | 6-scf00360    | 6  |
| AX-158202898 | 17 | 78.273 | KV452892.1 | 1165619 | 6-scf00360    | 6  |
| AX-158202899 | 17 | 78.273 | KV452892.1 | 1166130 | 6-scf00360    | 6  |
| AX-158202900 | 17 | 78.382 | KV452892.1 | 1166493 | 6-scf00360    | 6  |
| AX-157770720 | 17 | 78.382 | KV452892.1 | 1168887 | 6-scf00360    | 6  |
| AX-158202901 | 17 | 78.382 | KV452892.1 | 1170076 | 6-scf00360    | 6  |
| AX-158202902 | 17 | 78.491 | KV452892.1 | 1172235 | 6-scf00360    | 6  |
| AX-157750947 | 17 | 78.491 | KV452892.1 | 1176315 | 6-scf00360    | 6  |
| AX-158202962 | 17 | 78.491 | KV452892.1 | 1254166 | 6-scf00360    | 6  |
| AX-158202908 | 17 | 78.569 | KV452892.1 | 1180343 | 6-scf00360    | 6  |
| AX-158202919 | 17 | 78.6   | KV452892.1 | 1196460 | 6-scf00360    | 6  |
| AX-158202920 | 17 | 78.6   | KV452892.1 | 1197530 | 6-scf00360    | 6  |

|              |    |        |            |         |            |   |
|--------------|----|--------|------------|---------|------------|---|
| AX-158202921 | 17 | 78.6   | KV452892.1 | 1198261 | 6-scf00360 | 6 |
| AX-158202925 | 17 | 78.6   | KV452892.1 | 1202572 | 6-scf00360 | 6 |
| AX-157887040 | 17 | 78.6   | KV452892.1 | 1202934 | 6-scf00360 | 6 |
| AX-157771318 | 17 | 78.6   | KV452892.1 | 1205190 | 6-scf00360 | 6 |
| AX-158202930 | 17 | 78.6   | KV452892.1 | 1206173 | 6-scf00360 | 6 |
| AX-157722304 | 17 | 78.601 | KV452892.1 | 1206716 | 6-scf00360 | 6 |
| AX-158202929 | 17 | 78.633 | KV452892.1 | 1205786 | 6-scf00360 | 6 |
| AX-158202931 | 17 | 78.633 | KV452892.1 | 1207806 | 6-scf00360 | 6 |
| AX-157837614 | 17 | 78.633 | KV452892.1 | 1270245 | 6-scf00360 | 6 |
| AX-157837619 | 17 | 78.633 | KV452892.1 | 1309480 | 6-scf00360 | 6 |
| AX-158202996 | 17 | 78.633 | KV452892.1 | 1313271 | 6-scf00360 | 6 |
| AX-158203034 | 17 | 78.633 | KV452892.1 | 1354859 | 6-scf00360 | 6 |
| AX-158203071 | 17 | 78.633 | KV452892.1 | 1411757 | 6-scf00360 | 6 |
| AX-158202936 | 17 | 78.678 | KV452892.1 | 1213320 | 6-scf00360 | 6 |
| AX-158202927 | 17 | 78.736 | KV452892.1 | 1203521 | 6-scf00360 | 6 |
| AX-158202937 | 17 | 78.736 | KV452892.1 | 1214940 | 6-scf00360 | 6 |
| AX-158202938 | 17 | 78.736 | KV452892.1 | 1215952 | 6-scf00360 | 6 |
| AX-158202939 | 17 | 78.736 | KV452892.1 | 1216616 | 6-scf00360 | 6 |
| AX-158202946 | 17 | 78.736 | KV452892.1 | 1234614 | 6-scf00360 | 6 |
| AX-158202947 | 17 | 78.736 | KV452892.1 | 1235840 | 6-scf00360 | 6 |
| AX-158202961 | 17 | 78.736 | KV452892.1 | 1253524 | 6-scf00360 | 6 |
| AX-158202965 | 17 | 78.736 | KV452892.1 | 1258339 | 6-scf00360 | 6 |
| AX-158202905 | 17 | 78.776 | KV452892.1 | 1175920 | 6-scf00360 | 6 |
| AX-158202942 | 17 | 78.776 | KV452892.1 | 1224322 | 6-scf00360 | 6 |
| AX-158202952 | 17 | 78.851 | KV452892.1 | 1240947 | 6-scf00360 | 6 |
| AX-157725383 | 17 | 78.926 | KV452892.1 | 1242737 | 6-scf00360 | 6 |
| AX-158202958 | 17 | 79.002 | KV452892.1 | 1250039 | 6-scf00360 | 6 |
| AX-158202974 | 17 | 79.002 | KV452892.1 | 1271435 | 6-scf00360 | 6 |
| AX-157887043 | 17 | 79.075 | KV452892.1 | 1255662 | 6-scf00360 | 6 |
| AX-158202966 | 17 | 79.147 | KV452892.1 | 1259287 | 6-scf00360 | 6 |
| AX-157887044 | 17 | 79.147 | KV452892.1 | 1263381 | 6-scf00360 | 6 |
| AX-158202989 | 17 | 79.147 | KV452892.1 | 1297892 | 6-scf00360 | 6 |
| AX-157837615 | 17 | 79.148 | KV452892.1 | 1270325 | 6-scf00360 | 6 |
| AX-157720314 | 17 | 79.148 | KV452892.1 | 1271957 | 6-scf00360 | 6 |
| AX-158202979 | 17 | 79.148 | KV452892.1 | 1279003 | 6-scf00360 | 6 |
| AX-158202982 | 17 | 79.148 | KV452892.1 | 1283241 | 6-scf00360 | 6 |
| AX-157745497 | 17 | 79.148 | KV452892.1 | 1287024 | 6-scf00360 | 6 |
| AX-158202987 | 17 | 79.148 | KV452892.1 | 1296331 | 6-scf00360 | 6 |
| AX-158202988 | 17 | 79.148 | KV452892.1 | 1296550 | 6-scf00360 | 6 |
| AX-158202992 | 17 | 79.148 | KV452892.1 | 1303061 | 6-scf00360 | 6 |
| AX-158202993 | 17 | 79.148 | KV452892.1 | 1304515 | 6-scf00360 | 6 |
| AX-157837622 | 17 | 79.148 | KV452892.1 | 1315146 | 6-scf00360 | 6 |
| AX-158203010 | 17 | 79.148 | KV452892.1 | 1329980 | 6-scf00360 | 6 |
| AX-158386258 | 17 | 79.177 | KV452892.1 | 1175425 | 6-scf00360 | 6 |
| AX-158202995 | 17 | 79.177 | KV452892.1 | 1310157 | 6-scf00360 | 6 |
| AX-158203006 | 17 | 79.177 | KV452892.1 | 1322190 | 6-scf00360 | 6 |
| AX-157887046 | 17 | 79.177 | KV452892.1 | 1379329 | 6-scf00360 | 6 |
| AX-157716876 | 17 | 79.194 | KV452892.1 | 1299619 | 6-scf00360 | 6 |
| AX-157837624 | 17 | 79.194 | KV452892.1 | 1318774 | 6-scf00360 | 6 |
| AX-158202922 | 17 | 79.212 | KV452892.1 | 1199446 | 6-scf00360 | 6 |
| AX-158202943 | 17 | 79.212 | KV452892.1 | 1227269 | 6-scf00360 | 6 |

|              |    |        |            |         |            |   |
|--------------|----|--------|------------|---------|------------|---|
| AX-157872310 | 17 | 79.212 | KV452892.1 | 1319148 | 6-scf00360 | 6 |
| AX-157710962 | 17 | 79.233 | KV452892.1 | 1331541 | 6-scf00360 | 6 |
| AX-157837621 | 17 | 79.257 | KV452892.1 | 1311715 | 6-scf00360 | 6 |
| AX-158203002 | 17 | 79.257 | KV452892.1 | 1320670 | 6-scf00360 | 6 |
| AX-158203012 | 17 | 79.257 | KV452892.1 | 1331968 | 6-scf00360 | 6 |
| AX-158203013 | 17 | 79.257 | KV452892.1 | 1332218 | 6-scf00360 | 6 |
| AX-157749231 | 17 | 79.257 | KV452892.1 | 1398125 | 6-scf00360 | 6 |
| AX-158202950 | 17 | 79.296 | KV452892.1 | 1238381 | 6-scf00360 | 6 |
| AX-158202956 | 17 | 79.296 | KV452892.1 | 1248293 | 6-scf00360 | 6 |
| AX-158202967 | 17 | 79.296 | KV452892.1 | 1260090 | 6-scf00360 | 6 |
| AX-158203016 | 17 | 79.296 | KV452892.1 | 1333548 | 6-scf00360 | 6 |
| AX-158203017 | 17 | 79.331 | KV452892.1 | 1334149 | 6-scf00360 | 6 |
| AX-158203003 | 17 | 79.366 | KV452892.1 | 1320962 | 6-scf00360 | 6 |
| AX-158203021 | 17 | 79.366 | KV452892.1 | 1339689 | 6-scf00360 | 6 |
| AX-158203022 | 17 | 79.366 | KV452892.1 | 1340051 | 6-scf00360 | 6 |
| AX-158203024 | 17 | 79.549 | KV452892.1 | 1341212 | 6-scf00360 | 6 |
| AX-158203025 | 17 | 79.694 | KV452892.1 | 1342148 | 6-scf00360 | 6 |
| AX-158203027 | 17 | 79.694 | KV452892.1 | 1343670 | 6-scf00360 | 6 |
| AX-158203029 | 17 | 79.752 | KV452892.1 | 1345630 | 6-scf00360 | 6 |
| AX-158203031 | 17 | 79.803 | KV452892.1 | 1350015 | 6-scf00360 | 6 |
| AX-158203044 | 17 | 79.904 | KV452892.1 | 1370173 | 6-scf00360 | 6 |
| AX-158393913 | 17 | 80.022 | KV452892.1 | 1368210 | 6-scf00360 | 6 |
| AX-158203045 | 17 | 80.022 | KV452892.1 | 1370544 | 6-scf00360 | 6 |
| AX-158380722 | 17 | 80.022 | KV452892.1 | 1373392 | 6-scf00360 | 6 |
| AX-157758625 | 17 | 80.022 | KV452892.1 | 1376786 | 6-scf00360 | 6 |
| AX-158203047 | 17 | 80.022 | KV452892.1 | 1377687 | 6-scf00360 | 6 |
| AX-157757168 | 17 | 80.022 | KV452892.1 | 1382428 | 6-scf00360 | 6 |
| AX-157773255 | 17 | 80.042 | KV452892.1 | 1382839 | 6-scf00360 | 6 |
| AX-158203052 | 17 | 80.09  | KV452892.1 | 1380740 | 6-scf00360 | 6 |
| AX-157720121 | 17 | 80.09  | KV452892.1 | 1385546 | 6-scf00360 | 6 |
| AX-158203056 | 17 | 80.131 | KV452892.1 | 1388451 | 6-scf00360 | 6 |
| AX-158203059 | 17 | 80.131 | KV452892.1 | 1390748 | 6-scf00360 | 6 |
| AX-158386263 | 17 | 80.242 | KV452892.1 | 1392881 | 6-scf00360 | 6 |
| AX-158203062 | 17 | 80.35  | KV452892.1 | 1399187 | 6-scf00360 | 6 |
| AX-158203064 | 17 | 80.535 | KV452892.1 | 1401964 | 6-scf00360 | 6 |
| AX-158203065 | 17 | 80.617 | KV452892.1 | 1403715 | 6-scf00360 | 6 |
| AX-158203068 | 17 | 80.722 | KV452892.1 | 1407187 | 6-scf00360 | 6 |
| AX-158203070 | 17 | 80.724 | KV452892.1 | 1410756 | 6-scf00360 | 6 |
| AX-158203074 | 17 | 81.093 | KV452892.1 | 1416406 | 6-scf00360 | 6 |
| AX-158203075 | 17 | 81.095 | KV452892.1 | 1417003 | 6-scf00360 | 6 |
| AX-158203083 | 17 | 81.21  | KV452892.1 | 1425232 | 6-scf00360 | 6 |
| AX-158203096 | 17 | 81.21  | KV452892.1 | 1441159 | 6-scf00360 | 6 |
| AX-158203084 | 17 | 81.212 | KV452892.1 | 1427071 | 6-scf00360 | 6 |
| AX-158203085 | 17 | 81.217 | KV452892.1 | 1427226 | 6-scf00360 | 6 |
| AX-158203081 | 17 | 81.222 | KV452892.1 | 1424337 | 6-scf00360 | 6 |
| AX-158203086 | 17 | 81.222 | KV452892.1 | 1427720 | 6-scf00360 | 6 |
| AX-158203100 | 17 | 81.222 | KV452892.1 | 1442648 | 6-scf00360 | 6 |
| AX-157859020 | 17 | 81.222 | KV452892.1 | 1444114 | 6-scf00360 | 6 |
| AX-158202859 | 17 | 81.225 | KV452892.1 | 1116357 | 6-scf00360 | 6 |
| AX-158202871 | 17 | 81.225 | KV452892.1 | 1134336 | 6-scf00360 | 6 |
| AX-158202885 | 17 | 81.225 | KV452892.1 | 1149678 | 6-scf00360 | 6 |

|              |    |        |            |         |            |   |
|--------------|----|--------|------------|---------|------------|---|
| AX-158202944 | 17 | 81.225 | KV452892.1 | 1229548 | 6-scf00360 | 6 |
| AX-158202984 | 17 | 81.225 | KV452892.1 | 1290247 | 6-scf00360 | 6 |
| AX-158203076 | 17 | 81.225 | KV452892.1 | 1418014 | 6-scf00360 | 6 |
| AX-158203090 | 17 | 81.225 | KV452892.1 | 1433517 | 6-scf00360 | 6 |
| AX-158203091 | 17 | 81.225 | KV452892.1 | 1435021 | 6-scf00360 | 6 |
| AX-158203092 | 17 | 81.225 | KV452892.1 | 1436456 | 6-scf00360 | 6 |
| AX-158203093 | 17 | 81.225 | KV452892.1 | 1437238 | 6-scf00360 | 6 |
| AX-158203097 | 17 | 81.225 | KV452892.1 | 1441403 | 6-scf00360 | 6 |
| AX-158203098 | 17 | 81.225 | KV452892.1 | 1441748 | 6-scf00360 | 6 |
| AX-157756071 | 17 | 81.225 | KV452892.1 | 1442347 | 6-scf00360 | 6 |
| AX-158203101 | 17 | 81.429 | KV452892.1 | 1443022 | 6-scf00360 | 6 |
| AX-158380723 | 17 | 81.453 | KV452892.1 | 1445866 | 6-scf00360 | 6 |
| AX-157872312 | 17 | 81.806 | KV452892.1 | 1445974 | 6-scf00360 | 6 |
| AX-158203111 | 17 | 82     | KV452892.1 | 1457039 | 6-scf00360 | 6 |
| AX-158203112 | 17 | 82     | KV452892.1 | 1458307 | 6-scf00360 | 6 |
| AX-157724709 | 17 | 82     | KV452892.1 | 1460444 | 6-scf00360 | 6 |
| AX-158203117 | 17 | 82.014 | KV452892.1 | 1462374 | 6-scf00360 | 6 |
| AX-157756139 | 17 | 82.014 | KV452892.1 | 1473807 | 6-scf00360 | 6 |
| AX-158203105 | 17 | 82.022 | KV452892.1 | 1447299 | 6-scf00360 | 6 |
| AX-157709634 | 17 | 82.022 | KV452892.1 | 1462901 | 6-scf00360 | 6 |
| AX-158203122 | 17 | 82.035 | KV452892.1 | 1468373 | 6-scf00360 | 6 |
| AX-158203123 | 17 | 82.053 | KV452892.1 | 1468743 | 6-scf00360 | 6 |
| AX-158203127 | 17 | 82.193 | KV452892.1 | 1472102 | 6-scf00360 | 6 |
| AX-158203128 | 17 | 82.472 | KV452892.1 | 1472835 | 6-scf00360 | 6 |
| AX-158203138 | 17 | 82.598 | KV452892.1 | 1489766 | 6-scf00360 | 6 |
| AX-158203140 | 17 | 82.977 | KV452892.1 | 1493002 | 6-scf00360 | 6 |
| AX-158203143 | 17 | 82.979 | KV452892.1 | 1496251 | 6-scf00360 | 6 |
| AX-158203149 | 17 | 82.979 | KV452892.1 | 1504179 | 6-scf00360 | 6 |
| AX-158203150 | 17 | 82.979 | KV452892.1 | 1505266 | 6-scf00360 | 6 |
| AX-158203156 | 17 | 82.979 | KV452892.1 | 1508646 | 6-scf00360 | 6 |
| AX-158203157 | 17 | 82.979 | KV452892.1 | 1509108 | 6-scf00360 | 6 |
| AX-157755500 | 17 | 82.979 | KV452892.1 | 1516618 | 6-scf00360 | 6 |
| AX-158203162 | 17 | 82.979 | KV452892.1 | 1517165 | 6-scf00360 | 6 |
| AX-158203163 | 17 | 82.979 | KV452892.1 | 1517691 | 6-scf00360 | 6 |
| AX-158203164 | 17 | 82.979 | KV452892.1 | 1518624 | 6-scf00360 | 6 |
| AX-158203166 | 17 | 82.979 | KV452892.1 | 1523328 | 6-scf00360 | 6 |
| AX-158203167 | 17 | 82.979 | KV452892.1 | 1526439 | 6-scf00360 | 6 |
| AX-158203174 | 17 | 82.979 | KV452892.1 | 1540580 | 6-scf00360 | 6 |
| AX-158203172 | 17 | 83.246 | KV452892.1 | 1533936 | 6-scf00360 | 6 |
| AX-158203173 | 17 | 83.246 | KV452892.1 | 1536056 | 6-scf00360 | 6 |
| AX-158203239 | 17 | 83.246 | KV452892.1 | 1625180 | 6-scf00360 | 6 |
| AX-158203176 | 17 | 83.37  | KV452892.1 | 1546603 | 6-scf00360 | 6 |
| AX-158203177 | 17 | 83.514 | KV452892.1 | 1547860 | 6-scf00360 | 6 |
| AX-158203181 | 17 | 83.514 | KV452892.1 | 1553392 | 6-scf00360 | 6 |
| AX-158203184 | 17 | 83.711 | KV452892.1 | 1555115 | 6-scf00360 | 6 |
| AX-158203201 | 17 | 83.711 | KV452892.1 | 1579779 | 6-scf00360 | 6 |
| AX-158203236 | 17 | 83.711 | KV452892.1 | 1622336 | 6-scf00360 | 6 |
| AX-158203186 | 17 | 83.914 | KV452892.1 | 1556377 | 6-scf00360 | 6 |
| AX-157837626 | 17 | 83.915 | KV452892.1 | 1568998 | 6-scf00360 | 6 |
| AX-158203142 | 17 | 83.916 | KV452892.1 | 1494755 | 6-scf00360 | 6 |
| AX-158203183 | 17 | 83.916 | KV452892.1 | 1554370 | 6-scf00360 | 6 |

|              |    |        |            |         |            |   |
|--------------|----|--------|------------|---------|------------|---|
| AX-158203190 | 17 | 83.916 | KV452892.1 | 1560065 | 6-scf00360 | 6 |
| AX-158203195 | 17 | 83.916 | KV452892.1 | 1574167 | 6-scf00360 | 6 |
| AX-158203196 | 17 | 83.916 | KV452892.1 | 1574540 | 6-scf00360 | 6 |
| AX-158203198 | 17 | 83.916 | KV452892.1 | 1577017 | 6-scf00360 | 6 |
| AX-158203202 | 17 | 83.916 | KV452892.1 | 1580056 | 6-scf00360 | 6 |
| AX-158203203 | 17 | 83.916 | KV452892.1 | 1581919 | 6-scf00360 | 6 |
| AX-158203204 | 17 | 83.916 | KV452892.1 | 1583380 | 6-scf00360 | 6 |
| AX-158203205 | 17 | 83.916 | KV452892.1 | 1583684 | 6-scf00360 | 6 |
| AX-158203211 | 17 | 83.916 | KV452892.1 | 1593332 | 6-scf00360 | 6 |
| AX-157704073 | 17 | 84.176 | KV452892.1 | 1599722 | 6-scf00360 | 6 |
| AX-158203219 | 17 | 84.176 | KV452892.1 | 1603387 | 6-scf00360 | 6 |
| AX-157773124 | 17 | 84.178 | KV452892.1 | 1607162 | 6-scf00360 | 6 |
| AX-158203193 | 17 | 84.259 | KV452892.1 | 1570511 | 6-scf00360 | 6 |
| AX-158203225 | 17 | 84.259 | KV452892.1 | 1611767 | 6-scf00360 | 6 |
| AX-158203226 | 17 | 84.259 | KV452892.1 | 1612914 | 6-scf00360 | 6 |
| AX-158203229 | 17 | 84.259 | KV452892.1 | 1615511 | 6-scf00360 | 6 |
| AX-158203232 | 17 | 84.384 | KV452892.1 | 1618114 | 6-scf00360 | 6 |
| AX-157755007 | 17 | 84.461 | KV452892.1 | 1639477 | 6-scf00360 | 6 |
| AX-158203245 | 17 | 84.461 | KV452892.1 | 1641638 | 6-scf00360 | 6 |
| AX-157756757 | 17 | 84.468 | KV452892.1 | 1642542 | 6-scf00360 | 6 |
| AX-158203250 | 17 | 84.666 | KV452892.1 | 1649425 | 6-scf00360 | 6 |
| AX-158203251 | 17 | 84.666 | KV452892.1 | 1651588 | 6-scf00360 | 6 |
| AX-158203252 | 17 | 84.666 | KV452892.1 | 1652723 | 6-scf00360 | 6 |
| AX-158203255 | 17 | 84.762 | KV452892.1 | 1656837 | 6-scf00360 | 6 |
| AX-158386271 | 17 | 84.762 | KV452892.1 | 1659684 | 6-scf00360 | 6 |
| AX-158203263 | 17 | 84.762 | KV452892.1 | 1667448 | 6-scf00360 | 6 |
| AX-158203144 | 17 | 84.948 | KV452892.1 | 1496473 | 6-scf00360 | 6 |
| AX-157837631 | 17 | 84.948 | KV452892.1 | 1663568 | 6-scf00360 | 6 |
| AX-158414311 | 17 | 84.948 | KV452892.1 | 1665100 | 6-scf00360 | 6 |
| AX-158203261 | 17 | 84.948 | KV452892.1 | 1665414 | 6-scf00360 | 6 |
| AX-158203262 | 17 | 84.948 | KV452892.1 | 1666045 | 6-scf00360 | 6 |
| AX-158203264 | 17 | 84.948 | KV452892.1 | 1667802 | 6-scf00360 | 6 |
| AX-158203267 | 17 | 84.948 | KV452892.1 | 1671652 | 6-scf00360 | 6 |
| AX-158203268 | 17 | 84.948 | KV452892.1 | 1672694 | 6-scf00360 | 6 |
| AX-158203269 | 17 | 84.948 | KV452892.1 | 1674677 | 6-scf00360 | 6 |
| AX-158203273 | 17 | 84.948 | KV452892.1 | 1676698 | 6-scf00360 | 6 |
| AX-158203276 | 17 | 84.948 | KV452892.1 | 1680241 | 6-scf00360 | 6 |
| AX-157753807 | 17 | 84.948 | KV452892.1 | 1681607 | 6-scf00360 | 6 |
| AX-158203278 | 17 | 84.948 | KV452892.1 | 1682318 | 6-scf00360 | 6 |
| AX-157837632 | 17 | 84.948 | KV452892.1 | 1683834 | 6-scf00360 | 6 |
| AX-158203281 | 17 | 84.948 | KV452892.1 | 1690513 | 6-scf00360 | 6 |
| AX-158203282 | 17 | 84.948 | KV452892.1 | 1690993 | 6-scf00360 | 6 |
| AX-158203285 | 17 | 84.948 | KV452892.1 | 1698106 | 6-scf00360 | 6 |
| AX-158203286 | 17 | 84.948 | KV452892.1 | 1698675 | 6-scf00360 | 6 |
| AX-158203292 | 17 | 84.948 | KV452892.1 | 1708847 | 6-scf00360 | 6 |
| AX-158203302 | 17 | 85.122 | KV452892.1 | 1728221 | 6-scf00360 | 6 |
| AX-158203305 | 17 | 85.126 | KV452892.1 | 1733548 | 6-scf00360 | 6 |
| AX-158203299 | 17 | 85.129 | KV452892.1 | 1723674 | 6-scf00360 | 6 |
| AX-158203307 | 17 | 85.129 | KV452892.1 | 1735323 | 6-scf00360 | 6 |
| AX-158203213 | 17 | 85.226 | KV452892.1 | 1595391 | 6-scf00360 | 6 |
| AX-158203308 | 17 | 85.226 | KV452892.1 | 1736332 | 6-scf00360 | 6 |

|              |    |        |            |         |            |   |
|--------------|----|--------|------------|---------|------------|---|
| AX-157747979 | 17 | 86.112 | KV452892.1 | 1787033 | 6-scf00360 | 6 |
| AX-158203348 | 17 | 86.113 | KV452892.1 | 1788360 | 6-scf00360 | 6 |
| AX-157719869 | 17 | 86.33  | KV452892.1 | 1790128 | 6-scf00360 | 6 |
| AX-158203350 | 17 | 86.336 | KV452892.1 | 1790317 | 6-scf00360 | 6 |
| AX-158203351 | 17 | 86.342 | KV452892.1 | 1790653 | 6-scf00360 | 6 |
| AX-158203353 | 17 | 86.349 | KV452892.1 | 1794868 | 6-scf00360 | 6 |
| AX-158203355 | 17 | 86.468 | KV452892.1 | 1796665 | 6-scf00360 | 6 |
| AX-158203356 | 17 | 86.577 | KV452892.1 | 1797373 | 6-scf00360 | 6 |
| AX-157837646 | 17 | 86.699 | KV452892.1 | 1798674 | 6-scf00360 | 6 |
| AX-157837647 | 17 | 86.699 | KV452892.1 | 1799362 | 6-scf00360 | 6 |
| AX-158203361 | 17 | 86.768 | KV452892.1 | 1801639 | 6-scf00360 | 6 |
| AX-157744492 | 17 | 86.826 | KV452892.1 | 1794312 | 6-scf00360 | 6 |
| AX-157717612 | 17 | 86.826 | KV452892.1 | 1802123 | 6-scf00360 | 6 |
| AX-158203362 | 17 | 86.918 | KV452892.1 | 1803011 | 6-scf00360 | 6 |
| AX-158203363 | 17 | 86.928 | KV452892.1 | 1806859 | 6-scf00360 | 6 |
| AX-158203364 | 17 | 87.049 | KV452892.1 | 1807530 | 6-scf00360 | 6 |
| AX-158203365 | 17 | 87.278 | KV452892.1 | 1808093 | 6-scf00360 | 6 |
| AX-158203368 | 17 | 87.278 | KV452892.1 | 1810322 | 6-scf00360 | 6 |
| AX-158203370 | 17 | 87.278 | KV452892.1 | 1810993 | 6-scf00360 | 6 |
| AX-158203372 | 17 | 87.278 | KV452892.1 | 1813702 | 6-scf00360 | 6 |
| AX-158203373 | 17 | 87.278 | KV452892.1 | 1814298 | 6-scf00360 | 6 |
| AX-158203374 | 17 | 87.278 | KV452892.1 | 1814705 | 6-scf00360 | 6 |
| AX-158203375 | 17 | 87.278 | KV452892.1 | 1815170 | 6-scf00360 | 6 |
| AX-157837653 | 17 | 87.278 | KV452892.1 | 1831931 | 6-scf00360 | 6 |
| AX-158203377 | 17 | 87.506 | KV452892.1 | 1818261 | 6-scf00360 | 6 |
| AX-158203378 | 17 | 87.506 | KV452892.1 | 1818620 | 6-scf00360 | 6 |
| AX-158203385 | 17 | 87.507 | KV452892.1 | 1829250 | 6-scf00360 | 6 |
| AX-158203387 | 17 | 87.833 | KV452892.1 | 1833333 | 6-scf00360 | 6 |
| AX-158203393 | 17 | 87.833 | KV452892.1 | 1841928 | 6-scf00360 | 6 |
| AX-158203388 | 17 | 87.841 | KV452892.1 | 1834593 | 6-scf00360 | 6 |
| AX-157710257 | 17 | 87.841 | KV452892.1 | 1837932 | 6-scf00360 | 6 |
| AX-158203394 | 17 | 87.841 | KV452892.1 | 1842373 | 6-scf00360 | 6 |
| AX-157837654 | 17 | 87.859 | KV452892.1 | 1843697 | 6-scf00360 | 6 |
| AX-158203398 | 17 | 88.264 | KV452892.1 | 1849131 | 6-scf00360 | 6 |
| AX-158203404 | 17 | 88.373 | KV452892.1 | 1853978 | 6-scf00360 | 6 |
| AX-157716558 | 17 | 88.491 | KV452892.1 | 1855566 | 6-scf00360 | 6 |
| AX-158203406 | 17 | 88.495 | KV452892.1 | 1856138 | 6-scf00360 | 6 |
| AX-158203408 | 17 | 88.527 | KV452892.1 | 1859728 | 6-scf00360 | 6 |
| AX-158203409 | 17 | 88.527 | KV452892.1 | 1859977 | 6-scf00360 | 6 |
| AX-158203411 | 17 | 88.577 | KV452892.1 | 1861459 | 6-scf00360 | 6 |
| AX-158203412 | 17 | 88.605 | KV452892.1 | 1862484 | 6-scf00360 | 6 |
| AX-158203416 | 17 | 88.669 | KV452892.1 | 1867063 | 6-scf00360 | 6 |
| AX-158203417 | 17 | 88.669 | KV452892.1 | 1867509 | 6-scf00360 | 6 |
| AX-158203413 | 17 | 88.67  | KV452892.1 | 1863380 | 6-scf00360 | 6 |
| AX-158203420 | 17 | 88.67  | KV452892.1 | 1869116 | 6-scf00360 | 6 |
| AX-158203423 | 17 | 88.997 | KV452892.1 | 1872986 | 6-scf00360 | 6 |
| AX-158203426 | 17 | 88.997 | KV452892.1 | 1875704 | 6-scf00360 | 6 |
| AX-158386274 | 17 | 89.048 | KV452892.1 | 1879609 | 6-scf00360 | 6 |
| AX-157837657 | 17 | 89.106 | KV452892.1 | 1885645 | 6-scf00360 | 6 |
| AX-158203431 | 17 | 89.106 | KV452892.1 | 1886388 | 6-scf00360 | 6 |
| AX-158203432 | 17 | 89.106 | KV452892.1 | 1887123 | 6-scf00360 | 6 |



|              |    |        |            |         |            |   |
|--------------|----|--------|------------|---------|------------|---|
| AX-157859025 | 17 | 89.106 | KV452892.1 | 1889925 | 6-scf00360 | 6 |
| AX-158203439 | 17 | 89.271 | KV452892.1 | 1895504 | 6-scf00360 | 6 |
| AX-158203443 | 17 | 89.581 | KV452892.1 | 1900295 | 6-scf00360 | 6 |
| AX-158203450 | 17 | 89.762 | KV452892.1 | 1909794 | 6-scf00360 | 6 |
| AX-157757649 | 17 | 89.763 | KV452892.1 | 1910124 | 6-scf00360 | 6 |
| AX-158203452 | 17 | 89.763 | KV452892.1 | 1912367 | 6-scf00360 | 6 |
| AX-158203455 | 17 | 89.763 | KV452892.1 | 1915103 | 6-scf00360 | 6 |
| AX-157749616 | 17 | 89.763 | KV452892.1 | 1918296 | 6-scf00360 | 6 |
| AX-158203458 | 17 | 89.872 | KV452892.1 | 1921425 | 6-scf00360 | 6 |
| AX-158203461 | 17 | 89.872 | KV452892.1 | 1925180 | 6-scf00360 | 6 |
| AX-158203466 | 17 | 89.872 | KV452892.1 | 1930304 | 6-scf00360 | 6 |
| AX-158203469 | 17 | 89.872 | KV452892.1 | 1934251 | 6-scf00360 | 6 |
| AX-157872315 | 17 | 89.985 | KV452892.1 | 1935415 | 6-scf00360 | 6 |
| AX-158203464 | 17 | 90.09  | KV452892.1 | 1928542 | 6-scf00360 | 6 |
| AX-158203471 | 17 | 90.09  | KV452892.1 | 1939134 | 6-scf00360 | 6 |
| AX-157872316 | 17 | 90.09  | KV452892.1 | 1939969 | 6-scf00360 | 6 |
| AX-157709368 | 17 | 90.09  | KV452892.1 | 1941287 | 6-scf00360 | 6 |
| AX-157775191 | 17 | 90.144 | KV452892.1 | 1952323 | 6-scf00360 | 6 |
| AX-157742059 | 17 | 90.2   | KV452892.1 | 1953284 | 6-scf00360 | 6 |
| AX-158203478 | 17 | 90.2   | KV452892.1 | 1956919 | 6-scf00360 | 6 |
| AX-157837661 | 17 | 90.2   | KV452892.1 | 1962287 | 6-scf00360 | 6 |
| AX-158203480 | 17 | 90.2   | KV452892.1 | 1965476 | 6-scf00360 | 6 |
| AX-158203438 | 17 | 90.418 | KV452892.1 | 1895058 | 6-scf00360 | 6 |
| AX-158203476 | 17 | 90.418 | KV452892.1 | 1952361 | 6-scf00360 | 6 |
| AX-157722963 | 17 | 90.418 | KV452892.1 | 1958298 | 6-scf00360 | 6 |
| AX-158203481 | 17 | 90.418 | KV452892.1 | 1966232 | 6-scf00360 | 6 |
| AX-158203483 | 17 | 90.418 | KV452892.1 | 1968034 | 6-scf00360 | 6 |
| AX-158203486 | 17 | 90.418 | KV452892.1 | 1975518 | 6-scf00360 | 6 |
| AX-157725217 | 17 | 90.418 | KV452892.1 | 1984472 | 6-scf00360 | 6 |
| AX-158203492 | 17 | 90.418 | KV452892.1 | 1985320 | 6-scf00360 | 6 |
| AX-158203495 | 17 | 90.527 | KV452892.1 | 1987619 | 6-scf00360 | 6 |
| AX-158203496 | 17 | 90.527 | KV452892.1 | 1988405 | 6-scf00360 | 6 |
| AX-157714183 | 17 | 90.527 | KV452892.1 | 1996178 | 6-scf00360 | 6 |
| AX-157837666 | 17 | 90.527 | KV452892.1 | 1997699 | 6-scf00360 | 6 |
| AX-158203502 | 17 | 90.527 | KV452892.1 | 2003652 | 6-scf00360 | 6 |
| AX-158203503 | 17 | 90.527 | KV452892.1 | 2008316 | 6-scf00360 | 6 |
| AX-158203506 | 17 | 90.527 | KV452892.1 | 2013450 | 6-scf00360 | 6 |
| AX-158203509 | 17 | 90.527 | KV452892.1 | 2015569 | 6-scf00360 | 6 |
| AX-158203512 | 17 | 90.527 | KV452892.1 | 2019788 | 6-scf00360 | 6 |
| AX-158203514 | 17 | 90.527 | KV452892.1 | 2021093 | 6-scf00360 | 6 |
| AX-158203515 | 17 | 90.527 | KV452892.1 | 2024404 | 6-scf00360 | 6 |
| AX-158203517 | 17 | 90.527 | KV452892.1 | 2026560 | 6-scf00360 | 6 |
| AX-157718981 | 17 | 90.527 | KV452892.1 | 2028485 | 6-scf00360 | 6 |
| AX-158203520 | 17 | 90.527 | KV452892.1 | 2030449 | 6-scf00360 | 6 |
| AX-158203521 | 17 | 90.527 | KV452892.1 | 2031078 | 6-scf00360 | 6 |
| AX-158203524 | 17 | 90.527 | KV452892.1 | 2033111 | 6-scf00360 | 6 |
| AX-158203535 | 17 | 90.527 | KV452892.1 | 2042380 | 6-scf00360 | 6 |
| AX-157837674 | 17 | 90.527 | KV452892.1 | 2083308 | 6-scf00360 | 6 |
| AX-157837677 | 17 | 90.527 | KV452892.1 | 2094736 | 6-scf00360 | 6 |
| AX-158203629 | 17 | 90.527 | KV452892.1 | 2182604 | 6-scf00360 | 6 |
| AX-157837669 | 17 | 90.529 | KV452892.1 | 2007235 | 6-scf00360 | 6 |

|              |    |        |            |         |            |   |
|--------------|----|--------|------------|---------|------------|---|
| AX-158203527 | 17 | 90.529 | KV452892.1 | 2034761 | 6-scf00360 | 6 |
| AX-158203529 | 17 | 90.529 | KV452892.1 | 2036307 | 6-scf00360 | 6 |
| AX-158203541 | 17 | 90.853 | KV452892.1 | 2047227 | 6-scf00360 | 6 |
| AX-158203538 | 17 | 90.855 | KV452892.1 | 2045343 | 6-scf00360 | 6 |
| AX-158203542 | 17 | 90.855 | KV452892.1 | 2048005 | 6-scf00360 | 6 |
| AX-158203543 | 17 | 90.855 | KV452892.1 | 2048436 | 6-scf00360 | 6 |
| AX-158203546 | 17 | 90.855 | KV452892.1 | 2051587 | 6-scf00360 | 6 |
| AX-158203551 | 17 | 90.855 | KV452892.1 | 2058179 | 6-scf00360 | 6 |
| AX-158203554 | 17 | 90.855 | KV452892.1 | 2061472 | 6-scf00360 | 6 |
| AX-158203555 | 17 | 90.855 | KV452892.1 | 2061826 | 6-scf00360 | 6 |
| AX-158203557 | 17 | 90.855 | KV452892.1 | 2063539 | 6-scf00360 | 6 |
| AX-158203559 | 17 | 90.855 | KV452892.1 | 2065969 | 6-scf00360 | 6 |
| AX-158203560 | 17 | 90.855 | KV452892.1 | 2067026 | 6-scf00360 | 6 |
| AX-158203562 | 17 | 90.964 | KV452892.1 | 2070364 | 6-scf00360 | 6 |
| AX-158203547 | 17 | 91.031 | KV452892.1 | 2053660 | 6-scf00360 | 6 |
| AX-158203564 | 17 | 91.031 | KV452892.1 | 2072627 | 6-scf00360 | 6 |
| AX-158203567 | 17 | 91.115 | KV452892.1 | 2075513 | 6-scf00360 | 6 |
| AX-157714086 | 17 | 91.115 | KV452892.1 | 2089213 | 6-scf00360 | 6 |
| AX-158203549 | 17 | 91.183 | KV452892.1 | 2054951 | 6-scf00360 | 6 |
| AX-157747581 | 17 | 91.183 | KV452892.1 | 2071592 | 6-scf00360 | 6 |
| AX-158203566 | 17 | 91.183 | KV452892.1 | 2074913 | 6-scf00360 | 6 |
| AX-157747348 | 17 | 91.183 | KV452892.1 | 2090636 | 6-scf00360 | 6 |
| AX-157837680 | 17 | 91.183 | KV452892.1 | 2100516 | 6-scf00360 | 6 |
| AX-158203580 | 17 | 91.183 | KV452892.1 | 2102225 | 6-scf00360 | 6 |
| AX-158203589 | 17 | 91.183 | KV452892.1 | 2112204 | 6-scf00360 | 6 |
| AX-158203595 | 17 | 91.183 | KV452892.1 | 2118928 | 6-scf00360 | 6 |
| AX-158203596 | 17 | 91.183 | KV452892.1 | 2119316 | 6-scf00360 | 6 |
| AX-158203501 | 17 | 91.184 | KV452892.1 | 2002840 | 6-scf00360 | 6 |
| AX-158203597 | 17 | 91.184 | KV452892.1 | 2120351 | 6-scf00360 | 6 |
| AX-158203615 | 17 | 91.184 | KV452892.1 | 2146761 | 6-scf00360 | 6 |
| AX-157726033 | 17 | 91.184 | KV452892.1 | 2148095 | 6-scf00360 | 6 |
| AX-158203601 | 17 | 91.346 | KV452892.1 | 2123387 | 6-scf00360 | 6 |
| AX-158203603 | 17 | 91.346 | KV452892.1 | 2126660 | 6-scf00360 | 6 |
| AX-158203611 | 17 | 91.346 | KV452892.1 | 2136689 | 6-scf00360 | 6 |
| AX-158203571 | 17 | 91.428 | KV452892.1 | 2078823 | 6-scf00360 | 6 |
| AX-158203588 | 17 | 91.428 | KV452892.1 | 2111332 | 6-scf00360 | 6 |
| AX-158203604 | 17 | 91.428 | KV452892.1 | 2127198 | 6-scf00360 | 6 |
| AX-158203613 | 17 | 91.51  | KV452892.1 | 2140933 | 6-scf00360 | 6 |
| AX-158203614 | 17 | 91.51  | KV452892.1 | 2145397 | 6-scf00360 | 6 |
| AX-158203616 | 17 | 91.51  | KV452892.1 | 2149770 | 6-scf00360 | 6 |
| AX-158203617 | 17 | 91.51  | KV452892.1 | 2150555 | 6-scf00360 | 6 |
| AX-158203618 | 17 | 91.51  | KV452892.1 | 2151559 | 6-scf00360 | 6 |
| AX-158203582 | 17 | 91.6   | KV452892.1 | 2104666 | 6-scf00360 | 6 |
| AX-157747103 | 17 | 91.6   | KV452892.1 | 2151627 | 6-scf00360 | 6 |
| AX-158203621 | 17 | 91.693 | KV452892.1 | 2163615 | 6-scf00360 | 6 |
| AX-158203623 | 17 | 91.875 | KV452892.1 | 2171031 | 6-scf00360 | 6 |
| AX-157837683 | 17 | 91.875 | KV452892.1 | 2171612 | 6-scf00360 | 6 |
| AX-157742411 | 17 | 91.875 | KV452892.1 | 2174728 | 6-scf00360 | 6 |
| AX-158203628 | 17 | 91.875 | KV452892.1 | 2181344 | 6-scf00360 | 6 |
| AX-157724995 | 17 | 91.875 | KV452892.1 | 2187210 | 6-scf00360 | 6 |
| AX-158203633 | 17 | 91.875 | KV452892.1 | 2187622 | 6-scf00360 | 6 |

|              |    |        |            |         |            |   |
|--------------|----|--------|------------|---------|------------|---|
| AX-158203634 | 17 | 91.875 | KV452892.1 | 2188262 | 6-scf00360 | 6 |
| AX-158203637 | 17 | 92.057 | KV452892.1 | 2192809 | 6-scf00360 | 6 |
| AX-158203638 | 17 | 92.057 | KV452892.1 | 2193919 | 6-scf00360 | 6 |
| AX-158203639 | 17 | 92.101 | KV452892.1 | 2194620 | 6-scf00360 | 6 |
| AX-158203640 | 17 | 92.195 | KV452892.1 | 2198026 | 6-scf00360 | 6 |
| AX-158203642 | 17 | 92.28  | KV452892.1 | 2202843 | 6-scf00360 | 6 |
| AX-157754174 | 17 | 92.363 | KV452892.1 | 2204707 | 6-scf00360 | 6 |
| AX-157887058 | 17 | 92.363 | KV452892.1 | 2220853 | 6-scf00360 | 6 |
| AX-158203645 | 17 | 92.451 | KV452892.1 | 2206442 | 6-scf00360 | 6 |
| AX-158203646 | 17 | 92.451 | KV452892.1 | 2207983 | 6-scf00360 | 6 |
| AX-157859028 | 17 | 92.451 | KV452892.1 | 2210908 | 6-scf00360 | 6 |
| AX-158203649 | 17 | 92.713 | KV452892.1 | 2214049 | 6-scf00360 | 6 |
| AX-158203650 | 17 | 92.713 | KV452892.1 | 2214545 | 6-scf00360 | 6 |
| AX-158203652 | 17 | 92.714 | KV452892.1 | 2217273 | 6-scf00360 | 6 |
| AX-158203655 | 17 | 92.714 | KV452892.1 | 2222094 | 6-scf00360 | 6 |
| AX-158203656 | 17 | 92.883 | KV452892.1 | 2225893 | 6-scf00360 | 6 |
| AX-158203657 | 17 | 93.015 | KV452892.1 | 2226411 | 6-scf00360 | 6 |
| AX-158203660 | 17 | 93.015 | KV452892.1 | 2228778 | 6-scf00360 | 6 |
| AX-158203663 | 17 | 93.125 | KV452892.1 | 2232386 | 6-scf00360 | 6 |
| AX-158203664 | 17 | 93.125 | KV452892.1 | 2234093 | 6-scf00360 | 6 |
| AX-158203668 | 17 | 93.125 | KV452892.1 | 2240993 | 6-scf00360 | 6 |
| AX-158203674 | 17 | 93.359 | KV452892.1 | 2247598 | 6-scf00360 | 6 |
| AX-158203669 | 17 | 93.581 | KV452892.1 | 2241653 | 6-scf00360 | 6 |
| AX-158386280 | 17 | 93.581 | KV452892.1 | 2254614 | 6-scf00360 | 6 |
| AX-158203681 | 17 | 93.588 | KV452892.1 | 2257597 | 6-scf00360 | 6 |
| AX-157740575 | 17 | 93.589 | KV452892.1 | 2258423 | 6-scf00360 | 6 |
| AX-157739938 | 17 | 93.589 | KV452892.1 | 2264428 | 6-scf00360 | 6 |
| AX-158203686 | 17 | 93.589 | KV452892.1 | 2265035 | 6-scf00360 | 6 |
| AX-158203687 | 17 | 93.589 | KV452892.1 | 2265589 | 6-scf00360 | 6 |
| AX-158203688 | 17 | 93.805 | KV452892.1 | 2266361 | 6-scf00360 | 6 |
| AX-158203690 | 17 | 93.805 | KV452892.1 | 2268230 | 6-scf00360 | 6 |
| AX-158203692 | 17 | 93.805 | KV452892.1 | 2269992 | 6-scf00360 | 6 |
| AX-158203695 | 17 | 93.955 | KV452892.1 | 2273414 | 6-scf00360 | 6 |
| AX-158203699 | 17 | 94.236 | KV452892.1 | 2283774 | 6-scf00360 | 6 |
| AX-158203654 | 17 | 94.237 | KV452892.1 | 2221838 | 6-scf00360 | 6 |
| AX-158203673 | 17 | 94.237 | KV452892.1 | 2245444 | 6-scf00360 | 6 |
| AX-158203702 | 17 | 94.237 | KV452892.1 | 2286034 | 6-scf00360 | 6 |
| AX-158203704 | 17 | 94.237 | KV452892.1 | 2291116 | 6-scf00360 | 6 |
| AX-158203709 | 17 | 94.237 | KV452892.1 | 2299352 | 6-scf00360 | 6 |
| AX-158203661 | 17 | 94.552 | KV452892.1 | 2231546 | 6-scf00360 | 6 |
| AX-158203711 | 17 | 94.552 | KV452892.1 | 2306666 | 6-scf00360 | 6 |
| AX-158380729 | 17 | 94.552 | KV452892.1 | 2307491 | 6-scf00360 | 6 |
| AX-158203713 | 17 | 94.552 | KV452892.1 | 2309770 | 6-scf00360 | 6 |
| AX-158203714 | 17 | 94.553 | KV452892.1 | 2310228 | 6-scf00360 | 6 |
| AX-158203715 | 17 | 94.991 | KV452892.1 | 2311954 | 6-scf00360 | 6 |
| AX-158203717 | 17 | 95.167 | KV452892.1 | 2313173 | 6-scf00360 | 6 |
| AX-158203723 | 17 | 95.167 | KV452892.1 | 2321837 | 6-scf00360 | 6 |
| AX-158203725 | 17 | 95.167 | KV452892.1 | 2327952 | 6-scf00360 | 6 |
| AX-158203729 | 17 | 95.182 | KV452892.1 | 2332411 | 6-scf00360 | 6 |
| AX-158203731 | 17 | 95.182 | KV452892.1 | 2335117 | 6-scf00360 | 6 |
| AX-158203734 | 17 | 95.182 | KV452892.1 | 2338216 | 6-scf00360 | 6 |

|              |    |        |            |         |            |   |
|--------------|----|--------|------------|---------|------------|---|
| AX-157715908 | 17 | 95.264 | KV452892.1 | 2322288 | 6-scf00360 | 6 |
| AX-158203735 | 17 | 95.264 | KV452892.1 | 2341065 | 6-scf00360 | 6 |
| AX-158203739 | 17 | 95.341 | KV452892.1 | 2344393 | 6-scf00360 | 6 |
| AX-157866892 | 17 | 95.341 | KV452892.1 | 2344570 | 6-scf00360 | 6 |
| AX-158203748 | 17 | 95.436 | KV452892.1 | 2350474 | 6-scf00360 | 6 |
| AX-158203753 | 17 | 95.499 | KV452892.1 | 2354013 | 6-scf00360 | 6 |
| AX-157750452 | 17 | 95.559 | KV452892.1 | 2318669 | 6-scf00360 | 6 |
| AX-157866891 | 17 | 95.559 | KV452892.1 | 2333684 | 6-scf00360 | 6 |
| AX-158203758 | 17 | 95.559 | KV452892.1 | 2357782 | 6-scf00360 | 6 |
| AX-158203760 | 17 | 95.559 | KV452892.1 | 2362630 | 6-scf00360 | 6 |
| AX-158203761 | 17 | 95.559 | KV452892.1 | 2363063 | 6-scf00360 | 6 |
| AX-158203762 | 17 | 95.559 | KV452892.1 | 2363668 | 6-scf00360 | 6 |
| AX-158203763 | 17 | 95.559 | KV452892.1 | 2364475 | 6-scf00360 | 6 |
| AX-158203768 | 17 | 95.723 | KV452892.1 | 2379013 | 6-scf00360 | 6 |
| AX-157837687 | 17 | 95.723 | KV452892.1 | 2380698 | 6-scf00360 | 6 |
| AX-158203751 | 17 | 95.887 | KV452892.1 | 2353493 | 6-scf00360 | 6 |
| AX-158203764 | 17 | 95.887 | KV452892.1 | 2371438 | 6-scf00360 | 6 |
| AX-157859034 | 17 | 95.887 | KV452892.1 | 2373095 | 6-scf00360 | 6 |
| AX-158203773 | 17 | 95.887 | KV452892.1 | 2381928 | 6-scf00360 | 6 |
| AX-158203775 | 17 | 95.887 | KV452892.1 | 2383166 | 6-scf00360 | 6 |
| AX-158203778 | 17 | 95.887 | KV452892.1 | 2386207 | 6-scf00360 | 6 |
| AX-158203780 | 17 | 95.997 | KV452892.1 | 2389238 | 6-scf00360 | 6 |
| AX-157859035 | 17 | 95.997 | KV452892.1 | 2390160 | 6-scf00360 | 6 |
| AX-158203781 | 17 | 96.02  | KV452892.1 | 2390886 | 6-scf00360 | 6 |
| AX-158203783 | 17 | 96.026 | KV452892.1 | 2393033 | 6-scf00360 | 6 |
| AX-158203785 | 17 | 96.039 | KV452892.1 | 2395153 | 6-scf00360 | 6 |
| AX-158393918 | 17 | 96.062 | KV452892.1 | 2397932 | 6-scf00360 | 6 |
| AX-158203782 | 17 | 96.07  | KV452892.1 | 2392737 | 6-scf00360 | 6 |
| AX-158203791 | 17 | 96.07  | KV452892.1 | 2398099 | 6-scf00360 | 6 |
| AX-158203792 | 17 | 96.086 | KV452892.1 | 2398611 | 6-scf00360 | 6 |
| AX-158203786 | 17 | 96.106 | KV452892.1 | 2395672 | 6-scf00360 | 6 |
| AX-158203797 | 17 | 96.106 | KV452892.1 | 2403678 | 6-scf00360 | 6 |
| AX-158203798 | 17 | 96.106 | KV452892.1 | 2404344 | 6-scf00360 | 6 |
| AX-158203804 | 17 | 96.216 | KV452892.1 | 2407869 | 6-scf00360 | 6 |
| AX-158203752 | 17 | 96.324 | KV452892.1 | 2353773 | 6-scf00360 | 6 |
| AX-158203776 | 17 | 96.324 | KV452892.1 | 2383343 | 6-scf00360 | 6 |
| AX-158203788 | 17 | 96.324 | KV452892.1 | 2396585 | 6-scf00360 | 6 |
| AX-158203795 | 17 | 96.324 | KV452892.1 | 2401493 | 6-scf00360 | 6 |
| AX-158203800 | 17 | 96.324 | KV452892.1 | 2405691 | 6-scf00360 | 6 |
| AX-158203801 | 17 | 96.324 | KV452892.1 | 2405906 | 6-scf00360 | 6 |
| AX-158203805 | 17 | 96.324 | KV452892.1 | 2408305 | 6-scf00360 | 6 |
| AX-158203808 | 17 | 96.324 | KV452892.1 | 2412868 | 6-scf00360 | 6 |
| AX-157859036 | 17 | 96.324 | KV452892.1 | 2414729 | 6-scf00360 | 6 |
| AX-158203811 | 17 | 96.324 | KV452892.1 | 2415635 | 6-scf00360 | 6 |
| AX-158203814 | 17 | 96.324 | KV452892.1 | 2419157 | 6-scf00360 | 6 |
| AX-158203815 | 17 | 96.324 | KV452892.1 | 2419598 | 6-scf00360 | 6 |
| AX-157720922 | 17 | 96.324 | KV452892.1 | 2421998 | 6-scf00360 | 6 |
| AX-158203818 | 17 | 96.324 | KV452892.1 | 2424177 | 6-scf00360 | 6 |
| AX-158203819 | 17 | 96.324 | KV452892.1 | 2424838 | 6-scf00360 | 6 |
| AX-158203821 | 17 | 96.324 | KV452892.1 | 2426110 | 6-scf00360 | 6 |
| AX-158203824 | 17 | 96.324 | KV452892.1 | 2428109 | 6-scf00360 | 6 |

|              |    |        |            |         |            |   |
|--------------|----|--------|------------|---------|------------|---|
| AX-158203825 | 17 | 96.324 | KV452892.1 | 2430635 | 6-scf00360 | 6 |
| AX-157747021 | 17 | 96.324 | KV452892.1 | 2432139 | 6-scf00360 | 6 |
| AX-158203828 | 17 | 96.324 | KV452892.1 | 2438674 | 6-scf00360 | 6 |
| AX-158203829 | 17 | 96.324 | KV452892.1 | 2440045 | 6-scf00360 | 6 |
| AX-158203830 | 17 | 96.324 | KV452892.1 | 2441071 | 6-scf00360 | 6 |
| AX-158203832 | 17 | 96.324 | KV452892.1 | 2442359 | 6-scf00360 | 6 |
| AX-158203839 | 17 | 96.324 | KV452892.1 | 2447943 | 6-scf00360 | 6 |
| AX-158203843 | 17 | 96.324 | KV452892.1 | 2452325 | 6-scf00360 | 6 |
| AX-158203848 | 17 | 96.324 | KV452892.1 | 2460261 | 6-scf00360 | 6 |
| AX-158203851 | 17 | 96.324 | KV452892.1 | 2462106 | 6-scf00360 | 6 |
| AX-158203841 | 17 | 96.325 | KV452892.1 | 2450262 | 6-scf00360 | 6 |
| AX-158203845 | 17 | 96.402 | KV452892.1 | 2454970 | 6-scf00360 | 6 |
| AX-158203755 | 17 | 96.543 | KV452892.1 | 2356665 | 6-scf00360 | 6 |
| AX-158203803 | 17 | 96.543 | KV452892.1 | 2407068 | 6-scf00360 | 6 |
| AX-157715398 | 17 | 96.543 | KV452892.1 | 2416551 | 6-scf00360 | 6 |
| AX-158203850 | 17 | 96.543 | KV452892.1 | 2461393 | 6-scf00360 | 6 |
| AX-158203853 | 17 | 96.543 | KV452892.1 | 2463422 | 6-scf00360 | 6 |
| AX-157771809 | 17 | 96.543 | KV452892.1 | 2465155 | 6-scf00360 | 6 |
| AX-158203863 | 17 | 96.543 | KV452892.1 | 2497400 | 6-scf00360 | 6 |
| AX-158203864 | 17 | 96.543 | KV452892.1 | 2497847 | 6-scf00360 | 6 |
| AX-158203867 | 17 | 96.543 | KV452892.1 | 2500508 | 6-scf00360 | 6 |
| AX-157837696 | 17 | 96.652 | KV452892.1 | 2503665 | 6-scf00360 | 6 |
| AX-157837697 | 17 | 96.652 | KV452892.1 | 2504878 | 6-scf00360 | 6 |
| AX-158203868 | 17 | 96.652 | KV452892.1 | 2505280 | 6-scf00360 | 6 |
| AX-158203869 | 17 | 96.652 | KV452892.1 | 2505899 | 6-scf00360 | 6 |
| AX-158203872 | 17 | 96.871 | KV452892.1 | 2514597 | 6-scf00360 | 6 |
| AX-158203874 | 17 | 96.871 | KV452892.1 | 2520914 | 6-scf00360 | 6 |
| AX-157837702 | 17 | 96.871 | KV452892.1 | 2522587 | 6-scf00360 | 6 |
| AX-158203875 | 17 | 96.871 | KV452892.1 | 2522948 | 6-scf00360 | 6 |
| AX-158203878 | 17 | 96.871 | KV452892.1 | 2526843 | 6-scf00360 | 6 |
| AX-158203880 | 17 | 96.871 | KV452892.1 | 2527583 | 6-scf00360 | 6 |
| AX-158203881 | 17 | 96.871 | KV452892.1 | 2528832 | 6-scf00360 | 6 |
| AX-157837705 | 17 | 96.871 | KV452892.1 | 2530651 | 6-scf00360 | 6 |
| AX-157745034 | 17 | 96.871 | KV452892.1 | 2531818 | 6-scf00360 | 6 |
| AX-157837706 | 17 | 96.871 | KV452892.1 | 2532147 | 6-scf00360 | 6 |
| AX-157837708 | 17 | 96.871 | KV452892.1 | 2534643 | 6-scf00360 | 6 |
| AX-158203884 | 17 | 96.871 | KV452892.1 | 2535863 | 6-scf00360 | 6 |
| AX-158203886 | 17 | 96.871 | KV452892.1 | 2539737 | 6-scf00360 | 6 |
| AX-158203887 | 17 | 96.871 | KV452892.1 | 2539945 | 6-scf00360 | 6 |
| AX-158203889 | 17 | 96.871 | KV452892.1 | 2542556 | 6-scf00360 | 6 |
| AX-157756662 | 17 | 96.871 | KV452892.1 | 2544340 | 6-scf00360 | 6 |
| AX-158203891 | 17 | 96.871 | KV452892.1 | 2546273 | 6-scf00360 | 6 |
| AX-158203896 | 17 | 96.871 | KV452892.1 | 2552906 | 6-scf00360 | 6 |
| AX-158203907 | 17 | 96.871 | KV452892.1 | 2561452 | 6-scf00360 | 6 |
| AX-158203935 | 17 | 96.871 | KV452892.1 | 2601396 | 6-scf00360 | 6 |
| AX-158203943 | 17 | 96.871 | KV452892.1 | 2611689 | 6-scf00360 | 6 |
| AX-158203947 | 17 | 96.871 | KV452892.1 | 2615929 | 6-scf00360 | 6 |
| AX-158203948 | 17 | 96.871 | KV452892.1 | 2616943 | 6-scf00360 | 6 |
| AX-158203949 | 17 | 96.871 | KV452892.1 | 2617331 | 6-scf00360 | 6 |
| AX-158203967 | 17 | 96.871 | KV452892.1 | 2641399 | 6-scf00360 | 6 |
| AX-157739193 | 17 | 96.871 | KV452892.1 | 2645115 | 6-scf00360 | 6 |

|              |    |        |             |         |            |    |
|--------------|----|--------|-------------|---------|------------|----|
| AX-158203976 | 17 | 96.871 | KV452892.1  | 2651651 | 6-scf00360 | 6  |
| AX-158203893 | 17 | 97.197 | KV452892.1  | 2549252 | 6-scf00360 | 6  |
| AX-157866893 | 17 | 97.198 | KV452892.1  | 2346314 | 6-scf00360 | 6  |
| AX-158203883 | 17 | 97.198 | KV452892.1  | 2535445 | 6-scf00360 | 6  |
| AX-157837709 | 17 | 97.198 | KV452892.1  | 2547832 | 6-scf00360 | 6  |
| AX-158203894 | 17 | 97.198 | KV452892.1  | 2550045 | 6-scf00360 | 6  |
| AX-158203899 | 17 | 97.198 | KV452892.1  | 2555463 | 6-scf00360 | 6  |
| AX-158203904 | 17 | 97.198 | KV452892.1  | 2558540 | 6-scf00360 | 6  |
| AX-158203906 | 17 | 97.198 | KV452892.1  | 2560982 | 6-scf00360 | 6  |
| AX-158203908 | 17 | 97.198 | KV452892.1  | 2561864 | 6-scf00360 | 6  |
| AX-158203910 | 17 | 97.198 | KV452892.1  | 2564263 | 6-scf00360 | 6  |
| AX-158203911 | 17 | 97.198 | KV452892.1  | 2565008 | 6-scf00360 | 6  |
| AX-158203912 | 17 | 97.198 | KV452892.1  | 2568156 | 6-scf00360 | 6  |
| AX-158203913 | 17 | 97.198 | KV452892.1  | 2569496 | 6-scf00360 | 6  |
| AX-158203916 | 17 | 97.198 | KV452892.1  | 2573526 | 6-scf00360 | 6  |
| AX-157837712 | 17 | 97.198 | KV452892.1  | 2575978 | 6-scf00360 | 6  |
| AX-157837713 | 17 | 97.198 | KV452892.1  | 2576591 | 6-scf00360 | 6  |
| AX-158203917 | 17 | 97.198 | KV452892.1  | 2577868 | 6-scf00360 | 6  |
| AX-157747540 | 17 | 97.198 | KV452892.1  | 2580309 | 6-scf00360 | 6  |
| AX-157748224 | 17 | 97.198 | KV452892.1  | 2583985 | 6-scf00360 | 6  |
| AX-158203932 | 17 | 97.198 | KV452892.1  | 2598824 | 6-scf00360 | 6  |
| AX-158203940 | 17 | 97.198 | KV452892.1  | 2608467 | 6-scf00360 | 6  |
| AX-158203942 | 17 | 97.198 | KV452892.1  | 2611097 | 6-scf00360 | 6  |
| AX-158203957 | 17 | 97.198 | KV452892.1  | 2625895 | 6-scf00360 | 6  |
| AX-158203969 | 17 | 97.198 | KV452892.1  | 2642698 | 6-scf00360 | 6  |
| AX-158203983 | 17 | 97.198 | KV452892.1  | 2659267 | 6-scf00360 | 6  |
| AX-157721794 | 17 | 97.285 | KV452892.1  | 2548732 | 6-scf00360 | 6  |
| AX-158203955 | 17 | 97.285 | KV452892.1  | 2624119 | 6-scf00360 | 6  |
| AX-158204023 | 17 | 97.285 | KV452892.1  | 2705754 | 6-scf00360 | 6  |
| AX-158203852 | 17 | 97.307 | KV452892.1  | 2463122 | 6-scf00360 | 6  |
| AX-157715004 | 17 | 97.307 | KV452892.1  | 2485429 | 6-scf00360 | 6  |
| AX-158203876 | 17 | 97.307 | KV452892.1  | 2523799 | 6-scf00360 | 6  |
| AX-158203877 | 17 | 97.307 | KV452892.1  | 2524158 | 6-scf00360 | 6  |
| AX-157837707 | 17 | 97.307 | KV452892.1  | 2532607 | 6-scf00360 | 6  |
| AX-157872322 | 17 | 97.307 | KV452892.1  | 2624415 | 6-scf00360 | 6  |
| AX-158203958 | 17 | 97.307 | KV452892.1  | 2627649 | 6-scf00360 | 6  |
| AX-158203963 | 17 | 97.307 | KV452892.1  | 2634035 | 6-scf00360 | 6  |
| AX-158203966 | 17 | 97.307 | KV452892.1  | 2640370 | 6-scf00360 | 6  |
| AX-158203968 | 17 | 97.307 | KV452892.1  | 2642076 | 6-scf00360 | 6  |
| AX-158203988 | 17 | 97.307 | KV452892.1  | 2665394 | 6-scf00360 | 6  |
| AX-157712018 | 17 | 97.307 | 3ML01031549 | 552     | scf07166_1 | UN |
| AX-158203973 | 17 | 97.316 | KV452892.1  | 2646036 | 6-scf00360 | 6  |
| AX-158203974 | 17 | 97.336 | KV452892.1  | 2647195 | 6-scf00360 | 6  |
| AX-158203998 | 17 | 97.336 | KV452892.1  | 2679003 | 6-scf00360 | 6  |
| AX-158203980 | 17 | 97.346 | KV452892.1  | 2656946 | 6-scf00360 | 6  |
| AX-158203989 | 17 | 97.366 | KV452892.1  | 2666602 | 6-scf00360 | 6  |
| AX-158203977 | 17 | 97.386 | KV452892.1  | 2655244 | 6-scf00360 | 6  |
| AX-158203990 | 17 | 97.386 | KV452892.1  | 2667852 | 6-scf00360 | 6  |
| AX-158203986 | 17 | 97.403 | KV452892.1  | 2663811 | 6-scf00360 | 6  |
| AX-158203997 | 17 | 97.403 | KV452892.1  | 2678172 | 6-scf00360 | 6  |
| AX-158204000 | 17 | 97.417 | KV452892.1  | 2680037 | 6-scf00360 | 6  |

|              |    |        |            |         |            |   |
|--------------|----|--------|------------|---------|------------|---|
| AX-158204004 | 17 | 97.417 | KV452892.1 | 2684412 | 6-scf00360 | 6 |
| AX-158204009 | 17 | 97.417 | KV452892.1 | 2687382 | 6-scf00360 | 6 |
| AX-158204011 | 17 | 97.417 | KV452892.1 | 2691801 | 6-scf00360 | 6 |
| AX-158204017 | 17 | 97.496 | KV452892.1 | 2700118 | 6-scf00360 | 6 |
| AX-158204022 | 17 | 97.58  | KV452892.1 | 2705059 | 6-scf00360 | 6 |
| AX-157837694 | 17 | 97.744 | KV452892.1 | 2485506 | 6-scf00360 | 6 |
| AX-157708390 | 17 | 97.744 | KV452892.1 | 2550257 | 6-scf00360 | 6 |
| AX-158204006 | 17 | 97.744 | KV452892.1 | 2685757 | 6-scf00360 | 6 |
| AX-158204016 | 17 | 97.744 | KV452892.1 | 2698753 | 6-scf00360 | 6 |
| AX-158204020 | 17 | 97.744 | KV452892.1 | 2703118 | 6-scf00360 | 6 |
| AX-158204024 | 17 | 97.744 | KV452892.1 | 2707060 | 6-scf00360 | 6 |
| AX-158204025 | 17 | 97.744 | KV452892.1 | 2708252 | 6-scf00360 | 6 |
| AX-158204026 | 17 | 97.744 | KV452892.1 | 2708612 | 6-scf00360 | 6 |
| AX-158204030 | 17 | 97.744 | KV452892.1 | 2714219 | 6-scf00360 | 6 |
| AX-158204031 | 17 | 97.744 | KV452892.1 | 2715018 | 6-scf00360 | 6 |
| AX-157773084 | 17 | 97.744 | KV452892.1 | 2717084 | 6-scf00360 | 6 |
| AX-158204032 | 17 | 97.744 | KV452892.1 | 2718607 | 6-scf00360 | 6 |
| AX-158204036 | 17 | 97.744 | KV452892.1 | 2725061 | 6-scf00360 | 6 |
| AX-158204038 | 17 | 97.744 | KV452892.1 | 2727144 | 6-scf00360 | 6 |
| AX-158418428 | 17 | 97.744 | KV452892.1 | 2728562 | 6-scf00360 | 6 |
| AX-158204043 | 17 | 97.744 | KV452892.1 | 2732148 | 6-scf00360 | 6 |
| AX-157837722 | 17 | 97.744 | KV452892.1 | 2733416 | 6-scf00360 | 6 |
| AX-158204044 | 17 | 97.744 | KV452892.1 | 2733713 | 6-scf00360 | 6 |
| AX-158204045 | 17 | 97.744 | KV452892.1 | 2735382 | 6-scf00360 | 6 |
| AX-158204049 | 17 | 97.744 | KV452892.1 | 2742636 | 6-scf00360 | 6 |
| AX-157720238 | 17 | 97.744 | KV452892.1 | 2746353 | 6-scf00360 | 6 |
| AX-158204054 | 17 | 97.744 | KV452892.1 | 2749458 | 6-scf00360 | 6 |
| AX-158204055 | 17 | 97.744 | KV452892.1 | 2751120 | 6-scf00360 | 6 |
| AX-158204058 | 17 | 97.744 | KV452892.1 | 2753468 | 6-scf00360 | 6 |
| AX-158204061 | 17 | 97.744 | KV452892.1 | 2756578 | 6-scf00360 | 6 |
| AX-158204062 | 17 | 97.744 | KV452892.1 | 2757655 | 6-scf00360 | 6 |
| AX-158204064 | 17 | 97.744 | KV452892.1 | 2759602 | 6-scf00360 | 6 |
| AX-158204065 | 17 | 97.744 | KV452892.1 | 2760518 | 6-scf00360 | 6 |
| AX-158204100 | 17 | 97.744 | KV452892.1 | 2817054 | 6-scf00360 | 6 |
| AX-158204040 | 17 | 97.854 | KV452892.1 | 2730311 | 6-scf00360 | 6 |
| AX-158204060 | 17 | 97.854 | KV452892.1 | 2755257 | 6-scf00360 | 6 |
| AX-157722003 | 17 | 97.854 | KV452892.1 | 2762925 | 6-scf00360 | 6 |
| AX-158204066 | 17 | 97.854 | KV452892.1 | 2763610 | 6-scf00360 | 6 |
| AX-158204069 | 17 | 97.854 | KV452892.1 | 2767601 | 6-scf00360 | 6 |
| AX-158204072 | 17 | 97.854 | KV452892.1 | 2770047 | 6-scf00360 | 6 |
| AX-158204079 | 17 | 97.854 | KV452892.1 | 2789302 | 6-scf00360 | 6 |
| AX-158204087 | 17 | 97.854 | KV452892.1 | 2799941 | 6-scf00360 | 6 |
| AX-158204088 | 17 | 97.854 | KV452892.1 | 2802633 | 6-scf00360 | 6 |
| AX-158204110 | 17 | 97.854 | KV452892.1 | 2834781 | 6-scf00360 | 6 |
| AX-158204093 | 17 | 97.917 | KV452892.1 | 2810473 | 6-scf00360 | 6 |
| AX-158204082 | 17 | 97.963 | KV452892.1 | 2793193 | 6-scf00360 | 6 |
| AX-158204095 | 17 | 97.963 | KV452892.1 | 2812396 | 6-scf00360 | 6 |
| AX-158204096 | 17 | 97.963 | KV452892.1 | 2813466 | 6-scf00360 | 6 |
| AX-158204098 | 17 | 97.963 | KV452892.1 | 2815995 | 6-scf00360 | 6 |
| AX-158204101 | 17 | 97.963 | KV452892.1 | 2820685 | 6-scf00360 | 6 |
| AX-158204102 | 17 | 97.963 | KV452892.1 | 2822651 | 6-scf00360 | 6 |

|              |    |         |            |         |            |   |
|--------------|----|---------|------------|---------|------------|---|
| AX-158204103 | 17 | 97.963  | KV452892.1 | 2823207 | 6-scf00360 | 6 |
| AX-158204104 | 17 | 97.963  | KV452892.1 | 2824227 | 6-scf00360 | 6 |
| AX-158204105 | 17 | 97.963  | KV452892.1 | 2825148 | 6-scf00360 | 6 |
| AX-158204106 | 17 | 97.963  | KV452892.1 | 2826676 | 6-scf00360 | 6 |
| AX-158204111 | 17 | 97.963  | KV452892.1 | 2835645 | 6-scf00360 | 6 |
| AX-157859039 | 17 | 97.963  | KV452892.1 | 2835921 | 6-scf00360 | 6 |
| AX-158204121 | 17 | 98.181  | KV452892.1 | 2853664 | 6-scf00360 | 6 |
| AX-158414322 | 17 | 98.181  | KV452892.1 | 2855567 | 6-scf00360 | 6 |
| AX-158204122 | 17 | 98.181  | KV452892.1 | 2855630 | 6-scf00360 | 6 |
| AX-157751981 | 17 | 98.181  | KV452892.1 | 2858319 | 6-scf00360 | 6 |
| AX-158204125 | 17 | 98.181  | KV452892.1 | 2859406 | 6-scf00360 | 6 |
| AX-158204127 | 17 | 98.181  | KV452892.1 | 2861168 | 6-scf00360 | 6 |
| AX-157725790 | 17 | 98.181  | KV452892.1 | 2862250 | 6-scf00360 | 6 |
| AX-158204130 | 17 | 98.181  | KV452892.1 | 2864458 | 6-scf00360 | 6 |
| AX-158204131 | 17 | 98.674  | KV452892.1 | 2866307 | 6-scf00360 | 6 |
| AX-158204132 | 17 | 98.686  | KV452892.1 | 2866792 | 6-scf00360 | 6 |
| AX-158204133 | 17 | 98.686  | KV452892.1 | 2867792 | 6-scf00360 | 6 |
| AX-157879322 | 17 | 98.704  | KV452892.1 | 2869377 | 6-scf00360 | 6 |
| AX-158204135 | 17 | 98.704  | KV452892.1 | 2877383 | 6-scf00360 | 6 |
| AX-157758659 | 17 | 98.704  | KV452892.1 | 2916945 | 6-scf00360 | 6 |
| AX-158204138 | 17 | 99.095  | KV452892.1 | 2878769 | 6-scf00360 | 6 |
| AX-158204141 | 17 | 99.096  | KV452892.1 | 2880315 | 6-scf00360 | 6 |
| AX-158380732 | 17 | 99.096  | KV452892.1 | 2881420 | 6-scf00360 | 6 |
| AX-158204144 | 17 | 99.174  | KV452892.1 | 2884219 | 6-scf00360 | 6 |
| AX-158204147 | 17 | 99.275  | KV452892.1 | 2890226 | 6-scf00360 | 6 |
| AX-158204148 | 17 | 99.275  | KV452892.1 | 2890659 | 6-scf00360 | 6 |
| AX-157745649 | 17 | 99.275  | KV452892.1 | 2922082 | 6-scf00360 | 6 |
| AX-158204164 | 17 | 99.275  | KV452892.1 | 2922807 | 6-scf00360 | 6 |
| AX-158204166 | 17 | 99.275  | KV452892.1 | 2924765 | 6-scf00360 | 6 |
| AX-158204172 | 17 | 99.275  | KV452892.1 | 2932444 | 6-scf00360 | 6 |
| AX-158204174 | 17 | 99.275  | KV452892.1 | 2935030 | 6-scf00360 | 6 |
| AX-158204175 | 17 | 99.275  | KV452892.1 | 2935485 | 6-scf00360 | 6 |
| AX-158204177 | 17 | 99.275  | KV452892.1 | 2936437 | 6-scf00360 | 6 |
| AX-158204180 | 17 | 99.275  | KV452892.1 | 2940508 | 6-scf00360 | 6 |
| AX-158204173 | 17 | 99.399  | KV452892.1 | 2933502 | 6-scf00360 | 6 |
| AX-158204178 | 17 | 99.399  | KV452892.1 | 2936952 | 6-scf00360 | 6 |
| AX-158204185 | 17 | 99.493  | KV452892.1 | 2948869 | 6-scf00360 | 6 |
| AX-157753351 | 17 | 99.493  | KV452892.1 | 2950592 | 6-scf00360 | 6 |
| AX-157751404 | 17 | 99.775  | KV452892.1 | 2954217 | 6-scf00360 | 6 |
| AX-158204186 | 17 | 99.775  | KV452892.1 | 2954367 | 6-scf00360 | 6 |
| AX-157748005 | 17 | 99.775  | KV452892.1 | 2955528 | 6-scf00360 | 6 |
| AX-158204187 | 17 | 99.848  | KV452892.1 | 2958402 | 6-scf00360 | 6 |
| AX-158204188 | 17 | 99.848  | KV452892.1 | 2963867 | 6-scf00360 | 6 |
| AX-157837729 | 17 | 99.848  | KV452892.1 | 2968490 | 6-scf00360 | 6 |
| AX-158204192 | 17 | 99.848  | KV452892.1 | 2968600 | 6-scf00360 | 6 |
| AX-158204195 | 17 | 99.848  | KV452892.1 | 2975428 | 6-scf00360 | 6 |
| AX-158204196 | 17 | 99.848  | KV452892.1 | 2978030 | 6-scf00360 | 6 |
| AX-158204198 | 17 | 99.848  | KV452892.1 | 2980006 | 6-scf00360 | 6 |
| AX-158204191 | 17 | 100.079 | KV452892.1 | 2966303 | 6-scf00360 | 6 |
| AX-157837731 | 17 | 100.079 | KV452892.1 | 2986613 | 6-scf00360 | 6 |
| AX-158204211 | 17 | 100.079 | KV452892.1 | 3007173 | 6-scf00360 | 6 |



|              |    |         |            |         |            |   |
|--------------|----|---------|------------|---------|------------|---|
| AX-158204202 | 17 | 100.08  | KV452892.1 | 2988847 | 6-scf00360 | 6 |
| AX-158393920 | 17 | 100.08  | KV452892.1 | 2990949 | 6-scf00360 | 6 |
| AX-158204203 | 17 | 100.212 | KV452892.1 | 2993474 | 6-scf00360 | 6 |
| AX-158204207 | 17 | 100.477 | KV452892.1 | 3000906 | 6-scf00360 | 6 |
| AX-158204209 | 17 | 100.477 | KV452892.1 | 3002634 | 6-scf00360 | 6 |
| AX-158204212 | 17 | 100.477 | KV452892.1 | 3008326 | 6-scf00360 | 6 |
| AX-158204216 | 17 | 100.477 | KV452892.1 | 3010272 | 6-scf00360 | 6 |
| AX-158204220 | 17 | 100.479 | KV452892.1 | 3016329 | 6-scf00360 | 6 |
| AX-157750492 | 17 | 100.609 | KV452892.1 | 3018048 | 6-scf00360 | 6 |
| AX-158204223 | 17 | 100.659 | KV452892.1 | 3023201 | 6-scf00360 | 6 |
| AX-158204226 | 17 | 100.693 | KV452892.1 | 3025933 | 6-scf00360 | 6 |
| AX-158204227 | 17 | 100.743 | KV452892.1 | 3027585 | 6-scf00360 | 6 |
| AX-158204230 | 17 | 100.743 | KV452892.1 | 3031064 | 6-scf00360 | 6 |
| AX-158204231 | 17 | 100.85  | KV452892.1 | 3032733 | 6-scf00360 | 6 |
| AX-158204222 | 17 | 100.958 | KV452892.1 | 3022686 | 6-scf00360 | 6 |
| AX-158204232 | 17 | 100.958 | KV452892.1 | 3033216 | 6-scf00360 | 6 |
| AX-158204234 | 17 | 101.09  | KV452892.1 | 3036151 | 6-scf00360 | 6 |
| AX-158204238 | 17 | 101.3   | KV452892.1 | 3040245 | 6-scf00360 | 6 |
| AX-158204235 | 17 | 101.301 | KV452892.1 | 3037324 | 6-scf00360 | 6 |
| AX-158204239 | 17 | 101.301 | KV452892.1 | 3040665 | 6-scf00360 | 6 |
| AX-158204241 | 17 | 101.301 | KV452892.1 | 3046190 | 6-scf00360 | 6 |
| AX-158204243 | 17 | 101.301 | KV452892.1 | 3050596 | 6-scf00360 | 6 |
| AX-157759025 | 17 | 101.301 | KV452892.1 | 3051106 | 6-scf00360 | 6 |
| AX-158204248 | 17 | 101.46  | KV452892.1 | 3055266 | 6-scf00360 | 6 |
| AX-158204252 | 17 | 101.606 | KV452892.1 | 3065085 | 6-scf00360 | 6 |
| AX-158204242 | 17 | 101.616 | KV452892.1 | 3047444 | 6-scf00360 | 6 |
| AX-158204256 | 17 | 101.616 | KV452892.1 | 3069844 | 6-scf00360 | 6 |
| AX-158204258 | 17 | 101.616 | KV452892.1 | 3072627 | 6-scf00360 | 6 |
| AX-158414326 | 17 | 101.616 | KV452892.1 | 3079220 | 6-scf00360 | 6 |
| AX-158414327 | 17 | 101.616 | KV452892.1 | 3079259 | 6-scf00360 | 6 |
| AX-158204265 | 17 | 101.616 | KV452892.1 | 3080202 | 6-scf00360 | 6 |
| AX-158204286 | 17 | 101.616 | KV452892.1 | 3106842 | 6-scf00360 | 6 |
| AX-158204267 | 17 | 101.874 | KV452892.1 | 3081439 | 6-scf00360 | 6 |
| AX-158204269 | 17 | 101.874 | KV452892.1 | 3083525 | 6-scf00360 | 6 |
| AX-157837735 | 17 | 102.084 | KV452892.1 | 3088083 | 6-scf00360 | 6 |
| AX-158204271 | 17 | 102.092 | KV452892.1 | 3088194 | 6-scf00360 | 6 |
| AX-158204247 | 17 | 102.104 | KV452892.1 | 3053717 | 6-scf00360 | 6 |
| AX-158204254 | 17 | 102.104 | KV452892.1 | 3067467 | 6-scf00360 | 6 |
| AX-157837736 | 17 | 102.104 | KV452892.1 | 3088363 | 6-scf00360 | 6 |
| AX-157837738 | 17 | 102.104 | KV452892.1 | 3116492 | 6-scf00360 | 6 |
| AX-157719514 | 17 | 102.104 | KV452892.1 | 3133560 | 6-scf00360 | 6 |
| AX-158204304 | 17 | 102.104 | KV452892.1 | 3147560 | 6-scf00360 | 6 |
| AX-157753059 | 17 | 102.104 | KV452892.1 | 3152363 | 6-scf00360 | 6 |
| AX-158204257 | 17 | 102.118 | KV452892.1 | 3071273 | 6-scf00360 | 6 |
| AX-158204272 | 17 | 102.118 | KV452892.1 | 3089324 | 6-scf00360 | 6 |
| AX-157772683 | 17 | 102.118 | KV452892.1 | 3090642 | 6-scf00360 | 6 |
| AX-158204275 | 17 | 102.118 | KV452892.1 | 3092868 | 6-scf00360 | 6 |
| AX-158204279 | 17 | 102.118 | KV452892.1 | 3098468 | 6-scf00360 | 6 |
| AX-157758794 | 17 | 102.118 | KV452892.1 | 3099829 | 6-scf00360 | 6 |
| AX-158204283 | 17 | 102.118 | KV452892.1 | 3103836 | 6-scf00360 | 6 |
| AX-158204285 | 17 | 102.118 | KV452892.1 | 3105308 | 6-scf00360 | 6 |

|              |    |         |            |         |            |   |
|--------------|----|---------|------------|---------|------------|---|
| AX-158204296 | 17 | 102.118 | KV452892.1 | 3121704 | 6-scf00360 | 6 |
| AX-158204289 | 17 | 102.119 | KV452892.1 | 3111768 | 6-scf00360 | 6 |
| AX-158393924 | 17 | 102.661 | KV452892.1 | 3113347 | 6-scf00360 | 6 |
| AX-157837740 | 17 | 102.661 | KV452892.1 | 3139171 | 6-scf00360 | 6 |
| AX-158204291 | 17 | 102.662 | KV452892.1 | 3114238 | 6-scf00360 | 6 |
| AX-158204293 | 17 | 102.662 | KV452892.1 | 3116988 | 6-scf00360 | 6 |
| AX-157887066 | 17 | 102.662 | KV452892.1 | 3126089 | 6-scf00360 | 6 |
| AX-158204299 | 17 | 102.662 | KV452892.1 | 3133969 | 6-scf00360 | 6 |
| AX-158204300 | 17 | 102.662 | KV452892.1 | 3134360 | 6-scf00360 | 6 |
| AX-158204301 | 17 | 102.662 | KV452892.1 | 3135007 | 6-scf00360 | 6 |
| AX-157715909 | 17 | 102.662 | KV452892.1 | 3148677 | 6-scf00360 | 6 |
| AX-158204306 | 17 | 102.662 | KV452892.1 | 3152885 | 6-scf00360 | 6 |
| AX-158204310 | 17 | 102.662 | KV452892.1 | 3158556 | 6-scf00360 | 6 |
| AX-157837743 | 17 | 102.662 | KV452892.1 | 3160555 | 6-scf00360 | 6 |
| AX-158204313 | 17 | 102.662 | KV452892.1 | 3165106 | 6-scf00360 | 6 |
| AX-158204314 | 17 | 102.662 | KV452892.1 | 3165599 | 6-scf00360 | 6 |
| AX-158204315 | 17 | 102.662 | KV452892.1 | 3167719 | 6-scf00360 | 6 |
| AX-158204318 | 17 | 102.662 | KV452892.1 | 3171341 | 6-scf00360 | 6 |
| AX-158204320 | 17 | 102.666 | KV452892.1 | 3183571 | 6-scf00360 | 6 |
| AX-158204302 | 17 | 102.672 | KV452892.1 | 3139506 | 6-scf00360 | 6 |
| AX-158204309 | 17 | 102.672 | KV452892.1 | 3156530 | 6-scf00360 | 6 |
| AX-158204311 | 17 | 102.672 | KV452892.1 | 3160291 | 6-scf00360 | 6 |
| AX-158204321 | 17 | 102.672 | KV452892.1 | 3186271 | 6-scf00360 | 6 |
| AX-158204305 | 17 | 102.745 | KV452892.1 | 3151012 | 6-scf00360 | 6 |
| AX-157715569 | 17 | 102.745 | KV452892.1 | 3190982 | 6-scf00360 | 6 |
| AX-157725500 | 17 | 103.145 | KV452892.1 | 3194852 | 6-scf00360 | 6 |
| AX-158204326 | 17 | 103.402 | KV452892.1 | 3198771 | 6-scf00360 | 6 |
| AX-157859042 | 17 | 103.404 | KV452892.1 | 3205835 | 6-scf00360 | 6 |
| AX-157837746 | 17 | 103.404 | KV452892.1 | 3208631 | 6-scf00360 | 6 |
| AX-157837747 | 17 | 103.628 | KV452892.1 | 3214987 | 6-scf00360 | 6 |
| AX-158204335 | 17 | 103.628 | KV452892.1 | 3222892 | 6-scf00360 | 6 |
| AX-158204332 | 17 | 103.65  | KV452892.1 | 3219254 | 6-scf00360 | 6 |
| AX-158204330 | 17 | 103.76  | KV452892.1 | 3217628 | 6-scf00360 | 6 |
| AX-158204336 | 17 | 103.76  | KV452892.1 | 3224899 | 6-scf00360 | 6 |
| AX-157775068 | 17 | 103.76  | KV452892.1 | 3228109 | 6-scf00360 | 6 |
| AX-158204339 | 17 | 103.76  | KV452892.1 | 3231052 | 6-scf00360 | 6 |
| AX-158393925 | 17 | 103.979 | KV452892.1 | 3233729 | 6-scf00360 | 6 |
| AX-158204341 | 17 | 103.979 | KV452892.1 | 3235903 | 6-scf00360 | 6 |
| AX-158204342 | 17 | 103.979 | KV452892.1 | 3236657 | 6-scf00360 | 6 |
| AX-158204344 | 17 | 103.979 | KV452892.1 | 3239361 | 6-scf00360 | 6 |
| AX-157859043 | 17 | 103.979 | KV452892.1 | 3240119 | 6-scf00360 | 6 |
| AX-158204345 | 17 | 103.979 | KV452892.1 | 3241967 | 6-scf00360 | 6 |
| AX-158204346 | 17 | 103.979 | KV452892.1 | 3243498 | 6-scf00360 | 6 |
| AX-158204347 | 17 | 103.979 | KV452892.1 | 3244852 | 6-scf00360 | 6 |
| AX-158204348 | 17 | 103.979 | KV452892.1 | 3246729 | 6-scf00360 | 6 |
| AX-158204351 | 17 | 103.979 | KV452892.1 | 3248421 | 6-scf00360 | 6 |
| AX-158204359 | 17 | 103.979 | KV452892.1 | 3256675 | 6-scf00360 | 6 |
| AX-158204363 | 17 | 103.979 | KV452892.1 | 3260949 | 6-scf00360 | 6 |
| AX-158204366 | 17 | 103.979 | KV452892.1 | 3266560 | 6-scf00360 | 6 |
| AX-158204368 | 17 | 103.979 | KV452892.1 | 3271609 | 6-scf00360 | 6 |
| AX-158204369 | 17 | 103.979 | KV452892.1 | 3271768 | 6-scf00360 | 6 |

|              |    |         |            |         |            |   |
|--------------|----|---------|------------|---------|------------|---|
| AX-157751555 | 17 | 103.979 | KV452892.1 | 3273898 | 6-scf00360 | 6 |
| AX-158204375 | 17 | 103.979 | KV452892.1 | 3282475 | 6-scf00360 | 6 |
| AX-158204380 | 17 | 103.979 | KV452892.1 | 3286532 | 6-scf00360 | 6 |
| AX-158204381 | 17 | 104.362 | KV452892.1 | 3287438 | 6-scf00360 | 6 |
| AX-158204398 | 17 | 104.745 | KV452892.1 | 3307201 | 6-scf00360 | 6 |
| AX-158204399 | 17 | 104.745 | KV452892.1 | 3309800 | 6-scf00360 | 6 |
| AX-158204400 | 17 | 104.745 | KV452892.1 | 3310614 | 6-scf00360 | 6 |
| AX-158204401 | 17 | 104.745 | KV452892.1 | 3311390 | 6-scf00360 | 6 |
| AX-158204403 | 17 | 104.745 | KV452892.1 | 3312903 | 6-scf00360 | 6 |
| AX-158204404 | 17 | 104.745 | KV452892.1 | 3313510 | 6-scf00360 | 6 |
| AX-158204408 | 17 | 104.745 | KV452892.1 | 3316594 | 6-scf00360 | 6 |
| AX-158204413 | 17 | 104.745 | KV452892.1 | 3322267 | 6-scf00360 | 6 |
| AX-158204422 | 17 | 104.745 | KV452892.1 | 3336664 | 6-scf00360 | 6 |
| AX-158204428 | 17 | 104.745 | KV452892.1 | 3347579 | 6-scf00360 | 6 |
| AX-157837748 | 17 | 104.87  | KV452892.1 | 3296712 | 6-scf00360 | 6 |
| AX-158204409 | 17 | 104.87  | KV452892.1 | 3317053 | 6-scf00360 | 6 |
| AX-158204412 | 17 | 104.87  | KV452892.1 | 3321084 | 6-scf00360 | 6 |
| AX-158204334 | 17 | 105.056 | KV452892.1 | 3221369 | 6-scf00360 | 6 |
| AX-158204354 | 17 | 105.056 | KV452892.1 | 3250724 | 6-scf00360 | 6 |
| AX-158204360 | 17 | 105.056 | KV452892.1 | 3258538 | 6-scf00360 | 6 |
| AX-158204361 | 17 | 105.056 | KV452892.1 | 3259146 | 6-scf00360 | 6 |
| AX-157879328 | 17 | 105.056 | KV452892.1 | 3261619 | 6-scf00360 | 6 |
| AX-158393927 | 17 | 105.056 | KV452892.1 | 3285523 | 6-scf00360 | 6 |
| AX-158204383 | 17 | 105.056 | KV452892.1 | 3289232 | 6-scf00360 | 6 |
| AX-158204387 | 17 | 105.056 | KV452892.1 | 3293369 | 6-scf00360 | 6 |
| AX-157859044 | 17 | 105.056 | KV452892.1 | 3293719 | 6-scf00360 | 6 |
| AX-158380735 | 17 | 105.056 | KV452892.1 | 3303470 | 6-scf00360 | 6 |
| AX-158204395 | 17 | 105.056 | KV452892.1 | 3303648 | 6-scf00360 | 6 |
| AX-158204402 | 17 | 105.056 | KV452892.1 | 3312190 | 6-scf00360 | 6 |
| AX-158204406 | 17 | 105.056 | KV452892.1 | 3315259 | 6-scf00360 | 6 |
| AX-158204414 | 17 | 105.056 | KV452892.1 | 3322785 | 6-scf00360 | 6 |
| AX-157723597 | 17 | 105.171 | KV452892.1 | 3268599 | 6-scf00360 | 6 |
| AX-158204420 | 17 | 105.171 | KV452892.1 | 3332062 | 6-scf00360 | 6 |
| AX-158204421 | 17 | 105.171 | KV452892.1 | 3334501 | 6-scf00360 | 6 |
| AX-157724333 | 17 | 105.194 | KV452892.1 | 3275737 | 6-scf00360 | 6 |
| AX-158204405 | 17 | 105.194 | KV452892.1 | 3314841 | 6-scf00360 | 6 |
| AX-158204416 | 17 | 105.194 | KV452892.1 | 3326947 | 6-scf00360 | 6 |
| AX-158204417 | 17 | 105.194 | KV452892.1 | 3327743 | 6-scf00360 | 6 |
| AX-158204427 | 17 | 105.194 | KV452892.1 | 3346612 | 6-scf00360 | 6 |
| AX-157720634 | 17 | 105.194 | KV452892.1 | 3350013 | 6-scf00360 | 6 |
| AX-158204390 | 17 | 105.321 | KV452892.1 | 3296385 | 6-scf00360 | 6 |
| AX-158204432 | 17 | 105.321 | KV452892.1 | 3355418 | 6-scf00360 | 6 |
| AX-158204433 | 17 | 105.321 | KV452892.1 | 3357620 | 6-scf00360 | 6 |
| AX-158204436 | 17 | 105.321 | KV452892.1 | 3361230 | 6-scf00360 | 6 |
| AX-158204463 | 17 | 105.321 | KV452892.1 | 3392655 | 6-scf00360 | 6 |
| AX-158204430 | 17 | 105.322 | KV452892.1 | 3352986 | 6-scf00360 | 6 |
| AX-158204437 | 17 | 105.322 | KV452892.1 | 3362362 | 6-scf00360 | 6 |
| AX-158204440 | 17 | 105.322 | KV452892.1 | 3363945 | 6-scf00360 | 6 |
| AX-157726335 | 17 | 105.622 | KV452892.1 | 3366893 | 6-scf00360 | 6 |
| AX-158204442 | 17 | 105.622 | KV452892.1 | 3368562 | 6-scf00360 | 6 |
| AX-158204356 | 17 | 105.813 | KV452892.1 | 3253180 | 6-scf00360 | 6 |

|              |    |         |            |         |            |   |
|--------------|----|---------|------------|---------|------------|---|
| AX-158204384 | 17 | 105.813 | KV452892.1 | 3290401 | 6-scf00360 | 6 |
| AX-158204385 | 17 | 105.813 | KV452892.1 | 3291325 | 6-scf00360 | 6 |
| AX-158204444 | 17 | 105.813 | KV452892.1 | 3370886 | 6-scf00360 | 6 |
| AX-157720117 | 17 | 105.813 | KV452892.1 | 3388563 | 6-scf00360 | 6 |
| AX-158204449 | 17 | 106.061 | KV452892.1 | 3375199 | 6-scf00360 | 6 |
| AX-158204450 | 17 | 106.061 | KV452892.1 | 3376218 | 6-scf00360 | 6 |
| AX-158204451 | 17 | 106.061 | KV452892.1 | 3376907 | 6-scf00360 | 6 |
| AX-158204452 | 17 | 106.061 | KV452892.1 | 3377845 | 6-scf00360 | 6 |
| AX-158204454 | 17 | 106.17  | KV452892.1 | 3380287 | 6-scf00360 | 6 |
| AX-158204455 | 17 | 106.223 | KV452892.1 | 3381189 | 6-scf00360 | 6 |
| AX-158204456 | 17 | 106.28  | KV452892.1 | 3382319 | 6-scf00360 | 6 |
| AX-158204457 | 17 | 106.28  | KV452892.1 | 3383611 | 6-scf00360 | 6 |
| AX-158204458 | 17 | 106.28  | KV452892.1 | 3384478 | 6-scf00360 | 6 |
| AX-157837750 | 17 | 106.28  | KV452892.1 | 3386941 | 6-scf00360 | 6 |
| AX-158204461 | 17 | 106.28  | KV452892.1 | 3388927 | 6-scf00360 | 6 |
| AX-158204464 | 17 | 106.553 | KV452892.1 | 3394181 | 6-scf00360 | 6 |
| AX-157745551 | 17 | 106.553 | KV452892.1 | 3394548 | 6-scf00360 | 6 |
| AX-158204467 | 17 | 106.553 | KV452892.1 | 3397589 | 6-scf00360 | 6 |
| AX-158204472 | 17 | 106.553 | KV452892.1 | 3408877 | 6-scf00360 | 6 |
| AX-158204474 | 17 | 106.553 | KV452892.1 | 3410714 | 6-scf00360 | 6 |
| AX-158204475 | 17 | 106.553 | KV452892.1 | 3411391 | 6-scf00360 | 6 |
| AX-158204478 | 17 | 106.553 | KV452892.1 | 3413585 | 6-scf00360 | 6 |
| AX-158204491 | 17 | 106.553 | KV452892.1 | 3429507 | 6-scf00360 | 6 |
| AX-158204499 | 17 | 106.553 | KV452892.1 | 3437298 | 6-scf00360 | 6 |
| AX-158204500 | 17 | 106.553 | KV452892.1 | 3438913 | 6-scf00360 | 6 |
| AX-158204501 | 17 | 106.553 | KV452892.1 | 3439716 | 6-scf00360 | 6 |
| AX-158204462 | 17 | 106.826 | KV452892.1 | 3390702 | 6-scf00360 | 6 |
| AX-158204473 | 17 | 106.826 | KV452892.1 | 3409757 | 6-scf00360 | 6 |
| AX-158204482 | 17 | 106.826 | KV452892.1 | 3416953 | 6-scf00360 | 6 |
| AX-157837751 | 17 | 106.826 | KV452892.1 | 3421084 | 6-scf00360 | 6 |
| AX-158204487 | 17 | 106.826 | KV452892.1 | 3425032 | 6-scf00360 | 6 |
| AX-158204488 | 17 | 106.826 | KV452892.1 | 3426673 | 6-scf00360 | 6 |
| AX-158204490 | 17 | 106.826 | KV452892.1 | 3428001 | 6-scf00360 | 6 |
| AX-158204492 | 17 | 106.826 | KV452892.1 | 3429765 | 6-scf00360 | 6 |
| AX-157866899 | 17 | 106.826 | KV452892.1 | 3432343 | 6-scf00360 | 6 |
| AX-158204496 | 17 | 106.826 | KV452892.1 | 3434991 | 6-scf00360 | 6 |
| AX-158204498 | 17 | 106.826 | KV452892.1 | 3436245 | 6-scf00360 | 6 |
| AX-158204502 | 17 | 106.826 | KV452892.1 | 3440248 | 6-scf00360 | 6 |
| AX-158204504 | 17 | 106.864 | KV452892.1 | 3441091 | 6-scf00360 | 6 |
| AX-157757849 | 17 | 106.935 | KV452892.1 | 3442434 | 6-scf00360 | 6 |
| AX-158204506 | 17 | 106.935 | KV452892.1 | 3443679 | 6-scf00360 | 6 |
| AX-158204513 | 17 | 107.135 | KV452892.1 | 3453502 | 6-scf00360 | 6 |
| AX-158204514 | 17 | 107.135 | KV452892.1 | 3454712 | 6-scf00360 | 6 |
| AX-158204516 | 17 | 107.174 | KV452892.1 | 3456337 | 6-scf00360 | 6 |
| AX-157774850 | 17 | 107.174 | KV452892.1 | 3458422 | 6-scf00360 | 6 |
| AX-157837754 | 17 | 107.176 | KV452892.1 | 3460526 | 6-scf00360 | 6 |
| AX-157719542 | 17 | 107.359 | KV452892.1 | 3466268 | 6-scf00360 | 6 |
| AX-158204521 | 17 | 107.359 | KV452892.1 | 3467691 | 6-scf00360 | 6 |
| AX-158204525 | 17 | 107.359 | KV452892.1 | 3471807 | 6-scf00360 | 6 |
| AX-158204526 | 17 | 107.474 | KV452892.1 | 3474048 | 6-scf00360 | 6 |
| AX-158204531 | 17 | 107.589 | KV452892.1 | 3478900 | 6-scf00360 | 6 |

|              |    |         |            |         |            |   |
|--------------|----|---------|------------|---------|------------|---|
| AX-158204538 | 17 | 107.59  | KV452892.1 | 3488012 | 6-scf00360 | 6 |
| AX-157775775 | 17 | 107.591 | KV452892.1 | 3486028 | 6-scf00360 | 6 |
| AX-158204541 | 17 | 107.591 | KV452892.1 | 3490988 | 6-scf00360 | 6 |
| AX-158204542 | 17 | 107.591 | KV452892.1 | 3492915 | 6-scf00360 | 6 |
| AX-158204545 | 17 | 107.591 | KV452892.1 | 3498369 | 6-scf00360 | 6 |
| AX-158204548 | 17 | 107.591 | KV452892.1 | 3500170 | 6-scf00360 | 6 |
| AX-158204549 | 17 | 107.591 | KV452892.1 | 3501820 | 6-scf00360 | 6 |
| AX-158204550 | 17 | 107.591 | KV452892.1 | 3503546 | 6-scf00360 | 6 |
| AX-157837755 | 17 | 107.591 | KV452892.1 | 3505111 | 6-scf00360 | 6 |
| AX-157772581 | 17 | 107.591 | KV452892.1 | 3510457 | 6-scf00360 | 6 |
| AX-158204556 | 17 | 107.591 | KV452892.1 | 3513493 | 6-scf00360 | 6 |
| AX-158204558 | 17 | 107.591 | KV452892.1 | 3514304 | 6-scf00360 | 6 |
| AX-158204559 | 17 | 107.591 | KV452892.1 | 3514834 | 6-scf00360 | 6 |
| AX-158204527 | 17 | 107.771 | KV452892.1 | 3475241 | 6-scf00360 | 6 |
| AX-158204560 | 17 | 107.771 | KV452892.1 | 3518053 | 6-scf00360 | 6 |
| AX-158204561 | 17 | 107.771 | KV452892.1 | 3518990 | 6-scf00360 | 6 |
| AX-158204562 | 17 | 107.771 | KV452892.1 | 3520411 | 6-scf00360 | 6 |
| AX-157747901 | 17 | 107.771 | KV452892.1 | 3521589 | 6-scf00360 | 6 |
| AX-158204564 | 17 | 107.771 | KV452892.1 | 3528985 | 6-scf00360 | 6 |
| AX-157837756 | 17 | 107.771 | KV452892.1 | 3530986 | 6-scf00360 | 6 |
| AX-158204566 | 17 | 107.772 | KV452892.1 | 3531436 | 6-scf00360 | 6 |
| AX-158204543 | 17 | 107.949 | KV452892.1 | 3494547 | 6-scf00360 | 6 |
| AX-158204567 | 17 | 107.949 | KV452892.1 | 3534101 | 6-scf00360 | 6 |
| AX-157775270 | 17 | 107.949 | KV452892.1 | 3538099 | 6-scf00360 | 6 |
| AX-158204568 | 17 | 108.132 | KV452892.1 | 3536943 | 6-scf00360 | 6 |
| AX-158204569 | 17 | 108.132 | KV452892.1 | 3538419 | 6-scf00360 | 6 |
| AX-158204570 | 17 | 108.133 | KV452892.1 | 3538996 | 6-scf00360 | 6 |
| AX-157755057 | 17 | 108.159 | KV452892.1 | 3541016 | 6-scf00360 | 6 |
| AX-157711794 | 17 | 108.16  | KV452892.1 | 3542021 | 6-scf00360 | 6 |
| AX-158204572 | 17 | 108.16  | KV452892.1 | 3543583 | 6-scf00360 | 6 |
| AX-158204573 | 17 | 108.16  | KV452892.1 | 3545293 | 6-scf00360 | 6 |
| AX-157746337 | 17 | 108.161 | KV452892.1 | 3548571 | 6-scf00360 | 6 |
| AX-158204579 | 17 | 108.574 | KV452892.1 | 3557753 | 6-scf00360 | 6 |
| AX-158204580 | 17 | 108.574 | KV452892.1 | 3559073 | 6-scf00360 | 6 |
| AX-158414335 | 17 | 108.575 | KV452892.1 | 3543344 | 6-scf00360 | 6 |
| AX-158204576 | 17 | 108.575 | KV452892.1 | 3551137 | 6-scf00360 | 6 |
| AX-158204581 | 17 | 108.575 | KV452892.1 | 3559473 | 6-scf00360 | 6 |
| AX-158204582 | 17 | 108.575 | KV452892.1 | 3559642 | 6-scf00360 | 6 |
| AX-157837758 | 17 | 108.575 | KV452892.1 | 3560507 | 6-scf00360 | 6 |
| AX-158204583 | 17 | 108.608 | KV452892.1 | 3561075 | 6-scf00360 | 6 |
| AX-158204584 | 17 | 108.647 | KV452892.1 | 3561467 | 6-scf00360 | 6 |
| AX-158204587 | 17 | 108.683 | KV452892.1 | 3564140 | 6-scf00360 | 6 |
| AX-158204588 | 17 | 108.683 | KV452892.1 | 3564630 | 6-scf00360 | 6 |
| AX-157721196 | 17 | 108.683 | KV452892.1 | 3569676 | 6-scf00360 | 6 |
| AX-158204575 | 17 | 108.793 | KV452892.1 | 3550425 | 6-scf00360 | 6 |
| AX-157837759 | 17 | 108.793 | KV452892.1 | 3575324 | 6-scf00360 | 6 |
| AX-157837760 | 17 | 108.793 | KV452892.1 | 3577308 | 6-scf00360 | 6 |
| AX-157837763 | 17 | 108.905 | KV452892.1 | 3578883 | 6-scf00360 | 6 |
| AX-158204594 | 17 | 108.911 | KV452892.1 | 3576979 | 6-scf00360 | 6 |
| AX-157837761 | 17 | 108.911 | KV452892.1 | 3578001 | 6-scf00360 | 6 |
| AX-158380737 | 17 | 108.911 | KV452892.1 | 3579732 | 6-scf00360 | 6 |

|              |    |         |            |         |            |   |
|--------------|----|---------|------------|---------|------------|---|
| AX-158204596 | 17 | 108.93  | KV452892.1 | 3580693 | 6-scf00360 | 6 |
| AX-157837765 | 17 | 108.93  | KV452892.1 | 3583711 | 6-scf00360 | 6 |
| AX-157719157 | 17 | 108.93  | KV452892.1 | 3585482 | 6-scf00360 | 6 |
| AX-157749758 | 17 | 108.93  | KV452892.1 | 3589434 | 6-scf00360 | 6 |
| AX-158204603 | 17 | 108.93  | KV452892.1 | 3593034 | 6-scf00360 | 6 |
| AX-157740089 | 17 | 108.984 | KV452892.1 | 3599117 | 6-scf00360 | 6 |
| AX-158204604 | 17 | 109.033 | KV452892.1 | 3595143 | 6-scf00360 | 6 |
| AX-158386297 | 17 | 109.033 | KV452892.1 | 3602930 | 6-scf00360 | 6 |
| AX-158204609 | 17 | 109.066 | KV452892.1 | 3603420 | 6-scf00360 | 6 |
| AX-158386298 | 17 | 109.066 | KV452892.1 | 3606076 | 6-scf00360 | 6 |
| AX-158204613 | 17 | 109.066 | KV452892.1 | 3606353 | 6-scf00360 | 6 |
| AX-158414336 | 17 | 109.066 | KV452892.1 | 3608650 | 6-scf00360 | 6 |
| AX-157859049 | 17 | 109.066 | KV452892.1 | 3612107 | 6-scf00360 | 6 |
| AX-158204617 | 17 | 109.203 | KV452892.1 | 3610454 | 6-scf00360 | 6 |
| AX-158204618 | 17 | 109.203 | KV452892.1 | 3610862 | 6-scf00360 | 6 |
| AX-158204619 | 17 | 109.339 | KV452892.1 | 3612396 | 6-scf00360 | 6 |
| AX-158204621 | 17 | 109.339 | KV452892.1 | 3614120 | 6-scf00360 | 6 |
| AX-157740395 | 17 | 109.339 | KV452892.1 | 3615828 | 6-scf00360 | 6 |
| AX-158204622 | 17 | 109.339 | KV452892.1 | 3617316 | 6-scf00360 | 6 |
| AX-158409894 | 17 | 109.339 | KV452892.1 | 3619763 | 6-scf00360 | 6 |
| AX-157723264 | 17 | 109.34  | KV452892.1 | 3623389 | 6-scf00360 | 6 |
| AX-157754310 | 17 | 109.667 | KV452892.1 | 3631645 | 6-scf00360 | 6 |
| AX-158204634 | 17 | 109.667 | KV452892.1 | 3636404 | 6-scf00360 | 6 |
| AX-157751238 | 17 | 109.667 | KV452892.1 | 3637488 | 6-scf00360 | 6 |
| AX-158204637 | 17 | 109.694 | KV452892.1 | 3638578 | 6-scf00360 | 6 |
| AX-158386301 | 17 | 109.75  | KV452892.1 | 3640605 | 6-scf00360 | 6 |
| AX-157879338 | 17 | 109.776 | KV452892.1 | 3641197 | 6-scf00360 | 6 |
| AX-158204639 | 17 | 109.776 | KV452892.1 | 3642034 | 6-scf00360 | 6 |
| AX-158204640 | 17 | 109.776 | KV452892.1 | 3644643 | 6-scf00360 | 6 |
| AX-158204642 | 17 | 109.776 | KV452892.1 | 3646866 | 6-scf00360 | 6 |
| AX-157724321 | 17 | 109.776 | KV452892.1 | 3648246 | 6-scf00360 | 6 |
| AX-158204644 | 17 | 109.803 | KV452892.1 | 3649322 | 6-scf00360 | 6 |
| AX-158386302 | 17 | 109.822 | KV452892.1 | 3650463 | 6-scf00360 | 6 |
| AX-158204653 | 17 | 109.886 | KV452892.1 | 3660616 | 6-scf00360 | 6 |
| AX-158204654 | 17 | 109.922 | KV452892.1 | 3661282 | 6-scf00360 | 6 |
| AX-158204657 | 17 | 109.971 | KV452892.1 | 3665260 | 6-scf00360 | 6 |
| AX-157887076 | 17 | 109.995 | KV452892.1 | 3643261 | 6-scf00360 | 6 |
| AX-158204641 | 17 | 109.995 | KV452892.1 | 3645274 | 6-scf00360 | 6 |
| AX-158204649 | 17 | 109.995 | KV452892.1 | 3653925 | 6-scf00360 | 6 |
| AX-158204658 | 17 | 109.995 | KV452892.1 | 3666177 | 6-scf00360 | 6 |
| AX-158204667 | 17 | 109.995 | KV452892.1 | 3680532 | 6-scf00360 | 6 |
| AX-158204669 | 17 | 109.995 | KV452892.1 | 3682127 | 6-scf00360 | 6 |
| AX-158204670 | 17 | 109.995 | KV452892.1 | 3683245 | 6-scf00360 | 6 |
| AX-157753805 | 17 | 109.995 | KV452892.1 | 3684313 | 6-scf00360 | 6 |
| AX-158204671 | 17 | 109.995 | KV452892.1 | 3684552 | 6-scf00360 | 6 |
| AX-157754022 | 17 | 109.995 | KV452892.1 | 3685531 | 6-scf00360 | 6 |
| AX-158204674 | 17 | 109.995 | KV452892.1 | 3688595 | 6-scf00360 | 6 |
| AX-158204678 | 17 | 109.995 | KV452892.1 | 3691763 | 6-scf00360 | 6 |
| AX-158204679 | 17 | 109.995 | KV452892.1 | 3693340 | 6-scf00360 | 6 |
| AX-158204681 | 17 | 109.995 | KV452892.1 | 3694641 | 6-scf00360 | 6 |
| AX-158204682 | 17 | 109.995 | KV452892.1 | 3696258 | 6-scf00360 | 6 |

|              |    |         |            |         |            |   |
|--------------|----|---------|------------|---------|------------|---|
| AX-157697642 | 17 | 109.995 | KV452892.1 | 3697756 | 6-scf00360 | 6 |
| AX-158204685 | 17 | 109.995 | KV452892.1 | 3697894 | 6-scf00360 | 6 |
| AX-157716912 | 17 | 109.995 | KV452892.1 | 3700560 | 6-scf00360 | 6 |
| AX-158204695 | 17 | 109.995 | KV452892.1 | 3718384 | 6-scf00360 | 6 |
| AX-158204655 | 17 | 110.128 | KV452892.1 | 3661948 | 6-scf00360 | 6 |
| AX-158386304 | 17 | 110.128 | KV452892.1 | 3674226 | 6-scf00360 | 6 |
| AX-157707978 | 17 | 110.128 | KV452892.1 | 3709542 | 6-scf00360 | 6 |
| AX-157754600 | 17 | 110.128 | KV452892.1 | 3721789 | 6-scf00360 | 6 |
| AX-157859053 | 17 | 110.128 | KV452892.1 | 3821576 | 6-scf00360 | 6 |
| AX-158204793 | 17 | 110.128 | KV452892.1 | 3859180 | 6-scf00360 | 6 |
| AX-158204795 | 17 | 110.128 | KV452892.1 | 3861560 | 6-scf00360 | 6 |
| AX-158204812 | 17 | 110.128 | KV452892.1 | 3882443 | 6-scf00360 | 6 |
| AX-157724675 | 17 | 110.432 | KV452892.1 | 3676137 | 6-scf00360 | 6 |
| AX-158204693 | 17 | 110.432 | KV452892.1 | 3714646 | 6-scf00360 | 6 |
| AX-158204694 | 17 | 110.432 | KV452892.1 | 3717619 | 6-scf00360 | 6 |
| AX-157837768 | 17 | 110.432 | KV452892.1 | 3720626 | 6-scf00360 | 6 |
| AX-158204699 | 17 | 110.432 | KV452892.1 | 3727030 | 6-scf00360 | 6 |
| AX-158204701 | 17 | 110.432 | KV452892.1 | 3728892 | 6-scf00360 | 6 |
| AX-158204705 | 17 | 110.432 | KV452892.1 | 3740787 | 6-scf00360 | 6 |
| AX-157772333 | 17 | 110.432 | KV452892.1 | 3742201 | 6-scf00360 | 6 |
| AX-158204707 | 17 | 110.432 | KV452892.1 | 3742255 | 6-scf00360 | 6 |
| AX-157866903 | 17 | 110.432 | KV452892.1 | 3743473 | 6-scf00360 | 6 |
| AX-158204708 | 17 | 110.432 | KV452892.1 | 3745213 | 6-scf00360 | 6 |
| AX-158204710 | 17 | 110.432 | KV452892.1 | 3745926 | 6-scf00360 | 6 |
| AX-158204711 | 17 | 110.432 | KV452892.1 | 3747676 | 6-scf00360 | 6 |
| AX-158204717 | 17 | 110.432 | KV452892.1 | 3754063 | 6-scf00360 | 6 |
| AX-157754969 | 17 | 110.432 | KV452892.1 | 3754585 | 6-scf00360 | 6 |
| AX-158204718 | 17 | 110.432 | KV452892.1 | 3755011 | 6-scf00360 | 6 |
| AX-158204721 | 17 | 110.432 | KV452892.1 | 3759877 | 6-scf00360 | 6 |
| AX-157837771 | 17 | 110.432 | KV452892.1 | 3759945 | 6-scf00360 | 6 |
| AX-158204723 | 17 | 110.432 | KV452892.1 | 3761201 | 6-scf00360 | 6 |
| AX-158204724 | 17 | 110.432 | KV452892.1 | 3762958 | 6-scf00360 | 6 |
| AX-158204725 | 17 | 110.432 | KV452892.1 | 3763351 | 6-scf00360 | 6 |
| AX-158414338 | 17 | 110.486 | KV452892.1 | 3765446 | 6-scf00360 | 6 |
| AX-158386306 | 17 | 110.542 | KV452892.1 | 3767281 | 6-scf00360 | 6 |
| AX-158204729 | 17 | 110.589 | KV452892.1 | 3768747 | 6-scf00360 | 6 |
| AX-158204676 | 17 | 110.651 | KV452892.1 | 3690286 | 6-scf00360 | 6 |
| AX-158204696 | 17 | 110.651 | KV452892.1 | 3720114 | 6-scf00360 | 6 |
| AX-158204700 | 17 | 110.651 | KV452892.1 | 3727286 | 6-scf00360 | 6 |
| AX-158204728 | 17 | 110.651 | KV452892.1 | 3768210 | 6-scf00360 | 6 |
| AX-158204733 | 17 | 110.651 | KV452892.1 | 3773398 | 6-scf00360 | 6 |
| AX-158204736 | 17 | 110.651 | KV452892.1 | 3777247 | 6-scf00360 | 6 |
| AX-158409896 | 17 | 110.651 | KV452892.1 | 3777549 | 6-scf00360 | 6 |
| AX-158204737 | 17 | 110.651 | KV452892.1 | 3778566 | 6-scf00360 | 6 |
| AX-158204742 | 17 | 110.651 | KV452892.1 | 3784504 | 6-scf00360 | 6 |
| AX-157879341 | 17 | 110.651 | KV452892.1 | 3789474 | 6-scf00360 | 6 |
| AX-158204745 | 17 | 110.651 | KV452892.1 | 3791659 | 6-scf00360 | 6 |
| AX-157837778 | 17 | 110.651 | KV452892.1 | 3843779 | 6-scf00360 | 6 |
| AX-158204743 | 17 | 110.702 | KV452892.1 | 3785998 | 6-scf00360 | 6 |
| AX-158204730 | 17 | 110.76  | KV452892.1 | 3771125 | 6-scf00360 | 6 |
| AX-158204744 | 17 | 110.76  | KV452892.1 | 3786469 | 6-scf00360 | 6 |

|              |    |         |            |         |            |   |
|--------------|----|---------|------------|---------|------------|---|
| AX-157837773 | 17 | 110.76  | KV452892.1 | 3787219 | 6-scf00360 | 6 |
| AX-157837774 | 17 | 110.76  | KV452892.1 | 3787402 | 6-scf00360 | 6 |
| AX-158204746 | 17 | 110.76  | KV452892.1 | 3792738 | 6-scf00360 | 6 |
| AX-157772313 | 17 | 110.761 | KV452892.1 | 3747218 | 6-scf00360 | 6 |
| AX-158204732 | 17 | 110.761 | KV452892.1 | 3773026 | 6-scf00360 | 6 |
| AX-158204749 | 17 | 110.761 | KV452892.1 | 3796419 | 6-scf00360 | 6 |
| AX-158204752 | 17 | 110.761 | KV452892.1 | 3798334 | 6-scf00360 | 6 |
| AX-158204755 | 17 | 110.761 | KV452892.1 | 3801464 | 6-scf00360 | 6 |
| AX-157751989 | 17 | 110.761 | KV452892.1 | 3802353 | 6-scf00360 | 6 |
| AX-158204759 | 17 | 110.761 | KV452892.1 | 3806793 | 6-scf00360 | 6 |
| AX-158204764 | 17 | 110.761 | KV452892.1 | 3815968 | 6-scf00360 | 6 |
| AX-158204771 | 17 | 110.761 | KV452892.1 | 3823014 | 6-scf00360 | 6 |
| AX-158204763 | 17 | 110.876 | KV452892.1 | 3813062 | 6-scf00360 | 6 |
| AX-157709026 | 17 | 110.982 | KV452892.1 | 3752783 | 6-scf00360 | 6 |
| AX-158204761 | 17 | 110.982 | KV452892.1 | 3810916 | 6-scf00360 | 6 |
| AX-158204765 | 17 | 110.982 | KV452892.1 | 3816492 | 6-scf00360 | 6 |
| AX-158204767 | 17 | 110.982 | KV452892.1 | 3819622 | 6-scf00360 | 6 |
| AX-157749136 | 17 | 111.092 | KV452892.1 | 3788559 | 6-scf00360 | 6 |
| AX-157753640 | 17 | 111.092 | KV452892.1 | 3820797 | 6-scf00360 | 6 |
| AX-158204769 | 17 | 111.092 | KV452892.1 | 3821493 | 6-scf00360 | 6 |
| AX-158204773 | 17 | 111.092 | KV452892.1 | 3824616 | 6-scf00360 | 6 |
| AX-158204774 | 17 | 111.092 | KV452892.1 | 3825606 | 6-scf00360 | 6 |
| AX-158204806 | 17 | 111.092 | KV452892.1 | 3876457 | 6-scf00360 | 6 |
| AX-158204778 | 17 | 111.198 | KV452892.1 | 3830497 | 6-scf00360 | 6 |
| AX-157879342 | 17 | 111.307 | KV452892.1 | 3823408 | 6-scf00360 | 6 |
| AX-157887084 | 17 | 111.307 | KV452892.1 | 3834386 | 6-scf00360 | 6 |
| AX-157837776 | 17 | 111.307 | KV452892.1 | 3837664 | 6-scf00360 | 6 |
| AX-158204784 | 17 | 111.307 | KV452892.1 | 3841863 | 6-scf00360 | 6 |
| AX-157837777 | 17 | 111.307 | KV452892.1 | 3842221 | 6-scf00360 | 6 |
| AX-158204786 | 17 | 111.307 | KV452892.1 | 3844272 | 6-scf00360 | 6 |
| AX-158204787 | 17 | 111.307 | KV452892.1 | 3849259 | 6-scf00360 | 6 |
| AX-158204792 | 17 | 111.307 | KV452892.1 | 3856821 | 6-scf00360 | 6 |
| AX-158204794 | 17 | 111.307 | KV452892.1 | 3859728 | 6-scf00360 | 6 |
| AX-158204797 | 17 | 111.307 | KV452892.1 | 3864548 | 6-scf00360 | 6 |
| AX-158204799 | 17 | 111.307 | KV452892.1 | 3865489 | 6-scf00360 | 6 |
| AX-158204800 | 17 | 111.307 | KV452892.1 | 3869481 | 6-scf00360 | 6 |
| AX-157751712 | 17 | 111.307 | KV452892.1 | 3872146 | 6-scf00360 | 6 |
| AX-158204819 | 17 | 111.307 | KV452892.1 | 3893466 | 6-scf00360 | 6 |
| AX-158204762 | 17 | 111.347 | KV452892.1 | 3811681 | 6-scf00360 | 6 |
| AX-158204805 | 17 | 111.347 | KV452892.1 | 3875830 | 6-scf00360 | 6 |
| AX-158204817 | 17 | 111.347 | KV452892.1 | 3890087 | 6-scf00360 | 6 |
| AX-158204814 | 17 | 111.486 | KV452892.1 | 3887222 | 6-scf00360 | 6 |
| AX-158204815 | 17 | 111.586 | KV452892.1 | 3889118 | 6-scf00360 | 6 |
| AX-158204816 | 17 | 111.586 | KV452892.1 | 3889503 | 6-scf00360 | 6 |
| AX-157859057 | 17 | 111.586 | KV452892.1 | 3895965 | 6-scf00360 | 6 |
| AX-158204820 | 17 | 111.853 | KV452892.1 | 3897031 | 6-scf00360 | 6 |
| AX-158204823 | 17 | 111.853 | KV452892.1 | 3904988 | 6-scf00360 | 6 |
| AX-158204824 | 17 | 111.853 | KV452892.1 | 3906786 | 6-scf00360 | 6 |
| AX-158414344 | 17 | 111.853 | KV452892.1 | 3912432 | 6-scf00360 | 6 |
| AX-158414345 | 17 | 111.853 | KV452892.1 | 3931576 | 6-scf00360 | 6 |
| AX-158204837 | 17 | 111.853 | KV452892.1 | 3938840 | 6-scf00360 | 6 |



|              |    |         |            |         |            |   |
|--------------|----|---------|------------|---------|------------|---|
| AX-157710875 | 17 | 111.859 | KV452892.1 | 3915337 | 6-scf00360 | 6 |
| AX-158204833 | 17 | 111.859 | KV452892.1 | 3928582 | 6-scf00360 | 6 |
| AX-158204828 | 17 | 111.863 | KV452892.1 | 3916510 | 6-scf00360 | 6 |
| AX-158204829 | 17 | 111.866 | KV452892.1 | 3920343 | 6-scf00360 | 6 |
| AX-158204822 | 17 | 111.87  | KV452892.1 | 3904137 | 6-scf00360 | 6 |
| AX-157837782 | 17 | 111.87  | KV452892.1 | 3923100 | 6-scf00360 | 6 |
| AX-157837775 | 17 | 111.981 | KV452892.1 | 3833604 | 6-scf00360 | 6 |
| AX-157837783 | 17 | 111.981 | KV452892.1 | 3924369 | 6-scf00360 | 6 |
| AX-158204831 | 17 | 111.981 | KV452892.1 | 3925068 | 6-scf00360 | 6 |
| AX-158204835 | 17 | 111.981 | KV452892.1 | 3931344 | 6-scf00360 | 6 |
| AX-158414346 | 17 | 111.981 | KV452892.1 | 3932401 | 6-scf00360 | 6 |
| AX-158204836 | 17 | 111.981 | KV452892.1 | 3935084 | 6-scf00360 | 6 |
| AX-158204838 | 17 | 111.981 | KV452892.1 | 3939603 | 6-scf00360 | 6 |
| AX-158204872 | 17 | 111.981 | KV452892.1 | 3991920 | 6-scf00360 | 6 |
| AX-158204949 | 17 | 111.981 | KV452892.1 | 4116337 | 6-scf00360 | 6 |
| AX-158204843 | 17 | 112.114 | KV452892.1 | 3949227 | 6-scf00360 | 6 |
| AX-158204844 | 17 | 112.114 | KV452892.1 | 3949420 | 6-scf00360 | 6 |
| AX-158204845 | 17 | 112.114 | KV452892.1 | 3950221 | 6-scf00360 | 6 |
| AX-158204660 | 17 | 112.306 | KV452892.1 | 3668237 | 6-scf00360 | 6 |
| AX-158204672 | 17 | 112.306 | KV452892.1 | 3686008 | 6-scf00360 | 6 |
| AX-158204673 | 17 | 112.306 | KV452892.1 | 3686122 | 6-scf00360 | 6 |
| AX-158204691 | 17 | 112.306 | KV452892.1 | 3711964 | 6-scf00360 | 6 |
| AX-157727808 | 17 | 112.306 | KV452892.1 | 3956125 | 6-scf00360 | 6 |
| AX-158204861 | 17 | 112.51  | KV452892.1 | 3970090 | 6-scf00360 | 6 |
| AX-157722799 | 17 | 112.51  | KV452892.1 | 3974424 | 6-scf00360 | 6 |
| AX-158204864 | 17 | 112.51  | KV452892.1 | 3978955 | 6-scf00360 | 6 |
| AX-158204865 | 17 | 112.51  | KV452892.1 | 3982881 | 6-scf00360 | 6 |
| AX-158204866 | 17 | 112.51  | KV452892.1 | 3984312 | 6-scf00360 | 6 |
| AX-158204868 | 17 | 112.728 | KV452892.1 | 3988297 | 6-scf00360 | 6 |
| AX-158204870 | 17 | 112.728 | KV452892.1 | 3990581 | 6-scf00360 | 6 |
| AX-158204873 | 17 | 112.728 | KV452892.1 | 3992671 | 6-scf00360 | 6 |
| AX-158204874 | 17 | 112.728 | KV452892.1 | 3995325 | 6-scf00360 | 6 |
| AX-158204875 | 17 | 112.728 | KV452892.1 | 3996426 | 6-scf00360 | 6 |
| AX-158380740 | 17 | 112.728 | KV452892.1 | 4000190 | 6-scf00360 | 6 |
| AX-158204878 | 17 | 112.728 | KV452892.1 | 4000385 | 6-scf00360 | 6 |
| AX-158204879 | 17 | 112.728 | KV452892.1 | 4000480 | 6-scf00360 | 6 |
| AX-157717649 | 17 | 112.947 | KV452892.1 | 3967379 | 6-scf00360 | 6 |
| AX-158204887 | 17 | 112.947 | KV452892.1 | 4019993 | 6-scf00360 | 6 |
| AX-158204889 | 17 | 112.947 | KV452892.1 | 4023462 | 6-scf00360 | 6 |
| AX-158204891 | 17 | 112.947 | KV452892.1 | 4024644 | 6-scf00360 | 6 |
| AX-157887087 | 17 | 112.947 | KV452892.1 | 4026528 | 6-scf00360 | 6 |
| AX-158204898 | 17 | 112.947 | KV452892.1 | 4030644 | 6-scf00360 | 6 |
| AX-158204901 | 17 | 112.947 | KV452892.1 | 4035606 | 6-scf00360 | 6 |
| AX-158204902 | 17 | 112.947 | KV452892.1 | 4035867 | 6-scf00360 | 6 |
| AX-157750721 | 17 | 112.947 | KV452892.1 | 4036524 | 6-scf00360 | 6 |
| AX-157837786 | 17 | 112.947 | KV452892.1 | 4036815 | 6-scf00360 | 6 |
| AX-157837787 | 17 | 112.947 | KV452892.1 | 4038118 | 6-scf00360 | 6 |
| AX-157708802 | 17 | 112.947 | KV452892.1 | 4039305 | 6-scf00360 | 6 |
| AX-157743527 | 17 | 112.947 | KV452892.1 | 4039893 | 6-scf00360 | 6 |
| AX-158204903 | 17 | 112.947 | KV452892.1 | 4042851 | 6-scf00360 | 6 |
| AX-157837790 | 17 | 112.947 | KV452892.1 | 4045331 | 6-scf00360 | 6 |

|              |    |         |            |         |            |   |
|--------------|----|---------|------------|---------|------------|---|
| AX-158204907 | 17 | 112.947 | KV452892.1 | 4046958 | 6-scf00360 | 6 |
| AX-158204917 | 17 | 112.947 | KV452892.1 | 4058573 | 6-scf00360 | 6 |
| AX-157709077 | 17 | 112.947 | KV452892.1 | 4161896 | 6-scf00360 | 6 |
| AX-158204997 | 17 | 112.947 | KV452892.1 | 4196934 | 6-scf00360 | 6 |
| AX-157715349 | 17 | 112.947 | KV452892.1 | 4402720 | 6-scf00360 | 6 |
| AX-157879352 | 17 | 112.947 | KV452892.1 | 4455795 | 6-scf00360 | 6 |
| AX-158205212 | 17 | 112.947 | KV452892.1 | 4582017 | 6-scf00360 | 6 |
| AX-157775431 | 17 | 112.947 | KV452892.1 | 4582697 | 6-scf00360 | 6 |
| AX-158205241 | 17 | 112.947 | KV452892.1 | 4640982 | 6-scf00360 | 6 |
| AX-158205253 | 17 | 112.947 | KV452892.1 | 4651027 | 6-scf00360 | 6 |
| AX-158205296 | 17 | 112.947 | KV452892.1 | 4702750 | 6-scf00360 | 6 |
| AX-158205313 | 17 | 112.947 | KV452892.1 | 4729286 | 6-scf00360 | 6 |
| AX-158205334 | 17 | 112.947 | KV452892.1 | 4749758 | 6-scf00360 | 6 |
| AX-158205355 | 17 | 112.947 | KV452892.1 | 4778274 | 6-scf00360 | 6 |
| AX-157887095 | 17 | 112.947 | KV452892.1 | 4884555 | 6-scf00360 | 6 |
| AX-158205485 | 17 | 112.947 | KV452892.1 | 4951650 | 6-scf00360 | 6 |
| AX-157879363 | 17 | 112.947 | KV452892.1 | 5050524 | 6-scf00360 | 6 |
| AX-158205622 | 17 | 112.947 | KV452892.1 | 5176451 | 6-scf00360 | 6 |
| AX-158205635 | 17 | 112.947 | KV452892.1 | 5207534 | 6-scf00360 | 6 |
| AX-157837895 | 17 | 112.947 | KV452892.1 | 5223901 | 6-scf00360 | 6 |
| AX-158205651 | 17 | 112.947 | KV452892.1 | 5234262 | 6-scf00360 | 6 |
| AX-158204885 | 17 | 113.056 | KV452892.1 | 4014187 | 6-scf00360 | 6 |
| AX-158204886 | 17 | 113.056 | KV452892.1 | 4017850 | 6-scf00360 | 6 |
| AX-158204890 | 17 | 113.056 | KV452892.1 | 4024305 | 6-scf00360 | 6 |
| AX-158204896 | 17 | 113.056 | KV452892.1 | 4028583 | 6-scf00360 | 6 |
| AX-158204900 | 17 | 113.056 | KV452892.1 | 4034420 | 6-scf00360 | 6 |
| AX-158204905 | 17 | 113.056 | KV452892.1 | 4045192 | 6-scf00360 | 6 |
| AX-157837791 | 17 | 113.056 | KV452892.1 | 4046760 | 6-scf00360 | 6 |
| AX-158204908 | 17 | 113.056 | KV452892.1 | 4047635 | 6-scf00360 | 6 |
| AX-157837792 | 17 | 113.056 | KV452892.1 | 4048123 | 6-scf00360 | 6 |
| AX-158204909 | 17 | 113.056 | KV452892.1 | 4048198 | 6-scf00360 | 6 |
| AX-158204910 | 17 | 113.056 | KV452892.1 | 4049985 | 6-scf00360 | 6 |
| AX-158204912 | 17 | 113.056 | KV452892.1 | 4051854 | 6-scf00360 | 6 |
| AX-158204913 | 17 | 113.056 | KV452892.1 | 4053592 | 6-scf00360 | 6 |
| AX-158204914 | 17 | 113.056 | KV452892.1 | 4056077 | 6-scf00360 | 6 |
| AX-158204916 | 17 | 113.056 | KV452892.1 | 4057738 | 6-scf00360 | 6 |
| AX-158204919 | 17 | 113.056 | KV452892.1 | 4063658 | 6-scf00360 | 6 |
| AX-157721300 | 17 | 113.073 | KV452892.1 | 4064436 | 6-scf00360 | 6 |
| AX-158204920 | 17 | 113.116 | KV452892.1 | 4065045 | 6-scf00360 | 6 |
| AX-158204924 | 17 | 113.165 | KV452892.1 | 4074427 | 6-scf00360 | 6 |
| AX-157750702 | 17 | 113.165 | KV452892.1 | 4083736 | 6-scf00360 | 6 |
| AX-158204928 | 17 | 113.166 | KV452892.1 | 4085720 | 6-scf00360 | 6 |
| AX-158204925 | 17 | 113.196 | KV452892.1 | 4075205 | 6-scf00360 | 6 |
| AX-157727051 | 17 | 113.196 | KV452892.1 | 4089203 | 6-scf00360 | 6 |
| AX-157837796 | 17 | 113.196 | KV452892.1 | 4122027 | 6-scf00360 | 6 |
| AX-158204936 | 17 | 113.226 | KV452892.1 | 4095473 | 6-scf00360 | 6 |
| AX-158204937 | 17 | 113.256 | KV452892.1 | 4096233 | 6-scf00360 | 6 |
| AX-158204942 | 17 | 113.256 | KV452892.1 | 4103440 | 6-scf00360 | 6 |
| AX-158204933 | 17 | 113.296 | KV452892.1 | 4090990 | 6-scf00360 | 6 |
| AX-158204944 | 17 | 113.296 | KV452892.1 | 4106419 | 6-scf00360 | 6 |
| AX-157837795 | 17 | 113.296 | KV452892.1 | 4109091 | 6-scf00360 | 6 |

|              |    |         |            |         |            |   |
|--------------|----|---------|------------|---------|------------|---|
| AX-158204946 | 17 | 113.296 | KV452892.1 | 4109297 | 6-scf00360 | 6 |
| AX-158204948 | 17 | 113.296 | KV452892.1 | 4114478 | 6-scf00360 | 6 |
| AX-157714488 | 17 | 113.296 | KV452892.1 | 4118228 | 6-scf00360 | 6 |
| AX-158204930 | 17 | 113.298 | KV452892.1 | 4088380 | 6-scf00360 | 6 |
| AX-157837797 | 17 | 113.298 | KV452892.1 | 4122126 | 6-scf00360 | 6 |
| AX-158204951 | 17 | 113.303 | KV452892.1 | 4123821 | 6-scf00360 | 6 |
| AX-158204953 | 17 | 113.469 | KV452892.1 | 4128109 | 6-scf00360 | 6 |
| AX-158204957 | 17 | 113.469 | KV452892.1 | 4138122 | 6-scf00360 | 6 |
| AX-158380741 | 17 | 113.469 | KV452892.1 | 4141587 | 6-scf00360 | 6 |
| AX-158204943 | 17 | 113.821 | KV452892.1 | 4106045 | 6-scf00360 | 6 |
| AX-157837799 | 17 | 113.821 | KV452892.1 | 4155790 | 6-scf00360 | 6 |
| AX-158204970 | 17 | 113.821 | KV452892.1 | 4157658 | 6-scf00360 | 6 |
| AX-157837800 | 17 | 113.821 | KV452892.1 | 4159086 | 6-scf00360 | 6 |
| AX-158204974 | 17 | 113.821 | KV452892.1 | 4162215 | 6-scf00360 | 6 |
| AX-158204979 | 17 | 113.821 | KV452892.1 | 4166052 | 6-scf00360 | 6 |
| AX-158204980 | 17 | 113.821 | KV452892.1 | 4166494 | 6-scf00360 | 6 |
| AX-158204982 | 17 | 113.821 | KV452892.1 | 4167338 | 6-scf00360 | 6 |
| AX-158204983 | 17 | 113.821 | KV452892.1 | 4168091 | 6-scf00360 | 6 |
| AX-158204984 | 17 | 113.821 | KV452892.1 | 4168435 | 6-scf00360 | 6 |
| AX-158204985 | 17 | 113.821 | KV452892.1 | 4169116 | 6-scf00360 | 6 |
| AX-158204986 | 17 | 113.821 | KV452892.1 | 4170761 | 6-scf00360 | 6 |
| AX-157837802 | 17 | 113.821 | KV452892.1 | 4172873 | 6-scf00360 | 6 |
| AX-158204992 | 17 | 113.821 | KV452892.1 | 4188740 | 6-scf00360 | 6 |
| AX-158204994 | 17 | 113.821 | KV452892.1 | 4194573 | 6-scf00360 | 6 |
| AX-158204996 | 17 | 113.821 | KV452892.1 | 4196176 | 6-scf00360 | 6 |
| AX-158204999 | 17 | 113.821 | KV452892.1 | 4204663 | 6-scf00360 | 6 |
| AX-158205000 | 17 | 113.821 | KV452892.1 | 4204982 | 6-scf00360 | 6 |
| AX-158205001 | 17 | 113.821 | KV452892.1 | 4205931 | 6-scf00360 | 6 |
| AX-157769730 | 17 | 113.821 | KV452892.1 | 4206779 | 6-scf00360 | 6 |
| AX-158205003 | 17 | 113.821 | KV452892.1 | 4207064 | 6-scf00360 | 6 |
| AX-158205004 | 17 | 113.821 | KV452892.1 | 4208139 | 6-scf00360 | 6 |
| AX-158205008 | 17 | 113.821 | KV452892.1 | 4213097 | 6-scf00360 | 6 |
| AX-157837810 | 17 | 113.821 | KV452892.1 | 4217231 | 6-scf00360 | 6 |
| AX-158205012 | 17 | 113.821 | KV452892.1 | 4217915 | 6-scf00360 | 6 |
| AX-158205015 | 17 | 113.821 | KV452892.1 | 4220373 | 6-scf00360 | 6 |
| AX-158205017 | 17 | 113.821 | KV452892.1 | 4222151 | 6-scf00360 | 6 |
| AX-157837812 | 17 | 113.821 | KV452892.1 | 4224339 | 6-scf00360 | 6 |
| AX-158205023 | 17 | 113.821 | KV452892.1 | 4225438 | 6-scf00360 | 6 |
| AX-158205027 | 17 | 113.821 | KV452892.1 | 4229055 | 6-scf00360 | 6 |
| AX-158205030 | 17 | 113.821 | KV452892.1 | 4234185 | 6-scf00360 | 6 |
| AX-157755559 | 17 | 113.821 | KV452892.1 | 4236561 | 6-scf00360 | 6 |
| AX-158205047 | 17 | 113.821 | KV452892.1 | 4352959 | 6-scf00360 | 6 |
| AX-158205050 | 17 | 113.821 | KV452892.1 | 4356838 | 6-scf00360 | 6 |
| AX-158205052 | 17 | 113.821 | KV452892.1 | 4358489 | 6-scf00360 | 6 |
| AX-157837818 | 17 | 113.821 | KV452892.1 | 4360595 | 6-scf00360 | 6 |
| AX-158205053 | 17 | 113.821 | KV452892.1 | 4361329 | 6-scf00360 | 6 |
| AX-158205055 | 17 | 113.821 | KV452892.1 | 4363644 | 6-scf00360 | 6 |
| AX-158205057 | 17 | 113.821 | KV452892.1 | 4364634 | 6-scf00360 | 6 |
| AX-158205058 | 17 | 113.821 | KV452892.1 | 4365754 | 6-scf00360 | 6 |
| AX-158205062 | 17 | 113.821 | KV452892.1 | 4369172 | 6-scf00360 | 6 |
| AX-158205063 | 17 | 113.821 | KV452892.1 | 4369547 | 6-scf00360 | 6 |

|              |    |         |            |         |                |    |
|--------------|----|---------|------------|---------|----------------|----|
| AX-157742006 | 17 | 113.821 | KV452892.1 | 4369954 | 6-scf00360     | 6  |
| AX-157837819 | 17 | 113.821 | KV452892.1 | 4371248 | 6-scf00360     | 6  |
| AX-158205066 | 17 | 113.821 | KV452892.1 | 4372752 | 6-scf00360     | 6  |
| AX-158205068 | 17 | 113.821 | KV452892.1 | 4374749 | 6-scf00360     | 6  |
| AX-158205069 | 17 | 113.821 | KV452892.1 | 4375654 | 6-scf00360     | 6  |
| AX-158205072 | 17 | 113.821 | KV452892.1 | 4377915 | 6-scf00360     | 6  |
| AX-158205080 | 17 | 113.821 | KV452892.1 | 4385949 | 6-scf00360     | 6  |
| AX-157837822 | 17 | 113.821 | KV452892.1 | 4390315 | 6-scf00360     | 6  |
| AX-158205085 | 17 | 113.821 | KV452892.1 | 4391640 | 6-scf00360     | 6  |
| AX-158205088 | 17 | 113.821 | KV452892.1 | 4395770 | 6-scf00360     | 6  |
| AX-157746948 | 17 | 113.821 | KV452892.1 | 4401505 | 6-scf00360     | 6  |
| AX-158205094 | 17 | 113.821 | KV452892.1 | 4407650 | 6-scf00360     | 6  |
| AX-158205095 | 17 | 113.821 | KV452892.1 | 4408602 | 6-scf00360     | 6  |
| AX-157837823 | 17 | 113.821 | KV452892.1 | 4414580 | 6-scf00360     | 6  |
| AX-158205101 | 17 | 113.821 | KV452892.1 | 4420811 | 6-scf00360     | 6  |
| AX-158205102 | 17 | 113.821 | KV452892.1 | 4422164 | 6-scf00360     | 6  |
| AX-158205105 | 17 | 113.821 | KV452892.1 | 4423351 | 6-scf00360     | 6  |
| AX-158205107 | 17 | 113.821 | KV452892.1 | 4426402 | 6-scf00360     | 6  |
| AX-158205108 | 17 | 113.821 | KV452892.1 | 4426726 | 6-scf00360     | 6  |
| AX-158205114 | 17 | 113.821 | KV452892.1 | 4447507 | 6-scf00360     | 6  |
| AX-157837829 | 17 | 113.821 | KV452892.1 | 4451651 | 6-scf00360     | 6  |
| AX-158205120 | 17 | 113.821 | KV452892.1 | 4459651 | 6-scf00360     | 6  |
| AX-158205122 | 17 | 113.821 | KV452892.1 | 4465903 | 6-scf00360     | 6  |
| AX-158205125 | 17 | 113.821 | KV452892.1 | 4467297 | 6-scf00360     | 6  |
| AX-158205131 | 17 | 113.821 | KV452892.1 | 4471335 | 6-scf00360     | 6  |
| AX-158205136 | 17 | 113.821 | KV452892.1 | 4477686 | 6-scf00360     | 6  |
| AX-158205140 | 17 | 113.821 | KV452892.1 | 4483001 | 6-scf00360     | 6  |
| AX-158205142 | 17 | 113.821 | KV452892.1 | 4490061 | 6-scf00360     | 6  |
| AX-157725637 | 17 | 113.821 | KV452892.1 | 4491481 | 6-scf00360     | 6  |
| AX-158205144 | 17 | 113.821 | KV452892.1 | 4492387 | 6-scf00360     | 6  |
| AX-158205149 | 17 | 113.821 | KV452892.1 | 4501465 | 6-scf00360     | 6  |
| AX-158205150 | 17 | 113.821 | KV452892.1 | 4502581 | 6-scf00360     | 6  |
| AX-158205151 | 17 | 113.821 | KV452892.1 | 4502935 | 6-scf00360     | 6  |
| AX-158205152 | 17 | 113.821 | KV452892.1 | 4503792 | 6-scf00360     | 6  |
| AX-158205155 | 17 | 113.821 | KV452892.1 | 4506013 | 6-scf00360     | 6  |
| AX-158205168 | 17 | 113.821 | KV452892.1 | 4529796 | 6-scf00360     | 6  |
| AX-157693968 | 17 | 113.821 | KV452892.1 | 4531291 | 6-scf00360     | 6  |
| AX-158205171 | 17 | 113.821 | KV452892.1 | 4533289 | 6-scf00360     | 6  |
| AX-158205172 | 17 | 113.821 | KV452892.1 | 4534570 | 6-scf00360     | 6  |
| AX-158205175 | 17 | 113.821 | KV452892.1 | 4537753 | 6-scf00360     | 6  |
| AX-158205176 | 17 | 113.821 | KV452892.1 | 4538454 | 6-scf00360     | 6  |
| AX-157698546 | 17 | 113.821 | FI865597.1 | 124     | IORI212 lctalu | UN |
| AX-158205177 | 17 | 113.886 | KV452892.1 | 4538860 | 6-scf00360     | 6  |
| AX-157725561 | 17 | 113.93  | KV452892.1 | 4538968 | 6-scf00360     | 6  |
| AX-158205178 | 17 | 113.93  | KV452892.1 | 4540481 | 6-scf00360     | 6  |
| AX-158418440 | 17 | 113.93  | KV452892.1 | 4639582 | 6-scf00360     | 6  |
| AX-158205260 | 17 | 113.93  | KV452892.1 | 4658470 | 6-scf00360     | 6  |
| AX-158205261 | 17 | 113.93  | KV452892.1 | 4661282 | 6-scf00360     | 6  |
| AX-158205277 | 17 | 113.93  | KV452892.1 | 4681725 | 6-scf00360     | 6  |
| AX-158205181 | 17 | 114.039 | KV452892.1 | 4544950 | 6-scf00360     | 6  |
| AX-158204883 | 17 | 114.093 | KV452892.1 | 4011457 | 6-scf00360     | 6  |

|              |    |         |            |         |            |   |
|--------------|----|---------|------------|---------|------------|---|
| AX-158204965 | 17 | 114.093 | KV452892.1 | 4148824 | 6-scf00360 | 6 |
| AX-158205157 | 17 | 114.093 | KV452892.1 | 4514008 | 6-scf00360 | 6 |
| AX-158205182 | 17 | 114.093 | KV452892.1 | 4548263 | 6-scf00360 | 6 |
| AX-158205186 | 17 | 114.093 | KV452892.1 | 4550572 | 6-scf00360 | 6 |
| AX-158205306 | 17 | 114.093 | KV452892.1 | 4714516 | 6-scf00360 | 6 |
| AX-158204882 | 17 | 114.149 | KV452892.1 | 4010816 | 6-scf00360 | 6 |
| AX-157752162 | 17 | 114.149 | KV452892.1 | 4084351 | 6-scf00360 | 6 |
| AX-158204978 | 17 | 114.149 | KV452892.1 | 4165423 | 6-scf00360 | 6 |
| AX-157721817 | 17 | 114.149 | KV452892.1 | 4215523 | 6-scf00360 | 6 |
| AX-157740210 | 17 | 114.149 | KV452892.1 | 4222793 | 6-scf00360 | 6 |
| AX-158205059 | 17 | 114.149 | KV452892.1 | 4366078 | 6-scf00360 | 6 |
| AX-157866906 | 17 | 114.149 | KV452892.1 | 4401096 | 6-scf00360 | 6 |
| AX-158205124 | 17 | 114.149 | KV452892.1 | 4466895 | 6-scf00360 | 6 |
| AX-158205160 | 17 | 114.149 | KV452892.1 | 4518509 | 6-scf00360 | 6 |
| AX-158205169 | 17 | 114.149 | KV452892.1 | 4530248 | 6-scf00360 | 6 |
| AX-157837833 | 17 | 114.149 | KV452892.1 | 4542027 | 6-scf00360 | 6 |
| AX-158205179 | 17 | 114.149 | KV452892.1 | 4543032 | 6-scf00360 | 6 |
| AX-158205192 | 17 | 114.149 | KV452892.1 | 4558930 | 6-scf00360 | 6 |
| AX-157745773 | 17 | 114.149 | KV452892.1 | 4575298 | 6-scf00360 | 6 |
| AX-158205208 | 17 | 114.149 | KV452892.1 | 4576349 | 6-scf00360 | 6 |
| AX-158205209 | 17 | 114.149 | KV452892.1 | 4576862 | 6-scf00360 | 6 |
| AX-158205210 | 17 | 114.149 | KV452892.1 | 4577854 | 6-scf00360 | 6 |
| AX-158205211 | 17 | 114.149 | KV452892.1 | 4579132 | 6-scf00360 | 6 |
| AX-158205214 | 17 | 114.149 | KV452892.1 | 4587697 | 6-scf00360 | 6 |
| AX-157887092 | 17 | 114.149 | KV452892.1 | 4592889 | 6-scf00360 | 6 |
| AX-158205215 | 17 | 114.149 | KV452892.1 | 4593074 | 6-scf00360 | 6 |
| AX-158205220 | 17 | 114.149 | KV452892.1 | 4604341 | 6-scf00360 | 6 |
| AX-158205222 | 17 | 114.149 | KV452892.1 | 4607326 | 6-scf00360 | 6 |
| AX-158205225 | 17 | 114.149 | KV452892.1 | 4609180 | 6-scf00360 | 6 |
| AX-158205226 | 17 | 114.149 | KV452892.1 | 4612436 | 6-scf00360 | 6 |
| AX-158205227 | 17 | 114.149 | KV452892.1 | 4612867 | 6-scf00360 | 6 |
| AX-157837838 | 17 | 114.149 | KV452892.1 | 4613376 | 6-scf00360 | 6 |
| AX-157837839 | 17 | 114.149 | KV452892.1 | 4613697 | 6-scf00360 | 6 |
| AX-158205229 | 17 | 114.149 | KV452892.1 | 4614522 | 6-scf00360 | 6 |
| AX-157837840 | 17 | 114.149 | KV452892.1 | 4615746 | 6-scf00360 | 6 |
| AX-158205230 | 17 | 114.149 | KV452892.1 | 4616729 | 6-scf00360 | 6 |
| AX-157837841 | 17 | 114.149 | KV452892.1 | 4618233 | 6-scf00360 | 6 |
| AX-157837842 | 17 | 114.149 | KV452892.1 | 4622141 | 6-scf00360 | 6 |
| AX-157837843 | 17 | 114.149 | KV452892.1 | 4623029 | 6-scf00360 | 6 |
| AX-158205234 | 17 | 114.149 | KV452892.1 | 4624080 | 6-scf00360 | 6 |
| AX-157879357 | 17 | 114.149 | KV452892.1 | 4624127 | 6-scf00360 | 6 |
| AX-158205236 | 17 | 114.149 | KV452892.1 | 4631165 | 6-scf00360 | 6 |
| AX-158205240 | 17 | 114.149 | KV452892.1 | 4640582 | 6-scf00360 | 6 |
| AX-158205242 | 17 | 114.149 | KV452892.1 | 4641802 | 6-scf00360 | 6 |
| AX-158205244 | 17 | 114.149 | KV452892.1 | 4643385 | 6-scf00360 | 6 |
| AX-158205246 | 17 | 114.149 | KV452892.1 | 4645744 | 6-scf00360 | 6 |
| AX-158205248 | 17 | 114.149 | KV452892.1 | 4646463 | 6-scf00360 | 6 |
| AX-157738330 | 17 | 114.149 | KV452892.1 | 4649856 | 6-scf00360 | 6 |
| AX-158205252 | 17 | 114.149 | KV452892.1 | 4650753 | 6-scf00360 | 6 |
| AX-157749946 | 17 | 114.149 | KV452892.1 | 4653003 | 6-scf00360 | 6 |
| AX-158205255 | 17 | 114.149 | KV452892.1 | 4654232 | 6-scf00360 | 6 |

|              |    |         |            |         |            |   |
|--------------|----|---------|------------|---------|------------|---|
| AX-158205263 | 17 | 114.149 | KV452892.1 | 4662172 | 6-scf00360 | 6 |
| AX-158205264 | 17 | 114.149 | KV452892.1 | 4664045 | 6-scf00360 | 6 |
| AX-157715798 | 17 | 114.149 | KV452892.1 | 4677204 | 6-scf00360 | 6 |
| AX-158205271 | 17 | 114.149 | KV452892.1 | 4677665 | 6-scf00360 | 6 |
| AX-158205273 | 17 | 114.149 | KV452892.1 | 4678987 | 6-scf00360 | 6 |
| AX-158205276 | 17 | 114.149 | KV452892.1 | 4680742 | 6-scf00360 | 6 |
| AX-158205279 | 17 | 114.149 | KV452892.1 | 4682817 | 6-scf00360 | 6 |
| AX-157747239 | 17 | 114.149 | KV452892.1 | 4683455 | 6-scf00360 | 6 |
| AX-158205298 | 17 | 114.149 | KV452892.1 | 4704278 | 6-scf00360 | 6 |
| AX-158205300 | 17 | 114.149 | KV452892.1 | 4706072 | 6-scf00360 | 6 |
| AX-157727142 | 17 | 114.149 | KV452892.1 | 4709306 | 6-scf00360 | 6 |
| AX-158205303 | 17 | 114.149 | KV452892.1 | 4712910 | 6-scf00360 | 6 |
| AX-158380743 | 17 | 114.149 | KV452892.1 | 4713291 | 6-scf00360 | 6 |
| AX-158205304 | 17 | 114.149 | KV452892.1 | 4713357 | 6-scf00360 | 6 |
| AX-157722079 | 17 | 114.149 | KV452892.1 | 4715041 | 6-scf00360 | 6 |
| AX-158205307 | 17 | 114.149 | KV452892.1 | 4715567 | 6-scf00360 | 6 |
| AX-158205308 | 17 | 114.149 | KV452892.1 | 4716473 | 6-scf00360 | 6 |
| AX-158205315 | 17 | 114.149 | KV452892.1 | 4730171 | 6-scf00360 | 6 |
| AX-157726589 | 17 | 114.149 | KV452892.1 | 4736535 | 6-scf00360 | 6 |
| AX-158205323 | 17 | 114.149 | KV452892.1 | 4740921 | 6-scf00360 | 6 |
| AX-158205382 | 17 | 114.149 | KV452892.1 | 4809015 | 6-scf00360 | 6 |
| AX-158205424 | 17 | 114.149 | KV452892.1 | 4860114 | 6-scf00360 | 6 |
| AX-157771771 | 17 | 114.149 | KV452892.1 | 4867310 | 6-scf00360 | 6 |
| AX-157879366 | 17 | 114.149 | KV452892.1 | 5096627 | 6-scf00360 | 6 |
| AX-158205582 | 17 | 114.149 | KV452892.1 | 5120710 | 6-scf00360 | 6 |
| AX-158205649 | 17 | 114.149 | KV452892.1 | 5226507 | 6-scf00360 | 6 |
| AX-157837793 | 17 | 114.258 | KV452892.1 | 4051087 | 6-scf00360 | 6 |
| AX-158205089 | 17 | 114.258 | KV452892.1 | 4401980 | 6-scf00360 | 6 |
| AX-158205314 | 17 | 114.258 | KV452892.1 | 4729724 | 6-scf00360 | 6 |
| AX-158205320 | 17 | 114.258 | KV452892.1 | 4740122 | 6-scf00360 | 6 |
| AX-158205324 | 17 | 114.258 | KV452892.1 | 4741198 | 6-scf00360 | 6 |
| AX-158205407 | 17 | 114.258 | KV452892.1 | 4842481 | 6-scf00360 | 6 |
| AX-158205598 | 17 | 114.258 | KV452892.1 | 5143573 | 6-scf00360 | 6 |
| AX-157743413 | 17 | 114.258 | KV452892.1 | 5154262 | 6-scf00360 | 6 |
| AX-158205604 | 17 | 114.258 | KV452892.1 | 5154385 | 6-scf00360 | 6 |
| AX-158205605 | 17 | 114.258 | KV452892.1 | 5156513 | 6-scf00360 | 6 |
| AX-158205620 | 17 | 114.258 | KV452892.1 | 5173222 | 6-scf00360 | 6 |
| AX-158204884 | 17 | 114.476 | KV452892.1 | 4012138 | 6-scf00360 | 6 |
| AX-158204888 | 17 | 114.476 | KV452892.1 | 4021788 | 6-scf00360 | 6 |
| AX-157837813 | 17 | 114.476 | KV452892.1 | 4235200 | 6-scf00360 | 6 |
| AX-157837814 | 17 | 114.476 | KV452892.1 | 4235724 | 6-scf00360 | 6 |
| AX-158205135 | 17 | 114.476 | KV452892.1 | 4475500 | 6-scf00360 | 6 |
| AX-158205218 | 17 | 114.476 | KV452892.1 | 4598675 | 6-scf00360 | 6 |
| AX-158205228 | 17 | 114.476 | KV452892.1 | 4614209 | 6-scf00360 | 6 |
| AX-158205311 | 17 | 114.476 | KV452892.1 | 4719070 | 6-scf00360 | 6 |
| AX-158205326 | 17 | 114.476 | KV452892.1 | 4742106 | 6-scf00360 | 6 |
| AX-158205327 | 17 | 114.476 | KV452892.1 | 4742577 | 6-scf00360 | 6 |
| AX-158205331 | 17 | 114.476 | KV452892.1 | 4746303 | 6-scf00360 | 6 |
| AX-158205336 | 17 | 114.476 | KV452892.1 | 4751830 | 6-scf00360 | 6 |
| AX-158205337 | 17 | 114.476 | KV452892.1 | 4753650 | 6-scf00360 | 6 |
| AX-158205338 | 17 | 114.476 | KV452892.1 | 4757197 | 6-scf00360 | 6 |

|              |    |         |             |         |            |    |
|--------------|----|---------|-------------|---------|------------|----|
| AX-158205341 | 17 | 114.476 | KV452892.1  | 4761346 | 6-scf00360 | 6  |
| AX-158205342 | 17 | 114.476 | KV452892.1  | 4761983 | 6-scf00360 | 6  |
| AX-158205343 | 17 | 114.476 | KV452892.1  | 4762637 | 6-scf00360 | 6  |
| AX-158205344 | 17 | 114.476 | KV452892.1  | 4763294 | 6-scf00360 | 6  |
| AX-158205349 | 17 | 114.476 | KV452892.1  | 4771454 | 6-scf00360 | 6  |
| AX-158205351 | 17 | 114.476 | KV452892.1  | 4775344 | 6-scf00360 | 6  |
| AX-158205354 | 17 | 114.476 | KV452892.1  | 4777494 | 6-scf00360 | 6  |
| AX-158205356 | 17 | 114.476 | KV452892.1  | 4778455 | 6-scf00360 | 6  |
| AX-158386317 | 17 | 114.476 | KV452892.1  | 4781046 | 6-scf00360 | 6  |
| AX-157725714 | 17 | 114.476 | KV452892.1  | 4782490 | 6-scf00360 | 6  |
| AX-158205359 | 17 | 114.476 | KV452892.1  | 4784010 | 6-scf00360 | 6  |
| AX-158205366 | 17 | 114.476 | KV452892.1  | 4791078 | 6-scf00360 | 6  |
| AX-157721198 | 17 | 114.476 | KV452892.1  | 4792357 | 6-scf00360 | 6  |
| AX-158205368 | 17 | 114.476 | KV452892.1  | 4793498 | 6-scf00360 | 6  |
| AX-158205369 | 17 | 114.476 | KV452892.1  | 4793840 | 6-scf00360 | 6  |
| AX-158205374 | 17 | 114.476 | KV452892.1  | 4799196 | 6-scf00360 | 6  |
| AX-157837849 | 17 | 114.476 | KV452892.1  | 4809579 | 6-scf00360 | 6  |
| AX-158205385 | 17 | 114.476 | KV452892.1  | 4812050 | 6-scf00360 | 6  |
| AX-158205386 | 17 | 114.476 | KV452892.1  | 4812617 | 6-scf00360 | 6  |
| AX-158205387 | 17 | 114.476 | KV452892.1  | 4814595 | 6-scf00360 | 6  |
| AX-158205388 | 17 | 114.476 | KV452892.1  | 4814812 | 6-scf00360 | 6  |
| AX-158205390 | 17 | 114.476 | KV452892.1  | 4817547 | 6-scf00360 | 6  |
| AX-158380744 | 17 | 114.476 | KV452892.1  | 4817644 | 6-scf00360 | 6  |
| AX-158205392 | 17 | 114.476 | KV452892.1  | 4819302 | 6-scf00360 | 6  |
| AX-158205393 | 17 | 114.476 | KV452892.1  | 4819695 | 6-scf00360 | 6  |
| AX-157775902 | 17 | 114.476 | KV452892.1  | 4822746 | 6-scf00360 | 6  |
| AX-157837852 | 17 | 114.476 | KV452892.1  | 4828191 | 6-scf00360 | 6  |
| AX-157837854 | 17 | 114.476 | KV452892.1  | 4831446 | 6-scf00360 | 6  |
| AX-157751515 | 17 | 114.476 | KV452892.1  | 4832312 | 6-scf00360 | 6  |
| AX-158205400 | 17 | 114.476 | KV452892.1  | 4836053 | 6-scf00360 | 6  |
| AX-157837857 | 17 | 114.476 | KV452892.1  | 4838768 | 6-scf00360 | 6  |
| AX-158205404 | 17 | 114.476 | KV452892.1  | 4839818 | 6-scf00360 | 6  |
| AX-157837861 | 17 | 114.476 | KV452892.1  | 4843864 | 6-scf00360 | 6  |
| AX-158205410 | 17 | 114.476 | KV452892.1  | 4846061 | 6-scf00360 | 6  |
| AX-157879360 | 17 | 114.476 | KV452892.1  | 4848108 | 6-scf00360 | 6  |
| AX-158205412 | 17 | 114.476 | KV452892.1  | 4850029 | 6-scf00360 | 6  |
| AX-158205414 | 17 | 114.476 | KV452892.1  | 4851265 | 6-scf00360 | 6  |
| AX-157774161 | 17 | 114.476 | KV452892.1  | 4851984 | 6-scf00360 | 6  |
| AX-157708776 | 17 | 114.476 | KV452892.1  | 4854431 | 6-scf00360 | 6  |
| AX-158205418 | 17 | 114.476 | KV452892.1  | 4854826 | 6-scf00360 | 6  |
| AX-158205467 | 17 | 114.476 | KV452892.1  | 4923042 | 6-scf00360 | 6  |
| AX-157705590 | 17 | 114.476 | 3ML01030318 | 87      | scf05914_1 | UN |
| AX-157837788 | 17 | 114.518 | KV452892.1  | 4039543 | 6-scf00360 | 6  |
| AX-158205056 | 17 | 114.518 | KV452892.1  | 4363950 | 6-scf00360 | 6  |
| AX-158205090 | 17 | 114.518 | KV452892.1  | 4403059 | 6-scf00360 | 6  |
| AX-158205097 | 17 | 114.518 | KV452892.1  | 4412066 | 6-scf00360 | 6  |
| AX-158205202 | 17 | 114.518 | KV452892.1  | 4567549 | 6-scf00360 | 6  |
| AX-158205363 | 17 | 114.518 | KV452892.1  | 4788804 | 6-scf00360 | 6  |
| AX-158205416 | 17 | 114.518 | KV452892.1  | 4853391 | 6-scf00360 | 6  |
| AX-158205425 | 17 | 114.518 | KV452892.1  | 4860208 | 6-scf00360 | 6  |
| AX-158205449 | 17 | 114.518 | KV452892.1  | 4889722 | 6-scf00360 | 6  |

|              |    |         |            |         |            |   |
|--------------|----|---------|------------|---------|------------|---|
| AX-158205536 | 17 | 114.518 | KV452892.1 | 5058664 | 6-scf00360 | 6 |
| AX-158205718 | 17 | 114.518 | KV452892.1 | 5358316 | 6-scf00360 | 6 |
| AX-158205433 | 17 | 114.571 | KV452892.1 | 4866862 | 6-scf00360 | 6 |
| AX-158205537 | 17 | 114.571 | KV452892.1 | 5060677 | 6-scf00360 | 6 |
| AX-158205578 | 17 | 114.571 | KV452892.1 | 5115874 | 6-scf00360 | 6 |
| AX-157747400 | 17 | 114.585 | KV452892.1 | 4034659 | 6-scf00360 | 6 |
| AX-157837789 | 17 | 114.585 | KV452892.1 | 4043561 | 6-scf00360 | 6 |
| AX-158204926 | 17 | 114.585 | KV452892.1 | 4076324 | 6-scf00360 | 6 |
| AX-157713455 | 17 | 114.585 | KV452892.1 | 4129090 | 6-scf00360 | 6 |
| AX-158205020 | 17 | 114.585 | KV452892.1 | 4223719 | 6-scf00360 | 6 |
| AX-158205021 | 17 | 114.585 | KV452892.1 | 4223972 | 6-scf00360 | 6 |
| AX-158205031 | 17 | 114.585 | KV452892.1 | 4238441 | 6-scf00360 | 6 |
| AX-157772945 | 17 | 114.585 | KV452892.1 | 4380050 | 6-scf00360 | 6 |
| AX-158205137 | 17 | 114.585 | KV452892.1 | 4478592 | 6-scf00360 | 6 |
| AX-158205297 | 17 | 114.585 | KV452892.1 | 4703349 | 6-scf00360 | 6 |
| AX-158205316 | 17 | 114.585 | KV452892.1 | 4731766 | 6-scf00360 | 6 |
| AX-158205328 | 17 | 114.585 | KV452892.1 | 4743232 | 6-scf00360 | 6 |
| AX-158205347 | 17 | 114.585 | KV452892.1 | 4766651 | 6-scf00360 | 6 |
| AX-158205350 | 17 | 114.585 | KV452892.1 | 4774241 | 6-scf00360 | 6 |
| AX-158205372 | 17 | 114.585 | KV452892.1 | 4797558 | 6-scf00360 | 6 |
| AX-157754633 | 17 | 114.585 | KV452892.1 | 4811811 | 6-scf00360 | 6 |
| AX-158205434 | 17 | 114.585 | KV452892.1 | 4868109 | 6-scf00360 | 6 |
| AX-158205438 | 17 | 114.585 | KV452892.1 | 4873581 | 6-scf00360 | 6 |
| AX-157715239 | 17 | 114.585 | KV452892.1 | 4878508 | 6-scf00360 | 6 |
| AX-158205441 | 17 | 114.585 | KV452892.1 | 4879040 | 6-scf00360 | 6 |
| AX-158205442 | 17 | 114.585 | KV452892.1 | 4879851 | 6-scf00360 | 6 |
| AX-158205443 | 17 | 114.585 | KV452892.1 | 4883879 | 6-scf00360 | 6 |
| AX-158205445 | 17 | 114.585 | KV452892.1 | 4886621 | 6-scf00360 | 6 |
| AX-158205446 | 17 | 114.585 | KV452892.1 | 4887151 | 6-scf00360 | 6 |
| AX-158205447 | 17 | 114.585 | KV452892.1 | 4887690 | 6-scf00360 | 6 |
| AX-158205448 | 17 | 114.585 | KV452892.1 | 4888280 | 6-scf00360 | 6 |
| AX-158205454 | 17 | 114.585 | KV452892.1 | 4899971 | 6-scf00360 | 6 |
| AX-157837863 | 17 | 114.585 | KV452892.1 | 4901110 | 6-scf00360 | 6 |
| AX-158205456 | 17 | 114.585 | KV452892.1 | 4902202 | 6-scf00360 | 6 |
| AX-158205457 | 17 | 114.585 | KV452892.1 | 4904199 | 6-scf00360 | 6 |
| AX-158205458 | 17 | 114.585 | KV452892.1 | 4907388 | 6-scf00360 | 6 |
| AX-157752395 | 17 | 114.585 | KV452892.1 | 4913352 | 6-scf00360 | 6 |
| AX-158205463 | 17 | 114.585 | KV452892.1 | 4917277 | 6-scf00360 | 6 |
| AX-158205465 | 17 | 114.585 | KV452892.1 | 4918632 | 6-scf00360 | 6 |
| AX-158205469 | 17 | 114.585 | KV452892.1 | 4924025 | 6-scf00360 | 6 |
| AX-158205473 | 17 | 114.585 | KV452892.1 | 4927725 | 6-scf00360 | 6 |
| AX-158205474 | 17 | 114.585 | KV452892.1 | 4928200 | 6-scf00360 | 6 |
| AX-158205475 | 17 | 114.585 | KV452892.1 | 4928631 | 6-scf00360 | 6 |
| AX-158205476 | 17 | 114.585 | KV452892.1 | 4929534 | 6-scf00360 | 6 |
| AX-158205477 | 17 | 114.585 | KV452892.1 | 4930113 | 6-scf00360 | 6 |
| AX-158205481 | 17 | 114.585 | KV452892.1 | 4933362 | 6-scf00360 | 6 |
| AX-157753744 | 17 | 114.585 | KV452892.1 | 4935292 | 6-scf00360 | 6 |
| AX-158205484 | 17 | 114.585 | KV452892.1 | 4935562 | 6-scf00360 | 6 |
| AX-157837869 | 17 | 114.585 | KV452892.1 | 5004722 | 6-scf00360 | 6 |
| AX-158205494 | 17 | 114.585 | KV452892.1 | 5008977 | 6-scf00360 | 6 |
| AX-157859065 | 17 | 114.585 | KV452892.1 | 5009988 | 6-scf00360 | 6 |



|              |    |         |            |         |            |   |
|--------------|----|---------|------------|---------|------------|---|
| AX-158205498 | 17 | 114.585 | KV452892.1 | 5014041 | 6-scf00360 | 6 |
| AX-158205499 | 17 | 114.585 | KV452892.1 | 5015212 | 6-scf00360 | 6 |
| AX-157837870 | 17 | 114.585 | KV452892.1 | 5018339 | 6-scf00360 | 6 |
| AX-158205501 | 17 | 114.585 | KV452892.1 | 5019522 | 6-scf00360 | 6 |
| AX-158205506 | 17 | 114.585 | KV452892.1 | 5025201 | 6-scf00360 | 6 |
| AX-158205507 | 17 | 114.585 | KV452892.1 | 5027443 | 6-scf00360 | 6 |
| AX-158205508 | 17 | 114.585 | KV452892.1 | 5027798 | 6-scf00360 | 6 |
| AX-158205513 | 17 | 114.585 | KV452892.1 | 5038870 | 6-scf00360 | 6 |
| AX-158205514 | 17 | 114.585 | KV452892.1 | 5039847 | 6-scf00360 | 6 |
| AX-158205515 | 17 | 114.585 | KV452892.1 | 5040583 | 6-scf00360 | 6 |
| AX-158205516 | 17 | 114.585 | KV452892.1 | 5041314 | 6-scf00360 | 6 |
| AX-157724680 | 17 | 114.585 | KV452892.1 | 5041935 | 6-scf00360 | 6 |
| AX-158205517 | 17 | 114.585 | KV452892.1 | 5042881 | 6-scf00360 | 6 |
| AX-158205518 | 17 | 114.585 | KV452892.1 | 5043931 | 6-scf00360 | 6 |
| AX-158205520 | 17 | 114.585 | KV452892.1 | 5045525 | 6-scf00360 | 6 |
| AX-158205522 | 17 | 114.585 | KV452892.1 | 5046462 | 6-scf00360 | 6 |
| AX-158205524 | 17 | 114.585 | KV452892.1 | 5047869 | 6-scf00360 | 6 |
| AX-158205531 | 17 | 114.585 | KV452892.1 | 5053335 | 6-scf00360 | 6 |
| AX-158205533 | 17 | 114.585 | KV452892.1 | 5056334 | 6-scf00360 | 6 |
| AX-158205534 | 17 | 114.585 | KV452892.1 | 5056692 | 6-scf00360 | 6 |
| AX-157859066 | 17 | 114.585 | KV452892.1 | 5057040 | 6-scf00360 | 6 |
| AX-158205535 | 17 | 114.585 | KV452892.1 | 5057892 | 6-scf00360 | 6 |
| AX-157837874 | 17 | 114.585 | KV452892.1 | 5059700 | 6-scf00360 | 6 |
| AX-158205540 | 17 | 114.585 | KV452892.1 | 5063393 | 6-scf00360 | 6 |
| AX-157837876 | 17 | 114.585 | KV452892.1 | 5063432 | 6-scf00360 | 6 |
| AX-158205542 | 17 | 114.585 | KV452892.1 | 5064394 | 6-scf00360 | 6 |
| AX-158205543 | 17 | 114.585 | KV452892.1 | 5065179 | 6-scf00360 | 6 |
| AX-158205544 | 17 | 114.585 | KV452892.1 | 5065777 | 6-scf00360 | 6 |
| AX-158205545 | 17 | 114.585 | KV452892.1 | 5067251 | 6-scf00360 | 6 |
| AX-158205548 | 17 | 114.585 | KV452892.1 | 5071382 | 6-scf00360 | 6 |
| AX-158205549 | 17 | 114.585 | KV452892.1 | 5075187 | 6-scf00360 | 6 |
| AX-158205550 | 17 | 114.585 | KV452892.1 | 5076393 | 6-scf00360 | 6 |
| AX-157837878 | 17 | 114.585 | KV452892.1 | 5080253 | 6-scf00360 | 6 |
| AX-158205551 | 17 | 114.585 | KV452892.1 | 5081071 | 6-scf00360 | 6 |
| AX-158205552 | 17 | 114.585 | KV452892.1 | 5083194 | 6-scf00360 | 6 |
| AX-158205553 | 17 | 114.585 | KV452892.1 | 5084593 | 6-scf00360 | 6 |
| AX-158205555 | 17 | 114.585 | KV452892.1 | 5088289 | 6-scf00360 | 6 |
| AX-158205560 | 17 | 114.585 | KV452892.1 | 5092468 | 6-scf00360 | 6 |
| AX-158205562 | 17 | 114.585 | KV452892.1 | 5093658 | 6-scf00360 | 6 |
| AX-158205564 | 17 | 114.585 | KV452892.1 | 5095573 | 6-scf00360 | 6 |
| AX-158205565 | 17 | 114.585 | KV452892.1 | 5097137 | 6-scf00360 | 6 |
| AX-157837879 | 17 | 114.585 | KV452892.1 | 5098610 | 6-scf00360 | 6 |
| AX-158205566 | 17 | 114.585 | KV452892.1 | 5099985 | 6-scf00360 | 6 |
| AX-158205568 | 17 | 114.585 | KV452892.1 | 5103725 | 6-scf00360 | 6 |
| AX-158205569 | 17 | 114.585 | KV452892.1 | 5105552 | 6-scf00360 | 6 |
| AX-158205570 | 17 | 114.585 | KV452892.1 | 5107166 | 6-scf00360 | 6 |
| AX-158205571 | 17 | 114.585 | KV452892.1 | 5107855 | 6-scf00360 | 6 |
| AX-158205572 | 17 | 114.585 | KV452892.1 | 5108290 | 6-scf00360 | 6 |
| AX-158205573 | 17 | 114.585 | KV452892.1 | 5108676 | 6-scf00360 | 6 |
| AX-158205574 | 17 | 114.585 | KV452892.1 | 5109470 | 6-scf00360 | 6 |
| AX-158205580 | 17 | 114.585 | KV452892.1 | 5117689 | 6-scf00360 | 6 |

|              |    |         |            |         |            |   |
|--------------|----|---------|------------|---------|------------|---|
| AX-157887096 | 17 | 114.585 | KV452892.1 | 5120144 | 6-scf00360 | 6 |
| AX-157753633 | 17 | 114.585 | KV452892.1 | 5122925 | 6-scf00360 | 6 |
| AX-158205586 | 17 | 114.585 | KV452892.1 | 5125841 | 6-scf00360 | 6 |
| AX-158205595 | 17 | 114.585 | KV452892.1 | 5137723 | 6-scf00360 | 6 |
| AX-158205596 | 17 | 114.585 | KV452892.1 | 5140504 | 6-scf00360 | 6 |
| AX-158414359 | 17 | 114.585 | KV452892.1 | 5142312 | 6-scf00360 | 6 |
| AX-157837880 | 17 | 114.585 | KV452892.1 | 5143674 | 6-scf00360 | 6 |
| AX-158205599 | 17 | 114.585 | KV452892.1 | 5145142 | 6-scf00360 | 6 |
| AX-157837884 | 17 | 114.585 | KV452892.1 | 5146987 | 6-scf00360 | 6 |
| AX-157837885 | 17 | 114.585 | KV452892.1 | 5148514 | 6-scf00360 | 6 |
| AX-158205601 | 17 | 114.585 | KV452892.1 | 5148951 | 6-scf00360 | 6 |
| AX-158205603 | 17 | 114.585 | KV452892.1 | 5151865 | 6-scf00360 | 6 |
| AX-157753440 | 17 | 114.585 | KV452892.1 | 5155286 | 6-scf00360 | 6 |
| AX-158205606 | 17 | 114.585 | KV452892.1 | 5158940 | 6-scf00360 | 6 |
| AX-158205607 | 17 | 114.585 | KV452892.1 | 5159981 | 6-scf00360 | 6 |
| AX-158205608 | 17 | 114.585 | KV452892.1 | 5160681 | 6-scf00360 | 6 |
| AX-158205610 | 17 | 114.585 | KV452892.1 | 5162372 | 6-scf00360 | 6 |
| AX-158205613 | 17 | 114.585 | KV452892.1 | 5165729 | 6-scf00360 | 6 |
| AX-158205614 | 17 | 114.585 | KV452892.1 | 5168665 | 6-scf00360 | 6 |
| AX-157887098 | 17 | 114.585 | KV452892.1 | 5169864 | 6-scf00360 | 6 |
| AX-158205616 | 17 | 114.585 | KV452892.1 | 5170222 | 6-scf00360 | 6 |
| AX-157837889 | 17 | 114.585 | KV452892.1 | 5174481 | 6-scf00360 | 6 |
| AX-157745994 | 17 | 114.585 | KV452892.1 | 5175607 | 6-scf00360 | 6 |
| AX-157837892 | 17 | 114.585 | KV452892.1 | 5178777 | 6-scf00360 | 6 |
| AX-158205624 | 17 | 114.585 | KV452892.1 | 5179039 | 6-scf00360 | 6 |
| AX-157723052 | 17 | 114.585 | KV452892.1 | 5179527 | 6-scf00360 | 6 |
| AX-158414361 | 17 | 114.585 | KV452892.1 | 5193427 | 6-scf00360 | 6 |
| AX-158205627 | 17 | 114.585 | KV452892.1 | 5193626 | 6-scf00360 | 6 |
| AX-158205630 | 17 | 114.585 | KV452892.1 | 5200774 | 6-scf00360 | 6 |
| AX-158205632 | 17 | 114.585 | KV452892.1 | 5202455 | 6-scf00360 | 6 |
| AX-158205633 | 17 | 114.585 | KV452892.1 | 5203609 | 6-scf00360 | 6 |
| AX-157837893 | 17 | 114.585 | KV452892.1 | 5204314 | 6-scf00360 | 6 |
| AX-157872340 | 17 | 114.585 | KV452892.1 | 5206092 | 6-scf00360 | 6 |
| AX-158205636 | 17 | 114.585 | KV452892.1 | 5209620 | 6-scf00360 | 6 |
| AX-158205637 | 17 | 114.585 | KV452892.1 | 5210132 | 6-scf00360 | 6 |
| AX-158205638 | 17 | 114.585 | KV452892.1 | 5211531 | 6-scf00360 | 6 |
| AX-158205641 | 17 | 114.585 | KV452892.1 | 5215988 | 6-scf00360 | 6 |
| AX-157774011 | 17 | 114.585 | KV452892.1 | 5217961 | 6-scf00360 | 6 |
| AX-158205643 | 17 | 114.585 | KV452892.1 | 5218963 | 6-scf00360 | 6 |
| AX-158205644 | 17 | 114.585 | KV452892.1 | 5219554 | 6-scf00360 | 6 |
| AX-157744011 | 17 | 114.585 | KV452892.1 | 5221928 | 6-scf00360 | 6 |
| AX-158205648 | 17 | 114.585 | KV452892.1 | 5225445 | 6-scf00360 | 6 |
| AX-158205650 | 17 | 114.585 | KV452892.1 | 5230848 | 6-scf00360 | 6 |
| AX-158205654 | 17 | 114.585 | KV452892.1 | 5239066 | 6-scf00360 | 6 |
| AX-158205655 | 17 | 114.585 | KV452892.1 | 5239786 | 6-scf00360 | 6 |
| AX-158205656 | 17 | 114.585 | KV452892.1 | 5241000 | 6-scf00360 | 6 |
| AX-158205657 | 17 | 114.585 | KV452892.1 | 5241145 | 6-scf00360 | 6 |
| AX-158380747 | 17 | 114.585 | KV452892.1 | 5242944 | 6-scf00360 | 6 |
| AX-158205659 | 17 | 114.585 | KV452892.1 | 5245161 | 6-scf00360 | 6 |
| AX-157837896 | 17 | 114.585 | KV452892.1 | 5249941 | 6-scf00360 | 6 |
| AX-157837897 | 17 | 114.585 | KV452892.1 | 5250088 | 6-scf00360 | 6 |

|              |    |         |            |         |            |   |
|--------------|----|---------|------------|---------|------------|---|
| AX-158205661 | 17 | 114.585 | KV452892.1 | 5253620 | 6-scf00360 | 6 |
| AX-157716693 | 17 | 114.585 | KV452892.1 | 5257639 | 6-scf00360 | 6 |
| AX-157837901 | 17 | 114.585 | KV452892.1 | 5257922 | 6-scf00360 | 6 |
| AX-158205666 | 17 | 114.585 | KV452892.1 | 5273138 | 6-scf00360 | 6 |
| AX-158205667 | 17 | 114.585 | KV452892.1 | 5275619 | 6-scf00360 | 6 |
| AX-158205668 | 17 | 114.585 | KV452892.1 | 5276399 | 6-scf00360 | 6 |
| AX-158205669 | 17 | 114.585 | KV452892.1 | 5277241 | 6-scf00360 | 6 |
| AX-158205670 | 17 | 114.585 | KV452892.1 | 5278320 | 6-scf00360 | 6 |
| AX-157837902 | 17 | 114.585 | KV452892.1 | 5280516 | 6-scf00360 | 6 |
| AX-157837903 | 17 | 114.585 | KV452892.1 | 5281323 | 6-scf00360 | 6 |
| AX-158205673 | 17 | 114.585 | KV452892.1 | 5285854 | 6-scf00360 | 6 |
| AX-158205675 | 17 | 114.585 | KV452892.1 | 5286920 | 6-scf00360 | 6 |
| AX-158205676 | 17 | 114.585 | KV452892.1 | 5287491 | 6-scf00360 | 6 |
| AX-158205677 | 17 | 114.585 | KV452892.1 | 5287959 | 6-scf00360 | 6 |
| AX-158205678 | 17 | 114.585 | KV452892.1 | 5288325 | 6-scf00360 | 6 |
| AX-157773203 | 17 | 114.585 | KV452892.1 | 5289622 | 6-scf00360 | 6 |
| AX-158205680 | 17 | 114.585 | KV452892.1 | 5292254 | 6-scf00360 | 6 |
| AX-158205681 | 17 | 114.585 | KV452892.1 | 5294436 | 6-scf00360 | 6 |
| AX-158205682 | 17 | 114.585 | KV452892.1 | 5295414 | 6-scf00360 | 6 |
| AX-157837905 | 17 | 114.585 | KV452892.1 | 5296468 | 6-scf00360 | 6 |
| AX-158205683 | 17 | 114.585 | KV452892.1 | 5296899 | 6-scf00360 | 6 |
| AX-158205684 | 17 | 114.585 | KV452892.1 | 5297740 | 6-scf00360 | 6 |
| AX-158205686 | 17 | 114.585 | KV452892.1 | 5300020 | 6-scf00360 | 6 |
| AX-157837907 | 17 | 114.585 | KV452892.1 | 5302065 | 6-scf00360 | 6 |
| AX-158205687 | 17 | 114.585 | KV452892.1 | 5302125 | 6-scf00360 | 6 |
| AX-158205688 | 17 | 114.585 | KV452892.1 | 5304779 | 6-scf00360 | 6 |
| AX-157837910 | 17 | 114.585 | KV452892.1 | 5307735 | 6-scf00360 | 6 |
| AX-158205689 | 17 | 114.585 | KV452892.1 | 5309408 | 6-scf00360 | 6 |
| AX-157837911 | 17 | 114.585 | KV452892.1 | 5310134 | 6-scf00360 | 6 |
| AX-158205690 | 17 | 114.585 | KV452892.1 | 5311371 | 6-scf00360 | 6 |
| AX-157837912 | 17 | 114.585 | KV452892.1 | 5312980 | 6-scf00360 | 6 |
| AX-158205691 | 17 | 114.585 | KV452892.1 | 5313438 | 6-scf00360 | 6 |
| AX-158205692 | 17 | 114.585 | KV452892.1 | 5316638 | 6-scf00360 | 6 |
| AX-158414363 | 17 | 114.585 | KV452892.1 | 5319005 | 6-scf00360 | 6 |
| AX-158205696 | 17 | 114.585 | KV452892.1 | 5322496 | 6-scf00360 | 6 |
| AX-157837913 | 17 | 114.585 | KV452892.1 | 5324599 | 6-scf00360 | 6 |
| AX-158205703 | 17 | 114.585 | KV452892.1 | 5334427 | 6-scf00360 | 6 |
| AX-158205705 | 17 | 114.585 | KV452892.1 | 5335791 | 6-scf00360 | 6 |
| AX-158205706 | 17 | 114.585 | KV452892.1 | 5337999 | 6-scf00360 | 6 |
| AX-157773704 | 17 | 114.585 | KV452892.1 | 5343363 | 6-scf00360 | 6 |
| AX-158205711 | 17 | 114.585 | KV452892.1 | 5347099 | 6-scf00360 | 6 |
| AX-158205712 | 17 | 114.585 | KV452892.1 | 5347501 | 6-scf00360 | 6 |
| AX-157837914 | 17 | 114.585 | KV452892.1 | 5348027 | 6-scf00360 | 6 |
| AX-157837915 | 17 | 114.585 | KV452892.1 | 5348513 | 6-scf00360 | 6 |
| AX-158205715 | 17 | 114.585 | KV452892.1 | 5349743 | 6-scf00360 | 6 |
| AX-158205717 | 17 | 114.585 | KV452892.1 | 5357109 | 6-scf00360 | 6 |
| AX-158386321 | 17 | 114.585 | KV452892.1 | 5359118 | 6-scf00360 | 6 |
| AX-158205719 | 17 | 114.585 | KV452892.1 | 5359321 | 6-scf00360 | 6 |
| AX-158205726 | 17 | 114.585 | KV452892.1 | 5367044 | 6-scf00360 | 6 |
| AX-158205730 | 17 | 114.585 | KV452892.1 | 5370461 | 6-scf00360 | 6 |
| AX-158205732 | 17 | 114.585 | KV452892.1 | 5372059 | 6-scf00360 | 6 |

|              |    |         |             |         |             |    |
|--------------|----|---------|-------------|---------|-------------|----|
| AX-158205733 | 17 | 114.585 | KV452892.1  | 5372791 | 6-scf00360  | 6  |
| AX-158205734 | 17 | 114.585 | KV452892.1  | 5374227 | 6-scf00360  | 6  |
| AX-158205735 | 17 | 114.585 | KV452892.1  | 5375289 | 6-scf00360  | 6  |
| AX-158205737 | 17 | 114.585 | KV452892.1  | 5376256 | 6-scf00360  | 6  |
| AX-157837918 | 17 | 114.585 | KV452892.1  | 5376388 | 6-scf00360  | 6  |
| AX-157837920 | 17 | 114.585 | KV452892.1  | 5377134 | 6-scf00360  | 6  |
| AX-158205738 | 17 | 114.585 | KV452892.1  | 5377558 | 6-scf00360  | 6  |
| AX-157706127 | 17 | 114.585 | 3ML01031660 | 152     | scf07278_1  | UN |
| AX-157707328 | 17 | 114.585 | 3ML01034368 | 57      | scf10042_1  | UN |
| AX-158205739 | 17 | 114.924 | KV452892.1  | 5378346 | 6-scf00360  | 6  |
| AX-157683920 | 18 | 0       | KV453047.1  | 867     | 14-scf00363 | 14 |
| AX-158205762 | 18 | 1.022   | KV453051.1  | 40925   | 14-scf00362 | 14 |
| AX-157837926 | 18 | 1.022   | KV453051.1  | 41964   | 14-scf00362 | 14 |
| AX-158205765 | 18 | 1.022   | KV453051.1  | 46801   | 14-scf00362 | 14 |
| AX-158205768 | 18 | 1.022   | KV453051.1  | 57420   | 14-scf00362 | 14 |
| AX-158386323 | 18 | 1.022   | KV453051.1  | 79327   | 14-scf00362 | 14 |
| AX-158205799 | 18 | 1.022   | KV453051.1  | 88234   | 14-scf00362 | 14 |
| AX-158205866 | 18 | 1.022   | KV453051.1  | 201544  | 14-scf00362 | 14 |
| AX-158205867 | 18 | 1.022   | KV453051.1  | 202576  | 14-scf00362 | 14 |
| AX-158205915 | 18 | 1.022   | KV453051.1  | 287930  | 14-scf00362 | 14 |
| AX-158205979 | 18 | 1.022   | KV453049.1  | 16752   | 14-scf00364 | 14 |
| AX-157837950 | 18 | 1.022   | KV453049.1  | 24724   | 14-scf00364 | 14 |
| AX-158205980 | 18 | 1.022   | KV453049.1  | 25404   | 14-scf00364 | 14 |
| AX-158205981 | 18 | 1.022   | KV453049.1  | 26030   | 14-scf00364 | 14 |
| AX-158409907 | 18 | 1.022   | KV453049.1  | 26593   | 14-scf00364 | 14 |
| AX-157742273 | 18 | 1.022   | KV453049.1  | 28251   | 14-scf00364 | 14 |
| AX-157751523 | 18 | 1.022   | KV453049.1  | 31009   | 14-scf00364 | 14 |
| AX-158205985 | 18 | 1.022   | KV453049.1  | 34461   | 14-scf00364 | 14 |
| AX-158206005 | 18 | 1.022   | KV453049.1  | 73062   | 14-scf00364 | 14 |
| AX-158206007 | 18 | 1.022   | KV453049.1  | 74654   | 14-scf00364 | 14 |
| AX-158206008 | 18 | 1.022   | KV453049.1  | 76261   | 14-scf00364 | 14 |
| AX-158206013 | 18 | 1.022   | KV453049.1  | 82680   | 14-scf00364 | 14 |
| AX-158206018 | 18 | 1.022   | KV453049.1  | 85812   | 14-scf00364 | 14 |
| AX-157724530 | 18 | 1.022   | KV453049.1  | 89223   | 14-scf00364 | 14 |
| AX-158206023 | 18 | 1.022   | KV453049.1  | 91751   | 14-scf00364 | 14 |
| AX-158206024 | 18 | 1.022   | KV453049.1  | 92359   | 14-scf00364 | 14 |
| AX-158206027 | 18 | 1.022   | KV453049.1  | 95370   | 14-scf00364 | 14 |
| AX-158206028 | 18 | 1.022   | KV453049.1  | 96234   | 14-scf00364 | 14 |
| AX-158206029 | 18 | 1.022   | KV453049.1  | 97308   | 14-scf00364 | 14 |
| AX-158206030 | 18 | 1.022   | KV453049.1  | 98474   | 14-scf00364 | 14 |
| AX-158206031 | 18 | 1.022   | KV453049.1  | 99252   | 14-scf00364 | 14 |
| AX-158206032 | 18 | 1.022   | KV453049.1  | 99604   | 14-scf00364 | 14 |
| AX-158206033 | 18 | 1.022   | KV453049.1  | 100492  | 14-scf00364 | 14 |
| AX-158206035 | 18 | 1.022   | KV453049.1  | 102843  | 14-scf00364 | 14 |
| AX-158206037 | 18 | 1.022   | KV453049.1  | 106209  | 14-scf00364 | 14 |
| AX-158206039 | 18 | 1.022   | KV453049.1  | 108399  | 14-scf00364 | 14 |
| AX-158206040 | 18 | 1.022   | KV453049.1  | 109359  | 14-scf00364 | 14 |
| AX-158206041 | 18 | 1.022   | KV453049.1  | 109595  | 14-scf00364 | 14 |
| AX-158206042 | 18 | 1.022   | KV453049.1  | 109823  | 14-scf00364 | 14 |
| AX-158206043 | 18 | 1.022   | KV453049.1  | 110148  | 14-scf00364 | 14 |
| AX-158206044 | 18 | 1.022   | KV453049.1  | 111581  | 14-scf00364 | 14 |

|              |    |       |            |        |             |    |
|--------------|----|-------|------------|--------|-------------|----|
| AX-158206045 | 18 | 1.022 | KV453049.1 | 112991 | 14-scf00364 | 14 |
| AX-158206048 | 18 | 1.022 | KV453049.1 | 116335 | 14-scf00364 | 14 |
| AX-158206050 | 18 | 1.022 | KV453049.1 | 117273 | 14-scf00364 | 14 |
| AX-158206051 | 18 | 1.022 | KV453049.1 | 117811 | 14-scf00364 | 14 |
| AX-158206052 | 18 | 1.022 | KV453049.1 | 119482 | 14-scf00364 | 14 |
| AX-158206056 | 18 | 1.022 | KV453049.1 | 123257 | 14-scf00364 | 14 |
| AX-158206059 | 18 | 1.022 | KV453049.1 | 128338 | 14-scf00364 | 14 |
| AX-158206060 | 18 | 1.022 | KV453049.1 | 128825 | 14-scf00364 | 14 |
| AX-158206061 | 18 | 1.022 | KV453049.1 | 129789 | 14-scf00364 | 14 |
| AX-157746628 | 18 | 1.022 | KV453049.1 | 132701 | 14-scf00364 | 14 |
| AX-158206064 | 18 | 1.022 | KV453049.1 | 133928 | 14-scf00364 | 14 |
| AX-158206066 | 18 | 1.022 | KV453049.1 | 136902 | 14-scf00364 | 14 |
| AX-157837953 | 18 | 1.022 | KV453049.1 | 139880 | 14-scf00364 | 14 |
| AX-158206069 | 18 | 1.022 | KV453049.1 | 140468 | 14-scf00364 | 14 |
| AX-158206073 | 18 | 1.022 | KV453049.1 | 145036 | 14-scf00364 | 14 |
| AX-158206075 | 18 | 1.022 | KV453049.1 | 148455 | 14-scf00364 | 14 |
| AX-158206076 | 18 | 1.022 | KV453049.1 | 149641 | 14-scf00364 | 14 |
| AX-157837954 | 18 | 1.022 | KV453049.1 | 152156 | 14-scf00364 | 14 |
| AX-158206077 | 18 | 1.022 | KV453049.1 | 155339 | 14-scf00364 | 14 |
| AX-158206079 | 18 | 1.022 | KV453049.1 | 158834 | 14-scf00364 | 14 |
| AX-158206080 | 18 | 1.022 | KV453049.1 | 159348 | 14-scf00364 | 14 |
| AX-158206081 | 18 | 1.022 | KV453049.1 | 160452 | 14-scf00364 | 14 |
| AX-157798328 | 18 | 1.022 | KV453049.1 | 167839 | 14-scf00364 | 14 |
| AX-157798329 | 18 | 1.022 | KV453049.1 | 167876 | 14-scf00364 | 14 |
| AX-157716154 | 18 | 1.022 | KV453049.1 | 170368 | 14-scf00364 | 14 |
| AX-157798332 | 18 | 1.022 | KV453049.1 | 176691 | 14-scf00364 | 14 |
| AX-158206088 | 18 | 1.022 | KV453049.1 | 191162 | 14-scf00364 | 14 |
| AX-158206091 | 18 | 1.022 | KV453049.1 | 195986 | 14-scf00364 | 14 |
| AX-158206095 | 18 | 1.022 | KV453049.1 | 200655 | 14-scf00364 | 14 |
| AX-158206097 | 18 | 1.022 | KV453049.1 | 203435 | 14-scf00364 | 14 |
| AX-158206102 | 18 | 1.022 | KV453049.1 | 209502 | 14-scf00364 | 14 |
| AX-158206103 | 18 | 1.022 | KV453049.1 | 210544 | 14-scf00364 | 14 |
| AX-157837964 | 18 | 1.022 | KV453049.1 | 212547 | 14-scf00364 | 14 |
| AX-158206104 | 18 | 1.022 | KV453049.1 | 213226 | 14-scf00364 | 14 |
| AX-158206105 | 18 | 1.022 | KV453049.1 | 214449 | 14-scf00364 | 14 |
| AX-158206106 | 18 | 1.022 | KV453049.1 | 217581 | 14-scf00364 | 14 |
| AX-158206107 | 18 | 1.022 | KV453049.1 | 218448 | 14-scf00364 | 14 |
| AX-157714842 | 18 | 1.022 | KV453049.1 | 218728 | 14-scf00364 | 14 |
| AX-157746496 | 18 | 1.022 | KV453049.1 | 220231 | 14-scf00364 | 14 |
| AX-157866916 | 18 | 1.022 | KV453049.1 | 222295 | 14-scf00364 | 14 |
| AX-158206110 | 18 | 1.022 | KV453049.1 | 224842 | 14-scf00364 | 14 |
| AX-158206113 | 18 | 1.022 | KV453049.1 | 236066 | 14-scf00364 | 14 |
| AX-158206279 | 18 | 1.022 | KV453053.1 | 288433 | 14-scf00365 | 14 |
| AX-157838018 | 18 | 1.022 | KV453055.1 | 243712 | 14-scf00366 | 14 |
| AX-157862564 | 18 | 1.022 | KV453045.1 | 24754  | 14-scf00620 | 14 |
| AX-158377854 | 18 | 1.022 | KV453045.1 | 25248  | 14-scf00620 | 14 |
| AX-158377856 | 18 | 1.022 | KV453045.1 | 26935  | 14-scf00620 | 14 |
| AX-157853466 | 18 | 1.022 | KV453045.1 | 27074  | 14-scf00620 | 14 |
| AX-158377857 | 18 | 1.022 | KV453045.1 | 27457  | 14-scf00620 | 14 |
| AX-158377858 | 18 | 1.022 | KV453045.1 | 29046  | 14-scf00620 | 14 |
| AX-158377859 | 18 | 1.022 | KV453045.1 | 31260  | 14-scf00620 | 14 |

|              |    |       |            |        |             |    |
|--------------|----|-------|------------|--------|-------------|----|
| AX-158377864 | 18 | 1.022 | KV453045.1 | 35891  | 14-scf00620 | 14 |
| AX-158377866 | 18 | 1.022 | KV453045.1 | 36972  | 14-scf00620 | 14 |
| AX-157883003 | 18 | 1.022 | KV453045.1 | 40419  | 14-scf00620 | 14 |
| AX-158421179 | 18 | 1.022 | KV453045.1 | 46351  | 14-scf00620 | 14 |
| AX-158377871 | 18 | 1.022 | KV453045.1 | 50878  | 14-scf00620 | 14 |
| AX-158377872 | 18 | 1.022 | KV453045.1 | 51421  | 14-scf00620 | 14 |
| AX-158377875 | 18 | 1.022 | KV453045.1 | 59029  | 14-scf00620 | 14 |
| AX-158377877 | 18 | 1.022 | KV453045.1 | 59803  | 14-scf00620 | 14 |
| AX-158377878 | 18 | 1.022 | KV453045.1 | 60288  | 14-scf00620 | 14 |
| AX-158377880 | 18 | 1.022 | KV453045.1 | 62510  | 14-scf00620 | 14 |
| AX-158377881 | 18 | 1.022 | KV453045.1 | 62907  | 14-scf00620 | 14 |
| AX-158377882 | 18 | 1.022 | KV453045.1 | 63086  | 14-scf00620 | 14 |
| AX-157853467 | 18 | 1.022 | KV453045.1 | 67217  | 14-scf00620 | 14 |
| AX-158377886 | 18 | 1.022 | KV453045.1 | 68181  | 14-scf00620 | 14 |
| AX-158377887 | 18 | 1.022 | KV453045.1 | 69923  | 14-scf00620 | 14 |
| AX-158377888 | 18 | 1.022 | KV453045.1 | 70147  | 14-scf00620 | 14 |
| AX-158377889 | 18 | 1.022 | KV453045.1 | 70476  | 14-scf00620 | 14 |
| AX-157862565 | 18 | 1.022 | KV453045.1 | 70784  | 14-scf00620 | 14 |
| AX-157853469 | 18 | 1.022 | KV453045.1 | 79685  | 14-scf00620 | 14 |
| AX-158377891 | 18 | 1.022 | KV453045.1 | 87782  | 14-scf00620 | 14 |
| AX-157853470 | 18 | 1.022 | KV453045.1 | 88188  | 14-scf00620 | 14 |
| AX-158377892 | 18 | 1.022 | KV453045.1 | 88234  | 14-scf00620 | 14 |
| AX-158377893 | 18 | 1.022 | KV453045.1 | 88585  | 14-scf00620 | 14 |
| AX-158377894 | 18 | 1.022 | KV453045.1 | 91231  | 14-scf00620 | 14 |
| AX-157853471 | 18 | 1.022 | KV453045.1 | 92883  | 14-scf00620 | 14 |
| AX-157853473 | 18 | 1.022 | KV453045.1 | 93778  | 14-scf00620 | 14 |
| AX-158377898 | 18 | 1.022 | KV453045.1 | 96321  | 14-scf00620 | 14 |
| AX-158377900 | 18 | 1.022 | KV453045.1 | 105060 | 14-scf00620 | 14 |
| AX-158377901 | 18 | 1.022 | KV453045.1 | 105588 | 14-scf00620 | 14 |
| AX-158377905 | 18 | 1.022 | KV453045.1 | 110199 | 14-scf00620 | 14 |
| AX-158377906 | 18 | 1.022 | KV453045.1 | 110502 | 14-scf00620 | 14 |
| AX-158377908 | 18 | 1.022 | KV453045.1 | 111771 | 14-scf00620 | 14 |
| AX-158377909 | 18 | 1.022 | KV453045.1 | 112630 | 14-scf00620 | 14 |
| AX-158377910 | 18 | 1.022 | KV453045.1 | 113029 | 14-scf00620 | 14 |
| AX-157853476 | 18 | 1.022 | KV453045.1 | 115665 | 14-scf00620 | 14 |
| AX-158377913 | 18 | 1.022 | KV453045.1 | 115733 | 14-scf00620 | 14 |
| AX-158377914 | 18 | 1.022 | KV453045.1 | 117946 | 14-scf00620 | 14 |
| AX-158377916 | 18 | 1.022 | KV453045.1 | 119779 | 14-scf00620 | 14 |
| AX-158377917 | 18 | 1.022 | KV453045.1 | 122768 | 14-scf00620 | 14 |
| AX-158378032 | 18 | 1.022 | KV453048.1 | 873    | 14-scf00643 | 14 |
| AX-158378033 | 18 | 1.022 | KV453048.1 | 1647   | 14-scf00643 | 14 |
| AX-158378035 | 18 | 1.022 | KV453048.1 | 7641   | 14-scf00643 | 14 |
| AX-158378038 | 18 | 1.022 | KV453048.1 | 15646  | 14-scf00643 | 14 |
| AX-158378039 | 18 | 1.022 | KV453048.1 | 16016  | 14-scf00643 | 14 |
| AX-158378043 | 18 | 1.022 | KV453048.1 | 24418  | 14-scf00643 | 14 |
| AX-157764673 | 18 | 1.022 | KV453048.1 | 26280  | 14-scf00643 | 14 |
| AX-158379073 | 18 | 1.022 | KV453048.1 | 27553  | 14-scf00643 | 14 |
| AX-158378047 | 18 | 1.022 | KV453048.1 | 30130  | 14-scf00643 | 14 |
| AX-158378052 | 18 | 1.022 | KV453048.1 | 39004  | 14-scf00643 | 14 |
| AX-158379074 | 18 | 1.022 | KV453048.1 | 41761  | 14-scf00643 | 14 |
| AX-158378057 | 18 | 1.022 | KV453048.1 | 46265  | 14-scf00643 | 14 |

|              |    |       |             |        |             |    |
|--------------|----|-------|-------------|--------|-------------|----|
| AX-158378070 | 18 | 1.022 | KV453048.1  | 67369  | 14-scf00643 | 14 |
| AX-158378073 | 18 | 1.022 | KV453048.1  | 70748  | 14-scf00643 | 14 |
| AX-158378075 | 18 | 1.022 | KV453048.1  | 71961  | 14-scf00643 | 14 |
| AX-157853493 | 18 | 1.022 | KV453048.1  | 76124  | 14-scf00643 | 14 |
| AX-157853494 | 18 | 1.022 | KV453048.1  | 79404  | 14-scf00643 | 14 |
| AX-158378077 | 18 | 1.022 | KV453048.1  | 81264  | 14-scf00643 | 14 |
| AX-158378080 | 18 | 1.022 | KV453048.1  | 87964  | 14-scf00643 | 14 |
| AX-158378081 | 18 | 1.022 | KV453048.1  | 88436  | 14-scf00643 | 14 |
| AX-158378082 | 18 | 1.022 | KV453048.1  | 91273  | 14-scf00643 | 14 |
| AX-158378083 | 18 | 1.022 | KV453048.1  | 91646  | 14-scf00643 | 14 |
| AX-157686625 | 18 | 1.022 | KV453044.1  | 1563   | 14-scf00712 | 14 |
| AX-157686626 | 18 | 1.022 | KV453044.1  | 1712   | 14-scf00712 | 14 |
| AX-157686628 | 18 | 1.022 | KV453044.1  | 3764   | 14-scf00712 | 14 |
| AX-157686629 | 18 | 1.022 | KV453044.1  | 3996   | 14-scf00712 | 14 |
| AX-157686633 | 18 | 1.022 | KV453044.1  | 7980   | 14-scf00712 | 14 |
| AX-157686634 | 18 | 1.022 | KV453044.1  | 8530   | 14-scf00712 | 14 |
| AX-157686635 | 18 | 1.022 | KV453044.1  | 9175   | 14-scf00712 | 14 |
| AX-157686638 | 18 | 1.022 | KV453044.1  | 15167  | 14-scf00712 | 14 |
| AX-157686641 | 18 | 1.022 | KV453044.1  | 19998  | 14-scf00712 | 14 |
| AX-157686643 | 18 | 1.022 | KV453044.1  | 23849  | 14-scf00712 | 14 |
| AX-157686646 | 18 | 1.022 | KV453044.1  | 27644  | 14-scf00712 | 14 |
| AX-157686647 | 18 | 1.022 | KV453044.1  | 30043  | 14-scf00712 | 14 |
| AX-157686648 | 18 | 1.022 | KV453044.1  | 31829  | 14-scf00712 | 14 |
| AX-157686649 | 18 | 1.022 | KV453044.1  | 33043  | 14-scf00712 | 14 |
| AX-157686650 | 18 | 1.022 | KV453044.1  | 33474  | 14-scf00712 | 14 |
| AX-157686651 | 18 | 1.022 | KV453044.1  | 37752  | 14-scf00712 | 14 |
| AX-157686652 | 18 | 1.022 | KV453044.1  | 39362  | 14-scf00712 | 14 |
| AX-157680236 | 18 | 1.022 | KV453046.1  | 1108   | 14-scf02006 | 14 |
| AX-157688302 | 18 | 1.022 | 3ML01025885 | 1010   | scf01494_1  | UN |
| AX-157689052 | 18 | 1.049 | 3ML01027987 | 689    | scf03593_1  | UN |
| AX-158206428 | 18 | 1.077 | KV453055.1  | 142235 | 14-scf00366 | 14 |
| AX-158206458 | 18 | 1.077 | KV453055.1  | 209930 | 14-scf00366 | 14 |
| AX-157751246 | 18 | 1.077 | KV453055.1  | 235328 | 14-scf00366 | 14 |
| AX-158206466 | 18 | 1.077 | KV453055.1  | 235707 | 14-scf00366 | 14 |
| AX-158206502 | 18 | 1.077 | KV453055.1  | 296364 | 14-scf00366 | 14 |
| AX-158206659 | 18 | 1.077 | KV453055.1  | 562816 | 14-scf00366 | 14 |
| AX-157681664 | 18 | 1.077 | KV453050.1  | 28182  | 14-scf00627 | 14 |
| AX-157685604 | 18 | 1.077 | KV453050.1  | 74039  | 14-scf00627 | 14 |
| AX-157721028 | 18 | 1.132 | KV453051.1  | 11774  | 14-scf00362 | 14 |
| AX-158205750 | 18 | 1.132 | KV453051.1  | 17921  | 14-scf00362 | 14 |
| AX-158205761 | 18 | 1.132 | KV453051.1  | 40258  | 14-scf00362 | 14 |
| AX-157837927 | 18 | 1.132 | KV453051.1  | 42336  | 14-scf00362 | 14 |
| AX-158205804 | 18 | 1.132 | KV453051.1  | 92798  | 14-scf00362 | 14 |
| AX-158205807 | 18 | 1.132 | KV453051.1  | 95400  | 14-scf00362 | 14 |
| AX-158205808 | 18 | 1.132 | KV453051.1  | 97467  | 14-scf00362 | 14 |
| AX-158205809 | 18 | 1.132 | KV453051.1  | 99539  | 14-scf00362 | 14 |
| AX-158206230 | 18 | 1.132 | KV453053.1  | 232812 | 14-scf00365 | 14 |
| AX-157686639 | 18 | 1.132 | KV453044.1  | 15848  | 14-scf00712 | 14 |
| AX-158205810 | 18 | 1.133 | KV453051.1  | 100342 | 14-scf00362 | 14 |
| AX-158205813 | 18 | 1.133 | KV453051.1  | 107418 | 14-scf00362 | 14 |
| AX-158380748 | 18 | 1.134 | KV453051.1  | 17988  | 14-scf00362 | 14 |

|              |    |       |            |        |             |    |
|--------------|----|-------|------------|--------|-------------|----|
| AX-157770645 | 18 | 1.134 | KV453051.1 | 18061  | 14-scf00362 | 14 |
| AX-158205751 | 18 | 1.134 | KV453051.1 | 19353  | 14-scf00362 | 14 |
| AX-158205752 | 18 | 1.134 | KV453051.1 | 19634  | 14-scf00362 | 14 |
| AX-157837924 | 18 | 1.134 | KV453051.1 | 28543  | 14-scf00362 | 14 |
| AX-157714295 | 18 | 1.134 | KV453051.1 | 30294  | 14-scf00362 | 14 |
| AX-158205757 | 18 | 1.134 | KV453051.1 | 32933  | 14-scf00362 | 14 |
| AX-158205760 | 18 | 1.134 | KV453051.1 | 37075  | 14-scf00362 | 14 |
| AX-158205763 | 18 | 1.134 | KV453051.1 | 43574  | 14-scf00362 | 14 |
| AX-157757873 | 18 | 1.134 | KV453051.1 | 53546  | 14-scf00362 | 14 |
| AX-158205766 | 18 | 1.134 | KV453051.1 | 55903  | 14-scf00362 | 14 |
| AX-158205770 | 18 | 1.134 | KV453051.1 | 60005  | 14-scf00362 | 14 |
| AX-158205771 | 18 | 1.134 | KV453051.1 | 62923  | 14-scf00362 | 14 |
| AX-158205780 | 18 | 1.134 | KV453051.1 | 70860  | 14-scf00362 | 14 |
| AX-158205791 | 18 | 1.134 | KV453051.1 | 80920  | 14-scf00362 | 14 |
| AX-158205793 | 18 | 1.134 | KV453051.1 | 81718  | 14-scf00362 | 14 |
| AX-158205798 | 18 | 1.134 | KV453051.1 | 87584  | 14-scf00362 | 14 |
| AX-158205805 | 18 | 1.134 | KV453051.1 | 93945  | 14-scf00362 | 14 |
| AX-157722521 | 18 | 1.134 | KV453051.1 | 109562 | 14-scf00362 | 14 |
| AX-158205814 | 18 | 1.134 | KV453051.1 | 111636 | 14-scf00362 | 14 |
| AX-158205815 | 18 | 1.134 | KV453051.1 | 113031 | 14-scf00362 | 14 |
| AX-158205816 | 18 | 1.134 | KV453051.1 | 114195 | 14-scf00362 | 14 |
| AX-158205819 | 18 | 1.134 | KV453051.1 | 120573 | 14-scf00362 | 14 |
| AX-158205825 | 18 | 1.134 | KV453051.1 | 133427 | 14-scf00362 | 14 |
| AX-158205829 | 18 | 1.134 | KV453051.1 | 136453 | 14-scf00362 | 14 |
| AX-158205831 | 18 | 1.134 | KV453051.1 | 137613 | 14-scf00362 | 14 |
| AX-158205835 | 18 | 1.134 | KV453051.1 | 151127 | 14-scf00362 | 14 |
| AX-158205838 | 18 | 1.134 | KV453051.1 | 157011 | 14-scf00362 | 14 |
| AX-157743631 | 18 | 1.134 | KV453051.1 | 183402 | 14-scf00362 | 14 |
| AX-158205860 | 18 | 1.134 | KV453051.1 | 194263 | 14-scf00362 | 14 |
| AX-158205861 | 18 | 1.134 | KV453051.1 | 194566 | 14-scf00362 | 14 |
| AX-157748661 | 18 | 1.134 | KV453051.1 | 194638 | 14-scf00362 | 14 |
| AX-158205862 | 18 | 1.134 | KV453051.1 | 196805 | 14-scf00362 | 14 |
| AX-158205863 | 18 | 1.134 | KV453051.1 | 197260 | 14-scf00362 | 14 |
| AX-158205868 | 18 | 1.134 | KV453051.1 | 203289 | 14-scf00362 | 14 |
| AX-158205869 | 18 | 1.134 | KV453051.1 | 203780 | 14-scf00362 | 14 |
| AX-158205871 | 18 | 1.134 | KV453051.1 | 206395 | 14-scf00362 | 14 |
| AX-157837932 | 18 | 1.134 | KV453051.1 | 208671 | 14-scf00362 | 14 |
| AX-157745689 | 18 | 1.134 | KV453051.1 | 209787 | 14-scf00362 | 14 |
| AX-158205874 | 18 | 1.134 | KV453051.1 | 215798 | 14-scf00362 | 14 |
| AX-157772350 | 18 | 1.134 | KV453051.1 | 217489 | 14-scf00362 | 14 |
| AX-157837934 | 18 | 1.134 | KV453051.1 | 217637 | 14-scf00362 | 14 |
| AX-158205875 | 18 | 1.134 | KV453051.1 | 218758 | 14-scf00362 | 14 |
| AX-158205877 | 18 | 1.134 | KV453051.1 | 223514 | 14-scf00362 | 14 |
| AX-158205878 | 18 | 1.134 | KV453051.1 | 226652 | 14-scf00362 | 14 |
| AX-157859070 | 18 | 1.134 | KV453051.1 | 227329 | 14-scf00362 | 14 |
| AX-158205879 | 18 | 1.134 | KV453051.1 | 228772 | 14-scf00362 | 14 |
| AX-158205880 | 18 | 1.134 | KV453051.1 | 230243 | 14-scf00362 | 14 |
| AX-158205882 | 18 | 1.134 | KV453051.1 | 234476 | 14-scf00362 | 14 |
| AX-157837935 | 18 | 1.134 | KV453051.1 | 234954 | 14-scf00362 | 14 |
| AX-158205884 | 18 | 1.134 | KV453051.1 | 235471 | 14-scf00362 | 14 |
| AX-157837936 | 18 | 1.134 | KV453051.1 | 236578 | 14-scf00362 | 14 |



|              |    |       |             |        |             |    |
|--------------|----|-------|-------------|--------|-------------|----|
| AX-158205885 | 18 | 1.134 | KV453051.1  | 238228 | 14-scf00362 | 14 |
| AX-158205886 | 18 | 1.134 | KV453051.1  | 238794 | 14-scf00362 | 14 |
| AX-158205890 | 18 | 1.134 | KV453051.1  | 245453 | 14-scf00362 | 14 |
| AX-158205892 | 18 | 1.134 | KV453051.1  | 253201 | 14-scf00362 | 14 |
| AX-158205895 | 18 | 1.134 | KV453051.1  | 254616 | 14-scf00362 | 14 |
| AX-158205897 | 18 | 1.134 | KV453051.1  | 260129 | 14-scf00362 | 14 |
| AX-158205898 | 18 | 1.134 | KV453051.1  | 260736 | 14-scf00362 | 14 |
| AX-158205900 | 18 | 1.134 | KV453051.1  | 266629 | 14-scf00362 | 14 |
| AX-158205901 | 18 | 1.134 | KV453051.1  | 267073 | 14-scf00362 | 14 |
| AX-158205903 | 18 | 1.134 | KV453051.1  | 271486 | 14-scf00362 | 14 |
| AX-157837937 | 18 | 1.134 | KV453051.1  | 272537 | 14-scf00362 | 14 |
| AX-157837938 | 18 | 1.134 | KV453051.1  | 272686 | 14-scf00362 | 14 |
| AX-158205905 | 18 | 1.134 | KV453051.1  | 273085 | 14-scf00362 | 14 |
| AX-158205906 | 18 | 1.134 | KV453051.1  | 273994 | 14-scf00362 | 14 |
| AX-157719840 | 18 | 1.134 | KV453051.1  | 276392 | 14-scf00362 | 14 |
| AX-158205909 | 18 | 1.134 | KV453051.1  | 276901 | 14-scf00362 | 14 |
| AX-158205910 | 18 | 1.134 | KV453051.1  | 277465 | 14-scf00362 | 14 |
| AX-158205913 | 18 | 1.134 | KV453051.1  | 282570 | 14-scf00362 | 14 |
| AX-157837939 | 18 | 1.134 | KV453051.1  | 283497 | 14-scf00362 | 14 |
| AX-157744553 | 18 | 1.134 | KV453051.1  | 284517 | 14-scf00362 | 14 |
| AX-158205925 | 18 | 1.134 | KV453051.1  | 298157 | 14-scf00362 | 14 |
| AX-158205928 | 18 | 1.134 | KV453051.1  | 305690 | 14-scf00362 | 14 |
| AX-157714684 | 18 | 1.134 | KV453051.1  | 337061 | 14-scf00362 | 14 |
| AX-158205953 | 18 | 1.134 | KV453051.1  | 342593 | 14-scf00362 | 14 |
| AX-158205954 | 18 | 1.134 | KV453051.1  | 344231 | 14-scf00362 | 14 |
| AX-157774968 | 18 | 1.134 | KV453051.1  | 364940 | 14-scf00362 | 14 |
| AX-158205973 | 18 | 1.134 | KV453051.1  | 391813 | 14-scf00362 | 14 |
| AX-158206015 | 18 | 1.134 | KV453049.1  | 83447  | 14-scf00364 | 14 |
| AX-158206058 | 18 | 1.134 | KV453049.1  | 127076 | 14-scf00364 | 14 |
| AX-158206065 | 18 | 1.134 | KV453049.1  | 136334 | 14-scf00364 | 14 |
| AX-158206068 | 18 | 1.134 | KV453049.1  | 138843 | 14-scf00364 | 14 |
| AX-158206072 | 18 | 1.134 | KV453049.1  | 143517 | 14-scf00364 | 14 |
| AX-158206074 | 18 | 1.134 | KV453049.1  | 146044 | 14-scf00364 | 14 |
| AX-158206086 | 18 | 1.134 | KV453049.1  | 182136 | 14-scf00364 | 14 |
| AX-157837961 | 18 | 1.134 | KV453049.1  | 194434 | 14-scf00364 | 14 |
| AX-158206094 | 18 | 1.134 | KV453049.1  | 199985 | 14-scf00364 | 14 |
| AX-157837965 | 18 | 1.134 | KV453053.1  | 795    | 14-scf00365 | 14 |
| AX-157837966 | 18 | 1.134 | KV453053.1  | 1231   | 14-scf00365 | 14 |
| AX-158206129 | 18 | 1.134 | KV453053.1  | 22910  | 14-scf00365 | 14 |
| AX-158206151 | 18 | 1.134 | KV453053.1  | 54477  | 14-scf00365 | 14 |
| AX-157866919 | 18 | 1.134 | KV453053.1  | 66646  | 14-scf00365 | 14 |
| AX-158206171 | 18 | 1.134 | KV453053.1  | 88512  | 14-scf00365 | 14 |
| AX-157837974 | 18 | 1.134 | KV453053.1  | 102462 | 14-scf00365 | 14 |
| AX-158378071 | 18 | 1.134 | KV453048.1  | 67900  | 14-scf00643 | 14 |
| AX-157686239 | 18 | 1.134 | KV453388.1  | 2384   | scf00679    | UN |
| AX-157689832 | 18 | 1.134 | 3ML01033279 | 449    | scf08921_1  | UN |
| AX-158205758 | 18 | 1.243 | KV453051.1  | 34001  | 14-scf00362 | 14 |
| AX-157723763 | 18 | 1.243 | KV453051.1  | 168473 | 14-scf00362 | 14 |
| AX-158205907 | 18 | 1.243 | KV453051.1  | 274329 | 14-scf00362 | 14 |
| AX-157715737 | 18 | 1.243 | KV453051.1  | 292115 | 14-scf00362 | 14 |
| AX-158205917 | 18 | 1.243 | KV453051.1  | 292901 | 14-scf00362 | 14 |

|              |    |       |            |        |             |    |
|--------------|----|-------|------------|--------|-------------|----|
| AX-158205920 | 18 | 1.243 | KV453051.1 | 295163 | 14-scf00362 | 14 |
| AX-158205921 | 18 | 1.243 | KV453051.1 | 295646 | 14-scf00362 | 14 |
| AX-158205922 | 18 | 1.243 | KV453051.1 | 295947 | 14-scf00362 | 14 |
| AX-158205923 | 18 | 1.243 | KV453051.1 | 296459 | 14-scf00362 | 14 |
| AX-158205924 | 18 | 1.243 | KV453051.1 | 297207 | 14-scf00362 | 14 |
| AX-157752144 | 18 | 1.243 | KV453051.1 | 304927 | 14-scf00362 | 14 |
| AX-158205930 | 18 | 1.243 | KV453051.1 | 311151 | 14-scf00362 | 14 |
| AX-158205932 | 18 | 1.243 | KV453051.1 | 313841 | 14-scf00362 | 14 |
| AX-158205934 | 18 | 1.243 | KV453051.1 | 318418 | 14-scf00362 | 14 |
| AX-158205952 | 18 | 1.243 | KV453051.1 | 339674 | 14-scf00362 | 14 |
| AX-157759033 | 18 | 1.243 | KV453051.1 | 352134 | 14-scf00362 | 14 |
| AX-158205961 | 18 | 1.243 | KV453051.1 | 360782 | 14-scf00362 | 14 |
| AX-158206120 | 18 | 1.243 | KV453053.1 | 10783  | 14-scf00365 | 14 |
| AX-158206121 | 18 | 1.243 | KV453053.1 | 10831  | 14-scf00365 | 14 |
| AX-158206123 | 18 | 1.243 | KV453053.1 | 12135  | 14-scf00365 | 14 |
| AX-158206125 | 18 | 1.243 | KV453053.1 | 14497  | 14-scf00365 | 14 |
| AX-158206126 | 18 | 1.243 | KV453053.1 | 17214  | 14-scf00365 | 14 |
| AX-157837970 | 18 | 1.243 | KV453053.1 | 47454  | 14-scf00365 | 14 |
| AX-157859075 | 18 | 1.243 | KV453053.1 | 92876  | 14-scf00365 | 14 |
| AX-158206182 | 18 | 1.243 | KV453053.1 | 110846 | 14-scf00365 | 14 |
| AX-157837978 | 18 | 1.243 | KV453053.1 | 124557 | 14-scf00365 | 14 |
| AX-158206238 | 18 | 1.243 | KV453053.1 | 236815 | 14-scf00365 | 14 |
| AX-158206278 | 18 | 1.243 | KV453053.1 | 287835 | 14-scf00365 | 14 |
| AX-158206306 | 18 | 1.243 | KV453053.1 | 329474 | 14-scf00365 | 14 |
| AX-158206399 | 18 | 1.243 | KV453055.1 | 99996  | 14-scf00366 | 14 |
| AX-158205935 | 18 | 1.352 | KV453051.1 | 318901 | 14-scf00362 | 14 |
| AX-158205936 | 18 | 1.352 | KV453051.1 | 320499 | 14-scf00362 | 14 |
| AX-158205943 | 18 | 1.352 | KV453051.1 | 327296 | 14-scf00362 | 14 |
| AX-158205945 | 18 | 1.352 | KV453051.1 | 328920 | 14-scf00362 | 14 |
| AX-158205946 | 18 | 1.352 | KV453051.1 | 331337 | 14-scf00362 | 14 |
| AX-158205949 | 18 | 1.352 | KV453051.1 | 334903 | 14-scf00362 | 14 |
| AX-158205950 | 18 | 1.352 | KV453051.1 | 335821 | 14-scf00362 | 14 |
| AX-157739260 | 18 | 1.352 | KV453051.1 | 339829 | 14-scf00362 | 14 |
| AX-158205955 | 18 | 1.352 | KV453051.1 | 344735 | 14-scf00362 | 14 |
| AX-158206143 | 18 | 1.352 | KV453053.1 | 38471  | 14-scf00365 | 14 |
| AX-158206198 | 18 | 1.352 | KV453053.1 | 148187 | 14-scf00365 | 14 |
| AX-158206247 | 18 | 1.352 | KV453053.1 | 244728 | 14-scf00365 | 14 |
| AX-158206256 | 18 | 1.352 | KV453053.1 | 253420 | 14-scf00365 | 14 |
| AX-158206316 | 18 | 1.352 | KV453053.1 | 343353 | 14-scf00365 | 14 |
| AX-158206322 | 18 | 1.352 | KV453053.1 | 368339 | 14-scf00365 | 14 |
| AX-158206324 | 18 | 1.352 | KV453053.1 | 376435 | 14-scf00365 | 14 |
| AX-157838001 | 18 | 1.352 | KV453055.1 | 4397   | 14-scf00366 | 14 |
| AX-158206339 | 18 | 1.352 | KV453055.1 | 4773   | 14-scf00366 | 14 |
| AX-157741801 | 18 | 1.352 | KV453055.1 | 11353  | 14-scf00366 | 14 |
| AX-157859079 | 18 | 1.352 | KV453055.1 | 14401  | 14-scf00366 | 14 |
| AX-158206409 | 18 | 1.352 | KV453055.1 | 120537 | 14-scf00366 | 14 |
| AX-157744980 | 18 | 1.352 | KV453055.1 | 121806 | 14-scf00366 | 14 |
| AX-157838007 | 18 | 1.352 | KV453055.1 | 130842 | 14-scf00366 | 14 |
| AX-158206418 | 18 | 1.352 | KV453055.1 | 133844 | 14-scf00366 | 14 |
| AX-158206422 | 18 | 1.352 | KV453055.1 | 137057 | 14-scf00366 | 14 |
| AX-157838010 | 18 | 1.352 | KV453055.1 | 160906 | 14-scf00366 | 14 |

|              |    |       |             |        |             |    |
|--------------|----|-------|-------------|--------|-------------|----|
| AX-157713338 | 18 | 1.352 | KV453055.1  | 191757 | 14-scf00366 | 14 |
| AX-158206468 | 18 | 1.352 | KV453055.1  | 238234 | 14-scf00366 | 14 |
| AX-158206473 | 18 | 1.352 | KV453055.1  | 244722 | 14-scf00366 | 14 |
| AX-158206543 | 18 | 1.352 | KV453055.1  | 371889 | 14-scf00366 | 14 |
| AX-158206589 | 18 | 1.352 | KV453055.1  | 439171 | 14-scf00366 | 14 |
| AX-158206592 | 18 | 1.352 | KV453055.1  | 458139 | 14-scf00366 | 14 |
| AX-158206664 | 18 | 1.352 | KV453055.1  | 568525 | 14-scf00366 | 14 |
| AX-158206678 | 18 | 1.352 | KV453055.1  | 585143 | 14-scf00366 | 14 |
| AX-158386337 | 18 | 1.352 | KV453055.1  | 606226 | 14-scf00366 | 14 |
| AX-158378076 | 18 | 1.352 | KV453048.1  | 73235  | 14-scf00643 | 14 |
| AX-157686790 | 18 | 1.352 | KV453043.1  | 21176  | 14-scf00739 | 14 |
| AX-157705383 | 18 | 1.352 | 3ML01029574 | 52     | scf05197_1  | UN |
| AX-157837943 | 18 | 1.57  | KV453051.1  | 350423 | 14-scf00362 | 14 |
| AX-157837945 | 18 | 1.57  | KV453051.1  | 353419 | 14-scf00362 | 14 |
| AX-157743722 | 18 | 1.57  | KV453051.1  | 356519 | 14-scf00362 | 14 |
| AX-158205748 | 18 | 1.68  | KV453051.1  | 12269  | 14-scf00362 | 14 |
| AX-158205803 | 18 | 1.68  | KV453051.1  | 92203  | 14-scf00362 | 14 |
| AX-158205811 | 18 | 1.68  | KV453051.1  | 101221 | 14-scf00362 | 14 |
| AX-158205865 | 18 | 1.68  | KV453051.1  | 198390 | 14-scf00362 | 14 |
| AX-157837933 | 18 | 1.68  | KV453051.1  | 209153 | 14-scf00362 | 14 |
| AX-158205918 | 18 | 1.68  | KV453051.1  | 293676 | 14-scf00362 | 14 |
| AX-157837942 | 18 | 1.68  | KV453051.1  | 339381 | 14-scf00362 | 14 |
| AX-157837946 | 18 | 1.68  | KV453051.1  | 356648 | 14-scf00362 | 14 |
| AX-158205958 | 18 | 1.68  | KV453051.1  | 356871 | 14-scf00362 | 14 |
| AX-158205959 | 18 | 1.68  | KV453051.1  | 358413 | 14-scf00362 | 14 |
| AX-158380750 | 18 | 1.68  | KV453051.1  | 358645 | 14-scf00362 | 14 |
| AX-158205960 | 18 | 1.68  | KV453051.1  | 359985 | 14-scf00362 | 14 |
| AX-158205962 | 18 | 1.68  | KV453051.1  | 361313 | 14-scf00362 | 14 |
| AX-158205963 | 18 | 1.68  | KV453051.1  | 363322 | 14-scf00362 | 14 |
| AX-158205964 | 18 | 1.68  | KV453051.1  | 364280 | 14-scf00362 | 14 |
| AX-157863693 | 18 | 1.68  | KV453051.1  | 364589 | 14-scf00362 | 14 |
| AX-158205965 | 18 | 1.68  | KV453051.1  | 365633 | 14-scf00362 | 14 |
| AX-158205969 | 18 | 1.68  | KV453051.1  | 373523 | 14-scf00362 | 14 |
| AX-158205970 | 18 | 1.68  | KV453051.1  | 374474 | 14-scf00362 | 14 |
| AX-157717966 | 18 | 1.68  | KV453051.1  | 387617 | 14-scf00362 | 14 |
| AX-158206000 | 18 | 1.68  | KV453049.1  | 64762  | 14-scf00364 | 14 |
| AX-158206038 | 18 | 1.68  | KV453049.1  | 107570 | 14-scf00364 | 14 |
| AX-158206055 | 18 | 1.68  | KV453049.1  | 122135 | 14-scf00364 | 14 |
| AX-157742885 | 18 | 1.68  | KV453049.1  | 171099 | 14-scf00364 | 14 |
| AX-158206099 | 18 | 1.68  | KV453049.1  | 206405 | 14-scf00364 | 14 |
| AX-158206117 | 18 | 1.68  | KV453053.1  | 4718   | 14-scf00365 | 14 |
| AX-158418454 | 18 | 1.68  | KV453053.1  | 20876  | 14-scf00365 | 14 |
| AX-158206128 | 18 | 1.68  | KV453053.1  | 21602  | 14-scf00365 | 14 |
| AX-158206131 | 18 | 1.68  | KV453053.1  | 24991  | 14-scf00365 | 14 |
| AX-157837967 | 18 | 1.68  | KV453053.1  | 25794  | 14-scf00365 | 14 |
| AX-158206132 | 18 | 1.68  | KV453053.1  | 26834  | 14-scf00365 | 14 |
| AX-158206133 | 18 | 1.68  | KV453053.1  | 27627  | 14-scf00365 | 14 |
| AX-157837968 | 18 | 1.68  | KV453053.1  | 28209  | 14-scf00365 | 14 |
| AX-158206135 | 18 | 1.68  | KV453053.1  | 32456  | 14-scf00365 | 14 |
| AX-158206136 | 18 | 1.68  | KV453053.1  | 32767  | 14-scf00365 | 14 |
| AX-158206137 | 18 | 1.68  | KV453053.1  | 33073  | 14-scf00365 | 14 |

|              |    |      |            |        |             |    |
|--------------|----|------|------------|--------|-------------|----|
| AX-158206138 | 18 | 1.68 | KV453053.1 | 33610  | 14-scf00365 | 14 |
| AX-158206139 | 18 | 1.68 | KV453053.1 | 35373  | 14-scf00365 | 14 |
| AX-158206145 | 18 | 1.68 | KV453053.1 | 43895  | 14-scf00365 | 14 |
| AX-158206146 | 18 | 1.68 | KV453053.1 | 45174  | 14-scf00365 | 14 |
| AX-158206148 | 18 | 1.68 | KV453053.1 | 52449  | 14-scf00365 | 14 |
| AX-158206150 | 18 | 1.68 | KV453053.1 | 53817  | 14-scf00365 | 14 |
| AX-158206152 | 18 | 1.68 | KV453053.1 | 55184  | 14-scf00365 | 14 |
| AX-158206154 | 18 | 1.68 | KV453053.1 | 57879  | 14-scf00365 | 14 |
| AX-158206156 | 18 | 1.68 | KV453053.1 | 62825  | 14-scf00365 | 14 |
| AX-158206157 | 18 | 1.68 | KV453053.1 | 67365  | 14-scf00365 | 14 |
| AX-157756299 | 18 | 1.68 | KV453053.1 | 67412  | 14-scf00365 | 14 |
| AX-158206159 | 18 | 1.68 | KV453053.1 | 76233  | 14-scf00365 | 14 |
| AX-158206161 | 18 | 1.68 | KV453053.1 | 77445  | 14-scf00365 | 14 |
| AX-157859074 | 18 | 1.68 | KV453053.1 | 77925  | 14-scf00365 | 14 |
| AX-158206162 | 18 | 1.68 | KV453053.1 | 78791  | 14-scf00365 | 14 |
| AX-158206163 | 18 | 1.68 | KV453053.1 | 80872  | 14-scf00365 | 14 |
| AX-158206165 | 18 | 1.68 | KV453053.1 | 82349  | 14-scf00365 | 14 |
| AX-158206166 | 18 | 1.68 | KV453053.1 | 83452  | 14-scf00365 | 14 |
| AX-158206167 | 18 | 1.68 | KV453053.1 | 85432  | 14-scf00365 | 14 |
| AX-158206168 | 18 | 1.68 | KV453053.1 | 86080  | 14-scf00365 | 14 |
| AX-158206170 | 18 | 1.68 | KV453053.1 | 87986  | 14-scf00365 | 14 |
| AX-158206172 | 18 | 1.68 | KV453053.1 | 89457  | 14-scf00365 | 14 |
| AX-158206173 | 18 | 1.68 | KV453053.1 | 90692  | 14-scf00365 | 14 |
| AX-158206176 | 18 | 1.68 | KV453053.1 | 96286  | 14-scf00365 | 14 |
| AX-157859076 | 18 | 1.68 | KV453053.1 | 97710  | 14-scf00365 | 14 |
| AX-158206177 | 18 | 1.68 | KV453053.1 | 98528  | 14-scf00365 | 14 |
| AX-157837973 | 18 | 1.68 | KV453053.1 | 101988 | 14-scf00365 | 14 |
| AX-157837975 | 18 | 1.68 | KV453053.1 | 102546 | 14-scf00365 | 14 |
| AX-157837976 | 18 | 1.68 | KV453053.1 | 102645 | 14-scf00365 | 14 |
| AX-157713339 | 18 | 1.68 | KV453053.1 | 103101 | 14-scf00365 | 14 |
| AX-158206179 | 18 | 1.68 | KV453053.1 | 103784 | 14-scf00365 | 14 |
| AX-157727601 | 18 | 1.68 | KV453053.1 | 105609 | 14-scf00365 | 14 |
| AX-157837977 | 18 | 1.68 | KV453053.1 | 114254 | 14-scf00365 | 14 |
| AX-158206187 | 18 | 1.68 | KV453053.1 | 115865 | 14-scf00365 | 14 |
| AX-158206188 | 18 | 1.68 | KV453053.1 | 121324 | 14-scf00365 | 14 |
| AX-158206189 | 18 | 1.68 | KV453053.1 | 123255 | 14-scf00365 | 14 |
| AX-158206192 | 18 | 1.68 | KV453053.1 | 134181 | 14-scf00365 | 14 |
| AX-158206193 | 18 | 1.68 | KV453053.1 | 135869 | 14-scf00365 | 14 |
| AX-158206196 | 18 | 1.68 | KV453053.1 | 146697 | 14-scf00365 | 14 |
| AX-158206202 | 18 | 1.68 | KV453053.1 | 155398 | 14-scf00365 | 14 |
| AX-158206205 | 18 | 1.68 | KV453053.1 | 159147 | 14-scf00365 | 14 |
| AX-157837983 | 18 | 1.68 | KV453053.1 | 159688 | 14-scf00365 | 14 |
| AX-158206207 | 18 | 1.68 | KV453053.1 | 162944 | 14-scf00365 | 14 |
| AX-157710313 | 18 | 1.68 | KV453053.1 | 174668 | 14-scf00365 | 14 |
| AX-158206215 | 18 | 1.68 | KV453053.1 | 176787 | 14-scf00365 | 14 |
| AX-158206218 | 18 | 1.68 | KV453053.1 | 183723 | 14-scf00365 | 14 |
| AX-157747563 | 18 | 1.68 | KV453053.1 | 186822 | 14-scf00365 | 14 |
| AX-158206221 | 18 | 1.68 | KV453053.1 | 188983 | 14-scf00365 | 14 |
| AX-157837984 | 18 | 1.68 | KV453053.1 | 228846 | 14-scf00365 | 14 |
| AX-158206225 | 18 | 1.68 | KV453053.1 | 229004 | 14-scf00365 | 14 |
| AX-158206227 | 18 | 1.68 | KV453053.1 | 230132 | 14-scf00365 | 14 |

|              |    |       |             |        |             |    |
|--------------|----|-------|-------------|--------|-------------|----|
| AX-157717708 | 18 | 1.68  | KV453053.1  | 230503 | 14-scf00365 | 14 |
| AX-158206228 | 18 | 1.68  | KV453053.1  | 230604 | 14-scf00365 | 14 |
| AX-158206233 | 18 | 1.68  | KV453053.1  | 234821 | 14-scf00365 | 14 |
| AX-158206234 | 18 | 1.68  | KV453053.1  | 235238 | 14-scf00365 | 14 |
| AX-158206235 | 18 | 1.68  | KV453053.1  | 235684 | 14-scf00365 | 14 |
| AX-158206236 | 18 | 1.68  | KV453053.1  | 236338 | 14-scf00365 | 14 |
| AX-158206237 | 18 | 1.68  | KV453053.1  | 236591 | 14-scf00365 | 14 |
| AX-158206240 | 18 | 1.68  | KV453053.1  | 239750 | 14-scf00365 | 14 |
| AX-158206241 | 18 | 1.68  | KV453053.1  | 240184 | 14-scf00365 | 14 |
| AX-158206253 | 18 | 1.68  | KV453053.1  | 250391 | 14-scf00365 | 14 |
| AX-158206254 | 18 | 1.68  | KV453053.1  | 251113 | 14-scf00365 | 14 |
| AX-158206255 | 18 | 1.68  | KV453053.1  | 251493 | 14-scf00365 | 14 |
| AX-157837986 | 18 | 1.68  | KV453053.1  | 252327 | 14-scf00365 | 14 |
| AX-157837987 | 18 | 1.68  | KV453053.1  | 253735 | 14-scf00365 | 14 |
| AX-158206257 | 18 | 1.68  | KV453053.1  | 254257 | 14-scf00365 | 14 |
| AX-158206263 | 18 | 1.68  | KV453053.1  | 260906 | 14-scf00365 | 14 |
| AX-157837993 | 18 | 1.68  | KV453053.1  | 270288 | 14-scf00365 | 14 |
| AX-158206286 | 18 | 1.68  | KV453053.1  | 296127 | 14-scf00365 | 14 |
| AX-157837997 | 18 | 1.68  | KV453053.1  | 326468 | 14-scf00365 | 14 |
| AX-157838003 | 18 | 1.68  | KV453055.1  | 11268  | 14-scf00366 | 14 |
| AX-157742640 | 18 | 1.68  | KV453055.1  | 38827  | 14-scf00366 | 14 |
| AX-158206411 | 18 | 1.68  | KV453055.1  | 125994 | 14-scf00366 | 14 |
| AX-158206414 | 18 | 1.68  | KV453055.1  | 128073 | 14-scf00366 | 14 |
| AX-158206435 | 18 | 1.68  | KV453055.1  | 157428 | 14-scf00366 | 14 |
| AX-158206444 | 18 | 1.68  | KV453055.1  | 183882 | 14-scf00366 | 14 |
| AX-158206469 | 18 | 1.68  | KV453055.1  | 240752 | 14-scf00366 | 14 |
| AX-158206479 | 18 | 1.68  | KV453055.1  | 255482 | 14-scf00366 | 14 |
| AX-157838019 | 18 | 1.68  | KV453055.1  | 262895 | 14-scf00366 | 14 |
| AX-158206501 | 18 | 1.68  | KV453055.1  | 292361 | 14-scf00366 | 14 |
| AX-158377850 | 18 | 1.68  | KV453045.1  | 12763  | 14-scf00620 | 14 |
| AX-158377855 | 18 | 1.68  | KV453045.1  | 26366  | 14-scf00620 | 14 |
| AX-157715740 | 18 | 1.68  | KV453045.1  | 58269  | 14-scf00620 | 14 |
| AX-158377883 | 18 | 1.68  | KV453045.1  | 64217  | 14-scf00620 | 14 |
| AX-157853468 | 18 | 1.68  | KV453045.1  | 73752  | 14-scf00620 | 14 |
| AX-158377895 | 18 | 1.68  | KV453045.1  | 93116  | 14-scf00620 | 14 |
| AX-158377897 | 18 | 1.68  | KV453045.1  | 95974  | 14-scf00620 | 14 |
| AX-158377902 | 18 | 1.68  | KV453045.1  | 107159 | 14-scf00620 | 14 |
| AX-158377903 | 18 | 1.68  | KV453045.1  | 107760 | 14-scf00620 | 14 |
| AX-158377915 | 18 | 1.68  | KV453045.1  | 118627 | 14-scf00620 | 14 |
| AX-158378034 | 18 | 1.68  | KV453048.1  | 1981   | 14-scf00643 | 14 |
| AX-158378036 | 18 | 1.68  | KV453048.1  | 10978  | 14-scf00643 | 14 |
| AX-158378066 | 18 | 1.68  | KV453048.1  | 61343  | 14-scf00643 | 14 |
| AX-157686631 | 18 | 1.68  | KV453044.1  | 5048   | 14-scf00712 | 14 |
| AX-157686632 | 18 | 1.68  | KV453044.1  | 7268   | 14-scf00712 | 14 |
| AX-157686640 | 18 | 1.68  | KV453044.1  | 19582  | 14-scf00712 | 14 |
| AX-157702925 | 18 | 1.68  | DX095143.1  | 509    | 14-scf00712 | UN |
| AX-157688301 | 18 | 1.68  | 3ML01025885 | 716    | scf01494_1  | UN |
| AX-157688304 | 18 | 1.68  | 3ML01025885 | 1415   | scf01494_1  | UN |
| AX-157688970 | 18 | 1.68  | 3ML01027669 | 1136   | scf03275_1  | UN |
| AX-157705850 | 18 | 1.68  | 3ML01031205 | 729    | scf06811_1  | UN |
| AX-158206275 | 18 | 1.682 | KV453053.1  | 281118 | 14-scf00365 | 14 |

|              |    |       |             |        |             |    |
|--------------|----|-------|-------------|--------|-------------|----|
| AX-158206141 | 18 | 1.685 | KV453053.1  | 37190  | 14-scf00365 | 14 |
| AX-158409913 | 18 | 1.685 | KV453053.1  | 96867  | 14-scf00365 | 14 |
| AX-158206276 | 18 | 1.685 | KV453053.1  | 282716 | 14-scf00365 | 14 |
| AX-158206277 | 18 | 1.685 | KV453053.1  | 284739 | 14-scf00365 | 14 |
| AX-158206376 | 18 | 1.685 | KV453055.1  | 77126  | 14-scf00366 | 14 |
| AX-158206402 | 18 | 1.685 | KV453055.1  | 102853 | 14-scf00366 | 14 |
| AX-158206575 | 18 | 1.685 | KV453055.1  | 409877 | 14-scf00366 | 14 |
| AX-157686789 | 18 | 1.685 | KV453043.1  | 18275  | 14-scf00739 | 14 |
| AX-158424095 | 18 | 1.685 | 3ML01026394 | 279    | scf01990_1  | UN |
| AX-158206281 | 18 | 1.93  | KV453053.1  | 290922 | 14-scf00365 | 14 |
| AX-158206009 | 18 | 2.17  | KV453049.1  | 76940  | 14-scf00364 | 14 |
| AX-158206014 | 18 | 2.17  | KV453049.1  | 83087  | 14-scf00364 | 14 |
| AX-158206049 | 18 | 2.17  | KV453049.1  | 116562 | 14-scf00364 | 14 |
| AX-157757635 | 18 | 2.17  | KV453049.1  | 121902 | 14-scf00364 | 14 |
| AX-158206057 | 18 | 2.17  | KV453049.1  | 124134 | 14-scf00364 | 14 |
| AX-157887103 | 18 | 2.17  | KV453049.1  | 126339 | 14-scf00364 | 14 |
| AX-157837971 | 18 | 2.17  | KV453053.1  | 98867  | 14-scf00365 | 14 |
| AX-158206296 | 18 | 2.17  | KV453053.1  | 313713 | 14-scf00365 | 14 |
| AX-158206381 | 18 | 2.17  | KV453055.1  | 80711  | 14-scf00366 | 14 |
| AX-158206539 | 18 | 2.17  | KV453055.1  | 367401 | 14-scf00366 | 14 |
| AX-158206299 | 18 | 2.172 | KV453053.1  | 319458 | 14-scf00365 | 14 |
| AX-158206184 | 18 | 2.173 | KV453053.1  | 113478 | 14-scf00365 | 14 |
| AX-158206232 | 18 | 2.173 | KV453053.1  | 233700 | 14-scf00365 | 14 |
| AX-158380752 | 18 | 2.173 | KV453053.1  | 290802 | 14-scf00365 | 14 |
| AX-158206282 | 18 | 2.173 | KV453053.1  | 291488 | 14-scf00365 | 14 |
| AX-157837995 | 18 | 2.173 | KV453053.1  | 292400 | 14-scf00365 | 14 |
| AX-158206301 | 18 | 2.173 | KV453053.1  | 321670 | 14-scf00365 | 14 |
| AX-158206302 | 18 | 2.173 | KV453053.1  | 322477 | 14-scf00365 | 14 |
| AX-158206351 | 18 | 2.173 | KV453055.1  | 22792  | 14-scf00366 | 14 |
| AX-157733949 | 18 | 2.173 | KV453055.1  | 24942  | 14-scf00366 | 14 |
| AX-158206353 | 18 | 2.173 | KV453055.1  | 27407  | 14-scf00366 | 14 |
| AX-158206356 | 18 | 2.173 | KV453055.1  | 30387  | 14-scf00366 | 14 |
| AX-158206357 | 18 | 2.173 | KV453055.1  | 31415  | 14-scf00366 | 14 |
| AX-158206360 | 18 | 2.173 | KV453055.1  | 34079  | 14-scf00366 | 14 |
| AX-158206361 | 18 | 2.173 | KV453055.1  | 36700  | 14-scf00366 | 14 |
| AX-158206365 | 18 | 2.173 | KV453055.1  | 44127  | 14-scf00366 | 14 |
| AX-158206367 | 18 | 2.173 | KV453055.1  | 49905  | 14-scf00366 | 14 |
| AX-157747813 | 18 | 2.173 | KV453055.1  | 72431  | 14-scf00366 | 14 |
| AX-157717646 | 18 | 2.173 | KV453055.1  | 74648  | 14-scf00366 | 14 |
| AX-158206375 | 18 | 2.173 | KV453055.1  | 76767  | 14-scf00366 | 14 |
| AX-158206379 | 18 | 2.173 | KV453055.1  | 79389  | 14-scf00366 | 14 |
| AX-158206390 | 18 | 2.173 | KV453055.1  | 90122  | 14-scf00366 | 14 |
| AX-158409915 | 18 | 2.173 | KV453055.1  | 91503  | 14-scf00366 | 14 |
| AX-158206392 | 18 | 2.173 | KV453055.1  | 92098  | 14-scf00366 | 14 |
| AX-157887113 | 18 | 2.173 | KV453055.1  | 95637  | 14-scf00366 | 14 |
| AX-157743469 | 18 | 2.173 | KV453055.1  | 96006  | 14-scf00366 | 14 |
| AX-158206396 | 18 | 2.173 | KV453055.1  | 97245  | 14-scf00366 | 14 |
| AX-158206398 | 18 | 2.173 | KV453055.1  | 99850  | 14-scf00366 | 14 |
| AX-158206407 | 18 | 2.173 | KV453055.1  | 119777 | 14-scf00366 | 14 |
| AX-158206413 | 18 | 2.173 | KV453055.1  | 127825 | 14-scf00366 | 14 |
| AX-158206424 | 18 | 2.173 | KV453055.1  | 138106 | 14-scf00366 | 14 |

|              |    |       |             |        |             |    |
|--------------|----|-------|-------------|--------|-------------|----|
| AX-158206427 | 18 | 2.173 | KV453055.1  | 140652 | 14-scf00366 | 14 |
| AX-157838009 | 18 | 2.173 | KV453055.1  | 157767 | 14-scf00366 | 14 |
| AX-158206442 | 18 | 2.173 | KV453055.1  | 171297 | 14-scf00366 | 14 |
| AX-158206443 | 18 | 2.173 | KV453055.1  | 171620 | 14-scf00366 | 14 |
| AX-158206447 | 18 | 2.173 | KV453055.1  | 194148 | 14-scf00366 | 14 |
| AX-158206449 | 18 | 2.173 | KV453055.1  | 197562 | 14-scf00366 | 14 |
| AX-157719795 | 18 | 2.173 | KV453055.1  | 200236 | 14-scf00366 | 14 |
| AX-157743969 | 18 | 2.173 | KV453055.1  | 202153 | 14-scf00366 | 14 |
| AX-158206453 | 18 | 2.173 | KV453055.1  | 202494 | 14-scf00366 | 14 |
| AX-158206456 | 18 | 2.173 | KV453055.1  | 206020 | 14-scf00366 | 14 |
| AX-158206461 | 18 | 2.173 | KV453055.1  | 215015 | 14-scf00366 | 14 |
| AX-158206462 | 18 | 2.173 | KV453055.1  | 215409 | 14-scf00366 | 14 |
| AX-157838015 | 18 | 2.173 | KV453055.1  | 217157 | 14-scf00366 | 14 |
| AX-158206467 | 18 | 2.173 | KV453055.1  | 236293 | 14-scf00366 | 14 |
| AX-158206475 | 18 | 2.173 | KV453055.1  | 249595 | 14-scf00366 | 14 |
| AX-157716608 | 18 | 2.173 | KV453055.1  | 252438 | 14-scf00366 | 14 |
| AX-158206480 | 18 | 2.173 | KV453055.1  | 260846 | 14-scf00366 | 14 |
| AX-157727773 | 18 | 2.173 | KV453055.1  | 268135 | 14-scf00366 | 14 |
| AX-158206490 | 18 | 2.173 | KV453055.1  | 278017 | 14-scf00366 | 14 |
| AX-158206492 | 18 | 2.173 | KV453055.1  | 279249 | 14-scf00366 | 14 |
| AX-158206494 | 18 | 2.173 | KV453055.1  | 280934 | 14-scf00366 | 14 |
| AX-157746207 | 18 | 2.173 | KV453055.1  | 311650 | 14-scf00366 | 14 |
| AX-158393957 | 18 | 2.173 | KV453055.1  | 389163 | 14-scf00366 | 14 |
| AX-158206605 | 18 | 2.173 | KV453055.1  | 477800 | 14-scf00366 | 14 |
| AX-157688763 | 18 | 2.173 | 3ML01026972 | 916    | scf02575_1  | UN |
| AX-157887117 | 18 | 2.419 | KV453055.1  | 290767 | 14-scf00366 | 14 |
| AX-158206504 | 18 | 2.419 | KV453055.1  | 300788 | 14-scf00366 | 14 |
| AX-158206509 | 18 | 2.419 | KV453055.1  | 304839 | 14-scf00366 | 14 |
| AX-158414390 | 18 | 2.419 | KV453055.1  | 308584 | 14-scf00366 | 14 |
| AX-158205957 | 18 | 2.664 | KV453051.1  | 354380 | 14-scf00362 | 14 |
| AX-158206251 | 18 | 2.664 | KV453053.1  | 248803 | 14-scf00365 | 14 |
| AX-158206314 | 18 | 2.664 | KV453053.1  | 341948 | 14-scf00365 | 14 |
| AX-158206317 | 18 | 2.664 | KV453053.1  | 343929 | 14-scf00365 | 14 |
| AX-158206359 | 18 | 2.664 | KV453055.1  | 32733  | 14-scf00366 | 14 |
| AX-158206366 | 18 | 2.664 | KV453055.1  | 47367  | 14-scf00366 | 14 |
| AX-157745471 | 18 | 2.664 | KV453055.1  | 80657  | 14-scf00366 | 14 |
| AX-158206403 | 18 | 2.664 | KV453055.1  | 110015 | 14-scf00366 | 14 |
| AX-158206434 | 18 | 2.664 | KV453055.1  | 156424 | 14-scf00366 | 14 |
| AX-158206438 | 18 | 2.664 | KV453055.1  | 165679 | 14-scf00366 | 14 |
| AX-157838021 | 18 | 2.664 | KV453055.1  | 268220 | 14-scf00366 | 14 |
| AX-158206486 | 18 | 2.664 | KV453055.1  | 272515 | 14-scf00366 | 14 |
| AX-158206487 | 18 | 2.664 | KV453055.1  | 273606 | 14-scf00366 | 14 |
| AX-158206496 | 18 | 2.664 | KV453055.1  | 281805 | 14-scf00366 | 14 |
| AX-158206497 | 18 | 2.664 | KV453055.1  | 283013 | 14-scf00366 | 14 |
| AX-158206499 | 18 | 2.664 | KV453055.1  | 287412 | 14-scf00366 | 14 |
| AX-158206500 | 18 | 2.664 | KV453055.1  | 287884 | 14-scf00366 | 14 |
| AX-158206506 | 18 | 2.664 | KV453055.1  | 302011 | 14-scf00366 | 14 |
| AX-158206512 | 18 | 2.664 | KV453055.1  | 312677 | 14-scf00366 | 14 |
| AX-158206514 | 18 | 2.664 | KV453055.1  | 319475 | 14-scf00366 | 14 |
| AX-157838024 | 18 | 2.664 | KV453055.1  | 322752 | 14-scf00366 | 14 |
| AX-157838025 | 18 | 2.664 | KV453055.1  | 322806 | 14-scf00366 | 14 |

|              |    |       |            |        |             |    |
|--------------|----|-------|------------|--------|-------------|----|
| AX-158380757 | 18 | 2.664 | KV453055.1 | 323764 | 14-scf00366 | 14 |
| AX-158206517 | 18 | 2.664 | KV453055.1 | 327169 | 14-scf00366 | 14 |
| AX-158206519 | 18 | 2.664 | KV453055.1 | 328294 | 14-scf00366 | 14 |
| AX-158206520 | 18 | 2.664 | KV453055.1 | 330564 | 14-scf00366 | 14 |
| AX-158206521 | 18 | 2.664 | KV453055.1 | 332500 | 14-scf00366 | 14 |
| AX-158206524 | 18 | 2.664 | KV453055.1 | 350695 | 14-scf00366 | 14 |
| AX-158206525 | 18 | 2.664 | KV453055.1 | 351334 | 14-scf00366 | 14 |
| AX-157771416 | 18 | 2.664 | KV453055.1 | 352589 | 14-scf00366 | 14 |
| AX-158206527 | 18 | 2.664 | KV453055.1 | 355646 | 14-scf00366 | 14 |
| AX-157755301 | 18 | 2.664 | KV453055.1 | 356784 | 14-scf00366 | 14 |
| AX-158206528 | 18 | 2.664 | KV453055.1 | 357195 | 14-scf00366 | 14 |
| AX-158206531 | 18 | 2.664 | KV453055.1 | 359982 | 14-scf00366 | 14 |
| AX-158206532 | 18 | 2.664 | KV453055.1 | 360534 | 14-scf00366 | 14 |
| AX-158206533 | 18 | 2.664 | KV453055.1 | 360872 | 14-scf00366 | 14 |
| AX-158206535 | 18 | 2.664 | KV453055.1 | 362715 | 14-scf00366 | 14 |
| AX-158206538 | 18 | 2.664 | KV453055.1 | 366540 | 14-scf00366 | 14 |
| AX-157887118 | 18 | 2.664 | KV453055.1 | 368584 | 14-scf00366 | 14 |
| AX-158206541 | 18 | 2.664 | KV453055.1 | 368666 | 14-scf00366 | 14 |
| AX-158206542 | 18 | 2.664 | KV453055.1 | 369553 | 14-scf00366 | 14 |
| AX-158206546 | 18 | 2.664 | KV453055.1 | 379174 | 14-scf00366 | 14 |
| AX-158206547 | 18 | 2.664 | KV453055.1 | 379637 | 14-scf00366 | 14 |
| AX-157718758 | 18 | 2.664 | KV453055.1 | 381326 | 14-scf00366 | 14 |
| AX-158206551 | 18 | 2.664 | KV453055.1 | 382564 | 14-scf00366 | 14 |
| AX-157723403 | 18 | 2.664 | KV453055.1 | 383565 | 14-scf00366 | 14 |
| AX-158206553 | 18 | 2.664 | KV453055.1 | 385158 | 14-scf00366 | 14 |
| AX-158206554 | 18 | 2.664 | KV453055.1 | 386667 | 14-scf00366 | 14 |
| AX-158206555 | 18 | 2.664 | KV453055.1 | 387311 | 14-scf00366 | 14 |
| AX-158206557 | 18 | 2.664 | KV453055.1 | 388688 | 14-scf00366 | 14 |
| AX-157726944 | 18 | 2.664 | KV453055.1 | 390531 | 14-scf00366 | 14 |
| AX-158206558 | 18 | 2.664 | KV453055.1 | 392125 | 14-scf00366 | 14 |
| AX-157718087 | 18 | 2.664 | KV453055.1 | 394348 | 14-scf00366 | 14 |
| AX-158206560 | 18 | 2.664 | KV453055.1 | 394969 | 14-scf00366 | 14 |
| AX-158206561 | 18 | 2.664 | KV453055.1 | 396572 | 14-scf00366 | 14 |
| AX-158206562 | 18 | 2.664 | KV453055.1 | 396767 | 14-scf00366 | 14 |
| AX-158206563 | 18 | 2.664 | KV453055.1 | 397256 | 14-scf00366 | 14 |
| AX-157838026 | 18 | 2.664 | KV453055.1 | 397527 | 14-scf00366 | 14 |
| AX-158206566 | 18 | 2.664 | KV453055.1 | 399333 | 14-scf00366 | 14 |
| AX-158206568 | 18 | 2.664 | KV453055.1 | 403919 | 14-scf00366 | 14 |
| AX-158206569 | 18 | 2.664 | KV453055.1 | 405030 | 14-scf00366 | 14 |
| AX-158206574 | 18 | 2.664 | KV453055.1 | 409472 | 14-scf00366 | 14 |
| AX-158206578 | 18 | 2.664 | KV453055.1 | 415848 | 14-scf00366 | 14 |
| AX-158206586 | 18 | 2.664 | KV453055.1 | 434589 | 14-scf00366 | 14 |
| AX-157758841 | 18 | 2.664 | KV453055.1 | 436910 | 14-scf00366 | 14 |
| AX-158206591 | 18 | 2.664 | KV453055.1 | 447769 | 14-scf00366 | 14 |
| AX-157750668 | 18 | 2.664 | KV453055.1 | 454221 | 14-scf00366 | 14 |
| AX-157748614 | 18 | 2.664 | KV453055.1 | 456487 | 14-scf00366 | 14 |
| AX-158418477 | 18 | 2.664 | KV453055.1 | 460227 | 14-scf00366 | 14 |
| AX-158206593 | 18 | 2.664 | KV453055.1 | 461236 | 14-scf00366 | 14 |
| AX-158206596 | 18 | 2.664 | KV453055.1 | 467227 | 14-scf00366 | 14 |
| AX-158206598 | 18 | 2.664 | KV453055.1 | 468273 | 14-scf00366 | 14 |
| AX-158206602 | 18 | 2.664 | KV453055.1 | 474251 | 14-scf00366 | 14 |



|              |    |       |             |        |             |    |
|--------------|----|-------|-------------|--------|-------------|----|
| AX-158206603 | 18 | 2.664 | KV453055.1  | 475283 | 14-scf00366 | 14 |
| AX-158206604 | 18 | 2.664 | KV453055.1  | 476964 | 14-scf00366 | 14 |
| AX-158206606 | 18 | 2.664 | KV453055.1  | 478408 | 14-scf00366 | 14 |
| AX-158206607 | 18 | 2.664 | KV453055.1  | 479019 | 14-scf00366 | 14 |
| AX-158206608 | 18 | 2.664 | KV453055.1  | 480143 | 14-scf00366 | 14 |
| AX-158393958 | 18 | 2.664 | KV453055.1  | 484266 | 14-scf00366 | 14 |
| AX-158206614 | 18 | 2.664 | KV453055.1  | 491538 | 14-scf00366 | 14 |
| AX-158206616 | 18 | 2.664 | KV453055.1  | 496828 | 14-scf00366 | 14 |
| AX-158206617 | 18 | 2.664 | KV453055.1  | 499153 | 14-scf00366 | 14 |
| AX-158206619 | 18 | 2.664 | KV453055.1  | 501299 | 14-scf00366 | 14 |
| AX-158206620 | 18 | 2.664 | KV453055.1  | 502031 | 14-scf00366 | 14 |
| AX-158206621 | 18 | 2.664 | KV453055.1  | 502766 | 14-scf00366 | 14 |
| AX-158206623 | 18 | 2.664 | KV453055.1  | 506230 | 14-scf00366 | 14 |
| AX-158206625 | 18 | 2.664 | KV453055.1  | 509115 | 14-scf00366 | 14 |
| AX-158386336 | 18 | 2.664 | KV453055.1  | 510265 | 14-scf00366 | 14 |
| AX-158206626 | 18 | 2.664 | KV453055.1  | 510465 | 14-scf00366 | 14 |
| AX-157838030 | 18 | 2.664 | KV453055.1  | 519695 | 14-scf00366 | 14 |
| AX-158206633 | 18 | 2.664 | KV453055.1  | 521674 | 14-scf00366 | 14 |
| AX-158206634 | 18 | 2.664 | KV453055.1  | 522140 | 14-scf00366 | 14 |
| AX-158206635 | 18 | 2.664 | KV453055.1  | 522764 | 14-scf00366 | 14 |
| AX-158206638 | 18 | 2.664 | KV453055.1  | 528700 | 14-scf00366 | 14 |
| AX-158206646 | 18 | 2.664 | KV453055.1  | 544820 | 14-scf00366 | 14 |
| AX-158206654 | 18 | 2.664 | KV453055.1  | 554585 | 14-scf00366 | 14 |
| AX-158206656 | 18 | 2.664 | KV453055.1  | 558054 | 14-scf00366 | 14 |
| AX-157754505 | 18 | 2.664 | KV453055.1  | 570879 | 14-scf00366 | 14 |
| AX-158206679 | 18 | 2.664 | KV453055.1  | 585586 | 14-scf00366 | 14 |
| AX-158206683 | 18 | 2.664 | KV453055.1  | 589674 | 14-scf00366 | 14 |
| AX-158206687 | 18 | 2.664 | KV453055.1  | 595383 | 14-scf00366 | 14 |
| AX-158206688 | 18 | 2.664 | KV453055.1  | 595750 | 14-scf00366 | 14 |
| AX-158206689 | 18 | 2.664 | KV453055.1  | 596800 | 14-scf00366 | 14 |
| AX-158206692 | 18 | 2.664 | KV453055.1  | 598592 | 14-scf00366 | 14 |
| AX-158206694 | 18 | 2.664 | KV453055.1  | 600810 | 14-scf00366 | 14 |
| AX-158206701 | 18 | 2.664 | KV453055.1  | 607525 | 14-scf00366 | 14 |
| AX-158206773 | 18 | 2.664 | KV453055.1  | 714030 | 14-scf00366 | 14 |
| AX-158378041 | 18 | 2.664 | KV453048.1  | 18914  | 14-scf00643 | 14 |
| AX-157701492 | 18 | 2.664 | KV453440.1  | 13217  | scf00757    | UN |
| AX-157706190 | 18 | 2.664 | 3ML01031790 | 36     | scf07411_1  | UN |
| AX-157706312 | 18 | 2.664 | 3ML01032026 | 423    | scf07643_1  | UN |
| AX-158206640 | 18 | 2.883 | KV453055.1  | 532487 | 14-scf00366 | 14 |
| AX-158206641 | 18 | 2.883 | KV453055.1  | 533173 | 14-scf00366 | 14 |
| AX-158206643 | 18 | 2.883 | KV453055.1  | 534442 | 14-scf00366 | 14 |
| AX-157773001 | 18 | 2.883 | KV453055.1  | 535245 | 14-scf00366 | 14 |
| AX-158206645 | 18 | 2.883 | KV453055.1  | 539957 | 14-scf00366 | 14 |
| AX-157771708 | 18 | 2.883 | KV453055.1  | 545997 | 14-scf00366 | 14 |
| AX-158206648 | 18 | 2.883 | KV453055.1  | 550179 | 14-scf00366 | 14 |
| AX-158206649 | 18 | 2.883 | KV453055.1  | 551360 | 14-scf00366 | 14 |
| AX-158206651 | 18 | 2.883 | KV453055.1  | 552843 | 14-scf00366 | 14 |
| AX-158206652 | 18 | 2.883 | KV453055.1  | 553200 | 14-scf00366 | 14 |
| AX-158206653 | 18 | 2.883 | KV453055.1  | 553609 | 14-scf00366 | 14 |
| AX-157700956 | 18 | 2.883 | KV453055.1  | 557660 | 14-scf00366 | 14 |
| AX-157744109 | 18 | 3.028 | KV453055.1  | 556585 | 14-scf00366 | 14 |

|              |    |       |            |        |             |    |
|--------------|----|-------|------------|--------|-------------|----|
| AX-158206658 | 18 | 3.028 | KV453055.1 | 560054 | 14-scf00366 | 14 |
| AX-158414393 | 18 | 3.319 | KV453055.1 | 574727 | 14-scf00366 | 14 |
| AX-158206667 | 18 | 3.319 | KV453055.1 | 575168 | 14-scf00366 | 14 |
| AX-158414395 | 18 | 3.319 | KV453055.1 | 576293 | 14-scf00366 | 14 |
| AX-158206668 | 18 | 3.319 | KV453055.1 | 577268 | 14-scf00366 | 14 |
| AX-158206669 | 18 | 3.319 | KV453055.1 | 577815 | 14-scf00366 | 14 |
| AX-158206670 | 18 | 3.319 | KV453055.1 | 578728 | 14-scf00366 | 14 |
| AX-158206672 | 18 | 3.319 | KV453055.1 | 580548 | 14-scf00366 | 14 |
| AX-158206674 | 18 | 3.319 | KV453055.1 | 581579 | 14-scf00366 | 14 |
| AX-158206676 | 18 | 3.319 | KV453055.1 | 583433 | 14-scf00366 | 14 |
| AX-157746588 | 18 | 3.319 | KV453055.1 | 589274 | 14-scf00366 | 14 |
| AX-158206685 | 18 | 3.319 | KV453055.1 | 593732 | 14-scf00366 | 14 |
| AX-158206699 | 18 | 3.368 | KV453055.1 | 605765 | 14-scf00366 | 14 |
| AX-158206700 | 18 | 3.429 | KV453055.1 | 606307 | 14-scf00366 | 14 |
| AX-158206702 | 18 | 3.538 | KV453055.1 | 607982 | 14-scf00366 | 14 |
| AX-158206705 | 18 | 3.538 | KV453055.1 | 611150 | 14-scf00366 | 14 |
| AX-158206707 | 18 | 3.538 | KV453055.1 | 614231 | 14-scf00366 | 14 |
| AX-157838031 | 18 | 3.538 | KV453055.1 | 616001 | 14-scf00366 | 14 |
| AX-157838032 | 18 | 3.758 | KV453055.1 | 616820 | 14-scf00366 | 14 |
| AX-158206710 | 18 | 3.865 | KV453055.1 | 621244 | 14-scf00366 | 14 |
| AX-158206712 | 18 | 3.865 | KV453055.1 | 627976 | 14-scf00366 | 14 |
| AX-158206713 | 18 | 3.865 | KV453055.1 | 629154 | 14-scf00366 | 14 |
| AX-158206714 | 18 | 3.865 | KV453055.1 | 630447 | 14-scf00366 | 14 |
| AX-158206716 | 18 | 3.865 | KV453055.1 | 637570 | 14-scf00366 | 14 |
| AX-157798376 | 18 | 3.866 | KV453055.1 | 619052 | 14-scf00366 | 14 |
| AX-158414396 | 18 | 3.866 | KV453055.1 | 637466 | 14-scf00366 | 14 |
| AX-158206719 | 18 | 3.866 | KV453055.1 | 640263 | 14-scf00366 | 14 |
| AX-158206720 | 18 | 3.866 | KV453055.1 | 641675 | 14-scf00366 | 14 |
| AX-158206721 | 18 | 3.866 | KV453055.1 | 642820 | 14-scf00366 | 14 |
| AX-158206723 | 18 | 3.866 | KV453055.1 | 646515 | 14-scf00366 | 14 |
| AX-158206724 | 18 | 3.866 | KV453055.1 | 648718 | 14-scf00366 | 14 |
| AX-158206727 | 18 | 3.866 | KV453055.1 | 650221 | 14-scf00366 | 14 |
| AX-158206728 | 18 | 3.866 | KV453055.1 | 651577 | 14-scf00366 | 14 |
| AX-158206730 | 18 | 3.866 | KV453055.1 | 652831 | 14-scf00366 | 14 |
| AX-158206732 | 18 | 3.866 | KV453055.1 | 653870 | 14-scf00366 | 14 |
| AX-158206734 | 18 | 3.866 | KV453055.1 | 655968 | 14-scf00366 | 14 |
| AX-158206735 | 18 | 3.866 | KV453055.1 | 657053 | 14-scf00366 | 14 |
| AX-158206738 | 18 | 3.866 | KV453055.1 | 662157 | 14-scf00366 | 14 |
| AX-158206739 | 18 | 3.911 | KV453055.1 | 664334 | 14-scf00366 | 14 |
| AX-157872341 | 18 | 3.975 | KV453055.1 | 189068 | 14-scf00366 | 14 |
| AX-158206742 | 18 | 3.975 | KV453055.1 | 667352 | 14-scf00366 | 14 |
| AX-158206743 | 18 | 3.975 | KV453055.1 | 669664 | 14-scf00366 | 14 |
| AX-158206744 | 18 | 3.975 | KV453055.1 | 670852 | 14-scf00366 | 14 |
| AX-158206747 | 18 | 3.975 | KV453055.1 | 676426 | 14-scf00366 | 14 |
| AX-158206748 | 18 | 3.975 | KV453055.1 | 677378 | 14-scf00366 | 14 |
| AX-158206752 | 18 | 3.975 | KV453055.1 | 684686 | 14-scf00366 | 14 |
| AX-158206754 | 18 | 3.975 | KV453055.1 | 686231 | 14-scf00366 | 14 |
| AX-158206755 | 18 | 3.975 | KV453055.1 | 686760 | 14-scf00366 | 14 |
| AX-158206759 | 18 | 3.975 | KV453055.1 | 690601 | 14-scf00366 | 14 |
| AX-158206763 | 18 | 3.975 | KV453055.1 | 698058 | 14-scf00366 | 14 |
| AX-158206766 | 18 | 4.084 | KV453055.1 | 700503 | 14-scf00366 | 14 |

|              |    |       |            |        |             |    |
|--------------|----|-------|------------|--------|-------------|----|
| AX-158206769 | 18 | 4.084 | KV453055.1 | 706005 | 14-scf00366 | 14 |
| AX-158206770 | 18 | 4.084 | KV453055.1 | 707139 | 14-scf00366 | 14 |
| AX-158206771 | 18 | 4.084 | KV453055.1 | 707729 | 14-scf00366 | 14 |
| AX-158206772 | 18 | 4.084 | KV453055.1 | 710945 | 14-scf00366 | 14 |
| AX-158206775 | 18 | 4.121 | KV453055.1 | 718056 | 14-scf00366 | 14 |
| AX-158380760 | 18 | 4.158 | KV453055.1 | 718565 | 14-scf00366 | 14 |
| AX-158386342 | 18 | 4.194 | KV453055.1 | 670405 | 14-scf00366 | 14 |
| AX-158206751 | 18 | 4.194 | KV453055.1 | 682933 | 14-scf00366 | 14 |
| AX-158206776 | 18 | 4.194 | KV453055.1 | 719224 | 14-scf00366 | 14 |
| AX-158206777 | 18 | 4.194 | KV453055.1 | 720733 | 14-scf00366 | 14 |
| AX-158206778 | 18 | 4.194 | KV453055.1 | 721455 | 14-scf00366 | 14 |
| AX-158206779 | 18 | 4.194 | KV453055.1 | 721840 | 14-scf00366 | 14 |
| AX-158206780 | 18 | 4.194 | KV453055.1 | 722274 | 14-scf00366 | 14 |
| AX-158414398 | 18 | 4.194 | KV453055.1 | 722811 | 14-scf00366 | 14 |
| AX-158206783 | 18 | 4.194 | KV453055.1 | 726369 | 14-scf00366 | 14 |
| AX-158206784 | 18 | 4.194 | KV453055.1 | 726758 | 14-scf00366 | 14 |
| AX-158206789 | 18 | 4.194 | KV453055.1 | 731404 | 14-scf00366 | 14 |
| AX-158414399 | 18 | 4.194 | KV453055.1 | 733284 | 14-scf00366 | 14 |
| AX-158414400 | 18 | 4.194 | KV453055.1 | 734350 | 14-scf00366 | 14 |
| AX-158206793 | 18 | 4.521 | KV453055.1 | 737691 | 14-scf00366 | 14 |
| AX-158206794 | 18 | 4.521 | KV453055.1 | 738492 | 14-scf00366 | 14 |
| AX-157751758 | 18 | 4.521 | KV453055.1 | 738843 | 14-scf00366 | 14 |
| AX-158206795 | 18 | 4.521 | KV453055.1 | 740455 | 14-scf00366 | 14 |
| AX-158206797 | 18 | 4.521 | KV453055.1 | 742672 | 14-scf00366 | 14 |
| AX-158206798 | 18 | 4.521 | KV453055.1 | 745743 | 14-scf00366 | 14 |
| AX-158206802 | 18 | 4.521 | KV453055.1 | 753120 | 14-scf00366 | 14 |
| AX-157748097 | 18 | 4.521 | KV453055.1 | 756599 | 14-scf00366 | 14 |
| AX-158206807 | 18 | 4.521 | KV453055.1 | 759470 | 14-scf00366 | 14 |
| AX-158206808 | 18 | 4.521 | KV453055.1 | 759685 | 14-scf00366 | 14 |
| AX-158206810 | 18 | 4.521 | KV453055.1 | 766023 | 14-scf00366 | 14 |
| AX-158206811 | 18 | 4.521 | KV453055.1 | 767005 | 14-scf00366 | 14 |
| AX-158206812 | 18 | 4.521 | KV453055.1 | 767438 | 14-scf00366 | 14 |
| AX-158206813 | 18 | 4.521 | KV453055.1 | 769051 | 14-scf00366 | 14 |
| AX-158206817 | 18 | 4.521 | KV453055.1 | 773945 | 14-scf00366 | 14 |
| AX-158206818 | 18 | 4.521 | KV453055.1 | 774741 | 14-scf00366 | 14 |
| AX-157739448 | 18 | 4.521 | KV453055.1 | 778983 | 14-scf00366 | 14 |
| AX-158206829 | 18 | 4.521 | KV453055.1 | 782683 | 14-scf00366 | 14 |
| AX-158206830 | 18 | 4.521 | KV453055.1 | 784821 | 14-scf00366 | 14 |
| AX-158206841 | 18 | 4.521 | KV453055.1 | 794389 | 14-scf00366 | 14 |
| AX-157745768 | 18 | 4.616 | KV453055.1 | 750788 | 14-scf00366 | 14 |
| AX-158206805 | 18 | 4.616 | KV453055.1 | 757352 | 14-scf00366 | 14 |
| AX-158206822 | 18 | 4.616 | KV453055.1 | 778229 | 14-scf00366 | 14 |
| AX-158206846 | 18 | 4.616 | KV453055.1 | 801401 | 14-scf00366 | 14 |
| AX-158206852 | 18 | 4.616 | KV453055.1 | 809672 | 14-scf00366 | 14 |
| AX-158206826 | 18 | 4.67  | KV453055.1 | 781094 | 14-scf00366 | 14 |
| AX-158206800 | 18 | 4.739 | KV453055.1 | 751566 | 14-scf00366 | 14 |
| AX-158206801 | 18 | 4.739 | KV453055.1 | 752606 | 14-scf00366 | 14 |
| AX-158206823 | 18 | 4.739 | KV453055.1 | 778689 | 14-scf00366 | 14 |
| AX-158206831 | 18 | 4.739 | KV453055.1 | 786347 | 14-scf00366 | 14 |
| AX-158206832 | 18 | 4.739 | KV453055.1 | 787281 | 14-scf00366 | 14 |
| AX-158206833 | 18 | 4.739 | KV453055.1 | 787978 | 14-scf00366 | 14 |

|              |    |       |            |        |             |    |
|--------------|----|-------|------------|--------|-------------|----|
| AX-158206835 | 18 | 4.74  | KV453055.1 | 789184 | 14-scf00366 | 14 |
| AX-158206844 | 18 | 5.066 | KV453055.1 | 797456 | 14-scf00366 | 14 |
| AX-158206849 | 18 | 5.067 | KV453055.1 | 803238 | 14-scf00366 | 14 |
| AX-158206853 | 18 | 5.067 | KV453055.1 | 810422 | 14-scf00366 | 14 |
| AX-158206855 | 18 | 5.067 | KV453055.1 | 814384 | 14-scf00366 | 14 |
| AX-158206857 | 18 | 5.067 | KV453055.1 | 820333 | 14-scf00366 | 14 |
| AX-158206858 | 18 | 5.176 | KV453055.1 | 821891 | 14-scf00366 | 14 |
| AX-158206860 | 18 | 5.214 | KV453055.1 | 823656 | 14-scf00366 | 14 |
| AX-157838036 | 18 | 5.285 | KV453055.1 | 744496 | 14-scf00366 | 14 |
| AX-158206814 | 18 | 5.285 | KV453055.1 | 770299 | 14-scf00366 | 14 |
| AX-158206862 | 18 | 5.285 | KV453055.1 | 824919 | 14-scf00366 | 14 |
| AX-158206863 | 18 | 5.285 | KV453055.1 | 825270 | 14-scf00366 | 14 |
| AX-157720143 | 18 | 5.285 | KV453055.1 | 830984 | 14-scf00366 | 14 |
| AX-158206869 | 18 | 5.285 | KV453055.1 | 840326 | 14-scf00366 | 14 |
| AX-158206871 | 18 | 5.285 | KV453055.1 | 842481 | 14-scf00366 | 14 |
| AX-158206873 | 18 | 5.285 | KV453055.1 | 845920 | 14-scf00366 | 14 |
| AX-157772148 | 18 | 5.285 | KV453055.1 | 854118 | 14-scf00366 | 14 |
| AX-158206886 | 18 | 5.285 | KV453055.1 | 859576 | 14-scf00366 | 14 |
| AX-157879398 | 18 | 5.286 | KV453055.1 | 843087 | 14-scf00366 | 14 |
| AX-158206880 | 18 | 5.286 | KV453055.1 | 851679 | 14-scf00366 | 14 |
| AX-158206881 | 18 | 5.286 | KV453055.1 | 852836 | 14-scf00366 | 14 |
| AX-158206884 | 18 | 5.286 | KV453055.1 | 856200 | 14-scf00366 | 14 |
| AX-157754797 | 18 | 5.323 | KV453055.1 | 856640 | 14-scf00366 | 14 |
| AX-158206887 | 18 | 5.376 | KV453055.1 | 860851 | 14-scf00366 | 14 |
| AX-157887126 | 18 | 5.438 | KV453055.1 | 861725 | 14-scf00366 | 14 |
| AX-158206895 | 18 | 5.655 | KV453055.1 | 871155 | 14-scf00366 | 14 |
| AX-158206896 | 18 | 5.655 | KV453055.1 | 873487 | 14-scf00366 | 14 |
| AX-157771147 | 18 | 5.655 | KV453055.1 | 876689 | 14-scf00366 | 14 |
| AX-158206904 | 18 | 5.655 | KV453055.1 | 885829 | 14-scf00366 | 14 |
| AX-158206847 | 18 | 5.656 | KV453055.1 | 801977 | 14-scf00366 | 14 |
| AX-158206851 | 18 | 5.656 | KV453055.1 | 808939 | 14-scf00366 | 14 |
| AX-158206866 | 18 | 5.656 | KV453055.1 | 833503 | 14-scf00366 | 14 |
| AX-157693928 | 18 | 5.656 | KV453055.1 | 889052 | 14-scf00366 | 14 |
| AX-157710273 | 18 | 5.987 | KV453055.1 | 882069 | 14-scf00366 | 14 |
| AX-158206908 | 18 | 5.987 | KV453055.1 | 892294 | 14-scf00366 | 14 |
| AX-158206911 | 18 | 5.987 | KV453055.1 | 897622 | 14-scf00366 | 14 |
| AX-158206916 | 18 | 5.987 | KV453055.1 | 900107 | 14-scf00366 | 14 |
| AX-158206919 | 18 | 5.987 | KV453055.1 | 901026 | 14-scf00366 | 14 |
| AX-157757983 | 18 | 5.987 | KV453055.1 | 902102 | 14-scf00366 | 14 |
| AX-157838040 | 18 | 5.987 | KV453055.1 | 902188 | 14-scf00366 | 14 |
| AX-158206922 | 18 | 5.987 | KV453055.1 | 902816 | 14-scf00366 | 14 |
| AX-157774602 | 18 | 5.987 | KV453055.1 | 903638 | 14-scf00366 | 14 |
| AX-158206924 | 18 | 5.987 | KV453055.1 | 906806 | 14-scf00366 | 14 |
| AX-158206926 | 18 | 5.987 | KV453055.1 | 909058 | 14-scf00366 | 14 |
| AX-158206940 | 18 | 5.987 | KV453055.1 | 930913 | 14-scf00366 | 14 |
| AX-157754207 | 18 | 5.987 | KV453055.1 | 931617 | 14-scf00366 | 14 |
| AX-158206952 | 18 | 5.987 | KV453055.1 | 941192 | 14-scf00366 | 14 |
| AX-158206962 | 18 | 5.987 | KV453055.1 | 955130 | 14-scf00366 | 14 |
| AX-158206963 | 18 | 5.987 | KV453055.1 | 957599 | 14-scf00366 | 14 |
| AX-158206965 | 18 | 5.987 | KV453055.1 | 960739 | 14-scf00366 | 14 |
| AX-158206933 | 18 | 6.192 | KV453055.1 | 920245 | 14-scf00366 | 14 |

|              |    |       |            |         |             |    |
|--------------|----|-------|------------|---------|-------------|----|
| AX-158206915 | 18 | 6.212 | KV453055.1 | 899788  | 14-scf00366 | 14 |
| AX-158206936 | 18 | 6.212 | KV453055.1 | 926081  | 14-scf00366 | 14 |
| AX-158206938 | 18 | 6.317 | KV453055.1 | 928370  | 14-scf00366 | 14 |
| AX-158206939 | 18 | 6.317 | KV453055.1 | 929694  | 14-scf00366 | 14 |
| AX-158380762 | 18 | 6.377 | KV453055.1 | 931581  | 14-scf00366 | 14 |
| AX-158206894 | 18 | 6.622 | KV453055.1 | 870725  | 14-scf00366 | 14 |
| AX-157751969 | 18 | 6.622 | KV453055.1 | 913012  | 14-scf00366 | 14 |
| AX-158206941 | 18 | 6.622 | KV453055.1 | 932798  | 14-scf00366 | 14 |
| AX-158206942 | 18 | 6.622 | KV453055.1 | 933406  | 14-scf00366 | 14 |
| AX-158206944 | 18 | 6.622 | KV453055.1 | 934557  | 14-scf00366 | 14 |
| AX-157773777 | 18 | 6.622 | KV453055.1 | 935825  | 14-scf00366 | 14 |
| AX-158206947 | 18 | 6.622 | KV453055.1 | 938061  | 14-scf00366 | 14 |
| AX-158206948 | 18 | 6.622 | KV453055.1 | 938644  | 14-scf00366 | 14 |
| AX-158206950 | 18 | 6.622 | KV453055.1 | 939976  | 14-scf00366 | 14 |
| AX-158206953 | 18 | 6.622 | KV453055.1 | 942289  | 14-scf00366 | 14 |
| AX-158206954 | 18 | 6.622 | KV453055.1 | 943926  | 14-scf00366 | 14 |
| AX-157754689 | 18 | 6.622 | KV453055.1 | 944612  | 14-scf00366 | 14 |
| AX-158414404 | 18 | 6.622 | KV453055.1 | 945500  | 14-scf00366 | 14 |
| AX-158206956 | 18 | 6.622 | KV453055.1 | 947116  | 14-scf00366 | 14 |
| AX-157757759 | 18 | 6.623 | KV453055.1 | 957880  | 14-scf00366 | 14 |
| AX-158206964 | 18 | 7.048 | KV453055.1 | 958609  | 14-scf00366 | 14 |
| AX-158206968 | 18 | 7.116 | KV453055.1 | 964349  | 14-scf00366 | 14 |
| AX-158206969 | 18 | 7.236 | KV453055.1 | 964872  | 14-scf00366 | 14 |
| AX-158206974 | 18 | 7.236 | KV453055.1 | 972799  | 14-scf00366 | 14 |
| AX-158206976 | 18 | 7.259 | KV453055.1 | 975414  | 14-scf00366 | 14 |
| AX-158206977 | 18 | 7.259 | KV453055.1 | 976183  | 14-scf00366 | 14 |
| AX-158206972 | 18 | 7.315 | KV453055.1 | 970190  | 14-scf00366 | 14 |
| AX-158393960 | 18 | 7.315 | KV453055.1 | 976374  | 14-scf00366 | 14 |
| AX-158206978 | 18 | 7.315 | KV453055.1 | 977886  | 14-scf00366 | 14 |
| AX-158206979 | 18 | 7.413 | KV453055.1 | 978212  | 14-scf00366 | 14 |
| AX-158206981 | 18 | 7.504 | KV453055.1 | 985537  | 14-scf00366 | 14 |
| AX-158206983 | 18 | 7.504 | KV453055.1 | 986499  | 14-scf00366 | 14 |
| AX-158206984 | 18 | 7.504 | KV453055.1 | 987622  | 14-scf00366 | 14 |
| AX-158206985 | 18 | 7.504 | KV453055.1 | 989420  | 14-scf00366 | 14 |
| AX-158206986 | 18 | 7.531 | KV453055.1 | 991357  | 14-scf00366 | 14 |
| AX-157744672 | 18 | 7.556 | KV453055.1 | 991812  | 14-scf00366 | 14 |
| AX-158206987 | 18 | 7.569 | KV453055.1 | 992892  | 14-scf00366 | 14 |
| AX-158206988 | 18 | 7.594 | KV453055.1 | 993484  | 14-scf00366 | 14 |
| AX-158206989 | 18 | 7.604 | KV453055.1 | 993547  | 14-scf00366 | 14 |
| AX-158206990 | 18 | 7.626 | KV453055.1 | 995956  | 14-scf00366 | 14 |
| AX-158206991 | 18 | 7.749 | KV453055.1 | 997539  | 14-scf00366 | 14 |
| AX-158206992 | 18 | 7.754 | KV453055.1 | 998779  | 14-scf00366 | 14 |
| AX-158206993 | 18 | 7.759 | KV453055.1 | 1000915 | 14-scf00366 | 14 |
| AX-158206997 | 18 | 7.905 | KV453055.1 | 1003505 | 14-scf00366 | 14 |
| AX-158207003 | 18 | 7.905 | KV453055.1 | 1013199 | 14-scf00366 | 14 |
| AX-158207012 | 18 | 8.226 | KV453055.1 | 1022448 | 14-scf00366 | 14 |
| AX-158207013 | 18 | 8.272 | KV453055.1 | 1030345 | 14-scf00366 | 14 |
| AX-158207014 | 18 | 8.275 | KV453055.1 | 1030923 | 14-scf00366 | 14 |
| AX-158414408 | 18 | 8.275 | KV453055.1 | 1033219 | 14-scf00366 | 14 |
| AX-158414409 | 18 | 8.275 | KV453055.1 | 1033353 | 14-scf00366 | 14 |
| AX-158207017 | 18 | 8.57  | KV453055.1 | 1038300 | 14-scf00366 | 14 |

|              |    |        |            |         |             |    |
|--------------|----|--------|------------|---------|-------------|----|
| AX-157754944 | 18 | 8.57   | KV453055.1 | 1038909 | 14-scf00366 | 14 |
| AX-158207020 | 18 | 8.57   | KV453055.1 | 1042886 | 14-scf00366 | 14 |
| AX-158207021 | 18 | 8.571  | KV453055.1 | 1042989 | 14-scf00366 | 14 |
| AX-158207022 | 18 | 8.733  | KV453055.1 | 1044085 | 14-scf00366 | 14 |
| AX-158207024 | 18 | 8.733  | KV453055.1 | 1050200 | 14-scf00366 | 14 |
| AX-158207025 | 18 | 8.733  | KV453055.1 | 1052608 | 14-scf00366 | 14 |
| AX-158207028 | 18 | 8.899  | KV453055.1 | 1055455 | 14-scf00366 | 14 |
| AX-158207032 | 18 | 8.9    | KV453055.1 | 1057630 | 14-scf00366 | 14 |
| AX-158207036 | 18 | 8.9    | KV453055.1 | 1062472 | 14-scf00366 | 14 |
| AX-157744964 | 18 | 8.9    | KV453055.1 | 1064345 | 14-scf00366 | 14 |
| AX-158207038 | 18 | 8.989  | KV453055.1 | 1066915 | 14-scf00366 | 14 |
| AX-158207039 | 18 | 9.061  | KV453055.1 | 1067468 | 14-scf00366 | 14 |
| AX-158207040 | 18 | 9.061  | KV453055.1 | 1068027 | 14-scf00366 | 14 |
| AX-158207042 | 18 | 9.061  | KV453055.1 | 1069603 | 14-scf00366 | 14 |
| AX-158207045 | 18 | 9.061  | KV453055.1 | 1073828 | 14-scf00366 | 14 |
| AX-158207044 | 18 | 9.127  | KV453055.1 | 1073062 | 14-scf00366 | 14 |
| AX-158207047 | 18 | 9.226  | KV453055.1 | 1079130 | 14-scf00366 | 14 |
| AX-158207048 | 18 | 9.226  | KV453055.1 | 1079865 | 14-scf00366 | 14 |
| AX-158207050 | 18 | 9.226  | KV453055.1 | 1085048 | 14-scf00366 | 14 |
| AX-158207051 | 18 | 9.295  | KV453055.1 | 1087727 | 14-scf00366 | 14 |
| AX-158207053 | 18 | 9.328  | KV453055.1 | 1090757 | 14-scf00366 | 14 |
| AX-157887130 | 18 | 9.328  | KV453055.1 | 1112001 | 14-scf00366 | 14 |
| AX-158207058 | 18 | 9.388  | KV453055.1 | 1096177 | 14-scf00366 | 14 |
| AX-158207061 | 18 | 9.444  | KV453055.1 | 1103898 | 14-scf00366 | 14 |
| AX-158207063 | 18 | 9.444  | KV453055.1 | 1106360 | 14-scf00366 | 14 |
| AX-158207065 | 18 | 9.444  | KV453055.1 | 1108381 | 14-scf00366 | 14 |
| AX-158207067 | 18 | 9.698  | KV453055.1 | 1112446 | 14-scf00366 | 14 |
| AX-158207070 | 18 | 9.698  | KV453055.1 | 1119815 | 14-scf00366 | 14 |
| AX-158207076 | 18 | 9.698  | KV453055.1 | 1126831 | 14-scf00366 | 14 |
| AX-158207112 | 18 | 9.698  | KV453055.1 | 1192742 | 14-scf00366 | 14 |
| AX-157774196 | 18 | 9.698  | KV453055.1 | 1269817 | 14-scf00366 | 14 |
| AX-157747068 | 18 | 9.698  | KV453055.1 | 1280396 | 14-scf00366 | 14 |
| AX-158207077 | 18 | 9.737  | KV453055.1 | 1127130 | 14-scf00366 | 14 |
| AX-158207079 | 18 | 9.991  | KV453055.1 | 1131546 | 14-scf00366 | 14 |
| AX-158207080 | 18 | 9.991  | KV453055.1 | 1132470 | 14-scf00366 | 14 |
| AX-158207082 | 18 | 10.022 | KV453055.1 | 1136816 | 14-scf00366 | 14 |
| AX-158207085 | 18 | 10.056 | KV453055.1 | 1145363 | 14-scf00366 | 14 |
| AX-158207068 | 18 | 10.1   | KV453055.1 | 1113138 | 14-scf00366 | 14 |
| AX-158380764 | 18 | 10.1   | KV453055.1 | 1149296 | 14-scf00366 | 14 |
| AX-158207088 | 18 | 10.1   | KV453055.1 | 1149605 | 14-scf00366 | 14 |
| AX-158207089 | 18 | 10.1   | KV453055.1 | 1150754 | 14-scf00366 | 14 |
| AX-158207091 | 18 | 10.1   | KV453055.1 | 1163832 | 14-scf00366 | 14 |
| AX-158207092 | 18 | 10.1   | KV453055.1 | 1165357 | 14-scf00366 | 14 |
| AX-158207093 | 18 | 10.1   | KV453055.1 | 1166569 | 14-scf00366 | 14 |
| AX-158207100 | 18 | 10.1   | KV453055.1 | 1175075 | 14-scf00366 | 14 |
| AX-158207104 | 18 | 10.1   | KV453055.1 | 1181865 | 14-scf00366 | 14 |
| AX-158207108 | 18 | 10.1   | KV453055.1 | 1188869 | 14-scf00366 | 14 |
| AX-158207109 | 18 | 10.1   | KV453055.1 | 1189811 | 14-scf00366 | 14 |
| AX-157740257 | 18 | 10.1   | KV453055.1 | 1273672 | 14-scf00366 | 14 |
| AX-158207071 | 18 | 10.318 | KV453055.1 | 1122304 | 14-scf00366 | 14 |
| AX-158207078 | 18 | 10.318 | KV453055.1 | 1128175 | 14-scf00366 | 14 |

|              |    |        |            |         |             |    |
|--------------|----|--------|------------|---------|-------------|----|
| AX-157838042 | 18 | 10.318 | KV453055.1 | 1128386 | 14-scf00366 | 14 |
| AX-158207083 | 18 | 10.318 | KV453055.1 | 1143449 | 14-scf00366 | 14 |
| AX-158207087 | 18 | 10.318 | KV453055.1 | 1149118 | 14-scf00366 | 14 |
| AX-157748463 | 18 | 10.318 | KV453055.1 | 1182399 | 14-scf00366 | 14 |
| AX-158207106 | 18 | 10.318 | KV453055.1 | 1186819 | 14-scf00366 | 14 |
| AX-158207111 | 18 | 10.318 | KV453055.1 | 1191145 | 14-scf00366 | 14 |
| AX-158207117 | 18 | 10.318 | KV453055.1 | 1200651 | 14-scf00366 | 14 |
| AX-158207118 | 18 | 10.318 | KV453055.1 | 1201189 | 14-scf00366 | 14 |
| AX-158207119 | 18 | 10.318 | KV453055.1 | 1202034 | 14-scf00366 | 14 |
| AX-158207121 | 18 | 10.318 | KV453055.1 | 1204296 | 14-scf00366 | 14 |
| AX-158207123 | 18 | 10.318 | KV453055.1 | 1206772 | 14-scf00366 | 14 |
| AX-158207126 | 18 | 10.318 | KV453055.1 | 1212117 | 14-scf00366 | 14 |
| AX-158207128 | 18 | 10.318 | KV453055.1 | 1214218 | 14-scf00366 | 14 |
| AX-158207129 | 18 | 10.318 | KV453055.1 | 1215372 | 14-scf00366 | 14 |
| AX-158207133 | 18 | 10.318 | KV453055.1 | 1221112 | 14-scf00366 | 14 |
| AX-158207136 | 18 | 10.318 | KV453055.1 | 1227663 | 14-scf00366 | 14 |
| AX-158207137 | 18 | 10.318 | KV453055.1 | 1227989 | 14-scf00366 | 14 |
| AX-158207138 | 18 | 10.318 | KV453055.1 | 1228651 | 14-scf00366 | 14 |
| AX-158207140 | 18 | 10.318 | KV453055.1 | 1230291 | 14-scf00366 | 14 |
| AX-158207143 | 18 | 10.318 | KV453055.1 | 1234961 | 14-scf00366 | 14 |
| AX-158207146 | 18 | 10.318 | KV453055.1 | 1236947 | 14-scf00366 | 14 |
| AX-157727747 | 18 | 10.318 | KV453055.1 | 1242412 | 14-scf00366 | 14 |
| AX-158207155 | 18 | 10.318 | KV453055.1 | 1253558 | 14-scf00366 | 14 |
| AX-158207159 | 18 | 10.318 | KV453055.1 | 1257612 | 14-scf00366 | 14 |
| AX-158207164 | 18 | 10.318 | KV453055.1 | 1277263 | 14-scf00366 | 14 |
| AX-158207165 | 18 | 10.318 | KV453055.1 | 1279971 | 14-scf00366 | 14 |
| AX-158207186 | 18 | 10.318 | KV453055.1 | 1307433 | 14-scf00366 | 14 |
| AX-157866927 | 18 | 10.318 | KV453055.1 | 1325460 | 14-scf00366 | 14 |
| AX-157866928 | 18 | 10.318 | KV453055.1 | 1376927 | 14-scf00366 | 14 |
| AX-158207098 | 18 | 10.333 | KV453055.1 | 1173173 | 14-scf00366 | 14 |
| AX-158207149 | 18 | 10.333 | KV453055.1 | 1245809 | 14-scf00366 | 14 |
| AX-158207152 | 18 | 10.333 | KV453055.1 | 1249484 | 14-scf00366 | 14 |
| AX-158207162 | 18 | 10.333 | KV453055.1 | 1267233 | 14-scf00366 | 14 |
| AX-158207183 | 18 | 10.333 | KV453055.1 | 1306068 | 14-scf00366 | 14 |
| AX-157709337 | 18 | 10.346 | KV453055.1 | 1247744 | 14-scf00366 | 14 |
| AX-157755439 | 18 | 10.36  | KV453055.1 | 1248564 | 14-scf00366 | 14 |
| AX-158380765 | 18 | 10.371 | KV453055.1 | 1250364 | 14-scf00366 | 14 |
| AX-158207154 | 18 | 10.382 | KV453055.1 | 1252807 | 14-scf00366 | 14 |
| AX-158207156 | 18 | 10.393 | KV453055.1 | 1255450 | 14-scf00366 | 14 |
| AX-157735865 | 18 | 10.408 | KV453055.1 | 1262409 | 14-scf00366 | 14 |
| AX-158207107 | 18 | 10.418 | KV453055.1 | 1187457 | 14-scf00366 | 14 |
| AX-157879404 | 18 | 10.418 | KV453055.1 | 1199852 | 14-scf00366 | 14 |
| AX-158207139 | 18 | 10.418 | KV453055.1 | 1229975 | 14-scf00366 | 14 |
| AX-157709336 | 18 | 10.418 | KV453055.1 | 1247786 | 14-scf00366 | 14 |
| AX-157838047 | 18 | 10.418 | KV453055.1 | 1263479 | 14-scf00366 | 14 |
| AX-157838043 | 18 | 10.428 | KV453055.1 | 1129128 | 14-scf00366 | 14 |
| AX-157751790 | 18 | 10.428 | KV453055.1 | 1190403 | 14-scf00366 | 14 |
| AX-158207120 | 18 | 10.428 | KV453055.1 | 1203981 | 14-scf00366 | 14 |
| AX-158207161 | 18 | 10.428 | KV453055.1 | 1265278 | 14-scf00366 | 14 |
| AX-158207168 | 18 | 10.428 | KV453055.1 | 1285945 | 14-scf00366 | 14 |
| AX-158207171 | 18 | 10.428 | KV453055.1 | 1288795 | 14-scf00366 | 14 |

|              |    |        |            |         |             |    |
|--------------|----|--------|------------|---------|-------------|----|
| AX-158207172 | 18 | 10.428 | KV453055.1 | 1289823 | 14-scf00366 | 14 |
| AX-158207174 | 18 | 10.428 | KV453055.1 | 1291350 | 14-scf00366 | 14 |
| AX-158207175 | 18 | 10.428 | KV453055.1 | 1291877 | 14-scf00366 | 14 |
| AX-158207176 | 18 | 10.428 | KV453055.1 | 1294243 | 14-scf00366 | 14 |
| AX-158207177 | 18 | 10.428 | KV453055.1 | 1295654 | 14-scf00366 | 14 |
| AX-158207179 | 18 | 10.428 | KV453055.1 | 1297133 | 14-scf00366 | 14 |
| AX-158207181 | 18 | 10.428 | KV453055.1 | 1299131 | 14-scf00366 | 14 |
| AX-157838049 | 18 | 10.428 | KV453055.1 | 1301612 | 14-scf00366 | 14 |
| AX-157838050 | 18 | 10.428 | KV453055.1 | 1303614 | 14-scf00366 | 14 |
| AX-158207184 | 18 | 10.428 | KV453055.1 | 1306274 | 14-scf00366 | 14 |
| AX-158207185 | 18 | 10.428 | KV453055.1 | 1307046 | 14-scf00366 | 14 |
| AX-158207187 | 18 | 10.428 | KV453055.1 | 1308764 | 14-scf00366 | 14 |
| AX-158207190 | 18 | 10.428 | KV453055.1 | 1314593 | 14-scf00366 | 14 |
| AX-158207204 | 18 | 10.428 | KV453055.1 | 1345159 | 14-scf00366 | 14 |
| AX-158207237 | 18 | 10.428 | KV453055.1 | 1397954 | 14-scf00366 | 14 |
| AX-158207191 | 18 | 10.755 | KV453055.1 | 1316790 | 14-scf00366 | 14 |
| AX-157758328 | 18 | 10.755 | KV453055.1 | 1317632 | 14-scf00366 | 14 |
| AX-157718982 | 18 | 10.755 | KV453055.1 | 1318626 | 14-scf00366 | 14 |
| AX-157838051 | 18 | 10.755 | KV453055.1 | 1319749 | 14-scf00366 | 14 |
| AX-157838052 | 18 | 10.755 | KV453055.1 | 1321992 | 14-scf00366 | 14 |
| AX-158207196 | 18 | 10.755 | KV453055.1 | 1324288 | 14-scf00366 | 14 |
| AX-158207197 | 18 | 10.755 | KV453055.1 | 1325619 | 14-scf00366 | 14 |
| AX-158207201 | 18 | 10.919 | KV453055.1 | 1335335 | 14-scf00366 | 14 |
| AX-157773901 | 18 | 10.919 | KV453055.1 | 1338994 | 14-scf00366 | 14 |
| AX-157755760 | 18 | 11.082 | KV453055.1 | 1340083 | 14-scf00366 | 14 |
| AX-158207203 | 18 | 11.086 | KV453055.1 | 1342897 | 14-scf00366 | 14 |
| AX-158207205 | 18 | 11.092 | KV453055.1 | 1345413 | 14-scf00366 | 14 |
| AX-158207207 | 18 | 11.516 | KV453055.1 | 1346948 | 14-scf00366 | 14 |
| AX-158207213 | 18 | 11.521 | KV453055.1 | 1357692 | 14-scf00366 | 14 |
| AX-158207215 | 18 | 11.521 | KV453055.1 | 1362539 | 14-scf00366 | 14 |
| AX-157709928 | 18 | 11.521 | KV453055.1 | 1369279 | 14-scf00366 | 14 |
| AX-157872345 | 18 | 11.521 | KV453055.1 | 1369736 | 14-scf00366 | 14 |
| AX-158207220 | 18 | 11.521 | KV453055.1 | 1374316 | 14-scf00366 | 14 |
| AX-158207221 | 18 | 11.521 | KV453055.1 | 1374851 | 14-scf00366 | 14 |
| AX-158207222 | 18 | 11.521 | KV453055.1 | 1375335 | 14-scf00366 | 14 |
| AX-158207224 | 18 | 11.521 | KV453055.1 | 1383198 | 14-scf00366 | 14 |
| AX-158207232 | 18 | 11.521 | KV453055.1 | 1392429 | 14-scf00366 | 14 |
| AX-158207234 | 18 | 11.521 | KV453055.1 | 1394552 | 14-scf00366 | 14 |
| AX-158207236 | 18 | 11.685 | KV453055.1 | 1396543 | 14-scf00366 | 14 |
| AX-157887133 | 18 | 11.753 | KV453055.1 | 1407027 | 14-scf00366 | 14 |
| AX-158207242 | 18 | 11.849 | KV453055.1 | 1407769 | 14-scf00366 | 14 |
| AX-158207243 | 18 | 11.849 | KV453055.1 | 1408890 | 14-scf00366 | 14 |
| AX-158207245 | 18 | 11.904 | KV453055.1 | 1410074 | 14-scf00366 | 14 |
| AX-158207116 | 18 | 11.958 | KV453055.1 | 1199797 | 14-scf00366 | 14 |
| AX-158207246 | 18 | 11.958 | KV453055.1 | 1410451 | 14-scf00366 | 14 |
| AX-157838059 | 18 | 11.958 | KV453055.1 | 1416476 | 14-scf00366 | 14 |
| AX-158207252 | 18 | 11.958 | KV453055.1 | 1417704 | 14-scf00366 | 14 |
| AX-157838060 | 18 | 11.958 | KV453055.1 | 1424203 | 14-scf00366 | 14 |
| AX-158207253 | 18 | 11.958 | KV453055.1 | 1426774 | 14-scf00366 | 14 |
| AX-158207262 | 18 | 11.958 | KV453055.1 | 1441173 | 14-scf00366 | 14 |
| AX-157739413 | 18 | 11.958 | KV453055.1 | 1446729 | 14-scf00366 | 14 |



|              |    |        |            |         |             |    |
|--------------|----|--------|------------|---------|-------------|----|
| AX-158207275 | 18 | 11.958 | KV453055.1 | 1453363 | 14-scf00366 | 14 |
| AX-158404050 | 18 | 11.958 | KV453055.1 | 1503123 | 14-scf00366 | 14 |
| AX-157866932 | 18 | 11.958 | KV453055.1 | 1524052 | 14-scf00366 | 14 |
| AX-158207326 | 18 | 11.958 | KV453055.1 | 1530390 | 14-scf00366 | 14 |
| AX-158207254 | 18 | 11.959 | KV453055.1 | 1427406 | 14-scf00366 | 14 |
| AX-158207258 | 18 | 11.959 | KV453055.1 | 1436199 | 14-scf00366 | 14 |
| AX-157773283 | 18 | 12.123 | KV453055.1 | 1439445 | 14-scf00366 | 14 |
| AX-158207267 | 18 | 12.285 | KV453055.1 | 1445472 | 14-scf00366 | 14 |
| AX-158207268 | 18 | 12.286 | KV453055.1 | 1447583 | 14-scf00366 | 14 |
| AX-158207269 | 18 | 12.286 | KV453055.1 | 1448188 | 14-scf00366 | 14 |
| AX-158207271 | 18 | 12.286 | KV453055.1 | 1450117 | 14-scf00366 | 14 |
| AX-158207272 | 18 | 12.286 | KV453055.1 | 1450766 | 14-scf00366 | 14 |
| AX-158207274 | 18 | 12.286 | KV453055.1 | 1451689 | 14-scf00366 | 14 |
| AX-158207276 | 18 | 12.358 | KV453055.1 | 1454645 | 14-scf00366 | 14 |
| AX-158207256 | 18 | 12.432 | KV453055.1 | 1430380 | 14-scf00366 | 14 |
| AX-157838061 | 18 | 12.432 | KV453055.1 | 1435456 | 14-scf00366 | 14 |
| AX-158207259 | 18 | 12.432 | KV453055.1 | 1437373 | 14-scf00366 | 14 |
| AX-158207277 | 18 | 12.432 | KV453055.1 | 1455939 | 14-scf00366 | 14 |
| AX-158207278 | 18 | 12.432 | KV453055.1 | 1456940 | 14-scf00366 | 14 |
| AX-158207279 | 18 | 12.432 | KV453055.1 | 1457735 | 14-scf00366 | 14 |
| AX-157743375 | 18 | 12.432 | KV453055.1 | 1560794 | 14-scf00366 | 14 |
| AX-157866930 | 18 | 12.723 | KV453055.1 | 1423495 | 14-scf00366 | 14 |
| AX-158207280 | 18 | 12.723 | KV453055.1 | 1459438 | 14-scf00366 | 14 |
| AX-158207284 | 18 | 12.723 | KV453055.1 | 1469166 | 14-scf00366 | 14 |
| AX-158207286 | 18 | 12.723 | KV453055.1 | 1469757 | 14-scf00366 | 14 |
| AX-158207288 | 18 | 12.723 | KV453055.1 | 1472058 | 14-scf00366 | 14 |
| AX-158207291 | 18 | 12.723 | KV453055.1 | 1484358 | 14-scf00366 | 14 |
| AX-158207293 | 18 | 12.723 | KV453055.1 | 1486220 | 14-scf00366 | 14 |
| AX-158207294 | 18 | 12.723 | KV453055.1 | 1486662 | 14-scf00366 | 14 |
| AX-158207295 | 18 | 12.723 | KV453055.1 | 1487472 | 14-scf00366 | 14 |
| AX-158207296 | 18 | 12.723 | KV453055.1 | 1488258 | 14-scf00366 | 14 |
| AX-158207299 | 18 | 12.723 | KV453055.1 | 1490643 | 14-scf00366 | 14 |
| AX-158207301 | 18 | 12.723 | KV453055.1 | 1492104 | 14-scf00366 | 14 |
| AX-158207302 | 18 | 12.723 | KV453055.1 | 1497071 | 14-scf00366 | 14 |
| AX-158207304 | 18 | 12.723 | KV453055.1 | 1498477 | 14-scf00366 | 14 |
| AX-158414416 | 18 | 12.723 | KV453055.1 | 1502098 | 14-scf00366 | 14 |
| AX-158414417 | 18 | 12.723 | KV453055.1 | 1503468 | 14-scf00366 | 14 |
| AX-158414418 | 18 | 12.723 | KV453055.1 | 1503596 | 14-scf00366 | 14 |
| AX-158207307 | 18 | 12.723 | KV453055.1 | 1506375 | 14-scf00366 | 14 |
| AX-158207308 | 18 | 12.723 | KV453055.1 | 1506522 | 14-scf00366 | 14 |
| AX-158207309 | 18 | 12.723 | KV453055.1 | 1506804 | 14-scf00366 | 14 |
| AX-158207315 | 18 | 12.723 | KV453055.1 | 1516030 | 14-scf00366 | 14 |
| AX-158207319 | 18 | 12.723 | KV453055.1 | 1521964 | 14-scf00366 | 14 |
| AX-158207320 | 18 | 12.723 | KV453055.1 | 1522825 | 14-scf00366 | 14 |
| AX-158207321 | 18 | 12.723 | KV453055.1 | 1524535 | 14-scf00366 | 14 |
| AX-158207322 | 18 | 12.723 | KV453055.1 | 1525114 | 14-scf00366 | 14 |
| AX-158207324 | 18 | 12.723 | KV453055.1 | 1526715 | 14-scf00366 | 14 |
| AX-158207325 | 18 | 12.723 | KV453055.1 | 1528105 | 14-scf00366 | 14 |
| AX-157751136 | 18 | 12.723 | KV453055.1 | 1530033 | 14-scf00366 | 14 |
| AX-158207329 | 18 | 12.723 | KV453055.1 | 1533861 | 14-scf00366 | 14 |
| AX-158207332 | 18 | 12.723 | KV453055.1 | 1535420 | 14-scf00366 | 14 |

|              |    |        |            |         |             |    |
|--------------|----|--------|------------|---------|-------------|----|
| AX-158207334 | 18 | 12.723 | KV453055.1 | 1536544 | 14-scf00366 | 14 |
| AX-158207337 | 18 | 12.723 | KV453055.1 | 1539363 | 14-scf00366 | 14 |
| AX-158207339 | 18 | 12.723 | KV453055.1 | 1542559 | 14-scf00366 | 14 |
| AX-158207342 | 18 | 12.723 | KV453055.1 | 1546581 | 14-scf00366 | 14 |
| AX-158207346 | 18 | 12.723 | KV453055.1 | 1550541 | 14-scf00366 | 14 |
| AX-158207356 | 18 | 12.723 | KV453055.1 | 1560437 | 14-scf00366 | 14 |
| AX-158207360 | 18 | 12.723 | KV453055.1 | 1563348 | 14-scf00366 | 14 |
| AX-158207361 | 18 | 12.723 | KV453055.1 | 1564495 | 14-scf00366 | 14 |
| AX-157746735 | 18 | 12.724 | KV453055.1 | 1508639 | 14-scf00366 | 14 |
| AX-158207357 | 18 | 12.724 | KV453055.1 | 1561309 | 14-scf00366 | 14 |
| AX-158207316 | 18 | 13.263 | KV453055.1 | 1517027 | 14-scf00366 | 14 |
| AX-158414419 | 18 | 13.263 | KV453055.1 | 1567341 | 14-scf00366 | 14 |
| AX-158207366 | 18 | 13.281 | KV453055.1 | 1572645 | 14-scf00366 | 14 |
| AX-157887134 | 18 | 13.33  | KV453055.1 | 1574321 | 14-scf00366 | 14 |
| AX-158207369 | 18 | 13.598 | KV453055.1 | 1577154 | 14-scf00366 | 14 |
| AX-158207371 | 18 | 13.598 | KV453055.1 | 1582743 | 14-scf00366 | 14 |
| AX-158207374 | 18 | 13.598 | KV453055.1 | 1584165 | 14-scf00366 | 14 |
| AX-158207375 | 18 | 13.598 | KV453055.1 | 1585562 | 14-scf00366 | 14 |
| AX-158207376 | 18 | 13.598 | KV453055.1 | 1585994 | 14-scf00366 | 14 |
| AX-158207377 | 18 | 13.598 | KV453055.1 | 1586767 | 14-scf00366 | 14 |
| AX-158207379 | 18 | 13.598 | KV453055.1 | 1588632 | 14-scf00366 | 14 |
| AX-158207381 | 18 | 13.598 | KV453055.1 | 1590407 | 14-scf00366 | 14 |
| AX-158207382 | 18 | 13.598 | KV453055.1 | 1593374 | 14-scf00366 | 14 |
| AX-157879411 | 18 | 13.598 | KV453055.1 | 1597087 | 14-scf00366 | 14 |
| AX-158207384 | 18 | 13.598 | KV453055.1 | 1597817 | 14-scf00366 | 14 |
| AX-158207385 | 18 | 13.598 | KV453055.1 | 1598335 | 14-scf00366 | 14 |
| AX-157743855 | 18 | 13.598 | KV453055.1 | 1599985 | 14-scf00366 | 14 |
| AX-158207386 | 18 | 13.598 | KV453055.1 | 1601466 | 14-scf00366 | 14 |
| AX-158207388 | 18 | 13.598 | KV453055.1 | 1603750 | 14-scf00366 | 14 |
| AX-158207389 | 18 | 13.598 | KV453055.1 | 1604483 | 14-scf00366 | 14 |
| AX-158207390 | 18 | 13.598 | KV453055.1 | 1605035 | 14-scf00366 | 14 |
| AX-158207391 | 18 | 13.598 | KV453055.1 | 1605836 | 14-scf00366 | 14 |
| AX-158207396 | 18 | 13.598 | KV453055.1 | 1609287 | 14-scf00366 | 14 |
| AX-158207398 | 18 | 13.598 | KV453055.1 | 1612285 | 14-scf00366 | 14 |
| AX-158207400 | 18 | 13.598 | KV453055.1 | 1616465 | 14-scf00366 | 14 |
| AX-158207401 | 18 | 13.598 | KV453055.1 | 1616983 | 14-scf00366 | 14 |
| AX-158207399 | 18 | 13.599 | KV453055.1 | 1615231 | 14-scf00366 | 14 |
| AX-157838066 | 18 | 13.9   | KV453055.1 | 1619780 | 14-scf00366 | 14 |
| AX-158207404 | 18 | 13.9   | KV453055.1 | 1621791 | 14-scf00366 | 14 |
| AX-158207407 | 18 | 13.97  | KV453055.1 | 1623377 | 14-scf00366 | 14 |
| AX-158207523 | 18 | 13.97  | KV453055.1 | 1774720 | 14-scf00366 | 14 |
| AX-158207408 | 18 | 14.117 | KV453055.1 | 1624897 | 14-scf00366 | 14 |
| AX-158207409 | 18 | 14.117 | KV453055.1 | 1627432 | 14-scf00366 | 14 |
| AX-158207411 | 18 | 14.188 | KV453055.1 | 1629172 | 14-scf00366 | 14 |
| AX-158207416 | 18 | 14.45  | KV453055.1 | 1634956 | 14-scf00366 | 14 |
| AX-158207417 | 18 | 14.45  | KV453055.1 | 1635716 | 14-scf00366 | 14 |
| AX-158207420 | 18 | 14.45  | KV453055.1 | 1638800 | 14-scf00366 | 14 |
| AX-158207421 | 18 | 14.45  | KV453055.1 | 1639360 | 14-scf00366 | 14 |
| AX-158207426 | 18 | 14.45  | KV453055.1 | 1643942 | 14-scf00366 | 14 |
| AX-157772344 | 18 | 14.54  | KV453055.1 | 1639917 | 14-scf00366 | 14 |
| AX-158207423 | 18 | 14.668 | KV453055.1 | 1641236 | 14-scf00366 | 14 |

|              |    |        |             |         |             |    |
|--------------|----|--------|-------------|---------|-------------|----|
| AX-158207428 | 18 | 14.88  | KV453055.1  | 1645577 | 14-scf00366 | 14 |
| AX-158207431 | 18 | 14.919 | KV453055.1  | 1649761 | 14-scf00366 | 14 |
| AX-158207424 | 18 | 15.021 | KV453055.1  | 1641727 | 14-scf00366 | 14 |
| AX-157879413 | 18 | 15.021 | KV453055.1  | 1642441 | 14-scf00366 | 14 |
| AX-158207432 | 18 | 15.021 | KV453055.1  | 1653335 | 14-scf00366 | 14 |
| AX-158207433 | 18 | 15.021 | KV453055.1  | 1654416 | 14-scf00366 | 14 |
| AX-158207434 | 18 | 15.021 | KV453055.1  | 1655318 | 14-scf00366 | 14 |
| AX-158207448 | 18 | 15.021 | KV453055.1  | 1676916 | 14-scf00366 | 14 |
| AX-158207453 | 18 | 15.021 | KV453055.1  | 1683565 | 14-scf00366 | 14 |
| AX-157707059 | 18 | 15.021 | 3ML01033614 | 269     | scf09273_1  | UN |
| AX-158207439 | 18 | 15.038 | KV453055.1  | 1663282 | 14-scf00366 | 14 |
| AX-158207441 | 18 | 15.058 | KV453055.1  | 1665775 | 14-scf00366 | 14 |
| AX-158207444 | 18 | 15.094 | KV453055.1  | 1669957 | 14-scf00366 | 14 |
| AX-158207445 | 18 | 15.123 | KV453055.1  | 1671174 | 14-scf00366 | 14 |
| AX-158207487 | 18 | 15.123 | KV453055.1  | 1719869 | 14-scf00366 | 14 |
| AX-158207429 | 18 | 15.13  | KV453055.1  | 1647574 | 14-scf00366 | 14 |
| AX-158207449 | 18 | 15.13  | KV453055.1  | 1677933 | 14-scf00366 | 14 |
| AX-157725715 | 18 | 15.13  | KV453055.1  | 1679541 | 14-scf00366 | 14 |
| AX-158207451 | 18 | 15.13  | KV453055.1  | 1680300 | 14-scf00366 | 14 |
| AX-158207454 | 18 | 15.13  | KV453055.1  | 1683822 | 14-scf00366 | 14 |
| AX-158207458 | 18 | 15.13  | KV453055.1  | 1686962 | 14-scf00366 | 14 |
| AX-158207459 | 18 | 15.13  | KV453055.1  | 1687844 | 14-scf00366 | 14 |
| AX-158207461 | 18 | 15.13  | KV453055.1  | 1691167 | 14-scf00366 | 14 |
| AX-157724046 | 18 | 15.13  | KV453055.1  | 1691953 | 14-scf00366 | 14 |
| AX-158207463 | 18 | 15.13  | KV453055.1  | 1694503 | 14-scf00366 | 14 |
| AX-158207465 | 18 | 15.13  | KV453055.1  | 1699151 | 14-scf00366 | 14 |
| AX-158207470 | 18 | 15.13  | KV453055.1  | 1702353 | 14-scf00366 | 14 |
| AX-158207473 | 18 | 15.13  | KV453055.1  | 1707928 | 14-scf00366 | 14 |
| AX-158207485 | 18 | 15.13  | KV453055.1  | 1717657 | 14-scf00366 | 14 |
| AX-158207489 | 18 | 15.13  | KV453055.1  | 1725261 | 14-scf00366 | 14 |
| AX-158207490 | 18 | 15.13  | KV453055.1  | 1730439 | 14-scf00366 | 14 |
| AX-157755892 | 18 | 15.13  | KV453055.1  | 1745613 | 14-scf00366 | 14 |
| AX-158207507 | 18 | 15.13  | KV453055.1  | 1752795 | 14-scf00366 | 14 |
| AX-158207508 | 18 | 15.13  | KV453055.1  | 1753664 | 14-scf00366 | 14 |
| AX-158414424 | 18 | 15.13  | KV453055.1  | 1756266 | 14-scf00366 | 14 |
| AX-158207466 | 18 | 15.172 | KV453055.1  | 1699796 | 14-scf00366 | 14 |
| AX-158207468 | 18 | 15.225 | KV453055.1  | 1701282 | 14-scf00366 | 14 |
| AX-158207472 | 18 | 15.23  | KV453055.1  | 1706051 | 14-scf00366 | 14 |
| AX-158207474 | 18 | 15.234 | KV453055.1  | 1709438 | 14-scf00366 | 14 |
| AX-158207481 | 18 | 15.234 | KV453055.1  | 1713889 | 14-scf00366 | 14 |
| AX-158207456 | 18 | 15.237 | KV453055.1  | 1685361 | 14-scf00366 | 14 |
| AX-158207482 | 18 | 15.237 | KV453055.1  | 1714253 | 14-scf00366 | 14 |
| AX-158207471 | 18 | 15.239 | KV453055.1  | 1703923 | 14-scf00366 | 14 |
| AX-158207483 | 18 | 15.239 | KV453055.1  | 1715710 | 14-scf00366 | 14 |
| AX-158207484 | 18 | 15.239 | KV453055.1  | 1717066 | 14-scf00366 | 14 |
| AX-157859094 | 18 | 15.256 | KV453055.1  | 1723174 | 14-scf00366 | 14 |
| AX-158207491 | 18 | 15.298 | KV453055.1  | 1735542 | 14-scf00366 | 14 |
| AX-158207446 | 18 | 15.348 | KV453055.1  | 1672227 | 14-scf00366 | 14 |
| AX-158207450 | 18 | 15.348 | KV453055.1  | 1679715 | 14-scf00366 | 14 |
| AX-157751411 | 18 | 15.348 | KV453055.1  | 1727397 | 14-scf00366 | 14 |
| AX-158207492 | 18 | 15.348 | KV453055.1  | 1736276 | 14-scf00366 | 14 |

|              |    |        |            |         |             |    |
|--------------|----|--------|------------|---------|-------------|----|
| AX-158207493 | 18 | 15.348 | KV453055.1 | 1737438 | 14-scf00366 | 14 |
| AX-158207494 | 18 | 15.348 | KV453055.1 | 1738199 | 14-scf00366 | 14 |
| AX-158207495 | 18 | 15.348 | KV453055.1 | 1738751 | 14-scf00366 | 14 |
| AX-158207500 | 18 | 15.348 | KV453055.1 | 1744020 | 14-scf00366 | 14 |
| AX-158207501 | 18 | 15.348 | KV453055.1 | 1744672 | 14-scf00366 | 14 |
| AX-158207502 | 18 | 15.348 | KV453055.1 | 1746306 | 14-scf00366 | 14 |
| AX-158207503 | 18 | 15.348 | KV453055.1 | 1747089 | 14-scf00366 | 14 |
| AX-158207504 | 18 | 15.348 | KV453055.1 | 1748256 | 14-scf00366 | 14 |
| AX-157742461 | 18 | 15.348 | KV453055.1 | 1753179 | 14-scf00366 | 14 |
| AX-158207509 | 18 | 15.348 | KV453055.1 | 1758561 | 14-scf00366 | 14 |
| AX-158207510 | 18 | 15.348 | KV453055.1 | 1759044 | 14-scf00366 | 14 |
| AX-158207513 | 18 | 15.348 | KV453055.1 | 1760799 | 14-scf00366 | 14 |
| AX-158207515 | 18 | 15.348 | KV453055.1 | 1762868 | 14-scf00366 | 14 |
| AX-158207728 | 18 | 15.348 | KV453055.1 | 2020435 | 14-scf00366 | 14 |
| AX-158207475 | 18 | 15.567 | KV453055.1 | 1709827 | 14-scf00366 | 14 |
| AX-158207519 | 18 | 15.567 | KV453055.1 | 1769080 | 14-scf00366 | 14 |
| AX-158207521 | 18 | 15.567 | KV453055.1 | 1770599 | 14-scf00366 | 14 |
| AX-158207525 | 18 | 15.567 | KV453055.1 | 1779739 | 14-scf00366 | 14 |
| AX-158207527 | 18 | 15.567 | KV453055.1 | 1781510 | 14-scf00366 | 14 |
| AX-158207528 | 18 | 15.567 | KV453055.1 | 1781950 | 14-scf00366 | 14 |
| AX-158207530 | 18 | 15.567 | KV453055.1 | 1783402 | 14-scf00366 | 14 |
| AX-158207405 | 18 | 15.676 | KV453055.1 | 1622243 | 14-scf00366 | 14 |
| AX-158207410 | 18 | 15.676 | KV453055.1 | 1627881 | 14-scf00366 | 14 |
| AX-158207414 | 18 | 15.676 | KV453055.1 | 1633032 | 14-scf00366 | 14 |
| AX-158207452 | 18 | 15.676 | KV453055.1 | 1681108 | 14-scf00366 | 14 |
| AX-157727033 | 18 | 15.676 | KV453055.1 | 1696017 | 14-scf00366 | 14 |
| AX-158207533 | 18 | 15.676 | KV453055.1 | 1791724 | 14-scf00366 | 14 |
| AX-158207534 | 18 | 15.676 | KV453055.1 | 1792512 | 14-scf00366 | 14 |
| AX-158207535 | 18 | 15.676 | KV453055.1 | 1793513 | 14-scf00366 | 14 |
| AX-158207539 | 18 | 15.716 | KV453055.1 | 1796576 | 14-scf00366 | 14 |
| AX-158207542 | 18 | 15.756 | KV453055.1 | 1800578 | 14-scf00366 | 14 |
| AX-158207413 | 18 | 15.785 | KV453055.1 | 1631318 | 14-scf00366 | 14 |
| AX-158207496 | 18 | 15.785 | KV453055.1 | 1741278 | 14-scf00366 | 14 |
| AX-158207498 | 18 | 15.785 | KV453055.1 | 1742748 | 14-scf00366 | 14 |
| AX-158207506 | 18 | 15.785 | KV453055.1 | 1750967 | 14-scf00366 | 14 |
| AX-158207544 | 18 | 15.785 | KV453055.1 | 1803432 | 14-scf00366 | 14 |
| AX-158207546 | 18 | 15.785 | KV453055.1 | 1807213 | 14-scf00366 | 14 |
| AX-158207547 | 18 | 15.785 | KV453055.1 | 1808749 | 14-scf00366 | 14 |
| AX-158207549 | 18 | 15.785 | KV453055.1 | 1809972 | 14-scf00366 | 14 |
| AX-158207548 | 18 | 15.806 | KV453055.1 | 1809845 | 14-scf00366 | 14 |
| AX-158207556 | 18 | 15.806 | KV453055.1 | 1818559 | 14-scf00366 | 14 |
| AX-158207559 | 18 | 15.806 | KV453055.1 | 1823373 | 14-scf00366 | 14 |
| AX-158207558 | 18 | 16.185 | KV453055.1 | 1822427 | 14-scf00366 | 14 |
| AX-158207560 | 18 | 16.187 | KV453055.1 | 1824712 | 14-scf00366 | 14 |
| AX-158207561 | 18 | 16.187 | KV453055.1 | 1825947 | 14-scf00366 | 14 |
| AX-158207572 | 18 | 16.368 | KV453055.1 | 1838802 | 14-scf00366 | 14 |
| AX-158207573 | 18 | 16.426 | KV453055.1 | 1840452 | 14-scf00366 | 14 |
| AX-158207576 | 18 | 16.426 | KV453055.1 | 1843371 | 14-scf00366 | 14 |
| AX-158207577 | 18 | 16.426 | KV453055.1 | 1844201 | 14-scf00366 | 14 |
| AX-158207578 | 18 | 16.427 | KV453055.1 | 1844827 | 14-scf00366 | 14 |
| AX-158207563 | 18 | 17.091 | KV453055.1 | 1827918 | 14-scf00366 | 14 |

|              |    |        |            |         |             |    |
|--------------|----|--------|------------|---------|-------------|----|
| AX-158207581 | 18 | 17.091 | KV453055.1 | 1847659 | 14-scf00366 | 14 |
| AX-158207583 | 18 | 17.091 | KV453055.1 | 1849992 | 14-scf00366 | 14 |
| AX-157721974 | 18 | 17.091 | KV453055.1 | 1863302 | 14-scf00366 | 14 |
| AX-158207631 | 18 | 17.091 | KV453055.1 | 1900849 | 14-scf00366 | 14 |
| AX-158207604 | 18 | 17.098 | KV453055.1 | 1872693 | 14-scf00366 | 14 |
| AX-158207627 | 18 | 17.104 | KV453055.1 | 1895461 | 14-scf00366 | 14 |
| AX-157740858 | 18 | 17.104 | KV453055.1 | 1916693 | 14-scf00366 | 14 |
| AX-158207645 | 18 | 17.533 | KV453055.1 | 1918617 | 14-scf00366 | 14 |
| AX-158207647 | 18 | 17.533 | KV453055.1 | 1919925 | 14-scf00366 | 14 |
| AX-158207651 | 18 | 17.533 | KV453055.1 | 1926404 | 14-scf00366 | 14 |
| AX-158207652 | 18 | 17.533 | KV453055.1 | 1928607 | 14-scf00366 | 14 |
| AX-158207657 | 18 | 17.533 | KV453055.1 | 1933994 | 14-scf00366 | 14 |
| AX-158207660 | 18 | 17.533 | KV453055.1 | 1938244 | 14-scf00366 | 14 |
| AX-158207662 | 18 | 17.533 | KV453055.1 | 1939115 | 14-scf00366 | 14 |
| AX-158207663 | 18 | 17.533 | KV453055.1 | 1939507 | 14-scf00366 | 14 |
| AX-158207694 | 18 | 17.533 | KV453055.1 | 1984159 | 14-scf00366 | 14 |
| AX-158207696 | 18 | 17.533 | KV453055.1 | 1985775 | 14-scf00366 | 14 |
| AX-158207664 | 18 | 17.697 | KV453055.1 | 1939921 | 14-scf00366 | 14 |
| AX-158207731 | 18 | 17.697 | KV453055.1 | 2022541 | 14-scf00366 | 14 |
| AX-158207584 | 18 | 17.861 | KV453055.1 | 1850748 | 14-scf00366 | 14 |
| AX-158207591 | 18 | 17.861 | KV453055.1 | 1858454 | 14-scf00366 | 14 |
| AX-158386363 | 18 | 17.861 | KV453055.1 | 1881421 | 14-scf00366 | 14 |
| AX-158207642 | 18 | 17.861 | KV453055.1 | 1913768 | 14-scf00366 | 14 |
| AX-158386365 | 18 | 17.861 | KV453055.1 | 1926362 | 14-scf00366 | 14 |
| AX-158207661 | 18 | 17.861 | KV453055.1 | 1938682 | 14-scf00366 | 14 |
| AX-158207665 | 18 | 17.861 | KV453055.1 | 1941426 | 14-scf00366 | 14 |
| AX-158207667 | 18 | 17.861 | KV453055.1 | 1943693 | 14-scf00366 | 14 |
| AX-157753524 | 18 | 17.861 | KV453055.1 | 1951060 | 14-scf00366 | 14 |
| AX-158207670 | 18 | 17.861 | KV453055.1 | 1957240 | 14-scf00366 | 14 |
| AX-157740805 | 18 | 17.861 | KV453055.1 | 1963229 | 14-scf00366 | 14 |
| AX-158207674 | 18 | 17.861 | KV453055.1 | 1964055 | 14-scf00366 | 14 |
| AX-158207675 | 18 | 17.861 | KV453055.1 | 1964284 | 14-scf00366 | 14 |
| AX-158207676 | 18 | 17.861 | KV453055.1 | 1964764 | 14-scf00366 | 14 |
| AX-158207679 | 18 | 17.861 | KV453055.1 | 1966391 | 14-scf00366 | 14 |
| AX-158207681 | 18 | 17.861 | KV453055.1 | 1970812 | 14-scf00366 | 14 |
| AX-158207683 | 18 | 17.861 | KV453055.1 | 1972227 | 14-scf00366 | 14 |
| AX-158207688 | 18 | 17.861 | KV453055.1 | 1975444 | 14-scf00366 | 14 |
| AX-157838070 | 18 | 17.861 | KV453055.1 | 1980396 | 14-scf00366 | 14 |
| AX-158207692 | 18 | 17.861 | KV453055.1 | 1983043 | 14-scf00366 | 14 |
| AX-158207697 | 18 | 17.861 | KV453055.1 | 1986431 | 14-scf00366 | 14 |
| AX-158207713 | 18 | 17.861 | KV453055.1 | 2002842 | 14-scf00366 | 14 |
| AX-157879420 | 18 | 17.861 | KV453055.1 | 2045818 | 14-scf00366 | 14 |
| AX-158207685 | 18 | 18.079 | KV453055.1 | 1973968 | 14-scf00366 | 14 |
| AX-158207687 | 18 | 18.079 | KV453055.1 | 1974905 | 14-scf00366 | 14 |
| AX-158207689 | 18 | 18.079 | KV453055.1 | 1977651 | 14-scf00366 | 14 |
| AX-158207691 | 18 | 18.079 | KV453055.1 | 1981176 | 14-scf00366 | 14 |
| AX-158207705 | 18 | 18.079 | KV453055.1 | 1996061 | 14-scf00366 | 14 |
| AX-158207726 | 18 | 18.079 | KV453055.1 | 2018332 | 14-scf00366 | 14 |
| AX-158207606 | 18 | 18.523 | KV453055.1 | 1874994 | 14-scf00366 | 14 |
| AX-158207608 | 18 | 18.523 | KV453055.1 | 1878217 | 14-scf00366 | 14 |
| AX-158207609 | 18 | 18.523 | KV453055.1 | 1879024 | 14-scf00366 | 14 |

|              |    |        |             |         |             |    |
|--------------|----|--------|-------------|---------|-------------|----|
| AX-158207702 | 18 | 19.507 | KV453055.1  | 1993042 | 14-scf00366 | 14 |
| AX-158207741 | 18 | 19.511 | KV453055.1  | 2031621 | 14-scf00366 | 14 |
| AX-158207755 | 18 | 19.511 | KV453055.1  | 2049973 | 14-scf00366 | 14 |
| AX-158207763 | 18 | 19.511 | KV453055.1  | 2068209 | 14-scf00366 | 14 |
| AX-158207710 | 18 | 19.512 | KV453055.1  | 2001084 | 14-scf00366 | 14 |
| AX-158207716 | 18 | 19.512 | KV453055.1  | 2006546 | 14-scf00366 | 14 |
| AX-158207717 | 18 | 19.512 | KV453055.1  | 2006858 | 14-scf00366 | 14 |
| AX-158409946 | 18 | 19.512 | KV453055.1  | 2008866 | 14-scf00366 | 14 |
| AX-158207722 | 18 | 19.512 | KV453055.1  | 2011645 | 14-scf00366 | 14 |
| AX-158207725 | 18 | 19.512 | KV453055.1  | 2014588 | 14-scf00366 | 14 |
| AX-158207727 | 18 | 19.512 | KV453055.1  | 2020126 | 14-scf00366 | 14 |
| AX-158207765 | 18 | 19.512 | KV453055.1  | 2069654 | 14-scf00366 | 14 |
| AX-158207797 | 18 | 19.512 | KV453055.1  | 2117328 | 14-scf00366 | 14 |
| AX-158207712 | 18 | 19.628 | KV453055.1  | 2002431 | 14-scf00366 | 14 |
| AX-158207715 | 18 | 19.628 | KV453055.1  | 2005206 | 14-scf00366 | 14 |
| AX-158207719 | 18 | 19.628 | KV453055.1  | 2008578 | 14-scf00366 | 14 |
| AX-158207764 | 18 | 19.628 | KV453055.1  | 2069174 | 14-scf00366 | 14 |
| AX-158207585 | 18 | 19.727 | KV453055.1  | 1851130 | 14-scf00366 | 14 |
| AX-158207633 | 18 | 19.727 | KV453055.1  | 1901931 | 14-scf00366 | 14 |
| AX-157708453 | 18 | 19.727 | KV453055.1  | 2016396 | 14-scf00366 | 14 |
| AX-158207732 | 18 | 19.727 | KV453055.1  | 2023368 | 14-scf00366 | 14 |
| AX-158207736 | 18 | 19.727 | KV453055.1  | 2027551 | 14-scf00366 | 14 |
| AX-158207737 | 18 | 19.727 | KV453055.1  | 2028231 | 14-scf00366 | 14 |
| AX-158207821 | 18 | 19.727 | KV453055.1  | 2146486 | 14-scf00366 | 14 |
| AX-158414433 | 18 | 19.837 | KV453055.1  | 2009152 | 14-scf00366 | 14 |
| AX-158207733 | 18 | 19.837 | KV453055.1  | 2024846 | 14-scf00366 | 14 |
| AX-158207738 | 18 | 19.837 | KV453055.1  | 2028659 | 14-scf00366 | 14 |
| AX-158207742 | 18 | 19.837 | KV453055.1  | 2032602 | 14-scf00366 | 14 |
| AX-158207745 | 18 | 19.837 | KV453055.1  | 2039345 | 14-scf00366 | 14 |
| AX-158207746 | 18 | 19.837 | KV453055.1  | 2043021 | 14-scf00366 | 14 |
| AX-158207748 | 18 | 19.837 | KV453055.1  | 2044586 | 14-scf00366 | 14 |
| AX-158207751 | 18 | 19.837 | KV453055.1  | 2046662 | 14-scf00366 | 14 |
| AX-158207753 | 18 | 19.837 | KV453055.1  | 2048066 | 14-scf00366 | 14 |
| AX-158207756 | 18 | 19.837 | KV453055.1  | 2050413 | 14-scf00366 | 14 |
| AX-158207757 | 18 | 19.837 | KV453055.1  | 2050928 | 14-scf00366 | 14 |
| AX-158207759 | 18 | 19.837 | KV453055.1  | 2058400 | 14-scf00366 | 14 |
| AX-158207760 | 18 | 19.837 | KV453055.1  | 2059729 | 14-scf00366 | 14 |
| AX-158207767 | 18 | 19.837 | KV453055.1  | 2075602 | 14-scf00366 | 14 |
| AX-158207768 | 18 | 19.837 | KV453055.1  | 2076936 | 14-scf00366 | 14 |
| AX-158207784 | 18 | 19.837 | KV453055.1  | 2102549 | 14-scf00366 | 14 |
| AX-157706156 | 18 | 19.837 | 3ML01032143 | 624     | scf07756_1  | UN |
| AX-158207774 | 18 | 20.273 | KV453055.1  | 2085388 | 14-scf00366 | 14 |
| AX-158207780 | 18 | 20.273 | KV453055.1  | 2095126 | 14-scf00366 | 14 |
| AX-158207781 | 18 | 20.273 | KV453055.1  | 2098389 | 14-scf00366 | 14 |
| AX-157758867 | 18 | 20.273 | KV453055.1  | 2101853 | 14-scf00366 | 14 |
| AX-158207814 | 18 | 20.273 | KV453055.1  | 2138258 | 14-scf00366 | 14 |
| AX-158207786 | 18 | 20.492 | KV453055.1  | 2104109 | 14-scf00366 | 14 |
| AX-158207789 | 18 | 20.492 | KV453055.1  | 2113332 | 14-scf00366 | 14 |
| AX-158380772 | 18 | 20.492 | KV453055.1  | 2113502 | 14-scf00366 | 14 |
| AX-158207790 | 18 | 20.492 | KV453055.1  | 2113782 | 14-scf00366 | 14 |
| AX-158207794 | 18 | 20.601 | KV453055.1  | 2115835 | 14-scf00366 | 14 |

|              |    |        |             |         |             |    |
|--------------|----|--------|-------------|---------|-------------|----|
| AX-158207795 | 18 | 20.601 | KV453055.1  | 2116292 | 14-scf00366 | 14 |
| AX-158207798 | 18 | 20.601 | KV453055.1  | 2118206 | 14-scf00366 | 14 |
| AX-158207799 | 18 | 20.601 | KV453055.1  | 2119600 | 14-scf00366 | 14 |
| AX-158207801 | 18 | 20.601 | KV453055.1  | 2122993 | 14-scf00366 | 14 |
| AX-158207803 | 18 | 20.601 | KV453055.1  | 2125174 | 14-scf00366 | 14 |
| AX-158386369 | 18 | 20.601 | KV453055.1  | 2131417 | 14-scf00366 | 14 |
| AX-157744075 | 18 | 20.601 | KV453055.1  | 2149338 | 14-scf00366 | 14 |
| AX-157838072 | 18 | 20.966 | KV453055.1  | 2137578 | 14-scf00366 | 14 |
| AX-157706155 | 18 | 20.967 | 3ML01032143 | 260     | scf07756_1  | UN |
| AX-157751292 | 18 | 21.33  | KV453055.1  | 2148882 | 14-scf00366 | 14 |
| AX-158207796 | 18 | 21.331 | KV453055.1  | 2116781 | 14-scf00366 | 14 |
| AX-158207805 | 18 | 21.331 | KV453055.1  | 2127117 | 14-scf00366 | 14 |
| AX-158207816 | 18 | 21.331 | KV453055.1  | 2139535 | 14-scf00366 | 14 |
| AX-157838073 | 18 | 21.331 | KV453055.1  | 2139809 | 14-scf00366 | 14 |
| AX-158207818 | 18 | 21.331 | KV453055.1  | 2142130 | 14-scf00366 | 14 |
| AX-158207819 | 18 | 21.331 | KV453055.1  | 2143853 | 14-scf00366 | 14 |
| AX-158207820 | 18 | 21.331 | KV453055.1  | 2144482 | 14-scf00366 | 14 |
| AX-158207823 | 18 | 21.331 | KV453055.1  | 2148163 | 14-scf00366 | 14 |
| AX-158380773 | 18 | 21.331 | KV453055.1  | 2149659 | 14-scf00366 | 14 |
| AX-158207827 | 18 | 21.331 | KV453055.1  | 2153804 | 14-scf00366 | 14 |
| AX-158207829 | 18 | 21.331 | KV453055.1  | 2156850 | 14-scf00366 | 14 |
| AX-157838074 | 18 | 21.331 | KV453055.1  | 2165238 | 14-scf00366 | 14 |
| AX-158207837 | 18 | 21.331 | KV453055.1  | 2173880 | 14-scf00366 | 14 |
| AX-158207848 | 18 | 21.331 | KV453055.1  | 2191257 | 14-scf00366 | 14 |
| AX-158207813 | 18 | 21.695 | KV453055.1  | 2137812 | 14-scf00366 | 14 |
| AX-158207822 | 18 | 21.695 | KV453055.1  | 2147418 | 14-scf00366 | 14 |
| AX-158207828 | 18 | 21.695 | KV453055.1  | 2154722 | 14-scf00366 | 14 |
| AX-157755569 | 18 | 21.695 | KV453055.1  | 2161082 | 14-scf00366 | 14 |
| AX-158207832 | 18 | 21.695 | KV453055.1  | 2161479 | 14-scf00366 | 14 |
| AX-158207833 | 18 | 21.695 | KV453055.1  | 2162123 | 14-scf00366 | 14 |
| AX-158207835 | 18 | 21.695 | KV453055.1  | 2163694 | 14-scf00366 | 14 |
| AX-158207836 | 18 | 21.695 | KV453055.1  | 2164111 | 14-scf00366 | 14 |
| AX-158207839 | 18 | 21.695 | KV453055.1  | 2177808 | 14-scf00366 | 14 |
| AX-158207840 | 18 | 21.695 | KV453055.1  | 2178688 | 14-scf00366 | 14 |
| AX-158207843 | 18 | 21.695 | KV453055.1  | 2183724 | 14-scf00366 | 14 |
| AX-157838075 | 18 | 21.695 | KV453055.1  | 2195722 | 14-scf00366 | 14 |
| AX-158207850 | 18 | 21.695 | KV453055.1  | 2197928 | 14-scf00366 | 14 |
| AX-158207844 | 18 | 21.805 | KV453055.1  | 2187496 | 14-scf00366 | 14 |
| AX-158207845 | 18 | 21.805 | KV453055.1  | 2187956 | 14-scf00366 | 14 |
| AX-158207847 | 18 | 21.93  | KV453055.1  | 2190454 | 14-scf00366 | 14 |
| AX-157859098 | 18 | 21.93  | KV453055.1  | 2200732 | 14-scf00366 | 14 |
| AX-158207851 | 18 | 21.93  | KV453055.1  | 2200992 | 14-scf00366 | 14 |
| AX-157713844 | 18 | 21.93  | KV453055.1  | 2208896 | 14-scf00366 | 14 |
| AX-158207857 | 18 | 22.529 | KV453055.1  | 2213857 | 14-scf00366 | 14 |
| AX-158207892 | 18 | 22.57  | KV453055.1  | 2267197 | 14-scf00366 | 14 |
| AX-158207853 | 18 | 22.679 | KV453055.1  | 2203758 | 14-scf00366 | 14 |
| AX-157750831 | 18 | 22.679 | KV453055.1  | 2205168 | 14-scf00366 | 14 |
| AX-158207854 | 18 | 22.679 | KV453055.1  | 2205660 | 14-scf00366 | 14 |
| AX-158207856 | 18 | 22.679 | KV453055.1  | 2206967 | 14-scf00366 | 14 |
| AX-158207862 | 18 | 22.679 | KV453055.1  | 2218859 | 14-scf00366 | 14 |
| AX-158207863 | 18 | 22.679 | KV453055.1  | 2219597 | 14-scf00366 | 14 |

|              |    |        |            |         |             |    |
|--------------|----|--------|------------|---------|-------------|----|
| AX-158207898 | 18 | 22.679 | KV453055.1 | 2276700 | 14-scf00366 | 14 |
| AX-158207864 | 18 | 22.898 | KV453055.1 | 2223105 | 14-scf00366 | 14 |
| AX-158207865 | 18 | 22.898 | KV453055.1 | 2223587 | 14-scf00366 | 14 |
| AX-158207868 | 18 | 22.898 | KV453055.1 | 2227787 | 14-scf00366 | 14 |
| AX-158207869 | 18 | 22.898 | KV453055.1 | 2228644 | 14-scf00366 | 14 |
| AX-157724655 | 18 | 22.898 | KV453055.1 | 2234721 | 14-scf00366 | 14 |
| AX-158207873 | 18 | 22.898 | KV453055.1 | 2238262 | 14-scf00366 | 14 |
| AX-157726555 | 18 | 22.898 | KV453055.1 | 2244081 | 14-scf00366 | 14 |
| AX-158207881 | 18 | 23.465 | KV453055.1 | 2254046 | 14-scf00366 | 14 |
| AX-158207901 | 18 | 23.465 | KV453055.1 | 2279834 | 14-scf00366 | 14 |
| AX-158393970 | 18 | 23.607 | KV453055.1 | 2274995 | 14-scf00366 | 14 |
| AX-158207875 | 18 | 23.654 | KV453055.1 | 2243090 | 14-scf00366 | 14 |
| AX-158207907 | 18 | 23.763 | KV453055.1 | 2291121 | 14-scf00366 | 14 |
| AX-158207885 | 18 | 23.764 | KV453055.1 | 2259875 | 14-scf00366 | 14 |
| AX-157755662 | 18 | 23.764 | KV453055.1 | 2274507 | 14-scf00366 | 14 |
| AX-158207900 | 18 | 23.764 | KV453055.1 | 2278309 | 14-scf00366 | 14 |
| AX-158207905 | 18 | 23.764 | KV453055.1 | 2288881 | 14-scf00366 | 14 |
| AX-157742835 | 18 | 24.012 | KV453055.1 | 2298539 | 14-scf00366 | 14 |
| AX-157887143 | 18 | 24.012 | KV453055.1 | 2306231 | 14-scf00366 | 14 |
| AX-158207918 | 18 | 24.012 | KV453055.1 | 2309191 | 14-scf00366 | 14 |
| AX-158207920 | 18 | 24.012 | KV453055.1 | 2310269 | 14-scf00366 | 14 |
| AX-158207934 | 18 | 24.137 | KV453055.1 | 2328946 | 14-scf00366 | 14 |
| AX-158207919 | 18 | 24.261 | KV453055.1 | 2309743 | 14-scf00366 | 14 |
| AX-158207922 | 18 | 24.385 | KV453055.1 | 2316747 | 14-scf00366 | 14 |
| AX-158207886 | 18 | 24.509 | KV453055.1 | 2261123 | 14-scf00366 | 14 |
| AX-158409950 | 18 | 24.509 | KV453055.1 | 2311712 | 14-scf00366 | 14 |
| AX-158393972 | 18 | 24.509 | KV453055.1 | 2320292 | 14-scf00366 | 14 |
| AX-158207929 | 18 | 24.634 | KV453055.1 | 2323031 | 14-scf00366 | 14 |
| AX-158207931 | 18 | 24.758 | KV453055.1 | 2326234 | 14-scf00366 | 14 |
| AX-158207933 | 18 | 24.758 | KV453055.1 | 2328122 | 14-scf00366 | 14 |
| AX-157754787 | 18 | 24.758 | KV453055.1 | 2328543 | 14-scf00366 | 14 |
| AX-158207935 | 18 | 24.758 | KV453055.1 | 2329979 | 14-scf00366 | 14 |
| AX-158207936 | 18 | 24.758 | KV453055.1 | 2333877 | 14-scf00366 | 14 |
| AX-157838082 | 18 | 24.758 | KV453055.1 | 2384117 | 14-scf00366 | 14 |
| AX-158207945 | 18 | 24.977 | KV453055.1 | 2353853 | 14-scf00366 | 14 |
| AX-157838079 | 18 | 25.044 | KV453055.1 | 2362411 | 14-scf00366 | 14 |
| AX-158207943 | 18 | 25.119 | KV453055.1 | 2352482 | 14-scf00366 | 14 |
| AX-157715664 | 18 | 25.119 | KV453055.1 | 2376043 | 14-scf00366 | 14 |
| AX-158208013 | 18 | 25.119 | KV453055.1 | 2484057 | 14-scf00366 | 14 |
| AX-158207902 | 18 | 25.194 | KV453055.1 | 2280412 | 14-scf00366 | 14 |
| AX-158207949 | 18 | 25.194 | KV453055.1 | 2357985 | 14-scf00366 | 14 |
| AX-158207889 | 18 | 25.195 | KV453055.1 | 2262874 | 14-scf00366 | 14 |
| AX-158207942 | 18 | 25.195 | KV453055.1 | 2349753 | 14-scf00366 | 14 |
| AX-157838078 | 18 | 25.196 | KV453055.1 | 2354830 | 14-scf00366 | 14 |
| AX-158207882 | 18 | 25.632 | KV453055.1 | 2254834 | 14-scf00366 | 14 |
| AX-158207912 | 18 | 25.632 | KV453055.1 | 2299543 | 14-scf00366 | 14 |
| AX-157838077 | 18 | 25.632 | KV453055.1 | 2316542 | 14-scf00366 | 14 |
| AX-158207941 | 18 | 25.632 | KV453055.1 | 2348227 | 14-scf00366 | 14 |
| AX-157716741 | 18 | 25.632 | KV453055.1 | 2365905 | 14-scf00366 | 14 |
| AX-157721738 | 18 | 25.632 | KV453055.1 | 2372333 | 14-scf00366 | 14 |
| AX-158207952 | 18 | 25.632 | KV453055.1 | 2376541 | 14-scf00366 | 14 |



|              |    |        |            |         |             |    |
|--------------|----|--------|------------|---------|-------------|----|
| AX-157756099 | 18 | 25.632 | KV453055.1 | 2381860 | 14-scf00366 | 14 |
| AX-158207957 | 18 | 25.632 | KV453055.1 | 2385044 | 14-scf00366 | 14 |
| AX-157838083 | 18 | 25.883 | KV453055.1 | 2388755 | 14-scf00366 | 14 |
| AX-158207959 | 18 | 25.883 | KV453055.1 | 2391888 | 14-scf00366 | 14 |
| AX-157838087 | 18 | 25.883 | KV453055.1 | 2461803 | 14-scf00366 | 14 |
| AX-158207961 | 18 | 26.469 | KV453055.1 | 2397734 | 14-scf00366 | 14 |
| AX-157711829 | 18 | 26.469 | KV453055.1 | 2398138 | 14-scf00366 | 14 |
| AX-158207962 | 18 | 26.469 | KV453055.1 | 2398990 | 14-scf00366 | 14 |
| AX-158207963 | 18 | 26.469 | KV453055.1 | 2400728 | 14-scf00366 | 14 |
| AX-158207964 | 18 | 26.469 | KV453055.1 | 2403127 | 14-scf00366 | 14 |
| AX-158207967 | 18 | 26.707 | KV453055.1 | 2405972 | 14-scf00366 | 14 |
| AX-158207970 | 18 | 26.945 | KV453055.1 | 2409423 | 14-scf00366 | 14 |
| AX-158207972 | 18 | 26.945 | KV453055.1 | 2412843 | 14-scf00366 | 14 |
| AX-158207974 | 18 | 26.945 | KV453055.1 | 2414662 | 14-scf00366 | 14 |
| AX-158207969 | 18 | 27.381 | KV453055.1 | 2408260 | 14-scf00366 | 14 |
| AX-158207973 | 18 | 27.381 | KV453055.1 | 2414111 | 14-scf00366 | 14 |
| AX-158207979 | 18 | 27.381 | KV453055.1 | 2417845 | 14-scf00366 | 14 |
| AX-158207987 | 18 | 27.381 | KV453055.1 | 2429435 | 14-scf00366 | 14 |
| AX-158207989 | 18 | 27.381 | KV453055.1 | 2434743 | 14-scf00366 | 14 |
| AX-158207994 | 18 | 27.381 | KV453055.1 | 2449070 | 14-scf00366 | 14 |
| AX-158207995 | 18 | 27.381 | KV453055.1 | 2453483 | 14-scf00366 | 14 |
| AX-158208000 | 18 | 27.381 | KV453055.1 | 2457602 | 14-scf00366 | 14 |
| AX-158207968 | 18 | 27.491 | KV453055.1 | 2407175 | 14-scf00366 | 14 |
| AX-157717449 | 18 | 27.491 | KV453055.1 | 2410903 | 14-scf00366 | 14 |
| AX-158207982 | 18 | 27.491 | KV453055.1 | 2425651 | 14-scf00366 | 14 |
| AX-158207983 | 18 | 27.491 | KV453055.1 | 2426096 | 14-scf00366 | 14 |
| AX-158207988 | 18 | 27.491 | KV453055.1 | 2430803 | 14-scf00366 | 14 |
| AX-158207990 | 18 | 27.491 | KV453055.1 | 2436900 | 14-scf00366 | 14 |
| AX-158207991 | 18 | 27.491 | KV453055.1 | 2437316 | 14-scf00366 | 14 |
| AX-158207993 | 18 | 27.491 | KV453055.1 | 2445069 | 14-scf00366 | 14 |
| AX-158208001 | 18 | 27.491 | KV453055.1 | 2461363 | 14-scf00366 | 14 |
| AX-157748215 | 18 | 27.491 | KV453055.1 | 2463643 | 14-scf00366 | 14 |
| AX-157838088 | 18 | 27.491 | KV453055.1 | 2463685 | 14-scf00366 | 14 |
| AX-158208002 | 18 | 27.491 | KV453055.1 | 2464115 | 14-scf00366 | 14 |
| AX-157716408 | 18 | 27.491 | KV453055.1 | 2465534 | 14-scf00366 | 14 |
| AX-157773707 | 18 | 27.491 | KV453055.1 | 2467363 | 14-scf00366 | 14 |
| AX-158208003 | 18 | 27.491 | KV453055.1 | 2468430 | 14-scf00366 | 14 |
| AX-157838089 | 18 | 27.491 | KV453055.1 | 2471210 | 14-scf00366 | 14 |
| AX-157717357 | 18 | 27.491 | KV453055.1 | 2474038 | 14-scf00366 | 14 |
| AX-158208009 | 18 | 27.491 | KV453055.1 | 2480180 | 14-scf00366 | 14 |
| AX-157838091 | 18 | 27.491 | KV453055.1 | 2481607 | 14-scf00366 | 14 |
| AX-157717058 | 18 | 27.491 | KV453055.1 | 2482924 | 14-scf00366 | 14 |
| AX-158208012 | 18 | 27.491 | KV453055.1 | 2483538 | 14-scf00366 | 14 |
| AX-158208017 | 18 | 27.491 | KV453055.1 | 2501287 | 14-scf00366 | 14 |
| AX-158208024 | 18 | 27.491 | KV453055.1 | 2513636 | 14-scf00366 | 14 |
| AX-158207980 | 18 | 27.618 | KV453055.1 | 2423716 | 14-scf00366 | 14 |
| AX-158208008 | 18 | 27.71  | KV453055.1 | 2478114 | 14-scf00366 | 14 |
| AX-157838092 | 18 | 27.71  | KV453055.1 | 2494767 | 14-scf00366 | 14 |
| AX-158207996 | 18 | 28.147 | KV453055.1 | 2453915 | 14-scf00366 | 14 |
| AX-158208004 | 18 | 28.147 | KV453055.1 | 2469515 | 14-scf00366 | 14 |
| AX-157887144 | 18 | 28.147 | KV453055.1 | 2501034 | 14-scf00366 | 14 |

|              |    |        |            |         |              |    |
|--------------|----|--------|------------|---------|--------------|----|
| AX-158208021 | 18 | 28.147 | KV453055.1 | 2507411 | 14-scf00366  | 14 |
| AX-158208023 | 18 | 28.147 | KV453055.1 | 2512951 | 14-scf00366  | 14 |
| AX-157754664 | 18 | 28.147 | KV453055.1 | 2515885 | 14-scf00366  | 14 |
| AX-157838093 | 18 | 28.147 | KV453055.1 | 2525271 | 14-scf00366  | 14 |
| AX-158208032 | 18 | 28.147 | KV453055.1 | 2525587 | 14-scf00366  | 14 |
| AX-158208033 | 18 | 28.147 | KV453055.1 | 2526386 | 14-scf00366  | 14 |
| AX-157727826 | 18 | 28.147 | KV453055.1 | 2531491 | 14-scf00366  | 14 |
| AX-157838094 | 18 | 28.147 | KV453055.1 | 2533811 | 14-scf00366  | 14 |
| AX-158208036 | 18 | 28.147 | KV453055.1 | 2535807 | 14-scf00366  | 14 |
| AX-158208037 | 18 | 28.147 | KV453055.1 | 2536309 | 14-scf00366  | 14 |
| AX-157744881 | 18 | 28.147 | KV453055.1 | 2536976 | 14-scf00366  | 14 |
| AX-158208038 | 18 | 28.147 | KV453055.1 | 2537370 | 14-scf00366  | 14 |
| AX-158208042 | 18 | 28.147 | KV453055.1 | 2544845 | 14-scf00366  | 14 |
| AX-158208058 | 18 | 28.147 | KV453055.1 | 2570382 | 14-scf00366  | 14 |
| AX-158208247 | 18 | 28.147 | KV453055.1 | 2889429 | 14-scf00366  | 14 |
| AX-157711017 | 18 | 28.147 |            | 382     | :222605_g4_i | UN |
| AX-157879430 | 18 | 28.415 | KV453055.1 | 2547086 | 14-scf00366  | 14 |
| AX-158208065 | 18 | 28.415 | KV453055.1 | 2579010 | 14-scf00366  | 14 |
| AX-158208046 | 18 | 28.515 | KV453055.1 | 2553343 | 14-scf00366  | 14 |
| AX-157774769 | 18 | 28.515 | KV453055.1 | 2554637 | 14-scf00366  | 14 |
| AX-158208018 | 18 | 28.694 | KV453055.1 | 2503322 | 14-scf00366  | 14 |
| AX-158208019 | 18 | 28.694 | KV453055.1 | 2503926 | 14-scf00366  | 14 |
| AX-157755025 | 18 | 28.694 | KV453055.1 | 2547208 | 14-scf00366  | 14 |
| AX-157721524 | 18 | 28.694 | KV453055.1 | 2549824 | 14-scf00366  | 14 |
| AX-158208049 | 18 | 28.694 | KV453055.1 | 2557443 | 14-scf00366  | 14 |
| AX-158208050 | 18 | 28.694 | KV453055.1 | 2559127 | 14-scf00366  | 14 |
| AX-158208056 | 18 | 28.694 | KV453055.1 | 2567823 | 14-scf00366  | 14 |
| AX-157771613 | 18 | 28.694 | KV453055.1 | 2587193 | 14-scf00366  | 14 |
| AX-158208240 | 18 | 28.694 | KV453055.1 | 2880800 | 14-scf00366  | 14 |
| AX-157859108 | 18 | 28.694 | KV453055.1 | 2904217 | 14-scf00366  | 14 |
| AX-158208011 | 18 | 28.912 | KV453055.1 | 2481299 | 14-scf00366  | 14 |
| AX-158208031 | 18 | 28.912 | KV453055.1 | 2525220 | 14-scf00366  | 14 |
| AX-158208054 | 18 | 28.912 | KV453055.1 | 2566279 | 14-scf00366  | 14 |
| AX-158208057 | 18 | 28.912 | KV453055.1 | 2569999 | 14-scf00366  | 14 |
| AX-158208061 | 18 | 28.912 | KV453055.1 | 2574088 | 14-scf00366  | 14 |
| AX-158208063 | 18 | 28.912 | KV453055.1 | 2575204 | 14-scf00366  | 14 |
| AX-158208067 | 18 | 28.912 | KV453055.1 | 2581440 | 14-scf00366  | 14 |
| AX-158208073 | 18 | 28.912 | KV453055.1 | 2587525 | 14-scf00366  | 14 |
| AX-158386380 | 18 | 28.912 | KV453055.1 | 2587946 | 14-scf00366  | 14 |
| AX-157743211 | 18 | 28.912 | KV453055.1 | 2589830 | 14-scf00366  | 14 |
| AX-158208078 | 18 | 28.912 | KV453055.1 | 2593495 | 14-scf00366  | 14 |
| AX-158208083 | 18 | 28.912 | KV453055.1 | 2598135 | 14-scf00366  | 14 |
| AX-157838100 | 18 | 28.912 | KV453055.1 | 2626225 | 14-scf00366  | 14 |
| AX-157739609 | 18 | 28.912 | KV453055.1 | 2641937 | 14-scf00366  | 14 |
| AX-158208059 | 18 | 29.021 | KV453055.1 | 2571034 | 14-scf00366  | 14 |
| AX-158208071 | 18 | 29.131 | KV453055.1 | 2584087 | 14-scf00366  | 14 |
| AX-158208079 | 18 | 29.131 | KV453055.1 | 2594292 | 14-scf00366  | 14 |
| AX-158208080 | 18 | 29.131 | KV453055.1 | 2595737 | 14-scf00366  | 14 |
| AX-158208084 | 18 | 29.299 | KV453055.1 | 2598990 | 14-scf00366  | 14 |
| AX-158208085 | 18 | 29.299 | KV453055.1 | 2599347 | 14-scf00366  | 14 |
| AX-157838095 | 18 | 29.299 | KV453055.1 | 2599657 | 14-scf00366  | 14 |

|              |    |        |            |         |             |    |
|--------------|----|--------|------------|---------|-------------|----|
| AX-158208086 | 18 | 29.299 | KV453055.1 | 2602191 | 14-scf00366 | 14 |
| AX-158208087 | 18 | 29.299 | KV453055.1 | 2603522 | 14-scf00366 | 14 |
| AX-157838097 | 18 | 29.299 | KV453055.1 | 2609295 | 14-scf00366 | 14 |
| AX-157716360 | 18 | 29.299 | KV453055.1 | 2609820 | 14-scf00366 | 14 |
| AX-157725990 | 18 | 29.299 | KV453055.1 | 2616429 | 14-scf00366 | 14 |
| AX-158208163 | 18 | 29.299 | KV453055.1 | 2757763 | 14-scf00366 | 14 |
| AX-158208051 | 18 | 29.44  | KV453055.1 | 2560671 | 14-scf00366 | 14 |
| AX-158208066 | 18 | 29.44  | KV453055.1 | 2581168 | 14-scf00366 | 14 |
| AX-158208088 | 18 | 29.44  | KV453055.1 | 2605270 | 14-scf00366 | 14 |
| AX-158208090 | 18 | 29.44  | KV453055.1 | 2607417 | 14-scf00366 | 14 |
| AX-157838099 | 18 | 29.747 | KV453055.1 | 2626013 | 14-scf00366 | 14 |
| AX-157751245 | 18 | 29.747 | KV453055.1 | 2629948 | 14-scf00366 | 14 |
| AX-158208097 | 18 | 29.747 | KV453055.1 | 2631330 | 14-scf00366 | 14 |
| AX-158208199 | 18 | 29.747 | KV453055.1 | 2815112 | 14-scf00366 | 14 |
| AX-158208203 | 18 | 29.747 | KV453055.1 | 2821349 | 14-scf00366 | 14 |
| AX-158208027 | 18 | 30.005 | KV453055.1 | 2521554 | 14-scf00366 | 14 |
| AX-158208030 | 18 | 30.005 | KV453055.1 | 2524719 | 14-scf00366 | 14 |
| AX-157879434 | 18 | 30.005 | KV453055.1 | 2624766 | 14-scf00366 | 14 |
| AX-158208104 | 18 | 30.005 | KV453055.1 | 2639332 | 14-scf00366 | 14 |
| AX-158208105 | 18 | 30.005 | KV453055.1 | 2641530 | 14-scf00366 | 14 |
| AX-158208106 | 18 | 30.005 | KV453055.1 | 2642479 | 14-scf00366 | 14 |
| AX-158208107 | 18 | 30.005 | KV453055.1 | 2644066 | 14-scf00366 | 14 |
| AX-158208108 | 18 | 30.005 | KV453055.1 | 2650457 | 14-scf00366 | 14 |
| AX-158208111 | 18 | 30.005 | KV453055.1 | 2653516 | 14-scf00366 | 14 |
| AX-158414439 | 18 | 30.005 | KV453055.1 | 2664554 | 14-scf00366 | 14 |
| AX-157726360 | 18 | 30.005 | KV453055.1 | 2665736 | 14-scf00366 | 14 |
| AX-158208120 | 18 | 30.005 | KV453055.1 | 2669414 | 14-scf00366 | 14 |
| AX-157838104 | 18 | 30.005 | KV453055.1 | 2670521 | 14-scf00366 | 14 |
| AX-158208121 | 18 | 30.005 | KV453055.1 | 2671588 | 14-scf00366 | 14 |
| AX-158208124 | 18 | 30.005 | KV453055.1 | 2677151 | 14-scf00366 | 14 |
| AX-157726791 | 18 | 30.005 | KV453055.1 | 2693904 | 14-scf00366 | 14 |
| AX-158208133 | 18 | 30.005 | KV453055.1 | 2700354 | 14-scf00366 | 14 |
| AX-158208138 | 18 | 30.005 | KV453055.1 | 2708960 | 14-scf00366 | 14 |
| AX-158208146 | 18 | 30.005 | KV453055.1 | 2717914 | 14-scf00366 | 14 |
| AX-158208148 | 18 | 30.005 | KV453055.1 | 2718673 | 14-scf00366 | 14 |
| AX-157838117 | 18 | 30.005 | KV453055.1 | 2721323 | 14-scf00366 | 14 |
| AX-157838119 | 18 | 30.005 | KV453055.1 | 2723149 | 14-scf00366 | 14 |
| AX-158208154 | 18 | 30.005 | KV453055.1 | 2735701 | 14-scf00366 | 14 |
| AX-158208161 | 18 | 30.005 | KV453055.1 | 2751721 | 14-scf00366 | 14 |
| AX-158208193 | 18 | 30.005 | KV453055.1 | 2805366 | 14-scf00366 | 14 |
| AX-158208228 | 18 | 30.005 | KV453055.1 | 2855115 | 14-scf00366 | 14 |
| AX-158208317 | 18 | 30.005 | KV453055.1 | 3001818 | 14-scf00366 | 14 |
| AX-158208110 | 18 | 30.114 | KV453055.1 | 2652993 | 14-scf00366 | 14 |
| AX-157838101 | 18 | 30.114 | KV453055.1 | 2660297 | 14-scf00366 | 14 |
| AX-158208117 | 18 | 30.114 | KV453055.1 | 2663249 | 14-scf00366 | 14 |
| AX-157717777 | 18 | 30.114 | KV453055.1 | 2680371 | 14-scf00366 | 14 |
| AX-158208125 | 18 | 30.114 | KV453055.1 | 2681421 | 14-scf00366 | 14 |
| AX-158208126 | 18 | 30.114 | KV453055.1 | 2683866 | 14-scf00366 | 14 |
| AX-158208130 | 18 | 30.114 | KV453055.1 | 2695645 | 14-scf00366 | 14 |
| AX-158414442 | 18 | 30.114 | KV453055.1 | 2699937 | 14-scf00366 | 14 |
| AX-157838107 | 18 | 30.114 | KV453055.1 | 2702668 | 14-scf00366 | 14 |

|              |    |        |            |         |             |    |
|--------------|----|--------|------------|---------|-------------|----|
| AX-158208135 | 18 | 30.114 | KV453055.1 | 2704085 | 14-scf00366 | 14 |
| AX-157838109 | 18 | 30.114 | KV453055.1 | 2705833 | 14-scf00366 | 14 |
| AX-157838110 | 18 | 30.114 | KV453055.1 | 2706637 | 14-scf00366 | 14 |
| AX-157838112 | 18 | 30.114 | KV453055.1 | 2710945 | 14-scf00366 | 14 |
| AX-158208151 | 18 | 30.114 | KV453055.1 | 2723704 | 14-scf00366 | 14 |
| AX-157838126 | 18 | 30.114 | KV453055.1 | 2755826 | 14-scf00366 | 14 |
| AX-158208189 | 18 | 30.114 | KV453055.1 | 2799721 | 14-scf00366 | 14 |
| AX-158208137 | 18 | 30.224 | KV453055.1 | 2708467 | 14-scf00366 | 14 |
| AX-158208140 | 18 | 30.224 | KV453055.1 | 2709756 | 14-scf00366 | 14 |
| AX-157838114 | 18 | 30.224 | KV453055.1 | 2716455 | 14-scf00366 | 14 |
| AX-157838115 | 18 | 30.224 | KV453055.1 | 2716668 | 14-scf00366 | 14 |
| AX-158208147 | 18 | 30.224 | KV453055.1 | 2718372 | 14-scf00366 | 14 |
| AX-158208152 | 18 | 30.224 | KV453055.1 | 2729290 | 14-scf00366 | 14 |
| AX-157838120 | 18 | 30.224 | KV453055.1 | 2734286 | 14-scf00366 | 14 |
| AX-158208158 | 18 | 30.224 | KV453055.1 | 2740959 | 14-scf00366 | 14 |
| AX-157838121 | 18 | 30.224 | KV453055.1 | 2747199 | 14-scf00366 | 14 |
| AX-157838122 | 18 | 30.224 | KV453055.1 | 2748245 | 14-scf00366 | 14 |
| AX-158208162 | 18 | 30.224 | KV453055.1 | 2753254 | 14-scf00366 | 14 |
| AX-158208167 | 18 | 30.224 | KV453055.1 | 2760400 | 14-scf00366 | 14 |
| AX-157838129 | 18 | 30.224 | KV453055.1 | 2780468 | 14-scf00366 | 14 |
| AX-157752715 | 18 | 30.224 | KV453055.1 | 2807956 | 14-scf00366 | 14 |
| AX-158208229 | 18 | 30.224 | KV453055.1 | 2857656 | 14-scf00366 | 14 |
| AX-158208232 | 18 | 30.224 | KV453055.1 | 2869962 | 14-scf00366 | 14 |
| AX-158208260 | 18 | 30.224 | KV453055.1 | 2909957 | 14-scf00366 | 14 |
| AX-158208129 | 18 | 30.333 | KV453055.1 | 2693288 | 14-scf00366 | 14 |
| AX-158414440 | 18 | 30.333 | KV453055.1 | 2699765 | 14-scf00366 | 14 |
| AX-157838108 | 18 | 30.333 | KV453055.1 | 2704307 | 14-scf00366 | 14 |
| AX-158208142 | 18 | 30.333 | KV453055.1 | 2712652 | 14-scf00366 | 14 |
| AX-158208143 | 18 | 30.333 | KV453055.1 | 2715986 | 14-scf00366 | 14 |
| AX-158208144 | 18 | 30.333 | KV453055.1 | 2716742 | 14-scf00366 | 14 |
| AX-158208150 | 18 | 30.333 | KV453055.1 | 2722755 | 14-scf00366 | 14 |
| AX-158208157 | 18 | 30.333 | KV453055.1 | 2740362 | 14-scf00366 | 14 |
| AX-158208169 | 18 | 30.333 | KV453055.1 | 2764796 | 14-scf00366 | 14 |
| AX-157838127 | 18 | 30.333 | KV453055.1 | 2765853 | 14-scf00366 | 14 |
| AX-157746997 | 18 | 30.333 | KV453055.1 | 2776374 | 14-scf00366 | 14 |
| AX-158208174 | 18 | 30.333 | KV453055.1 | 2776949 | 14-scf00366 | 14 |
| AX-157879435 | 18 | 30.333 | KV453055.1 | 2777582 | 14-scf00366 | 14 |
| AX-157838130 | 18 | 30.333 | KV453055.1 | 2780761 | 14-scf00366 | 14 |
| AX-157740692 | 18 | 30.333 | KV453055.1 | 2784706 | 14-scf00366 | 14 |
| AX-158208178 | 18 | 30.333 | KV453055.1 | 2785063 | 14-scf00366 | 14 |
| AX-158208179 | 18 | 30.333 | KV453055.1 | 2785547 | 14-scf00366 | 14 |
| AX-158208184 | 18 | 30.333 | KV453055.1 | 2792095 | 14-scf00366 | 14 |
| AX-157773354 | 18 | 30.333 | KV453055.1 | 2792725 | 14-scf00366 | 14 |
| AX-158208215 | 18 | 30.333 | KV453055.1 | 2836904 | 14-scf00366 | 14 |
| AX-158386387 | 18 | 30.333 | KV453055.1 | 2874181 | 14-scf00366 | 14 |
| AX-158208244 | 18 | 30.333 | KV453055.1 | 2886571 | 14-scf00366 | 14 |
| AX-158208062 | 18 | 30.442 | KV453055.1 | 2574567 | 14-scf00366 | 14 |
| AX-158208109 | 18 | 30.442 | KV453055.1 | 2651379 | 14-scf00366 | 14 |
| AX-158208156 | 18 | 30.442 | KV453055.1 | 2737849 | 14-scf00366 | 14 |
| AX-157838125 | 18 | 30.442 | KV453055.1 | 2754541 | 14-scf00366 | 14 |
| AX-158208171 | 18 | 30.442 | KV453055.1 | 2767603 | 14-scf00366 | 14 |

|              |    |        |            |         |                  |    |
|--------------|----|--------|------------|---------|------------------|----|
| AX-158208180 | 18 | 30.442 | KV453055.1 | 2786100 | 14-scf00366      | 14 |
| AX-158208186 | 18 | 30.442 | KV453055.1 | 2796357 | 14-scf00366      | 14 |
| AX-158208187 | 18 | 30.442 | KV453055.1 | 2796790 | 14-scf00366      | 14 |
| AX-158208188 | 18 | 30.442 | KV453055.1 | 2799578 | 14-scf00366      | 14 |
| AX-158208190 | 18 | 30.442 | KV453055.1 | 2800147 | 14-scf00366      | 14 |
| AX-158208099 | 18 | 30.66  | KV453055.1 | 2633394 | 14-scf00366      | 14 |
| AX-158208191 | 18 | 30.66  | KV453055.1 | 2803930 | 14-scf00366      | 14 |
| AX-158208216 | 18 | 30.66  | KV453055.1 | 2838109 | 14-scf00366      | 14 |
| AX-158208226 | 18 | 30.66  | KV453055.1 | 2853950 | 14-scf00366      | 14 |
| AX-157838111 | 18 | 30.879 | KV453055.1 | 2708207 | 14-scf00366      | 14 |
| AX-157838113 | 18 | 30.879 | KV453055.1 | 2715190 | 14-scf00366      | 14 |
| AX-158208164 | 18 | 30.879 | KV453055.1 | 2758647 | 14-scf00366      | 14 |
| AX-158208172 | 18 | 30.879 | KV453055.1 | 2772944 | 14-scf00366      | 14 |
| AX-157772725 | 18 | 30.879 | KV453055.1 | 2807407 | 14-scf00366      | 14 |
| AX-158208196 | 18 | 30.879 | KV453055.1 | 2813170 | 14-scf00366      | 14 |
| AX-158208198 | 18 | 30.879 | KV453055.1 | 2814155 | 14-scf00366      | 14 |
| AX-158208204 | 18 | 30.879 | KV453055.1 | 2821847 | 14-scf00366      | 14 |
| AX-158208206 | 18 | 30.879 | KV453055.1 | 2822849 | 14-scf00366      | 14 |
| AX-158208166 | 18 | 31.097 | KV453055.1 | 2759980 | 14-scf00366      | 14 |
| AX-158208175 | 18 | 31.097 | KV453055.1 | 2777536 | 14-scf00366      | 14 |
| AX-158386385 | 18 | 31.097 | KV453055.1 | 2819557 | 14-scf00366      | 14 |
| AX-158208211 | 18 | 31.097 | KV453055.1 | 2830933 | 14-scf00366      | 14 |
| AX-157697119 | 18 | 31.097 | KV453055.1 | 2832564 | 14-scf00366      | 14 |
| AX-158208214 | 18 | 31.097 | KV453055.1 | 2835282 | 14-scf00366      | 14 |
| AX-158208219 | 18 | 31.097 | KV453055.1 | 2844143 | 14-scf00366      | 14 |
| AX-157747700 | 18 | 31.097 | KV453055.1 | 2858757 | 14-scf00366      | 14 |
| AX-158208251 | 18 | 31.097 | KV453055.1 | 2892795 | 14-scf00366      | 14 |
| AX-158208103 | 18 | 31.261 | KV453055.1 | 2637966 | 14-scf00366      | 14 |
| AX-158414443 | 18 | 31.261 | KV453055.1 | 2738070 | 14-scf00366      | 14 |
| AX-158208165 | 18 | 31.261 | KV453055.1 | 2759203 | 14-scf00366      | 14 |
| AX-158208173 | 18 | 31.261 | KV453055.1 | 2773897 | 14-scf00366      | 14 |
| AX-158208217 | 18 | 31.261 | KV453055.1 | 2838621 | 14-scf00366      | 14 |
| AX-158208218 | 18 | 31.261 | KV453055.1 | 2840646 | 14-scf00366      | 14 |
| AX-158208221 | 18 | 31.261 | KV453055.1 | 2846378 | 14-scf00366      | 14 |
| AX-158208225 | 18 | 31.261 | KV453055.1 | 2849881 | 14-scf00366      | 14 |
| AX-158393976 | 18 | 31.261 | KV453055.1 | 2850141 | 14-scf00366      | 14 |
| AX-158208307 | 18 | 31.261 | KV453055.1 | 2985244 | 14-scf00366      | 14 |
| AX-158208224 | 18 | 31.284 | KV453055.1 | 2848727 | 14-scf00366      | 14 |
| AX-158414446 | 18 | 31.425 | KV453055.1 | 2865077 | 14-scf00366      | 14 |
| AX-158208231 | 18 | 31.425 | KV453055.1 | 2868767 | 14-scf00366      | 14 |
| AX-158208234 | 18 | 31.425 | KV453055.1 | 2874004 | 14-scf00366      | 14 |
| AX-158208236 | 18 | 31.425 | KV453055.1 | 2876544 | 14-scf00366      | 14 |
| AX-158208237 | 18 | 31.425 | KV453055.1 | 2877833 | 14-scf00366      | 14 |
| AX-158208241 | 18 | 31.425 | KV453055.1 | 2882036 | 14-scf00366      | 14 |
| AX-158208242 | 18 | 31.425 | KV453055.1 | 2882210 | 14-scf00366      | 14 |
| AX-158208248 | 18 | 31.425 | KV453055.1 | 2889963 | 14-scf00366      | 14 |
| AX-158208249 | 18 | 31.425 | KV453055.1 | 2890709 | 14-scf00366      | 14 |
| AX-158208254 | 18 | 31.425 | KV453055.1 | 2901889 | 14-scf00366      | 14 |
| AX-158208256 | 18 | 31.425 | KV453055.1 | 2904562 | 14-scf00366      | 14 |
| AX-157697308 | 18 | 31.425 | FI885765.1 | 185     | 14-ORI212 lctalk | UN |
| AX-158208250 | 18 | 31.521 | KV453055.1 | 2892359 | 14-scf00366      | 14 |

|              |    |        |            |         |             |    |
|--------------|----|--------|------------|---------|-------------|----|
| AX-158208210 | 18 | 31.643 | KV453055.1 | 2828575 | 14-scf00366 | 14 |
| AX-158208227 | 18 | 31.643 | KV453055.1 | 2854737 | 14-scf00366 | 14 |
| AX-158208239 | 18 | 31.643 | KV453055.1 | 2880200 | 14-scf00366 | 14 |
| AX-157743481 | 18 | 31.643 | KV453055.1 | 2899883 | 14-scf00366 | 14 |
| AX-158208263 | 18 | 31.643 | KV453055.1 | 2913170 | 14-scf00366 | 14 |
| AX-157744666 | 18 | 31.643 | KV453055.1 | 2913928 | 14-scf00366 | 14 |
| AX-158208264 | 18 | 31.643 | KV453055.1 | 2914331 | 14-scf00366 | 14 |
| AX-158208267 | 18 | 31.643 | KV453055.1 | 2916400 | 14-scf00366 | 14 |
| AX-158208270 | 18 | 31.643 | KV453055.1 | 2919157 | 14-scf00366 | 14 |
| AX-158208276 | 18 | 31.643 | KV453055.1 | 2929250 | 14-scf00366 | 14 |
| AX-157838132 | 18 | 31.643 | KV453055.1 | 2937390 | 14-scf00366 | 14 |
| AX-158208284 | 18 | 31.643 | KV453055.1 | 2952399 | 14-scf00366 | 14 |
| AX-157838145 | 18 | 31.643 | KV453055.1 | 3011105 | 14-scf00366 | 14 |
| AX-158208347 | 18 | 31.643 | KV453055.1 | 3050592 | 14-scf00366 | 14 |
| AX-158208388 | 18 | 31.643 | KV453055.1 | 3112770 | 14-scf00366 | 14 |
| AX-158208430 | 18 | 31.643 | KV453055.1 | 3162301 | 14-scf00366 | 14 |
| AX-158208465 | 18 | 31.643 | KV453055.1 | 3218306 | 14-scf00366 | 14 |
| AX-158208476 | 18 | 31.643 | KV453055.1 | 3229340 | 14-scf00366 | 14 |
| AX-158208479 | 18 | 31.643 | KV453055.1 | 3231380 | 14-scf00366 | 14 |
| AX-157727863 | 18 | 31.753 | KV453055.1 | 2859573 | 14-scf00366 | 14 |
| AX-158208273 | 18 | 31.753 | KV453055.1 | 2923906 | 14-scf00366 | 14 |
| AX-158208274 | 18 | 31.753 | KV453055.1 | 2924127 | 14-scf00366 | 14 |
| AX-158208282 | 18 | 31.753 | KV453055.1 | 2950116 | 14-scf00366 | 14 |
| AX-158208295 | 18 | 31.753 | KV453055.1 | 2965254 | 14-scf00366 | 14 |
| AX-158208342 | 18 | 31.753 | KV453055.1 | 3041490 | 14-scf00366 | 14 |
| AX-158208348 | 18 | 31.753 | KV453055.1 | 3051491 | 14-scf00366 | 14 |
| AX-158208268 | 18 | 31.862 | KV453055.1 | 2916794 | 14-scf00366 | 14 |
| AX-157838133 | 18 | 31.862 | KV453055.1 | 2943187 | 14-scf00366 | 14 |
| AX-157715057 | 18 | 31.862 | KV453055.1 | 2945098 | 14-scf00366 | 14 |
| AX-158208287 | 18 | 32.044 | KV453055.1 | 2955655 | 14-scf00366 | 14 |
| AX-158208293 | 18 | 32.408 | KV453055.1 | 2964159 | 14-scf00366 | 14 |
| AX-158208302 | 18 | 32.408 | KV453055.1 | 2976894 | 14-scf00366 | 14 |
| AX-157838137 | 18 | 32.408 | KV453055.1 | 2982437 | 14-scf00366 | 14 |
| AX-158208311 | 18 | 32.408 | KV453055.1 | 2990302 | 14-scf00366 | 14 |
| AX-158208315 | 18 | 32.408 | KV453055.1 | 2995450 | 14-scf00366 | 14 |
| AX-157838139 | 18 | 32.408 | KV453055.1 | 2995506 | 14-scf00366 | 14 |
| AX-157710994 | 18 | 32.408 | KV453055.1 | 2996534 | 14-scf00366 | 14 |
| AX-158208428 | 18 | 32.408 | KV453055.1 | 3158347 | 14-scf00366 | 14 |
| AX-157710317 | 18 | 32.408 | KV453055.1 | 3235224 | 14-scf00366 | 14 |
| AX-158208258 | 18 | 32.627 | KV453055.1 | 2908840 | 14-scf00366 | 14 |
| AX-157838131 | 18 | 32.627 | KV453055.1 | 2926256 | 14-scf00366 | 14 |
| AX-158208286 | 18 | 32.627 | KV453055.1 | 2953659 | 14-scf00366 | 14 |
| AX-158208298 | 18 | 32.627 | KV453055.1 | 2968645 | 14-scf00366 | 14 |
| AX-158208305 | 18 | 32.627 | KV453055.1 | 2982690 | 14-scf00366 | 14 |
| AX-157740482 | 18 | 32.627 | KV453055.1 | 2998461 | 14-scf00366 | 14 |
| AX-158208327 | 18 | 32.627 | KV453055.1 | 3027754 | 14-scf00366 | 14 |
| AX-158208333 | 18 | 32.627 | KV453055.1 | 3034794 | 14-scf00366 | 14 |
| AX-158208338 | 18 | 32.627 | KV453055.1 | 3037916 | 14-scf00366 | 14 |
| AX-157747616 | 18 | 32.627 | KV453055.1 | 3045856 | 14-scf00366 | 14 |
| AX-158208349 | 18 | 32.627 | KV453055.1 | 3052778 | 14-scf00366 | 14 |
| AX-157734055 | 18 | 32.627 | KV453055.1 | 3053905 | 14-scf00366 | 14 |

|              |    |        |             |         |             |    |
|--------------|----|--------|-------------|---------|-------------|----|
| AX-157838148 | 18 | 32.627 | KV453055.1  | 3054111 | 14-scf00366 | 14 |
| AX-158208445 | 18 | 32.627 | KV453055.1  | 3178867 | 14-scf00366 | 14 |
| AX-158208459 | 18 | 32.627 | KV453055.1  | 3200550 | 14-scf00366 | 14 |
| AX-157756808 | 18 | 32.627 | KV453055.1  | 3203011 | 14-scf00366 | 14 |
| AX-157744487 | 18 | 32.627 | KV453055.1  | 3216861 | 14-scf00366 | 14 |
| AX-158208475 | 18 | 32.627 | KV453055.1  | 3228784 | 14-scf00366 | 14 |
| AX-157838136 | 18 | 32.784 | KV453055.1  | 2974802 | 14-scf00366 | 14 |
| AX-157744997 | 18 | 32.784 | KV453055.1  | 2998030 | 14-scf00366 | 14 |
| AX-157838147 | 18 | 32.784 | KV453055.1  | 3047022 | 14-scf00366 | 14 |
| AX-157689907 | 18 | 33.348 |             | 173     | scf11841    | UN |
| AX-157838172 | 18 | 33.828 | KV453057.1  | 13307   | 14-scf00368 | 14 |
| AX-158208493 | 18 | 33.828 | KV453057.1  | 24433   | 14-scf00368 | 14 |
| AX-157740608 | 18 | 33.893 | KV453055.1  | 3098760 | 14-scf00366 | 14 |
| AX-158208401 | 18 | 33.893 | KV453055.1  | 3138132 | 14-scf00366 | 14 |
| AX-158208461 | 18 | 33.893 | KV453055.1  | 3207402 | 14-scf00366 | 14 |
| AX-158208488 | 18 | 33.893 | KV453057.1  | 14033   | 14-scf00368 | 14 |
| AX-158208625 | 18 | 33.893 | KV453057.1  | 203909  | 14-scf00368 | 14 |
| AX-158208490 | 18 | 33.895 | KV453057.1  | 19438   | 14-scf00368 | 14 |
| AX-157689190 | 18 | 33.895 | 3ML01028557 | 611     | scf04167_1  | UN |
| AX-158208299 | 18 | 34.018 | KV453055.1  | 2970321 | 14-scf00366 | 14 |
| AX-157859111 | 18 | 34.018 | KV453055.1  | 3063783 | 14-scf00366 | 14 |
| AX-158208356 | 18 | 34.018 | KV453055.1  | 3070084 | 14-scf00366 | 14 |
| AX-158208357 | 18 | 34.018 | KV453055.1  | 3070846 | 14-scf00366 | 14 |
| AX-157879439 | 18 | 34.018 | KV453055.1  | 3071800 | 14-scf00366 | 14 |
| AX-158208358 | 18 | 34.018 | KV453055.1  | 3072334 | 14-scf00366 | 14 |
| AX-158208374 | 18 | 34.018 | KV453055.1  | 3094666 | 14-scf00366 | 14 |
| AX-158208450 | 18 | 34.018 | KV453055.1  | 3188602 | 14-scf00366 | 14 |
| AX-158208464 | 18 | 34.018 | KV453055.1  | 3216202 | 14-scf00366 | 14 |
| AX-158208468 | 18 | 34.018 | KV453055.1  | 3220302 | 14-scf00366 | 14 |
| AX-158208469 | 18 | 34.018 | KV453055.1  | 3220942 | 14-scf00366 | 14 |
| AX-157838166 | 18 | 34.018 | KV453055.1  | 3227565 | 14-scf00366 | 14 |
| AX-157838161 | 18 | 34.051 | KV453055.1  | 3209583 | 14-scf00366 | 14 |
| AX-158208470 | 18 | 34.051 | KV453055.1  | 3221764 | 14-scf00366 | 14 |
| AX-158208474 | 18 | 34.084 | KV453055.1  | 3226964 | 14-scf00366 | 14 |
| AX-157859113 | 18 | 34.106 | KV453055.1  | 3148101 | 14-scf00366 | 14 |
| AX-158208418 | 18 | 34.106 | KV453055.1  | 3150798 | 14-scf00366 | 14 |
| AX-158208443 | 18 | 34.106 | KV453055.1  | 3177235 | 14-scf00366 | 14 |
| AX-158208477 | 18 | 34.106 | KV453055.1  | 3229879 | 14-scf00366 | 14 |
| AX-158208279 | 18 | 34.141 | KV453055.1  | 2940579 | 14-scf00366 | 14 |
| AX-158208352 | 18 | 34.141 | KV453055.1  | 3065369 | 14-scf00366 | 14 |
| AX-157838160 | 18 | 34.141 | KV453055.1  | 3207602 | 14-scf00366 | 14 |
| AX-157838155 | 18 | 34.263 | KV453055.1  | 3176561 | 14-scf00366 | 14 |
| AX-158208457 | 18 | 34.263 | KV453055.1  | 3197027 | 14-scf00366 | 14 |
| AX-158208458 | 18 | 34.263 | KV453055.1  | 3199246 | 14-scf00366 | 14 |
| AX-157838159 | 18 | 34.263 | KV453055.1  | 3203683 | 14-scf00366 | 14 |
| AX-158208497 | 18 | 34.263 | KV453057.1  | 26669   | 14-scf00368 | 14 |
| AX-157838158 | 18 | 34.326 | KV453055.1  | 3201368 | 14-scf00366 | 14 |
| AX-158208456 | 18 | 34.38  | KV453055.1  | 3195369 | 14-scf00366 | 14 |
| AX-158208291 | 18 | 34.385 | KV453055.1  | 2960769 | 14-scf00366 | 14 |
| AX-158208294 | 18 | 34.385 | KV453055.1  | 2964609 | 14-scf00366 | 14 |
| AX-158208296 | 18 | 34.385 | KV453055.1  | 2966012 | 14-scf00366 | 14 |

|              |    |        |            |         |             |    |
|--------------|----|--------|------------|---------|-------------|----|
| AX-158208300 | 18 | 34.385 | KV453055.1 | 2972491 | 14-scf00366 | 14 |
| AX-158208313 | 18 | 34.385 | KV453055.1 | 2992556 | 14-scf00366 | 14 |
| AX-157710520 | 18 | 34.385 | KV453055.1 | 3013308 | 14-scf00366 | 14 |
| AX-158208337 | 18 | 34.385 | KV453055.1 | 3037387 | 14-scf00366 | 14 |
| AX-157859112 | 18 | 34.385 | KV453055.1 | 3063883 | 14-scf00366 | 14 |
| AX-157741186 | 18 | 34.385 | KV453055.1 | 3064047 | 14-scf00366 | 14 |
| AX-158208363 | 18 | 34.385 | KV453055.1 | 3082809 | 14-scf00366 | 14 |
| AX-158208370 | 18 | 34.385 | KV453055.1 | 3089345 | 14-scf00366 | 14 |
| AX-157838150 | 18 | 34.385 | KV453055.1 | 3097191 | 14-scf00366 | 14 |
| AX-157748056 | 18 | 34.385 | KV453055.1 | 3097729 | 14-scf00366 | 14 |
| AX-158208378 | 18 | 34.385 | KV453055.1 | 3100625 | 14-scf00366 | 14 |
| AX-157838151 | 18 | 34.385 | KV453055.1 | 3105496 | 14-scf00366 | 14 |
| AX-158208384 | 18 | 34.385 | KV453055.1 | 3107460 | 14-scf00366 | 14 |
| AX-158208395 | 18 | 34.385 | KV453055.1 | 3126530 | 14-scf00366 | 14 |
| AX-158208406 | 18 | 34.385 | KV453055.1 | 3143499 | 14-scf00366 | 14 |
| AX-158208411 | 18 | 34.385 | KV453055.1 | 3147354 | 14-scf00366 | 14 |
| AX-158208412 | 18 | 34.385 | KV453055.1 | 3147931 | 14-scf00366 | 14 |
| AX-158208414 | 18 | 34.385 | KV453055.1 | 3148872 | 14-scf00366 | 14 |
| AX-158208416 | 18 | 34.385 | KV453055.1 | 3149685 | 14-scf00366 | 14 |
| AX-158208417 | 18 | 34.385 | KV453055.1 | 3150375 | 14-scf00366 | 14 |
| AX-158208419 | 18 | 34.385 | KV453055.1 | 3151242 | 14-scf00366 | 14 |
| AX-158208420 | 18 | 34.385 | KV453055.1 | 3151883 | 14-scf00366 | 14 |
| AX-158208421 | 18 | 34.385 | KV453055.1 | 3152699 | 14-scf00366 | 14 |
| AX-158208423 | 18 | 34.385 | KV453055.1 | 3153535 | 14-scf00366 | 14 |
| AX-158208427 | 18 | 34.385 | KV453055.1 | 3157545 | 14-scf00366 | 14 |
| AX-158208439 | 18 | 34.385 | KV453055.1 | 3171984 | 14-scf00366 | 14 |
| AX-158208446 | 18 | 34.385 | KV453055.1 | 3180324 | 14-scf00366 | 14 |
| AX-158208451 | 18 | 34.385 | KV453055.1 | 3191324 | 14-scf00366 | 14 |
| AX-158208454 | 18 | 34.385 | KV453055.1 | 3193589 | 14-scf00366 | 14 |
| AX-158208455 | 18 | 34.385 | KV453055.1 | 3194102 | 14-scf00366 | 14 |
| AX-157743298 | 18 | 34.385 | KV453055.1 | 3196249 | 14-scf00366 | 14 |
| AX-157838157 | 18 | 34.385 | KV453055.1 | 3200961 | 14-scf00366 | 14 |
| AX-157713335 | 18 | 34.385 | KV453055.1 | 3206772 | 14-scf00366 | 14 |
| AX-158208462 | 18 | 34.385 | KV453055.1 | 3212299 | 14-scf00366 | 14 |
| AX-157838163 | 18 | 34.385 | KV453055.1 | 3215215 | 14-scf00366 | 14 |
| AX-158208466 | 18 | 34.385 | KV453055.1 | 3219193 | 14-scf00366 | 14 |
| AX-158208467 | 18 | 34.385 | KV453055.1 | 3219983 | 14-scf00366 | 14 |
| AX-158208472 | 18 | 34.385 | KV453055.1 | 3224950 | 14-scf00366 | 14 |
| AX-158208473 | 18 | 34.385 | KV453055.1 | 3226010 | 14-scf00366 | 14 |
| AX-158208487 | 18 | 34.385 | KV453057.1 | 13464   | 14-scf00368 | 14 |
| AX-158208523 | 18 | 34.385 | KV453057.1 | 61831   | 14-scf00368 | 14 |
| AX-158208539 | 18 | 34.385 | KV453057.1 | 89337   | 14-scf00368 | 14 |
| AX-157715792 | 18 | 34.495 | KV453055.1 | 3026396 | 14-scf00366 | 14 |
| AX-157759040 | 18 | 34.495 | KV453055.1 | 3196480 | 14-scf00366 | 14 |
| AX-158208478 | 18 | 34.495 | KV453055.1 | 3230601 | 14-scf00366 | 14 |
| AX-158208499 | 18 | 34.495 | KV453057.1 | 31578   | 14-scf00368 | 14 |
| AX-158208500 | 18 | 34.495 | KV453057.1 | 31997   | 14-scf00368 | 14 |
| AX-157704176 | 18 | 34.713 | KV453055.1 | 2922143 | 14-scf00366 | 14 |
| AX-158208297 | 18 | 34.713 | KV453055.1 | 2968057 | 14-scf00366 | 14 |
| AX-157838138 | 18 | 34.713 | KV453055.1 | 2986176 | 14-scf00366 | 14 |
| AX-158208316 | 18 | 34.713 | KV453055.1 | 2996181 | 14-scf00366 | 14 |



|              |    |        |            |         |             |    |
|--------------|----|--------|------------|---------|-------------|----|
| AX-157745410 | 18 | 34.713 | KV453055.1 | 3017473 | 14-scf00366 | 14 |
| AX-158208350 | 18 | 34.713 | KV453055.1 | 3060845 | 14-scf00366 | 14 |
| AX-158208354 | 18 | 34.713 | KV453055.1 | 3067867 | 14-scf00366 | 14 |
| AX-158208355 | 18 | 34.713 | KV453055.1 | 3069217 | 14-scf00366 | 14 |
| AX-158208366 | 18 | 34.713 | KV453055.1 | 3086579 | 14-scf00366 | 14 |
| AX-158208371 | 18 | 34.713 | KV453055.1 | 3089745 | 14-scf00366 | 14 |
| AX-158208393 | 18 | 34.713 | KV453055.1 | 3124826 | 14-scf00366 | 14 |
| AX-157838153 | 18 | 34.713 | KV453055.1 | 3127746 | 14-scf00366 | 14 |
| AX-158208402 | 18 | 34.713 | KV453055.1 | 3138608 | 14-scf00366 | 14 |
| AX-158208407 | 18 | 34.713 | KV453055.1 | 3144268 | 14-scf00366 | 14 |
| AX-158208408 | 18 | 34.713 | KV453055.1 | 3144628 | 14-scf00366 | 14 |
| AX-158208410 | 18 | 34.713 | KV453055.1 | 3146191 | 14-scf00366 | 14 |
| AX-158208506 | 18 | 34.713 | KV453057.1 | 39050   | 14-scf00368 | 14 |
| AX-157711030 | 18 | 34.932 | KV453055.1 | 2731047 | 14-scf00366 | 14 |
| AX-158208292 | 18 | 34.932 | KV453055.1 | 2961627 | 14-scf00366 | 14 |
| AX-158208351 | 18 | 34.932 | KV453055.1 | 3063393 | 14-scf00366 | 14 |
| AX-158208359 | 18 | 34.932 | KV453055.1 | 3077309 | 14-scf00366 | 14 |
| AX-158208375 | 18 | 34.932 | KV453055.1 | 3095342 | 14-scf00366 | 14 |
| AX-158208389 | 18 | 34.932 | KV453055.1 | 3115832 | 14-scf00366 | 14 |
| AX-158208399 | 18 | 34.932 | KV453055.1 | 3135074 | 14-scf00366 | 14 |
| AX-158208409 | 18 | 34.932 | KV453055.1 | 3145463 | 14-scf00366 | 14 |
| AX-158208422 | 18 | 34.932 | KV453055.1 | 3152940 | 14-scf00366 | 14 |
| AX-158208440 | 18 | 34.932 | KV453055.1 | 3172723 | 14-scf00366 | 14 |
| AX-158208365 | 18 | 36.462 | KV453055.1 | 3085280 | 14-scf00366 | 14 |
| AX-158208394 | 18 | 36.462 | KV453055.1 | 3125449 | 14-scf00366 | 14 |
| AX-158208485 | 18 | 36.462 | KV453057.1 | 5902    | 14-scf00368 | 14 |
| AX-158208495 | 18 | 36.462 | KV453057.1 | 25280   | 14-scf00368 | 14 |
| AX-158208498 | 18 | 36.462 | KV453057.1 | 29143   | 14-scf00368 | 14 |
| AX-157838175 | 18 | 36.462 | KV453057.1 | 30233   | 14-scf00368 | 14 |
| AX-158208509 | 18 | 36.462 | KV453057.1 | 43680   | 14-scf00368 | 14 |
| AX-158208510 | 18 | 36.462 | KV453057.1 | 45715   | 14-scf00368 | 14 |
| AX-158208511 | 18 | 36.462 | KV453057.1 | 46242   | 14-scf00368 | 14 |
| AX-158208512 | 18 | 36.462 | KV453057.1 | 51020   | 14-scf00368 | 14 |
| AX-158208513 | 18 | 36.462 | KV453057.1 | 51931   | 14-scf00368 | 14 |
| AX-158208514 | 18 | 36.462 | KV453057.1 | 52485   | 14-scf00368 | 14 |
| AX-158208516 | 18 | 36.462 | KV453057.1 | 53506   | 14-scf00368 | 14 |
| AX-158208518 | 18 | 36.462 | KV453057.1 | 54600   | 14-scf00368 | 14 |
| AX-158208520 | 18 | 36.462 | KV453057.1 | 55141   | 14-scf00368 | 14 |
| AX-158208521 | 18 | 36.462 | KV453057.1 | 59453   | 14-scf00368 | 14 |
| AX-157838177 | 18 | 36.462 | KV453057.1 | 59863   | 14-scf00368 | 14 |
| AX-158208524 | 18 | 36.462 | KV453057.1 | 63202   | 14-scf00368 | 14 |
| AX-157887152 | 18 | 36.462 | KV453057.1 | 64302   | 14-scf00368 | 14 |
| AX-158208525 | 18 | 36.462 | KV453057.1 | 64351   | 14-scf00368 | 14 |
| AX-158208526 | 18 | 36.462 | KV453057.1 | 65909   | 14-scf00368 | 14 |
| AX-158208527 | 18 | 36.462 | KV453057.1 | 67582   | 14-scf00368 | 14 |
| AX-157726762 | 18 | 36.462 | KV453057.1 | 68486   | 14-scf00368 | 14 |
| AX-158208529 | 18 | 36.462 | KV453057.1 | 75599   | 14-scf00368 | 14 |
| AX-158393983 | 18 | 36.462 | KV453057.1 | 77460   | 14-scf00368 | 14 |
| AX-158208533 | 18 | 36.462 | KV453057.1 | 82401   | 14-scf00368 | 14 |
| AX-158208538 | 18 | 36.462 | KV453057.1 | 85363   | 14-scf00368 | 14 |
| AX-158208587 | 18 | 36.462 | KV453057.1 | 147187  | 14-scf00368 | 14 |

|              |    |        |             |        |             |    |
|--------------|----|--------|-------------|--------|-------------|----|
| AX-158208528 | 18 | 36.536 | KV453057.1  | 72510  | 14-scf00368 | 14 |
| AX-157723433 | 18 | 36.55  | KV453057.1  | 78186  | 14-scf00368 | 14 |
| AX-158208531 | 18 | 36.559 | KV453057.1  | 79226  | 14-scf00368 | 14 |
| AX-158208535 | 18 | 36.564 | KV453057.1  | 83271  | 14-scf00368 | 14 |
| AX-158208536 | 18 | 36.571 | KV453057.1  | 83494  | 14-scf00368 | 14 |
| AX-158208537 | 18 | 36.571 | KV453057.1  | 85014  | 14-scf00368 | 14 |
| AX-158208508 | 18 | 36.898 | KV453057.1  | 42059  | 14-scf00368 | 14 |
| AX-157838178 | 18 | 36.898 | KV453057.1  | 59994  | 14-scf00368 | 14 |
| AX-158208530 | 18 | 36.898 | KV453057.1  | 76652  | 14-scf00368 | 14 |
| AX-158208540 | 18 | 36.898 | KV453057.1  | 90097  | 14-scf00368 | 14 |
| AX-158208542 | 18 | 36.898 | KV453057.1  | 92574  | 14-scf00368 | 14 |
| AX-158208543 | 18 | 36.898 | KV453057.1  | 93544  | 14-scf00368 | 14 |
| AX-158208544 | 18 | 36.898 | KV453057.1  | 94114  | 14-scf00368 | 14 |
| AX-158208546 | 18 | 36.898 | KV453057.1  | 95595  | 14-scf00368 | 14 |
| AX-158208549 | 18 | 36.898 | KV453057.1  | 98549  | 14-scf00368 | 14 |
| AX-158208551 | 18 | 36.898 | KV453057.1  | 100810 | 14-scf00368 | 14 |
| AX-157838179 | 18 | 36.898 | KV453057.1  | 102553 | 14-scf00368 | 14 |
| AX-157752531 | 18 | 36.898 | KV453057.1  | 130190 | 14-scf00368 | 14 |
| AX-158208548 | 18 | 37.008 | KV453057.1  | 98205  | 14-scf00368 | 14 |
| AX-158208552 | 18 | 37.008 | KV453057.1  | 102884 | 14-scf00368 | 14 |
| AX-158208556 | 18 | 37.008 | KV453057.1  | 106741 | 14-scf00368 | 14 |
| AX-157709920 | 18 | 37.008 | KV453057.1  | 107959 | 14-scf00368 | 14 |
| AX-157709921 | 18 | 37.008 | KV453057.1  | 108077 | 14-scf00368 | 14 |
| AX-157741333 | 18 | 37.008 | KV453057.1  | 118197 | 14-scf00368 | 14 |
| AX-158208562 | 18 | 37.008 | KV453057.1  | 120547 | 14-scf00368 | 14 |
| AX-158208564 | 18 | 37.008 | KV453057.1  | 123457 | 14-scf00368 | 14 |
| AX-158208565 | 18 | 37.008 | KV453057.1  | 123721 | 14-scf00368 | 14 |
| AX-158208566 | 18 | 37.008 | KV453057.1  | 123965 | 14-scf00368 | 14 |
| AX-158208567 | 18 | 37.008 | KV453057.1  | 126071 | 14-scf00368 | 14 |
| AX-157872347 | 18 | 37.008 | KV453057.1  | 127634 | 14-scf00368 | 14 |
| AX-158208583 | 18 | 37.008 | KV453057.1  | 141848 | 14-scf00368 | 14 |
| AX-157838180 | 18 | 37.013 | KV453057.1  | 126160 | 14-scf00368 | 14 |
| AX-158208568 | 18 | 37.02  | KV453057.1  | 127042 | 14-scf00368 | 14 |
| AX-158208571 | 18 | 37.063 | KV453057.1  | 130302 | 14-scf00368 | 14 |
| AX-158208492 | 18 | 37.117 | KV453057.1  | 22474  | 14-scf00368 | 14 |
| AX-158208573 | 18 | 37.117 | KV453057.1  | 132106 | 14-scf00368 | 14 |
| AX-158208576 | 18 | 37.117 | KV453057.1  | 135331 | 14-scf00368 | 14 |
| AX-158208579 | 18 | 37.117 | KV453057.1  | 137423 | 14-scf00368 | 14 |
| AX-158208581 | 18 | 37.117 | KV453057.1  | 141102 | 14-scf00368 | 14 |
| AX-158208588 | 18 | 37.117 | KV453057.1  | 147590 | 14-scf00368 | 14 |
| AX-158208589 | 18 | 37.117 | KV453057.1  | 149680 | 14-scf00368 | 14 |
| AX-158208598 | 18 | 37.117 | KV453057.1  | 162752 | 14-scf00368 | 14 |
| AX-157705775 | 18 | 37.117 | 3ML01030843 | 264    | scf06447_1  | UN |
| AX-158208591 | 18 | 37.263 | KV453057.1  | 152399 | 14-scf00368 | 14 |
| AX-158208594 | 18 | 37.332 | KV453057.1  | 155968 | 14-scf00368 | 14 |
| AX-158208595 | 18 | 37.332 | KV453057.1  | 157767 | 14-scf00368 | 14 |
| AX-158208596 | 18 | 37.332 | KV453057.1  | 158021 | 14-scf00368 | 14 |
| AX-157838182 | 18 | 37.332 | KV453057.1  | 159423 | 14-scf00368 | 14 |
| AX-158208597 | 18 | 37.332 | KV453057.1  | 161684 | 14-scf00368 | 14 |
| AX-158208599 | 18 | 37.338 | KV453057.1  | 163835 | 14-scf00368 | 14 |
| AX-157887153 | 18 | 37.663 | KV453057.1  | 171850 | 14-scf00368 | 14 |

|              |    |        |            |        |             |    |
|--------------|----|--------|------------|--------|-------------|----|
| AX-158208606 | 18 | 37.663 | KV453057.1 | 174633 | 14-scf00368 | 14 |
| AX-157838183 | 18 | 37.663 | KV453057.1 | 175372 | 14-scf00368 | 14 |
| AX-158208609 | 18 | 37.663 | KV453057.1 | 176252 | 14-scf00368 | 14 |
| AX-158208610 | 18 | 37.717 | KV453057.1 | 178414 | 14-scf00368 | 14 |
| AX-158208615 | 18 | 37.717 | KV453057.1 | 190677 | 14-scf00368 | 14 |
| AX-158208612 | 18 | 37.772 | KV453057.1 | 180737 | 14-scf00368 | 14 |
| AX-157742590 | 18 | 37.772 | KV453057.1 | 184201 | 14-scf00368 | 14 |
| AX-158208655 | 18 | 37.772 | KV453057.1 | 257493 | 14-scf00368 | 14 |
| AX-157838201 | 18 | 37.772 | KV453058.1 | 89627  | 14-scf00369 | 14 |
| AX-158208750 | 18 | 37.772 | KV453058.1 | 178524 | 14-scf00369 | 14 |
| AX-158208751 | 18 | 37.772 | KV453058.1 | 178960 | 14-scf00369 | 14 |
| AX-158208806 | 18 | 37.772 | KV453058.1 | 252435 | 14-scf00369 | 14 |
| AX-157758849 | 18 | 37.803 | KV453057.1 | 185808 | 14-scf00368 | 14 |
| AX-158208605 | 18 | 37.834 | KV453057.1 | 174084 | 14-scf00368 | 14 |
| AX-157755346 | 18 | 37.834 | KV453057.1 | 186984 | 14-scf00368 | 14 |
| AX-157887154 | 18 | 37.851 | KV453057.1 | 188045 | 14-scf00368 | 14 |
| AX-157838184 | 18 | 37.851 | KV453057.1 | 209094 | 14-scf00368 | 14 |
| AX-158208614 | 18 | 37.882 | KV453057.1 | 188307 | 14-scf00368 | 14 |
| AX-158208569 | 18 | 38.1   | KV453057.1 | 128665 | 14-scf00368 | 14 |
| AX-158208582 | 18 | 38.1   | KV453057.1 | 141565 | 14-scf00368 | 14 |
| AX-158208584 | 18 | 38.1   | KV453057.1 | 142236 | 14-scf00368 | 14 |
| AX-158208618 | 18 | 38.1   | KV453057.1 | 194124 | 14-scf00368 | 14 |
| AX-158208619 | 18 | 38.1   | KV453057.1 | 194514 | 14-scf00368 | 14 |
| AX-158208631 | 18 | 38.1   | KV453057.1 | 212283 | 14-scf00368 | 14 |
| AX-157838186 | 18 | 38.1   | KV453057.1 | 218768 | 14-scf00368 | 14 |
| AX-158208633 | 18 | 38.1   | KV453057.1 | 220679 | 14-scf00368 | 14 |
| AX-158208634 | 18 | 38.1   | KV453057.1 | 221275 | 14-scf00368 | 14 |
| AX-158208635 | 18 | 38.1   | KV453057.1 | 222478 | 14-scf00368 | 14 |
| AX-158208636 | 18 | 38.1   | KV453057.1 | 223170 | 14-scf00368 | 14 |
| AX-158208663 | 18 | 38.1   | KV453058.1 | 12008  | 14-scf00369 | 14 |
| AX-157838191 | 18 | 38.318 | KV453058.1 | 39576  | 14-scf00369 | 14 |
| AX-157838192 | 18 | 38.318 | KV453058.1 | 40275  | 14-scf00369 | 14 |
| AX-158208673 | 18 | 38.318 | KV453058.1 | 48454  | 14-scf00369 | 14 |
| AX-157715481 | 18 | 38.318 | KV453058.1 | 51097  | 14-scf00369 | 14 |
| AX-157838195 | 18 | 38.318 | KV453058.1 | 51941  | 14-scf00369 | 14 |
| AX-157717457 | 18 | 38.318 | KV453058.1 | 54821  | 14-scf00369 | 14 |
| AX-157859115 | 18 | 38.318 | KV453058.1 | 73517  | 14-scf00369 | 14 |
| AX-158208675 | 18 | 38.383 | KV453058.1 | 57318  | 14-scf00369 | 14 |
| AX-158208677 | 18 | 38.428 | KV453058.1 | 60627  | 14-scf00369 | 14 |
| AX-158208682 | 18 | 38.428 | KV453058.1 | 71245  | 14-scf00369 | 14 |
| AX-157838198 | 18 | 38.428 | KV453058.1 | 76310  | 14-scf00369 | 14 |
| AX-158208684 | 18 | 38.428 | KV453058.1 | 77370  | 14-scf00369 | 14 |
| AX-158208685 | 18 | 38.428 | KV453058.1 | 77763  | 14-scf00369 | 14 |
| AX-158208686 | 18 | 38.428 | KV453058.1 | 78680  | 14-scf00369 | 14 |
| AX-157712352 | 18 | 38.428 | KV453058.1 | 79065  | 14-scf00369 | 14 |
| AX-158208687 | 18 | 38.428 | KV453058.1 | 81703  | 14-scf00369 | 14 |
| AX-158208718 | 18 | 38.428 | KV453058.1 | 130078 | 14-scf00369 | 14 |
| AX-158208692 | 18 | 38.537 | KV453058.1 | 88889  | 14-scf00369 | 14 |
| AX-158208694 | 18 | 38.537 | KV453058.1 | 90504  | 14-scf00369 | 14 |
| AX-158208695 | 18 | 38.537 | KV453058.1 | 91229  | 14-scf00369 | 14 |
| AX-158208698 | 18 | 38.537 | KV453058.1 | 94528  | 14-scf00369 | 14 |

|              |    |        |            |        |             |    |
|--------------|----|--------|------------|--------|-------------|----|
| AX-158208701 | 18 | 38.537 | KV453058.1 | 110611 | 14-scf00369 | 14 |
| AX-158208702 | 18 | 38.537 | KV453058.1 | 111499 | 14-scf00369 | 14 |
| AX-158208705 | 18 | 38.537 | KV453058.1 | 114519 | 14-scf00369 | 14 |
| AX-158208706 | 18 | 38.537 | KV453058.1 | 115123 | 14-scf00369 | 14 |
| AX-158208707 | 18 | 38.537 | KV453058.1 | 115625 | 14-scf00369 | 14 |
| AX-158208708 | 18 | 38.537 | KV453058.1 | 116132 | 14-scf00369 | 14 |
| AX-157775236 | 18 | 38.537 | KV453058.1 | 117566 | 14-scf00369 | 14 |
| AX-158208709 | 18 | 38.537 | KV453058.1 | 118838 | 14-scf00369 | 14 |
| AX-158208710 | 18 | 38.537 | KV453058.1 | 120912 | 14-scf00369 | 14 |
| AX-158208711 | 18 | 38.537 | KV453058.1 | 121327 | 14-scf00369 | 14 |
| AX-158208712 | 18 | 38.537 | KV453058.1 | 121602 | 14-scf00369 | 14 |
| AX-157757291 | 18 | 38.537 | KV453058.1 | 121651 | 14-scf00369 | 14 |
| AX-158208713 | 18 | 38.537 | KV453058.1 | 122244 | 14-scf00369 | 14 |
| AX-158208714 | 18 | 38.537 | KV453058.1 | 124920 | 14-scf00369 | 14 |
| AX-158208759 | 18 | 38.537 | KV453058.1 | 189744 | 14-scf00369 | 14 |
| AX-158208775 | 18 | 38.537 | KV453058.1 | 213167 | 14-scf00369 | 14 |
| AX-158208787 | 18 | 38.537 | KV453058.1 | 228278 | 14-scf00369 | 14 |
| AX-157748727 | 18 | 38.547 | KV453058.1 | 58098  | 14-scf00369 | 14 |
| AX-158208683 | 18 | 38.547 | KV453058.1 | 74230  | 14-scf00369 | 14 |
| AX-158380781 | 18 | 38.547 | KV453058.1 | 90853  | 14-scf00369 | 14 |
| AX-158208700 | 18 | 38.547 | KV453058.1 | 95713  | 14-scf00369 | 14 |
| AX-158208717 | 18 | 38.547 | KV453058.1 | 129375 | 14-scf00369 | 14 |
| AX-158208727 | 18 | 38.547 | KV453058.1 | 144266 | 14-scf00369 | 14 |
| AX-158208696 | 18 | 38.555 | KV453058.1 | 91388  | 14-scf00369 | 14 |
| AX-158208716 | 18 | 38.555 | KV453058.1 | 129139 | 14-scf00369 | 14 |
| AX-157753466 | 18 | 38.555 | KV453058.1 | 129726 | 14-scf00369 | 14 |
| AX-158208719 | 18 | 38.555 | KV453058.1 | 130636 | 14-scf00369 | 14 |
| AX-158208720 | 18 | 38.555 | KV453058.1 | 132466 | 14-scf00369 | 14 |
| AX-158208734 | 18 | 38.555 | KV453058.1 | 150986 | 14-scf00369 | 14 |
| AX-157838204 | 18 | 38.562 | KV453058.1 | 133470 | 14-scf00369 | 14 |
| AX-158208721 | 18 | 38.569 | KV453058.1 | 135856 | 14-scf00369 | 14 |
| AX-158208723 | 18 | 38.586 | KV453058.1 | 137954 | 14-scf00369 | 14 |
| AX-158208726 | 18 | 38.604 | KV453058.1 | 143887 | 14-scf00369 | 14 |
| AX-158208730 | 18 | 38.625 | KV453058.1 | 147117 | 14-scf00369 | 14 |
| AX-158208632 | 18 | 38.646 | KV453057.1 | 217012 | 14-scf00368 | 14 |
| AX-158208668 | 18 | 38.646 | KV453058.1 | 41471  | 14-scf00369 | 14 |
| AX-158208678 | 18 | 38.646 | KV453058.1 | 62897  | 14-scf00369 | 14 |
| AX-158208680 | 18 | 38.646 | KV453058.1 | 68350  | 14-scf00369 | 14 |
| AX-158208681 | 18 | 38.646 | KV453058.1 | 68873  | 14-scf00369 | 14 |
| AX-157838196 | 18 | 38.646 | KV453058.1 | 68929  | 14-scf00369 | 14 |
| AX-157711225 | 18 | 38.646 | KV453058.1 | 79329  | 14-scf00369 | 14 |
| AX-157838202 | 18 | 38.646 | KV453058.1 | 124300 | 14-scf00369 | 14 |
| AX-158208728 | 18 | 38.646 | KV453058.1 | 144671 | 14-scf00369 | 14 |
| AX-158208731 | 18 | 38.646 | KV453058.1 | 147820 | 14-scf00369 | 14 |
| AX-157859117 | 18 | 38.646 | KV453058.1 | 150146 | 14-scf00369 | 14 |
| AX-158208733 | 18 | 38.646 | KV453058.1 | 150535 | 14-scf00369 | 14 |
| AX-158208735 | 18 | 38.646 | KV453058.1 | 152621 | 14-scf00369 | 14 |
| AX-158208736 | 18 | 38.646 | KV453058.1 | 153186 | 14-scf00369 | 14 |
| AX-158208737 | 18 | 38.646 | KV453058.1 | 153947 | 14-scf00369 | 14 |
| AX-158208738 | 18 | 38.646 | KV453058.1 | 155341 | 14-scf00369 | 14 |
| AX-158208739 | 18 | 38.646 | KV453058.1 | 160556 | 14-scf00369 | 14 |

|              |    |        |            |        |             |    |
|--------------|----|--------|------------|--------|-------------|----|
| AX-158208742 | 18 | 38.646 | KV453058.1 | 166158 | 14-scf00369 | 14 |
| AX-158208743 | 18 | 38.646 | KV453058.1 | 166953 | 14-scf00369 | 14 |
| AX-158208745 | 18 | 38.646 | KV453058.1 | 168488 | 14-scf00369 | 14 |
| AX-158208747 | 18 | 38.646 | KV453058.1 | 175196 | 14-scf00369 | 14 |
| AX-157838206 | 18 | 38.646 | KV453058.1 | 176686 | 14-scf00369 | 14 |
| AX-158208752 | 18 | 38.646 | KV453058.1 | 182372 | 14-scf00369 | 14 |
| AX-158208755 | 18 | 38.646 | KV453058.1 | 186215 | 14-scf00369 | 14 |
| AX-158208756 | 18 | 38.646 | KV453058.1 | 186809 | 14-scf00369 | 14 |
| AX-158208757 | 18 | 38.646 | KV453058.1 | 187686 | 14-scf00369 | 14 |
| AX-158208762 | 18 | 38.646 | KV453058.1 | 193034 | 14-scf00369 | 14 |
| AX-158208764 | 18 | 38.646 | KV453058.1 | 197596 | 14-scf00369 | 14 |
| AX-158208766 | 18 | 38.646 | KV453058.1 | 200244 | 14-scf00369 | 14 |
| AX-158208768 | 18 | 38.646 | KV453058.1 | 208645 | 14-scf00369 | 14 |
| AX-158208769 | 18 | 38.646 | KV453058.1 | 209426 | 14-scf00369 | 14 |
| AX-158208771 | 18 | 38.646 | KV453058.1 | 210560 | 14-scf00369 | 14 |
| AX-158208772 | 18 | 38.646 | KV453058.1 | 210973 | 14-scf00369 | 14 |
| AX-158208780 | 18 | 38.646 | KV453058.1 | 219700 | 14-scf00369 | 14 |
| AX-158208781 | 18 | 38.646 | KV453058.1 | 220357 | 14-scf00369 | 14 |
| AX-158208782 | 18 | 38.646 | KV453058.1 | 221017 | 14-scf00369 | 14 |
| AX-158208788 | 18 | 38.646 | KV453058.1 | 229643 | 14-scf00369 | 14 |
| AX-157739233 | 18 | 38.646 | KV453058.1 | 238647 | 14-scf00369 | 14 |
| AX-158208792 | 18 | 38.646 | KV453058.1 | 239186 | 14-scf00369 | 14 |
| AX-158208798 | 18 | 38.646 | KV453058.1 | 243004 | 14-scf00369 | 14 |
| AX-157773009 | 18 | 38.646 | KV453058.1 | 346606 | 14-scf00369 | 14 |
| AX-158208911 | 18 | 38.646 | KV453058.1 | 366452 | 14-scf00369 | 14 |
| AX-158208917 | 18 | 38.646 | KV453058.1 | 374156 | 14-scf00369 | 14 |
| AX-158208926 | 18 | 38.646 | KV453058.1 | 384556 | 14-scf00369 | 14 |
| AX-158208929 | 18 | 38.646 | KV453058.1 | 389383 | 14-scf00369 | 14 |
| AX-158208930 | 18 | 38.646 | KV453058.1 | 395525 | 14-scf00369 | 14 |
| AX-158208954 | 18 | 38.646 | KV453058.1 | 425652 | 14-scf00369 | 14 |
| AX-158393984 | 18 | 38.701 | KV453058.1 | 230203 | 14-scf00369 | 14 |
| AX-158208785 | 18 | 38.757 | KV453058.1 | 224854 | 14-scf00369 | 14 |
| AX-157755487 | 18 | 38.757 | KV453058.1 | 226421 | 14-scf00369 | 14 |
| AX-158208802 | 18 | 38.757 | KV453058.1 | 246930 | 14-scf00369 | 14 |
| AX-158208803 | 18 | 38.757 | KV453058.1 | 248650 | 14-scf00369 | 14 |
| AX-157859118 | 18 | 38.757 | KV453058.1 | 251537 | 14-scf00369 | 14 |
| AX-158208808 | 18 | 38.757 | KV453058.1 | 257575 | 14-scf00369 | 14 |
| AX-158208809 | 18 | 38.867 | KV453058.1 | 260714 | 14-scf00369 | 14 |
| AX-158208811 | 18 | 38.867 | KV453058.1 | 261526 | 14-scf00369 | 14 |
| AX-158208812 | 18 | 38.867 | KV453058.1 | 262322 | 14-scf00369 | 14 |
| AX-158208815 | 18 | 38.867 | KV453058.1 | 265140 | 14-scf00369 | 14 |
| AX-158208816 | 18 | 38.867 | KV453058.1 | 265798 | 14-scf00369 | 14 |
| AX-158208817 | 18 | 38.867 | KV453058.1 | 266855 | 14-scf00369 | 14 |
| AX-158208819 | 18 | 38.867 | KV453058.1 | 270037 | 14-scf00369 | 14 |
| AX-158208822 | 18 | 38.867 | KV453058.1 | 271787 | 14-scf00369 | 14 |
| AX-158208823 | 18 | 38.867 | KV453058.1 | 273790 | 14-scf00369 | 14 |
| AX-158208699 | 18 | 39.086 | KV453058.1 | 95108  | 14-scf00369 | 14 |
| AX-158208725 | 18 | 39.086 | KV453058.1 | 140425 | 14-scf00369 | 14 |
| AX-158208741 | 18 | 39.086 | KV453058.1 | 163374 | 14-scf00369 | 14 |
| AX-158208767 | 18 | 39.086 | KV453058.1 | 208142 | 14-scf00369 | 14 |
| AX-158208790 | 18 | 39.086 | KV453058.1 | 236265 | 14-scf00369 | 14 |

|              |    |        |            |        |             |    |
|--------------|----|--------|------------|--------|-------------|----|
| AX-158208791 | 18 | 39.086 | KV453058.1 | 237220 | 14-scf00369 | 14 |
| AX-158208877 | 18 | 39.086 | KV453058.1 | 328526 | 14-scf00369 | 14 |
| AX-158208878 | 18 | 39.086 | KV453058.1 | 329105 | 14-scf00369 | 14 |
| AX-158208879 | 18 | 39.086 | KV453058.1 | 329457 | 14-scf00369 | 14 |
| AX-158208880 | 18 | 39.086 | KV453058.1 | 329977 | 14-scf00369 | 14 |
| AX-158208885 | 18 | 39.086 | KV453058.1 | 334703 | 14-scf00369 | 14 |
| AX-158208889 | 18 | 39.086 | KV453058.1 | 341881 | 14-scf00369 | 14 |
| AX-158208890 | 18 | 39.086 | KV453058.1 | 342558 | 14-scf00369 | 14 |
| AX-158208893 | 18 | 39.086 | KV453058.1 | 348692 | 14-scf00369 | 14 |
| AX-158208894 | 18 | 39.086 | KV453058.1 | 349188 | 14-scf00369 | 14 |
| AX-158208896 | 18 | 39.086 | KV453058.1 | 352097 | 14-scf00369 | 14 |
| AX-158208897 | 18 | 39.086 | KV453058.1 | 352802 | 14-scf00369 | 14 |
| AX-158208898 | 18 | 39.086 | KV453058.1 | 353107 | 14-scf00369 | 14 |
| AX-158208899 | 18 | 39.086 | KV453058.1 | 354900 | 14-scf00369 | 14 |
| AX-158208902 | 18 | 39.086 | KV453058.1 | 357461 | 14-scf00369 | 14 |
| AX-158208904 | 18 | 39.086 | KV453058.1 | 359685 | 14-scf00369 | 14 |
| AX-158208905 | 18 | 39.086 | KV453058.1 | 360243 | 14-scf00369 | 14 |
| AX-158208907 | 18 | 39.086 | KV453058.1 | 361862 | 14-scf00369 | 14 |
| AX-158208908 | 18 | 39.086 | KV453058.1 | 364498 | 14-scf00369 | 14 |
| AX-158208909 | 18 | 39.086 | KV453058.1 | 364867 | 14-scf00369 | 14 |
| AX-157754955 | 18 | 39.086 | KV453058.1 | 368501 | 14-scf00369 | 14 |
| AX-158208913 | 18 | 39.086 | KV453058.1 | 369040 | 14-scf00369 | 14 |
| AX-158208914 | 18 | 39.086 | KV453058.1 | 369807 | 14-scf00369 | 14 |
| AX-158208915 | 18 | 39.086 | KV453058.1 | 371431 | 14-scf00369 | 14 |
| AX-158208916 | 18 | 39.086 | KV453058.1 | 372608 | 14-scf00369 | 14 |
| AX-158208918 | 18 | 39.086 | KV453058.1 | 374557 | 14-scf00369 | 14 |
| AX-158208919 | 18 | 39.086 | KV453058.1 | 375170 | 14-scf00369 | 14 |
| AX-158208921 | 18 | 39.086 | KV453058.1 | 376738 | 14-scf00369 | 14 |
| AX-158208922 | 18 | 39.086 | KV453058.1 | 377926 | 14-scf00369 | 14 |
| AX-158208923 | 18 | 39.086 | KV453058.1 | 380987 | 14-scf00369 | 14 |
| AX-158208924 | 18 | 39.086 | KV453058.1 | 382285 | 14-scf00369 | 14 |
| AX-158208925 | 18 | 39.086 | KV453058.1 | 382896 | 14-scf00369 | 14 |
| AX-158208800 | 18 | 39.304 | KV453058.1 | 245253 | 14-scf00369 | 14 |
| AX-158208884 | 18 | 39.304 | KV453058.1 | 333712 | 14-scf00369 | 14 |
| AX-157838207 | 18 | 39.304 | KV453058.1 | 394246 | 14-scf00369 | 14 |
| AX-158208931 | 18 | 39.304 | KV453058.1 | 396237 | 14-scf00369 | 14 |
| AX-157838208 | 18 | 39.304 | KV453058.1 | 397869 | 14-scf00369 | 14 |
| AX-157838209 | 18 | 39.304 | KV453058.1 | 403597 | 14-scf00369 | 14 |
| AX-158208932 | 18 | 39.304 | KV453058.1 | 404307 | 14-scf00369 | 14 |
| AX-158208934 | 18 | 39.304 | KV453058.1 | 407117 | 14-scf00369 | 14 |
| AX-158208935 | 18 | 39.304 | KV453058.1 | 408029 | 14-scf00369 | 14 |
| AX-158208936 | 18 | 39.304 | KV453058.1 | 410089 | 14-scf00369 | 14 |
| AX-158208939 | 18 | 39.304 | KV453058.1 | 412868 | 14-scf00369 | 14 |
| AX-158208940 | 18 | 39.304 | KV453058.1 | 413837 | 14-scf00369 | 14 |
| AX-158208943 | 18 | 39.304 | KV453058.1 | 417459 | 14-scf00369 | 14 |
| AX-158208947 | 18 | 39.304 | KV453058.1 | 419679 | 14-scf00369 | 14 |
| AX-158208948 | 18 | 39.304 | KV453058.1 | 419925 | 14-scf00369 | 14 |
| AX-158208950 | 18 | 39.304 | KV453058.1 | 421840 | 14-scf00369 | 14 |
| AX-158208952 | 18 | 39.304 | KV453058.1 | 423927 | 14-scf00369 | 14 |
| AX-157838211 | 18 | 39.304 | KV453058.1 | 426997 | 14-scf00369 | 14 |
| AX-158208960 | 18 | 39.304 | KV453058.1 | 436294 | 14-scf00369 | 14 |

|              |    |        |            |        |             |    |
|--------------|----|--------|------------|--------|-------------|----|
| AX-158208963 | 18 | 39.304 | KV453058.1 | 442328 | 14-scf00369 | 14 |
| AX-158208966 | 18 | 39.304 | KV453058.1 | 445082 | 14-scf00369 | 14 |
| AX-158209008 | 18 | 39.304 | KV453058.1 | 501847 | 14-scf00369 | 14 |
| AX-158209082 | 18 | 39.304 | KV453058.1 | 601029 | 14-scf00369 | 14 |
| AX-158208967 | 18 | 39.522 | KV453058.1 | 447216 | 14-scf00369 | 14 |
| AX-158208968 | 18 | 39.522 | KV453058.1 | 447811 | 14-scf00369 | 14 |
| AX-158208969 | 18 | 39.522 | KV453058.1 | 448475 | 14-scf00369 | 14 |
| AX-158380782 | 18 | 39.522 | KV453058.1 | 451021 | 14-scf00369 | 14 |
| AX-158208972 | 18 | 39.522 | KV453058.1 | 452328 | 14-scf00369 | 14 |
| AX-157745717 | 18 | 39.522 | KV453058.1 | 482347 | 14-scf00369 | 14 |
| AX-158209094 | 18 | 39.522 | KV453058.1 | 612443 | 14-scf00369 | 14 |
| AX-158208971 | 18 | 39.632 | KV453058.1 | 451227 | 14-scf00369 | 14 |
| AX-158208976 | 18 | 39.632 | KV453058.1 | 457344 | 14-scf00369 | 14 |
| AX-157774862 | 18 | 39.632 | KV453058.1 | 459330 | 14-scf00369 | 14 |
| AX-158208978 | 18 | 39.632 | KV453058.1 | 461311 | 14-scf00369 | 14 |
| AX-158393987 | 18 | 39.632 | KV453058.1 | 463421 | 14-scf00369 | 14 |
| AX-158208981 | 18 | 39.632 | KV453058.1 | 465481 | 14-scf00369 | 14 |
| AX-157718135 | 18 | 39.632 | KV453058.1 | 468196 | 14-scf00369 | 14 |
| AX-158409987 | 18 | 39.632 | KV453058.1 | 470317 | 14-scf00369 | 14 |
| AX-158208983 | 18 | 39.632 | KV453058.1 | 471166 | 14-scf00369 | 14 |
| AX-158208984 | 18 | 39.632 | KV453058.1 | 471386 | 14-scf00369 | 14 |
| AX-158208985 | 18 | 39.632 | KV453058.1 | 472239 | 14-scf00369 | 14 |
| AX-158208986 | 18 | 39.632 | KV453058.1 | 472912 | 14-scf00369 | 14 |
| AX-158208988 | 18 | 39.632 | KV453058.1 | 479085 | 14-scf00369 | 14 |
| AX-158208991 | 18 | 39.632 | KV453058.1 | 482061 | 14-scf00369 | 14 |
| AX-158208992 | 18 | 39.632 | KV453058.1 | 483223 | 14-scf00369 | 14 |
| AX-158208997 | 18 | 39.632 | KV453058.1 | 487104 | 14-scf00369 | 14 |
| AX-158208998 | 18 | 39.632 | KV453058.1 | 487634 | 14-scf00369 | 14 |
| AX-158208999 | 18 | 39.632 | KV453058.1 | 487809 | 14-scf00369 | 14 |
| AX-158209000 | 18 | 39.632 | KV453058.1 | 490245 | 14-scf00369 | 14 |
| AX-158209001 | 18 | 39.632 | KV453058.1 | 490623 | 14-scf00369 | 14 |
| AX-158209010 | 18 | 39.632 | KV453058.1 | 504251 | 14-scf00369 | 14 |
| AX-158209002 | 18 | 39.686 | KV453058.1 | 491753 | 14-scf00369 | 14 |
| AX-158209004 | 18 | 39.741 | KV453058.1 | 495141 | 14-scf00369 | 14 |
| AX-158209005 | 18 | 39.741 | KV453058.1 | 496536 | 14-scf00369 | 14 |
| AX-157838215 | 18 | 39.741 | KV453058.1 | 503621 | 14-scf00369 | 14 |
| AX-158209011 | 18 | 39.741 | KV453058.1 | 506526 | 14-scf00369 | 14 |
| AX-158209012 | 18 | 39.741 | KV453058.1 | 507332 | 14-scf00369 | 14 |
| AX-158209013 | 18 | 39.741 | KV453058.1 | 507527 | 14-scf00369 | 14 |
| AX-157838216 | 18 | 39.741 | KV453058.1 | 509431 | 14-scf00369 | 14 |
| AX-157724028 | 18 | 39.741 | KV453058.1 | 527914 | 14-scf00369 | 14 |
| AX-158209015 | 18 | 39.779 | KV453058.1 | 512084 | 14-scf00369 | 14 |
| AX-158209016 | 18 | 39.816 | KV453058.1 | 512530 | 14-scf00369 | 14 |
| AX-158209017 | 18 | 39.85  | KV453058.1 | 515000 | 14-scf00369 | 14 |
| AX-158209022 | 18 | 39.85  | KV453058.1 | 518752 | 14-scf00369 | 14 |
| AX-158209023 | 18 | 39.85  | KV453058.1 | 520763 | 14-scf00369 | 14 |
| AX-158209026 | 18 | 39.85  | KV453058.1 | 523598 | 14-scf00369 | 14 |
| AX-158209029 | 18 | 39.85  | KV453058.1 | 527373 | 14-scf00369 | 14 |
| AX-158209031 | 18 | 39.85  | KV453058.1 | 530859 | 14-scf00369 | 14 |
| AX-157838218 | 18 | 39.942 | KV453058.1 | 531432 | 14-scf00369 | 14 |
| AX-158208973 | 18 | 40.068 | KV453058.1 | 452912 | 14-scf00369 | 14 |

|              |    |        |            |        |             |    |
|--------------|----|--------|------------|--------|-------------|----|
| AX-157745091 | 18 | 40.068 | KV453058.1 | 489384 | 14-scf00369 | 14 |
| AX-158209014 | 18 | 40.068 | KV453058.1 | 508306 | 14-scf00369 | 14 |
| AX-158209039 | 18 | 40.068 | KV453058.1 | 539546 | 14-scf00369 | 14 |
| AX-157838219 | 18 | 40.068 | KV453058.1 | 542233 | 14-scf00369 | 14 |
| AX-158209040 | 18 | 40.068 | KV453058.1 | 543996 | 14-scf00369 | 14 |
| AX-158209042 | 18 | 40.068 | KV453058.1 | 545977 | 14-scf00369 | 14 |
| AX-158209043 | 18 | 40.068 | KV453058.1 | 546713 | 14-scf00369 | 14 |
| AX-157838221 | 18 | 40.068 | KV453058.1 | 549053 | 14-scf00369 | 14 |
| AX-158209046 | 18 | 40.068 | KV453058.1 | 550325 | 14-scf00369 | 14 |
| AX-157838222 | 18 | 40.068 | KV453058.1 | 552740 | 14-scf00369 | 14 |
| AX-158209050 | 18 | 40.068 | KV453058.1 | 554966 | 14-scf00369 | 14 |
| AX-158209051 | 18 | 40.068 | KV453058.1 | 555256 | 14-scf00369 | 14 |
| AX-158209054 | 18 | 40.068 | KV453058.1 | 557923 | 14-scf00369 | 14 |
| AX-158209055 | 18 | 40.068 | KV453058.1 | 558974 | 14-scf00369 | 14 |
| AX-158209056 | 18 | 40.068 | KV453058.1 | 559695 | 14-scf00369 | 14 |
| AX-158209061 | 18 | 40.068 | KV453058.1 | 572229 | 14-scf00369 | 14 |
| AX-158209057 | 18 | 40.116 | KV453058.1 | 560183 | 14-scf00369 | 14 |
| AX-158208974 | 18 | 40.178 | KV453058.1 | 455677 | 14-scf00369 | 14 |
| AX-158209025 | 18 | 40.178 | KV453058.1 | 522537 | 14-scf00369 | 14 |
| AX-157838217 | 18 | 40.178 | KV453058.1 | 523500 | 14-scf00369 | 14 |
| AX-158209032 | 18 | 40.178 | KV453058.1 | 531022 | 14-scf00369 | 14 |
| AX-157838220 | 18 | 40.178 | KV453058.1 | 546368 | 14-scf00369 | 14 |
| AX-158209044 | 18 | 40.178 | KV453058.1 | 547122 | 14-scf00369 | 14 |
| AX-158209047 | 18 | 40.178 | KV453058.1 | 551430 | 14-scf00369 | 14 |
| AX-157838223 | 18 | 40.178 | KV453058.1 | 572716 | 14-scf00369 | 14 |
| AX-157759015 | 18 | 40.178 | KV453058.1 | 572835 | 14-scf00369 | 14 |
| AX-158209062 | 18 | 40.178 | KV453058.1 | 574044 | 14-scf00369 | 14 |
| AX-158209063 | 18 | 40.178 | KV453058.1 | 575837 | 14-scf00369 | 14 |
| AX-158209064 | 18 | 40.178 | KV453058.1 | 577948 | 14-scf00369 | 14 |
| AX-158209065 | 18 | 40.178 | KV453058.1 | 578117 | 14-scf00369 | 14 |
| AX-157716462 | 18 | 40.178 | KV453058.1 | 578909 | 14-scf00369 | 14 |
| AX-158209066 | 18 | 40.178 | KV453058.1 | 579366 | 14-scf00369 | 14 |
| AX-158209067 | 18 | 40.178 | KV453058.1 | 579735 | 14-scf00369 | 14 |
| AX-158209068 | 18 | 40.178 | KV453058.1 | 580542 | 14-scf00369 | 14 |
| AX-158209069 | 18 | 40.178 | KV453058.1 | 580940 | 14-scf00369 | 14 |
| AX-158209070 | 18 | 40.178 | KV453058.1 | 582160 | 14-scf00369 | 14 |
| AX-158209071 | 18 | 40.178 | KV453058.1 | 583212 | 14-scf00369 | 14 |
| AX-158209073 | 18 | 40.178 | KV453058.1 | 585939 | 14-scf00369 | 14 |
| AX-158209074 | 18 | 40.178 | KV453058.1 | 586986 | 14-scf00369 | 14 |
| AX-158209075 | 18 | 40.178 | KV453058.1 | 587746 | 14-scf00369 | 14 |
| AX-157773760 | 18 | 40.178 | KV453058.1 | 593071 | 14-scf00369 | 14 |
| AX-158209078 | 18 | 40.178 | KV453058.1 | 593841 | 14-scf00369 | 14 |
| AX-158209080 | 18 | 40.178 | KV453058.1 | 597960 | 14-scf00369 | 14 |
| AX-157838225 | 18 | 40.178 | KV453058.1 | 599437 | 14-scf00369 | 14 |
| AX-158209081 | 18 | 40.178 | KV453058.1 | 600462 | 14-scf00369 | 14 |
| AX-157713355 | 18 | 40.178 | KV453058.1 | 601685 | 14-scf00369 | 14 |
| AX-158209083 | 18 | 40.178 | KV453058.1 | 602330 | 14-scf00369 | 14 |
| AX-158209084 | 18 | 40.178 | KV453058.1 | 602927 | 14-scf00369 | 14 |
| AX-158209085 | 18 | 40.178 | KV453058.1 | 604437 | 14-scf00369 | 14 |
| AX-158209086 | 18 | 40.178 | KV453058.1 | 605184 | 14-scf00369 | 14 |
| AX-158209087 | 18 | 40.178 | KV453058.1 | 605752 | 14-scf00369 | 14 |



|              |    |        |            |        |             |    |
|--------------|----|--------|------------|--------|-------------|----|
| AX-158209088 | 18 | 40.178 | KV453058.1 | 606137 | 14-scf00369 | 14 |
| AX-157713184 | 18 | 40.178 | KV453058.1 | 608261 | 14-scf00369 | 14 |
| AX-158209090 | 18 | 40.178 | KV453058.1 | 610293 | 14-scf00369 | 14 |
| AX-158209091 | 18 | 40.178 | KV453058.1 | 610625 | 14-scf00369 | 14 |
| AX-158209095 | 18 | 40.178 | KV453058.1 | 612655 | 14-scf00369 | 14 |
| AX-158209096 | 18 | 40.178 | KV453058.1 | 613009 | 14-scf00369 | 14 |
| AX-158209097 | 18 | 40.178 | KV453058.1 | 613506 | 14-scf00369 | 14 |
| AX-158209098 | 18 | 40.178 | KV453058.1 | 613641 | 14-scf00369 | 14 |
| AX-158209099 | 18 | 40.178 | KV453058.1 | 615982 | 14-scf00369 | 14 |
| AX-158209101 | 18 | 40.178 | KV453058.1 | 617731 | 14-scf00369 | 14 |
| AX-158209102 | 18 | 40.178 | KV453058.1 | 619023 | 14-scf00369 | 14 |
| AX-158209103 | 18 | 40.178 | KV453058.1 | 620104 | 14-scf00369 | 14 |
| AX-157772524 | 18 | 40.178 | KV453058.1 | 620602 | 14-scf00369 | 14 |
| AX-158209106 | 18 | 40.178 | KV453058.1 | 621870 | 14-scf00369 | 14 |
| AX-158209111 | 18 | 40.178 | KV453058.1 | 638086 | 14-scf00369 | 14 |
| AX-158209113 | 18 | 40.178 | KV453058.1 | 639727 | 14-scf00369 | 14 |
| AX-157719086 | 18 | 40.178 | KV453058.1 | 641339 | 14-scf00369 | 14 |
| AX-158209204 | 18 | 40.178 | KV453058.1 | 780200 | 14-scf00369 | 14 |
| AX-158209228 | 18 | 40.178 | KV453058.1 | 805477 | 14-scf00369 | 14 |
| AX-157714965 | 18 | 40.178 | KV453058.1 | 836075 | 14-scf00369 | 14 |
| AX-157838227 | 18 | 40.349 | KV453058.1 | 639370 | 14-scf00369 | 14 |
| AX-158209116 | 18 | 40.352 | KV453058.1 | 644448 | 14-scf00369 | 14 |
| AX-157756043 | 18 | 40.355 | KV453058.1 | 429686 | 14-scf00369 | 14 |
| AX-157757078 | 18 | 40.355 | KV453058.1 | 644507 | 14-scf00369 | 14 |
| AX-158209120 | 18 | 40.634 | KV453058.1 | 650607 | 14-scf00369 | 14 |
| AX-158209123 | 18 | 40.634 | KV453058.1 | 656515 | 14-scf00369 | 14 |
| AX-158209036 | 18 | 40.775 | KV453058.1 | 534901 | 14-scf00369 | 14 |
| AX-157838229 | 18 | 40.775 | KV453058.1 | 664030 | 14-scf00369 | 14 |
| AX-158209132 | 18 | 40.775 | KV453058.1 | 668221 | 14-scf00369 | 14 |
| AX-157775102 | 18 | 40.942 | KV453058.1 | 672945 | 14-scf00369 | 14 |
| AX-158209134 | 18 | 40.943 | KV453058.1 | 673662 | 14-scf00369 | 14 |
| AX-158209137 | 18 | 40.98  | KV453058.1 | 680303 | 14-scf00369 | 14 |
| AX-157859123 | 18 | 41.008 | KV453058.1 | 668053 | 14-scf00369 | 14 |
| AX-158209140 | 18 | 41.008 | KV453058.1 | 685259 | 14-scf00369 | 14 |
| AX-158209141 | 18 | 41.052 | KV453058.1 | 686114 | 14-scf00369 | 14 |
| AX-158209143 | 18 | 41.271 | KV453058.1 | 690380 | 14-scf00369 | 14 |
| AX-157859124 | 18 | 41.271 | KV453058.1 | 693475 | 14-scf00369 | 14 |
| AX-158209145 | 18 | 41.271 | KV453058.1 | 694941 | 14-scf00369 | 14 |
| AX-158209146 | 18 | 41.271 | KV453058.1 | 698722 | 14-scf00369 | 14 |
| AX-158209147 | 18 | 41.271 | KV453058.1 | 700448 | 14-scf00369 | 14 |
| AX-158209149 | 18 | 41.271 | KV453058.1 | 701496 | 14-scf00369 | 14 |
| AX-158209151 | 18 | 41.271 | KV453058.1 | 705389 | 14-scf00369 | 14 |
| AX-158209152 | 18 | 41.271 | KV453058.1 | 706590 | 14-scf00369 | 14 |
| AX-158209153 | 18 | 41.271 | KV453058.1 | 707315 | 14-scf00369 | 14 |
| AX-158209154 | 18 | 41.271 | KV453058.1 | 708714 | 14-scf00369 | 14 |
| AX-158209155 | 18 | 41.271 | KV453058.1 | 710946 | 14-scf00369 | 14 |
| AX-158209158 | 18 | 41.528 | KV453058.1 | 715617 | 14-scf00369 | 14 |
| AX-158209159 | 18 | 41.535 | KV453058.1 | 716285 | 14-scf00369 | 14 |
| AX-157838240 | 18 | 41.535 | KV453058.1 | 851496 | 14-scf00369 | 14 |
| AX-158209164 | 18 | 41.909 | KV453058.1 | 723669 | 14-scf00369 | 14 |
| AX-158209112 | 18 | 42.037 | KV453058.1 | 638517 | 14-scf00369 | 14 |

|              |    |        |            |        |             |    |
|--------------|----|--------|------------|--------|-------------|----|
| AX-158209114 | 18 | 42.037 | KV453058.1 | 640428 | 14-scf00369 | 14 |
| AX-158418515 | 18 | 42.037 | KV453058.1 | 697336 | 14-scf00369 | 14 |
| AX-157879470 | 18 | 42.037 | KV453058.1 | 700865 | 14-scf00369 | 14 |
| AX-158209156 | 18 | 42.037 | KV453058.1 | 711140 | 14-scf00369 | 14 |
| AX-158209160 | 18 | 42.037 | KV453058.1 | 717440 | 14-scf00369 | 14 |
| AX-158209171 | 18 | 42.037 | KV453058.1 | 734693 | 14-scf00369 | 14 |
| AX-158209173 | 18 | 42.037 | KV453058.1 | 737441 | 14-scf00369 | 14 |
| AX-158209175 | 18 | 42.037 | KV453058.1 | 742708 | 14-scf00369 | 14 |
| AX-158209177 | 18 | 42.037 | KV453058.1 | 748249 | 14-scf00369 | 14 |
| AX-158209181 | 18 | 42.037 | KV453058.1 | 752057 | 14-scf00369 | 14 |
| AX-158209192 | 18 | 42.037 | KV453058.1 | 763762 | 14-scf00369 | 14 |
| AX-158209194 | 18 | 42.037 | KV453058.1 | 765159 | 14-scf00369 | 14 |
| AX-158209195 | 18 | 42.037 | KV453058.1 | 767425 | 14-scf00369 | 14 |
| AX-158209198 | 18 | 42.037 | KV453058.1 | 773836 | 14-scf00369 | 14 |
| AX-158209201 | 18 | 42.037 | KV453058.1 | 778136 | 14-scf00369 | 14 |
| AX-158209205 | 18 | 42.037 | KV453058.1 | 780842 | 14-scf00369 | 14 |
| AX-158209206 | 18 | 42.037 | KV453058.1 | 781094 | 14-scf00369 | 14 |
| AX-157715579 | 18 | 42.037 | KV453058.1 | 781342 | 14-scf00369 | 14 |
| AX-158209217 | 18 | 42.037 | KV453058.1 | 789773 | 14-scf00369 | 14 |
| AX-157721773 | 18 | 42.037 | KV453058.1 | 810050 | 14-scf00369 | 14 |
| AX-158209233 | 18 | 42.037 | KV453058.1 | 817105 | 14-scf00369 | 14 |
| AX-158209244 | 18 | 42.037 | KV453058.1 | 835219 | 14-scf00369 | 14 |
| AX-158209218 | 18 | 42.06  | KV453058.1 | 792815 | 14-scf00369 | 14 |
| AX-158209221 | 18 | 42.092 | KV453058.1 | 795276 | 14-scf00369 | 14 |
| AX-158209222 | 18 | 42.123 | KV453058.1 | 796753 | 14-scf00369 | 14 |
| AX-157838236 | 18 | 42.17  | KV453058.1 | 799469 | 14-scf00369 | 14 |
| AX-157838237 | 18 | 42.17  | KV453058.1 | 801831 | 14-scf00369 | 14 |
| AX-158209229 | 18 | 42.211 | KV453058.1 | 806289 | 14-scf00369 | 14 |
| AX-158209193 | 18 | 42.255 | KV453058.1 | 764395 | 14-scf00369 | 14 |
| AX-157838234 | 18 | 42.255 | KV453058.1 | 771787 | 14-scf00369 | 14 |
| AX-158209210 | 18 | 42.255 | KV453058.1 | 783812 | 14-scf00369 | 14 |
| AX-158209226 | 18 | 42.255 | KV453058.1 | 804367 | 14-scf00369 | 14 |
| AX-158209230 | 18 | 42.255 | KV453058.1 | 808936 | 14-scf00369 | 14 |
| AX-157775148 | 18 | 42.255 | KV453058.1 | 809614 | 14-scf00369 | 14 |
| AX-157838238 | 18 | 42.255 | KV453058.1 | 822582 | 14-scf00369 | 14 |
| AX-158209235 | 18 | 42.255 | KV453058.1 | 822884 | 14-scf00369 | 14 |
| AX-158209237 | 18 | 42.255 | KV453058.1 | 823435 | 14-scf00369 | 14 |
| AX-158209238 | 18 | 42.255 | KV453058.1 | 823683 | 14-scf00369 | 14 |
| AX-158209241 | 18 | 42.255 | KV453058.1 | 826546 | 14-scf00369 | 14 |
| AX-158209242 | 18 | 42.255 | KV453058.1 | 826919 | 14-scf00369 | 14 |
| AX-158209243 | 18 | 42.255 | KV453058.1 | 830029 | 14-scf00369 | 14 |
| AX-157715289 | 18 | 42.255 | KV453058.1 | 833038 | 14-scf00369 | 14 |
| AX-158209246 | 18 | 42.255 | KV453058.1 | 838269 | 14-scf00369 | 14 |
| AX-158209248 | 18 | 42.255 | KV453058.1 | 841899 | 14-scf00369 | 14 |
| AX-158209249 | 18 | 42.255 | KV453058.1 | 844769 | 14-scf00369 | 14 |
| AX-158209250 | 18 | 42.255 | KV453058.1 | 847185 | 14-scf00369 | 14 |
| AX-157744398 | 18 | 42.255 | KV453058.1 | 860710 | 14-scf00369 | 14 |
| AX-158209251 | 18 | 42.474 | KV453058.1 | 850790 | 14-scf00369 | 14 |
| AX-158209255 | 18 | 42.474 | KV453058.1 | 854527 | 14-scf00369 | 14 |
| AX-157745052 | 18 | 42.474 | KV453058.1 | 858475 | 14-scf00369 | 14 |
| AX-158209257 | 18 | 42.474 | KV453058.1 | 858632 | 14-scf00369 | 14 |

|              |    |        |            |        |             |    |
|--------------|----|--------|------------|--------|-------------|----|
| AX-158209258 | 18 | 42.474 | KV453058.1 | 859584 | 14-scf00369 | 14 |
| AX-157746643 | 18 | 42.584 | KV453058.1 | 861460 | 14-scf00369 | 14 |
| AX-158209260 | 18 | 42.692 | KV453058.1 | 863488 | 14-scf00369 | 14 |
| AX-158209263 | 18 | 42.692 | KV453058.1 | 866799 | 14-scf00369 | 14 |
| AX-157838241 | 18 | 42.692 | KV453058.1 | 870809 | 14-scf00369 | 14 |
| AX-158209275 | 18 | 42.801 | KV453058.1 | 885704 | 14-scf00369 | 14 |
| AX-158209281 | 18 | 42.827 | KV453058.1 | 894411 | 14-scf00369 | 14 |
| AX-158209282 | 18 | 42.84  | KV453058.1 | 894839 | 14-scf00369 | 14 |
| AX-158209287 | 18 | 42.872 | KV453058.1 | 898960 | 14-scf00369 | 14 |
| AX-158209284 | 18 | 42.911 | KV453058.1 | 896741 | 14-scf00369 | 14 |
| AX-158209289 | 18 | 42.911 | KV453058.1 | 900462 | 14-scf00369 | 14 |
| AX-158209290 | 18 | 42.911 | KV453058.1 | 901196 | 14-scf00369 | 14 |
| AX-157838246 | 18 | 42.959 | KV453058.1 | 904899 | 14-scf00369 | 14 |
| AX-158209138 | 18 | 43.02  | KV453058.1 | 680776 | 14-scf00369 | 14 |
| AX-157751381 | 18 | 43.02  | KV453058.1 | 729290 | 14-scf00369 | 14 |
| AX-157838239 | 18 | 43.02  | KV453058.1 | 831672 | 14-scf00369 | 14 |
| AX-158209280 | 18 | 43.02  | KV453058.1 | 892262 | 14-scf00369 | 14 |
| AX-158209291 | 18 | 43.02  | KV453058.1 | 903433 | 14-scf00369 | 14 |
| AX-158209292 | 18 | 43.02  | KV453058.1 | 905135 | 14-scf00369 | 14 |
| AX-158209293 | 18 | 43.02  | KV453058.1 | 905995 | 14-scf00369 | 14 |
| AX-158209295 | 18 | 43.02  | KV453058.1 | 907959 | 14-scf00369 | 14 |
| AX-158209297 | 18 | 43.02  | KV453058.1 | 910786 | 14-scf00369 | 14 |
| AX-158209302 | 18 | 43.02  | KV453058.1 | 916593 | 14-scf00369 | 14 |
| AX-157738806 | 18 | 43.02  | KV453058.1 | 920295 | 14-scf00369 | 14 |
| AX-158209304 | 18 | 43.02  | KV453058.1 | 921769 | 14-scf00369 | 14 |
| AX-158209306 | 18 | 43.02  | KV453058.1 | 927323 | 14-scf00369 | 14 |
| AX-158209307 | 18 | 43.02  | KV453058.1 | 928446 | 14-scf00369 | 14 |
| AX-158209308 | 18 | 43.347 | KV453058.1 | 929336 | 14-scf00369 | 14 |
| AX-158209227 | 18 | 43.348 | KV453058.1 | 805208 | 14-scf00369 | 14 |
| AX-158209309 | 18 | 43.348 | KV453058.1 | 930803 | 14-scf00369 | 14 |
| AX-158386424 | 18 | 43.348 | KV453058.1 | 931765 | 14-scf00369 | 14 |
| AX-157724588 | 18 | 43.348 | KV453058.1 | 933384 | 14-scf00369 | 14 |
| AX-158209315 | 18 | 43.348 | KV453058.1 | 937442 | 14-scf00369 | 14 |
| AX-158209316 | 18 | 43.348 | KV453058.1 | 937854 | 14-scf00369 | 14 |
| AX-158209317 | 18 | 43.348 | KV453058.1 | 939494 | 14-scf00369 | 14 |
| AX-157838248 | 18 | 43.348 | KV453058.1 | 941551 | 14-scf00369 | 14 |
| AX-158209323 | 18 | 43.348 | KV453058.1 | 949407 | 14-scf00369 | 14 |
| AX-158209327 | 18 | 43.348 | KV453058.1 | 951880 | 14-scf00369 | 14 |
| AX-158209329 | 18 | 43.348 | KV453058.1 | 959613 | 14-scf00369 | 14 |
| AX-158209330 | 18 | 43.348 | KV453058.1 | 960165 | 14-scf00369 | 14 |
| AX-157838253 | 18 | 43.348 | KV453058.1 | 967390 | 14-scf00369 | 14 |
| AX-158209333 | 18 | 43.348 | KV453058.1 | 968300 | 14-scf00369 | 14 |
| AX-157879476 | 18 | 43.348 | KV453058.1 | 975436 | 14-scf00369 | 14 |
| AX-157838251 | 18 | 43.38  | KV453058.1 | 961962 | 14-scf00369 | 14 |
| AX-158209335 | 18 | 43.457 | KV453058.1 | 972852 | 14-scf00369 | 14 |
| AX-157720062 | 18 | 43.457 | KV453058.1 | 975225 | 14-scf00369 | 14 |
| AX-158209337 | 18 | 43.457 | KV453058.1 | 976223 | 14-scf00369 | 14 |
| AX-158209338 | 18 | 43.457 | KV453058.1 | 977662 | 14-scf00369 | 14 |
| AX-158209339 | 18 | 43.513 | KV453058.1 | 978088 | 14-scf00369 | 14 |
| AX-158209265 | 18 | 43.675 | KV453058.1 | 873528 | 14-scf00369 | 14 |
| AX-158209268 | 18 | 43.675 | KV453058.1 | 878734 | 14-scf00369 | 14 |

|              |    |        |            |         |             |    |
|--------------|----|--------|------------|---------|-------------|----|
| AX-158209311 | 18 | 43.675 | KV453058.1 | 932712  | 14-scf00369 | 14 |
| AX-158209318 | 18 | 43.675 | KV453058.1 | 940364  | 14-scf00369 | 14 |
| AX-157838252 | 18 | 43.675 | KV453058.1 | 963984  | 14-scf00369 | 14 |
| AX-157838254 | 18 | 43.675 | KV453058.1 | 981593  | 14-scf00369 | 14 |
| AX-157866948 | 18 | 43.675 | KV453058.1 | 986358  | 14-scf00369 | 14 |
| AX-158209342 | 18 | 43.675 | KV453058.1 | 987514  | 14-scf00369 | 14 |
| AX-158209344 | 18 | 43.675 | KV453058.1 | 988852  | 14-scf00369 | 14 |
| AX-158386427 | 18 | 43.675 | KV453058.1 | 993059  | 14-scf00369 | 14 |
| AX-158209349 | 18 | 43.675 | KV453058.1 | 994610  | 14-scf00369 | 14 |
| AX-157743616 | 18 | 43.675 | KV453058.1 | 995767  | 14-scf00369 | 14 |
| AX-158209351 | 18 | 43.675 | KV453058.1 | 997397  | 14-scf00369 | 14 |
| AX-158209366 | 18 | 43.675 | KV453058.1 | 1013152 | 14-scf00369 | 14 |
| AX-158209375 | 18 | 43.675 | KV453058.1 | 1028452 | 14-scf00369 | 14 |
| AX-158209377 | 18 | 43.675 | KV453058.1 | 1031100 | 14-scf00369 | 14 |
| AX-157838260 | 18 | 43.675 | KV453058.1 | 1050635 | 14-scf00369 | 14 |
| AX-158209412 | 18 | 43.675 | KV453058.1 | 1076517 | 14-scf00369 | 14 |
| AX-157838264 | 18 | 43.675 | KV453058.1 | 1089951 | 14-scf00369 | 14 |
| AX-158209353 | 18 | 43.694 | KV453058.1 | 999841  | 14-scf00369 | 14 |
| AX-158209376 | 18 | 43.694 | KV453058.1 | 1030574 | 14-scf00369 | 14 |
| AX-157738641 | 18 | 43.694 | KV453058.1 | 1031871 | 14-scf00369 | 14 |
| AX-158209393 | 18 | 43.694 | KV453058.1 | 1042603 | 14-scf00369 | 14 |
| AX-158209354 | 18 | 43.724 | KV453058.1 | 1002356 | 14-scf00369 | 14 |
| AX-158209356 | 18 | 43.748 | KV453058.1 | 1003363 | 14-scf00369 | 14 |
| AX-158209360 | 18 | 43.785 | KV453058.1 | 1007362 | 14-scf00369 | 14 |
| AX-158209361 | 18 | 43.785 | KV453058.1 | 1008271 | 14-scf00369 | 14 |
| AX-158209386 | 18 | 43.785 | KV453058.1 | 1037231 | 14-scf00369 | 14 |
| AX-158209390 | 18 | 43.785 | KV453058.1 | 1040647 | 14-scf00369 | 14 |
| AX-158209364 | 18 | 43.805 | KV453058.1 | 1010569 | 14-scf00369 | 14 |
| AX-158386428 | 18 | 43.826 | KV453058.1 | 1020440 | 14-scf00369 | 14 |
| AX-158209370 | 18 | 43.85  | KV453058.1 | 1023693 | 14-scf00369 | 14 |
| AX-158209397 | 18 | 43.85  | KV453058.1 | 1049901 | 14-scf00369 | 14 |
| AX-158209350 | 18 | 43.872 | KV453058.1 | 995169  | 14-scf00369 | 14 |
| AX-158209373 | 18 | 43.872 | KV453058.1 | 1027501 | 14-scf00369 | 14 |
| AX-158209382 | 18 | 43.872 | KV453058.1 | 1035852 | 14-scf00369 | 14 |
| AX-158209345 | 18 | 43.894 | KV453058.1 | 989570  | 14-scf00369 | 14 |
| AX-157838259 | 18 | 43.894 | KV453058.1 | 1024720 | 14-scf00369 | 14 |
| AX-158209379 | 18 | 43.894 | KV453058.1 | 1034162 | 14-scf00369 | 14 |
| AX-158209384 | 18 | 43.894 | KV453058.1 | 1036580 | 14-scf00369 | 14 |
| AX-158209387 | 18 | 43.894 | KV453058.1 | 1037653 | 14-scf00369 | 14 |
| AX-158209391 | 18 | 43.894 | KV453058.1 | 1041257 | 14-scf00369 | 14 |
| AX-158209392 | 18 | 43.894 | KV453058.1 | 1041863 | 14-scf00369 | 14 |
| AX-158209410 | 18 | 43.894 | KV453058.1 | 1073433 | 14-scf00369 | 14 |
| AX-157838261 | 18 | 43.918 | KV453058.1 | 1050862 | 14-scf00369 | 14 |
| AX-157726423 | 18 | 43.96  | KV453058.1 | 1057285 | 14-scf00369 | 14 |
| AX-158209262 | 18 | 44.003 | KV453058.1 | 865792  | 14-scf00369 | 14 |
| AX-157838249 | 18 | 44.003 | KV453058.1 | 954405  | 14-scf00369 | 14 |
| AX-158209341 | 18 | 44.003 | KV453058.1 | 987175  | 14-scf00369 | 14 |
| AX-158209343 | 18 | 44.003 | KV453058.1 | 988471  | 14-scf00369 | 14 |
| AX-158209352 | 18 | 44.003 | KV453058.1 | 999057  | 14-scf00369 | 14 |
| AX-157838258 | 18 | 44.003 | KV453058.1 | 1017649 | 14-scf00369 | 14 |
| AX-158209369 | 18 | 44.003 | KV453058.1 | 1022270 | 14-scf00369 | 14 |

|              |    |        |            |         |             |    |
|--------------|----|--------|------------|---------|-------------|----|
| AX-158209388 | 18 | 44.003 | KV453058.1 | 1038097 | 14-scf00369 | 14 |
| AX-158209398 | 18 | 44.003 | KV453058.1 | 1053097 | 14-scf00369 | 14 |
| AX-158209402 | 18 | 44.003 | KV453058.1 | 1061774 | 14-scf00369 | 14 |
| AX-158209404 | 18 | 44.003 | KV453058.1 | 1065427 | 14-scf00369 | 14 |
| AX-158209405 | 18 | 44.003 | KV453058.1 | 1066264 | 14-scf00369 | 14 |
| AX-158209406 | 18 | 44.003 | KV453058.1 | 1069326 | 14-scf00369 | 14 |
| AX-158209407 | 18 | 44.003 | KV453058.1 | 1070290 | 14-scf00369 | 14 |
| AX-158209408 | 18 | 44.003 | KV453058.1 | 1070643 | 14-scf00369 | 14 |
| AX-158209409 | 18 | 44.003 | KV453058.1 | 1071563 | 14-scf00369 | 14 |
| AX-157745006 | 18 | 44.003 | KV453058.1 | 1075801 | 14-scf00369 | 14 |
| AX-157887159 | 18 | 44.003 | KV453058.1 | 1077353 | 14-scf00369 | 14 |
| AX-157838262 | 18 | 44.003 | KV453058.1 | 1079974 | 14-scf00369 | 14 |
| AX-157700760 | 18 | 44.003 | KV453058.1 | 1082309 | 14-scf00369 | 14 |
| AX-158209416 | 18 | 44.003 | KV453058.1 | 1089589 | 14-scf00369 | 14 |
| AX-157751034 | 18 | 44.003 | KV453058.1 | 1090136 | 14-scf00369 | 14 |
| AX-157770419 | 18 | 44.003 | KV453058.1 | 1090690 | 14-scf00369 | 14 |
| AX-158209418 | 18 | 44.003 | KV453058.1 | 1094134 | 14-scf00369 | 14 |
| AX-158209419 | 18 | 44.003 | KV453058.1 | 1094612 | 14-scf00369 | 14 |
| AX-157838266 | 18 | 44.33  | KV453058.1 | 1104587 | 14-scf00369 | 14 |
| AX-158209456 | 18 | 44.33  | KV453058.1 | 1155804 | 14-scf00369 | 14 |
| AX-158209421 | 18 | 44.331 | KV453058.1 | 1105199 | 14-scf00369 | 14 |
| AX-158209425 | 18 | 44.419 | KV453058.1 | 1116089 | 14-scf00369 | 14 |
| AX-158209427 | 18 | 44.495 | KV453058.1 | 1119358 | 14-scf00369 | 14 |
| AX-158209429 | 18 | 44.659 | KV453058.1 | 1120832 | 14-scf00369 | 14 |
| AX-157744694 | 18 | 44.659 | KV453058.1 | 1120924 | 14-scf00369 | 14 |
| AX-157838268 | 18 | 44.659 | KV453058.1 | 1121229 | 14-scf00369 | 14 |
| AX-158209432 | 18 | 44.659 | KV453058.1 | 1123547 | 14-scf00369 | 14 |
| AX-158209435 | 18 | 44.659 | KV453058.1 | 1126979 | 14-scf00369 | 14 |
| AX-158209437 | 18 | 44.659 | KV453058.1 | 1128128 | 14-scf00369 | 14 |
| AX-157838269 | 18 | 44.659 | KV453058.1 | 1128721 | 14-scf00369 | 14 |
| AX-157755977 | 18 | 44.659 | KV453058.1 | 1129657 | 14-scf00369 | 14 |
| AX-158209439 | 18 | 44.659 | KV453058.1 | 1130821 | 14-scf00369 | 14 |
| AX-157838271 | 18 | 44.659 | KV453058.1 | 1132362 | 14-scf00369 | 14 |
| AX-158209441 | 18 | 44.659 | KV453058.1 | 1135561 | 14-scf00369 | 14 |
| AX-158209444 | 18 | 44.659 | KV453058.1 | 1139833 | 14-scf00369 | 14 |
| AX-158209448 | 18 | 44.659 | KV453058.1 | 1145577 | 14-scf00369 | 14 |
| AX-158209455 | 18 | 44.659 | KV453058.1 | 1155246 | 14-scf00369 | 14 |
| AX-158209458 | 18 | 44.659 | KV453058.1 | 1157272 | 14-scf00369 | 14 |
| AX-158209460 | 18 | 44.659 | KV453058.1 | 1160537 | 14-scf00369 | 14 |
| AX-158209461 | 18 | 44.659 | KV453058.1 | 1162985 | 14-scf00369 | 14 |
| AX-157724765 | 18 | 44.659 | KV453058.1 | 1166513 | 14-scf00369 | 14 |
| AX-158209484 | 18 | 44.659 | KV453058.1 | 1195388 | 14-scf00369 | 14 |
| AX-158209529 | 18 | 44.659 | KV453058.1 | 1264142 | 14-scf00369 | 14 |
| AX-158209531 | 18 | 44.659 | KV453058.1 | 1266528 | 14-scf00369 | 14 |
| AX-158209431 | 18 | 44.768 | KV453058.1 | 1122901 | 14-scf00369 | 14 |
| AX-158209438 | 18 | 44.768 | KV453058.1 | 1129903 | 14-scf00369 | 14 |
| AX-158209463 | 18 | 44.768 | KV453058.1 | 1164847 | 14-scf00369 | 14 |
| AX-157838273 | 18 | 44.768 | KV453058.1 | 1166610 | 14-scf00369 | 14 |
| AX-158209465 | 18 | 44.768 | KV453058.1 | 1169673 | 14-scf00369 | 14 |
| AX-158209467 | 18 | 44.768 | KV453058.1 | 1173222 | 14-scf00369 | 14 |
| AX-158209468 | 18 | 44.768 | KV453058.1 | 1173598 | 14-scf00369 | 14 |

|              |    |        |            |         |             |    |
|--------------|----|--------|------------|---------|-------------|----|
| AX-157838274 | 18 | 44.768 | KV453058.1 | 1178156 | 14-scf00369 | 14 |
| AX-158209473 | 18 | 44.768 | KV453058.1 | 1179564 | 14-scf00369 | 14 |
| AX-157738531 | 18 | 44.768 | KV453058.1 | 1181211 | 14-scf00369 | 14 |
| AX-158209474 | 18 | 44.768 | KV453058.1 | 1181360 | 14-scf00369 | 14 |
| AX-158209475 | 18 | 44.768 | KV453058.1 | 1181797 | 14-scf00369 | 14 |
| AX-157838275 | 18 | 44.768 | KV453058.1 | 1182820 | 14-scf00369 | 14 |
| AX-158209478 | 18 | 44.768 | KV453058.1 | 1184046 | 14-scf00369 | 14 |
| AX-158209481 | 18 | 44.768 | KV453058.1 | 1189272 | 14-scf00369 | 14 |
| AX-157838278 | 18 | 44.768 | KV453058.1 | 1195951 | 14-scf00369 | 14 |
| AX-157749842 | 18 | 44.768 | KV453058.1 | 1198393 | 14-scf00369 | 14 |
| AX-157887161 | 18 | 44.768 | KV453058.1 | 1200408 | 14-scf00369 | 14 |
| AX-158209488 | 18 | 44.768 | KV453058.1 | 1206477 | 14-scf00369 | 14 |
| AX-158209489 | 18 | 44.768 | KV453058.1 | 1207504 | 14-scf00369 | 14 |
| AX-157740611 | 18 | 44.768 | KV453058.1 | 1213357 | 14-scf00369 | 14 |
| AX-158209494 | 18 | 44.768 | KV453058.1 | 1215122 | 14-scf00369 | 14 |
| AX-158209495 | 18 | 44.768 | KV453058.1 | 1218016 | 14-scf00369 | 14 |
| AX-157748963 | 18 | 44.768 | KV453058.1 | 1221382 | 14-scf00369 | 14 |
| AX-157866951 | 18 | 44.768 | KV453058.1 | 1221785 | 14-scf00369 | 14 |
| AX-158209496 | 18 | 44.768 | KV453058.1 | 1223785 | 14-scf00369 | 14 |
| AX-158209497 | 18 | 44.768 | KV453058.1 | 1224400 | 14-scf00369 | 14 |
| AX-157726122 | 18 | 44.768 | KV453058.1 | 1227444 | 14-scf00369 | 14 |
| AX-158209499 | 18 | 44.768 | KV453058.1 | 1227962 | 14-scf00369 | 14 |
| AX-158209501 | 18 | 44.768 | KV453058.1 | 1228479 | 14-scf00369 | 14 |
| AX-158209502 | 18 | 44.768 | KV453058.1 | 1229619 | 14-scf00369 | 14 |
| AX-158209513 | 18 | 44.768 | KV453058.1 | 1245185 | 14-scf00369 | 14 |
| AX-158209424 | 18 | 44.772 | KV453058.1 | 1115551 | 14-scf00369 | 14 |
| AX-158209453 | 18 | 44.772 | KV453058.1 | 1153611 | 14-scf00369 | 14 |
| AX-158209504 | 18 | 44.772 | KV453058.1 | 1231260 | 14-scf00369 | 14 |
| AX-157887162 | 18 | 44.772 | KV453058.1 | 1240702 | 14-scf00369 | 14 |
| AX-158209509 | 18 | 44.772 | KV453058.1 | 1242134 | 14-scf00369 | 14 |
| AX-158209508 | 18 | 44.791 | KV453058.1 | 1235503 | 14-scf00369 | 14 |
| AX-158209423 | 18 | 44.816 | KV453058.1 | 1110690 | 14-scf00369 | 14 |
| AX-157746201 | 18 | 44.816 | KV453058.1 | 1238986 | 14-scf00369 | 14 |
| AX-158209510 | 18 | 44.816 | KV453058.1 | 1242996 | 14-scf00369 | 14 |
| AX-158209515 | 18 | 44.848 | KV453058.1 | 1248301 | 14-scf00369 | 14 |
| AX-158209420 | 18 | 44.877 | KV453058.1 | 1095961 | 14-scf00369 | 14 |
| AX-158209459 | 18 | 44.877 | KV453058.1 | 1159869 | 14-scf00369 | 14 |
| AX-158209462 | 18 | 44.877 | KV453058.1 | 1164385 | 14-scf00369 | 14 |
| AX-158209490 | 18 | 44.877 | KV453058.1 | 1209736 | 14-scf00369 | 14 |
| AX-158209491 | 18 | 44.877 | KV453058.1 | 1210451 | 14-scf00369 | 14 |
| AX-158209503 | 18 | 44.877 | KV453058.1 | 1230786 | 14-scf00369 | 14 |
| AX-158209505 | 18 | 44.877 | KV453058.1 | 1231976 | 14-scf00369 | 14 |
| AX-158209506 | 18 | 44.877 | KV453058.1 | 1234184 | 14-scf00369 | 14 |
| AX-158209517 | 18 | 44.877 | KV453058.1 | 1251039 | 14-scf00369 | 14 |
| AX-157750838 | 18 | 44.877 | KV453058.1 | 1258193 | 14-scf00369 | 14 |
| AX-158209522 | 18 | 44.877 | KV453058.1 | 1258328 | 14-scf00369 | 14 |
| AX-158209527 | 18 | 44.877 | KV453058.1 | 1261215 | 14-scf00369 | 14 |
| AX-157773383 | 18 | 44.877 | KV453058.1 | 1267035 | 14-scf00369 | 14 |
| AX-157708937 | 18 | 44.877 | KV453058.1 | 1268670 | 14-scf00369 | 14 |
| AX-158209536 | 18 | 44.877 | KV453058.1 | 1271657 | 14-scf00369 | 14 |
| AX-157838285 | 18 | 44.877 | KV453058.1 | 1274078 | 14-scf00369 | 14 |

|              |    |        |            |         |             |    |
|--------------|----|--------|------------|---------|-------------|----|
| AX-158209537 | 18 | 44.877 | KV453058.1 | 1277204 | 14-scf00369 | 14 |
| AX-158209552 | 18 | 44.877 | KV453058.1 | 1295775 | 14-scf00369 | 14 |
| AX-158380787 | 18 | 44.877 | KV453058.1 | 1309604 | 14-scf00369 | 14 |
| AX-158209565 | 18 | 44.877 | KV453058.1 | 1318291 | 14-scf00369 | 14 |
| AX-158209589 | 18 | 44.877 | KV453058.1 | 1360181 | 14-scf00369 | 14 |
| AX-157879494 | 18 | 44.877 | KV453058.1 | 1373537 | 14-scf00369 | 14 |
| AX-158209606 | 18 | 44.877 | KV453058.1 | 1381117 | 14-scf00369 | 14 |
| AX-157744074 | 18 | 44.986 | KV453058.1 | 1112997 | 14-scf00369 | 14 |
| AX-157740519 | 18 | 44.986 | KV453058.1 | 1272392 | 14-scf00369 | 14 |
| AX-157838286 | 18 | 44.986 | KV453058.1 | 1275068 | 14-scf00369 | 14 |
| AX-158209539 | 18 | 44.986 | KV453058.1 | 1280887 | 14-scf00369 | 14 |
| AX-158209543 | 18 | 44.986 | KV453058.1 | 1284710 | 14-scf00369 | 14 |
| AX-158209546 | 18 | 44.986 | KV453058.1 | 1288542 | 14-scf00369 | 14 |
| AX-158209547 | 18 | 44.986 | KV453058.1 | 1290431 | 14-scf00369 | 14 |
| AX-158209548 | 18 | 44.986 | KV453058.1 | 1292397 | 14-scf00369 | 14 |
| AX-158209549 | 18 | 44.986 | KV453058.1 | 1293297 | 14-scf00369 | 14 |
| AX-158209550 | 18 | 44.986 | KV453058.1 | 1293966 | 14-scf00369 | 14 |
| AX-158414464 | 18 | 44.986 | KV453058.1 | 1295041 | 14-scf00369 | 14 |
| AX-158209551 | 18 | 44.986 | KV453058.1 | 1295333 | 14-scf00369 | 14 |
| AX-158209554 | 18 | 44.986 | KV453058.1 | 1302021 | 14-scf00369 | 14 |
| AX-158209555 | 18 | 44.986 | KV453058.1 | 1303368 | 14-scf00369 | 14 |
| AX-158209556 | 18 | 44.986 | KV453058.1 | 1303751 | 14-scf00369 | 14 |
| AX-157774519 | 18 | 44.986 | KV453058.1 | 1304865 | 14-scf00369 | 14 |
| AX-158209558 | 18 | 44.986 | KV453058.1 | 1307924 | 14-scf00369 | 14 |
| AX-158209559 | 18 | 44.986 | KV453058.1 | 1309319 | 14-scf00369 | 14 |
| AX-158209560 | 18 | 44.986 | KV453058.1 | 1309739 | 14-scf00369 | 14 |
| AX-158209563 | 18 | 44.986 | KV453058.1 | 1312935 | 14-scf00369 | 14 |
| AX-158209564 | 18 | 44.986 | KV453058.1 | 1314424 | 14-scf00369 | 14 |
| AX-158393990 | 18 | 44.986 | KV453058.1 | 1320148 | 14-scf00369 | 14 |
| AX-158209567 | 18 | 44.986 | KV453058.1 | 1320516 | 14-scf00369 | 14 |
| AX-158209568 | 18 | 44.986 | KV453058.1 | 1323859 | 14-scf00369 | 14 |
| AX-158209586 | 18 | 44.986 | KV453058.1 | 1353263 | 14-scf00369 | 14 |
| AX-157879497 | 18 | 44.986 | KV453058.1 | 1387096 | 14-scf00369 | 14 |
| AX-158209681 | 18 | 44.986 | KV453058.1 | 1495047 | 14-scf00369 | 14 |
| AX-158414462 | 18 | 45.002 | KV453058.1 | 1284606 | 14-scf00369 | 14 |
| AX-157838287 | 18 | 45.002 | KV453058.1 | 1285224 | 14-scf00369 | 14 |
| AX-158209569 | 18 | 45.002 | KV453058.1 | 1325413 | 14-scf00369 | 14 |
| AX-158209570 | 18 | 45.002 | KV453058.1 | 1326719 | 14-scf00369 | 14 |
| AX-158209477 | 18 | 45.011 | KV453058.1 | 1183555 | 14-scf00369 | 14 |
| AX-157859130 | 18 | 45.011 | KV453058.1 | 1325828 | 14-scf00369 | 14 |
| AX-158209585 | 18 | 45.011 | KV453058.1 | 1352281 | 14-scf00369 | 14 |
| AX-158209593 | 18 | 45.011 | KV453058.1 | 1364484 | 14-scf00369 | 14 |
| AX-158209573 | 18 | 45.029 | KV453058.1 | 1332689 | 14-scf00369 | 14 |
| AX-158209574 | 18 | 45.065 | KV453058.1 | 1333324 | 14-scf00369 | 14 |
| AX-157838289 | 18 | 45.095 | KV453058.1 | 1335193 | 14-scf00369 | 14 |
| AX-158209590 | 18 | 45.095 | KV453058.1 | 1362436 | 14-scf00369 | 14 |
| AX-158209594 | 18 | 45.095 | KV453058.1 | 1365324 | 14-scf00369 | 14 |
| AX-158209598 | 18 | 45.095 | KV453058.1 | 1368850 | 14-scf00369 | 14 |
| AX-158209599 | 18 | 45.095 | KV453058.1 | 1370545 | 14-scf00369 | 14 |
| AX-158209545 | 18 | 45.148 | KV453058.1 | 1287222 | 14-scf00369 | 14 |
| AX-158209596 | 18 | 45.148 | KV453058.1 | 1366556 | 14-scf00369 | 14 |

|              |    |        |            |         |             |    |
|--------------|----|--------|------------|---------|-------------|----|
| AX-158209597 | 18 | 45.148 | KV453058.1 | 1367658 | 14-scf00369 | 14 |
| AX-158209601 | 18 | 45.148 | KV453058.1 | 1372130 | 14-scf00369 | 14 |
| AX-157757052 | 18 | 45.148 | KV453058.1 | 1374922 | 14-scf00369 | 14 |
| AX-158209622 | 18 | 45.148 | KV453058.1 | 1401131 | 14-scf00369 | 14 |
| AX-158209625 | 18 | 45.148 | KV453058.1 | 1402252 | 14-scf00369 | 14 |
| AX-158209426 | 18 | 45.205 | KV453058.1 | 1116737 | 14-scf00369 | 14 |
| AX-158209578 | 18 | 45.205 | KV453058.1 | 1342438 | 14-scf00369 | 14 |
| AX-158209600 | 18 | 45.205 | KV453058.1 | 1371519 | 14-scf00369 | 14 |
| AX-158209604 | 18 | 45.205 | KV453058.1 | 1378456 | 14-scf00369 | 14 |
| AX-157838294 | 18 | 45.205 | KV453058.1 | 1379631 | 14-scf00369 | 14 |
| AX-158209607 | 18 | 45.205 | KV453058.1 | 1381765 | 14-scf00369 | 14 |
| AX-157838295 | 18 | 45.205 | KV453058.1 | 1382432 | 14-scf00369 | 14 |
| AX-158209608 | 18 | 45.205 | KV453058.1 | 1382664 | 14-scf00369 | 14 |
| AX-157756296 | 18 | 45.205 | KV453058.1 | 1382952 | 14-scf00369 | 14 |
| AX-158209610 | 18 | 45.205 | KV453058.1 | 1385528 | 14-scf00369 | 14 |
| AX-157887163 | 18 | 45.205 | KV453058.1 | 1386195 | 14-scf00369 | 14 |
| AX-158209611 | 18 | 45.205 | KV453058.1 | 1386310 | 14-scf00369 | 14 |
| AX-158209612 | 18 | 45.205 | KV453058.1 | 1386825 | 14-scf00369 | 14 |
| AX-158209615 | 18 | 45.205 | KV453058.1 | 1390545 | 14-scf00369 | 14 |
| AX-157722140 | 18 | 45.205 | KV453058.1 | 1393573 | 14-scf00369 | 14 |
| AX-158209616 | 18 | 45.205 | KV453058.1 | 1393775 | 14-scf00369 | 14 |
| AX-158414466 | 18 | 45.205 | KV453058.1 | 1398265 | 14-scf00369 | 14 |
| AX-158209618 | 18 | 45.205 | KV453058.1 | 1398300 | 14-scf00369 | 14 |
| AX-158209619 | 18 | 45.205 | KV453058.1 | 1398503 | 14-scf00369 | 14 |
| AX-157715091 | 18 | 45.205 | KV453058.1 | 1398982 | 14-scf00369 | 14 |
| AX-158209620 | 18 | 45.205 | KV453058.1 | 1399316 | 14-scf00369 | 14 |
| AX-158209621 | 18 | 45.205 | KV453058.1 | 1399620 | 14-scf00369 | 14 |
| AX-158209623 | 18 | 45.205 | KV453058.1 | 1401419 | 14-scf00369 | 14 |
| AX-158209624 | 18 | 45.205 | KV453058.1 | 1401725 | 14-scf00369 | 14 |
| AX-158209626 | 18 | 45.205 | KV453058.1 | 1402665 | 14-scf00369 | 14 |
| AX-158209634 | 18 | 45.205 | KV453058.1 | 1413344 | 14-scf00369 | 14 |
| AX-158209635 | 18 | 45.205 | KV453058.1 | 1414645 | 14-scf00369 | 14 |
| AX-158209637 | 18 | 45.205 | KV453058.1 | 1416871 | 14-scf00369 | 14 |
| AX-158209644 | 18 | 45.205 | KV453058.1 | 1423426 | 14-scf00369 | 14 |
| AX-158209645 | 18 | 45.205 | KV453058.1 | 1426333 | 14-scf00369 | 14 |
| AX-157838307 | 18 | 45.205 | KV453058.1 | 1456758 | 14-scf00369 | 14 |
| AX-158209664 | 18 | 45.205 | KV453058.1 | 1461272 | 14-scf00369 | 14 |
| AX-158209642 | 18 | 45.261 | KV453058.1 | 1422467 | 14-scf00369 | 14 |
| AX-157838267 | 18 | 45.314 | KV453058.1 | 1105641 | 14-scf00369 | 14 |
| AX-158209571 | 18 | 45.314 | KV453058.1 | 1327532 | 14-scf00369 | 14 |
| AX-158209581 | 18 | 45.314 | KV453058.1 | 1345777 | 14-scf00369 | 14 |
| AX-157743543 | 18 | 45.314 | KV453058.1 | 1346179 | 14-scf00369 | 14 |
| AX-158209617 | 18 | 45.314 | KV453058.1 | 1394114 | 14-scf00369 | 14 |
| AX-158209639 | 18 | 45.314 | KV453058.1 | 1420149 | 14-scf00369 | 14 |
| AX-158209649 | 18 | 45.314 | KV453058.1 | 1430540 | 14-scf00369 | 14 |
| AX-157838302 | 18 | 45.314 | KV453058.1 | 1442465 | 14-scf00369 | 14 |
| AX-157743984 | 18 | 45.314 | KV453058.1 | 1442717 | 14-scf00369 | 14 |
| AX-158209661 | 18 | 45.314 | KV453058.1 | 1456065 | 14-scf00369 | 14 |
| AX-158209663 | 18 | 45.314 | KV453058.1 | 1459277 | 14-scf00369 | 14 |
| AX-157838310 | 18 | 45.314 | KV453058.1 | 1462388 | 14-scf00369 | 14 |
| AX-158209666 | 18 | 45.314 | KV453058.1 | 1467298 | 14-scf00369 | 14 |



|              |    |        |            |         |             |    |
|--------------|----|--------|------------|---------|-------------|----|
| AX-158209667 | 18 | 45.314 | KV453058.1 | 1467876 | 14-scf00369 | 14 |
| AX-158209670 | 18 | 45.314 | KV453058.1 | 1471336 | 14-scf00369 | 14 |
| AX-158209671 | 18 | 45.314 | KV453058.1 | 1475731 | 14-scf00369 | 14 |
| AX-157838313 | 18 | 45.314 | KV453058.1 | 1478011 | 14-scf00369 | 14 |
| AX-158209672 | 18 | 45.314 | KV453058.1 | 1478315 | 14-scf00369 | 14 |
| AX-158209674 | 18 | 45.314 | KV453058.1 | 1482087 | 14-scf00369 | 14 |
| AX-158209675 | 18 | 45.314 | KV453058.1 | 1482289 | 14-scf00369 | 14 |
| AX-158209676 | 18 | 45.314 | KV453058.1 | 1484576 | 14-scf00369 | 14 |
| AX-157746004 | 18 | 45.314 | KV453058.1 | 1568874 | 14-scf00369 | 14 |
| AX-158209771 | 18 | 45.314 | KV453058.1 | 1635625 | 14-scf00369 | 14 |
| AX-158209917 | 18 | 45.314 | KV453058.1 | 1841124 | 14-scf00369 | 14 |
| AX-158209678 | 18 | 45.478 | KV453058.1 | 1489675 | 14-scf00369 | 14 |
| AX-158209679 | 18 | 45.478 | KV453058.1 | 1491695 | 14-scf00369 | 14 |
| AX-158209701 | 18 | 45.478 | KV453058.1 | 1521987 | 14-scf00369 | 14 |
| AX-158209702 | 18 | 45.478 | KV453058.1 | 1523103 | 14-scf00369 | 14 |
| AX-158209682 | 18 | 45.556 | KV453058.1 | 1495541 | 14-scf00369 | 14 |
| AX-158209629 | 18 | 45.642 | KV453058.1 | 1405280 | 14-scf00369 | 14 |
| AX-158209685 | 18 | 45.642 | KV453058.1 | 1499153 | 14-scf00369 | 14 |
| AX-158209686 | 18 | 45.642 | KV453058.1 | 1501871 | 14-scf00369 | 14 |
| AX-158209687 | 18 | 45.642 | KV453058.1 | 1502717 | 14-scf00369 | 14 |
| AX-158209688 | 18 | 45.642 | KV453058.1 | 1502933 | 14-scf00369 | 14 |
| AX-157872351 | 18 | 45.642 | KV453058.1 | 1506645 | 14-scf00369 | 14 |
| AX-158209689 | 18 | 45.642 | KV453058.1 | 1509215 | 14-scf00369 | 14 |
| AX-158209690 | 18 | 45.642 | KV453058.1 | 1510506 | 14-scf00369 | 14 |
| AX-157710922 | 18 | 45.642 | KV453058.1 | 1511878 | 14-scf00369 | 14 |
| AX-158209692 | 18 | 45.642 | KV453058.1 | 1513461 | 14-scf00369 | 14 |
| AX-157756182 | 18 | 45.752 | KV453058.1 | 1140443 | 14-scf00369 | 14 |
| AX-158209605 | 18 | 45.752 | KV453058.1 | 1378702 | 14-scf00369 | 14 |
| AX-158209630 | 18 | 45.752 | KV453058.1 | 1406480 | 14-scf00369 | 14 |
| AX-157746888 | 18 | 45.752 | KV453058.1 | 1406797 | 14-scf00369 | 14 |
| AX-158209646 | 18 | 45.752 | KV453058.1 | 1427176 | 14-scf00369 | 14 |
| AX-157838301 | 18 | 45.752 | KV453058.1 | 1435351 | 14-scf00369 | 14 |
| AX-158209657 | 18 | 45.752 | KV453058.1 | 1450763 | 14-scf00369 | 14 |
| AX-157838303 | 18 | 45.752 | KV453058.1 | 1451016 | 14-scf00369 | 14 |
| AX-158209658 | 18 | 45.752 | KV453058.1 | 1451940 | 14-scf00369 | 14 |
| AX-157774465 | 18 | 45.752 | KV453058.1 | 1452299 | 14-scf00369 | 14 |
| AX-158209659 | 18 | 45.752 | KV453058.1 | 1452625 | 14-scf00369 | 14 |
| AX-157859131 | 18 | 45.752 | KV453058.1 | 1465542 | 14-scf00369 | 14 |
| AX-157872352 | 18 | 45.752 | KV453058.1 | 1510154 | 14-scf00369 | 14 |
| AX-158209695 | 18 | 45.752 | KV453058.1 | 1517038 | 14-scf00369 | 14 |
| AX-158209696 | 18 | 45.752 | KV453058.1 | 1517829 | 14-scf00369 | 14 |
| AX-157872353 | 18 | 45.752 | KV453058.1 | 1518300 | 14-scf00369 | 14 |
| AX-158380789 | 18 | 45.752 | KV453058.1 | 1518596 | 14-scf00369 | 14 |
| AX-158209697 | 18 | 45.752 | KV453058.1 | 1518852 | 14-scf00369 | 14 |
| AX-158209699 | 18 | 45.752 | KV453058.1 | 1519865 | 14-scf00369 | 14 |
| AX-158209704 | 18 | 45.807 | KV453058.1 | 1524789 | 14-scf00369 | 14 |
| AX-158209755 | 18 | 45.807 | KV453058.1 | 1621108 | 14-scf00369 | 14 |
| AX-158210169 | 18 | 45.807 | KV453058.1 | 2231690 | 14-scf00369 | 14 |
| AX-158210173 | 18 | 45.807 | KV453058.1 | 2242361 | 14-scf00369 | 14 |
| AX-157838316 | 18 | 45.97  | KV453058.1 | 1530670 | 14-scf00369 | 14 |
| AX-157838318 | 18 | 45.97  | KV453058.1 | 1534479 | 14-scf00369 | 14 |

|              |    |        |            |         |             |    |
|--------------|----|--------|------------|---------|-------------|----|
| AX-158209709 | 18 | 45.97  | KV453058.1 | 1536544 | 14-scf00369 | 14 |
| AX-158209711 | 18 | 45.97  | KV453058.1 | 1538061 | 14-scf00369 | 14 |
| AX-157838319 | 18 | 45.97  | KV453058.1 | 1538610 | 14-scf00369 | 14 |
| AX-158209713 | 18 | 45.97  | KV453058.1 | 1540011 | 14-scf00369 | 14 |
| AX-158209715 | 18 | 45.97  | KV453058.1 | 1542274 | 14-scf00369 | 14 |
| AX-158209717 | 18 | 45.97  | KV453058.1 | 1544437 | 14-scf00369 | 14 |
| AX-158209720 | 18 | 45.97  | KV453058.1 | 1548954 | 14-scf00369 | 14 |
| AX-158209721 | 18 | 45.97  | KV453058.1 | 1549975 | 14-scf00369 | 14 |
| AX-158209724 | 18 | 45.97  | KV453058.1 | 1556173 | 14-scf00369 | 14 |
| AX-157838320 | 18 | 45.97  | KV453058.1 | 1558303 | 14-scf00369 | 14 |
| AX-157838321 | 18 | 45.97  | KV453058.1 | 1558447 | 14-scf00369 | 14 |
| AX-157739279 | 18 | 45.97  | KV453058.1 | 1559057 | 14-scf00369 | 14 |
| AX-158209729 | 18 | 46.029 | KV453058.1 | 1568087 | 14-scf00369 | 14 |
| AX-158209742 | 18 | 46.029 | KV453058.1 | 1598267 | 14-scf00369 | 14 |
| AX-158209726 | 18 | 46.079 | KV453058.1 | 1562816 | 14-scf00369 | 14 |
| AX-158209730 | 18 | 46.079 | KV453058.1 | 1569048 | 14-scf00369 | 14 |
| AX-158209731 | 18 | 46.079 | KV453058.1 | 1569782 | 14-scf00369 | 14 |
| AX-158209732 | 18 | 46.079 | KV453058.1 | 1570165 | 14-scf00369 | 14 |
| AX-158209736 | 18 | 46.079 | KV453058.1 | 1587528 | 14-scf00369 | 14 |
| AX-157753382 | 18 | 46.079 | KV453058.1 | 1588904 | 14-scf00369 | 14 |
| AX-158209739 | 18 | 46.079 | KV453058.1 | 1591244 | 14-scf00369 | 14 |
| AX-157872354 | 18 | 46.079 | KV453058.1 | 1591424 | 14-scf00369 | 14 |
| AX-158209740 | 18 | 46.079 | KV453058.1 | 1595138 | 14-scf00369 | 14 |
| AX-158209741 | 18 | 46.079 | KV453058.1 | 1596638 | 14-scf00369 | 14 |
| AX-157859133 | 18 | 46.079 | KV453058.1 | 1601170 | 14-scf00369 | 14 |
| AX-158209743 | 18 | 46.079 | KV453058.1 | 1603090 | 14-scf00369 | 14 |
| AX-158209747 | 18 | 46.079 | KV453058.1 | 1609413 | 14-scf00369 | 14 |
| AX-158209749 | 18 | 46.079 | KV453058.1 | 1610519 | 14-scf00369 | 14 |
| AX-157838325 | 18 | 46.079 | KV453058.1 | 1610939 | 14-scf00369 | 14 |
| AX-158209752 | 18 | 46.079 | KV453058.1 | 1613052 | 14-scf00369 | 14 |
| AX-158209756 | 18 | 46.079 | KV453058.1 | 1621388 | 14-scf00369 | 14 |
| AX-158209762 | 18 | 46.079 | KV453058.1 | 1625991 | 14-scf00369 | 14 |
| AX-158209763 | 18 | 46.079 | KV453058.1 | 1626419 | 14-scf00369 | 14 |
| AX-157838326 | 18 | 46.079 | KV453058.1 | 1626936 | 14-scf00369 | 14 |
| AX-158209766 | 18 | 46.079 | KV453058.1 | 1628951 | 14-scf00369 | 14 |
| AX-158209768 | 18 | 46.079 | KV453058.1 | 1630431 | 14-scf00369 | 14 |
| AX-158209769 | 18 | 46.079 | KV453058.1 | 1631821 | 14-scf00369 | 14 |
| AX-158210045 | 18 | 46.079 | KV453058.1 | 2012394 | 14-scf00369 | 14 |
| AX-158209792 | 18 | 46.135 | KV453058.1 | 1666349 | 14-scf00369 | 14 |
| AX-158386433 | 18 | 46.297 | KV453058.1 | 1545076 | 14-scf00369 | 14 |
| AX-157859132 | 18 | 46.297 | KV453058.1 | 1545528 | 14-scf00369 | 14 |
| AX-157713119 | 18 | 46.297 | KV453058.1 | 1626552 | 14-scf00369 | 14 |
| AX-158209793 | 18 | 46.297 | KV453058.1 | 1667460 | 14-scf00369 | 14 |
| AX-157725248 | 18 | 46.297 | KV453058.1 | 1668947 | 14-scf00369 | 14 |
| AX-158209806 | 18 | 46.297 | KV453058.1 | 1687627 | 14-scf00369 | 14 |
| AX-158209808 | 18 | 46.297 | KV453058.1 | 1689174 | 14-scf00369 | 14 |
| AX-158209811 | 18 | 46.297 | KV453058.1 | 1691487 | 14-scf00369 | 14 |
| AX-158209812 | 18 | 46.297 | KV453058.1 | 1691960 | 14-scf00369 | 14 |
| AX-157838327 | 18 | 46.297 | KV453058.1 | 1692455 | 14-scf00369 | 14 |
| AX-157773232 | 18 | 46.297 | KV453058.1 | 1693579 | 14-scf00369 | 14 |
| AX-158209813 | 18 | 46.297 | KV453058.1 | 1694216 | 14-scf00369 | 14 |

|              |    |        |            |         |             |    |
|--------------|----|--------|------------|---------|-------------|----|
| AX-158209823 | 18 | 46.297 | KV453058.1 | 1700497 | 14-scf00369 | 14 |
| AX-158209952 | 18 | 46.297 | KV453058.1 | 1901072 | 14-scf00369 | 14 |
| AX-158209989 | 18 | 46.297 | KV453058.1 | 1942296 | 14-scf00369 | 14 |
| AX-158209710 | 18 | 46.407 | KV453058.1 | 1536994 | 14-scf00369 | 14 |
| AX-158209712 | 18 | 46.407 | KV453058.1 | 1539042 | 14-scf00369 | 14 |
| AX-158209733 | 18 | 46.407 | KV453058.1 | 1572110 | 14-scf00369 | 14 |
| AX-158209734 | 18 | 46.407 | KV453058.1 | 1585618 | 14-scf00369 | 14 |
| AX-158209761 | 18 | 46.407 | KV453058.1 | 1624894 | 14-scf00369 | 14 |
| AX-158209765 | 18 | 46.407 | KV453058.1 | 1628708 | 14-scf00369 | 14 |
| AX-158209794 | 18 | 46.407 | KV453058.1 | 1669239 | 14-scf00369 | 14 |
| AX-158209799 | 18 | 46.407 | KV453058.1 | 1675540 | 14-scf00369 | 14 |
| AX-158209805 | 18 | 46.407 | KV453058.1 | 1686683 | 14-scf00369 | 14 |
| AX-158209809 | 18 | 46.407 | KV453058.1 | 1689537 | 14-scf00369 | 14 |
| AX-158209814 | 18 | 46.407 | KV453058.1 | 1694749 | 14-scf00369 | 14 |
| AX-157887167 | 18 | 46.407 | KV453058.1 | 1695984 | 14-scf00369 | 14 |
| AX-158209819 | 18 | 46.407 | KV453058.1 | 1698167 | 14-scf00369 | 14 |
| AX-158209820 | 18 | 46.407 | KV453058.1 | 1698824 | 14-scf00369 | 14 |
| AX-158209822 | 18 | 46.407 | KV453058.1 | 1700070 | 14-scf00369 | 14 |
| AX-158209826 | 18 | 46.407 | KV453058.1 | 1701854 | 14-scf00369 | 14 |
| AX-158209830 | 18 | 46.407 | KV453058.1 | 1709905 | 14-scf00369 | 14 |
| AX-158209831 | 18 | 46.407 | KV453058.1 | 1711209 | 14-scf00369 | 14 |
| AX-158209832 | 18 | 46.407 | KV453058.1 | 1712164 | 14-scf00369 | 14 |
| AX-158209833 | 18 | 46.407 | KV453058.1 | 1713045 | 14-scf00369 | 14 |
| AX-158209837 | 18 | 46.407 | KV453058.1 | 1721818 | 14-scf00369 | 14 |
| AX-158209838 | 18 | 46.407 | KV453058.1 | 1723322 | 14-scf00369 | 14 |
| AX-158209839 | 18 | 46.407 | KV453058.1 | 1724151 | 14-scf00369 | 14 |
| AX-158209841 | 18 | 46.407 | KV453058.1 | 1725116 | 14-scf00369 | 14 |
| AX-158209844 | 18 | 46.407 | KV453058.1 | 1729188 | 14-scf00369 | 14 |
| AX-158209845 | 18 | 46.407 | KV453058.1 | 1730411 | 14-scf00369 | 14 |
| AX-158209848 | 18 | 46.407 | KV453058.1 | 1734118 | 14-scf00369 | 14 |
| AX-158209851 | 18 | 46.407 | KV453058.1 | 1739012 | 14-scf00369 | 14 |
| AX-158209853 | 18 | 46.407 | KV453058.1 | 1744029 | 14-scf00369 | 14 |
| AX-158209854 | 18 | 46.407 | KV453058.1 | 1745244 | 14-scf00369 | 14 |
| AX-158209855 | 18 | 46.407 | KV453058.1 | 1746312 | 14-scf00369 | 14 |
| AX-158209856 | 18 | 46.407 | KV453058.1 | 1746719 | 14-scf00369 | 14 |
| AX-157838328 | 18 | 46.407 | KV453058.1 | 1749079 | 14-scf00369 | 14 |
| AX-158209858 | 18 | 46.407 | KV453058.1 | 1750940 | 14-scf00369 | 14 |
| AX-158209859 | 18 | 46.407 | KV453058.1 | 1752614 | 14-scf00369 | 14 |
| AX-158209860 | 18 | 46.407 | KV453058.1 | 1752977 | 14-scf00369 | 14 |
| AX-157748108 | 18 | 46.407 | KV453058.1 | 1754210 | 14-scf00369 | 14 |
| AX-157838330 | 18 | 46.407 | KV453058.1 | 1756146 | 14-scf00369 | 14 |
| AX-158209862 | 18 | 46.407 | KV453058.1 | 1759516 | 14-scf00369 | 14 |
| AX-158209863 | 18 | 46.407 | KV453058.1 | 1759910 | 14-scf00369 | 14 |
| AX-157750230 | 18 | 46.407 | KV453058.1 | 1763657 | 14-scf00369 | 14 |
| AX-158209865 | 18 | 46.407 | KV453058.1 | 1764912 | 14-scf00369 | 14 |
| AX-158209866 | 18 | 46.407 | KV453058.1 | 1768416 | 14-scf00369 | 14 |
| AX-158209867 | 18 | 46.407 | KV453058.1 | 1769616 | 14-scf00369 | 14 |
| AX-158209869 | 18 | 46.407 | KV453058.1 | 1772339 | 14-scf00369 | 14 |
| AX-157838331 | 18 | 46.407 | KV453058.1 | 1772525 | 14-scf00369 | 14 |
| AX-157866956 | 18 | 46.407 | KV453058.1 | 1775030 | 14-scf00369 | 14 |
| AX-158209873 | 18 | 46.407 | KV453058.1 | 1775590 | 14-scf00369 | 14 |

|              |    |        |            |         |             |    |
|--------------|----|--------|------------|---------|-------------|----|
| AX-158209874 | 18 | 46.407 | KV453058.1 | 1776162 | 14-scf00369 | 14 |
| AX-157838332 | 18 | 46.407 | KV453058.1 | 1778373 | 14-scf00369 | 14 |
| AX-158209877 | 18 | 46.407 | KV453058.1 | 1784891 | 14-scf00369 | 14 |
| AX-158209878 | 18 | 46.407 | KV453058.1 | 1786227 | 14-scf00369 | 14 |
| AX-158209879 | 18 | 46.407 | KV453058.1 | 1786456 | 14-scf00369 | 14 |
| AX-157838334 | 18 | 46.407 | KV453058.1 | 1788748 | 14-scf00369 | 14 |
| AX-158209881 | 18 | 46.407 | KV453058.1 | 1790419 | 14-scf00369 | 14 |
| AX-158209882 | 18 | 46.407 | KV453058.1 | 1791767 | 14-scf00369 | 14 |
| AX-158209884 | 18 | 46.407 | KV453058.1 | 1793075 | 14-scf00369 | 14 |
| AX-158209888 | 18 | 46.407 | KV453058.1 | 1797550 | 14-scf00369 | 14 |
| AX-158209889 | 18 | 46.407 | KV453058.1 | 1798121 | 14-scf00369 | 14 |
| AX-158209891 | 18 | 46.407 | KV453058.1 | 1799067 | 14-scf00369 | 14 |
| AX-157838335 | 18 | 46.407 | KV453058.1 | 1802659 | 14-scf00369 | 14 |
| AX-158209894 | 18 | 46.407 | KV453058.1 | 1804142 | 14-scf00369 | 14 |
| AX-158209896 | 18 | 46.407 | KV453058.1 | 1810696 | 14-scf00369 | 14 |
| AX-158209897 | 18 | 46.407 | KV453058.1 | 1814406 | 14-scf00369 | 14 |
| AX-158209900 | 18 | 46.407 | KV453058.1 | 1818574 | 14-scf00369 | 14 |
| AX-158209901 | 18 | 46.407 | KV453058.1 | 1819746 | 14-scf00369 | 14 |
| AX-158209902 | 18 | 46.407 | KV453058.1 | 1820858 | 14-scf00369 | 14 |
| AX-158209903 | 18 | 46.407 | KV453058.1 | 1822686 | 14-scf00369 | 14 |
| AX-158209904 | 18 | 46.407 | KV453058.1 | 1823106 | 14-scf00369 | 14 |
| AX-158209909 | 18 | 46.407 | KV453058.1 | 1834618 | 14-scf00369 | 14 |
| AX-158209912 | 18 | 46.407 | KV453058.1 | 1837466 | 14-scf00369 | 14 |
| AX-158209913 | 18 | 46.407 | KV453058.1 | 1838152 | 14-scf00369 | 14 |
| AX-158209914 | 18 | 46.407 | KV453058.1 | 1838800 | 14-scf00369 | 14 |
| AX-158209915 | 18 | 46.407 | KV453058.1 | 1839179 | 14-scf00369 | 14 |
| AX-158393993 | 18 | 46.407 | KV453058.1 | 1842633 | 14-scf00369 | 14 |
| AX-158209919 | 18 | 46.407 | KV453058.1 | 1843398 | 14-scf00369 | 14 |
| AX-158209922 | 18 | 46.407 | KV453058.1 | 1855616 | 14-scf00369 | 14 |
| AX-158209923 | 18 | 46.407 | KV453058.1 | 1857519 | 14-scf00369 | 14 |
| AX-158209924 | 18 | 46.407 | KV453058.1 | 1861611 | 14-scf00369 | 14 |
| AX-157866959 | 18 | 46.407 | KV453058.1 | 1869463 | 14-scf00369 | 14 |
| AX-158209927 | 18 | 46.407 | KV453058.1 | 1872373 | 14-scf00369 | 14 |
| AX-158209929 | 18 | 46.407 | KV453058.1 | 1875961 | 14-scf00369 | 14 |
| AX-158209931 | 18 | 46.407 | KV453058.1 | 1877138 | 14-scf00369 | 14 |
| AX-158209932 | 18 | 46.407 | KV453058.1 | 1877526 | 14-scf00369 | 14 |
| AX-158209935 | 18 | 46.407 | KV453058.1 | 1878699 | 14-scf00369 | 14 |
| AX-158209939 | 18 | 46.407 | KV453058.1 | 1883391 | 14-scf00369 | 14 |
| AX-158209940 | 18 | 46.407 | KV453058.1 | 1885167 | 14-scf00369 | 14 |
| AX-157838341 | 18 | 46.407 | KV453058.1 | 1886279 | 14-scf00369 | 14 |
| AX-158209944 | 18 | 46.407 | KV453058.1 | 1890275 | 14-scf00369 | 14 |
| AX-158209946 | 18 | 46.407 | KV453058.1 | 1893180 | 14-scf00369 | 14 |
| AX-158209948 | 18 | 46.407 | KV453058.1 | 1895154 | 14-scf00369 | 14 |
| AX-158209949 | 18 | 46.407 | KV453058.1 | 1898867 | 14-scf00369 | 14 |
| AX-158209950 | 18 | 46.407 | KV453058.1 | 1899261 | 14-scf00369 | 14 |
| AX-158209951 | 18 | 46.407 | KV453058.1 | 1900312 | 14-scf00369 | 14 |
| AX-158209958 | 18 | 46.407 | KV453058.1 | 1906006 | 14-scf00369 | 14 |
| AX-157754676 | 18 | 46.407 | KV453058.1 | 1911201 | 14-scf00369 | 14 |
| AX-158209964 | 18 | 46.407 | KV453058.1 | 1911603 | 14-scf00369 | 14 |
| AX-157879511 | 18 | 46.407 | KV453058.1 | 1913233 | 14-scf00369 | 14 |
| AX-158209967 | 18 | 46.407 | KV453058.1 | 1914163 | 14-scf00369 | 14 |

|              |    |        |             |         |             |    |
|--------------|----|--------|-------------|---------|-------------|----|
| AX-158209970 | 18 | 46.407 | KV453058.1  | 1917577 | 14-scf00369 | 14 |
| AX-158209972 | 18 | 46.407 | KV453058.1  | 1920497 | 14-scf00369 | 14 |
| AX-158209974 | 18 | 46.407 | KV453058.1  | 1923386 | 14-scf00369 | 14 |
| AX-158209975 | 18 | 46.407 | KV453058.1  | 1923766 | 14-scf00369 | 14 |
| AX-158209976 | 18 | 46.407 | KV453058.1  | 1924470 | 14-scf00369 | 14 |
| AX-158209978 | 18 | 46.407 | KV453058.1  | 1925939 | 14-scf00369 | 14 |
| AX-158209982 | 18 | 46.407 | KV453058.1  | 1932889 | 14-scf00369 | 14 |
| AX-157740137 | 18 | 46.407 | KV453058.1  | 1934421 | 14-scf00369 | 14 |
| AX-158209984 | 18 | 46.407 | KV453058.1  | 1934591 | 14-scf00369 | 14 |
| AX-158209985 | 18 | 46.407 | KV453058.1  | 1935768 | 14-scf00369 | 14 |
| AX-158209987 | 18 | 46.407 | KV453058.1  | 1937355 | 14-scf00369 | 14 |
| AX-157720489 | 18 | 46.407 | KV453058.1  | 1938940 | 14-scf00369 | 14 |
| AX-158209990 | 18 | 46.407 | KV453058.1  | 1943238 | 14-scf00369 | 14 |
| AX-158209991 | 18 | 46.407 | KV453058.1  | 1944353 | 14-scf00369 | 14 |
| AX-158209993 | 18 | 46.407 | KV453058.1  | 1950051 | 14-scf00369 | 14 |
| AX-157887168 | 18 | 46.407 | KV453058.1  | 1951721 | 14-scf00369 | 14 |
| AX-158210003 | 18 | 46.407 | KV453058.1  | 1958783 | 14-scf00369 | 14 |
| AX-157859136 | 18 | 46.407 | KV453058.1  | 1959362 | 14-scf00369 | 14 |
| AX-158210008 | 18 | 46.407 | KV453058.1  | 1961672 | 14-scf00369 | 14 |
| AX-158210009 | 18 | 46.407 | KV453058.1  | 1962032 | 14-scf00369 | 14 |
| AX-158210014 | 18 | 46.407 | KV453058.1  | 1969199 | 14-scf00369 | 14 |
| AX-158210016 | 18 | 46.407 | KV453058.1  | 1970349 | 14-scf00369 | 14 |
| AX-158210021 | 18 | 46.407 | KV453058.1  | 1976524 | 14-scf00369 | 14 |
| AX-158210022 | 18 | 46.407 | KV453058.1  | 1977199 | 14-scf00369 | 14 |
| AX-158210024 | 18 | 46.407 | KV453058.1  | 1980885 | 14-scf00369 | 14 |
| AX-158210027 | 18 | 46.407 | KV453058.1  | 1984983 | 14-scf00369 | 14 |
| AX-158210028 | 18 | 46.407 | KV453058.1  | 1985719 | 14-scf00369 | 14 |
| AX-158210033 | 18 | 46.407 | KV453058.1  | 1992030 | 14-scf00369 | 14 |
| AX-158210035 | 18 | 46.407 | KV453058.1  | 1993853 | 14-scf00369 | 14 |
| AX-158210036 | 18 | 46.407 | KV453058.1  | 1995133 | 14-scf00369 | 14 |
| AX-158210047 | 18 | 46.407 | KV453058.1  | 2016631 | 14-scf00369 | 14 |
| AX-157838342 | 18 | 46.407 | KV453058.1  | 2032240 | 14-scf00369 | 14 |
| AX-157755645 | 18 | 46.407 | KV453058.1  | 2093239 | 14-scf00369 | 14 |
| AX-158210149 | 18 | 46.407 | KV453058.1  | 2189709 | 14-scf00369 | 14 |
| AX-158210177 | 18 | 46.407 | KV453058.1  | 2246857 | 14-scf00369 | 14 |
| AX-158210189 | 18 | 46.407 | KV453058.1  | 2263458 | 14-scf00369 | 14 |
| AX-158210232 | 18 | 46.407 | KV453058.1  | 2325162 | 14-scf00369 | 14 |
| AX-157838360 | 18 | 46.407 | KV453058.1  | 2332200 | 14-scf00369 | 14 |
| AX-157773781 | 18 | 46.407 | KV453058.1  | 2565353 | 14-scf00369 | 14 |
| AX-158210395 | 18 | 46.407 | KV453058.1  | 2576465 | 14-scf00369 | 14 |
| AX-157706377 | 18 | 46.407 | 3ML01032149 | 524     | scf07763_1  | UN |
| AX-157859137 | 18 | 46.408 | KV453058.1  | 2017354 | 14-scf00369 | 14 |
| AX-158210050 | 18 | 46.408 | KV453058.1  | 2024335 | 14-scf00369 | 14 |
| AX-158210053 | 18 | 46.733 | KV453058.1  | 2037584 | 14-scf00369 | 14 |
| AX-158209790 | 18 | 46.734 | KV453058.1  | 1661990 | 14-scf00369 | 14 |
| AX-158209905 | 18 | 46.734 | KV453058.1  | 1823790 | 14-scf00369 | 14 |
| AX-158209908 | 18 | 46.734 | KV453058.1  | 1829428 | 14-scf00369 | 14 |
| AX-158209953 | 18 | 46.734 | KV453058.1  | 1901844 | 14-scf00369 | 14 |
| AX-158209959 | 18 | 46.734 | KV453058.1  | 1906384 | 14-scf00369 | 14 |
| AX-158209988 | 18 | 46.734 | KV453058.1  | 1938301 | 14-scf00369 | 14 |
| AX-158210018 | 18 | 46.734 | KV453058.1  | 1973051 | 14-scf00369 | 14 |

|              |    |        |            |         |             |    |
|--------------|----|--------|------------|---------|-------------|----|
| AX-158210037 | 18 | 46.734 | KV453058.1 | 1995687 | 14-scf00369 | 14 |
| AX-157838343 | 18 | 46.734 | KV453058.1 | 2045104 | 14-scf00369 | 14 |
| AX-158210059 | 18 | 46.734 | KV453058.1 | 2047617 | 14-scf00369 | 14 |
| AX-158210061 | 18 | 46.734 | KV453058.1 | 2048267 | 14-scf00369 | 14 |
| AX-158210062 | 18 | 46.734 | KV453058.1 | 2049175 | 14-scf00369 | 14 |
| AX-158210064 | 18 | 46.734 | KV453058.1 | 2050440 | 14-scf00369 | 14 |
| AX-158210065 | 18 | 46.734 | KV453058.1 | 2050968 | 14-scf00369 | 14 |
| AX-158210067 | 18 | 46.734 | KV453058.1 | 2052169 | 14-scf00369 | 14 |
| AX-158210068 | 18 | 46.734 | KV453058.1 | 2052778 | 14-scf00369 | 14 |
| AX-158210073 | 18 | 46.734 | KV453058.1 | 2064379 | 14-scf00369 | 14 |
| AX-158210074 | 18 | 46.734 | KV453058.1 | 2065883 | 14-scf00369 | 14 |
| AX-158210075 | 18 | 46.734 | KV453058.1 | 2066656 | 14-scf00369 | 14 |
| AX-158210077 | 18 | 46.734 | KV453058.1 | 2068104 | 14-scf00369 | 14 |
| AX-158210078 | 18 | 46.734 | KV453058.1 | 2068658 | 14-scf00369 | 14 |
| AX-158210080 | 18 | 46.734 | KV453058.1 | 2071728 | 14-scf00369 | 14 |
| AX-158210082 | 18 | 46.734 | KV453058.1 | 2074142 | 14-scf00369 | 14 |
| AX-158210083 | 18 | 46.734 | KV453058.1 | 2074559 | 14-scf00369 | 14 |
| AX-157838345 | 18 | 46.734 | KV453058.1 | 2074767 | 14-scf00369 | 14 |
| AX-158210085 | 18 | 46.734 | KV453058.1 | 2077270 | 14-scf00369 | 14 |
| AX-158210089 | 18 | 46.734 | KV453058.1 | 2081994 | 14-scf00369 | 14 |
| AX-158210090 | 18 | 46.734 | KV453058.1 | 2083350 | 14-scf00369 | 14 |
| AX-158210091 | 18 | 46.734 | KV453058.1 | 2084153 | 14-scf00369 | 14 |
| AX-158210092 | 18 | 46.734 | KV453058.1 | 2084955 | 14-scf00369 | 14 |
| AX-158210095 | 18 | 46.734 | KV453058.1 | 2097479 | 14-scf00369 | 14 |
| AX-157838347 | 18 | 46.734 | KV453058.1 | 2101001 | 14-scf00369 | 14 |
| AX-158210098 | 18 | 46.734 | KV453058.1 | 2105618 | 14-scf00369 | 14 |
| AX-158210099 | 18 | 46.734 | KV453058.1 | 2106026 | 14-scf00369 | 14 |
| AX-158210101 | 18 | 46.734 | KV453058.1 | 2107890 | 14-scf00369 | 14 |
| AX-158210103 | 18 | 46.734 | KV453058.1 | 2109316 | 14-scf00369 | 14 |
| AX-157838348 | 18 | 46.734 | KV453058.1 | 2109436 | 14-scf00369 | 14 |
| AX-158210106 | 18 | 46.734 | KV453058.1 | 2112292 | 14-scf00369 | 14 |
| AX-158210110 | 18 | 46.734 | KV453058.1 | 2116952 | 14-scf00369 | 14 |
| AX-158210120 | 18 | 46.734 | KV453058.1 | 2135704 | 14-scf00369 | 14 |
| AX-158210121 | 18 | 46.734 | KV453058.1 | 2136840 | 14-scf00369 | 14 |
| AX-158210123 | 18 | 46.734 | KV453058.1 | 2138182 | 14-scf00369 | 14 |
| AX-158380791 | 18 | 46.734 | KV453058.1 | 2139874 | 14-scf00369 | 14 |
| AX-158210128 | 18 | 46.734 | KV453058.1 | 2148884 | 14-scf00369 | 14 |
| AX-158210132 | 18 | 46.734 | KV453058.1 | 2160013 | 14-scf00369 | 14 |
| AX-158210133 | 18 | 46.734 | KV453058.1 | 2162141 | 14-scf00369 | 14 |
| AX-158210134 | 18 | 46.734 | KV453058.1 | 2163055 | 14-scf00369 | 14 |
| AX-158210135 | 18 | 46.734 | KV453058.1 | 2165331 | 14-scf00369 | 14 |
| AX-158210136 | 18 | 46.734 | KV453058.1 | 2165798 | 14-scf00369 | 14 |
| AX-158210137 | 18 | 46.734 | KV453058.1 | 2166291 | 14-scf00369 | 14 |
| AX-158210138 | 18 | 46.734 | KV453058.1 | 2167431 | 14-scf00369 | 14 |
| AX-158210139 | 18 | 46.734 | KV453058.1 | 2169020 | 14-scf00369 | 14 |
| AX-158210140 | 18 | 46.734 | KV453058.1 | 2169783 | 14-scf00369 | 14 |
| AX-158210141 | 18 | 46.734 | KV453058.1 | 2170611 | 14-scf00369 | 14 |
| AX-158210148 | 18 | 46.734 | KV453058.1 | 2188031 | 14-scf00369 | 14 |
| AX-158418543 | 18 | 46.734 | KV453058.1 | 2194590 | 14-scf00369 | 14 |
| AX-158210150 | 18 | 46.734 | KV453058.1 | 2196010 | 14-scf00369 | 14 |
| AX-158210152 | 18 | 46.734 | KV453058.1 | 2199051 | 14-scf00369 | 14 |

|              |    |        |            |         |             |    |
|--------------|----|--------|------------|---------|-------------|----|
| AX-158210153 | 18 | 46.734 | KV453058.1 | 2199606 | 14-scf00369 | 14 |
| AX-158210155 | 18 | 46.734 | KV453058.1 | 2204465 | 14-scf00369 | 14 |
| AX-158210158 | 18 | 46.734 | KV453058.1 | 2207320 | 14-scf00369 | 14 |
| AX-158210159 | 18 | 46.734 | KV453058.1 | 2208007 | 14-scf00369 | 14 |
| AX-158210160 | 18 | 46.734 | KV453058.1 | 2210448 | 14-scf00369 | 14 |
| AX-158210161 | 18 | 46.734 | KV453058.1 | 2214526 | 14-scf00369 | 14 |
| AX-157742842 | 18 | 46.734 | KV453058.1 | 2216485 | 14-scf00369 | 14 |
| AX-158210162 | 18 | 46.734 | KV453058.1 | 2216879 | 14-scf00369 | 14 |
| AX-158210163 | 18 | 46.734 | KV453058.1 | 2219594 | 14-scf00369 | 14 |
| AX-158210165 | 18 | 46.734 | KV453058.1 | 2227883 | 14-scf00369 | 14 |
| AX-158210167 | 18 | 46.734 | KV453058.1 | 2229264 | 14-scf00369 | 14 |
| AX-158386444 | 18 | 46.734 | KV453058.1 | 2239991 | 14-scf00369 | 14 |
| AX-158210172 | 18 | 46.734 | KV453058.1 | 2241264 | 14-scf00369 | 14 |
| AX-158210174 | 18 | 46.734 | KV453058.1 | 2243667 | 14-scf00369 | 14 |
| AX-158210175 | 18 | 46.734 | KV453058.1 | 2244542 | 14-scf00369 | 14 |
| AX-158210178 | 18 | 46.734 | KV453058.1 | 2250378 | 14-scf00369 | 14 |
| AX-158210179 | 18 | 46.734 | KV453058.1 | 2252107 | 14-scf00369 | 14 |
| AX-157838351 | 18 | 46.734 | KV453058.1 | 2252874 | 14-scf00369 | 14 |
| AX-158210182 | 18 | 46.734 | KV453058.1 | 2256263 | 14-scf00369 | 14 |
| AX-157866962 | 18 | 46.734 | KV453058.1 | 2265716 | 14-scf00369 | 14 |
| AX-158210192 | 18 | 46.734 | KV453058.1 | 2267622 | 14-scf00369 | 14 |
| AX-158210193 | 18 | 46.734 | KV453058.1 | 2269476 | 14-scf00369 | 14 |
| AX-157838352 | 18 | 46.734 | KV453058.1 | 2270058 | 14-scf00369 | 14 |
| AX-157717920 | 18 | 46.734 | KV453058.1 | 2270220 | 14-scf00369 | 14 |
| AX-158210195 | 18 | 46.734 | KV453058.1 | 2273911 | 14-scf00369 | 14 |
| AX-157838353 | 18 | 46.734 | KV453058.1 | 2277104 | 14-scf00369 | 14 |
| AX-158210198 | 18 | 46.734 | KV453058.1 | 2279598 | 14-scf00369 | 14 |
| AX-158210199 | 18 | 46.734 | KV453058.1 | 2280927 | 14-scf00369 | 14 |
| AX-158210201 | 18 | 46.734 | KV453058.1 | 2281711 | 14-scf00369 | 14 |
| AX-158210204 | 18 | 46.734 | KV453058.1 | 2284572 | 14-scf00369 | 14 |
| AX-158210206 | 18 | 46.734 | KV453058.1 | 2288446 | 14-scf00369 | 14 |
| AX-158210207 | 18 | 46.734 | KV453058.1 | 2288718 | 14-scf00369 | 14 |
| AX-158210208 | 18 | 46.734 | KV453058.1 | 2289500 | 14-scf00369 | 14 |
| AX-158210212 | 18 | 46.734 | KV453058.1 | 2293201 | 14-scf00369 | 14 |
| AX-158210213 | 18 | 46.734 | KV453058.1 | 2294011 | 14-scf00369 | 14 |
| AX-158210214 | 18 | 46.734 | KV453058.1 | 2295399 | 14-scf00369 | 14 |
| AX-158210215 | 18 | 46.734 | KV453058.1 | 2295924 | 14-scf00369 | 14 |
| AX-158210216 | 18 | 46.734 | KV453058.1 | 2296340 | 14-scf00369 | 14 |
| AX-158210217 | 18 | 46.734 | KV453058.1 | 2297514 | 14-scf00369 | 14 |
| AX-157838354 | 18 | 46.734 | KV453058.1 | 2298142 | 14-scf00369 | 14 |
| AX-158210218 | 18 | 46.734 | KV453058.1 | 2298237 | 14-scf00369 | 14 |
| AX-158210219 | 18 | 46.734 | KV453058.1 | 2300304 | 14-scf00369 | 14 |
| AX-157838355 | 18 | 46.734 | KV453058.1 | 2310143 | 14-scf00369 | 14 |
| AX-158210226 | 18 | 46.734 | KV453058.1 | 2313455 | 14-scf00369 | 14 |
| AX-158210227 | 18 | 46.734 | KV453058.1 | 2314279 | 14-scf00369 | 14 |
| AX-158210228 | 18 | 46.734 | KV453058.1 | 2314856 | 14-scf00369 | 14 |
| AX-157747558 | 18 | 46.734 | KV453058.1 | 2317676 | 14-scf00369 | 14 |
| AX-157838356 | 18 | 46.734 | KV453058.1 | 2318006 | 14-scf00369 | 14 |
| AX-158210230 | 18 | 46.734 | KV453058.1 | 2320777 | 14-scf00369 | 14 |
| AX-157838357 | 18 | 46.734 | KV453058.1 | 2322781 | 14-scf00369 | 14 |
| AX-158210233 | 18 | 46.734 | KV453058.1 | 2326197 | 14-scf00369 | 14 |

|              |    |        |            |         |             |    |
|--------------|----|--------|------------|---------|-------------|----|
| AX-157838359 | 18 | 46.734 | KV453058.1 | 2331064 | 14-scf00369 | 14 |
| AX-158210245 | 18 | 46.734 | KV453058.1 | 2353105 | 14-scf00369 | 14 |
| AX-158210248 | 18 | 46.734 | KV453058.1 | 2363868 | 14-scf00369 | 14 |
| AX-158210249 | 18 | 46.734 | KV453058.1 | 2365899 | 14-scf00369 | 14 |
| AX-158210250 | 18 | 46.734 | KV453058.1 | 2366493 | 14-scf00369 | 14 |
| AX-158210252 | 18 | 46.734 | KV453058.1 | 2367656 | 14-scf00369 | 14 |
| AX-158210253 | 18 | 46.734 | KV453058.1 | 2368110 | 14-scf00369 | 14 |
| AX-158210254 | 18 | 46.734 | KV453058.1 | 2368749 | 14-scf00369 | 14 |
| AX-158210256 | 18 | 46.734 | KV453058.1 | 2372798 | 14-scf00369 | 14 |
| AX-158210258 | 18 | 46.734 | KV453058.1 | 2374930 | 14-scf00369 | 14 |
| AX-158210261 | 18 | 46.734 | KV453058.1 | 2376691 | 14-scf00369 | 14 |
| AX-158210265 | 18 | 46.734 | KV453058.1 | 2391367 | 14-scf00369 | 14 |
| AX-158210267 | 18 | 46.734 | KV453058.1 | 2393355 | 14-scf00369 | 14 |
| AX-158210269 | 18 | 46.734 | KV453058.1 | 2397837 | 14-scf00369 | 14 |
| AX-158210270 | 18 | 46.734 | KV453058.1 | 2399255 | 14-scf00369 | 14 |
| AX-158210272 | 18 | 46.734 | KV453058.1 | 2400629 | 14-scf00369 | 14 |
| AX-158210273 | 18 | 46.734 | KV453058.1 | 2401945 | 14-scf00369 | 14 |
| AX-158210274 | 18 | 46.734 | KV453058.1 | 2402508 | 14-scf00369 | 14 |
| AX-158210276 | 18 | 46.734 | KV453058.1 | 2404040 | 14-scf00369 | 14 |
| AX-158210277 | 18 | 46.734 | KV453058.1 | 2404626 | 14-scf00369 | 14 |
| AX-158210279 | 18 | 46.734 | KV453058.1 | 2410187 | 14-scf00369 | 14 |
| AX-158210294 | 18 | 46.734 | KV453058.1 | 2427777 | 14-scf00369 | 14 |
| AX-158210295 | 18 | 46.734 | KV453058.1 | 2429659 | 14-scf00369 | 14 |
| AX-158210296 | 18 | 46.734 | KV453058.1 | 2430843 | 14-scf00369 | 14 |
| AX-158210297 | 18 | 46.734 | KV453058.1 | 2431695 | 14-scf00369 | 14 |
| AX-158210303 | 18 | 46.734 | KV453058.1 | 2438806 | 14-scf00369 | 14 |
| AX-158210308 | 18 | 46.734 | KV453058.1 | 2447160 | 14-scf00369 | 14 |
| AX-158210309 | 18 | 46.734 | KV453058.1 | 2449672 | 14-scf00369 | 14 |
| AX-157768692 | 18 | 46.734 | KV453058.1 | 2466334 | 14-scf00369 | 14 |
| AX-157838369 | 18 | 46.734 | KV453058.1 | 2466880 | 14-scf00369 | 14 |
| AX-157838371 | 18 | 46.734 | KV453058.1 | 2470213 | 14-scf00369 | 14 |
| AX-158210322 | 18 | 46.734 | KV453058.1 | 2470762 | 14-scf00369 | 14 |
| AX-158394004 | 18 | 46.734 | KV453058.1 | 2487378 | 14-scf00369 | 14 |
| AX-158210334 | 18 | 46.734 | KV453058.1 | 2493291 | 14-scf00369 | 14 |
| AX-158210356 | 18 | 46.734 | KV453058.1 | 2525571 | 14-scf00369 | 14 |
| AX-158210359 | 18 | 46.734 | KV453058.1 | 2526803 | 14-scf00369 | 14 |
| AX-158210361 | 18 | 46.734 | KV453058.1 | 2532425 | 14-scf00369 | 14 |
| AX-157838380 | 18 | 46.734 | KV453058.1 | 2596654 | 14-scf00369 | 14 |
| AX-158210425 | 18 | 46.734 | KV453058.1 | 2610051 | 14-scf00369 | 14 |
| AX-158210427 | 18 | 46.734 | KV453058.1 | 2611536 | 14-scf00369 | 14 |
| AX-158210430 | 18 | 46.734 | KV453058.1 | 2617403 | 14-scf00369 | 14 |
| AX-158210086 | 18 | 46.843 | KV453058.1 | 2078164 | 14-scf00369 | 14 |
| AX-158386442 | 18 | 46.843 | KV453058.1 | 2087760 | 14-scf00369 | 14 |
| AX-158210093 | 18 | 46.843 | KV453058.1 | 2091778 | 14-scf00369 | 14 |
| AX-158210278 | 18 | 46.843 | KV453058.1 | 2407280 | 14-scf00369 | 14 |
| AX-158210281 | 18 | 46.843 | KV453058.1 | 2414245 | 14-scf00369 | 14 |
| AX-158210283 | 18 | 46.843 | KV453058.1 | 2417172 | 14-scf00369 | 14 |
| AX-157859139 | 18 | 46.843 | KV453058.1 | 2417257 | 14-scf00369 | 14 |
| AX-158380792 | 18 | 46.843 | KV453058.1 | 2467370 | 14-scf00369 | 14 |
| AX-158210057 | 18 | 47.062 | KV453058.1 | 2044022 | 14-scf00369 | 14 |
| AX-158210070 | 18 | 47.062 | KV453058.1 | 2054464 | 14-scf00369 | 14 |



|              |    |        |            |         |             |    |
|--------------|----|--------|------------|---------|-------------|----|
| AX-158210171 | 18 | 47.062 | KV453058.1 | 2239916 | 14-scf00369 | 14 |
| AX-158210209 | 18 | 47.062 | KV453058.1 | 2290726 | 14-scf00369 | 14 |
| AX-158210231 | 18 | 47.062 | KV453058.1 | 2323757 | 14-scf00369 | 14 |
| AX-158210291 | 18 | 47.062 | KV453058.1 | 2424956 | 14-scf00369 | 14 |
| AX-158210300 | 18 | 47.062 | KV453058.1 | 2435071 | 14-scf00369 | 14 |
| AX-157838362 | 18 | 47.062 | KV453058.1 | 2440514 | 14-scf00369 | 14 |
| AX-158210305 | 18 | 47.062 | KV453058.1 | 2442188 | 14-scf00369 | 14 |
| AX-157838365 | 18 | 47.062 | KV453058.1 | 2443933 | 14-scf00369 | 14 |
| AX-158210307 | 18 | 47.062 | KV453058.1 | 2444936 | 14-scf00369 | 14 |
| AX-158210315 | 18 | 47.062 | KV453058.1 | 2461679 | 14-scf00369 | 14 |
| AX-157774130 | 18 | 47.062 | KV453058.1 | 2464315 | 14-scf00369 | 14 |
| AX-157838368 | 18 | 47.062 | KV453058.1 | 2464804 | 14-scf00369 | 14 |
| AX-158210318 | 18 | 47.062 | KV453058.1 | 2464970 | 14-scf00369 | 14 |
| AX-158394003 | 18 | 47.062 | KV453058.1 | 2474831 | 14-scf00369 | 14 |
| AX-158210325 | 18 | 47.062 | KV453058.1 | 2475926 | 14-scf00369 | 14 |
| AX-157726768 | 18 | 47.062 | KV453058.1 | 2477647 | 14-scf00369 | 14 |
| AX-158414473 | 18 | 47.062 | KV453058.1 | 2478814 | 14-scf00369 | 14 |
| AX-158210326 | 18 | 47.062 | KV453058.1 | 2483354 | 14-scf00369 | 14 |
| AX-158210327 | 18 | 47.062 | KV453058.1 | 2484430 | 14-scf00369 | 14 |
| AX-157887174 | 18 | 47.062 | KV453058.1 | 2485272 | 14-scf00369 | 14 |
| AX-158210328 | 18 | 47.062 | KV453058.1 | 2486360 | 14-scf00369 | 14 |
| AX-157838373 | 18 | 47.062 | KV453058.1 | 2489466 | 14-scf00369 | 14 |
| AX-158210332 | 18 | 47.062 | KV453058.1 | 2490844 | 14-scf00369 | 14 |
| AX-158210333 | 18 | 47.062 | KV453058.1 | 2492009 | 14-scf00369 | 14 |
| AX-158210341 | 18 | 47.062 | KV453058.1 | 2508231 | 14-scf00369 | 14 |
| AX-158210342 | 18 | 47.062 | KV453058.1 | 2508572 | 14-scf00369 | 14 |
| AX-158210343 | 18 | 47.062 | KV453058.1 | 2509193 | 14-scf00369 | 14 |
| AX-158210344 | 18 | 47.062 | KV453058.1 | 2509584 | 14-scf00369 | 14 |
| AX-157838374 | 18 | 47.062 | KV453058.1 | 2509831 | 14-scf00369 | 14 |
| AX-158210346 | 18 | 47.062 | KV453058.1 | 2511671 | 14-scf00369 | 14 |
| AX-158210347 | 18 | 47.062 | KV453058.1 | 2513757 | 14-scf00369 | 14 |
| AX-158210348 | 18 | 47.062 | KV453058.1 | 2514485 | 14-scf00369 | 14 |
| AX-157838375 | 18 | 47.062 | KV453058.1 | 2520771 | 14-scf00369 | 14 |
| AX-158210351 | 18 | 47.062 | KV453058.1 | 2522482 | 14-scf00369 | 14 |
| AX-158210353 | 18 | 47.062 | KV453058.1 | 2523266 | 14-scf00369 | 14 |
| AX-158210357 | 18 | 47.062 | KV453058.1 | 2525835 | 14-scf00369 | 14 |
| AX-158210358 | 18 | 47.062 | KV453058.1 | 2526146 | 14-scf00369 | 14 |
| AX-157838376 | 18 | 47.062 | KV453058.1 | 2528403 | 14-scf00369 | 14 |
| AX-158210360 | 18 | 47.062 | KV453058.1 | 2529890 | 14-scf00369 | 14 |
| AX-158210366 | 18 | 47.062 | KV453058.1 | 2545006 | 14-scf00369 | 14 |
| AX-158210369 | 18 | 47.062 | KV453058.1 | 2547697 | 14-scf00369 | 14 |
| AX-158210362 | 18 | 47.096 | KV453058.1 | 2535132 | 14-scf00369 | 14 |
| AX-158210363 | 18 | 47.135 | KV453058.1 | 2541236 | 14-scf00369 | 14 |
| AX-158210293 | 18 | 47.171 | KV453058.1 | 2427323 | 14-scf00369 | 14 |
| AX-158210319 | 18 | 47.171 | KV453058.1 | 2465547 | 14-scf00369 | 14 |
| AX-158210365 | 18 | 47.171 | KV453058.1 | 2542800 | 14-scf00369 | 14 |
| AX-158210367 | 18 | 47.171 | KV453058.1 | 2546009 | 14-scf00369 | 14 |
| AX-158210368 | 18 | 47.171 | KV453058.1 | 2546365 | 14-scf00369 | 14 |
| AX-158210371 | 18 | 47.28  | KV453058.1 | 2549513 | 14-scf00369 | 14 |
| AX-158210376 | 18 | 47.28  | KV453058.1 | 2552875 | 14-scf00369 | 14 |
| AX-158210381 | 18 | 47.28  | KV453058.1 | 2554826 | 14-scf00369 | 14 |

|              |    |        |             |         |             |    |
|--------------|----|--------|-------------|---------|-------------|----|
| AX-158210384 | 18 | 47.28  | KV453058.1  | 2558102 | 14-scf00369 | 14 |
| AX-158210385 | 18 | 47.28  | KV453058.1  | 2558369 | 14-scf00369 | 14 |
| AX-157755602 | 18 | 47.28  | KV453058.1  | 2569318 | 14-scf00369 | 14 |
| AX-158210393 | 18 | 47.28  | KV453058.1  | 2574023 | 14-scf00369 | 14 |
| AX-158210394 | 18 | 47.28  | KV453058.1  | 2576072 | 14-scf00369 | 14 |
| AX-158210398 | 18 | 47.28  | KV453058.1  | 2581658 | 14-scf00369 | 14 |
| AX-158210402 | 18 | 47.28  | KV453058.1  | 2585415 | 14-scf00369 | 14 |
| AX-158210415 | 18 | 47.28  | KV453058.1  | 2602491 | 14-scf00369 | 14 |
| AX-158210420 | 18 | 47.28  | KV453058.1  | 2606501 | 14-scf00369 | 14 |
| AX-158210435 | 18 | 47.28  | KV453058.1  | 2623139 | 14-scf00369 | 14 |
| AX-158210466 | 18 | 47.28  | KV453058.1  | 2672702 | 14-scf00369 | 14 |
| AX-157705484 | 18 | 47.28  | 3ML01029930 | 289     | scf05552_1  | UN |
| AX-158209887 | 18 | 47.292 | KV453058.1  | 1796962 | 14-scf00369 | 14 |
| AX-158209938 | 18 | 47.292 | KV453058.1  | 1882567 | 14-scf00369 | 14 |
| AX-157689830 | 18 | 47.292 | 3ML01033205 | 416     | scf08845_1  | UN |
| AX-158210403 | 18 | 47.304 | KV453058.1  | 2586952 | 14-scf00369 | 14 |
| AX-158210404 | 18 | 47.314 | KV453058.1  | 2587365 | 14-scf00369 | 14 |
| AX-158210405 | 18 | 47.324 | KV453058.1  | 2587996 | 14-scf00369 | 14 |
| AX-158210407 | 18 | 47.335 | KV453058.1  | 2591239 | 14-scf00369 | 14 |
| AX-158210408 | 18 | 47.347 | KV453058.1  | 2592152 | 14-scf00369 | 14 |
| AX-158210409 | 18 | 47.376 | KV453058.1  | 2594285 | 14-scf00369 | 14 |
| AX-158210410 | 18 | 47.383 | KV453058.1  | 2594892 | 14-scf00369 | 14 |
| AX-158210422 | 18 | 47.383 | KV453058.1  | 2607295 | 14-scf00369 | 14 |
| AX-158210076 | 18 | 47.387 | KV453058.1  | 2067612 | 14-scf00369 | 14 |
| AX-157838370 | 18 | 47.387 | KV453058.1  | 2467227 | 14-scf00369 | 14 |
| AX-158210364 | 18 | 47.387 | KV453058.1  | 2541528 | 14-scf00369 | 14 |
| AX-158210379 | 18 | 47.387 | KV453058.1  | 2554158 | 14-scf00369 | 14 |
| AX-158210392 | 18 | 47.387 | KV453058.1  | 2572735 | 14-scf00369 | 14 |
| AX-158210406 | 18 | 47.387 | KV453058.1  | 2588407 | 14-scf00369 | 14 |
| AX-158210412 | 18 | 47.387 | KV453058.1  | 2597502 | 14-scf00369 | 14 |
| AX-158210431 | 18 | 47.387 | KV453058.1  | 2618267 | 14-scf00369 | 14 |
| AX-157749404 | 18 | 47.387 | KV453058.1  | 2627436 | 14-scf00369 | 14 |
| AX-158210374 | 18 | 47.389 | KV453058.1  | 2551794 | 14-scf00369 | 14 |
| AX-158210378 | 18 | 47.389 | KV453058.1  | 2553715 | 14-scf00369 | 14 |
| AX-158210411 | 18 | 47.389 | KV453058.1  | 2595907 | 14-scf00369 | 14 |
| AX-158210414 | 18 | 47.389 | KV453058.1  | 2601700 | 14-scf00369 | 14 |
| AX-158210417 | 18 | 47.389 | KV453058.1  | 2605061 | 14-scf00369 | 14 |
| AX-158210426 | 18 | 47.389 | KV453058.1  | 2610805 | 14-scf00369 | 14 |
| AX-158210429 | 18 | 47.389 | KV453058.1  | 2616519 | 14-scf00369 | 14 |
| AX-158210432 | 18 | 47.389 | KV453058.1  | 2618470 | 14-scf00369 | 14 |
| AX-158394005 | 18 | 47.389 | KV453058.1  | 2620784 | 14-scf00369 | 14 |
| AX-158210434 | 18 | 47.389 | KV453058.1  | 2621986 | 14-scf00369 | 14 |
| AX-158210437 | 18 | 47.389 | KV453058.1  | 2625540 | 14-scf00369 | 14 |
| AX-158210497 | 18 | 47.389 | KV453058.1  | 2724055 | 14-scf00369 | 14 |
| AX-158210442 | 18 | 47.655 | KV453058.1  | 2634559 | 14-scf00369 | 14 |
| AX-158210445 | 18 | 47.655 | KV453058.1  | 2638311 | 14-scf00369 | 14 |
| AX-158414474 | 18 | 47.655 | KV453058.1  | 2649917 | 14-scf00369 | 14 |
| AX-158210452 | 18 | 47.655 | KV453058.1  | 2652451 | 14-scf00369 | 14 |
| AX-158210453 | 18 | 47.789 | KV453058.1  | 2654982 | 14-scf00369 | 14 |
| AX-158210454 | 18 | 47.789 | KV453058.1  | 2655668 | 14-scf00369 | 14 |
| AX-158210457 | 18 | 47.789 | KV453058.1  | 2659805 | 14-scf00369 | 14 |

|              |    |        |            |         |             |    |
|--------------|----|--------|------------|---------|-------------|----|
| AX-158210459 | 18 | 47.789 | KV453058.1 | 2660771 | 14-scf00369 | 14 |
| AX-158210460 | 18 | 47.789 | KV453058.1 | 2661781 | 14-scf00369 | 14 |
| AX-158210461 | 18 | 47.789 | KV453058.1 | 2662984 | 14-scf00369 | 14 |
| AX-158210462 | 18 | 47.789 | KV453058.1 | 2666343 | 14-scf00369 | 14 |
| AX-158210464 | 18 | 47.865 | KV453058.1 | 2668978 | 14-scf00369 | 14 |
| AX-158210469 | 18 | 47.934 | KV453058.1 | 2675430 | 14-scf00369 | 14 |
| AX-158210487 | 18 | 47.934 | KV453058.1 | 2706689 | 14-scf00369 | 14 |
| AX-158210472 | 18 | 47.998 | KV453058.1 | 2682210 | 14-scf00369 | 14 |
| AX-158210473 | 18 | 47.998 | KV453058.1 | 2683109 | 14-scf00369 | 14 |
| AX-158210484 | 18 | 47.998 | KV453058.1 | 2703320 | 14-scf00369 | 14 |
| AX-158210504 | 18 | 47.998 | KV453058.1 | 2740086 | 14-scf00369 | 14 |
| AX-158210375 | 18 | 48.061 | KV453058.1 | 2552388 | 14-scf00369 | 14 |
| AX-157756968 | 18 | 48.061 | KV453058.1 | 2684460 | 14-scf00369 | 14 |
| AX-158210142 | 18 | 48.154 | KV453058.1 | 2171265 | 14-scf00369 | 14 |
| AX-157741126 | 18 | 48.154 | KV453058.1 | 2690492 | 14-scf00369 | 14 |
| AX-158210479 | 18 | 48.154 | KV453058.1 | 2694980 | 14-scf00369 | 14 |
| AX-157859143 | 18 | 48.154 | KV453058.1 | 2701445 | 14-scf00369 | 14 |
| AX-158210482 | 18 | 48.154 | KV453058.1 | 2701768 | 14-scf00369 | 14 |
| AX-158210483 | 18 | 48.154 | KV453058.1 | 2701904 | 14-scf00369 | 14 |
| AX-158210391 | 18 | 48.245 | KV453058.1 | 2571686 | 14-scf00369 | 14 |
| AX-158210433 | 18 | 48.245 | KV453058.1 | 2618942 | 14-scf00369 | 14 |
| AX-158210485 | 18 | 48.245 | KV453058.1 | 2704784 | 14-scf00369 | 14 |
| AX-158210488 | 18 | 48.245 | KV453058.1 | 2708762 | 14-scf00369 | 14 |
| AX-158210505 | 18 | 48.245 | KV453058.1 | 2740570 | 14-scf00369 | 14 |
| AX-158210421 | 18 | 48.331 | KV453058.1 | 2606676 | 14-scf00369 | 14 |
| AX-158210486 | 18 | 48.331 | KV453058.1 | 2705254 | 14-scf00369 | 14 |
| AX-158210493 | 18 | 48.395 | KV453058.1 | 2718914 | 14-scf00369 | 14 |
| AX-157859144 | 18 | 48.482 | KV453058.1 | 2719425 | 14-scf00369 | 14 |
| AX-158210494 | 18 | 48.482 | KV453058.1 | 2719950 | 14-scf00369 | 14 |
| AX-158210495 | 18 | 48.572 | KV453058.1 | 2721422 | 14-scf00369 | 14 |
| AX-158210496 | 18 | 48.62  | KV453058.1 | 2721911 | 14-scf00369 | 14 |
| AX-158210498 | 18 | 48.701 | KV453058.1 | 2731041 | 14-scf00369 | 14 |
| AX-158210499 | 18 | 48.701 | KV453058.1 | 2731483 | 14-scf00369 | 14 |
| AX-157720369 | 18 | 48.701 | KV453058.1 | 2731839 | 14-scf00369 | 14 |
| AX-157723989 | 18 | 48.81  | KV453058.1 | 2718077 | 14-scf00369 | 14 |
| AX-158210506 | 18 | 48.81  | KV453058.1 | 2741134 | 14-scf00369 | 14 |
| AX-158210522 | 18 | 48.81  | KV453058.1 | 2757639 | 14-scf00369 | 14 |
| AX-158210530 | 18 | 48.81  | KV453058.1 | 2766169 | 14-scf00369 | 14 |
| AX-158210511 | 18 | 48.919 | KV453058.1 | 2746348 | 14-scf00369 | 14 |
| AX-158210512 | 18 | 48.919 | KV453058.1 | 2747771 | 14-scf00369 | 14 |
| AX-158210527 | 18 | 48.919 | KV453058.1 | 2763182 | 14-scf00369 | 14 |
| AX-158210510 | 18 | 49.028 | KV453058.1 | 2745867 | 14-scf00369 | 14 |
| AX-158210513 | 18 | 49.028 | KV453058.1 | 2749057 | 14-scf00369 | 14 |
| AX-158210515 | 18 | 49.028 | KV453058.1 | 2749955 | 14-scf00369 | 14 |
| AX-158210516 | 18 | 49.028 | KV453058.1 | 2751023 | 14-scf00369 | 14 |
| AX-158210518 | 18 | 49.028 | KV453058.1 | 2753750 | 14-scf00369 | 14 |
| AX-158210525 | 18 | 49.028 | KV453058.1 | 2759608 | 14-scf00369 | 14 |
| AX-157838385 | 18 | 49.028 | KV453058.1 | 2763128 | 14-scf00369 | 14 |
| AX-158210528 | 18 | 49.028 | KV453058.1 | 2763922 | 14-scf00369 | 14 |
| AX-158210529 | 18 | 49.028 | KV453058.1 | 2765244 | 14-scf00369 | 14 |
| AX-158210531 | 18 | 49.028 | KV453058.1 | 2766604 | 14-scf00369 | 14 |

|              |    |        |            |         |             |    |
|--------------|----|--------|------------|---------|-------------|----|
| AX-158210532 | 18 | 49.028 | KV453058.1 | 2767088 | 14-scf00369 | 14 |
| AX-158210536 | 18 | 49.028 | KV453058.1 | 2768624 | 14-scf00369 | 14 |
| AX-158210537 | 18 | 49.028 | KV453058.1 | 2772147 | 14-scf00369 | 14 |
| AX-158210538 | 18 | 49.028 | KV453058.1 | 2773421 | 14-scf00369 | 14 |
| AX-158210539 | 18 | 49.028 | KV453058.1 | 2773664 | 14-scf00369 | 14 |
| AX-157838386 | 18 | 49.028 | KV453058.1 | 2774864 | 14-scf00369 | 14 |
| AX-157772554 | 18 | 49.028 | KV453058.1 | 2777561 | 14-scf00369 | 14 |
| AX-158210541 | 18 | 49.028 | KV453058.1 | 2778773 | 14-scf00369 | 14 |
| AX-157838388 | 18 | 49.028 | KV453058.1 | 2779971 | 14-scf00369 | 14 |
| AX-158210543 | 18 | 49.028 | KV453058.1 | 2781922 | 14-scf00369 | 14 |
| AX-158210544 | 18 | 49.028 | KV453058.1 | 2782680 | 14-scf00369 | 14 |
| AX-158210551 | 18 | 49.028 | KV453058.1 | 2795221 | 14-scf00369 | 14 |
| AX-158386449 | 18 | 49.029 | KV453058.1 | 2757600 | 14-scf00369 | 14 |
| AX-158210523 | 18 | 49.029 | KV453058.1 | 2758018 | 14-scf00369 | 14 |
| AX-158210546 | 18 | 49.029 | KV453058.1 | 2785385 | 14-scf00369 | 14 |
| AX-158210548 | 18 | 49.163 | KV453058.1 | 2787834 | 14-scf00369 | 14 |
| AX-158210568 | 18 | 49.163 | KV453058.1 | 2810329 | 14-scf00369 | 14 |
| AX-158210552 | 18 | 49.203 | KV453058.1 | 2795645 | 14-scf00369 | 14 |
| AX-158210554 | 18 | 49.356 | KV453058.1 | 2796948 | 14-scf00369 | 14 |
| AX-158210556 | 18 | 49.356 | KV453058.1 | 2798152 | 14-scf00369 | 14 |
| AX-158210557 | 18 | 49.356 | KV453058.1 | 2798988 | 14-scf00369 | 14 |
| AX-158210559 | 18 | 49.356 | KV453058.1 | 2800600 | 14-scf00369 | 14 |
| AX-158210560 | 18 | 49.356 | KV453058.1 | 2800969 | 14-scf00369 | 14 |
| AX-157751675 | 18 | 49.356 | KV453058.1 | 2801418 | 14-scf00369 | 14 |
| AX-158210561 | 18 | 49.356 | KV453058.1 | 2801954 | 14-scf00369 | 14 |
| AX-158210562 | 18 | 49.356 | KV453058.1 | 2803469 | 14-scf00369 | 14 |
| AX-158210492 | 18 | 49.357 | KV453058.1 | 2714467 | 14-scf00369 | 14 |
| AX-158210520 | 18 | 49.357 | KV453058.1 | 2755991 | 14-scf00369 | 14 |
| AX-158210563 | 18 | 49.357 | KV453058.1 | 2804098 | 14-scf00369 | 14 |
| AX-158210630 | 18 | 49.357 | KV453058.1 | 2902901 | 14-scf00369 | 14 |
| AX-157740929 | 18 | 49.358 | KV453058.1 | 2755540 | 14-scf00369 | 14 |
| AX-158210534 | 18 | 49.358 | KV453058.1 | 2767724 | 14-scf00369 | 14 |
| AX-158210545 | 18 | 49.358 | KV453058.1 | 2784219 | 14-scf00369 | 14 |
| AX-158386450 | 18 | 49.358 | KV453058.1 | 2804244 | 14-scf00369 | 14 |
| AX-158210565 | 18 | 49.358 | KV453058.1 | 2806387 | 14-scf00369 | 14 |
| AX-158210567 | 18 | 49.358 | KV453058.1 | 2809765 | 14-scf00369 | 14 |
| AX-158210569 | 18 | 49.358 | KV453058.1 | 2811144 | 14-scf00369 | 14 |
| AX-158211284 | 18 | 49.358 | KV453058.1 | 3845307 | 14-scf00369 | 14 |
| AX-158210572 | 18 | 49.683 | KV453058.1 | 2815864 | 14-scf00369 | 14 |
| AX-158210580 | 18 | 49.683 | KV453058.1 | 2834136 | 14-scf00369 | 14 |
| AX-158210573 | 18 | 49.684 | KV453058.1 | 2823935 | 14-scf00369 | 14 |
| AX-157713397 | 18 | 49.684 | KV453058.1 | 2829406 | 14-scf00369 | 14 |
| AX-158210576 | 18 | 49.684 | KV453058.1 | 2830957 | 14-scf00369 | 14 |
| AX-158210578 | 18 | 49.684 | KV453058.1 | 2832129 | 14-scf00369 | 14 |
| AX-158210581 | 18 | 49.684 | KV453058.1 | 2834958 | 14-scf00369 | 14 |
| AX-158210582 | 18 | 49.684 | KV453058.1 | 2835698 | 14-scf00369 | 14 |
| AX-158210583 | 18 | 49.684 | KV453058.1 | 2836092 | 14-scf00369 | 14 |
| AX-158210584 | 18 | 49.711 | KV453058.1 | 2837244 | 14-scf00369 | 14 |
| AX-158210586 | 18 | 49.734 | KV453058.1 | 2838598 | 14-scf00369 | 14 |
| AX-158210587 | 18 | 49.746 | KV453058.1 | 2838978 | 14-scf00369 | 14 |
| AX-158210589 | 18 | 49.765 | KV453058.1 | 2840161 | 14-scf00369 | 14 |

|              |    |        |            |         |             |    |
|--------------|----|--------|------------|---------|-------------|----|
| AX-158210592 | 18 | 49.777 | KV453058.1 | 2846745 | 14-scf00369 | 14 |
| AX-157838391 | 18 | 49.793 | KV453058.1 | 2847710 | 14-scf00369 | 14 |
| AX-158414476 | 18 | 49.793 | KV453058.1 | 2848430 | 14-scf00369 | 14 |
| AX-157838392 | 18 | 49.793 | KV453058.1 | 2849462 | 14-scf00369 | 14 |
| AX-158210597 | 18 | 49.793 | KV453058.1 | 2854918 | 14-scf00369 | 14 |
| AX-158210600 | 18 | 49.793 | KV453058.1 | 2855932 | 14-scf00369 | 14 |
| AX-158210608 | 18 | 49.793 | KV453058.1 | 2867864 | 14-scf00369 | 14 |
| AX-157838400 | 18 | 49.793 | KV453058.1 | 2900356 | 14-scf00369 | 14 |
| AX-158210646 | 18 | 49.793 | KV453058.1 | 2921539 | 14-scf00369 | 14 |
| AX-158210656 | 18 | 49.793 | KV453058.1 | 2936667 | 14-scf00369 | 14 |
| AX-158210672 | 18 | 49.793 | KV453058.1 | 2953366 | 14-scf00369 | 14 |
| AX-158210682 | 18 | 49.793 | KV453058.1 | 2965510 | 14-scf00369 | 14 |
| AX-157838394 | 18 | 49.811 | KV453058.1 | 2858666 | 14-scf00369 | 14 |
| AX-157715803 | 18 | 49.837 | KV453058.1 | 2821906 | 14-scf00369 | 14 |
| AX-158210604 | 18 | 49.837 | KV453058.1 | 2859650 | 14-scf00369 | 14 |
| AX-158210609 | 18 | 49.867 | KV453058.1 | 2868150 | 14-scf00369 | 14 |
| AX-158210574 | 18 | 49.902 | KV453058.1 | 2826347 | 14-scf00369 | 14 |
| AX-158210579 | 18 | 49.902 | KV453058.1 | 2832848 | 14-scf00369 | 14 |
| AX-157699962 | 18 | 49.902 | KV453058.1 | 2874441 | 14-scf00369 | 14 |
| AX-157838397 | 18 | 49.902 | KV453058.1 | 2875091 | 14-scf00369 | 14 |
| AX-158210616 | 18 | 49.902 | KV453058.1 | 2876766 | 14-scf00369 | 14 |
| AX-158210617 | 18 | 49.902 | KV453058.1 | 2878887 | 14-scf00369 | 14 |
| AX-158210619 | 18 | 49.902 | KV453058.1 | 2880264 | 14-scf00369 | 14 |
| AX-158210620 | 18 | 49.902 | KV453058.1 | 2880615 | 14-scf00369 | 14 |
| AX-158210621 | 18 | 49.902 | KV453058.1 | 2881827 | 14-scf00369 | 14 |
| AX-158210622 | 18 | 49.902 | KV453058.1 | 2882231 | 14-scf00369 | 14 |
| AX-157715350 | 18 | 49.902 | KV453058.1 | 2883249 | 14-scf00369 | 14 |
| AX-157838398 | 18 | 49.902 | KV453058.1 | 2884822 | 14-scf00369 | 14 |
| AX-157758898 | 18 | 49.902 | KV453058.1 | 2888427 | 14-scf00369 | 14 |
| AX-157838399 | 18 | 49.902 | KV453058.1 | 2889332 | 14-scf00369 | 14 |
| AX-157866967 | 18 | 49.902 | KV453058.1 | 2897473 | 14-scf00369 | 14 |
| AX-157838401 | 18 | 49.902 | KV453058.1 | 2901208 | 14-scf00369 | 14 |
| AX-158210634 | 18 | 49.902 | KV453058.1 | 2906532 | 14-scf00369 | 14 |
| AX-158210637 | 18 | 49.902 | KV453058.1 | 2911700 | 14-scf00369 | 14 |
| AX-158210638 | 18 | 49.902 | KV453058.1 | 2914071 | 14-scf00369 | 14 |
| AX-158210640 | 18 | 49.902 | KV453058.1 | 2914792 | 14-scf00369 | 14 |
| AX-158210641 | 18 | 49.902 | KV453058.1 | 2915361 | 14-scf00369 | 14 |
| AX-157773826 | 18 | 49.902 | KV453058.1 | 2915917 | 14-scf00369 | 14 |
| AX-158210642 | 18 | 49.902 | KV453058.1 | 2916377 | 14-scf00369 | 14 |
| AX-158210643 | 18 | 49.902 | KV453058.1 | 2919271 | 14-scf00369 | 14 |
| AX-158210644 | 18 | 49.902 | KV453058.1 | 2920624 | 14-scf00369 | 14 |
| AX-158210649 | 18 | 49.902 | KV453058.1 | 2924393 | 14-scf00369 | 14 |
| AX-158210650 | 18 | 49.902 | KV453058.1 | 2925481 | 14-scf00369 | 14 |
| AX-158210653 | 18 | 49.902 | KV453058.1 | 2927854 | 14-scf00369 | 14 |
| AX-157838403 | 18 | 49.902 | KV453058.1 | 2932637 | 14-scf00369 | 14 |
| AX-157717288 | 18 | 49.902 | KV453058.1 | 2933978 | 14-scf00369 | 14 |
| AX-158210669 | 18 | 49.902 | KV453058.1 | 2947517 | 14-scf00369 | 14 |
| AX-158210654 | 18 | 49.952 | KV453058.1 | 2930875 | 14-scf00369 | 14 |
| AX-158210629 | 18 | 50.012 | KV453058.1 | 2900672 | 14-scf00369 | 14 |
| AX-158210652 | 18 | 50.012 | KV453058.1 | 2927321 | 14-scf00369 | 14 |
| AX-158210658 | 18 | 50.012 | KV453058.1 | 2939054 | 14-scf00369 | 14 |

|              |    |        |            |         |             |    |
|--------------|----|--------|------------|---------|-------------|----|
| AX-158210661 | 18 | 50.012 | KV453058.1 | 2940729 | 14-scf00369 | 14 |
| AX-158210662 | 18 | 50.012 | KV453058.1 | 2941033 | 14-scf00369 | 14 |
| AX-158210668 | 18 | 50.012 | KV453058.1 | 2947027 | 14-scf00369 | 14 |
| AX-158210673 | 18 | 50.012 | KV453058.1 | 2954283 | 14-scf00369 | 14 |
| AX-158210890 | 18 | 50.012 | KV453058.1 | 3225492 | 14-scf00369 | 14 |
| AX-157699883 | 18 | 50.034 | KV453058.1 | 2953674 | 14-scf00369 | 14 |
| AX-157838407 | 18 | 50.06  | KV453058.1 | 2958400 | 14-scf00369 | 14 |
| AX-158210699 | 18 | 50.06  | KV453058.1 | 2985931 | 14-scf00369 | 14 |
| AX-158210711 | 18 | 50.06  | KV453058.1 | 3004123 | 14-scf00369 | 14 |
| AX-158210778 | 18 | 50.06  | KV453058.1 | 3088787 | 14-scf00369 | 14 |
| AX-158210783 | 18 | 50.06  | KV453058.1 | 3093337 | 14-scf00369 | 14 |
| AX-158210795 | 18 | 50.06  | KV453058.1 | 3106925 | 14-scf00369 | 14 |
| AX-157774073 | 18 | 50.06  | KV453058.1 | 3122017 | 14-scf00369 | 14 |
| AX-158210920 | 18 | 50.06  | KV453058.1 | 3271582 | 14-scf00369 | 14 |
| AX-158211086 | 18 | 50.06  | KV453058.1 | 3535845 | 14-scf00369 | 14 |
| AX-157699706 | 18 | 50.06  | KV453058.1 | 3608303 | 14-scf00369 | 14 |
| AX-158211148 | 18 | 50.06  | KV453058.1 | 3620718 | 14-scf00369 | 14 |
| AX-158211161 | 18 | 50.06  | KV453058.1 | 3642115 | 14-scf00369 | 14 |
| AX-158211164 | 18 | 50.06  | KV453058.1 | 3643634 | 14-scf00369 | 14 |
| AX-158414490 | 18 | 50.06  | KV453058.1 | 3649433 | 14-scf00369 | 14 |
| AX-157756095 | 18 | 50.06  | KV453058.1 | 3673057 | 14-scf00369 | 14 |
| AX-158211203 | 18 | 50.06  | KV453058.1 | 3727396 | 14-scf00369 | 14 |
| AX-158211205 | 18 | 50.06  | KV453058.1 | 3727946 | 14-scf00369 | 14 |
| AX-158211212 | 18 | 50.06  | KV453058.1 | 3733775 | 14-scf00369 | 14 |
| AX-158211214 | 18 | 50.06  | KV453058.1 | 3734708 | 14-scf00369 | 14 |
| AX-158211218 | 18 | 50.06  | KV453058.1 | 3738524 | 14-scf00369 | 14 |
| AX-158211219 | 18 | 50.06  | KV453058.1 | 3739280 | 14-scf00369 | 14 |
| AX-158211220 | 18 | 50.06  | KV453058.1 | 3740133 | 14-scf00369 | 14 |
| AX-158211226 | 18 | 50.06  | KV453058.1 | 3750409 | 14-scf00369 | 14 |
| AX-158211229 | 18 | 50.06  | KV453058.1 | 3758785 | 14-scf00369 | 14 |
| AX-158211230 | 18 | 50.06  | KV453058.1 | 3759300 | 14-scf00369 | 14 |
| AX-158211329 | 18 | 50.06  | KV453058.1 | 3927712 | 14-scf00369 | 14 |
| AX-158211337 | 18 | 50.06  | KV453058.1 | 3942741 | 14-scf00369 | 14 |
| AX-158211343 | 18 | 50.06  | KV453058.1 | 3955744 | 14-scf00369 | 14 |
| AX-158211354 | 18 | 50.06  | KV453058.1 | 4002688 | 14-scf00369 | 14 |
| AX-158211399 | 18 | 50.06  | KV453058.1 | 4084689 | 14-scf00369 | 14 |
| AX-157838474 | 18 | 50.06  | KV453058.1 | 4110675 | 14-scf00369 | 14 |
| AX-157859145 | 18 | 50.076 | KV453058.1 | 2887175 | 14-scf00369 | 14 |
| AX-158210663 | 18 | 50.076 | KV453058.1 | 2942419 | 14-scf00369 | 14 |
| AX-158210684 | 18 | 50.076 | KV453058.1 | 2966734 | 14-scf00369 | 14 |
| AX-158211149 | 18 | 50.076 | KV453058.1 | 3622042 | 14-scf00369 | 14 |
| AX-158211153 | 18 | 50.076 | KV453058.1 | 3628891 | 14-scf00369 | 14 |
| AX-158211222 | 18 | 50.076 | KV453058.1 | 3742207 | 14-scf00369 | 14 |
| AX-157838408 | 18 | 50.093 | KV453058.1 | 2968219 | 14-scf00369 | 14 |
| AX-158210690 | 18 | 50.108 | KV453058.1 | 2972482 | 14-scf00369 | 14 |
| AX-158210585 | 18 | 50.121 | KV453058.1 | 2838188 | 14-scf00369 | 14 |
| AX-158210603 | 18 | 50.121 | KV453058.1 | 2859262 | 14-scf00369 | 14 |
| AX-157838409 | 18 | 50.121 | KV453058.1 | 2976986 | 14-scf00369 | 14 |
| AX-158210692 | 18 | 50.121 | KV453058.1 | 2977219 | 14-scf00369 | 14 |
| AX-158210693 | 18 | 50.121 | KV453058.1 | 2977591 | 14-scf00369 | 14 |
| AX-158210698 | 18 | 50.121 | KV453058.1 | 2985047 | 14-scf00369 | 14 |

|              |    |        |            |         |             |    |
|--------------|----|--------|------------|---------|-------------|----|
| AX-157838410 | 18 | 50.121 | KV453058.1 | 2986701 | 14-scf00369 | 14 |
| AX-158210700 | 18 | 50.121 | KV453058.1 | 2987199 | 14-scf00369 | 14 |
| AX-158210701 | 18 | 50.121 | KV453058.1 | 2988905 | 14-scf00369 | 14 |
| AX-158210703 | 18 | 50.121 | KV453058.1 | 2991659 | 14-scf00369 | 14 |
| AX-158210707 | 18 | 50.121 | KV453058.1 | 2999436 | 14-scf00369 | 14 |
| AX-158210713 | 18 | 50.121 | KV453058.1 | 3005516 | 14-scf00369 | 14 |
| AX-158210718 | 18 | 50.121 | KV453058.1 | 3012356 | 14-scf00369 | 14 |
| AX-158210723 | 18 | 50.121 | KV453058.1 | 3018711 | 14-scf00369 | 14 |
| AX-157838415 | 18 | 50.121 | KV453058.1 | 3029122 | 14-scf00369 | 14 |
| AX-158210779 | 18 | 50.121 | KV453058.1 | 3089066 | 14-scf00369 | 14 |
| AX-158210803 | 18 | 50.121 | KV453058.1 | 3116306 | 14-scf00369 | 14 |
| AX-158210891 | 18 | 50.121 | KV453058.1 | 3227626 | 14-scf00369 | 14 |
| AX-158211041 | 18 | 50.121 | KV453058.1 | 3483014 | 14-scf00369 | 14 |
| AX-158211042 | 18 | 50.121 | KV453058.1 | 3483476 | 14-scf00369 | 14 |
| AX-158211070 | 18 | 50.121 | KV453058.1 | 3518913 | 14-scf00369 | 14 |
| AX-158211136 | 18 | 50.121 | KV453058.1 | 3598425 | 14-scf00369 | 14 |
| AX-158423192 | 18 | 50.121 | KV453058.1 | 3662951 | 14-scf00369 | 14 |
| AX-158211228 | 18 | 50.121 | KV453058.1 | 3758302 | 14-scf00369 | 14 |
| AX-158210732 | 18 | 50.152 | KV453058.1 | 3035538 | 14-scf00369 | 14 |
| AX-158210742 | 18 | 50.182 | KV453058.1 | 3044115 | 14-scf00369 | 14 |
| AX-158210695 | 18 | 50.23  | KV453058.1 | 2978741 | 14-scf00369 | 14 |
| AX-158210712 | 18 | 50.23  | KV453058.1 | 3005073 | 14-scf00369 | 14 |
| AX-158210714 | 18 | 50.23  | KV453058.1 | 3005933 | 14-scf00369 | 14 |
| AX-158210717 | 18 | 50.23  | KV453058.1 | 3010428 | 14-scf00369 | 14 |
| AX-158210719 | 18 | 50.23  | KV453058.1 | 3014159 | 14-scf00369 | 14 |
| AX-158210721 | 18 | 50.23  | KV453058.1 | 3017088 | 14-scf00369 | 14 |
| AX-157887177 | 18 | 50.23  | KV453058.1 | 3019749 | 14-scf00369 | 14 |
| AX-158210724 | 18 | 50.23  | KV453058.1 | 3020502 | 14-scf00369 | 14 |
| AX-158210725 | 18 | 50.23  | KV453058.1 | 3021196 | 14-scf00369 | 14 |
| AX-158210727 | 18 | 50.23  | KV453058.1 | 3024046 | 14-scf00369 | 14 |
| AX-157838414 | 18 | 50.23  | KV453058.1 | 3025444 | 14-scf00369 | 14 |
| AX-158210728 | 18 | 50.23  | KV453058.1 | 3026306 | 14-scf00369 | 14 |
| AX-158210749 | 18 | 50.23  | KV453058.1 | 3052279 | 14-scf00369 | 14 |
| AX-158210750 | 18 | 50.23  | KV453058.1 | 3052789 | 14-scf00369 | 14 |
| AX-157745860 | 18 | 50.23  | KV453058.1 | 3063713 | 14-scf00369 | 14 |
| AX-158210759 | 18 | 50.23  | KV453058.1 | 3063917 | 14-scf00369 | 14 |
| AX-157838416 | 18 | 50.23  | KV453058.1 | 3064464 | 14-scf00369 | 14 |
| AX-157715111 | 18 | 50.23  | KV453058.1 | 3067947 | 14-scf00369 | 14 |
| AX-158210764 | 18 | 50.23  | KV453058.1 | 3074321 | 14-scf00369 | 14 |
| AX-158210767 | 18 | 50.23  | KV453058.1 | 3076564 | 14-scf00369 | 14 |
| AX-158210770 | 18 | 50.23  | KV453058.1 | 3081094 | 14-scf00369 | 14 |
| AX-158210771 | 18 | 50.23  | KV453058.1 | 3082073 | 14-scf00369 | 14 |
| AX-158210774 | 18 | 50.23  | KV453058.1 | 3085229 | 14-scf00369 | 14 |
| AX-158210785 | 18 | 50.23  | KV453058.1 | 3095084 | 14-scf00369 | 14 |
| AX-158210788 | 18 | 50.23  | KV453058.1 | 3098771 | 14-scf00369 | 14 |
| AX-158210792 | 18 | 50.23  | KV453058.1 | 3103303 | 14-scf00369 | 14 |
| AX-158210793 | 18 | 50.23  | KV453058.1 | 3105159 | 14-scf00369 | 14 |
| AX-158210794 | 18 | 50.23  | KV453058.1 | 3105638 | 14-scf00369 | 14 |
| AX-158210796 | 18 | 50.23  | KV453058.1 | 3109031 | 14-scf00369 | 14 |
| AX-158210798 | 18 | 50.23  | KV453058.1 | 3112194 | 14-scf00369 | 14 |
| AX-158210800 | 18 | 50.23  | KV453058.1 | 3113108 | 14-scf00369 | 14 |

|              |    |       |            |         |             |    |
|--------------|----|-------|------------|---------|-------------|----|
| AX-158210801 | 18 | 50.23 | KV453058.1 | 3113534 | 14-scf00369 | 14 |
| AX-158210802 | 18 | 50.23 | KV453058.1 | 3114469 | 14-scf00369 | 14 |
| AX-158210804 | 18 | 50.23 | KV453058.1 | 3117024 | 14-scf00369 | 14 |
| AX-158210805 | 18 | 50.23 | KV453058.1 | 3117441 | 14-scf00369 | 14 |
| AX-158210807 | 18 | 50.23 | KV453058.1 | 3121418 | 14-scf00369 | 14 |
| AX-158210808 | 18 | 50.23 | KV453058.1 | 3122741 | 14-scf00369 | 14 |
| AX-158210810 | 18 | 50.23 | KV453058.1 | 3127798 | 14-scf00369 | 14 |
| AX-158210813 | 18 | 50.23 | KV453058.1 | 3135112 | 14-scf00369 | 14 |
| AX-158210815 | 18 | 50.23 | KV453058.1 | 3136980 | 14-scf00369 | 14 |
| AX-158210816 | 18 | 50.23 | KV453058.1 | 3137487 | 14-scf00369 | 14 |
| AX-158210818 | 18 | 50.23 | KV453058.1 | 3138024 | 14-scf00369 | 14 |
| AX-157726154 | 18 | 50.23 | KV453058.1 | 3148513 | 14-scf00369 | 14 |
| AX-158210826 | 18 | 50.23 | KV453058.1 | 3149177 | 14-scf00369 | 14 |
| AX-158210828 | 18 | 50.23 | KV453058.1 | 3150108 | 14-scf00369 | 14 |
| AX-158210829 | 18 | 50.23 | KV453058.1 | 3150728 | 14-scf00369 | 14 |
| AX-158210831 | 18 | 50.23 | KV453058.1 | 3152196 | 14-scf00369 | 14 |
| AX-158210832 | 18 | 50.23 | KV453058.1 | 3153236 | 14-scf00369 | 14 |
| AX-158210837 | 18 | 50.23 | KV453058.1 | 3165114 | 14-scf00369 | 14 |
| AX-158210838 | 18 | 50.23 | KV453058.1 | 3165803 | 14-scf00369 | 14 |
| AX-157859146 | 18 | 50.23 | KV453058.1 | 3166330 | 14-scf00369 | 14 |
| AX-158210839 | 18 | 50.23 | KV453058.1 | 3167504 | 14-scf00369 | 14 |
| AX-158210840 | 18 | 50.23 | KV453058.1 | 3169130 | 14-scf00369 | 14 |
| AX-158210841 | 18 | 50.23 | KV453058.1 | 3170323 | 14-scf00369 | 14 |
| AX-157859147 | 18 | 50.23 | KV453058.1 | 3172580 | 14-scf00369 | 14 |
| AX-158210843 | 18 | 50.23 | KV453058.1 | 3173274 | 14-scf00369 | 14 |
| AX-158210846 | 18 | 50.23 | KV453058.1 | 3183160 | 14-scf00369 | 14 |
| AX-158210847 | 18 | 50.23 | KV453058.1 | 3184550 | 14-scf00369 | 14 |
| AX-158210849 | 18 | 50.23 | KV453058.1 | 3187390 | 14-scf00369 | 14 |
| AX-158210850 | 18 | 50.23 | KV453058.1 | 3187957 | 14-scf00369 | 14 |
| AX-158210851 | 18 | 50.23 | KV453058.1 | 3188696 | 14-scf00369 | 14 |
| AX-157838420 | 18 | 50.23 | KV453058.1 | 3189715 | 14-scf00369 | 14 |
| AX-157838421 | 18 | 50.23 | KV453058.1 | 3189809 | 14-scf00369 | 14 |
| AX-158210853 | 18 | 50.23 | KV453058.1 | 3190624 | 14-scf00369 | 14 |
| AX-158210855 | 18 | 50.23 | KV453058.1 | 3192406 | 14-scf00369 | 14 |
| AX-158210858 | 18 | 50.23 | KV453058.1 | 3194498 | 14-scf00369 | 14 |
| AX-158210867 | 18 | 50.23 | KV453058.1 | 3203385 | 14-scf00369 | 14 |
| AX-158210872 | 18 | 50.23 | KV453058.1 | 3211508 | 14-scf00369 | 14 |
| AX-158210881 | 18 | 50.23 | KV453058.1 | 3218183 | 14-scf00369 | 14 |
| AX-157838424 | 18 | 50.23 | KV453058.1 | 3219762 | 14-scf00369 | 14 |
| AX-158210886 | 18 | 50.23 | KV453058.1 | 3223286 | 14-scf00369 | 14 |
| AX-158210887 | 18 | 50.23 | KV453058.1 | 3223817 | 14-scf00369 | 14 |
| AX-158210889 | 18 | 50.23 | KV453058.1 | 3225161 | 14-scf00369 | 14 |
| AX-157838425 | 18 | 50.23 | KV453058.1 | 3235394 | 14-scf00369 | 14 |
| AX-158210893 | 18 | 50.23 | KV453058.1 | 3235723 | 14-scf00369 | 14 |
| AX-158210894 | 18 | 50.23 | KV453058.1 | 3236165 | 14-scf00369 | 14 |
| AX-158210907 | 18 | 50.23 | KV453058.1 | 3251786 | 14-scf00369 | 14 |
| AX-158210909 | 18 | 50.23 | KV453058.1 | 3254517 | 14-scf00369 | 14 |
| AX-158210911 | 18 | 50.23 | KV453058.1 | 3255597 | 14-scf00369 | 14 |
| AX-158210924 | 18 | 50.23 | KV453058.1 | 3281822 | 14-scf00369 | 14 |
| AX-158210926 | 18 | 50.23 | KV453058.1 | 3283444 | 14-scf00369 | 14 |
| AX-158210927 | 18 | 50.23 | KV453058.1 | 3284982 | 14-scf00369 | 14 |



|              |    |        |             |         |             |    |
|--------------|----|--------|-------------|---------|-------------|----|
| AX-158210950 | 18 | 50.23  | KV453058.1  | 3317026 | 14-scf00369 | 14 |
| AX-158210962 | 18 | 50.23  | KV453058.1  | 3340552 | 14-scf00369 | 14 |
| AX-158211048 | 18 | 50.23  | KV453058.1  | 3493075 | 14-scf00369 | 14 |
| AX-158211158 | 18 | 50.23  | KV453058.1  | 3637812 | 14-scf00369 | 14 |
| AX-158211324 | 18 | 50.23  | KV453058.1  | 3922370 | 14-scf00369 | 14 |
| AX-158211363 | 18 | 50.23  | KV453058.1  | 4014066 | 14-scf00369 | 14 |
| AX-158211383 | 18 | 50.23  | KV453058.1  | 4063488 | 14-scf00369 | 14 |
| AX-158211454 | 18 | 50.23  | KV453058.1  | 4176760 | 14-scf00369 | 14 |
| AX-158211456 | 18 | 50.23  | KV453058.1  | 4178384 | 14-scf00369 | 14 |
| AX-158211512 | 18 | 50.23  | KV453058.1  | 4249740 | 14-scf00369 | 14 |
| AX-157705643 | 18 | 50.23  | 3ML01030507 | 586     | scf06106_1  | UN |
| AX-158210897 | 18 | 50.24  | KV453058.1  | 3241310 | 14-scf00369 | 14 |
| AX-158210833 | 18 | 50.257 | KV453058.1  | 3154785 | 14-scf00369 | 14 |
| AX-158210892 | 18 | 50.257 | KV453058.1  | 3232971 | 14-scf00369 | 14 |
| AX-158210898 | 18 | 50.257 | KV453058.1  | 3242752 | 14-scf00369 | 14 |
| AX-158210902 | 18 | 50.257 | KV453058.1  | 3247587 | 14-scf00369 | 14 |
| AX-158210904 | 18 | 50.257 | KV453058.1  | 3248389 | 14-scf00369 | 14 |
| AX-158211290 | 18 | 50.257 | KV453058.1  | 3860423 | 14-scf00369 | 14 |
| AX-158210899 | 18 | 50.292 | KV453058.1  | 3244908 | 14-scf00369 | 14 |
| AX-158210905 | 18 | 50.326 | KV453058.1  | 3249076 | 14-scf00369 | 14 |
| AX-158210610 | 18 | 50.339 | KV453058.1  | 2869310 | 14-scf00369 | 14 |
| AX-157879553 | 18 | 50.339 | KV453058.1  | 2883427 | 14-scf00369 | 14 |
| AX-158210636 | 18 | 50.339 | KV453058.1  | 2910116 | 14-scf00369 | 14 |
| AX-157838404 | 18 | 50.339 | KV453058.1  | 2941675 | 14-scf00369 | 14 |
| AX-158210685 | 18 | 50.339 | KV453058.1  | 2967201 | 14-scf00369 | 14 |
| AX-157772690 | 18 | 50.339 | KV453058.1  | 3022474 | 14-scf00369 | 14 |
| AX-158210731 | 18 | 50.339 | KV453058.1  | 3035285 | 14-scf00369 | 14 |
| AX-158414480 | 18 | 50.339 | KV453058.1  | 3048758 | 14-scf00369 | 14 |
| AX-158210755 | 18 | 50.339 | KV453058.1  | 3058170 | 14-scf00369 | 14 |
| AX-158210784 | 18 | 50.339 | KV453058.1  | 3094446 | 14-scf00369 | 14 |
| AX-158210786 | 18 | 50.339 | KV453058.1  | 3095714 | 14-scf00369 | 14 |
| AX-158210814 | 18 | 50.339 | KV453058.1  | 3135297 | 14-scf00369 | 14 |
| AX-158210823 | 18 | 50.339 | KV453058.1  | 3144250 | 14-scf00369 | 14 |
| AX-157838422 | 18 | 50.339 | KV453058.1  | 3191003 | 14-scf00369 | 14 |
| AX-158210857 | 18 | 50.339 | KV453058.1  | 3194055 | 14-scf00369 | 14 |
| AX-158210859 | 18 | 50.339 | KV453058.1  | 3195630 | 14-scf00369 | 14 |
| AX-158210861 | 18 | 50.339 | KV453058.1  | 3197435 | 14-scf00369 | 14 |
| AX-158210862 | 18 | 50.339 | KV453058.1  | 3197873 | 14-scf00369 | 14 |
| AX-158210863 | 18 | 50.339 | KV453058.1  | 3198799 | 14-scf00369 | 14 |
| AX-158210864 | 18 | 50.339 | KV453058.1  | 3200400 | 14-scf00369 | 14 |
| AX-158210871 | 18 | 50.339 | KV453058.1  | 3211112 | 14-scf00369 | 14 |
| AX-158210875 | 18 | 50.339 | KV453058.1  | 3212821 | 14-scf00369 | 14 |
| AX-158210878 | 18 | 50.339 | KV453058.1  | 3214315 | 14-scf00369 | 14 |
| AX-158210882 | 18 | 50.339 | KV453058.1  | 3218895 | 14-scf00369 | 14 |
| AX-158210908 | 18 | 50.339 | KV453058.1  | 3252551 | 14-scf00369 | 14 |
| AX-158210914 | 18 | 50.339 | KV453058.1  | 3263258 | 14-scf00369 | 14 |
| AX-158210915 | 18 | 50.339 | KV453058.1  | 3263868 | 14-scf00369 | 14 |
| AX-158210917 | 18 | 50.339 | KV453058.1  | 3267126 | 14-scf00369 | 14 |
| AX-158210919 | 18 | 50.339 | KV453058.1  | 3269643 | 14-scf00369 | 14 |
| AX-158210922 | 18 | 50.339 | KV453058.1  | 3278730 | 14-scf00369 | 14 |
| AX-158210923 | 18 | 50.339 | KV453058.1  | 3280708 | 14-scf00369 | 14 |

|              |    |        |            |         |             |    |
|--------------|----|--------|------------|---------|-------------|----|
| AX-158210931 | 18 | 50.339 | KV453058.1 | 3290015 | 14-scf00369 | 14 |
| AX-158210939 | 18 | 50.339 | KV453058.1 | 3297477 | 14-scf00369 | 14 |
| AX-158210941 | 18 | 50.339 | KV453058.1 | 3304086 | 14-scf00369 | 14 |
| AX-158210943 | 18 | 50.339 | KV453058.1 | 3306021 | 14-scf00369 | 14 |
| AX-158210944 | 18 | 50.339 | KV453058.1 | 3309285 | 14-scf00369 | 14 |
| AX-158210949 | 18 | 50.339 | KV453058.1 | 3314987 | 14-scf00369 | 14 |
| AX-158210951 | 18 | 50.339 | KV453058.1 | 3317802 | 14-scf00369 | 14 |
| AX-158210952 | 18 | 50.339 | KV453058.1 | 3319480 | 14-scf00369 | 14 |
| AX-158210953 | 18 | 50.339 | KV453058.1 | 3322167 | 14-scf00369 | 14 |
| AX-158210954 | 18 | 50.339 | KV453058.1 | 3322888 | 14-scf00369 | 14 |
| AX-158210957 | 18 | 50.339 | KV453058.1 | 3327318 | 14-scf00369 | 14 |
| AX-157859149 | 18 | 50.339 | KV453058.1 | 3335499 | 14-scf00369 | 14 |
| AX-157697420 | 18 | 50.339 | KV453058.1 | 3338142 | 14-scf00369 | 14 |
| AX-158210966 | 18 | 50.339 | KV453058.1 | 3344494 | 14-scf00369 | 14 |
| AX-158210967 | 18 | 50.339 | KV453058.1 | 3345614 | 14-scf00369 | 14 |
| AX-158210971 | 18 | 50.339 | KV453058.1 | 3348535 | 14-scf00369 | 14 |
| AX-158210972 | 18 | 50.339 | KV453058.1 | 3350876 | 14-scf00369 | 14 |
| AX-158210974 | 18 | 50.339 | KV453058.1 | 3357932 | 14-scf00369 | 14 |
| AX-158210975 | 18 | 50.339 | KV453058.1 | 3358544 | 14-scf00369 | 14 |
| AX-157879570 | 18 | 50.339 | KV453058.1 | 3360249 | 14-scf00369 | 14 |
| AX-158210977 | 18 | 50.339 | KV453058.1 | 3362033 | 14-scf00369 | 14 |
| AX-158210980 | 18 | 50.339 | KV453058.1 | 3365384 | 14-scf00369 | 14 |
| AX-158210981 | 18 | 50.339 | KV453058.1 | 3365638 | 14-scf00369 | 14 |
| AX-158210982 | 18 | 50.339 | KV453058.1 | 3366015 | 14-scf00369 | 14 |
| AX-158210984 | 18 | 50.339 | KV453058.1 | 3368151 | 14-scf00369 | 14 |
| AX-158210985 | 18 | 50.339 | KV453058.1 | 3370914 | 14-scf00369 | 14 |
| AX-157838428 | 18 | 50.339 | KV453058.1 | 3373651 | 14-scf00369 | 14 |
| AX-157879572 | 18 | 50.339 | KV453058.1 | 3374212 | 14-scf00369 | 14 |
| AX-158210986 | 18 | 50.339 | KV453058.1 | 3374250 | 14-scf00369 | 14 |
| AX-158210988 | 18 | 50.339 | KV453058.1 | 3379359 | 14-scf00369 | 14 |
| AX-158210992 | 18 | 50.339 | KV453058.1 | 3388790 | 14-scf00369 | 14 |
| AX-158210995 | 18 | 50.339 | KV453058.1 | 3392063 | 14-scf00369 | 14 |
| AX-158211001 | 18 | 50.339 | KV453058.1 | 3404285 | 14-scf00369 | 14 |
| AX-157741735 | 18 | 50.339 | KV453058.1 | 3407198 | 14-scf00369 | 14 |
| AX-157859150 | 18 | 50.339 | KV453058.1 | 3410085 | 14-scf00369 | 14 |
| AX-158211002 | 18 | 50.339 | KV453058.1 | 3411908 | 14-scf00369 | 14 |
| AX-158211005 | 18 | 50.339 | KV453058.1 | 3416633 | 14-scf00369 | 14 |
| AX-157838432 | 18 | 50.339 | KV453058.1 | 3418122 | 14-scf00369 | 14 |
| AX-158211007 | 18 | 50.339 | KV453058.1 | 3419001 | 14-scf00369 | 14 |
| AX-158211009 | 18 | 50.339 | KV453058.1 | 3426218 | 14-scf00369 | 14 |
| AX-158211011 | 18 | 50.339 | KV453058.1 | 3435760 | 14-scf00369 | 14 |
| AX-157838434 | 18 | 50.339 | KV453058.1 | 3438218 | 14-scf00369 | 14 |
| AX-158211014 | 18 | 50.339 | KV453058.1 | 3442930 | 14-scf00369 | 14 |
| AX-157879574 | 18 | 50.339 | KV453058.1 | 3444842 | 14-scf00369 | 14 |
| AX-158211017 | 18 | 50.339 | KV453058.1 | 3448654 | 14-scf00369 | 14 |
| AX-158211019 | 18 | 50.339 | KV453058.1 | 3453258 | 14-scf00369 | 14 |
| AX-158211021 | 18 | 50.339 | KV453058.1 | 3456371 | 14-scf00369 | 14 |
| AX-158211024 | 18 | 50.339 | KV453058.1 | 3460634 | 14-scf00369 | 14 |
| AX-158211025 | 18 | 50.339 | KV453058.1 | 3461041 | 14-scf00369 | 14 |
| AX-158211027 | 18 | 50.339 | KV453058.1 | 3463164 | 14-scf00369 | 14 |
| AX-158211028 | 18 | 50.339 | KV453058.1 | 3463642 | 14-scf00369 | 14 |

|              |    |        |            |         |             |    |
|--------------|----|--------|------------|---------|-------------|----|
| AX-158211029 | 18 | 50.339 | KV453058.1 | 3466767 | 14-scf00369 | 14 |
| AX-157726202 | 18 | 50.339 | KV453058.1 | 3470553 | 14-scf00369 | 14 |
| AX-158211030 | 18 | 50.339 | KV453058.1 | 3470945 | 14-scf00369 | 14 |
| AX-158211031 | 18 | 50.339 | KV453058.1 | 3474975 | 14-scf00369 | 14 |
| AX-158211032 | 18 | 50.339 | KV453058.1 | 3475940 | 14-scf00369 | 14 |
| AX-158211033 | 18 | 50.339 | KV453058.1 | 3476879 | 14-scf00369 | 14 |
| AX-158211034 | 18 | 50.339 | KV453058.1 | 3477337 | 14-scf00369 | 14 |
| AX-157879575 | 18 | 50.339 | KV453058.1 | 3477557 | 14-scf00369 | 14 |
| AX-158211035 | 18 | 50.339 | KV453058.1 | 3478344 | 14-scf00369 | 14 |
| AX-158211040 | 18 | 50.339 | KV453058.1 | 3482538 | 14-scf00369 | 14 |
| AX-158211045 | 18 | 50.339 | KV453058.1 | 3490150 | 14-scf00369 | 14 |
| AX-158211047 | 18 | 50.339 | KV453058.1 | 3492676 | 14-scf00369 | 14 |
| AX-158211049 | 18 | 50.339 | KV453058.1 | 3493463 | 14-scf00369 | 14 |
| AX-158211050 | 18 | 50.339 | KV453058.1 | 3494870 | 14-scf00369 | 14 |
| AX-158211052 | 18 | 50.339 | KV453058.1 | 3497562 | 14-scf00369 | 14 |
| AX-158211054 | 18 | 50.339 | KV453058.1 | 3498542 | 14-scf00369 | 14 |
| AX-157698568 | 18 | 50.339 | KV453058.1 | 3503324 | 14-scf00369 | 14 |
| AX-158211060 | 18 | 50.339 | KV453058.1 | 3505934 | 14-scf00369 | 14 |
| AX-158211062 | 18 | 50.339 | KV453058.1 | 3506861 | 14-scf00369 | 14 |
| AX-158418550 | 18 | 50.339 | KV453058.1 | 3508708 | 14-scf00369 | 14 |
| AX-158211064 | 18 | 50.339 | KV453058.1 | 3509229 | 14-scf00369 | 14 |
| AX-158211066 | 18 | 50.339 | KV453058.1 | 3510283 | 14-scf00369 | 14 |
| AX-158211068 | 18 | 50.339 | KV453058.1 | 3515466 | 14-scf00369 | 14 |
| AX-158386453 | 18 | 50.339 | KV453058.1 | 3525467 | 14-scf00369 | 14 |
| AX-158386454 | 18 | 50.339 | KV453058.1 | 3527914 | 14-scf00369 | 14 |
| AX-158211077 | 18 | 50.339 | KV453058.1 | 3528324 | 14-scf00369 | 14 |
| AX-158211078 | 18 | 50.339 | KV453058.1 | 3529399 | 14-scf00369 | 14 |
| AX-158211080 | 18 | 50.339 | KV453058.1 | 3530188 | 14-scf00369 | 14 |
| AX-158211081 | 18 | 50.339 | KV453058.1 | 3531089 | 14-scf00369 | 14 |
| AX-158211082 | 18 | 50.339 | KV453058.1 | 3533034 | 14-scf00369 | 14 |
| AX-158211085 | 18 | 50.339 | KV453058.1 | 3534455 | 14-scf00369 | 14 |
| AX-157743069 | 18 | 50.339 | KV453058.1 | 3535095 | 14-scf00369 | 14 |
| AX-158211087 | 18 | 50.339 | KV453058.1 | 3539438 | 14-scf00369 | 14 |
| AX-158211089 | 18 | 50.339 | KV453058.1 | 3541769 | 14-scf00369 | 14 |
| AX-158211090 | 18 | 50.339 | KV453058.1 | 3542782 | 14-scf00369 | 14 |
| AX-158211091 | 18 | 50.339 | KV453058.1 | 3544555 | 14-scf00369 | 14 |
| AX-158211118 | 18 | 50.339 | KV453058.1 | 3577060 | 14-scf00369 | 14 |
| AX-158211128 | 18 | 50.339 | KV453058.1 | 3588261 | 14-scf00369 | 14 |
| AX-157872360 | 18 | 50.339 | KV453058.1 | 3604951 | 14-scf00369 | 14 |
| AX-157755383 | 18 | 50.339 | KV453058.1 | 3605752 | 14-scf00369 | 14 |
| AX-158211142 | 18 | 50.339 | KV453058.1 | 3607619 | 14-scf00369 | 14 |
| AX-157838447 | 18 | 50.339 | KV453058.1 | 3621599 | 14-scf00369 | 14 |
| AX-157887178 | 18 | 50.339 | KV453058.1 | 3621767 | 14-scf00369 | 14 |
| AX-158211150 | 18 | 50.339 | KV453058.1 | 3626606 | 14-scf00369 | 14 |
| AX-158386457 | 18 | 50.339 | KV453058.1 | 3629150 | 14-scf00369 | 14 |
| AX-157726525 | 18 | 50.339 | KV453058.1 | 3630133 | 14-scf00369 | 14 |
| AX-158211157 | 18 | 50.339 | KV453058.1 | 3637327 | 14-scf00369 | 14 |
| AX-158211171 | 18 | 50.339 | KV453058.1 | 3654799 | 14-scf00369 | 14 |
| AX-158414491 | 18 | 50.339 | KV453058.1 | 3662035 | 14-scf00369 | 14 |
| AX-158211180 | 18 | 50.339 | KV453058.1 | 3675839 | 14-scf00369 | 14 |
| AX-158211187 | 18 | 50.339 | KV453058.1 | 3687241 | 14-scf00369 | 14 |

|              |    |        |             |         |             |    |
|--------------|----|--------|-------------|---------|-------------|----|
| AX-158211188 | 18 | 50.339 | KV453058.1  | 3689203 | 14-scf00369 | 14 |
| AX-158211189 | 18 | 50.339 | KV453058.1  | 3693132 | 14-scf00369 | 14 |
| AX-158211193 | 18 | 50.339 | KV453058.1  | 3704077 | 14-scf00369 | 14 |
| AX-158211257 | 18 | 50.339 | KV453058.1  | 3794283 | 14-scf00369 | 14 |
| AX-158211306 | 18 | 50.339 | KV453058.1  | 3893238 | 14-scf00369 | 14 |
| AX-158211318 | 18 | 50.339 | KV453058.1  | 3915474 | 14-scf00369 | 14 |
| AX-157838456 | 18 | 50.339 | KV453058.1  | 3989472 | 14-scf00369 | 14 |
| AX-158211368 | 18 | 50.339 | KV453058.1  | 4027580 | 14-scf00369 | 14 |
| AX-157838460 | 18 | 50.339 | KV453058.1  | 4034244 | 14-scf00369 | 14 |
| AX-158211433 | 18 | 50.339 | KV453058.1  | 4148262 | 14-scf00369 | 14 |
| AX-158211436 | 18 | 50.339 | KV453058.1  | 4152400 | 14-scf00369 | 14 |
| AX-158211468 | 18 | 50.339 | KV453058.1  | 4191046 | 14-scf00369 | 14 |
| AX-158211481 | 18 | 50.339 | KV453058.1  | 4210285 | 14-scf00369 | 14 |
| AX-158211495 | 18 | 50.339 | KV453058.1  | 4231604 | 14-scf00369 | 14 |
| AX-157879594 | 18 | 50.339 | KV453058.1  | 4238230 | 14-scf00369 | 14 |
| AX-157887181 | 18 | 50.339 | KV453058.1  | 4289040 | 14-scf00369 | 14 |
| AX-158211619 | 18 | 50.339 | KV453058.1  | 4396239 | 14-scf00369 | 14 |
| AX-157705883 | 18 | 50.339 | 3ML01031154 | 490     | scf06761_1  | UN |
| AX-158210645 | 18 | 50.449 | KV453058.1  | 2921009 | 14-scf00369 | 14 |
| AX-158210691 | 18 | 50.449 | KV453058.1  | 2975229 | 14-scf00369 | 14 |
| AX-158210751 | 18 | 50.449 | KV453058.1  | 3053170 | 14-scf00369 | 14 |
| AX-157838418 | 18 | 50.449 | KV453058.1  | 3129994 | 14-scf00369 | 14 |
| AX-158210820 | 18 | 50.449 | KV453058.1  | 3142240 | 14-scf00369 | 14 |
| AX-158211051 | 18 | 50.449 | KV453058.1  | 3496441 | 14-scf00369 | 14 |
| AX-158211053 | 18 | 50.449 | KV453058.1  | 3497961 | 14-scf00369 | 14 |
| AX-158211154 | 18 | 50.449 | KV453058.1  | 3631233 | 14-scf00369 | 14 |
| AX-158211170 | 18 | 50.449 | KV453058.1  | 3654101 | 14-scf00369 | 14 |
| AX-158211173 | 18 | 50.449 | KV453058.1  | 3657254 | 14-scf00369 | 14 |
| AX-158418553 | 18 | 50.449 | KV453058.1  | 3686193 | 14-scf00369 | 14 |
| AX-157838449 | 18 | 50.449 | KV453058.1  | 3708638 | 14-scf00369 | 14 |
| AX-157838450 | 18 | 50.449 | KV453058.1  | 3712754 | 14-scf00369 | 14 |
| AX-158211200 | 18 | 50.449 | KV453058.1  | 3724526 | 14-scf00369 | 14 |
| AX-158211201 | 18 | 50.449 | KV453058.1  | 3725293 | 14-scf00369 | 14 |
| AX-158380797 | 18 | 50.449 | KV453058.1  | 3725428 | 14-scf00369 | 14 |
| AX-158211206 | 18 | 50.449 | KV453058.1  | 3728185 | 14-scf00369 | 14 |
| AX-158211208 | 18 | 50.449 | KV453058.1  | 3731271 | 14-scf00369 | 14 |
| AX-158211209 | 18 | 50.449 | KV453058.1  | 3731967 | 14-scf00369 | 14 |
| AX-158211210 | 18 | 50.449 | KV453058.1  | 3732512 | 14-scf00369 | 14 |
| AX-158211211 | 18 | 50.449 | KV453058.1  | 3732892 | 14-scf00369 | 14 |
| AX-158211213 | 18 | 50.449 | KV453058.1  | 3734164 | 14-scf00369 | 14 |
| AX-158211216 | 18 | 50.449 | KV453058.1  | 3736494 | 14-scf00369 | 14 |
| AX-158211217 | 18 | 50.449 | KV453058.1  | 3738180 | 14-scf00369 | 14 |
| AX-157838451 | 18 | 50.449 | KV453058.1  | 3756181 | 14-scf00369 | 14 |
| AX-158211234 | 18 | 50.449 | KV453058.1  | 3763975 | 14-scf00369 | 14 |
| AX-158211236 | 18 | 50.449 | KV453058.1  | 3772127 | 14-scf00369 | 14 |
| AX-158211237 | 18 | 50.449 | KV453058.1  | 3772328 | 14-scf00369 | 14 |
| AX-158211239 | 18 | 50.449 | KV453058.1  | 3777496 | 14-scf00369 | 14 |
| AX-158211244 | 18 | 50.449 | KV453058.1  | 3780984 | 14-scf00369 | 14 |
| AX-158211245 | 18 | 50.449 | KV453058.1  | 3781639 | 14-scf00369 | 14 |
| AX-158211246 | 18 | 50.449 | KV453058.1  | 3785098 | 14-scf00369 | 14 |
| AX-158211248 | 18 | 50.449 | KV453058.1  | 3786210 | 14-scf00369 | 14 |

|              |    |        |             |         |             |    |
|--------------|----|--------|-------------|---------|-------------|----|
| AX-158211249 | 18 | 50.449 | KV453058.1  | 3787190 | 14-scf00369 | 14 |
| AX-158211256 | 18 | 50.449 | KV453058.1  | 3792302 | 14-scf00369 | 14 |
| AX-158211265 | 18 | 50.449 | KV453058.1  | 3804354 | 14-scf00369 | 14 |
| AX-158211266 | 18 | 50.449 | KV453058.1  | 3806642 | 14-scf00369 | 14 |
| AX-158211279 | 18 | 50.449 | KV453058.1  | 3824830 | 14-scf00369 | 14 |
| AX-157759095 | 18 | 50.449 | KV453058.1  | 4021381 | 14-scf00369 | 14 |
| AX-157838459 | 18 | 50.449 | KV453058.1  | 4021576 | 14-scf00369 | 14 |
| AX-157705366 | 18 | 50.449 | 3ML01029512 | 418     | scf05135_1  | UN |
| AX-157705367 | 18 | 50.449 | 3ML01029512 | 698     | scf05135_1  | UN |
| AX-157705368 | 18 | 50.449 | 3ML01029512 | 968     | scf05135_1  | UN |
| AX-158211262 | 18 | 50.503 | KV453058.1  | 3798901 | 14-scf00369 | 14 |
| AX-157747208 | 18 | 50.558 | KV453058.1  | 2939304 | 14-scf00369 | 14 |
| AX-158210671 | 18 | 50.558 | KV453058.1  | 2948721 | 14-scf00369 | 14 |
| AX-158210777 | 18 | 50.558 | KV453058.1  | 3088015 | 14-scf00369 | 14 |
| AX-158210790 | 18 | 50.558 | KV453058.1  | 3100188 | 14-scf00369 | 14 |
| AX-158210865 | 18 | 50.558 | KV453058.1  | 3202416 | 14-scf00369 | 14 |
| AX-157838426 | 18 | 50.558 | KV453058.1  | 3237908 | 14-scf00369 | 14 |
| AX-158211044 | 18 | 50.558 | KV453058.1  | 3489411 | 14-scf00369 | 14 |
| AX-158211074 | 18 | 50.558 | KV453058.1  | 3521963 | 14-scf00369 | 14 |
| AX-157726446 | 18 | 50.558 | KV453058.1  | 3539791 | 14-scf00369 | 14 |
| AX-158211097 | 18 | 50.558 | KV453058.1  | 3549776 | 14-scf00369 | 14 |
| AX-158211160 | 18 | 50.558 | KV453058.1  | 3640341 | 14-scf00369 | 14 |
| AX-158211163 | 18 | 50.558 | KV453058.1  | 3643223 | 14-scf00369 | 14 |
| AX-158211172 | 18 | 50.558 | KV453058.1  | 3656124 | 14-scf00369 | 14 |
| AX-158211194 | 18 | 50.558 | KV453058.1  | 3704778 | 14-scf00369 | 14 |
| AX-157713795 | 18 | 50.558 | KV453058.1  | 3705180 | 14-scf00369 | 14 |
| AX-158211197 | 18 | 50.558 | KV453058.1  | 3709650 | 14-scf00369 | 14 |
| AX-158211199 | 18 | 50.558 | KV453058.1  | 3722423 | 14-scf00369 | 14 |
| AX-158211215 | 18 | 50.558 | KV453058.1  | 3735376 | 14-scf00369 | 14 |
| AX-157859153 | 18 | 50.558 | KV453058.1  | 3759970 | 14-scf00369 | 14 |
| AX-157866972 | 18 | 50.558 | KV453058.1  | 3762377 | 14-scf00369 | 14 |
| AX-158211233 | 18 | 50.558 | KV453058.1  | 3763574 | 14-scf00369 | 14 |
| AX-158211250 | 18 | 50.558 | KV453058.1  | 3787251 | 14-scf00369 | 14 |
| AX-158211251 | 18 | 50.558 | KV453058.1  | 3788384 | 14-scf00369 | 14 |
| AX-158211252 | 18 | 50.558 | KV453058.1  | 3788593 | 14-scf00369 | 14 |
| AX-158211253 | 18 | 50.558 | KV453058.1  | 3790128 | 14-scf00369 | 14 |
| AX-158211254 | 18 | 50.558 | KV453058.1  | 3791071 | 14-scf00369 | 14 |
| AX-158211263 | 18 | 50.558 | KV453058.1  | 3800393 | 14-scf00369 | 14 |
| AX-158211269 | 18 | 50.558 | KV453058.1  | 3809567 | 14-scf00369 | 14 |
| AX-158211274 | 18 | 50.558 | KV453058.1  | 3818341 | 14-scf00369 | 14 |
| AX-158211275 | 18 | 50.558 | KV453058.1  | 3819410 | 14-scf00369 | 14 |
| AX-157756956 | 18 | 50.558 | KV453058.1  | 3821201 | 14-scf00369 | 14 |
| AX-158211277 | 18 | 50.558 | KV453058.1  | 3822584 | 14-scf00369 | 14 |
| AX-158211278 | 18 | 50.558 | KV453058.1  | 3822877 | 14-scf00369 | 14 |
| AX-158211280 | 18 | 50.558 | KV453058.1  | 3825925 | 14-scf00369 | 14 |
| AX-157838452 | 18 | 50.558 | KV453058.1  | 3841163 | 14-scf00369 | 14 |
| AX-157838453 | 18 | 50.558 | KV453058.1  | 3841873 | 14-scf00369 | 14 |
| AX-157838454 | 18 | 50.558 | KV453058.1  | 3856151 | 14-scf00369 | 14 |
| AX-158211295 | 18 | 50.558 | KV453058.1  | 3870739 | 14-scf00369 | 14 |
| AX-158211296 | 18 | 50.558 | KV453058.1  | 3871735 | 14-scf00369 | 14 |
| AX-158211297 | 18 | 50.558 | KV453058.1  | 3872359 | 14-scf00369 | 14 |

|              |    |        |             |         |             |    |
|--------------|----|--------|-------------|---------|-------------|----|
| AX-157866973 | 18 | 50.558 | KV453058.1  | 3878789 | 14-scf00369 | 14 |
| AX-157866974 | 18 | 50.558 | KV453058.1  | 3881151 | 14-scf00369 | 14 |
| AX-158211304 | 18 | 50.558 | KV453058.1  | 3891868 | 14-scf00369 | 14 |
| AX-158211313 | 18 | 50.558 | KV453058.1  | 3907916 | 14-scf00369 | 14 |
| AX-158211317 | 18 | 50.558 | KV453058.1  | 3913661 | 14-scf00369 | 14 |
| AX-158211326 | 18 | 50.558 | KV453058.1  | 3923377 | 14-scf00369 | 14 |
| AX-157866975 | 18 | 50.558 | KV453058.1  | 3924404 | 14-scf00369 | 14 |
| AX-158211331 | 18 | 50.558 | KV453058.1  | 3933987 | 14-scf00369 | 14 |
| AX-158211332 | 18 | 50.558 | KV453058.1  | 3935266 | 14-scf00369 | 14 |
| AX-158211333 | 18 | 50.558 | KV453058.1  | 3935988 | 14-scf00369 | 14 |
| AX-157708184 | 18 | 50.558 | KV453058.1  | 3936399 | 14-scf00369 | 14 |
| AX-158211334 | 18 | 50.558 | KV453058.1  | 3938697 | 14-scf00369 | 14 |
| AX-158211335 | 18 | 50.558 | KV453058.1  | 3939760 | 14-scf00369 | 14 |
| AX-158211345 | 18 | 50.558 | KV453058.1  | 3958167 | 14-scf00369 | 14 |
| AX-157838455 | 18 | 50.558 | KV453058.1  | 3977113 | 14-scf00369 | 14 |
| AX-158211346 | 18 | 50.558 | KV453058.1  | 3979209 | 14-scf00369 | 14 |
| AX-158211347 | 18 | 50.558 | KV453058.1  | 3980191 | 14-scf00369 | 14 |
| AX-158211348 | 18 | 50.558 | KV453058.1  | 3981194 | 14-scf00369 | 14 |
| AX-158211349 | 18 | 50.558 | KV453058.1  | 3981655 | 14-scf00369 | 14 |
| AX-157740159 | 18 | 50.558 | KV453058.1  | 3982893 | 14-scf00369 | 14 |
| AX-157838457 | 18 | 50.558 | KV453058.1  | 3997115 | 14-scf00369 | 14 |
| AX-158211352 | 18 | 50.558 | KV453058.1  | 4000664 | 14-scf00369 | 14 |
| AX-158211355 | 18 | 50.558 | KV453058.1  | 4004556 | 14-scf00369 | 14 |
| AX-158211357 | 18 | 50.558 | KV453058.1  | 4007127 | 14-scf00369 | 14 |
| AX-158211360 | 18 | 50.558 | KV453058.1  | 4012417 | 14-scf00369 | 14 |
| AX-158211361 | 18 | 50.558 | KV453058.1  | 4013176 | 14-scf00369 | 14 |
| AX-157739865 | 18 | 50.558 | KV453058.1  | 4021652 | 14-scf00369 | 14 |
| AX-158211367 | 18 | 50.558 | KV453058.1  | 4023786 | 14-scf00369 | 14 |
| AX-158211369 | 18 | 50.558 | KV453058.1  | 4028263 | 14-scf00369 | 14 |
| AX-158211374 | 18 | 50.558 | KV453058.1  | 4046645 | 14-scf00369 | 14 |
| AX-157715808 | 18 | 50.558 | KV453058.1  | 4051254 | 14-scf00369 | 14 |
| AX-157838464 | 18 | 50.558 | KV453058.1  | 4054929 | 14-scf00369 | 14 |
| AX-157838465 | 18 | 50.558 | KV453058.1  | 4055958 | 14-scf00369 | 14 |
| AX-158211380 | 18 | 50.558 | KV453058.1  | 4056831 | 14-scf00369 | 14 |
| AX-158211381 | 18 | 50.558 | KV453058.1  | 4057375 | 14-scf00369 | 14 |
| AX-158211397 | 18 | 50.558 | KV453058.1  | 4079597 | 14-scf00369 | 14 |
| AX-157838468 | 18 | 50.558 | KV453058.1  | 4095514 | 14-scf00369 | 14 |
| AX-158211407 | 18 | 50.558 | KV453058.1  | 4097050 | 14-scf00369 | 14 |
| AX-158211437 | 18 | 50.558 | KV453058.1  | 4153488 | 14-scf00369 | 14 |
| AX-157838482 | 18 | 50.558 | KV453058.1  | 4174594 | 14-scf00369 | 14 |
| AX-157727018 | 18 | 50.558 | KV453058.1  | 4175050 | 14-scf00369 | 14 |
| AX-158211612 | 18 | 50.558 | KV453058.1  | 4381675 | 14-scf00369 | 14 |
| AX-158211740 | 18 | 50.558 | KV453058.1  | 4605756 | 14-scf00369 | 14 |
| AX-158211890 | 18 | 50.558 | KV453058.1  | 4792412 | 14-scf00369 | 14 |
| AX-158414528 | 18 | 50.558 | KV453058.1  | 5179245 | 14-scf00369 | 14 |
| AX-158212401 | 18 | 50.558 | KV453058.1  | 5519517 | 14-scf00369 | 14 |
| AX-157705821 | 18 | 50.558 | 3ML01030980 | 135     | scf06584_1  | UN |
| AX-157707532 | 18 | 50.558 | 3ML01034505 | 288     | scf10181_1  | UN |
| AX-158380798 | 18 | 50.585 | KV453058.1  | 4074317 | 14-scf00369 | 14 |
| AX-158211395 | 18 | 50.614 | KV453058.1  | 4074477 | 14-scf00369 | 14 |
| AX-158210776 | 18 | 50.667 | KV453058.1  | 3087403 | 14-scf00369 | 14 |

|              |    |        |            |         |             |    |
|--------------|----|--------|------------|---------|-------------|----|
| AX-158414483 | 18 | 50.667 | KV453058.1 | 3126024 | 14-scf00369 | 14 |
| AX-157838431 | 18 | 50.667 | KV453058.1 | 3403346 | 14-scf00369 | 14 |
| AX-158211006 | 18 | 50.667 | KV453058.1 | 3417832 | 14-scf00369 | 14 |
| AX-158211018 | 18 | 50.667 | KV453058.1 | 3451468 | 14-scf00369 | 14 |
| AX-158211271 | 18 | 50.667 | KV453058.1 | 3811591 | 14-scf00369 | 14 |
| AX-157773825 | 18 | 50.667 | KV453058.1 | 3826181 | 14-scf00369 | 14 |
| AX-158211305 | 18 | 50.667 | KV453058.1 | 3892453 | 14-scf00369 | 14 |
| AX-158211320 | 18 | 50.667 | KV453058.1 | 3917354 | 14-scf00369 | 14 |
| AX-158211396 | 18 | 50.667 | KV453058.1 | 4076714 | 14-scf00369 | 14 |
| AX-157872363 | 18 | 50.667 | KV453058.1 | 4079814 | 14-scf00369 | 14 |
| AX-158211405 | 18 | 50.667 | KV453058.1 | 4093503 | 14-scf00369 | 14 |
| AX-157838469 | 18 | 50.667 | KV453058.1 | 4096695 | 14-scf00369 | 14 |
| AX-158211408 | 18 | 50.667 | KV453058.1 | 4097554 | 14-scf00369 | 14 |
| AX-157739209 | 18 | 50.667 | KV453058.1 | 4104429 | 14-scf00369 | 14 |
| AX-157746102 | 18 | 50.667 | KV453058.1 | 4105104 | 14-scf00369 | 14 |
| AX-157838475 | 18 | 50.667 | KV453058.1 | 4116380 | 14-scf00369 | 14 |
| AX-157838477 | 18 | 50.667 | KV453058.1 | 4119988 | 14-scf00369 | 14 |
| AX-158211420 | 18 | 50.667 | KV453058.1 | 4121598 | 14-scf00369 | 14 |
| AX-158211421 | 18 | 50.667 | KV453058.1 | 4127093 | 14-scf00369 | 14 |
| AX-157749590 | 18 | 50.667 | KV453058.1 | 4141968 | 14-scf00369 | 14 |
| AX-158211429 | 18 | 50.667 | KV453058.1 | 4144711 | 14-scf00369 | 14 |
| AX-158211430 | 18 | 50.667 | KV453058.1 | 4145702 | 14-scf00369 | 14 |
| AX-157838480 | 18 | 50.667 | KV453058.1 | 4146827 | 14-scf00369 | 14 |
| AX-158211431 | 18 | 50.667 | KV453058.1 | 4147026 | 14-scf00369 | 14 |
| AX-158211432 | 18 | 50.667 | KV453058.1 | 4147564 | 14-scf00369 | 14 |
| AX-158414506 | 18 | 50.667 | KV453058.1 | 4149184 | 14-scf00369 | 14 |
| AX-158211439 | 18 | 50.667 | KV453058.1 | 4155250 | 14-scf00369 | 14 |
| AX-157746744 | 18 | 50.667 | KV453058.1 | 4155979 | 14-scf00369 | 14 |
| AX-158211441 | 18 | 50.667 | KV453058.1 | 4157809 | 14-scf00369 | 14 |
| AX-158211443 | 18 | 50.667 | KV453058.1 | 4160293 | 14-scf00369 | 14 |
| AX-158211444 | 18 | 50.667 | KV453058.1 | 4163422 | 14-scf00369 | 14 |
| AX-157872364 | 18 | 50.667 | KV453058.1 | 4168311 | 14-scf00369 | 14 |
| AX-158211448 | 18 | 50.667 | KV453058.1 | 4169223 | 14-scf00369 | 14 |
| AX-158211452 | 18 | 50.667 | KV453058.1 | 4173538 | 14-scf00369 | 14 |
| AX-158211457 | 18 | 50.667 | KV453058.1 | 4180578 | 14-scf00369 | 14 |
| AX-158414507 | 18 | 50.667 | KV453058.1 | 4181233 | 14-scf00369 | 14 |
| AX-158211458 | 18 | 50.667 | KV453058.1 | 4181757 | 14-scf00369 | 14 |
| AX-158211459 | 18 | 50.667 | KV453058.1 | 4181960 | 14-scf00369 | 14 |
| AX-158211460 | 18 | 50.667 | KV453058.1 | 4183212 | 14-scf00369 | 14 |
| AX-158211461 | 18 | 50.667 | KV453058.1 | 4183973 | 14-scf00369 | 14 |
| AX-158211594 | 18 | 50.667 | KV453058.1 | 4351293 | 14-scf00369 | 14 |
| AX-158211597 | 18 | 50.667 | KV453058.1 | 4355646 | 14-scf00369 | 14 |
| AX-158211617 | 18 | 50.667 | KV453058.1 | 4394276 | 14-scf00369 | 14 |
| AX-158211462 | 18 | 50.679 | KV453058.1 | 4186541 | 14-scf00369 | 14 |
| AX-158211391 | 18 | 50.711 | KV453058.1 | 4071842 | 14-scf00369 | 14 |
| AX-157838476 | 18 | 50.711 | KV453058.1 | 4117254 | 14-scf00369 | 14 |
| AX-158211463 | 18 | 50.711 | KV453058.1 | 4187158 | 14-scf00369 | 14 |
| AX-158210738 | 18 | 50.718 | KV453058.1 | 3040702 | 14-scf00369 | 14 |
| AX-158210930 | 18 | 50.718 | KV453058.1 | 3287511 | 14-scf00369 | 14 |
| AX-158210948 | 18 | 50.718 | KV453058.1 | 3314233 | 14-scf00369 | 14 |
| AX-158211465 | 18 | 50.718 | KV453058.1 | 4188887 | 14-scf00369 | 14 |

|              |    |        |            |         |             |    |
|--------------|----|--------|------------|---------|-------------|----|
| AX-158211497 | 18 | 50.718 | KV453058.1 | 4236932 | 14-scf00369 | 14 |
| AX-158211498 | 18 | 50.718 | KV453058.1 | 4237358 | 14-scf00369 | 14 |
| AX-158211527 | 18 | 50.718 | KV453058.1 | 4262937 | 14-scf00369 | 14 |
| AX-158211528 | 18 | 50.718 | KV453058.1 | 4263242 | 14-scf00369 | 14 |
| AX-158211529 | 18 | 50.718 | KV453058.1 | 4263709 | 14-scf00369 | 14 |
| AX-157838483 | 18 | 50.749 | KV453058.1 | 4195540 | 14-scf00369 | 14 |
| AX-158210720 | 18 | 50.776 | KV453058.1 | 3016785 | 14-scf00369 | 14 |
| AX-158210817 | 18 | 50.776 | KV453058.1 | 3137710 | 14-scf00369 | 14 |
| AX-158210879 | 18 | 50.776 | KV453058.1 | 3216523 | 14-scf00369 | 14 |
| AX-158211055 | 18 | 50.776 | KV453058.1 | 3500050 | 14-scf00369 | 14 |
| AX-158211270 | 18 | 50.776 | KV453058.1 | 3810665 | 14-scf00369 | 14 |
| AX-158211389 | 18 | 50.776 | KV453058.1 | 4069450 | 14-scf00369 | 14 |
| AX-157752904 | 18 | 50.776 | KV453058.1 | 4070441 | 14-scf00369 | 14 |
| AX-158211392 | 18 | 50.776 | KV453058.1 | 4072771 | 14-scf00369 | 14 |
| AX-157838470 | 18 | 50.776 | KV453058.1 | 4101012 | 14-scf00369 | 14 |
| AX-157838471 | 18 | 50.776 | KV453058.1 | 4101496 | 14-scf00369 | 14 |
| AX-158211413 | 18 | 50.776 | KV453058.1 | 4104875 | 14-scf00369 | 14 |
| AX-158414505 | 18 | 50.776 | KV453058.1 | 4123724 | 14-scf00369 | 14 |
| AX-157775859 | 18 | 50.776 | KV453058.1 | 4136855 | 14-scf00369 | 14 |
| AX-158211434 | 18 | 50.776 | KV453058.1 | 4150338 | 14-scf00369 | 14 |
| AX-158211435 | 18 | 50.776 | KV453058.1 | 4150989 | 14-scf00369 | 14 |
| AX-158211440 | 18 | 50.776 | KV453058.1 | 4156600 | 14-scf00369 | 14 |
| AX-158211446 | 18 | 50.776 | KV453058.1 | 4166811 | 14-scf00369 | 14 |
| AX-158211467 | 18 | 50.776 | KV453058.1 | 4189774 | 14-scf00369 | 14 |
| AX-158211469 | 18 | 50.776 | KV453058.1 | 4196127 | 14-scf00369 | 14 |
| AX-158211470 | 18 | 50.776 | KV453058.1 | 4196757 | 14-scf00369 | 14 |
| AX-158211472 | 18 | 50.776 | KV453058.1 | 4198866 | 14-scf00369 | 14 |
| AX-158211473 | 18 | 50.776 | KV453058.1 | 4199306 | 14-scf00369 | 14 |
| AX-158211474 | 18 | 50.776 | KV453058.1 | 4199536 | 14-scf00369 | 14 |
| AX-157838484 | 18 | 50.776 | KV453058.1 | 4202768 | 14-scf00369 | 14 |
| AX-158211476 | 18 | 50.776 | KV453058.1 | 4204059 | 14-scf00369 | 14 |
| AX-158211477 | 18 | 50.776 | KV453058.1 | 4205110 | 14-scf00369 | 14 |
| AX-158211478 | 18 | 50.776 | KV453058.1 | 4206802 | 14-scf00369 | 14 |
| AX-158211479 | 18 | 50.776 | KV453058.1 | 4207864 | 14-scf00369 | 14 |
| AX-158386462 | 18 | 50.776 | KV453058.1 | 4211066 | 14-scf00369 | 14 |
| AX-158211484 | 18 | 50.776 | KV453058.1 | 4213890 | 14-scf00369 | 14 |
| AX-158211486 | 18 | 50.776 | KV453058.1 | 4214877 | 14-scf00369 | 14 |
| AX-157838487 | 18 | 50.776 | KV453058.1 | 4220192 | 14-scf00369 | 14 |
| AX-158211488 | 18 | 50.776 | KV453058.1 | 4223443 | 14-scf00369 | 14 |
| AX-158211489 | 18 | 50.776 | KV453058.1 | 4224219 | 14-scf00369 | 14 |
| AX-158211491 | 18 | 50.776 | KV453058.1 | 4225578 | 14-scf00369 | 14 |
| AX-157872365 | 18 | 50.776 | KV453058.1 | 4226124 | 14-scf00369 | 14 |
| AX-158211501 | 18 | 50.776 | KV453058.1 | 4239594 | 14-scf00369 | 14 |
| AX-157838488 | 18 | 50.776 | KV453058.1 | 4241597 | 14-scf00369 | 14 |
| AX-158211504 | 18 | 50.776 | KV453058.1 | 4241923 | 14-scf00369 | 14 |
| AX-157838490 | 18 | 50.776 | KV453058.1 | 4244180 | 14-scf00369 | 14 |
| AX-157757184 | 18 | 50.776 | KV453058.1 | 4250490 | 14-scf00369 | 14 |
| AX-158211516 | 18 | 50.776 | KV453058.1 | 4253643 | 14-scf00369 | 14 |
| AX-158211517 | 18 | 50.776 | KV453058.1 | 4254510 | 14-scf00369 | 14 |
| AX-158211518 | 18 | 50.776 | KV453058.1 | 4254807 | 14-scf00369 | 14 |
| AX-158211523 | 18 | 50.776 | KV453058.1 | 4259803 | 14-scf00369 | 14 |



|              |    |        |            |         |                |    |
|--------------|----|--------|------------|---------|----------------|----|
| AX-158211530 | 18 | 50.776 | KV453058.1 | 4263912 | 14-scf00369    | 14 |
| AX-158211532 | 18 | 50.776 | KV453058.1 | 4266952 | 14-scf00369    | 14 |
| AX-158211534 | 18 | 50.776 | KV453058.1 | 4268644 | 14-scf00369    | 14 |
| AX-158211536 | 18 | 50.776 | KV453058.1 | 4269459 | 14-scf00369    | 14 |
| AX-158211537 | 18 | 50.776 | KV453058.1 | 4270119 | 14-scf00369    | 14 |
| AX-157774999 | 18 | 50.776 | KV453058.1 | 4270742 | 14-scf00369    | 14 |
| AX-158211538 | 18 | 50.776 | KV453058.1 | 4271741 | 14-scf00369    | 14 |
| AX-157755558 | 18 | 50.776 | KV453058.1 | 4271973 | 14-scf00369    | 14 |
| AX-158211539 | 18 | 50.776 | KV453058.1 | 4272276 | 14-scf00369    | 14 |
| AX-158211540 | 18 | 50.776 | KV453058.1 | 4272755 | 14-scf00369    | 14 |
| AX-158211541 | 18 | 50.776 | KV453058.1 | 4273222 | 14-scf00369    | 14 |
| AX-158380799 | 18 | 50.776 | KV453058.1 | 4274266 | 14-scf00369    | 14 |
| AX-158211542 | 18 | 50.776 | KV453058.1 | 4274399 | 14-scf00369    | 14 |
| AX-158211544 | 18 | 50.776 | KV453058.1 | 4275855 | 14-scf00369    | 14 |
| AX-158211545 | 18 | 50.776 | KV453058.1 | 4276434 | 14-scf00369    | 14 |
| AX-158211546 | 18 | 50.776 | KV453058.1 | 4277370 | 14-scf00369    | 14 |
| AX-158211547 | 18 | 50.776 | KV453058.1 | 4277934 | 14-scf00369    | 14 |
| AX-158211548 | 18 | 50.776 | KV453058.1 | 4278683 | 14-scf00369    | 14 |
| AX-158211550 | 18 | 50.776 | KV453058.1 | 4280530 | 14-scf00369    | 14 |
| AX-158211551 | 18 | 50.776 | KV453058.1 | 4282532 | 14-scf00369    | 14 |
| AX-158211555 | 18 | 50.776 | KV453058.1 | 4286075 | 14-scf00369    | 14 |
| AX-158211558 | 18 | 50.776 | KV453058.1 | 4288707 | 14-scf00369    | 14 |
| AX-157773224 | 18 | 50.776 | KV453058.1 | 4292044 | 14-scf00369    | 14 |
| AX-158211560 | 18 | 50.776 | KV453058.1 | 4295661 | 14-scf00369    | 14 |
| AX-158211562 | 18 | 50.776 | KV453058.1 | 4296677 | 14-scf00369    | 14 |
| AX-158211563 | 18 | 50.776 | KV453058.1 | 4298121 | 14-scf00369    | 14 |
| AX-158211568 | 18 | 50.776 | KV453058.1 | 4303880 | 14-scf00369    | 14 |
| AX-157887182 | 18 | 50.776 | KV453058.1 | 4306285 | 14-scf00369    | 14 |
| AX-158211570 | 18 | 50.776 | KV453058.1 | 4309318 | 14-scf00369    | 14 |
| AX-158211573 | 18 | 50.776 | KV453058.1 | 4314624 | 14-scf00369    | 14 |
| AX-158211574 | 18 | 50.776 | KV453058.1 | 4319042 | 14-scf00369    | 14 |
| AX-158211575 | 18 | 50.776 | KV453058.1 | 4319866 | 14-scf00369    | 14 |
| AX-158211576 | 18 | 50.776 | KV453058.1 | 4321616 | 14-scf00369    | 14 |
| AX-158211584 | 18 | 50.776 | KV453058.1 | 4333355 | 14-scf00369    | 14 |
| AX-158211613 | 18 | 50.776 | KV453058.1 | 4383910 | 14-scf00369    | 14 |
| AX-158211615 | 18 | 50.776 | KV453058.1 | 4389392 | 14-scf00369    | 14 |
| AX-158211624 | 18 | 50.776 | KV453058.1 | 4401989 | 14-scf00369    | 14 |
| AX-157695243 | 18 | 50.776 | FI869397.1 | 375     | IORI212 lctalu | UN |
| AX-158386461 | 18 | 50.805 | KV453058.1 | 4142734 | 14-scf00369    | 14 |
| AX-158211515 | 18 | 50.805 | KV453058.1 | 4253098 | 14-scf00369    | 14 |
| AX-158211566 | 18 | 50.805 | KV453058.1 | 4301346 | 14-scf00369    | 14 |
| AX-158211571 | 18 | 50.805 | KV453058.1 | 4311498 | 14-scf00369    | 14 |
| AX-158211579 | 18 | 50.805 | KV453058.1 | 4326958 | 14-scf00369    | 14 |
| AX-158210782 | 18 | 50.885 | KV453058.1 | 3092710 | 14-scf00369    | 14 |
| AX-158210789 | 18 | 50.885 | KV453058.1 | 3099620 | 14-scf00369    | 14 |
| AX-158211020 | 18 | 50.885 | KV453058.1 | 3454403 | 14-scf00369    | 14 |
| AX-158211159 | 18 | 50.885 | KV453058.1 | 3638298 | 14-scf00369    | 14 |
| AX-158211162 | 18 | 50.885 | KV453058.1 | 3642581 | 14-scf00369    | 14 |
| AX-158211264 | 18 | 50.885 | KV453058.1 | 3801358 | 14-scf00369    | 14 |
| AX-158211268 | 18 | 50.885 | KV453058.1 | 3809230 | 14-scf00369    | 14 |
| AX-158211311 | 18 | 50.885 | KV453058.1 | 3905044 | 14-scf00369    | 14 |

|              |    |        |            |         |             |    |
|--------------|----|--------|------------|---------|-------------|----|
| AX-158211321 | 18 | 50.885 | KV453058.1 | 3918915 | 14-scf00369 | 14 |
| AX-158211325 | 18 | 50.885 | KV453058.1 | 3922824 | 14-scf00369 | 14 |
| AX-158211341 | 18 | 50.885 | KV453058.1 | 3954811 | 14-scf00369 | 14 |
| AX-158211412 | 18 | 50.885 | KV453058.1 | 4103637 | 14-scf00369 | 14 |
| AX-158211505 | 18 | 50.885 | KV453058.1 | 4243375 | 14-scf00369 | 14 |
| AX-158211511 | 18 | 50.885 | KV453058.1 | 4248950 | 14-scf00369 | 14 |
| AX-157838491 | 18 | 50.885 | KV453058.1 | 4249348 | 14-scf00369 | 14 |
| AX-158211567 | 18 | 50.885 | KV453058.1 | 4302484 | 14-scf00369 | 14 |
| AX-158414510 | 18 | 50.885 | KV453058.1 | 4305995 | 14-scf00369 | 14 |
| AX-158211581 | 18 | 50.885 | KV453058.1 | 4330466 | 14-scf00369 | 14 |
| AX-158211582 | 18 | 50.885 | KV453058.1 | 4332185 | 14-scf00369 | 14 |
| AX-158211585 | 18 | 50.885 | KV453058.1 | 4334485 | 14-scf00369 | 14 |
| AX-158211589 | 18 | 50.885 | KV453058.1 | 4339937 | 14-scf00369 | 14 |
| AX-158211593 | 18 | 50.885 | KV453058.1 | 4345800 | 14-scf00369 | 14 |
| AX-157753398 | 18 | 50.885 | KV453058.1 | 4346151 | 14-scf00369 | 14 |
| AX-158211599 | 18 | 50.885 | KV453058.1 | 4356669 | 14-scf00369 | 14 |
| AX-158211601 | 18 | 50.885 | KV453058.1 | 4358922 | 14-scf00369 | 14 |
| AX-158211603 | 18 | 50.885 | KV453058.1 | 4360506 | 14-scf00369 | 14 |
| AX-158211604 | 18 | 50.885 | KV453058.1 | 4361804 | 14-scf00369 | 14 |
| AX-158211609 | 18 | 50.885 | KV453058.1 | 4371299 | 14-scf00369 | 14 |
| AX-158418559 | 18 | 50.885 | KV453058.1 | 4371999 | 14-scf00369 | 14 |
| AX-157751718 | 18 | 50.885 | KV453058.1 | 4387616 | 14-scf00369 | 14 |
| AX-158211618 | 18 | 50.885 | KV453058.1 | 4395345 | 14-scf00369 | 14 |
| AX-158211626 | 18 | 50.885 | KV453058.1 | 4404085 | 14-scf00369 | 14 |
| AX-158211627 | 18 | 50.885 | KV453058.1 | 4405645 | 14-scf00369 | 14 |
| AX-158211630 | 18 | 50.885 | KV453058.1 | 4408323 | 14-scf00369 | 14 |
| AX-157725326 | 18 | 50.885 | KV453058.1 | 4411292 | 14-scf00369 | 14 |
| AX-158211632 | 18 | 50.885 | KV453058.1 | 4412092 | 14-scf00369 | 14 |
| AX-158211633 | 18 | 50.955 | KV453058.1 | 4413799 | 14-scf00369 | 14 |
| AX-158211426 | 18 | 51.018 | KV453058.1 | 4134079 | 14-scf00369 | 14 |
| AX-158211636 | 18 | 51.018 | KV453058.1 | 4417643 | 14-scf00369 | 14 |
| AX-158211641 | 18 | 51.505 | KV453058.1 | 4436102 | 14-scf00369 | 14 |
| AX-158211642 | 18 | 51.519 | KV453058.1 | 4440460 | 14-scf00369 | 14 |
| AX-157838494 | 18 | 51.519 | KV453058.1 | 4447115 | 14-scf00369 | 14 |
| AX-158211645 | 18 | 51.596 | KV453058.1 | 4451397 | 14-scf00369 | 14 |
| AX-158211647 | 18 | 51.596 | KV453058.1 | 4461056 | 14-scf00369 | 14 |
| AX-157838496 | 18 | 51.648 | KV453058.1 | 4452342 | 14-scf00369 | 14 |
| AX-158211646 | 18 | 51.651 | KV453058.1 | 4458886 | 14-scf00369 | 14 |
| AX-157697115 | 18 | 51.651 | KV453058.1 | 4462710 | 14-scf00369 | 14 |
| AX-158211653 | 18 | 51.651 | KV453058.1 | 4470547 | 14-scf00369 | 14 |
| AX-158211654 | 18 | 51.651 | KV453058.1 | 4473217 | 14-scf00369 | 14 |
| AX-158211660 | 18 | 51.651 | KV453058.1 | 4478819 | 14-scf00369 | 14 |
| AX-158211656 | 18 | 51.814 | KV453058.1 | 4475755 | 14-scf00369 | 14 |
| AX-158211658 | 18 | 51.814 | KV453058.1 | 4477240 | 14-scf00369 | 14 |
| AX-157838497 | 18 | 51.814 | KV453058.1 | 4481044 | 14-scf00369 | 14 |
| AX-158211671 | 18 | 51.814 | KV453058.1 | 4494832 | 14-scf00369 | 14 |
| AX-158211711 | 18 | 51.814 | KV453058.1 | 4565282 | 14-scf00369 | 14 |
| AX-158211587 | 18 | 51.979 | KV453058.1 | 4337003 | 14-scf00369 | 14 |
| AX-158211662 | 18 | 51.979 | KV453058.1 | 4482760 | 14-scf00369 | 14 |
| AX-158211664 | 18 | 51.979 | KV453058.1 | 4486838 | 14-scf00369 | 14 |
| AX-157746169 | 18 | 51.979 | KV453058.1 | 4487807 | 14-scf00369 | 14 |

|              |    |        |            |         |             |    |
|--------------|----|--------|------------|---------|-------------|----|
| AX-158211666 | 18 | 51.979 | KV453058.1 | 4489243 | 14-scf00369 | 14 |
| AX-158211667 | 18 | 51.979 | KV453058.1 | 4490114 | 14-scf00369 | 14 |
| AX-157745932 | 18 | 51.979 | KV453058.1 | 4493769 | 14-scf00369 | 14 |
| AX-158211670 | 18 | 51.979 | KV453058.1 | 4494763 | 14-scf00369 | 14 |
| AX-158211675 | 18 | 51.979 | KV453058.1 | 4498222 | 14-scf00369 | 14 |
| AX-158211676 | 18 | 51.979 | KV453058.1 | 4498926 | 14-scf00369 | 14 |
| AX-158211679 | 18 | 51.979 | KV453058.1 | 4506911 | 14-scf00369 | 14 |
| AX-158211674 | 18 | 51.982 | KV453058.1 | 4497702 | 14-scf00369 | 14 |
| AX-157745954 | 18 | 51.982 | KV453058.1 | 4503988 | 14-scf00369 | 14 |
| AX-158211680 | 18 | 51.982 | KV453058.1 | 4508490 | 14-scf00369 | 14 |
| AX-158211683 | 18 | 52.123 | KV453058.1 | 4517588 | 14-scf00369 | 14 |
| AX-158211706 | 18 | 52.27  | KV453058.1 | 4554379 | 14-scf00369 | 14 |
| AX-158211606 | 18 | 52.323 | KV453058.1 | 4366889 | 14-scf00369 | 14 |
| AX-158211707 | 18 | 52.323 | KV453058.1 | 4555487 | 14-scf00369 | 14 |
| AX-158211884 | 18 | 52.323 | KV453058.1 | 4777661 | 14-scf00369 | 14 |
| AX-157866983 | 18 | 52.323 | KV453058.1 | 4781961 | 14-scf00369 | 14 |
| AX-158211887 | 18 | 52.323 | KV453058.1 | 4783994 | 14-scf00369 | 14 |
| AX-158211888 | 18 | 52.323 | KV453058.1 | 4784491 | 14-scf00369 | 14 |
| AX-157859157 | 18 | 52.323 | KV453058.1 | 4790420 | 14-scf00369 | 14 |
| AX-158211976 | 18 | 52.323 | KV453058.1 | 4913032 | 14-scf00369 | 14 |
| AX-158212043 | 18 | 52.323 | KV453058.1 | 5014556 | 14-scf00369 | 14 |
| AX-158212169 | 18 | 52.323 | KV453058.1 | 5197964 | 14-scf00369 | 14 |
| AX-158212360 | 18 | 52.323 | KV453058.1 | 5448416 | 14-scf00369 | 14 |
| AX-158212404 | 18 | 52.323 | KV453058.1 | 5524951 | 14-scf00369 | 14 |
| AX-157859200 | 18 | 52.323 | KV453058.1 | 5527587 | 14-scf00369 | 14 |
| AX-157769026 | 18 | 52.323 | KV453058.1 | 5534618 | 14-scf00369 | 14 |
| AX-158211709 | 18 | 52.416 | KV453058.1 | 4562134 | 14-scf00369 | 14 |
| AX-157838498 | 18 | 52.416 | KV453058.1 | 4563330 | 14-scf00369 | 14 |
| AX-158211710 | 18 | 52.416 | KV453058.1 | 4564152 | 14-scf00369 | 14 |
| AX-158211712 | 18 | 52.416 | KV453058.1 | 4565755 | 14-scf00369 | 14 |
| AX-158211715 | 18 | 52.416 | KV453058.1 | 4567720 | 14-scf00369 | 14 |
| AX-158211717 | 18 | 52.416 | KV453058.1 | 4568378 | 14-scf00369 | 14 |
| AX-158211719 | 18 | 52.416 | KV453058.1 | 4570385 | 14-scf00369 | 14 |
| AX-158211720 | 18 | 52.416 | KV453058.1 | 4573700 | 14-scf00369 | 14 |
| AX-158211726 | 18 | 52.498 | KV453058.1 | 4581451 | 14-scf00369 | 14 |
| AX-158212347 | 18 | 52.498 | KV453058.1 | 5431643 | 14-scf00369 | 14 |
| AX-158212358 | 18 | 52.498 | KV453058.1 | 5442715 | 14-scf00369 | 14 |
| AX-158211728 | 18 | 52.744 | KV453058.1 | 4585367 | 14-scf00369 | 14 |
| AX-158211730 | 18 | 52.854 | KV453058.1 | 4590144 | 14-scf00369 | 14 |
| AX-158212397 | 18 | 52.854 | KV453058.1 | 5509759 | 14-scf00369 | 14 |
| AX-157838499 | 18 | 52.963 | KV453058.1 | 4595315 | 14-scf00369 | 14 |
| AX-158211733 | 18 | 52.963 | KV453058.1 | 4596343 | 14-scf00369 | 14 |
| AX-158211734 | 18 | 52.963 | KV453058.1 | 4596965 | 14-scf00369 | 14 |
| AX-158211735 | 18 | 52.963 | KV453058.1 | 4600071 | 14-scf00369 | 14 |
| AX-157755787 | 18 | 52.963 | KV453058.1 | 4600515 | 14-scf00369 | 14 |
| AX-158211736 | 18 | 52.963 | KV453058.1 | 4601405 | 14-scf00369 | 14 |
| AX-157838500 | 18 | 52.963 | KV453058.1 | 4602026 | 14-scf00369 | 14 |
| AX-158211742 | 18 | 52.963 | KV453058.1 | 4608264 | 14-scf00369 | 14 |
| AX-158211744 | 18 | 52.963 | KV453058.1 | 4612569 | 14-scf00369 | 14 |
| AX-158211755 | 18 | 52.963 | KV453058.1 | 4622488 | 14-scf00369 | 14 |
| AX-158414515 | 18 | 52.963 | KV453058.1 | 4624151 | 14-scf00369 | 14 |

|              |    |        |            |         |             |    |
|--------------|----|--------|------------|---------|-------------|----|
| AX-158211872 | 18 | 52.963 | KV453058.1 | 4752668 | 14-scf00369 | 14 |
| AX-158211875 | 18 | 52.963 | KV453058.1 | 4754591 | 14-scf00369 | 14 |
| AX-158211727 | 18 | 53.072 | KV453058.1 | 4583969 | 14-scf00369 | 14 |
| AX-158211741 | 18 | 53.072 | KV453058.1 | 4606639 | 14-scf00369 | 14 |
| AX-158211748 | 18 | 53.072 | KV453058.1 | 4617266 | 14-scf00369 | 14 |
| AX-158211749 | 18 | 53.072 | KV453058.1 | 4617951 | 14-scf00369 | 14 |
| AX-158211751 | 18 | 53.072 | KV453058.1 | 4619278 | 14-scf00369 | 14 |
| AX-158211752 | 18 | 53.072 | KV453058.1 | 4620157 | 14-scf00369 | 14 |
| AX-158211753 | 18 | 53.072 | KV453058.1 | 4620632 | 14-scf00369 | 14 |
| AX-158410055 | 18 | 53.072 | KV453058.1 | 4622000 | 14-scf00369 | 14 |
| AX-157752798 | 18 | 53.072 | KV453058.1 | 4623191 | 14-scf00369 | 14 |
| AX-158211757 | 18 | 53.072 | KV453058.1 | 4625272 | 14-scf00369 | 14 |
| AX-158211758 | 18 | 53.072 | KV453058.1 | 4625589 | 14-scf00369 | 14 |
| AX-158211760 | 18 | 53.072 | KV453058.1 | 4627117 | 14-scf00369 | 14 |
| AX-158211761 | 18 | 53.072 | KV453058.1 | 4627477 | 14-scf00369 | 14 |
| AX-157838501 | 18 | 53.072 | KV453058.1 | 4627681 | 14-scf00369 | 14 |
| AX-158211762 | 18 | 53.072 | KV453058.1 | 4628151 | 14-scf00369 | 14 |
| AX-158211793 | 18 | 53.072 | KV453058.1 | 4671080 | 14-scf00369 | 14 |
| AX-158211804 | 18 | 53.072 | KV453058.1 | 4686606 | 14-scf00369 | 14 |
| AX-158211846 | 18 | 53.072 | KV453058.1 | 4721668 | 14-scf00369 | 14 |
| AX-158211877 | 18 | 53.072 | KV453058.1 | 4760783 | 14-scf00369 | 14 |
| AX-158212073 | 18 | 53.072 | KV453058.1 | 5055559 | 14-scf00369 | 14 |
| AX-158212410 | 18 | 53.072 | KV453058.1 | 5538677 | 14-scf00369 | 14 |
| AX-158212783 | 18 | 53.072 | KV453058.1 | 6017460 | 14-scf00369 | 14 |
| AX-158212850 | 18 | 53.072 | KV453058.1 | 6125294 | 14-scf00369 | 14 |
| AX-158212936 | 18 | 53.072 | KV453058.1 | 6219012 | 14-scf00369 | 14 |
| AX-157754967 | 18 | 53.072 | KV453058.1 | 6508968 | 14-scf00369 | 14 |
| AX-158214007 | 18 | 53.072 | KV453058.1 | 7918999 | 14-scf00369 | 14 |
| AX-158214090 | 18 | 53.072 | KV453058.1 | 8048633 | 14-scf00369 | 14 |
| AX-158211631 | 18 | 53.181 | KV453058.1 | 4409296 | 14-scf00369 | 14 |
| AX-158211745 | 18 | 53.181 | KV453058.1 | 4614785 | 14-scf00369 | 14 |
| AX-158211747 | 18 | 53.181 | KV453058.1 | 4616328 | 14-scf00369 | 14 |
| AX-158211750 | 18 | 53.181 | KV453058.1 | 4618692 | 14-scf00369 | 14 |
| AX-158211766 | 18 | 53.181 | KV453058.1 | 4632612 | 14-scf00369 | 14 |
| AX-158211768 | 18 | 53.181 | KV453058.1 | 4642003 | 14-scf00369 | 14 |
| AX-158211769 | 18 | 53.181 | KV453058.1 | 4642360 | 14-scf00369 | 14 |
| AX-158211770 | 18 | 53.181 | KV453058.1 | 4643514 | 14-scf00369 | 14 |
| AX-158211771 | 18 | 53.181 | KV453058.1 | 4644059 | 14-scf00369 | 14 |
| AX-157838503 | 18 | 53.181 | KV453058.1 | 4644932 | 14-scf00369 | 14 |
| AX-158211772 | 18 | 53.181 | KV453058.1 | 4645367 | 14-scf00369 | 14 |
| AX-157754084 | 18 | 53.181 | KV453058.1 | 4646640 | 14-scf00369 | 14 |
| AX-158211774 | 18 | 53.181 | KV453058.1 | 4647686 | 14-scf00369 | 14 |
| AX-157747492 | 18 | 53.181 | KV453058.1 | 4650206 | 14-scf00369 | 14 |
| AX-158211776 | 18 | 53.181 | KV453058.1 | 4654596 | 14-scf00369 | 14 |
| AX-158211780 | 18 | 53.181 | KV453058.1 | 4658581 | 14-scf00369 | 14 |
| AX-157838505 | 18 | 53.181 | KV453058.1 | 4660020 | 14-scf00369 | 14 |
| AX-157838506 | 18 | 53.181 | KV453058.1 | 4660228 | 14-scf00369 | 14 |
| AX-158211781 | 18 | 53.181 | KV453058.1 | 4660800 | 14-scf00369 | 14 |
| AX-158380800 | 18 | 53.181 | KV453058.1 | 4661229 | 14-scf00369 | 14 |
| AX-158211782 | 18 | 53.181 | KV453058.1 | 4662812 | 14-scf00369 | 14 |
| AX-157838507 | 18 | 53.181 | KV453058.1 | 4663009 | 14-scf00369 | 14 |

|              |    |        |            |         |             |    |
|--------------|----|--------|------------|---------|-------------|----|
| AX-158211783 | 18 | 53.181 | KV453058.1 | 4663338 | 14-scf00369 | 14 |
| AX-158211785 | 18 | 53.181 | KV453058.1 | 4664926 | 14-scf00369 | 14 |
| AX-157838508 | 18 | 53.181 | KV453058.1 | 4665249 | 14-scf00369 | 14 |
| AX-158211786 | 18 | 53.181 | KV453058.1 | 4665798 | 14-scf00369 | 14 |
| AX-158211787 | 18 | 53.181 | KV453058.1 | 4667324 | 14-scf00369 | 14 |
| AX-158211788 | 18 | 53.181 | KV453058.1 | 4667577 | 14-scf00369 | 14 |
| AX-158211789 | 18 | 53.181 | KV453058.1 | 4667982 | 14-scf00369 | 14 |
| AX-158211790 | 18 | 53.181 | KV453058.1 | 4668134 | 14-scf00369 | 14 |
| AX-158211791 | 18 | 53.181 | KV453058.1 | 4668416 | 14-scf00369 | 14 |
| AX-157696052 | 18 | 53.181 | KV453058.1 | 4669356 | 14-scf00369 | 14 |
| AX-157838509 | 18 | 53.181 | KV453058.1 | 4671745 | 14-scf00369 | 14 |
| AX-158211794 | 18 | 53.181 | KV453058.1 | 4672401 | 14-scf00369 | 14 |
| AX-158211796 | 18 | 53.181 | KV453058.1 | 4678981 | 14-scf00369 | 14 |
| AX-158211797 | 18 | 53.181 | KV453058.1 | 4681189 | 14-scf00369 | 14 |
| AX-158211800 | 18 | 53.181 | KV453058.1 | 4685022 | 14-scf00369 | 14 |
| AX-158211802 | 18 | 53.181 | KV453058.1 | 4685652 | 14-scf00369 | 14 |
| AX-158211806 | 18 | 53.181 | KV453058.1 | 4687257 | 14-scf00369 | 14 |
| AX-158211807 | 18 | 53.181 | KV453058.1 | 4688568 | 14-scf00369 | 14 |
| AX-158211809 | 18 | 53.181 | KV453058.1 | 4690245 | 14-scf00369 | 14 |
| AX-158211811 | 18 | 53.181 | KV453058.1 | 4692207 | 14-scf00369 | 14 |
| AX-158211814 | 18 | 53.181 | KV453058.1 | 4693343 | 14-scf00369 | 14 |
| AX-157872367 | 18 | 53.181 | KV453058.1 | 4694675 | 14-scf00369 | 14 |
| AX-158211816 | 18 | 53.181 | KV453058.1 | 4695015 | 14-scf00369 | 14 |
| AX-158211818 | 18 | 53.181 | KV453058.1 | 4696390 | 14-scf00369 | 14 |
| AX-158211819 | 18 | 53.181 | KV453058.1 | 4696678 | 14-scf00369 | 14 |
| AX-158211820 | 18 | 53.181 | KV453058.1 | 4697020 | 14-scf00369 | 14 |
| AX-158211823 | 18 | 53.181 | KV453058.1 | 4698210 | 14-scf00369 | 14 |
| AX-158211825 | 18 | 53.181 | KV453058.1 | 4699629 | 14-scf00369 | 14 |
| AX-158211831 | 18 | 53.181 | KV453058.1 | 4702630 | 14-scf00369 | 14 |
| AX-158211834 | 18 | 53.181 | KV453058.1 | 4704225 | 14-scf00369 | 14 |
| AX-158211835 | 18 | 53.181 | KV453058.1 | 4704888 | 14-scf00369 | 14 |
| AX-157838510 | 18 | 53.181 | KV453058.1 | 4705412 | 14-scf00369 | 14 |
| AX-157838511 | 18 | 53.181 | KV453058.1 | 4705673 | 14-scf00369 | 14 |
| AX-158211837 | 18 | 53.181 | KV453058.1 | 4708138 | 14-scf00369 | 14 |
| AX-158211838 | 18 | 53.181 | KV453058.1 | 4710732 | 14-scf00369 | 14 |
| AX-158211893 | 18 | 53.181 | KV453058.1 | 4796955 | 14-scf00369 | 14 |
| AX-158211894 | 18 | 53.181 | KV453058.1 | 4799817 | 14-scf00369 | 14 |
| AX-158211990 | 18 | 53.181 | KV453058.1 | 4926855 | 14-scf00369 | 14 |
| AX-158212061 | 18 | 53.181 | KV453058.1 | 5038313 | 14-scf00369 | 14 |
| AX-157774703 | 18 | 53.181 | KV453058.1 | 5409714 | 14-scf00369 | 14 |
| AX-158212330 | 18 | 53.181 | KV453058.1 | 5410235 | 14-scf00369 | 14 |
| AX-158212333 | 18 | 53.181 | KV453058.1 | 5412038 | 14-scf00369 | 14 |
| AX-158212334 | 18 | 53.181 | KV453058.1 | 5414290 | 14-scf00369 | 14 |
| AX-158212339 | 18 | 53.181 | KV453058.1 | 5423313 | 14-scf00369 | 14 |
| AX-158212341 | 18 | 53.181 | KV453058.1 | 5424441 | 14-scf00369 | 14 |
| AX-158212352 | 18 | 53.181 | KV453058.1 | 5438030 | 14-scf00369 | 14 |
| AX-158212362 | 18 | 53.181 | KV453058.1 | 5450054 | 14-scf00369 | 14 |
| AX-158212364 | 18 | 53.181 | KV453058.1 | 5452131 | 14-scf00369 | 14 |
| AX-158212367 | 18 | 53.181 | KV453058.1 | 5454863 | 14-scf00369 | 14 |
| AX-158212413 | 18 | 53.181 | KV453058.1 | 5547449 | 14-scf00369 | 14 |
| AX-158212414 | 18 | 53.181 | KV453058.1 | 5548068 | 14-scf00369 | 14 |

|              |    |        |             |          |             |    |
|--------------|----|--------|-------------|----------|-------------|----|
| AX-158212416 | 18 | 53.181 | KV453058.1  | 5548615  | 14-scf00369 | 14 |
| AX-158212420 | 18 | 53.181 | KV453058.1  | 5551947  | 14-scf00369 | 14 |
| AX-158212422 | 18 | 53.181 | KV453058.1  | 5554217  | 14-scf00369 | 14 |
| AX-158212423 | 18 | 53.181 | KV453058.1  | 5557663  | 14-scf00369 | 14 |
| AX-158212425 | 18 | 53.181 | KV453058.1  | 5559009  | 14-scf00369 | 14 |
| AX-157838573 | 18 | 53.181 | KV453058.1  | 5561526  | 14-scf00369 | 14 |
| AX-158212440 | 18 | 53.181 | KV453058.1  | 5586952  | 14-scf00369 | 14 |
| AX-158213118 | 18 | 53.181 | KV453058.1  | 6450549  | 14-scf00369 | 14 |
| AX-158213140 | 18 | 53.181 | KV453058.1  | 6509958  | 14-scf00369 | 14 |
| AX-158213217 | 18 | 53.181 | KV453058.1  | 6669210  | 14-scf00369 | 14 |
| AX-158213247 | 18 | 53.181 | KV453058.1  | 6721648  | 14-scf00369 | 14 |
| AX-158213361 | 18 | 53.181 | KV453058.1  | 6911065  | 14-scf00369 | 14 |
| AX-157745903 | 18 | 53.181 | KV453058.1  | 7549550  | 14-scf00369 | 14 |
| AX-158213898 | 18 | 53.181 | KV453058.1  | 7749756  | 14-scf00369 | 14 |
| AX-158213945 | 18 | 53.181 | KV453058.1  | 7813098  | 14-scf00369 | 14 |
| AX-158216465 | 18 | 53.181 | KV453058.1  | 10894108 | 14-scf00369 | 14 |
| AX-158216987 | 18 | 53.181 | KV453060.1  | 332318   | 14-scf00370 | 14 |
| AX-157697452 | 18 | 53.181 | FI883939.1  | 510      | 14-scf00370 | UN |
| AX-157706651 | 18 | 53.181 | 3ML01032668 | 218      | scf08295_1  | UN |
| AX-158211853 | 18 | 53.262 | KV453058.1  | 4730482  | 14-scf00369 | 14 |
| AX-158211861 | 18 | 53.342 | KV453058.1  | 4740638  | 14-scf00369 | 14 |
| AX-158211881 | 18 | 53.366 | KV453058.1  | 4769426  | 14-scf00369 | 14 |
| AX-158211623 | 18 | 53.4   | KV453058.1  | 4401218  | 14-scf00369 | 14 |
| AX-157720006 | 18 | 53.4   | KV453058.1  | 4594795  | 14-scf00369 | 14 |
| AX-158386468 | 18 | 53.4   | KV453058.1  | 4594951  | 14-scf00369 | 14 |
| AX-158211759 | 18 | 53.4   | KV453058.1  | 4626284  | 14-scf00369 | 14 |
| AX-158211773 | 18 | 53.4   | KV453058.1  | 4645619  | 14-scf00369 | 14 |
| AX-158211777 | 18 | 53.4   | KV453058.1  | 4656026  | 14-scf00369 | 14 |
| AX-157721449 | 18 | 53.4   | KV453058.1  | 4687297  | 14-scf00369 | 14 |
| AX-158211815 | 18 | 53.4   | KV453058.1  | 4693770  | 14-scf00369 | 14 |
| AX-157771938 | 18 | 53.4   | KV453058.1  | 4703879  | 14-scf00369 | 14 |
| AX-158211844 | 18 | 53.4   | KV453058.1  | 4717766  | 14-scf00369 | 14 |
| AX-158211849 | 18 | 53.4   | KV453058.1  | 4724308  | 14-scf00369 | 14 |
| AX-157859156 | 18 | 53.4   | KV453058.1  | 4727311  | 14-scf00369 | 14 |
| AX-158211851 | 18 | 53.4   | KV453058.1  | 4728901  | 14-scf00369 | 14 |
| AX-158211855 | 18 | 53.4   | KV453058.1  | 4734078  | 14-scf00369 | 14 |
| AX-158211858 | 18 | 53.4   | KV453058.1  | 4737997  | 14-scf00369 | 14 |
| AX-158211860 | 18 | 53.4   | KV453058.1  | 4740120  | 14-scf00369 | 14 |
| AX-158211862 | 18 | 53.4   | KV453058.1  | 4741106  | 14-scf00369 | 14 |
| AX-158211864 | 18 | 53.4   | KV453058.1  | 4742679  | 14-scf00369 | 14 |
| AX-157715254 | 18 | 53.4   | KV453058.1  | 4744224  | 14-scf00369 | 14 |
| AX-158211867 | 18 | 53.4   | KV453058.1  | 4744291  | 14-scf00369 | 14 |
| AX-157866981 | 18 | 53.4   | KV453058.1  | 4747733  | 14-scf00369 | 14 |
| AX-158211873 | 18 | 53.4   | KV453058.1  | 4753734  | 14-scf00369 | 14 |
| AX-158414517 | 18 | 53.4   | KV453058.1  | 4773554  | 14-scf00369 | 14 |
| AX-158211883 | 18 | 53.4   | KV453058.1  | 4773995  | 14-scf00369 | 14 |
| AX-158211889 | 18 | 53.4   | KV453058.1  | 4785700  | 14-scf00369 | 14 |
| AX-158414519 | 18 | 53.4   | KV453058.1  | 4787002  | 14-scf00369 | 14 |
| AX-158211892 | 18 | 53.4   | KV453058.1  | 4796520  | 14-scf00369 | 14 |
| AX-157753582 | 18 | 53.4   | KV453058.1  | 4797642  | 14-scf00369 | 14 |
| AX-158211924 | 18 | 53.4   | KV453058.1  | 4848016  | 14-scf00369 | 14 |

|              |    |      |            |         |             |    |
|--------------|----|------|------------|---------|-------------|----|
| AX-158211934 | 18 | 53.4 | KV453058.1 | 4862073 | 14-scf00369 | 14 |
| AX-157727898 | 18 | 53.4 | KV453058.1 | 4867286 | 14-scf00369 | 14 |
| AX-158211937 | 18 | 53.4 | KV453058.1 | 4868987 | 14-scf00369 | 14 |
| AX-158211942 | 18 | 53.4 | KV453058.1 | 4871431 | 14-scf00369 | 14 |
| AX-157770849 | 18 | 53.4 | KV453058.1 | 4887798 | 14-scf00369 | 14 |
| AX-158211970 | 18 | 53.4 | KV453058.1 | 4904706 | 14-scf00369 | 14 |
| AX-158211972 | 18 | 53.4 | KV453058.1 | 4909639 | 14-scf00369 | 14 |
| AX-158211975 | 18 | 53.4 | KV453058.1 | 4912319 | 14-scf00369 | 14 |
| AX-158211992 | 18 | 53.4 | KV453058.1 | 4929411 | 14-scf00369 | 14 |
| AX-158211998 | 18 | 53.4 | KV453058.1 | 4934978 | 14-scf00369 | 14 |
| AX-158212001 | 18 | 53.4 | KV453058.1 | 4936569 | 14-scf00369 | 14 |
| AX-158212002 | 18 | 53.4 | KV453058.1 | 4938362 | 14-scf00369 | 14 |
| AX-158212004 | 18 | 53.4 | KV453058.1 | 4940928 | 14-scf00369 | 14 |
| AX-158212006 | 18 | 53.4 | KV453058.1 | 4946742 | 14-scf00369 | 14 |
| AX-157757148 | 18 | 53.4 | KV453058.1 | 4968840 | 14-scf00369 | 14 |
| AX-158212036 | 18 | 53.4 | KV453058.1 | 5002562 | 14-scf00369 | 14 |
| AX-158212038 | 18 | 53.4 | KV453058.1 | 5004021 | 14-scf00369 | 14 |
| AX-158212052 | 18 | 53.4 | KV453058.1 | 5027313 | 14-scf00369 | 14 |
| AX-158212053 | 18 | 53.4 | KV453058.1 | 5028578 | 14-scf00369 | 14 |
| AX-158212062 | 18 | 53.4 | KV453058.1 | 5039927 | 14-scf00369 | 14 |
| AX-158212065 | 18 | 53.4 | KV453058.1 | 5046862 | 14-scf00369 | 14 |
| AX-158212081 | 18 | 53.4 | KV453058.1 | 5062187 | 14-scf00369 | 14 |
| AX-158212105 | 18 | 53.4 | KV453058.1 | 5097519 | 14-scf00369 | 14 |
| AX-158212112 | 18 | 53.4 | KV453058.1 | 5111094 | 14-scf00369 | 14 |
| AX-158212114 | 18 | 53.4 | KV453058.1 | 5112207 | 14-scf00369 | 14 |
| AX-158212115 | 18 | 53.4 | KV453058.1 | 5112475 | 14-scf00369 | 14 |
| AX-158212125 | 18 | 53.4 | KV453058.1 | 5121939 | 14-scf00369 | 14 |
| AX-158212129 | 18 | 53.4 | KV453058.1 | 5124665 | 14-scf00369 | 14 |
| AX-158212132 | 18 | 53.4 | KV453058.1 | 5129053 | 14-scf00369 | 14 |
| AX-158212134 | 18 | 53.4 | KV453058.1 | 5130579 | 14-scf00369 | 14 |
| AX-158212143 | 18 | 53.4 | KV453058.1 | 5141152 | 14-scf00369 | 14 |
| AX-158212176 | 18 | 53.4 | KV453058.1 | 5205156 | 14-scf00369 | 14 |
| AX-158212212 | 18 | 53.4 | KV453058.1 | 5258068 | 14-scf00369 | 14 |
| AX-157721836 | 18 | 53.4 | KV453058.1 | 5268778 | 14-scf00369 | 14 |
| AX-158212238 | 18 | 53.4 | KV453058.1 | 5292480 | 14-scf00369 | 14 |
| AX-157739681 | 18 | 53.4 | KV453058.1 | 5300441 | 14-scf00369 | 14 |
| AX-158212279 | 18 | 53.4 | KV453058.1 | 5340470 | 14-scf00369 | 14 |
| AX-158212280 | 18 | 53.4 | KV453058.1 | 5340756 | 14-scf00369 | 14 |
| AX-158212300 | 18 | 53.4 | KV453058.1 | 5359583 | 14-scf00369 | 14 |
| AX-158212301 | 18 | 53.4 | KV453058.1 | 5359952 | 14-scf00369 | 14 |
| AX-158212303 | 18 | 53.4 | KV453058.1 | 5360989 | 14-scf00369 | 14 |
| AX-158212331 | 18 | 53.4 | KV453058.1 | 5411363 | 14-scf00369 | 14 |
| AX-158212332 | 18 | 53.4 | KV453058.1 | 5411522 | 14-scf00369 | 14 |
| AX-158212336 | 18 | 53.4 | KV453058.1 | 5416439 | 14-scf00369 | 14 |
| AX-158212337 | 18 | 53.4 | KV453058.1 | 5418209 | 14-scf00369 | 14 |
| AX-157866986 | 18 | 53.4 | KV453058.1 | 5421162 | 14-scf00369 | 14 |
| AX-158212338 | 18 | 53.4 | KV453058.1 | 5422415 | 14-scf00369 | 14 |
| AX-158212340 | 18 | 53.4 | KV453058.1 | 5423904 | 14-scf00369 | 14 |
| AX-158212342 | 18 | 53.4 | KV453058.1 | 5424771 | 14-scf00369 | 14 |
| AX-158212343 | 18 | 53.4 | KV453058.1 | 5424841 | 14-scf00369 | 14 |
| AX-157716112 | 18 | 53.4 | KV453058.1 | 5424926 | 14-scf00369 | 14 |

|              |    |      |            |         |             |    |
|--------------|----|------|------------|---------|-------------|----|
| AX-158212345 | 18 | 53.4 | KV453058.1 | 5427838 | 14-scf00369 | 14 |
| AX-158212346 | 18 | 53.4 | KV453058.1 | 5428423 | 14-scf00369 | 14 |
| AX-158212348 | 18 | 53.4 | KV453058.1 | 5432986 | 14-scf00369 | 14 |
| AX-158212349 | 18 | 53.4 | KV453058.1 | 5433949 | 14-scf00369 | 14 |
| AX-158212350 | 18 | 53.4 | KV453058.1 | 5434172 | 14-scf00369 | 14 |
| AX-158212353 | 18 | 53.4 | KV453058.1 | 5438236 | 14-scf00369 | 14 |
| AX-158212354 | 18 | 53.4 | KV453058.1 | 5439087 | 14-scf00369 | 14 |
| AX-158212356 | 18 | 53.4 | KV453058.1 | 5440944 | 14-scf00369 | 14 |
| AX-158212357 | 18 | 53.4 | KV453058.1 | 5441555 | 14-scf00369 | 14 |
| AX-158212361 | 18 | 53.4 | KV453058.1 | 5449522 | 14-scf00369 | 14 |
| AX-158212363 | 18 | 53.4 | KV453058.1 | 5451422 | 14-scf00369 | 14 |
| AX-158212365 | 18 | 53.4 | KV453058.1 | 5452892 | 14-scf00369 | 14 |
| AX-158212366 | 18 | 53.4 | KV453058.1 | 5454277 | 14-scf00369 | 14 |
| AX-158212369 | 18 | 53.4 | KV453058.1 | 5455865 | 14-scf00369 | 14 |
| AX-158212372 | 18 | 53.4 | KV453058.1 | 5457324 | 14-scf00369 | 14 |
| AX-158212373 | 18 | 53.4 | KV453058.1 | 5458288 | 14-scf00369 | 14 |
| AX-158212374 | 18 | 53.4 | KV453058.1 | 5459676 | 14-scf00369 | 14 |
| AX-158212375 | 18 | 53.4 | KV453058.1 | 5459892 | 14-scf00369 | 14 |
| AX-158212376 | 18 | 53.4 | KV453058.1 | 5460887 | 14-scf00369 | 14 |
| AX-158212379 | 18 | 53.4 | KV453058.1 | 5470900 | 14-scf00369 | 14 |
| AX-158212382 | 18 | 53.4 | KV453058.1 | 5477388 | 14-scf00369 | 14 |
| AX-158212384 | 18 | 53.4 | KV453058.1 | 5490251 | 14-scf00369 | 14 |
| AX-158212385 | 18 | 53.4 | KV453058.1 | 5492598 | 14-scf00369 | 14 |
| AX-158212390 | 18 | 53.4 | KV453058.1 | 5499110 | 14-scf00369 | 14 |
| AX-158212392 | 18 | 53.4 | KV453058.1 | 5501748 | 14-scf00369 | 14 |
| AX-158212394 | 18 | 53.4 | KV453058.1 | 5503542 | 14-scf00369 | 14 |
| AX-158212396 | 18 | 53.4 | KV453058.1 | 5506876 | 14-scf00369 | 14 |
| AX-158212400 | 18 | 53.4 | KV453058.1 | 5516440 | 14-scf00369 | 14 |
| AX-158212405 | 18 | 53.4 | KV453058.1 | 5526460 | 14-scf00369 | 14 |
| AX-158212411 | 18 | 53.4 | KV453058.1 | 5542370 | 14-scf00369 | 14 |
| AX-157838571 | 18 | 53.4 | KV453058.1 | 5542522 | 14-scf00369 | 14 |
| AX-158212412 | 18 | 53.4 | KV453058.1 | 5543984 | 14-scf00369 | 14 |
| AX-158212417 | 18 | 53.4 | KV453058.1 | 5550033 | 14-scf00369 | 14 |
| AX-158212421 | 18 | 53.4 | KV453058.1 | 5553616 | 14-scf00369 | 14 |
| AX-158414540 | 18 | 53.4 | KV453058.1 | 5557411 | 14-scf00369 | 14 |
| AX-158414541 | 18 | 53.4 | KV453058.1 | 5560434 | 14-scf00369 | 14 |
| AX-157838574 | 18 | 53.4 | KV453058.1 | 5561752 | 14-scf00369 | 14 |
| AX-158212427 | 18 | 53.4 | KV453058.1 | 5561933 | 14-scf00369 | 14 |
| AX-158212429 | 18 | 53.4 | KV453058.1 | 5564017 | 14-scf00369 | 14 |
| AX-158212431 | 18 | 53.4 | KV453058.1 | 5570776 | 14-scf00369 | 14 |
| AX-158212432 | 18 | 53.4 | KV453058.1 | 5574244 | 14-scf00369 | 14 |
| AX-158212433 | 18 | 53.4 | KV453058.1 | 5574495 | 14-scf00369 | 14 |
| AX-158212434 | 18 | 53.4 | KV453058.1 | 5575228 | 14-scf00369 | 14 |
| AX-157838577 | 18 | 53.4 | KV453058.1 | 5575478 | 14-scf00369 | 14 |
| AX-157713166 | 18 | 53.4 | KV453058.1 | 5577290 | 14-scf00369 | 14 |
| AX-158212435 | 18 | 53.4 | KV453058.1 | 5577486 | 14-scf00369 | 14 |
| AX-157838578 | 18 | 53.4 | KV453058.1 | 5581562 | 14-scf00369 | 14 |
| AX-158212436 | 18 | 53.4 | KV453058.1 | 5583448 | 14-scf00369 | 14 |
| AX-158212437 | 18 | 53.4 | KV453058.1 | 5584198 | 14-scf00369 | 14 |
| AX-158212439 | 18 | 53.4 | KV453058.1 | 5586534 | 14-scf00369 | 14 |
| AX-158212441 | 18 | 53.4 | KV453058.1 | 5587079 | 14-scf00369 | 14 |



|              |    |        |            |         |             |    |
|--------------|----|--------|------------|---------|-------------|----|
| AX-157859201 | 18 | 53.4   | KV453058.1 | 5588659 | 14-scf00369 | 14 |
| AX-158212444 | 18 | 53.4   | KV453058.1 | 5591004 | 14-scf00369 | 14 |
| AX-157756957 | 18 | 53.4   | KV453058.1 | 5592275 | 14-scf00369 | 14 |
| AX-158212445 | 18 | 53.4   | KV453058.1 | 5593569 | 14-scf00369 | 14 |
| AX-158212520 | 18 | 53.4   | KV453058.1 | 5690796 | 14-scf00369 | 14 |
| AX-157859220 | 18 | 53.4   | KV453058.1 | 5717736 | 14-scf00369 | 14 |
| AX-158212573 | 18 | 53.4   | KV453058.1 | 5753507 | 14-scf00369 | 14 |
| AX-158212582 | 18 | 53.4   | KV453058.1 | 5763151 | 14-scf00369 | 14 |
| AX-158212618 | 18 | 53.4   | KV453058.1 | 5797595 | 14-scf00369 | 14 |
| AX-158212637 | 18 | 53.4   | KV453058.1 | 5817155 | 14-scf00369 | 14 |
| AX-158212641 | 18 | 53.4   | KV453058.1 | 5822653 | 14-scf00369 | 14 |
| AX-158212684 | 18 | 53.4   | KV453058.1 | 5856299 | 14-scf00369 | 14 |
| AX-158212706 | 18 | 53.4   | KV453058.1 | 5881004 | 14-scf00369 | 14 |
| AX-158212728 | 18 | 53.4   | KV453058.1 | 5911589 | 14-scf00369 | 14 |
| AX-157838598 | 18 | 53.4   | KV453058.1 | 5956318 | 14-scf00369 | 14 |
| AX-158212749 | 18 | 53.4   | KV453058.1 | 5960460 | 14-scf00369 | 14 |
| AX-157798746 | 18 | 53.4   | KV453058.1 | 5999441 | 14-scf00369 | 14 |
| AX-158212789 | 18 | 53.4   | KV453058.1 | 6028724 | 14-scf00369 | 14 |
| AX-157859237 | 18 | 53.4   | KV453058.1 | 6032424 | 14-scf00369 | 14 |
| AX-157838608 | 18 | 53.4   | KV453058.1 | 6050302 | 14-scf00369 | 14 |
| AX-158212808 | 18 | 53.4   | KV453058.1 | 6056503 | 14-scf00369 | 14 |
| AX-158212816 | 18 | 53.4   | KV453058.1 | 6074581 | 14-scf00369 | 14 |
| AX-157715552 | 18 | 53.4   | KV453058.1 | 6185068 | 14-scf00369 | 14 |
| AX-158213092 | 18 | 53.4   | KV453058.1 | 6390147 | 14-scf00369 | 14 |
| AX-158213095 | 18 | 53.4   | KV453058.1 | 6392498 | 14-scf00369 | 14 |
| AX-158213099 | 18 | 53.4   | KV453058.1 | 6404912 | 14-scf00369 | 14 |
| AX-157859249 | 18 | 53.4   | KV453058.1 | 6426449 | 14-scf00369 | 14 |
| AX-158213121 | 18 | 53.4   | KV453058.1 | 6454396 | 14-scf00369 | 14 |
| AX-158213124 | 18 | 53.4   | KV453058.1 | 6463607 | 14-scf00369 | 14 |
| AX-158213129 | 18 | 53.4   | KV453058.1 | 6476194 | 14-scf00369 | 14 |
| AX-158414555 | 18 | 53.4   | KV453058.1 | 6477855 | 14-scf00369 | 14 |
| AX-157714674 | 18 | 53.4   | KV453058.1 | 6515878 | 14-scf00369 | 14 |
| AX-158213154 | 18 | 53.4   | KV453058.1 | 6562046 | 14-scf00369 | 14 |
| AX-158213171 | 18 | 53.4   | KV453058.1 | 6593454 | 14-scf00369 | 14 |
| AX-157754979 | 18 | 53.4   | KV453058.1 | 6627718 | 14-scf00369 | 14 |
| AX-158213246 | 18 | 53.4   | KV453058.1 | 6720218 | 14-scf00369 | 14 |
| AX-158213323 | 18 | 53.4   | KV453058.1 | 6856586 | 14-scf00369 | 14 |
| AX-158213376 | 18 | 53.4   | KV453058.1 | 6939262 | 14-scf00369 | 14 |
| AX-158213377 | 18 | 53.4   | KV453058.1 | 6940945 | 14-scf00369 | 14 |
| AX-157838663 | 18 | 53.4   | KV453058.1 | 7004862 | 14-scf00369 | 14 |
| AX-158213485 | 18 | 53.4   | KV453058.1 | 7088209 | 14-scf00369 | 14 |
| AX-158213488 | 18 | 53.4   | KV453058.1 | 7093166 | 14-scf00369 | 14 |
| AX-158213576 | 18 | 53.4   | KV453058.1 | 7231320 | 14-scf00369 | 14 |
| AX-158213646 | 18 | 53.4   | KV453058.1 | 7322507 | 14-scf00369 | 14 |
| AX-158214093 | 18 | 53.4   | KV453058.1 | 8049348 | 14-scf00369 | 14 |
| AX-158214143 | 18 | 53.4   | KV453058.1 | 8118133 | 14-scf00369 | 14 |
| AX-158215150 | 18 | 53.4   | KV453058.1 | 9277893 | 14-scf00369 | 14 |
| AX-157756310 | 18 | 53.4   | KV453060.1 | 199567  | 14-scf00370 | 14 |
| AX-158211792 | 18 | 53.509 | KV453058.1 | 4668945 | 14-scf00369 | 14 |
| AX-158211832 | 18 | 53.509 | KV453058.1 | 4702890 | 14-scf00369 | 14 |
| AX-158211870 | 18 | 53.509 | KV453058.1 | 4745989 | 14-scf00369 | 14 |

|              |    |        |            |         |             |    |
|--------------|----|--------|------------|---------|-------------|----|
| AX-157879606 | 18 | 53.509 | KV453058.1 | 5113087 | 14-scf00369 | 14 |
| AX-157838543 | 18 | 53.509 | KV453058.1 | 5129184 | 14-scf00369 | 14 |
| AX-158212145 | 18 | 53.509 | KV453058.1 | 5142495 | 14-scf00369 | 14 |
| AX-158212220 | 18 | 53.509 | KV453058.1 | 5266266 | 14-scf00369 | 14 |
| AX-158212271 | 18 | 53.509 | KV453058.1 | 5328254 | 14-scf00369 | 14 |
| AX-158212318 | 18 | 53.509 | KV453058.1 | 5385475 | 14-scf00369 | 14 |
| AX-158212377 | 18 | 53.509 | KV453058.1 | 5465609 | 14-scf00369 | 14 |
| AX-158212378 | 18 | 53.509 | KV453058.1 | 5467446 | 14-scf00369 | 14 |
| AX-158212380 | 18 | 53.509 | KV453058.1 | 5475109 | 14-scf00369 | 14 |
| AX-158212381 | 18 | 53.509 | KV453058.1 | 5475750 | 14-scf00369 | 14 |
| AX-158212383 | 18 | 53.509 | KV453058.1 | 5479485 | 14-scf00369 | 14 |
| AX-158212387 | 18 | 53.509 | KV453058.1 | 5494771 | 14-scf00369 | 14 |
| AX-157872370 | 18 | 53.509 | KV453058.1 | 5507307 | 14-scf00369 | 14 |
| AX-158212398 | 18 | 53.509 | KV453058.1 | 5510340 | 14-scf00369 | 14 |
| AX-158212428 | 18 | 53.509 | KV453058.1 | 5563600 | 14-scf00369 | 14 |
| AX-158212442 | 18 | 53.509 | KV453058.1 | 5587851 | 14-scf00369 | 14 |
| AX-158212443 | 18 | 53.509 | KV453058.1 | 5589826 | 14-scf00369 | 14 |
| AX-158212448 | 18 | 53.509 | KV453058.1 | 5596133 | 14-scf00369 | 14 |
| AX-158212449 | 18 | 53.509 | KV453058.1 | 5596878 | 14-scf00369 | 14 |
| AX-157838580 | 18 | 53.509 | KV453058.1 | 5597728 | 14-scf00369 | 14 |
| AX-158212450 | 18 | 53.509 | KV453058.1 | 5597837 | 14-scf00369 | 14 |
| AX-158212451 | 18 | 53.509 | KV453058.1 | 5599232 | 14-scf00369 | 14 |
| AX-158212453 | 18 | 53.509 | KV453058.1 | 5602554 | 14-scf00369 | 14 |
| AX-158212454 | 18 | 53.509 | KV453058.1 | 5604549 | 14-scf00369 | 14 |
| AX-158212458 | 18 | 53.509 | KV453058.1 | 5607655 | 14-scf00369 | 14 |
| AX-158212460 | 18 | 53.509 | KV453058.1 | 5610082 | 14-scf00369 | 14 |
| AX-158212461 | 18 | 53.509 | KV453058.1 | 5610686 | 14-scf00369 | 14 |
| AX-158212474 | 18 | 53.509 | KV453058.1 | 5627857 | 14-scf00369 | 14 |
| AX-157859204 | 18 | 53.509 | KV453058.1 | 5629164 | 14-scf00369 | 14 |
| AX-158212489 | 18 | 53.509 | KV453058.1 | 5642289 | 14-scf00369 | 14 |
| AX-157859205 | 18 | 53.509 | KV453058.1 | 5648527 | 14-scf00369 | 14 |
| AX-158212490 | 18 | 53.509 | KV453058.1 | 5648711 | 14-scf00369 | 14 |
| AX-157887187 | 18 | 53.509 | KV453058.1 | 5655072 | 14-scf00369 | 14 |
| AX-157859207 | 18 | 53.509 | KV453058.1 | 5657786 | 14-scf00369 | 14 |
| AX-158212494 | 18 | 53.509 | KV453058.1 | 5658039 | 14-scf00369 | 14 |
| AX-157695002 | 18 | 53.509 | KV453058.1 | 5659520 | 14-scf00369 | 14 |
| AX-158212496 | 18 | 53.509 | KV453058.1 | 5659614 | 14-scf00369 | 14 |
| AX-158212498 | 18 | 53.509 | KV453058.1 | 5662047 | 14-scf00369 | 14 |
| AX-157859208 | 18 | 53.509 | KV453058.1 | 5663081 | 14-scf00369 | 14 |
| AX-158212500 | 18 | 53.509 | KV453058.1 | 5666423 | 14-scf00369 | 14 |
| AX-158212501 | 18 | 53.509 | KV453058.1 | 5668108 | 14-scf00369 | 14 |
| AX-158212503 | 18 | 53.509 | KV453058.1 | 5669271 | 14-scf00369 | 14 |
| AX-158212506 | 18 | 53.509 | KV453058.1 | 5672363 | 14-scf00369 | 14 |
| AX-157741421 | 18 | 53.509 | KV453058.1 | 5677239 | 14-scf00369 | 14 |
| AX-157838584 | 18 | 53.509 | KV453058.1 | 5678513 | 14-scf00369 | 14 |
| AX-157838585 | 18 | 53.509 | KV453058.1 | 5678971 | 14-scf00369 | 14 |
| AX-157838586 | 18 | 53.509 | KV453058.1 | 5679320 | 14-scf00369 | 14 |
| AX-158212513 | 18 | 53.509 | KV453058.1 | 5684292 | 14-scf00369 | 14 |
| AX-158212514 | 18 | 53.509 | KV453058.1 | 5686367 | 14-scf00369 | 14 |
| AX-157838588 | 18 | 53.509 | KV453058.1 | 5687425 | 14-scf00369 | 14 |
| AX-158212517 | 18 | 53.509 | KV453058.1 | 5688219 | 14-scf00369 | 14 |

|              |    |        |            |         |             |    |
|--------------|----|--------|------------|---------|-------------|----|
| AX-158212518 | 18 | 53.509 | KV453058.1 | 5688933 | 14-scf00369 | 14 |
| AX-158212519 | 18 | 53.509 | KV453058.1 | 5689889 | 14-scf00369 | 14 |
| AX-157838589 | 18 | 53.509 | KV453058.1 | 5691977 | 14-scf00369 | 14 |
| AX-158212522 | 18 | 53.509 | KV453058.1 | 5692987 | 14-scf00369 | 14 |
| AX-157859214 | 18 | 53.509 | KV453058.1 | 5696107 | 14-scf00369 | 14 |
| AX-158212530 | 18 | 53.509 | KV453058.1 | 5701669 | 14-scf00369 | 14 |
| AX-158212533 | 18 | 53.509 | KV453058.1 | 5703362 | 14-scf00369 | 14 |
| AX-157859217 | 18 | 53.509 | KV453058.1 | 5709415 | 14-scf00369 | 14 |
| AX-158212545 | 18 | 53.509 | KV453058.1 | 5722774 | 14-scf00369 | 14 |
| AX-158212549 | 18 | 53.509 | KV453058.1 | 5727796 | 14-scf00369 | 14 |
| AX-158212550 | 18 | 53.509 | KV453058.1 | 5728329 | 14-scf00369 | 14 |
| AX-157838595 | 18 | 53.509 | KV453058.1 | 5728773 | 14-scf00369 | 14 |
| AX-158212553 | 18 | 53.509 | KV453058.1 | 5729905 | 14-scf00369 | 14 |
| AX-158212557 | 18 | 53.509 | KV453058.1 | 5735225 | 14-scf00369 | 14 |
| AX-158212567 | 18 | 53.509 | KV453058.1 | 5745554 | 14-scf00369 | 14 |
| AX-158212587 | 18 | 53.509 | KV453058.1 | 5765597 | 14-scf00369 | 14 |
| AX-157745873 | 18 | 53.509 | KV453058.1 | 5766266 | 14-scf00369 | 14 |
| AX-158212593 | 18 | 53.509 | KV453058.1 | 5771624 | 14-scf00369 | 14 |
| AX-158212599 | 18 | 53.509 | KV453058.1 | 5777631 | 14-scf00369 | 14 |
| AX-158212601 | 18 | 53.509 | KV453058.1 | 5779346 | 14-scf00369 | 14 |
| AX-158212603 | 18 | 53.509 | KV453058.1 | 5780509 | 14-scf00369 | 14 |
| AX-158212606 | 18 | 53.509 | KV453058.1 | 5786407 | 14-scf00369 | 14 |
| AX-158212612 | 18 | 53.509 | KV453058.1 | 5790616 | 14-scf00369 | 14 |
| AX-158212614 | 18 | 53.509 | KV453058.1 | 5792888 | 14-scf00369 | 14 |
| AX-158212628 | 18 | 53.509 | KV453058.1 | 5807997 | 14-scf00369 | 14 |
| AX-158212636 | 18 | 53.509 | KV453058.1 | 5816982 | 14-scf00369 | 14 |
| AX-158212639 | 18 | 53.509 | KV453058.1 | 5820249 | 14-scf00369 | 14 |
| AX-158212646 | 18 | 53.509 | KV453058.1 | 5827425 | 14-scf00369 | 14 |
| AX-157859231 | 18 | 53.509 | KV453058.1 | 5838560 | 14-scf00369 | 14 |
| AX-158212656 | 18 | 53.509 | KV453058.1 | 5838611 | 14-scf00369 | 14 |
| AX-158212659 | 18 | 53.509 | KV453058.1 | 5840504 | 14-scf00369 | 14 |
| AX-158212660 | 18 | 53.509 | KV453058.1 | 5841068 | 14-scf00369 | 14 |
| AX-158212669 | 18 | 53.509 | KV453058.1 | 5845732 | 14-scf00369 | 14 |
| AX-158212672 | 18 | 53.509 | KV453058.1 | 5847817 | 14-scf00369 | 14 |
| AX-158212678 | 18 | 53.509 | KV453058.1 | 5851478 | 14-scf00369 | 14 |
| AX-158212680 | 18 | 53.509 | KV453058.1 | 5852308 | 14-scf00369 | 14 |
| AX-158212681 | 18 | 53.509 | KV453058.1 | 5854116 | 14-scf00369 | 14 |
| AX-157859232 | 18 | 53.509 | KV453058.1 | 5858349 | 14-scf00369 | 14 |
| AX-158212689 | 18 | 53.509 | KV453058.1 | 5859123 | 14-scf00369 | 14 |
| AX-158212690 | 18 | 53.509 | KV453058.1 | 5860247 | 14-scf00369 | 14 |
| AX-158212695 | 18 | 53.509 | KV453058.1 | 5871144 | 14-scf00369 | 14 |
| AX-158212697 | 18 | 53.509 | KV453058.1 | 5873846 | 14-scf00369 | 14 |
| AX-158212699 | 18 | 53.509 | KV453058.1 | 5875172 | 14-scf00369 | 14 |
| AX-157757889 | 18 | 53.509 | KV453058.1 | 5895751 | 14-scf00369 | 14 |
| AX-158212739 | 18 | 53.509 | KV453058.1 | 5950068 | 14-scf00369 | 14 |
| AX-158212758 | 18 | 53.509 | KV453058.1 | 5971232 | 14-scf00369 | 14 |
| AX-158212761 | 18 | 53.509 | KV453058.1 | 5982117 | 14-scf00369 | 14 |
| AX-158212766 | 18 | 53.509 | KV453058.1 | 5987539 | 14-scf00369 | 14 |
| AX-157859236 | 18 | 53.509 | KV453058.1 | 5990124 | 14-scf00369 | 14 |
| AX-158212774 | 18 | 53.509 | KV453058.1 | 5999812 | 14-scf00369 | 14 |
| AX-158212778 | 18 | 53.509 | KV453058.1 | 6013453 | 14-scf00369 | 14 |

|              |    |        |            |          |             |    |
|--------------|----|--------|------------|----------|-------------|----|
| AX-158212782 | 18 | 53.509 | KV453058.1 | 6016022  | 14-scf00369 | 14 |
| AX-157859238 | 18 | 53.509 | KV453058.1 | 6033383  | 14-scf00369 | 14 |
| AX-158212793 | 18 | 53.509 | KV453058.1 | 6034476  | 14-scf00369 | 14 |
| AX-158212803 | 18 | 53.509 | KV453058.1 | 6048138  | 14-scf00369 | 14 |
| AX-158212805 | 18 | 53.509 | KV453058.1 | 6050691  | 14-scf00369 | 14 |
| AX-157838610 | 18 | 53.509 | KV453058.1 | 6050812  | 14-scf00369 | 14 |
| AX-157746604 | 18 | 53.509 | KV453058.1 | 6051499  | 14-scf00369 | 14 |
| AX-158212807 | 18 | 53.509 | KV453058.1 | 6054689  | 14-scf00369 | 14 |
| AX-158212812 | 18 | 53.509 | KV453058.1 | 6062227  | 14-scf00369 | 14 |
| AX-158212818 | 18 | 53.509 | KV453058.1 | 6077007  | 14-scf00369 | 14 |
| AX-158212819 | 18 | 53.509 | KV453058.1 | 6079623  | 14-scf00369 | 14 |
| AX-157748043 | 18 | 53.509 | KV453058.1 | 6080282  | 14-scf00369 | 14 |
| AX-158212821 | 18 | 53.509 | KV453058.1 | 6081876  | 14-scf00369 | 14 |
| AX-158212823 | 18 | 53.509 | KV453058.1 | 6085311  | 14-scf00369 | 14 |
| AX-158212827 | 18 | 53.509 | KV453058.1 | 6092847  | 14-scf00369 | 14 |
| AX-158212829 | 18 | 53.509 | KV453058.1 | 6094462  | 14-scf00369 | 14 |
| AX-158212831 | 18 | 53.509 | KV453058.1 | 6098669  | 14-scf00369 | 14 |
| AX-158212834 | 18 | 53.509 | KV453058.1 | 6100489  | 14-scf00369 | 14 |
| AX-158212835 | 18 | 53.509 | KV453058.1 | 6101203  | 14-scf00369 | 14 |
| AX-158212837 | 18 | 53.509 | KV453058.1 | 6102803  | 14-scf00369 | 14 |
| AX-158212838 | 18 | 53.509 | KV453058.1 | 6103303  | 14-scf00369 | 14 |
| AX-158212839 | 18 | 53.509 | KV453058.1 | 6105389  | 14-scf00369 | 14 |
| AX-157859241 | 18 | 53.509 | KV453058.1 | 6111940  | 14-scf00369 | 14 |
| AX-157745155 | 18 | 53.509 | KV453058.1 | 6112677  | 14-scf00369 | 14 |
| AX-158212847 | 18 | 53.509 | KV453058.1 | 6120712  | 14-scf00369 | 14 |
| AX-158212855 | 18 | 53.509 | KV453058.1 | 6128515  | 14-scf00369 | 14 |
| AX-158212990 | 18 | 53.509 | KV453058.1 | 6278903  | 14-scf00369 | 14 |
| AX-158213014 | 18 | 53.509 | KV453058.1 | 6314794  | 14-scf00369 | 14 |
| AX-158213046 | 18 | 53.509 | KV453058.1 | 6353373  | 14-scf00369 | 14 |
| AX-157838644 | 18 | 53.509 | KV453058.1 | 6506976  | 14-scf00369 | 14 |
| AX-158213225 | 18 | 53.509 | KV453058.1 | 6687083  | 14-scf00369 | 14 |
| AX-158213236 | 18 | 53.509 | KV453058.1 | 6704263  | 14-scf00369 | 14 |
| AX-158213268 | 18 | 53.509 | KV453058.1 | 6762482  | 14-scf00369 | 14 |
| AX-158213297 | 18 | 53.509 | KV453058.1 | 6826476  | 14-scf00369 | 14 |
| AX-158414563 | 18 | 53.509 | KV453058.1 | 6828117  | 14-scf00369 | 14 |
| AX-158213496 | 18 | 53.509 | KV453058.1 | 7100768  | 14-scf00369 | 14 |
| AX-158213501 | 18 | 53.509 | KV453058.1 | 7106936  | 14-scf00369 | 14 |
| AX-158213511 | 18 | 53.509 | KV453058.1 | 7118669  | 14-scf00369 | 14 |
| AX-158213523 | 18 | 53.509 | KV453058.1 | 7130324  | 14-scf00369 | 14 |
| AX-158213596 | 18 | 53.509 | KV453058.1 | 7258474  | 14-scf00369 | 14 |
| AX-157798848 | 18 | 53.509 | KV453058.1 | 7344715  | 14-scf00369 | 14 |
| AX-157838756 | 18 | 53.509 | KV453058.1 | 8000087  | 14-scf00369 | 14 |
| AX-157838757 | 18 | 53.509 | KV453058.1 | 8002067  | 14-scf00369 | 14 |
| AX-158214055 | 18 | 53.509 | KV453058.1 | 8008697  | 14-scf00369 | 14 |
| AX-158214056 | 18 | 53.509 | KV453058.1 | 8009112  | 14-scf00369 | 14 |
| AX-158214075 | 18 | 53.509 | KV453058.1 | 8032700  | 14-scf00369 | 14 |
| AX-158214100 | 18 | 53.509 | KV453058.1 | 8057138  | 14-scf00369 | 14 |
| AX-157718872 | 18 | 53.509 | KV453058.1 | 8083290  | 14-scf00369 | 14 |
| AX-158386569 | 18 | 53.509 | KV453058.1 | 10926574 | 14-scf00369 | 14 |
| AX-157859414 | 18 | 53.509 | KV453058.1 | 11200216 | 14-scf00369 | 14 |
| AX-158216858 | 18 | 53.509 | KV453060.1 | 163533   | 14-scf00370 | 14 |

|              |    |        |            |         |             |    |
|--------------|----|--------|------------|---------|-------------|----|
| AX-158211639 | 18 | 53.618 | KV453058.1 | 4430758 | 14-scf00369 | 14 |
| AX-158211721 | 18 | 53.618 | KV453058.1 | 4574243 | 14-scf00369 | 14 |
| AX-158211743 | 18 | 53.618 | KV453058.1 | 4609938 | 14-scf00369 | 14 |
| AX-158211746 | 18 | 53.618 | KV453058.1 | 4615158 | 14-scf00369 | 14 |
| AX-158211763 | 18 | 53.618 | KV453058.1 | 4630145 | 14-scf00369 | 14 |
| AX-157872366 | 18 | 53.618 | KV453058.1 | 4694383 | 14-scf00369 | 14 |
| AX-158211847 | 18 | 53.618 | KV453058.1 | 4722386 | 14-scf00369 | 14 |
| AX-158414516 | 18 | 53.618 | KV453058.1 | 4773385 | 14-scf00369 | 14 |
| AX-158211932 | 18 | 53.618 | KV453058.1 | 4860658 | 14-scf00369 | 14 |
| AX-158211957 | 18 | 53.618 | KV453058.1 | 4890879 | 14-scf00369 | 14 |
| AX-158211962 | 18 | 53.618 | KV453058.1 | 4897477 | 14-scf00369 | 14 |
| AX-157838526 | 18 | 53.618 | KV453058.1 | 4948848 | 14-scf00369 | 14 |
| AX-158212063 | 18 | 53.618 | KV453058.1 | 5041042 | 14-scf00369 | 14 |
| AX-158212147 | 18 | 53.618 | KV453058.1 | 5144756 | 14-scf00369 | 14 |
| AX-158212181 | 18 | 53.618 | KV453058.1 | 5211438 | 14-scf00369 | 14 |
| AX-157720894 | 18 | 53.618 | KV453058.1 | 5249515 | 14-scf00369 | 14 |
| AX-157757285 | 18 | 53.618 | KV453058.1 | 5504916 | 14-scf00369 | 14 |
| AX-158212418 | 18 | 53.618 | KV453058.1 | 5550452 | 14-scf00369 | 14 |
| AX-158212419 | 18 | 53.618 | KV453058.1 | 5550976 | 14-scf00369 | 14 |
| AX-158212512 | 18 | 53.618 | KV453058.1 | 5682607 | 14-scf00369 | 14 |
| AX-158212521 | 18 | 53.618 | KV453058.1 | 5692490 | 14-scf00369 | 14 |
| AX-158212523 | 18 | 53.618 | KV453058.1 | 5694832 | 14-scf00369 | 14 |
| AX-157770041 | 18 | 53.618 | KV453058.1 | 5695023 | 14-scf00369 | 14 |
| AX-158212527 | 18 | 53.618 | KV453058.1 | 5697394 | 14-scf00369 | 14 |
| AX-158212529 | 18 | 53.618 | KV453058.1 | 5699672 | 14-scf00369 | 14 |
| AX-158212531 | 18 | 53.618 | KV453058.1 | 5702004 | 14-scf00369 | 14 |
| AX-157859215 | 18 | 53.618 | KV453058.1 | 5705137 | 14-scf00369 | 14 |
| AX-158212534 | 18 | 53.618 | KV453058.1 | 5708526 | 14-scf00369 | 14 |
| AX-158212535 | 18 | 53.618 | KV453058.1 | 5709819 | 14-scf00369 | 14 |
| AX-157859218 | 18 | 53.618 | KV453058.1 | 5710924 | 14-scf00369 | 14 |
| AX-158212538 | 18 | 53.618 | KV453058.1 | 5712436 | 14-scf00369 | 14 |
| AX-157859219 | 18 | 53.618 | KV453058.1 | 5712718 | 14-scf00369 | 14 |
| AX-158212542 | 18 | 53.618 | KV453058.1 | 5718163 | 14-scf00369 | 14 |
| AX-158212543 | 18 | 53.618 | KV453058.1 | 5718486 | 14-scf00369 | 14 |
| AX-157859221 | 18 | 53.618 | KV453058.1 | 5719432 | 14-scf00369 | 14 |
| AX-158212546 | 18 | 53.618 | KV453058.1 | 5724623 | 14-scf00369 | 14 |
| AX-157859222 | 18 | 53.618 | KV453058.1 | 5729094 | 14-scf00369 | 14 |
| AX-157859223 | 18 | 53.618 | KV453058.1 | 5730138 | 14-scf00369 | 14 |
| AX-158212560 | 18 | 53.618 | KV453058.1 | 5738131 | 14-scf00369 | 14 |
| AX-158212569 | 18 | 53.618 | KV453058.1 | 5748467 | 14-scf00369 | 14 |
| AX-158212571 | 18 | 53.618 | KV453058.1 | 5751756 | 14-scf00369 | 14 |
| AX-158212576 | 18 | 53.618 | KV453058.1 | 5757375 | 14-scf00369 | 14 |
| AX-158212577 | 18 | 53.618 | KV453058.1 | 5757967 | 14-scf00369 | 14 |
| AX-158212580 | 18 | 53.618 | KV453058.1 | 5761602 | 14-scf00369 | 14 |
| AX-158212581 | 18 | 53.618 | KV453058.1 | 5762632 | 14-scf00369 | 14 |
| AX-158212583 | 18 | 53.618 | KV453058.1 | 5763668 | 14-scf00369 | 14 |
| AX-158212586 | 18 | 53.618 | KV453058.1 | 5765175 | 14-scf00369 | 14 |
| AX-158212590 | 18 | 53.618 | KV453058.1 | 5769402 | 14-scf00369 | 14 |
| AX-158212594 | 18 | 53.618 | KV453058.1 | 5772269 | 14-scf00369 | 14 |
| AX-158212595 | 18 | 53.618 | KV453058.1 | 5773187 | 14-scf00369 | 14 |
| AX-158212596 | 18 | 53.618 | KV453058.1 | 5773698 | 14-scf00369 | 14 |

|              |    |        |            |         |             |    |
|--------------|----|--------|------------|---------|-------------|----|
| AX-158212600 | 18 | 53.618 | KV453058.1 | 5778412 | 14-scf00369 | 14 |
| AX-158212602 | 18 | 53.618 | KV453058.1 | 5780264 | 14-scf00369 | 14 |
| AX-158212604 | 18 | 53.618 | KV453058.1 | 5780790 | 14-scf00369 | 14 |
| AX-157859226 | 18 | 53.618 | KV453058.1 | 5783808 | 14-scf00369 | 14 |
| AX-158212605 | 18 | 53.618 | KV453058.1 | 5785860 | 14-scf00369 | 14 |
| AX-158212607 | 18 | 53.618 | KV453058.1 | 5787059 | 14-scf00369 | 14 |
| AX-158212608 | 18 | 53.618 | KV453058.1 | 5788338 | 14-scf00369 | 14 |
| AX-158212611 | 18 | 53.618 | KV453058.1 | 5789835 | 14-scf00369 | 14 |
| AX-157725529 | 18 | 53.618 | KV453058.1 | 5793875 | 14-scf00369 | 14 |
| AX-158212615 | 18 | 53.618 | KV453058.1 | 5794429 | 14-scf00369 | 14 |
| AX-157726996 | 18 | 53.618 | KV453058.1 | 5796060 | 14-scf00369 | 14 |
| AX-158212619 | 18 | 53.618 | KV453058.1 | 5798910 | 14-scf00369 | 14 |
| AX-157838596 | 18 | 53.618 | KV453058.1 | 5801944 | 14-scf00369 | 14 |
| AX-158212623 | 18 | 53.618 | KV453058.1 | 5802953 | 14-scf00369 | 14 |
| AX-158212624 | 18 | 53.618 | KV453058.1 | 5803497 | 14-scf00369 | 14 |
| AX-158212625 | 18 | 53.618 | KV453058.1 | 5804248 | 14-scf00369 | 14 |
| AX-158212626 | 18 | 53.618 | KV453058.1 | 5804928 | 14-scf00369 | 14 |
| AX-158212632 | 18 | 53.618 | KV453058.1 | 5812626 | 14-scf00369 | 14 |
| AX-158212638 | 18 | 53.618 | KV453058.1 | 5819167 | 14-scf00369 | 14 |
| AX-157726826 | 18 | 53.618 | KV453058.1 | 5821268 | 14-scf00369 | 14 |
| AX-158212644 | 18 | 53.618 | KV453058.1 | 5824676 | 14-scf00369 | 14 |
| AX-158212645 | 18 | 53.618 | KV453058.1 | 5825350 | 14-scf00369 | 14 |
| AX-157859229 | 18 | 53.618 | KV453058.1 | 5827672 | 14-scf00369 | 14 |
| AX-158212657 | 18 | 53.618 | KV453058.1 | 5839216 | 14-scf00369 | 14 |
| AX-158212661 | 18 | 53.618 | KV453058.1 | 5841472 | 14-scf00369 | 14 |
| AX-158212662 | 18 | 53.618 | KV453058.1 | 5841873 | 14-scf00369 | 14 |
| AX-158212664 | 18 | 53.618 | KV453058.1 | 5843210 | 14-scf00369 | 14 |
| AX-158212670 | 18 | 53.618 | KV453058.1 | 5846608 | 14-scf00369 | 14 |
| AX-158212673 | 18 | 53.618 | KV453058.1 | 5848532 | 14-scf00369 | 14 |
| AX-158212676 | 18 | 53.618 | KV453058.1 | 5849918 | 14-scf00369 | 14 |
| AX-158212677 | 18 | 53.618 | KV453058.1 | 5850453 | 14-scf00369 | 14 |
| AX-158212682 | 18 | 53.618 | KV453058.1 | 5854528 | 14-scf00369 | 14 |
| AX-158212683 | 18 | 53.618 | KV453058.1 | 5855820 | 14-scf00369 | 14 |
| AX-158212686 | 18 | 53.618 | KV453058.1 | 5857684 | 14-scf00369 | 14 |
| AX-158212688 | 18 | 53.618 | KV453058.1 | 5858701 | 14-scf00369 | 14 |
| AX-158212692 | 18 | 53.618 | KV453058.1 | 5861728 | 14-scf00369 | 14 |
| AX-158212693 | 18 | 53.618 | KV453058.1 | 5862253 | 14-scf00369 | 14 |
| AX-157755198 | 18 | 53.618 | KV453058.1 | 5862942 | 14-scf00369 | 14 |
| AX-157859233 | 18 | 53.618 | KV453058.1 | 5874464 | 14-scf00369 | 14 |
| AX-158212700 | 18 | 53.618 | KV453058.1 | 5875960 | 14-scf00369 | 14 |
| AX-158212701 | 18 | 53.618 | KV453058.1 | 5876569 | 14-scf00369 | 14 |
| AX-158212702 | 18 | 53.618 | KV453058.1 | 5878413 | 14-scf00369 | 14 |
| AX-158212704 | 18 | 53.618 | KV453058.1 | 5879475 | 14-scf00369 | 14 |
| AX-158212705 | 18 | 53.618 | KV453058.1 | 5880160 | 14-scf00369 | 14 |
| AX-157741951 | 18 | 53.618 | KV453058.1 | 5883350 | 14-scf00369 | 14 |
| AX-158212707 | 18 | 53.618 | KV453058.1 | 5883949 | 14-scf00369 | 14 |
| AX-157709859 | 18 | 53.618 | KV453058.1 | 5884196 | 14-scf00369 | 14 |
| AX-158212709 | 18 | 53.618 | KV453058.1 | 5885274 | 14-scf00369 | 14 |
| AX-157887188 | 18 | 53.618 | KV453058.1 | 5887028 | 14-scf00369 | 14 |
| AX-158212712 | 18 | 53.618 | KV453058.1 | 5891866 | 14-scf00369 | 14 |
| AX-158212713 | 18 | 53.618 | KV453058.1 | 5892688 | 14-scf00369 | 14 |

|              |    |        |            |         |             |    |
|--------------|----|--------|------------|---------|-------------|----|
| AX-158212714 | 18 | 53.618 | KV453058.1 | 5893060 | 14-scf00369 | 14 |
| AX-157859234 | 18 | 53.618 | KV453058.1 | 5894126 | 14-scf00369 | 14 |
| AX-158212717 | 18 | 53.618 | KV453058.1 | 5894756 | 14-scf00369 | 14 |
| AX-158212718 | 18 | 53.618 | KV453058.1 | 5896156 | 14-scf00369 | 14 |
| AX-158212721 | 18 | 53.618 | KV453058.1 | 5901372 | 14-scf00369 | 14 |
| AX-158212726 | 18 | 53.618 | KV453058.1 | 5908537 | 14-scf00369 | 14 |
| AX-158212729 | 18 | 53.618 | KV453058.1 | 5915918 | 14-scf00369 | 14 |
| AX-158212730 | 18 | 53.618 | KV453058.1 | 5916316 | 14-scf00369 | 14 |
| AX-157887189 | 18 | 53.618 | KV453058.1 | 5944257 | 14-scf00369 | 14 |
| AX-158212741 | 18 | 53.618 | KV453058.1 | 5952810 | 14-scf00369 | 14 |
| AX-158212742 | 18 | 53.618 | KV453058.1 | 5953981 | 14-scf00369 | 14 |
| AX-158212746 | 18 | 53.618 | KV453058.1 | 5958457 | 14-scf00369 | 14 |
| AX-158212747 | 18 | 53.618 | KV453058.1 | 5958873 | 14-scf00369 | 14 |
| AX-158212751 | 18 | 53.618 | KV453058.1 | 5961043 | 14-scf00369 | 14 |
| AX-157838600 | 18 | 53.618 | KV453058.1 | 5963388 | 14-scf00369 | 14 |
| AX-158212752 | 18 | 53.618 | KV453058.1 | 5963561 | 14-scf00369 | 14 |
| AX-158212753 | 18 | 53.618 | KV453058.1 | 5965788 | 14-scf00369 | 14 |
| AX-158212754 | 18 | 53.618 | KV453058.1 | 5966223 | 14-scf00369 | 14 |
| AX-157838601 | 18 | 53.618 | KV453058.1 | 5967001 | 14-scf00369 | 14 |
| AX-158212757 | 18 | 53.618 | KV453058.1 | 5970921 | 14-scf00369 | 14 |
| AX-158212759 | 18 | 53.618 | KV453058.1 | 5973239 | 14-scf00369 | 14 |
| AX-157872372 | 18 | 53.618 | KV453058.1 | 6092284 | 14-scf00369 | 14 |
| AX-158212848 | 18 | 53.618 | KV453058.1 | 6123805 | 14-scf00369 | 14 |
| AX-158414545 | 18 | 53.618 | KV453058.1 | 6142553 | 14-scf00369 | 14 |
| AX-158212864 | 18 | 53.618 | KV453058.1 | 6145080 | 14-scf00369 | 14 |
| AX-158212865 | 18 | 53.618 | KV453058.1 | 6145850 | 14-scf00369 | 14 |
| AX-158212868 | 18 | 53.618 | KV453058.1 | 6147335 | 14-scf00369 | 14 |
| AX-158212869 | 18 | 53.618 | KV453058.1 | 6148015 | 14-scf00369 | 14 |
| AX-158212874 | 18 | 53.618 | KV453058.1 | 6152494 | 14-scf00369 | 14 |
| AX-158212876 | 18 | 53.618 | KV453058.1 | 6153594 | 14-scf00369 | 14 |
| AX-158212877 | 18 | 53.618 | KV453058.1 | 6154011 | 14-scf00369 | 14 |
| AX-158212878 | 18 | 53.618 | KV453058.1 | 6155927 | 14-scf00369 | 14 |
| AX-158212879 | 18 | 53.618 | KV453058.1 | 6156416 | 14-scf00369 | 14 |
| AX-158212880 | 18 | 53.618 | KV453058.1 | 6156925 | 14-scf00369 | 14 |
| AX-158212881 | 18 | 53.618 | KV453058.1 | 6157981 | 14-scf00369 | 14 |
| AX-158212882 | 18 | 53.618 | KV453058.1 | 6158581 | 14-scf00369 | 14 |
| AX-158212884 | 18 | 53.618 | KV453058.1 | 6160117 | 14-scf00369 | 14 |
| AX-158212885 | 18 | 53.618 | KV453058.1 | 6160574 | 14-scf00369 | 14 |
| AX-158212886 | 18 | 53.618 | KV453058.1 | 6161307 | 14-scf00369 | 14 |
| AX-158212887 | 18 | 53.618 | KV453058.1 | 6162225 | 14-scf00369 | 14 |
| AX-158212888 | 18 | 53.618 | KV453058.1 | 6162767 | 14-scf00369 | 14 |
| AX-158212890 | 18 | 53.618 | KV453058.1 | 6163411 | 14-scf00369 | 14 |
| AX-158212891 | 18 | 53.618 | KV453058.1 | 6165407 | 14-scf00369 | 14 |
| AX-158212892 | 18 | 53.618 | KV453058.1 | 6166033 | 14-scf00369 | 14 |
| AX-158212893 | 18 | 53.618 | KV453058.1 | 6167347 | 14-scf00369 | 14 |
| AX-158212894 | 18 | 53.618 | KV453058.1 | 6168539 | 14-scf00369 | 14 |
| AX-157744391 | 18 | 53.618 | KV453058.1 | 6169483 | 14-scf00369 | 14 |
| AX-158212895 | 18 | 53.618 | KV453058.1 | 6170087 | 14-scf00369 | 14 |
| AX-158212899 | 18 | 53.618 | KV453058.1 | 6175599 | 14-scf00369 | 14 |
| AX-158380805 | 18 | 53.618 | KV453058.1 | 6175757 | 14-scf00369 | 14 |
| AX-158212900 | 18 | 53.618 | KV453058.1 | 6176735 | 14-scf00369 | 14 |

|              |    |        |            |         |             |    |
|--------------|----|--------|------------|---------|-------------|----|
| AX-158212901 | 18 | 53.618 | KV453058.1 | 6177268 | 14-scf00369 | 14 |
| AX-158212902 | 18 | 53.618 | KV453058.1 | 6178164 | 14-scf00369 | 14 |
| AX-158212903 | 18 | 53.618 | KV453058.1 | 6179196 | 14-scf00369 | 14 |
| AX-158212904 | 18 | 53.618 | KV453058.1 | 6180471 | 14-scf00369 | 14 |
| AX-158212905 | 18 | 53.618 | KV453058.1 | 6180885 | 14-scf00369 | 14 |
| AX-157714531 | 18 | 53.618 | KV453058.1 | 6180961 | 14-scf00369 | 14 |
| AX-158212906 | 18 | 53.618 | KV453058.1 | 6182619 | 14-scf00369 | 14 |
| AX-157838615 | 18 | 53.618 | KV453058.1 | 6183010 | 14-scf00369 | 14 |
| AX-157749146 | 18 | 53.618 | KV453058.1 | 6183786 | 14-scf00369 | 14 |
| AX-158212907 | 18 | 53.618 | KV453058.1 | 6184165 | 14-scf00369 | 14 |
| AX-158212909 | 18 | 53.618 | KV453058.1 | 6185374 | 14-scf00369 | 14 |
| AX-158212911 | 18 | 53.618 | KV453058.1 | 6186800 | 14-scf00369 | 14 |
| AX-157838616 | 18 | 53.618 | KV453058.1 | 6186991 | 14-scf00369 | 14 |
| AX-158212912 | 18 | 53.618 | KV453058.1 | 6188504 | 14-scf00369 | 14 |
| AX-158212913 | 18 | 53.618 | KV453058.1 | 6189585 | 14-scf00369 | 14 |
| AX-158212914 | 18 | 53.618 | KV453058.1 | 6189934 | 14-scf00369 | 14 |
| AX-158212915 | 18 | 53.618 | KV453058.1 | 6190753 | 14-scf00369 | 14 |
| AX-158212916 | 18 | 53.618 | KV453058.1 | 6192697 | 14-scf00369 | 14 |
| AX-157859243 | 18 | 53.618 | KV453058.1 | 6197937 | 14-scf00369 | 14 |
| AX-157872373 | 18 | 53.618 | KV453058.1 | 6198867 | 14-scf00369 | 14 |
| AX-157838618 | 18 | 53.618 | KV453058.1 | 6199092 | 14-scf00369 | 14 |
| AX-158212919 | 18 | 53.618 | KV453058.1 | 6200953 | 14-scf00369 | 14 |
| AX-158212920 | 18 | 53.618 | KV453058.1 | 6201377 | 14-scf00369 | 14 |
| AX-157838619 | 18 | 53.618 | KV453058.1 | 6202147 | 14-scf00369 | 14 |
| AX-158212922 | 18 | 53.618 | KV453058.1 | 6203296 | 14-scf00369 | 14 |
| AX-158212924 | 18 | 53.618 | KV453058.1 | 6204298 | 14-scf00369 | 14 |
| AX-158212925 | 18 | 53.618 | KV453058.1 | 6205121 | 14-scf00369 | 14 |
| AX-158212926 | 18 | 53.618 | KV453058.1 | 6207378 | 14-scf00369 | 14 |
| AX-158212928 | 18 | 53.618 | KV453058.1 | 6210809 | 14-scf00369 | 14 |
| AX-158212929 | 18 | 53.618 | KV453058.1 | 6212922 | 14-scf00369 | 14 |
| AX-158212931 | 18 | 53.618 | KV453058.1 | 6214731 | 14-scf00369 | 14 |
| AX-158212932 | 18 | 53.618 | KV453058.1 | 6215480 | 14-scf00369 | 14 |
| AX-157838620 | 18 | 53.618 | KV453058.1 | 6215803 | 14-scf00369 | 14 |
| AX-157838621 | 18 | 53.618 | KV453058.1 | 6216852 | 14-scf00369 | 14 |
| AX-158212934 | 18 | 53.618 | KV453058.1 | 6217248 | 14-scf00369 | 14 |
| AX-158212935 | 18 | 53.618 | KV453058.1 | 6218561 | 14-scf00369 | 14 |
| AX-158212939 | 18 | 53.618 | KV453058.1 | 6221260 | 14-scf00369 | 14 |
| AX-158212940 | 18 | 53.618 | KV453058.1 | 6222028 | 14-scf00369 | 14 |
| AX-158212941 | 18 | 53.618 | KV453058.1 | 6222437 | 14-scf00369 | 14 |
| AX-157838622 | 18 | 53.618 | KV453058.1 | 6222838 | 14-scf00369 | 14 |
| AX-158212943 | 18 | 53.618 | KV453058.1 | 6224430 | 14-scf00369 | 14 |
| AX-158212944 | 18 | 53.618 | KV453058.1 | 6224725 | 14-scf00369 | 14 |
| AX-158212945 | 18 | 53.618 | KV453058.1 | 6226164 | 14-scf00369 | 14 |
| AX-158212946 | 18 | 53.618 | KV453058.1 | 6227074 | 14-scf00369 | 14 |
| AX-158212948 | 18 | 53.618 | KV453058.1 | 6228246 | 14-scf00369 | 14 |
| AX-158212950 | 18 | 53.618 | KV453058.1 | 6229294 | 14-scf00369 | 14 |
| AX-158212951 | 18 | 53.618 | KV453058.1 | 6229762 | 14-scf00369 | 14 |
| AX-157838624 | 18 | 53.618 | KV453058.1 | 6230322 | 14-scf00369 | 14 |
| AX-158212952 | 18 | 53.618 | KV453058.1 | 6234200 | 14-scf00369 | 14 |
| AX-158212954 | 18 | 53.618 | KV453058.1 | 6237042 | 14-scf00369 | 14 |
| AX-158212956 | 18 | 53.618 | KV453058.1 | 6238773 | 14-scf00369 | 14 |



|              |    |        |            |         |             |    |
|--------------|----|--------|------------|---------|-------------|----|
| AX-158212958 | 18 | 53.618 | KV453058.1 | 6240621 | 14-scf00369 | 14 |
| AX-157838625 | 18 | 53.618 | KV453058.1 | 6240766 | 14-scf00369 | 14 |
| AX-158212959 | 18 | 53.618 | KV453058.1 | 6241771 | 14-scf00369 | 14 |
| AX-158212960 | 18 | 53.618 | KV453058.1 | 6242778 | 14-scf00369 | 14 |
| AX-158212961 | 18 | 53.618 | KV453058.1 | 6243139 | 14-scf00369 | 14 |
| AX-157838626 | 18 | 53.618 | KV453058.1 | 6243520 | 14-scf00369 | 14 |
| AX-158212962 | 18 | 53.618 | KV453058.1 | 6246276 | 14-scf00369 | 14 |
| AX-158212963 | 18 | 53.618 | KV453058.1 | 6248872 | 14-scf00369 | 14 |
| AX-157742097 | 18 | 53.618 | KV453058.1 | 6249287 | 14-scf00369 | 14 |
| AX-157838627 | 18 | 53.618 | KV453058.1 | 6249478 | 14-scf00369 | 14 |
| AX-158212964 | 18 | 53.618 | KV453058.1 | 6249925 | 14-scf00369 | 14 |
| AX-157838628 | 18 | 53.618 | KV453058.1 | 6250717 | 14-scf00369 | 14 |
| AX-157838629 | 18 | 53.618 | KV453058.1 | 6253141 | 14-scf00369 | 14 |
| AX-157838630 | 18 | 53.618 | KV453058.1 | 6255572 | 14-scf00369 | 14 |
| AX-158212965 | 18 | 53.618 | KV453058.1 | 6256078 | 14-scf00369 | 14 |
| AX-158212969 | 18 | 53.618 | KV453058.1 | 6257841 | 14-scf00369 | 14 |
| AX-158212972 | 18 | 53.618 | KV453058.1 | 6261448 | 14-scf00369 | 14 |
| AX-157838631 | 18 | 53.618 | KV453058.1 | 6262973 | 14-scf00369 | 14 |
| AX-158212983 | 18 | 53.618 | KV453058.1 | 6271635 | 14-scf00369 | 14 |
| AX-158212984 | 18 | 53.618 | KV453058.1 | 6272909 | 14-scf00369 | 14 |
| AX-158212986 | 18 | 53.618 | KV453058.1 | 6274559 | 14-scf00369 | 14 |
| AX-158212987 | 18 | 53.618 | KV453058.1 | 6275094 | 14-scf00369 | 14 |
| AX-157859244 | 18 | 53.618 | KV453058.1 | 6276183 | 14-scf00369 | 14 |
| AX-157755041 | 18 | 53.618 | KV453058.1 | 6276724 | 14-scf00369 | 14 |
| AX-158212988 | 18 | 53.618 | KV453058.1 | 6277330 | 14-scf00369 | 14 |
| AX-158212989 | 18 | 53.618 | KV453058.1 | 6277872 | 14-scf00369 | 14 |
| AX-158212993 | 18 | 53.618 | KV453058.1 | 6283287 | 14-scf00369 | 14 |
| AX-158212994 | 18 | 53.618 | KV453058.1 | 6284846 | 14-scf00369 | 14 |
| AX-158212995 | 18 | 53.618 | KV453058.1 | 6285339 | 14-scf00369 | 14 |
| AX-158212996 | 18 | 53.618 | KV453058.1 | 6285689 | 14-scf00369 | 14 |
| AX-158212997 | 18 | 53.618 | KV453058.1 | 6286159 | 14-scf00369 | 14 |
| AX-157838634 | 18 | 53.618 | KV453058.1 | 6287480 | 14-scf00369 | 14 |
| AX-158212998 | 18 | 53.618 | KV453058.1 | 6289496 | 14-scf00369 | 14 |
| AX-158212999 | 18 | 53.618 | KV453058.1 | 6292483 | 14-scf00369 | 14 |
| AX-158213000 | 18 | 53.618 | KV453058.1 | 6294706 | 14-scf00369 | 14 |
| AX-158213001 | 18 | 53.618 | KV453058.1 | 6295602 | 14-scf00369 | 14 |
| AX-158213002 | 18 | 53.618 | KV453058.1 | 6296108 | 14-scf00369 | 14 |
| AX-158213003 | 18 | 53.618 | KV453058.1 | 6297207 | 14-scf00369 | 14 |
| AX-158213004 | 18 | 53.618 | KV453058.1 | 6297768 | 14-scf00369 | 14 |
| AX-157838635 | 18 | 53.618 | KV453058.1 | 6297980 | 14-scf00369 | 14 |
| AX-158213005 | 18 | 53.618 | KV453058.1 | 6298625 | 14-scf00369 | 14 |
| AX-158213006 | 18 | 53.618 | KV453058.1 | 6298812 | 14-scf00369 | 14 |
| AX-158213007 | 18 | 53.618 | KV453058.1 | 6299346 | 14-scf00369 | 14 |
| AX-158213008 | 18 | 53.618 | KV453058.1 | 6300868 | 14-scf00369 | 14 |
| AX-158414548 | 18 | 53.618 | KV453058.1 | 6305013 | 14-scf00369 | 14 |
| AX-158213009 | 18 | 53.618 | KV453058.1 | 6305628 | 14-scf00369 | 14 |
| AX-158213011 | 18 | 53.618 | KV453058.1 | 6307717 | 14-scf00369 | 14 |
| AX-158213012 | 18 | 53.618 | KV453058.1 | 6311825 | 14-scf00369 | 14 |
| AX-158213013 | 18 | 53.618 | KV453058.1 | 6312312 | 14-scf00369 | 14 |
| AX-158213015 | 18 | 53.618 | KV453058.1 | 6317392 | 14-scf00369 | 14 |
| AX-158213016 | 18 | 53.618 | KV453058.1 | 6317796 | 14-scf00369 | 14 |

|              |    |        |            |         |             |    |
|--------------|----|--------|------------|---------|-------------|----|
| AX-158213017 | 18 | 53.618 | KV453058.1 | 6318510 | 14-scf00369 | 14 |
| AX-158213018 | 18 | 53.618 | KV453058.1 | 6319940 | 14-scf00369 | 14 |
| AX-158213019 | 18 | 53.618 | KV453058.1 | 6322342 | 14-scf00369 | 14 |
| AX-157859245 | 18 | 53.618 | KV453058.1 | 6322385 | 14-scf00369 | 14 |
| AX-158213020 | 18 | 53.618 | KV453058.1 | 6322879 | 14-scf00369 | 14 |
| AX-158213021 | 18 | 53.618 | KV453058.1 | 6323425 | 14-scf00369 | 14 |
| AX-157702453 | 18 | 53.618 | KV453058.1 | 6323632 | 14-scf00369 | 14 |
| AX-157699448 | 18 | 53.618 | KV453058.1 | 6324854 | 14-scf00369 | 14 |
| AX-158213022 | 18 | 53.618 | KV453058.1 | 6325628 | 14-scf00369 | 14 |
| AX-158213023 | 18 | 53.618 | KV453058.1 | 6326952 | 14-scf00369 | 14 |
| AX-158213024 | 18 | 53.618 | KV453058.1 | 6327611 | 14-scf00369 | 14 |
| AX-158213025 | 18 | 53.618 | KV453058.1 | 6328957 | 14-scf00369 | 14 |
| AX-158213028 | 18 | 53.618 | KV453058.1 | 6331287 | 14-scf00369 | 14 |
| AX-158213029 | 18 | 53.618 | KV453058.1 | 6332020 | 14-scf00369 | 14 |
| AX-158213030 | 18 | 53.618 | KV453058.1 | 6332404 | 14-scf00369 | 14 |
| AX-158213031 | 18 | 53.618 | KV453058.1 | 6333116 | 14-scf00369 | 14 |
| AX-158213032 | 18 | 53.618 | KV453058.1 | 6333738 | 14-scf00369 | 14 |
| AX-158213033 | 18 | 53.618 | KV453058.1 | 6334352 | 14-scf00369 | 14 |
| AX-158213035 | 18 | 53.618 | KV453058.1 | 6336055 | 14-scf00369 | 14 |
| AX-157859246 | 18 | 53.618 | KV453058.1 | 6341407 | 14-scf00369 | 14 |
| AX-157866993 | 18 | 53.618 | KV453058.1 | 6342148 | 14-scf00369 | 14 |
| AX-158213039 | 18 | 53.618 | KV453058.1 | 6345806 | 14-scf00369 | 14 |
| AX-158213040 | 18 | 53.618 | KV453058.1 | 6345926 | 14-scf00369 | 14 |
| AX-158213041 | 18 | 53.618 | KV453058.1 | 6346992 | 14-scf00369 | 14 |
| AX-158213042 | 18 | 53.618 | KV453058.1 | 6348310 | 14-scf00369 | 14 |
| AX-158213044 | 18 | 53.618 | KV453058.1 | 6352955 | 14-scf00369 | 14 |
| AX-158213045 | 18 | 53.618 | KV453058.1 | 6353159 | 14-scf00369 | 14 |
| AX-158213049 | 18 | 53.618 | KV453058.1 | 6355229 | 14-scf00369 | 14 |
| AX-157838637 | 18 | 53.618 | KV453058.1 | 6355748 | 14-scf00369 | 14 |
| AX-158213050 | 18 | 53.618 | KV453058.1 | 6357162 | 14-scf00369 | 14 |
| AX-158213056 | 18 | 53.618 | KV453058.1 | 6362322 | 14-scf00369 | 14 |
| AX-158213058 | 18 | 53.618 | KV453058.1 | 6363423 | 14-scf00369 | 14 |
| AX-158213060 | 18 | 53.618 | KV453058.1 | 6364430 | 14-scf00369 | 14 |
| AX-157838638 | 18 | 53.618 | KV453058.1 | 6368779 | 14-scf00369 | 14 |
| AX-157743124 | 18 | 53.618 | KV453058.1 | 6371445 | 14-scf00369 | 14 |
| AX-158213069 | 18 | 53.618 | KV453058.1 | 6373423 | 14-scf00369 | 14 |
| AX-158213071 | 18 | 53.618 | KV453058.1 | 6376710 | 14-scf00369 | 14 |
| AX-158213072 | 18 | 53.618 | KV453058.1 | 6377317 | 14-scf00369 | 14 |
| AX-158213073 | 18 | 53.618 | KV453058.1 | 6378162 | 14-scf00369 | 14 |
| AX-158213077 | 18 | 53.618 | KV453058.1 | 6380332 | 14-scf00369 | 14 |
| AX-158213078 | 18 | 53.618 | KV453058.1 | 6380690 | 14-scf00369 | 14 |
| AX-158213079 | 18 | 53.618 | KV453058.1 | 6381185 | 14-scf00369 | 14 |
| AX-158213081 | 18 | 53.618 | KV453058.1 | 6382582 | 14-scf00369 | 14 |
| AX-158213083 | 18 | 53.618 | KV453058.1 | 6383988 | 14-scf00369 | 14 |
| AX-158213084 | 18 | 53.618 | KV453058.1 | 6384206 | 14-scf00369 | 14 |
| AX-158213086 | 18 | 53.618 | KV453058.1 | 6385016 | 14-scf00369 | 14 |
| AX-158213087 | 18 | 53.618 | KV453058.1 | 6385946 | 14-scf00369 | 14 |
| AX-157866994 | 18 | 53.618 | KV453058.1 | 6387906 | 14-scf00369 | 14 |
| AX-158213091 | 18 | 53.618 | KV453058.1 | 6389795 | 14-scf00369 | 14 |
| AX-158213094 | 18 | 53.618 | KV453058.1 | 6391436 | 14-scf00369 | 14 |
| AX-158213097 | 18 | 53.618 | KV453058.1 | 6393593 | 14-scf00369 | 14 |

|              |    |        |            |         |             |    |
|--------------|----|--------|------------|---------|-------------|----|
| AX-157859248 | 18 | 53.618 | KV453058.1 | 6393902 | 14-scf00369 | 14 |
| AX-158213098 | 18 | 53.618 | KV453058.1 | 6394482 | 14-scf00369 | 14 |
| AX-157725148 | 18 | 53.618 | KV453058.1 | 6397232 | 14-scf00369 | 14 |
| AX-158213102 | 18 | 53.618 | KV453058.1 | 6411524 | 14-scf00369 | 14 |
| AX-158213103 | 18 | 53.618 | KV453058.1 | 6413058 | 14-scf00369 | 14 |
| AX-158213105 | 18 | 53.618 | KV453058.1 | 6420163 | 14-scf00369 | 14 |
| AX-158213111 | 18 | 53.618 | KV453058.1 | 6435003 | 14-scf00369 | 14 |
| AX-158213112 | 18 | 53.618 | KV453058.1 | 6437168 | 14-scf00369 | 14 |
| AX-158213113 | 18 | 53.618 | KV453058.1 | 6438263 | 14-scf00369 | 14 |
| AX-158213116 | 18 | 53.618 | KV453058.1 | 6447240 | 14-scf00369 | 14 |
| AX-158213123 | 18 | 53.618 | KV453058.1 | 6461307 | 14-scf00369 | 14 |
| AX-158418582 | 18 | 53.618 | KV453058.1 | 6472304 | 14-scf00369 | 14 |
| AX-158213128 | 18 | 53.618 | KV453058.1 | 6473362 | 14-scf00369 | 14 |
| AX-158414551 | 18 | 53.618 | KV453058.1 | 6477045 | 14-scf00369 | 14 |
| AX-158213130 | 18 | 53.618 | KV453058.1 | 6487139 | 14-scf00369 | 14 |
| AX-157838641 | 18 | 53.618 | KV453058.1 | 6488093 | 14-scf00369 | 14 |
| AX-158213132 | 18 | 53.618 | KV453058.1 | 6491566 | 14-scf00369 | 14 |
| AX-158213133 | 18 | 53.618 | KV453058.1 | 6492033 | 14-scf00369 | 14 |
| AX-158213134 | 18 | 53.618 | KV453058.1 | 6495132 | 14-scf00369 | 14 |
| AX-158213136 | 18 | 53.618 | KV453058.1 | 6498300 | 14-scf00369 | 14 |
| AX-157859250 | 18 | 53.618 | KV453058.1 | 6498961 | 14-scf00369 | 14 |
| AX-158213137 | 18 | 53.618 | KV453058.1 | 6499304 | 14-scf00369 | 14 |
| AX-158213138 | 18 | 53.618 | KV453058.1 | 6501260 | 14-scf00369 | 14 |
| AX-157838642 | 18 | 53.618 | KV453058.1 | 6504494 | 14-scf00369 | 14 |
| AX-157838643 | 18 | 53.618 | KV453058.1 | 6504982 | 14-scf00369 | 14 |
| AX-157859251 | 18 | 53.618 | KV453058.1 | 6511210 | 14-scf00369 | 14 |
| AX-158213144 | 18 | 53.618 | KV453058.1 | 6514602 | 14-scf00369 | 14 |
| AX-157838646 | 18 | 53.618 | KV453058.1 | 6515041 | 14-scf00369 | 14 |
| AX-157707759 | 18 | 53.618 | KV453058.1 | 6515358 | 14-scf00369 | 14 |
| AX-157838647 | 18 | 53.618 | KV453058.1 | 6517487 | 14-scf00369 | 14 |
| AX-157838648 | 18 | 53.618 | KV453058.1 | 6518411 | 14-scf00369 | 14 |
| AX-158213147 | 18 | 53.618 | KV453058.1 | 6534636 | 14-scf00369 | 14 |
| AX-158213149 | 18 | 53.618 | KV453058.1 | 6536291 | 14-scf00369 | 14 |
| AX-158213150 | 18 | 53.618 | KV453058.1 | 6541296 | 14-scf00369 | 14 |
| AX-157859259 | 18 | 53.618 | KV453058.1 | 6547314 | 14-scf00369 | 14 |
| AX-158213158 | 18 | 53.618 | KV453058.1 | 6569833 | 14-scf00369 | 14 |
| AX-158213159 | 18 | 53.618 | KV453058.1 | 6570430 | 14-scf00369 | 14 |
| AX-158213161 | 18 | 53.618 | KV453058.1 | 6575636 | 14-scf00369 | 14 |
| AX-158213162 | 18 | 53.618 | KV453058.1 | 6576180 | 14-scf00369 | 14 |
| AX-157742394 | 18 | 53.618 | KV453058.1 | 6579369 | 14-scf00369 | 14 |
| AX-158213168 | 18 | 53.618 | KV453058.1 | 6583389 | 14-scf00369 | 14 |
| AX-157859264 | 18 | 53.618 | KV453058.1 | 6585681 | 14-scf00369 | 14 |
| AX-157838651 | 18 | 53.618 | KV453058.1 | 6588149 | 14-scf00369 | 14 |
| AX-158213172 | 18 | 53.618 | KV453058.1 | 6593857 | 14-scf00369 | 14 |
| AX-158213173 | 18 | 53.618 | KV453058.1 | 6595083 | 14-scf00369 | 14 |
| AX-157859271 | 18 | 53.618 | KV453058.1 | 6600531 | 14-scf00369 | 14 |
| AX-157859275 | 18 | 53.618 | KV453058.1 | 6603775 | 14-scf00369 | 14 |
| AX-157859279 | 18 | 53.618 | KV453058.1 | 6608389 | 14-scf00369 | 14 |
| AX-158213184 | 18 | 53.618 | KV453058.1 | 6610174 | 14-scf00369 | 14 |
| AX-158213185 | 18 | 53.618 | KV453058.1 | 6612080 | 14-scf00369 | 14 |
| AX-158213187 | 18 | 53.618 | KV453058.1 | 6615487 | 14-scf00369 | 14 |

|              |    |        |            |         |             |    |
|--------------|----|--------|------------|---------|-------------|----|
| AX-158213188 | 18 | 53.618 | KV453058.1 | 6616179 | 14-scf00369 | 14 |
| AX-157772909 | 18 | 53.618 | KV453058.1 | 6616395 | 14-scf00369 | 14 |
| AX-157859287 | 18 | 53.618 | KV453058.1 | 6623678 | 14-scf00369 | 14 |
| AX-158213192 | 18 | 53.618 | KV453058.1 | 6623989 | 14-scf00369 | 14 |
| AX-157859288 | 18 | 53.618 | KV453058.1 | 6624411 | 14-scf00369 | 14 |
| AX-158213193 | 18 | 53.618 | KV453058.1 | 6626110 | 14-scf00369 | 14 |
| AX-157859292 | 18 | 53.618 | KV453058.1 | 6626569 | 14-scf00369 | 14 |
| AX-158213194 | 18 | 53.618 | KV453058.1 | 6629237 | 14-scf00369 | 14 |
| AX-157859296 | 18 | 53.618 | KV453058.1 | 6634627 | 14-scf00369 | 14 |
| AX-157859301 | 18 | 53.618 | KV453058.1 | 6641946 | 14-scf00369 | 14 |
| AX-158213197 | 18 | 53.618 | KV453058.1 | 6642245 | 14-scf00369 | 14 |
| AX-157859307 | 18 | 53.618 | KV453058.1 | 6646326 | 14-scf00369 | 14 |
| AX-158213200 | 18 | 53.618 | KV453058.1 | 6646541 | 14-scf00369 | 14 |
| AX-157859308 | 18 | 53.618 | KV453058.1 | 6648793 | 14-scf00369 | 14 |
| AX-158213207 | 18 | 53.618 | KV453058.1 | 6652529 | 14-scf00369 | 14 |
| AX-157838654 | 18 | 53.618 | KV453058.1 | 6655678 | 14-scf00369 | 14 |
| AX-158213210 | 18 | 53.618 | KV453058.1 | 6656338 | 14-scf00369 | 14 |
| AX-158213211 | 18 | 53.618 | KV453058.1 | 6657160 | 14-scf00369 | 14 |
| AX-157859313 | 18 | 53.618 | KV453058.1 | 6657740 | 14-scf00369 | 14 |
| AX-158213213 | 18 | 53.618 | KV453058.1 | 6662569 | 14-scf00369 | 14 |
| AX-157859320 | 18 | 53.618 | KV453058.1 | 6664761 | 14-scf00369 | 14 |
| AX-157838655 | 18 | 53.618 | KV453058.1 | 6665824 | 14-scf00369 | 14 |
| AX-158394019 | 18 | 53.618 | KV453058.1 | 6666887 | 14-scf00369 | 14 |
| AX-157859324 | 18 | 53.618 | KV453058.1 | 6668101 | 14-scf00369 | 14 |
| AX-157859326 | 18 | 53.618 | KV453058.1 | 6670518 | 14-scf00369 | 14 |
| AX-157859328 | 18 | 53.618 | KV453058.1 | 6674737 | 14-scf00369 | 14 |
| AX-158213221 | 18 | 53.618 | KV453058.1 | 6678539 | 14-scf00369 | 14 |
| AX-157758473 | 18 | 53.618 | KV453058.1 | 6679794 | 14-scf00369 | 14 |
| AX-157773689 | 18 | 53.618 | KV453058.1 | 6680495 | 14-scf00369 | 14 |
| AX-157859332 | 18 | 53.618 | KV453058.1 | 6684178 | 14-scf00369 | 14 |
| AX-157859333 | 18 | 53.618 | KV453058.1 | 6685346 | 14-scf00369 | 14 |
| AX-157859337 | 18 | 53.618 | KV453058.1 | 6690159 | 14-scf00369 | 14 |
| AX-158213227 | 18 | 53.618 | KV453058.1 | 6690362 | 14-scf00369 | 14 |
| AX-158213234 | 18 | 53.618 | KV453058.1 | 6702383 | 14-scf00369 | 14 |
| AX-158213235 | 18 | 53.618 | KV453058.1 | 6703758 | 14-scf00369 | 14 |
| AX-158213239 | 18 | 53.618 | KV453058.1 | 6706532 | 14-scf00369 | 14 |
| AX-157752873 | 18 | 53.618 | KV453058.1 | 6712791 | 14-scf00369 | 14 |
| AX-157838657 | 18 | 53.618 | KV453058.1 | 6713838 | 14-scf00369 | 14 |
| AX-158213242 | 18 | 53.618 | KV453058.1 | 6714242 | 14-scf00369 | 14 |
| AX-158213243 | 18 | 53.618 | KV453058.1 | 6715294 | 14-scf00369 | 14 |
| AX-158213248 | 18 | 53.618 | KV453058.1 | 6721996 | 14-scf00369 | 14 |
| AX-157756581 | 18 | 53.618 | KV453058.1 | 6722877 | 14-scf00369 | 14 |
| AX-158213249 | 18 | 53.618 | KV453058.1 | 6723668 | 14-scf00369 | 14 |
| AX-158213250 | 18 | 53.618 | KV453058.1 | 6724777 | 14-scf00369 | 14 |
| AX-158213253 | 18 | 53.618 | KV453058.1 | 6730228 | 14-scf00369 | 14 |
| AX-158213254 | 18 | 53.618 | KV453058.1 | 6730913 | 14-scf00369 | 14 |
| AX-157859344 | 18 | 53.618 | KV453058.1 | 6731211 | 14-scf00369 | 14 |
| AX-158213257 | 18 | 53.618 | KV453058.1 | 6734589 | 14-scf00369 | 14 |
| AX-158213259 | 18 | 53.618 | KV453058.1 | 6745301 | 14-scf00369 | 14 |
| AX-157859347 | 18 | 53.618 | KV453058.1 | 6747563 | 14-scf00369 | 14 |
| AX-158213265 | 18 | 53.618 | KV453058.1 | 6758489 | 14-scf00369 | 14 |

|              |    |        |            |         |             |    |
|--------------|----|--------|------------|---------|-------------|----|
| AX-158213270 | 18 | 53.618 | KV453058.1 | 6768330 | 14-scf00369 | 14 |
| AX-158213272 | 18 | 53.618 | KV453058.1 | 6773430 | 14-scf00369 | 14 |
| AX-158213275 | 18 | 53.618 | KV453058.1 | 6786952 | 14-scf00369 | 14 |
| AX-158213289 | 18 | 53.618 | KV453058.1 | 6813265 | 14-scf00369 | 14 |
| AX-158213292 | 18 | 53.618 | KV453058.1 | 6818329 | 14-scf00369 | 14 |
| AX-158213312 | 18 | 53.618 | KV453058.1 | 6844401 | 14-scf00369 | 14 |
| AX-158423198 | 18 | 53.618 | KV453058.1 | 6846122 | 14-scf00369 | 14 |
| AX-158213316 | 18 | 53.618 | KV453058.1 | 6849518 | 14-scf00369 | 14 |
| AX-158213318 | 18 | 53.618 | KV453058.1 | 6852779 | 14-scf00369 | 14 |
| AX-158213321 | 18 | 53.618 | KV453058.1 | 6854918 | 14-scf00369 | 14 |
| AX-158213328 | 18 | 53.618 | KV453058.1 | 6863240 | 14-scf00369 | 14 |
| AX-158213329 | 18 | 53.618 | KV453058.1 | 6864623 | 14-scf00369 | 14 |
| AX-158213330 | 18 | 53.618 | KV453058.1 | 6865070 | 14-scf00369 | 14 |
| AX-158213332 | 18 | 53.618 | KV453058.1 | 6866541 | 14-scf00369 | 14 |
| AX-158213335 | 18 | 53.618 | KV453058.1 | 6871837 | 14-scf00369 | 14 |
| AX-158213341 | 18 | 53.618 | KV453058.1 | 6880659 | 14-scf00369 | 14 |
| AX-158213342 | 18 | 53.618 | KV453058.1 | 6882525 | 14-scf00369 | 14 |
| AX-158213344 | 18 | 53.618 | KV453058.1 | 6885537 | 14-scf00369 | 14 |
| AX-158213346 | 18 | 53.618 | KV453058.1 | 6887459 | 14-scf00369 | 14 |
| AX-158213347 | 18 | 53.618 | KV453058.1 | 6891190 | 14-scf00369 | 14 |
| AX-158213348 | 18 | 53.618 | KV453058.1 | 6892380 | 14-scf00369 | 14 |
| AX-158213349 | 18 | 53.618 | KV453058.1 | 6894186 | 14-scf00369 | 14 |
| AX-158213353 | 18 | 53.618 | KV453058.1 | 6898386 | 14-scf00369 | 14 |
| AX-158213354 | 18 | 53.618 | KV453058.1 | 6899762 | 14-scf00369 | 14 |
| AX-158213355 | 18 | 53.618 | KV453058.1 | 6901075 | 14-scf00369 | 14 |
| AX-158213357 | 18 | 53.618 | KV453058.1 | 6906063 | 14-scf00369 | 14 |
| AX-158213358 | 18 | 53.618 | KV453058.1 | 6906583 | 14-scf00369 | 14 |
| AX-158213363 | 18 | 53.618 | KV453058.1 | 6916055 | 14-scf00369 | 14 |
| AX-158213364 | 18 | 53.618 | KV453058.1 | 6918979 | 14-scf00369 | 14 |
| AX-158213365 | 18 | 53.618 | KV453058.1 | 6920176 | 14-scf00369 | 14 |
| AX-158213366 | 18 | 53.618 | KV453058.1 | 6921206 | 14-scf00369 | 14 |
| AX-158213367 | 18 | 53.618 | KV453058.1 | 6921990 | 14-scf00369 | 14 |
| AX-158213369 | 18 | 53.618 | KV453058.1 | 6923922 | 14-scf00369 | 14 |
| AX-158213372 | 18 | 53.618 | KV453058.1 | 6926632 | 14-scf00369 | 14 |
| AX-157859353 | 18 | 53.618 | KV453058.1 | 6930708 | 14-scf00369 | 14 |
| AX-158213375 | 18 | 53.618 | KV453058.1 | 6936733 | 14-scf00369 | 14 |
| AX-158213378 | 18 | 53.618 | KV453058.1 | 6942894 | 14-scf00369 | 14 |
| AX-158213380 | 18 | 53.618 | KV453058.1 | 6944068 | 14-scf00369 | 14 |
| AX-158213381 | 18 | 53.618 | KV453058.1 | 6944823 | 14-scf00369 | 14 |
| AX-158213382 | 18 | 53.618 | KV453058.1 | 6945750 | 14-scf00369 | 14 |
| AX-158213383 | 18 | 53.618 | KV453058.1 | 6947170 | 14-scf00369 | 14 |
| AX-157722351 | 18 | 53.618 | KV453058.1 | 6948042 | 14-scf00369 | 14 |
| AX-158213384 | 18 | 53.618 | KV453058.1 | 6948682 | 14-scf00369 | 14 |
| AX-158213386 | 18 | 53.618 | KV453058.1 | 6954339 | 14-scf00369 | 14 |
| AX-158213387 | 18 | 53.618 | KV453058.1 | 6958395 | 14-scf00369 | 14 |
| AX-158213390 | 18 | 53.618 | KV453058.1 | 6962324 | 14-scf00369 | 14 |
| AX-157765116 | 18 | 53.618 | KV453058.1 | 6963181 | 14-scf00369 | 14 |
| AX-158213392 | 18 | 53.618 | KV453058.1 | 6964690 | 14-scf00369 | 14 |
| AX-157838660 | 18 | 53.618 | KV453058.1 | 6968774 | 14-scf00369 | 14 |
| AX-158213395 | 18 | 53.618 | KV453058.1 | 6971702 | 14-scf00369 | 14 |
| AX-157859358 | 18 | 53.618 | KV453058.1 | 6972863 | 14-scf00369 | 14 |

|              |    |        |            |         |             |    |
|--------------|----|--------|------------|---------|-------------|----|
| AX-157859359 | 18 | 53.618 | KV453058.1 | 6973845 | 14-scf00369 | 14 |
| AX-158213397 | 18 | 53.618 | KV453058.1 | 6976160 | 14-scf00369 | 14 |
| AX-158213400 | 18 | 53.618 | KV453058.1 | 6981860 | 14-scf00369 | 14 |
| AX-158213401 | 18 | 53.618 | KV453058.1 | 6982307 | 14-scf00369 | 14 |
| AX-158213402 | 18 | 53.618 | KV453058.1 | 6982996 | 14-scf00369 | 14 |
| AX-158213404 | 18 | 53.618 | KV453058.1 | 6984590 | 14-scf00369 | 14 |
| AX-158213407 | 18 | 53.618 | KV453058.1 | 6988883 | 14-scf00369 | 14 |
| AX-158380807 | 18 | 53.618 | KV453058.1 | 6989167 | 14-scf00369 | 14 |
| AX-158213408 | 18 | 53.618 | KV453058.1 | 6990358 | 14-scf00369 | 14 |
| AX-158213422 | 18 | 53.618 | KV453058.1 | 7003266 | 14-scf00369 | 14 |
| AX-157766842 | 18 | 53.618 | KV453058.1 | 7003599 | 14-scf00369 | 14 |
| AX-157859361 | 18 | 53.618 | KV453058.1 | 7004506 | 14-scf00369 | 14 |
| AX-158213424 | 18 | 53.618 | KV453058.1 | 7005146 | 14-scf00369 | 14 |
| AX-157723806 | 18 | 53.618 | KV453058.1 | 7029895 | 14-scf00369 | 14 |
| AX-157859363 | 18 | 53.618 | KV453058.1 | 7036495 | 14-scf00369 | 14 |
| AX-158213441 | 18 | 53.618 | KV453058.1 | 7039180 | 14-scf00369 | 14 |
| AX-158213442 | 18 | 53.618 | KV453058.1 | 7039567 | 14-scf00369 | 14 |
| AX-158213443 | 18 | 53.618 | KV453058.1 | 7040586 | 14-scf00369 | 14 |
| AX-158213445 | 18 | 53.618 | KV453058.1 | 7041203 | 14-scf00369 | 14 |
| AX-158213449 | 18 | 53.618 | KV453058.1 | 7044597 | 14-scf00369 | 14 |
| AX-158213451 | 18 | 53.618 | KV453058.1 | 7045150 | 14-scf00369 | 14 |
| AX-157838666 | 18 | 53.618 | KV453058.1 | 7048098 | 14-scf00369 | 14 |
| AX-157838667 | 18 | 53.618 | KV453058.1 | 7048612 | 14-scf00369 | 14 |
| AX-158213453 | 18 | 53.618 | KV453058.1 | 7049003 | 14-scf00369 | 14 |
| AX-157756028 | 18 | 53.618 | KV453058.1 | 7053446 | 14-scf00369 | 14 |
| AX-158213459 | 18 | 53.618 | KV453058.1 | 7057062 | 14-scf00369 | 14 |
| AX-157716259 | 18 | 53.618 | KV453058.1 | 7061846 | 14-scf00369 | 14 |
| AX-158213464 | 18 | 53.618 | KV453058.1 | 7065957 | 14-scf00369 | 14 |
| AX-158213466 | 18 | 53.618 | KV453058.1 | 7067059 | 14-scf00369 | 14 |
| AX-158213467 | 18 | 53.618 | KV453058.1 | 7068038 | 14-scf00369 | 14 |
| AX-158213468 | 18 | 53.618 | KV453058.1 | 7068658 | 14-scf00369 | 14 |
| AX-158213469 | 18 | 53.618 | KV453058.1 | 7069624 | 14-scf00369 | 14 |
| AX-158213470 | 18 | 53.618 | KV453058.1 | 7070298 | 14-scf00369 | 14 |
| AX-158213471 | 18 | 53.618 | KV453058.1 | 7071575 | 14-scf00369 | 14 |
| AX-158213475 | 18 | 53.618 | KV453058.1 | 7074762 | 14-scf00369 | 14 |
| AX-158213477 | 18 | 53.618 | KV453058.1 | 7077591 | 14-scf00369 | 14 |
| AX-158213483 | 18 | 53.618 | KV453058.1 | 7084629 | 14-scf00369 | 14 |
| AX-158213484 | 18 | 53.618 | KV453058.1 | 7087268 | 14-scf00369 | 14 |
| AX-158213486 | 18 | 53.618 | KV453058.1 | 7090782 | 14-scf00369 | 14 |
| AX-158213487 | 18 | 53.618 | KV453058.1 | 7092614 | 14-scf00369 | 14 |
| AX-158213489 | 18 | 53.618 | KV453058.1 | 7093715 | 14-scf00369 | 14 |
| AX-158213490 | 18 | 53.618 | KV453058.1 | 7094792 | 14-scf00369 | 14 |
| AX-158213491 | 18 | 53.618 | KV453058.1 | 7096246 | 14-scf00369 | 14 |
| AX-158213492 | 18 | 53.618 | KV453058.1 | 7097104 | 14-scf00369 | 14 |
| AX-158213493 | 18 | 53.618 | KV453058.1 | 7097837 | 14-scf00369 | 14 |
| AX-158213495 | 18 | 53.618 | KV453058.1 | 7099222 | 14-scf00369 | 14 |
| AX-158213500 | 18 | 53.618 | KV453058.1 | 7104933 | 14-scf00369 | 14 |
| AX-158213502 | 18 | 53.618 | KV453058.1 | 7107689 | 14-scf00369 | 14 |
| AX-158213503 | 18 | 53.618 | KV453058.1 | 7108495 | 14-scf00369 | 14 |
| AX-157838670 | 18 | 53.618 | KV453058.1 | 7110846 | 14-scf00369 | 14 |
| AX-158213506 | 18 | 53.618 | KV453058.1 | 7111157 | 14-scf00369 | 14 |

|              |    |        |             |          |               |    |
|--------------|----|--------|-------------|----------|---------------|----|
| AX-158414570 | 18 | 53.618 | KV453058.1  | 7112206  | 14-scf00369   | 14 |
| AX-158213509 | 18 | 53.618 | KV453058.1  | 7115882  | 14-scf00369   | 14 |
| AX-158394021 | 18 | 53.618 | KV453058.1  | 7121074  | 14-scf00369   | 14 |
| AX-158213514 | 18 | 53.618 | KV453058.1  | 7123203  | 14-scf00369   | 14 |
| AX-158213515 | 18 | 53.618 | KV453058.1  | 7124144  | 14-scf00369   | 14 |
| AX-158213521 | 18 | 53.618 | KV453058.1  | 7128516  | 14-scf00369   | 14 |
| AX-158213553 | 18 | 53.618 | KV453058.1  | 7167871  | 14-scf00369   | 14 |
| AX-158213639 | 18 | 53.618 | KV453058.1  | 7313291  | 14-scf00369   | 14 |
| AX-158213692 | 18 | 53.618 | KV453058.1  | 7414108  | 14-scf00369   | 14 |
| AX-158213720 | 18 | 53.618 | KV453058.1  | 7468944  | 14-scf00369   | 14 |
| AX-158214017 | 18 | 53.618 | KV453058.1  | 7931594  | 14-scf00369   | 14 |
| AX-158214018 | 18 | 53.618 | KV453058.1  | 7934623  | 14-scf00369   | 14 |
| AX-158214673 | 18 | 53.618 | KV453058.1  | 8758225  | 14-scf00369   | 14 |
| AX-158214738 | 18 | 53.618 | KV453058.1  | 8819768  | 14-scf00369   | 14 |
| AX-157743824 | 18 | 53.618 | KV453058.1  | 8953190  | 14-scf00369   | 14 |
| AX-158214878 | 18 | 53.618 | KV453058.1  | 8954757  | 14-scf00369   | 14 |
| AX-158215677 | 18 | 53.618 | KV453058.1  | 9977118  | 14-scf00369   | 14 |
| AX-157838885 | 18 | 53.618 | KV453058.1  | 10294480 | 14-scf00369   | 14 |
| AX-158216049 | 18 | 53.618 | KV453058.1  | 10444444 | 14-scf00369   | 14 |
| AX-158216440 | 18 | 53.618 | KV453058.1  | 10870266 | 14-scf00369   | 14 |
| AX-158216447 | 18 | 53.618 | KV453058.1  | 10878576 | 14-scf00369   | 14 |
| AX-158216775 | 18 | 53.618 | KV453060.1  | 60170    | 14-scf00370   | 14 |
| AX-158216915 | 18 | 53.618 | KV453060.1  | 256712   | 14-scf00370   | 14 |
| AX-157696670 | 18 | 53.618 | FI864650.1  | 172      | ORI212 lctalu | UN |
| AX-157704649 | 18 | 53.618 | 3ML01026884 | 950      | scf02485_1    | UN |
| AX-157706226 | 18 | 53.618 | 3ML01031857 | 577      | scf07478_1    | UN |
| AX-157706509 | 18 | 53.618 | 3ML01033095 | 530      | scf08732_1    | UN |
| AX-158213411 | 18 | 53.62  | KV453058.1  | 6992171  | 14-scf00369   | 14 |
| AX-158212933 | 18 | 53.622 | KV453058.1  | 6216429  | 14-scf00369   | 14 |
| AX-158213126 | 18 | 53.622 | KV453058.1  | 6467690  | 14-scf00369   | 14 |
| AX-158213131 | 18 | 53.622 | KV453058.1  | 6490922  | 14-scf00369   | 14 |
| AX-158213339 | 18 | 53.622 | KV453058.1  | 6875361  | 14-scf00369   | 14 |
| AX-158213415 | 18 | 53.622 | KV453058.1  | 6997831  | 14-scf00369   | 14 |
| AX-158213416 | 18 | 53.622 | KV453058.1  | 6998763  | 14-scf00369   | 14 |
| AX-158213426 | 18 | 53.622 | KV453058.1  | 7009981  | 14-scf00369   | 14 |
| AX-158213427 | 18 | 53.622 | KV453058.1  | 7011044  | 14-scf00369   | 14 |
| AX-158213428 | 18 | 53.622 | KV453058.1  | 7011986  | 14-scf00369   | 14 |
| AX-157859362 | 18 | 53.622 | KV453058.1  | 7012671  | 14-scf00369   | 14 |
| AX-158213430 | 18 | 53.622 | KV453058.1  | 7016286  | 14-scf00369   | 14 |
| AX-157756109 | 18 | 53.622 | KV453058.1  | 7017832  | 14-scf00369   | 14 |
| AX-158213432 | 18 | 53.622 | KV453058.1  | 7019783  | 14-scf00369   | 14 |
| AX-158213434 | 18 | 53.622 | KV453058.1  | 7023603  | 14-scf00369   | 14 |
| AX-158213436 | 18 | 53.622 | KV453058.1  | 7025693  | 14-scf00369   | 14 |
| AX-157838664 | 18 | 53.622 | KV453058.1  | 7041697  | 14-scf00369   | 14 |
| AX-158213458 | 18 | 53.622 | KV453058.1  | 7055705  | 14-scf00369   | 14 |
| AX-158213529 | 18 | 53.622 | KV453058.1  | 7138722  | 14-scf00369   | 14 |
| AX-158213533 | 18 | 53.622 | KV453058.1  | 7141781  | 14-scf00369   | 14 |
| AX-158213684 | 18 | 53.622 | KV453058.1  | 7403422  | 14-scf00369   | 14 |
| AX-157838697 | 18 | 53.622 | KV453058.1  | 7412870  | 14-scf00369   | 14 |
| AX-158213691 | 18 | 53.622 | KV453058.1  | 7413585  | 14-scf00369   | 14 |
| AX-157838700 | 18 | 53.622 | KV453058.1  | 7417154  | 14-scf00369   | 14 |

|              |    |        |            |          |             |    |
|--------------|----|--------|------------|----------|-------------|----|
| AX-158214777 | 18 | 53.622 | KV453058.1 | 8854565  | 14-scf00369 | 14 |
| AX-158216344 | 18 | 53.622 | KV453058.1 | 10772323 | 14-scf00369 | 14 |
| AX-158213421 | 18 | 53.623 | KV453058.1 | 7002895  | 14-scf00369 | 14 |
| AX-158213440 | 18 | 53.628 | KV453058.1 | 7038592  | 14-scf00369 | 14 |
| AX-158211813 | 18 | 53.634 | KV453058.1 | 4693083  | 14-scf00369 | 14 |
| AX-157859360 | 18 | 53.634 | KV453058.1 | 6994121  | 14-scf00369 | 14 |
| AX-158213455 | 18 | 53.634 | KV453058.1 | 7050717  | 14-scf00369 | 14 |
| AX-158213456 | 18 | 53.648 | KV453058.1 | 7051414  | 14-scf00369 | 14 |
| AX-158213513 | 18 | 53.657 | KV453058.1 | 7122124  | 14-scf00369 | 14 |
| AX-158213530 | 18 | 53.67  | KV453058.1 | 7139112  | 14-scf00369 | 14 |
| AX-157879640 | 18 | 53.685 | KV453058.1 | 7139325  | 14-scf00369 | 14 |
| AX-157859339 | 18 | 53.708 | KV453058.1 | 6694545  | 14-scf00369 | 14 |
| AX-158213537 | 18 | 53.708 | KV453058.1 | 7146418  | 14-scf00369 | 14 |
| AX-157838673 | 18 | 53.719 | KV453058.1 | 7155352  | 14-scf00369 | 14 |
| AX-157727803 | 18 | 53.721 | KV453058.1 | 7162348  | 14-scf00369 | 14 |
| AX-157755642 | 18 | 53.722 | KV453058.1 | 5623538  | 14-scf00369 | 14 |
| AX-158212479 | 18 | 53.722 | KV453058.1 | 5631207  | 14-scf00369 | 14 |
| AX-158212482 | 18 | 53.722 | KV453058.1 | 5635039  | 14-scf00369 | 14 |
| AX-158212991 | 18 | 53.722 | KV453058.1 | 6279684  | 14-scf00369 | 14 |
| AX-157838676 | 18 | 53.722 | KV453058.1 | 7163145  | 14-scf00369 | 14 |
| AX-158213550 | 18 | 53.722 | KV453058.1 | 7163419  | 14-scf00369 | 14 |
| AX-157838677 | 18 | 53.722 | KV453058.1 | 7164713  | 14-scf00369 | 14 |
| AX-157725008 | 18 | 53.722 | KV453058.1 | 7173347  | 14-scf00369 | 14 |
| AX-158213557 | 18 | 53.722 | KV453058.1 | 7173788  | 14-scf00369 | 14 |
| AX-157713779 | 18 | 53.722 | KV453058.1 | 7174745  | 14-scf00369 | 14 |
| AX-157773380 | 18 | 53.722 | KV453058.1 | 7175294  | 14-scf00369 | 14 |
| AX-158213558 | 18 | 53.722 | KV453058.1 | 7175835  | 14-scf00369 | 14 |
| AX-157744518 | 18 | 53.722 | KV453058.1 | 7178228  | 14-scf00369 | 14 |
| AX-157755729 | 18 | 53.722 | KV453058.1 | 7184540  | 14-scf00369 | 14 |
| AX-158213626 | 18 | 53.722 | KV453058.1 | 7297466  | 14-scf00369 | 14 |
| AX-158213943 | 18 | 53.722 | KV453058.1 | 7809613  | 14-scf00369 | 14 |
| AX-158213983 | 18 | 53.722 | KV453058.1 | 7882604  | 14-scf00369 | 14 |
| AX-157772639 | 18 | 53.722 | KV453058.1 | 7885418  | 14-scf00369 | 14 |
| AX-157751913 | 18 | 53.722 | KV453058.1 | 7891078  | 14-scf00369 | 14 |
| AX-157775480 | 18 | 53.722 | KV453058.1 | 7902553  | 14-scf00369 | 14 |
| AX-158213994 | 18 | 53.722 | KV453058.1 | 7905107  | 14-scf00369 | 14 |
| AX-158214000 | 18 | 53.722 | KV453058.1 | 7911375  | 14-scf00369 | 14 |
| AX-158213555 | 18 | 53.723 | KV453058.1 | 7170524  | 14-scf00369 | 14 |
| AX-157838678 | 18 | 53.725 | KV453058.1 | 7172693  | 14-scf00369 | 14 |
| AX-158213337 | 18 | 53.726 | KV453058.1 | 6874108  | 14-scf00369 | 14 |
| AX-158213340 | 18 | 53.726 | KV453058.1 | 6877067  | 14-scf00369 | 14 |
| AX-157727934 | 18 | 53.726 | KV453058.1 | 7178734  | 14-scf00369 | 14 |
| AX-158213900 | 18 | 53.726 | KV453058.1 | 7755199  | 14-scf00369 | 14 |
| AX-157838755 | 18 | 53.726 | KV453058.1 | 7993243  | 14-scf00369 | 14 |
| AX-158214076 | 18 | 53.726 | KV453058.1 | 8032958  | 14-scf00369 | 14 |
| AX-158214082 | 18 | 53.726 | KV453058.1 | 8039324  | 14-scf00369 | 14 |
| AX-158214102 | 18 | 53.726 | KV453058.1 | 8059685  | 14-scf00369 | 14 |
| AX-158214103 | 18 | 53.726 | KV453058.1 | 8060532  | 14-scf00369 | 14 |
| AX-158214848 | 18 | 53.726 | KV453058.1 | 8921854  | 14-scf00369 | 14 |
| AX-158211702 | 18 | 53.727 | KV453058.1 | 4548895  | 14-scf00369 | 14 |
| AX-158212011 | 18 | 53.727 | KV453058.1 | 4953096  | 14-scf00369 | 14 |



|              |    |        |            |         |             |    |
|--------------|----|--------|------------|---------|-------------|----|
| AX-158212078 | 18 | 53.727 | KV453058.1 | 5059232 | 14-scf00369 | 14 |
| AX-157748647 | 18 | 53.727 | KV453058.1 | 5225254 | 14-scf00369 | 14 |
| AX-158212191 | 18 | 53.727 | KV453058.1 | 5226077 | 14-scf00369 | 14 |
| AX-158212192 | 18 | 53.727 | KV453058.1 | 5226697 | 14-scf00369 | 14 |
| AX-158212197 | 18 | 53.727 | KV453058.1 | 5243550 | 14-scf00369 | 14 |
| AX-158212218 | 18 | 53.727 | KV453058.1 | 5263378 | 14-scf00369 | 14 |
| AX-158212250 | 18 | 53.727 | KV453058.1 | 5305099 | 14-scf00369 | 14 |
| AX-158212290 | 18 | 53.727 | KV453058.1 | 5353814 | 14-scf00369 | 14 |
| AX-158212370 | 18 | 53.727 | KV453058.1 | 5456758 | 14-scf00369 | 14 |
| AX-157838570 | 18 | 53.727 | KV453058.1 | 5481445 | 14-scf00369 | 14 |
| AX-158212389 | 18 | 53.727 | KV453058.1 | 5498407 | 14-scf00369 | 14 |
| AX-157838576 | 18 | 53.727 | KV453058.1 | 5572080 | 14-scf00369 | 14 |
| AX-157754381 | 18 | 53.727 | KV453058.1 | 5574022 | 14-scf00369 | 14 |
| AX-157721088 | 18 | 53.727 | KV453058.1 | 5581229 | 14-scf00369 | 14 |
| AX-157838579 | 18 | 53.727 | KV453058.1 | 5582584 | 14-scf00369 | 14 |
| AX-157774310 | 18 | 53.727 | KV453058.1 | 5586162 | 14-scf00369 | 14 |
| AX-157747422 | 18 | 53.727 | KV453058.1 | 5626445 | 14-scf00369 | 14 |
| AX-158212476 | 18 | 53.727 | KV453058.1 | 5628712 | 14-scf00369 | 14 |
| AX-157838583 | 18 | 53.727 | KV453058.1 | 5632666 | 14-scf00369 | 14 |
| AX-158212515 | 18 | 53.727 | KV453058.1 | 5686901 | 14-scf00369 | 14 |
| AX-158212526 | 18 | 53.727 | KV453058.1 | 5697222 | 14-scf00369 | 14 |
| AX-158212532 | 18 | 53.727 | KV453058.1 | 5702249 | 14-scf00369 | 14 |
| AX-157838592 | 18 | 53.727 | KV453058.1 | 5707892 | 14-scf00369 | 14 |
| AX-157838593 | 18 | 53.727 | KV453058.1 | 5713738 | 14-scf00369 | 14 |
| AX-158212540 | 18 | 53.727 | KV453058.1 | 5715518 | 14-scf00369 | 14 |
| AX-158212552 | 18 | 53.727 | KV453058.1 | 5729414 | 14-scf00369 | 14 |
| AX-158212559 | 18 | 53.727 | KV453058.1 | 5737478 | 14-scf00369 | 14 |
| AX-158212575 | 18 | 53.727 | KV453058.1 | 5756426 | 14-scf00369 | 14 |
| AX-158212579 | 18 | 53.727 | KV453058.1 | 5760083 | 14-scf00369 | 14 |
| AX-157697741 | 18 | 53.727 | KV453058.1 | 5766831 | 14-scf00369 | 14 |
| AX-158212588 | 18 | 53.727 | KV453058.1 | 5767418 | 14-scf00369 | 14 |
| AX-158212591 | 18 | 53.727 | KV453058.1 | 5770266 | 14-scf00369 | 14 |
| AX-157859225 | 18 | 53.727 | KV453058.1 | 5775564 | 14-scf00369 | 14 |
| AX-158212616 | 18 | 53.727 | KV453058.1 | 5795416 | 14-scf00369 | 14 |
| AX-158212621 | 18 | 53.727 | KV453058.1 | 5800586 | 14-scf00369 | 14 |
| AX-158212627 | 18 | 53.727 | KV453058.1 | 5806218 | 14-scf00369 | 14 |
| AX-158212630 | 18 | 53.727 | KV453058.1 | 5810354 | 14-scf00369 | 14 |
| AX-158212631 | 18 | 53.727 | KV453058.1 | 5810954 | 14-scf00369 | 14 |
| AX-157859228 | 18 | 53.727 | KV453058.1 | 5813351 | 14-scf00369 | 14 |
| AX-158212640 | 18 | 53.727 | KV453058.1 | 5821639 | 14-scf00369 | 14 |
| AX-158212642 | 18 | 53.727 | KV453058.1 | 5822964 | 14-scf00369 | 14 |
| AX-158212654 | 18 | 53.727 | KV453058.1 | 5837352 | 14-scf00369 | 14 |
| AX-158212679 | 18 | 53.727 | KV453058.1 | 5851725 | 14-scf00369 | 14 |
| AX-158212685 | 18 | 53.727 | KV453058.1 | 5857051 | 14-scf00369 | 14 |
| AX-157694689 | 18 | 53.727 | KV453058.1 | 5858623 | 14-scf00369 | 14 |
| AX-158212691 | 18 | 53.727 | KV453058.1 | 5860932 | 14-scf00369 | 14 |
| AX-157750975 | 18 | 53.727 | KV453058.1 | 5944185 | 14-scf00369 | 14 |
| AX-158212745 | 18 | 53.727 | KV453058.1 | 5957914 | 14-scf00369 | 14 |
| AX-158212750 | 18 | 53.727 | KV453058.1 | 5960937 | 14-scf00369 | 14 |
| AX-157838602 | 18 | 53.727 | KV453058.1 | 5969568 | 14-scf00369 | 14 |
| AX-157872371 | 18 | 53.727 | KV453058.1 | 6013605 | 14-scf00369 | 14 |

|              |    |        |            |         |             |    |
|--------------|----|--------|------------|---------|-------------|----|
| AX-158212794 | 18 | 53.727 | KV453058.1 | 6034752 | 14-scf00369 | 14 |
| AX-158212820 | 18 | 53.727 | KV453058.1 | 6080764 | 14-scf00369 | 14 |
| AX-158212824 | 18 | 53.727 | KV453058.1 | 6086926 | 14-scf00369 | 14 |
| AX-158212825 | 18 | 53.727 | KV453058.1 | 6091591 | 14-scf00369 | 14 |
| AX-158212828 | 18 | 53.727 | KV453058.1 | 6093957 | 14-scf00369 | 14 |
| AX-158212836 | 18 | 53.727 | KV453058.1 | 6101444 | 14-scf00369 | 14 |
| AX-158212851 | 18 | 53.727 | KV453058.1 | 6125542 | 14-scf00369 | 14 |
| AX-158212985 | 18 | 53.727 | KV453058.1 | 6273636 | 14-scf00369 | 14 |
| AX-158213065 | 18 | 53.727 | KV453058.1 | 6369529 | 14-scf00369 | 14 |
| AX-158213066 | 18 | 53.727 | KV453058.1 | 6369895 | 14-scf00369 | 14 |
| AX-157859247 | 18 | 53.727 | KV453058.1 | 6377877 | 14-scf00369 | 14 |
| AX-158213074 | 18 | 53.727 | KV453058.1 | 6378653 | 14-scf00369 | 14 |
| AX-158213085 | 18 | 53.727 | KV453058.1 | 6384627 | 14-scf00369 | 14 |
| AX-158213145 | 18 | 53.727 | KV453058.1 | 6523007 | 14-scf00369 | 14 |
| AX-157859258 | 18 | 53.727 | KV453058.1 | 6542834 | 14-scf00369 | 14 |
| AX-158213223 | 18 | 53.727 | KV453058.1 | 6684853 | 14-scf00369 | 14 |
| AX-158213237 | 18 | 53.727 | KV453058.1 | 6704823 | 14-scf00369 | 14 |
| AX-158213238 | 18 | 53.727 | KV453058.1 | 6706085 | 14-scf00369 | 14 |
| AX-158213261 | 18 | 53.727 | KV453058.1 | 6753522 | 14-scf00369 | 14 |
| AX-158213262 | 18 | 53.727 | KV453058.1 | 6754033 | 14-scf00369 | 14 |
| AX-158213279 | 18 | 53.727 | KV453058.1 | 6794605 | 14-scf00369 | 14 |
| AX-158213298 | 18 | 53.727 | KV453058.1 | 6826913 | 14-scf00369 | 14 |
| AX-158213334 | 18 | 53.727 | KV453058.1 | 6871627 | 14-scf00369 | 14 |
| AX-158213338 | 18 | 53.727 | KV453058.1 | 6874633 | 14-scf00369 | 14 |
| AX-158213362 | 18 | 53.727 | KV453058.1 | 6911926 | 14-scf00369 | 14 |
| AX-158213399 | 18 | 53.727 | KV453058.1 | 6978717 | 14-scf00369 | 14 |
| AX-157838662 | 18 | 53.727 | KV453058.1 | 6993075 | 14-scf00369 | 14 |
| AX-157838665 | 18 | 53.727 | KV453058.1 | 7043486 | 14-scf00369 | 14 |
| AX-158213463 | 18 | 53.727 | KV453058.1 | 7063213 | 14-scf00369 | 14 |
| AX-158213482 | 18 | 53.727 | KV453058.1 | 7084145 | 14-scf00369 | 14 |
| AX-158213499 | 18 | 53.727 | KV453058.1 | 7104523 | 14-scf00369 | 14 |
| AX-158213534 | 18 | 53.727 | KV453058.1 | 7142825 | 14-scf00369 | 14 |
| AX-158213536 | 18 | 53.727 | KV453058.1 | 7144532 | 14-scf00369 | 14 |
| AX-157838672 | 18 | 53.727 | KV453058.1 | 7155199 | 14-scf00369 | 14 |
| AX-157838675 | 18 | 53.727 | KV453058.1 | 7162214 | 14-scf00369 | 14 |
| AX-158213548 | 18 | 53.727 | KV453058.1 | 7162441 | 14-scf00369 | 14 |
| AX-158213551 | 18 | 53.727 | KV453058.1 | 7164181 | 14-scf00369 | 14 |
| AX-158213552 | 18 | 53.727 | KV453058.1 | 7164611 | 14-scf00369 | 14 |
| AX-158213556 | 18 | 53.727 | KV453058.1 | 7171660 | 14-scf00369 | 14 |
| AX-158213559 | 18 | 53.727 | KV453058.1 | 7176657 | 14-scf00369 | 14 |
| AX-157740869 | 18 | 53.727 | KV453058.1 | 7186565 | 14-scf00369 | 14 |
| AX-158213562 | 18 | 53.727 | KV453058.1 | 7198277 | 14-scf00369 | 14 |
| AX-158213563 | 18 | 53.727 | KV453058.1 | 7198667 | 14-scf00369 | 14 |
| AX-158213565 | 18 | 53.727 | KV453058.1 | 7202962 | 14-scf00369 | 14 |
| AX-157859366 | 18 | 53.727 | KV453058.1 | 7205465 | 14-scf00369 | 14 |
| AX-157838680 | 18 | 53.727 | KV453058.1 | 7205846 | 14-scf00369 | 14 |
| AX-158213569 | 18 | 53.727 | KV453058.1 | 7215941 | 14-scf00369 | 14 |
| AX-158213570 | 18 | 53.727 | KV453058.1 | 7216720 | 14-scf00369 | 14 |
| AX-158213574 | 18 | 53.727 | KV453058.1 | 7230315 | 14-scf00369 | 14 |
| AX-158213577 | 18 | 53.727 | KV453058.1 | 7232318 | 14-scf00369 | 14 |
| AX-158213579 | 18 | 53.727 | KV453058.1 | 7235726 | 14-scf00369 | 14 |

|              |    |        |            |         |             |    |
|--------------|----|--------|------------|---------|-------------|----|
| AX-158213583 | 18 | 53.727 | KV453058.1 | 7240997 | 14-scf00369 | 14 |
| AX-158213584 | 18 | 53.727 | KV453058.1 | 7242375 | 14-scf00369 | 14 |
| AX-158213585 | 18 | 53.727 | KV453058.1 | 7243879 | 14-scf00369 | 14 |
| AX-158213586 | 18 | 53.727 | KV453058.1 | 7244533 | 14-scf00369 | 14 |
| AX-157751881 | 18 | 53.727 | KV453058.1 | 7244939 | 14-scf00369 | 14 |
| AX-158213587 | 18 | 53.727 | KV453058.1 | 7250111 | 14-scf00369 | 14 |
| AX-158213589 | 18 | 53.727 | KV453058.1 | 7251552 | 14-scf00369 | 14 |
| AX-158213592 | 18 | 53.727 | KV453058.1 | 7254000 | 14-scf00369 | 14 |
| AX-158213593 | 18 | 53.727 | KV453058.1 | 7255701 | 14-scf00369 | 14 |
| AX-158213594 | 18 | 53.727 | KV453058.1 | 7256951 | 14-scf00369 | 14 |
| AX-158213597 | 18 | 53.727 | KV453058.1 | 7258934 | 14-scf00369 | 14 |
| AX-158414572 | 18 | 53.727 | KV453058.1 | 7259322 | 14-scf00369 | 14 |
| AX-158410092 | 18 | 53.727 | KV453058.1 | 7259494 | 14-scf00369 | 14 |
| AX-158414573 | 18 | 53.727 | KV453058.1 | 7259565 | 14-scf00369 | 14 |
| AX-158213601 | 18 | 53.727 | KV453058.1 | 7263030 | 14-scf00369 | 14 |
| AX-158213604 | 18 | 53.727 | KV453058.1 | 7265600 | 14-scf00369 | 14 |
| AX-158213605 | 18 | 53.727 | KV453058.1 | 7267206 | 14-scf00369 | 14 |
| AX-158213610 | 18 | 53.727 | KV453058.1 | 7272099 | 14-scf00369 | 14 |
| AX-158213620 | 18 | 53.727 | KV453058.1 | 7290777 | 14-scf00369 | 14 |
| AX-158213622 | 18 | 53.727 | KV453058.1 | 7294661 | 14-scf00369 | 14 |
| AX-158213624 | 18 | 53.727 | KV453058.1 | 7296425 | 14-scf00369 | 14 |
| AX-158213631 | 18 | 53.727 | KV453058.1 | 7306033 | 14-scf00369 | 14 |
| AX-158213632 | 18 | 53.727 | KV453058.1 | 7306398 | 14-scf00369 | 14 |
| AX-157838685 | 18 | 53.727 | KV453058.1 | 7308357 | 14-scf00369 | 14 |
| AX-158213635 | 18 | 53.727 | KV453058.1 | 7309625 | 14-scf00369 | 14 |
| AX-158213636 | 18 | 53.727 | KV453058.1 | 7309863 | 14-scf00369 | 14 |
| AX-158213637 | 18 | 53.727 | KV453058.1 | 7310383 | 14-scf00369 | 14 |
| AX-158213638 | 18 | 53.727 | KV453058.1 | 7310717 | 14-scf00369 | 14 |
| AX-158213640 | 18 | 53.727 | KV453058.1 | 7314531 | 14-scf00369 | 14 |
| AX-158213641 | 18 | 53.727 | KV453058.1 | 7316891 | 14-scf00369 | 14 |
| AX-157866995 | 18 | 53.727 | KV453058.1 | 7319018 | 14-scf00369 | 14 |
| AX-158213645 | 18 | 53.727 | KV453058.1 | 7320545 | 14-scf00369 | 14 |
| AX-158213647 | 18 | 53.727 | KV453058.1 | 7324473 | 14-scf00369 | 14 |
| AX-157744016 | 18 | 53.727 | KV453058.1 | 7330264 | 14-scf00369 | 14 |
| AX-158213648 | 18 | 53.727 | KV453058.1 | 7332136 | 14-scf00369 | 14 |
| AX-158213649 | 18 | 53.727 | KV453058.1 | 7332550 | 14-scf00369 | 14 |
| AX-158386482 | 18 | 53.727 | KV453058.1 | 7332864 | 14-scf00369 | 14 |
| AX-158213650 | 18 | 53.727 | KV453058.1 | 7333812 | 14-scf00369 | 14 |
| AX-158414577 | 18 | 53.727 | KV453058.1 | 7334449 | 14-scf00369 | 14 |
| AX-158414579 | 18 | 53.727 | KV453058.1 | 7334566 | 14-scf00369 | 14 |
| AX-157859367 | 18 | 53.727 | KV453058.1 | 7337551 | 14-scf00369 | 14 |
| AX-158213653 | 18 | 53.727 | KV453058.1 | 7339380 | 14-scf00369 | 14 |
| AX-157770771 | 18 | 53.727 | KV453058.1 | 7344202 | 14-scf00369 | 14 |
| AX-157712957 | 18 | 53.727 | KV453058.1 | 7344852 | 14-scf00369 | 14 |
| AX-157798851 | 18 | 53.727 | KV453058.1 | 7345384 | 14-scf00369 | 14 |
| AX-157716478 | 18 | 53.727 | KV453058.1 | 7349500 | 14-scf00369 | 14 |
| AX-157715128 | 18 | 53.727 | KV453058.1 | 7349693 | 14-scf00369 | 14 |
| AX-158213654 | 18 | 53.727 | KV453058.1 | 7350767 | 14-scf00369 | 14 |
| AX-157859368 | 18 | 53.727 | KV453058.1 | 7350969 | 14-scf00369 | 14 |
| AX-157838693 | 18 | 53.727 | KV453058.1 | 7352069 | 14-scf00369 | 14 |
| AX-158213655 | 18 | 53.727 | KV453058.1 | 7352521 | 14-scf00369 | 14 |

|              |    |        |            |         |             |    |
|--------------|----|--------|------------|---------|-------------|----|
| AX-157775688 | 18 | 53.727 | KV453058.1 | 7353954 | 14-scf00369 | 14 |
| AX-158380809 | 18 | 53.727 | KV453058.1 | 7353993 | 14-scf00369 | 14 |
| AX-157838694 | 18 | 53.727 | KV453058.1 | 7356403 | 14-scf00369 | 14 |
| AX-157752010 | 18 | 53.727 | KV453058.1 | 7356865 | 14-scf00369 | 14 |
| AX-157718378 | 18 | 53.727 | KV453058.1 | 7359305 | 14-scf00369 | 14 |
| AX-158213658 | 18 | 53.727 | KV453058.1 | 7364913 | 14-scf00369 | 14 |
| AX-158213659 | 18 | 53.727 | KV453058.1 | 7365595 | 14-scf00369 | 14 |
| AX-158213660 | 18 | 53.727 | KV453058.1 | 7366810 | 14-scf00369 | 14 |
| AX-157748552 | 18 | 53.727 | KV453058.1 | 7367777 | 14-scf00369 | 14 |
| AX-158213661 | 18 | 53.727 | KV453058.1 | 7369286 | 14-scf00369 | 14 |
| AX-157739042 | 18 | 53.727 | KV453058.1 | 7369613 | 14-scf00369 | 14 |
| AX-158213662 | 18 | 53.727 | KV453058.1 | 7370781 | 14-scf00369 | 14 |
| AX-158213663 | 18 | 53.727 | KV453058.1 | 7371096 | 14-scf00369 | 14 |
| AX-158213664 | 18 | 53.727 | KV453058.1 | 7372512 | 14-scf00369 | 14 |
| AX-158213665 | 18 | 53.727 | KV453058.1 | 7376887 | 14-scf00369 | 14 |
| AX-158213666 | 18 | 53.727 | KV453058.1 | 7377728 | 14-scf00369 | 14 |
| AX-158213667 | 18 | 53.727 | KV453058.1 | 7378180 | 14-scf00369 | 14 |
| AX-158213668 | 18 | 53.727 | KV453058.1 | 7379439 | 14-scf00369 | 14 |
| AX-158213669 | 18 | 53.727 | KV453058.1 | 7379811 | 14-scf00369 | 14 |
| AX-158213670 | 18 | 53.727 | KV453058.1 | 7380463 | 14-scf00369 | 14 |
| AX-157838695 | 18 | 53.727 | KV453058.1 | 7380598 | 14-scf00369 | 14 |
| AX-158213671 | 18 | 53.727 | KV453058.1 | 7382225 | 14-scf00369 | 14 |
| AX-158213672 | 18 | 53.727 | KV453058.1 | 7383042 | 14-scf00369 | 14 |
| AX-157772508 | 18 | 53.727 | KV453058.1 | 7384306 | 14-scf00369 | 14 |
| AX-158213673 | 18 | 53.727 | KV453058.1 | 7385260 | 14-scf00369 | 14 |
| AX-158213674 | 18 | 53.727 | KV453058.1 | 7387931 | 14-scf00369 | 14 |
| AX-158213675 | 18 | 53.727 | KV453058.1 | 7388351 | 14-scf00369 | 14 |
| AX-157750013 | 18 | 53.727 | KV453058.1 | 7390371 | 14-scf00369 | 14 |
| AX-158386483 | 18 | 53.727 | KV453058.1 | 7390670 | 14-scf00369 | 14 |
| AX-158213676 | 18 | 53.727 | KV453058.1 | 7390785 | 14-scf00369 | 14 |
| AX-158213678 | 18 | 53.727 | KV453058.1 | 7393686 | 14-scf00369 | 14 |
| AX-158213679 | 18 | 53.727 | KV453058.1 | 7394403 | 14-scf00369 | 14 |
| AX-158213680 | 18 | 53.727 | KV453058.1 | 7395110 | 14-scf00369 | 14 |
| AX-158213681 | 18 | 53.727 | KV453058.1 | 7395329 | 14-scf00369 | 14 |
| AX-158213682 | 18 | 53.727 | KV453058.1 | 7400547 | 14-scf00369 | 14 |
| AX-158213683 | 18 | 53.727 | KV453058.1 | 7403066 | 14-scf00369 | 14 |
| AX-158213685 | 18 | 53.727 | KV453058.1 | 7404459 | 14-scf00369 | 14 |
| AX-158213686 | 18 | 53.727 | KV453058.1 | 7404864 | 14-scf00369 | 14 |
| AX-158213687 | 18 | 53.727 | KV453058.1 | 7406809 | 14-scf00369 | 14 |
| AX-158213690 | 18 | 53.727 | KV453058.1 | 7409585 | 14-scf00369 | 14 |
| AX-157838698 | 18 | 53.727 | KV453058.1 | 7413773 | 14-scf00369 | 14 |
| AX-157838699 | 18 | 53.727 | KV453058.1 | 7414462 | 14-scf00369 | 14 |
| AX-158213693 | 18 | 53.727 | KV453058.1 | 7415747 | 14-scf00369 | 14 |
| AX-158213694 | 18 | 53.727 | KV453058.1 | 7416250 | 14-scf00369 | 14 |
| AX-158213695 | 18 | 53.727 | KV453058.1 | 7416719 | 14-scf00369 | 14 |
| AX-157838701 | 18 | 53.727 | KV453058.1 | 7417703 | 14-scf00369 | 14 |
| AX-157838703 | 18 | 53.727 | KV453058.1 | 7422304 | 14-scf00369 | 14 |
| AX-158213696 | 18 | 53.727 | KV453058.1 | 7422649 | 14-scf00369 | 14 |
| AX-158213697 | 18 | 53.727 | KV453058.1 | 7424521 | 14-scf00369 | 14 |
| AX-158213698 | 18 | 53.727 | KV453058.1 | 7425196 | 14-scf00369 | 14 |
| AX-157798860 | 18 | 53.727 | KV453058.1 | 7427033 | 14-scf00369 | 14 |

|              |    |        |            |         |             |    |
|--------------|----|--------|------------|---------|-------------|----|
| AX-158213699 | 18 | 53.727 | KV453058.1 | 7430975 | 14-scf00369 | 14 |
| AX-158213700 | 18 | 53.727 | KV453058.1 | 7433343 | 14-scf00369 | 14 |
| AX-157859369 | 18 | 53.727 | KV453058.1 | 7437252 | 14-scf00369 | 14 |
| AX-158213702 | 18 | 53.727 | KV453058.1 | 7437671 | 14-scf00369 | 14 |
| AX-158213703 | 18 | 53.727 | KV453058.1 | 7437942 | 14-scf00369 | 14 |
| AX-158213704 | 18 | 53.727 | KV453058.1 | 7438220 | 14-scf00369 | 14 |
| AX-158213705 | 18 | 53.727 | KV453058.1 | 7438486 | 14-scf00369 | 14 |
| AX-157866996 | 18 | 53.727 | KV453058.1 | 7439982 | 14-scf00369 | 14 |
| AX-157838705 | 18 | 53.727 | KV453058.1 | 7440414 | 14-scf00369 | 14 |
| AX-158213706 | 18 | 53.727 | KV453058.1 | 7441000 | 14-scf00369 | 14 |
| AX-158213707 | 18 | 53.727 | KV453058.1 | 7443787 | 14-scf00369 | 14 |
| AX-158213708 | 18 | 53.727 | KV453058.1 | 7444506 | 14-scf00369 | 14 |
| AX-157838706 | 18 | 53.727 | KV453058.1 | 7447071 | 14-scf00369 | 14 |
| AX-158213710 | 18 | 53.727 | KV453058.1 | 7447992 | 14-scf00369 | 14 |
| AX-158213711 | 18 | 53.727 | KV453058.1 | 7451840 | 14-scf00369 | 14 |
| AX-157859370 | 18 | 53.727 | KV453058.1 | 7451881 | 14-scf00369 | 14 |
| AX-157838708 | 18 | 53.727 | KV453058.1 | 7453919 | 14-scf00369 | 14 |
| AX-158213712 | 18 | 53.727 | KV453058.1 | 7454367 | 14-scf00369 | 14 |
| AX-157775408 | 18 | 53.727 | KV453058.1 | 7454866 | 14-scf00369 | 14 |
| AX-158213713 | 18 | 53.727 | KV453058.1 | 7455346 | 14-scf00369 | 14 |
| AX-158213714 | 18 | 53.727 | KV453058.1 | 7456095 | 14-scf00369 | 14 |
| AX-158213715 | 18 | 53.727 | KV453058.1 | 7457225 | 14-scf00369 | 14 |
| AX-158213717 | 18 | 53.727 | KV453058.1 | 7462081 | 14-scf00369 | 14 |
| AX-158213718 | 18 | 53.727 | KV453058.1 | 7462758 | 14-scf00369 | 14 |
| AX-158213719 | 18 | 53.727 | KV453058.1 | 7465766 | 14-scf00369 | 14 |
| AX-158213721 | 18 | 53.727 | KV453058.1 | 7469362 | 14-scf00369 | 14 |
| AX-158386484 | 18 | 53.727 | KV453058.1 | 7469403 | 14-scf00369 | 14 |
| AX-158213722 | 18 | 53.727 | KV453058.1 | 7469905 | 14-scf00369 | 14 |
| AX-158213724 | 18 | 53.727 | KV453058.1 | 7474225 | 14-scf00369 | 14 |
| AX-158213725 | 18 | 53.727 | KV453058.1 | 7476131 | 14-scf00369 | 14 |
| AX-158213726 | 18 | 53.727 | KV453058.1 | 7476277 | 14-scf00369 | 14 |
| AX-158213727 | 18 | 53.727 | KV453058.1 | 7476861 | 14-scf00369 | 14 |
| AX-158213728 | 18 | 53.727 | KV453058.1 | 7477207 | 14-scf00369 | 14 |
| AX-157838709 | 18 | 53.727 | KV453058.1 | 7478027 | 14-scf00369 | 14 |
| AX-158213729 | 18 | 53.727 | KV453058.1 | 7478667 | 14-scf00369 | 14 |
| AX-158213730 | 18 | 53.727 | KV453058.1 | 7478923 | 14-scf00369 | 14 |
| AX-158213731 | 18 | 53.727 | KV453058.1 | 7479979 | 14-scf00369 | 14 |
| AX-158213732 | 18 | 53.727 | KV453058.1 | 7482247 | 14-scf00369 | 14 |
| AX-158213733 | 18 | 53.727 | KV453058.1 | 7486367 | 14-scf00369 | 14 |
| AX-158213736 | 18 | 53.727 | KV453058.1 | 7489339 | 14-scf00369 | 14 |
| AX-158213737 | 18 | 53.727 | KV453058.1 | 7489872 | 14-scf00369 | 14 |
| AX-158213738 | 18 | 53.727 | KV453058.1 | 7491330 | 14-scf00369 | 14 |
| AX-157838710 | 18 | 53.727 | KV453058.1 | 7492184 | 14-scf00369 | 14 |
| AX-157838711 | 18 | 53.727 | KV453058.1 | 7492246 | 14-scf00369 | 14 |
| AX-157838712 | 18 | 53.727 | KV453058.1 | 7492792 | 14-scf00369 | 14 |
| AX-157838714 | 18 | 53.727 | KV453058.1 | 7493652 | 14-scf00369 | 14 |
| AX-158213739 | 18 | 53.727 | KV453058.1 | 7494179 | 14-scf00369 | 14 |
| AX-158213740 | 18 | 53.727 | KV453058.1 | 7494713 | 14-scf00369 | 14 |
| AX-157887202 | 18 | 53.727 | KV453058.1 | 7495166 | 14-scf00369 | 14 |
| AX-157866997 | 18 | 53.727 | KV453058.1 | 7496393 | 14-scf00369 | 14 |
| AX-157716479 | 18 | 53.727 | KV453058.1 | 7496775 | 14-scf00369 | 14 |

|              |    |        |            |         |             |    |
|--------------|----|--------|------------|---------|-------------|----|
| AX-158213742 | 18 | 53.727 | KV453058.1 | 7502138 | 14-scf00369 | 14 |
| AX-158213743 | 18 | 53.727 | KV453058.1 | 7502953 | 14-scf00369 | 14 |
| AX-157866998 | 18 | 53.727 | KV453058.1 | 7503375 | 14-scf00369 | 14 |
| AX-158213744 | 18 | 53.727 | KV453058.1 | 7504628 | 14-scf00369 | 14 |
| AX-157838715 | 18 | 53.727 | KV453058.1 | 7505215 | 14-scf00369 | 14 |
| AX-158213746 | 18 | 53.727 | KV453058.1 | 7506877 | 14-scf00369 | 14 |
| AX-158213748 | 18 | 53.727 | KV453058.1 | 7507729 | 14-scf00369 | 14 |
| AX-158213749 | 18 | 53.727 | KV453058.1 | 7509117 | 14-scf00369 | 14 |
| AX-158213750 | 18 | 53.727 | KV453058.1 | 7510457 | 14-scf00369 | 14 |
| AX-158213751 | 18 | 53.727 | KV453058.1 | 7511098 | 14-scf00369 | 14 |
| AX-158213752 | 18 | 53.727 | KV453058.1 | 7512770 | 14-scf00369 | 14 |
| AX-157838716 | 18 | 53.727 | KV453058.1 | 7513490 | 14-scf00369 | 14 |
| AX-157750521 | 18 | 53.727 | KV453058.1 | 7513935 | 14-scf00369 | 14 |
| AX-158213753 | 18 | 53.727 | KV453058.1 | 7514974 | 14-scf00369 | 14 |
| AX-158213754 | 18 | 53.727 | KV453058.1 | 7515846 | 14-scf00369 | 14 |
| AX-158213755 | 18 | 53.727 | KV453058.1 | 7516117 | 14-scf00369 | 14 |
| AX-158213757 | 18 | 53.727 | KV453058.1 | 7518091 | 14-scf00369 | 14 |
| AX-158213758 | 18 | 53.727 | KV453058.1 | 7519103 | 14-scf00369 | 14 |
| AX-157749571 | 18 | 53.727 | KV453058.1 | 7522107 | 14-scf00369 | 14 |
| AX-157713913 | 18 | 53.727 | KV453058.1 | 7523250 | 14-scf00369 | 14 |
| AX-158213759 | 18 | 53.727 | KV453058.1 | 7524296 | 14-scf00369 | 14 |
| AX-158213760 | 18 | 53.727 | KV453058.1 | 7527898 | 14-scf00369 | 14 |
| AX-158213761 | 18 | 53.727 | KV453058.1 | 7528436 | 14-scf00369 | 14 |
| AX-158213762 | 18 | 53.727 | KV453058.1 | 7528947 | 14-scf00369 | 14 |
| AX-158213763 | 18 | 53.727 | KV453058.1 | 7529360 | 14-scf00369 | 14 |
| AX-158213764 | 18 | 53.727 | KV453058.1 | 7530563 | 14-scf00369 | 14 |
| AX-158213765 | 18 | 53.727 | KV453058.1 | 7532301 | 14-scf00369 | 14 |
| AX-158213766 | 18 | 53.727 | KV453058.1 | 7532852 | 14-scf00369 | 14 |
| AX-158213767 | 18 | 53.727 | KV453058.1 | 7533627 | 14-scf00369 | 14 |
| AX-158213768 | 18 | 53.727 | KV453058.1 | 7533925 | 14-scf00369 | 14 |
| AX-158213769 | 18 | 53.727 | KV453058.1 | 7534200 | 14-scf00369 | 14 |
| AX-157866999 | 18 | 53.727 | KV453058.1 | 7534816 | 14-scf00369 | 14 |
| AX-158213770 | 18 | 53.727 | KV453058.1 | 7535267 | 14-scf00369 | 14 |
| AX-158213771 | 18 | 53.727 | KV453058.1 | 7536724 | 14-scf00369 | 14 |
| AX-158213772 | 18 | 53.727 | KV453058.1 | 7536998 | 14-scf00369 | 14 |
| AX-158213773 | 18 | 53.727 | KV453058.1 | 7537343 | 14-scf00369 | 14 |
| AX-157722532 | 18 | 53.727 | KV453058.1 | 7538351 | 14-scf00369 | 14 |
| AX-158213775 | 18 | 53.727 | KV453058.1 | 7539932 | 14-scf00369 | 14 |
| AX-158213776 | 18 | 53.727 | KV453058.1 | 7541864 | 14-scf00369 | 14 |
| AX-157838718 | 18 | 53.727 | KV453058.1 | 7542717 | 14-scf00369 | 14 |
| AX-158414584 | 18 | 53.727 | KV453058.1 | 7543924 | 14-scf00369 | 14 |
| AX-158213778 | 18 | 53.727 | KV453058.1 | 7548384 | 14-scf00369 | 14 |
| AX-158213779 | 18 | 53.727 | KV453058.1 | 7550405 | 14-scf00369 | 14 |
| AX-158213780 | 18 | 53.727 | KV453058.1 | 7551113 | 14-scf00369 | 14 |
| AX-157838720 | 18 | 53.727 | KV453058.1 | 7552970 | 14-scf00369 | 14 |
| AX-158213781 | 18 | 53.727 | KV453058.1 | 7553654 | 14-scf00369 | 14 |
| AX-157838721 | 18 | 53.727 | KV453058.1 | 7553736 | 14-scf00369 | 14 |
| AX-158386485 | 18 | 53.727 | KV453058.1 | 7559503 | 14-scf00369 | 14 |
| AX-158213783 | 18 | 53.727 | KV453058.1 | 7560052 | 14-scf00369 | 14 |
| AX-158213784 | 18 | 53.727 | KV453058.1 | 7560696 | 14-scf00369 | 14 |
| AX-158213785 | 18 | 53.727 | KV453058.1 | 7561243 | 14-scf00369 | 14 |

|              |    |        |            |         |             |    |
|--------------|----|--------|------------|---------|-------------|----|
| AX-157838722 | 18 | 53.727 | KV453058.1 | 7563360 | 14-scf00369 | 14 |
| AX-158213788 | 18 | 53.727 | KV453058.1 | 7565232 | 14-scf00369 | 14 |
| AX-157838723 | 18 | 53.727 | KV453058.1 | 7565288 | 14-scf00369 | 14 |
| AX-157838724 | 18 | 53.727 | KV453058.1 | 7566076 | 14-scf00369 | 14 |
| AX-157715332 | 18 | 53.727 | KV453058.1 | 7569254 | 14-scf00369 | 14 |
| AX-158213793 | 18 | 53.727 | KV453058.1 | 7575794 | 14-scf00369 | 14 |
| AX-158380810 | 18 | 53.727 | KV453058.1 | 7576693 | 14-scf00369 | 14 |
| AX-158213794 | 18 | 53.727 | KV453058.1 | 7579255 | 14-scf00369 | 14 |
| AX-158213795 | 18 | 53.727 | KV453058.1 | 7579796 | 14-scf00369 | 14 |
| AX-158386486 | 18 | 53.727 | KV453058.1 | 7580755 | 14-scf00369 | 14 |
| AX-158213796 | 18 | 53.727 | KV453058.1 | 7581344 | 14-scf00369 | 14 |
| AX-158386487 | 18 | 53.727 | KV453058.1 | 7581478 | 14-scf00369 | 14 |
| AX-158213797 | 18 | 53.727 | KV453058.1 | 7582383 | 14-scf00369 | 14 |
| AX-158213799 | 18 | 53.727 | KV453058.1 | 7586886 | 14-scf00369 | 14 |
| AX-158213800 | 18 | 53.727 | KV453058.1 | 7587950 | 14-scf00369 | 14 |
| AX-158213801 | 18 | 53.727 | KV453058.1 | 7588959 | 14-scf00369 | 14 |
| AX-158213802 | 18 | 53.727 | KV453058.1 | 7589954 | 14-scf00369 | 14 |
| AX-158213803 | 18 | 53.727 | KV453058.1 | 7591857 | 14-scf00369 | 14 |
| AX-158213805 | 18 | 53.727 | KV453058.1 | 7596296 | 14-scf00369 | 14 |
| AX-158213807 | 18 | 53.727 | KV453058.1 | 7598660 | 14-scf00369 | 14 |
| AX-158213809 | 18 | 53.727 | KV453058.1 | 7601164 | 14-scf00369 | 14 |
| AX-158213810 | 18 | 53.727 | KV453058.1 | 7601864 | 14-scf00369 | 14 |
| AX-158213811 | 18 | 53.727 | KV453058.1 | 7603768 | 14-scf00369 | 14 |
| AX-158213812 | 18 | 53.727 | KV453058.1 | 7604222 | 14-scf00369 | 14 |
| AX-158213813 | 18 | 53.727 | KV453058.1 | 7604763 | 14-scf00369 | 14 |
| AX-158213814 | 18 | 53.727 | KV453058.1 | 7605158 | 14-scf00369 | 14 |
| AX-158213815 | 18 | 53.727 | KV453058.1 | 7608886 | 14-scf00369 | 14 |
| AX-158213818 | 18 | 53.727 | KV453058.1 | 7610153 | 14-scf00369 | 14 |
| AX-158213819 | 18 | 53.727 | KV453058.1 | 7610714 | 14-scf00369 | 14 |
| AX-158213820 | 18 | 53.727 | KV453058.1 | 7612755 | 14-scf00369 | 14 |
| AX-158213821 | 18 | 53.727 | KV453058.1 | 7614534 | 14-scf00369 | 14 |
| AX-157867001 | 18 | 53.727 | KV453058.1 | 7618752 | 14-scf00369 | 14 |
| AX-158213822 | 18 | 53.727 | KV453058.1 | 7619030 | 14-scf00369 | 14 |
| AX-158213824 | 18 | 53.727 | KV453058.1 | 7624870 | 14-scf00369 | 14 |
| AX-158213825 | 18 | 53.727 | KV453058.1 | 7626674 | 14-scf00369 | 14 |
| AX-158213827 | 18 | 53.727 | KV453058.1 | 7628134 | 14-scf00369 | 14 |
| AX-158213828 | 18 | 53.727 | KV453058.1 | 7629685 | 14-scf00369 | 14 |
| AX-158213829 | 18 | 53.727 | KV453058.1 | 7631832 | 14-scf00369 | 14 |
| AX-158213831 | 18 | 53.727 | KV453058.1 | 7633240 | 14-scf00369 | 14 |
| AX-158213832 | 18 | 53.727 | KV453058.1 | 7634261 | 14-scf00369 | 14 |
| AX-158213833 | 18 | 53.727 | KV453058.1 | 7634635 | 14-scf00369 | 14 |
| AX-158213834 | 18 | 53.727 | KV453058.1 | 7634933 | 14-scf00369 | 14 |
| AX-158213836 | 18 | 53.727 | KV453058.1 | 7635652 | 14-scf00369 | 14 |
| AX-158213838 | 18 | 53.727 | KV453058.1 | 7637136 | 14-scf00369 | 14 |
| AX-158213842 | 18 | 53.727 | KV453058.1 | 7642407 | 14-scf00369 | 14 |
| AX-158213843 | 18 | 53.727 | KV453058.1 | 7642617 | 14-scf00369 | 14 |
| AX-158213845 | 18 | 53.727 | KV453058.1 | 7644676 | 14-scf00369 | 14 |
| AX-158213847 | 18 | 53.727 | KV453058.1 | 7646245 | 14-scf00369 | 14 |
| AX-157755191 | 18 | 53.727 | KV453058.1 | 7650374 | 14-scf00369 | 14 |
| AX-158213867 | 18 | 53.727 | KV453058.1 | 7684690 | 14-scf00369 | 14 |
| AX-158213869 | 18 | 53.727 | KV453058.1 | 7691150 | 14-scf00369 | 14 |

|              |    |        |             |          |               |    |
|--------------|----|--------|-------------|----------|---------------|----|
| AX-158213870 | 18 | 53.727 | KV453058.1  | 7693342  | 14-scf00369   | 14 |
| AX-158213899 | 18 | 53.727 | KV453058.1  | 7750309  | 14-scf00369   | 14 |
| AX-157721938 | 18 | 53.727 | KV453058.1  | 7760681  | 14-scf00369   | 14 |
| AX-158213933 | 18 | 53.727 | KV453058.1  | 7800101  | 14-scf00369   | 14 |
| AX-158213950 | 18 | 53.727 | KV453058.1  | 7817400  | 14-scf00369   | 14 |
| AX-157859372 | 18 | 53.727 | KV453058.1  | 7834460  | 14-scf00369   | 14 |
| AX-158213957 | 18 | 53.727 | KV453058.1  | 7838897  | 14-scf00369   | 14 |
| AX-158386496 | 18 | 53.727 | KV453058.1  | 7839159  | 14-scf00369   | 14 |
| AX-157713513 | 18 | 53.727 | KV453058.1  | 7840285  | 14-scf00369   | 14 |
| AX-158213959 | 18 | 53.727 | KV453058.1  | 7843387  | 14-scf00369   | 14 |
| AX-158213968 | 18 | 53.727 | KV453058.1  | 7862020  | 14-scf00369   | 14 |
| AX-158213969 | 18 | 53.727 | KV453058.1  | 7863016  | 14-scf00369   | 14 |
| AX-158213971 | 18 | 53.727 | KV453058.1  | 7866315  | 14-scf00369   | 14 |
| AX-157838744 | 18 | 53.727 | KV453058.1  | 7866828  | 14-scf00369   | 14 |
| AX-158213972 | 18 | 53.727 | KV453058.1  | 7866914  | 14-scf00369   | 14 |
| AX-158213975 | 18 | 53.727 | KV453058.1  | 7871347  | 14-scf00369   | 14 |
| AX-158418593 | 18 | 53.727 | KV453058.1  | 7872580  | 14-scf00369   | 14 |
| AX-157838745 | 18 | 53.727 | KV453058.1  | 7875747  | 14-scf00369   | 14 |
| AX-158213979 | 18 | 53.727 | KV453058.1  | 7878147  | 14-scf00369   | 14 |
| AX-158213980 | 18 | 53.727 | KV453058.1  | 7878505  | 14-scf00369   | 14 |
| AX-158213992 | 18 | 53.727 | KV453058.1  | 7903169  | 14-scf00369   | 14 |
| AX-158213993 | 18 | 53.727 | KV453058.1  | 7903811  | 14-scf00369   | 14 |
| AX-157887209 | 18 | 53.727 | KV453058.1  | 7909892  | 14-scf00369   | 14 |
| AX-157887210 | 18 | 53.727 | KV453058.1  | 7926351  | 14-scf00369   | 14 |
| AX-157887211 | 18 | 53.727 | KV453058.1  | 7926453  | 14-scf00369   | 14 |
| AX-157863730 | 18 | 53.727 | KV453058.1  | 7929859  | 14-scf00369   | 14 |
| AX-157838750 | 18 | 53.727 | KV453058.1  | 7951804  | 14-scf00369   | 14 |
| AX-158214060 | 18 | 53.727 | KV453058.1  | 8012219  | 14-scf00369   | 14 |
| AX-157838767 | 18 | 53.727 | KV453058.1  | 8135337  | 14-scf00369   | 14 |
| AX-157838772 | 18 | 53.727 | KV453058.1  | 8158514  | 14-scf00369   | 14 |
| AX-157838773 | 18 | 53.727 | KV453058.1  | 8159443  | 14-scf00369   | 14 |
| AX-158214192 | 18 | 53.727 | KV453058.1  | 8179934  | 14-scf00369   | 14 |
| AX-158214599 | 18 | 53.727 | KV453058.1  | 8680001  | 14-scf00369   | 14 |
| AX-158214607 | 18 | 53.727 | KV453058.1  | 8690701  | 14-scf00369   | 14 |
| AX-158214717 | 18 | 53.727 | KV453058.1  | 8800670  | 14-scf00369   | 14 |
| AX-158214719 | 18 | 53.727 | KV453058.1  | 8801841  | 14-scf00369   | 14 |
| AX-158215631 | 18 | 53.727 | KV453058.1  | 9921302  | 14-scf00369   | 14 |
| AX-158215947 | 18 | 53.727 | KV453058.1  | 10307383 | 14-scf00369   | 14 |
| AX-157838893 | 18 | 53.727 | KV453058.1  | 10393342 | 14-scf00369   | 14 |
| AX-157838894 | 18 | 53.727 | KV453058.1  | 10394606 | 14-scf00369   | 14 |
| AX-157767680 | 18 | 53.727 | KV453058.1  | 10430620 | 14-scf00369   | 14 |
| AX-158216292 | 18 | 53.727 | KV453058.1  | 10712883 | 14-scf00369   | 14 |
| AX-157723291 | 18 | 53.727 | KV453058.1  | 10718129 | 14-scf00369   | 14 |
| AX-158216394 | 18 | 53.727 | KV453058.1  | 10819226 | 14-scf00369   | 14 |
| AX-157747639 | 18 | 53.727 | KV453058.1  | 11058360 | 14-scf00369   | 14 |
| AX-158216738 | 18 | 53.727 | KV453060.1  | 11227    | 14-scf00370   | 14 |
| AX-158216791 | 18 | 53.727 | KV453060.1  | 87625    | 14-scf00370   | 14 |
| AX-158216846 | 18 | 53.727 | KV453060.1  | 147447   | 14-scf00370   | 14 |
| AX-158216924 | 18 | 53.727 | KV453060.1  | 266851   | 14-scf00370   | 14 |
| AX-157712739 | 18 | 53.727 | DX096690.1  | 140      | ORI212 lctalu | UN |
| AX-158424106 | 18 | 53.727 | 3ML01027640 | 295      | scf03246_1    | UN |



|              |    |        |             |         |             |    |
|--------------|----|--------|-------------|---------|-------------|----|
| AX-157705886 | 18 | 53.727 | 3ML01031170 | 522     | scf06777_1  | UN |
| AX-157707498 | 18 | 53.727 | 3ML01034402 | 446     | scf10076_1  | UN |
| AX-157696077 | 18 | 53.742 | KV453058.1  | 7544647 | 14-scf00369 | 14 |
| AX-158213777 | 18 | 53.759 | KV453058.1  | 7547792 | 14-scf00369 | 14 |
| AX-158213782 | 18 | 53.772 | KV453058.1  | 7559106 | 14-scf00369 | 14 |
| AX-158213786 | 18 | 53.788 | KV453058.1  | 7561610 | 14-scf00369 | 14 |
| AX-157763209 | 18 | 53.803 | KV453058.1  | 7563236 | 14-scf00369 | 14 |
| AX-158213789 | 18 | 53.821 | KV453058.1  | 7569081 | 14-scf00369 | 14 |
| AX-158211848 | 18 | 53.837 | KV453058.1  | 4723874 | 14-scf00369 | 14 |
| AX-157838575 | 18 | 53.837 | KV453058.1  | 5566433 | 14-scf00369 | 14 |
| AX-157859202 | 18 | 53.837 | KV453058.1  | 5593961 | 14-scf00369 | 14 |
| AX-158212446 | 18 | 53.837 | KV453058.1  | 5594232 | 14-scf00369 | 14 |
| AX-158212452 | 18 | 53.837 | KV453058.1  | 5600878 | 14-scf00369 | 14 |
| AX-158212455 | 18 | 53.837 | KV453058.1  | 5605613 | 14-scf00369 | 14 |
| AX-158212456 | 18 | 53.837 | KV453058.1  | 5606011 | 14-scf00369 | 14 |
| AX-158414542 | 18 | 53.837 | KV453058.1  | 5606055 | 14-scf00369 | 14 |
| AX-158212459 | 18 | 53.837 | KV453058.1  | 5608556 | 14-scf00369 | 14 |
| AX-158418575 | 18 | 53.837 | KV453058.1  | 5611980 | 14-scf00369 | 14 |
| AX-158212462 | 18 | 53.837 | KV453058.1  | 5612496 | 14-scf00369 | 14 |
| AX-158212463 | 18 | 53.837 | KV453058.1  | 5613951 | 14-scf00369 | 14 |
| AX-158212464 | 18 | 53.837 | KV453058.1  | 5614260 | 14-scf00369 | 14 |
| AX-158212465 | 18 | 53.837 | KV453058.1  | 5614989 | 14-scf00369 | 14 |
| AX-157749809 | 18 | 53.837 | KV453058.1  | 5618261 | 14-scf00369 | 14 |
| AX-157859203 | 18 | 53.837 | KV453058.1  | 5618426 | 14-scf00369 | 14 |
| AX-158212467 | 18 | 53.837 | KV453058.1  | 5619306 | 14-scf00369 | 14 |
| AX-158212468 | 18 | 53.837 | KV453058.1  | 5620240 | 14-scf00369 | 14 |
| AX-158212471 | 18 | 53.837 | KV453058.1  | 5624384 | 14-scf00369 | 14 |
| AX-158212481 | 18 | 53.837 | KV453058.1  | 5634518 | 14-scf00369 | 14 |
| AX-158212488 | 18 | 53.837 | KV453058.1  | 5641922 | 14-scf00369 | 14 |
| AX-157859206 | 18 | 53.837 | KV453058.1  | 5654659 | 14-scf00369 | 14 |
| AX-158212492 | 18 | 53.837 | KV453058.1  | 5655136 | 14-scf00369 | 14 |
| AX-158212493 | 18 | 53.837 | KV453058.1  | 5657205 | 14-scf00369 | 14 |
| AX-157859210 | 18 | 53.837 | KV453058.1  | 5666036 | 14-scf00369 | 14 |
| AX-157859211 | 18 | 53.837 | KV453058.1  | 5677727 | 14-scf00369 | 14 |
| AX-158212508 | 18 | 53.837 | KV453058.1  | 5678147 | 14-scf00369 | 14 |
| AX-157838587 | 18 | 53.837 | KV453058.1  | 5679577 | 14-scf00369 | 14 |
| AX-158212509 | 18 | 53.837 | KV453058.1  | 5679932 | 14-scf00369 | 14 |
| AX-157859212 | 18 | 53.837 | KV453058.1  | 5680921 | 14-scf00369 | 14 |
| AX-158212537 | 18 | 53.837 | KV453058.1  | 5711439 | 14-scf00369 | 14 |
| AX-158213052 | 18 | 53.837 | KV453058.1  | 6358328 | 14-scf00369 | 14 |
| AX-158213054 | 18 | 53.837 | KV453058.1  | 6361294 | 14-scf00369 | 14 |
| AX-158213055 | 18 | 53.837 | KV453058.1  | 6361846 | 14-scf00369 | 14 |
| AX-157762872 | 18 | 53.837 | KV453058.1  | 6362608 | 14-scf00369 | 14 |
| AX-158213057 | 18 | 53.837 | KV453058.1  | 6362891 | 14-scf00369 | 14 |
| AX-158213062 | 18 | 53.837 | KV453058.1  | 6366235 | 14-scf00369 | 14 |
| AX-157756598 | 18 | 53.837 | KV453058.1  | 6367023 | 14-scf00369 | 14 |
| AX-158213063 | 18 | 53.837 | KV453058.1  | 6367836 | 14-scf00369 | 14 |
| AX-157859252 | 18 | 53.837 | KV453058.1  | 6524607 | 14-scf00369 | 14 |
| AX-157859255 | 18 | 53.837 | KV453058.1  | 6533618 | 14-scf00369 | 14 |
| AX-157859256 | 18 | 53.837 | KV453058.1  | 6534550 | 14-scf00369 | 14 |
| AX-157859260 | 18 | 53.837 | KV453058.1  | 6562708 | 14-scf00369 | 14 |

|              |    |        |            |         |             |    |
|--------------|----|--------|------------|---------|-------------|----|
| AX-158213156 | 18 | 53.837 | KV453058.1 | 6565528 | 14-scf00369 | 14 |
| AX-157859261 | 18 | 53.837 | KV453058.1 | 6566263 | 14-scf00369 | 14 |
| AX-158213157 | 18 | 53.837 | KV453058.1 | 6568883 | 14-scf00369 | 14 |
| AX-157859262 | 18 | 53.837 | KV453058.1 | 6572082 | 14-scf00369 | 14 |
| AX-157859263 | 18 | 53.837 | KV453058.1 | 6573127 | 14-scf00369 | 14 |
| AX-157859265 | 18 | 53.837 | KV453058.1 | 6585859 | 14-scf00369 | 14 |
| AX-157838652 | 18 | 53.837 | KV453058.1 | 6589819 | 14-scf00369 | 14 |
| AX-157859266 | 18 | 53.837 | KV453058.1 | 6590521 | 14-scf00369 | 14 |
| AX-157859267 | 18 | 53.837 | KV453058.1 | 6591817 | 14-scf00369 | 14 |
| AX-157859269 | 18 | 53.837 | KV453058.1 | 6594787 | 14-scf00369 | 14 |
| AX-157859270 | 18 | 53.837 | KV453058.1 | 6595374 | 14-scf00369 | 14 |
| AX-158213174 | 18 | 53.837 | KV453058.1 | 6597077 | 14-scf00369 | 14 |
| AX-157859272 | 18 | 53.837 | KV453058.1 | 6600964 | 14-scf00369 | 14 |
| AX-157859273 | 18 | 53.837 | KV453058.1 | 6601503 | 14-scf00369 | 14 |
| AX-157859274 | 18 | 53.837 | KV453058.1 | 6603338 | 14-scf00369 | 14 |
| AX-157859276 | 18 | 53.837 | KV453058.1 | 6604545 | 14-scf00369 | 14 |
| AX-157859277 | 18 | 53.837 | KV453058.1 | 6605360 | 14-scf00369 | 14 |
| AX-157859278 | 18 | 53.837 | KV453058.1 | 6607388 | 14-scf00369 | 14 |
| AX-157859280 | 18 | 53.837 | KV453058.1 | 6611276 | 14-scf00369 | 14 |
| AX-157859281 | 18 | 53.837 | KV453058.1 | 6611756 | 14-scf00369 | 14 |
| AX-157859282 | 18 | 53.837 | KV453058.1 | 6612649 | 14-scf00369 | 14 |
| AX-157859283 | 18 | 53.837 | KV453058.1 | 6614848 | 14-scf00369 | 14 |
| AX-157859284 | 18 | 53.837 | KV453058.1 | 6616669 | 14-scf00369 | 14 |
| AX-157859286 | 18 | 53.837 | KV453058.1 | 6618147 | 14-scf00369 | 14 |
| AX-157859289 | 18 | 53.837 | KV453058.1 | 6625285 | 14-scf00369 | 14 |
| AX-157859291 | 18 | 53.837 | KV453058.1 | 6625650 | 14-scf00369 | 14 |
| AX-157859293 | 18 | 53.837 | KV453058.1 | 6628864 | 14-scf00369 | 14 |
| AX-157859294 | 18 | 53.837 | KV453058.1 | 6630829 | 14-scf00369 | 14 |
| AX-157859297 | 18 | 53.837 | KV453058.1 | 6636226 | 14-scf00369 | 14 |
| AX-157859298 | 18 | 53.837 | KV453058.1 | 6639744 | 14-scf00369 | 14 |
| AX-157859299 | 18 | 53.837 | KV453058.1 | 6640486 | 14-scf00369 | 14 |
| AX-157859300 | 18 | 53.837 | KV453058.1 | 6641207 | 14-scf00369 | 14 |
| AX-157859302 | 18 | 53.837 | KV453058.1 | 6642641 | 14-scf00369 | 14 |
| AX-157859303 | 18 | 53.837 | KV453058.1 | 6644284 | 14-scf00369 | 14 |
| AX-157859304 | 18 | 53.837 | KV453058.1 | 6644439 | 14-scf00369 | 14 |
| AX-157859305 | 18 | 53.837 | KV453058.1 | 6644487 | 14-scf00369 | 14 |
| AX-157859306 | 18 | 53.837 | KV453058.1 | 6646001 | 14-scf00369 | 14 |
| AX-157859309 | 18 | 53.837 | KV453058.1 | 6649808 | 14-scf00369 | 14 |
| AX-157859310 | 18 | 53.837 | KV453058.1 | 6654170 | 14-scf00369 | 14 |
| AX-157859311 | 18 | 53.837 | KV453058.1 | 6655766 | 14-scf00369 | 14 |
| AX-157859312 | 18 | 53.837 | KV453058.1 | 6655966 | 14-scf00369 | 14 |
| AX-157859314 | 18 | 53.837 | KV453058.1 | 6662217 | 14-scf00369 | 14 |
| AX-157859315 | 18 | 53.837 | KV453058.1 | 6662492 | 14-scf00369 | 14 |
| AX-157859318 | 18 | 53.837 | KV453058.1 | 6663793 | 14-scf00369 | 14 |
| AX-157859319 | 18 | 53.837 | KV453058.1 | 6664232 | 14-scf00369 | 14 |
| AX-158213215 | 18 | 53.837 | KV453058.1 | 6665881 | 14-scf00369 | 14 |
| AX-157859322 | 18 | 53.837 | KV453058.1 | 6666349 | 14-scf00369 | 14 |
| AX-157859323 | 18 | 53.837 | KV453058.1 | 6667979 | 14-scf00369 | 14 |
| AX-157859325 | 18 | 53.837 | KV453058.1 | 6668726 | 14-scf00369 | 14 |
| AX-157859327 | 18 | 53.837 | KV453058.1 | 6673353 | 14-scf00369 | 14 |
| AX-157859329 | 18 | 53.837 | KV453058.1 | 6675595 | 14-scf00369 | 14 |

|              |    |        |            |         |             |    |
|--------------|----|--------|------------|---------|-------------|----|
| AX-157859331 | 18 | 53.837 | KV453058.1 | 6679144 | 14-scf00369 | 14 |
| AX-157838656 | 18 | 53.837 | KV453058.1 | 6682852 | 14-scf00369 | 14 |
| AX-157859334 | 18 | 53.837 | KV453058.1 | 6685601 | 14-scf00369 | 14 |
| AX-157859335 | 18 | 53.837 | KV453058.1 | 6686760 | 14-scf00369 | 14 |
| AX-157859336 | 18 | 53.837 | KV453058.1 | 6687155 | 14-scf00369 | 14 |
| AX-157859338 | 18 | 53.837 | KV453058.1 | 6692108 | 14-scf00369 | 14 |
| AX-157859340 | 18 | 53.837 | KV453058.1 | 6696663 | 14-scf00369 | 14 |
| AX-157859341 | 18 | 53.837 | KV453058.1 | 6697476 | 14-scf00369 | 14 |
| AX-157859342 | 18 | 53.837 | KV453058.1 | 6698159 | 14-scf00369 | 14 |
| AX-157859343 | 18 | 53.837 | KV453058.1 | 6699617 | 14-scf00369 | 14 |
| AX-157859345 | 18 | 53.837 | KV453058.1 | 6732750 | 14-scf00369 | 14 |
| AX-158213320 | 18 | 53.837 | KV453058.1 | 6854395 | 14-scf00369 | 14 |
| AX-157753765 | 18 | 53.837 | KV453058.1 | 6888870 | 14-scf00369 | 14 |
| AX-158213352 | 18 | 53.837 | KV453058.1 | 6897208 | 14-scf00369 | 14 |
| AX-157859354 | 18 | 53.837 | KV453058.1 | 6936242 | 14-scf00369 | 14 |
| AX-158213391 | 18 | 53.837 | KV453058.1 | 6963048 | 14-scf00369 | 14 |
| AX-158213423 | 18 | 53.837 | KV453058.1 | 7004708 | 14-scf00369 | 14 |
| AX-158213425 | 18 | 53.837 | KV453058.1 | 7006869 | 14-scf00369 | 14 |
| AX-158213450 | 18 | 53.837 | KV453058.1 | 7044772 | 14-scf00369 | 14 |
| AX-158213473 | 18 | 53.837 | KV453058.1 | 7073342 | 14-scf00369 | 14 |
| AX-158213510 | 18 | 53.837 | KV453058.1 | 7118267 | 14-scf00369 | 14 |
| AX-158213516 | 18 | 53.837 | KV453058.1 | 7124814 | 14-scf00369 | 14 |
| AX-158213517 | 18 | 53.837 | KV453058.1 | 7126102 | 14-scf00369 | 14 |
| AX-158213518 | 18 | 53.837 | KV453058.1 | 7127302 | 14-scf00369 | 14 |
| AX-158213519 | 18 | 53.837 | KV453058.1 | 7127398 | 14-scf00369 | 14 |
| AX-158213526 | 18 | 53.837 | KV453058.1 | 7132118 | 14-scf00369 | 14 |
| AX-158213527 | 18 | 53.837 | KV453058.1 | 7132464 | 14-scf00369 | 14 |
| AX-158213531 | 18 | 53.837 | KV453058.1 | 7140666 | 14-scf00369 | 14 |
| AX-158213532 | 18 | 53.837 | KV453058.1 | 7141041 | 14-scf00369 | 14 |
| AX-158213535 | 18 | 53.837 | KV453058.1 | 7143983 | 14-scf00369 | 14 |
| AX-158213540 | 18 | 53.837 | KV453058.1 | 7149546 | 14-scf00369 | 14 |
| AX-158213541 | 18 | 53.837 | KV453058.1 | 7150360 | 14-scf00369 | 14 |
| AX-157838671 | 18 | 53.837 | KV453058.1 | 7153192 | 14-scf00369 | 14 |
| AX-158213543 | 18 | 53.837 | KV453058.1 | 7153532 | 14-scf00369 | 14 |
| AX-158213547 | 18 | 53.837 | KV453058.1 | 7161990 | 14-scf00369 | 14 |
| AX-158213554 | 18 | 53.837 | KV453058.1 | 7169627 | 14-scf00369 | 14 |
| AX-158213561 | 18 | 53.837 | KV453058.1 | 7195370 | 14-scf00369 | 14 |
| AX-158213571 | 18 | 53.837 | KV453058.1 | 7229150 | 14-scf00369 | 14 |
| AX-158213575 | 18 | 53.837 | KV453058.1 | 7230738 | 14-scf00369 | 14 |
| AX-158213580 | 18 | 53.837 | KV453058.1 | 7236434 | 14-scf00369 | 14 |
| AX-158213582 | 18 | 53.837 | KV453058.1 | 7239926 | 14-scf00369 | 14 |
| AX-157838682 | 18 | 53.837 | KV453058.1 | 7247283 | 14-scf00369 | 14 |
| AX-157744334 | 18 | 53.837 | KV453058.1 | 7252992 | 14-scf00369 | 14 |
| AX-158213595 | 18 | 53.837 | KV453058.1 | 7257287 | 14-scf00369 | 14 |
| AX-158213599 | 18 | 53.837 | KV453058.1 | 7262348 | 14-scf00369 | 14 |
| AX-157879641 | 18 | 53.837 | KV453058.1 | 7263676 | 14-scf00369 | 14 |
| AX-158213607 | 18 | 53.837 | KV453058.1 | 7268321 | 14-scf00369 | 14 |
| AX-158213627 | 18 | 53.837 | KV453058.1 | 7300490 | 14-scf00369 | 14 |
| AX-158213628 | 18 | 53.837 | KV453058.1 | 7301074 | 14-scf00369 | 14 |
| AX-158213629 | 18 | 53.837 | KV453058.1 | 7303303 | 14-scf00369 | 14 |
| AX-158213630 | 18 | 53.837 | KV453058.1 | 7304064 | 14-scf00369 | 14 |

|              |    |        |            |         |             |    |
|--------------|----|--------|------------|---------|-------------|----|
| AX-158414576 | 18 | 53.837 | KV453058.1 | 7304510 | 14-scf00369 | 14 |
| AX-157838686 | 18 | 53.837 | KV453058.1 | 7328665 | 14-scf00369 | 14 |
| AX-157694256 | 18 | 53.837 | KV453058.1 | 7335804 | 14-scf00369 | 14 |
| AX-157838687 | 18 | 53.837 | KV453058.1 | 7340739 | 14-scf00369 | 14 |
| AX-157838688 | 18 | 53.837 | KV453058.1 | 7342044 | 14-scf00369 | 14 |
| AX-157838689 | 18 | 53.837 | KV453058.1 | 7342709 | 14-scf00369 | 14 |
| AX-157838691 | 18 | 53.837 | KV453058.1 | 7345259 | 14-scf00369 | 14 |
| AX-157838692 | 18 | 53.837 | KV453058.1 | 7348792 | 14-scf00369 | 14 |
| AX-157838719 | 18 | 53.837 | KV453058.1 | 7550112 | 14-scf00369 | 14 |
| AX-158213798 | 18 | 53.837 | KV453058.1 | 7585023 | 14-scf00369 | 14 |
| AX-157746012 | 18 | 53.837 | KV453058.1 | 7621844 | 14-scf00369 | 14 |
| AX-158213835 | 18 | 53.837 | KV453058.1 | 7635186 | 14-scf00369 | 14 |
| AX-158213837 | 18 | 53.837 | KV453058.1 | 7636237 | 14-scf00369 | 14 |
| AX-158213839 | 18 | 53.837 | KV453058.1 | 7638077 | 14-scf00369 | 14 |
| AX-157887203 | 18 | 53.837 | KV453058.1 | 7640072 | 14-scf00369 | 14 |
| AX-158213841 | 18 | 53.837 | KV453058.1 | 7642093 | 14-scf00369 | 14 |
| AX-158213844 | 18 | 53.837 | KV453058.1 | 7643939 | 14-scf00369 | 14 |
| AX-158213848 | 18 | 53.837 | KV453058.1 | 7646965 | 14-scf00369 | 14 |
| AX-158213849 | 18 | 53.837 | KV453058.1 | 7648125 | 14-scf00369 | 14 |
| AX-157838726 | 18 | 53.837 | KV453058.1 | 7648544 | 14-scf00369 | 14 |
| AX-158213850 | 18 | 53.837 | KV453058.1 | 7651434 | 14-scf00369 | 14 |
| AX-158213851 | 18 | 53.837 | KV453058.1 | 7653691 | 14-scf00369 | 14 |
| AX-158213852 | 18 | 53.837 | KV453058.1 | 7654129 | 14-scf00369 | 14 |
| AX-158213853 | 18 | 53.837 | KV453058.1 | 7655690 | 14-scf00369 | 14 |
| AX-158213854 | 18 | 53.837 | KV453058.1 | 7658873 | 14-scf00369 | 14 |
| AX-157754274 | 18 | 53.837 | KV453058.1 | 7659380 | 14-scf00369 | 14 |
| AX-157838728 | 18 | 53.837 | KV453058.1 | 7659882 | 14-scf00369 | 14 |
| AX-158213855 | 18 | 53.837 | KV453058.1 | 7661153 | 14-scf00369 | 14 |
| AX-158213856 | 18 | 53.837 | KV453058.1 | 7661431 | 14-scf00369 | 14 |
| AX-158213857 | 18 | 53.837 | KV453058.1 | 7661783 | 14-scf00369 | 14 |
| AX-158213858 | 18 | 53.837 | KV453058.1 | 7662998 | 14-scf00369 | 14 |
| AX-158213859 | 18 | 53.837 | KV453058.1 | 7663837 | 14-scf00369 | 14 |
| AX-157838730 | 18 | 53.837 | KV453058.1 | 7664920 | 14-scf00369 | 14 |
| AX-158213860 | 18 | 53.837 | KV453058.1 | 7666321 | 14-scf00369 | 14 |
| AX-158213861 | 18 | 53.837 | KV453058.1 | 7668750 | 14-scf00369 | 14 |
| AX-158418591 | 18 | 53.837 | KV453058.1 | 7670690 | 14-scf00369 | 14 |
| AX-158414585 | 18 | 53.837 | KV453058.1 | 7670910 | 14-scf00369 | 14 |
| AX-158213863 | 18 | 53.837 | KV453058.1 | 7673478 | 14-scf00369 | 14 |
| AX-157742032 | 18 | 53.837 | KV453058.1 | 7673847 | 14-scf00369 | 14 |
| AX-158213864 | 18 | 53.837 | KV453058.1 | 7674466 | 14-scf00369 | 14 |
| AX-158213866 | 18 | 53.837 | KV453058.1 | 7678481 | 14-scf00369 | 14 |
| AX-158386491 | 18 | 53.837 | KV453058.1 | 7678843 | 14-scf00369 | 14 |
| AX-157838732 | 18 | 53.837 | KV453058.1 | 7699855 | 14-scf00369 | 14 |
| AX-158213872 | 18 | 53.837 | KV453058.1 | 7702350 | 14-scf00369 | 14 |
| AX-158213885 | 18 | 53.837 | KV453058.1 | 7727447 | 14-scf00369 | 14 |
| AX-158386493 | 18 | 53.837 | KV453058.1 | 7735131 | 14-scf00369 | 14 |
| AX-158213896 | 18 | 53.837 | KV453058.1 | 7745134 | 14-scf00369 | 14 |
| AX-158213903 | 18 | 53.837 | KV453058.1 | 7765188 | 14-scf00369 | 14 |
| AX-158213904 | 18 | 53.837 | KV453058.1 | 7766693 | 14-scf00369 | 14 |
| AX-158213905 | 18 | 53.837 | KV453058.1 | 7769366 | 14-scf00369 | 14 |
| AX-158213906 | 18 | 53.837 | KV453058.1 | 7769588 | 14-scf00369 | 14 |

|              |    |        |            |         |             |    |
|--------------|----|--------|------------|---------|-------------|----|
| AX-158213907 | 18 | 53.837 | KV453058.1 | 7771715 | 14-scf00369 | 14 |
| AX-158213908 | 18 | 53.837 | KV453058.1 | 7775867 | 14-scf00369 | 14 |
| AX-158213909 | 18 | 53.837 | KV453058.1 | 7776017 | 14-scf00369 | 14 |
| AX-158213910 | 18 | 53.837 | KV453058.1 | 7776602 | 14-scf00369 | 14 |
| AX-157838734 | 18 | 53.837 | KV453058.1 | 7777176 | 14-scf00369 | 14 |
| AX-158213911 | 18 | 53.837 | KV453058.1 | 7779031 | 14-scf00369 | 14 |
| AX-158213912 | 18 | 53.837 | KV453058.1 | 7779453 | 14-scf00369 | 14 |
| AX-158213913 | 18 | 53.837 | KV453058.1 | 7780769 | 14-scf00369 | 14 |
| AX-158213914 | 18 | 53.837 | KV453058.1 | 7784766 | 14-scf00369 | 14 |
| AX-157838735 | 18 | 53.837 | KV453058.1 | 7786472 | 14-scf00369 | 14 |
| AX-157718001 | 18 | 53.837 | KV453058.1 | 7786721 | 14-scf00369 | 14 |
| AX-158213916 | 18 | 53.837 | KV453058.1 | 7787581 | 14-scf00369 | 14 |
| AX-158213919 | 18 | 53.837 | KV453058.1 | 7790299 | 14-scf00369 | 14 |
| AX-157838736 | 18 | 53.837 | KV453058.1 | 7790751 | 14-scf00369 | 14 |
| AX-158213920 | 18 | 53.837 | KV453058.1 | 7791614 | 14-scf00369 | 14 |
| AX-158213921 | 18 | 53.837 | KV453058.1 | 7792246 | 14-scf00369 | 14 |
| AX-158213924 | 18 | 53.837 | KV453058.1 | 7794657 | 14-scf00369 | 14 |
| AX-158213925 | 18 | 53.837 | KV453058.1 | 7794883 | 14-scf00369 | 14 |
| AX-158380811 | 18 | 53.837 | KV453058.1 | 7795298 | 14-scf00369 | 14 |
| AX-158213927 | 18 | 53.837 | KV453058.1 | 7796462 | 14-scf00369 | 14 |
| AX-158213929 | 18 | 53.837 | KV453058.1 | 7798277 | 14-scf00369 | 14 |
| AX-158213931 | 18 | 53.837 | KV453058.1 | 7798674 | 14-scf00369 | 14 |
| AX-158213932 | 18 | 53.837 | KV453058.1 | 7798926 | 14-scf00369 | 14 |
| AX-157838737 | 18 | 53.837 | KV453058.1 | 7799895 | 14-scf00369 | 14 |
| AX-158213934 | 18 | 53.837 | KV453058.1 | 7800734 | 14-scf00369 | 14 |
| AX-158213935 | 18 | 53.837 | KV453058.1 | 7801897 | 14-scf00369 | 14 |
| AX-158213936 | 18 | 53.837 | KV453058.1 | 7803753 | 14-scf00369 | 14 |
| AX-158213938 | 18 | 53.837 | KV453058.1 | 7805437 | 14-scf00369 | 14 |
| AX-158213940 | 18 | 53.837 | KV453058.1 | 7806744 | 14-scf00369 | 14 |
| AX-158213944 | 18 | 53.837 | KV453058.1 | 7811189 | 14-scf00369 | 14 |
| AX-157859371 | 18 | 53.837 | KV453058.1 | 7812692 | 14-scf00369 | 14 |
| AX-158386495 | 18 | 53.837 | KV453058.1 | 7814471 | 14-scf00369 | 14 |
| AX-158213948 | 18 | 53.837 | KV453058.1 | 7815817 | 14-scf00369 | 14 |
| AX-157838738 | 18 | 53.837 | KV453058.1 | 7817078 | 14-scf00369 | 14 |
| AX-157759071 | 18 | 53.837 | KV453058.1 | 7819317 | 14-scf00369 | 14 |
| AX-157774791 | 18 | 53.837 | KV453058.1 | 7820598 | 14-scf00369 | 14 |
| AX-158213951 | 18 | 53.837 | KV453058.1 | 7822735 | 14-scf00369 | 14 |
| AX-157798898 | 18 | 53.837 | KV453058.1 | 7823735 | 14-scf00369 | 14 |
| AX-157838739 | 18 | 53.837 | KV453058.1 | 7829088 | 14-scf00369 | 14 |
| AX-157838740 | 18 | 53.837 | KV453058.1 | 7831369 | 14-scf00369 | 14 |
| AX-157838741 | 18 | 53.837 | KV453058.1 | 7831715 | 14-scf00369 | 14 |
| AX-157747291 | 18 | 53.837 | KV453058.1 | 7833587 | 14-scf00369 | 14 |
| AX-158213954 | 18 | 53.837 | KV453058.1 | 7834988 | 14-scf00369 | 14 |
| AX-158213955 | 18 | 53.837 | KV453058.1 | 7835605 | 14-scf00369 | 14 |
| AX-158213960 | 18 | 53.837 | KV453058.1 | 7846116 | 14-scf00369 | 14 |
| AX-157725948 | 18 | 53.837 | KV453058.1 | 7847395 | 14-scf00369 | 14 |
| AX-158213961 | 18 | 53.837 | KV453058.1 | 7848907 | 14-scf00369 | 14 |
| AX-158213962 | 18 | 53.837 | KV453058.1 | 7852194 | 14-scf00369 | 14 |
| AX-158213963 | 18 | 53.837 | KV453058.1 | 7852926 | 14-scf00369 | 14 |
| AX-158213964 | 18 | 53.837 | KV453058.1 | 7853965 | 14-scf00369 | 14 |
| AX-158213965 | 18 | 53.837 | KV453058.1 | 7854891 | 14-scf00369 | 14 |

|              |    |        |            |         |             |    |
|--------------|----|--------|------------|---------|-------------|----|
| AX-158213966 | 18 | 53.837 | KV453058.1 | 7855595 | 14-scf00369 | 14 |
| AX-158213976 | 18 | 53.837 | KV453058.1 | 7874552 | 14-scf00369 | 14 |
| AX-158213977 | 18 | 53.837 | KV453058.1 | 7876530 | 14-scf00369 | 14 |
| AX-158213978 | 18 | 53.837 | KV453058.1 | 7877434 | 14-scf00369 | 14 |
| AX-158213981 | 18 | 53.837 | KV453058.1 | 7879960 | 14-scf00369 | 14 |
| AX-157859373 | 18 | 53.837 | KV453058.1 | 7900481 | 14-scf00369 | 14 |
| AX-158213996 | 18 | 53.837 | KV453058.1 | 7906266 | 14-scf00369 | 14 |
| AX-158213997 | 18 | 53.837 | KV453058.1 | 7907768 | 14-scf00369 | 14 |
| AX-158214006 | 18 | 53.837 | KV453058.1 | 7918044 | 14-scf00369 | 14 |
| AX-158423201 | 18 | 53.837 | KV453058.1 | 7925246 | 14-scf00369 | 14 |
| AX-158214014 | 18 | 53.837 | KV453058.1 | 7927839 | 14-scf00369 | 14 |
| AX-158214021 | 18 | 53.837 | KV453058.1 | 7949532 | 14-scf00369 | 14 |
| AX-157838751 | 18 | 53.837 | KV453058.1 | 7952509 | 14-scf00369 | 14 |
| AX-157718012 | 18 | 53.837 | KV453058.1 | 7955417 | 14-scf00369 | 14 |
| AX-158214023 | 18 | 53.837 | KV453058.1 | 7959473 | 14-scf00369 | 14 |
| AX-157838752 | 18 | 53.837 | KV453058.1 | 7960789 | 14-scf00369 | 14 |
| AX-158214024 | 18 | 53.837 | KV453058.1 | 7961500 | 14-scf00369 | 14 |
| AX-158214025 | 18 | 53.837 | KV453058.1 | 7962053 | 14-scf00369 | 14 |
| AX-158214027 | 18 | 53.837 | KV453058.1 | 7963504 | 14-scf00369 | 14 |
| AX-158214028 | 18 | 53.837 | KV453058.1 | 7966609 | 14-scf00369 | 14 |
| AX-158214030 | 18 | 53.837 | KV453058.1 | 7971307 | 14-scf00369 | 14 |
| AX-158214031 | 18 | 53.837 | KV453058.1 | 7972253 | 14-scf00369 | 14 |
| AX-158214033 | 18 | 53.837 | KV453058.1 | 7975276 | 14-scf00369 | 14 |
| AX-158214034 | 18 | 53.837 | KV453058.1 | 7976004 | 14-scf00369 | 14 |
| AX-158386497 | 18 | 53.837 | KV453058.1 | 7976703 | 14-scf00369 | 14 |
| AX-158214037 | 18 | 53.837 | KV453058.1 | 7982790 | 14-scf00369 | 14 |
| AX-158214039 | 18 | 53.837 | KV453058.1 | 7984047 | 14-scf00369 | 14 |
| AX-157751059 | 18 | 53.837 | KV453058.1 | 7985094 | 14-scf00369 | 14 |
| AX-157838754 | 18 | 53.837 | KV453058.1 | 7993080 | 14-scf00369 | 14 |
| AX-158214044 | 18 | 53.837 | KV453058.1 | 7994226 | 14-scf00369 | 14 |
| AX-157774116 | 18 | 53.837 | KV453058.1 | 8000213 | 14-scf00369 | 14 |
| AX-158214047 | 18 | 53.837 | KV453058.1 | 8001776 | 14-scf00369 | 14 |
| AX-157838758 | 18 | 53.837 | KV453058.1 | 8002102 | 14-scf00369 | 14 |
| AX-158214048 | 18 | 53.837 | KV453058.1 | 8002173 | 14-scf00369 | 14 |
| AX-158214049 | 18 | 53.837 | KV453058.1 | 8003744 | 14-scf00369 | 14 |
| AX-158214051 | 18 | 53.837 | KV453058.1 | 8005627 | 14-scf00369 | 14 |
| AX-158214053 | 18 | 53.837 | KV453058.1 | 8007572 | 14-scf00369 | 14 |
| AX-157741757 | 18 | 53.837 | KV453058.1 | 8011673 | 14-scf00369 | 14 |
| AX-158214061 | 18 | 53.837 | KV453058.1 | 8013464 | 14-scf00369 | 14 |
| AX-157725327 | 18 | 53.837 | KV453058.1 | 8015293 | 14-scf00369 | 14 |
| AX-158214063 | 18 | 53.837 | KV453058.1 | 8018877 | 14-scf00369 | 14 |
| AX-158214064 | 18 | 53.837 | KV453058.1 | 8019674 | 14-scf00369 | 14 |
| AX-158214066 | 18 | 53.837 | KV453058.1 | 8020942 | 14-scf00369 | 14 |
| AX-158214068 | 18 | 53.837 | KV453058.1 | 8024527 | 14-scf00369 | 14 |
| AX-158214071 | 18 | 53.837 | KV453058.1 | 8029698 | 14-scf00369 | 14 |
| AX-158214072 | 18 | 53.837 | KV453058.1 | 8030526 | 14-scf00369 | 14 |
| AX-158214073 | 18 | 53.837 | KV453058.1 | 8031040 | 14-scf00369 | 14 |
| AX-158214074 | 18 | 53.837 | KV453058.1 | 8031855 | 14-scf00369 | 14 |
| AX-158214077 | 18 | 53.837 | KV453058.1 | 8035358 | 14-scf00369 | 14 |
| AX-158214078 | 18 | 53.837 | KV453058.1 | 8037062 | 14-scf00369 | 14 |
| AX-158214080 | 18 | 53.837 | KV453058.1 | 8038281 | 14-scf00369 | 14 |

|              |    |        |            |         |             |    |
|--------------|----|--------|------------|---------|-------------|----|
| AX-158214081 | 18 | 53.837 | KV453058.1 | 8038823 | 14-scf00369 | 14 |
| AX-158214084 | 18 | 53.837 | KV453058.1 | 8043241 | 14-scf00369 | 14 |
| AX-158214087 | 18 | 53.837 | KV453058.1 | 8045958 | 14-scf00369 | 14 |
| AX-158214089 | 18 | 53.837 | KV453058.1 | 8048249 | 14-scf00369 | 14 |
| AX-158214091 | 18 | 53.837 | KV453058.1 | 8048962 | 14-scf00369 | 14 |
| AX-158214092 | 18 | 53.837 | KV453058.1 | 8049225 | 14-scf00369 | 14 |
| AX-158214095 | 18 | 53.837 | KV453058.1 | 8051478 | 14-scf00369 | 14 |
| AX-158214096 | 18 | 53.837 | KV453058.1 | 8053124 | 14-scf00369 | 14 |
| AX-158214097 | 18 | 53.837 | KV453058.1 | 8054865 | 14-scf00369 | 14 |
| AX-158214098 | 18 | 53.837 | KV453058.1 | 8055418 | 14-scf00369 | 14 |
| AX-158214099 | 18 | 53.837 | KV453058.1 | 8055802 | 14-scf00369 | 14 |
| AX-158214101 | 18 | 53.837 | KV453058.1 | 8057603 | 14-scf00369 | 14 |
| AX-157714994 | 18 | 53.837 | KV453058.1 | 8058531 | 14-scf00369 | 14 |
| AX-158214104 | 18 | 53.837 | KV453058.1 | 8063073 | 14-scf00369 | 14 |
| AX-157859374 | 18 | 53.837 | KV453058.1 | 8067405 | 14-scf00369 | 14 |
| AX-158214108 | 18 | 53.837 | KV453058.1 | 8069099 | 14-scf00369 | 14 |
| AX-158214110 | 18 | 53.837 | KV453058.1 | 8070439 | 14-scf00369 | 14 |
| AX-158214111 | 18 | 53.837 | KV453058.1 | 8071332 | 14-scf00369 | 14 |
| AX-158214113 | 18 | 53.837 | KV453058.1 | 8075566 | 14-scf00369 | 14 |
| AX-158214114 | 18 | 53.837 | KV453058.1 | 8076085 | 14-scf00369 | 14 |
| AX-157838760 | 18 | 53.837 | KV453058.1 | 8079925 | 14-scf00369 | 14 |
| AX-158214117 | 18 | 53.837 | KV453058.1 | 8084456 | 14-scf00369 | 14 |
| AX-157700175 | 18 | 53.837 | KV453058.1 | 8087764 | 14-scf00369 | 14 |
| AX-158214120 | 18 | 53.837 | KV453058.1 | 8088099 | 14-scf00369 | 14 |
| AX-158214122 | 18 | 53.837 | KV453058.1 | 8089954 | 14-scf00369 | 14 |
| AX-158214123 | 18 | 53.837 | KV453058.1 | 8090648 | 14-scf00369 | 14 |
| AX-157748327 | 18 | 53.837 | KV453058.1 | 8090814 | 14-scf00369 | 14 |
| AX-158214124 | 18 | 53.837 | KV453058.1 | 8092038 | 14-scf00369 | 14 |
| AX-158214125 | 18 | 53.837 | KV453058.1 | 8093944 | 14-scf00369 | 14 |
| AX-157838761 | 18 | 53.837 | KV453058.1 | 8096282 | 14-scf00369 | 14 |
| AX-158418596 | 18 | 53.837 | KV453058.1 | 8098468 | 14-scf00369 | 14 |
| AX-158214128 | 18 | 53.837 | KV453058.1 | 8098661 | 14-scf00369 | 14 |
| AX-158214129 | 18 | 53.837 | KV453058.1 | 8100960 | 14-scf00369 | 14 |
| AX-158214130 | 18 | 53.837 | KV453058.1 | 8101635 | 14-scf00369 | 14 |
| AX-158214131 | 18 | 53.837 | KV453058.1 | 8101757 | 14-scf00369 | 14 |
| AX-158214132 | 18 | 53.837 | KV453058.1 | 8102743 | 14-scf00369 | 14 |
| AX-158214133 | 18 | 53.837 | KV453058.1 | 8103166 | 14-scf00369 | 14 |
| AX-157838762 | 18 | 53.837 | KV453058.1 | 8103542 | 14-scf00369 | 14 |
| AX-158214134 | 18 | 53.837 | KV453058.1 | 8107215 | 14-scf00369 | 14 |
| AX-158214135 | 18 | 53.837 | KV453058.1 | 8107446 | 14-scf00369 | 14 |
| AX-158214136 | 18 | 53.837 | KV453058.1 | 8110802 | 14-scf00369 | 14 |
| AX-158214137 | 18 | 53.837 | KV453058.1 | 8113033 | 14-scf00369 | 14 |
| AX-158214138 | 18 | 53.837 | KV453058.1 | 8113753 | 14-scf00369 | 14 |
| AX-157716319 | 18 | 53.837 | KV453058.1 | 8113952 | 14-scf00369 | 14 |
| AX-158214139 | 18 | 53.837 | KV453058.1 | 8114800 | 14-scf00369 | 14 |
| AX-158214140 | 18 | 53.837 | KV453058.1 | 8115715 | 14-scf00369 | 14 |
| AX-157747176 | 18 | 53.837 | KV453058.1 | 8115835 | 14-scf00369 | 14 |
| AX-158214144 | 18 | 53.837 | KV453058.1 | 8118702 | 14-scf00369 | 14 |
| AX-158214145 | 18 | 53.837 | KV453058.1 | 8119406 | 14-scf00369 | 14 |
| AX-157838763 | 18 | 53.837 | KV453058.1 | 8121102 | 14-scf00369 | 14 |
| AX-158214146 | 18 | 53.837 | KV453058.1 | 8121591 | 14-scf00369 | 14 |

|              |    |        |            |         |             |    |
|--------------|----|--------|------------|---------|-------------|----|
| AX-158214147 | 18 | 53.837 | KV453058.1 | 8122398 | 14-scf00369 | 14 |
| AX-157838764 | 18 | 53.837 | KV453058.1 | 8122949 | 14-scf00369 | 14 |
| AX-157838765 | 18 | 53.837 | KV453058.1 | 8123064 | 14-scf00369 | 14 |
| AX-157887213 | 18 | 53.837 | KV453058.1 | 8124459 | 14-scf00369 | 14 |
| AX-157879646 | 18 | 53.837 | KV453058.1 | 8125041 | 14-scf00369 | 14 |
| AX-158214150 | 18 | 53.837 | KV453058.1 | 8127620 | 14-scf00369 | 14 |
| AX-158214151 | 18 | 53.837 | KV453058.1 | 8128021 | 14-scf00369 | 14 |
| AX-158214154 | 18 | 53.837 | KV453058.1 | 8130376 | 14-scf00369 | 14 |
| AX-157741584 | 18 | 53.837 | KV453058.1 | 8131723 | 14-scf00369 | 14 |
| AX-158214157 | 18 | 53.837 | KV453058.1 | 8131975 | 14-scf00369 | 14 |
| AX-157838766 | 18 | 53.837 | KV453058.1 | 8133846 | 14-scf00369 | 14 |
| AX-158214159 | 18 | 53.837 | KV453058.1 | 8135805 | 14-scf00369 | 14 |
| AX-158214160 | 18 | 53.837 | KV453058.1 | 8137566 | 14-scf00369 | 14 |
| AX-158214161 | 18 | 53.837 | KV453058.1 | 8140247 | 14-scf00369 | 14 |
| AX-157775379 | 18 | 53.837 | KV453058.1 | 8141123 | 14-scf00369 | 14 |
| AX-158214162 | 18 | 53.837 | KV453058.1 | 8141257 | 14-scf00369 | 14 |
| AX-158214163 | 18 | 53.837 | KV453058.1 | 8141602 | 14-scf00369 | 14 |
| AX-158214164 | 18 | 53.837 | KV453058.1 | 8142113 | 14-scf00369 | 14 |
| AX-158214165 | 18 | 53.837 | KV453058.1 | 8142987 | 14-scf00369 | 14 |
| AX-157717201 | 18 | 53.837 | KV453058.1 | 8143358 | 14-scf00369 | 14 |
| AX-158214167 | 18 | 53.837 | KV453058.1 | 8145197 | 14-scf00369 | 14 |
| AX-158214168 | 18 | 53.837 | KV453058.1 | 8145532 | 14-scf00369 | 14 |
| AX-157838768 | 18 | 53.837 | KV453058.1 | 8148419 | 14-scf00369 | 14 |
| AX-157867006 | 18 | 53.837 | KV453058.1 | 8149289 | 14-scf00369 | 14 |
| AX-158214171 | 18 | 53.837 | KV453058.1 | 8152038 | 14-scf00369 | 14 |
| AX-158214172 | 18 | 53.837 | KV453058.1 | 8153129 | 14-scf00369 | 14 |
| AX-157838769 | 18 | 53.837 | KV453058.1 | 8154697 | 14-scf00369 | 14 |
| AX-157838770 | 18 | 53.837 | KV453058.1 | 8155767 | 14-scf00369 | 14 |
| AX-157838771 | 18 | 53.837 | KV453058.1 | 8156836 | 14-scf00369 | 14 |
| AX-158214173 | 18 | 53.837 | KV453058.1 | 8157935 | 14-scf00369 | 14 |
| AX-158214176 | 18 | 53.837 | KV453058.1 | 8161786 | 14-scf00369 | 14 |
| AX-157759097 | 18 | 53.837 | KV453058.1 | 8165547 | 14-scf00369 | 14 |
| AX-158214178 | 18 | 53.837 | KV453058.1 | 8165683 | 14-scf00369 | 14 |
| AX-158214179 | 18 | 53.837 | KV453058.1 | 8167156 | 14-scf00369 | 14 |
| AX-158214180 | 18 | 53.837 | KV453058.1 | 8167687 | 14-scf00369 | 14 |
| AX-158214181 | 18 | 53.837 | KV453058.1 | 8170070 | 14-scf00369 | 14 |
| AX-158214183 | 18 | 53.837 | KV453058.1 | 8171826 | 14-scf00369 | 14 |
| AX-158214184 | 18 | 53.837 | KV453058.1 | 8173718 | 14-scf00369 | 14 |
| AX-158214186 | 18 | 53.837 | KV453058.1 | 8175128 | 14-scf00369 | 14 |
| AX-158214187 | 18 | 53.837 | KV453058.1 | 8175877 | 14-scf00369 | 14 |
| AX-158214188 | 18 | 53.837 | KV453058.1 | 8176455 | 14-scf00369 | 14 |
| AX-158214189 | 18 | 53.837 | KV453058.1 | 8177092 | 14-scf00369 | 14 |
| AX-158214193 | 18 | 53.837 | KV453058.1 | 8180385 | 14-scf00369 | 14 |
| AX-158214194 | 18 | 53.837 | KV453058.1 | 8182030 | 14-scf00369 | 14 |
| AX-158214195 | 18 | 53.837 | KV453058.1 | 8182396 | 14-scf00369 | 14 |
| AX-158386500 | 18 | 53.837 | KV453058.1 | 8182858 | 14-scf00369 | 14 |
| AX-158214196 | 18 | 53.837 | KV453058.1 | 8183231 | 14-scf00369 | 14 |
| AX-158214197 | 18 | 53.837 | KV453058.1 | 8183700 | 14-scf00369 | 14 |
| AX-158214198 | 18 | 53.837 | KV453058.1 | 8184385 | 14-scf00369 | 14 |
| AX-158214199 | 18 | 53.837 | KV453058.1 | 8185633 | 14-scf00369 | 14 |
| AX-158214200 | 18 | 53.837 | KV453058.1 | 8186792 | 14-scf00369 | 14 |



|              |    |        |            |         |             |    |
|--------------|----|--------|------------|---------|-------------|----|
| AX-158214202 | 18 | 53.837 | KV453058.1 | 8188251 | 14-scf00369 | 14 |
| AX-158214203 | 18 | 53.837 | KV453058.1 | 8188903 | 14-scf00369 | 14 |
| AX-158214204 | 18 | 53.837 | KV453058.1 | 8189431 | 14-scf00369 | 14 |
| AX-158214205 | 18 | 53.837 | KV453058.1 | 8191432 | 14-scf00369 | 14 |
| AX-158214206 | 18 | 53.837 | KV453058.1 | 8191723 | 14-scf00369 | 14 |
| AX-158214207 | 18 | 53.837 | KV453058.1 | 8192798 | 14-scf00369 | 14 |
| AX-158214208 | 18 | 53.837 | KV453058.1 | 8193010 | 14-scf00369 | 14 |
| AX-158214209 | 18 | 53.837 | KV453058.1 | 8194230 | 14-scf00369 | 14 |
| AX-158214211 | 18 | 53.837 | KV453058.1 | 8196910 | 14-scf00369 | 14 |
| AX-158214212 | 18 | 53.837 | KV453058.1 | 8197191 | 14-scf00369 | 14 |
| AX-158214213 | 18 | 53.837 | KV453058.1 | 8198390 | 14-scf00369 | 14 |
| AX-158214214 | 18 | 53.837 | KV453058.1 | 8198826 | 14-scf00369 | 14 |
| AX-158214215 | 18 | 53.837 | KV453058.1 | 8200075 | 14-scf00369 | 14 |
| AX-158214216 | 18 | 53.837 | KV453058.1 | 8200663 | 14-scf00369 | 14 |
| AX-158214217 | 18 | 53.837 | KV453058.1 | 8201120 | 14-scf00369 | 14 |
| AX-158214218 | 18 | 53.837 | KV453058.1 | 8201805 | 14-scf00369 | 14 |
| AX-158214220 | 18 | 53.837 | KV453058.1 | 8203604 | 14-scf00369 | 14 |
| AX-158214221 | 18 | 53.837 | KV453058.1 | 8204732 | 14-scf00369 | 14 |
| AX-158214222 | 18 | 53.837 | KV453058.1 | 8205661 | 14-scf00369 | 14 |
| AX-158214223 | 18 | 53.837 | KV453058.1 | 8206109 | 14-scf00369 | 14 |
| AX-158214224 | 18 | 53.837 | KV453058.1 | 8206624 | 14-scf00369 | 14 |
| AX-158214226 | 18 | 53.837 | KV453058.1 | 8209736 | 14-scf00369 | 14 |
| AX-158214227 | 18 | 53.837 | KV453058.1 | 8209966 | 14-scf00369 | 14 |
| AX-158214228 | 18 | 53.837 | KV453058.1 | 8210752 | 14-scf00369 | 14 |
| AX-158214229 | 18 | 53.837 | KV453058.1 | 8210874 | 14-scf00369 | 14 |
| AX-158214230 | 18 | 53.837 | KV453058.1 | 8212047 | 14-scf00369 | 14 |
| AX-158214231 | 18 | 53.837 | KV453058.1 | 8212132 | 14-scf00369 | 14 |
| AX-157859376 | 18 | 53.837 | KV453058.1 | 8212542 | 14-scf00369 | 14 |
| AX-158214234 | 18 | 53.837 | KV453058.1 | 8218133 | 14-scf00369 | 14 |
| AX-158214235 | 18 | 53.837 | KV453058.1 | 8219785 | 14-scf00369 | 14 |
| AX-158214238 | 18 | 53.837 | KV453058.1 | 8223388 | 14-scf00369 | 14 |
| AX-157867007 | 18 | 53.837 | KV453058.1 | 8224056 | 14-scf00369 | 14 |
| AX-158214239 | 18 | 53.837 | KV453058.1 | 8224892 | 14-scf00369 | 14 |
| AX-158214240 | 18 | 53.837 | KV453058.1 | 8225403 | 14-scf00369 | 14 |
| AX-157751788 | 18 | 53.837 | KV453058.1 | 8226194 | 14-scf00369 | 14 |
| AX-157741083 | 18 | 53.837 | KV453058.1 | 8226626 | 14-scf00369 | 14 |
| AX-158214241 | 18 | 53.837 | KV453058.1 | 8228347 | 14-scf00369 | 14 |
| AX-157838775 | 18 | 53.837 | KV453058.1 | 8230258 | 14-scf00369 | 14 |
| AX-158214242 | 18 | 53.837 | KV453058.1 | 8230591 | 14-scf00369 | 14 |
| AX-157838776 | 18 | 53.837 | KV453058.1 | 8231300 | 14-scf00369 | 14 |
| AX-157738553 | 18 | 53.837 | KV453058.1 | 8231585 | 14-scf00369 | 14 |
| AX-158214243 | 18 | 53.837 | KV453058.1 | 8232290 | 14-scf00369 | 14 |
| AX-158414599 | 18 | 53.837 | KV453058.1 | 8232943 | 14-scf00369 | 14 |
| AX-158414600 | 18 | 53.837 | KV453058.1 | 8233168 | 14-scf00369 | 14 |
| AX-157838777 | 18 | 53.837 | KV453058.1 | 8234519 | 14-scf00369 | 14 |
| AX-158214244 | 18 | 53.837 | KV453058.1 | 8234606 | 14-scf00369 | 14 |
| AX-157838778 | 18 | 53.837 | KV453058.1 | 8235382 | 14-scf00369 | 14 |
| AX-157838779 | 18 | 53.837 | KV453058.1 | 8235949 | 14-scf00369 | 14 |
| AX-158214245 | 18 | 53.837 | KV453058.1 | 8236768 | 14-scf00369 | 14 |
| AX-158214246 | 18 | 53.837 | KV453058.1 | 8238215 | 14-scf00369 | 14 |
| AX-157748368 | 18 | 53.837 | KV453058.1 | 8239046 | 14-scf00369 | 14 |

|              |    |        |            |         |             |    |
|--------------|----|--------|------------|---------|-------------|----|
| AX-158214247 | 18 | 53.837 | KV453058.1 | 8239442 | 14-scf00369 | 14 |
| AX-158214250 | 18 | 53.837 | KV453058.1 | 8241134 | 14-scf00369 | 14 |
| AX-157771424 | 18 | 53.837 | KV453058.1 | 8242795 | 14-scf00369 | 14 |
| AX-158214251 | 18 | 53.837 | KV453058.1 | 8244029 | 14-scf00369 | 14 |
| AX-157838780 | 18 | 53.837 | KV453058.1 | 8244511 | 14-scf00369 | 14 |
| AX-158214252 | 18 | 53.837 | KV453058.1 | 8246826 | 14-scf00369 | 14 |
| AX-157775672 | 18 | 53.837 | KV453058.1 | 8246915 | 14-scf00369 | 14 |
| AX-157838781 | 18 | 53.837 | KV453058.1 | 8247488 | 14-scf00369 | 14 |
| AX-157859377 | 18 | 53.837 | KV453058.1 | 8248401 | 14-scf00369 | 14 |
| AX-158214255 | 18 | 53.837 | KV453058.1 | 8251198 | 14-scf00369 | 14 |
| AX-158414602 | 18 | 53.837 | KV453058.1 | 8252007 | 14-scf00369 | 14 |
| AX-158214256 | 18 | 53.837 | KV453058.1 | 8253966 | 14-scf00369 | 14 |
| AX-158214257 | 18 | 53.837 | KV453058.1 | 8255378 | 14-scf00369 | 14 |
| AX-158214258 | 18 | 53.837 | KV453058.1 | 8255646 | 14-scf00369 | 14 |
| AX-158214260 | 18 | 53.837 | KV453058.1 | 8256751 | 14-scf00369 | 14 |
| AX-158214261 | 18 | 53.837 | KV453058.1 | 8257441 | 14-scf00369 | 14 |
| AX-158214262 | 18 | 53.837 | KV453058.1 | 8258059 | 14-scf00369 | 14 |
| AX-158214263 | 18 | 53.837 | KV453058.1 | 8258496 | 14-scf00369 | 14 |
| AX-158214264 | 18 | 53.837 | KV453058.1 | 8258957 | 14-scf00369 | 14 |
| AX-157838784 | 18 | 53.837 | KV453058.1 | 8259855 | 14-scf00369 | 14 |
| AX-158214266 | 18 | 53.837 | KV453058.1 | 8262637 | 14-scf00369 | 14 |
| AX-158214267 | 18 | 53.837 | KV453058.1 | 8263450 | 14-scf00369 | 14 |
| AX-157838785 | 18 | 53.837 | KV453058.1 | 8263915 | 14-scf00369 | 14 |
| AX-157713863 | 18 | 53.837 | KV453058.1 | 8264623 | 14-scf00369 | 14 |
| AX-158214268 | 18 | 53.837 | KV453058.1 | 8264854 | 14-scf00369 | 14 |
| AX-157859378 | 18 | 53.837 | KV453058.1 | 8268035 | 14-scf00369 | 14 |
| AX-158214269 | 18 | 53.837 | KV453058.1 | 8269774 | 14-scf00369 | 14 |
| AX-158214270 | 18 | 53.837 | KV453058.1 | 8270709 | 14-scf00369 | 14 |
| AX-158214272 | 18 | 53.837 | KV453058.1 | 8272681 | 14-scf00369 | 14 |
| AX-158214273 | 18 | 53.837 | KV453058.1 | 8273055 | 14-scf00369 | 14 |
| AX-158214274 | 18 | 53.837 | KV453058.1 | 8275649 | 14-scf00369 | 14 |
| AX-158214278 | 18 | 53.837 | KV453058.1 | 8280044 | 14-scf00369 | 14 |
| AX-158214280 | 18 | 53.837 | KV453058.1 | 8283621 | 14-scf00369 | 14 |
| AX-157726528 | 18 | 53.837 | KV453058.1 | 8284147 | 14-scf00369 | 14 |
| AX-158214281 | 18 | 53.837 | KV453058.1 | 8286144 | 14-scf00369 | 14 |
| AX-158214283 | 18 | 53.837 | KV453058.1 | 8289503 | 14-scf00369 | 14 |
| AX-158214285 | 18 | 53.837 | KV453058.1 | 8290573 | 14-scf00369 | 14 |
| AX-158214286 | 18 | 53.837 | KV453058.1 | 8291473 | 14-scf00369 | 14 |
| AX-158214287 | 18 | 53.837 | KV453058.1 | 8291875 | 14-scf00369 | 14 |
| AX-158214288 | 18 | 53.837 | KV453058.1 | 8292967 | 14-scf00369 | 14 |
| AX-157742250 | 18 | 53.837 | KV453058.1 | 8293790 | 14-scf00369 | 14 |
| AX-158214289 | 18 | 53.837 | KV453058.1 | 8294366 | 14-scf00369 | 14 |
| AX-157838786 | 18 | 53.837 | KV453058.1 | 8294636 | 14-scf00369 | 14 |
| AX-158214290 | 18 | 53.837 | KV453058.1 | 8296331 | 14-scf00369 | 14 |
| AX-158214291 | 18 | 53.837 | KV453058.1 | 8297784 | 14-scf00369 | 14 |
| AX-158214294 | 18 | 53.837 | KV453058.1 | 8299586 | 14-scf00369 | 14 |
| AX-158214295 | 18 | 53.837 | KV453058.1 | 8300039 | 14-scf00369 | 14 |
| AX-158214296 | 18 | 53.837 | KV453058.1 | 8300793 | 14-scf00369 | 14 |
| AX-158214297 | 18 | 53.837 | KV453058.1 | 8303618 | 14-scf00369 | 14 |
| AX-157838788 | 18 | 53.837 | KV453058.1 | 8304227 | 14-scf00369 | 14 |
| AX-158214299 | 18 | 53.837 | KV453058.1 | 8305320 | 14-scf00369 | 14 |

|              |    |        |            |         |             |    |
|--------------|----|--------|------------|---------|-------------|----|
| AX-158214300 | 18 | 53.837 | KV453058.1 | 8305408 | 14-scf00369 | 14 |
| AX-158214301 | 18 | 53.837 | KV453058.1 | 8307049 | 14-scf00369 | 14 |
| AX-158214302 | 18 | 53.837 | KV453058.1 | 8307454 | 14-scf00369 | 14 |
| AX-158214303 | 18 | 53.837 | KV453058.1 | 8307860 | 14-scf00369 | 14 |
| AX-157698133 | 18 | 53.837 | KV453058.1 | 8308035 | 14-scf00369 | 14 |
| AX-158214304 | 18 | 53.837 | KV453058.1 | 8308551 | 14-scf00369 | 14 |
| AX-158414603 | 18 | 53.837 | KV453058.1 | 8309438 | 14-scf00369 | 14 |
| AX-158214305 | 18 | 53.837 | KV453058.1 | 8309611 | 14-scf00369 | 14 |
| AX-158214306 | 18 | 53.837 | KV453058.1 | 8311863 | 14-scf00369 | 14 |
| AX-158214307 | 18 | 53.837 | KV453058.1 | 8313844 | 14-scf00369 | 14 |
| AX-158214308 | 18 | 53.837 | KV453058.1 | 8314284 | 14-scf00369 | 14 |
| AX-157715699 | 18 | 53.837 | KV453058.1 | 8315408 | 14-scf00369 | 14 |
| AX-158214310 | 18 | 53.837 | KV453058.1 | 8315533 | 14-scf00369 | 14 |
| AX-158214311 | 18 | 53.837 | KV453058.1 | 8315760 | 14-scf00369 | 14 |
| AX-158214313 | 18 | 53.837 | KV453058.1 | 8316593 | 14-scf00369 | 14 |
| AX-158214314 | 18 | 53.837 | KV453058.1 | 8317767 | 14-scf00369 | 14 |
| AX-158214316 | 18 | 53.837 | KV453058.1 | 8319643 | 14-scf00369 | 14 |
| AX-158214317 | 18 | 53.837 | KV453058.1 | 8319879 | 14-scf00369 | 14 |
| AX-158214319 | 18 | 53.837 | KV453058.1 | 8321665 | 14-scf00369 | 14 |
| AX-158214320 | 18 | 53.837 | KV453058.1 | 8322456 | 14-scf00369 | 14 |
| AX-158214321 | 18 | 53.837 | KV453058.1 | 8324727 | 14-scf00369 | 14 |
| AX-158214322 | 18 | 53.837 | KV453058.1 | 8325049 | 14-scf00369 | 14 |
| AX-158214323 | 18 | 53.837 | KV453058.1 | 8327364 | 14-scf00369 | 14 |
| AX-157838789 | 18 | 53.837 | KV453058.1 | 8327731 | 14-scf00369 | 14 |
| AX-158214324 | 18 | 53.837 | KV453058.1 | 8328048 | 14-scf00369 | 14 |
| AX-158214325 | 18 | 53.837 | KV453058.1 | 8329917 | 14-scf00369 | 14 |
| AX-158214326 | 18 | 53.837 | KV453058.1 | 8332232 | 14-scf00369 | 14 |
| AX-158214328 | 18 | 53.837 | KV453058.1 | 8334280 | 14-scf00369 | 14 |
| AX-157838790 | 18 | 53.837 | KV453058.1 | 8334650 | 14-scf00369 | 14 |
| AX-157838791 | 18 | 53.837 | KV453058.1 | 8335824 | 14-scf00369 | 14 |
| AX-158214329 | 18 | 53.837 | KV453058.1 | 8337299 | 14-scf00369 | 14 |
| AX-158214330 | 18 | 53.837 | KV453058.1 | 8338453 | 14-scf00369 | 14 |
| AX-158214332 | 18 | 53.837 | KV453058.1 | 8342315 | 14-scf00369 | 14 |
| AX-158214333 | 18 | 53.837 | KV453058.1 | 8343265 | 14-scf00369 | 14 |
| AX-158214335 | 18 | 53.837 | KV453058.1 | 8345341 | 14-scf00369 | 14 |
| AX-158214337 | 18 | 53.837 | KV453058.1 | 8348430 | 14-scf00369 | 14 |
| AX-158214339 | 18 | 53.837 | KV453058.1 | 8349607 | 14-scf00369 | 14 |
| AX-158214340 | 18 | 53.837 | KV453058.1 | 8350477 | 14-scf00369 | 14 |
| AX-158214341 | 18 | 53.837 | KV453058.1 | 8351380 | 14-scf00369 | 14 |
| AX-158214342 | 18 | 53.837 | KV453058.1 | 8351967 | 14-scf00369 | 14 |
| AX-158214343 | 18 | 53.837 | KV453058.1 | 8352386 | 14-scf00369 | 14 |
| AX-158214344 | 18 | 53.837 | KV453058.1 | 8353506 | 14-scf00369 | 14 |
| AX-158214346 | 18 | 53.837 | KV453058.1 | 8356857 | 14-scf00369 | 14 |
| AX-158214348 | 18 | 53.837 | KV453058.1 | 8359276 | 14-scf00369 | 14 |
| AX-158214351 | 18 | 53.837 | KV453058.1 | 8363836 | 14-scf00369 | 14 |
| AX-157753080 | 18 | 53.837 | KV453058.1 | 8365538 | 14-scf00369 | 14 |
| AX-157859379 | 18 | 53.837 | KV453058.1 | 8365794 | 14-scf00369 | 14 |
| AX-157859380 | 18 | 53.837 | KV453058.1 | 8367728 | 14-scf00369 | 14 |
| AX-157859381 | 18 | 53.837 | KV453058.1 | 8370094 | 14-scf00369 | 14 |
| AX-158214352 | 18 | 53.837 | KV453058.1 | 8370423 | 14-scf00369 | 14 |
| AX-158214353 | 18 | 53.837 | KV453058.1 | 8371889 | 14-scf00369 | 14 |

|              |    |        |            |         |             |    |
|--------------|----|--------|------------|---------|-------------|----|
| AX-158214354 | 18 | 53.837 | KV453058.1 | 8372744 | 14-scf00369 | 14 |
| AX-158214356 | 18 | 53.837 | KV453058.1 | 8375651 | 14-scf00369 | 14 |
| AX-158214357 | 18 | 53.837 | KV453058.1 | 8377819 | 14-scf00369 | 14 |
| AX-158214358 | 18 | 53.837 | KV453058.1 | 8380747 | 14-scf00369 | 14 |
| AX-157838793 | 18 | 53.837 | KV453058.1 | 8381123 | 14-scf00369 | 14 |
| AX-158214359 | 18 | 53.837 | KV453058.1 | 8381811 | 14-scf00369 | 14 |
| AX-158214360 | 18 | 53.837 | KV453058.1 | 8385074 | 14-scf00369 | 14 |
| AX-158214361 | 18 | 53.837 | KV453058.1 | 8386752 | 14-scf00369 | 14 |
| AX-158214363 | 18 | 53.837 | KV453058.1 | 8388099 | 14-scf00369 | 14 |
| AX-158214364 | 18 | 53.837 | KV453058.1 | 8389134 | 14-scf00369 | 14 |
| AX-158214365 | 18 | 53.837 | KV453058.1 | 8390648 | 14-scf00369 | 14 |
| AX-158214366 | 18 | 53.837 | KV453058.1 | 8392204 | 14-scf00369 | 14 |
| AX-158214368 | 18 | 53.837 | KV453058.1 | 8393132 | 14-scf00369 | 14 |
| AX-157754030 | 18 | 53.837 | KV453058.1 | 8394946 | 14-scf00369 | 14 |
| AX-158214369 | 18 | 53.837 | KV453058.1 | 8395855 | 14-scf00369 | 14 |
| AX-158214371 | 18 | 53.837 | KV453058.1 | 8401525 | 14-scf00369 | 14 |
| AX-158214372 | 18 | 53.837 | KV453058.1 | 8403053 | 14-scf00369 | 14 |
| AX-158214373 | 18 | 53.837 | KV453058.1 | 8403523 | 14-scf00369 | 14 |
| AX-158214374 | 18 | 53.837 | KV453058.1 | 8404003 | 14-scf00369 | 14 |
| AX-158214376 | 18 | 53.837 | KV453058.1 | 8408337 | 14-scf00369 | 14 |
| AX-158214377 | 18 | 53.837 | KV453058.1 | 8408691 | 14-scf00369 | 14 |
| AX-158214379 | 18 | 53.837 | KV453058.1 | 8410236 | 14-scf00369 | 14 |
| AX-158214380 | 18 | 53.837 | KV453058.1 | 8410837 | 14-scf00369 | 14 |
| AX-158214381 | 18 | 53.837 | KV453058.1 | 8411971 | 14-scf00369 | 14 |
| AX-158214382 | 18 | 53.837 | KV453058.1 | 8412432 | 14-scf00369 | 14 |
| AX-158214383 | 18 | 53.837 | KV453058.1 | 8414827 | 14-scf00369 | 14 |
| AX-157859383 | 18 | 53.837 | KV453058.1 | 8419826 | 14-scf00369 | 14 |
| AX-158214386 | 18 | 53.837 | KV453058.1 | 8419991 | 14-scf00369 | 14 |
| AX-158214387 | 18 | 53.837 | KV453058.1 | 8421746 | 14-scf00369 | 14 |
| AX-158214388 | 18 | 53.837 | KV453058.1 | 8422612 | 14-scf00369 | 14 |
| AX-158214390 | 18 | 53.837 | KV453058.1 | 8426673 | 14-scf00369 | 14 |
| AX-158214391 | 18 | 53.837 | KV453058.1 | 8427312 | 14-scf00369 | 14 |
| AX-158214395 | 18 | 53.837 | KV453058.1 | 8432375 | 14-scf00369 | 14 |
| AX-158214396 | 18 | 53.837 | KV453058.1 | 8433585 | 14-scf00369 | 14 |
| AX-157750656 | 18 | 53.837 | KV453058.1 | 8434070 | 14-scf00369 | 14 |
| AX-158214397 | 18 | 53.837 | KV453058.1 | 8434766 | 14-scf00369 | 14 |
| AX-158380814 | 18 | 53.837 | KV453058.1 | 8435066 | 14-scf00369 | 14 |
| AX-158214398 | 18 | 53.837 | KV453058.1 | 8435772 | 14-scf00369 | 14 |
| AX-158214399 | 18 | 53.837 | KV453058.1 | 8436792 | 14-scf00369 | 14 |
| AX-157838794 | 18 | 53.837 | KV453058.1 | 8439180 | 14-scf00369 | 14 |
| AX-158214400 | 18 | 53.837 | KV453058.1 | 8440157 | 14-scf00369 | 14 |
| AX-158214401 | 18 | 53.837 | KV453058.1 | 8440801 | 14-scf00369 | 14 |
| AX-158214403 | 18 | 53.837 | KV453058.1 | 8441621 | 14-scf00369 | 14 |
| AX-158214406 | 18 | 53.837 | KV453058.1 | 8444097 | 14-scf00369 | 14 |
| AX-158214407 | 18 | 53.837 | KV453058.1 | 8444646 | 14-scf00369 | 14 |
| AX-158214408 | 18 | 53.837 | KV453058.1 | 8445762 | 14-scf00369 | 14 |
| AX-158214409 | 18 | 53.837 | KV453058.1 | 8448062 | 14-scf00369 | 14 |
| AX-158214410 | 18 | 53.837 | KV453058.1 | 8448657 | 14-scf00369 | 14 |
| AX-158214411 | 18 | 53.837 | KV453058.1 | 8449562 | 14-scf00369 | 14 |
| AX-158214412 | 18 | 53.837 | KV453058.1 | 8450095 | 14-scf00369 | 14 |
| AX-158214413 | 18 | 53.837 | KV453058.1 | 8451416 | 14-scf00369 | 14 |

|              |    |        |            |         |             |    |
|--------------|----|--------|------------|---------|-------------|----|
| AX-158214415 | 18 | 53.837 | KV453058.1 | 8453761 | 14-scf00369 | 14 |
| AX-158214416 | 18 | 53.837 | KV453058.1 | 8454590 | 14-scf00369 | 14 |
| AX-158214418 | 18 | 53.837 | KV453058.1 | 8457319 | 14-scf00369 | 14 |
| AX-157748122 | 18 | 53.837 | KV453058.1 | 8457986 | 14-scf00369 | 14 |
| AX-158214419 | 18 | 53.837 | KV453058.1 | 8458873 | 14-scf00369 | 14 |
| AX-158214420 | 18 | 53.837 | KV453058.1 | 8460030 | 14-scf00369 | 14 |
| AX-158214421 | 18 | 53.837 | KV453058.1 | 8460722 | 14-scf00369 | 14 |
| AX-158214422 | 18 | 53.837 | KV453058.1 | 8465907 | 14-scf00369 | 14 |
| AX-157838795 | 18 | 53.837 | KV453058.1 | 8466348 | 14-scf00369 | 14 |
| AX-158214423 | 18 | 53.837 | KV453058.1 | 8466759 | 14-scf00369 | 14 |
| AX-158214425 | 18 | 53.837 | KV453058.1 | 8468017 | 14-scf00369 | 14 |
| AX-157746933 | 18 | 53.837 | KV453058.1 | 8468426 | 14-scf00369 | 14 |
| AX-157838796 | 18 | 53.837 | KV453058.1 | 8468681 | 14-scf00369 | 14 |
| AX-158214426 | 18 | 53.837 | KV453058.1 | 8469172 | 14-scf00369 | 14 |
| AX-158214427 | 18 | 53.837 | KV453058.1 | 8471702 | 14-scf00369 | 14 |
| AX-157741360 | 18 | 53.837 | KV453058.1 | 8472054 | 14-scf00369 | 14 |
| AX-158214428 | 18 | 53.837 | KV453058.1 | 8474845 | 14-scf00369 | 14 |
| AX-158214429 | 18 | 53.837 | KV453058.1 | 8476241 | 14-scf00369 | 14 |
| AX-158214430 | 18 | 53.837 | KV453058.1 | 8477451 | 14-scf00369 | 14 |
| AX-158214431 | 18 | 53.837 | KV453058.1 | 8478163 | 14-scf00369 | 14 |
| AX-157746027 | 18 | 53.837 | KV453058.1 | 8480788 | 14-scf00369 | 14 |
| AX-158214435 | 18 | 53.837 | KV453058.1 | 8487282 | 14-scf00369 | 14 |
| AX-158380815 | 18 | 53.837 | KV453058.1 | 8487438 | 14-scf00369 | 14 |
| AX-158214436 | 18 | 53.837 | KV453058.1 | 8489557 | 14-scf00369 | 14 |
| AX-157774297 | 18 | 53.837 | KV453058.1 | 8494458 | 14-scf00369 | 14 |
| AX-158214437 | 18 | 53.837 | KV453058.1 | 8497104 | 14-scf00369 | 14 |
| AX-158214438 | 18 | 53.837 | KV453058.1 | 8499637 | 14-scf00369 | 14 |
| AX-158214439 | 18 | 53.837 | KV453058.1 | 8500421 | 14-scf00369 | 14 |
| AX-158214440 | 18 | 53.837 | KV453058.1 | 8501439 | 14-scf00369 | 14 |
| AX-158214441 | 18 | 53.837 | KV453058.1 | 8501809 | 14-scf00369 | 14 |
| AX-158214442 | 18 | 53.837 | KV453058.1 | 8502194 | 14-scf00369 | 14 |
| AX-158214443 | 18 | 53.837 | KV453058.1 | 8502328 | 14-scf00369 | 14 |
| AX-158214444 | 18 | 53.837 | KV453058.1 | 8502727 | 14-scf00369 | 14 |
| AX-158214445 | 18 | 53.837 | KV453058.1 | 8504113 | 14-scf00369 | 14 |
| AX-157775060 | 18 | 53.837 | KV453058.1 | 8504926 | 14-scf00369 | 14 |
| AX-158214446 | 18 | 53.837 | KV453058.1 | 8505748 | 14-scf00369 | 14 |
| AX-158214447 | 18 | 53.837 | KV453058.1 | 8506350 | 14-scf00369 | 14 |
| AX-158214449 | 18 | 53.837 | KV453058.1 | 8507654 | 14-scf00369 | 14 |
| AX-158214450 | 18 | 53.837 | KV453058.1 | 8508491 | 14-scf00369 | 14 |
| AX-158214451 | 18 | 53.837 | KV453058.1 | 8511637 | 14-scf00369 | 14 |
| AX-158214452 | 18 | 53.837 | KV453058.1 | 8512372 | 14-scf00369 | 14 |
| AX-158214453 | 18 | 53.837 | KV453058.1 | 8512850 | 14-scf00369 | 14 |
| AX-158214454 | 18 | 53.837 | KV453058.1 | 8514384 | 14-scf00369 | 14 |
| AX-158214455 | 18 | 53.837 | KV453058.1 | 8514837 | 14-scf00369 | 14 |
| AX-158214458 | 18 | 53.837 | KV453058.1 | 8516771 | 14-scf00369 | 14 |
| AX-158214459 | 18 | 53.837 | KV453058.1 | 8521488 | 14-scf00369 | 14 |
| AX-158214460 | 18 | 53.837 | KV453058.1 | 8523052 | 14-scf00369 | 14 |
| AX-158214461 | 18 | 53.837 | KV453058.1 | 8523409 | 14-scf00369 | 14 |
| AX-157718800 | 18 | 53.837 | KV453058.1 | 8524585 | 14-scf00369 | 14 |
| AX-158214462 | 18 | 53.837 | KV453058.1 | 8525689 | 14-scf00369 | 14 |
| AX-157838798 | 18 | 53.837 | KV453058.1 | 8526133 | 14-scf00369 | 14 |

|              |    |        |            |         |             |    |
|--------------|----|--------|------------|---------|-------------|----|
| AX-158214463 | 18 | 53.837 | KV453058.1 | 8526709 | 14-scf00369 | 14 |
| AX-157838799 | 18 | 53.837 | KV453058.1 | 8526833 | 14-scf00369 | 14 |
| AX-157838800 | 18 | 53.837 | KV453058.1 | 8527166 | 14-scf00369 | 14 |
| AX-158214466 | 18 | 53.837 | KV453058.1 | 8529596 | 14-scf00369 | 14 |
| AX-157838801 | 18 | 53.837 | KV453058.1 | 8529919 | 14-scf00369 | 14 |
| AX-158214467 | 18 | 53.837 | KV453058.1 | 8532397 | 14-scf00369 | 14 |
| AX-158214469 | 18 | 53.837 | KV453058.1 | 8537072 | 14-scf00369 | 14 |
| AX-158214471 | 18 | 53.837 | KV453058.1 | 8539725 | 14-scf00369 | 14 |
| AX-158214472 | 18 | 53.837 | KV453058.1 | 8540283 | 14-scf00369 | 14 |
| AX-158214474 | 18 | 53.837 | KV453058.1 | 8541379 | 14-scf00369 | 14 |
| AX-157859386 | 18 | 53.837 | KV453058.1 | 8542340 | 14-scf00369 | 14 |
| AX-158214475 | 18 | 53.837 | KV453058.1 | 8543023 | 14-scf00369 | 14 |
| AX-158214476 | 18 | 53.837 | KV453058.1 | 8543714 | 14-scf00369 | 14 |
| AX-158214477 | 18 | 53.837 | KV453058.1 | 8544052 | 14-scf00369 | 14 |
| AX-158214478 | 18 | 53.837 | KV453058.1 | 8545026 | 14-scf00369 | 14 |
| AX-158214479 | 18 | 53.837 | KV453058.1 | 8545799 | 14-scf00369 | 14 |
| AX-158214480 | 18 | 53.837 | KV453058.1 | 8546160 | 14-scf00369 | 14 |
| AX-158214481 | 18 | 53.837 | KV453058.1 | 8547091 | 14-scf00369 | 14 |
| AX-158214483 | 18 | 53.837 | KV453058.1 | 8549949 | 14-scf00369 | 14 |
| AX-158214484 | 18 | 53.837 | KV453058.1 | 8550649 | 14-scf00369 | 14 |
| AX-158214485 | 18 | 53.837 | KV453058.1 | 8553997 | 14-scf00369 | 14 |
| AX-158214486 | 18 | 53.837 | KV453058.1 | 8554634 | 14-scf00369 | 14 |
| AX-158214488 | 18 | 53.837 | KV453058.1 | 8555745 | 14-scf00369 | 14 |
| AX-158214489 | 18 | 53.837 | KV453058.1 | 8556406 | 14-scf00369 | 14 |
| AX-158214490 | 18 | 53.837 | KV453058.1 | 8557971 | 14-scf00369 | 14 |
| AX-157745365 | 18 | 53.837 | KV453058.1 | 8559277 | 14-scf00369 | 14 |
| AX-158214491 | 18 | 53.837 | KV453058.1 | 8560135 | 14-scf00369 | 14 |
| AX-158214492 | 18 | 53.837 | KV453058.1 | 8561774 | 14-scf00369 | 14 |
| AX-158214493 | 18 | 53.837 | KV453058.1 | 8562536 | 14-scf00369 | 14 |
| AX-157859387 | 18 | 53.837 | KV453058.1 | 8562847 | 14-scf00369 | 14 |
| AX-158214495 | 18 | 53.837 | KV453058.1 | 8563484 | 14-scf00369 | 14 |
| AX-157838802 | 18 | 53.837 | KV453058.1 | 8568048 | 14-scf00369 | 14 |
| AX-157838803 | 18 | 53.837 | KV453058.1 | 8570185 | 14-scf00369 | 14 |
| AX-157859388 | 18 | 53.837 | KV453058.1 | 8571995 | 14-scf00369 | 14 |
| AX-158214499 | 18 | 53.837 | KV453058.1 | 8572585 | 14-scf00369 | 14 |
| AX-157838804 | 18 | 53.837 | KV453058.1 | 8572972 | 14-scf00369 | 14 |
| AX-158214500 | 18 | 53.837 | KV453058.1 | 8574077 | 14-scf00369 | 14 |
| AX-158214501 | 18 | 53.837 | KV453058.1 | 8575952 | 14-scf00369 | 14 |
| AX-158214502 | 18 | 53.837 | KV453058.1 | 8576400 | 14-scf00369 | 14 |
| AX-158214503 | 18 | 53.837 | KV453058.1 | 8576877 | 14-scf00369 | 14 |
| AX-158214504 | 18 | 53.837 | KV453058.1 | 8578374 | 14-scf00369 | 14 |
| AX-157838806 | 18 | 53.837 | KV453058.1 | 8578769 | 14-scf00369 | 14 |
| AX-158214508 | 18 | 53.837 | KV453058.1 | 8582913 | 14-scf00369 | 14 |
| AX-158214509 | 18 | 53.837 | KV453058.1 | 8584291 | 14-scf00369 | 14 |
| AX-158214510 | 18 | 53.837 | KV453058.1 | 8584660 | 14-scf00369 | 14 |
| AX-158214511 | 18 | 53.837 | KV453058.1 | 8585939 | 14-scf00369 | 14 |
| AX-158214513 | 18 | 53.837 | KV453058.1 | 8587426 | 14-scf00369 | 14 |
| AX-158214514 | 18 | 53.837 | KV453058.1 | 8587848 | 14-scf00369 | 14 |
| AX-158214515 | 18 | 53.837 | KV453058.1 | 8589130 | 14-scf00369 | 14 |
| AX-158214517 | 18 | 53.837 | KV453058.1 | 8591950 | 14-scf00369 | 14 |
| AX-157838809 | 18 | 53.837 | KV453058.1 | 8592431 | 14-scf00369 | 14 |

|              |    |        |            |         |             |    |
|--------------|----|--------|------------|---------|-------------|----|
| AX-158214518 | 18 | 53.837 | KV453058.1 | 8592720 | 14-scf00369 | 14 |
| AX-158214519 | 18 | 53.837 | KV453058.1 | 8593002 | 14-scf00369 | 14 |
| AX-158214520 | 18 | 53.837 | KV453058.1 | 8593443 | 14-scf00369 | 14 |
| AX-157859389 | 18 | 53.837 | KV453058.1 | 8593723 | 14-scf00369 | 14 |
| AX-158214521 | 18 | 53.837 | KV453058.1 | 8593974 | 14-scf00369 | 14 |
| AX-157838810 | 18 | 53.837 | KV453058.1 | 8594081 | 14-scf00369 | 14 |
| AX-157727008 | 18 | 53.837 | KV453058.1 | 8595128 | 14-scf00369 | 14 |
| AX-157838811 | 18 | 53.837 | KV453058.1 | 8596005 | 14-scf00369 | 14 |
| AX-158214524 | 18 | 53.837 | KV453058.1 | 8598538 | 14-scf00369 | 14 |
| AX-157838813 | 18 | 53.837 | KV453058.1 | 8598920 | 14-scf00369 | 14 |
| AX-157863733 | 18 | 53.837 | KV453058.1 | 8599222 | 14-scf00369 | 14 |
| AX-158214525 | 18 | 53.837 | KV453058.1 | 8599637 | 14-scf00369 | 14 |
| AX-158214527 | 18 | 53.837 | KV453058.1 | 8600325 | 14-scf00369 | 14 |
| AX-157773507 | 18 | 53.837 | KV453058.1 | 8602384 | 14-scf00369 | 14 |
| AX-158214530 | 18 | 53.837 | KV453058.1 | 8604697 | 14-scf00369 | 14 |
| AX-158214531 | 18 | 53.837 | KV453058.1 | 8605120 | 14-scf00369 | 14 |
| AX-158214532 | 18 | 53.837 | KV453058.1 | 8605565 | 14-scf00369 | 14 |
| AX-158214533 | 18 | 53.837 | KV453058.1 | 8606063 | 14-scf00369 | 14 |
| AX-158214534 | 18 | 53.837 | KV453058.1 | 8606932 | 14-scf00369 | 14 |
| AX-158214535 | 18 | 53.837 | KV453058.1 | 8607343 | 14-scf00369 | 14 |
| AX-158214536 | 18 | 53.837 | KV453058.1 | 8607858 | 14-scf00369 | 14 |
| AX-158214537 | 18 | 53.837 | KV453058.1 | 8608305 | 14-scf00369 | 14 |
| AX-158214540 | 18 | 53.837 | KV453058.1 | 8610363 | 14-scf00369 | 14 |
| AX-158214542 | 18 | 53.837 | KV453058.1 | 8611949 | 14-scf00369 | 14 |
| AX-158214544 | 18 | 53.837 | KV453058.1 | 8613375 | 14-scf00369 | 14 |
| AX-158214545 | 18 | 53.837 | KV453058.1 | 8616212 | 14-scf00369 | 14 |
| AX-158214548 | 18 | 53.837 | KV453058.1 | 8619251 | 14-scf00369 | 14 |
| AX-158214549 | 18 | 53.837 | KV453058.1 | 8620102 | 14-scf00369 | 14 |
| AX-157859390 | 18 | 53.837 | KV453058.1 | 8620139 | 14-scf00369 | 14 |
| AX-158214550 | 18 | 53.837 | KV453058.1 | 8621170 | 14-scf00369 | 14 |
| AX-158214551 | 18 | 53.837 | KV453058.1 | 8621594 | 14-scf00369 | 14 |
| AX-158214552 | 18 | 53.837 | KV453058.1 | 8622507 | 14-scf00369 | 14 |
| AX-158214555 | 18 | 53.837 | KV453058.1 | 8624848 | 14-scf00369 | 14 |
| AX-157838816 | 18 | 53.837 | KV453058.1 | 8626090 | 14-scf00369 | 14 |
| AX-158214558 | 18 | 53.837 | KV453058.1 | 8628151 | 14-scf00369 | 14 |
| AX-157838817 | 18 | 53.837 | KV453058.1 | 8628568 | 14-scf00369 | 14 |
| AX-158214560 | 18 | 53.837 | KV453058.1 | 8631570 | 14-scf00369 | 14 |
| AX-158214564 | 18 | 53.837 | KV453058.1 | 8638928 | 14-scf00369 | 14 |
| AX-158214566 | 18 | 53.837 | KV453058.1 | 8640819 | 14-scf00369 | 14 |
| AX-157838818 | 18 | 53.837 | KV453058.1 | 8641070 | 14-scf00369 | 14 |
| AX-157838819 | 18 | 53.837 | KV453058.1 | 8643128 | 14-scf00369 | 14 |
| AX-158214568 | 18 | 53.837 | KV453058.1 | 8645608 | 14-scf00369 | 14 |
| AX-158214569 | 18 | 53.837 | KV453058.1 | 8646269 | 14-scf00369 | 14 |
| AX-158214572 | 18 | 53.837 | KV453058.1 | 8648202 | 14-scf00369 | 14 |
| AX-158214573 | 18 | 53.837 | KV453058.1 | 8648732 | 14-scf00369 | 14 |
| AX-158214575 | 18 | 53.837 | KV453058.1 | 8649274 | 14-scf00369 | 14 |
| AX-158214577 | 18 | 53.837 | KV453058.1 | 8650204 | 14-scf00369 | 14 |
| AX-158214578 | 18 | 53.837 | KV453058.1 | 8653317 | 14-scf00369 | 14 |
| AX-158214580 | 18 | 53.837 | KV453058.1 | 8654099 | 14-scf00369 | 14 |
| AX-158214581 | 18 | 53.837 | KV453058.1 | 8654465 | 14-scf00369 | 14 |
| AX-158214583 | 18 | 53.837 | KV453058.1 | 8657851 | 14-scf00369 | 14 |

|              |    |        |            |          |             |    |
|--------------|----|--------|------------|----------|-------------|----|
| AX-158214584 | 18 | 53.837 | KV453058.1 | 8658475  | 14-scf00369 | 14 |
| AX-158214586 | 18 | 53.837 | KV453058.1 | 8659500  | 14-scf00369 | 14 |
| AX-158214588 | 18 | 53.837 | KV453058.1 | 8661295  | 14-scf00369 | 14 |
| AX-157713205 | 18 | 53.837 | KV453058.1 | 8662266  | 14-scf00369 | 14 |
| AX-158214589 | 18 | 53.837 | KV453058.1 | 8663511  | 14-scf00369 | 14 |
| AX-158214596 | 18 | 53.837 | KV453058.1 | 8672856  | 14-scf00369 | 14 |
| AX-158214600 | 18 | 53.837 | KV453058.1 | 8681161  | 14-scf00369 | 14 |
| AX-157859392 | 18 | 53.837 | KV453058.1 | 8683274  | 14-scf00369 | 14 |
| AX-158214603 | 18 | 53.837 | KV453058.1 | 8684403  | 14-scf00369 | 14 |
| AX-157859393 | 18 | 53.837 | KV453058.1 | 8684965  | 14-scf00369 | 14 |
| AX-158214606 | 18 | 53.837 | KV453058.1 | 8689848  | 14-scf00369 | 14 |
| AX-158214610 | 18 | 53.837 | KV453058.1 | 8692795  | 14-scf00369 | 14 |
| AX-158214611 | 18 | 53.837 | KV453058.1 | 8693937  | 14-scf00369 | 14 |
| AX-158214612 | 18 | 53.837 | KV453058.1 | 8695216  | 14-scf00369 | 14 |
| AX-158214613 | 18 | 53.837 | KV453058.1 | 8695541  | 14-scf00369 | 14 |
| AX-158214614 | 18 | 53.837 | KV453058.1 | 8696581  | 14-scf00369 | 14 |
| AX-158214616 | 18 | 53.837 | KV453058.1 | 8698789  | 14-scf00369 | 14 |
| AX-158214617 | 18 | 53.837 | KV453058.1 | 8699171  | 14-scf00369 | 14 |
| AX-158214619 | 18 | 53.837 | KV453058.1 | 8702236  | 14-scf00369 | 14 |
| AX-158214620 | 18 | 53.837 | KV453058.1 | 8702644  | 14-scf00369 | 14 |
| AX-158214621 | 18 | 53.837 | KV453058.1 | 8703108  | 14-scf00369 | 14 |
| AX-158214623 | 18 | 53.837 | KV453058.1 | 8705702  | 14-scf00369 | 14 |
| AX-158214624 | 18 | 53.837 | KV453058.1 | 8706353  | 14-scf00369 | 14 |
| AX-158214630 | 18 | 53.837 | KV453058.1 | 8712797  | 14-scf00369 | 14 |
| AX-158214631 | 18 | 53.837 | KV453058.1 | 8714178  | 14-scf00369 | 14 |
| AX-158214632 | 18 | 53.837 | KV453058.1 | 8716469  | 14-scf00369 | 14 |
| AX-158214633 | 18 | 53.837 | KV453058.1 | 8716992  | 14-scf00369 | 14 |
| AX-158214636 | 18 | 53.837 | KV453058.1 | 8720804  | 14-scf00369 | 14 |
| AX-158214637 | 18 | 53.837 | KV453058.1 | 8721207  | 14-scf00369 | 14 |
| AX-158214639 | 18 | 53.837 | KV453058.1 | 8724369  | 14-scf00369 | 14 |
| AX-158214642 | 18 | 53.837 | KV453058.1 | 8725999  | 14-scf00369 | 14 |
| AX-158214643 | 18 | 53.837 | KV453058.1 | 8726526  | 14-scf00369 | 14 |
| AX-157859395 | 18 | 53.837 | KV453058.1 | 8728915  | 14-scf00369 | 14 |
| AX-158214646 | 18 | 53.837 | KV453058.1 | 8729165  | 14-scf00369 | 14 |
| AX-157838823 | 18 | 53.837 | KV453058.1 | 8730529  | 14-scf00369 | 14 |
| AX-158214648 | 18 | 53.837 | KV453058.1 | 8730816  | 14-scf00369 | 14 |
| AX-158214649 | 18 | 53.837 | KV453058.1 | 8731322  | 14-scf00369 | 14 |
| AX-157859396 | 18 | 53.837 | KV453058.1 | 8732608  | 14-scf00369 | 14 |
| AX-158214684 | 18 | 53.837 | KV453058.1 | 8768338  | 14-scf00369 | 14 |
| AX-158214821 | 18 | 53.837 | KV453058.1 | 8895461  | 14-scf00369 | 14 |
| AX-158214914 | 18 | 53.837 | KV453058.1 | 8991161  | 14-scf00369 | 14 |
| AX-158214969 | 18 | 53.837 | KV453058.1 | 9035443  | 14-scf00369 | 14 |
| AX-158215014 | 18 | 53.837 | KV453058.1 | 9089226  | 14-scf00369 | 14 |
| AX-158215032 | 18 | 53.837 | KV453058.1 | 9112696  | 14-scf00369 | 14 |
| AX-158215036 | 18 | 53.837 | KV453058.1 | 9116148  | 14-scf00369 | 14 |
| AX-158215191 | 18 | 53.837 | KV453058.1 | 9328503  | 14-scf00369 | 14 |
| AX-158414626 | 18 | 53.837 | KV453058.1 | 9762256  | 14-scf00369 | 14 |
| AX-158215566 | 18 | 53.837 | KV453058.1 | 9838416  | 14-scf00369 | 14 |
| AX-158215578 | 18 | 53.837 | KV453058.1 | 9858972  | 14-scf00369 | 14 |
| AX-158215720 | 18 | 53.837 | KV453058.1 | 10028353 | 14-scf00369 | 14 |
| AX-158215768 | 18 | 53.837 | KV453058.1 | 10092953 | 14-scf00369 | 14 |



|              |    |        |             |          |             |    |
|--------------|----|--------|-------------|----------|-------------|----|
| AX-158215771 | 18 | 53.837 | KV453058.1  | 10095903 | 14-scf00369 | 14 |
| AX-158215816 | 18 | 53.837 | KV453058.1  | 10144439 | 14-scf00369 | 14 |
| AX-158215836 | 18 | 53.837 | KV453058.1  | 10171828 | 14-scf00369 | 14 |
| AX-158215873 | 18 | 53.837 | KV453058.1  | 10209127 | 14-scf00369 | 14 |
| AX-158215902 | 18 | 53.837 | KV453058.1  | 10248292 | 14-scf00369 | 14 |
| AX-158216111 | 18 | 53.837 | KV453058.1  | 10517876 | 14-scf00369 | 14 |
| AX-158216259 | 18 | 53.837 | KV453058.1  | 10659720 | 14-scf00369 | 14 |
| AX-158216276 | 18 | 53.837 | KV453058.1  | 10674930 | 14-scf00369 | 14 |
| AX-157838914 | 18 | 53.837 | KV453058.1  | 10737526 | 14-scf00369 | 14 |
| AX-158216321 | 18 | 53.837 | KV453058.1  | 10747516 | 14-scf00369 | 14 |
| AX-158216358 | 18 | 53.837 | KV453058.1  | 10788080 | 14-scf00369 | 14 |
| AX-158216362 | 18 | 53.837 | KV453058.1  | 10790281 | 14-scf00369 | 14 |
| AX-158216496 | 18 | 53.837 | KV453058.1  | 10927372 | 14-scf00369 | 14 |
| AX-158216579 | 18 | 53.837 | KV453058.1  | 11015894 | 14-scf00369 | 14 |
| AX-158216676 | 18 | 53.837 | KV453058.1  | 11126266 | 14-scf00369 | 14 |
| AX-157773314 | 18 | 53.837 | KV453060.1  | 623297   | 14-scf00370 | 14 |
| AX-157705799 | 18 | 53.837 | 3ML01030904 | 42       | scf06508_1  | UN |
| AX-158214494 | 18 | 53.919 | KV453058.1  | 8563326  | 14-scf00369 | 14 |
| AX-157741802 | 18 | 54.001 | KV453058.1  | 8565254  | 14-scf00369 | 14 |
| AX-158214496 | 18 | 54.001 | KV453058.1  | 8565477  | 14-scf00369 | 14 |
| AX-157714110 | 18 | 54.164 | KV453058.1  | 5580736  | 14-scf00369 | 14 |
| AX-158212499 | 18 | 54.164 | KV453058.1  | 5664875  | 14-scf00369 | 14 |
| AX-158212565 | 18 | 54.164 | KV453058.1  | 5743197  | 14-scf00369 | 14 |
| AX-158212598 | 18 | 54.164 | KV453058.1  | 5776309  | 14-scf00369 | 14 |
| AX-157859227 | 18 | 54.164 | KV453058.1  | 5787630  | 14-scf00369 | 14 |
| AX-158212696 | 18 | 54.164 | KV453058.1  | 5872643  | 14-scf00369 | 14 |
| AX-158213327 | 18 | 54.164 | KV453058.1  | 6861862  | 14-scf00369 | 14 |
| AX-158213412 | 18 | 54.164 | KV453058.1  | 6993292  | 14-scf00369 | 14 |
| AX-158213446 | 18 | 54.164 | KV453058.1  | 7042187  | 14-scf00369 | 14 |
| AX-158213452 | 18 | 54.164 | KV453058.1  | 7047425  | 14-scf00369 | 14 |
| AX-158213454 | 18 | 54.164 | KV453058.1  | 7049357  | 14-scf00369 | 14 |
| AX-158213460 | 18 | 54.164 | KV453058.1  | 7057216  | 14-scf00369 | 14 |
| AX-158213461 | 18 | 54.164 | KV453058.1  | 7058004  | 14-scf00369 | 14 |
| AX-157859364 | 18 | 54.164 | KV453058.1  | 7058217  | 14-scf00369 | 14 |
| AX-158213507 | 18 | 54.164 | KV453058.1  | 7113772  | 14-scf00369 | 14 |
| AX-158213545 | 18 | 54.164 | KV453058.1  | 7158239  | 14-scf00369 | 14 |
| AX-158213603 | 18 | 54.164 | KV453058.1  | 7264293  | 14-scf00369 | 14 |
| AX-158213614 | 18 | 54.164 | KV453058.1  | 7279669  | 14-scf00369 | 14 |
| AX-158213634 | 18 | 54.164 | KV453058.1  | 7308474  | 14-scf00369 | 14 |
| AX-158213644 | 18 | 54.164 | KV453058.1  | 7319912  | 14-scf00369 | 14 |
| AX-157838727 | 18 | 54.164 | KV453058.1  | 7649937  | 14-scf00369 | 14 |
| AX-158213942 | 18 | 54.164 | KV453058.1  | 7807945  | 14-scf00369 | 14 |
| AX-158214011 | 18 | 54.164 | KV453058.1  | 7921019  | 14-scf00369 | 14 |
| AX-158386498 | 18 | 54.164 | KV453058.1  | 7985666  | 14-scf00369 | 14 |
| AX-158214046 | 18 | 54.164 | KV453058.1  | 7998585  | 14-scf00369 | 14 |
| AX-158214070 | 18 | 54.164 | KV453058.1  | 8029446  | 14-scf00369 | 14 |
| AX-157714487 | 18 | 54.164 | KV453058.1  | 8057087  | 14-scf00369 | 14 |
| AX-158214141 | 18 | 54.164 | KV453058.1  | 8116196  | 14-scf00369 | 14 |
| AX-158380813 | 18 | 54.164 | KV453058.1  | 8166015  | 14-scf00369 | 14 |
| AX-157838774 | 18 | 54.164 | KV453058.1  | 8223467  | 14-scf00369 | 14 |
| AX-158214254 | 18 | 54.164 | KV453058.1  | 8250166  | 14-scf00369 | 14 |

|              |    |        |            |         |             |    |
|--------------|----|--------|------------|---------|-------------|----|
| AX-157838783 | 18 | 54.164 | KV453058.1 | 8252925 | 14-scf00369 | 14 |
| AX-158214275 | 18 | 54.164 | KV453058.1 | 8276405 | 14-scf00369 | 14 |
| AX-158214318 | 18 | 54.164 | KV453058.1 | 8321043 | 14-scf00369 | 14 |
| AX-158214327 | 18 | 54.164 | KV453058.1 | 8332753 | 14-scf00369 | 14 |
| AX-157838792 | 18 | 54.164 | KV453058.1 | 8337179 | 14-scf00369 | 14 |
| AX-158214331 | 18 | 54.164 | KV453058.1 | 8339646 | 14-scf00369 | 14 |
| AX-158214338 | 18 | 54.164 | KV453058.1 | 8349188 | 14-scf00369 | 14 |
| AX-158214347 | 18 | 54.164 | KV453058.1 | 8358346 | 14-scf00369 | 14 |
| AX-158214349 | 18 | 54.164 | KV453058.1 | 8360883 | 14-scf00369 | 14 |
| AX-158214402 | 18 | 54.164 | KV453058.1 | 8441258 | 14-scf00369 | 14 |
| AX-158214405 | 18 | 54.164 | KV453058.1 | 8442481 | 14-scf00369 | 14 |
| AX-158214417 | 18 | 54.164 | KV453058.1 | 8455854 | 14-scf00369 | 14 |
| AX-158214424 | 18 | 54.164 | KV453058.1 | 8466977 | 14-scf00369 | 14 |
| AX-158214432 | 18 | 54.164 | KV453058.1 | 8478988 | 14-scf00369 | 14 |
| AX-157715323 | 18 | 54.164 | KV453058.1 | 8490946 | 14-scf00369 | 14 |
| AX-158214448 | 18 | 54.164 | KV453058.1 | 8506897 | 14-scf00369 | 14 |
| AX-158214456 | 18 | 54.164 | KV453058.1 | 8516290 | 14-scf00369 | 14 |
| AX-158214468 | 18 | 54.164 | KV453058.1 | 8533061 | 14-scf00369 | 14 |
| AX-158214473 | 18 | 54.164 | KV453058.1 | 8540700 | 14-scf00369 | 14 |
| AX-158214482 | 18 | 54.164 | KV453058.1 | 8549200 | 14-scf00369 | 14 |
| AX-158214497 | 18 | 54.164 | KV453058.1 | 8567741 | 14-scf00369 | 14 |
| AX-158214498 | 18 | 54.164 | KV453058.1 | 8570919 | 14-scf00369 | 14 |
| AX-157838805 | 18 | 54.164 | KV453058.1 | 8573566 | 14-scf00369 | 14 |
| AX-158214505 | 18 | 54.164 | KV453058.1 | 8581134 | 14-scf00369 | 14 |
| AX-157838807 | 18 | 54.164 | KV453058.1 | 8585402 | 14-scf00369 | 14 |
| AX-158214516 | 18 | 54.164 | KV453058.1 | 8590578 | 14-scf00369 | 14 |
| AX-157838808 | 18 | 54.164 | KV453058.1 | 8591600 | 14-scf00369 | 14 |
| AX-158214523 | 18 | 54.164 | KV453058.1 | 8597865 | 14-scf00369 | 14 |
| AX-158214526 | 18 | 54.164 | KV453058.1 | 8599734 | 14-scf00369 | 14 |
| AX-158214528 | 18 | 54.164 | KV453058.1 | 8601080 | 14-scf00369 | 14 |
| AX-158214541 | 18 | 54.164 | KV453058.1 | 8611005 | 14-scf00369 | 14 |
| AX-158214546 | 18 | 54.164 | KV453058.1 | 8616698 | 14-scf00369 | 14 |
| AX-158214547 | 18 | 54.164 | KV453058.1 | 8618848 | 14-scf00369 | 14 |
| AX-158214553 | 18 | 54.164 | KV453058.1 | 8622891 | 14-scf00369 | 14 |
| AX-158214554 | 18 | 54.164 | KV453058.1 | 8623483 | 14-scf00369 | 14 |
| AX-157838814 | 18 | 54.164 | KV453058.1 | 8624636 | 14-scf00369 | 14 |
| AX-157838815 | 18 | 54.164 | KV453058.1 | 8625682 | 14-scf00369 | 14 |
| AX-158214556 | 18 | 54.164 | KV453058.1 | 8627138 | 14-scf00369 | 14 |
| AX-158214559 | 18 | 54.164 | KV453058.1 | 8630415 | 14-scf00369 | 14 |
| AX-158214561 | 18 | 54.164 | KV453058.1 | 8632796 | 14-scf00369 | 14 |
| AX-158214567 | 18 | 54.164 | KV453058.1 | 8642243 | 14-scf00369 | 14 |
| AX-157838820 | 18 | 54.164 | KV453058.1 | 8643642 | 14-scf00369 | 14 |
| AX-158214570 | 18 | 54.164 | KV453058.1 | 8647002 | 14-scf00369 | 14 |
| AX-158214571 | 18 | 54.164 | KV453058.1 | 8647671 | 14-scf00369 | 14 |
| AX-158214574 | 18 | 54.164 | KV453058.1 | 8649112 | 14-scf00369 | 14 |
| AX-158214576 | 18 | 54.164 | KV453058.1 | 8649616 | 14-scf00369 | 14 |
| AX-157838821 | 18 | 54.164 | KV453058.1 | 8652618 | 14-scf00369 | 14 |
| AX-158214579 | 18 | 54.164 | KV453058.1 | 8653547 | 14-scf00369 | 14 |
| AX-158214582 | 18 | 54.164 | KV453058.1 | 8654867 | 14-scf00369 | 14 |
| AX-157838822 | 18 | 54.164 | KV453058.1 | 8659778 | 14-scf00369 | 14 |
| AX-158214587 | 18 | 54.164 | KV453058.1 | 8661088 | 14-scf00369 | 14 |

|              |    |        |            |         |             |    |
|--------------|----|--------|------------|---------|-------------|----|
| AX-158214590 | 18 | 54.164 | KV453058.1 | 8664157 | 14-scf00369 | 14 |
| AX-158214591 | 18 | 54.164 | KV453058.1 | 8665580 | 14-scf00369 | 14 |
| AX-158214592 | 18 | 54.164 | KV453058.1 | 8665677 | 14-scf00369 | 14 |
| AX-158214593 | 18 | 54.164 | KV453058.1 | 8666774 | 14-scf00369 | 14 |
| AX-157753016 | 18 | 54.164 | KV453058.1 | 8668910 | 14-scf00369 | 14 |
| AX-158214594 | 18 | 54.164 | KV453058.1 | 8669509 | 14-scf00369 | 14 |
| AX-157754197 | 18 | 54.164 | KV453058.1 | 8677714 | 14-scf00369 | 14 |
| AX-158214601 | 18 | 54.164 | KV453058.1 | 8682344 | 14-scf00369 | 14 |
| AX-158214602 | 18 | 54.164 | KV453058.1 | 8683183 | 14-scf00369 | 14 |
| AX-158214604 | 18 | 54.164 | KV453058.1 | 8687747 | 14-scf00369 | 14 |
| AX-158214605 | 18 | 54.164 | KV453058.1 | 8688779 | 14-scf00369 | 14 |
| AX-158214609 | 18 | 54.164 | KV453058.1 | 8691962 | 14-scf00369 | 14 |
| AX-157859394 | 18 | 54.164 | KV453058.1 | 8693045 | 14-scf00369 | 14 |
| AX-158214615 | 18 | 54.164 | KV453058.1 | 8697445 | 14-scf00369 | 14 |
| AX-157723482 | 18 | 54.164 | KV453058.1 | 8699746 | 14-scf00369 | 14 |
| AX-158214625 | 18 | 54.164 | KV453058.1 | 8706892 | 14-scf00369 | 14 |
| AX-158214626 | 18 | 54.164 | KV453058.1 | 8707595 | 14-scf00369 | 14 |
| AX-158214627 | 18 | 54.164 | KV453058.1 | 8708032 | 14-scf00369 | 14 |
| AX-158214628 | 18 | 54.164 | KV453058.1 | 8708542 | 14-scf00369 | 14 |
| AX-157753462 | 18 | 54.164 | KV453058.1 | 8715313 | 14-scf00369 | 14 |
| AX-158214634 | 18 | 54.164 | KV453058.1 | 8718052 | 14-scf00369 | 14 |
| AX-158214635 | 18 | 54.164 | KV453058.1 | 8719403 | 14-scf00369 | 14 |
| AX-158214644 | 18 | 54.164 | KV453058.1 | 8727324 | 14-scf00369 | 14 |
| AX-158214651 | 18 | 54.164 | KV453058.1 | 8735230 | 14-scf00369 | 14 |
| AX-158214653 | 18 | 54.164 | KV453058.1 | 8738712 | 14-scf00369 | 14 |
| AX-157859397 | 18 | 54.164 | KV453058.1 | 8739681 | 14-scf00369 | 14 |
| AX-158214656 | 18 | 54.164 | KV453058.1 | 8741983 | 14-scf00369 | 14 |
| AX-158214658 | 18 | 54.164 | KV453058.1 | 8743099 | 14-scf00369 | 14 |
| AX-158214659 | 18 | 54.164 | KV453058.1 | 8743762 | 14-scf00369 | 14 |
| AX-158214660 | 18 | 54.164 | KV453058.1 | 8744613 | 14-scf00369 | 14 |
| AX-158214661 | 18 | 54.164 | KV453058.1 | 8745098 | 14-scf00369 | 14 |
| AX-158214663 | 18 | 54.164 | KV453058.1 | 8745660 | 14-scf00369 | 14 |
| AX-158214664 | 18 | 54.164 | KV453058.1 | 8749096 | 14-scf00369 | 14 |
| AX-158214666 | 18 | 54.164 | KV453058.1 | 8750565 | 14-scf00369 | 14 |
| AX-158214667 | 18 | 54.164 | KV453058.1 | 8751386 | 14-scf00369 | 14 |
| AX-158214668 | 18 | 54.164 | KV453058.1 | 8752330 | 14-scf00369 | 14 |
| AX-158214669 | 18 | 54.164 | KV453058.1 | 8752729 | 14-scf00369 | 14 |
| AX-158214670 | 18 | 54.164 | KV453058.1 | 8753380 | 14-scf00369 | 14 |
| AX-157838825 | 18 | 54.164 | KV453058.1 | 8754223 | 14-scf00369 | 14 |
| AX-158214671 | 18 | 54.164 | KV453058.1 | 8754727 | 14-scf00369 | 14 |
| AX-157859398 | 18 | 54.164 | KV453058.1 | 8754956 | 14-scf00369 | 14 |
| AX-158214672 | 18 | 54.164 | KV453058.1 | 8758008 | 14-scf00369 | 14 |
| AX-158214674 | 18 | 54.164 | KV453058.1 | 8758764 | 14-scf00369 | 14 |
| AX-157746610 | 18 | 54.164 | KV453058.1 | 8760319 | 14-scf00369 | 14 |
| AX-158214675 | 18 | 54.164 | KV453058.1 | 8762225 | 14-scf00369 | 14 |
| AX-158214677 | 18 | 54.164 | KV453058.1 | 8763102 | 14-scf00369 | 14 |
| AX-158214680 | 18 | 54.164 | KV453058.1 | 8764402 | 14-scf00369 | 14 |
| AX-158214681 | 18 | 54.164 | KV453058.1 | 8765665 | 14-scf00369 | 14 |
| AX-157741902 | 18 | 54.164 | KV453058.1 | 8767355 | 14-scf00369 | 14 |
| AX-158214685 | 18 | 54.164 | KV453058.1 | 8770305 | 14-scf00369 | 14 |
| AX-158214687 | 18 | 54.164 | KV453058.1 | 8772991 | 14-scf00369 | 14 |

|              |    |        |            |         |             |    |
|--------------|----|--------|------------|---------|-------------|----|
| AX-158214688 | 18 | 54.164 | KV453058.1 | 8773068 | 14-scf00369 | 14 |
| AX-158214690 | 18 | 54.164 | KV453058.1 | 8774040 | 14-scf00369 | 14 |
| AX-158214691 | 18 | 54.164 | KV453058.1 | 8774515 | 14-scf00369 | 14 |
| AX-158214692 | 18 | 54.164 | KV453058.1 | 8774944 | 14-scf00369 | 14 |
| AX-158214693 | 18 | 54.164 | KV453058.1 | 8777029 | 14-scf00369 | 14 |
| AX-158214694 | 18 | 54.164 | KV453058.1 | 8777520 | 14-scf00369 | 14 |
| AX-158214695 | 18 | 54.164 | KV453058.1 | 8778436 | 14-scf00369 | 14 |
| AX-158214696 | 18 | 54.164 | KV453058.1 | 8779979 | 14-scf00369 | 14 |
| AX-158214698 | 18 | 54.164 | KV453058.1 | 8781403 | 14-scf00369 | 14 |
| AX-158214699 | 18 | 54.164 | KV453058.1 | 8783904 | 14-scf00369 | 14 |
| AX-158214700 | 18 | 54.164 | KV453058.1 | 8784318 | 14-scf00369 | 14 |
| AX-158214701 | 18 | 54.164 | KV453058.1 | 8784993 | 14-scf00369 | 14 |
| AX-158214704 | 18 | 54.164 | KV453058.1 | 8787167 | 14-scf00369 | 14 |
| AX-158214707 | 18 | 54.164 | KV453058.1 | 8788378 | 14-scf00369 | 14 |
| AX-157859400 | 18 | 54.164 | KV453058.1 | 8789071 | 14-scf00369 | 14 |
| AX-158214708 | 18 | 54.164 | KV453058.1 | 8789547 | 14-scf00369 | 14 |
| AX-157838827 | 18 | 54.164 | KV453058.1 | 8789916 | 14-scf00369 | 14 |
| AX-158214709 | 18 | 54.164 | KV453058.1 | 8790575 | 14-scf00369 | 14 |
| AX-158214710 | 18 | 54.164 | KV453058.1 | 8790847 | 14-scf00369 | 14 |
| AX-158214712 | 18 | 54.164 | KV453058.1 | 8794057 | 14-scf00369 | 14 |
| AX-158214714 | 18 | 54.164 | KV453058.1 | 8797279 | 14-scf00369 | 14 |
| AX-157798973 | 18 | 54.164 | KV453058.1 | 8798085 | 14-scf00369 | 14 |
| AX-157859401 | 18 | 54.164 | KV453058.1 | 8798325 | 14-scf00369 | 14 |
| AX-157859402 | 18 | 54.164 | KV453058.1 | 8798382 | 14-scf00369 | 14 |
| AX-158214715 | 18 | 54.164 | KV453058.1 | 8798590 | 14-scf00369 | 14 |
| AX-158214716 | 18 | 54.164 | KV453058.1 | 8798956 | 14-scf00369 | 14 |
| AX-157740330 | 18 | 54.164 | KV453058.1 | 8800118 | 14-scf00369 | 14 |
| AX-157859403 | 18 | 54.164 | KV453058.1 | 8801344 | 14-scf00369 | 14 |
| AX-157859404 | 18 | 54.164 | KV453058.1 | 8801382 | 14-scf00369 | 14 |
| AX-158214718 | 18 | 54.164 | KV453058.1 | 8801440 | 14-scf00369 | 14 |
| AX-158214720 | 18 | 54.164 | KV453058.1 | 8802212 | 14-scf00369 | 14 |
| AX-158214721 | 18 | 54.164 | KV453058.1 | 8802804 | 14-scf00369 | 14 |
| AX-158214722 | 18 | 54.164 | KV453058.1 | 8804684 | 14-scf00369 | 14 |
| AX-158214723 | 18 | 54.164 | KV453058.1 | 8805390 | 14-scf00369 | 14 |
| AX-158214724 | 18 | 54.164 | KV453058.1 | 8807047 | 14-scf00369 | 14 |
| AX-158214725 | 18 | 54.164 | KV453058.1 | 8808162 | 14-scf00369 | 14 |
| AX-158214726 | 18 | 54.164 | KV453058.1 | 8809065 | 14-scf00369 | 14 |
| AX-158214727 | 18 | 54.164 | KV453058.1 | 8809475 | 14-scf00369 | 14 |
| AX-158214728 | 18 | 54.164 | KV453058.1 | 8810310 | 14-scf00369 | 14 |
| AX-158214729 | 18 | 54.164 | KV453058.1 | 8811204 | 14-scf00369 | 14 |
| AX-158214730 | 18 | 54.164 | KV453058.1 | 8812009 | 14-scf00369 | 14 |
| AX-158214731 | 18 | 54.164 | KV453058.1 | 8813800 | 14-scf00369 | 14 |
| AX-157722690 | 18 | 54.164 | KV453058.1 | 8816168 | 14-scf00369 | 14 |
| AX-158214733 | 18 | 54.164 | KV453058.1 | 8817097 | 14-scf00369 | 14 |
| AX-157838828 | 18 | 54.164 | KV453058.1 | 8817337 | 14-scf00369 | 14 |
| AX-158214734 | 18 | 54.164 | KV453058.1 | 8817770 | 14-scf00369 | 14 |
| AX-158214735 | 18 | 54.164 | KV453058.1 | 8818386 | 14-scf00369 | 14 |
| AX-158214736 | 18 | 54.164 | KV453058.1 | 8818745 | 14-scf00369 | 14 |
| AX-158214737 | 18 | 54.164 | KV453058.1 | 8819124 | 14-scf00369 | 14 |
| AX-157838830 | 18 | 54.164 | KV453058.1 | 8819206 | 14-scf00369 | 14 |
| AX-158214739 | 18 | 54.164 | KV453058.1 | 8820212 | 14-scf00369 | 14 |

|              |    |        |            |         |             |    |
|--------------|----|--------|------------|---------|-------------|----|
| AX-158214740 | 18 | 54.164 | KV453058.1 | 8821595 | 14-scf00369 | 14 |
| AX-158214741 | 18 | 54.164 | KV453058.1 | 8822800 | 14-scf00369 | 14 |
| AX-158214742 | 18 | 54.164 | KV453058.1 | 8824703 | 14-scf00369 | 14 |
| AX-158214743 | 18 | 54.164 | KV453058.1 | 8825370 | 14-scf00369 | 14 |
| AX-158214745 | 18 | 54.164 | KV453058.1 | 8826374 | 14-scf00369 | 14 |
| AX-158214746 | 18 | 54.164 | KV453058.1 | 8827510 | 14-scf00369 | 14 |
| AX-158214747 | 18 | 54.164 | KV453058.1 | 8827983 | 14-scf00369 | 14 |
| AX-158214751 | 18 | 54.164 | KV453058.1 | 8832123 | 14-scf00369 | 14 |
| AX-158214752 | 18 | 54.164 | KV453058.1 | 8833426 | 14-scf00369 | 14 |
| AX-158214753 | 18 | 54.164 | KV453058.1 | 8834641 | 14-scf00369 | 14 |
| AX-158214755 | 18 | 54.164 | KV453058.1 | 8836467 | 14-scf00369 | 14 |
| AX-158214756 | 18 | 54.164 | KV453058.1 | 8837000 | 14-scf00369 | 14 |
| AX-158214758 | 18 | 54.164 | KV453058.1 | 8839002 | 14-scf00369 | 14 |
| AX-158214760 | 18 | 54.164 | KV453058.1 | 8840474 | 14-scf00369 | 14 |
| AX-158214761 | 18 | 54.164 | KV453058.1 | 8841365 | 14-scf00369 | 14 |
| AX-158214762 | 18 | 54.164 | KV453058.1 | 8841921 | 14-scf00369 | 14 |
| AX-158214764 | 18 | 54.164 | KV453058.1 | 8842831 | 14-scf00369 | 14 |
| AX-158214767 | 18 | 54.164 | KV453058.1 | 8846763 | 14-scf00369 | 14 |
| AX-157838832 | 18 | 54.164 | KV453058.1 | 8847321 | 14-scf00369 | 14 |
| AX-158214768 | 18 | 54.164 | KV453058.1 | 8847412 | 14-scf00369 | 14 |
| AX-158214769 | 18 | 54.164 | KV453058.1 | 8847845 | 14-scf00369 | 14 |
| AX-158214770 | 18 | 54.164 | KV453058.1 | 8848345 | 14-scf00369 | 14 |
| AX-158214771 | 18 | 54.164 | KV453058.1 | 8848839 | 14-scf00369 | 14 |
| AX-158214773 | 18 | 54.164 | KV453058.1 | 8851042 | 14-scf00369 | 14 |
| AX-158214775 | 18 | 54.164 | KV453058.1 | 8852728 | 14-scf00369 | 14 |
| AX-158214778 | 18 | 54.164 | KV453058.1 | 8856577 | 14-scf00369 | 14 |
| AX-158214779 | 18 | 54.164 | KV453058.1 | 8856648 | 14-scf00369 | 14 |
| AX-158214780 | 18 | 54.164 | KV453058.1 | 8859419 | 14-scf00369 | 14 |
| AX-158214781 | 18 | 54.164 | KV453058.1 | 8860332 | 14-scf00369 | 14 |
| AX-158214784 | 18 | 54.164 | KV453058.1 | 8862732 | 14-scf00369 | 14 |
| AX-158214789 | 18 | 54.164 | KV453058.1 | 8866560 | 14-scf00369 | 14 |
| AX-158214790 | 18 | 54.164 | KV453058.1 | 8867242 | 14-scf00369 | 14 |
| AX-158386506 | 18 | 54.164 | KV453058.1 | 8867872 | 14-scf00369 | 14 |
| AX-158214792 | 18 | 54.164 | KV453058.1 | 8869025 | 14-scf00369 | 14 |
| AX-158214793 | 18 | 54.164 | KV453058.1 | 8870778 | 14-scf00369 | 14 |
| AX-158214795 | 18 | 54.164 | KV453058.1 | 8872148 | 14-scf00369 | 14 |
| AX-158214796 | 18 | 54.164 | KV453058.1 | 8873811 | 14-scf00369 | 14 |
| AX-158214798 | 18 | 54.164 | KV453058.1 | 8875836 | 14-scf00369 | 14 |
| AX-158214799 | 18 | 54.164 | KV453058.1 | 8876160 | 14-scf00369 | 14 |
| AX-158214800 | 18 | 54.164 | KV453058.1 | 8876756 | 14-scf00369 | 14 |
| AX-157745891 | 18 | 54.164 | KV453058.1 | 8877367 | 14-scf00369 | 14 |
| AX-158214801 | 18 | 54.164 | KV453058.1 | 8877594 | 14-scf00369 | 14 |
| AX-158386507 | 18 | 54.164 | KV453058.1 | 8878945 | 14-scf00369 | 14 |
| AX-158214803 | 18 | 54.164 | KV453058.1 | 8879775 | 14-scf00369 | 14 |
| AX-158214804 | 18 | 54.164 | KV453058.1 | 8880321 | 14-scf00369 | 14 |
| AX-157838833 | 18 | 54.164 | KV453058.1 | 8880387 | 14-scf00369 | 14 |
| AX-158214805 | 18 | 54.164 | KV453058.1 | 8880724 | 14-scf00369 | 14 |
| AX-157838834 | 18 | 54.164 | KV453058.1 | 8881569 | 14-scf00369 | 14 |
| AX-157838835 | 18 | 54.164 | KV453058.1 | 8882007 | 14-scf00369 | 14 |
| AX-157745353 | 18 | 54.164 | KV453058.1 | 8883170 | 14-scf00369 | 14 |
| AX-157745186 | 18 | 54.164 | KV453058.1 | 8883539 | 14-scf00369 | 14 |

|              |    |        |            |         |             |    |
|--------------|----|--------|------------|---------|-------------|----|
| AX-158214806 | 18 | 54.164 | KV453058.1 | 8884588 | 14-scf00369 | 14 |
| AX-157838838 | 18 | 54.164 | KV453058.1 | 8886485 | 14-scf00369 | 14 |
| AX-158214807 | 18 | 54.164 | KV453058.1 | 8886798 | 14-scf00369 | 14 |
| AX-158214809 | 18 | 54.164 | KV453058.1 | 8888075 | 14-scf00369 | 14 |
| AX-158214811 | 18 | 54.164 | KV453058.1 | 8889256 | 14-scf00369 | 14 |
| AX-158214812 | 18 | 54.164 | KV453058.1 | 8890054 | 14-scf00369 | 14 |
| AX-158214813 | 18 | 54.164 | KV453058.1 | 8890884 | 14-scf00369 | 14 |
| AX-158214814 | 18 | 54.164 | KV453058.1 | 8891407 | 14-scf00369 | 14 |
| AX-158214815 | 18 | 54.164 | KV453058.1 | 8891922 | 14-scf00369 | 14 |
| AX-158214816 | 18 | 54.164 | KV453058.1 | 8892459 | 14-scf00369 | 14 |
| AX-158214818 | 18 | 54.164 | KV453058.1 | 8893291 | 14-scf00369 | 14 |
| AX-158214820 | 18 | 54.164 | KV453058.1 | 8894441 | 14-scf00369 | 14 |
| AX-157695955 | 18 | 54.164 | KV453058.1 | 8895780 | 14-scf00369 | 14 |
| AX-158214822 | 18 | 54.164 | KV453058.1 | 8896572 | 14-scf00369 | 14 |
| AX-158214824 | 18 | 54.164 | KV453058.1 | 8897562 | 14-scf00369 | 14 |
| AX-158418600 | 18 | 54.164 | KV453058.1 | 8898367 | 14-scf00369 | 14 |
| AX-158214825 | 18 | 54.164 | KV453058.1 | 8899285 | 14-scf00369 | 14 |
| AX-158214826 | 18 | 54.164 | KV453058.1 | 8899798 | 14-scf00369 | 14 |
| AX-158214827 | 18 | 54.164 | KV453058.1 | 8900356 | 14-scf00369 | 14 |
| AX-158214828 | 18 | 54.164 | KV453058.1 | 8900869 | 14-scf00369 | 14 |
| AX-158214829 | 18 | 54.164 | KV453058.1 | 8902234 | 14-scf00369 | 14 |
| AX-158214830 | 18 | 54.164 | KV453058.1 | 8902594 | 14-scf00369 | 14 |
| AX-158214831 | 18 | 54.164 | KV453058.1 | 8903091 | 14-scf00369 | 14 |
| AX-158214835 | 18 | 54.164 | KV453058.1 | 8905613 | 14-scf00369 | 14 |
| AX-158214836 | 18 | 54.164 | KV453058.1 | 8909672 | 14-scf00369 | 14 |
| AX-158214837 | 18 | 54.164 | KV453058.1 | 8910077 | 14-scf00369 | 14 |
| AX-158214839 | 18 | 54.164 | KV453058.1 | 8913265 | 14-scf00369 | 14 |
| AX-158214841 | 18 | 54.164 | KV453058.1 | 8914130 | 14-scf00369 | 14 |
| AX-157716429 | 18 | 54.164 | KV453058.1 | 8915039 | 14-scf00369 | 14 |
| AX-158214843 | 18 | 54.164 | KV453058.1 | 8918152 | 14-scf00369 | 14 |
| AX-158214844 | 18 | 54.164 | KV453058.1 | 8918414 | 14-scf00369 | 14 |
| AX-158214850 | 18 | 54.164 | KV453058.1 | 8922810 | 14-scf00369 | 14 |
| AX-158214851 | 18 | 54.164 | KV453058.1 | 8924605 | 14-scf00369 | 14 |
| AX-158214854 | 18 | 54.164 | KV453058.1 | 8927096 | 14-scf00369 | 14 |
| AX-158214855 | 18 | 54.164 | KV453058.1 | 8928269 | 14-scf00369 | 14 |
| AX-158410131 | 18 | 54.164 | KV453058.1 | 8930414 | 14-scf00369 | 14 |
| AX-158214856 | 18 | 54.164 | KV453058.1 | 8933171 | 14-scf00369 | 14 |
| AX-158214858 | 18 | 54.164 | KV453058.1 | 8938829 | 14-scf00369 | 14 |
| AX-158214859 | 18 | 54.164 | KV453058.1 | 8939102 | 14-scf00369 | 14 |
| AX-158214860 | 18 | 54.164 | KV453058.1 | 8939534 | 14-scf00369 | 14 |
| AX-157867009 | 18 | 54.164 | KV453058.1 | 8940022 | 14-scf00369 | 14 |
| AX-157718501 | 18 | 54.164 | KV453058.1 | 8940227 | 14-scf00369 | 14 |
| AX-158380817 | 18 | 54.164 | KV453058.1 | 8940624 | 14-scf00369 | 14 |
| AX-158214862 | 18 | 54.164 | KV453058.1 | 8941857 | 14-scf00369 | 14 |
| AX-158214863 | 18 | 54.164 | KV453058.1 | 8942137 | 14-scf00369 | 14 |
| AX-158214864 | 18 | 54.164 | KV453058.1 | 8943665 | 14-scf00369 | 14 |
| AX-158214865 | 18 | 54.164 | KV453058.1 | 8944093 | 14-scf00369 | 14 |
| AX-158214866 | 18 | 54.164 | KV453058.1 | 8944553 | 14-scf00369 | 14 |
| AX-158214867 | 18 | 54.164 | KV453058.1 | 8945534 | 14-scf00369 | 14 |
| AX-158214868 | 18 | 54.164 | KV453058.1 | 8945845 | 14-scf00369 | 14 |
| AX-158214870 | 18 | 54.164 | KV453058.1 | 8950005 | 14-scf00369 | 14 |

|              |    |        |            |         |             |    |
|--------------|----|--------|------------|---------|-------------|----|
| AX-158214871 | 18 | 54.164 | KV453058.1 | 8950938 | 14-scf00369 | 14 |
| AX-158214872 | 18 | 54.164 | KV453058.1 | 8951484 | 14-scf00369 | 14 |
| AX-158214873 | 18 | 54.164 | KV453058.1 | 8952088 | 14-scf00369 | 14 |
| AX-158214875 | 18 | 54.164 | KV453058.1 | 8952822 | 14-scf00369 | 14 |
| AX-158214880 | 18 | 54.164 | KV453058.1 | 8956561 | 14-scf00369 | 14 |
| AX-158214883 | 18 | 54.164 | KV453058.1 | 8958918 | 14-scf00369 | 14 |
| AX-158214885 | 18 | 54.164 | KV453058.1 | 8962867 | 14-scf00369 | 14 |
| AX-158214886 | 18 | 54.164 | KV453058.1 | 8964877 | 14-scf00369 | 14 |
| AX-158214888 | 18 | 54.164 | KV453058.1 | 8965903 | 14-scf00369 | 14 |
| AX-158214889 | 18 | 54.164 | KV453058.1 | 8966372 | 14-scf00369 | 14 |
| AX-158214890 | 18 | 54.164 | KV453058.1 | 8966803 | 14-scf00369 | 14 |
| AX-158214893 | 18 | 54.164 | KV453058.1 | 8969379 | 14-scf00369 | 14 |
| AX-158214894 | 18 | 54.164 | KV453058.1 | 8970426 | 14-scf00369 | 14 |
| AX-158214895 | 18 | 54.164 | KV453058.1 | 8971571 | 14-scf00369 | 14 |
| AX-158414611 | 18 | 54.164 | KV453058.1 | 8972635 | 14-scf00369 | 14 |
| AX-158214897 | 18 | 54.164 | KV453058.1 | 8975529 | 14-scf00369 | 14 |
| AX-158214899 | 18 | 54.164 | KV453058.1 | 8977490 | 14-scf00369 | 14 |
| AX-158214901 | 18 | 54.164 | KV453058.1 | 8979486 | 14-scf00369 | 14 |
| AX-158214902 | 18 | 54.164 | KV453058.1 | 8981152 | 14-scf00369 | 14 |
| AX-158214903 | 18 | 54.164 | KV453058.1 | 8982217 | 14-scf00369 | 14 |
| AX-158214904 | 18 | 54.164 | KV453058.1 | 8982918 | 14-scf00369 | 14 |
| AX-158214906 | 18 | 54.164 | KV453058.1 | 8984482 | 14-scf00369 | 14 |
| AX-158214907 | 18 | 54.164 | KV453058.1 | 8985126 | 14-scf00369 | 14 |
| AX-158214908 | 18 | 54.164 | KV453058.1 | 8985938 | 14-scf00369 | 14 |
| AX-158386509 | 18 | 54.164 | KV453058.1 | 8986479 | 14-scf00369 | 14 |
| AX-158214909 | 18 | 54.164 | KV453058.1 | 8987807 | 14-scf00369 | 14 |
| AX-158214911 | 18 | 54.164 | KV453058.1 | 8989548 | 14-scf00369 | 14 |
| AX-158214912 | 18 | 54.164 | KV453058.1 | 8989970 | 14-scf00369 | 14 |
| AX-158214915 | 18 | 54.164 | KV453058.1 | 8991621 | 14-scf00369 | 14 |
| AX-158214916 | 18 | 54.164 | KV453058.1 | 8992295 | 14-scf00369 | 14 |
| AX-158386510 | 18 | 54.164 | KV453058.1 | 8992497 | 14-scf00369 | 14 |
| AX-158214917 | 18 | 54.164 | KV453058.1 | 8992660 | 14-scf00369 | 14 |
| AX-158214918 | 18 | 54.164 | KV453058.1 | 8993531 | 14-scf00369 | 14 |
| AX-158214919 | 18 | 54.164 | KV453058.1 | 8994111 | 14-scf00369 | 14 |
| AX-158214920 | 18 | 54.164 | KV453058.1 | 8994427 | 14-scf00369 | 14 |
| AX-158214921 | 18 | 54.164 | KV453058.1 | 8994911 | 14-scf00369 | 14 |
| AX-158214922 | 18 | 54.164 | KV453058.1 | 8995465 | 14-scf00369 | 14 |
| AX-158214923 | 18 | 54.164 | KV453058.1 | 8995888 | 14-scf00369 | 14 |
| AX-158214924 | 18 | 54.164 | KV453058.1 | 8996412 | 14-scf00369 | 14 |
| AX-158214927 | 18 | 54.164 | KV453058.1 | 8998254 | 14-scf00369 | 14 |
| AX-158214929 | 18 | 54.164 | KV453058.1 | 9000604 | 14-scf00369 | 14 |
| AX-158214930 | 18 | 54.164 | KV453058.1 | 9002616 | 14-scf00369 | 14 |
| AX-158386511 | 18 | 54.164 | KV453058.1 | 9004141 | 14-scf00369 | 14 |
| AX-158214931 | 18 | 54.164 | KV453058.1 | 9004387 | 14-scf00369 | 14 |
| AX-158214934 | 18 | 54.164 | KV453058.1 | 9007345 | 14-scf00369 | 14 |
| AX-158214935 | 18 | 54.164 | KV453058.1 | 9007531 | 14-scf00369 | 14 |
| AX-158214936 | 18 | 54.164 | KV453058.1 | 9008849 | 14-scf00369 | 14 |
| AX-157838840 | 18 | 54.164 | KV453058.1 | 9009917 | 14-scf00369 | 14 |
| AX-158214937 | 18 | 54.164 | KV453058.1 | 9010712 | 14-scf00369 | 14 |
| AX-158386512 | 18 | 54.164 | KV453058.1 | 9011791 | 14-scf00369 | 14 |
| AX-158214939 | 18 | 54.164 | KV453058.1 | 9012137 | 14-scf00369 | 14 |

|              |    |        |            |         |             |    |
|--------------|----|--------|------------|---------|-------------|----|
| AX-158214940 | 18 | 54.164 | KV453058.1 | 9013350 | 14-scf00369 | 14 |
| AX-158214941 | 18 | 54.164 | KV453058.1 | 9013769 | 14-scf00369 | 14 |
| AX-158214942 | 18 | 54.164 | KV453058.1 | 9015344 | 14-scf00369 | 14 |
| AX-158214945 | 18 | 54.164 | KV453058.1 | 9017766 | 14-scf00369 | 14 |
| AX-158214947 | 18 | 54.164 | KV453058.1 | 9018921 | 14-scf00369 | 14 |
| AX-158214948 | 18 | 54.164 | KV453058.1 | 9019779 | 14-scf00369 | 14 |
| AX-158214949 | 18 | 54.164 | KV453058.1 | 9019928 | 14-scf00369 | 14 |
| AX-158214950 | 18 | 54.164 | KV453058.1 | 9020496 | 14-scf00369 | 14 |
| AX-158214951 | 18 | 54.164 | KV453058.1 | 9021657 | 14-scf00369 | 14 |
| AX-157838841 | 18 | 54.164 | KV453058.1 | 9022013 | 14-scf00369 | 14 |
| AX-158214952 | 18 | 54.164 | KV453058.1 | 9022536 | 14-scf00369 | 14 |
| AX-158214953 | 18 | 54.164 | KV453058.1 | 9022787 | 14-scf00369 | 14 |
| AX-158214954 | 18 | 54.164 | KV453058.1 | 9023060 | 14-scf00369 | 14 |
| AX-158214956 | 18 | 54.164 | KV453058.1 | 9023998 | 14-scf00369 | 14 |
| AX-158214957 | 18 | 54.164 | KV453058.1 | 9024473 | 14-scf00369 | 14 |
| AX-158214959 | 18 | 54.164 | KV453058.1 | 9025518 | 14-scf00369 | 14 |
| AX-158214960 | 18 | 54.164 | KV453058.1 | 9025749 | 14-scf00369 | 14 |
| AX-158214961 | 18 | 54.164 | KV453058.1 | 9027734 | 14-scf00369 | 14 |
| AX-158214964 | 18 | 54.164 | KV453058.1 | 9030264 | 14-scf00369 | 14 |
| AX-158214965 | 18 | 54.164 | KV453058.1 | 9030957 | 14-scf00369 | 14 |
| AX-158214966 | 18 | 54.164 | KV453058.1 | 9034313 | 14-scf00369 | 14 |
| AX-158214968 | 18 | 54.164 | KV453058.1 | 9034948 | 14-scf00369 | 14 |
| AX-157838842 | 18 | 54.164 | KV453058.1 | 9036222 | 14-scf00369 | 14 |
| AX-158214970 | 18 | 54.164 | KV453058.1 | 9036596 | 14-scf00369 | 14 |
| AX-158214971 | 18 | 54.164 | KV453058.1 | 9037920 | 14-scf00369 | 14 |
| AX-158214972 | 18 | 54.164 | KV453058.1 | 9038460 | 14-scf00369 | 14 |
| AX-158214973 | 18 | 54.164 | KV453058.1 | 9038953 | 14-scf00369 | 14 |
| AX-158214975 | 18 | 54.164 | KV453058.1 | 9040259 | 14-scf00369 | 14 |
| AX-158214976 | 18 | 54.164 | KV453058.1 | 9040835 | 14-scf00369 | 14 |
| AX-158214977 | 18 | 54.164 | KV453058.1 | 9042392 | 14-scf00369 | 14 |
| AX-157838844 | 18 | 54.164 | KV453058.1 | 9042727 | 14-scf00369 | 14 |
| AX-158214978 | 18 | 54.164 | KV453058.1 | 9042931 | 14-scf00369 | 14 |
| AX-157838845 | 18 | 54.164 | KV453058.1 | 9043273 | 14-scf00369 | 14 |
| AX-158214979 | 18 | 54.164 | KV453058.1 | 9043929 | 14-scf00369 | 14 |
| AX-158214982 | 18 | 54.164 | KV453058.1 | 9048504 | 14-scf00369 | 14 |
| AX-158214983 | 18 | 54.164 | KV453058.1 | 9050618 | 14-scf00369 | 14 |
| AX-158214984 | 18 | 54.164 | KV453058.1 | 9053411 | 14-scf00369 | 14 |
| AX-158214985 | 18 | 54.164 | KV453058.1 | 9054142 | 14-scf00369 | 14 |
| AX-158214986 | 18 | 54.164 | KV453058.1 | 9054508 | 14-scf00369 | 14 |
| AX-158214987 | 18 | 54.164 | KV453058.1 | 9055457 | 14-scf00369 | 14 |
| AX-158214988 | 18 | 54.164 | KV453058.1 | 9055830 | 14-scf00369 | 14 |
| AX-158214989 | 18 | 54.164 | KV453058.1 | 9056670 | 14-scf00369 | 14 |
| AX-158214991 | 18 | 54.164 | KV453058.1 | 9058715 | 14-scf00369 | 14 |
| AX-158214992 | 18 | 54.164 | KV453058.1 | 9059826 | 14-scf00369 | 14 |
| AX-158386513 | 18 | 54.164 | KV453058.1 | 9060496 | 14-scf00369 | 14 |
| AX-158214993 | 18 | 54.164 | KV453058.1 | 9060940 | 14-scf00369 | 14 |
| AX-157838846 | 18 | 54.164 | KV453058.1 | 9061103 | 14-scf00369 | 14 |
| AX-158214995 | 18 | 54.164 | KV453058.1 | 9062935 | 14-scf00369 | 14 |
| AX-158214996 | 18 | 54.164 | KV453058.1 | 9064050 | 14-scf00369 | 14 |
| AX-158214997 | 18 | 54.164 | KV453058.1 | 9065205 | 14-scf00369 | 14 |
| AX-158214998 | 18 | 54.164 | KV453058.1 | 9065690 | 14-scf00369 | 14 |



|              |    |        |            |         |             |    |
|--------------|----|--------|------------|---------|-------------|----|
| AX-158214999 | 18 | 54.164 | KV453058.1 | 9066165 | 14-scf00369 | 14 |
| AX-158215000 | 18 | 54.164 | KV453058.1 | 9066641 | 14-scf00369 | 14 |
| AX-158215003 | 18 | 54.164 | KV453058.1 | 9070182 | 14-scf00369 | 14 |
| AX-158215005 | 18 | 54.164 | KV453058.1 | 9070969 | 14-scf00369 | 14 |
| AX-158215006 | 18 | 54.164 | KV453058.1 | 9073010 | 14-scf00369 | 14 |
| AX-158215008 | 18 | 54.164 | KV453058.1 | 9079680 | 14-scf00369 | 14 |
| AX-158215009 | 18 | 54.164 | KV453058.1 | 9080888 | 14-scf00369 | 14 |
| AX-157867010 | 18 | 54.164 | KV453058.1 | 9081490 | 14-scf00369 | 14 |
| AX-158215011 | 18 | 54.164 | KV453058.1 | 9082705 | 14-scf00369 | 14 |
| AX-158215013 | 18 | 54.164 | KV453058.1 | 9084493 | 14-scf00369 | 14 |
| AX-157715637 | 18 | 54.164 | KV453058.1 | 9086816 | 14-scf00369 | 14 |
| AX-157716460 | 18 | 54.164 | KV453058.1 | 9087495 | 14-scf00369 | 14 |
| AX-157743573 | 18 | 54.164 | KV453058.1 | 9089506 | 14-scf00369 | 14 |
| AX-158215016 | 18 | 54.164 | KV453058.1 | 9091307 | 14-scf00369 | 14 |
| AX-158215017 | 18 | 54.164 | KV453058.1 | 9092328 | 14-scf00369 | 14 |
| AX-158215018 | 18 | 54.164 | KV453058.1 | 9092621 | 14-scf00369 | 14 |
| AX-157838847 | 18 | 54.164 | KV453058.1 | 9093682 | 14-scf00369 | 14 |
| AX-158215019 | 18 | 54.164 | KV453058.1 | 9093880 | 14-scf00369 | 14 |
| AX-158215021 | 18 | 54.164 | KV453058.1 | 9098194 | 14-scf00369 | 14 |
| AX-158215023 | 18 | 54.164 | KV453058.1 | 9104584 | 14-scf00369 | 14 |
| AX-158215024 | 18 | 54.164 | KV453058.1 | 9105040 | 14-scf00369 | 14 |
| AX-158215025 | 18 | 54.164 | KV453058.1 | 9105840 | 14-scf00369 | 14 |
| AX-158215026 | 18 | 54.164 | KV453058.1 | 9106301 | 14-scf00369 | 14 |
| AX-157838848 | 18 | 54.164 | KV453058.1 | 9107288 | 14-scf00369 | 14 |
| AX-158215027 | 18 | 54.164 | KV453058.1 | 9108128 | 14-scf00369 | 14 |
| AX-158215028 | 18 | 54.164 | KV453058.1 | 9109131 | 14-scf00369 | 14 |
| AX-158215029 | 18 | 54.164 | KV453058.1 | 9109608 | 14-scf00369 | 14 |
| AX-158215030 | 18 | 54.164 | KV453058.1 | 9110301 | 14-scf00369 | 14 |
| AX-158215031 | 18 | 54.164 | KV453058.1 | 9112304 | 14-scf00369 | 14 |
| AX-158215039 | 18 | 54.164 | KV453058.1 | 9119614 | 14-scf00369 | 14 |
| AX-157838849 | 18 | 54.164 | KV453058.1 | 9121801 | 14-scf00369 | 14 |
| AX-158215043 | 18 | 54.164 | KV453058.1 | 9123483 | 14-scf00369 | 14 |
| AX-158215044 | 18 | 54.164 | KV453058.1 | 9124586 | 14-scf00369 | 14 |
| AX-158215045 | 18 | 54.164 | KV453058.1 | 9125012 | 14-scf00369 | 14 |
| AX-158215046 | 18 | 54.164 | KV453058.1 | 9125448 | 14-scf00369 | 14 |
| AX-157713032 | 18 | 54.164 | KV453058.1 | 9126057 | 14-scf00369 | 14 |
| AX-158215047 | 18 | 54.164 | KV453058.1 | 9128567 | 14-scf00369 | 14 |
| AX-158215049 | 18 | 54.164 | KV453058.1 | 9131423 | 14-scf00369 | 14 |
| AX-158215051 | 18 | 54.164 | KV453058.1 | 9133575 | 14-scf00369 | 14 |
| AX-157772864 | 18 | 54.164 | KV453058.1 | 9135571 | 14-scf00369 | 14 |
| AX-158215052 | 18 | 54.164 | KV453058.1 | 9135913 | 14-scf00369 | 14 |
| AX-158215053 | 18 | 54.164 | KV453058.1 | 9137260 | 14-scf00369 | 14 |
| AX-157838851 | 18 | 54.164 | KV453058.1 | 9140130 | 14-scf00369 | 14 |
| AX-157838852 | 18 | 54.164 | KV453058.1 | 9142439 | 14-scf00369 | 14 |
| AX-158215054 | 18 | 54.164 | KV453058.1 | 9142884 | 14-scf00369 | 14 |
| AX-157708128 | 18 | 54.164 | KV453058.1 | 9144245 | 14-scf00369 | 14 |
| AX-157867011 | 18 | 54.164 | KV453058.1 | 9146237 | 14-scf00369 | 14 |
| AX-158215056 | 18 | 54.164 | KV453058.1 | 9146438 | 14-scf00369 | 14 |
| AX-158215057 | 18 | 54.164 | KV453058.1 | 9148032 | 14-scf00369 | 14 |
| AX-158215058 | 18 | 54.164 | KV453058.1 | 9148384 | 14-scf00369 | 14 |
| AX-158215059 | 18 | 54.164 | KV453058.1 | 9149131 | 14-scf00369 | 14 |

|              |    |        |            |         |             |    |
|--------------|----|--------|------------|---------|-------------|----|
| AX-158215061 | 18 | 54.164 | KV453058.1 | 9152061 | 14-scf00369 | 14 |
| AX-158215062 | 18 | 54.164 | KV453058.1 | 9152463 | 14-scf00369 | 14 |
| AX-157748025 | 18 | 54.164 | KV453058.1 | 9153736 | 14-scf00369 | 14 |
| AX-158215063 | 18 | 54.164 | KV453058.1 | 9154206 | 14-scf00369 | 14 |
| AX-158215064 | 18 | 54.164 | KV453058.1 | 9154461 | 14-scf00369 | 14 |
| AX-157838853 | 18 | 54.164 | KV453058.1 | 9155113 | 14-scf00369 | 14 |
| AX-158215065 | 18 | 54.164 | KV453058.1 | 9155537 | 14-scf00369 | 14 |
| AX-158215066 | 18 | 54.164 | KV453058.1 | 9156472 | 14-scf00369 | 14 |
| AX-158215067 | 18 | 54.164 | KV453058.1 | 9157063 | 14-scf00369 | 14 |
| AX-158215069 | 18 | 54.164 | KV453058.1 | 9161109 | 14-scf00369 | 14 |
| AX-157745992 | 18 | 54.164 | KV453058.1 | 9167660 | 14-scf00369 | 14 |
| AX-158386514 | 18 | 54.164 | KV453058.1 | 9168209 | 14-scf00369 | 14 |
| AX-158215072 | 18 | 54.164 | KV453058.1 | 9168436 | 14-scf00369 | 14 |
| AX-158215073 | 18 | 54.164 | KV453058.1 | 9169139 | 14-scf00369 | 14 |
| AX-158215074 | 18 | 54.164 | KV453058.1 | 9169804 | 14-scf00369 | 14 |
| AX-158215075 | 18 | 54.164 | KV453058.1 | 9170268 | 14-scf00369 | 14 |
| AX-158215076 | 18 | 54.164 | KV453058.1 | 9174809 | 14-scf00369 | 14 |
| AX-158386515 | 18 | 54.164 | KV453058.1 | 9180713 | 14-scf00369 | 14 |
| AX-158215077 | 18 | 54.164 | KV453058.1 | 9182101 | 14-scf00369 | 14 |
| AX-158215078 | 18 | 54.164 | KV453058.1 | 9183011 | 14-scf00369 | 14 |
| AX-157725759 | 18 | 54.164 | KV453058.1 | 9184736 | 14-scf00369 | 14 |
| AX-158215080 | 18 | 54.164 | KV453058.1 | 9185532 | 14-scf00369 | 14 |
| AX-158215082 | 18 | 54.164 | KV453058.1 | 9186151 | 14-scf00369 | 14 |
| AX-157838856 | 18 | 54.164 | KV453058.1 | 9189114 | 14-scf00369 | 14 |
| AX-158215083 | 18 | 54.164 | KV453058.1 | 9192423 | 14-scf00369 | 14 |
| AX-158215084 | 18 | 54.164 | KV453058.1 | 9194277 | 14-scf00369 | 14 |
| AX-158215085 | 18 | 54.164 | KV453058.1 | 9195414 | 14-scf00369 | 14 |
| AX-158215086 | 18 | 54.164 | KV453058.1 | 9196135 | 14-scf00369 | 14 |
| AX-158215087 | 18 | 54.164 | KV453058.1 | 9198970 | 14-scf00369 | 14 |
| AX-158215088 | 18 | 54.164 | KV453058.1 | 9199639 | 14-scf00369 | 14 |
| AX-158215091 | 18 | 54.164 | KV453058.1 | 9202514 | 14-scf00369 | 14 |
| AX-158215092 | 18 | 54.164 | KV453058.1 | 9203220 | 14-scf00369 | 14 |
| AX-158215093 | 18 | 54.164 | KV453058.1 | 9206230 | 14-scf00369 | 14 |
| AX-158215095 | 18 | 54.164 | KV453058.1 | 9210738 | 14-scf00369 | 14 |
| AX-158215098 | 18 | 54.164 | KV453058.1 | 9215190 | 14-scf00369 | 14 |
| AX-158215099 | 18 | 54.164 | KV453058.1 | 9219773 | 14-scf00369 | 14 |
| AX-158215100 | 18 | 54.164 | KV453058.1 | 9221118 | 14-scf00369 | 14 |
| AX-158215101 | 18 | 54.164 | KV453058.1 | 9222083 | 14-scf00369 | 14 |
| AX-158386516 | 18 | 54.164 | KV453058.1 | 9222807 | 14-scf00369 | 14 |
| AX-158215102 | 18 | 54.164 | KV453058.1 | 9222934 | 14-scf00369 | 14 |
| AX-157709825 | 18 | 54.164 | KV453058.1 | 9223255 | 14-scf00369 | 14 |
| AX-158215103 | 18 | 54.164 | KV453058.1 | 9223310 | 14-scf00369 | 14 |
| AX-158215104 | 18 | 54.164 | KV453058.1 | 9223810 | 14-scf00369 | 14 |
| AX-158215105 | 18 | 54.164 | KV453058.1 | 9224348 | 14-scf00369 | 14 |
| AX-158215107 | 18 | 54.164 | KV453058.1 | 9227020 | 14-scf00369 | 14 |
| AX-158215108 | 18 | 54.164 | KV453058.1 | 9227996 | 14-scf00369 | 14 |
| AX-158215109 | 18 | 54.164 | KV453058.1 | 9228357 | 14-scf00369 | 14 |
| AX-158215111 | 18 | 54.164 | KV453058.1 | 9237136 | 14-scf00369 | 14 |
| AX-158215112 | 18 | 54.164 | KV453058.1 | 9237798 | 14-scf00369 | 14 |
| AX-158215113 | 18 | 54.164 | KV453058.1 | 9238785 | 14-scf00369 | 14 |
| AX-158215114 | 18 | 54.164 | KV453058.1 | 9239699 | 14-scf00369 | 14 |

|              |    |        |            |         |             |    |
|--------------|----|--------|------------|---------|-------------|----|
| AX-158215115 | 18 | 54.164 | KV453058.1 | 9240337 | 14-scf00369 | 14 |
| AX-158215117 | 18 | 54.164 | KV453058.1 | 9243563 | 14-scf00369 | 14 |
| AX-158215118 | 18 | 54.164 | KV453058.1 | 9244096 | 14-scf00369 | 14 |
| AX-158215119 | 18 | 54.164 | KV453058.1 | 9244929 | 14-scf00369 | 14 |
| AX-158386517 | 18 | 54.164 | KV453058.1 | 9245918 | 14-scf00369 | 14 |
| AX-158215120 | 18 | 54.164 | KV453058.1 | 9247310 | 14-scf00369 | 14 |
| AX-158215121 | 18 | 54.164 | KV453058.1 | 9247821 | 14-scf00369 | 14 |
| AX-158386518 | 18 | 54.164 | KV453058.1 | 9247989 | 14-scf00369 | 14 |
| AX-158215122 | 18 | 54.164 | KV453058.1 | 9248878 | 14-scf00369 | 14 |
| AX-158215123 | 18 | 54.164 | KV453058.1 | 9250230 | 14-scf00369 | 14 |
| AX-158215125 | 18 | 54.164 | KV453058.1 | 9252488 | 14-scf00369 | 14 |
| AX-158215126 | 18 | 54.164 | KV453058.1 | 9253120 | 14-scf00369 | 14 |
| AX-158215127 | 18 | 54.164 | KV453058.1 | 9253617 | 14-scf00369 | 14 |
| AX-158215128 | 18 | 54.164 | KV453058.1 | 9255825 | 14-scf00369 | 14 |
| AX-158215129 | 18 | 54.164 | KV453058.1 | 9257557 | 14-scf00369 | 14 |
| AX-158215130 | 18 | 54.164 | KV453058.1 | 9258150 | 14-scf00369 | 14 |
| AX-158215131 | 18 | 54.164 | KV453058.1 | 9260370 | 14-scf00369 | 14 |
| AX-158215132 | 18 | 54.164 | KV453058.1 | 9261258 | 14-scf00369 | 14 |
| AX-158215134 | 18 | 54.164 | KV453058.1 | 9263054 | 14-scf00369 | 14 |
| AX-158215135 | 18 | 54.164 | KV453058.1 | 9264921 | 14-scf00369 | 14 |
| AX-158215136 | 18 | 54.164 | KV453058.1 | 9265401 | 14-scf00369 | 14 |
| AX-158386519 | 18 | 54.164 | KV453058.1 | 9266177 | 14-scf00369 | 14 |
| AX-158215137 | 18 | 54.164 | KV453058.1 | 9268321 | 14-scf00369 | 14 |
| AX-158215139 | 18 | 54.164 | KV453058.1 | 9269524 | 14-scf00369 | 14 |
| AX-158215140 | 18 | 54.164 | KV453058.1 | 9270643 | 14-scf00369 | 14 |
| AX-158215141 | 18 | 54.164 | KV453058.1 | 9271761 | 14-scf00369 | 14 |
| AX-158215144 | 18 | 54.164 | KV453058.1 | 9273877 | 14-scf00369 | 14 |
| AX-158215146 | 18 | 54.164 | KV453058.1 | 9275260 | 14-scf00369 | 14 |
| AX-158215148 | 18 | 54.164 | KV453058.1 | 9276847 | 14-scf00369 | 14 |
| AX-158215149 | 18 | 54.164 | KV453058.1 | 9277491 | 14-scf00369 | 14 |
| AX-158215152 | 18 | 54.164 | KV453058.1 | 9281826 | 14-scf00369 | 14 |
| AX-158215153 | 18 | 54.164 | KV453058.1 | 9282937 | 14-scf00369 | 14 |
| AX-157749733 | 18 | 54.164 | KV453058.1 | 9283297 | 14-scf00369 | 14 |
| AX-158215154 | 18 | 54.164 | KV453058.1 | 9284159 | 14-scf00369 | 14 |
| AX-158215155 | 18 | 54.164 | KV453058.1 | 9285370 | 14-scf00369 | 14 |
| AX-158215156 | 18 | 54.164 | KV453058.1 | 9285982 | 14-scf00369 | 14 |
| AX-158215159 | 18 | 54.164 | KV453058.1 | 9290019 | 14-scf00369 | 14 |
| AX-158215163 | 18 | 54.164 | KV453058.1 | 9294679 | 14-scf00369 | 14 |
| AX-158215166 | 18 | 54.164 | KV453058.1 | 9298685 | 14-scf00369 | 14 |
| AX-158215167 | 18 | 54.164 | KV453058.1 | 9302596 | 14-scf00369 | 14 |
| AX-158215169 | 18 | 54.164 | KV453058.1 | 9304123 | 14-scf00369 | 14 |
| AX-158215170 | 18 | 54.164 | KV453058.1 | 9304575 | 14-scf00369 | 14 |
| AX-158215172 | 18 | 54.164 | KV453058.1 | 9305584 | 14-scf00369 | 14 |
| AX-158215173 | 18 | 54.164 | KV453058.1 | 9307030 | 14-scf00369 | 14 |
| AX-158215174 | 18 | 54.164 | KV453058.1 | 9307909 | 14-scf00369 | 14 |
| AX-158215175 | 18 | 54.164 | KV453058.1 | 9307965 | 14-scf00369 | 14 |
| AX-158215176 | 18 | 54.164 | KV453058.1 | 9309171 | 14-scf00369 | 14 |
| AX-158215178 | 18 | 54.164 | KV453058.1 | 9310089 | 14-scf00369 | 14 |
| AX-158215179 | 18 | 54.164 | KV453058.1 | 9311051 | 14-scf00369 | 14 |
| AX-158414616 | 18 | 54.164 | KV453058.1 | 9316039 | 14-scf00369 | 14 |
| AX-158414617 | 18 | 54.164 | KV453058.1 | 9316417 | 14-scf00369 | 14 |

|              |    |        |            |         |             |    |
|--------------|----|--------|------------|---------|-------------|----|
| AX-158414618 | 18 | 54.164 | KV453058.1 | 9316462 | 14-scf00369 | 14 |
| AX-158215182 | 18 | 54.164 | KV453058.1 | 9317325 | 14-scf00369 | 14 |
| AX-158215184 | 18 | 54.164 | KV453058.1 | 9318983 | 14-scf00369 | 14 |
| AX-158215185 | 18 | 54.164 | KV453058.1 | 9319518 | 14-scf00369 | 14 |
| AX-158215186 | 18 | 54.164 | KV453058.1 | 9320286 | 14-scf00369 | 14 |
| AX-158215187 | 18 | 54.164 | KV453058.1 | 9321228 | 14-scf00369 | 14 |
| AX-158215190 | 18 | 54.164 | KV453058.1 | 9328095 | 14-scf00369 | 14 |
| AX-158215193 | 18 | 54.164 | KV453058.1 | 9330586 | 14-scf00369 | 14 |
| AX-158215194 | 18 | 54.164 | KV453058.1 | 9330988 | 14-scf00369 | 14 |
| AX-158215195 | 18 | 54.164 | KV453058.1 | 9332070 | 14-scf00369 | 14 |
| AX-158215197 | 18 | 54.164 | KV453058.1 | 9334380 | 14-scf00369 | 14 |
| AX-158215198 | 18 | 54.164 | KV453058.1 | 9335893 | 14-scf00369 | 14 |
| AX-158215203 | 18 | 54.164 | KV453058.1 | 9340699 | 14-scf00369 | 14 |
| AX-158215205 | 18 | 54.164 | KV453058.1 | 9342784 | 14-scf00369 | 14 |
| AX-157755833 | 18 | 54.164 | KV453058.1 | 9343656 | 14-scf00369 | 14 |
| AX-158215207 | 18 | 54.164 | KV453058.1 | 9344733 | 14-scf00369 | 14 |
| AX-158215208 | 18 | 54.164 | KV453058.1 | 9345549 | 14-scf00369 | 14 |
| AX-158215209 | 18 | 54.164 | KV453058.1 | 9346642 | 14-scf00369 | 14 |
| AX-158215210 | 18 | 54.164 | KV453058.1 | 9347936 | 14-scf00369 | 14 |
| AX-158215211 | 18 | 54.164 | KV453058.1 | 9349527 | 14-scf00369 | 14 |
| AX-158215212 | 18 | 54.164 | KV453058.1 | 9351215 | 14-scf00369 | 14 |
| AX-158215213 | 18 | 54.164 | KV453058.1 | 9351951 | 14-scf00369 | 14 |
| AX-158215215 | 18 | 54.164 | KV453058.1 | 9353944 | 14-scf00369 | 14 |
| AX-158215216 | 18 | 54.164 | KV453058.1 | 9355083 | 14-scf00369 | 14 |
| AX-158215217 | 18 | 54.164 | KV453058.1 | 9355168 | 14-scf00369 | 14 |
| AX-158215218 | 18 | 54.164 | KV453058.1 | 9357424 | 14-scf00369 | 14 |
| AX-158215221 | 18 | 54.164 | KV453058.1 | 9364436 | 14-scf00369 | 14 |
| AX-158215222 | 18 | 54.164 | KV453058.1 | 9365912 | 14-scf00369 | 14 |
| AX-158215225 | 18 | 54.164 | KV453058.1 | 9371102 | 14-scf00369 | 14 |
| AX-158215226 | 18 | 54.164 | KV453058.1 | 9371511 | 14-scf00369 | 14 |
| AX-158215229 | 18 | 54.164 | KV453058.1 | 9373767 | 14-scf00369 | 14 |
| AX-158215231 | 18 | 54.164 | KV453058.1 | 9376138 | 14-scf00369 | 14 |
| AX-158215232 | 18 | 54.164 | KV453058.1 | 9378389 | 14-scf00369 | 14 |
| AX-158215236 | 18 | 54.164 | KV453058.1 | 9386214 | 14-scf00369 | 14 |
| AX-158215239 | 18 | 54.164 | KV453058.1 | 9390711 | 14-scf00369 | 14 |
| AX-158215240 | 18 | 54.164 | KV453058.1 | 9391640 | 14-scf00369 | 14 |
| AX-158386521 | 18 | 54.164 | KV453058.1 | 9391807 | 14-scf00369 | 14 |
| AX-158215241 | 18 | 54.164 | KV453058.1 | 9392823 | 14-scf00369 | 14 |
| AX-158215242 | 18 | 54.164 | KV453058.1 | 9393448 | 14-scf00369 | 14 |
| AX-158215243 | 18 | 54.164 | KV453058.1 | 9394079 | 14-scf00369 | 14 |
| AX-158215244 | 18 | 54.164 | KV453058.1 | 9394882 | 14-scf00369 | 14 |
| AX-158215247 | 18 | 54.164 | KV453058.1 | 9399282 | 14-scf00369 | 14 |
| AX-157838857 | 18 | 54.164 | KV453058.1 | 9400727 | 14-scf00369 | 14 |
| AX-158215249 | 18 | 54.164 | KV453058.1 | 9401329 | 14-scf00369 | 14 |
| AX-158215250 | 18 | 54.164 | KV453058.1 | 9401747 | 14-scf00369 | 14 |
| AX-158215251 | 18 | 54.164 | KV453058.1 | 9402436 | 14-scf00369 | 14 |
| AX-158215252 | 18 | 54.164 | KV453058.1 | 9403029 | 14-scf00369 | 14 |
| AX-158215254 | 18 | 54.164 | KV453058.1 | 9404155 | 14-scf00369 | 14 |
| AX-158215255 | 18 | 54.164 | KV453058.1 | 9404780 | 14-scf00369 | 14 |
| AX-158215256 | 18 | 54.164 | KV453058.1 | 9405590 | 14-scf00369 | 14 |
| AX-158215258 | 18 | 54.164 | KV453058.1 | 9409604 | 14-scf00369 | 14 |

|              |    |        |            |         |             |    |
|--------------|----|--------|------------|---------|-------------|----|
| AX-157838858 | 18 | 54.164 | KV453058.1 | 9409814 | 14-scf00369 | 14 |
| AX-158386522 | 18 | 54.164 | KV453058.1 | 9412277 | 14-scf00369 | 14 |
| AX-158215261 | 18 | 54.164 | KV453058.1 | 9412984 | 14-scf00369 | 14 |
| AX-158215262 | 18 | 54.164 | KV453058.1 | 9413274 | 14-scf00369 | 14 |
| AX-158215263 | 18 | 54.164 | KV453058.1 | 9415359 | 14-scf00369 | 14 |
| AX-158215264 | 18 | 54.164 | KV453058.1 | 9416109 | 14-scf00369 | 14 |
| AX-158215265 | 18 | 54.164 | KV453058.1 | 9417699 | 14-scf00369 | 14 |
| AX-157742490 | 18 | 54.164 | KV453058.1 | 9418517 | 14-scf00369 | 14 |
| AX-158215267 | 18 | 54.164 | KV453058.1 | 9434722 | 14-scf00369 | 14 |
| AX-158215268 | 18 | 54.164 | KV453058.1 | 9435274 | 14-scf00369 | 14 |
| AX-158215269 | 18 | 54.164 | KV453058.1 | 9435620 | 14-scf00369 | 14 |
| AX-158215270 | 18 | 54.164 | KV453058.1 | 9436502 | 14-scf00369 | 14 |
| AX-158386523 | 18 | 54.164 | KV453058.1 | 9436714 | 14-scf00369 | 14 |
| AX-158215271 | 18 | 54.164 | KV453058.1 | 9437448 | 14-scf00369 | 14 |
| AX-158386524 | 18 | 54.164 | KV453058.1 | 9444853 | 14-scf00369 | 14 |
| AX-158215275 | 18 | 54.164 | KV453058.1 | 9444956 | 14-scf00369 | 14 |
| AX-158215276 | 18 | 54.164 | KV453058.1 | 9445705 | 14-scf00369 | 14 |
| AX-158215277 | 18 | 54.164 | KV453058.1 | 9447722 | 14-scf00369 | 14 |
| AX-158215278 | 18 | 54.164 | KV453058.1 | 9448503 | 14-scf00369 | 14 |
| AX-158386525 | 18 | 54.164 | KV453058.1 | 9448564 | 14-scf00369 | 14 |
| AX-158215279 | 18 | 54.164 | KV453058.1 | 9449119 | 14-scf00369 | 14 |
| AX-158215281 | 18 | 54.164 | KV453058.1 | 9450877 | 14-scf00369 | 14 |
| AX-158215282 | 18 | 54.164 | KV453058.1 | 9451306 | 14-scf00369 | 14 |
| AX-158386526 | 18 | 54.164 | KV453058.1 | 9451817 | 14-scf00369 | 14 |
| AX-158215283 | 18 | 54.164 | KV453058.1 | 9452053 | 14-scf00369 | 14 |
| AX-158215285 | 18 | 54.164 | KV453058.1 | 9453157 | 14-scf00369 | 14 |
| AX-158215289 | 18 | 54.164 | KV453058.1 | 9461212 | 14-scf00369 | 14 |
| AX-158215290 | 18 | 54.164 | KV453058.1 | 9461596 | 14-scf00369 | 14 |
| AX-158215291 | 18 | 54.164 | KV453058.1 | 9462187 | 14-scf00369 | 14 |
| AX-157749224 | 18 | 54.164 | KV453058.1 | 9463212 | 14-scf00369 | 14 |
| AX-158215292 | 18 | 54.164 | KV453058.1 | 9465646 | 14-scf00369 | 14 |
| AX-158215293 | 18 | 54.164 | KV453058.1 | 9468095 | 14-scf00369 | 14 |
| AX-158215296 | 18 | 54.164 | KV453058.1 | 9470430 | 14-scf00369 | 14 |
| AX-158215297 | 18 | 54.164 | KV453058.1 | 9470759 | 14-scf00369 | 14 |
| AX-158215300 | 18 | 54.164 | KV453058.1 | 9473760 | 14-scf00369 | 14 |
| AX-158215305 | 18 | 54.164 | KV453058.1 | 9476857 | 14-scf00369 | 14 |
| AX-158215307 | 18 | 54.164 | KV453058.1 | 9479224 | 14-scf00369 | 14 |
| AX-158215309 | 18 | 54.164 | KV453058.1 | 9481231 | 14-scf00369 | 14 |
| AX-158215310 | 18 | 54.164 | KV453058.1 | 9482261 | 14-scf00369 | 14 |
| AX-158215311 | 18 | 54.164 | KV453058.1 | 9483403 | 14-scf00369 | 14 |
| AX-158215312 | 18 | 54.164 | KV453058.1 | 9484515 | 14-scf00369 | 14 |
| AX-157838860 | 18 | 54.164 | KV453058.1 | 9485374 | 14-scf00369 | 14 |
| AX-158215315 | 18 | 54.164 | KV453058.1 | 9486345 | 14-scf00369 | 14 |
| AX-158215318 | 18 | 54.164 | KV453058.1 | 9489461 | 14-scf00369 | 14 |
| AX-157754217 | 18 | 54.164 | KV453058.1 | 9490087 | 14-scf00369 | 14 |
| AX-158215320 | 18 | 54.164 | KV453058.1 | 9490985 | 14-scf00369 | 14 |
| AX-158410134 | 18 | 54.164 | KV453058.1 | 9491169 | 14-scf00369 | 14 |
| AX-158386528 | 18 | 54.164 | KV453058.1 | 9494935 | 14-scf00369 | 14 |
| AX-158215323 | 18 | 54.164 | KV453058.1 | 9499455 | 14-scf00369 | 14 |
| AX-158215325 | 18 | 54.164 | KV453058.1 | 9504664 | 14-scf00369 | 14 |
| AX-158386529 | 18 | 54.164 | KV453058.1 | 9506416 | 14-scf00369 | 14 |

|              |    |        |            |         |             |    |
|--------------|----|--------|------------|---------|-------------|----|
| AX-158215328 | 18 | 54.164 | KV453058.1 | 9508146 | 14-scf00369 | 14 |
| AX-158215329 | 18 | 54.164 | KV453058.1 | 9509817 | 14-scf00369 | 14 |
| AX-158215330 | 18 | 54.164 | KV453058.1 | 9510358 | 14-scf00369 | 14 |
| AX-158414621 | 18 | 54.164 | KV453058.1 | 9511819 | 14-scf00369 | 14 |
| AX-158418606 | 18 | 54.164 | KV453058.1 | 9512168 | 14-scf00369 | 14 |
| AX-158215332 | 18 | 54.164 | KV453058.1 | 9515950 | 14-scf00369 | 14 |
| AX-158215333 | 18 | 54.164 | KV453058.1 | 9517165 | 14-scf00369 | 14 |
| AX-158215340 | 18 | 54.164 | KV453058.1 | 9522140 | 14-scf00369 | 14 |
| AX-158215341 | 18 | 54.164 | KV453058.1 | 9522709 | 14-scf00369 | 14 |
| AX-158215342 | 18 | 54.164 | KV453058.1 | 9523763 | 14-scf00369 | 14 |
| AX-158215347 | 18 | 54.164 | KV453058.1 | 9529503 | 14-scf00369 | 14 |
| AX-158215348 | 18 | 54.164 | KV453058.1 | 9529920 | 14-scf00369 | 14 |
| AX-158215349 | 18 | 54.164 | KV453058.1 | 9530700 | 14-scf00369 | 14 |
| AX-158215350 | 18 | 54.164 | KV453058.1 | 9532091 | 14-scf00369 | 14 |
| AX-158215351 | 18 | 54.164 | KV453058.1 | 9532707 | 14-scf00369 | 14 |
| AX-158386531 | 18 | 54.164 | KV453058.1 | 9533541 | 14-scf00369 | 14 |
| AX-158215354 | 18 | 54.164 | KV453058.1 | 9544104 | 14-scf00369 | 14 |
| AX-158215355 | 18 | 54.164 | KV453058.1 | 9545436 | 14-scf00369 | 14 |
| AX-158215356 | 18 | 54.164 | KV453058.1 | 9551081 | 14-scf00369 | 14 |
| AX-158215357 | 18 | 54.164 | KV453058.1 | 9552183 | 14-scf00369 | 14 |
| AX-158386532 | 18 | 54.164 | KV453058.1 | 9552294 | 14-scf00369 | 14 |
| AX-158215361 | 18 | 54.164 | KV453058.1 | 9554954 | 14-scf00369 | 14 |
| AX-158215362 | 18 | 54.164 | KV453058.1 | 9555495 | 14-scf00369 | 14 |
| AX-158215363 | 18 | 54.164 | KV453058.1 | 9556286 | 14-scf00369 | 14 |
| AX-158215364 | 18 | 54.164 | KV453058.1 | 9557078 | 14-scf00369 | 14 |
| AX-158215366 | 18 | 54.164 | KV453058.1 | 9562511 | 14-scf00369 | 14 |
| AX-158215367 | 18 | 54.164 | KV453058.1 | 9565837 | 14-scf00369 | 14 |
| AX-158215368 | 18 | 54.164 | KV453058.1 | 9566748 | 14-scf00369 | 14 |
| AX-158215370 | 18 | 54.164 | KV453058.1 | 9568312 | 14-scf00369 | 14 |
| AX-158215371 | 18 | 54.164 | KV453058.1 | 9569069 | 14-scf00369 | 14 |
| AX-157859405 | 18 | 54.164 | KV453058.1 | 9569940 | 14-scf00369 | 14 |
| AX-158215373 | 18 | 54.164 | KV453058.1 | 9570788 | 14-scf00369 | 14 |
| AX-158215374 | 18 | 54.164 | KV453058.1 | 9571796 | 14-scf00369 | 14 |
| AX-157722656 | 18 | 54.164 | KV453058.1 | 9572575 | 14-scf00369 | 14 |
| AX-158215375 | 18 | 54.164 | KV453058.1 | 9573878 | 14-scf00369 | 14 |
| AX-158215376 | 18 | 54.164 | KV453058.1 | 9575632 | 14-scf00369 | 14 |
| AX-158215377 | 18 | 54.164 | KV453058.1 | 9576555 | 14-scf00369 | 14 |
| AX-158215379 | 18 | 54.164 | KV453058.1 | 9583631 | 14-scf00369 | 14 |
| AX-158215380 | 18 | 54.164 | KV453058.1 | 9584225 | 14-scf00369 | 14 |
| AX-158386533 | 18 | 54.164 | KV453058.1 | 9584662 | 14-scf00369 | 14 |
| AX-158215381 | 18 | 54.164 | KV453058.1 | 9584771 | 14-scf00369 | 14 |
| AX-158215382 | 18 | 54.164 | KV453058.1 | 9585765 | 14-scf00369 | 14 |
| AX-158215387 | 18 | 54.164 | KV453058.1 | 9588143 | 14-scf00369 | 14 |
| AX-158215388 | 18 | 54.164 | KV453058.1 | 9592268 | 14-scf00369 | 14 |
| AX-158215389 | 18 | 54.164 | KV453058.1 | 9592727 | 14-scf00369 | 14 |
| AX-158215390 | 18 | 54.164 | KV453058.1 | 9593097 | 14-scf00369 | 14 |
| AX-158215391 | 18 | 54.164 | KV453058.1 | 9593942 | 14-scf00369 | 14 |
| AX-158215392 | 18 | 54.164 | KV453058.1 | 9594435 | 14-scf00369 | 14 |
| AX-158215393 | 18 | 54.164 | KV453058.1 | 9595012 | 14-scf00369 | 14 |
| AX-158215394 | 18 | 54.164 | KV453058.1 | 9596517 | 14-scf00369 | 14 |
| AX-158215395 | 18 | 54.164 | KV453058.1 | 9597369 | 14-scf00369 | 14 |

|              |    |        |            |         |             |    |
|--------------|----|--------|------------|---------|-------------|----|
| AX-158386534 | 18 | 54.164 | KV453058.1 | 9598238 | 14-scf00369 | 14 |
| AX-157838861 | 18 | 54.164 | KV453058.1 | 9598402 | 14-scf00369 | 14 |
| AX-157838862 | 18 | 54.164 | KV453058.1 | 9599149 | 14-scf00369 | 14 |
| AX-158215397 | 18 | 54.164 | KV453058.1 | 9599451 | 14-scf00369 | 14 |
| AX-157838863 | 18 | 54.164 | KV453058.1 | 9599531 | 14-scf00369 | 14 |
| AX-158215398 | 18 | 54.164 | KV453058.1 | 9600622 | 14-scf00369 | 14 |
| AX-157838864 | 18 | 54.164 | KV453058.1 | 9605434 | 14-scf00369 | 14 |
| AX-158215401 | 18 | 54.164 | KV453058.1 | 9605654 | 14-scf00369 | 14 |
| AX-157838865 | 18 | 54.164 | KV453058.1 | 9606670 | 14-scf00369 | 14 |
| AX-158215402 | 18 | 54.164 | KV453058.1 | 9606966 | 14-scf00369 | 14 |
| AX-157752866 | 18 | 54.164 | KV453058.1 | 9607210 | 14-scf00369 | 14 |
| AX-158215404 | 18 | 54.164 | KV453058.1 | 9608576 | 14-scf00369 | 14 |
| AX-158215407 | 18 | 54.164 | KV453058.1 | 9611995 | 14-scf00369 | 14 |
| AX-158215408 | 18 | 54.164 | KV453058.1 | 9612386 | 14-scf00369 | 14 |
| AX-158215410 | 18 | 54.164 | KV453058.1 | 9614585 | 14-scf00369 | 14 |
| AX-158215411 | 18 | 54.164 | KV453058.1 | 9616109 | 14-scf00369 | 14 |
| AX-158215412 | 18 | 54.164 | KV453058.1 | 9617091 | 14-scf00369 | 14 |
| AX-158215413 | 18 | 54.164 | KV453058.1 | 9617792 | 14-scf00369 | 14 |
| AX-158215414 | 18 | 54.164 | KV453058.1 | 9618112 | 14-scf00369 | 14 |
| AX-158215415 | 18 | 54.164 | KV453058.1 | 9623155 | 14-scf00369 | 14 |
| AX-158215416 | 18 | 54.164 | KV453058.1 | 9623592 | 14-scf00369 | 14 |
| AX-158215417 | 18 | 54.164 | KV453058.1 | 9624417 | 14-scf00369 | 14 |
| AX-158215418 | 18 | 54.164 | KV453058.1 | 9624811 | 14-scf00369 | 14 |
| AX-158215420 | 18 | 54.164 | KV453058.1 | 9629654 | 14-scf00369 | 14 |
| AX-158215421 | 18 | 54.164 | KV453058.1 | 9631267 | 14-scf00369 | 14 |
| AX-158215422 | 18 | 54.164 | KV453058.1 | 9631701 | 14-scf00369 | 14 |
| AX-158215423 | 18 | 54.164 | KV453058.1 | 9632590 | 14-scf00369 | 14 |
| AX-158380819 | 18 | 54.164 | KV453058.1 | 9633508 | 14-scf00369 | 14 |
| AX-158215425 | 18 | 54.164 | KV453058.1 | 9633747 | 14-scf00369 | 14 |
| AX-158215427 | 18 | 54.164 | KV453058.1 | 9636556 | 14-scf00369 | 14 |
| AX-158386535 | 18 | 54.164 | KV453058.1 | 9639762 | 14-scf00369 | 14 |
| AX-158215431 | 18 | 54.164 | KV453058.1 | 9640411 | 14-scf00369 | 14 |
| AX-158215433 | 18 | 54.164 | KV453058.1 | 9644490 | 14-scf00369 | 14 |
| AX-158386536 | 18 | 54.164 | KV453058.1 | 9651617 | 14-scf00369 | 14 |
| AX-158215434 | 18 | 54.164 | KV453058.1 | 9653933 | 14-scf00369 | 14 |
| AX-158386537 | 18 | 54.164 | KV453058.1 | 9653988 | 14-scf00369 | 14 |
| AX-158215435 | 18 | 54.164 | KV453058.1 | 9654571 | 14-scf00369 | 14 |
| AX-158215437 | 18 | 54.164 | KV453058.1 | 9657291 | 14-scf00369 | 14 |
| AX-158215441 | 18 | 54.164 | KV453058.1 | 9661124 | 14-scf00369 | 14 |
| AX-158215442 | 18 | 54.164 | KV453058.1 | 9661599 | 14-scf00369 | 14 |
| AX-158215444 | 18 | 54.164 | KV453058.1 | 9663986 | 14-scf00369 | 14 |
| AX-158215450 | 18 | 54.164 | KV453058.1 | 9671478 | 14-scf00369 | 14 |
| AX-158215451 | 18 | 54.164 | KV453058.1 | 9671905 | 14-scf00369 | 14 |
| AX-158386539 | 18 | 54.164 | KV453058.1 | 9672110 | 14-scf00369 | 14 |
| AX-158215454 | 18 | 54.164 | KV453058.1 | 9673775 | 14-scf00369 | 14 |
| AX-158215458 | 18 | 54.164 | KV453058.1 | 9682658 | 14-scf00369 | 14 |
| AX-157725266 | 18 | 54.164 | KV453058.1 | 9687609 | 14-scf00369 | 14 |
| AX-158418608 | 18 | 54.164 | KV453058.1 | 9689344 | 14-scf00369 | 14 |
| AX-158215466 | 18 | 54.164 | KV453058.1 | 9690812 | 14-scf00369 | 14 |
| AX-158215468 | 18 | 54.164 | KV453058.1 | 9695037 | 14-scf00369 | 14 |
| AX-158215469 | 18 | 54.164 | KV453058.1 | 9697466 | 14-scf00369 | 14 |

|              |    |        |            |         |             |    |
|--------------|----|--------|------------|---------|-------------|----|
| AX-158215470 | 18 | 54.164 | KV453058.1 | 9698083 | 14-scf00369 | 14 |
| AX-158215471 | 18 | 54.164 | KV453058.1 | 9700771 | 14-scf00369 | 14 |
| AX-158215472 | 18 | 54.164 | KV453058.1 | 9703262 | 14-scf00369 | 14 |
| AX-158215473 | 18 | 54.164 | KV453058.1 | 9706030 | 14-scf00369 | 14 |
| AX-158215474 | 18 | 54.164 | KV453058.1 | 9706883 | 14-scf00369 | 14 |
| AX-158215475 | 18 | 54.164 | KV453058.1 | 9707685 | 14-scf00369 | 14 |
| AX-158215478 | 18 | 54.164 | KV453058.1 | 9714904 | 14-scf00369 | 14 |
| AX-158215479 | 18 | 54.164 | KV453058.1 | 9716096 | 14-scf00369 | 14 |
| AX-158215483 | 18 | 54.164 | KV453058.1 | 9719374 | 14-scf00369 | 14 |
| AX-158215485 | 18 | 54.164 | KV453058.1 | 9721164 | 14-scf00369 | 14 |
| AX-158215486 | 18 | 54.164 | KV453058.1 | 9724018 | 14-scf00369 | 14 |
| AX-158215487 | 18 | 54.164 | KV453058.1 | 9725399 | 14-scf00369 | 14 |
| AX-158215488 | 18 | 54.164 | KV453058.1 | 9725893 | 14-scf00369 | 14 |
| AX-158215490 | 18 | 54.164 | KV453058.1 | 9732138 | 14-scf00369 | 14 |
| AX-158215491 | 18 | 54.164 | KV453058.1 | 9736480 | 14-scf00369 | 14 |
| AX-158215493 | 18 | 54.164 | KV453058.1 | 9737841 | 14-scf00369 | 14 |
| AX-158215494 | 18 | 54.164 | KV453058.1 | 9738254 | 14-scf00369 | 14 |
| AX-157725718 | 18 | 54.164 | KV453058.1 | 9742531 | 14-scf00369 | 14 |
| AX-158215500 | 18 | 54.164 | KV453058.1 | 9749650 | 14-scf00369 | 14 |
| AX-158215501 | 18 | 54.164 | KV453058.1 | 9751713 | 14-scf00369 | 14 |
| AX-158215504 | 18 | 54.164 | KV453058.1 | 9755476 | 14-scf00369 | 14 |
| AX-158215507 | 18 | 54.164 | KV453058.1 | 9757571 | 14-scf00369 | 14 |
| AX-158215508 | 18 | 54.164 | KV453058.1 | 9758018 | 14-scf00369 | 14 |
| AX-158215509 | 18 | 54.164 | KV453058.1 | 9758396 | 14-scf00369 | 14 |
| AX-158215514 | 18 | 54.164 | KV453058.1 | 9763064 | 14-scf00369 | 14 |
| AX-158215516 | 18 | 54.164 | KV453058.1 | 9766806 | 14-scf00369 | 14 |
| AX-158215517 | 18 | 54.164 | KV453058.1 | 9767571 | 14-scf00369 | 14 |
| AX-158215519 | 18 | 54.164 | KV453058.1 | 9768343 | 14-scf00369 | 14 |
| AX-158386544 | 18 | 54.164 | KV453058.1 | 9772317 | 14-scf00369 | 14 |
| AX-157756165 | 18 | 54.164 | KV453058.1 | 9776560 | 14-scf00369 | 14 |
| AX-158215524 | 18 | 54.164 | KV453058.1 | 9776912 | 14-scf00369 | 14 |
| AX-158215525 | 18 | 54.164 | KV453058.1 | 9777917 | 14-scf00369 | 14 |
| AX-158215526 | 18 | 54.164 | KV453058.1 | 9778663 | 14-scf00369 | 14 |
| AX-158215529 | 18 | 54.164 | KV453058.1 | 9785105 | 14-scf00369 | 14 |
| AX-158215530 | 18 | 54.164 | KV453058.1 | 9786355 | 14-scf00369 | 14 |
| AX-158215532 | 18 | 54.164 | KV453058.1 | 9788440 | 14-scf00369 | 14 |
| AX-158215533 | 18 | 54.164 | KV453058.1 | 9791743 | 14-scf00369 | 14 |
| AX-158215534 | 18 | 54.164 | KV453058.1 | 9793430 | 14-scf00369 | 14 |
| AX-158215536 | 18 | 54.164 | KV453058.1 | 9794830 | 14-scf00369 | 14 |
| AX-158215538 | 18 | 54.164 | KV453058.1 | 9803120 | 14-scf00369 | 14 |
| AX-158215542 | 18 | 54.164 | KV453058.1 | 9810484 | 14-scf00369 | 14 |
| AX-158215545 | 18 | 54.164 | KV453058.1 | 9812747 | 14-scf00369 | 14 |
| AX-158215549 | 18 | 54.164 | KV453058.1 | 9815693 | 14-scf00369 | 14 |
| AX-158215550 | 18 | 54.164 | KV453058.1 | 9817065 | 14-scf00369 | 14 |
| AX-158215551 | 18 | 54.164 | KV453058.1 | 9818383 | 14-scf00369 | 14 |
| AX-158215553 | 18 | 54.164 | KV453058.1 | 9820843 | 14-scf00369 | 14 |
| AX-158215554 | 18 | 54.164 | KV453058.1 | 9822332 | 14-scf00369 | 14 |
| AX-158215555 | 18 | 54.164 | KV453058.1 | 9823241 | 14-scf00369 | 14 |
| AX-158215556 | 18 | 54.164 | KV453058.1 | 9823864 | 14-scf00369 | 14 |
| AX-158215557 | 18 | 54.164 | KV453058.1 | 9826156 | 14-scf00369 | 14 |
| AX-158215558 | 18 | 54.164 | KV453058.1 | 9831927 | 14-scf00369 | 14 |



|              |    |        |            |         |             |    |
|--------------|----|--------|------------|---------|-------------|----|
| AX-158215559 | 18 | 54.164 | KV453058.1 | 9833592 | 14-scf00369 | 14 |
| AX-158215560 | 18 | 54.164 | KV453058.1 | 9834570 | 14-scf00369 | 14 |
| AX-158215562 | 18 | 54.164 | KV453058.1 | 9835442 | 14-scf00369 | 14 |
| AX-157741881 | 18 | 54.164 | KV453058.1 | 9843213 | 14-scf00369 | 14 |
| AX-158414630 | 18 | 54.164 | KV453058.1 | 9844051 | 14-scf00369 | 14 |
| AX-158215572 | 18 | 54.164 | KV453058.1 | 9849557 | 14-scf00369 | 14 |
| AX-158215573 | 18 | 54.164 | KV453058.1 | 9853067 | 14-scf00369 | 14 |
| AX-158215575 | 18 | 54.164 | KV453058.1 | 9856175 | 14-scf00369 | 14 |
| AX-158215580 | 18 | 54.164 | KV453058.1 | 9860338 | 14-scf00369 | 14 |
| AX-158215581 | 18 | 54.164 | KV453058.1 | 9861097 | 14-scf00369 | 14 |
| AX-158215587 | 18 | 54.164 | KV453058.1 | 9866816 | 14-scf00369 | 14 |
| AX-158215588 | 18 | 54.164 | KV453058.1 | 9867283 | 14-scf00369 | 14 |
| AX-158215594 | 18 | 54.164 | KV453058.1 | 9873924 | 14-scf00369 | 14 |
| AX-158215595 | 18 | 54.164 | KV453058.1 | 9874724 | 14-scf00369 | 14 |
| AX-158215600 | 18 | 54.164 | KV453058.1 | 9878929 | 14-scf00369 | 14 |
| AX-158215601 | 18 | 54.164 | KV453058.1 | 9879682 | 14-scf00369 | 14 |
| AX-158215608 | 18 | 54.164 | KV453058.1 | 9890083 | 14-scf00369 | 14 |
| AX-158215609 | 18 | 54.164 | KV453058.1 | 9890498 | 14-scf00369 | 14 |
| AX-158215610 | 18 | 54.164 | KV453058.1 | 9890907 | 14-scf00369 | 14 |
| AX-158215613 | 18 | 54.164 | KV453058.1 | 9893947 | 14-scf00369 | 14 |
| AX-158215616 | 18 | 54.164 | KV453058.1 | 9899206 | 14-scf00369 | 14 |
| AX-158386546 | 18 | 54.164 | KV453058.1 | 9899955 | 14-scf00369 | 14 |
| AX-158386547 | 18 | 54.164 | KV453058.1 | 9901863 | 14-scf00369 | 14 |
| AX-158215620 | 18 | 54.164 | KV453058.1 | 9903616 | 14-scf00369 | 14 |
| AX-158215622 | 18 | 54.164 | KV453058.1 | 9904728 | 14-scf00369 | 14 |
| AX-158215624 | 18 | 54.164 | KV453058.1 | 9908808 | 14-scf00369 | 14 |
| AX-158215626 | 18 | 54.164 | KV453058.1 | 9913877 | 14-scf00369 | 14 |
| AX-158215627 | 18 | 54.164 | KV453058.1 | 9917261 | 14-scf00369 | 14 |
| AX-158215629 | 18 | 54.164 | KV453058.1 | 9918245 | 14-scf00369 | 14 |
| AX-158414631 | 18 | 54.164 | KV453058.1 | 9918566 | 14-scf00369 | 14 |
| AX-158215633 | 18 | 54.164 | KV453058.1 | 9923954 | 14-scf00369 | 14 |
| AX-158215634 | 18 | 54.164 | KV453058.1 | 9924774 | 14-scf00369 | 14 |
| AX-158215635 | 18 | 54.164 | KV453058.1 | 9925553 | 14-scf00369 | 14 |
| AX-158215636 | 18 | 54.164 | KV453058.1 | 9925660 | 14-scf00369 | 14 |
| AX-158215637 | 18 | 54.164 | KV453058.1 | 9926286 | 14-scf00369 | 14 |
| AX-158215638 | 18 | 54.164 | KV453058.1 | 9926936 | 14-scf00369 | 14 |
| AX-158215641 | 18 | 54.164 | KV453058.1 | 9935209 | 14-scf00369 | 14 |
| AX-158215643 | 18 | 54.164 | KV453058.1 | 9937013 | 14-scf00369 | 14 |
| AX-158215645 | 18 | 54.164 | KV453058.1 | 9939161 | 14-scf00369 | 14 |
| AX-158215646 | 18 | 54.164 | KV453058.1 | 9943014 | 14-scf00369 | 14 |
| AX-158215648 | 18 | 54.164 | KV453058.1 | 9945600 | 14-scf00369 | 14 |
| AX-158215649 | 18 | 54.164 | KV453058.1 | 9945974 | 14-scf00369 | 14 |
| AX-158215650 | 18 | 54.164 | KV453058.1 | 9947510 | 14-scf00369 | 14 |
| AX-158215651 | 18 | 54.164 | KV453058.1 | 9947794 | 14-scf00369 | 14 |
| AX-157727454 | 18 | 54.164 | KV453058.1 | 9948475 | 14-scf00369 | 14 |
| AX-158418614 | 18 | 54.164 | KV453058.1 | 9951084 | 14-scf00369 | 14 |
| AX-158215654 | 18 | 54.164 | KV453058.1 | 9953328 | 14-scf00369 | 14 |
| AX-158215656 | 18 | 54.164 | KV453058.1 | 9955028 | 14-scf00369 | 14 |
| AX-158215658 | 18 | 54.164 | KV453058.1 | 9960005 | 14-scf00369 | 14 |
| AX-158215659 | 18 | 54.164 | KV453058.1 | 9962055 | 14-scf00369 | 14 |
| AX-158215660 | 18 | 54.164 | KV453058.1 | 9962600 | 14-scf00369 | 14 |

|              |    |        |            |          |             |    |
|--------------|----|--------|------------|----------|-------------|----|
| AX-158386548 | 18 | 54.164 | KV453058.1 | 9963153  | 14-scf00369 | 14 |
| AX-158215662 | 18 | 54.164 | KV453058.1 | 9963682  | 14-scf00369 | 14 |
| AX-158215663 | 18 | 54.164 | KV453058.1 | 9964058  | 14-scf00369 | 14 |
| AX-158215665 | 18 | 54.164 | KV453058.1 | 9965333  | 14-scf00369 | 14 |
| AX-158215668 | 18 | 54.164 | KV453058.1 | 9969394  | 14-scf00369 | 14 |
| AX-158215669 | 18 | 54.164 | KV453058.1 | 9969819  | 14-scf00369 | 14 |
| AX-158215670 | 18 | 54.164 | KV453058.1 | 9970926  | 14-scf00369 | 14 |
| AX-158215672 | 18 | 54.164 | KV453058.1 | 9974537  | 14-scf00369 | 14 |
| AX-158215680 | 18 | 54.164 | KV453058.1 | 9980906  | 14-scf00369 | 14 |
| AX-158215682 | 18 | 54.164 | KV453058.1 | 9986239  | 14-scf00369 | 14 |
| AX-158215684 | 18 | 54.164 | KV453058.1 | 9989996  | 14-scf00369 | 14 |
| AX-158215685 | 18 | 54.164 | KV453058.1 | 9990776  | 14-scf00369 | 14 |
| AX-158215687 | 18 | 54.164 | KV453058.1 | 9993249  | 14-scf00369 | 14 |
| AX-158215688 | 18 | 54.164 | KV453058.1 | 9994195  | 14-scf00369 | 14 |
| AX-158215689 | 18 | 54.164 | KV453058.1 | 9995152  | 14-scf00369 | 14 |
| AX-158215692 | 18 | 54.164 | KV453058.1 | 9997171  | 14-scf00369 | 14 |
| AX-158215693 | 18 | 54.164 | KV453058.1 | 9997772  | 14-scf00369 | 14 |
| AX-158215694 | 18 | 54.164 | KV453058.1 | 9998368  | 14-scf00369 | 14 |
| AX-158215695 | 18 | 54.164 | KV453058.1 | 10000177 | 14-scf00369 | 14 |
| AX-158215696 | 18 | 54.164 | KV453058.1 | 10000854 | 14-scf00369 | 14 |
| AX-158215697 | 18 | 54.164 | KV453058.1 | 10001577 | 14-scf00369 | 14 |
| AX-158215698 | 18 | 54.164 | KV453058.1 | 10002264 | 14-scf00369 | 14 |
| AX-158215699 | 18 | 54.164 | KV453058.1 | 10002832 | 14-scf00369 | 14 |
| AX-158215700 | 18 | 54.164 | KV453058.1 | 10003397 | 14-scf00369 | 14 |
| AX-158215702 | 18 | 54.164 | KV453058.1 | 10006724 | 14-scf00369 | 14 |
| AX-158215703 | 18 | 54.164 | KV453058.1 | 10007858 | 14-scf00369 | 14 |
| AX-158215704 | 18 | 54.164 | KV453058.1 | 10008923 | 14-scf00369 | 14 |
| AX-158215706 | 18 | 54.164 | KV453058.1 | 10010398 | 14-scf00369 | 14 |
| AX-158215710 | 18 | 54.164 | KV453058.1 | 10013230 | 14-scf00369 | 14 |
| AX-158215711 | 18 | 54.164 | KV453058.1 | 10013948 | 14-scf00369 | 14 |
| AX-158215716 | 18 | 54.164 | KV453058.1 | 10019760 | 14-scf00369 | 14 |
| AX-158215718 | 18 | 54.164 | KV453058.1 | 10026817 | 14-scf00369 | 14 |
| AX-158215719 | 18 | 54.164 | KV453058.1 | 10027859 | 14-scf00369 | 14 |
| AX-158215722 | 18 | 54.164 | KV453058.1 | 10032300 | 14-scf00369 | 14 |
| AX-158215724 | 18 | 54.164 | KV453058.1 | 10034021 | 14-scf00369 | 14 |
| AX-158215725 | 18 | 54.164 | KV453058.1 | 10037198 | 14-scf00369 | 14 |
| AX-158215732 | 18 | 54.164 | KV453058.1 | 10045040 | 14-scf00369 | 14 |
| AX-158215733 | 18 | 54.164 | KV453058.1 | 10045983 | 14-scf00369 | 14 |
| AX-158215735 | 18 | 54.164 | KV453058.1 | 10047252 | 14-scf00369 | 14 |
| AX-158215736 | 18 | 54.164 | KV453058.1 | 10049123 | 14-scf00369 | 14 |
| AX-158215737 | 18 | 54.164 | KV453058.1 | 10050219 | 14-scf00369 | 14 |
| AX-158215741 | 18 | 54.164 | KV453058.1 | 10052897 | 14-scf00369 | 14 |
| AX-158215742 | 18 | 54.164 | KV453058.1 | 10053911 | 14-scf00369 | 14 |
| AX-158215744 | 18 | 54.164 | KV453058.1 | 10055132 | 14-scf00369 | 14 |
| AX-158215745 | 18 | 54.164 | KV453058.1 | 10055310 | 14-scf00369 | 14 |
| AX-158215746 | 18 | 54.164 | KV453058.1 | 10056223 | 14-scf00369 | 14 |
| AX-157754817 | 18 | 54.164 | KV453058.1 | 10060397 | 14-scf00369 | 14 |
| AX-158215747 | 18 | 54.164 | KV453058.1 | 10060634 | 14-scf00369 | 14 |
| AX-157838869 | 18 | 54.164 | KV453058.1 | 10060850 | 14-scf00369 | 14 |
| AX-158215749 | 18 | 54.164 | KV453058.1 | 10062426 | 14-scf00369 | 14 |
| AX-157838870 | 18 | 54.164 | KV453058.1 | 10063372 | 14-scf00369 | 14 |

|              |    |        |            |          |             |    |
|--------------|----|--------|------------|----------|-------------|----|
| AX-157838871 | 18 | 54.164 | KV453058.1 | 10064633 | 14-scf00369 | 14 |
| AX-157718130 | 18 | 54.164 | KV453058.1 | 10064791 | 14-scf00369 | 14 |
| AX-157741593 | 18 | 54.164 | KV453058.1 | 10068711 | 14-scf00369 | 14 |
| AX-158215750 | 18 | 54.164 | KV453058.1 | 10069449 | 14-scf00369 | 14 |
| AX-158215751 | 18 | 54.164 | KV453058.1 | 10071641 | 14-scf00369 | 14 |
| AX-158215752 | 18 | 54.164 | KV453058.1 | 10071941 | 14-scf00369 | 14 |
| AX-158215753 | 18 | 54.164 | KV453058.1 | 10073164 | 14-scf00369 | 14 |
| AX-158215756 | 18 | 54.164 | KV453058.1 | 10076662 | 14-scf00369 | 14 |
| AX-157838873 | 18 | 54.164 | KV453058.1 | 10076938 | 14-scf00369 | 14 |
| AX-158215758 | 18 | 54.164 | KV453058.1 | 10078864 | 14-scf00369 | 14 |
| AX-158215760 | 18 | 54.164 | KV453058.1 | 10080572 | 14-scf00369 | 14 |
| AX-157838874 | 18 | 54.164 | KV453058.1 | 10080823 | 14-scf00369 | 14 |
| AX-158215762 | 18 | 54.164 | KV453058.1 | 10087968 | 14-scf00369 | 14 |
| AX-158215763 | 18 | 54.164 | KV453058.1 | 10088823 | 14-scf00369 | 14 |
| AX-158215767 | 18 | 54.164 | KV453058.1 | 10091738 | 14-scf00369 | 14 |
| AX-158215769 | 18 | 54.164 | KV453058.1 | 10094289 | 14-scf00369 | 14 |
| AX-158380820 | 18 | 54.164 | KV453058.1 | 10099006 | 14-scf00369 | 14 |
| AX-158215775 | 18 | 54.164 | KV453058.1 | 10099297 | 14-scf00369 | 14 |
| AX-158215776 | 18 | 54.164 | KV453058.1 | 10100774 | 14-scf00369 | 14 |
| AX-158215777 | 18 | 54.164 | KV453058.1 | 10101348 | 14-scf00369 | 14 |
| AX-158215778 | 18 | 54.164 | KV453058.1 | 10102295 | 14-scf00369 | 14 |
| AX-158215779 | 18 | 54.164 | KV453058.1 | 10103063 | 14-scf00369 | 14 |
| AX-158215784 | 18 | 54.164 | KV453058.1 | 10106327 | 14-scf00369 | 14 |
| AX-158215785 | 18 | 54.164 | KV453058.1 | 10106846 | 14-scf00369 | 14 |
| AX-158215786 | 18 | 54.164 | KV453058.1 | 10107222 | 14-scf00369 | 14 |
| AX-158215787 | 18 | 54.164 | KV453058.1 | 10108285 | 14-scf00369 | 14 |
| AX-158215788 | 18 | 54.164 | KV453058.1 | 10108696 | 14-scf00369 | 14 |
| AX-158215789 | 18 | 54.164 | KV453058.1 | 10110456 | 14-scf00369 | 14 |
| AX-158215791 | 18 | 54.164 | KV453058.1 | 10111145 | 14-scf00369 | 14 |
| AX-157743683 | 18 | 54.164 | KV453058.1 | 10116573 | 14-scf00369 | 14 |
| AX-158414639 | 18 | 54.164 | KV453058.1 | 10119168 | 14-scf00369 | 14 |
| AX-158215792 | 18 | 54.164 | KV453058.1 | 10119389 | 14-scf00369 | 14 |
| AX-158215793 | 18 | 54.164 | KV453058.1 | 10119705 | 14-scf00369 | 14 |
| AX-158215795 | 18 | 54.164 | KV453058.1 | 10122621 | 14-scf00369 | 14 |
| AX-158215798 | 18 | 54.164 | KV453058.1 | 10127255 | 14-scf00369 | 14 |
| AX-158215799 | 18 | 54.164 | KV453058.1 | 10127936 | 14-scf00369 | 14 |
| AX-157867012 | 18 | 54.164 | KV453058.1 | 10128540 | 14-scf00369 | 14 |
| AX-158215801 | 18 | 54.164 | KV453058.1 | 10129181 | 14-scf00369 | 14 |
| AX-158215802 | 18 | 54.164 | KV453058.1 | 10129875 | 14-scf00369 | 14 |
| AX-158215803 | 18 | 54.164 | KV453058.1 | 10131752 | 14-scf00369 | 14 |
| AX-158215804 | 18 | 54.164 | KV453058.1 | 10131997 | 14-scf00369 | 14 |
| AX-158215805 | 18 | 54.164 | KV453058.1 | 10132277 | 14-scf00369 | 14 |
| AX-157838875 | 18 | 54.164 | KV453058.1 | 10133291 | 14-scf00369 | 14 |
| AX-158215807 | 18 | 54.164 | KV453058.1 | 10133994 | 14-scf00369 | 14 |
| AX-157859408 | 18 | 54.164 | KV453058.1 | 10136117 | 14-scf00369 | 14 |
| AX-158215810 | 18 | 54.164 | KV453058.1 | 10137929 | 14-scf00369 | 14 |
| AX-158215811 | 18 | 54.164 | KV453058.1 | 10138435 | 14-scf00369 | 14 |
| AX-158215818 | 18 | 54.164 | KV453058.1 | 10147040 | 14-scf00369 | 14 |
| AX-158215821 | 18 | 54.164 | KV453058.1 | 10149617 | 14-scf00369 | 14 |
| AX-158215823 | 18 | 54.164 | KV453058.1 | 10151913 | 14-scf00369 | 14 |
| AX-158215825 | 18 | 54.164 | KV453058.1 | 10153548 | 14-scf00369 | 14 |

|              |    |        |            |          |             |    |
|--------------|----|--------|------------|----------|-------------|----|
| AX-158215826 | 18 | 54.164 | KV453058.1 | 10154184 | 14-scf00369 | 14 |
| AX-158215829 | 18 | 54.164 | KV453058.1 | 10156810 | 14-scf00369 | 14 |
| AX-157838876 | 18 | 54.164 | KV453058.1 | 10157432 | 14-scf00369 | 14 |
| AX-158215830 | 18 | 54.164 | KV453058.1 | 10157806 | 14-scf00369 | 14 |
| AX-158215832 | 18 | 54.164 | KV453058.1 | 10160785 | 14-scf00369 | 14 |
| AX-158215834 | 18 | 54.164 | KV453058.1 | 10169258 | 14-scf00369 | 14 |
| AX-158386556 | 18 | 54.164 | KV453058.1 | 10170788 | 14-scf00369 | 14 |
| AX-158215835 | 18 | 54.164 | KV453058.1 | 10170857 | 14-scf00369 | 14 |
| AX-158215837 | 18 | 54.164 | KV453058.1 | 10172406 | 14-scf00369 | 14 |
| AX-158215838 | 18 | 54.164 | KV453058.1 | 10173421 | 14-scf00369 | 14 |
| AX-158215840 | 18 | 54.164 | KV453058.1 | 10177020 | 14-scf00369 | 14 |
| AX-158215841 | 18 | 54.164 | KV453058.1 | 10177577 | 14-scf00369 | 14 |
| AX-158215844 | 18 | 54.164 | KV453058.1 | 10178676 | 14-scf00369 | 14 |
| AX-158215845 | 18 | 54.164 | KV453058.1 | 10179645 | 14-scf00369 | 14 |
| AX-158215846 | 18 | 54.164 | KV453058.1 | 10180147 | 14-scf00369 | 14 |
| AX-158215847 | 18 | 54.164 | KV453058.1 | 10180960 | 14-scf00369 | 14 |
| AX-158215850 | 18 | 54.164 | KV453058.1 | 10183215 | 14-scf00369 | 14 |
| AX-158386558 | 18 | 54.164 | KV453058.1 | 10185463 | 14-scf00369 | 14 |
| AX-158215852 | 18 | 54.164 | KV453058.1 | 10185554 | 14-scf00369 | 14 |
| AX-158215853 | 18 | 54.164 | KV453058.1 | 10186223 | 14-scf00369 | 14 |
| AX-158215855 | 18 | 54.164 | KV453058.1 | 10187795 | 14-scf00369 | 14 |
| AX-158215858 | 18 | 54.164 | KV453058.1 | 10190515 | 14-scf00369 | 14 |
| AX-158215860 | 18 | 54.164 | KV453058.1 | 10192521 | 14-scf00369 | 14 |
| AX-158215861 | 18 | 54.164 | KV453058.1 | 10195366 | 14-scf00369 | 14 |
| AX-158215862 | 18 | 54.164 | KV453058.1 | 10195884 | 14-scf00369 | 14 |
| AX-158215863 | 18 | 54.164 | KV453058.1 | 10196470 | 14-scf00369 | 14 |
| AX-158215864 | 18 | 54.164 | KV453058.1 | 10196573 | 14-scf00369 | 14 |
| AX-158215867 | 18 | 54.164 | KV453058.1 | 10198914 | 14-scf00369 | 14 |
| AX-157867013 | 18 | 54.164 | KV453058.1 | 10199622 | 14-scf00369 | 14 |
| AX-158215868 | 18 | 54.164 | KV453058.1 | 10200237 | 14-scf00369 | 14 |
| AX-157867014 | 18 | 54.164 | KV453058.1 | 10203659 | 14-scf00369 | 14 |
| AX-157867015 | 18 | 54.164 | KV453058.1 | 10203940 | 14-scf00369 | 14 |
| AX-158215870 | 18 | 54.164 | KV453058.1 | 10204568 | 14-scf00369 | 14 |
| AX-157717723 | 18 | 54.164 | KV453058.1 | 10205097 | 14-scf00369 | 14 |
| AX-158215871 | 18 | 54.164 | KV453058.1 | 10206972 | 14-scf00369 | 14 |
| AX-157742247 | 18 | 54.164 | KV453058.1 | 10207127 | 14-scf00369 | 14 |
| AX-158215872 | 18 | 54.164 | KV453058.1 | 10207855 | 14-scf00369 | 14 |
| AX-158215874 | 18 | 54.164 | KV453058.1 | 10209533 | 14-scf00369 | 14 |
| AX-158215876 | 18 | 54.164 | KV453058.1 | 10210574 | 14-scf00369 | 14 |
| AX-158215877 | 18 | 54.164 | KV453058.1 | 10211372 | 14-scf00369 | 14 |
| AX-158215880 | 18 | 54.164 | KV453058.1 | 10215137 | 14-scf00369 | 14 |
| AX-158215881 | 18 | 54.164 | KV453058.1 | 10215344 | 14-scf00369 | 14 |
| AX-158215882 | 18 | 54.164 | KV453058.1 | 10215596 | 14-scf00369 | 14 |
| AX-158215887 | 18 | 54.164 | KV453058.1 | 10224499 | 14-scf00369 | 14 |
| AX-158215891 | 18 | 54.164 | KV453058.1 | 10229706 | 14-scf00369 | 14 |
| AX-158215892 | 18 | 54.164 | KV453058.1 | 10231757 | 14-scf00369 | 14 |
| AX-158215897 | 18 | 54.164 | KV453058.1 | 10236608 | 14-scf00369 | 14 |
| AX-158215899 | 18 | 54.164 | KV453058.1 | 10242979 | 14-scf00369 | 14 |
| AX-157838879 | 18 | 54.164 | KV453058.1 | 10246990 | 14-scf00369 | 14 |
| AX-158215903 | 18 | 54.164 | KV453058.1 | 10248612 | 14-scf00369 | 14 |
| AX-158215909 | 18 | 54.164 | KV453058.1 | 10254211 | 14-scf00369 | 14 |

|              |    |        |            |          |             |    |
|--------------|----|--------|------------|----------|-------------|----|
| AX-158215910 | 18 | 54.164 | KV453058.1 | 10255958 | 14-scf00369 | 14 |
| AX-158215911 | 18 | 54.164 | KV453058.1 | 10259385 | 14-scf00369 | 14 |
| AX-158215913 | 18 | 54.164 | KV453058.1 | 10262925 | 14-scf00369 | 14 |
| AX-158215914 | 18 | 54.164 | KV453058.1 | 10264233 | 14-scf00369 | 14 |
| AX-158215915 | 18 | 54.164 | KV453058.1 | 10264460 | 14-scf00369 | 14 |
| AX-158215916 | 18 | 54.164 | KV453058.1 | 10265576 | 14-scf00369 | 14 |
| AX-158215917 | 18 | 54.164 | KV453058.1 | 10265783 | 14-scf00369 | 14 |
| AX-157838880 | 18 | 54.164 | KV453058.1 | 10266166 | 14-scf00369 | 14 |
| AX-158215919 | 18 | 54.164 | KV453058.1 | 10268142 | 14-scf00369 | 14 |
| AX-158215921 | 18 | 54.164 | KV453058.1 | 10271697 | 14-scf00369 | 14 |
| AX-158215923 | 18 | 54.164 | KV453058.1 | 10275031 | 14-scf00369 | 14 |
| AX-158215928 | 18 | 54.164 | KV453058.1 | 10279282 | 14-scf00369 | 14 |
| AX-158215929 | 18 | 54.164 | KV453058.1 | 10279381 | 14-scf00369 | 14 |
| AX-158215930 | 18 | 54.164 | KV453058.1 | 10280490 | 14-scf00369 | 14 |
| AX-158215931 | 18 | 54.164 | KV453058.1 | 10280811 | 14-scf00369 | 14 |
| AX-158215932 | 18 | 54.164 | KV453058.1 | 10282150 | 14-scf00369 | 14 |
| AX-158215934 | 18 | 54.164 | KV453058.1 | 10284647 | 14-scf00369 | 14 |
| AX-157748353 | 18 | 54.164 | KV453058.1 | 10295936 | 14-scf00369 | 14 |
| AX-158215938 | 18 | 54.164 | KV453058.1 | 10298596 | 14-scf00369 | 14 |
| AX-158414646 | 18 | 54.164 | KV453058.1 | 10299220 | 14-scf00369 | 14 |
| AX-158410141 | 18 | 54.164 | KV453058.1 | 10300102 | 14-scf00369 | 14 |
| AX-158215941 | 18 | 54.164 | KV453058.1 | 10302503 | 14-scf00369 | 14 |
| AX-158215942 | 18 | 54.164 | KV453058.1 | 10303060 | 14-scf00369 | 14 |
| AX-158215944 | 18 | 54.164 | KV453058.1 | 10304415 | 14-scf00369 | 14 |
| AX-158215945 | 18 | 54.164 | KV453058.1 | 10305407 | 14-scf00369 | 14 |
| AX-157867021 | 18 | 54.164 | KV453058.1 | 10308561 | 14-scf00369 | 14 |
| AX-157838886 | 18 | 54.164 | KV453058.1 | 10309369 | 14-scf00369 | 14 |
| AX-158215950 | 18 | 54.164 | KV453058.1 | 10309849 | 14-scf00369 | 14 |
| AX-157867022 | 18 | 54.164 | KV453058.1 | 10310682 | 14-scf00369 | 14 |
| AX-157867024 | 18 | 54.164 | KV453058.1 | 10313445 | 14-scf00369 | 14 |
| AX-157746746 | 18 | 54.164 | KV453058.1 | 10317417 | 14-scf00369 | 14 |
| AX-158215953 | 18 | 54.164 | KV453058.1 | 10318101 | 14-scf00369 | 14 |
| AX-158215955 | 18 | 54.164 | KV453058.1 | 10320713 | 14-scf00369 | 14 |
| AX-157771213 | 18 | 54.164 | KV453058.1 | 10323919 | 14-scf00369 | 14 |
| AX-158215957 | 18 | 54.164 | KV453058.1 | 10324461 | 14-scf00369 | 14 |
| AX-158215961 | 18 | 54.164 | KV453058.1 | 10331855 | 14-scf00369 | 14 |
| AX-158215963 | 18 | 54.164 | KV453058.1 | 10333560 | 14-scf00369 | 14 |
| AX-158386561 | 18 | 54.164 | KV453058.1 | 10334357 | 14-scf00369 | 14 |
| AX-158215964 | 18 | 54.164 | KV453058.1 | 10335211 | 14-scf00369 | 14 |
| AX-158215965 | 18 | 54.164 | KV453058.1 | 10335612 | 14-scf00369 | 14 |
| AX-158215966 | 18 | 54.164 | KV453058.1 | 10336405 | 14-scf00369 | 14 |
| AX-158215967 | 18 | 54.164 | KV453058.1 | 10337242 | 14-scf00369 | 14 |
| AX-158215969 | 18 | 54.164 | KV453058.1 | 10338354 | 14-scf00369 | 14 |
| AX-157838887 | 18 | 54.164 | KV453058.1 | 10341107 | 14-scf00369 | 14 |
| AX-157751611 | 18 | 54.164 | KV453058.1 | 10343931 | 14-scf00369 | 14 |
| AX-158215973 | 18 | 54.164 | KV453058.1 | 10344604 | 14-scf00369 | 14 |
| AX-158215974 | 18 | 54.164 | KV453058.1 | 10345348 | 14-scf00369 | 14 |
| AX-158215978 | 18 | 54.164 | KV453058.1 | 10349018 | 14-scf00369 | 14 |
| AX-158215979 | 18 | 54.164 | KV453058.1 | 10349291 | 14-scf00369 | 14 |
| AX-158215980 | 18 | 54.164 | KV453058.1 | 10349712 | 14-scf00369 | 14 |
| AX-158215982 | 18 | 54.164 | KV453058.1 | 10350552 | 14-scf00369 | 14 |

|              |    |        |            |          |             |    |
|--------------|----|--------|------------|----------|-------------|----|
| AX-157867025 | 18 | 54.164 | KV453058.1 | 10351020 | 14-scf00369 | 14 |
| AX-158215983 | 18 | 54.164 | KV453058.1 | 10351124 | 14-scf00369 | 14 |
| AX-158215984 | 18 | 54.164 | KV453058.1 | 10356189 | 14-scf00369 | 14 |
| AX-158215985 | 18 | 54.164 | KV453058.1 | 10357156 | 14-scf00369 | 14 |
| AX-158215986 | 18 | 54.164 | KV453058.1 | 10359233 | 14-scf00369 | 14 |
| AX-157743966 | 18 | 54.164 | KV453058.1 | 10359622 | 14-scf00369 | 14 |
| AX-157838889 | 18 | 54.164 | KV453058.1 | 10362694 | 14-scf00369 | 14 |
| AX-158215990 | 18 | 54.164 | KV453058.1 | 10364086 | 14-scf00369 | 14 |
| AX-158215991 | 18 | 54.164 | KV453058.1 | 10364240 | 14-scf00369 | 14 |
| AX-158215993 | 18 | 54.164 | KV453058.1 | 10364973 | 14-scf00369 | 14 |
| AX-157838890 | 18 | 54.164 | KV453058.1 | 10366847 | 14-scf00369 | 14 |
| AX-157867027 | 18 | 54.164 | KV453058.1 | 10368934 | 14-scf00369 | 14 |
| AX-158215996 | 18 | 54.164 | KV453058.1 | 10370348 | 14-scf00369 | 14 |
| AX-158215997 | 18 | 54.164 | KV453058.1 | 10370819 | 14-scf00369 | 14 |
| AX-158215999 | 18 | 54.164 | KV453058.1 | 10371521 | 14-scf00369 | 14 |
| AX-158216001 | 18 | 54.164 | KV453058.1 | 10373061 | 14-scf00369 | 14 |
| AX-158216002 | 18 | 54.164 | KV453058.1 | 10373805 | 14-scf00369 | 14 |
| AX-158216003 | 18 | 54.164 | KV453058.1 | 10374376 | 14-scf00369 | 14 |
| AX-158216004 | 18 | 54.164 | KV453058.1 | 10375287 | 14-scf00369 | 14 |
| AX-158216006 | 18 | 54.164 | KV453058.1 | 10382697 | 14-scf00369 | 14 |
| AX-158216007 | 18 | 54.164 | KV453058.1 | 10383121 | 14-scf00369 | 14 |
| AX-158216009 | 18 | 54.164 | KV453058.1 | 10384342 | 14-scf00369 | 14 |
| AX-158216010 | 18 | 54.164 | KV453058.1 | 10385842 | 14-scf00369 | 14 |
| AX-157838897 | 18 | 54.164 | KV453058.1 | 10425231 | 14-scf00369 | 14 |
| AX-158216034 | 18 | 54.164 | KV453058.1 | 10428132 | 14-scf00369 | 14 |
| AX-157838899 | 18 | 54.164 | KV453058.1 | 10429473 | 14-scf00369 | 14 |
| AX-158216037 | 18 | 54.164 | KV453058.1 | 10430508 | 14-scf00369 | 14 |
| AX-158216038 | 18 | 54.164 | KV453058.1 | 10431797 | 14-scf00369 | 14 |
| AX-158216039 | 18 | 54.164 | KV453058.1 | 10432494 | 14-scf00369 | 14 |
| AX-158216041 | 18 | 54.164 | KV453058.1 | 10433130 | 14-scf00369 | 14 |
| AX-157746412 | 18 | 54.164 | KV453058.1 | 10434587 | 14-scf00369 | 14 |
| AX-157838900 | 18 | 54.164 | KV453058.1 | 10435929 | 14-scf00369 | 14 |
| AX-157714215 | 18 | 54.164 | KV453058.1 | 10437440 | 14-scf00369 | 14 |
| AX-157838901 | 18 | 54.164 | KV453058.1 | 10438062 | 14-scf00369 | 14 |
| AX-158380821 | 18 | 54.164 | KV453058.1 | 10438351 | 14-scf00369 | 14 |
| AX-157745362 | 18 | 54.164 | KV453058.1 | 10438424 | 14-scf00369 | 14 |
| AX-158216044 | 18 | 54.164 | KV453058.1 | 10441317 | 14-scf00369 | 14 |
| AX-157838902 | 18 | 54.164 | KV453058.1 | 10441775 | 14-scf00369 | 14 |
| AX-158216048 | 18 | 54.164 | KV453058.1 | 10443929 | 14-scf00369 | 14 |
| AX-158216050 | 18 | 54.164 | KV453058.1 | 10444851 | 14-scf00369 | 14 |
| AX-158216054 | 18 | 54.164 | KV453058.1 | 10449794 | 14-scf00369 | 14 |
| AX-157718332 | 18 | 54.164 | KV453058.1 | 10453410 | 14-scf00369 | 14 |
| AX-158216064 | 18 | 54.164 | KV453058.1 | 10461676 | 14-scf00369 | 14 |
| AX-158216065 | 18 | 54.164 | KV453058.1 | 10462354 | 14-scf00369 | 14 |
| AX-158216066 | 18 | 54.164 | KV453058.1 | 10465510 | 14-scf00369 | 14 |
| AX-158216067 | 18 | 54.164 | KV453058.1 | 10468796 | 14-scf00369 | 14 |
| AX-157718688 | 18 | 54.164 | KV453058.1 | 10469461 | 14-scf00369 | 14 |
| AX-157838903 | 18 | 54.164 | KV453058.1 | 10471685 | 14-scf00369 | 14 |
| AX-157775323 | 18 | 54.164 | KV453058.1 | 10474475 | 14-scf00369 | 14 |
| AX-158216070 | 18 | 54.164 | KV453058.1 | 10477595 | 14-scf00369 | 14 |
| AX-158216071 | 18 | 54.164 | KV453058.1 | 10478631 | 14-scf00369 | 14 |

|              |    |        |            |          |             |    |
|--------------|----|--------|------------|----------|-------------|----|
| AX-158216072 | 18 | 54.164 | KV453058.1 | 10479189 | 14-scf00369 | 14 |
| AX-158216073 | 18 | 54.164 | KV453058.1 | 10479664 | 14-scf00369 | 14 |
| AX-158216075 | 18 | 54.164 | KV453058.1 | 10480814 | 14-scf00369 | 14 |
| AX-158216076 | 18 | 54.164 | KV453058.1 | 10481293 | 14-scf00369 | 14 |
| AX-158216077 | 18 | 54.164 | KV453058.1 | 10481957 | 14-scf00369 | 14 |
| AX-158216078 | 18 | 54.164 | KV453058.1 | 10482915 | 14-scf00369 | 14 |
| AX-158216083 | 18 | 54.164 | KV453058.1 | 10487372 | 14-scf00369 | 14 |
| AX-158216084 | 18 | 54.164 | KV453058.1 | 10487834 | 14-scf00369 | 14 |
| AX-157753804 | 18 | 54.164 | KV453058.1 | 10489741 | 14-scf00369 | 14 |
| AX-158216087 | 18 | 54.164 | KV453058.1 | 10489995 | 14-scf00369 | 14 |
| AX-158216088 | 18 | 54.164 | KV453058.1 | 10490487 | 14-scf00369 | 14 |
| AX-158216089 | 18 | 54.164 | KV453058.1 | 10491415 | 14-scf00369 | 14 |
| AX-158216090 | 18 | 54.164 | KV453058.1 | 10491723 | 14-scf00369 | 14 |
| AX-158216091 | 18 | 54.164 | KV453058.1 | 10494214 | 14-scf00369 | 14 |
| AX-158216092 | 18 | 54.164 | KV453058.1 | 10494747 | 14-scf00369 | 14 |
| AX-158216093 | 18 | 54.164 | KV453058.1 | 10495852 | 14-scf00369 | 14 |
| AX-158216094 | 18 | 54.164 | KV453058.1 | 10496738 | 14-scf00369 | 14 |
| AX-158216095 | 18 | 54.164 | KV453058.1 | 10497501 | 14-scf00369 | 14 |
| AX-158216096 | 18 | 54.164 | KV453058.1 | 10498835 | 14-scf00369 | 14 |
| AX-158216097 | 18 | 54.164 | KV453058.1 | 10499912 | 14-scf00369 | 14 |
| AX-157740734 | 18 | 54.164 | KV453058.1 | 10507769 | 14-scf00369 | 14 |
| AX-158216106 | 18 | 54.164 | KV453058.1 | 10513465 | 14-scf00369 | 14 |
| AX-158216109 | 18 | 54.164 | KV453058.1 | 10515751 | 14-scf00369 | 14 |
| AX-158216110 | 18 | 54.164 | KV453058.1 | 10516604 | 14-scf00369 | 14 |
| AX-158216112 | 18 | 54.164 | KV453058.1 | 10518298 | 14-scf00369 | 14 |
| AX-158216113 | 18 | 54.164 | KV453058.1 | 10518736 | 14-scf00369 | 14 |
| AX-158216114 | 18 | 54.164 | KV453058.1 | 10519677 | 14-scf00369 | 14 |
| AX-158216118 | 18 | 54.164 | KV453058.1 | 10523620 | 14-scf00369 | 14 |
| AX-158216119 | 18 | 54.164 | KV453058.1 | 10524594 | 14-scf00369 | 14 |
| AX-158216120 | 18 | 54.164 | KV453058.1 | 10525602 | 14-scf00369 | 14 |
| AX-158216121 | 18 | 54.164 | KV453058.1 | 10528542 | 14-scf00369 | 14 |
| AX-158216122 | 18 | 54.164 | KV453058.1 | 10529874 | 14-scf00369 | 14 |
| AX-158216124 | 18 | 54.164 | KV453058.1 | 10531308 | 14-scf00369 | 14 |
| AX-158216128 | 18 | 54.164 | KV453058.1 | 10534148 | 14-scf00369 | 14 |
| AX-158216133 | 18 | 54.164 | KV453058.1 | 10537388 | 14-scf00369 | 14 |
| AX-158216134 | 18 | 54.164 | KV453058.1 | 10537930 | 14-scf00369 | 14 |
| AX-158216136 | 18 | 54.164 | KV453058.1 | 10539254 | 14-scf00369 | 14 |
| AX-158216142 | 18 | 54.164 | KV453058.1 | 10547039 | 14-scf00369 | 14 |
| AX-158216143 | 18 | 54.164 | KV453058.1 | 10547324 | 14-scf00369 | 14 |
| AX-158216144 | 18 | 54.164 | KV453058.1 | 10547869 | 14-scf00369 | 14 |
| AX-158216145 | 18 | 54.164 | KV453058.1 | 10548926 | 14-scf00369 | 14 |
| AX-158414655 | 18 | 54.164 | KV453058.1 | 10549824 | 14-scf00369 | 14 |
| AX-158386563 | 18 | 54.164 | KV453058.1 | 10551287 | 14-scf00369 | 14 |
| AX-158216148 | 18 | 54.164 | KV453058.1 | 10551702 | 14-scf00369 | 14 |
| AX-158216149 | 18 | 54.164 | KV453058.1 | 10552509 | 14-scf00369 | 14 |
| AX-158216150 | 18 | 54.164 | KV453058.1 | 10553339 | 14-scf00369 | 14 |
| AX-158216152 | 18 | 54.164 | KV453058.1 | 10556503 | 14-scf00369 | 14 |
| AX-157756556 | 18 | 54.164 | KV453058.1 | 10556860 | 14-scf00369 | 14 |
| AX-158216156 | 18 | 54.164 | KV453058.1 | 10560310 | 14-scf00369 | 14 |
| AX-158216157 | 18 | 54.164 | KV453058.1 | 10560964 | 14-scf00369 | 14 |
| AX-158216158 | 18 | 54.164 | KV453058.1 | 10561929 | 14-scf00369 | 14 |

|              |    |        |            |          |             |    |
|--------------|----|--------|------------|----------|-------------|----|
| AX-158216160 | 18 | 54.164 | KV453058.1 | 10564577 | 14-scf00369 | 14 |
| AX-158216161 | 18 | 54.164 | KV453058.1 | 10565073 | 14-scf00369 | 14 |
| AX-158216162 | 18 | 54.164 | KV453058.1 | 10565992 | 14-scf00369 | 14 |
| AX-158216165 | 18 | 54.164 | KV453058.1 | 10567366 | 14-scf00369 | 14 |
| AX-158216167 | 18 | 54.164 | KV453058.1 | 10569408 | 14-scf00369 | 14 |
| AX-158216171 | 18 | 54.164 | KV453058.1 | 10572625 | 14-scf00369 | 14 |
| AX-158216172 | 18 | 54.164 | KV453058.1 | 10573173 | 14-scf00369 | 14 |
| AX-158216173 | 18 | 54.164 | KV453058.1 | 10573881 | 14-scf00369 | 14 |
| AX-158216179 | 18 | 54.164 | KV453058.1 | 10578835 | 14-scf00369 | 14 |
| AX-158216180 | 18 | 54.164 | KV453058.1 | 10579256 | 14-scf00369 | 14 |
| AX-158216182 | 18 | 54.164 | KV453058.1 | 10582596 | 14-scf00369 | 14 |
| AX-158216183 | 18 | 54.164 | KV453058.1 | 10582944 | 14-scf00369 | 14 |
| AX-158216184 | 18 | 54.164 | KV453058.1 | 10583608 | 14-scf00369 | 14 |
| AX-158216185 | 18 | 54.164 | KV453058.1 | 10584495 | 14-scf00369 | 14 |
| AX-158216186 | 18 | 54.164 | KV453058.1 | 10585058 | 14-scf00369 | 14 |
| AX-158216187 | 18 | 54.164 | KV453058.1 | 10585561 | 14-scf00369 | 14 |
| AX-158216194 | 18 | 54.164 | KV453058.1 | 10591077 | 14-scf00369 | 14 |
| AX-157731575 | 18 | 54.164 | KV453058.1 | 10593356 | 14-scf00369 | 14 |
| AX-158216196 | 18 | 54.164 | KV453058.1 | 10594313 | 14-scf00369 | 14 |
| AX-157838905 | 18 | 54.164 | KV453058.1 | 10596661 | 14-scf00369 | 14 |
| AX-158216199 | 18 | 54.164 | KV453058.1 | 10599281 | 14-scf00369 | 14 |
| AX-158216201 | 18 | 54.164 | KV453058.1 | 10600721 | 14-scf00369 | 14 |
| AX-158216202 | 18 | 54.164 | KV453058.1 | 10601136 | 14-scf00369 | 14 |
| AX-158216204 | 18 | 54.164 | KV453058.1 | 10603279 | 14-scf00369 | 14 |
| AX-158216207 | 18 | 54.164 | KV453058.1 | 10610079 | 14-scf00369 | 14 |
| AX-158216209 | 18 | 54.164 | KV453058.1 | 10611970 | 14-scf00369 | 14 |
| AX-158216212 | 18 | 54.164 | KV453058.1 | 10614101 | 14-scf00369 | 14 |
| AX-158216213 | 18 | 54.164 | KV453058.1 | 10614949 | 14-scf00369 | 14 |
| AX-157710056 | 18 | 54.164 | KV453058.1 | 10618853 | 14-scf00369 | 14 |
| AX-158216218 | 18 | 54.164 | KV453058.1 | 10619012 | 14-scf00369 | 14 |
| AX-158216219 | 18 | 54.164 | KV453058.1 | 10621485 | 14-scf00369 | 14 |
| AX-157838906 | 18 | 54.164 | KV453058.1 | 10624272 | 14-scf00369 | 14 |
| AX-158216221 | 18 | 54.164 | KV453058.1 | 10624369 | 14-scf00369 | 14 |
| AX-158216222 | 18 | 54.164 | KV453058.1 | 10625139 | 14-scf00369 | 14 |
| AX-158216225 | 18 | 54.164 | KV453058.1 | 10628390 | 14-scf00369 | 14 |
| AX-158386565 | 18 | 54.164 | KV453058.1 | 10632005 | 14-scf00369 | 14 |
| AX-158216230 | 18 | 54.164 | KV453058.1 | 10632420 | 14-scf00369 | 14 |
| AX-158216232 | 18 | 54.164 | KV453058.1 | 10636343 | 14-scf00369 | 14 |
| AX-158216234 | 18 | 54.164 | KV453058.1 | 10637753 | 14-scf00369 | 14 |
| AX-158216235 | 18 | 54.164 | KV453058.1 | 10638346 | 14-scf00369 | 14 |
| AX-158216236 | 18 | 54.164 | KV453058.1 | 10638831 | 14-scf00369 | 14 |
| AX-158216237 | 18 | 54.164 | KV453058.1 | 10639747 | 14-scf00369 | 14 |
| AX-158216238 | 18 | 54.164 | KV453058.1 | 10640512 | 14-scf00369 | 14 |
| AX-158216239 | 18 | 54.164 | KV453058.1 | 10640928 | 14-scf00369 | 14 |
| AX-158216240 | 18 | 54.164 | KV453058.1 | 10641346 | 14-scf00369 | 14 |
| AX-158216243 | 18 | 54.164 | KV453058.1 | 10642905 | 14-scf00369 | 14 |
| AX-158216245 | 18 | 54.164 | KV453058.1 | 10645063 | 14-scf00369 | 14 |
| AX-158386566 | 18 | 54.164 | KV453058.1 | 10645200 | 14-scf00369 | 14 |
| AX-157750188 | 18 | 54.164 | KV453058.1 | 10646345 | 14-scf00369 | 14 |
| AX-157754873 | 18 | 54.164 | KV453058.1 | 10648412 | 14-scf00369 | 14 |
| AX-158216248 | 18 | 54.164 | KV453058.1 | 10651942 | 14-scf00369 | 14 |



|              |    |        |            |          |             |    |
|--------------|----|--------|------------|----------|-------------|----|
| AX-158216250 | 18 | 54.164 | KV453058.1 | 10653255 | 14-scf00369 | 14 |
| AX-158216251 | 18 | 54.164 | KV453058.1 | 10653629 | 14-scf00369 | 14 |
| AX-158216252 | 18 | 54.164 | KV453058.1 | 10654421 | 14-scf00369 | 14 |
| AX-158216253 | 18 | 54.164 | KV453058.1 | 10654832 | 14-scf00369 | 14 |
| AX-157838908 | 18 | 54.164 | KV453058.1 | 10658460 | 14-scf00369 | 14 |
| AX-158216258 | 18 | 54.164 | KV453058.1 | 10659297 | 14-scf00369 | 14 |
| AX-158216260 | 18 | 54.164 | KV453058.1 | 10661660 | 14-scf00369 | 14 |
| AX-158216261 | 18 | 54.164 | KV453058.1 | 10663225 | 14-scf00369 | 14 |
| AX-158216262 | 18 | 54.164 | KV453058.1 | 10663634 | 14-scf00369 | 14 |
| AX-158216264 | 18 | 54.164 | KV453058.1 | 10665515 | 14-scf00369 | 14 |
| AX-158216265 | 18 | 54.164 | KV453058.1 | 10666224 | 14-scf00369 | 14 |
| AX-158216268 | 18 | 54.164 | KV453058.1 | 10668891 | 14-scf00369 | 14 |
| AX-158216269 | 18 | 54.164 | KV453058.1 | 10669664 | 14-scf00369 | 14 |
| AX-158216270 | 18 | 54.164 | KV453058.1 | 10670305 | 14-scf00369 | 14 |
| AX-158216273 | 18 | 54.164 | KV453058.1 | 10673670 | 14-scf00369 | 14 |
| AX-158216274 | 18 | 54.164 | KV453058.1 | 10674162 | 14-scf00369 | 14 |
| AX-158216275 | 18 | 54.164 | KV453058.1 | 10674541 | 14-scf00369 | 14 |
| AX-158216281 | 18 | 54.164 | KV453058.1 | 10683090 | 14-scf00369 | 14 |
| AX-158386568 | 18 | 54.164 | KV453058.1 | 10684058 | 14-scf00369 | 14 |
| AX-158216282 | 18 | 54.164 | KV453058.1 | 10684400 | 14-scf00369 | 14 |
| AX-158216283 | 18 | 54.164 | KV453058.1 | 10685032 | 14-scf00369 | 14 |
| AX-157739094 | 18 | 54.164 | KV453058.1 | 10689343 | 14-scf00369 | 14 |
| AX-157838909 | 18 | 54.164 | KV453058.1 | 10696666 | 14-scf00369 | 14 |
| AX-158216288 | 18 | 54.164 | KV453058.1 | 10700009 | 14-scf00369 | 14 |
| AX-157838910 | 18 | 54.164 | KV453058.1 | 10710171 | 14-scf00369 | 14 |
| AX-157838911 | 18 | 54.164 | KV453058.1 | 10715012 | 14-scf00369 | 14 |
| AX-157738471 | 18 | 54.164 | KV453058.1 | 10719787 | 14-scf00369 | 14 |
| AX-158216297 | 18 | 54.164 | KV453058.1 | 10719975 | 14-scf00369 | 14 |
| AX-158216298 | 18 | 54.164 | KV453058.1 | 10720687 | 14-scf00369 | 14 |
| AX-157838912 | 18 | 54.164 | KV453058.1 | 10721837 | 14-scf00369 | 14 |
| AX-157772897 | 18 | 54.164 | KV453058.1 | 10726352 | 14-scf00369 | 14 |
| AX-158216304 | 18 | 54.164 | KV453058.1 | 10727013 | 14-scf00369 | 14 |
| AX-158216308 | 18 | 54.164 | KV453058.1 | 10731638 | 14-scf00369 | 14 |
| AX-158216314 | 18 | 54.164 | KV453058.1 | 10734055 | 14-scf00369 | 14 |
| AX-158216317 | 18 | 54.164 | KV453058.1 | 10739601 | 14-scf00369 | 14 |
| AX-158216320 | 18 | 54.164 | KV453058.1 | 10744751 | 14-scf00369 | 14 |
| AX-158216322 | 18 | 54.164 | KV453058.1 | 10749666 | 14-scf00369 | 14 |
| AX-158216323 | 18 | 54.164 | KV453058.1 | 10750031 | 14-scf00369 | 14 |
| AX-158216325 | 18 | 54.164 | KV453058.1 | 10750536 | 14-scf00369 | 14 |
| AX-158216327 | 18 | 54.164 | KV453058.1 | 10752635 | 14-scf00369 | 14 |
| AX-158216328 | 18 | 54.164 | KV453058.1 | 10754011 | 14-scf00369 | 14 |
| AX-158216330 | 18 | 54.164 | KV453058.1 | 10755781 | 14-scf00369 | 14 |
| AX-158216331 | 18 | 54.164 | KV453058.1 | 10757725 | 14-scf00369 | 14 |
| AX-158216332 | 18 | 54.164 | KV453058.1 | 10758375 | 14-scf00369 | 14 |
| AX-158216333 | 18 | 54.164 | KV453058.1 | 10761481 | 14-scf00369 | 14 |
| AX-158216335 | 18 | 54.164 | KV453058.1 | 10762922 | 14-scf00369 | 14 |
| AX-158216336 | 18 | 54.164 | KV453058.1 | 10763848 | 14-scf00369 | 14 |
| AX-158216339 | 18 | 54.164 | KV453058.1 | 10766850 | 14-scf00369 | 14 |
| AX-158216340 | 18 | 54.164 | KV453058.1 | 10767716 | 14-scf00369 | 14 |
| AX-158216341 | 18 | 54.164 | KV453058.1 | 10769176 | 14-scf00369 | 14 |
| AX-158216342 | 18 | 54.164 | KV453058.1 | 10770608 | 14-scf00369 | 14 |

|              |    |        |            |          |             |    |
|--------------|----|--------|------------|----------|-------------|----|
| AX-157838917 | 18 | 54.164 | KV453058.1 | 10770962 | 14-scf00369 | 14 |
| AX-157726830 | 18 | 54.164 | KV453058.1 | 10775528 | 14-scf00369 | 14 |
| AX-157717399 | 18 | 54.164 | KV453058.1 | 10777110 | 14-scf00369 | 14 |
| AX-158216349 | 18 | 54.164 | KV453058.1 | 10779703 | 14-scf00369 | 14 |
| AX-158216352 | 18 | 54.164 | KV453058.1 | 10781690 | 14-scf00369 | 14 |
| AX-158216355 | 18 | 54.164 | KV453058.1 | 10783394 | 14-scf00369 | 14 |
| AX-157838918 | 18 | 54.164 | KV453058.1 | 10786289 | 14-scf00369 | 14 |
| AX-157748497 | 18 | 54.164 | KV453058.1 | 10787689 | 14-scf00369 | 14 |
| AX-158216360 | 18 | 54.164 | KV453058.1 | 10789876 | 14-scf00369 | 14 |
| AX-158216361 | 18 | 54.164 | KV453058.1 | 10789956 | 14-scf00369 | 14 |
| AX-158216363 | 18 | 54.164 | KV453058.1 | 10790605 | 14-scf00369 | 14 |
| AX-158216364 | 18 | 54.164 | KV453058.1 | 10790966 | 14-scf00369 | 14 |
| AX-158216367 | 18 | 54.164 | KV453058.1 | 10792549 | 14-scf00369 | 14 |
| AX-158216369 | 18 | 54.164 | KV453058.1 | 10793568 | 14-scf00369 | 14 |
| AX-158216370 | 18 | 54.164 | KV453058.1 | 10795850 | 14-scf00369 | 14 |
| AX-157838920 | 18 | 54.164 | KV453058.1 | 10797975 | 14-scf00369 | 14 |
| AX-158216374 | 18 | 54.164 | KV453058.1 | 10799079 | 14-scf00369 | 14 |
| AX-158216377 | 18 | 54.164 | KV453058.1 | 10801443 | 14-scf00369 | 14 |
| AX-157721293 | 18 | 54.164 | KV453058.1 | 10803232 | 14-scf00369 | 14 |
| AX-157838921 | 18 | 54.164 | KV453058.1 | 10804246 | 14-scf00369 | 14 |
| AX-157838922 | 18 | 54.164 | KV453058.1 | 10804296 | 14-scf00369 | 14 |
| AX-158216378 | 18 | 54.164 | KV453058.1 | 10805168 | 14-scf00369 | 14 |
| AX-158216380 | 18 | 54.164 | KV453058.1 | 10806289 | 14-scf00369 | 14 |
| AX-158216381 | 18 | 54.164 | KV453058.1 | 10806888 | 14-scf00369 | 14 |
| AX-158216382 | 18 | 54.164 | KV453058.1 | 10807468 | 14-scf00369 | 14 |
| AX-158216383 | 18 | 54.164 | KV453058.1 | 10812765 | 14-scf00369 | 14 |
| AX-158216387 | 18 | 54.164 | KV453058.1 | 10815440 | 14-scf00369 | 14 |
| AX-158216388 | 18 | 54.164 | KV453058.1 | 10816190 | 14-scf00369 | 14 |
| AX-158216389 | 18 | 54.164 | KV453058.1 | 10816600 | 14-scf00369 | 14 |
| AX-158216390 | 18 | 54.164 | KV453058.1 | 10817155 | 14-scf00369 | 14 |
| AX-158216392 | 18 | 54.164 | KV453058.1 | 10817979 | 14-scf00369 | 14 |
| AX-158216396 | 18 | 54.164 | KV453058.1 | 10820114 | 14-scf00369 | 14 |
| AX-158216397 | 18 | 54.164 | KV453058.1 | 10820946 | 14-scf00369 | 14 |
| AX-158216398 | 18 | 54.164 | KV453058.1 | 10821866 | 14-scf00369 | 14 |
| AX-158216399 | 18 | 54.164 | KV453058.1 | 10822367 | 14-scf00369 | 14 |
| AX-158216400 | 18 | 54.164 | KV453058.1 | 10824040 | 14-scf00369 | 14 |
| AX-157738611 | 18 | 54.164 | KV453058.1 | 10824634 | 14-scf00369 | 14 |
| AX-158216401 | 18 | 54.164 | KV453058.1 | 10826701 | 14-scf00369 | 14 |
| AX-158216403 | 18 | 54.164 | KV453058.1 | 10827631 | 14-scf00369 | 14 |
| AX-158216404 | 18 | 54.164 | KV453058.1 | 10829399 | 14-scf00369 | 14 |
| AX-158216405 | 18 | 54.164 | KV453058.1 | 10829630 | 14-scf00369 | 14 |
| AX-158216408 | 18 | 54.164 | KV453058.1 | 10833084 | 14-scf00369 | 14 |
| AX-158216409 | 18 | 54.164 | KV453058.1 | 10833486 | 14-scf00369 | 14 |
| AX-158216414 | 18 | 54.164 | KV453058.1 | 10837070 | 14-scf00369 | 14 |
| AX-158216415 | 18 | 54.164 | KV453058.1 | 10837923 | 14-scf00369 | 14 |
| AX-158216416 | 18 | 54.164 | KV453058.1 | 10838132 | 14-scf00369 | 14 |
| AX-158216417 | 18 | 54.164 | KV453058.1 | 10838789 | 14-scf00369 | 14 |
| AX-158216418 | 18 | 54.164 | KV453058.1 | 10839600 | 14-scf00369 | 14 |
| AX-157752412 | 18 | 54.164 | KV453058.1 | 10842126 | 14-scf00369 | 14 |
| AX-158216420 | 18 | 54.164 | KV453058.1 | 10843760 | 14-scf00369 | 14 |
| AX-158216421 | 18 | 54.164 | KV453058.1 | 10844168 | 14-scf00369 | 14 |

|              |    |        |            |          |             |    |
|--------------|----|--------|------------|----------|-------------|----|
| AX-157838925 | 18 | 54.164 | KV453058.1 | 10844389 | 14-scf00369 | 14 |
| AX-158216422 | 18 | 54.164 | KV453058.1 | 10844882 | 14-scf00369 | 14 |
| AX-158216423 | 18 | 54.164 | KV453058.1 | 10845255 | 14-scf00369 | 14 |
| AX-158216424 | 18 | 54.164 | KV453058.1 | 10846090 | 14-scf00369 | 14 |
| AX-158216425 | 18 | 54.164 | KV453058.1 | 10846617 | 14-scf00369 | 14 |
| AX-158216429 | 18 | 54.164 | KV453058.1 | 10853599 | 14-scf00369 | 14 |
| AX-158380823 | 18 | 54.164 | KV453058.1 | 10855002 | 14-scf00369 | 14 |
| AX-158216430 | 18 | 54.164 | KV453058.1 | 10855417 | 14-scf00369 | 14 |
| AX-158216431 | 18 | 54.164 | KV453058.1 | 10856334 | 14-scf00369 | 14 |
| AX-158216432 | 18 | 54.164 | KV453058.1 | 10857328 | 14-scf00369 | 14 |
| AX-158216434 | 18 | 54.164 | KV453058.1 | 10858889 | 14-scf00369 | 14 |
| AX-158216435 | 18 | 54.164 | KV453058.1 | 10859360 | 14-scf00369 | 14 |
| AX-157838928 | 18 | 54.164 | KV453058.1 | 10860774 | 14-scf00369 | 14 |
| AX-157838929 | 18 | 54.164 | KV453058.1 | 10861338 | 14-scf00369 | 14 |
| AX-157799073 | 18 | 54.164 | KV453058.1 | 10862887 | 14-scf00369 | 14 |
| AX-158216437 | 18 | 54.164 | KV453058.1 | 10863919 | 14-scf00369 | 14 |
| AX-157754071 | 18 | 54.164 | KV453058.1 | 10865660 | 14-scf00369 | 14 |
| AX-157838930 | 18 | 54.164 | KV453058.1 | 10867259 | 14-scf00369 | 14 |
| AX-158216438 | 18 | 54.164 | KV453058.1 | 10868625 | 14-scf00369 | 14 |
| AX-158216441 | 18 | 54.164 | KV453058.1 | 10870660 | 14-scf00369 | 14 |
| AX-158216442 | 18 | 54.164 | KV453058.1 | 10871493 | 14-scf00369 | 14 |
| AX-158216443 | 18 | 54.164 | KV453058.1 | 10873524 | 14-scf00369 | 14 |
| AX-157714617 | 18 | 54.164 | KV453058.1 | 10877278 | 14-scf00369 | 14 |
| AX-158216445 | 18 | 54.164 | KV453058.1 | 10877475 | 14-scf00369 | 14 |
| AX-158216448 | 18 | 54.164 | KV453058.1 | 10879522 | 14-scf00369 | 14 |
| AX-158216449 | 18 | 54.164 | KV453058.1 | 10881411 | 14-scf00369 | 14 |
| AX-158216451 | 18 | 54.164 | KV453058.1 | 10882616 | 14-scf00369 | 14 |
| AX-158216454 | 18 | 54.164 | KV453058.1 | 10885180 | 14-scf00369 | 14 |
| AX-158216455 | 18 | 54.164 | KV453058.1 | 10886218 | 14-scf00369 | 14 |
| AX-158216456 | 18 | 54.164 | KV453058.1 | 10886731 | 14-scf00369 | 14 |
| AX-158216457 | 18 | 54.164 | KV453058.1 | 10887460 | 14-scf00369 | 14 |
| AX-158216458 | 18 | 54.164 | KV453058.1 | 10887952 | 14-scf00369 | 14 |
| AX-158216459 | 18 | 54.164 | KV453058.1 | 10888866 | 14-scf00369 | 14 |
| AX-158216460 | 18 | 54.164 | KV453058.1 | 10890531 | 14-scf00369 | 14 |
| AX-158216461 | 18 | 54.164 | KV453058.1 | 10891376 | 14-scf00369 | 14 |
| AX-158216464 | 18 | 54.164 | KV453058.1 | 10893391 | 14-scf00369 | 14 |
| AX-158216467 | 18 | 54.164 | KV453058.1 | 10897570 | 14-scf00369 | 14 |
| AX-158216470 | 18 | 54.164 | KV453058.1 | 10900744 | 14-scf00369 | 14 |
| AX-158216471 | 18 | 54.164 | KV453058.1 | 10902205 | 14-scf00369 | 14 |
| AX-158216472 | 18 | 54.164 | KV453058.1 | 10902933 | 14-scf00369 | 14 |
| AX-158216474 | 18 | 54.164 | KV453058.1 | 10904796 | 14-scf00369 | 14 |
| AX-158216475 | 18 | 54.164 | KV453058.1 | 10906362 | 14-scf00369 | 14 |
| AX-158216476 | 18 | 54.164 | KV453058.1 | 10907163 | 14-scf00369 | 14 |
| AX-158216477 | 18 | 54.164 | KV453058.1 | 10911474 | 14-scf00369 | 14 |
| AX-158216480 | 18 | 54.164 | KV453058.1 | 10914710 | 14-scf00369 | 14 |
| AX-158216481 | 18 | 54.164 | KV453058.1 | 10915504 | 14-scf00369 | 14 |
| AX-158216482 | 18 | 54.164 | KV453058.1 | 10916814 | 14-scf00369 | 14 |
| AX-158216484 | 18 | 54.164 | KV453058.1 | 10918410 | 14-scf00369 | 14 |
| AX-158216485 | 18 | 54.164 | KV453058.1 | 10919288 | 14-scf00369 | 14 |
| AX-158216487 | 18 | 54.164 | KV453058.1 | 10920545 | 14-scf00369 | 14 |
| AX-158216489 | 18 | 54.164 | KV453058.1 | 10922481 | 14-scf00369 | 14 |

|              |    |        |            |          |             |    |
|--------------|----|--------|------------|----------|-------------|----|
| AX-158216492 | 18 | 54.164 | KV453058.1 | 10924496 | 14-scf00369 | 14 |
| AX-158216495 | 18 | 54.164 | KV453058.1 | 10926788 | 14-scf00369 | 14 |
| AX-157750958 | 18 | 54.164 | KV453058.1 | 10928686 | 14-scf00369 | 14 |
| AX-158216498 | 18 | 54.164 | KV453058.1 | 10929948 | 14-scf00369 | 14 |
| AX-158216505 | 18 | 54.164 | KV453058.1 | 10936778 | 14-scf00369 | 14 |
| AX-158216506 | 18 | 54.164 | KV453058.1 | 10938940 | 14-scf00369 | 14 |
| AX-158216507 | 18 | 54.164 | KV453058.1 | 10939163 | 14-scf00369 | 14 |
| AX-158216509 | 18 | 54.164 | KV453058.1 | 10942871 | 14-scf00369 | 14 |
| AX-158216510 | 18 | 54.164 | KV453058.1 | 10943408 | 14-scf00369 | 14 |
| AX-158216511 | 18 | 54.164 | KV453058.1 | 10943917 | 14-scf00369 | 14 |
| AX-157752879 | 18 | 54.164 | KV453058.1 | 10946761 | 14-scf00369 | 14 |
| AX-158216515 | 18 | 54.164 | KV453058.1 | 10949833 | 14-scf00369 | 14 |
| AX-158216516 | 18 | 54.164 | KV453058.1 | 10951695 | 14-scf00369 | 14 |
| AX-158216518 | 18 | 54.164 | KV453058.1 | 10952151 | 14-scf00369 | 14 |
| AX-158216519 | 18 | 54.164 | KV453058.1 | 10953679 | 14-scf00369 | 14 |
| AX-158216520 | 18 | 54.164 | KV453058.1 | 10954266 | 14-scf00369 | 14 |
| AX-158216521 | 18 | 54.164 | KV453058.1 | 10956085 | 14-scf00369 | 14 |
| AX-158216522 | 18 | 54.164 | KV453058.1 | 10958055 | 14-scf00369 | 14 |
| AX-157838935 | 18 | 54.164 | KV453058.1 | 10960875 | 14-scf00369 | 14 |
| AX-158216525 | 18 | 54.164 | KV453058.1 | 10961473 | 14-scf00369 | 14 |
| AX-158216526 | 18 | 54.164 | KV453058.1 | 10961848 | 14-scf00369 | 14 |
| AX-157838936 | 18 | 54.164 | KV453058.1 | 10962209 | 14-scf00369 | 14 |
| AX-158216529 | 18 | 54.164 | KV453058.1 | 10963452 | 14-scf00369 | 14 |
| AX-158216530 | 18 | 54.164 | KV453058.1 | 10964831 | 14-scf00369 | 14 |
| AX-158216531 | 18 | 54.164 | KV453058.1 | 10965604 | 14-scf00369 | 14 |
| AX-158216534 | 18 | 54.164 | KV453058.1 | 10967188 | 14-scf00369 | 14 |
| AX-158216535 | 18 | 54.164 | KV453058.1 | 10967595 | 14-scf00369 | 14 |
| AX-158216536 | 18 | 54.164 | KV453058.1 | 10968163 | 14-scf00369 | 14 |
| AX-158216538 | 18 | 54.164 | KV453058.1 | 10971189 | 14-scf00369 | 14 |
| AX-158216541 | 18 | 54.164 | KV453058.1 | 10975038 | 14-scf00369 | 14 |
| AX-158216544 | 18 | 54.164 | KV453058.1 | 10978699 | 14-scf00369 | 14 |
| AX-158216545 | 18 | 54.164 | KV453058.1 | 10979504 | 14-scf00369 | 14 |
| AX-158216546 | 18 | 54.164 | KV453058.1 | 10980502 | 14-scf00369 | 14 |
| AX-158216547 | 18 | 54.164 | KV453058.1 | 10981831 | 14-scf00369 | 14 |
| AX-158216548 | 18 | 54.164 | KV453058.1 | 10983019 | 14-scf00369 | 14 |
| AX-158216549 | 18 | 54.164 | KV453058.1 | 10983559 | 14-scf00369 | 14 |
| AX-158216550 | 18 | 54.164 | KV453058.1 | 10983973 | 14-scf00369 | 14 |
| AX-158216553 | 18 | 54.164 | KV453058.1 | 10987678 | 14-scf00369 | 14 |
| AX-158216554 | 18 | 54.164 | KV453058.1 | 10988449 | 14-scf00369 | 14 |
| AX-158216555 | 18 | 54.164 | KV453058.1 | 10988949 | 14-scf00369 | 14 |
| AX-158216556 | 18 | 54.164 | KV453058.1 | 10989274 | 14-scf00369 | 14 |
| AX-158216561 | 18 | 54.164 | KV453058.1 | 10994311 | 14-scf00369 | 14 |
| AX-158216562 | 18 | 54.164 | KV453058.1 | 10995540 | 14-scf00369 | 14 |
| AX-158216564 | 18 | 54.164 | KV453058.1 | 10997659 | 14-scf00369 | 14 |
| AX-158216565 | 18 | 54.164 | KV453058.1 | 10997901 | 14-scf00369 | 14 |
| AX-158216566 | 18 | 54.164 | KV453058.1 | 10998410 | 14-scf00369 | 14 |
| AX-158216567 | 18 | 54.164 | KV453058.1 | 10999898 | 14-scf00369 | 14 |
| AX-158216572 | 18 | 54.164 | KV453058.1 | 11006493 | 14-scf00369 | 14 |
| AX-158216573 | 18 | 54.164 | KV453058.1 | 11007326 | 14-scf00369 | 14 |
| AX-158216575 | 18 | 54.164 | KV453058.1 | 11009653 | 14-scf00369 | 14 |
| AX-158216577 | 18 | 54.164 | KV453058.1 | 11013599 | 14-scf00369 | 14 |

|              |    |        |            |          |             |    |
|--------------|----|--------|------------|----------|-------------|----|
| AX-157838938 | 18 | 54.164 | KV453058.1 | 11015947 | 14-scf00369 | 14 |
| AX-158216581 | 18 | 54.164 | KV453058.1 | 11019847 | 14-scf00369 | 14 |
| AX-157838939 | 18 | 54.164 | KV453058.1 | 11020332 | 14-scf00369 | 14 |
| AX-157749249 | 18 | 54.164 | KV453058.1 | 11021269 | 14-scf00369 | 14 |
| AX-158216582 | 18 | 54.164 | KV453058.1 | 11021952 | 14-scf00369 | 14 |
| AX-158216583 | 18 | 54.164 | KV453058.1 | 11022353 | 14-scf00369 | 14 |
| AX-158216584 | 18 | 54.164 | KV453058.1 | 11023287 | 14-scf00369 | 14 |
| AX-158216585 | 18 | 54.164 | KV453058.1 | 11023919 | 14-scf00369 | 14 |
| AX-158410153 | 18 | 54.164 | KV453058.1 | 11025792 | 14-scf00369 | 14 |
| AX-158423210 | 18 | 54.164 | KV453058.1 | 11026003 | 14-scf00369 | 14 |
| AX-157799078 | 18 | 54.164 | KV453058.1 | 11030109 | 14-scf00369 | 14 |
| AX-157838940 | 18 | 54.164 | KV453058.1 | 11030407 | 14-scf00369 | 14 |
| AX-158216590 | 18 | 54.164 | KV453058.1 | 11031752 | 14-scf00369 | 14 |
| AX-157718585 | 18 | 54.164 | KV453058.1 | 11037034 | 14-scf00369 | 14 |
| AX-158216595 | 18 | 54.164 | KV453058.1 | 11038727 | 14-scf00369 | 14 |
| AX-158216597 | 18 | 54.164 | KV453058.1 | 11039320 | 14-scf00369 | 14 |
| AX-157838942 | 18 | 54.164 | KV453058.1 | 11040425 | 14-scf00369 | 14 |
| AX-158216599 | 18 | 54.164 | KV453058.1 | 11040950 | 14-scf00369 | 14 |
| AX-158216601 | 18 | 54.164 | KV453058.1 | 11041938 | 14-scf00369 | 14 |
| AX-158216602 | 18 | 54.164 | KV453058.1 | 11042729 | 14-scf00369 | 14 |
| AX-158216603 | 18 | 54.164 | KV453058.1 | 11043144 | 14-scf00369 | 14 |
| AX-157741624 | 18 | 54.164 | KV453058.1 | 11043627 | 14-scf00369 | 14 |
| AX-158216604 | 18 | 54.164 | KV453058.1 | 11045211 | 14-scf00369 | 14 |
| AX-158216605 | 18 | 54.164 | KV453058.1 | 11045728 | 14-scf00369 | 14 |
| AX-158216606 | 18 | 54.164 | KV453058.1 | 11046118 | 14-scf00369 | 14 |
| AX-157838943 | 18 | 54.164 | KV453058.1 | 11046253 | 14-scf00369 | 14 |
| AX-158216607 | 18 | 54.164 | KV453058.1 | 11047550 | 14-scf00369 | 14 |
| AX-158216608 | 18 | 54.164 | KV453058.1 | 11048240 | 14-scf00369 | 14 |
| AX-158216609 | 18 | 54.164 | KV453058.1 | 11048778 | 14-scf00369 | 14 |
| AX-158216610 | 18 | 54.164 | KV453058.1 | 11049780 | 14-scf00369 | 14 |
| AX-158216611 | 18 | 54.164 | KV453058.1 | 11050479 | 14-scf00369 | 14 |
| AX-158216678 | 18 | 54.164 | KV453058.1 | 11127165 | 14-scf00369 | 14 |
| AX-158216689 | 18 | 54.164 | KV453058.1 | 11139761 | 14-scf00369 | 14 |
| AX-158216691 | 18 | 54.164 | KV453058.1 | 11140703 | 14-scf00369 | 14 |
| AX-158216692 | 18 | 54.164 | KV453058.1 | 11143917 | 14-scf00369 | 14 |
| AX-158216693 | 18 | 54.164 | KV453058.1 | 11144064 | 14-scf00369 | 14 |
| AX-158216694 | 18 | 54.164 | KV453058.1 | 11151573 | 14-scf00369 | 14 |
| AX-158216695 | 18 | 54.164 | KV453058.1 | 11153233 | 14-scf00369 | 14 |
| AX-158216696 | 18 | 54.164 | KV453058.1 | 11153353 | 14-scf00369 | 14 |
| AX-157838960 | 18 | 54.164 | KV453058.1 | 11155013 | 14-scf00369 | 14 |
| AX-158216700 | 18 | 54.164 | KV453058.1 | 11156788 | 14-scf00369 | 14 |
| AX-158216701 | 18 | 54.164 | KV453058.1 | 11159139 | 14-scf00369 | 14 |
| AX-157838963 | 18 | 54.164 | KV453058.1 | 11159358 | 14-scf00369 | 14 |
| AX-157838964 | 18 | 54.164 | KV453058.1 | 11159432 | 14-scf00369 | 14 |
| AX-158216705 | 18 | 54.164 | KV453058.1 | 11176716 | 14-scf00369 | 14 |
| AX-158216756 | 18 | 54.164 | KV453060.1 | 39173    | 14-scf00370 | 14 |
| AX-157720837 | 18 | 54.164 | KV453060.1 | 61498    | 14-scf00370 | 14 |
| AX-158216780 | 18 | 54.164 | KV453060.1 | 65545    | 14-scf00370 | 14 |
| AX-158216813 | 18 | 54.164 | KV453060.1 | 108435   | 14-scf00370 | 14 |
| AX-157838983 | 18 | 54.164 | KV453060.1 | 119988   | 14-scf00370 | 14 |
| AX-158216832 | 18 | 54.164 | KV453060.1 | 133600   | 14-scf00370 | 14 |

|              |    |        |             |         |             |    |
|--------------|----|--------|-------------|---------|-------------|----|
| AX-158216835 | 18 | 54.164 | KV453060.1  | 140157  | 14-scf00370 | 14 |
| AX-157838993 | 18 | 54.164 | KV453060.1  | 222703  | 14-scf00370 | 14 |
| AX-158217001 | 18 | 54.164 | KV453060.1  | 343633  | 14-scf00370 | 14 |
| AX-158217047 | 18 | 54.164 | KV453060.1  | 406655  | 14-scf00370 | 14 |
| AX-158217056 | 18 | 54.164 | KV453060.1  | 416678  | 14-scf00370 | 14 |
| AX-158217097 | 18 | 54.164 | KV453060.1  | 461910  | 14-scf00370 | 14 |
| AX-157705254 | 18 | 54.164 | 3ML01029202 | 364     | scf04823_1  | UN |
| AX-157705758 | 18 | 54.164 | 3ML01030803 | 248     | scf06406_1  | UN |
| AX-157706063 | 18 | 54.164 | 3ML01031523 | 409     | scf07138_1  | UN |
| AX-158215429 | 18 | 54.274 | KV453058.1  | 9639582 | 14-scf00369 | 14 |
| AX-158215440 | 18 | 54.274 | KV453058.1  | 9660027 | 14-scf00369 | 14 |
| AX-158215443 | 18 | 54.274 | KV453058.1  | 9662328 | 14-scf00369 | 14 |
| AX-158212477 | 18 | 54.383 | KV453058.1  | 5629814 | 14-scf00369 | 14 |
| AX-157859213 | 18 | 54.383 | KV453058.1  | 5694089 | 14-scf00369 | 14 |
| AX-158212585 | 18 | 54.383 | KV453058.1  | 5764736 | 14-scf00369 | 14 |
| AX-158212597 | 18 | 54.383 | KV453058.1  | 5775219 | 14-scf00369 | 14 |
| AX-158212798 | 18 | 54.383 | KV453058.1  | 6042803 | 14-scf00369 | 14 |
| AX-158212799 | 18 | 54.383 | KV453058.1  | 6043606 | 14-scf00369 | 14 |
| AX-158212804 | 18 | 54.383 | KV453058.1  | 6049483 | 14-scf00369 | 14 |
| AX-157838609 | 18 | 54.383 | KV453058.1  | 6050476 | 14-scf00369 | 14 |
| AX-158212806 | 18 | 54.383 | KV453058.1  | 6052246 | 14-scf00369 | 14 |
| AX-158212811 | 18 | 54.383 | KV453058.1  | 6059932 | 14-scf00369 | 14 |
| AX-157754382 | 18 | 54.383 | KV453058.1  | 6064537 | 14-scf00369 | 14 |
| AX-158212814 | 18 | 54.383 | KV453058.1  | 6069523 | 14-scf00369 | 14 |
| AX-158213064 | 18 | 54.383 | KV453058.1  | 6368498 | 14-scf00369 | 14 |
| AX-158213076 | 18 | 54.383 | KV453058.1  | 6380125 | 14-scf00369 | 14 |
| AX-158414565 | 18 | 54.383 | KV453058.1  | 6867500 | 14-scf00369 | 14 |
| AX-157859357 | 18 | 54.383 | KV453058.1  | 6971441 | 14-scf00369 | 14 |
| AX-158213433 | 18 | 54.383 | KV453058.1  | 7023001 | 14-scf00369 | 14 |
| AX-158213524 | 18 | 54.383 | KV453058.1  | 7130601 | 14-scf00369 | 14 |
| AX-158213588 | 18 | 54.383 | KV453058.1  | 7250336 | 14-scf00369 | 14 |
| AX-158213608 | 18 | 54.383 | KV453058.1  | 7269461 | 14-scf00369 | 14 |
| AX-158414574 | 18 | 54.383 | KV453058.1  | 7274692 | 14-scf00369 | 14 |
| AX-158213617 | 18 | 54.383 | KV453058.1  | 7285526 | 14-scf00369 | 14 |
| AX-158213619 | 18 | 54.383 | KV453058.1  | 7288895 | 14-scf00369 | 14 |
| AX-158213623 | 18 | 54.383 | KV453058.1  | 7296201 | 14-scf00369 | 14 |
| AX-157838713 | 18 | 54.383 | KV453058.1  | 7493088 | 14-scf00369 | 14 |
| AX-158213816 | 18 | 54.383 | KV453058.1  | 7609143 | 14-scf00369 | 14 |
| AX-158213817 | 18 | 54.383 | KV453058.1  | 7609759 | 14-scf00369 | 14 |
| AX-157838733 | 18 | 54.383 | KV453058.1  | 7703857 | 14-scf00369 | 14 |
| AX-158386492 | 18 | 54.383 | KV453058.1  | 7718385 | 14-scf00369 | 14 |
| AX-158213889 | 18 | 54.383 | KV453058.1  | 7731015 | 14-scf00369 | 14 |
| AX-158213958 | 18 | 54.383 | KV453058.1  | 7841493 | 14-scf00369 | 14 |
| AX-157838742 | 18 | 54.383 | KV453058.1  | 7846540 | 14-scf00369 | 14 |
| AX-158213987 | 18 | 54.383 | KV453058.1  | 7892645 | 14-scf00369 | 14 |
| AX-157838748 | 18 | 54.383 | KV453058.1  | 7915549 | 14-scf00369 | 14 |
| AX-158214005 | 18 | 54.383 | KV453058.1  | 7917678 | 14-scf00369 | 14 |
| AX-158214032 | 18 | 54.383 | KV453058.1  | 7973865 | 14-scf00369 | 14 |
| AX-158214035 | 18 | 54.383 | KV453058.1  | 7976497 | 14-scf00369 | 14 |
| AX-158214042 | 18 | 54.383 | KV453058.1  | 7989103 | 14-scf00369 | 14 |
| AX-158214050 | 18 | 54.383 | KV453058.1  | 8004509 | 14-scf00369 | 14 |

|              |    |        |            |         |             |    |
|--------------|----|--------|------------|---------|-------------|----|
| AX-158214054 | 18 | 54.383 | KV453058.1 | 8008039 | 14-scf00369 | 14 |
| AX-158214058 | 18 | 54.383 | KV453058.1 | 8010591 | 14-scf00369 | 14 |
| AX-158214094 | 18 | 54.383 | KV453058.1 | 8050711 | 14-scf00369 | 14 |
| AX-158214334 | 18 | 54.383 | KV453058.1 | 8344878 | 14-scf00369 | 14 |
| AX-158214336 | 18 | 54.383 | KV453058.1 | 8346905 | 14-scf00369 | 14 |
| AX-158214464 | 18 | 54.383 | KV453058.1 | 8528228 | 14-scf00369 | 14 |
| AX-158214522 | 18 | 54.383 | KV453058.1 | 8595369 | 14-scf00369 | 14 |
| AX-158214563 | 18 | 54.383 | KV453058.1 | 8637227 | 14-scf00369 | 14 |
| AX-158214618 | 18 | 54.383 | KV453058.1 | 8700407 | 14-scf00369 | 14 |
| AX-158214641 | 18 | 54.383 | KV453058.1 | 8725766 | 14-scf00369 | 14 |
| AX-158214647 | 18 | 54.383 | KV453058.1 | 8730036 | 14-scf00369 | 14 |
| AX-158214657 | 18 | 54.383 | KV453058.1 | 8742453 | 14-scf00369 | 14 |
| AX-158214676 | 18 | 54.383 | KV453058.1 | 8762801 | 14-scf00369 | 14 |
| AX-158214682 | 18 | 54.383 | KV453058.1 | 8766357 | 14-scf00369 | 14 |
| AX-158214686 | 18 | 54.383 | KV453058.1 | 8772684 | 14-scf00369 | 14 |
| AX-158214689 | 18 | 54.383 | KV453058.1 | 8773609 | 14-scf00369 | 14 |
| AX-158214697 | 18 | 54.383 | KV453058.1 | 8780335 | 14-scf00369 | 14 |
| AX-158214711 | 18 | 54.383 | KV453058.1 | 8793195 | 14-scf00369 | 14 |
| AX-157747710 | 18 | 54.383 | KV453058.1 | 8812587 | 14-scf00369 | 14 |
| AX-158214744 | 18 | 54.383 | KV453058.1 | 8826019 | 14-scf00369 | 14 |
| AX-157838831 | 18 | 54.383 | KV453058.1 | 8831460 | 14-scf00369 | 14 |
| AX-158214750 | 18 | 54.383 | KV453058.1 | 8831578 | 14-scf00369 | 14 |
| AX-158214754 | 18 | 54.383 | KV453058.1 | 8834879 | 14-scf00369 | 14 |
| AX-158214759 | 18 | 54.383 | KV453058.1 | 8839775 | 14-scf00369 | 14 |
| AX-158214763 | 18 | 54.383 | KV453058.1 | 8842331 | 14-scf00369 | 14 |
| AX-158214765 | 18 | 54.383 | KV453058.1 | 8844541 | 14-scf00369 | 14 |
| AX-158214772 | 18 | 54.383 | KV453058.1 | 8849856 | 14-scf00369 | 14 |
| AX-158214774 | 18 | 54.383 | KV453058.1 | 8852236 | 14-scf00369 | 14 |
| AX-158214776 | 18 | 54.383 | KV453058.1 | 8853536 | 14-scf00369 | 14 |
| AX-157754590 | 18 | 54.383 | KV453058.1 | 8860985 | 14-scf00369 | 14 |
| AX-158214783 | 18 | 54.383 | KV453058.1 | 8862082 | 14-scf00369 | 14 |
| AX-157838837 | 18 | 54.383 | KV453058.1 | 8885198 | 14-scf00369 | 14 |
| AX-157887219 | 18 | 54.383 | KV453058.1 | 8889671 | 14-scf00369 | 14 |
| AX-158214834 | 18 | 54.383 | KV453058.1 | 8904980 | 14-scf00369 | 14 |
| AX-158214838 | 18 | 54.383 | KV453058.1 | 8912332 | 14-scf00369 | 14 |
| AX-158214842 | 18 | 54.383 | KV453058.1 | 8915362 | 14-scf00369 | 14 |
| AX-158214849 | 18 | 54.383 | KV453058.1 | 8922598 | 14-scf00369 | 14 |
| AX-158214852 | 18 | 54.383 | KV453058.1 | 8926199 | 14-scf00369 | 14 |
| AX-157713356 | 18 | 54.383 | KV453058.1 | 8930117 | 14-scf00369 | 14 |
| AX-158214857 | 18 | 54.383 | KV453058.1 | 8933561 | 14-scf00369 | 14 |
| AX-158214861 | 18 | 54.383 | KV453058.1 | 8941281 | 14-scf00369 | 14 |
| AX-158214869 | 18 | 54.383 | KV453058.1 | 8948610 | 14-scf00369 | 14 |
| AX-158214876 | 18 | 54.383 | KV453058.1 | 8953741 | 14-scf00369 | 14 |
| AX-158214877 | 18 | 54.383 | KV453058.1 | 8954369 | 14-scf00369 | 14 |
| AX-158214879 | 18 | 54.383 | KV453058.1 | 8956130 | 14-scf00369 | 14 |
| AX-158214881 | 18 | 54.383 | KV453058.1 | 8957464 | 14-scf00369 | 14 |
| AX-158214891 | 18 | 54.383 | KV453058.1 | 8967630 | 14-scf00369 | 14 |
| AX-158214892 | 18 | 54.383 | KV453058.1 | 8968529 | 14-scf00369 | 14 |
| AX-157838839 | 18 | 54.383 | KV453058.1 | 8972588 | 14-scf00369 | 14 |
| AX-158214896 | 18 | 54.383 | KV453058.1 | 8974362 | 14-scf00369 | 14 |
| AX-158214900 | 18 | 54.383 | KV453058.1 | 8978180 | 14-scf00369 | 14 |

|              |    |        |            |         |             |    |
|--------------|----|--------|------------|---------|-------------|----|
| AX-158214905 | 18 | 54.383 | KV453058.1 | 8983389 | 14-scf00369 | 14 |
| AX-158214910 | 18 | 54.383 | KV453058.1 | 8988244 | 14-scf00369 | 14 |
| AX-158214925 | 18 | 54.383 | KV453058.1 | 8997087 | 14-scf00369 | 14 |
| AX-158214928 | 18 | 54.383 | KV453058.1 | 8999879 | 14-scf00369 | 14 |
| AX-158214932 | 18 | 54.383 | KV453058.1 | 9004984 | 14-scf00369 | 14 |
| AX-158214938 | 18 | 54.383 | KV453058.1 | 9011680 | 14-scf00369 | 14 |
| AX-158214944 | 18 | 54.383 | KV453058.1 | 9016681 | 14-scf00369 | 14 |
| AX-158214946 | 18 | 54.383 | KV453058.1 | 9018394 | 14-scf00369 | 14 |
| AX-158214958 | 18 | 54.383 | KV453058.1 | 9025226 | 14-scf00369 | 14 |
| AX-158214963 | 18 | 54.383 | KV453058.1 | 9029327 | 14-scf00369 | 14 |
| AX-158214967 | 18 | 54.383 | KV453058.1 | 9034719 | 14-scf00369 | 14 |
| AX-157838843 | 18 | 54.383 | KV453058.1 | 9041717 | 14-scf00369 | 14 |
| AX-158214980 | 18 | 54.383 | KV453058.1 | 9044215 | 14-scf00369 | 14 |
| AX-158214981 | 18 | 54.383 | KV453058.1 | 9047107 | 14-scf00369 | 14 |
| AX-158214994 | 18 | 54.383 | KV453058.1 | 9061754 | 14-scf00369 | 14 |
| AX-158215001 | 18 | 54.383 | KV453058.1 | 9067160 | 14-scf00369 | 14 |
| AX-158215004 | 18 | 54.383 | KV453058.1 | 9070759 | 14-scf00369 | 14 |
| AX-158215007 | 18 | 54.383 | KV453058.1 | 9074175 | 14-scf00369 | 14 |
| AX-158215010 | 18 | 54.383 | KV453058.1 | 9082159 | 14-scf00369 | 14 |
| AX-158215015 | 18 | 54.383 | KV453058.1 | 9090016 | 14-scf00369 | 14 |
| AX-158215020 | 18 | 54.383 | KV453058.1 | 9095901 | 14-scf00369 | 14 |
| AX-158215022 | 18 | 54.383 | KV453058.1 | 9101484 | 14-scf00369 | 14 |
| AX-158215034 | 18 | 54.383 | KV453058.1 | 9113974 | 14-scf00369 | 14 |
| AX-158215035 | 18 | 54.383 | KV453058.1 | 9115180 | 14-scf00369 | 14 |
| AX-158215040 | 18 | 54.383 | KV453058.1 | 9120288 | 14-scf00369 | 14 |
| AX-157713106 | 18 | 54.383 | KV453058.1 | 9126475 | 14-scf00369 | 14 |
| AX-158215050 | 18 | 54.383 | KV453058.1 | 9131877 | 14-scf00369 | 14 |
| AX-157838850 | 18 | 54.383 | KV453058.1 | 9134980 | 14-scf00369 | 14 |
| AX-158215068 | 18 | 54.383 | KV453058.1 | 9160403 | 14-scf00369 | 14 |
| AX-158215071 | 18 | 54.383 | KV453058.1 | 9162922 | 14-scf00369 | 14 |
| AX-157838855 | 18 | 54.383 | KV453058.1 | 9167311 | 14-scf00369 | 14 |
| AX-157723760 | 18 | 54.383 | KV453058.1 | 9170784 | 14-scf00369 | 14 |
| AX-158215079 | 18 | 54.383 | KV453058.1 | 9184197 | 14-scf00369 | 14 |
| AX-158215090 | 18 | 54.383 | KV453058.1 | 9201853 | 14-scf00369 | 14 |
| AX-158215094 | 18 | 54.383 | KV453058.1 | 9209465 | 14-scf00369 | 14 |
| AX-158215096 | 18 | 54.383 | KV453058.1 | 9211424 | 14-scf00369 | 14 |
| AX-158215097 | 18 | 54.383 | KV453058.1 | 9214354 | 14-scf00369 | 14 |
| AX-158215110 | 18 | 54.383 | KV453058.1 | 9229914 | 14-scf00369 | 14 |
| AX-158215124 | 18 | 54.383 | KV453058.1 | 9251524 | 14-scf00369 | 14 |
| AX-158215133 | 18 | 54.383 | KV453058.1 | 9261907 | 14-scf00369 | 14 |
| AX-158215143 | 18 | 54.383 | KV453058.1 | 9273395 | 14-scf00369 | 14 |
| AX-158215147 | 18 | 54.383 | KV453058.1 | 9276050 | 14-scf00369 | 14 |
| AX-158215157 | 18 | 54.383 | KV453058.1 | 9286332 | 14-scf00369 | 14 |
| AX-158215161 | 18 | 54.383 | KV453058.1 | 9290992 | 14-scf00369 | 14 |
| AX-158215164 | 18 | 54.383 | KV453058.1 | 9295309 | 14-scf00369 | 14 |
| AX-158215171 | 18 | 54.383 | KV453058.1 | 9305065 | 14-scf00369 | 14 |
| AX-158215180 | 18 | 54.383 | KV453058.1 | 9311696 | 14-scf00369 | 14 |
| AX-158215181 | 18 | 54.383 | KV453058.1 | 9315839 | 14-scf00369 | 14 |
| AX-158215188 | 18 | 54.383 | KV453058.1 | 9322046 | 14-scf00369 | 14 |
| AX-158215192 | 18 | 54.383 | KV453058.1 | 9329682 | 14-scf00369 | 14 |
| AX-158215199 | 18 | 54.383 | KV453058.1 | 9336313 | 14-scf00369 | 14 |



|              |    |        |            |         |             |    |
|--------------|----|--------|------------|---------|-------------|----|
| AX-158215200 | 18 | 54.383 | KV453058.1 | 9337990 | 14-scf00369 | 14 |
| AX-158215201 | 18 | 54.383 | KV453058.1 | 9338490 | 14-scf00369 | 14 |
| AX-158386520 | 18 | 54.383 | KV453058.1 | 9347454 | 14-scf00369 | 14 |
| AX-158380818 | 18 | 54.383 | KV453058.1 | 9351452 | 14-scf00369 | 14 |
| AX-158215219 | 18 | 54.383 | KV453058.1 | 9359283 | 14-scf00369 | 14 |
| AX-158215223 | 18 | 54.383 | KV453058.1 | 9366478 | 14-scf00369 | 14 |
| AX-158215224 | 18 | 54.383 | KV453058.1 | 9369983 | 14-scf00369 | 14 |
| AX-158215227 | 18 | 54.383 | KV453058.1 | 9372004 | 14-scf00369 | 14 |
| AX-158215237 | 18 | 54.383 | KV453058.1 | 9387114 | 14-scf00369 | 14 |
| AX-158215238 | 18 | 54.383 | KV453058.1 | 9388283 | 14-scf00369 | 14 |
| AX-158215245 | 18 | 54.383 | KV453058.1 | 9396816 | 14-scf00369 | 14 |
| AX-158215253 | 18 | 54.383 | KV453058.1 | 9403678 | 14-scf00369 | 14 |
| AX-158215257 | 18 | 54.383 | KV453058.1 | 9406992 | 14-scf00369 | 14 |
| AX-158215259 | 18 | 54.383 | KV453058.1 | 9411052 | 14-scf00369 | 14 |
| AX-157838859 | 18 | 54.383 | KV453058.1 | 9412099 | 14-scf00369 | 14 |
| AX-158215272 | 18 | 54.383 | KV453058.1 | 9438874 | 14-scf00369 | 14 |
| AX-158215284 | 18 | 54.383 | KV453058.1 | 9452784 | 14-scf00369 | 14 |
| AX-158215286 | 18 | 54.383 | KV453058.1 | 9453515 | 14-scf00369 | 14 |
| AX-158215295 | 18 | 54.383 | KV453058.1 | 9469464 | 14-scf00369 | 14 |
| AX-158215299 | 18 | 54.383 | KV453058.1 | 9472778 | 14-scf00369 | 14 |
| AX-158215301 | 18 | 54.383 | KV453058.1 | 9474188 | 14-scf00369 | 14 |
| AX-158215303 | 18 | 54.383 | KV453058.1 | 9475481 | 14-scf00369 | 14 |
| AX-158215304 | 18 | 54.383 | KV453058.1 | 9476495 | 14-scf00369 | 14 |
| AX-158215314 | 18 | 54.383 | KV453058.1 | 9485543 | 14-scf00369 | 14 |
| AX-158215319 | 18 | 54.383 | KV453058.1 | 9490459 | 14-scf00369 | 14 |
| AX-158215321 | 18 | 54.383 | KV453058.1 | 9491352 | 14-scf00369 | 14 |
| AX-158215324 | 18 | 54.383 | KV453058.1 | 9503471 | 14-scf00369 | 14 |
| AX-158215327 | 18 | 54.383 | KV453058.1 | 9506741 | 14-scf00369 | 14 |
| AX-158215346 | 18 | 54.383 | KV453058.1 | 9527911 | 14-scf00369 | 14 |
| AX-158215352 | 18 | 54.383 | KV453058.1 | 9533315 | 14-scf00369 | 14 |
| AX-158215353 | 18 | 54.383 | KV453058.1 | 9540043 | 14-scf00369 | 14 |
| AX-158215358 | 18 | 54.383 | KV453058.1 | 9552597 | 14-scf00369 | 14 |
| AX-158215365 | 18 | 54.383 | KV453058.1 | 9557605 | 14-scf00369 | 14 |
| AX-158215369 | 18 | 54.383 | KV453058.1 | 9567436 | 14-scf00369 | 14 |
| AX-157726001 | 18 | 54.383 | KV453058.1 | 9576958 | 14-scf00369 | 14 |
| AX-158215383 | 18 | 54.383 | KV453058.1 | 9586123 | 14-scf00369 | 14 |
| AX-158215385 | 18 | 54.383 | KV453058.1 | 9587226 | 14-scf00369 | 14 |
| AX-158215386 | 18 | 54.383 | KV453058.1 | 9587696 | 14-scf00369 | 14 |
| AX-158215396 | 18 | 54.383 | KV453058.1 | 9598745 | 14-scf00369 | 14 |
| AX-158215399 | 18 | 54.383 | KV453058.1 | 9601603 | 14-scf00369 | 14 |
| AX-158215400 | 18 | 54.383 | KV453058.1 | 9603482 | 14-scf00369 | 14 |
| AX-158215403 | 18 | 54.383 | KV453058.1 | 9607906 | 14-scf00369 | 14 |
| AX-158215406 | 18 | 54.383 | KV453058.1 | 9610366 | 14-scf00369 | 14 |
| AX-158215419 | 18 | 54.383 | KV453058.1 | 9626835 | 14-scf00369 | 14 |
| AX-157838866 | 18 | 54.383 | KV453058.1 | 9629954 | 14-scf00369 | 14 |
| AX-158215424 | 18 | 54.383 | KV453058.1 | 9632938 | 14-scf00369 | 14 |
| AX-158215428 | 18 | 54.383 | KV453058.1 | 9637575 | 14-scf00369 | 14 |
| AX-158215430 | 18 | 54.383 | KV453058.1 | 9640056 | 14-scf00369 | 14 |
| AX-158215436 | 18 | 54.383 | KV453058.1 | 9655558 | 14-scf00369 | 14 |
| AX-158215438 | 18 | 54.383 | KV453058.1 | 9658224 | 14-scf00369 | 14 |
| AX-158215439 | 18 | 54.383 | KV453058.1 | 9658584 | 14-scf00369 | 14 |

|              |    |        |            |         |             |    |
|--------------|----|--------|------------|---------|-------------|----|
| AX-158215445 | 18 | 54.383 | KV453058.1 | 9667300 | 14-scf00369 | 14 |
| AX-158215446 | 18 | 54.383 | KV453058.1 | 9668454 | 14-scf00369 | 14 |
| AX-158215447 | 18 | 54.383 | KV453058.1 | 9668825 | 14-scf00369 | 14 |
| AX-158215448 | 18 | 54.383 | KV453058.1 | 9670250 | 14-scf00369 | 14 |
| AX-158215449 | 18 | 54.383 | KV453058.1 | 9670901 | 14-scf00369 | 14 |
| AX-158215452 | 18 | 54.383 | KV453058.1 | 9672386 | 14-scf00369 | 14 |
| AX-158215453 | 18 | 54.383 | KV453058.1 | 9673197 | 14-scf00369 | 14 |
| AX-158215456 | 18 | 54.383 | KV453058.1 | 9677083 | 14-scf00369 | 14 |
| AX-158215457 | 18 | 54.383 | KV453058.1 | 9678044 | 14-scf00369 | 14 |
| AX-158215460 | 18 | 54.383 | KV453058.1 | 9684866 | 14-scf00369 | 14 |
| AX-158215461 | 18 | 54.383 | KV453058.1 | 9685622 | 14-scf00369 | 14 |
| AX-158215462 | 18 | 54.383 | KV453058.1 | 9686276 | 14-scf00369 | 14 |
| AX-158215463 | 18 | 54.383 | KV453058.1 | 9686523 | 14-scf00369 | 14 |
| AX-158215464 | 18 | 54.383 | KV453058.1 | 9686994 | 14-scf00369 | 14 |
| AX-158215467 | 18 | 54.383 | KV453058.1 | 9691878 | 14-scf00369 | 14 |
| AX-158386541 | 18 | 54.383 | KV453058.1 | 9698707 | 14-scf00369 | 14 |
| AX-157758512 | 18 | 54.383 | KV453058.1 | 9706282 | 14-scf00369 | 14 |
| AX-157741645 | 18 | 54.383 | KV453058.1 | 9707008 | 14-scf00369 | 14 |
| AX-158386542 | 18 | 54.383 | KV453058.1 | 9714403 | 14-scf00369 | 14 |
| AX-158215484 | 18 | 54.383 | KV453058.1 | 9720431 | 14-scf00369 | 14 |
| AX-158414624 | 18 | 54.383 | KV453058.1 | 9721616 | 14-scf00369 | 14 |
| AX-158414625 | 18 | 54.383 | KV453058.1 | 9722471 | 14-scf00369 | 14 |
| AX-158215489 | 18 | 54.383 | KV453058.1 | 9727587 | 14-scf00369 | 14 |
| AX-158215492 | 18 | 54.383 | KV453058.1 | 9737440 | 14-scf00369 | 14 |
| AX-158215495 | 18 | 54.383 | KV453058.1 | 9738834 | 14-scf00369 | 14 |
| AX-158215496 | 18 | 54.383 | KV453058.1 | 9739326 | 14-scf00369 | 14 |
| AX-158215498 | 18 | 54.383 | KV453058.1 | 9746711 | 14-scf00369 | 14 |
| AX-157754543 | 18 | 54.383 | KV453058.1 | 9752233 | 14-scf00369 | 14 |
| AX-158215502 | 18 | 54.383 | KV453058.1 | 9753171 | 14-scf00369 | 14 |
| AX-158215503 | 18 | 54.383 | KV453058.1 | 9753592 | 14-scf00369 | 14 |
| AX-158215505 | 18 | 54.383 | KV453058.1 | 9755950 | 14-scf00369 | 14 |
| AX-158215506 | 18 | 54.383 | KV453058.1 | 9756912 | 14-scf00369 | 14 |
| AX-158215511 | 18 | 54.383 | KV453058.1 | 9760684 | 14-scf00369 | 14 |
| AX-158215513 | 18 | 54.383 | KV453058.1 | 9761962 | 14-scf00369 | 14 |
| AX-158410136 | 18 | 54.383 | KV453058.1 | 9766057 | 14-scf00369 | 14 |
| AX-158215518 | 18 | 54.383 | KV453058.1 | 9767991 | 14-scf00369 | 14 |
| AX-158215522 | 18 | 54.383 | KV453058.1 | 9773441 | 14-scf00369 | 14 |
| AX-158215523 | 18 | 54.383 | KV453058.1 | 9773873 | 14-scf00369 | 14 |
| AX-158215527 | 18 | 54.383 | KV453058.1 | 9779153 | 14-scf00369 | 14 |
| AX-158215528 | 18 | 54.383 | KV453058.1 | 9779989 | 14-scf00369 | 14 |
| AX-158215535 | 18 | 54.383 | KV453058.1 | 9794010 | 14-scf00369 | 14 |
| AX-158215537 | 18 | 54.383 | KV453058.1 | 9799474 | 14-scf00369 | 14 |
| AX-158215546 | 18 | 54.383 | KV453058.1 | 9813142 | 14-scf00369 | 14 |
| AX-158215561 | 18 | 54.383 | KV453058.1 | 9835286 | 14-scf00369 | 14 |
| AX-158215564 | 18 | 54.383 | KV453058.1 | 9836957 | 14-scf00369 | 14 |
| AX-158215565 | 18 | 54.383 | KV453058.1 | 9837685 | 14-scf00369 | 14 |
| AX-158215567 | 18 | 54.383 | KV453058.1 | 9842674 | 14-scf00369 | 14 |
| AX-158215568 | 18 | 54.383 | KV453058.1 | 9843717 | 14-scf00369 | 14 |
| AX-158215569 | 18 | 54.383 | KV453058.1 | 9844425 | 14-scf00369 | 14 |
| AX-158215570 | 18 | 54.383 | KV453058.1 | 9847420 | 14-scf00369 | 14 |
| AX-158215571 | 18 | 54.383 | KV453058.1 | 9848566 | 14-scf00369 | 14 |

|              |    |        |            |          |             |    |
|--------------|----|--------|------------|----------|-------------|----|
| AX-158215576 | 18 | 54.383 | KV453058.1 | 9856679  | 14-scf00369 | 14 |
| AX-158215591 | 18 | 54.383 | KV453058.1 | 9870039  | 14-scf00369 | 14 |
| AX-158215592 | 18 | 54.383 | KV453058.1 | 9871339  | 14-scf00369 | 14 |
| AX-158215604 | 18 | 54.383 | KV453058.1 | 9883318  | 14-scf00369 | 14 |
| AX-158215606 | 18 | 54.383 | KV453058.1 | 9885437  | 14-scf00369 | 14 |
| AX-157726806 | 18 | 54.383 | KV453058.1 | 9892175  | 14-scf00369 | 14 |
| AX-158386545 | 18 | 54.383 | KV453058.1 | 9893090  | 14-scf00369 | 14 |
| AX-158215612 | 18 | 54.383 | KV453058.1 | 9893434  | 14-scf00369 | 14 |
| AX-158215615 | 18 | 54.383 | KV453058.1 | 9898321  | 14-scf00369 | 14 |
| AX-158215617 | 18 | 54.383 | KV453058.1 | 9900797  | 14-scf00369 | 14 |
| AX-158215619 | 18 | 54.383 | KV453058.1 | 9902285  | 14-scf00369 | 14 |
| AX-158215621 | 18 | 54.383 | KV453058.1 | 9904206  | 14-scf00369 | 14 |
| AX-158215623 | 18 | 54.383 | KV453058.1 | 9907338  | 14-scf00369 | 14 |
| AX-158215625 | 18 | 54.383 | KV453058.1 | 9913165  | 14-scf00369 | 14 |
| AX-158215628 | 18 | 54.383 | KV453058.1 | 9917818  | 14-scf00369 | 14 |
| AX-158215630 | 18 | 54.383 | KV453058.1 | 9919412  | 14-scf00369 | 14 |
| AX-158215639 | 18 | 54.383 | KV453058.1 | 9927769  | 14-scf00369 | 14 |
| AX-158215640 | 18 | 54.383 | KV453058.1 | 9931820  | 14-scf00369 | 14 |
| AX-158215642 | 18 | 54.383 | KV453058.1 | 9936677  | 14-scf00369 | 14 |
| AX-157701835 | 18 | 54.383 | KV453058.1 | 9938357  | 14-scf00369 | 14 |
| AX-158215652 | 18 | 54.383 | KV453058.1 | 9951193  | 14-scf00369 | 14 |
| AX-158215655 | 18 | 54.383 | KV453058.1 | 9954153  | 14-scf00369 | 14 |
| AX-158215657 | 18 | 54.383 | KV453058.1 | 9958358  | 14-scf00369 | 14 |
| AX-158215661 | 18 | 54.383 | KV453058.1 | 9963083  | 14-scf00369 | 14 |
| AX-158215664 | 18 | 54.383 | KV453058.1 | 9964926  | 14-scf00369 | 14 |
| AX-158215666 | 18 | 54.383 | KV453058.1 | 9965963  | 14-scf00369 | 14 |
| AX-158215667 | 18 | 54.383 | KV453058.1 | 9969027  | 14-scf00369 | 14 |
| AX-158215671 | 18 | 54.383 | KV453058.1 | 9974081  | 14-scf00369 | 14 |
| AX-158215673 | 18 | 54.383 | KV453058.1 | 9974909  | 14-scf00369 | 14 |
| AX-158215674 | 18 | 54.383 | KV453058.1 | 9975363  | 14-scf00369 | 14 |
| AX-158215675 | 18 | 54.383 | KV453058.1 | 9975997  | 14-scf00369 | 14 |
| AX-158215676 | 18 | 54.383 | KV453058.1 | 9976648  | 14-scf00369 | 14 |
| AX-158215678 | 18 | 54.383 | KV453058.1 | 9979493  | 14-scf00369 | 14 |
| AX-158215679 | 18 | 54.383 | KV453058.1 | 9980312  | 14-scf00369 | 14 |
| AX-158215681 | 18 | 54.383 | KV453058.1 | 9984657  | 14-scf00369 | 14 |
| AX-158215683 | 18 | 54.383 | KV453058.1 | 9989543  | 14-scf00369 | 14 |
| AX-158215690 | 18 | 54.383 | KV453058.1 | 9995658  | 14-scf00369 | 14 |
| AX-158215691 | 18 | 54.383 | KV453058.1 | 9996335  | 14-scf00369 | 14 |
| AX-158215701 | 18 | 54.383 | KV453058.1 | 10004509 | 14-scf00369 | 14 |
| AX-158215707 | 18 | 54.383 | KV453058.1 | 10011111 | 14-scf00369 | 14 |
| AX-158215709 | 18 | 54.383 | KV453058.1 | 10012812 | 14-scf00369 | 14 |
| AX-158215713 | 18 | 54.383 | KV453058.1 | 10016265 | 14-scf00369 | 14 |
| AX-158215714 | 18 | 54.383 | KV453058.1 | 10016894 | 14-scf00369 | 14 |
| AX-158215717 | 18 | 54.383 | KV453058.1 | 10022747 | 14-scf00369 | 14 |
| AX-158215721 | 18 | 54.383 | KV453058.1 | 10031786 | 14-scf00369 | 14 |
| AX-158215723 | 18 | 54.383 | KV453058.1 | 10033015 | 14-scf00369 | 14 |
| AX-157838868 | 18 | 54.383 | KV453058.1 | 10033052 | 14-scf00369 | 14 |
| AX-158215726 | 18 | 54.383 | KV453058.1 | 10037884 | 14-scf00369 | 14 |
| AX-158215727 | 18 | 54.383 | KV453058.1 | 10038780 | 14-scf00369 | 14 |
| AX-158215729 | 18 | 54.383 | KV453058.1 | 10042722 | 14-scf00369 | 14 |
| AX-158215730 | 18 | 54.383 | KV453058.1 | 10043607 | 14-scf00369 | 14 |

|              |    |        |            |          |             |    |
|--------------|----|--------|------------|----------|-------------|----|
| AX-158386550 | 18 | 54.383 | KV453058.1 | 10046374 | 14-scf00369 | 14 |
| AX-158215734 | 18 | 54.383 | KV453058.1 | 10046497 | 14-scf00369 | 14 |
| AX-158215738 | 18 | 54.383 | KV453058.1 | 10051456 | 14-scf00369 | 14 |
| AX-158215739 | 18 | 54.383 | KV453058.1 | 10052292 | 14-scf00369 | 14 |
| AX-158215740 | 18 | 54.383 | KV453058.1 | 10052756 | 14-scf00369 | 14 |
| AX-158215743 | 18 | 54.383 | KV453058.1 | 10054602 | 14-scf00369 | 14 |
| AX-157717438 | 18 | 54.383 | KV453058.1 | 10057343 | 14-scf00369 | 14 |
| AX-158215748 | 18 | 54.383 | KV453058.1 | 10061067 | 14-scf00369 | 14 |
| AX-158215755 | 18 | 54.383 | KV453058.1 | 10074354 | 14-scf00369 | 14 |
| AX-157838872 | 18 | 54.383 | KV453058.1 | 10076128 | 14-scf00369 | 14 |
| AX-157739335 | 18 | 54.383 | KV453058.1 | 10076205 | 14-scf00369 | 14 |
| AX-157775440 | 18 | 54.383 | KV453058.1 | 10081400 | 14-scf00369 | 14 |
| AX-158414638 | 18 | 54.383 | KV453058.1 | 10088965 | 14-scf00369 | 14 |
| AX-158215765 | 18 | 54.383 | KV453058.1 | 10090478 | 14-scf00369 | 14 |
| AX-158215766 | 18 | 54.383 | KV453058.1 | 10091212 | 14-scf00369 | 14 |
| AX-157724755 | 18 | 54.383 | KV453058.1 | 10095010 | 14-scf00369 | 14 |
| AX-158215770 | 18 | 54.383 | KV453058.1 | 10095369 | 14-scf00369 | 14 |
| AX-158215773 | 18 | 54.383 | KV453058.1 | 10097748 | 14-scf00369 | 14 |
| AX-158215774 | 18 | 54.383 | KV453058.1 | 10098535 | 14-scf00369 | 14 |
| AX-158215780 | 18 | 54.383 | KV453058.1 | 10103950 | 14-scf00369 | 14 |
| AX-158215781 | 18 | 54.383 | KV453058.1 | 10104693 | 14-scf00369 | 14 |
| AX-158215783 | 18 | 54.383 | KV453058.1 | 10105934 | 14-scf00369 | 14 |
| AX-158215790 | 18 | 54.383 | KV453058.1 | 10110769 | 14-scf00369 | 14 |
| AX-158215796 | 18 | 54.383 | KV453058.1 | 10123651 | 14-scf00369 | 14 |
| AX-157745184 | 18 | 54.383 | KV453058.1 | 10124125 | 14-scf00369 | 14 |
| AX-157748965 | 18 | 54.383 | KV453058.1 | 10125129 | 14-scf00369 | 14 |
| AX-158215800 | 18 | 54.383 | KV453058.1 | 10128109 | 14-scf00369 | 14 |
| AX-158215806 | 18 | 54.383 | KV453058.1 | 10132417 | 14-scf00369 | 14 |
| AX-158215808 | 18 | 54.383 | KV453058.1 | 10134718 | 14-scf00369 | 14 |
| AX-158215809 | 18 | 54.383 | KV453058.1 | 10136760 | 14-scf00369 | 14 |
| AX-158215813 | 18 | 54.383 | KV453058.1 | 10140384 | 14-scf00369 | 14 |
| AX-158215814 | 18 | 54.383 | KV453058.1 | 10143038 | 14-scf00369 | 14 |
| AX-158215815 | 18 | 54.383 | KV453058.1 | 10144053 | 14-scf00369 | 14 |
| AX-158215820 | 18 | 54.383 | KV453058.1 | 10149003 | 14-scf00369 | 14 |
| AX-158386552 | 18 | 54.383 | KV453058.1 | 10149109 | 14-scf00369 | 14 |
| AX-158215824 | 18 | 54.383 | KV453058.1 | 10152957 | 14-scf00369 | 14 |
| AX-157752615 | 18 | 54.383 | KV453058.1 | 10157344 | 14-scf00369 | 14 |
| AX-158215831 | 18 | 54.383 | KV453058.1 | 10159561 | 14-scf00369 | 14 |
| AX-158215833 | 18 | 54.383 | KV453058.1 | 10167976 | 14-scf00369 | 14 |
| AX-158215839 | 18 | 54.383 | KV453058.1 | 10174453 | 14-scf00369 | 14 |
| AX-158215842 | 18 | 54.383 | KV453058.1 | 10177983 | 14-scf00369 | 14 |
| AX-158215843 | 18 | 54.383 | KV453058.1 | 10178453 | 14-scf00369 | 14 |
| AX-158215848 | 18 | 54.383 | KV453058.1 | 10181357 | 14-scf00369 | 14 |
| AX-158215849 | 18 | 54.383 | KV453058.1 | 10181771 | 14-scf00369 | 14 |
| AX-158215854 | 18 | 54.383 | KV453058.1 | 10187088 | 14-scf00369 | 14 |
| AX-158215856 | 18 | 54.383 | KV453058.1 | 10188276 | 14-scf00369 | 14 |
| AX-158215857 | 18 | 54.383 | KV453058.1 | 10189008 | 14-scf00369 | 14 |
| AX-158215859 | 18 | 54.383 | KV453058.1 | 10191716 | 14-scf00369 | 14 |
| AX-158215865 | 18 | 54.383 | KV453058.1 | 10197115 | 14-scf00369 | 14 |
| AX-158215866 | 18 | 54.383 | KV453058.1 | 10197494 | 14-scf00369 | 14 |
| AX-157764215 | 18 | 54.383 | KV453058.1 | 10203753 | 14-scf00369 | 14 |

|              |    |        |            |          |             |    |
|--------------|----|--------|------------|----------|-------------|----|
| AX-158215869 | 18 | 54.383 | KV453058.1 | 10204336 | 14-scf00369 | 14 |
| AX-157867016 | 18 | 54.383 | KV453058.1 | 10206262 | 14-scf00369 | 14 |
| AX-158215875 | 18 | 54.383 | KV453058.1 | 10209914 | 14-scf00369 | 14 |
| AX-158215878 | 18 | 54.383 | KV453058.1 | 10213471 | 14-scf00369 | 14 |
| AX-157738739 | 18 | 54.383 | KV453058.1 | 10215793 | 14-scf00369 | 14 |
| AX-158215883 | 18 | 54.383 | KV453058.1 | 10217040 | 14-scf00369 | 14 |
| AX-157867017 | 18 | 54.383 | KV453058.1 | 10217732 | 14-scf00369 | 14 |
| AX-158215885 | 18 | 54.383 | KV453058.1 | 10221994 | 14-scf00369 | 14 |
| AX-158215886 | 18 | 54.383 | KV453058.1 | 10223573 | 14-scf00369 | 14 |
| AX-158215888 | 18 | 54.383 | KV453058.1 | 10225737 | 14-scf00369 | 14 |
| AX-158215890 | 18 | 54.383 | KV453058.1 | 10228278 | 14-scf00369 | 14 |
| AX-158215893 | 18 | 54.383 | KV453058.1 | 10233826 | 14-scf00369 | 14 |
| AX-158215894 | 18 | 54.383 | KV453058.1 | 10234611 | 14-scf00369 | 14 |
| AX-158215895 | 18 | 54.383 | KV453058.1 | 10235458 | 14-scf00369 | 14 |
| AX-157740148 | 18 | 54.383 | KV453058.1 | 10241729 | 14-scf00369 | 14 |
| AX-158215898 | 18 | 54.383 | KV453058.1 | 10242373 | 14-scf00369 | 14 |
| AX-158215900 | 18 | 54.383 | KV453058.1 | 10243569 | 14-scf00369 | 14 |
| AX-158215904 | 18 | 54.383 | KV453058.1 | 10249170 | 14-scf00369 | 14 |
| AX-158215905 | 18 | 54.383 | KV453058.1 | 10250248 | 14-scf00369 | 14 |
| AX-158215907 | 18 | 54.383 | KV453058.1 | 10251678 | 14-scf00369 | 14 |
| AX-157722668 | 18 | 54.383 | KV453058.1 | 10255451 | 14-scf00369 | 14 |
| AX-157867018 | 18 | 54.383 | KV453058.1 | 10263429 | 14-scf00369 | 14 |
| AX-157755201 | 18 | 54.383 | KV453058.1 | 10263955 | 14-scf00369 | 14 |
| AX-157725455 | 18 | 54.383 | KV453058.1 | 10265628 | 14-scf00369 | 14 |
| AX-158215918 | 18 | 54.383 | KV453058.1 | 10267851 | 14-scf00369 | 14 |
| AX-157838881 | 18 | 54.383 | KV453058.1 | 10272963 | 14-scf00369 | 14 |
| AX-158215926 | 18 | 54.383 | KV453058.1 | 10278070 | 14-scf00369 | 14 |
| AX-158215927 | 18 | 54.383 | KV453058.1 | 10278917 | 14-scf00369 | 14 |
| AX-158215933 | 18 | 54.383 | KV453058.1 | 10282772 | 14-scf00369 | 14 |
| AX-157838882 | 18 | 54.383 | KV453058.1 | 10283821 | 14-scf00369 | 14 |
| AX-158215935 | 18 | 54.383 | KV453058.1 | 10289007 | 14-scf00369 | 14 |
| AX-158215936 | 18 | 54.383 | KV453058.1 | 10291909 | 14-scf00369 | 14 |
| AX-158215937 | 18 | 54.383 | KV453058.1 | 10293889 | 14-scf00369 | 14 |
| AX-158215939 | 18 | 54.383 | KV453058.1 | 10300149 | 14-scf00369 | 14 |
| AX-158215943 | 18 | 54.383 | KV453058.1 | 10303557 | 14-scf00369 | 14 |
| AX-158215946 | 18 | 54.383 | KV453058.1 | 10307161 | 14-scf00369 | 14 |
| AX-158215951 | 18 | 54.383 | KV453058.1 | 10310350 | 14-scf00369 | 14 |
| AX-157867023 | 18 | 54.383 | KV453058.1 | 10313073 | 14-scf00369 | 14 |
| AX-158215952 | 18 | 54.383 | KV453058.1 | 10315933 | 14-scf00369 | 14 |
| AX-158215954 | 18 | 54.383 | KV453058.1 | 10319411 | 14-scf00369 | 14 |
| AX-158215958 | 18 | 54.383 | KV453058.1 | 10327161 | 14-scf00369 | 14 |
| AX-158386559 | 18 | 54.383 | KV453058.1 | 10327292 | 14-scf00369 | 14 |
| AX-158215959 | 18 | 54.383 | KV453058.1 | 10329150 | 14-scf00369 | 14 |
| AX-158215970 | 18 | 54.383 | KV453058.1 | 10341172 | 14-scf00369 | 14 |
| AX-158215971 | 18 | 54.383 | KV453058.1 | 10342142 | 14-scf00369 | 14 |
| AX-158215972 | 18 | 54.383 | KV453058.1 | 10343174 | 14-scf00369 | 14 |
| AX-158215975 | 18 | 54.383 | KV453058.1 | 10346238 | 14-scf00369 | 14 |
| AX-158215976 | 18 | 54.383 | KV453058.1 | 10346613 | 14-scf00369 | 14 |
| AX-158215977 | 18 | 54.383 | KV453058.1 | 10348412 | 14-scf00369 | 14 |
| AX-158215981 | 18 | 54.383 | KV453058.1 | 10350011 | 14-scf00369 | 14 |
| AX-157838888 | 18 | 54.383 | KV453058.1 | 10352088 | 14-scf00369 | 14 |

|              |    |        |            |          |             |    |
|--------------|----|--------|------------|----------|-------------|----|
| AX-158215989 | 18 | 54.383 | KV453058.1 | 10363197 | 14-scf00369 | 14 |
| AX-157867026 | 18 | 54.383 | KV453058.1 | 10363335 | 14-scf00369 | 14 |
| AX-158215992 | 18 | 54.383 | KV453058.1 | 10364630 | 14-scf00369 | 14 |
| AX-158215995 | 18 | 54.383 | KV453058.1 | 10369598 | 14-scf00369 | 14 |
| AX-158216000 | 18 | 54.383 | KV453058.1 | 10372009 | 14-scf00369 | 14 |
| AX-157838891 | 18 | 54.383 | KV453058.1 | 10379068 | 14-scf00369 | 14 |
| AX-157867028 | 18 | 54.383 | KV453058.1 | 10387113 | 14-scf00369 | 14 |
| AX-157740987 | 18 | 54.383 | KV453058.1 | 10389144 | 14-scf00369 | 14 |
| AX-157838892 | 18 | 54.383 | KV453058.1 | 10389741 | 14-scf00369 | 14 |
| AX-158216011 | 18 | 54.383 | KV453058.1 | 10391986 | 14-scf00369 | 14 |
| AX-158216012 | 18 | 54.383 | KV453058.1 | 10392901 | 14-scf00369 | 14 |
| AX-157867029 | 18 | 54.383 | KV453058.1 | 10393967 | 14-scf00369 | 14 |
| AX-158216013 | 18 | 54.383 | KV453058.1 | 10396289 | 14-scf00369 | 14 |
| AX-158216014 | 18 | 54.383 | KV453058.1 | 10397936 | 14-scf00369 | 14 |
| AX-157867030 | 18 | 54.383 | KV453058.1 | 10399406 | 14-scf00369 | 14 |
| AX-158216016 | 18 | 54.383 | KV453058.1 | 10399928 | 14-scf00369 | 14 |
| AX-158216017 | 18 | 54.383 | KV453058.1 | 10400261 | 14-scf00369 | 14 |
| AX-158216018 | 18 | 54.383 | KV453058.1 | 10400955 | 14-scf00369 | 14 |
| AX-158216019 | 18 | 54.383 | KV453058.1 | 10402260 | 14-scf00369 | 14 |
| AX-158216020 | 18 | 54.383 | KV453058.1 | 10402930 | 14-scf00369 | 14 |
| AX-158216021 | 18 | 54.383 | KV453058.1 | 10403935 | 14-scf00369 | 14 |
| AX-157838895 | 18 | 54.383 | KV453058.1 | 10404637 | 14-scf00369 | 14 |
| AX-157867031 | 18 | 54.383 | KV453058.1 | 10404864 | 14-scf00369 | 14 |
| AX-158216023 | 18 | 54.383 | KV453058.1 | 10407065 | 14-scf00369 | 14 |
| AX-158216024 | 18 | 54.383 | KV453058.1 | 10407291 | 14-scf00369 | 14 |
| AX-157750355 | 18 | 54.383 | KV453058.1 | 10407919 | 14-scf00369 | 14 |
| AX-158216025 | 18 | 54.383 | KV453058.1 | 10407998 | 14-scf00369 | 14 |
| AX-158216026 | 18 | 54.383 | KV453058.1 | 10408621 | 14-scf00369 | 14 |
| AX-158216027 | 18 | 54.383 | KV453058.1 | 10410989 | 14-scf00369 | 14 |
| AX-158216028 | 18 | 54.383 | KV453058.1 | 10412291 | 14-scf00369 | 14 |
| AX-157722148 | 18 | 54.383 | KV453058.1 | 10413122 | 14-scf00369 | 14 |
| AX-157738384 | 18 | 54.383 | KV453058.1 | 10413757 | 14-scf00369 | 14 |
| AX-158216029 | 18 | 54.383 | KV453058.1 | 10417635 | 14-scf00369 | 14 |
| AX-157838896 | 18 | 54.383 | KV453058.1 | 10418870 | 14-scf00369 | 14 |
| AX-157756849 | 18 | 54.383 | KV453058.1 | 10419121 | 14-scf00369 | 14 |
| AX-157743338 | 18 | 54.383 | KV453058.1 | 10419844 | 14-scf00369 | 14 |
| AX-158216030 | 18 | 54.383 | KV453058.1 | 10420857 | 14-scf00369 | 14 |
| AX-157743534 | 18 | 54.383 | KV453058.1 | 10424521 | 14-scf00369 | 14 |
| AX-158216031 | 18 | 54.383 | KV453058.1 | 10425190 | 14-scf00369 | 14 |
| AX-158216032 | 18 | 54.383 | KV453058.1 | 10426018 | 14-scf00369 | 14 |
| AX-158216033 | 18 | 54.383 | KV453058.1 | 10427778 | 14-scf00369 | 14 |
| AX-158216035 | 18 | 54.383 | KV453058.1 | 10428996 | 14-scf00369 | 14 |
| AX-158216040 | 18 | 54.383 | KV453058.1 | 10432718 | 14-scf00369 | 14 |
| AX-158216045 | 18 | 54.383 | KV453058.1 | 10441565 | 14-scf00369 | 14 |
| AX-158216047 | 18 | 54.383 | KV453058.1 | 10443164 | 14-scf00369 | 14 |
| AX-158216068 | 18 | 54.383 | KV453058.1 | 10472589 | 14-scf00369 | 14 |
| AX-158216074 | 18 | 54.383 | KV453058.1 | 10480252 | 14-scf00369 | 14 |
| AX-158216079 | 18 | 54.383 | KV453058.1 | 10483978 | 14-scf00369 | 14 |
| AX-158216082 | 18 | 54.383 | KV453058.1 | 10486636 | 14-scf00369 | 14 |
| AX-158216085 | 18 | 54.383 | KV453058.1 | 10488267 | 14-scf00369 | 14 |
| AX-158216086 | 18 | 54.383 | KV453058.1 | 10489062 | 14-scf00369 | 14 |

|              |    |        |            |          |             |    |
|--------------|----|--------|------------|----------|-------------|----|
| AX-158216098 | 18 | 54.383 | KV453058.1 | 10501272 | 14-scf00369 | 14 |
| AX-158216099 | 18 | 54.383 | KV453058.1 | 10502624 | 14-scf00369 | 14 |
| AX-157771921 | 18 | 54.383 | KV453058.1 | 10504238 | 14-scf00369 | 14 |
| AX-158216100 | 18 | 54.383 | KV453058.1 | 10504940 | 14-scf00369 | 14 |
| AX-158216104 | 18 | 54.383 | KV453058.1 | 10510015 | 14-scf00369 | 14 |
| AX-158216105 | 18 | 54.383 | KV453058.1 | 10513039 | 14-scf00369 | 14 |
| AX-158216107 | 18 | 54.383 | KV453058.1 | 10514707 | 14-scf00369 | 14 |
| AX-158216115 | 18 | 54.383 | KV453058.1 | 10521173 | 14-scf00369 | 14 |
| AX-158216116 | 18 | 54.383 | KV453058.1 | 10522502 | 14-scf00369 | 14 |
| AX-158216117 | 18 | 54.383 | KV453058.1 | 10522946 | 14-scf00369 | 14 |
| AX-158216123 | 18 | 54.383 | KV453058.1 | 10530583 | 14-scf00369 | 14 |
| AX-158216125 | 18 | 54.383 | KV453058.1 | 10531695 | 14-scf00369 | 14 |
| AX-158216126 | 18 | 54.383 | KV453058.1 | 10532834 | 14-scf00369 | 14 |
| AX-158216127 | 18 | 54.383 | KV453058.1 | 10533472 | 14-scf00369 | 14 |
| AX-158216129 | 18 | 54.383 | KV453058.1 | 10534735 | 14-scf00369 | 14 |
| AX-158216130 | 18 | 54.383 | KV453058.1 | 10535216 | 14-scf00369 | 14 |
| AX-158216131 | 18 | 54.383 | KV453058.1 | 10536044 | 14-scf00369 | 14 |
| AX-158216132 | 18 | 54.383 | KV453058.1 | 10536723 | 14-scf00369 | 14 |
| AX-158216135 | 18 | 54.383 | KV453058.1 | 10538684 | 14-scf00369 | 14 |
| AX-158216137 | 18 | 54.383 | KV453058.1 | 10540158 | 14-scf00369 | 14 |
| AX-158216139 | 18 | 54.383 | KV453058.1 | 10545172 | 14-scf00369 | 14 |
| AX-158386562 | 18 | 54.383 | KV453058.1 | 10545384 | 14-scf00369 | 14 |
| AX-158216146 | 18 | 54.383 | KV453058.1 | 10550295 | 14-scf00369 | 14 |
| AX-158216151 | 18 | 54.383 | KV453058.1 | 10555173 | 14-scf00369 | 14 |
| AX-158216153 | 18 | 54.383 | KV453058.1 | 10558112 | 14-scf00369 | 14 |
| AX-158216159 | 18 | 54.383 | KV453058.1 | 10563901 | 14-scf00369 | 14 |
| AX-158216163 | 18 | 54.383 | KV453058.1 | 10566464 | 14-scf00369 | 14 |
| AX-158216164 | 18 | 54.383 | KV453058.1 | 10566975 | 14-scf00369 | 14 |
| AX-158216174 | 18 | 54.383 | KV453058.1 | 10574165 | 14-scf00369 | 14 |
| AX-158216178 | 18 | 54.383 | KV453058.1 | 10577853 | 14-scf00369 | 14 |
| AX-158216189 | 18 | 54.383 | KV453058.1 | 10586568 | 14-scf00369 | 14 |
| AX-158216191 | 18 | 54.383 | KV453058.1 | 10589571 | 14-scf00369 | 14 |
| AX-158216193 | 18 | 54.383 | KV453058.1 | 10590620 | 14-scf00369 | 14 |
| AX-158216195 | 18 | 54.383 | KV453058.1 | 10592361 | 14-scf00369 | 14 |
| AX-158216198 | 18 | 54.383 | KV453058.1 | 10596352 | 14-scf00369 | 14 |
| AX-158216203 | 18 | 54.383 | KV453058.1 | 10601790 | 14-scf00369 | 14 |
| AX-158216206 | 18 | 54.383 | KV453058.1 | 10607629 | 14-scf00369 | 14 |
| AX-158216211 | 18 | 54.383 | KV453058.1 | 10613631 | 14-scf00369 | 14 |
| AX-158216214 | 18 | 54.383 | KV453058.1 | 10615802 | 14-scf00369 | 14 |
| AX-158216215 | 18 | 54.383 | KV453058.1 | 10616446 | 14-scf00369 | 14 |
| AX-158216216 | 18 | 54.383 | KV453058.1 | 10616949 | 14-scf00369 | 14 |
| AX-158216217 | 18 | 54.383 | KV453058.1 | 10617330 | 14-scf00369 | 14 |
| AX-158386564 | 18 | 54.383 | KV453058.1 | 10623823 | 14-scf00369 | 14 |
| AX-158216223 | 18 | 54.383 | KV453058.1 | 10626265 | 14-scf00369 | 14 |
| AX-158216224 | 18 | 54.383 | KV453058.1 | 10626996 | 14-scf00369 | 14 |
| AX-158216227 | 18 | 54.383 | KV453058.1 | 10630543 | 14-scf00369 | 14 |
| AX-158216229 | 18 | 54.383 | KV453058.1 | 10631610 | 14-scf00369 | 14 |
| AX-158216231 | 18 | 54.383 | KV453058.1 | 10632908 | 14-scf00369 | 14 |
| AX-158216233 | 18 | 54.383 | KV453058.1 | 10636750 | 14-scf00369 | 14 |
| AX-158216241 | 18 | 54.383 | KV453058.1 | 10641745 | 14-scf00369 | 14 |
| AX-158216242 | 18 | 54.383 | KV453058.1 | 10642176 | 14-scf00369 | 14 |

|              |    |        |            |          |             |    |
|--------------|----|--------|------------|----------|-------------|----|
| AX-158216244 | 18 | 54.383 | KV453058.1 | 10643486 | 14-scf00369 | 14 |
| AX-158216246 | 18 | 54.383 | KV453058.1 | 10647043 | 14-scf00369 | 14 |
| AX-158216247 | 18 | 54.383 | KV453058.1 | 10651118 | 14-scf00369 | 14 |
| AX-158216249 | 18 | 54.383 | KV453058.1 | 10652516 | 14-scf00369 | 14 |
| AX-158216254 | 18 | 54.383 | KV453058.1 | 10656270 | 14-scf00369 | 14 |
| AX-158216257 | 18 | 54.383 | KV453058.1 | 10658776 | 14-scf00369 | 14 |
| AX-158216263 | 18 | 54.383 | KV453058.1 | 10664276 | 14-scf00369 | 14 |
| AX-158216266 | 18 | 54.383 | KV453058.1 | 10667628 | 14-scf00369 | 14 |
| AX-158216267 | 18 | 54.383 | KV453058.1 | 10668205 | 14-scf00369 | 14 |
| AX-158386567 | 18 | 54.383 | KV453058.1 | 10668927 | 14-scf00369 | 14 |
| AX-158216272 | 18 | 54.383 | KV453058.1 | 10673076 | 14-scf00369 | 14 |
| AX-158216277 | 18 | 54.383 | KV453058.1 | 10675951 | 14-scf00369 | 14 |
| AX-158216279 | 18 | 54.383 | KV453058.1 | 10677874 | 14-scf00369 | 14 |
| AX-158216284 | 18 | 54.383 | KV453058.1 | 10687053 | 14-scf00369 | 14 |
| AX-158216285 | 18 | 54.383 | KV453058.1 | 10692348 | 14-scf00369 | 14 |
| AX-158216286 | 18 | 54.383 | KV453058.1 | 10693824 | 14-scf00369 | 14 |
| AX-158216287 | 18 | 54.383 | KV453058.1 | 10698244 | 14-scf00369 | 14 |
| AX-157887222 | 18 | 54.383 | KV453058.1 | 10702682 | 14-scf00369 | 14 |
| AX-158216289 | 18 | 54.383 | KV453058.1 | 10707371 | 14-scf00369 | 14 |
| AX-158216291 | 18 | 54.383 | KV453058.1 | 10711498 | 14-scf00369 | 14 |
| AX-158216294 | 18 | 54.383 | KV453058.1 | 10715452 | 14-scf00369 | 14 |
| AX-157717746 | 18 | 54.383 | KV453058.1 | 10717731 | 14-scf00369 | 14 |
| AX-158216299 | 18 | 54.383 | KV453058.1 | 10722535 | 14-scf00369 | 14 |
| AX-158216300 | 18 | 54.383 | KV453058.1 | 10723103 | 14-scf00369 | 14 |
| AX-158216306 | 18 | 54.383 | KV453058.1 | 10728347 | 14-scf00369 | 14 |
| AX-158216307 | 18 | 54.383 | KV453058.1 | 10728903 | 14-scf00369 | 14 |
| AX-158216309 | 18 | 54.383 | KV453058.1 | 10732283 | 14-scf00369 | 14 |
| AX-158216310 | 18 | 54.383 | KV453058.1 | 10732507 | 14-scf00369 | 14 |
| AX-158216311 | 18 | 54.383 | KV453058.1 | 10732777 | 14-scf00369 | 14 |
| AX-158216312 | 18 | 54.383 | KV453058.1 | 10733207 | 14-scf00369 | 14 |
| AX-157838913 | 18 | 54.383 | KV453058.1 | 10734319 | 14-scf00369 | 14 |
| AX-158216315 | 18 | 54.383 | KV453058.1 | 10735590 | 14-scf00369 | 14 |
| AX-158216318 | 18 | 54.383 | KV453058.1 | 10742824 | 14-scf00369 | 14 |
| AX-158216319 | 18 | 54.383 | KV453058.1 | 10743329 | 14-scf00369 | 14 |
| AX-158414657 | 18 | 54.383 | KV453058.1 | 10747755 | 14-scf00369 | 14 |
| AX-158216324 | 18 | 54.383 | KV453058.1 | 10750266 | 14-scf00369 | 14 |
| AX-157838915 | 18 | 54.383 | KV453058.1 | 10758105 | 14-scf00369 | 14 |
| AX-158216334 | 18 | 54.383 | KV453058.1 | 10762061 | 14-scf00369 | 14 |
| AX-158216338 | 18 | 54.383 | KV453058.1 | 10765620 | 14-scf00369 | 14 |
| AX-158216345 | 18 | 54.383 | KV453058.1 | 10772787 | 14-scf00369 | 14 |
| AX-158216348 | 18 | 54.383 | KV453058.1 | 10775763 | 14-scf00369 | 14 |
| AX-158216350 | 18 | 54.383 | KV453058.1 | 10780777 | 14-scf00369 | 14 |
| AX-158216354 | 18 | 54.383 | KV453058.1 | 10783012 | 14-scf00369 | 14 |
| AX-157719593 | 18 | 54.383 | KV453058.1 | 10783968 | 14-scf00369 | 14 |
| AX-158216357 | 18 | 54.383 | KV453058.1 | 10787519 | 14-scf00369 | 14 |
| AX-158216365 | 18 | 54.383 | KV453058.1 | 10792130 | 14-scf00369 | 14 |
| AX-158216366 | 18 | 54.383 | KV453058.1 | 10792234 | 14-scf00369 | 14 |
| AX-158216371 | 18 | 54.383 | KV453058.1 | 10796393 | 14-scf00369 | 14 |
| AX-158216373 | 18 | 54.383 | KV453058.1 | 10798087 | 14-scf00369 | 14 |
| AX-158216375 | 18 | 54.383 | KV453058.1 | 10799472 | 14-scf00369 | 14 |
| AX-158216376 | 18 | 54.383 | KV453058.1 | 10800867 | 14-scf00369 | 14 |



|              |    |        |            |          |             |    |
|--------------|----|--------|------------|----------|-------------|----|
| AX-158216379 | 18 | 54.383 | KV453058.1 | 10805954 | 14-scf00369 | 14 |
| AX-157838923 | 18 | 54.383 | KV453058.1 | 10806631 | 14-scf00369 | 14 |
| AX-157745235 | 18 | 54.383 | KV453058.1 | 10808449 | 14-scf00369 | 14 |
| AX-158216386 | 18 | 54.383 | KV453058.1 | 10814741 | 14-scf00369 | 14 |
| AX-158216391 | 18 | 54.383 | KV453058.1 | 10817511 | 14-scf00369 | 14 |
| AX-158216393 | 18 | 54.383 | KV453058.1 | 10818520 | 14-scf00369 | 14 |
| AX-158216402 | 18 | 54.383 | KV453058.1 | 10827097 | 14-scf00369 | 14 |
| AX-158216406 | 18 | 54.383 | KV453058.1 | 10830495 | 14-scf00369 | 14 |
| AX-158216407 | 18 | 54.383 | KV453058.1 | 10831121 | 14-scf00369 | 14 |
| AX-158216410 | 18 | 54.383 | KV453058.1 | 10833776 | 14-scf00369 | 14 |
| AX-158216411 | 18 | 54.383 | KV453058.1 | 10834571 | 14-scf00369 | 14 |
| AX-158216412 | 18 | 54.383 | KV453058.1 | 10835278 | 14-scf00369 | 14 |
| AX-158216419 | 18 | 54.383 | KV453058.1 | 10842822 | 14-scf00369 | 14 |
| AX-158216426 | 18 | 54.383 | KV453058.1 | 10847073 | 14-scf00369 | 14 |
| AX-158216427 | 18 | 54.383 | KV453058.1 | 10847344 | 14-scf00369 | 14 |
| AX-157838926 | 18 | 54.383 | KV453058.1 | 10853406 | 14-scf00369 | 14 |
| AX-157715485 | 18 | 54.383 | KV453058.1 | 10854747 | 14-scf00369 | 14 |
| AX-158216436 | 18 | 54.383 | KV453058.1 | 10860373 | 14-scf00369 | 14 |
| AX-157747597 | 18 | 54.383 | KV453058.1 | 10867886 | 14-scf00369 | 14 |
| AX-158216439 | 18 | 54.383 | KV453058.1 | 10869539 | 14-scf00369 | 14 |
| AX-158216444 | 18 | 54.383 | KV453058.1 | 10875743 | 14-scf00369 | 14 |
| AX-157838932 | 18 | 54.383 | KV453058.1 | 10880021 | 14-scf00369 | 14 |
| AX-158216450 | 18 | 54.383 | KV453058.1 | 10881985 | 14-scf00369 | 14 |
| AX-158216452 | 18 | 54.383 | KV453058.1 | 10883850 | 14-scf00369 | 14 |
| AX-158216453 | 18 | 54.383 | KV453058.1 | 10884830 | 14-scf00369 | 14 |
| AX-158216462 | 18 | 54.383 | KV453058.1 | 10892372 | 14-scf00369 | 14 |
| AX-158216466 | 18 | 54.383 | KV453058.1 | 10896451 | 14-scf00369 | 14 |
| AX-158216468 | 18 | 54.383 | KV453058.1 | 10898547 | 14-scf00369 | 14 |
| AX-158216469 | 18 | 54.383 | KV453058.1 | 10899637 | 14-scf00369 | 14 |
| AX-157695884 | 18 | 54.383 | KV453058.1 | 10901438 | 14-scf00369 | 14 |
| AX-158216473 | 18 | 54.383 | KV453058.1 | 10904083 | 14-scf00369 | 14 |
| AX-158216478 | 18 | 54.383 | KV453058.1 | 10912620 | 14-scf00369 | 14 |
| AX-158216483 | 18 | 54.383 | KV453058.1 | 10917554 | 14-scf00369 | 14 |
| AX-158216488 | 18 | 54.383 | KV453058.1 | 10922073 | 14-scf00369 | 14 |
| AX-158414665 | 18 | 54.383 | KV453058.1 | 10924774 | 14-scf00369 | 14 |
| AX-158216493 | 18 | 54.383 | KV453058.1 | 10925605 | 14-scf00369 | 14 |
| AX-158216497 | 18 | 54.383 | KV453058.1 | 10927885 | 14-scf00369 | 14 |
| AX-158216500 | 18 | 54.383 | KV453058.1 | 10932100 | 14-scf00369 | 14 |
| AX-158216502 | 18 | 54.383 | KV453058.1 | 10933955 | 14-scf00369 | 14 |
| AX-158216503 | 18 | 54.383 | KV453058.1 | 10935793 | 14-scf00369 | 14 |
| AX-158216508 | 18 | 54.383 | KV453058.1 | 10942546 | 14-scf00369 | 14 |
| AX-158216512 | 18 | 54.383 | KV453058.1 | 10947620 | 14-scf00369 | 14 |
| AX-158216513 | 18 | 54.383 | KV453058.1 | 10948304 | 14-scf00369 | 14 |
| AX-158216514 | 18 | 54.383 | KV453058.1 | 10949060 | 14-scf00369 | 14 |
| AX-158216517 | 18 | 54.383 | KV453058.1 | 10951950 | 14-scf00369 | 14 |
| AX-157838933 | 18 | 54.383 | KV453058.1 | 10953326 | 14-scf00369 | 14 |
| AX-157838934 | 18 | 54.383 | KV453058.1 | 10954716 | 14-scf00369 | 14 |
| AX-157747793 | 18 | 54.383 | KV453058.1 | 10955263 | 14-scf00369 | 14 |
| AX-158216523 | 18 | 54.383 | KV453058.1 | 10960162 | 14-scf00369 | 14 |
| AX-158216524 | 18 | 54.383 | KV453058.1 | 10960629 | 14-scf00369 | 14 |
| AX-158216527 | 18 | 54.383 | KV453058.1 | 10962534 | 14-scf00369 | 14 |

|              |    |        |            |          |             |    |
|--------------|----|--------|------------|----------|-------------|----|
| AX-158216528 | 18 | 54.383 | KV453058.1 | 10963052 | 14-scf00369 | 14 |
| AX-157838937 | 18 | 54.383 | KV453058.1 | 10964556 | 14-scf00369 | 14 |
| AX-158216532 | 18 | 54.383 | KV453058.1 | 10966202 | 14-scf00369 | 14 |
| AX-158216533 | 18 | 54.383 | KV453058.1 | 10966668 | 14-scf00369 | 14 |
| AX-157722736 | 18 | 54.383 | KV453058.1 | 10969461 | 14-scf00369 | 14 |
| AX-158216537 | 18 | 54.383 | KV453058.1 | 10970481 | 14-scf00369 | 14 |
| AX-158216539 | 18 | 54.383 | KV453058.1 | 10971518 | 14-scf00369 | 14 |
| AX-157731615 | 18 | 54.383 | KV453058.1 | 10975835 | 14-scf00369 | 14 |
| AX-158216542 | 18 | 54.383 | KV453058.1 | 10976560 | 14-scf00369 | 14 |
| AX-158216543 | 18 | 54.383 | KV453058.1 | 10978121 | 14-scf00369 | 14 |
| AX-158216552 | 18 | 54.383 | KV453058.1 | 10986536 | 14-scf00369 | 14 |
| AX-158216557 | 18 | 54.383 | KV453058.1 | 10990055 | 14-scf00369 | 14 |
| AX-158216558 | 18 | 54.383 | KV453058.1 | 10991630 | 14-scf00369 | 14 |
| AX-158216560 | 18 | 54.383 | KV453058.1 | 10993471 | 14-scf00369 | 14 |
| AX-158216563 | 18 | 54.383 | KV453058.1 | 10996267 | 14-scf00369 | 14 |
| AX-158216568 | 18 | 54.383 | KV453058.1 | 11000664 | 14-scf00369 | 14 |
| AX-158216569 | 18 | 54.383 | KV453058.1 | 11002309 | 14-scf00369 | 14 |
| AX-158216570 | 18 | 54.383 | KV453058.1 | 11003069 | 14-scf00369 | 14 |
| AX-157750119 | 18 | 54.383 | KV453058.1 | 11003719 | 14-scf00369 | 14 |
| AX-158216571 | 18 | 54.383 | KV453058.1 | 11005759 | 14-scf00369 | 14 |
| AX-158216574 | 18 | 54.383 | KV453058.1 | 11007904 | 14-scf00369 | 14 |
| AX-158216578 | 18 | 54.383 | KV453058.1 | 11013971 | 14-scf00369 | 14 |
| AX-158216586 | 18 | 54.383 | KV453058.1 | 11024467 | 14-scf00369 | 14 |
| AX-158414670 | 18 | 54.383 | KV453058.1 | 11026732 | 14-scf00369 | 14 |
| AX-158216588 | 18 | 54.383 | KV453058.1 | 11029126 | 14-scf00369 | 14 |
| AX-158216589 | 18 | 54.383 | KV453058.1 | 11029835 | 14-scf00369 | 14 |
| AX-158216591 | 18 | 54.383 | KV453058.1 | 11033295 | 14-scf00369 | 14 |
| AX-158216592 | 18 | 54.383 | KV453058.1 | 11035254 | 14-scf00369 | 14 |
| AX-157838941 | 18 | 54.383 | KV453058.1 | 11038051 | 14-scf00369 | 14 |
| AX-158216596 | 18 | 54.383 | KV453058.1 | 11039095 | 14-scf00369 | 14 |
| AX-157838944 | 18 | 54.383 | KV453058.1 | 11046959 | 14-scf00369 | 14 |
| AX-158216614 | 18 | 54.383 | KV453058.1 | 11053439 | 14-scf00369 | 14 |
| AX-158216616 | 18 | 54.383 | KV453058.1 | 11054629 | 14-scf00369 | 14 |
| AX-158216617 | 18 | 54.383 | KV453058.1 | 11056083 | 14-scf00369 | 14 |
| AX-157838946 | 18 | 54.383 | KV453058.1 | 11056567 | 14-scf00369 | 14 |
| AX-158216618 | 18 | 54.383 | KV453058.1 | 11057037 | 14-scf00369 | 14 |
| AX-158216620 | 18 | 54.383 | KV453058.1 | 11057753 | 14-scf00369 | 14 |
| AX-157859411 | 18 | 54.383 | KV453058.1 | 11058292 | 14-scf00369 | 14 |
| AX-157838947 | 18 | 54.383 | KV453058.1 | 11060760 | 14-scf00369 | 14 |
| AX-158216621 | 18 | 54.383 | KV453058.1 | 11061010 | 14-scf00369 | 14 |
| AX-158216622 | 18 | 54.383 | KV453058.1 | 11061613 | 14-scf00369 | 14 |
| AX-158216623 | 18 | 54.383 | KV453058.1 | 11062146 | 14-scf00369 | 14 |
| AX-158216625 | 18 | 54.383 | KV453058.1 | 11064850 | 14-scf00369 | 14 |
| AX-158216626 | 18 | 54.383 | KV453058.1 | 11066336 | 14-scf00369 | 14 |
| AX-157754922 | 18 | 54.383 | KV453058.1 | 11067636 | 14-scf00369 | 14 |
| AX-158216627 | 18 | 54.383 | KV453058.1 | 11070261 | 14-scf00369 | 14 |
| AX-157838948 | 18 | 54.383 | KV453058.1 | 11070737 | 14-scf00369 | 14 |
| AX-158216628 | 18 | 54.383 | KV453058.1 | 11071673 | 14-scf00369 | 14 |
| AX-157838950 | 18 | 54.383 | KV453058.1 | 11072610 | 14-scf00369 | 14 |
| AX-158216630 | 18 | 54.383 | KV453058.1 | 11073375 | 14-scf00369 | 14 |
| AX-158216632 | 18 | 54.383 | KV453058.1 | 11076453 | 14-scf00369 | 14 |

|              |    |        |            |          |             |    |
|--------------|----|--------|------------|----------|-------------|----|
| AX-158216633 | 18 | 54.383 | KV453058.1 | 11076916 | 14-scf00369 | 14 |
| AX-158216634 | 18 | 54.383 | KV453058.1 | 11077456 | 14-scf00369 | 14 |
| AX-158216635 | 18 | 54.383 | KV453058.1 | 11078209 | 14-scf00369 | 14 |
| AX-158216636 | 18 | 54.383 | KV453058.1 | 11078828 | 14-scf00369 | 14 |
| AX-158216638 | 18 | 54.383 | KV453058.1 | 11080248 | 14-scf00369 | 14 |
| AX-158216640 | 18 | 54.383 | KV453058.1 | 11084973 | 14-scf00369 | 14 |
| AX-157838951 | 18 | 54.383 | KV453058.1 | 11087648 | 14-scf00369 | 14 |
| AX-158216642 | 18 | 54.383 | KV453058.1 | 11089599 | 14-scf00369 | 14 |
| AX-157838952 | 18 | 54.383 | KV453058.1 | 11090101 | 14-scf00369 | 14 |
| AX-158216643 | 18 | 54.383 | KV453058.1 | 11090517 | 14-scf00369 | 14 |
| AX-158216644 | 18 | 54.383 | KV453058.1 | 11092129 | 14-scf00369 | 14 |
| AX-158216645 | 18 | 54.383 | KV453058.1 | 11093185 | 14-scf00369 | 14 |
| AX-157709744 | 18 | 54.383 | KV453058.1 | 11094767 | 14-scf00369 | 14 |
| AX-158216647 | 18 | 54.383 | KV453058.1 | 11095624 | 14-scf00369 | 14 |
| AX-158216648 | 18 | 54.383 | KV453058.1 | 11096881 | 14-scf00369 | 14 |
| AX-158216650 | 18 | 54.383 | KV453058.1 | 11098132 | 14-scf00369 | 14 |
| AX-158216652 | 18 | 54.383 | KV453058.1 | 11099935 | 14-scf00369 | 14 |
| AX-158216653 | 18 | 54.383 | KV453058.1 | 11102232 | 14-scf00369 | 14 |
| AX-158216654 | 18 | 54.383 | KV453058.1 | 11102903 | 14-scf00369 | 14 |
| AX-158216655 | 18 | 54.383 | KV453058.1 | 11103189 | 14-scf00369 | 14 |
| AX-157879658 | 18 | 54.383 | KV453058.1 | 11104098 | 14-scf00369 | 14 |
| AX-157838954 | 18 | 54.383 | KV453058.1 | 11105526 | 14-scf00369 | 14 |
| AX-158216656 | 18 | 54.383 | KV453058.1 | 11106057 | 14-scf00369 | 14 |
| AX-158216657 | 18 | 54.383 | KV453058.1 | 11106966 | 14-scf00369 | 14 |
| AX-157838955 | 18 | 54.383 | KV453058.1 | 11107132 | 14-scf00369 | 14 |
| AX-158216658 | 18 | 54.383 | KV453058.1 | 11107591 | 14-scf00369 | 14 |
| AX-158216659 | 18 | 54.383 | KV453058.1 | 11108166 | 14-scf00369 | 14 |
| AX-158216660 | 18 | 54.383 | KV453058.1 | 11108528 | 14-scf00369 | 14 |
| AX-157859412 | 18 | 54.383 | KV453058.1 | 11108571 | 14-scf00369 | 14 |
| AX-157838956 | 18 | 54.383 | KV453058.1 | 11108807 | 14-scf00369 | 14 |
| AX-158216661 | 18 | 54.383 | KV453058.1 | 11109917 | 14-scf00369 | 14 |
| AX-158216662 | 18 | 54.383 | KV453058.1 | 11111967 | 14-scf00369 | 14 |
| AX-158216663 | 18 | 54.383 | KV453058.1 | 11112775 | 14-scf00369 | 14 |
| AX-157838958 | 18 | 54.383 | KV453058.1 | 11113370 | 14-scf00369 | 14 |
| AX-158216664 | 18 | 54.383 | KV453058.1 | 11113804 | 14-scf00369 | 14 |
| AX-158216665 | 18 | 54.383 | KV453058.1 | 11114490 | 14-scf00369 | 14 |
| AX-158216666 | 18 | 54.383 | KV453058.1 | 11115236 | 14-scf00369 | 14 |
| AX-158216667 | 18 | 54.383 | KV453058.1 | 11115826 | 14-scf00369 | 14 |
| AX-158216668 | 18 | 54.383 | KV453058.1 | 11119007 | 14-scf00369 | 14 |
| AX-158216669 | 18 | 54.383 | KV453058.1 | 11119499 | 14-scf00369 | 14 |
| AX-157838959 | 18 | 54.383 | KV453058.1 | 11120237 | 14-scf00369 | 14 |
| AX-158216670 | 18 | 54.383 | KV453058.1 | 11120576 | 14-scf00369 | 14 |
| AX-158216671 | 18 | 54.383 | KV453058.1 | 11121095 | 14-scf00369 | 14 |
| AX-158216672 | 18 | 54.383 | KV453058.1 | 11121293 | 14-scf00369 | 14 |
| AX-158216673 | 18 | 54.383 | KV453058.1 | 11121967 | 14-scf00369 | 14 |
| AX-158216674 | 18 | 54.383 | KV453058.1 | 11122548 | 14-scf00369 | 14 |
| AX-158216679 | 18 | 54.383 | KV453058.1 | 11128033 | 14-scf00369 | 14 |
| AX-158216680 | 18 | 54.383 | KV453058.1 | 11128648 | 14-scf00369 | 14 |
| AX-158216681 | 18 | 54.383 | KV453058.1 | 11129764 | 14-scf00369 | 14 |
| AX-158216682 | 18 | 54.383 | KV453058.1 | 11130617 | 14-scf00369 | 14 |
| AX-158216683 | 18 | 54.383 | KV453058.1 | 11131122 | 14-scf00369 | 14 |

|              |    |        |            |          |             |    |
|--------------|----|--------|------------|----------|-------------|----|
| AX-158216684 | 18 | 54.383 | KV453058.1 | 11131405 | 14-scf00369 | 14 |
| AX-158216685 | 18 | 54.383 | KV453058.1 | 11134171 | 14-scf00369 | 14 |
| AX-157763473 | 18 | 54.383 | KV453058.1 | 11137578 | 14-scf00369 | 14 |
| AX-158216687 | 18 | 54.383 | KV453058.1 | 11137646 | 14-scf00369 | 14 |
| AX-158216688 | 18 | 54.383 | KV453058.1 | 11138939 | 14-scf00369 | 14 |
| AX-158216690 | 18 | 54.383 | KV453058.1 | 11140242 | 14-scf00369 | 14 |
| AX-158216698 | 18 | 54.383 | KV453058.1 | 11154822 | 14-scf00369 | 14 |
| AX-158216699 | 18 | 54.383 | KV453058.1 | 11156275 | 14-scf00369 | 14 |
| AX-157838962 | 18 | 54.383 | KV453058.1 | 11159177 | 14-scf00369 | 14 |
| AX-157727709 | 18 | 54.383 | KV453058.1 | 11172316 | 14-scf00369 | 14 |
| AX-158216706 | 18 | 54.383 | KV453058.1 | 11187100 | 14-scf00369 | 14 |
| AX-158216707 | 18 | 54.383 | KV453058.1 | 11187191 | 14-scf00369 | 14 |
| AX-158216708 | 18 | 54.383 | KV453058.1 | 11187756 | 14-scf00369 | 14 |
| AX-157838966 | 18 | 54.383 | KV453058.1 | 11187828 | 14-scf00369 | 14 |
| AX-158216709 | 18 | 54.383 | KV453058.1 | 11193589 | 14-scf00369 | 14 |
| AX-158216711 | 18 | 54.383 | KV453058.1 | 11195498 | 14-scf00369 | 14 |
| AX-158216712 | 18 | 54.383 | KV453058.1 | 11195948 | 14-scf00369 | 14 |
| AX-158216715 | 18 | 54.383 | KV453058.1 | 11197906 | 14-scf00369 | 14 |
| AX-158216717 | 18 | 54.383 | KV453058.1 | 11198625 | 14-scf00369 | 14 |
| AX-158216718 | 18 | 54.383 | KV453058.1 | 11202692 | 14-scf00369 | 14 |
| AX-157838967 | 18 | 54.383 | KV453058.1 | 11205439 | 14-scf00369 | 14 |
| AX-158216722 | 18 | 54.383 | KV453058.1 | 11213994 | 14-scf00369 | 14 |
| AX-157838968 | 18 | 54.383 | KV453058.1 | 11214095 | 14-scf00369 | 14 |
| AX-158216723 | 18 | 54.383 | KV453058.1 | 11214895 | 14-scf00369 | 14 |
| AX-158216724 | 18 | 54.383 | KV453058.1 | 11217321 | 14-scf00369 | 14 |
| AX-157838969 | 18 | 54.383 | KV453058.1 | 11218488 | 14-scf00369 | 14 |
| AX-158216726 | 18 | 54.383 | KV453058.1 | 11219726 | 14-scf00369 | 14 |
| AX-158216727 | 18 | 54.383 | KV453058.1 | 11220129 | 14-scf00369 | 14 |
| AX-158216737 | 18 | 54.383 | KV453060.1 | 9453     | 14-scf00370 | 14 |
| AX-158216743 | 18 | 54.383 | KV453060.1 | 21276    | 14-scf00370 | 14 |
| AX-158216749 | 18 | 54.383 | KV453060.1 | 28527    | 14-scf00370 | 14 |
| AX-158423215 | 18 | 54.383 | KV453060.1 | 31166    | 14-scf00370 | 14 |
| AX-158216752 | 18 | 54.383 | KV453060.1 | 34819    | 14-scf00370 | 14 |
| AX-158216753 | 18 | 54.383 | KV453060.1 | 35181    | 14-scf00370 | 14 |
| AX-158216754 | 18 | 54.383 | KV453060.1 | 36095    | 14-scf00370 | 14 |
| AX-157744786 | 18 | 54.383 | KV453060.1 | 37312    | 14-scf00370 | 14 |
| AX-158216755 | 18 | 54.383 | KV453060.1 | 38380    | 14-scf00370 | 14 |
| AX-158216757 | 18 | 54.383 | KV453060.1 | 39776    | 14-scf00370 | 14 |
| AX-158216758 | 18 | 54.383 | KV453060.1 | 40108    | 14-scf00370 | 14 |
| AX-157774666 | 18 | 54.383 | KV453060.1 | 41319    | 14-scf00370 | 14 |
| AX-158216759 | 18 | 54.383 | KV453060.1 | 41879    | 14-scf00370 | 14 |
| AX-157715735 | 18 | 54.383 | KV453060.1 | 43289    | 14-scf00370 | 14 |
| AX-157743351 | 18 | 54.383 | KV453060.1 | 44336    | 14-scf00370 | 14 |
| AX-157838975 | 18 | 54.383 | KV453060.1 | 45197    | 14-scf00370 | 14 |
| AX-158216760 | 18 | 54.383 | KV453060.1 | 45594    | 14-scf00370 | 14 |
| AX-158216761 | 18 | 54.383 | KV453060.1 | 46864    | 14-scf00370 | 14 |
| AX-158216762 | 18 | 54.383 | KV453060.1 | 48172    | 14-scf00370 | 14 |
| AX-158216763 | 18 | 54.383 | KV453060.1 | 48523    | 14-scf00370 | 14 |
| AX-158216764 | 18 | 54.383 | KV453060.1 | 49204    | 14-scf00370 | 14 |
| AX-158216765 | 18 | 54.383 | KV453060.1 | 49897    | 14-scf00370 | 14 |
| AX-158216766 | 18 | 54.383 | KV453060.1 | 50317    | 14-scf00370 | 14 |

|              |    |        |            |        |             |    |
|--------------|----|--------|------------|--------|-------------|----|
| AX-158216767 | 18 | 54.383 | KV453060.1 | 51362  | 14-scf00370 | 14 |
| AX-158216768 | 18 | 54.383 | KV453060.1 | 51877  | 14-scf00370 | 14 |
| AX-158216770 | 18 | 54.383 | KV453060.1 | 55259  | 14-scf00370 | 14 |
| AX-158216771 | 18 | 54.383 | KV453060.1 | 56716  | 14-scf00370 | 14 |
| AX-158216772 | 18 | 54.383 | KV453060.1 | 57111  | 14-scf00370 | 14 |
| AX-158216773 | 18 | 54.383 | KV453060.1 | 57335  | 14-scf00370 | 14 |
| AX-157838977 | 18 | 54.383 | KV453060.1 | 58976  | 14-scf00370 | 14 |
| AX-158216774 | 18 | 54.383 | KV453060.1 | 59461  | 14-scf00370 | 14 |
| AX-158216776 | 18 | 54.383 | KV453060.1 | 60787  | 14-scf00370 | 14 |
| AX-157838978 | 18 | 54.383 | KV453060.1 | 64152  | 14-scf00370 | 14 |
| AX-158216778 | 18 | 54.383 | KV453060.1 | 64484  | 14-scf00370 | 14 |
| AX-158216779 | 18 | 54.383 | KV453060.1 | 64817  | 14-scf00370 | 14 |
| AX-158216781 | 18 | 54.383 | KV453060.1 | 66975  | 14-scf00370 | 14 |
| AX-158216782 | 18 | 54.383 | KV453060.1 | 69063  | 14-scf00370 | 14 |
| AX-158216785 | 18 | 54.383 | KV453060.1 | 79199  | 14-scf00370 | 14 |
| AX-158216788 | 18 | 54.383 | KV453060.1 | 82971  | 14-scf00370 | 14 |
| AX-158386575 | 18 | 54.383 | KV453060.1 | 87882  | 14-scf00370 | 14 |
| AX-158216792 | 18 | 54.383 | KV453060.1 | 89036  | 14-scf00370 | 14 |
| AX-158216793 | 18 | 54.383 | KV453060.1 | 89907  | 14-scf00370 | 14 |
| AX-158216794 | 18 | 54.383 | KV453060.1 | 90924  | 14-scf00370 | 14 |
| AX-158216795 | 18 | 54.383 | KV453060.1 | 91918  | 14-scf00370 | 14 |
| AX-158216796 | 18 | 54.383 | KV453060.1 | 92651  | 14-scf00370 | 14 |
| AX-158216797 | 18 | 54.383 | KV453060.1 | 93670  | 14-scf00370 | 14 |
| AX-158216799 | 18 | 54.383 | KV453060.1 | 94809  | 14-scf00370 | 14 |
| AX-157838979 | 18 | 54.383 | KV453060.1 | 95183  | 14-scf00370 | 14 |
| AX-158216800 | 18 | 54.383 | KV453060.1 | 95436  | 14-scf00370 | 14 |
| AX-157838980 | 18 | 54.383 | KV453060.1 | 95660  | 14-scf00370 | 14 |
| AX-158216802 | 18 | 54.383 | KV453060.1 | 98974  | 14-scf00370 | 14 |
| AX-158216806 | 18 | 54.383 | KV453060.1 | 101371 | 14-scf00370 | 14 |
| AX-158216809 | 18 | 54.383 | KV453060.1 | 104620 | 14-scf00370 | 14 |
| AX-158216810 | 18 | 54.383 | KV453060.1 | 105194 | 14-scf00370 | 14 |
| AX-158216811 | 18 | 54.383 | KV453060.1 | 105640 | 14-scf00370 | 14 |
| AX-158216812 | 18 | 54.383 | KV453060.1 | 108044 | 14-scf00370 | 14 |
| AX-157741251 | 18 | 54.383 | KV453060.1 | 114564 | 14-scf00370 | 14 |
| AX-158216814 | 18 | 54.383 | KV453060.1 | 114868 | 14-scf00370 | 14 |
| AX-158216815 | 18 | 54.383 | KV453060.1 | 115105 | 14-scf00370 | 14 |
| AX-158216816 | 18 | 54.383 | KV453060.1 | 115719 | 14-scf00370 | 14 |
| AX-158216818 | 18 | 54.383 | KV453060.1 | 117185 | 14-scf00370 | 14 |
| AX-158216819 | 18 | 54.383 | KV453060.1 | 117537 | 14-scf00370 | 14 |
| AX-158216820 | 18 | 54.383 | KV453060.1 | 117681 | 14-scf00370 | 14 |
| AX-157720157 | 18 | 54.383 | KV453060.1 | 118092 | 14-scf00370 | 14 |
| AX-158380826 | 18 | 54.383 | KV453060.1 | 118172 | 14-scf00370 | 14 |
| AX-157748324 | 18 | 54.383 | KV453060.1 | 119750 | 14-scf00370 | 14 |
| AX-157838984 | 18 | 54.383 | KV453060.1 | 120333 | 14-scf00370 | 14 |
| AX-158216823 | 18 | 54.383 | KV453060.1 | 121328 | 14-scf00370 | 14 |
| AX-158216824 | 18 | 54.383 | KV453060.1 | 121565 | 14-scf00370 | 14 |
| AX-157742745 | 18 | 54.383 | KV453060.1 | 121632 | 14-scf00370 | 14 |
| AX-158216825 | 18 | 54.383 | KV453060.1 | 122559 | 14-scf00370 | 14 |
| AX-158216826 | 18 | 54.383 | KV453060.1 | 123676 | 14-scf00370 | 14 |
| AX-158216827 | 18 | 54.383 | KV453060.1 | 124642 | 14-scf00370 | 14 |
| AX-158216828 | 18 | 54.383 | KV453060.1 | 127070 | 14-scf00370 | 14 |

|              |    |        |            |        |             |    |
|--------------|----|--------|------------|--------|-------------|----|
| AX-158216829 | 18 | 54.383 | KV453060.1 | 127740 | 14-scf00370 | 14 |
| AX-157838985 | 18 | 54.383 | KV453060.1 | 128076 | 14-scf00370 | 14 |
| AX-158216830 | 18 | 54.383 | KV453060.1 | 128350 | 14-scf00370 | 14 |
| AX-157838986 | 18 | 54.383 | KV453060.1 | 130494 | 14-scf00370 | 14 |
| AX-158418621 | 18 | 54.383 | KV453060.1 | 131212 | 14-scf00370 | 14 |
| AX-158216836 | 18 | 54.383 | KV453060.1 | 140605 | 14-scf00370 | 14 |
| AX-158216837 | 18 | 54.383 | KV453060.1 | 140961 | 14-scf00370 | 14 |
| AX-158216839 | 18 | 54.383 | KV453060.1 | 142289 | 14-scf00370 | 14 |
| AX-158216842 | 18 | 54.383 | KV453060.1 | 144384 | 14-scf00370 | 14 |
| AX-157838989 | 18 | 54.383 | KV453060.1 | 144965 | 14-scf00370 | 14 |
| AX-158216847 | 18 | 54.383 | KV453060.1 | 147793 | 14-scf00370 | 14 |
| AX-158216849 | 18 | 54.383 | KV453060.1 | 148679 | 14-scf00370 | 14 |
| AX-157838990 | 18 | 54.383 | KV453060.1 | 150838 | 14-scf00370 | 14 |
| AX-158216851 | 18 | 54.383 | KV453060.1 | 151214 | 14-scf00370 | 14 |
| AX-157838991 | 18 | 54.383 | KV453060.1 | 152143 | 14-scf00370 | 14 |
| AX-158216852 | 18 | 54.383 | KV453060.1 | 153870 | 14-scf00370 | 14 |
| AX-158216865 | 18 | 54.383 | KV453060.1 | 168316 | 14-scf00370 | 14 |
| AX-158216866 | 18 | 54.383 | KV453060.1 | 169636 | 14-scf00370 | 14 |
| AX-158216867 | 18 | 54.383 | KV453060.1 | 169853 | 14-scf00370 | 14 |
| AX-158216869 | 18 | 54.383 | KV453060.1 | 172380 | 14-scf00370 | 14 |
| AX-158216870 | 18 | 54.383 | KV453060.1 | 172765 | 14-scf00370 | 14 |
| AX-158216871 | 18 | 54.383 | KV453060.1 | 173926 | 14-scf00370 | 14 |
| AX-158216875 | 18 | 54.383 | KV453060.1 | 176961 | 14-scf00370 | 14 |
| AX-157859415 | 18 | 54.383 | KV453060.1 | 179593 | 14-scf00370 | 14 |
| AX-157718706 | 18 | 54.383 | KV453060.1 | 184434 | 14-scf00370 | 14 |
| AX-158216879 | 18 | 54.383 | KV453060.1 | 186602 | 14-scf00370 | 14 |
| AX-157859416 | 18 | 54.383 | KV453060.1 | 188009 | 14-scf00370 | 14 |
| AX-157859417 | 18 | 54.383 | KV453060.1 | 188077 | 14-scf00370 | 14 |
| AX-157859418 | 18 | 54.383 | KV453060.1 | 188701 | 14-scf00370 | 14 |
| AX-157859419 | 18 | 54.383 | KV453060.1 | 190126 | 14-scf00370 | 14 |
| AX-158216882 | 18 | 54.383 | KV453060.1 | 193215 | 14-scf00370 | 14 |
| AX-158216884 | 18 | 54.383 | KV453060.1 | 197397 | 14-scf00370 | 14 |
| AX-158216885 | 18 | 54.383 | KV453060.1 | 205045 | 14-scf00370 | 14 |
| AX-157838992 | 18 | 54.383 | KV453060.1 | 215046 | 14-scf00370 | 14 |
| AX-157711746 | 18 | 54.383 | KV453060.1 | 216192 | 14-scf00370 | 14 |
| AX-158216888 | 18 | 54.383 | KV453060.1 | 220834 | 14-scf00370 | 14 |
| AX-157859420 | 18 | 54.383 | KV453060.1 | 221986 | 14-scf00370 | 14 |
| AX-157838994 | 18 | 54.383 | KV453060.1 | 223062 | 14-scf00370 | 14 |
| AX-158216891 | 18 | 54.383 | KV453060.1 | 224490 | 14-scf00370 | 14 |
| AX-158216892 | 18 | 54.383 | KV453060.1 | 225031 | 14-scf00370 | 14 |
| AX-158216895 | 18 | 54.383 | KV453060.1 | 226802 | 14-scf00370 | 14 |
| AX-158216898 | 18 | 54.383 | KV453060.1 | 232713 | 14-scf00370 | 14 |
| AX-158216899 | 18 | 54.383 | KV453060.1 | 234278 | 14-scf00370 | 14 |
| AX-158216900 | 18 | 54.383 | KV453060.1 | 234745 | 14-scf00370 | 14 |
| AX-158216901 | 18 | 54.383 | KV453060.1 | 235806 | 14-scf00370 | 14 |
| AX-158216906 | 18 | 54.383 | KV453060.1 | 245036 | 14-scf00370 | 14 |
| AX-158216913 | 18 | 54.383 | KV453060.1 | 255020 | 14-scf00370 | 14 |
| AX-158216918 | 18 | 54.383 | KV453060.1 | 261715 | 14-scf00370 | 14 |
| AX-158216920 | 18 | 54.383 | KV453060.1 | 262817 | 14-scf00370 | 14 |
| AX-158216921 | 18 | 54.383 | KV453060.1 | 265275 | 14-scf00370 | 14 |
| AX-157859422 | 18 | 54.383 | KV453060.1 | 265374 | 14-scf00370 | 14 |

|              |    |        |             |        |                |    |
|--------------|----|--------|-------------|--------|----------------|----|
| AX-158216925 | 18 | 54.383 | KV453060.1  | 267839 | 14-scf00370    | 14 |
| AX-158216926 | 18 | 54.383 | KV453060.1  | 268491 | 14-scf00370    | 14 |
| AX-158216928 | 18 | 54.383 | KV453060.1  | 271394 | 14-scf00370    | 14 |
| AX-158216929 | 18 | 54.383 | KV453060.1  | 272161 | 14-scf00370    | 14 |
| AX-158216930 | 18 | 54.383 | KV453060.1  | 273677 | 14-scf00370    | 14 |
| AX-158216931 | 18 | 54.383 | KV453060.1  | 275316 | 14-scf00370    | 14 |
| AX-158216932 | 18 | 54.383 | KV453060.1  | 277564 | 14-scf00370    | 14 |
| AX-158216933 | 18 | 54.383 | KV453060.1  | 279573 | 14-scf00370    | 14 |
| AX-158216937 | 18 | 54.383 | KV453060.1  | 284359 | 14-scf00370    | 14 |
| AX-158216938 | 18 | 54.383 | KV453060.1  | 289721 | 14-scf00370    | 14 |
| AX-158216939 | 18 | 54.383 | KV453060.1  | 291661 | 14-scf00370    | 14 |
| AX-158216941 | 18 | 54.383 | KV453060.1  | 292765 | 14-scf00370    | 14 |
| AX-158216942 | 18 | 54.383 | KV453060.1  | 298075 | 14-scf00370    | 14 |
| AX-158216943 | 18 | 54.383 | KV453060.1  | 298805 | 14-scf00370    | 14 |
| AX-158216947 | 18 | 54.383 | KV453060.1  | 301351 | 14-scf00370    | 14 |
| AX-158216949 | 18 | 54.383 | KV453060.1  | 302613 | 14-scf00370    | 14 |
| AX-158216951 | 18 | 54.383 | KV453060.1  | 303331 | 14-scf00370    | 14 |
| AX-158216953 | 18 | 54.383 | KV453060.1  | 305077 | 14-scf00370    | 14 |
| AX-158216955 | 18 | 54.383 | KV453060.1  | 306817 | 14-scf00370    | 14 |
| AX-158216956 | 18 | 54.383 | KV453060.1  | 307116 | 14-scf00370    | 14 |
| AX-158216961 | 18 | 54.383 | KV453060.1  | 309455 | 14-scf00370    | 14 |
| AX-158216962 | 18 | 54.383 | KV453060.1  | 310370 | 14-scf00370    | 14 |
| AX-158216965 | 18 | 54.383 | KV453060.1  | 313953 | 14-scf00370    | 14 |
| AX-158216970 | 18 | 54.383 | KV453060.1  | 319533 | 14-scf00370    | 14 |
| AX-158216974 | 18 | 54.383 | KV453060.1  | 321803 | 14-scf00370    | 14 |
| AX-158216975 | 18 | 54.383 | KV453060.1  | 323113 | 14-scf00370    | 14 |
| AX-158216990 | 18 | 54.383 | KV453060.1  | 335940 | 14-scf00370    | 14 |
| AX-158217022 | 18 | 54.383 | KV453060.1  | 372037 | 14-scf00370    | 14 |
| AX-157681001 | 18 | 54.383 | KV453059.1  | 6713   | 14-scf00881    | 14 |
| AX-157687447 | 18 | 54.383 | KV453059.1  | 7317   | 14-scf00881    | 14 |
| AX-157687448 | 18 | 54.383 | KV453059.1  | 7554   | 14-scf00881    | 14 |
| AX-157695194 | 18 | 54.383 | FI879720.1  | 44     | IORI212 Ictalt | UN |
| AX-157711408 | 18 | 54.383 | FI869765.1  | 254    | IORI212 Ictalt | UN |
| AX-157705767 | 18 | 54.383 | 3ML01030822 | 658    | scf06426_1     | UN |
| AX-158216831 | 18 | 54.523 | KV453060.1  | 129239 | 14-scf00370    | 14 |
| AX-157872381 | 18 | 55.366 | KV453060.1  | 479788 | 14-scf00370    | 14 |
| AX-158217172 | 18 | 55.366 | KV453060.1  | 543068 | 14-scf00370    | 14 |
| AX-158217173 | 18 | 55.366 | KV453060.1  | 543401 | 14-scf00370    | 14 |
| AX-158217227 | 18 | 55.366 | KV453060.1  | 601551 | 14-scf00370    | 14 |
| AX-158217237 | 18 | 55.366 | KV453060.1  | 611178 | 14-scf00370    | 14 |
| AX-157839015 | 18 | 55.366 | KV453060.1  | 612392 | 14-scf00370    | 14 |
| AX-158217239 | 18 | 55.366 | KV453060.1  | 614133 | 14-scf00370    | 14 |
| AX-158217240 | 18 | 55.366 | KV453060.1  | 614866 | 14-scf00370    | 14 |
| AX-158217241 | 18 | 55.366 | KV453060.1  | 617578 | 14-scf00370    | 14 |
| AX-158217257 | 18 | 55.366 | KV453060.1  | 642022 | 14-scf00370    | 14 |
| AX-158217259 | 18 | 55.366 | KV453060.1  | 643957 | 14-scf00370    | 14 |
| AX-157701173 | 18 | 55.366 | DX083610.1  | 292    | IORI212 Ictalt | UN |
| AX-158217242 | 18 | 55.367 | KV453060.1  | 618841 | 14-scf00370    | 14 |
| AX-157839016 | 18 | 55.367 | KV453060.1  | 622712 | 14-scf00370    | 14 |
| AX-158217247 | 18 | 55.367 | KV453060.1  | 633897 | 14-scf00370    | 14 |
| AX-158217250 | 18 | 55.367 | KV453060.1  | 635879 | 14-scf00370    | 14 |

|              |    |        |            |         |             |    |
|--------------|----|--------|------------|---------|-------------|----|
| AX-158217164 | 18 | 55.53  | KV453060.1 | 536429  | 14-scf00370 | 14 |
| AX-158217244 | 18 | 55.53  | KV453060.1 | 625927  | 14-scf00370 | 14 |
| AX-158217252 | 18 | 55.53  | KV453060.1 | 638363  | 14-scf00370 | 14 |
| AX-158217253 | 18 | 55.53  | KV453060.1 | 639741  | 14-scf00370 | 14 |
| AX-158217255 | 18 | 55.53  | KV453060.1 | 641149  | 14-scf00370 | 14 |
| AX-158217269 | 18 | 55.53  | KV453060.1 | 650329  | 14-scf00370 | 14 |
| AX-158217106 | 18 | 55.694 | KV453060.1 | 471398  | 14-scf00370 | 14 |
| AX-158217256 | 18 | 55.694 | KV453060.1 | 641521  | 14-scf00370 | 14 |
| AX-158217261 | 18 | 55.694 | KV453060.1 | 645799  | 14-scf00370 | 14 |
| AX-158217262 | 18 | 55.694 | KV453060.1 | 646130  | 14-scf00370 | 14 |
| AX-158217265 | 18 | 55.694 | KV453060.1 | 648764  | 14-scf00370 | 14 |
| AX-158217267 | 18 | 55.694 | KV453060.1 | 649246  | 14-scf00370 | 14 |
| AX-158217270 | 18 | 55.694 | KV453060.1 | 650791  | 14-scf00370 | 14 |
| AX-158217271 | 18 | 55.694 | KV453060.1 | 652109  | 14-scf00370 | 14 |
| AX-157839019 | 18 | 55.694 | KV453060.1 | 652618  | 14-scf00370 | 14 |
| AX-158217275 | 18 | 55.694 | KV453060.1 | 655929  | 14-scf00370 | 14 |
| AX-158217276 | 18 | 55.694 | KV453060.1 | 656457  | 14-scf00370 | 14 |
| AX-158217278 | 18 | 55.694 | KV453060.1 | 657327  | 14-scf00370 | 14 |
| AX-158217283 | 18 | 55.694 | KV453060.1 | 663728  | 14-scf00370 | 14 |
| AX-158217286 | 18 | 55.694 | KV453060.1 | 666647  | 14-scf00370 | 14 |
| AX-158217288 | 18 | 55.746 | KV453060.1 | 668719  | 14-scf00370 | 14 |
| AX-157838725 | 18 | 55.803 | KV453058.1 | 7570465 | 14-scf00369 | 14 |
| AX-158217254 | 18 | 55.803 | KV453060.1 | 640504  | 14-scf00370 | 14 |
| AX-158217289 | 18 | 55.803 | KV453060.1 | 669063  | 14-scf00370 | 14 |
| AX-158217290 | 18 | 55.803 | KV453060.1 | 669708  | 14-scf00370 | 14 |
| AX-158217294 | 18 | 55.803 | KV453060.1 | 673063  | 14-scf00370 | 14 |
| AX-158217840 | 18 | 55.803 | KV453060.1 | 1514024 | 14-scf00370 | 14 |
| AX-158217295 | 18 | 55.837 | KV453060.1 | 674019  | 14-scf00370 | 14 |
| AX-158217296 | 18 | 55.843 | KV453060.1 | 675006  | 14-scf00370 | 14 |
| AX-158217297 | 18 | 55.843 | KV453060.1 | 676699  | 14-scf00370 | 14 |
| AX-158380828 | 18 | 55.843 | KV453060.1 | 680973  | 14-scf00370 | 14 |
| AX-158217301 | 18 | 55.843 | KV453060.1 | 684068  | 14-scf00370 | 14 |
| AX-158217310 | 18 | 55.843 | KV453060.1 | 696490  | 14-scf00370 | 14 |
| AX-158217299 | 18 | 55.862 | KV453060.1 | 679363  | 14-scf00370 | 14 |
| AX-158217303 | 18 | 55.881 | KV453060.1 | 685821  | 14-scf00370 | 14 |
| AX-158217306 | 18 | 55.881 | KV453060.1 | 689644  | 14-scf00370 | 14 |
| AX-158217304 | 18 | 55.912 | KV453060.1 | 686555  | 14-scf00370 | 14 |
| AX-158217307 | 18 | 55.912 | KV453060.1 | 690624  | 14-scf00370 | 14 |
| AX-158217308 | 18 | 55.912 | KV453060.1 | 691405  | 14-scf00370 | 14 |
| AX-158217309 | 18 | 55.974 | KV453060.1 | 694475  | 14-scf00370 | 14 |
| AX-158217311 | 18 | 56.022 | KV453060.1 | 696859  | 14-scf00370 | 14 |
| AX-157756810 | 18 | 56.022 | KV453060.1 | 697381  | 14-scf00370 | 14 |
| AX-158217312 | 18 | 56.022 | KV453060.1 | 697599  | 14-scf00370 | 14 |
| AX-158217316 | 18 | 56.022 | KV453060.1 | 701688  | 14-scf00370 | 14 |
| AX-158217318 | 18 | 56.022 | KV453060.1 | 703236  | 14-scf00370 | 14 |
| AX-158217319 | 18 | 56.022 | KV453060.1 | 705805  | 14-scf00370 | 14 |
| AX-158217322 | 18 | 56.022 | KV453060.1 | 709003  | 14-scf00370 | 14 |
| AX-158217324 | 18 | 56.05  | KV453060.1 | 713461  | 14-scf00370 | 14 |
| AX-158217323 | 18 | 56.073 | KV453060.1 | 709910  | 14-scf00370 | 14 |
| AX-158217329 | 18 | 56.073 | KV453060.1 | 718467  | 14-scf00370 | 14 |
| AX-158418625 | 18 | 56.073 | KV453060.1 | 860219  | 14-scf00370 | 14 |



|              |    |        |            |        |             |    |
|--------------|----|--------|------------|--------|-------------|----|
| AX-158217320 | 18 | 56.093 | KV453060.1 | 706318 | 14-scf00370 | 14 |
| AX-158217330 | 18 | 56.093 | KV453060.1 | 719081 | 14-scf00370 | 14 |
| AX-158217331 | 18 | 56.111 | KV453060.1 | 720009 | 14-scf00370 | 14 |
| AX-158217317 | 18 | 56.131 | KV453060.1 | 702823 | 14-scf00370 | 14 |
| AX-158217327 | 18 | 56.131 | KV453060.1 | 716714 | 14-scf00370 | 14 |
| AX-158217337 | 18 | 56.131 | KV453060.1 | 729542 | 14-scf00370 | 14 |
| AX-158217338 | 18 | 56.131 | KV453060.1 | 730212 | 14-scf00370 | 14 |
| AX-158217340 | 18 | 56.131 | KV453060.1 | 731926 | 14-scf00370 | 14 |
| AX-158217343 | 18 | 56.131 | KV453060.1 | 734081 | 14-scf00370 | 14 |
| AX-158217344 | 18 | 56.131 | KV453060.1 | 736780 | 14-scf00370 | 14 |
| AX-158217345 | 18 | 56.131 | KV453060.1 | 737874 | 14-scf00370 | 14 |
| AX-158217349 | 18 | 56.131 | KV453060.1 | 742726 | 14-scf00370 | 14 |
| AX-158217350 | 18 | 56.131 | KV453060.1 | 744373 | 14-scf00370 | 14 |
| AX-158217352 | 18 | 56.131 | KV453060.1 | 746329 | 14-scf00370 | 14 |
| AX-158217353 | 18 | 56.131 | KV453060.1 | 748775 | 14-scf00370 | 14 |
| AX-158217354 | 18 | 56.131 | KV453060.1 | 751674 | 14-scf00370 | 14 |
| AX-158217355 | 18 | 56.131 | KV453060.1 | 752241 | 14-scf00370 | 14 |
| AX-158217382 | 18 | 56.131 | KV453060.1 | 781255 | 14-scf00370 | 14 |
| AX-158217356 | 18 | 56.298 | KV453060.1 | 753323 | 14-scf00370 | 14 |
| AX-158217358 | 18 | 56.298 | KV453060.1 | 756089 | 14-scf00370 | 14 |
| AX-158217360 | 18 | 56.298 | KV453060.1 | 757075 | 14-scf00370 | 14 |
| AX-158217367 | 18 | 56.298 | KV453060.1 | 767213 | 14-scf00370 | 14 |
| AX-158217361 | 18 | 56.381 | KV453060.1 | 759180 | 14-scf00370 | 14 |
| AX-158217363 | 18 | 56.432 | KV453060.1 | 761356 | 14-scf00370 | 14 |
| AX-158217368 | 18 | 56.459 | KV453060.1 | 767889 | 14-scf00370 | 14 |
| AX-158217370 | 18 | 56.459 | KV453060.1 | 770324 | 14-scf00370 | 14 |
| AX-158217371 | 18 | 56.459 | KV453060.1 | 770633 | 14-scf00370 | 14 |
| AX-158217373 | 18 | 56.459 | KV453060.1 | 772101 | 14-scf00370 | 14 |
| AX-158217374 | 18 | 56.459 | KV453060.1 | 774122 | 14-scf00370 | 14 |
| AX-158217376 | 18 | 56.459 | KV453060.1 | 776776 | 14-scf00370 | 14 |
| AX-158217377 | 18 | 56.459 | KV453060.1 | 777362 | 14-scf00370 | 14 |
| AX-158217379 | 18 | 56.459 | KV453060.1 | 778267 | 14-scf00370 | 14 |
| AX-158414695 | 18 | 56.492 | KV453060.1 | 775668 | 14-scf00370 | 14 |
| AX-157839021 | 18 | 56.573 | KV453060.1 | 776731 | 14-scf00370 | 14 |
| AX-158217381 | 18 | 56.601 | KV453060.1 | 779685 | 14-scf00370 | 14 |
| AX-158217383 | 18 | 56.677 | KV453060.1 | 784112 | 14-scf00370 | 14 |
| AX-158217384 | 18 | 56.677 | KV453060.1 | 786010 | 14-scf00370 | 14 |
| AX-158217389 | 18 | 56.677 | KV453060.1 | 791803 | 14-scf00370 | 14 |
| AX-157887229 | 18 | 56.677 | KV453060.1 | 792852 | 14-scf00370 | 14 |
| AX-158217397 | 18 | 56.677 | KV453060.1 | 804050 | 14-scf00370 | 14 |
| AX-158217390 | 18 | 56.719 | KV453060.1 | 792401 | 14-scf00370 | 14 |
| AX-158217393 | 18 | 56.761 | KV453060.1 | 797083 | 14-scf00370 | 14 |
| AX-158217398 | 18 | 56.787 | KV453060.1 | 804815 | 14-scf00370 | 14 |
| AX-158217399 | 18 | 56.896 | KV453060.1 | 805571 | 14-scf00370 | 14 |
| AX-158394031 | 18 | 56.898 | KV453060.1 | 808700 | 14-scf00370 | 14 |
| AX-158217403 | 18 | 56.899 | KV453060.1 | 810687 | 14-scf00370 | 14 |
| AX-158217405 | 18 | 57.058 | KV453060.1 | 812958 | 14-scf00370 | 14 |
| AX-158217406 | 18 | 57.058 | KV453060.1 | 813441 | 14-scf00370 | 14 |
| AX-158217407 | 18 | 57.058 | KV453060.1 | 813886 | 14-scf00370 | 14 |
| AX-157723015 | 18 | 57.058 | KV453060.1 | 814642 | 14-scf00370 | 14 |
| AX-158217408 | 18 | 57.058 | KV453060.1 | 815507 | 14-scf00370 | 14 |

|              |    |        |            |         |             |    |
|--------------|----|--------|------------|---------|-------------|----|
| AX-158217409 | 18 | 57.058 | KV453060.1 | 816436  | 14-scf00370 | 14 |
| AX-158217411 | 18 | 57.058 | KV453060.1 | 817332  | 14-scf00370 | 14 |
| AX-158217412 | 18 | 57.058 | KV453060.1 | 818309  | 14-scf00370 | 14 |
| AX-158217413 | 18 | 57.058 | KV453060.1 | 819208  | 14-scf00370 | 14 |
| AX-158217414 | 18 | 57.224 | KV453060.1 | 819915  | 14-scf00370 | 14 |
| AX-158217415 | 18 | 57.224 | KV453060.1 | 820607  | 14-scf00370 | 14 |
| AX-158217418 | 18 | 57.278 | KV453060.1 | 821897  | 14-scf00370 | 14 |
| AX-158217366 | 18 | 57.333 | KV453060.1 | 766740  | 14-scf00370 | 14 |
| AX-157757861 | 18 | 57.333 | KV453060.1 | 791151  | 14-scf00370 | 14 |
| AX-158217402 | 18 | 57.333 | KV453060.1 | 807683  | 14-scf00370 | 14 |
| AX-158217421 | 18 | 57.333 | KV453060.1 | 825130  | 14-scf00370 | 14 |
| AX-158217424 | 18 | 57.333 | KV453060.1 | 830926  | 14-scf00370 | 14 |
| AX-158217557 | 18 | 57.333 | KV453060.1 | 999734  | 14-scf00370 | 14 |
| AX-157839051 | 18 | 57.333 | KV453060.1 | 1159052 | 14-scf00370 | 14 |
| AX-158217823 | 18 | 57.333 | KV453060.1 | 1484509 | 14-scf00370 | 14 |
| AX-157711745 | 18 | 57.333 | KV453060.1 | 1711579 | 14-scf00370 | 14 |
| AX-158217422 | 18 | 57.445 | KV453060.1 | 825859  | 14-scf00370 | 14 |
| AX-158217420 | 18 | 57.535 | KV453060.1 | 824260  | 14-scf00370 | 14 |
| AX-158217425 | 18 | 57.624 | KV453060.1 | 831371  | 14-scf00370 | 14 |
| AX-157839024 | 18 | 57.683 | KV453060.1 | 832790  | 14-scf00370 | 14 |
| AX-158217430 | 18 | 57.77  | KV453060.1 | 838528  | 14-scf00370 | 14 |
| AX-158217432 | 18 | 57.77  | KV453060.1 | 844683  | 14-scf00370 | 14 |
| AX-158217433 | 18 | 57.77  | KV453060.1 | 845688  | 14-scf00370 | 14 |
| AX-158217439 | 18 | 57.78  | KV453060.1 | 850552  | 14-scf00370 | 14 |
| AX-158217585 | 18 | 57.78  | KV453060.1 | 1057080 | 14-scf00370 | 14 |
| AX-158217586 | 18 | 57.78  | KV453060.1 | 1057169 | 14-scf00370 | 14 |
| AX-158217446 | 18 | 57.795 | KV453060.1 | 856954  | 14-scf00370 | 14 |
| AX-158217431 | 18 | 57.819 | KV453060.1 | 842905  | 14-scf00370 | 14 |
| AX-158217447 | 18 | 57.819 | KV453060.1 | 859213  | 14-scf00370 | 14 |
| AX-158217461 | 18 | 57.819 | KV453060.1 | 874066  | 14-scf00370 | 14 |
| AX-158217462 | 18 | 57.819 | KV453060.1 | 875307  | 14-scf00370 | 14 |
| AX-157879672 | 18 | 57.819 | KV453060.1 | 875639  | 14-scf00370 | 14 |
| AX-158217448 | 18 | 57.879 | KV453060.1 | 859675  | 14-scf00370 | 14 |
| AX-158217451 | 18 | 57.879 | KV453060.1 | 862069  | 14-scf00370 | 14 |
| AX-158217452 | 18 | 57.879 | KV453060.1 | 863737  | 14-scf00370 | 14 |
| AX-158217453 | 18 | 57.879 | KV453060.1 | 864301  | 14-scf00370 | 14 |
| AX-157700220 | 18 | 57.879 | KV453060.1 | 865064  | 14-scf00370 | 14 |
| AX-158414696 | 18 | 57.879 | KV453060.1 | 867741  | 14-scf00370 | 14 |
| AX-157839025 | 18 | 57.879 | KV453060.1 | 870523  | 14-scf00370 | 14 |
| AX-158217498 | 18 | 57.879 | KV453060.1 | 921365  | 14-scf00370 | 14 |
| AX-158217591 | 18 | 57.879 | KV453060.1 | 1064853 | 14-scf00370 | 14 |
| AX-157872382 | 18 | 57.879 | KV453060.1 | 1069115 | 14-scf00370 | 14 |
| AX-157839045 | 18 | 57.879 | KV453060.1 | 1097665 | 14-scf00370 | 14 |
| AX-158217706 | 18 | 57.879 | KV453060.1 | 1238180 | 14-scf00370 | 14 |
| AX-158217954 | 18 | 57.879 | KV453060.1 | 1673766 | 14-scf00370 | 14 |
| AX-157839027 | 18 | 57.957 | KV453060.1 | 877915  | 14-scf00370 | 14 |
| AX-157716523 | 18 | 57.977 | KV453060.1 | 888104  | 14-scf00370 | 14 |
| AX-158217499 | 18 | 57.977 | KV453060.1 | 922188  | 14-scf00370 | 14 |
| AX-158217505 | 18 | 57.977 | KV453060.1 | 930525  | 14-scf00370 | 14 |
| AX-158217506 | 18 | 57.977 | KV453060.1 | 931004  | 14-scf00370 | 14 |
| AX-158217521 | 18 | 57.977 | KV453060.1 | 945414  | 14-scf00370 | 14 |

|              |    |        |            |         |             |    |
|--------------|----|--------|------------|---------|-------------|----|
| AX-157710024 | 18 | 57.977 | KV453060.1 | 949457  | 14-scf00370 | 14 |
| AX-158217523 | 18 | 57.977 | KV453060.1 | 950455  | 14-scf00370 | 14 |
| AX-158217534 | 18 | 57.977 | KV453060.1 | 963910  | 14-scf00370 | 14 |
| AX-157839031 | 18 | 57.977 | KV453060.1 | 964351  | 14-scf00370 | 14 |
| AX-158217544 | 18 | 57.977 | KV453060.1 | 976594  | 14-scf00370 | 14 |
| AX-158217546 | 18 | 57.977 | KV453060.1 | 978408  | 14-scf00370 | 14 |
| AX-158217547 | 18 | 57.977 | KV453060.1 | 978859  | 14-scf00370 | 14 |
| AX-158217548 | 18 | 57.977 | KV453060.1 | 979571  | 14-scf00370 | 14 |
| AX-158423217 | 18 | 57.977 | KV453060.1 | 982588  | 14-scf00370 | 14 |
| AX-158217549 | 18 | 57.977 | KV453060.1 | 984024  | 14-scf00370 | 14 |
| AX-158217551 | 18 | 57.977 | KV453060.1 | 985842  | 14-scf00370 | 14 |
| AX-157713541 | 18 | 57.977 | KV453060.1 | 989887  | 14-scf00370 | 14 |
| AX-158217555 | 18 | 57.977 | KV453060.1 | 992220  | 14-scf00370 | 14 |
| AX-158217556 | 18 | 57.977 | KV453060.1 | 998241  | 14-scf00370 | 14 |
| AX-158217558 | 18 | 57.977 | KV453060.1 | 1001772 | 14-scf00370 | 14 |
| AX-158217655 | 18 | 57.977 | KV453060.1 | 1158182 | 14-scf00370 | 14 |
| AX-158217657 | 18 | 57.977 | KV453060.1 | 1160028 | 14-scf00370 | 14 |
| AX-158217927 | 18 | 57.977 | KV453060.1 | 1637085 | 14-scf00370 | 14 |
| AX-157743293 | 18 | 57.989 | KV453060.1 | 833385  | 14-scf00370 | 14 |
| AX-158217434 | 18 | 57.989 | KV453060.1 | 846667  | 14-scf00370 | 14 |
| AX-157710876 | 18 | 57.989 | KV453060.1 | 853878  | 14-scf00370 | 14 |
| AX-158217449 | 18 | 57.989 | KV453060.1 | 860422  | 14-scf00370 | 14 |
| AX-158217456 | 18 | 57.989 | KV453060.1 | 868576  | 14-scf00370 | 14 |
| AX-157839026 | 18 | 57.989 | KV453060.1 | 872102  | 14-scf00370 | 14 |
| AX-158217463 | 18 | 57.989 | KV453060.1 | 876309  | 14-scf00370 | 14 |
| AX-158217468 | 18 | 57.989 | KV453060.1 | 888271  | 14-scf00370 | 14 |
| AX-158217469 | 18 | 57.989 | KV453060.1 | 890023  | 14-scf00370 | 14 |
| AX-157751269 | 18 | 57.989 | KV453060.1 | 892605  | 14-scf00370 | 14 |
| AX-158217472 | 18 | 57.989 | KV453060.1 | 894656  | 14-scf00370 | 14 |
| AX-158217473 | 18 | 57.989 | KV453060.1 | 895442  | 14-scf00370 | 14 |
| AX-157887230 | 18 | 57.989 | KV453060.1 | 901601  | 14-scf00370 | 14 |
| AX-158217477 | 18 | 57.989 | KV453060.1 | 901889  | 14-scf00370 | 14 |
| AX-158217479 | 18 | 57.989 | KV453060.1 | 903159  | 14-scf00370 | 14 |
| AX-158217483 | 18 | 57.989 | KV453060.1 | 907858  | 14-scf00370 | 14 |
| AX-158217484 | 18 | 57.989 | KV453060.1 | 908382  | 14-scf00370 | 14 |
| AX-158217485 | 18 | 57.989 | KV453060.1 | 910149  | 14-scf00370 | 14 |
| AX-158217487 | 18 | 57.989 | KV453060.1 | 911044  | 14-scf00370 | 14 |
| AX-157748157 | 18 | 57.989 | KV453060.1 | 911903  | 14-scf00370 | 14 |
| AX-158217489 | 18 | 57.989 | KV453060.1 | 913312  | 14-scf00370 | 14 |
| AX-158217490 | 18 | 57.989 | KV453060.1 | 913949  | 14-scf00370 | 14 |
| AX-158217492 | 18 | 57.989 | KV453060.1 | 916733  | 14-scf00370 | 14 |
| AX-158217493 | 18 | 57.989 | KV453060.1 | 917345  | 14-scf00370 | 14 |
| AX-158217494 | 18 | 57.989 | KV453060.1 | 917498  | 14-scf00370 | 14 |
| AX-158217495 | 18 | 57.989 | KV453060.1 | 918127  | 14-scf00370 | 14 |
| AX-158414698 | 18 | 57.989 | KV453060.1 | 918650  | 14-scf00370 | 14 |
| AX-158217500 | 18 | 57.989 | KV453060.1 | 922921  | 14-scf00370 | 14 |
| AX-157839030 | 18 | 57.989 | KV453060.1 | 924782  | 14-scf00370 | 14 |
| AX-158217512 | 18 | 57.989 | KV453060.1 | 935917  | 14-scf00370 | 14 |
| AX-158217513 | 18 | 57.989 | KV453060.1 | 936885  | 14-scf00370 | 14 |
| AX-158217514 | 18 | 57.989 | KV453060.1 | 937342  | 14-scf00370 | 14 |
| AX-158217515 | 18 | 57.989 | KV453060.1 | 939265  | 14-scf00370 | 14 |

|              |    |        |            |         |             |    |
|--------------|----|--------|------------|---------|-------------|----|
| AX-158217516 | 18 | 57.989 | KV453060.1 | 939790  | 14-scf00370 | 14 |
| AX-158217518 | 18 | 57.989 | KV453060.1 | 942786  | 14-scf00370 | 14 |
| AX-158217519 | 18 | 57.989 | KV453060.1 | 943805  | 14-scf00370 | 14 |
| AX-158217520 | 18 | 57.989 | KV453060.1 | 944231  | 14-scf00370 | 14 |
| AX-158217522 | 18 | 57.989 | KV453060.1 | 947636  | 14-scf00370 | 14 |
| AX-158217524 | 18 | 57.989 | KV453060.1 | 951953  | 14-scf00370 | 14 |
| AX-158217525 | 18 | 57.989 | KV453060.1 | 954034  | 14-scf00370 | 14 |
| AX-158217527 | 18 | 57.989 | KV453060.1 | 956299  | 14-scf00370 | 14 |
| AX-158217528 | 18 | 57.989 | KV453060.1 | 958106  | 14-scf00370 | 14 |
| AX-158217531 | 18 | 57.989 | KV453060.1 | 960386  | 14-scf00370 | 14 |
| AX-158217532 | 18 | 57.989 | KV453060.1 | 962304  | 14-scf00370 | 14 |
| AX-158217533 | 18 | 57.989 | KV453060.1 | 962593  | 14-scf00370 | 14 |
| AX-158217535 | 18 | 57.989 | KV453060.1 | 965006  | 14-scf00370 | 14 |
| AX-158217536 | 18 | 57.989 | KV453060.1 | 965400  | 14-scf00370 | 14 |
| AX-157839032 | 18 | 57.989 | KV453060.1 | 965873  | 14-scf00370 | 14 |
| AX-158217537 | 18 | 57.989 | KV453060.1 | 966106  | 14-scf00370 | 14 |
| AX-157839033 | 18 | 57.989 | KV453060.1 | 966409  | 14-scf00370 | 14 |
| AX-158217538 | 18 | 57.989 | KV453060.1 | 968500  | 14-scf00370 | 14 |
| AX-157839034 | 18 | 57.989 | KV453060.1 | 968945  | 14-scf00370 | 14 |
| AX-157742098 | 18 | 57.989 | KV453060.1 | 969019  | 14-scf00370 | 14 |
| AX-157839035 | 18 | 57.989 | KV453060.1 | 969556  | 14-scf00370 | 14 |
| AX-157879673 | 18 | 57.989 | KV453060.1 | 971610  | 14-scf00370 | 14 |
| AX-158217539 | 18 | 57.989 | KV453060.1 | 971846  | 14-scf00370 | 14 |
| AX-157839037 | 18 | 57.989 | KV453060.1 | 973498  | 14-scf00370 | 14 |
| AX-158217541 | 18 | 57.989 | KV453060.1 | 974563  | 14-scf00370 | 14 |
| AX-158217542 | 18 | 57.989 | KV453060.1 | 975556  | 14-scf00370 | 14 |
| AX-157756536 | 18 | 57.989 | KV453060.1 | 980302  | 14-scf00370 | 14 |
| AX-158217550 | 18 | 57.989 | KV453060.1 | 984780  | 14-scf00370 | 14 |
| AX-158217552 | 18 | 57.989 | KV453060.1 | 986464  | 14-scf00370 | 14 |
| AX-158217553 | 18 | 57.989 | KV453060.1 | 986700  | 14-scf00370 | 14 |
| AX-157839038 | 18 | 57.989 | KV453060.1 | 990631  | 14-scf00370 | 14 |
| AX-157839039 | 18 | 57.989 | KV453060.1 | 995459  | 14-scf00370 | 14 |
| AX-158414702 | 18 | 57.989 | KV453060.1 | 1008139 | 14-scf00370 | 14 |
| AX-158414703 | 18 | 57.989 | KV453060.1 | 1008334 | 14-scf00370 | 14 |
| AX-158217562 | 18 | 57.989 | KV453060.1 | 1013824 | 14-scf00370 | 14 |
| AX-158217563 | 18 | 57.989 | KV453060.1 | 1015078 | 14-scf00370 | 14 |
| AX-158217565 | 18 | 57.989 | KV453060.1 | 1016690 | 14-scf00370 | 14 |
| AX-158217566 | 18 | 57.989 | KV453060.1 | 1017319 | 14-scf00370 | 14 |
| AX-158217567 | 18 | 57.989 | KV453060.1 | 1017978 | 14-scf00370 | 14 |
| AX-158217568 | 18 | 57.989 | KV453060.1 | 1018496 | 14-scf00370 | 14 |
| AX-158217569 | 18 | 57.989 | KV453060.1 | 1019190 | 14-scf00370 | 14 |
| AX-158217571 | 18 | 57.989 | KV453060.1 | 1021604 | 14-scf00370 | 14 |
| AX-158217572 | 18 | 57.989 | KV453060.1 | 1031794 | 14-scf00370 | 14 |
| AX-158217574 | 18 | 57.989 | KV453060.1 | 1036702 | 14-scf00370 | 14 |
| AX-158217575 | 18 | 57.989 | KV453060.1 | 1037211 | 14-scf00370 | 14 |
| AX-158217576 | 18 | 57.989 | KV453060.1 | 1038489 | 14-scf00370 | 14 |
| AX-158217577 | 18 | 57.989 | KV453060.1 | 1040526 | 14-scf00370 | 14 |
| AX-158217578 | 18 | 57.989 | KV453060.1 | 1044577 | 14-scf00370 | 14 |
| AX-158217579 | 18 | 57.989 | KV453060.1 | 1046661 | 14-scf00370 | 14 |
| AX-158217580 | 18 | 57.989 | KV453060.1 | 1049919 | 14-scf00370 | 14 |
| AX-158217582 | 18 | 57.989 | KV453060.1 | 1051350 | 14-scf00370 | 14 |

|              |    |        |             |         |             |    |
|--------------|----|--------|-------------|---------|-------------|----|
| AX-157859429 | 18 | 57.989 | KV453060.1  | 1054656 | 14-scf00370 | 14 |
| AX-158217583 | 18 | 57.989 | KV453060.1  | 1056094 | 14-scf00370 | 14 |
| AX-158217593 | 18 | 57.989 | KV453060.1  | 1067100 | 14-scf00370 | 14 |
| AX-158217606 | 18 | 57.989 | KV453060.1  | 1084929 | 14-scf00370 | 14 |
| AX-157839041 | 18 | 57.989 | KV453060.1  | 1087666 | 14-scf00370 | 14 |
| AX-158217615 | 18 | 57.989 | KV453060.1  | 1092342 | 14-scf00370 | 14 |
| AX-158217616 | 18 | 57.989 | KV453060.1  | 1092784 | 14-scf00370 | 14 |
| AX-158217617 | 18 | 57.989 | KV453060.1  | 1093104 | 14-scf00370 | 14 |
| AX-158217619 | 18 | 57.989 | KV453060.1  | 1094737 | 14-scf00370 | 14 |
| AX-157839044 | 18 | 57.989 | KV453060.1  | 1095861 | 14-scf00370 | 14 |
| AX-158217628 | 18 | 57.989 | KV453060.1  | 1117320 | 14-scf00370 | 14 |
| AX-157839048 | 18 | 57.989 | KV453060.1  | 1130573 | 14-scf00370 | 14 |
| AX-158217642 | 18 | 57.989 | KV453060.1  | 1136682 | 14-scf00370 | 14 |
| AX-157799140 | 18 | 57.989 | KV453060.1  | 1150137 | 14-scf00370 | 14 |
| AX-158217652 | 18 | 57.989 | KV453060.1  | 1155631 | 14-scf00370 | 14 |
| AX-158217694 | 18 | 57.989 | KV453060.1  | 1223048 | 14-scf00370 | 14 |
| AX-158217745 | 18 | 57.989 | KV453060.1  | 1349694 | 14-scf00370 | 14 |
| AX-158217763 | 18 | 57.989 | KV453060.1  | 1368843 | 14-scf00370 | 14 |
| AX-157726916 | 18 | 57.989 | KV453060.1  | 1388722 | 14-scf00370 | 14 |
| AX-158217786 | 18 | 57.989 | KV453060.1  | 1422280 | 14-scf00370 | 14 |
| AX-158217799 | 18 | 57.989 | KV453060.1  | 1449115 | 14-scf00370 | 14 |
| AX-158217805 | 18 | 57.989 | KV453060.1  | 1456179 | 14-scf00370 | 14 |
| AX-158217837 | 18 | 57.989 | KV453060.1  | 1510662 | 14-scf00370 | 14 |
| AX-158217882 | 18 | 57.989 | KV453060.1  | 1575449 | 14-scf00370 | 14 |
| AX-158217889 | 18 | 57.989 | KV453060.1  | 1583671 | 14-scf00370 | 14 |
| AX-158217916 | 18 | 57.989 | KV453060.1  | 1626092 | 14-scf00370 | 14 |
| AX-158217929 | 18 | 57.989 | KV453060.1  | 1642272 | 14-scf00370 | 14 |
| AX-158217930 | 18 | 57.989 | KV453060.1  | 1645292 | 14-scf00370 | 14 |
| AX-158217934 | 18 | 57.989 | KV453060.1  | 1648399 | 14-scf00370 | 14 |
| AX-158217956 | 18 | 57.989 | KV453060.1  | 1675472 | 14-scf00370 | 14 |
| AX-158380831 | 18 | 57.989 | KV453060.1  | 1675726 | 14-scf00370 | 14 |
| AX-157726898 | 18 | 57.989 | KV453060.1  | 1690350 | 14-scf00370 | 14 |
| AX-158217964 | 18 | 57.989 | KV453060.1  | 1701171 | 14-scf00370 | 14 |
| AX-158217992 | 18 | 57.989 | KV453060.1  | 1747275 | 14-scf00370 | 14 |
| AX-158218018 | 18 | 57.989 | KV453060.1  | 1792912 | 14-scf00370 | 14 |
| AX-158414736 | 18 | 57.989 | KV453060.1  | 1797876 | 14-scf00370 | 14 |
| AX-158218022 | 18 | 57.989 | KV453060.1  | 1807137 | 14-scf00370 | 14 |
| AX-158218036 | 18 | 57.989 | KV453060.1  | 1825809 | 14-scf00370 | 14 |
| AX-158218046 | 18 | 57.989 | KV453060.1  | 1842059 | 14-scf00370 | 14 |
| AX-158218049 | 18 | 57.989 | KV453060.1  | 1851024 | 14-scf00370 | 14 |
| AX-158218088 | 18 | 57.989 | KV453060.1  | 1898004 | 14-scf00370 | 14 |
| AX-158218101 | 18 | 57.989 | KV453060.1  | 1915677 | 14-scf00370 | 14 |
| AX-158218128 | 18 | 57.989 | KV453060.1  | 1941888 | 14-scf00370 | 14 |
| AX-158218177 | 18 | 57.989 | KV453060.1  | 2012810 | 14-scf00370 | 14 |
| AX-157705526 | 18 | 57.989 | 3ML01030078 | 613     | scf05671_1  | UN |
| AX-158217587 | 18 | 57.993 | KV453060.1  | 1057863 | 14-scf00370 | 14 |
| AX-158217603 | 18 | 57.997 | KV453060.1  | 1082718 | 14-scf00370 | 14 |
| AX-158217369 | 18 | 58.01  | KV453060.1  | 769059  | 14-scf00370 | 14 |
| AX-158217480 | 18 | 58.01  | KV453060.1  | 904813  | 14-scf00370 | 14 |
| AX-158217510 | 18 | 58.01  | KV453060.1  | 933523  | 14-scf00370 | 14 |
| AX-158217517 | 18 | 58.01  | KV453060.1  | 940699  | 14-scf00370 | 14 |

|              |    |        |            |         |             |    |
|--------------|----|--------|------------|---------|-------------|----|
| AX-157859428 | 18 | 58.01  | KV453060.1 | 1024256 | 14-scf00370 | 14 |
| AX-158217589 | 18 | 58.01  | KV453060.1 | 1061102 | 14-scf00370 | 14 |
| AX-158217595 | 18 | 58.01  | KV453060.1 | 1070775 | 14-scf00370 | 14 |
| AX-158217611 | 18 | 58.01  | KV453060.1 | 1089152 | 14-scf00370 | 14 |
| AX-158217631 | 18 | 58.01  | KV453060.1 | 1121805 | 14-scf00370 | 14 |
| AX-158217664 | 18 | 58.01  | KV453060.1 | 1172319 | 14-scf00370 | 14 |
| AX-158217666 | 18 | 58.01  | KV453060.1 | 1173968 | 14-scf00370 | 14 |
| AX-157839054 | 18 | 58.01  | KV453060.1 | 1181044 | 14-scf00370 | 14 |
| AX-158217716 | 18 | 58.01  | KV453060.1 | 1267785 | 14-scf00370 | 14 |
| AX-157839061 | 18 | 58.01  | KV453060.1 | 1330574 | 14-scf00370 | 14 |
| AX-158386586 | 18 | 58.01  | KV453060.1 | 1380532 | 14-scf00370 | 14 |
| AX-158217806 | 18 | 58.01  | KV453060.1 | 1458049 | 14-scf00370 | 14 |
| AX-158217828 | 18 | 58.01  | KV453060.1 | 1489858 | 14-scf00370 | 14 |
| AX-158217829 | 18 | 58.01  | KV453060.1 | 1490493 | 14-scf00370 | 14 |
| AX-158217830 | 18 | 58.01  | KV453060.1 | 1494964 | 14-scf00370 | 14 |
| AX-158217844 | 18 | 58.01  | KV453060.1 | 1520054 | 14-scf00370 | 14 |
| AX-158217845 | 18 | 58.01  | KV453060.1 | 1520390 | 14-scf00370 | 14 |
| AX-158217846 | 18 | 58.01  | KV453060.1 | 1520709 | 14-scf00370 | 14 |
| AX-158217847 | 18 | 58.01  | KV453060.1 | 1521678 | 14-scf00370 | 14 |
| AX-158217852 | 18 | 58.01  | KV453060.1 | 1524406 | 14-scf00370 | 14 |
| AX-158217853 | 18 | 58.01  | KV453060.1 | 1525298 | 14-scf00370 | 14 |
| AX-157839094 | 18 | 58.01  | KV453060.1 | 1579693 | 14-scf00370 | 14 |
| AX-157839098 | 18 | 58.01  | KV453060.1 | 1652592 | 14-scf00370 | 14 |
| AX-157839100 | 18 | 58.01  | KV453060.1 | 1655017 | 14-scf00370 | 14 |
| AX-157713928 | 18 | 58.01  | KV453060.1 | 1676993 | 14-scf00370 | 14 |
| AX-158217968 | 18 | 58.01  | KV453060.1 | 1709627 | 14-scf00370 | 14 |
| AX-157839114 | 18 | 58.01  | KV453060.1 | 1756277 | 14-scf00370 | 14 |
| AX-158218017 | 18 | 58.01  | KV453060.1 | 1789539 | 14-scf00370 | 14 |
| AX-158218023 | 18 | 58.01  | KV453060.1 | 1807713 | 14-scf00370 | 14 |
| AX-158218027 | 18 | 58.01  | KV453060.1 | 1811441 | 14-scf00370 | 14 |
| AX-158218030 | 18 | 58.01  | KV453060.1 | 1817125 | 14-scf00370 | 14 |
| AX-157839117 | 18 | 58.01  | KV453060.1 | 1835699 | 14-scf00370 | 14 |
| AX-157879687 | 18 | 58.01  | KV453060.1 | 1887241 | 14-scf00370 | 14 |
| AX-158218084 | 18 | 58.01  | KV453060.1 | 1892763 | 14-scf00370 | 14 |
| AX-157744099 | 18 | 58.01  | KV453060.1 | 1902242 | 14-scf00370 | 14 |
| AX-158218094 | 18 | 58.01  | KV453060.1 | 1906017 | 14-scf00370 | 14 |
| AX-157839126 | 18 | 58.01  | KV453060.1 | 1924145 | 14-scf00370 | 14 |
| AX-158218143 | 18 | 58.01  | KV453060.1 | 1960840 | 14-scf00370 | 14 |
| AX-158218167 | 18 | 58.01  | KV453060.1 | 1997868 | 14-scf00370 | 14 |
| AX-158218227 | 18 | 58.01  | KV453060.1 | 2070370 | 14-scf00370 | 14 |
| AX-158218253 | 18 | 58.01  | KV453060.1 | 2096612 | 14-scf00370 | 14 |
| AX-158217612 | 18 | 58.067 | KV453060.1 | 1089641 | 14-scf00370 | 14 |
| AX-157839042 | 18 | 58.071 | KV453060.1 | 1094810 | 14-scf00370 | 14 |
| AX-157839043 | 18 | 58.075 | KV453060.1 | 1095656 | 14-scf00370 | 14 |
| AX-158217464 | 18 | 58.098 | KV453060.1 | 877378  | 14-scf00370 | 14 |
| AX-158217465 | 18 | 58.098 | KV453060.1 | 878658  | 14-scf00370 | 14 |
| AX-158217466 | 18 | 58.098 | KV453060.1 | 879489  | 14-scf00370 | 14 |
| AX-158217478 | 18 | 58.098 | KV453060.1 | 902921  | 14-scf00370 | 14 |
| AX-158217481 | 18 | 58.098 | KV453060.1 | 905381  | 14-scf00370 | 14 |
| AX-158217584 | 18 | 58.098 | KV453060.1 | 1056658 | 14-scf00370 | 14 |
| AX-158217590 | 18 | 58.098 | KV453060.1 | 1061983 | 14-scf00370 | 14 |

|              |    |        |            |         |             |    |
|--------------|----|--------|------------|---------|-------------|----|
| AX-158217604 | 18 | 58.098 | KV453060.1 | 1083328 | 14-scf00370 | 14 |
| AX-157839047 | 18 | 58.098 | KV453060.1 | 1117481 | 14-scf00370 | 14 |
| AX-158217629 | 18 | 58.098 | KV453060.1 | 1119007 | 14-scf00370 | 14 |
| AX-158217630 | 18 | 58.098 | KV453060.1 | 1121178 | 14-scf00370 | 14 |
| AX-158414705 | 18 | 58.098 | KV453060.1 | 1121275 | 14-scf00370 | 14 |
| AX-158217634 | 18 | 58.098 | KV453060.1 | 1127024 | 14-scf00370 | 14 |
| AX-158217637 | 18 | 58.098 | KV453060.1 | 1131299 | 14-scf00370 | 14 |
| AX-158217639 | 18 | 58.098 | KV453060.1 | 1133446 | 14-scf00370 | 14 |
| AX-158217653 | 18 | 58.098 | KV453060.1 | 1156649 | 14-scf00370 | 14 |
| AX-158217659 | 18 | 58.098 | KV453060.1 | 1162927 | 14-scf00370 | 14 |
| AX-158217665 | 18 | 58.098 | KV453060.1 | 1173471 | 14-scf00370 | 14 |
| AX-157839055 | 18 | 58.098 | KV453060.1 | 1181738 | 14-scf00370 | 14 |
| AX-158217667 | 18 | 58.098 | KV453060.1 | 1182084 | 14-scf00370 | 14 |
| AX-158217668 | 18 | 58.098 | KV453060.1 | 1182935 | 14-scf00370 | 14 |
| AX-158217670 | 18 | 58.098 | KV453060.1 | 1186024 | 14-scf00370 | 14 |
| AX-158217671 | 18 | 58.098 | KV453060.1 | 1192665 | 14-scf00370 | 14 |
| AX-158217674 | 18 | 58.098 | KV453060.1 | 1200866 | 14-scf00370 | 14 |
| AX-158217681 | 18 | 58.098 | KV453060.1 | 1209908 | 14-scf00370 | 14 |
| AX-158217683 | 18 | 58.098 | KV453060.1 | 1211173 | 14-scf00370 | 14 |
| AX-158217684 | 18 | 58.098 | KV453060.1 | 1212822 | 14-scf00370 | 14 |
| AX-158217685 | 18 | 58.098 | KV453060.1 | 1214216 | 14-scf00370 | 14 |
| AX-158217686 | 18 | 58.098 | KV453060.1 | 1214705 | 14-scf00370 | 14 |
| AX-158414709 | 18 | 58.098 | KV453060.1 | 1216728 | 14-scf00370 | 14 |
| AX-158217689 | 18 | 58.098 | KV453060.1 | 1216865 | 14-scf00370 | 14 |
| AX-158217690 | 18 | 58.098 | KV453060.1 | 1217717 | 14-scf00370 | 14 |
| AX-158217691 | 18 | 58.098 | KV453060.1 | 1218854 | 14-scf00370 | 14 |
| AX-158414710 | 18 | 58.098 | KV453060.1 | 1219519 | 14-scf00370 | 14 |
| AX-158217692 | 18 | 58.098 | KV453060.1 | 1219859 | 14-scf00370 | 14 |
| AX-158217697 | 18 | 58.098 | KV453060.1 | 1228734 | 14-scf00370 | 14 |
| AX-158217699 | 18 | 58.098 | KV453060.1 | 1229979 | 14-scf00370 | 14 |
| AX-158217703 | 18 | 58.098 | KV453060.1 | 1233428 | 14-scf00370 | 14 |
| AX-158217708 | 18 | 58.098 | KV453060.1 | 1239890 | 14-scf00370 | 14 |
| AX-157859430 | 18 | 58.098 | KV453060.1 | 1263553 | 14-scf00370 | 14 |
| AX-158414711 | 18 | 58.098 | KV453060.1 | 1264358 | 14-scf00370 | 14 |
| AX-157721641 | 18 | 58.098 | KV453060.1 | 1265273 | 14-scf00370 | 14 |
| AX-158217715 | 18 | 58.098 | KV453060.1 | 1266102 | 14-scf00370 | 14 |
| AX-158217723 | 18 | 58.098 | KV453060.1 | 1285259 | 14-scf00370 | 14 |
| AX-158217726 | 18 | 58.098 | KV453060.1 | 1312427 | 14-scf00370 | 14 |
| AX-158217732 | 18 | 58.098 | KV453060.1 | 1326849 | 14-scf00370 | 14 |
| AX-158217733 | 18 | 58.098 | KV453060.1 | 1334068 | 14-scf00370 | 14 |
| AX-158217735 | 18 | 58.098 | KV453060.1 | 1336177 | 14-scf00370 | 14 |
| AX-158217736 | 18 | 58.098 | KV453060.1 | 1336466 | 14-scf00370 | 14 |
| AX-158217739 | 18 | 58.098 | KV453060.1 | 1338304 | 14-scf00370 | 14 |
| AX-157839062 | 18 | 58.098 | KV453060.1 | 1338381 | 14-scf00370 | 14 |
| AX-158217741 | 18 | 58.098 | KV453060.1 | 1341466 | 14-scf00370 | 14 |
| AX-158217742 | 18 | 58.098 | KV453060.1 | 1342542 | 14-scf00370 | 14 |
| AX-158217744 | 18 | 58.098 | KV453060.1 | 1348332 | 14-scf00370 | 14 |
| AX-158217773 | 18 | 58.098 | KV453060.1 | 1391839 | 14-scf00370 | 14 |
| AX-158217774 | 18 | 58.098 | KV453060.1 | 1399847 | 14-scf00370 | 14 |
| AX-158217778 | 18 | 58.098 | KV453060.1 | 1410971 | 14-scf00370 | 14 |
| AX-158217779 | 18 | 58.098 | KV453060.1 | 1412557 | 14-scf00370 | 14 |

|              |    |        |            |         |             |    |
|--------------|----|--------|------------|---------|-------------|----|
| AX-158217780 | 18 | 58.098 | KV453060.1 | 1414224 | 14-scf00370 | 14 |
| AX-158217781 | 18 | 58.098 | KV453060.1 | 1415070 | 14-scf00370 | 14 |
| AX-158217782 | 18 | 58.098 | KV453060.1 | 1415623 | 14-scf00370 | 14 |
| AX-157700066 | 18 | 58.098 | KV453060.1 | 1416720 | 14-scf00370 | 14 |
| AX-158217787 | 18 | 58.098 | KV453060.1 | 1424173 | 14-scf00370 | 14 |
| AX-158217788 | 18 | 58.098 | KV453060.1 | 1424756 | 14-scf00370 | 14 |
| AX-158217790 | 18 | 58.098 | KV453060.1 | 1430400 | 14-scf00370 | 14 |
| AX-158217791 | 18 | 58.098 | KV453060.1 | 1432205 | 14-scf00370 | 14 |
| AX-158217793 | 18 | 58.098 | KV453060.1 | 1435427 | 14-scf00370 | 14 |
| AX-158217796 | 18 | 58.098 | KV453060.1 | 1441038 | 14-scf00370 | 14 |
| AX-158217798 | 18 | 58.098 | KV453060.1 | 1444913 | 14-scf00370 | 14 |
| AX-157839066 | 18 | 58.098 | KV453060.1 | 1446577 | 14-scf00370 | 14 |
| AX-158414717 | 18 | 58.098 | KV453060.1 | 1447751 | 14-scf00370 | 14 |
| AX-158217800 | 18 | 58.098 | KV453060.1 | 1449855 | 14-scf00370 | 14 |
| AX-158217801 | 18 | 58.098 | KV453060.1 | 1450359 | 14-scf00370 | 14 |
| AX-158217802 | 18 | 58.098 | KV453060.1 | 1451392 | 14-scf00370 | 14 |
| AX-158217807 | 18 | 58.098 | KV453060.1 | 1459480 | 14-scf00370 | 14 |
| AX-158217809 | 18 | 58.098 | KV453060.1 | 1465324 | 14-scf00370 | 14 |
| AX-158217810 | 18 | 58.098 | KV453060.1 | 1467076 | 14-scf00370 | 14 |
| AX-157839069 | 18 | 58.098 | KV453060.1 | 1467806 | 14-scf00370 | 14 |
| AX-158217812 | 18 | 58.098 | KV453060.1 | 1469092 | 14-scf00370 | 14 |
| AX-158217813 | 18 | 58.098 | KV453060.1 | 1469373 | 14-scf00370 | 14 |
| AX-158217815 | 18 | 58.098 | KV453060.1 | 1472433 | 14-scf00370 | 14 |
| AX-158217816 | 18 | 58.098 | KV453060.1 | 1473507 | 14-scf00370 | 14 |
| AX-158217820 | 18 | 58.098 | KV453060.1 | 1479559 | 14-scf00370 | 14 |
| AX-157774380 | 18 | 58.098 | KV453060.1 | 1480475 | 14-scf00370 | 14 |
| AX-157859432 | 18 | 58.098 | KV453060.1 | 1483089 | 14-scf00370 | 14 |
| AX-158217824 | 18 | 58.098 | KV453060.1 | 1485131 | 14-scf00370 | 14 |
| AX-157859433 | 18 | 58.098 | KV453060.1 | 1485342 | 14-scf00370 | 14 |
| AX-157839071 | 18 | 58.098 | KV453060.1 | 1485836 | 14-scf00370 | 14 |
| AX-157701393 | 18 | 58.098 | KV453060.1 | 1486096 | 14-scf00370 | 14 |
| AX-157839072 | 18 | 58.098 | KV453060.1 | 1487267 | 14-scf00370 | 14 |
| AX-158217826 | 18 | 58.098 | KV453060.1 | 1488371 | 14-scf00370 | 14 |
| AX-158217831 | 18 | 58.098 | KV453060.1 | 1497005 | 14-scf00370 | 14 |
| AX-157839075 | 18 | 58.098 | KV453060.1 | 1497462 | 14-scf00370 | 14 |
| AX-158217832 | 18 | 58.098 | KV453060.1 | 1497832 | 14-scf00370 | 14 |
| AX-157839076 | 18 | 58.098 | KV453060.1 | 1498454 | 14-scf00370 | 14 |
| AX-157739102 | 18 | 58.098 | KV453060.1 | 1498869 | 14-scf00370 | 14 |
| AX-157748266 | 18 | 58.098 | KV453060.1 | 1499982 | 14-scf00370 | 14 |
| AX-158217834 | 18 | 58.098 | KV453060.1 | 1502003 | 14-scf00370 | 14 |
| AX-157839079 | 18 | 58.098 | KV453060.1 | 1505431 | 14-scf00370 | 14 |
| AX-158217836 | 18 | 58.098 | KV453060.1 | 1507053 | 14-scf00370 | 14 |
| AX-157839081 | 18 | 58.098 | KV453060.1 | 1513147 | 14-scf00370 | 14 |
| AX-157839084 | 18 | 58.098 | KV453060.1 | 1519407 | 14-scf00370 | 14 |
| AX-158414719 | 18 | 58.098 | KV453060.1 | 1521725 | 14-scf00370 | 14 |
| AX-158217850 | 18 | 58.098 | KV453060.1 | 1523614 | 14-scf00370 | 14 |
| AX-158217851 | 18 | 58.098 | KV453060.1 | 1523816 | 14-scf00370 | 14 |
| AX-158217856 | 18 | 58.098 | KV453060.1 | 1529556 | 14-scf00370 | 14 |
| AX-157718321 | 18 | 58.098 | KV453060.1 | 1529927 | 14-scf00370 | 14 |
| AX-158414724 | 18 | 58.098 | KV453060.1 | 1534794 | 14-scf00370 | 14 |
| AX-158217858 | 18 | 58.098 | KV453060.1 | 1538122 | 14-scf00370 | 14 |



|              |    |        |            |         |             |    |
|--------------|----|--------|------------|---------|-------------|----|
| AX-157727690 | 18 | 58.098 | KV453060.1 | 1538835 | 14-scf00370 | 14 |
| AX-157839086 | 18 | 58.098 | KV453060.1 | 1538921 | 14-scf00370 | 14 |
| AX-157748887 | 18 | 58.098 | KV453060.1 | 1539199 | 14-scf00370 | 14 |
| AX-157839087 | 18 | 58.098 | KV453060.1 | 1539729 | 14-scf00370 | 14 |
| AX-157839088 | 18 | 58.098 | KV453060.1 | 1541169 | 14-scf00370 | 14 |
| AX-157839089 | 18 | 58.098 | KV453060.1 | 1542613 | 14-scf00370 | 14 |
| AX-158217861 | 18 | 58.098 | KV453060.1 | 1543070 | 14-scf00370 | 14 |
| AX-158217862 | 18 | 58.098 | KV453060.1 | 1544319 | 14-scf00370 | 14 |
| AX-158217864 | 18 | 58.098 | KV453060.1 | 1548039 | 14-scf00370 | 14 |
| AX-158217865 | 18 | 58.098 | KV453060.1 | 1548923 | 14-scf00370 | 14 |
| AX-157839090 | 18 | 58.098 | KV453060.1 | 1550627 | 14-scf00370 | 14 |
| AX-158217866 | 18 | 58.098 | KV453060.1 | 1551483 | 14-scf00370 | 14 |
| AX-158217867 | 18 | 58.098 | KV453060.1 | 1552675 | 14-scf00370 | 14 |
| AX-157839091 | 18 | 58.098 | KV453060.1 | 1552995 | 14-scf00370 | 14 |
| AX-158217868 | 18 | 58.098 | KV453060.1 | 1553481 | 14-scf00370 | 14 |
| AX-158217871 | 18 | 58.098 | KV453060.1 | 1557549 | 14-scf00370 | 14 |
| AX-157725526 | 18 | 58.098 | KV453060.1 | 1559200 | 14-scf00370 | 14 |
| AX-158217873 | 18 | 58.098 | KV453060.1 | 1564630 | 14-scf00370 | 14 |
| AX-158217874 | 18 | 58.098 | KV453060.1 | 1565115 | 14-scf00370 | 14 |
| AX-158217877 | 18 | 58.098 | KV453060.1 | 1567511 | 14-scf00370 | 14 |
| AX-157716201 | 18 | 58.098 | KV453060.1 | 1568174 | 14-scf00370 | 14 |
| AX-158217879 | 18 | 58.098 | KV453060.1 | 1570692 | 14-scf00370 | 14 |
| AX-157872385 | 18 | 58.098 | KV453060.1 | 1574663 | 14-scf00370 | 14 |
| AX-157839092 | 18 | 58.098 | KV453060.1 | 1576354 | 14-scf00370 | 14 |
| AX-157839093 | 18 | 58.098 | KV453060.1 | 1578468 | 14-scf00370 | 14 |
| AX-158217885 | 18 | 58.098 | KV453060.1 | 1580349 | 14-scf00370 | 14 |
| AX-158217886 | 18 | 58.098 | KV453060.1 | 1580910 | 14-scf00370 | 14 |
| AX-158217888 | 18 | 58.098 | KV453060.1 | 1582048 | 14-scf00370 | 14 |
| AX-158217890 | 18 | 58.098 | KV453060.1 | 1586432 | 14-scf00370 | 14 |
| AX-157713064 | 18 | 58.098 | KV453060.1 | 1586857 | 14-scf00370 | 14 |
| AX-158217892 | 18 | 58.098 | KV453060.1 | 1591598 | 14-scf00370 | 14 |
| AX-158217893 | 18 | 58.098 | KV453060.1 | 1592101 | 14-scf00370 | 14 |
| AX-158217894 | 18 | 58.098 | KV453060.1 | 1592374 | 14-scf00370 | 14 |
| AX-158217895 | 18 | 58.098 | KV453060.1 | 1593611 | 14-scf00370 | 14 |
| AX-158217896 | 18 | 58.098 | KV453060.1 | 1594272 | 14-scf00370 | 14 |
| AX-158217897 | 18 | 58.098 | KV453060.1 | 1594950 | 14-scf00370 | 14 |
| AX-158217898 | 18 | 58.098 | KV453060.1 | 1595725 | 14-scf00370 | 14 |
| AX-158217899 | 18 | 58.098 | KV453060.1 | 1596504 | 14-scf00370 | 14 |
| AX-158217900 | 18 | 58.098 | KV453060.1 | 1597014 | 14-scf00370 | 14 |
| AX-158217906 | 18 | 58.098 | KV453060.1 | 1608230 | 14-scf00370 | 14 |
| AX-158217907 | 18 | 58.098 | KV453060.1 | 1609985 | 14-scf00370 | 14 |
| AX-158217912 | 18 | 58.098 | KV453060.1 | 1617960 | 14-scf00370 | 14 |
| AX-157839097 | 18 | 58.098 | KV453060.1 | 1620111 | 14-scf00370 | 14 |
| AX-158217918 | 18 | 58.098 | KV453060.1 | 1628488 | 14-scf00370 | 14 |
| AX-158217923 | 18 | 58.098 | KV453060.1 | 1632077 | 14-scf00370 | 14 |
| AX-158217924 | 18 | 58.098 | KV453060.1 | 1634212 | 14-scf00370 | 14 |
| AX-158217925 | 18 | 58.098 | KV453060.1 | 1634823 | 14-scf00370 | 14 |
| AX-158217936 | 18 | 58.098 | KV453060.1 | 1649828 | 14-scf00370 | 14 |
| AX-158217943 | 18 | 58.098 | KV453060.1 | 1657328 | 14-scf00370 | 14 |
| AX-158217944 | 18 | 58.098 | KV453060.1 | 1657717 | 14-scf00370 | 14 |
| AX-158217946 | 18 | 58.098 | KV453060.1 | 1660272 | 14-scf00370 | 14 |

|              |    |        |            |         |             |    |
|--------------|----|--------|------------|---------|-------------|----|
| AX-158217951 | 18 | 58.098 | KV453060.1 | 1670040 | 14-scf00370 | 14 |
| AX-158217961 | 18 | 58.098 | KV453060.1 | 1687771 | 14-scf00370 | 14 |
| AX-157839105 | 18 | 58.098 | KV453060.1 | 1695202 | 14-scf00370 | 14 |
| AX-158414729 | 18 | 58.098 | KV453060.1 | 1713683 | 14-scf00370 | 14 |
| AX-158217978 | 18 | 58.098 | KV453060.1 | 1723724 | 14-scf00370 | 14 |
| AX-158217979 | 18 | 58.098 | KV453060.1 | 1724209 | 14-scf00370 | 14 |
| AX-158217981 | 18 | 58.098 | KV453060.1 | 1725507 | 14-scf00370 | 14 |
| AX-158217989 | 18 | 58.098 | KV453060.1 | 1739726 | 14-scf00370 | 14 |
| AX-158217991 | 18 | 58.098 | KV453060.1 | 1746887 | 14-scf00370 | 14 |
| AX-157714601 | 18 | 58.098 | KV453060.1 | 1748309 | 14-scf00370 | 14 |
| AX-157839112 | 18 | 58.098 | KV453060.1 | 1749553 | 14-scf00370 | 14 |
| AX-158217997 | 18 | 58.098 | KV453060.1 | 1756984 | 14-scf00370 | 14 |
| AX-158414732 | 18 | 58.098 | KV453060.1 | 1790307 | 14-scf00370 | 14 |
| AX-158218034 | 18 | 58.098 | KV453060.1 | 1824340 | 14-scf00370 | 14 |
| AX-158218045 | 18 | 58.098 | KV453060.1 | 1840160 | 14-scf00370 | 14 |
| AX-158218057 | 18 | 58.098 | KV453060.1 | 1858651 | 14-scf00370 | 14 |
| AX-158218082 | 18 | 58.098 | KV453060.1 | 1891537 | 14-scf00370 | 14 |
| AX-158218085 | 18 | 58.098 | KV453060.1 | 1893982 | 14-scf00370 | 14 |
| AX-158218086 | 18 | 58.098 | KV453060.1 | 1896674 | 14-scf00370 | 14 |
| AX-158218096 | 18 | 58.098 | KV453060.1 | 1910415 | 14-scf00370 | 14 |
| AX-158218097 | 18 | 58.098 | KV453060.1 | 1911250 | 14-scf00370 | 14 |
| AX-157744101 | 18 | 58.098 | KV453060.1 | 1913460 | 14-scf00370 | 14 |
| AX-158218099 | 18 | 58.098 | KV453060.1 | 1914489 | 14-scf00370 | 14 |
| AX-158218105 | 18 | 58.098 | KV453060.1 | 1921159 | 14-scf00370 | 14 |
| AX-158218113 | 18 | 58.098 | KV453060.1 | 1926868 | 14-scf00370 | 14 |
| AX-158218114 | 18 | 58.098 | KV453060.1 | 1927827 | 14-scf00370 | 14 |
| AX-157710939 | 18 | 58.098 | KV453060.1 | 1928632 | 14-scf00370 | 14 |
| AX-157710938 | 18 | 58.098 | KV453060.1 | 1928686 | 14-scf00370 | 14 |
| AX-158218116 | 18 | 58.098 | KV453060.1 | 1928837 | 14-scf00370 | 14 |
| AX-158218123 | 18 | 58.098 | KV453060.1 | 1937454 | 14-scf00370 | 14 |
| AX-158218124 | 18 | 58.098 | KV453060.1 | 1938501 | 14-scf00370 | 14 |
| AX-158218137 | 18 | 58.098 | KV453060.1 | 1951426 | 14-scf00370 | 14 |
| AX-157839130 | 18 | 58.098 | KV453060.1 | 1977992 | 14-scf00370 | 14 |
| AX-157839131 | 18 | 58.098 | KV453060.1 | 1983667 | 14-scf00370 | 14 |
| AX-158218157 | 18 | 58.098 | KV453060.1 | 1983771 | 14-scf00370 | 14 |
| AX-158218169 | 18 | 58.098 | KV453060.1 | 1999890 | 14-scf00370 | 14 |
| AX-157839135 | 18 | 58.098 | KV453060.1 | 2002334 | 14-scf00370 | 14 |
| AX-158218174 | 18 | 58.098 | KV453060.1 | 2010187 | 14-scf00370 | 14 |
| AX-158218197 | 18 | 58.098 | KV453060.1 | 2035655 | 14-scf00370 | 14 |
| AX-158218220 | 18 | 58.098 | KV453060.1 | 2059693 | 14-scf00370 | 14 |
| AX-158218238 | 18 | 58.098 | KV453060.1 | 2080425 | 14-scf00370 | 14 |
| AX-158218267 | 18 | 58.098 | KV453060.1 | 2107586 | 14-scf00370 | 14 |
| AX-158218275 | 18 | 58.098 | KV453060.1 | 2119952 | 14-scf00370 | 14 |
| AX-158218280 | 18 | 58.098 | KV453060.1 | 2128404 | 14-scf00370 | 14 |
| AX-158218282 | 18 | 58.098 | KV453060.1 | 2130587 | 14-scf00370 | 14 |
| AX-157742096 | 18 | 58.098 | KV453060.1 | 2154609 | 14-scf00370 | 14 |
| AX-158218303 | 18 | 58.098 | KV453060.1 | 2160165 | 14-scf00370 | 14 |
| AX-158218357 | 18 | 58.098 | KV453060.1 | 2249692 | 14-scf00370 | 14 |
| AX-157746562 | 18 | 58.098 | KV453060.1 | 2807926 | 14-scf00370 | 14 |
| AX-158219724 | 18 | 58.098 | KV453060.1 | 4084334 | 14-scf00370 | 14 |
| AX-158219756 | 18 | 58.098 | KV453060.1 | 4128715 | 14-scf00370 | 14 |

|              |    |        |            |         |             |    |
|--------------|----|--------|------------|---------|-------------|----|
| AX-158219777 | 18 | 58.098 | KV453060.1 | 4166598 | 14-scf00370 | 14 |
| AX-157839096 | 18 | 58.108 | KV453060.1 | 1614583 | 14-scf00370 | 14 |
| AX-158217932 | 18 | 58.117 | KV453060.1 | 1646792 | 14-scf00370 | 14 |
| AX-158217940 | 18 | 58.128 | KV453060.1 | 1651944 | 14-scf00370 | 14 |
| AX-157839102 | 18 | 58.135 | KV453060.1 | 1659147 | 14-scf00370 | 14 |
| AX-158217945 | 18 | 58.142 | KV453060.1 | 1659909 | 14-scf00370 | 14 |
| AX-158217688 | 18 | 58.146 | KV453060.1 | 1215836 | 14-scf00370 | 14 |
| AX-158217722 | 18 | 58.146 | KV453060.1 | 1283746 | 14-scf00370 | 14 |
| AX-157839077 | 18 | 58.146 | KV453060.1 | 1499290 | 14-scf00370 | 14 |
| AX-158217947 | 18 | 58.146 | KV453060.1 | 1660689 | 14-scf00370 | 14 |
| AX-158217960 | 18 | 58.148 | KV453060.1 | 1684730 | 14-scf00370 | 14 |
| AX-157839106 | 18 | 58.152 | KV453060.1 | 1697521 | 14-scf00370 | 14 |
| AX-158217749 | 18 | 58.156 | KV453060.1 | 1354753 | 14-scf00370 | 14 |
| AX-158217941 | 18 | 58.156 | KV453060.1 | 1652906 | 14-scf00370 | 14 |
| AX-158217948 | 18 | 58.156 | KV453060.1 | 1661432 | 14-scf00370 | 14 |
| AX-158217970 | 18 | 58.156 | KV453060.1 | 1713521 | 14-scf00370 | 14 |
| AX-158418631 | 18 | 58.156 | KV453060.1 | 1713847 | 14-scf00370 | 14 |
| AX-158217971 | 18 | 58.156 | KV453060.1 | 1715051 | 14-scf00370 | 14 |
| AX-158217972 | 18 | 58.156 | KV453060.1 | 1716333 | 14-scf00370 | 14 |
| AX-158217974 | 18 | 58.156 | KV453060.1 | 1717572 | 14-scf00370 | 14 |
| AX-158218109 | 18 | 58.156 | KV453060.1 | 1922495 | 14-scf00370 | 14 |
| AX-158218110 | 18 | 58.156 | KV453060.1 | 1922982 | 14-scf00370 | 14 |
| AX-158218129 | 18 | 58.156 | KV453060.1 | 1942959 | 14-scf00370 | 14 |
| AX-158218154 | 18 | 58.156 | KV453060.1 | 1978885 | 14-scf00370 | 14 |
| AX-158218210 | 18 | 58.156 | KV453060.1 | 2046785 | 14-scf00370 | 14 |
| AX-157753619 | 18 | 58.156 | KV453060.1 | 2066320 | 14-scf00370 | 14 |
| AX-158218330 | 18 | 58.156 | KV453060.1 | 2192423 | 14-scf00370 | 14 |
| AX-158218334 | 18 | 58.156 | KV453060.1 | 2195625 | 14-scf00370 | 14 |
| AX-158217973 | 18 | 58.159 | KV453060.1 | 1717009 | 14-scf00370 | 14 |
| AX-158217976 | 18 | 58.162 | KV453060.1 | 1722444 | 14-scf00370 | 14 |
| AX-157712188 | 18 | 58.162 | KV453060.1 | 1732230 | 14-scf00370 | 14 |
| AX-157839111 | 18 | 58.162 | KV453060.1 | 1737130 | 14-scf00370 | 14 |
| AX-158217980 | 18 | 58.165 | KV453060.1 | 1725102 | 14-scf00370 | 14 |
| AX-158217982 | 18 | 58.169 | KV453060.1 | 1728075 | 14-scf00370 | 14 |
| AX-157839110 | 18 | 58.169 | KV453060.1 | 1733667 | 14-scf00370 | 14 |
| AX-157839109 | 18 | 58.172 | KV453060.1 | 1728870 | 14-scf00370 | 14 |
| AX-158217985 | 18 | 58.176 | KV453060.1 | 1737621 | 14-scf00370 | 14 |
| AX-158217737 | 18 | 58.181 | KV453060.1 | 1336907 | 14-scf00370 | 14 |
| AX-157839080 | 18 | 58.181 | KV453060.1 | 1506141 | 14-scf00370 | 14 |
| AX-158217993 | 18 | 58.181 | KV453060.1 | 1748147 | 14-scf00370 | 14 |
| AX-158218546 | 18 | 58.181 | KV453060.1 | 2530811 | 14-scf00370 | 14 |
| AX-157740146 | 18 | 58.181 | KV453060.1 | 3190318 | 14-scf00370 | 14 |
| AX-157839113 | 18 | 58.187 | KV453060.1 | 1753499 | 14-scf00370 | 14 |
| AX-158217994 | 18 | 58.189 | KV453060.1 | 1754190 | 14-scf00370 | 14 |
| AX-158217995 | 18 | 58.197 | KV453060.1 | 1755475 | 14-scf00370 | 14 |
| AX-158217789 | 18 | 58.202 | KV453060.1 | 1428802 | 14-scf00370 | 14 |
| AX-158217827 | 18 | 58.202 | KV453060.1 | 1489399 | 14-scf00370 | 14 |
| AX-157839074 | 18 | 58.202 | KV453060.1 | 1495940 | 14-scf00370 | 14 |
| AX-158217839 | 18 | 58.202 | KV453060.1 | 1513802 | 14-scf00370 | 14 |
| AX-158217998 | 18 | 58.202 | KV453060.1 | 1760252 | 14-scf00370 | 14 |
| AX-158418560 | 18 | 58.207 | KV453058.1 | 4673943 | 14-scf00369 | 14 |

|              |    |        |            |          |             |    |
|--------------|----|--------|------------|----------|-------------|----|
| AX-158216730 | 18 | 58.207 | KV453058.1 | 11231042 | 14-scf00369 | 14 |
| AX-158217560 | 18 | 58.207 | KV453060.1 | 1003561  | 14-scf00370 | 14 |
| AX-158217594 | 18 | 58.207 | KV453060.1 | 1067384  | 14-scf00370 | 14 |
| AX-157839040 | 18 | 58.207 | KV453060.1 | 1069425  | 14-scf00370 | 14 |
| AX-158217596 | 18 | 58.207 | KV453060.1 | 1077878  | 14-scf00370 | 14 |
| AX-158217607 | 18 | 58.207 | KV453060.1 | 1085115  | 14-scf00370 | 14 |
| AX-158217608 | 18 | 58.207 | KV453060.1 | 1086163  | 14-scf00370 | 14 |
| AX-158217620 | 18 | 58.207 | KV453060.1 | 1097095  | 14-scf00370 | 14 |
| AX-158217621 | 18 | 58.207 | KV453060.1 | 1097972  | 14-scf00370 | 14 |
| AX-157839046 | 18 | 58.207 | KV453060.1 | 1098709  | 14-scf00370 | 14 |
| AX-157708900 | 18 | 58.207 | KV453060.1 | 1101353  | 14-scf00370 | 14 |
| AX-158217624 | 18 | 58.207 | KV453060.1 | 1103397  | 14-scf00370 | 14 |
| AX-158217633 | 18 | 58.207 | KV453060.1 | 1126131  | 14-scf00370 | 14 |
| AX-158217635 | 18 | 58.207 | KV453060.1 | 1128000  | 14-scf00370 | 14 |
| AX-158217638 | 18 | 58.207 | KV453060.1 | 1131977  | 14-scf00370 | 14 |
| AX-158217641 | 18 | 58.207 | KV453060.1 | 1135726  | 14-scf00370 | 14 |
| AX-158217643 | 18 | 58.207 | KV453060.1 | 1137213  | 14-scf00370 | 14 |
| AX-158217646 | 18 | 58.207 | KV453060.1 | 1139990  | 14-scf00370 | 14 |
| AX-158217647 | 18 | 58.207 | KV453060.1 | 1142082  | 14-scf00370 | 14 |
| AX-158217648 | 18 | 58.207 | KV453060.1 | 1142420  | 14-scf00370 | 14 |
| AX-158217649 | 18 | 58.207 | KV453060.1 | 1149348  | 14-scf00370 | 14 |
| AX-158217651 | 18 | 58.207 | KV453060.1 | 1150904  | 14-scf00370 | 14 |
| AX-158217662 | 18 | 58.207 | KV453060.1 | 1168786  | 14-scf00370 | 14 |
| AX-157839053 | 18 | 58.207 | KV453060.1 | 1169431  | 14-scf00370 | 14 |
| AX-158217673 | 18 | 58.207 | KV453060.1 | 1193335  | 14-scf00370 | 14 |
| AX-158217678 | 18 | 58.207 | KV453060.1 | 1205706  | 14-scf00370 | 14 |
| AX-158217695 | 18 | 58.207 | KV453060.1 | 1223771  | 14-scf00370 | 14 |
| AX-158217729 | 18 | 58.207 | KV453060.1 | 1317517  | 14-scf00370 | 14 |
| AX-158217860 | 18 | 58.207 | KV453060.1 | 1540783  | 14-scf00370 | 14 |
| AX-158217915 | 18 | 58.207 | KV453060.1 | 1621603  | 14-scf00370 | 14 |
| AX-157742696 | 18 | 58.207 | KV453060.1 | 1705838  | 14-scf00370 | 14 |
| AX-158217969 | 18 | 58.207 | KV453060.1 | 1710190  | 14-scf00370 | 14 |
| AX-157774640 | 18 | 58.207 | KV453060.1 | 1733976  | 14-scf00370 | 14 |
| AX-158217999 | 18 | 58.207 | KV453060.1 | 1761622  | 14-scf00370 | 14 |
| AX-157859435 | 18 | 58.207 | KV453060.1 | 1762533  | 14-scf00370 | 14 |
| AX-157859436 | 18 | 58.207 | KV453060.1 | 1762614  | 14-scf00370 | 14 |
| AX-158218000 | 18 | 58.207 | KV453060.1 | 1763738  | 14-scf00370 | 14 |
| AX-158218001 | 18 | 58.207 | KV453060.1 | 1764268  | 14-scf00370 | 14 |
| AX-157839115 | 18 | 58.207 | KV453060.1 | 1764678  | 14-scf00370 | 14 |
| AX-157859437 | 18 | 58.207 | KV453060.1 | 1764895  | 14-scf00370 | 14 |
| AX-158218003 | 18 | 58.207 | KV453060.1 | 1768560  | 14-scf00370 | 14 |
| AX-158218004 | 18 | 58.207 | KV453060.1 | 1769782  | 14-scf00370 | 14 |
| AX-158218005 | 18 | 58.207 | KV453060.1 | 1770666  | 14-scf00370 | 14 |
| AX-158218006 | 18 | 58.207 | KV453060.1 | 1771786  | 14-scf00370 | 14 |
| AX-158218007 | 18 | 58.207 | KV453060.1 | 1772978  | 14-scf00370 | 14 |
| AX-158218008 | 18 | 58.207 | KV453060.1 | 1773785  | 14-scf00370 | 14 |
| AX-157859438 | 18 | 58.207 | KV453060.1 | 1779430  | 14-scf00370 | 14 |
| AX-158218011 | 18 | 58.207 | KV453060.1 | 1780472  | 14-scf00370 | 14 |
| AX-157887239 | 18 | 58.207 | KV453060.1 | 1780519  | 14-scf00370 | 14 |
| AX-158218012 | 18 | 58.207 | KV453060.1 | 1781497  | 14-scf00370 | 14 |
| AX-158218013 | 18 | 58.207 | KV453060.1 | 1782526  | 14-scf00370 | 14 |

|              |    |        |            |         |             |    |
|--------------|----|--------|------------|---------|-------------|----|
| AX-158218014 | 18 | 58.207 | KV453060.1 | 1783360 | 14-scf00370 | 14 |
| AX-158218015 | 18 | 58.207 | KV453060.1 | 1785876 | 14-scf00370 | 14 |
| AX-158218016 | 18 | 58.207 | KV453060.1 | 1786503 | 14-scf00370 | 14 |
| AX-158410177 | 18 | 58.207 | KV453060.1 | 1788452 | 14-scf00370 | 14 |
| AX-158410178 | 18 | 58.207 | KV453060.1 | 1788513 | 14-scf00370 | 14 |
| AX-158414731 | 18 | 58.207 | KV453060.1 | 1788718 | 14-scf00370 | 14 |
| AX-158414734 | 18 | 58.207 | KV453060.1 | 1795570 | 14-scf00370 | 14 |
| AX-157859439 | 18 | 58.207 | KV453060.1 | 1797571 | 14-scf00370 | 14 |
| AX-158218020 | 18 | 58.207 | KV453060.1 | 1804082 | 14-scf00370 | 14 |
| AX-158218024 | 18 | 58.207 | KV453060.1 | 1808574 | 14-scf00370 | 14 |
| AX-157859441 | 18 | 58.207 | KV453060.1 | 1809687 | 14-scf00370 | 14 |
| AX-158218025 | 18 | 58.207 | KV453060.1 | 1809888 | 14-scf00370 | 14 |
| AX-158218026 | 18 | 58.207 | KV453060.1 | 1810638 | 14-scf00370 | 14 |
| AX-158218029 | 18 | 58.207 | KV453060.1 | 1815894 | 14-scf00370 | 14 |
| AX-158218041 | 18 | 58.207 | KV453060.1 | 1830087 | 14-scf00370 | 14 |
| AX-158218043 | 18 | 58.207 | KV453060.1 | 1833555 | 14-scf00370 | 14 |
| AX-158386590 | 18 | 58.207 | KV453060.1 | 1843370 | 14-scf00370 | 14 |
| AX-158218050 | 18 | 58.207 | KV453060.1 | 1851650 | 14-scf00370 | 14 |
| AX-158218052 | 18 | 58.207 | KV453060.1 | 1852845 | 14-scf00370 | 14 |
| AX-158218060 | 18 | 58.207 | KV453060.1 | 1864691 | 14-scf00370 | 14 |
| AX-158218063 | 18 | 58.207 | KV453060.1 | 1868951 | 14-scf00370 | 14 |
| AX-158218065 | 18 | 58.207 | KV453060.1 | 1870206 | 14-scf00370 | 14 |
| AX-158218067 | 18 | 58.207 | KV453060.1 | 1874857 | 14-scf00370 | 14 |
| AX-157839120 | 18 | 58.207 | KV453060.1 | 1879216 | 14-scf00370 | 14 |
| AX-158218069 | 18 | 58.207 | KV453060.1 | 1879312 | 14-scf00370 | 14 |
| AX-158218070 | 18 | 58.207 | KV453060.1 | 1880076 | 14-scf00370 | 14 |
| AX-158218071 | 18 | 58.207 | KV453060.1 | 1881026 | 14-scf00370 | 14 |
| AX-158218072 | 18 | 58.207 | KV453060.1 | 1881690 | 14-scf00370 | 14 |
| AX-158218074 | 18 | 58.207 | KV453060.1 | 1882798 | 14-scf00370 | 14 |
| AX-157879686 | 18 | 58.207 | KV453060.1 | 1882853 | 14-scf00370 | 14 |
| AX-158218075 | 18 | 58.207 | KV453060.1 | 1883871 | 14-scf00370 | 14 |
| AX-158218076 | 18 | 58.207 | KV453060.1 | 1884708 | 14-scf00370 | 14 |
| AX-157713782 | 18 | 58.207 | KV453060.1 | 1890063 | 14-scf00370 | 14 |
| AX-157839121 | 18 | 58.207 | KV453060.1 | 1890291 | 14-scf00370 | 14 |
| AX-158218081 | 18 | 58.207 | KV453060.1 | 1891099 | 14-scf00370 | 14 |
| AX-157839122 | 18 | 58.207 | KV453060.1 | 1893039 | 14-scf00370 | 14 |
| AX-157839123 | 18 | 58.207 | KV453060.1 | 1895630 | 14-scf00370 | 14 |
| AX-158218087 | 18 | 58.207 | KV453060.1 | 1897562 | 14-scf00370 | 14 |
| AX-158218089 | 18 | 58.207 | KV453060.1 | 1898630 | 14-scf00370 | 14 |
| AX-157799177 | 18 | 58.207 | KV453060.1 | 1901078 | 14-scf00370 | 14 |
| AX-157839124 | 18 | 58.207 | KV453060.1 | 1902729 | 14-scf00370 | 14 |
| AX-158218091 | 18 | 58.207 | KV453060.1 | 1903335 | 14-scf00370 | 14 |
| AX-157741444 | 18 | 58.207 | KV453060.1 | 1905316 | 14-scf00370 | 14 |
| AX-158218095 | 18 | 58.207 | KV453060.1 | 1908116 | 14-scf00370 | 14 |
| AX-158218100 | 18 | 58.207 | KV453060.1 | 1914960 | 14-scf00370 | 14 |
| AX-158218102 | 18 | 58.207 | KV453060.1 | 1917444 | 14-scf00370 | 14 |
| AX-158218104 | 18 | 58.207 | KV453060.1 | 1920211 | 14-scf00370 | 14 |
| AX-158218112 | 18 | 58.207 | KV453060.1 | 1926094 | 14-scf00370 | 14 |
| AX-158218115 | 18 | 58.207 | KV453060.1 | 1928101 | 14-scf00370 | 14 |
| AX-158218118 | 18 | 58.207 | KV453060.1 | 1930567 | 14-scf00370 | 14 |
| AX-157748010 | 18 | 58.207 | KV453060.1 | 1931585 | 14-scf00370 | 14 |

|              |    |        |            |         |             |    |
|--------------|----|--------|------------|---------|-------------|----|
| AX-158218119 | 18 | 58.207 | KV453060.1 | 1932490 | 14-scf00370 | 14 |
| AX-158218120 | 18 | 58.207 | KV453060.1 | 1933907 | 14-scf00370 | 14 |
| AX-158218125 | 18 | 58.207 | KV453060.1 | 1938715 | 14-scf00370 | 14 |
| AX-158218127 | 18 | 58.207 | KV453060.1 | 1940395 | 14-scf00370 | 14 |
| AX-158218132 | 18 | 58.207 | KV453060.1 | 1946692 | 14-scf00370 | 14 |
| AX-158218136 | 18 | 58.207 | KV453060.1 | 1951186 | 14-scf00370 | 14 |
| AX-157746121 | 18 | 58.207 | KV453060.1 | 1966444 | 14-scf00370 | 14 |
| AX-158218189 | 18 | 58.207 | KV453060.1 | 2027494 | 14-scf00370 | 14 |
| AX-158218250 | 18 | 58.207 | KV453060.1 | 2094665 | 14-scf00370 | 14 |
| AX-158218327 | 18 | 58.207 | KV453060.1 | 2190703 | 14-scf00370 | 14 |
| AX-158217983 | 18 | 58.353 | KV453060.1 | 1731582 | 14-scf00370 | 14 |
| AX-158218138 | 18 | 58.353 | KV453060.1 | 1953305 | 14-scf00370 | 14 |
| AX-158218139 | 18 | 58.353 | KV453060.1 | 1953578 | 14-scf00370 | 14 |
| AX-158218141 | 18 | 58.353 | KV453060.1 | 1957125 | 14-scf00370 | 14 |
| AX-158218145 | 18 | 58.353 | KV453060.1 | 1964570 | 14-scf00370 | 14 |
| AX-158380832 | 18 | 58.644 | KV453060.1 | 1975582 | 14-scf00370 | 14 |
| AX-157839129 | 18 | 58.644 | KV453060.1 | 1977904 | 14-scf00370 | 14 |
| AX-158218153 | 18 | 58.644 | KV453060.1 | 1978191 | 14-scf00370 | 14 |
| AX-158218155 | 18 | 58.644 | KV453060.1 | 1981366 | 14-scf00370 | 14 |
| AX-158218156 | 18 | 58.644 | KV453060.1 | 1982123 | 14-scf00370 | 14 |
| AX-157724889 | 18 | 58.644 | KV453060.1 | 1987521 | 14-scf00370 | 14 |
| AX-158218160 | 18 | 58.644 | KV453060.1 | 1988034 | 14-scf00370 | 14 |
| AX-158218162 | 18 | 58.644 | KV453060.1 | 1989402 | 14-scf00370 | 14 |
| AX-157839132 | 18 | 58.644 | KV453060.1 | 1990735 | 14-scf00370 | 14 |
| AX-158218166 | 18 | 58.644 | KV453060.1 | 1995621 | 14-scf00370 | 14 |
| AX-157839134 | 18 | 58.644 | KV453060.1 | 2000724 | 14-scf00370 | 14 |
| AX-157867053 | 18 | 58.644 | KV453060.1 | 2006903 | 14-scf00370 | 14 |
| AX-158218265 | 18 | 58.644 | KV453060.1 | 2105971 | 14-scf00370 | 14 |
| AX-158218274 | 18 | 58.644 | KV453060.1 | 2119508 | 14-scf00370 | 14 |
| AX-158218048 | 18 | 58.753 | KV453060.1 | 1848682 | 14-scf00370 | 14 |
| AX-158218093 | 18 | 58.753 | KV453060.1 | 1905846 | 14-scf00370 | 14 |
| AX-158218161 | 18 | 58.753 | KV453060.1 | 1988770 | 14-scf00370 | 14 |
| AX-157839133 | 18 | 58.753 | KV453060.1 | 1996768 | 14-scf00370 | 14 |
| AX-158218168 | 18 | 58.753 | KV453060.1 | 1998098 | 14-scf00370 | 14 |
| AX-158218170 | 18 | 58.753 | KV453060.1 | 2002599 | 14-scf00370 | 14 |
| AX-158218171 | 18 | 58.753 | KV453060.1 | 2005891 | 14-scf00370 | 14 |
| AX-158218175 | 18 | 58.753 | KV453060.1 | 2011237 | 14-scf00370 | 14 |
| AX-158218176 | 18 | 58.753 | KV453060.1 | 2011754 | 14-scf00370 | 14 |
| AX-158218178 | 18 | 58.753 | KV453060.1 | 2013052 | 14-scf00370 | 14 |
| AX-158218181 | 18 | 58.753 | KV453060.1 | 2015185 | 14-scf00370 | 14 |
| AX-158218182 | 18 | 58.753 | KV453060.1 | 2015552 | 14-scf00370 | 14 |
| AX-158218184 | 18 | 58.753 | KV453060.1 | 2017461 | 14-scf00370 | 14 |
| AX-158218185 | 18 | 58.753 | KV453060.1 | 2017863 | 14-scf00370 | 14 |
| AX-158218190 | 18 | 58.753 | KV453060.1 | 2028175 | 14-scf00370 | 14 |
| AX-158218191 | 18 | 58.753 | KV453060.1 | 2029194 | 14-scf00370 | 14 |
| AX-158218194 | 18 | 58.753 | KV453060.1 | 2031403 | 14-scf00370 | 14 |
| AX-157743022 | 18 | 58.753 | KV453060.1 | 2034437 | 14-scf00370 | 14 |
| AX-158218198 | 18 | 58.753 | KV453060.1 | 2037942 | 14-scf00370 | 14 |
| AX-158218200 | 18 | 58.753 | KV453060.1 | 2039810 | 14-scf00370 | 14 |
| AX-158218203 | 18 | 58.753 | KV453060.1 | 2041758 | 14-scf00370 | 14 |
| AX-158218204 | 18 | 58.753 | KV453060.1 | 2042336 | 14-scf00370 | 14 |

|              |    |        |            |         |             |    |
|--------------|----|--------|------------|---------|-------------|----|
| AX-157887244 | 18 | 58.753 | KV453060.1 | 2042968 | 14-scf00370 | 14 |
| AX-158218207 | 18 | 58.753 | KV453060.1 | 2044224 | 14-scf00370 | 14 |
| AX-158218209 | 18 | 58.753 | KV453060.1 | 2046335 | 14-scf00370 | 14 |
| AX-158218211 | 18 | 58.753 | KV453060.1 | 2047930 | 14-scf00370 | 14 |
| AX-158218212 | 18 | 58.753 | KV453060.1 | 2048629 | 14-scf00370 | 14 |
| AX-158218214 | 18 | 58.753 | KV453060.1 | 2050965 | 14-scf00370 | 14 |
| AX-158218216 | 18 | 58.753 | KV453060.1 | 2052361 | 14-scf00370 | 14 |
| AX-158218217 | 18 | 58.753 | KV453060.1 | 2053460 | 14-scf00370 | 14 |
| AX-158218225 | 18 | 58.753 | KV453060.1 | 2067414 | 14-scf00370 | 14 |
| AX-158386596 | 18 | 58.753 | KV453060.1 | 2067858 | 14-scf00370 | 14 |
| AX-158218230 | 18 | 58.753 | KV453060.1 | 2074907 | 14-scf00370 | 14 |
| AX-158218231 | 18 | 58.753 | KV453060.1 | 2076047 | 14-scf00370 | 14 |
| AX-158218232 | 18 | 58.753 | KV453060.1 | 2076304 | 14-scf00370 | 14 |
| AX-158218233 | 18 | 58.753 | KV453060.1 | 2076766 | 14-scf00370 | 14 |
| AX-158218234 | 18 | 58.753 | KV453060.1 | 2077548 | 14-scf00370 | 14 |
| AX-158218235 | 18 | 58.753 | KV453060.1 | 2078397 | 14-scf00370 | 14 |
| AX-158218239 | 18 | 58.753 | KV453060.1 | 2080887 | 14-scf00370 | 14 |
| AX-158218240 | 18 | 58.753 | KV453060.1 | 2081671 | 14-scf00370 | 14 |
| AX-158218243 | 18 | 58.753 | KV453060.1 | 2084908 | 14-scf00370 | 14 |
| AX-158218246 | 18 | 58.753 | KV453060.1 | 2086528 | 14-scf00370 | 14 |
| AX-158218248 | 18 | 58.753 | KV453060.1 | 2089365 | 14-scf00370 | 14 |
| AX-158218255 | 18 | 58.753 | KV453060.1 | 2100033 | 14-scf00370 | 14 |
| AX-158218256 | 18 | 58.753 | KV453060.1 | 2100342 | 14-scf00370 | 14 |
| AX-158218257 | 18 | 58.753 | KV453060.1 | 2101275 | 14-scf00370 | 14 |
| AX-158218258 | 18 | 58.753 | KV453060.1 | 2101934 | 14-scf00370 | 14 |
| AX-158218259 | 18 | 58.753 | KV453060.1 | 2102321 | 14-scf00370 | 14 |
| AX-158218260 | 18 | 58.753 | KV453060.1 | 2102572 | 14-scf00370 | 14 |
| AX-158218261 | 18 | 58.753 | KV453060.1 | 2103139 | 14-scf00370 | 14 |
| AX-158218263 | 18 | 58.753 | KV453060.1 | 2103582 | 14-scf00370 | 14 |
| AX-158218264 | 18 | 58.753 | KV453060.1 | 2104393 | 14-scf00370 | 14 |
| AX-157879689 | 18 | 58.753 | KV453060.1 | 2108800 | 14-scf00370 | 14 |
| AX-158218269 | 18 | 58.753 | KV453060.1 | 2109756 | 14-scf00370 | 14 |
| AX-158218272 | 18 | 58.753 | KV453060.1 | 2115382 | 14-scf00370 | 14 |
| AX-158218273 | 18 | 58.753 | KV453060.1 | 2117624 | 14-scf00370 | 14 |
| AX-158218277 | 18 | 58.753 | KV453060.1 | 2122236 | 14-scf00370 | 14 |
| AX-158218279 | 18 | 58.753 | KV453060.1 | 2127307 | 14-scf00370 | 14 |
| AX-158218283 | 18 | 58.753 | KV453060.1 | 2131723 | 14-scf00370 | 14 |
| AX-158218284 | 18 | 58.753 | KV453060.1 | 2132511 | 14-scf00370 | 14 |
| AX-158386598 | 18 | 58.753 | KV453060.1 | 2132862 | 14-scf00370 | 14 |
| AX-158218285 | 18 | 58.753 | KV453060.1 | 2133929 | 14-scf00370 | 14 |
| AX-158218288 | 18 | 58.753 | KV453060.1 | 2137762 | 14-scf00370 | 14 |
| AX-158218290 | 18 | 58.753 | KV453060.1 | 2141087 | 14-scf00370 | 14 |
| AX-158218296 | 18 | 58.753 | KV453060.1 | 2151558 | 14-scf00370 | 14 |
| AX-158218297 | 18 | 58.753 | KV453060.1 | 2152529 | 14-scf00370 | 14 |
| AX-158218298 | 18 | 58.753 | KV453060.1 | 2153149 | 14-scf00370 | 14 |
| AX-157839137 | 18 | 58.753 | KV453060.1 | 2156242 | 14-scf00370 | 14 |
| AX-158218307 | 18 | 58.753 | KV453060.1 | 2168658 | 14-scf00370 | 14 |
| AX-158218317 | 18 | 58.753 | KV453060.1 | 2180329 | 14-scf00370 | 14 |
| AX-158218333 | 18 | 58.753 | KV453060.1 | 2194519 | 14-scf00370 | 14 |
| AX-158218292 | 18 | 58.792 | KV453060.1 | 2142754 | 14-scf00370 | 14 |
| AX-158218299 | 18 | 58.817 | KV453060.1 | 2155142 | 14-scf00370 | 14 |

|              |    |        |            |         |             |    |
|--------------|----|--------|------------|---------|-------------|----|
| AX-158218301 | 18 | 58.842 | KV453060.1 | 2157476 | 14-scf00370 | 14 |
| AX-158218302 | 18 | 58.842 | KV453060.1 | 2158010 | 14-scf00370 | 14 |
| AX-158218073 | 18 | 58.862 | KV453060.1 | 1882193 | 14-scf00370 | 14 |
| AX-158218188 | 18 | 58.862 | KV453060.1 | 2019601 | 14-scf00370 | 14 |
| AX-158218205 | 18 | 58.862 | KV453060.1 | 2043318 | 14-scf00370 | 14 |
| AX-158218218 | 18 | 58.862 | KV453060.1 | 2054118 | 14-scf00370 | 14 |
| AX-157740694 | 18 | 58.862 | KV453060.1 | 2088320 | 14-scf00370 | 14 |
| AX-158218295 | 18 | 58.862 | KV453060.1 | 2147237 | 14-scf00370 | 14 |
| AX-158218309 | 18 | 58.862 | KV453060.1 | 2172355 | 14-scf00370 | 14 |
| AX-158218310 | 18 | 58.862 | KV453060.1 | 2175223 | 14-scf00370 | 14 |
| AX-158218312 | 18 | 58.862 | KV453060.1 | 2176878 | 14-scf00370 | 14 |
| AX-158218313 | 18 | 58.862 | KV453060.1 | 2178171 | 14-scf00370 | 14 |
| AX-158218316 | 18 | 58.862 | KV453060.1 | 2179837 | 14-scf00370 | 14 |
| AX-157748764 | 18 | 58.862 | KV453060.1 | 2183893 | 14-scf00370 | 14 |
| AX-158218326 | 18 | 58.862 | KV453060.1 | 2188774 | 14-scf00370 | 14 |
| AX-158218329 | 18 | 58.862 | KV453060.1 | 2191784 | 14-scf00370 | 14 |
| AX-158218335 | 18 | 58.862 | KV453060.1 | 2197803 | 14-scf00370 | 14 |
| AX-158218336 | 18 | 58.862 | KV453060.1 | 2198626 | 14-scf00370 | 14 |
| AX-157839138 | 18 | 58.862 | KV453060.1 | 2203131 | 14-scf00370 | 14 |
| AX-157743374 | 18 | 58.862 | KV453060.1 | 2204376 | 14-scf00370 | 14 |
| AX-157693142 | 18 | 58.862 | KV453060.1 | 2205497 | 14-scf00370 | 14 |
| AX-157887249 | 18 | 58.862 | KV453060.1 | 2208155 | 14-scf00370 | 14 |
| AX-157717521 | 18 | 58.862 | KV453060.1 | 2209656 | 14-scf00370 | 14 |
| AX-158218341 | 18 | 58.862 | KV453060.1 | 2211168 | 14-scf00370 | 14 |
| AX-157839142 | 18 | 58.862 | KV453060.1 | 2211654 | 14-scf00370 | 14 |
| AX-157721619 | 18 | 58.862 | KV453060.1 | 2214664 | 14-scf00370 | 14 |
| AX-157774938 | 18 | 59.075 | KV453060.1 | 2215218 | 14-scf00370 | 14 |
| AX-157721207 | 18 | 59.085 | KV453060.1 | 2217336 | 14-scf00370 | 14 |
| AX-157772206 | 18 | 59.085 | KV453060.1 | 2217782 | 14-scf00370 | 14 |
| AX-158218342 | 18 | 59.089 | KV453060.1 | 2222492 | 14-scf00370 | 14 |
| AX-158218343 | 18 | 59.371 | KV453060.1 | 2223437 | 14-scf00370 | 14 |
| AX-158218345 | 18 | 59.371 | KV453060.1 | 2227041 | 14-scf00370 | 14 |
| AX-158218346 | 18 | 59.447 | KV453060.1 | 2227619 | 14-scf00370 | 14 |
| AX-158217771 | 18 | 59.517 | KV453060.1 | 1381037 | 14-scf00370 | 14 |
| AX-158218348 | 18 | 59.517 | KV453060.1 | 2229746 | 14-scf00370 | 14 |
| AX-158218349 | 18 | 59.517 | KV453060.1 | 2234320 | 14-scf00370 | 14 |
| AX-158218347 | 18 | 59.518 | KV453060.1 | 2228804 | 14-scf00370 | 14 |
| AX-158218350 | 18 | 59.518 | KV453060.1 | 2242100 | 14-scf00370 | 14 |
| AX-158218351 | 18 | 59.518 | KV453060.1 | 2243033 | 14-scf00370 | 14 |
| AX-158380834 | 18 | 59.518 | KV453060.1 | 2243279 | 14-scf00370 | 14 |
| AX-158218354 | 18 | 59.518 | KV453060.1 | 2246915 | 14-scf00370 | 14 |
| AX-158218355 | 18 | 59.518 | KV453060.1 | 2248107 | 14-scf00370 | 14 |
| AX-158218358 | 18 | 59.518 | KV453060.1 | 2251342 | 14-scf00370 | 14 |
| AX-157716808 | 18 | 59.518 | KV453060.1 | 2252670 | 14-scf00370 | 14 |
| AX-158218360 | 18 | 59.518 | KV453060.1 | 2255128 | 14-scf00370 | 14 |
| AX-158218362 | 18 | 59.518 | KV453060.1 | 2257910 | 14-scf00370 | 14 |
| AX-157839143 | 18 | 59.518 | KV453060.1 | 2259335 | 14-scf00370 | 14 |
| AX-158218363 | 18 | 59.518 | KV453060.1 | 2259722 | 14-scf00370 | 14 |
| AX-158218364 | 18 | 59.518 | KV453060.1 | 2259888 | 14-scf00370 | 14 |
| AX-158217876 | 18 | 59.736 | KV453060.1 | 1566215 | 14-scf00370 | 14 |
| AX-158217949 | 18 | 59.736 | KV453060.1 | 1666547 | 14-scf00370 | 14 |



|              |    |        |             |         |             |    |
|--------------|----|--------|-------------|---------|-------------|----|
| AX-158218365 | 18 | 59.736 | KV453060.1  | 2261661 | 14-scf00370 | 14 |
| AX-158218366 | 18 | 59.736 | KV453060.1  | 2263312 | 14-scf00370 | 14 |
| AX-158218367 | 18 | 59.736 | KV453060.1  | 2264006 | 14-scf00370 | 14 |
| AX-157839144 | 18 | 59.736 | KV453060.1  | 2267409 | 14-scf00370 | 14 |
| AX-158218371 | 18 | 59.736 | KV453060.1  | 2268511 | 14-scf00370 | 14 |
| AX-157839145 | 18 | 59.736 | KV453060.1  | 2271259 | 14-scf00370 | 14 |
| AX-158218373 | 18 | 59.736 | KV453060.1  | 2272270 | 14-scf00370 | 14 |
| AX-158218374 | 18 | 59.736 | KV453060.1  | 2272911 | 14-scf00370 | 14 |
| AX-158218377 | 18 | 59.736 | KV453060.1  | 2277302 | 14-scf00370 | 14 |
| AX-158218378 | 18 | 59.736 | KV453060.1  | 2277800 | 14-scf00370 | 14 |
| AX-158218379 | 18 | 59.736 | KV453060.1  | 2281000 | 14-scf00370 | 14 |
| AX-157707016 | 18 | 59.736 | 3ML01033830 | 354     | scf09496_1  | UN |
| AX-158218382 | 18 | 60.064 | KV453060.1  | 2286371 | 14-scf00370 | 14 |
| AX-158218383 | 18 | 60.064 | KV453060.1  | 2288804 | 14-scf00370 | 14 |
| AX-158218384 | 18 | 60.064 | KV453060.1  | 2289264 | 14-scf00370 | 14 |
| AX-158394041 | 18 | 60.064 | KV453060.1  | 2289322 | 14-scf00370 | 14 |
| AX-157839146 | 18 | 60.064 | KV453060.1  | 2289830 | 14-scf00370 | 14 |
| AX-158218385 | 18 | 60.064 | KV453060.1  | 2290412 | 14-scf00370 | 14 |
| AX-157747349 | 18 | 60.064 | KV453060.1  | 2291685 | 14-scf00370 | 14 |
| AX-158218389 | 18 | 60.282 | KV453060.1  | 2299937 | 14-scf00370 | 14 |
| AX-158218390 | 18 | 60.282 | KV453060.1  | 2300692 | 14-scf00370 | 14 |
| AX-158218391 | 18 | 60.282 | KV453060.1  | 2302136 | 14-scf00370 | 14 |
| AX-157746110 | 18 | 60.282 | KV453060.1  | 2308690 | 14-scf00370 | 14 |
| AX-158218394 | 18 | 60.282 | KV453060.1  | 2309395 | 14-scf00370 | 14 |
| AX-158218396 | 18 | 60.282 | KV453060.1  | 2311095 | 14-scf00370 | 14 |
| AX-158217965 | 18 | 60.5   | KV453060.1  | 1705958 | 14-scf00370 | 14 |
| AX-157721336 | 18 | 60.5   | KV453060.1  | 2314187 | 14-scf00370 | 14 |
| AX-158219224 | 18 | 60.5   | KV453060.1  | 3455843 | 14-scf00370 | 14 |
| AX-158218399 | 18 | 60.607 | KV453060.1  | 2320814 | 14-scf00370 | 14 |
| AX-158218402 | 18 | 60.719 | KV453060.1  | 2328640 | 14-scf00370 | 14 |
| AX-158418634 | 18 | 60.719 | KV453060.1  | 2332036 | 14-scf00370 | 14 |
| AX-157743910 | 18 | 60.719 | KV453060.1  | 2336293 | 14-scf00370 | 14 |
| AX-158218403 | 18 | 60.719 | KV453060.1  | 2339790 | 14-scf00370 | 14 |
| AX-158218405 | 18 | 60.719 | KV453060.1  | 2342341 | 14-scf00370 | 14 |
| AX-158218411 | 18 | 60.719 | KV453060.1  | 2350543 | 14-scf00370 | 14 |
| AX-158218416 | 18 | 60.719 | KV453060.1  | 2356138 | 14-scf00370 | 14 |
| AX-158218406 | 18 | 60.828 | KV453060.1  | 2343568 | 14-scf00370 | 14 |
| AX-158218407 | 18 | 60.898 | KV453060.1  | 2345267 | 14-scf00370 | 14 |
| AX-158218408 | 18 | 60.961 | KV453060.1  | 2346726 | 14-scf00370 | 14 |
| AX-158218412 | 18 | 61.008 | KV453060.1  | 2352417 | 14-scf00370 | 14 |
| AX-157714618 | 18 | 61.047 | KV453060.1  | 2352897 | 14-scf00370 | 14 |
| AX-158218419 | 18 | 61.047 | KV453060.1  | 2359938 | 14-scf00370 | 14 |
| AX-158218420 | 18 | 61.106 | KV453060.1  | 2360621 | 14-scf00370 | 14 |
| AX-158380836 | 18 | 61.155 | KV453060.1  | 2364639 | 14-scf00370 | 14 |
| AX-158218392 | 18 | 61.375 | KV453060.1  | 2306299 | 14-scf00370 | 14 |
| AX-158218417 | 18 | 61.375 | KV453060.1  | 2357658 | 14-scf00370 | 14 |
| AX-157839149 | 18 | 61.375 | KV453060.1  | 2367396 | 14-scf00370 | 14 |
| AX-158218409 | 18 | 61.484 | KV453060.1  | 2347006 | 14-scf00370 | 14 |
| AX-157839148 | 18 | 61.484 | KV453060.1  | 2363257 | 14-scf00370 | 14 |
| AX-158218425 | 18 | 61.484 | KV453060.1  | 2371105 | 14-scf00370 | 14 |
| AX-157839152 | 18 | 61.484 | KV453060.1  | 2371635 | 14-scf00370 | 14 |

|              |    |        |            |         |             |    |
|--------------|----|--------|------------|---------|-------------|----|
| AX-157839153 | 18 | 61.484 | KV453060.1 | 2371787 | 14-scf00370 | 14 |
| AX-157701561 | 18 | 61.484 | KV453060.1 | 2373366 | 14-scf00370 | 14 |
| AX-158218428 | 18 | 61.484 | KV453060.1 | 2375033 | 14-scf00370 | 14 |
| AX-158218429 | 18 | 61.484 | KV453060.1 | 2378978 | 14-scf00370 | 14 |
| AX-158218430 | 18 | 61.484 | KV453060.1 | 2381587 | 14-scf00370 | 14 |
| AX-158218432 | 18 | 61.484 | KV453060.1 | 2384649 | 14-scf00370 | 14 |
| AX-157738627 | 18 | 61.484 | KV453060.1 | 2388183 | 14-scf00370 | 14 |
| AX-158218434 | 18 | 61.484 | KV453060.1 | 2389369 | 14-scf00370 | 14 |
| AX-157839155 | 18 | 61.484 | KV453060.1 | 2389770 | 14-scf00370 | 14 |
| AX-158218436 | 18 | 61.484 | KV453060.1 | 2390705 | 14-scf00370 | 14 |
| AX-157754531 | 18 | 61.484 | KV453060.1 | 2390903 | 14-scf00370 | 14 |
| AX-158218437 | 18 | 61.484 | KV453060.1 | 2391168 | 14-scf00370 | 14 |
| AX-158218440 | 18 | 61.484 | KV453060.1 | 2393772 | 14-scf00370 | 14 |
| AX-158218441 | 18 | 61.484 | KV453060.1 | 2394009 | 14-scf00370 | 14 |
| AX-157839156 | 18 | 61.484 | KV453060.1 | 2394279 | 14-scf00370 | 14 |
| AX-158218442 | 18 | 61.484 | KV453060.1 | 2394868 | 14-scf00370 | 14 |
| AX-158218443 | 18 | 61.484 | KV453060.1 | 2396402 | 14-scf00370 | 14 |
| AX-158218445 | 18 | 61.484 | KV453060.1 | 2397536 | 14-scf00370 | 14 |
| AX-157839158 | 18 | 61.484 | KV453060.1 | 2400449 | 14-scf00370 | 14 |
| AX-157709276 | 18 | 61.484 | KV453060.1 | 2411663 | 14-scf00370 | 14 |
| AX-158218447 | 18 | 61.537 | KV453060.1 | 2401746 | 14-scf00370 | 14 |
| AX-157747110 | 18 | 61.593 | KV453060.1 | 2406448 | 14-scf00370 | 14 |
| AX-158218453 | 18 | 61.702 | KV453060.1 | 2411999 | 14-scf00370 | 14 |
| AX-158218454 | 18 | 61.702 | KV453060.1 | 2412492 | 14-scf00370 | 14 |
| AX-158218455 | 18 | 61.702 | KV453060.1 | 2412858 | 14-scf00370 | 14 |
| AX-157839159 | 18 | 61.702 | KV453060.1 | 2413743 | 14-scf00370 | 14 |
| AX-157839160 | 18 | 61.702 | KV453060.1 | 2414877 | 14-scf00370 | 14 |
| AX-158218456 | 18 | 61.702 | KV453060.1 | 2415745 | 14-scf00370 | 14 |
| AX-157839161 | 18 | 61.702 | KV453060.1 | 2416029 | 14-scf00370 | 14 |
| AX-158218457 | 18 | 61.702 | KV453060.1 | 2416397 | 14-scf00370 | 14 |
| AX-158218463 | 18 | 61.702 | KV453060.1 | 2428600 | 14-scf00370 | 14 |
| AX-158218466 | 18 | 61.702 | KV453060.1 | 2433668 | 14-scf00370 | 14 |
| AX-158218467 | 18 | 61.702 | KV453060.1 | 2433828 | 14-scf00370 | 14 |
| AX-158218468 | 18 | 61.702 | KV453060.1 | 2435661 | 14-scf00370 | 14 |
| AX-158218469 | 18 | 61.702 | KV453060.1 | 2437626 | 14-scf00370 | 14 |
| AX-158218472 | 18 | 61.702 | KV453060.1 | 2443992 | 14-scf00370 | 14 |
| AX-157725226 | 18 | 61.702 | KV453060.1 | 2445009 | 14-scf00370 | 14 |
| AX-158218475 | 18 | 61.702 | KV453060.1 | 2446591 | 14-scf00370 | 14 |
| AX-157839163 | 18 | 61.702 | KV453060.1 | 2446889 | 14-scf00370 | 14 |
| AX-158218476 | 18 | 61.702 | KV453060.1 | 2447528 | 14-scf00370 | 14 |
| AX-158218477 | 18 | 61.702 | KV453060.1 | 2449257 | 14-scf00370 | 14 |
| AX-157839164 | 18 | 61.702 | KV453060.1 | 2449460 | 14-scf00370 | 14 |
| AX-158218478 | 18 | 61.702 | KV453060.1 | 2449876 | 14-scf00370 | 14 |
| AX-157872390 | 18 | 61.702 | KV453060.1 | 2460208 | 14-scf00370 | 14 |
| AX-158218484 | 18 | 61.812 | KV453060.1 | 2454458 | 14-scf00370 | 14 |
| AX-158218486 | 18 | 61.812 | KV453060.1 | 2455341 | 14-scf00370 | 14 |
| AX-158218487 | 18 | 61.812 | KV453060.1 | 2457464 | 14-scf00370 | 14 |
| AX-157727817 | 18 | 61.921 | KV453060.1 | 2461768 | 14-scf00370 | 14 |
| AX-158218494 | 18 | 61.921 | KV453060.1 | 2470346 | 14-scf00370 | 14 |
| AX-157872392 | 18 | 61.921 | KV453060.1 | 2470840 | 14-scf00370 | 14 |
| AX-158218495 | 18 | 61.921 | KV453060.1 | 2472441 | 14-scf00370 | 14 |

|              |    |        |            |         |             |    |
|--------------|----|--------|------------|---------|-------------|----|
| AX-158218498 | 18 | 61.921 | KV453060.1 | 2478615 | 14-scf00370 | 14 |
| AX-158218499 | 18 | 61.921 | KV453060.1 | 2479559 | 14-scf00370 | 14 |
| AX-158218500 | 18 | 61.921 | KV453060.1 | 2480374 | 14-scf00370 | 14 |
| AX-158218501 | 18 | 61.921 | KV453060.1 | 2480879 | 14-scf00370 | 14 |
| AX-158218503 | 18 | 61.921 | KV453060.1 | 2483447 | 14-scf00370 | 14 |
| AX-158218504 | 18 | 61.921 | KV453060.1 | 2483807 | 14-scf00370 | 14 |
| AX-158218507 | 18 | 61.921 | KV453060.1 | 2487282 | 14-scf00370 | 14 |
| AX-158218508 | 18 | 61.921 | KV453060.1 | 2488165 | 14-scf00370 | 14 |
| AX-158218509 | 18 | 61.921 | KV453060.1 | 2489722 | 14-scf00370 | 14 |
| AX-158218510 | 18 | 61.921 | KV453060.1 | 2491481 | 14-scf00370 | 14 |
| AX-158218511 | 18 | 61.921 | KV453060.1 | 2491916 | 14-scf00370 | 14 |
| AX-158218512 | 18 | 61.921 | KV453060.1 | 2492340 | 14-scf00370 | 14 |
| AX-158218513 | 18 | 61.921 | KV453060.1 | 2492820 | 14-scf00370 | 14 |
| AX-158218514 | 18 | 61.921 | KV453060.1 | 2493226 | 14-scf00370 | 14 |
| AX-158218516 | 18 | 61.921 | KV453060.1 | 2494776 | 14-scf00370 | 14 |
| AX-158218517 | 18 | 61.921 | KV453060.1 | 2495364 | 14-scf00370 | 14 |
| AX-158218519 | 18 | 61.921 | KV453060.1 | 2496449 | 14-scf00370 | 14 |
| AX-157752706 | 18 | 61.921 | KV453060.1 | 2499104 | 14-scf00370 | 14 |
| AX-158218522 | 18 | 61.921 | KV453060.1 | 2500198 | 14-scf00370 | 14 |
| AX-158218526 | 18 | 61.921 | KV453060.1 | 2508511 | 14-scf00370 | 14 |
| AX-158218527 | 18 | 61.921 | KV453060.1 | 2509233 | 14-scf00370 | 14 |
| AX-158218592 | 18 | 61.921 | KV453060.1 | 2593354 | 14-scf00370 | 14 |
| AX-158218661 | 18 | 61.921 | KV453060.1 | 2695758 | 14-scf00370 | 14 |
| AX-158218699 | 18 | 61.921 | KV453060.1 | 2745885 | 14-scf00370 | 14 |
| AX-158218523 | 18 | 61.972 | KV453060.1 | 2506731 | 14-scf00370 | 14 |
| AX-158218525 | 18 | 62.005 | KV453060.1 | 2508241 | 14-scf00370 | 14 |
| AX-158218502 | 18 | 62.03  | KV453060.1 | 2482796 | 14-scf00370 | 14 |
| AX-158218528 | 18 | 62.03  | KV453060.1 | 2510189 | 14-scf00370 | 14 |
| AX-158218529 | 18 | 62.03  | KV453060.1 | 2510844 | 14-scf00370 | 14 |
| AX-157727358 | 18 | 62.03  | KV453060.1 | 2512950 | 14-scf00370 | 14 |
| AX-158218530 | 18 | 62.03  | KV453060.1 | 2513305 | 14-scf00370 | 14 |
| AX-158218532 | 18 | 62.03  | KV453060.1 | 2515128 | 14-scf00370 | 14 |
| AX-158218533 | 18 | 62.03  | KV453060.1 | 2515387 | 14-scf00370 | 14 |
| AX-158218535 | 18 | 62.03  | KV453060.1 | 2519351 | 14-scf00370 | 14 |
| AX-158218536 | 18 | 62.03  | KV453060.1 | 2519835 | 14-scf00370 | 14 |
| AX-158218537 | 18 | 62.03  | KV453060.1 | 2520462 | 14-scf00370 | 14 |
| AX-158218538 | 18 | 62.03  | KV453060.1 | 2521241 | 14-scf00370 | 14 |
| AX-158218542 | 18 | 62.03  | KV453060.1 | 2527049 | 14-scf00370 | 14 |
| AX-158218556 | 18 | 62.03  | KV453060.1 | 2544562 | 14-scf00370 | 14 |
| AX-158218594 | 18 | 62.03  | KV453060.1 | 2595026 | 14-scf00370 | 14 |
| AX-158218617 | 18 | 62.03  | KV453060.1 | 2617664 | 14-scf00370 | 14 |
| AX-158218663 | 18 | 62.03  | KV453060.1 | 2697284 | 14-scf00370 | 14 |
| AX-158218726 | 18 | 62.03  | KV453060.1 | 2800340 | 14-scf00370 | 14 |
| AX-158218539 | 18 | 62.036 | KV453060.1 | 2521938 | 14-scf00370 | 14 |
| AX-158218543 | 18 | 62.046 | KV453060.1 | 2528195 | 14-scf00370 | 14 |
| AX-158218545 | 18 | 62.056 | KV453060.1 | 2529807 | 14-scf00370 | 14 |
| AX-157839170 | 18 | 62.061 | KV453060.1 | 2530111 | 14-scf00370 | 14 |
| AX-158218548 | 18 | 62.139 | KV453060.1 | 2535260 | 14-scf00370 | 14 |
| AX-158218550 | 18 | 62.139 | KV453060.1 | 2536096 | 14-scf00370 | 14 |
| AX-158414747 | 18 | 62.139 | KV453060.1 | 2537623 | 14-scf00370 | 14 |
| AX-158218551 | 18 | 62.139 | KV453060.1 | 2538485 | 14-scf00370 | 14 |

|              |    |        |            |         |             |    |
|--------------|----|--------|------------|---------|-------------|----|
| AX-158218552 | 18 | 62.139 | KV453060.1 | 2538736 | 14-scf00370 | 14 |
| AX-157839171 | 18 | 62.139 | KV453060.1 | 2539366 | 14-scf00370 | 14 |
| AX-158218554 | 18 | 62.139 | KV453060.1 | 2542659 | 14-scf00370 | 14 |
| AX-158218558 | 18 | 62.139 | KV453060.1 | 2546155 | 14-scf00370 | 14 |
| AX-157839173 | 18 | 62.139 | KV453060.1 | 2549353 | 14-scf00370 | 14 |
| AX-158218560 | 18 | 62.139 | KV453060.1 | 2549676 | 14-scf00370 | 14 |
| AX-158218561 | 18 | 62.139 | KV453060.1 | 2550261 | 14-scf00370 | 14 |
| AX-158218567 | 18 | 62.139 | KV453060.1 | 2562638 | 14-scf00370 | 14 |
| AX-158380837 | 18 | 62.139 | KV453060.1 | 2562829 | 14-scf00370 | 14 |
| AX-157872393 | 18 | 62.139 | KV453060.1 | 2563270 | 14-scf00370 | 14 |
| AX-158218568 | 18 | 62.139 | KV453060.1 | 2564058 | 14-scf00370 | 14 |
| AX-158218665 | 18 | 62.139 | KV453060.1 | 2698922 | 14-scf00370 | 14 |
| AX-158217901 | 18 | 62.357 | KV453060.1 | 1598237 | 14-scf00370 | 14 |
| AX-158218562 | 18 | 62.357 | KV453060.1 | 2551670 | 14-scf00370 | 14 |
| AX-158218571 | 18 | 62.357 | KV453060.1 | 2566913 | 14-scf00370 | 14 |
| AX-158218572 | 18 | 62.357 | KV453060.1 | 2567142 | 14-scf00370 | 14 |
| AX-157859446 | 18 | 62.357 | KV453060.1 | 2570441 | 14-scf00370 | 14 |
| AX-158218573 | 18 | 62.357 | KV453060.1 | 2570933 | 14-scf00370 | 14 |
| AX-158414749 | 18 | 62.357 | KV453060.1 | 2575016 | 14-scf00370 | 14 |
| AX-158218576 | 18 | 62.357 | KV453060.1 | 2576213 | 14-scf00370 | 14 |
| AX-158218579 | 18 | 62.357 | KV453060.1 | 2578863 | 14-scf00370 | 14 |
| AX-158218580 | 18 | 62.357 | KV453060.1 | 2579639 | 14-scf00370 | 14 |
| AX-158414750 | 18 | 62.357 | KV453060.1 | 2581357 | 14-scf00370 | 14 |
| AX-158218582 | 18 | 62.357 | KV453060.1 | 2582434 | 14-scf00370 | 14 |
| AX-158218588 | 18 | 62.357 | KV453060.1 | 2590131 | 14-scf00370 | 14 |
| AX-158218590 | 18 | 62.357 | KV453060.1 | 2592274 | 14-scf00370 | 14 |
| AX-158218593 | 18 | 62.357 | KV453060.1 | 2594113 | 14-scf00370 | 14 |
| AX-158218596 | 18 | 62.357 | KV453060.1 | 2597215 | 14-scf00370 | 14 |
| AX-158218600 | 18 | 62.357 | KV453060.1 | 2599840 | 14-scf00370 | 14 |
| AX-158218601 | 18 | 62.357 | KV453060.1 | 2600619 | 14-scf00370 | 14 |
| AX-157839176 | 18 | 62.357 | KV453060.1 | 2600953 | 14-scf00370 | 14 |
| AX-158218602 | 18 | 62.357 | KV453060.1 | 2601162 | 14-scf00370 | 14 |
| AX-158218606 | 18 | 62.357 | KV453060.1 | 2605196 | 14-scf00370 | 14 |
| AX-157839177 | 18 | 62.357 | KV453060.1 | 2606646 | 14-scf00370 | 14 |
| AX-158218609 | 18 | 62.357 | KV453060.1 | 2607415 | 14-scf00370 | 14 |
| AX-157721474 | 18 | 62.357 | KV453060.1 | 2615205 | 14-scf00370 | 14 |
| AX-158218615 | 18 | 62.357 | KV453060.1 | 2616909 | 14-scf00370 | 14 |
| AX-158218616 | 18 | 62.357 | KV453060.1 | 2617284 | 14-scf00370 | 14 |
| AX-157839178 | 18 | 62.357 | KV453060.1 | 2618092 | 14-scf00370 | 14 |
| AX-158218684 | 18 | 62.357 | KV453060.1 | 2721924 | 14-scf00370 | 14 |
| AX-158218893 | 18 | 62.357 | KV453060.1 | 3049454 | 14-scf00370 | 14 |
| AX-158218998 | 18 | 62.357 | KV453060.1 | 3186578 | 14-scf00370 | 14 |
| AX-158219013 | 18 | 62.357 | KV453060.1 | 3204406 | 14-scf00370 | 14 |
| AX-158219037 | 18 | 62.357 | KV453060.1 | 3226900 | 14-scf00370 | 14 |
| AX-158219052 | 18 | 62.357 | KV453060.1 | 3243389 | 14-scf00370 | 14 |
| AX-158219249 | 18 | 62.357 | KV453060.1 | 3488547 | 14-scf00370 | 14 |
| AX-157727766 | 18 | 62.357 | KV453060.1 | 3675171 | 14-scf00370 | 14 |
| AX-157839180 | 18 | 62.416 | KV453060.1 | 2623173 | 14-scf00370 | 14 |
| AX-157839172 | 18 | 62.467 | KV453060.1 | 2540868 | 14-scf00370 | 14 |
| AX-158218627 | 18 | 62.467 | KV453060.1 | 2629875 | 14-scf00370 | 14 |
| AX-158218629 | 18 | 62.467 | KV453060.1 | 2632401 | 14-scf00370 | 14 |

|              |    |        |            |         |             |    |
|--------------|----|--------|------------|---------|-------------|----|
| AX-158218631 | 18 | 62.467 | KV453060.1 | 2634176 | 14-scf00370 | 14 |
| AX-158218633 | 18 | 62.467 | KV453060.1 | 2637086 | 14-scf00370 | 14 |
| AX-158218634 | 18 | 62.467 | KV453060.1 | 2637212 | 14-scf00370 | 14 |
| AX-158218635 | 18 | 62.467 | KV453060.1 | 2637702 | 14-scf00370 | 14 |
| AX-158218638 | 18 | 62.467 | KV453060.1 | 2641019 | 14-scf00370 | 14 |
| AX-158218640 | 18 | 62.467 | KV453060.1 | 2643822 | 14-scf00370 | 14 |
| AX-158218641 | 18 | 62.467 | KV453060.1 | 2644196 | 14-scf00370 | 14 |
| AX-157759048 | 18 | 62.467 | KV453060.1 | 2644273 | 14-scf00370 | 14 |
| AX-157839181 | 18 | 62.467 | KV453060.1 | 2644845 | 14-scf00370 | 14 |
| AX-158218646 | 18 | 62.467 | KV453060.1 | 2655337 | 14-scf00370 | 14 |
| AX-158218647 | 18 | 62.467 | KV453060.1 | 2657175 | 14-scf00370 | 14 |
| AX-158218648 | 18 | 62.467 | KV453060.1 | 2657516 | 14-scf00370 | 14 |
| AX-158218654 | 18 | 62.467 | KV453060.1 | 2666978 | 14-scf00370 | 14 |
| AX-158218676 | 18 | 62.467 | KV453060.1 | 2715371 | 14-scf00370 | 14 |
| AX-158218696 | 18 | 62.467 | KV453060.1 | 2741517 | 14-scf00370 | 14 |
| AX-158218702 | 18 | 62.467 | KV453060.1 | 2749360 | 14-scf00370 | 14 |
| AX-158218716 | 18 | 62.467 | KV453060.1 | 2775994 | 14-scf00370 | 14 |
| AX-158218720 | 18 | 62.467 | KV453060.1 | 2784657 | 14-scf00370 | 14 |
| AX-158218728 | 18 | 62.467 | KV453060.1 | 2806635 | 14-scf00370 | 14 |
| AX-158218656 | 18 | 62.509 | KV453060.1 | 2671463 | 14-scf00370 | 14 |
| AX-158218712 | 18 | 62.509 | KV453060.1 | 2770290 | 14-scf00370 | 14 |
| AX-157729082 | 18 | 62.576 | KV453060.1 | 2409037 | 14-scf00370 | 14 |
| AX-158218458 | 18 | 62.576 | KV453060.1 | 2416910 | 14-scf00370 | 14 |
| AX-158218480 | 18 | 62.576 | KV453060.1 | 2452006 | 14-scf00370 | 14 |
| AX-158218492 | 18 | 62.576 | KV453060.1 | 2466881 | 14-scf00370 | 14 |
| AX-158218493 | 18 | 62.576 | KV453060.1 | 2467444 | 14-scf00370 | 14 |
| AX-157695397 | 18 | 62.576 | KV453060.1 | 2517315 | 14-scf00370 | 14 |
| AX-158218569 | 18 | 62.576 | KV453060.1 | 2565658 | 14-scf00370 | 14 |
| AX-158218587 | 18 | 62.576 | KV453060.1 | 2589264 | 14-scf00370 | 14 |
| AX-157839179 | 18 | 62.576 | KV453060.1 | 2620586 | 14-scf00370 | 14 |
| AX-158218626 | 18 | 62.576 | KV453060.1 | 2629362 | 14-scf00370 | 14 |
| AX-158218642 | 18 | 62.576 | KV453060.1 | 2645630 | 14-scf00370 | 14 |
| AX-158218651 | 18 | 62.576 | KV453060.1 | 2661310 | 14-scf00370 | 14 |
| AX-158218657 | 18 | 62.576 | KV453060.1 | 2671850 | 14-scf00370 | 14 |
| AX-158218659 | 18 | 62.576 | KV453060.1 | 2674971 | 14-scf00370 | 14 |
| AX-157839182 | 18 | 62.576 | KV453060.1 | 2675186 | 14-scf00370 | 14 |
| AX-157839183 | 18 | 62.576 | KV453060.1 | 2675498 | 14-scf00370 | 14 |
| AX-157748320 | 18 | 62.576 | KV453060.1 | 2675992 | 14-scf00370 | 14 |
| AX-157839184 | 18 | 62.576 | KV453060.1 | 2688590 | 14-scf00370 | 14 |
| AX-158218660 | 18 | 62.576 | KV453060.1 | 2692719 | 14-scf00370 | 14 |
| AX-157839185 | 18 | 62.576 | KV453060.1 | 2700710 | 14-scf00370 | 14 |
| AX-158218668 | 18 | 62.576 | KV453060.1 | 2705223 | 14-scf00370 | 14 |
| AX-158218669 | 18 | 62.576 | KV453060.1 | 2706013 | 14-scf00370 | 14 |
| AX-158218670 | 18 | 62.576 | KV453060.1 | 2707593 | 14-scf00370 | 14 |
| AX-158218672 | 18 | 62.576 | KV453060.1 | 2709536 | 14-scf00370 | 14 |
| AX-158218673 | 18 | 62.576 | KV453060.1 | 2710402 | 14-scf00370 | 14 |
| AX-158218678 | 18 | 62.576 | KV453060.1 | 2717097 | 14-scf00370 | 14 |
| AX-158218679 | 18 | 62.576 | KV453060.1 | 2717567 | 14-scf00370 | 14 |
| AX-158218683 | 18 | 62.576 | KV453060.1 | 2721315 | 14-scf00370 | 14 |
| AX-158218688 | 18 | 62.576 | KV453060.1 | 2729865 | 14-scf00370 | 14 |
| AX-158218689 | 18 | 62.576 | KV453060.1 | 2731092 | 14-scf00370 | 14 |

|              |    |        |            |         |             |    |
|--------------|----|--------|------------|---------|-------------|----|
| AX-158218690 | 18 | 62.576 | KV453060.1 | 2733389 | 14-scf00370 | 14 |
| AX-158218691 | 18 | 62.576 | KV453060.1 | 2733671 | 14-scf00370 | 14 |
| AX-158218692 | 18 | 62.576 | KV453060.1 | 2734706 | 14-scf00370 | 14 |
| AX-158218693 | 18 | 62.576 | KV453060.1 | 2735692 | 14-scf00370 | 14 |
| AX-158218700 | 18 | 62.576 | KV453060.1 | 2747445 | 14-scf00370 | 14 |
| AX-158218701 | 18 | 62.576 | KV453060.1 | 2747912 | 14-scf00370 | 14 |
| AX-157839187 | 18 | 62.576 | KV453060.1 | 2751585 | 14-scf00370 | 14 |
| AX-158218703 | 18 | 62.576 | KV453060.1 | 2752553 | 14-scf00370 | 14 |
| AX-158218710 | 18 | 62.576 | KV453060.1 | 2766166 | 14-scf00370 | 14 |
| AX-157742746 | 18 | 62.576 | KV453060.1 | 2768053 | 14-scf00370 | 14 |
| AX-158218714 | 18 | 62.576 | KV453060.1 | 2774886 | 14-scf00370 | 14 |
| AX-157839188 | 18 | 62.576 | KV453060.1 | 2774988 | 14-scf00370 | 14 |
| AX-158218715 | 18 | 62.576 | KV453060.1 | 2775384 | 14-scf00370 | 14 |
| AX-158218717 | 18 | 62.576 | KV453060.1 | 2777074 | 14-scf00370 | 14 |
| AX-158218718 | 18 | 62.576 | KV453060.1 | 2778960 | 14-scf00370 | 14 |
| AX-158218719 | 18 | 62.576 | KV453060.1 | 2781427 | 14-scf00370 | 14 |
| AX-157747260 | 18 | 62.576 | KV453060.1 | 2785690 | 14-scf00370 | 14 |
| AX-157720416 | 18 | 62.576 | KV453060.1 | 2789165 | 14-scf00370 | 14 |
| AX-158218721 | 18 | 62.576 | KV453060.1 | 2790302 | 14-scf00370 | 14 |
| AX-158218722 | 18 | 62.576 | KV453060.1 | 2792555 | 14-scf00370 | 14 |
| AX-158218724 | 18 | 62.576 | KV453060.1 | 2797439 | 14-scf00370 | 14 |
| AX-158218725 | 18 | 62.576 | KV453060.1 | 2797738 | 14-scf00370 | 14 |
| AX-157839190 | 18 | 62.576 | KV453060.1 | 2797996 | 14-scf00370 | 14 |
| AX-157839191 | 18 | 62.576 | KV453060.1 | 2799899 | 14-scf00370 | 14 |
| AX-158218771 | 18 | 62.576 | KV453060.1 | 2867482 | 14-scf00370 | 14 |
| AX-158218773 | 18 | 62.576 | KV453060.1 | 2870634 | 14-scf00370 | 14 |
| AX-158218727 | 18 | 63.009 | KV453060.1 | 2805353 | 14-scf00370 | 14 |
| AX-158218056 | 18 | 63.013 | KV453060.1 | 1857031 | 14-scf00370 | 14 |
| AX-158218426 | 18 | 63.013 | KV453060.1 | 2373485 | 14-scf00370 | 14 |
| AX-158218591 | 18 | 63.013 | KV453060.1 | 2592782 | 14-scf00370 | 14 |
| AX-158218731 | 18 | 63.013 | KV453060.1 | 2815099 | 14-scf00370 | 14 |
| AX-158218733 | 18 | 63.013 | KV453060.1 | 2817857 | 14-scf00370 | 14 |
| AX-157839193 | 18 | 63.013 | KV453060.1 | 2823532 | 14-scf00370 | 14 |
| AX-158218734 | 18 | 63.013 | KV453060.1 | 2823870 | 14-scf00370 | 14 |
| AX-158218737 | 18 | 63.013 | KV453060.1 | 2828899 | 14-scf00370 | 14 |
| AX-157738828 | 18 | 63.013 | KV453060.1 | 2829177 | 14-scf00370 | 14 |
| AX-158218739 | 18 | 63.013 | KV453060.1 | 2830400 | 14-scf00370 | 14 |
| AX-158218740 | 18 | 63.013 | KV453060.1 | 2832715 | 14-scf00370 | 14 |
| AX-158423228 | 18 | 63.013 | KV453060.1 | 2833835 | 14-scf00370 | 14 |
| AX-158218747 | 18 | 63.013 | KV453060.1 | 2840239 | 14-scf00370 | 14 |
| AX-158218748 | 18 | 63.013 | KV453060.1 | 2841292 | 14-scf00370 | 14 |
| AX-158218751 | 18 | 63.013 | KV453060.1 | 2845108 | 14-scf00370 | 14 |
| AX-157839197 | 18 | 63.013 | KV453060.1 | 2846764 | 14-scf00370 | 14 |
| AX-158218754 | 18 | 63.013 | KV453060.1 | 2849563 | 14-scf00370 | 14 |
| AX-158218757 | 18 | 63.013 | KV453060.1 | 2855080 | 14-scf00370 | 14 |
| AX-158218758 | 18 | 63.013 | KV453060.1 | 2855509 | 14-scf00370 | 14 |
| AX-158218759 | 18 | 63.013 | KV453060.1 | 2855896 | 14-scf00370 | 14 |
| AX-158218760 | 18 | 63.013 | KV453060.1 | 2857790 | 14-scf00370 | 14 |
| AX-158218761 | 18 | 63.013 | KV453060.1 | 2858350 | 14-scf00370 | 14 |
| AX-158218762 | 18 | 63.013 | KV453060.1 | 2858726 | 14-scf00370 | 14 |
| AX-158218765 | 18 | 63.013 | KV453060.1 | 2862591 | 14-scf00370 | 14 |

|              |    |        |            |         |                |    |
|--------------|----|--------|------------|---------|----------------|----|
| AX-158218766 | 18 | 63.013 | KV453060.1 | 2863104 | 14-scf00370    | 14 |
| AX-158218767 | 18 | 63.013 | KV453060.1 | 2863328 | 14-scf00370    | 14 |
| AX-158218980 | 18 | 63.013 | KV453060.1 | 3173824 | 14-scf00370    | 14 |
| AX-158219223 | 18 | 63.013 | KV453060.1 | 3454762 | 14-scf00370    | 14 |
| AX-158219302 | 18 | 63.013 | KV453060.1 | 3560888 | 14-scf00370    | 14 |
| AX-157872384 | 18 | 63.231 | KV453060.1 | 1330821 | 14-scf00370    | 14 |
| AX-158218452 | 18 | 63.231 | KV453060.1 | 2410995 | 14-scf00370    | 14 |
| AX-158218581 | 18 | 63.231 | KV453060.1 | 2581018 | 14-scf00370    | 14 |
| AX-157697694 | 18 | 63.231 | KV453060.1 | 2665036 | 14-scf00370    | 14 |
| AX-157714350 | 18 | 63.231 | KV453060.1 | 2670912 | 14-scf00370    | 14 |
| AX-158218730 | 18 | 63.231 | KV453060.1 | 2812712 | 14-scf00370    | 14 |
| AX-157726616 | 18 | 63.231 | KV453060.1 | 2854371 | 14-scf00370    | 14 |
| AX-158218770 | 18 | 63.231 | KV453060.1 | 2866773 | 14-scf00370    | 14 |
| AX-157772358 | 18 | 63.231 | KV453060.1 | 2877060 | 14-scf00370    | 14 |
| AX-158218775 | 18 | 63.231 | KV453060.1 | 2877575 | 14-scf00370    | 14 |
| AX-157839198 | 18 | 63.231 | KV453060.1 | 2879334 | 14-scf00370    | 14 |
| AX-158218777 | 18 | 63.231 | KV453060.1 | 2880964 | 14-scf00370    | 14 |
| AX-158218778 | 18 | 63.231 | KV453060.1 | 2881371 | 14-scf00370    | 14 |
| AX-158218780 | 18 | 63.231 | KV453060.1 | 2883048 | 14-scf00370    | 14 |
| AX-158218783 | 18 | 63.231 | KV453060.1 | 2886217 | 14-scf00370    | 14 |
| AX-158218784 | 18 | 63.231 | KV453060.1 | 2887333 | 14-scf00370    | 14 |
| AX-158218785 | 18 | 63.231 | KV453060.1 | 2887992 | 14-scf00370    | 14 |
| AX-158218786 | 18 | 63.231 | KV453060.1 | 2890247 | 14-scf00370    | 14 |
| AX-158218787 | 18 | 63.231 | KV453060.1 | 2892601 | 14-scf00370    | 14 |
| AX-157859448 | 18 | 63.231 | KV453060.1 | 2892925 | 14-scf00370    | 14 |
| AX-158218789 | 18 | 63.231 | KV453060.1 | 2893783 | 14-scf00370    | 14 |
| AX-158218791 | 18 | 63.231 | KV453060.1 | 2897855 | 14-scf00370    | 14 |
| AX-158218795 | 18 | 63.231 | KV453060.1 | 2906622 | 14-scf00370    | 14 |
| AX-157772673 | 18 | 63.231 | KV453060.1 | 2909443 | 14-scf00370    | 14 |
| AX-158218797 | 18 | 63.231 | KV453060.1 | 2910654 | 14-scf00370    | 14 |
| AX-158218799 | 18 | 63.231 | KV453060.1 | 2911582 | 14-scf00370    | 14 |
| AX-157694491 | 18 | 63.231 | FI861760.1 | 153     | IORI212 lctalu | UN |
| AX-158218803 | 18 | 63.339 | KV453060.1 | 2922036 | 14-scf00370    | 14 |
| AX-158218199 | 18 | 63.45  | KV453060.1 | 2038578 | 14-scf00370    | 14 |
| AX-157711448 | 18 | 63.45  | KV453060.1 | 2220191 | 14-scf00370    | 14 |
| AX-158218667 | 18 | 63.45  | KV453060.1 | 2704500 | 14-scf00370    | 14 |
| AX-158218698 | 18 | 63.45  | KV453060.1 | 2744337 | 14-scf00370    | 14 |
| AX-158218779 | 18 | 63.45  | KV453060.1 | 2882306 | 14-scf00370    | 14 |
| AX-157741844 | 18 | 63.45  | KV453060.1 | 2922750 | 14-scf00370    | 14 |
| AX-158218809 | 18 | 63.45  | KV453060.1 | 2928793 | 14-scf00370    | 14 |
| AX-158218810 | 18 | 63.45  | KV453060.1 | 2929229 | 14-scf00370    | 14 |
| AX-158218811 | 18 | 63.45  | KV453060.1 | 2929804 | 14-scf00370    | 14 |
| AX-158218813 | 18 | 63.45  | KV453060.1 | 2933456 | 14-scf00370    | 14 |
| AX-158218818 | 18 | 63.45  | KV453060.1 | 2939695 | 14-scf00370    | 14 |
| AX-158218820 | 18 | 63.45  | KV453060.1 | 2941044 | 14-scf00370    | 14 |
| AX-158218822 | 18 | 63.45  | KV453060.1 | 2942907 | 14-scf00370    | 14 |
| AX-158386608 | 18 | 63.45  | KV453060.1 | 2942944 | 14-scf00370    | 14 |
| AX-158218823 | 18 | 63.45  | KV453060.1 | 2943332 | 14-scf00370    | 14 |
| AX-158218856 | 18 | 63.45  | KV453060.1 | 2981642 | 14-scf00370    | 14 |
| AX-158218867 | 18 | 63.45  | KV453060.1 | 3006227 | 14-scf00370    | 14 |
| AX-158218946 | 18 | 63.45  | KV453060.1 | 3123821 | 14-scf00370    | 14 |

|              |    |        |            |         |             |    |
|--------------|----|--------|------------|---------|-------------|----|
| AX-158219023 | 18 | 63.45  | KV453060.1 | 3216878 | 14-scf00370 | 14 |
| AX-158219034 | 18 | 63.45  | KV453060.1 | 3224315 | 14-scf00370 | 14 |
| AX-158219145 | 18 | 63.45  | KV453060.1 | 3346361 | 14-scf00370 | 14 |
| AX-158219242 | 18 | 63.45  | KV453060.1 | 3481642 | 14-scf00370 | 14 |
| AX-157867061 | 18 | 63.45  | KV453060.1 | 3546273 | 14-scf00370 | 14 |
| AX-158219372 | 18 | 63.45  | KV453060.1 | 3670122 | 14-scf00370 | 14 |
| AX-158218833 | 18 | 63.559 | KV453060.1 | 2954271 | 14-scf00370 | 14 |
| AX-158218836 | 18 | 63.559 | KV453060.1 | 2958497 | 14-scf00370 | 14 |
| AX-158218839 | 18 | 63.559 | KV453060.1 | 2962411 | 14-scf00370 | 14 |
| AX-158218840 | 18 | 63.559 | KV453060.1 | 2963608 | 14-scf00370 | 14 |
| AX-158218841 | 18 | 63.559 | KV453060.1 | 2964251 | 14-scf00370 | 14 |
| AX-158218842 | 18 | 63.559 | KV453060.1 | 2965246 | 14-scf00370 | 14 |
| AX-157745172 | 18 | 63.559 | KV453060.1 | 3133636 | 14-scf00370 | 14 |
| AX-158219307 | 18 | 63.559 | KV453060.1 | 3567043 | 14-scf00370 | 14 |
| AX-158218845 | 18 | 63.668 | KV453060.1 | 2971713 | 14-scf00370 | 14 |
| AX-158218846 | 18 | 63.668 | KV453060.1 | 2972415 | 14-scf00370 | 14 |
| AX-158218847 | 18 | 63.668 | KV453060.1 | 2972806 | 14-scf00370 | 14 |
| AX-158218849 | 18 | 63.668 | KV453060.1 | 2974132 | 14-scf00370 | 14 |
| AX-158218850 | 18 | 63.668 | KV453060.1 | 2977700 | 14-scf00370 | 14 |
| AX-158218852 | 18 | 63.668 | KV453060.1 | 2978637 | 14-scf00370 | 14 |
| AX-158218853 | 18 | 63.668 | KV453060.1 | 2979957 | 14-scf00370 | 14 |
| AX-158218855 | 18 | 63.668 | KV453060.1 | 2981073 | 14-scf00370 | 14 |
| AX-158219086 | 18 | 63.668 | KV453060.1 | 3283902 | 14-scf00370 | 14 |
| AX-158218860 | 18 | 63.696 | KV453060.1 | 2991704 | 14-scf00370 | 14 |
| AX-158218862 | 18 | 63.716 | KV453060.1 | 2996509 | 14-scf00370 | 14 |
| AX-158218869 | 18 | 63.746 | KV453060.1 | 3011470 | 14-scf00370 | 14 |
| AX-157839052 | 18 | 63.777 | KV453060.1 | 1163767 | 14-scf00370 | 14 |
| AX-157839068 | 18 | 63.777 | KV453060.1 | 1461895 | 14-scf00370 | 14 |
| AX-158217814 | 18 | 63.777 | KV453060.1 | 1471760 | 14-scf00370 | 14 |
| AX-158394039 | 18 | 63.777 | KV453060.1 | 1566014 | 14-scf00370 | 14 |
| AX-158218042 | 18 | 63.777 | KV453060.1 | 1831158 | 14-scf00370 | 14 |
| AX-157750461 | 18 | 63.777 | KV453060.1 | 1841234 | 14-scf00370 | 14 |
| AX-158218195 | 18 | 63.777 | KV453060.1 | 2031626 | 14-scf00370 | 14 |
| AX-158218325 | 18 | 63.777 | KV453060.1 | 2188313 | 14-scf00370 | 14 |
| AX-157859444 | 18 | 63.777 | KV453060.1 | 2280829 | 14-scf00370 | 14 |
| AX-158218395 | 18 | 63.777 | KV453060.1 | 2310620 | 14-scf00370 | 14 |
| AX-157799197 | 18 | 63.777 | KV453060.1 | 2314557 | 14-scf00370 | 14 |
| AX-158218431 | 18 | 63.777 | KV453060.1 | 2383128 | 14-scf00370 | 14 |
| AX-158218607 | 18 | 63.777 | KV453060.1 | 2605911 | 14-scf00370 | 14 |
| AX-158394043 | 18 | 63.777 | KV453060.1 | 2615909 | 14-scf00370 | 14 |
| AX-158218621 | 18 | 63.777 | KV453060.1 | 2624456 | 14-scf00370 | 14 |
| AX-158218675 | 18 | 63.777 | KV453060.1 | 2714367 | 14-scf00370 | 14 |
| AX-158218685 | 18 | 63.777 | KV453060.1 | 2722610 | 14-scf00370 | 14 |
| AX-158218800 | 18 | 63.777 | KV453060.1 | 2913499 | 14-scf00370 | 14 |
| AX-158218815 | 18 | 63.777 | KV453060.1 | 2935770 | 14-scf00370 | 14 |
| AX-158218817 | 18 | 63.777 | KV453060.1 | 2939115 | 14-scf00370 | 14 |
| AX-158218819 | 18 | 63.777 | KV453060.1 | 2940138 | 14-scf00370 | 14 |
| AX-158218835 | 18 | 63.777 | KV453060.1 | 2957658 | 14-scf00370 | 14 |
| AX-158218837 | 18 | 63.777 | KV453060.1 | 2960458 | 14-scf00370 | 14 |
| AX-158218848 | 18 | 63.777 | KV453060.1 | 2973399 | 14-scf00370 | 14 |
| AX-157748171 | 18 | 63.777 | KV453060.1 | 2979251 | 14-scf00370 | 14 |



|              |    |        |            |         |             |    |
|--------------|----|--------|------------|---------|-------------|----|
| AX-158218858 | 18 | 63.777 | KV453060.1 | 2988111 | 14-scf00370 | 14 |
| AX-158218859 | 18 | 63.777 | KV453060.1 | 2988561 | 14-scf00370 | 14 |
| AX-157774423 | 18 | 63.777 | KV453060.1 | 2994889 | 14-scf00370 | 14 |
| AX-158218861 | 18 | 63.777 | KV453060.1 | 2996096 | 14-scf00370 | 14 |
| AX-158218870 | 18 | 63.777 | KV453060.1 | 3012010 | 14-scf00370 | 14 |
| AX-158218871 | 18 | 63.777 | KV453060.1 | 3012730 | 14-scf00370 | 14 |
| AX-158218873 | 18 | 63.777 | KV453060.1 | 3018760 | 14-scf00370 | 14 |
| AX-158218877 | 18 | 63.777 | KV453060.1 | 3024657 | 14-scf00370 | 14 |
| AX-158380839 | 18 | 63.777 | KV453060.1 | 3024725 | 14-scf00370 | 14 |
| AX-158218879 | 18 | 63.777 | KV453060.1 | 3029130 | 14-scf00370 | 14 |
| AX-158218880 | 18 | 63.777 | KV453060.1 | 3030033 | 14-scf00370 | 14 |
| AX-158218882 | 18 | 63.777 | KV453060.1 | 3033127 | 14-scf00370 | 14 |
| AX-158218883 | 18 | 63.777 | KV453060.1 | 3035724 | 14-scf00370 | 14 |
| AX-158218886 | 18 | 63.777 | KV453060.1 | 3041930 | 14-scf00370 | 14 |
| AX-158218887 | 18 | 63.777 | KV453060.1 | 3042496 | 14-scf00370 | 14 |
| AX-158218891 | 18 | 63.777 | KV453060.1 | 3044489 | 14-scf00370 | 14 |
| AX-157867060 | 18 | 63.777 | KV453060.1 | 3073791 | 14-scf00370 | 14 |
| AX-158218906 | 18 | 63.777 | KV453060.1 | 3074097 | 14-scf00370 | 14 |
| AX-158218907 | 18 | 63.777 | KV453060.1 | 3075526 | 14-scf00370 | 14 |
| AX-158218908 | 18 | 63.777 | KV453060.1 | 3076500 | 14-scf00370 | 14 |
| AX-158418636 | 18 | 63.777 | KV453060.1 | 3077175 | 14-scf00370 | 14 |
| AX-158418638 | 18 | 63.777 | KV453060.1 | 3077488 | 14-scf00370 | 14 |
| AX-158218909 | 18 | 63.777 | KV453060.1 | 3077572 | 14-scf00370 | 14 |
| AX-158218910 | 18 | 63.777 | KV453060.1 | 3078648 | 14-scf00370 | 14 |
| AX-158218911 | 18 | 63.777 | KV453060.1 | 3079052 | 14-scf00370 | 14 |
| AX-158394045 | 18 | 63.777 | KV453060.1 | 3081490 | 14-scf00370 | 14 |
| AX-158218913 | 18 | 63.777 | KV453060.1 | 3087520 | 14-scf00370 | 14 |
| AX-158218915 | 18 | 63.777 | KV453060.1 | 3089264 | 14-scf00370 | 14 |
| AX-158218916 | 18 | 63.777 | KV453060.1 | 3090452 | 14-scf00370 | 14 |
| AX-158218924 | 18 | 63.777 | KV453060.1 | 3097622 | 14-scf00370 | 14 |
| AX-158386612 | 18 | 63.777 | KV453060.1 | 3100643 | 14-scf00370 | 14 |
| AX-158218928 | 18 | 63.777 | KV453060.1 | 3101197 | 14-scf00370 | 14 |
| AX-158218930 | 18 | 63.777 | KV453060.1 | 3103210 | 14-scf00370 | 14 |
| AX-158218931 | 18 | 63.777 | KV453060.1 | 3106466 | 14-scf00370 | 14 |
| AX-158218932 | 18 | 63.777 | KV453060.1 | 3107444 | 14-scf00370 | 14 |
| AX-158218933 | 18 | 63.777 | KV453060.1 | 3108241 | 14-scf00370 | 14 |
| AX-158218935 | 18 | 63.777 | KV453060.1 | 3110071 | 14-scf00370 | 14 |
| AX-158218936 | 18 | 63.777 | KV453060.1 | 3110861 | 14-scf00370 | 14 |
| AX-158218938 | 18 | 63.777 | KV453060.1 | 3112366 | 14-scf00370 | 14 |
| AX-158218939 | 18 | 63.777 | KV453060.1 | 3114259 | 14-scf00370 | 14 |
| AX-158218940 | 18 | 63.777 | KV453060.1 | 3114951 | 14-scf00370 | 14 |
| AX-158218941 | 18 | 63.777 | KV453060.1 | 3116279 | 14-scf00370 | 14 |
| AX-158218942 | 18 | 63.777 | KV453060.1 | 3116928 | 14-scf00370 | 14 |
| AX-158218943 | 18 | 63.777 | KV453060.1 | 3117641 | 14-scf00370 | 14 |
| AX-158218944 | 18 | 63.777 | KV453060.1 | 3118209 | 14-scf00370 | 14 |
| AX-158218948 | 18 | 63.777 | KV453060.1 | 3125978 | 14-scf00370 | 14 |
| AX-158218949 | 18 | 63.777 | KV453060.1 | 3126162 | 14-scf00370 | 14 |
| AX-157839199 | 18 | 63.777 | KV453060.1 | 3126774 | 14-scf00370 | 14 |
| AX-158218950 | 18 | 63.777 | KV453060.1 | 3127058 | 14-scf00370 | 14 |
| AX-158218951 | 18 | 63.777 | KV453060.1 | 3130167 | 14-scf00370 | 14 |
| AX-158218952 | 18 | 63.777 | KV453060.1 | 3130872 | 14-scf00370 | 14 |

|              |    |        |            |         |             |    |
|--------------|----|--------|------------|---------|-------------|----|
| AX-158218953 | 18 | 63.777 | KV453060.1 | 3132276 | 14-scf00370 | 14 |
| AX-157839200 | 18 | 63.777 | KV453060.1 | 3134149 | 14-scf00370 | 14 |
| AX-158218954 | 18 | 63.777 | KV453060.1 | 3135657 | 14-scf00370 | 14 |
| AX-158218955 | 18 | 63.777 | KV453060.1 | 3137243 | 14-scf00370 | 14 |
| AX-158218956 | 18 | 63.777 | KV453060.1 | 3138120 | 14-scf00370 | 14 |
| AX-158218957 | 18 | 63.777 | KV453060.1 | 3138516 | 14-scf00370 | 14 |
| AX-158386613 | 18 | 63.777 | KV453060.1 | 3140096 | 14-scf00370 | 14 |
| AX-158218959 | 18 | 63.777 | KV453060.1 | 3140702 | 14-scf00370 | 14 |
| AX-157742388 | 18 | 63.777 | KV453060.1 | 3142016 | 14-scf00370 | 14 |
| AX-158218960 | 18 | 63.777 | KV453060.1 | 3142624 | 14-scf00370 | 14 |
| AX-158218965 | 18 | 63.777 | KV453060.1 | 3153275 | 14-scf00370 | 14 |
| AX-158218970 | 18 | 63.777 | KV453060.1 | 3163833 | 14-scf00370 | 14 |
| AX-158218975 | 18 | 63.777 | KV453060.1 | 3170259 | 14-scf00370 | 14 |
| AX-158218979 | 18 | 63.777 | KV453060.1 | 3173333 | 14-scf00370 | 14 |
| AX-158218981 | 18 | 63.777 | KV453060.1 | 3174259 | 14-scf00370 | 14 |
| AX-158218983 | 18 | 63.777 | KV453060.1 | 3176769 | 14-scf00370 | 14 |
| AX-158218986 | 18 | 63.777 | KV453060.1 | 3178192 | 14-scf00370 | 14 |
| AX-158218988 | 18 | 63.777 | KV453060.1 | 3179826 | 14-scf00370 | 14 |
| AX-158218989 | 18 | 63.777 | KV453060.1 | 3180352 | 14-scf00370 | 14 |
| AX-158218990 | 18 | 63.777 | KV453060.1 | 3180816 | 14-scf00370 | 14 |
| AX-158218991 | 18 | 63.777 | KV453060.1 | 3181340 | 14-scf00370 | 14 |
| AX-158218992 | 18 | 63.777 | KV453060.1 | 3181967 | 14-scf00370 | 14 |
| AX-158218994 | 18 | 63.777 | KV453060.1 | 3183062 | 14-scf00370 | 14 |
| AX-158218995 | 18 | 63.777 | KV453060.1 | 3184098 | 14-scf00370 | 14 |
| AX-158218996 | 18 | 63.777 | KV453060.1 | 3185284 | 14-scf00370 | 14 |
| AX-158219001 | 18 | 63.777 | KV453060.1 | 3190660 | 14-scf00370 | 14 |
| AX-158219003 | 18 | 63.777 | KV453060.1 | 3191805 | 14-scf00370 | 14 |
| AX-158219021 | 18 | 63.777 | KV453060.1 | 3215202 | 14-scf00370 | 14 |
| AX-158219022 | 18 | 63.777 | KV453060.1 | 3216471 | 14-scf00370 | 14 |
| AX-158219024 | 18 | 63.777 | KV453060.1 | 3217743 | 14-scf00370 | 14 |
| AX-158219025 | 18 | 63.777 | KV453060.1 | 3218410 | 14-scf00370 | 14 |
| AX-158219026 | 18 | 63.777 | KV453060.1 | 3218905 | 14-scf00370 | 14 |
| AX-158219027 | 18 | 63.777 | KV453060.1 | 3219949 | 14-scf00370 | 14 |
| AX-158219028 | 18 | 63.777 | KV453060.1 | 3220992 | 14-scf00370 | 14 |
| AX-158219029 | 18 | 63.777 | KV453060.1 | 3221378 | 14-scf00370 | 14 |
| AX-158219033 | 18 | 63.777 | KV453060.1 | 3223920 | 14-scf00370 | 14 |
| AX-158219035 | 18 | 63.777 | KV453060.1 | 3224755 | 14-scf00370 | 14 |
| AX-158394046 | 18 | 63.777 | KV453060.1 | 3228081 | 14-scf00370 | 14 |
| AX-158219039 | 18 | 63.777 | KV453060.1 | 3228546 | 14-scf00370 | 14 |
| AX-158219041 | 18 | 63.777 | KV453060.1 | 3231563 | 14-scf00370 | 14 |
| AX-158219043 | 18 | 63.777 | KV453060.1 | 3236911 | 14-scf00370 | 14 |
| AX-158219045 | 18 | 63.777 | KV453060.1 | 3238699 | 14-scf00370 | 14 |
| AX-158219048 | 18 | 63.777 | KV453060.1 | 3240687 | 14-scf00370 | 14 |
| AX-158219049 | 18 | 63.777 | KV453060.1 | 3240993 | 14-scf00370 | 14 |
| AX-158219051 | 18 | 63.777 | KV453060.1 | 3242575 | 14-scf00370 | 14 |
| AX-158219054 | 18 | 63.777 | KV453060.1 | 3246902 | 14-scf00370 | 14 |
| AX-158219056 | 18 | 63.777 | KV453060.1 | 3248337 | 14-scf00370 | 14 |
| AX-158219057 | 18 | 63.777 | KV453060.1 | 3248461 | 14-scf00370 | 14 |
| AX-158219058 | 18 | 63.777 | KV453060.1 | 3250288 | 14-scf00370 | 14 |
| AX-158219071 | 18 | 63.777 | KV453060.1 | 3266798 | 14-scf00370 | 14 |
| AX-158219075 | 18 | 63.777 | KV453060.1 | 3270732 | 14-scf00370 | 14 |

|              |    |        |            |         |             |    |
|--------------|----|--------|------------|---------|-------------|----|
| AX-158219076 | 18 | 63.777 | KV453060.1 | 3270983 | 14-scf00370 | 14 |
| AX-158219079 | 18 | 63.777 | KV453060.1 | 3274534 | 14-scf00370 | 14 |
| AX-158219087 | 18 | 63.777 | KV453060.1 | 3284524 | 14-scf00370 | 14 |
| AX-158219088 | 18 | 63.777 | KV453060.1 | 3285759 | 14-scf00370 | 14 |
| AX-158219089 | 18 | 63.777 | KV453060.1 | 3287106 | 14-scf00370 | 14 |
| AX-158219090 | 18 | 63.777 | KV453060.1 | 3288513 | 14-scf00370 | 14 |
| AX-158219091 | 18 | 63.777 | KV453060.1 | 3289077 | 14-scf00370 | 14 |
| AX-158219095 | 18 | 63.777 | KV453060.1 | 3292353 | 14-scf00370 | 14 |
| AX-158219096 | 18 | 63.777 | KV453060.1 | 3293043 | 14-scf00370 | 14 |
| AX-158219098 | 18 | 63.777 | KV453060.1 | 3295159 | 14-scf00370 | 14 |
| AX-158219100 | 18 | 63.777 | KV453060.1 | 3296878 | 14-scf00370 | 14 |
| AX-158219101 | 18 | 63.777 | KV453060.1 | 3297288 | 14-scf00370 | 14 |
| AX-158219103 | 18 | 63.777 | KV453060.1 | 3300365 | 14-scf00370 | 14 |
| AX-158219104 | 18 | 63.777 | KV453060.1 | 3301117 | 14-scf00370 | 14 |
| AX-158219105 | 18 | 63.777 | KV453060.1 | 3301529 | 14-scf00370 | 14 |
| AX-158219106 | 18 | 63.777 | KV453060.1 | 3303308 | 14-scf00370 | 14 |
| AX-158219108 | 18 | 63.777 | KV453060.1 | 3304330 | 14-scf00370 | 14 |
| AX-158219109 | 18 | 63.777 | KV453060.1 | 3305090 | 14-scf00370 | 14 |
| AX-158219110 | 18 | 63.777 | KV453060.1 | 3305667 | 14-scf00370 | 14 |
| AX-158219114 | 18 | 63.777 | KV453060.1 | 3315617 | 14-scf00370 | 14 |
| AX-158219140 | 18 | 63.777 | KV453060.1 | 3342531 | 14-scf00370 | 14 |
| AX-158219142 | 18 | 63.777 | KV453060.1 | 3344146 | 14-scf00370 | 14 |
| AX-158219144 | 18 | 63.777 | KV453060.1 | 3345742 | 14-scf00370 | 14 |
| AX-158219151 | 18 | 63.777 | KV453060.1 | 3352469 | 14-scf00370 | 14 |
| AX-158219153 | 18 | 63.777 | KV453060.1 | 3355200 | 14-scf00370 | 14 |
| AX-158219154 | 18 | 63.777 | KV453060.1 | 3356792 | 14-scf00370 | 14 |
| AX-158219155 | 18 | 63.777 | KV453060.1 | 3357104 | 14-scf00370 | 14 |
| AX-158219156 | 18 | 63.777 | KV453060.1 | 3359582 | 14-scf00370 | 14 |
| AX-158219158 | 18 | 63.777 | KV453060.1 | 3361716 | 14-scf00370 | 14 |
| AX-158219159 | 18 | 63.777 | KV453060.1 | 3362661 | 14-scf00370 | 14 |
| AX-158219160 | 18 | 63.777 | KV453060.1 | 3362794 | 14-scf00370 | 14 |
| AX-158219162 | 18 | 63.777 | KV453060.1 | 3365237 | 14-scf00370 | 14 |
| AX-158219163 | 18 | 63.777 | KV453060.1 | 3366051 | 14-scf00370 | 14 |
| AX-157839206 | 18 | 63.777 | KV453060.1 | 3366505 | 14-scf00370 | 14 |
| AX-157775690 | 18 | 63.777 | KV453060.1 | 3367175 | 14-scf00370 | 14 |
| AX-157707944 | 18 | 63.777 | KV453060.1 | 3367883 | 14-scf00370 | 14 |
| AX-158219164 | 18 | 63.777 | KV453060.1 | 3368790 | 14-scf00370 | 14 |
| AX-158219167 | 18 | 63.777 | KV453060.1 | 3373069 | 14-scf00370 | 14 |
| AX-158219168 | 18 | 63.777 | KV453060.1 | 3373991 | 14-scf00370 | 14 |
| AX-158219169 | 18 | 63.777 | KV453060.1 | 3375761 | 14-scf00370 | 14 |
| AX-158219170 | 18 | 63.777 | KV453060.1 | 3378198 | 14-scf00370 | 14 |
| AX-158219171 | 18 | 63.777 | KV453060.1 | 3378506 | 14-scf00370 | 14 |
| AX-158219175 | 18 | 63.777 | KV453060.1 | 3382386 | 14-scf00370 | 14 |
| AX-158219181 | 18 | 63.777 | KV453060.1 | 3391613 | 14-scf00370 | 14 |
| AX-158219183 | 18 | 63.777 | KV453060.1 | 3396227 | 14-scf00370 | 14 |
| AX-158219184 | 18 | 63.777 | KV453060.1 | 3396598 | 14-scf00370 | 14 |
| AX-157755174 | 18 | 63.777 | KV453060.1 | 3416306 | 14-scf00370 | 14 |
| AX-158219198 | 18 | 63.777 | KV453060.1 | 3417013 | 14-scf00370 | 14 |
| AX-158219199 | 18 | 63.777 | KV453060.1 | 3418968 | 14-scf00370 | 14 |
| AX-157723505 | 18 | 63.777 | KV453060.1 | 3419024 | 14-scf00370 | 14 |
| AX-158219200 | 18 | 63.777 | KV453060.1 | 3419920 | 14-scf00370 | 14 |

|              |    |        |            |         |             |    |
|--------------|----|--------|------------|---------|-------------|----|
| AX-158219201 | 18 | 63.777 | KV453060.1 | 3420534 | 14-scf00370 | 14 |
| AX-158219204 | 18 | 63.777 | KV453060.1 | 3425110 | 14-scf00370 | 14 |
| AX-158219207 | 18 | 63.777 | KV453060.1 | 3431182 | 14-scf00370 | 14 |
| AX-158219208 | 18 | 63.777 | KV453060.1 | 3431563 | 14-scf00370 | 14 |
| AX-158219209 | 18 | 63.777 | KV453060.1 | 3432197 | 14-scf00370 | 14 |
| AX-158219210 | 18 | 63.777 | KV453060.1 | 3436104 | 14-scf00370 | 14 |
| AX-158219211 | 18 | 63.777 | KV453060.1 | 3436645 | 14-scf00370 | 14 |
| AX-158219215 | 18 | 63.777 | KV453060.1 | 3440070 | 14-scf00370 | 14 |
| AX-158219216 | 18 | 63.777 | KV453060.1 | 3440490 | 14-scf00370 | 14 |
| AX-158219217 | 18 | 63.777 | KV453060.1 | 3444131 | 14-scf00370 | 14 |
| AX-158219218 | 18 | 63.777 | KV453060.1 | 3444788 | 14-scf00370 | 14 |
| AX-158219220 | 18 | 63.777 | KV453060.1 | 3447180 | 14-scf00370 | 14 |
| AX-158219226 | 18 | 63.777 | KV453060.1 | 3458570 | 14-scf00370 | 14 |
| AX-158219230 | 18 | 63.777 | KV453060.1 | 3467163 | 14-scf00370 | 14 |
| AX-158219233 | 18 | 63.777 | KV453060.1 | 3468989 | 14-scf00370 | 14 |
| AX-158219236 | 18 | 63.777 | KV453060.1 | 3474331 | 14-scf00370 | 14 |
| AX-158219237 | 18 | 63.777 | KV453060.1 | 3474975 | 14-scf00370 | 14 |
| AX-158219238 | 18 | 63.777 | KV453060.1 | 3475574 | 14-scf00370 | 14 |
| AX-158219240 | 18 | 63.777 | KV453060.1 | 3477178 | 14-scf00370 | 14 |
| AX-158219243 | 18 | 63.777 | KV453060.1 | 3482364 | 14-scf00370 | 14 |
| AX-158219244 | 18 | 63.777 | KV453060.1 | 3483223 | 14-scf00370 | 14 |
| AX-158219245 | 18 | 63.777 | KV453060.1 | 3483865 | 14-scf00370 | 14 |
| AX-158219253 | 18 | 63.777 | KV453060.1 | 3492583 | 14-scf00370 | 14 |
| AX-157839209 | 18 | 63.777 | KV453060.1 | 3501866 | 14-scf00370 | 14 |
| AX-158219256 | 18 | 63.777 | KV453060.1 | 3503694 | 14-scf00370 | 14 |
| AX-158219257 | 18 | 63.777 | KV453060.1 | 3505715 | 14-scf00370 | 14 |
| AX-158219259 | 18 | 63.777 | KV453060.1 | 3509667 | 14-scf00370 | 14 |
| AX-158414777 | 18 | 63.777 | KV453060.1 | 3510230 | 14-scf00370 | 14 |
| AX-157839211 | 18 | 63.777 | KV453060.1 | 3514774 | 14-scf00370 | 14 |
| AX-158219265 | 18 | 63.777 | KV453060.1 | 3517924 | 14-scf00370 | 14 |
| AX-158219266 | 18 | 63.777 | KV453060.1 | 3519304 | 14-scf00370 | 14 |
| AX-158219267 | 18 | 63.777 | KV453060.1 | 3519708 | 14-scf00370 | 14 |
| AX-158219268 | 18 | 63.777 | KV453060.1 | 3520068 | 14-scf00370 | 14 |
| AX-158219269 | 18 | 63.777 | KV453060.1 | 3521287 | 14-scf00370 | 14 |
| AX-157839212 | 18 | 63.777 | KV453060.1 | 3521555 | 14-scf00370 | 14 |
| AX-157745017 | 18 | 63.777 | KV453060.1 | 3522630 | 14-scf00370 | 14 |
| AX-158219271 | 18 | 63.777 | KV453060.1 | 3523416 | 14-scf00370 | 14 |
| AX-158219272 | 18 | 63.777 | KV453060.1 | 3523949 | 14-scf00370 | 14 |
| AX-158219273 | 18 | 63.777 | KV453060.1 | 3526762 | 14-scf00370 | 14 |
| AX-158219275 | 18 | 63.777 | KV453060.1 | 3531702 | 14-scf00370 | 14 |
| AX-157746212 | 18 | 63.777 | KV453060.1 | 3535255 | 14-scf00370 | 14 |
| AX-157744651 | 18 | 63.777 | KV453060.1 | 3535962 | 14-scf00370 | 14 |
| AX-158219281 | 18 | 63.777 | KV453060.1 | 3540399 | 14-scf00370 | 14 |
| AX-158219283 | 18 | 63.777 | KV453060.1 | 3541679 | 14-scf00370 | 14 |
| AX-158219284 | 18 | 63.777 | KV453060.1 | 3542058 | 14-scf00370 | 14 |
| AX-158219285 | 18 | 63.777 | KV453060.1 | 3542398 | 14-scf00370 | 14 |
| AX-157839213 | 18 | 63.777 | KV453060.1 | 3543496 | 14-scf00370 | 14 |
| AX-158219289 | 18 | 63.777 | KV453060.1 | 3548420 | 14-scf00370 | 14 |
| AX-158219290 | 18 | 63.777 | KV453060.1 | 3548716 | 14-scf00370 | 14 |
| AX-157839214 | 18 | 63.777 | KV453060.1 | 3549318 | 14-scf00370 | 14 |
| AX-157717988 | 18 | 63.777 | KV453060.1 | 3550410 | 14-scf00370 | 14 |

|              |    |        |            |         |             |    |
|--------------|----|--------|------------|---------|-------------|----|
| AX-158219292 | 18 | 63.777 | KV453060.1 | 3551182 | 14-scf00370 | 14 |
| AX-158219293 | 18 | 63.777 | KV453060.1 | 3552374 | 14-scf00370 | 14 |
| AX-158219294 | 18 | 63.777 | KV453060.1 | 3552733 | 14-scf00370 | 14 |
| AX-158219297 | 18 | 63.777 | KV453060.1 | 3557413 | 14-scf00370 | 14 |
| AX-158219299 | 18 | 63.777 | KV453060.1 | 3558907 | 14-scf00370 | 14 |
| AX-158219300 | 18 | 63.777 | KV453060.1 | 3559693 | 14-scf00370 | 14 |
| AX-158219308 | 18 | 63.777 | KV453060.1 | 3567531 | 14-scf00370 | 14 |
| AX-158219310 | 18 | 63.777 | KV453060.1 | 3569301 | 14-scf00370 | 14 |
| AX-158219311 | 18 | 63.777 | KV453060.1 | 3569904 | 14-scf00370 | 14 |
| AX-158219313 | 18 | 63.777 | KV453060.1 | 3574478 | 14-scf00370 | 14 |
| AX-158219314 | 18 | 63.777 | KV453060.1 | 3575876 | 14-scf00370 | 14 |
| AX-158219317 | 18 | 63.777 | KV453060.1 | 3578305 | 14-scf00370 | 14 |
| AX-158219318 | 18 | 63.777 | KV453060.1 | 3578832 | 14-scf00370 | 14 |
| AX-158219324 | 18 | 63.777 | KV453060.1 | 3582351 | 14-scf00370 | 14 |
| AX-157872395 | 18 | 63.777 | KV453060.1 | 3582830 | 14-scf00370 | 14 |
| AX-157872396 | 18 | 63.777 | KV453060.1 | 3583944 | 14-scf00370 | 14 |
| AX-157839216 | 18 | 63.777 | KV453060.1 | 3584489 | 14-scf00370 | 14 |
| AX-158219325 | 18 | 63.777 | KV453060.1 | 3586325 | 14-scf00370 | 14 |
| AX-158219326 | 18 | 63.777 | KV453060.1 | 3586701 | 14-scf00370 | 14 |
| AX-157839217 | 18 | 63.777 | KV453060.1 | 3587472 | 14-scf00370 | 14 |
| AX-158219328 | 18 | 63.777 | KV453060.1 | 3589412 | 14-scf00370 | 14 |
| AX-158219334 | 18 | 63.777 | KV453060.1 | 3594002 | 14-scf00370 | 14 |
| AX-158219337 | 18 | 63.777 | KV453060.1 | 3595790 | 14-scf00370 | 14 |
| AX-158219340 | 18 | 63.777 | KV453060.1 | 3600308 | 14-scf00370 | 14 |
| AX-157839218 | 18 | 63.777 | KV453060.1 | 3600350 | 14-scf00370 | 14 |
| AX-158219341 | 18 | 63.777 | KV453060.1 | 3602395 | 14-scf00370 | 14 |
| AX-158219342 | 18 | 63.777 | KV453060.1 | 3604440 | 14-scf00370 | 14 |
| AX-158219344 | 18 | 63.777 | KV453060.1 | 3605764 | 14-scf00370 | 14 |
| AX-158219345 | 18 | 63.777 | KV453060.1 | 3607397 | 14-scf00370 | 14 |
| AX-158219346 | 18 | 63.777 | KV453060.1 | 3609528 | 14-scf00370 | 14 |
| AX-158219347 | 18 | 63.777 | KV453060.1 | 3609984 | 14-scf00370 | 14 |
| AX-158219348 | 18 | 63.777 | KV453060.1 | 3610138 | 14-scf00370 | 14 |
| AX-157748106 | 18 | 63.777 | KV453060.1 | 3610776 | 14-scf00370 | 14 |
| AX-158219349 | 18 | 63.777 | KV453060.1 | 3611677 | 14-scf00370 | 14 |
| AX-158219353 | 18 | 63.777 | KV453060.1 | 3621795 | 14-scf00370 | 14 |
| AX-158219354 | 18 | 63.777 | KV453060.1 | 3623372 | 14-scf00370 | 14 |
| AX-157756845 | 18 | 63.777 | KV453060.1 | 3625034 | 14-scf00370 | 14 |
| AX-157747696 | 18 | 63.777 | KV453060.1 | 3627802 | 14-scf00370 | 14 |
| AX-158219355 | 18 | 63.777 | KV453060.1 | 3628232 | 14-scf00370 | 14 |
| AX-158219356 | 18 | 63.777 | KV453060.1 | 3631564 | 14-scf00370 | 14 |
| AX-158219357 | 18 | 63.777 | KV453060.1 | 3632149 | 14-scf00370 | 14 |
| AX-158219358 | 18 | 63.777 | KV453060.1 | 3632445 | 14-scf00370 | 14 |
| AX-158219360 | 18 | 63.777 | KV453060.1 | 3633341 | 14-scf00370 | 14 |
| AX-158219367 | 18 | 63.777 | KV453060.1 | 3659879 | 14-scf00370 | 14 |
| AX-158219369 | 18 | 63.777 | KV453060.1 | 3666057 | 14-scf00370 | 14 |
| AX-158219370 | 18 | 63.777 | KV453060.1 | 3666311 | 14-scf00370 | 14 |
| AX-157738862 | 18 | 63.777 | KV453060.1 | 3666350 | 14-scf00370 | 14 |
| AX-157750504 | 18 | 63.777 | KV453060.1 | 3668076 | 14-scf00370 | 14 |
| AX-158219373 | 18 | 63.777 | KV453060.1 | 3670953 | 14-scf00370 | 14 |
| AX-158219379 | 18 | 63.777 | KV453060.1 | 3677322 | 14-scf00370 | 14 |
| AX-158219382 | 18 | 63.777 | KV453060.1 | 3684268 | 14-scf00370 | 14 |

|              |    |        |            |         |             |    |
|--------------|----|--------|------------|---------|-------------|----|
| AX-157839220 | 18 | 63.777 | KV453060.1 | 3685086 | 14-scf00370 | 14 |
| AX-158219384 | 18 | 63.777 | KV453060.1 | 3685311 | 14-scf00370 | 14 |
| AX-157839221 | 18 | 63.777 | KV453060.1 | 3685398 | 14-scf00370 | 14 |
| AX-158219385 | 18 | 63.777 | KV453060.1 | 3686353 | 14-scf00370 | 14 |
| AX-158219387 | 18 | 63.777 | KV453060.1 | 3687457 | 14-scf00370 | 14 |
| AX-158219388 | 18 | 63.777 | KV453060.1 | 3688091 | 14-scf00370 | 14 |
| AX-158219389 | 18 | 63.777 | KV453060.1 | 3688704 | 14-scf00370 | 14 |
| AX-158219418 | 18 | 63.777 | KV453060.1 | 3729950 | 14-scf00370 | 14 |
| AX-158219438 | 18 | 63.777 | KV453060.1 | 3748657 | 14-scf00370 | 14 |
| AX-158219454 | 18 | 63.777 | KV453060.1 | 3767174 | 14-scf00370 | 14 |
| AX-158219460 | 18 | 63.777 | KV453060.1 | 3778149 | 14-scf00370 | 14 |
| AX-158219461 | 18 | 63.777 | KV453060.1 | 3778727 | 14-scf00370 | 14 |
| AX-158219462 | 18 | 63.777 | KV453060.1 | 3779174 | 14-scf00370 | 14 |
| AX-158219466 | 18 | 63.777 | KV453060.1 | 3782382 | 14-scf00370 | 14 |
| AX-158386627 | 18 | 63.777 | KV453060.1 | 3822526 | 14-scf00370 | 14 |
| AX-158219529 | 18 | 63.777 | KV453060.1 | 3844109 | 14-scf00370 | 14 |
| AX-158219530 | 18 | 63.777 | KV453060.1 | 3845214 | 14-scf00370 | 14 |
| AX-158418648 | 18 | 63.777 | KV453060.1 | 3972623 | 14-scf00370 | 14 |
| AX-158219782 | 18 | 63.777 | KV453060.1 | 4173706 | 14-scf00370 | 14 |
| AX-158218920 | 18 | 63.886 | KV453060.1 | 3095092 | 14-scf00370 | 14 |
| AX-158218961 | 18 | 63.886 | KV453060.1 | 3143632 | 14-scf00370 | 14 |
| AX-158218966 | 18 | 63.886 | KV453060.1 | 3154099 | 14-scf00370 | 14 |
| AX-158218973 | 18 | 63.886 | KV453060.1 | 3167048 | 14-scf00370 | 14 |
| AX-158219004 | 18 | 63.886 | KV453060.1 | 3192282 | 14-scf00370 | 14 |
| AX-158219046 | 18 | 63.886 | KV453060.1 | 3238967 | 14-scf00370 | 14 |
| AX-158219212 | 18 | 63.886 | KV453060.1 | 3437227 | 14-scf00370 | 14 |
| AX-158219214 | 18 | 63.886 | KV453060.1 | 3438943 | 14-scf00370 | 14 |
| AX-158219278 | 18 | 63.886 | KV453060.1 | 3533774 | 14-scf00370 | 14 |
| AX-158219295 | 18 | 63.886 | KV453060.1 | 3556658 | 14-scf00370 | 14 |
| AX-158219390 | 18 | 63.886 | KV453060.1 | 3690774 | 14-scf00370 | 14 |
| AX-158219392 | 18 | 63.886 | KV453060.1 | 3692510 | 14-scf00370 | 14 |
| AX-158219396 | 18 | 63.886 | KV453060.1 | 3697184 | 14-scf00370 | 14 |
| AX-158219397 | 18 | 63.886 | KV453060.1 | 3699247 | 14-scf00370 | 14 |
| AX-158219398 | 18 | 63.886 | KV453060.1 | 3699953 | 14-scf00370 | 14 |
| AX-158219402 | 18 | 63.886 | KV453060.1 | 3704620 | 14-scf00370 | 14 |
| AX-158219403 | 18 | 63.886 | KV453060.1 | 3709040 | 14-scf00370 | 14 |
| AX-158219404 | 18 | 63.886 | KV453060.1 | 3710293 | 14-scf00370 | 14 |
| AX-158219405 | 18 | 63.886 | KV453060.1 | 3711691 | 14-scf00370 | 14 |
| AX-158219406 | 18 | 63.886 | KV453060.1 | 3712422 | 14-scf00370 | 14 |
| AX-157758212 | 18 | 63.886 | KV453060.1 | 3712915 | 14-scf00370 | 14 |
| AX-158219408 | 18 | 63.886 | KV453060.1 | 3714096 | 14-scf00370 | 14 |
| AX-158219409 | 18 | 63.886 | KV453060.1 | 3715148 | 14-scf00370 | 14 |
| AX-158219410 | 18 | 63.886 | KV453060.1 | 3717505 | 14-scf00370 | 14 |
| AX-158219411 | 18 | 63.886 | KV453060.1 | 3720757 | 14-scf00370 | 14 |
| AX-158219412 | 18 | 63.886 | KV453060.1 | 3721150 | 14-scf00370 | 14 |
| AX-157753638 | 18 | 63.886 | KV453060.1 | 3723658 | 14-scf00370 | 14 |
| AX-158219413 | 18 | 63.886 | KV453060.1 | 3724579 | 14-scf00370 | 14 |
| AX-158219414 | 18 | 63.886 | KV453060.1 | 3725499 | 14-scf00370 | 14 |
| AX-158219415 | 18 | 63.886 | KV453060.1 | 3728090 | 14-scf00370 | 14 |
| AX-158219416 | 18 | 63.886 | KV453060.1 | 3728836 | 14-scf00370 | 14 |
| AX-158219417 | 18 | 63.886 | KV453060.1 | 3729253 | 14-scf00370 | 14 |

|              |    |        |            |         |             |    |
|--------------|----|--------|------------|---------|-------------|----|
| AX-158219420 | 18 | 63.886 | KV453060.1 | 3731592 | 14-scf00370 | 14 |
| AX-158219422 | 18 | 63.886 | KV453060.1 | 3733579 | 14-scf00370 | 14 |
| AX-158219424 | 18 | 63.886 | KV453060.1 | 3735304 | 14-scf00370 | 14 |
| AX-158219428 | 18 | 63.886 | KV453060.1 | 3739572 | 14-scf00370 | 14 |
| AX-158219430 | 18 | 63.886 | KV453060.1 | 3742182 | 14-scf00370 | 14 |
| AX-158219431 | 18 | 63.886 | KV453060.1 | 3742840 | 14-scf00370 | 14 |
| AX-158219432 | 18 | 63.886 | KV453060.1 | 3743040 | 14-scf00370 | 14 |
| AX-158219433 | 18 | 63.886 | KV453060.1 | 3743810 | 14-scf00370 | 14 |
| AX-158219434 | 18 | 63.886 | KV453060.1 | 3745553 | 14-scf00370 | 14 |
| AX-158219436 | 18 | 63.886 | KV453060.1 | 3746993 | 14-scf00370 | 14 |
| AX-158219440 | 18 | 63.886 | KV453060.1 | 3750930 | 14-scf00370 | 14 |
| AX-158219441 | 18 | 63.886 | KV453060.1 | 3751120 | 14-scf00370 | 14 |
| AX-158219443 | 18 | 63.886 | KV453060.1 | 3756414 | 14-scf00370 | 14 |
| AX-158219444 | 18 | 63.886 | KV453060.1 | 3757926 | 14-scf00370 | 14 |
| AX-158219445 | 18 | 63.886 | KV453060.1 | 3758456 | 14-scf00370 | 14 |
| AX-158219446 | 18 | 63.886 | KV453060.1 | 3759045 | 14-scf00370 | 14 |
| AX-158219447 | 18 | 63.886 | KV453060.1 | 3759636 | 14-scf00370 | 14 |
| AX-158219448 | 18 | 63.886 | KV453060.1 | 3760117 | 14-scf00370 | 14 |
| AX-158219451 | 18 | 63.886 | KV453060.1 | 3764430 | 14-scf00370 | 14 |
| AX-158219452 | 18 | 63.886 | KV453060.1 | 3765045 | 14-scf00370 | 14 |
| AX-158219455 | 18 | 63.886 | KV453060.1 | 3772127 | 14-scf00370 | 14 |
| AX-158219456 | 18 | 63.886 | KV453060.1 | 3775109 | 14-scf00370 | 14 |
| AX-158219463 | 18 | 63.886 | KV453060.1 | 3779679 | 14-scf00370 | 14 |
| AX-158219465 | 18 | 63.886 | KV453060.1 | 3782127 | 14-scf00370 | 14 |
| AX-158219467 | 18 | 63.886 | KV453060.1 | 3783248 | 14-scf00370 | 14 |
| AX-158219468 | 18 | 63.886 | KV453060.1 | 3783475 | 14-scf00370 | 14 |
| AX-158219469 | 18 | 63.886 | KV453060.1 | 3783705 | 14-scf00370 | 14 |
| AX-157773400 | 18 | 63.886 | KV453060.1 | 3784770 | 14-scf00370 | 14 |
| AX-158219471 | 18 | 63.886 | KV453060.1 | 3785311 | 14-scf00370 | 14 |
| AX-158219472 | 18 | 63.886 | KV453060.1 | 3786464 | 14-scf00370 | 14 |
| AX-158219473 | 18 | 63.886 | KV453060.1 | 3786827 | 14-scf00370 | 14 |
| AX-158219474 | 18 | 63.886 | KV453060.1 | 3786934 | 14-scf00370 | 14 |
| AX-158219475 | 18 | 63.886 | KV453060.1 | 3787401 | 14-scf00370 | 14 |
| AX-158219476 | 18 | 63.886 | KV453060.1 | 3787802 | 14-scf00370 | 14 |
| AX-158219478 | 18 | 63.886 | KV453060.1 | 3788292 | 14-scf00370 | 14 |
| AX-158219499 | 18 | 63.886 | KV453060.1 | 3810102 | 14-scf00370 | 14 |
| AX-158219287 | 18 | 63.996 | KV453060.1 | 3547086 | 14-scf00370 | 14 |
| AX-158219363 | 18 | 63.996 | KV453060.1 | 3641855 | 14-scf00370 | 14 |
| AX-158219421 | 18 | 63.996 | KV453060.1 | 3732630 | 14-scf00370 | 14 |
| AX-158219480 | 18 | 63.996 | KV453060.1 | 3790902 | 14-scf00370 | 14 |
| AX-158219481 | 18 | 63.996 | KV453060.1 | 3791237 | 14-scf00370 | 14 |
| AX-158219482 | 18 | 63.996 | KV453060.1 | 3791647 | 14-scf00370 | 14 |
| AX-158219483 | 18 | 63.996 | KV453060.1 | 3792184 | 14-scf00370 | 14 |
| AX-157839222 | 18 | 63.996 | KV453060.1 | 3793646 | 14-scf00370 | 14 |
| AX-158219484 | 18 | 63.996 | KV453060.1 | 3793707 | 14-scf00370 | 14 |
| AX-158219485 | 18 | 63.996 | KV453060.1 | 3794539 | 14-scf00370 | 14 |
| AX-158219486 | 18 | 63.996 | KV453060.1 | 3795188 | 14-scf00370 | 14 |
| AX-158219487 | 18 | 63.996 | KV453060.1 | 3795786 | 14-scf00370 | 14 |
| AX-158219488 | 18 | 63.996 | KV453060.1 | 3796196 | 14-scf00370 | 14 |
| AX-158219489 | 18 | 63.996 | KV453060.1 | 3796696 | 14-scf00370 | 14 |
| AX-158219490 | 18 | 63.996 | KV453060.1 | 3799680 | 14-scf00370 | 14 |

|              |    |        |            |         |             |    |
|--------------|----|--------|------------|---------|-------------|----|
| AX-158219491 | 18 | 63.996 | KV453060.1 | 3801047 | 14-scf00370 | 14 |
| AX-158219492 | 18 | 63.996 | KV453060.1 | 3802470 | 14-scf00370 | 14 |
| AX-158219493 | 18 | 63.996 | KV453060.1 | 3803088 | 14-scf00370 | 14 |
| AX-158219498 | 18 | 63.996 | KV453060.1 | 3809432 | 14-scf00370 | 14 |
| AX-158219500 | 18 | 63.996 | KV453060.1 | 3811217 | 14-scf00370 | 14 |
| AX-158219501 | 18 | 63.996 | KV453060.1 | 3811919 | 14-scf00370 | 14 |
| AX-158219503 | 18 | 63.996 | KV453060.1 | 3813021 | 14-scf00370 | 14 |
| AX-158219504 | 18 | 63.996 | KV453060.1 | 3814372 | 14-scf00370 | 14 |
| AX-158414782 | 18 | 63.996 | KV453060.1 | 3818223 | 14-scf00370 | 14 |
| AX-158219508 | 18 | 63.996 | KV453060.1 | 3818483 | 14-scf00370 | 14 |
| AX-158219510 | 18 | 63.996 | KV453060.1 | 3819531 | 14-scf00370 | 14 |
| AX-158219511 | 18 | 63.996 | KV453060.1 | 3819860 | 14-scf00370 | 14 |
| AX-158219513 | 18 | 63.996 | KV453060.1 | 3823145 | 14-scf00370 | 14 |
| AX-158219517 | 18 | 63.996 | KV453060.1 | 3827709 | 14-scf00370 | 14 |
| AX-158219518 | 18 | 63.996 | KV453060.1 | 3828170 | 14-scf00370 | 14 |
| AX-158219519 | 18 | 63.996 | KV453060.1 | 3828437 | 14-scf00370 | 14 |
| AX-158219520 | 18 | 63.996 | KV453060.1 | 3828978 | 14-scf00370 | 14 |
| AX-157839223 | 18 | 63.996 | KV453060.1 | 3829036 | 14-scf00370 | 14 |
| AX-157839224 | 18 | 63.996 | KV453060.1 | 3831651 | 14-scf00370 | 14 |
| AX-158219522 | 18 | 63.996 | KV453060.1 | 3832440 | 14-scf00370 | 14 |
| AX-157839225 | 18 | 63.996 | KV453060.1 | 3837012 | 14-scf00370 | 14 |
| AX-157839226 | 18 | 63.996 | KV453060.1 | 3839982 | 14-scf00370 | 14 |
| AX-158219523 | 18 | 63.996 | KV453060.1 | 3840337 | 14-scf00370 | 14 |
| AX-158219524 | 18 | 63.996 | KV453060.1 | 3840905 | 14-scf00370 | 14 |
| AX-158219525 | 18 | 63.996 | KV453060.1 | 3841324 | 14-scf00370 | 14 |
| AX-158219527 | 18 | 63.996 | KV453060.1 | 3842733 | 14-scf00370 | 14 |
| AX-158219528 | 18 | 63.996 | KV453060.1 | 3843452 | 14-scf00370 | 14 |
| AX-158380842 | 18 | 63.996 | KV453060.1 | 3845757 | 14-scf00370 | 14 |
| AX-158219532 | 18 | 63.996 | KV453060.1 | 3847778 | 14-scf00370 | 14 |
| AX-158219533 | 18 | 63.996 | KV453060.1 | 3848383 | 14-scf00370 | 14 |
| AX-158219535 | 18 | 63.996 | KV453060.1 | 3849533 | 14-scf00370 | 14 |
| AX-158219537 | 18 | 63.996 | KV453060.1 | 3852054 | 14-scf00370 | 14 |
| AX-158219538 | 18 | 63.996 | KV453060.1 | 3852203 | 14-scf00370 | 14 |
| AX-157774089 | 18 | 63.996 | KV453060.1 | 3852815 | 14-scf00370 | 14 |
| AX-158219539 | 18 | 63.996 | KV453060.1 | 3853160 | 14-scf00370 | 14 |
| AX-158219540 | 18 | 63.996 | KV453060.1 | 3854343 | 14-scf00370 | 14 |
| AX-158219541 | 18 | 63.996 | KV453060.1 | 3855721 | 14-scf00370 | 14 |
| AX-158219545 | 18 | 63.996 | KV453060.1 | 3859315 | 14-scf00370 | 14 |
| AX-158219548 | 18 | 63.996 | KV453060.1 | 3861437 | 14-scf00370 | 14 |
| AX-158219550 | 18 | 63.996 | KV453060.1 | 3863020 | 14-scf00370 | 14 |
| AX-158219552 | 18 | 63.996 | KV453060.1 | 3864391 | 14-scf00370 | 14 |
| AX-158219553 | 18 | 63.996 | KV453060.1 | 3865605 | 14-scf00370 | 14 |
| AX-158219555 | 18 | 63.996 | KV453060.1 | 3869873 | 14-scf00370 | 14 |
| AX-158219559 | 18 | 63.996 | KV453060.1 | 3871987 | 14-scf00370 | 14 |
| AX-158219561 | 18 | 63.996 | KV453060.1 | 3877869 | 14-scf00370 | 14 |
| AX-158219562 | 18 | 63.996 | KV453060.1 | 3878903 | 14-scf00370 | 14 |
| AX-158219563 | 18 | 63.996 | KV453060.1 | 3882545 | 14-scf00370 | 14 |
| AX-158219578 | 18 | 63.996 | KV453060.1 | 3896740 | 14-scf00370 | 14 |
| AX-158219579 | 18 | 63.996 | KV453060.1 | 3896967 | 14-scf00370 | 14 |
| AX-157746198 | 18 | 63.996 | KV453060.1 | 3898850 | 14-scf00370 | 14 |
| AX-158219581 | 18 | 63.996 | KV453060.1 | 3901427 | 14-scf00370 | 14 |



|              |    |        |            |         |             |    |
|--------------|----|--------|------------|---------|-------------|----|
| AX-158219584 | 18 | 63.996 | KV453060.1 | 3903614 | 14-scf00370 | 14 |
| AX-158219594 | 18 | 63.996 | KV453060.1 | 3921600 | 14-scf00370 | 14 |
| AX-158219595 | 18 | 63.996 | KV453060.1 | 3922219 | 14-scf00370 | 14 |
| AX-158219596 | 18 | 63.996 | KV453060.1 | 3922673 | 14-scf00370 | 14 |
| AX-158219598 | 18 | 63.996 | KV453060.1 | 3924086 | 14-scf00370 | 14 |
| AX-158219599 | 18 | 63.996 | KV453060.1 | 3924594 | 14-scf00370 | 14 |
| AX-158219601 | 18 | 63.996 | KV453060.1 | 3926659 | 14-scf00370 | 14 |
| AX-158219602 | 18 | 63.996 | KV453060.1 | 3927171 | 14-scf00370 | 14 |
| AX-158219604 | 18 | 63.996 | KV453060.1 | 3928853 | 14-scf00370 | 14 |
| AX-158219605 | 18 | 63.996 | KV453060.1 | 3929491 | 14-scf00370 | 14 |
| AX-158219612 | 18 | 63.996 | KV453060.1 | 3938638 | 14-scf00370 | 14 |
| AX-158219615 | 18 | 63.996 | KV453060.1 | 3940437 | 14-scf00370 | 14 |
| AX-158219616 | 18 | 63.996 | KV453060.1 | 3940807 | 14-scf00370 | 14 |
| AX-157713278 | 18 | 63.996 | KV453060.1 | 3941275 | 14-scf00370 | 14 |
| AX-158219617 | 18 | 63.996 | KV453060.1 | 3942109 | 14-scf00370 | 14 |
| AX-158219618 | 18 | 63.996 | KV453060.1 | 3942835 | 14-scf00370 | 14 |
| AX-158219619 | 18 | 63.996 | KV453060.1 | 3943239 | 14-scf00370 | 14 |
| AX-158219620 | 18 | 63.996 | KV453060.1 | 3943709 | 14-scf00370 | 14 |
| AX-157839229 | 18 | 63.996 | KV453060.1 | 3944643 | 14-scf00370 | 14 |
| AX-158219621 | 18 | 63.996 | KV453060.1 | 3944826 | 14-scf00370 | 14 |
| AX-158219622 | 18 | 63.996 | KV453060.1 | 3945338 | 14-scf00370 | 14 |
| AX-158219624 | 18 | 63.996 | KV453060.1 | 3948924 | 14-scf00370 | 14 |
| AX-158219636 | 18 | 63.996 | KV453060.1 | 3965789 | 14-scf00370 | 14 |
| AX-158219645 | 18 | 63.996 | KV453060.1 | 3974953 | 14-scf00370 | 14 |
| AX-158219542 | 18 | 63.999 | KV453060.1 | 3856252 | 14-scf00370 | 14 |
| AX-158394049 | 18 | 64.005 | KV453060.1 | 3856311 | 14-scf00370 | 14 |
| AX-158219543 | 18 | 64.016 | KV453060.1 | 3856811 | 14-scf00370 | 14 |
| AX-158219546 | 18 | 64.028 | KV453060.1 | 3859780 | 14-scf00370 | 14 |
| AX-158219547 | 18 | 64.038 | KV453060.1 | 3860518 | 14-scf00370 | 14 |
| AX-158219551 | 18 | 64.047 | KV453060.1 | 3864047 | 14-scf00370 | 14 |
| AX-158219554 | 18 | 64.055 | KV453060.1 | 3869482 | 14-scf00370 | 14 |
| AX-158219556 | 18 | 64.064 | KV453060.1 | 3870039 | 14-scf00370 | 14 |
| AX-158219536 | 18 | 64.073 | KV453060.1 | 3851525 | 14-scf00370 | 14 |
| AX-158219557 | 18 | 64.073 | KV453060.1 | 3871401 | 14-scf00370 | 14 |
| AX-158219560 | 18 | 64.081 | KV453060.1 | 3874931 | 14-scf00370 | 14 |
| AX-158218636 | 18 | 64.089 | KV453060.1 | 2639305 | 14-scf00370 | 14 |
| AX-158414757 | 18 | 64.089 | KV453060.1 | 2688190 | 14-scf00370 | 14 |
| AX-158219327 | 18 | 64.089 | KV453060.1 | 3587997 | 14-scf00370 | 14 |
| AX-158219509 | 18 | 64.089 | KV453060.1 | 3819079 | 14-scf00370 | 14 |
| AX-158219564 | 18 | 64.089 | KV453060.1 | 3882595 | 14-scf00370 | 14 |
| AX-158219565 | 18 | 64.092 | KV453060.1 | 3883133 | 14-scf00370 | 14 |
| AX-158219128 | 18 | 64.095 | KV453060.1 | 3333820 | 14-scf00370 | 14 |
| AX-158219129 | 18 | 64.095 | KV453060.1 | 3334516 | 14-scf00370 | 14 |
| AX-158219134 | 18 | 64.095 | KV453060.1 | 3338183 | 14-scf00370 | 14 |
| AX-158219136 | 18 | 64.095 | KV453060.1 | 3339167 | 14-scf00370 | 14 |
| AX-158219137 | 18 | 64.095 | KV453060.1 | 3340774 | 14-scf00370 | 14 |
| AX-158219138 | 18 | 64.095 | KV453060.1 | 3341202 | 14-scf00370 | 14 |
| AX-158219139 | 18 | 64.095 | KV453060.1 | 3341667 | 14-scf00370 | 14 |
| AX-158219141 | 18 | 64.095 | KV453060.1 | 3343314 | 14-scf00370 | 14 |
| AX-158219147 | 18 | 64.095 | KV453060.1 | 3348066 | 14-scf00370 | 14 |
| AX-158219148 | 18 | 64.095 | KV453060.1 | 3350177 | 14-scf00370 | 14 |

|              |    |        |            |         |             |    |
|--------------|----|--------|------------|---------|-------------|----|
| AX-157754546 | 18 | 64.095 | KV453060.1 | 3351412 | 14-scf00370 | 14 |
| AX-158219173 | 18 | 64.095 | KV453060.1 | 3381501 | 14-scf00370 | 14 |
| AX-157743657 | 18 | 64.095 | KV453060.1 | 3395615 | 14-scf00370 | 14 |
| AX-158219191 | 18 | 64.095 | KV453060.1 | 3409235 | 14-scf00370 | 14 |
| AX-158219192 | 18 | 64.095 | KV453060.1 | 3409919 | 14-scf00370 | 14 |
| AX-157708978 | 18 | 64.095 | KV453060.1 | 3414065 | 14-scf00370 | 14 |
| AX-158219197 | 18 | 64.095 | KV453060.1 | 3414993 | 14-scf00370 | 14 |
| AX-158219426 | 18 | 64.095 | KV453060.1 | 3737274 | 14-scf00370 | 14 |
| AX-158219494 | 18 | 64.095 | KV453060.1 | 3804153 | 14-scf00370 | 14 |
| AX-158219566 | 18 | 64.095 | KV453060.1 | 3884282 | 14-scf00370 | 14 |
| AX-158219567 | 18 | 64.095 | KV453060.1 | 3884814 | 14-scf00370 | 14 |
| AX-158219568 | 18 | 64.095 | KV453060.1 | 3885428 | 14-scf00370 | 14 |
| AX-158219569 | 18 | 64.095 | KV453060.1 | 3886118 | 14-scf00370 | 14 |
| AX-158219571 | 18 | 64.095 | KV453060.1 | 3888137 | 14-scf00370 | 14 |
| AX-158219572 | 18 | 64.095 | KV453060.1 | 3892250 | 14-scf00370 | 14 |
| AX-157739026 | 18 | 64.095 | KV453060.1 | 3892438 | 14-scf00370 | 14 |
| AX-158219573 | 18 | 64.095 | KV453060.1 | 3893877 | 14-scf00370 | 14 |
| AX-158219077 | 18 | 64.099 | KV453060.1 | 3272083 | 14-scf00370 | 14 |
| AX-158219185 | 18 | 64.099 | KV453060.1 | 3396985 | 14-scf00370 | 14 |
| AX-158219570 | 18 | 64.099 | KV453060.1 | 3886834 | 14-scf00370 | 14 |
| AX-158219574 | 18 | 64.101 | KV453060.1 | 3894379 | 14-scf00370 | 14 |
| AX-158219685 | 18 | 64.101 | KV453060.1 | 4023313 | 14-scf00370 | 14 |
| AX-158218340 | 18 | 64.102 | KV453060.1 | 2206682 | 14-scf00370 | 14 |
| AX-157859445 | 18 | 64.102 | KV453060.1 | 2509588 | 14-scf00370 | 14 |
| AX-158218854 | 18 | 64.102 | KV453060.1 | 2980606 | 14-scf00370 | 14 |
| AX-157751982 | 18 | 64.102 | KV453060.1 | 3529340 | 14-scf00370 | 14 |
| AX-158219575 | 18 | 64.102 | KV453060.1 | 3894542 | 14-scf00370 | 14 |
| AX-158219582 | 18 | 64.103 | KV453060.1 | 3902292 | 14-scf00370 | 14 |
| AX-158219583 | 18 | 64.103 | KV453060.1 | 3902764 | 14-scf00370 | 14 |
| AX-158218055 | 18 | 64.105 | KV453060.1 | 1856458 | 14-scf00370 | 14 |
| AX-157879690 | 18 | 64.105 | KV453060.1 | 2323668 | 14-scf00370 | 14 |
| AX-157751322 | 18 | 64.105 | KV453060.1 | 2378298 | 14-scf00370 | 14 |
| AX-157872388 | 18 | 64.105 | KV453060.1 | 2396790 | 14-scf00370 | 14 |
| AX-158218804 | 18 | 64.105 | KV453060.1 | 2924005 | 14-scf00370 | 14 |
| AX-157740818 | 18 | 64.105 | KV453060.1 | 3370181 | 14-scf00370 | 14 |
| AX-158219247 | 18 | 64.105 | KV453060.1 | 3487179 | 14-scf00370 | 14 |
| AX-158219288 | 18 | 64.105 | KV453060.1 | 3547648 | 14-scf00370 | 14 |
| AX-157709298 | 18 | 64.105 | KV453060.1 | 3560192 | 14-scf00370 | 14 |
| AX-158219497 | 18 | 64.105 | KV453060.1 | 3808218 | 14-scf00370 | 14 |
| AX-158219526 | 18 | 64.105 | KV453060.1 | 3842417 | 14-scf00370 | 14 |
| AX-158219544 | 18 | 64.105 | KV453060.1 | 3857369 | 14-scf00370 | 14 |
| AX-158219585 | 18 | 64.105 | KV453060.1 | 3903918 | 14-scf00370 | 14 |
| AX-158219587 | 18 | 64.105 | KV453060.1 | 3907006 | 14-scf00370 | 14 |
| AX-158219588 | 18 | 64.105 | KV453060.1 | 3908498 | 14-scf00370 | 14 |
| AX-158219589 | 18 | 64.105 | KV453060.1 | 3911204 | 14-scf00370 | 14 |
| AX-158219590 | 18 | 64.105 | KV453060.1 | 3916587 | 14-scf00370 | 14 |
| AX-158219591 | 18 | 64.105 | KV453060.1 | 3917251 | 14-scf00370 | 14 |
| AX-158219597 | 18 | 64.105 | KV453060.1 | 3923551 | 14-scf00370 | 14 |
| AX-158219603 | 18 | 64.105 | KV453060.1 | 3927836 | 14-scf00370 | 14 |
| AX-158219607 | 18 | 64.105 | KV453060.1 | 3931863 | 14-scf00370 | 14 |
| AX-158219608 | 18 | 64.105 | KV453060.1 | 3932832 | 14-scf00370 | 14 |

|              |    |        |             |         |             |    |
|--------------|----|--------|-------------|---------|-------------|----|
| AX-158219609 | 18 | 64.105 | KV453060.1  | 3934258 | 14-scf00370 | 14 |
| AX-158219610 | 18 | 64.105 | KV453060.1  | 3934794 | 14-scf00370 | 14 |
| AX-158219611 | 18 | 64.105 | KV453060.1  | 3937434 | 14-scf00370 | 14 |
| AX-158219613 | 18 | 64.105 | KV453060.1  | 3939224 | 14-scf00370 | 14 |
| AX-157770653 | 18 | 64.105 | KV453060.1  | 3947572 | 14-scf00370 | 14 |
| AX-158219623 | 18 | 64.105 | KV453060.1  | 3948283 | 14-scf00370 | 14 |
| AX-158219625 | 18 | 64.105 | KV453060.1  | 3949631 | 14-scf00370 | 14 |
| AX-158219627 | 18 | 64.105 | KV453060.1  | 3953279 | 14-scf00370 | 14 |
| AX-157887259 | 18 | 64.105 | KV453060.1  | 3958319 | 14-scf00370 | 14 |
| AX-157887260 | 18 | 64.105 | KV453060.1  | 3960356 | 14-scf00370 | 14 |
| AX-158219630 | 18 | 64.105 | KV453060.1  | 3960440 | 14-scf00370 | 14 |
| AX-158219631 | 18 | 64.105 | KV453060.1  | 3960826 | 14-scf00370 | 14 |
| AX-158219633 | 18 | 64.105 | KV453060.1  | 3963432 | 14-scf00370 | 14 |
| AX-158219641 | 18 | 64.105 | KV453060.1  | 3971272 | 14-scf00370 | 14 |
| AX-158219642 | 18 | 64.105 | KV453060.1  | 3972289 | 14-scf00370 | 14 |
| AX-158219643 | 18 | 64.105 | KV453060.1  | 3972715 | 14-scf00370 | 14 |
| AX-158414783 | 18 | 64.105 | KV453060.1  | 3972819 | 14-scf00370 | 14 |
| AX-158219644 | 18 | 64.105 | KV453060.1  | 3973630 | 14-scf00370 | 14 |
| AX-158219660 | 18 | 64.105 | KV453060.1  | 3994872 | 14-scf00370 | 14 |
| AX-158219661 | 18 | 64.105 | KV453060.1  | 3995254 | 14-scf00370 | 14 |
| AX-158219680 | 18 | 64.105 | KV453060.1  | 4014743 | 14-scf00370 | 14 |
| AX-157756643 | 18 | 64.105 | KV453060.1  | 4015490 | 14-scf00370 | 14 |
| AX-157718106 | 18 | 64.105 | KV453060.1  | 4028201 | 14-scf00370 | 14 |
| AX-158219737 | 18 | 64.105 | KV453060.1  | 4101814 | 14-scf00370 | 14 |
| AX-157706780 | 18 | 64.105 | 3ML01032900 | 231     | scf08531_1  | UN |
| AX-158219279 | 18 | 64.188 | KV453060.1  | 3534641 | 14-scf00370 | 14 |
| AX-158414780 | 18 | 64.188 | KV453060.1  | 3690417 | 14-scf00370 | 14 |
| AX-158219442 | 18 | 64.188 | KV453060.1  | 3754129 | 14-scf00370 | 14 |
| AX-158219450 | 18 | 64.188 | KV453060.1  | 3763816 | 14-scf00370 | 14 |
| AX-158219634 | 18 | 64.188 | KV453060.1  | 3964558 | 14-scf00370 | 14 |
| AX-157723591 | 18 | 64.188 | KV453060.1  | 3971838 | 14-scf00370 | 14 |
| AX-158219683 | 18 | 64.188 | KV453060.1  | 4022280 | 14-scf00370 | 14 |
| AX-158219686 | 18 | 64.269 | KV453060.1  | 4023918 | 14-scf00370 | 14 |
| AX-158219688 | 18 | 64.269 | KV453060.1  | 4027251 | 14-scf00370 | 14 |
| AX-158219689 | 18 | 64.312 | KV453060.1  | 4027913 | 14-scf00370 | 14 |
| AX-158219690 | 18 | 64.375 | KV453060.1  | 4029034 | 14-scf00370 | 14 |
| AX-158219099 | 18 | 64.433 | KV453060.1  | 3296163 | 14-scf00370 | 14 |
| AX-158219107 | 18 | 64.433 | KV453060.1  | 3303942 | 14-scf00370 | 14 |
| AX-158219112 | 18 | 64.433 | KV453060.1  | 3309440 | 14-scf00370 | 14 |
| AX-158219312 | 18 | 64.433 | KV453060.1  | 3571553 | 14-scf00370 | 14 |
| AX-158219329 | 18 | 64.433 | KV453060.1  | 3589902 | 14-scf00370 | 14 |
| AX-158219330 | 18 | 64.433 | KV453060.1  | 3590121 | 14-scf00370 | 14 |
| AX-158219351 | 18 | 64.433 | KV453060.1  | 3615168 | 14-scf00370 | 14 |
| AX-158219580 | 18 | 64.433 | KV453060.1  | 3901035 | 14-scf00370 | 14 |
| AX-157839228 | 18 | 64.433 | KV453060.1  | 3908705 | 14-scf00370 | 14 |
| AX-158219606 | 18 | 64.433 | KV453060.1  | 3930264 | 14-scf00370 | 14 |
| AX-158394051 | 18 | 64.433 | KV453060.1  | 3959475 | 14-scf00370 | 14 |
| AX-157738411 | 18 | 64.433 | KV453060.1  | 3961353 | 14-scf00370 | 14 |
| AX-158219691 | 18 | 64.433 | KV453060.1  | 4032881 | 14-scf00370 | 14 |
| AX-158219706 | 18 | 64.433 | KV453060.1  | 4058448 | 14-scf00370 | 14 |
| AX-158219707 | 18 | 64.433 | KV453060.1  | 4058864 | 14-scf00370 | 14 |

|              |    |        |            |         |             |    |
|--------------|----|--------|------------|---------|-------------|----|
| AX-158219709 | 18 | 64.433 | KV453060.1 | 4061334 | 14-scf00370 | 14 |
| AX-158219711 | 18 | 64.433 | KV453060.1 | 4065894 | 14-scf00370 | 14 |
| AX-158219713 | 18 | 64.433 | KV453060.1 | 4068810 | 14-scf00370 | 14 |
| AX-158219714 | 18 | 64.433 | KV453060.1 | 4071633 | 14-scf00370 | 14 |
| AX-158219715 | 18 | 64.433 | KV453060.1 | 4072365 | 14-scf00370 | 14 |
| AX-158219716 | 18 | 64.433 | KV453060.1 | 4075041 | 14-scf00370 | 14 |
| AX-158219717 | 18 | 64.433 | KV453060.1 | 4075881 | 14-scf00370 | 14 |
| AX-158219720 | 18 | 64.433 | KV453060.1 | 4079952 | 14-scf00370 | 14 |
| AX-158219723 | 18 | 64.433 | KV453060.1 | 4082142 | 14-scf00370 | 14 |
| AX-158219726 | 18 | 64.433 | KV453060.1 | 4087522 | 14-scf00370 | 14 |
| AX-158219730 | 18 | 64.433 | KV453060.1 | 4090964 | 14-scf00370 | 14 |
| AX-158219731 | 18 | 64.433 | KV453060.1 | 4091661 | 14-scf00370 | 14 |
| AX-158219732 | 18 | 64.433 | KV453060.1 | 4092209 | 14-scf00370 | 14 |
| AX-158219733 | 18 | 64.433 | KV453060.1 | 4095990 | 14-scf00370 | 14 |
| AX-158219734 | 18 | 64.433 | KV453060.1 | 4097691 | 14-scf00370 | 14 |
| AX-158219738 | 18 | 64.433 | KV453060.1 | 4102519 | 14-scf00370 | 14 |
| AX-158219742 | 18 | 64.433 | KV453060.1 | 4107038 | 14-scf00370 | 14 |
| AX-157773162 | 18 | 64.651 | KV453060.1 | 4111881 | 14-scf00370 | 14 |
| AX-158219744 | 18 | 64.651 | KV453060.1 | 4112494 | 14-scf00370 | 14 |
| AX-158219746 | 18 | 64.651 | KV453060.1 | 4118985 | 14-scf00370 | 14 |
| AX-158219748 | 18 | 64.651 | KV453060.1 | 4120701 | 14-scf00370 | 14 |
| AX-158219750 | 18 | 64.651 | KV453060.1 | 4123885 | 14-scf00370 | 14 |
| AX-158219752 | 18 | 64.651 | KV453060.1 | 4124714 | 14-scf00370 | 14 |
| AX-157747890 | 18 | 64.651 | KV453060.1 | 4125590 | 14-scf00370 | 14 |
| AX-158219753 | 18 | 64.651 | KV453060.1 | 4127125 | 14-scf00370 | 14 |
| AX-158219754 | 18 | 64.655 | KV453060.1 | 4127625 | 14-scf00370 | 14 |
| AX-158219758 | 18 | 65.088 | KV453060.1 | 4131485 | 14-scf00370 | 14 |
| AX-158219762 | 18 | 65.088 | KV453060.1 | 4135035 | 14-scf00370 | 14 |
| AX-157743914 | 18 | 65.088 | KV453060.1 | 4140053 | 14-scf00370 | 14 |
| AX-158219767 | 18 | 65.197 | KV453060.1 | 4147954 | 14-scf00370 | 14 |
| AX-157859454 | 18 | 65.197 | KV453060.1 | 4149953 | 14-scf00370 | 14 |
| AX-158219768 | 18 | 65.197 | KV453060.1 | 4150256 | 14-scf00370 | 14 |
| AX-157709953 | 18 | 65.306 | KV453060.1 | 4144348 | 14-scf00370 | 14 |
| AX-158219771 | 18 | 65.306 | KV453060.1 | 4156447 | 14-scf00370 | 14 |
| AX-158219772 | 18 | 65.306 | KV453060.1 | 4157835 | 14-scf00370 | 14 |
| AX-158219773 | 18 | 65.306 | KV453060.1 | 4158295 | 14-scf00370 | 14 |
| AX-158219774 | 18 | 65.42  | KV453060.1 | 4160462 | 14-scf00370 | 14 |
| AX-158219775 | 18 | 65.525 | KV453060.1 | 4164015 | 14-scf00370 | 14 |
| AX-158219776 | 18 | 65.525 | KV453060.1 | 4165265 | 14-scf00370 | 14 |
| AX-158219779 | 18 | 65.525 | KV453060.1 | 4168187 | 14-scf00370 | 14 |
| AX-157879710 | 18 | 65.525 | KV453060.1 | 4172285 | 14-scf00370 | 14 |
| AX-158219765 | 18 | 65.557 | KV453060.1 | 4137718 | 14-scf00370 | 14 |
| AX-158219780 | 18 | 65.557 | KV453060.1 | 4168716 | 14-scf00370 | 14 |
| AX-158219781 | 18 | 65.649 | KV453060.1 | 4171454 | 14-scf00370 | 14 |
| AX-158219785 | 18 | 65.743 | KV453060.1 | 4177914 | 14-scf00370 | 14 |
| AX-158219789 | 18 | 65.962 | KV453060.1 | 4187698 | 14-scf00370 | 14 |
| AX-158219791 | 18 | 65.962 | KV453060.1 | 4188710 | 14-scf00370 | 14 |
| AX-158219792 | 18 | 65.962 | KV453060.1 | 4190118 | 14-scf00370 | 14 |
| AX-158219793 | 18 | 65.962 | KV453060.1 | 4191357 | 14-scf00370 | 14 |
| AX-157772636 | 18 | 65.962 | KV453060.1 | 4192111 | 14-scf00370 | 14 |
| AX-158219794 | 18 | 65.962 | KV453060.1 | 4193325 | 14-scf00370 | 14 |

|              |    |        |             |         |             |    |
|--------------|----|--------|-------------|---------|-------------|----|
| AX-157757445 | 18 | 65.962 | KV453060.1  | 4194404 | 14-scf00370 | 14 |
| AX-158414786 | 18 | 65.962 | KV453060.1  | 4205940 | 14-scf00370 | 14 |
| AX-158219802 | 18 | 65.962 | KV453060.1  | 4206491 | 14-scf00370 | 14 |
| AX-158219804 | 18 | 65.962 | KV453060.1  | 4213169 | 14-scf00370 | 14 |
| AX-158219795 | 18 | 66.18  | KV453060.1  | 4197325 | 14-scf00370 | 14 |
| AX-158219797 | 18 | 66.18  | KV453060.1  | 4198969 | 14-scf00370 | 14 |
| AX-157716626 | 18 | 66.18  | KV453060.1  | 4202316 | 14-scf00370 | 14 |
| AX-158219800 | 18 | 66.18  | KV453060.1  | 4204219 | 14-scf00370 | 14 |
| AX-158219801 | 18 | 66.18  | KV453060.1  | 4205220 | 14-scf00370 | 14 |
| AX-157705812 | 18 | 66.18  | 3ML01030948 | 790     | scf06552_1  | UN |
| AX-158219803 | 18 | 66.289 | KV453060.1  | 4207584 | 14-scf00370 | 14 |
| AX-158219806 | 18 | 66.581 | KV453060.1  | 4217918 | 14-scf00370 | 14 |
| AX-158219808 | 18 | 66.725 | KV453060.1  | 4221821 | 14-scf00370 | 14 |
| AX-158219809 | 18 | 66.725 | KV453060.1  | 4222680 | 14-scf00370 | 14 |
| AX-158219818 | 18 | 66.725 | KV453060.1  | 4233178 | 14-scf00370 | 14 |
| AX-158219810 | 18 | 66.726 | KV453060.1  | 4224079 | 14-scf00370 | 14 |
| AX-158219812 | 18 | 66.726 | KV453060.1  | 4225813 | 14-scf00370 | 14 |
| AX-158219813 | 18 | 66.726 | KV453060.1  | 4226782 | 14-scf00370 | 14 |
| AX-158219814 | 18 | 66.744 | KV453060.1  | 4227393 | 14-scf00370 | 14 |
| AX-158219788 | 18 | 66.761 | KV453060.1  | 4187345 | 14-scf00370 | 14 |
| AX-158219807 | 18 | 66.761 | KV453060.1  | 4218503 | 14-scf00370 | 14 |
| AX-158219815 | 18 | 66.761 | KV453060.1  | 4229556 | 14-scf00370 | 14 |
| AX-158219820 | 18 | 66.761 | KV453060.1  | 4236586 | 14-scf00370 | 14 |
| AX-158219840 | 18 | 66.761 | KV453060.1  | 4258856 | 14-scf00370 | 14 |
| AX-157741767 | 18 | 66.778 | KV453060.1  | 4230482 | 14-scf00370 | 14 |
| AX-157718959 | 18 | 66.778 | KV453060.1  | 4243748 | 14-scf00370 | 14 |
| AX-157724040 | 18 | 66.778 | KV453060.1  | 4265417 | 14-scf00370 | 14 |
| AX-158219817 | 18 | 66.806 | KV453060.1  | 4231451 | 14-scf00370 | 14 |
| AX-158219821 | 18 | 66.836 | KV453060.1  | 4237415 | 14-scf00370 | 14 |
| AX-158219825 | 18 | 66.836 | KV453060.1  | 4240982 | 14-scf00370 | 14 |
| AX-158219826 | 18 | 66.836 | KV453060.1  | 4241822 | 14-scf00370 | 14 |
| AX-158219828 | 18 | 66.945 | KV453060.1  | 4243141 | 14-scf00370 | 14 |
| AX-158219829 | 18 | 66.945 | KV453060.1  | 4244392 | 14-scf00370 | 14 |
| AX-158219830 | 18 | 66.945 | KV453060.1  | 4244760 | 14-scf00370 | 14 |
| AX-158219836 | 18 | 66.945 | KV453060.1  | 4253186 | 14-scf00370 | 14 |
| AX-158219837 | 18 | 66.945 | KV453060.1  | 4253673 | 14-scf00370 | 14 |
| AX-158219838 | 18 | 66.945 | KV453060.1  | 4257066 | 14-scf00370 | 14 |
| AX-158219839 | 18 | 66.945 | KV453060.1  | 4257555 | 14-scf00370 | 14 |
| AX-157839234 | 18 | 66.945 | KV453060.1  | 4260580 | 14-scf00370 | 14 |
| AX-158219842 | 18 | 66.945 | KV453060.1  | 4260942 | 14-scf00370 | 14 |
| AX-158219846 | 18 | 66.945 | KV453060.1  | 4267212 | 14-scf00370 | 14 |
| AX-158219847 | 18 | 66.945 | KV453060.1  | 4267941 | 14-scf00370 | 14 |
| AX-158219811 | 18 | 66.986 | KV453060.1  | 4224602 | 14-scf00370 | 14 |
| AX-158219849 | 18 | 67.112 | KV453060.1  | 4271706 | 14-scf00370 | 14 |
| AX-158219852 | 18 | 67.275 | KV453060.1  | 4280824 | 14-scf00370 | 14 |
| AX-158219854 | 18 | 67.276 | KV453060.1  | 4283496 | 14-scf00370 | 14 |
| AX-158219855 | 18 | 67.492 | KV453060.1  | 4283781 | 14-scf00370 | 14 |
| AX-158219857 | 18 | 67.819 | KV453060.1  | 4286170 | 14-scf00370 | 14 |
| AX-158219858 | 18 | 67.819 | KV453060.1  | 4287584 | 14-scf00370 | 14 |
| AX-158219881 | 18 | 67.819 | KV453060.1  | 4323784 | 14-scf00370 | 14 |
| AX-158219859 | 18 | 67.82  | KV453060.1  | 4287996 | 14-scf00370 | 14 |

|              |    |        |            |         |             |    |
|--------------|----|--------|------------|---------|-------------|----|
| AX-158219860 | 18 | 67.82  | KV453060.1 | 4290688 | 14-scf00370 | 14 |
| AX-158219861 | 18 | 67.82  | KV453060.1 | 4292338 | 14-scf00370 | 14 |
| AX-158219863 | 18 | 67.82  | KV453060.1 | 4295297 | 14-scf00370 | 14 |
| AX-158219864 | 18 | 67.925 | KV453060.1 | 4299885 | 14-scf00370 | 14 |
| AX-158219865 | 18 | 67.925 | KV453060.1 | 4301930 | 14-scf00370 | 14 |
| AX-158219866 | 18 | 68.044 | KV453060.1 | 4303028 | 14-scf00370 | 14 |
| AX-158219869 | 18 | 68.148 | KV453060.1 | 4305884 | 14-scf00370 | 14 |
| AX-158219870 | 18 | 68.367 | KV453060.1 | 4308322 | 14-scf00370 | 14 |
| AX-158219871 | 18 | 68.367 | KV453060.1 | 4311435 | 14-scf00370 | 14 |
| AX-158219872 | 18 | 68.403 | KV453060.1 | 4313072 | 14-scf00370 | 14 |
| AX-158219873 | 18 | 68.476 | KV453060.1 | 4314850 | 14-scf00370 | 14 |
| AX-158219875 | 18 | 68.694 | KV453060.1 | 4318017 | 14-scf00370 | 14 |
| AX-158219877 | 18 | 68.804 | KV453060.1 | 4320010 | 14-scf00370 | 14 |
| AX-158219879 | 18 | 68.804 | KV453060.1 | 4321148 | 14-scf00370 | 14 |
| AX-158219880 | 18 | 68.804 | KV453060.1 | 4321500 | 14-scf00370 | 14 |
| AX-157774809 | 18 | 68.804 | KV453060.1 | 4321990 | 14-scf00370 | 14 |
| AX-158219882 | 18 | 68.804 | KV453060.1 | 4326034 | 14-scf00370 | 14 |
| AX-158219883 | 18 | 68.87  | KV453060.1 | 4326513 | 14-scf00370 | 14 |
| AX-157746682 | 18 | 68.913 | KV453060.1 | 4328828 | 14-scf00370 | 14 |
| AX-158219886 | 18 | 68.913 | KV453060.1 | 4329147 | 14-scf00370 | 14 |
| AX-158219887 | 18 | 68.913 | KV453060.1 | 4329563 | 14-scf00370 | 14 |
| AX-158219888 | 18 | 68.913 | KV453060.1 | 4330190 | 14-scf00370 | 14 |
| AX-157758953 | 18 | 68.913 | KV453060.1 | 4332735 | 14-scf00370 | 14 |
| AX-158219890 | 18 | 68.913 | KV453060.1 | 4336431 | 14-scf00370 | 14 |
| AX-158219891 | 18 | 68.913 | KV453060.1 | 4337396 | 14-scf00370 | 14 |
| AX-158219892 | 18 | 68.913 | KV453060.1 | 4338327 | 14-scf00370 | 14 |
| AX-158219894 | 18 | 68.913 | KV453060.1 | 4341927 | 14-scf00370 | 14 |
| AX-158219878 | 18 | 69.131 | KV453060.1 | 4320149 | 14-scf00370 | 14 |
| AX-157839235 | 18 | 69.131 | KV453060.1 | 4342167 | 14-scf00370 | 14 |
| AX-158219896 | 18 | 69.131 | KV453060.1 | 4348330 | 14-scf00370 | 14 |
| AX-158219897 | 18 | 69.131 | KV453060.1 | 4352461 | 14-scf00370 | 14 |
| AX-157773100 | 18 | 69.24  | KV453060.1 | 4354205 | 14-scf00370 | 14 |
| AX-158219899 | 18 | 69.24  | KV453060.1 | 4356587 | 14-scf00370 | 14 |
| AX-158219898 | 18 | 69.35  | KV453060.1 | 4356110 | 14-scf00370 | 14 |
| AX-158219900 | 18 | 69.35  | KV453060.1 | 4357373 | 14-scf00370 | 14 |
| AX-158219901 | 18 | 69.35  | KV453060.1 | 4359862 | 14-scf00370 | 14 |
| AX-158219902 | 18 | 69.351 | KV453060.1 | 4361956 | 14-scf00370 | 14 |
| AX-158219904 | 18 | 69.671 | KV453060.1 | 4362660 | 14-scf00370 | 14 |
| AX-158219905 | 18 | 69.671 | KV453060.1 | 4362880 | 14-scf00370 | 14 |
| AX-158219907 | 18 | 69.671 | KV453060.1 | 4363983 | 14-scf00370 | 14 |
| AX-158219908 | 18 | 69.671 | KV453060.1 | 4365767 | 14-scf00370 | 14 |
| AX-158219911 | 18 | 69.671 | KV453060.1 | 4371152 | 14-scf00370 | 14 |
| AX-158220132 | 18 | 69.671 | KV453060.1 | 4665436 | 14-scf00370 | 14 |
| AX-158219912 | 18 | 69.856 | KV453060.1 | 4373088 | 14-scf00370 | 14 |
| AX-157839237 | 18 | 69.856 | KV453060.1 | 4373304 | 14-scf00370 | 14 |
| AX-158219919 | 18 | 70.043 | KV453060.1 | 4385028 | 14-scf00370 | 14 |
| AX-158219921 | 18 | 70.076 | KV453060.1 | 4387437 | 14-scf00370 | 14 |
| AX-157750236 | 18 | 70.111 | KV453060.1 | 4378128 | 14-scf00370 | 14 |
| AX-158219922 | 18 | 70.111 | KV453060.1 | 4387756 | 14-scf00370 | 14 |
| AX-157745515 | 18 | 70.145 | KV453060.1 | 4341234 | 14-scf00370 | 14 |
| AX-157746889 | 18 | 70.145 | KV453060.1 | 4388930 | 14-scf00370 | 14 |

|              |    |        |             |         |             |    |
|--------------|----|--------|-------------|---------|-------------|----|
| AX-158219925 | 18 | 70.217 | KV453060.1  | 4392051 | 14-scf00370 | 14 |
| AX-158219988 | 18 | 70.217 | KV453060.1  | 4484047 | 14-scf00370 | 14 |
| AX-158219927 | 18 | 70.295 | KV453060.1  | 4392990 | 14-scf00370 | 14 |
| AX-157741192 | 18 | 70.295 | KV453060.1  | 4393164 | 14-scf00370 | 14 |
| AX-158219929 | 18 | 70.442 | KV453060.1  | 4397423 | 14-scf00370 | 14 |
| AX-158219916 | 18 | 70.444 | KV453060.1  | 4380295 | 14-scf00370 | 14 |
| AX-158219917 | 18 | 70.444 | KV453060.1  | 4381856 | 14-scf00370 | 14 |
| AX-158219932 | 18 | 70.444 | KV453060.1  | 4399362 | 14-scf00370 | 14 |
| AX-158219936 | 18 | 70.444 | KV453060.1  | 4402965 | 14-scf00370 | 14 |
| AX-158219937 | 18 | 70.444 | KV453060.1  | 4405415 | 14-scf00370 | 14 |
| AX-158219938 | 18 | 70.444 | KV453060.1  | 4406367 | 14-scf00370 | 14 |
| AX-157706392 | 18 | 70.444 | 3ML01032171 | 256     | scf07786_1  | UN |
| AX-158219941 | 18 | 70.492 | KV453060.1  | 4411066 | 14-scf00370 | 14 |
| AX-158219931 | 18 | 70.553 | KV453060.1  | 4399045 | 14-scf00370 | 14 |
| AX-158219942 | 18 | 70.553 | KV453060.1  | 4417744 | 14-scf00370 | 14 |
| AX-158219943 | 18 | 70.553 | KV453060.1  | 4420062 | 14-scf00370 | 14 |
| AX-158219944 | 18 | 70.553 | KV453060.1  | 4420381 | 14-scf00370 | 14 |
| AX-158219946 | 18 | 70.661 | KV453060.1  | 4423521 | 14-scf00370 | 14 |
| AX-158219947 | 18 | 70.661 | KV453060.1  | 4426600 | 14-scf00370 | 14 |
| AX-158219948 | 18 | 70.698 | KV453060.1  | 4429405 | 14-scf00370 | 14 |
| AX-158219950 | 18 | 70.741 | KV453060.1  | 4431330 | 14-scf00370 | 14 |
| AX-158219952 | 18 | 70.771 | KV453060.1  | 4432833 | 14-scf00370 | 14 |
| AX-157743021 | 18 | 70.771 | KV453060.1  | 4446247 | 14-scf00370 | 14 |
| AX-158219953 | 18 | 70.881 | KV453060.1  | 4434924 | 14-scf00370 | 14 |
| AX-157839241 | 18 | 70.881 | KV453060.1  | 4435139 | 14-scf00370 | 14 |
| AX-158219956 | 18 | 70.881 | KV453060.1  | 4438031 | 14-scf00370 | 14 |
| AX-158219957 | 18 | 70.881 | KV453060.1  | 4439221 | 14-scf00370 | 14 |
| AX-157839242 | 18 | 70.881 | KV453060.1  | 4440029 | 14-scf00370 | 14 |
| AX-158219958 | 18 | 70.881 | KV453060.1  | 4440525 | 14-scf00370 | 14 |
| AX-158219959 | 18 | 70.881 | KV453060.1  | 4440780 | 14-scf00370 | 14 |
| AX-158219960 | 18 | 70.881 | KV453060.1  | 4442152 | 14-scf00370 | 14 |
| AX-158219966 | 18 | 70.881 | KV453060.1  | 4450135 | 14-scf00370 | 14 |
| AX-158219967 | 18 | 70.881 | KV453060.1  | 4450399 | 14-scf00370 | 14 |
| AX-157839243 | 18 | 70.881 | KV453060.1  | 4460884 | 14-scf00370 | 14 |
| AX-158219996 | 18 | 70.881 | KV453060.1  | 4495989 | 14-scf00370 | 14 |
| AX-158219969 | 18 | 70.906 | KV453060.1  | 4453298 | 14-scf00370 | 14 |
| AX-158219971 | 18 | 70.929 | KV453060.1  | 4456669 | 14-scf00370 | 14 |
| AX-158219972 | 18 | 70.95  | KV453060.1  | 4457523 | 14-scf00370 | 14 |
| AX-157751696 | 18 | 70.97  | KV453060.1  | 4451070 | 14-scf00370 | 14 |
| AX-158219968 | 18 | 70.97  | KV453060.1  | 4451289 | 14-scf00370 | 14 |
| AX-158219973 | 18 | 70.97  | KV453060.1  | 4458003 | 14-scf00370 | 14 |
| AX-157872399 | 18 | 70.99  | KV453060.1  | 4459931 | 14-scf00370 | 14 |
| AX-157839244 | 18 | 70.99  | KV453060.1  | 4466055 | 14-scf00370 | 14 |
| AX-158219975 | 18 | 70.99  | KV453060.1  | 4466347 | 14-scf00370 | 14 |
| AX-158219976 | 18 | 70.99  | KV453060.1  | 4467741 | 14-scf00370 | 14 |
| AX-157839245 | 18 | 70.99  | KV453060.1  | 4471465 | 14-scf00370 | 14 |
| AX-157745332 | 18 | 70.99  | KV453060.1  | 4472742 | 14-scf00370 | 14 |
| AX-158219978 | 18 | 70.99  | KV453060.1  | 4473675 | 14-scf00370 | 14 |
| AX-158219979 | 18 | 70.99  | KV453060.1  | 4473925 | 14-scf00370 | 14 |
| AX-157839247 | 18 | 70.99  | KV453060.1  | 4474436 | 14-scf00370 | 14 |
| AX-157839248 | 18 | 71.099 | KV453060.1  | 4486791 | 14-scf00370 | 14 |

|              |    |        |            |         |             |    |
|--------------|----|--------|------------|---------|-------------|----|
| AX-158219993 | 18 | 71.208 | KV453060.1 | 4490330 | 14-scf00370 | 14 |
| AX-158219994 | 18 | 71.229 | KV453060.1 | 4490710 | 14-scf00370 | 14 |
| AX-158219997 | 18 | 71.287 | KV453060.1 | 4496763 | 14-scf00370 | 14 |
| AX-158219999 | 18 | 71.318 | KV453060.1 | 4498737 | 14-scf00370 | 14 |
| AX-157722449 | 18 | 71.318 | KV453060.1 | 4500429 | 14-scf00370 | 14 |
| AX-158220001 | 18 | 71.318 | KV453060.1 | 4501381 | 14-scf00370 | 14 |
| AX-158220002 | 18 | 71.318 | KV453060.1 | 4503228 | 14-scf00370 | 14 |
| AX-157839251 | 18 | 71.318 | KV453060.1 | 4503466 | 14-scf00370 | 14 |
| AX-157839250 | 18 | 71.362 | KV453060.1 | 4503381 | 14-scf00370 | 14 |
| AX-157839253 | 18 | 71.427 | KV453060.1 | 4511547 | 14-scf00370 | 14 |
| AX-158220005 | 18 | 71.427 | KV453060.1 | 4514025 | 14-scf00370 | 14 |
| AX-158220006 | 18 | 71.427 | KV453060.1 | 4514902 | 14-scf00370 | 14 |
| AX-158219954 | 18 | 71.536 | KV453060.1 | 4435520 | 14-scf00370 | 14 |
| AX-157720116 | 18 | 71.536 | KV453060.1 | 4443118 | 14-scf00370 | 14 |
| AX-158219961 | 18 | 71.536 | KV453060.1 | 4444780 | 14-scf00370 | 14 |
| AX-158220008 | 18 | 71.536 | KV453060.1 | 4516879 | 14-scf00370 | 14 |
| AX-157839254 | 18 | 71.536 | KV453060.1 | 4519776 | 14-scf00370 | 14 |
| AX-158220013 | 18 | 71.536 | KV453060.1 | 4523135 | 14-scf00370 | 14 |
| AX-158220014 | 18 | 71.536 | KV453060.1 | 4524059 | 14-scf00370 | 14 |
| AX-158220018 | 18 | 71.536 | KV453060.1 | 4530358 | 14-scf00370 | 14 |
| AX-157839257 | 18 | 71.536 | KV453060.1 | 4531205 | 14-scf00370 | 14 |
| AX-157839258 | 18 | 71.536 | KV453060.1 | 4531849 | 14-scf00370 | 14 |
| AX-157839259 | 18 | 71.536 | KV453060.1 | 4532312 | 14-scf00370 | 14 |
| AX-158220019 | 18 | 71.536 | KV453060.1 | 4533821 | 14-scf00370 | 14 |
| AX-158220021 | 18 | 71.536 | KV453060.1 | 4535599 | 14-scf00370 | 14 |
| AX-158220022 | 18 | 71.536 | KV453060.1 | 4537342 | 14-scf00370 | 14 |
| AX-157839260 | 18 | 71.536 | KV453060.1 | 4538353 | 14-scf00370 | 14 |
| AX-158220024 | 18 | 71.536 | KV453060.1 | 4539000 | 14-scf00370 | 14 |
| AX-157745343 | 18 | 71.536 | KV453060.1 | 4541046 | 14-scf00370 | 14 |
| AX-158220025 | 18 | 71.536 | KV453060.1 | 4541733 | 14-scf00370 | 14 |
| AX-158220026 | 18 | 71.536 | KV453060.1 | 4543239 | 14-scf00370 | 14 |
| AX-158220030 | 18 | 71.645 | KV453060.1 | 4548419 | 14-scf00370 | 14 |
| AX-158220032 | 18 | 71.755 | KV453060.1 | 4551658 | 14-scf00370 | 14 |
| AX-158220033 | 18 | 71.755 | KV453060.1 | 4552615 | 14-scf00370 | 14 |
| AX-158220034 | 18 | 71.755 | KV453060.1 | 4554810 | 14-scf00370 | 14 |
| AX-158220036 | 18 | 71.755 | KV453060.1 | 4557129 | 14-scf00370 | 14 |
| AX-158220041 | 18 | 71.755 | KV453060.1 | 4561036 | 14-scf00370 | 14 |
| AX-158220042 | 18 | 71.755 | KV453060.1 | 4561429 | 14-scf00370 | 14 |
| AX-158220040 | 18 | 71.756 | KV453060.1 | 4560451 | 14-scf00370 | 14 |
| AX-158220043 | 18 | 71.756 | KV453060.1 | 4564709 | 14-scf00370 | 14 |
| AX-157755420 | 18 | 71.756 | KV453060.1 | 4567372 | 14-scf00370 | 14 |
| AX-158220044 | 18 | 71.756 | KV453060.1 | 4567874 | 14-scf00370 | 14 |
| AX-158220045 | 18 | 71.756 | KV453060.1 | 4568875 | 14-scf00370 | 14 |
| AX-158220049 | 18 | 71.918 | KV453060.1 | 4577509 | 14-scf00370 | 14 |
| AX-158220050 | 18 | 71.918 | KV453060.1 | 4580025 | 14-scf00370 | 14 |
| AX-158220051 | 18 | 71.918 | KV453060.1 | 4580526 | 14-scf00370 | 14 |
| AX-158220053 | 18 | 72.082 | KV453060.1 | 4583440 | 14-scf00370 | 14 |
| AX-158220054 | 18 | 72.082 | KV453060.1 | 4584673 | 14-scf00370 | 14 |
| AX-158220056 | 18 | 72.082 | KV453060.1 | 4587259 | 14-scf00370 | 14 |
| AX-158220137 | 18 | 72.082 | KV453060.1 | 4670668 | 14-scf00370 | 14 |
| AX-158220058 | 18 | 72.159 | KV453060.1 | 4590498 | 14-scf00370 | 14 |



|              |    |        |            |         |             |    |
|--------------|----|--------|------------|---------|-------------|----|
| AX-158220060 | 18 | 72.192 | KV453060.1 | 4591619 | 14-scf00370 | 14 |
| AX-158220062 | 18 | 72.222 | KV453060.1 | 4593000 | 14-scf00370 | 14 |
| AX-158220063 | 18 | 72.253 | KV453060.1 | 4593744 | 14-scf00370 | 14 |
| AX-158220065 | 18 | 72.301 | KV453060.1 | 4594811 | 14-scf00370 | 14 |
| AX-158220066 | 18 | 72.361 | KV453060.1 | 4596054 | 14-scf00370 | 14 |
| AX-158220029 | 18 | 72.41  | KV453060.1 | 4546720 | 14-scf00370 | 14 |
| AX-158220069 | 18 | 72.41  | KV453060.1 | 4602922 | 14-scf00370 | 14 |
| AX-158220070 | 18 | 72.41  | KV453060.1 | 4603129 | 14-scf00370 | 14 |
| AX-158220071 | 18 | 72.41  | KV453060.1 | 4603657 | 14-scf00370 | 14 |
| AX-158220078 | 18 | 72.41  | KV453060.1 | 4612960 | 14-scf00370 | 14 |
| AX-157739310 | 18 | 72.41  | KV453060.1 | 4629850 | 14-scf00370 | 14 |
| AX-158220079 | 18 | 72.451 | KV453060.1 | 4613959 | 14-scf00370 | 14 |
| AX-158220081 | 18 | 72.485 | KV453060.1 | 4616060 | 14-scf00370 | 14 |
| AX-158220067 | 18 | 72.519 | KV453060.1 | 4601751 | 14-scf00370 | 14 |
| AX-158220080 | 18 | 72.519 | KV453060.1 | 4614884 | 14-scf00370 | 14 |
| AX-158220082 | 18 | 72.519 | KV453060.1 | 4616670 | 14-scf00370 | 14 |
| AX-158220083 | 18 | 72.519 | KV453060.1 | 4617207 | 14-scf00370 | 14 |
| AX-158220084 | 18 | 72.519 | KV453060.1 | 4617766 | 14-scf00370 | 14 |
| AX-158414792 | 18 | 72.519 | KV453060.1 | 4618138 | 14-scf00370 | 14 |
| AX-158220085 | 18 | 72.519 | KV453060.1 | 4618932 | 14-scf00370 | 14 |
| AX-158220086 | 18 | 72.519 | KV453060.1 | 4619362 | 14-scf00370 | 14 |
| AX-158220087 | 18 | 72.519 | KV453060.1 | 4620146 | 14-scf00370 | 14 |
| AX-158220088 | 18 | 72.519 | KV453060.1 | 4620576 | 14-scf00370 | 14 |
| AX-158220090 | 18 | 72.519 | KV453060.1 | 4622949 | 14-scf00370 | 14 |
| AX-158220091 | 18 | 72.519 | KV453060.1 | 4624028 | 14-scf00370 | 14 |
| AX-158220092 | 18 | 72.519 | KV453060.1 | 4624729 | 14-scf00370 | 14 |
| AX-158220093 | 18 | 72.519 | KV453060.1 | 4625385 | 14-scf00370 | 14 |
| AX-158220094 | 18 | 72.519 | KV453060.1 | 4626519 | 14-scf00370 | 14 |
| AX-158220096 | 18 | 72.519 | KV453060.1 | 4627614 | 14-scf00370 | 14 |
| AX-158220098 | 18 | 72.519 | KV453060.1 | 4630173 | 14-scf00370 | 14 |
| AX-158220099 | 18 | 72.519 | KV453060.1 | 4630625 | 14-scf00370 | 14 |
| AX-158220101 | 18 | 72.519 | KV453060.1 | 4631890 | 14-scf00370 | 14 |
| AX-158220103 | 18 | 72.519 | KV453060.1 | 4635155 | 14-scf00370 | 14 |
| AX-158220104 | 18 | 72.519 | KV453060.1 | 4635593 | 14-scf00370 | 14 |
| AX-158220107 | 18 | 72.519 | KV453060.1 | 4637251 | 14-scf00370 | 14 |
| AX-158220109 | 18 | 72.519 | KV453060.1 | 4638553 | 14-scf00370 | 14 |
| AX-158220112 | 18 | 72.519 | KV453060.1 | 4642785 | 14-scf00370 | 14 |
| AX-157746709 | 18 | 72.519 | KV453060.1 | 4646153 | 14-scf00370 | 14 |
| AX-158220118 | 18 | 72.519 | KV453060.1 | 4650260 | 14-scf00370 | 14 |
| AX-158220120 | 18 | 72.519 | KV453060.1 | 4651244 | 14-scf00370 | 14 |
| AX-158220123 | 18 | 72.519 | KV453060.1 | 4658308 | 14-scf00370 | 14 |
| AX-158220125 | 18 | 72.519 | KV453060.1 | 4660253 | 14-scf00370 | 14 |
| AX-157839264 | 18 | 72.519 | KV453060.1 | 4660694 | 14-scf00370 | 14 |
| AX-158220126 | 18 | 72.519 | KV453060.1 | 4661020 | 14-scf00370 | 14 |
| AX-158220133 | 18 | 72.519 | KV453060.1 | 4665785 | 14-scf00370 | 14 |
| AX-158220135 | 18 | 72.519 | KV453060.1 | 4667172 | 14-scf00370 | 14 |
| AX-158220142 | 18 | 72.519 | KV453060.1 | 4676211 | 14-scf00370 | 14 |
| AX-158220143 | 18 | 72.519 | KV453060.1 | 4677812 | 14-scf00370 | 14 |
| AX-158220146 | 18 | 72.519 | KV453060.1 | 4681237 | 14-scf00370 | 14 |
| AX-158220147 | 18 | 72.519 | KV453060.1 | 4681958 | 14-scf00370 | 14 |
| AX-158220149 | 18 | 72.519 | KV453060.1 | 4685512 | 14-scf00370 | 14 |

|              |    |        |            |         |             |    |
|--------------|----|--------|------------|---------|-------------|----|
| AX-158220150 | 18 | 72.519 | KV453060.1 | 4686002 | 14-scf00370 | 14 |
| AX-158220151 | 18 | 72.519 | KV453060.1 | 4686747 | 14-scf00370 | 14 |
| AX-158220154 | 18 | 72.519 | KV453060.1 | 4689044 | 14-scf00370 | 14 |
| AX-158220156 | 18 | 72.519 | KV453060.1 | 4690160 | 14-scf00370 | 14 |
| AX-157879724 | 18 | 72.519 | KV453060.1 | 4693439 | 14-scf00370 | 14 |
| AX-158220177 | 18 | 72.519 | KV453060.1 | 4716053 | 14-scf00370 | 14 |
| AX-158220182 | 18 | 72.519 | KV453060.1 | 4724298 | 14-scf00370 | 14 |
| AX-158220185 | 18 | 72.519 | KV453060.1 | 4725914 | 14-scf00370 | 14 |
| AX-158220198 | 18 | 72.519 | KV453060.1 | 4744724 | 14-scf00370 | 14 |
| AX-158220201 | 18 | 72.519 | KV453060.1 | 4748682 | 14-scf00370 | 14 |
| AX-158220205 | 18 | 72.519 | KV453060.1 | 4754133 | 14-scf00370 | 14 |
| AX-158220220 | 18 | 72.519 | KV453060.1 | 4774296 | 14-scf00370 | 14 |
| AX-158220223 | 18 | 72.519 | KV453060.1 | 4777130 | 14-scf00370 | 14 |
| AX-158220248 | 18 | 72.519 | KV453060.1 | 4810040 | 14-scf00370 | 14 |
| AX-158220258 | 18 | 72.519 | KV453060.1 | 4820300 | 14-scf00370 | 14 |
| AX-158220273 | 18 | 72.519 | KV453060.1 | 4841420 | 14-scf00370 | 14 |
| AX-158220275 | 18 | 72.519 | KV453060.1 | 4844145 | 14-scf00370 | 14 |
| AX-158220279 | 18 | 72.519 | KV453060.1 | 4854283 | 14-scf00370 | 14 |
| AX-158220363 | 18 | 72.519 | KV453060.1 | 4957394 | 14-scf00370 | 14 |
| AX-157839318 | 18 | 72.519 | KV453062.1 | 135489  | 14-scf00371 | 14 |
| AX-158394052 | 18 | 72.738 | KV453060.1 | 4558509 | 14-scf00370 | 14 |
| AX-157872400 | 18 | 72.738 | KV453060.1 | 4569447 | 14-scf00370 | 14 |
| AX-158220117 | 18 | 72.738 | KV453060.1 | 4649737 | 14-scf00370 | 14 |
| AX-158220128 | 18 | 72.738 | KV453060.1 | 4662619 | 14-scf00370 | 14 |
| AX-157743520 | 18 | 72.738 | KV453060.1 | 4684751 | 14-scf00370 | 14 |
| AX-158220155 | 18 | 72.738 | KV453060.1 | 4689761 | 14-scf00370 | 14 |
| AX-157724980 | 18 | 72.738 | KV453060.1 | 4690312 | 14-scf00370 | 14 |
| AX-158220157 | 18 | 72.738 | KV453060.1 | 4690955 | 14-scf00370 | 14 |
| AX-158220162 | 18 | 72.738 | KV453060.1 | 4695825 | 14-scf00370 | 14 |
| AX-157714154 | 18 | 72.738 | KV453060.1 | 4698282 | 14-scf00370 | 14 |
| AX-158380847 | 18 | 72.738 | KV453060.1 | 4698628 | 14-scf00370 | 14 |
| AX-157839265 | 18 | 72.738 | KV453060.1 | 4710336 | 14-scf00370 | 14 |
| AX-158220169 | 18 | 72.738 | KV453060.1 | 4710611 | 14-scf00370 | 14 |
| AX-158220170 | 18 | 72.738 | KV453060.1 | 4710818 | 14-scf00370 | 14 |
| AX-158220171 | 18 | 72.738 | KV453060.1 | 4711104 | 14-scf00370 | 14 |
| AX-158220172 | 18 | 72.738 | KV453060.1 | 4712058 | 14-scf00370 | 14 |
| AX-158220173 | 18 | 72.738 | KV453060.1 | 4712654 | 14-scf00370 | 14 |
| AX-158220174 | 18 | 72.738 | KV453060.1 | 4713061 | 14-scf00370 | 14 |
| AX-158220178 | 18 | 72.738 | KV453060.1 | 4717270 | 14-scf00370 | 14 |
| AX-157752852 | 18 | 72.738 | KV453060.1 | 4720090 | 14-scf00370 | 14 |
| AX-158220180 | 18 | 72.738 | KV453060.1 | 4723597 | 14-scf00370 | 14 |
| AX-158220181 | 18 | 72.738 | KV453060.1 | 4724050 | 14-scf00370 | 14 |
| AX-158220184 | 18 | 72.738 | KV453060.1 | 4724994 | 14-scf00370 | 14 |
| AX-158220188 | 18 | 72.738 | KV453060.1 | 4729500 | 14-scf00370 | 14 |
| AX-157839267 | 18 | 72.738 | KV453060.1 | 4730094 | 14-scf00370 | 14 |
| AX-158220189 | 18 | 72.738 | KV453060.1 | 4732269 | 14-scf00370 | 14 |
| AX-158220191 | 18 | 72.738 | KV453060.1 | 4733598 | 14-scf00370 | 14 |
| AX-158220192 | 18 | 72.738 | KV453060.1 | 4734545 | 14-scf00370 | 14 |
| AX-157839269 | 18 | 72.738 | KV453060.1 | 4735211 | 14-scf00370 | 14 |
| AX-158220193 | 18 | 72.738 | KV453060.1 | 4736347 | 14-scf00370 | 14 |
| AX-158220195 | 18 | 72.738 | KV453060.1 | 4741409 | 14-scf00370 | 14 |

|              |    |        |            |         |             |    |
|--------------|----|--------|------------|---------|-------------|----|
| AX-158220196 | 18 | 72.738 | KV453060.1 | 4741888 | 14-scf00370 | 14 |
| AX-158220197 | 18 | 72.738 | KV453060.1 | 4743211 | 14-scf00370 | 14 |
| AX-158220202 | 18 | 72.738 | KV453060.1 | 4749129 | 14-scf00370 | 14 |
| AX-158220210 | 18 | 72.738 | KV453060.1 | 4763783 | 14-scf00370 | 14 |
| AX-158220219 | 18 | 72.738 | KV453060.1 | 4773745 | 14-scf00370 | 14 |
| AX-158220222 | 18 | 72.738 | KV453060.1 | 4775510 | 14-scf00370 | 14 |
| AX-158220224 | 18 | 72.738 | KV453060.1 | 4779030 | 14-scf00370 | 14 |
| AX-158220225 | 18 | 72.738 | KV453060.1 | 4786383 | 14-scf00370 | 14 |
| AX-158220227 | 18 | 72.738 | KV453060.1 | 4787314 | 14-scf00370 | 14 |
| AX-158220228 | 18 | 72.738 | KV453060.1 | 4790055 | 14-scf00370 | 14 |
| AX-158220229 | 18 | 72.738 | KV453060.1 | 4790679 | 14-scf00370 | 14 |
| AX-158220231 | 18 | 72.738 | KV453060.1 | 4792377 | 14-scf00370 | 14 |
| AX-158220242 | 18 | 72.738 | KV453060.1 | 4804371 | 14-scf00370 | 14 |
| AX-157839271 | 18 | 72.738 | KV453060.1 | 4805410 | 14-scf00370 | 14 |
| AX-158220268 | 18 | 72.738 | KV453060.1 | 4836096 | 14-scf00370 | 14 |
| AX-158220270 | 18 | 72.738 | KV453060.1 | 4836978 | 14-scf00370 | 14 |
| AX-158220271 | 18 | 72.738 | KV453060.1 | 4838582 | 14-scf00370 | 14 |
| AX-158220281 | 18 | 72.738 | KV453060.1 | 4855924 | 14-scf00370 | 14 |
| AX-158220366 | 18 | 72.738 | KV453060.1 | 4961743 | 14-scf00370 | 14 |
| AX-158220501 | 18 | 72.738 | KV453060.1 | 5141366 | 14-scf00370 | 14 |
| AX-158220561 | 18 | 72.738 | KV453060.1 | 5197169 | 14-scf00370 | 14 |
| AX-158220778 | 18 | 72.738 | KV453060.1 | 5421921 | 14-scf00370 | 14 |
| AX-158220951 | 18 | 72.738 | KV453062.1 | 209182  | 14-scf00371 | 14 |
| AX-158220953 | 18 | 72.738 | KV453062.1 | 216757  | 14-scf00371 | 14 |
| AX-158221109 | 18 | 72.738 | KV453061.1 | 148909  | 14-scf00372 | 14 |
| AX-158221143 | 18 | 72.738 | KV453061.1 | 188453  | 14-scf00372 | 14 |
| AX-157839261 | 18 | 72.847 | KV453060.1 | 4567428 | 14-scf00370 | 14 |
| AX-158220072 | 18 | 72.847 | KV453060.1 | 4605408 | 14-scf00370 | 14 |
| AX-158220075 | 18 | 72.847 | KV453060.1 | 4610779 | 14-scf00370 | 14 |
| AX-157722056 | 18 | 72.847 | KV453060.1 | 4633091 | 14-scf00370 | 14 |
| AX-157757648 | 18 | 72.847 | KV453060.1 | 4639752 | 14-scf00370 | 14 |
| AX-158220114 | 18 | 72.847 | KV453060.1 | 4644192 | 14-scf00370 | 14 |
| AX-158220153 | 18 | 72.847 | KV453060.1 | 4688157 | 14-scf00370 | 14 |
| AX-158220163 | 18 | 72.847 | KV453060.1 | 4699532 | 14-scf00370 | 14 |
| AX-158220176 | 18 | 72.847 | KV453060.1 | 4715795 | 14-scf00370 | 14 |
| AX-157839268 | 18 | 72.847 | KV453060.1 | 4733349 | 14-scf00370 | 14 |
| AX-158220211 | 18 | 72.847 | KV453060.1 | 4764494 | 14-scf00370 | 14 |
| AX-158220217 | 18 | 72.847 | KV453060.1 | 4771201 | 14-scf00370 | 14 |
| AX-158220218 | 18 | 72.847 | KV453060.1 | 4772833 | 14-scf00370 | 14 |
| AX-158220226 | 18 | 72.847 | KV453060.1 | 4786908 | 14-scf00370 | 14 |
| AX-158220235 | 18 | 72.847 | KV453060.1 | 4797472 | 14-scf00370 | 14 |
| AX-158220236 | 18 | 72.847 | KV453060.1 | 4798235 | 14-scf00370 | 14 |
| AX-158220237 | 18 | 72.847 | KV453060.1 | 4798848 | 14-scf00370 | 14 |
| AX-158220238 | 18 | 72.847 | KV453060.1 | 4799245 | 14-scf00370 | 14 |
| AX-158220239 | 18 | 72.847 | KV453060.1 | 4801694 | 14-scf00370 | 14 |
| AX-158220240 | 18 | 72.847 | KV453060.1 | 4802073 | 14-scf00370 | 14 |
| AX-158220241 | 18 | 72.847 | KV453060.1 | 4803740 | 14-scf00370 | 14 |
| AX-158220243 | 18 | 72.847 | KV453060.1 | 4805830 | 14-scf00370 | 14 |
| AX-158220245 | 18 | 72.847 | KV453060.1 | 4806993 | 14-scf00370 | 14 |
| AX-158220251 | 18 | 72.847 | KV453060.1 | 4813905 | 14-scf00370 | 14 |
| AX-158220253 | 18 | 72.847 | KV453060.1 | 4815380 | 14-scf00370 | 14 |

|              |    |        |            |         |             |    |
|--------------|----|--------|------------|---------|-------------|----|
| AX-158220256 | 18 | 72.847 | KV453060.1 | 4818105 | 14-scf00370 | 14 |
| AX-157839272 | 18 | 72.847 | KV453060.1 | 4819266 | 14-scf00370 | 14 |
| AX-157839273 | 18 | 72.847 | KV453060.1 | 4824045 | 14-scf00370 | 14 |
| AX-157724861 | 18 | 72.847 | KV453060.1 | 4824835 | 14-scf00370 | 14 |
| AX-158220262 | 18 | 72.847 | KV453060.1 | 4825556 | 14-scf00370 | 14 |
| AX-158220264 | 18 | 72.847 | KV453060.1 | 4830999 | 14-scf00370 | 14 |
| AX-158220265 | 18 | 72.847 | KV453060.1 | 4832051 | 14-scf00370 | 14 |
| AX-157887265 | 18 | 72.847 | KV453060.1 | 4834687 | 14-scf00370 | 14 |
| AX-158220266 | 18 | 72.847 | KV453060.1 | 4834881 | 14-scf00370 | 14 |
| AX-158220269 | 18 | 72.847 | KV453060.1 | 4836616 | 14-scf00370 | 14 |
| AX-158220272 | 18 | 72.847 | KV453060.1 | 4839861 | 14-scf00370 | 14 |
| AX-157839275 | 18 | 72.847 | KV453060.1 | 4842493 | 14-scf00370 | 14 |
| AX-158220277 | 18 | 72.847 | KV453060.1 | 4849112 | 14-scf00370 | 14 |
| AX-158220278 | 18 | 72.847 | KV453060.1 | 4850477 | 14-scf00370 | 14 |
| AX-158220283 | 18 | 72.847 | KV453060.1 | 4857098 | 14-scf00370 | 14 |
| AX-158220286 | 18 | 72.847 | KV453060.1 | 4860432 | 14-scf00370 | 14 |
| AX-158220287 | 18 | 72.847 | KV453060.1 | 4861269 | 14-scf00370 | 14 |
| AX-158220290 | 18 | 72.847 | KV453060.1 | 4863983 | 14-scf00370 | 14 |
| AX-158220292 | 18 | 72.847 | KV453060.1 | 4867661 | 14-scf00370 | 14 |
| AX-158220387 | 18 | 72.847 | KV453060.1 | 4995520 | 14-scf00370 | 14 |
| AX-158221053 | 18 | 72.847 | KV453061.1 | 85123   | 14-scf00372 | 14 |
| AX-158221106 | 18 | 72.847 | KV453061.1 | 143625  | 14-scf00372 | 14 |
| AX-158222333 | 18 | 72.847 | KV453063.1 | 49625   | 14-scf00374 | 14 |
| AX-158220291 | 18 | 72.956 | KV453060.1 | 4867056 | 14-scf00370 | 14 |
| AX-158220356 | 18 | 72.956 | KV453060.1 | 4943214 | 14-scf00370 | 14 |
| AX-158220276 | 18 | 73.065 | KV453060.1 | 4846492 | 14-scf00370 | 14 |
| AX-157839276 | 18 | 73.065 | KV453060.1 | 4873273 | 14-scf00370 | 14 |
| AX-157839277 | 18 | 73.065 | KV453060.1 | 4874275 | 14-scf00370 | 14 |
| AX-158220296 | 18 | 73.065 | KV453060.1 | 4877367 | 14-scf00370 | 14 |
| AX-158220297 | 18 | 73.065 | KV453060.1 | 4877628 | 14-scf00370 | 14 |
| AX-158220300 | 18 | 73.065 | KV453060.1 | 4886314 | 14-scf00370 | 14 |
| AX-158220302 | 18 | 73.065 | KV453060.1 | 4887106 | 14-scf00370 | 14 |
| AX-158220306 | 18 | 73.065 | KV453060.1 | 4892217 | 14-scf00370 | 14 |
| AX-158220307 | 18 | 73.065 | KV453060.1 | 4896160 | 14-scf00370 | 14 |
| AX-157713510 | 18 | 73.065 | KV453060.1 | 4897503 | 14-scf00370 | 14 |
| AX-158220309 | 18 | 73.065 | KV453060.1 | 4899786 | 14-scf00370 | 14 |
| AX-158220310 | 18 | 73.065 | KV453060.1 | 4900356 | 14-scf00370 | 14 |
| AX-158220311 | 18 | 73.065 | KV453060.1 | 4900969 | 14-scf00370 | 14 |
| AX-158220313 | 18 | 73.065 | KV453060.1 | 4901606 | 14-scf00370 | 14 |
| AX-158220318 | 18 | 73.065 | KV453060.1 | 4904490 | 14-scf00370 | 14 |
| AX-158220320 | 18 | 73.065 | KV453060.1 | 4906723 | 14-scf00370 | 14 |
| AX-157725451 | 18 | 73.065 | KV453060.1 | 4907982 | 14-scf00370 | 14 |
| AX-158220354 | 18 | 73.065 | KV453060.1 | 4938190 | 14-scf00370 | 14 |
| AX-158220361 | 18 | 73.065 | KV453060.1 | 4949010 | 14-scf00370 | 14 |
| AX-158220364 | 18 | 73.065 | KV453060.1 | 4958284 | 14-scf00370 | 14 |
| AX-158220368 | 18 | 73.065 | KV453060.1 | 4964300 | 14-scf00370 | 14 |
| AX-158220376 | 18 | 73.065 | KV453060.1 | 4971754 | 14-scf00370 | 14 |
| AX-158220383 | 18 | 73.065 | KV453060.1 | 4992727 | 14-scf00370 | 14 |
| AX-158220396 | 18 | 73.065 | KV453060.1 | 5017853 | 14-scf00370 | 14 |
| AX-157775899 | 18 | 73.065 | KV453060.1 | 5031705 | 14-scf00370 | 14 |
| AX-158220409 | 18 | 73.065 | KV453060.1 | 5032926 | 14-scf00370 | 14 |

|              |    |        |            |         |             |    |
|--------------|----|--------|------------|---------|-------------|----|
| AX-158220412 | 18 | 73.065 | KV453060.1 | 5035878 | 14-scf00370 | 14 |
| AX-157755735 | 18 | 73.065 | KV453060.1 | 5111807 | 14-scf00370 | 14 |
| AX-158221086 | 18 | 73.065 | KV453061.1 | 116547  | 14-scf00372 | 14 |
| AX-157839421 | 18 | 73.065 | KV453063.1 | 6763    | 14-scf00374 | 14 |
| AX-158222335 | 18 | 73.065 | KV453063.1 | 51634   | 14-scf00374 | 14 |
| AX-157839435 | 18 | 73.065 | KV453063.1 | 159486  | 14-scf00374 | 14 |
| AX-158220325 | 18 | 73.094 | KV453060.1 | 4912664 | 14-scf00370 | 14 |
| AX-158220326 | 18 | 73.109 | KV453060.1 | 4913081 | 14-scf00370 | 14 |
| AX-158220261 | 18 | 73.136 | KV453060.1 | 4824245 | 14-scf00370 | 14 |
| AX-157872401 | 18 | 73.136 | KV453060.1 | 4879076 | 14-scf00370 | 14 |
| AX-157839279 | 18 | 73.136 | KV453060.1 | 4890677 | 14-scf00370 | 14 |
| AX-158220324 | 18 | 73.136 | KV453060.1 | 4911630 | 14-scf00370 | 14 |
| AX-158220327 | 18 | 73.136 | KV453060.1 | 4914214 | 14-scf00370 | 14 |
| AX-158220328 | 18 | 73.139 | KV453060.1 | 4914697 | 14-scf00370 | 14 |
| AX-157839278 | 18 | 73.152 | KV453060.1 | 4881368 | 14-scf00370 | 14 |
| AX-158220299 | 18 | 73.152 | KV453060.1 | 4882286 | 14-scf00370 | 14 |
| AX-158394055 | 18 | 73.152 | KV453060.1 | 4903951 | 14-scf00370 | 14 |
| AX-158220331 | 18 | 73.152 | KV453060.1 | 4916441 | 14-scf00370 | 14 |
| AX-158220332 | 18 | 73.152 | KV453060.1 | 4916802 | 14-scf00370 | 14 |
| AX-158220340 | 18 | 73.152 | KV453060.1 | 4922406 | 14-scf00370 | 14 |
| AX-157872402 | 18 | 73.152 | KV453060.1 | 5013049 | 14-scf00370 | 14 |
| AX-158220410 | 18 | 73.152 | KV453060.1 | 5034364 | 14-scf00370 | 14 |
| AX-158220411 | 18 | 73.152 | KV453060.1 | 5034913 | 14-scf00370 | 14 |
| AX-158220435 | 18 | 73.152 | KV453060.1 | 5068414 | 14-scf00370 | 14 |
| AX-158220485 | 18 | 73.152 | KV453060.1 | 5129376 | 14-scf00370 | 14 |
| AX-158220321 | 18 | 73.165 | KV453060.1 | 4909214 | 14-scf00370 | 14 |
| AX-158220338 | 18 | 73.165 | KV453060.1 | 4921419 | 14-scf00370 | 14 |
| AX-158220350 | 18 | 73.165 | KV453060.1 | 4934948 | 14-scf00370 | 14 |
| AX-158220303 | 18 | 73.175 | KV453060.1 | 4887632 | 14-scf00370 | 14 |
| AX-158220314 | 18 | 73.175 | KV453060.1 | 4902163 | 14-scf00370 | 14 |
| AX-158220317 | 18 | 73.175 | KV453060.1 | 4904011 | 14-scf00370 | 14 |
| AX-158220345 | 18 | 73.175 | KV453060.1 | 4929059 | 14-scf00370 | 14 |
| AX-158220348 | 18 | 73.175 | KV453060.1 | 4932799 | 14-scf00370 | 14 |
| AX-158220355 | 18 | 73.175 | KV453060.1 | 4942734 | 14-scf00370 | 14 |
| AX-158220365 | 18 | 73.175 | KV453060.1 | 4961102 | 14-scf00370 | 14 |
| AX-158220367 | 18 | 73.175 | KV453060.1 | 4962911 | 14-scf00370 | 14 |
| AX-158220369 | 18 | 73.175 | KV453060.1 | 4965187 | 14-scf00370 | 14 |
| AX-158220370 | 18 | 73.175 | KV453060.1 | 4966215 | 14-scf00370 | 14 |
| AX-158220371 | 18 | 73.175 | KV453060.1 | 4966889 | 14-scf00370 | 14 |
| AX-158220373 | 18 | 73.175 | KV453060.1 | 4967933 | 14-scf00370 | 14 |
| AX-158394056 | 18 | 73.175 | KV453060.1 | 4969887 | 14-scf00370 | 14 |
| AX-158394057 | 18 | 73.175 | KV453060.1 | 4973428 | 14-scf00370 | 14 |
| AX-158220378 | 18 | 73.175 | KV453060.1 | 4973993 | 14-scf00370 | 14 |
| AX-158220379 | 18 | 73.175 | KV453060.1 | 4974425 | 14-scf00370 | 14 |
| AX-157721381 | 18 | 73.175 | KV453060.1 | 4975768 | 14-scf00370 | 14 |
| AX-158394058 | 18 | 73.175 | KV453060.1 | 4976316 | 14-scf00370 | 14 |
| AX-157708515 | 18 | 73.175 | KV453060.1 | 4981683 | 14-scf00370 | 14 |
| AX-158220382 | 18 | 73.175 | KV453060.1 | 4990707 | 14-scf00370 | 14 |
| AX-158220384 | 18 | 73.175 | KV453060.1 | 4993935 | 14-scf00370 | 14 |
| AX-158220385 | 18 | 73.175 | KV453060.1 | 4994393 | 14-scf00370 | 14 |
| AX-158220386 | 18 | 73.175 | KV453060.1 | 4994999 | 14-scf00370 | 14 |

|              |    |        |            |         |             |    |
|--------------|----|--------|------------|---------|-------------|----|
| AX-158418653 | 18 | 73.175 | KV453060.1 | 5238379 | 14-scf00370 | 14 |
| AX-158220209 | 18 | 73.284 | KV453060.1 | 4762805 | 14-scf00370 | 14 |
| AX-157839280 | 18 | 73.284 | KV453060.1 | 4944892 | 14-scf00370 | 14 |
| AX-158220381 | 18 | 73.284 | KV453060.1 | 4984196 | 14-scf00370 | 14 |
| AX-158220395 | 18 | 73.284 | KV453060.1 | 5016449 | 14-scf00370 | 14 |
| AX-158220397 | 18 | 73.284 | KV453060.1 | 5018741 | 14-scf00370 | 14 |
| AX-158220399 | 18 | 73.284 | KV453060.1 | 5019926 | 14-scf00370 | 14 |
| AX-157749713 | 18 | 73.284 | KV453060.1 | 5020481 | 14-scf00370 | 14 |
| AX-158220402 | 18 | 73.284 | KV453060.1 | 5023875 | 14-scf00370 | 14 |
| AX-158220406 | 18 | 73.284 | KV453060.1 | 5027740 | 14-scf00370 | 14 |
| AX-158220408 | 18 | 73.284 | KV453060.1 | 5030495 | 14-scf00370 | 14 |
| AX-157753796 | 18 | 73.284 | KV453060.1 | 5030696 | 14-scf00370 | 14 |
| AX-158220413 | 18 | 73.284 | KV453060.1 | 5039613 | 14-scf00370 | 14 |
| AX-158220414 | 18 | 73.284 | KV453060.1 | 5040267 | 14-scf00370 | 14 |
| AX-158220418 | 18 | 73.284 | KV453060.1 | 5047645 | 14-scf00370 | 14 |
| AX-158220434 | 18 | 73.284 | KV453060.1 | 5067996 | 14-scf00370 | 14 |
| AX-158220454 | 18 | 73.284 | KV453060.1 | 5088921 | 14-scf00370 | 14 |
| AX-158220458 | 18 | 73.284 | KV453060.1 | 5094840 | 14-scf00370 | 14 |
| AX-157726303 | 18 | 73.384 | KV453060.1 | 5048056 | 14-scf00370 | 14 |
| AX-158220339 | 18 | 73.502 | KV453060.1 | 4921810 | 14-scf00370 | 14 |
| AX-157740264 | 18 | 73.502 | KV453060.1 | 5050188 | 14-scf00370 | 14 |
| AX-158220419 | 18 | 73.502 | KV453060.1 | 5050591 | 14-scf00370 | 14 |
| AX-158220424 | 18 | 73.502 | KV453060.1 | 5058863 | 14-scf00370 | 14 |
| AX-157719338 | 18 | 73.502 | KV453060.1 | 5061622 | 14-scf00370 | 14 |
| AX-158220428 | 18 | 73.502 | KV453060.1 | 5063484 | 14-scf00370 | 14 |
| AX-158220442 | 18 | 73.502 | KV453060.1 | 5074892 | 14-scf00370 | 14 |
| AX-158220443 | 18 | 73.502 | KV453060.1 | 5077849 | 14-scf00370 | 14 |
| AX-158220447 | 18 | 73.502 | KV453060.1 | 5079812 | 14-scf00370 | 14 |
| AX-157859455 | 18 | 73.502 | KV453060.1 | 5117616 | 14-scf00370 | 14 |
| AX-157751084 | 18 | 73.502 | KV453060.1 | 5121598 | 14-scf00370 | 14 |
| AX-157718521 | 18 | 73.502 | KV453060.1 | 5122218 | 14-scf00370 | 14 |
| AX-158220523 | 18 | 73.502 | KV453060.1 | 5170477 | 14-scf00370 | 14 |
| AX-158220552 | 18 | 73.502 | KV453060.1 | 5192479 | 14-scf00370 | 14 |
| AX-158220557 | 18 | 73.502 | KV453060.1 | 5195198 | 14-scf00370 | 14 |
| AX-158220567 | 18 | 73.502 | KV453060.1 | 5208238 | 14-scf00370 | 14 |
| AX-158220795 | 18 | 73.502 | KV453060.1 | 5455325 | 14-scf00370 | 14 |
| AX-157749017 | 18 | 73.571 | KV453060.1 | 5211282 | 14-scf00370 | 14 |
| AX-158220574 | 18 | 73.592 | KV453060.1 | 5212778 | 14-scf00370 | 14 |
| AX-158220578 | 18 | 73.592 | KV453060.1 | 5219023 | 14-scf00370 | 14 |
| AX-158220463 | 18 | 73.612 | KV453060.1 | 5100750 | 14-scf00370 | 14 |
| AX-158220470 | 18 | 73.612 | KV453060.1 | 5108020 | 14-scf00370 | 14 |
| AX-158220479 | 18 | 73.612 | KV453060.1 | 5121158 | 14-scf00370 | 14 |
| AX-158220491 | 18 | 73.612 | KV453060.1 | 5134830 | 14-scf00370 | 14 |
| AX-158220498 | 18 | 73.612 | KV453060.1 | 5139275 | 14-scf00370 | 14 |
| AX-158220535 | 18 | 73.612 | KV453060.1 | 5178435 | 14-scf00370 | 14 |
| AX-158220550 | 18 | 73.612 | KV453060.1 | 5190999 | 14-scf00370 | 14 |
| AX-157839286 | 18 | 73.612 | KV453060.1 | 5202504 | 14-scf00370 | 14 |
| AX-157839288 | 18 | 73.612 | KV453060.1 | 5212515 | 14-scf00370 | 14 |
| AX-157839293 | 18 | 73.612 | KV453060.1 | 5236064 | 14-scf00370 | 14 |
| AX-158220603 | 18 | 73.612 | KV453060.1 | 5247114 | 14-scf00370 | 14 |
| AX-158220605 | 18 | 73.612 | KV453060.1 | 5248131 | 14-scf00370 | 14 |

|              |    |        |            |         |             |    |
|--------------|----|--------|------------|---------|-------------|----|
| AX-158220606 | 18 | 73.612 | KV453060.1 | 5249308 | 14-scf00370 | 14 |
| AX-158220608 | 18 | 73.612 | KV453060.1 | 5249787 | 14-scf00370 | 14 |
| AX-158220611 | 18 | 73.612 | KV453060.1 | 5252516 | 14-scf00370 | 14 |
| AX-158220614 | 18 | 73.612 | KV453060.1 | 5254375 | 14-scf00370 | 14 |
| AX-158220615 | 18 | 73.612 | KV453060.1 | 5255206 | 14-scf00370 | 14 |
| AX-158220619 | 18 | 73.612 | KV453060.1 | 5258102 | 14-scf00370 | 14 |
| AX-158220625 | 18 | 73.612 | KV453060.1 | 5263184 | 14-scf00370 | 14 |
| AX-158220652 | 18 | 73.612 | KV453060.1 | 5290942 | 14-scf00370 | 14 |
| AX-157839296 | 18 | 73.612 | KV453060.1 | 5291434 | 14-scf00370 | 14 |
| AX-158220653 | 18 | 73.612 | KV453060.1 | 5291476 | 14-scf00370 | 14 |
| AX-157727974 | 18 | 73.612 | KV453060.1 | 5291822 | 14-scf00370 | 14 |
| AX-157742679 | 18 | 73.612 | KV453060.1 | 5291990 | 14-scf00370 | 14 |
| AX-158220654 | 18 | 73.612 | KV453060.1 | 5292716 | 14-scf00370 | 14 |
| AX-157839299 | 18 | 73.612 | KV453060.1 | 5292932 | 14-scf00370 | 14 |
| AX-157716695 | 18 | 73.612 | KV453060.1 | 5293157 | 14-scf00370 | 14 |
| AX-158220656 | 18 | 73.612 | KV453060.1 | 5294742 | 14-scf00370 | 14 |
| AX-158220657 | 18 | 73.612 | KV453060.1 | 5295724 | 14-scf00370 | 14 |
| AX-157839300 | 18 | 73.612 | KV453060.1 | 5297319 | 14-scf00370 | 14 |
| AX-157839301 | 18 | 73.612 | KV453060.1 | 5298206 | 14-scf00370 | 14 |
| AX-158220659 | 18 | 73.612 | KV453060.1 | 5299176 | 14-scf00370 | 14 |
| AX-158220661 | 18 | 73.612 | KV453060.1 | 5300285 | 14-scf00370 | 14 |
| AX-158220662 | 18 | 73.612 | KV453060.1 | 5300984 | 14-scf00370 | 14 |
| AX-158220663 | 18 | 73.612 | KV453060.1 | 5302125 | 14-scf00370 | 14 |
| AX-158220664 | 18 | 73.612 | KV453060.1 | 5302967 | 14-scf00370 | 14 |
| AX-158220665 | 18 | 73.612 | KV453060.1 | 5304863 | 14-scf00370 | 14 |
| AX-158220666 | 18 | 73.612 | KV453060.1 | 5305080 | 14-scf00370 | 14 |
| AX-158220668 | 18 | 73.612 | KV453060.1 | 5306505 | 14-scf00370 | 14 |
| AX-158220669 | 18 | 73.612 | KV453060.1 | 5307120 | 14-scf00370 | 14 |
| AX-158220670 | 18 | 73.612 | KV453060.1 | 5310049 | 14-scf00370 | 14 |
| AX-158220671 | 18 | 73.612 | KV453060.1 | 5310729 | 14-scf00370 | 14 |
| AX-157839302 | 18 | 73.612 | KV453060.1 | 5311053 | 14-scf00370 | 14 |
| AX-158220672 | 18 | 73.612 | KV453060.1 | 5311249 | 14-scf00370 | 14 |
| AX-158220673 | 18 | 73.612 | KV453060.1 | 5311844 | 14-scf00370 | 14 |
| AX-158220677 | 18 | 73.612 | KV453060.1 | 5315950 | 14-scf00370 | 14 |
| AX-158220678 | 18 | 73.612 | KV453060.1 | 5316399 | 14-scf00370 | 14 |
| AX-157714141 | 18 | 73.612 | KV453060.1 | 5318584 | 14-scf00370 | 14 |
| AX-158380849 | 18 | 73.612 | KV453060.1 | 5318636 | 14-scf00370 | 14 |
| AX-157879738 | 18 | 73.612 | KV453060.1 | 5319225 | 14-scf00370 | 14 |
| AX-158386643 | 18 | 73.612 | KV453060.1 | 5319443 | 14-scf00370 | 14 |
| AX-158220679 | 18 | 73.612 | KV453060.1 | 5319815 | 14-scf00370 | 14 |
| AX-158220681 | 18 | 73.612 | KV453060.1 | 5322090 | 14-scf00370 | 14 |
| AX-158220682 | 18 | 73.612 | KV453060.1 | 5322473 | 14-scf00370 | 14 |
| AX-158220683 | 18 | 73.612 | KV453060.1 | 5323871 | 14-scf00370 | 14 |
| AX-157839304 | 18 | 73.612 | KV453060.1 | 5325038 | 14-scf00370 | 14 |
| AX-158220684 | 18 | 73.612 | KV453060.1 | 5325343 | 14-scf00370 | 14 |
| AX-158220685 | 18 | 73.612 | KV453060.1 | 5326827 | 14-scf00370 | 14 |
| AX-158220686 | 18 | 73.612 | KV453060.1 | 5327871 | 14-scf00370 | 14 |
| AX-158220687 | 18 | 73.612 | KV453060.1 | 5328364 | 14-scf00370 | 14 |
| AX-158220688 | 18 | 73.612 | KV453060.1 | 5328971 | 14-scf00370 | 14 |
| AX-157839306 | 18 | 73.612 | KV453060.1 | 5330080 | 14-scf00370 | 14 |
| AX-158220689 | 18 | 73.612 | KV453060.1 | 5330633 | 14-scf00370 | 14 |

|              |    |        |            |         |             |    |
|--------------|----|--------|------------|---------|-------------|----|
| AX-158220690 | 18 | 73.612 | KV453060.1 | 5331392 | 14-scf00370 | 14 |
| AX-158220691 | 18 | 73.612 | KV453060.1 | 5332637 | 14-scf00370 | 14 |
| AX-158220692 | 18 | 73.612 | KV453060.1 | 5335976 | 14-scf00370 | 14 |
| AX-158220693 | 18 | 73.612 | KV453060.1 | 5336183 | 14-scf00370 | 14 |
| AX-158220694 | 18 | 73.612 | KV453060.1 | 5337475 | 14-scf00370 | 14 |
| AX-158220696 | 18 | 73.612 | KV453060.1 | 5338254 | 14-scf00370 | 14 |
| AX-158220697 | 18 | 73.612 | KV453060.1 | 5338750 | 14-scf00370 | 14 |
| AX-158220698 | 18 | 73.612 | KV453060.1 | 5340239 | 14-scf00370 | 14 |
| AX-158220699 | 18 | 73.612 | KV453060.1 | 5340979 | 14-scf00370 | 14 |
| AX-158220700 | 18 | 73.612 | KV453060.1 | 5341481 | 14-scf00370 | 14 |
| AX-158220701 | 18 | 73.612 | KV453060.1 | 5341997 | 14-scf00370 | 14 |
| AX-158220702 | 18 | 73.612 | KV453060.1 | 5343125 | 14-scf00370 | 14 |
| AX-158220703 | 18 | 73.612 | KV453060.1 | 5343962 | 14-scf00370 | 14 |
| AX-157839307 | 18 | 73.612 | KV453060.1 | 5344112 | 14-scf00370 | 14 |
| AX-158220704 | 18 | 73.612 | KV453060.1 | 5344545 | 14-scf00370 | 14 |
| AX-158220705 | 18 | 73.612 | KV453060.1 | 5345449 | 14-scf00370 | 14 |
| AX-158220706 | 18 | 73.612 | KV453060.1 | 5346276 | 14-scf00370 | 14 |
| AX-158220708 | 18 | 73.612 | KV453060.1 | 5347749 | 14-scf00370 | 14 |
| AX-157756841 | 18 | 73.612 | KV453060.1 | 5348695 | 14-scf00370 | 14 |
| AX-158220709 | 18 | 73.612 | KV453060.1 | 5349445 | 14-scf00370 | 14 |
| AX-158220710 | 18 | 73.612 | KV453060.1 | 5350322 | 14-scf00370 | 14 |
| AX-158220713 | 18 | 73.612 | KV453060.1 | 5352662 | 14-scf00370 | 14 |
| AX-158220714 | 18 | 73.612 | KV453060.1 | 5353908 | 14-scf00370 | 14 |
| AX-158220716 | 18 | 73.612 | KV453060.1 | 5357781 | 14-scf00370 | 14 |
| AX-158220717 | 18 | 73.612 | KV453060.1 | 5358571 | 14-scf00370 | 14 |
| AX-158220718 | 18 | 73.612 | KV453060.1 | 5359082 | 14-scf00370 | 14 |
| AX-157887272 | 18 | 73.612 | KV453062.1 | 164627  | 14-scf00371 | 14 |
| AX-158220930 | 18 | 73.612 | KV453062.1 | 176638  | 14-scf00371 | 14 |
| AX-157748024 | 18 | 73.612 | KV453062.1 | 176935  | 14-scf00371 | 14 |
| AX-158220931 | 18 | 73.612 | KV453062.1 | 177521  | 14-scf00371 | 14 |
| AX-158220976 | 18 | 73.612 | KV453062.1 | 272073  | 14-scf00371 | 14 |
| AX-158220985 | 18 | 73.612 | KV453062.1 | 290885  | 14-scf00371 | 14 |
| AX-158221048 | 18 | 73.612 | KV453061.1 | 75131   | 14-scf00372 | 14 |
| AX-158221049 | 18 | 73.612 | KV453061.1 | 76968   | 14-scf00372 | 14 |
| AX-158221051 | 18 | 73.612 | KV453061.1 | 82477   | 14-scf00372 | 14 |
| AX-157746578 | 18 | 73.612 | KV453061.1 | 84400   | 14-scf00372 | 14 |
| AX-158221054 | 18 | 73.612 | KV453061.1 | 87406   | 14-scf00372 | 14 |
| AX-157839337 | 18 | 73.612 | KV453061.1 | 88783   | 14-scf00372 | 14 |
| AX-158221055 | 18 | 73.612 | KV453061.1 | 90572   | 14-scf00372 | 14 |
| AX-158221056 | 18 | 73.612 | KV453061.1 | 90846   | 14-scf00372 | 14 |
| AX-158221057 | 18 | 73.612 | KV453061.1 | 91429   | 14-scf00372 | 14 |
| AX-158221059 | 18 | 73.612 | KV453061.1 | 92831   | 14-scf00372 | 14 |
| AX-158221064 | 18 | 73.612 | KV453061.1 | 95792   | 14-scf00372 | 14 |
| AX-158221065 | 18 | 73.612 | KV453061.1 | 96233   | 14-scf00372 | 14 |
| AX-158221073 | 18 | 73.612 | KV453061.1 | 100232  | 14-scf00372 | 14 |
| AX-158221074 | 18 | 73.612 | KV453061.1 | 105083  | 14-scf00372 | 14 |
| AX-158221076 | 18 | 73.612 | KV453061.1 | 106756  | 14-scf00372 | 14 |
| AX-158221080 | 18 | 73.612 | KV453061.1 | 110299  | 14-scf00372 | 14 |
| AX-158221081 | 18 | 73.612 | KV453061.1 | 110979  | 14-scf00372 | 14 |
| AX-158221088 | 18 | 73.612 | KV453061.1 | 121308  | 14-scf00372 | 14 |
| AX-158221105 | 18 | 73.612 | KV453061.1 | 142614  | 14-scf00372 | 14 |



|              |    |        |            |         |             |    |
|--------------|----|--------|------------|---------|-------------|----|
| AX-158221107 | 18 | 73.612 | KV453061.1 | 145410  | 14-scf00372 | 14 |
| AX-158221108 | 18 | 73.612 | KV453061.1 | 146315  | 14-scf00372 | 14 |
| AX-158221110 | 18 | 73.612 | KV453061.1 | 154564  | 14-scf00372 | 14 |
| AX-158221114 | 18 | 73.612 | KV453061.1 | 156405  | 14-scf00372 | 14 |
| AX-158221115 | 18 | 73.612 | KV453061.1 | 157056  | 14-scf00372 | 14 |
| AX-158221116 | 18 | 73.612 | KV453061.1 | 157455  | 14-scf00372 | 14 |
| AX-158221117 | 18 | 73.612 | KV453061.1 | 157845  | 14-scf00372 | 14 |
| AX-158414815 | 18 | 73.612 | KV453061.1 | 161310  | 14-scf00372 | 14 |
| AX-158221122 | 18 | 73.612 | KV453061.1 | 164623  | 14-scf00372 | 14 |
| AX-158221138 | 18 | 73.612 | KV453061.1 | 183198  | 14-scf00372 | 14 |
| AX-158221139 | 18 | 73.612 | KV453061.1 | 186263  | 14-scf00372 | 14 |
| AX-158221141 | 18 | 73.612 | KV453061.1 | 187857  | 14-scf00372 | 14 |
| AX-158221142 | 18 | 73.612 | KV453061.1 | 188089  | 14-scf00372 | 14 |
| AX-158221162 | 18 | 73.612 | KV453061.1 | 218635  | 14-scf00372 | 14 |
| AX-158222291 | 18 | 73.612 | KV453063.1 | 4962    | 14-scf00374 | 14 |
| AX-158222292 | 18 | 73.612 | KV453063.1 | 5574    | 14-scf00374 | 14 |
| AX-157839422 | 18 | 73.612 | KV453063.1 | 8845    | 14-scf00374 | 14 |
| AX-157839423 | 18 | 73.612 | KV453063.1 | 9542    | 14-scf00374 | 14 |
| AX-158222294 | 18 | 73.612 | KV453063.1 | 9765    | 14-scf00374 | 14 |
| AX-157746314 | 18 | 73.612 | KV453063.1 | 9856    | 14-scf00374 | 14 |
| AX-157743446 | 18 | 73.612 | KV453063.1 | 13053   | 14-scf00374 | 14 |
| AX-158222296 | 18 | 73.612 | KV453063.1 | 13287   | 14-scf00374 | 14 |
| AX-158222297 | 18 | 73.612 | KV453063.1 | 14072   | 14-scf00374 | 14 |
| AX-157839424 | 18 | 73.612 | KV453063.1 | 15783   | 14-scf00374 | 14 |
| AX-157839425 | 18 | 73.612 | KV453063.1 | 15818   | 14-scf00374 | 14 |
| AX-157839426 | 18 | 73.612 | KV453063.1 | 16429   | 14-scf00374 | 14 |
| AX-158222299 | 18 | 73.612 | KV453063.1 | 16875   | 14-scf00374 | 14 |
| AX-157839427 | 18 | 73.612 | KV453063.1 | 17530   | 14-scf00374 | 14 |
| AX-158222300 | 18 | 73.612 | KV453063.1 | 18130   | 14-scf00374 | 14 |
| AX-158222301 | 18 | 73.612 | KV453063.1 | 18974   | 14-scf00374 | 14 |
| AX-157839428 | 18 | 73.612 | KV453063.1 | 19009   | 14-scf00374 | 14 |
| AX-157839429 | 18 | 73.612 | KV453063.1 | 19878   | 14-scf00374 | 14 |
| AX-158222303 | 18 | 73.612 | KV453063.1 | 21915   | 14-scf00374 | 14 |
| AX-158222304 | 18 | 73.612 | KV453063.1 | 22369   | 14-scf00374 | 14 |
| AX-158222305 | 18 | 73.612 | KV453063.1 | 24753   | 14-scf00374 | 14 |
| AX-158222306 | 18 | 73.612 | KV453063.1 | 25340   | 14-scf00374 | 14 |
| AX-158222307 | 18 | 73.612 | KV453063.1 | 25948   | 14-scf00374 | 14 |
| AX-158222324 | 18 | 73.612 | KV453063.1 | 41756   | 14-scf00374 | 14 |
| AX-158222325 | 18 | 73.612 | KV453063.1 | 42531   | 14-scf00374 | 14 |
| AX-158222326 | 18 | 73.612 | KV453063.1 | 44104   | 14-scf00374 | 14 |
| AX-157839431 | 18 | 73.612 | KV453063.1 | 45254   | 14-scf00374 | 14 |
| AX-158222328 | 18 | 73.612 | KV453063.1 | 47783   | 14-scf00374 | 14 |
| AX-158222330 | 18 | 73.612 | KV453063.1 | 48456   | 14-scf00374 | 14 |
| AX-158222331 | 18 | 73.612 | KV453063.1 | 49133   | 14-scf00374 | 14 |
| AX-158222334 | 18 | 73.612 | KV453063.1 | 51193   | 14-scf00374 | 14 |
| AX-158222336 | 18 | 73.612 | KV453063.1 | 56703   | 14-scf00374 | 14 |
| AX-158222341 | 18 | 73.612 | KV453063.1 | 76234   | 14-scf00374 | 14 |
| AX-158414868 | 18 | 73.612 | KV453063.1 | 233446  | 14-scf00374 | 14 |
| AX-158220569 | 18 | 73.647 | KV453060.1 | 5209372 | 14-scf00370 | 14 |
| AX-158220601 | 18 | 73.647 | KV453060.1 | 5244738 | 14-scf00370 | 14 |
| AX-158220667 | 18 | 73.647 | KV453060.1 | 5306212 | 14-scf00370 | 14 |

|              |    |        |            |         |             |    |
|--------------|----|--------|------------|---------|-------------|----|
| AX-158220674 | 18 | 73.647 | KV453060.1 | 5312985 | 14-scf00370 | 14 |
| AX-158220719 | 18 | 73.647 | KV453060.1 | 5359580 | 14-scf00370 | 14 |
| AX-158220723 | 18 | 73.647 | KV453060.1 | 5367819 | 14-scf00370 | 14 |
| AX-158220724 | 18 | 73.647 | KV453060.1 | 5368323 | 14-scf00370 | 14 |
| AX-158220725 | 18 | 73.647 | KV453060.1 | 5368838 | 14-scf00370 | 14 |
| AX-157839308 | 18 | 73.647 | KV453060.1 | 5370124 | 14-scf00370 | 14 |
| AX-158220727 | 18 | 73.647 | KV453060.1 | 5370982 | 14-scf00370 | 14 |
| AX-158220728 | 18 | 73.647 | KV453060.1 | 5371384 | 14-scf00370 | 14 |
| AX-157839309 | 18 | 73.647 | KV453060.1 | 5373702 | 14-scf00370 | 14 |
| AX-158220729 | 18 | 73.647 | KV453060.1 | 5374589 | 14-scf00370 | 14 |
| AX-158220734 | 18 | 73.647 | KV453060.1 | 5382044 | 14-scf00370 | 14 |
| AX-158220735 | 18 | 73.647 | KV453060.1 | 5382876 | 14-scf00370 | 14 |
| AX-158220736 | 18 | 73.647 | KV453060.1 | 5383342 | 14-scf00370 | 14 |
| AX-158220737 | 18 | 73.647 | KV453060.1 | 5384681 | 14-scf00370 | 14 |
| AX-158220738 | 18 | 73.647 | KV453060.1 | 5385338 | 14-scf00370 | 14 |
| AX-158220739 | 18 | 73.647 | KV453060.1 | 5385814 | 14-scf00370 | 14 |
| AX-158220740 | 18 | 73.647 | KV453060.1 | 5387085 | 14-scf00370 | 14 |
| AX-158220742 | 18 | 73.647 | KV453060.1 | 5389675 | 14-scf00370 | 14 |
| AX-158220744 | 18 | 73.647 | KV453060.1 | 5391607 | 14-scf00370 | 14 |
| AX-158220746 | 18 | 73.647 | KV453060.1 | 5393066 | 14-scf00370 | 14 |
| AX-158410215 | 18 | 73.647 | KV453060.1 | 5393416 | 14-scf00370 | 14 |
| AX-158220749 | 18 | 73.647 | KV453060.1 | 5394562 | 14-scf00370 | 14 |
| AX-158220750 | 18 | 73.647 | KV453060.1 | 5395005 | 14-scf00370 | 14 |
| AX-158220751 | 18 | 73.647 | KV453060.1 | 5396636 | 14-scf00370 | 14 |
| AX-158220752 | 18 | 73.647 | KV453060.1 | 5397356 | 14-scf00370 | 14 |
| AX-158220754 | 18 | 73.647 | KV453060.1 | 5398899 | 14-scf00370 | 14 |
| AX-158220756 | 18 | 73.647 | KV453060.1 | 5399857 | 14-scf00370 | 14 |
| AX-158220759 | 18 | 73.647 | KV453060.1 | 5401630 | 14-scf00370 | 14 |
| AX-157744205 | 18 | 73.647 | KV453060.1 | 5403881 | 14-scf00370 | 14 |
| AX-157751281 | 18 | 73.647 | KV453060.1 | 5405330 | 14-scf00370 | 14 |
| AX-158220763 | 18 | 73.647 | KV453060.1 | 5406774 | 14-scf00370 | 14 |
| AX-158220764 | 18 | 73.647 | KV453060.1 | 5407705 | 14-scf00370 | 14 |
| AX-157839311 | 18 | 73.647 | KV453060.1 | 5410141 | 14-scf00370 | 14 |
| AX-158220767 | 18 | 73.647 | KV453060.1 | 5411663 | 14-scf00370 | 14 |
| AX-158220768 | 18 | 73.647 | KV453060.1 | 5414028 | 14-scf00370 | 14 |
| AX-158220772 | 18 | 73.647 | KV453060.1 | 5417493 | 14-scf00370 | 14 |
| AX-158220773 | 18 | 73.647 | KV453060.1 | 5418567 | 14-scf00370 | 14 |
| AX-158220775 | 18 | 73.647 | KV453060.1 | 5419212 | 14-scf00370 | 14 |
| AX-158220776 | 18 | 73.647 | KV453060.1 | 5419482 | 14-scf00370 | 14 |
| AX-158220781 | 18 | 73.647 | KV453060.1 | 5438036 | 14-scf00370 | 14 |
| AX-158220782 | 18 | 73.647 | KV453060.1 | 5445344 | 14-scf00370 | 14 |
| AX-158220783 | 18 | 73.647 | KV453060.1 | 5446146 | 14-scf00370 | 14 |
| AX-158220787 | 18 | 73.647 | KV453060.1 | 5448615 | 14-scf00370 | 14 |
| AX-158220789 | 18 | 73.647 | KV453060.1 | 5450166 | 14-scf00370 | 14 |
| AX-158220790 | 18 | 73.647 | KV453060.1 | 5450582 | 14-scf00370 | 14 |
| AX-158220791 | 18 | 73.647 | KV453060.1 | 5451340 | 14-scf00370 | 14 |
| AX-158220792 | 18 | 73.647 | KV453060.1 | 5451934 | 14-scf00370 | 14 |
| AX-158220796 | 18 | 73.647 | KV453060.1 | 5455763 | 14-scf00370 | 14 |
| AX-157839312 | 18 | 73.647 | KV453060.1 | 5457386 | 14-scf00370 | 14 |
| AX-157743674 | 18 | 73.647 | KV453060.1 | 5457741 | 14-scf00370 | 14 |
| AX-158220950 | 18 | 73.647 | KV453062.1 | 206368  | 14-scf00371 | 14 |

|              |    |        |            |         |             |    |
|--------------|----|--------|------------|---------|-------------|----|
| AX-158221146 | 18 | 73.647 | KV453061.1 | 196544  | 14-scf00372 | 14 |
| AX-158221147 | 18 | 73.647 | KV453061.1 | 196917  | 14-scf00372 | 14 |
| AX-158221150 | 18 | 73.647 | KV453061.1 | 198322  | 14-scf00372 | 14 |
| AX-158221151 | 18 | 73.647 | KV453061.1 | 199483  | 14-scf00372 | 14 |
| AX-158221153 | 18 | 73.647 | KV453061.1 | 201259  | 14-scf00372 | 14 |
| AX-158221158 | 18 | 73.647 | KV453061.1 | 210734  | 14-scf00372 | 14 |
| AX-158221163 | 18 | 73.647 | KV453061.1 | 218906  | 14-scf00372 | 14 |
| AX-158221164 | 18 | 73.647 | KV453061.1 | 219529  | 14-scf00372 | 14 |
| AX-158221165 | 18 | 73.647 | KV453061.1 | 220279  | 14-scf00372 | 14 |
| AX-158221167 | 18 | 73.647 | KV453061.1 | 220861  | 14-scf00372 | 14 |
| AX-158222389 | 18 | 73.647 | KV453063.1 | 156487  | 14-scf00374 | 14 |
| AX-158222398 | 18 | 73.647 | KV453063.1 | 176806  | 14-scf00374 | 14 |
| AX-158222399 | 18 | 73.647 | KV453063.1 | 177406  | 14-scf00374 | 14 |
| AX-158222400 | 18 | 73.647 | KV453063.1 | 177994  | 14-scf00374 | 14 |
| AX-158222401 | 18 | 73.647 | KV453063.1 | 178566  | 14-scf00374 | 14 |
| AX-157709048 | 18 | 73.647 | KV453063.1 | 179499  | 14-scf00374 | 14 |
| AX-158220721 | 18 | 73.676 | KV453060.1 | 5365467 | 14-scf00370 | 14 |
| AX-158220743 | 18 | 73.69  | KV453060.1 | 5390446 | 14-scf00370 | 14 |
| AX-158220747 | 18 | 73.706 | KV453060.1 | 5393511 | 14-scf00370 | 14 |
| AX-158220214 | 18 | 73.721 | KV453060.1 | 4766977 | 14-scf00370 | 14 |
| AX-158220591 | 18 | 73.721 | KV453060.1 | 5235205 | 14-scf00370 | 14 |
| AX-158220592 | 18 | 73.721 | KV453060.1 | 5235661 | 14-scf00370 | 14 |
| AX-157743259 | 18 | 73.721 | KV453060.1 | 5248310 | 14-scf00370 | 14 |
| AX-158220748 | 18 | 73.721 | KV453060.1 | 5394045 | 14-scf00370 | 14 |
| AX-158220753 | 18 | 73.721 | KV453060.1 | 5398132 | 14-scf00370 | 14 |
| AX-157757925 | 18 | 73.721 | KV453060.1 | 5399963 | 14-scf00370 | 14 |
| AX-158220758 | 18 | 73.721 | KV453060.1 | 5400366 | 14-scf00370 | 14 |
| AX-158220762 | 18 | 73.721 | KV453060.1 | 5405045 | 14-scf00370 | 14 |
| AX-158220765 | 18 | 73.721 | KV453060.1 | 5408175 | 14-scf00370 | 14 |
| AX-158220766 | 18 | 73.721 | KV453060.1 | 5409855 | 14-scf00370 | 14 |
| AX-158220769 | 18 | 73.721 | KV453060.1 | 5414770 | 14-scf00370 | 14 |
| AX-158220770 | 18 | 73.721 | KV453060.1 | 5415209 | 14-scf00370 | 14 |
| AX-158220771 | 18 | 73.721 | KV453060.1 | 5416219 | 14-scf00370 | 14 |
| AX-158220777 | 18 | 73.721 | KV453060.1 | 5419770 | 14-scf00370 | 14 |
| AX-157711345 | 18 | 73.721 | KV453060.1 | 5426374 | 14-scf00370 | 14 |
| AX-158220780 | 18 | 73.721 | KV453060.1 | 5436541 | 14-scf00370 | 14 |
| AX-158220785 | 18 | 73.721 | KV453060.1 | 5447124 | 14-scf00370 | 14 |
| AX-158220786 | 18 | 73.721 | KV453060.1 | 5447727 | 14-scf00370 | 14 |
| AX-158220788 | 18 | 73.721 | KV453060.1 | 5448974 | 14-scf00370 | 14 |
| AX-157751129 | 18 | 73.721 | KV453060.1 | 5452056 | 14-scf00370 | 14 |
| AX-158220794 | 18 | 73.721 | KV453060.1 | 5453075 | 14-scf00370 | 14 |
| AX-158220797 | 18 | 73.721 | KV453060.1 | 5458310 | 14-scf00370 | 14 |
| AX-158220856 | 18 | 73.721 | KV453062.1 | 68062   | 14-scf00371 | 14 |
| AX-158220857 | 18 | 73.721 | KV453062.1 | 69661   | 14-scf00371 | 14 |
| AX-158220860 | 18 | 73.721 | KV453062.1 | 72637   | 14-scf00371 | 14 |
| AX-158220861 | 18 | 73.721 | KV453062.1 | 73058   | 14-scf00371 | 14 |
| AX-158220862 | 18 | 73.721 | KV453062.1 | 74341   | 14-scf00371 | 14 |
| AX-158220863 | 18 | 73.721 | KV453062.1 | 75131   | 14-scf00371 | 14 |
| AX-158220867 | 18 | 73.721 | KV453062.1 | 80352   | 14-scf00371 | 14 |
| AX-158220868 | 18 | 73.721 | KV453062.1 | 81136   | 14-scf00371 | 14 |
| AX-158220870 | 18 | 73.721 | KV453062.1 | 85162   | 14-scf00371 | 14 |

|              |    |        |            |        |             |    |
|--------------|----|--------|------------|--------|-------------|----|
| AX-158220871 | 18 | 73.721 | KV453062.1 | 86284  | 14-scf00371 | 14 |
| AX-158220877 | 18 | 73.721 | KV453062.1 | 93183  | 14-scf00371 | 14 |
| AX-158220879 | 18 | 73.721 | KV453062.1 | 94414  | 14-scf00371 | 14 |
| AX-158220880 | 18 | 73.721 | KV453062.1 | 96470  | 14-scf00371 | 14 |
| AX-158220884 | 18 | 73.721 | KV453062.1 | 98414  | 14-scf00371 | 14 |
| AX-158414807 | 18 | 73.721 | KV453062.1 | 101432 | 14-scf00371 | 14 |
| AX-158220888 | 18 | 73.721 | KV453062.1 | 107252 | 14-scf00371 | 14 |
| AX-158220890 | 18 | 73.721 | KV453062.1 | 109152 | 14-scf00371 | 14 |
| AX-157771150 | 18 | 73.721 | KV453062.1 | 109724 | 14-scf00371 | 14 |
| AX-157709497 | 18 | 73.721 | KV453062.1 | 109984 | 14-scf00371 | 14 |
| AX-158220891 | 18 | 73.721 | KV453062.1 | 110416 | 14-scf00371 | 14 |
| AX-158220892 | 18 | 73.721 | KV453062.1 | 110867 | 14-scf00371 | 14 |
| AX-158220893 | 18 | 73.721 | KV453062.1 | 112759 | 14-scf00371 | 14 |
| AX-158220894 | 18 | 73.721 | KV453062.1 | 113890 | 14-scf00371 | 14 |
| AX-158220895 | 18 | 73.721 | KV453062.1 | 114284 | 14-scf00371 | 14 |
| AX-158220896 | 18 | 73.721 | KV453062.1 | 114635 | 14-scf00371 | 14 |
| AX-158220897 | 18 | 73.721 | KV453062.1 | 114949 | 14-scf00371 | 14 |
| AX-158220898 | 18 | 73.721 | KV453062.1 | 117875 | 14-scf00371 | 14 |
| AX-158220902 | 18 | 73.721 | KV453062.1 | 122905 | 14-scf00371 | 14 |
| AX-158220903 | 18 | 73.721 | KV453062.1 | 123859 | 14-scf00371 | 14 |
| AX-158220905 | 18 | 73.721 | KV453062.1 | 125339 | 14-scf00371 | 14 |
| AX-158220906 | 18 | 73.721 | KV453062.1 | 125612 | 14-scf00371 | 14 |
| AX-158220908 | 18 | 73.721 | KV453062.1 | 126796 | 14-scf00371 | 14 |
| AX-158220912 | 18 | 73.721 | KV453062.1 | 130012 | 14-scf00371 | 14 |
| AX-158220913 | 18 | 73.721 | KV453062.1 | 130513 | 14-scf00371 | 14 |
| AX-158220915 | 18 | 73.721 | KV453062.1 | 133282 | 14-scf00371 | 14 |
| AX-158220916 | 18 | 73.721 | KV453062.1 | 133821 | 14-scf00371 | 14 |
| AX-158220917 | 18 | 73.721 | KV453062.1 | 135051 | 14-scf00371 | 14 |
| AX-158220918 | 18 | 73.721 | KV453062.1 | 136437 | 14-scf00371 | 14 |
| AX-158220919 | 18 | 73.721 | KV453062.1 | 137345 | 14-scf00371 | 14 |
| AX-158220989 | 18 | 73.721 | KV453061.1 | 3729   | 14-scf00372 | 14 |
| AX-158220991 | 18 | 73.721 | KV453061.1 | 5830   | 14-scf00372 | 14 |
| AX-158220993 | 18 | 73.721 | KV453061.1 | 6653   | 14-scf00372 | 14 |
| AX-158220994 | 18 | 73.721 | KV453061.1 | 7579   | 14-scf00372 | 14 |
| AX-158220995 | 18 | 73.721 | KV453061.1 | 10636  | 14-scf00372 | 14 |
| AX-157839336 | 18 | 73.721 | KV453061.1 | 12764  | 14-scf00372 | 14 |
| AX-158220996 | 18 | 73.721 | KV453061.1 | 14587  | 14-scf00372 | 14 |
| AX-158220997 | 18 | 73.721 | KV453061.1 | 14940  | 14-scf00372 | 14 |
| AX-158220999 | 18 | 73.721 | KV453061.1 | 18096  | 14-scf00372 | 14 |
| AX-158221001 | 18 | 73.721 | KV453061.1 | 26098  | 14-scf00372 | 14 |
| AX-158221002 | 18 | 73.721 | KV453061.1 | 26686  | 14-scf00372 | 14 |
| AX-158221003 | 18 | 73.721 | KV453061.1 | 27401  | 14-scf00372 | 14 |
| AX-158221004 | 18 | 73.721 | KV453061.1 | 28181  | 14-scf00372 | 14 |
| AX-158221005 | 18 | 73.721 | KV453061.1 | 28841  | 14-scf00372 | 14 |
| AX-158221006 | 18 | 73.721 | KV453061.1 | 31653  | 14-scf00372 | 14 |
| AX-158221008 | 18 | 73.721 | KV453061.1 | 33161  | 14-scf00372 | 14 |
| AX-158221009 | 18 | 73.721 | KV453061.1 | 34555  | 14-scf00372 | 14 |
| AX-158221010 | 18 | 73.721 | KV453061.1 | 35384  | 14-scf00372 | 14 |
| AX-158221012 | 18 | 73.721 | KV453061.1 | 37077  | 14-scf00372 | 14 |
| AX-158221013 | 18 | 73.721 | KV453061.1 | 38053  | 14-scf00372 | 14 |
| AX-158221014 | 18 | 73.721 | KV453061.1 | 39059  | 14-scf00372 | 14 |

|              |    |        |            |        |             |    |
|--------------|----|--------|------------|--------|-------------|----|
| AX-158221017 | 18 | 73.721 | KV453061.1 | 41737  | 14-scf00372 | 14 |
| AX-158221018 | 18 | 73.721 | KV453061.1 | 42403  | 14-scf00372 | 14 |
| AX-158221019 | 18 | 73.721 | KV453061.1 | 42968  | 14-scf00372 | 14 |
| AX-158221020 | 18 | 73.721 | KV453061.1 | 43853  | 14-scf00372 | 14 |
| AX-158221021 | 18 | 73.721 | KV453061.1 | 46432  | 14-scf00372 | 14 |
| AX-158221022 | 18 | 73.721 | KV453061.1 | 48477  | 14-scf00372 | 14 |
| AX-158221023 | 18 | 73.721 | KV453061.1 | 48892  | 14-scf00372 | 14 |
| AX-158221024 | 18 | 73.721 | KV453061.1 | 51039  | 14-scf00372 | 14 |
| AX-158221025 | 18 | 73.721 | KV453061.1 | 52955  | 14-scf00372 | 14 |
| AX-158221026 | 18 | 73.721 | KV453061.1 | 53132  | 14-scf00372 | 14 |
| AX-158410218 | 18 | 73.721 | KV453061.1 | 54236  | 14-scf00372 | 14 |
| AX-158221027 | 18 | 73.721 | KV453061.1 | 55057  | 14-scf00372 | 14 |
| AX-158221028 | 18 | 73.721 | KV453061.1 | 56861  | 14-scf00372 | 14 |
| AX-158221029 | 18 | 73.721 | KV453061.1 | 57362  | 14-scf00372 | 14 |
| AX-158221030 | 18 | 73.721 | KV453061.1 | 57879  | 14-scf00372 | 14 |
| AX-158221032 | 18 | 73.721 | KV453061.1 | 59592  | 14-scf00372 | 14 |
| AX-158221034 | 18 | 73.721 | KV453061.1 | 61738  | 14-scf00372 | 14 |
| AX-158221035 | 18 | 73.721 | KV453061.1 | 63288  | 14-scf00372 | 14 |
| AX-158221036 | 18 | 73.721 | KV453061.1 | 63776  | 14-scf00372 | 14 |
| AX-158221043 | 18 | 73.721 | KV453061.1 | 69890  | 14-scf00372 | 14 |
| AX-158221044 | 18 | 73.721 | KV453061.1 | 71314  | 14-scf00372 | 14 |
| AX-158221045 | 18 | 73.721 | KV453061.1 | 71980  | 14-scf00372 | 14 |
| AX-158221046 | 18 | 73.721 | KV453061.1 | 72813  | 14-scf00372 | 14 |
| AX-158221047 | 18 | 73.721 | KV453061.1 | 74004  | 14-scf00372 | 14 |
| AX-158221050 | 18 | 73.721 | KV453061.1 | 78450  | 14-scf00372 | 14 |
| AX-158221052 | 18 | 73.721 | KV453061.1 | 84772  | 14-scf00372 | 14 |
| AX-158221075 | 18 | 73.721 | KV453061.1 | 105959 | 14-scf00372 | 14 |
| AX-158221079 | 18 | 73.721 | KV453061.1 | 109136 | 14-scf00372 | 14 |
| AX-158414812 | 18 | 73.721 | KV453061.1 | 109952 | 14-scf00372 | 14 |
| AX-157724782 | 18 | 73.721 | KV453061.1 | 112396 | 14-scf00372 | 14 |
| AX-158221085 | 18 | 73.721 | KV453061.1 | 113666 | 14-scf00372 | 14 |
| AX-158221089 | 18 | 73.721 | KV453061.1 | 121817 | 14-scf00372 | 14 |
| AX-158221090 | 18 | 73.721 | KV453061.1 | 122938 | 14-scf00372 | 14 |
| AX-158221091 | 18 | 73.721 | KV453061.1 | 124214 | 14-scf00372 | 14 |
| AX-158221092 | 18 | 73.721 | KV453061.1 | 124688 | 14-scf00372 | 14 |
| AX-158221094 | 18 | 73.721 | KV453061.1 | 127085 | 14-scf00372 | 14 |
| AX-158221095 | 18 | 73.721 | KV453061.1 | 128537 | 14-scf00372 | 14 |
| AX-158221096 | 18 | 73.721 | KV453061.1 | 130869 | 14-scf00372 | 14 |
| AX-158221097 | 18 | 73.721 | KV453061.1 | 131282 | 14-scf00372 | 14 |
| AX-158221098 | 18 | 73.721 | KV453061.1 | 132285 | 14-scf00372 | 14 |
| AX-158221099 | 18 | 73.721 | KV453061.1 | 132970 | 14-scf00372 | 14 |
| AX-158221100 | 18 | 73.721 | KV453061.1 | 135763 | 14-scf00372 | 14 |
| AX-158221101 | 18 | 73.721 | KV453061.1 | 136543 | 14-scf00372 | 14 |
| AX-158221102 | 18 | 73.721 | KV453061.1 | 139674 | 14-scf00372 | 14 |
| AX-157721307 | 18 | 73.721 | KV453061.1 | 140549 | 14-scf00372 | 14 |
| AX-158221104 | 18 | 73.721 | KV453061.1 | 142139 | 14-scf00372 | 14 |
| AX-158221113 | 18 | 73.721 | KV453061.1 | 155902 | 14-scf00372 | 14 |
| AX-158221119 | 18 | 73.721 | KV453061.1 | 160379 | 14-scf00372 | 14 |
| AX-158221121 | 18 | 73.721 | KV453061.1 | 164192 | 14-scf00372 | 14 |
| AX-158414816 | 18 | 73.721 | KV453061.1 | 167415 | 14-scf00372 | 14 |
| AX-158221123 | 18 | 73.721 | KV453061.1 | 167712 | 14-scf00372 | 14 |

|              |    |        |            |        |             |    |
|--------------|----|--------|------------|--------|-------------|----|
| AX-158221125 | 18 | 73.721 | KV453061.1 | 169241 | 14-scf00372 | 14 |
| AX-158221126 | 18 | 73.721 | KV453061.1 | 170078 | 14-scf00372 | 14 |
| AX-158221128 | 18 | 73.721 | KV453061.1 | 172829 | 14-scf00372 | 14 |
| AX-158221129 | 18 | 73.721 | KV453061.1 | 173181 | 14-scf00372 | 14 |
| AX-158221130 | 18 | 73.721 | KV453061.1 | 173458 | 14-scf00372 | 14 |
| AX-158221131 | 18 | 73.721 | KV453061.1 | 173686 | 14-scf00372 | 14 |
| AX-158221132 | 18 | 73.721 | KV453061.1 | 176201 | 14-scf00372 | 14 |
| AX-158221134 | 18 | 73.721 | KV453061.1 | 177115 | 14-scf00372 | 14 |
| AX-158221136 | 18 | 73.721 | KV453061.1 | 179638 | 14-scf00372 | 14 |
| AX-157859459 | 18 | 73.721 | KV453061.1 | 180575 | 14-scf00372 | 14 |
| AX-158414817 | 18 | 73.721 | KV453061.1 | 185748 | 14-scf00372 | 14 |
| AX-158221140 | 18 | 73.721 | KV453061.1 | 186939 | 14-scf00372 | 14 |
| AX-158221145 | 18 | 73.721 | KV453061.1 | 194873 | 14-scf00372 | 14 |
| AX-157714021 | 18 | 73.721 | KV453061.1 | 197143 | 14-scf00372 | 14 |
| AX-158221148 | 18 | 73.721 | KV453061.1 | 197426 | 14-scf00372 | 14 |
| AX-158221149 | 18 | 73.721 | KV453061.1 | 198044 | 14-scf00372 | 14 |
| AX-158221152 | 18 | 73.721 | KV453061.1 | 200096 | 14-scf00372 | 14 |
| AX-158221154 | 18 | 73.721 | KV453061.1 | 206097 | 14-scf00372 | 14 |
| AX-157839339 | 18 | 73.721 | KV453061.1 | 206760 | 14-scf00372 | 14 |
| AX-158221156 | 18 | 73.721 | KV453061.1 | 207634 | 14-scf00372 | 14 |
| AX-158221157 | 18 | 73.721 | KV453061.1 | 208362 | 14-scf00372 | 14 |
| AX-158221159 | 18 | 73.721 | KV453061.1 | 213863 | 14-scf00372 | 14 |
| AX-158221161 | 18 | 73.721 | KV453061.1 | 216979 | 14-scf00372 | 14 |
| AX-158221166 | 18 | 73.721 | KV453061.1 | 220656 | 14-scf00372 | 14 |
| AX-158221178 | 18 | 73.721 | KV453065.1 | 42071  | 14-scf00373 | 14 |
| AX-158221190 | 18 | 73.721 | KV453065.1 | 89624  | 14-scf00373 | 14 |
| AX-158222286 | 18 | 73.721 | KV453063.1 | 1131   | 14-scf00374 | 14 |
| AX-158222287 | 18 | 73.721 | KV453063.1 | 1546   | 14-scf00374 | 14 |
| AX-158222288 | 18 | 73.721 | KV453063.1 | 3752   | 14-scf00374 | 14 |
| AX-158222295 | 18 | 73.721 | KV453063.1 | 10917  | 14-scf00374 | 14 |
| AX-158222345 | 18 | 73.721 | KV453063.1 | 83833  | 14-scf00374 | 14 |
| AX-158222347 | 18 | 73.721 | KV453063.1 | 92319  | 14-scf00374 | 14 |
| AX-158222349 | 18 | 73.721 | KV453063.1 | 94532  | 14-scf00374 | 14 |
| AX-158222353 | 18 | 73.721 | KV453063.1 | 99674  | 14-scf00374 | 14 |
| AX-158222354 | 18 | 73.721 | KV453063.1 | 100410 | 14-scf00374 | 14 |
| AX-158222356 | 18 | 73.721 | KV453063.1 | 104959 | 14-scf00374 | 14 |
| AX-158222357 | 18 | 73.721 | KV453063.1 | 105345 | 14-scf00374 | 14 |
| AX-158222358 | 18 | 73.721 | KV453063.1 | 106711 | 14-scf00374 | 14 |
| AX-158222359 | 18 | 73.721 | KV453063.1 | 109187 | 14-scf00374 | 14 |
| AX-158222370 | 18 | 73.721 | KV453063.1 | 128488 | 14-scf00374 | 14 |
| AX-158222371 | 18 | 73.721 | KV453063.1 | 129017 | 14-scf00374 | 14 |
| AX-158222373 | 18 | 73.721 | KV453063.1 | 130254 | 14-scf00374 | 14 |
| AX-158222377 | 18 | 73.721 | KV453063.1 | 134346 | 14-scf00374 | 14 |
| AX-158222378 | 18 | 73.721 | KV453063.1 | 137093 | 14-scf00374 | 14 |
| AX-158222379 | 18 | 73.721 | KV453063.1 | 138129 | 14-scf00374 | 14 |
| AX-158222380 | 18 | 73.721 | KV453063.1 | 139043 | 14-scf00374 | 14 |
| AX-158222381 | 18 | 73.721 | KV453063.1 | 139740 | 14-scf00374 | 14 |
| AX-158414854 | 18 | 73.721 | KV453063.1 | 149375 | 14-scf00374 | 14 |
| AX-158222385 | 18 | 73.721 | KV453063.1 | 150955 | 14-scf00374 | 14 |
| AX-158222386 | 18 | 73.721 | KV453063.1 | 151201 | 14-scf00374 | 14 |
| AX-158222387 | 18 | 73.721 | KV453063.1 | 152458 | 14-scf00374 | 14 |

|              |    |        |            |        |             |    |
|--------------|----|--------|------------|--------|-------------|----|
| AX-158222391 | 18 | 73.721 | KV453063.1 | 158231 | 14-scf00374 | 14 |
| AX-157839436 | 18 | 73.721 | KV453063.1 | 159965 | 14-scf00374 | 14 |
| AX-158222393 | 18 | 73.721 | KV453063.1 | 163724 | 14-scf00374 | 14 |
| AX-157839437 | 18 | 73.721 | KV453063.1 | 167157 | 14-scf00374 | 14 |
| AX-158222395 | 18 | 73.721 | KV453063.1 | 167192 | 14-scf00374 | 14 |
| AX-158222403 | 18 | 73.721 | KV453063.1 | 188043 | 14-scf00374 | 14 |
| AX-157839440 | 18 | 73.721 | KV453063.1 | 198197 | 14-scf00374 | 14 |
| AX-158222409 | 18 | 73.721 | KV453063.1 | 202060 | 14-scf00374 | 14 |
| AX-158222412 | 18 | 73.721 | KV453063.1 | 205845 | 14-scf00374 | 14 |
| AX-158222413 | 18 | 73.721 | KV453063.1 | 208077 | 14-scf00374 | 14 |
| AX-158222414 | 18 | 73.721 | KV453063.1 | 209243 | 14-scf00374 | 14 |
| AX-158222417 | 18 | 73.721 | KV453063.1 | 212143 | 14-scf00374 | 14 |
| AX-158222428 | 18 | 73.721 | KV453063.1 | 229456 | 14-scf00374 | 14 |
| AX-158222429 | 18 | 73.721 | KV453063.1 | 230258 | 14-scf00374 | 14 |
| AX-158222626 | 18 | 73.721 | KV453063.1 | 470389 | 14-scf00374 | 14 |
| AX-158221169 | 18 | 73.722 | KV453061.1 | 223791 | 14-scf00372 | 14 |
| AX-157867076 | 18 | 73.724 | KV453061.1 | 225714 | 14-scf00372 | 14 |
| AX-158220799 | 18 | 73.727 | KV453062.1 | 941    | 14-scf00371 | 14 |
| AX-158220801 | 18 | 73.727 | KV453062.1 | 3536   | 14-scf00371 | 14 |
| AX-158220802 | 18 | 73.727 | KV453062.1 | 4163   | 14-scf00371 | 14 |
| AX-158220804 | 18 | 73.727 | KV453062.1 | 8457   | 14-scf00371 | 14 |
| AX-158220805 | 18 | 73.727 | KV453062.1 | 9035   | 14-scf00371 | 14 |
| AX-158220807 | 18 | 73.727 | KV453062.1 | 12491  | 14-scf00371 | 14 |
| AX-158220808 | 18 | 73.727 | KV453062.1 | 14921  | 14-scf00371 | 14 |
| AX-157839313 | 18 | 73.727 | KV453062.1 | 15120  | 14-scf00371 | 14 |
| AX-158220809 | 18 | 73.727 | KV453062.1 | 15826  | 14-scf00371 | 14 |
| AX-158220810 | 18 | 73.727 | KV453062.1 | 16245  | 14-scf00371 | 14 |
| AX-158220812 | 18 | 73.727 | KV453062.1 | 17736  | 14-scf00371 | 14 |
| AX-158220813 | 18 | 73.727 | KV453062.1 | 18646  | 14-scf00371 | 14 |
| AX-158220814 | 18 | 73.727 | KV453062.1 | 20460  | 14-scf00371 | 14 |
| AX-158220815 | 18 | 73.727 | KV453062.1 | 21076  | 14-scf00371 | 14 |
| AX-158220816 | 18 | 73.727 | KV453062.1 | 21676  | 14-scf00371 | 14 |
| AX-157839314 | 18 | 73.727 | KV453062.1 | 22174  | 14-scf00371 | 14 |
| AX-158220817 | 18 | 73.727 | KV453062.1 | 23693  | 14-scf00371 | 14 |
| AX-158220818 | 18 | 73.727 | KV453062.1 | 26154  | 14-scf00371 | 14 |
| AX-158220819 | 18 | 73.727 | KV453062.1 | 27032  | 14-scf00371 | 14 |
| AX-158220821 | 18 | 73.727 | KV453062.1 | 28513  | 14-scf00371 | 14 |
| AX-158220822 | 18 | 73.727 | KV453062.1 | 29149  | 14-scf00371 | 14 |
| AX-158220823 | 18 | 73.727 | KV453062.1 | 31529  | 14-scf00371 | 14 |
| AX-158220825 | 18 | 73.727 | KV453062.1 | 34712  | 14-scf00371 | 14 |
| AX-158220827 | 18 | 73.727 | KV453062.1 | 36301  | 14-scf00371 | 14 |
| AX-158220828 | 18 | 73.727 | KV453062.1 | 38054  | 14-scf00371 | 14 |
| AX-158220829 | 18 | 73.727 | KV453062.1 | 39333  | 14-scf00371 | 14 |
| AX-158220830 | 18 | 73.727 | KV453062.1 | 39839  | 14-scf00371 | 14 |
| AX-158220831 | 18 | 73.727 | KV453062.1 | 40361  | 14-scf00371 | 14 |
| AX-158220832 | 18 | 73.727 | KV453062.1 | 40837  | 14-scf00371 | 14 |
| AX-158220833 | 18 | 73.727 | KV453062.1 | 41836  | 14-scf00371 | 14 |
| AX-158220835 | 18 | 73.727 | KV453062.1 | 43186  | 14-scf00371 | 14 |
| AX-158220836 | 18 | 73.727 | KV453062.1 | 43727  | 14-scf00371 | 14 |
| AX-158220837 | 18 | 73.727 | KV453062.1 | 44475  | 14-scf00371 | 14 |
| AX-158220838 | 18 | 73.727 | KV453062.1 | 44656  | 14-scf00371 | 14 |

|              |    |        |            |        |             |    |
|--------------|----|--------|------------|--------|-------------|----|
| AX-158220841 | 18 | 73.727 | KV453062.1 | 47775  | 14-scf00371 | 14 |
| AX-158220842 | 18 | 73.727 | KV453062.1 | 48212  | 14-scf00371 | 14 |
| AX-158220845 | 18 | 73.727 | KV453062.1 | 50576  | 14-scf00371 | 14 |
| AX-158220846 | 18 | 73.727 | KV453062.1 | 51003  | 14-scf00371 | 14 |
| AX-158220849 | 18 | 73.727 | KV453062.1 | 57767  | 14-scf00371 | 14 |
| AX-158220850 | 18 | 73.727 | KV453062.1 | 58593  | 14-scf00371 | 14 |
| AX-158220851 | 18 | 73.727 | KV453062.1 | 59065  | 14-scf00371 | 14 |
| AX-158220852 | 18 | 73.727 | KV453062.1 | 60082  | 14-scf00371 | 14 |
| AX-158220855 | 18 | 73.727 | KV453062.1 | 66821  | 14-scf00371 | 14 |
| AX-158220883 | 18 | 73.727 | KV453062.1 | 97906  | 14-scf00371 | 14 |
| AX-158220889 | 18 | 73.727 | KV453062.1 | 107609 | 14-scf00371 | 14 |
| AX-158222418 | 18 | 73.727 | KV453063.1 | 215903 | 14-scf00374 | 14 |
| AX-158222419 | 18 | 73.727 | KV453063.1 | 218209 | 14-scf00374 | 14 |
| AX-158222420 | 18 | 73.727 | KV453063.1 | 218943 | 14-scf00374 | 14 |
| AX-158222421 | 18 | 73.727 | KV453063.1 | 219721 | 14-scf00374 | 14 |
| AX-158222422 | 18 | 73.727 | KV453063.1 | 224327 | 14-scf00374 | 14 |
| AX-158222423 | 18 | 73.727 | KV453063.1 | 224378 | 14-scf00374 | 14 |
| AX-158222425 | 18 | 73.727 | KV453063.1 | 227396 | 14-scf00374 | 14 |
| AX-158222427 | 18 | 73.727 | KV453063.1 | 228753 | 14-scf00374 | 14 |
| AX-158222430 | 18 | 73.727 | KV453063.1 | 231284 | 14-scf00374 | 14 |
| AX-158222431 | 18 | 73.727 | KV453063.1 | 234022 | 14-scf00374 | 14 |
| AX-158222437 | 18 | 73.727 | KV453063.1 | 245431 | 14-scf00374 | 14 |
| AX-158222438 | 18 | 73.727 | KV453063.1 | 246089 | 14-scf00374 | 14 |
| AX-158222442 | 18 | 73.727 | KV453063.1 | 252070 | 14-scf00374 | 14 |
| AX-158222444 | 18 | 73.727 | KV453063.1 | 254692 | 14-scf00374 | 14 |
| AX-158222446 | 18 | 73.727 | KV453063.1 | 258825 | 14-scf00374 | 14 |
| AX-158222447 | 18 | 73.727 | KV453063.1 | 259199 | 14-scf00374 | 14 |
| AX-158222448 | 18 | 73.727 | KV453063.1 | 260443 | 14-scf00374 | 14 |
| AX-158410249 | 18 | 73.727 | KV453063.1 | 263765 | 14-scf00374 | 14 |
| AX-158414870 | 18 | 73.727 | KV453063.1 | 264356 | 14-scf00374 | 14 |
| AX-158222451 | 18 | 73.727 | KV453063.1 | 269926 | 14-scf00374 | 14 |
| AX-158222452 | 18 | 73.727 | KV453063.1 | 270382 | 14-scf00374 | 14 |
| AX-158222453 | 18 | 73.727 | KV453063.1 | 271176 | 14-scf00374 | 14 |
| AX-158222455 | 18 | 73.727 | KV453063.1 | 273877 | 14-scf00374 | 14 |
| AX-158222457 | 18 | 73.727 | KV453063.1 | 276140 | 14-scf00374 | 14 |
| AX-158222458 | 18 | 73.727 | KV453063.1 | 276631 | 14-scf00374 | 14 |
| AX-158222460 | 18 | 73.727 | KV453063.1 | 277858 | 14-scf00374 | 14 |
| AX-158222461 | 18 | 73.727 | KV453063.1 | 278653 | 14-scf00374 | 14 |
| AX-158222464 | 18 | 73.727 | KV453063.1 | 288823 | 14-scf00374 | 14 |
| AX-158222466 | 18 | 73.727 | KV453063.1 | 289691 | 14-scf00374 | 14 |
| AX-157707810 | 18 | 73.727 | KV453063.1 | 290384 | 14-scf00374 | 14 |
| AX-158222468 | 18 | 73.727 | KV453063.1 | 291992 | 14-scf00374 | 14 |
| AX-158222470 | 18 | 73.727 | KV453063.1 | 293328 | 14-scf00374 | 14 |
| AX-158222471 | 18 | 73.727 | KV453063.1 | 296859 | 14-scf00374 | 14 |
| AX-158222472 | 18 | 73.727 | KV453063.1 | 298175 | 14-scf00374 | 14 |
| AX-158222474 | 18 | 73.727 | KV453063.1 | 299337 | 14-scf00374 | 14 |
| AX-158222475 | 18 | 73.727 | KV453063.1 | 299972 | 14-scf00374 | 14 |
| AX-158222476 | 18 | 73.727 | KV453063.1 | 300730 | 14-scf00374 | 14 |
| AX-158222481 | 18 | 73.727 | KV453063.1 | 307265 | 14-scf00374 | 14 |
| AX-158222483 | 18 | 73.727 | KV453063.1 | 308143 | 14-scf00374 | 14 |
| AX-158222484 | 18 | 73.727 | KV453063.1 | 308643 | 14-scf00374 | 14 |



|              |    |        |            |        |             |    |
|--------------|----|--------|------------|--------|-------------|----|
| AX-158222486 | 18 | 73.727 | KV453063.1 | 311141 | 14-scf00374 | 14 |
| AX-158222488 | 18 | 73.727 | KV453063.1 | 312660 | 14-scf00374 | 14 |
| AX-158222489 | 18 | 73.727 | KV453063.1 | 315243 | 14-scf00374 | 14 |
| AX-158222491 | 18 | 73.727 | KV453063.1 | 316978 | 14-scf00374 | 14 |
| AX-158222492 | 18 | 73.727 | KV453063.1 | 319203 | 14-scf00374 | 14 |
| AX-158222493 | 18 | 73.727 | KV453063.1 | 319605 | 14-scf00374 | 14 |
| AX-157698583 | 18 | 73.727 | KV453063.1 | 323082 | 14-scf00374 | 14 |
| AX-158222497 | 18 | 73.727 | KV453063.1 | 324057 | 14-scf00374 | 14 |
| AX-158222499 | 18 | 73.727 | KV453063.1 | 325343 | 14-scf00374 | 14 |
| AX-158222500 | 18 | 73.727 | KV453063.1 | 326467 | 14-scf00374 | 14 |
| AX-158222501 | 18 | 73.727 | KV453063.1 | 327023 | 14-scf00374 | 14 |
| AX-158222502 | 18 | 73.727 | KV453063.1 | 327619 | 14-scf00374 | 14 |
| AX-158222504 | 18 | 73.727 | KV453063.1 | 329211 | 14-scf00374 | 14 |
| AX-158222505 | 18 | 73.727 | KV453063.1 | 331585 | 14-scf00374 | 14 |
| AX-158222506 | 18 | 73.727 | KV453063.1 | 332169 | 14-scf00374 | 14 |
| AX-158222507 | 18 | 73.727 | KV453063.1 | 332499 | 14-scf00374 | 14 |
| AX-157839444 | 18 | 73.727 | KV453063.1 | 335780 | 14-scf00374 | 14 |
| AX-158222509 | 18 | 73.727 | KV453063.1 | 336669 | 14-scf00374 | 14 |
| AX-158222510 | 18 | 73.727 | KV453063.1 | 337202 | 14-scf00374 | 14 |
| AX-158222511 | 18 | 73.727 | KV453063.1 | 337715 | 14-scf00374 | 14 |
| AX-158222512 | 18 | 73.727 | KV453063.1 | 339177 | 14-scf00374 | 14 |
| AX-158222513 | 18 | 73.727 | KV453063.1 | 339966 | 14-scf00374 | 14 |
| AX-158222514 | 18 | 73.727 | KV453063.1 | 341249 | 14-scf00374 | 14 |
| AX-158222515 | 18 | 73.727 | KV453063.1 | 342197 | 14-scf00374 | 14 |
| AX-158222518 | 18 | 73.727 | KV453063.1 | 345117 | 14-scf00374 | 14 |
| AX-158222519 | 18 | 73.727 | KV453063.1 | 345690 | 14-scf00374 | 14 |
| AX-158222521 | 18 | 73.727 | KV453063.1 | 347838 | 14-scf00374 | 14 |
| AX-158222522 | 18 | 73.727 | KV453063.1 | 348790 | 14-scf00374 | 14 |
| AX-158222526 | 18 | 73.727 | KV453063.1 | 354190 | 14-scf00374 | 14 |
| AX-158222529 | 18 | 73.727 | KV453063.1 | 359533 | 14-scf00374 | 14 |
| AX-158222531 | 18 | 73.727 | KV453063.1 | 360529 | 14-scf00374 | 14 |
| AX-158222532 | 18 | 73.727 | KV453063.1 | 360861 | 14-scf00374 | 14 |
| AX-157708671 | 18 | 73.727 | KV453063.1 | 361087 | 14-scf00374 | 14 |
| AX-158222534 | 18 | 73.727 | KV453063.1 | 361799 | 14-scf00374 | 14 |
| AX-158222535 | 18 | 73.727 | KV453063.1 | 362410 | 14-scf00374 | 14 |
| AX-158222537 | 18 | 73.727 | KV453063.1 | 369870 | 14-scf00374 | 14 |
| AX-158222540 | 18 | 73.727 | KV453063.1 | 371665 | 14-scf00374 | 14 |
| AX-158222541 | 18 | 73.727 | KV453063.1 | 371984 | 14-scf00374 | 14 |
| AX-158222542 | 18 | 73.727 | KV453063.1 | 372444 | 14-scf00374 | 14 |
| AX-157839446 | 18 | 73.727 | KV453063.1 | 375074 | 14-scf00374 | 14 |
| AX-158222545 | 18 | 73.727 | KV453063.1 | 375409 | 14-scf00374 | 14 |
| AX-158222546 | 18 | 73.727 | KV453063.1 | 375811 | 14-scf00374 | 14 |
| AX-158222547 | 18 | 73.727 | KV453063.1 | 376812 | 14-scf00374 | 14 |
| AX-158222548 | 18 | 73.727 | KV453063.1 | 377063 | 14-scf00374 | 14 |
| AX-158222552 | 18 | 73.727 | KV453063.1 | 380540 | 14-scf00374 | 14 |
| AX-158222553 | 18 | 73.727 | KV453063.1 | 381429 | 14-scf00374 | 14 |
| AX-158222554 | 18 | 73.727 | KV453063.1 | 381990 | 14-scf00374 | 14 |
| AX-157839448 | 18 | 73.727 | KV453063.1 | 383382 | 14-scf00374 | 14 |
| AX-158222556 | 18 | 73.727 | KV453063.1 | 383666 | 14-scf00374 | 14 |
| AX-158222557 | 18 | 73.727 | KV453063.1 | 384439 | 14-scf00374 | 14 |
| AX-158222558 | 18 | 73.727 | KV453063.1 | 388826 | 14-scf00374 | 14 |

|              |    |        |            |        |             |    |
|--------------|----|--------|------------|--------|-------------|----|
| AX-158222559 | 18 | 73.727 | KV453063.1 | 390756 | 14-scf00374 | 14 |
| AX-158222560 | 18 | 73.727 | KV453063.1 | 391690 | 14-scf00374 | 14 |
| AX-158410250 | 18 | 73.727 | KV453063.1 | 393375 | 14-scf00374 | 14 |
| AX-158222561 | 18 | 73.727 | KV453063.1 | 396847 | 14-scf00374 | 14 |
| AX-158222562 | 18 | 73.727 | KV453063.1 | 398232 | 14-scf00374 | 14 |
| AX-158222563 | 18 | 73.727 | KV453063.1 | 401952 | 14-scf00374 | 14 |
| AX-158222566 | 18 | 73.727 | KV453063.1 | 408103 | 14-scf00374 | 14 |
| AX-158222567 | 18 | 73.727 | KV453063.1 | 409190 | 14-scf00374 | 14 |
| AX-158222568 | 18 | 73.727 | KV453063.1 | 411331 | 14-scf00374 | 14 |
| AX-158222571 | 18 | 73.727 | KV453063.1 | 413388 | 14-scf00374 | 14 |
| AX-158222572 | 18 | 73.727 | KV453063.1 | 414291 | 14-scf00374 | 14 |
| AX-158222574 | 18 | 73.727 | KV453063.1 | 415298 | 14-scf00374 | 14 |
| AX-158222576 | 18 | 73.727 | KV453063.1 | 416273 | 14-scf00374 | 14 |
| AX-157839449 | 18 | 73.727 | KV453063.1 | 418575 | 14-scf00374 | 14 |
| AX-158222577 | 18 | 73.727 | KV453063.1 | 419543 | 14-scf00374 | 14 |
| AX-158222578 | 18 | 73.727 | KV453063.1 | 419840 | 14-scf00374 | 14 |
| AX-158222580 | 18 | 73.727 | KV453063.1 | 420794 | 14-scf00374 | 14 |
| AX-158222581 | 18 | 73.727 | KV453063.1 | 421056 | 14-scf00374 | 14 |
| AX-158222583 | 18 | 73.727 | KV453063.1 | 422427 | 14-scf00374 | 14 |
| AX-158222584 | 18 | 73.727 | KV453063.1 | 422672 | 14-scf00374 | 14 |
| AX-158222586 | 18 | 73.727 | KV453063.1 | 424038 | 14-scf00374 | 14 |
| AX-158222588 | 18 | 73.727 | KV453063.1 | 425888 | 14-scf00374 | 14 |
| AX-158222589 | 18 | 73.727 | KV453063.1 | 427416 | 14-scf00374 | 14 |
| AX-158222590 | 18 | 73.727 | KV453063.1 | 427985 | 14-scf00374 | 14 |
| AX-158222591 | 18 | 73.727 | KV453063.1 | 429113 | 14-scf00374 | 14 |
| AX-158222593 | 18 | 73.727 | KV453063.1 | 430920 | 14-scf00374 | 14 |
| AX-158222594 | 18 | 73.727 | KV453063.1 | 431585 | 14-scf00374 | 14 |
| AX-158222596 | 18 | 73.727 | KV453063.1 | 435471 | 14-scf00374 | 14 |
| AX-158222597 | 18 | 73.727 | KV453063.1 | 435702 | 14-scf00374 | 14 |
| AX-158222599 | 18 | 73.727 | KV453063.1 | 440062 | 14-scf00374 | 14 |
| AX-158222600 | 18 | 73.727 | KV453063.1 | 440552 | 14-scf00374 | 14 |
| AX-158222601 | 18 | 73.727 | KV453063.1 | 440909 | 14-scf00374 | 14 |
| AX-158222602 | 18 | 73.727 | KV453063.1 | 441336 | 14-scf00374 | 14 |
| AX-158222603 | 18 | 73.727 | KV453063.1 | 441553 | 14-scf00374 | 14 |
| AX-158222604 | 18 | 73.727 | KV453063.1 | 442321 | 14-scf00374 | 14 |
| AX-158222605 | 18 | 73.727 | KV453063.1 | 443794 | 14-scf00374 | 14 |
| AX-157839451 | 18 | 73.727 | KV453063.1 | 450075 | 14-scf00374 | 14 |
| AX-158222611 | 18 | 73.727 | KV453063.1 | 453613 | 14-scf00374 | 14 |
| AX-158222613 | 18 | 73.727 | KV453063.1 | 455207 | 14-scf00374 | 14 |
| AX-158222614 | 18 | 73.727 | KV453063.1 | 456377 | 14-scf00374 | 14 |
| AX-158222615 | 18 | 73.727 | KV453063.1 | 457231 | 14-scf00374 | 14 |
| AX-158222616 | 18 | 73.727 | KV453063.1 | 457604 | 14-scf00374 | 14 |
| AX-158222618 | 18 | 73.727 | KV453063.1 | 459175 | 14-scf00374 | 14 |
| AX-158222620 | 18 | 73.727 | KV453063.1 | 461961 | 14-scf00374 | 14 |
| AX-158222621 | 18 | 73.727 | KV453063.1 | 462424 | 14-scf00374 | 14 |
| AX-158222622 | 18 | 73.727 | KV453063.1 | 464036 | 14-scf00374 | 14 |
| AX-158222623 | 18 | 73.727 | KV453063.1 | 464675 | 14-scf00374 | 14 |
| AX-158222624 | 18 | 73.727 | KV453063.1 | 465122 | 14-scf00374 | 14 |
| AX-158414874 | 18 | 73.727 | KV453063.1 | 465596 | 14-scf00374 | 14 |
| AX-158222625 | 18 | 73.727 | KV453063.1 | 466417 | 14-scf00374 | 14 |
| AX-157741552 | 18 | 73.727 | KV453063.1 | 472678 | 14-scf00374 | 14 |

|              |    |        |             |         |             |    |
|--------------|----|--------|-------------|---------|-------------|----|
| AX-158222628 | 18 | 73.727 | KV453063.1  | 473201  | 14-scf00374 | 14 |
| AX-158222630 | 18 | 73.727 | KV453063.1  | 477143  | 14-scf00374 | 14 |
| AX-158222631 | 18 | 73.727 | KV453063.1  | 478218  | 14-scf00374 | 14 |
| AX-158222632 | 18 | 73.727 | KV453063.1  | 478906  | 14-scf00374 | 14 |
| AX-157704846 | 18 | 73.727 | 3ML01027615 | 693     | scf03221_1  | UN |
| AX-157704847 | 18 | 73.727 | 3ML01027615 | 768     | scf03221_1  | UN |
| AX-158220800 | 18 | 73.729 | KV453062.1  | 977     | 14-scf00371 | 14 |
| AX-158220803 | 18 | 73.732 | KV453062.1  | 7515    | 14-scf00371 | 14 |
| AX-158220806 | 18 | 73.734 | KV453062.1  | 11539   | 14-scf00371 | 14 |
| AX-158220820 | 18 | 73.737 | KV453062.1  | 27628   | 14-scf00371 | 14 |
| AX-158220824 | 18 | 73.739 | KV453062.1  | 32025   | 14-scf00371 | 14 |
| AX-158220826 | 18 | 73.741 | KV453062.1  | 35014   | 14-scf00371 | 14 |
| AX-158220834 | 18 | 73.744 | KV453062.1  | 42251   | 14-scf00371 | 14 |
| AX-158220840 | 18 | 73.747 | KV453062.1  | 47398   | 14-scf00371 | 14 |
| AX-158220843 | 18 | 73.749 | KV453062.1  | 49113   | 14-scf00371 | 14 |
| AX-158220844 | 18 | 73.752 | KV453062.1  | 49833   | 14-scf00371 | 14 |
| AX-158220847 | 18 | 73.755 | KV453062.1  | 52683   | 14-scf00371 | 14 |
| AX-158220864 | 18 | 73.76  | KV453062.1  | 76346   | 14-scf00371 | 14 |
| AX-158220866 | 18 | 73.769 | KV453062.1  | 77565   | 14-scf00371 | 14 |
| AX-158220869 | 18 | 73.774 | KV453062.1  | 82461   | 14-scf00371 | 14 |
| AX-158386646 | 18 | 73.782 | KV453062.1  | 91177   | 14-scf00371 | 14 |
| AX-158220876 | 18 | 73.787 | KV453062.1  | 91281   | 14-scf00371 | 14 |
| AX-158220882 | 18 | 73.79  | KV453062.1  | 97395   | 14-scf00371 | 14 |
| AX-158220885 | 18 | 73.794 | KV453062.1  | 99195   | 14-scf00371 | 14 |
| AX-158414806 | 18 | 73.799 | KV453062.1  | 101034  | 14-scf00371 | 14 |
| AX-158423230 | 18 | 73.803 | KV453062.1  | 101645  | 14-scf00371 | 14 |
| AX-158220886 | 18 | 73.811 | KV453062.1  | 102763  | 14-scf00371 | 14 |
| AX-158220899 | 18 | 73.815 | KV453062.1  | 119762  | 14-scf00371 | 14 |
| AX-158220909 | 18 | 73.818 | KV453062.1  | 127684  | 14-scf00371 | 14 |
| AX-158220680 | 18 | 73.822 | KV453060.1  | 5320657 | 14-scf00370 | 14 |
| AX-157839319 | 18 | 73.822 | KV453062.1  | 170996  | 14-scf00371 | 14 |
| AX-158220932 | 18 | 73.822 | KV453062.1  | 178490  | 14-scf00371 | 14 |
| AX-158220444 | 18 | 73.827 | KV453060.1  | 5078282 | 14-scf00370 | 14 |
| AX-158220445 | 18 | 73.827 | KV453060.1  | 5078810 | 14-scf00370 | 14 |
| AX-158220695 | 18 | 73.827 | KV453060.1  | 5337909 | 14-scf00370 | 14 |
| AX-158220722 | 18 | 73.827 | KV453060.1  | 5366594 | 14-scf00370 | 14 |
| AX-158414801 | 18 | 73.827 | KV453060.1  | 5376832 | 14-scf00370 | 14 |
| AX-158220900 | 18 | 73.827 | KV453062.1  | 121716  | 14-scf00371 | 14 |
| AX-158220935 | 18 | 73.827 | KV453062.1  | 183553  | 14-scf00371 | 14 |
| AX-158220936 | 18 | 73.827 | KV453062.1  | 183960  | 14-scf00371 | 14 |
| AX-158220938 | 18 | 73.827 | KV453062.1  | 187770  | 14-scf00371 | 14 |
| AX-157839324 | 18 | 73.827 | KV453062.1  | 216661  | 14-scf00371 | 14 |
| AX-158220990 | 18 | 73.827 | KV453061.1  | 5406    | 14-scf00372 | 14 |
| AX-158221015 | 18 | 73.827 | KV453061.1  | 40087   | 14-scf00372 | 14 |
| AX-158221016 | 18 | 73.827 | KV453061.1  | 40863   | 14-scf00372 | 14 |
| AX-158221031 | 18 | 73.827 | KV453061.1  | 58556   | 14-scf00372 | 14 |
| AX-158221033 | 18 | 73.827 | KV453061.1  | 60032   | 14-scf00372 | 14 |
| AX-157709367 | 18 | 73.827 | KV453065.1  | 71682   | 14-scf00373 | 14 |
| AX-158221183 | 18 | 73.827 | KV453065.1  | 72026   | 14-scf00373 | 14 |
| AX-158386692 | 18 | 73.827 | KV453063.1  | 96981   | 14-scf00374 | 14 |
| AX-158222369 | 18 | 73.827 | KV453063.1  | 128062  | 14-scf00374 | 14 |

|              |    |        |            |         |             |    |
|--------------|----|--------|------------|---------|-------------|----|
| AX-157774389 | 18 | 73.827 | KV453063.1 | 184160  | 14-scf00374 | 14 |
| AX-158220939 | 18 | 73.828 | KV453062.1 | 188481  | 14-scf00371 | 14 |
| AX-158220208 | 18 | 73.83  | KV453060.1 | 4762343 | 14-scf00370 | 14 |
| AX-157839281 | 18 | 73.83  | KV453060.1 | 5015536 | 14-scf00370 | 14 |
| AX-158220451 | 18 | 73.83  | KV453060.1 | 5085968 | 14-scf00370 | 14 |
| AX-158220496 | 18 | 73.83  | KV453060.1 | 5138047 | 14-scf00370 | 14 |
| AX-158220598 | 18 | 73.83  | KV453060.1 | 5241537 | 14-scf00370 | 14 |
| AX-157839298 | 18 | 73.83  | KV453060.1 | 5292837 | 14-scf00370 | 14 |
| AX-158220720 | 18 | 73.83  | KV453060.1 | 5362696 | 14-scf00370 | 14 |
| AX-158380850 | 18 | 73.83  | KV453062.1 | 3907    | 14-scf00371 | 14 |
| AX-157714437 | 18 | 73.83  | KV453062.1 | 13852   | 14-scf00371 | 14 |
| AX-158220811 | 18 | 73.83  | KV453062.1 | 17065   | 14-scf00371 | 14 |
| AX-157839316 | 18 | 73.83  | KV453062.1 | 30828   | 14-scf00371 | 14 |
| AX-157723221 | 18 | 73.83  | KV453062.1 | 46533   | 14-scf00371 | 14 |
| AX-158220848 | 18 | 73.83  | KV453062.1 | 53203   | 14-scf00371 | 14 |
| AX-158220853 | 18 | 73.83  | KV453062.1 | 60579   | 14-scf00371 | 14 |
| AX-158220854 | 18 | 73.83  | KV453062.1 | 65779   | 14-scf00371 | 14 |
| AX-157751304 | 18 | 73.83  | KV453062.1 | 75947   | 14-scf00371 | 14 |
| AX-158220874 | 18 | 73.83  | KV453062.1 | 88335   | 14-scf00371 | 14 |
| AX-158220920 | 18 | 73.83  | KV453062.1 | 138274  | 14-scf00371 | 14 |
| AX-158220940 | 18 | 73.83  | KV453062.1 | 192037  | 14-scf00371 | 14 |
| AX-158220941 | 18 | 73.83  | KV453062.1 | 193268  | 14-scf00371 | 14 |
| AX-158220942 | 18 | 73.83  | KV453062.1 | 193660  | 14-scf00371 | 14 |
| AX-158220943 | 18 | 73.83  | KV453062.1 | 194405  | 14-scf00371 | 14 |
| AX-158220944 | 18 | 73.83  | KV453062.1 | 196522  | 14-scf00371 | 14 |
| AX-158220945 | 18 | 73.83  | KV453062.1 | 196899  | 14-scf00371 | 14 |
| AX-158220946 | 18 | 73.83  | KV453062.1 | 198130  | 14-scf00371 | 14 |
| AX-157839320 | 18 | 73.83  | KV453062.1 | 199125  | 14-scf00371 | 14 |
| AX-157839321 | 18 | 73.83  | KV453062.1 | 200197  | 14-scf00371 | 14 |
| AX-157839322 | 18 | 73.83  | KV453062.1 | 200325  | 14-scf00371 | 14 |
| AX-157839323 | 18 | 73.83  | KV453062.1 | 200979  | 14-scf00371 | 14 |
| AX-157799284 | 18 | 73.83  | KV453062.1 | 201416  | 14-scf00371 | 14 |
| AX-158220952 | 18 | 73.83  | KV453062.1 | 215235  | 14-scf00371 | 14 |
| AX-158220955 | 18 | 73.83  | KV453062.1 | 224168  | 14-scf00371 | 14 |
| AX-158220956 | 18 | 73.83  | KV453062.1 | 224322  | 14-scf00371 | 14 |
| AX-158220958 | 18 | 73.83  | KV453062.1 | 227221  | 14-scf00371 | 14 |
| AX-158220959 | 18 | 73.83  | KV453062.1 | 228016  | 14-scf00371 | 14 |
| AX-158220960 | 18 | 73.83  | KV453062.1 | 229403  | 14-scf00371 | 14 |
| AX-158220963 | 18 | 73.83  | KV453062.1 | 234595  | 14-scf00371 | 14 |
| AX-158220966 | 18 | 73.83  | KV453062.1 | 238397  | 14-scf00371 | 14 |
| AX-158220969 | 18 | 73.83  | KV453062.1 | 252496  | 14-scf00371 | 14 |
| AX-158220971 | 18 | 73.83  | KV453062.1 | 253973  | 14-scf00371 | 14 |
| AX-157839325 | 18 | 73.83  | KV453062.1 | 257667  | 14-scf00371 | 14 |
| AX-157839326 | 18 | 73.83  | KV453062.1 | 259424  | 14-scf00371 | 14 |
| AX-158220973 | 18 | 73.83  | KV453062.1 | 259852  | 14-scf00371 | 14 |
| AX-158220974 | 18 | 73.83  | KV453062.1 | 260349  | 14-scf00371 | 14 |
| AX-157839327 | 18 | 73.83  | KV453062.1 | 262966  | 14-scf00371 | 14 |
| AX-157839328 | 18 | 73.83  | KV453062.1 | 269783  | 14-scf00371 | 14 |
| AX-158220977 | 18 | 73.83  | KV453062.1 | 272547  | 14-scf00371 | 14 |
| AX-157839329 | 18 | 73.83  | KV453062.1 | 276313  | 14-scf00371 | 14 |
| AX-157839330 | 18 | 73.83  | KV453062.1 | 276788  | 14-scf00371 | 14 |

|              |    |       |            |        |             |    |
|--------------|----|-------|------------|--------|-------------|----|
| AX-158220981 | 18 | 73.83 | KV453062.1 | 281448 | 14-scf00371 | 14 |
| AX-158220984 | 18 | 73.83 | KV453062.1 | 286575 | 14-scf00371 | 14 |
| AX-157887273 | 18 | 73.83 | KV453062.1 | 286918 | 14-scf00371 | 14 |
| AX-157839331 | 18 | 73.83 | KV453062.1 | 290387 | 14-scf00371 | 14 |
| AX-157839332 | 18 | 73.83 | KV453062.1 | 293438 | 14-scf00371 | 14 |
| AX-157839333 | 18 | 73.83 | KV453062.1 | 302430 | 14-scf00371 | 14 |
| AX-158220987 | 18 | 73.83 | KV453062.1 | 305540 | 14-scf00371 | 14 |
| AX-158220988 | 18 | 73.83 | KV453062.1 | 306161 | 14-scf00371 | 14 |
| AX-157839334 | 18 | 73.83 | KV453062.1 | 307187 | 14-scf00371 | 14 |
| AX-157839335 | 18 | 73.83 | KV453062.1 | 308691 | 14-scf00371 | 14 |
| AX-158221082 | 18 | 73.83 | KV453061.1 | 111216 | 14-scf00372 | 14 |
| AX-158221083 | 18 | 73.83 | KV453061.1 | 111432 | 14-scf00372 | 14 |
| AX-158221084 | 18 | 73.83 | KV453061.1 | 112718 | 14-scf00372 | 14 |
| AX-158221103 | 18 | 73.83 | KV453061.1 | 140970 | 14-scf00372 | 14 |
| AX-158221160 | 18 | 73.83 | KV453061.1 | 216232 | 14-scf00372 | 14 |
| AX-157839342 | 18 | 73.83 | KV453065.1 | 19872  | 14-scf00373 | 14 |
| AX-158221176 | 18 | 73.83 | KV453065.1 | 33969  | 14-scf00373 | 14 |
| AX-158221177 | 18 | 73.83 | KV453065.1 | 37535  | 14-scf00373 | 14 |
| AX-158221180 | 18 | 73.83 | KV453065.1 | 50098  | 14-scf00373 | 14 |
| AX-157839343 | 18 | 73.83 | KV453065.1 | 54992  | 14-scf00373 | 14 |
| AX-158221185 | 18 | 73.83 | KV453065.1 | 74596  | 14-scf00373 | 14 |
| AX-158221187 | 18 | 73.83 | KV453065.1 | 78284  | 14-scf00373 | 14 |
| AX-158221188 | 18 | 73.83 | KV453065.1 | 80285  | 14-scf00373 | 14 |
| AX-158221198 | 18 | 73.83 | KV453065.1 | 101951 | 14-scf00373 | 14 |
| AX-158221200 | 18 | 73.83 | KV453065.1 | 104914 | 14-scf00373 | 14 |
| AX-158221211 | 18 | 73.83 | KV453065.1 | 120588 | 14-scf00373 | 14 |
| AX-157863743 | 18 | 73.83 | KV453065.1 | 143187 | 14-scf00373 | 14 |
| AX-158221226 | 18 | 73.83 | KV453065.1 | 146011 | 14-scf00373 | 14 |
| AX-158221247 | 18 | 73.83 | KV453065.1 | 169393 | 14-scf00373 | 14 |
| AX-158222289 | 18 | 73.83 | KV453063.1 | 3993   | 14-scf00374 | 14 |
| AX-158222290 | 18 | 73.83 | KV453063.1 | 4255   | 14-scf00374 | 14 |
| AX-157839430 | 18 | 73.83 | KV453063.1 | 20563  | 14-scf00374 | 14 |
| AX-158222302 | 18 | 73.83 | KV453063.1 | 20687  | 14-scf00374 | 14 |
| AX-158222308 | 18 | 73.83 | KV453063.1 | 26388  | 14-scf00374 | 14 |
| AX-158222309 | 18 | 73.83 | KV453063.1 | 28382  | 14-scf00374 | 14 |
| AX-158222310 | 18 | 73.83 | KV453063.1 | 29030  | 14-scf00374 | 14 |
| AX-158222313 | 18 | 73.83 | KV453063.1 | 31244  | 14-scf00374 | 14 |
| AX-158222315 | 18 | 73.83 | KV453063.1 | 32146  | 14-scf00374 | 14 |
| AX-158222319 | 18 | 73.83 | KV453063.1 | 37504  | 14-scf00374 | 14 |
| AX-158414853 | 18 | 73.83 | KV453063.1 | 44175  | 14-scf00374 | 14 |
| AX-158222332 | 18 | 73.83 | KV453063.1 | 49427  | 14-scf00374 | 14 |
| AX-158222338 | 18 | 73.83 | KV453063.1 | 65706  | 14-scf00374 | 14 |
| AX-158222339 | 18 | 73.83 | KV453063.1 | 66320  | 14-scf00374 | 14 |
| AX-158222342 | 18 | 73.83 | KV453063.1 | 76975  | 14-scf00374 | 14 |
| AX-157872418 | 18 | 73.83 | KV453063.1 | 91358  | 14-scf00374 | 14 |
| AX-158222346 | 18 | 73.83 | KV453063.1 | 91576  | 14-scf00374 | 14 |
| AX-158222362 | 18 | 73.83 | KV453063.1 | 114305 | 14-scf00374 | 14 |
| AX-158222365 | 18 | 73.83 | KV453063.1 | 120185 | 14-scf00374 | 14 |
| AX-158222366 | 18 | 73.83 | KV453063.1 | 124369 | 14-scf00374 | 14 |
| AX-158222367 | 18 | 73.83 | KV453063.1 | 125244 | 14-scf00374 | 14 |
| AX-158222368 | 18 | 73.83 | KV453063.1 | 126666 | 14-scf00374 | 14 |

|              |    |       |            |        |             |    |
|--------------|----|-------|------------|--------|-------------|----|
| AX-158418667 | 18 | 73.83 | KV453063.1 | 129281 | 14-scf00374 | 14 |
| AX-158222382 | 18 | 73.83 | KV453063.1 | 143705 | 14-scf00374 | 14 |
| AX-158414855 | 18 | 73.83 | KV453063.1 | 169609 | 14-scf00374 | 14 |
| AX-158222402 | 18 | 73.83 | KV453063.1 | 185232 | 14-scf00374 | 14 |
| AX-157839439 | 18 | 73.83 | KV453063.1 | 191876 | 14-scf00374 | 14 |
| AX-158222424 | 18 | 73.83 | KV453063.1 | 225202 | 14-scf00374 | 14 |
| AX-158222426 | 18 | 73.83 | KV453063.1 | 227986 | 14-scf00374 | 14 |
| AX-158222433 | 18 | 73.83 | KV453063.1 | 241908 | 14-scf00374 | 14 |
| AX-158222434 | 18 | 73.83 | KV453063.1 | 243534 | 14-scf00374 | 14 |
| AX-158222436 | 18 | 73.83 | KV453063.1 | 245061 | 14-scf00374 | 14 |
| AX-158222439 | 18 | 73.83 | KV453063.1 | 247285 | 14-scf00374 | 14 |
| AX-158222441 | 18 | 73.83 | KV453063.1 | 249466 | 14-scf00374 | 14 |
| AX-157712161 | 18 | 73.83 | KV453063.1 | 257533 | 14-scf00374 | 14 |
| AX-158222449 | 18 | 73.83 | KV453063.1 | 262188 | 14-scf00374 | 14 |
| AX-158222450 | 18 | 73.83 | KV453063.1 | 265193 | 14-scf00374 | 14 |
| AX-158222456 | 18 | 73.83 | KV453063.1 | 275025 | 14-scf00374 | 14 |
| AX-158222459 | 18 | 73.83 | KV453063.1 | 276796 | 14-scf00374 | 14 |
| AX-158222462 | 18 | 73.83 | KV453063.1 | 280469 | 14-scf00374 | 14 |
| AX-158423237 | 18 | 73.83 | KV453063.1 | 285025 | 14-scf00374 | 14 |
| AX-158222463 | 18 | 73.83 | KV453063.1 | 288118 | 14-scf00374 | 14 |
| AX-158222465 | 18 | 73.83 | KV453063.1 | 289000 | 14-scf00374 | 14 |
| AX-158222467 | 18 | 73.83 | KV453063.1 | 291045 | 14-scf00374 | 14 |
| AX-158222469 | 18 | 73.83 | KV453063.1 | 292382 | 14-scf00374 | 14 |
| AX-158222473 | 18 | 73.83 | KV453063.1 | 298868 | 14-scf00374 | 14 |
| AX-158222477 | 18 | 73.83 | KV453063.1 | 301147 | 14-scf00374 | 14 |
| AX-158222478 | 18 | 73.83 | KV453063.1 | 303314 | 14-scf00374 | 14 |
| AX-158222479 | 18 | 73.83 | KV453063.1 | 303892 | 14-scf00374 | 14 |
| AX-158222480 | 18 | 73.83 | KV453063.1 | 305516 | 14-scf00374 | 14 |
| AX-158222485 | 18 | 73.83 | KV453063.1 | 310640 | 14-scf00374 | 14 |
| AX-158222487 | 18 | 73.83 | KV453063.1 | 312061 | 14-scf00374 | 14 |
| AX-158222496 | 18 | 73.83 | KV453063.1 | 323718 | 14-scf00374 | 14 |
| AX-157839443 | 18 | 73.83 | KV453063.1 | 324591 | 14-scf00374 | 14 |
| AX-158222498 | 18 | 73.83 | KV453063.1 | 324770 | 14-scf00374 | 14 |
| AX-158222503 | 18 | 73.83 | KV453063.1 | 328537 | 14-scf00374 | 14 |
| AX-158222508 | 18 | 73.83 | KV453063.1 | 334759 | 14-scf00374 | 14 |
| AX-158222516 | 18 | 73.83 | KV453063.1 | 342964 | 14-scf00374 | 14 |
| AX-158222524 | 18 | 73.83 | KV453063.1 | 351854 | 14-scf00374 | 14 |
| AX-158222525 | 18 | 73.83 | KV453063.1 | 353148 | 14-scf00374 | 14 |
| AX-158222528 | 18 | 73.83 | KV453063.1 | 357491 | 14-scf00374 | 14 |
| AX-158222538 | 18 | 73.83 | KV453063.1 | 370548 | 14-scf00374 | 14 |
| AX-158222539 | 18 | 73.83 | KV453063.1 | 370973 | 14-scf00374 | 14 |
| AX-158222543 | 18 | 73.83 | KV453063.1 | 374074 | 14-scf00374 | 14 |
| AX-158222544 | 18 | 73.83 | KV453063.1 | 374142 | 14-scf00374 | 14 |
| AX-158222549 | 18 | 73.83 | KV453063.1 | 377966 | 14-scf00374 | 14 |
| AX-158222550 | 18 | 73.83 | KV453063.1 | 379264 | 14-scf00374 | 14 |
| AX-157839447 | 18 | 73.83 | KV453063.1 | 382216 | 14-scf00374 | 14 |
| AX-158222555 | 18 | 73.83 | KV453063.1 | 383246 | 14-scf00374 | 14 |
| AX-158222564 | 18 | 73.83 | KV453063.1 | 405079 | 14-scf00374 | 14 |
| AX-158222565 | 18 | 73.83 | KV453063.1 | 406357 | 14-scf00374 | 14 |
| AX-158222569 | 18 | 73.83 | KV453063.1 | 412684 | 14-scf00374 | 14 |
| AX-158222570 | 18 | 73.83 | KV453063.1 | 413105 | 14-scf00374 | 14 |

|              |    |        |             |         |             |    |
|--------------|----|--------|-------------|---------|-------------|----|
| AX-158222573 | 18 | 73.83  | KV453063.1  | 414711  | 14-scf00374 | 14 |
| AX-158222575 | 18 | 73.83  | KV453063.1  | 415869  | 14-scf00374 | 14 |
| AX-158222579 | 18 | 73.83  | KV453063.1  | 420333  | 14-scf00374 | 14 |
| AX-158222582 | 18 | 73.83  | KV453063.1  | 421782  | 14-scf00374 | 14 |
| AX-158222585 | 18 | 73.83  | KV453063.1  | 423354  | 14-scf00374 | 14 |
| AX-158222587 | 18 | 73.83  | KV453063.1  | 425044  | 14-scf00374 | 14 |
| AX-158222592 | 18 | 73.83  | KV453063.1  | 430442  | 14-scf00374 | 14 |
| AX-158222595 | 18 | 73.83  | KV453063.1  | 432443  | 14-scf00374 | 14 |
| AX-158222598 | 18 | 73.83  | KV453063.1  | 439730  | 14-scf00374 | 14 |
| AX-158222606 | 18 | 73.83  | KV453063.1  | 444494  | 14-scf00374 | 14 |
| AX-158222609 | 18 | 73.83  | KV453063.1  | 449614  | 14-scf00374 | 14 |
| AX-158222610 | 18 | 73.83  | KV453063.1  | 450737  | 14-scf00374 | 14 |
| AX-158222612 | 18 | 73.83  | KV453063.1  | 454093  | 14-scf00374 | 14 |
| AX-158222617 | 18 | 73.83  | KV453063.1  | 458314  | 14-scf00374 | 14 |
| AX-158222627 | 18 | 73.83  | KV453063.1  | 472098  | 14-scf00374 | 14 |
| AX-158222629 | 18 | 73.83  | KV453063.1  | 474012  | 14-scf00374 | 14 |
| AX-157687063 | 18 | 73.83  | KV453064.1  | 10706   | 14-scf00785 | 14 |
| AX-157680996 | 18 | 73.83  | 3ML01024856 | 9602    | scf00852_1  | UN |
| AX-157710551 | 18 | 73.86  | KV453063.1  | 471832  | 14-scf00374 | 14 |
| AX-157705032 | 18 | 73.898 | 3ML01028363 | 647     | scf03969_1  | UN |
| AX-158220121 | 18 | 73.939 | KV453060.1  | 4654193 | 14-scf00370 | 14 |
| AX-158220448 | 18 | 73.939 | KV453060.1  | 5080518 | 14-scf00370 | 14 |
| AX-158220453 | 18 | 73.939 | KV453060.1  | 5087616 | 14-scf00370 | 14 |
| AX-158220456 | 18 | 73.939 | KV453060.1  | 5090660 | 14-scf00370 | 14 |
| AX-158220457 | 18 | 73.939 | KV453060.1  | 5094376 | 14-scf00370 | 14 |
| AX-158220460 | 18 | 73.939 | KV453060.1  | 5098221 | 14-scf00370 | 14 |
| AX-158220465 | 18 | 73.939 | KV453060.1  | 5102856 | 14-scf00370 | 14 |
| AX-158220466 | 18 | 73.939 | KV453060.1  | 5103738 | 14-scf00370 | 14 |
| AX-158220471 | 18 | 73.939 | KV453060.1  | 5108544 | 14-scf00370 | 14 |
| AX-158220472 | 18 | 73.939 | KV453060.1  | 5108948 | 14-scf00370 | 14 |
| AX-158220475 | 18 | 73.939 | KV453060.1  | 5112577 | 14-scf00370 | 14 |
| AX-158220477 | 18 | 73.939 | KV453060.1  | 5114291 | 14-scf00370 | 14 |
| AX-158220480 | 18 | 73.939 | KV453060.1  | 5122961 | 14-scf00370 | 14 |
| AX-158220489 | 18 | 73.939 | KV453060.1  | 5133720 | 14-scf00370 | 14 |
| AX-158220490 | 18 | 73.939 | KV453060.1  | 5134410 | 14-scf00370 | 14 |
| AX-158220493 | 18 | 73.939 | KV453060.1  | 5136255 | 14-scf00370 | 14 |
| AX-158220494 | 18 | 73.939 | KV453060.1  | 5136758 | 14-scf00370 | 14 |
| AX-158220495 | 18 | 73.939 | KV453060.1  | 5137537 | 14-scf00370 | 14 |
| AX-158220497 | 18 | 73.939 | KV453060.1  | 5138632 | 14-scf00370 | 14 |
| AX-157724153 | 18 | 73.939 | KV453060.1  | 5142250 | 14-scf00370 | 14 |
| AX-158220508 | 18 | 73.939 | KV453060.1  | 5152210 | 14-scf00370 | 14 |
| AX-158414799 | 18 | 73.939 | KV453060.1  | 5155394 | 14-scf00370 | 14 |
| AX-157839282 | 18 | 73.939 | KV453060.1  | 5160760 | 14-scf00370 | 14 |
| AX-158220518 | 18 | 73.939 | KV453060.1  | 5163589 | 14-scf00370 | 14 |
| AX-158220519 | 18 | 73.939 | KV453060.1  | 5167438 | 14-scf00370 | 14 |
| AX-158220522 | 18 | 73.939 | KV453060.1  | 5168767 | 14-scf00370 | 14 |
| AX-158220525 | 18 | 73.939 | KV453060.1  | 5171152 | 14-scf00370 | 14 |
| AX-158220526 | 18 | 73.939 | KV453060.1  | 5171859 | 14-scf00370 | 14 |
| AX-158220527 | 18 | 73.939 | KV453060.1  | 5173474 | 14-scf00370 | 14 |
| AX-158220529 | 18 | 73.939 | KV453060.1  | 5173812 | 14-scf00370 | 14 |
| AX-158220534 | 18 | 73.939 | KV453060.1  | 5178181 | 14-scf00370 | 14 |

|              |    |        |            |         |             |    |
|--------------|----|--------|------------|---------|-------------|----|
| AX-158220558 | 18 | 73.939 | KV453060.1 | 5195735 | 14-scf00370 | 14 |
| AX-158220563 | 18 | 73.939 | KV453060.1 | 5201032 | 14-scf00370 | 14 |
| AX-158220566 | 18 | 73.939 | KV453060.1 | 5207127 | 14-scf00370 | 14 |
| AX-157715905 | 18 | 73.939 | KV453060.1 | 5208838 | 14-scf00370 | 14 |
| AX-158220570 | 18 | 73.939 | KV453060.1 | 5210279 | 14-scf00370 | 14 |
| AX-158220572 | 18 | 73.939 | KV453060.1 | 5212003 | 14-scf00370 | 14 |
| AX-158220573 | 18 | 73.939 | KV453060.1 | 5212251 | 14-scf00370 | 14 |
| AX-158220579 | 18 | 73.939 | KV453060.1 | 5219695 | 14-scf00370 | 14 |
| AX-158220580 | 18 | 73.939 | KV453060.1 | 5219979 | 14-scf00370 | 14 |
| AX-157749025 | 18 | 73.939 | KV453060.1 | 5222064 | 14-scf00370 | 14 |
| AX-158220586 | 18 | 73.939 | KV453060.1 | 5230206 | 14-scf00370 | 14 |
| AX-158220587 | 18 | 73.939 | KV453060.1 | 5230774 | 14-scf00370 | 14 |
| AX-158220589 | 18 | 73.939 | KV453060.1 | 5232214 | 14-scf00370 | 14 |
| AX-158220590 | 18 | 73.939 | KV453060.1 | 5233335 | 14-scf00370 | 14 |
| AX-158220594 | 18 | 73.939 | KV453060.1 | 5239108 | 14-scf00370 | 14 |
| AX-158220595 | 18 | 73.939 | KV453060.1 | 5239369 | 14-scf00370 | 14 |
| AX-158220607 | 18 | 73.939 | KV453060.1 | 5249578 | 14-scf00370 | 14 |
| AX-158220612 | 18 | 73.939 | KV453060.1 | 5253489 | 14-scf00370 | 14 |
| AX-158220613 | 18 | 73.939 | KV453060.1 | 5254129 | 14-scf00370 | 14 |
| AX-158220617 | 18 | 73.939 | KV453060.1 | 5256953 | 14-scf00370 | 14 |
| AX-158220622 | 18 | 73.939 | KV453060.1 | 5260125 | 14-scf00370 | 14 |
| AX-158220626 | 18 | 73.939 | KV453060.1 | 5263812 | 14-scf00370 | 14 |
| AX-158220627 | 18 | 73.939 | KV453060.1 | 5264438 | 14-scf00370 | 14 |
| AX-158220631 | 18 | 73.939 | KV453060.1 | 5268092 | 14-scf00370 | 14 |
| AX-157715655 | 18 | 73.939 | KV453060.1 | 5314948 | 14-scf00370 | 14 |
| AX-157710895 | 18 | 73.939 | KV453062.1 | 151537  | 14-scf00371 | 14 |
| AX-158220947 | 18 | 73.939 | KV453062.1 | 202137  | 14-scf00371 | 14 |
| AX-158221181 | 18 | 73.939 | KV453065.1 | 52758   | 14-scf00373 | 14 |
| AX-157722558 | 18 | 73.939 | KV453065.1 | 55291   | 14-scf00373 | 14 |
| AX-158221184 | 18 | 73.939 | KV453065.1 | 73261   | 14-scf00373 | 14 |
| AX-158221186 | 18 | 73.939 | KV453065.1 | 75922   | 14-scf00373 | 14 |
| AX-158221196 | 18 | 73.939 | KV453065.1 | 100530  | 14-scf00373 | 14 |
| AX-158221197 | 18 | 73.939 | KV453065.1 | 101315  | 14-scf00373 | 14 |
| AX-158221199 | 18 | 73.939 | KV453065.1 | 103332  | 14-scf00373 | 14 |
| AX-158221208 | 18 | 73.939 | KV453065.1 | 115955  | 14-scf00373 | 14 |
| AX-157839432 | 18 | 73.939 | KV453063.1 | 68836   | 14-scf00374 | 14 |
| AX-158221201 | 18 | 73.989 | KV453065.1 | 108001  | 14-scf00373 | 14 |
| AX-158221202 | 18 | 74.048 | KV453065.1 | 109735  | 14-scf00373 | 14 |
| AX-158221203 | 18 | 74.048 | KV453065.1 | 110195  | 14-scf00373 | 14 |
| AX-158221206 | 18 | 74.048 | KV453065.1 | 113101  | 14-scf00373 | 14 |
| AX-158221216 | 18 | 74.111 | KV453065.1 | 127451  | 14-scf00373 | 14 |
| AX-158220865 | 18 | 74.158 | KV453062.1 | 76729   | 14-scf00371 | 14 |
| AX-157879750 | 18 | 74.158 | KV453065.1 | 127910  | 14-scf00373 | 14 |
| AX-158221217 | 18 | 74.158 | KV453065.1 | 129521  | 14-scf00373 | 14 |
| AX-157755724 | 18 | 74.158 | KV453065.1 | 130064  | 14-scf00373 | 14 |
| AX-157839345 | 18 | 74.158 | KV453065.1 | 132227  | 14-scf00373 | 14 |
| AX-157839346 | 18 | 74.158 | KV453065.1 | 132263  | 14-scf00373 | 14 |
| AX-158221219 | 18 | 74.158 | KV453065.1 | 136200  | 14-scf00373 | 14 |
| AX-158221222 | 18 | 74.158 | KV453065.1 | 139648  | 14-scf00373 | 14 |
| AX-157887276 | 18 | 74.158 | KV453065.1 | 141469  | 14-scf00373 | 14 |
| AX-158221228 | 18 | 74.158 | KV453065.1 | 149070  | 14-scf00373 | 14 |



|              |    |        |             |        |             |    |
|--------------|----|--------|-------------|--------|-------------|----|
| AX-158221230 | 18 | 74.158 | KV453065.1  | 151325 | 14-scf00373 | 14 |
| AX-158221231 | 18 | 74.158 | KV453065.1  | 151733 | 14-scf00373 | 14 |
| AX-158221233 | 18 | 74.158 | KV453065.1  | 155967 | 14-scf00373 | 14 |
| AX-158221265 | 18 | 74.158 | KV453065.1  | 201974 | 14-scf00373 | 14 |
| AX-158221235 | 18 | 74.267 | KV453065.1  | 157566 | 14-scf00373 | 14 |
| AX-158221237 | 18 | 74.267 | KV453065.1  | 159599 | 14-scf00373 | 14 |
| AX-158221244 | 18 | 74.267 | KV453065.1  | 164153 | 14-scf00373 | 14 |
| AX-158221245 | 18 | 74.267 | KV453065.1  | 166011 | 14-scf00373 | 14 |
| AX-158221246 | 18 | 74.267 | KV453065.1  | 166957 | 14-scf00373 | 14 |
| AX-157687332 | 18 | 74.267 | 3ML01024856 | 6134   | scf00852_1  | UN |
| AX-157687333 | 18 | 74.34  | 3ML01024856 | 7355   | scf00852_1  | UN |
| AX-158221251 | 18 | 74.47  | KV453065.1  | 175124 | 14-scf00373 | 14 |
| AX-158221253 | 18 | 74.485 | KV453065.1  | 179029 | 14-scf00373 | 14 |
| AX-158221257 | 18 | 74.501 | KV453065.1  | 184697 | 14-scf00373 | 14 |
| AX-158221258 | 18 | 74.501 | KV453065.1  | 186510 | 14-scf00373 | 14 |
| AX-158221259 | 18 | 74.501 | KV453065.1  | 186721 | 14-scf00373 | 14 |
| AX-158221260 | 18 | 74.704 | KV453065.1  | 187464 | 14-scf00373 | 14 |
| AX-157748213 | 18 | 74.704 | KV453065.1  | 188504 | 14-scf00373 | 14 |
| AX-158221263 | 18 | 74.704 | KV453065.1  | 198950 | 14-scf00373 | 14 |
| AX-158221264 | 18 | 74.704 | KV453065.1  | 201692 | 14-scf00373 | 14 |
| AX-158221266 | 18 | 74.704 | KV453065.1  | 207770 | 14-scf00373 | 14 |
| AX-158221312 | 18 | 74.704 | KV453065.1  | 300714 | 14-scf00373 | 14 |
| AX-157887277 | 18 | 74.704 | KV453065.1  | 305979 | 14-scf00373 | 14 |
| AX-158221267 | 18 | 74.764 | KV453065.1  | 208286 | 14-scf00373 | 14 |
| AX-158221269 | 18 | 74.776 | KV453065.1  | 212912 | 14-scf00373 | 14 |
| AX-157879753 | 18 | 74.813 | KV453065.1  | 196701 | 14-scf00373 | 14 |
| AX-158221268 | 18 | 74.813 | KV453065.1  | 211987 | 14-scf00373 | 14 |
| AX-158221270 | 18 | 74.813 | KV453065.1  | 213425 | 14-scf00373 | 14 |
| AX-158221271 | 18 | 74.813 | KV453065.1  | 214037 | 14-scf00373 | 14 |
| AX-158221272 | 18 | 74.813 | KV453065.1  | 214296 | 14-scf00373 | 14 |
| AX-158221273 | 18 | 74.813 | KV453065.1  | 216427 | 14-scf00373 | 14 |
| AX-157749829 | 18 | 74.813 | KV453065.1  | 230910 | 14-scf00373 | 14 |
| AX-158221293 | 18 | 74.813 | KV453065.1  | 264107 | 14-scf00373 | 14 |
| AX-158221261 | 18 | 74.849 | KV453065.1  | 195433 | 14-scf00373 | 14 |
| AX-157753072 | 18 | 74.849 | KV453065.1  | 233181 | 14-scf00373 | 14 |
| AX-158221279 | 18 | 74.849 | KV453065.1  | 233955 | 14-scf00373 | 14 |
| AX-158221280 | 18 | 74.849 | KV453065.1  | 234390 | 14-scf00373 | 14 |
| AX-158221281 | 18 | 74.849 | KV453065.1  | 236295 | 14-scf00373 | 14 |
| AX-158221282 | 18 | 74.849 | KV453065.1  | 236813 | 14-scf00373 | 14 |
| AX-158221287 | 18 | 74.876 | KV453065.1  | 254299 | 14-scf00373 | 14 |
| AX-158221289 | 18 | 74.901 | KV453065.1  | 259078 | 14-scf00373 | 14 |
| AX-158221290 | 18 | 74.922 | KV453065.1  | 259930 | 14-scf00373 | 14 |
| AX-158221291 | 18 | 74.974 | KV453065.1  | 263210 | 14-scf00373 | 14 |
| AX-158221295 | 18 | 75.003 | KV453065.1  | 268077 | 14-scf00373 | 14 |
| AX-158221296 | 18 | 75.031 | KV453065.1  | 272555 | 14-scf00373 | 14 |
| AX-158221297 | 18 | 75.031 | KV453065.1  | 273294 | 14-scf00373 | 14 |
| AX-158221274 | 18 | 75.144 | KV453065.1  | 218591 | 14-scf00373 | 14 |
| AX-158221292 | 18 | 75.144 | KV453065.1  | 263560 | 14-scf00373 | 14 |
| AX-158414819 | 18 | 75.144 | KV453065.1  | 274956 | 14-scf00373 | 14 |
| AX-157839353 | 18 | 75.144 | KV453065.1  | 279375 | 14-scf00373 | 14 |
| AX-158221299 | 18 | 75.252 | KV453065.1  | 283185 | 14-scf00373 | 14 |

|              |    |        |            |        |             |    |
|--------------|----|--------|------------|--------|-------------|----|
| AX-158221300 | 18 | 75.252 | KV453065.1 | 285631 | 14-scf00373 | 14 |
| AX-157722049 | 18 | 75.583 | KV453065.1 | 290882 | 14-scf00373 | 14 |
| AX-158221305 | 18 | 75.583 | KV453065.1 | 291209 | 14-scf00373 | 14 |
| AX-157722718 | 18 | 75.583 | KV453065.1 | 291507 | 14-scf00373 | 14 |
| AX-158221306 | 18 | 75.583 | KV453065.1 | 292482 | 14-scf00373 | 14 |
| AX-158221307 | 18 | 75.584 | KV453065.1 | 293021 | 14-scf00373 | 14 |
| AX-158221313 | 18 | 76.859 | KV453065.1 | 306207 | 14-scf00373 | 14 |
| AX-158221326 | 18 | 76.859 | KV453065.1 | 326892 | 14-scf00373 | 14 |
| AX-158221315 | 18 | 77.103 | KV453065.1 | 307689 | 14-scf00373 | 14 |
| AX-158221316 | 18 | 77.212 | KV453065.1 | 316282 | 14-scf00373 | 14 |
| AX-158221317 | 18 | 77.212 | KV453065.1 | 317808 | 14-scf00373 | 14 |
| AX-158221318 | 18 | 77.354 | KV453065.1 | 319031 | 14-scf00373 | 14 |
| AX-158394064 | 18 | 77.354 | KV453065.1 | 319080 | 14-scf00373 | 14 |
| AX-158221319 | 18 | 77.354 | KV453065.1 | 320554 | 14-scf00373 | 14 |
| AX-158221321 | 18 | 77.354 | KV453065.1 | 321436 | 14-scf00373 | 14 |
| AX-157839356 | 18 | 77.354 | KV453065.1 | 323004 | 14-scf00373 | 14 |
| AX-158221330 | 18 | 77.354 | KV453065.1 | 340241 | 14-scf00373 | 14 |
| AX-158221322 | 18 | 77.546 | KV453065.1 | 322049 | 14-scf00373 | 14 |
| AX-158221325 | 18 | 77.791 | KV453065.1 | 325218 | 14-scf00373 | 14 |
| AX-158221329 | 18 | 77.829 | KV453065.1 | 338641 | 14-scf00373 | 14 |
| AX-157719685 | 18 | 78.086 | KV453065.1 | 339171 | 14-scf00373 | 14 |
| AX-158221331 | 18 | 78.094 | KV453065.1 | 340661 | 14-scf00373 | 14 |
| AX-158221332 | 18 | 78.102 | KV453065.1 | 342319 | 14-scf00373 | 14 |
| AX-158221335 | 18 | 78.279 | KV453065.1 | 344859 | 14-scf00373 | 14 |
| AX-158221340 | 18 | 78.896 | KV453065.1 | 359837 | 14-scf00373 | 14 |
| AX-158221341 | 18 | 78.896 | KV453065.1 | 360838 | 14-scf00373 | 14 |
| AX-158221338 | 18 | 79.037 | KV453065.1 | 357735 | 14-scf00373 | 14 |
| AX-158221344 | 18 | 79.037 | KV453065.1 | 364809 | 14-scf00373 | 14 |
| AX-158221345 | 18 | 79.116 | KV453065.1 | 366907 | 14-scf00373 | 14 |
| AX-158221348 | 18 | 79.557 | KV453065.1 | 372878 | 14-scf00373 | 14 |
| AX-158221347 | 18 | 79.776 | KV453065.1 | 372361 | 14-scf00373 | 14 |
| AX-158221351 | 18 | 79.776 | KV453065.1 | 374987 | 14-scf00373 | 14 |
| AX-158221352 | 18 | 79.776 | KV453065.1 | 375344 | 14-scf00373 | 14 |
| AX-158221358 | 18 | 79.98  | KV453065.1 | 389612 | 14-scf00373 | 14 |
| AX-158221360 | 18 | 79.983 | KV453065.1 | 390353 | 14-scf00373 | 14 |
| AX-158221361 | 18 | 79.983 | KV453065.1 | 391643 | 14-scf00373 | 14 |
| AX-158221362 | 18 | 79.988 | KV453065.1 | 392278 | 14-scf00373 | 14 |
| AX-158221364 | 18 | 79.988 | KV453065.1 | 397093 | 14-scf00373 | 14 |
| AX-158221374 | 18 | 80.481 | KV453065.1 | 407328 | 14-scf00373 | 14 |
| AX-158221368 | 18 | 80.542 | KV453065.1 | 401592 | 14-scf00373 | 14 |
| AX-158221369 | 18 | 80.542 | KV453065.1 | 402031 | 14-scf00373 | 14 |
| AX-158221376 | 18 | 80.542 | KV453065.1 | 408376 | 14-scf00373 | 14 |
| AX-158221377 | 18 | 80.542 | KV453065.1 | 410355 | 14-scf00373 | 14 |
| AX-158221379 | 18 | 80.542 | KV453065.1 | 415869 | 14-scf00373 | 14 |
| AX-158221381 | 18 | 80.542 | KV453065.1 | 418216 | 14-scf00373 | 14 |
| AX-158221384 | 18 | 80.542 | KV453065.1 | 421284 | 14-scf00373 | 14 |
| AX-157839358 | 18 | 80.542 | KV453065.1 | 423796 | 14-scf00373 | 14 |
| AX-157839359 | 18 | 80.542 | KV453065.1 | 423864 | 14-scf00373 | 14 |
| AX-157755120 | 18 | 80.542 | KV453065.1 | 425556 | 14-scf00373 | 14 |
| AX-158221390 | 18 | 80.542 | KV453065.1 | 432355 | 14-scf00373 | 14 |
| AX-158221392 | 18 | 80.542 | KV453065.1 | 433452 | 14-scf00373 | 14 |

|              |    |        |            |        |             |    |
|--------------|----|--------|------------|--------|-------------|----|
| AX-158221393 | 18 | 80.542 | KV453065.1 | 433877 | 14-scf00373 | 14 |
| AX-158221394 | 18 | 80.542 | KV453065.1 | 434289 | 14-scf00373 | 14 |
| AX-158221395 | 18 | 80.542 | KV453065.1 | 435915 | 14-scf00373 | 14 |
| AX-158221396 | 18 | 80.542 | KV453065.1 | 436434 | 14-scf00373 | 14 |
| AX-158221402 | 18 | 80.719 | KV453065.1 | 444402 | 14-scf00373 | 14 |
| AX-158221405 | 18 | 80.806 | KV453065.1 | 447230 | 14-scf00373 | 14 |
| AX-157775749 | 18 | 80.896 | KV453065.1 | 349784 | 14-scf00373 | 14 |
| AX-158221375 | 18 | 80.896 | KV453065.1 | 407760 | 14-scf00373 | 14 |
| AX-158221380 | 18 | 80.896 | KV453065.1 | 416747 | 14-scf00373 | 14 |
| AX-158221407 | 18 | 80.896 | KV453065.1 | 455728 | 14-scf00373 | 14 |
| AX-158221410 | 18 | 80.896 | KV453065.1 | 461891 | 14-scf00373 | 14 |
| AX-158221412 | 18 | 80.896 | KV453065.1 | 465302 | 14-scf00373 | 14 |
| AX-157741170 | 18 | 80.896 | KV453065.1 | 467923 | 14-scf00373 | 14 |
| AX-158221416 | 18 | 80.896 | KV453065.1 | 469853 | 14-scf00373 | 14 |
| AX-158221418 | 18 | 80.896 | KV453065.1 | 472035 | 14-scf00373 | 14 |
| AX-158221420 | 18 | 80.896 | KV453065.1 | 476168 | 14-scf00373 | 14 |
| AX-158221423 | 18 | 80.896 | KV453065.1 | 478985 | 14-scf00373 | 14 |
| AX-158221426 | 18 | 80.896 | KV453065.1 | 483619 | 14-scf00373 | 14 |
| AX-158221429 | 18 | 80.896 | KV453065.1 | 485346 | 14-scf00373 | 14 |
| AX-158221433 | 18 | 80.896 | KV453065.1 | 490203 | 14-scf00373 | 14 |
| AX-158221434 | 18 | 80.896 | KV453065.1 | 490671 | 14-scf00373 | 14 |
| AX-157749190 | 18 | 80.896 | KV453065.1 | 493286 | 14-scf00373 | 14 |
| AX-158221493 | 18 | 80.896 | KV453065.1 | 557528 | 14-scf00373 | 14 |
| AX-158386655 | 18 | 80.896 | KV453065.1 | 576148 | 14-scf00373 | 14 |
| AX-158221515 | 18 | 80.896 | KV453065.1 | 579206 | 14-scf00373 | 14 |
| AX-158221439 | 18 | 81.014 | KV453065.1 | 499694 | 14-scf00373 | 14 |
| AX-158221441 | 18 | 81.014 | KV453065.1 | 501756 | 14-scf00373 | 14 |
| AX-158221443 | 18 | 81.014 | KV453065.1 | 503280 | 14-scf00373 | 14 |
| AX-158221444 | 18 | 81.014 | KV453065.1 | 503856 | 14-scf00373 | 14 |
| AX-158221447 | 18 | 81.014 | KV453065.1 | 507708 | 14-scf00373 | 14 |
| AX-158221359 | 18 | 81.132 | KV453065.1 | 390181 | 14-scf00373 | 14 |
| AX-158221449 | 18 | 81.132 | KV453065.1 | 509433 | 14-scf00373 | 14 |
| AX-157757534 | 18 | 81.132 | KV453065.1 | 510112 | 14-scf00373 | 14 |
| AX-158221451 | 18 | 81.132 | KV453065.1 | 511545 | 14-scf00373 | 14 |
| AX-158221454 | 18 | 81.132 | KV453065.1 | 513325 | 14-scf00373 | 14 |
| AX-158221488 | 18 | 81.132 | KV453065.1 | 553665 | 14-scf00373 | 14 |
| AX-158221509 | 18 | 81.132 | KV453065.1 | 573000 | 14-scf00373 | 14 |
| AX-158221455 | 18 | 81.254 | KV453065.1 | 513983 | 14-scf00373 | 14 |
| AX-158221503 | 18 | 81.254 | KV453065.1 | 569816 | 14-scf00373 | 14 |
| AX-157722945 | 18 | 81.368 | KV453065.1 | 428426 | 14-scf00373 | 14 |
| AX-158221422 | 18 | 81.368 | KV453065.1 | 478245 | 14-scf00373 | 14 |
| AX-158221456 | 18 | 81.368 | KV453065.1 | 514573 | 14-scf00373 | 14 |
| AX-158221457 | 18 | 81.368 | KV453065.1 | 515246 | 14-scf00373 | 14 |
| AX-158221462 | 18 | 81.368 | KV453065.1 | 523079 | 14-scf00373 | 14 |
| AX-158221463 | 18 | 81.368 | KV453065.1 | 524807 | 14-scf00373 | 14 |
| AX-158221464 | 18 | 81.368 | KV453065.1 | 525399 | 14-scf00373 | 14 |
| AX-158221466 | 18 | 81.368 | KV453065.1 | 526209 | 14-scf00373 | 14 |
| AX-157743105 | 18 | 81.368 | KV453065.1 | 530014 | 14-scf00373 | 14 |
| AX-158221472 | 18 | 81.368 | KV453065.1 | 530743 | 14-scf00373 | 14 |
| AX-158221473 | 18 | 81.368 | KV453065.1 | 532431 | 14-scf00373 | 14 |
| AX-157839364 | 18 | 81.368 | KV453065.1 | 533038 | 14-scf00373 | 14 |

|              |    |        |             |        |             |    |
|--------------|----|--------|-------------|--------|-------------|----|
| AX-158221475 | 18 | 81.368 | KV453065.1  | 535840 | 14-scf00373 | 14 |
| AX-158221476 | 18 | 81.368 | KV453065.1  | 536602 | 14-scf00373 | 14 |
| AX-157744123 | 18 | 81.368 | KV453065.1  | 539956 | 14-scf00373 | 14 |
| AX-157839365 | 18 | 81.368 | KV453065.1  | 539994 | 14-scf00373 | 14 |
| AX-158221479 | 18 | 81.368 | KV453065.1  | 540127 | 14-scf00373 | 14 |
| AX-158221480 | 18 | 81.368 | KV453065.1  | 540382 | 14-scf00373 | 14 |
| AX-158221481 | 18 | 81.368 | KV453065.1  | 540885 | 14-scf00373 | 14 |
| AX-158221483 | 18 | 81.368 | KV453065.1  | 542220 | 14-scf00373 | 14 |
| AX-158221487 | 18 | 81.368 | KV453065.1  | 553000 | 14-scf00373 | 14 |
| AX-158221504 | 18 | 81.368 | KV453065.1  | 570568 | 14-scf00373 | 14 |
| AX-157706261 | 18 | 81.368 | 3ML01031933 | 202    | scf07556_1  | UN |
| AX-158221484 | 18 | 81.447 | KV453065.1  | 542699 | 14-scf00373 | 14 |
| AX-158221486 | 18 | 81.527 | KV453065.1  | 550053 | 14-scf00373 | 14 |
| AX-157750386 | 18 | 81.527 | KV453065.1  | 550652 | 14-scf00373 | 14 |
| AX-158221490 | 18 | 81.686 | KV453065.1  | 555793 | 14-scf00373 | 14 |
| AX-158221491 | 18 | 81.686 | KV453065.1  | 556098 | 14-scf00373 | 14 |
| AX-158221497 | 18 | 81.686 | KV453065.1  | 563494 | 14-scf00373 | 14 |
| AX-158221498 | 18 | 81.7   | KV453065.1  | 564443 | 14-scf00373 | 14 |
| AX-157839367 | 18 | 81.749 | KV453065.1  | 565841 | 14-scf00373 | 14 |
| AX-158221501 | 18 | 81.796 | KV453065.1  | 567006 | 14-scf00373 | 14 |
| AX-158221508 | 18 | 81.836 | KV453065.1  | 572536 | 14-scf00373 | 14 |
| AX-158221512 | 18 | 81.837 | KV453065.1  | 574735 | 14-scf00373 | 14 |
| AX-158221514 | 18 | 81.837 | KV453065.1  | 578189 | 14-scf00373 | 14 |
| AX-158221517 | 18 | 81.838 | KV453065.1  | 589546 | 14-scf00373 | 14 |
| AX-157739161 | 18 | 81.839 | KV453065.1  | 591954 | 14-scf00373 | 14 |
| AX-158221518 | 18 | 81.841 | KV453065.1  | 592642 | 14-scf00373 | 14 |
| AX-158221507 | 18 | 81.959 | KV453065.1  | 572093 | 14-scf00373 | 14 |
| AX-158221511 | 18 | 81.959 | KV453065.1  | 574401 | 14-scf00373 | 14 |
| AX-158221519 | 18 | 81.959 | KV453065.1  | 596506 | 14-scf00373 | 14 |
| AX-158221522 | 18 | 81.959 | KV453065.1  | 614867 | 14-scf00373 | 14 |
| AX-158410228 | 18 | 81.959 | KV453065.1  | 619344 | 14-scf00373 | 14 |
| AX-158221525 | 18 | 81.959 | KV453065.1  | 620648 | 14-scf00373 | 14 |
| AX-158221532 | 18 | 81.959 | KV453065.1  | 651115 | 14-scf00373 | 14 |
| AX-158221533 | 18 | 81.959 | KV453065.1  | 654517 | 14-scf00373 | 14 |
| AX-157839370 | 18 | 81.959 | KV453065.1  | 669043 | 14-scf00373 | 14 |
| AX-157839371 | 18 | 81.959 | KV453065.1  | 669113 | 14-scf00373 | 14 |
| AX-158221540 | 18 | 81.959 | KV453065.1  | 674600 | 14-scf00373 | 14 |
| AX-158221541 | 18 | 81.959 | KV453065.1  | 675790 | 14-scf00373 | 14 |
| AX-158221542 | 18 | 81.959 | KV453065.1  | 676345 | 14-scf00373 | 14 |
| AX-157700139 | 18 | 81.959 | KV453065.1  | 677149 | 14-scf00373 | 14 |
| AX-158221547 | 18 | 81.959 | KV453065.1  | 684332 | 14-scf00373 | 14 |
| AX-158221548 | 18 | 81.959 | KV453065.1  | 686243 | 14-scf00373 | 14 |
| AX-158221549 | 18 | 81.959 | KV453065.1  | 689084 | 14-scf00373 | 14 |
| AX-158221554 | 18 | 81.959 | KV453065.1  | 706976 | 14-scf00373 | 14 |
| AX-158221555 | 18 | 82.006 | KV453065.1  | 707957 | 14-scf00373 | 14 |
| AX-158221521 | 18 | 82.048 | KV453065.1  | 612565 | 14-scf00373 | 14 |
| AX-158221556 | 18 | 82.048 | KV453065.1  | 708517 | 14-scf00373 | 14 |
| AX-158221557 | 18 | 82.062 | KV453065.1  | 710640 | 14-scf00373 | 14 |
| AX-157745799 | 18 | 82.069 | KV453065.1  | 571379 | 14-scf00373 | 14 |
| AX-158221545 | 18 | 82.069 | KV453065.1  | 680404 | 14-scf00373 | 14 |
| AX-157839374 | 18 | 82.069 | KV453065.1  | 714507 | 14-scf00373 | 14 |

|              |    |        |            |        |             |    |
|--------------|----|--------|------------|--------|-------------|----|
| AX-158221563 | 18 | 82.069 | KV453065.1 | 720050 | 14-scf00373 | 14 |
| AX-158221564 | 18 | 82.069 | KV453065.1 | 721963 | 14-scf00373 | 14 |
| AX-158221565 | 18 | 82.069 | KV453065.1 | 724713 | 14-scf00373 | 14 |
| AX-158221566 | 18 | 82.069 | KV453065.1 | 725620 | 14-scf00373 | 14 |
| AX-157744637 | 18 | 82.069 | KV453065.1 | 726715 | 14-scf00373 | 14 |
| AX-158221567 | 18 | 82.069 | KV453065.1 | 727531 | 14-scf00373 | 14 |
| AX-158221568 | 18 | 82.069 | KV453065.1 | 729480 | 14-scf00373 | 14 |
| AX-158221569 | 18 | 82.069 | KV453065.1 | 729874 | 14-scf00373 | 14 |
| AX-158221572 | 18 | 82.069 | KV453065.1 | 734968 | 14-scf00373 | 14 |
| AX-158221576 | 18 | 82.069 | KV453065.1 | 740219 | 14-scf00373 | 14 |
| AX-158221578 | 18 | 82.069 | KV453065.1 | 744571 | 14-scf00373 | 14 |
| AX-158221579 | 18 | 82.069 | KV453065.1 | 746107 | 14-scf00373 | 14 |
| AX-157839377 | 18 | 82.069 | KV453065.1 | 747022 | 14-scf00373 | 14 |
| AX-157720535 | 18 | 82.069 | KV453065.1 | 748636 | 14-scf00373 | 14 |
| AX-157839381 | 18 | 82.069 | KV453065.1 | 751290 | 14-scf00373 | 14 |
| AX-158221588 | 18 | 82.069 | KV453065.1 | 755466 | 14-scf00373 | 14 |
| AX-158221603 | 18 | 82.069 | KV453065.1 | 778031 | 14-scf00373 | 14 |
| AX-158221633 | 18 | 82.069 | KV453065.1 | 824746 | 14-scf00373 | 14 |
| AX-158221643 | 18 | 82.069 | KV453065.1 | 841539 | 14-scf00373 | 14 |
| AX-157681747 | 18 | 82.069 | KV453064.1 | 1999   | 14-scf00785 | 14 |
| AX-158221590 | 18 | 82.092 | KV453065.1 | 759229 | 14-scf00373 | 14 |
| AX-158221591 | 18 | 82.101 | KV453065.1 | 759568 | 14-scf00373 | 14 |
| AX-158221601 | 18 | 82.101 | KV453065.1 | 775209 | 14-scf00373 | 14 |
| AX-158221592 | 18 | 82.123 | KV453065.1 | 759807 | 14-scf00373 | 14 |
| AX-158221593 | 18 | 82.152 | KV453065.1 | 760220 | 14-scf00373 | 14 |
| AX-157839376 | 18 | 82.178 | KV453065.1 | 728897 | 14-scf00373 | 14 |
| AX-158221575 | 18 | 82.178 | KV453065.1 | 738894 | 14-scf00373 | 14 |
| AX-157839380 | 18 | 82.178 | KV453065.1 | 751111 | 14-scf00373 | 14 |
| AX-158221595 | 18 | 82.178 | KV453065.1 | 761081 | 14-scf00373 | 14 |
| AX-158221596 | 18 | 82.178 | KV453065.1 | 761593 | 14-scf00373 | 14 |
| AX-158221597 | 18 | 82.178 | KV453065.1 | 762590 | 14-scf00373 | 14 |
| AX-158221598 | 18 | 82.178 | KV453065.1 | 767894 | 14-scf00373 | 14 |
| AX-157839382 | 18 | 82.178 | KV453065.1 | 772012 | 14-scf00373 | 14 |
| AX-158221600 | 18 | 82.178 | KV453065.1 | 772237 | 14-scf00373 | 14 |
| AX-157839383 | 18 | 82.178 | KV453065.1 | 774519 | 14-scf00373 | 14 |
| AX-158221602 | 18 | 82.178 | KV453065.1 | 776496 | 14-scf00373 | 14 |
| AX-158221608 | 18 | 82.178 | KV453065.1 | 783542 | 14-scf00373 | 14 |
| AX-158221609 | 18 | 82.178 | KV453065.1 | 783866 | 14-scf00373 | 14 |
| AX-158221612 | 18 | 82.178 | KV453065.1 | 786103 | 14-scf00373 | 14 |
| AX-158221634 | 18 | 82.178 | KV453065.1 | 825093 | 14-scf00373 | 14 |
| AX-157839384 | 18 | 82.178 | KV453065.1 | 825648 | 14-scf00373 | 14 |
| AX-157717104 | 18 | 82.178 | KV453065.1 | 828596 | 14-scf00373 | 14 |
| AX-158221638 | 18 | 82.178 | KV453065.1 | 838328 | 14-scf00373 | 14 |
| AX-158221639 | 18 | 82.178 | KV453065.1 | 838907 | 14-scf00373 | 14 |
| AX-158221640 | 18 | 82.178 | KV453065.1 | 839016 | 14-scf00373 | 14 |
| AX-158221642 | 18 | 82.178 | KV453065.1 | 839972 | 14-scf00373 | 14 |
| AX-157887278 | 18 | 82.178 | KV453065.1 | 842165 | 14-scf00373 | 14 |
| AX-158221645 | 18 | 82.178 | KV453065.1 | 845578 | 14-scf00373 | 14 |
| AX-158221646 | 18 | 82.178 | KV453065.1 | 846884 | 14-scf00373 | 14 |
| AX-158221647 | 18 | 82.178 | KV453065.1 | 848192 | 14-scf00373 | 14 |
| AX-158221648 | 18 | 82.178 | KV453065.1 | 848289 | 14-scf00373 | 14 |

|              |    |        |             |         |             |    |
|--------------|----|--------|-------------|---------|-------------|----|
| AX-158221649 | 18 | 82.178 | KV453065.1  | 850164  | 14-scf00373 | 14 |
| AX-157680972 | 18 | 82.178 | KV453064.1  | 1434    | 14-scf00785 | 14 |
| AX-158221650 | 18 | 82.287 | KV453065.1  | 853574  | 14-scf00373 | 14 |
| AX-158221651 | 18 | 82.287 | KV453065.1  | 854469  | 14-scf00373 | 14 |
| AX-158221652 | 18 | 82.287 | KV453065.1  | 855627  | 14-scf00373 | 14 |
| AX-158221611 | 18 | 82.318 | KV453065.1  | 785668  | 14-scf00373 | 14 |
| AX-157724432 | 18 | 82.318 | KV453065.1  | 857827  | 14-scf00373 | 14 |
| AX-158221711 | 18 | 82.318 | KV453065.1  | 964104  | 14-scf00373 | 14 |
| AX-158221653 | 18 | 82.352 | KV453065.1  | 856055  | 14-scf00373 | 14 |
| AX-158221654 | 18 | 82.352 | KV453065.1  | 859052  | 14-scf00373 | 14 |
| AX-158221655 | 18 | 82.397 | KV453065.1  | 861638  | 14-scf00373 | 14 |
| AX-157743180 | 18 | 82.506 | KV453065.1  | 864346  | 14-scf00373 | 14 |
| AX-158221656 | 18 | 82.506 | KV453065.1  | 864781  | 14-scf00373 | 14 |
| AX-158221657 | 18 | 82.506 | KV453065.1  | 867192  | 14-scf00373 | 14 |
| AX-158221666 | 18 | 82.506 | KV453065.1  | 879791  | 14-scf00373 | 14 |
| AX-158221667 | 18 | 82.506 | KV453065.1  | 881806  | 14-scf00373 | 14 |
| AX-158221668 | 18 | 82.506 | KV453065.1  | 882886  | 14-scf00373 | 14 |
| AX-158221670 | 18 | 82.506 | KV453065.1  | 885750  | 14-scf00373 | 14 |
| AX-158221671 | 18 | 82.506 | KV453065.1  | 890637  | 14-scf00373 | 14 |
| AX-157716930 | 18 | 82.506 | KV453065.1  | 893933  | 14-scf00373 | 14 |
| AX-157772785 | 18 | 82.506 | KV453065.1  | 894550  | 14-scf00373 | 14 |
| AX-157839386 | 18 | 82.506 | KV453065.1  | 896422  | 14-scf00373 | 14 |
| AX-158221672 | 18 | 82.506 | KV453065.1  | 896680  | 14-scf00373 | 14 |
| AX-158221673 | 18 | 82.506 | KV453065.1  | 899387  | 14-scf00373 | 14 |
| AX-158221675 | 18 | 82.506 | KV453065.1  | 901825  | 14-scf00373 | 14 |
| AX-157887280 | 18 | 82.506 | KV453065.1  | 902819  | 14-scf00373 | 14 |
| AX-157839388 | 18 | 82.506 | KV453065.1  | 904958  | 14-scf00373 | 14 |
| AX-158221679 | 18 | 82.506 | KV453065.1  | 906046  | 14-scf00373 | 14 |
| AX-158221680 | 18 | 82.506 | KV453065.1  | 908126  | 14-scf00373 | 14 |
| AX-158221681 | 18 | 82.506 | KV453065.1  | 909898  | 14-scf00373 | 14 |
| AX-158221682 | 18 | 82.506 | KV453065.1  | 910182  | 14-scf00373 | 14 |
| AX-158221684 | 18 | 82.506 | KV453065.1  | 914594  | 14-scf00373 | 14 |
| AX-158221686 | 18 | 82.506 | KV453065.1  | 918295  | 14-scf00373 | 14 |
| AX-158221691 | 18 | 82.506 | KV453065.1  | 924472  | 14-scf00373 | 14 |
| AX-158221698 | 18 | 82.506 | KV453065.1  | 938321  | 14-scf00373 | 14 |
| AX-157774860 | 18 | 82.506 | KV453065.1  | 995641  | 14-scf00373 | 14 |
| AX-158221689 | 18 | 82.615 | KV453065.1  | 923453  | 14-scf00373 | 14 |
| AX-158221659 | 18 | 82.724 | KV453065.1  | 868991  | 14-scf00373 | 14 |
| AX-157839387 | 18 | 82.724 | KV453065.1  | 896786  | 14-scf00373 | 14 |
| AX-158221695 | 18 | 82.724 | KV453065.1  | 931791  | 14-scf00373 | 14 |
| AX-158221699 | 18 | 82.724 | KV453065.1  | 938882  | 14-scf00373 | 14 |
| AX-158221700 | 18 | 82.724 | KV453065.1  | 939500  | 14-scf00373 | 14 |
| AX-157772603 | 18 | 82.724 | KV453065.1  | 943020  | 14-scf00373 | 14 |
| AX-158221704 | 18 | 82.724 | KV453065.1  | 949500  | 14-scf00373 | 14 |
| AX-158221706 | 18 | 82.724 | KV453065.1  | 954442  | 14-scf00373 | 14 |
| AX-157727339 | 18 | 82.724 | KV453065.1  | 961303  | 14-scf00373 | 14 |
| AX-158221713 | 18 | 82.724 | KV453065.1  | 965948  | 14-scf00373 | 14 |
| AX-157763584 | 18 | 82.724 | KV453065.1  | 1029908 | 14-scf00373 | 14 |
| AX-157707365 | 18 | 82.724 | 3ML01034110 | 97      | scf09781_1  | UN |
| AX-157707364 | 18 | 82.724 | 3ML01034110 | 423     | scf09781_1  | UN |
| AX-158221685 | 18 | 82.943 | KV453065.1  | 916561  | 14-scf00373 | 14 |

|              |    |        |            |         |             |    |
|--------------|----|--------|------------|---------|-------------|----|
| AX-157766538 | 18 | 82.943 | KV453065.1 | 937419  | 14-scf00373 | 14 |
| AX-158221701 | 18 | 82.943 | KV453065.1 | 940230  | 14-scf00373 | 14 |
| AX-158221702 | 18 | 82.943 | KV453065.1 | 940845  | 14-scf00373 | 14 |
| AX-158221709 | 18 | 82.943 | KV453065.1 | 959816  | 14-scf00373 | 14 |
| AX-158221710 | 18 | 82.943 | KV453065.1 | 960175  | 14-scf00373 | 14 |
| AX-158221712 | 18 | 82.943 | KV453065.1 | 964579  | 14-scf00373 | 14 |
| AX-158221720 | 18 | 82.943 | KV453065.1 | 975927  | 14-scf00373 | 14 |
| AX-158221721 | 18 | 82.943 | KV453065.1 | 979726  | 14-scf00373 | 14 |
| AX-158221724 | 18 | 82.943 | KV453065.1 | 983236  | 14-scf00373 | 14 |
| AX-158221728 | 18 | 82.943 | KV453065.1 | 984824  | 14-scf00373 | 14 |
| AX-157717207 | 18 | 82.943 | KV453065.1 | 993679  | 14-scf00373 | 14 |
| AX-158221730 | 18 | 82.943 | KV453065.1 | 994075  | 14-scf00373 | 14 |
| AX-158221738 | 18 | 82.943 | KV453065.1 | 1002473 | 14-scf00373 | 14 |
| AX-158221696 | 18 | 82.969 | KV453065.1 | 934135  | 14-scf00373 | 14 |
| AX-157722890 | 18 | 82.969 | KV453065.1 | 983650  | 14-scf00373 | 14 |
| AX-158221731 | 18 | 82.969 | KV453065.1 | 995977  | 14-scf00373 | 14 |
| AX-158221844 | 18 | 82.969 | KV453065.1 | 1153725 | 14-scf00373 | 14 |
| AX-158221733 | 18 | 82.999 | KV453065.1 | 996857  | 14-scf00373 | 14 |
| AX-158221732 | 18 | 83.052 | KV453065.1 | 996678  | 14-scf00373 | 14 |
| AX-158221735 | 18 | 83.052 | KV453065.1 | 998564  | 14-scf00373 | 14 |
| AX-158221739 | 18 | 83.052 | KV453065.1 | 1004329 | 14-scf00373 | 14 |
| AX-158221743 | 18 | 83.063 | KV453065.1 | 1008671 | 14-scf00373 | 14 |
| AX-158221745 | 18 | 83.266 | KV453065.1 | 1010940 | 14-scf00373 | 14 |
| AX-157713828 | 18 | 83.383 | KV453065.1 | 1019725 | 14-scf00373 | 14 |
| AX-158221754 | 18 | 83.709 | KV453065.1 | 1022597 | 14-scf00373 | 14 |
| AX-157721767 | 18 | 83.709 | KV453065.1 | 1034622 | 14-scf00373 | 14 |
| AX-157839396 | 18 | 83.709 | KV453065.1 | 1037021 | 14-scf00373 | 14 |
| AX-157771744 | 18 | 83.709 | KV453065.1 | 1038228 | 14-scf00373 | 14 |
| AX-158221758 | 18 | 83.709 | KV453065.1 | 1041100 | 14-scf00373 | 14 |
| AX-158221762 | 18 | 83.709 | KV453065.1 | 1045802 | 14-scf00373 | 14 |
| AX-158221829 | 18 | 83.709 | KV453065.1 | 1133549 | 14-scf00373 | 14 |
| AX-158221833 | 18 | 83.709 | KV453065.1 | 1136766 | 14-scf00373 | 14 |
| AX-158221759 | 18 | 83.738 | KV453065.1 | 1041633 | 14-scf00373 | 14 |
| AX-158221902 | 18 | 83.738 | KV453065.1 | 1264780 | 14-scf00373 | 14 |
| AX-158221737 | 18 | 83.792 | KV453065.1 | 1000562 | 14-scf00373 | 14 |
| AX-158221760 | 18 | 83.792 | KV453065.1 | 1044567 | 14-scf00373 | 14 |
| AX-157742239 | 18 | 83.792 | KV453065.1 | 1047289 | 14-scf00373 | 14 |
| AX-157839397 | 18 | 83.792 | KV453065.1 | 1065191 | 14-scf00373 | 14 |
| AX-158221818 | 18 | 83.792 | KV453065.1 | 1121580 | 14-scf00373 | 14 |
| AX-158221828 | 18 | 83.792 | KV453065.1 | 1133162 | 14-scf00373 | 14 |
| AX-158221764 | 18 | 83.863 | KV453065.1 | 1048080 | 14-scf00373 | 14 |
| AX-158221765 | 18 | 83.927 | KV453065.1 | 1048503 | 14-scf00373 | 14 |
| AX-158221766 | 18 | 83.927 | KV453065.1 | 1049333 | 14-scf00373 | 14 |
| AX-158386661 | 18 | 83.927 | KV453065.1 | 1051350 | 14-scf00373 | 14 |
| AX-158221767 | 18 | 83.927 | KV453065.1 | 1051547 | 14-scf00373 | 14 |
| AX-157747717 | 18 | 83.963 | KV453065.1 | 1054193 | 14-scf00373 | 14 |
| AX-158221770 | 18 | 84.036 | KV453065.1 | 1055801 | 14-scf00373 | 14 |
| AX-158221771 | 18 | 84.036 | KV453065.1 | 1057547 | 14-scf00373 | 14 |
| AX-158221775 | 18 | 84.036 | KV453065.1 | 1061135 | 14-scf00373 | 14 |
| AX-158221776 | 18 | 84.036 | KV453065.1 | 1062460 | 14-scf00373 | 14 |
| AX-158221778 | 18 | 84.04  | KV453065.1 | 1064176 | 14-scf00373 | 14 |

|              |    |        |            |         |             |    |
|--------------|----|--------|------------|---------|-------------|----|
| AX-158221784 | 18 | 84.04  | KV453065.1 | 1075813 | 14-scf00373 | 14 |
| AX-158221804 | 18 | 84.04  | KV453065.1 | 1102829 | 14-scf00373 | 14 |
| AX-158221783 | 18 | 84.044 | KV453065.1 | 1070752 | 14-scf00373 | 14 |
| AX-158221878 | 18 | 84.044 | KV453065.1 | 1210920 | 14-scf00373 | 14 |
| AX-158221787 | 18 | 84.047 | KV453065.1 | 1077213 | 14-scf00373 | 14 |
| AX-158221793 | 18 | 84.051 | KV453065.1 | 1084807 | 14-scf00373 | 14 |
| AX-158221795 | 18 | 84.057 | KV453065.1 | 1087798 | 14-scf00373 | 14 |
| AX-158221812 | 18 | 84.057 | KV453065.1 | 1111262 | 14-scf00373 | 14 |
| AX-158221803 | 18 | 84.069 | KV453065.1 | 1101712 | 14-scf00373 | 14 |
| AX-158221805 | 18 | 84.082 | KV453065.1 | 1103689 | 14-scf00373 | 14 |
| AX-158221808 | 18 | 84.098 | KV453065.1 | 1107779 | 14-scf00373 | 14 |
| AX-158221811 | 18 | 84.112 | KV453065.1 | 1110310 | 14-scf00373 | 14 |
| AX-158221819 | 18 | 84.123 | KV453065.1 | 1121935 | 14-scf00373 | 14 |
| AX-158221822 | 18 | 84.133 | KV453065.1 | 1124958 | 14-scf00373 | 14 |
| AX-158221782 | 18 | 84.14  | KV453065.1 | 1070400 | 14-scf00373 | 14 |
| AX-158221789 | 18 | 84.14  | KV453065.1 | 1078194 | 14-scf00373 | 14 |
| AX-157758517 | 18 | 84.14  | KV453065.1 | 1082350 | 14-scf00373 | 14 |
| AX-158221792 | 18 | 84.14  | KV453065.1 | 1084163 | 14-scf00373 | 14 |
| AX-158221823 | 18 | 84.14  | KV453065.1 | 1126115 | 14-scf00373 | 14 |
| AX-158221826 | 18 | 84.14  | KV453065.1 | 1130225 | 14-scf00373 | 14 |
| AX-158221827 | 18 | 84.14  | KV453065.1 | 1131137 | 14-scf00373 | 14 |
| AX-158221860 | 18 | 84.14  | KV453065.1 | 1177990 | 14-scf00373 | 14 |
| AX-158221861 | 18 | 84.14  | KV453065.1 | 1178992 | 14-scf00373 | 14 |
| AX-158414832 | 18 | 84.14  | KV453065.1 | 1205130 | 14-scf00373 | 14 |
| AX-158221832 | 18 | 84.147 | KV453065.1 | 1135479 | 14-scf00373 | 14 |
| AX-158221838 | 18 | 84.147 | KV453065.1 | 1142973 | 14-scf00373 | 14 |
| AX-158221835 | 18 | 84.153 | KV453065.1 | 1137626 | 14-scf00373 | 14 |
| AX-158221834 | 18 | 84.154 | KV453065.1 | 1136979 | 14-scf00373 | 14 |
| AX-158221836 | 18 | 84.154 | KV453065.1 | 1140139 | 14-scf00373 | 14 |
| AX-157775200 | 18 | 84.156 | KV453065.1 | 977446  | 14-scf00373 | 14 |
| AX-158221845 | 18 | 84.156 | KV453065.1 | 1154298 | 14-scf00373 | 14 |
| AX-158221846 | 18 | 84.156 | KV453065.1 | 1154691 | 14-scf00373 | 14 |
| AX-158221849 | 18 | 84.156 | KV453065.1 | 1156704 | 14-scf00373 | 14 |
| AX-158221847 | 18 | 84.157 | KV453065.1 | 1155511 | 14-scf00373 | 14 |
| AX-158221848 | 18 | 84.159 | KV453065.1 | 1156212 | 14-scf00373 | 14 |
| AX-158221851 | 18 | 84.16  | KV453065.1 | 1158136 | 14-scf00373 | 14 |
| AX-158221858 | 18 | 84.162 | KV453065.1 | 1176540 | 14-scf00373 | 14 |
| AX-158221797 | 18 | 84.169 | KV453065.1 | 1095031 | 14-scf00373 | 14 |
| AX-158221799 | 18 | 84.169 | KV453065.1 | 1097682 | 14-scf00373 | 14 |
| AX-158221800 | 18 | 84.169 | KV453065.1 | 1099785 | 14-scf00373 | 14 |
| AX-158221801 | 18 | 84.169 | KV453065.1 | 1100465 | 14-scf00373 | 14 |
| AX-158221807 | 18 | 84.169 | KV453065.1 | 1107246 | 14-scf00373 | 14 |
| AX-158221859 | 18 | 84.169 | KV453065.1 | 1176694 | 14-scf00373 | 14 |
| AX-158221867 | 18 | 85.01  | KV453065.1 | 1190230 | 14-scf00373 | 14 |
| AX-158386668 | 18 | 85.02  | KV453065.1 | 1193521 | 14-scf00373 | 14 |
| AX-158221870 | 18 | 85.047 | KV453065.1 | 1196259 | 14-scf00373 | 14 |
| AX-158221880 | 18 | 85.875 | KV453065.1 | 1223298 | 14-scf00373 | 14 |
| AX-158221869 | 18 | 85.879 | KV453065.1 | 1193265 | 14-scf00373 | 14 |
| AX-158221881 | 18 | 85.879 | KV453065.1 | 1223777 | 14-scf00373 | 14 |
| AX-158414833 | 18 | 85.879 | KV453065.1 | 1229388 | 14-scf00373 | 14 |
| AX-158221968 | 18 | 85.879 | KV453065.1 | 1381032 | 14-scf00373 | 14 |



|              |    |        |             |         |             |    |
|--------------|----|--------|-------------|---------|-------------|----|
| AX-158221884 | 18 | 85.88  | KV453065.1  | 1239078 | 14-scf00373 | 14 |
| AX-158221885 | 18 | 85.881 | KV453065.1  | 1239532 | 14-scf00373 | 14 |
| AX-158221891 | 18 | 85.881 | KV453065.1  | 1246114 | 14-scf00373 | 14 |
| AX-158221894 | 18 | 85.882 | KV453065.1  | 1249962 | 14-scf00373 | 14 |
| AX-158221897 | 18 | 85.883 | KV453065.1  | 1254885 | 14-scf00373 | 14 |
| AX-158222040 | 18 | 85.883 | KV453065.1  | 1475992 | 14-scf00373 | 14 |
| AX-157705001 | 18 | 85.885 | 3ML01028252 | 190     | scf03857_1  | UN |
| AX-157705000 | 18 | 85.887 | 3ML01028252 | 1230    | scf03857_1  | UN |
| AX-158221794 | 18 | 85.888 | KV453065.1  | 1086206 | 14-scf00373 | 14 |
| AX-158221830 | 18 | 85.888 | KV453065.1  | 1134195 | 14-scf00373 | 14 |
| AX-158221842 | 18 | 85.888 | KV453065.1  | 1151965 | 14-scf00373 | 14 |
| AX-158221843 | 18 | 85.888 | KV453065.1  | 1152558 | 14-scf00373 | 14 |
| AX-158221872 | 18 | 85.888 | KV453065.1  | 1199589 | 14-scf00373 | 14 |
| AX-157718577 | 18 | 85.888 | KV453065.1  | 1265912 | 14-scf00373 | 14 |
| AX-158221928 | 18 | 85.888 | KV453065.1  | 1317267 | 14-scf00373 | 14 |
| AX-158221904 | 18 | 85.889 | KV453065.1  | 1272171 | 14-scf00373 | 14 |
| AX-158221905 | 18 | 85.891 | KV453065.1  | 1274490 | 14-scf00373 | 14 |
| AX-158221911 | 18 | 85.891 | KV453065.1  | 1284443 | 14-scf00373 | 14 |
| AX-158222042 | 18 | 85.891 | KV453065.1  | 1477910 | 14-scf00373 | 14 |
| AX-158222044 | 18 | 85.891 | KV453065.1  | 1479773 | 14-scf00373 | 14 |
| AX-158222046 | 18 | 85.891 | KV453065.1  | 1480764 | 14-scf00373 | 14 |
| AX-158222049 | 18 | 85.891 | KV453065.1  | 1485168 | 14-scf00373 | 14 |
| AX-158222165 | 18 | 85.891 | KV453065.1  | 1666372 | 14-scf00373 | 14 |
| AX-158221906 | 18 | 85.892 | KV453065.1  | 1275118 | 14-scf00373 | 14 |
| AX-158221922 | 18 | 85.892 | KV453065.1  | 1306244 | 14-scf00373 | 14 |
| AX-158221908 | 18 | 85.893 | KV453065.1  | 1280004 | 14-scf00373 | 14 |
| AX-158221915 | 18 | 85.894 | KV453065.1  | 1289488 | 14-scf00373 | 14 |
| AX-158221919 | 18 | 85.909 | KV453065.1  | 1293098 | 14-scf00373 | 14 |
| AX-158221923 | 18 | 86.342 | KV453065.1  | 1308081 | 14-scf00373 | 14 |
| AX-158221925 | 18 | 86.775 | KV453065.1  | 1310167 | 14-scf00373 | 14 |
| AX-158221926 | 18 | 86.775 | KV453065.1  | 1313837 | 14-scf00373 | 14 |
| AX-157839399 | 18 | 87.181 | KV453065.1  | 1323891 | 14-scf00373 | 14 |
| AX-158221931 | 18 | 87.181 | KV453065.1  | 1324267 | 14-scf00373 | 14 |
| AX-158221994 | 18 | 87.181 | KV453065.1  | 1420785 | 14-scf00373 | 14 |
| AX-158221935 | 18 | 87.182 | KV453065.1  | 1330388 | 14-scf00373 | 14 |
| AX-158221936 | 18 | 87.183 | KV453065.1  | 1332724 | 14-scf00373 | 14 |
| AX-158221937 | 18 | 87.184 | KV453065.1  | 1333895 | 14-scf00373 | 14 |
| AX-158221940 | 18 | 87.185 | KV453065.1  | 1338146 | 14-scf00373 | 14 |
| AX-158221943 | 18 | 87.25  | KV453065.1  | 1343156 | 14-scf00373 | 14 |
| AX-158222210 | 18 | 87.25  | KV453065.1  | 1727558 | 14-scf00373 | 14 |
| AX-158221954 | 18 | 87.607 | KV453065.1  | 1369365 | 14-scf00373 | 14 |
| AX-158221955 | 18 | 87.608 | KV453065.1  | 1370090 | 14-scf00373 | 14 |
| AX-158221890 | 18 | 87.609 | KV453065.1  | 1245070 | 14-scf00373 | 14 |
| AX-158221913 | 18 | 87.609 | KV453065.1  | 1286196 | 14-scf00373 | 14 |
| AX-158221956 | 18 | 87.609 | KV453065.1  | 1370625 | 14-scf00373 | 14 |
| AX-158386676 | 18 | 87.609 | KV453065.1  | 1450026 | 14-scf00373 | 14 |
| AX-158221958 | 18 | 87.611 | KV453065.1  | 1372502 | 14-scf00373 | 14 |
| AX-158221960 | 18 | 87.613 | KV453065.1  | 1373817 | 14-scf00373 | 14 |
| AX-158221961 | 18 | 87.614 | KV453065.1  | 1374661 | 14-scf00373 | 14 |
| AX-158221962 | 18 | 87.616 | KV453065.1  | 1375104 | 14-scf00373 | 14 |
| AX-158221964 | 18 | 87.617 | KV453065.1  | 1376301 | 14-scf00373 | 14 |

|              |    |        |            |         |             |    |
|--------------|----|--------|------------|---------|-------------|----|
| AX-158221974 | 18 | 87.617 | KV453065.1 | 1392054 | 14-scf00373 | 14 |
| AX-158221973 | 18 | 87.619 | KV453065.1 | 1390305 | 14-scf00373 | 14 |
| AX-158221987 | 18 | 87.621 | KV453065.1 | 1414444 | 14-scf00373 | 14 |
| AX-158221993 | 18 | 87.623 | KV453065.1 | 1420360 | 14-scf00373 | 14 |
| AX-158222006 | 18 | 87.623 | KV453065.1 | 1434330 | 14-scf00373 | 14 |
| AX-157839400 | 18 | 87.624 | KV453065.1 | 1424462 | 14-scf00373 | 14 |
| AX-158221959 | 18 | 87.625 | KV453065.1 | 1373095 | 14-scf00373 | 14 |
| AX-158221997 | 18 | 87.625 | KV453065.1 | 1425215 | 14-scf00373 | 14 |
| AX-158222001 | 18 | 87.626 | KV453065.1 | 1428903 | 14-scf00373 | 14 |
| AX-158222005 | 18 | 87.628 | KV453065.1 | 1433186 | 14-scf00373 | 14 |
| AX-158222010 | 18 | 88.051 | KV453065.1 | 1442343 | 14-scf00373 | 14 |
| AX-158222015 | 18 | 88.052 | KV453065.1 | 1447672 | 14-scf00373 | 14 |
| AX-158222017 | 18 | 88.052 | KV453065.1 | 1449194 | 14-scf00373 | 14 |
| AX-158222030 | 18 | 88.052 | KV453065.1 | 1465969 | 14-scf00373 | 14 |
| AX-158222020 | 18 | 88.053 | KV453065.1 | 1455094 | 14-scf00373 | 14 |
| AX-158222021 | 18 | 88.055 | KV453065.1 | 1456255 | 14-scf00373 | 14 |
| AX-158221893 | 18 | 88.056 | KV453065.1 | 1248553 | 14-scf00373 | 14 |
| AX-158221899 | 18 | 88.056 | KV453065.1 | 1256390 | 14-scf00373 | 14 |
| AX-158221907 | 18 | 88.056 | KV453065.1 | 1278706 | 14-scf00373 | 14 |
| AX-158221934 | 18 | 88.056 | KV453065.1 | 1329699 | 14-scf00373 | 14 |
| AX-158221938 | 18 | 88.056 | KV453065.1 | 1334211 | 14-scf00373 | 14 |
| AX-158222023 | 18 | 88.056 | KV453065.1 | 1459613 | 14-scf00373 | 14 |
| AX-157879777 | 18 | 88.056 | KV453065.1 | 1463241 | 14-scf00373 | 14 |
| AX-158222033 | 18 | 88.056 | KV453065.1 | 1469810 | 14-scf00373 | 14 |
| AX-158222024 | 18 | 88.058 | KV453065.1 | 1460862 | 14-scf00373 | 14 |
| AX-158222028 | 18 | 88.059 | KV453065.1 | 1463862 | 14-scf00373 | 14 |
| AX-158222034 | 18 | 88.482 | KV453065.1 | 1471022 | 14-scf00373 | 14 |
| AX-158223095 | 18 | 88.482 | KV453066.1 | 194895  | 14-scf00375 | 14 |
| AX-158222041 | 18 | 88.484 | KV453065.1 | 1477556 | 14-scf00373 | 14 |
| AX-157839402 | 18 | 88.486 | KV453065.1 | 1487853 | 14-scf00373 | 14 |
| AX-158222050 | 18 | 88.487 | KV453065.1 | 1488072 | 14-scf00373 | 14 |
| AX-158222061 | 18 | 88.487 | KV453065.1 | 1499750 | 14-scf00373 | 14 |
| AX-158222118 | 18 | 88.487 | KV453065.1 | 1593935 | 14-scf00373 | 14 |
| AX-158414843 | 18 | 88.487 | KV453065.1 | 1599313 | 14-scf00373 | 14 |
| AX-158386680 | 18 | 88.689 | KV453065.1 | 1490739 | 14-scf00373 | 14 |
| AX-158222053 | 18 | 88.909 | KV453065.1 | 1491960 | 14-scf00373 | 14 |
| AX-158222125 | 18 | 88.909 | KV453065.1 | 1610105 | 14-scf00373 | 14 |
| AX-158222128 | 18 | 88.909 | KV453065.1 | 1613806 | 14-scf00373 | 14 |
| AX-158222054 | 18 | 88.91  | KV453065.1 | 1494724 | 14-scf00373 | 14 |
| AX-158222060 | 18 | 88.911 | KV453065.1 | 1498937 | 14-scf00373 | 14 |
| AX-158222018 | 18 | 88.912 | KV453065.1 | 1450362 | 14-scf00373 | 14 |
| AX-158222066 | 18 | 88.912 | KV453065.1 | 1507691 | 14-scf00373 | 14 |
| AX-158222068 | 18 | 88.912 | KV453065.1 | 1510461 | 14-scf00373 | 14 |
| AX-158222160 | 18 | 88.912 | KV453065.1 | 1657228 | 14-scf00373 | 14 |
| AX-158222089 | 18 | 88.913 | KV453065.1 | 1545243 | 14-scf00373 | 14 |
| AX-158221918 | 18 | 89.336 | KV453065.1 | 1292179 | 14-scf00373 | 14 |
| AX-158222093 | 18 | 89.336 | KV453065.1 | 1552055 | 14-scf00373 | 14 |
| AX-158222100 | 18 | 89.336 | KV453065.1 | 1564824 | 14-scf00373 | 14 |
| AX-158222104 | 18 | 89.337 | KV453065.1 | 1568070 | 14-scf00373 | 14 |
| AX-158222105 | 18 | 89.338 | KV453065.1 | 1570900 | 14-scf00373 | 14 |
| AX-158222107 | 18 | 89.338 | KV453065.1 | 1572899 | 14-scf00373 | 14 |

|              |    |        |            |         |             |    |
|--------------|----|--------|------------|---------|-------------|----|
| AX-158222064 | 18 | 89.339 | KV453065.1 | 1506507 | 14-scf00373 | 14 |
| AX-158222108 | 18 | 89.339 | KV453065.1 | 1573401 | 14-scf00373 | 14 |
| AX-158222109 | 18 | 89.339 | KV453065.1 | 1576439 | 14-scf00373 | 14 |
| AX-157727581 | 18 | 89.34  | KV453065.1 | 1493534 | 14-scf00373 | 14 |
| AX-158222106 | 18 | 89.34  | KV453065.1 | 1571390 | 14-scf00373 | 14 |
| AX-158222119 | 18 | 89.34  | KV453065.1 | 1602883 | 14-scf00373 | 14 |
| AX-158222151 | 18 | 89.34  | KV453065.1 | 1643740 | 14-scf00373 | 14 |
| AX-158414845 | 18 | 89.34  | KV453065.1 | 1719062 | 14-scf00373 | 14 |
| AX-157740044 | 18 | 89.341 | KV453065.1 | 1603519 | 14-scf00373 | 14 |
| AX-158222120 | 18 | 89.342 | KV453065.1 | 1605418 | 14-scf00373 | 14 |
| AX-158222122 | 18 | 89.343 | KV453065.1 | 1607226 | 14-scf00373 | 14 |
| AX-158222110 | 18 | 89.766 | KV453065.1 | 1577375 | 14-scf00373 | 14 |
| AX-158222136 | 18 | 89.766 | KV453065.1 | 1628266 | 14-scf00373 | 14 |
| AX-158222187 | 18 | 89.766 | KV453065.1 | 1692042 | 14-scf00373 | 14 |
| AX-158222059 | 18 | 89.767 | KV453065.1 | 1498487 | 14-scf00373 | 14 |
| AX-158222085 | 18 | 89.767 | KV453065.1 | 1536863 | 14-scf00373 | 14 |
| AX-157742594 | 18 | 89.767 | KV453065.1 | 1579335 | 14-scf00373 | 14 |
| AX-158222121 | 18 | 89.767 | KV453065.1 | 1606364 | 14-scf00373 | 14 |
| AX-158222133 | 18 | 89.767 | KV453065.1 | 1623544 | 14-scf00373 | 14 |
| AX-158222137 | 18 | 89.767 | KV453065.1 | 1628712 | 14-scf00373 | 14 |
| AX-158222142 | 18 | 89.767 | KV453065.1 | 1634152 | 14-scf00373 | 14 |
| AX-158222147 | 18 | 89.767 | KV453065.1 | 1637599 | 14-scf00373 | 14 |
| AX-158222161 | 18 | 89.767 | KV453065.1 | 1658938 | 14-scf00373 | 14 |
| AX-158222180 | 18 | 89.767 | KV453065.1 | 1686355 | 14-scf00373 | 14 |
| AX-157697914 | 18 | 89.767 | FI887853.1 | 265     | 14-scf00373 | UN |
| AX-158222143 | 18 | 89.768 | KV453065.1 | 1634849 | 14-scf00373 | 14 |
| AX-158222170 | 18 | 89.768 | KV453065.1 | 1672345 | 14-scf00373 | 14 |
| AX-158222145 | 18 | 89.769 | KV453065.1 | 1636498 | 14-scf00373 | 14 |
| AX-158222255 | 18 | 89.769 | KV453065.1 | 1808274 | 14-scf00373 | 14 |
| AX-158222262 | 18 | 89.769 | KV453065.1 | 1819009 | 14-scf00373 | 14 |
| AX-157839416 | 18 | 89.769 | KV453065.1 | 1819240 | 14-scf00373 | 14 |
| AX-158222263 | 18 | 89.769 | KV453065.1 | 1820209 | 14-scf00373 | 14 |
| AX-157867084 | 18 | 89.769 | KV453065.1 | 1820592 | 14-scf00373 | 14 |
| AX-158222264 | 18 | 89.769 | KV453065.1 | 1821398 | 14-scf00373 | 14 |
| AX-158222149 | 18 | 89.77  | KV453065.1 | 1641135 | 14-scf00373 | 14 |
| AX-158222156 | 18 | 89.771 | KV453065.1 | 1653339 | 14-scf00373 | 14 |
| AX-158222183 | 18 | 89.771 | KV453065.1 | 1688071 | 14-scf00373 | 14 |
| AX-158222237 | 18 | 89.771 | KV453065.1 | 1781917 | 14-scf00373 | 14 |
| AX-158222280 | 18 | 89.771 | KV453065.1 | 1853927 | 14-scf00373 | 14 |
| AX-158223196 | 18 | 89.771 | KV453066.1 | 24636   | 14-scf00375 | 14 |
| AX-158414891 | 18 | 89.771 | KV453066.1 | 45930   | 14-scf00375 | 14 |
| AX-158223185 | 18 | 89.771 | KV453066.1 | 48243   | 14-scf00375 | 14 |
| AX-158223138 | 18 | 89.771 | KV453066.1 | 142801  | 14-scf00375 | 14 |
| AX-157683933 | 18 | 89.771 | KV453068.1 | 5117    | 14-scf00377 | 14 |
| AX-158222163 | 18 | 89.772 | KV453065.1 | 1660917 | 14-scf00373 | 14 |
| AX-158222169 | 18 | 89.773 | KV453065.1 | 1671615 | 14-scf00373 | 14 |
| AX-158222002 | 18 | 89.774 | KV453065.1 | 1429317 | 14-scf00373 | 14 |
| AX-158222009 | 18 | 89.774 | KV453065.1 | 1438548 | 14-scf00373 | 14 |
| AX-158222171 | 18 | 89.774 | KV453065.1 | 1672593 | 14-scf00373 | 14 |
| AX-158222173 | 18 | 89.774 | KV453065.1 | 1674017 | 14-scf00373 | 14 |
| AX-158222214 | 18 | 89.774 | KV453065.1 | 1734893 | 14-scf00373 | 14 |

|              |    |        |            |         |             |    |
|--------------|----|--------|------------|---------|-------------|----|
| AX-158222219 | 18 | 89.774 | KV453065.1 | 1742156 | 14-scf00373 | 14 |
| AX-157683949 | 18 | 89.774 | KV453068.1 | 33938   | 14-scf00377 | 14 |
| AX-158222185 | 18 | 89.775 | KV453065.1 | 1690766 | 14-scf00373 | 14 |
| AX-158222273 | 18 | 89.775 | KV453065.1 | 1843411 | 14-scf00373 | 14 |
| AX-158222274 | 18 | 89.775 | KV453065.1 | 1844338 | 14-scf00373 | 14 |
| AX-157699284 | 18 | 89.776 | KV453065.1 | 1691871 | 14-scf00373 | 14 |
| AX-158222191 | 18 | 89.777 | KV453065.1 | 1697579 | 14-scf00373 | 14 |
| AX-158222194 | 18 | 89.777 | KV453065.1 | 1701222 | 14-scf00373 | 14 |
| AX-158222197 | 18 | 89.777 | KV453065.1 | 1702845 | 14-scf00373 | 14 |
| AX-158222113 | 18 | 89.778 | KV453065.1 | 1584613 | 14-scf00373 | 14 |
| AX-158222188 | 18 | 89.778 | KV453065.1 | 1692514 | 14-scf00373 | 14 |
| AX-158222203 | 18 | 89.778 | KV453065.1 | 1709615 | 14-scf00373 | 14 |
| AX-158222208 | 18 | 89.778 | KV453065.1 | 1723551 | 14-scf00373 | 14 |
| AX-157839407 | 18 | 89.778 | KV453065.1 | 1725925 | 14-scf00373 | 14 |
| AX-158222205 | 18 | 89.779 | KV453065.1 | 1715536 | 14-scf00373 | 14 |
| AX-157751171 | 18 | 89.781 | KV453065.1 | 1727071 | 14-scf00373 | 14 |
| AX-158222211 | 18 | 89.929 | KV453065.1 | 1731756 | 14-scf00373 | 14 |
| AX-157839414 | 18 | 89.929 | KV453065.1 | 1791594 | 14-scf00373 | 14 |
| AX-158222213 | 18 | 90.065 | KV453065.1 | 1732907 | 14-scf00373 | 14 |
| AX-158222217 | 18 | 90.205 | KV453065.1 | 1741152 | 14-scf00373 | 14 |
| AX-157749904 | 18 | 90.206 | KV453065.1 | 1755825 | 14-scf00373 | 14 |
| AX-158222216 | 18 | 90.207 | KV453065.1 | 1738737 | 14-scf00373 | 14 |
| AX-158222225 | 18 | 90.207 | KV453065.1 | 1756098 | 14-scf00373 | 14 |
| AX-158222228 | 18 | 90.207 | KV453065.1 | 1760656 | 14-scf00373 | 14 |
| AX-158222236 | 18 | 90.207 | KV453065.1 | 1778025 | 14-scf00373 | 14 |
| AX-157839413 | 18 | 90.207 | KV453065.1 | 1780019 | 14-scf00373 | 14 |
| AX-157839415 | 18 | 90.207 | KV453065.1 | 1793079 | 14-scf00373 | 14 |
| AX-157879783 | 18 | 90.207 | KV453065.1 | 1795102 | 14-scf00373 | 14 |
| AX-158222247 | 18 | 90.207 | KV453065.1 | 1797302 | 14-scf00373 | 14 |
| AX-157839411 | 18 | 90.208 | KV453065.1 | 1770869 | 14-scf00373 | 14 |
| AX-158222234 | 18 | 90.209 | KV453065.1 | 1771801 | 14-scf00373 | 14 |
| AX-158221898 | 18 | 90.21  | KV453065.1 | 1255125 | 14-scf00373 | 14 |
| AX-158414836 | 18 | 90.21  | KV453065.1 | 1341812 | 14-scf00373 | 14 |
| AX-158221957 | 18 | 90.21  | KV453065.1 | 1371594 | 14-scf00373 | 14 |
| AX-158221989 | 18 | 90.21  | KV453065.1 | 1417049 | 14-scf00373 | 14 |
| AX-158222031 | 18 | 90.21  | KV453065.1 | 1466523 | 14-scf00373 | 14 |
| AX-158222052 | 18 | 90.21  | KV453065.1 | 1491219 | 14-scf00373 | 14 |
| AX-158222056 | 18 | 90.21  | KV453065.1 | 1496369 | 14-scf00373 | 14 |
| AX-158222058 | 18 | 90.21  | KV453065.1 | 1497276 | 14-scf00373 | 14 |
| AX-158222111 | 18 | 90.21  | KV453065.1 | 1581553 | 14-scf00373 | 14 |
| AX-158222114 | 18 | 90.21  | KV453065.1 | 1587623 | 14-scf00373 | 14 |
| AX-158222134 | 18 | 90.21  | KV453065.1 | 1625089 | 14-scf00373 | 14 |
| AX-158222153 | 18 | 90.21  | KV453065.1 | 1647033 | 14-scf00373 | 14 |
| AX-158222155 | 18 | 90.21  | KV453065.1 | 1648546 | 14-scf00373 | 14 |
| AX-158222178 | 18 | 90.21  | KV453065.1 | 1684489 | 14-scf00373 | 14 |
| AX-158222201 | 18 | 90.21  | KV453065.1 | 1706485 | 14-scf00373 | 14 |
| AX-157717420 | 18 | 90.21  | KV453065.1 | 1712350 | 14-scf00373 | 14 |
| AX-157759102 | 18 | 90.21  | KV453065.1 | 1731336 | 14-scf00373 | 14 |
| AX-158222218 | 18 | 90.21  | KV453065.1 | 1741675 | 14-scf00373 | 14 |
| AX-158222226 | 18 | 90.21  | KV453065.1 | 1757615 | 14-scf00373 | 14 |
| AX-157723415 | 18 | 90.21  | KV453065.1 | 1774999 | 14-scf00373 | 14 |

|              |    |        |            |         |             |    |
|--------------|----|--------|------------|---------|-------------|----|
| AX-158222276 | 18 | 90.21  | KV453065.1 | 1847998 | 14-scf00373 | 14 |
| AX-158222282 | 18 | 90.21  | KV453065.1 | 1859466 | 14-scf00373 | 14 |
| AX-157715545 | 18 | 90.21  | KV453065.1 | 1873049 | 14-scf00373 | 14 |
| AX-158223170 | 18 | 90.21  | KV453066.1 | 96880   | 14-scf00375 | 14 |
| AX-158223139 | 18 | 90.21  | KV453066.1 | 141435  | 14-scf00375 | 14 |
| AX-158223124 | 18 | 90.21  | KV453066.1 | 166277  | 14-scf00375 | 14 |
| AX-157756268 | 18 | 90.21  | KV453066.1 | 170452  | 14-scf00375 | 14 |
| AX-158223072 | 18 | 90.21  | KV453066.1 | 221469  | 14-scf00375 | 14 |
| AX-157680243 | 18 | 90.21  | KV453067.1 | 18125   | 14-scf00376 | 14 |
| AX-157683925 | 18 | 90.21  | KV453067.1 | 20543   | 14-scf00376 | 14 |
| AX-158222238 | 18 | 90.211 | KV453065.1 | 1786192 | 14-scf00373 | 14 |
| AX-157757964 | 18 | 90.432 | KV453065.1 | 1104498 | 14-scf00373 | 14 |
| AX-158221815 | 18 | 90.432 | KV453065.1 | 1119221 | 14-scf00373 | 14 |
| AX-158221871 | 18 | 90.432 | KV453065.1 | 1197153 | 14-scf00373 | 14 |
| AX-158221887 | 18 | 90.432 | KV453065.1 | 1240410 | 14-scf00373 | 14 |
| AX-158221966 | 18 | 90.432 | KV453065.1 | 1379202 | 14-scf00373 | 14 |
| AX-157740542 | 18 | 90.432 | KV453065.1 | 1747743 | 14-scf00373 | 14 |
| AX-158222239 | 18 | 90.432 | KV453065.1 | 1788773 | 14-scf00373 | 14 |
| AX-158222244 | 18 | 90.432 | KV453065.1 | 1794001 | 14-scf00373 | 14 |
| AX-158222248 | 18 | 90.432 | KV453065.1 | 1798401 | 14-scf00373 | 14 |
| AX-158222251 | 18 | 90.432 | KV453065.1 | 1800269 | 14-scf00373 | 14 |
| AX-158222252 | 18 | 90.432 | KV453065.1 | 1801057 | 14-scf00373 | 14 |
| AX-157683923 | 18 | 90.432 | KV453067.1 | 14315   | 14-scf00376 | 14 |
| AX-158222223 | 18 | 90.635 | KV453065.1 | 1753267 | 14-scf00373 | 14 |
| AX-158222224 | 18 | 90.635 | KV453065.1 | 1755413 | 14-scf00373 | 14 |
| AX-158222266 | 18 | 90.635 | KV453065.1 | 1823903 | 14-scf00373 | 14 |
| AX-157839417 | 18 | 90.635 | KV453065.1 | 1827579 | 14-scf00373 | 14 |
| AX-157839418 | 18 | 90.635 | KV453065.1 | 1828049 | 14-scf00373 | 14 |
| AX-158222271 | 18 | 90.635 | KV453065.1 | 1839389 | 14-scf00373 | 14 |
| AX-158414890 | 18 | 90.635 | KV453066.1 | 46123   | 14-scf00375 | 14 |
| AX-158423240 | 18 | 90.635 | KV453066.1 | 46823   | 14-scf00375 | 14 |
| AX-158222257 | 18 | 90.636 | KV453065.1 | 1812630 | 14-scf00373 | 14 |
| AX-158222269 | 18 | 90.636 | KV453065.1 | 1828742 | 14-scf00373 | 14 |
| AX-157867085 | 18 | 90.636 | KV453065.1 | 1857971 | 14-scf00373 | 14 |
| AX-158423239 | 18 | 90.636 | KV453066.1 | 47008   | 14-scf00375 | 14 |
| AX-157680249 | 18 | 90.636 | KV453067.1 | 24651   | 14-scf00376 | 14 |
| AX-158222283 | 18 | 90.637 | KV453065.1 | 1860926 | 14-scf00373 | 14 |
| AX-158223192 | 18 | 90.638 | KV453066.1 | 36273   | 14-scf00375 | 14 |
| AX-157859467 | 18 | 90.64  | KV453066.1 | 52922   | 14-scf00375 | 14 |
| AX-158223183 | 18 | 90.641 | KV453066.1 | 54093   | 14-scf00375 | 14 |
| AX-157839503 | 18 | 90.641 | KV453066.1 | 100917  | 14-scf00375 | 14 |
| AX-158222272 | 18 | 90.643 | KV453065.1 | 1843053 | 14-scf00373 | 14 |
| AX-157839419 | 18 | 90.643 | KV453065.1 | 1847729 | 14-scf00373 | 14 |
| AX-158222277 | 18 | 90.643 | KV453065.1 | 1851543 | 14-scf00373 | 14 |
| AX-158222278 | 18 | 90.643 | KV453065.1 | 1852718 | 14-scf00373 | 14 |
| AX-157839420 | 18 | 90.643 | KV453065.1 | 1874667 | 14-scf00373 | 14 |
| AX-158223197 | 18 | 90.643 | KV453066.1 | 18402   | 14-scf00375 | 14 |
| AX-157751116 | 18 | 90.643 | KV453066.1 | 56790   | 14-scf00375 | 14 |
| AX-158223174 | 18 | 90.643 | KV453066.1 | 83240   | 14-scf00375 | 14 |
| AX-158223162 | 18 | 90.643 | KV453066.1 | 109003  | 14-scf00375 | 14 |
| AX-158223157 | 18 | 90.643 | KV453066.1 | 116333  | 14-scf00375 | 14 |

|              |    |        |            |         |             |    |
|--------------|----|--------|------------|---------|-------------|----|
| AX-157683931 | 18 | 90.643 | KV453067.1 | 42397   | 14-scf00376 | 14 |
| AX-157683932 | 18 | 90.643 | KV453068.1 | 3820    | 14-scf00377 | 14 |
| AX-157683945 | 18 | 90.643 | KV453068.1 | 25012   | 14-scf00377 | 14 |
| AX-158223169 | 18 | 90.644 | KV453066.1 | 98325   | 14-scf00375 | 14 |
| AX-158223168 | 18 | 90.645 | KV453066.1 | 99656   | 14-scf00375 | 14 |
| AX-158222193 | 18 | 90.646 | KV453065.1 | 1698765 | 14-scf00373 | 14 |
| AX-158222281 | 18 | 90.646 | KV453065.1 | 1856260 | 14-scf00373 | 14 |
| AX-158223166 | 18 | 90.646 | KV453066.1 | 104874  | 14-scf00375 | 14 |
| AX-157839505 | 18 | 90.647 | KV453066.1 | 33597   | 14-scf00375 | 14 |
| AX-157867089 | 18 | 90.647 | KV453066.1 | 35677   | 14-scf00375 | 14 |
| AX-157839504 | 18 | 90.647 | KV453066.1 | 54818   | 14-scf00375 | 14 |
| AX-158223182 | 18 | 90.647 | KV453066.1 | 55534   | 14-scf00375 | 14 |
| AX-158223179 | 18 | 90.647 | KV453066.1 | 72573   | 14-scf00375 | 14 |
| AX-158223163 | 18 | 90.647 | KV453066.1 | 108161  | 14-scf00375 | 14 |
| AX-158221916 | 18 | 90.648 | KV453065.1 | 1290686 | 14-scf00373 | 14 |
| AX-158222117 | 18 | 90.648 | KV453065.1 | 1592341 | 14-scf00373 | 14 |
| AX-158222275 | 18 | 90.648 | KV453065.1 | 1847502 | 14-scf00373 | 14 |
| AX-158223167 | 18 | 90.648 | KV453066.1 | 100514  | 14-scf00375 | 14 |
| AX-158223164 | 18 | 90.648 | KV453066.1 | 107640  | 14-scf00375 | 14 |
| AX-158223150 | 18 | 90.648 | KV453066.1 | 126701  | 14-scf00375 | 14 |
| AX-158223149 | 18 | 90.664 | KV453066.1 | 127429  | 14-scf00375 | 14 |
| AX-158223148 | 18 | 91.332 | KV453066.1 | 129052  | 14-scf00375 | 14 |
| AX-158223136 | 18 | 91.852 | KV453066.1 | 145706  | 14-scf00375 | 14 |
| AX-158223134 | 18 | 91.937 | KV453066.1 | 148003  | 14-scf00375 | 14 |
| AX-158223133 | 18 | 91.937 | KV453066.1 | 149998  | 14-scf00375 | 14 |
| AX-158223112 | 18 | 91.937 | KV453066.1 | 176717  | 14-scf00375 | 14 |
| AX-158223104 | 18 | 91.937 | KV453066.1 | 184213  | 14-scf00375 | 14 |
| AX-158223132 | 18 | 91.939 | KV453066.1 | 151396  | 14-scf00375 | 14 |
| AX-158223114 | 18 | 91.939 | KV453066.1 | 173887  | 14-scf00375 | 14 |
| AX-158222139 | 18 | 91.94  | KV453065.1 | 1630494 | 14-scf00373 | 14 |
| AX-158222140 | 18 | 91.94  | KV453065.1 | 1632411 | 14-scf00373 | 14 |
| AX-158222168 | 18 | 91.94  | KV453065.1 | 1670782 | 14-scf00373 | 14 |
| AX-158222176 | 18 | 91.94  | KV453065.1 | 1681493 | 14-scf00373 | 14 |
| AX-158222177 | 18 | 91.94  | KV453065.1 | 1681854 | 14-scf00373 | 14 |
| AX-158223130 | 18 | 91.94  | KV453066.1 | 153561  | 14-scf00375 | 14 |
| AX-158223127 | 18 | 91.94  | KV453066.1 | 155642  | 14-scf00375 | 14 |
| AX-158223125 | 18 | 91.94  | KV453066.1 | 161866  | 14-scf00375 | 14 |
| AX-158223115 | 18 | 91.94  | KV453066.1 | 172981  | 14-scf00375 | 14 |
| AX-158223106 | 18 | 91.94  | KV453066.1 | 181794  | 14-scf00375 | 14 |
| AX-158223121 | 18 | 91.941 | KV453066.1 | 168328  | 14-scf00375 | 14 |
| AX-158394079 | 18 | 91.942 | KV453066.1 | 169087  | 14-scf00375 | 14 |
| AX-157879771 | 18 | 91.944 | KV453065.1 | 1257899 | 14-scf00373 | 14 |
| AX-158223194 | 18 | 91.944 | KV453066.1 | 30981   | 14-scf00375 | 14 |
| AX-158223117 | 18 | 91.944 | KV453066.1 | 171963  | 14-scf00375 | 14 |
| AX-158223116 | 18 | 91.944 | KV453066.1 | 172621  | 14-scf00375 | 14 |
| AX-158223123 | 18 | 91.945 | KV453066.1 | 166825  | 14-scf00375 | 14 |
| AX-158223113 | 18 | 91.945 | KV453066.1 | 174353  | 14-scf00375 | 14 |
| AX-158223135 | 18 | 91.946 | KV453066.1 | 146983  | 14-scf00375 | 14 |
| AX-157726977 | 18 | 91.946 | KV453066.1 | 178553  | 14-scf00375 | 14 |
| AX-158223128 | 18 | 92.14  | KV453066.1 | 155182  | 14-scf00375 | 14 |
| AX-158223109 | 18 | 92.14  | KV453066.1 | 179781  | 14-scf00375 | 14 |

|              |    |        |             |         |             |    |
|--------------|----|--------|-------------|---------|-------------|----|
| AX-158223075 | 18 | 94.584 | KV453066.1  | 219394  | 14-scf00375 | 14 |
| AX-158223073 | 18 | 94.598 | KV453066.1  | 221320  | 14-scf00375 | 14 |
| AX-158410264 | 18 | 94.604 | KV453066.1  | 228848  | 14-scf00375 | 14 |
| AX-157759014 | 18 | 94.61  | KV453066.1  | 229013  | 14-scf00375 | 14 |
| AX-158223068 | 18 | 94.613 | KV453066.1  | 233643  | 14-scf00375 | 14 |
| AX-157839499 | 18 | 94.614 | KV453066.1  | 236660  | 14-scf00375 | 14 |
| AX-158223059 | 18 | 94.616 | KV453066.1  | 248623  | 14-scf00375 | 14 |
| AX-158386707 | 18 | 94.617 | KV453066.1  | 249837  | 14-scf00375 | 14 |
| AX-158223066 | 18 | 94.618 | KV453066.1  | 237160  | 14-scf00375 | 14 |
| AX-158223055 | 18 | 94.618 | KV453066.1  | 256244  | 14-scf00375 | 14 |
| AX-157746671 | 18 | 94.618 | KV453066.1  | 274911  | 14-scf00375 | 14 |
| AX-158222986 | 18 | 94.618 | KV453066.1  | 353018  | 14-scf00375 | 14 |
| AX-157758694 | 18 | 94.619 | KV453066.1  | 256995  | 14-scf00375 | 14 |
| AX-158223054 | 18 | 94.932 | KV453066.1  | 259085  | 14-scf00375 | 14 |
| AX-158223052 | 18 | 95.193 | KV453066.1  | 260008  | 14-scf00375 | 14 |
| AX-158223089 | 18 | 95.197 | KV453066.1  | 199344  | 14-scf00375 | 14 |
| AX-157879797 | 18 | 95.197 | KV453066.1  | 208203  | 14-scf00375 | 14 |
| AX-158223069 | 18 | 95.197 | KV453066.1  | 232385  | 14-scf00375 | 14 |
| AX-158223062 | 18 | 95.197 | KV453066.1  | 245083  | 14-scf00375 | 14 |
| AX-158223051 | 18 | 95.197 | KV453066.1  | 260938  | 14-scf00375 | 14 |
| AX-157715566 | 18 | 95.197 | KV453066.1  | 264130  | 14-scf00375 | 14 |
| AX-157706753 | 18 | 95.197 | 3ML01032854 | 109     | scf08485_1  | UN |
| AX-158223048 | 18 | 95.198 | KV453066.1  | 269898  | 14-scf00375 | 14 |
| AX-158223043 | 18 | 95.198 | KV453066.1  | 283822  | 14-scf00375 | 14 |
| AX-158223042 | 18 | 95.198 | KV453066.1  | 284584  | 14-scf00375 | 14 |
| AX-158223083 | 18 | 95.767 | KV453066.1  | 205324  | 14-scf00375 | 14 |
| AX-158223040 | 18 | 95.767 | KV453066.1  | 287574  | 14-scf00375 | 14 |
| AX-157839496 | 18 | 95.767 | KV453066.1  | 310611  | 14-scf00375 | 14 |
| AX-157745736 | 18 | 95.767 | KV453066.1  | 316546  | 14-scf00375 | 14 |
| AX-158394077 | 18 | 95.767 | KV453066.1  | 348275  | 14-scf00375 | 14 |
| AX-158222990 | 18 | 95.767 | KV453066.1  | 350243  | 14-scf00375 | 14 |
| AX-158223098 | 18 | 95.773 | KV453066.1  | 190726  | 14-scf00375 | 14 |
| AX-157839500 | 18 | 95.773 | KV453066.1  | 235694  | 14-scf00375 | 14 |
| AX-158223053 | 18 | 95.773 | KV453066.1  | 259473  | 14-scf00375 | 14 |
| AX-158223037 | 18 | 95.773 | KV453066.1  | 290280  | 14-scf00375 | 14 |
| AX-158222154 | 18 | 96.047 | KV453065.1  | 1647759 | 14-scf00373 | 14 |
| AX-158223033 | 18 | 96.047 | KV453066.1  | 295063  | 14-scf00375 | 14 |
| AX-158223030 | 18 | 96.271 | KV453066.1  | 302160  | 14-scf00375 | 14 |
| AX-158223029 | 18 | 96.324 | KV453066.1  | 307701  | 14-scf00375 | 14 |
| AX-158223028 | 18 | 96.325 | KV453066.1  | 308770  | 14-scf00375 | 14 |
| AX-157773222 | 18 | 96.326 | KV453066.1  | 314292  | 14-scf00375 | 14 |
| AX-157702988 | 18 | 96.327 | KV453066.1  | 317821  | 14-scf00375 | 14 |
| AX-158223022 | 18 | 96.327 | KV453066.1  | 320776  | 14-scf00375 | 14 |
| AX-158223021 | 18 | 96.328 | KV453066.1  | 321317  | 14-scf00375 | 14 |
| AX-158223020 | 18 | 96.376 | KV453066.1  | 322040  | 14-scf00375 | 14 |
| AX-158223070 | 18 | 97.119 | KV453066.1  | 225418  | 14-scf00375 | 14 |
| AX-158223027 | 18 | 97.119 | KV453066.1  | 309422  | 14-scf00375 | 14 |
| AX-158223016 | 18 | 97.119 | KV453066.1  | 328753  | 14-scf00375 | 14 |
| AX-158223035 | 18 | 97.149 | KV453066.1  | 293398  | 14-scf00375 | 14 |
| AX-158223031 | 18 | 97.149 | KV453066.1  | 300848  | 14-scf00375 | 14 |
| AX-158223015 | 18 | 97.149 | KV453066.1  | 329236  | 14-scf00375 | 14 |

|              |    |        |            |        |             |    |
|--------------|----|--------|------------|--------|-------------|----|
| AX-158223012 | 18 | 97.179 | KV453066.1 | 332785 | 14-scf00375 | 14 |
| AX-158223011 | 18 | 97.179 | KV453066.1 | 333642 | 14-scf00375 | 14 |
| AX-158223008 | 18 | 97.18  | KV453066.1 | 338439 | 14-scf00375 | 14 |
| AX-158223010 | 18 | 97.276 | KV453066.1 | 335815 | 14-scf00375 | 14 |
| AX-158223006 | 18 | 97.276 | KV453066.1 | 340070 | 14-scf00375 | 14 |
| AX-157839492 | 18 | 97.355 | KV453066.1 | 336389 | 14-scf00375 | 14 |
| AX-158223005 | 18 | 97.355 | KV453066.1 | 340444 | 14-scf00375 | 14 |
| AX-158223003 | 18 | 97.434 | KV453066.1 | 341714 | 14-scf00375 | 14 |
| AX-158223038 | 18 | 97.513 | KV453066.1 | 289593 | 14-scf00375 | 14 |
| AX-158222997 | 18 | 97.513 | KV453066.1 | 344279 | 14-scf00375 | 14 |
| AX-158222995 | 18 | 97.603 | KV453066.1 | 347699 | 14-scf00375 | 14 |
| AX-158222994 | 18 | 97.606 | KV453066.1 | 348450 | 14-scf00375 | 14 |
| AX-158222993 | 18 | 98.228 | KV453066.1 | 348957 | 14-scf00375 | 14 |
| AX-158222991 | 18 | 98.236 | KV453066.1 | 349805 | 14-scf00375 | 14 |
| AX-158222988 | 18 | 98.243 | KV453066.1 | 351304 | 14-scf00375 | 14 |
| AX-158222987 | 18 | 98.249 | KV453066.1 | 352839 | 14-scf00375 | 14 |
| AX-158222985 | 18 | 98.461 | KV453066.1 | 353556 | 14-scf00375 | 14 |
| AX-158222983 | 18 | 98.875 | KV453066.1 | 354716 | 14-scf00375 | 14 |
| AX-158222962 | 18 | 98.875 | KV453066.1 | 384930 | 14-scf00375 | 14 |
| AX-158222947 | 18 | 98.875 | KV453066.1 | 398568 | 14-scf00375 | 14 |
| AX-158222928 | 18 | 98.875 | KV453066.1 | 415549 | 14-scf00375 | 14 |
| AX-158222908 | 18 | 98.875 | KV453066.1 | 441504 | 14-scf00375 | 14 |
| AX-157723093 | 18 | 98.883 | KV453066.1 | 355655 | 14-scf00375 | 14 |
| AX-157739138 | 18 | 98.884 | KV453066.1 | 327490 | 14-scf00375 | 14 |
| AX-158222981 | 18 | 98.884 | KV453066.1 | 356075 | 14-scf00375 | 14 |
| AX-157773979 | 18 | 98.884 | KV453066.1 | 359075 | 14-scf00375 | 14 |
| AX-158222975 | 18 | 98.884 | KV453066.1 | 365310 | 14-scf00375 | 14 |
| AX-157839491 | 18 | 98.884 | KV453066.1 | 370674 | 14-scf00375 | 14 |
| AX-158222972 | 18 | 98.884 | KV453066.1 | 373488 | 14-scf00375 | 14 |
| AX-158222971 | 18 | 98.884 | KV453066.1 | 373971 | 14-scf00375 | 14 |
| AX-158222969 | 18 | 98.884 | KV453066.1 | 377397 | 14-scf00375 | 14 |
| AX-158222967 | 18 | 98.884 | KV453066.1 | 381094 | 14-scf00375 | 14 |
| AX-158222966 | 18 | 98.884 | KV453066.1 | 381529 | 14-scf00375 | 14 |
| AX-158222965 | 18 | 98.884 | KV453066.1 | 381942 | 14-scf00375 | 14 |
| AX-158222963 | 18 | 98.884 | KV453066.1 | 383192 | 14-scf00375 | 14 |
| AX-158222959 | 18 | 98.884 | KV453066.1 | 387043 | 14-scf00375 | 14 |
| AX-158222955 | 18 | 98.884 | KV453066.1 | 391474 | 14-scf00375 | 14 |
| AX-158222954 | 18 | 98.884 | KV453066.1 | 391986 | 14-scf00375 | 14 |
| AX-158222952 | 18 | 98.884 | KV453066.1 | 393064 | 14-scf00375 | 14 |
| AX-158394076 | 18 | 98.884 | KV453066.1 | 395505 | 14-scf00375 | 14 |
| AX-158222949 | 18 | 98.884 | KV453066.1 | 396004 | 14-scf00375 | 14 |
| AX-158222948 | 18 | 99.101 | KV453066.1 | 397861 | 14-scf00375 | 14 |
| AX-158222946 | 18 | 99.101 | KV453066.1 | 399326 | 14-scf00375 | 14 |
| AX-158222945 | 18 | 99.101 | KV453066.1 | 399658 | 14-scf00375 | 14 |
| AX-158222943 | 18 | 99.103 | KV453066.1 | 401305 | 14-scf00375 | 14 |
| AX-158222942 | 18 | 99.103 | KV453066.1 | 401931 | 14-scf00375 | 14 |
| AX-158222938 | 18 | 99.263 | KV453066.1 | 406162 | 14-scf00375 | 14 |
| AX-157754617 | 18 | 99.35  | KV453066.1 | 390226 | 14-scf00375 | 14 |
| AX-158418670 | 18 | 99.35  | KV453066.1 | 408367 | 14-scf00375 | 14 |
| AX-158222976 | 18 | 99.423 | KV453066.1 | 364204 | 14-scf00375 | 14 |
| AX-158222974 | 18 | 99.423 | KV453066.1 | 367672 | 14-scf00375 | 14 |



|              |    |         |            |        |             |    |
|--------------|----|---------|------------|--------|-------------|----|
| AX-158222935 | 18 | 99.423  | KV453066.1 | 409188 | 14-scf00375 | 14 |
| AX-158222913 | 18 | 99.423  | KV453066.1 | 437877 | 14-scf00375 | 14 |
| AX-157839489 | 18 | 99.445  | KV453066.1 | 410037 | 14-scf00375 | 14 |
| AX-157741100 | 18 | 99.445  | KV453066.1 | 410808 | 14-scf00375 | 14 |
| AX-158222930 | 18 | 99.445  | KV453066.1 | 414349 | 14-scf00375 | 14 |
| AX-158222929 | 18 | 99.599  | KV453066.1 | 414653 | 14-scf00375 | 14 |
| AX-158222909 | 18 | 99.599  | KV453066.1 | 440934 | 14-scf00375 | 14 |
| AX-158222907 | 18 | 99.599  | KV453066.1 | 442414 | 14-scf00375 | 14 |
| AX-158222893 | 18 | 99.599  | KV453066.1 | 457378 | 14-scf00375 | 14 |
| AX-158222883 | 18 | 99.599  | KV453066.1 | 476192 | 14-scf00375 | 14 |
| AX-158222970 | 18 | 99.78   | KV453066.1 | 375396 | 14-scf00375 | 14 |
| AX-158222951 | 18 | 99.78   | KV453066.1 | 393428 | 14-scf00375 | 14 |
| AX-158222926 | 18 | 99.78   | KV453066.1 | 419532 | 14-scf00375 | 14 |
| AX-158222923 | 18 | 99.78   | KV453066.1 | 427388 | 14-scf00375 | 14 |
| AX-158222922 | 18 | 99.78   | KV453066.1 | 428369 | 14-scf00375 | 14 |
| AX-158222921 | 18 | 99.78   | KV453066.1 | 428882 | 14-scf00375 | 14 |
| AX-158222920 | 18 | 99.78   | KV453066.1 | 429390 | 14-scf00375 | 14 |
| AX-158222919 | 18 | 99.78   | KV453066.1 | 431670 | 14-scf00375 | 14 |
| AX-158222917 | 18 | 99.78   | KV453066.1 | 433593 | 14-scf00375 | 14 |
| AX-158222912 | 18 | 99.78   | KV453066.1 | 438278 | 14-scf00375 | 14 |
| AX-158222916 | 18 | 99.798  | KV453066.1 | 434248 | 14-scf00375 | 14 |
| AX-158222904 | 18 | 99.817  | KV453066.1 | 444242 | 14-scf00375 | 14 |
| AX-158222900 | 18 | 99.838  | KV453066.1 | 446843 | 14-scf00375 | 14 |
| AX-158222899 | 18 | 99.904  | KV453066.1 | 447781 | 14-scf00375 | 14 |
| AX-158222896 | 18 | 100.366 | KV453066.1 | 452254 | 14-scf00375 | 14 |
| AX-158222894 | 18 | 100.412 | KV453066.1 | 454459 | 14-scf00375 | 14 |
| AX-158222891 | 18 | 100.412 | KV453066.1 | 460893 | 14-scf00375 | 14 |
| AX-158222885 | 18 | 100.412 | KV453066.1 | 471733 | 14-scf00375 | 14 |
| AX-158222879 | 18 | 100.412 | KV453066.1 | 482592 | 14-scf00375 | 14 |
| AX-158222890 | 18 | 100.548 | KV453066.1 | 465230 | 14-scf00375 | 14 |
| AX-158222889 | 18 | 100.548 | KV453066.1 | 467380 | 14-scf00375 | 14 |
| AX-158222888 | 18 | 100.702 | KV453066.1 | 467731 | 14-scf00375 | 14 |
| AX-158414883 | 18 | 100.852 | KV453066.1 | 470265 | 14-scf00375 | 14 |
| AX-157701091 | 18 | 100.993 | KV453066.1 | 473911 | 14-scf00375 | 14 |
| AX-158222881 | 18 | 101.073 | KV453066.1 | 481573 | 14-scf00375 | 14 |
| AX-158222876 | 18 | 101.511 | KV453066.1 | 486679 | 14-scf00375 | 14 |
| AX-158222873 | 18 | 101.511 | KV453066.1 | 489569 | 14-scf00375 | 14 |
| AX-157839487 | 18 | 101.511 | KV453066.1 | 492525 | 14-scf00375 | 14 |
| AX-157839486 | 18 | 101.511 | KV453066.1 | 492720 | 14-scf00375 | 14 |
| AX-158222866 | 18 | 101.609 | KV453066.1 | 500661 | 14-scf00375 | 14 |
| AX-158222865 | 18 | 101.675 | KV453066.1 | 502536 | 14-scf00375 | 14 |
| AX-158222863 | 18 | 101.754 | KV453066.1 | 503377 | 14-scf00375 | 14 |
| AX-158222861 | 18 | 101.838 | KV453066.1 | 505177 | 14-scf00375 | 14 |
| AX-158222859 | 18 | 101.839 | KV453066.1 | 506720 | 14-scf00375 | 14 |
| AX-158222857 | 18 | 101.839 | KV453066.1 | 508519 | 14-scf00375 | 14 |
| AX-158222855 | 18 | 101.948 | KV453066.1 | 509275 | 14-scf00375 | 14 |
| AX-158222854 | 18 | 101.948 | KV453066.1 | 510992 | 14-scf00375 | 14 |
| AX-158222853 | 18 | 101.948 | KV453066.1 | 511748 | 14-scf00375 | 14 |
| AX-158222852 | 18 | 101.948 | KV453066.1 | 515163 | 14-scf00375 | 14 |
| AX-158222850 | 18 | 101.948 | KV453066.1 | 517501 | 14-scf00375 | 14 |
| AX-158222848 | 18 | 101.948 | KV453066.1 | 518383 | 14-scf00375 | 14 |

|              |    |         |            |        |             |    |
|--------------|----|---------|------------|--------|-------------|----|
| AX-158222845 | 18 | 101.948 | KV453066.1 | 521094 | 14-scf00375 | 14 |
| AX-158222843 | 18 | 101.948 | KV453066.1 | 522444 | 14-scf00375 | 14 |
| AX-158222841 | 18 | 101.948 | KV453066.1 | 523440 | 14-scf00375 | 14 |
| AX-158222840 | 18 | 101.948 | KV453066.1 | 524116 | 14-scf00375 | 14 |
| AX-158222839 | 18 | 101.948 | KV453066.1 | 525193 | 14-scf00375 | 14 |
| AX-158222836 | 18 | 101.948 | KV453066.1 | 531425 | 14-scf00375 | 14 |
| AX-158222834 | 18 | 101.948 | KV453066.1 | 538271 | 14-scf00375 | 14 |
| AX-158410258 | 18 | 101.948 | KV453066.1 | 542362 | 14-scf00375 | 14 |
| AX-158414881 | 18 | 101.948 | KV453066.1 | 542597 | 14-scf00375 | 14 |
| AX-158222828 | 18 | 101.95  | KV453066.1 | 544502 | 14-scf00375 | 14 |
| AX-158222847 | 18 | 102.098 | KV453066.1 | 519013 | 14-scf00375 | 14 |
| AX-158222829 | 18 | 102.098 | KV453066.1 | 543801 | 14-scf00375 | 14 |
| AX-158222820 | 18 | 102.098 | KV453066.1 | 555186 | 14-scf00375 | 14 |
| AX-158222819 | 18 | 102.098 | KV453066.1 | 557312 | 14-scf00375 | 14 |
| AX-158222818 | 18 | 102.098 | KV453066.1 | 558977 | 14-scf00375 | 14 |
| AX-157752526 | 18 | 102.098 | KV453066.1 | 559526 | 14-scf00375 | 14 |
| AX-158222816 | 18 | 102.098 | KV453066.1 | 564178 | 14-scf00375 | 14 |
| AX-158222813 | 18 | 102.098 | KV453066.1 | 568061 | 14-scf00375 | 14 |
| AX-158222812 | 18 | 102.098 | KV453066.1 | 569215 | 14-scf00375 | 14 |
| AX-158386698 | 18 | 102.098 | KV453066.1 | 569532 | 14-scf00375 | 14 |
| AX-158222800 | 18 | 102.098 | KV453066.1 | 585595 | 14-scf00375 | 14 |
| AX-158222811 | 18 | 102.101 | KV453066.1 | 569935 | 14-scf00375 | 14 |
| AX-158222810 | 18 | 102.343 | KV453066.1 | 573448 | 14-scf00375 | 14 |
| AX-158222809 | 18 | 102.419 | KV453066.1 | 573773 | 14-scf00375 | 14 |
| AX-158222832 | 18 | 102.494 | KV453066.1 | 539723 | 14-scf00375 | 14 |
| AX-158222806 | 18 | 102.494 | KV453066.1 | 579206 | 14-scf00375 | 14 |
| AX-158222805 | 18 | 102.494 | KV453066.1 | 579839 | 14-scf00375 | 14 |
| AX-158222804 | 18 | 102.494 | KV453066.1 | 580195 | 14-scf00375 | 14 |
| AX-158414879 | 18 | 102.494 | KV453066.1 | 580559 | 14-scf00375 | 14 |
| AX-157839484 | 18 | 102.494 | KV453066.1 | 582191 | 14-scf00375 | 14 |
| AX-158222803 | 18 | 102.494 | KV453066.1 | 582669 | 14-scf00375 | 14 |
| AX-158222802 | 18 | 102.494 | KV453066.1 | 584101 | 14-scf00375 | 14 |
| AX-157839483 | 18 | 102.494 | KV453066.1 | 584857 | 14-scf00375 | 14 |
| AX-158222799 | 18 | 102.494 | KV453066.1 | 586716 | 14-scf00375 | 14 |
| AX-158222798 | 18 | 102.494 | KV453066.1 | 588455 | 14-scf00375 | 14 |
| AX-158222797 | 18 | 102.494 | KV453066.1 | 590848 | 14-scf00375 | 14 |
| AX-158222796 | 18 | 102.494 | KV453066.1 | 591598 | 14-scf00375 | 14 |
| AX-158222794 | 18 | 102.494 | KV453066.1 | 595218 | 14-scf00375 | 14 |
| AX-158222793 | 18 | 102.494 | KV453066.1 | 595821 | 14-scf00375 | 14 |
| AX-158222792 | 18 | 102.494 | KV453066.1 | 596331 | 14-scf00375 | 14 |
| AX-158222791 | 18 | 102.494 | KV453066.1 | 597594 | 14-scf00375 | 14 |
| AX-158222790 | 18 | 102.494 | KV453066.1 | 600670 | 14-scf00375 | 14 |
| AX-158222788 | 18 | 102.494 | KV453066.1 | 602909 | 14-scf00375 | 14 |
| AX-158222787 | 18 | 102.494 | KV453066.1 | 604332 | 14-scf00375 | 14 |
| AX-158222786 | 18 | 102.494 | KV453066.1 | 605284 | 14-scf00375 | 14 |
| AX-158222785 | 18 | 102.494 | KV453066.1 | 605680 | 14-scf00375 | 14 |
| AX-158222777 | 18 | 102.494 | KV453066.1 | 614627 | 14-scf00375 | 14 |
| AX-158414877 | 18 | 102.495 | KV453066.1 | 580648 | 14-scf00375 | 14 |
| AX-158222783 | 18 | 102.495 | KV453066.1 | 607541 | 14-scf00375 | 14 |
| AX-158222781 | 18 | 102.652 | KV453066.1 | 610046 | 14-scf00375 | 14 |
| AX-158222780 | 18 | 102.652 | KV453066.1 | 610851 | 14-scf00375 | 14 |

|              |    |         |            |        |             |    |
|--------------|----|---------|------------|--------|-------------|----|
| AX-157748338 | 18 | 102.652 | KV453066.1 | 612018 | 14-scf00375 | 14 |
| AX-158222776 | 18 | 102.846 | KV453066.1 | 616014 | 14-scf00375 | 14 |
| AX-157743059 | 18 | 102.975 | KV453066.1 | 616947 | 14-scf00375 | 14 |
| AX-157839482 | 18 | 103.137 | KV453066.1 | 618589 | 14-scf00375 | 14 |
| AX-158222775 | 18 | 103.137 | KV453066.1 | 620852 | 14-scf00375 | 14 |
| AX-157715791 | 18 | 103.17  | KV453066.1 | 626311 | 14-scf00375 | 14 |
| AX-158222770 | 18 | 103.681 | KV453066.1 | 634837 | 14-scf00375 | 14 |
| AX-158222769 | 18 | 103.909 | KV453066.1 | 635173 | 14-scf00375 | 14 |
| AX-158222768 | 18 | 103.909 | KV453066.1 | 636480 | 14-scf00375 | 14 |
| AX-158222764 | 18 | 103.929 | KV453066.1 | 640799 | 14-scf00375 | 14 |
| AX-158222763 | 18 | 103.929 | KV453066.1 | 641286 | 14-scf00375 | 14 |
| AX-157839480 | 18 | 104.004 | KV453066.1 | 644297 | 14-scf00375 | 14 |
| AX-158222761 | 18 | 104.046 | KV453066.1 | 646544 | 14-scf00375 | 14 |
| AX-158222760 | 18 | 104.138 | KV453066.1 | 646769 | 14-scf00375 | 14 |
| AX-157839479 | 18 | 104.274 | KV453066.1 | 648860 | 14-scf00375 | 14 |
| AX-158222758 | 18 | 104.274 | KV453066.1 | 652060 | 14-scf00375 | 14 |
| AX-158222754 | 18 | 104.685 | KV453066.1 | 659187 | 14-scf00375 | 14 |
| AX-157887290 | 18 | 104.685 | KV453066.1 | 659710 | 14-scf00375 | 14 |
| AX-158222749 | 18 | 104.685 | KV453066.1 | 676425 | 14-scf00375 | 14 |
| AX-158222748 | 18 | 104.685 | KV453066.1 | 680973 | 14-scf00375 | 14 |
| AX-158222746 | 18 | 104.685 | KV453066.1 | 683295 | 14-scf00375 | 14 |
| AX-157723076 | 18 | 104.685 | KV453066.1 | 685183 | 14-scf00375 | 14 |
| AX-158222743 | 18 | 104.685 | KV453066.1 | 686075 | 14-scf00375 | 14 |
| AX-158222742 | 18 | 104.685 | KV453066.1 | 686352 | 14-scf00375 | 14 |
| AX-157839476 | 18 | 104.685 | KV453066.1 | 693099 | 14-scf00375 | 14 |
| AX-157839475 | 18 | 104.685 | KV453066.1 | 693788 | 14-scf00375 | 14 |
| AX-158222739 | 18 | 104.685 | KV453066.1 | 694916 | 14-scf00375 | 14 |
| AX-158222737 | 18 | 104.685 | KV453066.1 | 698014 | 14-scf00375 | 14 |
| AX-158222736 | 18 | 104.685 | KV453066.1 | 698154 | 14-scf00375 | 14 |
| AX-158222735 | 18 | 104.685 | KV453066.1 | 698736 | 14-scf00375 | 14 |
| AX-158222734 | 18 | 104.685 | KV453066.1 | 699291 | 14-scf00375 | 14 |
| AX-157775477 | 18 | 104.685 | KV453066.1 | 700136 | 14-scf00375 | 14 |
| AX-158222733 | 18 | 104.685 | KV453066.1 | 701407 | 14-scf00375 | 14 |
| AX-157879790 | 18 | 104.685 | KV453066.1 | 703066 | 14-scf00375 | 14 |
| AX-158222731 | 18 | 104.685 | KV453066.1 | 703554 | 14-scf00375 | 14 |
| AX-158222727 | 18 | 104.685 | KV453066.1 | 706568 | 14-scf00375 | 14 |
| AX-157839474 | 18 | 104.685 | KV453066.1 | 706736 | 14-scf00375 | 14 |
| AX-157839473 | 18 | 104.685 | KV453066.1 | 708039 | 14-scf00375 | 14 |
| AX-158222725 | 18 | 104.685 | KV453066.1 | 710009 | 14-scf00375 | 14 |
| AX-158222721 | 18 | 104.685 | KV453066.1 | 714563 | 14-scf00375 | 14 |
| AX-158222720 | 18 | 104.685 | KV453066.1 | 718554 | 14-scf00375 | 14 |
| AX-158222716 | 18 | 104.685 | KV453066.1 | 726142 | 14-scf00375 | 14 |
| AX-157863750 | 18 | 104.685 | KV453066.1 | 741567 | 14-scf00375 | 14 |
| AX-157742719 | 18 | 104.685 | KV453066.1 | 752017 | 14-scf00375 | 14 |
| AX-157839472 | 18 | 104.903 | KV453066.1 | 720990 | 14-scf00375 | 14 |
| AX-158222717 | 18 | 104.903 | KV453066.1 | 725810 | 14-scf00375 | 14 |
| AX-157726000 | 18 | 104.903 | KV453066.1 | 736274 | 14-scf00375 | 14 |
| AX-157839467 | 18 | 104.903 | KV453066.1 | 737457 | 14-scf00375 | 14 |
| AX-158222703 | 18 | 104.903 | KV453066.1 | 741324 | 14-scf00375 | 14 |
| AX-158222702 | 18 | 104.903 | KV453066.1 | 744490 | 14-scf00375 | 14 |
| AX-158222699 | 18 | 104.903 | KV453066.1 | 753991 | 14-scf00375 | 14 |

|              |    |         |            |        |             |    |
|--------------|----|---------|------------|--------|-------------|----|
| AX-158222698 | 18 | 104.903 | KV453066.1 | 755213 | 14-scf00375 | 14 |
| AX-157839465 | 18 | 104.903 | KV453066.1 | 758363 | 14-scf00375 | 14 |
| AX-158222695 | 18 | 104.903 | KV453066.1 | 760739 | 14-scf00375 | 14 |
| AX-157887289 | 18 | 104.903 | KV453066.1 | 762218 | 14-scf00375 | 14 |
| AX-158222690 | 18 | 104.903 | KV453066.1 | 767547 | 14-scf00375 | 14 |
| AX-158222686 | 18 | 104.903 | KV453066.1 | 770261 | 14-scf00375 | 14 |
| AX-158222685 | 18 | 104.903 | KV453066.1 | 770624 | 14-scf00375 | 14 |
| AX-157839464 | 18 | 104.903 | KV453066.1 | 771088 | 14-scf00375 | 14 |
| AX-158222747 | 18 | 104.959 | KV453066.1 | 682205 | 14-scf00375 | 14 |
| AX-157879789 | 18 | 104.959 | KV453066.1 | 727322 | 14-scf00375 | 14 |
| AX-157839463 | 18 | 104.959 | KV453066.1 | 771492 | 14-scf00375 | 14 |
| AX-158222756 | 18 | 105.014 | KV453066.1 | 658718 | 14-scf00375 | 14 |
| AX-158222755 | 18 | 105.014 | KV453066.1 | 658788 | 14-scf00375 | 14 |
| AX-158222752 | 18 | 105.014 | KV453066.1 | 662261 | 14-scf00375 | 14 |
| AX-157710071 | 18 | 105.014 | KV453066.1 | 709440 | 14-scf00375 | 14 |
| AX-158222713 | 18 | 105.068 | KV453066.1 | 729563 | 14-scf00375 | 14 |
| AX-158222711 | 18 | 105.068 | KV453066.1 | 731756 | 14-scf00375 | 14 |
| AX-158222697 | 18 | 105.068 | KV453066.1 | 756698 | 14-scf00375 | 14 |
| AX-158386697 | 18 | 105.068 | KV453066.1 | 764198 | 14-scf00375 | 14 |
| AX-158222680 | 18 | 105.068 | KV453066.1 | 781240 | 14-scf00375 | 14 |
| AX-157726617 | 18 | 105.23  | KV453066.1 | 784164 | 14-scf00375 | 14 |
| AX-157770672 | 18 | 105.231 | KV453066.1 | 791124 | 14-scf00375 | 14 |
| AX-157839468 | 18 | 105.34  | KV453066.1 | 732971 | 14-scf00375 | 14 |
| AX-158222677 | 18 | 105.34  | KV453066.1 | 787481 | 14-scf00375 | 14 |
| AX-158222676 | 18 | 105.34  | KV453066.1 | 791325 | 14-scf00375 | 14 |
| AX-157751248 | 18 | 105.34  | KV453066.1 | 794239 | 14-scf00375 | 14 |
| AX-158222675 | 18 | 105.341 | KV453066.1 | 795370 | 14-scf00375 | 14 |
| AX-158222673 | 18 | 105.668 | KV453066.1 | 798321 | 14-scf00375 | 14 |
| AX-157774883 | 18 | 105.668 | KV453066.1 | 803384 | 14-scf00375 | 14 |
| AX-158222667 | 18 | 105.696 | KV453066.1 | 809772 | 14-scf00375 | 14 |
| AX-157733297 | 18 | 105.739 | KV453066.1 | 810666 | 14-scf00375 | 14 |
| AX-157757547 | 18 | 105.739 | KV453066.1 | 810809 | 14-scf00375 | 14 |
| AX-157839456 | 18 | 105.777 | KV453066.1 | 810900 | 14-scf00375 | 14 |
| AX-158222665 | 18 | 105.777 | KV453066.1 | 812505 | 14-scf00375 | 14 |
| AX-158222662 | 18 | 105.777 | KV453066.1 | 816923 | 14-scf00375 | 14 |
| AX-158222660 | 18 | 105.777 | KV453066.1 | 819085 | 14-scf00375 | 14 |
| AX-158222655 | 18 | 105.777 | KV453066.1 | 825846 | 14-scf00375 | 14 |
| AX-158222654 | 18 | 105.777 | KV453066.1 | 827909 | 14-scf00375 | 14 |
| AX-158222653 | 18 | 105.777 | KV453066.1 | 829610 | 14-scf00375 | 14 |
| AX-158222668 | 18 | 105.941 | KV453066.1 | 805544 | 14-scf00375 | 14 |
| AX-158222652 | 18 | 105.941 | KV453066.1 | 830392 | 14-scf00375 | 14 |
| AX-158222651 | 18 | 105.941 | KV453066.1 | 830997 | 14-scf00375 | 14 |
| AX-158222648 | 18 | 105.941 | KV453066.1 | 834421 | 14-scf00375 | 14 |
| AX-158222642 | 18 | 105.941 | KV453066.1 | 839575 | 14-scf00375 | 14 |
| AX-157839454 | 18 | 105.941 | KV453066.1 | 842827 | 14-scf00375 | 14 |
| AX-157839453 | 18 | 105.941 | KV453066.1 | 844365 | 14-scf00375 | 14 |
| AX-158222639 | 18 | 105.941 | KV453066.1 | 844766 | 14-scf00375 | 14 |
| AX-158222638 | 18 | 105.941 | KV453066.1 | 846114 | 14-scf00375 | 14 |
| AX-158223233 | 18 | 105.941 | KV453069.1 | 18145  | 14-scf00378 | 14 |
| AX-158423243 | 18 | 106.427 | KV453069.1 | 60642  | 14-scf00378 | 14 |
| AX-158222657 | 18 | 106.433 | KV453066.1 | 821379 | 14-scf00375 | 14 |

|              |    |         |            |        |             |    |
|--------------|----|---------|------------|--------|-------------|----|
| AX-158223225 | 18 | 106.433 | KV453069.1 | 31980  | 14-scf00378 | 14 |
| AX-157839506 | 18 | 106.433 | KV453069.1 | 51833  | 14-scf00378 | 14 |
| AX-158223206 | 18 | 106.433 | KV453069.1 | 52768  | 14-scf00378 | 14 |
| AX-158223205 | 18 | 106.433 | KV453069.1 | 54221  | 14-scf00378 | 14 |
| AX-158223204 | 18 | 106.433 | KV453069.1 | 54264  | 14-scf00378 | 14 |
| AX-158223202 | 18 | 106.433 | KV453069.1 | 58833  | 14-scf00378 | 14 |
| AX-157750455 | 18 | 106.512 | KV453069.1 | 49267  | 14-scf00378 | 14 |
| AX-158223241 | 18 | 106.542 | KV453069.1 | 5463   | 14-scf00378 | 14 |
| AX-157742805 | 18 | 106.542 | KV453069.1 | 45560  | 14-scf00378 | 14 |
| AX-158223208 | 18 | 106.542 | KV453069.1 | 47964  | 14-scf00378 | 14 |
| AX-157839460 | 18 | 106.651 | KV453066.1 | 800596 | 14-scf00375 | 14 |
| AX-158223246 | 18 | 106.651 | KV453069.1 | 285    | 14-scf00378 | 14 |
| AX-158223245 | 18 | 106.651 | KV453069.1 | 2720   | 14-scf00378 | 14 |
| AX-158223229 | 18 | 106.651 | KV453069.1 | 24779  | 14-scf00378 | 14 |
| AX-158223228 | 18 | 106.651 | KV453069.1 | 25604  | 14-scf00378 | 14 |
| AX-158223227 | 18 | 106.651 | KV453069.1 | 29848  | 14-scf00378 | 14 |
| AX-158223224 | 18 | 106.651 | KV453069.1 | 34116  | 14-scf00378 | 14 |
| AX-158223223 | 18 | 106.651 | KV453069.1 | 35147  | 14-scf00378 | 14 |
| AX-158223221 | 18 | 106.651 | KV453069.1 | 37105  | 14-scf00378 | 14 |
| AX-158223220 | 18 | 106.651 | KV453069.1 | 37687  | 14-scf00378 | 14 |
| AX-157839507 | 18 | 106.651 | KV453069.1 | 39280  | 14-scf00378 | 14 |
| AX-158223219 | 18 | 106.651 | KV453069.1 | 39701  | 14-scf00378 | 14 |
| AX-158223218 | 18 | 106.651 | KV453069.1 | 40164  | 14-scf00378 | 14 |
| AX-158223216 | 18 | 106.651 | KV453069.1 | 41377  | 14-scf00378 | 14 |
| AX-157758791 | 18 | 106.651 | KV453069.1 | 41543  | 14-scf00378 | 14 |
| AX-158223215 | 18 | 106.651 | KV453069.1 | 43293  | 14-scf00378 | 14 |
| AX-158223213 | 18 | 106.651 | KV453069.1 | 44568  | 14-scf00378 | 14 |
| AX-158223212 | 18 | 106.651 | KV453069.1 | 44806  | 14-scf00378 | 14 |
| AX-158223210 | 18 | 106.651 | KV453069.1 | 46059  | 14-scf00378 | 14 |
| AX-158223501 | 18 | 106.651 | KV453069.1 | 464499 | 14-scf00378 | 14 |
| AX-158223527 | 18 | 106.651 | KV453069.1 | 502863 | 14-scf00378 | 14 |
| AX-158223247 | 18 | 106.894 | KV453069.1 | 63640  | 14-scf00378 | 14 |
| AX-157839510 | 18 | 106.894 | KV453069.1 | 65213  | 14-scf00378 | 14 |
| AX-158223250 | 18 | 106.894 | KV453069.1 | 68975  | 14-scf00378 | 14 |
| AX-158223260 | 18 | 107.502 | KV453069.1 | 84332  | 14-scf00378 | 14 |
| AX-158223261 | 18 | 107.502 | KV453069.1 | 84977  | 14-scf00378 | 14 |
| AX-158223262 | 18 | 107.502 | KV453069.1 | 85174  | 14-scf00378 | 14 |
| AX-157739333 | 18 | 107.58  | KV453069.1 | 86589  | 14-scf00378 | 14 |
| AX-157839515 | 18 | 107.58  | KV453069.1 | 98885  | 14-scf00378 | 14 |
| AX-158223256 | 18 | 107.746 | KV453069.1 | 77543  | 14-scf00378 | 14 |
| AX-157839512 | 18 | 107.746 | KV453069.1 | 90075  | 14-scf00378 | 14 |
| AX-158223266 | 18 | 107.746 | KV453069.1 | 90898  | 14-scf00378 | 14 |
| AX-158414898 | 18 | 107.746 | KV453069.1 | 94061  | 14-scf00378 | 14 |
| AX-157839516 | 18 | 107.746 | KV453069.1 | 100088 | 14-scf00378 | 14 |
| AX-158223269 | 18 | 107.758 | KV453069.1 | 100572 | 14-scf00378 | 14 |
| AX-157872425 | 18 | 107.768 | KV453069.1 | 101634 | 14-scf00378 | 14 |
| AX-158223270 | 18 | 107.882 | KV453069.1 | 103002 | 14-scf00378 | 14 |
| AX-158223273 | 18 | 107.882 | KV453069.1 | 111792 | 14-scf00378 | 14 |
| AX-157714032 | 18 | 107.991 | KV453069.1 | 110224 | 14-scf00378 | 14 |
| AX-158223275 | 18 | 107.991 | KV453069.1 | 112932 | 14-scf00378 | 14 |
| AX-158223278 | 18 | 108.046 | KV453069.1 | 114667 | 14-scf00378 | 14 |

|              |    |         |            |        |             |    |
|--------------|----|---------|------------|--------|-------------|----|
| AX-158223282 | 18 | 108.119 | KV453069.1 | 118107 | 14-scf00378 | 14 |
| AX-158223284 | 18 | 108.119 | KV453069.1 | 120451 | 14-scf00378 | 14 |
| AX-158223286 | 18 | 108.243 | KV453069.1 | 123573 | 14-scf00378 | 14 |
| AX-157739369 | 18 | 108.243 | KV453069.1 | 126652 | 14-scf00378 | 14 |
| AX-158223289 | 18 | 108.432 | KV453069.1 | 132023 | 14-scf00378 | 14 |
| AX-158223293 | 18 | 108.489 | KV453069.1 | 137696 | 14-scf00378 | 14 |
| AX-158223294 | 18 | 108.62  | KV453069.1 | 138187 | 14-scf00378 | 14 |
| AX-158223295 | 18 | 108.62  | KV453069.1 | 138765 | 14-scf00378 | 14 |
| AX-158223297 | 18 | 108.62  | KV453069.1 | 140750 | 14-scf00378 | 14 |
| AX-157717687 | 18 | 108.62  | KV453069.1 | 140957 | 14-scf00378 | 14 |
| AX-158223298 | 18 | 108.62  | KV453069.1 | 142311 | 14-scf00378 | 14 |
| AX-158223301 | 18 | 108.62  | KV453069.1 | 143681 | 14-scf00378 | 14 |
| AX-158223303 | 18 | 108.729 | KV453069.1 | 146415 | 14-scf00378 | 14 |
| AX-158223304 | 18 | 108.729 | KV453069.1 | 148598 | 14-scf00378 | 14 |
| AX-158223309 | 18 | 108.948 | KV453069.1 | 155001 | 14-scf00378 | 14 |
| AX-158223312 | 18 | 108.948 | KV453069.1 | 158413 | 14-scf00378 | 14 |
| AX-157770759 | 18 | 108.948 | KV453069.1 | 159041 | 14-scf00378 | 14 |
| AX-158223313 | 18 | 108.948 | KV453069.1 | 161285 | 14-scf00378 | 14 |
| AX-158223314 | 18 | 108.948 | KV453069.1 | 162286 | 14-scf00378 | 14 |
| AX-158223315 | 18 | 108.948 | KV453069.1 | 164188 | 14-scf00378 | 14 |
| AX-157839522 | 18 | 108.948 | KV453069.1 | 165442 | 14-scf00378 | 14 |
| AX-158223317 | 18 | 108.948 | KV453069.1 | 166438 | 14-scf00378 | 14 |
| AX-158223320 | 18 | 108.948 | KV453069.1 | 168191 | 14-scf00378 | 14 |
| AX-157726821 | 18 | 108.948 | KV453069.1 | 168264 | 14-scf00378 | 14 |
| AX-158223322 | 18 | 108.948 | KV453069.1 | 170763 | 14-scf00378 | 14 |
| AX-157839523 | 18 | 108.948 | KV453069.1 | 171651 | 14-scf00378 | 14 |
| AX-157715445 | 18 | 108.948 | KV453069.1 | 171695 | 14-scf00378 | 14 |
| AX-158223325 | 18 | 108.948 | KV453069.1 | 174580 | 14-scf00378 | 14 |
| AX-157745989 | 18 | 108.948 | KV453069.1 | 175726 | 14-scf00378 | 14 |
| AX-158223327 | 18 | 108.948 | KV453069.1 | 176747 | 14-scf00378 | 14 |
| AX-157839529 | 18 | 108.948 | KV453069.1 | 206508 | 14-scf00378 | 14 |
| AX-158223352 | 18 | 108.948 | KV453069.1 | 218816 | 14-scf00378 | 14 |
| AX-158223362 | 18 | 108.948 | KV453069.1 | 233985 | 14-scf00378 | 14 |
| AX-158223330 | 18 | 109.164 | KV453069.1 | 183817 | 14-scf00378 | 14 |
| AX-158223331 | 18 | 109.167 | KV453069.1 | 186332 | 14-scf00378 | 14 |
| AX-158223332 | 18 | 109.168 | KV453069.1 | 186753 | 14-scf00378 | 14 |
| AX-157839526 | 18 | 109.352 | KV453069.1 | 187519 | 14-scf00378 | 14 |
| AX-158223274 | 18 | 109.439 | KV453069.1 | 112506 | 14-scf00378 | 14 |
| AX-157839527 | 18 | 109.439 | KV453069.1 | 189756 | 14-scf00378 | 14 |
| AX-158223310 | 18 | 109.494 | KV453069.1 | 156997 | 14-scf00378 | 14 |
| AX-158223328 | 18 | 109.494 | KV453069.1 | 177417 | 14-scf00378 | 14 |
| AX-157741874 | 18 | 109.494 | KV453069.1 | 185890 | 14-scf00378 | 14 |
| AX-158223334 | 18 | 109.494 | KV453069.1 | 193030 | 14-scf00378 | 14 |
| AX-158223336 | 18 | 109.494 | KV453069.1 | 194463 | 14-scf00378 | 14 |
| AX-158223341 | 18 | 109.494 | KV453069.1 | 198890 | 14-scf00378 | 14 |
| AX-158223342 | 18 | 109.494 | KV453069.1 | 198996 | 14-scf00378 | 14 |
| AX-158223345 | 18 | 109.494 | KV453069.1 | 207594 | 14-scf00378 | 14 |
| AX-157719228 | 18 | 109.494 | KV453069.1 | 227559 | 14-scf00378 | 14 |
| AX-158223492 | 18 | 109.494 | KV453069.1 | 437180 | 14-scf00378 | 14 |
| AX-157680720 | 18 | 109.506 | KV453068.1 | 32338  | 14-scf00377 | 14 |
| AX-157683948 | 18 | 109.506 | KV453068.1 | 33130  | 14-scf00377 | 14 |

|              |    |         |             |        |             |    |
|--------------|----|---------|-------------|--------|-------------|----|
| AX-158223318 | 18 | 109.733 | KV453069.1  | 166981 | 14-scf00378 | 14 |
| AX-158223323 | 18 | 109.733 | KV453069.1  | 171207 | 14-scf00378 | 14 |
| AX-157839525 | 18 | 109.733 | KV453069.1  | 185128 | 14-scf00378 | 14 |
| AX-158223349 | 18 | 109.733 | KV453069.1  | 215877 | 14-scf00378 | 14 |
| AX-158223350 | 18 | 109.929 | KV453069.1  | 216865 | 14-scf00378 | 14 |
| AX-158223351 | 18 | 109.932 | KV453069.1  | 217362 | 14-scf00378 | 14 |
| AX-158223353 | 18 | 109.932 | KV453069.1  | 222787 | 14-scf00378 | 14 |
| AX-157745366 | 18 | 109.932 | KV453069.1  | 223336 | 14-scf00378 | 14 |
| AX-158223354 | 18 | 109.932 | KV453069.1  | 223754 | 14-scf00378 | 14 |
| AX-158223355 | 18 | 109.932 | KV453069.1  | 224328 | 14-scf00378 | 14 |
| AX-158223357 | 18 | 109.932 | KV453069.1  | 225870 | 14-scf00378 | 14 |
| AX-158223359 | 18 | 109.932 | KV453069.1  | 229594 | 14-scf00378 | 14 |
| AX-158223360 | 18 | 109.932 | KV453069.1  | 230315 | 14-scf00378 | 14 |
| AX-158223361 | 18 | 109.932 | KV453069.1  | 231932 | 14-scf00378 | 14 |
| AX-157717339 | 18 | 109.932 | KV453069.1  | 234818 | 14-scf00378 | 14 |
| AX-158414900 | 18 | 109.932 | KV453069.1  | 237336 | 14-scf00378 | 14 |
| AX-158223363 | 18 | 109.932 | KV453069.1  | 238815 | 14-scf00378 | 14 |
| AX-157839531 | 18 | 110.15  | KV453069.1  | 236767 | 14-scf00378 | 14 |
| AX-158223367 | 18 | 110.15  | KV453069.1  | 247339 | 14-scf00378 | 14 |
| AX-158223369 | 18 | 110.15  | KV453069.1  | 248498 | 14-scf00378 | 14 |
| AX-158223371 | 18 | 110.15  | KV453069.1  | 250203 | 14-scf00378 | 14 |
| AX-158223373 | 18 | 110.15  | KV453069.1  | 251180 | 14-scf00378 | 14 |
| AX-157717155 | 18 | 110.15  | KV453069.1  | 253630 | 14-scf00378 | 14 |
| AX-158223374 | 18 | 110.15  | KV453069.1  | 254172 | 14-scf00378 | 14 |
| AX-158223375 | 18 | 110.15  | KV453069.1  | 254727 | 14-scf00378 | 14 |
| AX-158223377 | 18 | 110.15  | KV453069.1  | 255589 | 14-scf00378 | 14 |
| AX-158223378 | 18 | 110.15  | KV453069.1  | 256417 | 14-scf00378 | 14 |
| AX-158223379 | 18 | 110.15  | KV453069.1  | 257356 | 14-scf00378 | 14 |
| AX-158223381 | 18 | 110.15  | KV453069.1  | 258247 | 14-scf00378 | 14 |
| AX-158223382 | 18 | 110.15  | KV453069.1  | 258663 | 14-scf00378 | 14 |
| AX-158223386 | 18 | 110.15  | KV453069.1  | 264978 | 14-scf00378 | 14 |
| AX-158223387 | 18 | 110.543 | KV453069.1  | 269061 | 14-scf00378 | 14 |
| AX-158223388 | 18 | 110.544 | KV453069.1  | 271637 | 14-scf00378 | 14 |
| AX-158223271 | 18 | 110.806 | KV453069.1  | 107978 | 14-scf00378 | 14 |
| AX-158223346 | 18 | 110.806 | KV453069.1  | 208497 | 14-scf00378 | 14 |
| AX-158223368 | 18 | 110.806 | KV453069.1  | 248009 | 14-scf00378 | 14 |
| AX-158223372 | 18 | 110.806 | KV453069.1  | 250800 | 14-scf00378 | 14 |
| AX-158223390 | 18 | 110.806 | KV453069.1  | 279748 | 14-scf00378 | 14 |
| AX-158223391 | 18 | 110.806 | KV453069.1  | 282276 | 14-scf00378 | 14 |
| AX-158223396 | 18 | 110.806 | KV453069.1  | 288078 | 14-scf00378 | 14 |
| AX-158223397 | 18 | 110.806 | KV453069.1  | 290193 | 14-scf00378 | 14 |
| AX-158223401 | 18 | 110.806 | KV453069.1  | 292294 | 14-scf00378 | 14 |
| AX-157772140 | 18 | 110.806 | KV453069.1  | 336680 | 14-scf00378 | 14 |
| AX-157704562 | 18 | 110.806 | 3ML01026582 | 1541   | scf02180_1  | UN |
| AX-158223398 | 18 | 110.858 | KV453069.1  | 290480 | 14-scf00378 | 14 |
| AX-157872430 | 18 | 110.915 | KV453069.1  | 291514 | 14-scf00378 | 14 |
| AX-158223400 | 18 | 110.915 | KV453069.1  | 292058 | 14-scf00378 | 14 |
| AX-158223402 | 18 | 110.915 | KV453069.1  | 293088 | 14-scf00378 | 14 |
| AX-157722814 | 18 | 110.915 | KV453069.1  | 295962 | 14-scf00378 | 14 |
| AX-158223404 | 18 | 110.915 | KV453069.1  | 298431 | 14-scf00378 | 14 |
| AX-158223405 | 18 | 111.134 | KV453069.1  | 298718 | 14-scf00378 | 14 |

|              |    |         |            |        |             |    |
|--------------|----|---------|------------|--------|-------------|----|
| AX-158223407 | 18 | 111.134 | KV453069.1 | 301456 | 14-scf00378 | 14 |
| AX-158223408 | 18 | 111.134 | KV453069.1 | 301970 | 14-scf00378 | 14 |
| AX-158223411 | 18 | 111.134 | KV453069.1 | 304052 | 14-scf00378 | 14 |
| AX-158223412 | 18 | 111.134 | KV453069.1 | 304371 | 14-scf00378 | 14 |
| AX-158223413 | 18 | 111.134 | KV453069.1 | 304714 | 14-scf00378 | 14 |
| AX-158223414 | 18 | 111.134 | KV453069.1 | 305058 | 14-scf00378 | 14 |
| AX-158223415 | 18 | 111.134 | KV453069.1 | 305548 | 14-scf00378 | 14 |
| AX-158223416 | 18 | 111.134 | KV453069.1 | 306831 | 14-scf00378 | 14 |
| AX-158223418 | 18 | 111.134 | KV453069.1 | 307635 | 14-scf00378 | 14 |
| AX-158223419 | 18 | 111.134 | KV453069.1 | 308263 | 14-scf00378 | 14 |
| AX-158223421 | 18 | 111.134 | KV453069.1 | 311659 | 14-scf00378 | 14 |
| AX-158223422 | 18 | 111.134 | KV453069.1 | 311997 | 14-scf00378 | 14 |
| AX-158223425 | 18 | 111.134 | KV453069.1 | 315355 | 14-scf00378 | 14 |
| AX-157872431 | 18 | 111.134 | KV453069.1 | 324951 | 14-scf00378 | 14 |
| AX-158223429 | 18 | 111.282 | KV453069.1 | 327075 | 14-scf00378 | 14 |
| AX-157839534 | 18 | 111.35  | KV453069.1 | 329043 | 14-scf00378 | 14 |
| AX-158223431 | 18 | 111.354 | KV453069.1 | 331199 | 14-scf00378 | 14 |
| AX-158223438 | 18 | 111.354 | KV453069.1 | 347367 | 14-scf00378 | 14 |
| AX-158223432 | 18 | 111.434 | KV453069.1 | 331702 | 14-scf00378 | 14 |
| AX-157742532 | 18 | 111.516 | KV453069.1 | 339946 | 14-scf00378 | 14 |
| AX-158223440 | 18 | 111.678 | KV453069.1 | 351858 | 14-scf00378 | 14 |
| AX-158223443 | 18 | 111.678 | KV453069.1 | 354899 | 14-scf00378 | 14 |
| AX-158223444 | 18 | 111.678 | KV453069.1 | 355505 | 14-scf00378 | 14 |
| AX-157879803 | 18 | 111.678 | KV453069.1 | 427903 | 14-scf00378 | 14 |
| AX-157746648 | 18 | 111.678 | KV453069.1 | 427961 | 14-scf00378 | 14 |
| AX-157725325 | 18 | 111.678 | KV453069.1 | 458025 | 14-scf00378 | 14 |
| AX-158223430 | 18 | 111.68  | KV453069.1 | 329291 | 14-scf00378 | 14 |
| AX-158223447 | 18 | 111.68  | KV453069.1 | 357400 | 14-scf00378 | 14 |
| AX-158223449 | 18 | 111.68  | KV453069.1 | 358866 | 14-scf00378 | 14 |
| AX-158223450 | 18 | 111.68  | KV453069.1 | 360135 | 14-scf00378 | 14 |
| AX-158223453 | 18 | 111.68  | KV453069.1 | 363568 | 14-scf00378 | 14 |
| AX-157736702 | 18 | 111.684 | KV453069.1 | 359800 | 14-scf00378 | 14 |
| AX-157839536 | 18 | 111.684 | KV453069.1 | 362449 | 14-scf00378 | 14 |
| AX-158223454 | 18 | 111.686 | KV453069.1 | 364729 | 14-scf00378 | 14 |
| AX-158223457 | 18 | 111.951 | KV453069.1 | 368247 | 14-scf00378 | 14 |
| AX-158223348 | 18 | 112.118 | KV453069.1 | 212088 | 14-scf00378 | 14 |
| AX-157887299 | 18 | 112.118 | KV453069.1 | 259616 | 14-scf00378 | 14 |
| AX-158223452 | 18 | 112.118 | KV453069.1 | 362748 | 14-scf00378 | 14 |
| AX-157839538 | 18 | 112.118 | KV453069.1 | 381992 | 14-scf00378 | 14 |
| AX-157743261 | 18 | 112.118 | KV453069.1 | 397525 | 14-scf00378 | 14 |
| AX-157747092 | 18 | 112.118 | KV453069.1 | 397780 | 14-scf00378 | 14 |
| AX-158223468 | 18 | 112.118 | KV453069.1 | 398008 | 14-scf00378 | 14 |
| AX-157715685 | 18 | 112.118 | KV453069.1 | 399710 | 14-scf00378 | 14 |
| AX-158223469 | 18 | 112.118 | KV453069.1 | 399768 | 14-scf00378 | 14 |
| AX-158223472 | 18 | 112.118 | KV453069.1 | 402976 | 14-scf00378 | 14 |
| AX-158223476 | 18 | 112.118 | KV453069.1 | 408562 | 14-scf00378 | 14 |
| AX-158223478 | 18 | 112.118 | KV453069.1 | 409688 | 14-scf00378 | 14 |
| AX-158223479 | 18 | 112.118 | KV453069.1 | 410105 | 14-scf00378 | 14 |
| AX-157839540 | 18 | 112.118 | KV453069.1 | 412302 | 14-scf00378 | 14 |
| AX-158223481 | 18 | 112.118 | KV453069.1 | 412768 | 14-scf00378 | 14 |
| AX-158223484 | 18 | 112.118 | KV453069.1 | 419564 | 14-scf00378 | 14 |



|              |    |         |             |        |             |    |
|--------------|----|---------|-------------|--------|-------------|----|
| AX-158223485 | 18 | 112.118 | KV453069.1  | 420652 | 14-scf00378 | 14 |
| AX-158223490 | 18 | 112.118 | KV453069.1  | 431288 | 14-scf00378 | 14 |
| AX-158223491 | 18 | 112.118 | KV453069.1  | 433077 | 14-scf00378 | 14 |
| AX-157747937 | 18 | 112.118 | KV453069.1  | 433801 | 14-scf00378 | 14 |
| AX-157719078 | 18 | 112.118 | KV453069.1  | 444235 | 14-scf00378 | 14 |
| AX-157755189 | 18 | 112.118 | KV453069.1  | 447144 | 14-scf00378 | 14 |
| AX-158223499 | 18 | 112.118 | KV453069.1  | 460088 | 14-scf00378 | 14 |
| AX-158223515 | 18 | 112.118 | KV453069.1  | 487648 | 14-scf00378 | 14 |
| AX-158223537 | 18 | 112.118 | KV453069.1  | 516386 | 14-scf00378 | 14 |
| AX-158223538 | 18 | 112.118 | KV453069.1  | 519700 | 14-scf00378 | 14 |
| AX-158223630 | 18 | 112.118 | KV453071.1  | 3696   | 14-scf00383 | 14 |
| AX-158223636 | 18 | 112.118 | KV453071.1  | 10725  | 14-scf00383 | 14 |
| AX-158223650 | 18 | 112.118 | KV453071.1  | 24074  | 14-scf00383 | 14 |
| AX-158223656 | 18 | 112.118 | KV453071.1  | 37344  | 14-scf00383 | 14 |
| AX-157872433 | 18 | 112.118 | KV453071.1  | 49244  | 14-scf00383 | 14 |
| AX-158223662 | 18 | 112.118 | KV453071.1  | 49960  | 14-scf00383 | 14 |
| AX-158223665 | 18 | 112.118 | KV453071.1  | 55721  | 14-scf00383 | 14 |
| AX-158223669 | 18 | 112.118 | KV453071.1  | 58549  | 14-scf00383 | 14 |
| AX-157839579 | 18 | 112.118 | KV453071.1  | 61366  | 14-scf00383 | 14 |
| AX-158223670 | 18 | 112.118 | KV453071.1  | 62660  | 14-scf00383 | 14 |
| AX-157872434 | 18 | 112.118 | KV453071.1  | 63043  | 14-scf00383 | 14 |
| AX-157773658 | 18 | 112.118 | KV453071.1  | 72727  | 14-scf00383 | 14 |
| AX-157745807 | 18 | 112.118 | KV453071.1  | 72772  | 14-scf00383 | 14 |
| AX-157679973 | 18 | 112.118 | KV453072.1  | 842    | 14-scf00384 | 14 |
| AX-157704827 | 18 | 112.118 | 3ML01025229 | 5673   | scf01033_1  | UN |
| AX-157681025 | 18 | 112.118 | 3ML01025229 | 7875   | scf01033_1  | UN |
| AX-157689128 | 18 | 112.118 | 3ML01028313 | 519    | scf03918_1  | UN |
| AX-157689202 | 18 | 112.118 | 3ML01028613 | 1054   | scf04224_1  | UN |
| AX-157705108 | 18 | 112.118 | 3ML01029834 | 166    | scf05456_1  | UN |
| AX-157839543 | 18 | 112.227 | KV453069.1  | 451027 | 14-scf00378 | 14 |
| AX-157747071 | 18 | 112.337 | KV453069.1  | 455876 | 14-scf00378 | 14 |
| AX-158223500 | 18 | 112.446 | KV453069.1  | 463631 | 14-scf00378 | 14 |
| AX-157839544 | 18 | 112.446 | KV453069.1  | 466863 | 14-scf00378 | 14 |
| AX-157839545 | 18 | 112.446 | KV453069.1  | 473812 | 14-scf00378 | 14 |
| AX-158223505 | 18 | 112.446 | KV453069.1  | 473875 | 14-scf00378 | 14 |
| AX-158223506 | 18 | 112.446 | KV453069.1  | 474589 | 14-scf00378 | 14 |
| AX-157839546 | 18 | 112.446 | KV453069.1  | 476552 | 14-scf00378 | 14 |
| AX-158386714 | 18 | 112.446 | KV453069.1  | 478587 | 14-scf00378 | 14 |
| AX-157739889 | 18 | 112.446 | KV453069.1  | 482093 | 14-scf00378 | 14 |
| AX-158223513 | 18 | 112.446 | KV453069.1  | 483349 | 14-scf00378 | 14 |
| AX-158223519 | 18 | 112.446 | KV453069.1  | 491091 | 14-scf00378 | 14 |
| AX-158223520 | 18 | 112.446 | KV453069.1  | 491511 | 14-scf00378 | 14 |
| AX-158223524 | 18 | 112.446 | KV453069.1  | 499139 | 14-scf00378 | 14 |
| AX-158223525 | 18 | 112.446 | KV453069.1  | 500272 | 14-scf00378 | 14 |
| AX-158223526 | 18 | 112.446 | KV453069.1  | 501604 | 14-scf00378 | 14 |
| AX-158223528 | 18 | 112.446 | KV453069.1  | 509060 | 14-scf00378 | 14 |
| AX-157887300 | 18 | 112.446 | KV453069.1  | 510691 | 14-scf00378 | 14 |
| AX-157839549 | 18 | 112.446 | KV453069.1  | 513009 | 14-scf00378 | 14 |
| AX-158223531 | 18 | 112.446 | KV453069.1  | 514306 | 14-scf00378 | 14 |
| AX-158223533 | 18 | 112.446 | KV453069.1  | 515279 | 14-scf00378 | 14 |
| AX-158223534 | 18 | 112.446 | KV453069.1  | 515589 | 14-scf00378 | 14 |

|              |    |         |             |        |             |    |
|--------------|----|---------|-------------|--------|-------------|----|
| AX-158223536 | 18 | 112.446 | KV453069.1  | 516039 | 14-scf00378 | 14 |
| AX-158223544 | 18 | 112.446 | KV453069.1  | 531474 | 14-scf00378 | 14 |
| AX-157752076 | 18 | 112.446 | KV453069.1  | 533063 | 14-scf00378 | 14 |
| AX-157839557 | 18 | 112.446 | KV453069.1  | 538990 | 14-scf00378 | 14 |
| AX-158223548 | 18 | 112.446 | KV453069.1  | 539919 | 14-scf00378 | 14 |
| AX-158223549 | 18 | 112.446 | KV453069.1  | 540840 | 14-scf00378 | 14 |
| AX-158223552 | 18 | 112.446 | KV453069.1  | 542764 | 14-scf00378 | 14 |
| AX-158223553 | 18 | 112.446 | KV453069.1  | 544210 | 14-scf00378 | 14 |
| AX-158223554 | 18 | 112.446 | KV453069.1  | 544827 | 14-scf00378 | 14 |
| AX-158223555 | 18 | 112.446 | KV453069.1  | 545533 | 14-scf00378 | 14 |
| AX-158223556 | 18 | 112.446 | KV453069.1  | 546151 | 14-scf00378 | 14 |
| AX-158223557 | 18 | 112.446 | KV453069.1  | 546487 | 14-scf00378 | 14 |
| AX-158223558 | 18 | 112.446 | KV453069.1  | 547185 | 14-scf00378 | 14 |
| AX-158223559 | 18 | 112.446 | KV453069.1  | 547850 | 14-scf00378 | 14 |
| AX-158223560 | 18 | 112.446 | KV453069.1  | 548770 | 14-scf00378 | 14 |
| AX-157773592 | 18 | 112.446 | KV453069.1  | 549822 | 14-scf00378 | 14 |
| AX-158223562 | 18 | 112.446 | KV453069.1  | 551701 | 14-scf00378 | 14 |
| AX-158223563 | 18 | 112.446 | KV453069.1  | 552863 | 14-scf00378 | 14 |
| AX-158223568 | 18 | 112.446 | KV453069.1  | 558661 | 14-scf00378 | 14 |
| AX-157725720 | 18 | 112.446 | KV453069.1  | 559220 | 14-scf00378 | 14 |
| AX-158223570 | 18 | 112.446 | KV453069.1  | 562858 | 14-scf00378 | 14 |
| AX-158223577 | 18 | 112.446 | KV453069.1  | 577433 | 14-scf00378 | 14 |
| AX-158223642 | 18 | 112.446 | KV453071.1  | 17622  | 14-scf00383 | 14 |
| AX-157681848 | 18 | 112.446 | 3ML01031859 | 170    | scf07480_1  | UN |
| AX-158223406 | 18 | 112.57  | KV453069.1  | 299825 | 14-scf00378 | 14 |
| AX-158223539 | 18 | 112.57  | KV453069.1  | 520230 | 14-scf00378 | 14 |
| AX-158223585 | 18 | 112.57  | KV453069.1  | 584908 | 14-scf00378 | 14 |
| AX-158223588 | 18 | 112.57  | KV453069.1  | 591614 | 14-scf00378 | 14 |
| AX-157839537 | 18 | 112.695 | KV453069.1  | 372406 | 14-scf00378 | 14 |
| AX-158223471 | 18 | 112.695 | KV453069.1  | 401912 | 14-scf00378 | 14 |
| AX-158223507 | 18 | 112.695 | KV453069.1  | 475665 | 14-scf00378 | 14 |
| AX-158223508 | 18 | 112.695 | KV453069.1  | 476973 | 14-scf00378 | 14 |
| AX-158223511 | 18 | 112.695 | KV453069.1  | 479803 | 14-scf00378 | 14 |
| AX-157839547 | 18 | 112.695 | KV453069.1  | 489894 | 14-scf00378 | 14 |
| AX-158223529 | 18 | 112.695 | KV453069.1  | 511677 | 14-scf00378 | 14 |
| AX-158223540 | 18 | 112.695 | KV453069.1  | 520513 | 14-scf00378 | 14 |
| AX-157839551 | 18 | 112.695 | KV453069.1  | 521805 | 14-scf00378 | 14 |
| AX-158223541 | 18 | 112.695 | KV453069.1  | 522180 | 14-scf00378 | 14 |
| AX-158394088 | 18 | 112.695 | KV453069.1  | 523126 | 14-scf00378 | 14 |
| AX-158223547 | 18 | 112.695 | KV453069.1  | 534099 | 14-scf00378 | 14 |
| AX-158223551 | 18 | 112.695 | KV453069.1  | 542155 | 14-scf00378 | 14 |
| AX-158223569 | 18 | 112.695 | KV453069.1  | 560542 | 14-scf00378 | 14 |
| AX-158223575 | 18 | 112.695 | KV453069.1  | 575208 | 14-scf00378 | 14 |
| AX-158223576 | 18 | 112.695 | KV453069.1  | 576089 | 14-scf00378 | 14 |
| AX-158223578 | 18 | 112.695 | KV453069.1  | 579047 | 14-scf00378 | 14 |
| AX-158223580 | 18 | 112.695 | KV453069.1  | 580511 | 14-scf00378 | 14 |
| AX-157839558 | 18 | 112.695 | KV453069.1  | 581397 | 14-scf00378 | 14 |
| AX-158223581 | 18 | 112.695 | KV453069.1  | 581902 | 14-scf00378 | 14 |
| AX-158223582 | 18 | 112.695 | KV453069.1  | 582469 | 14-scf00378 | 14 |
| AX-158223583 | 18 | 112.695 | KV453069.1  | 582762 | 14-scf00378 | 14 |
| AX-158223584 | 18 | 112.695 | KV453069.1  | 584153 | 14-scf00378 | 14 |

|              |    |         |            |        |             |    |
|--------------|----|---------|------------|--------|-------------|----|
| AX-158223586 | 18 | 112.695 | KV453069.1 | 586151 | 14-scf00378 | 14 |
| AX-158223587 | 18 | 112.695 | KV453069.1 | 589591 | 14-scf00378 | 14 |
| AX-157839560 | 18 | 112.695 | KV453069.1 | 592065 | 14-scf00378 | 14 |
| AX-157839561 | 18 | 112.695 | KV453069.1 | 592329 | 14-scf00378 | 14 |
| AX-158223589 | 18 | 112.695 | KV453069.1 | 592575 | 14-scf00378 | 14 |
| AX-158223590 | 18 | 112.695 | KV453069.1 | 593557 | 14-scf00378 | 14 |
| AX-158223591 | 18 | 112.695 | KV453069.1 | 593793 | 14-scf00378 | 14 |
| AX-158223592 | 18 | 112.695 | KV453069.1 | 594703 | 14-scf00378 | 14 |
| AX-158223593 | 18 | 112.695 | KV453069.1 | 595273 | 14-scf00378 | 14 |
| AX-158223594 | 18 | 112.695 | KV453069.1 | 595817 | 14-scf00378 | 14 |
| AX-158223595 | 18 | 112.695 | KV453069.1 | 596035 | 14-scf00378 | 14 |
| AX-158223596 | 18 | 112.695 | KV453069.1 | 597299 | 14-scf00378 | 14 |
| AX-158223609 | 18 | 112.695 | KV453069.1 | 616471 | 14-scf00378 | 14 |
| AX-158223611 | 18 | 112.695 | KV453069.1 | 620860 | 14-scf00378 | 14 |
| AX-157839563 | 18 | 112.695 | KV453069.1 | 628342 | 14-scf00378 | 14 |
| AX-158223612 | 18 | 112.695 | KV453069.1 | 630858 | 14-scf00378 | 14 |
| AX-158223613 | 18 | 112.695 | KV453069.1 | 632088 | 14-scf00378 | 14 |
| AX-158223615 | 18 | 112.695 | KV453069.1 | 636238 | 14-scf00378 | 14 |
| AX-158223616 | 18 | 112.695 | KV453069.1 | 636738 | 14-scf00378 | 14 |
| AX-158223617 | 18 | 112.695 | KV453069.1 | 638308 | 14-scf00378 | 14 |
| AX-157747185 | 18 | 112.695 | KV453069.1 | 638819 | 14-scf00378 | 14 |
| AX-158223618 | 18 | 112.695 | KV453069.1 | 643239 | 14-scf00378 | 14 |
| AX-158223619 | 18 | 112.695 | KV453069.1 | 644292 | 14-scf00378 | 14 |
| AX-158223622 | 18 | 112.695 | KV453069.1 | 645595 | 14-scf00378 | 14 |
| AX-158223623 | 18 | 112.695 | KV453069.1 | 645916 | 14-scf00378 | 14 |
| AX-158223624 | 18 | 112.695 | KV453069.1 | 646393 | 14-scf00378 | 14 |
| AX-157839564 | 18 | 112.695 | KV453069.1 | 648613 | 14-scf00378 | 14 |
| AX-158223626 | 18 | 112.695 | KV453069.1 | 649935 | 14-scf00378 | 14 |
| AX-158223627 | 18 | 112.695 | KV453069.1 | 652659 | 14-scf00378 | 14 |
| AX-158223628 | 18 | 112.695 | KV453069.1 | 653075 | 14-scf00378 | 14 |
| AX-157683953 | 18 | 112.695 | KV453070.1 | 51540  | 14-scf00382 | 14 |
| AX-157683954 | 18 | 112.695 | KV453070.1 | 55144  | 14-scf00382 | 14 |
| AX-157680724 | 18 | 112.695 | KV453070.1 | 57000  | 14-scf00382 | 14 |
| AX-157683955 | 18 | 112.695 | KV453070.1 | 59200  | 14-scf00382 | 14 |
| AX-157679943 | 18 | 112.695 | KV453070.1 | 63841  | 14-scf00382 | 14 |
| AX-157680727 | 18 | 112.695 | KV453070.1 | 69963  | 14-scf00382 | 14 |
| AX-157683958 | 18 | 112.695 | KV453070.1 | 74994  | 14-scf00382 | 14 |
| AX-157683964 | 18 | 112.695 | KV453070.1 | 87703  | 14-scf00382 | 14 |
| AX-157680730 | 18 | 112.695 | KV453070.1 | 88628  | 14-scf00382 | 14 |
| AX-157683966 | 18 | 112.695 | KV453070.1 | 89036  | 14-scf00382 | 14 |
| AX-158223629 | 18 | 112.695 | KV453071.1 | 3213   | 14-scf00383 | 14 |
| AX-157745116 | 18 | 112.695 | KV453071.1 | 3836   | 14-scf00383 | 14 |
| AX-157713374 | 18 | 112.695 | KV453071.1 | 4620   | 14-scf00383 | 14 |
| AX-158223631 | 18 | 112.695 | KV453071.1 | 5002   | 14-scf00383 | 14 |
| AX-158223632 | 18 | 112.695 | KV453071.1 | 5881   | 14-scf00383 | 14 |
| AX-158223634 | 18 | 112.695 | KV453071.1 | 8645   | 14-scf00383 | 14 |
| AX-158223637 | 18 | 112.695 | KV453071.1 | 12119  | 14-scf00383 | 14 |
| AX-158223638 | 18 | 112.695 | KV453071.1 | 12407  | 14-scf00383 | 14 |
| AX-158223639 | 18 | 112.695 | KV453071.1 | 12874  | 14-scf00383 | 14 |
| AX-158223640 | 18 | 112.695 | KV453071.1 | 14037  | 14-scf00383 | 14 |
| AX-157839567 | 18 | 112.695 | KV453071.1 | 16675  | 14-scf00383 | 14 |

|              |    |         |            |        |             |    |
|--------------|----|---------|------------|--------|-------------|----|
| AX-158223641 | 18 | 112.695 | KV453071.1 | 16913  | 14-scf00383 | 14 |
| AX-158223644 | 18 | 112.695 | KV453071.1 | 19718  | 14-scf00383 | 14 |
| AX-158223645 | 18 | 112.695 | KV453071.1 | 20077  | 14-scf00383 | 14 |
| AX-158223647 | 18 | 112.695 | KV453071.1 | 20813  | 14-scf00383 | 14 |
| AX-158223648 | 18 | 112.695 | KV453071.1 | 22312  | 14-scf00383 | 14 |
| AX-158223649 | 18 | 112.695 | KV453071.1 | 23173  | 14-scf00383 | 14 |
| AX-157839569 | 18 | 112.695 | KV453071.1 | 26278  | 14-scf00383 | 14 |
| AX-158223653 | 18 | 112.695 | KV453071.1 | 28370  | 14-scf00383 | 14 |
| AX-157839570 | 18 | 112.695 | KV453071.1 | 30360  | 14-scf00383 | 14 |
| AX-157839571 | 18 | 112.695 | KV453071.1 | 30787  | 14-scf00383 | 14 |
| AX-157839572 | 18 | 112.695 | KV453071.1 | 32533  | 14-scf00383 | 14 |
| AX-157839573 | 18 | 112.695 | KV453071.1 | 32630  | 14-scf00383 | 14 |
| AX-157887301 | 18 | 112.695 | KV453071.1 | 33008  | 14-scf00383 | 14 |
| AX-157839574 | 18 | 112.695 | KV453071.1 | 34539  | 14-scf00383 | 14 |
| AX-158223658 | 18 | 112.695 | KV453071.1 | 43629  | 14-scf00383 | 14 |
| AX-158223661 | 18 | 112.695 | KV453071.1 | 48879  | 14-scf00383 | 14 |
| AX-157839577 | 18 | 112.695 | KV453071.1 | 53803  | 14-scf00383 | 14 |
| AX-158223667 | 18 | 112.695 | KV453071.1 | 57167  | 14-scf00383 | 14 |
| AX-157682239 | 18 | 112.695 | KV453616.1 | 4900   | scf01034    | UN |
| AX-157680728 | 18 | 113.06  | KV453070.1 | 76782  | 14-scf00382 | 14 |
| AX-157683965 | 18 | 113.228 | KV453070.1 | 88080  | 14-scf00382 | 14 |
| AX-157839580 | 19 | 0       | KV453239.1 | 1153   | 23-scf00385 | 23 |
| AX-158223672 | 19 | 0       | KV453239.1 | 2364   | 23-scf00385 | 23 |
| AX-157748278 | 19 | 0       | KV453239.1 | 6201   | 23-scf00385 | 23 |
| AX-157723431 | 19 | 0       | KV453239.1 | 10889  | 23-scf00385 | 23 |
| AX-158223676 | 19 | 0       | KV453239.1 | 11718  | 23-scf00385 | 23 |
| AX-157742368 | 19 | 0       | KV453239.1 | 12164  | 23-scf00385 | 23 |
| AX-158223677 | 19 | 0       | KV453239.1 | 12983  | 23-scf00385 | 23 |
| AX-157839581 | 19 | 0       | KV453239.1 | 14243  | 23-scf00385 | 23 |
| AX-158223678 | 19 | 0       | KV453239.1 | 15254  | 23-scf00385 | 23 |
| AX-158223688 | 19 | 0       | KV453239.1 | 24461  | 23-scf00385 | 23 |
| AX-157839582 | 19 | 0       | KV453239.1 | 28005  | 23-scf00385 | 23 |
| AX-158223695 | 19 | 0       | KV453239.1 | 37243  | 23-scf00385 | 23 |
| AX-158223717 | 19 | 0       | KV453239.1 | 74554  | 23-scf00385 | 23 |
| AX-157755908 | 19 | 0       | KV453239.1 | 96398  | 23-scf00385 | 23 |
| AX-158223740 | 19 | 0       | KV453239.1 | 96672  | 23-scf00385 | 23 |
| AX-158224038 | 19 | 0       | KV453239.1 | 556695 | 23-scf00385 | 23 |
| AX-157839615 | 19 | 0       | KV453239.1 | 659712 | 23-scf00385 | 23 |
| AX-158224116 | 19 | 0       | KV453239.1 | 664831 | 23-scf00385 | 23 |
| AX-158224167 | 19 | 0       | KV453239.1 | 723070 | 23-scf00385 | 23 |
| AX-158224185 | 19 | 0       | KV453239.1 | 754140 | 23-scf00385 | 23 |
| AX-157839620 | 19 | 0       | KV453239.1 | 755700 | 23-scf00385 | 23 |
| AX-157714704 | 19 | 0       | KV453239.1 | 771681 | 23-scf00385 | 23 |
| AX-158224201 | 19 | 0       | KV453239.1 | 772295 | 23-scf00385 | 23 |
| AX-158224207 | 19 | 0       | KV453239.1 | 779548 | 23-scf00385 | 23 |
| AX-158224228 | 19 | 0       | KV453239.1 | 802045 | 23-scf00385 | 23 |
| AX-158223675 | 19 | 0.109   | KV453239.1 | 9769   | 23-scf00385 | 23 |
| AX-158223680 | 19 | 0.109   | KV453239.1 | 19618  | 23-scf00385 | 23 |
| AX-158223682 | 19 | 0.109   | KV453239.1 | 21688  | 23-scf00385 | 23 |
| AX-158223686 | 19 | 0.109   | KV453239.1 | 22937  | 23-scf00385 | 23 |
| AX-158223689 | 19 | 0.109   | KV453239.1 | 29367  | 23-scf00385 | 23 |

|              |    |       |            |        |             |    |
|--------------|----|-------|------------|--------|-------------|----|
| AX-158223694 | 19 | 0.109 | KV453239.1 | 36860  | 23-scf00385 | 23 |
| AX-158223702 | 19 | 0.109 | KV453239.1 | 47088  | 23-scf00385 | 23 |
| AX-158223703 | 19 | 0.109 | KV453239.1 | 47497  | 23-scf00385 | 23 |
| AX-158380852 | 19 | 0.109 | KV453239.1 | 50859  | 23-scf00385 | 23 |
| AX-158223704 | 19 | 0.109 | KV453239.1 | 51726  | 23-scf00385 | 23 |
| AX-158223705 | 19 | 0.109 | KV453239.1 | 53154  | 23-scf00385 | 23 |
| AX-158223707 | 19 | 0.109 | KV453239.1 | 55049  | 23-scf00385 | 23 |
| AX-158223708 | 19 | 0.109 | KV453239.1 | 56706  | 23-scf00385 | 23 |
| AX-158223710 | 19 | 0.109 | KV453239.1 | 57909  | 23-scf00385 | 23 |
| AX-158223711 | 19 | 0.109 | KV453239.1 | 58519  | 23-scf00385 | 23 |
| AX-157839583 | 19 | 0.109 | KV453239.1 | 63085  | 23-scf00385 | 23 |
| AX-157715683 | 19 | 0.109 | KV453239.1 | 63370  | 23-scf00385 | 23 |
| AX-158223713 | 19 | 0.109 | KV453239.1 | 63947  | 23-scf00385 | 23 |
| AX-157839584 | 19 | 0.109 | KV453239.1 | 65284  | 23-scf00385 | 23 |
| AX-157751958 | 19 | 0.109 | KV453239.1 | 67217  | 23-scf00385 | 23 |
| AX-158223715 | 19 | 0.109 | KV453239.1 | 71976  | 23-scf00385 | 23 |
| AX-157744206 | 19 | 0.109 | KV453239.1 | 73059  | 23-scf00385 | 23 |
| AX-158223718 | 19 | 0.109 | KV453239.1 | 75150  | 23-scf00385 | 23 |
| AX-158223721 | 19 | 0.109 | KV453239.1 | 77682  | 23-scf00385 | 23 |
| AX-158223722 | 19 | 0.109 | KV453239.1 | 78186  | 23-scf00385 | 23 |
| AX-158223723 | 19 | 0.109 | KV453239.1 | 78763  | 23-scf00385 | 23 |
| AX-158223725 | 19 | 0.109 | KV453239.1 | 79588  | 23-scf00385 | 23 |
| AX-158410273 | 19 | 0.109 | KV453239.1 | 80604  | 23-scf00385 | 23 |
| AX-158223726 | 19 | 0.109 | KV453239.1 | 81489  | 23-scf00385 | 23 |
| AX-158223728 | 19 | 0.109 | KV453239.1 | 85573  | 23-scf00385 | 23 |
| AX-158223729 | 19 | 0.109 | KV453239.1 | 85745  | 23-scf00385 | 23 |
| AX-158223730 | 19 | 0.109 | KV453239.1 | 87457  | 23-scf00385 | 23 |
| AX-157739228 | 19 | 0.109 | KV453239.1 | 88614  | 23-scf00385 | 23 |
| AX-158223734 | 19 | 0.109 | KV453239.1 | 91507  | 23-scf00385 | 23 |
| AX-158223735 | 19 | 0.109 | KV453239.1 | 91744  | 23-scf00385 | 23 |
| AX-157867094 | 19 | 0.109 | KV453239.1 | 93056  | 23-scf00385 | 23 |
| AX-158223739 | 19 | 0.109 | KV453239.1 | 93947  | 23-scf00385 | 23 |
| AX-157727645 | 19 | 0.109 | KV453239.1 | 94245  | 23-scf00385 | 23 |
| AX-158223752 | 19 | 0.109 | KV453239.1 | 114898 | 23-scf00385 | 23 |
| AX-158223754 | 19 | 0.109 | KV453239.1 | 116598 | 23-scf00385 | 23 |
| AX-158223755 | 19 | 0.109 | KV453239.1 | 119549 | 23-scf00385 | 23 |
| AX-158223757 | 19 | 0.109 | KV453239.1 | 122251 | 23-scf00385 | 23 |
| AX-158223758 | 19 | 0.109 | KV453239.1 | 123874 | 23-scf00385 | 23 |
| AX-158223759 | 19 | 0.109 | KV453239.1 | 124360 | 23-scf00385 | 23 |
| AX-157839587 | 19 | 0.109 | KV453239.1 | 127076 | 23-scf00385 | 23 |
| AX-158223760 | 19 | 0.109 | KV453239.1 | 127817 | 23-scf00385 | 23 |
| AX-158223762 | 19 | 0.109 | KV453239.1 | 142656 | 23-scf00385 | 23 |
| AX-158223763 | 19 | 0.109 | KV453239.1 | 144365 | 23-scf00385 | 23 |
| AX-158223764 | 19 | 0.109 | KV453239.1 | 144908 | 23-scf00385 | 23 |
| AX-158223765 | 19 | 0.109 | KV453239.1 | 149542 | 23-scf00385 | 23 |
| AX-158223769 | 19 | 0.109 | KV453239.1 | 156103 | 23-scf00385 | 23 |
| AX-158223772 | 19 | 0.109 | KV453239.1 | 158026 | 23-scf00385 | 23 |
| AX-158223774 | 19 | 0.109 | KV453239.1 | 161790 | 23-scf00385 | 23 |
| AX-158223778 | 19 | 0.109 | KV453239.1 | 174125 | 23-scf00385 | 23 |
| AX-158223779 | 19 | 0.109 | KV453239.1 | 178549 | 23-scf00385 | 23 |
| AX-158223781 | 19 | 0.109 | KV453239.1 | 196493 | 23-scf00385 | 23 |

|              |    |       |            |        |             |    |
|--------------|----|-------|------------|--------|-------------|----|
| AX-158223784 | 19 | 0.109 | KV453239.1 | 202396 | 23-scf00385 | 23 |
| AX-158223785 | 19 | 0.109 | KV453239.1 | 203055 | 23-scf00385 | 23 |
| AX-157839590 | 19 | 0.109 | KV453239.1 | 206196 | 23-scf00385 | 23 |
| AX-158223786 | 19 | 0.109 | KV453239.1 | 208055 | 23-scf00385 | 23 |
| AX-158223787 | 19 | 0.109 | KV453239.1 | 209027 | 23-scf00385 | 23 |
| AX-158223789 | 19 | 0.109 | KV453239.1 | 214658 | 23-scf00385 | 23 |
| AX-158223790 | 19 | 0.109 | KV453239.1 | 215862 | 23-scf00385 | 23 |
| AX-158223793 | 19 | 0.109 | KV453239.1 | 223803 | 23-scf00385 | 23 |
| AX-158223795 | 19 | 0.109 | KV453239.1 | 224739 | 23-scf00385 | 23 |
| AX-158223796 | 19 | 0.109 | KV453239.1 | 224969 | 23-scf00385 | 23 |
| AX-158223797 | 19 | 0.109 | KV453239.1 | 225210 | 23-scf00385 | 23 |
| AX-158223798 | 19 | 0.109 | KV453239.1 | 225896 | 23-scf00385 | 23 |
| AX-157718046 | 19 | 0.109 | KV453239.1 | 233805 | 23-scf00385 | 23 |
| AX-158223801 | 19 | 0.109 | KV453239.1 | 235833 | 23-scf00385 | 23 |
| AX-158414908 | 19 | 0.109 | KV453239.1 | 236654 | 23-scf00385 | 23 |
| AX-158223802 | 19 | 0.109 | KV453239.1 | 237268 | 23-scf00385 | 23 |
| AX-158223803 | 19 | 0.109 | KV453239.1 | 238500 | 23-scf00385 | 23 |
| AX-158223804 | 19 | 0.109 | KV453239.1 | 239314 | 23-scf00385 | 23 |
| AX-158223805 | 19 | 0.109 | KV453239.1 | 239971 | 23-scf00385 | 23 |
| AX-158223808 | 19 | 0.109 | KV453239.1 | 244063 | 23-scf00385 | 23 |
| AX-157872435 | 19 | 0.109 | KV453239.1 | 244277 | 23-scf00385 | 23 |
| AX-158223811 | 19 | 0.109 | KV453239.1 | 248259 | 23-scf00385 | 23 |
| AX-158223812 | 19 | 0.109 | KV453239.1 | 248445 | 23-scf00385 | 23 |
| AX-158223813 | 19 | 0.109 | KV453239.1 | 249725 | 23-scf00385 | 23 |
| AX-158223814 | 19 | 0.109 | KV453239.1 | 250163 | 23-scf00385 | 23 |
| AX-158223817 | 19 | 0.109 | KV453239.1 | 265590 | 23-scf00385 | 23 |
| AX-158223818 | 19 | 0.109 | KV453239.1 | 268317 | 23-scf00385 | 23 |
| AX-158223819 | 19 | 0.109 | KV453239.1 | 269182 | 23-scf00385 | 23 |
| AX-158223820 | 19 | 0.109 | KV453239.1 | 269692 | 23-scf00385 | 23 |
| AX-158223821 | 19 | 0.109 | KV453239.1 | 271668 | 23-scf00385 | 23 |
| AX-158223824 | 19 | 0.109 | KV453239.1 | 274358 | 23-scf00385 | 23 |
| AX-157746447 | 19 | 0.109 | KV453239.1 | 284403 | 23-scf00385 | 23 |
| AX-158394089 | 19 | 0.109 | KV453239.1 | 296295 | 23-scf00385 | 23 |
| AX-158223847 | 19 | 0.109 | KV453239.1 | 305123 | 23-scf00385 | 23 |
| AX-158394090 | 19 | 0.109 | KV453239.1 | 317535 | 23-scf00385 | 23 |
| AX-158223857 | 19 | 0.109 | KV453239.1 | 324689 | 23-scf00385 | 23 |
| AX-158223880 | 19 | 0.109 | KV453239.1 | 353186 | 23-scf00385 | 23 |
| AX-158223889 | 19 | 0.109 | KV453239.1 | 361667 | 23-scf00385 | 23 |
| AX-158223909 | 19 | 0.109 | KV453239.1 | 387687 | 23-scf00385 | 23 |
| AX-158223923 | 19 | 0.109 | KV453239.1 | 399982 | 23-scf00385 | 23 |
| AX-158223925 | 19 | 0.109 | KV453239.1 | 401781 | 23-scf00385 | 23 |
| AX-158223928 | 19 | 0.109 | KV453239.1 | 405099 | 23-scf00385 | 23 |
| AX-158223929 | 19 | 0.109 | KV453239.1 | 406044 | 23-scf00385 | 23 |
| AX-158423247 | 19 | 0.109 | KV453239.1 | 407514 | 23-scf00385 | 23 |
| AX-158414914 | 19 | 0.109 | KV453239.1 | 407790 | 23-scf00385 | 23 |
| AX-158223930 | 19 | 0.109 | KV453239.1 | 408914 | 23-scf00385 | 23 |
| AX-158223932 | 19 | 0.109 | KV453239.1 | 411312 | 23-scf00385 | 23 |
| AX-158223933 | 19 | 0.109 | KV453239.1 | 412625 | 23-scf00385 | 23 |
| AX-158223934 | 19 | 0.109 | KV453239.1 | 420174 | 23-scf00385 | 23 |
| AX-158223935 | 19 | 0.109 | KV453239.1 | 420615 | 23-scf00385 | 23 |
| AX-157725378 | 19 | 0.109 | KV453239.1 | 426116 | 23-scf00385 | 23 |

|              |    |       |            |        |             |    |
|--------------|----|-------|------------|--------|-------------|----|
| AX-158223940 | 19 | 0.109 | KV453239.1 | 427886 | 23-scf00385 | 23 |
| AX-158223944 | 19 | 0.109 | KV453239.1 | 432034 | 23-scf00385 | 23 |
| AX-158223945 | 19 | 0.109 | KV453239.1 | 432311 | 23-scf00385 | 23 |
| AX-158223946 | 19 | 0.109 | KV453239.1 | 433398 | 23-scf00385 | 23 |
| AX-158223947 | 19 | 0.109 | KV453239.1 | 434652 | 23-scf00385 | 23 |
| AX-158223949 | 19 | 0.109 | KV453239.1 | 435817 | 23-scf00385 | 23 |
| AX-158223950 | 19 | 0.109 | KV453239.1 | 436229 | 23-scf00385 | 23 |
| AX-158223955 | 19 | 0.109 | KV453239.1 | 442717 | 23-scf00385 | 23 |
| AX-158223958 | 19 | 0.109 | KV453239.1 | 446271 | 23-scf00385 | 23 |
| AX-158223961 | 19 | 0.109 | KV453239.1 | 448063 | 23-scf00385 | 23 |
| AX-158223962 | 19 | 0.109 | KV453239.1 | 449940 | 23-scf00385 | 23 |
| AX-158223966 | 19 | 0.109 | KV453239.1 | 456573 | 23-scf00385 | 23 |
| AX-158223967 | 19 | 0.109 | KV453239.1 | 461440 | 23-scf00385 | 23 |
| AX-158223968 | 19 | 0.109 | KV453239.1 | 461749 | 23-scf00385 | 23 |
| AX-158223969 | 19 | 0.109 | KV453239.1 | 464909 | 23-scf00385 | 23 |
| AX-158223970 | 19 | 0.109 | KV453239.1 | 465125 | 23-scf00385 | 23 |
| AX-158223973 | 19 | 0.109 | KV453239.1 | 466948 | 23-scf00385 | 23 |
| AX-158223976 | 19 | 0.109 | KV453239.1 | 471638 | 23-scf00385 | 23 |
| AX-158223977 | 19 | 0.109 | KV453239.1 | 472463 | 23-scf00385 | 23 |
| AX-158223978 | 19 | 0.109 | KV453239.1 | 473415 | 23-scf00385 | 23 |
| AX-158223979 | 19 | 0.109 | KV453239.1 | 474540 | 23-scf00385 | 23 |
| AX-157839600 | 19 | 0.109 | KV453239.1 | 477578 | 23-scf00385 | 23 |
| AX-158223981 | 19 | 0.109 | KV453239.1 | 478419 | 23-scf00385 | 23 |
| AX-158223983 | 19 | 0.109 | KV453239.1 | 480133 | 23-scf00385 | 23 |
| AX-157755769 | 19 | 0.109 | KV453239.1 | 481089 | 23-scf00385 | 23 |
| AX-158223985 | 19 | 0.109 | KV453239.1 | 481820 | 23-scf00385 | 23 |
| AX-158223991 | 19 | 0.109 | KV453239.1 | 488777 | 23-scf00385 | 23 |
| AX-158223992 | 19 | 0.109 | KV453239.1 | 491121 | 23-scf00385 | 23 |
| AX-158223995 | 19 | 0.109 | KV453239.1 | 493692 | 23-scf00385 | 23 |
| AX-158223996 | 19 | 0.109 | KV453239.1 | 494348 | 23-scf00385 | 23 |
| AX-158223997 | 19 | 0.109 | KV453239.1 | 495076 | 23-scf00385 | 23 |
| AX-158223999 | 19 | 0.109 | KV453239.1 | 497985 | 23-scf00385 | 23 |
| AX-158224000 | 19 | 0.109 | KV453239.1 | 498705 | 23-scf00385 | 23 |
| AX-158224001 | 19 | 0.109 | KV453239.1 | 499498 | 23-scf00385 | 23 |
| AX-158224007 | 19 | 0.109 | KV453239.1 | 506521 | 23-scf00385 | 23 |
| AX-158224009 | 19 | 0.109 | KV453239.1 | 507886 | 23-scf00385 | 23 |
| AX-158224010 | 19 | 0.109 | KV453239.1 | 508658 | 23-scf00385 | 23 |
| AX-158224011 | 19 | 0.109 | KV453239.1 | 509156 | 23-scf00385 | 23 |
| AX-158224014 | 19 | 0.109 | KV453239.1 | 510782 | 23-scf00385 | 23 |
| AX-158224016 | 19 | 0.109 | KV453239.1 | 511981 | 23-scf00385 | 23 |
| AX-158224019 | 19 | 0.109 | KV453239.1 | 521007 | 23-scf00385 | 23 |
| AX-158224020 | 19 | 0.109 | KV453239.1 | 524877 | 23-scf00385 | 23 |
| AX-158224021 | 19 | 0.109 | KV453239.1 | 525439 | 23-scf00385 | 23 |
| AX-157839601 | 19 | 0.109 | KV453239.1 | 525654 | 23-scf00385 | 23 |
| AX-158224027 | 19 | 0.109 | KV453239.1 | 535141 | 23-scf00385 | 23 |
| AX-158224030 | 19 | 0.109 | KV453239.1 | 537189 | 23-scf00385 | 23 |
| AX-157700747 | 19 | 0.109 | KV453239.1 | 537561 | 23-scf00385 | 23 |
| AX-157839602 | 19 | 0.109 | KV453239.1 | 538712 | 23-scf00385 | 23 |
| AX-158224031 | 19 | 0.109 | KV453239.1 | 541165 | 23-scf00385 | 23 |
| AX-158224034 | 19 | 0.109 | KV453239.1 | 552963 | 23-scf00385 | 23 |
| AX-158224035 | 19 | 0.109 | KV453239.1 | 555009 | 23-scf00385 | 23 |

|              |    |       |            |        |             |    |
|--------------|----|-------|------------|--------|-------------|----|
| AX-158224037 | 19 | 0.109 | KV453239.1 | 555781 | 23-scf00385 | 23 |
| AX-157724297 | 19 | 0.109 | KV453239.1 | 559040 | 23-scf00385 | 23 |
| AX-158224040 | 19 | 0.109 | KV453239.1 | 566493 | 23-scf00385 | 23 |
| AX-157755572 | 19 | 0.109 | KV453239.1 | 567379 | 23-scf00385 | 23 |
| AX-158224041 | 19 | 0.109 | KV453239.1 | 568784 | 23-scf00385 | 23 |
| AX-158224044 | 19 | 0.109 | KV453239.1 | 573969 | 23-scf00385 | 23 |
| AX-158224047 | 19 | 0.109 | KV453239.1 | 579768 | 23-scf00385 | 23 |
| AX-157839603 | 19 | 0.109 | KV453239.1 | 580972 | 23-scf00385 | 23 |
| AX-158224048 | 19 | 0.109 | KV453239.1 | 582163 | 23-scf00385 | 23 |
| AX-158224049 | 19 | 0.109 | KV453239.1 | 585195 | 23-scf00385 | 23 |
| AX-158224050 | 19 | 0.109 | KV453239.1 | 585942 | 23-scf00385 | 23 |
| AX-158224051 | 19 | 0.109 | KV453239.1 | 587631 | 23-scf00385 | 23 |
| AX-158224053 | 19 | 0.109 | KV453239.1 | 589703 | 23-scf00385 | 23 |
| AX-158224054 | 19 | 0.109 | KV453239.1 | 591881 | 23-scf00385 | 23 |
| AX-158224055 | 19 | 0.109 | KV453239.1 | 592572 | 23-scf00385 | 23 |
| AX-157839604 | 19 | 0.109 | KV453239.1 | 598305 | 23-scf00385 | 23 |
| AX-158224057 | 19 | 0.109 | KV453239.1 | 598900 | 23-scf00385 | 23 |
| AX-157839605 | 19 | 0.109 | KV453239.1 | 599106 | 23-scf00385 | 23 |
| AX-157839606 | 19 | 0.109 | KV453239.1 | 601613 | 23-scf00385 | 23 |
| AX-157839607 | 19 | 0.109 | KV453239.1 | 604586 | 23-scf00385 | 23 |
| AX-158224061 | 19 | 0.109 | KV453239.1 | 608010 | 23-scf00385 | 23 |
| AX-158224062 | 19 | 0.109 | KV453239.1 | 609121 | 23-scf00385 | 23 |
| AX-158224064 | 19 | 0.109 | KV453239.1 | 613347 | 23-scf00385 | 23 |
| AX-158224066 | 19 | 0.109 | KV453239.1 | 615275 | 23-scf00385 | 23 |
| AX-158224067 | 19 | 0.109 | KV453239.1 | 615439 | 23-scf00385 | 23 |
| AX-158224068 | 19 | 0.109 | KV453239.1 | 616882 | 23-scf00385 | 23 |
| AX-158224070 | 19 | 0.109 | KV453239.1 | 617968 | 23-scf00385 | 23 |
| AX-158224071 | 19 | 0.109 | KV453239.1 | 618338 | 23-scf00385 | 23 |
| AX-157839608 | 19 | 0.109 | KV453239.1 | 618578 | 23-scf00385 | 23 |
| AX-158224074 | 19 | 0.109 | KV453239.1 | 621510 | 23-scf00385 | 23 |
| AX-158224076 | 19 | 0.109 | KV453239.1 | 623492 | 23-scf00385 | 23 |
| AX-158224078 | 19 | 0.109 | KV453239.1 | 625536 | 23-scf00385 | 23 |
| AX-158224080 | 19 | 0.109 | KV453239.1 | 627069 | 23-scf00385 | 23 |
| AX-158224082 | 19 | 0.109 | KV453239.1 | 627927 | 23-scf00385 | 23 |
| AX-158224083 | 19 | 0.109 | KV453239.1 | 628666 | 23-scf00385 | 23 |
| AX-158224085 | 19 | 0.109 | KV453239.1 | 630182 | 23-scf00385 | 23 |
| AX-158224086 | 19 | 0.109 | KV453239.1 | 630986 | 23-scf00385 | 23 |
| AX-158224090 | 19 | 0.109 | KV453239.1 | 633888 | 23-scf00385 | 23 |
| AX-158224092 | 19 | 0.109 | KV453239.1 | 637427 | 23-scf00385 | 23 |
| AX-158224093 | 19 | 0.109 | KV453239.1 | 637739 | 23-scf00385 | 23 |
| AX-158224094 | 19 | 0.109 | KV453239.1 | 638182 | 23-scf00385 | 23 |
| AX-157839610 | 19 | 0.109 | KV453239.1 | 638407 | 23-scf00385 | 23 |
| AX-158224095 | 19 | 0.109 | KV453239.1 | 639926 | 23-scf00385 | 23 |
| AX-157739462 | 19 | 0.109 | KV453239.1 | 642954 | 23-scf00385 | 23 |
| AX-158224097 | 19 | 0.109 | KV453239.1 | 644733 | 23-scf00385 | 23 |
| AX-158224101 | 19 | 0.109 | KV453239.1 | 648222 | 23-scf00385 | 23 |
| AX-158224106 | 19 | 0.109 | KV453239.1 | 651295 | 23-scf00385 | 23 |
| AX-157839612 | 19 | 0.109 | KV453239.1 | 654081 | 23-scf00385 | 23 |
| AX-157839613 | 19 | 0.109 | KV453239.1 | 654981 | 23-scf00385 | 23 |
| AX-158224109 | 19 | 0.109 | KV453239.1 | 655387 | 23-scf00385 | 23 |
| AX-157839614 | 19 | 0.109 | KV453239.1 | 656159 | 23-scf00385 | 23 |



|              |    |       |            |        |             |    |
|--------------|----|-------|------------|--------|-------------|----|
| AX-157747057 | 19 | 0.109 | KV453239.1 | 658126 | 23-scf00385 | 23 |
| AX-158224112 | 19 | 0.109 | KV453239.1 | 660212 | 23-scf00385 | 23 |
| AX-157839616 | 19 | 0.109 | KV453239.1 | 660881 | 23-scf00385 | 23 |
| AX-158224113 | 19 | 0.109 | KV453239.1 | 661587 | 23-scf00385 | 23 |
| AX-158224114 | 19 | 0.109 | KV453239.1 | 663514 | 23-scf00385 | 23 |
| AX-158224115 | 19 | 0.109 | KV453239.1 | 663837 | 23-scf00385 | 23 |
| AX-158224118 | 19 | 0.109 | KV453239.1 | 666044 | 23-scf00385 | 23 |
| AX-158224120 | 19 | 0.109 | KV453239.1 | 668239 | 23-scf00385 | 23 |
| AX-158224121 | 19 | 0.109 | KV453239.1 | 668492 | 23-scf00385 | 23 |
| AX-158224124 | 19 | 0.109 | KV453239.1 | 672069 | 23-scf00385 | 23 |
| AX-158224126 | 19 | 0.109 | KV453239.1 | 673052 | 23-scf00385 | 23 |
| AX-158224129 | 19 | 0.109 | KV453239.1 | 674202 | 23-scf00385 | 23 |
| AX-158224130 | 19 | 0.109 | KV453239.1 | 675155 | 23-scf00385 | 23 |
| AX-158224131 | 19 | 0.109 | KV453239.1 | 675968 | 23-scf00385 | 23 |
| AX-158224133 | 19 | 0.109 | KV453239.1 | 680341 | 23-scf00385 | 23 |
| AX-158224135 | 19 | 0.109 | KV453239.1 | 684417 | 23-scf00385 | 23 |
| AX-158224136 | 19 | 0.109 | KV453239.1 | 685128 | 23-scf00385 | 23 |
| AX-158224137 | 19 | 0.109 | KV453239.1 | 685551 | 23-scf00385 | 23 |
| AX-158224138 | 19 | 0.109 | KV453239.1 | 686720 | 23-scf00385 | 23 |
| AX-158224139 | 19 | 0.109 | KV453239.1 | 687737 | 23-scf00385 | 23 |
| AX-158224140 | 19 | 0.109 | KV453239.1 | 689788 | 23-scf00385 | 23 |
| AX-158224142 | 19 | 0.109 | KV453239.1 | 691882 | 23-scf00385 | 23 |
| AX-158224143 | 19 | 0.109 | KV453239.1 | 693221 | 23-scf00385 | 23 |
| AX-158224146 | 19 | 0.109 | KV453239.1 | 696285 | 23-scf00385 | 23 |
| AX-157839617 | 19 | 0.109 | KV453239.1 | 699391 | 23-scf00385 | 23 |
| AX-158224152 | 19 | 0.109 | KV453239.1 | 706117 | 23-scf00385 | 23 |
| AX-158224153 | 19 | 0.109 | KV453239.1 | 706755 | 23-scf00385 | 23 |
| AX-158224155 | 19 | 0.109 | KV453239.1 | 708168 | 23-scf00385 | 23 |
| AX-158224159 | 19 | 0.109 | KV453239.1 | 716114 | 23-scf00385 | 23 |
| AX-158224160 | 19 | 0.109 | KV453239.1 | 717045 | 23-scf00385 | 23 |
| AX-158224168 | 19 | 0.109 | KV453239.1 | 724864 | 23-scf00385 | 23 |
| AX-158224170 | 19 | 0.109 | KV453239.1 | 726621 | 23-scf00385 | 23 |
| AX-158224171 | 19 | 0.109 | KV453239.1 | 727195 | 23-scf00385 | 23 |
| AX-158224173 | 19 | 0.109 | KV453239.1 | 729587 | 23-scf00385 | 23 |
| AX-158224174 | 19 | 0.109 | KV453239.1 | 731541 | 23-scf00385 | 23 |
| AX-158224176 | 19 | 0.109 | KV453239.1 | 733597 | 23-scf00385 | 23 |
| AX-158224180 | 19 | 0.109 | KV453239.1 | 739050 | 23-scf00385 | 23 |
| AX-158224182 | 19 | 0.109 | KV453239.1 | 743692 | 23-scf00385 | 23 |
| AX-158224183 | 19 | 0.109 | KV453239.1 | 744079 | 23-scf00385 | 23 |
| AX-158224184 | 19 | 0.109 | KV453239.1 | 744479 | 23-scf00385 | 23 |
| AX-157721580 | 19 | 0.109 | KV453239.1 | 752493 | 23-scf00385 | 23 |
| AX-158224195 | 19 | 0.109 | KV453239.1 | 763855 | 23-scf00385 | 23 |
| AX-157743462 | 19 | 0.109 | KV453239.1 | 768804 | 23-scf00385 | 23 |
| AX-158224203 | 19 | 0.109 | KV453239.1 | 774390 | 23-scf00385 | 23 |
| AX-158224206 | 19 | 0.109 | KV453239.1 | 779128 | 23-scf00385 | 23 |
| AX-158224219 | 19 | 0.109 | KV453239.1 | 790054 | 23-scf00385 | 23 |
| AX-158224250 | 19 | 0.109 | KV453239.1 | 833037 | 23-scf00385 | 23 |
| AX-158224255 | 19 | 0.109 | KV453239.1 | 838275 | 23-scf00385 | 23 |
| AX-158224267 | 19 | 0.109 | KV453239.1 | 851477 | 23-scf00385 | 23 |
| AX-158224274 | 19 | 0.109 | KV453239.1 | 861550 | 23-scf00385 | 23 |
| AX-157743635 | 19 | 0.109 | KV453239.1 | 867321 | 23-scf00385 | 23 |

|              |    |       |            |         |             |    |
|--------------|----|-------|------------|---------|-------------|----|
| AX-158224283 | 19 | 0.109 | KV453239.1 | 872164  | 23-scf00385 | 23 |
| AX-158224297 | 19 | 0.109 | KV453239.1 | 885621  | 23-scf00385 | 23 |
| AX-158224301 | 19 | 0.109 | KV453239.1 | 898680  | 23-scf00385 | 23 |
| AX-158224303 | 19 | 0.109 | KV453239.1 | 902600  | 23-scf00385 | 23 |
| AX-158224304 | 19 | 0.109 | KV453239.1 | 902828  | 23-scf00385 | 23 |
| AX-158224308 | 19 | 0.109 | KV453239.1 | 907154  | 23-scf00385 | 23 |
| AX-158386722 | 19 | 0.109 | KV453239.1 | 925359  | 23-scf00385 | 23 |
| AX-158224333 | 19 | 0.109 | KV453239.1 | 939031  | 23-scf00385 | 23 |
| AX-158224349 | 19 | 0.109 | KV453239.1 | 957413  | 23-scf00385 | 23 |
| AX-158224351 | 19 | 0.109 | KV453239.1 | 959843  | 23-scf00385 | 23 |
| AX-158224354 | 19 | 0.109 | KV453239.1 | 962458  | 23-scf00385 | 23 |
| AX-157749358 | 19 | 0.109 | KV453239.1 | 975420  | 23-scf00385 | 23 |
| AX-158224377 | 19 | 0.109 | KV453239.1 | 1007613 | 23-scf00385 | 23 |
| AX-157839636 | 19 | 0.109 | KV453239.1 | 1008874 | 23-scf00385 | 23 |
| AX-158224384 | 19 | 0.109 | KV453239.1 | 1016122 | 23-scf00385 | 23 |
| AX-158224386 | 19 | 0.109 | KV453239.1 | 1023246 | 23-scf00385 | 23 |
| AX-158224398 | 19 | 0.109 | KV453239.1 | 1040869 | 23-scf00385 | 23 |
| AX-158223832 | 19 | 0.171 | KV453239.1 | 287594  | 23-scf00385 | 23 |
| AX-157713945 | 19 | 0.219 | KV453239.1 | 33187   | 23-scf00385 | 23 |
| AX-157743904 | 19 | 0.219 | KV453239.1 | 223909  | 23-scf00385 | 23 |
| AX-158223800 | 19 | 0.219 | KV453239.1 | 229793  | 23-scf00385 | 23 |
| AX-157839592 | 19 | 0.219 | KV453239.1 | 230549  | 23-scf00385 | 23 |
| AX-158223825 | 19 | 0.219 | KV453239.1 | 277160  | 23-scf00385 | 23 |
| AX-158223827 | 19 | 0.219 | KV453239.1 | 279217  | 23-scf00385 | 23 |
| AX-158223829 | 19 | 0.219 | KV453239.1 | 283988  | 23-scf00385 | 23 |
| AX-158223830 | 19 | 0.219 | KV453239.1 | 286866  | 23-scf00385 | 23 |
| AX-158223831 | 19 | 0.219 | KV453239.1 | 287240  | 23-scf00385 | 23 |
| AX-158223834 | 19 | 0.219 | KV453239.1 | 288982  | 23-scf00385 | 23 |
| AX-158223835 | 19 | 0.219 | KV453239.1 | 290097  | 23-scf00385 | 23 |
| AX-158223836 | 19 | 0.219 | KV453239.1 | 292036  | 23-scf00385 | 23 |
| AX-158223837 | 19 | 0.219 | KV453239.1 | 293381  | 23-scf00385 | 23 |
| AX-158223838 | 19 | 0.219 | KV453239.1 | 293780  | 23-scf00385 | 23 |
| AX-158223839 | 19 | 0.219 | KV453239.1 | 294309  | 23-scf00385 | 23 |
| AX-158223840 | 19 | 0.219 | KV453239.1 | 295142  | 23-scf00385 | 23 |
| AX-158223841 | 19 | 0.219 | KV453239.1 | 297025  | 23-scf00385 | 23 |
| AX-158223842 | 19 | 0.219 | KV453239.1 | 299376  | 23-scf00385 | 23 |
| AX-157721911 | 19 | 0.219 | KV453239.1 | 301451  | 23-scf00385 | 23 |
| AX-158223845 | 19 | 0.219 | KV453239.1 | 303400  | 23-scf00385 | 23 |
| AX-158223846 | 19 | 0.219 | KV453239.1 | 304012  | 23-scf00385 | 23 |
| AX-157839598 | 19 | 0.219 | KV453239.1 | 306102  | 23-scf00385 | 23 |
| AX-158223848 | 19 | 0.219 | KV453239.1 | 306293  | 23-scf00385 | 23 |
| AX-158223849 | 19 | 0.219 | KV453239.1 | 311309  | 23-scf00385 | 23 |
| AX-158223850 | 19 | 0.219 | KV453239.1 | 312433  | 23-scf00385 | 23 |
| AX-158223852 | 19 | 0.219 | KV453239.1 | 316426  | 23-scf00385 | 23 |
| AX-158223853 | 19 | 0.219 | KV453239.1 | 318067  | 23-scf00385 | 23 |
| AX-158223854 | 19 | 0.219 | KV453239.1 | 320648  | 23-scf00385 | 23 |
| AX-158223856 | 19 | 0.219 | KV453239.1 | 323921  | 23-scf00385 | 23 |
| AX-158394091 | 19 | 0.219 | KV453239.1 | 327176  | 23-scf00385 | 23 |
| AX-158223860 | 19 | 0.219 | KV453239.1 | 328647  | 23-scf00385 | 23 |
| AX-158223861 | 19 | 0.219 | KV453239.1 | 329548  | 23-scf00385 | 23 |
| AX-158223862 | 19 | 0.219 | KV453239.1 | 331036  | 23-scf00385 | 23 |

|              |    |       |            |        |             |    |
|--------------|----|-------|------------|--------|-------------|----|
| AX-158223864 | 19 | 0.219 | KV453239.1 | 334631 | 23-scf00385 | 23 |
| AX-158223865 | 19 | 0.219 | KV453239.1 | 335208 | 23-scf00385 | 23 |
| AX-158223866 | 19 | 0.219 | KV453239.1 | 335807 | 23-scf00385 | 23 |
| AX-158223869 | 19 | 0.219 | KV453239.1 | 339191 | 23-scf00385 | 23 |
| AX-158223870 | 19 | 0.219 | KV453239.1 | 340219 | 23-scf00385 | 23 |
| AX-158223871 | 19 | 0.219 | KV453239.1 | 341220 | 23-scf00385 | 23 |
| AX-158223872 | 19 | 0.219 | KV453239.1 | 342177 | 23-scf00385 | 23 |
| AX-158223873 | 19 | 0.219 | KV453239.1 | 343252 | 23-scf00385 | 23 |
| AX-158414909 | 19 | 0.219 | KV453239.1 | 343391 | 23-scf00385 | 23 |
| AX-158223876 | 19 | 0.219 | KV453239.1 | 347903 | 23-scf00385 | 23 |
| AX-158223878 | 19 | 0.219 | KV453239.1 | 351253 | 23-scf00385 | 23 |
| AX-158223879 | 19 | 0.219 | KV453239.1 | 352251 | 23-scf00385 | 23 |
| AX-158223881 | 19 | 0.219 | KV453239.1 | 354284 | 23-scf00385 | 23 |
| AX-158223882 | 19 | 0.219 | KV453239.1 | 355322 | 23-scf00385 | 23 |
| AX-158223883 | 19 | 0.219 | KV453239.1 | 355954 | 23-scf00385 | 23 |
| AX-158223884 | 19 | 0.219 | KV453239.1 | 357044 | 23-scf00385 | 23 |
| AX-158223885 | 19 | 0.219 | KV453239.1 | 358009 | 23-scf00385 | 23 |
| AX-158223886 | 19 | 0.219 | KV453239.1 | 358752 | 23-scf00385 | 23 |
| AX-158223887 | 19 | 0.219 | KV453239.1 | 359975 | 23-scf00385 | 23 |
| AX-158223888 | 19 | 0.219 | KV453239.1 | 360805 | 23-scf00385 | 23 |
| AX-158394092 | 19 | 0.219 | KV453239.1 | 361376 | 23-scf00385 | 23 |
| AX-158223890 | 19 | 0.219 | KV453239.1 | 362171 | 23-scf00385 | 23 |
| AX-158223891 | 19 | 0.219 | KV453239.1 | 362641 | 23-scf00385 | 23 |
| AX-158223892 | 19 | 0.219 | KV453239.1 | 363191 | 23-scf00385 | 23 |
| AX-158223893 | 19 | 0.219 | KV453239.1 | 363397 | 23-scf00385 | 23 |
| AX-158223894 | 19 | 0.219 | KV453239.1 | 364468 | 23-scf00385 | 23 |
| AX-158223895 | 19 | 0.219 | KV453239.1 | 364793 | 23-scf00385 | 23 |
| AX-158223898 | 19 | 0.219 | KV453239.1 | 367290 | 23-scf00385 | 23 |
| AX-158223899 | 19 | 0.219 | KV453239.1 | 371597 | 23-scf00385 | 23 |
| AX-158223900 | 19 | 0.219 | KV453239.1 | 371924 | 23-scf00385 | 23 |
| AX-158223901 | 19 | 0.219 | KV453239.1 | 372902 | 23-scf00385 | 23 |
| AX-158394093 | 19 | 0.219 | KV453239.1 | 373092 | 23-scf00385 | 23 |
| AX-158223906 | 19 | 0.219 | KV453239.1 | 381973 | 23-scf00385 | 23 |
| AX-158223907 | 19 | 0.219 | KV453239.1 | 386106 | 23-scf00385 | 23 |
| AX-158223910 | 19 | 0.219 | KV453239.1 | 387888 | 23-scf00385 | 23 |
| AX-158223912 | 19 | 0.219 | KV453239.1 | 389613 | 23-scf00385 | 23 |
| AX-158223937 | 19 | 0.219 | KV453239.1 | 421897 | 23-scf00385 | 23 |
| AX-158223939 | 19 | 0.219 | KV453239.1 | 426528 | 23-scf00385 | 23 |
| AX-158223943 | 19 | 0.219 | KV453239.1 | 431593 | 23-scf00385 | 23 |
| AX-158223951 | 19 | 0.219 | KV453239.1 | 439336 | 23-scf00385 | 23 |
| AX-158223959 | 19 | 0.219 | KV453239.1 | 446738 | 23-scf00385 | 23 |
| AX-158223964 | 19 | 0.219 | KV453239.1 | 452240 | 23-scf00385 | 23 |
| AX-158223975 | 19 | 0.219 | KV453239.1 | 470651 | 23-scf00385 | 23 |
| AX-158223980 | 19 | 0.219 | KV453239.1 | 475661 | 23-scf00385 | 23 |
| AX-158223984 | 19 | 0.219 | KV453239.1 | 480278 | 23-scf00385 | 23 |
| AX-158223993 | 19 | 0.219 | KV453239.1 | 491510 | 23-scf00385 | 23 |
| AX-158223994 | 19 | 0.219 | KV453239.1 | 493216 | 23-scf00385 | 23 |
| AX-158223998 | 19 | 0.219 | KV453239.1 | 497260 | 23-scf00385 | 23 |
| AX-158224002 | 19 | 0.219 | KV453239.1 | 500108 | 23-scf00385 | 23 |
| AX-158224006 | 19 | 0.219 | KV453239.1 | 505372 | 23-scf00385 | 23 |
| AX-158224017 | 19 | 0.219 | KV453239.1 | 512539 | 23-scf00385 | 23 |

|              |    |       |            |        |             |    |
|--------------|----|-------|------------|--------|-------------|----|
| AX-158224024 | 19 | 0.219 | KV453239.1 | 531931 | 23-scf00385 | 23 |
| AX-158224036 | 19 | 0.219 | KV453239.1 | 555440 | 23-scf00385 | 23 |
| AX-158224042 | 19 | 0.219 | KV453239.1 | 570625 | 23-scf00385 | 23 |
| AX-158224045 | 19 | 0.219 | KV453239.1 | 574612 | 23-scf00385 | 23 |
| AX-158224059 | 19 | 0.219 | KV453239.1 | 602752 | 23-scf00385 | 23 |
| AX-158224063 | 19 | 0.219 | KV453239.1 | 611533 | 23-scf00385 | 23 |
| AX-158224069 | 19 | 0.219 | KV453239.1 | 617427 | 23-scf00385 | 23 |
| AX-158224072 | 19 | 0.219 | KV453239.1 | 619318 | 23-scf00385 | 23 |
| AX-158224073 | 19 | 0.219 | KV453239.1 | 620468 | 23-scf00385 | 23 |
| AX-157839609 | 19 | 0.219 | KV453239.1 | 624602 | 23-scf00385 | 23 |
| AX-158224084 | 19 | 0.219 | KV453239.1 | 629472 | 23-scf00385 | 23 |
| AX-158224087 | 19 | 0.219 | KV453239.1 | 632471 | 23-scf00385 | 23 |
| AX-158224088 | 19 | 0.219 | KV453239.1 | 632934 | 23-scf00385 | 23 |
| AX-157727539 | 19 | 0.219 | KV453239.1 | 638626 | 23-scf00385 | 23 |
| AX-157839611 | 19 | 0.219 | KV453239.1 | 642478 | 23-scf00385 | 23 |
| AX-158224107 | 19 | 0.219 | KV453239.1 | 653262 | 23-scf00385 | 23 |
| AX-157747372 | 19 | 0.219 | KV453239.1 | 661787 | 23-scf00385 | 23 |
| AX-158224117 | 19 | 0.219 | KV453239.1 | 665408 | 23-scf00385 | 23 |
| AX-158224123 | 19 | 0.219 | KV453239.1 | 671577 | 23-scf00385 | 23 |
| AX-158224125 | 19 | 0.219 | KV453239.1 | 672519 | 23-scf00385 | 23 |
| AX-158224144 | 19 | 0.219 | KV453239.1 | 694295 | 23-scf00385 | 23 |
| AX-158224147 | 19 | 0.219 | KV453239.1 | 697880 | 23-scf00385 | 23 |
| AX-158224150 | 19 | 0.219 | KV453239.1 | 700507 | 23-scf00385 | 23 |
| AX-158224156 | 19 | 0.219 | KV453239.1 | 708467 | 23-scf00385 | 23 |
| AX-158224158 | 19 | 0.219 | KV453239.1 | 715249 | 23-scf00385 | 23 |
| AX-158224161 | 19 | 0.219 | KV453239.1 | 717717 | 23-scf00385 | 23 |
| AX-158224162 | 19 | 0.219 | KV453239.1 | 718099 | 23-scf00385 | 23 |
| AX-158224164 | 19 | 0.219 | KV453239.1 | 720864 | 23-scf00385 | 23 |
| AX-158224175 | 19 | 0.219 | KV453239.1 | 731987 | 23-scf00385 | 23 |
| AX-158224177 | 19 | 0.219 | KV453239.1 | 734200 | 23-scf00385 | 23 |
| AX-158224179 | 19 | 0.219 | KV453239.1 | 738289 | 23-scf00385 | 23 |
| AX-158224169 | 19 | 0.382 | KV453239.1 | 726028 | 23-scf00385 | 23 |
| AX-158223687 | 19 | 0.547 | KV453239.1 | 23885  | 23-scf00385 | 23 |
| AX-157839619 | 19 | 0.547 | KV453239.1 | 754082 | 23-scf00385 | 23 |
| AX-158224188 | 19 | 0.547 | KV453239.1 | 757826 | 23-scf00385 | 23 |
| AX-158386718 | 19 | 0.547 | KV453239.1 | 759095 | 23-scf00385 | 23 |
| AX-158224196 | 19 | 0.547 | KV453239.1 | 764273 | 23-scf00385 | 23 |
| AX-157839621 | 19 | 0.547 | KV453239.1 | 766319 | 23-scf00385 | 23 |
| AX-158224199 | 19 | 0.547 | KV453239.1 | 769605 | 23-scf00385 | 23 |
| AX-157839623 | 19 | 0.547 | KV453239.1 | 772400 | 23-scf00385 | 23 |
| AX-158224202 | 19 | 0.547 | KV453239.1 | 773013 | 23-scf00385 | 23 |
| AX-157702539 | 19 | 0.547 | KV453239.1 | 774742 | 23-scf00385 | 23 |
| AX-158224204 | 19 | 0.547 | KV453239.1 | 776765 | 23-scf00385 | 23 |
| AX-158224253 | 19 | 0.547 | KV453239.1 | 836513 | 23-scf00385 | 23 |
| AX-158224212 | 19 | 0.839 | KV453239.1 | 783014 | 23-scf00385 | 23 |
| AX-158224223 | 19 | 0.839 | KV453239.1 | 793948 | 23-scf00385 | 23 |
| AX-158224224 | 19 | 0.839 | KV453239.1 | 794790 | 23-scf00385 | 23 |
| AX-158224225 | 19 | 0.839 | KV453239.1 | 795557 | 23-scf00385 | 23 |
| AX-158224226 | 19 | 0.839 | KV453239.1 | 798938 | 23-scf00385 | 23 |
| AX-158224227 | 19 | 0.839 | KV453239.1 | 800253 | 23-scf00385 | 23 |
| AX-158224229 | 19 | 0.839 | KV453239.1 | 802780 | 23-scf00385 | 23 |

|              |    |       |            |         |             |    |
|--------------|----|-------|------------|---------|-------------|----|
| AX-158224233 | 19 | 0.839 | KV453239.1 | 806288  | 23-scf00385 | 23 |
| AX-158224234 | 19 | 0.839 | KV453239.1 | 807357  | 23-scf00385 | 23 |
| AX-158224235 | 19 | 0.839 | KV453239.1 | 808016  | 23-scf00385 | 23 |
| AX-158224238 | 19 | 0.839 | KV453239.1 | 809485  | 23-scf00385 | 23 |
| AX-157775006 | 19 | 0.839 | KV453239.1 | 810310  | 23-scf00385 | 23 |
| AX-158224058 | 19 | 0.981 | KV453239.1 | 600284  | 23-scf00385 | 23 |
| AX-158224240 | 19 | 0.981 | KV453239.1 | 813545  | 23-scf00385 | 23 |
| AX-158224242 | 19 | 0.981 | KV453239.1 | 816745  | 23-scf00385 | 23 |
| AX-158224396 | 19 | 0.981 | KV453239.1 | 1037202 | 23-scf00385 | 23 |
| AX-158224460 | 19 | 0.981 | KV453239.1 | 1127661 | 23-scf00385 | 23 |
| AX-158224640 | 19 | 0.981 | KV453239.1 | 1348969 | 23-scf00385 | 23 |
| AX-158224865 | 19 | 0.981 | KV453239.1 | 1642519 | 23-scf00385 | 23 |
| AX-158414916 | 19 | 0.984 | KV453239.1 | 817016  | 23-scf00385 | 23 |
| AX-157839629 | 19 | 0.984 | KV453239.1 | 830817  | 23-scf00385 | 23 |
| AX-158224251 | 19 | 0.984 | KV453239.1 | 834117  | 23-scf00385 | 23 |
| AX-158224256 | 19 | 0.984 | KV453239.1 | 840588  | 23-scf00385 | 23 |
| AX-158224260 | 19 | 0.984 | KV453239.1 | 844334  | 23-scf00385 | 23 |
| AX-158224263 | 19 | 0.984 | KV453239.1 | 848091  | 23-scf00385 | 23 |
| AX-158224265 | 19 | 0.984 | KV453239.1 | 849590  | 23-scf00385 | 23 |
| AX-158224270 | 19 | 0.984 | KV453239.1 | 854806  | 23-scf00385 | 23 |
| AX-158224273 | 19 | 0.984 | KV453239.1 | 860077  | 23-scf00385 | 23 |
| AX-158224278 | 19 | 0.984 | KV453239.1 | 864681  | 23-scf00385 | 23 |
| AX-158224279 | 19 | 0.984 | KV453239.1 | 867817  | 23-scf00385 | 23 |
| AX-157887304 | 19 | 0.991 | KV453239.1 | 854974  | 23-scf00385 | 23 |
| AX-158224280 | 19 | 1.015 | KV453239.1 | 869325  | 23-scf00385 | 23 |
| AX-158224281 | 19 | 1.025 | KV453239.1 | 870746  | 23-scf00385 | 23 |
| AX-157859473 | 19 | 1.06  | KV453239.1 | 871612  | 23-scf00385 | 23 |
| AX-158224286 | 19 | 1.093 | KV453239.1 | 873882  | 23-scf00385 | 23 |
| AX-158224328 | 19 | 1.093 | KV453239.1 | 931267  | 23-scf00385 | 23 |
| AX-158224407 | 19 | 1.093 | KV453239.1 | 1054166 | 23-scf00385 | 23 |
| AX-158224289 | 19 | 1.202 | KV453239.1 | 877095  | 23-scf00385 | 23 |
| AX-158224291 | 19 | 1.202 | KV453239.1 | 878449  | 23-scf00385 | 23 |
| AX-158224294 | 19 | 1.202 | KV453239.1 | 881238  | 23-scf00385 | 23 |
| AX-158224295 | 19 | 1.23  | KV453239.1 | 883091  | 23-scf00385 | 23 |
| AX-157739803 | 19 | 1.266 | KV453239.1 | 218548  | 23-scf00385 | 23 |
| AX-157757802 | 19 | 1.266 | KV453239.1 | 901484  | 23-scf00385 | 23 |
| AX-158224320 | 19 | 1.266 | KV453239.1 | 920879  | 23-scf00385 | 23 |
| AX-157711757 | 19 | 1.312 | KV453239.1 | 94327   | 23-scf00385 | 23 |
| AX-158224214 | 19 | 1.312 | KV453239.1 | 784742  | 23-scf00385 | 23 |
| AX-158224305 | 19 | 1.312 | KV453239.1 | 903695  | 23-scf00385 | 23 |
| AX-158224306 | 19 | 1.312 | KV453239.1 | 904845  | 23-scf00385 | 23 |
| AX-157859474 | 19 | 1.312 | KV453239.1 | 913780  | 23-scf00385 | 23 |
| AX-158224316 | 19 | 1.312 | KV453239.1 | 916503  | 23-scf00385 | 23 |
| AX-158224318 | 19 | 1.312 | KV453239.1 | 918855  | 23-scf00385 | 23 |
| AX-158224327 | 19 | 1.312 | KV453239.1 | 928647  | 23-scf00385 | 23 |
| AX-158224339 | 19 | 1.312 | KV453239.1 | 942679  | 23-scf00385 | 23 |
| AX-158224346 | 19 | 1.312 | KV453239.1 | 955172  | 23-scf00385 | 23 |
| AX-158224350 | 19 | 1.312 | KV453239.1 | 959105  | 23-scf00385 | 23 |
| AX-158224372 | 19 | 1.312 | KV453239.1 | 999454  | 23-scf00385 | 23 |
| AX-157721708 | 19 | 1.312 | KV453239.1 | 999891  | 23-scf00385 | 23 |
| AX-158224379 | 19 | 1.312 | KV453239.1 | 1009629 | 23-scf00385 | 23 |

|              |    |       |            |         |             |    |
|--------------|----|-------|------------|---------|-------------|----|
| AX-157738832 | 19 | 1.312 | KV453239.1 | 1030446 | 23-scf00385 | 23 |
| AX-158224319 | 19 | 1.314 | KV453239.1 | 920628  | 23-scf00385 | 23 |
| AX-158224323 | 19 | 1.37  | KV453239.1 | 925778  | 23-scf00385 | 23 |
| AX-158224335 | 19 | 1.378 | KV453239.1 | 939958  | 23-scf00385 | 23 |
| AX-158224336 | 19 | 1.386 | KV453239.1 | 940441  | 23-scf00385 | 23 |
| AX-158224338 | 19 | 1.393 | KV453239.1 | 941908  | 23-scf00385 | 23 |
| AX-158224342 | 19 | 1.404 | KV453239.1 | 945723  | 23-scf00385 | 23 |
| AX-158223761 | 19 | 1.421 | KV453239.1 | 140139  | 23-scf00385 | 23 |
| AX-158224236 | 19 | 1.421 | KV453239.1 | 808652  | 23-scf00385 | 23 |
| AX-157771675 | 19 | 1.421 | KV453239.1 | 847206  | 23-scf00385 | 23 |
| AX-158224272 | 19 | 1.421 | KV453239.1 | 858811  | 23-scf00385 | 23 |
| AX-158224292 | 19 | 1.421 | KV453239.1 | 879129  | 23-scf00385 | 23 |
| AX-158224302 | 19 | 1.421 | KV453239.1 | 901025  | 23-scf00385 | 23 |
| AX-157887306 | 19 | 1.421 | KV453239.1 | 909255  | 23-scf00385 | 23 |
| AX-158224311 | 19 | 1.421 | KV453239.1 | 909904  | 23-scf00385 | 23 |
| AX-158224312 | 19 | 1.421 | KV453239.1 | 910767  | 23-scf00385 | 23 |
| AX-158224313 | 19 | 1.421 | KV453239.1 | 912328  | 23-scf00385 | 23 |
| AX-158224324 | 19 | 1.421 | KV453239.1 | 926274  | 23-scf00385 | 23 |
| AX-158224330 | 19 | 1.421 | KV453239.1 | 933270  | 23-scf00385 | 23 |
| AX-158224343 | 19 | 1.421 | KV453239.1 | 947563  | 23-scf00385 | 23 |
| AX-158224345 | 19 | 1.421 | KV453239.1 | 950045  | 23-scf00385 | 23 |
| AX-158224347 | 19 | 1.421 | KV453239.1 | 956358  | 23-scf00385 | 23 |
| AX-158224352 | 19 | 1.421 | KV453239.1 | 961464  | 23-scf00385 | 23 |
| AX-157839632 | 19 | 1.421 | KV453239.1 | 961703  | 23-scf00385 | 23 |
| AX-158224353 | 19 | 1.421 | KV453239.1 | 962258  | 23-scf00385 | 23 |
| AX-158224355 | 19 | 1.421 | KV453239.1 | 963394  | 23-scf00385 | 23 |
| AX-158224361 | 19 | 1.421 | KV453239.1 | 979970  | 23-scf00385 | 23 |
| AX-158224363 | 19 | 1.421 | KV453239.1 | 981964  | 23-scf00385 | 23 |
| AX-158224364 | 19 | 1.421 | KV453239.1 | 982531  | 23-scf00385 | 23 |
| AX-158224365 | 19 | 1.421 | KV453239.1 | 983293  | 23-scf00385 | 23 |
| AX-158224366 | 19 | 1.421 | KV453239.1 | 985593  | 23-scf00385 | 23 |
| AX-158224368 | 19 | 1.421 | KV453239.1 | 989409  | 23-scf00385 | 23 |
| AX-158224369 | 19 | 1.421 | KV453239.1 | 990256  | 23-scf00385 | 23 |
| AX-157748526 | 19 | 1.421 | KV453239.1 | 993187  | 23-scf00385 | 23 |
| AX-157773312 | 19 | 1.421 | KV453239.1 | 995852  | 23-scf00385 | 23 |
| AX-158224374 | 19 | 1.421 | KV453239.1 | 1005003 | 23-scf00385 | 23 |
| AX-157839639 | 19 | 1.421 | KV453239.1 | 1018159 | 23-scf00385 | 23 |
| AX-157839640 | 19 | 1.421 | KV453239.1 | 1022908 | 23-scf00385 | 23 |
| AX-157839641 | 19 | 1.421 | KV453239.1 | 1023717 | 23-scf00385 | 23 |
| AX-158224391 | 19 | 1.421 | KV453239.1 | 1030903 | 23-scf00385 | 23 |
| AX-158414921 | 19 | 1.421 | KV453239.1 | 1031405 | 23-scf00385 | 23 |
| AX-158224393 | 19 | 1.421 | KV453239.1 | 1031642 | 23-scf00385 | 23 |
| AX-158224397 | 19 | 1.421 | KV453239.1 | 1040593 | 23-scf00385 | 23 |
| AX-158224400 | 19 | 1.421 | KV453239.1 | 1044654 | 23-scf00385 | 23 |
| AX-158224405 | 19 | 1.421 | KV453239.1 | 1052114 | 23-scf00385 | 23 |
| AX-158224410 | 19 | 1.421 | KV453239.1 | 1057454 | 23-scf00385 | 23 |
| AX-158224414 | 19 | 1.421 | KV453239.1 | 1068068 | 23-scf00385 | 23 |
| AX-158224416 | 19 | 1.421 | KV453239.1 | 1070270 | 23-scf00385 | 23 |
| AX-157775750 | 19 | 1.421 | KV453239.1 | 1073649 | 23-scf00385 | 23 |
| AX-158224431 | 19 | 1.421 | KV453239.1 | 1086941 | 23-scf00385 | 23 |
| AX-158224449 | 19 | 1.421 | KV453239.1 | 1112906 | 23-scf00385 | 23 |

|              |    |       |            |         |             |    |
|--------------|----|-------|------------|---------|-------------|----|
| AX-158224451 | 19 | 1.421 | KV453239.1 | 1115677 | 23-scf00385 | 23 |
| AX-158224422 | 19 | 1.53  | KV453239.1 | 1076511 | 23-scf00385 | 23 |
| AX-158224424 | 19 | 1.573 | KV453239.1 | 1079475 | 23-scf00385 | 23 |
| AX-158224426 | 19 | 1.597 | KV453239.1 | 1080378 | 23-scf00385 | 23 |
| AX-158224455 | 19 | 1.597 | KV453239.1 | 1120086 | 23-scf00385 | 23 |
| AX-158224389 | 19 | 1.621 | KV453239.1 | 1028237 | 23-scf00385 | 23 |
| AX-158224430 | 19 | 1.621 | KV453239.1 | 1086129 | 23-scf00385 | 23 |
| AX-157754643 | 19 | 1.621 | KV453239.1 | 1173183 | 23-scf00385 | 23 |
| AX-158224388 | 19 | 1.639 | KV453239.1 | 1026751 | 23-scf00385 | 23 |
| AX-157745885 | 19 | 1.639 | KV453239.1 | 1027883 | 23-scf00385 | 23 |
| AX-158224421 | 19 | 1.639 | KV453239.1 | 1076115 | 23-scf00385 | 23 |
| AX-158224435 | 19 | 1.639 | KV453239.1 | 1092083 | 23-scf00385 | 23 |
| AX-157773710 | 19 | 1.639 | KV453239.1 | 1095759 | 23-scf00385 | 23 |
| AX-158224437 | 19 | 1.639 | KV453239.1 | 1097399 | 23-scf00385 | 23 |
| AX-158224444 | 19 | 1.639 | KV453239.1 | 1104714 | 23-scf00385 | 23 |
| AX-158224447 | 19 | 1.639 | KV453239.1 | 1109547 | 23-scf00385 | 23 |
| AX-158224448 | 19 | 1.639 | KV453239.1 | 1111675 | 23-scf00385 | 23 |
| AX-158224452 | 19 | 1.639 | KV453239.1 | 1117004 | 23-scf00385 | 23 |
| AX-158224453 | 19 | 1.639 | KV453239.1 | 1118071 | 23-scf00385 | 23 |
| AX-158224595 | 19 | 1.639 | KV453239.1 | 1302929 | 23-scf00385 | 23 |
| AX-158224598 | 19 | 1.639 | KV453239.1 | 1305449 | 23-scf00385 | 23 |
| AX-158224601 | 19 | 1.639 | KV453239.1 | 1306326 | 23-scf00385 | 23 |
| AX-158224635 | 19 | 1.639 | KV453239.1 | 1345073 | 23-scf00385 | 23 |
| AX-158224644 | 19 | 1.639 | KV453239.1 | 1352658 | 23-scf00385 | 23 |
| AX-158224454 | 19 | 1.681 | KV453239.1 | 1118846 | 23-scf00385 | 23 |
| AX-158224456 | 19 | 1.749 | KV453239.1 | 1122076 | 23-scf00385 | 23 |
| AX-158224457 | 19 | 1.749 | KV453239.1 | 1123571 | 23-scf00385 | 23 |
| AX-158224461 | 19 | 1.775 | KV453239.1 | 1128276 | 23-scf00385 | 23 |
| AX-158224462 | 19 | 1.775 | KV453239.1 | 1128724 | 23-scf00385 | 23 |
| AX-158224465 | 19 | 1.801 | KV453239.1 | 1131467 | 23-scf00385 | 23 |
| AX-157739443 | 19 | 1.829 | KV453239.1 | 1133352 | 23-scf00385 | 23 |
| AX-158224244 | 19 | 1.858 | KV453239.1 | 818228  | 23-scf00385 | 23 |
| AX-158224427 | 19 | 1.858 | KV453239.1 | 1081508 | 23-scf00385 | 23 |
| AX-158224463 | 19 | 1.858 | KV453239.1 | 1129484 | 23-scf00385 | 23 |
| AX-157722950 | 19 | 1.858 | KV453239.1 | 1133637 | 23-scf00385 | 23 |
| AX-158224467 | 19 | 1.858 | KV453239.1 | 1134957 | 23-scf00385 | 23 |
| AX-158224473 | 19 | 1.858 | KV453239.1 | 1141625 | 23-scf00385 | 23 |
| AX-158224474 | 19 | 1.858 | KV453239.1 | 1143050 | 23-scf00385 | 23 |
| AX-158224478 | 19 | 1.858 | KV453239.1 | 1146777 | 23-scf00385 | 23 |
| AX-158386723 | 19 | 1.858 | KV453239.1 | 1157130 | 23-scf00385 | 23 |
| AX-157839642 | 19 | 1.858 | KV453239.1 | 1158881 | 23-scf00385 | 23 |
| AX-158224493 | 19 | 1.858 | KV453239.1 | 1160881 | 23-scf00385 | 23 |
| AX-158224494 | 19 | 1.858 | KV453239.1 | 1162567 | 23-scf00385 | 23 |
| AX-158224495 | 19 | 1.858 | KV453239.1 | 1163415 | 23-scf00385 | 23 |
| AX-158224496 | 19 | 1.858 | KV453239.1 | 1164150 | 23-scf00385 | 23 |
| AX-158224497 | 19 | 1.858 | KV453239.1 | 1165110 | 23-scf00385 | 23 |
| AX-158224500 | 19 | 1.858 | KV453239.1 | 1167972 | 23-scf00385 | 23 |
| AX-158224501 | 19 | 1.858 | KV453239.1 | 1170521 | 23-scf00385 | 23 |
| AX-158224502 | 19 | 1.858 | KV453239.1 | 1172554 | 23-scf00385 | 23 |
| AX-158224504 | 19 | 1.858 | KV453239.1 | 1174702 | 23-scf00385 | 23 |
| AX-157771117 | 19 | 1.858 | KV453239.1 | 1177829 | 23-scf00385 | 23 |

|              |    |       |            |         |             |    |
|--------------|----|-------|------------|---------|-------------|----|
| AX-158224515 | 19 | 1.858 | KV453239.1 | 1189519 | 23-scf00385 | 23 |
| AX-158224518 | 19 | 1.858 | KV453239.1 | 1196718 | 23-scf00385 | 23 |
| AX-158224521 | 19 | 1.858 | KV453239.1 | 1199593 | 23-scf00385 | 23 |
| AX-158224522 | 19 | 1.858 | KV453239.1 | 1200168 | 23-scf00385 | 23 |
| AX-158224524 | 19 | 1.858 | KV453239.1 | 1205017 | 23-scf00385 | 23 |
| AX-158224526 | 19 | 1.858 | KV453239.1 | 1208416 | 23-scf00385 | 23 |
| AX-158224527 | 19 | 1.858 | KV453239.1 | 1209523 | 23-scf00385 | 23 |
| AX-157839644 | 19 | 1.858 | KV453239.1 | 1211475 | 23-scf00385 | 23 |
| AX-157743944 | 19 | 1.858 | KV453239.1 | 1217830 | 23-scf00385 | 23 |
| AX-158224533 | 19 | 1.858 | KV453239.1 | 1221571 | 23-scf00385 | 23 |
| AX-158224673 | 19 | 1.858 | KV453239.1 | 1382493 | 23-scf00385 | 23 |
| AX-158224375 | 19 | 2.076 | KV453239.1 | 1005382 | 23-scf00385 | 23 |
| AX-158224472 | 19 | 2.076 | KV453239.1 | 1141150 | 23-scf00385 | 23 |
| AX-158224481 | 19 | 2.076 | KV453239.1 | 1149458 | 23-scf00385 | 23 |
| AX-158224490 | 19 | 2.076 | KV453239.1 | 1158038 | 23-scf00385 | 23 |
| AX-158224506 | 19 | 2.076 | KV453239.1 | 1176564 | 23-scf00385 | 23 |
| AX-157872436 | 19 | 2.076 | KV453239.1 | 1197207 | 23-scf00385 | 23 |
| AX-158224525 | 19 | 2.076 | KV453239.1 | 1206127 | 23-scf00385 | 23 |
| AX-158224531 | 19 | 2.076 | KV453239.1 | 1217559 | 23-scf00385 | 23 |
| AX-158224535 | 19 | 2.076 | KV453239.1 | 1226265 | 23-scf00385 | 23 |
| AX-158224537 | 19 | 2.076 | KV453239.1 | 1228524 | 23-scf00385 | 23 |
| AX-158224538 | 19 | 2.076 | KV453239.1 | 1228856 | 23-scf00385 | 23 |
| AX-157839649 | 19 | 2.076 | KV453239.1 | 1230232 | 23-scf00385 | 23 |
| AX-158224539 | 19 | 2.076 | KV453239.1 | 1230619 | 23-scf00385 | 23 |
| AX-158224540 | 19 | 2.076 | KV453239.1 | 1230895 | 23-scf00385 | 23 |
| AX-158224542 | 19 | 2.076 | KV453239.1 | 1233155 | 23-scf00385 | 23 |
| AX-158224546 | 19 | 2.076 | KV453239.1 | 1250003 | 23-scf00385 | 23 |
| AX-157839650 | 19 | 2.076 | KV453239.1 | 1251313 | 23-scf00385 | 23 |
| AX-157839651 | 19 | 2.076 | KV453239.1 | 1251985 | 23-scf00385 | 23 |
| AX-157700518 | 19 | 2.076 | KV453239.1 | 1253431 | 23-scf00385 | 23 |
| AX-157839653 | 19 | 2.076 | KV453239.1 | 1259063 | 23-scf00385 | 23 |
| AX-158224552 | 19 | 2.076 | KV453239.1 | 1259826 | 23-scf00385 | 23 |
| AX-158224554 | 19 | 2.076 | KV453239.1 | 1261395 | 23-scf00385 | 23 |
| AX-158224555 | 19 | 2.076 | KV453239.1 | 1262205 | 23-scf00385 | 23 |
| AX-158224556 | 19 | 2.076 | KV453239.1 | 1262617 | 23-scf00385 | 23 |
| AX-158224557 | 19 | 2.076 | KV453239.1 | 1265378 | 23-scf00385 | 23 |
| AX-158224559 | 19 | 2.076 | KV453239.1 | 1268463 | 23-scf00385 | 23 |
| AX-158224560 | 19 | 2.076 | KV453239.1 | 1269122 | 23-scf00385 | 23 |
| AX-158224561 | 19 | 2.076 | KV453239.1 | 1270142 | 23-scf00385 | 23 |
| AX-158224565 | 19 | 2.076 | KV453239.1 | 1274998 | 23-scf00385 | 23 |
| AX-157839654 | 19 | 2.076 | KV453239.1 | 1275662 | 23-scf00385 | 23 |
| AX-158224569 | 19 | 2.076 | KV453239.1 | 1279629 | 23-scf00385 | 23 |
| AX-158224571 | 19 | 2.076 | KV453239.1 | 1280698 | 23-scf00385 | 23 |
| AX-158224574 | 19 | 2.076 | KV453239.1 | 1283178 | 23-scf00385 | 23 |
| AX-157839655 | 19 | 2.076 | KV453239.1 | 1284380 | 23-scf00385 | 23 |
| AX-158224579 | 19 | 2.076 | KV453239.1 | 1287588 | 23-scf00385 | 23 |
| AX-158224580 | 19 | 2.076 | KV453239.1 | 1288344 | 23-scf00385 | 23 |
| AX-158224581 | 19 | 2.076 | KV453239.1 | 1289251 | 23-scf00385 | 23 |
| AX-158224582 | 19 | 2.076 | KV453239.1 | 1290126 | 23-scf00385 | 23 |
| AX-158224583 | 19 | 2.076 | KV453239.1 | 1291317 | 23-scf00385 | 23 |
| AX-158224584 | 19 | 2.076 | KV453239.1 | 1291657 | 23-scf00385 | 23 |



|              |    |       |            |         |               |    |
|--------------|----|-------|------------|---------|---------------|----|
| AX-158224585 | 19 | 2.076 | KV453239.1 | 1293429 | 23-scf00385   | 23 |
| AX-158224587 | 19 | 2.076 | KV453239.1 | 1295186 | 23-scf00385   | 23 |
| AX-158224592 | 19 | 2.076 | KV453239.1 | 1300859 | 23-scf00385   | 23 |
| AX-157839657 | 19 | 2.076 | KV453239.1 | 1301773 | 23-scf00385   | 23 |
| AX-158224605 | 19 | 2.076 | KV453239.1 | 1311908 | 23-scf00385   | 23 |
| AX-157750647 | 19 | 2.076 | KV453239.1 | 1318803 | 23-scf00385   | 23 |
| AX-158224611 | 19 | 2.076 | KV453239.1 | 1321946 | 23-scf00385   | 23 |
| AX-158224613 | 19 | 2.076 | KV453239.1 | 1323707 | 23-scf00385   | 23 |
| AX-158224614 | 19 | 2.076 | KV453239.1 | 1323816 | 23-scf00385   | 23 |
| AX-158224615 | 19 | 2.076 | KV453239.1 | 1324579 | 23-scf00385   | 23 |
| AX-158224616 | 19 | 2.076 | KV453239.1 | 1325611 | 23-scf00385   | 23 |
| AX-158224617 | 19 | 2.076 | KV453239.1 | 1326210 | 23-scf00385   | 23 |
| AX-158224618 | 19 | 2.076 | KV453239.1 | 1326730 | 23-scf00385   | 23 |
| AX-158224619 | 19 | 2.076 | KV453239.1 | 1327722 | 23-scf00385   | 23 |
| AX-158224620 | 19 | 2.076 | KV453239.1 | 1328149 | 23-scf00385   | 23 |
| AX-158224623 | 19 | 2.076 | KV453239.1 | 1333268 | 23-scf00385   | 23 |
| AX-157839661 | 19 | 2.076 | KV453239.1 | 1334168 | 23-scf00385   | 23 |
| AX-158224625 | 19 | 2.076 | KV453239.1 | 1335052 | 23-scf00385   | 23 |
| AX-158224626 | 19 | 2.076 | KV453239.1 | 1336106 | 23-scf00385   | 23 |
| AX-158224629 | 19 | 2.076 | KV453239.1 | 1339155 | 23-scf00385   | 23 |
| AX-158224630 | 19 | 2.076 | KV453239.1 | 1339548 | 23-scf00385   | 23 |
| AX-158224634 | 19 | 2.076 | KV453239.1 | 1343402 | 23-scf00385   | 23 |
| AX-158224637 | 19 | 2.076 | KV453239.1 | 1346681 | 23-scf00385   | 23 |
| AX-158224676 | 19 | 2.076 | KV453239.1 | 1384340 | 23-scf00385   | 23 |
| AX-157696467 | 19 | 2.076 | FI878217.1 | 395     | ORI212 Ictalu | UN |
| AX-158224639 | 19 | 2.185 | KV453239.1 | 1348100 | 23-scf00385   | 23 |
| AX-158224647 | 19 | 2.185 | KV453239.1 | 1358472 | 23-scf00385   | 23 |
| AX-157839659 | 19 | 2.295 | KV453239.1 | 1312863 | 23-scf00385   | 23 |
| AX-157755898 | 19 | 2.295 | KV453239.1 | 1364005 | 23-scf00385   | 23 |
| AX-158224655 | 19 | 2.295 | KV453239.1 | 1367857 | 23-scf00385   | 23 |
| AX-158224656 | 19 | 2.295 | KV453239.1 | 1368397 | 23-scf00385   | 23 |
| AX-158224658 | 19 | 2.295 | KV453239.1 | 1371533 | 23-scf00385   | 23 |
| AX-158224659 | 19 | 2.295 | KV453239.1 | 1371861 | 23-scf00385   | 23 |
| AX-158224660 | 19 | 2.295 | KV453239.1 | 1372144 | 23-scf00385   | 23 |
| AX-158224662 | 19 | 2.295 | KV453239.1 | 1373808 | 23-scf00385   | 23 |
| AX-158224663 | 19 | 2.295 | KV453239.1 | 1374063 | 23-scf00385   | 23 |
| AX-158224666 | 19 | 2.295 | KV453239.1 | 1376461 | 23-scf00385   | 23 |
| AX-158224668 | 19 | 2.295 | KV453239.1 | 1377542 | 23-scf00385   | 23 |
| AX-158224669 | 19 | 2.295 | KV453239.1 | 1378177 | 23-scf00385   | 23 |
| AX-158224672 | 19 | 2.295 | KV453239.1 | 1380876 | 23-scf00385   | 23 |
| AX-158224674 | 19 | 2.295 | KV453239.1 | 1383830 | 23-scf00385   | 23 |
| AX-158224675 | 19 | 2.295 | KV453239.1 | 1384102 | 23-scf00385   | 23 |
| AX-158224677 | 19 | 2.295 | KV453239.1 | 1385205 | 23-scf00385   | 23 |
| AX-157839663 | 19 | 2.513 | KV453239.1 | 1376000 | 23-scf00385   | 23 |
| AX-158224681 | 19 | 2.513 | KV453239.1 | 1389649 | 23-scf00385   | 23 |
| AX-157740603 | 19 | 2.513 | KV453239.1 | 1393544 | 23-scf00385   | 23 |
| AX-157839664 | 19 | 2.513 | KV453239.1 | 1393618 | 23-scf00385   | 23 |
| AX-158224684 | 19 | 2.513 | KV453239.1 | 1398335 | 23-scf00385   | 23 |
| AX-158224686 | 19 | 2.513 | KV453239.1 | 1399360 | 23-scf00385   | 23 |
| AX-158224688 | 19 | 2.513 | KV453239.1 | 1401122 | 23-scf00385   | 23 |
| AX-158224689 | 19 | 2.513 | KV453239.1 | 1403052 | 23-scf00385   | 23 |

|              |    |       |            |         |             |    |
|--------------|----|-------|------------|---------|-------------|----|
| AX-158224692 | 19 | 2.513 | KV453239.1 | 1404668 | 23-scf00385 | 23 |
| AX-157718433 | 19 | 2.513 | KV453239.1 | 1406269 | 23-scf00385 | 23 |
| AX-157839665 | 19 | 2.513 | KV453239.1 | 1408955 | 23-scf00385 | 23 |
| AX-157839666 | 19 | 2.513 | KV453239.1 | 1410748 | 23-scf00385 | 23 |
| AX-158224702 | 19 | 2.513 | KV453239.1 | 1425430 | 23-scf00385 | 23 |
| AX-158224696 | 19 | 2.731 | KV453239.1 | 1417830 | 23-scf00385 | 23 |
| AX-157859480 | 19 | 2.731 | KV453239.1 | 1420191 | 23-scf00385 | 23 |
| AX-158224700 | 19 | 2.731 | KV453239.1 | 1421892 | 23-scf00385 | 23 |
| AX-158224704 | 19 | 2.731 | KV453239.1 | 1426167 | 23-scf00385 | 23 |
| AX-158224706 | 19 | 2.731 | KV453239.1 | 1426596 | 23-scf00385 | 23 |
| AX-158224707 | 19 | 2.731 | KV453239.1 | 1427118 | 23-scf00385 | 23 |
| AX-157745826 | 19 | 2.731 | KV453239.1 | 1435995 | 23-scf00385 | 23 |
| AX-158224712 | 19 | 2.731 | KV453239.1 | 1442397 | 23-scf00385 | 23 |
| AX-157750029 | 19 | 2.731 | KV453239.1 | 1444900 | 23-scf00385 | 23 |
| AX-158224779 | 19 | 2.731 | KV453239.1 | 1534406 | 23-scf00385 | 23 |
| AX-157839667 | 19 | 2.84  | KV453239.1 | 1413136 | 23-scf00385 | 23 |
| AX-158224703 | 19 | 2.84  | KV453239.1 | 1425821 | 23-scf00385 | 23 |
| AX-157839669 | 19 | 2.84  | KV453239.1 | 1441864 | 23-scf00385 | 23 |
| AX-157839670 | 19 | 2.84  | KV453239.1 | 1445383 | 23-scf00385 | 23 |
| AX-158224716 | 19 | 2.84  | KV453239.1 | 1447949 | 23-scf00385 | 23 |
| AX-157716694 | 19 | 2.84  | KV453239.1 | 1448368 | 23-scf00385 | 23 |
| AX-158224717 | 19 | 2.84  | KV453239.1 | 1449309 | 23-scf00385 | 23 |
| AX-157715463 | 19 | 2.84  | KV453239.1 | 1452856 | 23-scf00385 | 23 |
| AX-158224720 | 19 | 2.84  | KV453239.1 | 1454109 | 23-scf00385 | 23 |
| AX-158224722 | 19 | 2.84  | KV453239.1 | 1458051 | 23-scf00385 | 23 |
| AX-158224723 | 19 | 2.84  | KV453239.1 | 1461768 | 23-scf00385 | 23 |
| AX-158224725 | 19 | 2.84  | KV453239.1 | 1468532 | 23-scf00385 | 23 |
| AX-158224728 | 19 | 2.84  | KV453239.1 | 1472211 | 23-scf00385 | 23 |
| AX-158224729 | 19 | 2.84  | KV453239.1 | 1472705 | 23-scf00385 | 23 |
| AX-157839672 | 19 | 2.84  | KV453239.1 | 1474621 | 23-scf00385 | 23 |
| AX-157839673 | 19 | 2.84  | KV453239.1 | 1474696 | 23-scf00385 | 23 |
| AX-158224730 | 19 | 2.84  | KV453239.1 | 1475036 | 23-scf00385 | 23 |
| AX-158224733 | 19 | 2.84  | KV453239.1 | 1480806 | 23-scf00385 | 23 |
| AX-158224737 | 19 | 2.84  | KV453239.1 | 1485446 | 23-scf00385 | 23 |
| AX-158224747 | 19 | 2.84  | KV453239.1 | 1493688 | 23-scf00385 | 23 |
| AX-158224749 | 19 | 2.84  | KV453239.1 | 1497449 | 23-scf00385 | 23 |
| AX-158224756 | 19 | 2.84  | KV453239.1 | 1508504 | 23-scf00385 | 23 |
| AX-158224764 | 19 | 2.84  | KV453239.1 | 1521462 | 23-scf00385 | 23 |
| AX-158224766 | 19 | 2.84  | KV453239.1 | 1522651 | 23-scf00385 | 23 |
| AX-158224771 | 19 | 2.84  | KV453239.1 | 1526112 | 23-scf00385 | 23 |
| AX-158224886 | 19 | 2.84  | KV453239.1 | 1663501 | 23-scf00385 | 23 |
| AX-158224899 | 19 | 2.84  | KV453239.1 | 1675702 | 23-scf00385 | 23 |
| AX-158224738 | 19 | 2.95  | KV453239.1 | 1485805 | 23-scf00385 | 23 |
| AX-158224739 | 19 | 2.95  | KV453239.1 | 1486286 | 23-scf00385 | 23 |
| AX-158224740 | 19 | 2.95  | KV453239.1 | 1486703 | 23-scf00385 | 23 |
| AX-158224743 | 19 | 2.95  | KV453239.1 | 1489351 | 23-scf00385 | 23 |
| AX-158224744 | 19 | 2.95  | KV453239.1 | 1490539 | 23-scf00385 | 23 |
| AX-158224768 | 19 | 2.95  | KV453239.1 | 1523600 | 23-scf00385 | 23 |
| AX-157723933 | 19 | 2.95  | KV453239.1 | 1562156 | 23-scf00385 | 23 |
| AX-157748059 | 19 | 2.999 | KV453239.1 | 1494977 | 23-scf00385 | 23 |
| AX-158224710 | 19 | 3.059 | KV453239.1 | 1437270 | 23-scf00385 | 23 |

|              |    |       |            |         |             |    |
|--------------|----|-------|------------|---------|-------------|----|
| AX-158224750 | 19 | 3.059 | KV453239.1 | 1499321 | 23-scf00385 | 23 |
| AX-158414931 | 19 | 3.059 | KV453239.1 | 1500410 | 23-scf00385 | 23 |
| AX-158224751 | 19 | 3.059 | KV453239.1 | 1500791 | 23-scf00385 | 23 |
| AX-158224754 | 19 | 3.059 | KV453239.1 | 1506654 | 23-scf00385 | 23 |
| AX-157709388 | 19 | 3.059 | KV453239.1 | 1514606 | 23-scf00385 | 23 |
| AX-158224761 | 19 | 3.059 | KV453239.1 | 1516827 | 23-scf00385 | 23 |
| AX-158224762 | 19 | 3.059 | KV453239.1 | 1517481 | 23-scf00385 | 23 |
| AX-158224765 | 19 | 3.059 | KV453239.1 | 1521962 | 23-scf00385 | 23 |
| AX-158224767 | 19 | 3.059 | KV453239.1 | 1523052 | 23-scf00385 | 23 |
| AX-158224769 | 19 | 3.059 | KV453239.1 | 1524357 | 23-scf00385 | 23 |
| AX-158224770 | 19 | 3.059 | KV453239.1 | 1524970 | 23-scf00385 | 23 |
| AX-158224773 | 19 | 3.059 | KV453239.1 | 1528944 | 23-scf00385 | 23 |
| AX-158224774 | 19 | 3.059 | KV453239.1 | 1529948 | 23-scf00385 | 23 |
| AX-158224775 | 19 | 3.059 | KV453239.1 | 1530646 | 23-scf00385 | 23 |
| AX-158224776 | 19 | 3.059 | KV453239.1 | 1531663 | 23-scf00385 | 23 |
| AX-158224802 | 19 | 3.059 | KV453239.1 | 1564271 | 23-scf00385 | 23 |
| AX-158224807 | 19 | 3.059 | KV453239.1 | 1571231 | 23-scf00385 | 23 |
| AX-158224811 | 19 | 3.059 | KV453239.1 | 1578242 | 23-scf00385 | 23 |
| AX-157859482 | 19 | 3.059 | KV453239.1 | 1579990 | 23-scf00385 | 23 |
| AX-158224815 | 19 | 3.059 | KV453239.1 | 1582730 | 23-scf00385 | 23 |
| AX-158224777 | 19 | 3.143 | KV453239.1 | 1532797 | 23-scf00385 | 23 |
| AX-158224373 | 19 | 3.277 | KV453239.1 | 1000913 | 23-scf00385 | 23 |
| AX-158224781 | 19 | 3.277 | KV453239.1 | 1537092 | 23-scf00385 | 23 |
| AX-158224784 | 19 | 3.277 | KV453239.1 | 1542002 | 23-scf00385 | 23 |
| AX-158224786 | 19 | 3.277 | KV453239.1 | 1543949 | 23-scf00385 | 23 |
| AX-158224796 | 19 | 3.277 | KV453239.1 | 1554274 | 23-scf00385 | 23 |
| AX-158224799 | 19 | 3.277 | KV453239.1 | 1557835 | 23-scf00385 | 23 |
| AX-158224804 | 19 | 3.277 | KV453239.1 | 1566643 | 23-scf00385 | 23 |
| AX-158224817 | 19 | 3.277 | KV453239.1 | 1584354 | 23-scf00385 | 23 |
| AX-158224840 | 19 | 3.277 | KV453239.1 | 1610629 | 23-scf00385 | 23 |
| AX-158224805 | 19 | 3.32  | KV453239.1 | 1569101 | 23-scf00385 | 23 |
| AX-158386727 | 19 | 3.387 | KV453239.1 | 1574285 | 23-scf00385 | 23 |
| AX-158224809 | 19 | 3.387 | KV453239.1 | 1575001 | 23-scf00385 | 23 |
| AX-158224812 | 19 | 3.387 | KV453239.1 | 1579654 | 23-scf00385 | 23 |
| AX-158224813 | 19 | 3.387 | KV453239.1 | 1580138 | 23-scf00385 | 23 |
| AX-158224814 | 19 | 3.387 | KV453239.1 | 1582211 | 23-scf00385 | 23 |
| AX-158224816 | 19 | 3.387 | KV453239.1 | 1583427 | 23-scf00385 | 23 |
| AX-158224819 | 19 | 3.387 | KV453239.1 | 1586056 | 23-scf00385 | 23 |
| AX-158224829 | 19 | 3.387 | KV453239.1 | 1597444 | 23-scf00385 | 23 |
| AX-157720120 | 19 | 3.387 | KV453239.1 | 1599197 | 23-scf00385 | 23 |
| AX-157887310 | 19 | 3.387 | KV453239.1 | 1623944 | 23-scf00385 | 23 |
| AX-158224822 | 19 | 3.424 | KV453239.1 | 1588965 | 23-scf00385 | 23 |
| AX-158224824 | 19 | 3.47  | KV453239.1 | 1590895 | 23-scf00385 | 23 |
| AX-158224826 | 19 | 3.54  | KV453239.1 | 1593401 | 23-scf00385 | 23 |
| AX-158418698 | 19 | 3.605 | KV453239.1 | 1597333 | 23-scf00385 | 23 |
| AX-158224831 | 19 | 3.605 | KV453239.1 | 1600833 | 23-scf00385 | 23 |
| AX-158224832 | 19 | 3.605 | KV453239.1 | 1601372 | 23-scf00385 | 23 |
| AX-158224835 | 19 | 3.642 | KV453239.1 | 1605554 | 23-scf00385 | 23 |
| AX-158224836 | 19 | 3.657 | KV453239.1 | 1606772 | 23-scf00385 | 23 |
| AX-158224839 | 19 | 3.657 | KV453239.1 | 1610114 | 23-scf00385 | 23 |
| AX-158224828 | 19 | 3.687 | KV453239.1 | 1594689 | 23-scf00385 | 23 |

|              |    |       |            |         |             |    |
|--------------|----|-------|------------|---------|-------------|----|
| AX-158394096 | 19 | 3.687 | KV453239.1 | 1621938 | 23-scf00385 | 23 |
| AX-158224852 | 19 | 3.714 | KV453239.1 | 1627700 | 23-scf00385 | 23 |
| AX-158224858 | 19 | 3.714 | KV453239.1 | 1636494 | 23-scf00385 | 23 |
| AX-158224859 | 19 | 3.714 | KV453239.1 | 1637224 | 23-scf00385 | 23 |
| AX-158224863 | 19 | 3.714 | KV453239.1 | 1640878 | 23-scf00385 | 23 |
| AX-158224864 | 19 | 3.714 | KV453239.1 | 1641493 | 23-scf00385 | 23 |
| AX-158224866 | 19 | 3.714 | KV453239.1 | 1642759 | 23-scf00385 | 23 |
| AX-158224868 | 19 | 3.714 | KV453239.1 | 1643941 | 23-scf00385 | 23 |
| AX-158224869 | 19 | 3.714 | KV453239.1 | 1644089 | 23-scf00385 | 23 |
| AX-158224875 | 19 | 3.811 | KV453239.1 | 1651304 | 23-scf00385 | 23 |
| AX-158224857 | 19 | 3.933 | KV453239.1 | 1635991 | 23-scf00385 | 23 |
| AX-158224876 | 19 | 3.933 | KV453239.1 | 1651661 | 23-scf00385 | 23 |
| AX-157750441 | 19 | 3.933 | KV453239.1 | 1653491 | 23-scf00385 | 23 |
| AX-158224880 | 19 | 3.933 | KV453239.1 | 1656049 | 23-scf00385 | 23 |
| AX-158224882 | 19 | 3.933 | KV453239.1 | 1657094 | 23-scf00385 | 23 |
| AX-158224883 | 19 | 3.933 | KV453239.1 | 1657483 | 23-scf00385 | 23 |
| AX-157839675 | 19 | 3.933 | KV453239.1 | 1660033 | 23-scf00385 | 23 |
| AX-157741796 | 19 | 3.933 | KV453239.1 | 1662852 | 23-scf00385 | 23 |
| AX-158224884 | 19 | 3.957 | KV453239.1 | 1661366 | 23-scf00385 | 23 |
| AX-158224885 | 19 | 4.013 | KV453239.1 | 1662175 | 23-scf00385 | 23 |
| AX-158224833 | 19 | 4.042 | KV453239.1 | 1603135 | 23-scf00385 | 23 |
| AX-158224867 | 19 | 4.042 | KV453239.1 | 1643328 | 23-scf00385 | 23 |
| AX-158224877 | 19 | 4.042 | KV453239.1 | 1652698 | 23-scf00385 | 23 |
| AX-158224881 | 19 | 4.042 | KV453239.1 | 1656679 | 23-scf00385 | 23 |
| AX-158224887 | 19 | 4.042 | KV453239.1 | 1664176 | 23-scf00385 | 23 |
| AX-158224888 | 19 | 4.042 | KV453239.1 | 1665349 | 23-scf00385 | 23 |
| AX-158224889 | 19 | 4.042 | KV453239.1 | 1668836 | 23-scf00385 | 23 |
| AX-158224891 | 19 | 4.042 | KV453239.1 | 1670235 | 23-scf00385 | 23 |
| AX-158224896 | 19 | 4.042 | KV453239.1 | 1673883 | 23-scf00385 | 23 |
| AX-158224935 | 19 | 4.042 | KV453239.1 | 1728978 | 23-scf00385 | 23 |
| AX-158224892 | 19 | 4.043 | KV453239.1 | 1670727 | 23-scf00385 | 23 |
| AX-158224897 | 19 | 4.043 | KV453239.1 | 1674272 | 23-scf00385 | 23 |
| AX-158224900 | 19 | 4.205 | KV453239.1 | 1677558 | 23-scf00385 | 23 |
| AX-158224902 | 19 | 4.205 | KV453239.1 | 1680082 | 23-scf00385 | 23 |
| AX-157879816 | 19 | 4.265 | KV453239.1 | 1680449 | 23-scf00385 | 23 |
| AX-158224962 | 19 | 4.265 | KV453239.1 | 1770604 | 23-scf00385 | 23 |
| AX-158225006 | 19 | 4.265 | KV453239.1 | 1824479 | 23-scf00385 | 23 |
| AX-157723730 | 19 | 4.37  | KV453239.1 | 1695631 | 23-scf00385 | 23 |
| AX-158224912 | 19 | 4.371 | KV453239.1 | 1703073 | 23-scf00385 | 23 |
| AX-158224917 | 19 | 4.371 | KV453239.1 | 1711115 | 23-scf00385 | 23 |
| AX-158224921 | 19 | 4.698 | KV453239.1 | 1714410 | 23-scf00385 | 23 |
| AX-158224926 | 19 | 4.698 | KV453239.1 | 1718091 | 23-scf00385 | 23 |
| AX-157839677 | 19 | 4.698 | KV453239.1 | 1718693 | 23-scf00385 | 23 |
| AX-157839678 | 19 | 4.698 | KV453239.1 | 1720372 | 23-scf00385 | 23 |
| AX-158224928 | 19 | 4.698 | KV453239.1 | 1720461 | 23-scf00385 | 23 |
| AX-158224929 | 19 | 4.698 | KV453239.1 | 1721217 | 23-scf00385 | 23 |
| AX-158224931 | 19 | 4.698 | KV453239.1 | 1722575 | 23-scf00385 | 23 |
| AX-158224995 | 19 | 4.698 | KV453239.1 | 1809668 | 23-scf00385 | 23 |
| AX-158224919 | 19 | 4.849 | KV453239.1 | 1712433 | 23-scf00385 | 23 |
| AX-158224920 | 19 | 4.849 | KV453239.1 | 1712854 | 23-scf00385 | 23 |
| AX-158224933 | 19 | 4.849 | KV453239.1 | 1724408 | 23-scf00385 | 23 |

|              |    |       |            |         |             |    |
|--------------|----|-------|------------|---------|-------------|----|
| AX-157773769 | 19 | 4.849 | KV453239.1 | 1787922 | 23-scf00385 | 23 |
| AX-158224981 | 19 | 4.849 | KV453239.1 | 1788732 | 23-scf00385 | 23 |
| AX-158224922 | 19 | 4.85  | KV453239.1 | 1715672 | 23-scf00385 | 23 |
| AX-158224937 | 19 | 4.85  | KV453239.1 | 1732048 | 23-scf00385 | 23 |
| AX-158224965 | 19 | 4.85  | KV453239.1 | 1773184 | 23-scf00385 | 23 |
| AX-158224972 | 19 | 4.85  | KV453239.1 | 1780575 | 23-scf00385 | 23 |
| AX-158224938 | 19 | 4.851 | KV453239.1 | 1733110 | 23-scf00385 | 23 |
| AX-158224979 | 19 | 4.851 | KV453239.1 | 1786814 | 23-scf00385 | 23 |
| AX-158224988 | 19 | 4.851 | KV453239.1 | 1794025 | 23-scf00385 | 23 |
| AX-157839680 | 19 | 5.093 | KV453239.1 | 1741224 | 23-scf00385 | 23 |
| AX-158224946 | 19 | 5.093 | KV453239.1 | 1746947 | 23-scf00385 | 23 |
| AX-158224949 | 19 | 5.243 | KV453239.1 | 1751656 | 23-scf00385 | 23 |
| AX-157746176 | 19 | 5.243 | KV453239.1 | 1756605 | 23-scf00385 | 23 |
| AX-158224989 | 19 | 5.243 | KV453239.1 | 1800104 | 23-scf00385 | 23 |
| AX-158224991 | 19 | 5.243 | KV453239.1 | 1802244 | 23-scf00385 | 23 |
| AX-158224932 | 19 | 5.244 | KV453239.1 | 1723061 | 23-scf00385 | 23 |
| AX-158224947 | 19 | 5.244 | KV453239.1 | 1747724 | 23-scf00385 | 23 |
| AX-157839681 | 19 | 5.244 | KV453239.1 | 1767266 | 23-scf00385 | 23 |
| AX-158224963 | 19 | 5.244 | KV453239.1 | 1771268 | 23-scf00385 | 23 |
| AX-158224966 | 19 | 5.244 | KV453239.1 | 1773822 | 23-scf00385 | 23 |
| AX-158224967 | 19 | 5.244 | KV453239.1 | 1774680 | 23-scf00385 | 23 |
| AX-158224969 | 19 | 5.244 | KV453239.1 | 1776847 | 23-scf00385 | 23 |
| AX-158224970 | 19 | 5.244 | KV453239.1 | 1777436 | 23-scf00385 | 23 |
| AX-158224974 | 19 | 5.244 | KV453239.1 | 1782513 | 23-scf00385 | 23 |
| AX-158224975 | 19 | 5.244 | KV453239.1 | 1782866 | 23-scf00385 | 23 |
| AX-158224993 | 19 | 5.244 | KV453239.1 | 1803504 | 23-scf00385 | 23 |
| AX-157772145 | 19 | 5.244 | KV453239.1 | 1806338 | 23-scf00385 | 23 |
| AX-158224998 | 19 | 5.355 | KV453239.1 | 1813093 | 23-scf00385 | 23 |
| AX-158225002 | 19 | 5.38  | KV453239.1 | 1816421 | 23-scf00385 | 23 |
| AX-158225014 | 19 | 5.38  | KV453239.1 | 1834113 | 23-scf00385 | 23 |
| AX-158225029 | 19 | 5.38  | KV453239.1 | 1849996 | 23-scf00385 | 23 |
| AX-158225033 | 19 | 5.38  | KV453239.1 | 1856131 | 23-scf00385 | 23 |
| AX-157723183 | 19 | 5.421 | KV453239.1 | 1820455 | 23-scf00385 | 23 |
| AX-158225013 | 19 | 5.421 | KV453239.1 | 1833130 | 23-scf00385 | 23 |
| AX-158225004 | 19 | 5.463 | KV453239.1 | 1822892 | 23-scf00385 | 23 |
| AX-158225007 | 19 | 5.463 | KV453239.1 | 1825765 | 23-scf00385 | 23 |
| AX-158225008 | 19 | 5.463 | KV453239.1 | 1826739 | 23-scf00385 | 23 |
| AX-158225010 | 19 | 5.463 | KV453239.1 | 1829742 | 23-scf00385 | 23 |
| AX-158225011 | 19 | 5.463 | KV453239.1 | 1830868 | 23-scf00385 | 23 |
| AX-157879817 | 19 | 5.463 | KV453239.1 | 1837034 | 23-scf00385 | 23 |
| AX-158225022 | 19 | 5.463 | KV453239.1 | 1840098 | 23-scf00385 | 23 |
| AX-157867103 | 19 | 5.463 | KV453239.1 | 1840632 | 23-scf00385 | 23 |
| AX-157755315 | 19 | 5.463 | KV453239.1 | 1841705 | 23-scf00385 | 23 |
| AX-158225026 | 19 | 5.463 | KV453239.1 | 1847672 | 23-scf00385 | 23 |
| AX-158225027 | 19 | 5.463 | KV453239.1 | 1848016 | 23-scf00385 | 23 |
| AX-158225032 | 19 | 5.463 | KV453239.1 | 1854973 | 23-scf00385 | 23 |
| AX-158224951 | 19 | 5.681 | KV453239.1 | 1754707 | 23-scf00385 | 23 |
| AX-157839682 | 19 | 5.681 | KV453239.1 | 1859251 | 23-scf00385 | 23 |
| AX-158225037 | 19 | 5.681 | KV453239.1 | 1859845 | 23-scf00385 | 23 |
| AX-158225038 | 19 | 5.681 | KV453239.1 | 1860570 | 23-scf00385 | 23 |
| AX-158225039 | 19 | 5.681 | KV453239.1 | 1861271 | 23-scf00385 | 23 |

|              |    |       |             |         |             |    |
|--------------|----|-------|-------------|---------|-------------|----|
| AX-158225042 | 19 | 5.681 | KV453239.1  | 1868153 | 23-scf00385 | 23 |
| AX-158225062 | 19 | 5.681 | KV453239.1  | 1890223 | 23-scf00385 | 23 |
| AX-158225063 | 19 | 5.681 | KV453239.1  | 1890468 | 23-scf00385 | 23 |
| AX-158225083 | 19 | 5.681 | KV453239.1  | 1921192 | 23-scf00385 | 23 |
| AX-157770738 | 19 | 5.681 | KV453239.1  | 1925505 | 23-scf00385 | 23 |
| AX-158225109 | 19 | 5.681 | KV453239.1  | 1950933 | 23-scf00385 | 23 |
| AX-158225005 | 19 | 5.9   | KV453239.1  | 1823205 | 23-scf00385 | 23 |
| AX-158225021 | 19 | 5.9   | KV453239.1  | 1839306 | 23-scf00385 | 23 |
| AX-157743073 | 19 | 5.9   | KV453239.1  | 1870227 | 23-scf00385 | 23 |
| AX-158225045 | 19 | 5.9   | KV453239.1  | 1873451 | 23-scf00385 | 23 |
| AX-157721018 | 19 | 5.9   | KV453239.1  | 1875859 | 23-scf00385 | 23 |
| AX-158225049 | 19 | 5.9   | KV453239.1  | 1876979 | 23-scf00385 | 23 |
| AX-158225050 | 19 | 5.9   | KV453239.1  | 1878673 | 23-scf00385 | 23 |
| AX-158225051 | 19 | 5.9   | KV453239.1  | 1879525 | 23-scf00385 | 23 |
| AX-158225052 | 19 | 5.9   | KV453239.1  | 1880187 | 23-scf00385 | 23 |
| AX-158225056 | 19 | 5.9   | KV453239.1  | 1885138 | 23-scf00385 | 23 |
| AX-158225057 | 19 | 5.9   | KV453239.1  | 1886232 | 23-scf00385 | 23 |
| AX-158225059 | 19 | 5.9   | KV453239.1  | 1887943 | 23-scf00385 | 23 |
| AX-158225060 | 19 | 5.9   | KV453239.1  | 1888799 | 23-scf00385 | 23 |
| AX-158225066 | 19 | 5.9   | KV453239.1  | 1898102 | 23-scf00385 | 23 |
| AX-158225069 | 19 | 5.9   | KV453239.1  | 1902346 | 23-scf00385 | 23 |
| AX-158225071 | 19 | 5.9   | KV453239.1  | 1904160 | 23-scf00385 | 23 |
| AX-158225072 | 19 | 5.9   | KV453239.1  | 1906025 | 23-scf00385 | 23 |
| AX-158225073 | 19 | 5.9   | KV453239.1  | 1907167 | 23-scf00385 | 23 |
| AX-158225074 | 19 | 5.9   | KV453239.1  | 1907892 | 23-scf00385 | 23 |
| AX-158225076 | 19 | 5.9   | KV453239.1  | 1912052 | 23-scf00385 | 23 |
| AX-158225077 | 19 | 5.9   | KV453239.1  | 1914532 | 23-scf00385 | 23 |
| AX-158225079 | 19 | 5.9   | KV453239.1  | 1916108 | 23-scf00385 | 23 |
| AX-158225086 | 19 | 5.9   | KV453239.1  | 1924763 | 23-scf00385 | 23 |
| AX-157839684 | 19 | 5.9   | KV453239.1  | 1940513 | 23-scf00385 | 23 |
| AX-158225106 | 19 | 5.9   | KV453239.1  | 1947980 | 23-scf00385 | 23 |
| AX-158225114 | 19 | 5.9   | KV453239.1  | 1956669 | 23-scf00385 | 23 |
| AX-158225116 | 19 | 5.9   | KV453239.1  | 1958234 | 23-scf00385 | 23 |
| AX-158225119 | 19 | 5.9   | KV453239.1  | 1961776 | 23-scf00385 | 23 |
| AX-158225120 | 19 | 5.9   | KV453239.1  | 1962074 | 23-scf00385 | 23 |
| AX-158225127 | 19 | 5.9   | KV453239.1  | 1971843 | 23-scf00385 | 23 |
| AX-158225129 | 19 | 5.9   | KV453239.1  | 1974966 | 23-scf00385 | 23 |
| AX-158225147 | 19 | 5.9   | KV453239.1  | 1996059 | 23-scf00385 | 23 |
| AX-158225155 | 19 | 5.9   | KV453239.1  | 2000874 | 23-scf00385 | 23 |
| AX-157716747 | 19 | 5.9   | KV453239.1  | 2093578 | 23-scf00385 | 23 |
| AX-157705832 | 19 | 5.9   | 3ML01030994 | 59      | scf06598_1  | UN |
| AX-157706224 | 19 | 5.9   | 3ML01031854 | 535     | scf07475_1  | UN |
| AX-158225084 | 19 | 5.93  | KV453239.1  | 1923589 | 23-scf00385 | 23 |
| AX-158225044 | 19 | 5.948 | KV453239.1  | 1871552 | 23-scf00385 | 23 |
| AX-158225087 | 19 | 5.948 | KV453239.1  | 1925282 | 23-scf00385 | 23 |
| AX-158225090 | 19 | 6.009 | KV453239.1  | 1931213 | 23-scf00385 | 23 |
| AX-158225092 | 19 | 6.01  | KV453239.1  | 1933441 | 23-scf00385 | 23 |
| AX-158225093 | 19 | 6.012 | KV453239.1  | 1934112 | 23-scf00385 | 23 |
| AX-158225096 | 19 | 6.014 | KV453239.1  | 1935335 | 23-scf00385 | 23 |
| AX-158380861 | 19 | 6.014 | KV453239.1  | 1951208 | 23-scf00385 | 23 |
| AX-158225097 | 19 | 6.016 | KV453239.1  | 1937100 | 23-scf00385 | 23 |

|              |    |       |            |         |             |    |
|--------------|----|-------|------------|---------|-------------|----|
| AX-158225102 | 19 | 6.018 | KV453239.1 | 1944341 | 23-scf00385 | 23 |
| AX-158225105 | 19 | 6.02  | KV453239.1 | 1947389 | 23-scf00385 | 23 |
| AX-158225108 | 19 | 6.022 | KV453239.1 | 1949779 | 23-scf00385 | 23 |
| AX-158414938 | 19 | 6.023 | KV453239.1 | 1954674 | 23-scf00385 | 23 |
| AX-158225117 | 19 | 6.025 | KV453239.1 | 1959118 | 23-scf00385 | 23 |
| AX-158225121 | 19 | 6.028 | KV453239.1 | 1963208 | 23-scf00385 | 23 |
| AX-158225125 | 19 | 6.141 | KV453239.1 | 1966235 | 23-scf00385 | 23 |
| AX-158225126 | 19 | 6.141 | KV453239.1 | 1969621 | 23-scf00385 | 23 |
| AX-158225140 | 19 | 6.279 | KV453239.1 | 1989396 | 23-scf00385 | 23 |
| AX-158225141 | 19 | 6.279 | KV453239.1 | 1989648 | 23-scf00385 | 23 |
| AX-158225142 | 19 | 6.279 | KV453239.1 | 1990079 | 23-scf00385 | 23 |
| AX-158225170 | 19 | 6.279 | KV453239.1 | 2016901 | 23-scf00385 | 23 |
| AX-158225144 | 19 | 6.555 | KV453239.1 | 1991177 | 23-scf00385 | 23 |
| AX-158225145 | 19 | 6.555 | KV453239.1 | 1992759 | 23-scf00385 | 23 |
| AX-158225146 | 19 | 6.555 | KV453239.1 | 1994135 | 23-scf00385 | 23 |
| AX-157739898 | 19 | 6.555 | KV453239.1 | 1995962 | 23-scf00385 | 23 |
| AX-158225149 | 19 | 6.555 | KV453239.1 | 1998486 | 23-scf00385 | 23 |
| AX-158225152 | 19 | 6.555 | KV453239.1 | 1999436 | 23-scf00385 | 23 |
| AX-158225153 | 19 | 6.555 | KV453239.1 | 1999806 | 23-scf00385 | 23 |
| AX-158225154 | 19 | 6.555 | KV453239.1 | 2000612 | 23-scf00385 | 23 |
| AX-158225159 | 19 | 6.555 | KV453239.1 | 2005303 | 23-scf00385 | 23 |
| AX-157718473 | 19 | 6.555 | KV453239.1 | 2006681 | 23-scf00385 | 23 |
| AX-158225161 | 19 | 6.664 | KV453239.1 | 2008195 | 23-scf00385 | 23 |
| AX-157746344 | 19 | 6.723 | KV453239.1 | 2008574 | 23-scf00385 | 23 |
| AX-158225167 | 19 | 6.787 | KV453239.1 | 2013804 | 23-scf00385 | 23 |
| AX-158410299 | 19 | 6.826 | KV453239.1 | 2015425 | 23-scf00385 | 23 |
| AX-158410300 | 19 | 6.883 | KV453239.1 | 2015494 | 23-scf00385 | 23 |
| AX-158225133 | 19 | 6.884 | KV453239.1 | 1983457 | 23-scf00385 | 23 |
| AX-158225162 | 19 | 6.884 | KV453239.1 | 2010206 | 23-scf00385 | 23 |
| AX-157839685 | 19 | 6.884 | KV453239.1 | 2017917 | 23-scf00385 | 23 |
| AX-158225171 | 19 | 6.884 | KV453239.1 | 2018322 | 23-scf00385 | 23 |
| AX-158225173 | 19 | 6.884 | KV453239.1 | 2020418 | 23-scf00385 | 23 |
| AX-158225184 | 19 | 6.884 | KV453239.1 | 2031532 | 23-scf00385 | 23 |
| AX-158225202 | 19 | 6.884 | KV453239.1 | 2052805 | 23-scf00385 | 23 |
| AX-158225241 | 19 | 6.884 | KV453239.1 | 2116367 | 23-scf00385 | 23 |
| AX-158225303 | 19 | 6.884 | KV453239.1 | 2187248 | 23-scf00385 | 23 |
| AX-158225174 | 19 | 6.958 | KV453239.1 | 2021571 | 23-scf00385 | 23 |
| AX-158225176 | 19 | 7.211 | KV453239.1 | 2023937 | 23-scf00385 | 23 |
| AX-158225178 | 19 | 7.32  | KV453239.1 | 2026660 | 23-scf00385 | 23 |
| AX-158225185 | 19 | 7.32  | KV453239.1 | 2032216 | 23-scf00385 | 23 |
| AX-158225187 | 19 | 7.32  | KV453239.1 | 2034844 | 23-scf00385 | 23 |
| AX-158225188 | 19 | 7.32  | KV453239.1 | 2036749 | 23-scf00385 | 23 |
| AX-158225189 | 19 | 7.32  | KV453239.1 | 2037249 | 23-scf00385 | 23 |
| AX-158225191 | 19 | 7.32  | KV453239.1 | 2038783 | 23-scf00385 | 23 |
| AX-157709147 | 19 | 7.32  | KV453239.1 | 2039328 | 23-scf00385 | 23 |
| AX-158225192 | 19 | 7.32  | KV453239.1 | 2041339 | 23-scf00385 | 23 |
| AX-158394101 | 19 | 7.32  | KV453239.1 | 2042401 | 23-scf00385 | 23 |
| AX-157753316 | 19 | 7.32  | KV453239.1 | 2042495 | 23-scf00385 | 23 |
| AX-158225194 | 19 | 7.32  | KV453239.1 | 2043836 | 23-scf00385 | 23 |
| AX-157758716 | 19 | 7.32  | KV453239.1 | 2045024 | 23-scf00385 | 23 |
| AX-158225195 | 19 | 7.32  | KV453239.1 | 2045459 | 23-scf00385 | 23 |

|              |    |       |            |         |             |    |
|--------------|----|-------|------------|---------|-------------|----|
| AX-157771052 | 19 | 7.32  | KV453239.1 | 2047627 | 23-scf00385 | 23 |
| AX-158225198 | 19 | 7.32  | KV453239.1 | 2048730 | 23-scf00385 | 23 |
| AX-158225205 | 19 | 7.32  | KV453239.1 | 2055552 | 23-scf00385 | 23 |
| AX-158225221 | 19 | 7.32  | KV453239.1 | 2074334 | 23-scf00385 | 23 |
| AX-157839693 | 19 | 7.32  | KV453239.1 | 2107340 | 23-scf00385 | 23 |
| AX-158225166 | 19 | 7.539 | KV453239.1 | 2013518 | 23-scf00385 | 23 |
| AX-158225175 | 19 | 7.539 | KV453239.1 | 2021962 | 23-scf00385 | 23 |
| AX-158225181 | 19 | 7.539 | KV453239.1 | 2029679 | 23-scf00385 | 23 |
| AX-158225196 | 19 | 7.539 | KV453239.1 | 2046193 | 23-scf00385 | 23 |
| AX-158225208 | 19 | 7.539 | KV453239.1 | 2056895 | 23-scf00385 | 23 |
| AX-158225211 | 19 | 7.539 | KV453239.1 | 2061963 | 23-scf00385 | 23 |
| AX-158225215 | 19 | 7.539 | KV453239.1 | 2065645 | 23-scf00385 | 23 |
| AX-158225216 | 19 | 7.539 | KV453239.1 | 2067234 | 23-scf00385 | 23 |
| AX-158394102 | 19 | 7.539 | KV453239.1 | 2074518 | 23-scf00385 | 23 |
| AX-157839688 | 19 | 7.539 | KV453239.1 | 2075154 | 23-scf00385 | 23 |
| AX-158225222 | 19 | 7.539 | KV453239.1 | 2076134 | 23-scf00385 | 23 |
| AX-158225225 | 19 | 7.539 | KV453239.1 | 2078333 | 23-scf00385 | 23 |
| AX-158225226 | 19 | 7.539 | KV453239.1 | 2080541 | 23-scf00385 | 23 |
| AX-158225227 | 19 | 7.539 | KV453239.1 | 2081391 | 23-scf00385 | 23 |
| AX-158225228 | 19 | 7.539 | KV453239.1 | 2086013 | 23-scf00385 | 23 |
| AX-157750950 | 19 | 7.539 | KV453239.1 | 2087147 | 23-scf00385 | 23 |
| AX-157715674 | 19 | 7.539 | KV453239.1 | 2091257 | 23-scf00385 | 23 |
| AX-157839690 | 19 | 7.539 | KV453239.1 | 2093921 | 23-scf00385 | 23 |
| AX-157887314 | 19 | 7.539 | KV453239.1 | 2094718 | 23-scf00385 | 23 |
| AX-157772769 | 19 | 7.539 | KV453239.1 | 2097131 | 23-scf00385 | 23 |
| AX-157839692 | 19 | 7.539 | KV453239.1 | 2098265 | 23-scf00385 | 23 |
| AX-158225230 | 19 | 7.539 | KV453239.1 | 2101888 | 23-scf00385 | 23 |
| AX-158225231 | 19 | 7.539 | KV453239.1 | 2103688 | 23-scf00385 | 23 |
| AX-158225232 | 19 | 7.539 | KV453239.1 | 2104689 | 23-scf00385 | 23 |
| AX-157714654 | 19 | 7.539 | KV453239.1 | 2106726 | 23-scf00385 | 23 |
| AX-158225237 | 19 | 7.539 | KV453239.1 | 2111029 | 23-scf00385 | 23 |
| AX-157715880 | 19 | 7.539 | KV453239.1 | 2111940 | 23-scf00385 | 23 |
| AX-157839694 | 19 | 7.539 | KV453239.1 | 2116107 | 23-scf00385 | 23 |
| AX-158225243 | 19 | 7.539 | KV453239.1 | 2120662 | 23-scf00385 | 23 |
| AX-158225244 | 19 | 7.539 | KV453239.1 | 2121557 | 23-scf00385 | 23 |
| AX-158380862 | 19 | 7.539 | KV453239.1 | 2122020 | 23-scf00385 | 23 |
| AX-157839695 | 19 | 7.539 | KV453239.1 | 2123307 | 23-scf00385 | 23 |
| AX-158225250 | 19 | 7.539 | KV453239.1 | 2132916 | 23-scf00385 | 23 |
| AX-158225252 | 19 | 7.539 | KV453239.1 | 2134985 | 23-scf00385 | 23 |
| AX-158225283 | 19 | 7.539 | KV453239.1 | 2166394 | 23-scf00385 | 23 |
| AX-158225315 | 19 | 7.539 | KV453239.1 | 2203661 | 23-scf00385 | 23 |
| AX-158225338 | 19 | 7.539 | KV453239.1 | 2233639 | 23-scf00385 | 23 |
| AX-157872439 | 19 | 7.54  | KV453239.1 | 2128710 | 23-scf00385 | 23 |
| AX-158225248 | 19 | 7.702 | KV453239.1 | 2129510 | 23-scf00385 | 23 |
| AX-157752429 | 19 | 7.702 | KV453239.1 | 2140302 | 23-scf00385 | 23 |
| AX-158225197 | 19 | 7.866 | KV453239.1 | 2047120 | 23-scf00385 | 23 |
| AX-158225201 | 19 | 7.866 | KV453239.1 | 2052192 | 23-scf00385 | 23 |
| AX-158225220 | 19 | 7.866 | KV453239.1 | 2073869 | 23-scf00385 | 23 |
| AX-157714321 | 19 | 7.866 | KV453239.1 | 2095473 | 23-scf00385 | 23 |
| AX-157743000 | 19 | 7.866 | KV453239.1 | 2106084 | 23-scf00385 | 23 |
| AX-157839697 | 19 | 7.866 | KV453239.1 | 2129819 | 23-scf00385 | 23 |



|              |    |       |            |         |             |    |
|--------------|----|-------|------------|---------|-------------|----|
| AX-158225251 | 19 | 7.866 | KV453239.1 | 2133647 | 23-scf00385 | 23 |
| AX-158225253 | 19 | 7.866 | KV453239.1 | 2137827 | 23-scf00385 | 23 |
| AX-158225257 | 19 | 7.866 | KV453239.1 | 2142521 | 23-scf00385 | 23 |
| AX-158225259 | 19 | 7.866 | KV453239.1 | 2144276 | 23-scf00385 | 23 |
| AX-158225260 | 19 | 7.866 | KV453239.1 | 2146998 | 23-scf00385 | 23 |
| AX-158225261 | 19 | 7.866 | KV453239.1 | 2147806 | 23-scf00385 | 23 |
| AX-158225262 | 19 | 7.866 | KV453239.1 | 2149374 | 23-scf00385 | 23 |
| AX-158225266 | 19 | 7.866 | KV453239.1 | 2153584 | 23-scf00385 | 23 |
| AX-158225267 | 19 | 7.866 | KV453239.1 | 2154447 | 23-scf00385 | 23 |
| AX-158225269 | 19 | 7.866 | KV453239.1 | 2156145 | 23-scf00385 | 23 |
| AX-158225270 | 19 | 7.866 | KV453239.1 | 2156689 | 23-scf00385 | 23 |
| AX-158225272 | 19 | 7.866 | KV453239.1 | 2158195 | 23-scf00385 | 23 |
| AX-158225273 | 19 | 7.866 | KV453239.1 | 2159550 | 23-scf00385 | 23 |
| AX-158225274 | 19 | 7.866 | KV453239.1 | 2159999 | 23-scf00385 | 23 |
| AX-158225277 | 19 | 7.866 | KV453239.1 | 2160938 | 23-scf00385 | 23 |
| AX-157719183 | 19 | 7.866 | KV453239.1 | 2162037 | 23-scf00385 | 23 |
| AX-158225278 | 19 | 7.866 | KV453239.1 | 2162711 | 23-scf00385 | 23 |
| AX-158225281 | 19 | 7.866 | KV453239.1 | 2165364 | 23-scf00385 | 23 |
| AX-158225282 | 19 | 7.866 | KV453239.1 | 2165649 | 23-scf00385 | 23 |
| AX-158225284 | 19 | 7.866 | KV453239.1 | 2167067 | 23-scf00385 | 23 |
| AX-158225285 | 19 | 7.866 | KV453239.1 | 2168414 | 23-scf00385 | 23 |
| AX-158225287 | 19 | 7.866 | KV453239.1 | 2169478 | 23-scf00385 | 23 |
| AX-158225288 | 19 | 7.866 | KV453239.1 | 2169973 | 23-scf00385 | 23 |
| AX-157774857 | 19 | 7.866 | KV453239.1 | 2171495 | 23-scf00385 | 23 |
| AX-157839700 | 19 | 7.866 | KV453239.1 | 2179313 | 23-scf00385 | 23 |
| AX-158225316 | 19 | 7.866 | KV453239.1 | 2206273 | 23-scf00385 | 23 |
| AX-158225319 | 19 | 7.866 | KV453239.1 | 2210208 | 23-scf00385 | 23 |
| AX-158225327 | 19 | 7.866 | KV453239.1 | 2218803 | 23-scf00385 | 23 |
| AX-158225328 | 19 | 7.866 | KV453239.1 | 2220145 | 23-scf00385 | 23 |
| AX-158225291 | 19 | 7.937 | KV453239.1 | 2174719 | 23-scf00385 | 23 |
| AX-158225293 | 19 | 8.085 | KV453239.1 | 2175979 | 23-scf00385 | 23 |
| AX-158225294 | 19 | 8.085 | KV453239.1 | 2176564 | 23-scf00385 | 23 |
| AX-158225297 | 19 | 8.085 | KV453239.1 | 2180001 | 23-scf00385 | 23 |
| AX-158225298 | 19 | 8.085 | KV453239.1 | 2180527 | 23-scf00385 | 23 |
| AX-158225301 | 19 | 8.085 | KV453239.1 | 2184973 | 23-scf00385 | 23 |
| AX-158225306 | 19 | 8.085 | KV453239.1 | 2190618 | 23-scf00385 | 23 |
| AX-158225308 | 19 | 8.085 | KV453239.1 | 2193844 | 23-scf00385 | 23 |
| AX-158225309 | 19 | 8.085 | KV453239.1 | 2194890 | 23-scf00385 | 23 |
| AX-158225310 | 19 | 8.085 | KV453239.1 | 2196126 | 23-scf00385 | 23 |
| AX-158225311 | 19 | 8.085 | KV453239.1 | 2196937 | 23-scf00385 | 23 |
| AX-158225317 | 19 | 8.085 | KV453239.1 | 2207978 | 23-scf00385 | 23 |
| AX-158225318 | 19 | 8.085 | KV453239.1 | 2209698 | 23-scf00385 | 23 |
| AX-158225321 | 19 | 8.085 | KV453239.1 | 2213334 | 23-scf00385 | 23 |
| AX-158225322 | 19 | 8.085 | KV453239.1 | 2213820 | 23-scf00385 | 23 |
| AX-158225324 | 19 | 8.085 | KV453239.1 | 2215293 | 23-scf00385 | 23 |
| AX-158225329 | 19 | 8.085 | KV453239.1 | 2221818 | 23-scf00385 | 23 |
| AX-158225330 | 19 | 8.143 | KV453239.1 | 2222380 | 23-scf00385 | 23 |
| AX-158225332 | 19 | 8.194 | KV453239.1 | 2224159 | 23-scf00385 | 23 |
| AX-158225334 | 19 | 8.194 | KV453239.1 | 2226680 | 23-scf00385 | 23 |
| AX-157879822 | 19 | 8.385 | KV453239.1 | 2230388 | 23-scf00385 | 23 |
| AX-158394103 | 19 | 8.385 | KV453239.1 | 2233518 | 23-scf00385 | 23 |

|              |    |        |            |         |             |    |
|--------------|----|--------|------------|---------|-------------|----|
| AX-157839701 | 19 | 8.707  | KV453239.1 | 2231206 | 23-scf00385 | 23 |
| AX-158225342 | 19 | 8.707  | KV453239.1 | 2240643 | 23-scf00385 | 23 |
| AX-157716549 | 19 | 8.707  | KV453239.1 | 2243232 | 23-scf00385 | 23 |
| AX-158225343 | 19 | 8.707  | KV453239.1 | 2243889 | 23-scf00385 | 23 |
| AX-158225344 | 19 | 8.707  | KV453239.1 | 2244698 | 23-scf00385 | 23 |
| AX-157739812 | 19 | 8.707  | KV453239.1 | 2249134 | 23-scf00385 | 23 |
| AX-158225347 | 19 | 8.707  | KV453239.1 | 2250197 | 23-scf00385 | 23 |
| AX-158225348 | 19 | 8.707  | KV453239.1 | 2250573 | 23-scf00385 | 23 |
| AX-158225349 | 19 | 8.707  | KV453239.1 | 2252809 | 23-scf00385 | 23 |
| AX-158225350 | 19 | 8.707  | KV453239.1 | 2254044 | 23-scf00385 | 23 |
| AX-158380863 | 19 | 8.707  | KV453239.1 | 2279794 | 23-scf00385 | 23 |
| AX-158225355 | 19 | 8.778  | KV453239.1 | 2264070 | 23-scf00385 | 23 |
| AX-158225351 | 19 | 8.85   | KV453239.1 | 2255877 | 23-scf00385 | 23 |
| AX-158225356 | 19 | 8.85   | KV453239.1 | 2264137 | 23-scf00385 | 23 |
| AX-158225359 | 19 | 8.85   | KV453239.1 | 2265945 | 23-scf00385 | 23 |
| AX-157772692 | 19 | 8.85   | KV453239.1 | 2268862 | 23-scf00385 | 23 |
| AX-158225363 | 19 | 8.85   | KV453239.1 | 2272466 | 23-scf00385 | 23 |
| AX-158225366 | 19 | 8.85   | KV453239.1 | 2277983 | 23-scf00385 | 23 |
| AX-157715285 | 19 | 9.234  | KV453239.1 | 2279546 | 23-scf00385 | 23 |
| AX-158225368 | 19 | 9.237  | KV453239.1 | 2282434 | 23-scf00385 | 23 |
| AX-158225369 | 19 | 9.24   | KV453239.1 | 2283542 | 23-scf00385 | 23 |
| AX-157749657 | 19 | 9.26   | KV453239.1 | 2287766 | 23-scf00385 | 23 |
| AX-158225371 | 19 | 9.552  | KV453239.1 | 2289924 | 23-scf00385 | 23 |
| AX-157872441 | 19 | 9.552  | KV453239.1 | 2291763 | 23-scf00385 | 23 |
| AX-158225373 | 19 | 9.624  | KV453239.1 | 2293388 | 23-scf00385 | 23 |
| AX-158225375 | 19 | 9.683  | KV453239.1 | 2295637 | 23-scf00385 | 23 |
| AX-157879824 | 19 | 9.944  | KV453239.1 | 2302847 | 23-scf00385 | 23 |
| AX-158225381 | 19 | 9.944  | KV453239.1 | 2306325 | 23-scf00385 | 23 |
| AX-157839703 | 19 | 9.944  | KV453239.1 | 2308252 | 23-scf00385 | 23 |
| AX-158225383 | 19 | 9.944  | KV453239.1 | 2309660 | 23-scf00385 | 23 |
| AX-158225384 | 19 | 9.944  | KV453239.1 | 2309878 | 23-scf00385 | 23 |
| AX-157774171 | 19 | 9.944  | KV453239.1 | 2310481 | 23-scf00385 | 23 |
| AX-158225385 | 19 | 9.944  | KV453239.1 | 2313701 | 23-scf00385 | 23 |
| AX-157745750 | 19 | 9.944  | KV453239.1 | 2316287 | 23-scf00385 | 23 |
| AX-158225388 | 19 | 9.944  | KV453239.1 | 2317009 | 23-scf00385 | 23 |
| AX-158225415 | 19 | 9.944  | KV453239.1 | 2358037 | 23-scf00385 | 23 |
| AX-158225389 | 19 | 10.249 | KV453239.1 | 2317431 | 23-scf00385 | 23 |
| AX-158225379 | 19 | 10.25  | KV453239.1 | 2303772 | 23-scf00385 | 23 |
| AX-157714903 | 19 | 10.25  | KV453239.1 | 2317818 | 23-scf00385 | 23 |
| AX-157839704 | 19 | 10.25  | KV453239.1 | 2319341 | 23-scf00385 | 23 |
| AX-158225390 | 19 | 10.25  | KV453239.1 | 2319711 | 23-scf00385 | 23 |
| AX-158225403 | 19 | 10.25  | KV453239.1 | 2338523 | 23-scf00385 | 23 |
| AX-158225407 | 19 | 10.25  | KV453239.1 | 2349564 | 23-scf00385 | 23 |
| AX-157839705 | 19 | 10.397 | KV453239.1 | 2319776 | 23-scf00385 | 23 |
| AX-157839707 | 19 | 10.556 | KV453239.1 | 2320792 | 23-scf00385 | 23 |
| AX-158225391 | 19 | 10.556 | KV453239.1 | 2321333 | 23-scf00385 | 23 |
| AX-158225392 | 19 | 10.556 | KV453239.1 | 2322497 | 23-scf00385 | 23 |
| AX-158225393 | 19 | 10.709 | KV453239.1 | 2323097 | 23-scf00385 | 23 |
| AX-158225399 | 19 | 10.709 | KV453239.1 | 2331348 | 23-scf00385 | 23 |
| AX-158225401 | 19 | 10.709 | KV453239.1 | 2335684 | 23-scf00385 | 23 |
| AX-158225404 | 19 | 10.709 | KV453239.1 | 2339474 | 23-scf00385 | 23 |

|              |    |        |            |         |             |    |
|--------------|----|--------|------------|---------|-------------|----|
| AX-158225409 | 19 | 10.709 | KV453239.1 | 2350284 | 23-scf00385 | 23 |
| AX-158225410 | 19 | 10.709 | KV453239.1 | 2350561 | 23-scf00385 | 23 |
| AX-158225411 | 19 | 10.709 | KV453239.1 | 2350990 | 23-scf00385 | 23 |
| AX-157839708 | 19 | 10.709 | KV453239.1 | 2351944 | 23-scf00385 | 23 |
| AX-157774713 | 19 | 10.709 | KV453239.1 | 2353455 | 23-scf00385 | 23 |
| AX-158225412 | 19 | 10.709 | KV453239.1 | 2354354 | 23-scf00385 | 23 |
| AX-158225413 | 19 | 10.709 | KV453239.1 | 2354936 | 23-scf00385 | 23 |
| AX-158225414 | 19 | 10.709 | KV453239.1 | 2355948 | 23-scf00385 | 23 |
| AX-158225416 | 19 | 10.709 | KV453239.1 | 2359489 | 23-scf00385 | 23 |
| AX-157746924 | 19 | 10.709 | KV453239.1 | 2360701 | 23-scf00385 | 23 |
| AX-158225419 | 19 | 10.709 | KV453239.1 | 2361310 | 23-scf00385 | 23 |
| AX-157867108 | 19 | 10.709 | KV453239.1 | 2361617 | 23-scf00385 | 23 |
| AX-157698220 | 19 | 10.709 | KV453239.1 | 2363458 | 23-scf00385 | 23 |
| AX-157859485 | 19 | 10.709 | KV453239.1 | 2363551 | 23-scf00385 | 23 |
| AX-158225422 | 19 | 10.709 | KV453239.1 | 2365560 | 23-scf00385 | 23 |
| AX-158225423 | 19 | 10.709 | KV453239.1 | 2366710 | 23-scf00385 | 23 |
| AX-158225424 | 19 | 10.709 | KV453239.1 | 2367108 | 23-scf00385 | 23 |
| AX-158380864 | 19 | 10.709 | KV453239.1 | 2377323 | 23-scf00385 | 23 |
| AX-157839712 | 19 | 10.709 | KV453239.1 | 2396840 | 23-scf00385 | 23 |
| AX-158225460 | 19 | 10.709 | KV453239.1 | 2401031 | 23-scf00385 | 23 |
| AX-157839711 | 19 | 10.927 | KV453239.1 | 2368973 | 23-scf00385 | 23 |
| AX-158225427 | 19 | 10.927 | KV453239.1 | 2369897 | 23-scf00385 | 23 |
| AX-158225431 | 19 | 10.927 | KV453239.1 | 2374437 | 23-scf00385 | 23 |
| AX-158225432 | 19 | 10.927 | KV453239.1 | 2374960 | 23-scf00385 | 23 |
| AX-158225433 | 19 | 10.927 | KV453239.1 | 2376390 | 23-scf00385 | 23 |
| AX-158225435 | 19 | 10.927 | KV453239.1 | 2378126 | 23-scf00385 | 23 |
| AX-158225436 | 19 | 10.927 | KV453239.1 | 2378610 | 23-scf00385 | 23 |
| AX-158225437 | 19 | 10.927 | KV453239.1 | 2379358 | 23-scf00385 | 23 |
| AX-158225444 | 19 | 10.927 | KV453239.1 | 2385457 | 23-scf00385 | 23 |
| AX-158225446 | 19 | 11.012 | KV453239.1 | 2389046 | 23-scf00385 | 23 |
| AX-158225449 | 19 | 11.073 | KV453239.1 | 2392427 | 23-scf00385 | 23 |
| AX-157722213 | 19 | 11.073 | KV453239.1 | 2394332 | 23-scf00385 | 23 |
| AX-158225457 | 19 | 11.073 | KV453239.1 | 2399129 | 23-scf00385 | 23 |
| AX-158225458 | 19 | 11.073 | KV453239.1 | 2399696 | 23-scf00385 | 23 |
| AX-157839713 | 19 | 11.073 | KV453239.1 | 2399974 | 23-scf00385 | 23 |
| AX-158225459 | 19 | 11.073 | KV453239.1 | 2400314 | 23-scf00385 | 23 |
| AX-158225463 | 19 | 11.073 | KV453239.1 | 2403785 | 23-scf00385 | 23 |
| AX-157839717 | 19 | 11.073 | KV453239.1 | 2438062 | 23-scf00385 | 23 |
| AX-157859486 | 19 | 11.073 | KV453239.1 | 2439906 | 23-scf00385 | 23 |
| AX-158225487 | 19 | 11.073 | KV453239.1 | 2449576 | 23-scf00385 | 23 |
| AX-158225461 | 19 | 11.208 | KV453239.1 | 2402717 | 23-scf00385 | 23 |
| AX-158225441 | 19 | 11.324 | KV453239.1 | 2382503 | 23-scf00385 | 23 |
| AX-158225462 | 19 | 11.324 | KV453239.1 | 2403053 | 23-scf00385 | 23 |
| AX-157749698 | 19 | 11.365 | KV453239.1 | 2325473 | 23-scf00385 | 23 |
| AX-158225468 | 19 | 11.365 | KV453239.1 | 2414029 | 23-scf00385 | 23 |
| AX-158225470 | 19 | 11.365 | KV453239.1 | 2420983 | 23-scf00385 | 23 |
| AX-157742466 | 19 | 11.365 | KV453239.1 | 2427710 | 23-scf00385 | 23 |
| AX-157839715 | 19 | 11.365 | KV453239.1 | 2428186 | 23-scf00385 | 23 |
| AX-157839716 | 19 | 11.365 | KV453239.1 | 2429025 | 23-scf00385 | 23 |
| AX-157879827 | 19 | 11.365 | KV453239.1 | 2429740 | 23-scf00385 | 23 |
| AX-158225473 | 19 | 11.365 | KV453239.1 | 2431132 | 23-scf00385 | 23 |

|              |    |        |             |         |             |    |
|--------------|----|--------|-------------|---------|-------------|----|
| AX-158225483 | 19 | 11.365 | KV453239.1  | 2442515 | 23-scf00385 | 23 |
| AX-158225490 | 19 | 11.365 | KV453239.1  | 2454266 | 23-scf00385 | 23 |
| AX-157839720 | 19 | 11.365 | KV453239.1  | 2474850 | 23-scf00385 | 23 |
| AX-158225442 | 19 | 11.474 | KV453239.1  | 2383524 | 23-scf00385 | 23 |
| AX-158225477 | 19 | 11.474 | KV453239.1  | 2435326 | 23-scf00385 | 23 |
| AX-158225478 | 19 | 11.474 | KV453239.1  | 2435789 | 23-scf00385 | 23 |
| AX-158225479 | 19 | 11.474 | KV453239.1  | 2438440 | 23-scf00385 | 23 |
| AX-157867112 | 19 | 11.474 | KV453239.1  | 2442936 | 23-scf00385 | 23 |
| AX-158225486 | 19 | 11.474 | KV453239.1  | 2449392 | 23-scf00385 | 23 |
| AX-158225467 | 19 | 11.499 | KV453239.1  | 2409313 | 23-scf00385 | 23 |
| AX-157839718 | 19 | 11.499 | KV453239.1  | 2454539 | 23-scf00385 | 23 |
| AX-158225491 | 19 | 11.531 | KV453239.1  | 2455907 | 23-scf00385 | 23 |
| AX-158225493 | 19 | 11.559 | KV453239.1  | 2459691 | 23-scf00385 | 23 |
| AX-158225494 | 19 | 11.583 | KV453239.1  | 2461391 | 23-scf00385 | 23 |
| AX-157744408 | 19 | 11.583 | KV453239.1  | 2462310 | 23-scf00385 | 23 |
| AX-158225495 | 19 | 11.583 | KV453239.1  | 2467120 | 23-scf00385 | 23 |
| AX-158225496 | 19 | 11.583 | KV453239.1  | 2468085 | 23-scf00385 | 23 |
| AX-158225499 | 19 | 11.583 | KV453239.1  | 2476087 | 23-scf00385 | 23 |
| AX-157758727 | 19 | 11.583 | KV453239.1  | 2490134 | 23-scf00385 | 23 |
| AX-158225523 | 19 | 11.583 | KV453239.1  | 2511944 | 23-scf00385 | 23 |
| AX-157705371 | 19 | 11.583 | 3ML01029523 | 293     | scf05146_1  | UN |
| AX-158225502 | 19 | 11.615 | KV453239.1  | 2480569 | 23-scf00385 | 23 |
| AX-157752080 | 19 | 11.642 | KV453239.1  | 2482118 | 23-scf00385 | 23 |
| AX-158225481 | 19 | 11.692 | KV453239.1  | 2440601 | 23-scf00385 | 23 |
| AX-158225504 | 19 | 11.692 | KV453239.1  | 2482540 | 23-scf00385 | 23 |
| AX-158225505 | 19 | 11.692 | KV453239.1  | 2484579 | 23-scf00385 | 23 |
| AX-158225506 | 19 | 11.692 | KV453239.1  | 2484982 | 23-scf00385 | 23 |
| AX-158225507 | 19 | 11.692 | KV453239.1  | 2486426 | 23-scf00385 | 23 |
| AX-157718005 | 19 | 11.692 | KV453239.1  | 2486483 | 23-scf00385 | 23 |
| AX-158225508 | 19 | 11.692 | KV453239.1  | 2487938 | 23-scf00385 | 23 |
| AX-158225509 | 19 | 11.692 | KV453239.1  | 2489345 | 23-scf00385 | 23 |
| AX-157693301 | 19 | 11.692 | KV453239.1  | 2489530 | 23-scf00385 | 23 |
| AX-157757016 | 19 | 11.692 | KV453239.1  | 2489626 | 23-scf00385 | 23 |
| AX-157749181 | 19 | 11.692 | KV453239.1  | 2493791 | 23-scf00385 | 23 |
| AX-158225513 | 19 | 11.692 | KV453239.1  | 2496912 | 23-scf00385 | 23 |
| AX-158225515 | 19 | 11.692 | KV453239.1  | 2498423 | 23-scf00385 | 23 |
| AX-158225517 | 19 | 11.692 | KV453239.1  | 2501794 | 23-scf00385 | 23 |
| AX-158225518 | 19 | 11.882 | KV453239.1  | 2503785 | 23-scf00385 | 23 |
| AX-158225511 | 19 | 11.916 | KV453239.1  | 2491069 | 23-scf00385 | 23 |
| AX-157747622 | 19 | 11.916 | KV453239.1  | 2508074 | 23-scf00385 | 23 |
| AX-158225520 | 19 | 11.945 | KV453239.1  | 2508163 | 23-scf00385 | 23 |
| AX-158225521 | 19 | 11.945 | KV453239.1  | 2508912 | 23-scf00385 | 23 |
| AX-158225524 | 19 | 12.002 | KV453239.1  | 2513925 | 23-scf00385 | 23 |
| AX-158225525 | 19 | 12.094 | KV453239.1  | 2516416 | 23-scf00385 | 23 |
| AX-157770664 | 19 | 12.094 | KV453239.1  | 2519649 | 23-scf00385 | 23 |
| AX-158225527 | 19 | 12.094 | KV453239.1  | 2520081 | 23-scf00385 | 23 |
| AX-158225529 | 19 | 12.125 | KV453239.1  | 2521890 | 23-scf00385 | 23 |
| AX-157752839 | 19 | 12.159 | KV453239.1  | 2523706 | 23-scf00385 | 23 |
| AX-158225532 | 19 | 12.348 | KV453239.1  | 2525181 | 23-scf00385 | 23 |
| AX-158225533 | 19 | 12.348 | KV453239.1  | 2526662 | 23-scf00385 | 23 |
| AX-158225534 | 19 | 12.348 | KV453239.1  | 2528461 | 23-scf00385 | 23 |

|              |    |        |             |         |                |    |
|--------------|----|--------|-------------|---------|----------------|----|
| AX-158225536 | 19 | 12.348 | KV453239.1  | 2529341 | 23-scf00385    | 23 |
| AX-158225538 | 19 | 12.348 | KV453239.1  | 2530512 | 23-scf00385    | 23 |
| AX-158225539 | 19 | 12.348 | KV453239.1  | 2532208 | 23-scf00385    | 23 |
| AX-158225542 | 19 | 12.348 | KV453239.1  | 2533988 | 23-scf00385    | 23 |
| AX-158225544 | 19 | 12.348 | KV453239.1  | 2535763 | 23-scf00385    | 23 |
| AX-158225546 | 19 | 12.348 | KV453239.1  | 2536742 | 23-scf00385    | 23 |
| AX-157708764 | 19 | 12.348 | 3ML01030530 | 729     | scf06130_1     | UN |
| AX-158225545 | 19 | 12.472 | KV453239.1  | 2536200 | 23-scf00385    | 23 |
| AX-158225547 | 19 | 12.567 | KV453239.1  | 2537381 | 23-scf00385    | 23 |
| AX-158225548 | 19 | 12.567 | KV453239.1  | 2538284 | 23-scf00385    | 23 |
| AX-158225579 | 19 | 12.567 | KV453239.1  | 2571926 | 23-scf00385    | 23 |
| AX-158225582 | 19 | 12.567 | KV453239.1  | 2575033 | 23-scf00385    | 23 |
| AX-158225550 | 19 | 12.634 | KV453239.1  | 2541162 | 23-scf00385    | 23 |
| AX-157740006 | 19 | 12.676 | KV453239.1  | 2542042 | 23-scf00385    | 23 |
| AX-158386733 | 19 | 12.676 | KV453239.1  | 2542681 | 23-scf00385    | 23 |
| AX-158225553 | 19 | 12.894 | KV453239.1  | 2543441 | 23-scf00385    | 23 |
| AX-158225556 | 19 | 13.113 | KV453239.1  | 2545006 | 23-scf00385    | 23 |
| AX-158225560 | 19 | 13.113 | KV453239.1  | 2549375 | 23-scf00385    | 23 |
| AX-158225567 | 19 | 13.113 | KV453239.1  | 2558899 | 23-scf00385    | 23 |
| AX-158225568 | 19 | 13.113 | KV453239.1  | 2559516 | 23-scf00385    | 23 |
| AX-158225571 | 19 | 13.113 | KV453239.1  | 2564589 | 23-scf00385    | 23 |
| AX-158225572 | 19 | 13.113 | KV453239.1  | 2564950 | 23-scf00385    | 23 |
| AX-157698121 | 19 | 13.113 | KV453239.1  | 2565341 | 23-scf00385    | 23 |
| AX-157839723 | 19 | 13.113 | KV453239.1  | 2567249 | 23-scf00385    | 23 |
| AX-158225573 | 19 | 13.113 | KV453239.1  | 2567452 | 23-scf00385    | 23 |
| AX-157839724 | 19 | 13.114 | KV453239.1  | 2567872 | 23-scf00385    | 23 |
| AX-158225563 | 19 | 13.115 | KV453239.1  | 2554396 | 23-scf00385    | 23 |
| AX-158225565 | 19 | 13.115 | KV453239.1  | 2556424 | 23-scf00385    | 23 |
| AX-158225566 | 19 | 13.115 | KV453239.1  | 2556906 | 23-scf00385    | 23 |
| AX-158225575 | 19 | 13.115 | KV453239.1  | 2569199 | 23-scf00385    | 23 |
| AX-158225576 | 19 | 13.115 | KV453239.1  | 2569483 | 23-scf00385    | 23 |
| AX-158225619 | 19 | 13.115 | KV453239.1  | 2613441 | 23-scf00385    | 23 |
| AX-157700862 | 19 | 13.115 | KV453239.1  | 2729798 | 23-scf00385    | 23 |
| AX-157695635 | 19 | 13.115 | FI866747.1  | 239     | IORI212 lctalu | UN |
| AX-158225577 | 19 | 13.116 | KV453239.1  | 2569912 | 23-scf00385    | 23 |
| AX-158225578 | 19 | 13.116 | KV453239.1  | 2571333 | 23-scf00385    | 23 |
| AX-158225580 | 19 | 13.116 | KV453239.1  | 2573188 | 23-scf00385    | 23 |
| AX-158225585 | 19 | 13.117 | KV453239.1  | 2577553 | 23-scf00385    | 23 |
| AX-158225587 | 19 | 13.222 | KV453239.1  | 2581180 | 23-scf00385    | 23 |
| AX-158225591 | 19 | 13.317 | KV453239.1  | 2587104 | 23-scf00385    | 23 |
| AX-158225595 | 19 | 13.523 | KV453239.1  | 2594043 | 23-scf00385    | 23 |
| AX-158225599 | 19 | 13.523 | KV453239.1  | 2597160 | 23-scf00385    | 23 |
| AX-158225605 | 19 | 13.523 | KV453239.1  | 2602935 | 23-scf00385    | 23 |
| AX-158225607 | 19 | 13.523 | KV453239.1  | 2604772 | 23-scf00385    | 23 |
| AX-158225609 | 19 | 13.523 | KV453239.1  | 2606416 | 23-scf00385    | 23 |
| AX-158225601 | 19 | 13.586 | KV453239.1  | 2600744 | 23-scf00385    | 23 |
| AX-158225594 | 19 | 13.66  | KV453239.1  | 2593450 | 23-scf00385    | 23 |
| AX-158225598 | 19 | 13.66  | KV453239.1  | 2596667 | 23-scf00385    | 23 |
| AX-158225606 | 19 | 13.66  | KV453239.1  | 2604129 | 23-scf00385    | 23 |
| AX-158225608 | 19 | 13.66  | KV453239.1  | 2605792 | 23-scf00385    | 23 |
| AX-157773968 | 19 | 13.66  | KV453239.1  | 2605973 | 23-scf00385    | 23 |

|              |    |        |            |         |             |    |
|--------------|----|--------|------------|---------|-------------|----|
| AX-158225611 | 19 | 13.66  | KV453239.1 | 2607260 | 23-scf00385 | 23 |
| AX-158225612 | 19 | 13.66  | KV453239.1 | 2607675 | 23-scf00385 | 23 |
| AX-158225616 | 19 | 13.66  | KV453239.1 | 2611020 | 23-scf00385 | 23 |
| AX-158225617 | 19 | 13.66  | KV453239.1 | 2612684 | 23-scf00385 | 23 |
| AX-158225620 | 19 | 13.66  | KV453239.1 | 2613698 | 23-scf00385 | 23 |
| AX-158225622 | 19 | 13.66  | KV453239.1 | 2615134 | 23-scf00385 | 23 |
| AX-158225623 | 19 | 13.66  | KV453239.1 | 2616251 | 23-scf00385 | 23 |
| AX-158225627 | 19 | 13.66  | KV453239.1 | 2618960 | 23-scf00385 | 23 |
| AX-158225629 | 19 | 13.66  | KV453239.1 | 2621043 | 23-scf00385 | 23 |
| AX-158225630 | 19 | 13.66  | KV453239.1 | 2624967 | 23-scf00385 | 23 |
| AX-158225632 | 19 | 13.66  | KV453239.1 | 2627278 | 23-scf00385 | 23 |
| AX-158225644 | 19 | 13.66  | KV453239.1 | 2643769 | 23-scf00385 | 23 |
| AX-158225696 | 19 | 13.66  | KV453239.1 | 2702657 | 23-scf00385 | 23 |
| AX-158225704 | 19 | 13.66  | KV453239.1 | 2714825 | 23-scf00385 | 23 |
| AX-158225710 | 19 | 13.66  | KV453239.1 | 2719558 | 23-scf00385 | 23 |
| AX-158225754 | 19 | 13.66  | KV453239.1 | 2777292 | 23-scf00385 | 23 |
| AX-158225757 | 19 | 13.66  | KV453239.1 | 2780148 | 23-scf00385 | 23 |
| AX-158225774 | 19 | 13.66  | KV453239.1 | 2796647 | 23-scf00385 | 23 |
| AX-158225793 | 19 | 13.66  | KV453239.1 | 2833002 | 23-scf00385 | 23 |
| AX-158225635 | 19 | 13.769 | KV453239.1 | 2629205 | 23-scf00385 | 23 |
| AX-158225638 | 19 | 13.769 | KV453239.1 | 2632809 | 23-scf00385 | 23 |
| AX-157726630 | 19 | 13.769 | KV453239.1 | 2633111 | 23-scf00385 | 23 |
| AX-157887317 | 19 | 13.877 | KV453239.1 | 2636572 | 23-scf00385 | 23 |
| AX-158225642 | 19 | 13.988 | KV453239.1 | 2643137 | 23-scf00385 | 23 |
| AX-158225647 | 19 | 14.063 | KV453239.1 | 2647052 | 23-scf00385 | 23 |
| AX-158226086 | 19 | 14.063 | KV453239.1 | 3237765 | 23-scf00385 | 23 |
| AX-158225653 | 19 | 14.132 | KV453239.1 | 2651013 | 23-scf00385 | 23 |
| AX-158225651 | 19 | 14.207 | KV453239.1 | 2650284 | 23-scf00385 | 23 |
| AX-158225654 | 19 | 14.207 | KV453239.1 | 2654812 | 23-scf00385 | 23 |
| AX-158225655 | 19 | 14.207 | KV453239.1 | 2655273 | 23-scf00385 | 23 |
| AX-158225656 | 19 | 14.207 | KV453239.1 | 2655767 | 23-scf00385 | 23 |
| AX-158225659 | 19 | 14.207 | KV453239.1 | 2657115 | 23-scf00385 | 23 |
| AX-157753622 | 19 | 14.207 | KV453239.1 | 2658623 | 23-scf00385 | 23 |
| AX-158225661 | 19 | 14.207 | KV453239.1 | 2658660 | 23-scf00385 | 23 |
| AX-158225664 | 19 | 14.207 | KV453239.1 | 2661857 | 23-scf00385 | 23 |
| AX-158225666 | 19 | 14.207 | KV453239.1 | 2663139 | 23-scf00385 | 23 |
| AX-158225668 | 19 | 14.207 | KV453239.1 | 2665372 | 23-scf00385 | 23 |
| AX-158225671 | 19 | 14.207 | KV453239.1 | 2669021 | 23-scf00385 | 23 |
| AX-158225672 | 19 | 14.207 | KV453239.1 | 2671712 | 23-scf00385 | 23 |
| AX-158225673 | 19 | 14.207 | KV453239.1 | 2672869 | 23-scf00385 | 23 |
| AX-157867115 | 19 | 14.207 | KV453239.1 | 2673350 | 23-scf00385 | 23 |
| AX-158225674 | 19 | 14.207 | KV453239.1 | 2673823 | 23-scf00385 | 23 |
| AX-158225675 | 19 | 14.207 | KV453239.1 | 2674289 | 23-scf00385 | 23 |
| AX-158225678 | 19 | 14.207 | KV453239.1 | 2677160 | 23-scf00385 | 23 |
| AX-158225679 | 19 | 14.207 | KV453239.1 | 2677526 | 23-scf00385 | 23 |
| AX-158225681 | 19 | 14.207 | KV453239.1 | 2679194 | 23-scf00385 | 23 |
| AX-158225682 | 19 | 14.207 | KV453239.1 | 2679756 | 23-scf00385 | 23 |
| AX-158225683 | 19 | 14.207 | KV453239.1 | 2680978 | 23-scf00385 | 23 |
| AX-158225684 | 19 | 14.207 | KV453239.1 | 2682434 | 23-scf00385 | 23 |
| AX-158225685 | 19 | 14.207 | KV453239.1 | 2683891 | 23-scf00385 | 23 |
| AX-158225687 | 19 | 14.207 | KV453239.1 | 2686795 | 23-scf00385 | 23 |

|              |    |        |            |         |             |    |
|--------------|----|--------|------------|---------|-------------|----|
| AX-158225689 | 19 | 14.207 | KV453239.1 | 2691279 | 23-scf00385 | 23 |
| AX-157774653 | 19 | 14.207 | KV453239.1 | 2692311 | 23-scf00385 | 23 |
| AX-158225693 | 19 | 14.207 | KV453239.1 | 2698817 | 23-scf00385 | 23 |
| AX-158225697 | 19 | 14.207 | KV453239.1 | 2704927 | 23-scf00385 | 23 |
| AX-158225698 | 19 | 14.207 | KV453239.1 | 2705809 | 23-scf00385 | 23 |
| AX-158225701 | 19 | 14.207 | KV453239.1 | 2708318 | 23-scf00385 | 23 |
| AX-157724322 | 19 | 14.207 | KV453239.1 | 2709139 | 23-scf00385 | 23 |
| AX-158418704 | 19 | 14.207 | KV453239.1 | 2714087 | 23-scf00385 | 23 |
| AX-158414954 | 19 | 14.207 | KV453239.1 | 2714312 | 23-scf00385 | 23 |
| AX-157752467 | 19 | 14.207 | KV453239.1 | 2715333 | 23-scf00385 | 23 |
| AX-158225707 | 19 | 14.207 | KV453239.1 | 2717163 | 23-scf00385 | 23 |
| AX-158225708 | 19 | 14.207 | KV453239.1 | 2717779 | 23-scf00385 | 23 |
| AX-158225709 | 19 | 14.207 | KV453239.1 | 2718368 | 23-scf00385 | 23 |
| AX-158225711 | 19 | 14.207 | KV453239.1 | 2723509 | 23-scf00385 | 23 |
| AX-158225712 | 19 | 14.207 | KV453239.1 | 2724402 | 23-scf00385 | 23 |
| AX-158225713 | 19 | 14.207 | KV453239.1 | 2729903 | 23-scf00385 | 23 |
| AX-158225714 | 19 | 14.207 | KV453239.1 | 2730319 | 23-scf00385 | 23 |
| AX-158225715 | 19 | 14.207 | KV453239.1 | 2731532 | 23-scf00385 | 23 |
| AX-158225717 | 19 | 14.207 | KV453239.1 | 2733130 | 23-scf00385 | 23 |
| AX-158225722 | 19 | 14.207 | KV453239.1 | 2739418 | 23-scf00385 | 23 |
| AX-158225723 | 19 | 14.207 | KV453239.1 | 2739940 | 23-scf00385 | 23 |
| AX-158225726 | 19 | 14.207 | KV453239.1 | 2744827 | 23-scf00385 | 23 |
| AX-158225727 | 19 | 14.207 | KV453239.1 | 2745042 | 23-scf00385 | 23 |
| AX-158225731 | 19 | 14.207 | KV453239.1 | 2748330 | 23-scf00385 | 23 |
| AX-158225733 | 19 | 14.207 | KV453239.1 | 2752901 | 23-scf00385 | 23 |
| AX-158225734 | 19 | 14.207 | KV453239.1 | 2753448 | 23-scf00385 | 23 |
| AX-158225739 | 19 | 14.207 | KV453239.1 | 2762935 | 23-scf00385 | 23 |
| AX-158225740 | 19 | 14.207 | KV453239.1 | 2763684 | 23-scf00385 | 23 |
| AX-158225741 | 19 | 14.207 | KV453239.1 | 2764456 | 23-scf00385 | 23 |
| AX-158225742 | 19 | 14.207 | KV453239.1 | 2765924 | 23-scf00385 | 23 |
| AX-158225744 | 19 | 14.207 | KV453239.1 | 2766949 | 23-scf00385 | 23 |
| AX-158386736 | 19 | 14.207 | KV453239.1 | 2771165 | 23-scf00385 | 23 |
| AX-157887320 | 19 | 14.207 | KV453239.1 | 2771377 | 23-scf00385 | 23 |
| AX-158225748 | 19 | 14.207 | KV453239.1 | 2771476 | 23-scf00385 | 23 |
| AX-158225751 | 19 | 14.207 | KV453239.1 | 2775605 | 23-scf00385 | 23 |
| AX-158225752 | 19 | 14.207 | KV453239.1 | 2776261 | 23-scf00385 | 23 |
| AX-158225755 | 19 | 14.207 | KV453239.1 | 2778831 | 23-scf00385 | 23 |
| AX-158225756 | 19 | 14.207 | KV453239.1 | 2779564 | 23-scf00385 | 23 |
| AX-158225762 | 19 | 14.207 | KV453239.1 | 2783144 | 23-scf00385 | 23 |
| AX-158225764 | 19 | 14.207 | KV453239.1 | 2784457 | 23-scf00385 | 23 |
| AX-158225766 | 19 | 14.207 | KV453239.1 | 2785823 | 23-scf00385 | 23 |
| AX-158225767 | 19 | 14.207 | KV453239.1 | 2786927 | 23-scf00385 | 23 |
| AX-158225770 | 19 | 14.207 | KV453239.1 | 2790336 | 23-scf00385 | 23 |
| AX-158225772 | 19 | 14.207 | KV453239.1 | 2794222 | 23-scf00385 | 23 |
| AX-158225775 | 19 | 14.207 | KV453239.1 | 2797147 | 23-scf00385 | 23 |
| AX-158225777 | 19 | 14.207 | KV453239.1 | 2799157 | 23-scf00385 | 23 |
| AX-158225778 | 19 | 14.207 | KV453239.1 | 2801463 | 23-scf00385 | 23 |
| AX-158225782 | 19 | 14.207 | KV453239.1 | 2809619 | 23-scf00385 | 23 |
| AX-158225784 | 19 | 14.207 | KV453239.1 | 2812845 | 23-scf00385 | 23 |
| AX-158225785 | 19 | 14.207 | KV453239.1 | 2815529 | 23-scf00385 | 23 |
| AX-157741856 | 19 | 14.207 | KV453239.1 | 2821916 | 23-scf00385 | 23 |

|              |    |        |             |         |             |    |
|--------------|----|--------|-------------|---------|-------------|----|
| AX-158225791 | 19 | 14.207 | KV453239.1  | 2830117 | 23-scf00385 | 23 |
| AX-157718911 | 19 | 14.207 | KV453239.1  | 2835815 | 23-scf00385 | 23 |
| AX-158225804 | 19 | 14.207 | KV453239.1  | 2843506 | 23-scf00385 | 23 |
| AX-158225812 | 19 | 14.207 | KV453239.1  | 2852170 | 23-scf00385 | 23 |
| AX-158225819 | 19 | 14.207 | KV453239.1  | 2864067 | 23-scf00385 | 23 |
| AX-158225840 | 19 | 14.207 | KV453239.1  | 2888108 | 23-scf00385 | 23 |
| AX-158225906 | 19 | 14.207 | KV453239.1  | 2982836 | 23-scf00385 | 23 |
| AX-158226090 | 19 | 14.207 | KV453239.1  | 3241886 | 23-scf00385 | 23 |
| AX-157705218 | 19 | 14.207 | 3ML01029046 | 68      | scf04664_1  | UN |
| AX-158225795 | 19 | 14.315 | KV453239.1  | 2835349 | 23-scf00385 | 23 |
| AX-157859488 | 19 | 14.426 | KV453239.1  | 2838479 | 23-scf00385 | 23 |
| AX-158414957 | 19 | 14.426 | KV453239.1  | 2839866 | 23-scf00385 | 23 |
| AX-158225802 | 19 | 14.47  | KV453239.1  | 2842014 | 23-scf00385 | 23 |
| AX-158225805 | 19 | 14.535 | KV453239.1  | 2843858 | 23-scf00385 | 23 |
| AX-158225807 | 19 | 14.535 | KV453239.1  | 2847233 | 23-scf00385 | 23 |
| AX-158225810 | 19 | 14.571 | KV453239.1  | 2849980 | 23-scf00385 | 23 |
| AX-157839728 | 19 | 14.608 | KV453239.1  | 2851597 | 23-scf00385 | 23 |
| AX-158225792 | 19 | 14.644 | KV453239.1  | 2832517 | 23-scf00385 | 23 |
| AX-158225798 | 19 | 14.644 | KV453239.1  | 2838755 | 23-scf00385 | 23 |
| AX-158225814 | 19 | 14.644 | KV453239.1  | 2855079 | 23-scf00385 | 23 |
| AX-158225817 | 19 | 14.644 | KV453239.1  | 2858940 | 23-scf00385 | 23 |
| AX-158225818 | 19 | 14.644 | KV453239.1  | 2859323 | 23-scf00385 | 23 |
| AX-158225825 | 19 | 14.644 | KV453239.1  | 2871359 | 23-scf00385 | 23 |
| AX-158225826 | 19 | 14.644 | KV453239.1  | 2872530 | 23-scf00385 | 23 |
| AX-158410318 | 19 | 14.644 | KV453239.1  | 2874422 | 23-scf00385 | 23 |
| AX-158225833 | 19 | 14.644 | KV453239.1  | 2883196 | 23-scf00385 | 23 |
| AX-158225995 | 19 | 14.644 | KV453239.1  | 3086522 | 23-scf00385 | 23 |
| AX-158226066 | 19 | 14.644 | KV453239.1  | 3208949 | 23-scf00385 | 23 |
| AX-157706648 | 19 | 14.644 | 3ML01032665 | 231     | scf08292_1  | UN |
| AX-158225690 | 19 | 14.753 | KV453239.1  | 2693001 | 23-scf00385 | 23 |
| AX-158225719 | 19 | 14.753 | KV453239.1  | 2734569 | 23-scf00385 | 23 |
| AX-158225830 | 19 | 14.753 | KV453239.1  | 2880569 | 23-scf00385 | 23 |
| AX-158225832 | 19 | 14.753 | KV453239.1  | 2882817 | 23-scf00385 | 23 |
| AX-157839729 | 19 | 14.753 | KV453239.1  | 2884137 | 23-scf00385 | 23 |
| AX-158225836 | 19 | 14.753 | KV453239.1  | 2885845 | 23-scf00385 | 23 |
| AX-158225841 | 19 | 14.753 | KV453239.1  | 2890365 | 23-scf00385 | 23 |
| AX-158225843 | 19 | 14.753 | KV453239.1  | 2891774 | 23-scf00385 | 23 |
| AX-158225845 | 19 | 14.753 | KV453239.1  | 2893809 | 23-scf00385 | 23 |
| AX-158225846 | 19 | 14.753 | KV453239.1  | 2894132 | 23-scf00385 | 23 |
| AX-158225849 | 19 | 14.753 | KV453239.1  | 2898469 | 23-scf00385 | 23 |
| AX-157739864 | 19 | 14.753 | KV453239.1  | 2904740 | 23-scf00385 | 23 |
| AX-158225851 | 19 | 14.753 | KV453239.1  | 2906513 | 23-scf00385 | 23 |
| AX-158225852 | 19 | 14.753 | KV453239.1  | 2907228 | 23-scf00385 | 23 |
| AX-158225854 | 19 | 14.753 | KV453239.1  | 2909080 | 23-scf00385 | 23 |
| AX-158225856 | 19 | 14.753 | KV453239.1  | 2911310 | 23-scf00385 | 23 |
| AX-158225857 | 19 | 14.753 | KV453239.1  | 2912139 | 23-scf00385 | 23 |
| AX-158225866 | 19 | 14.753 | KV453239.1  | 2926192 | 23-scf00385 | 23 |
| AX-157724773 | 19 | 14.753 | KV453239.1  | 2963234 | 23-scf00385 | 23 |
| AX-158225905 | 19 | 14.753 | KV453239.1  | 2981975 | 23-scf00385 | 23 |
| AX-158225968 | 19 | 14.753 | KV453239.1  | 3060610 | 23-scf00385 | 23 |
| AX-158225888 | 19 | 14.815 | KV453239.1  | 2954915 | 23-scf00385 | 23 |



|              |    |        |             |         |             |    |
|--------------|----|--------|-------------|---------|-------------|----|
| AX-158225850 | 19 | 14.972 | KV453239.1  | 2901075 | 23-scf00385 | 23 |
| AX-158225855 | 19 | 14.972 | KV453239.1  | 2909695 | 23-scf00385 | 23 |
| AX-157749252 | 19 | 14.972 | KV453239.1  | 2955451 | 23-scf00385 | 23 |
| AX-158225889 | 19 | 14.972 | KV453239.1  | 2955979 | 23-scf00385 | 23 |
| AX-158225890 | 19 | 14.972 | KV453239.1  | 2956428 | 23-scf00385 | 23 |
| AX-158394108 | 19 | 14.972 | KV453239.1  | 2956949 | 23-scf00385 | 23 |
| AX-158225891 | 19 | 14.972 | KV453239.1  | 2957432 | 23-scf00385 | 23 |
| AX-158225892 | 19 | 14.972 | KV453239.1  | 2958822 | 23-scf00385 | 23 |
| AX-158225895 | 19 | 14.972 | KV453239.1  | 2961273 | 23-scf00385 | 23 |
| AX-157887321 | 19 | 14.972 | KV453239.1  | 2963846 | 23-scf00385 | 23 |
| AX-158225897 | 19 | 14.972 | KV453239.1  | 2964454 | 23-scf00385 | 23 |
| AX-158225899 | 19 | 14.972 | KV453239.1  | 2966239 | 23-scf00385 | 23 |
| AX-158225904 | 19 | 14.972 | KV453239.1  | 2977787 | 23-scf00385 | 23 |
| AX-158225910 | 19 | 14.972 | KV453239.1  | 2987196 | 23-scf00385 | 23 |
| AX-157726488 | 19 | 14.972 | KV453239.1  | 2987875 | 23-scf00385 | 23 |
| AX-158225914 | 19 | 14.972 | KV453239.1  | 2993835 | 23-scf00385 | 23 |
| AX-157722643 | 19 | 14.972 | KV453239.1  | 2996136 | 23-scf00385 | 23 |
| AX-158225919 | 19 | 14.972 | KV453239.1  | 2998686 | 23-scf00385 | 23 |
| AX-158225928 | 19 | 14.972 | KV453239.1  | 3006616 | 23-scf00385 | 23 |
| AX-158225950 | 19 | 14.972 | KV453239.1  | 3031869 | 23-scf00385 | 23 |
| AX-158225960 | 19 | 14.972 | KV453239.1  | 3046096 | 23-scf00385 | 23 |
| AX-158225900 | 19 | 15.081 | KV453239.1  | 2966754 | 23-scf00385 | 23 |
| AX-158225920 | 19 | 15.081 | KV453239.1  | 2999303 | 23-scf00385 | 23 |
| AX-158225923 | 19 | 15.081 | KV453239.1  | 3002201 | 23-scf00385 | 23 |
| AX-158225926 | 19 | 15.081 | KV453239.1  | 3004111 | 23-scf00385 | 23 |
| AX-158225927 | 19 | 15.081 | KV453239.1  | 3006257 | 23-scf00385 | 23 |
| AX-158225929 | 19 | 15.081 | KV453239.1  | 3008247 | 23-scf00385 | 23 |
| AX-158225931 | 19 | 15.081 | KV453239.1  | 3014397 | 23-scf00385 | 23 |
| AX-157775155 | 19 | 15.081 | KV453239.1  | 3015785 | 23-scf00385 | 23 |
| AX-158225938 | 19 | 15.081 | KV453239.1  | 3020135 | 23-scf00385 | 23 |
| AX-158225941 | 19 | 15.081 | KV453239.1  | 3025469 | 23-scf00385 | 23 |
| AX-158225943 | 19 | 15.081 | KV453239.1  | 3026505 | 23-scf00385 | 23 |
| AX-158225944 | 19 | 15.081 | KV453239.1  | 3027089 | 23-scf00385 | 23 |
| AX-158225946 | 19 | 15.081 | KV453239.1  | 3028860 | 23-scf00385 | 23 |
| AX-158225947 | 19 | 15.081 | KV453239.1  | 3029260 | 23-scf00385 | 23 |
| AX-158225952 | 19 | 15.081 | KV453239.1  | 3035196 | 23-scf00385 | 23 |
| AX-158225953 | 19 | 15.081 | KV453239.1  | 3036645 | 23-scf00385 | 23 |
| AX-158225957 | 19 | 15.081 | KV453239.1  | 3044389 | 23-scf00385 | 23 |
| AX-158225958 | 19 | 15.081 | KV453239.1  | 3044751 | 23-scf00385 | 23 |
| AX-158386738 | 19 | 15.081 | KV453239.1  | 3045232 | 23-scf00385 | 23 |
| AX-158225961 | 19 | 15.081 | KV453239.1  | 3046747 | 23-scf00385 | 23 |
| AX-158414963 | 19 | 15.081 | KV453239.1  | 3049847 | 23-scf00385 | 23 |
| AX-158225962 | 19 | 15.081 | KV453239.1  | 3051198 | 23-scf00385 | 23 |
| AX-158225963 | 19 | 15.081 | KV453239.1  | 3054796 | 23-scf00385 | 23 |
| AX-157755655 | 19 | 15.081 | KV453239.1  | 3058421 | 23-scf00385 | 23 |
| AX-157699554 | 19 | 15.081 | KV453239.1  | 3059744 | 23-scf00385 | 23 |
| AX-158225967 | 19 | 15.081 | KV453239.1  | 3059887 | 23-scf00385 | 23 |
| AX-158225973 | 19 | 15.081 | KV453239.1  | 3064800 | 23-scf00385 | 23 |
| AX-158225974 | 19 | 15.081 | KV453239.1  | 3066188 | 23-scf00385 | 23 |
| AX-158225979 | 19 | 15.081 | KV453239.1  | 3069544 | 23-scf00385 | 23 |
| AX-157705968 | 19 | 15.081 | 3ML01031332 | 661     | scf06942_1  | UN |

|              |    |        |            |         |             |    |
|--------------|----|--------|------------|---------|-------------|----|
| AX-158225976 | 19 | 15.19  | KV453239.1 | 3067969 | 23-scf00385 | 23 |
| AX-158225977 | 19 | 15.19  | KV453239.1 | 3068391 | 23-scf00385 | 23 |
| AX-158225978 | 19 | 15.19  | KV453239.1 | 3068846 | 23-scf00385 | 23 |
| AX-157879835 | 19 | 15.19  | KV453239.1 | 3070711 | 23-scf00385 | 23 |
| AX-158225982 | 19 | 15.19  | KV453239.1 | 3072744 | 23-scf00385 | 23 |
| AX-158225983 | 19 | 15.19  | KV453239.1 | 3073400 | 23-scf00385 | 23 |
| AX-158225986 | 19 | 15.393 | KV453239.1 | 3076749 | 23-scf00385 | 23 |
| AX-158225911 | 19 | 15.424 | KV453239.1 | 2987240 | 23-scf00385 | 23 |
| AX-158225922 | 19 | 15.424 | KV453239.1 | 3001566 | 23-scf00385 | 23 |
| AX-158225987 | 19 | 15.424 | KV453239.1 | 3077773 | 23-scf00385 | 23 |
| AX-158225988 | 19 | 15.424 | KV453239.1 | 3078198 | 23-scf00385 | 23 |
| AX-158225991 | 19 | 15.424 | KV453239.1 | 3082855 | 23-scf00385 | 23 |
| AX-158226011 | 19 | 15.424 | KV453239.1 | 3109602 | 23-scf00385 | 23 |
| AX-158226013 | 19 | 15.424 | KV453239.1 | 3112396 | 23-scf00385 | 23 |
| AX-158226023 | 19 | 15.424 | KV453239.1 | 3123736 | 23-scf00385 | 23 |
| AX-158226032 | 19 | 15.424 | KV453239.1 | 3138035 | 23-scf00385 | 23 |
| AX-158226041 | 19 | 15.424 | KV453239.1 | 3154185 | 23-scf00385 | 23 |
| AX-158226057 | 19 | 15.424 | KV453239.1 | 3189493 | 23-scf00385 | 23 |
| AX-158226068 | 19 | 15.424 | KV453239.1 | 3210126 | 23-scf00385 | 23 |
| AX-158226096 | 19 | 15.424 | KV453239.1 | 3246477 | 23-scf00385 | 23 |
| AX-158226118 | 19 | 15.424 | KV453239.1 | 3274820 | 23-scf00385 | 23 |
| AX-157839726 | 19 | 15.627 | KV453239.1 | 2825516 | 23-scf00385 | 23 |
| AX-157755658 | 19 | 15.627 | KV453239.1 | 3010574 | 23-scf00385 | 23 |
| AX-158225994 | 19 | 15.627 | KV453239.1 | 3085300 | 23-scf00385 | 23 |
| AX-158225996 | 19 | 15.627 | KV453239.1 | 3089210 | 23-scf00385 | 23 |
| AX-158225998 | 19 | 15.627 | KV453239.1 | 3091062 | 23-scf00385 | 23 |
| AX-158226000 | 19 | 15.627 | KV453239.1 | 3092734 | 23-scf00385 | 23 |
| AX-158226001 | 19 | 15.627 | KV453239.1 | 3094682 | 23-scf00385 | 23 |
| AX-158226002 | 19 | 15.627 | KV453239.1 | 3095279 | 23-scf00385 | 23 |
| AX-157887322 | 19 | 15.627 | KV453239.1 | 3097423 | 23-scf00385 | 23 |
| AX-158226004 | 19 | 15.627 | KV453239.1 | 3101356 | 23-scf00385 | 23 |
| AX-158226005 | 19 | 15.627 | KV453239.1 | 3102719 | 23-scf00385 | 23 |
| AX-158226006 | 19 | 15.627 | KV453239.1 | 3103715 | 23-scf00385 | 23 |
| AX-158226008 | 19 | 15.627 | KV453239.1 | 3107506 | 23-scf00385 | 23 |
| AX-158226009 | 19 | 15.627 | KV453239.1 | 3107997 | 23-scf00385 | 23 |
| AX-158226014 | 19 | 15.627 | KV453239.1 | 3112995 | 23-scf00385 | 23 |
| AX-158226015 | 19 | 15.627 | KV453239.1 | 3114500 | 23-scf00385 | 23 |
| AX-158226017 | 19 | 15.627 | KV453239.1 | 3119468 | 23-scf00385 | 23 |
| AX-158226019 | 19 | 15.627 | KV453239.1 | 3121208 | 23-scf00385 | 23 |
| AX-158226021 | 19 | 15.627 | KV453239.1 | 3121928 | 23-scf00385 | 23 |
| AX-158226024 | 19 | 15.627 | KV453239.1 | 3127749 | 23-scf00385 | 23 |
| AX-158380868 | 19 | 15.627 | KV453239.1 | 3132653 | 23-scf00385 | 23 |
| AX-158226028 | 19 | 15.627 | KV453239.1 | 3134222 | 23-scf00385 | 23 |
| AX-158226029 | 19 | 15.627 | KV453239.1 | 3135290 | 23-scf00385 | 23 |
| AX-158226030 | 19 | 15.627 | KV453239.1 | 3136099 | 23-scf00385 | 23 |
| AX-158414968 | 19 | 15.627 | KV453239.1 | 3136449 | 23-scf00385 | 23 |
| AX-158226036 | 19 | 15.627 | KV453239.1 | 3143973 | 23-scf00385 | 23 |
| AX-158226039 | 19 | 15.627 | KV453239.1 | 3146155 | 23-scf00385 | 23 |
| AX-158226042 | 19 | 15.627 | KV453239.1 | 3157859 | 23-scf00385 | 23 |
| AX-158226047 | 19 | 15.627 | KV453239.1 | 3170164 | 23-scf00385 | 23 |
| AX-158226049 | 19 | 15.627 | KV453239.1 | 3175500 | 23-scf00385 | 23 |

|              |    |        |            |         |                |    |
|--------------|----|--------|------------|---------|----------------|----|
| AX-158226050 | 19 | 15.627 | KV453239.1 | 3176881 | 23-scf00385    | 23 |
| AX-158226052 | 19 | 15.627 | KV453239.1 | 3180060 | 23-scf00385    | 23 |
| AX-158226053 | 19 | 15.627 | KV453239.1 | 3181546 | 23-scf00385    | 23 |
| AX-158226054 | 19 | 15.627 | KV453239.1 | 3186965 | 23-scf00385    | 23 |
| AX-158226056 | 19 | 15.627 | KV453239.1 | 3188142 | 23-scf00385    | 23 |
| AX-158226069 | 19 | 15.627 | KV453239.1 | 3210465 | 23-scf00385    | 23 |
| AX-157839730 | 19 | 15.627 | KV453239.1 | 3214857 | 23-scf00385    | 23 |
| AX-158226098 | 19 | 15.627 | KV453239.1 | 3250548 | 23-scf00385    | 23 |
| AX-158226055 | 19 | 15.649 | KV453239.1 | 3187660 | 23-scf00385    | 23 |
| AX-158226038 | 19 | 15.668 | KV453239.1 | 3145447 | 23-scf00385    | 23 |
| AX-158386739 | 19 | 15.668 | KV453239.1 | 3153240 | 23-scf00385    | 23 |
| AX-158226046 | 19 | 15.668 | KV453239.1 | 3168828 | 23-scf00385    | 23 |
| AX-157721698 | 19 | 15.668 | KV453239.1 | 3193534 | 23-scf00385    | 23 |
| AX-158386740 | 19 | 15.668 | KV453239.1 | 3232944 | 23-scf00385    | 23 |
| AX-158226059 | 19 | 15.685 | KV453239.1 | 3194399 | 23-scf00385    | 23 |
| AX-158226075 | 19 | 15.685 | KV453239.1 | 3217058 | 23-scf00385    | 23 |
| AX-158226060 | 19 | 15.718 | KV453239.1 | 3198271 | 23-scf00385    | 23 |
| AX-158226063 | 19 | 15.736 | KV453239.1 | 3207602 | 23-scf00385    | 23 |
| AX-158226067 | 19 | 15.736 | KV453239.1 | 3209633 | 23-scf00385    | 23 |
| AX-158414969 | 19 | 15.736 | KV453239.1 | 3212823 | 23-scf00385    | 23 |
| AX-158226074 | 19 | 15.736 | KV453239.1 | 3216619 | 23-scf00385    | 23 |
| AX-158226076 | 19 | 15.736 | KV453239.1 | 3217686 | 23-scf00385    | 23 |
| AX-158226077 | 19 | 15.736 | KV453239.1 | 3217920 | 23-scf00385    | 23 |
| AX-158226078 | 19 | 15.736 | KV453239.1 | 3218370 | 23-scf00385    | 23 |
| AX-158226079 | 19 | 15.736 | KV453239.1 | 3219400 | 23-scf00385    | 23 |
| AX-158226080 | 19 | 15.736 | KV453239.1 | 3219771 | 23-scf00385    | 23 |
| AX-158226081 | 19 | 15.736 | KV453239.1 | 3221124 | 23-scf00385    | 23 |
| AX-158226082 | 19 | 15.736 | KV453239.1 | 3231212 | 23-scf00385    | 23 |
| AX-157709331 | 19 | 15.736 | KV453239.1 | 3231691 | 23-scf00385    | 23 |
| AX-158226097 | 19 | 15.736 | KV453239.1 | 3248891 | 23-scf00385    | 23 |
| AX-157887323 | 19 | 15.736 | KV453239.1 | 3257116 | 23-scf00385    | 23 |
| AX-158226112 | 19 | 15.736 | KV453239.1 | 3266268 | 23-scf00385    | 23 |
| AX-158226135 | 19 | 15.736 | KV453239.1 | 3299480 | 23-scf00385    | 23 |
| AX-157702016 | 19 | 15.736 | DX089263.1 | 476     | 4ORI212 lctalt | UN |
| AX-158225801 | 19 | 15.787 | KV453239.1 | 2841601 | 23-scf00385    | 23 |
| AX-158226010 | 19 | 15.787 | KV453239.1 | 3109531 | 23-scf00385    | 23 |
| AX-157752991 | 19 | 15.787 | KV453239.1 | 3161880 | 23-scf00385    | 23 |
| AX-158226061 | 19 | 15.787 | KV453239.1 | 3199625 | 23-scf00385    | 23 |
| AX-158226073 | 19 | 15.787 | KV453239.1 | 3215538 | 23-scf00385    | 23 |
| AX-158226091 | 19 | 15.787 | KV453239.1 | 3243083 | 23-scf00385    | 23 |
| AX-158380869 | 19 | 15.787 | KV453239.1 | 3250729 | 23-scf00385    | 23 |
| AX-158226092 | 19 | 15.804 | KV453239.1 | 3243867 | 23-scf00385    | 23 |
| AX-158226093 | 19 | 15.845 | KV453239.1 | 3244745 | 23-scf00385    | 23 |
| AX-158226095 | 19 | 15.845 | KV453239.1 | 3245946 | 23-scf00385    | 23 |
| AX-158226070 | 19 | 15.955 | KV453239.1 | 3211376 | 23-scf00385    | 23 |
| AX-158226099 | 19 | 15.955 | KV453239.1 | 3251759 | 23-scf00385    | 23 |
| AX-158226100 | 19 | 15.955 | KV453239.1 | 3252590 | 23-scf00385    | 23 |
| AX-158226102 | 19 | 15.955 | KV453239.1 | 3254111 | 23-scf00385    | 23 |
| AX-158226103 | 19 | 15.955 | KV453239.1 | 3255177 | 23-scf00385    | 23 |
| AX-158226104 | 19 | 15.955 | KV453239.1 | 3256771 | 23-scf00385    | 23 |
| AX-158226105 | 19 | 15.955 | KV453239.1 | 3257416 | 23-scf00385    | 23 |

|              |    |        |            |         |             |    |
|--------------|----|--------|------------|---------|-------------|----|
| AX-158226108 | 19 | 15.955 | KV453239.1 | 3259641 | 23-scf00385 | 23 |
| AX-158226109 | 19 | 15.955 | KV453239.1 | 3262714 | 23-scf00385 | 23 |
| AX-158226111 | 19 | 16.173 | KV453239.1 | 3265180 | 23-scf00385 | 23 |
| AX-158226113 | 19 | 16.173 | KV453239.1 | 3267419 | 23-scf00385 | 23 |
| AX-158226116 | 19 | 16.173 | KV453239.1 | 3273504 | 23-scf00385 | 23 |
| AX-158226119 | 19 | 16.173 | KV453239.1 | 3275461 | 23-scf00385 | 23 |
| AX-158226120 | 19 | 16.173 | KV453239.1 | 3275882 | 23-scf00385 | 23 |
| AX-158226121 | 19 | 16.173 | KV453239.1 | 3276438 | 23-scf00385 | 23 |
| AX-157719575 | 19 | 16.173 | KV453239.1 | 3278804 | 23-scf00385 | 23 |
| AX-158226127 | 19 | 16.173 | KV453239.1 | 3281452 | 23-scf00385 | 23 |
| AX-158226128 | 19 | 16.173 | KV453239.1 | 3282106 | 23-scf00385 | 23 |
| AX-158226130 | 19 | 16.173 | KV453239.1 | 3285049 | 23-scf00385 | 23 |
| AX-158226131 | 19 | 16.256 | KV453239.1 | 3286363 | 23-scf00385 | 23 |
| AX-158226132 | 19 | 16.282 | KV453239.1 | 3293459 | 23-scf00385 | 23 |
| AX-158226133 | 19 | 16.282 | KV453239.1 | 3294660 | 23-scf00385 | 23 |
| AX-157739409 | 19 | 16.282 | KV453239.1 | 3296771 | 23-scf00385 | 23 |
| AX-158226136 | 19 | 16.283 | KV453239.1 | 3303364 | 23-scf00385 | 23 |
| AX-158226137 | 19 | 16.336 | KV453239.1 | 3306176 | 23-scf00385 | 23 |
| AX-158226138 | 19 | 16.473 | KV453239.1 | 3306758 | 23-scf00385 | 23 |
| AX-158226158 | 19 | 17.048 | KV453239.1 | 3335179 | 23-scf00385 | 23 |
| AX-158226161 | 19 | 17.048 | KV453239.1 | 3337160 | 23-scf00385 | 23 |
| AX-157839731 | 19 | 17.048 | KV453239.1 | 3337471 | 23-scf00385 | 23 |
| AX-157700276 | 19 | 17.048 | KV453239.1 | 3337638 | 23-scf00385 | 23 |
| AX-157839732 | 19 | 17.048 | KV453239.1 | 3337711 | 23-scf00385 | 23 |
| AX-158226162 | 19 | 17.048 | KV453239.1 | 3339274 | 23-scf00385 | 23 |
| AX-157774917 | 19 | 17.048 | KV453239.1 | 3339966 | 23-scf00385 | 23 |
| AX-158226163 | 19 | 17.048 | KV453239.1 | 3342685 | 23-scf00385 | 23 |
| AX-157715099 | 19 | 17.048 | KV453239.1 | 3343711 | 23-scf00385 | 23 |
| AX-157839733 | 19 | 17.048 | KV453239.1 | 3345474 | 23-scf00385 | 23 |
| AX-158226165 | 19 | 17.048 | KV453239.1 | 3346090 | 23-scf00385 | 23 |
| AX-158226168 | 19 | 17.126 | KV453239.1 | 3350052 | 23-scf00385 | 23 |
| AX-158414975 | 19 | 17.197 | KV453239.1 | 3350422 | 23-scf00385 | 23 |
| AX-157839734 | 19 | 17.266 | KV453239.1 | 3357672 | 23-scf00385 | 23 |
| AX-158226172 | 19 | 17.266 | KV453239.1 | 3357921 | 23-scf00385 | 23 |
| AX-158226177 | 19 | 17.266 | KV453239.1 | 3360661 | 23-scf00385 | 23 |
| AX-158226175 | 19 | 17.322 | KV453239.1 | 3359839 | 23-scf00385 | 23 |
| AX-158226179 | 19 | 17.403 | KV453239.1 | 3362622 | 23-scf00385 | 23 |
| AX-158226181 | 19 | 17.485 | KV453239.1 | 3365945 | 23-scf00385 | 23 |
| AX-158226182 | 19 | 17.485 | KV453239.1 | 3366413 | 23-scf00385 | 23 |
| AX-158226183 | 19 | 17.485 | KV453239.1 | 3366720 | 23-scf00385 | 23 |
| AX-158226186 | 19 | 17.704 | KV453239.1 | 3370755 | 23-scf00385 | 23 |
| AX-158226189 | 19 | 17.704 | KV453239.1 | 3373068 | 23-scf00385 | 23 |
| AX-158226190 | 19 | 17.704 | KV453239.1 | 3373597 | 23-scf00385 | 23 |
| AX-158226193 | 19 | 17.704 | KV453239.1 | 3376017 | 23-scf00385 | 23 |
| AX-157839736 | 19 | 17.704 | KV453239.1 | 3376637 | 23-scf00385 | 23 |
| AX-158226196 | 19 | 17.704 | KV453239.1 | 3378405 | 23-scf00385 | 23 |
| AX-157733111 | 19 | 17.704 | KV453239.1 | 3401873 | 23-scf00385 | 23 |
| AX-158226198 | 19 | 18.138 | KV453239.1 | 3379904 | 23-scf00385 | 23 |
| AX-158226200 | 19 | 18.141 | KV453239.1 | 3386725 | 23-scf00385 | 23 |
| AX-158226202 | 19 | 18.141 | KV453239.1 | 3389394 | 23-scf00385 | 23 |
| AX-158226203 | 19 | 18.141 | KV453239.1 | 3389915 | 23-scf00385 | 23 |

|              |    |        |            |         |             |    |
|--------------|----|--------|------------|---------|-------------|----|
| AX-158226206 | 19 | 18.141 | KV453239.1 | 3391866 | 23-scf00385 | 23 |
| AX-158226207 | 19 | 18.141 | KV453239.1 | 3392560 | 23-scf00385 | 23 |
| AX-158226208 | 19 | 18.141 | KV453239.1 | 3392987 | 23-scf00385 | 23 |
| AX-158226209 | 19 | 18.141 | KV453239.1 | 3393525 | 23-scf00385 | 23 |
| AX-158226211 | 19 | 18.268 | KV453239.1 | 3397160 | 23-scf00385 | 23 |
| AX-157739252 | 19 | 18.469 | KV453239.1 | 3391922 | 23-scf00385 | 23 |
| AX-158226216 | 19 | 18.469 | KV453239.1 | 3400394 | 23-scf00385 | 23 |
| AX-158226222 | 19 | 18.469 | KV453239.1 | 3406329 | 23-scf00385 | 23 |
| AX-158226226 | 19 | 18.469 | KV453239.1 | 3408639 | 23-scf00385 | 23 |
| AX-158226227 | 19 | 18.469 | KV453239.1 | 3409180 | 23-scf00385 | 23 |
| AX-158226228 | 19 | 18.469 | KV453239.1 | 3409951 | 23-scf00385 | 23 |
| AX-158226229 | 19 | 18.469 | KV453239.1 | 3410342 | 23-scf00385 | 23 |
| AX-158226230 | 19 | 18.469 | KV453239.1 | 3412798 | 23-scf00385 | 23 |
| AX-157771364 | 19 | 18.578 | KV453239.1 | 3414418 | 23-scf00385 | 23 |
| AX-158226231 | 19 | 18.578 | KV453239.1 | 3415665 | 23-scf00385 | 23 |
| AX-158226233 | 19 | 18.578 | KV453239.1 | 3419054 | 23-scf00385 | 23 |
| AX-157743189 | 19 | 18.578 | KV453239.1 | 3420131 | 23-scf00385 | 23 |
| AX-157839740 | 19 | 18.578 | KV453239.1 | 3422640 | 23-scf00385 | 23 |
| AX-158226235 | 19 | 18.578 | KV453239.1 | 3423986 | 23-scf00385 | 23 |
| AX-158226237 | 19 | 18.578 | KV453239.1 | 3425002 | 23-scf00385 | 23 |
| AX-158226236 | 19 | 18.796 | KV453239.1 | 3424642 | 23-scf00385 | 23 |
| AX-158226239 | 19 | 18.796 | KV453239.1 | 3426544 | 23-scf00385 | 23 |
| AX-158226241 | 19 | 18.796 | KV453239.1 | 3427978 | 23-scf00385 | 23 |
| AX-157839741 | 19 | 19.162 | KV453239.1 | 3429322 | 23-scf00385 | 23 |
| AX-158226245 | 19 | 19.162 | KV453239.1 | 3433107 | 23-scf00385 | 23 |
| AX-157887326 | 19 | 19.344 | KV453239.1 | 3432322 | 23-scf00385 | 23 |
| AX-158226248 | 19 | 19.344 | KV453239.1 | 3438479 | 23-scf00385 | 23 |
| AX-158226249 | 19 | 19.344 | KV453239.1 | 3438976 | 23-scf00385 | 23 |
| AX-158226250 | 19 | 19.344 | KV453239.1 | 3440033 | 23-scf00385 | 23 |
| AX-158226252 | 19 | 19.344 | KV453239.1 | 3442765 | 23-scf00385 | 23 |
| AX-158226254 | 19 | 19.344 | KV453239.1 | 3446449 | 23-scf00385 | 23 |
| AX-158226257 | 19 | 19.344 | KV453239.1 | 3450406 | 23-scf00385 | 23 |
| AX-157751277 | 19 | 19.344 | KV453239.1 | 3451242 | 23-scf00385 | 23 |
| AX-157699254 | 19 | 19.344 | KV453239.1 | 3459610 | 23-scf00385 | 23 |
| AX-158226265 | 19 | 19.344 | KV453239.1 | 3459804 | 23-scf00385 | 23 |
| AX-158226283 | 19 | 19.344 | KV453239.1 | 3484454 | 23-scf00385 | 23 |
| AX-158226296 | 19 | 19.344 | KV453239.1 | 3498295 | 23-scf00385 | 23 |
| AX-157715659 | 19 | 19.387 | KV453239.1 | 3437786 | 23-scf00385 | 23 |
| AX-158226259 | 19 | 19.387 | KV453239.1 | 3454812 | 23-scf00385 | 23 |
| AX-158226260 | 19 | 19.408 | KV453239.1 | 3455222 | 23-scf00385 | 23 |
| AX-158226263 | 19 | 19.408 | KV453239.1 | 3458364 | 23-scf00385 | 23 |
| AX-158226261 | 19 | 19.419 | KV453239.1 | 3456469 | 23-scf00385 | 23 |
| AX-158226262 | 19 | 19.453 | KV453239.1 | 3457654 | 23-scf00385 | 23 |
| AX-158226266 | 19 | 19.546 | KV453239.1 | 3463093 | 23-scf00385 | 23 |
| AX-158226267 | 19 | 19.661 | KV453239.1 | 3463819 | 23-scf00385 | 23 |
| AX-158226268 | 19 | 19.782 | KV453239.1 | 3466224 | 23-scf00385 | 23 |
| AX-158226269 | 19 | 19.782 | KV453239.1 | 3466916 | 23-scf00385 | 23 |
| AX-158226271 | 19 | 19.782 | KV453239.1 | 3471011 | 23-scf00385 | 23 |
| AX-158226273 | 19 | 19.782 | KV453239.1 | 3472728 | 23-scf00385 | 23 |
| AX-158414977 | 19 | 19.888 | KV453239.1 | 3474199 | 23-scf00385 | 23 |
| AX-158226275 | 19 | 20     | KV453239.1 | 3474320 | 23-scf00385 | 23 |

|              |    |        |            |         |             |    |
|--------------|----|--------|------------|---------|-------------|----|
| AX-158226276 | 19 | 20.169 | KV453239.1 | 3475495 | 23-scf00385 | 23 |
| AX-158226278 | 19 | 20.22  | KV453239.1 | 3479176 | 23-scf00385 | 23 |
| AX-158226279 | 19 | 20.22  | KV453239.1 | 3480405 | 23-scf00385 | 23 |
| AX-158226282 | 19 | 20.22  | KV453239.1 | 3484135 | 23-scf00385 | 23 |
| AX-158226284 | 19 | 20.329 | KV453239.1 | 3485208 | 23-scf00385 | 23 |
| AX-158226285 | 19 | 20.329 | KV453239.1 | 3486188 | 23-scf00385 | 23 |
| AX-158226286 | 19 | 20.438 | KV453239.1 | 3487495 | 23-scf00385 | 23 |
| AX-158226288 | 19 | 20.547 | KV453239.1 | 3488578 | 23-scf00385 | 23 |
| AX-158226289 | 19 | 20.547 | KV453239.1 | 3489636 | 23-scf00385 | 23 |
| AX-158226291 | 19 | 20.547 | KV453239.1 | 3491989 | 23-scf00385 | 23 |
| AX-158226293 | 19 | 20.547 | KV453239.1 | 3494381 | 23-scf00385 | 23 |
| AX-158226295 | 19 | 20.562 | KV453239.1 | 3497125 | 23-scf00385 | 23 |
| AX-158394115 | 19 | 20.883 | KV453239.1 | 3500927 | 23-scf00385 | 23 |
| AX-158226297 | 19 | 20.883 | KV453239.1 | 3505297 | 23-scf00385 | 23 |
| AX-157839743 | 19 | 20.961 | KV453239.1 | 3503299 | 23-scf00385 | 23 |
| AX-158414978 | 19 | 20.961 | KV453239.1 | 3508403 | 23-scf00385 | 23 |
| AX-158226298 | 19 | 21.019 | KV453239.1 | 3509400 | 23-scf00385 | 23 |
| AX-157879841 | 19 | 21.019 | KV453239.1 | 3511335 | 23-scf00385 | 23 |
| AX-158226301 | 19 | 21.019 | KV453239.1 | 3513274 | 23-scf00385 | 23 |
| AX-157724391 | 19 | 21.037 | KV453239.1 | 3505795 | 23-scf00385 | 23 |
| AX-158226302 | 19 | 21.037 | KV453239.1 | 3514840 | 23-scf00385 | 23 |
| AX-158418709 | 19 | 21.334 | KV453239.1 | 3517214 | 23-scf00385 | 23 |
| AX-158226304 | 19 | 21.335 | KV453239.1 | 3517796 | 23-scf00385 | 23 |
| AX-157839744 | 19 | 21.335 | KV453239.1 | 3518595 | 23-scf00385 | 23 |
| AX-158226305 | 19 | 21.335 | KV453239.1 | 3519043 | 23-scf00385 | 23 |
| AX-158226299 | 19 | 21.531 | KV453239.1 | 3509786 | 23-scf00385 | 23 |
| AX-158226307 | 19 | 21.531 | KV453239.1 | 3522610 | 23-scf00385 | 23 |
| AX-158226308 | 19 | 21.531 | KV453239.1 | 3524706 | 23-scf00385 | 23 |
| AX-158226310 | 19 | 21.533 | KV453239.1 | 3529225 | 23-scf00385 | 23 |
| AX-158226311 | 19 | 21.534 | KV453239.1 | 3529441 | 23-scf00385 | 23 |
| AX-158226317 | 19 | 21.535 | KV453239.1 | 3536889 | 23-scf00385 | 23 |
| AX-158226326 | 19 | 21.755 | KV453239.1 | 3549590 | 23-scf00385 | 23 |
| AX-158226329 | 19 | 21.969 | KV453239.1 | 3552657 | 23-scf00385 | 23 |
| AX-158226335 | 19 | 21.969 | KV453239.1 | 3559448 | 23-scf00385 | 23 |
| AX-158226336 | 19 | 21.969 | KV453239.1 | 3560214 | 23-scf00385 | 23 |
| AX-158226353 | 19 | 21.969 | KV453239.1 | 3576423 | 23-scf00385 | 23 |
| AX-157839747 | 19 | 22.029 | KV453239.1 | 3562378 | 23-scf00385 | 23 |
| AX-158226322 | 19 | 22.078 | KV453239.1 | 3542710 | 23-scf00385 | 23 |
| AX-158226341 | 19 | 22.078 | KV453239.1 | 3563969 | 23-scf00385 | 23 |
| AX-158226343 | 19 | 22.078 | KV453239.1 | 3564917 | 23-scf00385 | 23 |
| AX-158226344 | 19 | 22.078 | KV453239.1 | 3565647 | 23-scf00385 | 23 |
| AX-158226345 | 19 | 22.078 | KV453239.1 | 3566194 | 23-scf00385 | 23 |
| AX-158226346 | 19 | 22.295 | KV453239.1 | 3568156 | 23-scf00385 | 23 |
| AX-158226348 | 19 | 22.512 | KV453239.1 | 3569307 | 23-scf00385 | 23 |
| AX-157757417 | 19 | 22.512 | KV453239.1 | 3572191 | 23-scf00385 | 23 |
| AX-157749520 | 19 | 22.739 | KV453239.1 | 3573050 | 23-scf00385 | 23 |
| AX-158226351 | 19 | 22.74  | KV453239.1 | 3573604 | 23-scf00385 | 23 |
| AX-158226354 | 19 | 22.953 | KV453239.1 | 3577172 | 23-scf00385 | 23 |
| AX-158226357 | 19 | 22.953 | KV453239.1 | 3579445 | 23-scf00385 | 23 |
| AX-158226360 | 19 | 22.953 | KV453239.1 | 3584334 | 23-scf00385 | 23 |
| AX-158226362 | 19 | 22.954 | KV453239.1 | 3587201 | 23-scf00385 | 23 |

|              |    |        |            |         |             |    |
|--------------|----|--------|------------|---------|-------------|----|
| AX-158226364 | 19 | 22.954 | KV453239.1 | 3592134 | 23-scf00385 | 23 |
| AX-158226365 | 19 | 22.964 | KV453239.1 | 3592607 | 23-scf00385 | 23 |
| AX-158226370 | 19 | 23.27  | KV453239.1 | 3597412 | 23-scf00385 | 23 |
| AX-158226375 | 19 | 23.56  | KV453239.1 | 3601356 | 23-scf00385 | 23 |
| AX-158226376 | 19 | 23.57  | KV453239.1 | 3602300 | 23-scf00385 | 23 |
| AX-158226378 | 19 | 23.57  | KV453239.1 | 3604654 | 23-scf00385 | 23 |
| AX-158226379 | 19 | 23.579 | KV453239.1 | 3607849 | 23-scf00385 | 23 |
| AX-158226380 | 19 | 23.579 | KV453239.1 | 3608351 | 23-scf00385 | 23 |
| AX-158226382 | 19 | 23.892 | KV453239.1 | 3609886 | 23-scf00385 | 23 |
| AX-158226384 | 19 | 23.969 | KV453239.1 | 3615806 | 23-scf00385 | 23 |
| AX-158226389 | 19 | 23.969 | KV453239.1 | 3623322 | 23-scf00385 | 23 |
| AX-158226393 | 19 | 24.048 | KV453239.1 | 3629100 | 23-scf00385 | 23 |
| AX-158226395 | 19 | 24.048 | KV453239.1 | 3633070 | 23-scf00385 | 23 |
| AX-158226397 | 19 | 24.048 | KV453239.1 | 3634298 | 23-scf00385 | 23 |
| AX-158226401 | 19 | 24.048 | KV453239.1 | 3637926 | 23-scf00385 | 23 |
| AX-157879844 | 19 | 24.048 | KV453239.1 | 3640301 | 23-scf00385 | 23 |
| AX-158226405 | 19 | 24.048 | KV453239.1 | 3642236 | 23-scf00385 | 23 |
| AX-157757521 | 19 | 24.048 | KV453239.1 | 3645700 | 23-scf00385 | 23 |
| AX-158226406 | 19 | 24.048 | KV453239.1 | 3645864 | 23-scf00385 | 23 |
| AX-158226407 | 19 | 24.048 | KV453239.1 | 3646448 | 23-scf00385 | 23 |
| AX-158226408 | 19 | 24.048 | KV453239.1 | 3646698 | 23-scf00385 | 23 |
| AX-158226409 | 19 | 24.048 | KV453239.1 | 3649133 | 23-scf00385 | 23 |
| AX-158226410 | 19 | 24.048 | KV453239.1 | 3649630 | 23-scf00385 | 23 |
| AX-158226412 | 19 | 24.048 | KV453239.1 | 3650329 | 23-scf00385 | 23 |
| AX-158226414 | 19 | 24.048 | KV453239.1 | 3652233 | 23-scf00385 | 23 |
| AX-158226416 | 19 | 24.048 | KV453239.1 | 3653471 | 23-scf00385 | 23 |
| AX-157839754 | 19 | 24.048 | KV453239.1 | 3700189 | 23-scf00385 | 23 |
| AX-158226419 | 19 | 24.157 | KV453239.1 | 3655172 | 23-scf00385 | 23 |
| AX-158226377 | 19 | 24.211 | KV453239.1 | 3602880 | 23-scf00385 | 23 |
| AX-157714563 | 19 | 24.211 | KV453239.1 | 3647274 | 23-scf00385 | 23 |
| AX-157713763 | 19 | 24.211 | KV453239.1 | 3659222 | 23-scf00385 | 23 |
| AX-158226421 | 19 | 24.211 | KV453239.1 | 3660290 | 23-scf00385 | 23 |
| AX-158226422 | 19 | 24.211 | KV453239.1 | 3660900 | 23-scf00385 | 23 |
| AX-158226423 | 19 | 24.267 | KV453239.1 | 3661287 | 23-scf00385 | 23 |
| AX-158226425 | 19 | 24.267 | KV453239.1 | 3664246 | 23-scf00385 | 23 |
| AX-158226427 | 19 | 24.267 | KV453239.1 | 3668108 | 23-scf00385 | 23 |
| AX-158226432 | 19 | 24.267 | KV453239.1 | 3679456 | 23-scf00385 | 23 |
| AX-157714325 | 19 | 24.339 | KV453239.1 | 3682140 | 23-scf00385 | 23 |
| AX-158226435 | 19 | 24.402 | KV453239.1 | 3687669 | 23-scf00385 | 23 |
| AX-158226386 | 19 | 24.485 | KV453239.1 | 3620222 | 23-scf00385 | 23 |
| AX-158226437 | 19 | 24.485 | KV453239.1 | 3689943 | 23-scf00385 | 23 |
| AX-158226438 | 19 | 24.485 | KV453239.1 | 3690761 | 23-scf00385 | 23 |
| AX-158226440 | 19 | 24.485 | KV453239.1 | 3692818 | 23-scf00385 | 23 |
| AX-158226442 | 19 | 24.485 | KV453239.1 | 3695847 | 23-scf00385 | 23 |
| AX-157773521 | 19 | 24.485 | KV453239.1 | 3696828 | 23-scf00385 | 23 |
| AX-157839751 | 19 | 24.594 | KV453239.1 | 3660208 | 23-scf00385 | 23 |
| AX-158226428 | 19 | 24.594 | KV453239.1 | 3668360 | 23-scf00385 | 23 |
| AX-157839755 | 19 | 24.594 | KV453239.1 | 3700513 | 23-scf00385 | 23 |
| AX-158226443 | 19 | 24.594 | KV453239.1 | 3701403 | 23-scf00385 | 23 |
| AX-158226444 | 19 | 24.594 | KV453239.1 | 3702159 | 23-scf00385 | 23 |
| AX-158226445 | 19 | 24.594 | KV453239.1 | 3702814 | 23-scf00385 | 23 |

|              |    |        |            |         |             |    |
|--------------|----|--------|------------|---------|-------------|----|
| AX-158226448 | 19 | 24.758 | KV453239.1 | 3705751 | 23-scf00385 | 23 |
| AX-157719384 | 19 | 24.758 | KV453239.1 | 3707699 | 23-scf00385 | 23 |
| AX-158226450 | 19 | 24.758 | KV453239.1 | 3709356 | 23-scf00385 | 23 |
| AX-158226451 | 19 | 24.758 | KV453239.1 | 3712979 | 23-scf00385 | 23 |
| AX-158226452 | 19 | 24.758 | KV453239.1 | 3714467 | 23-scf00385 | 23 |
| AX-158226453 | 19 | 24.758 | KV453239.1 | 3715985 | 23-scf00385 | 23 |
| AX-157839759 | 19 | 24.758 | KV453239.1 | 3717740 | 23-scf00385 | 23 |
| AX-158226481 | 19 | 24.758 | KV453239.1 | 3771519 | 23-scf00385 | 23 |
| AX-158226506 | 19 | 24.758 | KV453239.1 | 3799202 | 23-scf00385 | 23 |
| AX-158226525 | 19 | 24.758 | KV453239.1 | 3824193 | 23-scf00385 | 23 |
| AX-157799592 | 19 | 24.804 | KV453239.1 | 3716543 | 23-scf00385 | 23 |
| AX-157887330 | 19 | 24.84  | KV453239.1 | 3718214 | 23-scf00385 | 23 |
| AX-158226456 | 19 | 24.922 | KV453239.1 | 3725399 | 23-scf00385 | 23 |
| AX-158226457 | 19 | 24.922 | KV453239.1 | 3725855 | 23-scf00385 | 23 |
| AX-158226458 | 19 | 24.922 | KV453239.1 | 3726284 | 23-scf00385 | 23 |
| AX-158226460 | 19 | 25.031 | KV453239.1 | 3727529 | 23-scf00385 | 23 |
| AX-158226463 | 19 | 25.031 | KV453239.1 | 3736895 | 23-scf00385 | 23 |
| AX-157695524 | 19 | 25.031 | KV453239.1 | 3776093 | 23-scf00385 | 23 |
| AX-158226550 | 19 | 25.031 | KV453239.1 | 3870186 | 23-scf00385 | 23 |
| AX-157839760 | 19 | 25.053 | KV453239.1 | 3735901 | 23-scf00385 | 23 |
| AX-157725079 | 19 | 25.074 | KV453239.1 | 3736240 | 23-scf00385 | 23 |
| AX-157867116 | 19 | 25.074 | KV453239.1 | 3736378 | 23-scf00385 | 23 |
| AX-158226542 | 19 | 25.074 | KV453239.1 | 3854215 | 23-scf00385 | 23 |
| AX-158226462 | 19 | 25.097 | KV453239.1 | 3736827 | 23-scf00385 | 23 |
| AX-157839761 | 19 | 25.118 | KV453239.1 | 3740921 | 23-scf00385 | 23 |
| AX-157723865 | 19 | 25.141 | KV453239.1 | 3741031 | 23-scf00385 | 23 |
| AX-157839763 | 19 | 25.141 | KV453239.1 | 3750187 | 23-scf00385 | 23 |
| AX-158226469 | 19 | 25.25  | KV453239.1 | 3754250 | 23-scf00385 | 23 |
| AX-158226470 | 19 | 25.25  | KV453239.1 | 3754986 | 23-scf00385 | 23 |
| AX-157746913 | 19 | 25.25  | KV453239.1 | 3755292 | 23-scf00385 | 23 |
| AX-158226502 | 19 | 25.25  | KV453239.1 | 3795679 | 23-scf00385 | 23 |
| AX-158226471 | 19 | 25.284 | KV453239.1 | 3755998 | 23-scf00385 | 23 |
| AX-157839764 | 19 | 25.317 | KV453239.1 | 3757845 | 23-scf00385 | 23 |
| AX-158226475 | 19 | 25.359 | KV453239.1 | 3763654 | 23-scf00385 | 23 |
| AX-158226477 | 19 | 25.359 | KV453239.1 | 3766597 | 23-scf00385 | 23 |
| AX-158226478 | 19 | 25.359 | KV453239.1 | 3768748 | 23-scf00385 | 23 |
| AX-158226479 | 19 | 25.359 | KV453239.1 | 3769400 | 23-scf00385 | 23 |
| AX-158226485 | 19 | 25.359 | KV453239.1 | 3774565 | 23-scf00385 | 23 |
| AX-158226488 | 19 | 25.359 | KV453239.1 | 3779943 | 23-scf00385 | 23 |
| AX-158226491 | 19 | 25.359 | KV453239.1 | 3783098 | 23-scf00385 | 23 |
| AX-158226493 | 19 | 25.359 | KV453239.1 | 3784797 | 23-scf00385 | 23 |
| AX-158226498 | 19 | 25.359 | KV453239.1 | 3791224 | 23-scf00385 | 23 |
| AX-157751848 | 19 | 25.359 | KV453239.1 | 3794777 | 23-scf00385 | 23 |
| AX-158226503 | 19 | 25.359 | KV453239.1 | 3796258 | 23-scf00385 | 23 |
| AX-158226504 | 19 | 25.359 | KV453239.1 | 3796402 | 23-scf00385 | 23 |
| AX-158226505 | 19 | 25.359 | KV453239.1 | 3797563 | 23-scf00385 | 23 |
| AX-158226509 | 19 | 25.422 | KV453239.1 | 3801357 | 23-scf00385 | 23 |
| AX-158226486 | 19 | 25.445 | KV453239.1 | 3775698 | 23-scf00385 | 23 |
| AX-158226512 | 19 | 25.445 | KV453239.1 | 3806436 | 23-scf00385 | 23 |
| AX-157747186 | 19 | 25.468 | KV453239.1 | 3810568 | 23-scf00385 | 23 |
| AX-158226517 | 19 | 25.468 | KV453239.1 | 3814029 | 23-scf00385 | 23 |



|              |    |        |            |         |               |    |
|--------------|----|--------|------------|---------|---------------|----|
| AX-158226518 | 19 | 25.578 | KV453239.1 | 3815656 | 23-scf00385   | 23 |
| AX-158226519 | 19 | 25.578 | KV453239.1 | 3816466 | 23-scf00385   | 23 |
| AX-158226494 | 19 | 25.676 | KV453239.1 | 3786564 | 23-scf00385   | 23 |
| AX-157748263 | 19 | 25.676 | KV453239.1 | 3823184 | 23-scf00385   | 23 |
| AX-158226524 | 19 | 25.676 | KV453239.1 | 3823278 | 23-scf00385   | 23 |
| AX-158226526 | 19 | 25.676 | KV453239.1 | 3824927 | 23-scf00385   | 23 |
| AX-158226527 | 19 | 25.676 | KV453239.1 | 3827200 | 23-scf00385   | 23 |
| AX-158226528 | 19 | 25.676 | KV453239.1 | 3829275 | 23-scf00385   | 23 |
| AX-158394119 | 19 | 25.676 | KV453239.1 | 3849530 | 23-scf00385   | 23 |
| AX-158226545 | 19 | 25.676 | KV453239.1 | 3859689 | 23-scf00385   | 23 |
| AX-157739058 | 19 | 25.697 | KV453239.1 | 3829546 | 23-scf00385   | 23 |
| AX-157746173 | 19 | 25.697 | KV453239.1 | 3830376 | 23-scf00385   | 23 |
| AX-158226530 | 19 | 25.756 | KV453239.1 | 3834727 | 23-scf00385   | 23 |
| AX-158226533 | 19 | 25.833 | KV453239.1 | 3840561 | 23-scf00385   | 23 |
| AX-158226472 | 19 | 25.905 | KV453239.1 | 3758597 | 23-scf00385   | 23 |
| AX-158226521 | 19 | 25.905 | KV453239.1 | 3820832 | 23-scf00385   | 23 |
| AX-158226537 | 19 | 25.905 | KV453239.1 | 3845295 | 23-scf00385   | 23 |
| AX-157839768 | 19 | 25.905 | KV453239.1 | 3847630 | 23-scf00385   | 23 |
| AX-158226540 | 19 | 25.905 | KV453239.1 | 3849118 | 23-scf00385   | 23 |
| AX-158226541 | 19 | 25.905 | KV453239.1 | 3850107 | 23-scf00385   | 23 |
| AX-157748543 | 19 | 25.905 | KV453239.1 | 3853024 | 23-scf00385   | 23 |
| AX-158226555 | 19 | 25.905 | KV453239.1 | 3878625 | 23-scf00385   | 23 |
| AX-158226546 | 19 | 25.907 | KV453239.1 | 3861047 | 23-scf00385   | 23 |
| AX-158226547 | 19 | 25.938 | KV453239.1 | 3863018 | 23-scf00385   | 23 |
| AX-158226621 | 19 | 25.938 | KV453239.1 | 3960954 | 23-scf00385   | 23 |
| AX-158226548 | 19 | 26.015 | KV453239.1 | 3863532 | 23-scf00385   | 23 |
| AX-157713249 | 19 | 26.015 | KV453239.1 | 3865000 | 23-scf00385   | 23 |
| AX-158226549 | 19 | 26.015 | KV453239.1 | 3866021 | 23-scf00385   | 23 |
| AX-158226554 | 19 | 26.084 | KV453239.1 | 3874768 | 23-scf00385   | 23 |
| AX-157839771 | 19 | 26.158 | KV453239.1 | 3875074 | 23-scf00385   | 23 |
| AX-157697159 | 19 | 26.219 | FI864865.1 | 130     | ORI212 Ictalu | UN |
| AX-158226565 | 19 | 26.28  | KV453239.1 | 3892508 | 23-scf00385   | 23 |
| AX-158226522 | 19 | 26.343 | KV453239.1 | 3821264 | 23-scf00385   | 23 |
| AX-158226566 | 19 | 26.343 | KV453239.1 | 3893622 | 23-scf00385   | 23 |
| AX-158226568 | 19 | 26.343 | KV453239.1 | 3894955 | 23-scf00385   | 23 |
| AX-158226569 | 19 | 26.343 | KV453239.1 | 3896208 | 23-scf00385   | 23 |
| AX-158226572 | 19 | 26.343 | KV453239.1 | 3899929 | 23-scf00385   | 23 |
| AX-158226573 | 19 | 26.343 | KV453239.1 | 3901078 | 23-scf00385   | 23 |
| AX-158226574 | 19 | 26.343 | KV453239.1 | 3902159 | 23-scf00385   | 23 |
| AX-157839772 | 19 | 26.452 | KV453239.1 | 3905765 | 23-scf00385   | 23 |
| AX-157839773 | 19 | 26.452 | KV453239.1 | 3907520 | 23-scf00385   | 23 |
| AX-158226576 | 19 | 26.452 | KV453239.1 | 3907940 | 23-scf00385   | 23 |
| AX-158423258 | 19 | 26.452 | KV453239.1 | 3910635 | 23-scf00385   | 23 |
| AX-158226608 | 19 | 26.452 | KV453239.1 | 3945567 | 23-scf00385   | 23 |
| AX-158226577 | 19 | 26.523 | KV453239.1 | 3911385 | 23-scf00385   | 23 |
| AX-158226580 | 19 | 26.545 | KV453239.1 | 3915254 | 23-scf00385   | 23 |
| AX-158226581 | 19 | 26.561 | KV453239.1 | 3917389 | 23-scf00385   | 23 |
| AX-158226582 | 19 | 26.561 | KV453239.1 | 3918491 | 23-scf00385   | 23 |
| AX-158226583 | 19 | 26.561 | KV453239.1 | 3919068 | 23-scf00385   | 23 |
| AX-158226587 | 19 | 26.561 | KV453239.1 | 3921417 | 23-scf00385   | 23 |
| AX-158226588 | 19 | 26.561 | KV453239.1 | 3923719 | 23-scf00385   | 23 |

|              |    |        |            |         |             |    |
|--------------|----|--------|------------|---------|-------------|----|
| AX-158226590 | 19 | 26.561 | KV453239.1 | 3926555 | 23-scf00385 | 23 |
| AX-158226592 | 19 | 26.561 | KV453239.1 | 3930596 | 23-scf00385 | 23 |
| AX-158226594 | 19 | 26.561 | KV453239.1 | 3932731 | 23-scf00385 | 23 |
| AX-158226597 | 19 | 26.561 | KV453239.1 | 3934422 | 23-scf00385 | 23 |
| AX-158226600 | 19 | 26.561 | KV453239.1 | 3936888 | 23-scf00385 | 23 |
| AX-158226606 | 19 | 26.561 | KV453239.1 | 3942855 | 23-scf00385 | 23 |
| AX-158226618 | 19 | 26.561 | KV453239.1 | 3957188 | 23-scf00385 | 23 |
| AX-158226625 | 19 | 26.561 | KV453239.1 | 3964603 | 23-scf00385 | 23 |
| AX-158226604 | 19 | 26.571 | KV453239.1 | 3939583 | 23-scf00385 | 23 |
| AX-158226607 | 19 | 26.586 | KV453239.1 | 3944286 | 23-scf00385 | 23 |
| AX-158226609 | 19 | 26.605 | KV453239.1 | 3946825 | 23-scf00385 | 23 |
| AX-158226610 | 19 | 26.624 | KV453239.1 | 3947673 | 23-scf00385 | 23 |
| AX-158226620 | 19 | 26.648 | KV453239.1 | 3959900 | 23-scf00385 | 23 |
| AX-157709821 | 19 | 26.67  | KV453239.1 | 3822123 | 23-scf00385 | 23 |
| AX-158226535 | 19 | 26.67  | KV453239.1 | 3841996 | 23-scf00385 | 23 |
| AX-158226536 | 19 | 26.67  | KV453239.1 | 3842586 | 23-scf00385 | 23 |
| AX-158226543 | 19 | 26.67  | KV453239.1 | 3855503 | 23-scf00385 | 23 |
| AX-158226556 | 19 | 26.67  | KV453239.1 | 3879625 | 23-scf00385 | 23 |
| AX-158226624 | 19 | 26.67  | KV453239.1 | 3963021 | 23-scf00385 | 23 |
| AX-158226626 | 19 | 26.67  | KV453239.1 | 3965773 | 23-scf00385 | 23 |
| AX-158226627 | 19 | 26.67  | KV453239.1 | 3968282 | 23-scf00385 | 23 |
| AX-158226630 | 19 | 26.997 | KV453239.1 | 3974331 | 23-scf00385 | 23 |
| AX-158226634 | 19 | 26.997 | KV453239.1 | 3977153 | 23-scf00385 | 23 |
| AX-158226635 | 19 | 26.998 | KV453239.1 | 3979103 | 23-scf00385 | 23 |
| AX-158226637 | 19 | 26.998 | KV453239.1 | 3981030 | 23-scf00385 | 23 |
| AX-158226639 | 19 | 26.998 | KV453239.1 | 3983038 | 23-scf00385 | 23 |
| AX-158226636 | 19 | 27.107 | KV453239.1 | 3979947 | 23-scf00385 | 23 |
| AX-157725056 | 19 | 27.107 | KV453239.1 | 3988404 | 23-scf00385 | 23 |
| AX-158226653 | 19 | 27.107 | KV453239.1 | 4005404 | 23-scf00385 | 23 |
| AX-158226654 | 19 | 27.158 | KV453239.1 | 4006815 | 23-scf00385 | 23 |
| AX-158226674 | 19 | 27.158 | KV453239.1 | 4037609 | 23-scf00385 | 23 |
| AX-158226731 | 19 | 27.158 | KV453239.1 | 4115937 | 23-scf00385 | 23 |
| AX-158226758 | 19 | 27.158 | KV453239.1 | 4145289 | 23-scf00385 | 23 |
| AX-158226640 | 19 | 27.271 | KV453239.1 | 3983953 | 23-scf00385 | 23 |
| AX-158226656 | 19 | 27.271 | KV453239.1 | 4009683 | 23-scf00385 | 23 |
| AX-158226658 | 19 | 27.271 | KV453239.1 | 4011737 | 23-scf00385 | 23 |
| AX-158226659 | 19 | 27.271 | KV453239.1 | 4012382 | 23-scf00385 | 23 |
| AX-157718183 | 19 | 27.271 | KV453239.1 | 4017111 | 23-scf00385 | 23 |
| AX-158226663 | 19 | 27.271 | KV453239.1 | 4020035 | 23-scf00385 | 23 |
| AX-158226664 | 19 | 27.271 | KV453239.1 | 4020915 | 23-scf00385 | 23 |
| AX-158226665 | 19 | 27.271 | KV453239.1 | 4022224 | 23-scf00385 | 23 |
| AX-158226666 | 19 | 27.316 | KV453239.1 | 4023865 | 23-scf00385 | 23 |
| AX-158380874 | 19 | 27.365 | KV453239.1 | 4024007 | 23-scf00385 | 23 |
| AX-158226757 | 19 | 27.365 | KV453239.1 | 4143938 | 23-scf00385 | 23 |
| AX-158226667 | 19 | 27.435 | KV453239.1 | 4025423 | 23-scf00385 | 23 |
| AX-158226671 | 19 | 27.435 | KV453239.1 | 4031301 | 23-scf00385 | 23 |
| AX-158226673 | 19 | 27.435 | KV453239.1 | 4033823 | 23-scf00385 | 23 |
| AX-158226672 | 19 | 27.544 | KV453239.1 | 4031877 | 23-scf00385 | 23 |
| AX-158226675 | 19 | 27.544 | KV453239.1 | 4038640 | 23-scf00385 | 23 |
| AX-158226676 | 19 | 27.544 | KV453239.1 | 4039365 | 23-scf00385 | 23 |
| AX-158226677 | 19 | 27.544 | KV453239.1 | 4041113 | 23-scf00385 | 23 |

|              |    |        |             |         |             |    |
|--------------|----|--------|-------------|---------|-------------|----|
| AX-158226771 | 19 | 27.544 | KV453239.1  | 4166108 | 23-scf00385 | 23 |
| AX-158226685 | 19 | 27.763 | KV453239.1  | 4050420 | 23-scf00385 | 23 |
| AX-158226686 | 19 | 27.763 | KV453239.1  | 4051096 | 23-scf00385 | 23 |
| AX-158226680 | 19 | 27.804 | KV453239.1  | 4044486 | 23-scf00385 | 23 |
| AX-158226688 | 19 | 27.804 | KV453239.1  | 4055521 | 23-scf00385 | 23 |
| AX-158226710 | 19 | 27.804 | KV453239.1  | 4085082 | 23-scf00385 | 23 |
| AX-158226711 | 19 | 27.804 | KV453239.1  | 4087200 | 23-scf00385 | 23 |
| AX-158226717 | 19 | 27.804 | KV453239.1  | 4093211 | 23-scf00385 | 23 |
| AX-158226779 | 19 | 27.804 | KV453239.1  | 4176653 | 23-scf00385 | 23 |
| AX-158226804 | 19 | 27.804 | KV453239.1  | 4201935 | 23-scf00385 | 23 |
| AX-158226693 | 19 | 27.838 | KV453239.1  | 4063294 | 23-scf00385 | 23 |
| AX-158226684 | 19 | 27.872 | KV453239.1  | 4049770 | 23-scf00385 | 23 |
| AX-158226694 | 19 | 27.872 | KV453239.1  | 4063851 | 23-scf00385 | 23 |
| AX-158226695 | 19 | 27.872 | KV453239.1  | 4064594 | 23-scf00385 | 23 |
| AX-158226696 | 19 | 27.872 | KV453239.1  | 4065368 | 23-scf00385 | 23 |
| AX-158226698 | 19 | 27.872 | KV453239.1  | 4068701 | 23-scf00385 | 23 |
| AX-158226700 | 19 | 27.872 | KV453239.1  | 4069913 | 23-scf00385 | 23 |
| AX-158226702 | 19 | 27.872 | KV453239.1  | 4072454 | 23-scf00385 | 23 |
| AX-158226704 | 19 | 27.872 | KV453239.1  | 4074927 | 23-scf00385 | 23 |
| AX-158226705 | 19 | 27.872 | KV453239.1  | 4075783 | 23-scf00385 | 23 |
| AX-157725622 | 19 | 27.872 | KV453239.1  | 4077475 | 23-scf00385 | 23 |
| AX-157775021 | 19 | 27.872 | KV453239.1  | 4082653 | 23-scf00385 | 23 |
| AX-158226761 | 19 | 27.872 | KV453239.1  | 4148652 | 23-scf00385 | 23 |
| AX-158226767 | 19 | 27.872 | KV453239.1  | 4158886 | 23-scf00385 | 23 |
| AX-157706242 | 19 | 27.872 | 3ML01031885 | 357     | scf07507_1  | UN |
| AX-158226706 | 19 | 27.927 | KV453239.1  | 4080009 | 23-scf00385 | 23 |
| AX-158226708 | 19 | 27.96  | KV453239.1  | 4081982 | 23-scf00385 | 23 |
| AX-157718648 | 19 | 27.981 | KV453239.1  | 4066085 | 23-scf00385 | 23 |
| AX-157739918 | 19 | 27.981 | KV453239.1  | 4086835 | 23-scf00385 | 23 |
| AX-158226714 | 19 | 27.981 | KV453239.1  | 4089785 | 23-scf00385 | 23 |
| AX-158226715 | 19 | 27.981 | KV453239.1  | 4090445 | 23-scf00385 | 23 |
| AX-158226719 | 19 | 28.018 | KV453239.1  | 4095222 | 23-scf00385 | 23 |
| AX-158226720 | 19 | 28.053 | KV453239.1  | 4098083 | 23-scf00385 | 23 |
| AX-158226721 | 19 | 28.09  | KV453239.1  | 4099307 | 23-scf00385 | 23 |
| AX-158226722 | 19 | 28.09  | KV453239.1  | 4101952 | 23-scf00385 | 23 |
| AX-157839774 | 19 | 28.09  | KV453239.1  | 4113896 | 23-scf00385 | 23 |
| AX-158226729 | 19 | 28.09  | KV453239.1  | 4114461 | 23-scf00385 | 23 |
| AX-158226734 | 19 | 28.117 | KV453239.1  | 4119080 | 23-scf00385 | 23 |
| AX-158226735 | 19 | 28.151 | KV453239.1  | 4119879 | 23-scf00385 | 23 |
| AX-158226736 | 19 | 28.178 | KV453239.1  | 4120376 | 23-scf00385 | 23 |
| AX-158226737 | 19 | 28.199 | KV453239.1  | 4121359 | 23-scf00385 | 23 |
| AX-157879855 | 19 | 28.199 | KV453239.1  | 4121397 | 23-scf00385 | 23 |
| AX-158226738 | 19 | 28.199 | KV453239.1  | 4121859 | 23-scf00385 | 23 |
| AX-158226744 | 19 | 28.199 | KV453239.1  | 4126015 | 23-scf00385 | 23 |
| AX-158226747 | 19 | 28.199 | KV453239.1  | 4134304 | 23-scf00385 | 23 |
| AX-158226785 | 19 | 28.199 | KV453239.1  | 4181657 | 23-scf00385 | 23 |
| AX-158226861 | 19 | 28.199 | KV453239.1  | 4263930 | 23-scf00385 | 23 |
| AX-158226753 | 19 | 28.245 | KV453239.1  | 4141110 | 23-scf00385 | 23 |
| AX-158226754 | 19 | 28.269 | KV453239.1  | 4141308 | 23-scf00385 | 23 |
| AX-158226769 | 19 | 28.269 | KV453239.1  | 4164414 | 23-scf00385 | 23 |
| AX-158226689 | 19 | 28.309 | KV453239.1  | 4056212 | 23-scf00385 | 23 |

|              |    |        |            |         |             |    |
|--------------|----|--------|------------|---------|-------------|----|
| AX-158226748 | 19 | 28.309 | KV453239.1 | 4135702 | 23-scf00385 | 23 |
| AX-158226762 | 19 | 28.309 | KV453239.1 | 4150593 | 23-scf00385 | 23 |
| AX-157839776 | 19 | 28.309 | KV453239.1 | 4162374 | 23-scf00385 | 23 |
| AX-157839777 | 19 | 28.309 | KV453239.1 | 4166795 | 23-scf00385 | 23 |
| AX-158226772 | 19 | 28.309 | KV453239.1 | 4167027 | 23-scf00385 | 23 |
| AX-158414991 | 19 | 28.309 | KV453239.1 | 4181076 | 23-scf00385 | 23 |
| AX-158226774 | 19 | 28.367 | KV453239.1 | 4170051 | 23-scf00385 | 23 |
| AX-157859493 | 19 | 28.418 | KV453239.1 | 4153782 | 23-scf00385 | 23 |
| AX-158226776 | 19 | 28.418 | KV453239.1 | 4174063 | 23-scf00385 | 23 |
| AX-158226781 | 19 | 28.418 | KV453239.1 | 4178640 | 23-scf00385 | 23 |
| AX-158226783 | 19 | 28.418 | KV453239.1 | 4180316 | 23-scf00385 | 23 |
| AX-158226784 | 19 | 28.418 | KV453239.1 | 4180682 | 23-scf00385 | 23 |
| AX-157859494 | 19 | 28.418 | KV453239.1 | 4180757 | 23-scf00385 | 23 |
| AX-157757859 | 19 | 28.418 | KV453239.1 | 4184398 | 23-scf00385 | 23 |
| AX-158226790 | 19 | 28.418 | KV453239.1 | 4186266 | 23-scf00385 | 23 |
| AX-158226825 | 19 | 28.418 | KV453239.1 | 4227363 | 23-scf00385 | 23 |
| AX-158226839 | 19 | 28.418 | KV453239.1 | 4243327 | 23-scf00385 | 23 |
| AX-158226847 | 19 | 28.418 | KV453239.1 | 4250371 | 23-scf00385 | 23 |
| AX-158226794 | 19 | 28.598 | KV453239.1 | 4190782 | 23-scf00385 | 23 |
| AX-158226797 | 19 | 28.745 | KV453239.1 | 4193475 | 23-scf00385 | 23 |
| AX-158226852 | 19 | 28.745 | KV453239.1 | 4254698 | 23-scf00385 | 23 |
| AX-158226799 | 19 | 28.746 | KV453239.1 | 4194552 | 23-scf00385 | 23 |
| AX-158226801 | 19 | 28.746 | KV453239.1 | 4197723 | 23-scf00385 | 23 |
| AX-158226848 | 19 | 28.746 | KV453239.1 | 4252261 | 23-scf00385 | 23 |
| AX-158226803 | 19 | 28.796 | KV453239.1 | 4201275 | 23-scf00385 | 23 |
| AX-158414993 | 19 | 28.796 | KV453239.1 | 4232804 | 23-scf00385 | 23 |
| AX-158226765 | 19 | 28.855 | KV453239.1 | 4155590 | 23-scf00385 | 23 |
| AX-158226775 | 19 | 28.855 | KV453239.1 | 4172329 | 23-scf00385 | 23 |
| AX-158226788 | 19 | 28.855 | KV453239.1 | 4184699 | 23-scf00385 | 23 |
| AX-158226791 | 19 | 28.855 | KV453239.1 | 4186800 | 23-scf00385 | 23 |
| AX-158226796 | 19 | 28.855 | KV453239.1 | 4192867 | 23-scf00385 | 23 |
| AX-158226805 | 19 | 28.855 | KV453239.1 | 4202429 | 23-scf00385 | 23 |
| AX-158226806 | 19 | 28.855 | KV453239.1 | 4203678 | 23-scf00385 | 23 |
| AX-158226807 | 19 | 28.855 | KV453239.1 | 4206280 | 23-scf00385 | 23 |
| AX-158226808 | 19 | 28.855 | KV453239.1 | 4206639 | 23-scf00385 | 23 |
| AX-158226809 | 19 | 28.855 | KV453239.1 | 4209418 | 23-scf00385 | 23 |
| AX-158226813 | 19 | 28.855 | KV453239.1 | 4213839 | 23-scf00385 | 23 |
| AX-158226815 | 19 | 28.855 | KV453239.1 | 4214764 | 23-scf00385 | 23 |
| AX-158226816 | 19 | 28.855 | KV453239.1 | 4216119 | 23-scf00385 | 23 |
| AX-157695903 | 19 | 28.855 | KV453239.1 | 4217413 | 23-scf00385 | 23 |
| AX-158226817 | 19 | 28.855 | KV453239.1 | 4218628 | 23-scf00385 | 23 |
| AX-158226821 | 19 | 28.855 | KV453239.1 | 4221232 | 23-scf00385 | 23 |
| AX-158226823 | 19 | 28.855 | KV453239.1 | 4222456 | 23-scf00385 | 23 |
| AX-157750042 | 19 | 28.855 | KV453239.1 | 4223005 | 23-scf00385 | 23 |
| AX-158226830 | 19 | 28.855 | KV453239.1 | 4232634 | 23-scf00385 | 23 |
| AX-158226832 | 19 | 28.855 | KV453239.1 | 4233335 | 23-scf00385 | 23 |
| AX-158226834 | 19 | 28.855 | KV453239.1 | 4236323 | 23-scf00385 | 23 |
| AX-158226835 | 19 | 28.855 | KV453239.1 | 4237459 | 23-scf00385 | 23 |
| AX-158226836 | 19 | 28.855 | KV453239.1 | 4238450 | 23-scf00385 | 23 |
| AX-158226837 | 19 | 28.855 | KV453239.1 | 4240093 | 23-scf00385 | 23 |
| AX-158226841 | 19 | 28.855 | KV453239.1 | 4244306 | 23-scf00385 | 23 |

|              |    |        |            |         |             |    |
|--------------|----|--------|------------|---------|-------------|----|
| AX-158226842 | 19 | 28.855 | KV453239.1 | 4244994 | 23-scf00385 | 23 |
| AX-158226845 | 19 | 28.855 | KV453239.1 | 4248014 | 23-scf00385 | 23 |
| AX-158403473 | 19 | 28.855 | KV453239.1 | 4251813 | 23-scf00385 | 23 |
| AX-158226851 | 19 | 28.855 | KV453239.1 | 4253377 | 23-scf00385 | 23 |
| AX-157771182 | 19 | 28.855 | KV453239.1 | 4253823 | 23-scf00385 | 23 |
| AX-158226853 | 19 | 28.855 | KV453239.1 | 4256170 | 23-scf00385 | 23 |
| AX-158226998 | 19 | 28.855 | KV453239.1 | 4470559 | 23-scf00385 | 23 |
| AX-157839791 | 19 | 28.855 | KV453239.1 | 4478687 | 23-scf00385 | 23 |
| AX-158226859 | 19 | 29.292 | KV453239.1 | 4261737 | 23-scf00385 | 23 |
| AX-158226864 | 19 | 29.292 | KV453239.1 | 4268815 | 23-scf00385 | 23 |
| AX-158226866 | 19 | 29.292 | KV453239.1 | 4270230 | 23-scf00385 | 23 |
| AX-158226867 | 19 | 29.292 | KV453239.1 | 4270610 | 23-scf00385 | 23 |
| AX-158226868 | 19 | 29.292 | KV453239.1 | 4272622 | 23-scf00385 | 23 |
| AX-158226871 | 19 | 29.292 | KV453239.1 | 4276190 | 23-scf00385 | 23 |
| AX-158226872 | 19 | 29.292 | KV453239.1 | 4277869 | 23-scf00385 | 23 |
| AX-157839779 | 19 | 29.292 | KV453239.1 | 4280079 | 23-scf00385 | 23 |
| AX-158226874 | 19 | 29.292 | KV453239.1 | 4281077 | 23-scf00385 | 23 |
| AX-158226899 | 19 | 29.292 | KV453239.1 | 4314209 | 23-scf00385 | 23 |
| AX-158226875 | 19 | 29.434 | KV453239.1 | 4284488 | 23-scf00385 | 23 |
| AX-158226876 | 19 | 29.51  | KV453239.1 | 4286497 | 23-scf00385 | 23 |
| AX-158226877 | 19 | 29.51  | KV453239.1 | 4290091 | 23-scf00385 | 23 |
| AX-158226879 | 19 | 29.51  | KV453239.1 | 4291838 | 23-scf00385 | 23 |
| AX-157717184 | 19 | 29.51  | KV453239.1 | 4293818 | 23-scf00385 | 23 |
| AX-158226882 | 19 | 29.51  | KV453239.1 | 4295795 | 23-scf00385 | 23 |
| AX-158226883 | 19 | 29.51  | KV453239.1 | 4298698 | 23-scf00385 | 23 |
| AX-158226885 | 19 | 29.51  | KV453239.1 | 4299711 | 23-scf00385 | 23 |
| AX-158226886 | 19 | 29.51  | KV453239.1 | 4300624 | 23-scf00385 | 23 |
| AX-158226887 | 19 | 29.51  | KV453239.1 | 4301636 | 23-scf00385 | 23 |
| AX-158226888 | 19 | 29.51  | KV453239.1 | 4302519 | 23-scf00385 | 23 |
| AX-158226889 | 19 | 29.51  | KV453239.1 | 4304994 | 23-scf00385 | 23 |
| AX-158226891 | 19 | 29.51  | KV453239.1 | 4306530 | 23-scf00385 | 23 |
| AX-158226893 | 19 | 29.51  | KV453239.1 | 4309780 | 23-scf00385 | 23 |
| AX-158226894 | 19 | 29.51  | KV453239.1 | 4310248 | 23-scf00385 | 23 |
| AX-158226896 | 19 | 29.51  | KV453239.1 | 4312154 | 23-scf00385 | 23 |
| AX-158226905 | 19 | 29.51  | KV453239.1 | 4323008 | 23-scf00385 | 23 |
| AX-158226911 | 19 | 29.837 | KV453239.1 | 4329268 | 23-scf00385 | 23 |
| AX-158226912 | 19 | 29.838 | KV453239.1 | 4329480 | 23-scf00385 | 23 |
| AX-158226913 | 19 | 29.838 | KV453239.1 | 4329765 | 23-scf00385 | 23 |
| AX-158226914 | 19 | 29.838 | KV453239.1 | 4332894 | 23-scf00385 | 23 |
| AX-158226916 | 19 | 29.838 | KV453239.1 | 4333658 | 23-scf00385 | 23 |
| AX-158226918 | 19 | 29.838 | KV453239.1 | 4335681 | 23-scf00385 | 23 |
| AX-158226921 | 19 | 29.89  | KV453239.1 | 4336680 | 23-scf00385 | 23 |
| AX-158226923 | 19 | 29.89  | KV453239.1 | 4338759 | 23-scf00385 | 23 |
| AX-158226931 | 19 | 29.89  | KV453239.1 | 4346510 | 23-scf00385 | 23 |
| AX-157717434 | 19 | 29.89  | KV453239.1 | 4372816 | 23-scf00385 | 23 |
| AX-158226954 | 19 | 29.89  | KV453239.1 | 4394587 | 23-scf00385 | 23 |
| AX-157839775 | 19 | 29.947 | KV453239.1 | 4160392 | 23-scf00385 | 23 |
| AX-158226833 | 19 | 29.947 | KV453239.1 | 4235812 | 23-scf00385 | 23 |
| AX-158226856 | 19 | 29.947 | KV453239.1 | 4258754 | 23-scf00385 | 23 |
| AX-158226863 | 19 | 29.947 | KV453239.1 | 4267647 | 23-scf00385 | 23 |
| AX-158226917 | 19 | 29.947 | KV453239.1 | 4334618 | 23-scf00385 | 23 |

|              |    |        |             |         |             |    |
|--------------|----|--------|-------------|---------|-------------|----|
| AX-157872447 | 19 | 29.947 | KV453239.1  | 4339087 | 23-scf00385 | 23 |
| AX-158226925 | 19 | 29.947 | KV453239.1  | 4339954 | 23-scf00385 | 23 |
| AX-158226928 | 19 | 29.947 | KV453239.1  | 4341979 | 23-scf00385 | 23 |
| AX-157839780 | 19 | 29.947 | KV453239.1  | 4347529 | 23-scf00385 | 23 |
| AX-157839781 | 19 | 29.947 | KV453239.1  | 4347598 | 23-scf00385 | 23 |
| AX-157839782 | 19 | 29.947 | KV453239.1  | 4352238 | 23-scf00385 | 23 |
| AX-158226935 | 19 | 29.947 | KV453239.1  | 4355638 | 23-scf00385 | 23 |
| AX-158226937 | 19 | 29.947 | KV453239.1  | 4361952 | 23-scf00385 | 23 |
| AX-158226938 | 19 | 29.947 | KV453239.1  | 4362283 | 23-scf00385 | 23 |
| AX-158226940 | 19 | 29.947 | KV453239.1  | 4368195 | 23-scf00385 | 23 |
| AX-158226941 | 19 | 29.947 | KV453239.1  | 4371024 | 23-scf00385 | 23 |
| AX-158226943 | 19 | 29.947 | KV453239.1  | 4376246 | 23-scf00385 | 23 |
| AX-158226944 | 19 | 29.947 | KV453239.1  | 4379513 | 23-scf00385 | 23 |
| AX-158226945 | 19 | 29.947 | KV453239.1  | 4381012 | 23-scf00385 | 23 |
| AX-158226948 | 19 | 29.947 | KV453239.1  | 4385254 | 23-scf00385 | 23 |
| AX-158226963 | 19 | 29.947 | KV453239.1  | 4412858 | 23-scf00385 | 23 |
| AX-157712254 | 19 | 29.947 | KV453239.1  | 4417094 | 23-scf00385 | 23 |
| AX-158226965 | 19 | 29.947 | KV453239.1  | 4419061 | 23-scf00385 | 23 |
| AX-158226981 | 19 | 29.947 | KV453239.1  | 4440351 | 23-scf00385 | 23 |
| AX-157707622 | 19 | 29.947 | KV453239.1  | 4475412 | 23-scf00385 | 23 |
| AX-157706746 | 19 | 29.947 | 3ML01032842 | 413     | scf08473_1  | UN |
| AX-157706747 | 19 | 29.947 | 3ML01032842 | 562     | scf08473_1  | UN |
| AX-157706748 | 19 | 30.005 | 3ML01032842 | 86      | scf08473_1  | UN |
| AX-158226947 | 19 | 30.056 | KV453239.1  | 4383264 | 23-scf00385 | 23 |
| AX-158226949 | 19 | 30.056 | KV453239.1  | 4385840 | 23-scf00385 | 23 |
| AX-158226950 | 19 | 30.056 | KV453239.1  | 4389295 | 23-scf00385 | 23 |
| AX-158394122 | 19 | 30.056 | KV453239.1  | 4390202 | 23-scf00385 | 23 |
| AX-158226952 | 19 | 30.221 | KV453239.1  | 4391762 | 23-scf00385 | 23 |
| AX-158226955 | 19 | 30.384 | KV453239.1  | 4395748 | 23-scf00385 | 23 |
| AX-158226956 | 19 | 30.384 | KV453239.1  | 4402014 | 23-scf00385 | 23 |
| AX-158414995 | 19 | 30.384 | KV453239.1  | 4403851 | 23-scf00385 | 23 |
| AX-158226959 | 19 | 30.384 | KV453239.1  | 4404318 | 23-scf00385 | 23 |
| AX-158226961 | 19 | 30.384 | KV453239.1  | 4406373 | 23-scf00385 | 23 |
| AX-158226966 | 19 | 30.384 | KV453239.1  | 4420554 | 23-scf00385 | 23 |
| AX-157727383 | 19 | 30.418 | KV453239.1  | 4409009 | 23-scf00385 | 23 |
| AX-157708134 | 19 | 30.457 | KV453239.1  | 4412174 | 23-scf00385 | 23 |
| AX-157747444 | 19 | 30.494 | KV453239.1  | 4415915 | 23-scf00385 | 23 |
| AX-157859496 | 19 | 30.494 | KV453239.1  | 4418099 | 23-scf00385 | 23 |
| AX-158226967 | 19 | 30.494 | KV453239.1  | 4420812 | 23-scf00385 | 23 |
| AX-158226973 | 19 | 30.494 | KV453239.1  | 4427838 | 23-scf00385 | 23 |
| AX-158226974 | 19 | 30.494 | KV453239.1  | 4429443 | 23-scf00385 | 23 |
| AX-158227004 | 19 | 30.494 | KV453239.1  | 4480485 | 23-scf00385 | 23 |
| AX-158226977 | 19 | 30.748 | KV453239.1  | 4430928 | 23-scf00385 | 23 |
| AX-158226978 | 19 | 30.748 | KV453239.1  | 4431327 | 23-scf00385 | 23 |
| AX-158226997 | 19 | 30.748 | KV453239.1  | 4468025 | 23-scf00385 | 23 |
| AX-158226980 | 19 | 30.749 | KV453239.1  | 4438096 | 23-scf00385 | 23 |
| AX-158226983 | 19 | 30.749 | KV453239.1  | 4444447 | 23-scf00385 | 23 |
| AX-158226985 | 19 | 30.749 | KV453239.1  | 4447319 | 23-scf00385 | 23 |
| AX-158226986 | 19 | 30.749 | KV453239.1  | 4449169 | 23-scf00385 | 23 |
| AX-158226987 | 19 | 30.749 | KV453239.1  | 4452547 | 23-scf00385 | 23 |
| AX-158226990 | 19 | 30.749 | KV453239.1  | 4455722 | 23-scf00385 | 23 |

|              |    |        |            |         |             |    |
|--------------|----|--------|------------|---------|-------------|----|
| AX-157839787 | 19 | 30.749 | KV453239.1 | 4456239 | 23-scf00385 | 23 |
| AX-157839788 | 19 | 30.749 | KV453239.1 | 4456275 | 23-scf00385 | 23 |
| AX-158414996 | 19 | 30.876 | KV453239.1 | 4472724 | 23-scf00385 | 23 |
| AX-158226999 | 19 | 30.876 | KV453239.1 | 4473946 | 23-scf00385 | 23 |
| AX-158227000 | 19 | 30.876 | KV453239.1 | 4474489 | 23-scf00385 | 23 |
| AX-158227001 | 19 | 30.876 | KV453239.1 | 4475086 | 23-scf00385 | 23 |
| AX-158227002 | 19 | 30.876 | KV453239.1 | 4476797 | 23-scf00385 | 23 |
| AX-157754264 | 19 | 30.876 | KV453239.1 | 4506579 | 23-scf00385 | 23 |
| AX-158227029 | 19 | 30.876 | KV453239.1 | 4511557 | 23-scf00385 | 23 |
| AX-158227007 | 19 | 30.943 | KV453239.1 | 4486365 | 23-scf00385 | 23 |
| AX-158227008 | 19 | 31.005 | KV453239.1 | 4490356 | 23-scf00385 | 23 |
| AX-158227011 | 19 | 31.07  | KV453239.1 | 4493936 | 23-scf00385 | 23 |
| AX-158226994 | 19 | 31.254 | KV453239.1 | 4462944 | 23-scf00385 | 23 |
| AX-158227012 | 19 | 31.254 | KV453239.1 | 4494922 | 23-scf00385 | 23 |
| AX-158227022 | 19 | 31.254 | KV453239.1 | 4505796 | 23-scf00385 | 23 |
| AX-157753901 | 19 | 31.254 | KV453239.1 | 4522141 | 23-scf00385 | 23 |
| AX-158227015 | 19 | 31.255 | KV453239.1 | 4499732 | 23-scf00385 | 23 |
| AX-158227016 | 19 | 31.257 | KV453239.1 | 4501415 | 23-scf00385 | 23 |
| AX-158227019 | 19 | 31.257 | KV453239.1 | 4503987 | 23-scf00385 | 23 |
| AX-157839790 | 19 | 31.259 | KV453239.1 | 4478501 | 23-scf00385 | 23 |
| AX-158227010 | 19 | 31.259 | KV453239.1 | 4491367 | 23-scf00385 | 23 |
| AX-158227014 | 19 | 31.259 | KV453239.1 | 4499193 | 23-scf00385 | 23 |
| AX-158227020 | 19 | 31.259 | KV453239.1 | 4504454 | 23-scf00385 | 23 |
| AX-158227021 | 19 | 31.259 | KV453239.1 | 4504540 | 23-scf00385 | 23 |
| AX-157859498 | 19 | 31.259 | KV453239.1 | 4507066 | 23-scf00385 | 23 |
| AX-158227023 | 19 | 31.259 | KV453239.1 | 4507443 | 23-scf00385 | 23 |
| AX-158227024 | 19 | 31.259 | KV453239.1 | 4509184 | 23-scf00385 | 23 |
| AX-158227026 | 19 | 31.259 | KV453239.1 | 4509805 | 23-scf00385 | 23 |
| AX-158227030 | 19 | 31.259 | KV453239.1 | 4511658 | 23-scf00385 | 23 |
| AX-158227032 | 19 | 31.259 | KV453239.1 | 4512909 | 23-scf00385 | 23 |
| AX-158227034 | 19 | 31.259 | KV453239.1 | 4514398 | 23-scf00385 | 23 |
| AX-158227036 | 19 | 31.259 | KV453239.1 | 4515223 | 23-scf00385 | 23 |
| AX-158227040 | 19 | 31.259 | KV453239.1 | 4519850 | 23-scf00385 | 23 |
| AX-158227042 | 19 | 31.259 | KV453239.1 | 4526433 | 23-scf00385 | 23 |
| AX-158227045 | 19 | 31.703 | KV453239.1 | 4527863 | 23-scf00385 | 23 |
| AX-158227051 | 19 | 31.703 | KV453239.1 | 4534113 | 23-scf00385 | 23 |
| AX-157839794 | 19 | 31.703 | KV453239.1 | 4535245 | 23-scf00385 | 23 |
| AX-158227052 | 19 | 31.897 | KV453239.1 | 4538066 | 23-scf00385 | 23 |
| AX-157839796 | 19 | 31.945 | KV453239.1 | 4538885 | 23-scf00385 | 23 |
| AX-158227055 | 19 | 32.342 | KV453239.1 | 4545245 | 23-scf00385 | 23 |
| AX-157839798 | 19 | 32.342 | KV453239.1 | 4548329 | 23-scf00385 | 23 |
| AX-158227060 | 19 | 32.342 | KV453239.1 | 4554018 | 23-scf00385 | 23 |
| AX-158227061 | 19 | 32.408 | KV453239.1 | 4554298 | 23-scf00385 | 23 |
| AX-157839797 | 19 | 32.462 | KV453239.1 | 4543439 | 23-scf00385 | 23 |
| AX-157715183 | 19 | 32.462 | KV453239.1 | 4552356 | 23-scf00385 | 23 |
| AX-158227064 | 19 | 32.462 | KV453239.1 | 4556013 | 23-scf00385 | 23 |
| AX-157717164 | 19 | 32.462 | KV453239.1 | 4557108 | 23-scf00385 | 23 |
| AX-157839800 | 19 | 32.462 | KV453239.1 | 4557660 | 23-scf00385 | 23 |
| AX-158227065 | 19 | 32.462 | KV453239.1 | 4558109 | 23-scf00385 | 23 |
| AX-158227066 | 19 | 32.462 | KV453239.1 | 4559093 | 23-scf00385 | 23 |
| AX-158227068 | 19 | 32.462 | KV453239.1 | 4561284 | 23-scf00385 | 23 |

|              |    |        |            |         |             |    |
|--------------|----|--------|------------|---------|-------------|----|
| AX-157839803 | 19 | 32.462 | KV453239.1 | 4569219 | 23-scf00385 | 23 |
| AX-158227089 | 19 | 32.462 | KV453239.1 | 4581938 | 23-scf00385 | 23 |
| AX-158227067 | 19 | 32.49  | KV453239.1 | 4559643 | 23-scf00385 | 23 |
| AX-157744677 | 19 | 32.509 | KV453239.1 | 4561191 | 23-scf00385 | 23 |
| AX-158227070 | 19 | 32.509 | KV453239.1 | 4564184 | 23-scf00385 | 23 |
| AX-158227069 | 19 | 32.542 | KV453239.1 | 4561473 | 23-scf00385 | 23 |
| AX-158227072 | 19 | 32.572 | KV453239.1 | 4565307 | 23-scf00385 | 23 |
| AX-157772321 | 19 | 32.572 | KV453239.1 | 4566293 | 23-scf00385 | 23 |
| AX-157839802 | 19 | 32.572 | KV453239.1 | 4566616 | 23-scf00385 | 23 |
| AX-158227074 | 19 | 32.572 | KV453239.1 | 4568016 | 23-scf00385 | 23 |
| AX-158227075 | 19 | 32.572 | KV453239.1 | 4568305 | 23-scf00385 | 23 |
| AX-158227077 | 19 | 32.572 | KV453239.1 | 4569498 | 23-scf00385 | 23 |
| AX-157839804 | 19 | 32.572 | KV453239.1 | 4569719 | 23-scf00385 | 23 |
| AX-158227078 | 19 | 32.572 | KV453239.1 | 4570111 | 23-scf00385 | 23 |
| AX-158227194 | 19 | 32.572 | KV453239.1 | 4724671 | 23-scf00385 | 23 |
| AX-158227079 | 19 | 32.79  | KV453239.1 | 4571736 | 23-scf00385 | 23 |
| AX-158227083 | 19 | 32.79  | KV453239.1 | 4574421 | 23-scf00385 | 23 |
| AX-158227087 | 19 | 33.009 | KV453239.1 | 4579663 | 23-scf00385 | 23 |
| AX-157839806 | 19 | 33.009 | KV453239.1 | 4582801 | 23-scf00385 | 23 |
| AX-157719066 | 19 | 33.009 | KV453239.1 | 4584070 | 23-scf00385 | 23 |
| AX-158227091 | 19 | 33.009 | KV453239.1 | 4587584 | 23-scf00385 | 23 |
| AX-158227092 | 19 | 33.06  | KV453239.1 | 4588774 | 23-scf00385 | 23 |
| AX-158227093 | 19 | 33.118 | KV453239.1 | 4589633 | 23-scf00385 | 23 |
| AX-158227097 | 19 | 33.163 | KV453239.1 | 4598424 | 23-scf00385 | 23 |
| AX-158227098 | 19 | 33.202 | KV453239.1 | 4598757 | 23-scf00385 | 23 |
| AX-158227099 | 19 | 33.227 | KV453239.1 | 4599134 | 23-scf00385 | 23 |
| AX-158227105 | 19 | 33.272 | KV453239.1 | 4604957 | 23-scf00385 | 23 |
| AX-157839808 | 19 | 33.316 | KV453239.1 | 4606178 | 23-scf00385 | 23 |
| AX-158227111 | 19 | 33.316 | KV453239.1 | 4616033 | 23-scf00385 | 23 |
| AX-158227125 | 19 | 33.316 | KV453239.1 | 4633575 | 23-scf00385 | 23 |
| AX-157867130 | 19 | 33.316 | KV453239.1 | 5011217 | 23-scf00385 | 23 |
| AX-158227460 | 19 | 33.316 | KV453239.1 | 5147472 | 23-scf00385 | 23 |
| AX-157748995 | 19 | 33.316 | KV453239.1 | 5380997 | 23-scf00385 | 23 |
| AX-157722158 | 19 | 33.337 | KV453239.1 | 4621656 | 23-scf00385 | 23 |
| AX-157750092 | 19 | 33.337 | KV453239.1 | 4623866 | 23-scf00385 | 23 |
| AX-158227120 | 19 | 33.337 | KV453239.1 | 4625726 | 23-scf00385 | 23 |
| AX-158227681 | 19 | 33.337 | KV453239.1 | 5471460 | 23-scf00385 | 23 |
| AX-158227691 | 19 | 33.337 | KV453239.1 | 5482422 | 23-scf00385 | 23 |
| AX-158227797 | 19 | 33.337 | KV453239.1 | 5670206 | 23-scf00385 | 23 |
| AX-158227128 | 19 | 33.38  | KV453239.1 | 4640729 | 23-scf00385 | 23 |
| AX-158227129 | 19 | 33.409 | KV453239.1 | 4643680 | 23-scf00385 | 23 |
| AX-158227136 | 19 | 33.446 | KV453239.1 | 4653540 | 23-scf00385 | 23 |
| AX-158227137 | 19 | 33.446 | KV453239.1 | 4654022 | 23-scf00385 | 23 |
| AX-158227139 | 19 | 33.446 | KV453239.1 | 4655212 | 23-scf00385 | 23 |
| AX-158227141 | 19 | 33.446 | KV453239.1 | 4657725 | 23-scf00385 | 23 |
| AX-157839812 | 19 | 33.446 | KV453239.1 | 4658380 | 23-scf00385 | 23 |
| AX-158415002 | 19 | 33.479 | KV453239.1 | 4615290 | 23-scf00385 | 23 |
| AX-158227143 | 19 | 33.479 | KV453239.1 | 4659690 | 23-scf00385 | 23 |
| AX-158386755 | 19 | 33.479 | KV453239.1 | 4692474 | 23-scf00385 | 23 |
| AX-158227196 | 19 | 33.479 | KV453239.1 | 4730245 | 23-scf00385 | 23 |
| AX-158227145 | 19 | 33.665 | KV453239.1 | 4666726 | 23-scf00385 | 23 |



|              |    |        |             |         |             |    |
|--------------|----|--------|-------------|---------|-------------|----|
| AX-158227148 | 19 | 33.665 | KV453239.1  | 4670124 | 23-scf00385 | 23 |
| AX-158227151 | 19 | 33.665 | KV453239.1  | 4672692 | 23-scf00385 | 23 |
| AX-158227154 | 19 | 33.665 | KV453239.1  | 4675175 | 23-scf00385 | 23 |
| AX-158227167 | 19 | 33.665 | KV453239.1  | 4690248 | 23-scf00385 | 23 |
| AX-157719992 | 19 | 33.665 | KV453239.1  | 4839179 | 23-scf00385 | 23 |
| AX-157743233 | 19 | 33.702 | KV453239.1  | 4672099 | 23-scf00385 | 23 |
| AX-158227153 | 19 | 33.756 | KV453239.1  | 4674060 | 23-scf00385 | 23 |
| AX-157839814 | 19 | 33.774 | KV453239.1  | 4676661 | 23-scf00385 | 23 |
| AX-157744253 | 19 | 33.774 | KV453239.1  | 4676963 | 23-scf00385 | 23 |
| AX-158227162 | 19 | 33.774 | KV453239.1  | 4687036 | 23-scf00385 | 23 |
| AX-157739849 | 19 | 33.774 | KV453239.1  | 4690697 | 23-scf00385 | 23 |
| AX-158227173 | 19 | 33.774 | KV453239.1  | 4697286 | 23-scf00385 | 23 |
| AX-158227176 | 19 | 33.774 | KV453239.1  | 4702452 | 23-scf00385 | 23 |
| AX-158227177 | 19 | 33.774 | KV453239.1  | 4703187 | 23-scf00385 | 23 |
| AX-158227178 | 19 | 33.774 | KV453239.1  | 4705265 | 23-scf00385 | 23 |
| AX-157867123 | 19 | 33.774 | KV453239.1  | 4707685 | 23-scf00385 | 23 |
| AX-158227181 | 19 | 33.826 | KV453239.1  | 4710214 | 23-scf00385 | 23 |
| AX-157738415 | 19 | 33.883 | KV453239.1  | 4720552 | 23-scf00385 | 23 |
| AX-158227191 | 19 | 33.883 | KV453239.1  | 4722445 | 23-scf00385 | 23 |
| AX-158227195 | 19 | 33.883 | KV453239.1  | 4729889 | 23-scf00385 | 23 |
| AX-157887338 | 19 | 33.883 | KV453239.1  | 4730726 | 23-scf00385 | 23 |
| AX-158227203 | 19 | 33.883 | KV453239.1  | 4742035 | 23-scf00385 | 23 |
| AX-158227204 | 19 | 33.883 | KV453239.1  | 4743565 | 23-scf00385 | 23 |
| AX-158227208 | 19 | 34.182 | KV453239.1  | 4747312 | 23-scf00385 | 23 |
| AX-158227209 | 19 | 34.182 | KV453239.1  | 4747820 | 23-scf00385 | 23 |
| AX-157771320 | 19 | 34.183 | KV453239.1  | 4750517 | 23-scf00385 | 23 |
| AX-157839817 | 19 | 34.212 | KV453239.1  | 4756424 | 23-scf00385 | 23 |
| AX-158227217 | 19 | 34.235 | KV453239.1  | 4760386 | 23-scf00385 | 23 |
| AX-158227144 | 19 | 34.259 | KV453239.1  | 4665736 | 23-scf00385 | 23 |
| AX-158227182 | 19 | 34.259 | KV453239.1  | 4712143 | 23-scf00385 | 23 |
| AX-158227183 | 19 | 34.259 | KV453239.1  | 4712493 | 23-scf00385 | 23 |
| AX-158227214 | 19 | 34.259 | KV453239.1  | 4758498 | 23-scf00385 | 23 |
| AX-158227219 | 19 | 34.259 | KV453239.1  | 4772251 | 23-scf00385 | 23 |
| AX-158227243 | 19 | 34.259 | KV453239.1  | 4804294 | 23-scf00385 | 23 |
| AX-157879863 | 19 | 34.259 | KV453239.1  | 4861692 | 23-scf00385 | 23 |
| AX-158227283 | 19 | 34.259 | KV453239.1  | 4874186 | 23-scf00385 | 23 |
| AX-158227321 | 19 | 34.259 | KV453239.1  | 4935438 | 23-scf00385 | 23 |
| AX-157754672 | 19 | 34.259 | KV453239.1  | 4936031 | 23-scf00385 | 23 |
| AX-158227335 | 19 | 34.259 | KV453239.1  | 4950383 | 23-scf00385 | 23 |
| AX-158227341 | 19 | 34.259 | KV453239.1  | 4959892 | 23-scf00385 | 23 |
| AX-158415013 | 19 | 34.259 | KV453239.1  | 5000001 | 23-scf00385 | 23 |
| AX-158227373 | 19 | 34.259 | KV453239.1  | 5004110 | 23-scf00385 | 23 |
| AX-158227454 | 19 | 34.259 | KV453239.1  | 5135784 | 23-scf00385 | 23 |
| AX-158227463 | 19 | 34.259 | KV453239.1  | 5153073 | 23-scf00385 | 23 |
| AX-158227515 | 19 | 34.259 | KV453239.1  | 5206844 | 23-scf00385 | 23 |
| AX-158227527 | 19 | 34.259 | KV453239.1  | 5213846 | 23-scf00385 | 23 |
| AX-157839871 | 19 | 34.259 | KV453239.1  | 5223394 | 23-scf00385 | 23 |
| AX-157707150 | 19 | 34.259 | 3ML01033599 | 266     | scf09257_1  | UN |
| AX-158227224 | 19 | 34.284 | KV453239.1  | 4778766 | 23-scf00385 | 23 |
| AX-158227187 | 19 | 34.285 | KV453239.1  | 4714924 | 23-scf00385 | 23 |
| AX-158227212 | 19 | 34.285 | KV453239.1  | 4754447 | 23-scf00385 | 23 |

|              |    |        |             |         |             |    |
|--------------|----|--------|-------------|---------|-------------|----|
| AX-157839821 | 19 | 34.285 | KV453239.1  | 4763548 | 23-scf00385 | 23 |
| AX-158227227 | 19 | 34.285 | KV453239.1  | 4781838 | 23-scf00385 | 23 |
| AX-158227228 | 19 | 34.285 | KV453239.1  | 4782393 | 23-scf00385 | 23 |
| AX-158227229 | 19 | 34.285 | KV453239.1  | 4782628 | 23-scf00385 | 23 |
| AX-158227236 | 19 | 34.285 | KV453239.1  | 4790947 | 23-scf00385 | 23 |
| AX-157751801 | 19 | 34.285 | KV453239.1  | 4800693 | 23-scf00385 | 23 |
| AX-158227247 | 19 | 34.285 | KV453239.1  | 4809127 | 23-scf00385 | 23 |
| AX-158227647 | 19 | 34.285 | KV453239.1  | 5415695 | 23-scf00385 | 23 |
| AX-157705670 | 19 | 34.285 | 3ML01030573 | 218     | scf06173_1  | UN |
| AX-157839820 | 19 | 34.457 | KV453239.1  | 4763236 | 23-scf00385 | 23 |
| AX-158227241 | 19 | 34.457 | KV453239.1  | 4801196 | 23-scf00385 | 23 |
| AX-158227263 | 19 | 34.457 | KV453239.1  | 4843091 | 23-scf00385 | 23 |
| AX-158227266 | 19 | 34.457 | KV453239.1  | 4847562 | 23-scf00385 | 23 |
| AX-158227152 | 19 | 34.648 | KV453239.1  | 4673361 | 23-scf00385 | 23 |
| AX-158227169 | 19 | 34.648 | KV453239.1  | 4694286 | 23-scf00385 | 23 |
| AX-158227201 | 19 | 34.648 | KV453239.1  | 4739704 | 23-scf00385 | 23 |
| AX-157887339 | 19 | 34.648 | KV453239.1  | 4745836 | 23-scf00385 | 23 |
| AX-158227211 | 19 | 34.648 | KV453239.1  | 4749916 | 23-scf00385 | 23 |
| AX-158227215 | 19 | 34.648 | KV453239.1  | 4759200 | 23-scf00385 | 23 |
| AX-158386758 | 19 | 34.648 | KV453239.1  | 4794574 | 23-scf00385 | 23 |
| AX-158227242 | 19 | 34.648 | KV453239.1  | 4802948 | 23-scf00385 | 23 |
| AX-158227244 | 19 | 34.648 | KV453239.1  | 4804764 | 23-scf00385 | 23 |
| AX-158227245 | 19 | 34.648 | KV453239.1  | 4805096 | 23-scf00385 | 23 |
| AX-157748465 | 19 | 34.648 | KV453239.1  | 4807738 | 23-scf00385 | 23 |
| AX-158227246 | 19 | 34.648 | KV453239.1  | 4808603 | 23-scf00385 | 23 |
| AX-158227248 | 19 | 34.648 | KV453239.1  | 4810254 | 23-scf00385 | 23 |
| AX-158227249 | 19 | 34.648 | KV453239.1  | 4811781 | 23-scf00385 | 23 |
| AX-158227250 | 19 | 34.648 | KV453239.1  | 4813852 | 23-scf00385 | 23 |
| AX-158227252 | 19 | 34.648 | KV453239.1  | 4816203 | 23-scf00385 | 23 |
| AX-157738598 | 19 | 34.648 | KV453239.1  | 4824982 | 23-scf00385 | 23 |
| AX-157839830 | 19 | 34.648 | KV453239.1  | 4827559 | 23-scf00385 | 23 |
| AX-157722085 | 19 | 34.648 | KV453239.1  | 4843009 | 23-scf00385 | 23 |
| AX-158227267 | 19 | 34.648 | KV453239.1  | 4848411 | 23-scf00385 | 23 |
| AX-157736367 | 19 | 34.648 | KV453239.1  | 4853077 | 23-scf00385 | 23 |
| AX-158227269 | 19 | 34.648 | KV453239.1  | 4853642 | 23-scf00385 | 23 |
| AX-158227270 | 19 | 34.648 | KV453239.1  | 4854850 | 23-scf00385 | 23 |
| AX-158386759 | 19 | 34.648 | KV453239.1  | 4856198 | 23-scf00385 | 23 |
| AX-158227278 | 19 | 34.648 | KV453239.1  | 4862002 | 23-scf00385 | 23 |
| AX-158227276 | 19 | 34.687 | KV453239.1  | 4859908 | 23-scf00385 | 23 |
| AX-158227281 | 19 | 34.757 | KV453239.1  | 4869378 | 23-scf00385 | 23 |
| AX-157839835 | 19 | 34.757 | KV453239.1  | 4873428 | 23-scf00385 | 23 |
| AX-158227285 | 19 | 34.757 | KV453239.1  | 4878490 | 23-scf00385 | 23 |
| AX-158227287 | 19 | 34.757 | KV453239.1  | 4887387 | 23-scf00385 | 23 |
| AX-158227291 | 19 | 35.194 | KV453239.1  | 4894066 | 23-scf00385 | 23 |
| AX-158227294 | 19 | 35.194 | KV453239.1  | 4900588 | 23-scf00385 | 23 |
| AX-158227295 | 19 | 35.194 | KV453239.1  | 4901357 | 23-scf00385 | 23 |
| AX-158227296 | 19 | 35.194 | KV453239.1  | 4903440 | 23-scf00385 | 23 |
| AX-158227297 | 19 | 35.194 | KV453239.1  | 4903950 | 23-scf00385 | 23 |
| AX-157839836 | 19 | 35.194 | KV453239.1  | 4904326 | 23-scf00385 | 23 |
| AX-157725589 | 19 | 35.194 | KV453239.1  | 4904741 | 23-scf00385 | 23 |
| AX-158227299 | 19 | 35.194 | KV453239.1  | 4905244 | 23-scf00385 | 23 |

|              |    |        |            |         |             |    |
|--------------|----|--------|------------|---------|-------------|----|
| AX-158227300 | 19 | 35.194 | KV453239.1 | 4905933 | 23-scf00385 | 23 |
| AX-157839837 | 19 | 35.194 | KV453239.1 | 4908525 | 23-scf00385 | 23 |
| AX-158227302 | 19 | 35.194 | KV453239.1 | 4910635 | 23-scf00385 | 23 |
| AX-158227303 | 19 | 35.194 | KV453239.1 | 4911170 | 23-scf00385 | 23 |
| AX-158227305 | 19 | 35.194 | KV453239.1 | 4915508 | 23-scf00385 | 23 |
| AX-158227306 | 19 | 35.194 | KV453239.1 | 4916346 | 23-scf00385 | 23 |
| AX-158227307 | 19 | 35.194 | KV453239.1 | 4919954 | 23-scf00385 | 23 |
| AX-158227310 | 19 | 35.194 | KV453239.1 | 4922190 | 23-scf00385 | 23 |
| AX-158227312 | 19 | 35.194 | KV453239.1 | 4924860 | 23-scf00385 | 23 |
| AX-158227313 | 19 | 35.194 | KV453239.1 | 4925242 | 23-scf00385 | 23 |
| AX-158227315 | 19 | 35.194 | KV453239.1 | 4927590 | 23-scf00385 | 23 |
| AX-158227317 | 19 | 35.194 | KV453239.1 | 4928553 | 23-scf00385 | 23 |
| AX-157839840 | 19 | 35.194 | KV453239.1 | 4931511 | 23-scf00385 | 23 |
| AX-158227319 | 19 | 35.194 | KV453239.1 | 4934627 | 23-scf00385 | 23 |
| AX-158227320 | 19 | 35.194 | KV453239.1 | 4935018 | 23-scf00385 | 23 |
| AX-158227323 | 19 | 35.194 | KV453239.1 | 4936413 | 23-scf00385 | 23 |
| AX-158227325 | 19 | 35.194 | KV453239.1 | 4937302 | 23-scf00385 | 23 |
| AX-158227326 | 19 | 35.194 | KV453239.1 | 4938602 | 23-scf00385 | 23 |
| AX-158227327 | 19 | 35.194 | KV453239.1 | 4939827 | 23-scf00385 | 23 |
| AX-158227328 | 19 | 35.194 | KV453239.1 | 4940267 | 23-scf00385 | 23 |
| AX-158227330 | 19 | 35.194 | KV453239.1 | 4943974 | 23-scf00385 | 23 |
| AX-157712187 | 19 | 35.194 | KV453239.1 | 4945326 | 23-scf00385 | 23 |
| AX-158227331 | 19 | 35.194 | KV453239.1 | 4946867 | 23-scf00385 | 23 |
| AX-158227333 | 19 | 35.194 | KV453239.1 | 4948455 | 23-scf00385 | 23 |
| AX-158227336 | 19 | 35.194 | KV453239.1 | 4953726 | 23-scf00385 | 23 |
| AX-158227338 | 19 | 35.194 | KV453239.1 | 4954251 | 23-scf00385 | 23 |
| AX-157839842 | 19 | 35.194 | KV453239.1 | 4956002 | 23-scf00385 | 23 |
| AX-158227339 | 19 | 35.194 | KV453239.1 | 4957888 | 23-scf00385 | 23 |
| AX-158227340 | 19 | 35.194 | KV453239.1 | 4959150 | 23-scf00385 | 23 |
| AX-158227342 | 19 | 35.194 | KV453239.1 | 4960245 | 23-scf00385 | 23 |
| AX-158227343 | 19 | 35.194 | KV453239.1 | 4960466 | 23-scf00385 | 23 |
| AX-158227345 | 19 | 35.194 | KV453239.1 | 4965212 | 23-scf00385 | 23 |
| AX-157757426 | 19 | 35.194 | KV453239.1 | 4966177 | 23-scf00385 | 23 |
| AX-158227347 | 19 | 35.194 | KV453239.1 | 4966822 | 23-scf00385 | 23 |
| AX-158227351 | 19 | 35.194 | KV453239.1 | 4969548 | 23-scf00385 | 23 |
| AX-158227353 | 19 | 35.194 | KV453239.1 | 4976237 | 23-scf00385 | 23 |
| AX-157839845 | 19 | 35.194 | KV453239.1 | 4980809 | 23-scf00385 | 23 |
| AX-158227359 | 19 | 35.194 | KV453239.1 | 4982978 | 23-scf00385 | 23 |
| AX-157859501 | 19 | 35.194 | KV453239.1 | 4984565 | 23-scf00385 | 23 |
| AX-157839846 | 19 | 35.194 | KV453239.1 | 4994392 | 23-scf00385 | 23 |
| AX-157839899 | 19 | 35.194 | KV453239.1 | 5501925 | 23-scf00385 | 23 |
| AX-158227366 | 19 | 35.34  | KV453239.1 | 4989071 | 23-scf00385 | 23 |
| AX-158227368 | 19 | 35.398 | KV453239.1 | 4993299 | 23-scf00385 | 23 |
| AX-157744438 | 19 | 35.486 | KV453239.1 | 4994693 | 23-scf00385 | 23 |
| AX-158415007 | 19 | 35.486 | KV453239.1 | 4997372 | 23-scf00385 | 23 |
| AX-158410350 | 19 | 35.486 | KV453239.1 | 4999305 | 23-scf00385 | 23 |
| AX-158227371 | 19 | 35.486 | KV453239.1 | 5002943 | 23-scf00385 | 23 |
| AX-158227210 | 19 | 35.631 | KV453239.1 | 4749244 | 23-scf00385 | 23 |
| AX-157747288 | 19 | 35.631 | KV453239.1 | 4765846 | 23-scf00385 | 23 |
| AX-157698758 | 19 | 35.631 | KV453239.1 | 4799695 | 23-scf00385 | 23 |
| AX-158227257 | 19 | 35.631 | KV453239.1 | 4832427 | 23-scf00385 | 23 |

|              |    |        |            |         |             |    |
|--------------|----|--------|------------|---------|-------------|----|
| AX-158227259 | 19 | 35.631 | KV453239.1 | 4833004 | 23-scf00385 | 23 |
| AX-158227262 | 19 | 35.631 | KV453239.1 | 4840530 | 23-scf00385 | 23 |
| AX-158227322 | 19 | 35.631 | KV453239.1 | 4935878 | 23-scf00385 | 23 |
| AX-158227354 | 19 | 35.631 | KV453239.1 | 4976659 | 23-scf00385 | 23 |
| AX-158415011 | 19 | 35.631 | KV453239.1 | 4999693 | 23-scf00385 | 23 |
| AX-158227372 | 19 | 35.631 | KV453239.1 | 5003555 | 23-scf00385 | 23 |
| AX-157839847 | 19 | 35.631 | KV453239.1 | 5006199 | 23-scf00385 | 23 |
| AX-157867131 | 19 | 35.631 | KV453239.1 | 5013090 | 23-scf00385 | 23 |
| AX-158227376 | 19 | 35.631 | KV453239.1 | 5014459 | 23-scf00385 | 23 |
| AX-158227377 | 19 | 35.631 | KV453239.1 | 5015412 | 23-scf00385 | 23 |
| AX-158227378 | 19 | 35.631 | KV453239.1 | 5018750 | 23-scf00385 | 23 |
| AX-158227382 | 19 | 35.631 | KV453239.1 | 5022924 | 23-scf00385 | 23 |
| AX-158227383 | 19 | 35.631 | KV453239.1 | 5024057 | 23-scf00385 | 23 |
| AX-158227384 | 19 | 35.631 | KV453239.1 | 5024661 | 23-scf00385 | 23 |
| AX-158227385 | 19 | 35.631 | KV453239.1 | 5026403 | 23-scf00385 | 23 |
| AX-158227386 | 19 | 35.631 | KV453239.1 | 5027978 | 23-scf00385 | 23 |
| AX-157725467 | 19 | 35.631 | KV453239.1 | 5036977 | 23-scf00385 | 23 |
| AX-158227393 | 19 | 35.631 | KV453239.1 | 5037605 | 23-scf00385 | 23 |
| AX-158227394 | 19 | 35.631 | KV453239.1 | 5038717 | 23-scf00385 | 23 |
| AX-158227397 | 19 | 35.631 | KV453239.1 | 5042659 | 23-scf00385 | 23 |
| AX-158227398 | 19 | 35.631 | KV453239.1 | 5043613 | 23-scf00385 | 23 |
| AX-158227399 | 19 | 35.631 | KV453239.1 | 5044198 | 23-scf00385 | 23 |
| AX-158227400 | 19 | 35.631 | KV453239.1 | 5045188 | 23-scf00385 | 23 |
| AX-157859503 | 19 | 35.631 | KV453239.1 | 5045999 | 23-scf00385 | 23 |
| AX-157839848 | 19 | 35.631 | KV453239.1 | 5048862 | 23-scf00385 | 23 |
| AX-158394124 | 19 | 35.631 | KV453239.1 | 5067089 | 23-scf00385 | 23 |
| AX-158227435 | 19 | 35.631 | KV453239.1 | 5107818 | 23-scf00385 | 23 |
| AX-158227441 | 19 | 35.631 | KV453239.1 | 5114329 | 23-scf00385 | 23 |
| AX-158227447 | 19 | 35.631 | KV453239.1 | 5128169 | 23-scf00385 | 23 |
| AX-158227448 | 19 | 35.631 | KV453239.1 | 5128452 | 23-scf00385 | 23 |
| AX-158227467 | 19 | 35.631 | KV453239.1 | 5162149 | 23-scf00385 | 23 |
| AX-158227494 | 19 | 35.631 | KV453239.1 | 5190039 | 23-scf00385 | 23 |
| AX-158227496 | 19 | 35.631 | KV453239.1 | 5192473 | 23-scf00385 | 23 |
| AX-158227499 | 19 | 35.631 | KV453239.1 | 5194097 | 23-scf00385 | 23 |
| AX-158227500 | 19 | 35.631 | KV453239.1 | 5194373 | 23-scf00385 | 23 |
| AX-158227501 | 19 | 35.631 | KV453239.1 | 5194804 | 23-scf00385 | 23 |
| AX-158227502 | 19 | 35.631 | KV453239.1 | 5195084 | 23-scf00385 | 23 |
| AX-158227510 | 19 | 35.631 | KV453239.1 | 5200712 | 23-scf00385 | 23 |
| AX-158227511 | 19 | 35.631 | KV453239.1 | 5201164 | 23-scf00385 | 23 |
| AX-158227513 | 19 | 35.631 | KV453239.1 | 5203292 | 23-scf00385 | 23 |
| AX-158227514 | 19 | 35.631 | KV453239.1 | 5203594 | 23-scf00385 | 23 |
| AX-158227516 | 19 | 35.631 | KV453239.1 | 5207896 | 23-scf00385 | 23 |
| AX-158227517 | 19 | 35.631 | KV453239.1 | 5209055 | 23-scf00385 | 23 |
| AX-158415017 | 19 | 35.631 | KV453239.1 | 5209703 | 23-scf00385 | 23 |
| AX-158227523 | 19 | 35.631 | KV453239.1 | 5212228 | 23-scf00385 | 23 |
| AX-158227526 | 19 | 35.631 | KV453239.1 | 5213407 | 23-scf00385 | 23 |
| AX-158227528 | 19 | 35.631 | KV453239.1 | 5214089 | 23-scf00385 | 23 |
| AX-158227529 | 19 | 35.631 | KV453239.1 | 5214829 | 23-scf00385 | 23 |
| AX-158227530 | 19 | 35.631 | KV453239.1 | 5216998 | 23-scf00385 | 23 |
| AX-157839869 | 19 | 35.631 | KV453239.1 | 5221711 | 23-scf00385 | 23 |
| AX-158227620 | 19 | 35.631 | KV453239.1 | 5377291 | 23-scf00385 | 23 |

|              |    |        |            |         |             |    |
|--------------|----|--------|------------|---------|-------------|----|
| AX-157839844 | 19 | 35.85  | KV453239.1 | 4974672 | 23-scf00385 | 23 |
| AX-158227405 | 19 | 35.85  | KV453239.1 | 5051217 | 23-scf00385 | 23 |
| AX-158227406 | 19 | 35.85  | KV453239.1 | 5051566 | 23-scf00385 | 23 |
| AX-157839849 | 19 | 35.85  | KV453239.1 | 5056531 | 23-scf00385 | 23 |
| AX-157839850 | 19 | 35.85  | KV453239.1 | 5061345 | 23-scf00385 | 23 |
| AX-158227407 | 19 | 35.85  | KV453239.1 | 5063282 | 23-scf00385 | 23 |
| AX-158227408 | 19 | 35.85  | KV453239.1 | 5063819 | 23-scf00385 | 23 |
| AX-158227409 | 19 | 35.85  | KV453239.1 | 5064410 | 23-scf00385 | 23 |
| AX-158227410 | 19 | 35.85  | KV453239.1 | 5065007 | 23-scf00385 | 23 |
| AX-158227411 | 19 | 35.85  | KV453239.1 | 5066110 | 23-scf00385 | 23 |
| AX-158227412 | 19 | 35.85  | KV453239.1 | 5066230 | 23-scf00385 | 23 |
| AX-158227413 | 19 | 35.85  | KV453239.1 | 5066839 | 23-scf00385 | 23 |
| AX-158227414 | 19 | 35.85  | KV453239.1 | 5067763 | 23-scf00385 | 23 |
| AX-158227416 | 19 | 35.85  | KV453239.1 | 5069974 | 23-scf00385 | 23 |
| AX-157839852 | 19 | 35.85  | KV453239.1 | 5078677 | 23-scf00385 | 23 |
| AX-158227420 | 19 | 35.85  | KV453239.1 | 5079449 | 23-scf00385 | 23 |
| AX-157839864 | 19 | 35.85  | KV453239.1 | 5156354 | 23-scf00385 | 23 |
| AX-158227508 | 19 | 35.85  | KV453239.1 | 5199035 | 23-scf00385 | 23 |
| AX-158227570 | 19 | 35.85  | KV453239.1 | 5316934 | 23-scf00385 | 23 |
| AX-158227576 | 19 | 35.85  | KV453239.1 | 5321756 | 23-scf00385 | 23 |
| AX-158227582 | 19 | 35.85  | KV453239.1 | 5334204 | 23-scf00385 | 23 |
| AX-158227666 | 19 | 35.85  | KV453239.1 | 5445026 | 23-scf00385 | 23 |
| AX-158227723 | 19 | 35.85  | KV453239.1 | 5544321 | 23-scf00385 | 23 |
| AX-157839912 | 19 | 35.85  | KV453239.1 | 5598565 | 23-scf00385 | 23 |
| AX-158227809 | 19 | 35.85  | KV453239.1 | 5687663 | 23-scf00385 | 23 |
| AX-158227818 | 19 | 35.85  | KV453239.1 | 5701402 | 23-scf00385 | 23 |
| AX-158227424 | 19 | 35.854 | KV453239.1 | 5087400 | 23-scf00385 | 23 |
| AX-158227417 | 19 | 35.858 | KV453239.1 | 5072868 | 23-scf00385 | 23 |
| AX-158227434 | 19 | 35.858 | KV453239.1 | 5105360 | 23-scf00385 | 23 |
| AX-158227457 | 19 | 35.858 | KV453239.1 | 5139107 | 23-scf00385 | 23 |
| AX-158227464 | 19 | 35.858 | KV453239.1 | 5155018 | 23-scf00385 | 23 |
| AX-158227472 | 19 | 35.858 | KV453239.1 | 5167358 | 23-scf00385 | 23 |
| AX-157839866 | 19 | 35.858 | KV453239.1 | 5172172 | 23-scf00385 | 23 |
| AX-158227491 | 19 | 35.858 | KV453239.1 | 5186493 | 23-scf00385 | 23 |
| AX-158227520 | 19 | 35.858 | KV453239.1 | 5211238 | 23-scf00385 | 23 |
| AX-158227436 | 19 | 35.881 | KV453239.1 | 5109240 | 23-scf00385 | 23 |
| AX-158227439 | 19 | 35.881 | KV453239.1 | 5113790 | 23-scf00385 | 23 |
| AX-157710436 | 19 | 35.881 | KV453239.1 | 5143707 | 23-scf00385 | 23 |
| AX-157839862 | 19 | 35.881 | KV453239.1 | 5144007 | 23-scf00385 | 23 |
| AX-158227438 | 19 | 35.908 | KV453239.1 | 5111047 | 23-scf00385 | 23 |
| AX-158227440 | 19 | 35.935 | KV453239.1 | 5113878 | 23-scf00385 | 23 |
| AX-157839857 | 19 | 35.959 | KV453239.1 | 5116716 | 23-scf00385 | 23 |
| AX-158227442 | 19 | 35.959 | KV453239.1 | 5117350 | 23-scf00385 | 23 |
| AX-158227443 | 19 | 35.959 | KV453239.1 | 5118060 | 23-scf00385 | 23 |
| AX-158227444 | 19 | 35.959 | KV453239.1 | 5119167 | 23-scf00385 | 23 |
| AX-158227445 | 19 | 35.959 | KV453239.1 | 5124421 | 23-scf00385 | 23 |
| AX-158227449 | 19 | 35.959 | KV453239.1 | 5129475 | 23-scf00385 | 23 |
| AX-158227450 | 19 | 35.959 | KV453239.1 | 5131337 | 23-scf00385 | 23 |
| AX-157839860 | 19 | 35.959 | KV453239.1 | 5131936 | 23-scf00385 | 23 |
| AX-158227459 | 19 | 35.959 | KV453239.1 | 5145895 | 23-scf00385 | 23 |
| AX-157746808 | 19 | 35.959 | KV453239.1 | 5151075 | 23-scf00385 | 23 |

|              |    |        |            |         |             |    |
|--------------|----|--------|------------|---------|-------------|----|
| AX-158227465 | 19 | 35.959 | KV453239.1 | 5155922 | 23-scf00385 | 23 |
| AX-158227519 | 19 | 35.959 | KV453239.1 | 5210737 | 23-scf00385 | 23 |
| AX-158227521 | 19 | 35.959 | KV453239.1 | 5211575 | 23-scf00385 | 23 |
| AX-158227522 | 19 | 35.959 | KV453239.1 | 5211865 | 23-scf00385 | 23 |
| AX-158227525 | 19 | 35.959 | KV453239.1 | 5213064 | 23-scf00385 | 23 |
| AX-157839873 | 19 | 35.959 | KV453239.1 | 5230545 | 23-scf00385 | 23 |
| AX-158227531 | 19 | 35.959 | KV453239.1 | 5231213 | 23-scf00385 | 23 |
| AX-157839874 | 19 | 35.959 | KV453239.1 | 5233958 | 23-scf00385 | 23 |
| AX-158227667 | 19 | 35.959 | KV453239.1 | 5445857 | 23-scf00385 | 23 |
| AX-157757044 | 19 | 36.068 | KV453239.1 | 5080353 | 23-scf00385 | 23 |
| AX-158227429 | 19 | 36.068 | KV453239.1 | 5093523 | 23-scf00385 | 23 |
| AX-157839856 | 19 | 36.068 | KV453239.1 | 5105196 | 23-scf00385 | 23 |
| AX-157839859 | 19 | 36.068 | KV453239.1 | 5124692 | 23-scf00385 | 23 |
| AX-157839861 | 19 | 36.068 | KV453239.1 | 5138516 | 23-scf00385 | 23 |
| AX-158227469 | 19 | 36.068 | KV453239.1 | 5165444 | 23-scf00385 | 23 |
| AX-158227471 | 19 | 36.068 | KV453239.1 | 5166899 | 23-scf00385 | 23 |
| AX-158227475 | 19 | 36.068 | KV453239.1 | 5169657 | 23-scf00385 | 23 |
| AX-158227476 | 19 | 36.068 | KV453239.1 | 5170416 | 23-scf00385 | 23 |
| AX-158227482 | 19 | 36.068 | KV453239.1 | 5179310 | 23-scf00385 | 23 |
| AX-158227536 | 19 | 36.068 | KV453239.1 | 5257859 | 23-scf00385 | 23 |
| AX-157839876 | 19 | 36.068 | KV453239.1 | 5259588 | 23-scf00385 | 23 |
| AX-158227537 | 19 | 36.068 | KV453239.1 | 5260009 | 23-scf00385 | 23 |
| AX-157725059 | 19 | 36.068 | KV453239.1 | 5261564 | 23-scf00385 | 23 |
| AX-158227538 | 19 | 36.068 | KV453239.1 | 5262885 | 23-scf00385 | 23 |
| AX-158227539 | 19 | 36.068 | KV453239.1 | 5263410 | 23-scf00385 | 23 |
| AX-157839877 | 19 | 36.068 | KV453239.1 | 5263666 | 23-scf00385 | 23 |
| AX-158227541 | 19 | 36.068 | KV453239.1 | 5266532 | 23-scf00385 | 23 |
| AX-158227543 | 19 | 36.068 | KV453239.1 | 5269143 | 23-scf00385 | 23 |
| AX-158227544 | 19 | 36.068 | KV453239.1 | 5272918 | 23-scf00385 | 23 |
| AX-158227546 | 19 | 36.068 | KV453239.1 | 5275219 | 23-scf00385 | 23 |
| AX-157746553 | 19 | 36.068 | KV453239.1 | 5276734 | 23-scf00385 | 23 |
| AX-158227548 | 19 | 36.068 | KV453239.1 | 5280087 | 23-scf00385 | 23 |
| AX-158227549 | 19 | 36.068 | KV453239.1 | 5281193 | 23-scf00385 | 23 |
| AX-158227551 | 19 | 36.068 | KV453239.1 | 5283970 | 23-scf00385 | 23 |
| AX-158227554 | 19 | 36.068 | KV453239.1 | 5289654 | 23-scf00385 | 23 |
| AX-158227556 | 19 | 36.068 | KV453239.1 | 5291548 | 23-scf00385 | 23 |
| AX-157887349 | 19 | 36.068 | KV453239.1 | 5292115 | 23-scf00385 | 23 |
| AX-158227557 | 19 | 36.068 | KV453239.1 | 5292427 | 23-scf00385 | 23 |
| AX-158227558 | 19 | 36.068 | KV453239.1 | 5294532 | 23-scf00385 | 23 |
| AX-158227559 | 19 | 36.068 | KV453239.1 | 5295611 | 23-scf00385 | 23 |
| AX-158227561 | 19 | 36.068 | KV453239.1 | 5297796 | 23-scf00385 | 23 |
| AX-158227562 | 19 | 36.068 | KV453239.1 | 5299338 | 23-scf00385 | 23 |
| AX-158227564 | 19 | 36.068 | KV453239.1 | 5302874 | 23-scf00385 | 23 |
| AX-158227565 | 19 | 36.068 | KV453239.1 | 5304835 | 23-scf00385 | 23 |
| AX-158227567 | 19 | 36.068 | KV453239.1 | 5314198 | 23-scf00385 | 23 |
| AX-158227579 | 19 | 36.068 | KV453239.1 | 5329486 | 23-scf00385 | 23 |
| AX-158227581 | 19 | 36.068 | KV453239.1 | 5333077 | 23-scf00385 | 23 |
| AX-157867136 | 19 | 36.068 | KV453239.1 | 5341673 | 23-scf00385 | 23 |
| AX-158227586 | 19 | 36.068 | KV453239.1 | 5342069 | 23-scf00385 | 23 |
| AX-158227589 | 19 | 36.068 | KV453239.1 | 5343792 | 23-scf00385 | 23 |
| AX-158227590 | 19 | 36.068 | KV453239.1 | 5344059 | 23-scf00385 | 23 |

|              |    |        |            |         |             |    |
|--------------|----|--------|------------|---------|-------------|----|
| AX-158227591 | 19 | 36.068 | KV453239.1 | 5345609 | 23-scf00385 | 23 |
| AX-158227593 | 19 | 36.068 | KV453239.1 | 5349119 | 23-scf00385 | 23 |
| AX-158227594 | 19 | 36.068 | KV453239.1 | 5349689 | 23-scf00385 | 23 |
| AX-158227595 | 19 | 36.068 | KV453239.1 | 5349927 | 23-scf00385 | 23 |
| AX-158227596 | 19 | 36.068 | KV453239.1 | 5350286 | 23-scf00385 | 23 |
| AX-158227599 | 19 | 36.068 | KV453239.1 | 5352384 | 23-scf00385 | 23 |
| AX-158227602 | 19 | 36.068 | KV453239.1 | 5354176 | 23-scf00385 | 23 |
| AX-158227603 | 19 | 36.068 | KV453239.1 | 5354452 | 23-scf00385 | 23 |
| AX-158227604 | 19 | 36.068 | KV453239.1 | 5354510 | 23-scf00385 | 23 |
| AX-157839878 | 19 | 36.068 | KV453239.1 | 5358476 | 23-scf00385 | 23 |
| AX-158227607 | 19 | 36.068 | KV453239.1 | 5359805 | 23-scf00385 | 23 |
| AX-158227610 | 19 | 36.068 | KV453239.1 | 5362884 | 23-scf00385 | 23 |
| AX-158227611 | 19 | 36.068 | KV453239.1 | 5363969 | 23-scf00385 | 23 |
| AX-158227612 | 19 | 36.068 | KV453239.1 | 5364340 | 23-scf00385 | 23 |
| AX-157738844 | 19 | 36.068 | KV453239.1 | 5367021 | 23-scf00385 | 23 |
| AX-158227621 | 19 | 36.068 | KV453239.1 | 5378054 | 23-scf00385 | 23 |
| AX-158227622 | 19 | 36.068 | KV453239.1 | 5378666 | 23-scf00385 | 23 |
| AX-157839883 | 19 | 36.068 | KV453239.1 | 5387439 | 23-scf00385 | 23 |
| AX-158227632 | 19 | 36.068 | KV453239.1 | 5389451 | 23-scf00385 | 23 |
| AX-158227633 | 19 | 36.068 | KV453239.1 | 5391734 | 23-scf00385 | 23 |
| AX-158227637 | 19 | 36.068 | KV453239.1 | 5400858 | 23-scf00385 | 23 |
| AX-157771362 | 19 | 36.068 | KV453239.1 | 5401611 | 23-scf00385 | 23 |
| AX-157872455 | 19 | 36.068 | KV453239.1 | 5403196 | 23-scf00385 | 23 |
| AX-157839887 | 19 | 36.068 | KV453239.1 | 5406081 | 23-scf00385 | 23 |
| AX-158227639 | 19 | 36.068 | KV453239.1 | 5408261 | 23-scf00385 | 23 |
| AX-158227644 | 19 | 36.068 | KV453239.1 | 5412479 | 23-scf00385 | 23 |
| AX-158227646 | 19 | 36.068 | KV453239.1 | 5415029 | 23-scf00385 | 23 |
| AX-157743404 | 19 | 36.068 | KV453239.1 | 5415338 | 23-scf00385 | 23 |
| AX-157839890 | 19 | 36.068 | KV453239.1 | 5415464 | 23-scf00385 | 23 |
| AX-158227655 | 19 | 36.068 | KV453239.1 | 5428238 | 23-scf00385 | 23 |
| AX-157839892 | 19 | 36.068 | KV453239.1 | 5430364 | 23-scf00385 | 23 |
| AX-158227659 | 19 | 36.068 | KV453239.1 | 5432387 | 23-scf00385 | 23 |
| AX-158227660 | 19 | 36.068 | KV453239.1 | 5433941 | 23-scf00385 | 23 |
| AX-157774593 | 19 | 36.068 | KV453239.1 | 5434137 | 23-scf00385 | 23 |
| AX-158227661 | 19 | 36.068 | KV453239.1 | 5437622 | 23-scf00385 | 23 |
| AX-158227662 | 19 | 36.068 | KV453239.1 | 5439149 | 23-scf00385 | 23 |
| AX-157839893 | 19 | 36.068 | KV453239.1 | 5439448 | 23-scf00385 | 23 |
| AX-158227663 | 19 | 36.068 | KV453239.1 | 5439565 | 23-scf00385 | 23 |
| AX-158227664 | 19 | 36.068 | KV453239.1 | 5442701 | 23-scf00385 | 23 |
| AX-158227665 | 19 | 36.068 | KV453239.1 | 5443245 | 23-scf00385 | 23 |
| AX-157839896 | 19 | 36.068 | KV453239.1 | 5447948 | 23-scf00385 | 23 |
| AX-158227669 | 19 | 36.068 | KV453239.1 | 5451147 | 23-scf00385 | 23 |
| AX-158227670 | 19 | 36.068 | KV453239.1 | 5454692 | 23-scf00385 | 23 |
| AX-157799670 | 19 | 36.068 | KV453239.1 | 5456101 | 23-scf00385 | 23 |
| AX-158227671 | 19 | 36.068 | KV453239.1 | 5456896 | 23-scf00385 | 23 |
| AX-158227672 | 19 | 36.068 | KV453239.1 | 5457231 | 23-scf00385 | 23 |
| AX-158227673 | 19 | 36.068 | KV453239.1 | 5457960 | 23-scf00385 | 23 |
| AX-158227675 | 19 | 36.068 | KV453239.1 | 5461636 | 23-scf00385 | 23 |
| AX-158227677 | 19 | 36.068 | KV453239.1 | 5465674 | 23-scf00385 | 23 |
| AX-158227678 | 19 | 36.068 | KV453239.1 | 5466227 | 23-scf00385 | 23 |
| AX-157839897 | 19 | 36.068 | KV453239.1 | 5472522 | 23-scf00385 | 23 |

|              |    |        |             |         |             |    |
|--------------|----|--------|-------------|---------|-------------|----|
| AX-158227685 | 19 | 36.068 | KV453239.1  | 5476614 | 23-scf00385 | 23 |
| AX-158227687 | 19 | 36.068 | KV453239.1  | 5477937 | 23-scf00385 | 23 |
| AX-158227688 | 19 | 36.068 | KV453239.1  | 5479487 | 23-scf00385 | 23 |
| AX-158227689 | 19 | 36.068 | KV453239.1  | 5479958 | 23-scf00385 | 23 |
| AX-158227690 | 19 | 36.068 | KV453239.1  | 5481854 | 23-scf00385 | 23 |
| AX-158227692 | 19 | 36.068 | KV453239.1  | 5486591 | 23-scf00385 | 23 |
| AX-157753543 | 19 | 36.068 | KV453239.1  | 5489401 | 23-scf00385 | 23 |
| AX-158227693 | 19 | 36.068 | KV453239.1  | 5492623 | 23-scf00385 | 23 |
| AX-158227696 | 19 | 36.068 | KV453239.1  | 5495940 | 23-scf00385 | 23 |
| AX-158227698 | 19 | 36.068 | KV453239.1  | 5497082 | 23-scf00385 | 23 |
| AX-157839898 | 19 | 36.068 | KV453239.1  | 5498880 | 23-scf00385 | 23 |
| AX-158227701 | 19 | 36.068 | KV453239.1  | 5499411 | 23-scf00385 | 23 |
| AX-158227703 | 19 | 36.068 | KV453239.1  | 5504491 | 23-scf00385 | 23 |
| AX-158227706 | 19 | 36.068 | KV453239.1  | 5510878 | 23-scf00385 | 23 |
| AX-158227707 | 19 | 36.068 | KV453239.1  | 5512730 | 23-scf00385 | 23 |
| AX-158227708 | 19 | 36.068 | KV453239.1  | 5516874 | 23-scf00385 | 23 |
| AX-158227710 | 19 | 36.068 | KV453239.1  | 5519272 | 23-scf00385 | 23 |
| AX-158227713 | 19 | 36.068 | KV453239.1  | 5526589 | 23-scf00385 | 23 |
| AX-158227714 | 19 | 36.068 | KV453239.1  | 5527550 | 23-scf00385 | 23 |
| AX-157839904 | 19 | 36.068 | KV453239.1  | 5529050 | 23-scf00385 | 23 |
| AX-158227716 | 19 | 36.068 | KV453239.1  | 5530076 | 23-scf00385 | 23 |
| AX-158227717 | 19 | 36.068 | KV453239.1  | 5534672 | 23-scf00385 | 23 |
| AX-158227719 | 19 | 36.068 | KV453239.1  | 5539185 | 23-scf00385 | 23 |
| AX-158227726 | 19 | 36.068 | KV453239.1  | 5554363 | 23-scf00385 | 23 |
| AX-158227728 | 19 | 36.068 | KV453239.1  | 5555141 | 23-scf00385 | 23 |
| AX-157839907 | 19 | 36.068 | KV453239.1  | 5558745 | 23-scf00385 | 23 |
| AX-158227735 | 19 | 36.068 | KV453239.1  | 5565461 | 23-scf00385 | 23 |
| AX-158227737 | 19 | 36.068 | KV453239.1  | 5567033 | 23-scf00385 | 23 |
| AX-157741422 | 19 | 36.068 | KV453239.1  | 5572874 | 23-scf00385 | 23 |
| AX-158227743 | 19 | 36.068 | KV453239.1  | 5574202 | 23-scf00385 | 23 |
| AX-158227745 | 19 | 36.068 | KV453239.1  | 5575344 | 23-scf00385 | 23 |
| AX-158227748 | 19 | 36.068 | KV453239.1  | 5579824 | 23-scf00385 | 23 |
| AX-158227749 | 19 | 36.068 | KV453239.1  | 5581037 | 23-scf00385 | 23 |
| AX-158227753 | 19 | 36.068 | KV453239.1  | 5589123 | 23-scf00385 | 23 |
| AX-158415027 | 19 | 36.068 | KV453239.1  | 5595630 | 23-scf00385 | 23 |
| AX-158227764 | 19 | 36.068 | KV453239.1  | 5616048 | 23-scf00385 | 23 |
| AX-158227765 | 19 | 36.068 | KV453239.1  | 5616849 | 23-scf00385 | 23 |
| AX-158227766 | 19 | 36.068 | KV453239.1  | 5617654 | 23-scf00385 | 23 |
| AX-157713292 | 19 | 36.068 | KV453239.1  | 5624011 | 23-scf00385 | 23 |
| AX-157739150 | 19 | 36.068 | KV453239.1  | 5624119 | 23-scf00385 | 23 |
| AX-158227771 | 19 | 36.068 | KV453239.1  | 5625128 | 23-scf00385 | 23 |
| AX-158227776 | 19 | 36.068 | KV453239.1  | 5636489 | 23-scf00385 | 23 |
| AX-158227778 | 19 | 36.068 | KV453239.1  | 5639581 | 23-scf00385 | 23 |
| AX-158227781 | 19 | 36.068 | KV453239.1  | 5642127 | 23-scf00385 | 23 |
| AX-158227783 | 19 | 36.068 | KV453239.1  | 5644720 | 23-scf00385 | 23 |
| AX-158227785 | 19 | 36.068 | KV453239.1  | 5648491 | 23-scf00385 | 23 |
| AX-158227786 | 19 | 36.068 | KV453239.1  | 5648796 | 23-scf00385 | 23 |
| AX-157745470 | 19 | 36.068 | KV453239.1  | 5663942 | 23-scf00385 | 23 |
| AX-158227896 | 19 | 36.068 | KV453239.1  | 5813333 | 23-scf00385 | 23 |
| AX-157705041 | 19 | 36.068 | 3ML01028382 | 664     | scf03989_1  | UN |
| AX-157705574 | 19 | 36.068 | 3ML01030275 | 473     | scf05869_1  | UN |



|              |    |        |            |         |             |    |
|--------------|----|--------|------------|---------|-------------|----|
| AX-158227791 | 19 | 36.505 | KV453239.1 | 5655880 | 23-scf00385 | 23 |
| AX-158227792 | 19 | 36.505 | KV453239.1 | 5656239 | 23-scf00385 | 23 |
| AX-157839915 | 19 | 36.505 | KV453239.1 | 5657620 | 23-scf00385 | 23 |
| AX-158227793 | 19 | 36.505 | KV453239.1 | 5659772 | 23-scf00385 | 23 |
| AX-157839916 | 19 | 36.505 | KV453239.1 | 5660452 | 23-scf00385 | 23 |
| AX-157839917 | 19 | 36.505 | KV453239.1 | 5662017 | 23-scf00385 | 23 |
| AX-157839918 | 19 | 36.505 | KV453239.1 | 5662448 | 23-scf00385 | 23 |
| AX-158227794 | 19 | 36.505 | KV453239.1 | 5668161 | 23-scf00385 | 23 |
| AX-158227795 | 19 | 36.505 | KV453239.1 | 5668662 | 23-scf00385 | 23 |
| AX-158227799 | 19 | 36.505 | KV453239.1 | 5675805 | 23-scf00385 | 23 |
| AX-157745004 | 19 | 36.505 | KV453239.1 | 5676370 | 23-scf00385 | 23 |
| AX-158227704 | 19 | 36.552 | KV453239.1 | 5509052 | 23-scf00385 | 23 |
| AX-158227802 | 19 | 36.552 | KV453239.1 | 5681439 | 23-scf00385 | 23 |
| AX-158227839 | 19 | 36.552 | KV453239.1 | 5725593 | 23-scf00385 | 23 |
| AX-158227805 | 19 | 36.614 | KV453239.1 | 5683932 | 23-scf00385 | 23 |
| AX-158227806 | 19 | 36.614 | KV453239.1 | 5684528 | 23-scf00385 | 23 |
| AX-158227812 | 19 | 36.614 | KV453239.1 | 5691751 | 23-scf00385 | 23 |
| AX-157746538 | 19 | 36.614 | KV453239.1 | 5692173 | 23-scf00385 | 23 |
| AX-158227816 | 19 | 36.614 | KV453239.1 | 5697494 | 23-scf00385 | 23 |
| AX-158227823 | 19 | 36.614 | KV453239.1 | 5707182 | 23-scf00385 | 23 |
| AX-158227402 | 19 | 36.723 | KV453239.1 | 5047083 | 23-scf00385 | 23 |
| AX-158227751 | 19 | 36.723 | KV453239.1 | 5582949 | 23-scf00385 | 23 |
| AX-158227808 | 19 | 36.723 | KV453239.1 | 5686498 | 23-scf00385 | 23 |
| AX-158227824 | 19 | 36.723 | KV453239.1 | 5707915 | 23-scf00385 | 23 |
| AX-157723830 | 19 | 36.723 | KV453239.1 | 5709188 | 23-scf00385 | 23 |
| AX-158227826 | 19 | 36.723 | KV453239.1 | 5710105 | 23-scf00385 | 23 |
| AX-158227827 | 19 | 36.723 | KV453239.1 | 5711011 | 23-scf00385 | 23 |
| AX-158227831 | 19 | 36.723 | KV453239.1 | 5714085 | 23-scf00385 | 23 |
| AX-158227832 | 19 | 36.723 | KV453239.1 | 5716065 | 23-scf00385 | 23 |
| AX-157751554 | 19 | 36.723 | KV453239.1 | 5716190 | 23-scf00385 | 23 |
| AX-158227833 | 19 | 36.723 | KV453239.1 | 5716640 | 23-scf00385 | 23 |
| AX-158227834 | 19 | 36.723 | KV453239.1 | 5717260 | 23-scf00385 | 23 |
| AX-158227574 | 19 | 36.942 | KV453239.1 | 5320217 | 23-scf00385 | 23 |
| AX-158227616 | 19 | 36.942 | KV453239.1 | 5372076 | 23-scf00385 | 23 |
| AX-158227627 | 19 | 36.942 | KV453239.1 | 5384271 | 23-scf00385 | 23 |
| AX-157839884 | 19 | 36.942 | KV453239.1 | 5388779 | 23-scf00385 | 23 |
| AX-158227635 | 19 | 36.942 | KV453239.1 | 5399058 | 23-scf00385 | 23 |
| AX-158227709 | 19 | 36.942 | KV453239.1 | 5517655 | 23-scf00385 | 23 |
| AX-158227740 | 19 | 36.942 | KV453239.1 | 5569397 | 23-scf00385 | 23 |
| AX-158227762 | 19 | 36.942 | KV453239.1 | 5603301 | 23-scf00385 | 23 |
| AX-158410354 | 19 | 36.942 | KV453239.1 | 5620681 | 23-scf00385 | 23 |
| AX-158227770 | 19 | 36.942 | KV453239.1 | 5624924 | 23-scf00385 | 23 |
| AX-158227814 | 19 | 36.942 | KV453239.1 | 5695548 | 23-scf00385 | 23 |
| AX-158227838 | 19 | 36.942 | KV453239.1 | 5723597 | 23-scf00385 | 23 |
| AX-158227841 | 19 | 36.942 | KV453239.1 | 5733654 | 23-scf00385 | 23 |
| AX-157839924 | 19 | 36.942 | KV453239.1 | 5734401 | 23-scf00385 | 23 |
| AX-158227842 | 19 | 36.942 | KV453239.1 | 5735898 | 23-scf00385 | 23 |
| AX-157839925 | 19 | 36.942 | KV453239.1 | 5736705 | 23-scf00385 | 23 |
| AX-157715614 | 19 | 36.942 | KV453239.1 | 5740612 | 23-scf00385 | 23 |
| AX-157839926 | 19 | 36.942 | KV453239.1 | 5743414 | 23-scf00385 | 23 |
| AX-158227843 | 19 | 36.942 | KV453239.1 | 5743754 | 23-scf00385 | 23 |

|              |    |        |            |         |             |    |
|--------------|----|--------|------------|---------|-------------|----|
| AX-158227844 | 19 | 36.942 | KV453239.1 | 5744413 | 23-scf00385 | 23 |
| AX-158227846 | 19 | 36.942 | KV453239.1 | 5748792 | 23-scf00385 | 23 |
| AX-158227848 | 19 | 36.942 | KV453239.1 | 5750196 | 23-scf00385 | 23 |
| AX-158227854 | 19 | 36.942 | KV453239.1 | 5757205 | 23-scf00385 | 23 |
| AX-158227855 | 19 | 36.942 | KV453239.1 | 5757606 | 23-scf00385 | 23 |
| AX-158227862 | 19 | 36.942 | KV453239.1 | 5768562 | 23-scf00385 | 23 |
| AX-158380881 | 19 | 36.942 | KV453239.1 | 5813285 | 23-scf00385 | 23 |
| AX-158227900 | 19 | 36.942 | KV453239.1 | 5820897 | 23-scf00385 | 23 |
| AX-158227912 | 19 | 36.942 | KV453239.1 | 5844409 | 23-scf00385 | 23 |
| AX-158227917 | 19 | 36.942 | KV453239.1 | 5852226 | 23-scf00385 | 23 |
| AX-158227937 | 19 | 36.942 | KV453239.1 | 5891389 | 23-scf00385 | 23 |
| AX-158227951 | 19 | 36.942 | KV453239.1 | 5903790 | 23-scf00385 | 23 |
| AX-158227981 | 19 | 36.942 | KV453239.1 | 5941334 | 23-scf00385 | 23 |
| AX-157740300 | 19 | 37.051 | KV453239.1 | 5767991 | 23-scf00385 | 23 |
| AX-158227863 | 19 | 37.051 | KV453239.1 | 5769607 | 23-scf00385 | 23 |
| AX-158227866 | 19 | 37.051 | KV453239.1 | 5771804 | 23-scf00385 | 23 |
| AX-158227867 | 19 | 37.051 | KV453239.1 | 5772484 | 23-scf00385 | 23 |
| AX-158227869 | 19 | 37.051 | KV453239.1 | 5776687 | 23-scf00385 | 23 |
| AX-158227870 | 19 | 37.051 | KV453239.1 | 5777633 | 23-scf00385 | 23 |
| AX-158227871 | 19 | 37.051 | KV453239.1 | 5778945 | 23-scf00385 | 23 |
| AX-158227872 | 19 | 37.051 | KV453239.1 | 5782602 | 23-scf00385 | 23 |
| AX-158227873 | 19 | 37.051 | KV453239.1 | 5783508 | 23-scf00385 | 23 |
| AX-158227874 | 19 | 37.051 | KV453239.1 | 5785788 | 23-scf00385 | 23 |
| AX-158227880 | 19 | 37.051 | KV453239.1 | 5794405 | 23-scf00385 | 23 |
| AX-158227875 | 19 | 37.16  | KV453239.1 | 5787999 | 23-scf00385 | 23 |
| AX-158415030 | 19 | 37.16  | KV453239.1 | 5788853 | 23-scf00385 | 23 |
| AX-158227789 | 19 | 37.379 | KV453239.1 | 5650837 | 23-scf00385 | 23 |
| AX-158227813 | 19 | 37.379 | KV453239.1 | 5692758 | 23-scf00385 | 23 |
| AX-158227852 | 19 | 37.379 | KV453239.1 | 5755552 | 23-scf00385 | 23 |
| AX-158227876 | 19 | 37.379 | KV453239.1 | 5789725 | 23-scf00385 | 23 |
| AX-158227878 | 19 | 37.379 | KV453239.1 | 5793317 | 23-scf00385 | 23 |
| AX-158227879 | 19 | 37.379 | KV453239.1 | 5793974 | 23-scf00385 | 23 |
| AX-158227881 | 19 | 37.379 | KV453239.1 | 5795137 | 23-scf00385 | 23 |
| AX-158227882 | 19 | 37.379 | KV453239.1 | 5795395 | 23-scf00385 | 23 |
| AX-158227884 | 19 | 37.379 | KV453239.1 | 5797237 | 23-scf00385 | 23 |
| AX-158227886 | 19 | 37.379 | KV453239.1 | 5798825 | 23-scf00385 | 23 |
| AX-158227890 | 19 | 37.379 | KV453239.1 | 5803193 | 23-scf00385 | 23 |
| AX-158227893 | 19 | 37.379 | KV453239.1 | 5806437 | 23-scf00385 | 23 |
| AX-157738984 | 19 | 37.379 | KV453239.1 | 5809946 | 23-scf00385 | 23 |
| AX-158227898 | 19 | 37.379 | KV453239.1 | 5816551 | 23-scf00385 | 23 |
| AX-158227908 | 19 | 37.379 | KV453239.1 | 5833510 | 23-scf00385 | 23 |
| AX-158227899 | 19 | 37.488 | KV453239.1 | 5819916 | 23-scf00385 | 23 |
| AX-158227901 | 19 | 37.488 | KV453239.1 | 5821850 | 23-scf00385 | 23 |
| AX-158227902 | 19 | 37.488 | KV453239.1 | 5822090 | 23-scf00385 | 23 |
| AX-158227904 | 19 | 37.488 | KV453239.1 | 5824921 | 23-scf00385 | 23 |
| AX-158415031 | 19 | 37.488 | KV453239.1 | 5827043 | 23-scf00385 | 23 |
| AX-158227906 | 19 | 37.488 | KV453239.1 | 5828954 | 23-scf00385 | 23 |
| AX-158227909 | 19 | 37.488 | KV453239.1 | 5838376 | 23-scf00385 | 23 |
| AX-158227910 | 19 | 37.488 | KV453239.1 | 5839119 | 23-scf00385 | 23 |
| AX-158227911 | 19 | 37.488 | KV453239.1 | 5840479 | 23-scf00385 | 23 |
| AX-157755571 | 19 | 37.488 | KV453239.1 | 5841100 | 23-scf00385 | 23 |

|              |    |        |            |         |             |    |
|--------------|----|--------|------------|---------|-------------|----|
| AX-157859509 | 19 | 37.488 | KV453239.1 | 5843978 | 23-scf00385 | 23 |
| AX-158227913 | 19 | 37.488 | KV453239.1 | 5845856 | 23-scf00385 | 23 |
| AX-158227920 | 19 | 37.488 | KV453239.1 | 5858580 | 23-scf00385 | 23 |
| AX-158227921 | 19 | 37.488 | KV453239.1 | 5858938 | 23-scf00385 | 23 |
| AX-158227380 | 19 | 37.922 | KV453239.1 | 5020558 | 23-scf00385 | 23 |
| AX-158227924 | 19 | 37.922 | KV453239.1 | 5862887 | 23-scf00385 | 23 |
| AX-158227925 | 19 | 37.924 | KV453239.1 | 5863324 | 23-scf00385 | 23 |
| AX-158227926 | 19 | 37.924 | KV453239.1 | 5863954 | 23-scf00385 | 23 |
| AX-158227927 | 19 | 37.924 | KV453239.1 | 5865071 | 23-scf00385 | 23 |
| AX-158227923 | 19 | 37.925 | KV453239.1 | 5861790 | 23-scf00385 | 23 |
| AX-157839930 | 19 | 37.925 | KV453239.1 | 5878346 | 23-scf00385 | 23 |
| AX-157839931 | 19 | 37.925 | KV453239.1 | 5878426 | 23-scf00385 | 23 |
| AX-158227931 | 19 | 37.925 | KV453239.1 | 5880923 | 23-scf00385 | 23 |
| AX-158227932 | 19 | 37.925 | KV453239.1 | 5883264 | 23-scf00385 | 23 |
| AX-158227933 | 19 | 37.925 | KV453239.1 | 5884324 | 23-scf00385 | 23 |
| AX-158227934 | 19 | 37.925 | KV453239.1 | 5886679 | 23-scf00385 | 23 |
| AX-158227936 | 19 | 37.925 | KV453239.1 | 5891073 | 23-scf00385 | 23 |
| AX-158227940 | 19 | 37.925 | KV453239.1 | 5892992 | 23-scf00385 | 23 |
| AX-158227941 | 19 | 37.925 | KV453239.1 | 5894833 | 23-scf00385 | 23 |
| AX-158227942 | 19 | 37.925 | KV453239.1 | 5895394 | 23-scf00385 | 23 |
| AX-157748183 | 19 | 37.925 | KV453239.1 | 5896784 | 23-scf00385 | 23 |
| AX-157839885 | 19 | 38.03  | KV453239.1 | 5400959 | 23-scf00385 | 23 |
| AX-158227883 | 19 | 38.03  | KV453239.1 | 5796131 | 23-scf00385 | 23 |
| AX-158227907 | 19 | 38.03  | KV453239.1 | 5830879 | 23-scf00385 | 23 |
| AX-157839932 | 19 | 38.03  | KV453239.1 | 5896869 | 23-scf00385 | 23 |
| AX-158227947 | 19 | 38.144 | KV453239.1 | 5899337 | 23-scf00385 | 23 |
| AX-158227948 | 19 | 38.144 | KV453239.1 | 5901540 | 23-scf00385 | 23 |
| AX-158227949 | 19 | 38.144 | KV453239.1 | 5902436 | 23-scf00385 | 23 |
| AX-158227950 | 19 | 38.144 | KV453239.1 | 5903374 | 23-scf00385 | 23 |
| AX-158227952 | 19 | 38.144 | KV453239.1 | 5905306 | 23-scf00385 | 23 |
| AX-158227957 | 19 | 38.144 | KV453239.1 | 5908404 | 23-scf00385 | 23 |
| AX-158227958 | 19 | 38.144 | KV453239.1 | 5909223 | 23-scf00385 | 23 |
| AX-158227964 | 19 | 38.144 | KV453239.1 | 5916775 | 23-scf00385 | 23 |
| AX-157744370 | 19 | 38.144 | KV453239.1 | 5918202 | 23-scf00385 | 23 |
| AX-158227965 | 19 | 38.144 | KV453239.1 | 5919031 | 23-scf00385 | 23 |
| AX-158227966 | 19 | 38.144 | KV453239.1 | 5920434 | 23-scf00385 | 23 |
| AX-158227967 | 19 | 38.144 | KV453239.1 | 5921941 | 23-scf00385 | 23 |
| AX-158227968 | 19 | 38.144 | KV453239.1 | 5922940 | 23-scf00385 | 23 |
| AX-158227963 | 19 | 38.203 | KV453239.1 | 5916041 | 23-scf00385 | 23 |
| AX-157749380 | 19 | 38.203 | KV453239.1 | 5923555 | 23-scf00385 | 23 |
| AX-158227974 | 19 | 38.253 | KV453239.1 | 5931766 | 23-scf00385 | 23 |
| AX-158227969 | 19 | 38.363 | KV453239.1 | 5925754 | 23-scf00385 | 23 |
| AX-158227975 | 19 | 38.363 | KV453239.1 | 5935543 | 23-scf00385 | 23 |
| AX-157839934 | 19 | 38.363 | KV453239.1 | 5939494 | 23-scf00385 | 23 |
| AX-158227980 | 19 | 38.363 | KV453239.1 | 5941091 | 23-scf00385 | 23 |
| AX-158227984 | 19 | 38.363 | KV453239.1 | 5942767 | 23-scf00385 | 23 |
| AX-157859511 | 19 | 38.363 | KV453239.1 | 5947733 | 23-scf00385 | 23 |
| AX-158228014 | 19 | 38.363 | KV453239.1 | 5986459 | 23-scf00385 | 23 |
| AX-158227569 | 19 | 38.472 | KV453239.1 | 5315733 | 23-scf00385 | 23 |
| AX-158227780 | 19 | 38.472 | KV453239.1 | 5641374 | 23-scf00385 | 23 |
| AX-158227991 | 19 | 38.472 | KV453239.1 | 5948488 | 23-scf00385 | 23 |

|              |    |        |            |         |             |    |
|--------------|----|--------|------------|---------|-------------|----|
| AX-158227992 | 19 | 38.472 | KV453239.1 | 5948886 | 23-scf00385 | 23 |
| AX-158227994 | 19 | 38.472 | KV453239.1 | 5951371 | 23-scf00385 | 23 |
| AX-158227978 | 19 | 38.691 | KV453239.1 | 5938789 | 23-scf00385 | 23 |
| AX-158227986 | 19 | 38.691 | KV453239.1 | 5943751 | 23-scf00385 | 23 |
| AX-157859510 | 19 | 38.691 | KV453239.1 | 5944089 | 23-scf00385 | 23 |
| AX-158227997 | 19 | 38.691 | KV453239.1 | 5955282 | 23-scf00385 | 23 |
| AX-158227998 | 19 | 38.691 | KV453239.1 | 5957333 | 23-scf00385 | 23 |
| AX-158228003 | 19 | 38.691 | KV453239.1 | 5964007 | 23-scf00385 | 23 |
| AX-158228005 | 19 | 38.691 | KV453239.1 | 5965598 | 23-scf00385 | 23 |
| AX-158228006 | 19 | 38.691 | KV453239.1 | 5966371 | 23-scf00385 | 23 |
| AX-158228007 | 19 | 38.691 | KV453239.1 | 5966992 | 23-scf00385 | 23 |
| AX-157719582 | 19 | 38.691 | KV453239.1 | 5977488 | 23-scf00385 | 23 |
| AX-158228030 | 19 | 38.691 | KV453239.1 | 6001135 | 23-scf00385 | 23 |
| AX-158228000 | 19 | 39.118 | KV453239.1 | 5960503 | 23-scf00385 | 23 |
| AX-158228001 | 19 | 39.118 | KV453239.1 | 5961970 | 23-scf00385 | 23 |
| AX-157887354 | 19 | 39.118 | KV453239.1 | 5995952 | 23-scf00385 | 23 |
| AX-158228050 | 19 | 39.118 | KV453239.1 | 6027526 | 23-scf00385 | 23 |
| AX-158228074 | 19 | 39.118 | KV453239.1 | 6050304 | 23-scf00385 | 23 |
| AX-158228245 | 19 | 39.118 | KV453239.1 | 6240842 | 23-scf00385 | 23 |
| AX-158228342 | 19 | 39.118 | KV453239.1 | 6351008 | 23-scf00385 | 23 |
| AX-158228368 | 19 | 39.118 | KV453239.1 | 6405207 | 23-scf00385 | 23 |
| AX-158415038 | 19 | 39.118 | KV453239.1 | 6461898 | 23-scf00385 | 23 |
| AX-158228028 | 19 | 39.129 | KV453239.1 | 5999724 | 23-scf00385 | 23 |
| AX-158228031 | 19 | 39.129 | KV453239.1 | 6001765 | 23-scf00385 | 23 |
| AX-158228032 | 19 | 39.129 | KV453239.1 | 6003542 | 23-scf00385 | 23 |
| AX-158228033 | 19 | 39.129 | KV453239.1 | 6005157 | 23-scf00385 | 23 |
| AX-158228034 | 19 | 39.129 | KV453239.1 | 6006008 | 23-scf00385 | 23 |
| AX-158228035 | 19 | 39.129 | KV453239.1 | 6006449 | 23-scf00385 | 23 |
| AX-158228037 | 19 | 39.129 | KV453239.1 | 6007756 | 23-scf00385 | 23 |
| AX-158228039 | 19 | 39.129 | KV453239.1 | 6009898 | 23-scf00385 | 23 |
| AX-158228040 | 19 | 39.129 | KV453239.1 | 6010385 | 23-scf00385 | 23 |
| AX-158228046 | 19 | 39.129 | KV453239.1 | 6019410 | 23-scf00385 | 23 |
| AX-158228045 | 19 | 39.293 | KV453239.1 | 6018157 | 23-scf00385 | 23 |
| AX-158228047 | 19 | 39.458 | KV453239.1 | 6021380 | 23-scf00385 | 23 |
| AX-157726465 | 19 | 39.458 | KV453239.1 | 6023202 | 23-scf00385 | 23 |
| AX-158228048 | 19 | 39.458 | KV453239.1 | 6023826 | 23-scf00385 | 23 |
| AX-158228051 | 19 | 39.458 | KV453239.1 | 6027889 | 23-scf00385 | 23 |
| AX-158228057 | 19 | 39.458 | KV453239.1 | 6036367 | 23-scf00385 | 23 |
| AX-158228068 | 19 | 39.458 | KV453239.1 | 6045794 | 23-scf00385 | 23 |
| AX-158228069 | 19 | 39.458 | KV453239.1 | 6046247 | 23-scf00385 | 23 |
| AX-158228072 | 19 | 39.458 | KV453239.1 | 6048264 | 23-scf00385 | 23 |
| AX-157772135 | 19 | 39.704 | KV453239.1 | 6049373 | 23-scf00385 | 23 |
| AX-158228076 | 19 | 39.874 | KV453239.1 | 6053174 | 23-scf00385 | 23 |
| AX-158228079 | 19 | 39.876 | KV453239.1 | 6055493 | 23-scf00385 | 23 |
| AX-158228083 | 19 | 39.878 | KV453239.1 | 6059021 | 23-scf00385 | 23 |
| AX-158228087 | 19 | 39.878 | KV453239.1 | 6063116 | 23-scf00385 | 23 |
| AX-158228088 | 19 | 39.878 | KV453239.1 | 6064510 | 23-scf00385 | 23 |
| AX-158228089 | 19 | 39.878 | KV453239.1 | 6065853 | 23-scf00385 | 23 |
| AX-158228093 | 19 | 40.057 | KV453239.1 | 6068594 | 23-scf00385 | 23 |
| AX-158228099 | 19 | 40.067 | KV453239.1 | 6074820 | 23-scf00385 | 23 |
| AX-157710718 | 19 | 40.077 | KV453239.1 | 6021832 | 23-scf00385 | 23 |

|              |    |        |            |         |             |    |
|--------------|----|--------|------------|---------|-------------|----|
| AX-158228081 | 19 | 40.077 | KV453239.1 | 6056285 | 23-scf00385 | 23 |
| AX-158228094 | 19 | 40.077 | KV453239.1 | 6068976 | 23-scf00385 | 23 |
| AX-158228100 | 19 | 40.077 | KV453239.1 | 6076021 | 23-scf00385 | 23 |
| AX-158228101 | 19 | 40.077 | KV453239.1 | 6077351 | 23-scf00385 | 23 |
| AX-158228103 | 19 | 40.077 | KV453239.1 | 6079737 | 23-scf00385 | 23 |
| AX-158228104 | 19 | 40.077 | KV453239.1 | 6079889 | 23-scf00385 | 23 |
| AX-158228106 | 19 | 40.077 | KV453239.1 | 6082153 | 23-scf00385 | 23 |
| AX-158228112 | 19 | 40.077 | KV453239.1 | 6088869 | 23-scf00385 | 23 |
| AX-158228141 | 19 | 40.077 | KV453239.1 | 6126189 | 23-scf00385 | 23 |
| AX-158228105 | 19 | 40.216 | KV453239.1 | 6081358 | 23-scf00385 | 23 |
| AX-158228121 | 19 | 40.216 | KV453239.1 | 6099751 | 23-scf00385 | 23 |
| AX-158228165 | 19 | 40.216 | KV453239.1 | 6151975 | 23-scf00385 | 23 |
| AX-158228123 | 19 | 40.217 | KV453239.1 | 6105191 | 23-scf00385 | 23 |
| AX-158228126 | 19 | 40.217 | KV453239.1 | 6110283 | 23-scf00385 | 23 |
| AX-158228174 | 19 | 40.217 | KV453239.1 | 6160211 | 23-scf00385 | 23 |
| AX-158228128 | 19 | 40.218 | KV453239.1 | 6111824 | 23-scf00385 | 23 |
| AX-158228129 | 19 | 40.22  | KV453239.1 | 6112271 | 23-scf00385 | 23 |
| AX-158228131 | 19 | 40.22  | KV453239.1 | 6115289 | 23-scf00385 | 23 |
| AX-158228132 | 19 | 40.222 | KV453239.1 | 6116670 | 23-scf00385 | 23 |
| AX-158228133 | 19 | 40.224 | KV453239.1 | 6118635 | 23-scf00385 | 23 |
| AX-157774044 | 19 | 40.224 | KV453239.1 | 6383493 | 23-scf00385 | 23 |
| AX-158227915 | 19 | 40.225 | KV453239.1 | 5849602 | 23-scf00385 | 23 |
| AX-158227928 | 19 | 40.225 | KV453239.1 | 5869557 | 23-scf00385 | 23 |
| AX-157770976 | 19 | 40.225 | KV453239.1 | 6055858 | 23-scf00385 | 23 |
| AX-158228095 | 19 | 40.225 | KV453239.1 | 6070186 | 23-scf00385 | 23 |
| AX-158228111 | 19 | 40.225 | KV453239.1 | 6087342 | 23-scf00385 | 23 |
| AX-158228118 | 19 | 40.225 | KV453239.1 | 6095166 | 23-scf00385 | 23 |
| AX-158228125 | 19 | 40.225 | KV453239.1 | 6107886 | 23-scf00385 | 23 |
| AX-158228134 | 19 | 40.225 | KV453239.1 | 6118997 | 23-scf00385 | 23 |
| AX-158228135 | 19 | 40.225 | KV453239.1 | 6119470 | 23-scf00385 | 23 |
| AX-158228137 | 19 | 40.225 | KV453239.1 | 6120348 | 23-scf00385 | 23 |
| AX-157717200 | 19 | 40.225 | KV453239.1 | 6120838 | 23-scf00385 | 23 |
| AX-157716732 | 19 | 40.225 | KV453239.1 | 6123497 | 23-scf00385 | 23 |
| AX-158228142 | 19 | 40.225 | KV453239.1 | 6127356 | 23-scf00385 | 23 |
| AX-158228144 | 19 | 40.225 | KV453239.1 | 6127891 | 23-scf00385 | 23 |
| AX-158228146 | 19 | 40.225 | KV453239.1 | 6129445 | 23-scf00385 | 23 |
| AX-157774100 | 19 | 40.225 | KV453239.1 | 6132452 | 23-scf00385 | 23 |
| AX-158228148 | 19 | 40.225 | KV453239.1 | 6133132 | 23-scf00385 | 23 |
| AX-157723135 | 19 | 40.225 | KV453239.1 | 6133382 | 23-scf00385 | 23 |
| AX-158228152 | 19 | 40.225 | KV453239.1 | 6137185 | 23-scf00385 | 23 |
| AX-158228155 | 19 | 40.225 | KV453239.1 | 6138445 | 23-scf00385 | 23 |
| AX-158228164 | 19 | 40.225 | KV453239.1 | 6151220 | 23-scf00385 | 23 |
| AX-158228197 | 19 | 40.225 | KV453239.1 | 6184944 | 23-scf00385 | 23 |
| AX-157887360 | 19 | 40.225 | KV453239.1 | 6364533 | 23-scf00385 | 23 |
| AX-158229312 | 19 | 40.225 | KV453239.1 | 7569732 | 23-scf00385 | 23 |
| AX-158229333 | 19 | 40.225 | KV453239.1 | 7650520 | 23-scf00385 | 23 |
| AX-158228154 | 19 | 40.277 | KV453239.1 | 6138232 | 23-scf00385 | 23 |
| AX-158228113 | 19 | 40.335 | KV453239.1 | 6089350 | 23-scf00385 | 23 |
| AX-158228114 | 19 | 40.335 | KV453239.1 | 6090004 | 23-scf00385 | 23 |
| AX-158228170 | 19 | 40.335 | KV453239.1 | 6155529 | 23-scf00385 | 23 |
| AX-158228171 | 19 | 40.335 | KV453239.1 | 6156880 | 23-scf00385 | 23 |

|              |    |        |            |         |             |    |
|--------------|----|--------|------------|---------|-------------|----|
| AX-158228178 | 19 | 40.335 | KV453239.1 | 6162296 | 23-scf00385 | 23 |
| AX-158228179 | 19 | 40.335 | KV453239.1 | 6163980 | 23-scf00385 | 23 |
| AX-158228182 | 19 | 40.335 | KV453239.1 | 6165247 | 23-scf00385 | 23 |
| AX-158228183 | 19 | 40.335 | KV453239.1 | 6166151 | 23-scf00385 | 23 |
| AX-158228184 | 19 | 40.335 | KV453239.1 | 6168032 | 23-scf00385 | 23 |
| AX-158228189 | 19 | 40.335 | KV453239.1 | 6177020 | 23-scf00385 | 23 |
| AX-157887357 | 19 | 40.335 | KV453239.1 | 6184729 | 23-scf00385 | 23 |
| AX-158228215 | 19 | 40.335 | KV453239.1 | 6202205 | 23-scf00385 | 23 |
| AX-158228399 | 19 | 40.335 | KV453239.1 | 6454560 | 23-scf00385 | 23 |
| AX-158228200 | 19 | 40.373 | KV453239.1 | 6186227 | 23-scf00385 | 23 |
| AX-157839935 | 19 | 40.411 | KV453239.1 | 6162792 | 23-scf00385 | 23 |
| AX-158228201 | 19 | 40.411 | KV453239.1 | 6188075 | 23-scf00385 | 23 |
| AX-158228180 | 19 | 40.444 | KV453239.1 | 6164520 | 23-scf00385 | 23 |
| AX-158228203 | 19 | 40.444 | KV453239.1 | 6190175 | 23-scf00385 | 23 |
| AX-158228205 | 19 | 40.444 | KV453239.1 | 6191858 | 23-scf00385 | 23 |
| AX-158228206 | 19 | 40.444 | KV453239.1 | 6192815 | 23-scf00385 | 23 |
| AX-158228209 | 19 | 40.444 | KV453239.1 | 6196962 | 23-scf00385 | 23 |
| AX-158228214 | 19 | 40.444 | KV453239.1 | 6200917 | 23-scf00385 | 23 |
| AX-158228010 | 19 | 40.445 | KV453239.1 | 5975728 | 23-scf00385 | 23 |
| AX-158228011 | 19 | 40.445 | KV453239.1 | 5979686 | 23-scf00385 | 23 |
| AX-158228012 | 19 | 40.445 | KV453239.1 | 5981471 | 23-scf00385 | 23 |
| AX-158228019 | 19 | 40.445 | KV453239.1 | 5991273 | 23-scf00385 | 23 |
| AX-158228070 | 19 | 40.445 | KV453239.1 | 6046624 | 23-scf00385 | 23 |
| AX-158228196 | 19 | 40.445 | KV453239.1 | 6183397 | 23-scf00385 | 23 |
| AX-158228207 | 19 | 40.445 | KV453239.1 | 6193238 | 23-scf00385 | 23 |
| AX-158228208 | 19 | 40.445 | KV453239.1 | 6196450 | 23-scf00385 | 23 |
| AX-158228211 | 19 | 40.445 | KV453239.1 | 6198976 | 23-scf00385 | 23 |
| AX-157839941 | 19 | 40.445 | KV453239.1 | 6239285 | 23-scf00385 | 23 |
| AX-158228259 | 19 | 40.445 | KV453239.1 | 6255891 | 23-scf00385 | 23 |
| AX-158228346 | 19 | 40.445 | KV453239.1 | 6360444 | 23-scf00385 | 23 |
| AX-158228221 | 19 | 40.771 | KV453239.1 | 6214257 | 23-scf00385 | 23 |
| AX-158228225 | 19 | 40.771 | KV453239.1 | 6216650 | 23-scf00385 | 23 |
| AX-158228226 | 19 | 40.771 | KV453239.1 | 6217218 | 23-scf00385 | 23 |
| AX-158228227 | 19 | 40.772 | KV453239.1 | 6218504 | 23-scf00385 | 23 |
| AX-158228234 | 19 | 40.772 | KV453239.1 | 6229024 | 23-scf00385 | 23 |
| AX-158228235 | 19 | 40.772 | KV453239.1 | 6229398 | 23-scf00385 | 23 |
| AX-158228261 | 19 | 40.772 | KV453239.1 | 6256665 | 23-scf00385 | 23 |
| AX-158228238 | 19 | 40.789 | KV453239.1 | 6231167 | 23-scf00385 | 23 |
| AX-157755469 | 19 | 40.803 | KV453239.1 | 6238725 | 23-scf00385 | 23 |
| AX-157693659 | 19 | 40.818 | KV453239.1 | 6240377 | 23-scf00385 | 23 |
| AX-158228177 | 19 | 40.822 | KV453239.1 | 6162068 | 23-scf00385 | 23 |
| AX-158228199 | 19 | 40.822 | KV453239.1 | 6185808 | 23-scf00385 | 23 |
| AX-158228242 | 19 | 40.822 | KV453239.1 | 6236547 | 23-scf00385 | 23 |
| AX-158228244 | 19 | 40.822 | KV453239.1 | 6238126 | 23-scf00385 | 23 |
| AX-158228246 | 19 | 40.822 | KV453239.1 | 6241648 | 23-scf00385 | 23 |
| AX-158228247 | 19 | 40.822 | KV453239.1 | 6242125 | 23-scf00385 | 23 |
| AX-158228262 | 19 | 40.822 | KV453239.1 | 6257279 | 23-scf00385 | 23 |
| AX-158228306 | 19 | 40.822 | KV453239.1 | 6294209 | 23-scf00385 | 23 |
| AX-157867146 | 19 | 40.822 | KV453239.1 | 6323750 | 23-scf00385 | 23 |
| AX-158228419 | 19 | 40.822 | KV453239.1 | 6488553 | 23-scf00385 | 23 |
| AX-158228431 | 19 | 40.822 | KV453239.1 | 6503199 | 23-scf00385 | 23 |

|              |    |        |            |         |             |    |
|--------------|----|--------|------------|---------|-------------|----|
| AX-157721820 | 19 | 40.822 | KV453239.1 | 6543649 | 23-scf00385 | 23 |
| AX-158228248 | 19 | 40.851 | KV453239.1 | 6243404 | 23-scf00385 | 23 |
| AX-158228256 | 19 | 40.862 | KV453239.1 | 6251872 | 23-scf00385 | 23 |
| AX-158228219 | 19 | 40.881 | KV453239.1 | 6210998 | 23-scf00385 | 23 |
| AX-158228233 | 19 | 40.881 | KV453239.1 | 6225817 | 23-scf00385 | 23 |
| AX-158228260 | 19 | 40.881 | KV453239.1 | 6256276 | 23-scf00385 | 23 |
| AX-158228263 | 19 | 40.881 | KV453239.1 | 6257585 | 23-scf00385 | 23 |
| AX-157839945 | 19 | 40.881 | KV453239.1 | 6339782 | 23-scf00385 | 23 |
| AX-157839955 | 19 | 40.881 | KV453239.1 | 6428853 | 23-scf00385 | 23 |
| AX-158228389 | 19 | 40.881 | KV453239.1 | 6434685 | 23-scf00385 | 23 |
| AX-158228467 | 19 | 40.881 | KV453239.1 | 6542237 | 23-scf00385 | 23 |
| AX-158228269 | 19 | 40.935 | KV453239.1 | 6264821 | 23-scf00385 | 23 |
| AX-158228065 | 19 | 40.99  | KV453239.1 | 6042210 | 23-scf00385 | 23 |
| AX-158228098 | 19 | 40.99  | KV453239.1 | 6074395 | 23-scf00385 | 23 |
| AX-158228159 | 19 | 40.99  | KV453239.1 | 6144646 | 23-scf00385 | 23 |
| AX-158228210 | 19 | 40.99  | KV453239.1 | 6198119 | 23-scf00385 | 23 |
| AX-157839939 | 19 | 40.99  | KV453239.1 | 6222550 | 23-scf00385 | 23 |
| AX-157726720 | 19 | 40.99  | KV453239.1 | 6225038 | 23-scf00385 | 23 |
| AX-158228243 | 19 | 40.99  | KV453239.1 | 6237771 | 23-scf00385 | 23 |
| AX-158228252 | 19 | 40.99  | KV453239.1 | 6247076 | 23-scf00385 | 23 |
| AX-158228253 | 19 | 40.99  | KV453239.1 | 6249505 | 23-scf00385 | 23 |
| AX-158228268 | 19 | 40.99  | KV453239.1 | 6264584 | 23-scf00385 | 23 |
| AX-158228270 | 19 | 40.99  | KV453239.1 | 6265452 | 23-scf00385 | 23 |
| AX-158228272 | 19 | 40.99  | KV453239.1 | 6266575 | 23-scf00385 | 23 |
| AX-158228273 | 19 | 40.99  | KV453239.1 | 6266804 | 23-scf00385 | 23 |
| AX-158228274 | 19 | 40.99  | KV453239.1 | 6268005 | 23-scf00385 | 23 |
| AX-158228275 | 19 | 40.99  | KV453239.1 | 6268275 | 23-scf00385 | 23 |
| AX-158228276 | 19 | 40.99  | KV453239.1 | 6269107 | 23-scf00385 | 23 |
| AX-158228277 | 19 | 40.99  | KV453239.1 | 6271067 | 23-scf00385 | 23 |
| AX-158228278 | 19 | 40.99  | KV453239.1 | 6271580 | 23-scf00385 | 23 |
| AX-158228284 | 19 | 40.99  | KV453239.1 | 6275759 | 23-scf00385 | 23 |
| AX-158228285 | 19 | 40.99  | KV453239.1 | 6276280 | 23-scf00385 | 23 |
| AX-158228287 | 19 | 40.99  | KV453239.1 | 6278063 | 23-scf00385 | 23 |
| AX-158228288 | 19 | 40.99  | KV453239.1 | 6278311 | 23-scf00385 | 23 |
| AX-158228291 | 19 | 40.99  | KV453239.1 | 6281266 | 23-scf00385 | 23 |
| AX-158228294 | 19 | 40.99  | KV453239.1 | 6283362 | 23-scf00385 | 23 |
| AX-158228296 | 19 | 40.99  | KV453239.1 | 6285888 | 23-scf00385 | 23 |
| AX-158228297 | 19 | 40.99  | KV453239.1 | 6286158 | 23-scf00385 | 23 |
| AX-158228298 | 19 | 40.99  | KV453239.1 | 6286705 | 23-scf00385 | 23 |
| AX-158228299 | 19 | 40.99  | KV453239.1 | 6287335 | 23-scf00385 | 23 |
| AX-158228304 | 19 | 40.99  | KV453239.1 | 6291925 | 23-scf00385 | 23 |
| AX-158228309 | 19 | 40.99  | KV453239.1 | 6299445 | 23-scf00385 | 23 |
| AX-157751208 | 19 | 40.99  | KV453239.1 | 6299855 | 23-scf00385 | 23 |
| AX-157745318 | 19 | 40.99  | KV453239.1 | 6300440 | 23-scf00385 | 23 |
| AX-158228313 | 19 | 40.99  | KV453239.1 | 6305058 | 23-scf00385 | 23 |
| AX-158228315 | 19 | 40.99  | KV453239.1 | 6307385 | 23-scf00385 | 23 |
| AX-158228316 | 19 | 40.99  | KV453239.1 | 6308191 | 23-scf00385 | 23 |
| AX-158228318 | 19 | 40.99  | KV453239.1 | 6309338 | 23-scf00385 | 23 |
| AX-158228321 | 19 | 40.99  | KV453239.1 | 6312950 | 23-scf00385 | 23 |
| AX-158228322 | 19 | 40.99  | KV453239.1 | 6314061 | 23-scf00385 | 23 |
| AX-157839943 | 19 | 40.99  | KV453239.1 | 6318933 | 23-scf00385 | 23 |

|              |    |        |            |         |             |    |
|--------------|----|--------|------------|---------|-------------|----|
| AX-158228325 | 19 | 40.99  | KV453239.1 | 6322924 | 23-scf00385 | 23 |
| AX-158228330 | 19 | 40.99  | KV453239.1 | 6334706 | 23-scf00385 | 23 |
| AX-158228332 | 19 | 40.99  | KV453239.1 | 6335514 | 23-scf00385 | 23 |
| AX-158228333 | 19 | 40.99  | KV453239.1 | 6337846 | 23-scf00385 | 23 |
| AX-157839947 | 19 | 40.99  | KV453239.1 | 6343816 | 23-scf00385 | 23 |
| AX-158228338 | 19 | 40.99  | KV453239.1 | 6345835 | 23-scf00385 | 23 |
| AX-157747060 | 19 | 40.99  | KV453239.1 | 6345932 | 23-scf00385 | 23 |
| AX-158228339 | 19 | 40.99  | KV453239.1 | 6346329 | 23-scf00385 | 23 |
| AX-157839949 | 19 | 40.99  | KV453239.1 | 6351452 | 23-scf00385 | 23 |
| AX-157751578 | 19 | 40.99  | KV453239.1 | 6352883 | 23-scf00385 | 23 |
| AX-158228343 | 19 | 40.99  | KV453239.1 | 6353211 | 23-scf00385 | 23 |
| AX-158228344 | 19 | 40.99  | KV453239.1 | 6355077 | 23-scf00385 | 23 |
| AX-158228349 | 19 | 40.99  | KV453239.1 | 6369195 | 23-scf00385 | 23 |
| AX-158228356 | 19 | 40.99  | KV453239.1 | 6374553 | 23-scf00385 | 23 |
| AX-158228357 | 19 | 40.99  | KV453239.1 | 6375571 | 23-scf00385 | 23 |
| AX-158228358 | 19 | 40.99  | KV453239.1 | 6375756 | 23-scf00385 | 23 |
| AX-158228359 | 19 | 40.99  | KV453239.1 | 6379088 | 23-scf00385 | 23 |
| AX-158228362 | 19 | 40.99  | KV453239.1 | 6383406 | 23-scf00385 | 23 |
| AX-158228363 | 19 | 40.99  | KV453239.1 | 6388552 | 23-scf00385 | 23 |
| AX-158380884 | 19 | 40.99  | KV453239.1 | 6390230 | 23-scf00385 | 23 |
| AX-157839952 | 19 | 40.99  | KV453239.1 | 6408863 | 23-scf00385 | 23 |
| AX-158228420 | 19 | 40.99  | KV453239.1 | 6489132 | 23-scf00385 | 23 |
| AX-158228479 | 19 | 40.99  | KV453239.1 | 6558263 | 23-scf00385 | 23 |
| AX-158228481 | 19 | 40.99  | KV453239.1 | 6559324 | 23-scf00385 | 23 |
| AX-158228484 | 19 | 40.99  | KV453239.1 | 6560329 | 23-scf00385 | 23 |
| AX-158228570 | 19 | 40.99  | KV453239.1 | 6642559 | 23-scf00385 | 23 |
| AX-158228571 | 19 | 40.99  | KV453239.1 | 6643671 | 23-scf00385 | 23 |
| AX-158228572 | 19 | 40.99  | KV453239.1 | 6644679 | 23-scf00385 | 23 |
| AX-158228577 | 19 | 40.99  | KV453239.1 | 6648924 | 23-scf00385 | 23 |
| AX-157754940 | 19 | 40.99  | KV453239.1 | 6663749 | 23-scf00385 | 23 |
| AX-158228589 | 19 | 40.99  | KV453239.1 | 6664331 | 23-scf00385 | 23 |
| AX-158228596 | 19 | 40.99  | KV453239.1 | 6671178 | 23-scf00385 | 23 |
| AX-158228605 | 19 | 40.99  | KV453239.1 | 6684490 | 23-scf00385 | 23 |
| AX-158228606 | 19 | 40.99  | KV453239.1 | 6685269 | 23-scf00385 | 23 |
| AX-158228613 | 19 | 40.99  | KV453239.1 | 6692808 | 23-scf00385 | 23 |
| AX-157747105 | 19 | 41.027 | KV453239.1 | 6340515 | 23-scf00385 | 23 |
| AX-158228336 | 19 | 41.027 | KV453239.1 | 6342911 | 23-scf00385 | 23 |
| AX-157745993 | 19 | 41.027 | KV453239.1 | 6380828 | 23-scf00385 | 23 |
| AX-157839951 | 19 | 41.068 | KV453239.1 | 6408020 | 23-scf00385 | 23 |
| AX-157839938 | 19 | 41.1   | KV453239.1 | 6217918 | 23-scf00385 | 23 |
| AX-158228279 | 19 | 41.1   | KV453239.1 | 6272403 | 23-scf00385 | 23 |
| AX-158228280 | 19 | 41.1   | KV453239.1 | 6274080 | 23-scf00385 | 23 |
| AX-158228286 | 19 | 41.1   | KV453239.1 | 6277706 | 23-scf00385 | 23 |
| AX-158228293 | 19 | 41.1   | KV453239.1 | 6282962 | 23-scf00385 | 23 |
| AX-158228314 | 19 | 41.1   | KV453239.1 | 6305980 | 23-scf00385 | 23 |
| AX-158228323 | 19 | 41.1   | KV453239.1 | 6315202 | 23-scf00385 | 23 |
| AX-158228324 | 19 | 41.1   | KV453239.1 | 6322258 | 23-scf00385 | 23 |
| AX-158228337 | 19 | 41.1   | KV453239.1 | 6344200 | 23-scf00385 | 23 |
| AX-158228366 | 19 | 41.1   | KV453239.1 | 6396271 | 23-scf00385 | 23 |
| AX-157708530 | 19 | 41.1   | KV453239.1 | 6411299 | 23-scf00385 | 23 |
| AX-158228373 | 19 | 41.1   | KV453239.1 | 6420243 | 23-scf00385 | 23 |



|              |    |        |            |         |             |    |
|--------------|----|--------|------------|---------|-------------|----|
| AX-158228375 | 19 | 41.1   | KV453239.1 | 6421770 | 23-scf00385 | 23 |
| AX-158228376 | 19 | 41.1   | KV453239.1 | 6422873 | 23-scf00385 | 23 |
| AX-158228377 | 19 | 41.1   | KV453239.1 | 6423355 | 23-scf00385 | 23 |
| AX-158228378 | 19 | 41.1   | KV453239.1 | 6424199 | 23-scf00385 | 23 |
| AX-158228380 | 19 | 41.1   | KV453239.1 | 6425199 | 23-scf00385 | 23 |
| AX-158228382 | 19 | 41.1   | KV453239.1 | 6427285 | 23-scf00385 | 23 |
| AX-158228383 | 19 | 41.1   | KV453239.1 | 6428005 | 23-scf00385 | 23 |
| AX-157839954 | 19 | 41.1   | KV453239.1 | 6428650 | 23-scf00385 | 23 |
| AX-158228387 | 19 | 41.1   | KV453239.1 | 6431790 | 23-scf00385 | 23 |
| AX-158228390 | 19 | 41.1   | KV453239.1 | 6435304 | 23-scf00385 | 23 |
| AX-158228392 | 19 | 41.1   | KV453239.1 | 6439157 | 23-scf00385 | 23 |
| AX-158228393 | 19 | 41.1   | KV453239.1 | 6440013 | 23-scf00385 | 23 |
| AX-158415037 | 19 | 41.1   | KV453239.1 | 6441973 | 23-scf00385 | 23 |
| AX-158228395 | 19 | 41.1   | KV453239.1 | 6442514 | 23-scf00385 | 23 |
| AX-158228396 | 19 | 41.1   | KV453239.1 | 6443050 | 23-scf00385 | 23 |
| AX-158228398 | 19 | 41.1   | KV453239.1 | 6445777 | 23-scf00385 | 23 |
| AX-157839957 | 19 | 41.1   | KV453239.1 | 6446023 | 23-scf00385 | 23 |
| AX-157839958 | 19 | 41.1   | KV453239.1 | 6471116 | 23-scf00385 | 23 |
| AX-158228403 | 19 | 41.1   | KV453239.1 | 6471666 | 23-scf00385 | 23 |
| AX-158228404 | 19 | 41.1   | KV453239.1 | 6474168 | 23-scf00385 | 23 |
| AX-158228405 | 19 | 41.1   | KV453239.1 | 6475232 | 23-scf00385 | 23 |
| AX-158228411 | 19 | 41.1   | KV453239.1 | 6482883 | 23-scf00385 | 23 |
| AX-158228416 | 19 | 41.1   | KV453239.1 | 6486210 | 23-scf00385 | 23 |
| AX-158228418 | 19 | 41.1   | KV453239.1 | 6487495 | 23-scf00385 | 23 |
| AX-157720176 | 19 | 41.1   | KV453239.1 | 6493413 | 23-scf00385 | 23 |
| AX-158228425 | 19 | 41.1   | KV453239.1 | 6494629 | 23-scf00385 | 23 |
| AX-157710819 | 19 | 41.151 | KV453239.1 | 6474460 | 23-scf00385 | 23 |
| AX-158228410 | 19 | 41.24  | KV453239.1 | 6481325 | 23-scf00385 | 23 |
| AX-158228417 | 19 | 41.24  | KV453239.1 | 6486801 | 23-scf00385 | 23 |
| AX-157748975 | 19 | 41.24  | KV453239.1 | 6490353 | 23-scf00385 | 23 |
| AX-158228468 | 19 | 41.24  | KV453239.1 | 6544055 | 23-scf00385 | 23 |
| AX-158228504 | 19 | 41.24  | KV453239.1 | 6576148 | 23-scf00385 | 23 |
| AX-158228421 | 19 | 41.315 | KV453239.1 | 6489358 | 23-scf00385 | 23 |
| AX-158228422 | 19 | 41.326 | KV453239.1 | 6489859 | 23-scf00385 | 23 |
| AX-158228447 | 19 | 41.344 | KV453239.1 | 6521238 | 23-scf00385 | 23 |
| AX-158228463 | 19 | 41.37  | KV453239.1 | 6537679 | 23-scf00385 | 23 |
| AX-158228258 | 19 | 41.378 | KV453239.1 | 6255047 | 23-scf00385 | 23 |
| AX-158228271 | 19 | 41.378 | KV453239.1 | 6266307 | 23-scf00385 | 23 |
| AX-157714496 | 19 | 41.378 | KV453239.1 | 6300051 | 23-scf00385 | 23 |
| AX-158228311 | 19 | 41.378 | KV453239.1 | 6303173 | 23-scf00385 | 23 |
| AX-158228371 | 19 | 41.378 | KV453239.1 | 6418033 | 23-scf00385 | 23 |
| AX-157742630 | 19 | 41.378 | KV453239.1 | 6540929 | 23-scf00385 | 23 |
| AX-158228520 | 19 | 41.378 | KV453239.1 | 6595914 | 23-scf00385 | 23 |
| AX-158228543 | 19 | 41.378 | KV453239.1 | 6614534 | 23-scf00385 | 23 |
| AX-158228545 | 19 | 41.378 | KV453239.1 | 6616768 | 23-scf00385 | 23 |
| AX-158228556 | 19 | 41.378 | KV453239.1 | 6629338 | 23-scf00385 | 23 |
| AX-158228558 | 19 | 41.378 | KV453239.1 | 6631666 | 23-scf00385 | 23 |
| AX-158228302 | 19 | 41.399 | KV453239.1 | 6290667 | 23-scf00385 | 23 |
| AX-158228354 | 19 | 41.399 | KV453239.1 | 6371614 | 23-scf00385 | 23 |
| AX-158228563 | 19 | 41.399 | KV453239.1 | 6636611 | 23-scf00385 | 23 |
| AX-158228564 | 19 | 41.399 | KV453239.1 | 6637474 | 23-scf00385 | 23 |

|              |    |        |            |         |             |    |
|--------------|----|--------|------------|---------|-------------|----|
| AX-158228566 | 19 | 41.399 | KV453239.1 | 6638405 | 23-scf00385 | 23 |
| AX-158228569 | 19 | 41.399 | KV453239.1 | 6640896 | 23-scf00385 | 23 |
| AX-158228574 | 19 | 41.399 | KV453239.1 | 6646098 | 23-scf00385 | 23 |
| AX-158228576 | 19 | 41.399 | KV453239.1 | 6647555 | 23-scf00385 | 23 |
| AX-158228567 | 19 | 41.41  | KV453239.1 | 6638968 | 23-scf00385 | 23 |
| AX-158228300 | 19 | 41.432 | KV453239.1 | 6288177 | 23-scf00385 | 23 |
| AX-158228305 | 19 | 41.432 | KV453239.1 | 6293603 | 23-scf00385 | 23 |
| AX-158228351 | 19 | 41.432 | KV453239.1 | 6369840 | 23-scf00385 | 23 |
| AX-157859515 | 19 | 41.432 | KV453239.1 | 6399086 | 23-scf00385 | 23 |
| AX-158228491 | 19 | 41.432 | KV453239.1 | 6565532 | 23-scf00385 | 23 |
| AX-158228496 | 19 | 41.432 | KV453239.1 | 6568787 | 23-scf00385 | 23 |
| AX-158228497 | 19 | 41.432 | KV453239.1 | 6569800 | 23-scf00385 | 23 |
| AX-158228499 | 19 | 41.432 | KV453239.1 | 6571361 | 23-scf00385 | 23 |
| AX-158228506 | 19 | 41.432 | KV453239.1 | 6579680 | 23-scf00385 | 23 |
| AX-158228575 | 19 | 41.432 | KV453239.1 | 6646666 | 23-scf00385 | 23 |
| AX-158228525 | 19 | 41.512 | KV453239.1 | 6599424 | 23-scf00385 | 23 |
| AX-158228585 | 19 | 41.512 | KV453239.1 | 6660369 | 23-scf00385 | 23 |
| AX-158228587 | 19 | 41.512 | KV453239.1 | 6662174 | 23-scf00385 | 23 |
| AX-158228593 | 19 | 41.512 | KV453239.1 | 6668141 | 23-scf00385 | 23 |
| AX-158228600 | 19 | 41.512 | KV453239.1 | 6673968 | 23-scf00385 | 23 |
| AX-158228608 | 19 | 41.512 | KV453239.1 | 6687046 | 23-scf00385 | 23 |
| AX-158228617 | 19 | 41.512 | KV453239.1 | 6696790 | 23-scf00385 | 23 |
| AX-158228620 | 19 | 41.512 | KV453239.1 | 6699652 | 23-scf00385 | 23 |
| AX-158228643 | 19 | 41.555 | KV453239.1 | 6721094 | 23-scf00385 | 23 |
| AX-158228550 | 19 | 41.595 | KV453239.1 | 6623382 | 23-scf00385 | 23 |
| AX-158228553 | 19 | 41.595 | KV453239.1 | 6627825 | 23-scf00385 | 23 |
| AX-158228554 | 19 | 41.595 | KV453239.1 | 6628465 | 23-scf00385 | 23 |
| AX-157771083 | 19 | 41.595 | KV453239.1 | 6630668 | 23-scf00385 | 23 |
| AX-157700638 | 19 | 41.595 | KV453239.1 | 6691695 | 23-scf00385 | 23 |
| AX-158228632 | 19 | 41.595 | KV453239.1 | 6712357 | 23-scf00385 | 23 |
| AX-158228648 | 19 | 41.595 | KV453239.1 | 6728448 | 23-scf00385 | 23 |
| AX-157740431 | 19 | 41.595 | KV453239.1 | 6874977 | 23-scf00385 | 23 |
| AX-158228557 | 19 | 41.646 | KV453239.1 | 6629793 | 23-scf00385 | 23 |
| AX-158228644 | 19 | 41.646 | KV453239.1 | 6722413 | 23-scf00385 | 23 |
| AX-158228660 | 19 | 41.646 | KV453239.1 | 6740101 | 23-scf00385 | 23 |
| AX-158228668 | 19 | 41.646 | KV453239.1 | 6746921 | 23-scf00385 | 23 |
| AX-158228675 | 19 | 41.646 | KV453239.1 | 6755359 | 23-scf00385 | 23 |
| AX-158228678 | 19 | 41.646 | KV453239.1 | 6757656 | 23-scf00385 | 23 |
| AX-158228696 | 19 | 41.646 | KV453239.1 | 6772689 | 23-scf00385 | 23 |
| AX-158228729 | 19 | 41.646 | KV453239.1 | 6807445 | 23-scf00385 | 23 |
| AX-158228736 | 19 | 41.646 | KV453239.1 | 6814328 | 23-scf00385 | 23 |
| AX-158228778 | 19 | 41.646 | KV453239.1 | 6854500 | 23-scf00385 | 23 |
| AX-158228823 | 19 | 41.646 | KV453239.1 | 6895764 | 23-scf00385 | 23 |
| AX-158228828 | 19 | 41.646 | KV453239.1 | 6899527 | 23-scf00385 | 23 |
| AX-158228829 | 19 | 41.646 | KV453239.1 | 6900128 | 23-scf00385 | 23 |
| AX-157887385 | 19 | 41.646 | KV453239.1 | 6900231 | 23-scf00385 | 23 |
| AX-158228830 | 19 | 41.646 | KV453239.1 | 6900883 | 23-scf00385 | 23 |
| AX-158228831 | 19 | 41.646 | KV453239.1 | 6901322 | 23-scf00385 | 23 |
| AX-158228839 | 19 | 41.646 | KV453239.1 | 6907277 | 23-scf00385 | 23 |
| AX-158228841 | 19 | 41.646 | KV453239.1 | 6910022 | 23-scf00385 | 23 |
| AX-158228845 | 19 | 41.646 | KV453239.1 | 6914010 | 23-scf00385 | 23 |

|              |    |        |            |         |             |    |
|--------------|----|--------|------------|---------|-------------|----|
| AX-157839966 | 19 | 41.646 | KV453239.1 | 6918575 | 23-scf00385 | 23 |
| AX-158228848 | 19 | 41.646 | KV453239.1 | 6919010 | 23-scf00385 | 23 |
| AX-158228849 | 19 | 41.646 | KV453239.1 | 6920678 | 23-scf00385 | 23 |
| AX-158228850 | 19 | 41.646 | KV453239.1 | 6921419 | 23-scf00385 | 23 |
| AX-158228861 | 19 | 41.646 | KV453239.1 | 6936399 | 23-scf00385 | 23 |
| AX-158228862 | 19 | 41.646 | KV453239.1 | 6938455 | 23-scf00385 | 23 |
| AX-158228893 | 19 | 41.646 | KV453239.1 | 6979855 | 23-scf00385 | 23 |
| AX-158228898 | 19 | 41.646 | KV453239.1 | 6985436 | 23-scf00385 | 23 |
| AX-158228901 | 19 | 41.646 | KV453239.1 | 6987827 | 23-scf00385 | 23 |
| AX-158228905 | 19 | 41.646 | KV453239.1 | 6992935 | 23-scf00385 | 23 |
| AX-158228923 | 19 | 41.646 | KV453239.1 | 7016556 | 23-scf00385 | 23 |
| AX-158228924 | 19 | 41.646 | KV453239.1 | 7019473 | 23-scf00385 | 23 |
| AX-158228926 | 19 | 41.646 | KV453239.1 | 7020211 | 23-scf00385 | 23 |
| AX-158228927 | 19 | 41.646 | KV453239.1 | 7020885 | 23-scf00385 | 23 |
| AX-157751878 | 19 | 41.646 | KV453239.1 | 7022392 | 23-scf00385 | 23 |
| AX-158228929 | 19 | 41.646 | KV453239.1 | 7023038 | 23-scf00385 | 23 |
| AX-158228930 | 19 | 41.646 | KV453239.1 | 7023433 | 23-scf00385 | 23 |
| AX-158228931 | 19 | 41.646 | KV453239.1 | 7023892 | 23-scf00385 | 23 |
| AX-158228934 | 19 | 41.646 | KV453239.1 | 7026784 | 23-scf00385 | 23 |
| AX-157772165 | 19 | 41.646 | KV453239.1 | 7028319 | 23-scf00385 | 23 |
| AX-158228942 | 19 | 41.646 | KV453239.1 | 7039482 | 23-scf00385 | 23 |
| AX-158228944 | 19 | 41.646 | KV453239.1 | 7040982 | 23-scf00385 | 23 |
| AX-158228945 | 19 | 41.646 | KV453239.1 | 7041810 | 23-scf00385 | 23 |
| AX-158228950 | 19 | 41.646 | KV453239.1 | 7047016 | 23-scf00385 | 23 |
| AX-157693993 | 19 | 41.646 | KV453239.1 | 7048994 | 23-scf00385 | 23 |
| AX-158228956 | 19 | 41.646 | KV453239.1 | 7052665 | 23-scf00385 | 23 |
| AX-157839978 | 19 | 41.646 | KV453239.1 | 7054647 | 23-scf00385 | 23 |
| AX-158228958 | 19 | 41.646 | KV453239.1 | 7054755 | 23-scf00385 | 23 |
| AX-157839979 | 19 | 41.646 | KV453239.1 | 7057204 | 23-scf00385 | 23 |
| AX-158228962 | 19 | 41.646 | KV453239.1 | 7061586 | 23-scf00385 | 23 |
| AX-158228963 | 19 | 41.646 | KV453239.1 | 7062503 | 23-scf00385 | 23 |
| AX-158228964 | 19 | 41.646 | KV453239.1 | 7063263 | 23-scf00385 | 23 |
| AX-158228968 | 19 | 41.646 | KV453239.1 | 7067026 | 23-scf00385 | 23 |
| AX-158228969 | 19 | 41.646 | KV453239.1 | 7067134 | 23-scf00385 | 23 |
| AX-158228970 | 19 | 41.646 | KV453239.1 | 7067920 | 23-scf00385 | 23 |
| AX-157752140 | 19 | 41.646 | KV453239.1 | 7132263 | 23-scf00385 | 23 |
| AX-158229117 | 19 | 41.646 | KV453239.1 | 7268888 | 23-scf00385 | 23 |
| AX-158229195 | 19 | 41.646 | KV453239.1 | 7389392 | 23-scf00385 | 23 |
| AX-158228972 | 19 | 41.664 | KV453239.1 | 7069539 | 23-scf00385 | 23 |
| AX-158228981 | 19 | 41.682 | KV453239.1 | 7082599 | 23-scf00385 | 23 |
| AX-158228983 | 19 | 41.703 | KV453239.1 | 7083990 | 23-scf00385 | 23 |
| AX-158228984 | 19 | 41.721 | KV453239.1 | 7084770 | 23-scf00385 | 23 |
| AX-158228985 | 19 | 41.739 | KV453239.1 | 7085044 | 23-scf00385 | 23 |
| AX-158228264 | 19 | 41.755 | KV453239.1 | 6258701 | 23-scf00385 | 23 |
| AX-158228672 | 19 | 41.755 | KV453239.1 | 6751709 | 23-scf00385 | 23 |
| AX-158228677 | 19 | 41.755 | KV453239.1 | 6757183 | 23-scf00385 | 23 |
| AX-158228679 | 19 | 41.755 | KV453239.1 | 6758368 | 23-scf00385 | 23 |
| AX-158228686 | 19 | 41.755 | KV453239.1 | 6762573 | 23-scf00385 | 23 |
| AX-158228694 | 19 | 41.755 | KV453239.1 | 6769931 | 23-scf00385 | 23 |
| AX-158228987 | 19 | 41.755 | KV453239.1 | 7087156 | 23-scf00385 | 23 |
| AX-158228988 | 19 | 41.755 | KV453239.1 | 7087632 | 23-scf00385 | 23 |

|              |    |        |            |         |             |    |
|--------------|----|--------|------------|---------|-------------|----|
| AX-158228989 | 19 | 41.755 | KV453239.1 | 7088369 | 23-scf00385 | 23 |
| AX-158228993 | 19 | 41.755 | KV453239.1 | 7092763 | 23-scf00385 | 23 |
| AX-158228994 | 19 | 41.755 | KV453239.1 | 7093656 | 23-scf00385 | 23 |
| AX-158228995 | 19 | 41.755 | KV453239.1 | 7095375 | 23-scf00385 | 23 |
| AX-158229000 | 19 | 41.755 | KV453239.1 | 7097122 | 23-scf00385 | 23 |
| AX-158229002 | 19 | 41.755 | KV453239.1 | 7097902 | 23-scf00385 | 23 |
| AX-158229003 | 19 | 41.755 | KV453239.1 | 7099259 | 23-scf00385 | 23 |
| AX-158229004 | 19 | 41.755 | KV453239.1 | 7100023 | 23-scf00385 | 23 |
| AX-158229007 | 19 | 41.755 | KV453239.1 | 7101769 | 23-scf00385 | 23 |
| AX-158229008 | 19 | 41.755 | KV453239.1 | 7102910 | 23-scf00385 | 23 |
| AX-158229010 | 19 | 41.755 | KV453239.1 | 7104736 | 23-scf00385 | 23 |
| AX-158229011 | 19 | 41.755 | KV453239.1 | 7105278 | 23-scf00385 | 23 |
| AX-158229012 | 19 | 41.755 | KV453239.1 | 7106210 | 23-scf00385 | 23 |
| AX-158229013 | 19 | 41.755 | KV453239.1 | 7107011 | 23-scf00385 | 23 |
| AX-158229026 | 19 | 41.755 | KV453239.1 | 7127662 | 23-scf00385 | 23 |
| AX-158229028 | 19 | 41.755 | KV453239.1 | 7129617 | 23-scf00385 | 23 |
| AX-158229029 | 19 | 41.755 | KV453239.1 | 7130372 | 23-scf00385 | 23 |
| AX-158229036 | 19 | 41.755 | KV453239.1 | 7143788 | 23-scf00385 | 23 |
| AX-158229038 | 19 | 41.755 | KV453239.1 | 7147582 | 23-scf00385 | 23 |
| AX-158229044 | 19 | 41.755 | KV453239.1 | 7156282 | 23-scf00385 | 23 |
| AX-158229046 | 19 | 41.755 | KV453239.1 | 7158777 | 23-scf00385 | 23 |
| AX-158229047 | 19 | 41.755 | KV453239.1 | 7160066 | 23-scf00385 | 23 |
| AX-157839987 | 19 | 41.755 | KV453239.1 | 7161842 | 23-scf00385 | 23 |
| AX-157839990 | 19 | 41.755 | KV453239.1 | 7163369 | 23-scf00385 | 23 |
| AX-158229049 | 19 | 41.755 | KV453239.1 | 7165362 | 23-scf00385 | 23 |
| AX-158229051 | 19 | 41.755 | KV453239.1 | 7169060 | 23-scf00385 | 23 |
| AX-158229053 | 19 | 41.755 | KV453239.1 | 7170288 | 23-scf00385 | 23 |
| AX-158229058 | 19 | 41.755 | KV453239.1 | 7174278 | 23-scf00385 | 23 |
| AX-158229059 | 19 | 41.755 | KV453239.1 | 7175936 | 23-scf00385 | 23 |
| AX-158229060 | 19 | 41.755 | KV453239.1 | 7178025 | 23-scf00385 | 23 |
| AX-158228549 | 19 | 41.865 | KV453239.1 | 6622014 | 23-scf00385 | 23 |
| AX-158228583 | 19 | 41.865 | KV453239.1 | 6657558 | 23-scf00385 | 23 |
| AX-158228584 | 19 | 41.865 | KV453239.1 | 6659226 | 23-scf00385 | 23 |
| AX-158228586 | 19 | 41.865 | KV453239.1 | 6661886 | 23-scf00385 | 23 |
| AX-158228590 | 19 | 41.865 | KV453239.1 | 6664938 | 23-scf00385 | 23 |
| AX-158228597 | 19 | 41.865 | KV453239.1 | 6671745 | 23-scf00385 | 23 |
| AX-158228601 | 19 | 41.865 | KV453239.1 | 6675362 | 23-scf00385 | 23 |
| AX-158228604 | 19 | 41.865 | KV453239.1 | 6683446 | 23-scf00385 | 23 |
| AX-158228609 | 19 | 41.865 | KV453239.1 | 6688900 | 23-scf00385 | 23 |
| AX-158228610 | 19 | 41.865 | KV453239.1 | 6690889 | 23-scf00385 | 23 |
| AX-158228611 | 19 | 41.865 | KV453239.1 | 6691197 | 23-scf00385 | 23 |
| AX-158228614 | 19 | 41.865 | KV453239.1 | 6694944 | 23-scf00385 | 23 |
| AX-158228615 | 19 | 41.865 | KV453239.1 | 6695337 | 23-scf00385 | 23 |
| AX-158228621 | 19 | 41.865 | KV453239.1 | 6700155 | 23-scf00385 | 23 |
| AX-158228624 | 19 | 41.865 | KV453239.1 | 6702176 | 23-scf00385 | 23 |
| AX-158228629 | 19 | 41.865 | KV453239.1 | 6708763 | 23-scf00385 | 23 |
| AX-158386777 | 19 | 41.865 | KV453239.1 | 6723141 | 23-scf00385 | 23 |
| AX-158386779 | 19 | 41.865 | KV453239.1 | 6743214 | 23-scf00385 | 23 |
| AX-158228669 | 19 | 41.865 | KV453239.1 | 6747309 | 23-scf00385 | 23 |
| AX-158228674 | 19 | 41.865 | KV453239.1 | 6753598 | 23-scf00385 | 23 |
| AX-157754456 | 19 | 41.865 | KV453239.1 | 6754490 | 23-scf00385 | 23 |

|              |    |        |            |         |             |    |
|--------------|----|--------|------------|---------|-------------|----|
| AX-157727129 | 19 | 41.865 | KV453239.1 | 6756455 | 23-scf00385 | 23 |
| AX-158228681 | 19 | 41.865 | KV453239.1 | 6760004 | 23-scf00385 | 23 |
| AX-158228682 | 19 | 41.865 | KV453239.1 | 6761018 | 23-scf00385 | 23 |
| AX-158228690 | 19 | 41.865 | KV453239.1 | 6767672 | 23-scf00385 | 23 |
| AX-158228704 | 19 | 41.865 | KV453239.1 | 6786238 | 23-scf00385 | 23 |
| AX-158228708 | 19 | 41.865 | KV453239.1 | 6789118 | 23-scf00385 | 23 |
| AX-158228724 | 19 | 41.865 | KV453239.1 | 6803081 | 23-scf00385 | 23 |
| AX-158228737 | 19 | 41.865 | KV453239.1 | 6814723 | 23-scf00385 | 23 |
| AX-158228762 | 19 | 41.865 | KV453239.1 | 6839466 | 23-scf00385 | 23 |
| AX-158228763 | 19 | 41.865 | KV453239.1 | 6839750 | 23-scf00385 | 23 |
| AX-157693299 | 19 | 41.865 | KV453239.1 | 6842791 | 23-scf00385 | 23 |
| AX-158228765 | 19 | 41.865 | KV453239.1 | 6843727 | 23-scf00385 | 23 |
| AX-158228768 | 19 | 41.865 | KV453239.1 | 6845759 | 23-scf00385 | 23 |
| AX-158228772 | 19 | 41.865 | KV453239.1 | 6850341 | 23-scf00385 | 23 |
| AX-158228773 | 19 | 41.865 | KV453239.1 | 6850781 | 23-scf00385 | 23 |
| AX-158228776 | 19 | 41.865 | KV453239.1 | 6852789 | 23-scf00385 | 23 |
| AX-158228777 | 19 | 41.865 | KV453239.1 | 6853876 | 23-scf00385 | 23 |
| AX-158228781 | 19 | 41.865 | KV453239.1 | 6856415 | 23-scf00385 | 23 |
| AX-157839964 | 19 | 41.865 | KV453239.1 | 6857880 | 23-scf00385 | 23 |
| AX-158228782 | 19 | 41.865 | KV453239.1 | 6857931 | 23-scf00385 | 23 |
| AX-158228784 | 19 | 41.865 | KV453239.1 | 6862529 | 23-scf00385 | 23 |
| AX-158228792 | 19 | 41.865 | KV453239.1 | 6869973 | 23-scf00385 | 23 |
| AX-158228796 | 19 | 41.865 | KV453239.1 | 6874164 | 23-scf00385 | 23 |
| AX-158228808 | 19 | 41.865 | KV453239.1 | 6882823 | 23-scf00385 | 23 |
| AX-158228817 | 19 | 41.865 | KV453239.1 | 6889854 | 23-scf00385 | 23 |
| AX-158228821 | 19 | 41.865 | KV453239.1 | 6893692 | 23-scf00385 | 23 |
| AX-158228822 | 19 | 41.865 | KV453239.1 | 6894800 | 23-scf00385 | 23 |
| AX-158228843 | 19 | 41.865 | KV453239.1 | 6911905 | 23-scf00385 | 23 |
| AX-157839967 | 19 | 41.865 | KV453239.1 | 6924237 | 23-scf00385 | 23 |
| AX-158228855 | 19 | 41.865 | KV453239.1 | 6928070 | 23-scf00385 | 23 |
| AX-158228856 | 19 | 41.865 | KV453239.1 | 6929307 | 23-scf00385 | 23 |
| AX-158228877 | 19 | 41.865 | KV453239.1 | 6967248 | 23-scf00385 | 23 |
| AX-158228880 | 19 | 41.865 | KV453239.1 | 6969690 | 23-scf00385 | 23 |
| AX-158228881 | 19 | 41.865 | KV453239.1 | 6970186 | 23-scf00385 | 23 |
| AX-158228882 | 19 | 41.865 | KV453239.1 | 6971678 | 23-scf00385 | 23 |
| AX-158228887 | 19 | 41.865 | KV453239.1 | 6975090 | 23-scf00385 | 23 |
| AX-158228889 | 19 | 41.865 | KV453239.1 | 6976328 | 23-scf00385 | 23 |
| AX-158228892 | 19 | 41.865 | KV453239.1 | 6979050 | 23-scf00385 | 23 |
| AX-158228894 | 19 | 41.865 | KV453239.1 | 6980249 | 23-scf00385 | 23 |
| AX-158228895 | 19 | 41.865 | KV453239.1 | 6980724 | 23-scf00385 | 23 |
| AX-157839976 | 19 | 41.865 | KV453239.1 | 6981683 | 23-scf00385 | 23 |
| AX-157839977 | 19 | 41.865 | KV453239.1 | 6982163 | 23-scf00385 | 23 |
| AX-158228897 | 19 | 41.865 | KV453239.1 | 6984986 | 23-scf00385 | 23 |
| AX-158228899 | 19 | 41.865 | KV453239.1 | 6986414 | 23-scf00385 | 23 |
| AX-158228900 | 19 | 41.865 | KV453239.1 | 6987050 | 23-scf00385 | 23 |
| AX-158228902 | 19 | 41.865 | KV453239.1 | 6989561 | 23-scf00385 | 23 |
| AX-158394136 | 19 | 41.865 | KV453239.1 | 6991417 | 23-scf00385 | 23 |
| AX-158228904 | 19 | 41.865 | KV453239.1 | 6991646 | 23-scf00385 | 23 |
| AX-158228906 | 19 | 41.865 | KV453239.1 | 6993415 | 23-scf00385 | 23 |
| AX-158228909 | 19 | 41.865 | KV453239.1 | 6996627 | 23-scf00385 | 23 |
| AX-158228911 | 19 | 41.865 | KV453239.1 | 6998073 | 23-scf00385 | 23 |

|              |    |        |            |         |             |    |
|--------------|----|--------|------------|---------|-------------|----|
| AX-157887392 | 19 | 41.865 | KV453239.1 | 7004022 | 23-scf00385 | 23 |
| AX-158228949 | 19 | 41.865 | KV453239.1 | 7046359 | 23-scf00385 | 23 |
| AX-158228959 | 19 | 41.865 | KV453239.1 | 7057522 | 23-scf00385 | 23 |
| AX-158229040 | 19 | 41.865 | KV453239.1 | 7150507 | 23-scf00385 | 23 |
| AX-158229048 | 19 | 41.865 | KV453239.1 | 7163553 | 23-scf00385 | 23 |
| AX-158229056 | 19 | 41.865 | KV453239.1 | 7171965 | 23-scf00385 | 23 |
| AX-157839991 | 19 | 41.865 | KV453239.1 | 7180031 | 23-scf00385 | 23 |
| AX-158229065 | 19 | 41.865 | KV453239.1 | 7186061 | 23-scf00385 | 23 |
| AX-158229066 | 19 | 41.865 | KV453239.1 | 7186340 | 23-scf00385 | 23 |
| AX-157839992 | 19 | 41.865 | KV453239.1 | 7188061 | 23-scf00385 | 23 |
| AX-158229067 | 19 | 41.865 | KV453239.1 | 7188430 | 23-scf00385 | 23 |
| AX-158229068 | 19 | 41.865 | KV453239.1 | 7189488 | 23-scf00385 | 23 |
| AX-157771778 | 19 | 41.865 | KV453239.1 | 7191017 | 23-scf00385 | 23 |
| AX-158229070 | 19 | 41.865 | KV453239.1 | 7193568 | 23-scf00385 | 23 |
| AX-157839994 | 19 | 41.865 | KV453239.1 | 7196610 | 23-scf00385 | 23 |
| AX-158229072 | 19 | 41.865 | KV453239.1 | 7197941 | 23-scf00385 | 23 |
| AX-158229073 | 19 | 41.865 | KV453239.1 | 7198506 | 23-scf00385 | 23 |
| AX-158229074 | 19 | 41.865 | KV453239.1 | 7199009 | 23-scf00385 | 23 |
| AX-158229075 | 19 | 41.865 | KV453239.1 | 7199518 | 23-scf00385 | 23 |
| AX-157839995 | 19 | 41.865 | KV453239.1 | 7200375 | 23-scf00385 | 23 |
| AX-157754082 | 19 | 41.865 | KV453239.1 | 7203307 | 23-scf00385 | 23 |
| AX-158229082 | 19 | 41.865 | KV453239.1 | 7203583 | 23-scf00385 | 23 |
| AX-158229084 | 19 | 41.865 | KV453239.1 | 7204695 | 23-scf00385 | 23 |
| AX-158229085 | 19 | 41.865 | KV453239.1 | 7205725 | 23-scf00385 | 23 |
| AX-158229086 | 19 | 41.865 | KV453239.1 | 7206064 | 23-scf00385 | 23 |
| AX-157756541 | 19 | 41.865 | KV453239.1 | 7208109 | 23-scf00385 | 23 |
| AX-158229087 | 19 | 41.865 | KV453239.1 | 7208955 | 23-scf00385 | 23 |
| AX-157839996 | 19 | 41.865 | KV453239.1 | 7219696 | 23-scf00385 | 23 |
| AX-158229093 | 19 | 41.865 | KV453239.1 | 7220851 | 23-scf00385 | 23 |
| AX-158229095 | 19 | 41.865 | KV453239.1 | 7231524 | 23-scf00385 | 23 |
| AX-158229097 | 19 | 41.865 | KV453239.1 | 7232609 | 23-scf00385 | 23 |
| AX-158229098 | 19 | 41.865 | KV453239.1 | 7233032 | 23-scf00385 | 23 |
| AX-158229100 | 19 | 41.865 | KV453239.1 | 7234405 | 23-scf00385 | 23 |
| AX-157867152 | 19 | 41.865 | KV453239.1 | 7244669 | 23-scf00385 | 23 |
| AX-158229106 | 19 | 41.865 | KV453239.1 | 7246548 | 23-scf00385 | 23 |
| AX-158229101 | 19 | 41.895 | KV453239.1 | 7240531 | 23-scf00385 | 23 |
| AX-158229102 | 19 | 41.927 | KV453239.1 | 7241744 | 23-scf00385 | 23 |
| AX-157839997 | 19 | 41.974 | KV453239.1 | 7221145 | 23-scf00385 | 23 |
| AX-157840002 | 19 | 41.974 | KV453239.1 | 7253029 | 23-scf00385 | 23 |
| AX-158229109 | 19 | 41.974 | KV453239.1 | 7253562 | 23-scf00385 | 23 |
| AX-157840003 | 19 | 41.974 | KV453239.1 | 7253597 | 23-scf00385 | 23 |
| AX-158229113 | 19 | 42.223 | KV453239.1 | 7260839 | 23-scf00385 | 23 |
| AX-158228691 | 19 | 42.302 | KV453239.1 | 6768084 | 23-scf00385 | 23 |
| AX-157723364 | 19 | 42.302 | KV453239.1 | 7262778 | 23-scf00385 | 23 |
| AX-158229266 | 19 | 42.302 | KV453239.1 | 7470933 | 23-scf00385 | 23 |
| AX-158229292 | 19 | 42.302 | KV453239.1 | 7516977 | 23-scf00385 | 23 |
| AX-158229315 | 19 | 42.302 | KV453239.1 | 7574821 | 23-scf00385 | 23 |
| AX-158229116 | 19 | 42.336 | KV453239.1 | 7268026 | 23-scf00385 | 23 |
| AX-158228975 | 19 | 42.373 | KV453239.1 | 7072681 | 23-scf00385 | 23 |
| AX-158229120 | 19 | 42.373 | KV453239.1 | 7270858 | 23-scf00385 | 23 |
| AX-158229123 | 19 | 42.393 | KV453239.1 | 7273620 | 23-scf00385 | 23 |

|              |    |        |            |         |             |    |
|--------------|----|--------|------------|---------|-------------|----|
| AX-158228976 | 19 | 42.411 | KV453239.1 | 7074662 | 23-scf00385 | 23 |
| AX-157751658 | 19 | 42.411 | KV453239.1 | 7256975 | 23-scf00385 | 23 |
| AX-157859517 | 19 | 42.411 | KV453239.1 | 7273142 | 23-scf00385 | 23 |
| AX-157872461 | 19 | 42.411 | KV453239.1 | 7275835 | 23-scf00385 | 23 |
| AX-158229126 | 19 | 42.411 | KV453239.1 | 7279326 | 23-scf00385 | 23 |
| AX-158229128 | 19 | 42.411 | KV453239.1 | 7280543 | 23-scf00385 | 23 |
| AX-158229129 | 19 | 42.411 | KV453239.1 | 7283401 | 23-scf00385 | 23 |
| AX-157840004 | 19 | 42.411 | KV453239.1 | 7287256 | 23-scf00385 | 23 |
| AX-158229131 | 19 | 42.411 | KV453239.1 | 7290047 | 23-scf00385 | 23 |
| AX-158229136 | 19 | 42.411 | KV453239.1 | 7296736 | 23-scf00385 | 23 |
| AX-158229142 | 19 | 42.628 | KV453239.1 | 7308513 | 23-scf00385 | 23 |
| AX-158229145 | 19 | 42.628 | KV453239.1 | 7313303 | 23-scf00385 | 23 |
| AX-158229146 | 19 | 42.628 | KV453239.1 | 7315505 | 23-scf00385 | 23 |
| AX-158229150 | 19 | 42.628 | KV453239.1 | 7320824 | 23-scf00385 | 23 |
| AX-157688359 | 19 | 42.628 | KV453809.1 | 2153    | scf01615    | UN |
| AX-158229153 | 19 | 42.72  | KV453239.1 | 7323348 | 23-scf00385 | 23 |
| AX-158228546 | 19 | 42.758 | KV453239.1 | 6617284 | 23-scf00385 | 23 |
| AX-158228547 | 19 | 42.758 | KV453239.1 | 6620217 | 23-scf00385 | 23 |
| AX-158228548 | 19 | 42.758 | KV453239.1 | 6620888 | 23-scf00385 | 23 |
| AX-158228551 | 19 | 42.758 | KV453239.1 | 6624562 | 23-scf00385 | 23 |
| AX-158228568 | 19 | 42.758 | KV453239.1 | 6640703 | 23-scf00385 | 23 |
| AX-158228646 | 19 | 42.758 | KV453239.1 | 6726828 | 23-scf00385 | 23 |
| AX-158228650 | 19 | 42.758 | KV453239.1 | 6730154 | 23-scf00385 | 23 |
| AX-158229154 | 19 | 42.758 | KV453239.1 | 7324457 | 23-scf00385 | 23 |
| AX-158229077 | 19 | 42.85  | KV453239.1 | 7200569 | 23-scf00385 | 23 |
| AX-158229080 | 19 | 42.85  | KV453239.1 | 7202075 | 23-scf00385 | 23 |
| AX-158229155 | 19 | 42.85  | KV453239.1 | 7325480 | 23-scf00385 | 23 |
| AX-158229160 | 19 | 42.85  | KV453239.1 | 7338800 | 23-scf00385 | 23 |
| AX-158386788 | 19 | 42.85  | KV453239.1 | 7600802 | 23-scf00385 | 23 |
| AX-158229388 | 19 | 42.85  | KV453239.1 | 7815863 | 23-scf00385 | 23 |
| AX-158228573 | 19 | 43.067 | KV453239.1 | 6645284 | 23-scf00385 | 23 |
| AX-158228814 | 19 | 43.067 | KV453239.1 | 6888590 | 23-scf00385 | 23 |
| AX-158228973 | 19 | 43.067 | KV453239.1 | 7070775 | 23-scf00385 | 23 |
| AX-158228974 | 19 | 43.067 | KV453239.1 | 7071384 | 23-scf00385 | 23 |
| AX-158229016 | 19 | 43.067 | KV453239.1 | 7110596 | 23-scf00385 | 23 |
| AX-158229069 | 19 | 43.067 | KV453239.1 | 7193000 | 23-scf00385 | 23 |
| AX-158229151 | 19 | 43.067 | KV453239.1 | 7321173 | 23-scf00385 | 23 |
| AX-158229162 | 19 | 43.067 | KV453239.1 | 7340647 | 23-scf00385 | 23 |
| AX-158229164 | 19 | 43.067 | KV453239.1 | 7343477 | 23-scf00385 | 23 |
| AX-158229165 | 19 | 43.067 | KV453239.1 | 7343938 | 23-scf00385 | 23 |
| AX-158229170 | 19 | 43.067 | KV453239.1 | 7349933 | 23-scf00385 | 23 |
| AX-158229177 | 19 | 43.067 | KV453239.1 | 7360782 | 23-scf00385 | 23 |
| AX-157755102 | 19 | 43.067 | KV453239.1 | 7361359 | 23-scf00385 | 23 |
| AX-158229178 | 19 | 43.067 | KV453239.1 | 7361967 | 23-scf00385 | 23 |
| AX-158415063 | 19 | 43.067 | KV453239.1 | 7362055 | 23-scf00385 | 23 |
| AX-158229179 | 19 | 43.067 | KV453239.1 | 7362678 | 23-scf00385 | 23 |
| AX-158229180 | 19 | 43.067 | KV453239.1 | 7365086 | 23-scf00385 | 23 |
| AX-158229181 | 19 | 43.067 | KV453239.1 | 7365719 | 23-scf00385 | 23 |
| AX-158229183 | 19 | 43.067 | KV453239.1 | 7366761 | 23-scf00385 | 23 |
| AX-157887397 | 19 | 43.067 | KV453239.1 | 7367585 | 23-scf00385 | 23 |
| AX-157707787 | 19 | 43.067 | KV453239.1 | 7368314 | 23-scf00385 | 23 |

|              |    |        |             |         |             |    |
|--------------|----|--------|-------------|---------|-------------|----|
| AX-158229184 | 19 | 43.067 | KV453239.1  | 7368426 | 23-scf00385 | 23 |
| AX-157725876 | 19 | 43.067 | KV453239.1  | 7372514 | 23-scf00385 | 23 |
| AX-158229188 | 19 | 43.067 | KV453239.1  | 7375733 | 23-scf00385 | 23 |
| AX-157726870 | 19 | 43.067 | KV453239.1  | 7376173 | 23-scf00385 | 23 |
| AX-158229191 | 19 | 43.067 | KV453239.1  | 7385132 | 23-scf00385 | 23 |
| AX-158229193 | 19 | 43.067 | KV453239.1  | 7387004 | 23-scf00385 | 23 |
| AX-158229194 | 19 | 43.067 | KV453239.1  | 7388107 | 23-scf00385 | 23 |
| AX-158229198 | 19 | 43.067 | KV453239.1  | 7390935 | 23-scf00385 | 23 |
| AX-158229201 | 19 | 43.067 | KV453239.1  | 7393386 | 23-scf00385 | 23 |
| AX-158229202 | 19 | 43.067 | KV453239.1  | 7395162 | 23-scf00385 | 23 |
| AX-158229206 | 19 | 43.067 | KV453239.1  | 7403884 | 23-scf00385 | 23 |
| AX-158229207 | 19 | 43.067 | KV453239.1  | 7404466 | 23-scf00385 | 23 |
| AX-158229208 | 19 | 43.067 | KV453239.1  | 7405116 | 23-scf00385 | 23 |
| AX-158229209 | 19 | 43.067 | KV453239.1  | 7405483 | 23-scf00385 | 23 |
| AX-158229210 | 19 | 43.067 | KV453239.1  | 7407608 | 23-scf00385 | 23 |
| AX-158229211 | 19 | 43.067 | KV453239.1  | 7408960 | 23-scf00385 | 23 |
| AX-158229213 | 19 | 43.067 | KV453239.1  | 7410390 | 23-scf00385 | 23 |
| AX-158229214 | 19 | 43.067 | KV453239.1  | 7411293 | 23-scf00385 | 23 |
| AX-158229216 | 19 | 43.067 | KV453239.1  | 7413754 | 23-scf00385 | 23 |
| AX-158229218 | 19 | 43.067 | KV453239.1  | 7414792 | 23-scf00385 | 23 |
| AX-158229220 | 19 | 43.067 | KV453239.1  | 7418051 | 23-scf00385 | 23 |
| AX-158229222 | 19 | 43.067 | KV453239.1  | 7418809 | 23-scf00385 | 23 |
| AX-158229224 | 19 | 43.067 | KV453239.1  | 7421640 | 23-scf00385 | 23 |
| AX-157710764 | 19 | 43.067 | KV453239.1  | 7422114 | 23-scf00385 | 23 |
| AX-158229225 | 19 | 43.067 | KV453239.1  | 7422196 | 23-scf00385 | 23 |
| AX-158229228 | 19 | 43.067 | KV453239.1  | 7427659 | 23-scf00385 | 23 |
| AX-158229229 | 19 | 43.067 | KV453239.1  | 7428962 | 23-scf00385 | 23 |
| AX-157726312 | 19 | 43.067 | KV453239.1  | 7431282 | 23-scf00385 | 23 |
| AX-158229233 | 19 | 43.067 | KV453239.1  | 7433734 | 23-scf00385 | 23 |
| AX-158229239 | 19 | 43.067 | KV453239.1  | 7439837 | 23-scf00385 | 23 |
| AX-158229241 | 19 | 43.067 | KV453239.1  | 7441932 | 23-scf00385 | 23 |
| AX-158229246 | 19 | 43.067 | KV453239.1  | 7446878 | 23-scf00385 | 23 |
| AX-158229255 | 19 | 43.067 | KV453239.1  | 7453494 | 23-scf00385 | 23 |
| AX-158229257 | 19 | 43.067 | KV453239.1  | 7454807 | 23-scf00385 | 23 |
| AX-158229258 | 19 | 43.067 | KV453239.1  | 7456221 | 23-scf00385 | 23 |
| AX-158229259 | 19 | 43.067 | KV453239.1  | 7457207 | 23-scf00385 | 23 |
| AX-158394141 | 19 | 43.067 | KV453239.1  | 7464739 | 23-scf00385 | 23 |
| AX-157713859 | 19 | 43.067 | KV453239.1  | 7521513 | 23-scf00385 | 23 |
| AX-158229295 | 19 | 43.067 | KV453239.1  | 7523119 | 23-scf00385 | 23 |
| AX-157840008 | 19 | 43.067 | KV453239.1  | 7527805 | 23-scf00385 | 23 |
| AX-158229300 | 19 | 43.067 | KV453239.1  | 7530312 | 23-scf00385 | 23 |
| AX-158229303 | 19 | 43.067 | KV453239.1  | 7537917 | 23-scf00385 | 23 |
| AX-158229354 | 19 | 43.067 | KV453239.1  | 7757076 | 23-scf00385 | 23 |
| AX-158229437 | 19 | 43.067 | KV453239.1  | 7894935 | 23-scf00385 | 23 |
| AX-157706425 | 19 | 43.067 | 3ML01032218 | 613     | scf07834_1  | UN |
| AX-158228842 | 19 | 43.126 | KV453239.1  | 6911531 | 23-scf00385 | 23 |
| AX-158229134 | 19 | 43.126 | KV453239.1  | 7293743 | 23-scf00385 | 23 |
| AX-158229240 | 19 | 43.126 | KV453239.1  | 7440501 | 23-scf00385 | 23 |
| AX-158229385 | 19 | 43.126 | KV453239.1  | 7802916 | 23-scf00385 | 23 |
| AX-158394143 | 19 | 43.126 | KV453239.1  | 7807793 | 23-scf00385 | 23 |
| AX-158229247 | 19 | 43.176 | KV453239.1  | 7447940 | 23-scf00385 | 23 |



|              |    |        |            |         |             |    |
|--------------|----|--------|------------|---------|-------------|----|
| AX-158229248 | 19 | 43.176 | KV453239.1 | 7448387 | 23-scf00385 | 23 |
| AX-158229249 | 19 | 43.176 | KV453239.1 | 7448928 | 23-scf00385 | 23 |
| AX-158229254 | 19 | 43.176 | KV453239.1 | 7453102 | 23-scf00385 | 23 |
| AX-158229263 | 19 | 43.176 | KV453239.1 | 7460977 | 23-scf00385 | 23 |
| AX-158229341 | 19 | 43.176 | KV453239.1 | 7705068 | 23-scf00385 | 23 |
| AX-158228667 | 19 | 43.394 | KV453239.1 | 6745501 | 23-scf00385 | 23 |
| AX-157745191 | 19 | 43.394 | KV453239.1 | 7238300 | 23-scf00385 | 23 |
| AX-158229125 | 19 | 43.394 | KV453239.1 | 7279090 | 23-scf00385 | 23 |
| AX-157757116 | 19 | 43.394 | KV453239.1 | 7472873 | 23-scf00385 | 23 |
| AX-158229269 | 19 | 43.394 | KV453239.1 | 7475822 | 23-scf00385 | 23 |
| AX-158229271 | 19 | 43.394 | KV453239.1 | 7478107 | 23-scf00385 | 23 |
| AX-158229272 | 19 | 43.394 | KV453239.1 | 7479558 | 23-scf00385 | 23 |
| AX-158229275 | 19 | 43.394 | KV453239.1 | 7481688 | 23-scf00385 | 23 |
| AX-158229280 | 19 | 43.394 | KV453239.1 | 7498537 | 23-scf00385 | 23 |
| AX-157722317 | 19 | 43.394 | KV453239.1 | 7498717 | 23-scf00385 | 23 |
| AX-157745357 | 19 | 43.394 | KV453239.1 | 7501087 | 23-scf00385 | 23 |
| AX-157744474 | 19 | 43.394 | KV453239.1 | 7507313 | 23-scf00385 | 23 |
| AX-158229343 | 19 | 43.394 | KV453239.1 | 7726659 | 23-scf00385 | 23 |
| AX-158229283 | 19 | 43.43  | KV453239.1 | 7508223 | 23-scf00385 | 23 |
| AX-158229284 | 19 | 43.459 | KV453239.1 | 7509977 | 23-scf00385 | 23 |
| AX-158229285 | 19 | 43.477 | KV453239.1 | 7511462 | 23-scf00385 | 23 |
| AX-158228663 | 19 | 43.483 | KV453239.1 | 6742312 | 23-scf00385 | 23 |
| AX-158229287 | 19 | 43.483 | KV453239.1 | 7512554 | 23-scf00385 | 23 |
| AX-158229289 | 19 | 43.483 | KV453239.1 | 7515229 | 23-scf00385 | 23 |
| AX-158228943 | 19 | 43.504 | KV453239.1 | 7040128 | 23-scf00385 | 23 |
| AX-158228977 | 19 | 43.504 | KV453239.1 | 7075522 | 23-scf00385 | 23 |
| AX-158228978 | 19 | 43.504 | KV453239.1 | 7076164 | 23-scf00385 | 23 |
| AX-158228979 | 19 | 43.504 | KV453239.1 | 7077739 | 23-scf00385 | 23 |
| AX-158228980 | 19 | 43.504 | KV453239.1 | 7078541 | 23-scf00385 | 23 |
| AX-158228982 | 19 | 43.504 | KV453239.1 | 7083358 | 23-scf00385 | 23 |
| AX-158229173 | 19 | 43.504 | KV453239.1 | 7353075 | 23-scf00385 | 23 |
| AX-158229221 | 19 | 43.504 | KV453239.1 | 7418262 | 23-scf00385 | 23 |
| AX-158229230 | 19 | 43.504 | KV453239.1 | 7430321 | 23-scf00385 | 23 |
| AX-157772686 | 19 | 43.504 | KV453239.1 | 7437227 | 23-scf00385 | 23 |
| AX-158229237 | 19 | 43.504 | KV453239.1 | 7438299 | 23-scf00385 | 23 |
| AX-158229262 | 19 | 43.504 | KV453239.1 | 7459418 | 23-scf00385 | 23 |
| AX-158229273 | 19 | 43.504 | KV453239.1 | 7480044 | 23-scf00385 | 23 |
| AX-158229288 | 19 | 43.504 | KV453239.1 | 7514272 | 23-scf00385 | 23 |
| AX-158229290 | 19 | 43.504 | KV453239.1 | 7516104 | 23-scf00385 | 23 |
| AX-158380890 | 19 | 43.504 | KV453239.1 | 7516656 | 23-scf00385 | 23 |
| AX-158229297 | 19 | 43.504 | KV453239.1 | 7526378 | 23-scf00385 | 23 |
| AX-158229298 | 19 | 43.504 | KV453239.1 | 7527213 | 23-scf00385 | 23 |
| AX-157726222 | 19 | 43.504 | KV453239.1 | 7533252 | 23-scf00385 | 23 |
| AX-157840009 | 19 | 43.504 | KV453239.1 | 7533877 | 23-scf00385 | 23 |
| AX-158229302 | 19 | 43.504 | KV453239.1 | 7534471 | 23-scf00385 | 23 |
| AX-158415072 | 19 | 43.504 | KV453239.1 | 7553306 | 23-scf00385 | 23 |
| AX-158229310 | 19 | 43.504 | KV453239.1 | 7559495 | 23-scf00385 | 23 |
| AX-157867155 | 19 | 43.504 | KV453239.1 | 7561021 | 23-scf00385 | 23 |
| AX-157867156 | 19 | 43.504 | KV453239.1 | 7566528 | 23-scf00385 | 23 |
| AX-158229314 | 19 | 43.504 | KV453239.1 | 7574159 | 23-scf00385 | 23 |
| AX-158229321 | 19 | 43.504 | KV453239.1 | 7591526 | 23-scf00385 | 23 |

|              |    |        |            |         |             |    |
|--------------|----|--------|------------|---------|-------------|----|
| AX-158229322 | 19 | 43.504 | KV453239.1 | 7594956 | 23-scf00385 | 23 |
| AX-157840010 | 19 | 43.504 | KV453239.1 | 7612023 | 23-scf00385 | 23 |
| AX-158229330 | 19 | 43.504 | KV453239.1 | 7637985 | 23-scf00385 | 23 |
| AX-157714372 | 19 | 43.504 | KV453239.1 | 7648486 | 23-scf00385 | 23 |
| AX-158229334 | 19 | 43.504 | KV453239.1 | 7656435 | 23-scf00385 | 23 |
| AX-157840011 | 19 | 43.504 | KV453239.1 | 7667199 | 23-scf00385 | 23 |
| AX-158229338 | 19 | 43.504 | KV453239.1 | 7671027 | 23-scf00385 | 23 |
| AX-157840012 | 19 | 43.504 | KV453239.1 | 7702200 | 23-scf00385 | 23 |
| AX-158229348 | 19 | 43.504 | KV453239.1 | 7745834 | 23-scf00385 | 23 |
| AX-158229355 | 19 | 43.504 | KV453239.1 | 7757948 | 23-scf00385 | 23 |
| AX-158229417 | 19 | 43.504 | KV453239.1 | 7860842 | 23-scf00385 | 23 |
| AX-158229324 | 19 | 43.613 | KV453239.1 | 7603308 | 23-scf00385 | 23 |
| AX-158229347 | 19 | 43.613 | KV453239.1 | 7736750 | 23-scf00385 | 23 |
| AX-158229361 | 19 | 43.613 | KV453239.1 | 7771527 | 23-scf00385 | 23 |
| AX-157722546 | 19 | 43.613 | KV453239.1 | 7807932 | 23-scf00385 | 23 |
| AX-158229399 | 19 | 43.613 | KV453239.1 | 7835492 | 23-scf00385 | 23 |
| AX-158229186 | 19 | 43.831 | KV453239.1 | 7374223 | 23-scf00385 | 23 |
| AX-158229187 | 19 | 43.831 | KV453239.1 | 7375231 | 23-scf00385 | 23 |
| AX-158229349 | 19 | 43.831 | KV453239.1 | 7746899 | 23-scf00385 | 23 |
| AX-158229394 | 19 | 43.831 | KV453239.1 | 7829101 | 23-scf00385 | 23 |
| AX-158229395 | 19 | 43.831 | KV453239.1 | 7831369 | 23-scf00385 | 23 |
| AX-158229397 | 19 | 43.831 | KV453239.1 | 7832360 | 23-scf00385 | 23 |
| AX-158229400 | 19 | 43.831 | KV453239.1 | 7840151 | 23-scf00385 | 23 |
| AX-158229401 | 19 | 43.842 | KV453239.1 | 7841955 | 23-scf00385 | 23 |
| AX-158229403 | 19 | 43.873 | KV453239.1 | 7843627 | 23-scf00385 | 23 |
| AX-158229405 | 19 | 43.9   | KV453239.1 | 7845468 | 23-scf00385 | 23 |
| AX-158228812 | 19 | 43.941 | KV453239.1 | 6887521 | 23-scf00385 | 23 |
| AX-158229050 | 19 | 43.941 | KV453239.1 | 7167609 | 23-scf00385 | 23 |
| AX-158229407 | 19 | 43.941 | KV453239.1 | 7848885 | 23-scf00385 | 23 |
| AX-158229408 | 19 | 43.941 | KV453239.1 | 7850659 | 23-scf00385 | 23 |
| AX-158229409 | 19 | 43.941 | KV453239.1 | 7852160 | 23-scf00385 | 23 |
| AX-158229411 | 19 | 43.941 | KV453239.1 | 7852953 | 23-scf00385 | 23 |
| AX-158229412 | 19 | 43.941 | KV453239.1 | 7853492 | 23-scf00385 | 23 |
| AX-158229414 | 19 | 43.941 | KV453239.1 | 7856180 | 23-scf00385 | 23 |
| AX-158229415 | 19 | 43.941 | KV453239.1 | 7858446 | 23-scf00385 | 23 |
| AX-158229418 | 19 | 43.941 | KV453239.1 | 7861865 | 23-scf00385 | 23 |
| AX-158229420 | 19 | 43.941 | KV453239.1 | 7865205 | 23-scf00385 | 23 |
| AX-157887384 | 19 | 44.058 | KV453239.1 | 6889965 | 23-scf00385 | 23 |
| AX-158229064 | 19 | 44.058 | KV453239.1 | 7185833 | 23-scf00385 | 23 |
| AX-158229422 | 19 | 44.058 | KV453239.1 | 7870241 | 23-scf00385 | 23 |
| AX-158229443 | 19 | 44.058 | KV453239.1 | 7915940 | 23-scf00385 | 23 |
| AX-158229485 | 19 | 44.058 | KV453239.1 | 8007333 | 23-scf00385 | 23 |
| AX-158229424 | 19 | 44.159 | KV453239.1 | 7873718 | 23-scf00385 | 23 |
| AX-158229339 | 19 | 44.268 | KV453239.1 | 7680885 | 23-scf00385 | 23 |
| AX-158229427 | 19 | 44.268 | KV453239.1 | 7877594 | 23-scf00385 | 23 |
| AX-158229431 | 19 | 44.268 | KV453239.1 | 7887018 | 23-scf00385 | 23 |
| AX-158229433 | 19 | 44.434 | KV453239.1 | 7889164 | 23-scf00385 | 23 |
| AX-158229441 | 19 | 44.522 | KV453239.1 | 7907496 | 23-scf00385 | 23 |
| AX-158228779 | 19 | 44.596 | KV453239.1 | 6854830 | 23-scf00385 | 23 |
| AX-157887381 | 19 | 44.596 | KV453239.1 | 6856823 | 23-scf00385 | 23 |
| AX-158228847 | 19 | 44.596 | KV453239.1 | 6915657 | 23-scf00385 | 23 |

|              |    |        |            |         |             |    |
|--------------|----|--------|------------|---------|-------------|----|
| AX-157887394 | 19 | 44.596 | KV453239.1 | 7069728 | 23-scf00385 | 23 |
| AX-158229063 | 19 | 44.596 | KV453239.1 | 7185623 | 23-scf00385 | 23 |
| AX-158229130 | 19 | 44.596 | KV453239.1 | 7285701 | 23-scf00385 | 23 |
| AX-158229141 | 19 | 44.596 | KV453239.1 | 7308320 | 23-scf00385 | 23 |
| AX-158229192 | 19 | 44.596 | KV453239.1 | 7386343 | 23-scf00385 | 23 |
| AX-158229226 | 19 | 44.596 | KV453239.1 | 7423027 | 23-scf00385 | 23 |
| AX-158229260 | 19 | 44.596 | KV453239.1 | 7458037 | 23-scf00385 | 23 |
| AX-158229313 | 19 | 44.596 | KV453239.1 | 7573512 | 23-scf00385 | 23 |
| AX-158229318 | 19 | 44.596 | KV453239.1 | 7578913 | 23-scf00385 | 23 |
| AX-158229319 | 19 | 44.596 | KV453239.1 | 7579319 | 23-scf00385 | 23 |
| AX-158229320 | 19 | 44.596 | KV453239.1 | 7581134 | 23-scf00385 | 23 |
| AX-158229425 | 19 | 44.596 | KV453239.1 | 7875468 | 23-scf00385 | 23 |
| AX-158229426 | 19 | 44.596 | KV453239.1 | 7876239 | 23-scf00385 | 23 |
| AX-157840013 | 19 | 44.596 | KV453239.1 | 7912089 | 23-scf00385 | 23 |
| AX-158229444 | 19 | 44.596 | KV453239.1 | 7918395 | 23-scf00385 | 23 |
| AX-158229445 | 19 | 44.596 | KV453239.1 | 7920898 | 23-scf00385 | 23 |
| AX-158229448 | 19 | 44.596 | KV453239.1 | 7928252 | 23-scf00385 | 23 |
| AX-158229442 | 19 | 44.815 | KV453239.1 | 7909215 | 23-scf00385 | 23 |
| AX-158229453 | 19 | 44.815 | KV453239.1 | 7940307 | 23-scf00385 | 23 |
| AX-158229456 | 19 | 44.815 | KV453239.1 | 7942162 | 23-scf00385 | 23 |
| AX-158229458 | 19 | 44.815 | KV453239.1 | 7945458 | 23-scf00385 | 23 |
| AX-158229460 | 19 | 44.815 | KV453239.1 | 7948008 | 23-scf00385 | 23 |
| AX-158229461 | 19 | 44.815 | KV453239.1 | 7948543 | 23-scf00385 | 23 |
| AX-158229464 | 19 | 44.815 | KV453239.1 | 7953735 | 23-scf00385 | 23 |
| AX-157840014 | 19 | 44.815 | KV453239.1 | 7970912 | 23-scf00385 | 23 |
| AX-158229471 | 19 | 44.815 | KV453239.1 | 7980491 | 23-scf00385 | 23 |
| AX-158229473 | 19 | 44.815 | KV453239.1 | 7986636 | 23-scf00385 | 23 |
| AX-157757845 | 19 | 44.815 | KV453239.1 | 7992617 | 23-scf00385 | 23 |
| AX-158229478 | 19 | 44.815 | KV453239.1 | 7995127 | 23-scf00385 | 23 |
| AX-158229479 | 19 | 44.815 | KV453239.1 | 7997957 | 23-scf00385 | 23 |
| AX-157840017 | 19 | 44.815 | KV453239.1 | 7998211 | 23-scf00385 | 23 |
| AX-158229481 | 19 | 44.815 | KV453239.1 | 8003923 | 23-scf00385 | 23 |
| AX-158229482 | 19 | 44.815 | KV453239.1 | 8004584 | 23-scf00385 | 23 |
| AX-158229483 | 19 | 44.815 | KV453239.1 | 8005915 | 23-scf00385 | 23 |
| AX-158229484 | 19 | 44.815 | KV453239.1 | 8006304 | 23-scf00385 | 23 |
| AX-158229486 | 19 | 44.815 | KV453239.1 | 8010041 | 23-scf00385 | 23 |
| AX-158229488 | 19 | 44.815 | KV453239.1 | 8010928 | 23-scf00385 | 23 |
| AX-158229491 | 19 | 44.815 | KV453239.1 | 8013117 | 23-scf00385 | 23 |
| AX-158229492 | 19 | 44.815 | KV453239.1 | 8013557 | 23-scf00385 | 23 |
| AX-158229496 | 19 | 44.815 | KV453239.1 | 8017889 | 23-scf00385 | 23 |
| AX-158229500 | 19 | 44.815 | KV453239.1 | 8023730 | 23-scf00385 | 23 |
| AX-158229501 | 19 | 44.815 | KV453239.1 | 8024149 | 23-scf00385 | 23 |
| AX-158229502 | 19 | 44.815 | KV453239.1 | 8026190 | 23-scf00385 | 23 |
| AX-158229505 | 19 | 44.815 | KV453239.1 | 8030822 | 23-scf00385 | 23 |
| AX-158229506 | 19 | 44.815 | KV453239.1 | 8031389 | 23-scf00385 | 23 |
| AX-158229508 | 19 | 44.815 | KV453239.1 | 8034458 | 23-scf00385 | 23 |
| AX-158229509 | 19 | 44.815 | KV453239.1 | 8034834 | 23-scf00385 | 23 |
| AX-158229512 | 19 | 44.815 | KV453239.1 | 8036319 | 23-scf00385 | 23 |
| AX-158229521 | 19 | 44.815 | KV453239.1 | 8055397 | 23-scf00385 | 23 |
| AX-158229539 | 19 | 44.815 | KV453239.1 | 8083873 | 23-scf00385 | 23 |
| AX-158229606 | 19 | 44.815 | KV453239.1 | 8182870 | 23-scf00385 | 23 |

|              |    |        |            |         |             |    |
|--------------|----|--------|------------|---------|-------------|----|
| AX-158229632 | 19 | 44.815 | KV453239.1 | 8214636 | 23-scf00385 | 23 |
| AX-157756659 | 19 | 44.826 | KV453239.1 | 8039606 | 23-scf00385 | 23 |
| AX-157724691 | 19 | 44.854 | KV453239.1 | 8041579 | 23-scf00385 | 23 |
| AX-158229522 | 19 | 44.89  | KV453239.1 | 8056539 | 23-scf00385 | 23 |
| AX-158229311 | 19 | 44.924 | KV453239.1 | 7562444 | 23-scf00385 | 23 |
| AX-158229480 | 19 | 44.924 | KV453239.1 | 7999605 | 23-scf00385 | 23 |
| AX-158229494 | 19 | 44.924 | KV453239.1 | 8017357 | 23-scf00385 | 23 |
| AX-158229495 | 19 | 44.924 | KV453239.1 | 8017515 | 23-scf00385 | 23 |
| AX-157747088 | 19 | 44.924 | KV453239.1 | 8018712 | 23-scf00385 | 23 |
| AX-158229514 | 19 | 44.924 | KV453239.1 | 8039799 | 23-scf00385 | 23 |
| AX-158229523 | 19 | 44.924 | KV453239.1 | 8058522 | 23-scf00385 | 23 |
| AX-158229525 | 19 | 44.924 | KV453239.1 | 8064371 | 23-scf00385 | 23 |
| AX-158229526 | 19 | 44.924 | KV453239.1 | 8065069 | 23-scf00385 | 23 |
| AX-158229529 | 19 | 44.924 | KV453239.1 | 8069811 | 23-scf00385 | 23 |
| AX-158229534 | 19 | 44.924 | KV453239.1 | 8074102 | 23-scf00385 | 23 |
| AX-158229535 | 19 | 44.924 | KV453239.1 | 8074701 | 23-scf00385 | 23 |
| AX-158229536 | 19 | 44.924 | KV453239.1 | 8075846 | 23-scf00385 | 23 |
| AX-158229537 | 19 | 44.924 | KV453239.1 | 8078606 | 23-scf00385 | 23 |
| AX-158229583 | 19 | 44.924 | KV453239.1 | 8145427 | 23-scf00385 | 23 |
| AX-157840025 | 19 | 44.924 | KV453239.1 | 8238212 | 23-scf00385 | 23 |
| AX-158231063 | 19 | 44.924 | KV453243.1 | 1449085 | 23-scf00581 | 23 |
| AX-158229543 | 19 | 45.142 | KV453239.1 | 8087116 | 23-scf00385 | 23 |
| AX-158229544 | 19 | 45.142 | KV453239.1 | 8087747 | 23-scf00385 | 23 |
| AX-158229546 | 19 | 45.142 | KV453239.1 | 8090142 | 23-scf00385 | 23 |
| AX-158229548 | 19 | 45.142 | KV453239.1 | 8093264 | 23-scf00385 | 23 |
| AX-158229552 | 19 | 45.142 | KV453239.1 | 8103118 | 23-scf00385 | 23 |
| AX-158229553 | 19 | 45.212 | KV453239.1 | 8104543 | 23-scf00385 | 23 |
| AX-158229555 | 19 | 45.236 | KV453239.1 | 8107817 | 23-scf00385 | 23 |
| AX-157840023 | 19 | 45.236 | KV453239.1 | 8231550 | 23-scf00385 | 23 |
| AX-158229561 | 19 | 45.252 | KV453239.1 | 8115138 | 23-scf00385 | 23 |
| AX-158229564 | 19 | 45.252 | KV453239.1 | 8118346 | 23-scf00385 | 23 |
| AX-158228107 | 19 | 45.361 | KV453239.1 | 6082723 | 23-scf00385 | 23 |
| AX-158228401 | 19 | 45.361 | KV453239.1 | 6461369 | 23-scf00385 | 23 |
| AX-158229434 | 19 | 45.361 | KV453239.1 | 7889305 | 23-scf00385 | 23 |
| AX-158229472 | 19 | 45.361 | KV453239.1 | 7981620 | 23-scf00385 | 23 |
| AX-158229490 | 19 | 45.361 | KV453239.1 | 8012157 | 23-scf00385 | 23 |
| AX-158229560 | 19 | 45.361 | KV453239.1 | 8114676 | 23-scf00385 | 23 |
| AX-158229567 | 19 | 45.361 | KV453239.1 | 8120152 | 23-scf00385 | 23 |
| AX-157774031 | 19 | 45.361 | KV453239.1 | 8120757 | 23-scf00385 | 23 |
| AX-158229568 | 19 | 45.361 | KV453239.1 | 8122014 | 23-scf00385 | 23 |
| AX-157716251 | 19 | 45.361 | KV453239.1 | 8125899 | 23-scf00385 | 23 |
| AX-158229574 | 19 | 45.361 | KV453239.1 | 8134138 | 23-scf00385 | 23 |
| AX-158229576 | 19 | 45.361 | KV453239.1 | 8135261 | 23-scf00385 | 23 |
| AX-158229579 | 19 | 45.361 | KV453239.1 | 8140254 | 23-scf00385 | 23 |
| AX-158229581 | 19 | 45.361 | KV453239.1 | 8141881 | 23-scf00385 | 23 |
| AX-158229587 | 19 | 45.361 | KV453239.1 | 8159945 | 23-scf00385 | 23 |
| AX-158229588 | 19 | 45.361 | KV453239.1 | 8160364 | 23-scf00385 | 23 |
| AX-158229589 | 19 | 45.361 | KV453239.1 | 8162564 | 23-scf00385 | 23 |
| AX-158229590 | 19 | 45.361 | KV453239.1 | 8164241 | 23-scf00385 | 23 |
| AX-158229592 | 19 | 45.361 | KV453239.1 | 8166330 | 23-scf00385 | 23 |
| AX-158229607 | 19 | 45.361 | KV453239.1 | 8185652 | 23-scf00385 | 23 |

|              |    |        |            |         |             |    |
|--------------|----|--------|------------|---------|-------------|----|
| AX-157756816 | 19 | 45.361 | KV453239.1 | 8200103 | 23-scf00385 | 23 |
| AX-158229673 | 19 | 45.361 | KV453239.1 | 8306639 | 23-scf00385 | 23 |
| AX-158230035 | 19 | 45.361 | KV453239.1 | 8836771 | 23-scf00385 | 23 |
| AX-158229597 | 19 | 45.579 | KV453239.1 | 8173789 | 23-scf00385 | 23 |
| AX-157751403 | 19 | 45.579 | KV453239.1 | 8177157 | 23-scf00385 | 23 |
| AX-158229599 | 19 | 45.579 | KV453239.1 | 8178082 | 23-scf00385 | 23 |
| AX-158229601 | 19 | 45.579 | KV453239.1 | 8178856 | 23-scf00385 | 23 |
| AX-158229602 | 19 | 45.579 | KV453239.1 | 8180191 | 23-scf00385 | 23 |
| AX-158229603 | 19 | 45.579 | KV453239.1 | 8180825 | 23-scf00385 | 23 |
| AX-158229604 | 19 | 45.579 | KV453239.1 | 8182017 | 23-scf00385 | 23 |
| AX-158229608 | 19 | 45.579 | KV453239.1 | 8186181 | 23-scf00385 | 23 |
| AX-158229610 | 19 | 45.579 | KV453239.1 | 8190581 | 23-scf00385 | 23 |
| AX-158229611 | 19 | 45.579 | KV453239.1 | 8191148 | 23-scf00385 | 23 |
| AX-158229615 | 19 | 45.579 | KV453239.1 | 8196074 | 23-scf00385 | 23 |
| AX-158229617 | 19 | 45.579 | KV453239.1 | 8197629 | 23-scf00385 | 23 |
| AX-158229618 | 19 | 45.579 | KV453239.1 | 8199367 | 23-scf00385 | 23 |
| AX-158229622 | 19 | 45.579 | KV453239.1 | 8203815 | 23-scf00385 | 23 |
| AX-158229625 | 19 | 45.579 | KV453239.1 | 8206516 | 23-scf00385 | 23 |
| AX-158229626 | 19 | 45.579 | KV453239.1 | 8207691 | 23-scf00385 | 23 |
| AX-158229628 | 19 | 45.579 | KV453239.1 | 8211144 | 23-scf00385 | 23 |
| AX-158229629 | 19 | 45.579 | KV453239.1 | 8211762 | 23-scf00385 | 23 |
| AX-157840019 | 19 | 45.579 | KV453239.1 | 8217304 | 23-scf00385 | 23 |
| AX-157763900 | 19 | 45.579 | KV453239.1 | 8246655 | 23-scf00385 | 23 |
| AX-158229660 | 19 | 45.579 | KV453239.1 | 8281515 | 23-scf00385 | 23 |
| AX-158229676 | 19 | 45.579 | KV453239.1 | 8313197 | 23-scf00385 | 23 |
| AX-157716870 | 19 | 45.579 | KV453239.1 | 8345451 | 23-scf00385 | 23 |
| AX-158229702 | 19 | 45.579 | KV453239.1 | 8346528 | 23-scf00385 | 23 |
| AX-158229633 | 19 | 45.642 | KV453239.1 | 8219820 | 23-scf00385 | 23 |
| AX-158229635 | 19 | 45.642 | KV453239.1 | 8222822 | 23-scf00385 | 23 |
| AX-158229594 | 19 | 45.688 | KV453239.1 | 8171904 | 23-scf00385 | 23 |
| AX-158229620 | 19 | 45.688 | KV453239.1 | 8201318 | 23-scf00385 | 23 |
| AX-158229623 | 19 | 45.688 | KV453239.1 | 8204871 | 23-scf00385 | 23 |
| AX-158229630 | 19 | 45.688 | KV453239.1 | 8212357 | 23-scf00385 | 23 |
| AX-158229634 | 19 | 45.688 | KV453239.1 | 8222300 | 23-scf00385 | 23 |
| AX-158229638 | 19 | 45.688 | KV453239.1 | 8245006 | 23-scf00385 | 23 |
| AX-157741060 | 19 | 45.688 | KV453239.1 | 8247834 | 23-scf00385 | 23 |
| AX-158386794 | 19 | 45.688 | KV453239.1 | 8249857 | 23-scf00385 | 23 |
| AX-158229641 | 19 | 45.688 | KV453239.1 | 8250461 | 23-scf00385 | 23 |
| AX-158229642 | 19 | 45.688 | KV453239.1 | 8254107 | 23-scf00385 | 23 |
| AX-158229643 | 19 | 45.688 | KV453239.1 | 8256579 | 23-scf00385 | 23 |
| AX-158229644 | 19 | 45.688 | KV453239.1 | 8256889 | 23-scf00385 | 23 |
| AX-158229646 | 19 | 45.688 | KV453239.1 | 8260844 | 23-scf00385 | 23 |
| AX-158229648 | 19 | 45.688 | KV453239.1 | 8263065 | 23-scf00385 | 23 |
| AX-158229651 | 19 | 45.688 | KV453239.1 | 8268124 | 23-scf00385 | 23 |
| AX-158229652 | 19 | 45.688 | KV453239.1 | 8269668 | 23-scf00385 | 23 |
| AX-158229657 | 19 | 45.688 | KV453239.1 | 8273626 | 23-scf00385 | 23 |
| AX-158229658 | 19 | 45.688 | KV453239.1 | 8274779 | 23-scf00385 | 23 |
| AX-158229661 | 19 | 45.688 | KV453239.1 | 8286907 | 23-scf00385 | 23 |
| AX-158229663 | 19 | 45.688 | KV453239.1 | 8291064 | 23-scf00385 | 23 |
| AX-158229664 | 19 | 45.688 | KV453239.1 | 8293480 | 23-scf00385 | 23 |
| AX-158229667 | 19 | 45.688 | KV453239.1 | 8299991 | 23-scf00385 | 23 |

|              |    |        |            |         |             |    |
|--------------|----|--------|------------|---------|-------------|----|
| AX-158229670 | 19 | 45.688 | KV453239.1 | 8303784 | 23-scf00385 | 23 |
| AX-158229671 | 19 | 45.688 | KV453239.1 | 8303918 | 23-scf00385 | 23 |
| AX-157887405 | 19 | 45.688 | KV453239.1 | 8394001 | 23-scf00385 | 23 |
| AX-158229741 | 19 | 45.688 | KV453239.1 | 8403028 | 23-scf00385 | 23 |
| AX-158229824 | 19 | 45.688 | KV453239.1 | 8517825 | 23-scf00385 | 23 |
| AX-158229669 | 19 | 45.761 | KV453239.1 | 8302965 | 23-scf00385 | 23 |
| AX-158229672 | 19 | 45.829 | KV453239.1 | 8304533 | 23-scf00385 | 23 |
| AX-158229475 | 19 | 45.907 | KV453239.1 | 7989371 | 23-scf00385 | 23 |
| AX-158229675 | 19 | 45.907 | KV453239.1 | 8312157 | 23-scf00385 | 23 |
| AX-158229679 | 19 | 45.945 | KV453239.1 | 8315324 | 23-scf00385 | 23 |
| AX-158229659 | 19 | 45.975 | KV453239.1 | 8277961 | 23-scf00385 | 23 |
| AX-158229681 | 19 | 45.975 | KV453239.1 | 8316866 | 23-scf00385 | 23 |
| AX-158229685 | 19 | 46.016 | KV453239.1 | 8325089 | 23-scf00385 | 23 |
| AX-158229686 | 19 | 46.016 | KV453239.1 | 8325291 | 23-scf00385 | 23 |
| AX-158229687 | 19 | 46.235 | KV453239.1 | 8327282 | 23-scf00385 | 23 |
| AX-158229688 | 19 | 46.235 | KV453239.1 | 8327743 | 23-scf00385 | 23 |
| AX-158229690 | 19 | 46.235 | KV453239.1 | 8329930 | 23-scf00385 | 23 |
| AX-158229691 | 19 | 46.235 | KV453239.1 | 8330632 | 23-scf00385 | 23 |
| AX-158229692 | 19 | 46.235 | KV453239.1 | 8331274 | 23-scf00385 | 23 |
| AX-158229693 | 19 | 46.235 | KV453239.1 | 8332252 | 23-scf00385 | 23 |
| AX-158229694 | 19 | 46.235 | KV453239.1 | 8334867 | 23-scf00385 | 23 |
| AX-158229695 | 19 | 46.235 | KV453239.1 | 8338567 | 23-scf00385 | 23 |
| AX-158229699 | 19 | 46.235 | KV453239.1 | 8341751 | 23-scf00385 | 23 |
| AX-158229700 | 19 | 46.235 | KV453239.1 | 8343408 | 23-scf00385 | 23 |
| AX-158229703 | 19 | 46.235 | KV453239.1 | 8347542 | 23-scf00385 | 23 |
| AX-158229705 | 19 | 46.235 | KV453239.1 | 8349209 | 23-scf00385 | 23 |
| AX-158229707 | 19 | 46.235 | KV453239.1 | 8352493 | 23-scf00385 | 23 |
| AX-158229709 | 19 | 46.235 | KV453239.1 | 8356202 | 23-scf00385 | 23 |
| AX-158386796 | 19 | 46.39  | KV453239.1 | 8387211 | 23-scf00385 | 23 |
| AX-158229729 | 19 | 46.552 | KV453239.1 | 8388529 | 23-scf00385 | 23 |
| AX-158229731 | 19 | 46.567 | KV453239.1 | 8391922 | 23-scf00385 | 23 |
| AX-158229732 | 19 | 46.567 | KV453239.1 | 8392819 | 23-scf00385 | 23 |
| AX-158229734 | 19 | 46.567 | KV453239.1 | 8396863 | 23-scf00385 | 23 |
| AX-158229737 | 19 | 46.567 | KV453239.1 | 8400020 | 23-scf00385 | 23 |
| AX-158229740 | 19 | 46.567 | KV453239.1 | 8402609 | 23-scf00385 | 23 |
| AX-158229747 | 19 | 46.567 | KV453239.1 | 8415527 | 23-scf00385 | 23 |
| AX-158229748 | 19 | 46.567 | KV453239.1 | 8416663 | 23-scf00385 | 23 |
| AX-158380892 | 19 | 47     | KV453239.1 | 8096512 | 23-scf00385 | 23 |
| AX-158229744 | 19 | 47     | KV453239.1 | 8408974 | 23-scf00385 | 23 |
| AX-158229752 | 19 | 47     | KV453239.1 | 8421362 | 23-scf00385 | 23 |
| AX-158229753 | 19 | 47     | KV453239.1 | 8424959 | 23-scf00385 | 23 |
| AX-158229754 | 19 | 47     | KV453239.1 | 8425811 | 23-scf00385 | 23 |
| AX-158229755 | 19 | 47     | KV453239.1 | 8427309 | 23-scf00385 | 23 |
| AX-158229760 | 19 | 47     | KV453239.1 | 8436474 | 23-scf00385 | 23 |
| AX-158229766 | 19 | 47     | KV453239.1 | 8440354 | 23-scf00385 | 23 |
| AX-158229767 | 19 | 47     | KV453239.1 | 8443331 | 23-scf00385 | 23 |
| AX-158229770 | 19 | 47     | KV453239.1 | 8445665 | 23-scf00385 | 23 |
| AX-158229771 | 19 | 47     | KV453239.1 | 8445870 | 23-scf00385 | 23 |
| AX-158229772 | 19 | 47     | KV453239.1 | 8451950 | 23-scf00385 | 23 |
| AX-158229774 | 19 | 47     | KV453239.1 | 8454132 | 23-scf00385 | 23 |
| AX-158229775 | 19 | 47     | KV453239.1 | 8454656 | 23-scf00385 | 23 |

|              |    |        |            |         |             |    |
|--------------|----|--------|------------|---------|-------------|----|
| AX-158229776 | 19 | 47     | KV453239.1 | 8455278 | 23-scf00385 | 23 |
| AX-158229777 | 19 | 47     | KV453239.1 | 8455914 | 23-scf00385 | 23 |
| AX-158229779 | 19 | 47     | KV453239.1 | 8459686 | 23-scf00385 | 23 |
| AX-158229780 | 19 | 47     | KV453239.1 | 8461029 | 23-scf00385 | 23 |
| AX-158229784 | 19 | 47     | KV453239.1 | 8463662 | 23-scf00385 | 23 |
| AX-158229789 | 19 | 47     | KV453239.1 | 8469338 | 23-scf00385 | 23 |
| AX-158229792 | 19 | 47     | KV453239.1 | 8471705 | 23-scf00385 | 23 |
| AX-158229794 | 19 | 47     | KV453239.1 | 8476044 | 23-scf00385 | 23 |
| AX-158229796 | 19 | 47     | KV453239.1 | 8476685 | 23-scf00385 | 23 |
| AX-158229797 | 19 | 47     | KV453239.1 | 8478999 | 23-scf00385 | 23 |
| AX-157867161 | 19 | 47     | KV453239.1 | 8484396 | 23-scf00385 | 23 |
| AX-158229808 | 19 | 47     | KV453239.1 | 8494479 | 23-scf00385 | 23 |
| AX-158229809 | 19 | 47     | KV453239.1 | 8495210 | 23-scf00385 | 23 |
| AX-158229811 | 19 | 47     | KV453239.1 | 8498083 | 23-scf00385 | 23 |
| AX-158229812 | 19 | 47     | KV453239.1 | 8499872 | 23-scf00385 | 23 |
| AX-158229817 | 19 | 47     | KV453239.1 | 8505342 | 23-scf00385 | 23 |
| AX-158229818 | 19 | 47     | KV453239.1 | 8505771 | 23-scf00385 | 23 |
| AX-158229821 | 19 | 47     | KV453239.1 | 8511540 | 23-scf00385 | 23 |
| AX-158229822 | 19 | 47     | KV453239.1 | 8513008 | 23-scf00385 | 23 |
| AX-157773277 | 19 | 47     | KV453239.1 | 8523519 | 23-scf00385 | 23 |
| AX-158229853 | 19 | 47     | KV453239.1 | 8564086 | 23-scf00385 | 23 |
| AX-158229859 | 19 | 47     | KV453239.1 | 8576325 | 23-scf00385 | 23 |
| AX-157840043 | 19 | 47     | KV453239.1 | 8706877 | 23-scf00385 | 23 |
| AX-158229986 | 19 | 47     | KV453239.1 | 8782888 | 23-scf00385 | 23 |
| AX-158230051 | 19 | 47     | KV453239.1 | 8856651 | 23-scf00385 | 23 |
| AX-158230120 | 19 | 47     | KV453239.1 | 8949546 | 23-scf00385 | 23 |
| AX-158230131 | 19 | 47     | KV453239.1 | 8960304 | 23-scf00385 | 23 |
| AX-157757787 | 19 | 47     | KV453239.1 | 8972083 | 23-scf00385 | 23 |
| AX-158230176 | 19 | 47     | KV453239.1 | 9035802 | 23-scf00385 | 23 |
| AX-158230409 | 19 | 47     | KV453239.1 | 9385082 | 23-scf00385 | 23 |
| AX-158230419 | 19 | 47     | KV453239.1 | 9393633 | 23-scf00385 | 23 |
| AX-157723803 | 19 | 47     | KV453239.1 | 9433700 | 23-scf00385 | 23 |
| AX-158230517 | 19 | 47     | KV453243.1 | 428762  | 23-scf00581 | 23 |
| AX-158230548 | 19 | 47     | KV453243.1 | 559804  | 23-scf00581 | 23 |
| AX-158230550 | 19 | 47     | KV453243.1 | 566776  | 23-scf00581 | 23 |
| AX-158230941 | 19 | 47     | KV453243.1 | 1266555 | 23-scf00581 | 23 |
| AX-158230969 | 19 | 47     | KV453243.1 | 1305753 | 23-scf00581 | 23 |
| AX-158231029 | 19 | 47     | KV453243.1 | 1396452 | 23-scf00581 | 23 |
| AX-157840029 | 19 | 47.013 | KV453239.1 | 8530095 | 23-scf00385 | 23 |
| AX-158229746 | 19 | 47.109 | KV453239.1 | 8413755 | 23-scf00385 | 23 |
| AX-158229758 | 19 | 47.109 | KV453239.1 | 8432993 | 23-scf00385 | 23 |
| AX-158229765 | 19 | 47.109 | KV453239.1 | 8439869 | 23-scf00385 | 23 |
| AX-158229790 | 19 | 47.109 | KV453239.1 | 8470570 | 23-scf00385 | 23 |
| AX-157867160 | 19 | 47.109 | KV453239.1 | 8483889 | 23-scf00385 | 23 |
| AX-158229805 | 19 | 47.109 | KV453239.1 | 8492045 | 23-scf00385 | 23 |
| AX-157879894 | 19 | 47.109 | KV453239.1 | 8495615 | 23-scf00385 | 23 |
| AX-157757919 | 19 | 47.109 | KV453239.1 | 8512684 | 23-scf00385 | 23 |
| AX-158229825 | 19 | 47.109 | KV453239.1 | 8525608 | 23-scf00385 | 23 |
| AX-158229828 | 19 | 47.109 | KV453239.1 | 8532643 | 23-scf00385 | 23 |
| AX-157840031 | 19 | 47.109 | KV453239.1 | 8534883 | 23-scf00385 | 23 |
| AX-157840032 | 19 | 47.109 | KV453239.1 | 8536038 | 23-scf00385 | 23 |

|              |    |        |            |         |             |    |
|--------------|----|--------|------------|---------|-------------|----|
| AX-158229830 | 19 | 47.109 | KV453239.1 | 8538889 | 23-scf00385 | 23 |
| AX-158229832 | 19 | 47.109 | KV453239.1 | 8540412 | 23-scf00385 | 23 |
| AX-158229833 | 19 | 47.109 | KV453239.1 | 8541310 | 23-scf00385 | 23 |
| AX-158229837 | 19 | 47.109 | KV453239.1 | 8546777 | 23-scf00385 | 23 |
| AX-158229838 | 19 | 47.109 | KV453239.1 | 8548730 | 23-scf00385 | 23 |
| AX-158229839 | 19 | 47.109 | KV453239.1 | 8549443 | 23-scf00385 | 23 |
| AX-158229840 | 19 | 47.109 | KV453239.1 | 8549722 | 23-scf00385 | 23 |
| AX-157840035 | 19 | 47.109 | KV453239.1 | 8554279 | 23-scf00385 | 23 |
| AX-158229849 | 19 | 47.109 | KV453239.1 | 8559733 | 23-scf00385 | 23 |
| AX-158229851 | 19 | 47.109 | KV453239.1 | 8562897 | 23-scf00385 | 23 |
| AX-157840036 | 19 | 47.109 | KV453239.1 | 8564380 | 23-scf00385 | 23 |
| AX-157887406 | 19 | 47.109 | KV453239.1 | 8571848 | 23-scf00385 | 23 |
| AX-157859528 | 19 | 47.109 | KV453239.1 | 8583043 | 23-scf00385 | 23 |
| AX-157859529 | 19 | 47.109 | KV453239.1 | 8583134 | 23-scf00385 | 23 |
| AX-157859530 | 19 | 47.109 | KV453239.1 | 8583371 | 23-scf00385 | 23 |
| AX-158229862 | 19 | 47.109 | KV453239.1 | 8583920 | 23-scf00385 | 23 |
| AX-158229863 | 19 | 47.109 | KV453239.1 | 8586628 | 23-scf00385 | 23 |
| AX-158229864 | 19 | 47.109 | KV453239.1 | 8589370 | 23-scf00385 | 23 |
| AX-158229865 | 19 | 47.109 | KV453239.1 | 8589920 | 23-scf00385 | 23 |
| AX-158229866 | 19 | 47.109 | KV453239.1 | 8590399 | 23-scf00385 | 23 |
| AX-158229867 | 19 | 47.109 | KV453239.1 | 8590672 | 23-scf00385 | 23 |
| AX-158229868 | 19 | 47.109 | KV453239.1 | 8591968 | 23-scf00385 | 23 |
| AX-158229871 | 19 | 47.109 | KV453239.1 | 8597017 | 23-scf00385 | 23 |
| AX-158229872 | 19 | 47.109 | KV453239.1 | 8597450 | 23-scf00385 | 23 |
| AX-158229873 | 19 | 47.109 | KV453239.1 | 8597903 | 23-scf00385 | 23 |
| AX-158229874 | 19 | 47.109 | KV453239.1 | 8600070 | 23-scf00385 | 23 |
| AX-158229875 | 19 | 47.109 | KV453239.1 | 8602046 | 23-scf00385 | 23 |
| AX-158229877 | 19 | 47.109 | KV453239.1 | 8604592 | 23-scf00385 | 23 |
| AX-158229878 | 19 | 47.109 | KV453239.1 | 8604996 | 23-scf00385 | 23 |
| AX-158229879 | 19 | 47.109 | KV453239.1 | 8608229 | 23-scf00385 | 23 |
| AX-158229880 | 19 | 47.109 | KV453239.1 | 8608443 | 23-scf00385 | 23 |
| AX-157840037 | 19 | 47.109 | KV453239.1 | 8609461 | 23-scf00385 | 23 |
| AX-158229881 | 19 | 47.109 | KV453239.1 | 8609809 | 23-scf00385 | 23 |
| AX-157739469 | 19 | 47.109 | KV453239.1 | 8610041 | 23-scf00385 | 23 |
| AX-158229882 | 19 | 47.109 | KV453239.1 | 8610132 | 23-scf00385 | 23 |
| AX-158229884 | 19 | 47.109 | KV453239.1 | 8611582 | 23-scf00385 | 23 |
| AX-158229885 | 19 | 47.109 | KV453239.1 | 8614545 | 23-scf00385 | 23 |
| AX-158229886 | 19 | 47.109 | KV453239.1 | 8615303 | 23-scf00385 | 23 |
| AX-158229887 | 19 | 47.109 | KV453239.1 | 8617312 | 23-scf00385 | 23 |
| AX-158229888 | 19 | 47.109 | KV453239.1 | 8617757 | 23-scf00385 | 23 |
| AX-158229889 | 19 | 47.109 | KV453239.1 | 8619769 | 23-scf00385 | 23 |
| AX-158229891 | 19 | 47.109 | KV453239.1 | 8621239 | 23-scf00385 | 23 |
| AX-157872462 | 19 | 47.109 | KV453239.1 | 8621745 | 23-scf00385 | 23 |
| AX-158229892 | 19 | 47.109 | KV453239.1 | 8622998 | 23-scf00385 | 23 |
| AX-158415097 | 19 | 47.109 | KV453239.1 | 8623655 | 23-scf00385 | 23 |
| AX-158229893 | 19 | 47.109 | KV453239.1 | 8624851 | 23-scf00385 | 23 |
| AX-158229894 | 19 | 47.109 | KV453239.1 | 8626802 | 23-scf00385 | 23 |
| AX-158229895 | 19 | 47.109 | KV453239.1 | 8627918 | 23-scf00385 | 23 |
| AX-158229898 | 19 | 47.109 | KV453239.1 | 8633066 | 23-scf00385 | 23 |
| AX-158229900 | 19 | 47.109 | KV453239.1 | 8636636 | 23-scf00385 | 23 |
| AX-158229901 | 19 | 47.109 | KV453239.1 | 8636991 | 23-scf00385 | 23 |



|              |    |        |            |         |             |    |
|--------------|----|--------|------------|---------|-------------|----|
| AX-158229907 | 19 | 47.109 | KV453239.1 | 8644430 | 23-scf00385 | 23 |
| AX-158229908 | 19 | 47.109 | KV453239.1 | 8645343 | 23-scf00385 | 23 |
| AX-158229909 | 19 | 47.109 | KV453239.1 | 8646742 | 23-scf00385 | 23 |
| AX-158229910 | 19 | 47.109 | KV453239.1 | 8647434 | 23-scf00385 | 23 |
| AX-158229911 | 19 | 47.109 | KV453239.1 | 8647892 | 23-scf00385 | 23 |
| AX-157840039 | 19 | 47.109 | KV453239.1 | 8649852 | 23-scf00385 | 23 |
| AX-158229912 | 19 | 47.109 | KV453239.1 | 8650804 | 23-scf00385 | 23 |
| AX-158229913 | 19 | 47.109 | KV453239.1 | 8651173 | 23-scf00385 | 23 |
| AX-158229914 | 19 | 47.109 | KV453239.1 | 8653714 | 23-scf00385 | 23 |
| AX-158229915 | 19 | 47.109 | KV453239.1 | 8654641 | 23-scf00385 | 23 |
| AX-158229916 | 19 | 47.109 | KV453239.1 | 8655779 | 23-scf00385 | 23 |
| AX-158229917 | 19 | 47.109 | KV453239.1 | 8656195 | 23-scf00385 | 23 |
| AX-158229918 | 19 | 47.109 | KV453239.1 | 8659093 | 23-scf00385 | 23 |
| AX-157725687 | 19 | 47.109 | KV453239.1 | 8662211 | 23-scf00385 | 23 |
| AX-158229920 | 19 | 47.109 | KV453239.1 | 8662261 | 23-scf00385 | 23 |
| AX-158229921 | 19 | 47.109 | KV453239.1 | 8662740 | 23-scf00385 | 23 |
| AX-158229922 | 19 | 47.109 | KV453239.1 | 8663576 | 23-scf00385 | 23 |
| AX-158229923 | 19 | 47.109 | KV453239.1 | 8664174 | 23-scf00385 | 23 |
| AX-158229924 | 19 | 47.109 | KV453239.1 | 8665142 | 23-scf00385 | 23 |
| AX-158229925 | 19 | 47.109 | KV453239.1 | 8665501 | 23-scf00385 | 23 |
| AX-158229928 | 19 | 47.109 | KV453239.1 | 8668091 | 23-scf00385 | 23 |
| AX-157840040 | 19 | 47.109 | KV453239.1 | 8668795 | 23-scf00385 | 23 |
| AX-158229933 | 19 | 47.109 | KV453239.1 | 8677328 | 23-scf00385 | 23 |
| AX-158229935 | 19 | 47.109 | KV453239.1 | 8678940 | 23-scf00385 | 23 |
| AX-157887408 | 19 | 47.109 | KV453239.1 | 8679900 | 23-scf00385 | 23 |
| AX-157699153 | 19 | 47.109 | KV453239.1 | 8681863 | 23-scf00385 | 23 |
| AX-158229938 | 19 | 47.109 | KV453239.1 | 8682763 | 23-scf00385 | 23 |
| AX-158410382 | 19 | 47.109 | KV453239.1 | 8685982 | 23-scf00385 | 23 |
| AX-158229940 | 19 | 47.109 | KV453239.1 | 8690482 | 23-scf00385 | 23 |
| AX-158229941 | 19 | 47.109 | KV453239.1 | 8692608 | 23-scf00385 | 23 |
| AX-158229942 | 19 | 47.109 | KV453239.1 | 8693581 | 23-scf00385 | 23 |
| AX-158229943 | 19 | 47.109 | KV453239.1 | 8694242 | 23-scf00385 | 23 |
| AX-158229944 | 19 | 47.109 | KV453239.1 | 8696776 | 23-scf00385 | 23 |
| AX-157699937 | 19 | 47.109 | KV453239.1 | 8699477 | 23-scf00385 | 23 |
| AX-158229950 | 19 | 47.109 | KV453239.1 | 8710467 | 23-scf00385 | 23 |
| AX-158229960 | 19 | 47.109 | KV453239.1 | 8732678 | 23-scf00385 | 23 |
| AX-157840046 | 19 | 47.109 | KV453239.1 | 8733386 | 23-scf00385 | 23 |
| AX-158229961 | 19 | 47.109 | KV453239.1 | 8740741 | 23-scf00385 | 23 |
| AX-158230011 | 19 | 47.109 | KV453239.1 | 8803261 | 23-scf00385 | 23 |
| AX-158230012 | 19 | 47.109 | KV453239.1 | 8803479 | 23-scf00385 | 23 |
| AX-157840064 | 19 | 47.109 | KV453239.1 | 8938591 | 23-scf00385 | 23 |
| AX-158230128 | 19 | 47.109 | KV453239.1 | 8955464 | 23-scf00385 | 23 |
| AX-158230150 | 19 | 47.109 | KV453239.1 | 8998296 | 23-scf00385 | 23 |
| AX-158230172 | 19 | 47.109 | KV453239.1 | 9030326 | 23-scf00385 | 23 |
| AX-158230193 | 19 | 47.109 | KV453239.1 | 9058141 | 23-scf00385 | 23 |
| AX-157840075 | 19 | 47.109 | KV453239.1 | 9115989 | 23-scf00385 | 23 |
| AX-157887414 | 19 | 47.109 | KV453239.1 | 9258609 | 23-scf00385 | 23 |
| AX-157694620 | 19 | 47.109 | KV453239.1 | 9284363 | 23-scf00385 | 23 |
| AX-158230564 | 19 | 47.109 | KV453243.1 | 618769  | 23-scf00581 | 23 |
| AX-157725080 | 19 | 47.109 | KV453243.1 | 856125  | 23-scf00581 | 23 |
| AX-158230724 | 19 | 47.109 | KV453243.1 | 940629  | 23-scf00581 | 23 |

|              |    |        |            |         |             |    |
|--------------|----|--------|------------|---------|-------------|----|
| AX-158230794 | 19 | 47.109 | KV453243.1 | 1053608 | 23-scf00581 | 23 |
| AX-158230891 | 19 | 47.109 | KV453243.1 | 1199102 | 23-scf00581 | 23 |
| AX-158231044 | 19 | 47.109 | KV453243.1 | 1422269 | 23-scf00581 | 23 |
| AX-158231102 | 19 | 47.109 | KV453243.1 | 1518553 | 23-scf00581 | 23 |
| AX-158231111 | 19 | 47.109 | KV453243.1 | 1534238 | 23-scf00581 | 23 |
| AX-158231284 | 19 | 47.109 | KV453243.1 | 1949532 | 23-scf00581 | 23 |
| AX-157840214 | 19 | 47.109 | KV453243.1 | 2486807 | 23-scf00581 | 23 |
| AX-158231584 | 19 | 47.109 | KV453243.1 | 2502593 | 23-scf00581 | 23 |
| AX-158231585 | 19 | 47.109 | KV453243.1 | 2502675 | 23-scf00581 | 23 |
| AX-157867181 | 19 | 47.109 | KV453243.1 | 2504131 | 23-scf00581 | 23 |
| AX-158231632 | 19 | 47.109 | KV453243.1 | 2647749 | 23-scf00581 | 23 |
| AX-158231641 | 19 | 47.109 | KV453243.1 | 2661268 | 23-scf00581 | 23 |
| AX-157751534 | 19 | 47.109 | KV453243.1 | 2863690 | 23-scf00581 | 23 |
| AX-158231937 | 19 | 47.109 | KV453243.1 | 3052124 | 23-scf00581 | 23 |
| AX-157840041 | 19 | 47.161 | KV453239.1 | 8676457 | 23-scf00385 | 23 |
| AX-158229957 | 19 | 47.161 | KV453239.1 | 8730330 | 23-scf00385 | 23 |
| AX-158229959 | 19 | 47.161 | KV453239.1 | 8731600 | 23-scf00385 | 23 |
| AX-157755429 | 19 | 47.218 | KV453239.1 | 7961202 | 23-scf00385 | 23 |
| AX-157714530 | 19 | 47.218 | KV453239.1 | 8535533 | 23-scf00385 | 23 |
| AX-157859531 | 19 | 47.218 | KV453239.1 | 8599112 | 23-scf00385 | 23 |
| AX-158229883 | 19 | 47.218 | KV453239.1 | 8610902 | 23-scf00385 | 23 |
| AX-158229905 | 19 | 47.218 | KV453239.1 | 8642348 | 23-scf00385 | 23 |
| AX-157840038 | 19 | 47.218 | KV453239.1 | 8642788 | 23-scf00385 | 23 |
| AX-158229906 | 19 | 47.218 | KV453239.1 | 8643865 | 23-scf00385 | 23 |
| AX-157859533 | 19 | 47.218 | KV453239.1 | 8649653 | 23-scf00385 | 23 |
| AX-158229926 | 19 | 47.218 | KV453239.1 | 8665871 | 23-scf00385 | 23 |
| AX-158229951 | 19 | 47.218 | KV453239.1 | 8712448 | 23-scf00385 | 23 |
| AX-158229954 | 19 | 47.218 | KV453239.1 | 8717074 | 23-scf00385 | 23 |
| AX-157840045 | 19 | 47.218 | KV453239.1 | 8731316 | 23-scf00385 | 23 |
| AX-157840047 | 19 | 47.218 | KV453239.1 | 8745731 | 23-scf00385 | 23 |
| AX-158229967 | 19 | 47.218 | KV453239.1 | 8754985 | 23-scf00385 | 23 |
| AX-158229970 | 19 | 47.218 | KV453239.1 | 8761234 | 23-scf00385 | 23 |
| AX-158229971 | 19 | 47.218 | KV453239.1 | 8761589 | 23-scf00385 | 23 |
| AX-158229973 | 19 | 47.218 | KV453239.1 | 8766009 | 23-scf00385 | 23 |
| AX-158229974 | 19 | 47.218 | KV453239.1 | 8767524 | 23-scf00385 | 23 |
| AX-158229978 | 19 | 47.218 | KV453239.1 | 8772684 | 23-scf00385 | 23 |
| AX-157740411 | 19 | 47.218 | KV453239.1 | 8773959 | 23-scf00385 | 23 |
| AX-158229985 | 19 | 47.218 | KV453239.1 | 8781049 | 23-scf00385 | 23 |
| AX-157772577 | 19 | 47.218 | KV453239.1 | 8781579 | 23-scf00385 | 23 |
| AX-158229995 | 19 | 47.218 | KV453239.1 | 8792729 | 23-scf00385 | 23 |
| AX-158229996 | 19 | 47.218 | KV453239.1 | 8793101 | 23-scf00385 | 23 |
| AX-158229998 | 19 | 47.218 | KV453239.1 | 8794709 | 23-scf00385 | 23 |
| AX-158229999 | 19 | 47.218 | KV453239.1 | 8795149 | 23-scf00385 | 23 |
| AX-158230001 | 19 | 47.218 | KV453239.1 | 8796405 | 23-scf00385 | 23 |
| AX-158230002 | 19 | 47.218 | KV453239.1 | 8796669 | 23-scf00385 | 23 |
| AX-158230003 | 19 | 47.218 | KV453239.1 | 8798148 | 23-scf00385 | 23 |
| AX-157748664 | 19 | 47.218 | KV453239.1 | 8798309 | 23-scf00385 | 23 |
| AX-158230043 | 19 | 47.218 | KV453239.1 | 8849556 | 23-scf00385 | 23 |
| AX-158230054 | 19 | 47.218 | KV453239.1 | 8858925 | 23-scf00385 | 23 |
| AX-158230088 | 19 | 47.218 | KV453239.1 | 8902650 | 23-scf00385 | 23 |
| AX-158230129 | 19 | 47.218 | KV453239.1 | 8957314 | 23-scf00385 | 23 |

|              |    |        |            |         |             |    |
|--------------|----|--------|------------|---------|-------------|----|
| AX-158230138 | 19 | 47.218 | KV453239.1 | 8970269 | 23-scf00385 | 23 |
| AX-158230164 | 19 | 47.218 | KV453239.1 | 9018687 | 23-scf00385 | 23 |
| AX-157840072 | 19 | 47.218 | KV453239.1 | 9023204 | 23-scf00385 | 23 |
| AX-157840161 | 19 | 47.218 | KV453243.1 | 1186498 | 23-scf00581 | 23 |
| AX-158230006 | 19 | 47.274 | KV453239.1 | 8799328 | 23-scf00385 | 23 |
| AX-158229783 | 19 | 47.327 | KV453239.1 | 8463560 | 23-scf00385 | 23 |
| AX-158229813 | 19 | 47.327 | KV453239.1 | 8500444 | 23-scf00385 | 23 |
| AX-158229814 | 19 | 47.327 | KV453239.1 | 8500505 | 23-scf00385 | 23 |
| AX-157840034 | 19 | 47.327 | KV453239.1 | 8536710 | 23-scf00385 | 23 |
| AX-158229980 | 19 | 47.327 | KV453239.1 | 8775127 | 23-scf00385 | 23 |
| AX-158229982 | 19 | 47.327 | KV453239.1 | 8778936 | 23-scf00385 | 23 |
| AX-158230004 | 19 | 47.327 | KV453239.1 | 8798703 | 23-scf00385 | 23 |
| AX-158230005 | 19 | 47.327 | KV453239.1 | 8799072 | 23-scf00385 | 23 |
| AX-158230008 | 19 | 47.327 | KV453239.1 | 8800490 | 23-scf00385 | 23 |
| AX-157746209 | 19 | 47.327 | KV453239.1 | 8804719 | 23-scf00385 | 23 |
| AX-158230013 | 19 | 47.327 | KV453239.1 | 8805644 | 23-scf00385 | 23 |
| AX-158230017 | 19 | 47.327 | KV453239.1 | 8809923 | 23-scf00385 | 23 |
| AX-158230018 | 19 | 47.327 | KV453239.1 | 8811767 | 23-scf00385 | 23 |
| AX-158230019 | 19 | 47.327 | KV453239.1 | 8812523 | 23-scf00385 | 23 |
| AX-157840052 | 19 | 47.327 | KV453239.1 | 8814826 | 23-scf00385 | 23 |
| AX-158230021 | 19 | 47.327 | KV453239.1 | 8817332 | 23-scf00385 | 23 |
| AX-158230022 | 19 | 47.327 | KV453239.1 | 8818920 | 23-scf00385 | 23 |
| AX-158230023 | 19 | 47.327 | KV453239.1 | 8823122 | 23-scf00385 | 23 |
| AX-158230024 | 19 | 47.327 | KV453239.1 | 8823832 | 23-scf00385 | 23 |
| AX-157840053 | 19 | 47.327 | KV453239.1 | 8824746 | 23-scf00385 | 23 |
| AX-157773513 | 19 | 47.327 | KV453239.1 | 8826698 | 23-scf00385 | 23 |
| AX-158230026 | 19 | 47.327 | KV453239.1 | 8826735 | 23-scf00385 | 23 |
| AX-158230027 | 19 | 47.327 | KV453239.1 | 8826882 | 23-scf00385 | 23 |
| AX-158230029 | 19 | 47.327 | KV453239.1 | 8827976 | 23-scf00385 | 23 |
| AX-158230031 | 19 | 47.327 | KV453239.1 | 8832401 | 23-scf00385 | 23 |
| AX-158230032 | 19 | 47.327 | KV453239.1 | 8832724 | 23-scf00385 | 23 |
| AX-158230034 | 19 | 47.327 | KV453239.1 | 8835065 | 23-scf00385 | 23 |
| AX-158230037 | 19 | 47.327 | KV453239.1 | 8840837 | 23-scf00385 | 23 |
| AX-157718257 | 19 | 47.327 | KV453239.1 | 8843237 | 23-scf00385 | 23 |
| AX-157753826 | 19 | 47.327 | KV453239.1 | 8843885 | 23-scf00385 | 23 |
| AX-158230039 | 19 | 47.327 | KV453239.1 | 8847106 | 23-scf00385 | 23 |
| AX-158230041 | 19 | 47.327 | KV453239.1 | 8847944 | 23-scf00385 | 23 |
| AX-158230042 | 19 | 47.327 | KV453239.1 | 8848904 | 23-scf00385 | 23 |
| AX-157859537 | 19 | 47.327 | KV453239.1 | 8850253 | 23-scf00385 | 23 |
| AX-158230045 | 19 | 47.327 | KV453239.1 | 8850458 | 23-scf00385 | 23 |
| AX-158230053 | 19 | 47.327 | KV453239.1 | 8858419 | 23-scf00385 | 23 |
| AX-158230055 | 19 | 47.327 | KV453239.1 | 8859810 | 23-scf00385 | 23 |
| AX-158230056 | 19 | 47.327 | KV453239.1 | 8860847 | 23-scf00385 | 23 |
| AX-157840057 | 19 | 47.327 | KV453239.1 | 8861079 | 23-scf00385 | 23 |
| AX-158230057 | 19 | 47.327 | KV453239.1 | 8861237 | 23-scf00385 | 23 |
| AX-157742944 | 19 | 47.327 | KV453239.1 | 8861937 | 23-scf00385 | 23 |
| AX-158230058 | 19 | 47.327 | KV453239.1 | 8865916 | 23-scf00385 | 23 |
| AX-158230060 | 19 | 47.327 | KV453239.1 | 8868292 | 23-scf00385 | 23 |
| AX-158230065 | 19 | 47.327 | KV453239.1 | 8873686 | 23-scf00385 | 23 |
| AX-157840058 | 19 | 47.327 | KV453239.1 | 8874246 | 23-scf00385 | 23 |
| AX-158230074 | 19 | 47.327 | KV453239.1 | 8881948 | 23-scf00385 | 23 |

|              |    |        |             |         |             |    |
|--------------|----|--------|-------------|---------|-------------|----|
| AX-157840061 | 19 | 47.327 | KV453239.1  | 8889621 | 23-scf00385 | 23 |
| AX-158230079 | 19 | 47.327 | KV453239.1  | 8893614 | 23-scf00385 | 23 |
| AX-158230081 | 19 | 47.327 | KV453239.1  | 8895331 | 23-scf00385 | 23 |
| AX-158230083 | 19 | 47.327 | KV453239.1  | 8897132 | 23-scf00385 | 23 |
| AX-158230084 | 19 | 47.327 | KV453239.1  | 8897746 | 23-scf00385 | 23 |
| AX-158230085 | 19 | 47.327 | KV453239.1  | 8900784 | 23-scf00385 | 23 |
| AX-158230086 | 19 | 47.327 | KV453239.1  | 8901431 | 23-scf00385 | 23 |
| AX-158230087 | 19 | 47.327 | KV453239.1  | 8902167 | 23-scf00385 | 23 |
| AX-158230093 | 19 | 47.327 | KV453239.1  | 8910163 | 23-scf00385 | 23 |
| AX-158230095 | 19 | 47.327 | KV453239.1  | 8915715 | 23-scf00385 | 23 |
| AX-158230098 | 19 | 47.327 | KV453239.1  | 8919055 | 23-scf00385 | 23 |
| AX-158230100 | 19 | 47.327 | KV453239.1  | 8921577 | 23-scf00385 | 23 |
| AX-158230104 | 19 | 47.327 | KV453239.1  | 8927921 | 23-scf00385 | 23 |
| AX-158230109 | 19 | 47.327 | KV453239.1  | 8932319 | 23-scf00385 | 23 |
| AX-158230110 | 19 | 47.327 | KV453239.1  | 8932972 | 23-scf00385 | 23 |
| AX-158230114 | 19 | 47.327 | KV453239.1  | 8937490 | 23-scf00385 | 23 |
| AX-157840063 | 19 | 47.327 | KV453239.1  | 8938512 | 23-scf00385 | 23 |
| AX-158230119 | 19 | 47.327 | KV453239.1  | 8947600 | 23-scf00385 | 23 |
| AX-157840066 | 19 | 47.327 | KV453239.1  | 8959838 | 23-scf00385 | 23 |
| AX-158230133 | 19 | 47.327 | KV453239.1  | 8962951 | 23-scf00385 | 23 |
| AX-158230134 | 19 | 47.327 | KV453239.1  | 8963321 | 23-scf00385 | 23 |
| AX-158230197 | 19 | 47.327 | KV453239.1  | 9060355 | 23-scf00385 | 23 |
| AX-158230248 | 19 | 47.327 | KV453239.1  | 9157716 | 23-scf00385 | 23 |
| AX-158230875 | 19 | 47.327 | KV453243.1  | 1178692 | 23-scf00581 | 23 |
| AX-157705313 | 19 | 47.327 | 3ML01030250 | 141     | scf05844_1  | UN |
| AX-157705314 | 19 | 47.327 | 3ML01030250 | 443     | scf05844_1  | UN |
| AX-157887410 | 19 | 47.341 | KV453239.1  | 8940586 | 23-scf00385 | 23 |
| AX-157741869 | 19 | 47.389 | KV453239.1  | 8948647 | 23-scf00385 | 23 |
| AX-158229710 | 19 | 47.437 | KV453239.1  | 8357713 | 23-scf00385 | 23 |
| AX-158230015 | 19 | 47.437 | KV453239.1  | 8808696 | 23-scf00385 | 23 |
| AX-158230020 | 19 | 47.437 | KV453239.1  | 8815165 | 23-scf00385 | 23 |
| AX-158230063 | 19 | 47.437 | KV453239.1  | 8870323 | 23-scf00385 | 23 |
| AX-158230064 | 19 | 47.437 | KV453239.1  | 8871378 | 23-scf00385 | 23 |
| AX-157840059 | 19 | 47.437 | KV453239.1  | 8874450 | 23-scf00385 | 23 |
| AX-158230066 | 19 | 47.437 | KV453239.1  | 8875362 | 23-scf00385 | 23 |
| AX-158230069 | 19 | 47.437 | KV453239.1  | 8877712 | 23-scf00385 | 23 |
| AX-158230075 | 19 | 47.437 | KV453239.1  | 8883463 | 23-scf00385 | 23 |
| AX-158230076 | 19 | 47.437 | KV453239.1  | 8885322 | 23-scf00385 | 23 |
| AX-157840060 | 19 | 47.437 | KV453239.1  | 8887048 | 23-scf00385 | 23 |
| AX-157774815 | 19 | 47.437 | KV453239.1  | 8889384 | 23-scf00385 | 23 |
| AX-158230080 | 19 | 47.437 | KV453239.1  | 8894554 | 23-scf00385 | 23 |
| AX-157752884 | 19 | 47.437 | KV453239.1  | 8894965 | 23-scf00385 | 23 |
| AX-158230091 | 19 | 47.437 | KV453239.1  | 8909617 | 23-scf00385 | 23 |
| AX-158230094 | 19 | 47.437 | KV453239.1  | 8910859 | 23-scf00385 | 23 |
| AX-158230102 | 19 | 47.437 | KV453239.1  | 8923817 | 23-scf00385 | 23 |
| AX-158230121 | 19 | 47.437 | KV453239.1  | 8949964 | 23-scf00385 | 23 |
| AX-158230123 | 19 | 47.437 | KV453239.1  | 8952249 | 23-scf00385 | 23 |
| AX-158230124 | 19 | 47.437 | KV453239.1  | 8952747 | 23-scf00385 | 23 |
| AX-158230125 | 19 | 47.437 | KV453239.1  | 8953503 | 23-scf00385 | 23 |
| AX-158230126 | 19 | 47.437 | KV453239.1  | 8954609 | 23-scf00385 | 23 |
| AX-157757509 | 19 | 47.437 | KV453239.1  | 8976639 | 23-scf00385 | 23 |

|              |    |        |            |         |             |    |
|--------------|----|--------|------------|---------|-------------|----|
| AX-158230142 | 19 | 47.437 | KV453239.1 | 8980273 | 23-scf00385 | 23 |
| AX-158230143 | 19 | 47.437 | KV453239.1 | 8982028 | 23-scf00385 | 23 |
| AX-158230144 | 19 | 47.437 | KV453239.1 | 8985432 | 23-scf00385 | 23 |
| AX-158230148 | 19 | 47.437 | KV453239.1 | 8991257 | 23-scf00385 | 23 |
| AX-157840068 | 19 | 47.437 | KV453239.1 | 8994840 | 23-scf00385 | 23 |
| AX-158230153 | 19 | 47.437 | KV453239.1 | 9000674 | 23-scf00385 | 23 |
| AX-157840070 | 19 | 47.437 | KV453239.1 | 9002785 | 23-scf00385 | 23 |
| AX-158230159 | 19 | 47.437 | KV453239.1 | 9011776 | 23-scf00385 | 23 |
| AX-158230161 | 19 | 47.437 | KV453239.1 | 9015147 | 23-scf00385 | 23 |
| AX-158230162 | 19 | 47.437 | KV453239.1 | 9017815 | 23-scf00385 | 23 |
| AX-158230163 | 19 | 47.437 | KV453239.1 | 9018452 | 23-scf00385 | 23 |
| AX-157840073 | 19 | 47.437 | KV453239.1 | 9024485 | 23-scf00385 | 23 |
| AX-158230173 | 19 | 47.437 | KV453239.1 | 9031950 | 23-scf00385 | 23 |
| AX-158230174 | 19 | 47.437 | KV453239.1 | 9032415 | 23-scf00385 | 23 |
| AX-158230175 | 19 | 47.437 | KV453239.1 | 9035080 | 23-scf00385 | 23 |
| AX-158230177 | 19 | 47.437 | KV453239.1 | 9038644 | 23-scf00385 | 23 |
| AX-158230180 | 19 | 47.437 | KV453239.1 | 9042131 | 23-scf00385 | 23 |
| AX-158230181 | 19 | 47.437 | KV453239.1 | 9042372 | 23-scf00385 | 23 |
| AX-158230182 | 19 | 47.437 | KV453239.1 | 9043102 | 23-scf00385 | 23 |
| AX-158230183 | 19 | 47.437 | KV453239.1 | 9044034 | 23-scf00385 | 23 |
| AX-158230189 | 19 | 47.437 | KV453239.1 | 9050113 | 23-scf00385 | 23 |
| AX-158230191 | 19 | 47.437 | KV453239.1 | 9053676 | 23-scf00385 | 23 |
| AX-158230194 | 19 | 47.437 | KV453239.1 | 9058693 | 23-scf00385 | 23 |
| AX-158230212 | 19 | 47.437 | KV453239.1 | 9085527 | 23-scf00385 | 23 |
| AX-158230219 | 19 | 47.437 | KV453239.1 | 9089588 | 23-scf00385 | 23 |
| AX-158230227 | 19 | 47.437 | KV453239.1 | 9099292 | 23-scf00385 | 23 |
| AX-158230234 | 19 | 47.437 | KV453239.1 | 9123624 | 23-scf00385 | 23 |
| AX-157840077 | 19 | 47.437 | KV453239.1 | 9123664 | 23-scf00385 | 23 |
| AX-158230236 | 19 | 47.437 | KV453239.1 | 9125750 | 23-scf00385 | 23 |
| AX-157712149 | 19 | 47.437 | KV453239.1 | 9130600 | 23-scf00385 | 23 |
| AX-158230304 | 19 | 47.437 | KV453239.1 | 9262134 | 23-scf00385 | 23 |
| AX-158230307 | 19 | 47.437 | KV453239.1 | 9265470 | 23-scf00385 | 23 |
| AX-158230330 | 19 | 47.437 | KV453239.1 | 9284697 | 23-scf00385 | 23 |
| AX-158230350 | 19 | 47.437 | KV453239.1 | 9307766 | 23-scf00385 | 23 |
| AX-157840096 | 19 | 47.437 | KV453239.1 | 9347866 | 23-scf00385 | 23 |
| AX-157840097 | 19 | 47.437 | KV453239.1 | 9348291 | 23-scf00385 | 23 |
| AX-158230479 | 19 | 47.437 | KV453239.1 | 9487578 | 23-scf00385 | 23 |
| AX-158230530 | 19 | 47.437 | KV453243.1 | 484452  | 23-scf00581 | 23 |
| AX-158230531 | 19 | 47.437 | KV453243.1 | 485046  | 23-scf00581 | 23 |
| AX-157740572 | 19 | 47.437 | KV453243.1 | 485592  | 23-scf00581 | 23 |
| AX-157840114 | 19 | 47.437 | KV453243.1 | 496375  | 23-scf00581 | 23 |
| AX-158230552 | 19 | 47.437 | KV453243.1 | 574940  | 23-scf00581 | 23 |
| AX-158230553 | 19 | 47.437 | KV453243.1 | 576418  | 23-scf00581 | 23 |
| AX-158230557 | 19 | 47.437 | KV453243.1 | 597610  | 23-scf00581 | 23 |
| AX-158230593 | 19 | 47.437 | KV453243.1 | 692538  | 23-scf00581 | 23 |
| AX-158230665 | 19 | 47.437 | KV453243.1 | 850880  | 23-scf00581 | 23 |
| AX-157840136 | 19 | 47.437 | KV453243.1 | 988210  | 23-scf00581 | 23 |
| AX-158231227 | 19 | 47.437 | KV453243.1 | 1783437 | 23-scf00581 | 23 |
| AX-158231455 | 19 | 47.437 | KV453243.1 | 2318290 | 23-scf00581 | 23 |
| AX-158231473 | 19 | 47.437 | KV453243.1 | 2343431 | 23-scf00581 | 23 |
| AX-157680412 | 19 | 47.437 | KV453382.1 | 1993    | scf00665    | UN |

|              |    |        |            |         |             |    |
|--------------|----|--------|------------|---------|-------------|----|
| AX-157686060 | 19 | 47.437 | KV453382.1 | 4400    | scf00665    | UN |
| AX-158229745 | 19 | 47.45  | KV453239.1 | 8411966 | 23-scf00385 | 23 |
| AX-158229788 | 19 | 47.45  | KV453239.1 | 8468982 | 23-scf00385 | 23 |
| AX-158229929 | 19 | 47.45  | KV453239.1 | 8668402 | 23-scf00385 | 23 |
| AX-158229934 | 19 | 47.45  | KV453239.1 | 8678022 | 23-scf00385 | 23 |
| AX-157840044 | 19 | 47.45  | KV453239.1 | 8719872 | 23-scf00385 | 23 |
| AX-158418765 | 19 | 47.45  | KV453239.1 | 8737891 | 23-scf00385 | 23 |
| AX-158229975 | 19 | 47.45  | KV453239.1 | 8769961 | 23-scf00385 | 23 |
| AX-158229994 | 19 | 47.45  | KV453239.1 | 8789899 | 23-scf00385 | 23 |
| AX-158230116 | 19 | 47.45  | KV453239.1 | 8941247 | 23-scf00385 | 23 |
| AX-157859541 | 19 | 47.45  | KV453239.1 | 8960501 | 23-scf00385 | 23 |
| AX-157840069 | 19 | 47.45  | KV453239.1 | 8995896 | 23-scf00385 | 23 |
| AX-158230149 | 19 | 47.45  | KV453239.1 | 8996423 | 23-scf00385 | 23 |
| AX-158230151 | 19 | 47.45  | KV453239.1 | 8999017 | 23-scf00385 | 23 |
| AX-158230156 | 19 | 47.45  | KV453239.1 | 9005986 | 23-scf00385 | 23 |
| AX-158230185 | 19 | 47.45  | KV453239.1 | 9045643 | 23-scf00385 | 23 |
| AX-158230202 | 19 | 47.45  | KV453239.1 | 9068386 | 23-scf00385 | 23 |
| AX-158230207 | 19 | 47.45  | KV453239.1 | 9077369 | 23-scf00385 | 23 |
| AX-158230242 | 19 | 47.45  | KV453239.1 | 9143012 | 23-scf00385 | 23 |
| AX-157840087 | 19 | 47.45  | KV453239.1 | 9262860 | 23-scf00385 | 23 |
| AX-158230516 | 19 | 47.45  | KV453243.1 | 405483  | 23-scf00581 | 23 |
| AX-158230737 | 19 | 47.45  | KV453243.1 | 971956  | 23-scf00581 | 23 |
| AX-158230817 | 19 | 47.45  | KV453243.1 | 1096000 | 23-scf00581 | 23 |
| AX-158230877 | 19 | 47.45  | KV453243.1 | 1184309 | 23-scf00581 | 23 |
| AX-158230901 | 19 | 47.45  | KV453243.1 | 1209104 | 23-scf00581 | 23 |
| AX-157840162 | 19 | 47.45  | KV453243.1 | 1209616 | 23-scf00581 | 23 |
| AX-157742280 | 19 | 47.45  | KV453243.1 | 1230744 | 23-scf00581 | 23 |
| AX-158230953 | 19 | 47.45  | KV453243.1 | 1282716 | 23-scf00581 | 23 |
| AX-158230959 | 19 | 47.45  | KV453243.1 | 1290492 | 23-scf00581 | 23 |
| AX-158231504 | 19 | 47.45  | KV453243.1 | 2394666 | 23-scf00581 | 23 |
| AX-158231582 | 19 | 47.45  | KV453243.1 | 2498808 | 23-scf00581 | 23 |
| AX-158231625 | 19 | 47.45  | KV453243.1 | 2636927 | 23-scf00581 | 23 |
| AX-158231626 | 19 | 47.45  | KV453243.1 | 2638051 | 23-scf00581 | 23 |
| AX-158231628 | 19 | 47.45  | KV453243.1 | 2639838 | 23-scf00581 | 23 |
| AX-158231634 | 19 | 47.45  | KV453243.1 | 2651603 | 23-scf00581 | 23 |
| AX-158231638 | 19 | 47.45  | KV453243.1 | 2660183 | 23-scf00581 | 23 |
| AX-158231689 | 19 | 47.45  | KV453243.1 | 2730563 | 23-scf00581 | 23 |
| AX-157859555 | 19 | 47.45  | KV453243.1 | 2731351 | 23-scf00581 | 23 |
| AX-158231697 | 19 | 47.45  | KV453243.1 | 2737021 | 23-scf00581 | 23 |
| AX-158231752 | 19 | 47.45  | KV453243.1 | 2807503 | 23-scf00581 | 23 |
| AX-158231804 | 19 | 47.45  | KV453243.1 | 2894157 | 23-scf00581 | 23 |
| AX-158232081 | 19 | 47.45  | KV453243.1 | 3244435 | 23-scf00581 | 23 |
| AX-158230190 | 19 | 47.464 | KV453239.1 | 9050761 | 23-scf00385 | 23 |
| AX-158230208 | 19 | 47.482 | KV453239.1 | 9078486 | 23-scf00385 | 23 |
| AX-158230210 | 19 | 47.497 | KV453239.1 | 9080057 | 23-scf00385 | 23 |
| AX-158230092 | 19 | 47.512 | KV453239.1 | 8909954 | 23-scf00385 | 23 |
| AX-158230213 | 19 | 47.512 | KV453239.1 | 9085980 | 23-scf00385 | 23 |
| AX-158415107 | 19 | 47.512 | KV453239.1 | 9087303 | 23-scf00385 | 23 |
| AX-158230217 | 19 | 47.515 | KV453239.1 | 9088414 | 23-scf00385 | 23 |
| AX-158230218 | 19 | 47.515 | KV453239.1 | 9089211 | 23-scf00385 | 23 |
| AX-157710435 | 19 | 47.515 | KV453239.1 | 9125305 | 23-scf00385 | 23 |

|              |    |        |            |         |             |    |
|--------------|----|--------|------------|---------|-------------|----|
| AX-158230662 | 19 | 47.515 | KV453243.1 | 843943  | 23-scf00581 | 23 |
| AX-158231758 | 19 | 47.515 | KV453243.1 | 2817273 | 23-scf00581 | 23 |
| AX-158230232 | 19 | 47.522 | KV453239.1 | 9120176 | 23-scf00385 | 23 |
| AX-158230233 | 19 | 47.529 | KV453239.1 | 9120804 | 23-scf00385 | 23 |
| AX-158423276 | 19 | 47.529 | KV453239.1 | 9132342 | 23-scf00385 | 23 |
| AX-157708862 | 19 | 47.536 | KV453239.1 | 8649351 | 23-scf00385 | 23 |
| AX-158229932 | 19 | 47.536 | KV453239.1 | 8675986 | 23-scf00385 | 23 |
| AX-158230152 | 19 | 47.536 | KV453239.1 | 8999941 | 23-scf00385 | 23 |
| AX-157840076 | 19 | 47.536 | KV453239.1 | 9122490 | 23-scf00385 | 23 |
| AX-158229955 | 19 | 47.546 | KV453239.1 | 8723189 | 23-scf00385 | 23 |
| AX-157887411 | 19 | 47.546 | KV453239.1 | 8945006 | 23-scf00385 | 23 |
| AX-157840081 | 19 | 47.546 | KV453239.1 | 9150130 | 23-scf00385 | 23 |
| AX-158230254 | 19 | 47.546 | KV453239.1 | 9168128 | 23-scf00385 | 23 |
| AX-158230258 | 19 | 47.546 | KV453239.1 | 9181729 | 23-scf00385 | 23 |
| AX-158386801 | 19 | 47.546 | KV453239.1 | 9183096 | 23-scf00385 | 23 |
| AX-158230284 | 19 | 47.546 | KV453239.1 | 9231077 | 23-scf00385 | 23 |
| AX-158230285 | 19 | 47.546 | KV453239.1 | 9231497 | 23-scf00385 | 23 |
| AX-157770703 | 19 | 47.546 | KV453239.1 | 9232539 | 23-scf00385 | 23 |
| AX-157840086 | 19 | 47.546 | KV453239.1 | 9233063 | 23-scf00385 | 23 |
| AX-158230286 | 19 | 47.546 | KV453239.1 | 9233293 | 23-scf00385 | 23 |
| AX-157748820 | 19 | 47.546 | KV453239.1 | 9239579 | 23-scf00385 | 23 |
| AX-158230513 | 19 | 47.546 | KV453239.1 | 9547352 | 23-scf00385 | 23 |
| AX-158415125 | 19 | 47.546 | KV453243.1 | 606853  | 23-scf00581 | 23 |
| AX-158231031 | 19 | 47.546 | KV453243.1 | 1398744 | 23-scf00581 | 23 |
| AX-158231593 | 19 | 47.546 | KV453243.1 | 2536127 | 23-scf00581 | 23 |
| AX-158231633 | 19 | 47.546 | KV453243.1 | 2648774 | 23-scf00581 | 23 |
| AX-158231639 | 19 | 47.546 | KV453243.1 | 2660259 | 23-scf00581 | 23 |
| AX-158231725 | 19 | 47.546 | KV453243.1 | 2779281 | 23-scf00581 | 23 |
| AX-158231747 | 19 | 47.546 | KV453243.1 | 2802780 | 23-scf00581 | 23 |
| AX-158230322 | 19 | 47.571 | KV453239.1 | 9277454 | 23-scf00385 | 23 |
| AX-158230329 | 19 | 47.596 | KV453239.1 | 9283266 | 23-scf00385 | 23 |
| AX-157840089 | 19 | 47.623 | KV453239.1 | 9292028 | 23-scf00385 | 23 |
| AX-157741067 | 19 | 47.655 | KV453239.1 | 8335528 | 23-scf00385 | 23 |
| AX-158229697 | 19 | 47.655 | KV453239.1 | 8339694 | 23-scf00385 | 23 |
| AX-158229786 | 19 | 47.655 | KV453239.1 | 8465806 | 23-scf00385 | 23 |
| AX-158229930 | 19 | 47.655 | KV453239.1 | 8670926 | 23-scf00385 | 23 |
| AX-158229962 | 19 | 47.655 | KV453239.1 | 8747105 | 23-scf00385 | 23 |
| AX-158229988 | 19 | 47.655 | KV453239.1 | 8785227 | 23-scf00385 | 23 |
| AX-158230028 | 19 | 47.655 | KV453239.1 | 8827131 | 23-scf00385 | 23 |
| AX-158230112 | 19 | 47.655 | KV453239.1 | 8936141 | 23-scf00385 | 23 |
| AX-158230113 | 19 | 47.655 | KV453239.1 | 8937048 | 23-scf00385 | 23 |
| AX-157859538 | 19 | 47.655 | KV453239.1 | 8958066 | 23-scf00385 | 23 |
| AX-157840067 | 19 | 47.655 | KV453239.1 | 8974379 | 23-scf00385 | 23 |
| AX-158230186 | 19 | 47.655 | KV453239.1 | 9046149 | 23-scf00385 | 23 |
| AX-158230201 | 19 | 47.655 | KV453239.1 | 9066556 | 23-scf00385 | 23 |
| AX-158230204 | 19 | 47.655 | KV453239.1 | 9073081 | 23-scf00385 | 23 |
| AX-158230205 | 19 | 47.655 | KV453239.1 | 9075615 | 23-scf00385 | 23 |
| AX-158230209 | 19 | 47.655 | KV453239.1 | 9079553 | 23-scf00385 | 23 |
| AX-158230216 | 19 | 47.655 | KV453239.1 | 9087943 | 23-scf00385 | 23 |
| AX-158230223 | 19 | 47.655 | KV453239.1 | 9092909 | 23-scf00385 | 23 |
| AX-158230230 | 19 | 47.655 | KV453239.1 | 9107889 | 23-scf00385 | 23 |

|              |    |        |            |         |             |    |
|--------------|----|--------|------------|---------|-------------|----|
| AX-158230237 | 19 | 47.655 | KV453239.1 | 9131228 | 23-scf00385 | 23 |
| AX-158230239 | 19 | 47.655 | KV453239.1 | 9135196 | 23-scf00385 | 23 |
| AX-158230240 | 19 | 47.655 | KV453239.1 | 9135831 | 23-scf00385 | 23 |
| AX-158415111 | 19 | 47.655 | KV453239.1 | 9145573 | 23-scf00385 | 23 |
| AX-158230243 | 19 | 47.655 | KV453239.1 | 9145850 | 23-scf00385 | 23 |
| AX-158230244 | 19 | 47.655 | KV453239.1 | 9146847 | 23-scf00385 | 23 |
| AX-158230246 | 19 | 47.655 | KV453239.1 | 9151539 | 23-scf00385 | 23 |
| AX-158230250 | 19 | 47.655 | KV453239.1 | 9161435 | 23-scf00385 | 23 |
| AX-157726672 | 19 | 47.655 | KV453239.1 | 9166565 | 23-scf00385 | 23 |
| AX-158230252 | 19 | 47.655 | KV453239.1 | 9166882 | 23-scf00385 | 23 |
| AX-158230255 | 19 | 47.655 | KV453239.1 | 9173118 | 23-scf00385 | 23 |
| AX-157744591 | 19 | 47.655 | KV453239.1 | 9177741 | 23-scf00385 | 23 |
| AX-158230256 | 19 | 47.655 | KV453239.1 | 9179377 | 23-scf00385 | 23 |
| AX-157720546 | 19 | 47.655 | KV453239.1 | 9182596 | 23-scf00385 | 23 |
| AX-158230259 | 19 | 47.655 | KV453239.1 | 9183501 | 23-scf00385 | 23 |
| AX-157756920 | 19 | 47.655 | KV453239.1 | 9184105 | 23-scf00385 | 23 |
| AX-157840083 | 19 | 47.655 | KV453239.1 | 9197459 | 23-scf00385 | 23 |
| AX-158230266 | 19 | 47.655 | KV453239.1 | 9197726 | 23-scf00385 | 23 |
| AX-158230267 | 19 | 47.655 | KV453239.1 | 9199297 | 23-scf00385 | 23 |
| AX-158230268 | 19 | 47.655 | KV453239.1 | 9199852 | 23-scf00385 | 23 |
| AX-158230269 | 19 | 47.655 | KV453239.1 | 9200081 | 23-scf00385 | 23 |
| AX-158230270 | 19 | 47.655 | KV453239.1 | 9203672 | 23-scf00385 | 23 |
| AX-158230271 | 19 | 47.655 | KV453239.1 | 9204208 | 23-scf00385 | 23 |
| AX-158230272 | 19 | 47.655 | KV453239.1 | 9204793 | 23-scf00385 | 23 |
| AX-158230273 | 19 | 47.655 | KV453239.1 | 9206898 | 23-scf00385 | 23 |
| AX-157840084 | 19 | 47.655 | KV453239.1 | 9208056 | 23-scf00385 | 23 |
| AX-158230274 | 19 | 47.655 | KV453239.1 | 9213876 | 23-scf00385 | 23 |
| AX-158230275 | 19 | 47.655 | KV453239.1 | 9215638 | 23-scf00385 | 23 |
| AX-158230276 | 19 | 47.655 | KV453239.1 | 9216497 | 23-scf00385 | 23 |
| AX-158230277 | 19 | 47.655 | KV453239.1 | 9217095 | 23-scf00385 | 23 |
| AX-158230279 | 19 | 47.655 | KV453239.1 | 9225336 | 23-scf00385 | 23 |
| AX-157728460 | 19 | 47.655 | KV453239.1 | 9227118 | 23-scf00385 | 23 |
| AX-158230283 | 19 | 47.655 | KV453239.1 | 9230324 | 23-scf00385 | 23 |
| AX-158230288 | 19 | 47.655 | KV453239.1 | 9234717 | 23-scf00385 | 23 |
| AX-158230289 | 19 | 47.655 | KV453239.1 | 9235871 | 23-scf00385 | 23 |
| AX-158230290 | 19 | 47.655 | KV453239.1 | 9238155 | 23-scf00385 | 23 |
| AX-158230292 | 19 | 47.655 | KV453239.1 | 9241055 | 23-scf00385 | 23 |
| AX-158230293 | 19 | 47.655 | KV453239.1 | 9244900 | 23-scf00385 | 23 |
| AX-158230295 | 19 | 47.655 | KV453239.1 | 9247415 | 23-scf00385 | 23 |
| AX-158230298 | 19 | 47.655 | KV453239.1 | 9251691 | 23-scf00385 | 23 |
| AX-158230300 | 19 | 47.655 | KV453239.1 | 9254357 | 23-scf00385 | 23 |
| AX-158230301 | 19 | 47.655 | KV453239.1 | 9255891 | 23-scf00385 | 23 |
| AX-158230302 | 19 | 47.655 | KV453239.1 | 9256274 | 23-scf00385 | 23 |
| AX-157708210 | 19 | 47.655 | KV453239.1 | 9257918 | 23-scf00385 | 23 |
| AX-158230306 | 19 | 47.655 | KV453239.1 | 9263633 | 23-scf00385 | 23 |
| AX-158230308 | 19 | 47.655 | KV453239.1 | 9266192 | 23-scf00385 | 23 |
| AX-158230309 | 19 | 47.655 | KV453239.1 | 9266604 | 23-scf00385 | 23 |
| AX-158230310 | 19 | 47.655 | KV453239.1 | 9267555 | 23-scf00385 | 23 |
| AX-157872465 | 19 | 47.655 | KV453239.1 | 9271365 | 23-scf00385 | 23 |
| AX-158230315 | 19 | 47.655 | KV453239.1 | 9271657 | 23-scf00385 | 23 |
| AX-158230316 | 19 | 47.655 | KV453239.1 | 9272975 | 23-scf00385 | 23 |



|              |    |        |            |         |             |    |
|--------------|----|--------|------------|---------|-------------|----|
| AX-158230317 | 19 | 47.655 | KV453239.1 | 9273576 | 23-scf00385 | 23 |
| AX-158230319 | 19 | 47.655 | KV453239.1 | 9275330 | 23-scf00385 | 23 |
| AX-158230320 | 19 | 47.655 | KV453239.1 | 9275907 | 23-scf00385 | 23 |
| AX-158230323 | 19 | 47.655 | KV453239.1 | 9278691 | 23-scf00385 | 23 |
| AX-158230325 | 19 | 47.655 | KV453239.1 | 9279977 | 23-scf00385 | 23 |
| AX-158230326 | 19 | 47.655 | KV453239.1 | 9280713 | 23-scf00385 | 23 |
| AX-158230327 | 19 | 47.655 | KV453239.1 | 9281294 | 23-scf00385 | 23 |
| AX-158230331 | 19 | 47.655 | KV453239.1 | 9286402 | 23-scf00385 | 23 |
| AX-158230332 | 19 | 47.655 | KV453239.1 | 9288968 | 23-scf00385 | 23 |
| AX-158230333 | 19 | 47.655 | KV453239.1 | 9289634 | 23-scf00385 | 23 |
| AX-157840088 | 19 | 47.655 | KV453239.1 | 9290329 | 23-scf00385 | 23 |
| AX-158230336 | 19 | 47.655 | KV453239.1 | 9292825 | 23-scf00385 | 23 |
| AX-158230337 | 19 | 47.655 | KV453239.1 | 9294789 | 23-scf00385 | 23 |
| AX-157840090 | 19 | 47.655 | KV453239.1 | 9294828 | 23-scf00385 | 23 |
| AX-158230338 | 19 | 47.655 | KV453239.1 | 9296535 | 23-scf00385 | 23 |
| AX-158230339 | 19 | 47.655 | KV453239.1 | 9298397 | 23-scf00385 | 23 |
| AX-158230340 | 19 | 47.655 | KV453239.1 | 9299152 | 23-scf00385 | 23 |
| AX-158230341 | 19 | 47.655 | KV453239.1 | 9299851 | 23-scf00385 | 23 |
| AX-158230344 | 19 | 47.655 | KV453239.1 | 9304334 | 23-scf00385 | 23 |
| AX-158230347 | 19 | 47.655 | KV453239.1 | 9305849 | 23-scf00385 | 23 |
| AX-158230348 | 19 | 47.655 | KV453239.1 | 9306794 | 23-scf00385 | 23 |
| AX-158230349 | 19 | 47.655 | KV453239.1 | 9307272 | 23-scf00385 | 23 |
| AX-158230351 | 19 | 47.655 | KV453239.1 | 9309479 | 23-scf00385 | 23 |
| AX-158230353 | 19 | 47.655 | KV453239.1 | 9311470 | 23-scf00385 | 23 |
| AX-158230354 | 19 | 47.655 | KV453239.1 | 9314069 | 23-scf00385 | 23 |
| AX-158230355 | 19 | 47.655 | KV453239.1 | 9314327 | 23-scf00385 | 23 |
| AX-157840091 | 19 | 47.655 | KV453239.1 | 9315623 | 23-scf00385 | 23 |
| AX-158230356 | 19 | 47.655 | KV453239.1 | 9316705 | 23-scf00385 | 23 |
| AX-158410390 | 19 | 47.655 | KV453239.1 | 9318623 | 23-scf00385 | 23 |
| AX-157872466 | 19 | 47.655 | KV453239.1 | 9319439 | 23-scf00385 | 23 |
| AX-158230359 | 19 | 47.655 | KV453239.1 | 9320697 | 23-scf00385 | 23 |
| AX-158230361 | 19 | 47.655 | KV453239.1 | 9321575 | 23-scf00385 | 23 |
| AX-158230362 | 19 | 47.655 | KV453239.1 | 9321811 | 23-scf00385 | 23 |
| AX-158230363 | 19 | 47.655 | KV453239.1 | 9323080 | 23-scf00385 | 23 |
| AX-158230364 | 19 | 47.655 | KV453239.1 | 9323651 | 23-scf00385 | 23 |
| AX-157840092 | 19 | 47.655 | KV453239.1 | 9324325 | 23-scf00385 | 23 |
| AX-158230366 | 19 | 47.655 | KV453239.1 | 9324951 | 23-scf00385 | 23 |
| AX-158230367 | 19 | 47.655 | KV453239.1 | 9325244 | 23-scf00385 | 23 |
| AX-158230369 | 19 | 47.655 | KV453239.1 | 9326905 | 23-scf00385 | 23 |
| AX-157840093 | 19 | 47.655 | KV453239.1 | 9327149 | 23-scf00385 | 23 |
| AX-158230370 | 19 | 47.655 | KV453239.1 | 9327351 | 23-scf00385 | 23 |
| AX-158230371 | 19 | 47.655 | KV453239.1 | 9327681 | 23-scf00385 | 23 |
| AX-158230372 | 19 | 47.655 | KV453239.1 | 9328058 | 23-scf00385 | 23 |
| AX-157872467 | 19 | 47.655 | KV453239.1 | 9328372 | 23-scf00385 | 23 |
| AX-158230373 | 19 | 47.655 | KV453239.1 | 9328702 | 23-scf00385 | 23 |
| AX-157872468 | 19 | 47.655 | KV453239.1 | 9328987 | 23-scf00385 | 23 |
| AX-157872469 | 19 | 47.655 | KV453239.1 | 9332659 | 23-scf00385 | 23 |
| AX-157840095 | 19 | 47.655 | KV453239.1 | 9333375 | 23-scf00385 | 23 |
| AX-158230375 | 19 | 47.655 | KV453239.1 | 9336733 | 23-scf00385 | 23 |
| AX-158230376 | 19 | 47.655 | KV453239.1 | 9336993 | 23-scf00385 | 23 |
| AX-158230379 | 19 | 47.655 | KV453239.1 | 9340974 | 23-scf00385 | 23 |

|              |    |        |            |         |             |    |
|--------------|----|--------|------------|---------|-------------|----|
| AX-158230380 | 19 | 47.655 | KV453239.1 | 9342381 | 23-scf00385 | 23 |
| AX-158230381 | 19 | 47.655 | KV453239.1 | 9343974 | 23-scf00385 | 23 |
| AX-158230382 | 19 | 47.655 | KV453239.1 | 9344961 | 23-scf00385 | 23 |
| AX-158394148 | 19 | 47.655 | KV453239.1 | 9345197 | 23-scf00385 | 23 |
| AX-158230383 | 19 | 47.655 | KV453239.1 | 9345472 | 23-scf00385 | 23 |
| AX-158230384 | 19 | 47.655 | KV453239.1 | 9346266 | 23-scf00385 | 23 |
| AX-158230385 | 19 | 47.655 | KV453239.1 | 9347702 | 23-scf00385 | 23 |
| AX-158230386 | 19 | 47.655 | KV453239.1 | 9352853 | 23-scf00385 | 23 |
| AX-158230387 | 19 | 47.655 | KV453239.1 | 9353518 | 23-scf00385 | 23 |
| AX-158230389 | 19 | 47.655 | KV453239.1 | 9358077 | 23-scf00385 | 23 |
| AX-158230391 | 19 | 47.655 | KV453239.1 | 9361985 | 23-scf00385 | 23 |
| AX-158230395 | 19 | 47.655 | KV453239.1 | 9367560 | 23-scf00385 | 23 |
| AX-158230397 | 19 | 47.655 | KV453239.1 | 9369663 | 23-scf00385 | 23 |
| AX-158230398 | 19 | 47.655 | KV453239.1 | 9370683 | 23-scf00385 | 23 |
| AX-158230399 | 19 | 47.655 | KV453239.1 | 9371169 | 23-scf00385 | 23 |
| AX-158230400 | 19 | 47.655 | KV453239.1 | 9372020 | 23-scf00385 | 23 |
| AX-158230401 | 19 | 47.655 | KV453239.1 | 9372342 | 23-scf00385 | 23 |
| AX-158230402 | 19 | 47.655 | KV453239.1 | 9373583 | 23-scf00385 | 23 |
| AX-158230403 | 19 | 47.655 | KV453239.1 | 9375214 | 23-scf00385 | 23 |
| AX-158230405 | 19 | 47.655 | KV453239.1 | 9376719 | 23-scf00385 | 23 |
| AX-158230406 | 19 | 47.655 | KV453239.1 | 9377059 | 23-scf00385 | 23 |
| AX-157840098 | 19 | 47.655 | KV453239.1 | 9378623 | 23-scf00385 | 23 |
| AX-158230407 | 19 | 47.655 | KV453239.1 | 9382008 | 23-scf00385 | 23 |
| AX-158230408 | 19 | 47.655 | KV453239.1 | 9383699 | 23-scf00385 | 23 |
| AX-158230410 | 19 | 47.655 | KV453239.1 | 9385515 | 23-scf00385 | 23 |
| AX-158230413 | 19 | 47.655 | KV453239.1 | 9390124 | 23-scf00385 | 23 |
| AX-158230414 | 19 | 47.655 | KV453239.1 | 9390460 | 23-scf00385 | 23 |
| AX-158230415 | 19 | 47.655 | KV453239.1 | 9391005 | 23-scf00385 | 23 |
| AX-158230416 | 19 | 47.655 | KV453239.1 | 9391411 | 23-scf00385 | 23 |
| AX-158230420 | 19 | 47.655 | KV453239.1 | 9394850 | 23-scf00385 | 23 |
| AX-158230425 | 19 | 47.655 | KV453239.1 | 9396636 | 23-scf00385 | 23 |
| AX-158230426 | 19 | 47.655 | KV453239.1 | 9397184 | 23-scf00385 | 23 |
| AX-158230428 | 19 | 47.655 | KV453239.1 | 9400084 | 23-scf00385 | 23 |
| AX-157840100 | 19 | 47.655 | KV453239.1 | 9401497 | 23-scf00385 | 23 |
| AX-158230429 | 19 | 47.655 | KV453239.1 | 9401822 | 23-scf00385 | 23 |
| AX-158230430 | 19 | 47.655 | KV453239.1 | 9402174 | 23-scf00385 | 23 |
| AX-158230431 | 19 | 47.655 | KV453239.1 | 9403194 | 23-scf00385 | 23 |
| AX-158230433 | 19 | 47.655 | KV453239.1 | 9406371 | 23-scf00385 | 23 |
| AX-157840101 | 19 | 47.655 | KV453239.1 | 9406650 | 23-scf00385 | 23 |
| AX-158230434 | 19 | 47.655 | KV453239.1 | 9407776 | 23-scf00385 | 23 |
| AX-157840102 | 19 | 47.655 | KV453239.1 | 9411774 | 23-scf00385 | 23 |
| AX-157745614 | 19 | 47.655 | KV453239.1 | 9412943 | 23-scf00385 | 23 |
| AX-157872470 | 19 | 47.655 | KV453239.1 | 9414325 | 23-scf00385 | 23 |
| AX-158230435 | 19 | 47.655 | KV453239.1 | 9417078 | 23-scf00385 | 23 |
| AX-157872471 | 19 | 47.655 | KV453239.1 | 9424988 | 23-scf00385 | 23 |
| AX-157840103 | 19 | 47.655 | KV453239.1 | 9425153 | 23-scf00385 | 23 |
| AX-158230436 | 19 | 47.655 | KV453239.1 | 9425978 | 23-scf00385 | 23 |
| AX-158230437 | 19 | 47.655 | KV453239.1 | 9429755 | 23-scf00385 | 23 |
| AX-157757548 | 19 | 47.655 | KV453239.1 | 9432905 | 23-scf00385 | 23 |
| AX-157872472 | 19 | 47.655 | KV453239.1 | 9434747 | 23-scf00385 | 23 |
| AX-157872473 | 19 | 47.655 | KV453239.1 | 9435024 | 23-scf00385 | 23 |

|              |    |        |            |         |             |    |
|--------------|----|--------|------------|---------|-------------|----|
| AX-158230439 | 19 | 47.655 | KV453239.1 | 9437285 | 23-scf00385 | 23 |
| AX-158230440 | 19 | 47.655 | KV453239.1 | 9438289 | 23-scf00385 | 23 |
| AX-158230441 | 19 | 47.655 | KV453239.1 | 9440323 | 23-scf00385 | 23 |
| AX-158230445 | 19 | 47.655 | KV453239.1 | 9448539 | 23-scf00385 | 23 |
| AX-158230446 | 19 | 47.655 | KV453239.1 | 9451718 | 23-scf00385 | 23 |
| AX-158230447 | 19 | 47.655 | KV453239.1 | 9452212 | 23-scf00385 | 23 |
| AX-158230448 | 19 | 47.655 | KV453239.1 | 9453726 | 23-scf00385 | 23 |
| AX-158230449 | 19 | 47.655 | KV453239.1 | 9454480 | 23-scf00385 | 23 |
| AX-158394149 | 19 | 47.655 | KV453239.1 | 9455536 | 23-scf00385 | 23 |
| AX-158230451 | 19 | 47.655 | KV453239.1 | 9457214 | 23-scf00385 | 23 |
| AX-158230452 | 19 | 47.655 | KV453239.1 | 9459029 | 23-scf00385 | 23 |
| AX-158230453 | 19 | 47.655 | KV453239.1 | 9459721 | 23-scf00385 | 23 |
| AX-158230454 | 19 | 47.655 | KV453239.1 | 9460362 | 23-scf00385 | 23 |
| AX-158230455 | 19 | 47.655 | KV453239.1 | 9461072 | 23-scf00385 | 23 |
| AX-158394150 | 19 | 47.655 | KV453239.1 | 9461841 | 23-scf00385 | 23 |
| AX-158230457 | 19 | 47.655 | KV453239.1 | 9464307 | 23-scf00385 | 23 |
| AX-158394151 | 19 | 47.655 | KV453239.1 | 9465663 | 23-scf00385 | 23 |
| AX-158230462 | 19 | 47.655 | KV453239.1 | 9469648 | 23-scf00385 | 23 |
| AX-157715981 | 19 | 47.655 | KV453239.1 | 9470481 | 23-scf00385 | 23 |
| AX-158230463 | 19 | 47.655 | KV453239.1 | 9471354 | 23-scf00385 | 23 |
| AX-158230464 | 19 | 47.655 | KV453239.1 | 9472418 | 23-scf00385 | 23 |
| AX-157872476 | 19 | 47.655 | KV453239.1 | 9473188 | 23-scf00385 | 23 |
| AX-157872477 | 19 | 47.655 | KV453239.1 | 9473516 | 23-scf00385 | 23 |
| AX-158230465 | 19 | 47.655 | KV453239.1 | 9474314 | 23-scf00385 | 23 |
| AX-158230466 | 19 | 47.655 | KV453239.1 | 9475195 | 23-scf00385 | 23 |
| AX-158230467 | 19 | 47.655 | KV453239.1 | 9476192 | 23-scf00385 | 23 |
| AX-158230468 | 19 | 47.655 | KV453239.1 | 9476850 | 23-scf00385 | 23 |
| AX-158230469 | 19 | 47.655 | KV453239.1 | 9477557 | 23-scf00385 | 23 |
| AX-158230470 | 19 | 47.655 | KV453239.1 | 9477789 | 23-scf00385 | 23 |
| AX-158230472 | 19 | 47.655 | KV453239.1 | 9481857 | 23-scf00385 | 23 |
| AX-157887415 | 19 | 47.655 | KV453239.1 | 9482897 | 23-scf00385 | 23 |
| AX-158230474 | 19 | 47.655 | KV453239.1 | 9483141 | 23-scf00385 | 23 |
| AX-158230475 | 19 | 47.655 | KV453239.1 | 9484007 | 23-scf00385 | 23 |
| AX-157859543 | 19 | 47.655 | KV453239.1 | 9485113 | 23-scf00385 | 23 |
| AX-158230477 | 19 | 47.655 | KV453239.1 | 9486636 | 23-scf00385 | 23 |
| AX-157840107 | 19 | 47.655 | KV453239.1 | 9489916 | 23-scf00385 | 23 |
| AX-158230482 | 19 | 47.655 | KV453239.1 | 9490181 | 23-scf00385 | 23 |
| AX-158230483 | 19 | 47.655 | KV453239.1 | 9490752 | 23-scf00385 | 23 |
| AX-158230484 | 19 | 47.655 | KV453239.1 | 9492790 | 23-scf00385 | 23 |
| AX-158230485 | 19 | 47.655 | KV453239.1 | 9493551 | 23-scf00385 | 23 |
| AX-157840108 | 19 | 47.655 | KV453239.1 | 9500048 | 23-scf00385 | 23 |
| AX-158230489 | 19 | 47.655 | KV453239.1 | 9504953 | 23-scf00385 | 23 |
| AX-158230490 | 19 | 47.655 | KV453239.1 | 9507202 | 23-scf00385 | 23 |
| AX-158230491 | 19 | 47.655 | KV453239.1 | 9507998 | 23-scf00385 | 23 |
| AX-158230493 | 19 | 47.655 | KV453239.1 | 9515737 | 23-scf00385 | 23 |
| AX-158380898 | 19 | 47.655 | KV453239.1 | 9515897 | 23-scf00385 | 23 |
| AX-158230494 | 19 | 47.655 | KV453239.1 | 9516596 | 23-scf00385 | 23 |
| AX-158230495 | 19 | 47.655 | KV453239.1 | 9517370 | 23-scf00385 | 23 |
| AX-158230496 | 19 | 47.655 | KV453239.1 | 9520002 | 23-scf00385 | 23 |
| AX-158230497 | 19 | 47.655 | KV453239.1 | 9520238 | 23-scf00385 | 23 |
| AX-158230498 | 19 | 47.655 | KV453239.1 | 9521481 | 23-scf00385 | 23 |

|              |    |        |            |         |             |    |
|--------------|----|--------|------------|---------|-------------|----|
| AX-158230499 | 19 | 47.655 | KV453239.1 | 9522247 | 23-scf00385 | 23 |
| AX-158230501 | 19 | 47.655 | KV453239.1 | 9523624 | 23-scf00385 | 23 |
| AX-158230502 | 19 | 47.655 | KV453239.1 | 9525123 | 23-scf00385 | 23 |
| AX-158230504 | 19 | 47.655 | KV453239.1 | 9526957 | 23-scf00385 | 23 |
| AX-157840109 | 19 | 47.655 | KV453239.1 | 9530944 | 23-scf00385 | 23 |
| AX-158230507 | 19 | 47.655 | KV453239.1 | 9537588 | 23-scf00385 | 23 |
| AX-158230508 | 19 | 47.655 | KV453239.1 | 9537912 | 23-scf00385 | 23 |
| AX-158230509 | 19 | 47.655 | KV453239.1 | 9539838 | 23-scf00385 | 23 |
| AX-157840110 | 19 | 47.655 | KV453239.1 | 9541884 | 23-scf00385 | 23 |
| AX-158230510 | 19 | 47.655 | KV453239.1 | 9542307 | 23-scf00385 | 23 |
| AX-158230511 | 19 | 47.655 | KV453239.1 | 9543313 | 23-scf00385 | 23 |
| AX-158230512 | 19 | 47.655 | KV453239.1 | 9545391 | 23-scf00385 | 23 |
| AX-157859545 | 19 | 47.655 | KV453239.1 | 9556337 | 23-scf00385 | 23 |
| AX-157684924 | 19 | 47.655 | KV453242.1 | 82123   | 23-scf00565 | 23 |
| AX-157684920 | 19 | 47.655 | KV453242.1 | 413121  | 23-scf00565 | 23 |
| AX-157684919 | 19 | 47.655 | KV453242.1 | 438198  | 23-scf00565 | 23 |
| AX-157684917 | 19 | 47.655 | KV453242.1 | 544400  | 23-scf00565 | 23 |
| AX-158420407 | 19 | 47.655 | KV453242.1 | 736738  | 23-scf00565 | 23 |
| AX-157684912 | 19 | 47.655 | KV453242.1 | 783987  | 23-scf00565 | 23 |
| AX-157684933 | 19 | 47.655 | KV453240.1 | 439803  | 23-scf00566 | 23 |
| AX-157685009 | 19 | 47.655 | KV453243.1 | 219144  | 23-scf00581 | 23 |
| AX-157685008 | 19 | 47.655 | KV453243.1 | 220701  | 23-scf00581 | 23 |
| AX-157685006 | 19 | 47.655 | KV453243.1 | 311337  | 23-scf00581 | 23 |
| AX-158230522 | 19 | 47.655 | KV453243.1 | 467312  | 23-scf00581 | 23 |
| AX-158230535 | 19 | 47.655 | KV453243.1 | 524464  | 23-scf00581 | 23 |
| AX-158230536 | 19 | 47.655 | KV453243.1 | 527489  | 23-scf00581 | 23 |
| AX-157840119 | 19 | 47.655 | KV453243.1 | 527618  | 23-scf00581 | 23 |
| AX-158230537 | 19 | 47.655 | KV453243.1 | 529513  | 23-scf00581 | 23 |
| AX-158230538 | 19 | 47.655 | KV453243.1 | 530261  | 23-scf00581 | 23 |
| AX-157840120 | 19 | 47.655 | KV453243.1 | 532345  | 23-scf00581 | 23 |
| AX-158230539 | 19 | 47.655 | KV453243.1 | 533928  | 23-scf00581 | 23 |
| AX-158230540 | 19 | 47.655 | KV453243.1 | 534425  | 23-scf00581 | 23 |
| AX-158230541 | 19 | 47.655 | KV453243.1 | 534789  | 23-scf00581 | 23 |
| AX-158230543 | 19 | 47.655 | KV453243.1 | 537495  | 23-scf00581 | 23 |
| AX-158230546 | 19 | 47.655 | KV453243.1 | 553244  | 23-scf00581 | 23 |
| AX-158230547 | 19 | 47.655 | KV453243.1 | 556855  | 23-scf00581 | 23 |
| AX-158230569 | 19 | 47.655 | KV453243.1 | 635696  | 23-scf00581 | 23 |
| AX-158230580 | 19 | 47.655 | KV453243.1 | 666838  | 23-scf00581 | 23 |
| AX-158230583 | 19 | 47.655 | KV453243.1 | 669556  | 23-scf00581 | 23 |
| AX-158230586 | 19 | 47.655 | KV453243.1 | 672794  | 23-scf00581 | 23 |
| AX-158230587 | 19 | 47.655 | KV453243.1 | 674933  | 23-scf00581 | 23 |
| AX-158230588 | 19 | 47.655 | KV453243.1 | 676349  | 23-scf00581 | 23 |
| AX-158230590 | 19 | 47.655 | KV453243.1 | 685898  | 23-scf00581 | 23 |
| AX-158230591 | 19 | 47.655 | KV453243.1 | 688511  | 23-scf00581 | 23 |
| AX-158230592 | 19 | 47.655 | KV453243.1 | 688888  | 23-scf00581 | 23 |
| AX-158230594 | 19 | 47.655 | KV453243.1 | 701326  | 23-scf00581 | 23 |
| AX-158230596 | 19 | 47.655 | KV453243.1 | 712055  | 23-scf00581 | 23 |
| AX-157840125 | 19 | 47.655 | KV453243.1 | 722222  | 23-scf00581 | 23 |
| AX-158380899 | 19 | 47.655 | KV453243.1 | 751670  | 23-scf00581 | 23 |
| AX-157717159 | 19 | 47.655 | KV453243.1 | 751979  | 23-scf00581 | 23 |
| AX-157840126 | 19 | 47.655 | KV453243.1 | 755255  | 23-scf00581 | 23 |

|              |    |        |             |         |             |    |
|--------------|----|--------|-------------|---------|-------------|----|
| AX-158230621 | 19 | 47.655 | KV453243.1  | 779971  | 23-scf00581 | 23 |
| AX-158230622 | 19 | 47.655 | KV453243.1  | 780731  | 23-scf00581 | 23 |
| AX-158230626 | 19 | 47.655 | KV453243.1  | 784038  | 23-scf00581 | 23 |
| AX-158415130 | 19 | 47.655 | KV453243.1  | 787913  | 23-scf00581 | 23 |
| AX-158230636 | 19 | 47.655 | KV453243.1  | 809625  | 23-scf00581 | 23 |
| AX-158230638 | 19 | 47.655 | KV453243.1  | 811706  | 23-scf00581 | 23 |
| AX-158230642 | 19 | 47.655 | KV453243.1  | 818766  | 23-scf00581 | 23 |
| AX-158230646 | 19 | 47.655 | KV453243.1  | 824587  | 23-scf00581 | 23 |
| AX-158230647 | 19 | 47.655 | KV453243.1  | 824942  | 23-scf00581 | 23 |
| AX-158230648 | 19 | 47.655 | KV453243.1  | 825634  | 23-scf00581 | 23 |
| AX-158423282 | 19 | 47.655 | KV453243.1  | 827813  | 23-scf00581 | 23 |
| AX-158230651 | 19 | 47.655 | KV453243.1  | 831465  | 23-scf00581 | 23 |
| AX-158230652 | 19 | 47.655 | KV453243.1  | 831797  | 23-scf00581 | 23 |
| AX-158230653 | 19 | 47.655 | KV453243.1  | 832524  | 23-scf00581 | 23 |
| AX-158230655 | 19 | 47.655 | KV453243.1  | 833851  | 23-scf00581 | 23 |
| AX-158230657 | 19 | 47.655 | KV453243.1  | 837421  | 23-scf00581 | 23 |
| AX-158230660 | 19 | 47.655 | KV453243.1  | 842652  | 23-scf00581 | 23 |
| AX-158230661 | 19 | 47.655 | KV453243.1  | 843276  | 23-scf00581 | 23 |
| AX-158230673 | 19 | 47.655 | KV453243.1  | 859755  | 23-scf00581 | 23 |
| AX-158230677 | 19 | 47.655 | KV453243.1  | 865712  | 23-scf00581 | 23 |
| AX-158230684 | 19 | 47.655 | KV453243.1  | 871135  | 23-scf00581 | 23 |
| AX-157840128 | 19 | 47.655 | KV453243.1  | 871803  | 23-scf00581 | 23 |
| AX-157753729 | 19 | 47.655 | KV453243.1  | 872426  | 23-scf00581 | 23 |
| AX-158230690 | 19 | 47.655 | KV453243.1  | 880306  | 23-scf00581 | 23 |
| AX-158230691 | 19 | 47.655 | KV453243.1  | 880998  | 23-scf00581 | 23 |
| AX-158230697 | 19 | 47.655 | KV453243.1  | 885964  | 23-scf00581 | 23 |
| AX-158230700 | 19 | 47.655 | KV453243.1  | 892003  | 23-scf00581 | 23 |
| AX-158230711 | 19 | 47.655 | KV453243.1  | 902411  | 23-scf00581 | 23 |
| AX-157840131 | 19 | 47.655 | KV453243.1  | 948451  | 23-scf00581 | 23 |
| AX-158230732 | 19 | 47.655 | KV453243.1  | 966806  | 23-scf00581 | 23 |
| AX-157840133 | 19 | 47.655 | KV453243.1  | 967491  | 23-scf00581 | 23 |
| AX-157840135 | 19 | 47.655 | KV453243.1  | 987864  | 23-scf00581 | 23 |
| AX-158230760 | 19 | 47.655 | KV453243.1  | 1006166 | 23-scf00581 | 23 |
| AX-158230785 | 19 | 47.655 | KV453243.1  | 1040795 | 23-scf00581 | 23 |
| AX-158231009 | 19 | 47.655 | KV453243.1  | 1360345 | 23-scf00581 | 23 |
| AX-157686061 | 19 | 47.655 | KV453382.1  | 48946   | scf00665    | UN |
| AX-158421044 | 19 | 47.655 | 3ML01025833 | 1958    | scf01445_1  | UN |
| AX-157685877 | 19 | 47.655 | KV453807.1  | 27576   | scf01594    | UN |
| AX-158230717 | 19 | 47.873 | KV453243.1  | 922624  | 23-scf00581 | 23 |
| AX-158230721 | 19 | 47.873 | KV453243.1  | 932369  | 23-scf00581 | 23 |
| AX-158230722 | 19 | 47.873 | KV453243.1  | 932651  | 23-scf00581 | 23 |
| AX-158230723 | 19 | 47.873 | KV453243.1  | 933135  | 23-scf00581 | 23 |
| AX-157840129 | 19 | 47.873 | KV453243.1  | 933788  | 23-scf00581 | 23 |
| AX-157872481 | 19 | 47.873 | KV453243.1  | 940089  | 23-scf00581 | 23 |
| AX-158230725 | 19 | 47.873 | KV453243.1  | 943480  | 23-scf00581 | 23 |
| AX-158230728 | 19 | 47.873 | KV453243.1  | 955880  | 23-scf00581 | 23 |
| AX-158230731 | 19 | 47.873 | KV453243.1  | 965963  | 23-scf00581 | 23 |
| AX-158230734 | 19 | 47.873 | KV453243.1  | 968263  | 23-scf00581 | 23 |
| AX-158230735 | 19 | 47.873 | KV453243.1  | 969606  | 23-scf00581 | 23 |
| AX-158230736 | 19 | 47.873 | KV453243.1  | 971433  | 23-scf00581 | 23 |
| AX-158230739 | 19 | 47.873 | KV453243.1  | 973150  | 23-scf00581 | 23 |

|              |    |        |            |         |             |    |
|--------------|----|--------|------------|---------|-------------|----|
| AX-158230740 | 19 | 47.873 | KV453243.1 | 974688  | 23-scf00581 | 23 |
| AX-158230742 | 19 | 47.873 | KV453243.1 | 978875  | 23-scf00581 | 23 |
| AX-158230745 | 19 | 47.873 | KV453243.1 | 982734  | 23-scf00581 | 23 |
| AX-158230749 | 19 | 47.873 | KV453243.1 | 986114  | 23-scf00581 | 23 |
| AX-158230751 | 19 | 47.873 | KV453243.1 | 992508  | 23-scf00581 | 23 |
| AX-158415133 | 19 | 47.873 | KV453243.1 | 993666  | 23-scf00581 | 23 |
| AX-158230752 | 19 | 47.873 | KV453243.1 | 994639  | 23-scf00581 | 23 |
| AX-158418777 | 19 | 47.873 | KV453243.1 | 994674  | 23-scf00581 | 23 |
| AX-158230754 | 19 | 47.873 | KV453243.1 | 997266  | 23-scf00581 | 23 |
| AX-158230756 | 19 | 47.873 | KV453243.1 | 998793  | 23-scf00581 | 23 |
| AX-158230758 | 19 | 47.873 | KV453243.1 | 1002305 | 23-scf00581 | 23 |
| AX-158230759 | 19 | 47.873 | KV453243.1 | 1005122 | 23-scf00581 | 23 |
| AX-158230782 | 19 | 47.873 | KV453243.1 | 1035782 | 23-scf00581 | 23 |
| AX-158232310 | 19 | 47.873 | KV453243.1 | 3550063 | 23-scf00581 | 23 |
| AX-158230764 | 19 | 47.925 | KV453243.1 | 1010019 | 23-scf00581 | 23 |
| AX-157840065 | 19 | 47.983 | KV453239.1 | 8941603 | 23-scf00385 | 23 |
| AX-158230755 | 19 | 47.983 | KV453243.1 | 998511  | 23-scf00581 | 23 |
| AX-157750034 | 19 | 47.983 | KV453243.1 | 1011972 | 23-scf00581 | 23 |
| AX-158230766 | 19 | 47.983 | KV453243.1 | 1016260 | 23-scf00581 | 23 |
| AX-157840137 | 19 | 47.983 | KV453243.1 | 1018088 | 23-scf00581 | 23 |
| AX-158230768 | 19 | 47.983 | KV453243.1 | 1019226 | 23-scf00581 | 23 |
| AX-158230769 | 19 | 47.983 | KV453243.1 | 1019703 | 23-scf00581 | 23 |
| AX-158230770 | 19 | 47.983 | KV453243.1 | 1019916 | 23-scf00581 | 23 |
| AX-158230772 | 19 | 47.983 | KV453243.1 | 1020852 | 23-scf00581 | 23 |
| AX-158415136 | 19 | 47.983 | KV453243.1 | 1020938 | 23-scf00581 | 23 |
| AX-158230774 | 19 | 47.983 | KV453243.1 | 1023934 | 23-scf00581 | 23 |
| AX-158230775 | 19 | 47.983 | KV453243.1 | 1024538 | 23-scf00581 | 23 |
| AX-158230776 | 19 | 47.983 | KV453243.1 | 1025621 | 23-scf00581 | 23 |
| AX-157840139 | 19 | 47.983 | KV453243.1 | 1030018 | 23-scf00581 | 23 |
| AX-158230779 | 19 | 47.983 | KV453243.1 | 1030487 | 23-scf00581 | 23 |
| AX-157840140 | 19 | 47.983 | KV453243.1 | 1034066 | 23-scf00581 | 23 |
| AX-158230784 | 19 | 47.983 | KV453243.1 | 1038866 | 23-scf00581 | 23 |
| AX-158230786 | 19 | 47.983 | KV453243.1 | 1041263 | 23-scf00581 | 23 |
| AX-158230788 | 19 | 47.983 | KV453243.1 | 1043286 | 23-scf00581 | 23 |
| AX-157840142 | 19 | 47.983 | KV453243.1 | 1052020 | 23-scf00581 | 23 |
| AX-158230791 | 19 | 48.016 | KV453243.1 | 1048590 | 23-scf00581 | 23 |
| AX-158230793 | 19 | 48.016 | KV453243.1 | 1050434 | 23-scf00581 | 23 |
| AX-158230777 | 19 | 48.042 | KV453243.1 | 1026888 | 23-scf00581 | 23 |
| AX-158230792 | 19 | 48.042 | KV453243.1 | 1048998 | 23-scf00581 | 23 |
| AX-157840141 | 19 | 48.069 | KV453243.1 | 1049833 | 23-scf00581 | 23 |
| AX-158230795 | 19 | 48.092 | KV453243.1 | 1058253 | 23-scf00581 | 23 |
| AX-158230796 | 19 | 48.092 | KV453243.1 | 1058755 | 23-scf00581 | 23 |
| AX-157840144 | 19 | 48.092 | KV453243.1 | 1059755 | 23-scf00581 | 23 |
| AX-157775131 | 19 | 48.092 | KV453243.1 | 1059940 | 23-scf00581 | 23 |
| AX-158230798 | 19 | 48.092 | KV453243.1 | 1063112 | 23-scf00581 | 23 |
| AX-158230799 | 19 | 48.092 | KV453243.1 | 1064054 | 23-scf00581 | 23 |
| AX-158386806 | 19 | 48.092 | KV453243.1 | 1065592 | 23-scf00581 | 23 |
| AX-158230869 | 19 | 48.092 | KV453243.1 | 1167565 | 23-scf00581 | 23 |
| AX-158230887 | 19 | 48.092 | KV453243.1 | 1197458 | 23-scf00581 | 23 |
| AX-158230967 | 19 | 48.092 | KV453243.1 | 1303014 | 23-scf00581 | 23 |
| AX-158230412 | 19 | 48.31  | KV453239.1 | 9389237 | 23-scf00385 | 23 |

|              |    |        |            |         |             |    |
|--------------|----|--------|------------|---------|-------------|----|
| AX-157840146 | 19 | 48.31  | KV453243.1 | 1075683 | 23-scf00581 | 23 |
| AX-158230804 | 19 | 48.31  | KV453243.1 | 1076137 | 23-scf00581 | 23 |
| AX-158230805 | 19 | 48.31  | KV453243.1 | 1079277 | 23-scf00581 | 23 |
| AX-158380900 | 19 | 48.31  | KV453243.1 | 1079526 | 23-scf00581 | 23 |
| AX-158230808 | 19 | 48.31  | KV453243.1 | 1081569 | 23-scf00581 | 23 |
| AX-157840148 | 19 | 48.31  | KV453243.1 | 1082454 | 23-scf00581 | 23 |
| AX-158230809 | 19 | 48.31  | KV453243.1 | 1082732 | 23-scf00581 | 23 |
| AX-158230815 | 19 | 48.31  | KV453243.1 | 1090778 | 23-scf00581 | 23 |
| AX-158230816 | 19 | 48.31  | KV453243.1 | 1091848 | 23-scf00581 | 23 |
| AX-157840150 | 19 | 48.31  | KV453243.1 | 1096413 | 23-scf00581 | 23 |
| AX-157840151 | 19 | 48.31  | KV453243.1 | 1096501 | 23-scf00581 | 23 |
| AX-158230818 | 19 | 48.31  | KV453243.1 | 1097773 | 23-scf00581 | 23 |
| AX-158230867 | 19 | 48.31  | KV453243.1 | 1165549 | 23-scf00581 | 23 |
| AX-158230821 | 19 | 48.359 | KV453243.1 | 1100952 | 23-scf00581 | 23 |
| AX-158229919 | 19 | 48.42  | KV453239.1 | 8661769 | 23-scf00385 | 23 |
| AX-158230767 | 19 | 48.42  | KV453243.1 | 1016552 | 23-scf00581 | 23 |
| AX-158230781 | 19 | 48.42  | KV453243.1 | 1033987 | 23-scf00581 | 23 |
| AX-158230789 | 19 | 48.42  | KV453243.1 | 1046813 | 23-scf00581 | 23 |
| AX-157840147 | 19 | 48.42  | KV453243.1 | 1080408 | 23-scf00581 | 23 |
| AX-158230806 | 19 | 48.42  | KV453243.1 | 1080471 | 23-scf00581 | 23 |
| AX-158230807 | 19 | 48.42  | KV453243.1 | 1080965 | 23-scf00581 | 23 |
| AX-157840149 | 19 | 48.42  | KV453243.1 | 1094383 | 23-scf00581 | 23 |
| AX-158230819 | 19 | 48.42  | KV453243.1 | 1099280 | 23-scf00581 | 23 |
| AX-158230822 | 19 | 48.42  | KV453243.1 | 1101987 | 23-scf00581 | 23 |
| AX-158230823 | 19 | 48.42  | KV453243.1 | 1102405 | 23-scf00581 | 23 |
| AX-157840152 | 19 | 48.42  | KV453243.1 | 1102684 | 23-scf00581 | 23 |
| AX-158230824 | 19 | 48.42  | KV453243.1 | 1104270 | 23-scf00581 | 23 |
| AX-157840153 | 19 | 48.42  | KV453243.1 | 1105165 | 23-scf00581 | 23 |
| AX-158230825 | 19 | 48.42  | KV453243.1 | 1106941 | 23-scf00581 | 23 |
| AX-158230826 | 19 | 48.42  | KV453243.1 | 1108907 | 23-scf00581 | 23 |
| AX-158230827 | 19 | 48.42  | KV453243.1 | 1110477 | 23-scf00581 | 23 |
| AX-157859546 | 19 | 48.42  | KV453243.1 | 1114876 | 23-scf00581 | 23 |
| AX-157840154 | 19 | 48.42  | KV453243.1 | 1116489 | 23-scf00581 | 23 |
| AX-157840155 | 19 | 48.42  | KV453243.1 | 1117004 | 23-scf00581 | 23 |
| AX-157840156 | 19 | 48.42  | KV453243.1 | 1119132 | 23-scf00581 | 23 |
| AX-158230830 | 19 | 48.42  | KV453243.1 | 1120122 | 23-scf00581 | 23 |
| AX-158230837 | 19 | 48.42  | KV453243.1 | 1128423 | 23-scf00581 | 23 |
| AX-158230841 | 19 | 48.42  | KV453243.1 | 1135551 | 23-scf00581 | 23 |
| AX-158230843 | 19 | 48.42  | KV453243.1 | 1137047 | 23-scf00581 | 23 |
| AX-157757034 | 19 | 48.42  | KV453243.1 | 1137612 | 23-scf00581 | 23 |
| AX-158394154 | 19 | 48.42  | KV453243.1 | 1138032 | 23-scf00581 | 23 |
| AX-158230847 | 19 | 48.42  | KV453243.1 | 1142953 | 23-scf00581 | 23 |
| AX-158230849 | 19 | 48.42  | KV453243.1 | 1146511 | 23-scf00581 | 23 |
| AX-158230850 | 19 | 48.42  | KV453243.1 | 1146957 | 23-scf00581 | 23 |
| AX-158230852 | 19 | 48.42  | KV453243.1 | 1149381 | 23-scf00581 | 23 |
| AX-158230853 | 19 | 48.42  | KV453243.1 | 1150096 | 23-scf00581 | 23 |
| AX-158230854 | 19 | 48.42  | KV453243.1 | 1150794 | 23-scf00581 | 23 |
| AX-158230855 | 19 | 48.42  | KV453243.1 | 1151284 | 23-scf00581 | 23 |
| AX-158230857 | 19 | 48.42  | KV453243.1 | 1153047 | 23-scf00581 | 23 |
| AX-158410397 | 19 | 48.42  | KV453243.1 | 1157574 | 23-scf00581 | 23 |
| AX-158230860 | 19 | 48.42  | KV453243.1 | 1159251 | 23-scf00581 | 23 |

|              |    |        |            |         |             |    |
|--------------|----|--------|------------|---------|-------------|----|
| AX-158230861 | 19 | 48.42  | KV453243.1 | 1161269 | 23-scf00581 | 23 |
| AX-158230862 | 19 | 48.42  | KV453243.1 | 1161384 | 23-scf00581 | 23 |
| AX-158230864 | 19 | 48.42  | KV453243.1 | 1163327 | 23-scf00581 | 23 |
| AX-158230865 | 19 | 48.42  | KV453243.1 | 1164477 | 23-scf00581 | 23 |
| AX-158230866 | 19 | 48.42  | KV453243.1 | 1164815 | 23-scf00581 | 23 |
| AX-158230871 | 19 | 48.42  | KV453243.1 | 1174365 | 23-scf00581 | 23 |
| AX-158230872 | 19 | 48.42  | KV453243.1 | 1175540 | 23-scf00581 | 23 |
| AX-158230873 | 19 | 48.42  | KV453243.1 | 1177611 | 23-scf00581 | 23 |
| AX-158230874 | 19 | 48.42  | KV453243.1 | 1178439 | 23-scf00581 | 23 |
| AX-157719510 | 19 | 48.42  | KV453243.1 | 1195710 | 23-scf00581 | 23 |
| AX-158230896 | 19 | 48.42  | KV453243.1 | 1201671 | 23-scf00581 | 23 |
| AX-157879907 | 19 | 48.42  | KV453243.1 | 1215470 | 23-scf00581 | 23 |
| AX-158230909 | 19 | 48.42  | KV453243.1 | 1219845 | 23-scf00581 | 23 |
| AX-158230916 | 19 | 48.42  | KV453243.1 | 1228080 | 23-scf00581 | 23 |
| AX-158230918 | 19 | 48.42  | KV453243.1 | 1229663 | 23-scf00581 | 23 |
| AX-158232099 | 19 | 48.42  | KV453243.1 | 3266010 | 23-scf00581 | 23 |
| AX-158232199 | 19 | 48.42  | KV453243.1 | 3397924 | 23-scf00581 | 23 |
| AX-158230810 | 19 | 48.529 | KV453243.1 | 1083255 | 23-scf00581 | 23 |
| AX-158230829 | 19 | 48.529 | KV453243.1 | 1113119 | 23-scf00581 | 23 |
| AX-157840157 | 19 | 48.529 | KV453243.1 | 1125446 | 23-scf00581 | 23 |
| AX-158230870 | 19 | 48.529 | KV453243.1 | 1169855 | 23-scf00581 | 23 |
| AX-158230878 | 19 | 48.529 | KV453243.1 | 1185708 | 23-scf00581 | 23 |
| AX-158230881 | 19 | 48.529 | KV453243.1 | 1193983 | 23-scf00581 | 23 |
| AX-158230894 | 19 | 48.529 | KV453243.1 | 1200453 | 23-scf00581 | 23 |
| AX-157872483 | 19 | 48.529 | KV453243.1 | 1207549 | 23-scf00581 | 23 |
| AX-158230900 | 19 | 48.529 | KV453243.1 | 1208246 | 23-scf00581 | 23 |
| AX-158230902 | 19 | 48.529 | KV453243.1 | 1210022 | 23-scf00581 | 23 |
| AX-157840163 | 19 | 48.529 | KV453243.1 | 1210875 | 23-scf00581 | 23 |
| AX-157840164 | 19 | 48.529 | KV453243.1 | 1211207 | 23-scf00581 | 23 |
| AX-158230903 | 19 | 48.529 | KV453243.1 | 1211363 | 23-scf00581 | 23 |
| AX-157840165 | 19 | 48.529 | KV453243.1 | 1212649 | 23-scf00581 | 23 |
| AX-158230905 | 19 | 48.529 | KV453243.1 | 1216002 | 23-scf00581 | 23 |
| AX-158230906 | 19 | 48.529 | KV453243.1 | 1217196 | 23-scf00581 | 23 |
| AX-158230908 | 19 | 48.529 | KV453243.1 | 1218694 | 23-scf00581 | 23 |
| AX-158230914 | 19 | 48.529 | KV453243.1 | 1226012 | 23-scf00581 | 23 |
| AX-158230915 | 19 | 48.529 | KV453243.1 | 1227429 | 23-scf00581 | 23 |
| AX-158230917 | 19 | 48.529 | KV453243.1 | 1229081 | 23-scf00581 | 23 |
| AX-158230920 | 19 | 48.529 | KV453243.1 | 1231985 | 23-scf00581 | 23 |
| AX-158230922 | 19 | 48.529 | KV453243.1 | 1234255 | 23-scf00581 | 23 |
| AX-158230924 | 19 | 48.529 | KV453243.1 | 1239115 | 23-scf00581 | 23 |
| AX-158230972 | 19 | 48.529 | KV453243.1 | 1315074 | 23-scf00581 | 23 |
| AX-158230925 | 19 | 48.555 | KV453243.1 | 1241101 | 23-scf00581 | 23 |
| AX-158230907 | 19 | 48.638 | KV453243.1 | 1218120 | 23-scf00581 | 23 |
| AX-158230927 | 19 | 48.638 | KV453243.1 | 1243452 | 23-scf00581 | 23 |
| AX-158230932 | 19 | 48.638 | KV453243.1 | 1252058 | 23-scf00581 | 23 |
| AX-158230933 | 19 | 48.638 | KV453243.1 | 1253617 | 23-scf00581 | 23 |
| AX-157879908 | 19 | 48.638 | KV453243.1 | 1256030 | 23-scf00581 | 23 |
| AX-158230942 | 19 | 48.638 | KV453243.1 | 1266961 | 23-scf00581 | 23 |
| AX-158230951 | 19 | 48.638 | KV453243.1 | 1280544 | 23-scf00581 | 23 |
| AX-158230955 | 19 | 48.638 | KV453243.1 | 1284290 | 23-scf00581 | 23 |
| AX-158230961 | 19 | 48.638 | KV453243.1 | 1291483 | 23-scf00581 | 23 |



|              |    |        |            |         |             |    |
|--------------|----|--------|------------|---------|-------------|----|
| AX-158230962 | 19 | 48.638 | KV453243.1 | 1292162 | 23-scf00581 | 23 |
| AX-158230936 | 19 | 48.678 | KV453243.1 | 1257612 | 23-scf00581 | 23 |
| AX-157743748 | 19 | 48.714 | KV453243.1 | 1193594 | 23-scf00581 | 23 |
| AX-158230937 | 19 | 48.714 | KV453243.1 | 1259642 | 23-scf00581 | 23 |
| AX-158229785 | 19 | 48.747 | KV453239.1 | 8464129 | 23-scf00385 | 23 |
| AX-158229987 | 19 | 48.747 | KV453239.1 | 8783136 | 23-scf00385 | 23 |
| AX-158230390 | 19 | 48.747 | KV453239.1 | 9360522 | 23-scf00385 | 23 |
| AX-158230695 | 19 | 48.747 | KV453243.1 | 884446  | 23-scf00581 | 23 |
| AX-157840160 | 19 | 48.747 | KV453243.1 | 1152410 | 23-scf00581 | 23 |
| AX-158230926 | 19 | 48.747 | KV453243.1 | 1242029 | 23-scf00581 | 23 |
| AX-158230938 | 19 | 48.747 | KV453243.1 | 1261512 | 23-scf00581 | 23 |
| AX-157840166 | 19 | 48.747 | KV453243.1 | 1264297 | 23-scf00581 | 23 |
| AX-157724914 | 19 | 48.747 | KV453243.1 | 1267414 | 23-scf00581 | 23 |
| AX-158230945 | 19 | 48.747 | KV453243.1 | 1272406 | 23-scf00581 | 23 |
| AX-158230947 | 19 | 48.747 | KV453243.1 | 1275212 | 23-scf00581 | 23 |
| AX-158230949 | 19 | 48.747 | KV453243.1 | 1277888 | 23-scf00581 | 23 |
| AX-158230952 | 19 | 48.747 | KV453243.1 | 1281270 | 23-scf00581 | 23 |
| AX-158230954 | 19 | 48.747 | KV453243.1 | 1283932 | 23-scf00581 | 23 |
| AX-158230956 | 19 | 48.747 | KV453243.1 | 1284673 | 23-scf00581 | 23 |
| AX-158230957 | 19 | 48.747 | KV453243.1 | 1286929 | 23-scf00581 | 23 |
| AX-158230958 | 19 | 48.747 | KV453243.1 | 1290001 | 23-scf00581 | 23 |
| AX-158230960 | 19 | 48.747 | KV453243.1 | 1291105 | 23-scf00581 | 23 |
| AX-158418787 | 19 | 48.747 | KV453243.1 | 1293687 | 23-scf00581 | 23 |
| AX-157887420 | 19 | 48.747 | KV453243.1 | 1321666 | 23-scf00581 | 23 |
| AX-158231030 | 19 | 48.747 | KV453243.1 | 1398008 | 23-scf00581 | 23 |
| AX-158231056 | 19 | 48.747 | KV453243.1 | 1437518 | 23-scf00581 | 23 |
| AX-158231058 | 19 | 48.747 | KV453243.1 | 1441352 | 23-scf00581 | 23 |
| AX-158231059 | 19 | 48.747 | KV453243.1 | 1441702 | 23-scf00581 | 23 |
| AX-158231695 | 19 | 48.747 | KV453243.1 | 2735572 | 23-scf00581 | 23 |
| AX-158415139 | 19 | 48.774 | KV453243.1 | 1305088 | 23-scf00581 | 23 |
| AX-158230206 | 19 | 48.813 | KV453239.1 | 9077028 | 23-scf00385 | 23 |
| AX-158230971 | 19 | 48.813 | KV453243.1 | 1313351 | 23-scf00581 | 23 |
| AX-158230858 | 19 | 48.856 | KV453243.1 | 1154099 | 23-scf00581 | 23 |
| AX-158230973 | 19 | 48.856 | KV453243.1 | 1316721 | 23-scf00581 | 23 |
| AX-158230977 | 19 | 48.856 | KV453243.1 | 1318990 | 23-scf00581 | 23 |
| AX-158230979 | 19 | 48.856 | KV453243.1 | 1320146 | 23-scf00581 | 23 |
| AX-158410400 | 19 | 48.856 | KV453243.1 | 1322073 | 23-scf00581 | 23 |
| AX-158230981 | 19 | 48.856 | KV453243.1 | 1323975 | 23-scf00581 | 23 |
| AX-158230982 | 19 | 48.856 | KV453243.1 | 1324174 | 23-scf00581 | 23 |
| AX-158230983 | 19 | 48.856 | KV453243.1 | 1324754 | 23-scf00581 | 23 |
| AX-158230986 | 19 | 48.856 | KV453243.1 | 1330662 | 23-scf00581 | 23 |
| AX-158230988 | 19 | 48.856 | KV453243.1 | 1332054 | 23-scf00581 | 23 |
| AX-158230989 | 19 | 48.856 | KV453243.1 | 1332838 | 23-scf00581 | 23 |
| AX-158230991 | 19 | 48.856 | KV453243.1 | 1335118 | 23-scf00581 | 23 |
| AX-158230992 | 19 | 48.856 | KV453243.1 | 1336320 | 23-scf00581 | 23 |
| AX-157772547 | 19 | 48.856 | KV453243.1 | 1340853 | 23-scf00581 | 23 |
| AX-158231007 | 19 | 48.856 | KV453243.1 | 1357236 | 23-scf00581 | 23 |
| AX-158231078 | 19 | 48.856 | KV453243.1 | 1473588 | 23-scf00581 | 23 |
| AX-157756275 | 19 | 48.92  | KV453243.1 | 1360221 | 23-scf00581 | 23 |
| AX-158231053 | 19 | 48.92  | KV453243.1 | 1433746 | 23-scf00581 | 23 |
| AX-158230659 | 19 | 48.966 | KV453243.1 | 840771  | 23-scf00581 | 23 |

|              |    |        |            |         |             |    |
|--------------|----|--------|------------|---------|-------------|----|
| AX-157872482 | 19 | 48.966 | KV453243.1 | 955522  | 23-scf00581 | 23 |
| AX-158231006 | 19 | 48.966 | KV453243.1 | 1356207 | 23-scf00581 | 23 |
| AX-158231013 | 19 | 48.966 | KV453243.1 | 1365732 | 23-scf00581 | 23 |
| AX-157840169 | 19 | 48.966 | KV453243.1 | 1366446 | 23-scf00581 | 23 |
| AX-158231014 | 19 | 48.966 | KV453243.1 | 1368005 | 23-scf00581 | 23 |
| AX-158231016 | 19 | 48.966 | KV453243.1 | 1370628 | 23-scf00581 | 23 |
| AX-158231017 | 19 | 48.966 | KV453243.1 | 1373216 | 23-scf00581 | 23 |
| AX-158231018 | 19 | 48.966 | KV453243.1 | 1373496 | 23-scf00581 | 23 |
| AX-157840170 | 19 | 48.966 | KV453243.1 | 1375089 | 23-scf00581 | 23 |
| AX-158231019 | 19 | 48.966 | KV453243.1 | 1376818 | 23-scf00581 | 23 |
| AX-158231021 | 19 | 48.966 | KV453243.1 | 1378149 | 23-scf00581 | 23 |
| AX-158231026 | 19 | 48.966 | KV453243.1 | 1389190 | 23-scf00581 | 23 |
| AX-157859547 | 19 | 48.966 | KV453243.1 | 1391992 | 23-scf00581 | 23 |
| AX-158231028 | 19 | 48.966 | KV453243.1 | 1396204 | 23-scf00581 | 23 |
| AX-157773479 | 19 | 48.966 | KV453243.1 | 1397485 | 23-scf00581 | 23 |
| AX-157725609 | 19 | 48.966 | KV453243.1 | 1404516 | 23-scf00581 | 23 |
| AX-158231038 | 19 | 48.966 | KV453243.1 | 1404635 | 23-scf00581 | 23 |
| AX-157840171 | 19 | 48.966 | KV453243.1 | 1406314 | 23-scf00581 | 23 |
| AX-158231042 | 19 | 48.966 | KV453243.1 | 1416447 | 23-scf00581 | 23 |
| AX-158231050 | 19 | 48.966 | KV453243.1 | 1431477 | 23-scf00581 | 23 |
| AX-158231057 | 19 | 48.966 | KV453243.1 | 1438129 | 23-scf00581 | 23 |
| AX-158231061 | 19 | 48.966 | KV453243.1 | 1446282 | 23-scf00581 | 23 |
| AX-158231151 | 19 | 48.966 | KV453243.1 | 1608364 | 23-scf00581 | 23 |
| AX-158231510 | 19 | 48.966 | KV453243.1 | 2403748 | 23-scf00581 | 23 |
| AX-158231064 | 19 | 49.075 | KV453243.1 | 1453464 | 23-scf00581 | 23 |
| AX-158231068 | 19 | 49.075 | KV453243.1 | 1457704 | 23-scf00581 | 23 |
| AX-158231963 | 19 | 49.075 | KV453243.1 | 3086844 | 23-scf00581 | 23 |
| AX-158230966 | 19 | 49.184 | KV453243.1 | 1301564 | 23-scf00581 | 23 |
| AX-158231027 | 19 | 49.184 | KV453243.1 | 1394134 | 23-scf00581 | 23 |
| AX-157773992 | 19 | 49.184 | KV453243.1 | 1403739 | 23-scf00581 | 23 |
| AX-158231070 | 19 | 49.184 | KV453243.1 | 1463006 | 23-scf00581 | 23 |
| AX-158231072 | 19 | 49.184 | KV453243.1 | 1464878 | 23-scf00581 | 23 |
| AX-157702165 | 19 | 49.184 | KV453243.1 | 1465438 | 23-scf00581 | 23 |
| AX-158231073 | 19 | 49.184 | KV453243.1 | 1466344 | 23-scf00581 | 23 |
| AX-158231074 | 19 | 49.184 | KV453243.1 | 1467483 | 23-scf00581 | 23 |
| AX-157752360 | 19 | 49.184 | KV453243.1 | 1469577 | 23-scf00581 | 23 |
| AX-158230049 | 19 | 49.402 | KV453239.1 | 8853898 | 23-scf00385 | 23 |
| AX-158230839 | 19 | 49.402 | KV453243.1 | 1129977 | 23-scf00581 | 23 |
| AX-158230897 | 19 | 49.402 | KV453243.1 | 1205009 | 23-scf00581 | 23 |
| AX-158230975 | 19 | 49.402 | KV453243.1 | 1317732 | 23-scf00581 | 23 |
| AX-157840167 | 19 | 49.402 | KV453243.1 | 1342091 | 23-scf00581 | 23 |
| AX-158230995 | 19 | 49.402 | KV453243.1 | 1342142 | 23-scf00581 | 23 |
| AX-157840168 | 19 | 49.402 | KV453243.1 | 1347469 | 23-scf00581 | 23 |
| AX-158231000 | 19 | 49.402 | KV453243.1 | 1347506 | 23-scf00581 | 23 |
| AX-158231023 | 19 | 49.402 | KV453243.1 | 1380398 | 23-scf00581 | 23 |
| AX-158231081 | 19 | 49.402 | KV453243.1 | 1492000 | 23-scf00581 | 23 |
| AX-158231085 | 19 | 49.402 | KV453243.1 | 1494044 | 23-scf00581 | 23 |
| AX-158231099 | 19 | 49.402 | KV453243.1 | 1515372 | 23-scf00581 | 23 |
| AX-157717792 | 19 | 49.402 | KV453243.1 | 1519302 | 23-scf00581 | 23 |
| AX-157840181 | 19 | 49.402 | KV453243.1 | 1535865 | 23-scf00581 | 23 |
| AX-158231116 | 19 | 49.402 | KV453243.1 | 1553299 | 23-scf00581 | 23 |

|              |    |        |            |         |             |    |
|--------------|----|--------|------------|---------|-------------|----|
| AX-158231126 | 19 | 49.402 | KV453243.1 | 1576534 | 23-scf00581 | 23 |
| AX-157840188 | 19 | 49.402 | KV453243.1 | 1582616 | 23-scf00581 | 23 |
| AX-158231141 | 19 | 49.402 | KV453243.1 | 1597979 | 23-scf00581 | 23 |
| AX-158231147 | 19 | 49.402 | KV453243.1 | 1605641 | 23-scf00581 | 23 |
| AX-158231161 | 19 | 49.402 | KV453243.1 | 1617756 | 23-scf00581 | 23 |
| AX-157840197 | 19 | 49.402 | KV453243.1 | 1630149 | 23-scf00581 | 23 |
| AX-158231174 | 19 | 49.402 | KV453243.1 | 1634674 | 23-scf00581 | 23 |
| AX-158231177 | 19 | 49.402 | KV453243.1 | 1644779 | 23-scf00581 | 23 |
| AX-158231184 | 19 | 49.402 | KV453243.1 | 1649063 | 23-scf00581 | 23 |
| AX-158386809 | 19 | 49.402 | KV453243.1 | 1650922 | 23-scf00581 | 23 |
| AX-158231190 | 19 | 49.402 | KV453243.1 | 1654242 | 23-scf00581 | 23 |
| AX-158231193 | 19 | 49.402 | KV453243.1 | 1660044 | 23-scf00581 | 23 |
| AX-158231199 | 19 | 49.402 | KV453243.1 | 1677214 | 23-scf00581 | 23 |
| AX-158231206 | 19 | 49.402 | KV453243.1 | 1694653 | 23-scf00581 | 23 |
| AX-158231209 | 19 | 49.402 | KV453243.1 | 1731903 | 23-scf00581 | 23 |
| AX-158231213 | 19 | 49.402 | KV453243.1 | 1743111 | 23-scf00581 | 23 |
| AX-158231217 | 19 | 49.402 | KV453243.1 | 1756465 | 23-scf00581 | 23 |
| AX-158231223 | 19 | 49.402 | KV453243.1 | 1772103 | 23-scf00581 | 23 |
| AX-158231238 | 19 | 49.402 | KV453243.1 | 1822213 | 23-scf00581 | 23 |
| AX-158231239 | 19 | 49.402 | KV453243.1 | 1823749 | 23-scf00581 | 23 |
| AX-158231242 | 19 | 49.402 | KV453243.1 | 1839202 | 23-scf00581 | 23 |
| AX-158231255 | 19 | 49.402 | KV453243.1 | 1855049 | 23-scf00581 | 23 |
| AX-158231270 | 19 | 49.402 | KV453243.1 | 1899031 | 23-scf00581 | 23 |
| AX-158231272 | 19 | 49.402 | KV453243.1 | 1910665 | 23-scf00581 | 23 |
| AX-158231274 | 19 | 49.402 | KV453243.1 | 1919213 | 23-scf00581 | 23 |
| AX-158231306 | 19 | 49.402 | KV453243.1 | 2021300 | 23-scf00581 | 23 |
| AX-158231309 | 19 | 49.402 | KV453243.1 | 2029000 | 23-scf00581 | 23 |
| AX-158231328 | 19 | 49.402 | KV453243.1 | 2093114 | 23-scf00581 | 23 |
| AX-157752671 | 19 | 49.402 | KV453243.1 | 2267691 | 23-scf00581 | 23 |
| AX-158231475 | 19 | 49.402 | KV453243.1 | 2346006 | 23-scf00581 | 23 |
| AX-157750146 | 19 | 49.402 | KV453243.1 | 2368490 | 23-scf00581 | 23 |
| AX-158231522 | 19 | 49.402 | KV453243.1 | 2426737 | 23-scf00581 | 23 |
| AX-158231528 | 19 | 49.402 | KV453243.1 | 2436168 | 23-scf00581 | 23 |
| AX-158231548 | 19 | 49.402 | KV453243.1 | 2469684 | 23-scf00581 | 23 |
| AX-158231560 | 19 | 49.402 | KV453243.1 | 2479030 | 23-scf00581 | 23 |
| AX-158231570 | 19 | 49.402 | KV453243.1 | 2488549 | 23-scf00581 | 23 |
| AX-158231592 | 19 | 49.402 | KV453243.1 | 2533891 | 23-scf00581 | 23 |
| AX-157840219 | 19 | 49.402 | KV453243.1 | 2540454 | 23-scf00581 | 23 |
| AX-157840220 | 19 | 49.402 | KV453243.1 | 2540497 | 23-scf00581 | 23 |
| AX-158231594 | 19 | 49.402 | KV453243.1 | 2542795 | 23-scf00581 | 23 |
| AX-158231597 | 19 | 49.402 | KV453243.1 | 2545376 | 23-scf00581 | 23 |
| AX-158231598 | 19 | 49.402 | KV453243.1 | 2546556 | 23-scf00581 | 23 |
| AX-158231627 | 19 | 49.402 | KV453243.1 | 2638913 | 23-scf00581 | 23 |
| AX-158231642 | 19 | 49.402 | KV453243.1 | 2662108 | 23-scf00581 | 23 |
| AX-158231688 | 19 | 49.402 | KV453243.1 | 2729762 | 23-scf00581 | 23 |
| AX-157859556 | 19 | 49.402 | KV453243.1 | 2739007 | 23-scf00581 | 23 |
| AX-158231701 | 19 | 49.402 | KV453243.1 | 2741933 | 23-scf00581 | 23 |
| AX-158231712 | 19 | 49.402 | KV453243.1 | 2755970 | 23-scf00581 | 23 |
| AX-158231746 | 19 | 49.402 | KV453243.1 | 2801906 | 23-scf00581 | 23 |
| AX-158231748 | 19 | 49.402 | KV453243.1 | 2803540 | 23-scf00581 | 23 |
| AX-158231751 | 19 | 49.402 | KV453243.1 | 2806857 | 23-scf00581 | 23 |

|              |    |        |            |         |                |    |
|--------------|----|--------|------------|---------|----------------|----|
| AX-158231768 | 19 | 49.402 | KV453243.1 | 2833604 | 23-scf00581    | 23 |
| AX-157748766 | 19 | 49.402 | KV453243.1 | 2863188 | 23-scf00581    | 23 |
| AX-158231789 | 19 | 49.402 | KV453243.1 | 2867701 | 23-scf00581    | 23 |
| AX-157725034 | 19 | 49.402 | KV453243.1 | 2890999 | 23-scf00581    | 23 |
| AX-158231814 | 19 | 49.402 | KV453243.1 | 2903519 | 23-scf00581    | 23 |
| AX-158231815 | 19 | 49.402 | KV453243.1 | 2904035 | 23-scf00581    | 23 |
| AX-158394162 | 19 | 49.402 | KV453243.1 | 2908887 | 23-scf00581    | 23 |
| AX-158231821 | 19 | 49.402 | KV453243.1 | 2913574 | 23-scf00581    | 23 |
| AX-158231853 | 19 | 49.402 | KV453243.1 | 2950302 | 23-scf00581    | 23 |
| AX-158231902 | 19 | 49.402 | KV453243.1 | 3008901 | 23-scf00581    | 23 |
| AX-158231909 | 19 | 49.402 | KV453243.1 | 3022318 | 23-scf00581    | 23 |
| AX-158231321 | 19 | 49.512 | KV453243.1 | 2068099 | 23-scf00581    | 23 |
| AX-157701259 | 19 | 49.512 | DX084120.1 | 301     | 10R1212 lctalt | UN |
| AX-158228780 | 19 | 49.621 | KV453239.1 | 6855536 | 23-scf00385    | 23 |
| AX-158229393 | 19 | 49.621 | KV453239.1 | 7823819 | 23-scf00385    | 23 |
| AX-158229819 | 19 | 49.621 | KV453239.1 | 8506966 | 23-scf00385    | 23 |
| AX-157840033 | 19 | 49.621 | KV453239.1 | 8536206 | 23-scf00385    | 23 |
| AX-157859544 | 19 | 49.621 | KV453239.1 | 9545626 | 23-scf00385    | 23 |
| AX-158230515 | 19 | 49.621 | KV453239.1 | 9570642 | 23-scf00385    | 23 |
| AX-157684925 | 19 | 49.621 | KV453242.1 | 27968   | 23-scf00565    | 23 |
| AX-157684923 | 19 | 49.621 | KV453242.1 | 97179   | 23-scf00565    | 23 |
| AX-157684922 | 19 | 49.621 | KV453242.1 | 113454  | 23-scf00565    | 23 |
| AX-158420412 | 19 | 49.621 | KV453242.1 | 145412  | 23-scf00565    | 23 |
| AX-157684918 | 19 | 49.621 | KV453242.1 | 448022  | 23-scf00565    | 23 |
| AX-157684914 | 19 | 49.621 | KV453242.1 | 702364  | 23-scf00565    | 23 |
| AX-157684913 | 19 | 49.621 | KV453242.1 | 716254  | 23-scf00565    | 23 |
| AX-157684930 | 19 | 49.621 | KV453240.1 | 286077  | 23-scf00566    | 23 |
| AX-157684932 | 19 | 49.621 | KV453240.1 | 428605  | 23-scf00566    | 23 |
| AX-157684935 | 19 | 49.621 | KV453240.1 | 502931  | 23-scf00566    | 23 |
| AX-157684938 | 19 | 49.621 | KV453240.1 | 586239  | 23-scf00566    | 23 |
| AX-157681177 | 19 | 49.621 | KV453240.1 | 755846  | 23-scf00566    | 23 |
| AX-157685012 | 19 | 49.621 | KV453243.1 | 87535   | 23-scf00581    | 23 |
| AX-157685011 | 19 | 49.621 | KV453243.1 | 148186  | 23-scf00581    | 23 |
| AX-157685010 | 19 | 49.621 | KV453243.1 | 166020  | 23-scf00581    | 23 |
| AX-157685005 | 19 | 49.621 | KV453243.1 | 317018  | 23-scf00581    | 23 |
| AX-158230910 | 19 | 49.621 | KV453243.1 | 1220315 | 23-scf00581    | 23 |
| AX-158230921 | 19 | 49.621 | KV453243.1 | 1232477 | 23-scf00581    | 23 |
| AX-158230963 | 19 | 49.621 | KV453243.1 | 1294182 | 23-scf00581    | 23 |
| AX-158230996 | 19 | 49.621 | KV453243.1 | 1342644 | 23-scf00581    | 23 |
| AX-158230997 | 19 | 49.621 | KV453243.1 | 1343172 | 23-scf00581    | 23 |
| AX-158230998 | 19 | 49.621 | KV453243.1 | 1345683 | 23-scf00581    | 23 |
| AX-158231032 | 19 | 49.621 | KV453243.1 | 1399177 | 23-scf00581    | 23 |
| AX-158231037 | 19 | 49.621 | KV453243.1 | 1403837 | 23-scf00581    | 23 |
| AX-158231040 | 19 | 49.621 | KV453243.1 | 1408881 | 23-scf00581    | 23 |
| AX-158231052 | 19 | 49.621 | KV453243.1 | 1433454 | 23-scf00581    | 23 |
| AX-158380902 | 19 | 49.621 | KV453243.1 | 1444591 | 23-scf00581    | 23 |
| AX-157753271 | 19 | 49.621 | KV453243.1 | 1462684 | 23-scf00581    | 23 |
| AX-158231076 | 19 | 49.621 | KV453243.1 | 1471307 | 23-scf00581    | 23 |
| AX-157859550 | 19 | 49.621 | KV453243.1 | 1487690 | 23-scf00581    | 23 |
| AX-158231092 | 19 | 49.621 | KV453243.1 | 1506103 | 23-scf00581    | 23 |
| AX-158231096 | 19 | 49.621 | KV453243.1 | 1512725 | 23-scf00581    | 23 |

|              |    |        |            |         |             |    |
|--------------|----|--------|------------|---------|-------------|----|
| AX-158231101 | 19 | 49.621 | KV453243.1 | 1518315 | 23-scf00581 | 23 |
| AX-157726183 | 19 | 49.621 | KV453243.1 | 1518874 | 23-scf00581 | 23 |
| AX-158231103 | 19 | 49.621 | KV453243.1 | 1520955 | 23-scf00581 | 23 |
| AX-158231104 | 19 | 49.621 | KV453243.1 | 1521293 | 23-scf00581 | 23 |
| AX-157840178 | 19 | 49.621 | KV453243.1 | 1525627 | 23-scf00581 | 23 |
| AX-158231124 | 19 | 49.621 | KV453243.1 | 1573979 | 23-scf00581 | 23 |
| AX-158231125 | 19 | 49.621 | KV453243.1 | 1576250 | 23-scf00581 | 23 |
| AX-158231132 | 19 | 49.621 | KV453243.1 | 1583395 | 23-scf00581 | 23 |
| AX-158231133 | 19 | 49.621 | KV453243.1 | 1584705 | 23-scf00581 | 23 |
| AX-158231134 | 19 | 49.621 | KV453243.1 | 1586147 | 23-scf00581 | 23 |
| AX-157840192 | 19 | 49.621 | KV453243.1 | 1609414 | 23-scf00581 | 23 |
| AX-158231153 | 19 | 49.621 | KV453243.1 | 1610433 | 23-scf00581 | 23 |
| AX-158231162 | 19 | 49.621 | KV453243.1 | 1618004 | 23-scf00581 | 23 |
| AX-157840194 | 19 | 49.621 | KV453243.1 | 1618958 | 23-scf00581 | 23 |
| AX-158231163 | 19 | 49.621 | KV453243.1 | 1619892 | 23-scf00581 | 23 |
| AX-158231172 | 19 | 49.621 | KV453243.1 | 1630333 | 23-scf00581 | 23 |
| AX-158231173 | 19 | 49.621 | KV453243.1 | 1634240 | 23-scf00581 | 23 |
| AX-158231175 | 19 | 49.621 | KV453243.1 | 1635357 | 23-scf00581 | 23 |
| AX-158231176 | 19 | 49.621 | KV453243.1 | 1635923 | 23-scf00581 | 23 |
| AX-158231178 | 19 | 49.621 | KV453243.1 | 1645130 | 23-scf00581 | 23 |
| AX-158231179 | 19 | 49.621 | KV453243.1 | 1645721 | 23-scf00581 | 23 |
| AX-158231180 | 19 | 49.621 | KV453243.1 | 1646900 | 23-scf00581 | 23 |
| AX-158231181 | 19 | 49.621 | KV453243.1 | 1647835 | 23-scf00581 | 23 |
| AX-158231183 | 19 | 49.621 | KV453243.1 | 1648663 | 23-scf00581 | 23 |
| AX-158231185 | 19 | 49.621 | KV453243.1 | 1649810 | 23-scf00581 | 23 |
| AX-158231187 | 19 | 49.621 | KV453243.1 | 1650811 | 23-scf00581 | 23 |
| AX-158231191 | 19 | 49.621 | KV453243.1 | 1656238 | 23-scf00581 | 23 |
| AX-158231192 | 19 | 49.621 | KV453243.1 | 1657184 | 23-scf00581 | 23 |
| AX-158231195 | 19 | 49.621 | KV453243.1 | 1665994 | 23-scf00581 | 23 |
| AX-158231196 | 19 | 49.621 | KV453243.1 | 1666934 | 23-scf00581 | 23 |
| AX-158231198 | 19 | 49.621 | KV453243.1 | 1676206 | 23-scf00581 | 23 |
| AX-158231201 | 19 | 49.621 | KV453243.1 | 1685692 | 23-scf00581 | 23 |
| AX-158231210 | 19 | 49.621 | KV453243.1 | 1736094 | 23-scf00581 | 23 |
| AX-158231211 | 19 | 49.621 | KV453243.1 | 1738437 | 23-scf00581 | 23 |
| AX-158231219 | 19 | 49.621 | KV453243.1 | 1765631 | 23-scf00581 | 23 |
| AX-158231222 | 19 | 49.621 | KV453243.1 | 1771423 | 23-scf00581 | 23 |
| AX-158231229 | 19 | 49.621 | KV453243.1 | 1796331 | 23-scf00581 | 23 |
| AX-157840201 | 19 | 49.621 | KV453243.1 | 1798986 | 23-scf00581 | 23 |
| AX-158231240 | 19 | 49.621 | KV453243.1 | 1830932 | 23-scf00581 | 23 |
| AX-158231245 | 19 | 49.621 | KV453243.1 | 1844366 | 23-scf00581 | 23 |
| AX-158231252 | 19 | 49.621 | KV453243.1 | 1851875 | 23-scf00581 | 23 |
| AX-158231253 | 19 | 49.621 | KV453243.1 | 1853491 | 23-scf00581 | 23 |
| AX-158231261 | 19 | 49.621 | KV453243.1 | 1877832 | 23-scf00581 | 23 |
| AX-158231263 | 19 | 49.621 | KV453243.1 | 1881207 | 23-scf00581 | 23 |
| AX-158231279 | 19 | 49.621 | KV453243.1 | 1932581 | 23-scf00581 | 23 |
| AX-158231290 | 19 | 49.621 | KV453243.1 | 1977410 | 23-scf00581 | 23 |
| AX-158231292 | 19 | 49.621 | KV453243.1 | 1984596 | 23-scf00581 | 23 |
| AX-158231297 | 19 | 49.621 | KV453243.1 | 2000490 | 23-scf00581 | 23 |
| AX-158231303 | 19 | 49.621 | KV453243.1 | 2017504 | 23-scf00581 | 23 |
| AX-158231310 | 19 | 49.621 | KV453243.1 | 2033921 | 23-scf00581 | 23 |
| AX-158231312 | 19 | 49.621 | KV453243.1 | 2041528 | 23-scf00581 | 23 |

|              |    |        |            |         |             |    |
|--------------|----|--------|------------|---------|-------------|----|
| AX-158231320 | 19 | 49.621 | KV453243.1 | 2064831 | 23-scf00581 | 23 |
| AX-158231323 | 19 | 49.621 | KV453243.1 | 2071278 | 23-scf00581 | 23 |
| AX-158231327 | 19 | 49.621 | KV453243.1 | 2084135 | 23-scf00581 | 23 |
| AX-158231333 | 19 | 49.621 | KV453243.1 | 2101058 | 23-scf00581 | 23 |
| AX-158231354 | 19 | 49.621 | KV453243.1 | 2134389 | 23-scf00581 | 23 |
| AX-158231357 | 19 | 49.621 | KV453243.1 | 2138579 | 23-scf00581 | 23 |
| AX-158231360 | 19 | 49.621 | KV453243.1 | 2143719 | 23-scf00581 | 23 |
| AX-158231361 | 19 | 49.621 | KV453243.1 | 2146364 | 23-scf00581 | 23 |
| AX-158231376 | 19 | 49.621 | KV453243.1 | 2163345 | 23-scf00581 | 23 |
| AX-158231377 | 19 | 49.621 | KV453243.1 | 2163844 | 23-scf00581 | 23 |
| AX-158231378 | 19 | 49.621 | KV453243.1 | 2167167 | 23-scf00581 | 23 |
| AX-158231380 | 19 | 49.621 | KV453243.1 | 2168085 | 23-scf00581 | 23 |
| AX-158231381 | 19 | 49.621 | KV453243.1 | 2169913 | 23-scf00581 | 23 |
| AX-158231382 | 19 | 49.621 | KV453243.1 | 2172327 | 23-scf00581 | 23 |
| AX-158231383 | 19 | 49.621 | KV453243.1 | 2173199 | 23-scf00581 | 23 |
| AX-157755491 | 19 | 49.621 | KV453243.1 | 2173623 | 23-scf00581 | 23 |
| AX-158231385 | 19 | 49.621 | KV453243.1 | 2176211 | 23-scf00581 | 23 |
| AX-158231386 | 19 | 49.621 | KV453243.1 | 2179005 | 23-scf00581 | 23 |
| AX-158231387 | 19 | 49.621 | KV453243.1 | 2180485 | 23-scf00581 | 23 |
| AX-158231391 | 19 | 49.621 | KV453243.1 | 2184504 | 23-scf00581 | 23 |
| AX-158231393 | 19 | 49.621 | KV453243.1 | 2186053 | 23-scf00581 | 23 |
| AX-158231397 | 19 | 49.621 | KV453243.1 | 2191476 | 23-scf00581 | 23 |
| AX-158231399 | 19 | 49.621 | KV453243.1 | 2193255 | 23-scf00581 | 23 |
| AX-158231400 | 19 | 49.621 | KV453243.1 | 2193888 | 23-scf00581 | 23 |
| AX-158231403 | 19 | 49.621 | KV453243.1 | 2195342 | 23-scf00581 | 23 |
| AX-158231404 | 19 | 49.621 | KV453243.1 | 2196586 | 23-scf00581 | 23 |
| AX-158231405 | 19 | 49.621 | KV453243.1 | 2197240 | 23-scf00581 | 23 |
| AX-158231406 | 19 | 49.621 | KV453243.1 | 2198869 | 23-scf00581 | 23 |
| AX-158231413 | 19 | 49.621 | KV453243.1 | 2209583 | 23-scf00581 | 23 |
| AX-157722398 | 19 | 49.621 | KV453243.1 | 2215317 | 23-scf00581 | 23 |
| AX-158231415 | 19 | 49.621 | KV453243.1 | 2219598 | 23-scf00581 | 23 |
| AX-158231416 | 19 | 49.621 | KV453243.1 | 2222467 | 23-scf00581 | 23 |
| AX-157756488 | 19 | 49.621 | KV453243.1 | 2227320 | 23-scf00581 | 23 |
| AX-158231417 | 19 | 49.621 | KV453243.1 | 2228917 | 23-scf00581 | 23 |
| AX-158231422 | 19 | 49.621 | KV453243.1 | 2248644 | 23-scf00581 | 23 |
| AX-157723003 | 19 | 49.621 | KV453243.1 | 2266141 | 23-scf00581 | 23 |
| AX-158231431 | 19 | 49.621 | KV453243.1 | 2266727 | 23-scf00581 | 23 |
| AX-158231432 | 19 | 49.621 | KV453243.1 | 2272697 | 23-scf00581 | 23 |
| AX-158231433 | 19 | 49.621 | KV453243.1 | 2277843 | 23-scf00581 | 23 |
| AX-157840204 | 19 | 49.621 | KV453243.1 | 2277887 | 23-scf00581 | 23 |
| AX-158231434 | 19 | 49.621 | KV453243.1 | 2283489 | 23-scf00581 | 23 |
| AX-158231435 | 19 | 49.621 | KV453243.1 | 2284563 | 23-scf00581 | 23 |
| AX-158231437 | 19 | 49.621 | KV453243.1 | 2285891 | 23-scf00581 | 23 |
| AX-158231439 | 19 | 49.621 | KV453243.1 | 2291464 | 23-scf00581 | 23 |
| AX-158231440 | 19 | 49.621 | KV453243.1 | 2292208 | 23-scf00581 | 23 |
| AX-158231460 | 19 | 49.621 | KV453243.1 | 2329108 | 23-scf00581 | 23 |
| AX-158231467 | 19 | 49.621 | KV453243.1 | 2338828 | 23-scf00581 | 23 |
| AX-158231469 | 19 | 49.621 | KV453243.1 | 2339870 | 23-scf00581 | 23 |
| AX-158231471 | 19 | 49.621 | KV453243.1 | 2340808 | 23-scf00581 | 23 |
| AX-158231474 | 19 | 49.621 | KV453243.1 | 2344626 | 23-scf00581 | 23 |
| AX-158231476 | 19 | 49.621 | KV453243.1 | 2346580 | 23-scf00581 | 23 |

|              |    |        |            |         |             |    |
|--------------|----|--------|------------|---------|-------------|----|
| AX-158231479 | 19 | 49.621 | KV453243.1 | 2354164 | 23-scf00581 | 23 |
| AX-158231480 | 19 | 49.621 | KV453243.1 | 2356805 | 23-scf00581 | 23 |
| AX-158231481 | 19 | 49.621 | KV453243.1 | 2357529 | 23-scf00581 | 23 |
| AX-158231482 | 19 | 49.621 | KV453243.1 | 2357731 | 23-scf00581 | 23 |
| AX-158231484 | 19 | 49.621 | KV453243.1 | 2363376 | 23-scf00581 | 23 |
| AX-158231485 | 19 | 49.621 | KV453243.1 | 2366052 | 23-scf00581 | 23 |
| AX-157723310 | 19 | 49.621 | KV453243.1 | 2372810 | 23-scf00581 | 23 |
| AX-158231491 | 19 | 49.621 | KV453243.1 | 2374919 | 23-scf00581 | 23 |
| AX-158231493 | 19 | 49.621 | KV453243.1 | 2376231 | 23-scf00581 | 23 |
| AX-158231495 | 19 | 49.621 | KV453243.1 | 2378381 | 23-scf00581 | 23 |
| AX-158231497 | 19 | 49.621 | KV453243.1 | 2379527 | 23-scf00581 | 23 |
| AX-158231498 | 19 | 49.621 | KV453243.1 | 2380721 | 23-scf00581 | 23 |
| AX-158231499 | 19 | 49.621 | KV453243.1 | 2381096 | 23-scf00581 | 23 |
| AX-158231500 | 19 | 49.621 | KV453243.1 | 2383875 | 23-scf00581 | 23 |
| AX-158231501 | 19 | 49.621 | KV453243.1 | 2386651 | 23-scf00581 | 23 |
| AX-158231507 | 19 | 49.621 | KV453243.1 | 2398982 | 23-scf00581 | 23 |
| AX-158231508 | 19 | 49.621 | KV453243.1 | 2400586 | 23-scf00581 | 23 |
| AX-158231513 | 19 | 49.621 | KV453243.1 | 2406155 | 23-scf00581 | 23 |
| AX-158231517 | 19 | 49.621 | KV453243.1 | 2411566 | 23-scf00581 | 23 |
| AX-158231518 | 19 | 49.621 | KV453243.1 | 2412224 | 23-scf00581 | 23 |
| AX-158231520 | 19 | 49.621 | KV453243.1 | 2418329 | 23-scf00581 | 23 |
| AX-158231521 | 19 | 49.621 | KV453243.1 | 2420584 | 23-scf00581 | 23 |
| AX-157840212 | 19 | 49.621 | KV453243.1 | 2444608 | 23-scf00581 | 23 |
| AX-158231536 | 19 | 49.621 | KV453243.1 | 2449921 | 23-scf00581 | 23 |
| AX-158231541 | 19 | 49.621 | KV453243.1 | 2456284 | 23-scf00581 | 23 |
| AX-158231545 | 19 | 49.621 | KV453243.1 | 2466123 | 23-scf00581 | 23 |
| AX-157867178 | 19 | 49.621 | KV453243.1 | 2468884 | 23-scf00581 | 23 |
| AX-158231547 | 19 | 49.621 | KV453243.1 | 2469440 | 23-scf00581 | 23 |
| AX-158231550 | 19 | 49.621 | KV453243.1 | 2471672 | 23-scf00581 | 23 |
| AX-158231555 | 19 | 49.621 | KV453243.1 | 2475148 | 23-scf00581 | 23 |
| AX-158231559 | 19 | 49.621 | KV453243.1 | 2478755 | 23-scf00581 | 23 |
| AX-158231562 | 19 | 49.621 | KV453243.1 | 2480722 | 23-scf00581 | 23 |
| AX-158231565 | 19 | 49.621 | KV453243.1 | 2484203 | 23-scf00581 | 23 |
| AX-158231568 | 19 | 49.621 | KV453243.1 | 2485752 | 23-scf00581 | 23 |
| AX-158231569 | 19 | 49.621 | KV453243.1 | 2486259 | 23-scf00581 | 23 |
| AX-158231572 | 19 | 49.621 | KV453243.1 | 2492761 | 23-scf00581 | 23 |
| AX-158231575 | 19 | 49.621 | KV453243.1 | 2495126 | 23-scf00581 | 23 |
| AX-157840217 | 19 | 49.621 | KV453243.1 | 2526827 | 23-scf00581 | 23 |
| AX-158231589 | 19 | 49.621 | KV453243.1 | 2530666 | 23-scf00581 | 23 |
| AX-157840218 | 19 | 49.621 | KV453243.1 | 2531061 | 23-scf00581 | 23 |
| AX-158415162 | 19 | 49.621 | KV453243.1 | 2541102 | 23-scf00581 | 23 |
| AX-157840221 | 19 | 49.621 | KV453243.1 | 2543824 | 23-scf00581 | 23 |
| AX-158231595 | 19 | 49.621 | KV453243.1 | 2544718 | 23-scf00581 | 23 |
| AX-158231596 | 19 | 49.621 | KV453243.1 | 2544969 | 23-scf00581 | 23 |
| AX-158231599 | 19 | 49.621 | KV453243.1 | 2549424 | 23-scf00581 | 23 |
| AX-158231601 | 19 | 49.621 | KV453243.1 | 2552307 | 23-scf00581 | 23 |
| AX-158231608 | 19 | 49.621 | KV453243.1 | 2591523 | 23-scf00581 | 23 |
| AX-157840223 | 19 | 49.621 | KV453243.1 | 2592990 | 23-scf00581 | 23 |
| AX-157867183 | 19 | 49.621 | KV453243.1 | 2594608 | 23-scf00581 | 23 |
| AX-158231611 | 19 | 49.621 | KV453243.1 | 2599374 | 23-scf00581 | 23 |
| AX-158231613 | 19 | 49.621 | KV453243.1 | 2601408 | 23-scf00581 | 23 |

|              |    |        |            |         |             |    |
|--------------|----|--------|------------|---------|-------------|----|
| AX-158231614 | 19 | 49.621 | KV453243.1 | 2606079 | 23-scf00581 | 23 |
| AX-158231615 | 19 | 49.621 | KV453243.1 | 2607911 | 23-scf00581 | 23 |
| AX-158231616 | 19 | 49.621 | KV453243.1 | 2608870 | 23-scf00581 | 23 |
| AX-158231617 | 19 | 49.621 | KV453243.1 | 2609902 | 23-scf00581 | 23 |
| AX-158231620 | 19 | 49.621 | KV453243.1 | 2623704 | 23-scf00581 | 23 |
| AX-157727086 | 19 | 49.621 | KV453243.1 | 2627364 | 23-scf00581 | 23 |
| AX-158231622 | 19 | 49.621 | KV453243.1 | 2630913 | 23-scf00581 | 23 |
| AX-158231629 | 19 | 49.621 | KV453243.1 | 2642664 | 23-scf00581 | 23 |
| AX-157740754 | 19 | 49.621 | KV453243.1 | 2643612 | 23-scf00581 | 23 |
| AX-158231630 | 19 | 49.621 | KV453243.1 | 2643793 | 23-scf00581 | 23 |
| AX-158231636 | 19 | 49.621 | KV453243.1 | 2654579 | 23-scf00581 | 23 |
| AX-158231637 | 19 | 49.621 | KV453243.1 | 2655048 | 23-scf00581 | 23 |
| AX-157742760 | 19 | 49.621 | KV453243.1 | 2656639 | 23-scf00581 | 23 |
| AX-158231640 | 19 | 49.621 | KV453243.1 | 2660764 | 23-scf00581 | 23 |
| AX-158231644 | 19 | 49.621 | KV453243.1 | 2666352 | 23-scf00581 | 23 |
| AX-158231645 | 19 | 49.621 | KV453243.1 | 2669832 | 23-scf00581 | 23 |
| AX-157727392 | 19 | 49.621 | KV453243.1 | 2671334 | 23-scf00581 | 23 |
| AX-158231648 | 19 | 49.621 | KV453243.1 | 2672730 | 23-scf00581 | 23 |
| AX-158231650 | 19 | 49.621 | KV453243.1 | 2675738 | 23-scf00581 | 23 |
| AX-157756132 | 19 | 49.621 | KV453243.1 | 2679484 | 23-scf00581 | 23 |
| AX-158231654 | 19 | 49.621 | KV453243.1 | 2680737 | 23-scf00581 | 23 |
| AX-158231656 | 19 | 49.621 | KV453243.1 | 2685627 | 23-scf00581 | 23 |
| AX-158231657 | 19 | 49.621 | KV453243.1 | 2687470 | 23-scf00581 | 23 |
| AX-157727053 | 19 | 49.621 | KV453243.1 | 2687864 | 23-scf00581 | 23 |
| AX-158231658 | 19 | 49.621 | KV453243.1 | 2688767 | 23-scf00581 | 23 |
| AX-158231660 | 19 | 49.621 | KV453243.1 | 2689984 | 23-scf00581 | 23 |
| AX-158231662 | 19 | 49.621 | KV453243.1 | 2692838 | 23-scf00581 | 23 |
| AX-158231663 | 19 | 49.621 | KV453243.1 | 2694572 | 23-scf00581 | 23 |
| AX-158231666 | 19 | 49.621 | KV453243.1 | 2699070 | 23-scf00581 | 23 |
| AX-158380905 | 19 | 49.621 | KV453243.1 | 2699583 | 23-scf00581 | 23 |
| AX-158231672 | 19 | 49.621 | KV453243.1 | 2704784 | 23-scf00581 | 23 |
| AX-158231673 | 19 | 49.621 | KV453243.1 | 2705402 | 23-scf00581 | 23 |
| AX-158231675 | 19 | 49.621 | KV453243.1 | 2706702 | 23-scf00581 | 23 |
| AX-158231676 | 19 | 49.621 | KV453243.1 | 2707346 | 23-scf00581 | 23 |
| AX-158231679 | 19 | 49.621 | KV453243.1 | 2712866 | 23-scf00581 | 23 |
| AX-157840226 | 19 | 49.621 | KV453243.1 | 2714473 | 23-scf00581 | 23 |
| AX-158231680 | 19 | 49.621 | KV453243.1 | 2714656 | 23-scf00581 | 23 |
| AX-158231681 | 19 | 49.621 | KV453243.1 | 2716041 | 23-scf00581 | 23 |
| AX-157840227 | 19 | 49.621 | KV453243.1 | 2716543 | 23-scf00581 | 23 |
| AX-158231682 | 19 | 49.621 | KV453243.1 | 2716820 | 23-scf00581 | 23 |
| AX-158231683 | 19 | 49.621 | KV453243.1 | 2717130 | 23-scf00581 | 23 |
| AX-158231686 | 19 | 49.621 | KV453243.1 | 2726181 | 23-scf00581 | 23 |
| AX-158231692 | 19 | 49.621 | KV453243.1 | 2733933 | 23-scf00581 | 23 |
| AX-158231696 | 19 | 49.621 | KV453243.1 | 2736108 | 23-scf00581 | 23 |
| AX-158231699 | 19 | 49.621 | KV453243.1 | 2740711 | 23-scf00581 | 23 |
| AX-158231700 | 19 | 49.621 | KV453243.1 | 2741259 | 23-scf00581 | 23 |
| AX-158231704 | 19 | 49.621 | KV453243.1 | 2745512 | 23-scf00581 | 23 |
| AX-158231707 | 19 | 49.621 | KV453243.1 | 2747935 | 23-scf00581 | 23 |
| AX-158231709 | 19 | 49.621 | KV453243.1 | 2749889 | 23-scf00581 | 23 |
| AX-157840228 | 19 | 49.621 | KV453243.1 | 2753829 | 23-scf00581 | 23 |
| AX-157840229 | 19 | 49.621 | KV453243.1 | 2754835 | 23-scf00581 | 23 |



|              |    |        |            |         |             |    |
|--------------|----|--------|------------|---------|-------------|----|
| AX-158231713 | 19 | 49.621 | KV453243.1 | 2756429 | 23-scf00581 | 23 |
| AX-157840230 | 19 | 49.621 | KV453243.1 | 2759314 | 23-scf00581 | 23 |
| AX-158231718 | 19 | 49.621 | KV453243.1 | 2764030 | 23-scf00581 | 23 |
| AX-158231719 | 19 | 49.621 | KV453243.1 | 2765163 | 23-scf00581 | 23 |
| AX-158231720 | 19 | 49.621 | KV453243.1 | 2768628 | 23-scf00581 | 23 |
| AX-158231722 | 19 | 49.621 | KV453243.1 | 2773330 | 23-scf00581 | 23 |
| AX-158231723 | 19 | 49.621 | KV453243.1 | 2774110 | 23-scf00581 | 23 |
| AX-158231724 | 19 | 49.621 | KV453243.1 | 2776124 | 23-scf00581 | 23 |
| AX-158231727 | 19 | 49.621 | KV453243.1 | 2780536 | 23-scf00581 | 23 |
| AX-158231728 | 19 | 49.621 | KV453243.1 | 2781656 | 23-scf00581 | 23 |
| AX-158231729 | 19 | 49.621 | KV453243.1 | 2782021 | 23-scf00581 | 23 |
| AX-158231730 | 19 | 49.621 | KV453243.1 | 2782658 | 23-scf00581 | 23 |
| AX-158231734 | 19 | 49.621 | KV453243.1 | 2790802 | 23-scf00581 | 23 |
| AX-158231735 | 19 | 49.621 | KV453243.1 | 2791403 | 23-scf00581 | 23 |
| AX-158231744 | 19 | 49.621 | KV453243.1 | 2800360 | 23-scf00581 | 23 |
| AX-158231753 | 19 | 49.621 | KV453243.1 | 2809761 | 23-scf00581 | 23 |
| AX-158231755 | 19 | 49.621 | KV453243.1 | 2812461 | 23-scf00581 | 23 |
| AX-158231756 | 19 | 49.621 | KV453243.1 | 2813833 | 23-scf00581 | 23 |
| AX-158231761 | 19 | 49.621 | KV453243.1 | 2821502 | 23-scf00581 | 23 |
| AX-158231762 | 19 | 49.621 | KV453243.1 | 2822899 | 23-scf00581 | 23 |
| AX-158231763 | 19 | 49.621 | KV453243.1 | 2823588 | 23-scf00581 | 23 |
| AX-158231764 | 19 | 49.621 | KV453243.1 | 2824580 | 23-scf00581 | 23 |
| AX-158231766 | 19 | 49.621 | KV453243.1 | 2828201 | 23-scf00581 | 23 |
| AX-157872490 | 19 | 49.621 | KV453243.1 | 2835447 | 23-scf00581 | 23 |
| AX-158231772 | 19 | 49.621 | KV453243.1 | 2837734 | 23-scf00581 | 23 |
| AX-158231775 | 19 | 49.621 | KV453243.1 | 2841586 | 23-scf00581 | 23 |
| AX-158231776 | 19 | 49.621 | KV453243.1 | 2843143 | 23-scf00581 | 23 |
| AX-158231781 | 19 | 49.621 | KV453243.1 | 2846370 | 23-scf00581 | 23 |
| AX-157772319 | 19 | 49.621 | KV453243.1 | 2848419 | 23-scf00581 | 23 |
| AX-157840236 | 19 | 49.621 | KV453243.1 | 2849672 | 23-scf00581 | 23 |
| AX-157840237 | 19 | 49.621 | KV453243.1 | 2850063 | 23-scf00581 | 23 |
| AX-157715837 | 19 | 49.621 | KV453243.1 | 2852642 | 23-scf00581 | 23 |
| AX-157750376 | 19 | 49.621 | KV453243.1 | 2853175 | 23-scf00581 | 23 |
| AX-158231783 | 19 | 49.621 | KV453243.1 | 2853483 | 23-scf00581 | 23 |
| AX-157714209 | 19 | 49.621 | KV453243.1 | 2854083 | 23-scf00581 | 23 |
| AX-158231784 | 19 | 49.621 | KV453243.1 | 2857268 | 23-scf00581 | 23 |
| AX-158231786 | 19 | 49.621 | KV453243.1 | 2862103 | 23-scf00581 | 23 |
| AX-158231793 | 19 | 49.621 | KV453243.1 | 2876390 | 23-scf00581 | 23 |
| AX-158231794 | 19 | 49.621 | KV453243.1 | 2877404 | 23-scf00581 | 23 |
| AX-157739792 | 19 | 49.621 | KV453243.1 | 2879810 | 23-scf00581 | 23 |
| AX-158231796 | 19 | 49.621 | KV453243.1 | 2880621 | 23-scf00581 | 23 |
| AX-158231797 | 19 | 49.621 | KV453243.1 | 2882049 | 23-scf00581 | 23 |
| AX-158231798 | 19 | 49.621 | KV453243.1 | 2883562 | 23-scf00581 | 23 |
| AX-158231803 | 19 | 49.621 | KV453243.1 | 2893527 | 23-scf00581 | 23 |
| AX-158394161 | 19 | 49.621 | KV453243.1 | 2893602 | 23-scf00581 | 23 |
| AX-158231806 | 19 | 49.621 | KV453243.1 | 2895207 | 23-scf00581 | 23 |
| AX-158231807 | 19 | 49.621 | KV453243.1 | 2896752 | 23-scf00581 | 23 |
| AX-158231809 | 19 | 49.621 | KV453243.1 | 2899158 | 23-scf00581 | 23 |
| AX-158231811 | 19 | 49.621 | KV453243.1 | 2900963 | 23-scf00581 | 23 |
| AX-158231812 | 19 | 49.621 | KV453243.1 | 2901389 | 23-scf00581 | 23 |
| AX-158231817 | 19 | 49.621 | KV453243.1 | 2906387 | 23-scf00581 | 23 |

|              |    |        |             |         |             |    |
|--------------|----|--------|-------------|---------|-------------|----|
| AX-158231819 | 19 | 49.621 | KV453243.1  | 2911628 | 23-scf00581 | 23 |
| AX-158231823 | 19 | 49.621 | KV453243.1  | 2914636 | 23-scf00581 | 23 |
| AX-158231824 | 19 | 49.621 | KV453243.1  | 2915204 | 23-scf00581 | 23 |
| AX-158231825 | 19 | 49.621 | KV453243.1  | 2915624 | 23-scf00581 | 23 |
| AX-158231828 | 19 | 49.621 | KV453243.1  | 2919134 | 23-scf00581 | 23 |
| AX-158231829 | 19 | 49.621 | KV453243.1  | 2920633 | 23-scf00581 | 23 |
| AX-158231830 | 19 | 49.621 | KV453243.1  | 2922887 | 23-scf00581 | 23 |
| AX-158231832 | 19 | 49.621 | KV453243.1  | 2925411 | 23-scf00581 | 23 |
| AX-158231833 | 19 | 49.621 | KV453243.1  | 2925770 | 23-scf00581 | 23 |
| AX-158231835 | 19 | 49.621 | KV453243.1  | 2932257 | 23-scf00581 | 23 |
| AX-158231836 | 19 | 49.621 | KV453243.1  | 2932669 | 23-scf00581 | 23 |
| AX-158231837 | 19 | 49.621 | KV453243.1  | 2934920 | 23-scf00581 | 23 |
| AX-158231840 | 19 | 49.621 | KV453243.1  | 2937829 | 23-scf00581 | 23 |
| AX-158231842 | 19 | 49.621 | KV453243.1  | 2938813 | 23-scf00581 | 23 |
| AX-158386816 | 19 | 49.621 | KV453243.1  | 2943060 | 23-scf00581 | 23 |
| AX-158231847 | 19 | 49.621 | KV453243.1  | 2944087 | 23-scf00581 | 23 |
| AX-157840240 | 19 | 49.621 | KV453243.1  | 2945579 | 23-scf00581 | 23 |
| AX-158231848 | 19 | 49.621 | KV453243.1  | 2946246 | 23-scf00581 | 23 |
| AX-158231850 | 19 | 49.621 | KV453243.1  | 2948467 | 23-scf00581 | 23 |
| AX-158231855 | 19 | 49.621 | KV453243.1  | 2952673 | 23-scf00581 | 23 |
| AX-158231857 | 19 | 49.621 | KV453243.1  | 2953981 | 23-scf00581 | 23 |
| AX-158231860 | 19 | 49.621 | KV453243.1  | 2956193 | 23-scf00581 | 23 |
| AX-158231861 | 19 | 49.621 | KV453243.1  | 2957724 | 23-scf00581 | 23 |
| AX-158231868 | 19 | 49.621 | KV453243.1  | 2963194 | 23-scf00581 | 23 |
| AX-158231885 | 19 | 49.621 | KV453243.1  | 2984841 | 23-scf00581 | 23 |
| AX-158231895 | 19 | 49.621 | KV453243.1  | 2998691 | 23-scf00581 | 23 |
| AX-158231899 | 19 | 49.621 | KV453243.1  | 3006378 | 23-scf00581 | 23 |
| AX-158231904 | 19 | 49.621 | KV453243.1  | 3011647 | 23-scf00581 | 23 |
| AX-158231907 | 19 | 49.621 | KV453243.1  | 3020237 | 23-scf00581 | 23 |
| AX-158231913 | 19 | 49.621 | KV453243.1  | 3027592 | 23-scf00581 | 23 |
| AX-158231915 | 19 | 49.621 | KV453243.1  | 3029475 | 23-scf00581 | 23 |
| AX-157859560 | 19 | 49.621 | KV453243.1  | 3030112 | 23-scf00581 | 23 |
| AX-158232020 | 19 | 49.621 | KV453243.1  | 3170723 | 23-scf00581 | 23 |
| AX-158232060 | 19 | 49.621 | KV453243.1  | 3215904 | 23-scf00581 | 23 |
| AX-158232095 | 19 | 49.621 | KV453243.1  | 3261837 | 23-scf00581 | 23 |
| AX-157681179 | 19 | 49.621 | KV453241.1  | 35855   | 23-scf00590 | 23 |
| AX-157685138 | 19 | 49.621 | KV453241.1  | 75577   | 23-scf00590 | 23 |
| AX-157685140 | 19 | 49.621 | KV453241.1  | 164452  | 23-scf00590 | 23 |
| AX-157681194 | 19 | 49.621 | KV453807.1  | 17533   | scf01594    | UN |
| AX-157705521 | 19 | 49.621 | 3ML01030067 | 311     | scf05659_1  | UN |
| AX-158231843 | 19 | 49.785 | KV453243.1  | 2939791 | 23-scf00581 | 23 |
| AX-158231844 | 19 | 49.785 | KV453243.1  | 2940496 | 23-scf00581 | 23 |
| AX-158231702 | 19 | 49.949 | KV453243.1  | 2742561 | 23-scf00581 | 23 |
| AX-157714589 | 19 | 49.949 | KV453243.1  | 2771147 | 23-scf00581 | 23 |
| AX-158231849 | 19 | 49.949 | KV453243.1  | 2947217 | 23-scf00581 | 23 |
| AX-158231863 | 19 | 49.949 | KV453243.1  | 2960140 | 23-scf00581 | 23 |
| AX-158231864 | 19 | 49.949 | KV453243.1  | 2960559 | 23-scf00581 | 23 |
| AX-157879918 | 19 | 49.949 | KV453243.1  | 2962611 | 23-scf00581 | 23 |
| AX-158231871 | 19 | 49.949 | KV453243.1  | 2964893 | 23-scf00581 | 23 |
| AX-157720305 | 19 | 49.949 | KV453243.1  | 2981735 | 23-scf00581 | 23 |
| AX-158231889 | 19 | 49.949 | KV453243.1  | 2989340 | 23-scf00581 | 23 |

|              |    |        |            |         |             |    |
|--------------|----|--------|------------|---------|-------------|----|
| AX-158231892 | 19 | 49.949 | KV453243.1 | 2994819 | 23-scf00581 | 23 |
| AX-158231893 | 19 | 49.949 | KV453243.1 | 2996055 | 23-scf00581 | 23 |
| AX-157739542 | 19 | 49.949 | KV453243.1 | 3084194 | 23-scf00581 | 23 |
| AX-158231890 | 19 | 49.956 | KV453243.1 | 2991025 | 23-scf00581 | 23 |
| AX-158231896 | 19 | 49.967 | KV453243.1 | 2999736 | 23-scf00581 | 23 |
| AX-158231903 | 19 | 49.977 | KV453243.1 | 3011166 | 23-scf00581 | 23 |
| AX-157753588 | 19 | 50.05  | KV453243.1 | 3026829 | 23-scf00581 | 23 |
| AX-158231912 | 19 | 50.356 | KV453243.1 | 3025855 | 23-scf00581 | 23 |
| AX-158231917 | 19 | 50.356 | KV453243.1 | 3031583 | 23-scf00581 | 23 |
| AX-158231918 | 19 | 50.356 | KV453243.1 | 3033160 | 23-scf00581 | 23 |
| AX-158231982 | 19 | 50.356 | KV453243.1 | 3115923 | 23-scf00581 | 23 |
| AX-158231919 | 19 | 50.39  | KV453243.1 | 3033522 | 23-scf00581 | 23 |
| AX-158231973 | 19 | 50.39  | KV453243.1 | 3098120 | 23-scf00581 | 23 |
| AX-158231872 | 19 | 50.495 | KV453243.1 | 2965112 | 23-scf00581 | 23 |
| AX-158231901 | 19 | 50.495 | KV453243.1 | 3007822 | 23-scf00581 | 23 |
| AX-158231924 | 19 | 50.495 | KV453243.1 | 3038871 | 23-scf00581 | 23 |
| AX-158231927 | 19 | 50.495 | KV453243.1 | 3042498 | 23-scf00581 | 23 |
| AX-158231936 | 19 | 50.495 | KV453243.1 | 3048002 | 23-scf00581 | 23 |
| AX-158231940 | 19 | 50.495 | KV453243.1 | 3056740 | 23-scf00581 | 23 |
| AX-158380907 | 19 | 50.495 | KV453243.1 | 3058456 | 23-scf00581 | 23 |
| AX-158231943 | 19 | 50.495 | KV453243.1 | 3059103 | 23-scf00581 | 23 |
| AX-158231945 | 19 | 50.495 | KV453243.1 | 3060668 | 23-scf00581 | 23 |
| AX-158231946 | 19 | 50.495 | KV453243.1 | 3061205 | 23-scf00581 | 23 |
| AX-158231951 | 19 | 50.495 | KV453243.1 | 3065920 | 23-scf00581 | 23 |
| AX-158231952 | 19 | 50.495 | KV453243.1 | 3066558 | 23-scf00581 | 23 |
| AX-158231953 | 19 | 50.495 | KV453243.1 | 3067199 | 23-scf00581 | 23 |
| AX-157754528 | 19 | 50.495 | KV453243.1 | 3092263 | 23-scf00581 | 23 |
| AX-158231957 | 19 | 50.586 | KV453243.1 | 3071483 | 23-scf00581 | 23 |
| AX-158231961 | 19 | 50.605 | KV453243.1 | 3079566 | 23-scf00581 | 23 |
| AX-158231966 | 19 | 50.605 | KV453243.1 | 3091392 | 23-scf00581 | 23 |
| AX-158231970 | 19 | 50.605 | KV453243.1 | 3094611 | 23-scf00581 | 23 |
| AX-158415171 | 19 | 50.605 | KV453243.1 | 3094906 | 23-scf00581 | 23 |
| AX-157840242 | 19 | 50.605 | KV453243.1 | 3096851 | 23-scf00581 | 23 |
| AX-158231975 | 19 | 50.605 | KV453243.1 | 3105852 | 23-scf00581 | 23 |
| AX-158231976 | 19 | 50.727 | KV453243.1 | 3107721 | 23-scf00581 | 23 |
| AX-158231978 | 19 | 50.823 | KV453243.1 | 3109023 | 23-scf00581 | 23 |
| AX-158231980 | 19 | 50.823 | KV453243.1 | 3110013 | 23-scf00581 | 23 |
| AX-158231989 | 19 | 50.823 | KV453243.1 | 3126357 | 23-scf00581 | 23 |
| AX-158231996 | 19 | 50.823 | KV453243.1 | 3136668 | 23-scf00581 | 23 |
| AX-158231997 | 19 | 50.823 | KV453243.1 | 3137099 | 23-scf00581 | 23 |
| AX-158231998 | 19 | 50.823 | KV453243.1 | 3138835 | 23-scf00581 | 23 |
| AX-158232001 | 19 | 50.823 | KV453243.1 | 3144187 | 23-scf00581 | 23 |
| AX-158232004 | 19 | 50.823 | KV453243.1 | 3146306 | 23-scf00581 | 23 |
| AX-158232007 | 19 | 50.823 | KV453243.1 | 3148774 | 23-scf00581 | 23 |
| AX-158232008 | 19 | 50.823 | KV453243.1 | 3152012 | 23-scf00581 | 23 |
| AX-158415197 | 19 | 50.823 | KV453243.1 | 3589018 | 23-scf00581 | 23 |
| AX-157840298 | 19 | 50.823 | KV453243.1 | 3765724 | 23-scf00581 | 23 |
| AX-158232515 | 19 | 50.823 | KV453243.1 | 3874882 | 23-scf00581 | 23 |
| AX-158231941 | 19 | 50.859 | KV453243.1 | 3057617 | 23-scf00581 | 23 |
| AX-158231991 | 19 | 50.859 | KV453243.1 | 3131797 | 23-scf00581 | 23 |
| AX-158232010 | 19 | 50.859 | KV453243.1 | 3153537 | 23-scf00581 | 23 |

|              |    |        |            |         |             |    |
|--------------|----|--------|------------|---------|-------------|----|
| AX-157840246 | 19 | 50.859 | KV453243.1 | 3159492 | 23-scf00581 | 23 |
| AX-158232058 | 19 | 50.859 | KV453243.1 | 3213641 | 23-scf00581 | 23 |
| AX-158232076 | 19 | 50.859 | KV453243.1 | 3236445 | 23-scf00581 | 23 |
| AX-158232104 | 19 | 50.859 | KV453243.1 | 3271689 | 23-scf00581 | 23 |
| AX-158232012 | 19 | 50.895 | KV453243.1 | 3159609 | 23-scf00581 | 23 |
| AX-157758943 | 19 | 50.932 | KV453243.1 | 3070603 | 23-scf00581 | 23 |
| AX-158231958 | 19 | 50.932 | KV453243.1 | 3074207 | 23-scf00581 | 23 |
| AX-157872491 | 19 | 50.932 | KV453243.1 | 3141401 | 23-scf00581 | 23 |
| AX-158232011 | 19 | 50.932 | KV453243.1 | 3154495 | 23-scf00581 | 23 |
| AX-158232013 | 19 | 50.932 | KV453243.1 | 3160501 | 23-scf00581 | 23 |
| AX-158232014 | 19 | 50.932 | KV453243.1 | 3160866 | 23-scf00581 | 23 |
| AX-157840247 | 19 | 50.932 | KV453243.1 | 3170319 | 23-scf00581 | 23 |
| AX-158232022 | 19 | 50.932 | KV453243.1 | 3175400 | 23-scf00581 | 23 |
| AX-158232028 | 19 | 50.932 | KV453243.1 | 3182386 | 23-scf00581 | 23 |
| AX-158232029 | 19 | 50.932 | KV453243.1 | 3182864 | 23-scf00581 | 23 |
| AX-158232031 | 19 | 50.932 | KV453243.1 | 3184694 | 23-scf00581 | 23 |
| AX-158232033 | 19 | 50.932 | KV453243.1 | 3187624 | 23-scf00581 | 23 |
| AX-158232034 | 19 | 50.932 | KV453243.1 | 3188149 | 23-scf00581 | 23 |
| AX-158232035 | 19 | 50.932 | KV453243.1 | 3188402 | 23-scf00581 | 23 |
| AX-158232038 | 19 | 50.932 | KV453243.1 | 3192340 | 23-scf00581 | 23 |
| AX-158232040 | 19 | 50.932 | KV453243.1 | 3193232 | 23-scf00581 | 23 |
| AX-157749067 | 19 | 50.932 | KV453243.1 | 3196711 | 23-scf00581 | 23 |
| AX-157859562 | 19 | 50.932 | KV453243.1 | 3200096 | 23-scf00581 | 23 |
| AX-158232047 | 19 | 50.932 | KV453243.1 | 3200946 | 23-scf00581 | 23 |
| AX-158232049 | 19 | 50.932 | KV453243.1 | 3203064 | 23-scf00581 | 23 |
| AX-157748687 | 19 | 50.932 | KV453243.1 | 3206347 | 23-scf00581 | 23 |
| AX-158415174 | 19 | 50.932 | KV453243.1 | 3208296 | 23-scf00581 | 23 |
| AX-158232054 | 19 | 50.932 | KV453243.1 | 3209292 | 23-scf00581 | 23 |
| AX-158232055 | 19 | 50.932 | KV453243.1 | 3210309 | 23-scf00581 | 23 |
| AX-158232059 | 19 | 50.932 | KV453243.1 | 3215532 | 23-scf00581 | 23 |
| AX-158232061 | 19 | 50.932 | KV453243.1 | 3216438 | 23-scf00581 | 23 |
| AX-158232107 | 19 | 50.932 | KV453243.1 | 3274218 | 23-scf00581 | 23 |
| AX-158232164 | 19 | 50.932 | KV453243.1 | 3342538 | 23-scf00581 | 23 |
| AX-158232185 | 19 | 50.932 | KV453243.1 | 3383822 | 23-scf00581 | 23 |
| AX-158231987 | 19 | 51.096 | KV453243.1 | 3123657 | 23-scf00581 | 23 |
| AX-158232064 | 19 | 51.096 | KV453243.1 | 3219591 | 23-scf00581 | 23 |
| AX-158232072 | 19 | 51.195 | KV453243.1 | 3229814 | 23-scf00581 | 23 |
| AX-158232073 | 19 | 51.195 | KV453243.1 | 3230244 | 23-scf00581 | 23 |
| AX-158232002 | 19 | 51.26  | KV453243.1 | 3144611 | 23-scf00581 | 23 |
| AX-158232023 | 19 | 51.26  | KV453243.1 | 3176661 | 23-scf00581 | 23 |
| AX-157727572 | 19 | 51.26  | KV453243.1 | 3228096 | 23-scf00581 | 23 |
| AX-158232074 | 19 | 51.26  | KV453243.1 | 3233482 | 23-scf00581 | 23 |
| AX-158232075 | 19 | 51.26  | KV453243.1 | 3235473 | 23-scf00581 | 23 |
| AX-158232078 | 19 | 51.26  | KV453243.1 | 3240168 | 23-scf00581 | 23 |
| AX-158232082 | 19 | 51.26  | KV453243.1 | 3244853 | 23-scf00581 | 23 |
| AX-158232085 | 19 | 51.26  | KV453243.1 | 3247813 | 23-scf00581 | 23 |
| AX-157757299 | 19 | 51.26  | KV453243.1 | 3250275 | 23-scf00581 | 23 |
| AX-158232090 | 19 | 51.26  | KV453243.1 | 3255514 | 23-scf00581 | 23 |
| AX-158232093 | 19 | 51.26  | KV453243.1 | 3257429 | 23-scf00581 | 23 |
| AX-158232098 | 19 | 51.26  | KV453243.1 | 3264695 | 23-scf00581 | 23 |
| AX-158232101 | 19 | 51.26  | KV453243.1 | 3269251 | 23-scf00581 | 23 |

|              |    |        |             |         |             |    |
|--------------|----|--------|-------------|---------|-------------|----|
| AX-158232106 | 19 | 51.26  | KV453243.1  | 3273440 | 23-scf00581 | 23 |
| AX-158232111 | 19 | 51.26  | KV453243.1  | 3277602 | 23-scf00581 | 23 |
| AX-157840255 | 19 | 51.26  | KV453243.1  | 3375088 | 23-scf00581 | 23 |
| AX-158232191 | 19 | 51.26  | KV453243.1  | 3389989 | 23-scf00581 | 23 |
| AX-158232195 | 19 | 51.26  | KV453243.1  | 3392959 | 23-scf00581 | 23 |
| AX-157705035 | 19 | 51.26  | 3ML01028368 | 508     | scf03974_1  | UN |
| AX-158232109 | 19 | 51.313 | KV453243.1  | 3275466 | 23-scf00581 | 23 |
| AX-158232132 | 19 | 51.313 | KV453243.1  | 3304824 | 23-scf00581 | 23 |
| AX-157715488 | 19 | 51.313 | KV453243.1  | 3350310 | 23-scf00581 | 23 |
| AX-158232025 | 19 | 51.369 | KV453243.1  | 3178806 | 23-scf00581 | 23 |
| AX-158232027 | 19 | 51.369 | KV453243.1  | 3180529 | 23-scf00581 | 23 |
| AX-158232032 | 19 | 51.369 | KV453243.1  | 3186128 | 23-scf00581 | 23 |
| AX-157772355 | 19 | 51.369 | KV453243.1  | 3225371 | 23-scf00581 | 23 |
| AX-158232083 | 19 | 51.369 | KV453243.1  | 3245912 | 23-scf00581 | 23 |
| AX-157742663 | 19 | 51.369 | KV453243.1  | 3257972 | 23-scf00581 | 23 |
| AX-157726887 | 19 | 51.369 | KV453243.1  | 3266550 | 23-scf00581 | 23 |
| AX-158232105 | 19 | 51.369 | KV453243.1  | 3272781 | 23-scf00581 | 23 |
| AX-158232115 | 19 | 51.369 | KV453243.1  | 3282986 | 23-scf00581 | 23 |
| AX-158232118 | 19 | 51.369 | KV453243.1  | 3286712 | 23-scf00581 | 23 |
| AX-158232125 | 19 | 51.369 | KV453243.1  | 3294709 | 23-scf00581 | 23 |
| AX-158232127 | 19 | 51.369 | KV453243.1  | 3297664 | 23-scf00581 | 23 |
| AX-157753328 | 19 | 51.369 | KV453243.1  | 3307643 | 23-scf00581 | 23 |
| AX-157840252 | 19 | 51.369 | KV453243.1  | 3331012 | 23-scf00581 | 23 |
| AX-158232160 | 19 | 51.369 | KV453243.1  | 3339862 | 23-scf00581 | 23 |
| AX-158232193 | 19 | 51.369 | KV453243.1  | 3390890 | 23-scf00581 | 23 |
| AX-158232198 | 19 | 51.369 | KV453243.1  | 3395484 | 23-scf00581 | 23 |
| AX-158232200 | 19 | 51.369 | KV453243.1  | 3401653 | 23-scf00581 | 23 |
| AX-158232256 | 19 | 51.369 | KV453243.1  | 3483911 | 23-scf00581 | 23 |
| AX-157840250 | 19 | 51.479 | KV453243.1  | 3319978 | 23-scf00581 | 23 |
| AX-157840251 | 19 | 51.479 | KV453243.1  | 3326526 | 23-scf00581 | 23 |
| AX-157712068 | 19 | 51.479 | 3ML01033234 | 180     | scf08875_1  | UN |
| AX-158232117 | 19 | 51.588 | KV453243.1  | 3285449 | 23-scf00581 | 23 |
| AX-158232124 | 19 | 51.588 | KV453243.1  | 3293991 | 23-scf00581 | 23 |
| AX-158232129 | 19 | 51.588 | KV453243.1  | 3301358 | 23-scf00581 | 23 |
| AX-158232144 | 19 | 51.588 | KV453243.1  | 3327219 | 23-scf00581 | 23 |
| AX-157709917 | 19 | 51.588 | KV453243.1  | 3335631 | 23-scf00581 | 23 |
| AX-157840253 | 19 | 51.588 | KV453243.1  | 3336091 | 23-scf00581 | 23 |
| AX-158232156 | 19 | 51.588 | KV453243.1  | 3337843 | 23-scf00581 | 23 |
| AX-158232162 | 19 | 51.588 | KV453243.1  | 3340655 | 23-scf00581 | 23 |
| AX-157720213 | 19 | 51.588 | KV453243.1  | 3371135 | 23-scf00581 | 23 |
| AX-158232050 | 19 | 51.697 | KV453243.1  | 3204856 | 23-scf00581 | 23 |
| AX-158232063 | 19 | 51.697 | KV453243.1  | 3218771 | 23-scf00581 | 23 |
| AX-158232133 | 19 | 51.697 | KV453243.1  | 3305179 | 23-scf00581 | 23 |
| AX-158232167 | 19 | 51.697 | KV453243.1  | 3349723 | 23-scf00581 | 23 |
| AX-158232170 | 19 | 51.697 | KV453243.1  | 3353381 | 23-scf00581 | 23 |
| AX-158232174 | 19 | 51.697 | KV453243.1  | 3356840 | 23-scf00581 | 23 |
| AX-158232175 | 19 | 51.697 | KV453243.1  | 3357855 | 23-scf00581 | 23 |
| AX-158232180 | 19 | 51.697 | KV453243.1  | 3365253 | 23-scf00581 | 23 |
| AX-157840254 | 19 | 51.697 | KV453243.1  | 3365639 | 23-scf00581 | 23 |
| AX-158232184 | 19 | 51.697 | KV453243.1  | 3381705 | 23-scf00581 | 23 |
| AX-158232186 | 19 | 51.697 | KV453243.1  | 3384530 | 23-scf00581 | 23 |

|              |    |        |            |         |             |    |
|--------------|----|--------|------------|---------|-------------|----|
| AX-157727474 | 19 | 51.697 | KV453243.1 | 3385257 | 23-scf00581 | 23 |
| AX-158232189 | 19 | 51.697 | KV453243.1 | 3388253 | 23-scf00581 | 23 |
| AX-157721351 | 19 | 51.697 | KV453243.1 | 3392366 | 23-scf00581 | 23 |
| AX-158232250 | 19 | 51.697 | KV453243.1 | 3476587 | 23-scf00581 | 23 |
| AX-158232647 | 19 | 51.697 | KV453243.1 | 4084320 | 23-scf00581 | 23 |
| AX-157744900 | 19 | 51.71  | KV453243.1 | 3315843 | 23-scf00581 | 23 |
| AX-158232142 | 19 | 51.71  | KV453243.1 | 3322532 | 23-scf00581 | 23 |
| AX-158232152 | 19 | 51.71  | KV453243.1 | 3333382 | 23-scf00581 | 23 |
| AX-158232172 | 19 | 51.71  | KV453243.1 | 3354309 | 23-scf00581 | 23 |
| AX-158232196 | 19 | 51.71  | KV453243.1 | 3394344 | 23-scf00581 | 23 |
| AX-158380909 | 19 | 51.744 | KV453243.1 | 3407231 | 23-scf00581 | 23 |
| AX-158232204 | 19 | 51.762 | KV453243.1 | 3410857 | 23-scf00581 | 23 |
| AX-158232069 | 19 | 51.806 | KV453243.1 | 3226694 | 23-scf00581 | 23 |
| AX-158232131 | 19 | 51.806 | KV453243.1 | 3304022 | 23-scf00581 | 23 |
| AX-158232137 | 19 | 51.806 | KV453243.1 | 3310509 | 23-scf00581 | 23 |
| AX-158232157 | 19 | 51.806 | KV453243.1 | 3338435 | 23-scf00581 | 23 |
| AX-158232169 | 19 | 51.806 | KV453243.1 | 3351331 | 23-scf00581 | 23 |
| AX-157840258 | 19 | 51.806 | KV453243.1 | 3402508 | 23-scf00581 | 23 |
| AX-158232205 | 19 | 51.806 | KV453243.1 | 3411188 | 23-scf00581 | 23 |
| AX-157773911 | 19 | 51.806 | KV453243.1 | 3412251 | 23-scf00581 | 23 |
| AX-158232207 | 19 | 51.806 | KV453243.1 | 3412652 | 23-scf00581 | 23 |
| AX-157744909 | 19 | 51.806 | KV453243.1 | 3413370 | 23-scf00581 | 23 |
| AX-158232220 | 19 | 51.806 | KV453243.1 | 3433757 | 23-scf00581 | 23 |
| AX-158232221 | 19 | 51.806 | KV453243.1 | 3435924 | 23-scf00581 | 23 |
| AX-158232223 | 19 | 51.806 | KV453243.1 | 3438867 | 23-scf00581 | 23 |
| AX-157867187 | 19 | 51.806 | KV453243.1 | 3442512 | 23-scf00581 | 23 |
| AX-158232230 | 19 | 51.806 | KV453243.1 | 3443915 | 23-scf00581 | 23 |
| AX-158232232 | 19 | 51.806 | KV453243.1 | 3445645 | 23-scf00581 | 23 |
| AX-158232235 | 19 | 51.806 | KV453243.1 | 3449521 | 23-scf00581 | 23 |
| AX-158232240 | 19 | 51.806 | KV453243.1 | 3455387 | 23-scf00581 | 23 |
| AX-157715171 | 19 | 51.806 | KV453243.1 | 3465280 | 23-scf00581 | 23 |
| AX-158232244 | 19 | 51.806 | KV453243.1 | 3466107 | 23-scf00581 | 23 |
| AX-157840267 | 19 | 51.806 | KV453243.1 | 3467708 | 23-scf00581 | 23 |
| AX-158232246 | 19 | 51.806 | KV453243.1 | 3468496 | 23-scf00581 | 23 |
| AX-158232247 | 19 | 51.806 | KV453243.1 | 3468859 | 23-scf00581 | 23 |
| AX-158232251 | 19 | 51.806 | KV453243.1 | 3478815 | 23-scf00581 | 23 |
| AX-157746956 | 19 | 51.806 | KV453243.1 | 3480081 | 23-scf00581 | 23 |
| AX-158232254 | 19 | 51.806 | KV453243.1 | 3483440 | 23-scf00581 | 23 |
| AX-158232257 | 19 | 51.806 | KV453243.1 | 3484360 | 23-scf00581 | 23 |
| AX-157840268 | 19 | 51.806 | KV453243.1 | 3489139 | 23-scf00581 | 23 |
| AX-158232263 | 19 | 51.806 | KV453243.1 | 3491396 | 23-scf00581 | 23 |
| AX-157840270 | 19 | 51.806 | KV453243.1 | 3499010 | 23-scf00581 | 23 |
| AX-158232268 | 19 | 51.806 | KV453243.1 | 3501094 | 23-scf00581 | 23 |
| AX-158232270 | 19 | 51.806 | KV453243.1 | 3502384 | 23-scf00581 | 23 |
| AX-158232273 | 19 | 51.806 | KV453243.1 | 3504497 | 23-scf00581 | 23 |
| AX-157752055 | 19 | 51.806 | KV453243.1 | 3506053 | 23-scf00581 | 23 |
| AX-157867190 | 19 | 51.806 | KV453243.1 | 3527520 | 23-scf00581 | 23 |
| AX-158232320 | 19 | 51.806 | KV453243.1 | 3571016 | 23-scf00581 | 23 |
| AX-158232328 | 19 | 51.806 | KV453243.1 | 3579090 | 23-scf00581 | 23 |
| AX-158232329 | 19 | 51.806 | KV453243.1 | 3579527 | 23-scf00581 | 23 |
| AX-158232330 | 19 | 51.806 | KV453243.1 | 3580384 | 23-scf00581 | 23 |

|              |    |        |            |         |             |    |
|--------------|----|--------|------------|---------|-------------|----|
| AX-158232351 | 19 | 51.806 | KV453243.1 | 3612182 | 23-scf00581 | 23 |
| AX-158232354 | 19 | 51.806 | KV453243.1 | 3614046 | 23-scf00581 | 23 |
| AX-158232389 | 19 | 51.806 | KV453243.1 | 3674561 | 23-scf00581 | 23 |
| AX-158232391 | 19 | 51.806 | KV453243.1 | 3675694 | 23-scf00581 | 23 |
| AX-158232396 | 19 | 51.806 | KV453243.1 | 3682843 | 23-scf00581 | 23 |
| AX-158232398 | 19 | 51.806 | KV453243.1 | 3685663 | 23-scf00581 | 23 |
| AX-157840291 | 19 | 51.806 | KV453243.1 | 3685734 | 23-scf00581 | 23 |
| AX-158232421 | 19 | 51.806 | KV453243.1 | 3729117 | 23-scf00581 | 23 |
| AX-158232422 | 19 | 51.806 | KV453243.1 | 3729284 | 23-scf00581 | 23 |
| AX-157867195 | 19 | 51.806 | KV453243.1 | 3816584 | 23-scf00581 | 23 |
| AX-158232524 | 19 | 51.806 | KV453243.1 | 3885701 | 23-scf00581 | 23 |
| AX-158232535 | 19 | 51.806 | KV453243.1 | 3902866 | 23-scf00581 | 23 |
| AX-157840316 | 19 | 51.806 | KV453243.1 | 3939584 | 23-scf00581 | 23 |
| AX-157750225 | 19 | 51.806 | KV453243.1 | 3948005 | 23-scf00581 | 23 |
| AX-158232275 | 19 | 51.837 | KV453243.1 | 3505652 | 23-scf00581 | 23 |
| AX-158232278 | 19 | 51.871 | KV453243.1 | 3511532 | 23-scf00581 | 23 |
| AX-158232283 | 19 | 51.915 | KV453243.1 | 3513871 | 23-scf00581 | 23 |
| AX-157867188 | 19 | 51.951 | KV453243.1 | 3518301 | 23-scf00581 | 23 |
| AX-157771719 | 19 | 51.951 | KV453243.1 | 3955723 | 23-scf00581 | 23 |
| AX-157840274 | 19 | 51.988 | KV453243.1 | 3522204 | 23-scf00581 | 23 |
| AX-157745279 | 19 | 51.988 | KV453243.1 | 3773072 | 23-scf00581 | 23 |
| AX-158232471 | 19 | 51.988 | KV453243.1 | 3804344 | 23-scf00581 | 23 |
| AX-158232475 | 19 | 51.988 | KV453243.1 | 3807511 | 23-scf00581 | 23 |
| AX-157774265 | 19 | 51.988 | KV453243.1 | 3843667 | 23-scf00581 | 23 |
| AX-158232291 | 19 | 52.016 | KV453243.1 | 3528633 | 23-scf00581 | 23 |
| AX-157840287 | 19 | 52.016 | KV453243.1 | 3667317 | 23-scf00581 | 23 |
| AX-158232209 | 19 | 52.025 | KV453243.1 | 3415583 | 23-scf00581 | 23 |
| AX-157734689 | 19 | 52.025 | KV453243.1 | 3434269 | 23-scf00581 | 23 |
| AX-158232233 | 19 | 52.025 | KV453243.1 | 3445997 | 23-scf00581 | 23 |
| AX-158232239 | 19 | 52.025 | KV453243.1 | 3454336 | 23-scf00581 | 23 |
| AX-158232241 | 19 | 52.025 | KV453243.1 | 3457296 | 23-scf00581 | 23 |
| AX-158232242 | 19 | 52.025 | KV453243.1 | 3458001 | 23-scf00581 | 23 |
| AX-157701788 | 19 | 52.025 | KV453243.1 | 3458604 | 23-scf00581 | 23 |
| AX-158232261 | 19 | 52.025 | KV453243.1 | 3489912 | 23-scf00581 | 23 |
| AX-158232280 | 19 | 52.025 | KV453243.1 | 3512309 | 23-scf00581 | 23 |
| AX-158232282 | 19 | 52.025 | KV453243.1 | 3513322 | 23-scf00581 | 23 |
| AX-158232285 | 19 | 52.025 | KV453243.1 | 3517690 | 23-scf00581 | 23 |
| AX-158232286 | 19 | 52.025 | KV453243.1 | 3518918 | 23-scf00581 | 23 |
| AX-158232287 | 19 | 52.025 | KV453243.1 | 3522586 | 23-scf00581 | 23 |
| AX-158232289 | 19 | 52.025 | KV453243.1 | 3523409 | 23-scf00581 | 23 |
| AX-157867189 | 19 | 52.025 | KV453243.1 | 3524714 | 23-scf00581 | 23 |
| AX-158232298 | 19 | 52.025 | KV453243.1 | 3537145 | 23-scf00581 | 23 |
| AX-158232299 | 19 | 52.025 | KV453243.1 | 3538107 | 23-scf00581 | 23 |
| AX-158232300 | 19 | 52.025 | KV453243.1 | 3539180 | 23-scf00581 | 23 |
| AX-158232301 | 19 | 52.025 | KV453243.1 | 3540503 | 23-scf00581 | 23 |
| AX-158232303 | 19 | 52.025 | KV453243.1 | 3542261 | 23-scf00581 | 23 |
| AX-158232304 | 19 | 52.025 | KV453243.1 | 3543001 | 23-scf00581 | 23 |
| AX-158232307 | 19 | 52.025 | KV453243.1 | 3545960 | 23-scf00581 | 23 |
| AX-158232308 | 19 | 52.025 | KV453243.1 | 3547253 | 23-scf00581 | 23 |
| AX-157775648 | 19 | 52.025 | KV453243.1 | 3548528 | 23-scf00581 | 23 |
| AX-158232312 | 19 | 52.025 | KV453243.1 | 3556248 | 23-scf00581 | 23 |

|              |    |        |            |         |             |    |
|--------------|----|--------|------------|---------|-------------|----|
| AX-158232313 | 19 | 52.025 | KV453243.1 | 3558036 | 23-scf00581 | 23 |
| AX-158232314 | 19 | 52.025 | KV453243.1 | 3558562 | 23-scf00581 | 23 |
| AX-158232315 | 19 | 52.025 | KV453243.1 | 3560839 | 23-scf00581 | 23 |
| AX-158232321 | 19 | 52.025 | KV453243.1 | 3571224 | 23-scf00581 | 23 |
| AX-158232324 | 19 | 52.025 | KV453243.1 | 3573564 | 23-scf00581 | 23 |
| AX-158232327 | 19 | 52.025 | KV453243.1 | 3578336 | 23-scf00581 | 23 |
| AX-157724272 | 19 | 52.025 | KV453243.1 | 3581504 | 23-scf00581 | 23 |
| AX-157872494 | 19 | 52.025 | KV453243.1 | 3581907 | 23-scf00581 | 23 |
| AX-157840277 | 19 | 52.025 | KV453243.1 | 3593113 | 23-scf00581 | 23 |
| AX-158232339 | 19 | 52.025 | KV453243.1 | 3596859 | 23-scf00581 | 23 |
| AX-157859564 | 19 | 52.025 | KV453243.1 | 3598132 | 23-scf00581 | 23 |
| AX-158232342 | 19 | 52.025 | KV453243.1 | 3599193 | 23-scf00581 | 23 |
| AX-158232343 | 19 | 52.025 | KV453243.1 | 3600358 | 23-scf00581 | 23 |
| AX-158232346 | 19 | 52.025 | KV453243.1 | 3604128 | 23-scf00581 | 23 |
| AX-158232349 | 19 | 52.025 | KV453243.1 | 3608929 | 23-scf00581 | 23 |
| AX-157840279 | 19 | 52.025 | KV453243.1 | 3609232 | 23-scf00581 | 23 |
| AX-157747856 | 19 | 52.025 | KV453243.1 | 3609856 | 23-scf00581 | 23 |
| AX-158232352 | 19 | 52.025 | KV453243.1 | 3612595 | 23-scf00581 | 23 |
| AX-158232355 | 19 | 52.025 | KV453243.1 | 3621165 | 23-scf00581 | 23 |
| AX-158232358 | 19 | 52.025 | KV453243.1 | 3626534 | 23-scf00581 | 23 |
| AX-157840283 | 19 | 52.025 | KV453243.1 | 3626654 | 23-scf00581 | 23 |
| AX-158232359 | 19 | 52.025 | KV453243.1 | 3628697 | 23-scf00581 | 23 |
| AX-158232362 | 19 | 52.025 | KV453243.1 | 3632523 | 23-scf00581 | 23 |
| AX-158232364 | 19 | 52.025 | KV453243.1 | 3634379 | 23-scf00581 | 23 |
| AX-158232366 | 19 | 52.025 | KV453243.1 | 3635670 | 23-scf00581 | 23 |
| AX-158232369 | 19 | 52.025 | KV453243.1 | 3637452 | 23-scf00581 | 23 |
| AX-158232370 | 19 | 52.025 | KV453243.1 | 3637882 | 23-scf00581 | 23 |
| AX-158232378 | 19 | 52.025 | KV453243.1 | 3653216 | 23-scf00581 | 23 |
| AX-158232379 | 19 | 52.025 | KV453243.1 | 3654608 | 23-scf00581 | 23 |
| AX-157840284 | 19 | 52.025 | KV453243.1 | 3656567 | 23-scf00581 | 23 |
| AX-158232382 | 19 | 52.025 | KV453243.1 | 3660049 | 23-scf00581 | 23 |
| AX-158232384 | 19 | 52.025 | KV453243.1 | 3660957 | 23-scf00581 | 23 |
| AX-158232385 | 19 | 52.025 | KV453243.1 | 3663520 | 23-scf00581 | 23 |
| AX-158232387 | 19 | 52.025 | KV453243.1 | 3668765 | 23-scf00581 | 23 |
| AX-158232388 | 19 | 52.025 | KV453243.1 | 3669125 | 23-scf00581 | 23 |
| AX-157840288 | 19 | 52.025 | KV453243.1 | 3672944 | 23-scf00581 | 23 |
| AX-158232390 | 19 | 52.025 | KV453243.1 | 3675111 | 23-scf00581 | 23 |
| AX-158232393 | 19 | 52.025 | KV453243.1 | 3678920 | 23-scf00581 | 23 |
| AX-158232397 | 19 | 52.025 | KV453243.1 | 3683851 | 23-scf00581 | 23 |
| AX-158232399 | 19 | 52.025 | KV453243.1 | 3689311 | 23-scf00581 | 23 |
| AX-157775012 | 19 | 52.025 | KV453243.1 | 3689999 | 23-scf00581 | 23 |
| AX-158232400 | 19 | 52.025 | KV453243.1 | 3691239 | 23-scf00581 | 23 |
| AX-158232402 | 19 | 52.025 | KV453243.1 | 3692349 | 23-scf00581 | 23 |
| AX-158232403 | 19 | 52.025 | KV453243.1 | 3693663 | 23-scf00581 | 23 |
| AX-158232404 | 19 | 52.025 | KV453243.1 | 3695007 | 23-scf00581 | 23 |
| AX-158410441 | 19 | 52.025 | KV453243.1 | 3695490 | 23-scf00581 | 23 |
| AX-158232405 | 19 | 52.025 | KV453243.1 | 3702035 | 23-scf00581 | 23 |
| AX-158232406 | 19 | 52.025 | KV453243.1 | 3703368 | 23-scf00581 | 23 |
| AX-158232407 | 19 | 52.025 | KV453243.1 | 3706431 | 23-scf00581 | 23 |
| AX-157716734 | 19 | 52.025 | KV453243.1 | 3706899 | 23-scf00581 | 23 |
| AX-158232411 | 19 | 52.025 | KV453243.1 | 3718465 | 23-scf00581 | 23 |



|              |    |        |            |         |             |    |
|--------------|----|--------|------------|---------|-------------|----|
| AX-158232412 | 19 | 52.025 | KV453243.1 | 3719909 | 23-scf00581 | 23 |
| AX-158232413 | 19 | 52.025 | KV453243.1 | 3720299 | 23-scf00581 | 23 |
| AX-158232414 | 19 | 52.025 | KV453243.1 | 3721298 | 23-scf00581 | 23 |
| AX-157872496 | 19 | 52.025 | KV453243.1 | 3721742 | 23-scf00581 | 23 |
| AX-158232415 | 19 | 52.025 | KV453243.1 | 3721994 | 23-scf00581 | 23 |
| AX-158232416 | 19 | 52.025 | KV453243.1 | 3723154 | 23-scf00581 | 23 |
| AX-157746901 | 19 | 52.025 | KV453243.1 | 3725511 | 23-scf00581 | 23 |
| AX-158232417 | 19 | 52.025 | KV453243.1 | 3725638 | 23-scf00581 | 23 |
| AX-158232419 | 19 | 52.025 | KV453243.1 | 3726435 | 23-scf00581 | 23 |
| AX-157745587 | 19 | 52.025 | KV453243.1 | 3728332 | 23-scf00581 | 23 |
| AX-158232423 | 19 | 52.025 | KV453243.1 | 3730377 | 23-scf00581 | 23 |
| AX-158232425 | 19 | 52.025 | KV453243.1 | 3733255 | 23-scf00581 | 23 |
| AX-158232426 | 19 | 52.025 | KV453243.1 | 3734267 | 23-scf00581 | 23 |
| AX-158232427 | 19 | 52.025 | KV453243.1 | 3734925 | 23-scf00581 | 23 |
| AX-157740465 | 19 | 52.025 | KV453243.1 | 3735058 | 23-scf00581 | 23 |
| AX-158232429 | 19 | 52.025 | KV453243.1 | 3735665 | 23-scf00581 | 23 |
| AX-158232430 | 19 | 52.025 | KV453243.1 | 3736164 | 23-scf00581 | 23 |
| AX-158232434 | 19 | 52.025 | KV453243.1 | 3739222 | 23-scf00581 | 23 |
| AX-158232435 | 19 | 52.025 | KV453243.1 | 3739548 | 23-scf00581 | 23 |
| AX-158232436 | 19 | 52.025 | KV453243.1 | 3740542 | 23-scf00581 | 23 |
| AX-158232437 | 19 | 52.025 | KV453243.1 | 3741900 | 23-scf00581 | 23 |
| AX-158232439 | 19 | 52.025 | KV453243.1 | 3742681 | 23-scf00581 | 23 |
| AX-158232441 | 19 | 52.025 | KV453243.1 | 3743561 | 23-scf00581 | 23 |
| AX-158232444 | 19 | 52.025 | KV453243.1 | 3745216 | 23-scf00581 | 23 |
| AX-157840294 | 19 | 52.025 | KV453243.1 | 3752106 | 23-scf00581 | 23 |
| AX-158232448 | 19 | 52.025 | KV453243.1 | 3755732 | 23-scf00581 | 23 |
| AX-157840296 | 19 | 52.025 | KV453243.1 | 3760448 | 23-scf00581 | 23 |
| AX-158232449 | 19 | 52.025 | KV453243.1 | 3763768 | 23-scf00581 | 23 |
| AX-158232450 | 19 | 52.025 | KV453243.1 | 3765516 | 23-scf00581 | 23 |
| AX-157775008 | 19 | 52.025 | KV453243.1 | 3775259 | 23-scf00581 | 23 |
| AX-158232454 | 19 | 52.025 | KV453243.1 | 3778178 | 23-scf00581 | 23 |
| AX-158232455 | 19 | 52.025 | KV453243.1 | 3783674 | 23-scf00581 | 23 |
| AX-157717914 | 19 | 52.025 | KV453243.1 | 3784245 | 23-scf00581 | 23 |
| AX-158232458 | 19 | 52.025 | KV453243.1 | 3789260 | 23-scf00581 | 23 |
| AX-158232462 | 19 | 52.025 | KV453243.1 | 3792446 | 23-scf00581 | 23 |
| AX-157840301 | 19 | 52.025 | KV453243.1 | 3795499 | 23-scf00581 | 23 |
| AX-158232465 | 19 | 52.025 | KV453243.1 | 3795822 | 23-scf00581 | 23 |
| AX-157840302 | 19 | 52.025 | KV453243.1 | 3801632 | 23-scf00581 | 23 |
| AX-158232468 | 19 | 52.025 | KV453243.1 | 3801960 | 23-scf00581 | 23 |
| AX-158232469 | 19 | 52.025 | KV453243.1 | 3802396 | 23-scf00581 | 23 |
| AX-158232481 | 19 | 52.025 | KV453243.1 | 3813869 | 23-scf00581 | 23 |
| AX-157840303 | 19 | 52.025 | KV453243.1 | 3817162 | 23-scf00581 | 23 |
| AX-158232482 | 19 | 52.025 | KV453243.1 | 3817778 | 23-scf00581 | 23 |
| AX-158415206 | 19 | 52.025 | KV453243.1 | 3818082 | 23-scf00581 | 23 |
| AX-158232483 | 19 | 52.025 | KV453243.1 | 3823364 | 23-scf00581 | 23 |
| AX-158232484 | 19 | 52.025 | KV453243.1 | 3824903 | 23-scf00581 | 23 |
| AX-158232488 | 19 | 52.025 | KV453243.1 | 3832792 | 23-scf00581 | 23 |
| AX-157840306 | 19 | 52.025 | KV453243.1 | 3842332 | 23-scf00581 | 23 |
| AX-158232491 | 19 | 52.025 | KV453243.1 | 3842952 | 23-scf00581 | 23 |
| AX-157867196 | 19 | 52.025 | KV453243.1 | 3846562 | 23-scf00581 | 23 |
| AX-158232495 | 19 | 52.025 | KV453243.1 | 3847635 | 23-scf00581 | 23 |

|              |    |        |            |         |             |    |
|--------------|----|--------|------------|---------|-------------|----|
| AX-158232503 | 19 | 52.025 | KV453243.1 | 3856782 | 23-scf00581 | 23 |
| AX-157840311 | 19 | 52.025 | KV453243.1 | 3859578 | 23-scf00581 | 23 |
| AX-157867197 | 19 | 52.025 | KV453243.1 | 3861488 | 23-scf00581 | 23 |
| AX-157879929 | 19 | 52.025 | KV453243.1 | 3877802 | 23-scf00581 | 23 |
| AX-158232520 | 19 | 52.025 | KV453243.1 | 3880592 | 23-scf00581 | 23 |
| AX-158232521 | 19 | 52.025 | KV453243.1 | 3881036 | 23-scf00581 | 23 |
| AX-158415208 | 19 | 52.025 | KV453243.1 | 3884878 | 23-scf00581 | 23 |
| AX-158232526 | 19 | 52.025 | KV453243.1 | 3886709 | 23-scf00581 | 23 |
| AX-158232528 | 19 | 52.025 | KV453243.1 | 3889489 | 23-scf00581 | 23 |
| AX-158232529 | 19 | 52.025 | KV453243.1 | 3892066 | 23-scf00581 | 23 |
| AX-158232530 | 19 | 52.025 | KV453243.1 | 3895574 | 23-scf00581 | 23 |
| AX-158232537 | 19 | 52.025 | KV453243.1 | 3906414 | 23-scf00581 | 23 |
| AX-158232539 | 19 | 52.025 | KV453243.1 | 3908378 | 23-scf00581 | 23 |
| AX-158232541 | 19 | 52.025 | KV453243.1 | 3909537 | 23-scf00581 | 23 |
| AX-158232543 | 19 | 52.025 | KV453243.1 | 3912546 | 23-scf00581 | 23 |
| AX-158232558 | 19 | 52.025 | KV453243.1 | 3940088 | 23-scf00581 | 23 |
| AX-158232566 | 19 | 52.025 | KV453243.1 | 3955127 | 23-scf00581 | 23 |
| AX-158232567 | 19 | 52.025 | KV453243.1 | 3956692 | 23-scf00581 | 23 |
| AX-158232572 | 19 | 52.025 | KV453243.1 | 3961014 | 23-scf00581 | 23 |
| AX-158232575 | 19 | 52.025 | KV453243.1 | 3964059 | 23-scf00581 | 23 |
| AX-158232576 | 19 | 52.025 | KV453243.1 | 3964286 | 23-scf00581 | 23 |
| AX-158232577 | 19 | 52.025 | KV453243.1 | 3966891 | 23-scf00581 | 23 |
| AX-158232578 | 19 | 52.025 | KV453243.1 | 3967558 | 23-scf00581 | 23 |
| AX-158232579 | 19 | 52.025 | KV453243.1 | 3968013 | 23-scf00581 | 23 |
| AX-158232580 | 19 | 52.025 | KV453243.1 | 3968634 | 23-scf00581 | 23 |
| AX-158232586 | 19 | 52.025 | KV453243.1 | 3976768 | 23-scf00581 | 23 |
| AX-157867199 | 19 | 52.025 | KV453243.1 | 3983285 | 23-scf00581 | 23 |
| AX-157840325 | 19 | 52.025 | KV453243.1 | 4020686 | 23-scf00581 | 23 |
| AX-158232620 | 19 | 52.025 | KV453243.1 | 4038852 | 23-scf00581 | 23 |
| AX-157693442 | 19 | 52.025 | KV453243.1 | 4039059 | 23-scf00581 | 23 |
| AX-158232674 | 19 | 52.025 | KV453243.1 | 4107789 | 23-scf00581 | 23 |
| AX-158232691 | 19 | 52.025 | KV453243.1 | 4127664 | 23-scf00581 | 23 |
| AX-158232829 | 19 | 52.025 | KV453243.1 | 4287909 | 23-scf00581 | 23 |
| AX-157840346 | 19 | 52.025 | KV453243.1 | 4387829 | 23-scf00581 | 23 |
| AX-158232587 | 19 | 52.051 | KV453243.1 | 3977657 | 23-scf00581 | 23 |
| AX-158232325 | 19 | 52.134 | KV453243.1 | 3575246 | 23-scf00581 | 23 |
| AX-158232334 | 19 | 52.134 | KV453243.1 | 3588086 | 23-scf00581 | 23 |
| AX-157840286 | 19 | 52.134 | KV453243.1 | 3664954 | 23-scf00581 | 23 |
| AX-158232386 | 19 | 52.134 | KV453243.1 | 3666981 | 23-scf00581 | 23 |
| AX-158232392 | 19 | 52.134 | KV453243.1 | 3676658 | 23-scf00581 | 23 |
| AX-157717403 | 19 | 52.134 | KV453243.1 | 3685155 | 23-scf00581 | 23 |
| AX-158232596 | 19 | 52.134 | KV453243.1 | 3995688 | 23-scf00581 | 23 |
| AX-157840323 | 19 | 52.134 | KV453243.1 | 4000046 | 23-scf00581 | 23 |
| AX-157840326 | 19 | 52.134 | KV453243.1 | 4020776 | 23-scf00581 | 23 |
| AX-157718946 | 19 | 52.134 | KV453243.1 | 4023918 | 23-scf00581 | 23 |
| AX-158232609 | 19 | 52.134 | KV453243.1 | 4024864 | 23-scf00581 | 23 |
| AX-158232610 | 19 | 52.134 | KV453243.1 | 4025375 | 23-scf00581 | 23 |
| AX-158232613 | 19 | 52.134 | KV453243.1 | 4029315 | 23-scf00581 | 23 |
| AX-158232615 | 19 | 52.134 | KV453243.1 | 4033393 | 23-scf00581 | 23 |
| AX-158232619 | 19 | 52.134 | KV453243.1 | 4038088 | 23-scf00581 | 23 |
| AX-158232623 | 19 | 52.134 | KV453243.1 | 4045647 | 23-scf00581 | 23 |

|              |    |        |            |         |             |    |
|--------------|----|--------|------------|---------|-------------|----|
| AX-157718962 | 19 | 52.134 | KV453243.1 | 4048434 | 23-scf00581 | 23 |
| AX-158232630 | 19 | 52.134 | KV453243.1 | 4056291 | 23-scf00581 | 23 |
| AX-158232632 | 19 | 52.134 | KV453243.1 | 4057172 | 23-scf00581 | 23 |
| AX-158232636 | 19 | 52.134 | KV453243.1 | 4064783 | 23-scf00581 | 23 |
| AX-157840331 | 19 | 52.134 | KV453243.1 | 4065966 | 23-scf00581 | 23 |
| AX-158232637 | 19 | 52.134 | KV453243.1 | 4067781 | 23-scf00581 | 23 |
| AX-158232639 | 19 | 52.134 | KV453243.1 | 4071307 | 23-scf00581 | 23 |
| AX-158232645 | 19 | 52.134 | KV453243.1 | 4079551 | 23-scf00581 | 23 |
| AX-157840332 | 19 | 52.134 | KV453243.1 | 4082612 | 23-scf00581 | 23 |
| AX-157714195 | 19 | 52.134 | KV453243.1 | 4086445 | 23-scf00581 | 23 |
| AX-158232667 | 19 | 52.134 | KV453243.1 | 4102790 | 23-scf00581 | 23 |
| AX-158232679 | 19 | 52.134 | KV453243.1 | 4114027 | 23-scf00581 | 23 |
| AX-158232684 | 19 | 52.134 | KV453243.1 | 4115903 | 23-scf00581 | 23 |
| AX-158232693 | 19 | 52.134 | KV453243.1 | 4130630 | 23-scf00581 | 23 |
| AX-158232695 | 19 | 52.134 | KV453243.1 | 4132413 | 23-scf00581 | 23 |
| AX-158232698 | 19 | 52.134 | KV453243.1 | 4134195 | 23-scf00581 | 23 |
| AX-158232700 | 19 | 52.134 | KV453243.1 | 4137112 | 23-scf00581 | 23 |
| AX-158232705 | 19 | 52.134 | KV453243.1 | 4141961 | 23-scf00581 | 23 |
| AX-157840336 | 19 | 52.134 | KV453243.1 | 4151499 | 23-scf00581 | 23 |
| AX-158232727 | 19 | 52.134 | KV453243.1 | 4178502 | 23-scf00581 | 23 |
| AX-157719383 | 19 | 52.17  | KV453243.1 | 4088907 | 23-scf00581 | 23 |
| AX-158232480 | 19 | 52.243 | KV453243.1 | 3813586 | 23-scf00581 | 23 |
| AX-158232594 | 19 | 52.243 | KV453243.1 | 3993105 | 23-scf00581 | 23 |
| AX-157800083 | 19 | 52.243 | KV453243.1 | 4012287 | 23-scf00581 | 23 |
| AX-158232634 | 19 | 52.243 | KV453243.1 | 4060616 | 23-scf00581 | 23 |
| AX-158232640 | 19 | 52.243 | KV453243.1 | 4071902 | 23-scf00581 | 23 |
| AX-158232658 | 19 | 52.243 | KV453243.1 | 4096312 | 23-scf00581 | 23 |
| AX-158232664 | 19 | 52.243 | KV453243.1 | 4100494 | 23-scf00581 | 23 |
| AX-158232666 | 19 | 52.243 | KV453243.1 | 4101411 | 23-scf00581 | 23 |
| AX-158232668 | 19 | 52.243 | KV453243.1 | 4103929 | 23-scf00581 | 23 |
| AX-158232672 | 19 | 52.243 | KV453243.1 | 4106543 | 23-scf00581 | 23 |
| AX-157879931 | 19 | 52.243 | KV453243.1 | 4106776 | 23-scf00581 | 23 |
| AX-158232673 | 19 | 52.243 | KV453243.1 | 4107610 | 23-scf00581 | 23 |
| AX-158232680 | 19 | 52.243 | KV453243.1 | 4114278 | 23-scf00581 | 23 |
| AX-158232681 | 19 | 52.243 | KV453243.1 | 4114719 | 23-scf00581 | 23 |
| AX-158232682 | 19 | 52.243 | KV453243.1 | 4115173 | 23-scf00581 | 23 |
| AX-158232686 | 19 | 52.243 | KV453243.1 | 4120173 | 23-scf00581 | 23 |
| AX-158232689 | 19 | 52.243 | KV453243.1 | 4124640 | 23-scf00581 | 23 |
| AX-157840334 | 19 | 52.243 | KV453243.1 | 4126367 | 23-scf00581 | 23 |
| AX-158232697 | 19 | 52.243 | KV453243.1 | 4133751 | 23-scf00581 | 23 |
| AX-158232701 | 19 | 52.243 | KV453243.1 | 4137562 | 23-scf00581 | 23 |
| AX-158232703 | 19 | 52.243 | KV453243.1 | 4140544 | 23-scf00581 | 23 |
| AX-158232706 | 19 | 52.243 | KV453243.1 | 4142902 | 23-scf00581 | 23 |
| AX-158232708 | 19 | 52.243 | KV453243.1 | 4145519 | 23-scf00581 | 23 |
| AX-158232710 | 19 | 52.243 | KV453243.1 | 4147549 | 23-scf00581 | 23 |
| AX-157753231 | 19 | 52.243 | KV453243.1 | 4159095 | 23-scf00581 | 23 |
| AX-158232712 | 19 | 52.302 | KV453243.1 | 4154675 | 23-scf00581 | 23 |
| AX-158232717 | 19 | 52.408 | KV453243.1 | 4160955 | 23-scf00581 | 23 |
| AX-157740478 | 19 | 52.57  | KV453243.1 | 4178066 | 23-scf00581 | 23 |
| AX-158232741 | 19 | 52.57  | KV453243.1 | 4192738 | 23-scf00581 | 23 |
| AX-158415200 | 19 | 52.571 | KV453243.1 | 3659308 | 23-scf00581 | 23 |

|              |    |        |            |         |             |    |
|--------------|----|--------|------------|---------|-------------|----|
| AX-158232383 | 19 | 52.571 | KV453243.1 | 3660534 | 23-scf00581 | 23 |
| AX-157840304 | 19 | 52.571 | KV453243.1 | 3834925 | 23-scf00581 | 23 |
| AX-158232547 | 19 | 52.571 | KV453243.1 | 3923342 | 23-scf00581 | 23 |
| AX-158232554 | 19 | 52.571 | KV453243.1 | 3930336 | 23-scf00581 | 23 |
| AX-158232659 | 19 | 52.571 | KV453243.1 | 4097601 | 23-scf00581 | 23 |
| AX-158232728 | 19 | 52.571 | KV453243.1 | 4178710 | 23-scf00581 | 23 |
| AX-157726425 | 19 | 52.571 | KV453243.1 | 4196779 | 23-scf00581 | 23 |
| AX-158232744 | 19 | 52.571 | KV453243.1 | 4198591 | 23-scf00581 | 23 |
| AX-158232748 | 19 | 52.571 | KV453243.1 | 4199980 | 23-scf00581 | 23 |
| AX-158232755 | 19 | 52.571 | KV453243.1 | 4209398 | 23-scf00581 | 23 |
| AX-158232763 | 19 | 52.571 | KV453243.1 | 4215738 | 23-scf00581 | 23 |
| AX-158232767 | 19 | 52.571 | KV453243.1 | 4219566 | 23-scf00581 | 23 |
| AX-158232838 | 19 | 52.571 | KV453243.1 | 4300529 | 23-scf00581 | 23 |
| AX-158232768 | 19 | 52.592 | KV453243.1 | 4220249 | 23-scf00581 | 23 |
| AX-157703613 | 19 | 52.607 | KV453243.1 | 4238231 | 23-scf00581 | 23 |
| AX-158232780 | 19 | 52.674 | KV453243.1 | 4231336 | 23-scf00581 | 23 |
| AX-158232782 | 19 | 52.674 | KV453243.1 | 4238973 | 23-scf00581 | 23 |
| AX-158232203 | 19 | 52.68  | KV453243.1 | 3407089 | 23-scf00581 | 23 |
| AX-158232208 | 19 | 52.68  | KV453243.1 | 3413983 | 23-scf00581 | 23 |
| AX-158232210 | 19 | 52.68  | KV453243.1 | 3416053 | 23-scf00581 | 23 |
| AX-158232243 | 19 | 52.68  | KV453243.1 | 3459836 | 23-scf00581 | 23 |
| AX-158232276 | 19 | 52.68  | KV453243.1 | 3506562 | 23-scf00581 | 23 |
| AX-158232296 | 19 | 52.68  | KV453243.1 | 3533302 | 23-scf00581 | 23 |
| AX-158410438 | 19 | 52.68  | KV453243.1 | 3534925 | 23-scf00581 | 23 |
| AX-158232316 | 19 | 52.68  | KV453243.1 | 3564462 | 23-scf00581 | 23 |
| AX-158232341 | 19 | 52.68  | KV453243.1 | 3598661 | 23-scf00581 | 23 |
| AX-157867191 | 19 | 52.68  | KV453243.1 | 3601403 | 23-scf00581 | 23 |
| AX-158232360 | 19 | 52.68  | KV453243.1 | 3630903 | 23-scf00581 | 23 |
| AX-158232361 | 19 | 52.68  | KV453243.1 | 3631279 | 23-scf00581 | 23 |
| AX-158232367 | 19 | 52.68  | KV453243.1 | 3636742 | 23-scf00581 | 23 |
| AX-158232438 | 19 | 52.68  | KV453243.1 | 3742219 | 23-scf00581 | 23 |
| AX-158232445 | 19 | 52.68  | KV453243.1 | 3747090 | 23-scf00581 | 23 |
| AX-157840295 | 19 | 52.68  | KV453243.1 | 3754045 | 23-scf00581 | 23 |
| AX-158232522 | 19 | 52.68  | KV453243.1 | 3881811 | 23-scf00581 | 23 |
| AX-158232534 | 19 | 52.68  | KV453243.1 | 3900494 | 23-scf00581 | 23 |
| AX-158232546 | 19 | 52.68  | KV453243.1 | 3921437 | 23-scf00581 | 23 |
| AX-158232570 | 19 | 52.68  | KV453243.1 | 3959702 | 23-scf00581 | 23 |
| AX-158232590 | 19 | 52.68  | KV453243.1 | 3978962 | 23-scf00581 | 23 |
| AX-158232591 | 19 | 52.68  | KV453243.1 | 3979530 | 23-scf00581 | 23 |
| AX-158232593 | 19 | 52.68  | KV453243.1 | 3990733 | 23-scf00581 | 23 |
| AX-157840324 | 19 | 52.68  | KV453243.1 | 4016306 | 23-scf00581 | 23 |
| AX-158232616 | 19 | 52.68  | KV453243.1 | 4034127 | 23-scf00581 | 23 |
| AX-158232617 | 19 | 52.68  | KV453243.1 | 4035333 | 23-scf00581 | 23 |
| AX-157840328 | 19 | 52.68  | KV453243.1 | 4035653 | 23-scf00581 | 23 |
| AX-158232621 | 19 | 52.68  | KV453243.1 | 4039817 | 23-scf00581 | 23 |
| AX-158232638 | 19 | 52.68  | KV453243.1 | 4069477 | 23-scf00581 | 23 |
| AX-158232641 | 19 | 52.68  | KV453243.1 | 4072254 | 23-scf00581 | 23 |
| AX-158232642 | 19 | 52.68  | KV453243.1 | 4072625 | 23-scf00581 | 23 |
| AX-158232646 | 19 | 52.68  | KV453243.1 | 4083997 | 23-scf00581 | 23 |
| AX-158232648 | 19 | 52.68  | KV453243.1 | 4085905 | 23-scf00581 | 23 |
| AX-158232669 | 19 | 52.68  | KV453243.1 | 4105356 | 23-scf00581 | 23 |

|              |    |        |            |         |             |    |
|--------------|----|--------|------------|---------|-------------|----|
| AX-158232687 | 19 | 52.68  | KV453243.1 | 4121098 | 23-scf00581 | 23 |
| AX-158232688 | 19 | 52.68  | KV453243.1 | 4121304 | 23-scf00581 | 23 |
| AX-158232713 | 19 | 52.68  | KV453243.1 | 4154889 | 23-scf00581 | 23 |
| AX-158232714 | 19 | 52.68  | KV453243.1 | 4157935 | 23-scf00581 | 23 |
| AX-158232716 | 19 | 52.68  | KV453243.1 | 4159860 | 23-scf00581 | 23 |
| AX-158232733 | 19 | 52.68  | KV453243.1 | 4183867 | 23-scf00581 | 23 |
| AX-158232745 | 19 | 52.68  | KV453243.1 | 4198807 | 23-scf00581 | 23 |
| AX-158232790 | 19 | 52.68  | KV453243.1 | 4244338 | 23-scf00581 | 23 |
| AX-157745997 | 19 | 52.68  | KV453243.1 | 4245160 | 23-scf00581 | 23 |
| AX-158232794 | 19 | 52.68  | KV453243.1 | 4249334 | 23-scf00581 | 23 |
| AX-158232797 | 19 | 52.68  | KV453243.1 | 4250521 | 23-scf00581 | 23 |
| AX-158232798 | 19 | 52.68  | KV453243.1 | 4250911 | 23-scf00581 | 23 |
| AX-158415217 | 19 | 52.68  | KV453243.1 | 4251492 | 23-scf00581 | 23 |
| AX-157840338 | 19 | 52.68  | KV453243.1 | 4251890 | 23-scf00581 | 23 |
| AX-158232800 | 19 | 52.68  | KV453243.1 | 4252527 | 23-scf00581 | 23 |
| AX-158232805 | 19 | 52.68  | KV453243.1 | 4257106 | 23-scf00581 | 23 |
| AX-158232807 | 19 | 52.68  | KV453243.1 | 4258764 | 23-scf00581 | 23 |
| AX-158232811 | 19 | 52.68  | KV453243.1 | 4263812 | 23-scf00581 | 23 |
| AX-158232814 | 19 | 52.68  | KV453243.1 | 4266049 | 23-scf00581 | 23 |
| AX-158232819 | 19 | 52.68  | KV453243.1 | 4269925 | 23-scf00581 | 23 |
| AX-158232825 | 19 | 52.68  | KV453243.1 | 4279708 | 23-scf00581 | 23 |
| AX-157724292 | 19 | 52.68  | KV453243.1 | 4286225 | 23-scf00581 | 23 |
| AX-157872500 | 19 | 52.68  | KV453243.1 | 4304488 | 23-scf00581 | 23 |
| AX-158232855 | 19 | 52.68  | KV453243.1 | 4319079 | 23-scf00581 | 23 |
| AX-158394166 | 19 | 52.68  | KV453243.1 | 4326897 | 23-scf00581 | 23 |
| AX-158232862 | 19 | 52.68  | KV453243.1 | 4328991 | 23-scf00581 | 23 |
| AX-158232877 | 19 | 52.68  | KV453243.1 | 4350430 | 23-scf00581 | 23 |
| AX-158232880 | 19 | 52.68  | KV453243.1 | 4354312 | 23-scf00581 | 23 |
| AX-158232884 | 19 | 52.68  | KV453243.1 | 4361639 | 23-scf00581 | 23 |
| AX-158232885 | 19 | 52.68  | KV453243.1 | 4361956 | 23-scf00581 | 23 |
| AX-158232891 | 19 | 52.68  | KV453243.1 | 4373551 | 23-scf00581 | 23 |
| AX-157840345 | 19 | 52.68  | KV453243.1 | 4375870 | 23-scf00581 | 23 |
| AX-158232893 | 19 | 52.68  | KV453243.1 | 4376242 | 23-scf00581 | 23 |
| AX-158232931 | 19 | 52.68  | KV453243.1 | 4428083 | 23-scf00581 | 23 |
| AX-157840354 | 19 | 52.68  | KV453243.1 | 4476197 | 23-scf00581 | 23 |
| AX-158232810 | 19 | 52.79  | KV453243.1 | 4261259 | 23-scf00581 | 23 |
| AX-158232824 | 19 | 52.79  | KV453243.1 | 4278666 | 23-scf00581 | 23 |
| AX-158410446 | 19 | 52.8   | KV453243.1 | 4163741 | 23-scf00581 | 23 |
| AX-158232721 | 19 | 52.8   | KV453243.1 | 4165153 | 23-scf00581 | 23 |
| AX-157879933 | 19 | 52.8   | KV453243.1 | 4197906 | 23-scf00581 | 23 |
| AX-157745793 | 19 | 52.8   | KV453243.1 | 4244223 | 23-scf00581 | 23 |
| AX-157720994 | 19 | 52.8   | KV453243.1 | 4286896 | 23-scf00581 | 23 |
| AX-157743851 | 19 | 52.8   | KV453243.1 | 4348123 | 23-scf00581 | 23 |
| AX-158232934 | 19 | 52.8   | KV453243.1 | 4432746 | 23-scf00581 | 23 |
| AX-158232831 | 19 | 52.815 | KV453243.1 | 4292881 | 23-scf00581 | 23 |
| AX-158232457 | 19 | 52.825 | KV453243.1 | 3786625 | 23-scf00581 | 23 |
| AX-157747709 | 19 | 52.825 | KV453243.1 | 4307421 | 23-scf00581 | 23 |
| AX-158232847 | 19 | 52.84  | KV453243.1 | 4313038 | 23-scf00581 | 23 |
| AX-158232849 | 19 | 52.849 | KV453243.1 | 4314025 | 23-scf00581 | 23 |
| AX-157719893 | 19 | 52.849 | KV453243.1 | 4314330 | 23-scf00581 | 23 |
| AX-158232850 | 19 | 52.861 | KV453243.1 | 4315570 | 23-scf00581 | 23 |

|              |    |        |            |         |             |    |
|--------------|----|--------|------------|---------|-------------|----|
| AX-158232856 | 19 | 52.874 | KV453243.1 | 4319414 | 23-scf00581 | 23 |
| AX-158232319 | 19 | 52.887 | KV453243.1 | 3569488 | 23-scf00581 | 23 |
| AX-158232599 | 19 | 52.887 | KV453243.1 | 3998753 | 23-scf00581 | 23 |
| AX-158415212 | 19 | 52.887 | KV453243.1 | 4094189 | 23-scf00581 | 23 |
| AX-158232826 | 19 | 52.887 | KV453243.1 | 4282368 | 23-scf00581 | 23 |
| AX-158232860 | 19 | 52.887 | KV453243.1 | 4327261 | 23-scf00581 | 23 |
| AX-157840297 | 19 | 52.899 | KV453243.1 | 3764998 | 23-scf00581 | 23 |
| AX-157716227 | 19 | 52.899 | KV453243.1 | 3765078 | 23-scf00581 | 23 |
| AX-158232726 | 19 | 52.899 | KV453243.1 | 4177459 | 23-scf00581 | 23 |
| AX-158232742 | 19 | 52.899 | KV453243.1 | 4195001 | 23-scf00581 | 23 |
| AX-158232762 | 19 | 52.899 | KV453243.1 | 4214421 | 23-scf00581 | 23 |
| AX-158232817 | 19 | 52.899 | KV453243.1 | 4268586 | 23-scf00581 | 23 |
| AX-158232861 | 19 | 52.899 | KV453243.1 | 4327625 | 23-scf00581 | 23 |
| AX-158232866 | 19 | 52.899 | KV453243.1 | 4335974 | 23-scf00581 | 23 |
| AX-157747114 | 19 | 52.899 | KV453243.1 | 4360406 | 23-scf00581 | 23 |
| AX-158232871 | 19 | 52.903 | KV453243.1 | 4343235 | 23-scf00581 | 23 |
| AX-158232870 | 19 | 52.907 | KV453243.1 | 4340908 | 23-scf00581 | 23 |
| AX-158232872 | 19 | 52.907 | KV453243.1 | 4343944 | 23-scf00581 | 23 |
| AX-157716190 | 19 | 52.907 | KV453243.1 | 4472797 | 23-scf00581 | 23 |
| AX-157715741 | 19 | 52.916 | KV453243.1 | 4280790 | 23-scf00581 | 23 |
| AX-158232848 | 19 | 52.916 | KV453243.1 | 4313390 | 23-scf00581 | 23 |
| AX-158232851 | 19 | 52.916 | KV453243.1 | 4316399 | 23-scf00581 | 23 |
| AX-158232864 | 19 | 52.916 | KV453243.1 | 4333917 | 23-scf00581 | 23 |
| AX-158232897 | 19 | 52.916 | KV453243.1 | 4385471 | 23-scf00581 | 23 |
| AX-158232929 | 19 | 52.916 | KV453243.1 | 4427049 | 23-scf00581 | 23 |
| AX-158232943 | 19 | 52.916 | KV453243.1 | 4444682 | 23-scf00581 | 23 |
| AX-158232907 | 19 | 52.942 | KV453243.1 | 4398769 | 23-scf00581 | 23 |
| AX-158415219 | 19 | 52.964 | KV453243.1 | 4401367 | 23-scf00581 | 23 |
| AX-158232873 | 19 | 52.986 | KV453243.1 | 4344415 | 23-scf00581 | 23 |
| AX-158232919 | 19 | 52.986 | KV453243.1 | 4412343 | 23-scf00581 | 23 |
| AX-158232918 | 19 | 53.008 | KV453243.1 | 4410870 | 23-scf00581 | 23 |
| AX-157840349 | 19 | 53.008 | KV453243.1 | 4412890 | 23-scf00581 | 23 |
| AX-158232921 | 19 | 53.008 | KV453243.1 | 4414829 | 23-scf00581 | 23 |
| AX-158232922 | 19 | 53.008 | KV453243.1 | 4417172 | 23-scf00581 | 23 |
| AX-158232926 | 19 | 53.008 | KV453243.1 | 4422494 | 23-scf00581 | 23 |
| AX-158232927 | 19 | 53.008 | KV453243.1 | 4423185 | 23-scf00581 | 23 |
| AX-157748673 | 19 | 53.008 | KV453243.1 | 4424549 | 23-scf00581 | 23 |
| AX-158232938 | 19 | 53.008 | KV453243.1 | 4437411 | 23-scf00581 | 23 |
| AX-158232939 | 19 | 53.008 | KV453243.1 | 4437866 | 23-scf00581 | 23 |
| AX-158232941 | 19 | 53.008 | KV453243.1 | 4441309 | 23-scf00581 | 23 |
| AX-158232944 | 19 | 53.008 | KV453243.1 | 4446873 | 23-scf00581 | 23 |
| AX-158232945 | 19 | 53.008 | KV453243.1 | 4447371 | 23-scf00581 | 23 |
| AX-157738885 | 19 | 53.008 | KV453243.1 | 4475920 | 23-scf00581 | 23 |
| AX-158233013 | 19 | 53.008 | KV453243.1 | 4546464 | 23-scf00581 | 23 |
| AX-158232946 | 19 | 53.072 | KV453243.1 | 4448171 | 23-scf00581 | 23 |
| AX-157773525 | 19 | 53.117 | KV453243.1 | 3287093 | 23-scf00581 | 23 |
| AX-157840343 | 19 | 53.117 | KV453243.1 | 4353028 | 23-scf00581 | 23 |
| AX-158232951 | 19 | 53.117 | KV453243.1 | 4460720 | 23-scf00581 | 23 |
| AX-158232953 | 19 | 53.117 | KV453243.1 | 4466213 | 23-scf00581 | 23 |
| AX-158232966 | 19 | 53.117 | KV453243.1 | 4482295 | 23-scf00581 | 23 |
| AX-158232969 | 19 | 53.117 | KV453243.1 | 4489223 | 23-scf00581 | 23 |

|              |    |        |            |         |             |    |
|--------------|----|--------|------------|---------|-------------|----|
| AX-158232970 | 19 | 53.117 | KV453243.1 | 4489694 | 23-scf00581 | 23 |
| AX-158232973 | 19 | 53.117 | KV453243.1 | 4493517 | 23-scf00581 | 23 |
| AX-158232975 | 19 | 53.117 | KV453243.1 | 4496381 | 23-scf00581 | 23 |
| AX-158380916 | 19 | 53.117 | KV453243.1 | 4499591 | 23-scf00581 | 23 |
| AX-157746736 | 19 | 53.117 | KV453243.1 | 4502141 | 23-scf00581 | 23 |
| AX-157840359 | 19 | 53.117 | KV453243.1 | 4505095 | 23-scf00581 | 23 |
| AX-158232996 | 19 | 53.117 | KV453243.1 | 4524833 | 23-scf00581 | 23 |
| AX-157753414 | 19 | 53.117 | KV453243.1 | 4526189 | 23-scf00581 | 23 |
| AX-158232997 | 19 | 53.117 | KV453243.1 | 4527701 | 23-scf00581 | 23 |
| AX-158233001 | 19 | 53.117 | KV453243.1 | 4532065 | 23-scf00581 | 23 |
| AX-158233004 | 19 | 53.117 | KV453243.1 | 4534502 | 23-scf00581 | 23 |
| AX-158233075 | 19 | 53.117 | KV453243.1 | 4635191 | 23-scf00581 | 23 |
| AX-158233104 | 19 | 53.117 | KV453243.1 | 4682287 | 23-scf00581 | 23 |
| AX-158232917 | 19 | 53.226 | KV453243.1 | 4409672 | 23-scf00581 | 23 |
| AX-158380915 | 19 | 53.226 | KV453243.1 | 4442960 | 23-scf00581 | 23 |
| AX-158233009 | 19 | 53.226 | KV453243.1 | 4542536 | 23-scf00581 | 23 |
| AX-157751669 | 19 | 53.226 | KV453243.1 | 4543117 | 23-scf00581 | 23 |
| AX-158233010 | 19 | 53.226 | KV453243.1 | 4544026 | 23-scf00581 | 23 |
| AX-158233012 | 19 | 53.269 | KV453243.1 | 4545999 | 23-scf00581 | 23 |
| AX-158233016 | 19 | 53.293 | KV453243.1 | 4550555 | 23-scf00581 | 23 |
| AX-158232211 | 19 | 53.314 | KV453243.1 | 3416728 | 23-scf00581 | 23 |
| AX-157840340 | 19 | 53.314 | KV453243.1 | 4273801 | 23-scf00581 | 23 |
| AX-158232863 | 19 | 53.314 | KV453243.1 | 4331558 | 23-scf00581 | 23 |
| AX-158423289 | 19 | 53.314 | KV453243.1 | 4551913 | 23-scf00581 | 23 |
| AX-158233017 | 19 | 53.314 | KV453243.1 | 4552409 | 23-scf00581 | 23 |
| AX-158233020 | 19 | 53.314 | KV453243.1 | 4554442 | 23-scf00581 | 23 |
| AX-157726329 | 19 | 53.314 | KV453243.1 | 4584257 | 23-scf00581 | 23 |
| AX-158233061 | 19 | 53.314 | KV453243.1 | 4616246 | 23-scf00581 | 23 |
| AX-157840337 | 19 | 53.336 | KV453243.1 | 4236934 | 23-scf00581 | 23 |
| AX-158415229 | 19 | 53.336 | KV453243.1 | 4552033 | 23-scf00581 | 23 |
| AX-158233019 | 19 | 53.336 | KV453243.1 | 4554032 | 23-scf00581 | 23 |
| AX-158233021 | 19 | 53.336 | KV453243.1 | 4554844 | 23-scf00581 | 23 |
| AX-158233023 | 19 | 53.336 | KV453243.1 | 4557012 | 23-scf00581 | 23 |
| AX-157840293 | 19 | 53.445 | KV453243.1 | 3710008 | 23-scf00581 | 23 |
| AX-158232857 | 19 | 53.445 | KV453243.1 | 4320463 | 23-scf00581 | 23 |
| AX-157840353 | 19 | 53.445 | KV453243.1 | 4463648 | 23-scf00581 | 23 |
| AX-157840358 | 19 | 53.445 | KV453243.1 | 4505045 | 23-scf00581 | 23 |
| AX-158233027 | 19 | 53.445 | KV453243.1 | 4562476 | 23-scf00581 | 23 |
| AX-158233030 | 19 | 53.445 | KV453243.1 | 4568248 | 23-scf00581 | 23 |
| AX-158233031 | 19 | 53.445 | KV453243.1 | 4571118 | 23-scf00581 | 23 |
| AX-158233036 | 19 | 53.445 | KV453243.1 | 4579200 | 23-scf00581 | 23 |
| AX-157743412 | 19 | 53.445 | KV453243.1 | 4581549 | 23-scf00581 | 23 |
| AX-158233039 | 19 | 53.445 | KV453243.1 | 4582180 | 23-scf00581 | 23 |
| AX-158233041 | 19 | 53.445 | KV453243.1 | 4586325 | 23-scf00581 | 23 |
| AX-158233047 | 19 | 53.445 | KV453243.1 | 4592378 | 23-scf00581 | 23 |
| AX-158233048 | 19 | 53.445 | KV453243.1 | 4593693 | 23-scf00581 | 23 |
| AX-158233049 | 19 | 53.445 | KV453243.1 | 4595013 | 23-scf00581 | 23 |
| AX-158233052 | 19 | 53.445 | KV453243.1 | 4599355 | 23-scf00581 | 23 |
| AX-157708056 | 19 | 53.445 | KV453243.1 | 4600434 | 23-scf00581 | 23 |
| AX-158233054 | 19 | 53.445 | KV453243.1 | 4601333 | 23-scf00581 | 23 |
| AX-158233055 | 19 | 53.445 | KV453243.1 | 4605267 | 23-scf00581 | 23 |

|              |    |        |            |         |             |    |
|--------------|----|--------|------------|---------|-------------|----|
| AX-158233058 | 19 | 53.445 | KV453243.1 | 4611238 | 23-scf00581 | 23 |
| AX-157840365 | 19 | 53.445 | KV453243.1 | 4614596 | 23-scf00581 | 23 |
| AX-158233060 | 19 | 53.445 | KV453243.1 | 4615068 | 23-scf00581 | 23 |
| AX-157840366 | 19 | 53.445 | KV453243.1 | 4620289 | 23-scf00581 | 23 |
| AX-158233066 | 19 | 53.445 | KV453243.1 | 4624136 | 23-scf00581 | 23 |
| AX-158233069 | 19 | 53.445 | KV453243.1 | 4626690 | 23-scf00581 | 23 |
| AX-158233071 | 19 | 53.445 | KV453243.1 | 4629910 | 23-scf00581 | 23 |
| AX-158233079 | 19 | 53.445 | KV453243.1 | 4639354 | 23-scf00581 | 23 |
| AX-157752788 | 19 | 53.445 | KV453243.1 | 4643723 | 23-scf00581 | 23 |
| AX-158233083 | 19 | 53.445 | KV453243.1 | 4644405 | 23-scf00581 | 23 |
| AX-158233087 | 19 | 53.445 | KV453243.1 | 4651118 | 23-scf00581 | 23 |
| AX-157840371 | 19 | 53.445 | KV453243.1 | 4678642 | 23-scf00581 | 23 |
| AX-158233101 | 19 | 53.445 | KV453243.1 | 4678942 | 23-scf00581 | 23 |
| AX-157840373 | 19 | 53.445 | KV453243.1 | 4691795 | 23-scf00581 | 23 |
| AX-158415233 | 19 | 53.445 | KV453243.1 | 4725643 | 23-scf00581 | 23 |
| AX-158233169 | 19 | 53.445 | KV453243.1 | 4777443 | 23-scf00581 | 23 |
| AX-158233265 | 19 | 53.445 | KV453243.1 | 4915123 | 23-scf00581 | 23 |
| AX-158233282 | 19 | 53.445 | KV453243.1 | 4939264 | 23-scf00581 | 23 |
| AX-157705533 | 19 | 53.445 | KV453827.1 | 316     | scf05709    | UN |
| AX-158233051 | 19 | 53.473 | KV453243.1 | 4596478 | 23-scf00581 | 23 |
| AX-158233057 | 19 | 53.473 | KV453243.1 | 4608064 | 23-scf00581 | 23 |
| AX-158233088 | 19 | 53.473 | KV453243.1 | 4653699 | 23-scf00581 | 23 |
| AX-158233107 | 19 | 53.473 | KV453243.1 | 4685831 | 23-scf00581 | 23 |
| AX-157746694 | 19 | 53.473 | KV453243.1 | 4686469 | 23-scf00581 | 23 |
| AX-157840375 | 19 | 53.473 | KV453243.1 | 4702557 | 23-scf00581 | 23 |
| AX-158233184 | 19 | 53.473 | KV453243.1 | 4792136 | 23-scf00581 | 23 |
| AX-158233094 | 19 | 53.493 | KV453243.1 | 4668621 | 23-scf00581 | 23 |
| AX-157840372 | 19 | 53.493 | KV453243.1 | 4691242 | 23-scf00581 | 23 |
| AX-157840374 | 19 | 53.513 | KV453243.1 | 4698390 | 23-scf00581 | 23 |
| AX-158233112 | 19 | 53.525 | KV453243.1 | 4701171 | 23-scf00581 | 23 |
| AX-158233118 | 19 | 53.554 | KV453243.1 | 4709816 | 23-scf00581 | 23 |
| AX-157840378 | 19 | 53.554 | KV453243.1 | 4718157 | 23-scf00581 | 23 |
| AX-157840379 | 19 | 53.554 | KV453243.1 | 4735338 | 23-scf00581 | 23 |
| AX-158233139 | 19 | 53.554 | KV453243.1 | 4748075 | 23-scf00581 | 23 |
| AX-158233147 | 19 | 53.554 | KV453243.1 | 4760457 | 23-scf00581 | 23 |
| AX-158233180 | 19 | 53.554 | KV453243.1 | 4785265 | 23-scf00581 | 23 |
| AX-158232976 | 19 | 53.586 | KV453243.1 | 4497037 | 23-scf00581 | 23 |
| AX-158233063 | 19 | 53.586 | KV453243.1 | 4618403 | 23-scf00581 | 23 |
| AX-158394170 | 19 | 53.586 | KV453243.1 | 4741859 | 23-scf00581 | 23 |
| AX-158233137 | 19 | 53.605 | KV453243.1 | 4744745 | 23-scf00581 | 23 |
| AX-157840382 | 19 | 53.624 | KV453243.1 | 4748648 | 23-scf00581 | 23 |
| AX-158233149 | 19 | 53.624 | KV453243.1 | 4761662 | 23-scf00581 | 23 |
| AX-158233140 | 19 | 53.637 | KV453243.1 | 4750287 | 23-scf00581 | 23 |
| AX-158410458 | 19 | 53.637 | KV453243.1 | 4770102 | 23-scf00581 | 23 |
| AX-158233024 | 19 | 53.663 | KV453243.1 | 4558491 | 23-scf00581 | 23 |
| AX-158233043 | 19 | 53.663 | KV453243.1 | 4589738 | 23-scf00581 | 23 |
| AX-158233044 | 19 | 53.663 | KV453243.1 | 4590354 | 23-scf00581 | 23 |
| AX-158233064 | 19 | 53.663 | KV453243.1 | 4622501 | 23-scf00581 | 23 |
| AX-158233076 | 19 | 53.663 | KV453243.1 | 4636169 | 23-scf00581 | 23 |
| AX-158233092 | 19 | 53.663 | KV453243.1 | 4666779 | 23-scf00581 | 23 |
| AX-158233109 | 19 | 53.663 | KV453243.1 | 4690979 | 23-scf00581 | 23 |



|              |    |        |            |         |                |    |
|--------------|----|--------|------------|---------|----------------|----|
| AX-157840377 | 19 | 53.663 | KV453243.1 | 4708738 | 23-scf00581    | 23 |
| AX-158233127 | 19 | 53.663 | KV453243.1 | 4725304 | 23-scf00581    | 23 |
| AX-158233135 | 19 | 53.663 | KV453243.1 | 4734495 | 23-scf00581    | 23 |
| AX-158233141 | 19 | 53.663 | KV453243.1 | 4752477 | 23-scf00581    | 23 |
| AX-158233145 | 19 | 53.663 | KV453243.1 | 4759500 | 23-scf00581    | 23 |
| AX-158233146 | 19 | 53.663 | KV453243.1 | 4759655 | 23-scf00581    | 23 |
| AX-158233148 | 19 | 53.663 | KV453243.1 | 4761205 | 23-scf00581    | 23 |
| AX-158233154 | 19 | 53.663 | KV453243.1 | 4766279 | 23-scf00581    | 23 |
| AX-158233160 | 19 | 53.663 | KV453243.1 | 4770805 | 23-scf00581    | 23 |
| AX-158233161 | 19 | 53.663 | KV453243.1 | 4771172 | 23-scf00581    | 23 |
| AX-158233166 | 19 | 53.663 | KV453243.1 | 4775164 | 23-scf00581    | 23 |
| AX-158233167 | 19 | 53.663 | KV453243.1 | 4775851 | 23-scf00581    | 23 |
| AX-158233168 | 19 | 53.663 | KV453243.1 | 4776967 | 23-scf00581    | 23 |
| AX-158233170 | 19 | 53.663 | KV453243.1 | 4777796 | 23-scf00581    | 23 |
| AX-158233173 | 19 | 53.663 | KV453243.1 | 4780019 | 23-scf00581    | 23 |
| AX-158233174 | 19 | 53.663 | KV453243.1 | 4780769 | 23-scf00581    | 23 |
| AX-158233181 | 19 | 53.663 | KV453243.1 | 4785437 | 23-scf00581    | 23 |
| AX-158410459 | 19 | 53.663 | KV453243.1 | 4789599 | 23-scf00581    | 23 |
| AX-158233183 | 19 | 53.663 | KV453243.1 | 4790147 | 23-scf00581    | 23 |
| AX-157840384 | 19 | 53.663 | KV453243.1 | 4793822 | 23-scf00581    | 23 |
| AX-158233231 | 19 | 53.663 | KV453243.1 | 4859671 | 23-scf00581    | 23 |
| AX-157775359 | 19 | 53.663 | KV453243.1 | 4860628 | 23-scf00581    | 23 |
| AX-158233241 | 19 | 53.663 | KV453243.1 | 4875541 | 23-scf00581    | 23 |
| AX-158233125 | 19 | 53.772 | KV453243.1 | 4724119 | 23-scf00581    | 23 |
| AX-158233131 | 19 | 53.772 | KV453243.1 | 4727547 | 23-scf00581    | 23 |
| AX-158233176 | 19 | 53.772 | KV453243.1 | 4782059 | 23-scf00581    | 23 |
| AX-158233186 | 19 | 53.772 | KV453243.1 | 4794476 | 23-scf00581    | 23 |
| AX-158233187 | 19 | 53.772 | KV453243.1 | 4796055 | 23-scf00581    | 23 |
| AX-158233188 | 19 | 53.772 | KV453243.1 | 4799982 | 23-scf00581    | 23 |
| AX-158233192 | 19 | 53.991 | KV453243.1 | 4806294 | 23-scf00581    | 23 |
| AX-158233195 | 19 | 53.991 | KV453243.1 | 4817253 | 23-scf00581    | 23 |
| AX-158233199 | 19 | 53.991 | KV453243.1 | 4820280 | 23-scf00581    | 23 |
| AX-158233200 | 19 | 53.991 | KV453243.1 | 4821427 | 23-scf00581    | 23 |
| AX-158415241 | 19 | 53.991 | KV453243.1 | 4824645 | 23-scf00581    | 23 |
| AX-158233244 | 19 | 53.991 | KV453243.1 | 4878193 | 23-scf00581    | 23 |
| AX-158233246 | 19 | 53.991 | KV453243.1 | 4883715 | 23-scf00581    | 23 |
| AX-158233250 | 19 | 53.991 | KV453243.1 | 4891019 | 23-scf00581    | 23 |
| AX-158233264 | 19 | 53.991 | KV453243.1 | 4914050 | 23-scf00581    | 23 |
| AX-157695745 | 19 | 53.991 | FI885347.1 | 299     | 4ORI212 lctalt | UN |
| AX-158233202 | 19 | 54.002 | KV453243.1 | 4825006 | 23-scf00581    | 23 |
| AX-158233204 | 19 | 54.018 | KV453243.1 | 4829251 | 23-scf00581    | 23 |
| AX-158233206 | 19 | 54.029 | KV453243.1 | 4833886 | 23-scf00581    | 23 |
| AX-158233207 | 19 | 54.044 | KV453243.1 | 4834165 | 23-scf00581    | 23 |
| AX-158232911 | 19 | 54.058 | KV453243.1 | 4402742 | 23-scf00581    | 23 |
| AX-158233005 | 19 | 54.058 | KV453243.1 | 4536341 | 23-scf00581    | 23 |
| AX-158233209 | 19 | 54.058 | KV453243.1 | 4835797 | 23-scf00581    | 23 |
| AX-158233256 | 19 | 54.058 | KV453243.1 | 4899279 | 23-scf00581    | 23 |
| AX-158233309 | 19 | 54.058 | KV453243.1 | 4978918 | 23-scf00581    | 23 |
| AX-158233218 | 19 | 54.065 | KV453243.1 | 4845139 | 23-scf00581    | 23 |
| AX-157703800 | 19 | 54.079 | KV453243.1 | 4572153 | 23-scf00581    | 23 |
| AX-158233050 | 19 | 54.079 | KV453243.1 | 4595774 | 23-scf00581    | 23 |

|              |    |        |            |         |             |    |
|--------------|----|--------|------------|---------|-------------|----|
| AX-158233068 | 19 | 54.079 | KV453243.1 | 4624721 | 23-scf00581 | 23 |
| AX-158233179 | 19 | 54.079 | KV453243.1 | 4783947 | 23-scf00581 | 23 |
| AX-158233185 | 19 | 54.079 | KV453243.1 | 4792521 | 23-scf00581 | 23 |
| AX-158233219 | 19 | 54.079 | KV453243.1 | 4846227 | 23-scf00581 | 23 |
| AX-158233223 | 19 | 54.079 | KV453243.1 | 4852354 | 23-scf00581 | 23 |
| AX-158233243 | 19 | 54.079 | KV453243.1 | 4877119 | 23-scf00581 | 23 |
| AX-158233252 | 19 | 54.079 | KV453243.1 | 4893380 | 23-scf00581 | 23 |
| AX-158233284 | 19 | 54.079 | KV453243.1 | 4942590 | 23-scf00581 | 23 |
| AX-158233222 | 19 | 54.09  | KV453243.1 | 4851536 | 23-scf00581 | 23 |
| AX-158415242 | 19 | 54.1   | KV453243.1 | 4856612 | 23-scf00581 | 23 |
| AX-158233227 | 19 | 54.1   | KV453243.1 | 4856905 | 23-scf00581 | 23 |
| AX-158233228 | 19 | 54.1   | KV453243.1 | 4857952 | 23-scf00581 | 23 |
| AX-158233234 | 19 | 54.1   | KV453243.1 | 4864658 | 23-scf00581 | 23 |
| AX-158233238 | 19 | 54.1   | KV453243.1 | 4871894 | 23-scf00581 | 23 |
| AX-158233373 | 19 | 54.1   | KV453243.1 | 5051569 | 23-scf00581 | 23 |
| AX-158233242 | 19 | 54.141 | KV453243.1 | 4875914 | 23-scf00581 | 23 |
| AX-157840385 | 19 | 54.165 | KV453243.1 | 4814520 | 23-scf00581 | 23 |
| AX-158233245 | 19 | 54.165 | KV453243.1 | 4880074 | 23-scf00581 | 23 |
| AX-157887429 | 19 | 54.209 | KV453243.1 | 4869399 | 23-scf00581 | 23 |
| AX-158233251 | 19 | 54.209 | KV453243.1 | 4893082 | 23-scf00581 | 23 |
| AX-158233225 | 19 | 54.24  | KV453243.1 | 4854174 | 23-scf00581 | 23 |
| AX-158233230 | 19 | 54.24  | KV453243.1 | 4859100 | 23-scf00581 | 23 |
| AX-158380919 | 19 | 54.24  | KV453243.1 | 4897755 | 23-scf00581 | 23 |
| AX-158233281 | 19 | 54.24  | KV453243.1 | 4938375 | 23-scf00581 | 23 |
| AX-158233257 | 19 | 54.263 | KV453243.1 | 4900808 | 23-scf00581 | 23 |
| AX-158233258 | 19 | 54.319 | KV453243.1 | 4903263 | 23-scf00581 | 23 |
| AX-158233259 | 19 | 54.319 | KV453243.1 | 4904074 | 23-scf00581 | 23 |
| AX-158233261 | 19 | 54.319 | KV453243.1 | 4907016 | 23-scf00581 | 23 |
| AX-158233262 | 19 | 54.319 | KV453243.1 | 4911033 | 23-scf00581 | 23 |
| AX-158233269 | 19 | 54.533 | KV453243.1 | 4921729 | 23-scf00581 | 23 |
| AX-158233272 | 19 | 54.533 | KV453243.1 | 4925942 | 23-scf00581 | 23 |
| AX-158233275 | 19 | 54.748 | KV453243.1 | 4928715 | 23-scf00581 | 23 |
| AX-158233276 | 19 | 54.748 | KV453243.1 | 4929205 | 23-scf00581 | 23 |
| AX-158233277 | 19 | 54.748 | KV453243.1 | 4929893 | 23-scf00581 | 23 |
| AX-158233280 | 19 | 54.748 | KV453243.1 | 4931811 | 23-scf00581 | 23 |
| AX-158233395 | 19 | 54.748 | KV453243.1 | 5076811 | 23-scf00581 | 23 |
| AX-158233505 | 19 | 54.748 | KV453243.1 | 5211582 | 23-scf00581 | 23 |
| AX-157840387 | 19 | 54.912 | KV453243.1 | 4947436 | 23-scf00581 | 23 |
| AX-158233287 | 19 | 54.912 | KV453243.1 | 4947835 | 23-scf00581 | 23 |
| AX-158233290 | 19 | 54.912 | KV453243.1 | 4951338 | 23-scf00581 | 23 |
| AX-158233291 | 19 | 54.912 | KV453243.1 | 4952097 | 23-scf00581 | 23 |
| AX-158233292 | 19 | 55.074 | KV453243.1 | 4955426 | 23-scf00581 | 23 |
| AX-158233308 | 19 | 55.074 | KV453243.1 | 4977274 | 23-scf00581 | 23 |
| AX-157840386 | 19 | 55.075 | KV453243.1 | 4929113 | 23-scf00581 | 23 |
| AX-158233293 | 19 | 55.075 | KV453243.1 | 4956515 | 23-scf00581 | 23 |
| AX-158233302 | 19 | 55.075 | KV453243.1 | 4967276 | 23-scf00581 | 23 |
| AX-158233305 | 19 | 55.075 | KV453243.1 | 4972817 | 23-scf00581 | 23 |
| AX-158233306 | 19 | 55.075 | KV453243.1 | 4973308 | 23-scf00581 | 23 |
| AX-157700667 | 19 | 55.075 | KV453243.1 | 4976657 | 23-scf00581 | 23 |
| AX-157727324 | 19 | 55.075 | KV453243.1 | 4978490 | 23-scf00581 | 23 |
| AX-158233315 | 19 | 55.075 | KV453243.1 | 4983396 | 23-scf00581 | 23 |

|              |    |        |            |         |             |    |
|--------------|----|--------|------------|---------|-------------|----|
| AX-158233330 | 19 | 55.075 | KV453243.1 | 5002165 | 23-scf00581 | 23 |
| AX-158233317 | 19 | 55.099 | KV453243.1 | 4985361 | 23-scf00581 | 23 |
| AX-158233320 | 19 | 55.12  | KV453243.1 | 4990577 | 23-scf00581 | 23 |
| AX-158233294 | 19 | 55.184 | KV453243.1 | 4957179 | 23-scf00581 | 23 |
| AX-158233299 | 19 | 55.184 | KV453243.1 | 4963128 | 23-scf00581 | 23 |
| AX-157772817 | 19 | 55.184 | KV453243.1 | 4964781 | 23-scf00581 | 23 |
| AX-158233322 | 19 | 55.184 | KV453243.1 | 4993132 | 23-scf00581 | 23 |
| AX-158233323 | 19 | 55.184 | KV453243.1 | 4994059 | 23-scf00581 | 23 |
| AX-158233325 | 19 | 55.184 | KV453243.1 | 4998493 | 23-scf00581 | 23 |
| AX-158233328 | 19 | 55.184 | KV453243.1 | 5000357 | 23-scf00581 | 23 |
| AX-158233329 | 19 | 55.184 | KV453243.1 | 5001116 | 23-scf00581 | 23 |
| AX-158233333 | 19 | 55.184 | KV453243.1 | 5007430 | 23-scf00581 | 23 |
| AX-158233338 | 19 | 55.184 | KV453243.1 | 5014002 | 23-scf00581 | 23 |
| AX-158233340 | 19 | 55.184 | KV453243.1 | 5018035 | 23-scf00581 | 23 |
| AX-158233346 | 19 | 55.184 | KV453243.1 | 5023989 | 23-scf00581 | 23 |
| AX-158394172 | 19 | 55.184 | KV453243.1 | 5026156 | 23-scf00581 | 23 |
| AX-158233347 | 19 | 55.184 | KV453243.1 | 5026916 | 23-scf00581 | 23 |
| AX-158233348 | 19 | 55.184 | KV453243.1 | 5028438 | 23-scf00581 | 23 |
| AX-157840391 | 19 | 55.184 | KV453243.1 | 5030642 | 23-scf00581 | 23 |
| AX-157840392 | 19 | 55.184 | KV453243.1 | 5031270 | 23-scf00581 | 23 |
| AX-157840393 | 19 | 55.184 | KV453243.1 | 5033308 | 23-scf00581 | 23 |
| AX-158233357 | 19 | 55.184 | KV453243.1 | 5036701 | 23-scf00581 | 23 |
| AX-158233362 | 19 | 55.184 | KV453243.1 | 5040228 | 23-scf00581 | 23 |
| AX-158233405 | 19 | 55.184 | KV453243.1 | 5087564 | 23-scf00581 | 23 |
| AX-157867205 | 19 | 55.184 | KV453243.1 | 5117824 | 23-scf00581 | 23 |
| AX-158233483 | 19 | 55.184 | KV453243.1 | 5185094 | 23-scf00581 | 23 |
| AX-157887431 | 19 | 55.184 | KV453243.1 | 5203147 | 23-scf00581 | 23 |
| AX-157712278 | 19 | 55.293 | KV453243.1 | 4723007 | 23-scf00581 | 23 |
| AX-157840381 | 19 | 55.293 | KV453243.1 | 4741362 | 23-scf00581 | 23 |
| AX-158233226 | 19 | 55.293 | KV453243.1 | 4856085 | 23-scf00581 | 23 |
| AX-158233236 | 19 | 55.293 | KV453243.1 | 4866744 | 23-scf00581 | 23 |
| AX-158233300 | 19 | 55.293 | KV453243.1 | 4965193 | 23-scf00581 | 23 |
| AX-158233301 | 19 | 55.293 | KV453243.1 | 4965899 | 23-scf00581 | 23 |
| AX-158233327 | 19 | 55.293 | KV453243.1 | 4999972 | 23-scf00581 | 23 |
| AX-158233364 | 19 | 55.293 | KV453243.1 | 5042076 | 23-scf00581 | 23 |
| AX-158233365 | 19 | 55.293 | KV453243.1 | 5043255 | 23-scf00581 | 23 |
| AX-158233367 | 19 | 55.293 | KV453243.1 | 5045852 | 23-scf00581 | 23 |
| AX-158233372 | 19 | 55.293 | KV453243.1 | 5050635 | 23-scf00581 | 23 |
| AX-158233375 | 19 | 55.293 | KV453243.1 | 5053004 | 23-scf00581 | 23 |
| AX-158233377 | 19 | 55.293 | KV453243.1 | 5057038 | 23-scf00581 | 23 |
| AX-158233381 | 19 | 55.293 | KV453243.1 | 5059944 | 23-scf00581 | 23 |
| AX-158233388 | 19 | 55.293 | KV453243.1 | 5066665 | 23-scf00581 | 23 |
| AX-158233390 | 19 | 55.293 | KV453243.1 | 5068048 | 23-scf00581 | 23 |
| AX-157750837 | 19 | 55.293 | KV453243.1 | 5076742 | 23-scf00581 | 23 |
| AX-158233396 | 19 | 55.293 | KV453243.1 | 5078470 | 23-scf00581 | 23 |
| AX-158423293 | 19 | 55.293 | KV453243.1 | 5080169 | 23-scf00581 | 23 |
| AX-158233398 | 19 | 55.293 | KV453243.1 | 5080742 | 23-scf00581 | 23 |
| AX-158233400 | 19 | 55.293 | KV453243.1 | 5081285 | 23-scf00581 | 23 |
| AX-157735909 | 19 | 55.293 | KV453243.1 | 5084877 | 23-scf00581 | 23 |
| AX-157840394 | 19 | 55.293 | KV453243.1 | 5085072 | 23-scf00581 | 23 |
| AX-157746351 | 19 | 55.293 | KV453243.1 | 5086199 | 23-scf00581 | 23 |

|              |    |        |            |         |             |    |
|--------------|----|--------|------------|---------|-------------|----|
| AX-158233404 | 19 | 55.293 | KV453243.1 | 5086925 | 23-scf00581 | 23 |
| AX-157872501 | 19 | 55.293 | KV453243.1 | 5088831 | 23-scf00581 | 23 |
| AX-157840395 | 19 | 55.293 | KV453243.1 | 5089122 | 23-scf00581 | 23 |
| AX-158233407 | 19 | 55.293 | KV453243.1 | 5091329 | 23-scf00581 | 23 |
| AX-158233408 | 19 | 55.293 | KV453243.1 | 5096445 | 23-scf00581 | 23 |
| AX-158233411 | 19 | 55.293 | KV453243.1 | 5099340 | 23-scf00581 | 23 |
| AX-158233413 | 19 | 55.293 | KV453243.1 | 5102727 | 23-scf00581 | 23 |
| AX-158233417 | 19 | 55.293 | KV453243.1 | 5106082 | 23-scf00581 | 23 |
| AX-158233418 | 19 | 55.293 | KV453243.1 | 5107192 | 23-scf00581 | 23 |
| AX-158233419 | 19 | 55.293 | KV453243.1 | 5107724 | 23-scf00581 | 23 |
| AX-158233462 | 19 | 55.293 | KV453243.1 | 5165541 | 23-scf00581 | 23 |
| AX-158233474 | 19 | 55.293 | KV453243.1 | 5177502 | 23-scf00581 | 23 |
| AX-158233532 | 19 | 55.293 | KV453243.1 | 5244321 | 23-scf00581 | 23 |
| AX-158233366 | 19 | 55.346 | KV453243.1 | 5044949 | 23-scf00581 | 23 |
| AX-158233426 | 19 | 55.346 | KV453243.1 | 5116734 | 23-scf00581 | 23 |
| AX-158233514 | 19 | 55.346 | KV453243.1 | 5224315 | 23-scf00581 | 23 |
| AX-158233393 | 19 | 55.374 | KV453243.1 | 5075622 | 23-scf00581 | 23 |
| AX-158233410 | 19 | 55.374 | KV453243.1 | 5098014 | 23-scf00581 | 23 |
| AX-158233416 | 19 | 55.374 | KV453243.1 | 5105224 | 23-scf00581 | 23 |
| AX-158233421 | 19 | 55.374 | KV453243.1 | 5110489 | 23-scf00581 | 23 |
| AX-157867204 | 19 | 55.374 | KV453243.1 | 5117345 | 23-scf00581 | 23 |
| AX-158233324 | 19 | 55.403 | KV453243.1 | 4996001 | 23-scf00581 | 23 |
| AX-157840389 | 19 | 55.403 | KV453243.1 | 5018244 | 23-scf00581 | 23 |
| AX-158233353 | 19 | 55.403 | KV453243.1 | 5034682 | 23-scf00581 | 23 |
| AX-158233356 | 19 | 55.403 | KV453243.1 | 5036231 | 23-scf00581 | 23 |
| AX-157859567 | 19 | 55.403 | KV453243.1 | 5037446 | 23-scf00581 | 23 |
| AX-158233379 | 19 | 55.403 | KV453243.1 | 5059156 | 23-scf00581 | 23 |
| AX-158233386 | 19 | 55.403 | KV453243.1 | 5063880 | 23-scf00581 | 23 |
| AX-158380920 | 19 | 55.403 | KV453243.1 | 5090633 | 23-scf00581 | 23 |
| AX-158233425 | 19 | 55.403 | KV453243.1 | 5115744 | 23-scf00581 | 23 |
| AX-158233427 | 19 | 55.403 | KV453243.1 | 5118067 | 23-scf00581 | 23 |
| AX-158233428 | 19 | 55.403 | KV453243.1 | 5118690 | 23-scf00581 | 23 |
| AX-158233430 | 19 | 55.403 | KV453243.1 | 5119691 | 23-scf00581 | 23 |
| AX-158233431 | 19 | 55.403 | KV453243.1 | 5120138 | 23-scf00581 | 23 |
| AX-158233432 | 19 | 55.403 | KV453243.1 | 5121528 | 23-scf00581 | 23 |
| AX-157867206 | 19 | 55.403 | KV453243.1 | 5125417 | 23-scf00581 | 23 |
| AX-158233435 | 19 | 55.403 | KV453243.1 | 5125971 | 23-scf00581 | 23 |
| AX-157840398 | 19 | 55.403 | KV453243.1 | 5128532 | 23-scf00581 | 23 |
| AX-157754908 | 19 | 55.403 | KV453243.1 | 5133349 | 23-scf00581 | 23 |
| AX-157840399 | 19 | 55.403 | KV453243.1 | 5133577 | 23-scf00581 | 23 |
| AX-158233439 | 19 | 55.403 | KV453243.1 | 5134620 | 23-scf00581 | 23 |
| AX-157840400 | 19 | 55.403 | KV453243.1 | 5135870 | 23-scf00581 | 23 |
| AX-158233441 | 19 | 55.403 | KV453243.1 | 5140815 | 23-scf00581 | 23 |
| AX-158233442 | 19 | 55.403 | KV453243.1 | 5142314 | 23-scf00581 | 23 |
| AX-158233443 | 19 | 55.403 | KV453243.1 | 5145747 | 23-scf00581 | 23 |
| AX-158233447 | 19 | 55.403 | KV453243.1 | 5150110 | 23-scf00581 | 23 |
| AX-158233448 | 19 | 55.403 | KV453243.1 | 5151593 | 23-scf00581 | 23 |
| AX-158233454 | 19 | 55.403 | KV453243.1 | 5157027 | 23-scf00581 | 23 |
| AX-158233459 | 19 | 55.403 | KV453243.1 | 5160513 | 23-scf00581 | 23 |
| AX-158233461 | 19 | 55.403 | KV453243.1 | 5164634 | 23-scf00581 | 23 |
| AX-158233469 | 19 | 55.403 | KV453243.1 | 5173074 | 23-scf00581 | 23 |

|              |    |        |            |         |             |    |
|--------------|----|--------|------------|---------|-------------|----|
| AX-158233470 | 19 | 55.403 | KV453243.1 | 5174436 | 23-scf00581 | 23 |
| AX-158233471 | 19 | 55.403 | KV453243.1 | 5175017 | 23-scf00581 | 23 |
| AX-158233479 | 19 | 55.403 | KV453243.1 | 5181406 | 23-scf00581 | 23 |
| AX-158233482 | 19 | 55.403 | KV453243.1 | 5184767 | 23-scf00581 | 23 |
| AX-158233484 | 19 | 55.403 | KV453243.1 | 5186569 | 23-scf00581 | 23 |
| AX-158233487 | 19 | 55.403 | KV453243.1 | 5191316 | 23-scf00581 | 23 |
| AX-158233579 | 19 | 55.403 | KV453243.1 | 5292410 | 23-scf00581 | 23 |
| AX-158415252 | 19 | 55.424 | KV453243.1 | 5196033 | 23-scf00581 | 23 |
| AX-158233493 | 19 | 55.452 | KV453243.1 | 5200134 | 23-scf00581 | 23 |
| AX-158233496 | 19 | 55.491 | KV453243.1 | 5202161 | 23-scf00581 | 23 |
| AX-158233389 | 19 | 55.512 | KV453243.1 | 5067327 | 23-scf00581 | 23 |
| AX-158233500 | 19 | 55.512 | KV453243.1 | 5205587 | 23-scf00581 | 23 |
| AX-157740556 | 19 | 55.512 | KV453243.1 | 5206000 | 23-scf00581 | 23 |
| AX-158233501 | 19 | 55.512 | KV453243.1 | 5206282 | 23-scf00581 | 23 |
| AX-158233502 | 19 | 55.512 | KV453243.1 | 5207016 | 23-scf00581 | 23 |
| AX-158233511 | 19 | 55.648 | KV453243.1 | 5221872 | 23-scf00581 | 23 |
| AX-158233423 | 19 | 55.724 | KV453243.1 | 5113787 | 23-scf00581 | 23 |
| AX-158415251 | 19 | 55.724 | KV453243.1 | 5157294 | 23-scf00581 | 23 |
| AX-158233478 | 19 | 55.724 | KV453243.1 | 5180004 | 23-scf00581 | 23 |
| AX-158233506 | 19 | 55.724 | KV453243.1 | 5218326 | 23-scf00581 | 23 |
| AX-158233513 | 19 | 55.724 | KV453243.1 | 5223171 | 23-scf00581 | 23 |
| AX-158233515 | 19 | 55.724 | KV453243.1 | 5226089 | 23-scf00581 | 23 |
| AX-158233539 | 19 | 55.724 | KV453243.1 | 5253375 | 23-scf00581 | 23 |
| AX-158233434 | 19 | 55.84  | KV453243.1 | 5123395 | 23-scf00581 | 23 |
| AX-158233468 | 19 | 55.84  | KV453243.1 | 5172249 | 23-scf00581 | 23 |
| AX-157714014 | 19 | 55.84  | KV453243.1 | 5172862 | 23-scf00581 | 23 |
| AX-158233476 | 19 | 55.84  | KV453243.1 | 5178988 | 23-scf00581 | 23 |
| AX-158233477 | 19 | 55.84  | KV453243.1 | 5179205 | 23-scf00581 | 23 |
| AX-158233512 | 19 | 55.84  | KV453243.1 | 5222539 | 23-scf00581 | 23 |
| AX-158233521 | 19 | 55.84  | KV453243.1 | 5235449 | 23-scf00581 | 23 |
| AX-158233522 | 19 | 55.84  | KV453243.1 | 5236049 | 23-scf00581 | 23 |
| AX-158233523 | 19 | 55.84  | KV453243.1 | 5236402 | 23-scf00581 | 23 |
| AX-158233528 | 19 | 55.84  | KV453243.1 | 5240749 | 23-scf00581 | 23 |
| AX-158233529 | 19 | 55.84  | KV453243.1 | 5241658 | 23-scf00581 | 23 |
| AX-158233530 | 19 | 55.84  | KV453243.1 | 5242242 | 23-scf00581 | 23 |
| AX-158233531 | 19 | 55.84  | KV453243.1 | 5243176 | 23-scf00581 | 23 |
| AX-158233538 | 19 | 55.84  | KV453243.1 | 5252328 | 23-scf00581 | 23 |
| AX-158233536 | 19 | 55.91  | KV453243.1 | 5248569 | 23-scf00581 | 23 |
| AX-158233492 | 19 | 55.949 | KV453243.1 | 5199221 | 23-scf00581 | 23 |
| AX-158233517 | 19 | 55.949 | KV453243.1 | 5229436 | 23-scf00581 | 23 |
| AX-158233520 | 19 | 55.949 | KV453243.1 | 5234043 | 23-scf00581 | 23 |
| AX-158233533 | 19 | 55.949 | KV453243.1 | 5245981 | 23-scf00581 | 23 |
| AX-158233540 | 19 | 55.949 | KV453243.1 | 5255865 | 23-scf00581 | 23 |
| AX-158233542 | 19 | 55.949 | KV453243.1 | 5259539 | 23-scf00581 | 23 |
| AX-157756507 | 19 | 55.949 | KV453243.1 | 5260621 | 23-scf00581 | 23 |
| AX-158386839 | 19 | 55.949 | KV453243.1 | 5262403 | 23-scf00581 | 23 |
| AX-158233545 | 19 | 55.949 | KV453243.1 | 5262751 | 23-scf00581 | 23 |
| AX-158415256 | 19 | 55.949 | KV453243.1 | 5264654 | 23-scf00581 | 23 |
| AX-158415257 | 19 | 55.949 | KV453243.1 | 5264720 | 23-scf00581 | 23 |
| AX-158233440 | 19 | 56.058 | KV453243.1 | 5139803 | 23-scf00581 | 23 |
| AX-157840401 | 19 | 56.058 | KV453243.1 | 5170572 | 23-scf00581 | 23 |

|              |    |        |            |         |             |    |
|--------------|----|--------|------------|---------|-------------|----|
| AX-158233504 | 19 | 56.058 | KV453243.1 | 5210438 | 23-scf00581 | 23 |
| AX-158233524 | 19 | 56.058 | KV453243.1 | 5236960 | 23-scf00581 | 23 |
| AX-158233548 | 19 | 56.058 | KV453243.1 | 5267369 | 23-scf00581 | 23 |
| AX-158233550 | 19 | 56.058 | KV453243.1 | 5268039 | 23-scf00581 | 23 |
| AX-158233552 | 19 | 56.058 | KV453243.1 | 5269332 | 23-scf00581 | 23 |
| AX-158233553 | 19 | 56.058 | KV453243.1 | 5271571 | 23-scf00581 | 23 |
| AX-158233554 | 19 | 56.058 | KV453243.1 | 5272451 | 23-scf00581 | 23 |
| AX-158233558 | 19 | 56.058 | KV453243.1 | 5276736 | 23-scf00581 | 23 |
| AX-158233562 | 19 | 56.16  | KV453243.1 | 5280508 | 23-scf00581 | 23 |
| AX-158233561 | 19 | 56.26  | KV453243.1 | 5278442 | 23-scf00581 | 23 |
| AX-157859568 | 19 | 56.26  | KV453243.1 | 5280195 | 23-scf00581 | 23 |
| AX-158233565 | 19 | 56.26  | KV453243.1 | 5283659 | 23-scf00581 | 23 |
| AX-158233567 | 19 | 56.26  | KV453243.1 | 5284768 | 23-scf00581 | 23 |
| AX-158233569 | 19 | 56.267 | KV453243.1 | 5285877 | 23-scf00581 | 23 |
| AX-158233556 | 19 | 56.274 | KV453243.1 | 5275760 | 23-scf00581 | 23 |
| AX-158233571 | 19 | 56.274 | KV453243.1 | 5287480 | 23-scf00581 | 23 |
| AX-158233445 | 19 | 56.283 | KV453243.1 | 5147276 | 23-scf00581 | 23 |
| AX-158233573 | 19 | 56.283 | KV453243.1 | 5288342 | 23-scf00581 | 23 |
| AX-158233563 | 19 | 56.293 | KV453243.1 | 5280874 | 23-scf00581 | 23 |
| AX-158233575 | 19 | 56.293 | KV453243.1 | 5289880 | 23-scf00581 | 23 |
| AX-158233576 | 19 | 56.293 | KV453243.1 | 5290554 | 23-scf00581 | 23 |
| AX-158233472 | 19 | 56.495 | KV453243.1 | 5175444 | 23-scf00581 | 23 |
| AX-158233559 | 19 | 56.495 | KV453243.1 | 5277863 | 23-scf00581 | 23 |
| AX-158233578 | 19 | 56.495 | KV453243.1 | 5291599 | 23-scf00581 | 23 |
| AX-158233588 | 19 | 56.495 | KV453243.1 | 5311136 | 23-scf00581 | 23 |
| AX-158233589 | 19 | 56.495 | KV453243.1 | 5312524 | 23-scf00581 | 23 |
| AX-158233590 | 19 | 56.495 | KV453243.1 | 5312800 | 23-scf00581 | 23 |
| AX-158233593 | 19 | 56.495 | KV453243.1 | 5319624 | 23-scf00581 | 23 |
| AX-158233594 | 19 | 56.495 | KV453243.1 | 5320362 | 23-scf00581 | 23 |
| AX-158233595 | 19 | 56.495 | KV453243.1 | 5321556 | 23-scf00581 | 23 |
| AX-158233597 | 19 | 56.495 | KV453243.1 | 5322414 | 23-scf00581 | 23 |
| AX-158233599 | 19 | 56.495 | KV453243.1 | 5323733 | 23-scf00581 | 23 |
| AX-158233600 | 19 | 56.495 | KV453243.1 | 5325462 | 23-scf00581 | 23 |
| AX-158380921 | 19 | 56.495 | KV453243.1 | 5329285 | 23-scf00581 | 23 |
| AX-157773670 | 19 | 56.495 | KV453243.1 | 5329455 | 23-scf00581 | 23 |
| AX-157840404 | 19 | 56.495 | KV453243.1 | 5349957 | 23-scf00581 | 23 |
| AX-158233654 | 19 | 56.495 | KV453243.1 | 5421706 | 23-scf00581 | 23 |
| AX-158233659 | 19 | 56.495 | KV453243.1 | 5429718 | 23-scf00581 | 23 |
| AX-158233605 | 19 | 56.496 | KV453243.1 | 5330962 | 23-scf00581 | 23 |
| AX-158233606 | 19 | 56.496 | KV453243.1 | 5333378 | 23-scf00581 | 23 |
| AX-158233614 | 19 | 56.497 | KV453243.1 | 5344553 | 23-scf00581 | 23 |
| AX-158233615 | 19 | 56.82  | KV453243.1 | 5344882 | 23-scf00581 | 23 |
| AX-158233616 | 19 | 56.82  | KV453243.1 | 5345735 | 23-scf00581 | 23 |
| AX-158233628 | 19 | 56.828 | KV453243.1 | 5382331 | 23-scf00581 | 23 |
| AX-158233629 | 19 | 56.828 | KV453243.1 | 5382679 | 23-scf00581 | 23 |
| AX-157755105 | 19 | 56.828 | KV453243.1 | 5384333 | 23-scf00581 | 23 |
| AX-157840406 | 19 | 57.041 | KV453243.1 | 5381386 | 23-scf00581 | 23 |
| AX-157751829 | 19 | 57.041 | KV453243.1 | 5381967 | 23-scf00581 | 23 |
| AX-158233632 | 19 | 57.041 | KV453243.1 | 5387847 | 23-scf00581 | 23 |
| AX-158233635 | 19 | 57.041 | KV453243.1 | 5391866 | 23-scf00581 | 23 |
| AX-157771096 | 19 | 57.041 | KV453243.1 | 5392606 | 23-scf00581 | 23 |

|              |    |        |            |         |             |    |
|--------------|----|--------|------------|---------|-------------|----|
| AX-158233637 | 19 | 57.041 | KV453243.1 | 5395653 | 23-scf00581 | 23 |
| AX-157840407 | 19 | 57.041 | KV453243.1 | 5399281 | 23-scf00581 | 23 |
| AX-158233639 | 19 | 57.041 | KV453243.1 | 5400111 | 23-scf00581 | 23 |
| AX-158233640 | 19 | 57.041 | KV453243.1 | 5406071 | 23-scf00581 | 23 |
| AX-158233641 | 19 | 57.314 | KV453243.1 | 5406605 | 23-scf00581 | 23 |
| AX-158233645 | 19 | 57.573 | KV453243.1 | 5411662 | 23-scf00581 | 23 |
| AX-158233646 | 19 | 57.573 | KV453243.1 | 5413612 | 23-scf00581 | 23 |
| AX-158233656 | 19 | 57.617 | KV453243.1 | 5425734 | 23-scf00581 | 23 |
| AX-158233665 | 19 | 57.694 | KV453243.1 | 5438936 | 23-scf00581 | 23 |
| AX-158233666 | 19 | 57.698 | KV453243.1 | 5439907 | 23-scf00581 | 23 |
| AX-158233667 | 19 | 57.701 | KV453243.1 | 5440273 | 23-scf00581 | 23 |
| AX-158233671 | 19 | 57.915 | KV453243.1 | 5445439 | 23-scf00581 | 23 |
| AX-158233672 | 19 | 57.915 | KV453243.1 | 5447268 | 23-scf00581 | 23 |
| AX-158233676 | 19 | 58.135 | KV453243.1 | 5451535 | 23-scf00581 | 23 |
| AX-158233677 | 19 | 58.135 | KV453243.1 | 5452048 | 23-scf00581 | 23 |
| AX-157840408 | 19 | 58.135 | KV453243.1 | 5463285 | 23-scf00581 | 23 |
| AX-158233683 | 19 | 58.135 | KV453243.1 | 5464936 | 23-scf00581 | 23 |
| AX-158233684 | 19 | 58.135 | KV453243.1 | 5465825 | 23-scf00581 | 23 |
| AX-157840409 | 19 | 58.135 | KV453243.1 | 5466057 | 23-scf00581 | 23 |
| AX-158233685 | 19 | 58.135 | KV453243.1 | 5466362 | 23-scf00581 | 23 |
| AX-158233689 | 19 | 58.16  | KV453243.1 | 5471768 | 23-scf00581 | 23 |
| AX-158233690 | 19 | 58.245 | KV453243.1 | 5474913 | 23-scf00581 | 23 |
| AX-158233691 | 19 | 58.245 | KV453243.1 | 5475941 | 23-scf00581 | 23 |
| AX-158233694 | 19 | 58.245 | KV453243.1 | 5478317 | 23-scf00581 | 23 |
| AX-158233695 | 19 | 58.245 | KV453243.1 | 5478907 | 23-scf00581 | 23 |
| AX-158233697 | 19 | 58.245 | KV453243.1 | 5483369 | 23-scf00581 | 23 |
| AX-158233698 | 19 | 58.408 | KV453243.1 | 5483729 | 23-scf00581 | 23 |
| AX-158233703 | 19 | 58.454 | KV453243.1 | 5490897 | 23-scf00581 | 23 |
| AX-158233704 | 19 | 58.572 | KV453243.1 | 5491776 | 23-scf00581 | 23 |
| AX-158233705 | 19 | 58.572 | KV453243.1 | 5497841 | 23-scf00581 | 23 |
| AX-158233706 | 19 | 58.574 | KV453243.1 | 5499451 | 23-scf00581 | 23 |
| AX-158233707 | 19 | 58.576 | KV453243.1 | 5500111 | 23-scf00581 | 23 |
| AX-158233708 | 19 | 59.196 | KV453243.1 | 5501044 | 23-scf00581 | 23 |
| AX-158233711 | 19 | 59.197 | KV453243.1 | 5504777 | 23-scf00581 | 23 |
| AX-158233712 | 19 | 59.198 | KV453243.1 | 5505082 | 23-scf00581 | 23 |
| AX-158233713 | 19 | 59.273 | KV453243.1 | 5505728 | 23-scf00581 | 23 |
| AX-158233714 | 19 | 59.391 | KV453243.1 | 5509416 | 23-scf00581 | 23 |
| AX-158233716 | 19 | 59.447 | KV453243.1 | 5513563 | 23-scf00581 | 23 |
| AX-158233718 | 19 | 59.447 | KV453243.1 | 5517295 | 23-scf00581 | 23 |
| AX-158233722 | 19 | 59.447 | KV453243.1 | 5520646 | 23-scf00581 | 23 |
| AX-158233724 | 19 | 59.447 | KV453243.1 | 5522257 | 23-scf00581 | 23 |
| AX-158233725 | 19 | 59.447 | KV453243.1 | 5523886 | 23-scf00581 | 23 |
| AX-158233741 | 19 | 59.447 | KV453243.1 | 5550176 | 23-scf00581 | 23 |
| AX-158233742 | 19 | 59.447 | KV453243.1 | 5552479 | 23-scf00581 | 23 |
| AX-157775105 | 19 | 59.448 | KV453243.1 | 5528202 | 23-scf00581 | 23 |
| AX-158233746 | 19 | 59.448 | KV453243.1 | 5557157 | 23-scf00581 | 23 |
| AX-158233727 | 19 | 59.449 | KV453243.1 | 5528869 | 23-scf00581 | 23 |
| AX-158233732 | 19 | 59.45  | KV453243.1 | 5533317 | 23-scf00581 | 23 |
| AX-158233738 | 19 | 59.451 | KV453243.1 | 5546011 | 23-scf00581 | 23 |
| AX-157840413 | 19 | 59.451 | KV453243.1 | 5546195 | 23-scf00581 | 23 |
| AX-158233739 | 19 | 59.519 | KV453243.1 | 5547217 | 23-scf00581 | 23 |

|              |    |        |            |         |             |    |
|--------------|----|--------|------------|---------|-------------|----|
| AX-158233740 | 19 | 59.591 | KV453243.1 | 5548267 | 23-scf00581 | 23 |
| AX-158233743 | 19 | 59.721 | KV453243.1 | 5553360 | 23-scf00581 | 23 |
| AX-158233744 | 19 | 59.784 | KV453243.1 | 5555129 | 23-scf00581 | 23 |
| AX-158233700 | 19 | 59.893 | KV453243.1 | 5486337 | 23-scf00581 | 23 |
| AX-158233730 | 19 | 59.893 | KV453243.1 | 5530673 | 23-scf00581 | 23 |
| AX-158233735 | 19 | 59.893 | KV453243.1 | 5539547 | 23-scf00581 | 23 |
| AX-157840414 | 19 | 59.893 | KV453243.1 | 5556955 | 23-scf00581 | 23 |
| AX-158233747 | 19 | 59.945 | KV453243.1 | 5558246 | 23-scf00581 | 23 |
| AX-157745473 | 19 | 59.946 | KV453243.1 | 5558719 | 23-scf00581 | 23 |
| AX-158233748 | 19 | 59.946 | KV453243.1 | 5560398 | 23-scf00581 | 23 |
| AX-158380922 | 19 | 60.307 | KV453243.1 | 5565369 | 23-scf00581 | 23 |
| AX-158233750 | 19 | 60.307 | KV453243.1 | 5566199 | 23-scf00581 | 23 |
| AX-158233751 | 19 | 60.308 | KV453243.1 | 5567987 | 23-scf00581 | 23 |
| AX-157746250 | 19 | 60.308 | KV453243.1 | 5569542 | 23-scf00581 | 23 |
| AX-158233752 | 19 | 60.308 | KV453243.1 | 5572051 | 23-scf00581 | 23 |
| AX-158233754 | 19 | 60.308 | KV453243.1 | 5575659 | 23-scf00581 | 23 |
| AX-158233755 | 19 | 60.308 | KV453243.1 | 5578040 | 23-scf00581 | 23 |
| AX-157709993 | 19 | 60.308 | KV453243.1 | 5579656 | 23-scf00581 | 23 |
| AX-158233757 | 19 | 60.308 | KV453243.1 | 5580361 | 23-scf00581 | 23 |
| AX-158233758 | 19 | 60.418 | KV453243.1 | 5581060 | 23-scf00581 | 23 |
| AX-158233759 | 19 | 60.418 | KV453243.1 | 5582931 | 23-scf00581 | 23 |
| AX-158233761 | 19 | 60.425 | KV453243.1 | 5586267 | 23-scf00581 | 23 |
| AX-157709193 | 19 | 60.431 | KV453243.1 | 5589577 | 23-scf00581 | 23 |
| AX-158233767 | 19 | 60.431 | KV453243.1 | 5592280 | 23-scf00581 | 23 |
| AX-158233772 | 19 | 60.468 | KV453243.1 | 5597287 | 23-scf00581 | 23 |
| AX-157709992 | 19 | 60.508 | KV453243.1 | 5579742 | 23-scf00581 | 23 |
| AX-158233763 | 19 | 60.508 | KV453243.1 | 5587300 | 23-scf00581 | 23 |
| AX-158233773 | 19 | 60.508 | KV453243.1 | 5597814 | 23-scf00581 | 23 |
| AX-157754056 | 19 | 60.541 | KV453243.1 | 5567073 | 23-scf00581 | 23 |
| AX-158233765 | 19 | 60.541 | KV453243.1 | 5589991 | 23-scf00581 | 23 |
| AX-157751462 | 19 | 60.541 | KV453243.1 | 5599147 | 23-scf00581 | 23 |
| AX-158233774 | 19 | 60.541 | KV453243.1 | 5599876 | 23-scf00581 | 23 |
| AX-158233775 | 19 | 60.541 | KV453243.1 | 5600960 | 23-scf00581 | 23 |
| AX-157749663 | 19 | 60.541 | KV453243.1 | 5603259 | 23-scf00581 | 23 |
| AX-158233783 | 19 | 60.65  | KV453243.1 | 5612496 | 23-scf00581 | 23 |
| AX-157713143 | 19 | 60.65  | KV453243.1 | 5613503 | 23-scf00581 | 23 |
| AX-158233785 | 19 | 60.65  | KV453243.1 | 5615865 | 23-scf00581 | 23 |
| AX-158233788 | 19 | 60.65  | KV453243.1 | 5619141 | 23-scf00581 | 23 |
| AX-158233791 | 19 | 60.868 | KV453243.1 | 5621973 | 23-scf00581 | 23 |
| AX-158233792 | 19 | 60.868 | KV453243.1 | 5623171 | 23-scf00581 | 23 |
| AX-158233795 | 19 | 60.868 | KV453243.1 | 5627265 | 23-scf00581 | 23 |
| AX-158233797 | 19 | 60.868 | KV453243.1 | 5631159 | 23-scf00581 | 23 |
| AX-158233801 | 19 | 60.868 | KV453243.1 | 5635785 | 23-scf00581 | 23 |
| AX-158233802 | 19 | 60.868 | KV453243.1 | 5636367 | 23-scf00581 | 23 |
| AX-158233803 | 19 | 60.868 | KV453243.1 | 5637834 | 23-scf00581 | 23 |
| AX-158233804 | 19 | 60.868 | KV453243.1 | 5638609 | 23-scf00581 | 23 |
| AX-158233806 | 19 | 60.868 | KV453243.1 | 5639957 | 23-scf00581 | 23 |
| AX-158233809 | 19 | 60.868 | KV453243.1 | 5643600 | 23-scf00581 | 23 |
| AX-158233817 | 19 | 60.868 | KV453243.1 | 5654689 | 23-scf00581 | 23 |
| AX-158386844 | 19 | 60.868 | KV453243.1 | 5658937 | 23-scf00581 | 23 |
| AX-158233821 | 19 | 60.868 | KV453243.1 | 5662123 | 23-scf00581 | 23 |



|              |    |        |            |         |             |    |
|--------------|----|--------|------------|---------|-------------|----|
| AX-158233810 | 19 | 61.087 | KV453243.1 | 5645414 | 23-scf00581 | 23 |
| AX-158233812 | 19 | 61.087 | KV453243.1 | 5647643 | 23-scf00581 | 23 |
| AX-158386843 | 19 | 61.087 | KV453243.1 | 5654423 | 23-scf00581 | 23 |
| AX-158233819 | 19 | 61.087 | KV453243.1 | 5657980 | 23-scf00581 | 23 |
| AX-158233822 | 19 | 61.087 | KV453243.1 | 5663009 | 23-scf00581 | 23 |
| AX-158233778 | 19 | 61.386 | KV453243.1 | 5606614 | 23-scf00581 | 23 |
| AX-158233779 | 19 | 61.386 | KV453243.1 | 5608930 | 23-scf00581 | 23 |
| AX-158233823 | 19 | 61.386 | KV453243.1 | 5664664 | 23-scf00581 | 23 |
| AX-157840421 | 19 | 61.386 | KV453243.1 | 5671208 | 23-scf00581 | 23 |
| AX-157747695 | 19 | 61.386 | KV453243.1 | 5675807 | 23-scf00581 | 23 |
| AX-158233827 | 19 | 61.404 | KV453243.1 | 5676819 | 23-scf00581 | 23 |
| AX-158233830 | 19 | 61.428 | KV453243.1 | 5678988 | 23-scf00581 | 23 |
| AX-158233831 | 19 | 61.428 | KV453243.1 | 5679330 | 23-scf00581 | 23 |
| AX-158233871 | 19 | 61.428 | KV453243.1 | 5739918 | 23-scf00581 | 23 |
| AX-158233918 | 19 | 61.428 | KV453243.1 | 5826353 | 23-scf00581 | 23 |
| AX-157721692 | 19 | 61.428 | KV453243.1 | 5837109 | 23-scf00581 | 23 |
| AX-158233836 | 19 | 61.742 | KV453243.1 | 5691163 | 23-scf00581 | 23 |
| AX-158233837 | 19 | 61.742 | KV453243.1 | 5692272 | 23-scf00581 | 23 |
| AX-157752368 | 19 | 61.742 | KV453243.1 | 5692643 | 23-scf00581 | 23 |
| AX-158233838 | 19 | 61.742 | KV453243.1 | 5693747 | 23-scf00581 | 23 |
| AX-158233839 | 19 | 61.742 | KV453243.1 | 5694302 | 23-scf00581 | 23 |
| AX-158233840 | 19 | 61.784 | KV453243.1 | 5695114 | 23-scf00581 | 23 |
| AX-158233842 | 19 | 61.82  | KV453243.1 | 5696454 | 23-scf00581 | 23 |
| AX-158233843 | 19 | 61.851 | KV453243.1 | 5698615 | 23-scf00581 | 23 |
| AX-158233835 | 19 | 61.852 | KV453243.1 | 5691006 | 23-scf00581 | 23 |
| AX-158233845 | 19 | 61.852 | KV453243.1 | 5702304 | 23-scf00581 | 23 |
| AX-158233868 | 19 | 61.852 | KV453243.1 | 5735483 | 23-scf00581 | 23 |
| AX-157840424 | 19 | 61.852 | KV453243.1 | 5743972 | 23-scf00581 | 23 |
| AX-158233846 | 19 | 62.005 | KV453243.1 | 5702893 | 23-scf00581 | 23 |
| AX-157744442 | 19 | 62.179 | KV453243.1 | 5706446 | 23-scf00581 | 23 |
| AX-157738555 | 19 | 62.179 | KV453243.1 | 5706909 | 23-scf00581 | 23 |
| AX-158233847 | 19 | 62.179 | KV453243.1 | 5709571 | 23-scf00581 | 23 |
| AX-158233849 | 19 | 62.179 | KV453243.1 | 5710874 | 23-scf00581 | 23 |
| AX-158233851 | 19 | 62.179 | KV453243.1 | 5712740 | 23-scf00581 | 23 |
| AX-158233852 | 19 | 62.179 | KV453243.1 | 5713114 | 23-scf00581 | 23 |
| AX-158233853 | 19 | 62.179 | KV453243.1 | 5714303 | 23-scf00581 | 23 |
| AX-158233854 | 19 | 62.179 | KV453243.1 | 5715186 | 23-scf00581 | 23 |
| AX-158233855 | 19 | 62.179 | KV453243.1 | 5715680 | 23-scf00581 | 23 |
| AX-158233856 | 19 | 62.179 | KV453243.1 | 5716176 | 23-scf00581 | 23 |
| AX-158233858 | 19 | 62.179 | KV453243.1 | 5717237 | 23-scf00581 | 23 |
| AX-158233862 | 19 | 62.179 | KV453243.1 | 5719255 | 23-scf00581 | 23 |
| AX-158233864 | 19 | 62.179 | KV453243.1 | 5732331 | 23-scf00581 | 23 |
| AX-158233865 | 19 | 62.179 | KV453243.1 | 5732646 | 23-scf00581 | 23 |
| AX-158233866 | 19 | 62.179 | KV453243.1 | 5732800 | 23-scf00581 | 23 |
| AX-158233867 | 19 | 62.247 | KV453243.1 | 5734888 | 23-scf00581 | 23 |
| AX-157840425 | 19 | 62.289 | KV453243.1 | 5750892 | 23-scf00581 | 23 |
| AX-158386845 | 19 | 62.289 | KV453243.1 | 5752013 | 23-scf00581 | 23 |
| AX-157840427 | 19 | 62.289 | KV453243.1 | 5757926 | 23-scf00581 | 23 |
| AX-158233877 | 19 | 62.289 | KV453243.1 | 5759169 | 23-scf00581 | 23 |
| AX-157840429 | 19 | 62.289 | KV453243.1 | 5763075 | 23-scf00581 | 23 |
| AX-157800164 | 19 | 62.289 | KV453243.1 | 5763409 | 23-scf00581 | 23 |

|              |    |        |            |         |                |    |
|--------------|----|--------|------------|---------|----------------|----|
| AX-158233878 | 19 | 62.289 | KV453243.1 | 5768962 | 23-scf00581    | 23 |
| AX-158233882 | 19 | 62.289 | KV453243.1 | 5771748 | 23-scf00581    | 23 |
| AX-158233886 | 19 | 62.308 | KV453243.1 | 5777485 | 23-scf00581    | 23 |
| AX-157718971 | 19 | 62.327 | KV453243.1 | 5779105 | 23-scf00581    | 23 |
| AX-157695794 | 19 | 62.327 | KV453243.1 | 5812430 | 23-scf00581    | 23 |
| AX-157762845 | 19 | 62.389 | KV453243.1 | 5783745 | 23-scf00581    | 23 |
| AX-158233841 | 19 | 62.398 | KV453243.1 | 5695400 | 23-scf00581    | 23 |
| AX-157859571 | 19 | 62.398 | KV453243.1 | 5752541 | 23-scf00581    | 23 |
| AX-158233884 | 19 | 62.398 | KV453243.1 | 5774076 | 23-scf00581    | 23 |
| AX-158233898 | 19 | 62.398 | KV453243.1 | 5794069 | 23-scf00581    | 23 |
| AX-158233899 | 19 | 62.398 | KV453243.1 | 5794906 | 23-scf00581    | 23 |
| AX-158233900 | 19 | 62.398 | KV453243.1 | 5796509 | 23-scf00581    | 23 |
| AX-158233902 | 19 | 62.398 | KV453243.1 | 5799875 | 23-scf00581    | 23 |
| AX-158233903 | 19 | 62.398 | KV453243.1 | 5800689 | 23-scf00581    | 23 |
| AX-157840433 | 19 | 62.398 | KV453243.1 | 5805191 | 23-scf00581    | 23 |
| AX-158233964 | 19 | 62.398 | KV453243.1 | 5893441 | 23-scf00581    | 23 |
| AX-158233905 | 19 | 62.479 | KV453243.1 | 5806774 | 23-scf00581    | 23 |
| AX-157710966 | 19 | 62.479 | KV453243.1 | 5807513 | 23-scf00581    | 23 |
| AX-158233844 | 19 | 62.552 | KV453243.1 | 5700193 | 23-scf00581    | 23 |
| AX-158233873 | 19 | 62.552 | KV453243.1 | 5748641 | 23-scf00581    | 23 |
| AX-158233906 | 19 | 62.552 | KV453243.1 | 5809647 | 23-scf00581    | 23 |
| AX-158233908 | 19 | 62.611 | KV453243.1 | 5812213 | 23-scf00581    | 23 |
| AX-158233909 | 19 | 62.611 | KV453243.1 | 5813043 | 23-scf00581    | 23 |
| AX-157745526 | 19 | 62.615 | KV453243.1 | 5784957 | 23-scf00581    | 23 |
| AX-157695795 | 19 | 62.615 | KV453243.1 | 5812394 | 23-scf00581    | 23 |
| AX-158233998 | 19 | 62.615 | KV453243.1 | 5938077 | 23-scf00581    | 23 |
| AX-157753832 | 19 | 62.621 | KV453243.1 | 5819742 | 23-scf00581    | 23 |
| AX-158233915 | 19 | 62.703 | KV453243.1 | 5821445 | 23-scf00581    | 23 |
| AX-157751874 | 19 | 62.802 | KV453243.1 | 5832033 | 23-scf00581    | 23 |
| AX-157696609 | 19 | 62.886 | FI881616.1 | 220     | 10RI212 lctalt | UN |
| AX-158233926 | 19 | 62.983 | KV453243.1 | 5839171 | 23-scf00581    | 23 |
| AX-158233927 | 19 | 62.983 | KV453243.1 | 5840428 | 23-scf00581    | 23 |
| AX-157867211 | 19 | 62.983 | KV453243.1 | 5841672 | 23-scf00581    | 23 |
| AX-158233930 | 19 | 62.983 | KV453243.1 | 5844075 | 23-scf00581    | 23 |
| AX-158233887 | 19 | 63.163 | KV453243.1 | 5778355 | 23-scf00581    | 23 |
| AX-158233931 | 19 | 63.163 | KV453243.1 | 5846009 | 23-scf00581    | 23 |
| AX-158233932 | 19 | 63.163 | KV453243.1 | 5847940 | 23-scf00581    | 23 |
| AX-157840434 | 19 | 63.163 | KV453243.1 | 5853515 | 23-scf00581    | 23 |
| AX-158233960 | 19 | 63.163 | KV453243.1 | 5888848 | 23-scf00581    | 23 |
| AX-158233936 | 19 | 63.272 | KV453243.1 | 5855163 | 23-scf00581    | 23 |
| AX-158394175 | 19 | 63.272 | KV453243.1 | 5856599 | 23-scf00581    | 23 |
| AX-158233938 | 19 | 63.272 | KV453243.1 | 5857084 | 23-scf00581    | 23 |
| AX-158233939 | 19 | 63.272 | KV453243.1 | 5858184 | 23-scf00581    | 23 |
| AX-158233941 | 19 | 63.272 | KV453243.1 | 5859784 | 23-scf00581    | 23 |
| AX-157840435 | 19 | 63.272 | KV453243.1 | 5862207 | 23-scf00581    | 23 |
| AX-157774508 | 19 | 63.272 | KV453243.1 | 5868729 | 23-scf00581    | 23 |
| AX-158233946 | 19 | 63.272 | KV453243.1 | 5869070 | 23-scf00581    | 23 |
| AX-158233949 | 19 | 63.272 | KV453243.1 | 5871219 | 23-scf00581    | 23 |
| AX-158233944 | 19 | 63.451 | KV453243.1 | 5866595 | 23-scf00581    | 23 |
| AX-157840436 | 19 | 63.451 | KV453243.1 | 5875387 | 23-scf00581    | 23 |
| AX-158233951 | 19 | 63.451 | KV453243.1 | 5875994 | 23-scf00581    | 23 |

|              |    |        |             |         |             |    |
|--------------|----|--------|-------------|---------|-------------|----|
| AX-158233952 | 19 | 63.451 | KV453243.1  | 5877488 | 23-scf00581 | 23 |
| AX-158233954 | 19 | 63.451 | KV453243.1  | 5880805 | 23-scf00581 | 23 |
| AX-157840438 | 19 | 63.451 | KV453243.1  | 5881661 | 23-scf00581 | 23 |
| AX-158233955 | 19 | 63.451 | KV453243.1  | 5884464 | 23-scf00581 | 23 |
| AX-158233957 | 19 | 63.451 | KV453243.1  | 5886311 | 23-scf00581 | 23 |
| AX-157840440 | 19 | 63.451 | KV453243.1  | 5886747 | 23-scf00581 | 23 |
| AX-158233953 | 19 | 63.456 | KV453243.1  | 5879511 | 23-scf00581 | 23 |
| AX-158233958 | 19 | 63.456 | KV453243.1  | 5887122 | 23-scf00581 | 23 |
| AX-158233959 | 19 | 63.548 | KV453243.1  | 5887556 | 23-scf00581 | 23 |
| AX-158233992 | 19 | 64.365 | KV453243.1  | 5931544 | 23-scf00581 | 23 |
| AX-158233994 | 19 | 64.365 | KV453243.1  | 5934031 | 23-scf00581 | 23 |
| AX-158233995 | 19 | 64.365 | KV453243.1  | 5935002 | 23-scf00581 | 23 |
| AX-158233997 | 19 | 64.365 | KV453243.1  | 5937118 | 23-scf00581 | 23 |
| AX-158234001 | 19 | 64.365 | KV453243.1  | 5941507 | 23-scf00581 | 23 |
| AX-158234002 | 19 | 64.365 | KV453243.1  | 5942522 | 23-scf00581 | 23 |
| AX-158234020 | 19 | 64.365 | KV453243.1  | 5963480 | 23-scf00581 | 23 |
| AX-158234003 | 19 | 64.366 | KV453243.1  | 5944852 | 23-scf00581 | 23 |
| AX-158234004 | 19 | 64.519 | KV453243.1  | 5947780 | 23-scf00581 | 23 |
| AX-158234008 | 19 | 64.519 | KV453243.1  | 5951532 | 23-scf00581 | 23 |
| AX-158234006 | 19 | 64.693 | KV453243.1  | 5950671 | 23-scf00581 | 23 |
| AX-158234007 | 19 | 64.693 | KV453243.1  | 5951066 | 23-scf00581 | 23 |
| AX-158234009 | 19 | 64.693 | KV453243.1  | 5951715 | 23-scf00581 | 23 |
| AX-158234010 | 19 | 64.693 | KV453243.1  | 5952276 | 23-scf00581 | 23 |
| AX-157751500 | 19 | 64.693 | KV453243.1  | 5952740 | 23-scf00581 | 23 |
| AX-158234012 | 19 | 64.693 | KV453243.1  | 5955115 | 23-scf00581 | 23 |
| AX-158234014 | 19 | 64.693 | KV453243.1  | 5956038 | 23-scf00581 | 23 |
| AX-158386847 | 19 | 64.693 | KV453243.1  | 5956084 | 23-scf00581 | 23 |
| AX-158234015 | 19 | 64.693 | KV453243.1  | 5956739 | 23-scf00581 | 23 |
| AX-158234017 | 19 | 64.693 | KV453243.1  | 5958136 | 23-scf00581 | 23 |
| AX-157705530 | 19 | 64.697 | 3ML01030097 | 236     | scf05690_1  | UN |
| AX-158234019 | 19 | 65.016 | KV453243.1  | 5961355 | 23-scf00581 | 23 |
| AX-158234021 | 19 | 65.016 | KV453243.1  | 5965035 | 23-scf00581 | 23 |
| AX-157744347 | 19 | 65.016 | KV453243.1  | 6012230 | 23-scf00581 | 23 |
| AX-157706561 | 19 | 65.021 | 3ML01032501 | 384     | scf08122_1  | UN |
| AX-158234028 | 19 | 65.027 | KV453243.1  | 5973712 | 23-scf00581 | 23 |
| AX-158234029 | 19 | 65.239 | KV453243.1  | 5974821 | 23-scf00581 | 23 |
| AX-158234035 | 19 | 65.239 | KV453243.1  | 5981775 | 23-scf00581 | 23 |
| AX-158234036 | 19 | 65.239 | KV453243.1  | 5982428 | 23-scf00581 | 23 |
| AX-157774987 | 19 | 65.239 | KV453243.1  | 5989982 | 23-scf00581 | 23 |
| AX-158234043 | 19 | 65.239 | KV453243.1  | 5993200 | 23-scf00581 | 23 |
| AX-158234044 | 19 | 65.239 | KV453243.1  | 5993778 | 23-scf00581 | 23 |
| AX-157707165 | 19 | 65.239 | 3ML01033640 | 132     | scf09299_1  | UN |
| AX-158234045 | 19 | 65.278 | KV453243.1  | 5995220 | 23-scf00581 | 23 |
| AX-158234026 | 19 | 65.319 | KV453243.1  | 5971696 | 23-scf00581 | 23 |
| AX-158234051 | 19 | 65.319 | KV453243.1  | 6002801 | 23-scf00581 | 23 |
| AX-158234053 | 19 | 65.348 | KV453243.1  | 6005289 | 23-scf00581 | 23 |
| AX-158234055 | 19 | 65.348 | KV453243.1  | 6007175 | 23-scf00581 | 23 |
| AX-158234058 | 19 | 65.348 | KV453243.1  | 6008713 | 23-scf00581 | 23 |
| AX-157887439 | 19 | 65.399 | KV453243.1  | 6004586 | 23-scf00581 | 23 |
| AX-158234059 | 19 | 65.399 | KV453243.1  | 6009353 | 23-scf00581 | 23 |
| AX-157750009 | 19 | 65.422 | KV453243.1  | 5996434 | 23-scf00581 | 23 |

|              |    |        |            |         |             |    |
|--------------|----|--------|------------|---------|-------------|----|
| AX-158234049 | 19 | 65.422 | KV453243.1 | 5999316 | 23-scf00581 | 23 |
| AX-158234060 | 19 | 65.422 | KV453243.1 | 6010513 | 23-scf00581 | 23 |
| AX-158234061 | 19 | 65.458 | KV453243.1 | 6013323 | 23-scf00581 | 23 |
| AX-158234062 | 19 | 65.458 | KV453243.1 | 6014460 | 23-scf00581 | 23 |
| AX-158234067 | 19 | 65.785 | KV453243.1 | 6020828 | 23-scf00581 | 23 |
| AX-158234068 | 19 | 65.785 | KV453243.1 | 6021707 | 23-scf00581 | 23 |
| AX-158234070 | 19 | 65.785 | KV453243.1 | 6026645 | 23-scf00581 | 23 |
| AX-158234071 | 19 | 65.785 | KV453243.1 | 6027005 | 23-scf00581 | 23 |
| AX-158234072 | 19 | 65.785 | KV453243.1 | 6027595 | 23-scf00581 | 23 |
| AX-158234076 | 19 | 65.895 | KV453243.1 | 6031812 | 23-scf00581 | 23 |
| AX-158234077 | 19 | 65.895 | KV453243.1 | 6035218 | 23-scf00581 | 23 |
| AX-158234079 | 19 | 65.895 | KV453243.1 | 6036367 | 23-scf00581 | 23 |
| AX-158234080 | 19 | 65.895 | KV453243.1 | 6036954 | 23-scf00581 | 23 |
| AX-158234081 | 19 | 65.895 | KV453243.1 | 6037321 | 23-scf00581 | 23 |
| AX-158234082 | 19 | 65.895 | KV453243.1 | 6038475 | 23-scf00581 | 23 |
| AX-158234084 | 19 | 65.962 | KV453243.1 | 6041520 | 23-scf00581 | 23 |
| AX-158234069 | 19 | 66.004 | KV453243.1 | 6025423 | 23-scf00581 | 23 |
| AX-158234085 | 19 | 66.004 | KV453243.1 | 6042954 | 23-scf00581 | 23 |
| AX-157756661 | 19 | 66.004 | KV453243.1 | 6044114 | 23-scf00581 | 23 |
| AX-158234086 | 19 | 66.004 | KV453243.1 | 6044840 | 23-scf00581 | 23 |
| AX-158234087 | 19 | 66.004 | KV453243.1 | 6045454 | 23-scf00581 | 23 |
| AX-158234088 | 19 | 66.004 | KV453243.1 | 6046349 | 23-scf00581 | 23 |
| AX-158234114 | 19 | 66.004 | KV453243.1 | 6084953 | 23-scf00581 | 23 |
| AX-157859574 | 19 | 66.113 | KV453243.1 | 6047052 | 23-scf00581 | 23 |
| AX-157714420 | 19 | 66.286 | KV453243.1 | 6053150 | 23-scf00581 | 23 |
| AX-158234092 | 19 | 66.523 | KV453243.1 | 6055170 | 23-scf00581 | 23 |
| AX-157755250 | 19 | 66.524 | KV453243.1 | 6057779 | 23-scf00581 | 23 |
| AX-158234094 | 19 | 66.524 | KV453243.1 | 6059072 | 23-scf00581 | 23 |
| AX-158234095 | 19 | 66.524 | KV453243.1 | 6059693 | 23-scf00581 | 23 |
| AX-158415269 | 19 | 66.524 | KV453243.1 | 6060870 | 23-scf00581 | 23 |
| AX-157721700 | 19 | 66.585 | KV453243.1 | 6062042 | 23-scf00581 | 23 |
| AX-158234100 | 19 | 66.658 | KV453243.1 | 6070648 | 23-scf00581 | 23 |
| AX-158234102 | 19 | 66.66  | KV453243.1 | 6071865 | 23-scf00581 | 23 |
| AX-158234103 | 19 | 66.66  | KV453243.1 | 6072718 | 23-scf00581 | 23 |
| AX-158415270 | 19 | 66.66  | KV453243.1 | 6072946 | 23-scf00581 | 23 |
| AX-158234106 | 19 | 66.771 | KV453243.1 | 6074448 | 23-scf00581 | 23 |
| AX-158234108 | 19 | 66.879 | KV453243.1 | 6077536 | 23-scf00581 | 23 |
| AX-157775614 | 19 | 66.879 | KV453243.1 | 6079986 | 23-scf00581 | 23 |
| AX-157775693 | 19 | 66.879 | KV453243.1 | 6080505 | 23-scf00581 | 23 |
| AX-158234110 | 19 | 66.879 | KV453243.1 | 6083384 | 23-scf00581 | 23 |
| AX-158234111 | 19 | 66.879 | KV453243.1 | 6083832 | 23-scf00581 | 23 |
| AX-158380927 | 19 | 66.879 | KV453243.1 | 6084203 | 23-scf00581 | 23 |
| AX-158234115 | 19 | 66.879 | KV453243.1 | 6087048 | 23-scf00581 | 23 |
| AX-158234116 | 19 | 66.918 | KV453243.1 | 6087510 | 23-scf00581 | 23 |
| AX-158234118 | 19 | 67.061 | KV453243.1 | 6093883 | 23-scf00581 | 23 |
| AX-158234119 | 19 | 67.061 | KV453243.1 | 6094431 | 23-scf00581 | 23 |
| AX-158234124 | 19 | 67.424 | KV453243.1 | 6101007 | 23-scf00581 | 23 |
| AX-158234125 | 19 | 67.425 | KV453243.1 | 6104515 | 23-scf00581 | 23 |
| AX-158234126 | 19 | 67.425 | KV453243.1 | 6105198 | 23-scf00581 | 23 |
| AX-158234127 | 19 | 67.425 | KV453243.1 | 6105761 | 23-scf00581 | 23 |
| AX-158234128 | 19 | 67.425 | KV453243.1 | 6107896 | 23-scf00581 | 23 |

|              |    |        |            |         |             |    |
|--------------|----|--------|------------|---------|-------------|----|
| AX-158234138 | 19 | 67.425 | KV453243.1 | 6118152 | 23-scf00581 | 23 |
| AX-158234129 | 19 | 67.524 | KV453243.1 | 6108852 | 23-scf00581 | 23 |
| AX-158234131 | 19 | 67.611 | KV453243.1 | 6110630 | 23-scf00581 | 23 |
| AX-158234133 | 19 | 67.611 | KV453243.1 | 6113567 | 23-scf00581 | 23 |
| AX-158234134 | 19 | 67.611 | KV453243.1 | 6114225 | 23-scf00581 | 23 |
| AX-158234137 | 19 | 67.692 | KV453243.1 | 6117225 | 23-scf00581 | 23 |
| AX-158234140 | 19 | 67.795 | KV453243.1 | 6119590 | 23-scf00581 | 23 |
| AX-158234142 | 19 | 67.979 | KV453243.1 | 6122363 | 23-scf00581 | 23 |
| AX-158234144 | 19 | 68.163 | KV453243.1 | 6124233 | 23-scf00581 | 23 |
| AX-157722360 | 19 | 68.163 | KV453243.1 | 6126209 | 23-scf00581 | 23 |
| AX-158234146 | 19 | 68.163 | KV453243.1 | 6127473 | 23-scf00581 | 23 |
| AX-158234147 | 19 | 68.163 | KV453243.1 | 6128674 | 23-scf00581 | 23 |
| AX-158234148 | 19 | 68.163 | KV453243.1 | 6129450 | 23-scf00581 | 23 |
| AX-157859575 | 19 | 68.163 | KV453243.1 | 6129694 | 23-scf00581 | 23 |
| AX-158234150 | 19 | 68.163 | KV453243.1 | 6130446 | 23-scf00581 | 23 |
| AX-158234151 | 19 | 68.163 | KV453243.1 | 6131047 | 23-scf00581 | 23 |
| AX-158234153 | 19 | 68.163 | KV453243.1 | 6132556 | 23-scf00581 | 23 |
| AX-158234175 | 19 | 68.163 | KV453243.1 | 6158692 | 23-scf00581 | 23 |
| AX-158234156 | 19 | 68.165 | KV453243.1 | 6137889 | 23-scf00581 | 23 |
| AX-158234157 | 19 | 68.505 | KV453243.1 | 6140531 | 23-scf00581 | 23 |
| AX-157879958 | 19 | 68.521 | KV453243.1 | 6141242 | 23-scf00581 | 23 |
| AX-158234161 | 19 | 68.536 | KV453243.1 | 6144953 | 23-scf00581 | 23 |
| AX-158234158 | 19 | 68.549 | KV453243.1 | 6143306 | 23-scf00581 | 23 |
| AX-158234166 | 19 | 68.549 | KV453243.1 | 6149385 | 23-scf00581 | 23 |
| AX-158234168 | 19 | 68.549 | KV453243.1 | 6153515 | 23-scf00581 | 23 |
| AX-158234170 | 19 | 68.846 | KV453243.1 | 6154518 | 23-scf00581 | 23 |
| AX-158234172 | 19 | 68.846 | KV453243.1 | 6157025 | 23-scf00581 | 23 |
| AX-158234173 | 19 | 68.846 | KV453243.1 | 6157212 | 23-scf00581 | 23 |
| AX-157867214 | 19 | 68.846 | KV453243.1 | 6158288 | 23-scf00581 | 23 |
| AX-158234177 | 19 | 68.846 | KV453243.1 | 6160878 | 23-scf00581 | 23 |
| AX-158234178 | 19 | 68.846 | KV453243.1 | 6161126 | 23-scf00581 | 23 |
| AX-158234179 | 19 | 68.846 | KV453243.1 | 6161727 | 23-scf00581 | 23 |
| AX-158234180 | 19 | 68.846 | KV453243.1 | 6162002 | 23-scf00581 | 23 |
| AX-158234181 | 19 | 68.846 | KV453243.1 | 6162301 | 23-scf00581 | 23 |
| AX-158234182 | 19 | 68.846 | KV453243.1 | 6163333 | 23-scf00581 | 23 |
| AX-158234183 | 19 | 68.846 | KV453243.1 | 6163777 | 23-scf00581 | 23 |
| AX-158234184 | 19 | 68.846 | KV453243.1 | 6165666 | 23-scf00581 | 23 |
| AX-158234186 | 19 | 68.889 | KV453243.1 | 6169416 | 23-scf00581 | 23 |
| AX-158234205 | 19 | 68.889 | KV453243.1 | 6190561 | 23-scf00581 | 23 |
| AX-158234194 | 19 | 69.12  | KV453243.1 | 6175700 | 23-scf00581 | 23 |
| AX-158234195 | 19 | 69.148 | KV453243.1 | 6175832 | 23-scf00581 | 23 |
| AX-158234197 | 19 | 69.303 | KV453243.1 | 6178075 | 23-scf00581 | 23 |
| AX-157720893 | 19 | 69.667 | KV453243.1 | 6181345 | 23-scf00581 | 23 |
| AX-158380928 | 19 | 69.668 | KV453243.1 | 6183464 | 23-scf00581 | 23 |
| AX-158234200 | 19 | 69.668 | KV453243.1 | 6183535 | 23-scf00581 | 23 |
| AX-158234201 | 19 | 69.668 | KV453243.1 | 6185625 | 23-scf00581 | 23 |
| AX-157718926 | 19 | 69.668 | KV453243.1 | 6186963 | 23-scf00581 | 23 |
| AX-158234202 | 19 | 69.668 | KV453243.1 | 6188093 | 23-scf00581 | 23 |
| AX-158234204 | 19 | 69.668 | KV453243.1 | 6189609 | 23-scf00581 | 23 |
| AX-158234213 | 19 | 69.668 | KV453243.1 | 6202671 | 23-scf00581 | 23 |
| AX-158234208 | 19 | 69.805 | KV453243.1 | 6196318 | 23-scf00581 | 23 |

|              |    |        |            |         |             |    |
|--------------|----|--------|------------|---------|-------------|----|
| AX-158234211 | 19 | 69.868 | KV453243.1 | 6200120 | 23-scf00581 | 23 |
| AX-157721994 | 19 | 69.936 | KV453243.1 | 6200803 | 23-scf00581 | 23 |
| AX-158234215 | 19 | 69.937 | KV453243.1 | 6204696 | 23-scf00581 | 23 |
| AX-158234216 | 19 | 69.937 | KV453243.1 | 6205856 | 23-scf00581 | 23 |
| AX-158234217 | 19 | 69.938 | KV453243.1 | 6208329 | 23-scf00581 | 23 |
| AX-158234152 | 19 | 69.94  | KV453243.1 | 6131773 | 23-scf00581 | 23 |
| AX-158234193 | 19 | 69.94  | KV453243.1 | 6175054 | 23-scf00581 | 23 |
| AX-157879959 | 19 | 69.94  | KV453243.1 | 6192846 | 23-scf00581 | 23 |
| AX-158234206 | 19 | 69.94  | KV453243.1 | 6193168 | 23-scf00581 | 23 |
| AX-158234218 | 19 | 69.94  | KV453243.1 | 6211407 | 23-scf00581 | 23 |
| AX-158234219 | 19 | 69.94  | KV453243.1 | 6212805 | 23-scf00581 | 23 |
| AX-158234220 | 19 | 69.94  | KV453243.1 | 6213205 | 23-scf00581 | 23 |
| AX-158234223 | 19 | 70.055 | KV453243.1 | 6217607 | 23-scf00581 | 23 |
| AX-158234227 | 19 | 70.159 | KV453243.1 | 6221473 | 23-scf00581 | 23 |
| AX-158234230 | 19 | 70.159 | KV453243.1 | 6223816 | 23-scf00581 | 23 |
| AX-158234231 | 19 | 70.159 | KV453243.1 | 6225925 | 23-scf00581 | 23 |
| AX-158234232 | 19 | 70.159 | KV453243.1 | 6226504 | 23-scf00581 | 23 |
| AX-158234234 | 19 | 70.451 | KV453243.1 | 6228490 | 23-scf00581 | 23 |
| AX-158234235 | 19 | 70.451 | KV453243.1 | 6228970 | 23-scf00581 | 23 |
| AX-158234237 | 19 | 70.451 | KV453243.1 | 6230903 | 23-scf00581 | 23 |
| AX-158234238 | 19 | 70.451 | KV453243.1 | 6231596 | 23-scf00581 | 23 |
| AX-158234243 | 19 | 70.451 | KV453243.1 | 6238657 | 23-scf00581 | 23 |
| AX-158234233 | 19 | 70.594 | KV453243.1 | 6227501 | 23-scf00581 | 23 |
| AX-158234239 | 19 | 70.594 | KV453243.1 | 6232087 | 23-scf00581 | 23 |
| AX-158234236 | 19 | 70.596 | KV453243.1 | 6229462 | 23-scf00581 | 23 |
| AX-158234242 | 19 | 70.596 | KV453243.1 | 6237205 | 23-scf00581 | 23 |
| AX-158386851 | 19 | 70.596 | KV453243.1 | 6240088 | 23-scf00581 | 23 |
| AX-158234244 | 19 | 70.6   | KV453243.1 | 6240612 | 23-scf00581 | 23 |
| AX-158234291 | 19 | 72.23  | KV453243.1 | 6299570 | 23-scf00581 | 23 |
| AX-158234287 | 19 | 72.234 | KV453243.1 | 6295594 | 23-scf00581 | 23 |
| AX-157840446 | 19 | 72.234 | KV453243.1 | 6299743 | 23-scf00581 | 23 |
| AX-157840447 | 19 | 72.234 | KV453243.1 | 6301131 | 23-scf00581 | 23 |
| AX-158234294 | 19 | 72.234 | KV453243.1 | 6307082 | 23-scf00581 | 23 |
| AX-158234296 | 19 | 72.234 | KV453243.1 | 6308597 | 23-scf00581 | 23 |
| AX-158234297 | 19 | 72.234 | KV453243.1 | 6309046 | 23-scf00581 | 23 |
| AX-158234289 | 19 | 72.236 | KV453243.1 | 6297030 | 23-scf00581 | 23 |
| AX-158234298 | 19 | 72.236 | KV453243.1 | 6309618 | 23-scf00581 | 23 |
| AX-158234302 | 19 | 72.379 | KV453243.1 | 6315245 | 23-scf00581 | 23 |
| AX-157740915 | 19 | 72.379 | KV453243.1 | 6321015 | 23-scf00581 | 23 |
| AX-157840449 | 19 | 72.379 | KV453243.1 | 6325096 | 23-scf00581 | 23 |
| AX-158234307 | 19 | 72.379 | KV453243.1 | 6330323 | 23-scf00581 | 23 |
| AX-158415276 | 19 | 72.379 | KV453243.1 | 6370676 | 23-scf00581 | 23 |
| AX-158234311 | 19 | 72.671 | KV453243.1 | 6339002 | 23-scf00581 | 23 |
| AX-158234313 | 19 | 72.671 | KV453243.1 | 6340255 | 23-scf00581 | 23 |
| AX-157722787 | 19 | 72.723 | KV453243.1 | 6344531 | 23-scf00581 | 23 |
| AX-158234321 | 19 | 72.723 | KV453243.1 | 6357220 | 23-scf00581 | 23 |
| AX-158234327 | 19 | 72.723 | KV453243.1 | 6362112 | 23-scf00581 | 23 |
| AX-158234343 | 19 | 72.723 | KV453243.1 | 6384502 | 23-scf00581 | 23 |
| AX-158415273 | 19 | 72.78  | KV453243.1 | 6349946 | 23-scf00581 | 23 |
| AX-157721791 | 19 | 72.78  | KV453243.1 | 6350996 | 23-scf00581 | 23 |
| AX-158234315 | 19 | 72.78  | KV453243.1 | 6352711 | 23-scf00581 | 23 |

|              |    |        |             |         |             |    |
|--------------|----|--------|-------------|---------|-------------|----|
| AX-158234318 | 19 | 72.78  | KV453243.1  | 6355343 | 23-scf00581 | 23 |
| AX-158234320 | 19 | 72.78  | KV453243.1  | 6356900 | 23-scf00581 | 23 |
| AX-157725273 | 19 | 72.78  | KV453243.1  | 6358360 | 23-scf00581 | 23 |
| AX-158234323 | 19 | 72.78  | KV453243.1  | 6359624 | 23-scf00581 | 23 |
| AX-158234324 | 19 | 72.78  | KV453243.1  | 6359844 | 23-scf00581 | 23 |
| AX-158234326 | 19 | 72.78  | KV453243.1  | 6361018 | 23-scf00581 | 23 |
| AX-158234330 | 19 | 72.78  | KV453243.1  | 6364780 | 23-scf00581 | 23 |
| AX-157721360 | 19 | 72.78  | KV453243.1  | 6366434 | 23-scf00581 | 23 |
| AX-158234332 | 19 | 72.78  | KV453243.1  | 6366770 | 23-scf00581 | 23 |
| AX-157749743 | 19 | 72.78  | KV453243.1  | 6368715 | 23-scf00581 | 23 |
| AX-158415277 | 19 | 72.78  | KV453243.1  | 6370842 | 23-scf00581 | 23 |
| AX-157774993 | 19 | 72.78  | KV453243.1  | 6371722 | 23-scf00581 | 23 |
| AX-158234337 | 19 | 72.78  | KV453243.1  | 6372342 | 23-scf00581 | 23 |
| AX-157840453 | 19 | 72.78  | KV453243.1  | 6373676 | 23-scf00581 | 23 |
| AX-158234338 | 19 | 72.78  | KV453243.1  | 6376423 | 23-scf00581 | 23 |
| AX-158234341 | 19 | 72.78  | KV453243.1  | 6380659 | 23-scf00581 | 23 |
| AX-158234342 | 19 | 72.78  | KV453243.1  | 6381981 | 23-scf00581 | 23 |
| AX-158410477 | 19 | 72.78  | KV453243.1  | 6394032 | 23-scf00581 | 23 |
| AX-157775729 | 19 | 72.89  | KV453243.1  | 6382517 | 23-scf00581 | 23 |
| AX-157840455 | 19 | 72.89  | KV453243.1  | 6387602 | 23-scf00581 | 23 |
| AX-158234346 | 19 | 72.89  | KV453243.1  | 6390242 | 23-scf00581 | 23 |
| AX-157840456 | 19 | 72.89  | KV453243.1  | 6391926 | 23-scf00581 | 23 |
| AX-158234348 | 19 | 72.89  | KV453243.1  | 6392681 | 23-scf00581 | 23 |
| AX-157840458 | 19 | 72.89  | KV453243.1  | 6403877 | 23-scf00581 | 23 |
| AX-157859576 | 19 | 72.929 | KV453243.1  | 6394457 | 23-scf00581 | 23 |
| AX-158234339 | 19 | 72.999 | KV453243.1  | 6377295 | 23-scf00581 | 23 |
| AX-157754468 | 19 | 72.999 | KV453243.1  | 6397762 | 23-scf00581 | 23 |
| AX-158234350 | 19 | 72.999 | KV453243.1  | 6398235 | 23-scf00581 | 23 |
| AX-157742610 | 19 | 72.999 | KV453243.1  | 6399683 | 23-scf00581 | 23 |
| AX-158234351 | 19 | 72.999 | KV453243.1  | 6402514 | 23-scf00581 | 23 |
| AX-158234352 | 19 | 72.999 | KV453243.1  | 6404018 | 23-scf00581 | 23 |
| AX-158380930 | 19 | 72.999 | KV453243.1  | 6404464 | 23-scf00581 | 23 |
| AX-158234358 | 19 | 72.999 | KV453243.1  | 6411508 | 23-scf00581 | 23 |
| AX-157705929 | 19 | 72.999 | 3ML01031255 | 761     | scf06863_1  | UN |
| AX-157727785 | 19 | 73.099 | KV453243.1  | 6404755 | 23-scf00581 | 23 |
| AX-158234355 | 19 | 73.327 | KV453243.1  | 6408454 | 23-scf00581 | 23 |
| AX-158234356 | 19 | 73.327 | KV453243.1  | 6409390 | 23-scf00581 | 23 |
| AX-158234357 | 19 | 73.327 | KV453243.1  | 6410251 | 23-scf00581 | 23 |
| AX-158234360 | 19 | 73.545 | KV453243.1  | 6412775 | 23-scf00581 | 23 |
| AX-158234365 | 19 | 73.545 | KV453243.1  | 6419900 | 23-scf00581 | 23 |
| AX-158234366 | 19 | 73.545 | KV453243.1  | 6421652 | 23-scf00581 | 23 |
| AX-158234368 | 19 | 73.545 | KV453243.1  | 6423608 | 23-scf00581 | 23 |
| AX-158234370 | 19 | 73.545 | KV453243.1  | 6424132 | 23-scf00581 | 23 |
| AX-157754245 | 19 | 73.668 | KV453243.1  | 6432147 | 23-scf00581 | 23 |
| AX-157756939 | 19 | 73.811 | KV453243.1  | 6424272 | 23-scf00581 | 23 |
| AX-158234374 | 19 | 73.811 | KV453243.1  | 6435378 | 23-scf00581 | 23 |
| AX-157719014 | 19 | 73.91  | KV453243.1  | 6437298 | 23-scf00581 | 23 |
| AX-158234376 | 19 | 74.092 | KV453243.1  | 6440310 | 23-scf00581 | 23 |
| AX-158234377 | 19 | 74.092 | KV453243.1  | 6443930 | 23-scf00581 | 23 |
| AX-158234378 | 19 | 74.092 | KV453243.1  | 6448242 | 23-scf00581 | 23 |
| AX-157770979 | 19 | 74.092 | KV453243.1  | 6450615 | 23-scf00581 | 23 |

|              |    |        |            |         |             |    |
|--------------|----|--------|------------|---------|-------------|----|
| AX-158234379 | 19 | 74.092 | KV453243.1 | 6452041 | 23-scf00581 | 23 |
| AX-158234382 | 19 | 74.092 | KV453243.1 | 6454145 | 23-scf00581 | 23 |
| AX-158234383 | 19 | 74.092 | KV453243.1 | 6454799 | 23-scf00581 | 23 |
| AX-158234384 | 19 | 74.092 | KV453243.1 | 6455394 | 23-scf00581 | 23 |
| AX-157887442 | 19 | 74.118 | KV453243.1 | 6456564 | 23-scf00581 | 23 |
| AX-158234385 | 19 | 74.17  | KV453243.1 | 6456703 | 23-scf00581 | 23 |
| AX-158234386 | 19 | 74.214 | KV453243.1 | 6457300 | 23-scf00581 | 23 |
| AX-158234387 | 19 | 74.335 | KV453243.1 | 6458004 | 23-scf00581 | 23 |
| AX-158234395 | 19 | 74.632 | KV453243.1 | 6472557 | 23-scf00581 | 23 |
| AX-158234396 | 19 | 74.744 | KV453243.1 | 6473815 | 23-scf00581 | 23 |
| AX-158234398 | 19 | 74.744 | KV453243.1 | 6475017 | 23-scf00581 | 23 |
| AX-158234399 | 19 | 74.943 | KV453243.1 | 6477823 | 23-scf00581 | 23 |
| AX-158234405 | 19 | 75.18  | KV453243.1 | 6485124 | 23-scf00581 | 23 |
| AX-158234406 | 19 | 75.191 | KV453243.1 | 6485806 | 23-scf00581 | 23 |
| AX-158234408 | 19 | 75.515 | KV453243.1 | 6489615 | 23-scf00581 | 23 |
| AX-158234409 | 19 | 75.515 | KV453243.1 | 6490656 | 23-scf00581 | 23 |
| AX-158234412 | 19 | 75.515 | KV453243.1 | 6494572 | 23-scf00581 | 23 |
| AX-158234414 | 19 | 75.515 | KV453243.1 | 6497078 | 23-scf00581 | 23 |
| AX-158234415 | 19 | 75.515 | KV453243.1 | 6497441 | 23-scf00581 | 23 |
| AX-158234421 | 19 | 75.515 | KV453243.1 | 6503922 | 23-scf00581 | 23 |
| AX-158234424 | 19 | 75.515 | KV453243.1 | 6507556 | 23-scf00581 | 23 |
| AX-158234425 | 19 | 75.515 | KV453243.1 | 6510365 | 23-scf00581 | 23 |
| AX-157840466 | 19 | 75.515 | KV453243.1 | 6534676 | 23-scf00581 | 23 |
| AX-158234430 | 19 | 75.624 | KV453243.1 | 6515459 | 23-scf00581 | 23 |
| AX-158234410 | 19 | 75.733 | KV453243.1 | 6491549 | 23-scf00581 | 23 |
| AX-158234419 | 19 | 75.733 | KV453243.1 | 6502276 | 23-scf00581 | 23 |
| AX-158234432 | 19 | 75.733 | KV453243.1 | 6517697 | 23-scf00581 | 23 |
| AX-157840461 | 19 | 75.733 | KV453243.1 | 6518235 | 23-scf00581 | 23 |
| AX-158234434 | 19 | 75.733 | KV453243.1 | 6520216 | 23-scf00581 | 23 |
| AX-158234413 | 19 | 75.757 | KV453243.1 | 6495013 | 23-scf00581 | 23 |
| AX-157840462 | 19 | 75.757 | KV453243.1 | 6522092 | 23-scf00581 | 23 |
| AX-157840464 | 19 | 75.779 | KV453243.1 | 6524682 | 23-scf00581 | 23 |
| AX-157746728 | 19 | 75.8   | KV453243.1 | 6527894 | 23-scf00581 | 23 |
| AX-158234436 | 19 | 75.821 | KV453243.1 | 6528076 | 23-scf00581 | 23 |
| AX-158234437 | 19 | 75.843 | KV453243.1 | 6528608 | 23-scf00581 | 23 |
| AX-158234438 | 19 | 75.843 | KV453243.1 | 6528965 | 23-scf00581 | 23 |
| AX-158234440 | 19 | 75.843 | KV453243.1 | 6530966 | 23-scf00581 | 23 |
| AX-158234441 | 19 | 75.843 | KV453243.1 | 6531230 | 23-scf00581 | 23 |
| AX-158234442 | 19 | 75.843 | KV453243.1 | 6532764 | 23-scf00581 | 23 |
| AX-158234443 | 19 | 75.887 | KV453243.1 | 6533254 | 23-scf00581 | 23 |
| AX-157840467 | 19 | 75.952 | KV453243.1 | 6535743 | 23-scf00581 | 23 |
| AX-158234447 | 19 | 75.952 | KV453243.1 | 6539476 | 23-scf00581 | 23 |
| AX-158234451 | 19 | 75.952 | KV453243.1 | 6543215 | 23-scf00581 | 23 |
| AX-158234452 | 19 | 75.952 | KV453243.1 | 6543654 | 23-scf00581 | 23 |
| AX-158234439 | 19 | 76.053 | KV453243.1 | 6530632 | 23-scf00581 | 23 |
| AX-158234449 | 19 | 76.053 | KV453243.1 | 6541952 | 23-scf00581 | 23 |
| AX-157697574 | 19 | 76.053 | KV453243.1 | 6545076 | 23-scf00581 | 23 |
| AX-157840470 | 19 | 76.053 | KV453243.1 | 6560428 | 23-scf00581 | 23 |
| AX-158234454 | 19 | 76.14  | KV453243.1 | 6545976 | 23-scf00581 | 23 |
| AX-157742451 | 19 | 76.215 | KV453243.1 | 6547763 | 23-scf00581 | 23 |
| AX-157693909 | 19 | 76.215 | KV453243.1 | 6548404 | 23-scf00581 | 23 |



|              |    |        |            |         |             |    |
|--------------|----|--------|------------|---------|-------------|----|
| AX-157879962 | 19 | 76.215 | KV453243.1 | 6549711 | 23-scf00581 | 23 |
| AX-158234457 | 19 | 76.215 | KV453243.1 | 6555747 | 23-scf00581 | 23 |
| AX-158234458 | 19 | 76.215 | KV453243.1 | 6560233 | 23-scf00581 | 23 |
| AX-158234459 | 19 | 76.215 | KV453243.1 | 6560886 | 23-scf00581 | 23 |
| AX-157840474 | 19 | 76.215 | KV453243.1 | 6578787 | 23-scf00581 | 23 |
| AX-157713560 | 19 | 76.247 | KV453243.1 | 6567810 | 23-scf00581 | 23 |
| AX-157840473 | 19 | 76.321 | KV453243.1 | 6568726 | 23-scf00581 | 23 |
| AX-158234460 | 19 | 76.385 | KV453243.1 | 6570938 | 23-scf00581 | 23 |
| AX-158234462 | 19 | 76.498 | KV453243.1 | 6573381 | 23-scf00581 | 23 |
| AX-158234463 | 19 | 76.499 | KV453243.1 | 6574349 | 23-scf00581 | 23 |
| AX-158234464 | 19 | 76.499 | KV453243.1 | 6574717 | 23-scf00581 | 23 |
| AX-158234465 | 19 | 76.499 | KV453243.1 | 6575879 | 23-scf00581 | 23 |
| AX-158234466 | 19 | 76.499 | KV453243.1 | 6577357 | 23-scf00581 | 23 |
| AX-158234468 | 19 | 76.592 | KV453243.1 | 6584663 | 23-scf00581 | 23 |
| AX-157754687 | 19 | 76.827 | KV453243.1 | 6572488 | 23-scf00581 | 23 |
| AX-158234469 | 19 | 76.827 | KV453243.1 | 6585392 | 23-scf00581 | 23 |
| AX-158234470 | 19 | 76.827 | KV453243.1 | 6590100 | 23-scf00581 | 23 |
| AX-157840477 | 19 | 76.827 | KV453243.1 | 6591321 | 23-scf00581 | 23 |
| AX-157872514 | 19 | 76.827 | KV453243.1 | 6593623 | 23-scf00581 | 23 |
| AX-158234472 | 19 | 76.827 | KV453243.1 | 6594605 | 23-scf00581 | 23 |
| AX-158234474 | 19 | 76.827 | KV453243.1 | 6595749 | 23-scf00581 | 23 |
| AX-157747273 | 19 | 76.827 | KV453243.1 | 6599919 | 23-scf00581 | 23 |
| AX-157743893 | 19 | 76.827 | KV453243.1 | 6604831 | 23-scf00581 | 23 |
| AX-158234481 | 19 | 76.827 | KV453243.1 | 6605665 | 23-scf00581 | 23 |
| AX-158234485 | 19 | 76.827 | KV453243.1 | 6611559 | 23-scf00581 | 23 |
| AX-158234488 | 19 | 76.827 | KV453243.1 | 6617188 | 23-scf00581 | 23 |
| AX-158234489 | 19 | 76.827 | KV453243.1 | 6619438 | 23-scf00581 | 23 |
| AX-158234490 | 19 | 76.827 | KV453243.1 | 6619740 | 23-scf00581 | 23 |
| AX-158234493 | 19 | 76.827 | KV453243.1 | 6623399 | 23-scf00581 | 23 |
| AX-157840486 | 19 | 76.827 | KV453243.1 | 6632874 | 23-scf00581 | 23 |
| AX-157840487 | 19 | 76.827 | KV453243.1 | 6634014 | 23-scf00581 | 23 |
| AX-157840488 | 19 | 76.827 | KV453243.1 | 6637010 | 23-scf00581 | 23 |
| AX-157713954 | 19 | 76.827 | KV453243.1 | 6638088 | 23-scf00581 | 23 |
| AX-158234499 | 19 | 76.827 | KV453243.1 | 6638526 | 23-scf00581 | 23 |
| AX-158234500 | 19 | 76.827 | KV453243.1 | 6639782 | 23-scf00581 | 23 |
| AX-158234501 | 19 | 76.827 | KV453243.1 | 6640436 | 23-scf00581 | 23 |
| AX-158234502 | 19 | 76.827 | KV453243.1 | 6642242 | 23-scf00581 | 23 |
| AX-157738284 | 19 | 76.827 | KV453243.1 | 6642803 | 23-scf00581 | 23 |
| AX-158234505 | 19 | 76.827 | KV453243.1 | 6645500 | 23-scf00581 | 23 |
| AX-158234506 | 19 | 76.827 | KV453243.1 | 6645945 | 23-scf00581 | 23 |
| AX-158234507 | 19 | 76.827 | KV453243.1 | 6646719 | 23-scf00581 | 23 |
| AX-158234508 | 19 | 76.827 | KV453243.1 | 6648036 | 23-scf00581 | 23 |
| AX-157720579 | 19 | 76.827 | KV453243.1 | 6651595 | 23-scf00581 | 23 |
| AX-158415284 | 19 | 76.827 | KV453243.1 | 6653199 | 23-scf00581 | 23 |
| AX-158234512 | 19 | 76.827 | KV453243.1 | 6653957 | 23-scf00581 | 23 |
| AX-157751343 | 19 | 76.827 | KV453243.1 | 6656450 | 23-scf00581 | 23 |
| AX-157840489 | 19 | 76.827 | KV453243.1 | 6656537 | 23-scf00581 | 23 |
| AX-158234515 | 19 | 76.827 | KV453243.1 | 6658333 | 23-scf00581 | 23 |
| AX-157840490 | 19 | 76.827 | KV453243.1 | 6669781 | 23-scf00581 | 23 |
| AX-158234528 | 19 | 76.827 | KV453243.1 | 6679850 | 23-scf00581 | 23 |
| AX-158234538 | 19 | 76.827 | KV453243.1 | 6686604 | 23-scf00581 | 23 |

|              |    |        |            |         |             |    |
|--------------|----|--------|------------|---------|-------------|----|
| AX-158234540 | 19 | 76.827 | KV453243.1 | 6688514 | 23-scf00581 | 23 |
| AX-158234545 | 19 | 76.827 | KV453243.1 | 6694721 | 23-scf00581 | 23 |
| AX-158234546 | 19 | 76.827 | KV453243.1 | 6695206 | 23-scf00581 | 23 |
| AX-157711166 | 19 | 76.827 | KV453243.1 | 6697316 | 23-scf00581 | 23 |
| AX-158234523 | 19 | 76.861 | KV453243.1 | 6669857 | 23-scf00581 | 23 |
| AX-158234525 | 19 | 76.89  | KV453243.1 | 6673479 | 23-scf00581 | 23 |
| AX-158234527 | 19 | 76.917 | KV453243.1 | 6675979 | 23-scf00581 | 23 |
| AX-158234517 | 19 | 76.936 | KV453243.1 | 6663344 | 23-scf00581 | 23 |
| AX-158234519 | 19 | 76.936 | KV453243.1 | 6665458 | 23-scf00581 | 23 |
| AX-158394177 | 19 | 76.936 | KV453243.1 | 6678975 | 23-scf00581 | 23 |
| AX-158234531 | 19 | 76.936 | KV453243.1 | 6682249 | 23-scf00581 | 23 |
| AX-158234534 | 19 | 76.936 | KV453243.1 | 6683714 | 23-scf00581 | 23 |
| AX-158234535 | 19 | 76.936 | KV453243.1 | 6684240 | 23-scf00581 | 23 |
| AX-158234536 | 19 | 76.936 | KV453243.1 | 6684643 | 23-scf00581 | 23 |
| AX-158234539 | 19 | 76.936 | KV453243.1 | 6687275 | 23-scf00581 | 23 |
| AX-158415287 | 19 | 76.936 | KV453243.1 | 6689196 | 23-scf00581 | 23 |
| AX-158415288 | 19 | 76.936 | KV453243.1 | 6689844 | 23-scf00581 | 23 |
| AX-158234530 | 19 | 76.993 | KV453243.1 | 6681817 | 23-scf00581 | 23 |
| AX-158234542 | 19 | 76.993 | KV453243.1 | 6693390 | 23-scf00581 | 23 |
| AX-157863782 | 19 | 77.045 | KV453243.1 | 6662554 | 23-scf00581 | 23 |
| AX-158234526 | 19 | 77.045 | KV453243.1 | 6675575 | 23-scf00581 | 23 |
| AX-157840492 | 19 | 77.045 | KV453243.1 | 6695949 | 23-scf00581 | 23 |
| AX-158234547 | 19 | 77.045 | KV453243.1 | 6696355 | 23-scf00581 | 23 |
| AX-157745436 | 19 | 77.045 | KV453243.1 | 6696404 | 23-scf00581 | 23 |
| AX-158234548 | 19 | 77.078 | KV453243.1 | 6697905 | 23-scf00581 | 23 |
| AX-158234549 | 19 | 77.107 | KV453243.1 | 6698151 | 23-scf00581 | 23 |
| AX-158234551 | 19 | 77.154 | KV453243.1 | 6700890 | 23-scf00581 | 23 |
| AX-157840493 | 19 | 77.154 | KV453243.1 | 6701423 | 23-scf00581 | 23 |
| AX-158234552 | 19 | 77.154 | KV453243.1 | 6703514 | 23-scf00581 | 23 |
| AX-158234555 | 19 | 77.154 | KV453243.1 | 6706206 | 23-scf00581 | 23 |
| AX-158234556 | 19 | 77.154 | KV453243.1 | 6706671 | 23-scf00581 | 23 |
| AX-158234557 | 19 | 77.154 | KV453243.1 | 6707429 | 23-scf00581 | 23 |
| AX-158234558 | 19 | 77.154 | KV453243.1 | 6708685 | 23-scf00581 | 23 |
| AX-158234560 | 19 | 77.156 | KV453243.1 | 6710938 | 23-scf00581 | 23 |
| AX-157742329 | 19 | 77.161 | KV453243.1 | 6714167 | 23-scf00581 | 23 |
| AX-157872515 | 19 | 77.167 | KV453243.1 | 6714460 | 23-scf00581 | 23 |
| AX-158234563 | 19 | 77.169 | KV453243.1 | 6720791 | 23-scf00581 | 23 |
| AX-158234564 | 19 | 77.169 | KV453243.1 | 6721312 | 23-scf00581 | 23 |
| AX-158234565 | 19 | 77.171 | KV453243.1 | 6721684 | 23-scf00581 | 23 |
| AX-158234566 | 19 | 77.175 | KV453243.1 | 6722546 | 23-scf00581 | 23 |
| AX-158234568 | 19 | 77.282 | KV453243.1 | 6724403 | 23-scf00581 | 23 |
| AX-157721020 | 19 | 77.282 | KV453243.1 | 6725814 | 23-scf00581 | 23 |
| AX-158234569 | 19 | 77.282 | KV453243.1 | 6726631 | 23-scf00581 | 23 |
| AX-158234578 | 19 | 77.681 | KV453243.1 | 6734333 | 23-scf00581 | 23 |
| AX-158234581 | 19 | 77.681 | KV453243.1 | 6737815 | 23-scf00581 | 23 |
| AX-158234583 | 19 | 77.681 | KV453243.1 | 6744592 | 23-scf00581 | 23 |
| AX-158234575 | 19 | 77.801 | KV453243.1 | 6731926 | 23-scf00581 | 23 |
| AX-157720139 | 19 | 77.801 | KV453243.1 | 6739517 | 23-scf00581 | 23 |
| AX-157840496 | 19 | 77.805 | KV453243.1 | 6746027 | 23-scf00581 | 23 |
| AX-158234584 | 19 | 77.81  | KV453243.1 | 6746268 | 23-scf00581 | 23 |
| AX-157867219 | 19 | 77.81  | KV453243.1 | 6748845 | 23-scf00581 | 23 |

|              |    |        |            |         |             |    |
|--------------|----|--------|------------|---------|-------------|----|
| AX-158234586 | 19 | 77.81  | KV453243.1 | 6750596 | 23-scf00581 | 23 |
| AX-158234590 | 19 | 77.81  | KV453243.1 | 6752415 | 23-scf00581 | 23 |
| AX-158234592 | 19 | 77.81  | KV453243.1 | 6756186 | 23-scf00581 | 23 |
| AX-158234594 | 19 | 77.81  | KV453243.1 | 6757715 | 23-scf00581 | 23 |
| AX-158234595 | 19 | 77.81  | KV453243.1 | 6759356 | 23-scf00581 | 23 |
| AX-158234597 | 19 | 77.81  | KV453243.1 | 6762179 | 23-scf00581 | 23 |
| AX-158234574 | 19 | 78.138 | KV453243.1 | 6731090 | 23-scf00581 | 23 |
| AX-158234588 | 19 | 78.138 | KV453243.1 | 6751887 | 23-scf00581 | 23 |
| AX-158234593 | 19 | 78.138 | KV453243.1 | 6756583 | 23-scf00581 | 23 |
| AX-157719200 | 19 | 78.138 | KV453243.1 | 6757316 | 23-scf00581 | 23 |
| AX-158234598 | 19 | 78.138 | KV453243.1 | 6765861 | 23-scf00581 | 23 |
| AX-157698024 | 19 | 78.138 | KV453243.1 | 6767785 | 23-scf00581 | 23 |
| AX-158234599 | 19 | 78.138 | KV453243.1 | 6768281 | 23-scf00581 | 23 |
| AX-158234600 | 19 | 78.138 | KV453243.1 | 6769693 | 23-scf00581 | 23 |
| AX-157840497 | 19 | 78.138 | KV453243.1 | 6773807 | 23-scf00581 | 23 |
| AX-158234602 | 19 | 78.138 | KV453243.1 | 6773985 | 23-scf00581 | 23 |
| AX-158234603 | 19 | 78.138 | KV453243.1 | 6774684 | 23-scf00581 | 23 |
| AX-157713664 | 19 | 78.138 | KV453243.1 | 6777145 | 23-scf00581 | 23 |
| AX-158234608 | 19 | 78.463 | KV453243.1 | 6785582 | 23-scf00581 | 23 |
| AX-158234612 | 19 | 78.468 | KV453243.1 | 6789166 | 23-scf00581 | 23 |
| AX-158234613 | 19 | 78.468 | KV453243.1 | 6789591 | 23-scf00581 | 23 |
| AX-158418827 | 19 | 78.468 | KV453243.1 | 6791240 | 23-scf00581 | 23 |
| AX-158234615 | 19 | 78.682 | KV453243.1 | 6793152 | 23-scf00581 | 23 |
| AX-157840500 | 19 | 78.684 | KV453243.1 | 6801602 | 23-scf00581 | 23 |
| AX-158234618 | 19 | 78.693 | KV453243.1 | 6802412 | 23-scf00581 | 23 |
| AX-158234622 | 19 | 78.702 | KV453243.1 | 6808984 | 23-scf00581 | 23 |
| AX-158234607 | 19 | 79.182 | KV453243.1 | 6784707 | 23-scf00581 | 23 |
| AX-158234623 | 19 | 79.182 | KV453243.1 | 6809335 | 23-scf00581 | 23 |
| AX-158234625 | 19 | 79.183 | KV453243.1 | 6814868 | 23-scf00581 | 23 |
| AX-158234627 | 19 | 79.183 | KV453243.1 | 6816288 | 23-scf00581 | 23 |
| AX-157720286 | 19 | 79.183 | KV453243.1 | 6818470 | 23-scf00581 | 23 |
| AX-158380934 | 19 | 79.183 | KV453243.1 | 6819451 | 23-scf00581 | 23 |
| AX-158234631 | 19 | 79.558 | KV453243.1 | 6827574 | 23-scf00581 | 23 |
| AX-158234633 | 19 | 79.558 | KV453243.1 | 6829031 | 23-scf00581 | 23 |
| AX-157840503 | 19 | 79.558 | KV453243.1 | 6829475 | 23-scf00581 | 23 |
| AX-157840504 | 19 | 79.558 | KV453243.1 | 6829687 | 23-scf00581 | 23 |
| AX-158234634 | 19 | 79.558 | KV453243.1 | 6831100 | 23-scf00581 | 23 |
| AX-157742155 | 19 | 79.558 | KV453243.1 | 6831167 | 23-scf00581 | 23 |
| AX-158234635 | 19 | 79.558 | KV453243.1 | 6831483 | 23-scf00581 | 23 |
| AX-158234636 | 19 | 79.558 | KV453243.1 | 6832353 | 23-scf00581 | 23 |
| AX-158423299 | 19 | 79.558 | KV453243.1 | 6832559 | 23-scf00581 | 23 |
| AX-158234638 | 19 | 79.558 | KV453243.1 | 6835301 | 23-scf00581 | 23 |
| AX-158234641 | 19 | 79.558 | KV453243.1 | 6838271 | 23-scf00581 | 23 |
| AX-158234642 | 19 | 79.558 | KV453243.1 | 6838872 | 23-scf00581 | 23 |
| AX-157840505 | 19 | 79.558 | KV453243.1 | 6840977 | 23-scf00581 | 23 |
| AX-157758514 | 19 | 79.558 | KV453243.1 | 6846755 | 23-scf00581 | 23 |
| AX-158234645 | 19 | 79.558 | KV453243.1 | 6850540 | 23-scf00581 | 23 |
| AX-158234646 | 19 | 79.558 | KV453243.1 | 6851052 | 23-scf00581 | 23 |
| AX-158234648 | 19 | 80.103 | KV453243.1 | 6858030 | 23-scf00581 | 23 |
| AX-158234651 | 19 | 80.104 | KV453243.1 | 6859860 | 23-scf00581 | 23 |
| AX-158234653 | 19 | 80.104 | KV453243.1 | 6863516 | 23-scf00581 | 23 |

|              |    |        |            |         |             |    |
|--------------|----|--------|------------|---------|-------------|----|
| AX-158234654 | 19 | 80.104 | KV453243.1 | 6864268 | 23-scf00581 | 23 |
| AX-158234656 | 19 | 80.104 | KV453243.1 | 6868262 | 23-scf00581 | 23 |
| AX-158234659 | 19 | 80.431 | KV453243.1 | 6872099 | 23-scf00581 | 23 |
| AX-157744648 | 19 | 80.431 | KV453243.1 | 6872771 | 23-scf00581 | 23 |
| AX-157741918 | 19 | 80.431 | KV453243.1 | 6873673 | 23-scf00581 | 23 |
| AX-158234661 | 19 | 80.431 | KV453243.1 | 6875879 | 23-scf00581 | 23 |
| AX-158234663 | 19 | 80.431 | KV453243.1 | 6878718 | 23-scf00581 | 23 |
| AX-158234664 | 19 | 80.431 | KV453243.1 | 6879465 | 23-scf00581 | 23 |
| AX-157840510 | 19 | 80.433 | KV453243.1 | 6880294 | 23-scf00581 | 23 |
| AX-158234665 | 19 | 80.696 | KV453243.1 | 6880785 | 23-scf00581 | 23 |
| AX-158234669 | 19 | 80.8   | KV453243.1 | 6888649 | 23-scf00581 | 23 |
| AX-158234670 | 19 | 80.844 | KV453243.1 | 6890178 | 23-scf00581 | 23 |
| AX-158234668 | 19 | 80.888 | KV453243.1 | 6887066 | 23-scf00581 | 23 |
| AX-158234672 | 19 | 80.888 | KV453243.1 | 6892517 | 23-scf00581 | 23 |
| AX-158234681 | 19 | 80.888 | KV453243.1 | 6901274 | 23-scf00581 | 23 |
| AX-158234683 | 19 | 80.888 | KV453243.1 | 6903810 | 23-scf00581 | 23 |
| AX-158234698 | 19 | 80.888 | KV453243.1 | 6919322 | 23-scf00581 | 23 |
| AX-158234676 | 19 | 80.978 | KV453243.1 | 6895439 | 23-scf00581 | 23 |
| AX-158234680 | 19 | 80.978 | KV453243.1 | 6900821 | 23-scf00581 | 23 |
| AX-158234682 | 19 | 80.978 | KV453243.1 | 6903006 | 23-scf00581 | 23 |
| AX-158234684 | 19 | 81.054 | KV453243.1 | 6904393 | 23-scf00581 | 23 |
| AX-158234688 | 19 | 81.124 | KV453243.1 | 6908545 | 23-scf00581 | 23 |
| AX-158234689 | 19 | 81.149 | KV453243.1 | 6908942 | 23-scf00581 | 23 |
| AX-158234691 | 19 | 81.269 | KV453243.1 | 6913027 | 23-scf00581 | 23 |
| AX-158234692 | 19 | 81.269 | KV453243.1 | 6913325 | 23-scf00581 | 23 |
| AX-157840512 | 19 | 81.269 | KV453243.1 | 6917148 | 23-scf00581 | 23 |
| AX-157754328 | 19 | 81.269 | KV453243.1 | 6922518 | 23-scf00581 | 23 |
| AX-158234666 | 19 | 81.415 | KV453243.1 | 6881168 | 23-scf00581 | 23 |
| AX-158234675 | 19 | 81.415 | KV453243.1 | 6894496 | 23-scf00581 | 23 |
| AX-157719192 | 19 | 81.415 | KV453243.1 | 6923674 | 23-scf00581 | 23 |
| AX-158234704 | 19 | 81.415 | KV453243.1 | 6925993 | 23-scf00581 | 23 |
| AX-158234705 | 19 | 81.415 | KV453243.1 | 6926398 | 23-scf00581 | 23 |
| AX-157867220 | 19 | 81.415 | KV453243.1 | 6927492 | 23-scf00581 | 23 |
| AX-158234708 | 19 | 81.415 | KV453243.1 | 6929516 | 23-scf00581 | 23 |
| AX-157717731 | 19 | 81.415 | KV453243.1 | 6932610 | 23-scf00581 | 23 |
| AX-158234709 | 19 | 81.415 | KV453243.1 | 6934746 | 23-scf00581 | 23 |
| AX-157710504 | 19 | 81.415 | KV453243.1 | 6940527 | 23-scf00581 | 23 |
| AX-158234712 | 19 | 81.415 | KV453243.1 | 6940659 | 23-scf00581 | 23 |
| AX-158234713 | 19 | 81.415 | KV453243.1 | 6941080 | 23-scf00581 | 23 |
| AX-157772445 | 19 | 81.415 | KV453243.1 | 6943412 | 23-scf00581 | 23 |
| AX-157840514 | 19 | 81.415 | KV453243.1 | 6944375 | 23-scf00581 | 23 |
| AX-157748804 | 19 | 81.415 | KV453243.1 | 6944906 | 23-scf00581 | 23 |
| AX-158234715 | 19 | 81.415 | KV453243.1 | 6945295 | 23-scf00581 | 23 |
| AX-158234721 | 19 | 81.712 | KV453243.1 | 6952852 | 23-scf00581 | 23 |
| AX-158234722 | 19 | 81.773 | KV453243.1 | 6955728 | 23-scf00581 | 23 |
| AX-158234725 | 19 | 81.823 | KV453243.1 | 6959818 | 23-scf00581 | 23 |
| AX-158234749 | 19 | 81.852 | KV453243.1 | 6994465 | 23-scf00581 | 23 |
| AX-158234752 | 19 | 81.853 | KV453243.1 | 6997328 | 23-scf00581 | 23 |
| AX-158234754 | 19 | 81.853 | KV453243.1 | 6998356 | 23-scf00581 | 23 |
| AX-158234756 | 19 | 82.071 | KV453243.1 | 6999940 | 23-scf00581 | 23 |
| AX-158234769 | 19 | 82.071 | KV453243.1 | 7013883 | 23-scf00581 | 23 |

|              |    |        |            |         |             |    |
|--------------|----|--------|------------|---------|-------------|----|
| AX-158234757 | 19 | 82.125 | KV453243.1 | 7000441 | 23-scf00581 | 23 |
| AX-158234760 | 19 | 82.18  | KV453243.1 | 7001743 | 23-scf00581 | 23 |
| AX-158234761 | 19 | 82.18  | KV453243.1 | 7002355 | 23-scf00581 | 23 |
| AX-158234764 | 19 | 82.18  | KV453243.1 | 7005315 | 23-scf00581 | 23 |
| AX-158234768 | 19 | 82.205 | KV453243.1 | 7013093 | 23-scf00581 | 23 |
| AX-158234770 | 19 | 82.231 | KV453243.1 | 7015198 | 23-scf00581 | 23 |
| AX-158234771 | 19 | 82.252 | KV453243.1 | 7018653 | 23-scf00581 | 23 |
| AX-158234772 | 19 | 82.29  | KV453243.1 | 7019325 | 23-scf00581 | 23 |
| AX-158234773 | 19 | 82.29  | KV453243.1 | 7019708 | 23-scf00581 | 23 |
| AX-158234776 | 19 | 82.29  | KV453243.1 | 7021537 | 23-scf00581 | 23 |
| AX-157774296 | 19 | 82.29  | KV453243.1 | 7025470 | 23-scf00581 | 23 |
| AX-158234783 | 19 | 82.413 | KV453243.1 | 7030458 | 23-scf00581 | 23 |
| AX-158234784 | 19 | 82.413 | KV453243.1 | 7032314 | 23-scf00581 | 23 |
| AX-158234785 | 19 | 82.413 | KV453243.1 | 7033007 | 23-scf00581 | 23 |
| AX-158234786 | 19 | 82.536 | KV453243.1 | 7033576 | 23-scf00581 | 23 |
| AX-157748490 | 19 | 82.702 | KV453243.1 | 7058140 | 23-scf00581 | 23 |
| AX-158234795 | 19 | 83.022 | KV453243.1 | 7060374 | 23-scf00581 | 23 |
| AX-158234797 | 19 | 83.029 | KV453243.1 | 7062542 | 23-scf00581 | 23 |
| AX-157840520 | 19 | 83.029 | KV453243.1 | 7063113 | 23-scf00581 | 23 |
| AX-158234799 | 19 | 83.029 | KV453243.1 | 7063388 | 23-scf00581 | 23 |
| AX-158234800 | 19 | 83.275 | KV453243.1 | 7065012 | 23-scf00581 | 23 |
| AX-157840521 | 19 | 83.275 | KV453243.1 | 7065532 | 23-scf00581 | 23 |
| AX-158234802 | 19 | 83.275 | KV453243.1 | 7066346 | 23-scf00581 | 23 |
| AX-158234809 | 19 | 83.275 | KV453243.1 | 7072251 | 23-scf00581 | 23 |
| AX-158234803 | 19 | 83.276 | KV453243.1 | 7066722 | 23-scf00581 | 23 |
| AX-158234837 | 19 | 83.276 | KV453243.1 | 7123150 | 23-scf00581 | 23 |
| AX-158234810 | 19 | 83.277 | KV453243.1 | 7072757 | 23-scf00581 | 23 |
| AX-157724086 | 19 | 83.472 | KV453243.1 | 7077493 | 23-scf00581 | 23 |
| AX-157840523 | 19 | 83.521 | KV453243.1 | 7079662 | 23-scf00581 | 23 |
| AX-158234846 | 19 | 83.521 | KV453243.1 | 7130197 | 23-scf00581 | 23 |
| AX-158234816 | 19 | 83.731 | KV453243.1 | 7086407 | 23-scf00581 | 23 |
| AX-158234818 | 19 | 83.731 | KV453243.1 | 7089345 | 23-scf00581 | 23 |
| AX-158234820 | 19 | 83.834 | KV453243.1 | 7091052 | 23-scf00581 | 23 |
| AX-158234830 | 19 | 83.834 | KV453243.1 | 7115225 | 23-scf00581 | 23 |
| AX-157721685 | 19 | 83.932 | KV453243.1 | 7094001 | 23-scf00581 | 23 |
| AX-157735682 | 19 | 83.932 | KV453243.1 | 7095957 | 23-scf00581 | 23 |
| AX-157744163 | 19 | 83.932 | KV453243.1 | 7098946 | 23-scf00581 | 23 |
| AX-157715943 | 19 | 83.932 | KV453243.1 | 7100808 | 23-scf00581 | 23 |
| AX-158234823 | 19 | 83.932 | KV453243.1 | 7101273 | 23-scf00581 | 23 |
| AX-158234827 | 19 | 83.932 | KV453243.1 | 7105198 | 23-scf00581 | 23 |
| AX-158234828 | 19 | 83.932 | KV453243.1 | 7111953 | 23-scf00581 | 23 |
| AX-158234831 | 19 | 83.932 | KV453243.1 | 7115842 | 23-scf00581 | 23 |
| AX-158234834 | 19 | 83.932 | KV453243.1 | 7118992 | 23-scf00581 | 23 |
| AX-158415295 | 19 | 83.932 | KV453243.1 | 7120856 | 23-scf00581 | 23 |
| AX-157753435 | 19 | 83.935 | KV453243.1 | 7103322 | 23-scf00581 | 23 |
| AX-158234825 | 19 | 83.935 | KV453243.1 | 7103567 | 23-scf00581 | 23 |
| AX-158234836 | 19 | 83.935 | KV453243.1 | 7122306 | 23-scf00581 | 23 |
| AX-158234843 | 19 | 84.342 | KV453243.1 | 7127934 | 23-scf00581 | 23 |
| AX-158234845 | 19 | 84.412 | KV453243.1 | 7129182 | 23-scf00581 | 23 |
| AX-158234842 | 19 | 84.478 | KV453243.1 | 7127195 | 23-scf00581 | 23 |
| AX-158234852 | 19 | 84.478 | KV453243.1 | 7136963 | 23-scf00581 | 23 |

|              |    |        |            |         |             |    |
|--------------|----|--------|------------|---------|-------------|----|
| AX-158234853 | 19 | 84.478 | KV453243.1 | 7141222 | 23-scf00581 | 23 |
| AX-157840527 | 19 | 84.478 | KV453243.1 | 7143802 | 23-scf00581 | 23 |
| AX-158234859 | 19 | 84.697 | KV453243.1 | 7146972 | 23-scf00581 | 23 |
| AX-158234860 | 19 | 84.697 | KV453243.1 | 7147890 | 23-scf00581 | 23 |
| AX-157840528 | 19 | 84.915 | KV453243.1 | 7149721 | 23-scf00581 | 23 |
| AX-158234863 | 19 | 84.915 | KV453243.1 | 7149829 | 23-scf00581 | 23 |
| AX-157753280 | 19 | 84.915 | KV453243.1 | 7151194 | 23-scf00581 | 23 |
| AX-158234865 | 19 | 84.915 | KV453243.1 | 7151439 | 23-scf00581 | 23 |
| AX-157772718 | 19 | 84.915 | KV453243.1 | 7154844 | 23-scf00581 | 23 |
| AX-158234871 | 19 | 84.915 | KV453243.1 | 7160106 | 23-scf00581 | 23 |
| AX-158234872 | 19 | 84.915 | KV453243.1 | 7160917 | 23-scf00581 | 23 |
| AX-157840530 | 19 | 84.915 | KV453243.1 | 7164744 | 23-scf00581 | 23 |
| AX-157840531 | 19 | 84.915 | KV453243.1 | 7166285 | 23-scf00581 | 23 |
| AX-157840532 | 19 | 84.915 | KV453243.1 | 7166851 | 23-scf00581 | 23 |
| AX-157744737 | 19 | 84.915 | KV453243.1 | 7168448 | 23-scf00581 | 23 |
| AX-157741130 | 19 | 84.915 | KV453243.1 | 7169259 | 23-scf00581 | 23 |
| AX-158234874 | 19 | 84.915 | KV453243.1 | 7173938 | 23-scf00581 | 23 |
| AX-158234876 | 19 | 84.943 | KV453243.1 | 7175325 | 23-scf00581 | 23 |
| AX-158234881 | 19 | 84.986 | KV453243.1 | 7187345 | 23-scf00581 | 23 |
| AX-158234909 | 19 | 84.986 | KV453243.1 | 7233147 | 23-scf00581 | 23 |
| AX-158234862 | 19 | 85.025 | KV453243.1 | 7149137 | 23-scf00581 | 23 |
| AX-157713033 | 19 | 85.025 | KV453243.1 | 7191507 | 23-scf00581 | 23 |
| AX-158234884 | 19 | 85.025 | KV453243.1 | 7192037 | 23-scf00581 | 23 |
| AX-158234888 | 19 | 85.025 | KV453243.1 | 7194553 | 23-scf00581 | 23 |
| AX-158234882 | 19 | 85.053 | KV453243.1 | 7189436 | 23-scf00581 | 23 |
| AX-157840537 | 19 | 85.053 | KV453243.1 | 7204081 | 23-scf00581 | 23 |
| AX-158234896 | 19 | 85.053 | KV453243.1 | 7204152 | 23-scf00581 | 23 |
| AX-158234913 | 19 | 85.053 | KV453243.1 | 7248567 | 23-scf00581 | 23 |
| AX-158234963 | 19 | 85.053 | KV453243.1 | 7327484 | 23-scf00581 | 23 |
| AX-158234897 | 19 | 85.134 | KV453243.1 | 7205688 | 23-scf00581 | 23 |
| AX-158234900 | 19 | 85.134 | KV453243.1 | 7214260 | 23-scf00581 | 23 |
| AX-157774137 | 19 | 85.134 | KV453243.1 | 7230979 | 23-scf00581 | 23 |
| AX-158234910 | 19 | 85.134 | KV453243.1 | 7242313 | 23-scf00581 | 23 |
| AX-157755129 | 19 | 85.134 | KV453243.1 | 7246004 | 23-scf00581 | 23 |
| AX-158234912 | 19 | 85.134 | KV453243.1 | 7247758 | 23-scf00581 | 23 |
| AX-158380936 | 19 | 85.134 | KV453243.1 | 7248853 | 23-scf00581 | 23 |
| AX-158234914 | 19 | 85.134 | KV453243.1 | 7249211 | 23-scf00581 | 23 |
| AX-158234915 | 19 | 85.134 | KV453243.1 | 7249992 | 23-scf00581 | 23 |
| AX-157724367 | 19 | 85.134 | KV453243.1 | 7253987 | 23-scf00581 | 23 |
| AX-158234918 | 19 | 85.134 | KV453243.1 | 7256103 | 23-scf00581 | 23 |
| AX-158234920 | 19 | 85.134 | KV453243.1 | 7257378 | 23-scf00581 | 23 |
| AX-158234965 | 19 | 85.134 | KV453243.1 | 7331749 | 23-scf00581 | 23 |
| AX-158234984 | 19 | 85.134 | KV453243.1 | 7362550 | 23-scf00581 | 23 |
| AX-158234923 | 19 | 85.164 | KV453243.1 | 7263902 | 23-scf00581 | 23 |
| AX-158410495 | 19 | 85.204 | KV453243.1 | 7264511 | 23-scf00581 | 23 |
| AX-158234892 | 19 | 85.243 | KV453243.1 | 7199184 | 23-scf00581 | 23 |
| AX-158234924 | 19 | 85.243 | KV453243.1 | 7265956 | 23-scf00581 | 23 |
| AX-158234926 | 19 | 85.243 | KV453243.1 | 7267354 | 23-scf00581 | 23 |
| AX-158234927 | 19 | 85.243 | KV453243.1 | 7268693 | 23-scf00581 | 23 |
| AX-158234929 | 19 | 85.243 | KV453243.1 | 7272585 | 23-scf00581 | 23 |
| AX-158234933 | 19 | 85.243 | KV453243.1 | 7274007 | 23-scf00581 | 23 |

|              |    |        |             |         |             |    |
|--------------|----|--------|-------------|---------|-------------|----|
| AX-158234935 | 19 | 85.243 | KV453243.1  | 7275466 | 23-scf00581 | 23 |
| AX-158234941 | 19 | 85.243 | KV453243.1  | 7286166 | 23-scf00581 | 23 |
| AX-157775736 | 19 | 85.304 | KV453243.1  | 7278175 | 23-scf00581 | 23 |
| AX-158234889 | 19 | 85.352 | KV453243.1  | 7196957 | 23-scf00581 | 23 |
| AX-158234891 | 19 | 85.352 | KV453243.1  | 7198055 | 23-scf00581 | 23 |
| AX-158234919 | 19 | 85.352 | KV453243.1  | 7256839 | 23-scf00581 | 23 |
| AX-158234939 | 19 | 85.352 | KV453243.1  | 7283992 | 23-scf00581 | 23 |
| AX-158234940 | 19 | 85.352 | KV453243.1  | 7284531 | 23-scf00581 | 23 |
| AX-157771292 | 19 | 85.352 | KV453243.1  | 7287199 | 23-scf00581 | 23 |
| AX-158234943 | 19 | 85.352 | KV453243.1  | 7291562 | 23-scf00581 | 23 |
| AX-158234944 | 19 | 85.462 | KV453243.1  | 7293682 | 23-scf00581 | 23 |
| AX-157840543 | 19 | 85.462 | KV453243.1  | 7297383 | 23-scf00581 | 23 |
| AX-158234948 | 19 | 85.462 | KV453243.1  | 7298499 | 23-scf00581 | 23 |
| AX-158234950 | 19 | 85.462 | KV453243.1  | 7299398 | 23-scf00581 | 23 |
| AX-157840544 | 19 | 85.462 | KV453243.1  | 7301188 | 23-scf00581 | 23 |
| AX-157840545 | 19 | 85.462 | KV453243.1  | 7301765 | 23-scf00581 | 23 |
| AX-158234952 | 19 | 85.462 | KV453243.1  | 7303444 | 23-scf00581 | 23 |
| AX-158234953 | 19 | 85.462 | KV453243.1  | 7303997 | 23-scf00581 | 23 |
| AX-157840549 | 19 | 85.462 | KV453243.1  | 7310510 | 23-scf00581 | 23 |
| AX-158234956 | 19 | 85.462 | KV453243.1  | 7310777 | 23-scf00581 | 23 |
| AX-158234957 | 19 | 85.462 | KV453243.1  | 7313139 | 23-scf00581 | 23 |
| AX-157840550 | 19 | 85.462 | KV453243.1  | 7313943 | 23-scf00581 | 23 |
| AX-158234959 | 19 | 85.462 | KV453243.1  | 7319474 | 23-scf00581 | 23 |
| AX-158234962 | 19 | 85.462 | KV453243.1  | 7322555 | 23-scf00581 | 23 |
| AX-157751349 | 19 | 85.462 | KV453243.1  | 7349943 | 23-scf00581 | 23 |
| AX-158234992 | 19 | 85.462 | KV453243.1  | 7375685 | 23-scf00581 | 23 |
| AX-157840558 | 19 | 85.462 | KV453243.1  | 7383857 | 23-scf00581 | 23 |
| AX-157679999 | 19 | 85.462 | KV453390.1  | 52521   | scf00682    | UN |
| AX-157707087 | 19 | 85.462 | 3ML01033479 | 454     | scf09130_1  | UN |
| AX-158234967 | 19 | 85.511 | KV453243.1  | 7337430 | 23-scf00581 | 23 |
| AX-158234916 | 19 | 85.571 | KV453243.1  | 7253094 | 23-scf00581 | 23 |
| AX-157741201 | 19 | 85.571 | KV453243.1  | 7316821 | 23-scf00581 | 23 |
| AX-157719432 | 19 | 85.571 | KV453243.1  | 7320466 | 23-scf00581 | 23 |
| AX-158234960 | 19 | 85.571 | KV453243.1  | 7321471 | 23-scf00581 | 23 |
| AX-158234966 | 19 | 85.571 | KV453243.1  | 7335792 | 23-scf00581 | 23 |
| AX-158234971 | 19 | 85.571 | KV453243.1  | 7345689 | 23-scf00581 | 23 |
| AX-157840553 | 19 | 85.571 | KV453243.1  | 7346781 | 23-scf00581 | 23 |
| AX-157840554 | 19 | 85.571 | KV453243.1  | 7348581 | 23-scf00581 | 23 |
| AX-158234972 | 19 | 85.571 | KV453243.1  | 7348882 | 23-scf00581 | 23 |
| AX-158234975 | 19 | 85.571 | KV453243.1  | 7352421 | 23-scf00581 | 23 |
| AX-157742979 | 19 | 85.571 | KV453243.1  | 7354841 | 23-scf00581 | 23 |
| AX-158234978 | 19 | 85.571 | KV453243.1  | 7355370 | 23-scf00581 | 23 |
| AX-158234979 | 19 | 85.571 | KV453243.1  | 7356359 | 23-scf00581 | 23 |
| AX-157713023 | 19 | 85.571 | KV453243.1  | 7358424 | 23-scf00581 | 23 |
| AX-158234983 | 19 | 85.571 | KV453243.1  | 7362012 | 23-scf00581 | 23 |
| AX-157840556 | 19 | 85.571 | KV453243.1  | 7370269 | 23-scf00581 | 23 |
| AX-158234988 | 19 | 85.571 | KV453243.1  | 7370506 | 23-scf00581 | 23 |
| AX-158234989 | 19 | 85.571 | KV453243.1  | 7371689 | 23-scf00581 | 23 |
| AX-158234991 | 19 | 85.571 | KV453243.1  | 7373534 | 23-scf00581 | 23 |
| AX-157717672 | 19 | 85.571 | KV453243.1  | 7378843 | 23-scf00581 | 23 |
| AX-157840557 | 19 | 85.571 | KV453243.1  | 7380313 | 23-scf00581 | 23 |

|              |    |        |            |         |             |    |
|--------------|----|--------|------------|---------|-------------|----|
| AX-157887448 | 19 | 85.571 | KV453243.1 | 7382224 | 23-scf00581 | 23 |
| AX-158234999 | 19 | 85.571 | KV453243.1 | 7383146 | 23-scf00581 | 23 |
| AX-157859580 | 19 | 85.571 | KV453243.1 | 7384413 | 23-scf00581 | 23 |
| AX-158235001 | 19 | 85.571 | KV453243.1 | 7386357 | 23-scf00581 | 23 |
| AX-158235002 | 19 | 85.571 | KV453243.1 | 7387996 | 23-scf00581 | 23 |
| AX-157840559 | 19 | 85.571 | KV453243.1 | 7388033 | 23-scf00581 | 23 |
| AX-157747588 | 19 | 85.571 | KV453243.1 | 7388766 | 23-scf00581 | 23 |
| AX-158235003 | 19 | 85.571 | KV453243.1 | 7390747 | 23-scf00581 | 23 |
| AX-158235004 | 19 | 85.571 | KV453243.1 | 7391744 | 23-scf00581 | 23 |
| AX-157840560 | 19 | 85.571 | KV453243.1 | 7391989 | 23-scf00581 | 23 |
| AX-158235005 | 19 | 85.571 | KV453243.1 | 7392447 | 23-scf00581 | 23 |
| AX-158235006 | 19 | 85.571 | KV453243.1 | 7393611 | 23-scf00581 | 23 |
| AX-158235007 | 19 | 85.571 | KV453243.1 | 7393965 | 23-scf00581 | 23 |
| AX-158235008 | 19 | 85.571 | KV453243.1 | 7394306 | 23-scf00581 | 23 |
| AX-157719487 | 19 | 85.571 | KV453243.1 | 7400250 | 23-scf00581 | 23 |
| AX-157739340 | 19 | 85.571 | KV453243.1 | 7401597 | 23-scf00581 | 23 |
| AX-158235009 | 19 | 85.571 | KV453243.1 | 7403031 | 23-scf00581 | 23 |
| AX-158235012 | 19 | 85.571 | KV453243.1 | 7404821 | 23-scf00581 | 23 |
| AX-157748042 | 19 | 85.571 | KV453243.1 | 7405038 | 23-scf00581 | 23 |
| AX-158235013 | 19 | 85.571 | KV453243.1 | 7406915 | 23-scf00581 | 23 |
| AX-158235014 | 19 | 85.571 | KV453243.1 | 7407295 | 23-scf00581 | 23 |
| AX-158235015 | 19 | 85.571 | KV453243.1 | 7407718 | 23-scf00581 | 23 |
| AX-158235017 | 19 | 85.571 | KV453243.1 | 7408500 | 23-scf00581 | 23 |
| AX-157872521 | 19 | 85.571 | KV453243.1 | 7409212 | 23-scf00581 | 23 |
| AX-158235018 | 19 | 85.571 | KV453243.1 | 7409721 | 23-scf00581 | 23 |
| AX-158235019 | 19 | 85.571 | KV453243.1 | 7410584 | 23-scf00581 | 23 |
| AX-158235020 | 19 | 85.571 | KV453243.1 | 7411142 | 23-scf00581 | 23 |
| AX-158235021 | 19 | 85.571 | KV453243.1 | 7411364 | 23-scf00581 | 23 |
| AX-157840561 | 19 | 85.571 | KV453243.1 | 7418026 | 23-scf00581 | 23 |
| AX-157840562 | 19 | 85.571 | KV453243.1 | 7419125 | 23-scf00581 | 23 |
| AX-157840563 | 19 | 85.571 | KV453243.1 | 7420758 | 23-scf00581 | 23 |
| AX-157840564 | 19 | 85.571 | KV453243.1 | 7421330 | 23-scf00581 | 23 |
| AX-158235023 | 19 | 85.571 | KV453243.1 | 7421662 | 23-scf00581 | 23 |
| AX-157840565 | 19 | 85.571 | KV453243.1 | 7422314 | 23-scf00581 | 23 |
| AX-157840566 | 19 | 85.571 | KV453243.1 | 7422607 | 23-scf00581 | 23 |
| AX-158235024 | 19 | 85.571 | KV453243.1 | 7424396 | 23-scf00581 | 23 |
| AX-158235030 | 19 | 85.571 | KV453243.1 | 7445690 | 23-scf00581 | 23 |
| AX-157719330 | 19 | 85.571 | KV453243.1 | 7573076 | 23-scf00581 | 23 |
| AX-158235182 | 19 | 85.571 | KV453243.1 | 7691969 | 23-scf00581 | 23 |
| AX-157773047 | 19 | 85.716 | KV453243.1 | 7337960 | 23-scf00581 | 23 |
| AX-157724630 | 19 | 85.716 | KV453243.1 | 7394810 | 23-scf00581 | 23 |
| AX-157741509 | 19 | 85.716 | KV453243.1 | 7425836 | 23-scf00581 | 23 |
| AX-157840567 | 19 | 85.716 | KV453243.1 | 7426892 | 23-scf00581 | 23 |
| AX-157840568 | 19 | 85.716 | KV453243.1 | 7428904 | 23-scf00581 | 23 |
| AX-158235029 | 19 | 85.716 | KV453243.1 | 7444343 | 23-scf00581 | 23 |
| AX-157755749 | 19 | 85.716 | KV453243.1 | 7445072 | 23-scf00581 | 23 |
| AX-158235034 | 19 | 85.716 | KV453243.1 | 7455927 | 23-scf00581 | 23 |
| AX-158235039 | 19 | 85.716 | KV453243.1 | 7463847 | 23-scf00581 | 23 |
| AX-158235041 | 19 | 85.716 | KV453243.1 | 7468505 | 23-scf00581 | 23 |
| AX-158235043 | 19 | 85.716 | KV453243.1 | 7472554 | 23-scf00581 | 23 |
| AX-158235055 | 19 | 85.716 | KV453243.1 | 7522585 | 23-scf00581 | 23 |



|              |    |        |            |         |             |    |
|--------------|----|--------|------------|---------|-------------|----|
| AX-158235316 | 19 | 85.716 | KV453243.1 | 8015989 | 23-scf00581 | 23 |
| AX-157840569 | 19 | 86.008 | KV453243.1 | 7508675 | 23-scf00581 | 23 |
| AX-158235052 | 19 | 86.008 | KV453243.1 | 7518754 | 23-scf00581 | 23 |
| AX-158235056 | 19 | 86.008 | KV453243.1 | 7523066 | 23-scf00581 | 23 |
| AX-158386863 | 19 | 86.008 | KV453243.1 | 7524370 | 23-scf00581 | 23 |
| AX-158235064 | 19 | 86.008 | KV453243.1 | 7539986 | 23-scf00581 | 23 |
| AX-158235066 | 19 | 86.008 | KV453243.1 | 7540861 | 23-scf00581 | 23 |
| AX-158235067 | 19 | 86.008 | KV453243.1 | 7541255 | 23-scf00581 | 23 |
| AX-158235069 | 19 | 86.008 | KV453243.1 | 7546945 | 23-scf00581 | 23 |
| AX-158235070 | 19 | 86.008 | KV453243.1 | 7547574 | 23-scf00581 | 23 |
| AX-158235071 | 19 | 86.008 | KV453243.1 | 7548360 | 23-scf00581 | 23 |
| AX-158235072 | 19 | 86.008 | KV453243.1 | 7549175 | 23-scf00581 | 23 |
| AX-158235074 | 19 | 86.008 | KV453243.1 | 7549922 | 23-scf00581 | 23 |
| AX-158235077 | 19 | 86.008 | KV453243.1 | 7552838 | 23-scf00581 | 23 |
| AX-158235079 | 19 | 86.008 | KV453243.1 | 7554760 | 23-scf00581 | 23 |
| AX-157715077 | 19 | 86.008 | KV453243.1 | 7555537 | 23-scf00581 | 23 |
| AX-158235086 | 19 | 86.008 | KV453243.1 | 7561426 | 23-scf00581 | 23 |
| AX-157695700 | 19 | 86.008 | KV453243.1 | 7562354 | 23-scf00581 | 23 |
| AX-158235087 | 19 | 86.008 | KV453243.1 | 7563064 | 23-scf00581 | 23 |
| AX-158235089 | 19 | 86.008 | KV453243.1 | 7566776 | 23-scf00581 | 23 |
| AX-157773289 | 19 | 86.117 | KV453243.1 | 7485221 | 23-scf00581 | 23 |
| AX-158235080 | 19 | 86.117 | KV453243.1 | 7555241 | 23-scf00581 | 23 |
| AX-158235091 | 19 | 86.117 | KV453243.1 | 7568468 | 23-scf00581 | 23 |
| AX-158235092 | 19 | 86.117 | KV453243.1 | 7572865 | 23-scf00581 | 23 |
| AX-158235098 | 19 | 86.117 | KV453243.1 | 7580350 | 23-scf00581 | 23 |
| AX-157840540 | 19 | 86.175 | KV453243.1 | 7294485 | 23-scf00581 | 23 |
| AX-158235045 | 19 | 86.175 | KV453243.1 | 7498140 | 23-scf00581 | 23 |
| AX-158235073 | 19 | 86.175 | KV453243.1 | 7549424 | 23-scf00581 | 23 |
| AX-158235094 | 19 | 86.175 | KV453243.1 | 7575940 | 23-scf00581 | 23 |
| AX-158235106 | 19 | 86.175 | KV453243.1 | 7592570 | 23-scf00581 | 23 |
| AX-158235097 | 19 | 86.226 | KV453243.1 | 7577784 | 23-scf00581 | 23 |
| AX-158235111 | 19 | 86.445 | KV453243.1 | 7596154 | 23-scf00581 | 23 |
| AX-158235112 | 19 | 86.445 | KV453243.1 | 7597563 | 23-scf00581 | 23 |
| AX-158235113 | 19 | 86.445 | KV453243.1 | 7598748 | 23-scf00581 | 23 |
| AX-158235115 | 19 | 86.445 | KV453243.1 | 7599997 | 23-scf00581 | 23 |
| AX-158235116 | 19 | 86.445 | KV453243.1 | 7602638 | 23-scf00581 | 23 |
| AX-158235117 | 19 | 86.445 | KV453243.1 | 7603732 | 23-scf00581 | 23 |
| AX-158235120 | 19 | 86.445 | KV453243.1 | 7605802 | 23-scf00581 | 23 |
| AX-158235125 | 19 | 86.445 | KV453243.1 | 7610806 | 23-scf00581 | 23 |
| AX-158235128 | 19 | 86.445 | KV453243.1 | 7614061 | 23-scf00581 | 23 |
| AX-158235129 | 19 | 86.445 | KV453243.1 | 7615456 | 23-scf00581 | 23 |
| AX-158235139 | 19 | 86.445 | KV453243.1 | 7630553 | 23-scf00581 | 23 |
| AX-157840572 | 19 | 86.461 | KV453243.1 | 7623269 | 23-scf00581 | 23 |
| AX-158235065 | 19 | 86.468 | KV453243.1 | 7540488 | 23-scf00581 | 23 |
| AX-158235103 | 19 | 86.468 | KV453243.1 | 7585079 | 23-scf00581 | 23 |
| AX-158235136 | 19 | 86.468 | KV453243.1 | 7627896 | 23-scf00581 | 23 |
| AX-158235140 | 19 | 86.499 | KV453243.1 | 7633696 | 23-scf00581 | 23 |
| AX-158235133 | 19 | 86.554 | KV453243.1 | 7625232 | 23-scf00581 | 23 |
| AX-157867225 | 19 | 86.554 | KV453243.1 | 7633146 | 23-scf00581 | 23 |
| AX-158235142 | 19 | 86.554 | KV453243.1 | 7636805 | 23-scf00581 | 23 |
| AX-158235145 | 19 | 86.554 | KV453243.1 | 7639167 | 23-scf00581 | 23 |

|              |    |        |            |         |             |    |
|--------------|----|--------|------------|---------|-------------|----|
| AX-158235149 | 19 | 86.554 | KV453243.1 | 7643500 | 23-scf00581 | 23 |
| AX-158235159 | 19 | 86.554 | KV453243.1 | 7662124 | 23-scf00581 | 23 |
| AX-157887452 | 19 | 86.554 | KV453243.1 | 7681622 | 23-scf00581 | 23 |
| AX-157840579 | 19 | 86.554 | KV453243.1 | 7690493 | 23-scf00581 | 23 |
| AX-158235183 | 19 | 86.554 | KV453243.1 | 7693600 | 23-scf00581 | 23 |
| AX-158415302 | 19 | 86.554 | KV453243.1 | 7696759 | 23-scf00581 | 23 |
| AX-157840582 | 19 | 86.554 | KV453243.1 | 7701996 | 23-scf00581 | 23 |
| AX-157840584 | 19 | 86.554 | KV453243.1 | 7727708 | 23-scf00581 | 23 |
| AX-158235203 | 19 | 86.554 | KV453243.1 | 7731143 | 23-scf00581 | 23 |
| AX-157840589 | 19 | 86.554 | KV453243.1 | 7749961 | 23-scf00581 | 23 |
| AX-157840593 | 19 | 86.554 | KV453243.1 | 7784379 | 23-scf00581 | 23 |
| AX-158235227 | 19 | 86.554 | KV453243.1 | 7791323 | 23-scf00581 | 23 |
| AX-158235293 | 19 | 86.554 | KV453243.1 | 7957249 | 23-scf00581 | 23 |
| AX-158234973 | 19 | 86.663 | KV453243.1 | 7349395 | 23-scf00581 | 23 |
| AX-158235127 | 19 | 86.663 | KV453243.1 | 7613000 | 23-scf00581 | 23 |
| AX-158235148 | 19 | 86.663 | KV453243.1 | 7642589 | 23-scf00581 | 23 |
| AX-158235150 | 19 | 86.663 | KV453243.1 | 7646049 | 23-scf00581 | 23 |
| AX-157709719 | 19 | 86.663 | KV453243.1 | 7647568 | 23-scf00581 | 23 |
| AX-158235154 | 19 | 86.663 | KV453243.1 | 7654369 | 23-scf00581 | 23 |
| AX-158235155 | 19 | 86.701 | KV453243.1 | 7655001 | 23-scf00581 | 23 |
| AX-158235157 | 19 | 86.717 | KV453243.1 | 7657986 | 23-scf00581 | 23 |
| AX-157742212 | 19 | 86.732 | KV453243.1 | 7660041 | 23-scf00581 | 23 |
| AX-157750040 | 19 | 86.772 | KV453243.1 | 7661229 | 23-scf00581 | 23 |
| AX-158235162 | 19 | 86.772 | KV453243.1 | 7664915 | 23-scf00581 | 23 |
| AX-158380939 | 19 | 86.772 | KV453243.1 | 7669567 | 23-scf00581 | 23 |
| AX-158235167 | 19 | 86.772 | KV453243.1 | 7669688 | 23-scf00581 | 23 |
| AX-157840575 | 19 | 86.772 | KV453243.1 | 7671522 | 23-scf00581 | 23 |
| AX-158235169 | 19 | 86.772 | KV453243.1 | 7671723 | 23-scf00581 | 23 |
| AX-158235175 | 19 | 86.772 | KV453243.1 | 7684929 | 23-scf00581 | 23 |
| AX-158235229 | 19 | 86.772 | KV453243.1 | 7793713 | 23-scf00581 | 23 |
| AX-158235040 | 19 | 86.881 | KV453243.1 | 7467657 | 23-scf00581 | 23 |
| AX-157840573 | 19 | 86.881 | KV453243.1 | 7669084 | 23-scf00581 | 23 |
| AX-158235172 | 19 | 86.881 | KV453243.1 | 7677253 | 23-scf00581 | 23 |
| AX-157746353 | 19 | 86.881 | KV453243.1 | 7688580 | 23-scf00581 | 23 |
| AX-157840578 | 19 | 86.881 | KV453243.1 | 7689213 | 23-scf00581 | 23 |
| AX-158235181 | 19 | 86.881 | KV453243.1 | 7691152 | 23-scf00581 | 23 |
| AX-158235185 | 19 | 86.881 | KV453243.1 | 7697458 | 23-scf00581 | 23 |
| AX-158235187 | 19 | 86.881 | KV453243.1 | 7702928 | 23-scf00581 | 23 |
| AX-158235191 | 19 | 86.881 | KV453243.1 | 7710954 | 23-scf00581 | 23 |
| AX-158235193 | 19 | 86.881 | KV453243.1 | 7712200 | 23-scf00581 | 23 |
| AX-158235195 | 19 | 86.881 | KV453243.1 | 7714252 | 23-scf00581 | 23 |
| AX-158235196 | 19 | 86.881 | KV453243.1 | 7715996 | 23-scf00581 | 23 |
| AX-157840583 | 19 | 86.881 | KV453243.1 | 7716462 | 23-scf00581 | 23 |
| AX-158235197 | 19 | 86.881 | KV453243.1 | 7718786 | 23-scf00581 | 23 |
| AX-158235198 | 19 | 86.881 | KV453243.1 | 7721477 | 23-scf00581 | 23 |
| AX-157840576 | 19 | 86.893 | KV453243.1 | 7679832 | 23-scf00581 | 23 |
| AX-158235201 | 19 | 86.893 | KV453243.1 | 7726475 | 23-scf00581 | 23 |
| AX-157840586 | 19 | 86.893 | KV453243.1 | 7738267 | 23-scf00581 | 23 |
| AX-158235219 | 19 | 86.893 | KV453243.1 | 7763293 | 23-scf00581 | 23 |
| AX-158235240 | 19 | 86.893 | KV453243.1 | 7832808 | 23-scf00581 | 23 |
| AX-158235262 | 19 | 86.893 | KV453243.1 | 7905865 | 23-scf00581 | 23 |

|              |    |        |            |         |             |    |
|--------------|----|--------|------------|---------|-------------|----|
| AX-158235277 | 19 | 86.893 | KV453243.1 | 7930228 | 23-scf00581 | 23 |
| AX-158235206 | 19 | 86.909 | KV453243.1 | 7735022 | 23-scf00581 | 23 |
| AX-157840621 | 19 | 86.909 | KV453243.1 | 8026916 | 23-scf00581 | 23 |
| AX-158235210 | 19 | 86.937 | KV453243.1 | 7738203 | 23-scf00581 | 23 |
| AX-158235222 | 19 | 86.964 | KV453243.1 | 7781222 | 23-scf00581 | 23 |
| AX-157840592 | 19 | 86.991 | KV453243.1 | 7781535 | 23-scf00581 | 23 |
| AX-158235223 | 19 | 86.991 | KV453243.1 | 7782571 | 23-scf00581 | 23 |
| AX-158235224 | 19 | 86.991 | KV453243.1 | 7785054 | 23-scf00581 | 23 |
| AX-158235226 | 19 | 86.991 | KV453243.1 | 7789185 | 23-scf00581 | 23 |
| AX-157840595 | 19 | 86.991 | KV453243.1 | 7789435 | 23-scf00581 | 23 |
| AX-157840571 | 19 | 86.992 | KV453243.1 | 7613997 | 23-scf00581 | 23 |
| AX-158235230 | 19 | 86.992 | KV453243.1 | 7799255 | 23-scf00581 | 23 |
| AX-158235231 | 19 | 86.992 | KV453243.1 | 7799696 | 23-scf00581 | 23 |
| AX-158235261 | 19 | 86.992 | KV453243.1 | 7904938 | 23-scf00581 | 23 |
| AX-157748008 | 19 | 86.992 | KV453243.1 | 7991776 | 23-scf00581 | 23 |
| AX-158235232 | 19 | 87.269 | KV453243.1 | 7807515 | 23-scf00581 | 23 |
| AX-157840630 | 19 | 87.269 | KV453243.1 | 8180882 | 23-scf00581 | 23 |
| AX-157840600 | 19 | 87.757 | KV453243.1 | 7814247 | 23-scf00581 | 23 |
| AX-158235234 | 19 | 87.757 | KV453243.1 | 7814667 | 23-scf00581 | 23 |
| AX-158235241 | 19 | 87.757 | KV453243.1 | 7833835 | 23-scf00581 | 23 |
| AX-157840606 | 19 | 87.757 | KV453243.1 | 7844017 | 23-scf00581 | 23 |
| AX-157738305 | 19 | 87.757 | KV453243.1 | 7845818 | 23-scf00581 | 23 |
| AX-158235242 | 19 | 87.757 | KV453243.1 | 7848995 | 23-scf00581 | 23 |
| AX-158235244 | 19 | 87.757 | KV453243.1 | 7861826 | 23-scf00581 | 23 |
| AX-157754960 | 19 | 88.522 | KV453243.1 | 7715446 | 23-scf00581 | 23 |
| AX-158235250 | 19 | 88.522 | KV453243.1 | 7886288 | 23-scf00581 | 23 |
| AX-158235251 | 19 | 88.522 | KV453243.1 | 7886812 | 23-scf00581 | 23 |
| AX-158235252 | 19 | 88.522 | KV453243.1 | 7887552 | 23-scf00581 | 23 |
| AX-157717674 | 19 | 88.522 | KV453243.1 | 7891853 | 23-scf00581 | 23 |
| AX-158235254 | 19 | 88.522 | KV453243.1 | 7896336 | 23-scf00581 | 23 |
| AX-158235255 | 19 | 88.522 | KV453243.1 | 7897393 | 23-scf00581 | 23 |
| AX-158235256 | 19 | 88.522 | KV453243.1 | 7897816 | 23-scf00581 | 23 |
| AX-158394183 | 19 | 88.522 | KV453243.1 | 7898198 | 23-scf00581 | 23 |
| AX-158235260 | 19 | 88.522 | KV453243.1 | 7903290 | 23-scf00581 | 23 |
| AX-158235265 | 19 | 88.522 | KV453243.1 | 7912096 | 23-scf00581 | 23 |
| AX-157724407 | 19 | 88.632 | KV453243.1 | 7557336 | 23-scf00581 | 23 |
| AX-157723915 | 19 | 88.632 | KV453243.1 | 7679087 | 23-scf00581 | 23 |
| AX-158235225 | 19 | 88.632 | KV453243.1 | 7787442 | 23-scf00581 | 23 |
| AX-157840598 | 19 | 88.632 | KV453243.1 | 7800891 | 23-scf00581 | 23 |
| AX-157840599 | 19 | 88.632 | KV453243.1 | 7802273 | 23-scf00581 | 23 |
| AX-158235239 | 19 | 88.632 | KV453243.1 | 7827712 | 23-scf00581 | 23 |
| AX-158235264 | 19 | 88.632 | KV453243.1 | 7910115 | 23-scf00581 | 23 |
| AX-157840607 | 19 | 88.632 | KV453243.1 | 7914457 | 23-scf00581 | 23 |
| AX-158235266 | 19 | 88.632 | KV453243.1 | 7916099 | 23-scf00581 | 23 |
| AX-158235268 | 19 | 88.632 | KV453243.1 | 7920105 | 23-scf00581 | 23 |
| AX-158235269 | 19 | 88.632 | KV453243.1 | 7921577 | 23-scf00581 | 23 |
| AX-158235270 | 19 | 88.632 | KV453243.1 | 7922162 | 23-scf00581 | 23 |
| AX-158235271 | 19 | 88.632 | KV453243.1 | 7922581 | 23-scf00581 | 23 |
| AX-157840608 | 19 | 88.632 | KV453243.1 | 7923299 | 23-scf00581 | 23 |
| AX-158235272 | 19 | 88.632 | KV453243.1 | 7924160 | 23-scf00581 | 23 |
| AX-158235273 | 19 | 88.632 | KV453243.1 | 7924519 | 23-scf00581 | 23 |

|              |    |        |            |         |             |    |
|--------------|----|--------|------------|---------|-------------|----|
| AX-158235274 | 19 | 88.632 | KV453243.1 | 7925399 | 23-scf00581 | 23 |
| AX-158235275 | 19 | 88.632 | KV453243.1 | 7926491 | 23-scf00581 | 23 |
| AX-157840610 | 19 | 88.632 | KV453243.1 | 7927381 | 23-scf00581 | 23 |
| AX-157773894 | 19 | 88.632 | KV453243.1 | 7929845 | 23-scf00581 | 23 |
| AX-158235279 | 19 | 88.632 | KV453243.1 | 7934439 | 23-scf00581 | 23 |
| AX-158235285 | 19 | 88.632 | KV453243.1 | 7941098 | 23-scf00581 | 23 |
| AX-158235287 | 19 | 88.632 | KV453243.1 | 7943395 | 23-scf00581 | 23 |
| AX-158235288 | 19 | 88.632 | KV453243.1 | 7943764 | 23-scf00581 | 23 |
| AX-157744624 | 19 | 88.632 | KV453243.1 | 7946559 | 23-scf00581 | 23 |
| AX-158235290 | 19 | 88.632 | KV453243.1 | 7953852 | 23-scf00581 | 23 |
| AX-158235291 | 19 | 88.632 | KV453243.1 | 7954284 | 23-scf00581 | 23 |
| AX-158235292 | 19 | 88.632 | KV453243.1 | 7955420 | 23-scf00581 | 23 |
| AX-157840612 | 19 | 88.632 | KV453243.1 | 7956088 | 23-scf00581 | 23 |
| AX-157840613 | 19 | 88.632 | KV453243.1 | 7957466 | 23-scf00581 | 23 |
| AX-158235294 | 19 | 88.632 | KV453243.1 | 7957726 | 23-scf00581 | 23 |
| AX-158235295 | 19 | 88.632 | KV453243.1 | 7958319 | 23-scf00581 | 23 |
| AX-157731349 | 19 | 88.632 | KV453243.1 | 7959575 | 23-scf00581 | 23 |
| AX-157840614 | 19 | 88.632 | KV453243.1 | 7962412 | 23-scf00581 | 23 |
| AX-158235299 | 19 | 88.632 | KV453243.1 | 7973597 | 23-scf00581 | 23 |
| AX-158235300 | 19 | 88.632 | KV453243.1 | 7974430 | 23-scf00581 | 23 |
| AX-158235301 | 19 | 88.632 | KV453243.1 | 7976186 | 23-scf00581 | 23 |
| AX-158235302 | 19 | 88.632 | KV453243.1 | 7976414 | 23-scf00581 | 23 |
| AX-158235303 | 19 | 88.632 | KV453243.1 | 7979173 | 23-scf00581 | 23 |
| AX-158235304 | 19 | 88.632 | KV453243.1 | 7979409 | 23-scf00581 | 23 |
| AX-157887455 | 19 | 88.632 | KV453243.1 | 7983326 | 23-scf00581 | 23 |
| AX-158235306 | 19 | 88.632 | KV453243.1 | 7985893 | 23-scf00581 | 23 |
| AX-158235307 | 19 | 88.632 | KV453243.1 | 7987468 | 23-scf00581 | 23 |
| AX-158235308 | 19 | 88.632 | KV453243.1 | 7996472 | 23-scf00581 | 23 |
| AX-157840617 | 19 | 88.632 | KV453243.1 | 7996586 | 23-scf00581 | 23 |
| AX-158235309 | 19 | 88.632 | KV453243.1 | 7998506 | 23-scf00581 | 23 |
| AX-158235313 | 19 | 88.632 | KV453243.1 | 8009436 | 23-scf00581 | 23 |
| AX-157840618 | 19 | 88.632 | KV453243.1 | 8009935 | 23-scf00581 | 23 |
| AX-157840619 | 19 | 88.632 | KV453243.1 | 8011684 | 23-scf00581 | 23 |
| AX-158235314 | 19 | 88.632 | KV453243.1 | 8012064 | 23-scf00581 | 23 |
| AX-158235315 | 19 | 88.632 | KV453243.1 | 8015447 | 23-scf00581 | 23 |
| AX-157867229 | 19 | 88.632 | KV453243.1 | 8132627 | 23-scf00581 | 23 |
| AX-158235404 | 19 | 88.632 | KV453243.1 | 8181864 | 23-scf00581 | 23 |
| AX-158235318 | 19 | 88.741 | KV453243.1 | 8026252 | 23-scf00581 | 23 |
| AX-158235325 | 19 | 88.741 | KV453243.1 | 8036544 | 23-scf00581 | 23 |
| AX-158235329 | 19 | 88.741 | KV453243.1 | 8043080 | 23-scf00581 | 23 |
| AX-158235283 | 19 | 88.85  | KV453243.1 | 7939701 | 23-scf00581 | 23 |
| AX-158235334 | 19 | 88.85  | KV453243.1 | 8050792 | 23-scf00581 | 23 |
| AX-158235335 | 19 | 88.85  | KV453243.1 | 8051099 | 23-scf00581 | 23 |
| AX-158235337 | 19 | 88.85  | KV453243.1 | 8052236 | 23-scf00581 | 23 |
| AX-157859584 | 19 | 88.85  | KV453243.1 | 8052272 | 23-scf00581 | 23 |
| AX-158235340 | 19 | 88.85  | KV453243.1 | 8055224 | 23-scf00581 | 23 |
| AX-158235281 | 19 | 89.068 | KV453243.1 | 7936961 | 23-scf00581 | 23 |
| AX-158235320 | 19 | 89.068 | KV453243.1 | 8029676 | 23-scf00581 | 23 |
| AX-158235341 | 19 | 89.068 | KV453243.1 | 8056241 | 23-scf00581 | 23 |
| AX-158235343 | 19 | 89.068 | KV453243.1 | 8059513 | 23-scf00581 | 23 |
| AX-158235344 | 19 | 89.068 | KV453243.1 | 8060746 | 23-scf00581 | 23 |

|              |    |        |            |         |             |    |
|--------------|----|--------|------------|---------|-------------|----|
| AX-158235345 | 19 | 89.068 | KV453243.1 | 8061704 | 23-scf00581 | 23 |
| AX-158235347 | 19 | 89.068 | KV453243.1 | 8063858 | 23-scf00581 | 23 |
| AX-158235348 | 19 | 89.068 | KV453243.1 | 8064349 | 23-scf00581 | 23 |
| AX-158235349 | 19 | 89.068 | KV453243.1 | 8065277 | 23-scf00581 | 23 |
| AX-158235350 | 19 | 89.068 | KV453243.1 | 8067772 | 23-scf00581 | 23 |
| AX-158410539 | 19 | 89.068 | KV453243.1 | 8072038 | 23-scf00581 | 23 |
| AX-158235352 | 19 | 89.068 | KV453243.1 | 8073217 | 23-scf00581 | 23 |
| AX-158235353 | 19 | 89.068 | KV453243.1 | 8073595 | 23-scf00581 | 23 |
| AX-158235354 | 19 | 89.068 | KV453243.1 | 8074132 | 23-scf00581 | 23 |
| AX-158235355 | 19 | 89.068 | KV453243.1 | 8074903 | 23-scf00581 | 23 |
| AX-158235356 | 19 | 89.068 | KV453243.1 | 8076819 | 23-scf00581 | 23 |
| AX-158235357 | 19 | 89.068 | KV453243.1 | 8078477 | 23-scf00581 | 23 |
| AX-158235358 | 19 | 89.068 | KV453243.1 | 8082163 | 23-scf00581 | 23 |
| AX-158235383 | 19 | 89.068 | KV453243.1 | 8122741 | 23-scf00581 | 23 |
| AX-158235390 | 19 | 89.068 | KV453243.1 | 8144530 | 23-scf00581 | 23 |
| AX-157686285 | 19 | 89.068 | KV453390.1 | 5581    | scf00682    | UN |
| AX-158235246 | 19 | 89.178 | KV453243.1 | 7870504 | 23-scf00581 | 23 |
| AX-158235247 | 19 | 89.178 | KV453243.1 | 7880532 | 23-scf00581 | 23 |
| AX-157840611 | 19 | 89.178 | KV453243.1 | 7929558 | 23-scf00581 | 23 |
| AX-158235278 | 19 | 89.178 | KV453243.1 | 7931041 | 23-scf00581 | 23 |
| AX-157840623 | 19 | 89.178 | KV453243.1 | 8088235 | 23-scf00581 | 23 |
| AX-158235361 | 19 | 89.178 | KV453243.1 | 8090936 | 23-scf00581 | 23 |
| AX-158235364 | 19 | 89.178 | KV453243.1 | 8091836 | 23-scf00581 | 23 |
| AX-158235367 | 19 | 89.178 | KV453243.1 | 8098173 | 23-scf00581 | 23 |
| AX-158235369 | 19 | 89.178 | KV453243.1 | 8099013 | 23-scf00581 | 23 |
| AX-157722680 | 19 | 89.178 | KV453243.1 | 8101459 | 23-scf00581 | 23 |
| AX-157859586 | 19 | 89.178 | KV453243.1 | 8111367 | 23-scf00581 | 23 |
| AX-158235380 | 19 | 89.178 | KV453243.1 | 8120341 | 23-scf00581 | 23 |
| AX-158235381 | 19 | 89.178 | KV453243.1 | 8120648 | 23-scf00581 | 23 |
| AX-158235382 | 19 | 89.178 | KV453243.1 | 8121812 | 23-scf00581 | 23 |
| AX-157715866 | 19 | 89.178 | KV453243.1 | 8131870 | 23-scf00581 | 23 |
| AX-158423300 | 19 | 89.178 | KV453243.1 | 8137865 | 23-scf00581 | 23 |
| AX-158235392 | 19 | 89.178 | KV453243.1 | 8151073 | 23-scf00581 | 23 |
| AX-158235393 | 19 | 89.178 | KV453243.1 | 8154269 | 23-scf00581 | 23 |
| AX-157840626 | 19 | 89.178 | KV453243.1 | 8156022 | 23-scf00581 | 23 |
| AX-158235394 | 19 | 89.178 | KV453243.1 | 8157762 | 23-scf00581 | 23 |
| AX-158235397 | 19 | 89.178 | KV453243.1 | 8168111 | 23-scf00581 | 23 |
| AX-158235398 | 19 | 89.178 | KV453243.1 | 8168723 | 23-scf00581 | 23 |
| AX-157840627 | 19 | 89.178 | KV453243.1 | 8169605 | 23-scf00581 | 23 |
| AX-157840628 | 19 | 89.178 | KV453243.1 | 8172528 | 23-scf00581 | 23 |
| AX-158235400 | 19 | 89.178 | KV453243.1 | 8174654 | 23-scf00581 | 23 |
| AX-158235402 | 19 | 89.178 | KV453243.1 | 8177606 | 23-scf00581 | 23 |
| AX-158235403 | 19 | 89.178 | KV453243.1 | 8179368 | 23-scf00581 | 23 |
| AX-157686282 | 19 | 89.178 | KV453390.1 | 2871    | scf00682    | UN |
| AX-157686286 | 19 | 89.178 | KV453390.1 | 10860   | scf00682    | UN |
| AX-157686288 | 19 | 89.178 | KV453390.1 | 17831   | scf00682    | UN |
| AX-157686289 | 19 | 89.178 | KV453390.1 | 21039   | scf00682    | UN |
| AX-157686290 | 19 | 89.178 | KV453390.1 | 24585   | scf00682    | UN |
| AX-157686291 | 19 | 89.178 | KV453390.1 | 27751   | scf00682    | UN |
| AX-157686293 | 19 | 89.178 | KV453390.1 | 34487   | scf00682    | UN |
| AX-157686294 | 19 | 89.178 | KV453390.1 | 39069   | scf00682    | UN |

|              |    |        |             |        |             |    |
|--------------|----|--------|-------------|--------|-------------|----|
| AX-157686295 | 19 | 89.178 | KV453390.1  | 42364  | scf00682    | UN |
| AX-157686978 | 19 | 89.178 | KV453445.1  | 1900   | scf00768    | UN |
| AX-157686979 | 19 | 89.178 | KV453445.1  | 2582   | scf00768    | UN |
| AX-157689369 | 19 | 89.178 | 3ML01029345 | 563    | scf04966_1  | UN |
| AX-158236578 | 20 | 0      | KV452977.1  | 304    | 10-scf00388 | 10 |
| AX-158236580 | 20 | 0.518  | KV452977.1  | 1331   | 10-scf00388 | 10 |
| AX-158235865 | 20 | 0.693  | KV452978.1  | 898584 | 10-scf00387 | 10 |
| AX-158236581 | 20 | 0.693  | KV452977.1  | 2103   | 10-scf00388 | 10 |
| AX-158236582 | 20 | 0.693  | KV452977.1  | 3073   | 10-scf00388 | 10 |
| AX-158236583 | 20 | 0.694  | KV452977.1  | 3587   | 10-scf00388 | 10 |
| AX-158236585 | 20 | 0.694  | KV452977.1  | 5891   | 10-scf00388 | 10 |
| AX-158236587 | 20 | 0.694  | KV452977.1  | 9110   | 10-scf00388 | 10 |
| AX-158236610 | 20 | 0.694  | KV452977.1  | 39001  | 10-scf00388 | 10 |
| AX-158236594 | 20 | 0.715  | KV452977.1  | 18970  | 10-scf00388 | 10 |
| AX-157723846 | 20 | 0.749  | KV452977.1  | 21517  | 10-scf00388 | 10 |
| AX-158236592 | 20 | 0.785  | KV452977.1  | 15991  | 10-scf00388 | 10 |
| AX-158236596 | 20 | 0.785  | KV452977.1  | 22312  | 10-scf00388 | 10 |
| AX-158236601 | 20 | 0.785  | KV452977.1  | 25118  | 10-scf00388 | 10 |
| AX-158236602 | 20 | 0.785  | KV452977.1  | 25752  | 10-scf00388 | 10 |
| AX-158236599 | 20 | 0.82   | KV452977.1  | 24007  | 10-scf00388 | 10 |
| AX-158236600 | 20 | 0.832  | KV452977.1  | 24571  | 10-scf00388 | 10 |
| AX-158236603 | 20 | 0.862  | KV452977.1  | 27883  | 10-scf00388 | 10 |
| AX-158236612 | 20 | 0.862  | KV452977.1  | 42335  | 10-scf00388 | 10 |
| AX-158236628 | 20 | 0.862  | KV452977.1  | 72590  | 10-scf00388 | 10 |
| AX-158236634 | 20 | 0.862  | KV452977.1  | 80726  | 10-scf00388 | 10 |
| AX-158236639 | 20 | 0.862  | KV452977.1  | 91488  | 10-scf00388 | 10 |
| AX-158236676 | 20 | 0.862  | KV452977.1  | 143153 | 10-scf00388 | 10 |
| AX-158236707 | 20 | 0.862  | KV452977.1  | 200666 | 10-scf00388 | 10 |
| AX-158236586 | 20 | 0.863  | KV452977.1  | 7691   | 10-scf00388 | 10 |
| AX-158236597 | 20 | 0.863  | KV452977.1  | 23032  | 10-scf00388 | 10 |
| AX-158236604 | 20 | 0.863  | KV452977.1  | 31485  | 10-scf00388 | 10 |
| AX-158236605 | 20 | 0.863  | KV452977.1  | 32242  | 10-scf00388 | 10 |
| AX-158236607 | 20 | 0.863  | KV452977.1  | 33601  | 10-scf00388 | 10 |
| AX-158236614 | 20 | 0.977  | KV452977.1  | 45445  | 10-scf00388 | 10 |
| AX-158236615 | 20 | 1.074  | KV452977.1  | 45977  | 10-scf00388 | 10 |
| AX-158236616 | 20 | 1.14   | KV452977.1  | 46562  | 10-scf00388 | 10 |
| AX-158236617 | 20 | 1.373  | KV452977.1  | 50076  | 10-scf00388 | 10 |
| AX-158236620 | 20 | 1.373  | KV452977.1  | 54308  | 10-scf00388 | 10 |
| AX-158236624 | 20 | 1.373  | KV452977.1  | 62332  | 10-scf00388 | 10 |
| AX-158236629 | 20 | 1.374  | KV452977.1  | 73708  | 10-scf00388 | 10 |
| AX-158236632 | 20 | 1.374  | KV452977.1  | 78711  | 10-scf00388 | 10 |
| AX-158236633 | 20 | 1.374  | KV452977.1  | 80004  | 10-scf00388 | 10 |
| AX-158236623 | 20 | 1.483  | KV452977.1  | 60731  | 10-scf00388 | 10 |
| AX-157720193 | 20 | 1.483  | KV452977.1  | 82292  | 10-scf00388 | 10 |
| AX-158236635 | 20 | 1.483  | KV452977.1  | 84622  | 10-scf00388 | 10 |
| AX-158236636 | 20 | 1.483  | KV452977.1  | 86550  | 10-scf00388 | 10 |
| AX-158236637 | 20 | 1.483  | KV452977.1  | 89445  | 10-scf00388 | 10 |
| AX-158236640 | 20 | 1.483  | KV452977.1  | 92041  | 10-scf00388 | 10 |
| AX-158236642 | 20 | 1.483  | KV452977.1  | 95846  | 10-scf00388 | 10 |
| AX-158236644 | 20 | 1.483  | KV452977.1  | 96845  | 10-scf00388 | 10 |
| AX-158236647 | 20 | 1.483  | KV452977.1  | 107232 | 10-scf00388 | 10 |

|              |    |       |            |        |             |    |
|--------------|----|-------|------------|--------|-------------|----|
| AX-158418848 | 20 | 1.483 | KV452977.1 | 108518 | 10-scf00388 | 10 |
| AX-158236650 | 20 | 1.483 | KV452977.1 | 111463 | 10-scf00388 | 10 |
| AX-157859606 | 20 | 1.483 | KV452977.1 | 111740 | 10-scf00388 | 10 |
| AX-158236653 | 20 | 1.483 | KV452977.1 | 114092 | 10-scf00388 | 10 |
| AX-158236654 | 20 | 1.483 | KV452977.1 | 114709 | 10-scf00388 | 10 |
| AX-158236657 | 20 | 1.483 | KV452977.1 | 116988 | 10-scf00388 | 10 |
| AX-158236658 | 20 | 1.92  | KV452977.1 | 118988 | 10-scf00388 | 10 |
| AX-158236664 | 20 | 1.92  | KV452977.1 | 128014 | 10-scf00388 | 10 |
| AX-158236665 | 20 | 1.92  | KV452977.1 | 129786 | 10-scf00388 | 10 |
| AX-158236667 | 20 | 1.92  | KV452977.1 | 132195 | 10-scf00388 | 10 |
| AX-157722468 | 20 | 1.92  | KV452977.1 | 132661 | 10-scf00388 | 10 |
| AX-158236668 | 20 | 1.92  | KV452977.1 | 133932 | 10-scf00388 | 10 |
| AX-158236669 | 20 | 1.92  | KV452977.1 | 134912 | 10-scf00388 | 10 |
| AX-157709074 | 20 | 1.92  | KV452977.1 | 135879 | 10-scf00388 | 10 |
| AX-158236671 | 20 | 1.92  | KV452977.1 | 137905 | 10-scf00388 | 10 |
| AX-158236672 | 20 | 1.92  | KV452977.1 | 139826 | 10-scf00388 | 10 |
| AX-158236673 | 20 | 1.92  | KV452977.1 | 140311 | 10-scf00388 | 10 |
| AX-158236675 | 20 | 1.92  | KV452977.1 | 141868 | 10-scf00388 | 10 |
| AX-158236677 | 20 | 1.92  | KV452977.1 | 143707 | 10-scf00388 | 10 |
| AX-158236678 | 20 | 1.92  | KV452977.1 | 144669 | 10-scf00388 | 10 |
| AX-158236681 | 20 | 1.956 | KV452977.1 | 147251 | 10-scf00388 | 10 |
| AX-158236686 | 20 | 2.002 | KV452977.1 | 152622 | 10-scf00388 | 10 |
| AX-158236687 | 20 | 2.029 | KV452977.1 | 153063 | 10-scf00388 | 10 |
| AX-157887477 | 20 | 2.029 | KV452977.1 | 155081 | 10-scf00388 | 10 |
| AX-158236688 | 20 | 2.029 | KV452977.1 | 156886 | 10-scf00388 | 10 |
| AX-158236690 | 20 | 2.062 | KV452977.1 | 160201 | 10-scf00388 | 10 |
| AX-157840744 | 20 | 2.062 | KV452977.1 | 175007 | 10-scf00388 | 10 |
| AX-158236693 | 20 | 2.138 | KV452977.1 | 165696 | 10-scf00388 | 10 |
| AX-158236695 | 20 | 2.184 | KV452977.1 | 171944 | 10-scf00388 | 10 |
| AX-158236646 | 20 | 2.208 | KV452977.1 | 100730 | 10-scf00388 | 10 |
| AX-158236689 | 20 | 2.208 | KV452977.1 | 157721 | 10-scf00388 | 10 |
| AX-158236700 | 20 | 2.208 | KV452977.1 | 183798 | 10-scf00388 | 10 |
| AX-157840745 | 20 | 2.248 | KV452977.1 | 191599 | 10-scf00388 | 10 |
| AX-157859608 | 20 | 2.248 | KV452977.1 | 192030 | 10-scf00388 | 10 |
| AX-158236703 | 20 | 2.248 | KV452977.1 | 193551 | 10-scf00388 | 10 |
| AX-158236704 | 20 | 2.248 | KV452977.1 | 195385 | 10-scf00388 | 10 |
| AX-158236705 | 20 | 2.248 | KV452977.1 | 199228 | 10-scf00388 | 10 |
| AX-158236706 | 20 | 2.248 | KV452977.1 | 200135 | 10-scf00388 | 10 |
| AX-158236708 | 20 | 2.285 | KV452977.1 | 200926 | 10-scf00388 | 10 |
| AX-158236716 | 20 | 2.454 | KV452977.1 | 216892 | 10-scf00388 | 10 |
| AX-158236719 | 20 | 2.66  | KV452977.1 | 222174 | 10-scf00388 | 10 |
| AX-157755433 | 20 | 2.66  | KV452977.1 | 226769 | 10-scf00388 | 10 |
| AX-158236723 | 20 | 3.035 | KV452977.1 | 232394 | 10-scf00388 | 10 |
| AX-158236727 | 20 | 3.036 | KV452977.1 | 243944 | 10-scf00388 | 10 |
| AX-158236728 | 20 | 3.41  | KV452977.1 | 247030 | 10-scf00388 | 10 |
| AX-158236729 | 20 | 3.41  | KV452977.1 | 247576 | 10-scf00388 | 10 |
| AX-158236731 | 20 | 3.56  | KV452977.1 | 252004 | 10-scf00388 | 10 |
| AX-158236732 | 20 | 3.56  | KV452977.1 | 252969 | 10-scf00388 | 10 |
| AX-158236734 | 20 | 3.562 | KV452977.1 | 254596 | 10-scf00388 | 10 |
| AX-158236735 | 20 | 3.846 | KV452977.1 | 259037 | 10-scf00388 | 10 |
| AX-158236746 | 20 | 3.846 | KV452977.1 | 286384 | 10-scf00388 | 10 |

|              |    |       |            |         |             |    |
|--------------|----|-------|------------|---------|-------------|----|
| AX-157840751 | 20 | 3.87  | KV452977.1 | 275762  | 10-scf00388 | 10 |
| AX-158236745 | 20 | 4.33  | KV452977.1 | 283853  | 10-scf00388 | 10 |
| AX-158236747 | 20 | 4.332 | KV452977.1 | 293202  | 10-scf00388 | 10 |
| AX-158236751 | 20 | 4.332 | KV452977.1 | 301551  | 10-scf00388 | 10 |
| AX-158236752 | 20 | 4.332 | KV452977.1 | 303626  | 10-scf00388 | 10 |
| AX-157750257 | 20 | 4.332 | KV452977.1 | 304153  | 10-scf00388 | 10 |
| AX-158236754 | 20 | 4.334 | KV452977.1 | 307996  | 10-scf00388 | 10 |
| AX-158236755 | 20 | 4.339 | KV452977.1 | 308489  | 10-scf00388 | 10 |
| AX-158236756 | 20 | 4.342 | KV452977.1 | 310505  | 10-scf00388 | 10 |
| AX-157887479 | 20 | 4.342 | KV452977.1 | 317092  | 10-scf00388 | 10 |
| AX-158236757 | 20 | 4.347 | KV452977.1 | 313679  | 10-scf00388 | 10 |
| AX-157753383 | 20 | 4.458 | KV452977.1 | 316934  | 10-scf00388 | 10 |
| AX-157738514 | 20 | 4.458 | KV452977.1 | 318401  | 10-scf00388 | 10 |
| AX-158236760 | 20 | 4.458 | KV452977.1 | 319237  | 10-scf00388 | 10 |
| AX-157859613 | 20 | 4.458 | KV452977.1 | 323644  | 10-scf00388 | 10 |
| AX-157713066 | 20 | 4.602 | KV452977.1 | 326012  | 10-scf00388 | 10 |
| AX-157719451 | 20 | 4.695 | KV452977.1 | 331467  | 10-scf00388 | 10 |
| AX-157773308 | 20 | 4.792 | KV452977.1 | 331823  | 10-scf00388 | 10 |
| AX-158236766 | 20 | 4.893 | KV452977.1 | 342898  | 10-scf00388 | 10 |
| AX-158236767 | 20 | 4.893 | KV452977.1 | 343808  | 10-scf00388 | 10 |
| AX-157751224 | 20 | 6.505 | KV452978.1 | 950675  | 10-scf00387 | 10 |
| AX-158235898 | 20 | 6.854 | KV452978.1 | 953317  | 10-scf00387 | 10 |
| AX-157720151 | 20 | 6.854 | KV452978.1 | 958388  | 10-scf00387 | 10 |
| AX-158235901 | 20 | 6.854 | KV452978.1 | 958714  | 10-scf00387 | 10 |
| AX-158235936 | 20 | 6.854 | KV452978.1 | 1019919 | 10-scf00387 | 10 |
| AX-158235902 | 20 | 6.896 | KV452978.1 | 959825  | 10-scf00387 | 10 |
| AX-158235905 | 20 | 6.984 | KV452978.1 | 962295  | 10-scf00387 | 10 |
| AX-158235907 | 20 | 6.984 | KV452978.1 | 965419  | 10-scf00387 | 10 |
| AX-158235909 | 20 | 7.073 | KV452978.1 | 972702  | 10-scf00387 | 10 |
| AX-158235910 | 20 | 7.112 | KV452978.1 | 974363  | 10-scf00387 | 10 |
| AX-158235912 | 20 | 7.153 | KV452978.1 | 977590  | 10-scf00387 | 10 |
| AX-157840674 | 20 | 7.168 | KV452978.1 | 978599  | 10-scf00387 | 10 |
| AX-158235932 | 20 | 7.168 | KV452978.1 | 1015059 | 10-scf00387 | 10 |
| AX-158235940 | 20 | 7.168 | KV452978.1 | 1033518 | 10-scf00387 | 10 |
| AX-157713189 | 20 | 7.182 | KV452978.1 | 975217  | 10-scf00387 | 10 |
| AX-158235915 | 20 | 7.182 | KV452978.1 | 980523  | 10-scf00387 | 10 |
| AX-158235918 | 20 | 7.182 | KV452978.1 | 984632  | 10-scf00387 | 10 |
| AX-158235920 | 20 | 7.182 | KV452978.1 | 989271  | 10-scf00387 | 10 |
| AX-158235923 | 20 | 7.182 | KV452978.1 | 994316  | 10-scf00387 | 10 |
| AX-157743646 | 20 | 7.182 | KV452978.1 | 1004199 | 10-scf00387 | 10 |
| AX-157739430 | 20 | 7.182 | KV452978.1 | 1006158 | 10-scf00387 | 10 |
| AX-157840676 | 20 | 7.182 | KV452978.1 | 1006433 | 10-scf00387 | 10 |
| AX-157840677 | 20 | 7.182 | KV452978.1 | 1006827 | 10-scf00387 | 10 |
| AX-157725577 | 20 | 7.182 | KV452978.1 | 1008314 | 10-scf00387 | 10 |
| AX-158235928 | 20 | 7.182 | KV452978.1 | 1008429 | 10-scf00387 | 10 |
| AX-157707925 | 20 | 7.182 | KV452978.1 | 1012597 | 10-scf00387 | 10 |
| AX-158235933 | 20 | 7.182 | KV452978.1 | 1016089 | 10-scf00387 | 10 |
| AX-157840679 | 20 | 7.182 | KV452978.1 | 1024740 | 10-scf00387 | 10 |
| AX-158235938 | 20 | 7.182 | KV452978.1 | 1025066 | 10-scf00387 | 10 |
| AX-158235939 | 20 | 7.182 | KV452978.1 | 1029468 | 10-scf00387 | 10 |
| AX-158235943 | 20 | 7.182 | KV452978.1 | 1035573 | 10-scf00387 | 10 |



|              |    |       |            |         |             |    |
|--------------|----|-------|------------|---------|-------------|----|
| AX-157840680 | 20 | 7.182 | KV452978.1 | 1039860 | 10-scf00387 | 10 |
| AX-158235945 | 20 | 7.182 | KV452978.1 | 1042496 | 10-scf00387 | 10 |
| AX-158235948 | 20 | 7.182 | KV452978.1 | 1046529 | 10-scf00387 | 10 |
| AX-158235951 | 20 | 7.182 | KV452978.1 | 1049219 | 10-scf00387 | 10 |
| AX-157840682 | 20 | 7.182 | KV452978.1 | 1049838 | 10-scf00387 | 10 |
| AX-157840683 | 20 | 7.182 | KV452978.1 | 1050012 | 10-scf00387 | 10 |
| AX-158394188 | 20 | 7.182 | KV452978.1 | 1050200 | 10-scf00387 | 10 |
| AX-158235952 | 20 | 7.182 | KV452978.1 | 1052627 | 10-scf00387 | 10 |
| AX-158235954 | 20 | 7.182 | KV452978.1 | 1056197 | 10-scf00387 | 10 |
| AX-158235955 | 20 | 7.182 | KV452978.1 | 1057372 | 10-scf00387 | 10 |
| AX-158235957 | 20 | 7.182 | KV452978.1 | 1062443 | 10-scf00387 | 10 |
| AX-158235958 | 20 | 7.182 | KV452978.1 | 1063305 | 10-scf00387 | 10 |
| AX-158235959 | 20 | 7.182 | KV452978.1 | 1063797 | 10-scf00387 | 10 |
| AX-157771926 | 20 | 7.182 | KV452978.1 | 1063987 | 10-scf00387 | 10 |
| AX-158235961 | 20 | 7.182 | KV452978.1 | 1065478 | 10-scf00387 | 10 |
| AX-158235980 | 20 | 7.182 | KV452978.1 | 1095993 | 10-scf00387 | 10 |
| AX-158235960 | 20 | 7.256 | KV452978.1 | 1064875 | 10-scf00387 | 10 |
| AX-158235904 | 20 | 7.367 | KV452978.1 | 961192  | 10-scf00387 | 10 |
| AX-158235965 | 20 | 7.367 | KV452978.1 | 1073737 | 10-scf00387 | 10 |
| AX-158235966 | 20 | 7.367 | KV452978.1 | 1074035 | 10-scf00387 | 10 |
| AX-157740788 | 20 | 7.367 | KV452978.1 | 1079616 | 10-scf00387 | 10 |
| AX-158235968 | 20 | 7.367 | KV452978.1 | 1080057 | 10-scf00387 | 10 |
| AX-158235969 | 20 | 7.367 | KV452978.1 | 1080653 | 10-scf00387 | 10 |
| AX-158235970 | 20 | 7.367 | KV452978.1 | 1081035 | 10-scf00387 | 10 |
| AX-158235971 | 20 | 7.367 | KV452978.1 | 1083546 | 10-scf00387 | 10 |
| AX-158386877 | 20 | 7.367 | KV452978.1 | 1090347 | 10-scf00387 | 10 |
| AX-157758524 | 20 | 7.367 | KV452978.1 | 1093489 | 10-scf00387 | 10 |
| AX-157715519 | 20 | 7.367 | KV452978.1 | 1100893 | 10-scf00387 | 10 |
| AX-157840686 | 20 | 7.367 | KV452978.1 | 1104805 | 10-scf00387 | 10 |
| AX-158235982 | 20 | 7.367 | KV452978.1 | 1109438 | 10-scf00387 | 10 |
| AX-157840688 | 20 | 7.367 | KV452978.1 | 1111331 | 10-scf00387 | 10 |
| AX-158235983 | 20 | 7.367 | KV452978.1 | 1111655 | 10-scf00387 | 10 |
| AX-158235984 | 20 | 7.367 | KV452978.1 | 1114047 | 10-scf00387 | 10 |
| AX-157887467 | 20 | 7.367 | KV452978.1 | 1115618 | 10-scf00387 | 10 |
| AX-158235987 | 20 | 7.367 | KV452978.1 | 1119489 | 10-scf00387 | 10 |
| AX-158235988 | 20 | 7.367 | KV452978.1 | 1121302 | 10-scf00387 | 10 |
| AX-158235995 | 20 | 7.367 | KV452978.1 | 1134603 | 10-scf00387 | 10 |
| AX-158235990 | 20 | 7.485 | KV452978.1 | 1126381 | 10-scf00387 | 10 |
| AX-158235992 | 20 | 7.552 | KV452978.1 | 1129607 | 10-scf00387 | 10 |
| AX-157840689 | 20 | 7.738 | KV452978.1 | 1111998 | 10-scf00387 | 10 |
| AX-158235993 | 20 | 7.738 | KV452978.1 | 1131551 | 10-scf00387 | 10 |
| AX-158235997 | 20 | 7.738 | KV452978.1 | 1135328 | 10-scf00387 | 10 |
| AX-157840692 | 20 | 7.738 | KV452978.1 | 1135574 | 10-scf00387 | 10 |
| AX-158235998 | 20 | 7.738 | KV452978.1 | 1138000 | 10-scf00387 | 10 |
| AX-157840693 | 20 | 7.738 | KV452978.1 | 1146389 | 10-scf00387 | 10 |
| AX-157840694 | 20 | 7.738 | KV452978.1 | 1150207 | 10-scf00387 | 10 |
| AX-158236002 | 20 | 7.738 | KV452978.1 | 1150847 | 10-scf00387 | 10 |
| AX-158236010 | 20 | 7.738 | KV452978.1 | 1167241 | 10-scf00387 | 10 |
| AX-158236011 | 20 | 8.106 | KV452978.1 | 1168217 | 10-scf00387 | 10 |
| AX-158236012 | 20 | 8.108 | KV452978.1 | 1172262 | 10-scf00387 | 10 |
| AX-157719249 | 20 | 8.108 | KV452978.1 | 1208514 | 10-scf00387 | 10 |

|              |    |        |            |         |             |    |
|--------------|----|--------|------------|---------|-------------|----|
| AX-158236071 | 20 | 8.108  | KV452978.1 | 1275489 | 10-scf00387 | 10 |
| AX-157879985 | 20 | 8.108  | KV452978.1 | 1285975 | 10-scf00387 | 10 |
| AX-158236089 | 20 | 8.108  | KV452978.1 | 1301176 | 10-scf00387 | 10 |
| AX-158236014 | 20 | 8.115  | KV452978.1 | 1176241 | 10-scf00387 | 10 |
| AX-157840697 | 20 | 8.843  | KV452978.1 | 1198463 | 10-scf00387 | 10 |
| AX-157840698 | 20 | 8.851  | KV452978.1 | 1198801 | 10-scf00387 | 10 |
| AX-158236030 | 20 | 8.851  | KV452978.1 | 1198870 | 10-scf00387 | 10 |
| AX-158236031 | 20 | 8.851  | KV452978.1 | 1200415 | 10-scf00387 | 10 |
| AX-158236032 | 20 | 8.851  | KV452978.1 | 1201568 | 10-scf00387 | 10 |
| AX-157840699 | 20 | 8.851  | KV452978.1 | 1202143 | 10-scf00387 | 10 |
| AX-158236035 | 20 | 8.851  | KV452978.1 | 1209909 | 10-scf00387 | 10 |
| AX-158236036 | 20 | 9.223  | KV452978.1 | 1218016 | 10-scf00387 | 10 |
| AX-157840695 | 20 | 9.593  | KV452978.1 | 1151081 | 10-scf00387 | 10 |
| AX-157840700 | 20 | 9.593  | KV452978.1 | 1219930 | 10-scf00387 | 10 |
| AX-158236040 | 20 | 9.593  | KV452978.1 | 1224052 | 10-scf00387 | 10 |
| AX-157752043 | 20 | 9.593  | KV452978.1 | 1229403 | 10-scf00387 | 10 |
| AX-158236044 | 20 | 9.593  | KV452978.1 | 1233765 | 10-scf00387 | 10 |
| AX-158236049 | 20 | 9.593  | KV452978.1 | 1243691 | 10-scf00387 | 10 |
| AX-157840701 | 20 | 9.593  | KV452978.1 | 1246748 | 10-scf00387 | 10 |
| AX-158236058 | 20 | 9.593  | KV452978.1 | 1253061 | 10-scf00387 | 10 |
| AX-158236053 | 20 | 9.812  | KV452978.1 | 1251170 | 10-scf00387 | 10 |
| AX-158236055 | 20 | 9.812  | KV452978.1 | 1252191 | 10-scf00387 | 10 |
| AX-158236061 | 20 | 9.812  | KV452978.1 | 1255281 | 10-scf00387 | 10 |
| AX-158236062 | 20 | 9.812  | KV452978.1 | 1256590 | 10-scf00387 | 10 |
| AX-158236066 | 20 | 9.812  | KV452978.1 | 1264991 | 10-scf00387 | 10 |
| AX-158236067 | 20 | 9.812  | KV452978.1 | 1265365 | 10-scf00387 | 10 |
| AX-158236068 | 20 | 9.812  | KV452978.1 | 1266643 | 10-scf00387 | 10 |
| AX-158236069 | 20 | 9.812  | KV452978.1 | 1267148 | 10-scf00387 | 10 |
| AX-158236070 | 20 | 9.812  | KV452978.1 | 1271355 | 10-scf00387 | 10 |
| AX-157710528 | 20 | 9.812  | KV452978.1 | 1274149 | 10-scf00387 | 10 |
| AX-157753580 | 20 | 9.812  | KV452978.1 | 1276851 | 10-scf00387 | 10 |
| AX-158236075 | 20 | 9.812  | KV452978.1 | 1281446 | 10-scf00387 | 10 |
| AX-157754533 | 20 | 9.812  | KV452978.1 | 1283336 | 10-scf00387 | 10 |
| AX-158236078 | 20 | 9.812  | KV452978.1 | 1285850 | 10-scf00387 | 10 |
| AX-158236088 | 20 | 9.812  | KV452978.1 | 1300992 | 10-scf00387 | 10 |
| AX-158236081 | 20 | 9.876  | KV452978.1 | 1288331 | 10-scf00387 | 10 |
| AX-158236083 | 20 | 9.93   | KV452978.1 | 1292485 | 10-scf00387 | 10 |
| AX-157746795 | 20 | 9.975  | KV452978.1 | 1293113 | 10-scf00387 | 10 |
| AX-158236084 | 20 | 9.975  | KV452978.1 | 1294919 | 10-scf00387 | 10 |
| AX-158236086 | 20 | 10.138 | KV452978.1 | 1297596 | 10-scf00387 | 10 |
| AX-158236087 | 20 | 10.138 | KV452978.1 | 1298254 | 10-scf00387 | 10 |
| AX-157887468 | 20 | 10.138 | KV452978.1 | 1298426 | 10-scf00387 | 10 |
| AX-157840702 | 20 | 10.138 | KV452978.1 | 1298767 | 10-scf00387 | 10 |
| AX-158236090 | 20 | 10.464 | KV452978.1 | 1302148 | 10-scf00387 | 10 |
| AX-158236092 | 20 | 10.464 | KV452978.1 | 1306136 | 10-scf00387 | 10 |
| AX-158236094 | 20 | 10.464 | KV452978.1 | 1306992 | 10-scf00387 | 10 |
| AX-158236095 | 20 | 10.464 | KV452978.1 | 1309777 | 10-scf00387 | 10 |
| AX-158236097 | 20 | 10.464 | KV452978.1 | 1311505 | 10-scf00387 | 10 |
| AX-158236099 | 20 | 10.467 | KV452978.1 | 1313349 | 10-scf00387 | 10 |
| AX-157724343 | 20 | 10.469 | KV452978.1 | 1314662 | 10-scf00387 | 10 |
| AX-157751949 | 20 | 10.472 | KV452978.1 | 1318619 | 10-scf00387 | 10 |

|              |    |        |            |         |             |    |
|--------------|----|--------|------------|---------|-------------|----|
| AX-158236102 | 20 | 10.686 | KV452978.1 | 1329996 | 10-scf00387 | 10 |
| AX-158236103 | 20 | 10.686 | KV452978.1 | 1333697 | 10-scf00387 | 10 |
| AX-158236104 | 20 | 10.904 | KV452978.1 | 1338892 | 10-scf00387 | 10 |
| AX-158236105 | 20 | 10.904 | KV452978.1 | 1339232 | 10-scf00387 | 10 |
| AX-157840705 | 20 | 10.904 | KV452978.1 | 1339575 | 10-scf00387 | 10 |
| AX-157840706 | 20 | 11.014 | KV452978.1 | 1345307 | 10-scf00387 | 10 |
| AX-158236108 | 20 | 11.014 | KV452978.1 | 1346312 | 10-scf00387 | 10 |
| AX-158236109 | 20 | 11.014 | KV452978.1 | 1347642 | 10-scf00387 | 10 |
| AX-157720126 | 20 | 11.014 | KV452978.1 | 1351611 | 10-scf00387 | 10 |
| AX-158236110 | 20 | 11.014 | KV452978.1 | 1352624 | 10-scf00387 | 10 |
| AX-158236119 | 20 | 11.014 | KV452978.1 | 1372730 | 10-scf00387 | 10 |
| AX-158236171 | 20 | 11.014 | KV452978.1 | 1472218 | 10-scf00387 | 10 |
| AX-158236175 | 20 | 11.014 | KV452978.1 | 1488056 | 10-scf00387 | 10 |
| AX-158236111 | 20 | 11.16  | KV452978.1 | 1354961 | 10-scf00387 | 10 |
| AX-158236112 | 20 | 11.306 | KV452978.1 | 1356326 | 10-scf00387 | 10 |
| AX-157840720 | 20 | 11.306 | KV452978.1 | 1501021 | 10-scf00387 | 10 |
| AX-157743954 | 20 | 11.38  | KV452978.1 | 1357522 | 10-scf00387 | 10 |
| AX-158236113 | 20 | 11.448 | KV452978.1 | 1359541 | 10-scf00387 | 10 |
| AX-158236120 | 20 | 11.449 | KV452978.1 | 1374614 | 10-scf00387 | 10 |
| AX-157840708 | 20 | 11.45  | KV452978.1 | 1377464 | 10-scf00387 | 10 |
| AX-158236126 | 20 | 11.451 | KV452978.1 | 1383561 | 10-scf00387 | 10 |
| AX-158236123 | 20 | 11.456 | KV452978.1 | 1379226 | 10-scf00387 | 10 |
| AX-158236128 | 20 | 11.456 | KV452978.1 | 1386466 | 10-scf00387 | 10 |
| AX-157840710 | 20 | 11.456 | KV452978.1 | 1442149 | 10-scf00387 | 10 |
| AX-157840715 | 20 | 11.456 | KV452978.1 | 1479543 | 10-scf00387 | 10 |
| AX-158236130 | 20 | 11.465 | KV452978.1 | 1392912 | 10-scf00387 | 10 |
| AX-158236131 | 20 | 11.467 | KV452978.1 | 1393076 | 10-scf00387 | 10 |
| AX-158236133 | 20 | 11.475 | KV452978.1 | 1398655 | 10-scf00387 | 10 |
| AX-158236134 | 20 | 11.482 | KV452978.1 | 1403325 | 10-scf00387 | 10 |
| AX-158236106 | 20 | 11.485 | KV452978.1 | 1339869 | 10-scf00387 | 10 |
| AX-158236135 | 20 | 11.485 | KV452978.1 | 1406409 | 10-scf00387 | 10 |
| AX-158236143 | 20 | 11.531 | KV452978.1 | 1431008 | 10-scf00387 | 10 |
| AX-158236136 | 20 | 11.56  | KV452978.1 | 1418415 | 10-scf00387 | 10 |
| AX-158236147 | 20 | 11.56  | KV452978.1 | 1433283 | 10-scf00387 | 10 |
| AX-157749080 | 20 | 11.56  | KV452978.1 | 1434321 | 10-scf00387 | 10 |
| AX-158236150 | 20 | 11.56  | KV452978.1 | 1437590 | 10-scf00387 | 10 |
| AX-158236154 | 20 | 11.56  | KV452978.1 | 1455202 | 10-scf00387 | 10 |
| AX-158236117 | 20 | 11.57  | KV452978.1 | 1369027 | 10-scf00387 | 10 |
| AX-157840711 | 20 | 11.57  | KV452978.1 | 1450745 | 10-scf00387 | 10 |
| AX-158236162 | 20 | 11.57  | KV452978.1 | 1462461 | 10-scf00387 | 10 |
| AX-158236185 | 20 | 11.57  | KV452978.1 | 1503842 | 10-scf00387 | 10 |
| AX-158236153 | 20 | 11.777 | KV452978.1 | 1451362 | 10-scf00387 | 10 |
| AX-157747213 | 20 | 11.777 | KV452978.1 | 1452726 | 10-scf00387 | 10 |
| AX-157751516 | 20 | 11.777 | KV452978.1 | 1454730 | 10-scf00387 | 10 |
| AX-158236155 | 20 | 11.777 | KV452978.1 | 1457724 | 10-scf00387 | 10 |
| AX-158236156 | 20 | 11.99  | KV452978.1 | 1458409 | 10-scf00387 | 10 |
| AX-158236161 | 20 | 11.993 | KV452978.1 | 1461286 | 10-scf00387 | 10 |
| AX-158236165 | 20 | 11.997 | KV452978.1 | 1467026 | 10-scf00387 | 10 |
| AX-158236166 | 20 | 11.997 | KV452978.1 | 1467600 | 10-scf00387 | 10 |
| AX-158236167 | 20 | 11.997 | KV452978.1 | 1467797 | 10-scf00387 | 10 |
| AX-157840713 | 20 | 11.997 | KV452978.1 | 1471335 | 10-scf00387 | 10 |

|              |    |        |            |         |             |    |
|--------------|----|--------|------------|---------|-------------|----|
| AX-157867237 | 20 | 11.997 | KV452978.1 | 1472932 | 10-scf00387 | 10 |
| AX-157840714 | 20 | 11.997 | KV452978.1 | 1477011 | 10-scf00387 | 10 |
| AX-158236168 | 20 | 12.001 | KV452978.1 | 1468325 | 10-scf00387 | 10 |
| AX-157739018 | 20 | 12.001 | KV452978.1 | 1483994 | 10-scf00387 | 10 |
| AX-158236177 | 20 | 12.528 | KV452978.1 | 1489943 | 10-scf00387 | 10 |
| AX-158236188 | 20 | 12.528 | KV452978.1 | 1506189 | 10-scf00387 | 10 |
| AX-158236199 | 20 | 12.528 | KV452978.1 | 1522011 | 10-scf00387 | 10 |
| AX-158236178 | 20 | 12.534 | KV452978.1 | 1490684 | 10-scf00387 | 10 |
| AX-158236181 | 20 | 12.538 | KV452978.1 | 1496351 | 10-scf00387 | 10 |
| AX-158236157 | 20 | 12.543 | KV452978.1 | 1458681 | 10-scf00387 | 10 |
| AX-157716193 | 20 | 12.543 | KV452978.1 | 1487729 | 10-scf00387 | 10 |
| AX-157840719 | 20 | 12.543 | KV452978.1 | 1499976 | 10-scf00387 | 10 |
| AX-158236183 | 20 | 12.543 | KV452978.1 | 1501897 | 10-scf00387 | 10 |
| AX-158236184 | 20 | 12.543 | KV452978.1 | 1502139 | 10-scf00387 | 10 |
| AX-158236187 | 20 | 12.543 | KV452978.1 | 1505744 | 10-scf00387 | 10 |
| AX-158236189 | 20 | 12.617 | KV452978.1 | 1507197 | 10-scf00387 | 10 |
| AX-158236190 | 20 | 12.762 | KV452978.1 | 1508033 | 10-scf00387 | 10 |
| AX-157770841 | 20 | 12.871 | KV452978.1 | 1518066 | 10-scf00387 | 10 |
| AX-158236198 | 20 | 12.871 | KV452978.1 | 1521407 | 10-scf00387 | 10 |
| AX-158236204 | 20 | 12.871 | KV452978.1 | 1527421 | 10-scf00387 | 10 |
| AX-158236201 | 20 | 12.872 | KV452978.1 | 1524260 | 10-scf00387 | 10 |
| AX-158236205 | 20 | 12.872 | KV452978.1 | 1528855 | 10-scf00387 | 10 |
| AX-157751832 | 20 | 13.198 | KV452978.1 | 1497729 | 10-scf00387 | 10 |
| AX-158236207 | 20 | 13.198 | KV452978.1 | 1530693 | 10-scf00387 | 10 |
| AX-157741095 | 20 | 13.199 | KV452978.1 | 1494762 | 10-scf00387 | 10 |
| AX-158236194 | 20 | 13.199 | KV452978.1 | 1513964 | 10-scf00387 | 10 |
| AX-157725304 | 20 | 13.199 | KV452978.1 | 1528427 | 10-scf00387 | 10 |
| AX-158236208 | 20 | 13.199 | KV452978.1 | 1533486 | 10-scf00387 | 10 |
| AX-158236209 | 20 | 13.199 | KV452978.1 | 1534634 | 10-scf00387 | 10 |
| AX-158236210 | 20 | 13.199 | KV452978.1 | 1535246 | 10-scf00387 | 10 |
| AX-158236211 | 20 | 13.199 | KV452978.1 | 1536071 | 10-scf00387 | 10 |
| AX-158236212 | 20 | 13.199 | KV452978.1 | 1536747 | 10-scf00387 | 10 |
| AX-158236213 | 20 | 13.199 | KV452978.1 | 1537430 | 10-scf00387 | 10 |
| AX-158236215 | 20 | 13.199 | KV452978.1 | 1538502 | 10-scf00387 | 10 |
| AX-158236216 | 20 | 13.199 | KV452978.1 | 1538997 | 10-scf00387 | 10 |
| AX-158236217 | 20 | 13.199 | KV452978.1 | 1539299 | 10-scf00387 | 10 |
| AX-158236218 | 20 | 13.199 | KV452978.1 | 1542635 | 10-scf00387 | 10 |
| AX-158236219 | 20 | 13.199 | KV452978.1 | 1542822 | 10-scf00387 | 10 |
| AX-158236221 | 20 | 13.199 | KV452978.1 | 1547124 | 10-scf00387 | 10 |
| AX-158236224 | 20 | 13.199 | KV452978.1 | 1548401 | 10-scf00387 | 10 |
| AX-158236227 | 20 | 13.199 | KV452978.1 | 1552891 | 10-scf00387 | 10 |
| AX-158236229 | 20 | 13.199 | KV452978.1 | 1554698 | 10-scf00387 | 10 |
| AX-157737467 | 20 | 13.199 | KV452978.1 | 1557983 | 10-scf00387 | 10 |
| AX-157747583 | 20 | 13.199 | KV452978.1 | 1558044 | 10-scf00387 | 10 |
| AX-158236234 | 20 | 13.199 | KV452978.1 | 1568224 | 10-scf00387 | 10 |
| AX-158236235 | 20 | 13.199 | KV452978.1 | 1569586 | 10-scf00387 | 10 |
| AX-157741440 | 20 | 13.238 | KV452978.1 | 1561012 | 10-scf00387 | 10 |
| AX-157840721 | 20 | 13.251 | KV452978.1 | 1561732 | 10-scf00387 | 10 |
| AX-158236231 | 20 | 13.265 | KV452978.1 | 1565760 | 10-scf00387 | 10 |
| AX-158236246 | 20 | 13.265 | KV452978.1 | 1615776 | 10-scf00387 | 10 |
| AX-157840722 | 20 | 13.286 | KV452978.1 | 1568987 | 10-scf00387 | 10 |

|              |    |        |            |         |             |    |
|--------------|----|--------|------------|---------|-------------|----|
| AX-158236239 | 20 | 13.286 | KV452978.1 | 1577228 | 10-scf00387 | 10 |
| AX-158236237 | 20 | 13.308 | KV452978.1 | 1573840 | 10-scf00387 | 10 |
| AX-158236238 | 20 | 13.308 | KV452978.1 | 1575325 | 10-scf00387 | 10 |
| AX-157751466 | 20 | 13.308 | KV452978.1 | 1581781 | 10-scf00387 | 10 |
| AX-158236244 | 20 | 13.707 | KV452978.1 | 1607806 | 10-scf00387 | 10 |
| AX-157741101 | 20 | 13.798 | KV452978.1 | 1608545 | 10-scf00387 | 10 |
| AX-158236240 | 20 | 13.833 | KV452978.1 | 1585456 | 10-scf00387 | 10 |
| AX-157840725 | 20 | 13.833 | KV452978.1 | 1614436 | 10-scf00387 | 10 |
| AX-158236261 | 20 | 13.833 | KV452978.1 | 1642846 | 10-scf00387 | 10 |
| AX-157840726 | 20 | 13.917 | KV452978.1 | 1616374 | 10-scf00387 | 10 |
| AX-158236241 | 20 | 14.073 | KV452978.1 | 1587553 | 10-scf00387 | 10 |
| AX-158236249 | 20 | 14.073 | KV452978.1 | 1619189 | 10-scf00387 | 10 |
| AX-158236250 | 20 | 14.073 | KV452978.1 | 1624002 | 10-scf00387 | 10 |
| AX-157742243 | 20 | 14.073 | KV452978.1 | 1628809 | 10-scf00387 | 10 |
| AX-158236253 | 20 | 14.073 | KV452978.1 | 1629391 | 10-scf00387 | 10 |
| AX-158236257 | 20 | 14.073 | KV452978.1 | 1636749 | 10-scf00387 | 10 |
| AX-158236248 | 20 | 14.183 | KV452978.1 | 1618017 | 10-scf00387 | 10 |
| AX-158236263 | 20 | 14.183 | KV452978.1 | 1645961 | 10-scf00387 | 10 |
| AX-158236264 | 20 | 14.291 | KV452978.1 | 1647211 | 10-scf00387 | 10 |
| AX-158236266 | 20 | 14.401 | KV452978.1 | 1649302 | 10-scf00387 | 10 |
| AX-158236267 | 20 | 14.401 | KV452978.1 | 1650244 | 10-scf00387 | 10 |
| AX-158236252 | 20 | 14.437 | KV452978.1 | 1628496 | 10-scf00387 | 10 |
| AX-157738528 | 20 | 14.437 | KV452978.1 | 1651915 | 10-scf00387 | 10 |
| AX-158236270 | 20 | 14.467 | KV452978.1 | 1656122 | 10-scf00387 | 10 |
| AX-158236191 | 20 | 14.476 | KV452978.1 | 1509702 | 10-scf00387 | 10 |
| AX-158236245 | 20 | 14.476 | KV452978.1 | 1608939 | 10-scf00387 | 10 |
| AX-158236273 | 20 | 14.476 | KV452978.1 | 1661101 | 10-scf00387 | 10 |
| AX-157689921 | 20 | 14.476 |            | 256     | scf13243    | UN |
| AX-157753223 | 20 | 14.496 | KV452978.1 | 1665477 | 10-scf00387 | 10 |
| AX-158236278 | 20 | 14.512 | KV452978.1 | 1668098 | 10-scf00387 | 10 |
| AX-158236279 | 20 | 14.537 | KV452978.1 | 1668552 | 10-scf00387 | 10 |
| AX-157749759 | 20 | 14.575 | KV452978.1 | 1627268 | 10-scf00387 | 10 |
| AX-158236281 | 20 | 14.575 | KV452978.1 | 1671223 | 10-scf00387 | 10 |
| AX-158236251 | 20 | 14.619 | KV452978.1 | 1624858 | 10-scf00387 | 10 |
| AX-158236256 | 20 | 14.619 | KV452978.1 | 1635737 | 10-scf00387 | 10 |
| AX-158236258 | 20 | 14.619 | KV452978.1 | 1639870 | 10-scf00387 | 10 |
| AX-158236268 | 20 | 14.619 | KV452978.1 | 1650924 | 10-scf00387 | 10 |
| AX-158236269 | 20 | 14.619 | KV452978.1 | 1655370 | 10-scf00387 | 10 |
| AX-158236282 | 20 | 14.619 | KV452978.1 | 1671801 | 10-scf00387 | 10 |
| AX-158236283 | 20 | 14.619 | KV452978.1 | 1672325 | 10-scf00387 | 10 |
| AX-157840729 | 20 | 14.619 | KV452978.1 | 1672399 | 10-scf00387 | 10 |
| AX-158236284 | 20 | 14.619 | KV452978.1 | 1676495 | 10-scf00387 | 10 |
| AX-158236285 | 20 | 14.619 | KV452978.1 | 1676975 | 10-scf00387 | 10 |
| AX-158236286 | 20 | 14.619 | KV452978.1 | 1677233 | 10-scf00387 | 10 |
| AX-158236303 | 20 | 14.619 | KV452978.1 | 1697165 | 10-scf00387 | 10 |
| AX-158236291 | 20 | 14.824 | KV452978.1 | 1682762 | 10-scf00387 | 10 |
| AX-158236293 | 20 | 15.007 | KV452978.1 | 1685499 | 10-scf00387 | 10 |
| AX-158236294 | 20 | 15.218 | KV452978.1 | 1686857 | 10-scf00387 | 10 |
| AX-158236295 | 20 | 15.231 | KV452978.1 | 1687183 | 10-scf00387 | 10 |
| AX-158236298 | 20 | 15.231 | KV452978.1 | 1689911 | 10-scf00387 | 10 |
| AX-158236299 | 20 | 15.231 | KV452978.1 | 1690183 | 10-scf00387 | 10 |

|              |    |        |            |         |             |    |
|--------------|----|--------|------------|---------|-------------|----|
| AX-158236300 | 20 | 15.231 | KV452978.1 | 1691356 | 10-scf00387 | 10 |
| AX-158236304 | 20 | 15.307 | KV452978.1 | 1697748 | 10-scf00387 | 10 |
| AX-158236305 | 20 | 15.385 | KV452978.1 | 1698288 | 10-scf00387 | 10 |
| AX-158236308 | 20 | 15.385 | KV452978.1 | 1701927 | 10-scf00387 | 10 |
| AX-157752421 | 20 | 15.385 | KV452978.1 | 1703184 | 10-scf00387 | 10 |
| AX-158236310 | 20 | 15.385 | KV452978.1 | 1703932 | 10-scf00387 | 10 |
| AX-158236311 | 20 | 15.385 | KV452978.1 | 1704433 | 10-scf00387 | 10 |
| AX-158236313 | 20 | 15.385 | KV452978.1 | 1707118 | 10-scf00387 | 10 |
| AX-157753194 | 20 | 15.385 | KV452978.1 | 1713038 | 10-scf00387 | 10 |
| AX-157887473 | 20 | 15.974 | KV452978.1 | 1723411 | 10-scf00387 | 10 |
| AX-158236323 | 20 | 16.074 | KV452978.1 | 1724357 | 10-scf00387 | 10 |
| AX-158236324 | 20 | 16.663 | KV452978.1 | 1728005 | 10-scf00387 | 10 |
| AX-158236326 | 20 | 16.663 | KV452978.1 | 1729503 | 10-scf00387 | 10 |
| AX-158236328 | 20 | 16.663 | KV452978.1 | 1733345 | 10-scf00387 | 10 |
| AX-158236329 | 20 | 17.164 | KV452978.1 | 1743034 | 10-scf00387 | 10 |
| AX-158236331 | 20 | 17.186 | KV452978.1 | 1746092 | 10-scf00387 | 10 |
| AX-158236333 | 20 | 17.36  | KV452978.1 | 1750915 | 10-scf00387 | 10 |
| AX-158236334 | 20 | 17.36  | KV452978.1 | 1751616 | 10-scf00387 | 10 |
| AX-158236335 | 20 | 17.36  | KV452978.1 | 1753557 | 10-scf00387 | 10 |
| AX-158236337 | 20 | 17.36  | KV452978.1 | 1754864 | 10-scf00387 | 10 |
| AX-158236338 | 20 | 17.36  | KV452978.1 | 1756016 | 10-scf00387 | 10 |
| AX-158236340 | 20 | 17.578 | KV452978.1 | 1763957 | 10-scf00387 | 10 |
| AX-158236342 | 20 | 17.578 | KV452978.1 | 1767774 | 10-scf00387 | 10 |
| AX-158236344 | 20 | 17.578 | KV452978.1 | 1772440 | 10-scf00387 | 10 |
| AX-158236347 | 20 | 17.578 | KV452978.1 | 1786785 | 10-scf00387 | 10 |
| AX-158236349 | 20 | 17.578 | KV452978.1 | 1789576 | 10-scf00387 | 10 |
| AX-158236350 | 20 | 17.578 | KV452978.1 | 1790191 | 10-scf00387 | 10 |
| AX-158236383 | 20 | 17.578 | KV452978.1 | 1834103 | 10-scf00387 | 10 |
| AX-158236354 | 20 | 17.579 | KV452978.1 | 1793884 | 10-scf00387 | 10 |
| AX-158236355 | 20 | 17.67  | KV452978.1 | 1794389 | 10-scf00387 | 10 |
| AX-158236357 | 20 | 17.865 | KV452978.1 | 1795800 | 10-scf00387 | 10 |
| AX-158236381 | 20 | 17.865 | KV452978.1 | 1832662 | 10-scf00387 | 10 |
| AX-158236363 | 20 | 17.918 | KV452978.1 | 1805076 | 10-scf00387 | 10 |
| AX-158236367 | 20 | 18.325 | KV452978.1 | 1811500 | 10-scf00387 | 10 |
| AX-158236376 | 20 | 18.325 | KV452978.1 | 1823093 | 10-scf00387 | 10 |
| AX-158236386 | 20 | 18.325 | KV452978.1 | 1837860 | 10-scf00387 | 10 |
| AX-158236371 | 20 | 18.358 | KV452978.1 | 1816184 | 10-scf00387 | 10 |
| AX-158236374 | 20 | 18.371 | KV452978.1 | 1819593 | 10-scf00387 | 10 |
| AX-158236384 | 20 | 18.371 | KV452978.1 | 1835518 | 10-scf00387 | 10 |
| AX-158236399 | 20 | 18.381 | KV452978.1 | 1857320 | 10-scf00387 | 10 |
| AX-158236400 | 20 | 18.392 | KV452978.1 | 1858927 | 10-scf00387 | 10 |
| AX-158236403 | 20 | 18.801 | KV452978.1 | 1862346 | 10-scf00387 | 10 |
| AX-158236409 | 20 | 18.9   | KV452978.1 | 1875404 | 10-scf00387 | 10 |
| AX-158236410 | 20 | 19.07  | KV452978.1 | 1877347 | 10-scf00387 | 10 |
| AX-158236414 | 20 | 19.435 | KV452978.1 | 1884703 | 10-scf00387 | 10 |
| AX-158236415 | 20 | 19.677 | KV452978.1 | 1885552 | 10-scf00387 | 10 |
| AX-158236417 | 20 | 19.76  | KV452978.1 | 1888444 | 10-scf00387 | 10 |
| AX-157754254 | 20 | 19.76  | KV452978.1 | 1891035 | 10-scf00387 | 10 |
| AX-158236418 | 20 | 19.923 | KV452978.1 | 1889143 | 10-scf00387 | 10 |
| AX-157725471 | 20 | 20.047 | KV452978.1 | 1891435 | 10-scf00387 | 10 |
| AX-158236420 | 20 | 20.055 | KV452978.1 | 1892817 | 10-scf00387 | 10 |

|              |    |        |            |         |             |    |
|--------------|----|--------|------------|---------|-------------|----|
| AX-158236424 | 20 | 20.284 | KV452978.1 | 1903910 | 10-scf00387 | 10 |
| AX-158236426 | 20 | 20.286 | KV452978.1 | 1907459 | 10-scf00387 | 10 |
| AX-158236428 | 20 | 20.286 | KV452978.1 | 1908986 | 10-scf00387 | 10 |
| AX-157773928 | 20 | 20.286 | KV452978.1 | 1911802 | 10-scf00387 | 10 |
| AX-158236429 | 20 | 20.522 | KV452978.1 | 1912633 | 10-scf00387 | 10 |
| AX-158236430 | 20 | 20.522 | KV452978.1 | 1913291 | 10-scf00387 | 10 |
| AX-158236457 | 20 | 20.522 | KV452978.1 | 1954989 | 10-scf00387 | 10 |
| AX-157749679 | 20 | 20.585 | KV452978.1 | 1914297 | 10-scf00387 | 10 |
| AX-158236431 | 20 | 20.588 | KV452978.1 | 1915268 | 10-scf00387 | 10 |
| AX-158236445 | 20 | 20.588 | KV452978.1 | 1934106 | 10-scf00387 | 10 |
| AX-157708034 | 20 | 20.588 | KV452978.1 | 2023465 | 10-scf00387 | 10 |
| AX-157840734 | 20 | 20.591 | KV452978.1 | 1916765 | 10-scf00387 | 10 |
| AX-157840735 | 20 | 20.626 | KV452978.1 | 1916964 | 10-scf00387 | 10 |
| AX-157714171 | 20 | 20.658 | KV452978.1 | 1919520 | 10-scf00387 | 10 |
| AX-158236437 | 20 | 20.67  | KV452978.1 | 1921332 | 10-scf00387 | 10 |
| AX-158236438 | 20 | 20.67  | KV452978.1 | 1922654 | 10-scf00387 | 10 |
| AX-158236441 | 20 | 20.814 | KV452978.1 | 1926881 | 10-scf00387 | 10 |
| AX-158236444 | 20 | 20.814 | KV452978.1 | 1933618 | 10-scf00387 | 10 |
| AX-158236446 | 20 | 20.814 | KV452978.1 | 1938136 | 10-scf00387 | 10 |
| AX-157750613 | 20 | 20.815 | KV452978.1 | 1940923 | 10-scf00387 | 10 |
| AX-158236449 | 20 | 21.213 | KV452978.1 | 1944590 | 10-scf00387 | 10 |
| AX-158236452 | 20 | 21.489 | KV452978.1 | 1948674 | 10-scf00387 | 10 |
| AX-158236454 | 20 | 21.489 | KV452978.1 | 1952046 | 10-scf00387 | 10 |
| AX-158236456 | 20 | 21.489 | KV452978.1 | 1953503 | 10-scf00387 | 10 |
| AX-158386882 | 20 | 21.489 | KV452978.1 | 1953748 | 10-scf00387 | 10 |
| AX-158236458 | 20 | 21.489 | KV452978.1 | 1955412 | 10-scf00387 | 10 |
| AX-158236459 | 20 | 21.489 | KV452978.1 | 1955782 | 10-scf00387 | 10 |
| AX-158236461 | 20 | 21.489 | KV452978.1 | 1958040 | 10-scf00387 | 10 |
| AX-158236462 | 20 | 21.489 | KV452978.1 | 1958768 | 10-scf00387 | 10 |
| AX-158236479 | 20 | 21.489 | KV452978.1 | 1989585 | 10-scf00387 | 10 |
| AX-158236491 | 20 | 21.489 | KV452978.1 | 2004401 | 10-scf00387 | 10 |
| AX-158386885 | 20 | 21.489 | KV452978.1 | 2011778 | 10-scf00387 | 10 |
| AX-158394193 | 20 | 21.631 | KV452978.1 | 1962023 | 10-scf00387 | 10 |
| AX-158236465 | 20 | 21.635 | KV452978.1 | 1962824 | 10-scf00387 | 10 |
| AX-157773210 | 20 | 21.635 | KV452978.1 | 1972272 | 10-scf00387 | 10 |
| AX-158236474 | 20 | 21.744 | KV452978.1 | 1977682 | 10-scf00387 | 10 |
| AX-157840736 | 20 | 21.853 | KV452978.1 | 1984840 | 10-scf00387 | 10 |
| AX-158236481 | 20 | 21.853 | KV452978.1 | 1990358 | 10-scf00387 | 10 |
| AX-158236482 | 20 | 21.853 | KV452978.1 | 1991167 | 10-scf00387 | 10 |
| AX-158236483 | 20 | 21.853 | KV452978.1 | 1991721 | 10-scf00387 | 10 |
| AX-158236486 | 20 | 21.853 | KV452978.1 | 1995209 | 10-scf00387 | 10 |
| AX-157887476 | 20 | 21.853 | KV452978.1 | 1996907 | 10-scf00387 | 10 |
| AX-158236487 | 20 | 21.853 | KV452978.1 | 1997592 | 10-scf00387 | 10 |
| AX-158236490 | 20 | 21.853 | KV452978.1 | 2003526 | 10-scf00387 | 10 |
| AX-158236493 | 20 | 22.241 | KV452978.1 | 2006569 | 10-scf00387 | 10 |
| AX-158236496 | 20 | 22.251 | KV452978.1 | 2011448 | 10-scf00387 | 10 |
| AX-158236497 | 20 | 22.794 | KV452978.1 | 2021567 | 10-scf00387 | 10 |
| AX-158236501 | 20 | 22.794 | KV452978.1 | 2028805 | 10-scf00387 | 10 |
| AX-157840737 | 20 | 23.318 | KV452978.1 | 2033416 | 10-scf00387 | 10 |
| AX-158236503 | 20 | 23.32  | KV452978.1 | 2037244 | 10-scf00387 | 10 |
| AX-158236506 | 20 | 23.321 | KV452978.1 | 2043154 | 10-scf00387 | 10 |

|              |    |        |            |         |             |    |
|--------------|----|--------|------------|---------|-------------|----|
| AX-158236507 | 20 | 23.501 | KV452978.1 | 2047800 | 10-scf00387 | 10 |
| AX-158236509 | 20 | 23.501 | KV452978.1 | 2059649 | 10-scf00387 | 10 |
| AX-158236510 | 20 | 23.501 | KV452978.1 | 2061161 | 10-scf00387 | 10 |
| AX-158236513 | 20 | 23.505 | KV452978.1 | 2070035 | 10-scf00387 | 10 |
| AX-158236516 | 20 | 23.508 | KV452978.1 | 2075315 | 10-scf00387 | 10 |
| AX-158236517 | 20 | 23.779 | KV452978.1 | 2075682 | 10-scf00387 | 10 |
| AX-157771189 | 20 | 24.012 | KV452978.1 | 2039687 | 10-scf00387 | 10 |
| AX-157840739 | 20 | 24.012 | KV452978.1 | 2042903 | 10-scf00387 | 10 |
| AX-158236520 | 20 | 24.012 | KV452978.1 | 2082435 | 10-scf00387 | 10 |
| AX-157751983 | 20 | 24.053 | KV452978.1 | 2088569 | 10-scf00387 | 10 |
| AX-158236525 | 20 | 24.055 | KV452978.1 | 2092364 | 10-scf00387 | 10 |
| AX-158236527 | 20 | 24.055 | KV452978.1 | 2096318 | 10-scf00387 | 10 |
| AX-158236531 | 20 | 24.058 | KV452978.1 | 2107085 | 10-scf00387 | 10 |
| AX-158236524 | 20 | 24.123 | KV452978.1 | 2091608 | 10-scf00387 | 10 |
| AX-158236532 | 20 | 24.123 | KV452978.1 | 2114244 | 10-scf00387 | 10 |
| AX-158236515 | 20 | 25.203 | KV452978.1 | 2071082 | 10-scf00387 | 10 |
| AX-158236535 | 20 | 25.203 | KV452978.1 | 2124754 | 10-scf00387 | 10 |
| AX-158236537 | 20 | 25.572 | KV452978.1 | 2131225 | 10-scf00387 | 10 |
| AX-157754190 | 20 | 25.586 | KV452978.1 | 2132771 | 10-scf00387 | 10 |
| AX-158236538 | 20 | 25.586 | KV452978.1 | 2133341 | 10-scf00387 | 10 |
| AX-158236530 | 20 | 26.077 | KV452978.1 | 2099738 | 10-scf00387 | 10 |
| AX-158386887 | 20 | 26.077 | KV452978.1 | 2116886 | 10-scf00387 | 10 |
| AX-158236540 | 20 | 26.077 | KV452978.1 | 2137779 | 10-scf00387 | 10 |
| AX-158236544 | 20 | 26.077 | KV452978.1 | 2143717 | 10-scf00387 | 10 |
| AX-158236550 | 20 | 26.077 | KV452978.1 | 2154917 | 10-scf00387 | 10 |
| AX-157872529 | 20 | 26.089 | KV452978.1 | 2143062 | 10-scf00387 | 10 |
| AX-158236545 | 20 | 26.216 | KV452978.1 | 2147275 | 10-scf00387 | 10 |
| AX-158236549 | 20 | 26.344 | KV452978.1 | 2154092 | 10-scf00387 | 10 |
| AX-158236552 | 20 | 26.674 | KV452978.1 | 2156645 | 10-scf00387 | 10 |
| AX-158236561 | 20 | 26.674 | KV452978.1 | 2177487 | 10-scf00387 | 10 |
| AX-158236560 | 20 | 26.752 | KV452978.1 | 2175196 | 10-scf00387 | 10 |
| AX-158394194 | 20 | 26.809 | KV452978.1 | 2179470 | 10-scf00387 | 10 |
| AX-158236563 | 20 | 26.809 | KV452978.1 | 2182916 | 10-scf00387 | 10 |
| AX-158236565 | 20 | 26.809 | KV452978.1 | 2187429 | 10-scf00387 | 10 |
| AX-158236850 | 20 | 26.809 | KV452979.1 | 20298   | 10-scf00389 | 10 |
| AX-157840742 | 20 | 27.118 | KV452978.1 | 2198012 | 10-scf00387 | 10 |
| AX-158236573 | 20 | 27.119 | KV452978.1 | 2204649 | 10-scf00387 | 10 |
| AX-158236575 | 20 | 27.119 | KV452978.1 | 2206827 | 10-scf00387 | 10 |
| AX-158236577 | 20 | 27.119 | KV452978.1 | 2208845 | 10-scf00387 | 10 |
| AX-158236837 | 20 | 27.119 | KV452979.1 | 699     | 10-scf00389 | 10 |
| AX-158236838 | 20 | 27.119 | KV452979.1 | 1624    | 10-scf00389 | 10 |
| AX-157770989 | 20 | 27.119 | KV452979.1 | 2506    | 10-scf00389 | 10 |
| AX-158236846 | 20 | 27.119 | KV452979.1 | 16778   | 10-scf00389 | 10 |
| AX-158236854 | 20 | 27.119 | KV452979.1 | 23707   | 10-scf00389 | 10 |
| AX-158236857 | 20 | 27.119 | KV452979.1 | 26022   | 10-scf00389 | 10 |
| AX-157775065 | 20 | 27.119 | KV452979.1 | 32294   | 10-scf00389 | 10 |
| AX-158236576 | 20 | 27.337 | KV452978.1 | 2208147 | 10-scf00387 | 10 |
| AX-158236858 | 20 | 27.337 | KV452979.1 | 34952   | 10-scf00389 | 10 |
| AX-158236859 | 20 | 27.337 | KV452979.1 | 36461   | 10-scf00389 | 10 |
| AX-158236860 | 20 | 27.337 | KV452979.1 | 37324   | 10-scf00389 | 10 |
| AX-158236913 | 20 | 27.337 | KV452979.1 | 122253  | 10-scf00389 | 10 |



|              |    |        |            |        |             |    |
|--------------|----|--------|------------|--------|-------------|----|
| AX-158236960 | 20 | 27.337 | KV452979.1 | 202981 | 10-scf00389 | 10 |
| AX-157724388 | 20 | 27.398 | KV452979.1 | 48738  | 10-scf00389 | 10 |
| AX-158236867 | 20 | 27.556 | KV452979.1 | 52382  | 10-scf00389 | 10 |
| AX-158236868 | 20 | 27.556 | KV452979.1 | 54070  | 10-scf00389 | 10 |
| AX-158236871 | 20 | 27.556 | KV452979.1 | 55878  | 10-scf00389 | 10 |
| AX-157758031 | 20 | 27.556 | KV452979.1 | 60866  | 10-scf00389 | 10 |
| AX-158236874 | 20 | 27.556 | KV452979.1 | 60979  | 10-scf00389 | 10 |
| AX-158236875 | 20 | 27.556 | KV452979.1 | 61428  | 10-scf00389 | 10 |
| AX-158236876 | 20 | 27.556 | KV452979.1 | 61853  | 10-scf00389 | 10 |
| AX-158380942 | 20 | 27.556 | KV452979.1 | 63301  | 10-scf00389 | 10 |
| AX-157775087 | 20 | 27.556 | KV452979.1 | 65792  | 10-scf00389 | 10 |
| AX-158236880 | 20 | 27.556 | KV452979.1 | 66409  | 10-scf00389 | 10 |
| AX-158236882 | 20 | 27.556 | KV452979.1 | 71117  | 10-scf00389 | 10 |
| AX-158236883 | 20 | 27.556 | KV452979.1 | 72020  | 10-scf00389 | 10 |
| AX-157723453 | 20 | 27.556 | KV452979.1 | 74927  | 10-scf00389 | 10 |
| AX-157726851 | 20 | 27.722 | KV452979.1 | 76990  | 10-scf00389 | 10 |
| AX-158236887 | 20 | 27.722 | KV452979.1 | 79805  | 10-scf00389 | 10 |
| AX-158236888 | 20 | 27.878 | KV452979.1 | 82006  | 10-scf00389 | 10 |
| AX-158236885 | 20 | 27.885 | KV452979.1 | 79099  | 10-scf00389 | 10 |
| AX-158236889 | 20 | 27.885 | KV452979.1 | 84456  | 10-scf00389 | 10 |
| AX-157719589 | 20 | 27.885 | KV452979.1 | 85326  | 10-scf00389 | 10 |
| AX-158236892 | 20 | 27.885 | KV452979.1 | 86846  | 10-scf00389 | 10 |
| AX-158236893 | 20 | 27.886 | KV452979.1 | 88714  | 10-scf00389 | 10 |
| AX-158236895 | 20 | 28.321 | KV452979.1 | 91830  | 10-scf00389 | 10 |
| AX-158236899 | 20 | 28.54  | KV452979.1 | 98286  | 10-scf00389 | 10 |
| AX-158236901 | 20 | 28.54  | KV452979.1 | 99661  | 10-scf00389 | 10 |
| AX-158236903 | 20 | 28.54  | KV452979.1 | 106777 | 10-scf00389 | 10 |
| AX-157709722 | 20 | 28.54  | KV452979.1 | 109696 | 10-scf00389 | 10 |
| AX-158236906 | 20 | 28.54  | KV452979.1 | 113471 | 10-scf00389 | 10 |
| AX-157720370 | 20 | 28.54  | KV452979.1 | 116337 | 10-scf00389 | 10 |
| AX-158236908 | 20 | 28.54  | KV452979.1 | 119399 | 10-scf00389 | 10 |
| AX-158236909 | 20 | 28.54  | KV452979.1 | 119803 | 10-scf00389 | 10 |
| AX-158236910 | 20 | 28.54  | KV452979.1 | 120234 | 10-scf00389 | 10 |
| AX-158236911 | 20 | 28.54  | KV452979.1 | 121483 | 10-scf00389 | 10 |
| AX-158236914 | 20 | 28.759 | KV452979.1 | 122791 | 10-scf00389 | 10 |
| AX-158236916 | 20 | 28.759 | KV452979.1 | 124512 | 10-scf00389 | 10 |
| AX-158236918 | 20 | 28.759 | KV452979.1 | 126261 | 10-scf00389 | 10 |
| AX-157752105 | 20 | 28.759 | KV452979.1 | 127103 | 10-scf00389 | 10 |
| AX-157772432 | 20 | 28.759 | KV452979.1 | 128292 | 10-scf00389 | 10 |
| AX-158236921 | 20 | 28.759 | KV452979.1 | 129358 | 10-scf00389 | 10 |
| AX-158236923 | 20 | 28.759 | KV452979.1 | 130727 | 10-scf00389 | 10 |
| AX-158236924 | 20 | 28.759 | KV452979.1 | 130903 | 10-scf00389 | 10 |
| AX-158236925 | 20 | 28.759 | KV452979.1 | 131585 | 10-scf00389 | 10 |
| AX-158236929 | 20 | 28.759 | KV452979.1 | 139134 | 10-scf00389 | 10 |
| AX-158236937 | 20 | 28.759 | KV452979.1 | 159071 | 10-scf00389 | 10 |
| AX-158236946 | 20 | 28.759 | KV452979.1 | 177503 | 10-scf00389 | 10 |
| AX-157859617 | 20 | 28.759 | KV452979.1 | 184782 | 10-scf00389 | 10 |
| AX-157774685 | 20 | 28.759 | KV452979.1 | 185345 | 10-scf00389 | 10 |
| AX-158236936 | 20 | 28.83  | KV452979.1 | 156798 | 10-scf00389 | 10 |
| AX-158236944 | 20 | 28.868 | KV452979.1 | 172275 | 10-scf00389 | 10 |
| AX-158236945 | 20 | 28.868 | KV452979.1 | 174007 | 10-scf00389 | 10 |

|              |    |        |            |        |             |    |
|--------------|----|--------|------------|--------|-------------|----|
| AX-157840761 | 20 | 28.868 | KV452979.1 | 179353 | 10-scf00389 | 10 |
| AX-158236949 | 20 | 28.868 | KV452979.1 | 183906 | 10-scf00389 | 10 |
| AX-158236951 | 20 | 28.868 | KV452979.1 | 186227 | 10-scf00389 | 10 |
| AX-158236952 | 20 | 28.868 | KV452979.1 | 192276 | 10-scf00389 | 10 |
| AX-158236954 | 20 | 28.868 | KV452979.1 | 195306 | 10-scf00389 | 10 |
| AX-158236955 | 20 | 28.868 | KV452979.1 | 196541 | 10-scf00389 | 10 |
| AX-158236956 | 20 | 28.868 | KV452979.1 | 196901 | 10-scf00389 | 10 |
| AX-158236917 | 20 | 28.977 | KV452979.1 | 126059 | 10-scf00389 | 10 |
| AX-158236922 | 20 | 28.977 | KV452979.1 | 130067 | 10-scf00389 | 10 |
| AX-158236957 | 20 | 28.977 | KV452979.1 | 197786 | 10-scf00389 | 10 |
| AX-157840762 | 20 | 28.977 | KV452979.1 | 199028 | 10-scf00389 | 10 |
| AX-158236959 | 20 | 28.977 | KV452979.1 | 202774 | 10-scf00389 | 10 |
| AX-157714900 | 20 | 28.977 | KV452979.1 | 204770 | 10-scf00389 | 10 |
| AX-158236965 | 20 | 28.977 | KV452979.1 | 207037 | 10-scf00389 | 10 |
| AX-158236966 | 20 | 28.977 | KV452979.1 | 209637 | 10-scf00389 | 10 |
| AX-158236968 | 20 | 28.977 | KV452979.1 | 211092 | 10-scf00389 | 10 |
| AX-157754227 | 20 | 28.977 | KV452979.1 | 214309 | 10-scf00389 | 10 |
| AX-158236973 | 20 | 28.987 | KV452979.1 | 217234 | 10-scf00389 | 10 |
| AX-158236976 | 20 | 29.218 | KV452979.1 | 222033 | 10-scf00389 | 10 |
| AX-158236977 | 20 | 29.294 | KV452979.1 | 223186 | 10-scf00389 | 10 |
| AX-158236979 | 20 | 29.489 | KV452979.1 | 225307 | 10-scf00389 | 10 |
| AX-158236981 | 20 | 29.489 | KV452979.1 | 227467 | 10-scf00389 | 10 |
| AX-158236985 | 20 | 29.489 | KV452979.1 | 232114 | 10-scf00389 | 10 |
| AX-158236986 | 20 | 29.489 | KV452979.1 | 232859 | 10-scf00389 | 10 |
| AX-158236987 | 20 | 29.489 | KV452979.1 | 235439 | 10-scf00389 | 10 |
| AX-158236989 | 20 | 29.581 | KV452979.1 | 237570 | 10-scf00389 | 10 |
| AX-158236991 | 20 | 29.581 | KV452979.1 | 239178 | 10-scf00389 | 10 |
| AX-158236992 | 20 | 29.692 | KV452979.1 | 239682 | 10-scf00389 | 10 |
| AX-158236993 | 20 | 29.782 | KV452979.1 | 240145 | 10-scf00389 | 10 |
| AX-158236999 | 20 | 29.889 | KV452979.1 | 245804 | 10-scf00389 | 10 |
| AX-158237001 | 20 | 29.889 | KV452979.1 | 248879 | 10-scf00389 | 10 |
| AX-158237002 | 20 | 29.889 | KV452979.1 | 250140 | 10-scf00389 | 10 |
| AX-158237004 | 20 | 29.889 | KV452979.1 | 252981 | 10-scf00389 | 10 |
| AX-157880008 | 20 | 30.13  | KV452979.1 | 253955 | 10-scf00389 | 10 |
| AX-158237005 | 20 | 30.298 | KV452979.1 | 254190 | 10-scf00389 | 10 |
| AX-158237009 | 20 | 30.371 | KV452979.1 | 258350 | 10-scf00389 | 10 |
| AX-158237011 | 20 | 30.371 | KV452979.1 | 259636 | 10-scf00389 | 10 |
| AX-158237012 | 20 | 30.371 | KV452979.1 | 260386 | 10-scf00389 | 10 |
| AX-158237016 | 20 | 30.371 | KV452979.1 | 262541 | 10-scf00389 | 10 |
| AX-158237018 | 20 | 30.371 | KV452979.1 | 263822 | 10-scf00389 | 10 |
| AX-158237019 | 20 | 30.371 | KV452979.1 | 265524 | 10-scf00389 | 10 |
| AX-158237021 | 20 | 30.371 | KV452979.1 | 268324 | 10-scf00389 | 10 |
| AX-158237024 | 20 | 30.371 | KV452979.1 | 270713 | 10-scf00389 | 10 |
| AX-158237025 | 20 | 30.492 | KV452979.1 | 272517 | 10-scf00389 | 10 |
| AX-158237028 | 20 | 30.672 | KV452979.1 | 278134 | 10-scf00389 | 10 |
| AX-158237029 | 20 | 30.672 | KV452979.1 | 278859 | 10-scf00389 | 10 |
| AX-158237030 | 20 | 30.672 | KV452979.1 | 279176 | 10-scf00389 | 10 |
| AX-158237043 | 20 | 30.672 | KV452979.1 | 297796 | 10-scf00389 | 10 |
| AX-158237045 | 20 | 30.672 | KV452979.1 | 299811 | 10-scf00389 | 10 |
| AX-158237035 | 20 | 30.945 | KV452979.1 | 283932 | 10-scf00389 | 10 |
| AX-158237036 | 20 | 31.227 | KV452979.1 | 289472 | 10-scf00389 | 10 |

|              |    |        |            |        |             |    |
|--------------|----|--------|------------|--------|-------------|----|
| AX-158237047 | 20 | 31.227 | KV452979.1 | 302768 | 10-scf00389 | 10 |
| AX-158237038 | 20 | 31.291 | KV452979.1 | 289962 | 10-scf00389 | 10 |
| AX-158237044 | 20 | 31.323 | KV452979.1 | 298026 | 10-scf00389 | 10 |
| AX-158237049 | 20 | 31.385 | KV452979.1 | 306956 | 10-scf00389 | 10 |
| AX-158237051 | 20 | 31.385 | KV452979.1 | 308532 | 10-scf00389 | 10 |
| AX-158237056 | 20 | 31.385 | KV452979.1 | 311169 | 10-scf00389 | 10 |
| AX-158237058 | 20 | 31.385 | KV452979.1 | 313010 | 10-scf00389 | 10 |
| AX-158237067 | 20 | 31.385 | KV452979.1 | 321320 | 10-scf00389 | 10 |
| AX-158237060 | 20 | 31.441 | KV452979.1 | 314736 | 10-scf00389 | 10 |
| AX-157756833 | 20 | 31.494 | KV452979.1 | 316184 | 10-scf00389 | 10 |
| AX-158237062 | 20 | 31.494 | KV452979.1 | 319182 | 10-scf00389 | 10 |
| AX-158237064 | 20 | 31.494 | KV452979.1 | 319892 | 10-scf00389 | 10 |
| AX-158237065 | 20 | 31.494 | KV452979.1 | 319984 | 10-scf00389 | 10 |
| AX-158237066 | 20 | 31.494 | KV452979.1 | 320581 | 10-scf00389 | 10 |
| AX-158237087 | 20 | 31.494 | KV452979.1 | 348092 | 10-scf00389 | 10 |
| AX-158237093 | 20 | 31.494 | KV452979.1 | 356447 | 10-scf00389 | 10 |
| AX-158237094 | 20 | 31.494 | KV452979.1 | 357609 | 10-scf00389 | 10 |
| AX-158237098 | 20 | 31.494 | KV452979.1 | 363865 | 10-scf00389 | 10 |
| AX-158237142 | 20 | 31.494 | KV452979.1 | 435815 | 10-scf00389 | 10 |
| AX-158237163 | 20 | 31.494 | KV452979.1 | 451299 | 10-scf00389 | 10 |
| AX-158237055 | 20 | 31.603 | KV452979.1 | 311104 | 10-scf00389 | 10 |
| AX-158237061 | 20 | 31.603 | KV452979.1 | 315192 | 10-scf00389 | 10 |
| AX-158410604 | 20 | 31.603 | KV452979.1 | 327046 | 10-scf00389 | 10 |
| AX-158237073 | 20 | 31.603 | KV452979.1 | 330584 | 10-scf00389 | 10 |
| AX-158237074 | 20 | 31.603 | KV452979.1 | 331241 | 10-scf00389 | 10 |
| AX-158237075 | 20 | 31.603 | KV452979.1 | 335195 | 10-scf00389 | 10 |
| AX-158237076 | 20 | 31.603 | KV452979.1 | 335827 | 10-scf00389 | 10 |
| AX-158237077 | 20 | 31.603 | KV452979.1 | 336808 | 10-scf00389 | 10 |
| AX-158237078 | 20 | 31.603 | KV452979.1 | 340784 | 10-scf00389 | 10 |
| AX-158237083 | 20 | 31.603 | KV452979.1 | 345670 | 10-scf00389 | 10 |
| AX-158237084 | 20 | 31.603 | KV452979.1 | 346162 | 10-scf00389 | 10 |
| AX-158237086 | 20 | 31.603 | KV452979.1 | 347476 | 10-scf00389 | 10 |
| AX-158237088 | 20 | 31.603 | KV452979.1 | 348831 | 10-scf00389 | 10 |
| AX-157840767 | 20 | 31.603 | KV452979.1 | 349073 | 10-scf00389 | 10 |
| AX-158237091 | 20 | 31.603 | KV452979.1 | 351030 | 10-scf00389 | 10 |
| AX-157773744 | 20 | 31.603 | KV452979.1 | 353677 | 10-scf00389 | 10 |
| AX-158237095 | 20 | 31.603 | KV452979.1 | 358208 | 10-scf00389 | 10 |
| AX-158237096 | 20 | 31.603 | KV452979.1 | 359882 | 10-scf00389 | 10 |
| AX-158237100 | 20 | 31.603 | KV452979.1 | 366506 | 10-scf00389 | 10 |
| AX-158237155 | 20 | 31.603 | KV452979.1 | 443372 | 10-scf00389 | 10 |
| AX-158237252 | 20 | 31.603 | KV452979.1 | 584137 | 10-scf00389 | 10 |
| AX-157754698 | 20 | 31.623 | KV452979.1 | 339921 | 10-scf00389 | 10 |
| AX-157840770 | 20 | 31.623 | KV452979.1 | 361232 | 10-scf00389 | 10 |
| AX-157724393 | 20 | 31.623 | KV452979.1 | 386464 | 10-scf00389 | 10 |
| AX-158237161 | 20 | 31.623 | KV452979.1 | 450022 | 10-scf00389 | 10 |
| AX-158415358 | 20 | 31.623 | KV452979.1 | 496462 | 10-scf00389 | 10 |
| AX-158237097 | 20 | 31.66  | KV452979.1 | 363075 | 10-scf00389 | 10 |
| AX-158237102 | 20 | 31.712 | KV452979.1 | 368602 | 10-scf00389 | 10 |
| AX-157840772 | 20 | 31.712 | KV452979.1 | 371744 | 10-scf00389 | 10 |
| AX-157712948 | 20 | 31.712 | KV452979.1 | 373852 | 10-scf00389 | 10 |
| AX-158237103 | 20 | 31.712 | KV452979.1 | 376156 | 10-scf00389 | 10 |

|              |    |        |            |        |             |    |
|--------------|----|--------|------------|--------|-------------|----|
| AX-158237105 | 20 | 31.712 | KV452979.1 | 377358 | 10-scf00389 | 10 |
| AX-158237109 | 20 | 31.712 | KV452979.1 | 381405 | 10-scf00389 | 10 |
| AX-158237110 | 20 | 31.712 | KV452979.1 | 382408 | 10-scf00389 | 10 |
| AX-158237111 | 20 | 31.712 | KV452979.1 | 384266 | 10-scf00389 | 10 |
| AX-158237117 | 20 | 31.712 | KV452979.1 | 395650 | 10-scf00389 | 10 |
| AX-158237122 | 20 | 31.712 | KV452979.1 | 406761 | 10-scf00389 | 10 |
| AX-158237134 | 20 | 31.746 | KV452979.1 | 425191 | 10-scf00389 | 10 |
| AX-158237135 | 20 | 31.845 | KV452979.1 | 425575 | 10-scf00389 | 10 |
| AX-158237068 | 20 | 31.876 | KV452979.1 | 321892 | 10-scf00389 | 10 |
| AX-157859620 | 20 | 31.876 | KV452979.1 | 406178 | 10-scf00389 | 10 |
| AX-158237128 | 20 | 31.876 | KV452979.1 | 416266 | 10-scf00389 | 10 |
| AX-158237146 | 20 | 31.876 | KV452979.1 | 438223 | 10-scf00389 | 10 |
| AX-158237147 | 20 | 31.876 | KV452979.1 | 438681 | 10-scf00389 | 10 |
| AX-158237149 | 20 | 31.876 | KV452979.1 | 440681 | 10-scf00389 | 10 |
| AX-158237151 | 20 | 31.876 | KV452979.1 | 441944 | 10-scf00389 | 10 |
| AX-158237157 | 20 | 31.876 | KV452979.1 | 446357 | 10-scf00389 | 10 |
| AX-158237158 | 20 | 31.876 | KV452979.1 | 447133 | 10-scf00389 | 10 |
| AX-158237160 | 20 | 31.876 | KV452979.1 | 449453 | 10-scf00389 | 10 |
| AX-158237162 | 20 | 31.876 | KV452979.1 | 450981 | 10-scf00389 | 10 |
| AX-158237174 | 20 | 31.876 | KV452979.1 | 467220 | 10-scf00389 | 10 |
| AX-158237039 | 20 | 32.04  | KV452979.1 | 293781 | 10-scf00389 | 10 |
| AX-158237123 | 20 | 32.04  | KV452979.1 | 408334 | 10-scf00389 | 10 |
| AX-158237171 | 20 | 32.04  | KV452979.1 | 463646 | 10-scf00389 | 10 |
| AX-158237173 | 20 | 32.04  | KV452979.1 | 465897 | 10-scf00389 | 10 |
| AX-158237168 | 20 | 32.15  | KV452979.1 | 457902 | 10-scf00389 | 10 |
| AX-158237179 | 20 | 32.15  | KV452979.1 | 472830 | 10-scf00389 | 10 |
| AX-157840765 | 20 | 32.259 | KV452979.1 | 273843 | 10-scf00389 | 10 |
| AX-158237115 | 20 | 32.259 | KV452979.1 | 388439 | 10-scf00389 | 10 |
| AX-158237118 | 20 | 32.259 | KV452979.1 | 398513 | 10-scf00389 | 10 |
| AX-158237178 | 20 | 32.259 | KV452979.1 | 472571 | 10-scf00389 | 10 |
| AX-158237180 | 20 | 32.259 | KV452979.1 | 477697 | 10-scf00389 | 10 |
| AX-158237181 | 20 | 32.259 | KV452979.1 | 478136 | 10-scf00389 | 10 |
| AX-158237183 | 20 | 32.259 | KV452979.1 | 480067 | 10-scf00389 | 10 |
| AX-157840775 | 20 | 32.259 | KV452979.1 | 480354 | 10-scf00389 | 10 |
| AX-157840776 | 20 | 32.259 | KV452979.1 | 480639 | 10-scf00389 | 10 |
| AX-157840777 | 20 | 32.259 | KV452979.1 | 480716 | 10-scf00389 | 10 |
| AX-157751312 | 20 | 32.477 | KV452979.1 | 383583 | 10-scf00389 | 10 |
| AX-157707708 | 20 | 32.477 | KV452979.1 | 421256 | 10-scf00389 | 10 |
| AX-158237172 | 20 | 32.477 | KV452979.1 | 465090 | 10-scf00389 | 10 |
| AX-158237185 | 20 | 32.477 | KV452979.1 | 486525 | 10-scf00389 | 10 |
| AX-158237186 | 20 | 32.477 | KV452979.1 | 487784 | 10-scf00389 | 10 |
| AX-158237188 | 20 | 32.477 | KV452979.1 | 489426 | 10-scf00389 | 10 |
| AX-158237189 | 20 | 32.477 | KV452979.1 | 490061 | 10-scf00389 | 10 |
| AX-158237190 | 20 | 32.477 | KV452979.1 | 493545 | 10-scf00389 | 10 |
| AX-158237191 | 20 | 32.477 | KV452979.1 | 494987 | 10-scf00389 | 10 |
| AX-158237194 | 20 | 32.477 | KV452979.1 | 500629 | 10-scf00389 | 10 |
| AX-158237195 | 20 | 32.477 | KV452979.1 | 502727 | 10-scf00389 | 10 |
| AX-158237196 | 20 | 32.477 | KV452979.1 | 504429 | 10-scf00389 | 10 |
| AX-158237198 | 20 | 32.477 | KV452979.1 | 508650 | 10-scf00389 | 10 |
| AX-158237202 | 20 | 32.477 | KV452979.1 | 513602 | 10-scf00389 | 10 |
| AX-158237222 | 20 | 32.477 | KV452979.1 | 539156 | 10-scf00389 | 10 |

|              |    |        |            |        |             |    |
|--------------|----|--------|------------|--------|-------------|----|
| AX-157742668 | 20 | 32.477 | KV452979.1 | 545659 | 10-scf00389 | 10 |
| AX-158237229 | 20 | 32.477 | KV452979.1 | 550020 | 10-scf00389 | 10 |
| AX-158237237 | 20 | 32.477 | KV452979.1 | 562844 | 10-scf00389 | 10 |
| AX-157757623 | 20 | 32.477 | KV452979.1 | 565112 | 10-scf00389 | 10 |
| AX-158237256 | 20 | 32.477 | KV452979.1 | 591544 | 10-scf00389 | 10 |
| AX-157715967 | 20 | 32.477 | KV452979.1 | 603233 | 10-scf00389 | 10 |
| AX-158237197 | 20 | 32.506 | KV452979.1 | 507925 | 10-scf00389 | 10 |
| AX-158237200 | 20 | 32.538 | KV452979.1 | 510598 | 10-scf00389 | 10 |
| AX-157719808 | 20 | 32.586 | KV452979.1 | 513746 | 10-scf00389 | 10 |
| AX-158237204 | 20 | 32.586 | KV452979.1 | 517828 | 10-scf00389 | 10 |
| AX-158237206 | 20 | 32.586 | KV452979.1 | 518887 | 10-scf00389 | 10 |
| AX-158415359 | 20 | 32.586 | KV452979.1 | 521128 | 10-scf00389 | 10 |
| AX-157772868 | 20 | 32.586 | KV452979.1 | 523189 | 10-scf00389 | 10 |
| AX-157840779 | 20 | 32.586 | KV452979.1 | 527637 | 10-scf00389 | 10 |
| AX-158415360 | 20 | 32.586 | KV452979.1 | 531849 | 10-scf00389 | 10 |
| AX-158237215 | 20 | 32.586 | KV452979.1 | 533926 | 10-scf00389 | 10 |
| AX-158237218 | 20 | 32.586 | KV452979.1 | 536360 | 10-scf00389 | 10 |
| AX-158237219 | 20 | 32.586 | KV452979.1 | 536732 | 10-scf00389 | 10 |
| AX-157714999 | 20 | 32.586 | KV452979.1 | 540752 | 10-scf00389 | 10 |
| AX-158237224 | 20 | 32.586 | KV452979.1 | 542500 | 10-scf00389 | 10 |
| AX-158237227 | 20 | 32.586 | KV452979.1 | 546545 | 10-scf00389 | 10 |
| AX-157840781 | 20 | 32.586 | KV452979.1 | 550769 | 10-scf00389 | 10 |
| AX-158380947 | 20 | 32.586 | KV452979.1 | 564214 | 10-scf00389 | 10 |
| AX-158237244 | 20 | 32.586 | KV452979.1 | 574422 | 10-scf00389 | 10 |
| AX-157710206 | 20 | 32.586 | KV452979.1 | 611511 | 10-scf00389 | 10 |
| AX-158380946 | 20 | 32.805 | KV452979.1 | 522439 | 10-scf00389 | 10 |
| AX-158237230 | 20 | 32.805 | KV452979.1 | 551888 | 10-scf00389 | 10 |
| AX-158237231 | 20 | 32.805 | KV452979.1 | 552728 | 10-scf00389 | 10 |
| AX-158237233 | 20 | 32.805 | KV452979.1 | 556562 | 10-scf00389 | 10 |
| AX-158237238 | 20 | 32.805 | KV452979.1 | 564128 | 10-scf00389 | 10 |
| AX-158237240 | 20 | 32.805 | KV452979.1 | 569157 | 10-scf00389 | 10 |
| AX-158237241 | 20 | 32.805 | KV452979.1 | 570859 | 10-scf00389 | 10 |
| AX-158237242 | 20 | 32.805 | KV452979.1 | 572343 | 10-scf00389 | 10 |
| AX-158237243 | 20 | 32.805 | KV452979.1 | 573035 | 10-scf00389 | 10 |
| AX-158237245 | 20 | 32.805 | KV452979.1 | 575992 | 10-scf00389 | 10 |
| AX-158237250 | 20 | 32.808 | KV452979.1 | 581875 | 10-scf00389 | 10 |
| AX-158237216 | 20 | 32.955 | KV452979.1 | 534554 | 10-scf00389 | 10 |
| AX-158237255 | 20 | 32.955 | KV452979.1 | 589945 | 10-scf00389 | 10 |
| AX-158237288 | 20 | 33.99  | KV452979.1 | 633316 | 10-scf00389 | 10 |
| AX-158237292 | 20 | 34.007 | KV452979.1 | 642727 | 10-scf00389 | 10 |
| AX-158237294 | 20 | 34.007 | KV452979.1 | 644887 | 10-scf00389 | 10 |
| AX-158237303 | 20 | 34.007 | KV452979.1 | 658872 | 10-scf00389 | 10 |
| AX-158237306 | 20 | 34.007 | KV452979.1 | 660994 | 10-scf00389 | 10 |
| AX-158237311 | 20 | 34.007 | KV452979.1 | 666974 | 10-scf00389 | 10 |
| AX-157746197 | 20 | 34.062 | KV452979.1 | 668572 | 10-scf00389 | 10 |
| AX-158237291 | 20 | 34.103 | KV452979.1 | 640840 | 10-scf00389 | 10 |
| AX-158237313 | 20 | 34.103 | KV452979.1 | 670147 | 10-scf00389 | 10 |
| AX-158237314 | 20 | 34.103 | KV452979.1 | 670887 | 10-scf00389 | 10 |
| AX-158237296 | 20 | 34.132 | KV452979.1 | 647199 | 10-scf00389 | 10 |
| AX-158237316 | 20 | 34.132 | KV452979.1 | 673303 | 10-scf00389 | 10 |
| AX-157775807 | 20 | 34.132 | KV452979.1 | 683759 | 10-scf00389 | 10 |

|              |    |        |            |        |                  |    |
|--------------|----|--------|------------|--------|------------------|----|
| AX-158237324 | 20 | 34.132 | KV452979.1 | 689624 | 10-scf00389      | 10 |
| AX-158237327 | 20 | 34.132 | KV452979.1 | 690860 | 10-scf00389      | 10 |
| AX-158237328 | 20 | 34.132 | KV452979.1 | 691800 | 10-scf00389      | 10 |
| AX-158237329 | 20 | 34.132 | KV452979.1 | 695745 | 10-scf00389      | 10 |
| AX-158237310 | 20 | 34.256 | KV452979.1 | 666217 | 10-scf00389      | 10 |
| AX-158237331 | 20 | 34.256 | KV452979.1 | 697071 | 10-scf00389      | 10 |
| AX-158237332 | 20 | 34.389 | KV452979.1 | 697619 | 10-scf00389      | 10 |
| AX-158237340 | 20 | 34.905 | KV452979.1 | 708825 | 10-scf00389      | 10 |
| AX-158237351 | 20 | 35.098 | KV452979.1 | 721896 | 10-scf00389      | 10 |
| AX-157773421 | 20 | 35.102 | KV452979.1 | 685205 | 10-scf00389      | 10 |
| AX-158237341 | 20 | 35.102 | KV452979.1 | 709303 | 10-scf00389      | 10 |
| AX-158415371 | 20 | 35.102 | KV452979.1 | 726682 | 10-scf00389      | 10 |
| AX-158237358 | 20 | 35.102 | KV452979.1 | 732606 | 10-scf00389      | 10 |
| AX-158237360 | 20 | 35.102 | KV452979.1 | 734361 | 10-scf00389      | 10 |
| AX-158237363 | 20 | 35.219 | KV452979.1 | 739728 | 10-scf00389      | 10 |
| AX-158237364 | 20 | 35.219 | KV452979.1 | 741632 | 10-scf00389      | 10 |
| AX-158237366 | 20 | 35.219 | KV452979.1 | 744312 | 10-scf00389      | 10 |
| AX-157753884 | 20 | 35.355 | KV452979.1 | 745623 | 10-scf00389      | 10 |
| AX-158237368 | 20 | 35.502 | KV452979.1 | 749366 | 10-scf00389      | 10 |
| AX-158237369 | 20 | 35.502 | KV452979.1 | 750252 | 10-scf00389      | 10 |
| AX-157708231 | 20 | 35.648 | KV452979.1 | 706817 | 10-scf00389      | 10 |
| AX-158237370 | 20 | 35.648 | KV452979.1 | 751054 | 10-scf00389      | 10 |
| AX-158237372 | 20 | 35.648 | KV452979.1 | 752444 | 10-scf00389      | 10 |
| AX-157774439 | 20 | 35.654 | KV452979.1 | 758892 | 10-scf00389      | 10 |
| AX-158237378 | 20 | 36.174 | KV452979.1 | 762250 | 10-scf00389      | 10 |
| AX-158237379 | 20 | 36.174 | KV452979.1 | 763121 | 10-scf00389      | 10 |
| AX-158237385 | 20 | 36.174 | KV452979.1 | 771782 | 10-scf00389      | 10 |
| AX-158237392 | 20 | 36.222 | KV452979.1 | 779531 | 10-scf00389      | 10 |
| AX-158237393 | 20 | 36.306 | KV452979.1 | 780382 | 10-scf00389      | 10 |
| AX-158237395 | 20 | 36.525 | KV452979.1 | 781935 | 10-scf00389      | 10 |
| AX-158237400 | 20 | 36.525 | KV452979.1 | 789006 | 10-scf00389      | 10 |
| AX-158237402 | 20 | 36.525 | KV452979.1 | 790175 | 10-scf00389      | 10 |
| AX-158237404 | 20 | 36.743 | KV452979.1 | 791498 | 10-scf00389      | 10 |
| AX-158237405 | 20 | 36.743 | KV452979.1 | 792078 | 10-scf00389      | 10 |
| AX-158237409 | 20 | 36.743 | KV452979.1 | 798601 | 10-scf00389      | 10 |
| AX-158237411 | 20 | 36.743 | KV452979.1 | 800838 | 10-scf00389      | 10 |
| AX-157700125 | 20 | 36.743 | KV452979.1 | 805665 | 10-scf00389      | 10 |
| AX-158237417 | 20 | 36.8   | KV452979.1 | 809179 | 10-scf00389      | 10 |
| AX-158237386 | 20 | 36.852 | KV452979.1 | 771898 | 10-scf00389      | 10 |
| AX-157748850 | 20 | 36.852 | KV452979.1 | 809942 | 10-scf00389      | 10 |
| AX-158237419 | 20 | 36.852 | KV452979.1 | 812235 | 10-scf00389      | 10 |
| AX-157872535 | 20 | 36.852 | KV452979.1 | 818856 | 10-scf00389      | 10 |
| AX-158237428 | 20 | 36.852 | KV452979.1 | 830252 | 10-scf00389      | 10 |
| AX-157696233 | 20 | 36.878 | FI885556.1 | 58     | 10-ORI212 lctalt | UN |
| AX-157840785 | 20 | 36.908 | KV452979.1 | 819655 | 10-scf00389      | 10 |
| AX-158237440 | 20 | 36.908 | KV452979.1 | 840816 | 10-scf00389      | 10 |
| AX-158237450 | 20 | 36.908 | KV452979.1 | 851438 | 10-scf00389      | 10 |
| AX-158237423 | 20 | 36.934 | KV452979.1 | 820947 | 10-scf00389      | 10 |
| AX-157840784 | 20 | 36.961 | KV452979.1 | 810373 | 10-scf00389      | 10 |
| AX-158237432 | 20 | 36.961 | KV452979.1 | 834827 | 10-scf00389      | 10 |
| AX-158237433 | 20 | 36.961 | KV452979.1 | 836047 | 10-scf00389      | 10 |

|              |    |        |            |         |             |    |
|--------------|----|--------|------------|---------|-------------|----|
| AX-157867249 | 20 | 36.961 | KV452979.1 | 836624  | 10-scf00389 | 10 |
| AX-157722877 | 20 | 36.961 | KV452979.1 | 839103  | 10-scf00389 | 10 |
| AX-158237441 | 20 | 36.961 | KV452979.1 | 841391  | 10-scf00389 | 10 |
| AX-158237446 | 20 | 36.961 | KV452979.1 | 847546  | 10-scf00389 | 10 |
| AX-158237447 | 20 | 36.961 | KV452979.1 | 847898  | 10-scf00389 | 10 |
| AX-158237452 | 20 | 36.961 | KV452979.1 | 852846  | 10-scf00389 | 10 |
| AX-158237454 | 20 | 36.961 | KV452979.1 | 854320  | 10-scf00389 | 10 |
| AX-158237458 | 20 | 37.178 | KV452979.1 | 858274  | 10-scf00389 | 10 |
| AX-158237463 | 20 | 37.178 | KV452979.1 | 861094  | 10-scf00389 | 10 |
| AX-158237484 | 20 | 37.178 | KV452979.1 | 899568  | 10-scf00389 | 10 |
| AX-157756224 | 20 | 37.179 | KV452979.1 | 864743  | 10-scf00389 | 10 |
| AX-158237464 | 20 | 37.18  | KV452979.1 | 862599  | 10-scf00389 | 10 |
| AX-157722251 | 20 | 37.18  | KV452979.1 | 866290  | 10-scf00389 | 10 |
| AX-158237467 | 20 | 37.387 | KV452979.1 | 866494  | 10-scf00389 | 10 |
| AX-157738549 | 20 | 37.417 | KV452979.1 | 871840  | 10-scf00389 | 10 |
| AX-158237471 | 20 | 37.471 | KV452979.1 | 872661  | 10-scf00389 | 10 |
| AX-158237474 | 20 | 37.471 | KV452979.1 | 879528  | 10-scf00389 | 10 |
| AX-158237478 | 20 | 37.568 | KV452979.1 | 884053  | 10-scf00389 | 10 |
| AX-158237480 | 20 | 37.617 | KV452979.1 | 889461  | 10-scf00389 | 10 |
| AX-157716944 | 20 | 37.617 | KV452979.1 | 892166  | 10-scf00389 | 10 |
| AX-157840786 | 20 | 37.67  | KV452979.1 | 873854  | 10-scf00389 | 10 |
| AX-158237481 | 20 | 37.67  | KV452979.1 | 894380  | 10-scf00389 | 10 |
| AX-158237483 | 20 | 37.69  | KV452979.1 | 898942  | 10-scf00389 | 10 |
| AX-157756408 | 20 | 37.726 | KV452979.1 | 907912  | 10-scf00389 | 10 |
| AX-157840790 | 20 | 38.054 | KV452979.1 | 916769  | 10-scf00389 | 10 |
| AX-158237492 | 20 | 38.054 | KV452979.1 | 917851  | 10-scf00389 | 10 |
| AX-158237493 | 20 | 38.054 | KV452979.1 | 918467  | 10-scf00389 | 10 |
| AX-158237495 | 20 | 38.163 | KV452979.1 | 921160  | 10-scf00389 | 10 |
| AX-157840792 | 20 | 38.3   | KV452979.1 | 926560  | 10-scf00389 | 10 |
| AX-157840793 | 20 | 38.3   | KV452979.1 | 931572  | 10-scf00389 | 10 |
| AX-158237503 | 20 | 38.3   | KV452979.1 | 935059  | 10-scf00389 | 10 |
| AX-158237505 | 20 | 38.3   | KV452979.1 | 938318  | 10-scf00389 | 10 |
| AX-158237510 | 20 | 38.583 | KV452979.1 | 944299  | 10-scf00389 | 10 |
| AX-158237511 | 20 | 38.634 | KV452979.1 | 947137  | 10-scf00389 | 10 |
| AX-158237532 | 20 | 38.634 | KV452979.1 | 988208  | 10-scf00389 | 10 |
| AX-158237506 | 20 | 38.711 | KV452979.1 | 939163  | 10-scf00389 | 10 |
| AX-158237512 | 20 | 38.711 | KV452979.1 | 948596  | 10-scf00389 | 10 |
| AX-158237513 | 20 | 38.711 | KV452979.1 | 953077  | 10-scf00389 | 10 |
| AX-157887488 | 20 | 38.711 | KV452979.1 | 953460  | 10-scf00389 | 10 |
| AX-158237514 | 20 | 38.711 | KV452979.1 | 953829  | 10-scf00389 | 10 |
| AX-158237515 | 20 | 38.711 | KV452979.1 | 953931  | 10-scf00389 | 10 |
| AX-158237539 | 20 | 38.711 | KV452979.1 | 1000897 | 10-scf00389 | 10 |
| AX-158237543 | 20 | 38.711 | KV452979.1 | 1008025 | 10-scf00389 | 10 |
| AX-158237516 | 20 | 38.767 | KV452979.1 | 956910  | 10-scf00389 | 10 |
| AX-157840791 | 20 | 38.82  | KV452979.1 | 924321  | 10-scf00389 | 10 |
| AX-158237517 | 20 | 38.82  | KV452979.1 | 962273  | 10-scf00389 | 10 |
| AX-158237518 | 20 | 38.82  | KV452979.1 | 962984  | 10-scf00389 | 10 |
| AX-158237519 | 20 | 38.82  | KV452979.1 | 964374  | 10-scf00389 | 10 |
| AX-158237522 | 20 | 38.82  | KV452979.1 | 970020  | 10-scf00389 | 10 |
| AX-158237524 | 20 | 38.82  | KV452979.1 | 971949  | 10-scf00389 | 10 |
| AX-158237525 | 20 | 38.82  | KV452979.1 | 973970  | 10-scf00389 | 10 |

|              |    |        |            |         |             |    |
|--------------|----|--------|------------|---------|-------------|----|
| AX-157775508 | 20 | 38.82  | KV452979.1 | 977199  | 10-scf00389 | 10 |
| AX-158237529 | 20 | 38.82  | KV452979.1 | 981594  | 10-scf00389 | 10 |
| AX-158237530 | 20 | 38.82  | KV452979.1 | 982163  | 10-scf00389 | 10 |
| AX-157712969 | 20 | 38.82  | KV452979.1 | 992122  | 10-scf00389 | 10 |
| AX-157887490 | 20 | 38.82  | KV452979.1 | 994641  | 10-scf00389 | 10 |
| AX-157717957 | 20 | 38.82  | KV452979.1 | 995080  | 10-scf00389 | 10 |
| AX-158237537 | 20 | 38.82  | KV452979.1 | 997429  | 10-scf00389 | 10 |
| AX-158237544 | 20 | 38.82  | KV452979.1 | 1010750 | 10-scf00389 | 10 |
| AX-158237534 | 20 | 38.868 | KV452979.1 | 995250  | 10-scf00389 | 10 |
| AX-158237535 | 20 | 38.93  | KV452979.1 | 996038  | 10-scf00389 | 10 |
| AX-157752731 | 20 | 38.93  | KV452979.1 | 1002504 | 10-scf00389 | 10 |
| AX-158237540 | 20 | 38.93  | KV452979.1 | 1003001 | 10-scf00389 | 10 |
| AX-158237542 | 20 | 38.93  | KV452979.1 | 1007505 | 10-scf00389 | 10 |
| AX-158237545 | 20 | 39.047 | KV452979.1 | 1012250 | 10-scf00389 | 10 |
| AX-158237546 | 20 | 39.179 | KV452979.1 | 1013108 | 10-scf00389 | 10 |
| AX-157867252 | 20 | 39.179 | KV452979.1 | 1015909 | 10-scf00389 | 10 |
| AX-157720033 | 20 | 39.417 | KV452979.1 | 1018270 | 10-scf00389 | 10 |
| AX-157840799 | 20 | 39.422 | KV452979.1 | 1019366 | 10-scf00389 | 10 |
| AX-158237551 | 20 | 39.422 | KV452979.1 | 1019945 | 10-scf00389 | 10 |
| AX-157717858 | 20 | 39.422 | KV452979.1 | 1026685 | 10-scf00389 | 10 |
| AX-158237678 | 20 | 39.422 | KV452979.1 | 1217440 | 10-scf00389 | 10 |
| AX-158237554 | 20 | 39.66  | KV452979.1 | 1028518 | 10-scf00389 | 10 |
| AX-158237555 | 20 | 39.66  | KV452979.1 | 1028832 | 10-scf00389 | 10 |
| AX-158237557 | 20 | 39.661 | KV452979.1 | 1029990 | 10-scf00389 | 10 |
| AX-158415377 | 20 | 39.661 | KV452979.1 | 1031626 | 10-scf00389 | 10 |
| AX-157840795 | 20 | 39.676 | KV452979.1 | 970991  | 10-scf00389 | 10 |
| AX-158237533 | 20 | 39.676 | KV452979.1 | 993724  | 10-scf00389 | 10 |
| AX-157693470 | 20 | 39.676 | KV452979.1 | 1032089 | 10-scf00389 | 10 |
| AX-157714243 | 20 | 39.914 | KV452979.1 | 1039887 | 10-scf00389 | 10 |
| AX-158237564 | 20 | 39.914 | KV452979.1 | 1042978 | 10-scf00389 | 10 |
| AX-158237565 | 20 | 39.914 | KV452979.1 | 1043264 | 10-scf00389 | 10 |
| AX-158237569 | 20 | 39.914 | KV452979.1 | 1050401 | 10-scf00389 | 10 |
| AX-158237570 | 20 | 39.914 | KV452979.1 | 1050801 | 10-scf00389 | 10 |
| AX-157743762 | 20 | 39.914 | KV452979.1 | 1055506 | 10-scf00389 | 10 |
| AX-157840802 | 20 | 40.023 | KV452979.1 | 1058183 | 10-scf00389 | 10 |
| AX-158237574 | 20 | 40.023 | KV452979.1 | 1060025 | 10-scf00389 | 10 |
| AX-158237575 | 20 | 40.023 | KV452979.1 | 1060324 | 10-scf00389 | 10 |
| AX-157715246 | 20 | 40.023 | KV452979.1 | 1062477 | 10-scf00389 | 10 |
| AX-158237584 | 20 | 40.023 | KV452979.1 | 1074525 | 10-scf00389 | 10 |
| AX-158237587 | 20 | 40.025 | KV452979.1 | 1081601 | 10-scf00389 | 10 |
| AX-157755775 | 20 | 40.462 | KV452979.1 | 1088549 | 10-scf00389 | 10 |
| AX-158237593 | 20 | 40.462 | KV452979.1 | 1091890 | 10-scf00389 | 10 |
| AX-158237598 | 20 | 40.57  | KV452979.1 | 1096987 | 10-scf00389 | 10 |
| AX-158237599 | 20 | 40.57  | KV452979.1 | 1097780 | 10-scf00389 | 10 |
| AX-158237633 | 20 | 40.57  | KV452979.1 | 1140935 | 10-scf00389 | 10 |
| AX-158237600 | 20 | 40.634 | KV452979.1 | 1098399 | 10-scf00389 | 10 |
| AX-158237606 | 20 | 40.68  | KV452979.1 | 1106133 | 10-scf00389 | 10 |
| AX-158237611 | 20 | 40.68  | KV452979.1 | 1109897 | 10-scf00389 | 10 |
| AX-157772853 | 20 | 40.68  | KV452979.1 | 1112263 | 10-scf00389 | 10 |
| AX-158237613 | 20 | 40.68  | KV452979.1 | 1112703 | 10-scf00389 | 10 |
| AX-158237615 | 20 | 40.737 | KV452979.1 | 1116974 | 10-scf00389 | 10 |



|              |    |        |            |         |             |    |
|--------------|----|--------|------------|---------|-------------|----|
| AX-158237577 | 20 | 40.789 | KV452979.1 | 1063340 | 10-scf00389 | 10 |
| AX-158237619 | 20 | 40.789 | KV452979.1 | 1125633 | 10-scf00389 | 10 |
| AX-158237623 | 20 | 40.789 | KV452979.1 | 1129175 | 10-scf00389 | 10 |
| AX-158237627 | 20 | 40.789 | KV452979.1 | 1135465 | 10-scf00389 | 10 |
| AX-158237632 | 20 | 40.789 | KV452979.1 | 1138471 | 10-scf00389 | 10 |
| AX-157773023 | 20 | 40.789 | KV452979.1 | 1235183 | 10-scf00389 | 10 |
| AX-158237694 | 20 | 40.789 | KV452979.1 | 1249667 | 10-scf00389 | 10 |
| AX-158237727 | 20 | 40.789 | KV452979.1 | 1298803 | 10-scf00389 | 10 |
| AX-157745430 | 20 | 40.789 | KV452979.1 | 1301861 | 10-scf00389 | 10 |
| AX-158237748 | 20 | 40.789 | KV452979.1 | 1327599 | 10-scf00389 | 10 |
| AX-158237759 | 20 | 40.789 | KV452979.1 | 1338608 | 10-scf00389 | 10 |
| AX-158237638 | 20 | 40.815 | KV452979.1 | 1144818 | 10-scf00389 | 10 |
| AX-158237639 | 20 | 40.833 | KV452979.1 | 1146296 | 10-scf00389 | 10 |
| AX-157840805 | 20 | 40.861 | KV452979.1 | 1148687 | 10-scf00389 | 10 |
| AX-157746310 | 20 | 40.871 | KV452979.1 | 1151906 | 10-scf00389 | 10 |
| AX-158237654 | 20 | 40.871 | KV452979.1 | 1172392 | 10-scf00389 | 10 |
| AX-158237682 | 20 | 40.871 | KV452979.1 | 1232209 | 10-scf00389 | 10 |
| AX-157739962 | 20 | 40.886 | KV452979.1 | 1157782 | 10-scf00389 | 10 |
| AX-158237618 | 20 | 40.898 | KV452979.1 | 1120907 | 10-scf00389 | 10 |
| AX-158237631 | 20 | 40.898 | KV452979.1 | 1138420 | 10-scf00389 | 10 |
| AX-158237635 | 20 | 40.898 | KV452979.1 | 1143078 | 10-scf00389 | 10 |
| AX-158237644 | 20 | 40.898 | KV452979.1 | 1158170 | 10-scf00389 | 10 |
| AX-158237645 | 20 | 40.898 | KV452979.1 | 1158860 | 10-scf00389 | 10 |
| AX-157840806 | 20 | 40.898 | KV452979.1 | 1159594 | 10-scf00389 | 10 |
| AX-158237649 | 20 | 40.898 | KV452979.1 | 1162084 | 10-scf00389 | 10 |
| AX-158237650 | 20 | 40.898 | KV452979.1 | 1163466 | 10-scf00389 | 10 |
| AX-158237651 | 20 | 40.898 | KV452979.1 | 1163977 | 10-scf00389 | 10 |
| AX-158237652 | 20 | 40.898 | KV452979.1 | 1164847 | 10-scf00389 | 10 |
| AX-158237653 | 20 | 40.898 | KV452979.1 | 1165287 | 10-scf00389 | 10 |
| AX-157742525 | 20 | 40.898 | KV452979.1 | 1418248 | 10-scf00389 | 10 |
| AX-158237596 | 20 | 41.007 | KV452979.1 | 1094113 | 10-scf00389 | 10 |
| AX-158237604 | 20 | 41.007 | KV452979.1 | 1104341 | 10-scf00389 | 10 |
| AX-158237642 | 20 | 41.007 | KV452979.1 | 1156299 | 10-scf00389 | 10 |
| AX-158237658 | 20 | 41.007 | KV452979.1 | 1184271 | 10-scf00389 | 10 |
| AX-157840808 | 20 | 41.007 | KV452979.1 | 1185161 | 10-scf00389 | 10 |
| AX-158237660 | 20 | 41.007 | KV452979.1 | 1187954 | 10-scf00389 | 10 |
| AX-158237661 | 20 | 41.007 | KV452979.1 | 1189703 | 10-scf00389 | 10 |
| AX-158237662 | 20 | 41.007 | KV452979.1 | 1191543 | 10-scf00389 | 10 |
| AX-157840813 | 20 | 41.007 | KV452979.1 | 1199642 | 10-scf00389 | 10 |
| AX-158237668 | 20 | 41.007 | KV452979.1 | 1202269 | 10-scf00389 | 10 |
| AX-158237675 | 20 | 41.007 | KV452979.1 | 1206732 | 10-scf00389 | 10 |
| AX-157755090 | 20 | 41.007 | KV452979.1 | 1212718 | 10-scf00389 | 10 |
| AX-157840815 | 20 | 41.007 | KV452979.1 | 1213856 | 10-scf00389 | 10 |
| AX-157722525 | 20 | 41.007 | KV452979.1 | 1216170 | 10-scf00389 | 10 |
| AX-158237688 | 20 | 41.007 | KV452979.1 | 1242841 | 10-scf00389 | 10 |
| AX-158237693 | 20 | 41.007 | KV452979.1 | 1248457 | 10-scf00389 | 10 |
| AX-158237709 | 20 | 41.007 | KV452979.1 | 1276276 | 10-scf00389 | 10 |
| AX-157742863 | 20 | 41.007 | KV452979.1 | 1285323 | 10-scf00389 | 10 |
| AX-158237767 | 20 | 41.007 | KV452979.1 | 1344258 | 10-scf00389 | 10 |
| AX-158237846 | 20 | 41.007 | KV452979.1 | 1471971 | 10-scf00389 | 10 |
| AX-158237647 | 20 | 41.117 | KV452979.1 | 1161261 | 10-scf00389 | 10 |

|              |    |        |            |         |             |    |
|--------------|----|--------|------------|---------|-------------|----|
| AX-158237656 | 20 | 41.117 | KV452979.1 | 1178856 | 10-scf00389 | 10 |
| AX-157751564 | 20 | 41.117 | KV452979.1 | 1182498 | 10-scf00389 | 10 |
| AX-157840809 | 20 | 41.117 | KV452979.1 | 1189066 | 10-scf00389 | 10 |
| AX-157840812 | 20 | 41.117 | KV452979.1 | 1198002 | 10-scf00389 | 10 |
| AX-158237669 | 20 | 41.117 | KV452979.1 | 1203508 | 10-scf00389 | 10 |
| AX-158237681 | 20 | 41.117 | KV452979.1 | 1229412 | 10-scf00389 | 10 |
| AX-157744976 | 20 | 41.117 | KV452979.1 | 1231326 | 10-scf00389 | 10 |
| AX-158237683 | 20 | 41.117 | KV452979.1 | 1233269 | 10-scf00389 | 10 |
| AX-158237684 | 20 | 41.117 | KV452979.1 | 1233739 | 10-scf00389 | 10 |
| AX-158237689 | 20 | 41.117 | KV452979.1 | 1243753 | 10-scf00389 | 10 |
| AX-158237690 | 20 | 41.117 | KV452979.1 | 1244618 | 10-scf00389 | 10 |
| AX-158237691 | 20 | 41.117 | KV452979.1 | 1246302 | 10-scf00389 | 10 |
| AX-158237692 | 20 | 41.117 | KV452979.1 | 1247493 | 10-scf00389 | 10 |
| AX-158237696 | 20 | 41.117 | KV452979.1 | 1251648 | 10-scf00389 | 10 |
| AX-157720964 | 20 | 41.117 | KV452979.1 | 1252524 | 10-scf00389 | 10 |
| AX-158237699 | 20 | 41.117 | KV452979.1 | 1255764 | 10-scf00389 | 10 |
| AX-158237701 | 20 | 41.117 | KV452979.1 | 1258954 | 10-scf00389 | 10 |
| AX-158237702 | 20 | 41.117 | KV452979.1 | 1259590 | 10-scf00389 | 10 |
| AX-157721399 | 20 | 41.117 | KV452979.1 | 1260612 | 10-scf00389 | 10 |
| AX-157745031 | 20 | 41.117 | KV452979.1 | 1264066 | 10-scf00389 | 10 |
| AX-158237705 | 20 | 41.117 | KV452979.1 | 1267880 | 10-scf00389 | 10 |
| AX-158237706 | 20 | 41.117 | KV452979.1 | 1271484 | 10-scf00389 | 10 |
| AX-158237707 | 20 | 41.117 | KV452979.1 | 1272363 | 10-scf00389 | 10 |
| AX-158237710 | 20 | 41.117 | KV452979.1 | 1276627 | 10-scf00389 | 10 |
| AX-158237713 | 20 | 41.117 | KV452979.1 | 1280013 | 10-scf00389 | 10 |
| AX-158237716 | 20 | 41.117 | KV452979.1 | 1284860 | 10-scf00389 | 10 |
| AX-158237719 | 20 | 41.117 | KV452979.1 | 1289003 | 10-scf00389 | 10 |
| AX-158237720 | 20 | 41.117 | KV452979.1 | 1291521 | 10-scf00389 | 10 |
| AX-158237721 | 20 | 41.117 | KV452979.1 | 1292364 | 10-scf00389 | 10 |
| AX-158237722 | 20 | 41.117 | KV452979.1 | 1293374 | 10-scf00389 | 10 |
| AX-158237723 | 20 | 41.117 | KV452979.1 | 1293727 | 10-scf00389 | 10 |
| AX-158237726 | 20 | 41.117 | KV452979.1 | 1297801 | 10-scf00389 | 10 |
| AX-157840823 | 20 | 41.117 | KV452979.1 | 1300560 | 10-scf00389 | 10 |
| AX-158237742 | 20 | 41.117 | KV452979.1 | 1318145 | 10-scf00389 | 10 |
| AX-158237756 | 20 | 41.117 | KV452979.1 | 1334645 | 10-scf00389 | 10 |
| AX-157717788 | 20 | 41.117 | KV452979.1 | 1361552 | 10-scf00389 | 10 |
| AX-158237728 | 20 | 41.171 | KV452979.1 | 1299580 | 10-scf00389 | 10 |
| AX-158237725 | 20 | 41.226 | KV452979.1 | 1297237 | 10-scf00389 | 10 |
| AX-158237730 | 20 | 41.226 | KV452979.1 | 1306162 | 10-scf00389 | 10 |
| AX-158237734 | 20 | 41.226 | KV452979.1 | 1310819 | 10-scf00389 | 10 |
| AX-158237741 | 20 | 41.226 | KV452979.1 | 1317695 | 10-scf00389 | 10 |
| AX-158237744 | 20 | 41.226 | KV452979.1 | 1320347 | 10-scf00389 | 10 |
| AX-158237749 | 20 | 41.226 | KV452979.1 | 1328186 | 10-scf00389 | 10 |
| AX-158237751 | 20 | 41.226 | KV452979.1 | 1330182 | 10-scf00389 | 10 |
| AX-158237753 | 20 | 41.226 | KV452979.1 | 1331102 | 10-scf00389 | 10 |
| AX-158237755 | 20 | 41.226 | KV452979.1 | 1334076 | 10-scf00389 | 10 |
| AX-157738859 | 20 | 41.226 | KV452979.1 | 1334458 | 10-scf00389 | 10 |
| AX-158237758 | 20 | 41.226 | KV452979.1 | 1337656 | 10-scf00389 | 10 |
| AX-158237764 | 20 | 41.226 | KV452979.1 | 1342882 | 10-scf00389 | 10 |
| AX-158237766 | 20 | 41.226 | KV452979.1 | 1344014 | 10-scf00389 | 10 |
| AX-158237768 | 20 | 41.226 | KV452979.1 | 1345596 | 10-scf00389 | 10 |

|              |    |        |            |         |             |    |
|--------------|----|--------|------------|---------|-------------|----|
| AX-158237770 | 20 | 41.226 | KV452979.1 | 1346118 | 10-scf00389 | 10 |
| AX-158237771 | 20 | 41.226 | KV452979.1 | 1347107 | 10-scf00389 | 10 |
| AX-158237772 | 20 | 41.226 | KV452979.1 | 1347872 | 10-scf00389 | 10 |
| AX-158237773 | 20 | 41.226 | KV452979.1 | 1348074 | 10-scf00389 | 10 |
| AX-158237775 | 20 | 41.226 | KV452979.1 | 1351032 | 10-scf00389 | 10 |
| AX-158237786 | 20 | 41.226 | KV452979.1 | 1371121 | 10-scf00389 | 10 |
| AX-157840826 | 20 | 41.248 | KV452979.1 | 1348429 | 10-scf00389 | 10 |
| AX-158237793 | 20 | 41.248 | KV452979.1 | 1381280 | 10-scf00389 | 10 |
| AX-158237774 | 20 | 41.273 | KV452979.1 | 1350568 | 10-scf00389 | 10 |
| AX-157721156 | 20 | 41.273 | KV452979.1 | 1397309 | 10-scf00389 | 10 |
| AX-157721915 | 20 | 41.298 | KV452979.1 | 1352425 | 10-scf00389 | 10 |
| AX-158237667 | 20 | 41.335 | KV452979.1 | 1201864 | 10-scf00389 | 10 |
| AX-158237724 | 20 | 41.335 | KV452979.1 | 1294263 | 10-scf00389 | 10 |
| AX-158237769 | 20 | 41.335 | KV452979.1 | 1345847 | 10-scf00389 | 10 |
| AX-158237777 | 20 | 41.335 | KV452979.1 | 1356361 | 10-scf00389 | 10 |
| AX-158237778 | 20 | 41.335 | KV452979.1 | 1357609 | 10-scf00389 | 10 |
| AX-158237779 | 20 | 41.335 | KV452979.1 | 1360522 | 10-scf00389 | 10 |
| AX-158237780 | 20 | 41.335 | KV452979.1 | 1362948 | 10-scf00389 | 10 |
| AX-158237781 | 20 | 41.335 | KV452979.1 | 1364831 | 10-scf00389 | 10 |
| AX-158237784 | 20 | 41.335 | KV452979.1 | 1369658 | 10-scf00389 | 10 |
| AX-158237785 | 20 | 41.335 | KV452979.1 | 1370649 | 10-scf00389 | 10 |
| AX-158237787 | 20 | 41.335 | KV452979.1 | 1372630 | 10-scf00389 | 10 |
| AX-157743209 | 20 | 41.335 | KV452979.1 | 1375135 | 10-scf00389 | 10 |
| AX-158237790 | 20 | 41.335 | KV452979.1 | 1376196 | 10-scf00389 | 10 |
| AX-158237791 | 20 | 41.335 | KV452979.1 | 1378344 | 10-scf00389 | 10 |
| AX-158386910 | 20 | 41.335 | KV452979.1 | 1383108 | 10-scf00389 | 10 |
| AX-157721161 | 20 | 41.335 | KV452979.1 | 1383149 | 10-scf00389 | 10 |
| AX-158237795 | 20 | 41.335 | KV452979.1 | 1386961 | 10-scf00389 | 10 |
| AX-158237796 | 20 | 41.335 | KV452979.1 | 1387830 | 10-scf00389 | 10 |
| AX-158237805 | 20 | 41.335 | KV452979.1 | 1400159 | 10-scf00389 | 10 |
| AX-157751624 | 20 | 41.38  | KV452979.1 | 1388095 | 10-scf00389 | 10 |
| AX-158237798 | 20 | 41.444 | KV452979.1 | 1391939 | 10-scf00389 | 10 |
| AX-158237800 | 20 | 41.444 | KV452979.1 | 1395259 | 10-scf00389 | 10 |
| AX-158237801 | 20 | 41.444 | KV452979.1 | 1396537 | 10-scf00389 | 10 |
| AX-158237804 | 20 | 41.444 | KV452979.1 | 1399080 | 10-scf00389 | 10 |
| AX-157773849 | 20 | 41.444 | KV452979.1 | 1400924 | 10-scf00389 | 10 |
| AX-157747289 | 20 | 41.444 | KV452979.1 | 1406303 | 10-scf00389 | 10 |
| AX-158237815 | 20 | 41.774 | KV452979.1 | 1423472 | 10-scf00389 | 10 |
| AX-157724604 | 20 | 42.089 | KV452979.1 | 1428858 | 10-scf00389 | 10 |
| AX-157747329 | 20 | 42.104 | KV452979.1 | 1415107 | 10-scf00389 | 10 |
| AX-158237812 | 20 | 42.104 | KV452979.1 | 1417246 | 10-scf00389 | 10 |
| AX-158237818 | 20 | 42.104 | KV452979.1 | 1429616 | 10-scf00389 | 10 |
| AX-158237826 | 20 | 42.151 | KV452979.1 | 1445768 | 10-scf00389 | 10 |
| AX-157840837 | 20 | 42.151 | KV452979.1 | 1450788 | 10-scf00389 | 10 |
| AX-158237831 | 20 | 42.151 | KV452979.1 | 1451849 | 10-scf00389 | 10 |
| AX-157744745 | 20 | 42.151 | KV452979.1 | 1454092 | 10-scf00389 | 10 |
| AX-158237853 | 20 | 42.151 | KV452979.1 | 1481576 | 10-scf00389 | 10 |
| AX-157714356 | 20 | 42.151 | KV452979.1 | 1504117 | 10-scf00389 | 10 |
| AX-157772808 | 20 | 42.151 | KV452979.1 | 1504532 | 10-scf00389 | 10 |
| AX-158237828 | 20 | 42.239 | KV452979.1 | 1448283 | 10-scf00389 | 10 |
| AX-158237820 | 20 | 42.328 | KV452979.1 | 1433333 | 10-scf00389 | 10 |

|              |    |        |            |         |             |    |
|--------------|----|--------|------------|---------|-------------|----|
| AX-158237834 | 20 | 42.328 | KV452979.1 | 1457698 | 10-scf00389 | 10 |
| AX-157840836 | 20 | 42.429 | KV452979.1 | 1450519 | 10-scf00389 | 10 |
| AX-158237835 | 20 | 42.429 | KV452979.1 | 1458996 | 10-scf00389 | 10 |
| AX-158237843 | 20 | 42.429 | KV452979.1 | 1468015 | 10-scf00389 | 10 |
| AX-158237837 | 20 | 42.43  | KV452979.1 | 1460096 | 10-scf00389 | 10 |
| AX-157840838 | 20 | 42.43  | KV452979.1 | 1461413 | 10-scf00389 | 10 |
| AX-158237840 | 20 | 42.43  | KV452979.1 | 1462623 | 10-scf00389 | 10 |
| AX-158237844 | 20 | 42.43  | KV452979.1 | 1468495 | 10-scf00389 | 10 |
| AX-158237842 | 20 | 42.455 | KV452979.1 | 1467386 | 10-scf00389 | 10 |
| AX-157773808 | 20 | 42.455 | KV452979.1 | 1471333 | 10-scf00389 | 10 |
| AX-158237847 | 20 | 42.485 | KV452979.1 | 1472737 | 10-scf00389 | 10 |
| AX-158237854 | 20 | 42.516 | KV452979.1 | 1482764 | 10-scf00389 | 10 |
| AX-158237808 | 20 | 42.539 | KV452979.1 | 1402960 | 10-scf00389 | 10 |
| AX-158237833 | 20 | 42.539 | KV452979.1 | 1454615 | 10-scf00389 | 10 |
| AX-158237855 | 20 | 42.539 | KV452979.1 | 1483968 | 10-scf00389 | 10 |
| AX-157840839 | 20 | 42.539 | KV452979.1 | 1486572 | 10-scf00389 | 10 |
| AX-158237860 | 20 | 42.539 | KV452979.1 | 1491088 | 10-scf00389 | 10 |
| AX-158237862 | 20 | 42.539 | KV452979.1 | 1493559 | 10-scf00389 | 10 |
| AX-158237863 | 20 | 42.539 | KV452979.1 | 1495904 | 10-scf00389 | 10 |
| AX-158237865 | 20 | 42.539 | KV452979.1 | 1497829 | 10-scf00389 | 10 |
| AX-158237871 | 20 | 42.539 | KV452979.1 | 1503960 | 10-scf00389 | 10 |
| AX-157712273 | 20 | 42.539 | KV452979.1 | 1507051 | 10-scf00389 | 10 |
| AX-157840840 | 20 | 42.539 | KV452979.1 | 1508630 | 10-scf00389 | 10 |
| AX-158237876 | 20 | 42.539 | KV452979.1 | 1508902 | 10-scf00389 | 10 |
| AX-158237877 | 20 | 42.539 | KV452979.1 | 1509854 | 10-scf00389 | 10 |
| AX-157840841 | 20 | 42.539 | KV452979.1 | 1510804 | 10-scf00389 | 10 |
| AX-158237879 | 20 | 42.539 | KV452979.1 | 1516333 | 10-scf00389 | 10 |
| AX-158237880 | 20 | 42.539 | KV452979.1 | 1518294 | 10-scf00389 | 10 |
| AX-158237881 | 20 | 42.539 | KV452979.1 | 1519137 | 10-scf00389 | 10 |
| AX-158237885 | 20 | 42.539 | KV452979.1 | 1524088 | 10-scf00389 | 10 |
| AX-158237886 | 20 | 42.539 | KV452979.1 | 1524145 | 10-scf00389 | 10 |
| AX-158237887 | 20 | 42.539 | KV452979.1 | 1526201 | 10-scf00389 | 10 |
| AX-157726726 | 20 | 42.539 | KV452979.1 | 1526479 | 10-scf00389 | 10 |
| AX-158237888 | 20 | 42.539 | KV452979.1 | 1526926 | 10-scf00389 | 10 |
| AX-158237891 | 20 | 42.539 | KV452979.1 | 1529655 | 10-scf00389 | 10 |
| AX-158237893 | 20 | 42.539 | KV452979.1 | 1538782 | 10-scf00389 | 10 |
| AX-158237895 | 20 | 42.539 | KV452979.1 | 1540549 | 10-scf00389 | 10 |
| AX-158237898 | 20 | 42.539 | KV452979.1 | 1541885 | 10-scf00389 | 10 |
| AX-158237953 | 20 | 42.539 | KV452979.1 | 1615209 | 10-scf00389 | 10 |
| AX-158237905 | 20 | 42.54  | KV452979.1 | 1553484 | 10-scf00389 | 10 |
| AX-158237906 | 20 | 42.54  | KV452979.1 | 1555494 | 10-scf00389 | 10 |
| AX-158237908 | 20 | 42.864 | KV452979.1 | 1559100 | 10-scf00389 | 10 |
| AX-158237909 | 20 | 42.864 | KV452979.1 | 1559815 | 10-scf00389 | 10 |
| AX-157840833 | 20 | 42.87  | KV452979.1 | 1434557 | 10-scf00389 | 10 |
| AX-158237894 | 20 | 42.87  | KV452979.1 | 1540253 | 10-scf00389 | 10 |
| AX-157752119 | 20 | 42.87  | KV452979.1 | 1554489 | 10-scf00389 | 10 |
| AX-158237910 | 20 | 42.87  | KV452979.1 | 1562421 | 10-scf00389 | 10 |
| AX-158237912 | 20 | 42.87  | KV452979.1 | 1564635 | 10-scf00389 | 10 |
| AX-158237913 | 20 | 42.87  | KV452979.1 | 1565574 | 10-scf00389 | 10 |
| AX-158237923 | 20 | 42.87  | KV452979.1 | 1578738 | 10-scf00389 | 10 |
| AX-158238282 | 20 | 42.87  | KV452979.1 | 2031397 | 10-scf00389 | 10 |

|              |    |        |            |         |             |    |
|--------------|----|--------|------------|---------|-------------|----|
| AX-157840846 | 20 | 42.939 | KV452979.1 | 1555056 | 10-scf00389 | 10 |
| AX-157800422 | 20 | 42.939 | KV452979.1 | 1560125 | 10-scf00389 | 10 |
| AX-157840851 | 20 | 42.939 | KV452979.1 | 1571782 | 10-scf00389 | 10 |
| AX-158238435 | 20 | 42.939 | KV452979.1 | 2232136 | 10-scf00389 | 10 |
| AX-158237919 | 20 | 43.085 | KV452979.1 | 1572423 | 10-scf00389 | 10 |
| AX-158237921 | 20 | 43.085 | KV452979.1 | 1576473 | 10-scf00389 | 10 |
| AX-158237931 | 20 | 43.085 | KV452979.1 | 1589394 | 10-scf00389 | 10 |
| AX-158237932 | 20 | 43.085 | KV452979.1 | 1590808 | 10-scf00389 | 10 |
| AX-158237962 | 20 | 43.085 | KV452979.1 | 1627226 | 10-scf00389 | 10 |
| AX-158237809 | 20 | 43.093 | KV452979.1 | 1410170 | 10-scf00389 | 10 |
| AX-157840843 | 20 | 43.093 | KV452979.1 | 1543781 | 10-scf00389 | 10 |
| AX-157719901 | 20 | 43.093 | KV452979.1 | 1591540 | 10-scf00389 | 10 |
| AX-158237940 | 20 | 43.101 | KV452979.1 | 1603197 | 10-scf00389 | 10 |
| AX-158237978 | 20 | 43.101 | KV452979.1 | 1657197 | 10-scf00389 | 10 |
| AX-158237992 | 20 | 43.101 | KV452979.1 | 1679504 | 10-scf00389 | 10 |
| AX-157717218 | 20 | 43.111 | KV452979.1 | 1604167 | 10-scf00389 | 10 |
| AX-158237942 | 20 | 43.121 | KV452979.1 | 1605221 | 10-scf00389 | 10 |
| AX-158237944 | 20 | 43.123 | KV452979.1 | 1606485 | 10-scf00389 | 10 |
| AX-158237924 | 20 | 43.132 | KV452979.1 | 1581946 | 10-scf00389 | 10 |
| AX-158237938 | 20 | 43.132 | KV452979.1 | 1600104 | 10-scf00389 | 10 |
| AX-158237946 | 20 | 43.132 | KV452979.1 | 1609345 | 10-scf00389 | 10 |
| AX-157840856 | 20 | 43.132 | KV452979.1 | 1630456 | 10-scf00389 | 10 |
| AX-158238002 | 20 | 43.132 | KV452979.1 | 1694275 | 10-scf00389 | 10 |
| AX-158237907 | 20 | 43.141 | KV452979.1 | 1558554 | 10-scf00389 | 10 |
| AX-158237947 | 20 | 43.141 | KV452979.1 | 1610309 | 10-scf00389 | 10 |
| AX-158237971 | 20 | 43.141 | KV452979.1 | 1646866 | 10-scf00389 | 10 |
| AX-157840862 | 20 | 43.141 | KV452979.1 | 1662643 | 10-scf00389 | 10 |
| AX-158237991 | 20 | 43.141 | KV452979.1 | 1678044 | 10-scf00389 | 10 |
| AX-158237957 | 20 | 43.147 | KV452979.1 | 1620594 | 10-scf00389 | 10 |
| AX-157715071 | 20 | 43.158 | KV452979.1 | 1622225 | 10-scf00389 | 10 |
| AX-158237988 | 20 | 43.158 | KV452979.1 | 1671851 | 10-scf00389 | 10 |
| AX-158237961 | 20 | 43.167 | KV452979.1 | 1626492 | 10-scf00389 | 10 |
| AX-157840855 | 20 | 43.177 | KV452979.1 | 1630022 | 10-scf00389 | 10 |
| AX-158237964 | 20 | 43.182 | KV452979.1 | 1631298 | 10-scf00389 | 10 |
| AX-158237965 | 20 | 43.194 | KV452979.1 | 1631566 | 10-scf00389 | 10 |
| AX-157745097 | 20 | 43.194 | KV452979.1 | 1636157 | 10-scf00389 | 10 |
| AX-157840854 | 20 | 43.201 | KV452979.1 | 1628747 | 10-scf00389 | 10 |
| AX-157740272 | 20 | 43.201 | KV452979.1 | 1636724 | 10-scf00389 | 10 |
| AX-157717031 | 20 | 43.208 | KV452979.1 | 1621621 | 10-scf00389 | 10 |
| AX-157840857 | 20 | 43.208 | KV452979.1 | 1637944 | 10-scf00389 | 10 |
| AX-158238007 | 20 | 43.208 | KV452979.1 | 1699261 | 10-scf00389 | 10 |
| AX-157740934 | 20 | 43.208 | KV452979.1 | 1707404 | 10-scf00389 | 10 |
| AX-158237972 | 20 | 43.262 | KV452979.1 | 1647892 | 10-scf00389 | 10 |
| AX-158237918 | 20 | 43.303 | KV452979.1 | 1572033 | 10-scf00389 | 10 |
| AX-158237975 | 20 | 43.303 | KV452979.1 | 1652450 | 10-scf00389 | 10 |
| AX-158237980 | 20 | 43.303 | KV452979.1 | 1659674 | 10-scf00389 | 10 |
| AX-157731268 | 20 | 43.303 | KV452979.1 | 1678626 | 10-scf00389 | 10 |
| AX-158237993 | 20 | 43.303 | KV452979.1 | 1680048 | 10-scf00389 | 10 |
| AX-158237994 | 20 | 43.303 | KV452979.1 | 1683618 | 10-scf00389 | 10 |
| AX-158237998 | 20 | 43.303 | KV452979.1 | 1689236 | 10-scf00389 | 10 |
| AX-158238000 | 20 | 43.303 | KV452979.1 | 1691514 | 10-scf00389 | 10 |

|              |    |        |            |         |             |    |
|--------------|----|--------|------------|---------|-------------|----|
| AX-158238005 | 20 | 43.303 | KV452979.1 | 1696766 | 10-scf00389 | 10 |
| AX-158238012 | 20 | 43.522 | KV452979.1 | 1703647 | 10-scf00389 | 10 |
| AX-157840864 | 20 | 43.522 | KV452979.1 | 1708223 | 10-scf00389 | 10 |
| AX-158238014 | 20 | 43.585 | KV452979.1 | 1708276 | 10-scf00389 | 10 |
| AX-158238018 | 20 | 43.631 | KV452979.1 | 1711853 | 10-scf00389 | 10 |
| AX-158238021 | 20 | 43.631 | KV452979.1 | 1714971 | 10-scf00389 | 10 |
| AX-157753629 | 20 | 43.631 | KV452979.1 | 1717423 | 10-scf00389 | 10 |
| AX-158238023 | 20 | 43.631 | KV452979.1 | 1720310 | 10-scf00389 | 10 |
| AX-158238025 | 20 | 43.631 | KV452979.1 | 1722678 | 10-scf00389 | 10 |
| AX-157721447 | 20 | 43.631 | KV452979.1 | 1726539 | 10-scf00389 | 10 |
| AX-158238029 | 20 | 43.631 | KV452979.1 | 1727028 | 10-scf00389 | 10 |
| AX-157840865 | 20 | 43.631 | KV452979.1 | 1728762 | 10-scf00389 | 10 |
| AX-158238030 | 20 | 43.631 | KV452979.1 | 1729047 | 10-scf00389 | 10 |
| AX-158238031 | 20 | 43.631 | KV452979.1 | 1730498 | 10-scf00389 | 10 |
| AX-158238033 | 20 | 43.631 | KV452979.1 | 1732171 | 10-scf00389 | 10 |
| AX-158238034 | 20 | 43.631 | KV452979.1 | 1733922 | 10-scf00389 | 10 |
| AX-158238043 | 20 | 43.631 | KV452979.1 | 1745149 | 10-scf00389 | 10 |
| AX-158238076 | 20 | 43.631 | KV452979.1 | 1774159 | 10-scf00389 | 10 |
| AX-158238093 | 20 | 43.631 | KV452979.1 | 1791288 | 10-scf00389 | 10 |
| AX-158238113 | 20 | 43.631 | KV452979.1 | 1822562 | 10-scf00389 | 10 |
| AX-157720002 | 20 | 43.631 | KV452979.1 | 1840220 | 10-scf00389 | 10 |
| AX-158238136 | 20 | 43.631 | KV452979.1 | 1843680 | 10-scf00389 | 10 |
| AX-158238297 | 20 | 43.631 | KV452979.1 | 2048353 | 10-scf00389 | 10 |
| AX-158238035 | 20 | 43.85  | KV452979.1 | 1737363 | 10-scf00389 | 10 |
| AX-158238036 | 20 | 43.85  | KV452979.1 | 1738144 | 10-scf00389 | 10 |
| AX-158238037 | 20 | 43.85  | KV452979.1 | 1738795 | 10-scf00389 | 10 |
| AX-158238055 | 20 | 43.85  | KV452979.1 | 1760338 | 10-scf00389 | 10 |
| AX-158238056 | 20 | 43.85  | KV452979.1 | 1760817 | 10-scf00389 | 10 |
| AX-158238064 | 20 | 43.85  | KV452979.1 | 1766481 | 10-scf00389 | 10 |
| AX-158238071 | 20 | 43.85  | KV452979.1 | 1772086 | 10-scf00389 | 10 |
| AX-158238057 | 20 | 43.881 | KV452979.1 | 1761865 | 10-scf00389 | 10 |
| AX-158238060 | 20 | 43.923 | KV452979.1 | 1764329 | 10-scf00389 | 10 |
| AX-158380956 | 20 | 43.959 | KV452979.1 | 1751442 | 10-scf00389 | 10 |
| AX-158238048 | 20 | 43.959 | KV452979.1 | 1755169 | 10-scf00389 | 10 |
| AX-158238049 | 20 | 43.959 | KV452979.1 | 1755374 | 10-scf00389 | 10 |
| AX-158238053 | 20 | 43.959 | KV452979.1 | 1758120 | 10-scf00389 | 10 |
| AX-158238063 | 20 | 43.959 | KV452979.1 | 1765974 | 10-scf00389 | 10 |
| AX-158238068 | 20 | 43.959 | KV452979.1 | 1769611 | 10-scf00389 | 10 |
| AX-158238072 | 20 | 43.959 | KV452979.1 | 1772345 | 10-scf00389 | 10 |
| AX-158238079 | 20 | 43.959 | KV452979.1 | 1776341 | 10-scf00389 | 10 |
| AX-158238083 | 20 | 43.959 | KV452979.1 | 1778804 | 10-scf00389 | 10 |
| AX-158238084 | 20 | 43.959 | KV452979.1 | 1779379 | 10-scf00389 | 10 |
| AX-158238087 | 20 | 43.959 | KV452979.1 | 1781673 | 10-scf00389 | 10 |
| AX-158238090 | 20 | 43.959 | KV452979.1 | 1787489 | 10-scf00389 | 10 |
| AX-158238094 | 20 | 43.959 | KV452979.1 | 1794470 | 10-scf00389 | 10 |
| AX-157880041 | 20 | 43.959 | KV452979.1 | 1799003 | 10-scf00389 | 10 |
| AX-157751109 | 20 | 43.959 | KV452979.1 | 1799143 | 10-scf00389 | 10 |
| AX-158238097 | 20 | 43.959 | KV452979.1 | 1799316 | 10-scf00389 | 10 |
| AX-158238098 | 20 | 43.959 | KV452979.1 | 1799793 | 10-scf00389 | 10 |
| AX-158238099 | 20 | 43.959 | KV452979.1 | 1800245 | 10-scf00389 | 10 |
| AX-158238101 | 20 | 43.959 | KV452979.1 | 1801841 | 10-scf00389 | 10 |

|              |    |        |            |         |             |    |
|--------------|----|--------|------------|---------|-------------|----|
| AX-158238103 | 20 | 43.959 | KV452979.1 | 1803070 | 10-scf00389 | 10 |
| AX-156624808 | 20 | 43.959 | KV452979.1 | 1810207 | 10-scf00389 | 10 |
| AX-157840867 | 20 | 43.959 | KV452979.1 | 1814675 | 10-scf00389 | 10 |
| AX-158238109 | 20 | 43.959 | KV452979.1 | 1815881 | 10-scf00389 | 10 |
| AX-158238110 | 20 | 43.959 | KV452979.1 | 1818113 | 10-scf00389 | 10 |
| AX-158238154 | 20 | 43.959 | KV452979.1 | 1862097 | 10-scf00389 | 10 |
| AX-158238162 | 20 | 43.959 | KV452979.1 | 1869502 | 10-scf00389 | 10 |
| AX-158238231 | 20 | 43.959 | KV452979.1 | 1951148 | 10-scf00389 | 10 |
| AX-158238273 | 20 | 43.959 | KV452979.1 | 2025347 | 10-scf00389 | 10 |
| AX-157718813 | 20 | 44.068 | KV452979.1 | 1732876 | 10-scf00389 | 10 |
| AX-158238046 | 20 | 44.068 | KV452979.1 | 1751566 | 10-scf00389 | 10 |
| AX-158238052 | 20 | 44.068 | KV452979.1 | 1757793 | 10-scf00389 | 10 |
| AX-158238058 | 20 | 44.068 | KV452979.1 | 1763207 | 10-scf00389 | 10 |
| AX-158238067 | 20 | 44.068 | KV452979.1 | 1769268 | 10-scf00389 | 10 |
| AX-158238070 | 20 | 44.068 | KV452979.1 | 1770765 | 10-scf00389 | 10 |
| AX-158238117 | 20 | 44.068 | KV452979.1 | 1826143 | 10-scf00389 | 10 |
| AX-158238126 | 20 | 44.068 | KV452979.1 | 1832288 | 10-scf00389 | 10 |
| AX-158238127 | 20 | 44.068 | KV452979.1 | 1833863 | 10-scf00389 | 10 |
| AX-158238130 | 20 | 44.068 | KV452979.1 | 1836869 | 10-scf00389 | 10 |
| AX-157747461 | 20 | 44.068 | KV452979.1 | 1837659 | 10-scf00389 | 10 |
| AX-157710526 | 20 | 44.068 | KV452979.1 | 1842688 | 10-scf00389 | 10 |
| AX-158238140 | 20 | 44.068 | KV452979.1 | 1846091 | 10-scf00389 | 10 |
| AX-158238141 | 20 | 44.068 | KV452979.1 | 1846615 | 10-scf00389 | 10 |
| AX-158238142 | 20 | 44.068 | KV452979.1 | 1848406 | 10-scf00389 | 10 |
| AX-158238143 | 20 | 44.144 | KV452979.1 | 1848673 | 10-scf00389 | 10 |
| AX-158237922 | 20 | 44.177 | KV452979.1 | 1576776 | 10-scf00389 | 10 |
| AX-158237952 | 20 | 44.177 | KV452979.1 | 1614685 | 10-scf00389 | 10 |
| AX-158237956 | 20 | 44.177 | KV452979.1 | 1619721 | 10-scf00389 | 10 |
| AX-157840853 | 20 | 44.177 | KV452979.1 | 1627475 | 10-scf00389 | 10 |
| AX-158237984 | 20 | 44.177 | KV452979.1 | 1665260 | 10-scf00389 | 10 |
| AX-158238019 | 20 | 44.177 | KV452979.1 | 1712506 | 10-scf00389 | 10 |
| AX-158238062 | 20 | 44.177 | KV452979.1 | 1765348 | 10-scf00389 | 10 |
| AX-158238116 | 20 | 44.177 | KV452979.1 | 1825699 | 10-scf00389 | 10 |
| AX-157740860 | 20 | 44.177 | KV452979.1 | 1826859 | 10-scf00389 | 10 |
| AX-158238137 | 20 | 44.177 | KV452979.1 | 1843941 | 10-scf00389 | 10 |
| AX-158238145 | 20 | 44.177 | KV452979.1 | 1852495 | 10-scf00389 | 10 |
| AX-158238146 | 20 | 44.177 | KV452979.1 | 1853049 | 10-scf00389 | 10 |
| AX-158238147 | 20 | 44.177 | KV452979.1 | 1853472 | 10-scf00389 | 10 |
| AX-157748701 | 20 | 44.177 | KV452979.1 | 1860187 | 10-scf00389 | 10 |
| AX-158238151 | 20 | 44.177 | KV452979.1 | 1860265 | 10-scf00389 | 10 |
| AX-157742883 | 20 | 44.177 | KV452979.1 | 1866030 | 10-scf00389 | 10 |
| AX-158415395 | 20 | 44.177 | KV452979.1 | 1867682 | 10-scf00389 | 10 |
| AX-158238160 | 20 | 44.177 | KV452979.1 | 1868348 | 10-scf00389 | 10 |
| AX-158238161 | 20 | 44.177 | KV452979.1 | 1868763 | 10-scf00389 | 10 |
| AX-158238164 | 20 | 44.177 | KV452979.1 | 1872286 | 10-scf00389 | 10 |
| AX-158238165 | 20 | 44.177 | KV452979.1 | 1872807 | 10-scf00389 | 10 |
| AX-157840873 | 20 | 44.177 | KV452979.1 | 1874613 | 10-scf00389 | 10 |
| AX-158238167 | 20 | 44.177 | KV452979.1 | 1876503 | 10-scf00389 | 10 |
| AX-158238168 | 20 | 44.177 | KV452979.1 | 1876883 | 10-scf00389 | 10 |
| AX-158238169 | 20 | 44.177 | KV452979.1 | 1877545 | 10-scf00389 | 10 |
| AX-158238172 | 20 | 44.177 | KV452979.1 | 1879880 | 10-scf00389 | 10 |

|              |    |        |            |         |             |    |
|--------------|----|--------|------------|---------|-------------|----|
| AX-158238173 | 20 | 44.177 | KV452979.1 | 1882550 | 10-scf00389 | 10 |
| AX-157840875 | 20 | 44.177 | KV452979.1 | 1882855 | 10-scf00389 | 10 |
| AX-158238174 | 20 | 44.177 | KV452979.1 | 1887139 | 10-scf00389 | 10 |
| AX-158238202 | 20 | 44.177 | KV452979.1 | 1910434 | 10-scf00389 | 10 |
| AX-158238206 | 20 | 44.177 | KV452979.1 | 1918244 | 10-scf00389 | 10 |
| AX-158238238 | 20 | 44.177 | KV452979.1 | 1962499 | 10-scf00389 | 10 |
| AX-158238290 | 20 | 44.177 | KV452979.1 | 2040241 | 10-scf00389 | 10 |
| AX-158238306 | 20 | 44.177 | KV452979.1 | 2056700 | 10-scf00389 | 10 |
| AX-158394215 | 20 | 44.177 | KV452979.1 | 2103461 | 10-scf00389 | 10 |
| AX-158238365 | 20 | 44.177 | KV452979.1 | 2119566 | 10-scf00389 | 10 |
| AX-158238061 | 20 | 44.396 | KV452979.1 | 1764745 | 10-scf00389 | 10 |
| AX-158238069 | 20 | 44.396 | KV452979.1 | 1770529 | 10-scf00389 | 10 |
| AX-158238149 | 20 | 44.396 | KV452979.1 | 1856212 | 10-scf00389 | 10 |
| AX-158238171 | 20 | 44.396 | KV452979.1 | 1879212 | 10-scf00389 | 10 |
| AX-158238175 | 20 | 44.396 | KV452979.1 | 1889525 | 10-scf00389 | 10 |
| AX-158238186 | 20 | 44.396 | KV452979.1 | 1896566 | 10-scf00389 | 10 |
| AX-158238191 | 20 | 44.396 | KV452979.1 | 1900677 | 10-scf00389 | 10 |
| AX-158238192 | 20 | 44.396 | KV452979.1 | 1901177 | 10-scf00389 | 10 |
| AX-158238193 | 20 | 44.396 | KV452979.1 | 1901993 | 10-scf00389 | 10 |
| AX-158238196 | 20 | 44.396 | KV452979.1 | 1904601 | 10-scf00389 | 10 |
| AX-158238197 | 20 | 44.396 | KV452979.1 | 1907017 | 10-scf00389 | 10 |
| AX-158238199 | 20 | 44.396 | KV452979.1 | 1908133 | 10-scf00389 | 10 |
| AX-158238201 | 20 | 44.396 | KV452979.1 | 1910209 | 10-scf00389 | 10 |
| AX-158238203 | 20 | 44.396 | KV452979.1 | 1910764 | 10-scf00389 | 10 |
| AX-158238208 | 20 | 44.396 | KV452979.1 | 1919711 | 10-scf00389 | 10 |
| AX-158238211 | 20 | 44.396 | KV452979.1 | 1926622 | 10-scf00389 | 10 |
| AX-158238212 | 20 | 44.396 | KV452979.1 | 1927716 | 10-scf00389 | 10 |
| AX-158238214 | 20 | 44.396 | KV452979.1 | 1930206 | 10-scf00389 | 10 |
| AX-158238215 | 20 | 44.396 | KV452979.1 | 1930891 | 10-scf00389 | 10 |
| AX-157887497 | 20 | 44.396 | KV452979.1 | 1931544 | 10-scf00389 | 10 |
| AX-157756689 | 20 | 44.396 | KV452979.1 | 1931877 | 10-scf00389 | 10 |
| AX-158238217 | 20 | 44.396 | KV452979.1 | 1936797 | 10-scf00389 | 10 |
| AX-158238220 | 20 | 44.396 | KV452979.1 | 1938690 | 10-scf00389 | 10 |
| AX-158238221 | 20 | 44.396 | KV452979.1 | 1939462 | 10-scf00389 | 10 |
| AX-158238225 | 20 | 44.396 | KV452979.1 | 1943383 | 10-scf00389 | 10 |
| AX-158238227 | 20 | 44.396 | KV452979.1 | 1947068 | 10-scf00389 | 10 |
| AX-158238232 | 20 | 44.396 | KV452979.1 | 1951899 | 10-scf00389 | 10 |
| AX-158238240 | 20 | 44.396 | KV452979.1 | 1965724 | 10-scf00389 | 10 |
| AX-157719019 | 20 | 44.396 | KV452979.1 | 1966709 | 10-scf00389 | 10 |
| AX-157840878 | 20 | 44.396 | KV452979.1 | 1972769 | 10-scf00389 | 10 |
| AX-158238245 | 20 | 44.396 | KV452979.1 | 1982280 | 10-scf00389 | 10 |
| AX-158238246 | 20 | 44.396 | KV452979.1 | 1982970 | 10-scf00389 | 10 |
| AX-158238247 | 20 | 44.396 | KV452979.1 | 1983489 | 10-scf00389 | 10 |
| AX-158238254 | 20 | 44.396 | KV452979.1 | 1993362 | 10-scf00389 | 10 |
| AX-158238259 | 20 | 44.396 | KV452979.1 | 2004952 | 10-scf00389 | 10 |
| AX-158238264 | 20 | 44.396 | KV452979.1 | 2015480 | 10-scf00389 | 10 |
| AX-158238267 | 20 | 44.396 | KV452979.1 | 2017412 | 10-scf00389 | 10 |
| AX-158238274 | 20 | 44.396 | KV452979.1 | 2025703 | 10-scf00389 | 10 |
| AX-158238287 | 20 | 44.396 | KV452979.1 | 2035782 | 10-scf00389 | 10 |
| AX-158415402 | 20 | 44.426 | KV452979.1 | 1994462 | 10-scf00389 | 10 |
| AX-158238255 | 20 | 44.471 | KV452979.1 | 1996536 | 10-scf00389 | 10 |



|              |    |        |            |         |             |    |
|--------------|----|--------|------------|---------|-------------|----|
| AX-158238276 | 20 | 44.5   | KV452979.1 | 2027427 | 10-scf00389 | 10 |
| AX-158238288 | 20 | 44.5   | KV452979.1 | 2038727 | 10-scf00389 | 10 |
| AX-158238294 | 20 | 44.528 | KV452979.1 | 2042589 | 10-scf00389 | 10 |
| AX-158238222 | 20 | 44.532 | KV452979.1 | 1939872 | 10-scf00389 | 10 |
| AX-158238233 | 20 | 44.532 | KV452979.1 | 1952275 | 10-scf00389 | 10 |
| AX-158238291 | 20 | 44.532 | KV452979.1 | 2041154 | 10-scf00389 | 10 |
| AX-158238295 | 20 | 44.532 | KV452979.1 | 2042990 | 10-scf00389 | 10 |
| AX-158238298 | 20 | 44.532 | KV452979.1 | 2049797 | 10-scf00389 | 10 |
| AX-158238302 | 20 | 44.532 | KV452979.1 | 2053675 | 10-scf00389 | 10 |
| AX-158238307 | 20 | 44.532 | KV452979.1 | 2057135 | 10-scf00389 | 10 |
| AX-158238313 | 20 | 44.532 | KV452979.1 | 2061595 | 10-scf00389 | 10 |
| AX-158238315 | 20 | 44.94  | KV452979.1 | 2066948 | 10-scf00389 | 10 |
| AX-157840881 | 20 | 44.942 | KV452979.1 | 2070906 | 10-scf00389 | 10 |
| AX-158238322 | 20 | 44.942 | KV452979.1 | 2073788 | 10-scf00389 | 10 |
| AX-158238323 | 20 | 44.942 | KV452979.1 | 2074084 | 10-scf00389 | 10 |
| AX-158238324 | 20 | 44.942 | KV452979.1 | 2074791 | 10-scf00389 | 10 |
| AX-158238325 | 20 | 44.942 | KV452979.1 | 2077549 | 10-scf00389 | 10 |
| AX-158238327 | 20 | 44.942 | KV452979.1 | 2079283 | 10-scf00389 | 10 |
| AX-158238328 | 20 | 44.942 | KV452979.1 | 2079979 | 10-scf00389 | 10 |
| AX-158238330 | 20 | 44.942 | KV452979.1 | 2081272 | 10-scf00389 | 10 |
| AX-158238339 | 20 | 44.942 | KV452979.1 | 2087304 | 10-scf00389 | 10 |
| AX-158415407 | 20 | 44.942 | KV452979.1 | 2087798 | 10-scf00389 | 10 |
| AX-158238340 | 20 | 44.942 | KV452979.1 | 2088500 | 10-scf00389 | 10 |
| AX-158238341 | 20 | 44.942 | KV452979.1 | 2090418 | 10-scf00389 | 10 |
| AX-158238344 | 20 | 44.942 | KV452979.1 | 2093669 | 10-scf00389 | 10 |
| AX-158238356 | 20 | 44.942 | KV452979.1 | 2106751 | 10-scf00389 | 10 |
| AX-158238363 | 20 | 44.942 | KV452979.1 | 2113960 | 10-scf00389 | 10 |
| AX-158238364 | 20 | 44.942 | KV452979.1 | 2118863 | 10-scf00389 | 10 |
| AX-158238367 | 20 | 44.942 | KV452979.1 | 2121185 | 10-scf00389 | 10 |
| AX-158238366 | 20 | 44.984 | KV452979.1 | 2120593 | 10-scf00389 | 10 |
| AX-158238065 | 20 | 45.051 | KV452979.1 | 1767632 | 10-scf00389 | 10 |
| AX-158238308 | 20 | 45.051 | KV452979.1 | 2057308 | 10-scf00389 | 10 |
| AX-158238309 | 20 | 45.051 | KV452979.1 | 2057661 | 10-scf00389 | 10 |
| AX-158238310 | 20 | 45.051 | KV452979.1 | 2058344 | 10-scf00389 | 10 |
| AX-158415408 | 20 | 45.051 | KV452979.1 | 2088346 | 10-scf00389 | 10 |
| AX-157740962 | 20 | 45.051 | KV452979.1 | 2112481 | 10-scf00389 | 10 |
| AX-158238361 | 20 | 45.051 | KV452979.1 | 2112838 | 10-scf00389 | 10 |
| AX-158238373 | 20 | 45.051 | KV452979.1 | 2125926 | 10-scf00389 | 10 |
| AX-158238376 | 20 | 45.051 | KV452979.1 | 2128094 | 10-scf00389 | 10 |
| AX-158238379 | 20 | 45.051 | KV452979.1 | 2130451 | 10-scf00389 | 10 |
| AX-158238380 | 20 | 45.051 | KV452979.1 | 2133377 | 10-scf00389 | 10 |
| AX-158238383 | 20 | 45.051 | KV452979.1 | 2135435 | 10-scf00389 | 10 |
| AX-158238384 | 20 | 45.051 | KV452979.1 | 2135697 | 10-scf00389 | 10 |
| AX-158238388 | 20 | 45.051 | KV452979.1 | 2139617 | 10-scf00389 | 10 |
| AX-157887504 | 20 | 45.051 | KV452979.1 | 2142923 | 10-scf00389 | 10 |
| AX-157840885 | 20 | 45.051 | KV452979.1 | 2143034 | 10-scf00389 | 10 |
| AX-158238392 | 20 | 45.051 | KV452979.1 | 2145144 | 10-scf00389 | 10 |
| AX-157710541 | 20 | 45.051 | KV452979.1 | 2145619 | 10-scf00389 | 10 |
| AX-157717467 | 20 | 45.051 | KV452979.1 | 2146190 | 10-scf00389 | 10 |
| AX-157775192 | 20 | 45.051 | KV452979.1 | 2147149 | 10-scf00389 | 10 |
| AX-158238395 | 20 | 45.051 | KV452979.1 | 2147234 | 10-scf00389 | 10 |

|              |    |        |            |         |             |    |
|--------------|----|--------|------------|---------|-------------|----|
| AX-158238396 | 20 | 45.051 | KV452979.1 | 2147977 | 10-scf00389 | 10 |
| AX-158238405 | 20 | 45.051 | KV452979.1 | 2162503 | 10-scf00389 | 10 |
| AX-158238434 | 20 | 45.051 | KV452979.1 | 2230189 | 10-scf00389 | 10 |
| AX-158238402 | 20 | 45.253 | KV452979.1 | 2152830 | 10-scf00389 | 10 |
| AX-158238404 | 20 | 45.253 | KV452979.1 | 2160674 | 10-scf00389 | 10 |
| AX-158238407 | 20 | 45.253 | KV452979.1 | 2164062 | 10-scf00389 | 10 |
| AX-157748031 | 20 | 45.253 | KV452979.1 | 2165376 | 10-scf00389 | 10 |
| AX-157840887 | 20 | 45.288 | KV452979.1 | 2175009 | 10-scf00389 | 10 |
| AX-157775424 | 20 | 45.288 | KV452979.1 | 2175896 | 10-scf00389 | 10 |
| AX-158238414 | 20 | 45.288 | KV452979.1 | 2177391 | 10-scf00389 | 10 |
| AX-158238091 | 20 | 45.359 | KV452979.1 | 1788312 | 10-scf00389 | 10 |
| AX-158238415 | 20 | 45.359 | KV452979.1 | 2181145 | 10-scf00389 | 10 |
| AX-158238433 | 20 | 45.359 | KV452979.1 | 2229729 | 10-scf00389 | 10 |
| AX-157840889 | 20 | 45.41  | KV452979.1 | 2181354 | 10-scf00389 | 10 |
| AX-157887505 | 20 | 45.466 | KV452979.1 | 2177741 | 10-scf00389 | 10 |
| AX-158238416 | 20 | 45.466 | KV452979.1 | 2181793 | 10-scf00389 | 10 |
| AX-157770922 | 20 | 45.466 | KV452979.1 | 2219292 | 10-scf00389 | 10 |
| AX-158238421 | 20 | 45.467 | KV452979.1 | 2202834 | 10-scf00389 | 10 |
| AX-158238422 | 20 | 45.734 | KV452979.1 | 2203591 | 10-scf00389 | 10 |
| AX-158238443 | 20 | 45.734 | KV452979.1 | 2241831 | 10-scf00389 | 10 |
| AX-157840858 | 20 | 45.961 | KV452979.1 | 1648260 | 10-scf00389 | 10 |
| AX-158237985 | 20 | 45.961 | KV452979.1 | 1665844 | 10-scf00389 | 10 |
| AX-158238003 | 20 | 45.961 | KV452979.1 | 1694844 | 10-scf00389 | 10 |
| AX-158238092 | 20 | 45.961 | KV452979.1 | 1788848 | 10-scf00389 | 10 |
| AX-158238176 | 20 | 45.961 | KV452979.1 | 1890408 | 10-scf00389 | 10 |
| AX-158238249 | 20 | 45.961 | KV452979.1 | 1984406 | 10-scf00389 | 10 |
| AX-158238256 | 20 | 45.961 | KV452979.1 | 1997290 | 10-scf00389 | 10 |
| AX-158238258 | 20 | 45.961 | KV452979.1 | 2001256 | 10-scf00389 | 10 |
| AX-158238326 | 20 | 45.961 | KV452979.1 | 2078391 | 10-scf00389 | 10 |
| AX-158238385 | 20 | 45.961 | KV452979.1 | 2136266 | 10-scf00389 | 10 |
| AX-157755942 | 20 | 45.961 | KV452979.1 | 2170480 | 10-scf00389 | 10 |
| AX-158238426 | 20 | 45.961 | KV452979.1 | 2214785 | 10-scf00389 | 10 |
| AX-158238427 | 20 | 45.961 | KV452979.1 | 2219798 | 10-scf00389 | 10 |
| AX-158238436 | 20 | 45.961 | KV452979.1 | 2232683 | 10-scf00389 | 10 |
| AX-158238441 | 20 | 45.961 | KV452979.1 | 2238468 | 10-scf00389 | 10 |
| AX-158238445 | 20 | 45.961 | KV452979.1 | 2243654 | 10-scf00389 | 10 |
| AX-158238447 | 20 | 45.961 | KV452979.1 | 2246129 | 10-scf00389 | 10 |
| AX-158238449 | 20 | 45.969 | KV452979.1 | 2249504 | 10-scf00389 | 10 |
| AX-158238450 | 20 | 45.974 | KV452979.1 | 2250367 | 10-scf00389 | 10 |
| AX-158238085 | 20 | 46.213 | KV452979.1 | 1779657 | 10-scf00389 | 10 |
| AX-158238451 | 20 | 46.213 | KV452979.1 | 2251622 | 10-scf00389 | 10 |
| AX-157840894 | 20 | 46.357 | KV452979.1 | 2256992 | 10-scf00389 | 10 |
| AX-157840895 | 20 | 46.658 | KV452979.1 | 2257947 | 10-scf00389 | 10 |
| AX-158238474 | 20 | 46.658 | KV452979.1 | 2289823 | 10-scf00389 | 10 |
| AX-157840896 | 20 | 46.959 | KV452979.1 | 2272041 | 10-scf00389 | 10 |
| AX-158238464 | 20 | 46.959 | KV452979.1 | 2273518 | 10-scf00389 | 10 |
| AX-158386918 | 20 | 46.959 | KV452979.1 | 2298410 | 10-scf00389 | 10 |
| AX-157752203 | 20 | 46.959 | KV452979.1 | 2300030 | 10-scf00389 | 10 |
| AX-158238490 | 20 | 46.959 | KV452979.1 | 2307902 | 10-scf00389 | 10 |
| AX-158238465 | 20 | 46.96  | KV452979.1 | 2274559 | 10-scf00389 | 10 |
| AX-158238467 | 20 | 46.96  | KV452979.1 | 2277275 | 10-scf00389 | 10 |

|              |    |        |            |         |             |    |
|--------------|----|--------|------------|---------|-------------|----|
| AX-157887506 | 20 | 46.96  | KV452979.1 | 2281195 | 10-scf00389 | 10 |
| AX-158238479 | 20 | 47.09  | KV452979.1 | 2294333 | 10-scf00389 | 10 |
| AX-158238481 | 20 | 47.09  | KV452979.1 | 2296734 | 10-scf00389 | 10 |
| AX-157743427 | 20 | 47.09  | KV452979.1 | 2298355 | 10-scf00389 | 10 |
| AX-158238484 | 20 | 47.09  | KV452979.1 | 2298985 | 10-scf00389 | 10 |
| AX-158238485 | 20 | 47.09  | KV452979.1 | 2300758 | 10-scf00389 | 10 |
| AX-158238495 | 20 | 47.35  | KV452979.1 | 2322779 | 10-scf00389 | 10 |
| AX-158238499 | 20 | 47.385 | KV452979.1 | 2326836 | 10-scf00389 | 10 |
| AX-158238501 | 20 | 47.429 | KV452979.1 | 2329609 | 10-scf00389 | 10 |
| AX-158238599 | 20 | 47.429 | KV452979.1 | 2454872 | 10-scf00389 | 10 |
| AX-157840899 | 20 | 47.46  | KV452979.1 | 2308586 | 10-scf00389 | 10 |
| AX-158238496 | 20 | 47.46  | KV452979.1 | 2323736 | 10-scf00389 | 10 |
| AX-158238498 | 20 | 47.46  | KV452979.1 | 2325712 | 10-scf00389 | 10 |
| AX-158238502 | 20 | 47.46  | KV452979.1 | 2330156 | 10-scf00389 | 10 |
| AX-158238505 | 20 | 47.46  | KV452979.1 | 2331769 | 10-scf00389 | 10 |
| AX-158238506 | 20 | 47.46  | KV452979.1 | 2333302 | 10-scf00389 | 10 |
| AX-157840903 | 20 | 47.46  | KV452979.1 | 2335637 | 10-scf00389 | 10 |
| AX-158238510 | 20 | 47.46  | KV452979.1 | 2339331 | 10-scf00389 | 10 |
| AX-157880048 | 20 | 47.46  | KV452979.1 | 2340813 | 10-scf00389 | 10 |
| AX-158238513 | 20 | 47.46  | KV452979.1 | 2343416 | 10-scf00389 | 10 |
| AX-158238514 | 20 | 47.46  | KV452979.1 | 2344935 | 10-scf00389 | 10 |
| AX-158238517 | 20 | 47.46  | KV452979.1 | 2347691 | 10-scf00389 | 10 |
| AX-158238518 | 20 | 47.46  | KV452979.1 | 2348446 | 10-scf00389 | 10 |
| AX-158238519 | 20 | 47.46  | KV452979.1 | 2350596 | 10-scf00389 | 10 |
| AX-158238520 | 20 | 47.46  | KV452979.1 | 2351708 | 10-scf00389 | 10 |
| AX-158238523 | 20 | 47.46  | KV452979.1 | 2354758 | 10-scf00389 | 10 |
| AX-158238528 | 20 | 47.46  | KV452979.1 | 2358218 | 10-scf00389 | 10 |
| AX-158238530 | 20 | 47.46  | KV452979.1 | 2360435 | 10-scf00389 | 10 |
| AX-158238531 | 20 | 47.46  | KV452979.1 | 2361797 | 10-scf00389 | 10 |
| AX-158238533 | 20 | 47.46  | KV452979.1 | 2362910 | 10-scf00389 | 10 |
| AX-158238537 | 20 | 47.46  | KV452979.1 | 2366417 | 10-scf00389 | 10 |
| AX-158238538 | 20 | 47.46  | KV452979.1 | 2367208 | 10-scf00389 | 10 |
| AX-157718803 | 20 | 47.46  | KV452979.1 | 2368150 | 10-scf00389 | 10 |
| AX-158238539 | 20 | 47.46  | KV452979.1 | 2369675 | 10-scf00389 | 10 |
| AX-158238542 | 20 | 47.46  | KV452979.1 | 2372295 | 10-scf00389 | 10 |
| AX-158238543 | 20 | 47.46  | KV452979.1 | 2373449 | 10-scf00389 | 10 |
| AX-157731771 | 20 | 47.46  | KV452979.1 | 2374820 | 10-scf00389 | 10 |
| AX-158238544 | 20 | 47.46  | KV452979.1 | 2375170 | 10-scf00389 | 10 |
| AX-158238546 | 20 | 47.46  | KV452979.1 | 2378658 | 10-scf00389 | 10 |
| AX-157715155 | 20 | 47.46  | KV452979.1 | 2382166 | 10-scf00389 | 10 |
| AX-158238548 | 20 | 47.46  | KV452979.1 | 2385880 | 10-scf00389 | 10 |
| AX-158238551 | 20 | 47.46  | KV452979.1 | 2388338 | 10-scf00389 | 10 |
| AX-158238552 | 20 | 47.46  | KV452979.1 | 2389060 | 10-scf00389 | 10 |
| AX-158238553 | 20 | 47.46  | KV452979.1 | 2389676 | 10-scf00389 | 10 |
| AX-157720521 | 20 | 47.46  | KV452979.1 | 2390792 | 10-scf00389 | 10 |
| AX-158238555 | 20 | 47.46  | KV452979.1 | 2391256 | 10-scf00389 | 10 |
| AX-157715039 | 20 | 47.46  | KV452979.1 | 2392025 | 10-scf00389 | 10 |
| AX-158238558 | 20 | 47.46  | KV452979.1 | 2393861 | 10-scf00389 | 10 |
| AX-157840907 | 20 | 47.46  | KV452979.1 | 2397998 | 10-scf00389 | 10 |
| AX-158380959 | 20 | 47.46  | KV452979.1 | 2398641 | 10-scf00389 | 10 |
| AX-158238561 | 20 | 47.46  | KV452979.1 | 2398978 | 10-scf00389 | 10 |

|              |    |        |            |         |             |    |
|--------------|----|--------|------------|---------|-------------|----|
| AX-158238563 | 20 | 47.46  | KV452979.1 | 2402339 | 10-scf00389 | 10 |
| AX-158238565 | 20 | 47.46  | KV452979.1 | 2404405 | 10-scf00389 | 10 |
| AX-158238566 | 20 | 47.46  | KV452979.1 | 2405551 | 10-scf00389 | 10 |
| AX-157840909 | 20 | 47.46  | KV452979.1 | 2407741 | 10-scf00389 | 10 |
| AX-157840910 | 20 | 47.46  | KV452979.1 | 2412097 | 10-scf00389 | 10 |
| AX-158238572 | 20 | 47.46  | KV452979.1 | 2412562 | 10-scf00389 | 10 |
| AX-158238574 | 20 | 47.46  | KV452979.1 | 2415050 | 10-scf00389 | 10 |
| AX-158238576 | 20 | 47.46  | KV452979.1 | 2416400 | 10-scf00389 | 10 |
| AX-158238577 | 20 | 47.46  | KV452979.1 | 2417687 | 10-scf00389 | 10 |
| AX-158238578 | 20 | 47.46  | KV452979.1 | 2418489 | 10-scf00389 | 10 |
| AX-158238579 | 20 | 47.46  | KV452979.1 | 2420110 | 10-scf00389 | 10 |
| AX-158238580 | 20 | 47.46  | KV452979.1 | 2420479 | 10-scf00389 | 10 |
| AX-157771281 | 20 | 47.46  | KV452979.1 | 2421506 | 10-scf00389 | 10 |
| AX-158238583 | 20 | 47.46  | KV452979.1 | 2422969 | 10-scf00389 | 10 |
| AX-158238591 | 20 | 47.46  | KV452979.1 | 2433800 | 10-scf00389 | 10 |
| AX-157751156 | 20 | 47.46  | KV452979.1 | 2445036 | 10-scf00389 | 10 |
| AX-158238593 | 20 | 47.46  | KV452979.1 | 2447338 | 10-scf00389 | 10 |
| AX-157771643 | 20 | 47.46  | KV452979.1 | 2459422 | 10-scf00389 | 10 |
| AX-158238607 | 20 | 47.46  | KV452979.1 | 2473462 | 10-scf00389 | 10 |
| AX-158238609 | 20 | 47.46  | KV452979.1 | 2476269 | 10-scf00389 | 10 |
| AX-158238611 | 20 | 47.46  | KV452979.1 | 2478724 | 10-scf00389 | 10 |
| AX-157693244 | 20 | 47.46  | KV452979.1 | 2481847 | 10-scf00389 | 10 |
| AX-157757524 | 20 | 47.46  | KV452979.1 | 2503664 | 10-scf00389 | 10 |
| AX-158238638 | 20 | 47.46  | KV452979.1 | 2512839 | 10-scf00389 | 10 |
| AX-158238647 | 20 | 47.46  | KV452979.1 | 2519977 | 10-scf00389 | 10 |
| AX-158238651 | 20 | 47.46  | KV452979.1 | 2528452 | 10-scf00389 | 10 |
| AX-158238663 | 20 | 47.46  | KV452979.1 | 2549156 | 10-scf00389 | 10 |
| AX-158238677 | 20 | 47.46  | KV452979.1 | 2567496 | 10-scf00389 | 10 |
| AX-157738884 | 20 | 47.46  | KV452979.1 | 2572952 | 10-scf00389 | 10 |
| AX-157840906 | 20 | 47.482 | KV452979.1 | 2359916 | 10-scf00389 | 10 |
| AX-158238598 | 20 | 47.482 | KV452979.1 | 2454423 | 10-scf00389 | 10 |
| AX-158238600 | 20 | 47.524 | KV452979.1 | 2462538 | 10-scf00389 | 10 |
| AX-157840913 | 20 | 47.569 | KV452979.1 | 2462716 | 10-scf00389 | 10 |
| AX-158238601 | 20 | 47.569 | KV452979.1 | 2467590 | 10-scf00389 | 10 |
| AX-158238612 | 20 | 47.678 | KV452979.1 | 2479354 | 10-scf00389 | 10 |
| AX-158380960 | 20 | 47.678 | KV452979.1 | 2479987 | 10-scf00389 | 10 |
| AX-158238614 | 20 | 47.678 | KV452979.1 | 2482737 | 10-scf00389 | 10 |
| AX-158238615 | 20 | 47.678 | KV452979.1 | 2485704 | 10-scf00389 | 10 |
| AX-158238628 | 20 | 47.788 | KV452979.1 | 2500243 | 10-scf00389 | 10 |
| AX-158238636 | 20 | 47.788 | KV452979.1 | 2510284 | 10-scf00389 | 10 |
| AX-158238637 | 20 | 47.788 | KV452979.1 | 2512574 | 10-scf00389 | 10 |
| AX-158238644 | 20 | 47.788 | KV452979.1 | 2518072 | 10-scf00389 | 10 |
| AX-158238672 | 20 | 47.788 | KV452979.1 | 2563057 | 10-scf00389 | 10 |
| AX-157859634 | 20 | 47.788 | KV452979.1 | 2592198 | 10-scf00389 | 10 |
| AX-158238649 | 20 | 47.98  | KV452979.1 | 2521497 | 10-scf00389 | 10 |
| AX-158238650 | 20 | 47.98  | KV452979.1 | 2524965 | 10-scf00389 | 10 |
| AX-157887510 | 20 | 48.172 | KV452979.1 | 2531306 | 10-scf00389 | 10 |
| AX-158238701 | 20 | 48.172 | KV452979.1 | 2600548 | 10-scf00389 | 10 |
| AX-158238655 | 20 | 48.295 | KV452979.1 | 2535766 | 10-scf00389 | 10 |
| AX-158238671 | 20 | 48.295 | KV452979.1 | 2562668 | 10-scf00389 | 10 |
| AX-157840915 | 20 | 48.295 | KV452979.1 | 2622816 | 10-scf00389 | 10 |

|              |    |        |            |         |             |    |
|--------------|----|--------|------------|---------|-------------|----|
| AX-158238658 | 20 | 48.389 | KV452979.1 | 2537246 | 10-scf00389 | 10 |
| AX-158238659 | 20 | 48.466 | KV452979.1 | 2541500 | 10-scf00389 | 10 |
| AX-158238662 | 20 | 48.553 | KV452979.1 | 2545584 | 10-scf00389 | 10 |
| AX-158238664 | 20 | 48.707 | KV452979.1 | 2550200 | 10-scf00389 | 10 |
| AX-158238668 | 20 | 48.707 | KV452979.1 | 2557922 | 10-scf00389 | 10 |
| AX-157726760 | 20 | 48.707 | KV452979.1 | 2560459 | 10-scf00389 | 10 |
| AX-158415422 | 20 | 48.707 | KV452979.1 | 2911134 | 10-scf00389 | 10 |
| AX-158238521 | 20 | 48.881 | KV452979.1 | 2353078 | 10-scf00389 | 10 |
| AX-158238670 | 20 | 48.881 | KV452979.1 | 2561750 | 10-scf00389 | 10 |
| AX-158238673 | 20 | 48.881 | KV452979.1 | 2564206 | 10-scf00389 | 10 |
| AX-158238674 | 20 | 48.881 | KV452979.1 | 2564618 | 10-scf00389 | 10 |
| AX-158238676 | 20 | 48.881 | KV452979.1 | 2566281 | 10-scf00389 | 10 |
| AX-158238683 | 20 | 48.881 | KV452979.1 | 2576927 | 10-scf00389 | 10 |
| AX-158238686 | 20 | 48.881 | KV452979.1 | 2580817 | 10-scf00389 | 10 |
| AX-158238690 | 20 | 49.285 | KV452979.1 | 2586133 | 10-scf00389 | 10 |
| AX-158238692 | 20 | 49.285 | KV452979.1 | 2587130 | 10-scf00389 | 10 |
| AX-158238695 | 20 | 49.285 | KV452979.1 | 2589353 | 10-scf00389 | 10 |
| AX-158238696 | 20 | 49.285 | KV452979.1 | 2591809 | 10-scf00389 | 10 |
| AX-158238697 | 20 | 49.285 | KV452979.1 | 2594156 | 10-scf00389 | 10 |
| AX-158238699 | 20 | 49.285 | KV452979.1 | 2596331 | 10-scf00389 | 10 |
| AX-158238709 | 20 | 49.285 | KV452979.1 | 2609447 | 10-scf00389 | 10 |
| AX-158238710 | 20 | 49.595 | KV452979.1 | 2610655 | 10-scf00389 | 10 |
| AX-158238713 | 20 | 49.73  | KV452979.1 | 2612894 | 10-scf00389 | 10 |
| AX-158238714 | 20 | 49.73  | KV452979.1 | 2616001 | 10-scf00389 | 10 |
| AX-158238716 | 20 | 49.73  | KV452979.1 | 2620616 | 10-scf00389 | 10 |
| AX-158238719 | 20 | 49.789 | KV452979.1 | 2625840 | 10-scf00389 | 10 |
| AX-158238730 | 20 | 49.789 | KV452979.1 | 2638798 | 10-scf00389 | 10 |
| AX-158238740 | 20 | 49.789 | KV452979.1 | 2645267 | 10-scf00389 | 10 |
| AX-157840916 | 20 | 49.865 | KV452979.1 | 2625511 | 10-scf00389 | 10 |
| AX-158238720 | 20 | 49.865 | KV452979.1 | 2626953 | 10-scf00389 | 10 |
| AX-158238721 | 20 | 49.865 | KV452979.1 | 2627673 | 10-scf00389 | 10 |
| AX-157887513 | 20 | 49.865 | KV452979.1 | 2628677 | 10-scf00389 | 10 |
| AX-158386924 | 20 | 49.865 | KV452979.1 | 2629418 | 10-scf00389 | 10 |
| AX-158238724 | 20 | 49.865 | KV452979.1 | 2629838 | 10-scf00389 | 10 |
| AX-158238725 | 20 | 49.865 | KV452979.1 | 2630445 | 10-scf00389 | 10 |
| AX-158238727 | 20 | 49.865 | KV452979.1 | 2632198 | 10-scf00389 | 10 |
| AX-158238731 | 20 | 49.865 | KV452979.1 | 2639070 | 10-scf00389 | 10 |
| AX-158238754 | 20 | 49.865 | KV452979.1 | 2666893 | 10-scf00389 | 10 |
| AX-158238774 | 20 | 49.865 | KV452979.1 | 2695251 | 10-scf00389 | 10 |
| AX-158238729 | 20 | 49.866 | KV452979.1 | 2636989 | 10-scf00389 | 10 |
| AX-158238734 | 20 | 50.218 | KV452979.1 | 2641379 | 10-scf00389 | 10 |
| AX-158238741 | 20 | 50.278 | KV452979.1 | 2647119 | 10-scf00389 | 10 |
| AX-157840918 | 20 | 50.626 | KV452979.1 | 2676702 | 10-scf00389 | 10 |
| AX-157840919 | 20 | 50.629 | KV452979.1 | 2685457 | 10-scf00389 | 10 |
| AX-158238772 | 20 | 50.63  | KV452979.1 | 2688946 | 10-scf00389 | 10 |
| AX-157840920 | 20 | 50.63  | KV452979.1 | 2689007 | 10-scf00389 | 10 |
| AX-158238773 | 20 | 50.63  | KV452979.1 | 2690153 | 10-scf00389 | 10 |
| AX-157749407 | 20 | 50.63  | KV452979.1 | 2699692 | 10-scf00389 | 10 |
| AX-158238778 | 20 | 50.648 | KV452979.1 | 2700017 | 10-scf00389 | 10 |
| AX-158238765 | 20 | 50.692 | KV452979.1 | 2682641 | 10-scf00389 | 10 |
| AX-157714457 | 20 | 50.692 | KV452979.1 | 2702500 | 10-scf00389 | 10 |

|              |    |        |            |         |             |    |
|--------------|----|--------|------------|---------|-------------|----|
| AX-158238783 | 20 | 50.692 | KV452979.1 | 2704363 | 10-scf00389 | 10 |
| AX-158238781 | 20 | 50.711 | KV452979.1 | 2703738 | 10-scf00389 | 10 |
| AX-158238744 | 20 | 50.751 | KV452979.1 | 2654487 | 10-scf00389 | 10 |
| AX-158238749 | 20 | 50.751 | KV452979.1 | 2657391 | 10-scf00389 | 10 |
| AX-158238785 | 20 | 50.751 | KV452979.1 | 2710482 | 10-scf00389 | 10 |
| AX-158238786 | 20 | 50.751 | KV452979.1 | 2711099 | 10-scf00389 | 10 |
| AX-157715857 | 20 | 50.992 | KV452979.1 | 2744404 | 10-scf00389 | 10 |
| AX-157840928 | 20 | 50.992 | KV452979.1 | 2748113 | 10-scf00389 | 10 |
| AX-157840930 | 20 | 50.992 | KV452979.1 | 2760129 | 10-scf00389 | 10 |
| AX-158238817 | 20 | 50.992 | KV452979.1 | 2760311 | 10-scf00389 | 10 |
| AX-158238818 | 20 | 50.992 | KV452979.1 | 2761045 | 10-scf00389 | 10 |
| AX-157840932 | 20 | 50.992 | KV452979.1 | 2767487 | 10-scf00389 | 10 |
| AX-158238823 | 20 | 50.992 | KV452979.1 | 2771606 | 10-scf00389 | 10 |
| AX-158239063 | 20 | 50.992 | KV452979.1 | 3153315 | 10-scf00389 | 10 |
| AX-158239173 | 20 | 50.992 | KV452979.1 | 3347947 | 10-scf00389 | 10 |
| AX-158239174 | 20 | 50.992 | KV452979.1 | 3348778 | 10-scf00389 | 10 |
| AX-158239297 | 20 | 50.992 | KV452979.1 | 3527648 | 10-scf00389 | 10 |
| AX-158239323 | 20 | 50.992 | KV452979.1 | 3562412 | 10-scf00389 | 10 |
| AX-158239375 | 20 | 50.992 | KV452979.1 | 3629319 | 10-scf00389 | 10 |
| AX-157840924 | 20 | 50.993 | KV452979.1 | 2729159 | 10-scf00389 | 10 |
| AX-158238796 | 20 | 50.993 | KV452979.1 | 2731871 | 10-scf00389 | 10 |
| AX-158238800 | 20 | 50.993 | KV452979.1 | 2733482 | 10-scf00389 | 10 |
| AX-158238821 | 20 | 50.993 | KV452979.1 | 2769819 | 10-scf00389 | 10 |
| AX-158238822 | 20 | 50.993 | KV452979.1 | 2770498 | 10-scf00389 | 10 |
| AX-158238827 | 20 | 51.352 | KV452979.1 | 2777641 | 10-scf00389 | 10 |
| AX-157840921 | 20 | 51.353 | KV452979.1 | 2699316 | 10-scf00389 | 10 |
| AX-158238779 | 20 | 51.353 | KV452979.1 | 2702728 | 10-scf00389 | 10 |
| AX-158238834 | 20 | 51.353 | KV452979.1 | 2786543 | 10-scf00389 | 10 |
| AX-158394224 | 20 | 51.353 | KV452979.1 | 2797555 | 10-scf00389 | 10 |
| AX-158238843 | 20 | 51.353 | KV452979.1 | 2804560 | 10-scf00389 | 10 |
| AX-158238846 | 20 | 51.353 | KV452979.1 | 2807305 | 10-scf00389 | 10 |
| AX-157738656 | 20 | 51.353 | KV452979.1 | 2808214 | 10-scf00389 | 10 |
| AX-158238847 | 20 | 51.353 | KV452979.1 | 2808587 | 10-scf00389 | 10 |
| AX-158238849 | 20 | 51.353 | KV452979.1 | 2810704 | 10-scf00389 | 10 |
| AX-158238850 | 20 | 51.353 | KV452979.1 | 2811145 | 10-scf00389 | 10 |
| AX-157718028 | 20 | 51.353 | KV452979.1 | 2816043 | 10-scf00389 | 10 |
| AX-158238853 | 20 | 51.353 | KV452979.1 | 2822378 | 10-scf00389 | 10 |
| AX-157840938 | 20 | 51.353 | KV452979.1 | 2824575 | 10-scf00389 | 10 |
| AX-158238854 | 20 | 51.353 | KV452979.1 | 2825737 | 10-scf00389 | 10 |
| AX-158238858 | 20 | 51.353 | KV452979.1 | 2833257 | 10-scf00389 | 10 |
| AX-158238863 | 20 | 51.353 | KV452979.1 | 2838908 | 10-scf00389 | 10 |
| AX-158238866 | 20 | 51.353 | KV452979.1 | 2842782 | 10-scf00389 | 10 |
| AX-158238884 | 20 | 51.353 | KV452979.1 | 2875580 | 10-scf00389 | 10 |
| AX-158239162 | 20 | 51.353 | KV452979.1 | 3336455 | 10-scf00389 | 10 |
| AX-158238860 | 20 | 51.395 | KV452979.1 | 2835062 | 10-scf00389 | 10 |
| AX-158238867 | 20 | 51.395 | KV452979.1 | 2847136 | 10-scf00389 | 10 |
| AX-158238869 | 20 | 51.395 | KV452979.1 | 2849421 | 10-scf00389 | 10 |
| AX-158238883 | 20 | 51.395 | KV452979.1 | 2874592 | 10-scf00389 | 10 |
| AX-158238870 | 20 | 51.434 | KV452979.1 | 2850026 | 10-scf00389 | 10 |
| AX-158238873 | 20 | 51.473 | KV452979.1 | 2858616 | 10-scf00389 | 10 |
| AX-158238738 | 20 | 51.496 | KV452979.1 | 2642878 | 10-scf00389 | 10 |

|              |    |        |            |         |             |    |
|--------------|----|--------|------------|---------|-------------|----|
| AX-158238797 | 20 | 51.496 | KV452979.1 | 2732432 | 10-scf00389 | 10 |
| AX-157840927 | 20 | 51.496 | KV452979.1 | 2746276 | 10-scf00389 | 10 |
| AX-158238830 | 20 | 51.496 | KV452979.1 | 2779491 | 10-scf00389 | 10 |
| AX-158238835 | 20 | 51.496 | KV452979.1 | 2787119 | 10-scf00389 | 10 |
| AX-158238844 | 20 | 51.496 | KV452979.1 | 2805098 | 10-scf00389 | 10 |
| AX-158238890 | 20 | 51.496 | KV452979.1 | 2885006 | 10-scf00389 | 10 |
| AX-158238891 | 20 | 51.514 | KV452979.1 | 2886161 | 10-scf00389 | 10 |
| AX-158238897 | 20 | 51.514 | KV452979.1 | 2891413 | 10-scf00389 | 10 |
| AX-158238840 | 20 | 51.544 | KV452979.1 | 2798987 | 10-scf00389 | 10 |
| AX-158238851 | 20 | 51.544 | KV452979.1 | 2817065 | 10-scf00389 | 10 |
| AX-158415417 | 20 | 51.544 | KV452979.1 | 2822695 | 10-scf00389 | 10 |
| AX-158410630 | 20 | 51.544 | KV452979.1 | 2823090 | 10-scf00389 | 10 |
| AX-157710773 | 20 | 51.544 | KV452979.1 | 2856098 | 10-scf00389 | 10 |
| AX-158238894 | 20 | 51.544 | KV452979.1 | 2887885 | 10-scf00389 | 10 |
| AX-158238901 | 20 | 51.544 | KV452979.1 | 2899124 | 10-scf00389 | 10 |
| AX-158238931 | 20 | 51.544 | KV452979.1 | 2963895 | 10-scf00389 | 10 |
| AX-158238993 | 20 | 51.544 | KV452979.1 | 3053069 | 10-scf00389 | 10 |
| AX-158238998 | 20 | 51.544 | KV452979.1 | 3058919 | 10-scf00389 | 10 |
| AX-158239024 | 20 | 51.544 | KV452979.1 | 3091388 | 10-scf00389 | 10 |
| AX-157774628 | 20 | 51.544 | KV452979.1 | 3121029 | 10-scf00389 | 10 |
| AX-158239057 | 20 | 51.544 | KV452979.1 | 3143768 | 10-scf00389 | 10 |
| AX-158239061 | 20 | 51.544 | KV452979.1 | 3150948 | 10-scf00389 | 10 |
| AX-157748904 | 20 | 51.544 | KV452979.1 | 3182984 | 10-scf00389 | 10 |
| AX-158239077 | 20 | 51.544 | KV452979.1 | 3183725 | 10-scf00389 | 10 |
| AX-158239091 | 20 | 51.544 | KV452979.1 | 3200772 | 10-scf00389 | 10 |
| AX-158239107 | 20 | 51.544 | KV452979.1 | 3223045 | 10-scf00389 | 10 |
| AX-158239125 | 20 | 51.544 | KV452979.1 | 3264542 | 10-scf00389 | 10 |
| AX-158238885 | 20 | 51.568 | KV452979.1 | 2878024 | 10-scf00389 | 10 |
| AX-158238895 | 20 | 51.568 | KV452979.1 | 2888797 | 10-scf00389 | 10 |
| AX-158238838 | 20 | 51.593 | KV452979.1 | 2790026 | 10-scf00389 | 10 |
| AX-158415421 | 20 | 51.593 | KV452979.1 | 2871898 | 10-scf00389 | 10 |
| AX-157755113 | 20 | 51.593 | KV452979.1 | 2893974 | 10-scf00389 | 10 |
| AX-157859640 | 20 | 51.593 | KV452979.1 | 2895687 | 10-scf00389 | 10 |
| AX-158238899 | 20 | 51.593 | KV452979.1 | 2897661 | 10-scf00389 | 10 |
| AX-158238909 | 20 | 51.593 | KV452979.1 | 2915590 | 10-scf00389 | 10 |
| AX-158238910 | 20 | 51.593 | KV452979.1 | 2916175 | 10-scf00389 | 10 |
| AX-157745613 | 20 | 51.593 | KV452979.1 | 3442974 | 10-scf00389 | 10 |
| AX-158238929 | 20 | 51.834 | KV452979.1 | 2962143 | 10-scf00389 | 10 |
| AX-158238932 | 20 | 51.834 | KV452979.1 | 2964954 | 10-scf00389 | 10 |
| AX-158238933 | 20 | 51.834 | KV452979.1 | 2965976 | 10-scf00389 | 10 |
| AX-158238941 | 20 | 51.834 | KV452979.1 | 2979530 | 10-scf00389 | 10 |
| AX-158238948 | 20 | 51.834 | KV452979.1 | 2991181 | 10-scf00389 | 10 |
| AX-158238957 | 20 | 51.834 | KV452979.1 | 3007048 | 10-scf00389 | 10 |
| AX-158238963 | 20 | 51.834 | KV452979.1 | 3013731 | 10-scf00389 | 10 |
| AX-157750926 | 20 | 51.834 | KV452979.1 | 3014829 | 10-scf00389 | 10 |
| AX-158238966 | 20 | 51.834 | KV452979.1 | 3016870 | 10-scf00389 | 10 |
| AX-158238976 | 20 | 51.834 | KV452979.1 | 3032698 | 10-scf00389 | 10 |
| AX-158238978 | 20 | 51.834 | KV452979.1 | 3035901 | 10-scf00389 | 10 |
| AX-158238980 | 20 | 51.834 | KV452979.1 | 3038191 | 10-scf00389 | 10 |
| AX-158238981 | 20 | 51.834 | KV452979.1 | 3039206 | 10-scf00389 | 10 |
| AX-158238982 | 20 | 51.834 | KV452979.1 | 3040194 | 10-scf00389 | 10 |

|              |    |        |            |         |             |    |
|--------------|----|--------|------------|---------|-------------|----|
| AX-158238989 | 20 | 51.834 | KV452979.1 | 3048725 | 10-scf00389 | 10 |
| AX-158238992 | 20 | 51.834 | KV452979.1 | 3050603 | 10-scf00389 | 10 |
| AX-158238994 | 20 | 51.834 | KV452979.1 | 3053724 | 10-scf00389 | 10 |
| AX-158238996 | 20 | 51.834 | KV452979.1 | 3057864 | 10-scf00389 | 10 |
| AX-158238997 | 20 | 51.834 | KV452979.1 | 3058477 | 10-scf00389 | 10 |
| AX-158238999 | 20 | 51.834 | KV452979.1 | 3059273 | 10-scf00389 | 10 |
| AX-158239001 | 20 | 51.834 | KV452979.1 | 3060742 | 10-scf00389 | 10 |
| AX-158239002 | 20 | 51.834 | KV452979.1 | 3061190 | 10-scf00389 | 10 |
| AX-158239003 | 20 | 51.834 | KV452979.1 | 3061625 | 10-scf00389 | 10 |
| AX-158239005 | 20 | 51.834 | KV452979.1 | 3063651 | 10-scf00389 | 10 |
| AX-158239006 | 20 | 51.834 | KV452979.1 | 3064249 | 10-scf00389 | 10 |
| AX-158239007 | 20 | 51.834 | KV452979.1 | 3066864 | 10-scf00389 | 10 |
| AX-158239010 | 20 | 51.834 | KV452979.1 | 3069631 | 10-scf00389 | 10 |
| AX-158239011 | 20 | 51.834 | KV452979.1 | 3070162 | 10-scf00389 | 10 |
| AX-158239013 | 20 | 51.834 | KV452979.1 | 3073310 | 10-scf00389 | 10 |
| AX-158239014 | 20 | 51.834 | KV452979.1 | 3074835 | 10-scf00389 | 10 |
| AX-158394228 | 20 | 51.834 | KV452979.1 | 3077435 | 10-scf00389 | 10 |
| AX-158239015 | 20 | 51.834 | KV452979.1 | 3078004 | 10-scf00389 | 10 |
| AX-158239016 | 20 | 51.834 | KV452979.1 | 3081108 | 10-scf00389 | 10 |
| AX-158239017 | 20 | 51.834 | KV452979.1 | 3083250 | 10-scf00389 | 10 |
| AX-158239020 | 20 | 51.834 | KV452979.1 | 3085513 | 10-scf00389 | 10 |
| AX-158239021 | 20 | 51.834 | KV452979.1 | 3088602 | 10-scf00389 | 10 |
| AX-157859642 | 20 | 51.834 | KV452979.1 | 3088847 | 10-scf00389 | 10 |
| AX-158239025 | 20 | 51.834 | KV452979.1 | 3094897 | 10-scf00389 | 10 |
| AX-157840944 | 20 | 51.834 | KV452979.1 | 3095139 | 10-scf00389 | 10 |
| AX-158239026 | 20 | 51.834 | KV452979.1 | 3095477 | 10-scf00389 | 10 |
| AX-158239027 | 20 | 51.834 | KV452979.1 | 3098194 | 10-scf00389 | 10 |
| AX-157840946 | 20 | 51.834 | KV452979.1 | 3098525 | 10-scf00389 | 10 |
| AX-157746665 | 20 | 51.834 | KV452979.1 | 3100170 | 10-scf00389 | 10 |
| AX-157707649 | 20 | 51.834 | KV452979.1 | 3102028 | 10-scf00389 | 10 |
| AX-158239033 | 20 | 51.834 | KV452979.1 | 3106174 | 10-scf00389 | 10 |
| AX-158239036 | 20 | 51.834 | KV452979.1 | 3107295 | 10-scf00389 | 10 |
| AX-158239037 | 20 | 51.834 | KV452979.1 | 3108916 | 10-scf00389 | 10 |
| AX-158239038 | 20 | 51.834 | KV452979.1 | 3109320 | 10-scf00389 | 10 |
| AX-158239039 | 20 | 51.834 | KV452979.1 | 3111784 | 10-scf00389 | 10 |
| AX-158239042 | 20 | 51.834 | KV452979.1 | 3115790 | 10-scf00389 | 10 |
| AX-157744587 | 20 | 51.834 | KV452979.1 | 3119002 | 10-scf00389 | 10 |
| AX-158239045 | 20 | 51.834 | KV452979.1 | 3121680 | 10-scf00389 | 10 |
| AX-158239047 | 20 | 51.834 | KV452979.1 | 3124124 | 10-scf00389 | 10 |
| AX-157840949 | 20 | 51.834 | KV452979.1 | 3126954 | 10-scf00389 | 10 |
| AX-158239053 | 20 | 51.834 | KV452979.1 | 3138907 | 10-scf00389 | 10 |
| AX-158239055 | 20 | 51.834 | KV452979.1 | 3141125 | 10-scf00389 | 10 |
| AX-158239056 | 20 | 51.834 | KV452979.1 | 3141453 | 10-scf00389 | 10 |
| AX-158239058 | 20 | 51.834 | KV452979.1 | 3144308 | 10-scf00389 | 10 |
| AX-157840951 | 20 | 51.834 | KV452979.1 | 3144869 | 10-scf00389 | 10 |
| AX-158239073 | 20 | 51.834 | KV452979.1 | 3174309 | 10-scf00389 | 10 |
| AX-158418890 | 20 | 51.834 | KV452979.1 | 3175198 | 10-scf00389 | 10 |
| AX-158415430 | 20 | 51.834 | KV452979.1 | 3175579 | 10-scf00389 | 10 |
| AX-158239074 | 20 | 51.834 | KV452979.1 | 3175899 | 10-scf00389 | 10 |
| AX-158239076 | 20 | 51.834 | KV452979.1 | 3182212 | 10-scf00389 | 10 |
| AX-158239078 | 20 | 51.834 | KV452979.1 | 3184282 | 10-scf00389 | 10 |



|              |    |        |            |         |             |    |
|--------------|----|--------|------------|---------|-------------|----|
| AX-158239079 | 20 | 51.834 | KV452979.1 | 3185063 | 10-scf00389 | 10 |
| AX-158239080 | 20 | 51.834 | KV452979.1 | 3185668 | 10-scf00389 | 10 |
| AX-158239083 | 20 | 51.834 | KV452979.1 | 3189492 | 10-scf00389 | 10 |
| AX-158239087 | 20 | 51.834 | KV452979.1 | 3195488 | 10-scf00389 | 10 |
| AX-157724290 | 20 | 51.834 | KV452979.1 | 3198357 | 10-scf00389 | 10 |
| AX-158415431 | 20 | 51.834 | KV452979.1 | 3198943 | 10-scf00389 | 10 |
| AX-158418891 | 20 | 51.834 | KV452979.1 | 3199040 | 10-scf00389 | 10 |
| AX-158239092 | 20 | 51.834 | KV452979.1 | 3203177 | 10-scf00389 | 10 |
| AX-158415433 | 20 | 51.834 | KV452979.1 | 3213362 | 10-scf00389 | 10 |
| AX-158239098 | 20 | 51.834 | KV452979.1 | 3213599 | 10-scf00389 | 10 |
| AX-158239114 | 20 | 51.834 | KV452979.1 | 3231104 | 10-scf00389 | 10 |
| AX-158239123 | 20 | 51.834 | KV452979.1 | 3259755 | 10-scf00389 | 10 |
| AX-158239124 | 20 | 51.834 | KV452979.1 | 3260403 | 10-scf00389 | 10 |
| AX-157840954 | 20 | 51.834 | KV452979.1 | 3263807 | 10-scf00389 | 10 |
| AX-157840955 | 20 | 51.834 | KV452979.1 | 3277303 | 10-scf00389 | 10 |
| AX-158239137 | 20 | 51.834 | KV452979.1 | 3290840 | 10-scf00389 | 10 |
| AX-158380964 | 20 | 51.834 | KV452979.1 | 3305128 | 10-scf00389 | 10 |
| AX-158239154 | 20 | 51.834 | KV452979.1 | 3324041 | 10-scf00389 | 10 |
| AX-158239169 | 20 | 51.834 | KV452979.1 | 3344350 | 10-scf00389 | 10 |
| AX-158239185 | 20 | 51.834 | KV452979.1 | 3366232 | 10-scf00389 | 10 |
| AX-158239208 | 20 | 51.834 | KV452979.1 | 3414907 | 10-scf00389 | 10 |
| AX-157840973 | 20 | 51.834 | KV452979.1 | 3439325 | 10-scf00389 | 10 |
| AX-158239273 | 20 | 51.834 | KV452979.1 | 3479973 | 10-scf00389 | 10 |
| AX-158239276 | 20 | 51.834 | KV452979.1 | 3483532 | 10-scf00389 | 10 |
| AX-158239289 | 20 | 51.834 | KV452979.1 | 3509167 | 10-scf00389 | 10 |
| AX-158239290 | 20 | 51.834 | KV452979.1 | 3510914 | 10-scf00389 | 10 |
| AX-157840982 | 20 | 51.834 | KV452979.1 | 3511820 | 10-scf00389 | 10 |
| AX-158239292 | 20 | 51.834 | KV452979.1 | 3515228 | 10-scf00389 | 10 |
| AX-157840984 | 20 | 51.834 | KV452979.1 | 3518997 | 10-scf00389 | 10 |
| AX-158239309 | 20 | 51.834 | KV452979.1 | 3547484 | 10-scf00389 | 10 |
| AX-158239314 | 20 | 51.834 | KV452979.1 | 3550087 | 10-scf00389 | 10 |
| AX-158239341 | 20 | 51.834 | KV452979.1 | 3585916 | 10-scf00389 | 10 |
| AX-158239408 | 20 | 51.834 | KV452979.1 | 3691409 | 10-scf00389 | 10 |
| AX-158239776 | 20 | 51.834 | KV452979.1 | 4233608 | 10-scf00389 | 10 |
| AX-158239941 | 20 | 51.834 | KV452979.1 | 4455788 | 10-scf00389 | 10 |
| AX-158239988 | 20 | 51.834 | KV452979.1 | 4557277 | 10-scf00389 | 10 |
| AX-158240109 | 20 | 51.834 | KV452979.1 | 4800868 | 10-scf00389 | 10 |
| AX-157867264 | 20 | 51.905 | KV452979.1 | 3208984 | 10-scf00389 | 10 |
| AX-158239106 | 20 | 51.943 | KV452979.1 | 3222078 | 10-scf00389 | 10 |
| AX-158239117 | 20 | 51.943 | KV452979.1 | 3240428 | 10-scf00389 | 10 |
| AX-157743960 | 20 | 51.943 | KV452979.1 | 3255269 | 10-scf00389 | 10 |
| AX-158239121 | 20 | 52.052 | KV452979.1 | 3255727 | 10-scf00389 | 10 |
| AX-158239122 | 20 | 52.052 | KV452979.1 | 3258061 | 10-scf00389 | 10 |
| AX-158239128 | 20 | 52.052 | KV452979.1 | 3276440 | 10-scf00389 | 10 |
| AX-157840956 | 20 | 52.052 | KV452979.1 | 3286331 | 10-scf00389 | 10 |
| AX-158239136 | 20 | 52.052 | KV452979.1 | 3290540 | 10-scf00389 | 10 |
| AX-158239142 | 20 | 52.052 | KV452979.1 | 3302584 | 10-scf00389 | 10 |
| AX-157840960 | 20 | 52.052 | KV452979.1 | 3306813 | 10-scf00389 | 10 |
| AX-158239143 | 20 | 52.052 | KV452979.1 | 3307076 | 10-scf00389 | 10 |
| AX-158239155 | 20 | 52.052 | KV452979.1 | 3326201 | 10-scf00389 | 10 |
| AX-158239156 | 20 | 52.052 | KV452979.1 | 3326763 | 10-scf00389 | 10 |

|              |    |        |            |         |             |    |
|--------------|----|--------|------------|---------|-------------|----|
| AX-158239198 | 20 | 52.052 | KV452979.1 | 3392614 | 10-scf00389 | 10 |
| AX-157840947 | 20 | 52.104 | KV452979.1 | 3110371 | 10-scf00389 | 10 |
| AX-157739238 | 20 | 52.104 | KV452979.1 | 3110425 | 10-scf00389 | 10 |
| AX-158239101 | 20 | 52.104 | KV452979.1 | 3217323 | 10-scf00389 | 10 |
| AX-158239160 | 20 | 52.104 | KV452979.1 | 3335287 | 10-scf00389 | 10 |
| AX-158239161 | 20 | 52.104 | KV452979.1 | 3336142 | 10-scf00389 | 10 |
| AX-158239164 | 20 | 52.104 | KV452979.1 | 3338312 | 10-scf00389 | 10 |
| AX-158239243 | 20 | 52.104 | KV452979.1 | 3447454 | 10-scf00389 | 10 |
| AX-158239267 | 20 | 52.104 | KV452979.1 | 3474463 | 10-scf00389 | 10 |
| AX-158239282 | 20 | 52.104 | KV452979.1 | 3495347 | 10-scf00389 | 10 |
| AX-158380966 | 20 | 52.104 | KV452979.1 | 3588802 | 10-scf00389 | 10 |
| AX-158239163 | 20 | 52.135 | KV452979.1 | 3337700 | 10-scf00389 | 10 |
| AX-157775352 | 20 | 52.161 | KV452979.1 | 2990427 | 10-scf00389 | 10 |
| AX-157725926 | 20 | 52.161 | KV452979.1 | 3008064 | 10-scf00389 | 10 |
| AX-158239084 | 20 | 52.161 | KV452979.1 | 3190273 | 10-scf00389 | 10 |
| AX-157859644 | 20 | 52.161 | KV452979.1 | 3329499 | 10-scf00389 | 10 |
| AX-158239165 | 20 | 52.161 | KV452979.1 | 3338879 | 10-scf00389 | 10 |
| AX-158239177 | 20 | 52.161 | KV452979.1 | 3354258 | 10-scf00389 | 10 |
| AX-158239178 | 20 | 52.161 | KV452979.1 | 3357474 | 10-scf00389 | 10 |
| AX-157840966 | 20 | 52.161 | KV452979.1 | 3360737 | 10-scf00389 | 10 |
| AX-158239187 | 20 | 52.161 | KV452979.1 | 3367783 | 10-scf00389 | 10 |
| AX-158239194 | 20 | 52.161 | KV452979.1 | 3384497 | 10-scf00389 | 10 |
| AX-157840970 | 20 | 52.161 | KV452979.1 | 3387387 | 10-scf00389 | 10 |
| AX-158239199 | 20 | 52.161 | KV452979.1 | 3393808 | 10-scf00389 | 10 |
| AX-158239202 | 20 | 52.161 | KV452979.1 | 3403377 | 10-scf00389 | 10 |
| AX-158239203 | 20 | 52.161 | KV452979.1 | 3403895 | 10-scf00389 | 10 |
| AX-158239205 | 20 | 52.161 | KV452979.1 | 3406309 | 10-scf00389 | 10 |
| AX-158239206 | 20 | 52.161 | KV452979.1 | 3408089 | 10-scf00389 | 10 |
| AX-158239209 | 20 | 52.161 | KV452979.1 | 3415284 | 10-scf00389 | 10 |
| AX-158239211 | 20 | 52.161 | KV452979.1 | 3417632 | 10-scf00389 | 10 |
| AX-158239218 | 20 | 52.161 | KV452979.1 | 3422089 | 10-scf00389 | 10 |
| AX-158239219 | 20 | 52.161 | KV452979.1 | 3422348 | 10-scf00389 | 10 |
| AX-158239220 | 20 | 52.161 | KV452979.1 | 3423550 | 10-scf00389 | 10 |
| AX-158239233 | 20 | 52.161 | KV452979.1 | 3441355 | 10-scf00389 | 10 |
| AX-158239246 | 20 | 52.161 | KV452979.1 | 3449562 | 10-scf00389 | 10 |
| AX-158239250 | 20 | 52.161 | KV452979.1 | 3454451 | 10-scf00389 | 10 |
| AX-158239252 | 20 | 52.161 | KV452979.1 | 3456654 | 10-scf00389 | 10 |
| AX-157714376 | 20 | 52.161 | KV452979.1 | 3460321 | 10-scf00389 | 10 |
| AX-158239254 | 20 | 52.161 | KV452979.1 | 3463253 | 10-scf00389 | 10 |
| AX-158239255 | 20 | 52.161 | KV452979.1 | 3464133 | 10-scf00389 | 10 |
| AX-158239258 | 20 | 52.161 | KV452979.1 | 3467382 | 10-scf00389 | 10 |
| AX-158239259 | 20 | 52.161 | KV452979.1 | 3467698 | 10-scf00389 | 10 |
| AX-158239261 | 20 | 52.161 | KV452979.1 | 3468252 | 10-scf00389 | 10 |
| AX-158239262 | 20 | 52.161 | KV452979.1 | 3468597 | 10-scf00389 | 10 |
| AX-157751150 | 20 | 52.161 | KV452979.1 | 3470806 | 10-scf00389 | 10 |
| AX-158239263 | 20 | 52.161 | KV452979.1 | 3470902 | 10-scf00389 | 10 |
| AX-158239264 | 20 | 52.161 | KV452979.1 | 3472805 | 10-scf00389 | 10 |
| AX-158239266 | 20 | 52.161 | KV452979.1 | 3473991 | 10-scf00389 | 10 |
| AX-158239274 | 20 | 52.161 | KV452979.1 | 3480536 | 10-scf00389 | 10 |
| AX-158239277 | 20 | 52.161 | KV452979.1 | 3484888 | 10-scf00389 | 10 |
| AX-158239280 | 20 | 52.161 | KV452979.1 | 3491964 | 10-scf00389 | 10 |

|              |    |        |            |         |             |    |
|--------------|----|--------|------------|---------|-------------|----|
| AX-158239281 | 20 | 52.161 | KV452979.1 | 3494408 | 10-scf00389 | 10 |
| AX-157716828 | 20 | 52.161 | KV452979.1 | 3516323 | 10-scf00389 | 10 |
| AX-158239296 | 20 | 52.161 | KV452979.1 | 3525279 | 10-scf00389 | 10 |
| AX-158239302 | 20 | 52.161 | KV452979.1 | 3532515 | 10-scf00389 | 10 |
| AX-157719584 | 20 | 52.161 | KV452979.1 | 3543985 | 10-scf00389 | 10 |
| AX-158239312 | 20 | 52.161 | KV452979.1 | 3549142 | 10-scf00389 | 10 |
| AX-158239318 | 20 | 52.161 | KV452979.1 | 3553036 | 10-scf00389 | 10 |
| AX-158239321 | 20 | 52.161 | KV452979.1 | 3560336 | 10-scf00389 | 10 |
| AX-158239322 | 20 | 52.161 | KV452979.1 | 3561347 | 10-scf00389 | 10 |
| AX-158239346 | 20 | 52.161 | KV452979.1 | 3589904 | 10-scf00389 | 10 |
| AX-157880069 | 20 | 52.161 | KV452979.1 | 3601275 | 10-scf00389 | 10 |
| AX-158239352 | 20 | 52.161 | KV452979.1 | 3602574 | 10-scf00389 | 10 |
| AX-158239358 | 20 | 52.161 | KV452979.1 | 3612384 | 10-scf00389 | 10 |
| AX-158239364 | 20 | 52.161 | KV452979.1 | 3617697 | 10-scf00389 | 10 |
| AX-158239953 | 20 | 52.161 | KV452979.1 | 4478049 | 10-scf00389 | 10 |
| AX-158240023 | 20 | 52.161 | KV452979.1 | 4627961 | 10-scf00389 | 10 |
| AX-158240117 | 20 | 52.161 | KV452979.1 | 4811529 | 10-scf00389 | 10 |
| AX-158240335 | 20 | 52.161 | KV452979.1 | 5187446 | 10-scf00389 | 10 |
| AX-158240350 | 20 | 52.161 | KV452979.1 | 5207508 | 10-scf00389 | 10 |
| AX-158238977 | 20 | 52.194 | KV452979.1 | 3033437 | 10-scf00389 | 10 |
| AX-158239319 | 20 | 52.249 | KV452979.1 | 3557105 | 10-scf00389 | 10 |
| AX-158239172 | 20 | 52.271 | KV452979.1 | 3346935 | 10-scf00389 | 10 |
| AX-158239244 | 20 | 52.271 | KV452979.1 | 3447745 | 10-scf00389 | 10 |
| AX-158239245 | 20 | 52.271 | KV452979.1 | 3449145 | 10-scf00389 | 10 |
| AX-157840977 | 20 | 52.271 | KV452979.1 | 3449832 | 10-scf00389 | 10 |
| AX-158239247 | 20 | 52.271 | KV452979.1 | 3451393 | 10-scf00389 | 10 |
| AX-158239249 | 20 | 52.271 | KV452979.1 | 3453196 | 10-scf00389 | 10 |
| AX-157758611 | 20 | 52.271 | KV452979.1 | 3461059 | 10-scf00389 | 10 |
| AX-157840978 | 20 | 52.271 | KV452979.1 | 3461185 | 10-scf00389 | 10 |
| AX-157840979 | 20 | 52.271 | KV452979.1 | 3461647 | 10-scf00389 | 10 |
| AX-158239271 | 20 | 52.271 | KV452979.1 | 3478863 | 10-scf00389 | 10 |
| AX-158239328 | 20 | 52.271 | KV452979.1 | 3566583 | 10-scf00389 | 10 |
| AX-158239333 | 20 | 52.271 | KV452979.1 | 3575654 | 10-scf00389 | 10 |
| AX-158239340 | 20 | 52.271 | KV452979.1 | 3585286 | 10-scf00389 | 10 |
| AX-158239342 | 20 | 52.271 | KV452979.1 | 3587118 | 10-scf00389 | 10 |
| AX-157749218 | 20 | 52.271 | KV452979.1 | 3588120 | 10-scf00389 | 10 |
| AX-157840992 | 20 | 52.271 | KV452979.1 | 3595245 | 10-scf00389 | 10 |
| AX-157746950 | 20 | 52.271 | KV452979.1 | 3599116 | 10-scf00389 | 10 |
| AX-158239355 | 20 | 52.271 | KV452979.1 | 3607774 | 10-scf00389 | 10 |
| AX-158239367 | 20 | 52.271 | KV452979.1 | 3621367 | 10-scf00389 | 10 |
| AX-158239373 | 20 | 52.271 | KV452979.1 | 3627718 | 10-scf00389 | 10 |
| AX-158239116 | 20 | 52.489 | KV452979.1 | 3233606 | 10-scf00389 | 10 |
| AX-158239135 | 20 | 52.489 | KV452979.1 | 3289941 | 10-scf00389 | 10 |
| AX-158239204 | 20 | 52.489 | KV452979.1 | 3405941 | 10-scf00389 | 10 |
| AX-157724575 | 20 | 52.489 | KV452979.1 | 3409205 | 10-scf00389 | 10 |
| AX-158239356 | 20 | 52.489 | KV452979.1 | 3608640 | 10-scf00389 | 10 |
| AX-158239360 | 20 | 52.489 | KV452979.1 | 3614473 | 10-scf00389 | 10 |
| AX-158415442 | 20 | 52.489 | KV452979.1 | 3615042 | 10-scf00389 | 10 |
| AX-158239363 | 20 | 52.489 | KV452979.1 | 3616763 | 10-scf00389 | 10 |
| AX-157707866 | 20 | 52.489 | KV452979.1 | 3620329 | 10-scf00389 | 10 |
| AX-158239368 | 20 | 52.489 | KV452979.1 | 3622733 | 10-scf00389 | 10 |

|              |    |        |            |         |             |    |
|--------------|----|--------|------------|---------|-------------|----|
| AX-158239369 | 20 | 52.489 | KV452979.1 | 3624957 | 10-scf00389 | 10 |
| AX-158239395 | 20 | 52.489 | KV452979.1 | 3670443 | 10-scf00389 | 10 |
| AX-158239400 | 20 | 52.489 | KV452979.1 | 3678057 | 10-scf00389 | 10 |
| AX-158239180 | 20 | 52.598 | KV452979.1 | 3361347 | 10-scf00389 | 10 |
| AX-157859646 | 20 | 52.598 | KV452979.1 | 3521210 | 10-scf00389 | 10 |
| AX-158239300 | 20 | 52.598 | KV452979.1 | 3530917 | 10-scf00389 | 10 |
| AX-158239301 | 20 | 52.598 | KV452979.1 | 3532003 | 10-scf00389 | 10 |
| AX-157714249 | 20 | 52.598 | KV452979.1 | 3536500 | 10-scf00389 | 10 |
| AX-158239359 | 20 | 52.598 | KV452979.1 | 3613958 | 10-scf00389 | 10 |
| AX-158423319 | 20 | 52.598 | KV452979.1 | 3634220 | 10-scf00389 | 10 |
| AX-158239380 | 20 | 52.598 | KV452979.1 | 3635766 | 10-scf00389 | 10 |
| AX-158415444 | 20 | 52.598 | KV452979.1 | 3640755 | 10-scf00389 | 10 |
| AX-157859647 | 20 | 52.598 | KV452979.1 | 3642626 | 10-scf00389 | 10 |
| AX-158239384 | 20 | 52.598 | KV452979.1 | 3644784 | 10-scf00389 | 10 |
| AX-158239385 | 20 | 52.598 | KV452979.1 | 3645760 | 10-scf00389 | 10 |
| AX-158239386 | 20 | 52.598 | KV452979.1 | 3646579 | 10-scf00389 | 10 |
| AX-158239388 | 20 | 52.598 | KV452979.1 | 3649027 | 10-scf00389 | 10 |
| AX-158239391 | 20 | 52.598 | KV452979.1 | 3658400 | 10-scf00389 | 10 |
| AX-158239397 | 20 | 52.598 | KV452979.1 | 3675962 | 10-scf00389 | 10 |
| AX-158239401 | 20 | 52.598 | KV452979.1 | 3678896 | 10-scf00389 | 10 |
| AX-158239403 | 20 | 52.598 | KV452979.1 | 3682506 | 10-scf00389 | 10 |
| AX-158239404 | 20 | 52.598 | KV452979.1 | 3683382 | 10-scf00389 | 10 |
| AX-158239405 | 20 | 52.598 | KV452979.1 | 3683724 | 10-scf00389 | 10 |
| AX-158239406 | 20 | 52.598 | KV452979.1 | 3684286 | 10-scf00389 | 10 |
| AX-158239407 | 20 | 52.598 | KV452979.1 | 3685385 | 10-scf00389 | 10 |
| AX-158239469 | 20 | 52.598 | KV452979.1 | 3778008 | 10-scf00389 | 10 |
| AX-157840997 | 20 | 52.679 | KV452979.1 | 3681137 | 10-scf00389 | 10 |
| AX-157840998 | 20 | 52.707 | KV452979.1 | 3688924 | 10-scf00389 | 10 |
| AX-158239411 | 20 | 52.707 | KV452979.1 | 3693063 | 10-scf00389 | 10 |
| AX-158240054 | 20 | 52.707 | KV452979.1 | 4720681 | 10-scf00389 | 10 |
| AX-158240127 | 20 | 52.707 | KV452979.1 | 4825842 | 10-scf00389 | 10 |
| AX-158239814 | 20 | 52.736 | KV452979.1 | 4289981 | 10-scf00389 | 10 |
| AX-158240643 | 20 | 52.736 | KV452979.1 | 5563982 | 10-scf00389 | 10 |
| AX-157841200 | 20 | 52.736 | KV452979.1 | 6119013 | 10-scf00389 | 10 |
| AX-157721316 | 20 | 52.736 | KV452979.1 | 6123299 | 10-scf00389 | 10 |
| AX-158241214 | 20 | 52.736 | KV452979.1 | 6128063 | 10-scf00389 | 10 |
| AX-158241516 | 20 | 52.736 | KV452979.1 | 6480397 | 10-scf00389 | 10 |
| AX-158241559 | 20 | 52.736 | KV452979.1 | 6538784 | 10-scf00389 | 10 |
| AX-158241563 | 20 | 52.736 | KV452979.1 | 6545242 | 10-scf00389 | 10 |
| AX-158239446 | 20 | 52.761 | KV452979.1 | 3740419 | 10-scf00389 | 10 |
| AX-158239448 | 20 | 52.793 | KV452979.1 | 3741224 | 10-scf00389 | 10 |
| AX-157880056 | 20 | 52.817 | KV452979.1 | 2677695 | 10-scf00389 | 10 |
| AX-157741745 | 20 | 52.817 | KV452979.1 | 2704489 | 10-scf00389 | 10 |
| AX-158238802 | 20 | 52.817 | KV452979.1 | 2736535 | 10-scf00389 | 10 |
| AX-158238805 | 20 | 52.817 | KV452979.1 | 2739133 | 10-scf00389 | 10 |
| AX-157859638 | 20 | 52.817 | KV452979.1 | 2749036 | 10-scf00389 | 10 |
| AX-158238831 | 20 | 52.817 | KV452979.1 | 2780879 | 10-scf00389 | 10 |
| AX-158415420 | 20 | 52.817 | KV452979.1 | 2823912 | 10-scf00389 | 10 |
| AX-157840937 | 20 | 52.817 | KV452979.1 | 2824528 | 10-scf00389 | 10 |
| AX-157880058 | 20 | 52.817 | KV452979.1 | 2875168 | 10-scf00389 | 10 |
| AX-158238975 | 20 | 52.817 | KV452979.1 | 3032236 | 10-scf00389 | 10 |

|              |    |        |            |         |             |    |
|--------------|----|--------|------------|---------|-------------|----|
| AX-158239171 | 20 | 52.817 | KV452979.1 | 3345634 | 10-scf00389 | 10 |
| AX-157840968 | 20 | 52.817 | KV452979.1 | 3373747 | 10-scf00389 | 10 |
| AX-157694616 | 20 | 52.817 | KV452979.1 | 3391891 | 10-scf00389 | 10 |
| AX-158239197 | 20 | 52.817 | KV452979.1 | 3392076 | 10-scf00389 | 10 |
| AX-158239234 | 20 | 52.817 | KV452979.1 | 3442131 | 10-scf00389 | 10 |
| AX-157704154 | 20 | 52.817 | KV452979.1 | 3491659 | 10-scf00389 | 10 |
| AX-158239348 | 20 | 52.817 | KV452979.1 | 3590831 | 10-scf00389 | 10 |
| AX-158239390 | 20 | 52.817 | KV452979.1 | 3657599 | 10-scf00389 | 10 |
| AX-158239422 | 20 | 52.817 | KV452979.1 | 3704930 | 10-scf00389 | 10 |
| AX-158239428 | 20 | 52.817 | KV452979.1 | 3713113 | 10-scf00389 | 10 |
| AX-157841000 | 20 | 52.817 | KV452979.1 | 3714722 | 10-scf00389 | 10 |
| AX-157746867 | 20 | 52.817 | KV452979.1 | 3716628 | 10-scf00389 | 10 |
| AX-158239434 | 20 | 52.817 | KV452979.1 | 3721699 | 10-scf00389 | 10 |
| AX-157872559 | 20 | 52.817 | KV452979.1 | 3723220 | 10-scf00389 | 10 |
| AX-158239435 | 20 | 52.817 | KV452979.1 | 3731354 | 10-scf00389 | 10 |
| AX-158239436 | 20 | 52.817 | KV452979.1 | 3732660 | 10-scf00389 | 10 |
| AX-158239437 | 20 | 52.817 | KV452979.1 | 3733263 | 10-scf00389 | 10 |
| AX-158239449 | 20 | 52.817 | KV452979.1 | 3742953 | 10-scf00389 | 10 |
| AX-158239451 | 20 | 52.817 | KV452979.1 | 3745964 | 10-scf00389 | 10 |
| AX-158239452 | 20 | 52.817 | KV452979.1 | 3746881 | 10-scf00389 | 10 |
| AX-158239453 | 20 | 52.817 | KV452979.1 | 3747487 | 10-scf00389 | 10 |
| AX-158239455 | 20 | 52.817 | KV452979.1 | 3752927 | 10-scf00389 | 10 |
| AX-158239456 | 20 | 52.817 | KV452979.1 | 3757085 | 10-scf00389 | 10 |
| AX-158239459 | 20 | 52.817 | KV452979.1 | 3762820 | 10-scf00389 | 10 |
| AX-158239461 | 20 | 52.817 | KV452979.1 | 3769501 | 10-scf00389 | 10 |
| AX-158239463 | 20 | 52.817 | KV452979.1 | 3771256 | 10-scf00389 | 10 |
| AX-158239465 | 20 | 52.817 | KV452979.1 | 3773532 | 10-scf00389 | 10 |
| AX-158239466 | 20 | 52.817 | KV452979.1 | 3774056 | 10-scf00389 | 10 |
| AX-158239467 | 20 | 52.817 | KV452979.1 | 3775550 | 10-scf00389 | 10 |
| AX-158239470 | 20 | 52.817 | KV452979.1 | 3778571 | 10-scf00389 | 10 |
| AX-158239471 | 20 | 52.817 | KV452979.1 | 3780007 | 10-scf00389 | 10 |
| AX-158239472 | 20 | 52.817 | KV452979.1 | 3780695 | 10-scf00389 | 10 |
| AX-158239473 | 20 | 52.817 | KV452979.1 | 3781358 | 10-scf00389 | 10 |
| AX-158239474 | 20 | 52.817 | KV452979.1 | 3781813 | 10-scf00389 | 10 |
| AX-158239476 | 20 | 52.817 | KV452979.1 | 3784122 | 10-scf00389 | 10 |
| AX-158239488 | 20 | 52.817 | KV452979.1 | 3800787 | 10-scf00389 | 10 |
| AX-158239503 | 20 | 52.817 | KV452979.1 | 3820711 | 10-scf00389 | 10 |
| AX-158239505 | 20 | 52.817 | KV452979.1 | 3823208 | 10-scf00389 | 10 |
| AX-157841006 | 20 | 52.817 | KV452979.1 | 3831505 | 10-scf00389 | 10 |
| AX-158239511 | 20 | 52.817 | KV452979.1 | 3832414 | 10-scf00389 | 10 |
| AX-157715523 | 20 | 52.817 | KV452979.1 | 3833460 | 10-scf00389 | 10 |
| AX-158239516 | 20 | 52.817 | KV452979.1 | 3836784 | 10-scf00389 | 10 |
| AX-158239523 | 20 | 52.817 | KV452979.1 | 3846802 | 10-scf00389 | 10 |
| AX-158239525 | 20 | 52.817 | KV452979.1 | 3849123 | 10-scf00389 | 10 |
| AX-158239528 | 20 | 52.817 | KV452979.1 | 3852753 | 10-scf00389 | 10 |
| AX-157867270 | 20 | 52.817 | KV452979.1 | 3862139 | 10-scf00389 | 10 |
| AX-157841009 | 20 | 52.817 | KV452979.1 | 3866087 | 10-scf00389 | 10 |
| AX-157859648 | 20 | 52.817 | KV452979.1 | 3869031 | 10-scf00389 | 10 |
| AX-157859649 | 20 | 52.817 | KV452979.1 | 3869394 | 10-scf00389 | 10 |
| AX-158239537 | 20 | 52.817 | KV452979.1 | 3870787 | 10-scf00389 | 10 |
| AX-158239538 | 20 | 52.817 | KV452979.1 | 3872528 | 10-scf00389 | 10 |

|              |    |        |            |         |             |    |
|--------------|----|--------|------------|---------|-------------|----|
| AX-158239539 | 20 | 52.817 | KV452979.1 | 3872937 | 10-scf00389 | 10 |
| AX-158239540 | 20 | 52.817 | KV452979.1 | 3873566 | 10-scf00389 | 10 |
| AX-158239542 | 20 | 52.817 | KV452979.1 | 3874809 | 10-scf00389 | 10 |
| AX-158415449 | 20 | 52.817 | KV452979.1 | 3875607 | 10-scf00389 | 10 |
| AX-158239543 | 20 | 52.817 | KV452979.1 | 3876437 | 10-scf00389 | 10 |
| AX-158239544 | 20 | 52.817 | KV452979.1 | 3877479 | 10-scf00389 | 10 |
| AX-158239545 | 20 | 52.817 | KV452979.1 | 3883201 | 10-scf00389 | 10 |
| AX-157841010 | 20 | 52.817 | KV452979.1 | 3885781 | 10-scf00389 | 10 |
| AX-157841011 | 20 | 52.817 | KV452979.1 | 3887977 | 10-scf00389 | 10 |
| AX-158239546 | 20 | 52.817 | KV452979.1 | 3894213 | 10-scf00389 | 10 |
| AX-158239550 | 20 | 52.817 | KV452979.1 | 3911880 | 10-scf00389 | 10 |
| AX-158239551 | 20 | 52.817 | KV452979.1 | 3912638 | 10-scf00389 | 10 |
| AX-157872562 | 20 | 52.817 | KV452979.1 | 3913537 | 10-scf00389 | 10 |
| AX-158239552 | 20 | 52.817 | KV452979.1 | 3915105 | 10-scf00389 | 10 |
| AX-158239554 | 20 | 52.817 | KV452979.1 | 3923383 | 10-scf00389 | 10 |
| AX-158394233 | 20 | 52.817 | KV452979.1 | 3925389 | 10-scf00389 | 10 |
| AX-158239556 | 20 | 52.817 | KV452979.1 | 3930142 | 10-scf00389 | 10 |
| AX-158394234 | 20 | 52.817 | KV452979.1 | 3937735 | 10-scf00389 | 10 |
| AX-157872563 | 20 | 52.817 | KV452979.1 | 3939107 | 10-scf00389 | 10 |
| AX-157872564 | 20 | 52.817 | KV452979.1 | 3939446 | 10-scf00389 | 10 |
| AX-158239560 | 20 | 52.817 | KV452979.1 | 3943880 | 10-scf00389 | 10 |
| AX-158239561 | 20 | 52.817 | KV452979.1 | 3949861 | 10-scf00389 | 10 |
| AX-158239562 | 20 | 52.817 | KV452979.1 | 3952654 | 10-scf00389 | 10 |
| AX-157841015 | 20 | 52.817 | KV452979.1 | 3952894 | 10-scf00389 | 10 |
| AX-158239570 | 20 | 52.817 | KV452979.1 | 3967061 | 10-scf00389 | 10 |
| AX-158239594 | 20 | 52.817 | KV452979.1 | 4011392 | 10-scf00389 | 10 |
| AX-157841016 | 20 | 52.817 | KV452979.1 | 4015752 | 10-scf00389 | 10 |
| AX-158239621 | 20 | 52.817 | KV452979.1 | 4059046 | 10-scf00389 | 10 |
| AX-158239622 | 20 | 52.817 | KV452979.1 | 4059505 | 10-scf00389 | 10 |
| AX-157749495 | 20 | 52.817 | KV452979.1 | 4072675 | 10-scf00389 | 10 |
| AX-158239649 | 20 | 52.817 | KV452979.1 | 4079595 | 10-scf00389 | 10 |
| AX-158239650 | 20 | 52.817 | KV452979.1 | 4080409 | 10-scf00389 | 10 |
| AX-158239651 | 20 | 52.817 | KV452979.1 | 4080888 | 10-scf00389 | 10 |
| AX-158239652 | 20 | 52.817 | KV452979.1 | 4081369 | 10-scf00389 | 10 |
| AX-158415455 | 20 | 52.817 | KV452979.1 | 4081715 | 10-scf00389 | 10 |
| AX-157841018 | 20 | 52.817 | KV452979.1 | 4082505 | 10-scf00389 | 10 |
| AX-158239657 | 20 | 52.817 | KV452979.1 | 4086435 | 10-scf00389 | 10 |
| AX-158239658 | 20 | 52.817 | KV452979.1 | 4087209 | 10-scf00389 | 10 |
| AX-158239660 | 20 | 52.817 | KV452979.1 | 4090128 | 10-scf00389 | 10 |
| AX-158239663 | 20 | 52.817 | KV452979.1 | 4092771 | 10-scf00389 | 10 |
| AX-158239664 | 20 | 52.817 | KV452979.1 | 4093001 | 10-scf00389 | 10 |
| AX-158239666 | 20 | 52.817 | KV452979.1 | 4095144 | 10-scf00389 | 10 |
| AX-158239667 | 20 | 52.817 | KV452979.1 | 4095751 | 10-scf00389 | 10 |
| AX-158394237 | 20 | 52.817 | KV452979.1 | 4096011 | 10-scf00389 | 10 |
| AX-158239668 | 20 | 52.817 | KV452979.1 | 4096408 | 10-scf00389 | 10 |
| AX-158239670 | 20 | 52.817 | KV452979.1 | 4097571 | 10-scf00389 | 10 |
| AX-158239677 | 20 | 52.817 | KV452979.1 | 4105620 | 10-scf00389 | 10 |
| AX-158239679 | 20 | 52.817 | KV452979.1 | 4107664 | 10-scf00389 | 10 |
| AX-158239680 | 20 | 52.817 | KV452979.1 | 4109409 | 10-scf00389 | 10 |
| AX-158239687 | 20 | 52.817 | KV452979.1 | 4113667 | 10-scf00389 | 10 |
| AX-158239701 | 20 | 52.817 | KV452979.1 | 4125100 | 10-scf00389 | 10 |

|              |    |        |            |         |             |    |
|--------------|----|--------|------------|---------|-------------|----|
| AX-158239704 | 20 | 52.817 | KV452979.1 | 4128871 | 10-scf00389 | 10 |
| AX-157841019 | 20 | 52.817 | KV452979.1 | 4146105 | 10-scf00389 | 10 |
| AX-157742889 | 20 | 52.817 | KV452979.1 | 4146791 | 10-scf00389 | 10 |
| AX-158239714 | 20 | 52.817 | KV452979.1 | 4148590 | 10-scf00389 | 10 |
| AX-157841020 | 20 | 52.817 | KV452979.1 | 4149624 | 10-scf00389 | 10 |
| AX-158239715 | 20 | 52.817 | KV452979.1 | 4151137 | 10-scf00389 | 10 |
| AX-158239726 | 20 | 52.817 | KV452979.1 | 4164126 | 10-scf00389 | 10 |
| AX-158239728 | 20 | 52.817 | KV452979.1 | 4168086 | 10-scf00389 | 10 |
| AX-157701767 | 20 | 52.817 | KV452979.1 | 4170453 | 10-scf00389 | 10 |
| AX-158239737 | 20 | 52.817 | KV452979.1 | 4186095 | 10-scf00389 | 10 |
| AX-158239739 | 20 | 52.817 | KV452979.1 | 4187559 | 10-scf00389 | 10 |
| AX-158239745 | 20 | 52.817 | KV452979.1 | 4196069 | 10-scf00389 | 10 |
| AX-158239752 | 20 | 52.817 | KV452979.1 | 4208870 | 10-scf00389 | 10 |
| AX-158239755 | 20 | 52.817 | KV452979.1 | 4211524 | 10-scf00389 | 10 |
| AX-158239756 | 20 | 52.817 | KV452979.1 | 4212218 | 10-scf00389 | 10 |
| AX-157841025 | 20 | 52.817 | KV452979.1 | 4213078 | 10-scf00389 | 10 |
| AX-158239758 | 20 | 52.817 | KV452979.1 | 4214519 | 10-scf00389 | 10 |
| AX-158239762 | 20 | 52.817 | KV452979.1 | 4216049 | 10-scf00389 | 10 |
| AX-158239770 | 20 | 52.817 | KV452979.1 | 4226170 | 10-scf00389 | 10 |
| AX-158239771 | 20 | 52.817 | KV452979.1 | 4229175 | 10-scf00389 | 10 |
| AX-158239772 | 20 | 52.817 | KV452979.1 | 4230484 | 10-scf00389 | 10 |
| AX-158239773 | 20 | 52.817 | KV452979.1 | 4230861 | 10-scf00389 | 10 |
| AX-158239774 | 20 | 52.817 | KV452979.1 | 4231269 | 10-scf00389 | 10 |
| AX-158239777 | 20 | 52.817 | KV452979.1 | 4233863 | 10-scf00389 | 10 |
| AX-157762223 | 20 | 52.817 | KV452979.1 | 4236138 | 10-scf00389 | 10 |
| AX-158239778 | 20 | 52.817 | KV452979.1 | 4237766 | 10-scf00389 | 10 |
| AX-158239779 | 20 | 52.817 | KV452979.1 | 4238074 | 10-scf00389 | 10 |
| AX-158239788 | 20 | 52.817 | KV452979.1 | 4256176 | 10-scf00389 | 10 |
| AX-158239791 | 20 | 52.817 | KV452979.1 | 4259249 | 10-scf00389 | 10 |
| AX-158239793 | 20 | 52.817 | KV452979.1 | 4260955 | 10-scf00389 | 10 |
| AX-158239794 | 20 | 52.817 | KV452979.1 | 4262271 | 10-scf00389 | 10 |
| AX-158239797 | 20 | 52.817 | KV452979.1 | 4264526 | 10-scf00389 | 10 |
| AX-158239800 | 20 | 52.817 | KV452979.1 | 4271591 | 10-scf00389 | 10 |
| AX-158239810 | 20 | 52.817 | KV452979.1 | 4285525 | 10-scf00389 | 10 |
| AX-158239811 | 20 | 52.817 | KV452979.1 | 4286097 | 10-scf00389 | 10 |
| AX-158239817 | 20 | 52.817 | KV452979.1 | 4293805 | 10-scf00389 | 10 |
| AX-158239820 | 20 | 52.817 | KV452979.1 | 4294745 | 10-scf00389 | 10 |
| AX-158239832 | 20 | 52.817 | KV452979.1 | 4317822 | 10-scf00389 | 10 |
| AX-158239833 | 20 | 52.817 | KV452979.1 | 4318114 | 10-scf00389 | 10 |
| AX-158239835 | 20 | 52.817 | KV452979.1 | 4321209 | 10-scf00389 | 10 |
| AX-158239841 | 20 | 52.817 | KV452979.1 | 4326481 | 10-scf00389 | 10 |
| AX-158239842 | 20 | 52.817 | KV452979.1 | 4328290 | 10-scf00389 | 10 |
| AX-157872576 | 20 | 52.817 | KV452979.1 | 4336668 | 10-scf00389 | 10 |
| AX-157841033 | 20 | 52.817 | KV452979.1 | 4342593 | 10-scf00389 | 10 |
| AX-158239852 | 20 | 52.817 | KV452979.1 | 4343410 | 10-scf00389 | 10 |
| AX-158239853 | 20 | 52.817 | KV452979.1 | 4344715 | 10-scf00389 | 10 |
| AX-158239855 | 20 | 52.817 | KV452979.1 | 4345720 | 10-scf00389 | 10 |
| AX-158239856 | 20 | 52.817 | KV452979.1 | 4346464 | 10-scf00389 | 10 |
| AX-158239857 | 20 | 52.817 | KV452979.1 | 4346932 | 10-scf00389 | 10 |
| AX-158418915 | 20 | 52.817 | KV452979.1 | 4349229 | 10-scf00389 | 10 |
| AX-158415465 | 20 | 52.817 | KV452979.1 | 4355344 | 10-scf00389 | 10 |

|              |    |        |            |         |             |    |
|--------------|----|--------|------------|---------|-------------|----|
| AX-158239863 | 20 | 52.817 | KV452979.1 | 4355861 | 10-scf00389 | 10 |
| AX-158239867 | 20 | 52.817 | KV452979.1 | 4361228 | 10-scf00389 | 10 |
| AX-157887525 | 20 | 52.817 | KV452979.1 | 4379704 | 10-scf00389 | 10 |
| AX-158239891 | 20 | 52.817 | KV452979.1 | 4388568 | 10-scf00389 | 10 |
| AX-158239892 | 20 | 52.817 | KV452979.1 | 4389009 | 10-scf00389 | 10 |
| AX-157754683 | 20 | 52.817 | KV452979.1 | 4395763 | 10-scf00389 | 10 |
| AX-157841040 | 20 | 52.817 | KV452979.1 | 4397770 | 10-scf00389 | 10 |
| AX-157841042 | 20 | 52.817 | KV452979.1 | 4401976 | 10-scf00389 | 10 |
| AX-157841044 | 20 | 52.817 | KV452979.1 | 4414047 | 10-scf00389 | 10 |
| AX-158239916 | 20 | 52.817 | KV452979.1 | 4414513 | 10-scf00389 | 10 |
| AX-157841045 | 20 | 52.817 | KV452979.1 | 4417813 | 10-scf00389 | 10 |
| AX-157872578 | 20 | 52.817 | KV452979.1 | 4418429 | 10-scf00389 | 10 |
| AX-158239950 | 20 | 52.817 | KV452979.1 | 4473055 | 10-scf00389 | 10 |
| AX-157841052 | 20 | 52.817 | KV452979.1 | 4473454 | 10-scf00389 | 10 |
| AX-158239951 | 20 | 52.817 | KV452979.1 | 4475433 | 10-scf00389 | 10 |
| AX-158239952 | 20 | 52.817 | KV452979.1 | 4477434 | 10-scf00389 | 10 |
| AX-158239957 | 20 | 52.817 | KV452979.1 | 4482763 | 10-scf00389 | 10 |
| AX-158239961 | 20 | 52.817 | KV452979.1 | 4487486 | 10-scf00389 | 10 |
| AX-157859654 | 20 | 52.817 | KV452979.1 | 4504870 | 10-scf00389 | 10 |
| AX-158239965 | 20 | 52.817 | KV452979.1 | 4507148 | 10-scf00389 | 10 |
| AX-157757017 | 20 | 52.817 | KV452979.1 | 4528286 | 10-scf00389 | 10 |
| AX-158239973 | 20 | 52.817 | KV452979.1 | 4532838 | 10-scf00389 | 10 |
| AX-157841058 | 20 | 52.817 | KV452979.1 | 4534097 | 10-scf00389 | 10 |
| AX-157749467 | 20 | 52.817 | KV452979.1 | 4535081 | 10-scf00389 | 10 |
| AX-157841059 | 20 | 52.817 | KV452979.1 | 4536492 | 10-scf00389 | 10 |
| AX-157841060 | 20 | 52.817 | KV452979.1 | 4541140 | 10-scf00389 | 10 |
| AX-158239976 | 20 | 52.817 | KV452979.1 | 4541666 | 10-scf00389 | 10 |
| AX-158239977 | 20 | 52.817 | KV452979.1 | 4543000 | 10-scf00389 | 10 |
| AX-157841061 | 20 | 52.817 | KV452979.1 | 4544257 | 10-scf00389 | 10 |
| AX-158415469 | 20 | 52.817 | KV452979.1 | 4545137 | 10-scf00389 | 10 |
| AX-157841063 | 20 | 52.817 | KV452979.1 | 4547161 | 10-scf00389 | 10 |
| AX-158239981 | 20 | 52.817 | KV452979.1 | 4550904 | 10-scf00389 | 10 |
| AX-157841064 | 20 | 52.817 | KV452979.1 | 4551590 | 10-scf00389 | 10 |
| AX-157771954 | 20 | 52.817 | KV452979.1 | 4552747 | 10-scf00389 | 10 |
| AX-158239983 | 20 | 52.817 | KV452979.1 | 4553080 | 10-scf00389 | 10 |
| AX-158239991 | 20 | 52.817 | KV452979.1 | 4564103 | 10-scf00389 | 10 |
| AX-157867274 | 20 | 52.817 | KV452979.1 | 4567240 | 10-scf00389 | 10 |
| AX-158239994 | 20 | 52.817 | KV452979.1 | 4569281 | 10-scf00389 | 10 |
| AX-157841065 | 20 | 52.817 | KV452979.1 | 4576932 | 10-scf00389 | 10 |
| AX-158239998 | 20 | 52.817 | KV452979.1 | 4577807 | 10-scf00389 | 10 |
| AX-157841066 | 20 | 52.817 | KV452979.1 | 4580889 | 10-scf00389 | 10 |
| AX-157841067 | 20 | 52.817 | KV452979.1 | 4580997 | 10-scf00389 | 10 |
| AX-158240006 | 20 | 52.817 | KV452979.1 | 4599233 | 10-scf00389 | 10 |
| AX-158240007 | 20 | 52.817 | KV452979.1 | 4600978 | 10-scf00389 | 10 |
| AX-158240012 | 20 | 52.817 | KV452979.1 | 4611464 | 10-scf00389 | 10 |
| AX-158240013 | 20 | 52.817 | KV452979.1 | 4614543 | 10-scf00389 | 10 |
| AX-158240017 | 20 | 52.817 | KV452979.1 | 4616962 | 10-scf00389 | 10 |
| AX-157841074 | 20 | 52.817 | KV452979.1 | 4621020 | 10-scf00389 | 10 |
| AX-158240018 | 20 | 52.817 | KV452979.1 | 4621161 | 10-scf00389 | 10 |
| AX-158240021 | 20 | 52.817 | KV452979.1 | 4624018 | 10-scf00389 | 10 |
| AX-158240022 | 20 | 52.817 | KV452979.1 | 4625332 | 10-scf00389 | 10 |



|              |    |        |            |         |             |    |
|--------------|----|--------|------------|---------|-------------|----|
| AX-157841075 | 20 | 52.817 | KV452979.1 | 4625423 | 10-scf00389 | 10 |
| AX-157743026 | 20 | 52.817 | KV452979.1 | 4626778 | 10-scf00389 | 10 |
| AX-157841076 | 20 | 52.817 | KV452979.1 | 4626820 | 10-scf00389 | 10 |
| AX-158240025 | 20 | 52.817 | KV452979.1 | 4628909 | 10-scf00389 | 10 |
| AX-157748014 | 20 | 52.817 | KV452979.1 | 4629461 | 10-scf00389 | 10 |
| AX-158240026 | 20 | 52.817 | KV452979.1 | 4629787 | 10-scf00389 | 10 |
| AX-158240027 | 20 | 52.817 | KV452979.1 | 4630442 | 10-scf00389 | 10 |
| AX-158240028 | 20 | 52.817 | KV452979.1 | 4631247 | 10-scf00389 | 10 |
| AX-158240029 | 20 | 52.817 | KV452979.1 | 4631542 | 10-scf00389 | 10 |
| AX-158240030 | 20 | 52.817 | KV452979.1 | 4633254 | 10-scf00389 | 10 |
| AX-157841078 | 20 | 52.817 | KV452979.1 | 4634686 | 10-scf00389 | 10 |
| AX-158240031 | 20 | 52.817 | KV452979.1 | 4636937 | 10-scf00389 | 10 |
| AX-157841080 | 20 | 52.817 | KV452979.1 | 4641255 | 10-scf00389 | 10 |
| AX-157841081 | 20 | 52.817 | KV452979.1 | 4641777 | 10-scf00389 | 10 |
| AX-157716668 | 20 | 52.817 | KV452979.1 | 4669353 | 10-scf00389 | 10 |
| AX-157841085 | 20 | 52.817 | KV452979.1 | 4672540 | 10-scf00389 | 10 |
| AX-158240052 | 20 | 52.817 | KV452979.1 | 4715241 | 10-scf00389 | 10 |
| AX-158240057 | 20 | 52.817 | KV452979.1 | 4723280 | 10-scf00389 | 10 |
| AX-158240065 | 20 | 52.817 | KV452979.1 | 4744997 | 10-scf00389 | 10 |
| AX-158240067 | 20 | 52.817 | KV452979.1 | 4746037 | 10-scf00389 | 10 |
| AX-158415476 | 20 | 52.817 | KV452979.1 | 4748517 | 10-scf00389 | 10 |
| AX-158240068 | 20 | 52.817 | KV452979.1 | 4749232 | 10-scf00389 | 10 |
| AX-158240094 | 20 | 52.817 | KV452979.1 | 4776851 | 10-scf00389 | 10 |
| AX-158240098 | 20 | 52.817 | KV452979.1 | 4780418 | 10-scf00389 | 10 |
| AX-158240099 | 20 | 52.817 | KV452979.1 | 4782453 | 10-scf00389 | 10 |
| AX-158240101 | 20 | 52.817 | KV452979.1 | 4783571 | 10-scf00389 | 10 |
| AX-158240102 | 20 | 52.817 | KV452979.1 | 4784963 | 10-scf00389 | 10 |
| AX-158240114 | 20 | 52.817 | KV452979.1 | 4806778 | 10-scf00389 | 10 |
| AX-158240115 | 20 | 52.817 | KV452979.1 | 4807437 | 10-scf00389 | 10 |
| AX-158240116 | 20 | 52.817 | KV452979.1 | 4807800 | 10-scf00389 | 10 |
| AX-158240123 | 20 | 52.817 | KV452979.1 | 4820881 | 10-scf00389 | 10 |
| AX-157841101 | 20 | 52.817 | KV452979.1 | 4822587 | 10-scf00389 | 10 |
| AX-158240129 | 20 | 52.817 | KV452979.1 | 4828730 | 10-scf00389 | 10 |
| AX-157744012 | 20 | 52.817 | KV452979.1 | 4833445 | 10-scf00389 | 10 |
| AX-158240141 | 20 | 52.817 | KV452979.1 | 4848765 | 10-scf00389 | 10 |
| AX-157746822 | 20 | 52.817 | KV452979.1 | 4849032 | 10-scf00389 | 10 |
| AX-158240142 | 20 | 52.817 | KV452979.1 | 4849324 | 10-scf00389 | 10 |
| AX-158240160 | 20 | 52.817 | KV452979.1 | 4882079 | 10-scf00389 | 10 |
| AX-158415479 | 20 | 52.817 | KV452979.1 | 4890609 | 10-scf00389 | 10 |
| AX-158240172 | 20 | 52.817 | KV452979.1 | 4892998 | 10-scf00389 | 10 |
| AX-157859666 | 20 | 52.817 | KV452979.1 | 4914558 | 10-scf00389 | 10 |
| AX-157859667 | 20 | 52.817 | KV452979.1 | 4915261 | 10-scf00389 | 10 |
| AX-157859668 | 20 | 52.817 | KV452979.1 | 4920398 | 10-scf00389 | 10 |
| AX-157859670 | 20 | 52.817 | KV452979.1 | 4924669 | 10-scf00389 | 10 |
| AX-158240188 | 20 | 52.817 | KV452979.1 | 4925189 | 10-scf00389 | 10 |
| AX-158240192 | 20 | 52.817 | KV452979.1 | 4930808 | 10-scf00389 | 10 |
| AX-158240215 | 20 | 52.817 | KV452979.1 | 4979368 | 10-scf00389 | 10 |
| AX-158240225 | 20 | 52.817 | KV452979.1 | 4997987 | 10-scf00389 | 10 |
| AX-158240251 | 20 | 52.817 | KV452979.1 | 5051477 | 10-scf00389 | 10 |
| AX-158240261 | 20 | 52.817 | KV452979.1 | 5063515 | 10-scf00389 | 10 |
| AX-158240264 | 20 | 52.817 | KV452979.1 | 5064593 | 10-scf00389 | 10 |

|              |    |        |            |         |               |    |
|--------------|----|--------|------------|---------|---------------|----|
| AX-157841123 | 20 | 52.817 | KV452979.1 | 5071402 | 10-scf00389   | 10 |
| AX-158240289 | 20 | 52.817 | KV452979.1 | 5100025 | 10-scf00389   | 10 |
| AX-158240292 | 20 | 52.817 | KV452979.1 | 5112006 | 10-scf00389   | 10 |
| AX-158240361 | 20 | 52.817 | KV452979.1 | 5220763 | 10-scf00389   | 10 |
| AX-157841139 | 20 | 52.817 | KV452979.1 | 5270910 | 10-scf00389   | 10 |
| AX-158240399 | 20 | 52.817 | KV452979.1 | 5274329 | 10-scf00389   | 10 |
| AX-158240436 | 20 | 52.817 | KV452979.1 | 5333616 | 10-scf00389   | 10 |
| AX-158240437 | 20 | 52.817 | KV452979.1 | 5335034 | 10-scf00389   | 10 |
| AX-158240612 | 20 | 52.817 | KV452979.1 | 5538497 | 10-scf00389   | 10 |
| AX-158415550 | 20 | 52.817 | KV452979.1 | 6753175 | 10-scf00389   | 10 |
| AX-158242390 | 20 | 52.817 | KV452980.1 | 963374  | 10-scf00391   | 10 |
| AX-158242902 | 20 | 52.817 | KV452980.1 | 1674163 | 10-scf00391   | 10 |
| AX-158245069 | 20 | 52.817 | KV452981.1 | 1583100 | 10-scf00393   | 10 |
| AX-157696023 | 20 | 52.817 | FI874313.1 | 432     | ORI212 lctalu | UN |
| AX-158240086 | 20 | 52.866 | KV452979.1 | 4766210 | 10-scf00389   | 10 |
| AX-157840925 | 20 | 52.926 | KV452979.1 | 2736113 | 10-scf00389   | 10 |
| AX-158238888 | 20 | 52.926 | KV452979.1 | 2879934 | 10-scf00389   | 10 |
| AX-158238902 | 20 | 52.926 | KV452979.1 | 2899490 | 10-scf00389   | 10 |
| AX-158238904 | 20 | 52.926 | KV452979.1 | 2902835 | 10-scf00389   | 10 |
| AX-157701268 | 20 | 52.926 | KV452979.1 | 2918281 | 10-scf00389   | 10 |
| AX-158238943 | 20 | 52.926 | KV452979.1 | 2986248 | 10-scf00389   | 10 |
| AX-158239052 | 20 | 52.926 | KV452979.1 | 3136472 | 10-scf00389   | 10 |
| AX-158415428 | 20 | 52.926 | KV452979.1 | 3165601 | 10-scf00389   | 10 |
| AX-158239144 | 20 | 52.926 | KV452979.1 | 3307438 | 10-scf00389   | 10 |
| AX-158239330 | 20 | 52.926 | KV452979.1 | 3568745 | 10-scf00389   | 10 |
| AX-158394231 | 20 | 52.926 | KV452979.1 | 3688986 | 10-scf00389   | 10 |
| AX-158239414 | 20 | 52.926 | KV452979.1 | 3698048 | 10-scf00389   | 10 |
| AX-158239439 | 20 | 52.926 | KV452979.1 | 3735355 | 10-scf00389   | 10 |
| AX-158239482 | 20 | 52.926 | KV452979.1 | 3793988 | 10-scf00389   | 10 |
| AX-158239485 | 20 | 52.926 | KV452979.1 | 3796273 | 10-scf00389   | 10 |
| AX-158239490 | 20 | 52.926 | KV452979.1 | 3801831 | 10-scf00389   | 10 |
| AX-158239491 | 20 | 52.926 | KV452979.1 | 3802338 | 10-scf00389   | 10 |
| AX-158239492 | 20 | 52.926 | KV452979.1 | 3804706 | 10-scf00389   | 10 |
| AX-158239493 | 20 | 52.926 | KV452979.1 | 3805934 | 10-scf00389   | 10 |
| AX-158239494 | 20 | 52.926 | KV452979.1 | 3806230 | 10-scf00389   | 10 |
| AX-157841004 | 20 | 52.926 | KV452979.1 | 3818707 | 10-scf00389   | 10 |
| AX-158239504 | 20 | 52.926 | KV452979.1 | 3822623 | 10-scf00389   | 10 |
| AX-158239506 | 20 | 52.926 | KV452979.1 | 3823458 | 10-scf00389   | 10 |
| AX-158239508 | 20 | 52.926 | KV452979.1 | 3825548 | 10-scf00389   | 10 |
| AX-158415445 | 20 | 52.926 | KV452979.1 | 3826280 | 10-scf00389   | 10 |
| AX-157841005 | 20 | 52.926 | KV452979.1 | 3828350 | 10-scf00389   | 10 |
| AX-158239510 | 20 | 52.926 | KV452979.1 | 3829769 | 10-scf00389   | 10 |
| AX-157841007 | 20 | 52.926 | KV452979.1 | 3831999 | 10-scf00389   | 10 |
| AX-158239512 | 20 | 52.926 | KV452979.1 | 3834087 | 10-scf00389   | 10 |
| AX-158239514 | 20 | 52.926 | KV452979.1 | 3835568 | 10-scf00389   | 10 |
| AX-157841008 | 20 | 52.926 | KV452979.1 | 3840690 | 10-scf00389   | 10 |
| AX-158239519 | 20 | 52.926 | KV452979.1 | 3840940 | 10-scf00389   | 10 |
| AX-158239520 | 20 | 52.926 | KV452979.1 | 3841085 | 10-scf00389   | 10 |
| AX-158239521 | 20 | 52.926 | KV452979.1 | 3844111 | 10-scf00389   | 10 |
| AX-158239524 | 20 | 52.926 | KV452979.1 | 3848364 | 10-scf00389   | 10 |
| AX-158239526 | 20 | 52.926 | KV452979.1 | 3851095 | 10-scf00389   | 10 |

|              |    |        |            |         |             |    |
|--------------|----|--------|------------|---------|-------------|----|
| AX-158415451 | 20 | 52.926 | KV452979.1 | 3904014 | 10-scf00389 | 10 |
| AX-158239553 | 20 | 52.926 | KV452979.1 | 3916242 | 10-scf00389 | 10 |
| AX-157718315 | 20 | 52.926 | KV452979.1 | 4089381 | 10-scf00389 | 10 |
| AX-158239685 | 20 | 52.926 | KV452979.1 | 4112795 | 10-scf00389 | 10 |
| AX-158239692 | 20 | 52.926 | KV452979.1 | 4118328 | 10-scf00389 | 10 |
| AX-158239693 | 20 | 52.926 | KV452979.1 | 4119471 | 10-scf00389 | 10 |
| AX-158239702 | 20 | 52.926 | KV452979.1 | 4126236 | 10-scf00389 | 10 |
| AX-158239706 | 20 | 52.926 | KV452979.1 | 4132931 | 10-scf00389 | 10 |
| AX-158239710 | 20 | 52.926 | KV452979.1 | 4139483 | 10-scf00389 | 10 |
| AX-158239711 | 20 | 52.926 | KV452979.1 | 4141309 | 10-scf00389 | 10 |
| AX-158239741 | 20 | 52.926 | KV452979.1 | 4190344 | 10-scf00389 | 10 |
| AX-158239757 | 20 | 52.926 | KV452979.1 | 4213493 | 10-scf00389 | 10 |
| AX-158239765 | 20 | 52.926 | KV452979.1 | 4219583 | 10-scf00389 | 10 |
| AX-158239783 | 20 | 52.926 | KV452979.1 | 4240930 | 10-scf00389 | 10 |
| AX-157872567 | 20 | 52.926 | KV452979.1 | 4258866 | 10-scf00389 | 10 |
| AX-157723835 | 20 | 52.926 | KV452979.1 | 4267255 | 10-scf00389 | 10 |
| AX-158239805 | 20 | 52.926 | KV452979.1 | 4278708 | 10-scf00389 | 10 |
| AX-158239807 | 20 | 52.926 | KV452979.1 | 4282044 | 10-scf00389 | 10 |
| AX-158239809 | 20 | 52.926 | KV452979.1 | 4285175 | 10-scf00389 | 10 |
| AX-158239812 | 20 | 52.926 | KV452979.1 | 4286680 | 10-scf00389 | 10 |
| AX-158239815 | 20 | 52.926 | KV452979.1 | 4290478 | 10-scf00389 | 10 |
| AX-158239818 | 20 | 52.926 | KV452979.1 | 4294125 | 10-scf00389 | 10 |
| AX-158239824 | 20 | 52.926 | KV452979.1 | 4301404 | 10-scf00389 | 10 |
| AX-157694341 | 20 | 52.926 | KV452979.1 | 4302130 | 10-scf00389 | 10 |
| AX-158239829 | 20 | 52.926 | KV452979.1 | 4312653 | 10-scf00389 | 10 |
| AX-157841029 | 20 | 52.926 | KV452979.1 | 4314927 | 10-scf00389 | 10 |
| AX-158239831 | 20 | 52.926 | KV452979.1 | 4317175 | 10-scf00389 | 10 |
| AX-158239834 | 20 | 52.926 | KV452979.1 | 4318695 | 10-scf00389 | 10 |
| AX-158239836 | 20 | 52.926 | KV452979.1 | 4321886 | 10-scf00389 | 10 |
| AX-158239838 | 20 | 52.926 | KV452979.1 | 4322980 | 10-scf00389 | 10 |
| AX-158239843 | 20 | 52.926 | KV452979.1 | 4328974 | 10-scf00389 | 10 |
| AX-158239844 | 20 | 52.926 | KV452979.1 | 4329509 | 10-scf00389 | 10 |
| AX-158239845 | 20 | 52.926 | KV452979.1 | 4332488 | 10-scf00389 | 10 |
| AX-157872575 | 20 | 52.926 | KV452979.1 | 4336311 | 10-scf00389 | 10 |
| AX-157841031 | 20 | 52.926 | KV452979.1 | 4338171 | 10-scf00389 | 10 |
| AX-158239849 | 20 | 52.926 | KV452979.1 | 4338820 | 10-scf00389 | 10 |
| AX-157841032 | 20 | 52.926 | KV452979.1 | 4338887 | 10-scf00389 | 10 |
| AX-158239851 | 20 | 52.926 | KV452979.1 | 4341985 | 10-scf00389 | 10 |
| AX-158239854 | 20 | 52.926 | KV452979.1 | 4345256 | 10-scf00389 | 10 |
| AX-158239858 | 20 | 52.926 | KV452979.1 | 4349023 | 10-scf00389 | 10 |
| AX-158394239 | 20 | 52.926 | KV452979.1 | 4349956 | 10-scf00389 | 10 |
| AX-158239860 | 20 | 52.926 | KV452979.1 | 4350738 | 10-scf00389 | 10 |
| AX-158239861 | 20 | 52.926 | KV452979.1 | 4351768 | 10-scf00389 | 10 |
| AX-158239862 | 20 | 52.926 | KV452979.1 | 4352910 | 10-scf00389 | 10 |
| AX-158239866 | 20 | 52.926 | KV452979.1 | 4359162 | 10-scf00389 | 10 |
| AX-158239869 | 20 | 52.926 | KV452979.1 | 4363621 | 10-scf00389 | 10 |
| AX-158239870 | 20 | 52.926 | KV452979.1 | 4364112 | 10-scf00389 | 10 |
| AX-158239871 | 20 | 52.926 | KV452979.1 | 4365607 | 10-scf00389 | 10 |
| AX-158239872 | 20 | 52.926 | KV452979.1 | 4365941 | 10-scf00389 | 10 |
| AX-158239873 | 20 | 52.926 | KV452979.1 | 4366433 | 10-scf00389 | 10 |
| AX-158239874 | 20 | 52.926 | KV452979.1 | 4367171 | 10-scf00389 | 10 |

|              |    |        |            |         |             |    |
|--------------|----|--------|------------|---------|-------------|----|
| AX-158239876 | 20 | 52.926 | KV452979.1 | 4368664 | 10-scf00389 | 10 |
| AX-158239877 | 20 | 52.926 | KV452979.1 | 4370099 | 10-scf00389 | 10 |
| AX-158239882 | 20 | 52.926 | KV452979.1 | 4375908 | 10-scf00389 | 10 |
| AX-158239885 | 20 | 52.926 | KV452979.1 | 4379188 | 10-scf00389 | 10 |
| AX-158239886 | 20 | 52.926 | KV452979.1 | 4379481 | 10-scf00389 | 10 |
| AX-158239889 | 20 | 52.926 | KV452979.1 | 4383510 | 10-scf00389 | 10 |
| AX-158239894 | 20 | 52.926 | KV452979.1 | 4389846 | 10-scf00389 | 10 |
| AX-158239899 | 20 | 52.926 | KV452979.1 | 4396716 | 10-scf00389 | 10 |
| AX-157841039 | 20 | 52.926 | KV452979.1 | 4397656 | 10-scf00389 | 10 |
| AX-158239900 | 20 | 52.926 | KV452979.1 | 4398285 | 10-scf00389 | 10 |
| AX-157841041 | 20 | 52.926 | KV452979.1 | 4400372 | 10-scf00389 | 10 |
| AX-158239902 | 20 | 52.926 | KV452979.1 | 4400699 | 10-scf00389 | 10 |
| AX-158239904 | 20 | 52.926 | KV452979.1 | 4402757 | 10-scf00389 | 10 |
| AX-158239905 | 20 | 52.926 | KV452979.1 | 4403206 | 10-scf00389 | 10 |
| AX-157841043 | 20 | 52.926 | KV452979.1 | 4403514 | 10-scf00389 | 10 |
| AX-158239908 | 20 | 52.926 | KV452979.1 | 4404222 | 10-scf00389 | 10 |
| AX-158239911 | 20 | 52.926 | KV452979.1 | 4406634 | 10-scf00389 | 10 |
| AX-158239912 | 20 | 52.926 | KV452979.1 | 4406835 | 10-scf00389 | 10 |
| AX-158239919 | 20 | 52.926 | KV452979.1 | 4417440 | 10-scf00389 | 10 |
| AX-158423321 | 20 | 52.926 | KV452979.1 | 4420508 | 10-scf00389 | 10 |
| AX-158239921 | 20 | 52.926 | KV452979.1 | 4420678 | 10-scf00389 | 10 |
| AX-158239922 | 20 | 52.926 | KV452979.1 | 4422193 | 10-scf00389 | 10 |
| AX-157841046 | 20 | 52.926 | KV452979.1 | 4425007 | 10-scf00389 | 10 |
| AX-158239924 | 20 | 52.926 | KV452979.1 | 4428890 | 10-scf00389 | 10 |
| AX-158239925 | 20 | 52.926 | KV452979.1 | 4429425 | 10-scf00389 | 10 |
| AX-158239929 | 20 | 52.926 | KV452979.1 | 4436831 | 10-scf00389 | 10 |
| AX-158239930 | 20 | 52.926 | KV452979.1 | 4438166 | 10-scf00389 | 10 |
| AX-158239931 | 20 | 52.926 | KV452979.1 | 4438725 | 10-scf00389 | 10 |
| AX-158394241 | 20 | 52.926 | KV452979.1 | 4439448 | 10-scf00389 | 10 |
| AX-158239933 | 20 | 52.926 | KV452979.1 | 4441389 | 10-scf00389 | 10 |
| AX-158239934 | 20 | 52.926 | KV452979.1 | 4442248 | 10-scf00389 | 10 |
| AX-157841048 | 20 | 52.926 | KV452979.1 | 4448211 | 10-scf00389 | 10 |
| AX-158239937 | 20 | 52.926 | KV452979.1 | 4452371 | 10-scf00389 | 10 |
| AX-158239940 | 20 | 52.926 | KV452979.1 | 4455017 | 10-scf00389 | 10 |
| AX-158239946 | 20 | 52.926 | KV452979.1 | 4470362 | 10-scf00389 | 10 |
| AX-157841051 | 20 | 52.926 | KV452979.1 | 4470576 | 10-scf00389 | 10 |
| AX-158239954 | 20 | 52.926 | KV452979.1 | 4478255 | 10-scf00389 | 10 |
| AX-158239955 | 20 | 52.926 | KV452979.1 | 4479730 | 10-scf00389 | 10 |
| AX-158239959 | 20 | 52.926 | KV452979.1 | 4485351 | 10-scf00389 | 10 |
| AX-158239963 | 20 | 52.926 | KV452979.1 | 4495137 | 10-scf00389 | 10 |
| AX-157859653 | 20 | 52.926 | KV452979.1 | 4504075 | 10-scf00389 | 10 |
| AX-158239974 | 20 | 52.926 | KV452979.1 | 4535442 | 10-scf00389 | 10 |
| AX-158239978 | 20 | 52.926 | KV452979.1 | 4546720 | 10-scf00389 | 10 |
| AX-158239979 | 20 | 52.926 | KV452979.1 | 4548336 | 10-scf00389 | 10 |
| AX-158239987 | 20 | 52.926 | KV452979.1 | 4556106 | 10-scf00389 | 10 |
| AX-158239999 | 20 | 52.926 | KV452979.1 | 4579402 | 10-scf00389 | 10 |
| AX-158240000 | 20 | 52.926 | KV452979.1 | 4580066 | 10-scf00389 | 10 |
| AX-158240002 | 20 | 52.926 | KV452979.1 | 4583417 | 10-scf00389 | 10 |
| AX-158240034 | 20 | 52.926 | KV452979.1 | 4640547 | 10-scf00389 | 10 |
| AX-158380969 | 20 | 52.926 | KV452979.1 | 4643026 | 10-scf00389 | 10 |
| AX-158240035 | 20 | 52.926 | KV452979.1 | 4643858 | 10-scf00389 | 10 |

|              |    |        |            |         |             |    |
|--------------|----|--------|------------|---------|-------------|----|
| AX-158240038 | 20 | 52.926 | KV452979.1 | 4651617 | 10-scf00389 | 10 |
| AX-158240055 | 20 | 52.926 | KV452979.1 | 4721319 | 10-scf00389 | 10 |
| AX-157841096 | 20 | 52.926 | KV452979.1 | 4735976 | 10-scf00389 | 10 |
| AX-158240089 | 20 | 52.926 | KV452979.1 | 4770296 | 10-scf00389 | 10 |
| AX-158240090 | 20 | 52.926 | KV452979.1 | 4773575 | 10-scf00389 | 10 |
| AX-157841098 | 20 | 52.926 | KV452979.1 | 4780803 | 10-scf00389 | 10 |
| AX-157841099 | 20 | 52.926 | KV452979.1 | 4781033 | 10-scf00389 | 10 |
| AX-158240104 | 20 | 52.926 | KV452979.1 | 4790821 | 10-scf00389 | 10 |
| AX-158240110 | 20 | 52.926 | KV452979.1 | 4804130 | 10-scf00389 | 10 |
| AX-158240118 | 20 | 52.926 | KV452979.1 | 4812213 | 10-scf00389 | 10 |
| AX-158240121 | 20 | 52.926 | KV452979.1 | 4819250 | 10-scf00389 | 10 |
| AX-158240125 | 20 | 52.926 | KV452979.1 | 4824080 | 10-scf00389 | 10 |
| AX-158240133 | 20 | 52.926 | KV452979.1 | 4838364 | 10-scf00389 | 10 |
| AX-158240139 | 20 | 52.926 | KV452979.1 | 4847454 | 10-scf00389 | 10 |
| AX-158240140 | 20 | 52.926 | KV452979.1 | 4848512 | 10-scf00389 | 10 |
| AX-158240143 | 20 | 52.926 | KV452979.1 | 4852809 | 10-scf00389 | 10 |
| AX-158240146 | 20 | 52.926 | KV452979.1 | 4856068 | 10-scf00389 | 10 |
| AX-157841102 | 20 | 52.926 | KV452979.1 | 4860151 | 10-scf00389 | 10 |
| AX-158240148 | 20 | 52.926 | KV452979.1 | 4860269 | 10-scf00389 | 10 |
| AX-158240149 | 20 | 52.926 | KV452979.1 | 4860843 | 10-scf00389 | 10 |
| AX-158240150 | 20 | 52.926 | KV452979.1 | 4861948 | 10-scf00389 | 10 |
| AX-157718530 | 20 | 52.926 | KV452979.1 | 4863992 | 10-scf00389 | 10 |
| AX-157746268 | 20 | 52.926 | KV452979.1 | 4873317 | 10-scf00389 | 10 |
| AX-158240157 | 20 | 52.926 | KV452979.1 | 4873848 | 10-scf00389 | 10 |
| AX-158380970 | 20 | 52.926 | KV452979.1 | 4878667 | 10-scf00389 | 10 |
| AX-158240159 | 20 | 52.926 | KV452979.1 | 4879912 | 10-scf00389 | 10 |
| AX-158240166 | 20 | 52.926 | KV452979.1 | 4887407 | 10-scf00389 | 10 |
| AX-158240174 | 20 | 52.926 | KV452979.1 | 4893937 | 10-scf00389 | 10 |
| AX-157726523 | 20 | 52.926 | KV452979.1 | 4905299 | 10-scf00389 | 10 |
| AX-158240183 | 20 | 52.926 | KV452979.1 | 4917522 | 10-scf00389 | 10 |
| AX-157859669 | 20 | 52.926 | KV452979.1 | 4922262 | 10-scf00389 | 10 |
| AX-158240187 | 20 | 52.926 | KV452979.1 | 4924313 | 10-scf00389 | 10 |
| AX-158240194 | 20 | 52.926 | KV452979.1 | 4932948 | 10-scf00389 | 10 |
| AX-158240195 | 20 | 52.926 | KV452979.1 | 4936747 | 10-scf00389 | 10 |
| AX-158240196 | 20 | 52.926 | KV452979.1 | 4940191 | 10-scf00389 | 10 |
| AX-158240197 | 20 | 52.926 | KV452979.1 | 4940571 | 10-scf00389 | 10 |
| AX-158240222 | 20 | 52.926 | KV452979.1 | 4992324 | 10-scf00389 | 10 |
| AX-157841112 | 20 | 52.926 | KV452979.1 | 5013868 | 10-scf00389 | 10 |
| AX-158240198 | 20 | 53.035 | KV452979.1 | 4947794 | 10-scf00389 | 10 |
| AX-158240199 | 20 | 53.035 | KV452979.1 | 4949860 | 10-scf00389 | 10 |
| AX-158240200 | 20 | 53.035 | KV452979.1 | 4950298 | 10-scf00389 | 10 |
| AX-157859671 | 20 | 53.035 | KV452979.1 | 4951033 | 10-scf00389 | 10 |
| AX-158240201 | 20 | 53.035 | KV452979.1 | 4951397 | 10-scf00389 | 10 |
| AX-158240202 | 20 | 53.035 | KV452979.1 | 4952770 | 10-scf00389 | 10 |
| AX-158240203 | 20 | 53.035 | KV452979.1 | 4953862 | 10-scf00389 | 10 |
| AX-158240204 | 20 | 53.035 | KV452979.1 | 4954249 | 10-scf00389 | 10 |
| AX-157710200 | 20 | 53.035 | KV452979.1 | 4954984 | 10-scf00389 | 10 |
| AX-157841106 | 20 | 53.035 | KV452979.1 | 4958815 | 10-scf00389 | 10 |
| AX-157841107 | 20 | 53.035 | KV452979.1 | 4958911 | 10-scf00389 | 10 |
| AX-158240206 | 20 | 53.035 | KV452979.1 | 4959378 | 10-scf00389 | 10 |
| AX-158240207 | 20 | 53.035 | KV452979.1 | 4959807 | 10-scf00389 | 10 |

|              |    |        |             |         |             |    |
|--------------|----|--------|-------------|---------|-------------|----|
| AX-157841108 | 20 | 53.035 | KV452979.1  | 4959843 | 10-scf00389 | 10 |
| AX-157696899 | 20 | 53.035 | KV452979.1  | 4963365 | 10-scf00389 | 10 |
| AX-158410679 | 20 | 53.035 | KV452979.1  | 4963932 | 10-scf00389 | 10 |
| AX-158240209 | 20 | 53.035 | KV452979.1  | 4970174 | 10-scf00389 | 10 |
| AX-158240211 | 20 | 53.035 | KV452979.1  | 4971907 | 10-scf00389 | 10 |
| AX-158240212 | 20 | 53.035 | KV452979.1  | 4972569 | 10-scf00389 | 10 |
| AX-158240214 | 20 | 53.035 | KV452979.1  | 4978728 | 10-scf00389 | 10 |
| AX-158240216 | 20 | 53.035 | KV452979.1  | 4980650 | 10-scf00389 | 10 |
| AX-158240217 | 20 | 53.035 | KV452979.1  | 4981385 | 10-scf00389 | 10 |
| AX-158240220 | 20 | 53.035 | KV452979.1  | 4987655 | 10-scf00389 | 10 |
| AX-157841110 | 20 | 53.035 | KV452979.1  | 4988605 | 10-scf00389 | 10 |
| AX-157707658 | 20 | 53.035 | KV452979.1  | 4991265 | 10-scf00389 | 10 |
| AX-158240226 | 20 | 53.035 | KV452979.1  | 4998459 | 10-scf00389 | 10 |
| AX-157697338 | 20 | 53.035 | KV452979.1  | 4999695 | 10-scf00389 | 10 |
| AX-157841113 | 20 | 53.035 | KV452979.1  | 5017805 | 10-scf00389 | 10 |
| AX-157800619 | 20 | 53.035 | KV452979.1  | 5032439 | 10-scf00389 | 10 |
| AX-157712053 | 20 | 53.035 | 3ML01032651 | 591     | scf08277_1  | UN |
| AX-157747735 | 20 | 53.036 | KV452979.1  | 4966011 | 10-scf00389 | 10 |
| AX-158240221 | 20 | 53.036 | KV452979.1  | 4990834 | 10-scf00389 | 10 |
| AX-157727451 | 20 | 53.036 | KV452979.1  | 5005709 | 10-scf00389 | 10 |
| AX-158240223 | 20 | 53.038 | KV452979.1  | 4993541 | 10-scf00389 | 10 |
| AX-158240224 | 20 | 53.04  | KV452979.1  | 4997069 | 10-scf00389 | 10 |
| AX-157841111 | 20 | 53.041 | KV452979.1  | 5002380 | 10-scf00389 | 10 |
| AX-158240230 | 20 | 53.043 | KV452979.1  | 5011659 | 10-scf00389 | 10 |
| AX-157841122 | 20 | 53.472 | KV452979.1  | 5049837 | 10-scf00389 | 10 |
| AX-158240253 | 20 | 53.472 | KV452979.1  | 5052974 | 10-scf00389 | 10 |
| AX-158240254 | 20 | 53.472 | KV452979.1  | 5054393 | 10-scf00389 | 10 |
| AX-158240255 | 20 | 53.472 | KV452979.1  | 5057017 | 10-scf00389 | 10 |
| AX-158240268 | 20 | 53.472 | KV452979.1  | 5069478 | 10-scf00389 | 10 |
| AX-158240280 | 20 | 53.472 | KV452979.1  | 5082989 | 10-scf00389 | 10 |
| AX-158240285 | 20 | 53.472 | KV452979.1  | 5089404 | 10-scf00389 | 10 |
| AX-157756153 | 20 | 53.472 | KV452979.1  | 5152346 | 10-scf00389 | 10 |
| AX-157841137 | 20 | 53.472 | KV452979.1  | 5227664 | 10-scf00389 | 10 |
| AX-158240388 | 20 | 53.472 | KV452979.1  | 5254692 | 10-scf00389 | 10 |
| AX-158240389 | 20 | 53.472 | KV452979.1  | 5256082 | 10-scf00389 | 10 |
| AX-158240391 | 20 | 53.472 | KV452979.1  | 5258765 | 10-scf00389 | 10 |
| AX-157709070 | 20 | 53.472 | KV452979.1  | 5269290 | 10-scf00389 | 10 |
| AX-158240256 | 20 | 53.529 | KV452979.1  | 5058422 | 10-scf00389 | 10 |
| AX-158240258 | 20 | 53.581 | KV452979.1  | 5060333 | 10-scf00389 | 10 |
| AX-158240275 | 20 | 53.581 | KV452979.1  | 5075770 | 10-scf00389 | 10 |
| AX-158240277 | 20 | 53.581 | KV452979.1  | 5078445 | 10-scf00389 | 10 |
| AX-158240279 | 20 | 53.581 | KV452979.1  | 5079379 | 10-scf00389 | 10 |
| AX-158240281 | 20 | 53.581 | KV452979.1  | 5083635 | 10-scf00389 | 10 |
| AX-158240282 | 20 | 53.581 | KV452979.1  | 5085373 | 10-scf00389 | 10 |
| AX-157859673 | 20 | 53.581 | KV452979.1  | 5085677 | 10-scf00389 | 10 |
| AX-158240283 | 20 | 53.581 | KV452979.1  | 5087266 | 10-scf00389 | 10 |
| AX-158240284 | 20 | 53.581 | KV452979.1  | 5087849 | 10-scf00389 | 10 |
| AX-157841124 | 20 | 53.581 | KV452979.1  | 5088391 | 10-scf00389 | 10 |
| AX-158394243 | 20 | 53.581 | KV452979.1  | 5093387 | 10-scf00389 | 10 |
| AX-158240294 | 20 | 53.581 | KV452979.1  | 5113705 | 10-scf00389 | 10 |
| AX-158240295 | 20 | 53.581 | KV452979.1  | 5113971 | 10-scf00389 | 10 |

|              |    |        |            |         |             |    |
|--------------|----|--------|------------|---------|-------------|----|
| AX-157771703 | 20 | 53.581 | KV452979.1 | 5125033 | 10-scf00389 | 10 |
| AX-157859674 | 20 | 53.581 | KV452979.1 | 5126649 | 10-scf00389 | 10 |
| AX-158240305 | 20 | 53.581 | KV452979.1 | 5134402 | 10-scf00389 | 10 |
| AX-158240306 | 20 | 53.581 | KV452979.1 | 5134541 | 10-scf00389 | 10 |
| AX-157716638 | 20 | 53.581 | KV452979.1 | 5135295 | 10-scf00389 | 10 |
| AX-157772632 | 20 | 53.581 | KV452979.1 | 5135720 | 10-scf00389 | 10 |
| AX-158240308 | 20 | 53.581 | KV452979.1 | 5137099 | 10-scf00389 | 10 |
| AX-158240309 | 20 | 53.581 | KV452979.1 | 5139843 | 10-scf00389 | 10 |
| AX-157718694 | 20 | 53.581 | KV452979.1 | 5141478 | 10-scf00389 | 10 |
| AX-158240310 | 20 | 53.581 | KV452979.1 | 5146209 | 10-scf00389 | 10 |
| AX-158240415 | 20 | 53.581 | KV452979.1 | 5299228 | 10-scf00389 | 10 |
| AX-158240474 | 20 | 53.581 | KV452979.1 | 5369392 | 10-scf00389 | 10 |
| AX-158240307 | 20 | 53.631 | KV452979.1 | 5136578 | 10-scf00389 | 10 |
| AX-158239827 | 20 | 53.69  | KV452979.1 | 4309451 | 10-scf00389 | 10 |
| AX-158239943 | 20 | 53.69  | KV452979.1 | 4462294 | 10-scf00389 | 10 |
| AX-158240252 | 20 | 53.69  | KV452979.1 | 5052737 | 10-scf00389 | 10 |
| AX-158240265 | 20 | 53.69  | KV452979.1 | 5068408 | 10-scf00389 | 10 |
| AX-158240270 | 20 | 53.69  | KV452979.1 | 5071135 | 10-scf00389 | 10 |
| AX-158240276 | 20 | 53.69  | KV452979.1 | 5077899 | 10-scf00389 | 10 |
| AX-158240316 | 20 | 53.69  | KV452979.1 | 5155173 | 10-scf00389 | 10 |
| AX-157872583 | 20 | 53.69  | KV452979.1 | 5166847 | 10-scf00389 | 10 |
| AX-157841131 | 20 | 53.69  | KV452979.1 | 5168049 | 10-scf00389 | 10 |
| AX-158240325 | 20 | 53.69  | KV452979.1 | 5171567 | 10-scf00389 | 10 |
| AX-158240326 | 20 | 53.69  | KV452979.1 | 5172353 | 10-scf00389 | 10 |
| AX-158240327 | 20 | 53.69  | KV452979.1 | 5173812 | 10-scf00389 | 10 |
| AX-158240328 | 20 | 53.69  | KV452979.1 | 5173990 | 10-scf00389 | 10 |
| AX-158240329 | 20 | 53.69  | KV452979.1 | 5177093 | 10-scf00389 | 10 |
| AX-158240336 | 20 | 53.69  | KV452979.1 | 5188630 | 10-scf00389 | 10 |
| AX-158240338 | 20 | 53.69  | KV452979.1 | 5190199 | 10-scf00389 | 10 |
| AX-158240339 | 20 | 53.69  | KV452979.1 | 5192613 | 10-scf00389 | 10 |
| AX-158240342 | 20 | 53.69  | KV452979.1 | 5195324 | 10-scf00389 | 10 |
| AX-158240347 | 20 | 53.69  | KV452979.1 | 5203138 | 10-scf00389 | 10 |
| AX-158240348 | 20 | 53.69  | KV452979.1 | 5204378 | 10-scf00389 | 10 |
| AX-158240351 | 20 | 53.69  | KV452979.1 | 5209546 | 10-scf00389 | 10 |
| AX-157859676 | 20 | 53.69  | KV452979.1 | 5210089 | 10-scf00389 | 10 |
| AX-158240354 | 20 | 53.69  | KV452979.1 | 5212561 | 10-scf00389 | 10 |
| AX-158240360 | 20 | 53.69  | KV452979.1 | 5219222 | 10-scf00389 | 10 |
| AX-157841135 | 20 | 53.69  | KV452979.1 | 5224767 | 10-scf00389 | 10 |
| AX-157859678 | 20 | 53.69  | KV452979.1 | 5229600 | 10-scf00389 | 10 |
| AX-158240364 | 20 | 53.69  | KV452979.1 | 5231971 | 10-scf00389 | 10 |
| AX-158240390 | 20 | 53.69  | KV452979.1 | 5256969 | 10-scf00389 | 10 |
| AX-158394244 | 20 | 53.69  | KV452979.1 | 5257092 | 10-scf00389 | 10 |
| AX-158240392 | 20 | 53.69  | KV452979.1 | 5259827 | 10-scf00389 | 10 |
| AX-157744610 | 20 | 53.69  | KV452979.1 | 5262245 | 10-scf00389 | 10 |
| AX-157758270 | 20 | 53.69  | KV452979.1 | 5265077 | 10-scf00389 | 10 |
| AX-158240397 | 20 | 53.69  | KV452979.1 | 5273064 | 10-scf00389 | 10 |
| AX-158240398 | 20 | 53.69  | KV452979.1 | 5273584 | 10-scf00389 | 10 |
| AX-158240400 | 20 | 53.69  | KV452979.1 | 5275773 | 10-scf00389 | 10 |
| AX-158240401 | 20 | 53.69  | KV452979.1 | 5276427 | 10-scf00389 | 10 |
| AX-158240403 | 20 | 53.69  | KV452979.1 | 5279790 | 10-scf00389 | 10 |
| AX-157762732 | 20 | 53.69  | KV452979.1 | 5280076 | 10-scf00389 | 10 |

|              |    |        |            |         |             |    |
|--------------|----|--------|------------|---------|-------------|----|
| AX-158394245 | 20 | 53.69  | KV452979.1 | 5280131 | 10-scf00389 | 10 |
| AX-158240405 | 20 | 53.69  | KV452979.1 | 5284804 | 10-scf00389 | 10 |
| AX-158240407 | 20 | 53.69  | KV452979.1 | 5286292 | 10-scf00389 | 10 |
| AX-158240410 | 20 | 53.69  | KV452979.1 | 5292876 | 10-scf00389 | 10 |
| AX-158240412 | 20 | 53.69  | KV452979.1 | 5296778 | 10-scf00389 | 10 |
| AX-158240414 | 20 | 53.69  | KV452979.1 | 5298186 | 10-scf00389 | 10 |
| AX-157841142 | 20 | 53.69  | KV452979.1 | 5300823 | 10-scf00389 | 10 |
| AX-157723038 | 20 | 53.69  | KV452979.1 | 5306144 | 10-scf00389 | 10 |
| AX-158415490 | 20 | 53.69  | KV452979.1 | 5309210 | 10-scf00389 | 10 |
| AX-158415491 | 20 | 53.69  | KV452979.1 | 5309380 | 10-scf00389 | 10 |
| AX-158240440 | 20 | 53.69  | KV452979.1 | 5338712 | 10-scf00389 | 10 |
| AX-158240441 | 20 | 53.69  | KV452979.1 | 5339105 | 10-scf00389 | 10 |
| AX-158240498 | 20 | 53.69  | KV452979.1 | 5391188 | 10-scf00389 | 10 |
| AX-158240520 | 20 | 53.69  | KV452979.1 | 5420386 | 10-scf00389 | 10 |
| AX-158240525 | 20 | 53.69  | KV452979.1 | 5423012 | 10-scf00389 | 10 |
| AX-158240538 | 20 | 53.69  | KV452979.1 | 5439704 | 10-scf00389 | 10 |
| AX-158240540 | 20 | 53.69  | KV452979.1 | 5443851 | 10-scf00389 | 10 |
| AX-158240597 | 20 | 53.69  | KV452979.1 | 5516166 | 10-scf00389 | 10 |
| AX-158240602 | 20 | 53.69  | KV452979.1 | 5521607 | 10-scf00389 | 10 |
| AX-158240606 | 20 | 53.69  | KV452979.1 | 5526284 | 10-scf00389 | 10 |
| AX-157725818 | 20 | 53.69  | KV452979.1 | 5532663 | 10-scf00389 | 10 |
| AX-158240615 | 20 | 53.69  | KV452979.1 | 5540191 | 10-scf00389 | 10 |
| AX-158240620 | 20 | 53.69  | KV452979.1 | 5546437 | 10-scf00389 | 10 |
| AX-158240626 | 20 | 53.69  | KV452979.1 | 5551425 | 10-scf00389 | 10 |
| AX-158240631 | 20 | 53.69  | KV452979.1 | 5554251 | 10-scf00389 | 10 |
| AX-158240632 | 20 | 53.69  | KV452979.1 | 5555299 | 10-scf00389 | 10 |
| AX-158241124 | 20 | 53.69  | KV452979.1 | 6025392 | 10-scf00389 | 10 |
| AX-157841199 | 20 | 53.69  | KV452979.1 | 6117743 | 10-scf00389 | 10 |
| AX-158241206 | 20 | 53.69  | KV452979.1 | 6120853 | 10-scf00389 | 10 |
| AX-158241208 | 20 | 53.69  | KV452979.1 | 6122334 | 10-scf00389 | 10 |
| AX-157720512 | 20 | 53.69  | KV452979.1 | 6184197 | 10-scf00389 | 10 |
| AX-157752051 | 20 | 53.69  | KV452979.1 | 6187679 | 10-scf00389 | 10 |
| AX-158241317 | 20 | 53.69  | KV452979.1 | 6240623 | 10-scf00389 | 10 |
| AX-158241368 | 20 | 53.69  | KV452979.1 | 6297211 | 10-scf00389 | 10 |
| AX-158415492 | 20 | 53.909 | KV452979.1 | 5309556 | 10-scf00389 | 10 |
| AX-158240419 | 20 | 53.909 | KV452979.1 | 5310255 | 10-scf00389 | 10 |
| AX-158240421 | 20 | 53.909 | KV452979.1 | 5316372 | 10-scf00389 | 10 |
| AX-158240434 | 20 | 53.909 | KV452979.1 | 5329928 | 10-scf00389 | 10 |
| AX-158240445 | 20 | 53.909 | KV452979.1 | 5341982 | 10-scf00389 | 10 |
| AX-158240446 | 20 | 53.909 | KV452979.1 | 5342473 | 10-scf00389 | 10 |
| AX-158240448 | 20 | 53.909 | KV452979.1 | 5344285 | 10-scf00389 | 10 |
| AX-158240449 | 20 | 53.909 | KV452979.1 | 5344793 | 10-scf00389 | 10 |
| AX-158240454 | 20 | 53.909 | KV452979.1 | 5349529 | 10-scf00389 | 10 |
| AX-158240455 | 20 | 53.909 | KV452979.1 | 5350489 | 10-scf00389 | 10 |
| AX-158240456 | 20 | 53.909 | KV452979.1 | 5351057 | 10-scf00389 | 10 |
| AX-158240458 | 20 | 53.909 | KV452979.1 | 5352007 | 10-scf00389 | 10 |
| AX-158240460 | 20 | 53.909 | KV452979.1 | 5353271 | 10-scf00389 | 10 |
| AX-158240461 | 20 | 53.909 | KV452979.1 | 5353588 | 10-scf00389 | 10 |
| AX-157720854 | 20 | 53.909 | KV452979.1 | 5359662 | 10-scf00389 | 10 |
| AX-158240468 | 20 | 53.909 | KV452979.1 | 5364793 | 10-scf00389 | 10 |
| AX-158394247 | 20 | 53.909 | KV452979.1 | 5366145 | 10-scf00389 | 10 |



|              |    |        |            |         |             |    |
|--------------|----|--------|------------|---------|-------------|----|
| AX-158240470 | 20 | 53.909 | KV452979.1 | 5366771 | 10-scf00389 | 10 |
| AX-158240471 | 20 | 53.909 | KV452979.1 | 5367468 | 10-scf00389 | 10 |
| AX-158240473 | 20 | 53.909 | KV452979.1 | 5368920 | 10-scf00389 | 10 |
| AX-158415497 | 20 | 53.909 | KV452979.1 | 5370399 | 10-scf00389 | 10 |
| AX-158240475 | 20 | 53.909 | KV452979.1 | 5371127 | 10-scf00389 | 10 |
| AX-158240476 | 20 | 53.909 | KV452979.1 | 5372074 | 10-scf00389 | 10 |
| AX-158240477 | 20 | 53.909 | KV452979.1 | 5372762 | 10-scf00389 | 10 |
| AX-158240478 | 20 | 53.909 | KV452979.1 | 5373690 | 10-scf00389 | 10 |
| AX-158240479 | 20 | 53.909 | KV452979.1 | 5374066 | 10-scf00389 | 10 |
| AX-158240482 | 20 | 53.909 | KV452979.1 | 5375922 | 10-scf00389 | 10 |
| AX-158240483 | 20 | 53.909 | KV452979.1 | 5376704 | 10-scf00389 | 10 |
| AX-158240485 | 20 | 53.909 | KV452979.1 | 5381196 | 10-scf00389 | 10 |
| AX-158240486 | 20 | 53.909 | KV452979.1 | 5381828 | 10-scf00389 | 10 |
| AX-158240487 | 20 | 53.909 | KV452979.1 | 5382589 | 10-scf00389 | 10 |
| AX-158240488 | 20 | 53.909 | KV452979.1 | 5383188 | 10-scf00389 | 10 |
| AX-158240489 | 20 | 53.909 | KV452979.1 | 5384375 | 10-scf00389 | 10 |
| AX-158240492 | 20 | 53.909 | KV452979.1 | 5387254 | 10-scf00389 | 10 |
| AX-158240493 | 20 | 53.909 | KV452979.1 | 5387505 | 10-scf00389 | 10 |
| AX-158240495 | 20 | 53.909 | KV452979.1 | 5388396 | 10-scf00389 | 10 |
| AX-158240500 | 20 | 53.909 | KV452979.1 | 5392545 | 10-scf00389 | 10 |
| AX-158240501 | 20 | 53.909 | KV452979.1 | 5392673 | 10-scf00389 | 10 |
| AX-158240502 | 20 | 53.909 | KV452979.1 | 5395183 | 10-scf00389 | 10 |
| AX-158240506 | 20 | 53.909 | KV452979.1 | 5398056 | 10-scf00389 | 10 |
| AX-158240507 | 20 | 53.909 | KV452979.1 | 5399672 | 10-scf00389 | 10 |
| AX-158240512 | 20 | 53.909 | KV452979.1 | 5405572 | 10-scf00389 | 10 |
| AX-158240513 | 20 | 53.909 | KV452979.1 | 5407309 | 10-scf00389 | 10 |
| AX-158240514 | 20 | 53.909 | KV452979.1 | 5407828 | 10-scf00389 | 10 |
| AX-158240515 | 20 | 53.909 | KV452979.1 | 5408427 | 10-scf00389 | 10 |
| AX-157746170 | 20 | 53.909 | KV452979.1 | 5411182 | 10-scf00389 | 10 |
| AX-157841147 | 20 | 53.909 | KV452979.1 | 5415003 | 10-scf00389 | 10 |
| AX-157841148 | 20 | 53.909 | KV452979.1 | 5417328 | 10-scf00389 | 10 |
| AX-158240518 | 20 | 53.909 | KV452979.1 | 5418523 | 10-scf00389 | 10 |
| AX-158240521 | 20 | 53.909 | KV452979.1 | 5421207 | 10-scf00389 | 10 |
| AX-158240522 | 20 | 53.909 | KV452979.1 | 5421413 | 10-scf00389 | 10 |
| AX-158240524 | 20 | 53.909 | KV452979.1 | 5422427 | 10-scf00389 | 10 |
| AX-157770996 | 20 | 53.909 | KV452979.1 | 5422853 | 10-scf00389 | 10 |
| AX-158240526 | 20 | 53.909 | KV452979.1 | 5423462 | 10-scf00389 | 10 |
| AX-158240531 | 20 | 53.909 | KV452979.1 | 5429494 | 10-scf00389 | 10 |
| AX-158240532 | 20 | 53.909 | KV452979.1 | 5429759 | 10-scf00389 | 10 |
| AX-158240541 | 20 | 53.909 | KV452979.1 | 5444247 | 10-scf00389 | 10 |
| AX-158240543 | 20 | 53.909 | KV452979.1 | 5446851 | 10-scf00389 | 10 |
| AX-158240547 | 20 | 53.909 | KV452979.1 | 5450595 | 10-scf00389 | 10 |
| AX-157841151 | 20 | 53.909 | KV452979.1 | 5452789 | 10-scf00389 | 10 |
| AX-158415501 | 20 | 53.909 | KV452979.1 | 5456222 | 10-scf00389 | 10 |
| AX-158240550 | 20 | 53.909 | KV452979.1 | 5461053 | 10-scf00389 | 10 |
| AX-158240551 | 20 | 53.909 | KV452979.1 | 5462767 | 10-scf00389 | 10 |
| AX-158240552 | 20 | 53.909 | KV452979.1 | 5464930 | 10-scf00389 | 10 |
| AX-158240557 | 20 | 53.909 | KV452979.1 | 5474218 | 10-scf00389 | 10 |
| AX-158240558 | 20 | 53.909 | KV452979.1 | 5474557 | 10-scf00389 | 10 |
| AX-158240559 | 20 | 53.909 | KV452979.1 | 5474815 | 10-scf00389 | 10 |
| AX-158240560 | 20 | 53.909 | KV452979.1 | 5476113 | 10-scf00389 | 10 |

|              |    |        |            |         |             |    |
|--------------|----|--------|------------|---------|-------------|----|
| AX-157872590 | 20 | 53.909 | KV452979.1 | 5476872 | 10-scf00389 | 10 |
| AX-157841155 | 20 | 53.909 | KV452979.1 | 5478173 | 10-scf00389 | 10 |
| AX-158240561 | 20 | 53.909 | KV452979.1 | 5478450 | 10-scf00389 | 10 |
| AX-158240562 | 20 | 53.909 | KV452979.1 | 5478960 | 10-scf00389 | 10 |
| AX-158240563 | 20 | 53.909 | KV452979.1 | 5479206 | 10-scf00389 | 10 |
| AX-158240564 | 20 | 53.909 | KV452979.1 | 5479589 | 10-scf00389 | 10 |
| AX-157872591 | 20 | 53.909 | KV452979.1 | 5481807 | 10-scf00389 | 10 |
| AX-158240566 | 20 | 53.909 | KV452979.1 | 5482836 | 10-scf00389 | 10 |
| AX-158240568 | 20 | 53.909 | KV452979.1 | 5483966 | 10-scf00389 | 10 |
| AX-158240569 | 20 | 53.909 | KV452979.1 | 5484675 | 10-scf00389 | 10 |
| AX-158240570 | 20 | 53.909 | KV452979.1 | 5485135 | 10-scf00389 | 10 |
| AX-158240571 | 20 | 53.909 | KV452979.1 | 5485611 | 10-scf00389 | 10 |
| AX-158240572 | 20 | 53.909 | KV452979.1 | 5486411 | 10-scf00389 | 10 |
| AX-157841156 | 20 | 53.909 | KV452979.1 | 5486635 | 10-scf00389 | 10 |
| AX-157872592 | 20 | 53.909 | KV452979.1 | 5487421 | 10-scf00389 | 10 |
| AX-158240573 | 20 | 53.909 | KV452979.1 | 5487922 | 10-scf00389 | 10 |
| AX-158240574 | 20 | 53.909 | KV452979.1 | 5488496 | 10-scf00389 | 10 |
| AX-158240582 | 20 | 53.909 | KV452979.1 | 5504304 | 10-scf00389 | 10 |
| AX-158240586 | 20 | 53.909 | KV452979.1 | 5507163 | 10-scf00389 | 10 |
| AX-158240587 | 20 | 53.909 | KV452979.1 | 5507731 | 10-scf00389 | 10 |
| AX-158394249 | 20 | 53.909 | KV452979.1 | 5507853 | 10-scf00389 | 10 |
| AX-158240589 | 20 | 53.909 | KV452979.1 | 5509334 | 10-scf00389 | 10 |
| AX-158240590 | 20 | 53.909 | KV452979.1 | 5509906 | 10-scf00389 | 10 |
| AX-158240591 | 20 | 53.909 | KV452979.1 | 5510018 | 10-scf00389 | 10 |
| AX-158240592 | 20 | 53.909 | KV452979.1 | 5512250 | 10-scf00389 | 10 |
| AX-158240594 | 20 | 53.909 | KV452979.1 | 5513834 | 10-scf00389 | 10 |
| AX-158240595 | 20 | 53.909 | KV452979.1 | 5514592 | 10-scf00389 | 10 |
| AX-158240598 | 20 | 53.909 | KV452979.1 | 5517203 | 10-scf00389 | 10 |
| AX-158240604 | 20 | 53.909 | KV452979.1 | 5523328 | 10-scf00389 | 10 |
| AX-158240610 | 20 | 53.909 | KV452979.1 | 5530616 | 10-scf00389 | 10 |
| AX-158240611 | 20 | 53.909 | KV452979.1 | 5532051 | 10-scf00389 | 10 |
| AX-158240614 | 20 | 53.909 | KV452979.1 | 5539804 | 10-scf00389 | 10 |
| AX-158418927 | 20 | 53.909 | KV452979.1 | 5542075 | 10-scf00389 | 10 |
| AX-158240624 | 20 | 53.909 | KV452979.1 | 5549226 | 10-scf00389 | 10 |
| AX-158240625 | 20 | 53.909 | KV452979.1 | 5550935 | 10-scf00389 | 10 |
| AX-158240635 | 20 | 53.909 | KV452979.1 | 5556836 | 10-scf00389 | 10 |
| AX-158240665 | 20 | 53.909 | KV452979.1 | 5588592 | 10-scf00389 | 10 |
| AX-158380974 | 20 | 53.909 | KV452979.1 | 5590365 | 10-scf00389 | 10 |
| AX-157725956 | 20 | 53.909 | KV452979.1 | 5628348 | 10-scf00389 | 10 |
| AX-158240723 | 20 | 53.909 | KV452979.1 | 5646513 | 10-scf00389 | 10 |
| AX-158240724 | 20 | 53.909 | KV452979.1 | 5647626 | 10-scf00389 | 10 |
| AX-158240731 | 20 | 53.909 | KV452979.1 | 5652370 | 10-scf00389 | 10 |
| AX-158240759 | 20 | 53.909 | KV452979.1 | 5671839 | 10-scf00389 | 10 |
| AX-158240765 | 20 | 53.909 | KV452979.1 | 5674991 | 10-scf00389 | 10 |
| AX-158240785 | 20 | 53.909 | KV452979.1 | 5696032 | 10-scf00389 | 10 |
| AX-158240878 | 20 | 53.909 | KV452979.1 | 5776250 | 10-scf00389 | 10 |
| AX-158241019 | 20 | 53.909 | KV452979.1 | 5913732 | 10-scf00389 | 10 |
| AX-158241138 | 20 | 53.909 | KV452979.1 | 6040700 | 10-scf00389 | 10 |
| AX-158241182 | 20 | 53.909 | KV452979.1 | 6088730 | 10-scf00389 | 10 |
| AX-158241183 | 20 | 53.909 | KV452979.1 | 6089250 | 10-scf00389 | 10 |
| AX-157872606 | 20 | 53.909 | KV452979.1 | 6110759 | 10-scf00389 | 10 |

|              |    |        |            |         |             |    |
|--------------|----|--------|------------|---------|-------------|----|
| AX-157872607 | 20 | 53.909 | KV452979.1 | 6116404 | 10-scf00389 | 10 |
| AX-157770815 | 20 | 53.909 | KV452979.1 | 6132716 | 10-scf00389 | 10 |
| AX-157714542 | 20 | 53.909 | KV452979.1 | 6134265 | 10-scf00389 | 10 |
| AX-158241236 | 20 | 53.909 | KV452979.1 | 6151134 | 10-scf00389 | 10 |
| AX-158241296 | 20 | 53.909 | KV452979.1 | 6216395 | 10-scf00389 | 10 |
| AX-158241323 | 20 | 53.909 | KV452979.1 | 6243427 | 10-scf00389 | 10 |
| AX-158241358 | 20 | 53.909 | KV452979.1 | 6276872 | 10-scf00389 | 10 |
| AX-158241369 | 20 | 53.909 | KV452979.1 | 6297464 | 10-scf00389 | 10 |
| AX-158241387 | 20 | 53.909 | KV452979.1 | 6318265 | 10-scf00389 | 10 |
| AX-157841239 | 20 | 53.909 | KV452979.1 | 6388890 | 10-scf00389 | 10 |
| AX-158241478 | 20 | 53.909 | KV452979.1 | 6427377 | 10-scf00389 | 10 |
| AX-158241594 | 20 | 53.909 | KV452979.1 | 6581414 | 10-scf00389 | 10 |
| AX-158242029 | 20 | 53.909 | KV452979.1 | 7084195 | 10-scf00389 | 10 |
| AX-158242378 | 20 | 53.909 | KV452980.1 | 937807  | 10-scf00391 | 10 |
| AX-157800721 | 20 | 53.909 | KV452980.1 | 1005721 | 10-scf00391 | 10 |
| AX-157841321 | 20 | 53.909 | KV452980.1 | 1106187 | 10-scf00391 | 10 |
| AX-158242497 | 20 | 53.909 | KV452980.1 | 1141490 | 10-scf00391 | 10 |
| AX-158242508 | 20 | 53.909 | KV452980.1 | 1158051 | 10-scf00391 | 10 |
| AX-158242533 | 20 | 53.909 | KV452980.1 | 1191630 | 10-scf00391 | 10 |
| AX-158242578 | 20 | 53.909 | KV452980.1 | 1256416 | 10-scf00391 | 10 |
| AX-158242641 | 20 | 53.909 | KV452980.1 | 1344503 | 10-scf00391 | 10 |
| AX-158242659 | 20 | 53.909 | KV452980.1 | 1363110 | 10-scf00391 | 10 |
| AX-158242673 | 20 | 53.909 | KV452980.1 | 1380497 | 10-scf00391 | 10 |
| AX-158242725 | 20 | 53.909 | KV452980.1 | 1449720 | 10-scf00391 | 10 |
| AX-158242745 | 20 | 53.909 | KV452980.1 | 1475904 | 10-scf00391 | 10 |
| AX-158242824 | 20 | 53.909 | KV452980.1 | 1552270 | 10-scf00391 | 10 |
| AX-157769949 | 20 | 53.909 | KV452980.1 | 1611749 | 10-scf00391 | 10 |
| AX-158242871 | 20 | 53.909 | KV452980.1 | 1617411 | 10-scf00391 | 10 |
| AX-158242874 | 20 | 53.909 | KV452980.1 | 1620938 | 10-scf00391 | 10 |
| AX-158242882 | 20 | 53.909 | KV452980.1 | 1627933 | 10-scf00391 | 10 |
| AX-158242884 | 20 | 53.909 | KV452980.1 | 1634180 | 10-scf00391 | 10 |
| AX-158242886 | 20 | 53.909 | KV452980.1 | 1639658 | 10-scf00391 | 10 |
| AX-158242894 | 20 | 53.909 | KV452980.1 | 1657760 | 10-scf00391 | 10 |
| AX-158242905 | 20 | 53.909 | KV452980.1 | 1677880 | 10-scf00391 | 10 |
| AX-158242910 | 20 | 53.909 | KV452980.1 | 1681020 | 10-scf00391 | 10 |
| AX-158242911 | 20 | 53.909 | KV452980.1 | 1681709 | 10-scf00391 | 10 |
| AX-158242920 | 20 | 53.909 | KV452980.1 | 1691860 | 10-scf00391 | 10 |
| AX-158243000 | 20 | 53.909 | KV452980.1 | 1819095 | 10-scf00391 | 10 |
| AX-158246998 | 20 | 53.909 | KV452981.1 | 419397  | 10-scf00393 | 10 |
| AX-157880121 | 20 | 53.909 | KV452981.1 | 542265  | 10-scf00393 | 10 |
| AX-158244399 | 20 | 53.909 | KV452981.1 | 639674  | 10-scf00393 | 10 |
| AX-157707756 | 20 | 53.909 | KV452981.1 | 1024883 | 10-scf00393 | 10 |
| AX-157748049 | 20 | 53.909 | KV452981.1 | 1393972 | 10-scf00393 | 10 |
| AX-158244990 | 20 | 53.909 | KV452981.1 | 1466129 | 10-scf00393 | 10 |
| AX-158245055 | 20 | 53.909 | KV452981.1 | 1556729 | 10-scf00393 | 10 |
| AX-158245056 | 20 | 53.909 | KV452981.1 | 1557956 | 10-scf00393 | 10 |
| AX-157698915 | 20 | 53.909 | KV452981.1 | 1562316 | 10-scf00393 | 10 |
| AX-157711440 | 20 | 53.909 | KV452981.1 | 1562394 | 10-scf00393 | 10 |
| AX-157694795 | 20 | 53.909 | KV452981.1 | 1573462 | 10-scf00393 | 10 |
| AX-158245065 | 20 | 53.909 | KV452981.1 | 1579285 | 10-scf00393 | 10 |
| AX-158245070 | 20 | 53.909 | KV452981.1 | 1583468 | 10-scf00393 | 10 |

|              |    |        |            |         |                |    |
|--------------|----|--------|------------|---------|----------------|----|
| AX-158245074 | 20 | 53.909 | KV452981.1 | 1587002 | 10-scf00393    | 10 |
| AX-158245076 | 20 | 53.909 | KV452981.1 | 1588530 | 10-scf00393    | 10 |
| AX-157774779 | 20 | 53.909 | KV452981.1 | 1593413 | 10-scf00393    | 10 |
| AX-157754340 | 20 | 53.909 | KV452981.1 | 1868025 | 10-scf00393    | 10 |
| AX-157711618 | 20 | 53.909 | FI863482.1 | 168     | IORI212 Ictalu | UN |
| AX-157698097 | 20 | 53.909 | FI868794.1 | 573     | IORI212 Ictalu | UN |
| AX-158239215 | 20 | 54.018 | KV452979.1 | 3418635 | 10-scf00389    | 10 |
| AX-158239507 | 20 | 54.018 | KV452979.1 | 3824257 | 10-scf00389    | 10 |
| AX-158239623 | 20 | 54.018 | KV452979.1 | 4059689 | 10-scf00389    | 10 |
| AX-158239628 | 20 | 54.018 | KV452979.1 | 4062962 | 10-scf00389    | 10 |
| AX-158239703 | 20 | 54.018 | KV452979.1 | 4128277 | 10-scf00389    | 10 |
| AX-158239790 | 20 | 54.018 | KV452979.1 | 4257065 | 10-scf00389    | 10 |
| AX-158239975 | 20 | 54.018 | KV452979.1 | 4536788 | 10-scf00389    | 10 |
| AX-157841062 | 20 | 54.018 | KV452979.1 | 4546303 | 10-scf00389    | 10 |
| AX-157841084 | 20 | 54.018 | KV452979.1 | 4670958 | 10-scf00389    | 10 |
| AX-158240112 | 20 | 54.018 | KV452979.1 | 4805191 | 10-scf00389    | 10 |
| AX-158240137 | 20 | 54.018 | KV452979.1 | 4843903 | 10-scf00389    | 10 |
| AX-157723699 | 20 | 54.018 | KV452979.1 | 4861531 | 10-scf00389    | 10 |
| AX-158240189 | 20 | 54.018 | KV452979.1 | 4927235 | 10-scf00389    | 10 |
| AX-157841109 | 20 | 54.018 | KV452979.1 | 4974892 | 10-scf00389    | 10 |
| AX-158240262 | 20 | 54.018 | KV452979.1 | 5063938 | 10-scf00389    | 10 |
| AX-158240296 | 20 | 54.018 | KV452979.1 | 5114406 | 10-scf00389    | 10 |
| AX-158240302 | 20 | 54.018 | KV452979.1 | 5125556 | 10-scf00389    | 10 |
| AX-157841129 | 20 | 54.018 | KV452979.1 | 5127558 | 10-scf00389    | 10 |
| AX-157872582 | 20 | 54.018 | KV452979.1 | 5142680 | 10-scf00389    | 10 |
| AX-158240331 | 20 | 54.018 | KV452979.1 | 5180159 | 10-scf00389    | 10 |
| AX-158240334 | 20 | 54.018 | KV452979.1 | 5185320 | 10-scf00389    | 10 |
| AX-158240341 | 20 | 54.018 | KV452979.1 | 5194369 | 10-scf00389    | 10 |
| AX-157841138 | 20 | 54.018 | KV452979.1 | 5232725 | 10-scf00389    | 10 |
| AX-158240395 | 20 | 54.018 | KV452979.1 | 5270575 | 10-scf00389    | 10 |
| AX-158240462 | 20 | 54.018 | KV452979.1 | 5354133 | 10-scf00389    | 10 |
| AX-157747924 | 20 | 54.018 | KV452979.1 | 5358842 | 10-scf00389    | 10 |
| AX-158240484 | 20 | 54.018 | KV452979.1 | 5377433 | 10-scf00389    | 10 |
| AX-157872588 | 20 | 54.018 | KV452979.1 | 5458578 | 10-scf00389    | 10 |
| AX-157773201 | 20 | 54.018 | KV452979.1 | 5466227 | 10-scf00389    | 10 |
| AX-157841157 | 20 | 54.018 | KV452979.1 | 5490424 | 10-scf00389    | 10 |
| AX-158240596 | 20 | 54.018 | KV452979.1 | 5515010 | 10-scf00389    | 10 |
| AX-158240600 | 20 | 54.018 | KV452979.1 | 5520251 | 10-scf00389    | 10 |
| AX-158394250 | 20 | 54.018 | KV452979.1 | 5551468 | 10-scf00389    | 10 |
| AX-158240636 | 20 | 54.018 | KV452979.1 | 5557744 | 10-scf00389    | 10 |
| AX-158240637 | 20 | 54.018 | KV452979.1 | 5558116 | 10-scf00389    | 10 |
| AX-158240649 | 20 | 54.018 | KV452979.1 | 5570499 | 10-scf00389    | 10 |
| AX-157717280 | 20 | 54.018 | KV452979.1 | 5574269 | 10-scf00389    | 10 |
| AX-158240652 | 20 | 54.018 | KV452979.1 | 5574947 | 10-scf00389    | 10 |
| AX-158240654 | 20 | 54.018 | KV452979.1 | 5576272 | 10-scf00389    | 10 |
| AX-158240655 | 20 | 54.018 | KV452979.1 | 5578434 | 10-scf00389    | 10 |
| AX-158240656 | 20 | 54.018 | KV452979.1 | 5579691 | 10-scf00389    | 10 |
| AX-158240658 | 20 | 54.018 | KV452979.1 | 5581224 | 10-scf00389    | 10 |
| AX-158240660 | 20 | 54.018 | KV452979.1 | 5582089 | 10-scf00389    | 10 |
| AX-158240664 | 20 | 54.018 | KV452979.1 | 5587936 | 10-scf00389    | 10 |
| AX-158240669 | 20 | 54.018 | KV452979.1 | 5592848 | 10-scf00389    | 10 |

|              |    |        |            |         |             |    |
|--------------|----|--------|------------|---------|-------------|----|
| AX-158240670 | 20 | 54.018 | KV452979.1 | 5593268 | 10-scf00389 | 10 |
| AX-158240672 | 20 | 54.018 | KV452979.1 | 5594107 | 10-scf00389 | 10 |
| AX-158240674 | 20 | 54.018 | KV452979.1 | 5598005 | 10-scf00389 | 10 |
| AX-158240675 | 20 | 54.018 | KV452979.1 | 5598254 | 10-scf00389 | 10 |
| AX-158240677 | 20 | 54.018 | KV452979.1 | 5600181 | 10-scf00389 | 10 |
| AX-158240678 | 20 | 54.018 | KV452979.1 | 5600596 | 10-scf00389 | 10 |
| AX-158240679 | 20 | 54.018 | KV452979.1 | 5601068 | 10-scf00389 | 10 |
| AX-158240680 | 20 | 54.018 | KV452979.1 | 5601430 | 10-scf00389 | 10 |
| AX-158240682 | 20 | 54.018 | KV452979.1 | 5603179 | 10-scf00389 | 10 |
| AX-158240684 | 20 | 54.018 | KV452979.1 | 5605179 | 10-scf00389 | 10 |
| AX-158418929 | 20 | 54.018 | KV452979.1 | 5611412 | 10-scf00389 | 10 |
| AX-158240687 | 20 | 54.018 | KV452979.1 | 5612273 | 10-scf00389 | 10 |
| AX-158240690 | 20 | 54.018 | KV452979.1 | 5614220 | 10-scf00389 | 10 |
| AX-158240691 | 20 | 54.018 | KV452979.1 | 5614847 | 10-scf00389 | 10 |
| AX-158240692 | 20 | 54.018 | KV452979.1 | 5615413 | 10-scf00389 | 10 |
| AX-158240693 | 20 | 54.018 | KV452979.1 | 5616053 | 10-scf00389 | 10 |
| AX-158240694 | 20 | 54.018 | KV452979.1 | 5617639 | 10-scf00389 | 10 |
| AX-157703450 | 20 | 54.018 | KV452979.1 | 5618072 | 10-scf00389 | 10 |
| AX-158240695 | 20 | 54.018 | KV452979.1 | 5619146 | 10-scf00389 | 10 |
| AX-158240696 | 20 | 54.018 | KV452979.1 | 5619512 | 10-scf00389 | 10 |
| AX-158240698 | 20 | 54.018 | KV452979.1 | 5620407 | 10-scf00389 | 10 |
| AX-158240699 | 20 | 54.018 | KV452979.1 | 5621548 | 10-scf00389 | 10 |
| AX-158240701 | 20 | 54.018 | KV452979.1 | 5622553 | 10-scf00389 | 10 |
| AX-158240703 | 20 | 54.018 | KV452979.1 | 5623489 | 10-scf00389 | 10 |
| AX-157841160 | 20 | 54.018 | KV452979.1 | 5623971 | 10-scf00389 | 10 |
| AX-158394254 | 20 | 54.018 | KV452979.1 | 5624251 | 10-scf00389 | 10 |
| AX-158240704 | 20 | 54.018 | KV452979.1 | 5624343 | 10-scf00389 | 10 |
| AX-158418932 | 20 | 54.018 | KV452979.1 | 5624426 | 10-scf00389 | 10 |
| AX-158240705 | 20 | 54.018 | KV452979.1 | 5626910 | 10-scf00389 | 10 |
| AX-158240706 | 20 | 54.018 | KV452979.1 | 5627196 | 10-scf00389 | 10 |
| AX-158240708 | 20 | 54.018 | KV452979.1 | 5629621 | 10-scf00389 | 10 |
| AX-158240709 | 20 | 54.018 | KV452979.1 | 5630483 | 10-scf00389 | 10 |
| AX-158240711 | 20 | 54.018 | KV452979.1 | 5633577 | 10-scf00389 | 10 |
| AX-158240712 | 20 | 54.018 | KV452979.1 | 5634113 | 10-scf00389 | 10 |
| AX-158240713 | 20 | 54.018 | KV452979.1 | 5635189 | 10-scf00389 | 10 |
| AX-158240714 | 20 | 54.018 | KV452979.1 | 5635971 | 10-scf00389 | 10 |
| AX-158240715 | 20 | 54.018 | KV452979.1 | 5636052 | 10-scf00389 | 10 |
| AX-158240718 | 20 | 54.018 | KV452979.1 | 5638619 | 10-scf00389 | 10 |
| AX-157872593 | 20 | 54.018 | KV452979.1 | 5641349 | 10-scf00389 | 10 |
| AX-158240719 | 20 | 54.018 | KV452979.1 | 5642035 | 10-scf00389 | 10 |
| AX-158240722 | 20 | 54.018 | KV452979.1 | 5646119 | 10-scf00389 | 10 |
| AX-157872594 | 20 | 54.018 | KV452979.1 | 5647071 | 10-scf00389 | 10 |
| AX-158240725 | 20 | 54.018 | KV452979.1 | 5648039 | 10-scf00389 | 10 |
| AX-158240726 | 20 | 54.018 | KV452979.1 | 5648579 | 10-scf00389 | 10 |
| AX-158240727 | 20 | 54.018 | KV452979.1 | 5649220 | 10-scf00389 | 10 |
| AX-158240728 | 20 | 54.018 | KV452979.1 | 5650368 | 10-scf00389 | 10 |
| AX-158240729 | 20 | 54.018 | KV452979.1 | 5650917 | 10-scf00389 | 10 |
| AX-158240730 | 20 | 54.018 | KV452979.1 | 5651364 | 10-scf00389 | 10 |
| AX-158240732 | 20 | 54.018 | KV452979.1 | 5652826 | 10-scf00389 | 10 |
| AX-158240733 | 20 | 54.018 | KV452979.1 | 5653224 | 10-scf00389 | 10 |
| AX-157872595 | 20 | 54.018 | KV452979.1 | 5654237 | 10-scf00389 | 10 |

|              |    |        |            |         |             |    |
|--------------|----|--------|------------|---------|-------------|----|
| AX-158240735 | 20 | 54.018 | KV452979.1 | 5654718 | 10-scf00389 | 10 |
| AX-158240736 | 20 | 54.018 | KV452979.1 | 5655214 | 10-scf00389 | 10 |
| AX-158240737 | 20 | 54.018 | KV452979.1 | 5655516 | 10-scf00389 | 10 |
| AX-158240738 | 20 | 54.018 | KV452979.1 | 5655893 | 10-scf00389 | 10 |
| AX-158240739 | 20 | 54.018 | KV452979.1 | 5656571 | 10-scf00389 | 10 |
| AX-158240740 | 20 | 54.018 | KV452979.1 | 5657063 | 10-scf00389 | 10 |
| AX-158240741 | 20 | 54.018 | KV452979.1 | 5657472 | 10-scf00389 | 10 |
| AX-158240742 | 20 | 54.018 | KV452979.1 | 5657915 | 10-scf00389 | 10 |
| AX-158240743 | 20 | 54.018 | KV452979.1 | 5660058 | 10-scf00389 | 10 |
| AX-158240744 | 20 | 54.018 | KV452979.1 | 5660869 | 10-scf00389 | 10 |
| AX-158240745 | 20 | 54.018 | KV452979.1 | 5662133 | 10-scf00389 | 10 |
| AX-157841162 | 20 | 54.018 | KV452979.1 | 5662478 | 10-scf00389 | 10 |
| AX-158240746 | 20 | 54.018 | KV452979.1 | 5664053 | 10-scf00389 | 10 |
| AX-158240747 | 20 | 54.018 | KV452979.1 | 5664816 | 10-scf00389 | 10 |
| AX-158240748 | 20 | 54.018 | KV452979.1 | 5665053 | 10-scf00389 | 10 |
| AX-158240749 | 20 | 54.018 | KV452979.1 | 5665753 | 10-scf00389 | 10 |
| AX-158240751 | 20 | 54.018 | KV452979.1 | 5666495 | 10-scf00389 | 10 |
| AX-158240752 | 20 | 54.018 | KV452979.1 | 5667142 | 10-scf00389 | 10 |
| AX-158240753 | 20 | 54.018 | KV452979.1 | 5667747 | 10-scf00389 | 10 |
| AX-158240754 | 20 | 54.018 | KV452979.1 | 5668204 | 10-scf00389 | 10 |
| AX-157872596 | 20 | 54.018 | KV452979.1 | 5668865 | 10-scf00389 | 10 |
| AX-158240755 | 20 | 54.018 | KV452979.1 | 5669696 | 10-scf00389 | 10 |
| AX-158240757 | 20 | 54.018 | KV452979.1 | 5671306 | 10-scf00389 | 10 |
| AX-158240760 | 20 | 54.018 | KV452979.1 | 5672185 | 10-scf00389 | 10 |
| AX-158240761 | 20 | 54.018 | KV452979.1 | 5672526 | 10-scf00389 | 10 |
| AX-158240762 | 20 | 54.018 | KV452979.1 | 5672937 | 10-scf00389 | 10 |
| AX-158240763 | 20 | 54.018 | KV452979.1 | 5673544 | 10-scf00389 | 10 |
| AX-158240766 | 20 | 54.018 | KV452979.1 | 5675472 | 10-scf00389 | 10 |
| AX-158240767 | 20 | 54.018 | KV452979.1 | 5676154 | 10-scf00389 | 10 |
| AX-158240768 | 20 | 54.018 | KV452979.1 | 5676367 | 10-scf00389 | 10 |
| AX-158240772 | 20 | 54.018 | KV452979.1 | 5680159 | 10-scf00389 | 10 |
| AX-158240774 | 20 | 54.018 | KV452979.1 | 5681787 | 10-scf00389 | 10 |
| AX-158240775 | 20 | 54.018 | KV452979.1 | 5682067 | 10-scf00389 | 10 |
| AX-158240776 | 20 | 54.018 | KV452979.1 | 5682851 | 10-scf00389 | 10 |
| AX-158240778 | 20 | 54.018 | KV452979.1 | 5684197 | 10-scf00389 | 10 |
| AX-158240782 | 20 | 54.018 | KV452979.1 | 5688960 | 10-scf00389 | 10 |
| AX-158240784 | 20 | 54.018 | KV452979.1 | 5694315 | 10-scf00389 | 10 |
| AX-158240790 | 20 | 54.018 | KV452979.1 | 5700612 | 10-scf00389 | 10 |
| AX-157841163 | 20 | 54.018 | KV452979.1 | 5702051 | 10-scf00389 | 10 |
| AX-158240795 | 20 | 54.018 | KV452979.1 | 5703426 | 10-scf00389 | 10 |
| AX-158240798 | 20 | 54.018 | KV452979.1 | 5707319 | 10-scf00389 | 10 |
| AX-158240801 | 20 | 54.018 | KV452979.1 | 5710090 | 10-scf00389 | 10 |
| AX-158240802 | 20 | 54.018 | KV452979.1 | 5710576 | 10-scf00389 | 10 |
| AX-158240803 | 20 | 54.018 | KV452979.1 | 5711607 | 10-scf00389 | 10 |
| AX-158240807 | 20 | 54.018 | KV452979.1 | 5714064 | 10-scf00389 | 10 |
| AX-158240809 | 20 | 54.018 | KV452979.1 | 5716861 | 10-scf00389 | 10 |
| AX-158240810 | 20 | 54.018 | KV452979.1 | 5717619 | 10-scf00389 | 10 |
| AX-158240811 | 20 | 54.018 | KV452979.1 | 5718465 | 10-scf00389 | 10 |
| AX-158240812 | 20 | 54.018 | KV452979.1 | 5719206 | 10-scf00389 | 10 |
| AX-158240813 | 20 | 54.018 | KV452979.1 | 5719995 | 10-scf00389 | 10 |
| AX-158240814 | 20 | 54.018 | KV452979.1 | 5720930 | 10-scf00389 | 10 |

|              |    |        |            |         |             |    |
|--------------|----|--------|------------|---------|-------------|----|
| AX-158240815 | 20 | 54.018 | KV452979.1 | 5721484 | 10-scf00389 | 10 |
| AX-158240817 | 20 | 54.018 | KV452979.1 | 5723899 | 10-scf00389 | 10 |
| AX-158240818 | 20 | 54.018 | KV452979.1 | 5724433 | 10-scf00389 | 10 |
| AX-158240821 | 20 | 54.018 | KV452979.1 | 5726635 | 10-scf00389 | 10 |
| AX-158240822 | 20 | 54.018 | KV452979.1 | 5726994 | 10-scf00389 | 10 |
| AX-158415509 | 20 | 54.018 | KV452979.1 | 5727440 | 10-scf00389 | 10 |
| AX-158240823 | 20 | 54.018 | KV452979.1 | 5727520 | 10-scf00389 | 10 |
| AX-158240824 | 20 | 54.018 | KV452979.1 | 5729069 | 10-scf00389 | 10 |
| AX-157744794 | 20 | 54.018 | KV452979.1 | 5729579 | 10-scf00389 | 10 |
| AX-158240828 | 20 | 54.018 | KV452979.1 | 5732312 | 10-scf00389 | 10 |
| AX-158240829 | 20 | 54.018 | KV452979.1 | 5733171 | 10-scf00389 | 10 |
| AX-158240830 | 20 | 54.018 | KV452979.1 | 5734389 | 10-scf00389 | 10 |
| AX-158240831 | 20 | 54.018 | KV452979.1 | 5734908 | 10-scf00389 | 10 |
| AX-158240832 | 20 | 54.018 | KV452979.1 | 5735859 | 10-scf00389 | 10 |
| AX-158240833 | 20 | 54.018 | KV452979.1 | 5736327 | 10-scf00389 | 10 |
| AX-158240834 | 20 | 54.018 | KV452979.1 | 5736787 | 10-scf00389 | 10 |
| AX-158240835 | 20 | 54.018 | KV452979.1 | 5737943 | 10-scf00389 | 10 |
| AX-158240836 | 20 | 54.018 | KV452979.1 | 5738067 | 10-scf00389 | 10 |
| AX-158240837 | 20 | 54.018 | KV452979.1 | 5738580 | 10-scf00389 | 10 |
| AX-158240838 | 20 | 54.018 | KV452979.1 | 5739785 | 10-scf00389 | 10 |
| AX-158240839 | 20 | 54.018 | KV452979.1 | 5741447 | 10-scf00389 | 10 |
| AX-158240840 | 20 | 54.018 | KV452979.1 | 5742516 | 10-scf00389 | 10 |
| AX-158415510 | 20 | 54.018 | KV452979.1 | 5744200 | 10-scf00389 | 10 |
| AX-158240842 | 20 | 54.018 | KV452979.1 | 5744750 | 10-scf00389 | 10 |
| AX-158240845 | 20 | 54.018 | KV452979.1 | 5746208 | 10-scf00389 | 10 |
| AX-158394255 | 20 | 54.018 | KV452979.1 | 5748747 | 10-scf00389 | 10 |
| AX-158240848 | 20 | 54.018 | KV452979.1 | 5750183 | 10-scf00389 | 10 |
| AX-158240850 | 20 | 54.018 | KV452979.1 | 5751899 | 10-scf00389 | 10 |
| AX-158240851 | 20 | 54.018 | KV452979.1 | 5753626 | 10-scf00389 | 10 |
| AX-158240852 | 20 | 54.018 | KV452979.1 | 5754631 | 10-scf00389 | 10 |
| AX-158240853 | 20 | 54.018 | KV452979.1 | 5755249 | 10-scf00389 | 10 |
| AX-158240855 | 20 | 54.018 | KV452979.1 | 5756134 | 10-scf00389 | 10 |
| AX-158240856 | 20 | 54.018 | KV452979.1 | 5757001 | 10-scf00389 | 10 |
| AX-158240858 | 20 | 54.018 | KV452979.1 | 5758052 | 10-scf00389 | 10 |
| AX-158240860 | 20 | 54.018 | KV452979.1 | 5759347 | 10-scf00389 | 10 |
| AX-157841164 | 20 | 54.018 | KV452979.1 | 5760950 | 10-scf00389 | 10 |
| AX-158240862 | 20 | 54.018 | KV452979.1 | 5761163 | 10-scf00389 | 10 |
| AX-157841165 | 20 | 54.018 | KV452979.1 | 5762489 | 10-scf00389 | 10 |
| AX-158240863 | 20 | 54.018 | KV452979.1 | 5762939 | 10-scf00389 | 10 |
| AX-158240864 | 20 | 54.018 | KV452979.1 | 5764594 | 10-scf00389 | 10 |
| AX-158240865 | 20 | 54.018 | KV452979.1 | 5765095 | 10-scf00389 | 10 |
| AX-158240867 | 20 | 54.018 | KV452979.1 | 5767080 | 10-scf00389 | 10 |
| AX-157696534 | 20 | 54.018 | KV452979.1 | 5767592 | 10-scf00389 | 10 |
| AX-158240868 | 20 | 54.018 | KV452979.1 | 5768285 | 10-scf00389 | 10 |
| AX-158240869 | 20 | 54.018 | KV452979.1 | 5768553 | 10-scf00389 | 10 |
| AX-158240870 | 20 | 54.018 | KV452979.1 | 5769228 | 10-scf00389 | 10 |
| AX-158240871 | 20 | 54.018 | KV452979.1 | 5770022 | 10-scf00389 | 10 |
| AX-158240872 | 20 | 54.018 | KV452979.1 | 5770332 | 10-scf00389 | 10 |
| AX-158240873 | 20 | 54.018 | KV452979.1 | 5770832 | 10-scf00389 | 10 |
| AX-157841166 | 20 | 54.018 | KV452979.1 | 5771257 | 10-scf00389 | 10 |
| AX-158240875 | 20 | 54.018 | KV452979.1 | 5773292 | 10-scf00389 | 10 |

|              |    |        |            |         |             |    |
|--------------|----|--------|------------|---------|-------------|----|
| AX-158240876 | 20 | 54.018 | KV452979.1 | 5773943 | 10-scf00389 | 10 |
| AX-158240877 | 20 | 54.018 | KV452979.1 | 5775547 | 10-scf00389 | 10 |
| AX-158240879 | 20 | 54.018 | KV452979.1 | 5778811 | 10-scf00389 | 10 |
| AX-158240882 | 20 | 54.018 | KV452979.1 | 5780407 | 10-scf00389 | 10 |
| AX-157841167 | 20 | 54.018 | KV452979.1 | 5780852 | 10-scf00389 | 10 |
| AX-158240883 | 20 | 54.018 | KV452979.1 | 5781490 | 10-scf00389 | 10 |
| AX-158240884 | 20 | 54.018 | KV452979.1 | 5782855 | 10-scf00389 | 10 |
| AX-158240885 | 20 | 54.018 | KV452979.1 | 5784218 | 10-scf00389 | 10 |
| AX-158240886 | 20 | 54.018 | KV452979.1 | 5785766 | 10-scf00389 | 10 |
| AX-158240887 | 20 | 54.018 | KV452979.1 | 5786529 | 10-scf00389 | 10 |
| AX-158240888 | 20 | 54.018 | KV452979.1 | 5786689 | 10-scf00389 | 10 |
| AX-158240893 | 20 | 54.018 | KV452979.1 | 5789976 | 10-scf00389 | 10 |
| AX-158240894 | 20 | 54.018 | KV452979.1 | 5790862 | 10-scf00389 | 10 |
| AX-158240895 | 20 | 54.018 | KV452979.1 | 5794161 | 10-scf00389 | 10 |
| AX-158240896 | 20 | 54.018 | KV452979.1 | 5794645 | 10-scf00389 | 10 |
| AX-158240897 | 20 | 54.018 | KV452979.1 | 5795099 | 10-scf00389 | 10 |
| AX-158240899 | 20 | 54.018 | KV452979.1 | 5796633 | 10-scf00389 | 10 |
| AX-158240900 | 20 | 54.018 | KV452979.1 | 5797056 | 10-scf00389 | 10 |
| AX-157841168 | 20 | 54.018 | KV452979.1 | 5797531 | 10-scf00389 | 10 |
| AX-158240901 | 20 | 54.018 | KV452979.1 | 5797684 | 10-scf00389 | 10 |
| AX-158240902 | 20 | 54.018 | KV452979.1 | 5798714 | 10-scf00389 | 10 |
| AX-158240905 | 20 | 54.018 | KV452979.1 | 5799901 | 10-scf00389 | 10 |
| AX-158240906 | 20 | 54.018 | KV452979.1 | 5800145 | 10-scf00389 | 10 |
| AX-158240907 | 20 | 54.018 | KV452979.1 | 5800535 | 10-scf00389 | 10 |
| AX-158240908 | 20 | 54.018 | KV452979.1 | 5801769 | 10-scf00389 | 10 |
| AX-158240909 | 20 | 54.018 | KV452979.1 | 5803923 | 10-scf00389 | 10 |
| AX-158240911 | 20 | 54.018 | KV452979.1 | 5805870 | 10-scf00389 | 10 |
| AX-158240912 | 20 | 54.018 | KV452979.1 | 5806764 | 10-scf00389 | 10 |
| AX-158240913 | 20 | 54.018 | KV452979.1 | 5809734 | 10-scf00389 | 10 |
| AX-158240914 | 20 | 54.018 | KV452979.1 | 5811983 | 10-scf00389 | 10 |
| AX-158240915 | 20 | 54.018 | KV452979.1 | 5812577 | 10-scf00389 | 10 |
| AX-158394256 | 20 | 54.018 | KV452979.1 | 5813133 | 10-scf00389 | 10 |
| AX-158240917 | 20 | 54.018 | KV452979.1 | 5814621 | 10-scf00389 | 10 |
| AX-158240918 | 20 | 54.018 | KV452979.1 | 5816654 | 10-scf00389 | 10 |
| AX-158240919 | 20 | 54.018 | KV452979.1 | 5819112 | 10-scf00389 | 10 |
| AX-158240920 | 20 | 54.018 | KV452979.1 | 5819781 | 10-scf00389 | 10 |
| AX-158240921 | 20 | 54.018 | KV452979.1 | 5821270 | 10-scf00389 | 10 |
| AX-158240922 | 20 | 54.018 | KV452979.1 | 5822852 | 10-scf00389 | 10 |
| AX-158240924 | 20 | 54.018 | KV452979.1 | 5823686 | 10-scf00389 | 10 |
| AX-158240925 | 20 | 54.018 | KV452979.1 | 5823988 | 10-scf00389 | 10 |
| AX-158240926 | 20 | 54.018 | KV452979.1 | 5824542 | 10-scf00389 | 10 |
| AX-158240927 | 20 | 54.018 | KV452979.1 | 5825950 | 10-scf00389 | 10 |
| AX-158240928 | 20 | 54.018 | KV452979.1 | 5826947 | 10-scf00389 | 10 |
| AX-158240929 | 20 | 54.018 | KV452979.1 | 5827483 | 10-scf00389 | 10 |
| AX-158240930 | 20 | 54.018 | KV452979.1 | 5828177 | 10-scf00389 | 10 |
| AX-158240932 | 20 | 54.018 | KV452979.1 | 5829932 | 10-scf00389 | 10 |
| AX-158240934 | 20 | 54.018 | KV452979.1 | 5837213 | 10-scf00389 | 10 |
| AX-158240935 | 20 | 54.018 | KV452979.1 | 5837674 | 10-scf00389 | 10 |
| AX-158240936 | 20 | 54.018 | KV452979.1 | 5840260 | 10-scf00389 | 10 |
| AX-158240937 | 20 | 54.018 | KV452979.1 | 5841091 | 10-scf00389 | 10 |
| AX-158240938 | 20 | 54.018 | KV452979.1 | 5841343 | 10-scf00389 | 10 |



|              |    |        |            |         |             |    |
|--------------|----|--------|------------|---------|-------------|----|
| AX-158240939 | 20 | 54.018 | KV452979.1 | 5841582 | 10-scf00389 | 10 |
| AX-158240940 | 20 | 54.018 | KV452979.1 | 5842358 | 10-scf00389 | 10 |
| AX-158240941 | 20 | 54.018 | KV452979.1 | 5844363 | 10-scf00389 | 10 |
| AX-157723226 | 20 | 54.018 | KV452979.1 | 5844792 | 10-scf00389 | 10 |
| AX-158240942 | 20 | 54.018 | KV452979.1 | 5844884 | 10-scf00389 | 10 |
| AX-158240943 | 20 | 54.018 | KV452979.1 | 5845537 | 10-scf00389 | 10 |
| AX-158240945 | 20 | 54.018 | KV452979.1 | 5847170 | 10-scf00389 | 10 |
| AX-158240946 | 20 | 54.018 | KV452979.1 | 5847580 | 10-scf00389 | 10 |
| AX-158240947 | 20 | 54.018 | KV452979.1 | 5848056 | 10-scf00389 | 10 |
| AX-158240950 | 20 | 54.018 | KV452979.1 | 5851572 | 10-scf00389 | 10 |
| AX-158240951 | 20 | 54.018 | KV452979.1 | 5852350 | 10-scf00389 | 10 |
| AX-158240952 | 20 | 54.018 | KV452979.1 | 5853076 | 10-scf00389 | 10 |
| AX-158240954 | 20 | 54.018 | KV452979.1 | 5854385 | 10-scf00389 | 10 |
| AX-158240955 | 20 | 54.018 | KV452979.1 | 5855221 | 10-scf00389 | 10 |
| AX-158240956 | 20 | 54.018 | KV452979.1 | 5856617 | 10-scf00389 | 10 |
| AX-158240957 | 20 | 54.018 | KV452979.1 | 5857387 | 10-scf00389 | 10 |
| AX-158240958 | 20 | 54.018 | KV452979.1 | 5859161 | 10-scf00389 | 10 |
| AX-158240959 | 20 | 54.018 | KV452979.1 | 5859813 | 10-scf00389 | 10 |
| AX-158240960 | 20 | 54.018 | KV452979.1 | 5860327 | 10-scf00389 | 10 |
| AX-158240962 | 20 | 54.018 | KV452979.1 | 5861548 | 10-scf00389 | 10 |
| AX-157841169 | 20 | 54.018 | KV452979.1 | 5861762 | 10-scf00389 | 10 |
| AX-157841170 | 20 | 54.018 | KV452979.1 | 5863200 | 10-scf00389 | 10 |
| AX-158240963 | 20 | 54.018 | KV452979.1 | 5863830 | 10-scf00389 | 10 |
| AX-158240964 | 20 | 54.018 | KV452979.1 | 5864804 | 10-scf00389 | 10 |
| AX-158240966 | 20 | 54.018 | KV452979.1 | 5865663 | 10-scf00389 | 10 |
| AX-157841171 | 20 | 54.018 | KV452979.1 | 5866618 | 10-scf00389 | 10 |
| AX-158240967 | 20 | 54.018 | KV452979.1 | 5866720 | 10-scf00389 | 10 |
| AX-158240968 | 20 | 54.018 | KV452979.1 | 5867047 | 10-scf00389 | 10 |
| AX-157841172 | 20 | 54.018 | KV452979.1 | 5867390 | 10-scf00389 | 10 |
| AX-158240970 | 20 | 54.018 | KV452979.1 | 5868502 | 10-scf00389 | 10 |
| AX-157841173 | 20 | 54.018 | KV452979.1 | 5868823 | 10-scf00389 | 10 |
| AX-158240971 | 20 | 54.018 | KV452979.1 | 5869567 | 10-scf00389 | 10 |
| AX-157710750 | 20 | 54.018 | KV452979.1 | 5872445 | 10-scf00389 | 10 |
| AX-158240973 | 20 | 54.018 | KV452979.1 | 5873124 | 10-scf00389 | 10 |
| AX-157696525 | 20 | 54.018 | KV452979.1 | 5873605 | 10-scf00389 | 10 |
| AX-157841174 | 20 | 54.018 | KV452979.1 | 5874093 | 10-scf00389 | 10 |
| AX-157841175 | 20 | 54.018 | KV452979.1 | 5874133 | 10-scf00389 | 10 |
| AX-158240974 | 20 | 54.018 | KV452979.1 | 5874237 | 10-scf00389 | 10 |
| AX-158240975 | 20 | 54.018 | KV452979.1 | 5874671 | 10-scf00389 | 10 |
| AX-158240976 | 20 | 54.018 | KV452979.1 | 5875116 | 10-scf00389 | 10 |
| AX-158240977 | 20 | 54.018 | KV452979.1 | 5878009 | 10-scf00389 | 10 |
| AX-158240978 | 20 | 54.018 | KV452979.1 | 5879170 | 10-scf00389 | 10 |
| AX-158240979 | 20 | 54.018 | KV452979.1 | 5880344 | 10-scf00389 | 10 |
| AX-158240980 | 20 | 54.018 | KV452979.1 | 5881063 | 10-scf00389 | 10 |
| AX-158240981 | 20 | 54.018 | KV452979.1 | 5882567 | 10-scf00389 | 10 |
| AX-158240983 | 20 | 54.018 | KV452979.1 | 5884823 | 10-scf00389 | 10 |
| AX-158240984 | 20 | 54.018 | KV452979.1 | 5885478 | 10-scf00389 | 10 |
| AX-158240985 | 20 | 54.018 | KV452979.1 | 5885671 | 10-scf00389 | 10 |
| AX-158240986 | 20 | 54.018 | KV452979.1 | 5886645 | 10-scf00389 | 10 |
| AX-158394257 | 20 | 54.018 | KV452979.1 | 5887220 | 10-scf00389 | 10 |
| AX-158240988 | 20 | 54.018 | KV452979.1 | 5887822 | 10-scf00389 | 10 |

|              |    |        |            |         |             |    |
|--------------|----|--------|------------|---------|-------------|----|
| AX-158240989 | 20 | 54.018 | KV452979.1 | 5888809 | 10-scf00389 | 10 |
| AX-158240990 | 20 | 54.018 | KV452979.1 | 5890338 | 10-scf00389 | 10 |
| AX-158240991 | 20 | 54.018 | KV452979.1 | 5890651 | 10-scf00389 | 10 |
| AX-158240992 | 20 | 54.018 | KV452979.1 | 5891389 | 10-scf00389 | 10 |
| AX-158240997 | 20 | 54.018 | KV452979.1 | 5895773 | 10-scf00389 | 10 |
| AX-158240998 | 20 | 54.018 | KV452979.1 | 5896800 | 10-scf00389 | 10 |
| AX-158240999 | 20 | 54.018 | KV452979.1 | 5897096 | 10-scf00389 | 10 |
| AX-158241000 | 20 | 54.018 | KV452979.1 | 5898142 | 10-scf00389 | 10 |
| AX-158241002 | 20 | 54.018 | KV452979.1 | 5899316 | 10-scf00389 | 10 |
| AX-158241004 | 20 | 54.018 | KV452979.1 | 5902278 | 10-scf00389 | 10 |
| AX-158241005 | 20 | 54.018 | KV452979.1 | 5902772 | 10-scf00389 | 10 |
| AX-158241006 | 20 | 54.018 | KV452979.1 | 5903236 | 10-scf00389 | 10 |
| AX-158241008 | 20 | 54.018 | KV452979.1 | 5905394 | 10-scf00389 | 10 |
| AX-158241010 | 20 | 54.018 | KV452979.1 | 5907039 | 10-scf00389 | 10 |
| AX-158241012 | 20 | 54.018 | KV452979.1 | 5908309 | 10-scf00389 | 10 |
| AX-158394258 | 20 | 54.018 | KV452979.1 | 5908636 | 10-scf00389 | 10 |
| AX-158241014 | 20 | 54.018 | KV452979.1 | 5909999 | 10-scf00389 | 10 |
| AX-158241015 | 20 | 54.018 | KV452979.1 | 5910391 | 10-scf00389 | 10 |
| AX-158241016 | 20 | 54.018 | KV452979.1 | 5911147 | 10-scf00389 | 10 |
| AX-158241018 | 20 | 54.018 | KV452979.1 | 5913270 | 10-scf00389 | 10 |
| AX-157841177 | 20 | 54.018 | KV452979.1 | 5917685 | 10-scf00389 | 10 |
| AX-157841178 | 20 | 54.018 | KV452979.1 | 5920418 | 10-scf00389 | 10 |
| AX-158241022 | 20 | 54.018 | KV452979.1 | 5921215 | 10-scf00389 | 10 |
| AX-158241023 | 20 | 54.018 | KV452979.1 | 5921729 | 10-scf00389 | 10 |
| AX-158241025 | 20 | 54.018 | KV452979.1 | 5923088 | 10-scf00389 | 10 |
| AX-158241026 | 20 | 54.018 | KV452979.1 | 5923486 | 10-scf00389 | 10 |
| AX-158241027 | 20 | 54.018 | KV452979.1 | 5924196 | 10-scf00389 | 10 |
| AX-158241028 | 20 | 54.018 | KV452979.1 | 5925062 | 10-scf00389 | 10 |
| AX-158241030 | 20 | 54.018 | KV452979.1 | 5927551 | 10-scf00389 | 10 |
| AX-158241031 | 20 | 54.018 | KV452979.1 | 5928622 | 10-scf00389 | 10 |
| AX-157841179 | 20 | 54.018 | KV452979.1 | 5929996 | 10-scf00389 | 10 |
| AX-157841182 | 20 | 54.018 | KV452979.1 | 5938240 | 10-scf00389 | 10 |
| AX-158241036 | 20 | 54.018 | KV452979.1 | 5939431 | 10-scf00389 | 10 |
| AX-157727176 | 20 | 54.018 | KV452979.1 | 5941101 | 10-scf00389 | 10 |
| AX-157841183 | 20 | 54.018 | KV452979.1 | 5942073 | 10-scf00389 | 10 |
| AX-158241038 | 20 | 54.018 | KV452979.1 | 5943873 | 10-scf00389 | 10 |
| AX-158241039 | 20 | 54.018 | KV452979.1 | 5944474 | 10-scf00389 | 10 |
| AX-158241040 | 20 | 54.018 | KV452979.1 | 5946223 | 10-scf00389 | 10 |
| AX-158241041 | 20 | 54.018 | KV452979.1 | 5946555 | 10-scf00389 | 10 |
| AX-158241042 | 20 | 54.018 | KV452979.1 | 5948641 | 10-scf00389 | 10 |
| AX-157872600 | 20 | 54.018 | KV452979.1 | 5949070 | 10-scf00389 | 10 |
| AX-158241043 | 20 | 54.018 | KV452979.1 | 5949378 | 10-scf00389 | 10 |
| AX-158241044 | 20 | 54.018 | KV452979.1 | 5951990 | 10-scf00389 | 10 |
| AX-158241045 | 20 | 54.018 | KV452979.1 | 5952047 | 10-scf00389 | 10 |
| AX-158241048 | 20 | 54.018 | KV452979.1 | 5953808 | 10-scf00389 | 10 |
| AX-158241049 | 20 | 54.018 | KV452979.1 | 5954588 | 10-scf00389 | 10 |
| AX-158241050 | 20 | 54.018 | KV452979.1 | 5955358 | 10-scf00389 | 10 |
| AX-157872601 | 20 | 54.018 | KV452979.1 | 5955572 | 10-scf00389 | 10 |
| AX-158241052 | 20 | 54.018 | KV452979.1 | 5959105 | 10-scf00389 | 10 |
| AX-158241054 | 20 | 54.018 | KV452979.1 | 5962084 | 10-scf00389 | 10 |
| AX-158241055 | 20 | 54.018 | KV452979.1 | 5962427 | 10-scf00389 | 10 |

|              |    |        |            |         |             |    |
|--------------|----|--------|------------|---------|-------------|----|
| AX-157872602 | 20 | 54.018 | KV452979.1 | 5964210 | 10-scf00389 | 10 |
| AX-158241057 | 20 | 54.018 | KV452979.1 | 5964595 | 10-scf00389 | 10 |
| AX-158241059 | 20 | 54.018 | KV452979.1 | 5965683 | 10-scf00389 | 10 |
| AX-157841186 | 20 | 54.018 | KV452979.1 | 5966090 | 10-scf00389 | 10 |
| AX-158241061 | 20 | 54.018 | KV452979.1 | 5970064 | 10-scf00389 | 10 |
| AX-158241066 | 20 | 54.018 | KV452979.1 | 5975902 | 10-scf00389 | 10 |
| AX-158241067 | 20 | 54.018 | KV452979.1 | 5976673 | 10-scf00389 | 10 |
| AX-158415517 | 20 | 54.018 | KV452979.1 | 5978790 | 10-scf00389 | 10 |
| AX-157707601 | 20 | 54.018 | KV452979.1 | 5980359 | 10-scf00389 | 10 |
| AX-157863798 | 20 | 54.018 | KV452979.1 | 5983093 | 10-scf00389 | 10 |
| AX-158241068 | 20 | 54.018 | KV452979.1 | 5984404 | 10-scf00389 | 10 |
| AX-158241070 | 20 | 54.018 | KV452979.1 | 5986491 | 10-scf00389 | 10 |
| AX-158241071 | 20 | 54.018 | KV452979.1 | 5987112 | 10-scf00389 | 10 |
| AX-158241072 | 20 | 54.018 | KV452979.1 | 5987352 | 10-scf00389 | 10 |
| AX-158241073 | 20 | 54.018 | KV452979.1 | 5987749 | 10-scf00389 | 10 |
| AX-158241074 | 20 | 54.018 | KV452979.1 | 5988017 | 10-scf00389 | 10 |
| AX-158241075 | 20 | 54.018 | KV452979.1 | 5988569 | 10-scf00389 | 10 |
| AX-158241076 | 20 | 54.018 | KV452979.1 | 5989001 | 10-scf00389 | 10 |
| AX-158241077 | 20 | 54.018 | KV452979.1 | 5989515 | 10-scf00389 | 10 |
| AX-158241079 | 20 | 54.018 | KV452979.1 | 5990832 | 10-scf00389 | 10 |
| AX-157872603 | 20 | 54.018 | KV452979.1 | 5991077 | 10-scf00389 | 10 |
| AX-158241080 | 20 | 54.018 | KV452979.1 | 5991435 | 10-scf00389 | 10 |
| AX-158241081 | 20 | 54.018 | KV452979.1 | 5991727 | 10-scf00389 | 10 |
| AX-158241082 | 20 | 54.018 | KV452979.1 | 5991939 | 10-scf00389 | 10 |
| AX-158241083 | 20 | 54.018 | KV452979.1 | 5992183 | 10-scf00389 | 10 |
| AX-158241085 | 20 | 54.018 | KV452979.1 | 5993199 | 10-scf00389 | 10 |
| AX-158241086 | 20 | 54.018 | KV452979.1 | 5994238 | 10-scf00389 | 10 |
| AX-158241087 | 20 | 54.018 | KV452979.1 | 5994552 | 10-scf00389 | 10 |
| AX-158241088 | 20 | 54.018 | KV452979.1 | 5994941 | 10-scf00389 | 10 |
| AX-158241089 | 20 | 54.018 | KV452979.1 | 5997900 | 10-scf00389 | 10 |
| AX-158241090 | 20 | 54.018 | KV452979.1 | 5998436 | 10-scf00389 | 10 |
| AX-158241091 | 20 | 54.018 | KV452979.1 | 5999084 | 10-scf00389 | 10 |
| AX-158241092 | 20 | 54.018 | KV452979.1 | 5999372 | 10-scf00389 | 10 |
| AX-158241093 | 20 | 54.018 | KV452979.1 | 6000260 | 10-scf00389 | 10 |
| AX-158241094 | 20 | 54.018 | KV452979.1 | 6000415 | 10-scf00389 | 10 |
| AX-158241095 | 20 | 54.018 | KV452979.1 | 6001108 | 10-scf00389 | 10 |
| AX-158241096 | 20 | 54.018 | KV452979.1 | 6001836 | 10-scf00389 | 10 |
| AX-158241097 | 20 | 54.018 | KV452979.1 | 6002234 | 10-scf00389 | 10 |
| AX-158241098 | 20 | 54.018 | KV452979.1 | 6002499 | 10-scf00389 | 10 |
| AX-158241099 | 20 | 54.018 | KV452979.1 | 6003122 | 10-scf00389 | 10 |
| AX-158241100 | 20 | 54.018 | KV452979.1 | 6003359 | 10-scf00389 | 10 |
| AX-158241101 | 20 | 54.018 | KV452979.1 | 6004461 | 10-scf00389 | 10 |
| AX-158241102 | 20 | 54.018 | KV452979.1 | 6004923 | 10-scf00389 | 10 |
| AX-158241103 | 20 | 54.018 | KV452979.1 | 6005683 | 10-scf00389 | 10 |
| AX-158241104 | 20 | 54.018 | KV452979.1 | 6006396 | 10-scf00389 | 10 |
| AX-158241105 | 20 | 54.018 | KV452979.1 | 6006497 | 10-scf00389 | 10 |
| AX-158241107 | 20 | 54.018 | KV452979.1 | 6008013 | 10-scf00389 | 10 |
| AX-158241108 | 20 | 54.018 | KV452979.1 | 6008671 | 10-scf00389 | 10 |
| AX-158241109 | 20 | 54.018 | KV452979.1 | 6008898 | 10-scf00389 | 10 |
| AX-158241110 | 20 | 54.018 | KV452979.1 | 6009152 | 10-scf00389 | 10 |
| AX-158241111 | 20 | 54.018 | KV452979.1 | 6009465 | 10-scf00389 | 10 |

|              |    |        |            |         |             |    |
|--------------|----|--------|------------|---------|-------------|----|
| AX-158241112 | 20 | 54.018 | KV452979.1 | 6009809 | 10-scf00389 | 10 |
| AX-158241113 | 20 | 54.018 | KV452979.1 | 6011132 | 10-scf00389 | 10 |
| AX-158241115 | 20 | 54.018 | KV452979.1 | 6011650 | 10-scf00389 | 10 |
| AX-158241116 | 20 | 54.018 | KV452979.1 | 6012403 | 10-scf00389 | 10 |
| AX-158241117 | 20 | 54.018 | KV452979.1 | 6013130 | 10-scf00389 | 10 |
| AX-158241118 | 20 | 54.018 | KV452979.1 | 6014467 | 10-scf00389 | 10 |
| AX-157841189 | 20 | 54.018 | KV452979.1 | 6015782 | 10-scf00389 | 10 |
| AX-158241120 | 20 | 54.018 | KV452979.1 | 6017210 | 10-scf00389 | 10 |
| AX-157872604 | 20 | 54.018 | KV452979.1 | 6018699 | 10-scf00389 | 10 |
| AX-158241121 | 20 | 54.018 | KV452979.1 | 6022247 | 10-scf00389 | 10 |
| AX-158241122 | 20 | 54.018 | KV452979.1 | 6022641 | 10-scf00389 | 10 |
| AX-157872605 | 20 | 54.018 | KV452979.1 | 6024596 | 10-scf00389 | 10 |
| AX-158241123 | 20 | 54.018 | KV452979.1 | 6024860 | 10-scf00389 | 10 |
| AX-158241125 | 20 | 54.018 | KV452979.1 | 6025894 | 10-scf00389 | 10 |
| AX-158241126 | 20 | 54.018 | KV452979.1 | 6026261 | 10-scf00389 | 10 |
| AX-158241127 | 20 | 54.018 | KV452979.1 | 6026496 | 10-scf00389 | 10 |
| AX-158241128 | 20 | 54.018 | KV452979.1 | 6026841 | 10-scf00389 | 10 |
| AX-158241130 | 20 | 54.018 | KV452979.1 | 6028815 | 10-scf00389 | 10 |
| AX-158241131 | 20 | 54.018 | KV452979.1 | 6030122 | 10-scf00389 | 10 |
| AX-158394259 | 20 | 54.018 | KV452979.1 | 6033101 | 10-scf00389 | 10 |
| AX-157841191 | 20 | 54.018 | KV452979.1 | 6034766 | 10-scf00389 | 10 |
| AX-158241133 | 20 | 54.018 | KV452979.1 | 6034823 | 10-scf00389 | 10 |
| AX-158241134 | 20 | 54.018 | KV452979.1 | 6035241 | 10-scf00389 | 10 |
| AX-158241137 | 20 | 54.018 | KV452979.1 | 6038491 | 10-scf00389 | 10 |
| AX-157718460 | 20 | 54.018 | KV452979.1 | 6040211 | 10-scf00389 | 10 |
| AX-157841192 | 20 | 54.018 | KV452979.1 | 6041368 | 10-scf00389 | 10 |
| AX-158241140 | 20 | 54.018 | KV452979.1 | 6042786 | 10-scf00389 | 10 |
| AX-158241141 | 20 | 54.018 | KV452979.1 | 6044513 | 10-scf00389 | 10 |
| AX-158241144 | 20 | 54.018 | KV452979.1 | 6047318 | 10-scf00389 | 10 |
| AX-157841194 | 20 | 54.018 | KV452979.1 | 6048777 | 10-scf00389 | 10 |
| AX-158241145 | 20 | 54.018 | KV452979.1 | 6049457 | 10-scf00389 | 10 |
| AX-158241147 | 20 | 54.018 | KV452979.1 | 6050884 | 10-scf00389 | 10 |
| AX-157714549 | 20 | 54.018 | KV452979.1 | 6053252 | 10-scf00389 | 10 |
| AX-157841195 | 20 | 54.018 | KV452979.1 | 6054664 | 10-scf00389 | 10 |
| AX-157720848 | 20 | 54.018 | KV452979.1 | 6054948 | 10-scf00389 | 10 |
| AX-158241150 | 20 | 54.018 | KV452979.1 | 6055904 | 10-scf00389 | 10 |
| AX-158241151 | 20 | 54.018 | KV452979.1 | 6056740 | 10-scf00389 | 10 |
| AX-157841196 | 20 | 54.018 | KV452979.1 | 6056961 | 10-scf00389 | 10 |
| AX-158380975 | 20 | 54.018 | KV452979.1 | 6057030 | 10-scf00389 | 10 |
| AX-158241152 | 20 | 54.018 | KV452979.1 | 6057386 | 10-scf00389 | 10 |
| AX-158241153 | 20 | 54.018 | KV452979.1 | 6058099 | 10-scf00389 | 10 |
| AX-158241156 | 20 | 54.018 | KV452979.1 | 6061497 | 10-scf00389 | 10 |
| AX-157728344 | 20 | 54.018 | KV452979.1 | 6062366 | 10-scf00389 | 10 |
| AX-158241158 | 20 | 54.018 | KV452979.1 | 6064845 | 10-scf00389 | 10 |
| AX-158241159 | 20 | 54.018 | KV452979.1 | 6065284 | 10-scf00389 | 10 |
| AX-158241160 | 20 | 54.018 | KV452979.1 | 6065855 | 10-scf00389 | 10 |
| AX-158241161 | 20 | 54.018 | KV452979.1 | 6067426 | 10-scf00389 | 10 |
| AX-158241162 | 20 | 54.018 | KV452979.1 | 6070414 | 10-scf00389 | 10 |
| AX-158241163 | 20 | 54.018 | KV452979.1 | 6071025 | 10-scf00389 | 10 |
| AX-158241165 | 20 | 54.018 | KV452979.1 | 6073126 | 10-scf00389 | 10 |
| AX-158241166 | 20 | 54.018 | KV452979.1 | 6074164 | 10-scf00389 | 10 |

|              |    |        |            |         |             |    |
|--------------|----|--------|------------|---------|-------------|----|
| AX-158241167 | 20 | 54.018 | KV452979.1 | 6077917 | 10-scf00389 | 10 |
| AX-158241168 | 20 | 54.018 | KV452979.1 | 6078377 | 10-scf00389 | 10 |
| AX-158241170 | 20 | 54.018 | KV452979.1 | 6081237 | 10-scf00389 | 10 |
| AX-158241173 | 20 | 54.018 | KV452979.1 | 6082417 | 10-scf00389 | 10 |
| AX-157751799 | 20 | 54.018 | KV452979.1 | 6082901 | 10-scf00389 | 10 |
| AX-158241175 | 20 | 54.018 | KV452979.1 | 6083520 | 10-scf00389 | 10 |
| AX-158241176 | 20 | 54.018 | KV452979.1 | 6085495 | 10-scf00389 | 10 |
| AX-158241178 | 20 | 54.018 | KV452979.1 | 6086912 | 10-scf00389 | 10 |
| AX-158241179 | 20 | 54.018 | KV452979.1 | 6087125 | 10-scf00389 | 10 |
| AX-158241180 | 20 | 54.018 | KV452979.1 | 6087732 | 10-scf00389 | 10 |
| AX-158241181 | 20 | 54.018 | KV452979.1 | 6088327 | 10-scf00389 | 10 |
| AX-158241185 | 20 | 54.018 | KV452979.1 | 6093979 | 10-scf00389 | 10 |
| AX-158241186 | 20 | 54.018 | KV452979.1 | 6094506 | 10-scf00389 | 10 |
| AX-158241187 | 20 | 54.018 | KV452979.1 | 6095453 | 10-scf00389 | 10 |
| AX-158241188 | 20 | 54.018 | KV452979.1 | 6096243 | 10-scf00389 | 10 |
| AX-158241189 | 20 | 54.018 | KV452979.1 | 6096884 | 10-scf00389 | 10 |
| AX-157719843 | 20 | 54.018 | KV452979.1 | 6098008 | 10-scf00389 | 10 |
| AX-158241190 | 20 | 54.018 | KV452979.1 | 6098971 | 10-scf00389 | 10 |
| AX-158241192 | 20 | 54.018 | KV452979.1 | 6102559 | 10-scf00389 | 10 |
| AX-158241194 | 20 | 54.018 | KV452979.1 | 6104909 | 10-scf00389 | 10 |
| AX-158241196 | 20 | 54.018 | KV452979.1 | 6106511 | 10-scf00389 | 10 |
| AX-158241197 | 20 | 54.018 | KV452979.1 | 6107692 | 10-scf00389 | 10 |
| AX-158241198 | 20 | 54.018 | KV452979.1 | 6108229 | 10-scf00389 | 10 |
| AX-158241199 | 20 | 54.018 | KV452979.1 | 6109223 | 10-scf00389 | 10 |
| AX-158241200 | 20 | 54.018 | KV452979.1 | 6111158 | 10-scf00389 | 10 |
| AX-158241201 | 20 | 54.018 | KV452979.1 | 6112307 | 10-scf00389 | 10 |
| AX-158241202 | 20 | 54.018 | KV452979.1 | 6113985 | 10-scf00389 | 10 |
| AX-157841198 | 20 | 54.018 | KV452979.1 | 6116647 | 10-scf00389 | 10 |
| AX-157841201 | 20 | 54.018 | KV452979.1 | 6121241 | 10-scf00389 | 10 |
| AX-158241209 | 20 | 54.018 | KV452979.1 | 6123100 | 10-scf00389 | 10 |
| AX-158241211 | 20 | 54.018 | KV452979.1 | 6125998 | 10-scf00389 | 10 |
| AX-157841202 | 20 | 54.018 | KV452979.1 | 6127852 | 10-scf00389 | 10 |
| AX-158241215 | 20 | 54.018 | KV452979.1 | 6128799 | 10-scf00389 | 10 |
| AX-158241217 | 20 | 54.018 | KV452979.1 | 6131054 | 10-scf00389 | 10 |
| AX-158241218 | 20 | 54.018 | KV452979.1 | 6131306 | 10-scf00389 | 10 |
| AX-158241219 | 20 | 54.018 | KV452979.1 | 6131655 | 10-scf00389 | 10 |
| AX-157722123 | 20 | 54.018 | KV452979.1 | 6135571 | 10-scf00389 | 10 |
| AX-158241221 | 20 | 54.018 | KV452979.1 | 6136714 | 10-scf00389 | 10 |
| AX-158241222 | 20 | 54.018 | KV452979.1 | 6137808 | 10-scf00389 | 10 |
| AX-158394260 | 20 | 54.018 | KV452979.1 | 6138568 | 10-scf00389 | 10 |
| AX-157755968 | 20 | 54.018 | KV452979.1 | 6139179 | 10-scf00389 | 10 |
| AX-158241223 | 20 | 54.018 | KV452979.1 | 6139820 | 10-scf00389 | 10 |
| AX-157841203 | 20 | 54.018 | KV452979.1 | 6140973 | 10-scf00389 | 10 |
| AX-158241225 | 20 | 54.018 | KV452979.1 | 6141051 | 10-scf00389 | 10 |
| AX-158241226 | 20 | 54.018 | KV452979.1 | 6141606 | 10-scf00389 | 10 |
| AX-158241227 | 20 | 54.018 | KV452979.1 | 6142589 | 10-scf00389 | 10 |
| AX-158241230 | 20 | 54.018 | KV452979.1 | 6144232 | 10-scf00389 | 10 |
| AX-158241231 | 20 | 54.018 | KV452979.1 | 6144680 | 10-scf00389 | 10 |
| AX-157719446 | 20 | 54.018 | KV452979.1 | 6144992 | 10-scf00389 | 10 |
| AX-158241233 | 20 | 54.018 | KV452979.1 | 6146046 | 10-scf00389 | 10 |
| AX-158394261 | 20 | 54.018 | KV452979.1 | 6147906 | 10-scf00389 | 10 |

|              |    |        |            |         |             |    |
|--------------|----|--------|------------|---------|-------------|----|
| AX-157841204 | 20 | 54.018 | KV452979.1 | 6149207 | 10-scf00389 | 10 |
| AX-158241235 | 20 | 54.018 | KV452979.1 | 6150334 | 10-scf00389 | 10 |
| AX-158241237 | 20 | 54.018 | KV452979.1 | 6151459 | 10-scf00389 | 10 |
| AX-158241243 | 20 | 54.018 | KV452979.1 | 6157653 | 10-scf00389 | 10 |
| AX-157841207 | 20 | 54.018 | KV452979.1 | 6158013 | 10-scf00389 | 10 |
| AX-157841208 | 20 | 54.018 | KV452979.1 | 6158214 | 10-scf00389 | 10 |
| AX-158241246 | 20 | 54.018 | KV452979.1 | 6161206 | 10-scf00389 | 10 |
| AX-158241249 | 20 | 54.018 | KV452979.1 | 6162817 | 10-scf00389 | 10 |
| AX-157841209 | 20 | 54.018 | KV452979.1 | 6172614 | 10-scf00389 | 10 |
| AX-158241261 | 20 | 54.018 | KV452979.1 | 6174315 | 10-scf00389 | 10 |
| AX-158241262 | 20 | 54.018 | KV452979.1 | 6174634 | 10-scf00389 | 10 |
| AX-157841210 | 20 | 54.018 | KV452979.1 | 6175469 | 10-scf00389 | 10 |
| AX-157841211 | 20 | 54.018 | KV452979.1 | 6176023 | 10-scf00389 | 10 |
| AX-157841212 | 20 | 54.018 | KV452979.1 | 6176770 | 10-scf00389 | 10 |
| AX-158241264 | 20 | 54.018 | KV452979.1 | 6177427 | 10-scf00389 | 10 |
| AX-157841214 | 20 | 54.018 | KV452979.1 | 6177467 | 10-scf00389 | 10 |
| AX-158394262 | 20 | 54.018 | KV452979.1 | 6177641 | 10-scf00389 | 10 |
| AX-157841215 | 20 | 54.018 | KV452979.1 | 6179565 | 10-scf00389 | 10 |
| AX-158241267 | 20 | 54.018 | KV452979.1 | 6180843 | 10-scf00389 | 10 |
| AX-158241268 | 20 | 54.018 | KV452979.1 | 6181918 | 10-scf00389 | 10 |
| AX-158241269 | 20 | 54.018 | KV452979.1 | 6183139 | 10-scf00389 | 10 |
| AX-158241270 | 20 | 54.018 | KV452979.1 | 6183515 | 10-scf00389 | 10 |
| AX-157715658 | 20 | 54.018 | KV452979.1 | 6184756 | 10-scf00389 | 10 |
| AX-158241271 | 20 | 54.018 | KV452979.1 | 6184794 | 10-scf00389 | 10 |
| AX-157841216 | 20 | 54.018 | KV452979.1 | 6185289 | 10-scf00389 | 10 |
| AX-158241272 | 20 | 54.018 | KV452979.1 | 6185498 | 10-scf00389 | 10 |
| AX-158241274 | 20 | 54.018 | KV452979.1 | 6187322 | 10-scf00389 | 10 |
| AX-158241276 | 20 | 54.018 | KV452979.1 | 6188231 | 10-scf00389 | 10 |
| AX-158241277 | 20 | 54.018 | KV452979.1 | 6189601 | 10-scf00389 | 10 |
| AX-158241278 | 20 | 54.018 | KV452979.1 | 6190734 | 10-scf00389 | 10 |
| AX-157841218 | 20 | 54.018 | KV452979.1 | 6194326 | 10-scf00389 | 10 |
| AX-157841219 | 20 | 54.018 | KV452979.1 | 6196776 | 10-scf00389 | 10 |
| AX-158241282 | 20 | 54.018 | KV452979.1 | 6202534 | 10-scf00389 | 10 |
| AX-158241283 | 20 | 54.018 | KV452979.1 | 6202819 | 10-scf00389 | 10 |
| AX-157841221 | 20 | 54.018 | KV452979.1 | 6204246 | 10-scf00389 | 10 |
| AX-158241284 | 20 | 54.018 | KV452979.1 | 6204619 | 10-scf00389 | 10 |
| AX-158241285 | 20 | 54.018 | KV452979.1 | 6205429 | 10-scf00389 | 10 |
| AX-158241286 | 20 | 54.018 | KV452979.1 | 6206997 | 10-scf00389 | 10 |
| AX-158241287 | 20 | 54.018 | KV452979.1 | 6207825 | 10-scf00389 | 10 |
| AX-158241288 | 20 | 54.018 | KV452979.1 | 6208301 | 10-scf00389 | 10 |
| AX-158241289 | 20 | 54.018 | KV452979.1 | 6208915 | 10-scf00389 | 10 |
| AX-158241291 | 20 | 54.018 | KV452979.1 | 6210304 | 10-scf00389 | 10 |
| AX-158241292 | 20 | 54.018 | KV452979.1 | 6211689 | 10-scf00389 | 10 |
| AX-158241293 | 20 | 54.018 | KV452979.1 | 6212030 | 10-scf00389 | 10 |
| AX-158241294 | 20 | 54.018 | KV452979.1 | 6213825 | 10-scf00389 | 10 |
| AX-158241295 | 20 | 54.018 | KV452979.1 | 6215890 | 10-scf00389 | 10 |
| AX-158241297 | 20 | 54.018 | KV452979.1 | 6216675 | 10-scf00389 | 10 |
| AX-158241298 | 20 | 54.018 | KV452979.1 | 6217007 | 10-scf00389 | 10 |
| AX-157755904 | 20 | 54.018 | KV452979.1 | 6217111 | 10-scf00389 | 10 |
| AX-158241299 | 20 | 54.018 | KV452979.1 | 6217421 | 10-scf00389 | 10 |
| AX-158241300 | 20 | 54.018 | KV452979.1 | 6217623 | 10-scf00389 | 10 |

|              |    |        |            |         |             |    |
|--------------|----|--------|------------|---------|-------------|----|
| AX-158241301 | 20 | 54.018 | KV452979.1 | 6217979 | 10-scf00389 | 10 |
| AX-158241302 | 20 | 54.018 | KV452979.1 | 6219308 | 10-scf00389 | 10 |
| AX-158241303 | 20 | 54.018 | KV452979.1 | 6221435 | 10-scf00389 | 10 |
| AX-158241304 | 20 | 54.018 | KV452979.1 | 6222273 | 10-scf00389 | 10 |
| AX-158241305 | 20 | 54.018 | KV452979.1 | 6223122 | 10-scf00389 | 10 |
| AX-158241306 | 20 | 54.018 | KV452979.1 | 6224270 | 10-scf00389 | 10 |
| AX-158241307 | 20 | 54.018 | KV452979.1 | 6224942 | 10-scf00389 | 10 |
| AX-158241308 | 20 | 54.018 | KV452979.1 | 6225796 | 10-scf00389 | 10 |
| AX-157841223 | 20 | 54.018 | KV452979.1 | 6225852 | 10-scf00389 | 10 |
| AX-158241309 | 20 | 54.018 | KV452979.1 | 6227836 | 10-scf00389 | 10 |
| AX-158241310 | 20 | 54.018 | KV452979.1 | 6228649 | 10-scf00389 | 10 |
| AX-158241311 | 20 | 54.018 | KV452979.1 | 6229271 | 10-scf00389 | 10 |
| AX-158241312 | 20 | 54.018 | KV452979.1 | 6229673 | 10-scf00389 | 10 |
| AX-157841224 | 20 | 54.018 | KV452979.1 | 6235714 | 10-scf00389 | 10 |
| AX-158241316 | 20 | 54.018 | KV452979.1 | 6237113 | 10-scf00389 | 10 |
| AX-157714958 | 20 | 54.018 | KV452979.1 | 6239534 | 10-scf00389 | 10 |
| AX-158241318 | 20 | 54.018 | KV452979.1 | 6241058 | 10-scf00389 | 10 |
| AX-158241319 | 20 | 54.018 | KV452979.1 | 6241297 | 10-scf00389 | 10 |
| AX-158241320 | 20 | 54.018 | KV452979.1 | 6241739 | 10-scf00389 | 10 |
| AX-158241321 | 20 | 54.018 | KV452979.1 | 6242207 | 10-scf00389 | 10 |
| AX-158241322 | 20 | 54.018 | KV452979.1 | 6242441 | 10-scf00389 | 10 |
| AX-157710130 | 20 | 54.018 | KV452979.1 | 6244128 | 10-scf00389 | 10 |
| AX-158241324 | 20 | 54.018 | KV452979.1 | 6244934 | 10-scf00389 | 10 |
| AX-158241326 | 20 | 54.018 | KV452979.1 | 6246418 | 10-scf00389 | 10 |
| AX-158241327 | 20 | 54.018 | KV452979.1 | 6248229 | 10-scf00389 | 10 |
| AX-158241328 | 20 | 54.018 | KV452979.1 | 6249587 | 10-scf00389 | 10 |
| AX-158241330 | 20 | 54.018 | KV452979.1 | 6254238 | 10-scf00389 | 10 |
| AX-158241331 | 20 | 54.018 | KV452979.1 | 6254883 | 10-scf00389 | 10 |
| AX-158241333 | 20 | 54.018 | KV452979.1 | 6258839 | 10-scf00389 | 10 |
| AX-158241334 | 20 | 54.018 | KV452979.1 | 6259666 | 10-scf00389 | 10 |
| AX-158241335 | 20 | 54.018 | KV452979.1 | 6260030 | 10-scf00389 | 10 |
| AX-158241336 | 20 | 54.018 | KV452979.1 | 6260746 | 10-scf00389 | 10 |
| AX-158241337 | 20 | 54.018 | KV452979.1 | 6261548 | 10-scf00389 | 10 |
| AX-158241338 | 20 | 54.018 | KV452979.1 | 6262660 | 10-scf00389 | 10 |
| AX-158241339 | 20 | 54.018 | KV452979.1 | 6263308 | 10-scf00389 | 10 |
| AX-158241340 | 20 | 54.018 | KV452979.1 | 6263975 | 10-scf00389 | 10 |
| AX-158241341 | 20 | 54.018 | KV452979.1 | 6265100 | 10-scf00389 | 10 |
| AX-158241342 | 20 | 54.018 | KV452979.1 | 6266069 | 10-scf00389 | 10 |
| AX-158241344 | 20 | 54.018 | KV452979.1 | 6267464 | 10-scf00389 | 10 |
| AX-157841227 | 20 | 54.018 | KV452979.1 | 6268001 | 10-scf00389 | 10 |
| AX-158241345 | 20 | 54.018 | KV452979.1 | 6268657 | 10-scf00389 | 10 |
| AX-158241346 | 20 | 54.018 | KV452979.1 | 6269304 | 10-scf00389 | 10 |
| AX-158241347 | 20 | 54.018 | KV452979.1 | 6269849 | 10-scf00389 | 10 |
| AX-158241350 | 20 | 54.018 | KV452979.1 | 6270946 | 10-scf00389 | 10 |
| AX-158241352 | 20 | 54.018 | KV452979.1 | 6272727 | 10-scf00389 | 10 |
| AX-158241354 | 20 | 54.018 | KV452979.1 | 6273861 | 10-scf00389 | 10 |
| AX-158241355 | 20 | 54.018 | KV452979.1 | 6274201 | 10-scf00389 | 10 |
| AX-158241356 | 20 | 54.018 | KV452979.1 | 6275302 | 10-scf00389 | 10 |
| AX-157735495 | 20 | 54.018 | KV452979.1 | 6278912 | 10-scf00389 | 10 |
| AX-158241361 | 20 | 54.018 | KV452979.1 | 6282221 | 10-scf00389 | 10 |
| AX-157753167 | 20 | 54.018 | KV452979.1 | 6282696 | 10-scf00389 | 10 |

|              |    |        |            |         |             |    |
|--------------|----|--------|------------|---------|-------------|----|
| AX-158241365 | 20 | 54.018 | KV452979.1 | 6293237 | 10-scf00389 | 10 |
| AX-158241366 | 20 | 54.018 | KV452979.1 | 6294848 | 10-scf00389 | 10 |
| AX-158241367 | 20 | 54.018 | KV452979.1 | 6295922 | 10-scf00389 | 10 |
| AX-158415526 | 20 | 54.018 | KV452979.1 | 6297158 | 10-scf00389 | 10 |
| AX-158241370 | 20 | 54.018 | KV452979.1 | 6298172 | 10-scf00389 | 10 |
| AX-158241371 | 20 | 54.018 | KV452979.1 | 6298939 | 10-scf00389 | 10 |
| AX-158241372 | 20 | 54.018 | KV452979.1 | 6299784 | 10-scf00389 | 10 |
| AX-157841228 | 20 | 54.018 | KV452979.1 | 6300298 | 10-scf00389 | 10 |
| AX-158241373 | 20 | 54.018 | KV452979.1 | 6300723 | 10-scf00389 | 10 |
| AX-158241374 | 20 | 54.018 | KV452979.1 | 6301526 | 10-scf00389 | 10 |
| AX-158241376 | 20 | 54.018 | KV452979.1 | 6303002 | 10-scf00389 | 10 |
| AX-158241377 | 20 | 54.018 | KV452979.1 | 6304254 | 10-scf00389 | 10 |
| AX-158241379 | 20 | 54.018 | KV452979.1 | 6306522 | 10-scf00389 | 10 |
| AX-158241381 | 20 | 54.018 | KV452979.1 | 6309373 | 10-scf00389 | 10 |
| AX-158241382 | 20 | 54.018 | KV452979.1 | 6311044 | 10-scf00389 | 10 |
| AX-158241383 | 20 | 54.018 | KV452979.1 | 6311499 | 10-scf00389 | 10 |
| AX-158241384 | 20 | 54.018 | KV452979.1 | 6313331 | 10-scf00389 | 10 |
| AX-158241385 | 20 | 54.018 | KV452979.1 | 6315112 | 10-scf00389 | 10 |
| AX-158241386 | 20 | 54.018 | KV452979.1 | 6318047 | 10-scf00389 | 10 |
| AX-158241388 | 20 | 54.018 | KV452979.1 | 6318858 | 10-scf00389 | 10 |
| AX-158241389 | 20 | 54.018 | KV452979.1 | 6319212 | 10-scf00389 | 10 |
| AX-158241390 | 20 | 54.018 | KV452979.1 | 6319450 | 10-scf00389 | 10 |
| AX-158241391 | 20 | 54.018 | KV452979.1 | 6319949 | 10-scf00389 | 10 |
| AX-158241393 | 20 | 54.018 | KV452979.1 | 6322138 | 10-scf00389 | 10 |
| AX-158241394 | 20 | 54.018 | KV452979.1 | 6322486 | 10-scf00389 | 10 |
| AX-158241395 | 20 | 54.018 | KV452979.1 | 6322869 | 10-scf00389 | 10 |
| AX-158241396 | 20 | 54.018 | KV452979.1 | 6323385 | 10-scf00389 | 10 |
| AX-158241397 | 20 | 54.018 | KV452979.1 | 6324051 | 10-scf00389 | 10 |
| AX-158241398 | 20 | 54.018 | KV452979.1 | 6324696 | 10-scf00389 | 10 |
| AX-158241399 | 20 | 54.018 | KV452979.1 | 6326205 | 10-scf00389 | 10 |
| AX-158241400 | 20 | 54.018 | KV452979.1 | 6326911 | 10-scf00389 | 10 |
| AX-158241401 | 20 | 54.018 | KV452979.1 | 6327381 | 10-scf00389 | 10 |
| AX-158241402 | 20 | 54.018 | KV452979.1 | 6329110 | 10-scf00389 | 10 |
| AX-158241403 | 20 | 54.018 | KV452979.1 | 6329842 | 10-scf00389 | 10 |
| AX-158241404 | 20 | 54.018 | KV452979.1 | 6332719 | 10-scf00389 | 10 |
| AX-158241405 | 20 | 54.018 | KV452979.1 | 6333472 | 10-scf00389 | 10 |
| AX-158241406 | 20 | 54.018 | KV452979.1 | 6334244 | 10-scf00389 | 10 |
| AX-158241407 | 20 | 54.018 | KV452979.1 | 6334473 | 10-scf00389 | 10 |
| AX-158241408 | 20 | 54.018 | KV452979.1 | 6338462 | 10-scf00389 | 10 |
| AX-157841238 | 20 | 54.018 | KV452979.1 | 6379075 | 10-scf00389 | 10 |
| AX-158241441 | 20 | 54.018 | KV452979.1 | 6380625 | 10-scf00389 | 10 |
| AX-158241457 | 20 | 54.018 | KV452979.1 | 6399905 | 10-scf00389 | 10 |
| AX-158241477 | 20 | 54.018 | KV452979.1 | 6425094 | 10-scf00389 | 10 |
| AX-158241480 | 20 | 54.018 | KV452979.1 | 6430178 | 10-scf00389 | 10 |
| AX-158241481 | 20 | 54.018 | KV452979.1 | 6431609 | 10-scf00389 | 10 |
| AX-158241482 | 20 | 54.018 | KV452979.1 | 6432283 | 10-scf00389 | 10 |
| AX-158241483 | 20 | 54.018 | KV452979.1 | 6432798 | 10-scf00389 | 10 |
| AX-158241485 | 20 | 54.018 | KV452979.1 | 6435410 | 10-scf00389 | 10 |
| AX-158241486 | 20 | 54.018 | KV452979.1 | 6437204 | 10-scf00389 | 10 |
| AX-158241488 | 20 | 54.018 | KV452979.1 | 6440037 | 10-scf00389 | 10 |
| AX-158415537 | 20 | 54.018 | KV452979.1 | 6443212 | 10-scf00389 | 10 |



|              |    |        |            |         |             |    |
|--------------|----|--------|------------|---------|-------------|----|
| AX-158241495 | 20 | 54.018 | KV452979.1 | 6456154 | 10-scf00389 | 10 |
| AX-158241518 | 20 | 54.018 | KV452979.1 | 6482968 | 10-scf00389 | 10 |
| AX-158241519 | 20 | 54.018 | KV452979.1 | 6483523 | 10-scf00389 | 10 |
| AX-157887534 | 20 | 54.018 | KV452979.1 | 6496848 | 10-scf00389 | 10 |
| AX-158241535 | 20 | 54.018 | KV452979.1 | 6506907 | 10-scf00389 | 10 |
| AX-158241536 | 20 | 54.018 | KV452979.1 | 6507896 | 10-scf00389 | 10 |
| AX-158241537 | 20 | 54.018 | KV452979.1 | 6509522 | 10-scf00389 | 10 |
| AX-158241545 | 20 | 54.018 | KV452979.1 | 6515683 | 10-scf00389 | 10 |
| AX-157755817 | 20 | 54.018 | KV452979.1 | 6516657 | 10-scf00389 | 10 |
| AX-158241550 | 20 | 54.018 | KV452979.1 | 6523242 | 10-scf00389 | 10 |
| AX-157747630 | 20 | 54.018 | KV452979.1 | 6524536 | 10-scf00389 | 10 |
| AX-157841256 | 20 | 54.018 | KV452979.1 | 6534031 | 10-scf00389 | 10 |
| AX-158241590 | 20 | 54.018 | KV452979.1 | 6577507 | 10-scf00389 | 10 |
| AX-157710558 | 20 | 54.018 | KV452979.1 | 6578397 | 10-scf00389 | 10 |
| AX-158241613 | 20 | 54.018 | KV452979.1 | 6602246 | 10-scf00389 | 10 |
| AX-158241619 | 20 | 54.018 | KV452979.1 | 6612743 | 10-scf00389 | 10 |
| AX-158241623 | 20 | 54.018 | KV452979.1 | 6617342 | 10-scf00389 | 10 |
| AX-158241626 | 20 | 54.018 | KV452979.1 | 6619495 | 10-scf00389 | 10 |
| AX-158241648 | 20 | 54.018 | KV452979.1 | 6643777 | 10-scf00389 | 10 |
| AX-157841262 | 20 | 54.018 | KV452979.1 | 6661035 | 10-scf00389 | 10 |
| AX-158241701 | 20 | 54.018 | KV452979.1 | 6717801 | 10-scf00389 | 10 |
| AX-158241703 | 20 | 54.018 | KV452979.1 | 6720892 | 10-scf00389 | 10 |
| AX-158241745 | 20 | 54.018 | KV452979.1 | 6763676 | 10-scf00389 | 10 |
| AX-158241749 | 20 | 54.018 | KV452979.1 | 6766223 | 10-scf00389 | 10 |
| AX-158241791 | 20 | 54.018 | KV452979.1 | 6806690 | 10-scf00389 | 10 |
| AX-158415552 | 20 | 54.018 | KV452979.1 | 6808344 | 10-scf00389 | 10 |
| AX-158241792 | 20 | 54.018 | KV452979.1 | 6808613 | 10-scf00389 | 10 |
| AX-158241836 | 20 | 54.018 | KV452979.1 | 6858918 | 10-scf00389 | 10 |
| AX-158241837 | 20 | 54.018 | KV452979.1 | 6859872 | 10-scf00389 | 10 |
| AX-157723045 | 20 | 54.018 | KV452979.1 | 6875109 | 10-scf00389 | 10 |
| AX-158241853 | 20 | 54.018 | KV452979.1 | 6882597 | 10-scf00389 | 10 |
| AX-158241875 | 20 | 54.018 | KV452979.1 | 6906403 | 10-scf00389 | 10 |
| AX-158241908 | 20 | 54.018 | KV452979.1 | 6940297 | 10-scf00389 | 10 |
| AX-158415557 | 20 | 54.018 | KV452979.1 | 6941485 | 10-scf00389 | 10 |
| AX-157753437 | 20 | 54.018 | KV452979.1 | 6966604 | 10-scf00389 | 10 |
| AX-158241937 | 20 | 54.018 | KV452979.1 | 6973379 | 10-scf00389 | 10 |
| AX-158241947 | 20 | 54.018 | KV452979.1 | 6981892 | 10-scf00389 | 10 |
| AX-158241948 | 20 | 54.018 | KV452979.1 | 6982609 | 10-scf00389 | 10 |
| AX-158241953 | 20 | 54.018 | KV452979.1 | 6990366 | 10-scf00389 | 10 |
| AX-158380981 | 20 | 54.018 | KV452979.1 | 7009168 | 10-scf00389 | 10 |
| AX-158242018 | 20 | 54.018 | KV452979.1 | 7076562 | 10-scf00389 | 10 |
| AX-158386957 | 20 | 54.018 | KV452979.1 | 7077731 | 10-scf00389 | 10 |
| AX-158242046 | 20 | 54.018 | KV452979.1 | 7101050 | 10-scf00389 | 10 |
| AX-158242060 | 20 | 54.018 | KV452979.1 | 7111953 | 10-scf00389 | 10 |
| AX-158242091 | 20 | 54.018 | KV452979.1 | 7142202 | 10-scf00389 | 10 |
| AX-157887541 | 20 | 54.018 | KV452979.1 | 7154605 | 10-scf00389 | 10 |
| AX-157695017 | 20 | 54.018 | KV452979.1 | 7389353 | 10-scf00389 | 10 |
| AX-157689926 | 20 | 54.018 | KV452979.1 | 7470598 | 10-scf00389 | 10 |
| AX-157709364 | 20 | 54.018 | KV452979.1 | 7536192 | 10-scf00389 | 10 |
| AX-157702952 | 20 | 54.018 | KV452979.1 | 7756677 | 10-scf00389 | 10 |
| AX-157841484 | 20 | 54.018 | KV452980.1 | 51835   | 10-scf00391 | 10 |

|              |    |        |             |         |                  |    |
|--------------|----|--------|-------------|---------|------------------|----|
| AX-158242364 | 20 | 54.018 | KV452980.1  | 916704  | 10-scf00391      | 10 |
| AX-158242447 | 20 | 54.018 | KV452980.1  | 1067328 | 10-scf00391      | 10 |
| AX-158242448 | 20 | 54.018 | KV452980.1  | 1068709 | 10-scf00391      | 10 |
| AX-158242453 | 20 | 54.018 | KV452980.1  | 1075036 | 10-scf00391      | 10 |
| AX-158242480 | 20 | 54.018 | KV452980.1  | 1118417 | 10-scf00391      | 10 |
| AX-158242487 | 20 | 54.018 | KV452980.1  | 1129116 | 10-scf00391      | 10 |
| AX-158242489 | 20 | 54.018 | KV452980.1  | 1130304 | 10-scf00391      | 10 |
| AX-158242504 | 20 | 54.018 | KV452980.1  | 1148765 | 10-scf00391      | 10 |
| AX-158242530 | 20 | 54.018 | KV452980.1  | 1190217 | 10-scf00391      | 10 |
| AX-158242540 | 20 | 54.018 | KV452980.1  | 1199624 | 10-scf00391      | 10 |
| AX-158394282 | 20 | 54.018 | KV452980.1  | 1209338 | 10-scf00391      | 10 |
| AX-158242575 | 20 | 54.018 | KV452980.1  | 1254261 | 10-scf00391      | 10 |
| AX-158242723 | 20 | 54.018 | KV452980.1  | 1446800 | 10-scf00391      | 10 |
| AX-158242912 | 20 | 54.018 | KV452980.1  | 1682127 | 10-scf00391      | 10 |
| AX-157880101 | 20 | 54.018 | KV452980.1  | 1684487 | 10-scf00391      | 10 |
| AX-158415593 | 20 | 54.018 | KV452980.1  | 1855244 | 10-scf00391      | 10 |
| AX-158243092 | 20 | 54.018 | KV452980.1  | 1916289 | 10-scf00391      | 10 |
| AX-158244473 | 20 | 54.018 | KV452981.1  | 749013  | 10-scf00393      | 10 |
| AX-158244496 | 20 | 54.018 | KV452981.1  | 774525  | 10-scf00393      | 10 |
| AX-157748413 | 20 | 54.018 | KV452981.1  | 864392  | 10-scf00393      | 10 |
| AX-158244590 | 20 | 54.018 | KV452981.1  | 897939  | 10-scf00393      | 10 |
| AX-157887559 | 20 | 54.018 | KV452981.1  | 1128000 | 10-scf00393      | 10 |
| AX-157841604 | 20 | 54.018 | KV452981.1  | 1516280 | 10-scf00393      | 10 |
| AX-158415655 | 20 | 54.018 | KV452981.1  | 1539533 | 10-scf00393      | 10 |
| AX-157749309 | 20 | 54.018 | KV452981.1  | 1568313 | 10-scf00393      | 10 |
| AX-158394334 | 20 | 54.018 | KV452981.1  | 1579420 | 10-scf00393      | 10 |
| AX-158245140 | 20 | 54.018 | KV452981.1  | 1675127 | 10-scf00393      | 10 |
| AX-158245301 | 20 | 54.018 | KV452981.1  | 1862716 | 10-scf00393      | 10 |
| AX-157701945 | 20 | 54.018 | DX088733.1  | 481     | 10-ORI212 lctalt | UN |
| AX-157705076 | 20 | 54.018 | 3ML01028541 | 695     | scf04151_1       | UN |
| AX-158240657 | 20 | 54.045 | KV452979.1  | 5580508 | 10-scf00389      | 10 |
| AX-157872608 | 20 | 54.045 | KV452979.1  | 6340987 | 10-scf00389      | 10 |
| AX-158241409 | 20 | 54.045 | KV452979.1  | 6341480 | 10-scf00389      | 10 |
| AX-158241410 | 20 | 54.045 | KV452979.1  | 6342912 | 10-scf00389      | 10 |
| AX-157748642 | 20 | 54.045 | KV452980.1  | 895052  | 10-scf00391      | 10 |
| AX-158415528 | 20 | 54.064 | KV452979.1  | 6341535 | 10-scf00389      | 10 |
| AX-158410696 | 20 | 54.087 | KV452979.1  | 6341708 | 10-scf00389      | 10 |
| AX-158239966 | 20 | 54.127 | KV452979.1  | 4508139 | 10-scf00389      | 10 |
| AX-158240095 | 20 | 54.127 | KV452979.1  | 4777509 | 10-scf00389      | 10 |
| AX-157841125 | 20 | 54.127 | KV452979.1  | 5102585 | 10-scf00389      | 10 |
| AX-158240889 | 20 | 54.127 | KV452979.1  | 5788045 | 10-scf00389      | 10 |
| AX-157841193 | 20 | 54.127 | KV452979.1  | 6045086 | 10-scf00389      | 10 |
| AX-157722946 | 20 | 54.127 | KV452979.1  | 6185559 | 10-scf00389      | 10 |
| AX-157859682 | 20 | 54.127 | KV452979.1  | 6186409 | 10-scf00389      | 10 |
| AX-158241412 | 20 | 54.127 | KV452979.1  | 6345780 | 10-scf00389      | 10 |
| AX-158241413 | 20 | 54.127 | KV452979.1  | 6349394 | 10-scf00389      | 10 |
| AX-158241415 | 20 | 54.127 | KV452979.1  | 6350698 | 10-scf00389      | 10 |
| AX-158241416 | 20 | 54.127 | KV452979.1  | 6352030 | 10-scf00389      | 10 |
| AX-157859683 | 20 | 54.127 | KV452979.1  | 6353132 | 10-scf00389      | 10 |
| AX-158241417 | 20 | 54.127 | KV452979.1  | 6353387 | 10-scf00389      | 10 |
| AX-158241419 | 20 | 54.127 | KV452979.1  | 6355224 | 10-scf00389      | 10 |

|              |    |        |            |         |             |    |
|--------------|----|--------|------------|---------|-------------|----|
| AX-158241420 | 20 | 54.127 | KV452979.1 | 6357503 | 10-scf00389 | 10 |
| AX-158241427 | 20 | 54.127 | KV452979.1 | 6366645 | 10-scf00389 | 10 |
| AX-158241429 | 20 | 54.127 | KV452979.1 | 6368052 | 10-scf00389 | 10 |
| AX-158241430 | 20 | 54.127 | KV452979.1 | 6369268 | 10-scf00389 | 10 |
| AX-158241433 | 20 | 54.127 | KV452979.1 | 6372297 | 10-scf00389 | 10 |
| AX-157841231 | 20 | 54.127 | KV452979.1 | 6372545 | 10-scf00389 | 10 |
| AX-157841232 | 20 | 54.127 | KV452979.1 | 6373042 | 10-scf00389 | 10 |
| AX-158241434 | 20 | 54.127 | KV452979.1 | 6373409 | 10-scf00389 | 10 |
| AX-157872609 | 20 | 54.127 | KV452979.1 | 6376168 | 10-scf00389 | 10 |
| AX-157841233 | 20 | 54.127 | KV452979.1 | 6377036 | 10-scf00389 | 10 |
| AX-157841234 | 20 | 54.127 | KV452979.1 | 6377266 | 10-scf00389 | 10 |
| AX-157841235 | 20 | 54.127 | KV452979.1 | 6377564 | 10-scf00389 | 10 |
| AX-158241447 | 20 | 54.127 | KV452979.1 | 6389749 | 10-scf00389 | 10 |
| AX-158241448 | 20 | 54.127 | KV452979.1 | 6390221 | 10-scf00389 | 10 |
| AX-158241450 | 20 | 54.127 | KV452979.1 | 6392078 | 10-scf00389 | 10 |
| AX-158241451 | 20 | 54.127 | KV452979.1 | 6392616 | 10-scf00389 | 10 |
| AX-158241452 | 20 | 54.127 | KV452979.1 | 6394242 | 10-scf00389 | 10 |
| AX-158415530 | 20 | 54.127 | KV452979.1 | 6397281 | 10-scf00389 | 10 |
| AX-158241459 | 20 | 54.127 | KV452979.1 | 6401258 | 10-scf00389 | 10 |
| AX-157748134 | 20 | 54.127 | KV452979.1 | 6402351 | 10-scf00389 | 10 |
| AX-158241461 | 20 | 54.127 | KV452979.1 | 6405502 | 10-scf00389 | 10 |
| AX-157841240 | 20 | 54.127 | KV452979.1 | 6411841 | 10-scf00389 | 10 |
| AX-158241471 | 20 | 54.127 | KV452979.1 | 6416132 | 10-scf00389 | 10 |
| AX-158241472 | 20 | 54.127 | KV452979.1 | 6417104 | 10-scf00389 | 10 |
| AX-158241476 | 20 | 54.127 | KV452979.1 | 6421064 | 10-scf00389 | 10 |
| AX-158415533 | 20 | 54.127 | KV452979.1 | 6433163 | 10-scf00389 | 10 |
| AX-158241484 | 20 | 54.127 | KV452979.1 | 6434093 | 10-scf00389 | 10 |
| AX-158418938 | 20 | 54.127 | KV452979.1 | 6438754 | 10-scf00389 | 10 |
| AX-158241487 | 20 | 54.127 | KV452979.1 | 6439533 | 10-scf00389 | 10 |
| AX-158241520 | 20 | 54.127 | KV452979.1 | 6486325 | 10-scf00389 | 10 |
| AX-157841247 | 20 | 54.127 | KV452979.1 | 6491378 | 10-scf00389 | 10 |
| AX-157724832 | 20 | 54.127 | KV452979.1 | 6500229 | 10-scf00389 | 10 |
| AX-157859685 | 20 | 54.127 | KV452979.1 | 6503041 | 10-scf00389 | 10 |
| AX-158241620 | 20 | 54.127 | KV452979.1 | 6613421 | 10-scf00389 | 10 |
| AX-157726741 | 20 | 54.127 | KV452979.1 | 6616009 | 10-scf00389 | 10 |
| AX-158241630 | 20 | 54.127 | KV452979.1 | 6627374 | 10-scf00389 | 10 |
| AX-158394269 | 20 | 54.127 | KV452979.1 | 6631879 | 10-scf00389 | 10 |
| AX-158241637 | 20 | 54.127 | KV452979.1 | 6633663 | 10-scf00389 | 10 |
| AX-158241639 | 20 | 54.127 | KV452979.1 | 6635234 | 10-scf00389 | 10 |
| AX-158241640 | 20 | 54.127 | KV452979.1 | 6635693 | 10-scf00389 | 10 |
| AX-158241642 | 20 | 54.127 | KV452979.1 | 6637705 | 10-scf00389 | 10 |
| AX-158241645 | 20 | 54.127 | KV452979.1 | 6640885 | 10-scf00389 | 10 |
| AX-158241646 | 20 | 54.127 | KV452979.1 | 6641874 | 10-scf00389 | 10 |
| AX-158241647 | 20 | 54.127 | KV452979.1 | 6643046 | 10-scf00389 | 10 |
| AX-158241649 | 20 | 54.127 | KV452979.1 | 6644893 | 10-scf00389 | 10 |
| AX-158241653 | 20 | 54.127 | KV452979.1 | 6650673 | 10-scf00389 | 10 |
| AX-157841261 | 20 | 54.127 | KV452979.1 | 6659117 | 10-scf00389 | 10 |
| AX-158241660 | 20 | 54.127 | KV452979.1 | 6659203 | 10-scf00389 | 10 |
| AX-158241661 | 20 | 54.127 | KV452979.1 | 6662659 | 10-scf00389 | 10 |
| AX-157841263 | 20 | 54.127 | KV452979.1 | 6663188 | 10-scf00389 | 10 |
| AX-158241665 | 20 | 54.127 | KV452979.1 | 6669356 | 10-scf00389 | 10 |

|              |    |        |            |         |             |    |
|--------------|----|--------|------------|---------|-------------|----|
| AX-158241671 | 20 | 54.127 | KV452979.1 | 6675324 | 10-scf00389 | 10 |
| AX-158241672 | 20 | 54.127 | KV452979.1 | 6676032 | 10-scf00389 | 10 |
| AX-158241676 | 20 | 54.127 | KV452979.1 | 6681035 | 10-scf00389 | 10 |
| AX-158241677 | 20 | 54.127 | KV452979.1 | 6681696 | 10-scf00389 | 10 |
| AX-158241683 | 20 | 54.127 | KV452979.1 | 6691969 | 10-scf00389 | 10 |
| AX-158241684 | 20 | 54.127 | KV452979.1 | 6692155 | 10-scf00389 | 10 |
| AX-158241695 | 20 | 54.127 | KV452979.1 | 6704759 | 10-scf00389 | 10 |
| AX-157772751 | 20 | 54.127 | KV452979.1 | 6706801 | 10-scf00389 | 10 |
| AX-157708435 | 20 | 54.127 | KV452979.1 | 6707069 | 10-scf00389 | 10 |
| AX-158241697 | 20 | 54.127 | KV452979.1 | 6710266 | 10-scf00389 | 10 |
| AX-158241698 | 20 | 54.127 | KV452979.1 | 6710696 | 10-scf00389 | 10 |
| AX-158241706 | 20 | 54.127 | KV452979.1 | 6723120 | 10-scf00389 | 10 |
| AX-158241707 | 20 | 54.127 | KV452979.1 | 6724433 | 10-scf00389 | 10 |
| AX-158241712 | 20 | 54.127 | KV452979.1 | 6727863 | 10-scf00389 | 10 |
| AX-158241714 | 20 | 54.127 | KV452979.1 | 6729612 | 10-scf00389 | 10 |
| AX-158241720 | 20 | 54.127 | KV452979.1 | 6737525 | 10-scf00389 | 10 |
| AX-158241722 | 20 | 54.127 | KV452979.1 | 6738702 | 10-scf00389 | 10 |
| AX-158241725 | 20 | 54.127 | KV452979.1 | 6740865 | 10-scf00389 | 10 |
| AX-158241728 | 20 | 54.127 | KV452979.1 | 6744161 | 10-scf00389 | 10 |
| AX-158241730 | 20 | 54.127 | KV452979.1 | 6747494 | 10-scf00389 | 10 |
| AX-158241736 | 20 | 54.127 | KV452979.1 | 6752916 | 10-scf00389 | 10 |
| AX-157859687 | 20 | 54.127 | KV452979.1 | 6754521 | 10-scf00389 | 10 |
| AX-158241738 | 20 | 54.127 | KV452979.1 | 6755477 | 10-scf00389 | 10 |
| AX-158241741 | 20 | 54.127 | KV452979.1 | 6758208 | 10-scf00389 | 10 |
| AX-158241742 | 20 | 54.127 | KV452979.1 | 6759863 | 10-scf00389 | 10 |
| AX-158241744 | 20 | 54.127 | KV452979.1 | 6760923 | 10-scf00389 | 10 |
| AX-158415551 | 20 | 54.127 | KV452979.1 | 6761709 | 10-scf00389 | 10 |
| AX-158241747 | 20 | 54.127 | KV452979.1 | 6764487 | 10-scf00389 | 10 |
| AX-158241748 | 20 | 54.127 | KV452979.1 | 6765430 | 10-scf00389 | 10 |
| AX-158241750 | 20 | 54.127 | KV452979.1 | 6767366 | 10-scf00389 | 10 |
| AX-158241753 | 20 | 54.127 | KV452979.1 | 6768573 | 10-scf00389 | 10 |
| AX-158241758 | 20 | 54.127 | KV452979.1 | 6771664 | 10-scf00389 | 10 |
| AX-157716306 | 20 | 54.127 | KV452979.1 | 6777607 | 10-scf00389 | 10 |
| AX-158241773 | 20 | 54.127 | KV452979.1 | 6788573 | 10-scf00389 | 10 |
| AX-158241774 | 20 | 54.127 | KV452979.1 | 6789006 | 10-scf00389 | 10 |
| AX-158241777 | 20 | 54.127 | KV452979.1 | 6791229 | 10-scf00389 | 10 |
| AX-158241778 | 20 | 54.127 | KV452979.1 | 6792753 | 10-scf00389 | 10 |
| AX-158241783 | 20 | 54.127 | KV452979.1 | 6796588 | 10-scf00389 | 10 |
| AX-158241784 | 20 | 54.127 | KV452979.1 | 6797729 | 10-scf00389 | 10 |
| AX-157773916 | 20 | 54.127 | KV452979.1 | 6799595 | 10-scf00389 | 10 |
| AX-158241788 | 20 | 54.127 | KV452979.1 | 6805145 | 10-scf00389 | 10 |
| AX-157841269 | 20 | 54.127 | KV452979.1 | 6807833 | 10-scf00389 | 10 |
| AX-158241794 | 20 | 54.127 | KV452979.1 | 6811353 | 10-scf00389 | 10 |
| AX-157699858 | 20 | 54.127 | KV452979.1 | 6812397 | 10-scf00389 | 10 |
| AX-157841271 | 20 | 54.127 | KV452979.1 | 6815906 | 10-scf00389 | 10 |
| AX-158241803 | 20 | 54.127 | KV452979.1 | 6822797 | 10-scf00389 | 10 |
| AX-158241804 | 20 | 54.127 | KV452979.1 | 6823794 | 10-scf00389 | 10 |
| AX-158241809 | 20 | 54.127 | KV452979.1 | 6827584 | 10-scf00389 | 10 |
| AX-158241810 | 20 | 54.127 | KV452979.1 | 6827852 | 10-scf00389 | 10 |
| AX-157696593 | 20 | 54.127 | KV452979.1 | 6829439 | 10-scf00389 | 10 |
| AX-158241812 | 20 | 54.127 | KV452979.1 | 6830413 | 10-scf00389 | 10 |

|              |    |        |            |         |             |    |
|--------------|----|--------|------------|---------|-------------|----|
| AX-158241813 | 20 | 54.127 | KV452979.1 | 6833661 | 10-scf00389 | 10 |
| AX-158241814 | 20 | 54.127 | KV452979.1 | 6834642 | 10-scf00389 | 10 |
| AX-158415555 | 20 | 54.127 | KV452979.1 | 6835688 | 10-scf00389 | 10 |
| AX-158241817 | 20 | 54.127 | KV452979.1 | 6837811 | 10-scf00389 | 10 |
| AX-158241818 | 20 | 54.127 | KV452979.1 | 6838657 | 10-scf00389 | 10 |
| AX-158241821 | 20 | 54.127 | KV452979.1 | 6841078 | 10-scf00389 | 10 |
| AX-158241822 | 20 | 54.127 | KV452979.1 | 6841543 | 10-scf00389 | 10 |
| AX-158241823 | 20 | 54.127 | KV452979.1 | 6841972 | 10-scf00389 | 10 |
| AX-158241826 | 20 | 54.127 | KV452979.1 | 6844599 | 10-scf00389 | 10 |
| AX-157859689 | 20 | 54.127 | KV452979.1 | 6845806 | 10-scf00389 | 10 |
| AX-158241842 | 20 | 54.127 | KV452979.1 | 6864944 | 10-scf00389 | 10 |
| AX-158241869 | 20 | 54.127 | KV452979.1 | 6896750 | 10-scf00389 | 10 |
| AX-158241900 | 20 | 54.127 | KV452979.1 | 6929267 | 10-scf00389 | 10 |
| AX-158241904 | 20 | 54.127 | KV452979.1 | 6935725 | 10-scf00389 | 10 |
| AX-158241906 | 20 | 54.127 | KV452979.1 | 6937740 | 10-scf00389 | 10 |
| AX-158241925 | 20 | 54.127 | KV452979.1 | 6960725 | 10-scf00389 | 10 |
| AX-158241926 | 20 | 54.127 | KV452979.1 | 6962201 | 10-scf00389 | 10 |
| AX-158241927 | 20 | 54.127 | KV452979.1 | 6963005 | 10-scf00389 | 10 |
| AX-158241929 | 20 | 54.127 | KV452979.1 | 6966154 | 10-scf00389 | 10 |
| AX-158241930 | 20 | 54.127 | KV452979.1 | 6967011 | 10-scf00389 | 10 |
| AX-158241934 | 20 | 54.127 | KV452979.1 | 6969350 | 10-scf00389 | 10 |
| AX-158241936 | 20 | 54.127 | KV452979.1 | 6972852 | 10-scf00389 | 10 |
| AX-158241940 | 20 | 54.127 | KV452979.1 | 6976139 | 10-scf00389 | 10 |
| AX-158241941 | 20 | 54.127 | KV452979.1 | 6976545 | 10-scf00389 | 10 |
| AX-158241942 | 20 | 54.127 | KV452979.1 | 6977046 | 10-scf00389 | 10 |
| AX-158241944 | 20 | 54.127 | KV452979.1 | 6978726 | 10-scf00389 | 10 |
| AX-158241945 | 20 | 54.127 | KV452979.1 | 6979223 | 10-scf00389 | 10 |
| AX-158394272 | 20 | 54.127 | KV452979.1 | 6981405 | 10-scf00389 | 10 |
| AX-158241955 | 20 | 54.127 | KV452979.1 | 6991199 | 10-scf00389 | 10 |
| AX-158394273 | 20 | 54.127 | KV452979.1 | 6991642 | 10-scf00389 | 10 |
| AX-158241956 | 20 | 54.127 | KV452979.1 | 6992313 | 10-scf00389 | 10 |
| AX-158241957 | 20 | 54.127 | KV452979.1 | 6995186 | 10-scf00389 | 10 |
| AX-158241959 | 20 | 54.127 | KV452979.1 | 6996105 | 10-scf00389 | 10 |
| AX-158241961 | 20 | 54.127 | KV452979.1 | 6997516 | 10-scf00389 | 10 |
| AX-158241962 | 20 | 54.127 | KV452979.1 | 6998481 | 10-scf00389 | 10 |
| AX-158241964 | 20 | 54.127 | KV452979.1 | 7000312 | 10-scf00389 | 10 |
| AX-158394274 | 20 | 54.127 | KV452979.1 | 7001474 | 10-scf00389 | 10 |
| AX-158241968 | 20 | 54.127 | KV452979.1 | 7004968 | 10-scf00389 | 10 |
| AX-158241969 | 20 | 54.127 | KV452979.1 | 7005366 | 10-scf00389 | 10 |
| AX-158241971 | 20 | 54.127 | KV452979.1 | 7006854 | 10-scf00389 | 10 |
| AX-158241973 | 20 | 54.127 | KV452979.1 | 7008773 | 10-scf00389 | 10 |
| AX-158241974 | 20 | 54.127 | KV452979.1 | 7009306 | 10-scf00389 | 10 |
| AX-158241975 | 20 | 54.127 | KV452979.1 | 7010576 | 10-scf00389 | 10 |
| AX-158241979 | 20 | 54.127 | KV452979.1 | 7014670 | 10-scf00389 | 10 |
| AX-158241981 | 20 | 54.127 | KV452979.1 | 7016080 | 10-scf00389 | 10 |
| AX-158241982 | 20 | 54.127 | KV452979.1 | 7018508 | 10-scf00389 | 10 |
| AX-158241983 | 20 | 54.127 | KV452979.1 | 7019156 | 10-scf00389 | 10 |
| AX-158241985 | 20 | 54.127 | KV452979.1 | 7020703 | 10-scf00389 | 10 |
| AX-157841277 | 20 | 54.127 | KV452979.1 | 7021141 | 10-scf00389 | 10 |
| AX-158241988 | 20 | 54.127 | KV452979.1 | 7022709 | 10-scf00389 | 10 |
| AX-157841278 | 20 | 54.127 | KV452979.1 | 7022796 | 10-scf00389 | 10 |

|              |    |        |            |         |               |    |
|--------------|----|--------|------------|---------|---------------|----|
| AX-158241993 | 20 | 54.127 | KV452979.1 | 7034599 | 10-scf00389   | 10 |
| AX-158241995 | 20 | 54.127 | KV452979.1 | 7038581 | 10-scf00389   | 10 |
| AX-158241997 | 20 | 54.127 | KV452979.1 | 7042517 | 10-scf00389   | 10 |
| AX-158241998 | 20 | 54.127 | KV452979.1 | 7043408 | 10-scf00389   | 10 |
| AX-158241999 | 20 | 54.127 | KV452979.1 | 7043734 | 10-scf00389   | 10 |
| AX-158242001 | 20 | 54.127 | KV452979.1 | 7046189 | 10-scf00389   | 10 |
| AX-158242004 | 20 | 54.127 | KV452979.1 | 7054602 | 10-scf00389   | 10 |
| AX-157841282 | 20 | 54.127 | KV452979.1 | 7055071 | 10-scf00389   | 10 |
| AX-158242012 | 20 | 54.127 | KV452979.1 | 7071421 | 10-scf00389   | 10 |
| AX-158242013 | 20 | 54.127 | KV452979.1 | 7072168 | 10-scf00389   | 10 |
| AX-158242025 | 20 | 54.127 | KV452979.1 | 7080963 | 10-scf00389   | 10 |
| AX-158242032 | 20 | 54.127 | KV452979.1 | 7089113 | 10-scf00389   | 10 |
| AX-158242036 | 20 | 54.127 | KV452979.1 | 7092708 | 10-scf00389   | 10 |
| AX-158242037 | 20 | 54.127 | KV452979.1 | 7093420 | 10-scf00389   | 10 |
| AX-158242048 | 20 | 54.127 | KV452979.1 | 7103112 | 10-scf00389   | 10 |
| AX-158242052 | 20 | 54.127 | KV452979.1 | 7106663 | 10-scf00389   | 10 |
| AX-158242053 | 20 | 54.127 | KV452979.1 | 7107177 | 10-scf00389   | 10 |
| AX-158242058 | 20 | 54.127 | KV452979.1 | 7110418 | 10-scf00389   | 10 |
| AX-158242061 | 20 | 54.127 | KV452979.1 | 7112610 | 10-scf00389   | 10 |
| AX-158242063 | 20 | 54.127 | KV452979.1 | 7114728 | 10-scf00389   | 10 |
| AX-158242064 | 20 | 54.127 | KV452979.1 | 7115273 | 10-scf00389   | 10 |
| AX-157703368 | 20 | 54.127 | KV452979.1 | 7439723 | 10-scf00389   | 10 |
| AX-157703747 | 20 | 54.127 | DX100324.1 | 170     | ORI212 lctalu | UN |
| AX-158239129 | 20 | 54.236 | KV452979.1 | 3277499 | 10-scf00389   | 10 |
| AX-158239751 | 20 | 54.236 | KV452979.1 | 4207018 | 10-scf00389   | 10 |
| AX-158240447 | 20 | 54.236 | KV452979.1 | 5343483 | 10-scf00389   | 10 |
| AX-158240565 | 20 | 54.236 | KV452979.1 | 5479790 | 10-scf00389   | 10 |
| AX-158241444 | 20 | 54.236 | KV452979.1 | 6385034 | 10-scf00389   | 10 |
| AX-157841246 | 20 | 54.236 | KV452979.1 | 6491239 | 10-scf00389   | 10 |
| AX-158241529 | 20 | 54.236 | KV452979.1 | 6498080 | 10-scf00389   | 10 |
| AX-157841251 | 20 | 54.236 | KV452979.1 | 6512248 | 10-scf00389   | 10 |
| AX-157841255 | 20 | 54.236 | KV452979.1 | 6526634 | 10-scf00389   | 10 |
| AX-157714229 | 20 | 54.236 | KV452979.1 | 6533337 | 10-scf00389   | 10 |
| AX-158241581 | 20 | 54.236 | KV452979.1 | 6565147 | 10-scf00389   | 10 |
| AX-158241582 | 20 | 54.236 | KV452979.1 | 6567842 | 10-scf00389   | 10 |
| AX-157713623 | 20 | 54.236 | KV452979.1 | 6648404 | 10-scf00389   | 10 |
| AX-158241693 | 20 | 54.236 | KV452979.1 | 6702284 | 10-scf00389   | 10 |
| AX-158241705 | 20 | 54.236 | KV452979.1 | 6722768 | 10-scf00389   | 10 |
| AX-158241724 | 20 | 54.236 | KV452979.1 | 6740228 | 10-scf00389   | 10 |
| AX-158241754 | 20 | 54.236 | KV452979.1 | 6769384 | 10-scf00389   | 10 |
| AX-158241781 | 20 | 54.236 | KV452979.1 | 6794348 | 10-scf00389   | 10 |
| AX-158241793 | 20 | 54.236 | KV452979.1 | 6810176 | 10-scf00389   | 10 |
| AX-158241808 | 20 | 54.236 | KV452979.1 | 6827127 | 10-scf00389   | 10 |
| AX-158241839 | 20 | 54.236 | KV452979.1 | 6860987 | 10-scf00389   | 10 |
| AX-158241928 | 20 | 54.236 | KV452979.1 | 6965068 | 10-scf00389   | 10 |
| AX-158242009 | 20 | 54.236 | KV452979.1 | 7069168 | 10-scf00389   | 10 |
| AX-158242014 | 20 | 54.236 | KV452979.1 | 7072850 | 10-scf00389   | 10 |
| AX-158242024 | 20 | 54.236 | KV452979.1 | 7080260 | 10-scf00389   | 10 |
| AX-158242043 | 20 | 54.236 | KV452979.1 | 7098973 | 10-scf00389   | 10 |
| AX-158242066 | 20 | 54.236 | KV452979.1 | 7117050 | 10-scf00389   | 10 |
| AX-158242082 | 20 | 54.236 | KV452979.1 | 7131724 | 10-scf00389   | 10 |

|              |    |        |            |         |             |    |
|--------------|----|--------|------------|---------|-------------|----|
| AX-157841286 | 20 | 54.236 | KV452979.1 | 7131873 | 10-scf00389 | 10 |
| AX-158242099 | 20 | 54.236 | KV452979.1 | 7152076 | 10-scf00389 | 10 |
| AX-157696139 | 20 | 54.236 | KV452979.1 | 7422118 | 10-scf00389 | 10 |
| AX-157701031 | 20 | 54.236 | KV452979.1 | 7438727 | 10-scf00389 | 10 |
| AX-157703740 | 20 | 54.236 | KV452979.1 | 7440163 | 10-scf00389 | 10 |
| AX-157701650 | 20 | 54.236 | KV452979.1 | 7651481 | 10-scf00389 | 10 |
| AX-157701580 | 20 | 54.236 | KV452979.1 | 7850896 | 10-scf00389 | 10 |
| AX-158242481 | 20 | 54.236 | KV452980.1 | 1121174 | 10-scf00391 | 10 |
| AX-158242501 | 20 | 54.236 | KV452980.1 | 1143863 | 10-scf00391 | 10 |
| AX-158242536 | 20 | 54.236 | KV452980.1 | 1194966 | 10-scf00391 | 10 |
| AX-158386979 | 20 | 54.236 | KV452981.1 | 805977  | 10-scf00393 | 10 |
| AX-158241556 | 20 | 54.278 | KV452979.1 | 6535873 | 10-scf00389 | 10 |
| AX-158240287 | 20 | 54.314 | KV452979.1 | 5094782 | 10-scf00389 | 10 |
| AX-158240317 | 20 | 54.314 | KV452979.1 | 5156345 | 10-scf00389 | 10 |
| AX-157841143 | 20 | 54.314 | KV452979.1 | 5301897 | 10-scf00389 | 10 |
| AX-157841229 | 20 | 54.314 | KV452979.1 | 6352339 | 10-scf00389 | 10 |
| AX-158241456 | 20 | 54.314 | KV452979.1 | 6398688 | 10-scf00389 | 10 |
| AX-158241460 | 20 | 54.314 | KV452979.1 | 6404260 | 10-scf00389 | 10 |
| AX-158241462 | 20 | 54.314 | KV452979.1 | 6405736 | 10-scf00389 | 10 |
| AX-158241464 | 20 | 54.314 | KV452979.1 | 6409073 | 10-scf00389 | 10 |
| AX-158241465 | 20 | 54.314 | KV452979.1 | 6409940 | 10-scf00389 | 10 |
| AX-158241466 | 20 | 54.314 | KV452979.1 | 6411581 | 10-scf00389 | 10 |
| AX-158241467 | 20 | 54.314 | KV452979.1 | 6411954 | 10-scf00389 | 10 |
| AX-158241468 | 20 | 54.314 | KV452979.1 | 6412921 | 10-scf00389 | 10 |
| AX-158241470 | 20 | 54.314 | KV452979.1 | 6414819 | 10-scf00389 | 10 |
| AX-158241473 | 20 | 54.314 | KV452979.1 | 6418602 | 10-scf00389 | 10 |
| AX-157859684 | 20 | 54.314 | KV452979.1 | 6421544 | 10-scf00389 | 10 |
| AX-158415532 | 20 | 54.314 | KV452979.1 | 6422196 | 10-scf00389 | 10 |
| AX-157749405 | 20 | 54.314 | KV452979.1 | 6422872 | 10-scf00389 | 10 |
| AX-158241490 | 20 | 54.314 | KV452979.1 | 6446405 | 10-scf00389 | 10 |
| AX-158241496 | 20 | 54.314 | KV452979.1 | 6457626 | 10-scf00389 | 10 |
| AX-158241500 | 20 | 54.314 | KV452979.1 | 6462892 | 10-scf00389 | 10 |
| AX-158241503 | 20 | 54.314 | KV452979.1 | 6467091 | 10-scf00389 | 10 |
| AX-158241504 | 20 | 54.314 | KV452979.1 | 6470571 | 10-scf00389 | 10 |
| AX-158241511 | 20 | 54.314 | KV452979.1 | 6475432 | 10-scf00389 | 10 |
| AX-157841245 | 20 | 54.314 | KV452979.1 | 6475473 | 10-scf00389 | 10 |
| AX-158241512 | 20 | 54.314 | KV452979.1 | 6475846 | 10-scf00389 | 10 |
| AX-158241513 | 20 | 54.314 | KV452979.1 | 6476639 | 10-scf00389 | 10 |
| AX-158241514 | 20 | 54.314 | KV452979.1 | 6477123 | 10-scf00389 | 10 |
| AX-158241515 | 20 | 54.314 | KV452979.1 | 6479657 | 10-scf00389 | 10 |
| AX-158241521 | 20 | 54.314 | KV452979.1 | 6487569 | 10-scf00389 | 10 |
| AX-158241522 | 20 | 54.314 | KV452979.1 | 6488087 | 10-scf00389 | 10 |
| AX-158241523 | 20 | 54.314 | KV452979.1 | 6488568 | 10-scf00389 | 10 |
| AX-158241524 | 20 | 54.314 | KV452979.1 | 6491816 | 10-scf00389 | 10 |
| AX-157841248 | 20 | 54.314 | KV452979.1 | 6494039 | 10-scf00389 | 10 |
| AX-158241526 | 20 | 54.314 | KV452979.1 | 6495672 | 10-scf00389 | 10 |
| AX-158241528 | 20 | 54.314 | KV452979.1 | 6497406 | 10-scf00389 | 10 |
| AX-158241530 | 20 | 54.314 | KV452979.1 | 6499459 | 10-scf00389 | 10 |
| AX-158241534 | 20 | 54.314 | KV452979.1 | 6506556 | 10-scf00389 | 10 |
| AX-158241538 | 20 | 54.314 | KV452979.1 | 6511326 | 10-scf00389 | 10 |
| AX-158241539 | 20 | 54.314 | KV452979.1 | 6511710 | 10-scf00389 | 10 |

|              |    |        |            |         |             |    |
|--------------|----|--------|------------|---------|-------------|----|
| AX-158241547 | 20 | 54.314 | KV452979.1 | 6518258 | 10-scf00389 | 10 |
| AX-158241549 | 20 | 54.314 | KV452979.1 | 6521635 | 10-scf00389 | 10 |
| AX-158241553 | 20 | 54.314 | KV452979.1 | 6529289 | 10-scf00389 | 10 |
| AX-158241557 | 20 | 54.314 | KV452979.1 | 6536754 | 10-scf00389 | 10 |
| AX-158241558 | 20 | 54.314 | KV452979.1 | 6537333 | 10-scf00389 | 10 |
| AX-157841257 | 20 | 54.314 | KV452979.1 | 6539556 | 10-scf00389 | 10 |
| AX-158241564 | 20 | 54.314 | KV452979.1 | 6545856 | 10-scf00389 | 10 |
| AX-158241568 | 20 | 54.314 | KV452979.1 | 6549609 | 10-scf00389 | 10 |
| AX-157841258 | 20 | 54.314 | KV452979.1 | 6550698 | 10-scf00389 | 10 |
| AX-157841259 | 20 | 54.314 | KV452979.1 | 6554389 | 10-scf00389 | 10 |
| AX-158241571 | 20 | 54.314 | KV452979.1 | 6554796 | 10-scf00389 | 10 |
| AX-158241573 | 20 | 54.314 | KV452979.1 | 6556432 | 10-scf00389 | 10 |
| AX-158241574 | 20 | 54.314 | KV452979.1 | 6556981 | 10-scf00389 | 10 |
| AX-158241576 | 20 | 54.314 | KV452979.1 | 6561692 | 10-scf00389 | 10 |
| AX-158241577 | 20 | 54.314 | KV452979.1 | 6562298 | 10-scf00389 | 10 |
| AX-158241578 | 20 | 54.314 | KV452979.1 | 6562671 | 10-scf00389 | 10 |
| AX-158241579 | 20 | 54.314 | KV452979.1 | 6563680 | 10-scf00389 | 10 |
| AX-158241580 | 20 | 54.314 | KV452979.1 | 6564410 | 10-scf00389 | 10 |
| AX-158241583 | 20 | 54.314 | KV452979.1 | 6568582 | 10-scf00389 | 10 |
| AX-158241585 | 20 | 54.314 | KV452979.1 | 6571249 | 10-scf00389 | 10 |
| AX-158241586 | 20 | 54.314 | KV452979.1 | 6572579 | 10-scf00389 | 10 |
| AX-158241596 | 20 | 54.314 | KV452979.1 | 6584014 | 10-scf00389 | 10 |
| AX-158241597 | 20 | 54.314 | KV452979.1 | 6584623 | 10-scf00389 | 10 |
| AX-158241598 | 20 | 54.314 | KV452979.1 | 6587700 | 10-scf00389 | 10 |
| AX-158241641 | 20 | 54.314 | KV452979.1 | 6636389 | 10-scf00389 | 10 |
| AX-157695121 | 20 | 54.314 | KV452979.1 | 7634655 | 10-scf00389 | 10 |
| AX-157702262 | 20 | 54.314 | KV452979.1 | 7645246 | 10-scf00389 | 10 |
| AX-157702261 | 20 | 54.314 | KV452979.1 | 7645445 | 10-scf00389 | 10 |
| AX-158240409 | 20 | 54.346 | KV452979.1 | 5292390 | 10-scf00389 | 10 |
| AX-158240777 | 20 | 54.346 | KV452979.1 | 5683433 | 10-scf00389 | 10 |
| AX-158241498 | 20 | 54.346 | KV452979.1 | 6459367 | 10-scf00389 | 10 |
| AX-158241517 | 20 | 54.346 | KV452979.1 | 6482169 | 10-scf00389 | 10 |
| AX-157724964 | 20 | 54.346 | KV452979.1 | 6496200 | 10-scf00389 | 10 |
| AX-157841254 | 20 | 54.346 | KV452979.1 | 6525270 | 10-scf00389 | 10 |
| AX-158241560 | 20 | 54.346 | KV452979.1 | 6541484 | 10-scf00389 | 10 |
| AX-158241561 | 20 | 54.346 | KV452979.1 | 6543501 | 10-scf00389 | 10 |
| AX-157773537 | 20 | 54.346 | KV452979.1 | 6558548 | 10-scf00389 | 10 |
| AX-157887537 | 20 | 54.346 | KV452979.1 | 6629796 | 10-scf00389 | 10 |
| AX-158241634 | 20 | 54.346 | KV452979.1 | 6630682 | 10-scf00389 | 10 |
| AX-158241651 | 20 | 54.346 | KV452979.1 | 6646549 | 10-scf00389 | 10 |
| AX-158394270 | 20 | 54.346 | KV452979.1 | 6717721 | 10-scf00389 | 10 |
| AX-158241709 | 20 | 54.346 | KV452979.1 | 6725601 | 10-scf00389 | 10 |
| AX-158241715 | 20 | 54.346 | KV452979.1 | 6731736 | 10-scf00389 | 10 |
| AX-158241740 | 20 | 54.346 | KV452979.1 | 6757216 | 10-scf00389 | 10 |
| AX-158241757 | 20 | 54.346 | KV452979.1 | 6771267 | 10-scf00389 | 10 |
| AX-158241759 | 20 | 54.346 | KV452979.1 | 6772077 | 10-scf00389 | 10 |
| AX-158241789 | 20 | 54.346 | KV452979.1 | 6805887 | 10-scf00389 | 10 |
| AX-158241790 | 20 | 54.346 | KV452979.1 | 6806089 | 10-scf00389 | 10 |
| AX-157841268 | 20 | 54.346 | KV452979.1 | 6806418 | 10-scf00389 | 10 |
| AX-158241805 | 20 | 54.346 | KV452979.1 | 6825917 | 10-scf00389 | 10 |
| AX-158241824 | 20 | 54.346 | KV452979.1 | 6842434 | 10-scf00389 | 10 |



|              |    |        |             |         |             |    |
|--------------|----|--------|-------------|---------|-------------|----|
| AX-158241858 | 20 | 54.346 | KV452979.1  | 6888130 | 10-scf00389 | 10 |
| AX-157775662 | 20 | 54.346 | KV452979.1  | 6888903 | 10-scf00389 | 10 |
| AX-158241862 | 20 | 54.346 | KV452979.1  | 6890975 | 10-scf00389 | 10 |
| AX-158241865 | 20 | 54.346 | KV452979.1  | 6892717 | 10-scf00389 | 10 |
| AX-158241913 | 20 | 54.346 | KV452979.1  | 6946015 | 10-scf00389 | 10 |
| AX-157841279 | 20 | 54.346 | KV452979.1  | 7042464 | 10-scf00389 | 10 |
| AX-158242022 | 20 | 54.346 | KV452979.1  | 7079123 | 10-scf00389 | 10 |
| AX-157693327 | 20 | 54.675 | KV452979.1  | 7975920 | 10-scf00389 | 10 |
| AX-157696536 | 20 | 54.675 | KV452979.1  | 8052228 | 10-scf00389 | 10 |
| AX-157681265 | 20 | 54.675 | 3ML01031270 | 700     | scf06878_1  | UN |
| AX-157697061 | 20 | 55.239 | KV452979.1  | 8623428 | 10-scf00389 | 10 |
| AX-157701790 | 20 | 55.808 | KV452979.1  | 8704914 | 10-scf00389 | 10 |
| AX-157701247 | 20 | 57.059 | KV452979.1  | 8972728 | 10-scf00389 | 10 |
| AX-158243908 | 20 | 57.322 | KV452980.1  | 19242   | 10-scf00391 | 10 |
| AX-158243918 | 20 | 57.322 | KV452980.1  | 38830   | 10-scf00391 | 10 |
| AX-158243919 | 20 | 57.322 | KV452980.1  | 39285   | 10-scf00391 | 10 |
| AX-157841483 | 20 | 57.322 | KV452980.1  | 49799   | 10-scf00391 | 10 |
| AX-158243930 | 20 | 57.322 | KV452980.1  | 54836   | 10-scf00391 | 10 |
| AX-157744896 | 20 | 57.322 | KV452980.1  | 55785   | 10-scf00391 | 10 |
| AX-158243932 | 20 | 57.322 | KV452980.1  | 57595   | 10-scf00391 | 10 |
| AX-158243933 | 20 | 57.322 | KV452980.1  | 58003   | 10-scf00391 | 10 |
| AX-158243934 | 20 | 57.322 | KV452980.1  | 58620   | 10-scf00391 | 10 |
| AX-158243935 | 20 | 57.322 | KV452980.1  | 59005   | 10-scf00391 | 10 |
| AX-157841485 | 20 | 57.322 | KV452980.1  | 62361   | 10-scf00391 | 10 |
| AX-158243941 | 20 | 57.322 | KV452980.1  | 63798   | 10-scf00391 | 10 |
| AX-158243945 | 20 | 57.322 | KV452980.1  | 67212   | 10-scf00391 | 10 |
| AX-157753710 | 20 | 57.322 | KV452980.1  | 68939   | 10-scf00391 | 10 |
| AX-158243947 | 20 | 57.322 | KV452980.1  | 72126   | 10-scf00391 | 10 |
| AX-158243959 | 20 | 57.322 | KV452980.1  | 85465   | 10-scf00391 | 10 |
| AX-158243964 | 20 | 57.322 | KV452980.1  | 88450   | 10-scf00391 | 10 |
| AX-158243966 | 20 | 57.322 | KV452980.1  | 90676   | 10-scf00391 | 10 |
| AX-158243967 | 20 | 57.322 | KV452980.1  | 91739   | 10-scf00391 | 10 |
| AX-157756749 | 20 | 57.322 | KV452980.1  | 92199   | 10-scf00391 | 10 |
| AX-158243968 | 20 | 57.322 | KV452980.1  | 92325   | 10-scf00391 | 10 |
| AX-158243978 | 20 | 57.322 | KV452980.1  | 103093  | 10-scf00391 | 10 |
| AX-158243981 | 20 | 57.322 | KV452980.1  | 114451  | 10-scf00391 | 10 |
| AX-157713481 | 20 | 57.322 | KV452980.1  | 132901  | 10-scf00391 | 10 |
| AX-158244011 | 20 | 57.322 | KV452980.1  | 150992  | 10-scf00391 | 10 |
| AX-157841496 | 20 | 57.322 | KV452980.1  | 185014  | 10-scf00391 | 10 |
| AX-158244036 | 20 | 57.322 | KV452980.1  | 188340  | 10-scf00391 | 10 |
| AX-158244042 | 20 | 57.322 | KV452980.1  | 192600  | 10-scf00391 | 10 |
| AX-158242365 | 20 | 57.322 | KV452980.1  | 917319  | 10-scf00391 | 10 |
| AX-158242449 | 20 | 57.322 | KV452980.1  | 1069829 | 10-scf00391 | 10 |
| AX-158243901 | 20 | 57.432 | KV452980.1  | 13692   | 10-scf00391 | 10 |
| AX-158243921 | 20 | 57.432 | KV452980.1  | 40647   | 10-scf00391 | 10 |
| AX-158243922 | 20 | 57.432 | KV452980.1  | 41723   | 10-scf00391 | 10 |
| AX-158243924 | 20 | 57.432 | KV452980.1  | 45565   | 10-scf00391 | 10 |
| AX-157771241 | 20 | 57.432 | KV452980.1  | 49757   | 10-scf00391 | 10 |
| AX-157723359 | 20 | 57.432 | KV452980.1  | 59936   | 10-scf00391 | 10 |
| AX-158243949 | 20 | 57.432 | KV452980.1  | 73054   | 10-scf00391 | 10 |
| AX-157867293 | 20 | 57.432 | KV452980.1  | 76756   | 10-scf00391 | 10 |

|              |    |        |            |        |             |    |
|--------------|----|--------|------------|--------|-------------|----|
| AX-158243953 | 20 | 57.432 | KV452980.1 | 77965  | 10-scf00391 | 10 |
| AX-158243969 | 20 | 57.432 | KV452980.1 | 92604  | 10-scf00391 | 10 |
| AX-158243972 | 20 | 57.432 | KV452980.1 | 94822  | 10-scf00391 | 10 |
| AX-158243973 | 20 | 57.432 | KV452980.1 | 95460  | 10-scf00391 | 10 |
| AX-158243974 | 20 | 57.432 | KV452980.1 | 96032  | 10-scf00391 | 10 |
| AX-158243976 | 20 | 57.432 | KV452980.1 | 101308 | 10-scf00391 | 10 |
| AX-157841489 | 20 | 57.432 | KV452980.1 | 102863 | 10-scf00391 | 10 |
| AX-158243983 | 20 | 57.432 | KV452980.1 | 115424 | 10-scf00391 | 10 |
| AX-158243984 | 20 | 57.432 | KV452980.1 | 117487 | 10-scf00391 | 10 |
| AX-158243985 | 20 | 57.432 | KV452980.1 | 118194 | 10-scf00391 | 10 |
| AX-158243987 | 20 | 57.432 | KV452980.1 | 119545 | 10-scf00391 | 10 |
| AX-158243997 | 20 | 57.432 | KV452980.1 | 132507 | 10-scf00391 | 10 |
| AX-157715406 | 20 | 57.432 | KV452980.1 | 138022 | 10-scf00391 | 10 |
| AX-158244002 | 20 | 57.432 | KV452980.1 | 140968 | 10-scf00391 | 10 |
| AX-158244003 | 20 | 57.432 | KV452980.1 | 143044 | 10-scf00391 | 10 |
| AX-158244004 | 20 | 57.432 | KV452980.1 | 143438 | 10-scf00391 | 10 |
| AX-158415627 | 20 | 57.432 | KV452980.1 | 143618 | 10-scf00391 | 10 |
| AX-158418981 | 20 | 57.432 | KV452980.1 | 145299 | 10-scf00391 | 10 |
| AX-157748674 | 20 | 57.432 | KV452980.1 | 145980 | 10-scf00391 | 10 |
| AX-158244008 | 20 | 57.432 | KV452980.1 | 149516 | 10-scf00391 | 10 |
| AX-158244010 | 20 | 57.432 | KV452980.1 | 150587 | 10-scf00391 | 10 |
| AX-158244012 | 20 | 57.432 | KV452980.1 | 151224 | 10-scf00391 | 10 |
| AX-158244013 | 20 | 57.432 | KV452980.1 | 151595 | 10-scf00391 | 10 |
| AX-158244014 | 20 | 57.432 | KV452980.1 | 153976 | 10-scf00391 | 10 |
| AX-157841494 | 20 | 57.432 | KV452980.1 | 156130 | 10-scf00391 | 10 |
| AX-158244016 | 20 | 57.432 | KV452980.1 | 157104 | 10-scf00391 | 10 |
| AX-158244017 | 20 | 57.432 | KV452980.1 | 157749 | 10-scf00391 | 10 |
| AX-157859727 | 20 | 57.432 | KV452980.1 | 158674 | 10-scf00391 | 10 |
| AX-158244020 | 20 | 57.432 | KV452980.1 | 164051 | 10-scf00391 | 10 |
| AX-157841495 | 20 | 57.432 | KV452980.1 | 164420 | 10-scf00391 | 10 |
| AX-158244022 | 20 | 57.432 | KV452980.1 | 166147 | 10-scf00391 | 10 |
| AX-158244023 | 20 | 57.432 | KV452980.1 | 167297 | 10-scf00391 | 10 |
| AX-157737056 | 20 | 57.432 | KV452980.1 | 169378 | 10-scf00391 | 10 |
| AX-158244028 | 20 | 57.432 | KV452980.1 | 180579 | 10-scf00391 | 10 |
| AX-158244031 | 20 | 57.432 | KV452980.1 | 182551 | 10-scf00391 | 10 |
| AX-158244034 | 20 | 57.432 | KV452980.1 | 186403 | 10-scf00391 | 10 |
| AX-158244035 | 20 | 57.432 | KV452980.1 | 187150 | 10-scf00391 | 10 |
| AX-157706601 | 20 | 57.432 | KV452980.1 | 187515 | 10-scf00391 | 10 |
| AX-158244037 | 20 | 57.432 | KV452980.1 | 188702 | 10-scf00391 | 10 |
| AX-158244038 | 20 | 57.432 | KV452980.1 | 190259 | 10-scf00391 | 10 |
| AX-158244039 | 20 | 57.432 | KV452980.1 | 190971 | 10-scf00391 | 10 |
| AX-158244041 | 20 | 57.432 | KV452980.1 | 191901 | 10-scf00391 | 10 |
| AX-158244044 | 20 | 57.432 | KV452980.1 | 196033 | 10-scf00391 | 10 |
| AX-158244047 | 20 | 57.432 | KV452980.1 | 198804 | 10-scf00391 | 10 |
| AX-158244048 | 20 | 57.432 | KV452980.1 | 199574 | 10-scf00391 | 10 |
| AX-158244050 | 20 | 57.432 | KV452980.1 | 201040 | 10-scf00391 | 10 |
| AX-158244052 | 20 | 57.432 | KV452980.1 | 207722 | 10-scf00391 | 10 |
| AX-158244055 | 20 | 57.432 | KV452980.1 | 210142 | 10-scf00391 | 10 |
| AX-158244056 | 20 | 57.432 | KV452980.1 | 212293 | 10-scf00391 | 10 |
| AX-158244057 | 20 | 57.432 | KV452980.1 | 212499 | 10-scf00391 | 10 |
| AX-158244058 | 20 | 57.432 | KV452980.1 | 213042 | 10-scf00391 | 10 |

|              |    |        |            |        |             |    |
|--------------|----|--------|------------|--------|-------------|----|
| AX-158244060 | 20 | 57.432 | KV452980.1 | 216493 | 10-scf00391 | 10 |
| AX-158244064 | 20 | 57.432 | KV452980.1 | 222829 | 10-scf00391 | 10 |
| AX-157859729 | 20 | 57.432 | KV452980.1 | 229211 | 10-scf00391 | 10 |
| AX-158244071 | 20 | 57.432 | KV452980.1 | 229354 | 10-scf00391 | 10 |
| AX-158244072 | 20 | 57.432 | KV452980.1 | 229980 | 10-scf00391 | 10 |
| AX-158244076 | 20 | 57.432 | KV452980.1 | 232819 | 10-scf00391 | 10 |
| AX-158244077 | 20 | 57.432 | KV452980.1 | 233679 | 10-scf00391 | 10 |
| AX-158244078 | 20 | 57.432 | KV452980.1 | 234892 | 10-scf00391 | 10 |
| AX-158244082 | 20 | 57.432 | KV452980.1 | 239830 | 10-scf00391 | 10 |
| AX-158244083 | 20 | 57.432 | KV452980.1 | 240397 | 10-scf00391 | 10 |
| AX-158244085 | 20 | 57.432 | KV452980.1 | 241609 | 10-scf00391 | 10 |
| AX-158244086 | 20 | 57.432 | KV452980.1 | 242180 | 10-scf00391 | 10 |
| AX-158244089 | 20 | 57.432 | KV452980.1 | 244377 | 10-scf00391 | 10 |
| AX-158244090 | 20 | 57.432 | KV452980.1 | 245054 | 10-scf00391 | 10 |
| AX-158244092 | 20 | 57.432 | KV452980.1 | 248111 | 10-scf00391 | 10 |
| AX-158244093 | 20 | 57.432 | KV452980.1 | 248955 | 10-scf00391 | 10 |
| AX-158244094 | 20 | 57.432 | KV452980.1 | 249479 | 10-scf00391 | 10 |
| AX-158244095 | 20 | 57.432 | KV452980.1 | 250028 | 10-scf00391 | 10 |
| AX-158244096 | 20 | 57.432 | KV452980.1 | 250484 | 10-scf00391 | 10 |
| AX-158244097 | 20 | 57.432 | KV452980.1 | 253685 | 10-scf00391 | 10 |
| AX-158244098 | 20 | 57.432 | KV452980.1 | 254135 | 10-scf00391 | 10 |
| AX-158244099 | 20 | 57.432 | KV452980.1 | 254723 | 10-scf00391 | 10 |
| AX-158244101 | 20 | 57.432 | KV452980.1 | 257118 | 10-scf00391 | 10 |
| AX-158244103 | 20 | 57.432 | KV452980.1 | 259798 | 10-scf00391 | 10 |
| AX-158244104 | 20 | 57.432 | KV452980.1 | 260585 | 10-scf00391 | 10 |
| AX-158244106 | 20 | 57.432 | KV452980.1 | 261909 | 10-scf00391 | 10 |
| AX-158244108 | 20 | 57.432 | KV452980.1 | 266304 | 10-scf00391 | 10 |
| AX-158244109 | 20 | 57.432 | KV452980.1 | 266740 | 10-scf00391 | 10 |
| AX-158244110 | 20 | 57.432 | KV452980.1 | 268087 | 10-scf00391 | 10 |
| AX-158244111 | 20 | 57.432 | KV452980.1 | 268586 | 10-scf00391 | 10 |
| AX-158244112 | 20 | 57.432 | KV452980.1 | 269298 | 10-scf00391 | 10 |
| AX-158415631 | 20 | 57.432 | KV452980.1 | 270742 | 10-scf00391 | 10 |
| AX-158244114 | 20 | 57.432 | KV452980.1 | 272154 | 10-scf00391 | 10 |
| AX-157859730 | 20 | 57.432 | KV452980.1 | 272772 | 10-scf00391 | 10 |
| AX-158244115 | 20 | 57.432 | KV452980.1 | 273131 | 10-scf00391 | 10 |
| AX-158394317 | 20 | 57.432 | KV452980.1 | 274122 | 10-scf00391 | 10 |
| AX-158244117 | 20 | 57.432 | KV452980.1 | 274432 | 10-scf00391 | 10 |
| AX-158244118 | 20 | 57.432 | KV452980.1 | 274837 | 10-scf00391 | 10 |
| AX-158244119 | 20 | 57.432 | KV452980.1 | 275431 | 10-scf00391 | 10 |
| AX-158244120 | 20 | 57.432 | KV452980.1 | 275824 | 10-scf00391 | 10 |
| AX-158244122 | 20 | 57.432 | KV452980.1 | 277394 | 10-scf00391 | 10 |
| AX-158244123 | 20 | 57.432 | KV452980.1 | 277819 | 10-scf00391 | 10 |
| AX-158244124 | 20 | 57.432 | KV452980.1 | 278368 | 10-scf00391 | 10 |
| AX-158244125 | 20 | 57.432 | KV452980.1 | 278838 | 10-scf00391 | 10 |
| AX-158244127 | 20 | 57.432 | KV452980.1 | 280729 | 10-scf00391 | 10 |
| AX-158244128 | 20 | 57.432 | KV452980.1 | 280910 | 10-scf00391 | 10 |
| AX-158244129 | 20 | 57.432 | KV452980.1 | 281355 | 10-scf00391 | 10 |
| AX-158244130 | 20 | 57.432 | KV452980.1 | 281849 | 10-scf00391 | 10 |
| AX-158244131 | 20 | 57.432 | KV452980.1 | 282279 | 10-scf00391 | 10 |
| AX-158244132 | 20 | 57.432 | KV452980.1 | 284669 | 10-scf00391 | 10 |
| AX-158244133 | 20 | 57.432 | KV452980.1 | 285445 | 10-scf00391 | 10 |

|              |    |        |            |        |             |    |
|--------------|----|--------|------------|--------|-------------|----|
| AX-158244134 | 20 | 57.432 | KV452980.1 | 285974 | 10-scf00391 | 10 |
| AX-158244136 | 20 | 57.432 | KV452980.1 | 287452 | 10-scf00391 | 10 |
| AX-158244137 | 20 | 57.432 | KV452980.1 | 287828 | 10-scf00391 | 10 |
| AX-158244139 | 20 | 57.432 | KV452980.1 | 290944 | 10-scf00391 | 10 |
| AX-158244140 | 20 | 57.432 | KV452980.1 | 291280 | 10-scf00391 | 10 |
| AX-158244142 | 20 | 57.432 | KV452980.1 | 296143 | 10-scf00391 | 10 |
| AX-158244143 | 20 | 57.432 | KV452980.1 | 297051 | 10-scf00391 | 10 |
| AX-158244145 | 20 | 57.432 | KV452980.1 | 300052 | 10-scf00391 | 10 |
| AX-158244146 | 20 | 57.432 | KV452980.1 | 301352 | 10-scf00391 | 10 |
| AX-158244147 | 20 | 57.432 | KV452980.1 | 303649 | 10-scf00391 | 10 |
| AX-158244148 | 20 | 57.432 | KV452980.1 | 304655 | 10-scf00391 | 10 |
| AX-158244149 | 20 | 57.432 | KV452980.1 | 304971 | 10-scf00391 | 10 |
| AX-158244150 | 20 | 57.432 | KV452980.1 | 306384 | 10-scf00391 | 10 |
| AX-158244151 | 20 | 57.432 | KV452980.1 | 307206 | 10-scf00391 | 10 |
| AX-158244152 | 20 | 57.432 | KV452980.1 | 308599 | 10-scf00391 | 10 |
| AX-158244153 | 20 | 57.432 | KV452980.1 | 309519 | 10-scf00391 | 10 |
| AX-158244154 | 20 | 57.432 | KV452980.1 | 310874 | 10-scf00391 | 10 |
| AX-158244156 | 20 | 57.432 | KV452980.1 | 312715 | 10-scf00391 | 10 |
| AX-158244157 | 20 | 57.432 | KV452980.1 | 313691 | 10-scf00391 | 10 |
| AX-158244160 | 20 | 57.432 | KV452980.1 | 317954 | 10-scf00391 | 10 |
| AX-158244164 | 20 | 57.432 | KV452980.1 | 321935 | 10-scf00391 | 10 |
| AX-158244165 | 20 | 57.432 | KV452980.1 | 323354 | 10-scf00391 | 10 |
| AX-158244166 | 20 | 57.432 | KV452980.1 | 324669 | 10-scf00391 | 10 |
| AX-158244170 | 20 | 57.432 | KV452980.1 | 327646 | 10-scf00391 | 10 |
| AX-158244171 | 20 | 57.432 | KV452980.1 | 329803 | 10-scf00391 | 10 |
| AX-158244173 | 20 | 57.432 | KV452980.1 | 331928 | 10-scf00391 | 10 |
| AX-158244177 | 20 | 57.432 | KV452980.1 | 339154 | 10-scf00391 | 10 |
| AX-158244178 | 20 | 57.432 | KV452980.1 | 339677 | 10-scf00391 | 10 |
| AX-158244179 | 20 | 57.432 | KV452980.1 | 339946 | 10-scf00391 | 10 |
| AX-158244180 | 20 | 57.432 | KV452980.1 | 341128 | 10-scf00391 | 10 |
| AX-158244183 | 20 | 57.432 | KV452980.1 | 344764 | 10-scf00391 | 10 |
| AX-158244185 | 20 | 57.432 | KV452980.1 | 345505 | 10-scf00391 | 10 |
| AX-158244186 | 20 | 57.432 | KV452980.1 | 347237 | 10-scf00391 | 10 |
| AX-157841497 | 20 | 57.432 | KV452980.1 | 352375 | 10-scf00391 | 10 |
| AX-158244189 | 20 | 57.432 | KV452980.1 | 355016 | 10-scf00391 | 10 |
| AX-158244192 | 20 | 57.432 | KV452980.1 | 361527 | 10-scf00391 | 10 |
| AX-158244193 | 20 | 57.432 | KV452980.1 | 362200 | 10-scf00391 | 10 |
| AX-158244194 | 20 | 57.432 | KV452980.1 | 362466 | 10-scf00391 | 10 |
| AX-158244195 | 20 | 57.432 | KV452980.1 | 363906 | 10-scf00391 | 10 |
| AX-158244197 | 20 | 57.432 | KV452980.1 | 364767 | 10-scf00391 | 10 |
| AX-158244199 | 20 | 57.432 | KV452980.1 | 365966 | 10-scf00391 | 10 |
| AX-158244201 | 20 | 57.432 | KV452980.1 | 369147 | 10-scf00391 | 10 |
| AX-158244203 | 20 | 57.432 | KV452980.1 | 372809 | 10-scf00391 | 10 |
| AX-157841499 | 20 | 57.432 | KV452980.1 | 373204 | 10-scf00391 | 10 |
| AX-157841500 | 20 | 57.432 | KV452980.1 | 375979 | 10-scf00391 | 10 |
| AX-158244209 | 20 | 57.432 | KV452980.1 | 383807 | 10-scf00391 | 10 |
| AX-158244210 | 20 | 57.432 | KV452980.1 | 386903 | 10-scf00391 | 10 |
| AX-158244211 | 20 | 57.432 | KV452980.1 | 388207 | 10-scf00391 | 10 |
| AX-158244212 | 20 | 57.432 | KV452980.1 | 388782 | 10-scf00391 | 10 |
| AX-158244213 | 20 | 57.432 | KV452980.1 | 389465 | 10-scf00391 | 10 |
| AX-158244215 | 20 | 57.432 | KV452980.1 | 393198 | 10-scf00391 | 10 |

|              |    |        |            |        |             |    |
|--------------|----|--------|------------|--------|-------------|----|
| AX-158244216 | 20 | 57.432 | KV452980.1 | 394018 | 10-scf00391 | 10 |
| AX-158244217 | 20 | 57.432 | KV452980.1 | 394384 | 10-scf00391 | 10 |
| AX-157841501 | 20 | 57.432 | KV452980.1 | 396416 | 10-scf00391 | 10 |
| AX-157841503 | 20 | 57.432 | KV452980.1 | 398264 | 10-scf00391 | 10 |
| AX-158244220 | 20 | 57.432 | KV452980.1 | 400100 | 10-scf00391 | 10 |
| AX-158244221 | 20 | 57.432 | KV452980.1 | 401186 | 10-scf00391 | 10 |
| AX-158244222 | 20 | 57.432 | KV452980.1 | 401552 | 10-scf00391 | 10 |
| AX-158244223 | 20 | 57.432 | KV452980.1 | 401962 | 10-scf00391 | 10 |
| AX-158244224 | 20 | 57.432 | KV452980.1 | 402424 | 10-scf00391 | 10 |
| AX-158244225 | 20 | 57.432 | KV452980.1 | 402761 | 10-scf00391 | 10 |
| AX-158244226 | 20 | 57.432 | KV452980.1 | 403184 | 10-scf00391 | 10 |
| AX-158244227 | 20 | 57.432 | KV452980.1 | 406632 | 10-scf00391 | 10 |
| AX-158244228 | 20 | 57.432 | KV452980.1 | 408768 | 10-scf00391 | 10 |
| AX-158244229 | 20 | 57.432 | KV452980.1 | 409195 | 10-scf00391 | 10 |
| AX-158244230 | 20 | 57.432 | KV452980.1 | 409623 | 10-scf00391 | 10 |
| AX-158244231 | 20 | 57.432 | KV452980.1 | 410964 | 10-scf00391 | 10 |
| AX-158244232 | 20 | 57.432 | KV452980.1 | 414377 | 10-scf00391 | 10 |
| AX-158244234 | 20 | 57.432 | KV452980.1 | 416427 | 10-scf00391 | 10 |
| AX-158244235 | 20 | 57.432 | KV452980.1 | 417433 | 10-scf00391 | 10 |
| AX-158244236 | 20 | 57.432 | KV452980.1 | 417803 | 10-scf00391 | 10 |
| AX-158244238 | 20 | 57.432 | KV452980.1 | 420246 | 10-scf00391 | 10 |
| AX-158244239 | 20 | 57.432 | KV452980.1 | 420588 | 10-scf00391 | 10 |
| AX-158244240 | 20 | 57.432 | KV452980.1 | 421575 | 10-scf00391 | 10 |
| AX-158244241 | 20 | 57.432 | KV452980.1 | 422049 | 10-scf00391 | 10 |
| AX-158244242 | 20 | 57.432 | KV452980.1 | 423123 | 10-scf00391 | 10 |
| AX-157841504 | 20 | 57.432 | KV452980.1 | 423419 | 10-scf00391 | 10 |
| AX-158244243 | 20 | 57.432 | KV452980.1 | 423657 | 10-scf00391 | 10 |
| AX-158244248 | 20 | 57.432 | KV452980.1 | 428634 | 10-scf00391 | 10 |
| AX-157841505 | 20 | 57.432 | KV452980.1 | 434560 | 10-scf00391 | 10 |
| AX-158244251 | 20 | 57.432 | KV452980.1 | 435176 | 10-scf00391 | 10 |
| AX-157733609 | 20 | 57.432 | KV452980.1 | 435900 | 10-scf00391 | 10 |
| AX-158244252 | 20 | 57.432 | KV452980.1 | 440143 | 10-scf00391 | 10 |
| AX-158244253 | 20 | 57.432 | KV452980.1 | 442426 | 10-scf00391 | 10 |
| AX-157841508 | 20 | 57.432 | KV452980.1 | 444586 | 10-scf00391 | 10 |
| AX-158415633 | 20 | 57.432 | KV452980.1 | 445795 | 10-scf00391 | 10 |
| AX-157743376 | 20 | 57.432 | KV452980.1 | 446231 | 10-scf00391 | 10 |
| AX-158244256 | 20 | 57.432 | KV452980.1 | 450747 | 10-scf00391 | 10 |
| AX-157859731 | 20 | 57.432 | KV452980.1 | 451983 | 10-scf00391 | 10 |
| AX-158242106 | 20 | 57.432 | KV452980.1 | 462341 | 10-scf00391 | 10 |
| AX-158242108 | 20 | 57.432 | KV452980.1 | 464720 | 10-scf00391 | 10 |
| AX-158242109 | 20 | 57.432 | KV452980.1 | 466922 | 10-scf00391 | 10 |
| AX-158242110 | 20 | 57.432 | KV452980.1 | 468597 | 10-scf00391 | 10 |
| AX-157859697 | 20 | 57.432 | KV452980.1 | 474401 | 10-scf00391 | 10 |
| AX-158242112 | 20 | 57.432 | KV452980.1 | 477715 | 10-scf00391 | 10 |
| AX-158242115 | 20 | 57.432 | KV452980.1 | 489761 | 10-scf00391 | 10 |
| AX-158242119 | 20 | 57.432 | KV452980.1 | 502060 | 10-scf00391 | 10 |
| AX-158242120 | 20 | 57.432 | KV452980.1 | 509345 | 10-scf00391 | 10 |
| AX-158242121 | 20 | 57.432 | KV452980.1 | 516692 | 10-scf00391 | 10 |
| AX-158242122 | 20 | 57.432 | KV452980.1 | 520848 | 10-scf00391 | 10 |
| AX-157841291 | 20 | 57.432 | KV452980.1 | 521470 | 10-scf00391 | 10 |
| AX-158242130 | 20 | 57.432 | KV452980.1 | 548488 | 10-scf00391 | 10 |

|              |    |        |            |        |             |    |
|--------------|----|--------|------------|--------|-------------|----|
| AX-158242135 | 20 | 57.432 | KV452980.1 | 567833 | 10-scf00391 | 10 |
| AX-158242136 | 20 | 57.432 | KV452980.1 | 570376 | 10-scf00391 | 10 |
| AX-158242139 | 20 | 57.432 | KV452980.1 | 576520 | 10-scf00391 | 10 |
| AX-158242140 | 20 | 57.432 | KV452980.1 | 577101 | 10-scf00391 | 10 |
| AX-158242142 | 20 | 57.432 | KV452980.1 | 577967 | 10-scf00391 | 10 |
| AX-158242143 | 20 | 57.432 | KV452980.1 | 578430 | 10-scf00391 | 10 |
| AX-158242145 | 20 | 57.432 | KV452980.1 | 579843 | 10-scf00391 | 10 |
| AX-158242146 | 20 | 57.432 | KV452980.1 | 580905 | 10-scf00391 | 10 |
| AX-158242147 | 20 | 57.432 | KV452980.1 | 582216 | 10-scf00391 | 10 |
| AX-158242148 | 20 | 57.432 | KV452980.1 | 582671 | 10-scf00391 | 10 |
| AX-158242149 | 20 | 57.432 | KV452980.1 | 583825 | 10-scf00391 | 10 |
| AX-158242150 | 20 | 57.432 | KV452980.1 | 584552 | 10-scf00391 | 10 |
| AX-158242151 | 20 | 57.432 | KV452980.1 | 586730 | 10-scf00391 | 10 |
| AX-158242152 | 20 | 57.432 | KV452980.1 | 587275 | 10-scf00391 | 10 |
| AX-158242153 | 20 | 57.432 | KV452980.1 | 588281 | 10-scf00391 | 10 |
| AX-158242155 | 20 | 57.432 | KV452980.1 | 589622 | 10-scf00391 | 10 |
| AX-158242157 | 20 | 57.432 | KV452980.1 | 590979 | 10-scf00391 | 10 |
| AX-158242159 | 20 | 57.432 | KV452980.1 | 593823 | 10-scf00391 | 10 |
| AX-158242160 | 20 | 57.432 | KV452980.1 | 595179 | 10-scf00391 | 10 |
| AX-158242163 | 20 | 57.432 | KV452980.1 | 597134 | 10-scf00391 | 10 |
| AX-158242165 | 20 | 57.432 | KV452980.1 | 599192 | 10-scf00391 | 10 |
| AX-158242166 | 20 | 57.432 | KV452980.1 | 600237 | 10-scf00391 | 10 |
| AX-158242167 | 20 | 57.432 | KV452980.1 | 600636 | 10-scf00391 | 10 |
| AX-158242168 | 20 | 57.432 | KV452980.1 | 601047 | 10-scf00391 | 10 |
| AX-158242169 | 20 | 57.432 | KV452980.1 | 602581 | 10-scf00391 | 10 |
| AX-158242170 | 20 | 57.432 | KV452980.1 | 604078 | 10-scf00391 | 10 |
| AX-158242171 | 20 | 57.432 | KV452980.1 | 604771 | 10-scf00391 | 10 |
| AX-158242172 | 20 | 57.432 | KV452980.1 | 606018 | 10-scf00391 | 10 |
| AX-158242174 | 20 | 57.432 | KV452980.1 | 606908 | 10-scf00391 | 10 |
| AX-157709676 | 20 | 57.432 | KV452980.1 | 608921 | 10-scf00391 | 10 |
| AX-158242176 | 20 | 57.432 | KV452980.1 | 609708 | 10-scf00391 | 10 |
| AX-158242179 | 20 | 57.432 | KV452980.1 | 612104 | 10-scf00391 | 10 |
| AX-158242180 | 20 | 57.432 | KV452980.1 | 615591 | 10-scf00391 | 10 |
| AX-158242182 | 20 | 57.432 | KV452980.1 | 617633 | 10-scf00391 | 10 |
| AX-158242183 | 20 | 57.432 | KV452980.1 | 618310 | 10-scf00391 | 10 |
| AX-158242184 | 20 | 57.432 | KV452980.1 | 619558 | 10-scf00391 | 10 |
| AX-158242187 | 20 | 57.432 | KV452980.1 | 623135 | 10-scf00391 | 10 |
| AX-158242190 | 20 | 57.432 | KV452980.1 | 624929 | 10-scf00391 | 10 |
| AX-157859699 | 20 | 57.432 | KV452980.1 | 625291 | 10-scf00391 | 10 |
| AX-158242191 | 20 | 57.432 | KV452980.1 | 625347 | 10-scf00391 | 10 |
| AX-158380982 | 20 | 57.432 | KV452980.1 | 628271 | 10-scf00391 | 10 |
| AX-158415563 | 20 | 57.432 | KV452980.1 | 629044 | 10-scf00391 | 10 |
| AX-158423327 | 20 | 57.432 | KV452980.1 | 629265 | 10-scf00391 | 10 |
| AX-158242196 | 20 | 57.432 | KV452980.1 | 629535 | 10-scf00391 | 10 |
| AX-157859700 | 20 | 57.432 | KV452980.1 | 630405 | 10-scf00391 | 10 |
| AX-158242199 | 20 | 57.432 | KV452980.1 | 633715 | 10-scf00391 | 10 |
| AX-158242200 | 20 | 57.432 | KV452980.1 | 636084 | 10-scf00391 | 10 |
| AX-158242201 | 20 | 57.432 | KV452980.1 | 636514 | 10-scf00391 | 10 |
| AX-158242202 | 20 | 57.432 | KV452980.1 | 638005 | 10-scf00391 | 10 |
| AX-158242204 | 20 | 57.432 | KV452980.1 | 639119 | 10-scf00391 | 10 |
| AX-158242205 | 20 | 57.432 | KV452980.1 | 639920 | 10-scf00391 | 10 |

|              |    |        |            |        |             |    |
|--------------|----|--------|------------|--------|-------------|----|
| AX-158242206 | 20 | 57.432 | KV452980.1 | 640446 | 10-scf00391 | 10 |
| AX-158242207 | 20 | 57.432 | KV452980.1 | 641820 | 10-scf00391 | 10 |
| AX-158242209 | 20 | 57.432 | KV452980.1 | 643281 | 10-scf00391 | 10 |
| AX-158242211 | 20 | 57.432 | KV452980.1 | 644887 | 10-scf00391 | 10 |
| AX-158242212 | 20 | 57.432 | KV452980.1 | 645387 | 10-scf00391 | 10 |
| AX-158242213 | 20 | 57.432 | KV452980.1 | 646792 | 10-scf00391 | 10 |
| AX-158242214 | 20 | 57.432 | KV452980.1 | 648058 | 10-scf00391 | 10 |
| AX-158242217 | 20 | 57.432 | KV452980.1 | 651131 | 10-scf00391 | 10 |
| AX-158242218 | 20 | 57.432 | KV452980.1 | 651737 | 10-scf00391 | 10 |
| AX-158242220 | 20 | 57.432 | KV452980.1 | 654591 | 10-scf00391 | 10 |
| AX-158242221 | 20 | 57.432 | KV452980.1 | 654637 | 10-scf00391 | 10 |
| AX-158242223 | 20 | 57.432 | KV452980.1 | 655720 | 10-scf00391 | 10 |
| AX-157742372 | 20 | 57.432 | KV452980.1 | 657883 | 10-scf00391 | 10 |
| AX-158242227 | 20 | 57.432 | KV452980.1 | 661475 | 10-scf00391 | 10 |
| AX-158394279 | 20 | 57.432 | KV452980.1 | 663643 | 10-scf00391 | 10 |
| AX-158242231 | 20 | 57.432 | KV452980.1 | 667805 | 10-scf00391 | 10 |
| AX-158242232 | 20 | 57.432 | KV452980.1 | 668500 | 10-scf00391 | 10 |
| AX-158242233 | 20 | 57.432 | KV452980.1 | 670760 | 10-scf00391 | 10 |
| AX-158242234 | 20 | 57.432 | KV452980.1 | 673966 | 10-scf00391 | 10 |
| AX-158242236 | 20 | 57.432 | KV452980.1 | 675587 | 10-scf00391 | 10 |
| AX-158242237 | 20 | 57.432 | KV452980.1 | 676114 | 10-scf00391 | 10 |
| AX-158242239 | 20 | 57.432 | KV452980.1 | 676745 | 10-scf00391 | 10 |
| AX-158242240 | 20 | 57.432 | KV452980.1 | 677379 | 10-scf00391 | 10 |
| AX-158242241 | 20 | 57.432 | KV452980.1 | 680157 | 10-scf00391 | 10 |
| AX-158242244 | 20 | 57.432 | KV452980.1 | 683742 | 10-scf00391 | 10 |
| AX-158242245 | 20 | 57.432 | KV452980.1 | 685016 | 10-scf00391 | 10 |
| AX-158242246 | 20 | 57.432 | KV452980.1 | 688287 | 10-scf00391 | 10 |
| AX-158418953 | 20 | 57.432 | KV452980.1 | 689685 | 10-scf00391 | 10 |
| AX-158242248 | 20 | 57.432 | KV452980.1 | 691779 | 10-scf00391 | 10 |
| AX-158242250 | 20 | 57.432 | KV452980.1 | 697461 | 10-scf00391 | 10 |
| AX-158242252 | 20 | 57.432 | KV452980.1 | 709734 | 10-scf00391 | 10 |
| AX-158242253 | 20 | 57.432 | KV452980.1 | 711261 | 10-scf00391 | 10 |
| AX-158242254 | 20 | 57.432 | KV452980.1 | 711534 | 10-scf00391 | 10 |
| AX-158242257 | 20 | 57.432 | KV452980.1 | 715717 | 10-scf00391 | 10 |
| AX-158242258 | 20 | 57.432 | KV452980.1 | 716428 | 10-scf00391 | 10 |
| AX-158242259 | 20 | 57.432 | KV452980.1 | 717501 | 10-scf00391 | 10 |
| AX-158242260 | 20 | 57.432 | KV452980.1 | 718694 | 10-scf00391 | 10 |
| AX-158242261 | 20 | 57.432 | KV452980.1 | 718882 | 10-scf00391 | 10 |
| AX-158242262 | 20 | 57.432 | KV452980.1 | 720789 | 10-scf00391 | 10 |
| AX-158242263 | 20 | 57.432 | KV452980.1 | 721407 | 10-scf00391 | 10 |
| AX-158242264 | 20 | 57.432 | KV452980.1 | 722210 | 10-scf00391 | 10 |
| AX-158242266 | 20 | 57.432 | KV452980.1 | 725042 | 10-scf00391 | 10 |
| AX-158242267 | 20 | 57.432 | KV452980.1 | 726291 | 10-scf00391 | 10 |
| AX-157859702 | 20 | 57.432 | KV452980.1 | 727695 | 10-scf00391 | 10 |
| AX-158242269 | 20 | 57.432 | KV452980.1 | 728147 | 10-scf00391 | 10 |
| AX-158242270 | 20 | 57.432 | KV452980.1 | 730314 | 10-scf00391 | 10 |
| AX-158242272 | 20 | 57.432 | KV452980.1 | 733958 | 10-scf00391 | 10 |
| AX-157841292 | 20 | 57.432 | KV452980.1 | 737034 | 10-scf00391 | 10 |
| AX-158242273 | 20 | 57.432 | KV452980.1 | 738373 | 10-scf00391 | 10 |
| AX-158242274 | 20 | 57.432 | KV452980.1 | 738896 | 10-scf00391 | 10 |
| AX-158242277 | 20 | 57.432 | KV452980.1 | 748723 | 10-scf00391 | 10 |

|              |    |        |            |        |             |    |
|--------------|----|--------|------------|--------|-------------|----|
| AX-158242278 | 20 | 57.432 | KV452980.1 | 753410 | 10-scf00391 | 10 |
| AX-158242279 | 20 | 57.432 | KV452980.1 | 753908 | 10-scf00391 | 10 |
| AX-158242281 | 20 | 57.432 | KV452980.1 | 755861 | 10-scf00391 | 10 |
| AX-158242282 | 20 | 57.432 | KV452980.1 | 756555 | 10-scf00391 | 10 |
| AX-158242284 | 20 | 57.432 | KV452980.1 | 765656 | 10-scf00391 | 10 |
| AX-158242286 | 20 | 57.432 | KV452980.1 | 767709 | 10-scf00391 | 10 |
| AX-158242288 | 20 | 57.432 | KV452980.1 | 770190 | 10-scf00391 | 10 |
| AX-158242289 | 20 | 57.432 | KV452980.1 | 771142 | 10-scf00391 | 10 |
| AX-158242290 | 20 | 57.432 | KV452980.1 | 773861 | 10-scf00391 | 10 |
| AX-158242292 | 20 | 57.432 | KV452980.1 | 781617 | 10-scf00391 | 10 |
| AX-158242293 | 20 | 57.432 | KV452980.1 | 783185 | 10-scf00391 | 10 |
| AX-158242294 | 20 | 57.432 | KV452980.1 | 783326 | 10-scf00391 | 10 |
| AX-158242295 | 20 | 57.432 | KV452980.1 | 784136 | 10-scf00391 | 10 |
| AX-158242296 | 20 | 57.432 | KV452980.1 | 788694 | 10-scf00391 | 10 |
| AX-158242299 | 20 | 57.432 | KV452980.1 | 796038 | 10-scf00391 | 10 |
| AX-157753245 | 20 | 57.432 | KV452980.1 | 796544 | 10-scf00391 | 10 |
| AX-158242301 | 20 | 57.432 | KV452980.1 | 797384 | 10-scf00391 | 10 |
| AX-157727537 | 20 | 57.432 | KV452980.1 | 800272 | 10-scf00391 | 10 |
| AX-158242302 | 20 | 57.432 | KV452980.1 | 801720 | 10-scf00391 | 10 |
| AX-158242308 | 20 | 57.432 | KV452980.1 | 816008 | 10-scf00391 | 10 |
| AX-158415568 | 20 | 57.432 | KV452980.1 | 820173 | 10-scf00391 | 10 |
| AX-158242309 | 20 | 57.432 | KV452980.1 | 820711 | 10-scf00391 | 10 |
| AX-158242311 | 20 | 57.432 | KV452980.1 | 833445 | 10-scf00391 | 10 |
| AX-158242313 | 20 | 57.432 | KV452980.1 | 836075 | 10-scf00391 | 10 |
| AX-158242314 | 20 | 57.432 | KV452980.1 | 836343 | 10-scf00391 | 10 |
| AX-158242315 | 20 | 57.432 | KV452980.1 | 837552 | 10-scf00391 | 10 |
| AX-158242316 | 20 | 57.432 | KV452980.1 | 839032 | 10-scf00391 | 10 |
| AX-157859703 | 20 | 57.432 | KV452980.1 | 839424 | 10-scf00391 | 10 |
| AX-157859704 | 20 | 57.432 | KV452980.1 | 839975 | 10-scf00391 | 10 |
| AX-158242317 | 20 | 57.432 | KV452980.1 | 840282 | 10-scf00391 | 10 |
| AX-158242318 | 20 | 57.432 | KV452980.1 | 841318 | 10-scf00391 | 10 |
| AX-158242320 | 20 | 57.432 | KV452980.1 | 845298 | 10-scf00391 | 10 |
| AX-158242323 | 20 | 57.432 | KV452980.1 | 852636 | 10-scf00391 | 10 |
| AX-158242325 | 20 | 57.432 | KV452980.1 | 857946 | 10-scf00391 | 10 |
| AX-158242326 | 20 | 57.432 | KV452980.1 | 859173 | 10-scf00391 | 10 |
| AX-158242327 | 20 | 57.432 | KV452980.1 | 860869 | 10-scf00391 | 10 |
| AX-158242328 | 20 | 57.432 | KV452980.1 | 865684 | 10-scf00391 | 10 |
| AX-157859705 | 20 | 57.432 | KV452980.1 | 868563 | 10-scf00391 | 10 |
| AX-158242332 | 20 | 57.432 | KV452980.1 | 869612 | 10-scf00391 | 10 |
| AX-157775498 | 20 | 57.432 | KV452980.1 | 873459 | 10-scf00391 | 10 |
| AX-158242337 | 20 | 57.432 | KV452980.1 | 875138 | 10-scf00391 | 10 |
| AX-158242338 | 20 | 57.432 | KV452980.1 | 876037 | 10-scf00391 | 10 |
| AX-158242339 | 20 | 57.432 | KV452980.1 | 877038 | 10-scf00391 | 10 |
| AX-158242340 | 20 | 57.432 | KV452980.1 | 879470 | 10-scf00391 | 10 |
| AX-157800714 | 20 | 57.432 | KV452980.1 | 884109 | 10-scf00391 | 10 |
| AX-158242342 | 20 | 57.432 | KV452980.1 | 884402 | 10-scf00391 | 10 |
| AX-158242343 | 20 | 57.432 | KV452980.1 | 884852 | 10-scf00391 | 10 |
| AX-158242344 | 20 | 57.432 | KV452980.1 | 888966 | 10-scf00391 | 10 |
| AX-157841296 | 20 | 57.432 | KV452980.1 | 889249 | 10-scf00391 | 10 |
| AX-158242345 | 20 | 57.432 | KV452980.1 | 889339 | 10-scf00391 | 10 |
| AX-157841297 | 20 | 57.432 | KV452980.1 | 891240 | 10-scf00391 | 10 |



|              |    |        |            |         |             |    |
|--------------|----|--------|------------|---------|-------------|----|
| AX-158242348 | 20 | 57.432 | KV452980.1 | 896830  | 10-scf00391 | 10 |
| AX-158242353 | 20 | 57.432 | KV452980.1 | 905416  | 10-scf00391 | 10 |
| AX-158242355 | 20 | 57.432 | KV452980.1 | 906241  | 10-scf00391 | 10 |
| AX-158242366 | 20 | 57.432 | KV452980.1 | 918790  | 10-scf00391 | 10 |
| AX-158242385 | 20 | 57.432 | KV452980.1 | 951466  | 10-scf00391 | 10 |
| AX-158242387 | 20 | 57.432 | KV452980.1 | 954784  | 10-scf00391 | 10 |
| AX-158242393 | 20 | 57.432 | KV452980.1 | 973600  | 10-scf00391 | 10 |
| AX-158380983 | 20 | 57.432 | KV452980.1 | 974606  | 10-scf00391 | 10 |
| AX-157841302 | 20 | 57.432 | KV452980.1 | 981078  | 10-scf00391 | 10 |
| AX-158242400 | 20 | 57.432 | KV452980.1 | 993355  | 10-scf00391 | 10 |
| AX-157841303 | 20 | 57.432 | KV452980.1 | 993914  | 10-scf00391 | 10 |
| AX-158242401 | 20 | 57.432 | KV452980.1 | 994321  | 10-scf00391 | 10 |
| AX-157841305 | 20 | 57.432 | KV452980.1 | 996163  | 10-scf00391 | 10 |
| AX-157841306 | 20 | 57.432 | KV452980.1 | 998320  | 10-scf00391 | 10 |
| AX-158242410 | 20 | 57.432 | KV452980.1 | 1005221 | 10-scf00391 | 10 |
| AX-158242411 | 20 | 57.432 | KV452980.1 | 1006057 | 10-scf00391 | 10 |
| AX-158415573 | 20 | 57.432 | KV452980.1 | 1013911 | 10-scf00391 | 10 |
| AX-158242415 | 20 | 57.432 | KV452980.1 | 1014392 | 10-scf00391 | 10 |
| AX-158242418 | 20 | 57.432 | KV452980.1 | 1020146 | 10-scf00391 | 10 |
| AX-158242421 | 20 | 57.432 | KV452980.1 | 1025321 | 10-scf00391 | 10 |
| AX-158242423 | 20 | 57.432 | KV452980.1 | 1027580 | 10-scf00391 | 10 |
| AX-158242427 | 20 | 57.432 | KV452980.1 | 1032707 | 10-scf00391 | 10 |
| AX-157841309 | 20 | 57.432 | KV452980.1 | 1033186 | 10-scf00391 | 10 |
| AX-158242428 | 20 | 57.432 | KV452980.1 | 1034674 | 10-scf00391 | 10 |
| AX-158242429 | 20 | 57.432 | KV452980.1 | 1035227 | 10-scf00391 | 10 |
| AX-158242430 | 20 | 57.432 | KV452980.1 | 1035817 | 10-scf00391 | 10 |
| AX-157841310 | 20 | 57.432 | KV452980.1 | 1038848 | 10-scf00391 | 10 |
| AX-158242435 | 20 | 57.432 | KV452980.1 | 1042250 | 10-scf00391 | 10 |
| AX-158242438 | 20 | 57.432 | KV452980.1 | 1045510 | 10-scf00391 | 10 |
| AX-158242439 | 20 | 57.432 | KV452980.1 | 1045762 | 10-scf00391 | 10 |
| AX-158242440 | 20 | 57.432 | KV452980.1 | 1047450 | 10-scf00391 | 10 |
| AX-158242445 | 20 | 57.432 | KV452980.1 | 1059503 | 10-scf00391 | 10 |
| AX-158242458 | 20 | 57.432 | KV452980.1 | 1080515 | 10-scf00391 | 10 |
| AX-157725116 | 20 | 57.432 | KV452980.1 | 1082280 | 10-scf00391 | 10 |
| AX-158242479 | 20 | 57.432 | KV452980.1 | 1113847 | 10-scf00391 | 10 |
| AX-157841324 | 20 | 57.432 | KV452980.1 | 1120484 | 10-scf00391 | 10 |
| AX-157841326 | 20 | 57.432 | KV452980.1 | 1122139 | 10-scf00391 | 10 |
| AX-158242483 | 20 | 57.432 | KV452980.1 | 1122929 | 10-scf00391 | 10 |
| AX-158242490 | 20 | 57.432 | KV452980.1 | 1134415 | 10-scf00391 | 10 |
| AX-158242496 | 20 | 57.432 | KV452980.1 | 1139966 | 10-scf00391 | 10 |
| AX-157720834 | 20 | 57.432 | KV452980.1 | 1142152 | 10-scf00391 | 10 |
| AX-158242499 | 20 | 57.432 | KV452980.1 | 1143197 | 10-scf00391 | 10 |
| AX-158242503 | 20 | 57.432 | KV452980.1 | 1146986 | 10-scf00391 | 10 |
| AX-158242515 | 20 | 57.432 | KV452980.1 | 1169963 | 10-scf00391 | 10 |
| AX-158242543 | 20 | 57.432 | KV452980.1 | 1204944 | 10-scf00391 | 10 |
| AX-158242553 | 20 | 57.432 | KV452980.1 | 1223965 | 10-scf00391 | 10 |
| AX-158242728 | 20 | 57.432 | KV452980.1 | 1451437 | 10-scf00391 | 10 |
| AX-158242775 | 20 | 57.432 | KV452980.1 | 1509109 | 10-scf00391 | 10 |
| AX-157771397 | 20 | 57.432 | KV452980.1 | 1673788 | 10-scf00391 | 10 |
| AX-158244682 | 20 | 57.432 | KV452981.1 | 1039317 | 10-scf00393 | 10 |
| AX-158245105 | 20 | 57.432 | KV452981.1 | 1626379 | 10-scf00393 | 10 |

|              |    |        |            |         |                |    |
|--------------|----|--------|------------|---------|----------------|----|
| AX-158245162 | 20 | 57.432 | KV452981.1 | 1692913 | 10-scf00393    | 10 |
| AX-158242432 | 20 | 57.863 | KV452980.1 | 1039910 | 10-scf00391    | 10 |
| AX-157841313 | 20 | 57.863 | KV452980.1 | 1060352 | 10-scf00391    | 10 |
| AX-158242446 | 20 | 57.864 | KV452980.1 | 1067122 | 10-scf00391    | 10 |
| AX-158242470 | 20 | 57.865 | KV452980.1 | 1104514 | 10-scf00391    | 10 |
| AX-158242431 | 20 | 57.867 | KV452980.1 | 1039687 | 10-scf00391    | 10 |
| AX-158242471 | 20 | 57.867 | KV452980.1 | 1104945 | 10-scf00391    | 10 |
| AX-157841486 | 20 | 57.868 | KV452980.1 | 84268   | 10-scf00391    | 10 |
| AX-157841312 | 20 | 57.868 | KV452980.1 | 1051470 | 10-scf00391    | 10 |
| AX-158242473 | 20 | 57.868 | KV452980.1 | 1107109 | 10-scf00391    | 10 |
| AX-158242485 | 20 | 57.868 | KV452980.1 | 1125993 | 10-scf00391    | 10 |
| AX-158242488 | 20 | 57.868 | KV452980.1 | 1129787 | 10-scf00391    | 10 |
| AX-158242502 | 20 | 57.868 | KV452980.1 | 1145102 | 10-scf00391    | 10 |
| AX-157841328 | 20 | 57.868 | KV452980.1 | 1145318 | 10-scf00391    | 10 |
| AX-157841329 | 20 | 57.868 | KV452980.1 | 1145655 | 10-scf00391    | 10 |
| AX-157859707 | 20 | 57.868 | KV452980.1 | 1146295 | 10-scf00391    | 10 |
| AX-158244105 | 20 | 57.879 | KV452980.1 | 261181  | 10-scf00391    | 10 |
| AX-158244218 | 20 | 57.879 | KV452980.1 | 395037  | 10-scf00391    | 10 |
| AX-158242505 | 20 | 57.879 | KV452980.1 | 1149737 | 10-scf00391    | 10 |
| AX-158242509 | 20 | 57.9   | KV452980.1 | 1158379 | 10-scf00391    | 10 |
| AX-157841331 | 20 | 57.935 | KV452980.1 | 1166407 | 10-scf00391    | 10 |
| AX-158242375 | 20 | 57.978 | KV452980.1 | 935459  | 10-scf00391    | 10 |
| AX-158242484 | 20 | 57.978 | KV452980.1 | 1125511 | 10-scf00391    | 10 |
| AX-157841327 | 20 | 57.978 | KV452980.1 | 1126136 | 10-scf00391    | 10 |
| AX-158242510 | 20 | 57.978 | KV452980.1 | 1160032 | 10-scf00391    | 10 |
| AX-158242517 | 20 | 57.978 | KV452980.1 | 1172467 | 10-scf00391    | 10 |
| AX-158242519 | 20 | 57.978 | KV452980.1 | 1176627 | 10-scf00391    | 10 |
| AX-158242520 | 20 | 57.978 | KV452980.1 | 1176916 | 10-scf00391    | 10 |
| AX-158242521 | 20 | 57.978 | KV452980.1 | 1177415 | 10-scf00391    | 10 |
| AX-158242522 | 20 | 57.978 | KV452980.1 | 1177708 | 10-scf00391    | 10 |
| AX-158242523 | 20 | 57.978 | KV452980.1 | 1178335 | 10-scf00391    | 10 |
| AX-157841333 | 20 | 57.978 | KV452980.1 | 1181147 | 10-scf00391    | 10 |
| AX-158242524 | 20 | 57.978 | KV452980.1 | 1181470 | 10-scf00391    | 10 |
| AX-157841334 | 20 | 57.978 | KV452980.1 | 1182220 | 10-scf00391    | 10 |
| AX-158242537 | 20 | 57.978 | KV452980.1 | 1195605 | 10-scf00391    | 10 |
| AX-157841336 | 20 | 57.978 | KV452980.1 | 1197776 | 10-scf00391    | 10 |
| AX-157721393 | 20 | 57.978 | KV452980.1 | 1214322 | 10-scf00391    | 10 |
| AX-158242547 | 20 | 57.978 | KV452980.1 | 1218408 | 10-scf00391    | 10 |
| AX-158242548 | 20 | 57.978 | KV452980.1 | 1218673 | 10-scf00391    | 10 |
| AX-158242550 | 20 | 57.978 | KV452980.1 | 1219861 | 10-scf00391    | 10 |
| AX-158242556 | 20 | 57.978 | KV452980.1 | 1227350 | 10-scf00391    | 10 |
| AX-158242557 | 20 | 57.978 | KV452980.1 | 1228306 | 10-scf00391    | 10 |
| AX-157715873 | 20 | 57.978 | KV452980.1 | 1228768 | 10-scf00391    | 10 |
| AX-158242615 | 20 | 57.978 | KV452980.1 | 1313755 | 10-scf00391    | 10 |
| AX-158242845 | 20 | 57.978 | KV452980.1 | 1580157 | 10-scf00391    | 10 |
| AX-158242855 | 20 | 57.978 | KV452980.1 | 1596142 | 10-scf00391    | 10 |
| AX-158244530 | 20 | 57.978 | KV452981.1 | 811223  | 10-scf00393    | 10 |
| AX-157841598 | 20 | 57.978 | KV452981.1 | 1454095 | 10-scf00393    | 10 |
| AX-157700668 | 20 | 57.978 | FI858200.1 | 592     | IORI212 Ictalu | UN |
| AX-158242561 | 20 | 58.304 | KV452980.1 | 1235354 | 10-scf00391    | 10 |
| AX-158380984 | 20 | 58.304 | KV452980.1 | 1235433 | 10-scf00391    | 10 |

|              |    |        |            |         |             |    |
|--------------|----|--------|------------|---------|-------------|----|
| AX-157744751 | 20 | 58.304 | KV452980.1 | 1354320 | 10-scf00391 | 10 |
| AX-158242565 | 20 | 58.305 | KV452980.1 | 1239407 | 10-scf00391 | 10 |
| AX-158242568 | 20 | 58.305 | KV452980.1 | 1245279 | 10-scf00391 | 10 |
| AX-158242572 | 20 | 58.305 | KV452980.1 | 1249980 | 10-scf00391 | 10 |
| AX-157841351 | 20 | 58.305 | KV452980.1 | 1345619 | 10-scf00391 | 10 |
| AX-158242709 | 20 | 58.305 | KV452980.1 | 1423789 | 10-scf00391 | 10 |
| AX-158242712 | 20 | 58.305 | KV452980.1 | 1427079 | 10-scf00391 | 10 |
| AX-158242544 | 20 | 58.329 | KV452980.1 | 1213427 | 10-scf00391 | 10 |
| AX-158242554 | 20 | 58.329 | KV452980.1 | 1224888 | 10-scf00391 | 10 |
| AX-158242559 | 20 | 58.329 | KV452980.1 | 1230369 | 10-scf00391 | 10 |
| AX-158242569 | 20 | 58.329 | KV452980.1 | 1246555 | 10-scf00391 | 10 |
| AX-158243704 | 20 | 58.329 | KV452980.1 | 2704174 | 10-scf00391 | 10 |
| AX-157732787 | 20 | 58.329 | KV452981.1 | 731849  | 10-scf00393 | 10 |
| AX-158242573 | 20 | 58.336 | KV452980.1 | 1251356 | 10-scf00391 | 10 |
| AX-158242576 | 20 | 58.358 | KV452980.1 | 1254816 | 10-scf00391 | 10 |
| AX-158242696 | 20 | 58.358 | KV452980.1 | 1411148 | 10-scf00391 | 10 |
| AX-157841365 | 20 | 58.358 | KV452980.1 | 1448282 | 10-scf00391 | 10 |
| AX-158242731 | 20 | 58.358 | KV452980.1 | 1456301 | 10-scf00391 | 10 |
| AX-158242757 | 20 | 58.358 | KV452980.1 | 1487729 | 10-scf00391 | 10 |
| AX-158242777 | 20 | 58.358 | KV452980.1 | 1510202 | 10-scf00391 | 10 |
| AX-158244169 | 20 | 58.379 | KV452980.1 | 326821  | 10-scf00391 | 10 |
| AX-158242426 | 20 | 58.379 | KV452980.1 | 1032209 | 10-scf00391 | 10 |
| AX-157748342 | 20 | 58.379 | KV452980.1 | 1255967 | 10-scf00391 | 10 |
| AX-158242580 | 20 | 58.379 | KV452980.1 | 1260401 | 10-scf00391 | 10 |
| AX-158242736 | 20 | 58.379 | KV452980.1 | 1464012 | 10-scf00391 | 10 |
| AX-157716607 | 20 | 58.414 | KV452980.1 | 1175672 | 10-scf00391 | 10 |
| AX-158242581 | 20 | 58.414 | KV452980.1 | 1260981 | 10-scf00391 | 10 |
| AX-158242582 | 20 | 58.414 | KV452980.1 | 1261716 | 10-scf00391 | 10 |
| AX-158242583 | 20 | 58.414 | KV452980.1 | 1262152 | 10-scf00391 | 10 |
| AX-157841339 | 20 | 58.414 | KV452980.1 | 1262456 | 10-scf00391 | 10 |
| AX-158242585 | 20 | 58.524 | KV452980.1 | 1263100 | 10-scf00391 | 10 |
| AX-158243975 | 20 | 58.742 | KV452980.1 | 97135   | 10-scf00391 | 10 |
| AX-158244043 | 20 | 58.742 | KV452980.1 | 192870  | 10-scf00391 | 10 |
| AX-158244080 | 20 | 58.742 | KV452980.1 | 237193  | 10-scf00391 | 10 |
| AX-158244141 | 20 | 58.742 | KV452980.1 | 292161  | 10-scf00391 | 10 |
| AX-158244144 | 20 | 58.742 | KV452980.1 | 299403  | 10-scf00391 | 10 |
| AX-158244181 | 20 | 58.742 | KV452980.1 | 342151  | 10-scf00391 | 10 |
| AX-158244206 | 20 | 58.742 | KV452980.1 | 381509  | 10-scf00391 | 10 |
| AX-158244219 | 20 | 58.742 | KV452980.1 | 395411  | 10-scf00391 | 10 |
| AX-157841295 | 20 | 58.742 | KV452980.1 | 885300  | 10-scf00391 | 10 |
| AX-157841341 | 20 | 58.742 | KV452980.1 | 1281242 | 10-scf00391 | 10 |
| AX-158242599 | 20 | 58.742 | KV452980.1 | 1282896 | 10-scf00391 | 10 |
| AX-157841343 | 20 | 58.742 | KV452980.1 | 1290770 | 10-scf00391 | 10 |
| AX-158242606 | 20 | 58.742 | KV452980.1 | 1299653 | 10-scf00391 | 10 |
| AX-158242609 | 20 | 58.742 | KV452980.1 | 1303429 | 10-scf00391 | 10 |
| AX-158242610 | 20 | 58.742 | KV452980.1 | 1304034 | 10-scf00391 | 10 |
| AX-158242611 | 20 | 58.742 | KV452980.1 | 1306736 | 10-scf00391 | 10 |
| AX-157841347 | 20 | 58.742 | KV452980.1 | 1307522 | 10-scf00391 | 10 |
| AX-158242612 | 20 | 58.742 | KV452980.1 | 1309991 | 10-scf00391 | 10 |
| AX-158242616 | 20 | 58.742 | KV452980.1 | 1314480 | 10-scf00391 | 10 |
| AX-158242621 | 20 | 58.742 | KV452980.1 | 1318599 | 10-scf00391 | 10 |

|              |    |        |            |         |             |    |
|--------------|----|--------|------------|---------|-------------|----|
| AX-157716909 | 20 | 58.742 | KV452980.1 | 1321911 | 10-scf00391 | 10 |
| AX-158242625 | 20 | 58.742 | KV452980.1 | 1327187 | 10-scf00391 | 10 |
| AX-158242626 | 20 | 58.742 | KV452980.1 | 1327822 | 10-scf00391 | 10 |
| AX-157774724 | 20 | 58.742 | KV452980.1 | 1329625 | 10-scf00391 | 10 |
| AX-158242657 | 20 | 58.742 | KV452980.1 | 1359554 | 10-scf00391 | 10 |
| AX-158242676 | 20 | 58.742 | KV452980.1 | 1384035 | 10-scf00391 | 10 |
| AX-157750401 | 20 | 58.742 | KV452980.1 | 1489002 | 10-scf00391 | 10 |
| AX-158242797 | 20 | 58.742 | KV452980.1 | 1525589 | 10-scf00391 | 10 |
| AX-158242925 | 20 | 58.742 | KV452980.1 | 1695172 | 10-scf00391 | 10 |
| AX-158242935 | 20 | 58.742 | KV452980.1 | 1714848 | 10-scf00391 | 10 |
| AX-158244710 | 20 | 58.742 | KV452981.1 | 1061998 | 10-scf00393 | 10 |
| AX-157841350 | 20 | 58.906 | KV452980.1 | 1342477 | 10-scf00391 | 10 |
| AX-158386963 | 20 | 58.906 | KV452980.1 | 1356341 | 10-scf00391 | 10 |
| AX-158242682 | 20 | 58.906 | KV452980.1 | 1395907 | 10-scf00391 | 10 |
| AX-157841398 | 20 | 58.906 | KV452980.1 | 1722610 | 10-scf00391 | 10 |
| AX-158242643 | 20 | 58.964 | KV452980.1 | 1344934 | 10-scf00391 | 10 |
| AX-157841352 | 20 | 59.02  | KV452980.1 | 1351603 | 10-scf00391 | 10 |
| AX-158242388 | 20 | 59.07  | KV452980.1 | 955266  | 10-scf00391 | 10 |
| AX-157841315 | 20 | 59.07  | KV452980.1 | 1101436 | 10-scf00391 | 10 |
| AX-158242477 | 20 | 59.07  | KV452980.1 | 1111910 | 10-scf00391 | 10 |
| AX-157747743 | 20 | 59.07  | KV452980.1 | 1254201 | 10-scf00391 | 10 |
| AX-157841354 | 20 | 59.07  | KV452980.1 | 1351852 | 10-scf00391 | 10 |
| AX-158242653 | 20 | 59.07  | KV452980.1 | 1352593 | 10-scf00391 | 10 |
| AX-157743003 | 20 | 59.07  | KV452980.1 | 1360701 | 10-scf00391 | 10 |
| AX-158242665 | 20 | 59.07  | KV452980.1 | 1367720 | 10-scf00391 | 10 |
| AX-158242667 | 20 | 59.07  | KV452980.1 | 1372227 | 10-scf00391 | 10 |
| AX-158242668 | 20 | 59.07  | KV452980.1 | 1374173 | 10-scf00391 | 10 |
| AX-158242672 | 20 | 59.07  | KV452980.1 | 1378707 | 10-scf00391 | 10 |
| AX-158242675 | 20 | 59.07  | KV452980.1 | 1382618 | 10-scf00391 | 10 |
| AX-157841358 | 20 | 59.07  | KV452980.1 | 1384841 | 10-scf00391 | 10 |
| AX-158242679 | 20 | 59.07  | KV452980.1 | 1388778 | 10-scf00391 | 10 |
| AX-158242680 | 20 | 59.07  | KV452980.1 | 1393749 | 10-scf00391 | 10 |
| AX-158242681 | 20 | 59.07  | KV452980.1 | 1395152 | 10-scf00391 | 10 |
| AX-158242688 | 20 | 59.07  | KV452980.1 | 1402553 | 10-scf00391 | 10 |
| AX-158242700 | 20 | 59.07  | KV452980.1 | 1414135 | 10-scf00391 | 10 |
| AX-158242703 | 20 | 59.07  | KV452980.1 | 1415666 | 10-scf00391 | 10 |
| AX-158242751 | 20 | 59.07  | KV452980.1 | 1482947 | 10-scf00391 | 10 |
| AX-157872615 | 20 | 59.07  | KV452980.1 | 1483781 | 10-scf00391 | 10 |
| AX-157867287 | 20 | 59.07  | KV452980.1 | 1495236 | 10-scf00391 | 10 |
| AX-158244460 | 20 | 59.07  | KV452981.1 | 730844  | 10-scf00393 | 10 |
| AX-158244536 | 20 | 59.07  | KV452981.1 | 825012  | 10-scf00393 | 10 |
| AX-158245262 | 20 | 59.07  | KV452981.1 | 1823070 | 10-scf00393 | 10 |
| AX-158245263 | 20 | 59.07  | KV452981.1 | 1823509 | 10-scf00393 | 10 |
| AX-158245265 | 20 | 59.07  | KV452981.1 | 1825571 | 10-scf00393 | 10 |
| AX-158245266 | 20 | 59.07  | KV452981.1 | 1825964 | 10-scf00393 | 10 |
| AX-158242687 | 20 | 59.126 | KV452980.1 | 1401947 | 10-scf00391 | 10 |
| AX-157755227 | 20 | 59.179 | KV452979.1 | 6881336 | 10-scf00389 | 10 |
| AX-158394281 | 20 | 59.179 | KV452980.1 | 1198393 | 10-scf00391 | 10 |
| AX-158242603 | 20 | 59.179 | KV452980.1 | 1295855 | 10-scf00391 | 10 |
| AX-158242613 | 20 | 59.179 | KV452980.1 | 1310125 | 10-scf00391 | 10 |
| AX-158242640 | 20 | 59.179 | KV452980.1 | 1342400 | 10-scf00391 | 10 |

|              |    |        |            |         |             |    |
|--------------|----|--------|------------|---------|-------------|----|
| AX-158242649 | 20 | 59.179 | KV452980.1 | 1348629 | 10-scf00391 | 10 |
| AX-157841355 | 20 | 59.179 | KV452980.1 | 1355498 | 10-scf00391 | 10 |
| AX-158242666 | 20 | 59.179 | KV452980.1 | 1368436 | 10-scf00391 | 10 |
| AX-158242689 | 20 | 59.179 | KV452980.1 | 1405109 | 10-scf00391 | 10 |
| AX-158242697 | 20 | 59.179 | KV452980.1 | 1412196 | 10-scf00391 | 10 |
| AX-158242698 | 20 | 59.179 | KV452980.1 | 1413215 | 10-scf00391 | 10 |
| AX-158242699 | 20 | 59.179 | KV452980.1 | 1413458 | 10-scf00391 | 10 |
| AX-157841361 | 20 | 59.179 | KV452980.1 | 1414635 | 10-scf00391 | 10 |
| AX-158242701 | 20 | 59.179 | KV452980.1 | 1414783 | 10-scf00391 | 10 |
| AX-158242704 | 20 | 59.179 | KV452980.1 | 1416426 | 10-scf00391 | 10 |
| AX-158242705 | 20 | 59.179 | KV452980.1 | 1416799 | 10-scf00391 | 10 |
| AX-158242707 | 20 | 59.179 | KV452980.1 | 1418787 | 10-scf00391 | 10 |
| AX-157740430 | 20 | 59.179 | KV452980.1 | 1425338 | 10-scf00391 | 10 |
| AX-158242711 | 20 | 59.179 | KV452980.1 | 1425910 | 10-scf00391 | 10 |
| AX-158242716 | 20 | 59.179 | KV452980.1 | 1434093 | 10-scf00391 | 10 |
| AX-158242719 | 20 | 59.179 | KV452980.1 | 1436184 | 10-scf00391 | 10 |
| AX-157841363 | 20 | 59.179 | KV452980.1 | 1437077 | 10-scf00391 | 10 |
| AX-158242726 | 20 | 59.179 | KV452980.1 | 1450090 | 10-scf00391 | 10 |
| AX-158242735 | 20 | 59.179 | KV452980.1 | 1462824 | 10-scf00391 | 10 |
| AX-158242741 | 20 | 59.179 | KV452980.1 | 1471129 | 10-scf00391 | 10 |
| AX-158242743 | 20 | 59.179 | KV452980.1 | 1472316 | 10-scf00391 | 10 |
| AX-157748350 | 20 | 59.179 | KV452980.1 | 1474531 | 10-scf00391 | 10 |
| AX-157841368 | 20 | 59.179 | KV452980.1 | 1476408 | 10-scf00391 | 10 |
| AX-158242747 | 20 | 59.179 | KV452980.1 | 1477487 | 10-scf00391 | 10 |
| AX-157841369 | 20 | 59.179 | KV452980.1 | 1484132 | 10-scf00391 | 10 |
| AX-157841370 | 20 | 59.179 | KV452980.1 | 1493238 | 10-scf00391 | 10 |
| AX-158242759 | 20 | 59.179 | KV452980.1 | 1494100 | 10-scf00391 | 10 |
| AX-158242760 | 20 | 59.179 | KV452980.1 | 1494405 | 10-scf00391 | 10 |
| AX-158242763 | 20 | 59.179 | KV452980.1 | 1496052 | 10-scf00391 | 10 |
| AX-158242756 | 20 | 59.263 | KV452980.1 | 1487237 | 10-scf00391 | 10 |
| AX-158242765 | 20 | 59.398 | KV452980.1 | 1498747 | 10-scf00391 | 10 |
| AX-158242767 | 20 | 59.398 | KV452980.1 | 1502223 | 10-scf00391 | 10 |
| AX-158242769 | 20 | 59.398 | KV452980.1 | 1503420 | 10-scf00391 | 10 |
| AX-158242773 | 20 | 59.398 | KV452980.1 | 1508231 | 10-scf00391 | 10 |
| AX-158242774 | 20 | 59.398 | KV452980.1 | 1508763 | 10-scf00391 | 10 |
| AX-158242783 | 20 | 59.421 | KV452980.1 | 1517826 | 10-scf00391 | 10 |
| AX-158242784 | 20 | 59.435 | KV452980.1 | 1517951 | 10-scf00391 | 10 |
| AX-157841377 | 20 | 59.435 | KV452980.1 | 1563268 | 10-scf00391 | 10 |
| AX-158242791 | 20 | 59.446 | KV452980.1 | 1522000 | 10-scf00391 | 10 |
| AX-158242792 | 20 | 59.458 | KV452980.1 | 1522547 | 10-scf00391 | 10 |
| AX-158242793 | 20 | 59.471 | KV452980.1 | 1523037 | 10-scf00391 | 10 |
| AX-158242794 | 20 | 59.494 | KV452980.1 | 1523757 | 10-scf00391 | 10 |
| AX-158242795 | 20 | 59.507 | KV452980.1 | 1524104 | 10-scf00391 | 10 |
| AX-158242796 | 20 | 59.507 | KV452980.1 | 1524867 | 10-scf00391 | 10 |
| AX-158242798 | 20 | 59.507 | KV452980.1 | 1526196 | 10-scf00391 | 10 |
| AX-158242807 | 20 | 59.549 | KV452980.1 | 1537533 | 10-scf00391 | 10 |
| AX-158242788 | 20 | 59.59  | KV452980.1 | 1520589 | 10-scf00391 | 10 |
| AX-158242810 | 20 | 59.59  | KV452980.1 | 1538575 | 10-scf00391 | 10 |
| AX-158243008 | 20 | 59.59  | KV452980.1 | 1824961 | 10-scf00391 | 10 |
| AX-157841437 | 20 | 59.59  | KV452980.1 | 2304321 | 10-scf00391 | 10 |
| AX-158243382 | 20 | 59.59  | KV452980.1 | 2320739 | 10-scf00391 | 10 |

|              |    |        |            |         |             |    |
|--------------|----|--------|------------|---------|-------------|----|
| AX-158243462 | 20 | 59.59  | KV452980.1 | 2428654 | 10-scf00391 | 10 |
| AX-158242368 | 20 | 59.616 | KV452980.1 | 923291  | 10-scf00391 | 10 |
| AX-157841335 | 20 | 59.616 | KV452980.1 | 1190277 | 10-scf00391 | 10 |
| AX-158242669 | 20 | 59.616 | KV452980.1 | 1375362 | 10-scf00391 | 10 |
| AX-157841357 | 20 | 59.616 | KV452980.1 | 1383124 | 10-scf00391 | 10 |
| AX-158242677 | 20 | 59.616 | KV452980.1 | 1385140 | 10-scf00391 | 10 |
| AX-158242789 | 20 | 59.616 | KV452980.1 | 1521258 | 10-scf00391 | 10 |
| AX-157841373 | 20 | 59.616 | KV452980.1 | 1531624 | 10-scf00391 | 10 |
| AX-158242808 | 20 | 59.616 | KV452980.1 | 1537857 | 10-scf00391 | 10 |
| AX-158242811 | 20 | 59.616 | KV452980.1 | 1539200 | 10-scf00391 | 10 |
| AX-158242812 | 20 | 59.616 | KV452980.1 | 1539430 | 10-scf00391 | 10 |
| AX-158242813 | 20 | 59.616 | KV452980.1 | 1539791 | 10-scf00391 | 10 |
| AX-158242817 | 20 | 59.616 | KV452980.1 | 1543936 | 10-scf00391 | 10 |
| AX-158418958 | 20 | 59.616 | KV452980.1 | 1546779 | 10-scf00391 | 10 |
| AX-158242828 | 20 | 59.616 | KV452980.1 | 1558567 | 10-scf00391 | 10 |
| AX-158242830 | 20 | 59.616 | KV452980.1 | 1559336 | 10-scf00391 | 10 |
| AX-158242834 | 20 | 59.616 | KV452980.1 | 1561953 | 10-scf00391 | 10 |
| AX-158242835 | 20 | 59.616 | KV452980.1 | 1562245 | 10-scf00391 | 10 |
| AX-158380986 | 20 | 59.616 | KV452980.1 | 1572973 | 10-scf00391 | 10 |
| AX-158242839 | 20 | 59.616 | KV452980.1 | 1573755 | 10-scf00391 | 10 |
| AX-158242841 | 20 | 59.616 | KV452980.1 | 1575350 | 10-scf00391 | 10 |
| AX-158242842 | 20 | 59.616 | KV452980.1 | 1576889 | 10-scf00391 | 10 |
| AX-158242846 | 20 | 59.616 | KV452980.1 | 1582826 | 10-scf00391 | 10 |
| AX-158242848 | 20 | 59.616 | KV452980.1 | 1584422 | 10-scf00391 | 10 |
| AX-158242849 | 20 | 59.616 | KV452980.1 | 1584787 | 10-scf00391 | 10 |
| AX-157715123 | 20 | 59.616 | KV452980.1 | 1593368 | 10-scf00391 | 10 |
| AX-158242852 | 20 | 59.616 | KV452980.1 | 1593482 | 10-scf00391 | 10 |
| AX-158242933 | 20 | 59.616 | KV452980.1 | 1711462 | 10-scf00391 | 10 |
| AX-158242937 | 20 | 59.616 | KV452980.1 | 1719106 | 10-scf00391 | 10 |
| AX-158242938 | 20 | 59.616 | KV452980.1 | 1726125 | 10-scf00391 | 10 |
| AX-158242949 | 20 | 59.616 | KV452980.1 | 1741415 | 10-scf00391 | 10 |
| AX-158242967 | 20 | 59.616 | KV452980.1 | 1766009 | 10-scf00391 | 10 |
| AX-157717061 | 20 | 59.616 | KV452980.1 | 1784206 | 10-scf00391 | 10 |
| AX-158243031 | 20 | 59.616 | KV452980.1 | 1847976 | 10-scf00391 | 10 |
| AX-158243086 | 20 | 59.616 | KV452980.1 | 1905379 | 10-scf00391 | 10 |
| AX-158243088 | 20 | 59.616 | KV452980.1 | 1907993 | 10-scf00391 | 10 |
| AX-158243102 | 20 | 59.616 | KV452980.1 | 1930818 | 10-scf00391 | 10 |
| AX-158243108 | 20 | 59.616 | KV452980.1 | 1939294 | 10-scf00391 | 10 |
| AX-158243195 | 20 | 59.616 | KV452980.1 | 2031339 | 10-scf00391 | 10 |
| AX-157841443 | 20 | 59.616 | KV452980.1 | 2321518 | 10-scf00391 | 10 |
| AX-157718646 | 20 | 59.616 | KV452980.1 | 2379560 | 10-scf00391 | 10 |
| AX-158243739 | 20 | 59.616 | KV452980.1 | 2741119 | 10-scf00391 | 10 |
| AX-158243742 | 20 | 59.616 | KV452980.1 | 2742708 | 10-scf00391 | 10 |
| AX-158244344 | 20 | 59.616 | KV452981.1 | 583690  | 10-scf00393 | 10 |
| AX-158244850 | 20 | 59.616 | KV452981.1 | 1233281 | 10-scf00393 | 10 |
| AX-157880142 | 20 | 59.616 | KV452981.1 | 1660359 | 10-scf00393 | 10 |
| AX-158242851 | 20 | 59.753 | KV452980.1 | 1586877 | 10-scf00391 | 10 |
| AX-157841479 | 20 | 59.753 | KV452980.1 | 3044965 | 10-scf00391 | 10 |
| AX-158242854 | 20 | 59.875 | KV452980.1 | 1594269 | 10-scf00391 | 10 |
| AX-158242928 | 20 | 60.026 | KV452980.1 | 1702074 | 10-scf00391 | 10 |
| AX-157841396 | 20 | 60.075 | KV452980.1 | 1711156 | 10-scf00391 | 10 |

|              |    |        |            |         |                |    |
|--------------|----|--------|------------|---------|----------------|----|
| AX-158242805 | 20 | 60.163 | KV452980.1 | 1535921 | 10-scf00391    | 10 |
| AX-158242806 | 20 | 60.163 | KV452980.1 | 1536358 | 10-scf00391    | 10 |
| AX-158242826 | 20 | 60.163 | KV452980.1 | 1556980 | 10-scf00391    | 10 |
| AX-157716511 | 20 | 60.163 | KV452980.1 | 1583497 | 10-scf00391    | 10 |
| AX-158242940 | 20 | 60.163 | KV452980.1 | 1730016 | 10-scf00391    | 10 |
| AX-158242968 | 20 | 60.163 | KV452980.1 | 1769585 | 10-scf00391    | 10 |
| AX-158242981 | 20 | 60.163 | KV452980.1 | 1786905 | 10-scf00391    | 10 |
| AX-158242983 | 20 | 60.163 | KV452980.1 | 1788553 | 10-scf00391    | 10 |
| AX-158242984 | 20 | 60.163 | KV452980.1 | 1788815 | 10-scf00391    | 10 |
| AX-158242985 | 20 | 60.163 | KV452980.1 | 1791752 | 10-scf00391    | 10 |
| AX-158242986 | 20 | 60.163 | KV452980.1 | 1792046 | 10-scf00391    | 10 |
| AX-158242987 | 20 | 60.163 | KV452980.1 | 1792458 | 10-scf00391    | 10 |
| AX-158242992 | 20 | 60.163 | KV452980.1 | 1795777 | 10-scf00391    | 10 |
| AX-157703402 | 20 | 60.163 | DX098074.1 | 45      | IORI212 lctalu | UN |
| AX-158242988 | 20 | 60.383 | KV452980.1 | 1792690 | 10-scf00391    | 10 |
| AX-158243027 | 20 | 60.489 | KV452980.1 | 1844569 | 10-scf00391    | 10 |
| AX-158243038 | 20 | 60.489 | KV452980.1 | 1853185 | 10-scf00391    | 10 |
| AX-158243054 | 20 | 60.489 | KV452980.1 | 1864804 | 10-scf00391    | 10 |
| AX-158243055 | 20 | 60.489 | KV452980.1 | 1865412 | 10-scf00391    | 10 |
| AX-157770682 | 20 | 60.489 | KV452980.1 | 1876464 | 10-scf00391    | 10 |
| AX-158243069 | 20 | 60.489 | KV452980.1 | 1883850 | 10-scf00391    | 10 |
| AX-157841410 | 20 | 60.489 | KV452980.1 | 1893525 | 10-scf00391    | 10 |
| AX-158243089 | 20 | 60.489 | KV452980.1 | 1908736 | 10-scf00391    | 10 |
| AX-158243134 | 20 | 60.489 | KV452980.1 | 1963714 | 10-scf00391    | 10 |
| AX-158243135 | 20 | 60.489 | KV452980.1 | 1966887 | 10-scf00391    | 10 |
| AX-158243137 | 20 | 60.489 | KV452980.1 | 1971216 | 10-scf00391    | 10 |
| AX-157714166 | 20 | 60.489 | KV452981.1 | 445771  | 10-scf00393    | 10 |
| AX-158243118 | 20 | 60.49  | KV452980.1 | 1950128 | 10-scf00391    | 10 |
| AX-158243122 | 20 | 60.49  | KV452980.1 | 1952993 | 10-scf00391    | 10 |
| AX-158243129 | 20 | 60.49  | KV452980.1 | 1959598 | 10-scf00391    | 10 |
| AX-158243132 | 20 | 60.49  | KV452980.1 | 1961883 | 10-scf00391    | 10 |
| AX-158243147 | 20 | 60.49  | KV452980.1 | 1981919 | 10-scf00391    | 10 |
| AX-158242636 | 20 | 60.491 | KV452980.1 | 1337429 | 10-scf00391    | 10 |
| AX-157738675 | 20 | 60.491 | KV452980.1 | 1530453 | 10-scf00391    | 10 |
| AX-158242821 | 20 | 60.491 | KV452980.1 | 1550072 | 10-scf00391    | 10 |
| AX-158242822 | 20 | 60.491 | KV452980.1 | 1550661 | 10-scf00391    | 10 |
| AX-158242825 | 20 | 60.491 | KV452980.1 | 1555855 | 10-scf00391    | 10 |
| AX-158242890 | 20 | 60.491 | KV452980.1 | 1651895 | 10-scf00391    | 10 |
| AX-158242891 | 20 | 60.491 | KV452980.1 | 1653515 | 10-scf00391    | 10 |
| AX-158242892 | 20 | 60.491 | KV452980.1 | 1653941 | 10-scf00391    | 10 |
| AX-158242898 | 20 | 60.491 | KV452980.1 | 1666910 | 10-scf00391    | 10 |
| AX-158242900 | 20 | 60.491 | KV452980.1 | 1668003 | 10-scf00391    | 10 |
| AX-158242916 | 20 | 60.491 | KV452980.1 | 1686486 | 10-scf00391    | 10 |
| AX-158242921 | 20 | 60.491 | KV452980.1 | 1692264 | 10-scf00391    | 10 |
| AX-158242930 | 20 | 60.491 | KV452980.1 | 1704114 | 10-scf00391    | 10 |
| AX-157841397 | 20 | 60.491 | KV452980.1 | 1718827 | 10-scf00391    | 10 |
| AX-158242958 | 20 | 60.491 | KV452980.1 | 1750760 | 10-scf00391    | 10 |
| AX-158242972 | 20 | 60.491 | KV452980.1 | 1774715 | 10-scf00391    | 10 |
| AX-158242993 | 20 | 60.491 | KV452980.1 | 1796132 | 10-scf00391    | 10 |
| AX-158242996 | 20 | 60.491 | KV452980.1 | 1801254 | 10-scf00391    | 10 |
| AX-157841403 | 20 | 60.491 | KV452980.1 | 1801825 | 10-scf00391    | 10 |

|              |    |        |            |         |             |    |
|--------------|----|--------|------------|---------|-------------|----|
| AX-158242998 | 20 | 60.491 | KV452980.1 | 1813203 | 10-scf00391 | 10 |
| AX-157757460 | 20 | 60.491 | KV452980.1 | 1813535 | 10-scf00391 | 10 |
| AX-158243036 | 20 | 60.491 | KV452980.1 | 1850815 | 10-scf00391 | 10 |
| AX-158243053 | 20 | 60.491 | KV452980.1 | 1863628 | 10-scf00391 | 10 |
| AX-158243060 | 20 | 60.491 | KV452980.1 | 1870346 | 10-scf00391 | 10 |
| AX-158243061 | 20 | 60.491 | KV452980.1 | 1873231 | 10-scf00391 | 10 |
| AX-158243064 | 20 | 60.491 | KV452980.1 | 1879029 | 10-scf00391 | 10 |
| AX-158243074 | 20 | 60.491 | KV452980.1 | 1887862 | 10-scf00391 | 10 |
| AX-158243079 | 20 | 60.491 | KV452980.1 | 1891620 | 10-scf00391 | 10 |
| AX-158243082 | 20 | 60.491 | KV452980.1 | 1895719 | 10-scf00391 | 10 |
| AX-157841411 | 20 | 60.491 | KV452980.1 | 1896958 | 10-scf00391 | 10 |
| AX-158243087 | 20 | 60.491 | KV452980.1 | 1907140 | 10-scf00391 | 10 |
| AX-158243095 | 20 | 60.491 | KV452980.1 | 1925738 | 10-scf00391 | 10 |
| AX-158243098 | 20 | 60.491 | KV452980.1 | 1928220 | 10-scf00391 | 10 |
| AX-158243107 | 20 | 60.491 | KV452980.1 | 1938536 | 10-scf00391 | 10 |
| AX-158243114 | 20 | 60.491 | KV452980.1 | 1945706 | 10-scf00391 | 10 |
| AX-158243140 | 20 | 60.491 | KV452980.1 | 1973334 | 10-scf00391 | 10 |
| AX-158243143 | 20 | 60.491 | KV452980.1 | 1978232 | 10-scf00391 | 10 |
| AX-158243148 | 20 | 60.491 | KV452980.1 | 1982449 | 10-scf00391 | 10 |
| AX-158243153 | 20 | 60.491 | KV452980.1 | 1986458 | 10-scf00391 | 10 |
| AX-158243155 | 20 | 60.491 | KV452980.1 | 1988217 | 10-scf00391 | 10 |
| AX-158243157 | 20 | 60.491 | KV452980.1 | 1989664 | 10-scf00391 | 10 |
| AX-158243159 | 20 | 60.491 | KV452980.1 | 1991270 | 10-scf00391 | 10 |
| AX-158243161 | 20 | 60.491 | KV452980.1 | 1992575 | 10-scf00391 | 10 |
| AX-158243162 | 20 | 60.491 | KV452980.1 | 1993237 | 10-scf00391 | 10 |
| AX-158243163 | 20 | 60.491 | KV452980.1 | 1994336 | 10-scf00391 | 10 |
| AX-158243164 | 20 | 60.491 | KV452980.1 | 1996520 | 10-scf00391 | 10 |
| AX-158243165 | 20 | 60.491 | KV452980.1 | 1997075 | 10-scf00391 | 10 |
| AX-158243166 | 20 | 60.491 | KV452980.1 | 1997432 | 10-scf00391 | 10 |
| AX-158243167 | 20 | 60.491 | KV452980.1 | 1999455 | 10-scf00391 | 10 |
| AX-158243168 | 20 | 60.491 | KV452980.1 | 1999934 | 10-scf00391 | 10 |
| AX-158243169 | 20 | 60.491 | KV452980.1 | 2000169 | 10-scf00391 | 10 |
| AX-158243170 | 20 | 60.491 | KV452980.1 | 2001100 | 10-scf00391 | 10 |
| AX-158243171 | 20 | 60.491 | KV452980.1 | 2003180 | 10-scf00391 | 10 |
| AX-158243172 | 20 | 60.491 | KV452980.1 | 2004129 | 10-scf00391 | 10 |
| AX-158243173 | 20 | 60.491 | KV452980.1 | 2004597 | 10-scf00391 | 10 |
| AX-158243174 | 20 | 60.491 | KV452980.1 | 2007585 | 10-scf00391 | 10 |
| AX-158243176 | 20 | 60.491 | KV452980.1 | 2008573 | 10-scf00391 | 10 |
| AX-158243177 | 20 | 60.491 | KV452980.1 | 2008817 | 10-scf00391 | 10 |
| AX-158243178 | 20 | 60.491 | KV452980.1 | 2009929 | 10-scf00391 | 10 |
| AX-158243179 | 20 | 60.491 | KV452980.1 | 2010145 | 10-scf00391 | 10 |
| AX-158243181 | 20 | 60.491 | KV452980.1 | 2011188 | 10-scf00391 | 10 |
| AX-158243182 | 20 | 60.491 | KV452980.1 | 2013616 | 10-scf00391 | 10 |
| AX-157841414 | 20 | 60.491 | KV452980.1 | 2015438 | 10-scf00391 | 10 |
| AX-157717383 | 20 | 60.491 | KV452980.1 | 2015850 | 10-scf00391 | 10 |
| AX-158243185 | 20 | 60.491 | KV452980.1 | 2017824 | 10-scf00391 | 10 |
| AX-158243186 | 20 | 60.491 | KV452980.1 | 2018232 | 10-scf00391 | 10 |
| AX-158243187 | 20 | 60.491 | KV452980.1 | 2019075 | 10-scf00391 | 10 |
| AX-158415596 | 20 | 60.491 | KV452980.1 | 2019393 | 10-scf00391 | 10 |
| AX-158415597 | 20 | 60.491 | KV452980.1 | 2019616 | 10-scf00391 | 10 |
| AX-158243188 | 20 | 60.491 | KV452980.1 | 2019746 | 10-scf00391 | 10 |



|              |    |        |            |         |             |    |
|--------------|----|--------|------------|---------|-------------|----|
| AX-157841415 | 20 | 60.491 | KV452980.1 | 2020094 | 10-scf00391 | 10 |
| AX-158243189 | 20 | 60.491 | KV452980.1 | 2020886 | 10-scf00391 | 10 |
| AX-158243190 | 20 | 60.491 | KV452980.1 | 2022318 | 10-scf00391 | 10 |
| AX-157841416 | 20 | 60.491 | KV452980.1 | 2023121 | 10-scf00391 | 10 |
| AX-158394286 | 20 | 60.491 | KV452980.1 | 2024099 | 10-scf00391 | 10 |
| AX-158243191 | 20 | 60.491 | KV452980.1 | 2024161 | 10-scf00391 | 10 |
| AX-157841417 | 20 | 60.491 | KV452980.1 | 2026204 | 10-scf00391 | 10 |
| AX-158243192 | 20 | 60.491 | KV452980.1 | 2026467 | 10-scf00391 | 10 |
| AX-158243193 | 20 | 60.491 | KV452980.1 | 2028092 | 10-scf00391 | 10 |
| AX-158243194 | 20 | 60.491 | KV452980.1 | 2029714 | 10-scf00391 | 10 |
| AX-157872624 | 20 | 60.491 | KV452980.1 | 2031647 | 10-scf00391 | 10 |
| AX-158243196 | 20 | 60.491 | KV452980.1 | 2032325 | 10-scf00391 | 10 |
| AX-158243197 | 20 | 60.491 | KV452980.1 | 2033024 | 10-scf00391 | 10 |
| AX-158243198 | 20 | 60.491 | KV452980.1 | 2033342 | 10-scf00391 | 10 |
| AX-157841418 | 20 | 60.491 | KV452980.1 | 2033693 | 10-scf00391 | 10 |
| AX-158243199 | 20 | 60.491 | KV452980.1 | 2034207 | 10-scf00391 | 10 |
| AX-157872625 | 20 | 60.491 | KV452980.1 | 2035286 | 10-scf00391 | 10 |
| AX-158243200 | 20 | 60.491 | KV452980.1 | 2035520 | 10-scf00391 | 10 |
| AX-158415598 | 20 | 60.491 | KV452980.1 | 2037196 | 10-scf00391 | 10 |
| AX-158243201 | 20 | 60.491 | KV452980.1 | 2039652 | 10-scf00391 | 10 |
| AX-158243202 | 20 | 60.491 | KV452980.1 | 2040134 | 10-scf00391 | 10 |
| AX-158243203 | 20 | 60.491 | KV452980.1 | 2041308 | 10-scf00391 | 10 |
| AX-158243204 | 20 | 60.491 | KV452980.1 | 2041620 | 10-scf00391 | 10 |
| AX-158243205 | 20 | 60.491 | KV452980.1 | 2044379 | 10-scf00391 | 10 |
| AX-158243206 | 20 | 60.491 | KV452980.1 | 2044761 | 10-scf00391 | 10 |
| AX-158243209 | 20 | 60.491 | KV452980.1 | 2047521 | 10-scf00391 | 10 |
| AX-158243210 | 20 | 60.491 | KV452980.1 | 2048118 | 10-scf00391 | 10 |
| AX-158243213 | 20 | 60.491 | KV452980.1 | 2054790 | 10-scf00391 | 10 |
| AX-157863806 | 20 | 60.491 | KV452980.1 | 2055015 | 10-scf00391 | 10 |
| AX-157841419 | 20 | 60.491 | KV452980.1 | 2055682 | 10-scf00391 | 10 |
| AX-158243215 | 20 | 60.491 | KV452980.1 | 2060183 | 10-scf00391 | 10 |
| AX-158243217 | 20 | 60.491 | KV452980.1 | 2062673 | 10-scf00391 | 10 |
| AX-157841421 | 20 | 60.491 | KV452980.1 | 2066384 | 10-scf00391 | 10 |
| AX-157859710 | 20 | 60.491 | KV452980.1 | 2066719 | 10-scf00391 | 10 |
| AX-158394287 | 20 | 60.491 | KV452980.1 | 2067913 | 10-scf00391 | 10 |
| AX-158243221 | 20 | 60.491 | KV452980.1 | 2072485 | 10-scf00391 | 10 |
| AX-158243224 | 20 | 60.491 | KV452980.1 | 2075598 | 10-scf00391 | 10 |
| AX-158243225 | 20 | 60.491 | KV452980.1 | 2076049 | 10-scf00391 | 10 |
| AX-158243227 | 20 | 60.491 | KV452980.1 | 2077208 | 10-scf00391 | 10 |
| AX-158243228 | 20 | 60.491 | KV452980.1 | 2079119 | 10-scf00391 | 10 |
| AX-158243229 | 20 | 60.491 | KV452980.1 | 2080524 | 10-scf00391 | 10 |
| AX-158243230 | 20 | 60.491 | KV452980.1 | 2081772 | 10-scf00391 | 10 |
| AX-157872629 | 20 | 60.491 | KV452980.1 | 2082045 | 10-scf00391 | 10 |
| AX-158243231 | 20 | 60.491 | KV452980.1 | 2084444 | 10-scf00391 | 10 |
| AX-158243232 | 20 | 60.491 | KV452980.1 | 2084957 | 10-scf00391 | 10 |
| AX-158243234 | 20 | 60.491 | KV452980.1 | 2085754 | 10-scf00391 | 10 |
| AX-158243236 | 20 | 60.491 | KV452980.1 | 2086862 | 10-scf00391 | 10 |
| AX-158243238 | 20 | 60.491 | KV452980.1 | 2089114 | 10-scf00391 | 10 |
| AX-157872632 | 20 | 60.491 | KV452980.1 | 2090992 | 10-scf00391 | 10 |
| AX-157872633 | 20 | 60.491 | KV452980.1 | 2091227 | 10-scf00391 | 10 |
| AX-158394289 | 20 | 60.491 | KV452980.1 | 2093196 | 10-scf00391 | 10 |

|              |    |        |            |         |             |    |
|--------------|----|--------|------------|---------|-------------|----|
| AX-158243241 | 20 | 60.491 | KV452980.1 | 2093820 | 10-scf00391 | 10 |
| AX-158243243 | 20 | 60.491 | KV452980.1 | 2096150 | 10-scf00391 | 10 |
| AX-157700069 | 20 | 60.491 | KV452980.1 | 2101795 | 10-scf00391 | 10 |
| AX-158243248 | 20 | 60.491 | KV452980.1 | 2102487 | 10-scf00391 | 10 |
| AX-157859712 | 20 | 60.491 | KV452980.1 | 2104387 | 10-scf00391 | 10 |
| AX-158243251 | 20 | 60.491 | KV452980.1 | 2106893 | 10-scf00391 | 10 |
| AX-158394291 | 20 | 60.491 | KV452980.1 | 2115779 | 10-scf00391 | 10 |
| AX-158243259 | 20 | 60.491 | KV452980.1 | 2117262 | 10-scf00391 | 10 |
| AX-158243260 | 20 | 60.491 | KV452980.1 | 2118437 | 10-scf00391 | 10 |
| AX-158243263 | 20 | 60.491 | KV452980.1 | 2123672 | 10-scf00391 | 10 |
| AX-158243274 | 20 | 60.491 | KV452980.1 | 2143255 | 10-scf00391 | 10 |
| AX-157872638 | 20 | 60.491 | KV452980.1 | 2154128 | 10-scf00391 | 10 |
| AX-158243280 | 20 | 60.491 | KV452980.1 | 2166669 | 10-scf00391 | 10 |
| AX-158243281 | 20 | 60.491 | KV452980.1 | 2172540 | 10-scf00391 | 10 |
| AX-158243282 | 20 | 60.491 | KV452980.1 | 2172791 | 10-scf00391 | 10 |
| AX-158243283 | 20 | 60.491 | KV452980.1 | 2174138 | 10-scf00391 | 10 |
| AX-158243284 | 20 | 60.491 | KV452980.1 | 2174900 | 10-scf00391 | 10 |
| AX-158243285 | 20 | 60.491 | KV452980.1 | 2177575 | 10-scf00391 | 10 |
| AX-158243286 | 20 | 60.491 | KV452980.1 | 2179264 | 10-scf00391 | 10 |
| AX-157841430 | 20 | 60.491 | KV452980.1 | 2183219 | 10-scf00391 | 10 |
| AX-157859719 | 20 | 60.491 | KV452980.1 | 2183497 | 10-scf00391 | 10 |
| AX-158243289 | 20 | 60.491 | KV452980.1 | 2188309 | 10-scf00391 | 10 |
| AX-158243290 | 20 | 60.491 | KV452980.1 | 2188851 | 10-scf00391 | 10 |
| AX-158243292 | 20 | 60.491 | KV452980.1 | 2191621 | 10-scf00391 | 10 |
| AX-158243293 | 20 | 60.491 | KV452980.1 | 2192367 | 10-scf00391 | 10 |
| AX-158415599 | 20 | 60.491 | KV452980.1 | 2194056 | 10-scf00391 | 10 |
| AX-158243296 | 20 | 60.491 | KV452980.1 | 2196469 | 10-scf00391 | 10 |
| AX-158243297 | 20 | 60.491 | KV452980.1 | 2198697 | 10-scf00391 | 10 |
| AX-158243298 | 20 | 60.491 | KV452980.1 | 2201085 | 10-scf00391 | 10 |
| AX-158243299 | 20 | 60.491 | KV452980.1 | 2202379 | 10-scf00391 | 10 |
| AX-157859720 | 20 | 60.491 | KV452980.1 | 2202476 | 10-scf00391 | 10 |
| AX-157859721 | 20 | 60.491 | KV452980.1 | 2203065 | 10-scf00391 | 10 |
| AX-158243301 | 20 | 60.491 | KV452980.1 | 2203327 | 10-scf00391 | 10 |
| AX-158243302 | 20 | 60.491 | KV452980.1 | 2203789 | 10-scf00391 | 10 |
| AX-158243303 | 20 | 60.491 | KV452980.1 | 2204351 | 10-scf00391 | 10 |
| AX-158243304 | 20 | 60.491 | KV452980.1 | 2205068 | 10-scf00391 | 10 |
| AX-158243305 | 20 | 60.491 | KV452980.1 | 2205790 | 10-scf00391 | 10 |
| AX-158243306 | 20 | 60.491 | KV452980.1 | 2206711 | 10-scf00391 | 10 |
| AX-158243307 | 20 | 60.491 | KV452980.1 | 2207388 | 10-scf00391 | 10 |
| AX-158243308 | 20 | 60.491 | KV452980.1 | 2208435 | 10-scf00391 | 10 |
| AX-158243309 | 20 | 60.491 | KV452980.1 | 2210027 | 10-scf00391 | 10 |
| AX-158243310 | 20 | 60.491 | KV452980.1 | 2210473 | 10-scf00391 | 10 |
| AX-158243311 | 20 | 60.491 | KV452980.1 | 2211295 | 10-scf00391 | 10 |
| AX-158243312 | 20 | 60.491 | KV452980.1 | 2214302 | 10-scf00391 | 10 |
| AX-158243313 | 20 | 60.491 | KV452980.1 | 2215148 | 10-scf00391 | 10 |
| AX-158243315 | 20 | 60.491 | KV452980.1 | 2216688 | 10-scf00391 | 10 |
| AX-158243316 | 20 | 60.491 | KV452980.1 | 2218630 | 10-scf00391 | 10 |
| AX-157841432 | 20 | 60.491 | KV452980.1 | 2219207 | 10-scf00391 | 10 |
| AX-158243317 | 20 | 60.491 | KV452980.1 | 2220817 | 10-scf00391 | 10 |
| AX-158243318 | 20 | 60.491 | KV452980.1 | 2222183 | 10-scf00391 | 10 |
| AX-158243319 | 20 | 60.491 | KV452980.1 | 2223981 | 10-scf00391 | 10 |

|              |    |        |            |         |             |    |
|--------------|----|--------|------------|---------|-------------|----|
| AX-158243320 | 20 | 60.491 | KV452980.1 | 2224338 | 10-scf00391 | 10 |
| AX-158243321 | 20 | 60.491 | KV452980.1 | 2225087 | 10-scf00391 | 10 |
| AX-158394299 | 20 | 60.491 | KV452980.1 | 2225145 | 10-scf00391 | 10 |
| AX-158243322 | 20 | 60.491 | KV452980.1 | 2226969 | 10-scf00391 | 10 |
| AX-158243323 | 20 | 60.491 | KV452980.1 | 2227683 | 10-scf00391 | 10 |
| AX-158243324 | 20 | 60.491 | KV452980.1 | 2227823 | 10-scf00391 | 10 |
| AX-158243325 | 20 | 60.491 | KV452980.1 | 2230063 | 10-scf00391 | 10 |
| AX-158415601 | 20 | 60.491 | KV452980.1 | 2230202 | 10-scf00391 | 10 |
| AX-158243329 | 20 | 60.491 | KV452980.1 | 2236064 | 10-scf00391 | 10 |
| AX-158243330 | 20 | 60.491 | KV452980.1 | 2239118 | 10-scf00391 | 10 |
| AX-158418965 | 20 | 60.491 | KV452980.1 | 2240178 | 10-scf00391 | 10 |
| AX-158243331 | 20 | 60.491 | KV452980.1 | 2241440 | 10-scf00391 | 10 |
| AX-158243333 | 20 | 60.491 | KV452980.1 | 2244164 | 10-scf00391 | 10 |
| AX-158243334 | 20 | 60.491 | KV452980.1 | 2245801 | 10-scf00391 | 10 |
| AX-158243335 | 20 | 60.491 | KV452980.1 | 2246518 | 10-scf00391 | 10 |
| AX-158243336 | 20 | 60.491 | KV452980.1 | 2247168 | 10-scf00391 | 10 |
| AX-158243337 | 20 | 60.491 | KV452980.1 | 2247939 | 10-scf00391 | 10 |
| AX-158243338 | 20 | 60.491 | KV452980.1 | 2249437 | 10-scf00391 | 10 |
| AX-158243339 | 20 | 60.491 | KV452980.1 | 2249640 | 10-scf00391 | 10 |
| AX-158243340 | 20 | 60.491 | KV452980.1 | 2249918 | 10-scf00391 | 10 |
| AX-158418968 | 20 | 60.491 | KV452980.1 | 2252056 | 10-scf00391 | 10 |
| AX-158243343 | 20 | 60.491 | KV452980.1 | 2252887 | 10-scf00391 | 10 |
| AX-158243344 | 20 | 60.491 | KV452980.1 | 2254246 | 10-scf00391 | 10 |
| AX-158243345 | 20 | 60.491 | KV452980.1 | 2254332 | 10-scf00391 | 10 |
| AX-158243346 | 20 | 60.491 | KV452980.1 | 2256347 | 10-scf00391 | 10 |
| AX-158243348 | 20 | 60.491 | KV452980.1 | 2259082 | 10-scf00391 | 10 |
| AX-158243349 | 20 | 60.491 | KV452980.1 | 2260685 | 10-scf00391 | 10 |
| AX-158243350 | 20 | 60.491 | KV452980.1 | 2261242 | 10-scf00391 | 10 |
| AX-158243351 | 20 | 60.491 | KV452980.1 | 2263253 | 10-scf00391 | 10 |
| AX-158243352 | 20 | 60.491 | KV452980.1 | 2264411 | 10-scf00391 | 10 |
| AX-158243353 | 20 | 60.491 | KV452980.1 | 2265284 | 10-scf00391 | 10 |
| AX-158243355 | 20 | 60.491 | KV452980.1 | 2267737 | 10-scf00391 | 10 |
| AX-158243356 | 20 | 60.491 | KV452980.1 | 2271575 | 10-scf00391 | 10 |
| AX-158243357 | 20 | 60.491 | KV452980.1 | 2273755 | 10-scf00391 | 10 |
| AX-157872640 | 20 | 60.491 | KV452980.1 | 2274373 | 10-scf00391 | 10 |
| AX-158243358 | 20 | 60.491 | KV452980.1 | 2280101 | 10-scf00391 | 10 |
| AX-158243360 | 20 | 60.491 | KV452980.1 | 2284037 | 10-scf00391 | 10 |
| AX-158243361 | 20 | 60.491 | KV452980.1 | 2284551 | 10-scf00391 | 10 |
| AX-158243364 | 20 | 60.491 | KV452980.1 | 2287555 | 10-scf00391 | 10 |
| AX-158243365 | 20 | 60.491 | KV452980.1 | 2287796 | 10-scf00391 | 10 |
| AX-157700087 | 20 | 60.491 | KV452980.1 | 2289281 | 10-scf00391 | 10 |
| AX-158243367 | 20 | 60.491 | KV452980.1 | 2292635 | 10-scf00391 | 10 |
| AX-158243368 | 20 | 60.491 | KV452980.1 | 2293541 | 10-scf00391 | 10 |
| AX-158243369 | 20 | 60.491 | KV452980.1 | 2295609 | 10-scf00391 | 10 |
| AX-158243370 | 20 | 60.491 | KV452980.1 | 2295890 | 10-scf00391 | 10 |
| AX-157841434 | 20 | 60.491 | KV452980.1 | 2295941 | 10-scf00391 | 10 |
| AX-157841435 | 20 | 60.491 | KV452980.1 | 2296250 | 10-scf00391 | 10 |
| AX-158243371 | 20 | 60.491 | KV452980.1 | 2299601 | 10-scf00391 | 10 |
| AX-158243372 | 20 | 60.491 | KV452980.1 | 2300497 | 10-scf00391 | 10 |
| AX-158243373 | 20 | 60.491 | KV452980.1 | 2300888 | 10-scf00391 | 10 |
| AX-158394300 | 20 | 60.491 | KV452980.1 | 2302385 | 10-scf00391 | 10 |

|              |    |        |            |         |             |    |
|--------------|----|--------|------------|---------|-------------|----|
| AX-157841436 | 20 | 60.491 | KV452980.1 | 2303578 | 10-scf00391 | 10 |
| AX-158243374 | 20 | 60.491 | KV452980.1 | 2304060 | 10-scf00391 | 10 |
| AX-157841438 | 20 | 60.491 | KV452980.1 | 2308688 | 10-scf00391 | 10 |
| AX-157872641 | 20 | 60.491 | KV452980.1 | 2309608 | 10-scf00391 | 10 |
| AX-157841439 | 20 | 60.491 | KV452980.1 | 2310074 | 10-scf00391 | 10 |
| AX-157841440 | 20 | 60.491 | KV452980.1 | 2310952 | 10-scf00391 | 10 |
| AX-158243375 | 20 | 60.491 | KV452980.1 | 2311921 | 10-scf00391 | 10 |
| AX-157841441 | 20 | 60.491 | KV452980.1 | 2313625 | 10-scf00391 | 10 |
| AX-158243377 | 20 | 60.491 | KV452980.1 | 2314060 | 10-scf00391 | 10 |
| AX-158243378 | 20 | 60.491 | KV452980.1 | 2314754 | 10-scf00391 | 10 |
| AX-158243379 | 20 | 60.491 | KV452980.1 | 2315590 | 10-scf00391 | 10 |
| AX-158243381 | 20 | 60.491 | KV452980.1 | 2317021 | 10-scf00391 | 10 |
| AX-157841442 | 20 | 60.491 | KV452980.1 | 2318802 | 10-scf00391 | 10 |
| AX-157872642 | 20 | 60.491 | KV452980.1 | 2319841 | 10-scf00391 | 10 |
| AX-158243383 | 20 | 60.491 | KV452980.1 | 2322826 | 10-scf00391 | 10 |
| AX-158243384 | 20 | 60.491 | KV452980.1 | 2323581 | 10-scf00391 | 10 |
| AX-157841444 | 20 | 60.491 | KV452980.1 | 2325286 | 10-scf00391 | 10 |
| AX-157841445 | 20 | 60.491 | KV452980.1 | 2326159 | 10-scf00391 | 10 |
| AX-157841446 | 20 | 60.491 | KV452980.1 | 2326241 | 10-scf00391 | 10 |
| AX-157841447 | 20 | 60.491 | KV452980.1 | 2326681 | 10-scf00391 | 10 |
| AX-158243386 | 20 | 60.491 | KV452980.1 | 2326771 | 10-scf00391 | 10 |
| AX-157859723 | 20 | 60.491 | KV452980.1 | 2332913 | 10-scf00391 | 10 |
| AX-158243389 | 20 | 60.491 | KV452980.1 | 2333107 | 10-scf00391 | 10 |
| AX-158243390 | 20 | 60.491 | KV452980.1 | 2333781 | 10-scf00391 | 10 |
| AX-158423332 | 20 | 60.491 | KV452980.1 | 2336869 | 10-scf00391 | 10 |
| AX-158243392 | 20 | 60.491 | KV452980.1 | 2338385 | 10-scf00391 | 10 |
| AX-158243393 | 20 | 60.491 | KV452980.1 | 2339759 | 10-scf00391 | 10 |
| AX-158243394 | 20 | 60.491 | KV452980.1 | 2341962 | 10-scf00391 | 10 |
| AX-158243395 | 20 | 60.491 | KV452980.1 | 2342989 | 10-scf00391 | 10 |
| AX-158243396 | 20 | 60.491 | KV452980.1 | 2343681 | 10-scf00391 | 10 |
| AX-158410739 | 20 | 60.491 | KV452980.1 | 2344830 | 10-scf00391 | 10 |
| AX-158423333 | 20 | 60.491 | KV452980.1 | 2345040 | 10-scf00391 | 10 |
| AX-157841449 | 20 | 60.491 | KV452980.1 | 2346289 | 10-scf00391 | 10 |
| AX-157841450 | 20 | 60.491 | KV452980.1 | 2347193 | 10-scf00391 | 10 |
| AX-157841451 | 20 | 60.491 | KV452980.1 | 2350472 | 10-scf00391 | 10 |
| AX-158243399 | 20 | 60.491 | KV452980.1 | 2350848 | 10-scf00391 | 10 |
| AX-158243400 | 20 | 60.491 | KV452980.1 | 2351632 | 10-scf00391 | 10 |
| AX-158243401 | 20 | 60.491 | KV452980.1 | 2353034 | 10-scf00391 | 10 |
| AX-158243404 | 20 | 60.491 | KV452980.1 | 2359115 | 10-scf00391 | 10 |
| AX-158243405 | 20 | 60.491 | KV452980.1 | 2360923 | 10-scf00391 | 10 |
| AX-158415605 | 20 | 60.491 | KV452980.1 | 2361241 | 10-scf00391 | 10 |
| AX-158243406 | 20 | 60.491 | KV452980.1 | 2361826 | 10-scf00391 | 10 |
| AX-158243407 | 20 | 60.491 | KV452980.1 | 2362665 | 10-scf00391 | 10 |
| AX-158243409 | 20 | 60.491 | KV452980.1 | 2364886 | 10-scf00391 | 10 |
| AX-157711712 | 20 | 60.491 | KV452980.1 | 2366809 | 10-scf00391 | 10 |
| AX-158243410 | 20 | 60.491 | KV452980.1 | 2368282 | 10-scf00391 | 10 |
| AX-158243411 | 20 | 60.491 | KV452980.1 | 2368559 | 10-scf00391 | 10 |
| AX-158243412 | 20 | 60.491 | KV452980.1 | 2368759 | 10-scf00391 | 10 |
| AX-158243413 | 20 | 60.491 | KV452980.1 | 2371674 | 10-scf00391 | 10 |
| AX-158243415 | 20 | 60.491 | KV452980.1 | 2372954 | 10-scf00391 | 10 |
| AX-158243416 | 20 | 60.491 | KV452980.1 | 2373815 | 10-scf00391 | 10 |

|              |    |        |            |         |             |    |
|--------------|----|--------|------------|---------|-------------|----|
| AX-158243418 | 20 | 60.491 | KV452980.1 | 2374253 | 10-scf00391 | 10 |
| AX-157841453 | 20 | 60.491 | KV452980.1 | 2374838 | 10-scf00391 | 10 |
| AX-158243419 | 20 | 60.491 | KV452980.1 | 2377441 | 10-scf00391 | 10 |
| AX-158243420 | 20 | 60.491 | KV452980.1 | 2378431 | 10-scf00391 | 10 |
| AX-158243423 | 20 | 60.491 | KV452980.1 | 2380684 | 10-scf00391 | 10 |
| AX-158243426 | 20 | 60.491 | KV452980.1 | 2382458 | 10-scf00391 | 10 |
| AX-158243427 | 20 | 60.491 | KV452980.1 | 2383006 | 10-scf00391 | 10 |
| AX-157841456 | 20 | 60.491 | KV452980.1 | 2386678 | 10-scf00391 | 10 |
| AX-158243428 | 20 | 60.491 | KV452980.1 | 2389431 | 10-scf00391 | 10 |
| AX-158243429 | 20 | 60.491 | KV452980.1 | 2389983 | 10-scf00391 | 10 |
| AX-158243430 | 20 | 60.491 | KV452980.1 | 2390942 | 10-scf00391 | 10 |
| AX-158243431 | 20 | 60.491 | KV452980.1 | 2392671 | 10-scf00391 | 10 |
| AX-158243432 | 20 | 60.491 | KV452980.1 | 2394017 | 10-scf00391 | 10 |
| AX-158243433 | 20 | 60.491 | KV452980.1 | 2397708 | 10-scf00391 | 10 |
| AX-158243434 | 20 | 60.491 | KV452980.1 | 2400937 | 10-scf00391 | 10 |
| AX-158243436 | 20 | 60.491 | KV452980.1 | 2403196 | 10-scf00391 | 10 |
| AX-157841457 | 20 | 60.491 | KV452980.1 | 2403375 | 10-scf00391 | 10 |
| AX-158243437 | 20 | 60.491 | KV452980.1 | 2404596 | 10-scf00391 | 10 |
| AX-158243438 | 20 | 60.491 | KV452980.1 | 2406551 | 10-scf00391 | 10 |
| AX-158243439 | 20 | 60.491 | KV452980.1 | 2407182 | 10-scf00391 | 10 |
| AX-158243440 | 20 | 60.491 | KV452980.1 | 2407737 | 10-scf00391 | 10 |
| AX-158243441 | 20 | 60.491 | KV452980.1 | 2409132 | 10-scf00391 | 10 |
| AX-158243442 | 20 | 60.491 | KV452980.1 | 2409702 | 10-scf00391 | 10 |
| AX-158243443 | 20 | 60.491 | KV452980.1 | 2410415 | 10-scf00391 | 10 |
| AX-158243444 | 20 | 60.491 | KV452980.1 | 2411513 | 10-scf00391 | 10 |
| AX-158243445 | 20 | 60.491 | KV452980.1 | 2411843 | 10-scf00391 | 10 |
| AX-157841458 | 20 | 60.491 | KV452980.1 | 2413464 | 10-scf00391 | 10 |
| AX-158243447 | 20 | 60.491 | KV452980.1 | 2413847 | 10-scf00391 | 10 |
| AX-158394301 | 20 | 60.491 | KV452980.1 | 2414035 | 10-scf00391 | 10 |
| AX-158243448 | 20 | 60.491 | KV452980.1 | 2414821 | 10-scf00391 | 10 |
| AX-158243449 | 20 | 60.491 | KV452980.1 | 2415367 | 10-scf00391 | 10 |
| AX-158243451 | 20 | 60.491 | KV452980.1 | 2417275 | 10-scf00391 | 10 |
| AX-158243452 | 20 | 60.491 | KV452980.1 | 2418112 | 10-scf00391 | 10 |
| AX-158243453 | 20 | 60.491 | KV452980.1 | 2420187 | 10-scf00391 | 10 |
| AX-158243454 | 20 | 60.491 | KV452980.1 | 2421459 | 10-scf00391 | 10 |
| AX-158243455 | 20 | 60.491 | KV452980.1 | 2422647 | 10-scf00391 | 10 |
| AX-158243456 | 20 | 60.491 | KV452980.1 | 2423228 | 10-scf00391 | 10 |
| AX-158243457 | 20 | 60.491 | KV452980.1 | 2424066 | 10-scf00391 | 10 |
| AX-158243458 | 20 | 60.491 | KV452980.1 | 2425846 | 10-scf00391 | 10 |
| AX-158243459 | 20 | 60.491 | KV452980.1 | 2426725 | 10-scf00391 | 10 |
| AX-158243460 | 20 | 60.491 | KV452980.1 | 2427818 | 10-scf00391 | 10 |
| AX-158243461 | 20 | 60.491 | KV452980.1 | 2428298 | 10-scf00391 | 10 |
| AX-158243463 | 20 | 60.491 | KV452980.1 | 2429197 | 10-scf00391 | 10 |
| AX-157757277 | 20 | 60.491 | KV452980.1 | 2429663 | 10-scf00391 | 10 |
| AX-158243464 | 20 | 60.491 | KV452980.1 | 2429784 | 10-scf00391 | 10 |
| AX-158243465 | 20 | 60.491 | KV452980.1 | 2430282 | 10-scf00391 | 10 |
| AX-157841459 | 20 | 60.491 | KV452980.1 | 2431130 | 10-scf00391 | 10 |
| AX-158243466 | 20 | 60.491 | KV452980.1 | 2431491 | 10-scf00391 | 10 |
| AX-157800816 | 20 | 60.491 | KV452980.1 | 2436859 | 10-scf00391 | 10 |
| AX-158243467 | 20 | 60.491 | KV452980.1 | 2437061 | 10-scf00391 | 10 |
| AX-157841460 | 20 | 60.491 | KV452980.1 | 2437511 | 10-scf00391 | 10 |

|              |    |        |            |         |             |    |
|--------------|----|--------|------------|---------|-------------|----|
| AX-157841461 | 20 | 60.491 | KV452980.1 | 2438950 | 10-scf00391 | 10 |
| AX-158243468 | 20 | 60.491 | KV452980.1 | 2441235 | 10-scf00391 | 10 |
| AX-158243469 | 20 | 60.491 | KV452980.1 | 2441742 | 10-scf00391 | 10 |
| AX-158243470 | 20 | 60.491 | KV452980.1 | 2442158 | 10-scf00391 | 10 |
| AX-157872643 | 20 | 60.491 | KV452980.1 | 2442372 | 10-scf00391 | 10 |
| AX-157701304 | 20 | 60.491 | KV452980.1 | 2442755 | 10-scf00391 | 10 |
| AX-158243471 | 20 | 60.491 | KV452980.1 | 2443391 | 10-scf00391 | 10 |
| AX-158243472 | 20 | 60.491 | KV452980.1 | 2444164 | 10-scf00391 | 10 |
| AX-157872644 | 20 | 60.491 | KV452980.1 | 2444668 | 10-scf00391 | 10 |
| AX-158243474 | 20 | 60.491 | KV452980.1 | 2446371 | 10-scf00391 | 10 |
| AX-158243475 | 20 | 60.491 | KV452980.1 | 2449128 | 10-scf00391 | 10 |
| AX-157859725 | 20 | 60.491 | KV452980.1 | 2449797 | 10-scf00391 | 10 |
| AX-158243476 | 20 | 60.491 | KV452980.1 | 2450751 | 10-scf00391 | 10 |
| AX-158243477 | 20 | 60.491 | KV452980.1 | 2453420 | 10-scf00391 | 10 |
| AX-157708678 | 20 | 60.491 | KV452980.1 | 2454009 | 10-scf00391 | 10 |
| AX-158243479 | 20 | 60.491 | KV452980.1 | 2455405 | 10-scf00391 | 10 |
| AX-158243480 | 20 | 60.491 | KV452980.1 | 2456050 | 10-scf00391 | 10 |
| AX-158243481 | 20 | 60.491 | KV452980.1 | 2456983 | 10-scf00391 | 10 |
| AX-158243483 | 20 | 60.491 | KV452980.1 | 2458796 | 10-scf00391 | 10 |
| AX-158243484 | 20 | 60.491 | KV452980.1 | 2460476 | 10-scf00391 | 10 |
| AX-158243485 | 20 | 60.491 | KV452980.1 | 2461288 | 10-scf00391 | 10 |
| AX-158243486 | 20 | 60.491 | KV452980.1 | 2461840 | 10-scf00391 | 10 |
| AX-158243487 | 20 | 60.491 | KV452980.1 | 2462477 | 10-scf00391 | 10 |
| AX-157841462 | 20 | 60.491 | KV452980.1 | 2463222 | 10-scf00391 | 10 |
| AX-158394302 | 20 | 60.491 | KV452980.1 | 2463263 | 10-scf00391 | 10 |
| AX-158243488 | 20 | 60.491 | KV452980.1 | 2463452 | 10-scf00391 | 10 |
| AX-158243489 | 20 | 60.491 | KV452980.1 | 2464494 | 10-scf00391 | 10 |
| AX-158243490 | 20 | 60.491 | KV452980.1 | 2464893 | 10-scf00391 | 10 |
| AX-157841463 | 20 | 60.491 | KV452980.1 | 2465693 | 10-scf00391 | 10 |
| AX-158243491 | 20 | 60.491 | KV452980.1 | 2467222 | 10-scf00391 | 10 |
| AX-158243493 | 20 | 60.491 | KV452980.1 | 2468439 | 10-scf00391 | 10 |
| AX-158243494 | 20 | 60.491 | KV452980.1 | 2469319 | 10-scf00391 | 10 |
| AX-158243495 | 20 | 60.491 | KV452980.1 | 2470245 | 10-scf00391 | 10 |
| AX-157713217 | 20 | 60.491 | KV452980.1 | 2470540 | 10-scf00391 | 10 |
| AX-158243496 | 20 | 60.491 | KV452980.1 | 2470719 | 10-scf00391 | 10 |
| AX-158243497 | 20 | 60.491 | KV452980.1 | 2470961 | 10-scf00391 | 10 |
| AX-158243498 | 20 | 60.491 | KV452980.1 | 2471676 | 10-scf00391 | 10 |
| AX-158243499 | 20 | 60.491 | KV452980.1 | 2471939 | 10-scf00391 | 10 |
| AX-157872645 | 20 | 60.491 | KV452980.1 | 2472490 | 10-scf00391 | 10 |
| AX-157841464 | 20 | 60.491 | KV452980.1 | 2472982 | 10-scf00391 | 10 |
| AX-158243500 | 20 | 60.491 | KV452980.1 | 2473275 | 10-scf00391 | 10 |
| AX-158243501 | 20 | 60.491 | KV452980.1 | 2474455 | 10-scf00391 | 10 |
| AX-158243502 | 20 | 60.491 | KV452980.1 | 2475100 | 10-scf00391 | 10 |
| AX-158243503 | 20 | 60.491 | KV452980.1 | 2475527 | 10-scf00391 | 10 |
| AX-157872646 | 20 | 60.491 | KV452980.1 | 2478720 | 10-scf00391 | 10 |
| AX-158243506 | 20 | 60.491 | KV452980.1 | 2479097 | 10-scf00391 | 10 |
| AX-158243507 | 20 | 60.491 | KV452980.1 | 2481352 | 10-scf00391 | 10 |
| AX-158243509 | 20 | 60.491 | KV452980.1 | 2482865 | 10-scf00391 | 10 |
| AX-157872647 | 20 | 60.491 | KV452980.1 | 2484146 | 10-scf00391 | 10 |
| AX-158243510 | 20 | 60.491 | KV452980.1 | 2484498 | 10-scf00391 | 10 |
| AX-157872648 | 20 | 60.491 | KV452980.1 | 2484940 | 10-scf00391 | 10 |

|              |    |        |            |         |             |    |
|--------------|----|--------|------------|---------|-------------|----|
| AX-158243511 | 20 | 60.491 | KV452980.1 | 2485266 | 10-scf00391 | 10 |
| AX-158243512 | 20 | 60.491 | KV452980.1 | 2488325 | 10-scf00391 | 10 |
| AX-158243513 | 20 | 60.491 | KV452980.1 | 2491669 | 10-scf00391 | 10 |
| AX-157700752 | 20 | 60.491 | KV452980.1 | 2493518 | 10-scf00391 | 10 |
| AX-158243514 | 20 | 60.491 | KV452980.1 | 2494132 | 10-scf00391 | 10 |
| AX-158243516 | 20 | 60.491 | KV452980.1 | 2495659 | 10-scf00391 | 10 |
| AX-158243517 | 20 | 60.491 | KV452980.1 | 2496565 | 10-scf00391 | 10 |
| AX-158243518 | 20 | 60.491 | KV452980.1 | 2496993 | 10-scf00391 | 10 |
| AX-158243519 | 20 | 60.491 | KV452980.1 | 2497614 | 10-scf00391 | 10 |
| AX-157709333 | 20 | 60.491 | KV452980.1 | 2498308 | 10-scf00391 | 10 |
| AX-158243521 | 20 | 60.491 | KV452980.1 | 2499014 | 10-scf00391 | 10 |
| AX-158243522 | 20 | 60.491 | KV452980.1 | 2500258 | 10-scf00391 | 10 |
| AX-158243523 | 20 | 60.491 | KV452980.1 | 2500670 | 10-scf00391 | 10 |
| AX-157841465 | 20 | 60.491 | KV452980.1 | 2500726 | 10-scf00391 | 10 |
| AX-158243524 | 20 | 60.491 | KV452980.1 | 2501360 | 10-scf00391 | 10 |
| AX-158243525 | 20 | 60.491 | KV452980.1 | 2503067 | 10-scf00391 | 10 |
| AX-158243526 | 20 | 60.491 | KV452980.1 | 2504045 | 10-scf00391 | 10 |
| AX-158243527 | 20 | 60.491 | KV452980.1 | 2504820 | 10-scf00391 | 10 |
| AX-158243528 | 20 | 60.491 | KV452980.1 | 2505074 | 10-scf00391 | 10 |
| AX-158243529 | 20 | 60.491 | KV452980.1 | 2505361 | 10-scf00391 | 10 |
| AX-158243530 | 20 | 60.491 | KV452980.1 | 2506675 | 10-scf00391 | 10 |
| AX-158243531 | 20 | 60.491 | KV452980.1 | 2507201 | 10-scf00391 | 10 |
| AX-158243532 | 20 | 60.491 | KV452980.1 | 2508795 | 10-scf00391 | 10 |
| AX-158243533 | 20 | 60.491 | KV452980.1 | 2509079 | 10-scf00391 | 10 |
| AX-157841466 | 20 | 60.491 | KV452980.1 | 2509402 | 10-scf00391 | 10 |
| AX-158243534 | 20 | 60.491 | KV452980.1 | 2509857 | 10-scf00391 | 10 |
| AX-158243535 | 20 | 60.491 | KV452980.1 | 2510157 | 10-scf00391 | 10 |
| AX-158243536 | 20 | 60.491 | KV452980.1 | 2510444 | 10-scf00391 | 10 |
| AX-158243537 | 20 | 60.491 | KV452980.1 | 2510738 | 10-scf00391 | 10 |
| AX-158243538 | 20 | 60.491 | KV452980.1 | 2511671 | 10-scf00391 | 10 |
| AX-158243539 | 20 | 60.491 | KV452980.1 | 2512117 | 10-scf00391 | 10 |
| AX-158243540 | 20 | 60.491 | KV452980.1 | 2513218 | 10-scf00391 | 10 |
| AX-158243541 | 20 | 60.491 | KV452980.1 | 2513781 | 10-scf00391 | 10 |
| AX-158243542 | 20 | 60.491 | KV452980.1 | 2514632 | 10-scf00391 | 10 |
| AX-158243543 | 20 | 60.491 | KV452980.1 | 2515211 | 10-scf00391 | 10 |
| AX-158394303 | 20 | 60.491 | KV452980.1 | 2515481 | 10-scf00391 | 10 |
| AX-158243544 | 20 | 60.491 | KV452980.1 | 2517090 | 10-scf00391 | 10 |
| AX-158243545 | 20 | 60.491 | KV452980.1 | 2518017 | 10-scf00391 | 10 |
| AX-158243546 | 20 | 60.491 | KV452980.1 | 2523031 | 10-scf00391 | 10 |
| AX-158243548 | 20 | 60.491 | KV452980.1 | 2524130 | 10-scf00391 | 10 |
| AX-158243549 | 20 | 60.491 | KV452980.1 | 2524877 | 10-scf00391 | 10 |
| AX-158243550 | 20 | 60.491 | KV452980.1 | 2525835 | 10-scf00391 | 10 |
| AX-158243552 | 20 | 60.491 | KV452980.1 | 2527046 | 10-scf00391 | 10 |
| AX-158243554 | 20 | 60.491 | KV452980.1 | 2529640 | 10-scf00391 | 10 |
| AX-158243555 | 20 | 60.491 | KV452980.1 | 2531345 | 10-scf00391 | 10 |
| AX-158243556 | 20 | 60.491 | KV452980.1 | 2532083 | 10-scf00391 | 10 |
| AX-158243557 | 20 | 60.491 | KV452980.1 | 2534820 | 10-scf00391 | 10 |
| AX-158243559 | 20 | 60.491 | KV452980.1 | 2536837 | 10-scf00391 | 10 |
| AX-158243562 | 20 | 60.491 | KV452980.1 | 2538664 | 10-scf00391 | 10 |
| AX-158243565 | 20 | 60.491 | KV452980.1 | 2541266 | 10-scf00391 | 10 |
| AX-158243567 | 20 | 60.491 | KV452980.1 | 2542147 | 10-scf00391 | 10 |

|              |    |        |            |         |             |    |
|--------------|----|--------|------------|---------|-------------|----|
| AX-158243568 | 20 | 60.491 | KV452980.1 | 2543046 | 10-scf00391 | 10 |
| AX-158243575 | 20 | 60.491 | KV452980.1 | 2550887 | 10-scf00391 | 10 |
| AX-157841469 | 20 | 60.491 | KV452980.1 | 2551213 | 10-scf00391 | 10 |
| AX-157841470 | 20 | 60.491 | KV452980.1 | 2555775 | 10-scf00391 | 10 |
| AX-157841471 | 20 | 60.491 | KV452980.1 | 2556638 | 10-scf00391 | 10 |
| AX-158243576 | 20 | 60.491 | KV452980.1 | 2557006 | 10-scf00391 | 10 |
| AX-158243577 | 20 | 60.491 | KV452980.1 | 2557212 | 10-scf00391 | 10 |
| AX-158243578 | 20 | 60.491 | KV452980.1 | 2557567 | 10-scf00391 | 10 |
| AX-158243580 | 20 | 60.491 | KV452980.1 | 2563325 | 10-scf00391 | 10 |
| AX-158243581 | 20 | 60.491 | KV452980.1 | 2564150 | 10-scf00391 | 10 |
| AX-158243586 | 20 | 60.491 | KV452980.1 | 2568168 | 10-scf00391 | 10 |
| AX-158243588 | 20 | 60.491 | KV452980.1 | 2573834 | 10-scf00391 | 10 |
| AX-158243589 | 20 | 60.491 | KV452980.1 | 2574285 | 10-scf00391 | 10 |
| AX-157698203 | 20 | 60.491 | KV452980.1 | 2574918 | 10-scf00391 | 10 |
| AX-158243590 | 20 | 60.491 | KV452980.1 | 2583546 | 10-scf00391 | 10 |
| AX-158243591 | 20 | 60.491 | KV452980.1 | 2584950 | 10-scf00391 | 10 |
| AX-158243593 | 20 | 60.491 | KV452980.1 | 2587897 | 10-scf00391 | 10 |
| AX-158243596 | 20 | 60.491 | KV452980.1 | 2590587 | 10-scf00391 | 10 |
| AX-157841472 | 20 | 60.491 | KV452980.1 | 2596554 | 10-scf00391 | 10 |
| AX-158243598 | 20 | 60.491 | KV452980.1 | 2598168 | 10-scf00391 | 10 |
| AX-158415612 | 20 | 60.491 | KV452980.1 | 2599038 | 10-scf00391 | 10 |
| AX-158418970 | 20 | 60.491 | KV452980.1 | 2599187 | 10-scf00391 | 10 |
| AX-158243599 | 20 | 60.491 | KV452980.1 | 2600864 | 10-scf00391 | 10 |
| AX-158243600 | 20 | 60.491 | KV452980.1 | 2601482 | 10-scf00391 | 10 |
| AX-158243601 | 20 | 60.491 | KV452980.1 | 2602647 | 10-scf00391 | 10 |
| AX-158243602 | 20 | 60.491 | KV452980.1 | 2603339 | 10-scf00391 | 10 |
| AX-158243603 | 20 | 60.491 | KV452980.1 | 2604361 | 10-scf00391 | 10 |
| AX-158243604 | 20 | 60.491 | KV452980.1 | 2605049 | 10-scf00391 | 10 |
| AX-158243605 | 20 | 60.491 | KV452980.1 | 2610134 | 10-scf00391 | 10 |
| AX-158243606 | 20 | 60.491 | KV452980.1 | 2612006 | 10-scf00391 | 10 |
| AX-157841473 | 20 | 60.491 | KV452980.1 | 2612405 | 10-scf00391 | 10 |
| AX-158243609 | 20 | 60.491 | KV452980.1 | 2614681 | 10-scf00391 | 10 |
| AX-158243610 | 20 | 60.491 | KV452980.1 | 2615252 | 10-scf00391 | 10 |
| AX-158243611 | 20 | 60.491 | KV452980.1 | 2615999 | 10-scf00391 | 10 |
| AX-158243612 | 20 | 60.491 | KV452980.1 | 2616611 | 10-scf00391 | 10 |
| AX-158243613 | 20 | 60.491 | KV452980.1 | 2618605 | 10-scf00391 | 10 |
| AX-158243615 | 20 | 60.491 | KV452980.1 | 2619178 | 10-scf00391 | 10 |
| AX-158243616 | 20 | 60.491 | KV452980.1 | 2620115 | 10-scf00391 | 10 |
| AX-158243617 | 20 | 60.491 | KV452980.1 | 2620712 | 10-scf00391 | 10 |
| AX-158243618 | 20 | 60.491 | KV452980.1 | 2622436 | 10-scf00391 | 10 |
| AX-158243619 | 20 | 60.491 | KV452980.1 | 2623364 | 10-scf00391 | 10 |
| AX-158243620 | 20 | 60.491 | KV452980.1 | 2624223 | 10-scf00391 | 10 |
| AX-158243621 | 20 | 60.491 | KV452980.1 | 2624797 | 10-scf00391 | 10 |
| AX-158243622 | 20 | 60.491 | KV452980.1 | 2625019 | 10-scf00391 | 10 |
| AX-158243623 | 20 | 60.491 | KV452980.1 | 2627056 | 10-scf00391 | 10 |
| AX-158243624 | 20 | 60.491 | KV452980.1 | 2628427 | 10-scf00391 | 10 |
| AX-158243625 | 20 | 60.491 | KV452980.1 | 2629739 | 10-scf00391 | 10 |
| AX-158243626 | 20 | 60.491 | KV452980.1 | 2630073 | 10-scf00391 | 10 |
| AX-158243627 | 20 | 60.491 | KV452980.1 | 2633311 | 10-scf00391 | 10 |
| AX-158243629 | 20 | 60.491 | KV452980.1 | 2638084 | 10-scf00391 | 10 |
| AX-158243630 | 20 | 60.491 | KV452980.1 | 2638422 | 10-scf00391 | 10 |



|              |    |        |            |         |             |    |
|--------------|----|--------|------------|---------|-------------|----|
| AX-158243631 | 20 | 60.491 | KV452980.1 | 2639069 | 10-scf00391 | 10 |
| AX-158243632 | 20 | 60.491 | KV452980.1 | 2640631 | 10-scf00391 | 10 |
| AX-158243633 | 20 | 60.491 | KV452980.1 | 2641125 | 10-scf00391 | 10 |
| AX-158243634 | 20 | 60.491 | KV452980.1 | 2641480 | 10-scf00391 | 10 |
| AX-158243635 | 20 | 60.491 | KV452980.1 | 2642646 | 10-scf00391 | 10 |
| AX-158243636 | 20 | 60.491 | KV452980.1 | 2643226 | 10-scf00391 | 10 |
| AX-158243637 | 20 | 60.491 | KV452980.1 | 2644633 | 10-scf00391 | 10 |
| AX-157841474 | 20 | 60.491 | KV452980.1 | 2645076 | 10-scf00391 | 10 |
| AX-157841475 | 20 | 60.491 | KV452980.1 | 2645539 | 10-scf00391 | 10 |
| AX-158243638 | 20 | 60.491 | KV452980.1 | 2646935 | 10-scf00391 | 10 |
| AX-158243639 | 20 | 60.491 | KV452980.1 | 2647393 | 10-scf00391 | 10 |
| AX-158243640 | 20 | 60.491 | KV452980.1 | 2650031 | 10-scf00391 | 10 |
| AX-157872649 | 20 | 60.491 | KV452980.1 | 2652087 | 10-scf00391 | 10 |
| AX-158243642 | 20 | 60.491 | KV452980.1 | 2652662 | 10-scf00391 | 10 |
| AX-158243643 | 20 | 60.491 | KV452980.1 | 2653523 | 10-scf00391 | 10 |
| AX-158243644 | 20 | 60.491 | KV452980.1 | 2655362 | 10-scf00391 | 10 |
| AX-158243645 | 20 | 60.491 | KV452980.1 | 2656290 | 10-scf00391 | 10 |
| AX-158243646 | 20 | 60.491 | KV452980.1 | 2656524 | 10-scf00391 | 10 |
| AX-158243647 | 20 | 60.491 | KV452980.1 | 2657452 | 10-scf00391 | 10 |
| AX-158243650 | 20 | 60.491 | KV452980.1 | 2659698 | 10-scf00391 | 10 |
| AX-157872650 | 20 | 60.491 | KV452980.1 | 2660317 | 10-scf00391 | 10 |
| AX-158243651 | 20 | 60.491 | KV452980.1 | 2660562 | 10-scf00391 | 10 |
| AX-158243652 | 20 | 60.491 | KV452980.1 | 2660771 | 10-scf00391 | 10 |
| AX-158243653 | 20 | 60.491 | KV452980.1 | 2661226 | 10-scf00391 | 10 |
| AX-158243654 | 20 | 60.491 | KV452980.1 | 2661559 | 10-scf00391 | 10 |
| AX-158243655 | 20 | 60.491 | KV452980.1 | 2661995 | 10-scf00391 | 10 |
| AX-158243656 | 20 | 60.491 | KV452980.1 | 2663476 | 10-scf00391 | 10 |
| AX-158243657 | 20 | 60.491 | KV452980.1 | 2664089 | 10-scf00391 | 10 |
| AX-158243659 | 20 | 60.491 | KV452980.1 | 2667099 | 10-scf00391 | 10 |
| AX-158243660 | 20 | 60.491 | KV452980.1 | 2668054 | 10-scf00391 | 10 |
| AX-158243661 | 20 | 60.491 | KV452980.1 | 2669187 | 10-scf00391 | 10 |
| AX-158243662 | 20 | 60.491 | KV452980.1 | 2669737 | 10-scf00391 | 10 |
| AX-158243663 | 20 | 60.491 | KV452980.1 | 2670871 | 10-scf00391 | 10 |
| AX-158243664 | 20 | 60.491 | KV452980.1 | 2672372 | 10-scf00391 | 10 |
| AX-158243665 | 20 | 60.491 | KV452980.1 | 2672566 | 10-scf00391 | 10 |
| AX-158243666 | 20 | 60.491 | KV452980.1 | 2672954 | 10-scf00391 | 10 |
| AX-158243667 | 20 | 60.491 | KV452980.1 | 2673725 | 10-scf00391 | 10 |
| AX-157872651 | 20 | 60.491 | KV452980.1 | 2674130 | 10-scf00391 | 10 |
| AX-158243668 | 20 | 60.491 | KV452980.1 | 2674700 | 10-scf00391 | 10 |
| AX-158243669 | 20 | 60.491 | KV452980.1 | 2675408 | 10-scf00391 | 10 |
| AX-158243670 | 20 | 60.491 | KV452980.1 | 2676584 | 10-scf00391 | 10 |
| AX-158243671 | 20 | 60.491 | KV452980.1 | 2677237 | 10-scf00391 | 10 |
| AX-158243672 | 20 | 60.491 | KV452980.1 | 2677449 | 10-scf00391 | 10 |
| AX-158243673 | 20 | 60.491 | KV452980.1 | 2677755 | 10-scf00391 | 10 |
| AX-157872652 | 20 | 60.491 | KV452980.1 | 2678227 | 10-scf00391 | 10 |
| AX-158243674 | 20 | 60.491 | KV452980.1 | 2679145 | 10-scf00391 | 10 |
| AX-158243675 | 20 | 60.491 | KV452980.1 | 2680157 | 10-scf00391 | 10 |
| AX-158243676 | 20 | 60.491 | KV452980.1 | 2680446 | 10-scf00391 | 10 |
| AX-158243677 | 20 | 60.491 | KV452980.1 | 2680705 | 10-scf00391 | 10 |
| AX-158243678 | 20 | 60.491 | KV452980.1 | 2681141 | 10-scf00391 | 10 |
| AX-158243679 | 20 | 60.491 | KV452980.1 | 2682704 | 10-scf00391 | 10 |

|              |    |        |            |         |             |    |
|--------------|----|--------|------------|---------|-------------|----|
| AX-158243680 | 20 | 60.491 | KV452980.1 | 2683382 | 10-scf00391 | 10 |
| AX-158243682 | 20 | 60.491 | KV452980.1 | 2685133 | 10-scf00391 | 10 |
| AX-158243683 | 20 | 60.491 | KV452980.1 | 2685850 | 10-scf00391 | 10 |
| AX-157703142 | 20 | 60.491 | KV452980.1 | 2686027 | 10-scf00391 | 10 |
| AX-158243684 | 20 | 60.491 | KV452980.1 | 2686990 | 10-scf00391 | 10 |
| AX-158243685 | 20 | 60.491 | KV452980.1 | 2687421 | 10-scf00391 | 10 |
| AX-158243687 | 20 | 60.491 | KV452980.1 | 2688541 | 10-scf00391 | 10 |
| AX-158243688 | 20 | 60.491 | KV452980.1 | 2689112 | 10-scf00391 | 10 |
| AX-158243690 | 20 | 60.491 | KV452980.1 | 2690560 | 10-scf00391 | 10 |
| AX-157841476 | 20 | 60.491 | KV452980.1 | 2691651 | 10-scf00391 | 10 |
| AX-158243691 | 20 | 60.491 | KV452980.1 | 2692286 | 10-scf00391 | 10 |
| AX-158243692 | 20 | 60.491 | KV452980.1 | 2693225 | 10-scf00391 | 10 |
| AX-158243694 | 20 | 60.491 | KV452980.1 | 2694189 | 10-scf00391 | 10 |
| AX-158243695 | 20 | 60.491 | KV452980.1 | 2694685 | 10-scf00391 | 10 |
| AX-158243696 | 20 | 60.491 | KV452980.1 | 2695282 | 10-scf00391 | 10 |
| AX-158243699 | 20 | 60.491 | KV452980.1 | 2698702 | 10-scf00391 | 10 |
| AX-158243700 | 20 | 60.491 | KV452980.1 | 2699670 | 10-scf00391 | 10 |
| AX-158243701 | 20 | 60.491 | KV452980.1 | 2700793 | 10-scf00391 | 10 |
| AX-158243702 | 20 | 60.491 | KV452980.1 | 2701566 | 10-scf00391 | 10 |
| AX-158243713 | 20 | 60.491 | KV452980.1 | 2711469 | 10-scf00391 | 10 |
| AX-158243718 | 20 | 60.491 | KV452980.1 | 2719296 | 10-scf00391 | 10 |
| AX-158243744 | 20 | 60.491 | KV452980.1 | 2744390 | 10-scf00391 | 10 |
| AX-158243745 | 20 | 60.491 | KV452980.1 | 2745468 | 10-scf00391 | 10 |
| AX-158243750 | 20 | 60.491 | KV452980.1 | 2750432 | 10-scf00391 | 10 |
| AX-157752999 | 20 | 60.491 | KV452980.1 | 2752899 | 10-scf00391 | 10 |
| AX-157722474 | 20 | 60.491 | KV452980.1 | 2758046 | 10-scf00391 | 10 |
| AX-158243757 | 20 | 60.491 | KV452980.1 | 2760310 | 10-scf00391 | 10 |
| AX-157724221 | 20 | 60.491 | KV452980.1 | 2761970 | 10-scf00391 | 10 |
| AX-158243761 | 20 | 60.491 | KV452980.1 | 2770350 | 10-scf00391 | 10 |
| AX-158243762 | 20 | 60.491 | KV452980.1 | 2774028 | 10-scf00391 | 10 |
| AX-158243763 | 20 | 60.491 | KV452980.1 | 2776220 | 10-scf00391 | 10 |
| AX-158243764 | 20 | 60.491 | KV452980.1 | 2782905 | 10-scf00391 | 10 |
| AX-158243778 | 20 | 60.491 | KV452980.1 | 2842483 | 10-scf00391 | 10 |
| AX-158243781 | 20 | 60.491 | KV452980.1 | 2851235 | 10-scf00391 | 10 |
| AX-158243782 | 20 | 60.491 | KV452980.1 | 2863386 | 10-scf00391 | 10 |
| AX-158243785 | 20 | 60.491 | KV452980.1 | 2872204 | 10-scf00391 | 10 |
| AX-158243789 | 20 | 60.491 | KV452980.1 | 2888222 | 10-scf00391 | 10 |
| AX-158243791 | 20 | 60.491 | KV452980.1 | 2889238 | 10-scf00391 | 10 |
| AX-158243800 | 20 | 60.491 | KV452980.1 | 2915722 | 10-scf00391 | 10 |
| AX-158243807 | 20 | 60.491 | KV452980.1 | 2936057 | 10-scf00391 | 10 |
| AX-158243808 | 20 | 60.491 | KV452980.1 | 2940270 | 10-scf00391 | 10 |
| AX-158243812 | 20 | 60.491 | KV452980.1 | 2950946 | 10-scf00391 | 10 |
| AX-158243815 | 20 | 60.491 | KV452980.1 | 2961577 | 10-scf00391 | 10 |
| AX-158243820 | 20 | 60.491 | KV452980.1 | 2968186 | 10-scf00391 | 10 |
| AX-158243825 | 20 | 60.491 | KV452980.1 | 2988751 | 10-scf00391 | 10 |
| AX-158243844 | 20 | 60.491 | KV452980.1 | 3091976 | 10-scf00391 | 10 |
| AX-158243847 | 20 | 60.491 | KV452980.1 | 3106061 | 10-scf00391 | 10 |
| AX-158243849 | 20 | 60.491 | KV452980.1 | 3108801 | 10-scf00391 | 10 |
| AX-157880112 | 20 | 60.491 | KV452980.1 | 3114133 | 10-scf00391 | 10 |
| AX-157694064 | 20 | 60.491 | KV452980.1 | 3127639 | 10-scf00391 | 10 |
| AX-158243858 | 20 | 60.491 | KV452980.1 | 3151846 | 10-scf00391 | 10 |

|              |    |        |            |         |             |    |
|--------------|----|--------|------------|---------|-------------|----|
| AX-158243865 | 20 | 60.491 | KV452980.1 | 3192108 | 10-scf00391 | 10 |
| AX-158243866 | 20 | 60.491 | KV452980.1 | 3195068 | 10-scf00391 | 10 |
| AX-158243867 | 20 | 60.491 | KV452980.1 | 3200029 | 10-scf00391 | 10 |
| AX-158243870 | 20 | 60.491 | KV452980.1 | 3219297 | 10-scf00391 | 10 |
| AX-158243871 | 20 | 60.491 | KV452980.1 | 3219725 | 10-scf00391 | 10 |
| AX-158243878 | 20 | 60.491 | KV452980.1 | 3245907 | 10-scf00391 | 10 |
| AX-158243880 | 20 | 60.491 | KV452980.1 | 3261040 | 10-scf00391 | 10 |
| AX-158246796 | 20 | 60.491 | KV452981.1 | 23310   | 10-scf00393 | 10 |
| AX-158246802 | 20 | 60.491 | KV452981.1 | 56446   | 10-scf00393 | 10 |
| AX-158246806 | 20 | 60.491 | KV452981.1 | 72178   | 10-scf00393 | 10 |
| AX-158246812 | 20 | 60.491 | KV452981.1 | 86916   | 10-scf00393 | 10 |
| AX-158246822 | 20 | 60.491 | KV452981.1 | 120877  | 10-scf00393 | 10 |
| AX-157716325 | 20 | 60.491 | KV452981.1 | 124894  | 10-scf00393 | 10 |
| AX-157743224 | 20 | 60.491 | KV452981.1 | 125456  | 10-scf00393 | 10 |
| AX-157716105 | 20 | 60.491 | KV452981.1 | 126616  | 10-scf00393 | 10 |
| AX-158246826 | 20 | 60.491 | KV452981.1 | 128486  | 10-scf00393 | 10 |
| AX-157710736 | 20 | 60.491 | KV452981.1 | 133596  | 10-scf00393 | 10 |
| AX-158246834 | 20 | 60.491 | KV452981.1 | 167955  | 10-scf00393 | 10 |
| AX-158246835 | 20 | 60.491 | KV452981.1 | 169318  | 10-scf00393 | 10 |
| AX-158246839 | 20 | 60.491 | KV452981.1 | 173880  | 10-scf00393 | 10 |
| AX-157841804 | 20 | 60.491 | KV452981.1 | 179154  | 10-scf00393 | 10 |
| AX-158246841 | 20 | 60.491 | KV452981.1 | 182298  | 10-scf00393 | 10 |
| AX-158246842 | 20 | 60.491 | KV452981.1 | 186380  | 10-scf00393 | 10 |
| AX-158415728 | 20 | 60.491 | KV452981.1 | 190051  | 10-scf00393 | 10 |
| AX-158246844 | 20 | 60.491 | KV452981.1 | 191500  | 10-scf00393 | 10 |
| AX-157872708 | 20 | 60.491 | KV452981.1 | 195218  | 10-scf00393 | 10 |
| AX-158246847 | 20 | 60.491 | KV452981.1 | 195537  | 10-scf00393 | 10 |
| AX-158246848 | 20 | 60.491 | KV452981.1 | 199228  | 10-scf00393 | 10 |
| AX-158246849 | 20 | 60.491 | KV452981.1 | 200539  | 10-scf00393 | 10 |
| AX-158394367 | 20 | 60.491 | KV452981.1 | 203508  | 10-scf00393 | 10 |
| AX-158246850 | 20 | 60.491 | KV452981.1 | 205672  | 10-scf00393 | 10 |
| AX-158246851 | 20 | 60.491 | KV452981.1 | 208995  | 10-scf00393 | 10 |
| AX-158246855 | 20 | 60.491 | KV452981.1 | 218126  | 10-scf00393 | 10 |
| AX-158246856 | 20 | 60.491 | KV452981.1 | 219494  | 10-scf00393 | 10 |
| AX-157841805 | 20 | 60.491 | KV452981.1 | 221381  | 10-scf00393 | 10 |
| AX-158246859 | 20 | 60.491 | KV452981.1 | 222737  | 10-scf00393 | 10 |
| AX-157841806 | 20 | 60.491 | KV452981.1 | 224370  | 10-scf00393 | 10 |
| AX-157841807 | 20 | 60.491 | KV452981.1 | 224936  | 10-scf00393 | 10 |
| AX-158246860 | 20 | 60.491 | KV452981.1 | 225482  | 10-scf00393 | 10 |
| AX-158246861 | 20 | 60.491 | KV452981.1 | 226605  | 10-scf00393 | 10 |
| AX-158394368 | 20 | 60.491 | KV452981.1 | 229401  | 10-scf00393 | 10 |
| AX-157841808 | 20 | 60.491 | KV452981.1 | 230817  | 10-scf00393 | 10 |
| AX-158246864 | 20 | 60.491 | KV452981.1 | 230879  | 10-scf00393 | 10 |
| AX-157841809 | 20 | 60.491 | KV452981.1 | 234285  | 10-scf00393 | 10 |
| AX-158246867 | 20 | 60.491 | KV452981.1 | 239373  | 10-scf00393 | 10 |
| AX-158246868 | 20 | 60.491 | KV452981.1 | 244282  | 10-scf00393 | 10 |
| AX-158246869 | 20 | 60.491 | KV452981.1 | 247490  | 10-scf00393 | 10 |
| AX-158246871 | 20 | 60.491 | KV452981.1 | 250157  | 10-scf00393 | 10 |
| AX-158246872 | 20 | 60.491 | KV452981.1 | 257663  | 10-scf00393 | 10 |
| AX-158246873 | 20 | 60.491 | KV452981.1 | 259355  | 10-scf00393 | 10 |
| AX-158246874 | 20 | 60.491 | KV452981.1 | 261177  | 10-scf00393 | 10 |

|              |    |        |            |        |             |    |
|--------------|----|--------|------------|--------|-------------|----|
| AX-158246875 | 20 | 60.491 | KV452981.1 | 262651 | 10-scf00393 | 10 |
| AX-158246876 | 20 | 60.491 | KV452981.1 | 264527 | 10-scf00393 | 10 |
| AX-157841810 | 20 | 60.491 | KV452981.1 | 264927 | 10-scf00393 | 10 |
| AX-158246878 | 20 | 60.491 | KV452981.1 | 265947 | 10-scf00393 | 10 |
| AX-158246880 | 20 | 60.491 | KV452981.1 | 268489 | 10-scf00393 | 10 |
| AX-157872709 | 20 | 60.491 | KV452981.1 | 270231 | 10-scf00393 | 10 |
| AX-158246883 | 20 | 60.491 | KV452981.1 | 270640 | 10-scf00393 | 10 |
| AX-158246885 | 20 | 60.491 | KV452981.1 | 272772 | 10-scf00393 | 10 |
| AX-158246886 | 20 | 60.491 | KV452981.1 | 273660 | 10-scf00393 | 10 |
| AX-158246887 | 20 | 60.491 | KV452981.1 | 273850 | 10-scf00393 | 10 |
| AX-158246889 | 20 | 60.491 | KV452981.1 | 275169 | 10-scf00393 | 10 |
| AX-157872710 | 20 | 60.491 | KV452981.1 | 275624 | 10-scf00393 | 10 |
| AX-158246894 | 20 | 60.491 | KV452981.1 | 281026 | 10-scf00393 | 10 |
| AX-158246895 | 20 | 60.491 | KV452981.1 | 282352 | 10-scf00393 | 10 |
| AX-158246899 | 20 | 60.491 | KV452981.1 | 289544 | 10-scf00393 | 10 |
| AX-158246901 | 20 | 60.491 | KV452981.1 | 291653 | 10-scf00393 | 10 |
| AX-158246902 | 20 | 60.491 | KV452981.1 | 293196 | 10-scf00393 | 10 |
| AX-157859792 | 20 | 60.491 | KV452981.1 | 299362 | 10-scf00393 | 10 |
| AX-158246907 | 20 | 60.491 | KV452981.1 | 304232 | 10-scf00393 | 10 |
| AX-158246910 | 20 | 60.491 | KV452981.1 | 306260 | 10-scf00393 | 10 |
| AX-157710486 | 20 | 60.491 | KV452981.1 | 309215 | 10-scf00393 | 10 |
| AX-158246914 | 20 | 60.491 | KV452981.1 | 314064 | 10-scf00393 | 10 |
| AX-158246916 | 20 | 60.491 | KV452981.1 | 315418 | 10-scf00393 | 10 |
| AX-158246917 | 20 | 60.491 | KV452981.1 | 316486 | 10-scf00393 | 10 |
| AX-158246918 | 20 | 60.491 | KV452981.1 | 317060 | 10-scf00393 | 10 |
| AX-158246922 | 20 | 60.491 | KV452981.1 | 322036 | 10-scf00393 | 10 |
| AX-158246924 | 20 | 60.491 | KV452981.1 | 324784 | 10-scf00393 | 10 |
| AX-158246926 | 20 | 60.491 | KV452981.1 | 326310 | 10-scf00393 | 10 |
| AX-158246930 | 20 | 60.491 | KV452981.1 | 328075 | 10-scf00393 | 10 |
| AX-158246935 | 20 | 60.491 | KV452981.1 | 332378 | 10-scf00393 | 10 |
| AX-158410803 | 20 | 60.491 | KV452981.1 | 334273 | 10-scf00393 | 10 |
| AX-158415730 | 20 | 60.491 | KV452981.1 | 334634 | 10-scf00393 | 10 |
| AX-157859794 | 20 | 60.491 | KV452981.1 | 334965 | 10-scf00393 | 10 |
| AX-158246937 | 20 | 60.491 | KV452981.1 | 337924 | 10-scf00393 | 10 |
| AX-158246939 | 20 | 60.491 | KV452981.1 | 341168 | 10-scf00393 | 10 |
| AX-158415731 | 20 | 60.491 | KV452981.1 | 341697 | 10-scf00393 | 10 |
| AX-158246940 | 20 | 60.491 | KV452981.1 | 347681 | 10-scf00393 | 10 |
| AX-158246941 | 20 | 60.491 | KV452981.1 | 349055 | 10-scf00393 | 10 |
| AX-158246951 | 20 | 60.491 | KV452981.1 | 360164 | 10-scf00393 | 10 |
| AX-158246957 | 20 | 60.491 | KV452981.1 | 371628 | 10-scf00393 | 10 |
| AX-158246959 | 20 | 60.491 | KV452981.1 | 373684 | 10-scf00393 | 10 |
| AX-158246960 | 20 | 60.491 | KV452981.1 | 374719 | 10-scf00393 | 10 |
| AX-158246961 | 20 | 60.491 | KV452981.1 | 375288 | 10-scf00393 | 10 |
| AX-158246968 | 20 | 60.491 | KV452981.1 | 385739 | 10-scf00393 | 10 |
| AX-158246971 | 20 | 60.491 | KV452981.1 | 387206 | 10-scf00393 | 10 |
| AX-158246972 | 20 | 60.491 | KV452981.1 | 387997 | 10-scf00393 | 10 |
| AX-158246974 | 20 | 60.491 | KV452981.1 | 388701 | 10-scf00393 | 10 |
| AX-157757330 | 20 | 60.491 | KV452981.1 | 391059 | 10-scf00393 | 10 |
| AX-158246978 | 20 | 60.491 | KV452981.1 | 393668 | 10-scf00393 | 10 |
| AX-158246980 | 20 | 60.491 | KV452981.1 | 397791 | 10-scf00393 | 10 |
| AX-158246981 | 20 | 60.491 | KV452981.1 | 399379 | 10-scf00393 | 10 |

|              |    |        |            |        |             |    |
|--------------|----|--------|------------|--------|-------------|----|
| AX-158246984 | 20 | 60.491 | KV452981.1 | 403293 | 10-scf00393 | 10 |
| AX-158246987 | 20 | 60.491 | KV452981.1 | 405722 | 10-scf00393 | 10 |
| AX-158246989 | 20 | 60.491 | KV452981.1 | 407257 | 10-scf00393 | 10 |
| AX-157772027 | 20 | 60.491 | KV452981.1 | 418649 | 10-scf00393 | 10 |
| AX-158246999 | 20 | 60.491 | KV452981.1 | 419784 | 10-scf00393 | 10 |
| AX-158247000 | 20 | 60.491 | KV452981.1 | 420250 | 10-scf00393 | 10 |
| AX-157841819 | 20 | 60.491 | KV452981.1 | 425523 | 10-scf00393 | 10 |
| AX-157841820 | 20 | 60.491 | KV452981.1 | 427489 | 10-scf00393 | 10 |
| AX-157841821 | 20 | 60.491 | KV452981.1 | 428222 | 10-scf00393 | 10 |
| AX-157711683 | 20 | 60.491 | KV452981.1 | 430782 | 10-scf00393 | 10 |
| AX-158247004 | 20 | 60.491 | KV452981.1 | 433214 | 10-scf00393 | 10 |
| AX-158247006 | 20 | 60.491 | KV452981.1 | 436324 | 10-scf00393 | 10 |
| AX-158247008 | 20 | 60.491 | KV452981.1 | 440459 | 10-scf00393 | 10 |
| AX-157841822 | 20 | 60.491 | KV452981.1 | 442269 | 10-scf00393 | 10 |
| AX-158247010 | 20 | 60.491 | KV452981.1 | 443314 | 10-scf00393 | 10 |
| AX-157841823 | 20 | 60.491 | KV452981.1 | 443774 | 10-scf00393 | 10 |
| AX-158247011 | 20 | 60.491 | KV452981.1 | 444157 | 10-scf00393 | 10 |
| AX-158247012 | 20 | 60.491 | KV452981.1 | 446192 | 10-scf00393 | 10 |
| AX-157841824 | 20 | 60.491 | KV452981.1 | 446346 | 10-scf00393 | 10 |
| AX-158247013 | 20 | 60.491 | KV452981.1 | 447357 | 10-scf00393 | 10 |
| AX-158247015 | 20 | 60.491 | KV452981.1 | 452739 | 10-scf00393 | 10 |
| AX-158247016 | 20 | 60.491 | KV452981.1 | 453703 | 10-scf00393 | 10 |
| AX-157841827 | 20 | 60.491 | KV452981.1 | 454524 | 10-scf00393 | 10 |
| AX-158244259 | 20 | 60.491 | KV452981.1 | 456418 | 10-scf00393 | 10 |
| AX-158244260 | 20 | 60.491 | KV452981.1 | 456707 | 10-scf00393 | 10 |
| AX-158244261 | 20 | 60.491 | KV452981.1 | 458378 | 10-scf00393 | 10 |
| AX-157755342 | 20 | 60.491 | KV452981.1 | 461540 | 10-scf00393 | 10 |
| AX-158244263 | 20 | 60.491 | KV452981.1 | 461633 | 10-scf00393 | 10 |
| AX-157859733 | 20 | 60.491 | KV452981.1 | 462504 | 10-scf00393 | 10 |
| AX-158244267 | 20 | 60.491 | KV452981.1 | 466218 | 10-scf00393 | 10 |
| AX-158244272 | 20 | 60.491 | KV452981.1 | 470599 | 10-scf00393 | 10 |
| AX-158244273 | 20 | 60.491 | KV452981.1 | 471290 | 10-scf00393 | 10 |
| AX-158244274 | 20 | 60.491 | KV452981.1 | 472316 | 10-scf00393 | 10 |
| AX-157773000 | 20 | 60.491 | KV452981.1 | 473184 | 10-scf00393 | 10 |
| AX-158244276 | 20 | 60.491 | KV452981.1 | 476735 | 10-scf00393 | 10 |
| AX-158380990 | 20 | 60.491 | KV452981.1 | 479070 | 10-scf00393 | 10 |
| AX-158244282 | 20 | 60.491 | KV452981.1 | 482717 | 10-scf00393 | 10 |
| AX-158244284 | 20 | 60.491 | KV452981.1 | 484708 | 10-scf00393 | 10 |
| AX-158244285 | 20 | 60.491 | KV452981.1 | 485592 | 10-scf00393 | 10 |
| AX-158244286 | 20 | 60.491 | KV452981.1 | 486356 | 10-scf00393 | 10 |
| AX-158244287 | 20 | 60.491 | KV452981.1 | 487865 | 10-scf00393 | 10 |
| AX-157716514 | 20 | 60.491 | KV452981.1 | 491071 | 10-scf00393 | 10 |
| AX-157841516 | 20 | 60.491 | KV452981.1 | 496364 | 10-scf00393 | 10 |
| AX-158244294 | 20 | 60.491 | KV452981.1 | 499767 | 10-scf00393 | 10 |
| AX-158244295 | 20 | 60.491 | KV452981.1 | 503694 | 10-scf00393 | 10 |
| AX-157841517 | 20 | 60.491 | KV452981.1 | 504689 | 10-scf00393 | 10 |
| AX-158244296 | 20 | 60.491 | KV452981.1 | 507219 | 10-scf00393 | 10 |
| AX-158244297 | 20 | 60.491 | KV452981.1 | 507756 | 10-scf00393 | 10 |
| AX-158244299 | 20 | 60.491 | KV452981.1 | 509065 | 10-scf00393 | 10 |
| AX-158244300 | 20 | 60.491 | KV452981.1 | 509215 | 10-scf00393 | 10 |
| AX-157756126 | 20 | 60.491 | KV452981.1 | 511943 | 10-scf00393 | 10 |

|              |    |        |            |        |             |    |
|--------------|----|--------|------------|--------|-------------|----|
| AX-158244305 | 20 | 60.491 | KV452981.1 | 515885 | 10-scf00393 | 10 |
| AX-158244311 | 20 | 60.491 | KV452981.1 | 525311 | 10-scf00393 | 10 |
| AX-158244313 | 20 | 60.491 | KV452981.1 | 526904 | 10-scf00393 | 10 |
| AX-158244316 | 20 | 60.491 | KV452981.1 | 528933 | 10-scf00393 | 10 |
| AX-158244319 | 20 | 60.491 | KV452981.1 | 532158 | 10-scf00393 | 10 |
| AX-158394318 | 20 | 60.491 | KV452981.1 | 532769 | 10-scf00393 | 10 |
| AX-158244321 | 20 | 60.491 | KV452981.1 | 534822 | 10-scf00393 | 10 |
| AX-158244323 | 20 | 60.491 | KV452981.1 | 536906 | 10-scf00393 | 10 |
| AX-157841520 | 20 | 60.491 | KV452981.1 | 536942 | 10-scf00393 | 10 |
| AX-158244325 | 20 | 60.491 | KV452981.1 | 540134 | 10-scf00393 | 10 |
| AX-158244326 | 20 | 60.491 | KV452981.1 | 541271 | 10-scf00393 | 10 |
| AX-157841521 | 20 | 60.491 | KV452981.1 | 542823 | 10-scf00393 | 10 |
| AX-158244328 | 20 | 60.491 | KV452981.1 | 543140 | 10-scf00393 | 10 |
| AX-158244330 | 20 | 60.491 | KV452981.1 | 545591 | 10-scf00393 | 10 |
| AX-158244332 | 20 | 60.491 | KV452981.1 | 551600 | 10-scf00393 | 10 |
| AX-157756713 | 20 | 60.491 | KV452981.1 | 557742 | 10-scf00393 | 10 |
| AX-157859738 | 20 | 60.491 | KV452981.1 | 558651 | 10-scf00393 | 10 |
| AX-158244336 | 20 | 60.491 | KV452981.1 | 559174 | 10-scf00393 | 10 |
| AX-158244337 | 20 | 60.491 | KV452981.1 | 560332 | 10-scf00393 | 10 |
| AX-157841522 | 20 | 60.491 | KV452981.1 | 563180 | 10-scf00393 | 10 |
| AX-157841523 | 20 | 60.491 | KV452981.1 | 564255 | 10-scf00393 | 10 |
| AX-157859740 | 20 | 60.491 | KV452981.1 | 566712 | 10-scf00393 | 10 |
| AX-158244347 | 20 | 60.491 | KV452981.1 | 586606 | 10-scf00393 | 10 |
| AX-158244348 | 20 | 60.491 | KV452981.1 | 588418 | 10-scf00393 | 10 |
| AX-158244349 | 20 | 60.491 | KV452981.1 | 589162 | 10-scf00393 | 10 |
| AX-158244350 | 20 | 60.491 | KV452981.1 | 589704 | 10-scf00393 | 10 |
| AX-158244351 | 20 | 60.491 | KV452981.1 | 590681 | 10-scf00393 | 10 |
| AX-157859742 | 20 | 60.491 | KV452981.1 | 592658 | 10-scf00393 | 10 |
| AX-158244354 | 20 | 60.491 | KV452981.1 | 595813 | 10-scf00393 | 10 |
| AX-157841525 | 20 | 60.491 | KV452981.1 | 600287 | 10-scf00393 | 10 |
| AX-158244361 | 20 | 60.491 | KV452981.1 | 603838 | 10-scf00393 | 10 |
| AX-158244362 | 20 | 60.491 | KV452981.1 | 604141 | 10-scf00393 | 10 |
| AX-158244365 | 20 | 60.491 | KV452981.1 | 605260 | 10-scf00393 | 10 |
| AX-158244367 | 20 | 60.491 | KV452981.1 | 606182 | 10-scf00393 | 10 |
| AX-158244369 | 20 | 60.491 | KV452981.1 | 607155 | 10-scf00393 | 10 |
| AX-158244370 | 20 | 60.491 | KV452981.1 | 607627 | 10-scf00393 | 10 |
| AX-158244378 | 20 | 60.491 | KV452981.1 | 611708 | 10-scf00393 | 10 |
| AX-158244381 | 20 | 60.491 | KV452981.1 | 615972 | 10-scf00393 | 10 |
| AX-157752567 | 20 | 60.491 | KV452981.1 | 616720 | 10-scf00393 | 10 |
| AX-158244384 | 20 | 60.491 | KV452981.1 | 621348 | 10-scf00393 | 10 |
| AX-158244386 | 20 | 60.491 | KV452981.1 | 621762 | 10-scf00393 | 10 |
| AX-158244387 | 20 | 60.491 | KV452981.1 | 622376 | 10-scf00393 | 10 |
| AX-158244395 | 20 | 60.491 | KV452981.1 | 630722 | 10-scf00393 | 10 |
| AX-158394320 | 20 | 60.491 | KV452981.1 | 634024 | 10-scf00393 | 10 |
| AX-158244397 | 20 | 60.491 | KV452981.1 | 635715 | 10-scf00393 | 10 |
| AX-158244401 | 20 | 60.491 | KV452981.1 | 641393 | 10-scf00393 | 10 |
| AX-158244405 | 20 | 60.491 | KV452981.1 | 647448 | 10-scf00393 | 10 |
| AX-158244408 | 20 | 60.491 | KV452981.1 | 650447 | 10-scf00393 | 10 |
| AX-158244409 | 20 | 60.491 | KV452981.1 | 651597 | 10-scf00393 | 10 |
| AX-157841531 | 20 | 60.491 | KV452981.1 | 678326 | 10-scf00393 | 10 |
| AX-158244428 | 20 | 60.491 | KV452981.1 | 690966 | 10-scf00393 | 10 |

|              |    |        |            |         |             |    |
|--------------|----|--------|------------|---------|-------------|----|
| AX-158244430 | 20 | 60.491 | KV452981.1 | 693963  | 10-scf00393 | 10 |
| AX-158244433 | 20 | 60.491 | KV452981.1 | 697370  | 10-scf00393 | 10 |
| AX-158244434 | 20 | 60.491 | KV452981.1 | 699049  | 10-scf00393 | 10 |
| AX-157859748 | 20 | 60.491 | KV452981.1 | 700113  | 10-scf00393 | 10 |
| AX-157859749 | 20 | 60.491 | KV452981.1 | 701573  | 10-scf00393 | 10 |
| AX-158244437 | 20 | 60.491 | KV452981.1 | 702755  | 10-scf00393 | 10 |
| AX-158244449 | 20 | 60.491 | KV452981.1 | 717561  | 10-scf00393 | 10 |
| AX-158244450 | 20 | 60.491 | KV452981.1 | 717987  | 10-scf00393 | 10 |
| AX-158244451 | 20 | 60.491 | KV452981.1 | 719456  | 10-scf00393 | 10 |
| AX-157841535 | 20 | 60.491 | KV452981.1 | 741092  | 10-scf00393 | 10 |
| AX-158244469 | 20 | 60.491 | KV452981.1 | 742644  | 10-scf00393 | 10 |
| AX-158244470 | 20 | 60.491 | KV452981.1 | 744285  | 10-scf00393 | 10 |
| AX-158244474 | 20 | 60.491 | KV452981.1 | 750184  | 10-scf00393 | 10 |
| AX-158244476 | 20 | 60.491 | KV452981.1 | 753582  | 10-scf00393 | 10 |
| AX-158244477 | 20 | 60.491 | KV452981.1 | 753824  | 10-scf00393 | 10 |
| AX-158380991 | 20 | 60.491 | KV452981.1 | 772086  | 10-scf00393 | 10 |
| AX-157841539 | 20 | 60.491 | KV452981.1 | 772401  | 10-scf00393 | 10 |
| AX-158244497 | 20 | 60.491 | KV452981.1 | 774838  | 10-scf00393 | 10 |
| AX-158244498 | 20 | 60.491 | KV452981.1 | 775174  | 10-scf00393 | 10 |
| AX-158244499 | 20 | 60.491 | KV452981.1 | 776921  | 10-scf00393 | 10 |
| AX-158244510 | 20 | 60.491 | KV452981.1 | 792520  | 10-scf00393 | 10 |
| AX-158244518 | 20 | 60.491 | KV452981.1 | 797703  | 10-scf00393 | 10 |
| AX-158244520 | 20 | 60.491 | KV452981.1 | 799724  | 10-scf00393 | 10 |
| AX-158244526 | 20 | 60.491 | KV452981.1 | 808441  | 10-scf00393 | 10 |
| AX-158244539 | 20 | 60.491 | KV452981.1 | 831080  | 10-scf00393 | 10 |
| AX-158244540 | 20 | 60.491 | KV452981.1 | 834464  | 10-scf00393 | 10 |
| AX-158244575 | 20 | 60.491 | KV452981.1 | 880533  | 10-scf00393 | 10 |
| AX-158244577 | 20 | 60.491 | KV452981.1 | 882707  | 10-scf00393 | 10 |
| AX-158244579 | 20 | 60.491 | KV452981.1 | 886207  | 10-scf00393 | 10 |
| AX-158244583 | 20 | 60.491 | KV452981.1 | 891099  | 10-scf00393 | 10 |
| AX-158244649 | 20 | 60.491 | KV452981.1 | 989064  | 10-scf00393 | 10 |
| AX-158244668 | 20 | 60.491 | KV452981.1 | 1012842 | 10-scf00393 | 10 |
| AX-158244674 | 20 | 60.491 | KV452981.1 | 1021592 | 10-scf00393 | 10 |
| AX-157841562 | 20 | 60.491 | KV452981.1 | 1024039 | 10-scf00393 | 10 |
| AX-158244691 | 20 | 60.491 | KV452981.1 | 1048807 | 10-scf00393 | 10 |
| AX-158244693 | 20 | 60.491 | KV452981.1 | 1050433 | 10-scf00393 | 10 |
| AX-158244694 | 20 | 60.491 | KV452981.1 | 1052080 | 10-scf00393 | 10 |
| AX-158244695 | 20 | 60.491 | KV452981.1 | 1052531 | 10-scf00393 | 10 |
| AX-158244701 | 20 | 60.491 | KV452981.1 | 1055320 | 10-scf00393 | 10 |
| AX-158244702 | 20 | 60.491 | KV452981.1 | 1056011 | 10-scf00393 | 10 |
| AX-158244703 | 20 | 60.491 | KV452981.1 | 1056763 | 10-scf00393 | 10 |
| AX-158244704 | 20 | 60.491 | KV452981.1 | 1057469 | 10-scf00393 | 10 |
| AX-158244705 | 20 | 60.491 | KV452981.1 | 1058170 | 10-scf00393 | 10 |
| AX-158244706 | 20 | 60.491 | KV452981.1 | 1058548 | 10-scf00393 | 10 |
| AX-158244709 | 20 | 60.491 | KV452981.1 | 1061375 | 10-scf00393 | 10 |
| AX-158244711 | 20 | 60.491 | KV452981.1 | 1062445 | 10-scf00393 | 10 |
| AX-158244715 | 20 | 60.491 | KV452981.1 | 1066801 | 10-scf00393 | 10 |
| AX-158394327 | 20 | 60.491 | KV452981.1 | 1068779 | 10-scf00393 | 10 |
| AX-158244720 | 20 | 60.491 | KV452981.1 | 1069585 | 10-scf00393 | 10 |
| AX-157757483 | 20 | 60.491 | KV452981.1 | 1079065 | 10-scf00393 | 10 |
| AX-158244726 | 20 | 60.491 | KV452981.1 | 1082988 | 10-scf00393 | 10 |

|              |    |        |            |         |             |    |
|--------------|----|--------|------------|---------|-------------|----|
| AX-158244729 | 20 | 60.491 | KV452981.1 | 1085097 | 10-scf00393 | 10 |
| AX-158244732 | 20 | 60.491 | KV452981.1 | 1087681 | 10-scf00393 | 10 |
| AX-158244735 | 20 | 60.491 | KV452981.1 | 1090734 | 10-scf00393 | 10 |
| AX-158244736 | 20 | 60.491 | KV452981.1 | 1091231 | 10-scf00393 | 10 |
| AX-158244740 | 20 | 60.491 | KV452981.1 | 1094644 | 10-scf00393 | 10 |
| AX-158244744 | 20 | 60.491 | KV452981.1 | 1098346 | 10-scf00393 | 10 |
| AX-158244746 | 20 | 60.491 | KV452981.1 | 1099866 | 10-scf00393 | 10 |
| AX-158244752 | 20 | 60.491 | KV452981.1 | 1103814 | 10-scf00393 | 10 |
| AX-158244753 | 20 | 60.491 | KV452981.1 | 1105388 | 10-scf00393 | 10 |
| AX-158244758 | 20 | 60.491 | KV452981.1 | 1111111 | 10-scf00393 | 10 |
| AX-158244759 | 20 | 60.491 | KV452981.1 | 1111715 | 10-scf00393 | 10 |
| AX-158244761 | 20 | 60.491 | KV452981.1 | 1112073 | 10-scf00393 | 10 |
| AX-157872661 | 20 | 60.491 | KV452981.1 | 1116500 | 10-scf00393 | 10 |
| AX-158244772 | 20 | 60.491 | KV452981.1 | 1132827 | 10-scf00393 | 10 |
| AX-158244778 | 20 | 60.491 | KV452981.1 | 1139842 | 10-scf00393 | 10 |
| AX-157872662 | 20 | 60.491 | KV452981.1 | 1146681 | 10-scf00393 | 10 |
| AX-158244782 | 20 | 60.491 | KV452981.1 | 1148793 | 10-scf00393 | 10 |
| AX-158244783 | 20 | 60.491 | KV452981.1 | 1149398 | 10-scf00393 | 10 |
| AX-158244786 | 20 | 60.491 | KV452981.1 | 1152301 | 10-scf00393 | 10 |
| AX-158244810 | 20 | 60.491 | KV452981.1 | 1172972 | 10-scf00393 | 10 |
| AX-158244856 | 20 | 60.491 | KV452981.1 | 1248260 | 10-scf00393 | 10 |
| AX-158244860 | 20 | 60.491 | KV452981.1 | 1255795 | 10-scf00393 | 10 |
| AX-158244866 | 20 | 60.491 | KV452981.1 | 1259499 | 10-scf00393 | 10 |
| AX-158244867 | 20 | 60.491 | KV452981.1 | 1262017 | 10-scf00393 | 10 |
| AX-158244868 | 20 | 60.491 | KV452981.1 | 1264187 | 10-scf00393 | 10 |
| AX-157800886 | 20 | 60.491 | KV452981.1 | 1270668 | 10-scf00393 | 10 |
| AX-158244879 | 20 | 60.491 | KV452981.1 | 1286557 | 10-scf00393 | 10 |
| AX-157841572 | 20 | 60.491 | KV452981.1 | 1289532 | 10-scf00393 | 10 |
| AX-158244880 | 20 | 60.491 | KV452981.1 | 1293187 | 10-scf00393 | 10 |
| AX-157841575 | 20 | 60.491 | KV452981.1 | 1299072 | 10-scf00393 | 10 |
| AX-157841579 | 20 | 60.491 | KV452981.1 | 1335034 | 10-scf00393 | 10 |
| AX-158244925 | 20 | 60.491 | KV452981.1 | 1378488 | 10-scf00393 | 10 |
| AX-158244938 | 20 | 60.491 | KV452981.1 | 1402634 | 10-scf00393 | 10 |
| AX-158244942 | 20 | 60.491 | KV452981.1 | 1408625 | 10-scf00393 | 10 |
| AX-158245035 | 20 | 60.491 | KV452981.1 | 1521662 | 10-scf00393 | 10 |
| AX-158245038 | 20 | 60.491 | KV452981.1 | 1525499 | 10-scf00393 | 10 |
| AX-158245040 | 20 | 60.491 | KV452981.1 | 1532978 | 10-scf00393 | 10 |
| AX-158245041 | 20 | 60.491 | KV452981.1 | 1533696 | 10-scf00393 | 10 |
| AX-158245048 | 20 | 60.491 | KV452981.1 | 1541913 | 10-scf00393 | 10 |
| AX-158245053 | 20 | 60.491 | KV452981.1 | 1553980 | 10-scf00393 | 10 |
| AX-157751038 | 20 | 60.491 | KV452981.1 | 1622594 | 10-scf00393 | 10 |
| AX-157718000 | 20 | 60.491 | KV452981.1 | 1627121 | 10-scf00393 | 10 |
| AX-158245138 | 20 | 60.491 | KV452981.1 | 1672801 | 10-scf00393 | 10 |
| AX-158245187 | 20 | 60.491 | KV452981.1 | 1719646 | 10-scf00393 | 10 |
| AX-158245203 | 20 | 60.491 | KV452981.1 | 1745476 | 10-scf00393 | 10 |
| AX-158245228 | 20 | 60.491 | KV452981.1 | 1768432 | 10-scf00393 | 10 |
| AX-158245251 | 20 | 60.491 | KV452981.1 | 1806561 | 10-scf00393 | 10 |
| AX-158245252 | 20 | 60.491 | KV452981.1 | 1807005 | 10-scf00393 | 10 |
| AX-157751900 | 20 | 60.491 | KV452981.1 | 1830815 | 10-scf00393 | 10 |
| AX-158245331 | 20 | 60.491 | KV452981.1 | 1913767 | 10-scf00393 | 10 |
| AX-158245349 | 20 | 60.491 | KV452981.1 | 1951960 | 10-scf00393 | 10 |



|              |    |        |            |         |                  |    |
|--------------|----|--------|------------|---------|------------------|----|
| AX-158245687 | 20 | 60.491 | KV452981.1 | 2504950 | 10-scf00393      | 10 |
| AX-158245699 | 20 | 60.491 | KV452981.1 | 2516055 | 10-scf00393      | 10 |
| AX-158245703 | 20 | 60.491 | KV452981.1 | 2519225 | 10-scf00393      | 10 |
| AX-158245807 | 20 | 60.491 | KV452981.1 | 2637151 | 10-scf00393      | 10 |
| AX-157887567 | 20 | 60.491 | KV452981.1 | 2762861 | 10-scf00393      | 10 |
| AX-158246414 | 20 | 60.491 | KV452981.1 | 3396372 | 10-scf00393      | 10 |
| AX-157696134 | 20 | 60.491 | FI884464.1 | 239     | 10-ORI212 lctalu | UN |
| AX-157701002 | 20 | 60.491 | FI863448.1 | 483     | 10-ORI212 lctalu | UN |
| AX-157681285 | 20 | 60.491 |            | 45      | 10-scf18882      | UN |
| AX-158246840 | 20 | 60.529 | KV452981.1 | 181153  | 10-scf00393      | 10 |
| AX-158246846 | 20 | 60.529 | KV452981.1 | 194610  | 10-scf00393      | 10 |
| AX-158246865 | 20 | 60.529 | KV452981.1 | 232592  | 10-scf00393      | 10 |
| AX-157859743 | 20 | 60.529 | KV452981.1 | 616911  | 10-scf00393      | 10 |
| AX-158244414 | 20 | 60.529 | KV452981.1 | 655593  | 10-scf00393      | 10 |
| AX-157715351 | 20 | 60.565 | KV452980.1 | 1871331 | 10-scf00391      | 10 |
| AX-158243242 | 20 | 60.565 | KV452980.1 | 2094217 | 10-scf00391      | 10 |
| AX-158243254 | 20 | 60.565 | KV452980.1 | 2110939 | 10-scf00391      | 10 |
| AX-158243726 | 20 | 60.565 | KV452980.1 | 2724381 | 10-scf00391      | 10 |
| AX-158243727 | 20 | 60.565 | KV452980.1 | 2726718 | 10-scf00391      | 10 |
| AX-157747226 | 20 | 60.565 | KV452981.1 | 668365  | 10-scf00393      | 10 |
| AX-158244422 | 20 | 60.565 | KV452981.1 | 669412  | 10-scf00393      | 10 |
| AX-158244483 | 20 | 60.565 | KV452981.1 | 763347  | 10-scf00393      | 10 |
| AX-157724656 | 20 | 60.6   | KV452981.1 | 672728  | 10-scf00393      | 10 |
| AX-157770692 | 20 | 60.651 | KV452981.1 | 676527  | 10-scf00393      | 10 |
| AX-158244446 | 20 | 60.71  | KV452981.1 | 712639  | 10-scf00393      | 10 |
| AX-158244452 | 20 | 60.71  | KV452981.1 | 720072  | 10-scf00393      | 10 |
| AX-157859750 | 20 | 60.71  | KV452981.1 | 720412  | 10-scf00393      | 10 |
| AX-158244453 | 20 | 60.71  | KV452981.1 | 721304  | 10-scf00393      | 10 |
| AX-158244455 | 20 | 60.71  | KV452981.1 | 722737  | 10-scf00393      | 10 |
| AX-157872627 | 20 | 60.733 | KV452980.1 | 2076500 | 10-scf00391      | 10 |
| AX-157841422 | 20 | 60.733 | KV452980.1 | 2084231 | 10-scf00391      | 10 |
| AX-157859711 | 20 | 60.733 | KV452980.1 | 2100082 | 10-scf00391      | 10 |
| AX-157872634 | 20 | 60.733 | KV452980.1 | 2100718 | 10-scf00391      | 10 |
| AX-158243249 | 20 | 60.733 | KV452980.1 | 2104477 | 10-scf00391      | 10 |
| AX-158243250 | 20 | 60.733 | KV452980.1 | 2105369 | 10-scf00391      | 10 |
| AX-157859713 | 20 | 60.733 | KV452980.1 | 2107080 | 10-scf00391      | 10 |
| AX-158243252 | 20 | 60.733 | KV452980.1 | 2109853 | 10-scf00391      | 10 |
| AX-158243255 | 20 | 60.733 | KV452980.1 | 2112583 | 10-scf00391      | 10 |
| AX-158243256 | 20 | 60.733 | KV452980.1 | 2113716 | 10-scf00391      | 10 |
| AX-158243257 | 20 | 60.733 | KV452980.1 | 2114425 | 10-scf00391      | 10 |
| AX-158394292 | 20 | 60.733 | KV452980.1 | 2117475 | 10-scf00391      | 10 |
| AX-158394293 | 20 | 60.733 | KV452980.1 | 2123823 | 10-scf00391      | 10 |
| AX-158243264 | 20 | 60.733 | KV452980.1 | 2124715 | 10-scf00391      | 10 |
| AX-158243265 | 20 | 60.733 | KV452980.1 | 2126578 | 10-scf00391      | 10 |
| AX-158394294 | 20 | 60.733 | KV452980.1 | 2126696 | 10-scf00391      | 10 |
| AX-158243266 | 20 | 60.733 | KV452980.1 | 2130631 | 10-scf00391      | 10 |
| AX-158394295 | 20 | 60.733 | KV452980.1 | 2131153 | 10-scf00391      | 10 |
| AX-158394297 | 20 | 60.733 | KV452980.1 | 2138556 | 10-scf00391      | 10 |
| AX-158243272 | 20 | 60.733 | KV452980.1 | 2139192 | 10-scf00391      | 10 |
| AX-157859717 | 20 | 60.733 | KV452980.1 | 2140043 | 10-scf00391      | 10 |
| AX-157841424 | 20 | 60.733 | KV452980.1 | 2140110 | 10-scf00391      | 10 |

|              |    |        |            |         |             |    |
|--------------|----|--------|------------|---------|-------------|----|
| AX-157859718 | 20 | 60.733 | KV452980.1 | 2140716 | 10-scf00391 | 10 |
| AX-157872636 | 20 | 60.733 | KV452980.1 | 2143747 | 10-scf00391 | 10 |
| AX-158243275 | 20 | 60.733 | KV452980.1 | 2146665 | 10-scf00391 | 10 |
| AX-157841426 | 20 | 60.733 | KV452980.1 | 2148434 | 10-scf00391 | 10 |
| AX-157841427 | 20 | 60.733 | KV452980.1 | 2148795 | 10-scf00391 | 10 |
| AX-158243276 | 20 | 60.733 | KV452980.1 | 2153486 | 10-scf00391 | 10 |
| AX-158243277 | 20 | 60.733 | KV452980.1 | 2154377 | 10-scf00391 | 10 |
| AX-158243278 | 20 | 60.733 | KV452980.1 | 2159738 | 10-scf00391 | 10 |
| AX-158243708 | 20 | 60.733 | KV452980.1 | 2708082 | 10-scf00391 | 10 |
| AX-158243709 | 20 | 60.733 | KV452980.1 | 2708971 | 10-scf00391 | 10 |
| AX-158243714 | 20 | 60.733 | KV452980.1 | 2712332 | 10-scf00391 | 10 |
| AX-158243716 | 20 | 60.733 | KV452980.1 | 2714005 | 10-scf00391 | 10 |
| AX-158243720 | 20 | 60.733 | KV452980.1 | 2720111 | 10-scf00391 | 10 |
| AX-158243722 | 20 | 60.733 | KV452980.1 | 2720862 | 10-scf00391 | 10 |
| AX-158415615 | 20 | 60.733 | KV452980.1 | 2722145 | 10-scf00391 | 10 |
| AX-158243729 | 20 | 60.733 | KV452980.1 | 2728174 | 10-scf00391 | 10 |
| AX-158243730 | 20 | 60.733 | KV452980.1 | 2729727 | 10-scf00391 | 10 |
| AX-158243749 | 20 | 60.733 | KV452980.1 | 2749294 | 10-scf00391 | 10 |
| AX-158243754 | 20 | 60.733 | KV452980.1 | 2754578 | 10-scf00391 | 10 |
| AX-158243755 | 20 | 60.733 | KV452980.1 | 2755053 | 10-scf00391 | 10 |
| AX-158246913 | 20 | 60.733 | KV452981.1 | 313685  | 10-scf00393 | 10 |
| AX-158246967 | 20 | 60.733 | KV452981.1 | 385149  | 10-scf00393 | 10 |
| AX-157841818 | 20 | 60.733 | KV452981.1 | 397297  | 10-scf00393 | 10 |
| AX-158244292 | 20 | 60.733 | KV452981.1 | 495120  | 10-scf00393 | 10 |
| AX-158244301 | 20 | 60.733 | KV452981.1 | 509799  | 10-scf00393 | 10 |
| AX-158244379 | 20 | 60.733 | KV452981.1 | 613168  | 10-scf00393 | 10 |
| AX-158244385 | 20 | 60.733 | KV452981.1 | 621458  | 10-scf00393 | 10 |
| AX-158244389 | 20 | 60.733 | KV452981.1 | 623937  | 10-scf00393 | 10 |
| AX-158244391 | 20 | 60.733 | KV452981.1 | 625095  | 10-scf00393 | 10 |
| AX-158244392 | 20 | 60.733 | KV452981.1 | 625384  | 10-scf00393 | 10 |
| AX-158244394 | 20 | 60.733 | KV452981.1 | 627351  | 10-scf00393 | 10 |
| AX-158244403 | 20 | 60.733 | KV452981.1 | 645354  | 10-scf00393 | 10 |
| AX-157841527 | 20 | 60.733 | KV452981.1 | 652839  | 10-scf00393 | 10 |
| AX-157841528 | 20 | 60.733 | KV452981.1 | 660578  | 10-scf00393 | 10 |
| AX-157841529 | 20 | 60.733 | KV452981.1 | 670516  | 10-scf00393 | 10 |
| AX-158244458 | 20 | 60.733 | KV452981.1 | 726102  | 10-scf00393 | 10 |
| AX-158244459 | 20 | 60.733 | KV452981.1 | 728824  | 10-scf00393 | 10 |
| AX-158244461 | 20 | 60.733 | KV452981.1 | 731200  | 10-scf00393 | 10 |
| AX-158244472 | 20 | 60.733 | KV452981.1 | 747299  | 10-scf00393 | 10 |
| AX-158244463 | 20 | 60.771 | KV452981.1 | 736803  | 10-scf00393 | 10 |
| AX-158244464 | 20 | 60.819 | KV452981.1 | 738704  | 10-scf00393 | 10 |
| AX-157841536 | 20 | 60.819 | KV452981.1 | 742161  | 10-scf00393 | 10 |
| AX-158244475 | 20 | 60.819 | KV452981.1 | 750782  | 10-scf00393 | 10 |
| AX-158244478 | 20 | 60.819 | KV452981.1 | 755755  | 10-scf00393 | 10 |
| AX-158244482 | 20 | 60.819 | KV452981.1 | 761598  | 10-scf00393 | 10 |
| AX-157841431 | 20 | 60.845 | KV452980.1 | 2193484 | 10-scf00391 | 10 |
| AX-157727932 | 20 | 60.845 | KV452981.1 | 763907  | 10-scf00393 | 10 |
| AX-158244485 | 20 | 60.845 | KV452981.1 | 764688  | 10-scf00393 | 10 |
| AX-158242322 | 20 | 60.867 | KV452980.1 | 848899  | 10-scf00391 | 10 |
| AX-158243001 | 20 | 60.867 | KV452980.1 | 1819594 | 10-scf00391 | 10 |
| AX-157841530 | 20 | 60.867 | KV452981.1 | 673403  | 10-scf00393 | 10 |

|              |    |        |            |         |                  |    |
|--------------|----|--------|------------|---------|------------------|----|
| AX-157747644 | 20 | 60.867 | KV452981.1 | 764741  | 10-scf00393      | 10 |
| AX-157859759 | 20 | 60.867 | KV452981.1 | 1552048 | 10-scf00393      | 10 |
| AX-157859760 | 20 | 60.867 | KV452981.1 | 1552961 | 10-scf00393      | 10 |
| AX-157841624 | 20 | 60.867 | KV452981.1 | 1658499 | 10-scf00393      | 10 |
| AX-158403943 | 20 | 60.867 | DX086439.1 | 134     | 10-ORI212 lctalt | UN |
| AX-158244492 | 20 | 60.884 | KV452981.1 | 770425  | 10-scf00393      | 10 |
| AX-158244494 | 20 | 60.892 | KV452981.1 | 773195  | 10-scf00393      | 10 |
| AX-157745398 | 20 | 60.928 | KV452980.1 | 19993   | 10-scf00391      | 10 |
| AX-158386974 | 20 | 60.928 | KV452980.1 | 38917   | 10-scf00391      | 10 |
| AX-158242395 | 20 | 60.928 | KV452980.1 | 975043  | 10-scf00391      | 10 |
| AX-158242511 | 20 | 60.928 | KV452980.1 | 1160884 | 10-scf00391      | 10 |
| AX-158243042 | 20 | 60.928 | KV452980.1 | 1856300 | 10-scf00391      | 10 |
| AX-158243136 | 20 | 60.928 | KV452980.1 | 1967916 | 10-scf00391      | 10 |
| AX-157867291 | 20 | 60.928 | KV452980.1 | 2181461 | 10-scf00391      | 10 |
| AX-158243703 | 20 | 60.928 | KV452980.1 | 2702572 | 10-scf00391      | 10 |
| AX-158244331 | 20 | 60.928 | KV452981.1 | 550612  | 10-scf00393      | 10 |
| AX-158244500 | 20 | 60.928 | KV452981.1 | 777589  | 10-scf00393      | 10 |
| AX-158244503 | 20 | 60.928 | KV452981.1 | 783825  | 10-scf00393      | 10 |
| AX-158244505 | 20 | 60.928 | KV452981.1 | 786872  | 10-scf00393      | 10 |
| AX-158244507 | 20 | 60.928 | KV452981.1 | 787946  | 10-scf00393      | 10 |
| AX-158244508 | 20 | 60.928 | KV452981.1 | 788905  | 10-scf00393      | 10 |
| AX-158244509 | 20 | 60.928 | KV452981.1 | 792148  | 10-scf00393      | 10 |
| AX-158244511 | 20 | 60.928 | KV452981.1 | 792703  | 10-scf00393      | 10 |
| AX-157841545 | 20 | 60.928 | KV452981.1 | 825222  | 10-scf00393      | 10 |
| AX-158244600 | 20 | 60.928 | KV452981.1 | 920769  | 10-scf00393      | 10 |
| AX-158245260 | 20 | 60.928 | KV452981.1 | 1820171 | 10-scf00393      | 10 |
| AX-158245267 | 20 | 60.928 | KV452981.1 | 1826419 | 10-scf00393      | 10 |
| AX-158245997 | 20 | 60.928 | KV452981.1 | 2825928 | 10-scf00393      | 10 |
| AX-158242690 | 20 | 61.037 | KV452980.1 | 1405594 | 10-scf00391      | 10 |
| AX-157841454 | 20 | 61.037 | KV452980.1 | 2375409 | 10-scf00391      | 10 |
| AX-157721454 | 20 | 61.037 | KV452981.1 | 780500  | 10-scf00393      | 10 |
| AX-158244513 | 20 | 61.037 | KV452981.1 | 794598  | 10-scf00393      | 10 |
| AX-158244514 | 20 | 61.037 | KV452981.1 | 794907  | 10-scf00393      | 10 |
| AX-158244519 | 20 | 61.037 | KV452981.1 | 798455  | 10-scf00393      | 10 |
| AX-158244525 | 20 | 61.037 | KV452981.1 | 805885  | 10-scf00393      | 10 |
| AX-158243081 | 20 | 61.256 | KV452980.1 | 1894838 | 10-scf00391      | 10 |
| AX-158244534 | 20 | 61.256 | KV452981.1 | 821362  | 10-scf00393      | 10 |
| AX-157718136 | 20 | 61.256 | KV452981.1 | 823533  | 10-scf00393      | 10 |
| AX-158244535 | 20 | 61.256 | KV452981.1 | 824487  | 10-scf00393      | 10 |
| AX-158244543 | 20 | 61.256 | KV452981.1 | 835249  | 10-scf00393      | 10 |
| AX-157744552 | 20 | 61.256 | KV452981.1 | 843339  | 10-scf00393      | 10 |
| AX-158244551 | 20 | 61.256 | KV452981.1 | 843515  | 10-scf00393      | 10 |
| AX-158244552 | 20 | 61.256 | KV452981.1 | 843767  | 10-scf00393      | 10 |
| AX-158244553 | 20 | 61.256 | KV452981.1 | 844013  | 10-scf00393      | 10 |
| AX-158244558 | 20 | 61.256 | KV452981.1 | 849098  | 10-scf00393      | 10 |
| AX-158244566 | 20 | 61.256 | KV452981.1 | 867130  | 10-scf00393      | 10 |
| AX-158244569 | 20 | 61.256 | KV452981.1 | 870818  | 10-scf00393      | 10 |
| AX-158244572 | 20 | 61.256 | KV452981.1 | 874989  | 10-scf00393      | 10 |
| AX-158244581 | 20 | 61.256 | KV452981.1 | 889844  | 10-scf00393      | 10 |
| AX-158244743 | 20 | 61.256 | KV452981.1 | 1097231 | 10-scf00393      | 10 |
| AX-157841549 | 20 | 61.319 | KV452981.1 | 880930  | 10-scf00393      | 10 |

|              |    |        |            |         |             |    |
|--------------|----|--------|------------|---------|-------------|----|
| AX-158244582 | 20 | 61.394 | KV452981.1 | 890537  | 10-scf00393 | 10 |
| AX-158242766 | 20 | 61.438 | KV452980.1 | 1499487 | 10-scf00391 | 10 |
| AX-157841374 | 20 | 61.438 | KV452980.1 | 1534229 | 10-scf00391 | 10 |
| AX-157841375 | 20 | 61.438 | KV452980.1 | 1540085 | 10-scf00391 | 10 |
| AX-157718083 | 20 | 61.438 | KV452980.1 | 1766990 | 10-scf00391 | 10 |
| AX-158244466 | 20 | 61.438 | KV452981.1 | 739405  | 10-scf00393 | 10 |
| AX-157841543 | 20 | 61.438 | KV452981.1 | 818660  | 10-scf00393 | 10 |
| AX-158244586 | 20 | 61.438 | KV452981.1 | 895611  | 10-scf00393 | 10 |
| AX-157756298 | 20 | 61.438 | KV452981.1 | 900662  | 10-scf00393 | 10 |
| AX-158244657 | 20 | 61.438 | KV452981.1 | 996890  | 10-scf00393 | 10 |
| AX-158244739 | 20 | 61.438 | KV452981.1 | 1093601 | 10-scf00393 | 10 |
| AX-158410759 | 20 | 61.62  | KV452981.1 | 906727  | 10-scf00393 | 10 |
| AX-158244587 | 20 | 61.802 | KV452981.1 | 895892  | 10-scf00393 | 10 |
| AX-158244601 | 20 | 61.802 | KV452981.1 | 927720  | 10-scf00393 | 10 |
| AX-158244602 | 20 | 61.802 | KV452981.1 | 927928  | 10-scf00393 | 10 |
| AX-158244604 | 20 | 61.802 | KV452981.1 | 928561  | 10-scf00393 | 10 |
| AX-157708546 | 20 | 61.802 | KV452981.1 | 929226  | 10-scf00393 | 10 |
| AX-158244605 | 20 | 61.802 | KV452981.1 | 930009  | 10-scf00393 | 10 |
| AX-158244606 | 20 | 61.802 | KV452981.1 | 930612  | 10-scf00393 | 10 |
| AX-158244609 | 20 | 61.802 | KV452981.1 | 932550  | 10-scf00393 | 10 |
| AX-157841552 | 20 | 61.802 | KV452981.1 | 933656  | 10-scf00393 | 10 |
| AX-158244610 | 20 | 61.802 | KV452981.1 | 934178  | 10-scf00393 | 10 |
| AX-157841553 | 20 | 61.802 | KV452981.1 | 934294  | 10-scf00393 | 10 |
| AX-158244613 | 20 | 61.802 | KV452981.1 | 938250  | 10-scf00393 | 10 |
| AX-158244618 | 20 | 61.802 | KV452981.1 | 945469  | 10-scf00393 | 10 |
| AX-158244620 | 20 | 61.802 | KV452981.1 | 947868  | 10-scf00393 | 10 |
| AX-158244621 | 20 | 61.802 | KV452981.1 | 948605  | 10-scf00393 | 10 |
| AX-158244625 | 20 | 61.802 | KV452981.1 | 953005  | 10-scf00393 | 10 |
| AX-158244626 | 20 | 61.802 | KV452981.1 | 953607  | 10-scf00393 | 10 |
| AX-158244833 | 20 | 61.802 | KV452981.1 | 1209901 | 10-scf00393 | 10 |
| AX-158244857 | 20 | 61.802 | KV452981.1 | 1251559 | 10-scf00393 | 10 |
| AX-158244630 | 20 | 61.829 | KV452981.1 | 961464  | 10-scf00393 | 10 |
| AX-158244637 | 20 | 61.875 | KV452981.1 | 971946  | 10-scf00393 | 10 |
| AX-157841563 | 20 | 61.875 | KV452981.1 | 1036937 | 10-scf00393 | 10 |
| AX-158244765 | 20 | 61.875 | KV452981.1 | 1118111 | 10-scf00393 | 10 |
| AX-158244638 | 20 | 61.912 | KV452981.1 | 973182  | 10-scf00393 | 10 |
| AX-157841559 | 20 | 61.912 | KV452981.1 | 982205  | 10-scf00393 | 10 |
| AX-158244580 | 20 | 62.021 | KV452981.1 | 886690  | 10-scf00393 | 10 |
| AX-158244660 | 20 | 62.021 | KV452981.1 | 1001054 | 10-scf00393 | 10 |
| AX-158244664 | 20 | 62.021 | KV452981.1 | 1007517 | 10-scf00393 | 10 |
| AX-158244671 | 20 | 62.021 | KV452981.1 | 1016661 | 10-scf00393 | 10 |
| AX-158244672 | 20 | 62.021 | KV452981.1 | 1018340 | 10-scf00393 | 10 |
| AX-157841561 | 20 | 62.021 | KV452981.1 | 1018688 | 10-scf00393 | 10 |
| AX-158244675 | 20 | 62.021 | KV452981.1 | 1022279 | 10-scf00393 | 10 |
| AX-158244676 | 20 | 62.021 | KV452981.1 | 1025606 | 10-scf00393 | 10 |
| AX-157867297 | 20 | 62.021 | KV452981.1 | 1143825 | 10-scf00393 | 10 |
| AX-157867298 | 20 | 62.021 | KV452981.1 | 1147420 | 10-scf00393 | 10 |
| AX-158244851 | 20 | 62.021 | KV452981.1 | 1233647 | 10-scf00393 | 10 |
| AX-157774521 | 20 | 62.021 | KV452981.1 | 1302239 | 10-scf00393 | 10 |
| AX-158244911 | 20 | 62.021 | KV452981.1 | 1347539 | 10-scf00393 | 10 |
| AX-158244914 | 20 | 62.021 | KV452981.1 | 1354799 | 10-scf00393 | 10 |

|              |    |        |            |         |             |    |
|--------------|----|--------|------------|---------|-------------|----|
| AX-157775741 | 20 | 62.021 | KV452981.1 | 1436951 | 10-scf00393 | 10 |
| AX-158245025 | 20 | 62.021 | KV452981.1 | 1514450 | 10-scf00393 | 10 |
| AX-157715135 | 20 | 62.021 | KV452981.1 | 1526462 | 10-scf00393 | 10 |
| AX-158245044 | 20 | 62.021 | KV452981.1 | 1538605 | 10-scf00393 | 10 |
| AX-158242995 | 20 | 62.13  | KV452980.1 | 1800813 | 10-scf00391 | 10 |
| AX-158242997 | 20 | 62.13  | KV452980.1 | 1806040 | 10-scf00391 | 10 |
| AX-158243037 | 20 | 62.13  | KV452980.1 | 1851631 | 10-scf00391 | 10 |
| AX-157746405 | 20 | 62.13  | KV452981.1 | 107089  | 10-scf00393 | 10 |
| AX-157710737 | 20 | 62.13  | KV452981.1 | 133440  | 10-scf00393 | 10 |
| AX-158244529 | 20 | 62.13  | KV452981.1 | 810641  | 10-scf00393 | 10 |
| AX-157743863 | 20 | 62.13  | KV452981.1 | 832323  | 10-scf00393 | 10 |
| AX-158244578 | 20 | 62.13  | KV452981.1 | 883452  | 10-scf00393 | 10 |
| AX-158244603 | 20 | 62.13  | KV452981.1 | 928252  | 10-scf00393 | 10 |
| AX-158244677 | 20 | 62.13  | KV452981.1 | 1028017 | 10-scf00393 | 10 |
| AX-157741775 | 20 | 62.13  | KV452981.1 | 1029624 | 10-scf00393 | 10 |
| AX-157725910 | 20 | 62.13  | KV452981.1 | 1036776 | 10-scf00393 | 10 |
| AX-158244697 | 20 | 62.13  | KV452981.1 | 1053491 | 10-scf00393 | 10 |
| AX-158244698 | 20 | 62.13  | KV452981.1 | 1053872 | 10-scf00393 | 10 |
| AX-158244716 | 20 | 62.13  | KV452981.1 | 1067082 | 10-scf00393 | 10 |
| AX-158244718 | 20 | 62.13  | KV452981.1 | 1068508 | 10-scf00393 | 10 |
| AX-157720818 | 20 | 62.13  | KV452981.1 | 1068573 | 10-scf00393 | 10 |
| AX-158244722 | 20 | 62.13  | KV452981.1 | 1076813 | 10-scf00393 | 10 |
| AX-158244734 | 20 | 62.13  | KV452981.1 | 1090238 | 10-scf00393 | 10 |
| AX-158244751 | 20 | 62.13  | KV452981.1 | 1103470 | 10-scf00393 | 10 |
| AX-158244773 | 20 | 62.13  | KV452981.1 | 1133849 | 10-scf00393 | 10 |
| AX-158244776 | 20 | 62.13  | KV452981.1 | 1136779 | 10-scf00393 | 10 |
| AX-157841566 | 20 | 62.13  | KV452981.1 | 1150646 | 10-scf00393 | 10 |
| AX-158244785 | 20 | 62.13  | KV452981.1 | 1150805 | 10-scf00393 | 10 |
| AX-158244789 | 20 | 62.13  | KV452981.1 | 1153970 | 10-scf00393 | 10 |
| AX-158244793 | 20 | 62.13  | KV452981.1 | 1155509 | 10-scf00393 | 10 |
| AX-158244794 | 20 | 62.13  | KV452981.1 | 1157512 | 10-scf00393 | 10 |
| AX-158244795 | 20 | 62.13  | KV452981.1 | 1158867 | 10-scf00393 | 10 |
| AX-158244796 | 20 | 62.13  | KV452981.1 | 1159416 | 10-scf00393 | 10 |
| AX-158244798 | 20 | 62.13  | KV452981.1 | 1159849 | 10-scf00393 | 10 |
| AX-157841567 | 20 | 62.13  | KV452981.1 | 1160773 | 10-scf00393 | 10 |
| AX-158244800 | 20 | 62.13  | KV452981.1 | 1163388 | 10-scf00393 | 10 |
| AX-158244801 | 20 | 62.13  | KV452981.1 | 1163750 | 10-scf00393 | 10 |
| AX-158244802 | 20 | 62.13  | KV452981.1 | 1163998 | 10-scf00393 | 10 |
| AX-157748238 | 20 | 62.13  | KV452981.1 | 1166150 | 10-scf00393 | 10 |
| AX-158244803 | 20 | 62.13  | KV452981.1 | 1167307 | 10-scf00393 | 10 |
| AX-157718621 | 20 | 62.13  | KV452981.1 | 1170792 | 10-scf00393 | 10 |
| AX-158244806 | 20 | 62.13  | KV452981.1 | 1172164 | 10-scf00393 | 10 |
| AX-158244807 | 20 | 62.13  | KV452981.1 | 1172272 | 10-scf00393 | 10 |
| AX-158244808 | 20 | 62.13  | KV452981.1 | 1172566 | 10-scf00393 | 10 |
| AX-158244809 | 20 | 62.13  | KV452981.1 | 1172813 | 10-scf00393 | 10 |
| AX-158244811 | 20 | 62.13  | KV452981.1 | 1173999 | 10-scf00393 | 10 |
| AX-158244814 | 20 | 62.13  | KV452981.1 | 1177848 | 10-scf00393 | 10 |
| AX-157841568 | 20 | 62.13  | KV452981.1 | 1181156 | 10-scf00393 | 10 |
| AX-158244820 | 20 | 62.13  | KV452981.1 | 1195638 | 10-scf00393 | 10 |
| AX-158244825 | 20 | 62.13  | KV452981.1 | 1202409 | 10-scf00393 | 10 |
| AX-157841570 | 20 | 62.13  | KV452981.1 | 1282330 | 10-scf00393 | 10 |

|              |    |        |            |         |             |    |
|--------------|----|--------|------------|---------|-------------|----|
| AX-158244877 | 20 | 62.13  | KV452981.1 | 1284054 | 10-scf00393 | 10 |
| AX-158244917 | 20 | 62.13  | KV452981.1 | 1358223 | 10-scf00393 | 10 |
| AX-157841596 | 20 | 62.13  | KV452981.1 | 1420110 | 10-scf00393 | 10 |
| AX-158245005 | 20 | 62.13  | KV452981.1 | 1476867 | 10-scf00393 | 10 |
| AX-158423337 | 20 | 62.13  | KV452981.1 | 1486683 | 10-scf00393 | 10 |
| AX-158245030 | 20 | 62.13  | KV452981.1 | 1518194 | 10-scf00393 | 10 |
| AX-157841609 | 20 | 62.13  | KV452981.1 | 1523768 | 10-scf00393 | 10 |
| AX-158245046 | 20 | 62.13  | KV452981.1 | 1540367 | 10-scf00393 | 10 |
| AX-158415656 | 20 | 62.13  | KV452981.1 | 1546118 | 10-scf00393 | 10 |
| AX-158245089 | 20 | 62.13  | KV452981.1 | 1604208 | 10-scf00393 | 10 |
| AX-158245212 | 20 | 62.13  | KV452981.1 | 1756244 | 10-scf00393 | 10 |
| AX-157841626 | 20 | 62.13  | KV452981.1 | 1777623 | 10-scf00393 | 10 |
| AX-158245333 | 20 | 62.13  | KV452981.1 | 1916086 | 10-scf00393 | 10 |
| AX-158245606 | 20 | 62.13  | KV452981.1 | 2332874 | 10-scf00393 | 10 |
| AX-158386991 | 20 | 62.13  | KV452981.1 | 2351623 | 10-scf00393 | 10 |
| AX-158244836 | 20 | 62.167 | KV452981.1 | 1213330 | 10-scf00393 | 10 |
| AX-158244838 | 20 | 62.191 | KV452981.1 | 1214438 | 10-scf00393 | 10 |
| AX-158245858 | 20 | 62.191 | KV452981.1 | 2686653 | 10-scf00393 | 10 |
| AX-157754449 | 20 | 62.191 | KV452981.1 | 2755673 | 10-scf00393 | 10 |
| AX-158246236 | 20 | 62.191 | KV452981.1 | 3139536 | 10-scf00393 | 10 |
| AX-158244846 | 20 | 62.222 | KV452981.1 | 1230431 | 10-scf00393 | 10 |
| AX-158244847 | 20 | 62.239 | KV452981.1 | 1231094 | 10-scf00393 | 10 |
| AX-158244852 | 20 | 62.239 | KV452981.1 | 1238437 | 10-scf00393 | 10 |
| AX-158244855 | 20 | 62.239 | KV452981.1 | 1244277 | 10-scf00393 | 10 |
| AX-158244862 | 20 | 62.239 | KV452981.1 | 1257840 | 10-scf00393 | 10 |
| AX-158244863 | 20 | 62.239 | KV452981.1 | 1258204 | 10-scf00393 | 10 |
| AX-158242885 | 20 | 62.348 | KV452980.1 | 1634436 | 10-scf00391 | 10 |
| AX-158242909 | 20 | 62.348 | KV452980.1 | 1680804 | 10-scf00391 | 10 |
| AX-157872618 | 20 | 62.348 | KV452980.1 | 1694983 | 10-scf00391 | 10 |
| AX-158242926 | 20 | 62.348 | KV452980.1 | 1697210 | 10-scf00391 | 10 |
| AX-157872619 | 20 | 62.348 | KV452980.1 | 1697905 | 10-scf00391 | 10 |
| AX-158242927 | 20 | 62.348 | KV452980.1 | 1698211 | 10-scf00391 | 10 |
| AX-158242932 | 20 | 62.348 | KV452980.1 | 1706107 | 10-scf00391 | 10 |
| AX-157872621 | 20 | 62.348 | KV452980.1 | 1708161 | 10-scf00391 | 10 |
| AX-157841399 | 20 | 62.348 | KV452980.1 | 1725796 | 10-scf00391 | 10 |
| AX-158242939 | 20 | 62.348 | KV452980.1 | 1727724 | 10-scf00391 | 10 |
| AX-158242941 | 20 | 62.348 | KV452980.1 | 1730642 | 10-scf00391 | 10 |
| AX-158242942 | 20 | 62.348 | KV452980.1 | 1733623 | 10-scf00391 | 10 |
| AX-158242945 | 20 | 62.348 | KV452980.1 | 1738667 | 10-scf00391 | 10 |
| AX-158242957 | 20 | 62.348 | KV452980.1 | 1749164 | 10-scf00391 | 10 |
| AX-158242960 | 20 | 62.348 | KV452980.1 | 1757920 | 10-scf00391 | 10 |
| AX-158242964 | 20 | 62.348 | KV452980.1 | 1760425 | 10-scf00391 | 10 |
| AX-158242969 | 20 | 62.348 | KV452980.1 | 1770732 | 10-scf00391 | 10 |
| AX-158242971 | 20 | 62.348 | KV452980.1 | 1773475 | 10-scf00391 | 10 |
| AX-158242973 | 20 | 62.348 | KV452980.1 | 1775205 | 10-scf00391 | 10 |
| AX-158242975 | 20 | 62.348 | KV452980.1 | 1777338 | 10-scf00391 | 10 |
| AX-158415591 | 20 | 62.348 | KV452980.1 | 1779539 | 10-scf00391 | 10 |
| AX-158242978 | 20 | 62.348 | KV452980.1 | 1779746 | 10-scf00391 | 10 |
| AX-158242979 | 20 | 62.348 | KV452980.1 | 1780760 | 10-scf00391 | 10 |
| AX-158243093 | 20 | 62.348 | KV452980.1 | 1922905 | 10-scf00391 | 10 |
| AX-158243094 | 20 | 62.348 | KV452980.1 | 1925356 | 10-scf00391 | 10 |

|              |    |        |            |         |             |    |
|--------------|----|--------|------------|---------|-------------|----|
| AX-158243096 | 20 | 62.348 | KV452980.1 | 1926599 | 10-scf00391 | 10 |
| AX-158243099 | 20 | 62.348 | KV452980.1 | 1928800 | 10-scf00391 | 10 |
| AX-158243100 | 20 | 62.348 | KV452980.1 | 1929247 | 10-scf00391 | 10 |
| AX-158243101 | 20 | 62.348 | KV452980.1 | 1929989 | 10-scf00391 | 10 |
| AX-158243103 | 20 | 62.348 | KV452980.1 | 1932623 | 10-scf00391 | 10 |
| AX-158243104 | 20 | 62.348 | KV452980.1 | 1933936 | 10-scf00391 | 10 |
| AX-158243105 | 20 | 62.348 | KV452980.1 | 1936406 | 10-scf00391 | 10 |
| AX-158243106 | 20 | 62.348 | KV452980.1 | 1938140 | 10-scf00391 | 10 |
| AX-158243109 | 20 | 62.348 | KV452980.1 | 1940486 | 10-scf00391 | 10 |
| AX-158243113 | 20 | 62.348 | KV452980.1 | 1944854 | 10-scf00391 | 10 |
| AX-158243115 | 20 | 62.348 | KV452980.1 | 1946705 | 10-scf00391 | 10 |
| AX-158243117 | 20 | 62.348 | KV452980.1 | 1949343 | 10-scf00391 | 10 |
| AX-158243119 | 20 | 62.348 | KV452980.1 | 1951409 | 10-scf00391 | 10 |
| AX-158243121 | 20 | 62.348 | KV452980.1 | 1952436 | 10-scf00391 | 10 |
| AX-158243123 | 20 | 62.348 | KV452980.1 | 1954147 | 10-scf00391 | 10 |
| AX-158243124 | 20 | 62.348 | KV452980.1 | 1954878 | 10-scf00391 | 10 |
| AX-158243125 | 20 | 62.348 | KV452980.1 | 1956303 | 10-scf00391 | 10 |
| AX-158243128 | 20 | 62.348 | KV452980.1 | 1959216 | 10-scf00391 | 10 |
| AX-158243139 | 20 | 62.348 | KV452980.1 | 1972307 | 10-scf00391 | 10 |
| AX-158243141 | 20 | 62.348 | KV452980.1 | 1977003 | 10-scf00391 | 10 |
| AX-158243145 | 20 | 62.348 | KV452980.1 | 1980212 | 10-scf00391 | 10 |
| AX-158243150 | 20 | 62.348 | KV452980.1 | 1984899 | 10-scf00391 | 10 |
| AX-158243151 | 20 | 62.348 | KV452980.1 | 1985378 | 10-scf00391 | 10 |
| AX-158243152 | 20 | 62.348 | KV452980.1 | 1985731 | 10-scf00391 | 10 |
| AX-158243154 | 20 | 62.348 | KV452980.1 | 1986959 | 10-scf00391 | 10 |
| AX-158243156 | 20 | 62.348 | KV452980.1 | 1989124 | 10-scf00391 | 10 |
| AX-158243158 | 20 | 62.348 | KV452980.1 | 1990778 | 10-scf00391 | 10 |
| AX-158243294 | 20 | 62.348 | KV452980.1 | 2194363 | 10-scf00391 | 10 |
| AX-157841467 | 20 | 62.348 | KV452980.1 | 2511059 | 10-scf00391 | 10 |
| AX-157841532 | 20 | 62.348 | KV452981.1 | 679743  | 10-scf00393 | 10 |
| AX-158244506 | 20 | 62.348 | KV452981.1 | 787027  | 10-scf00393 | 10 |
| AX-158244708 | 20 | 62.348 | KV452981.1 | 1060755 | 10-scf00393 | 10 |
| AX-158244719 | 20 | 62.348 | KV452981.1 | 1069037 | 10-scf00393 | 10 |
| AX-158244755 | 20 | 62.348 | KV452981.1 | 1106448 | 10-scf00393 | 10 |
| AX-158244757 | 20 | 62.348 | KV452981.1 | 1109896 | 10-scf00393 | 10 |
| AX-158244767 | 20 | 62.348 | KV452981.1 | 1122302 | 10-scf00393 | 10 |
| AX-158244797 | 20 | 62.348 | KV452981.1 | 1159637 | 10-scf00393 | 10 |
| AX-158244817 | 20 | 62.348 | KV452981.1 | 1186160 | 10-scf00393 | 10 |
| AX-158244837 | 20 | 62.348 | KV452981.1 | 1214131 | 10-scf00393 | 10 |
| AX-158244839 | 20 | 62.348 | KV452981.1 | 1214831 | 10-scf00393 | 10 |
| AX-158244872 | 20 | 62.348 | KV452981.1 | 1274880 | 10-scf00393 | 10 |
| AX-158244873 | 20 | 62.348 | KV452981.1 | 1278993 | 10-scf00393 | 10 |
| AX-158244874 | 20 | 62.348 | KV452981.1 | 1279799 | 10-scf00393 | 10 |
| AX-158244875 | 20 | 62.348 | KV452981.1 | 1281625 | 10-scf00393 | 10 |
| AX-158244876 | 20 | 62.348 | KV452981.1 | 1282167 | 10-scf00393 | 10 |
| AX-158244878 | 20 | 62.348 | KV452981.1 | 1285238 | 10-scf00393 | 10 |
| AX-158244881 | 20 | 62.348 | KV452981.1 | 1294845 | 10-scf00393 | 10 |
| AX-158244882 | 20 | 62.348 | KV452981.1 | 1297167 | 10-scf00393 | 10 |
| AX-158244883 | 20 | 62.348 | KV452981.1 | 1299371 | 10-scf00393 | 10 |
| AX-158244885 | 20 | 62.348 | KV452981.1 | 1303581 | 10-scf00393 | 10 |
| AX-157757593 | 20 | 62.348 | KV452981.1 | 1304148 | 10-scf00393 | 10 |

|              |    |        |            |         |             |    |
|--------------|----|--------|------------|---------|-------------|----|
| AX-158244890 | 20 | 62.348 | KV452981.1 | 1313644 | 10-scf00393 | 10 |
| AX-158244892 | 20 | 62.348 | KV452981.1 | 1320874 | 10-scf00393 | 10 |
| AX-158244893 | 20 | 62.348 | KV452981.1 | 1321318 | 10-scf00393 | 10 |
| AX-157841576 | 20 | 62.348 | KV452981.1 | 1325437 | 10-scf00393 | 10 |
| AX-158244902 | 20 | 62.348 | KV452981.1 | 1330236 | 10-scf00393 | 10 |
| AX-158380993 | 20 | 62.348 | KV452981.1 | 1334616 | 10-scf00393 | 10 |
| AX-157775491 | 20 | 62.348 | KV452981.1 | 1342663 | 10-scf00393 | 10 |
| AX-158244910 | 20 | 62.348 | KV452981.1 | 1347279 | 10-scf00393 | 10 |
| AX-158244916 | 20 | 62.348 | KV452981.1 | 1357461 | 10-scf00393 | 10 |
| AX-158244918 | 20 | 62.348 | KV452981.1 | 1359749 | 10-scf00393 | 10 |
| AX-158423335 | 20 | 62.348 | KV452981.1 | 1367584 | 10-scf00393 | 10 |
| AX-158244920 | 20 | 62.348 | KV452981.1 | 1372194 | 10-scf00393 | 10 |
| AX-157841583 | 20 | 62.348 | KV452981.1 | 1374159 | 10-scf00393 | 10 |
| AX-157841584 | 20 | 62.348 | KV452981.1 | 1374686 | 10-scf00393 | 10 |
| AX-158244921 | 20 | 62.348 | KV452981.1 | 1375151 | 10-scf00393 | 10 |
| AX-158244922 | 20 | 62.348 | KV452981.1 | 1376480 | 10-scf00393 | 10 |
| AX-158244923 | 20 | 62.348 | KV452981.1 | 1377065 | 10-scf00393 | 10 |
| AX-157841585 | 20 | 62.348 | KV452981.1 | 1377457 | 10-scf00393 | 10 |
| AX-158244926 | 20 | 62.348 | KV452981.1 | 1381760 | 10-scf00393 | 10 |
| AX-158244927 | 20 | 62.348 | KV452981.1 | 1382828 | 10-scf00393 | 10 |
| AX-158244928 | 20 | 62.348 | KV452981.1 | 1383336 | 10-scf00393 | 10 |
| AX-158244930 | 20 | 62.348 | KV452981.1 | 1384598 | 10-scf00393 | 10 |
| AX-157841586 | 20 | 62.348 | KV452981.1 | 1384998 | 10-scf00393 | 10 |
| AX-157841587 | 20 | 62.348 | KV452981.1 | 1387494 | 10-scf00393 | 10 |
| AX-158244932 | 20 | 62.348 | KV452981.1 | 1387975 | 10-scf00393 | 10 |
| AX-157841588 | 20 | 62.348 | KV452981.1 | 1400619 | 10-scf00393 | 10 |
| AX-158244937 | 20 | 62.348 | KV452981.1 | 1402091 | 10-scf00393 | 10 |
| AX-157841591 | 20 | 62.348 | KV452981.1 | 1402734 | 10-scf00393 | 10 |
| AX-157841592 | 20 | 62.348 | KV452981.1 | 1403621 | 10-scf00393 | 10 |
| AX-157841593 | 20 | 62.348 | KV452981.1 | 1403831 | 10-scf00393 | 10 |
| AX-158244939 | 20 | 62.348 | KV452981.1 | 1405012 | 10-scf00393 | 10 |
| AX-158244940 | 20 | 62.348 | KV452981.1 | 1407583 | 10-scf00393 | 10 |
| AX-157725806 | 20 | 62.348 | KV452981.1 | 1411843 | 10-scf00393 | 10 |
| AX-158244946 | 20 | 62.348 | KV452981.1 | 1412951 | 10-scf00393 | 10 |
| AX-158244947 | 20 | 62.348 | KV452981.1 | 1413274 | 10-scf00393 | 10 |
| AX-158244948 | 20 | 62.348 | KV452981.1 | 1413767 | 10-scf00393 | 10 |
| AX-158244949 | 20 | 62.348 | KV452981.1 | 1414729 | 10-scf00393 | 10 |
| AX-158244950 | 20 | 62.348 | KV452981.1 | 1414956 | 10-scf00393 | 10 |
| AX-158244951 | 20 | 62.348 | KV452981.1 | 1415234 | 10-scf00393 | 10 |
| AX-158244952 | 20 | 62.348 | KV452981.1 | 1416980 | 10-scf00393 | 10 |
| AX-158244953 | 20 | 62.348 | KV452981.1 | 1417739 | 10-scf00393 | 10 |
| AX-158244955 | 20 | 62.348 | KV452981.1 | 1419587 | 10-scf00393 | 10 |
| AX-158244960 | 20 | 62.348 | KV452981.1 | 1425854 | 10-scf00393 | 10 |
| AX-158244962 | 20 | 62.348 | KV452981.1 | 1426505 | 10-scf00393 | 10 |
| AX-158244963 | 20 | 62.348 | KV452981.1 | 1430233 | 10-scf00393 | 10 |
| AX-158244969 | 20 | 62.348 | KV452981.1 | 1437960 | 10-scf00393 | 10 |
| AX-158244970 | 20 | 62.348 | KV452981.1 | 1438445 | 10-scf00393 | 10 |
| AX-158244975 | 20 | 62.348 | KV452981.1 | 1443102 | 10-scf00393 | 10 |
| AX-158244976 | 20 | 62.348 | KV452981.1 | 1443934 | 10-scf00393 | 10 |
| AX-158244977 | 20 | 62.348 | KV452981.1 | 1446493 | 10-scf00393 | 10 |
| AX-158244979 | 20 | 62.348 | KV452981.1 | 1447096 | 10-scf00393 | 10 |



|              |    |        |            |         |             |    |
|--------------|----|--------|------------|---------|-------------|----|
| AX-158244980 | 20 | 62.348 | KV452981.1 | 1448481 | 10-scf00393 | 10 |
| AX-157723152 | 20 | 62.348 | KV452981.1 | 1449654 | 10-scf00393 | 10 |
| AX-158244981 | 20 | 62.348 | KV452981.1 | 1450197 | 10-scf00393 | 10 |
| AX-158244982 | 20 | 62.348 | KV452981.1 | 1451327 | 10-scf00393 | 10 |
| AX-158244984 | 20 | 62.348 | KV452981.1 | 1452415 | 10-scf00393 | 10 |
| AX-158244985 | 20 | 62.348 | KV452981.1 | 1453528 | 10-scf00393 | 10 |
| AX-157773033 | 20 | 62.348 | KV452981.1 | 1454212 | 10-scf00393 | 10 |
| AX-158244986 | 20 | 62.348 | KV452981.1 | 1455005 | 10-scf00393 | 10 |
| AX-157721406 | 20 | 62.348 | KV452981.1 | 1455563 | 10-scf00393 | 10 |
| AX-157722047 | 20 | 62.348 | KV452981.1 | 1464202 | 10-scf00393 | 10 |
| AX-158244991 | 20 | 62.348 | KV452981.1 | 1467080 | 10-scf00393 | 10 |
| AX-158244993 | 20 | 62.348 | KV452981.1 | 1468659 | 10-scf00393 | 10 |
| AX-158244994 | 20 | 62.348 | KV452981.1 | 1469266 | 10-scf00393 | 10 |
| AX-158244995 | 20 | 62.348 | KV452981.1 | 1469712 | 10-scf00393 | 10 |
| AX-157713692 | 20 | 62.348 | KV452981.1 | 1470986 | 10-scf00393 | 10 |
| AX-158245002 | 20 | 62.348 | KV452981.1 | 1475974 | 10-scf00393 | 10 |
| AX-157773599 | 20 | 62.348 | KV452981.1 | 1476144 | 10-scf00393 | 10 |
| AX-158245004 | 20 | 62.348 | KV452981.1 | 1476536 | 10-scf00393 | 10 |
| AX-157748609 | 20 | 62.348 | KV452981.1 | 1481657 | 10-scf00393 | 10 |
| AX-157859757 | 20 | 62.348 | KV452981.1 | 1484456 | 10-scf00393 | 10 |
| AX-158245008 | 20 | 62.348 | KV452981.1 | 1486274 | 10-scf00393 | 10 |
| AX-158245009 | 20 | 62.348 | KV452981.1 | 1487325 | 10-scf00393 | 10 |
| AX-158245010 | 20 | 62.348 | KV452981.1 | 1487955 | 10-scf00393 | 10 |
| AX-158245011 | 20 | 62.348 | KV452981.1 | 1488496 | 10-scf00393 | 10 |
| AX-158245012 | 20 | 62.348 | KV452981.1 | 1491309 | 10-scf00393 | 10 |
| AX-158245013 | 20 | 62.348 | KV452981.1 | 1492681 | 10-scf00393 | 10 |
| AX-158245014 | 20 | 62.348 | KV452981.1 | 1493675 | 10-scf00393 | 10 |
| AX-158245015 | 20 | 62.348 | KV452981.1 | 1494226 | 10-scf00393 | 10 |
| AX-158245016 | 20 | 62.348 | KV452981.1 | 1494977 | 10-scf00393 | 10 |
| AX-158245017 | 20 | 62.348 | KV452981.1 | 1497551 | 10-scf00393 | 10 |
| AX-158245018 | 20 | 62.348 | KV452981.1 | 1500175 | 10-scf00393 | 10 |
| AX-157841602 | 20 | 62.348 | KV452981.1 | 1506270 | 10-scf00393 | 10 |
| AX-158245021 | 20 | 62.348 | KV452981.1 | 1507721 | 10-scf00393 | 10 |
| AX-158245022 | 20 | 62.348 | KV452981.1 | 1509208 | 10-scf00393 | 10 |
| AX-158245027 | 20 | 62.348 | KV452981.1 | 1516238 | 10-scf00393 | 10 |
| AX-157841605 | 20 | 62.348 | KV452981.1 | 1517595 | 10-scf00393 | 10 |
| AX-158245029 | 20 | 62.348 | KV452981.1 | 1517944 | 10-scf00393 | 10 |
| AX-158245033 | 20 | 62.348 | KV452981.1 | 1520693 | 10-scf00393 | 10 |
| AX-157841610 | 20 | 62.348 | KV452981.1 | 1524039 | 10-scf00393 | 10 |
| AX-158245037 | 20 | 62.348 | KV452981.1 | 1524235 | 10-scf00393 | 10 |
| AX-157772300 | 20 | 62.348 | KV452981.1 | 1530878 | 10-scf00393 | 10 |
| AX-158245039 | 20 | 62.348 | KV452981.1 | 1531271 | 10-scf00393 | 10 |
| AX-158245042 | 20 | 62.348 | KV452981.1 | 1534473 | 10-scf00393 | 10 |
| AX-158245052 | 20 | 62.348 | KV452981.1 | 1553148 | 10-scf00393 | 10 |
| AX-157859762 | 20 | 62.348 | KV452981.1 | 1554288 | 10-scf00393 | 10 |
| AX-157841616 | 20 | 62.348 | KV452981.1 | 1554885 | 10-scf00393 | 10 |
| AX-158245059 | 20 | 62.348 | KV452981.1 | 1565051 | 10-scf00393 | 10 |
| AX-158245143 | 20 | 62.348 | KV452981.1 | 1677812 | 10-scf00393 | 10 |
| AX-158245164 | 20 | 62.348 | KV452981.1 | 1694255 | 10-scf00393 | 10 |
| AX-158245183 | 20 | 62.348 | KV452981.1 | 1716874 | 10-scf00393 | 10 |
| AX-158245192 | 20 | 62.348 | KV452981.1 | 1726366 | 10-scf00393 | 10 |

|              |    |        |            |         |             |    |
|--------------|----|--------|------------|---------|-------------|----|
| AX-158245204 | 20 | 62.348 | KV452981.1 | 1746031 | 10-scf00393 | 10 |
| AX-157841625 | 20 | 62.348 | KV452981.1 | 1770999 | 10-scf00393 | 10 |
| AX-158245248 | 20 | 62.348 | KV452981.1 | 1803727 | 10-scf00393 | 10 |
| AX-158245276 | 20 | 62.348 | KV452981.1 | 1834487 | 10-scf00393 | 10 |
| AX-158245278 | 20 | 62.348 | KV452981.1 | 1837969 | 10-scf00393 | 10 |
| AX-158245370 | 20 | 62.348 | KV452981.1 | 1989886 | 10-scf00393 | 10 |
| AX-158245597 | 20 | 62.348 | KV452981.1 | 2311430 | 10-scf00393 | 10 |
| AX-158245663 | 20 | 62.348 | KV452981.1 | 2442741 | 10-scf00393 | 10 |
| AX-158246271 | 20 | 62.348 | KV452981.1 | 3184186 | 10-scf00393 | 10 |
| AX-158243144 | 20 | 62.567 | KV452980.1 | 1978749 | 10-scf00391 | 10 |
| AX-158244974 | 20 | 62.567 | KV452981.1 | 1442263 | 10-scf00393 | 10 |
| AX-158245043 | 20 | 62.567 | KV452981.1 | 1538021 | 10-scf00393 | 10 |
| AX-158245050 | 20 | 62.567 | KV452981.1 | 1546859 | 10-scf00393 | 10 |
| AX-157841615 | 20 | 62.567 | KV452981.1 | 1548924 | 10-scf00393 | 10 |
| AX-157859761 | 20 | 62.567 | KV452981.1 | 1553901 | 10-scf00393 | 10 |
| AX-158245054 | 20 | 62.567 | KV452981.1 | 1555618 | 10-scf00393 | 10 |
| AX-157841618 | 20 | 62.567 | KV452981.1 | 1559535 | 10-scf00393 | 10 |
| AX-158245058 | 20 | 62.567 | KV452981.1 | 1564648 | 10-scf00393 | 10 |
| AX-158245060 | 20 | 62.567 | KV452981.1 | 1567143 | 10-scf00393 | 10 |
| AX-158245077 | 20 | 62.567 | KV452981.1 | 1590134 | 10-scf00393 | 10 |
| AX-158245078 | 20 | 62.567 | KV452981.1 | 1591048 | 10-scf00393 | 10 |
| AX-158245082 | 20 | 62.567 | KV452981.1 | 1598120 | 10-scf00393 | 10 |
| AX-158245083 | 20 | 62.567 | KV452981.1 | 1598707 | 10-scf00393 | 10 |
| AX-157724665 | 20 | 62.567 | KV452981.1 | 1599065 | 10-scf00393 | 10 |
| AX-158245084 | 20 | 62.567 | KV452981.1 | 1599611 | 10-scf00393 | 10 |
| AX-158245086 | 20 | 62.567 | KV452981.1 | 1600931 | 10-scf00393 | 10 |
| AX-158245110 | 20 | 62.567 | KV452981.1 | 1632057 | 10-scf00393 | 10 |
| AX-158245118 | 20 | 62.567 | KV452981.1 | 1642693 | 10-scf00393 | 10 |
| AX-158245122 | 20 | 62.567 | KV452981.1 | 1646062 | 10-scf00393 | 10 |
| AX-158245130 | 20 | 62.567 | KV452981.1 | 1659255 | 10-scf00393 | 10 |
| AX-158245134 | 20 | 62.567 | KV452981.1 | 1662921 | 10-scf00393 | 10 |
| AX-158245135 | 20 | 62.567 | KV452981.1 | 1665038 | 10-scf00393 | 10 |
| AX-158245139 | 20 | 62.567 | KV452981.1 | 1673479 | 10-scf00393 | 10 |
| AX-158245141 | 20 | 62.567 | KV452981.1 | 1675703 | 10-scf00393 | 10 |
| AX-158245142 | 20 | 62.567 | KV452981.1 | 1676268 | 10-scf00393 | 10 |
| AX-157749396 | 20 | 62.567 | KV452981.1 | 1677155 | 10-scf00393 | 10 |
| AX-158245144 | 20 | 62.567 | KV452981.1 | 1678262 | 10-scf00393 | 10 |
| AX-158245145 | 20 | 62.567 | KV452981.1 | 1679071 | 10-scf00393 | 10 |
| AX-158245147 | 20 | 62.567 | KV452981.1 | 1681122 | 10-scf00393 | 10 |
| AX-158245148 | 20 | 62.567 | KV452981.1 | 1681697 | 10-scf00393 | 10 |
| AX-158245150 | 20 | 62.567 | KV452981.1 | 1683678 | 10-scf00393 | 10 |
| AX-158245151 | 20 | 62.567 | KV452981.1 | 1684083 | 10-scf00393 | 10 |
| AX-158245152 | 20 | 62.567 | KV452981.1 | 1684880 | 10-scf00393 | 10 |
| AX-158245153 | 20 | 62.567 | KV452981.1 | 1686647 | 10-scf00393 | 10 |
| AX-158245155 | 20 | 62.567 | KV452981.1 | 1687912 | 10-scf00393 | 10 |
| AX-157742721 | 20 | 62.567 | KV452981.1 | 1688332 | 10-scf00393 | 10 |
| AX-158245156 | 20 | 62.567 | KV452981.1 | 1688506 | 10-scf00393 | 10 |
| AX-158245157 | 20 | 62.567 | KV452981.1 | 1689069 | 10-scf00393 | 10 |
| AX-158245160 | 20 | 62.567 | KV452981.1 | 1690596 | 10-scf00393 | 10 |
| AX-158245167 | 20 | 62.567 | KV452981.1 | 1698758 | 10-scf00393 | 10 |
| AX-158245170 | 20 | 62.567 | KV452981.1 | 1701116 | 10-scf00393 | 10 |

|              |    |        |            |         |             |    |
|--------------|----|--------|------------|---------|-------------|----|
| AX-158245172 | 20 | 62.567 | KV452981.1 | 1702348 | 10-scf00393 | 10 |
| AX-158245174 | 20 | 62.567 | KV452981.1 | 1703168 | 10-scf00393 | 10 |
| AX-158245177 | 20 | 62.567 | KV452981.1 | 1705929 | 10-scf00393 | 10 |
| AX-158245178 | 20 | 62.567 | KV452981.1 | 1706362 | 10-scf00393 | 10 |
| AX-158245184 | 20 | 62.567 | KV452981.1 | 1717381 | 10-scf00393 | 10 |
| AX-158245185 | 20 | 62.567 | KV452981.1 | 1718110 | 10-scf00393 | 10 |
| AX-158245186 | 20 | 62.567 | KV452981.1 | 1718909 | 10-scf00393 | 10 |
| AX-158245191 | 20 | 62.567 | KV452981.1 | 1725340 | 10-scf00393 | 10 |
| AX-158245201 | 20 | 62.567 | KV452981.1 | 1740017 | 10-scf00393 | 10 |
| AX-158245202 | 20 | 62.567 | KV452981.1 | 1743058 | 10-scf00393 | 10 |
| AX-158245208 | 20 | 62.567 | KV452981.1 | 1753806 | 10-scf00393 | 10 |
| AX-158245210 | 20 | 62.567 | KV452981.1 | 1754814 | 10-scf00393 | 10 |
| AX-158245211 | 20 | 62.567 | KV452981.1 | 1755512 | 10-scf00393 | 10 |
| AX-158245214 | 20 | 62.567 | KV452981.1 | 1758062 | 10-scf00393 | 10 |
| AX-158245217 | 20 | 62.567 | KV452981.1 | 1759854 | 10-scf00393 | 10 |
| AX-158245219 | 20 | 62.567 | KV452981.1 | 1761401 | 10-scf00393 | 10 |
| AX-158245222 | 20 | 62.567 | KV452981.1 | 1763522 | 10-scf00393 | 10 |
| AX-158245224 | 20 | 62.567 | KV452981.1 | 1764859 | 10-scf00393 | 10 |
| AX-158245226 | 20 | 62.567 | KV452981.1 | 1765972 | 10-scf00393 | 10 |
| AX-158245230 | 20 | 62.567 | KV452981.1 | 1771178 | 10-scf00393 | 10 |
| AX-158245236 | 20 | 62.567 | KV452981.1 | 1774567 | 10-scf00393 | 10 |
| AX-158245303 | 20 | 62.567 | KV452981.1 | 1867644 | 10-scf00393 | 10 |
| AX-158245322 | 20 | 62.567 | KV452981.1 | 1897669 | 10-scf00393 | 10 |
| AX-157880145 | 20 | 62.567 | KV452981.1 | 1901051 | 10-scf00393 | 10 |
| AX-157841645 | 20 | 62.567 | KV452981.1 | 1925797 | 10-scf00393 | 10 |
| AX-158245338 | 20 | 62.567 | KV452981.1 | 1930170 | 10-scf00393 | 10 |
| AX-158245345 | 20 | 62.567 | KV452981.1 | 1939653 | 10-scf00393 | 10 |
| AX-157714631 | 20 | 62.567 | KV452981.1 | 2220330 | 10-scf00393 | 10 |
| AX-158245615 | 20 | 62.567 | KV452981.1 | 2362117 | 10-scf00393 | 10 |
| AX-158245850 | 20 | 62.567 | KV452981.1 | 2678992 | 10-scf00393 | 10 |
| AX-158245996 | 20 | 62.567 | KV452981.1 | 2825089 | 10-scf00393 | 10 |
| AX-157753324 | 20 | 62.567 | KV452981.1 | 2860978 | 10-scf00393 | 10 |
| AX-158246209 | 20 | 62.567 | KV452981.1 | 3106912 | 10-scf00393 | 10 |
| AX-158246404 | 20 | 62.567 | KV452981.1 | 3378217 | 10-scf00393 | 10 |
| AX-158244611 | 20 | 62.676 | KV452981.1 | 934533  | 10-scf00393 | 10 |
| AX-158244774 | 20 | 62.676 | KV452981.1 | 1134740 | 10-scf00393 | 10 |
| AX-158394331 | 20 | 62.676 | KV452981.1 | 1227799 | 10-scf00393 | 10 |
| AX-158394332 | 20 | 62.676 | KV452981.1 | 1231217 | 10-scf00393 | 10 |
| AX-158244849 | 20 | 62.676 | KV452981.1 | 1232489 | 10-scf00393 | 10 |
| AX-157872666 | 20 | 62.676 | KV452981.1 | 1235243 | 10-scf00393 | 10 |
| AX-158244864 | 20 | 62.676 | KV452981.1 | 1258429 | 10-scf00393 | 10 |
| AX-158244888 | 20 | 62.676 | KV452981.1 | 1312028 | 10-scf00393 | 10 |
| AX-158245003 | 20 | 62.676 | KV452981.1 | 1476303 | 10-scf00393 | 10 |
| AX-158245006 | 20 | 62.676 | KV452981.1 | 1477293 | 10-scf00393 | 10 |
| AX-158415652 | 20 | 62.676 | KV452981.1 | 1486501 | 10-scf00393 | 10 |
| AX-158245154 | 20 | 62.676 | KV452981.1 | 1687538 | 10-scf00393 | 10 |
| AX-158245158 | 20 | 62.676 | KV452981.1 | 1689328 | 10-scf00393 | 10 |
| AX-158245159 | 20 | 62.676 | KV452981.1 | 1690027 | 10-scf00393 | 10 |
| AX-158245165 | 20 | 62.676 | KV452981.1 | 1694840 | 10-scf00393 | 10 |
| AX-158245171 | 20 | 62.676 | KV452981.1 | 1701875 | 10-scf00393 | 10 |
| AX-158245173 | 20 | 62.676 | KV452981.1 | 1702734 | 10-scf00393 | 10 |

|              |    |        |            |         |             |    |
|--------------|----|--------|------------|---------|-------------|----|
| AX-158245175 | 20 | 62.676 | KV452981.1 | 1703578 | 10-scf00393 | 10 |
| AX-158245176 | 20 | 62.676 | KV452981.1 | 1704672 | 10-scf00393 | 10 |
| AX-158245180 | 20 | 62.676 | KV452981.1 | 1708156 | 10-scf00393 | 10 |
| AX-157724286 | 20 | 62.676 | KV452981.1 | 1711137 | 10-scf00393 | 10 |
| AX-158245181 | 20 | 62.676 | KV452981.1 | 1712254 | 10-scf00393 | 10 |
| AX-158386985 | 20 | 62.676 | KV452981.1 | 1717905 | 10-scf00393 | 10 |
| AX-158245189 | 20 | 62.676 | KV452981.1 | 1724045 | 10-scf00393 | 10 |
| AX-158245190 | 20 | 62.676 | KV452981.1 | 1724732 | 10-scf00393 | 10 |
| AX-158245194 | 20 | 62.676 | KV452981.1 | 1727923 | 10-scf00393 | 10 |
| AX-158245195 | 20 | 62.676 | KV452981.1 | 1728921 | 10-scf00393 | 10 |
| AX-158245196 | 20 | 62.676 | KV452981.1 | 1733476 | 10-scf00393 | 10 |
| AX-158245198 | 20 | 62.676 | KV452981.1 | 1736485 | 10-scf00393 | 10 |
| AX-158245199 | 20 | 62.676 | KV452981.1 | 1737531 | 10-scf00393 | 10 |
| AX-157752159 | 20 | 62.676 | KV452981.1 | 1742648 | 10-scf00393 | 10 |
| AX-158245206 | 20 | 62.676 | KV452981.1 | 1749037 | 10-scf00393 | 10 |
| AX-157859764 | 20 | 62.676 | KV452981.1 | 1749985 | 10-scf00393 | 10 |
| AX-158245209 | 20 | 62.676 | KV452981.1 | 1754537 | 10-scf00393 | 10 |
| AX-158245213 | 20 | 62.676 | KV452981.1 | 1756408 | 10-scf00393 | 10 |
| AX-158245220 | 20 | 62.676 | KV452981.1 | 1761526 | 10-scf00393 | 10 |
| AX-158245227 | 20 | 62.676 | KV452981.1 | 1767236 | 10-scf00393 | 10 |
| AX-157770899 | 20 | 62.676 | KV452981.1 | 1769531 | 10-scf00393 | 10 |
| AX-158245229 | 20 | 62.676 | KV452981.1 | 1770271 | 10-scf00393 | 10 |
| AX-157713172 | 20 | 62.676 | KV452981.1 | 1777582 | 10-scf00393 | 10 |
| AX-157841627 | 20 | 62.676 | KV452981.1 | 1777891 | 10-scf00393 | 10 |
| AX-158245242 | 20 | 62.676 | KV452981.1 | 1786562 | 10-scf00393 | 10 |
| AX-158245245 | 20 | 62.676 | KV452981.1 | 1796274 | 10-scf00393 | 10 |
| AX-157753379 | 20 | 62.676 | KV452981.1 | 1797826 | 10-scf00393 | 10 |
| AX-158245246 | 20 | 62.676 | KV452981.1 | 1798207 | 10-scf00393 | 10 |
| AX-158245249 | 20 | 62.676 | KV452981.1 | 1804389 | 10-scf00393 | 10 |
| AX-157841633 | 20 | 62.676 | KV452981.1 | 1808809 | 10-scf00393 | 10 |
| AX-158245255 | 20 | 62.676 | KV452981.1 | 1808962 | 10-scf00393 | 10 |
| AX-158245264 | 20 | 62.676 | KV452981.1 | 1824282 | 10-scf00393 | 10 |
| AX-158245272 | 20 | 62.676 | KV452981.1 | 1831947 | 10-scf00393 | 10 |
| AX-158245273 | 20 | 62.676 | KV452981.1 | 1832461 | 10-scf00393 | 10 |
| AX-158245292 | 20 | 62.676 | KV452981.1 | 1855762 | 10-scf00393 | 10 |
| AX-157841639 | 20 | 62.676 | KV452981.1 | 1869743 | 10-scf00393 | 10 |
| AX-158245305 | 20 | 62.676 | KV452981.1 | 1869853 | 10-scf00393 | 10 |
| AX-158245306 | 20 | 62.676 | KV452981.1 | 1870440 | 10-scf00393 | 10 |
| AX-158245311 | 20 | 62.676 | KV452981.1 | 1878773 | 10-scf00393 | 10 |
| AX-157739973 | 20 | 62.676 | KV452981.1 | 1898973 | 10-scf00393 | 10 |
| AX-158245324 | 20 | 62.676 | KV452981.1 | 1900676 | 10-scf00393 | 10 |
| AX-158245328 | 20 | 62.676 | KV452981.1 | 1910557 | 10-scf00393 | 10 |
| AX-158245332 | 20 | 62.676 | KV452981.1 | 1915104 | 10-scf00393 | 10 |
| AX-158245350 | 20 | 62.676 | KV452981.1 | 1956779 | 10-scf00393 | 10 |
| AX-158245351 | 20 | 62.676 | KV452981.1 | 1957376 | 10-scf00393 | 10 |
| AX-158245394 | 20 | 62.676 | KV452981.1 | 2030317 | 10-scf00393 | 10 |
| AX-158245500 | 20 | 62.676 | KV452981.1 | 2186053 | 10-scf00393 | 10 |
| AX-158245518 | 20 | 62.676 | KV452981.1 | 2210151 | 10-scf00393 | 10 |
| AX-158386990 | 20 | 62.676 | KV452981.1 | 2232757 | 10-scf00393 | 10 |
| AX-158245556 | 20 | 62.676 | KV452981.1 | 2264836 | 10-scf00393 | 10 |
| AX-158245617 | 20 | 62.676 | KV452981.1 | 2369136 | 10-scf00393 | 10 |

|              |    |        |            |         |             |    |
|--------------|----|--------|------------|---------|-------------|----|
| AX-158415680 | 20 | 62.676 | KV452981.1 | 2402868 | 10-scf00393 | 10 |
| AX-158245642 | 20 | 62.676 | KV452981.1 | 2405374 | 10-scf00393 | 10 |
| AX-158245644 | 20 | 62.676 | KV452981.1 | 2407388 | 10-scf00393 | 10 |
| AX-158245645 | 20 | 62.676 | KV452981.1 | 2408655 | 10-scf00393 | 10 |
| AX-158245658 | 20 | 62.676 | KV452981.1 | 2425630 | 10-scf00393 | 10 |
| AX-157887566 | 20 | 62.676 | KV452981.1 | 2526582 | 10-scf00393 | 10 |
| AX-157841689 | 20 | 62.676 | KV452981.1 | 2656650 | 10-scf00393 | 10 |
| AX-158423342 | 20 | 62.676 | KV452981.1 | 2720922 | 10-scf00393 | 10 |
| AX-158415694 | 20 | 62.676 | KV452981.1 | 2733381 | 10-scf00393 | 10 |
| AX-157841700 | 20 | 62.676 | KV452981.1 | 2844974 | 10-scf00393 | 10 |
| AX-157841703 | 20 | 62.676 | KV452981.1 | 2857555 | 10-scf00393 | 10 |
| AX-158245307 | 20 | 62.712 | KV452981.1 | 1875326 | 10-scf00393 | 10 |
| AX-158245308 | 20 | 62.751 | KV452981.1 | 1875477 | 10-scf00393 | 10 |
| AX-158245310 | 20 | 62.785 | KV452981.1 | 1878212 | 10-scf00393 | 10 |
| AX-158245312 | 20 | 62.785 | KV452981.1 | 1881636 | 10-scf00393 | 10 |
| AX-158245313 | 20 | 62.785 | KV452981.1 | 1883156 | 10-scf00393 | 10 |
| AX-158245314 | 20 | 62.785 | KV452981.1 | 1884674 | 10-scf00393 | 10 |
| AX-158245315 | 20 | 62.785 | KV452981.1 | 1886214 | 10-scf00393 | 10 |
| AX-158245316 | 20 | 62.785 | KV452981.1 | 1888399 | 10-scf00393 | 10 |
| AX-158245317 | 20 | 62.785 | KV452981.1 | 1889572 | 10-scf00393 | 10 |
| AX-157708838 | 20 | 62.785 | KV452981.1 | 1890411 | 10-scf00393 | 10 |
| AX-158245339 | 20 | 62.785 | KV452981.1 | 1930840 | 10-scf00393 | 10 |
| AX-158245346 | 20 | 62.785 | KV452981.1 | 1943383 | 10-scf00393 | 10 |
| AX-158245347 | 20 | 62.785 | KV452981.1 | 1945881 | 10-scf00393 | 10 |
| AX-157724247 | 20 | 62.785 | KV452981.1 | 1971017 | 10-scf00393 | 10 |
| AX-158245439 | 20 | 62.785 | KV452981.1 | 2095845 | 10-scf00393 | 10 |
| AX-158245550 | 20 | 62.785 | KV452981.1 | 2254442 | 10-scf00393 | 10 |
| AX-158245831 | 20 | 62.785 | KV452981.1 | 2660909 | 10-scf00393 | 10 |
| AX-158245832 | 20 | 62.785 | KV452981.1 | 2661698 | 10-scf00393 | 10 |
| AX-157753802 | 20 | 62.785 | KV452981.1 | 2815052 | 10-scf00393 | 10 |
| AX-158246100 | 20 | 62.785 | KV452981.1 | 2977700 | 10-scf00393 | 10 |
| AX-158246314 | 20 | 62.785 | KV452981.1 | 3247651 | 10-scf00393 | 10 |
| AX-158246429 | 20 | 62.785 | KV452981.1 | 3415281 | 10-scf00393 | 10 |
| AX-157867304 | 20 | 62.785 | KV452981.1 | 3539878 | 10-scf00393 | 10 |
| AX-158246690 | 20 | 62.785 | KV452981.1 | 3755329 | 10-scf00393 | 10 |
| AX-158246704 | 20 | 62.785 | KV452981.1 | 3782552 | 10-scf00393 | 10 |
| AX-157841781 | 20 | 62.785 | KV452981.1 | 3822984 | 10-scf00393 | 10 |
| AX-157867307 | 20 | 62.785 | KV452981.1 | 3844115 | 10-scf00393 | 10 |
| AX-158246781 | 20 | 62.785 | KV452981.1 | 3908434 | 10-scf00393 | 10 |
| AX-157867313 | 20 | 62.785 | KV452983.1 | 63894   | 10-scf00394 | 10 |
| AX-158247148 | 20 | 62.785 | KV452983.1 | 165443  | 10-scf00394 | 10 |
| AX-158247391 | 20 | 62.785 | KV452983.1 | 405658  | 10-scf00394 | 10 |
| AX-158247400 | 20 | 62.785 | KV452983.1 | 414822  | 10-scf00394 | 10 |
| AX-157726301 | 20 | 62.785 | KV452983.1 | 1432461 | 10-scf00394 | 10 |
| AX-158245319 | 20 | 62.849 | KV452981.1 | 1891541 | 10-scf00393 | 10 |
| AX-158415677 | 20 | 62.849 | KV452981.1 | 2321600 | 10-scf00393 | 10 |
| AX-158386998 | 20 | 62.849 | KV452981.1 | 3349222 | 10-scf00393 | 10 |
| AX-158247907 | 20 | 62.849 | KV452983.1 | 996161  | 10-scf00394 | 10 |
| AX-157841880 | 20 | 62.849 | KV452983.1 | 1314200 | 10-scf00394 | 10 |
| AX-157841642 | 20 | 62.894 | KV452981.1 | 1897984 | 10-scf00393 | 10 |
| AX-158245325 | 20 | 62.894 | KV452981.1 | 1902991 | 10-scf00393 | 10 |

|              |    |        |            |         |             |    |
|--------------|----|--------|------------|---------|-------------|----|
| AX-158244730 | 20 | 63.004 | KV452981.1 | 1085656 | 10-scf00393 | 10 |
| AX-158245103 | 20 | 63.004 | KV452981.1 | 1619853 | 10-scf00393 | 10 |
| AX-158245337 | 20 | 63.004 | KV452981.1 | 1928617 | 10-scf00393 | 10 |
| AX-157738645 | 20 | 63.004 | KV452981.1 | 1932343 | 10-scf00393 | 10 |
| AX-158245340 | 20 | 63.004 | KV452981.1 | 1932986 | 10-scf00393 | 10 |
| AX-158245343 | 20 | 63.004 | KV452981.1 | 1936149 | 10-scf00393 | 10 |
| AX-158245874 | 20 | 63.004 | KV452981.1 | 2701508 | 10-scf00393 | 10 |
| AX-157718405 | 20 | 63.113 | KV452979.1 | 6870170 | 10-scf00389 | 10 |
| AX-158242054 | 20 | 63.113 | KV452979.1 | 7107985 | 10-scf00389 | 10 |
| AX-158243923 | 20 | 63.113 | KV452980.1 | 44183   | 10-scf00391 | 10 |
| AX-158242404 | 20 | 63.113 | KV452980.1 | 1001386 | 10-scf00391 | 10 |
| AX-158242406 | 20 | 63.113 | KV452980.1 | 1003049 | 10-scf00391 | 10 |
| AX-157841314 | 20 | 63.113 | KV452980.1 | 1061598 | 10-scf00391 | 10 |
| AX-158242482 | 20 | 63.113 | KV452980.1 | 1122084 | 10-scf00391 | 10 |
| AX-158242494 | 20 | 63.113 | KV452980.1 | 1138245 | 10-scf00391 | 10 |
| AX-157872614 | 20 | 63.113 | KV452980.1 | 1340664 | 10-scf00391 | 10 |
| AX-157746218 | 20 | 63.113 | KV452980.1 | 1672890 | 10-scf00391 | 10 |
| AX-158242947 | 20 | 63.113 | KV452980.1 | 1739771 | 10-scf00391 | 10 |
| AX-158243046 | 20 | 63.113 | KV452980.1 | 1858475 | 10-scf00391 | 10 |
| AX-158243062 | 20 | 63.113 | KV452980.1 | 1877636 | 10-scf00391 | 10 |
| AX-157841413 | 20 | 63.113 | KV452980.1 | 1902327 | 10-scf00391 | 10 |
| AX-158243120 | 20 | 63.113 | KV452980.1 | 1951841 | 10-scf00391 | 10 |
| AX-158244632 | 20 | 63.113 | KV452981.1 | 965246  | 10-scf00393 | 10 |
| AX-158244826 | 20 | 63.113 | KV452981.1 | 1202504 | 10-scf00393 | 10 |
| AX-158415646 | 20 | 63.113 | KV452981.1 | 1227276 | 10-scf00393 | 10 |
| AX-158244886 | 20 | 63.113 | KV452981.1 | 1308708 | 10-scf00393 | 10 |
| AX-157746783 | 20 | 63.113 | KV452981.1 | 1501013 | 10-scf00393 | 10 |
| AX-157717530 | 20 | 63.113 | KV452981.1 | 1637642 | 10-scf00393 | 10 |
| AX-158245123 | 20 | 63.113 | KV452981.1 | 1646677 | 10-scf00393 | 10 |
| AX-158245126 | 20 | 63.113 | KV452981.1 | 1653165 | 10-scf00393 | 10 |
| AX-158245131 | 20 | 63.113 | KV452981.1 | 1660006 | 10-scf00393 | 10 |
| AX-158245320 | 20 | 63.113 | KV452981.1 | 1893772 | 10-scf00393 | 10 |
| AX-158245326 | 20 | 63.113 | KV452981.1 | 1908645 | 10-scf00393 | 10 |
| AX-158245348 | 20 | 63.113 | KV452981.1 | 1946575 | 10-scf00393 | 10 |
| AX-157841648 | 20 | 63.113 | KV452981.1 | 1970626 | 10-scf00393 | 10 |
| AX-157872679 | 20 | 63.113 | KV452981.1 | 1972123 | 10-scf00393 | 10 |
| AX-157841649 | 20 | 63.113 | KV452981.1 | 1975321 | 10-scf00393 | 10 |
| AX-158245360 | 20 | 63.113 | KV452981.1 | 1980385 | 10-scf00393 | 10 |
| AX-158245361 | 20 | 63.113 | KV452981.1 | 1981033 | 10-scf00393 | 10 |
| AX-158245362 | 20 | 63.113 | KV452981.1 | 1983189 | 10-scf00393 | 10 |
| AX-158245363 | 20 | 63.113 | KV452981.1 | 1984960 | 10-scf00393 | 10 |
| AX-158245367 | 20 | 63.113 | KV452981.1 | 1988441 | 10-scf00393 | 10 |
| AX-158245368 | 20 | 63.113 | KV452981.1 | 1988841 | 10-scf00393 | 10 |
| AX-158245371 | 20 | 63.113 | KV452981.1 | 1990346 | 10-scf00393 | 10 |
| AX-158394346 | 20 | 63.113 | KV452981.1 | 1991526 | 10-scf00393 | 10 |
| AX-158245374 | 20 | 63.113 | KV452981.1 | 1996079 | 10-scf00393 | 10 |
| AX-158245376 | 20 | 63.113 | KV452981.1 | 1997642 | 10-scf00393 | 10 |
| AX-158394347 | 20 | 63.113 | KV452981.1 | 1997787 | 10-scf00393 | 10 |
| AX-157841651 | 20 | 63.113 | KV452981.1 | 2004007 | 10-scf00393 | 10 |
| AX-157701577 | 20 | 63.113 | KV452981.1 | 2006308 | 10-scf00393 | 10 |
| AX-158245378 | 20 | 63.113 | KV452981.1 | 2007680 | 10-scf00393 | 10 |

|              |    |        |            |         |             |    |
|--------------|----|--------|------------|---------|-------------|----|
| AX-158245379 | 20 | 63.113 | KV452981.1 | 2008388 | 10-scf00393 | 10 |
| AX-158245380 | 20 | 63.113 | KV452981.1 | 2008864 | 10-scf00393 | 10 |
| AX-157716804 | 20 | 63.113 | KV452981.1 | 2010056 | 10-scf00393 | 10 |
| AX-158245382 | 20 | 63.113 | KV452981.1 | 2010387 | 10-scf00393 | 10 |
| AX-158245386 | 20 | 63.113 | KV452981.1 | 2013623 | 10-scf00393 | 10 |
| AX-158245387 | 20 | 63.113 | KV452981.1 | 2013880 | 10-scf00393 | 10 |
| AX-158245389 | 20 | 63.113 | KV452981.1 | 2023127 | 10-scf00393 | 10 |
| AX-158245397 | 20 | 63.113 | KV452981.1 | 2032625 | 10-scf00393 | 10 |
| AX-158245399 | 20 | 63.113 | KV452981.1 | 2036299 | 10-scf00393 | 10 |
| AX-158245401 | 20 | 63.113 | KV452981.1 | 2039944 | 10-scf00393 | 10 |
| AX-158245403 | 20 | 63.113 | KV452981.1 | 2043463 | 10-scf00393 | 10 |
| AX-157708662 | 20 | 63.113 | KV452981.1 | 2045099 | 10-scf00393 | 10 |
| AX-158245405 | 20 | 63.113 | KV452981.1 | 2045526 | 10-scf00393 | 10 |
| AX-157749263 | 20 | 63.113 | KV452981.1 | 2053494 | 10-scf00393 | 10 |
| AX-158245408 | 20 | 63.113 | KV452981.1 | 2059041 | 10-scf00393 | 10 |
| AX-158245409 | 20 | 63.113 | KV452981.1 | 2060162 | 10-scf00393 | 10 |
| AX-158245412 | 20 | 63.113 | KV452981.1 | 2063174 | 10-scf00393 | 10 |
| AX-158419010 | 20 | 63.113 | KV452981.1 | 2063406 | 10-scf00393 | 10 |
| AX-158394348 | 20 | 63.113 | KV452981.1 | 2064141 | 10-scf00393 | 10 |
| AX-158245413 | 20 | 63.113 | KV452981.1 | 2065655 | 10-scf00393 | 10 |
| AX-158245414 | 20 | 63.113 | KV452981.1 | 2068526 | 10-scf00393 | 10 |
| AX-158245416 | 20 | 63.113 | KV452981.1 | 2069306 | 10-scf00393 | 10 |
| AX-158245417 | 20 | 63.113 | KV452981.1 | 2070164 | 10-scf00393 | 10 |
| AX-158245418 | 20 | 63.113 | KV452981.1 | 2072208 | 10-scf00393 | 10 |
| AX-158245420 | 20 | 63.113 | KV452981.1 | 2075135 | 10-scf00393 | 10 |
| AX-158245421 | 20 | 63.113 | KV452981.1 | 2076400 | 10-scf00393 | 10 |
| AX-158245422 | 20 | 63.113 | KV452981.1 | 2077910 | 10-scf00393 | 10 |
| AX-158245423 | 20 | 63.113 | KV452981.1 | 2078700 | 10-scf00393 | 10 |
| AX-158245428 | 20 | 63.113 | KV452981.1 | 2081855 | 10-scf00393 | 10 |
| AX-158245430 | 20 | 63.113 | KV452981.1 | 2084213 | 10-scf00393 | 10 |
| AX-158245432 | 20 | 63.113 | KV452981.1 | 2086471 | 10-scf00393 | 10 |
| AX-158245435 | 20 | 63.113 | KV452981.1 | 2090179 | 10-scf00393 | 10 |
| AX-158245436 | 20 | 63.113 | KV452981.1 | 2090978 | 10-scf00393 | 10 |
| AX-158245440 | 20 | 63.113 | KV452981.1 | 2096315 | 10-scf00393 | 10 |
| AX-158245441 | 20 | 63.113 | KV452981.1 | 2099954 | 10-scf00393 | 10 |
| AX-158245442 | 20 | 63.113 | KV452981.1 | 2100589 | 10-scf00393 | 10 |
| AX-157717292 | 20 | 63.113 | KV452981.1 | 2102981 | 10-scf00393 | 10 |
| AX-158245443 | 20 | 63.113 | KV452981.1 | 2104058 | 10-scf00393 | 10 |
| AX-158245444 | 20 | 63.113 | KV452981.1 | 2104111 | 10-scf00393 | 10 |
| AX-157872682 | 20 | 63.113 | KV452981.1 | 2104414 | 10-scf00393 | 10 |
| AX-158245445 | 20 | 63.113 | KV452981.1 | 2105063 | 10-scf00393 | 10 |
| AX-158245449 | 20 | 63.113 | KV452981.1 | 2112213 | 10-scf00393 | 10 |
| AX-158245450 | 20 | 63.113 | KV452981.1 | 2114203 | 10-scf00393 | 10 |
| AX-158394349 | 20 | 63.113 | KV452981.1 | 2114701 | 10-scf00393 | 10 |
| AX-157841656 | 20 | 63.113 | KV452981.1 | 2117538 | 10-scf00393 | 10 |
| AX-158245454 | 20 | 63.113 | KV452981.1 | 2122381 | 10-scf00393 | 10 |
| AX-158245457 | 20 | 63.113 | KV452981.1 | 2127120 | 10-scf00393 | 10 |
| AX-158245458 | 20 | 63.113 | KV452981.1 | 2127757 | 10-scf00393 | 10 |
| AX-158245459 | 20 | 63.113 | KV452981.1 | 2127835 | 10-scf00393 | 10 |
| AX-158245460 | 20 | 63.113 | KV452981.1 | 2129986 | 10-scf00393 | 10 |
| AX-158245462 | 20 | 63.113 | KV452981.1 | 2132003 | 10-scf00393 | 10 |

|              |    |        |            |         |             |    |
|--------------|----|--------|------------|---------|-------------|----|
| AX-157841657 | 20 | 63.113 | KV452981.1 | 2132288 | 10-scf00393 | 10 |
| AX-157841659 | 20 | 63.113 | KV452981.1 | 2134336 | 10-scf00393 | 10 |
| AX-157841660 | 20 | 63.113 | KV452981.1 | 2135588 | 10-scf00393 | 10 |
| AX-158245463 | 20 | 63.113 | KV452981.1 | 2135836 | 10-scf00393 | 10 |
| AX-158245464 | 20 | 63.113 | KV452981.1 | 2136230 | 10-scf00393 | 10 |
| AX-157754019 | 20 | 63.113 | KV452981.1 | 2141317 | 10-scf00393 | 10 |
| AX-158394351 | 20 | 63.113 | KV452981.1 | 2141493 | 10-scf00393 | 10 |
| AX-158245466 | 20 | 63.113 | KV452981.1 | 2142526 | 10-scf00393 | 10 |
| AX-158419012 | 20 | 63.113 | KV452981.1 | 2145710 | 10-scf00393 | 10 |
| AX-158245469 | 20 | 63.113 | KV452981.1 | 2150590 | 10-scf00393 | 10 |
| AX-158245470 | 20 | 63.113 | KV452981.1 | 2151784 | 10-scf00393 | 10 |
| AX-157841661 | 20 | 63.113 | KV452981.1 | 2152142 | 10-scf00393 | 10 |
| AX-158245471 | 20 | 63.113 | KV452981.1 | 2154030 | 10-scf00393 | 10 |
| AX-157872683 | 20 | 63.113 | KV452981.1 | 2155055 | 10-scf00393 | 10 |
| AX-157872684 | 20 | 63.113 | KV452981.1 | 2155647 | 10-scf00393 | 10 |
| AX-158245473 | 20 | 63.113 | KV452981.1 | 2157676 | 10-scf00393 | 10 |
| AX-158245474 | 20 | 63.113 | KV452981.1 | 2158770 | 10-scf00393 | 10 |
| AX-157841663 | 20 | 63.113 | KV452981.1 | 2158845 | 10-scf00393 | 10 |
| AX-158245475 | 20 | 63.113 | KV452981.1 | 2159399 | 10-scf00393 | 10 |
| AX-158245476 | 20 | 63.113 | KV452981.1 | 2160402 | 10-scf00393 | 10 |
| AX-158245477 | 20 | 63.113 | KV452981.1 | 2161458 | 10-scf00393 | 10 |
| AX-158245480 | 20 | 63.113 | KV452981.1 | 2164969 | 10-scf00393 | 10 |
| AX-158245481 | 20 | 63.113 | KV452981.1 | 2166093 | 10-scf00393 | 10 |
| AX-158245486 | 20 | 63.113 | KV452981.1 | 2170578 | 10-scf00393 | 10 |
| AX-158245487 | 20 | 63.113 | KV452981.1 | 2171515 | 10-scf00393 | 10 |
| AX-158245488 | 20 | 63.113 | KV452981.1 | 2172575 | 10-scf00393 | 10 |
| AX-158415667 | 20 | 63.113 | KV452981.1 | 2173065 | 10-scf00393 | 10 |
| AX-158245492 | 20 | 63.113 | KV452981.1 | 2178404 | 10-scf00393 | 10 |
| AX-158245493 | 20 | 63.113 | KV452981.1 | 2179235 | 10-scf00393 | 10 |
| AX-158394353 | 20 | 63.113 | KV452981.1 | 2181185 | 10-scf00393 | 10 |
| AX-158245495 | 20 | 63.113 | KV452981.1 | 2181387 | 10-scf00393 | 10 |
| AX-158245496 | 20 | 63.113 | KV452981.1 | 2182002 | 10-scf00393 | 10 |
| AX-158245498 | 20 | 63.113 | KV452981.1 | 2184051 | 10-scf00393 | 10 |
| AX-158394354 | 20 | 63.113 | KV452981.1 | 2184172 | 10-scf00393 | 10 |
| AX-158245499 | 20 | 63.113 | KV452981.1 | 2184597 | 10-scf00393 | 10 |
| AX-158394355 | 20 | 63.113 | KV452981.1 | 2185776 | 10-scf00393 | 10 |
| AX-158245501 | 20 | 63.113 | KV452981.1 | 2188353 | 10-scf00393 | 10 |
| AX-158245502 | 20 | 63.113 | KV452981.1 | 2190412 | 10-scf00393 | 10 |
| AX-158394356 | 20 | 63.113 | KV452981.1 | 2190992 | 10-scf00393 | 10 |
| AX-158245503 | 20 | 63.113 | KV452981.1 | 2192796 | 10-scf00393 | 10 |
| AX-157872685 | 20 | 63.113 | KV452981.1 | 2196032 | 10-scf00393 | 10 |
| AX-158245504 | 20 | 63.113 | KV452981.1 | 2197196 | 10-scf00393 | 10 |
| AX-157872686 | 20 | 63.113 | KV452981.1 | 2197658 | 10-scf00393 | 10 |
| AX-158245506 | 20 | 63.113 | KV452981.1 | 2199899 | 10-scf00393 | 10 |
| AX-158245507 | 20 | 63.113 | KV452981.1 | 2201274 | 10-scf00393 | 10 |
| AX-158245508 | 20 | 63.113 | KV452981.1 | 2202091 | 10-scf00393 | 10 |
| AX-158380996 | 20 | 63.113 | KV452981.1 | 2203010 | 10-scf00393 | 10 |
| AX-158245510 | 20 | 63.113 | KV452981.1 | 2203356 | 10-scf00393 | 10 |
| AX-158245511 | 20 | 63.113 | KV452981.1 | 2204320 | 10-scf00393 | 10 |
| AX-158245512 | 20 | 63.113 | KV452981.1 | 2204741 | 10-scf00393 | 10 |
| AX-158245514 | 20 | 63.113 | KV452981.1 | 2205988 | 10-scf00393 | 10 |



|              |    |        |            |         |             |    |
|--------------|----|--------|------------|---------|-------------|----|
| AX-158245516 | 20 | 63.113 | KV452981.1 | 2207860 | 10-scf00393 | 10 |
| AX-158245517 | 20 | 63.113 | KV452981.1 | 2208842 | 10-scf00393 | 10 |
| AX-158245519 | 20 | 63.113 | KV452981.1 | 2210630 | 10-scf00393 | 10 |
| AX-158245520 | 20 | 63.113 | KV452981.1 | 2212083 | 10-scf00393 | 10 |
| AX-158245525 | 20 | 63.113 | KV452981.1 | 2215420 | 10-scf00393 | 10 |
| AX-158245526 | 20 | 63.113 | KV452981.1 | 2216107 | 10-scf00393 | 10 |
| AX-158245528 | 20 | 63.113 | KV452981.1 | 2217357 | 10-scf00393 | 10 |
| AX-157841664 | 20 | 63.113 | KV452981.1 | 2218821 | 10-scf00393 | 10 |
| AX-157697427 | 20 | 63.113 | KV452981.1 | 2219380 | 10-scf00393 | 10 |
| AX-157841666 | 20 | 63.113 | KV452981.1 | 2221133 | 10-scf00393 | 10 |
| AX-158245530 | 20 | 63.113 | KV452981.1 | 2227506 | 10-scf00393 | 10 |
| AX-158245543 | 20 | 63.113 | KV452981.1 | 2242205 | 10-scf00393 | 10 |
| AX-157753263 | 20 | 63.113 | KV452981.1 | 2243583 | 10-scf00393 | 10 |
| AX-158245545 | 20 | 63.113 | KV452981.1 | 2245626 | 10-scf00393 | 10 |
| AX-158245547 | 20 | 63.113 | KV452981.1 | 2248717 | 10-scf00393 | 10 |
| AX-158245551 | 20 | 63.113 | KV452981.1 | 2254754 | 10-scf00393 | 10 |
| AX-158245552 | 20 | 63.113 | KV452981.1 | 2256293 | 10-scf00393 | 10 |
| AX-158245553 | 20 | 63.113 | KV452981.1 | 2257188 | 10-scf00393 | 10 |
| AX-158245554 | 20 | 63.113 | KV452981.1 | 2259245 | 10-scf00393 | 10 |
| AX-157775427 | 20 | 63.113 | KV452981.1 | 2260226 | 10-scf00393 | 10 |
| AX-157841668 | 20 | 63.113 | KV452981.1 | 2263701 | 10-scf00393 | 10 |
| AX-158394358 | 20 | 63.113 | KV452981.1 | 2265077 | 10-scf00393 | 10 |
| AX-158245559 | 20 | 63.113 | KV452981.1 | 2266756 | 10-scf00393 | 10 |
| AX-158245560 | 20 | 63.113 | KV452981.1 | 2267797 | 10-scf00393 | 10 |
| AX-158245561 | 20 | 63.113 | KV452981.1 | 2268246 | 10-scf00393 | 10 |
| AX-158245562 | 20 | 63.113 | KV452981.1 | 2269490 | 10-scf00393 | 10 |
| AX-157841669 | 20 | 63.113 | KV452981.1 | 2270151 | 10-scf00393 | 10 |
| AX-157841670 | 20 | 63.113 | KV452981.1 | 2270958 | 10-scf00393 | 10 |
| AX-158245564 | 20 | 63.113 | KV452981.1 | 2271496 | 10-scf00393 | 10 |
| AX-158245565 | 20 | 63.113 | KV452981.1 | 2272350 | 10-scf00393 | 10 |
| AX-158245566 | 20 | 63.113 | KV452981.1 | 2273373 | 10-scf00393 | 10 |
| AX-158245567 | 20 | 63.113 | KV452981.1 | 2274494 | 10-scf00393 | 10 |
| AX-158245569 | 20 | 63.113 | KV452981.1 | 2275645 | 10-scf00393 | 10 |
| AX-158245574 | 20 | 63.113 | KV452981.1 | 2281815 | 10-scf00393 | 10 |
| AX-158245578 | 20 | 63.113 | KV452981.1 | 2285757 | 10-scf00393 | 10 |
| AX-158245579 | 20 | 63.113 | KV452981.1 | 2286425 | 10-scf00393 | 10 |
| AX-158415672 | 20 | 63.113 | KV452981.1 | 2287637 | 10-scf00393 | 10 |
| AX-158245583 | 20 | 63.113 | KV452981.1 | 2291292 | 10-scf00393 | 10 |
| AX-158245584 | 20 | 63.113 | KV452981.1 | 2292216 | 10-scf00393 | 10 |
| AX-158245585 | 20 | 63.113 | KV452981.1 | 2292524 | 10-scf00393 | 10 |
| AX-158415673 | 20 | 63.113 | KV452981.1 | 2294079 | 10-scf00393 | 10 |
| AX-157841671 | 20 | 63.113 | KV452981.1 | 2295586 | 10-scf00393 | 10 |
| AX-158245588 | 20 | 63.113 | KV452981.1 | 2296681 | 10-scf00393 | 10 |
| AX-158245589 | 20 | 63.113 | KV452981.1 | 2296889 | 10-scf00393 | 10 |
| AX-158415675 | 20 | 63.113 | KV452981.1 | 2297181 | 10-scf00393 | 10 |
| AX-158245590 | 20 | 63.113 | KV452981.1 | 2297429 | 10-scf00393 | 10 |
| AX-158245594 | 20 | 63.113 | KV452981.1 | 2305923 | 10-scf00393 | 10 |
| AX-158245598 | 20 | 63.113 | KV452981.1 | 2311766 | 10-scf00393 | 10 |
| AX-158245599 | 20 | 63.113 | KV452981.1 | 2313850 | 10-scf00393 | 10 |
| AX-157872689 | 20 | 63.113 | KV452981.1 | 2318118 | 10-scf00393 | 10 |
| AX-158245604 | 20 | 63.113 | KV452981.1 | 2325503 | 10-scf00393 | 10 |

|              |    |        |            |         |             |    |
|--------------|----|--------|------------|---------|-------------|----|
| AX-157841673 | 20 | 63.113 | KV452981.1 | 2326328 | 10-scf00393 | 10 |
| AX-158415678 | 20 | 63.113 | KV452981.1 | 2327504 | 10-scf00393 | 10 |
| AX-157841674 | 20 | 63.113 | KV452981.1 | 2329199 | 10-scf00393 | 10 |
| AX-157867303 | 20 | 63.113 | KV452981.1 | 2340772 | 10-scf00393 | 10 |
| AX-158245609 | 20 | 63.113 | KV452981.1 | 2348124 | 10-scf00393 | 10 |
| AX-158245610 | 20 | 63.113 | KV452981.1 | 2349428 | 10-scf00393 | 10 |
| AX-158245612 | 20 | 63.113 | KV452981.1 | 2351664 | 10-scf00393 | 10 |
| AX-158245614 | 20 | 63.113 | KV452981.1 | 2355943 | 10-scf00393 | 10 |
| AX-158245618 | 20 | 63.113 | KV452981.1 | 2377646 | 10-scf00393 | 10 |
| AX-158245619 | 20 | 63.113 | KV452981.1 | 2379614 | 10-scf00393 | 10 |
| AX-158245620 | 20 | 63.113 | KV452981.1 | 2380512 | 10-scf00393 | 10 |
| AX-158245621 | 20 | 63.113 | KV452981.1 | 2381155 | 10-scf00393 | 10 |
| AX-158245623 | 20 | 63.113 | KV452981.1 | 2381926 | 10-scf00393 | 10 |
| AX-158245624 | 20 | 63.113 | KV452981.1 | 2382394 | 10-scf00393 | 10 |
| AX-158245627 | 20 | 63.113 | KV452981.1 | 2387192 | 10-scf00393 | 10 |
| AX-158245628 | 20 | 63.113 | KV452981.1 | 2392013 | 10-scf00393 | 10 |
| AX-158245629 | 20 | 63.113 | KV452981.1 | 2392664 | 10-scf00393 | 10 |
| AX-158245630 | 20 | 63.113 | KV452981.1 | 2394199 | 10-scf00393 | 10 |
| AX-157841675 | 20 | 63.113 | KV452981.1 | 2394239 | 10-scf00393 | 10 |
| AX-158245632 | 20 | 63.113 | KV452981.1 | 2395405 | 10-scf00393 | 10 |
| AX-158245633 | 20 | 63.113 | KV452981.1 | 2396056 | 10-scf00393 | 10 |
| AX-158245634 | 20 | 63.113 | KV452981.1 | 2396666 | 10-scf00393 | 10 |
| AX-158245635 | 20 | 63.113 | KV452981.1 | 2397243 | 10-scf00393 | 10 |
| AX-158245636 | 20 | 63.113 | KV452981.1 | 2398505 | 10-scf00393 | 10 |
| AX-158245637 | 20 | 63.113 | KV452981.1 | 2399081 | 10-scf00393 | 10 |
| AX-158245638 | 20 | 63.113 | KV452981.1 | 2400401 | 10-scf00393 | 10 |
| AX-158245639 | 20 | 63.113 | KV452981.1 | 2401846 | 10-scf00393 | 10 |
| AX-158245640 | 20 | 63.113 | KV452981.1 | 2403459 | 10-scf00393 | 10 |
| AX-158245641 | 20 | 63.113 | KV452981.1 | 2403956 | 10-scf00393 | 10 |
| AX-157841676 | 20 | 63.113 | KV452981.1 | 2404260 | 10-scf00393 | 10 |
| AX-157841678 | 20 | 63.113 | KV452981.1 | 2408114 | 10-scf00393 | 10 |
| AX-158245646 | 20 | 63.113 | KV452981.1 | 2409517 | 10-scf00393 | 10 |
| AX-157708347 | 20 | 63.113 | KV452981.1 | 2411609 | 10-scf00393 | 10 |
| AX-158245650 | 20 | 63.113 | KV452981.1 | 2412554 | 10-scf00393 | 10 |
| AX-158245651 | 20 | 63.113 | KV452981.1 | 2413879 | 10-scf00393 | 10 |
| AX-158245654 | 20 | 63.113 | KV452981.1 | 2421167 | 10-scf00393 | 10 |
| AX-157872690 | 20 | 63.113 | KV452981.1 | 2422774 | 10-scf00393 | 10 |
| AX-157872691 | 20 | 63.113 | KV452981.1 | 2424387 | 10-scf00393 | 10 |
| AX-157872692 | 20 | 63.113 | KV452981.1 | 2426563 | 10-scf00393 | 10 |
| AX-158245662 | 20 | 63.113 | KV452981.1 | 2440351 | 10-scf00393 | 10 |
| AX-158245665 | 20 | 63.113 | KV452981.1 | 2450950 | 10-scf00393 | 10 |
| AX-158245669 | 20 | 63.113 | KV452981.1 | 2453590 | 10-scf00393 | 10 |
| AX-158245671 | 20 | 63.113 | KV452981.1 | 2454685 | 10-scf00393 | 10 |
| AX-158245672 | 20 | 63.113 | KV452981.1 | 2456819 | 10-scf00393 | 10 |
| AX-158245674 | 20 | 63.113 | KV452981.1 | 2465975 | 10-scf00393 | 10 |
| AX-157859767 | 20 | 63.113 | KV452981.1 | 2481002 | 10-scf00393 | 10 |
| AX-157859768 | 20 | 63.113 | KV452981.1 | 2481104 | 10-scf00393 | 10 |
| AX-157841679 | 20 | 63.113 | KV452981.1 | 2483384 | 10-scf00393 | 10 |
| AX-158245681 | 20 | 63.113 | KV452981.1 | 2497714 | 10-scf00393 | 10 |
| AX-158245682 | 20 | 63.113 | KV452981.1 | 2498282 | 10-scf00393 | 10 |
| AX-157841681 | 20 | 63.113 | KV452981.1 | 2498524 | 10-scf00393 | 10 |

|              |    |        |            |         |             |    |
|--------------|----|--------|------------|---------|-------------|----|
| AX-157880151 | 20 | 63.113 | KV452981.1 | 2499453 | 10-scf00393 | 10 |
| AX-157841682 | 20 | 63.113 | KV452981.1 | 2506093 | 10-scf00393 | 10 |
| AX-157701784 | 20 | 63.113 | KV452981.1 | 2512202 | 10-scf00393 | 10 |
| AX-158245705 | 20 | 63.113 | KV452981.1 | 2520787 | 10-scf00393 | 10 |
| AX-158245706 | 20 | 63.113 | KV452981.1 | 2521419 | 10-scf00393 | 10 |
| AX-158245708 | 20 | 63.113 | KV452981.1 | 2522780 | 10-scf00393 | 10 |
| AX-158423341 | 20 | 63.113 | KV452981.1 | 2523113 | 10-scf00393 | 10 |
| AX-158245710 | 20 | 63.113 | KV452981.1 | 2524760 | 10-scf00393 | 10 |
| AX-158245711 | 20 | 63.113 | KV452981.1 | 2524949 | 10-scf00393 | 10 |
| AX-158245712 | 20 | 63.113 | KV452981.1 | 2525869 | 10-scf00393 | 10 |
| AX-158245713 | 20 | 63.113 | KV452981.1 | 2526346 | 10-scf00393 | 10 |
| AX-158245722 | 20 | 63.113 | KV452981.1 | 2538001 | 10-scf00393 | 10 |
| AX-158245724 | 20 | 63.113 | KV452981.1 | 2539271 | 10-scf00393 | 10 |
| AX-158245729 | 20 | 63.113 | KV452981.1 | 2548099 | 10-scf00393 | 10 |
| AX-158245731 | 20 | 63.113 | KV452981.1 | 2549077 | 10-scf00393 | 10 |
| AX-158245733 | 20 | 63.113 | KV452981.1 | 2550708 | 10-scf00393 | 10 |
| AX-158245735 | 20 | 63.113 | KV452981.1 | 2551787 | 10-scf00393 | 10 |
| AX-158245737 | 20 | 63.113 | KV452981.1 | 2552801 | 10-scf00393 | 10 |
| AX-158245739 | 20 | 63.113 | KV452981.1 | 2553927 | 10-scf00393 | 10 |
| AX-158245741 | 20 | 63.113 | KV452981.1 | 2555780 | 10-scf00393 | 10 |
| AX-158245742 | 20 | 63.113 | KV452981.1 | 2556172 | 10-scf00393 | 10 |
| AX-157841683 | 20 | 63.113 | KV452981.1 | 2557717 | 10-scf00393 | 10 |
| AX-158245745 | 20 | 63.113 | KV452981.1 | 2558222 | 10-scf00393 | 10 |
| AX-157841684 | 20 | 63.113 | KV452981.1 | 2558466 | 10-scf00393 | 10 |
| AX-158245746 | 20 | 63.113 | KV452981.1 | 2559083 | 10-scf00393 | 10 |
| AX-158245747 | 20 | 63.113 | KV452981.1 | 2559964 | 10-scf00393 | 10 |
| AX-158245748 | 20 | 63.113 | KV452981.1 | 2561759 | 10-scf00393 | 10 |
| AX-158245749 | 20 | 63.113 | KV452981.1 | 2562823 | 10-scf00393 | 10 |
| AX-158245750 | 20 | 63.113 | KV452981.1 | 2563112 | 10-scf00393 | 10 |
| AX-158245751 | 20 | 63.113 | KV452981.1 | 2564493 | 10-scf00393 | 10 |
| AX-158245752 | 20 | 63.113 | KV452981.1 | 2565655 | 10-scf00393 | 10 |
| AX-158245753 | 20 | 63.113 | KV452981.1 | 2566507 | 10-scf00393 | 10 |
| AX-158415684 | 20 | 63.113 | KV452981.1 | 2567043 | 10-scf00393 | 10 |
| AX-158245754 | 20 | 63.113 | KV452981.1 | 2567246 | 10-scf00393 | 10 |
| AX-158245755 | 20 | 63.113 | KV452981.1 | 2570241 | 10-scf00393 | 10 |
| AX-158245756 | 20 | 63.113 | KV452981.1 | 2570790 | 10-scf00393 | 10 |
| AX-158245757 | 20 | 63.113 | KV452981.1 | 2571403 | 10-scf00393 | 10 |
| AX-158245758 | 20 | 63.113 | KV452981.1 | 2572264 | 10-scf00393 | 10 |
| AX-158245759 | 20 | 63.113 | KV452981.1 | 2573027 | 10-scf00393 | 10 |
| AX-158245760 | 20 | 63.113 | KV452981.1 | 2573407 | 10-scf00393 | 10 |
| AX-157841686 | 20 | 63.113 | KV452981.1 | 2573484 | 10-scf00393 | 10 |
| AX-158245761 | 20 | 63.113 | KV452981.1 | 2573841 | 10-scf00393 | 10 |
| AX-158415685 | 20 | 63.113 | KV452981.1 | 2575322 | 10-scf00393 | 10 |
| AX-158415686 | 20 | 63.113 | KV452981.1 | 2575942 | 10-scf00393 | 10 |
| AX-158245763 | 20 | 63.113 | KV452981.1 | 2576215 | 10-scf00393 | 10 |
| AX-158245764 | 20 | 63.113 | KV452981.1 | 2577618 | 10-scf00393 | 10 |
| AX-157841687 | 20 | 63.113 | KV452981.1 | 2577796 | 10-scf00393 | 10 |
| AX-158245765 | 20 | 63.113 | KV452981.1 | 2578775 | 10-scf00393 | 10 |
| AX-158245766 | 20 | 63.113 | KV452981.1 | 2579275 | 10-scf00393 | 10 |
| AX-158245767 | 20 | 63.113 | KV452981.1 | 2580547 | 10-scf00393 | 10 |
| AX-158245768 | 20 | 63.113 | KV452981.1 | 2580995 | 10-scf00393 | 10 |

|              |    |        |            |         |             |    |
|--------------|----|--------|------------|---------|-------------|----|
| AX-158245769 | 20 | 63.113 | KV452981.1 | 2581638 | 10-scf00393 | 10 |
| AX-158245771 | 20 | 63.113 | KV452981.1 | 2587525 | 10-scf00393 | 10 |
| AX-158245772 | 20 | 63.113 | KV452981.1 | 2589738 | 10-scf00393 | 10 |
| AX-158245774 | 20 | 63.113 | KV452981.1 | 2591317 | 10-scf00393 | 10 |
| AX-158245775 | 20 | 63.113 | KV452981.1 | 2592357 | 10-scf00393 | 10 |
| AX-157697620 | 20 | 63.113 | KV452981.1 | 2592834 | 10-scf00393 | 10 |
| AX-158245778 | 20 | 63.113 | KV452981.1 | 2596067 | 10-scf00393 | 10 |
| AX-157701409 | 20 | 63.113 | KV452981.1 | 2600729 | 10-scf00393 | 10 |
| AX-158245780 | 20 | 63.113 | KV452981.1 | 2600949 | 10-scf00393 | 10 |
| AX-158245781 | 20 | 63.113 | KV452981.1 | 2601389 | 10-scf00393 | 10 |
| AX-158245782 | 20 | 63.113 | KV452981.1 | 2602141 | 10-scf00393 | 10 |
| AX-158245784 | 20 | 63.113 | KV452981.1 | 2605518 | 10-scf00393 | 10 |
| AX-158245785 | 20 | 63.113 | KV452981.1 | 2607331 | 10-scf00393 | 10 |
| AX-158245786 | 20 | 63.113 | KV452981.1 | 2608218 | 10-scf00393 | 10 |
| AX-158245787 | 20 | 63.113 | KV452981.1 | 2608790 | 10-scf00393 | 10 |
| AX-158245788 | 20 | 63.113 | KV452981.1 | 2609452 | 10-scf00393 | 10 |
| AX-158245789 | 20 | 63.113 | KV452981.1 | 2610471 | 10-scf00393 | 10 |
| AX-158245790 | 20 | 63.113 | KV452981.1 | 2611897 | 10-scf00393 | 10 |
| AX-158245791 | 20 | 63.113 | KV452981.1 | 2613885 | 10-scf00393 | 10 |
| AX-158415689 | 20 | 63.113 | KV452981.1 | 2615856 | 10-scf00393 | 10 |
| AX-158245792 | 20 | 63.113 | KV452981.1 | 2616391 | 10-scf00393 | 10 |
| AX-158245793 | 20 | 63.113 | KV452981.1 | 2616667 | 10-scf00393 | 10 |
| AX-157707676 | 20 | 63.113 | KV452981.1 | 2617461 | 10-scf00393 | 10 |
| AX-158245794 | 20 | 63.113 | KV452981.1 | 2618366 | 10-scf00393 | 10 |
| AX-158245795 | 20 | 63.113 | KV452981.1 | 2619562 | 10-scf00393 | 10 |
| AX-158245797 | 20 | 63.113 | KV452981.1 | 2624143 | 10-scf00393 | 10 |
| AX-158245798 | 20 | 63.113 | KV452981.1 | 2624534 | 10-scf00393 | 10 |
| AX-158245799 | 20 | 63.113 | KV452981.1 | 2625648 | 10-scf00393 | 10 |
| AX-158245805 | 20 | 63.113 | KV452981.1 | 2634094 | 10-scf00393 | 10 |
| AX-158245808 | 20 | 63.113 | KV452981.1 | 2638152 | 10-scf00393 | 10 |
| AX-158245809 | 20 | 63.113 | KV452981.1 | 2638561 | 10-scf00393 | 10 |
| AX-158245810 | 20 | 63.113 | KV452981.1 | 2638958 | 10-scf00393 | 10 |
| AX-157725627 | 20 | 63.113 | KV452981.1 | 2639494 | 10-scf00393 | 10 |
| AX-158245812 | 20 | 63.113 | KV452981.1 | 2642511 | 10-scf00393 | 10 |
| AX-158245813 | 20 | 63.113 | KV452981.1 | 2642986 | 10-scf00393 | 10 |
| AX-158245814 | 20 | 63.113 | KV452981.1 | 2643793 | 10-scf00393 | 10 |
| AX-158245815 | 20 | 63.113 | KV452981.1 | 2644780 | 10-scf00393 | 10 |
| AX-158245816 | 20 | 63.113 | KV452981.1 | 2646671 | 10-scf00393 | 10 |
| AX-158245818 | 20 | 63.113 | KV452981.1 | 2648163 | 10-scf00393 | 10 |
| AX-158245819 | 20 | 63.113 | KV452981.1 | 2649264 | 10-scf00393 | 10 |
| AX-158245821 | 20 | 63.113 | KV452981.1 | 2650841 | 10-scf00393 | 10 |
| AX-158245822 | 20 | 63.113 | KV452981.1 | 2654343 | 10-scf00393 | 10 |
| AX-158245823 | 20 | 63.113 | KV452981.1 | 2655122 | 10-scf00393 | 10 |
| AX-158245824 | 20 | 63.113 | KV452981.1 | 2655663 | 10-scf00393 | 10 |
| AX-158245825 | 20 | 63.113 | KV452981.1 | 2656714 | 10-scf00393 | 10 |
| AX-158245826 | 20 | 63.113 | KV452981.1 | 2657293 | 10-scf00393 | 10 |
| AX-158245828 | 20 | 63.113 | KV452981.1 | 2658327 | 10-scf00393 | 10 |
| AX-158245829 | 20 | 63.113 | KV452981.1 | 2658722 | 10-scf00393 | 10 |
| AX-158245830 | 20 | 63.113 | KV452981.1 | 2659945 | 10-scf00393 | 10 |
| AX-158245834 | 20 | 63.113 | KV452981.1 | 2662580 | 10-scf00393 | 10 |
| AX-158245836 | 20 | 63.113 | KV452981.1 | 2663735 | 10-scf00393 | 10 |

|              |    |        |            |         |             |    |
|--------------|----|--------|------------|---------|-------------|----|
| AX-158245837 | 20 | 63.113 | KV452981.1 | 2664777 | 10-scf00393 | 10 |
| AX-158245840 | 20 | 63.113 | KV452981.1 | 2666896 | 10-scf00393 | 10 |
| AX-158245841 | 20 | 63.113 | KV452981.1 | 2667358 | 10-scf00393 | 10 |
| AX-158245842 | 20 | 63.113 | KV452981.1 | 2667907 | 10-scf00393 | 10 |
| AX-158245843 | 20 | 63.113 | KV452981.1 | 2668684 | 10-scf00393 | 10 |
| AX-158245844 | 20 | 63.113 | KV452981.1 | 2669394 | 10-scf00393 | 10 |
| AX-157841690 | 20 | 63.113 | KV452981.1 | 2671386 | 10-scf00393 | 10 |
| AX-158245845 | 20 | 63.113 | KV452981.1 | 2674473 | 10-scf00393 | 10 |
| AX-158245846 | 20 | 63.113 | KV452981.1 | 2674938 | 10-scf00393 | 10 |
| AX-158245847 | 20 | 63.113 | KV452981.1 | 2675658 | 10-scf00393 | 10 |
| AX-158245848 | 20 | 63.113 | KV452981.1 | 2677212 | 10-scf00393 | 10 |
| AX-158245851 | 20 | 63.113 | KV452981.1 | 2681548 | 10-scf00393 | 10 |
| AX-158245852 | 20 | 63.113 | KV452981.1 | 2681988 | 10-scf00393 | 10 |
| AX-158245853 | 20 | 63.113 | KV452981.1 | 2682372 | 10-scf00393 | 10 |
| AX-158245855 | 20 | 63.113 | KV452981.1 | 2684012 | 10-scf00393 | 10 |
| AX-157755690 | 20 | 63.113 | KV452981.1 | 2684534 | 10-scf00393 | 10 |
| AX-158245859 | 20 | 63.113 | KV452981.1 | 2686993 | 10-scf00393 | 10 |
| AX-158245860 | 20 | 63.113 | KV452981.1 | 2687907 | 10-scf00393 | 10 |
| AX-158245863 | 20 | 63.113 | KV452981.1 | 2690885 | 10-scf00393 | 10 |
| AX-158245864 | 20 | 63.113 | KV452981.1 | 2691908 | 10-scf00393 | 10 |
| AX-157744000 | 20 | 63.113 | KV452981.1 | 2692292 | 10-scf00393 | 10 |
| AX-158245865 | 20 | 63.113 | KV452981.1 | 2693445 | 10-scf00393 | 10 |
| AX-158245866 | 20 | 63.113 | KV452981.1 | 2693811 | 10-scf00393 | 10 |
| AX-158245867 | 20 | 63.113 | KV452981.1 | 2694490 | 10-scf00393 | 10 |
| AX-158245869 | 20 | 63.113 | KV452981.1 | 2698301 | 10-scf00393 | 10 |
| AX-158245870 | 20 | 63.113 | KV452981.1 | 2698595 | 10-scf00393 | 10 |
| AX-158245872 | 20 | 63.113 | KV452981.1 | 2699619 | 10-scf00393 | 10 |
| AX-158245873 | 20 | 63.113 | KV452981.1 | 2700681 | 10-scf00393 | 10 |
| AX-158245875 | 20 | 63.113 | KV452981.1 | 2701857 | 10-scf00393 | 10 |
| AX-157756998 | 20 | 63.113 | KV452981.1 | 2702271 | 10-scf00393 | 10 |
| AX-158245878 | 20 | 63.113 | KV452981.1 | 2704165 | 10-scf00393 | 10 |
| AX-158245879 | 20 | 63.113 | KV452981.1 | 2704492 | 10-scf00393 | 10 |
| AX-158245880 | 20 | 63.113 | KV452981.1 | 2704945 | 10-scf00393 | 10 |
| AX-158245882 | 20 | 63.113 | KV452981.1 | 2706687 | 10-scf00393 | 10 |
| AX-158245883 | 20 | 63.113 | KV452981.1 | 2707705 | 10-scf00393 | 10 |
| AX-158245885 | 20 | 63.113 | KV452981.1 | 2708589 | 10-scf00393 | 10 |
| AX-158245886 | 20 | 63.113 | KV452981.1 | 2709135 | 10-scf00393 | 10 |
| AX-158245887 | 20 | 63.113 | KV452981.1 | 2709487 | 10-scf00393 | 10 |
| AX-158245888 | 20 | 63.113 | KV452981.1 | 2710443 | 10-scf00393 | 10 |
| AX-158245891 | 20 | 63.113 | KV452981.1 | 2712234 | 10-scf00393 | 10 |
| AX-158245892 | 20 | 63.113 | KV452981.1 | 2713240 | 10-scf00393 | 10 |
| AX-158245893 | 20 | 63.113 | KV452981.1 | 2713622 | 10-scf00393 | 10 |
| AX-158245895 | 20 | 63.113 | KV452981.1 | 2715467 | 10-scf00393 | 10 |
| AX-158245896 | 20 | 63.113 | KV452981.1 | 2716220 | 10-scf00393 | 10 |
| AX-158245897 | 20 | 63.113 | KV452981.1 | 2716760 | 10-scf00393 | 10 |
| AX-158245898 | 20 | 63.113 | KV452981.1 | 2717288 | 10-scf00393 | 10 |
| AX-158245899 | 20 | 63.113 | KV452981.1 | 2717808 | 10-scf00393 | 10 |
| AX-158245900 | 20 | 63.113 | KV452981.1 | 2718280 | 10-scf00393 | 10 |
| AX-158245902 | 20 | 63.113 | KV452981.1 | 2721153 | 10-scf00393 | 10 |
| AX-158245903 | 20 | 63.113 | KV452981.1 | 2721911 | 10-scf00393 | 10 |
| AX-158245904 | 20 | 63.113 | KV452981.1 | 2722452 | 10-scf00393 | 10 |

|              |    |        |            |         |             |    |
|--------------|----|--------|------------|---------|-------------|----|
| AX-158245906 | 20 | 63.113 | KV452981.1 | 2724227 | 10-scf00393 | 10 |
| AX-158245907 | 20 | 63.113 | KV452981.1 | 2725198 | 10-scf00393 | 10 |
| AX-158245908 | 20 | 63.113 | KV452981.1 | 2725906 | 10-scf00393 | 10 |
| AX-158245909 | 20 | 63.113 | KV452981.1 | 2726511 | 10-scf00393 | 10 |
| AX-158245910 | 20 | 63.113 | KV452981.1 | 2727113 | 10-scf00393 | 10 |
| AX-158245911 | 20 | 63.113 | KV452981.1 | 2728087 | 10-scf00393 | 10 |
| AX-158245914 | 20 | 63.113 | KV452981.1 | 2730482 | 10-scf00393 | 10 |
| AX-158415691 | 20 | 63.113 | KV452981.1 | 2732393 | 10-scf00393 | 10 |
| AX-158415692 | 20 | 63.113 | KV452981.1 | 2732747 | 10-scf00393 | 10 |
| AX-158419021 | 20 | 63.113 | KV452981.1 | 2733158 | 10-scf00393 | 10 |
| AX-158245915 | 20 | 63.113 | KV452981.1 | 2733928 | 10-scf00393 | 10 |
| AX-158245916 | 20 | 63.113 | KV452981.1 | 2735332 | 10-scf00393 | 10 |
| AX-158245917 | 20 | 63.113 | KV452981.1 | 2736152 | 10-scf00393 | 10 |
| AX-158245919 | 20 | 63.113 | KV452981.1 | 2737708 | 10-scf00393 | 10 |
| AX-158245921 | 20 | 63.113 | KV452981.1 | 2739114 | 10-scf00393 | 10 |
| AX-158245922 | 20 | 63.113 | KV452981.1 | 2739914 | 10-scf00393 | 10 |
| AX-157841691 | 20 | 63.113 | KV452981.1 | 2739968 | 10-scf00393 | 10 |
| AX-158245923 | 20 | 63.113 | KV452981.1 | 2741125 | 10-scf00393 | 10 |
| AX-158245924 | 20 | 63.113 | KV452981.1 | 2741533 | 10-scf00393 | 10 |
| AX-158245925 | 20 | 63.113 | KV452981.1 | 2742371 | 10-scf00393 | 10 |
| AX-158245926 | 20 | 63.113 | KV452981.1 | 2742574 | 10-scf00393 | 10 |
| AX-158245927 | 20 | 63.113 | KV452981.1 | 2742970 | 10-scf00393 | 10 |
| AX-157841692 | 20 | 63.113 | KV452981.1 | 2746514 | 10-scf00393 | 10 |
| AX-158245929 | 20 | 63.113 | KV452981.1 | 2748523 | 10-scf00393 | 10 |
| AX-158245930 | 20 | 63.113 | KV452981.1 | 2749154 | 10-scf00393 | 10 |
| AX-158245931 | 20 | 63.113 | KV452981.1 | 2751849 | 10-scf00393 | 10 |
| AX-158245932 | 20 | 63.113 | KV452981.1 | 2752518 | 10-scf00393 | 10 |
| AX-158245933 | 20 | 63.113 | KV452981.1 | 2753821 | 10-scf00393 | 10 |
| AX-158245935 | 20 | 63.113 | KV452981.1 | 2754876 | 10-scf00393 | 10 |
| AX-158245936 | 20 | 63.113 | KV452981.1 | 2756866 | 10-scf00393 | 10 |
| AX-158245937 | 20 | 63.113 | KV452981.1 | 2757356 | 10-scf00393 | 10 |
| AX-157841693 | 20 | 63.113 | KV452981.1 | 2760566 | 10-scf00393 | 10 |
| AX-158415696 | 20 | 63.113 | KV452981.1 | 2764520 | 10-scf00393 | 10 |
| AX-158245939 | 20 | 63.113 | KV452981.1 | 2765087 | 10-scf00393 | 10 |
| AX-158245940 | 20 | 63.113 | KV452981.1 | 2768007 | 10-scf00393 | 10 |
| AX-158245941 | 20 | 63.113 | KV452981.1 | 2768534 | 10-scf00393 | 10 |
| AX-158245942 | 20 | 63.113 | KV452981.1 | 2770156 | 10-scf00393 | 10 |
| AX-157841697 | 20 | 63.113 | KV452981.1 | 2771354 | 10-scf00393 | 10 |
| AX-158245943 | 20 | 63.113 | KV452981.1 | 2773699 | 10-scf00393 | 10 |
| AX-157841698 | 20 | 63.113 | KV452981.1 | 2773918 | 10-scf00393 | 10 |
| AX-158245944 | 20 | 63.113 | KV452981.1 | 2774146 | 10-scf00393 | 10 |
| AX-158245946 | 20 | 63.113 | KV452981.1 | 2775833 | 10-scf00393 | 10 |
| AX-158245947 | 20 | 63.113 | KV452981.1 | 2776534 | 10-scf00393 | 10 |
| AX-158245948 | 20 | 63.113 | KV452981.1 | 2776847 | 10-scf00393 | 10 |
| AX-158245949 | 20 | 63.113 | KV452981.1 | 2778673 | 10-scf00393 | 10 |
| AX-158245950 | 20 | 63.113 | KV452981.1 | 2779260 | 10-scf00393 | 10 |
| AX-158245952 | 20 | 63.113 | KV452981.1 | 2780572 | 10-scf00393 | 10 |
| AX-157841699 | 20 | 63.113 | KV452981.1 | 2781608 | 10-scf00393 | 10 |
| AX-158245953 | 20 | 63.113 | KV452981.1 | 2781897 | 10-scf00393 | 10 |
| AX-158245954 | 20 | 63.113 | KV452981.1 | 2783935 | 10-scf00393 | 10 |
| AX-158245955 | 20 | 63.113 | KV452981.1 | 2784539 | 10-scf00393 | 10 |

|              |    |        |            |         |             |    |
|--------------|----|--------|------------|---------|-------------|----|
| AX-158245956 | 20 | 63.113 | KV452981.1 | 2785579 | 10-scf00393 | 10 |
| AX-158245957 | 20 | 63.113 | KV452981.1 | 2786089 | 10-scf00393 | 10 |
| AX-158245958 | 20 | 63.113 | KV452981.1 | 2786550 | 10-scf00393 | 10 |
| AX-158245960 | 20 | 63.113 | KV452981.1 | 2788350 | 10-scf00393 | 10 |
| AX-158245961 | 20 | 63.113 | KV452981.1 | 2789304 | 10-scf00393 | 10 |
| AX-158245962 | 20 | 63.113 | KV452981.1 | 2790801 | 10-scf00393 | 10 |
| AX-158245963 | 20 | 63.113 | KV452981.1 | 2791379 | 10-scf00393 | 10 |
| AX-158245964 | 20 | 63.113 | KV452981.1 | 2791528 | 10-scf00393 | 10 |
| AX-158245965 | 20 | 63.113 | KV452981.1 | 2793864 | 10-scf00393 | 10 |
| AX-158245966 | 20 | 63.113 | KV452981.1 | 2794463 | 10-scf00393 | 10 |
| AX-158245967 | 20 | 63.113 | KV452981.1 | 2796565 | 10-scf00393 | 10 |
| AX-158245968 | 20 | 63.113 | KV452981.1 | 2797039 | 10-scf00393 | 10 |
| AX-158245969 | 20 | 63.113 | KV452981.1 | 2797765 | 10-scf00393 | 10 |
| AX-158245970 | 20 | 63.113 | KV452981.1 | 2798752 | 10-scf00393 | 10 |
| AX-158245971 | 20 | 63.113 | KV452981.1 | 2799693 | 10-scf00393 | 10 |
| AX-158245972 | 20 | 63.113 | KV452981.1 | 2800328 | 10-scf00393 | 10 |
| AX-158245973 | 20 | 63.113 | KV452981.1 | 2800771 | 10-scf00393 | 10 |
| AX-158245974 | 20 | 63.113 | KV452981.1 | 2801484 | 10-scf00393 | 10 |
| AX-158245975 | 20 | 63.113 | KV452981.1 | 2802877 | 10-scf00393 | 10 |
| AX-158245976 | 20 | 63.113 | KV452981.1 | 2803968 | 10-scf00393 | 10 |
| AX-158245978 | 20 | 63.113 | KV452981.1 | 2806806 | 10-scf00393 | 10 |
| AX-158245979 | 20 | 63.113 | KV452981.1 | 2807524 | 10-scf00393 | 10 |
| AX-158245980 | 20 | 63.113 | KV452981.1 | 2807840 | 10-scf00393 | 10 |
| AX-158245981 | 20 | 63.113 | KV452981.1 | 2808634 | 10-scf00393 | 10 |
| AX-158415697 | 20 | 63.113 | KV452981.1 | 2809293 | 10-scf00393 | 10 |
| AX-158245982 | 20 | 63.113 | KV452981.1 | 2809757 | 10-scf00393 | 10 |
| AX-158245984 | 20 | 63.113 | KV452981.1 | 2811204 | 10-scf00393 | 10 |
| AX-158245985 | 20 | 63.113 | KV452981.1 | 2811710 | 10-scf00393 | 10 |
| AX-158245988 | 20 | 63.113 | KV452981.1 | 2813274 | 10-scf00393 | 10 |
| AX-158245989 | 20 | 63.113 | KV452981.1 | 2813520 | 10-scf00393 | 10 |
| AX-158245990 | 20 | 63.113 | KV452981.1 | 2813976 | 10-scf00393 | 10 |
| AX-158245991 | 20 | 63.113 | KV452981.1 | 2814667 | 10-scf00393 | 10 |
| AX-158245992 | 20 | 63.113 | KV452981.1 | 2815151 | 10-scf00393 | 10 |
| AX-158245993 | 20 | 63.113 | KV452981.1 | 2818953 | 10-scf00393 | 10 |
| AX-158245995 | 20 | 63.113 | KV452981.1 | 2824572 | 10-scf00393 | 10 |
| AX-158245998 | 20 | 63.113 | KV452981.1 | 2828895 | 10-scf00393 | 10 |
| AX-158245999 | 20 | 63.113 | KV452981.1 | 2829425 | 10-scf00393 | 10 |
| AX-158246000 | 20 | 63.113 | KV452981.1 | 2830051 | 10-scf00393 | 10 |
| AX-158246001 | 20 | 63.113 | KV452981.1 | 2831070 | 10-scf00393 | 10 |
| AX-158246002 | 20 | 63.113 | KV452981.1 | 2833561 | 10-scf00393 | 10 |
| AX-158246003 | 20 | 63.113 | KV452981.1 | 2834915 | 10-scf00393 | 10 |
| AX-158246004 | 20 | 63.113 | KV452981.1 | 2835215 | 10-scf00393 | 10 |
| AX-158246006 | 20 | 63.113 | KV452981.1 | 2836364 | 10-scf00393 | 10 |
| AX-158246007 | 20 | 63.113 | KV452981.1 | 2836841 | 10-scf00393 | 10 |
| AX-158246008 | 20 | 63.113 | KV452981.1 | 2840237 | 10-scf00393 | 10 |
| AX-158246009 | 20 | 63.113 | KV452981.1 | 2841312 | 10-scf00393 | 10 |
| AX-158246010 | 20 | 63.113 | KV452981.1 | 2842932 | 10-scf00393 | 10 |
| AX-158246011 | 20 | 63.113 | KV452981.1 | 2845565 | 10-scf00393 | 10 |
| AX-158246012 | 20 | 63.113 | KV452981.1 | 2846528 | 10-scf00393 | 10 |
| AX-158246013 | 20 | 63.113 | KV452981.1 | 2846857 | 10-scf00393 | 10 |
| AX-158246014 | 20 | 63.113 | KV452981.1 | 2846940 | 10-scf00393 | 10 |

|              |    |        |            |         |             |    |
|--------------|----|--------|------------|---------|-------------|----|
| AX-158246015 | 20 | 63.113 | KV452981.1 | 2847392 | 10-scf00393 | 10 |
| AX-158246017 | 20 | 63.113 | KV452981.1 | 2848203 | 10-scf00393 | 10 |
| AX-158246019 | 20 | 63.113 | KV452981.1 | 2848872 | 10-scf00393 | 10 |
| AX-158246021 | 20 | 63.113 | KV452981.1 | 2851167 | 10-scf00393 | 10 |
| AX-158246022 | 20 | 63.113 | KV452981.1 | 2851525 | 10-scf00393 | 10 |
| AX-158246024 | 20 | 63.113 | KV452981.1 | 2852969 | 10-scf00393 | 10 |
| AX-157841701 | 20 | 63.113 | KV452981.1 | 2855470 | 10-scf00393 | 10 |
| AX-157841702 | 20 | 63.113 | KV452981.1 | 2857221 | 10-scf00393 | 10 |
| AX-158246027 | 20 | 63.113 | KV452981.1 | 2857503 | 10-scf00393 | 10 |
| AX-157841704 | 20 | 63.113 | KV452981.1 | 2857860 | 10-scf00393 | 10 |
| AX-158246028 | 20 | 63.113 | KV452981.1 | 2858516 | 10-scf00393 | 10 |
| AX-157841705 | 20 | 63.113 | KV452981.1 | 2858852 | 10-scf00393 | 10 |
| AX-158246029 | 20 | 63.113 | KV452981.1 | 2859092 | 10-scf00393 | 10 |
| AX-158246030 | 20 | 63.113 | KV452981.1 | 2859357 | 10-scf00393 | 10 |
| AX-157841706 | 20 | 63.113 | KV452981.1 | 2860851 | 10-scf00393 | 10 |
| AX-158246031 | 20 | 63.113 | KV452981.1 | 2861276 | 10-scf00393 | 10 |
| AX-158246032 | 20 | 63.113 | KV452981.1 | 2862394 | 10-scf00393 | 10 |
| AX-158246033 | 20 | 63.113 | KV452981.1 | 2862802 | 10-scf00393 | 10 |
| AX-158246034 | 20 | 63.113 | KV452981.1 | 2863472 | 10-scf00393 | 10 |
| AX-158246037 | 20 | 63.113 | KV452981.1 | 2890380 | 10-scf00393 | 10 |
| AX-158246038 | 20 | 63.113 | KV452981.1 | 2891824 | 10-scf00393 | 10 |
| AX-157715665 | 20 | 63.113 | KV452981.1 | 2892212 | 10-scf00393 | 10 |
| AX-158246039 | 20 | 63.113 | KV452981.1 | 2892618 | 10-scf00393 | 10 |
| AX-158246040 | 20 | 63.113 | KV452981.1 | 2893259 | 10-scf00393 | 10 |
| AX-158246041 | 20 | 63.113 | KV452981.1 | 2894007 | 10-scf00393 | 10 |
| AX-158246042 | 20 | 63.113 | KV452981.1 | 2896016 | 10-scf00393 | 10 |
| AX-158246044 | 20 | 63.113 | KV452981.1 | 2900534 | 10-scf00393 | 10 |
| AX-158246046 | 20 | 63.113 | KV452981.1 | 2901725 | 10-scf00393 | 10 |
| AX-158246048 | 20 | 63.113 | KV452981.1 | 2907233 | 10-scf00393 | 10 |
| AX-158246049 | 20 | 63.113 | KV452981.1 | 2909535 | 10-scf00393 | 10 |
| AX-157841709 | 20 | 63.113 | KV452981.1 | 2911116 | 10-scf00393 | 10 |
| AX-157841710 | 20 | 63.113 | KV452981.1 | 2911549 | 10-scf00393 | 10 |
| AX-158246053 | 20 | 63.113 | KV452981.1 | 2916774 | 10-scf00393 | 10 |
| AX-158246057 | 20 | 63.113 | KV452981.1 | 2924520 | 10-scf00393 | 10 |
| AX-158246070 | 20 | 63.113 | KV452981.1 | 2939181 | 10-scf00393 | 10 |
| AX-158246086 | 20 | 63.113 | KV452981.1 | 2961252 | 10-scf00393 | 10 |
| AX-158246089 | 20 | 63.113 | KV452981.1 | 2965301 | 10-scf00393 | 10 |
| AX-158246113 | 20 | 63.113 | KV452981.1 | 2987534 | 10-scf00393 | 10 |
| AX-158246124 | 20 | 63.113 | KV452981.1 | 3002672 | 10-scf00393 | 10 |
| AX-158246130 | 20 | 63.113 | KV452981.1 | 3010384 | 10-scf00393 | 10 |
| AX-157872693 | 20 | 63.113 | KV452981.1 | 3021270 | 10-scf00393 | 10 |
| AX-158246138 | 20 | 63.113 | KV452981.1 | 3023474 | 10-scf00393 | 10 |
| AX-158246159 | 20 | 63.113 | KV452981.1 | 3054641 | 10-scf00393 | 10 |
| AX-158246161 | 20 | 63.113 | KV452981.1 | 3055152 | 10-scf00393 | 10 |
| AX-158386994 | 20 | 63.113 | KV452981.1 | 3080440 | 10-scf00393 | 10 |
| AX-158246185 | 20 | 63.113 | KV452981.1 | 3082239 | 10-scf00393 | 10 |
| AX-158246187 | 20 | 63.113 | KV452981.1 | 3084998 | 10-scf00393 | 10 |
| AX-158246189 | 20 | 63.113 | KV452981.1 | 3087369 | 10-scf00393 | 10 |
| AX-158246191 | 20 | 63.113 | KV452981.1 | 3089293 | 10-scf00393 | 10 |
| AX-158246194 | 20 | 63.113 | KV452981.1 | 3094178 | 10-scf00393 | 10 |
| AX-158246195 | 20 | 63.113 | KV452981.1 | 3095537 | 10-scf00393 | 10 |



|              |    |        |            |         |             |    |
|--------------|----|--------|------------|---------|-------------|----|
| AX-158246196 | 20 | 63.113 | KV452981.1 | 3097697 | 10-scf00393 | 10 |
| AX-158246205 | 20 | 63.113 | KV452981.1 | 3104043 | 10-scf00393 | 10 |
| AX-158246206 | 20 | 63.113 | KV452981.1 | 3104646 | 10-scf00393 | 10 |
| AX-158246207 | 20 | 63.113 | KV452981.1 | 3105142 | 10-scf00393 | 10 |
| AX-158246212 | 20 | 63.113 | KV452981.1 | 3110664 | 10-scf00393 | 10 |
| AX-157841725 | 20 | 63.113 | KV452981.1 | 3113185 | 10-scf00393 | 10 |
| AX-158246223 | 20 | 63.113 | KV452981.1 | 3123315 | 10-scf00393 | 10 |
| AX-158246252 | 20 | 63.113 | KV452981.1 | 3154398 | 10-scf00393 | 10 |
| AX-158246257 | 20 | 63.113 | KV452981.1 | 3163512 | 10-scf00393 | 10 |
| AX-158246288 | 20 | 63.113 | KV452981.1 | 3211836 | 10-scf00393 | 10 |
| AX-157841737 | 20 | 63.113 | KV452981.1 | 3371003 | 10-scf00393 | 10 |
| AX-158246418 | 20 | 63.113 | KV452981.1 | 3399823 | 10-scf00393 | 10 |
| AX-158246460 | 20 | 63.113 | KV452981.1 | 3455270 | 10-scf00393 | 10 |
| AX-157887573 | 20 | 63.113 | KV452981.1 | 3499348 | 10-scf00393 | 10 |
| AX-158246529 | 20 | 63.113 | KV452981.1 | 3536049 | 10-scf00393 | 10 |
| AX-157703842 | 20 | 63.113 | KV452981.1 | 3716598 | 10-scf00393 | 10 |
| AX-158246683 | 20 | 63.113 | KV452981.1 | 3726771 | 10-scf00393 | 10 |
| AX-158246692 | 20 | 63.113 | KV452981.1 | 3757199 | 10-scf00393 | 10 |
| AX-157841782 | 20 | 63.113 | KV452981.1 | 3823471 | 10-scf00393 | 10 |
| AX-158246788 | 20 | 63.113 | KV452981.1 | 3932807 | 10-scf00393 | 10 |
| AX-157867312 | 20 | 63.113 | KV452983.1 | 63242   | 10-scf00394 | 10 |
| AX-158247056 | 20 | 63.113 | KV452983.1 | 65338   | 10-scf00394 | 10 |
| AX-157867314 | 20 | 63.113 | KV452983.1 | 65950   | 10-scf00394 | 10 |
| AX-157841835 | 20 | 63.113 | KV452983.1 | 97111   | 10-scf00394 | 10 |
| AX-157867318 | 20 | 63.113 | KV452983.1 | 105994  | 10-scf00394 | 10 |
| AX-157756525 | 20 | 63.113 | KV452983.1 | 149340  | 10-scf00394 | 10 |
| AX-158247497 | 20 | 63.113 | KV452983.1 | 514522  | 10-scf00394 | 10 |
| AX-157841856 | 20 | 63.113 | KV452983.1 | 1055316 | 10-scf00394 | 10 |
| AX-157746757 | 20 | 63.113 | KV452983.1 | 1076214 | 10-scf00394 | 10 |
| AX-157841879 | 20 | 63.113 | KV452983.1 | 1313385 | 10-scf00394 | 10 |
| AX-158248163 | 20 | 63.113 | KV452983.1 | 1314439 | 10-scf00394 | 10 |
| AX-158248204 | 20 | 63.113 | KV452983.1 | 1393143 | 10-scf00394 | 10 |
| AX-158248303 | 20 | 63.113 | KV452983.1 | 1519422 | 10-scf00394 | 10 |
| AX-157701844 | 20 | 63.113 | DX088107.1 | 214     | 10-scf00394 | UN |
| AX-157693044 | 20 | 63.113 |            | 744     | 10-scf00394 | UN |
| AX-158245392 | 20 | 63.222 | KV452981.1 | 2028844 | 10-scf00393 | 10 |
| AX-158245587 | 20 | 63.222 | KV452981.1 | 2296035 | 10-scf00393 | 10 |
| AX-158245596 | 20 | 63.222 | KV452981.1 | 2308117 | 10-scf00393 | 10 |
| AX-158245776 | 20 | 63.222 | KV452981.1 | 2593823 | 10-scf00393 | 10 |
| AX-158245779 | 20 | 63.222 | KV452981.1 | 2596710 | 10-scf00393 | 10 |
| AX-158246043 | 20 | 63.222 | KV452981.1 | 2899343 | 10-scf00393 | 10 |
| AX-158246051 | 20 | 63.222 | KV452981.1 | 2913494 | 10-scf00393 | 10 |
| AX-157859771 | 20 | 63.222 | KV452981.1 | 2916028 | 10-scf00393 | 10 |
| AX-157859772 | 20 | 63.222 | KV452981.1 | 2917079 | 10-scf00393 | 10 |
| AX-158246054 | 20 | 63.222 | KV452981.1 | 2918335 | 10-scf00393 | 10 |
| AX-158246055 | 20 | 63.222 | KV452981.1 | 2919407 | 10-scf00393 | 10 |
| AX-158246056 | 20 | 63.222 | KV452981.1 | 2923603 | 10-scf00393 | 10 |
| AX-158246058 | 20 | 63.222 | KV452981.1 | 2925470 | 10-scf00393 | 10 |
| AX-157841711 | 20 | 63.222 | KV452981.1 | 2925530 | 10-scf00393 | 10 |
| AX-158246059 | 20 | 63.222 | KV452981.1 | 2926666 | 10-scf00393 | 10 |
| AX-158246060 | 20 | 63.222 | KV452981.1 | 2928799 | 10-scf00393 | 10 |

|              |    |        |            |         |             |    |
|--------------|----|--------|------------|---------|-------------|----|
| AX-158246061 | 20 | 63.222 | KV452981.1 | 2929887 | 10-scf00393 | 10 |
| AX-158246062 | 20 | 63.222 | KV452981.1 | 2930315 | 10-scf00393 | 10 |
| AX-158246063 | 20 | 63.222 | KV452981.1 | 2931331 | 10-scf00393 | 10 |
| AX-158246064 | 20 | 63.222 | KV452981.1 | 2932145 | 10-scf00393 | 10 |
| AX-158246065 | 20 | 63.222 | KV452981.1 | 2933435 | 10-scf00393 | 10 |
| AX-158246066 | 20 | 63.222 | KV452981.1 | 2933955 | 10-scf00393 | 10 |
| AX-157841712 | 20 | 63.222 | KV452981.1 | 2935031 | 10-scf00393 | 10 |
| AX-157841713 | 20 | 63.222 | KV452981.1 | 2936454 | 10-scf00393 | 10 |
| AX-158246068 | 20 | 63.222 | KV452981.1 | 2937372 | 10-scf00393 | 10 |
| AX-158246069 | 20 | 63.222 | KV452981.1 | 2937821 | 10-scf00393 | 10 |
| AX-158246072 | 20 | 63.222 | KV452981.1 | 2940700 | 10-scf00393 | 10 |
| AX-158246073 | 20 | 63.222 | KV452981.1 | 2942629 | 10-scf00393 | 10 |
| AX-158246075 | 20 | 63.222 | KV452981.1 | 2946963 | 10-scf00393 | 10 |
| AX-158246079 | 20 | 63.222 | KV452981.1 | 2952782 | 10-scf00393 | 10 |
| AX-158246080 | 20 | 63.222 | KV452981.1 | 2953341 | 10-scf00393 | 10 |
| AX-158246084 | 20 | 63.222 | KV452981.1 | 2959225 | 10-scf00393 | 10 |
| AX-158246085 | 20 | 63.222 | KV452981.1 | 2960606 | 10-scf00393 | 10 |
| AX-158246087 | 20 | 63.222 | KV452981.1 | 2961931 | 10-scf00393 | 10 |
| AX-157859773 | 20 | 63.222 | KV452981.1 | 2963446 | 10-scf00393 | 10 |
| AX-158246090 | 20 | 63.222 | KV452981.1 | 2966271 | 10-scf00393 | 10 |
| AX-157841715 | 20 | 63.222 | KV452981.1 | 2969893 | 10-scf00393 | 10 |
| AX-157725854 | 20 | 63.222 | KV452981.1 | 2970930 | 10-scf00393 | 10 |
| AX-158246095 | 20 | 63.222 | KV452981.1 | 2970967 | 10-scf00393 | 10 |
| AX-158246096 | 20 | 63.222 | KV452981.1 | 2973384 | 10-scf00393 | 10 |
| AX-158246097 | 20 | 63.222 | KV452981.1 | 2973778 | 10-scf00393 | 10 |
| AX-158246099 | 20 | 63.222 | KV452981.1 | 2976233 | 10-scf00393 | 10 |
| AX-158246101 | 20 | 63.222 | KV452981.1 | 2978399 | 10-scf00393 | 10 |
| AX-158246102 | 20 | 63.222 | KV452981.1 | 2978651 | 10-scf00393 | 10 |
| AX-158246103 | 20 | 63.222 | KV452981.1 | 2980276 | 10-scf00393 | 10 |
| AX-158246104 | 20 | 63.222 | KV452981.1 | 2980533 | 10-scf00393 | 10 |
| AX-158246105 | 20 | 63.222 | KV452981.1 | 2980799 | 10-scf00393 | 10 |
| AX-157841717 | 20 | 63.222 | KV452981.1 | 2981006 | 10-scf00393 | 10 |
| AX-158246106 | 20 | 63.222 | KV452981.1 | 2981254 | 10-scf00393 | 10 |
| AX-158246107 | 20 | 63.222 | KV452981.1 | 2981901 | 10-scf00393 | 10 |
| AX-158246108 | 20 | 63.222 | KV452981.1 | 2982237 | 10-scf00393 | 10 |
| AX-158246109 | 20 | 63.222 | KV452981.1 | 2984608 | 10-scf00393 | 10 |
| AX-158246110 | 20 | 63.222 | KV452981.1 | 2985093 | 10-scf00393 | 10 |
| AX-158246111 | 20 | 63.222 | KV452981.1 | 2985448 | 10-scf00393 | 10 |
| AX-157841718 | 20 | 63.222 | KV452981.1 | 2986929 | 10-scf00393 | 10 |
| AX-158246112 | 20 | 63.222 | KV452981.1 | 2987300 | 10-scf00393 | 10 |
| AX-158246115 | 20 | 63.222 | KV452981.1 | 2989652 | 10-scf00393 | 10 |
| AX-158246117 | 20 | 63.222 | KV452981.1 | 2992637 | 10-scf00393 | 10 |
| AX-158246118 | 20 | 63.222 | KV452981.1 | 2993257 | 10-scf00393 | 10 |
| AX-158246119 | 20 | 63.222 | KV452981.1 | 2995340 | 10-scf00393 | 10 |
| AX-157841719 | 20 | 63.222 | KV452981.1 | 2996225 | 10-scf00393 | 10 |
| AX-158246120 | 20 | 63.222 | KV452981.1 | 2996530 | 10-scf00393 | 10 |
| AX-158246121 | 20 | 63.222 | KV452981.1 | 2997608 | 10-scf00393 | 10 |
| AX-157841720 | 20 | 63.222 | KV452981.1 | 2999171 | 10-scf00393 | 10 |
| AX-158246122 | 20 | 63.222 | KV452981.1 | 2999858 | 10-scf00393 | 10 |
| AX-158246123 | 20 | 63.222 | KV452981.1 | 3001503 | 10-scf00393 | 10 |
| AX-158246125 | 20 | 63.222 | KV452981.1 | 3003408 | 10-scf00393 | 10 |

|              |    |        |            |         |             |    |
|--------------|----|--------|------------|---------|-------------|----|
| AX-158246126 | 20 | 63.222 | KV452981.1 | 3005488 | 10-scf00393 | 10 |
| AX-158246127 | 20 | 63.222 | KV452981.1 | 3007620 | 10-scf00393 | 10 |
| AX-158246128 | 20 | 63.222 | KV452981.1 | 3008137 | 10-scf00393 | 10 |
| AX-158246131 | 20 | 63.222 | KV452981.1 | 3011509 | 10-scf00393 | 10 |
| AX-158246132 | 20 | 63.222 | KV452981.1 | 3015745 | 10-scf00393 | 10 |
| AX-158246133 | 20 | 63.222 | KV452981.1 | 3016214 | 10-scf00393 | 10 |
| AX-158246134 | 20 | 63.222 | KV452981.1 | 3018953 | 10-scf00393 | 10 |
| AX-158246135 | 20 | 63.222 | KV452981.1 | 3019157 | 10-scf00393 | 10 |
| AX-158246136 | 20 | 63.222 | KV452981.1 | 3020943 | 10-scf00393 | 10 |
| AX-158246139 | 20 | 63.222 | KV452981.1 | 3023998 | 10-scf00393 | 10 |
| AX-158246141 | 20 | 63.222 | KV452981.1 | 3026801 | 10-scf00393 | 10 |
| AX-158246142 | 20 | 63.222 | KV452981.1 | 3027738 | 10-scf00393 | 10 |
| AX-158246143 | 20 | 63.222 | KV452981.1 | 3028528 | 10-scf00393 | 10 |
| AX-158246144 | 20 | 63.222 | KV452981.1 | 3030822 | 10-scf00393 | 10 |
| AX-158246145 | 20 | 63.222 | KV452981.1 | 3032039 | 10-scf00393 | 10 |
| AX-158246146 | 20 | 63.222 | KV452981.1 | 3032375 | 10-scf00393 | 10 |
| AX-158246148 | 20 | 63.222 | KV452981.1 | 3033356 | 10-scf00393 | 10 |
| AX-158246149 | 20 | 63.222 | KV452981.1 | 3035009 | 10-scf00393 | 10 |
| AX-158246151 | 20 | 63.222 | KV452981.1 | 3037585 | 10-scf00393 | 10 |
| AX-158246152 | 20 | 63.222 | KV452981.1 | 3040523 | 10-scf00393 | 10 |
| AX-158246153 | 20 | 63.222 | KV452981.1 | 3040761 | 10-scf00393 | 10 |
| AX-158246154 | 20 | 63.222 | KV452981.1 | 3042885 | 10-scf00393 | 10 |
| AX-157723383 | 20 | 63.222 | KV452981.1 | 3046600 | 10-scf00393 | 10 |
| AX-157719754 | 20 | 63.222 | KV452981.1 | 3047085 | 10-scf00393 | 10 |
| AX-157745296 | 20 | 63.222 | KV452981.1 | 3048657 | 10-scf00393 | 10 |
| AX-157713723 | 20 | 63.222 | KV452981.1 | 3050783 | 10-scf00393 | 10 |
| AX-158246156 | 20 | 63.222 | KV452981.1 | 3053592 | 10-scf00393 | 10 |
| AX-158246158 | 20 | 63.222 | KV452981.1 | 3054414 | 10-scf00393 | 10 |
| AX-157841723 | 20 | 63.222 | KV452981.1 | 3057348 | 10-scf00393 | 10 |
| AX-158246163 | 20 | 63.222 | KV452981.1 | 3059161 | 10-scf00393 | 10 |
| AX-158246164 | 20 | 63.222 | KV452981.1 | 3060921 | 10-scf00393 | 10 |
| AX-158246165 | 20 | 63.222 | KV452981.1 | 3061486 | 10-scf00393 | 10 |
| AX-158246166 | 20 | 63.222 | KV452981.1 | 3062740 | 10-scf00393 | 10 |
| AX-158246167 | 20 | 63.222 | KV452981.1 | 3064653 | 10-scf00393 | 10 |
| AX-158246168 | 20 | 63.222 | KV452981.1 | 3065533 | 10-scf00393 | 10 |
| AX-158246169 | 20 | 63.222 | KV452981.1 | 3066375 | 10-scf00393 | 10 |
| AX-158246171 | 20 | 63.222 | KV452981.1 | 3067266 | 10-scf00393 | 10 |
| AX-158246172 | 20 | 63.222 | KV452981.1 | 3067869 | 10-scf00393 | 10 |
| AX-157755477 | 20 | 63.222 | KV452981.1 | 3068495 | 10-scf00393 | 10 |
| AX-158246173 | 20 | 63.222 | KV452981.1 | 3069131 | 10-scf00393 | 10 |
| AX-158246174 | 20 | 63.222 | KV452981.1 | 3069794 | 10-scf00393 | 10 |
| AX-157841724 | 20 | 63.222 | KV452981.1 | 3069946 | 10-scf00393 | 10 |
| AX-158246175 | 20 | 63.222 | KV452981.1 | 3070615 | 10-scf00393 | 10 |
| AX-158246176 | 20 | 63.222 | KV452981.1 | 3072213 | 10-scf00393 | 10 |
| AX-158246177 | 20 | 63.222 | KV452981.1 | 3073808 | 10-scf00393 | 10 |
| AX-157738996 | 20 | 63.222 | KV452981.1 | 3074575 | 10-scf00393 | 10 |
| AX-158246179 | 20 | 63.222 | KV452981.1 | 3078126 | 10-scf00393 | 10 |
| AX-158246181 | 20 | 63.222 | KV452981.1 | 3079724 | 10-scf00393 | 10 |
| AX-158246182 | 20 | 63.222 | KV452981.1 | 3080128 | 10-scf00393 | 10 |
| AX-158246183 | 20 | 63.222 | KV452981.1 | 3080704 | 10-scf00393 | 10 |
| AX-158246184 | 20 | 63.222 | KV452981.1 | 3081558 | 10-scf00393 | 10 |

|              |    |        |             |         |             |    |
|--------------|----|--------|-------------|---------|-------------|----|
| AX-158246188 | 20 | 63.222 | KV452981.1  | 3085858 | 10-scf00393 | 10 |
| AX-158246190 | 20 | 63.222 | KV452981.1  | 3088637 | 10-scf00393 | 10 |
| AX-158246198 | 20 | 63.222 | KV452981.1  | 3099984 | 10-scf00393 | 10 |
| AX-158246199 | 20 | 63.222 | KV452981.1  | 3100527 | 10-scf00393 | 10 |
| AX-158246201 | 20 | 63.222 | KV452981.1  | 3101505 | 10-scf00393 | 10 |
| AX-158246202 | 20 | 63.222 | KV452981.1  | 3102137 | 10-scf00393 | 10 |
| AX-158246203 | 20 | 63.222 | KV452981.1  | 3102747 | 10-scf00393 | 10 |
| AX-158246208 | 20 | 63.222 | KV452981.1  | 3106012 | 10-scf00393 | 10 |
| AX-158246210 | 20 | 63.222 | KV452981.1  | 3108214 | 10-scf00393 | 10 |
| AX-158246213 | 20 | 63.222 | KV452981.1  | 3111171 | 10-scf00393 | 10 |
| AX-158246214 | 20 | 63.222 | KV452981.1  | 3111637 | 10-scf00393 | 10 |
| AX-158246215 | 20 | 63.222 | KV452981.1  | 3112595 | 10-scf00393 | 10 |
| AX-158246217 | 20 | 63.222 | KV452981.1  | 3117353 | 10-scf00393 | 10 |
| AX-157841727 | 20 | 63.222 | KV452981.1  | 3118057 | 10-scf00393 | 10 |
| AX-158246219 | 20 | 63.222 | KV452981.1  | 3120318 | 10-scf00393 | 10 |
| AX-158246222 | 20 | 63.222 | KV452981.1  | 3122559 | 10-scf00393 | 10 |
| AX-158246224 | 20 | 63.222 | KV452981.1  | 3124626 | 10-scf00393 | 10 |
| AX-158246226 | 20 | 63.222 | KV452981.1  | 3126149 | 10-scf00393 | 10 |
| AX-158246227 | 20 | 63.222 | KV452981.1  | 3131107 | 10-scf00393 | 10 |
| AX-158246228 | 20 | 63.222 | KV452981.1  | 3132002 | 10-scf00393 | 10 |
| AX-158246231 | 20 | 63.222 | KV452981.1  | 3133511 | 10-scf00393 | 10 |
| AX-158246232 | 20 | 63.222 | KV452981.1  | 3135302 | 10-scf00393 | 10 |
| AX-158246234 | 20 | 63.222 | KV452981.1  | 3137592 | 10-scf00393 | 10 |
| AX-158246235 | 20 | 63.222 | KV452981.1  | 3138517 | 10-scf00393 | 10 |
| AX-158246237 | 20 | 63.222 | KV452981.1  | 3140694 | 10-scf00393 | 10 |
| AX-158246239 | 20 | 63.222 | KV452981.1  | 3141455 | 10-scf00393 | 10 |
| AX-158246241 | 20 | 63.222 | KV452981.1  | 3143125 | 10-scf00393 | 10 |
| AX-158246242 | 20 | 63.222 | KV452981.1  | 3144796 | 10-scf00393 | 10 |
| AX-158246243 | 20 | 63.222 | KV452981.1  | 3146125 | 10-scf00393 | 10 |
| AX-158246244 | 20 | 63.222 | KV452981.1  | 3149527 | 10-scf00393 | 10 |
| AX-158246245 | 20 | 63.222 | KV452981.1  | 3149793 | 10-scf00393 | 10 |
| AX-158246246 | 20 | 63.222 | KV452981.1  | 3150631 | 10-scf00393 | 10 |
| AX-157887569 | 20 | 63.222 | KV452981.1  | 3150931 | 10-scf00393 | 10 |
| AX-158246247 | 20 | 63.222 | KV452981.1  | 3151596 | 10-scf00393 | 10 |
| AX-158246248 | 20 | 63.222 | KV452981.1  | 3151945 | 10-scf00393 | 10 |
| AX-158246249 | 20 | 63.222 | KV452981.1  | 3152359 | 10-scf00393 | 10 |
| AX-158246250 | 20 | 63.222 | KV452981.1  | 3152910 | 10-scf00393 | 10 |
| AX-158246251 | 20 | 63.222 | KV452981.1  | 3153579 | 10-scf00393 | 10 |
| AX-158246267 | 20 | 63.222 | KV452981.1  | 3181296 | 10-scf00393 | 10 |
| AX-158246269 | 20 | 63.222 | KV452981.1  | 3182636 | 10-scf00393 | 10 |
| AX-158246270 | 20 | 63.222 | KV452981.1  | 3183878 | 10-scf00393 | 10 |
| AX-158246274 | 20 | 63.222 | KV452981.1  | 3194001 | 10-scf00393 | 10 |
| AX-158246292 | 20 | 63.222 | KV452981.1  | 3215685 | 10-scf00393 | 10 |
| AX-158246300 | 20 | 63.222 | KV452981.1  | 3227968 | 10-scf00393 | 10 |
| AX-157707104 | 20 | 63.222 | 3ML01033511 | 311     | scf09163_1  | UN |
| AX-158246254 | 20 | 63.271 | KV452981.1  | 3159101 | 10-scf00393 | 10 |
| AX-158246147 | 20 | 63.315 | KV452981.1  | 3032951 | 10-scf00393 | 10 |
| AX-158246256 | 20 | 63.315 | KV452981.1  | 3162767 | 10-scf00393 | 10 |
| AX-157841728 | 20 | 63.315 | KV452981.1  | 3163011 | 10-scf00393 | 10 |
| AX-158246285 | 20 | 63.315 | KV452981.1  | 3209315 | 10-scf00393 | 10 |
| AX-157759058 | 20 | 63.331 | KV452981.1  | 3167966 | 10-scf00393 | 10 |

|              |    |        |            |         |             |    |
|--------------|----|--------|------------|---------|-------------|----|
| AX-158246268 | 20 | 63.331 | KV452981.1 | 3182282 | 10-scf00393 | 10 |
| AX-158241972 | 20 | 63.412 | KV452979.1 | 7007824 | 10-scf00389 | 10 |
| AX-158246279 | 20 | 63.55  | KV452981.1 | 3204562 | 10-scf00393 | 10 |
| AX-158246280 | 20 | 63.55  | KV452981.1 | 3204997 | 10-scf00393 | 10 |
| AX-158246281 | 20 | 63.55  | KV452981.1 | 3205898 | 10-scf00393 | 10 |
| AX-158246283 | 20 | 63.55  | KV452981.1 | 3207731 | 10-scf00393 | 10 |
| AX-158246284 | 20 | 63.55  | KV452981.1 | 3208283 | 10-scf00393 | 10 |
| AX-158246291 | 20 | 63.55  | KV452981.1 | 3213718 | 10-scf00393 | 10 |
| AX-158246293 | 20 | 63.55  | KV452981.1 | 3216404 | 10-scf00393 | 10 |
| AX-158246297 | 20 | 63.55  | KV452981.1 | 3221415 | 10-scf00393 | 10 |
| AX-158246299 | 20 | 63.55  | KV452981.1 | 3226967 | 10-scf00393 | 10 |
| AX-158246346 | 20 | 63.55  | KV452981.1 | 3294232 | 10-scf00393 | 10 |
| AX-158246355 | 20 | 63.55  | KV452981.1 | 3315302 | 10-scf00393 | 10 |
| AX-158246305 | 20 | 63.603 | KV452981.1 | 3232227 | 10-scf00393 | 10 |
| AX-158246342 | 20 | 63.603 | KV452981.1 | 3284272 | 10-scf00393 | 10 |
| AX-157887570 | 20 | 63.619 | KV452981.1 | 3232344 | 10-scf00393 | 10 |
| AX-158246273 | 20 | 63.688 | KV452981.1 | 3192042 | 10-scf00393 | 10 |
| AX-158246304 | 20 | 63.688 | KV452981.1 | 3231754 | 10-scf00393 | 10 |
| AX-158246306 | 20 | 63.688 | KV452981.1 | 3234822 | 10-scf00393 | 10 |
| AX-158415703 | 20 | 63.688 | KV452981.1 | 3239857 | 10-scf00393 | 10 |
| AX-158246329 | 20 | 63.688 | KV452981.1 | 3270268 | 10-scf00393 | 10 |
| AX-158246330 | 20 | 63.688 | KV452981.1 | 3270347 | 10-scf00393 | 10 |
| AX-157741419 | 20 | 63.688 | KV452981.1 | 3312448 | 10-scf00393 | 10 |
| AX-157775420 | 20 | 63.688 | KV452981.1 | 3336901 | 10-scf00393 | 10 |
| AX-158246421 | 20 | 63.688 | KV452981.1 | 3405037 | 10-scf00393 | 10 |
| AX-158246286 | 20 | 63.768 | KV452981.1 | 3210065 | 10-scf00393 | 10 |
| AX-158246308 | 20 | 63.768 | KV452981.1 | 3238317 | 10-scf00393 | 10 |
| AX-158246309 | 20 | 63.768 | KV452981.1 | 3242431 | 10-scf00393 | 10 |
| AX-158246313 | 20 | 63.768 | KV452981.1 | 3246781 | 10-scf00393 | 10 |
| AX-158246315 | 20 | 63.768 | KV452981.1 | 3248991 | 10-scf00393 | 10 |
| AX-158246325 | 20 | 63.768 | KV452981.1 | 3265700 | 10-scf00393 | 10 |
| AX-158246333 | 20 | 63.768 | KV452981.1 | 3274516 | 10-scf00393 | 10 |
| AX-158246336 | 20 | 63.768 | KV452981.1 | 3276833 | 10-scf00393 | 10 |
| AX-157751702 | 20 | 63.768 | KV452981.1 | 3287338 | 10-scf00393 | 10 |
| AX-158246449 | 20 | 63.768 | KV452981.1 | 3445042 | 10-scf00393 | 10 |
| AX-157841747 | 20 | 63.768 | KV452981.1 | 3454691 | 10-scf00393 | 10 |
| AX-158247309 | 20 | 63.768 | KV452983.1 | 326941  | 10-scf00394 | 10 |
| AX-158246339 | 20 | 63.786 | KV452981.1 | 3282533 | 10-scf00393 | 10 |
| AX-158246340 | 20 | 63.786 | KV452981.1 | 3282752 | 10-scf00393 | 10 |
| AX-158245061 | 20 | 63.878 | KV452981.1 | 1567674 | 10-scf00393 | 10 |
| AX-158246278 | 20 | 63.878 | KV452981.1 | 3203470 | 10-scf00393 | 10 |
| AX-158246282 | 20 | 63.878 | KV452981.1 | 3207028 | 10-scf00393 | 10 |
| AX-158246290 | 20 | 63.878 | KV452981.1 | 3212771 | 10-scf00393 | 10 |
| AX-158246298 | 20 | 63.878 | KV452981.1 | 3222062 | 10-scf00393 | 10 |
| AX-158246303 | 20 | 63.878 | KV452981.1 | 3230872 | 10-scf00393 | 10 |
| AX-158246307 | 20 | 63.878 | KV452981.1 | 3237466 | 10-scf00393 | 10 |
| AX-157746857 | 20 | 63.878 | KV452981.1 | 3241919 | 10-scf00393 | 10 |
| AX-158246312 | 20 | 63.878 | KV452981.1 | 3245830 | 10-scf00393 | 10 |
| AX-158386997 | 20 | 63.878 | KV452981.1 | 3250314 | 10-scf00393 | 10 |
| AX-158246317 | 20 | 63.878 | KV452981.1 | 3251756 | 10-scf00393 | 10 |
| AX-158246318 | 20 | 63.878 | KV452981.1 | 3253524 | 10-scf00393 | 10 |

|              |    |        |            |         |             |    |
|--------------|----|--------|------------|---------|-------------|----|
| AX-158246320 | 20 | 63.878 | KV452981.1 | 3255750 | 10-scf00393 | 10 |
| AX-158246322 | 20 | 63.878 | KV452981.1 | 3258650 | 10-scf00393 | 10 |
| AX-158246323 | 20 | 63.878 | KV452981.1 | 3260179 | 10-scf00393 | 10 |
| AX-158246326 | 20 | 63.878 | KV452981.1 | 3266193 | 10-scf00393 | 10 |
| AX-158246331 | 20 | 63.878 | KV452981.1 | 3271994 | 10-scf00393 | 10 |
| AX-158246334 | 20 | 63.878 | KV452981.1 | 3275400 | 10-scf00393 | 10 |
| AX-158246335 | 20 | 63.878 | KV452981.1 | 3275973 | 10-scf00393 | 10 |
| AX-158246337 | 20 | 63.878 | KV452981.1 | 3277306 | 10-scf00393 | 10 |
| AX-158246338 | 20 | 63.878 | KV452981.1 | 3279661 | 10-scf00393 | 10 |
| AX-158246341 | 20 | 63.878 | KV452981.1 | 3283517 | 10-scf00393 | 10 |
| AX-158246347 | 20 | 63.878 | KV452981.1 | 3295104 | 10-scf00393 | 10 |
| AX-158246348 | 20 | 63.878 | KV452981.1 | 3297594 | 10-scf00393 | 10 |
| AX-158246349 | 20 | 63.878 | KV452981.1 | 3297880 | 10-scf00393 | 10 |
| AX-158246350 | 20 | 63.878 | KV452981.1 | 3301071 | 10-scf00393 | 10 |
| AX-157872694 | 20 | 63.878 | KV452981.1 | 3306858 | 10-scf00393 | 10 |
| AX-158246351 | 20 | 63.878 | KV452981.1 | 3309678 | 10-scf00393 | 10 |
| AX-158246352 | 20 | 63.878 | KV452981.1 | 3310500 | 10-scf00393 | 10 |
| AX-157841733 | 20 | 63.878 | KV452981.1 | 3312513 | 10-scf00393 | 10 |
| AX-158246353 | 20 | 63.878 | KV452981.1 | 3313472 | 10-scf00393 | 10 |
| AX-157841734 | 20 | 63.878 | KV452981.1 | 3313841 | 10-scf00393 | 10 |
| AX-158246357 | 20 | 63.878 | KV452981.1 | 3318692 | 10-scf00393 | 10 |
| AX-158246358 | 20 | 63.878 | KV452981.1 | 3322173 | 10-scf00393 | 10 |
| AX-158246359 | 20 | 63.878 | KV452981.1 | 3323051 | 10-scf00393 | 10 |
| AX-158246361 | 20 | 63.878 | KV452981.1 | 3323796 | 10-scf00393 | 10 |
| AX-158246362 | 20 | 63.878 | KV452981.1 | 3327095 | 10-scf00393 | 10 |
| AX-158246363 | 20 | 63.878 | KV452981.1 | 3327393 | 10-scf00393 | 10 |
| AX-158246364 | 20 | 63.878 | KV452981.1 | 3328462 | 10-scf00393 | 10 |
| AX-158246365 | 20 | 63.878 | KV452981.1 | 3329309 | 10-scf00393 | 10 |
| AX-158246366 | 20 | 63.878 | KV452981.1 | 3330615 | 10-scf00393 | 10 |
| AX-157754330 | 20 | 63.878 | KV452981.1 | 3331721 | 10-scf00393 | 10 |
| AX-158246367 | 20 | 63.878 | KV452981.1 | 3332122 | 10-scf00393 | 10 |
| AX-157841735 | 20 | 63.878 | KV452981.1 | 3332779 | 10-scf00393 | 10 |
| AX-158246368 | 20 | 63.878 | KV452981.1 | 3334559 | 10-scf00393 | 10 |
| AX-158246369 | 20 | 63.878 | KV452981.1 | 3335135 | 10-scf00393 | 10 |
| AX-158246371 | 20 | 63.878 | KV452981.1 | 3338550 | 10-scf00393 | 10 |
| AX-158246372 | 20 | 63.878 | KV452981.1 | 3341359 | 10-scf00393 | 10 |
| AX-158246373 | 20 | 63.878 | KV452981.1 | 3343997 | 10-scf00393 | 10 |
| AX-158246374 | 20 | 63.878 | KV452981.1 | 3346932 | 10-scf00393 | 10 |
| AX-158246375 | 20 | 63.878 | KV452981.1 | 3347761 | 10-scf00393 | 10 |
| AX-158246376 | 20 | 63.878 | KV452981.1 | 3348576 | 10-scf00393 | 10 |
| AX-158246378 | 20 | 63.878 | KV452981.1 | 3349791 | 10-scf00393 | 10 |
| AX-158246379 | 20 | 63.878 | KV452981.1 | 3350541 | 10-scf00393 | 10 |
| AX-158246380 | 20 | 63.878 | KV452981.1 | 3351353 | 10-scf00393 | 10 |
| AX-158246381 | 20 | 63.878 | KV452981.1 | 3352741 | 10-scf00393 | 10 |
| AX-158246384 | 20 | 63.878 | KV452981.1 | 3356481 | 10-scf00393 | 10 |
| AX-158246385 | 20 | 63.878 | KV452981.1 | 3358121 | 10-scf00393 | 10 |
| AX-158246386 | 20 | 63.878 | KV452981.1 | 3359613 | 10-scf00393 | 10 |
| AX-158246387 | 20 | 63.878 | KV452981.1 | 3360787 | 10-scf00393 | 10 |
| AX-158246391 | 20 | 63.878 | KV452981.1 | 3364132 | 10-scf00393 | 10 |
| AX-158246392 | 20 | 63.878 | KV452981.1 | 3364915 | 10-scf00393 | 10 |
| AX-158246394 | 20 | 63.878 | KV452981.1 | 3367064 | 10-scf00393 | 10 |

|              |    |        |            |         |             |    |
|--------------|----|--------|------------|---------|-------------|----|
| AX-158246395 | 20 | 63.878 | KV452981.1 | 3367394 | 10-scf00393 | 10 |
| AX-158246397 | 20 | 63.878 | KV452981.1 | 3368256 | 10-scf00393 | 10 |
| AX-158246399 | 20 | 63.878 | KV452981.1 | 3369746 | 10-scf00393 | 10 |
| AX-158246400 | 20 | 63.878 | KV452981.1 | 3370408 | 10-scf00393 | 10 |
| AX-157841736 | 20 | 63.878 | KV452981.1 | 3370845 | 10-scf00393 | 10 |
| AX-158246401 | 20 | 63.878 | KV452981.1 | 3371899 | 10-scf00393 | 10 |
| AX-158246409 | 20 | 63.878 | KV452981.1 | 3391103 | 10-scf00393 | 10 |
| AX-158246411 | 20 | 63.878 | KV452981.1 | 3392902 | 10-scf00393 | 10 |
| AX-158246412 | 20 | 63.878 | KV452981.1 | 3393568 | 10-scf00393 | 10 |
| AX-158246415 | 20 | 63.878 | KV452981.1 | 3396845 | 10-scf00393 | 10 |
| AX-158246422 | 20 | 63.878 | KV452981.1 | 3405321 | 10-scf00393 | 10 |
| AX-158246423 | 20 | 63.878 | KV452981.1 | 3405540 | 10-scf00393 | 10 |
| AX-158246425 | 20 | 63.878 | KV452981.1 | 3407668 | 10-scf00393 | 10 |
| AX-157720654 | 20 | 63.878 | KV452981.1 | 3408971 | 10-scf00393 | 10 |
| AX-157749537 | 20 | 63.878 | KV452981.1 | 3424499 | 10-scf00393 | 10 |
| AX-157714929 | 20 | 63.878 | KV452981.1 | 3441352 | 10-scf00393 | 10 |
| AX-158246458 | 20 | 63.878 | KV452981.1 | 3454576 | 10-scf00393 | 10 |
| AX-157719817 | 20 | 63.988 | KV452981.1 | 3409358 | 10-scf00393 | 10 |
| AX-158246427 | 20 | 64.096 | KV452981.1 | 3412796 | 10-scf00393 | 10 |
| AX-158246428 | 20 | 64.096 | KV452981.1 | 3413869 | 10-scf00393 | 10 |
| AX-158246431 | 20 | 64.096 | KV452981.1 | 3416639 | 10-scf00393 | 10 |
| AX-157772568 | 20 | 64.096 | KV452981.1 | 3420412 | 10-scf00393 | 10 |
| AX-158246434 | 20 | 64.096 | KV452981.1 | 3423339 | 10-scf00393 | 10 |
| AX-158246437 | 20 | 64.096 | KV452981.1 | 3427850 | 10-scf00393 | 10 |
| AX-157773522 | 20 | 64.096 | KV452981.1 | 3428075 | 10-scf00393 | 10 |
| AX-157841740 | 20 | 64.096 | KV452981.1 | 3428678 | 10-scf00393 | 10 |
| AX-158246440 | 20 | 64.096 | KV452981.1 | 3432141 | 10-scf00393 | 10 |
| AX-157841742 | 20 | 64.096 | KV452981.1 | 3436424 | 10-scf00393 | 10 |
| AX-157696464 | 20 | 64.096 | KV452981.1 | 3437349 | 10-scf00393 | 10 |
| AX-157841743 | 20 | 64.096 | KV452981.1 | 3437804 | 10-scf00393 | 10 |
| AX-158246441 | 20 | 64.096 | KV452981.1 | 3438413 | 10-scf00393 | 10 |
| AX-157872697 | 20 | 64.096 | KV452981.1 | 3439162 | 10-scf00393 | 10 |
| AX-158246443 | 20 | 64.096 | KV452981.1 | 3439376 | 10-scf00393 | 10 |
| AX-158246444 | 20 | 64.096 | KV452981.1 | 3440183 | 10-scf00393 | 10 |
| AX-158246445 | 20 | 64.096 | KV452981.1 | 3441886 | 10-scf00393 | 10 |
| AX-158246448 | 20 | 64.096 | KV452981.1 | 3444209 | 10-scf00393 | 10 |
| AX-158246457 | 20 | 64.096 | KV452981.1 | 3453821 | 10-scf00393 | 10 |
| AX-158246479 | 20 | 64.096 | KV452981.1 | 3472241 | 10-scf00393 | 10 |
| AX-158246502 | 20 | 64.096 | KV452981.1 | 3502559 | 10-scf00393 | 10 |
| AX-158246539 | 20 | 64.096 | KV452981.1 | 3546816 | 10-scf00393 | 10 |
| AX-158246547 | 20 | 64.096 | KV452981.1 | 3558447 | 10-scf00393 | 10 |
| AX-157867308 | 20 | 64.096 | KV452981.1 | 3856469 | 10-scf00393 | 10 |
| AX-158247078 | 20 | 64.096 | KV452983.1 | 86097   | 10-scf00394 | 10 |
| AX-158247089 | 20 | 64.096 | KV452983.1 | 104947  | 10-scf00394 | 10 |
| AX-157859804 | 20 | 64.096 | KV452983.1 | 999286  | 10-scf00394 | 10 |
| AX-158246433 | 20 | 64.102 | KV452981.1 | 3421663 | 10-scf00393 | 10 |
| AX-158246450 | 20 | 64.102 | KV452981.1 | 3449524 | 10-scf00393 | 10 |
| AX-158246514 | 20 | 64.102 | KV452981.1 | 3515370 | 10-scf00393 | 10 |
| AX-157841778 | 20 | 64.102 | KV452981.1 | 3799657 | 10-scf00393 | 10 |
| AX-158246713 | 20 | 64.102 | KV452981.1 | 3809640 | 10-scf00393 | 10 |
| AX-158246715 | 20 | 64.102 | KV452981.1 | 3811789 | 10-scf00393 | 10 |

|              |    |        |            |         |              |    |
|--------------|----|--------|------------|---------|--------------|----|
| AX-158246718 | 20 | 64.102 | KV452981.1 | 3817863 | 10-scf00393  | 10 |
| AX-157859783 | 20 | 64.102 | KV452981.1 | 3821746 | 10-scf00393  | 10 |
| AX-158246767 | 20 | 64.102 | KV452981.1 | 3890672 | 10-scf00393  | 10 |
| AX-157841833 | 20 | 64.102 | KV452983.1 | 82624   | 10-scf00394  | 10 |
| AX-157693088 | 20 | 64.102 |            | 1219    | :231057_g2_i | UN |
| AX-158246451 | 20 | 64.115 | KV452981.1 | 3450047 | 10-scf00393  | 10 |
| AX-158246455 | 20 | 64.136 | KV452981.1 | 3453071 | 10-scf00393  | 10 |
| AX-158246465 | 20 | 64.136 | KV452981.1 | 3460410 | 10-scf00393  | 10 |
| AX-158246462 | 20 | 64.152 | KV452981.1 | 3456532 | 10-scf00393  | 10 |
| AX-158246464 | 20 | 64.184 | KV452981.1 | 3459392 | 10-scf00393  | 10 |
| AX-158246466 | 20 | 64.206 | KV452981.1 | 3460653 | 10-scf00393  | 10 |
| AX-158246467 | 20 | 64.206 | KV452981.1 | 3462171 | 10-scf00393  | 10 |
| AX-158246651 | 20 | 64.206 | KV452981.1 | 3694268 | 10-scf00393  | 10 |
| AX-158246785 | 20 | 64.206 | KV452981.1 | 3920422 | 10-scf00393  | 10 |
| AX-157775556 | 20 | 64.232 | KV452981.1 | 3465218 | 10-scf00393  | 10 |
| AX-157841749 | 20 | 64.268 | KV452981.1 | 3469008 | 10-scf00393  | 10 |
| AX-158246476 | 20 | 64.313 | KV452981.1 | 3469424 | 10-scf00393  | 10 |
| AX-158246478 | 20 | 64.313 | KV452981.1 | 3470491 | 10-scf00393  | 10 |
| AX-158246482 | 20 | 64.533 | KV452981.1 | 3476721 | 10-scf00393  | 10 |
| AX-157841750 | 20 | 64.533 | KV452981.1 | 3479731 | 10-scf00393  | 10 |
| AX-157740761 | 20 | 64.533 | KV452981.1 | 3480497 | 10-scf00393  | 10 |
| AX-157717845 | 20 | 64.533 | KV452981.1 | 3480857 | 10-scf00393  | 10 |
| AX-158246486 | 20 | 64.533 | KV452981.1 | 3482046 | 10-scf00393  | 10 |
| AX-158246487 | 20 | 64.533 | KV452981.1 | 3484184 | 10-scf00393  | 10 |
| AX-158246489 | 20 | 64.533 | KV452981.1 | 3485447 | 10-scf00393  | 10 |
| AX-157701826 | 20 | 64.533 | KV452981.1 | 3496653 | 10-scf00393  | 10 |
| AX-158246503 | 20 | 64.533 | KV452981.1 | 3502979 | 10-scf00393  | 10 |
| AX-158246469 | 20 | 64.536 | KV452981.1 | 3463468 | 10-scf00393  | 10 |
| AX-157841751 | 20 | 64.536 | KV452981.1 | 3491154 | 10-scf00393  | 10 |
| AX-158246546 | 20 | 64.536 | KV452981.1 | 3557447 | 10-scf00393  | 10 |
| AX-157771946 | 20 | 64.543 | KV452981.1 | 3498002 | 10-scf00393  | 10 |
| AX-158246499 | 20 | 64.549 | KV452981.1 | 3499974 | 10-scf00393  | 10 |
| AX-158246504 | 20 | 64.556 | KV452981.1 | 3504434 | 10-scf00393  | 10 |
| AX-158246508 | 20 | 64.563 | KV452981.1 | 3507715 | 10-scf00393  | 10 |
| AX-158246510 | 20 | 64.571 | KV452981.1 | 3509544 | 10-scf00393  | 10 |
| AX-158246511 | 20 | 64.581 | KV452981.1 | 3509633 | 10-scf00393  | 10 |
| AX-158246515 | 20 | 64.595 | KV452981.1 | 3516658 | 10-scf00393  | 10 |
| AX-158246519 | 20 | 64.61  | KV452981.1 | 3521245 | 10-scf00393  | 10 |
| AX-158245616 | 20 | 64.624 | KV452981.1 | 2364152 | 10-scf00393  | 10 |
| AX-158245652 | 20 | 64.624 | KV452981.1 | 2416511 | 10-scf00393  | 10 |
| AX-157747457 | 20 | 64.624 | KV452981.1 | 2839846 | 10-scf00393  | 10 |
| AX-158246520 | 20 | 64.624 | KV452981.1 | 3521842 | 10-scf00393  | 10 |
| AX-158247022 | 20 | 64.624 | KV452983.1 | 5604    | 10-scf00394  | 10 |
| AX-158246525 | 20 | 64.633 | KV452981.1 | 3529284 | 10-scf00393  | 10 |
| AX-158246501 | 20 | 64.643 | KV452981.1 | 3501933 | 10-scf00393  | 10 |
| AX-158246507 | 20 | 64.643 | KV452981.1 | 3507263 | 10-scf00393  | 10 |
| AX-158246526 | 20 | 64.643 | KV452981.1 | 3531038 | 10-scf00393  | 10 |
| AX-158246532 | 20 | 64.643 | KV452981.1 | 3538661 | 10-scf00393  | 10 |
| AX-157718426 | 20 | 64.643 | KV452981.1 | 3547360 | 10-scf00393  | 10 |
| AX-158246542 | 20 | 64.643 | KV452981.1 | 3550384 | 10-scf00393  | 10 |
| AX-158246545 | 20 | 64.643 | KV452981.1 | 3554944 | 10-scf00393  | 10 |



|              |    |        |            |         |             |    |
|--------------|----|--------|------------|---------|-------------|----|
| AX-157841755 | 20 | 64.643 | KV452981.1 | 3557905 | 10-scf00393 | 10 |
| AX-158246548 | 20 | 64.643 | KV452981.1 | 3558891 | 10-scf00393 | 10 |
| AX-158246549 | 20 | 64.643 | KV452981.1 | 3559998 | 10-scf00393 | 10 |
| AX-158246551 | 20 | 64.643 | KV452981.1 | 3560781 | 10-scf00393 | 10 |
| AX-158246552 | 20 | 64.643 | KV452981.1 | 3561217 | 10-scf00393 | 10 |
| AX-157841756 | 20 | 64.643 | KV452981.1 | 3561963 | 10-scf00393 | 10 |
| AX-158246553 | 20 | 64.643 | KV452981.1 | 3563066 | 10-scf00393 | 10 |
| AX-158246554 | 20 | 64.643 | KV452981.1 | 3563484 | 10-scf00393 | 10 |
| AX-157727859 | 20 | 64.643 | KV452981.1 | 3564505 | 10-scf00393 | 10 |
| AX-158246555 | 20 | 64.643 | KV452981.1 | 3564617 | 10-scf00393 | 10 |
| AX-157740133 | 20 | 64.643 | KV452981.1 | 3589017 | 10-scf00393 | 10 |
| AX-157841765 | 20 | 64.643 | KV452981.1 | 3620753 | 10-scf00393 | 10 |
| AX-158246626 | 20 | 64.643 | KV452981.1 | 3639934 | 10-scf00393 | 10 |
| AX-158246632 | 20 | 64.643 | KV452981.1 | 3648290 | 10-scf00393 | 10 |
| AX-158246647 | 20 | 64.643 | KV452981.1 | 3672192 | 10-scf00393 | 10 |
| AX-158246656 | 20 | 64.643 | KV452981.1 | 3700658 | 10-scf00393 | 10 |
| AX-157841767 | 20 | 64.643 | KV452981.1 | 3701629 | 10-scf00393 | 10 |
| AX-158246657 | 20 | 64.643 | KV452981.1 | 3701946 | 10-scf00393 | 10 |
| AX-158246659 | 20 | 64.643 | KV452981.1 | 3704461 | 10-scf00393 | 10 |
| AX-158246660 | 20 | 64.643 | KV452981.1 | 3704916 | 10-scf00393 | 10 |
| AX-158246661 | 20 | 64.643 | KV452981.1 | 3705303 | 10-scf00393 | 10 |
| AX-158246662 | 20 | 64.643 | KV452981.1 | 3705373 | 10-scf00393 | 10 |
| AX-158246663 | 20 | 64.643 | KV452981.1 | 3705689 | 10-scf00393 | 10 |
| AX-158246664 | 20 | 64.643 | KV452981.1 | 3706227 | 10-scf00393 | 10 |
| AX-158246665 | 20 | 64.643 | KV452981.1 | 3706607 | 10-scf00393 | 10 |
| AX-158246669 | 20 | 64.643 | KV452981.1 | 3709223 | 10-scf00393 | 10 |
| AX-158246671 | 20 | 64.643 | KV452981.1 | 3711712 | 10-scf00393 | 10 |
| AX-158246675 | 20 | 64.643 | KV452981.1 | 3713229 | 10-scf00393 | 10 |
| AX-158246681 | 20 | 64.643 | KV452981.1 | 3715381 | 10-scf00393 | 10 |
| AX-157859778 | 20 | 64.643 | KV452981.1 | 3722960 | 10-scf00393 | 10 |
| AX-157859779 | 20 | 64.643 | KV452981.1 | 3725973 | 10-scf00393 | 10 |
| AX-158415714 | 20 | 64.643 | KV452981.1 | 3729177 | 10-scf00393 | 10 |
| AX-158415715 | 20 | 64.643 | KV452981.1 | 3729953 | 10-scf00393 | 10 |
| AX-157859780 | 20 | 64.643 | KV452981.1 | 3741438 | 10-scf00393 | 10 |
| AX-157859781 | 20 | 64.643 | KV452981.1 | 3742218 | 10-scf00393 | 10 |
| AX-157859782 | 20 | 64.643 | KV452981.1 | 3742925 | 10-scf00393 | 10 |
| AX-157712889 | 20 | 64.643 | KV452981.1 | 3766249 | 10-scf00393 | 10 |
| AX-158415716 | 20 | 64.643 | KV452981.1 | 3768825 | 10-scf00393 | 10 |
| AX-158246739 | 20 | 64.643 | KV452981.1 | 3844357 | 10-scf00393 | 10 |
| AX-158246751 | 20 | 64.643 | KV452981.1 | 3866891 | 10-scf00393 | 10 |
| AX-158246752 | 20 | 64.643 | KV452981.1 | 3867145 | 10-scf00393 | 10 |
| AX-158246756 | 20 | 64.643 | KV452981.1 | 3873197 | 10-scf00393 | 10 |
| AX-158246760 | 20 | 64.643 | KV452981.1 | 3878242 | 10-scf00393 | 10 |
| AX-158246763 | 20 | 64.643 | KV452981.1 | 3883701 | 10-scf00393 | 10 |
| AX-158246764 | 20 | 64.643 | KV452981.1 | 3888107 | 10-scf00393 | 10 |
| AX-158246768 | 20 | 64.643 | KV452981.1 | 3892712 | 10-scf00393 | 10 |
| AX-158246779 | 20 | 64.643 | KV452981.1 | 3907023 | 10-scf00393 | 10 |
| AX-158246780 | 20 | 64.643 | KV452981.1 | 3907480 | 10-scf00393 | 10 |
| AX-158246550 | 20 | 64.669 | KV452981.1 | 3560664 | 10-scf00393 | 10 |
| AX-158246556 | 20 | 64.669 | KV452981.1 | 3566139 | 10-scf00393 | 10 |
| AX-158246557 | 20 | 64.669 | KV452981.1 | 3566613 | 10-scf00393 | 10 |

|              |    |        |            |         |             |    |
|--------------|----|--------|------------|---------|-------------|----|
| AX-158246559 | 20 | 64.669 | KV452981.1 | 3568517 | 10-scf00393 | 10 |
| AX-158246560 | 20 | 64.669 | KV452981.1 | 3569486 | 10-scf00393 | 10 |
| AX-158246564 | 20 | 64.669 | KV452981.1 | 3572887 | 10-scf00393 | 10 |
| AX-158246527 | 20 | 64.697 | KV452981.1 | 3532093 | 10-scf00393 | 10 |
| AX-158246561 | 20 | 64.697 | KV452981.1 | 3570113 | 10-scf00393 | 10 |
| AX-158246570 | 20 | 64.697 | KV452981.1 | 3578961 | 10-scf00393 | 10 |
| AX-158246624 | 20 | 64.697 | KV452981.1 | 3638676 | 10-scf00393 | 10 |
| AX-158246528 | 20 | 64.724 | KV452981.1 | 3533410 | 10-scf00393 | 10 |
| AX-157841757 | 20 | 64.724 | KV452981.1 | 3570367 | 10-scf00393 | 10 |
| AX-157841772 | 20 | 64.724 | KV452981.1 | 3771223 | 10-scf00393 | 10 |
| AX-158247061 | 20 | 64.724 | KV452983.1 | 67878   | 10-scf00394 | 10 |
| AX-158247408 | 20 | 64.724 | KV452983.1 | 419950  | 10-scf00394 | 10 |
| AX-158246473 | 20 | 64.752 | KV452981.1 | 3465802 | 10-scf00393 | 10 |
| AX-157841758 | 20 | 64.752 | KV452981.1 | 3575019 | 10-scf00393 | 10 |
| AX-158246565 | 20 | 64.752 | KV452981.1 | 3575979 | 10-scf00393 | 10 |
| AX-158246568 | 20 | 64.752 | KV452981.1 | 3577563 | 10-scf00393 | 10 |
| AX-157841759 | 20 | 64.752 | KV452981.1 | 3577929 | 10-scf00393 | 10 |
| AX-158246578 | 20 | 64.752 | KV452981.1 | 3590378 | 10-scf00393 | 10 |
| AX-158246583 | 20 | 64.752 | KV452981.1 | 3597192 | 10-scf00393 | 10 |
| AX-158246584 | 20 | 64.752 | KV452981.1 | 3597667 | 10-scf00393 | 10 |
| AX-158246585 | 20 | 64.752 | KV452981.1 | 3599241 | 10-scf00393 | 10 |
| AX-157742366 | 20 | 64.752 | KV452981.1 | 3601731 | 10-scf00393 | 10 |
| AX-157841762 | 20 | 64.752 | KV452981.1 | 3606618 | 10-scf00393 | 10 |
| AX-158246595 | 20 | 64.752 | KV452981.1 | 3610015 | 10-scf00393 | 10 |
| AX-158246600 | 20 | 64.752 | KV452981.1 | 3620279 | 10-scf00393 | 10 |
| AX-158246602 | 20 | 64.752 | KV452981.1 | 3622538 | 10-scf00393 | 10 |
| AX-158246603 | 20 | 64.752 | KV452981.1 | 3623080 | 10-scf00393 | 10 |
| AX-158246604 | 20 | 64.752 | KV452981.1 | 3624435 | 10-scf00393 | 10 |
| AX-158246605 | 20 | 64.752 | KV452981.1 | 3625554 | 10-scf00393 | 10 |
| AX-158246606 | 20 | 64.752 | KV452981.1 | 3625826 | 10-scf00393 | 10 |
| AX-158246607 | 20 | 64.752 | KV452981.1 | 3626351 | 10-scf00393 | 10 |
| AX-158246608 | 20 | 64.752 | KV452981.1 | 3626748 | 10-scf00393 | 10 |
| AX-158246609 | 20 | 64.752 | KV452981.1 | 3628565 | 10-scf00393 | 10 |
| AX-158246610 | 20 | 64.752 | KV452981.1 | 3630618 | 10-scf00393 | 10 |
| AX-158246612 | 20 | 64.752 | KV452981.1 | 3631666 | 10-scf00393 | 10 |
| AX-158246614 | 20 | 64.752 | KV452981.1 | 3632282 | 10-scf00393 | 10 |
| AX-158246616 | 20 | 64.752 | KV452981.1 | 3634465 | 10-scf00393 | 10 |
| AX-157872703 | 20 | 64.752 | KV452981.1 | 3634565 | 10-scf00393 | 10 |
| AX-158246617 | 20 | 64.752 | KV452981.1 | 3634935 | 10-scf00393 | 10 |
| AX-158246618 | 20 | 64.752 | KV452981.1 | 3636359 | 10-scf00393 | 10 |
| AX-158246619 | 20 | 64.752 | KV452981.1 | 3636967 | 10-scf00393 | 10 |
| AX-158246620 | 20 | 64.752 | KV452981.1 | 3637242 | 10-scf00393 | 10 |
| AX-158246621 | 20 | 64.752 | KV452981.1 | 3637492 | 10-scf00393 | 10 |
| AX-158246623 | 20 | 64.752 | KV452981.1 | 3638452 | 10-scf00393 | 10 |
| AX-158246625 | 20 | 64.752 | KV452981.1 | 3639028 | 10-scf00393 | 10 |
| AX-158246629 | 20 | 64.752 | KV452981.1 | 3641185 | 10-scf00393 | 10 |
| AX-158246635 | 20 | 64.752 | KV452981.1 | 3652229 | 10-scf00393 | 10 |
| AX-158246636 | 20 | 64.752 | KV452981.1 | 3652919 | 10-scf00393 | 10 |
| AX-158246637 | 20 | 64.752 | KV452981.1 | 3654674 | 10-scf00393 | 10 |
| AX-158246638 | 20 | 64.752 | KV452981.1 | 3655255 | 10-scf00393 | 10 |
| AX-158246639 | 20 | 64.752 | KV452981.1 | 3657459 | 10-scf00393 | 10 |

|              |    |        |            |         |               |    |
|--------------|----|--------|------------|---------|---------------|----|
| AX-157880158 | 20 | 64.752 | KV452981.1 | 3657981 | 10-scf00393   | 10 |
| AX-157859777 | 20 | 64.752 | KV452981.1 | 3658413 | 10-scf00393   | 10 |
| AX-158246640 | 20 | 64.752 | KV452981.1 | 3658757 | 10-scf00393   | 10 |
| AX-158246641 | 20 | 64.752 | KV452981.1 | 3660381 | 10-scf00393   | 10 |
| AX-158246642 | 20 | 64.752 | KV452981.1 | 3665202 | 10-scf00393   | 10 |
| AX-158246643 | 20 | 64.752 | KV452981.1 | 3665585 | 10-scf00393   | 10 |
| AX-158246644 | 20 | 64.752 | KV452981.1 | 3667634 | 10-scf00393   | 10 |
| AX-158246649 | 20 | 64.752 | KV452981.1 | 3691089 | 10-scf00393   | 10 |
| AX-158246654 | 20 | 64.752 | KV452981.1 | 3697222 | 10-scf00393   | 10 |
| AX-157841768 | 20 | 64.752 | KV452981.1 | 3702395 | 10-scf00393   | 10 |
| AX-157841769 | 20 | 64.752 | KV452981.1 | 3703477 | 10-scf00393   | 10 |
| AX-157841770 | 20 | 64.752 | KV452981.1 | 3716059 | 10-scf00393   | 10 |
| AX-158246696 | 20 | 64.752 | KV452981.1 | 3771864 | 10-scf00393   | 10 |
| AX-158246709 | 20 | 64.752 | KV452981.1 | 3804211 | 10-scf00393   | 10 |
| AX-157841783 | 20 | 64.752 | KV452981.1 | 3827723 | 10-scf00393   | 10 |
| AX-158247315 | 20 | 64.752 | KV452983.1 | 333715  | 10-scf00394   | 10 |
| AX-158247418 | 20 | 64.752 | KV452983.1 | 430951  | 10-scf00394   | 10 |
| AX-157698436 | 20 | 64.752 | FI867769.1 | 623     | ORI212 Ictalu | UN |
| AX-158246658 | 20 | 64.76  | KV452981.1 | 3704004 | 10-scf00393   | 10 |
| AX-158246708 | 20 | 64.76  | KV452981.1 | 3800524 | 10-scf00393   | 10 |
| AX-158246721 | 20 | 64.76  | KV452981.1 | 3819850 | 10-scf00393   | 10 |
| AX-158246742 | 20 | 64.76  | KV452981.1 | 3857447 | 10-scf00393   | 10 |
| AX-158246674 | 20 | 64.769 | KV452981.1 | 3712802 | 10-scf00393   | 10 |
| AX-158247059 | 20 | 64.769 | KV452983.1 | 67186   | 10-scf00394   | 10 |
| AX-158247117 | 20 | 64.769 | KV452983.1 | 136182  | 10-scf00394   | 10 |
| AX-157756859 | 20 | 64.769 | KV452983.1 | 177012  | 10-scf00394   | 10 |
| AX-158247290 | 20 | 64.769 | KV452983.1 | 306739  | 10-scf00394   | 10 |
| AX-158246679 | 20 | 64.78  | KV452981.1 | 3714209 | 10-scf00393   | 10 |
| AX-158419027 | 20 | 64.785 | KV452981.1 | 3728520 | 10-scf00393   | 10 |
| AX-158247201 | 20 | 64.785 | KV452983.1 | 211236  | 10-scf00394   | 10 |
| AX-158247999 | 20 | 64.785 | KV452983.1 | 1101579 | 10-scf00394   | 10 |
| AX-158246699 | 20 | 64.803 | KV452981.1 | 3773592 | 10-scf00393   | 10 |
| AX-158246563 | 20 | 64.819 | KV452981.1 | 3571896 | 10-scf00393   | 10 |
| AX-158246580 | 20 | 64.819 | KV452981.1 | 3592418 | 10-scf00393   | 10 |
| AX-158246711 | 20 | 64.819 | KV452981.1 | 3807940 | 10-scf00393   | 10 |
| AX-158246512 | 20 | 64.861 | KV452981.1 | 3510698 | 10-scf00393   | 10 |
| AX-158246582 | 20 | 64.861 | KV452981.1 | 3594245 | 10-scf00393   | 10 |
| AX-158246592 | 20 | 64.861 | KV452981.1 | 3604924 | 10-scf00393   | 10 |
| AX-158246633 | 20 | 64.861 | KV452981.1 | 3648447 | 10-scf00393   | 10 |
| AX-158246653 | 20 | 64.861 | KV452981.1 | 3695852 | 10-scf00393   | 10 |
| AX-158246688 | 20 | 64.861 | KV452981.1 | 3751891 | 10-scf00393   | 10 |
| AX-158415717 | 20 | 64.861 | KV452981.1 | 3794316 | 10-scf00393   | 10 |
| AX-157721054 | 20 | 64.861 | KV452981.1 | 3808496 | 10-scf00393   | 10 |
| AX-158246712 | 20 | 64.861 | KV452981.1 | 3809241 | 10-scf00393   | 10 |
| AX-158246714 | 20 | 64.861 | KV452981.1 | 3810241 | 10-scf00393   | 10 |
| AX-158246716 | 20 | 64.861 | KV452981.1 | 3813971 | 10-scf00393   | 10 |
| AX-158246720 | 20 | 64.861 | KV452981.1 | 3819529 | 10-scf00393   | 10 |
| AX-157841784 | 20 | 64.861 | KV452981.1 | 3830935 | 10-scf00393   | 10 |
| AX-157751779 | 20 | 64.861 | KV452981.1 | 3832368 | 10-scf00393   | 10 |
| AX-157841785 | 20 | 64.861 | KV452981.1 | 3832727 | 10-scf00393   | 10 |
| AX-157743316 | 20 | 64.861 | KV452981.1 | 3833068 | 10-scf00393   | 10 |

|              |    |        |            |         |             |    |
|--------------|----|--------|------------|---------|-------------|----|
| AX-158246725 | 20 | 64.861 | KV452981.1 | 3834207 | 10-scf00393 | 10 |
| AX-158246728 | 20 | 64.861 | KV452981.1 | 3835660 | 10-scf00393 | 10 |
| AX-158246729 | 20 | 64.861 | KV452981.1 | 3835982 | 10-scf00393 | 10 |
| AX-158246730 | 20 | 64.861 | KV452981.1 | 3836834 | 10-scf00393 | 10 |
| AX-157887576 | 20 | 64.861 | KV452981.1 | 3837228 | 10-scf00393 | 10 |
| AX-158246731 | 20 | 64.861 | KV452981.1 | 3837806 | 10-scf00393 | 10 |
| AX-158246733 | 20 | 64.861 | KV452981.1 | 3838583 | 10-scf00393 | 10 |
| AX-157723177 | 20 | 64.861 | KV452981.1 | 3842204 | 10-scf00393 | 10 |
| AX-157841788 | 20 | 64.861 | KV452981.1 | 3862873 | 10-scf00393 | 10 |
| AX-158246748 | 20 | 64.861 | KV452981.1 | 3863942 | 10-scf00393 | 10 |
| AX-157841789 | 20 | 64.861 | KV452981.1 | 3865953 | 10-scf00393 | 10 |
| AX-158246772 | 20 | 64.861 | KV452981.1 | 3899781 | 10-scf00393 | 10 |
| AX-158246773 | 20 | 64.861 | KV452981.1 | 3901963 | 10-scf00393 | 10 |
| AX-158246783 | 20 | 64.861 | KV452981.1 | 3914492 | 10-scf00393 | 10 |
| AX-158246784 | 20 | 64.861 | KV452981.1 | 3915462 | 10-scf00393 | 10 |
| AX-158246787 | 20 | 64.861 | KV452981.1 | 3921866 | 10-scf00393 | 10 |
| AX-157722595 | 20 | 64.861 | KV452983.1 | 58175   | 10-scf00394 | 10 |
| AX-157872713 | 20 | 64.861 | KV452983.1 | 59616   | 10-scf00394 | 10 |
| AX-158247092 | 20 | 64.861 | KV452983.1 | 111647  | 10-scf00394 | 10 |
| AX-157880166 | 20 | 64.861 | KV452983.1 | 322589  | 10-scf00394 | 10 |
| AX-158247306 | 20 | 64.861 | KV452983.1 | 324143  | 10-scf00394 | 10 |
| AX-158247333 | 20 | 64.861 | KV452983.1 | 348801  | 10-scf00394 | 10 |
| AX-158247367 | 20 | 64.861 | KV452983.1 | 382699  | 10-scf00394 | 10 |
| AX-158247414 | 20 | 64.861 | KV452983.1 | 425243  | 10-scf00394 | 10 |
| AX-158386992 | 20 | 64.992 | KV452981.1 | 2581071 | 10-scf00393 | 10 |
| AX-157715172 | 20 | 64.992 | KV452981.1 | 2877707 | 10-scf00393 | 10 |
| AX-158246265 | 20 | 64.992 | KV452981.1 | 3178939 | 10-scf00393 | 10 |
| AX-158246383 | 20 | 64.992 | KV452981.1 | 3355305 | 10-scf00393 | 10 |
| AX-158246490 | 20 | 64.992 | KV452981.1 | 3486337 | 10-scf00393 | 10 |
| AX-158246516 | 20 | 64.992 | KV452981.1 | 3518780 | 10-scf00393 | 10 |
| AX-157743733 | 20 | 64.992 | KV452981.1 | 3823698 | 10-scf00393 | 10 |
| AX-158246738 | 20 | 64.992 | KV452981.1 | 3843420 | 10-scf00393 | 10 |
| AX-158247019 | 20 | 64.992 | KV452983.1 | 3838    | 10-scf00394 | 10 |
| AX-158247021 | 20 | 64.992 | KV452983.1 | 5206    | 10-scf00394 | 10 |
| AX-158247040 | 20 | 64.992 | KV452983.1 | 30642   | 10-scf00394 | 10 |
| AX-158247041 | 20 | 64.992 | KV452983.1 | 35512   | 10-scf00394 | 10 |
| AX-157737733 | 20 | 64.992 | KV452983.1 | 37369   | 10-scf00394 | 10 |
| AX-158381000 | 20 | 64.992 | KV452983.1 | 53481   | 10-scf00394 | 10 |
| AX-158247063 | 20 | 64.992 | KV452983.1 | 68928   | 10-scf00394 | 10 |
| AX-158247096 | 20 | 64.992 | KV452983.1 | 113907  | 10-scf00394 | 10 |
| AX-158247097 | 20 | 64.992 | KV452983.1 | 115568  | 10-scf00394 | 10 |
| AX-158247098 | 20 | 64.992 | KV452983.1 | 117391  | 10-scf00394 | 10 |
| AX-158247101 | 20 | 64.992 | KV452983.1 | 118851  | 10-scf00394 | 10 |
| AX-158247102 | 20 | 64.992 | KV452983.1 | 119338  | 10-scf00394 | 10 |
| AX-158247103 | 20 | 64.992 | KV452983.1 | 119681  | 10-scf00394 | 10 |
| AX-158247106 | 20 | 64.992 | KV452983.1 | 121671  | 10-scf00394 | 10 |
| AX-158247107 | 20 | 64.992 | KV452983.1 | 122531  | 10-scf00394 | 10 |
| AX-158247110 | 20 | 64.992 | KV452983.1 | 127046  | 10-scf00394 | 10 |
| AX-157772064 | 20 | 64.992 | KV452983.1 | 183292  | 10-scf00394 | 10 |
| AX-158247233 | 20 | 64.992 | KV452983.1 | 244276  | 10-scf00394 | 10 |
| AX-158247252 | 20 | 64.992 | KV452983.1 | 270835  | 10-scf00394 | 10 |

|              |    |        |            |         |             |    |
|--------------|----|--------|------------|---------|-------------|----|
| AX-158247255 | 20 | 64.992 | KV452983.1 | 275403  | 10-scf00394 | 10 |
| AX-158247272 | 20 | 64.992 | KV452983.1 | 289960  | 10-scf00394 | 10 |
| AX-158247289 | 20 | 64.992 | KV452983.1 | 306288  | 10-scf00394 | 10 |
| AX-158247409 | 20 | 64.992 | KV452983.1 | 421787  | 10-scf00394 | 10 |
| AX-157754420 | 20 | 64.992 | KV452983.1 | 441998  | 10-scf00394 | 10 |
| AX-158247446 | 20 | 64.992 | KV452983.1 | 456757  | 10-scf00394 | 10 |
| AX-158247457 | 20 | 64.992 | KV452983.1 | 471098  | 10-scf00394 | 10 |
| AX-158247909 | 20 | 64.992 | KV452983.1 | 1000205 | 10-scf00394 | 10 |
| AX-158247913 | 20 | 64.992 | KV452983.1 | 1003344 | 10-scf00394 | 10 |
| AX-158394457 | 20 | 64.992 | KV452983.1 | 1217419 | 10-scf00394 | 10 |
| AX-158248226 | 20 | 64.992 | KV452983.1 | 1435869 | 10-scf00394 | 10 |
| AX-157683971 | 20 | 64.992 | KV452982.1 | 6352    | 10-scf02532 | 10 |
| AX-157887577 | 20 | 65.097 | KV452983.1 | 139253  | 10-scf00394 | 10 |
| AX-158247151 | 20 | 65.254 | KV452983.1 | 168485  | 10-scf00394 | 10 |
| AX-158247161 | 20 | 65.254 | KV452983.1 | 175378  | 10-scf00394 | 10 |
| AX-157880165 | 20 | 65.254 | KV452983.1 | 281980  | 10-scf00394 | 10 |
| AX-158247310 | 20 | 65.254 | KV452983.1 | 328488  | 10-scf00394 | 10 |
| AX-158247323 | 20 | 65.254 | KV452983.1 | 339699  | 10-scf00394 | 10 |
| AX-158247358 | 20 | 65.254 | KV452983.1 | 374464  | 10-scf00394 | 10 |
| AX-158247159 | 20 | 65.255 | KV452983.1 | 174327  | 10-scf00394 | 10 |
| AX-158247163 | 20 | 65.255 | KV452983.1 | 176640  | 10-scf00394 | 10 |
| AX-158247169 | 20 | 65.255 | KV452983.1 | 182667  | 10-scf00394 | 10 |
| AX-158247172 | 20 | 65.255 | KV452983.1 | 185540  | 10-scf00394 | 10 |
| AX-158247177 | 20 | 65.255 | KV452983.1 | 189405  | 10-scf00394 | 10 |
| AX-158247181 | 20 | 65.255 | KV452983.1 | 194410  | 10-scf00394 | 10 |
| AX-158247185 | 20 | 65.255 | KV452983.1 | 196427  | 10-scf00394 | 10 |
| AX-158247189 | 20 | 65.255 | KV452983.1 | 198483  | 10-scf00394 | 10 |
| AX-158247197 | 20 | 65.255 | KV452983.1 | 206240  | 10-scf00394 | 10 |
| AX-158247200 | 20 | 65.255 | KV452983.1 | 210028  | 10-scf00394 | 10 |
| AX-158247218 | 20 | 65.255 | KV452983.1 | 229398  | 10-scf00394 | 10 |
| AX-158247271 | 20 | 65.255 | KV452983.1 | 289066  | 10-scf00394 | 10 |
| AX-158247288 | 20 | 65.255 | KV452983.1 | 305612  | 10-scf00394 | 10 |
| AX-158247295 | 20 | 65.255 | KV452983.1 | 314766  | 10-scf00394 | 10 |
| AX-158247298 | 20 | 65.255 | KV452983.1 | 317577  | 10-scf00394 | 10 |
| AX-158247301 | 20 | 65.255 | KV452983.1 | 320062  | 10-scf00394 | 10 |
| AX-158247308 | 20 | 65.255 | KV452983.1 | 326388  | 10-scf00394 | 10 |
| AX-158394381 | 20 | 65.255 | KV452983.1 | 329242  | 10-scf00394 | 10 |
| AX-158247312 | 20 | 65.255 | KV452983.1 | 331367  | 10-scf00394 | 10 |
| AX-157841842 | 20 | 65.255 | KV452983.1 | 334604  | 10-scf00394 | 10 |
| AX-158247316 | 20 | 65.255 | KV452983.1 | 334886  | 10-scf00394 | 10 |
| AX-158247317 | 20 | 65.255 | KV452983.1 | 336465  | 10-scf00394 | 10 |
| AX-158247319 | 20 | 65.255 | KV452983.1 | 337287  | 10-scf00394 | 10 |
| AX-158247321 | 20 | 65.255 | KV452983.1 | 338534  | 10-scf00394 | 10 |
| AX-158247327 | 20 | 65.255 | KV452983.1 | 342184  | 10-scf00394 | 10 |
| AX-158247344 | 20 | 65.255 | KV452983.1 | 360521  | 10-scf00394 | 10 |
| AX-158247347 | 20 | 65.255 | KV452983.1 | 364189  | 10-scf00394 | 10 |
| AX-158247349 | 20 | 65.255 | KV452983.1 | 365531  | 10-scf00394 | 10 |
| AX-158247366 | 20 | 65.255 | KV452983.1 | 381897  | 10-scf00394 | 10 |
| AX-158247405 | 20 | 65.255 | KV452983.1 | 417505  | 10-scf00394 | 10 |
| AX-158247410 | 20 | 65.255 | KV452983.1 | 422211  | 10-scf00394 | 10 |
| AX-158247411 | 20 | 65.255 | KV452983.1 | 422690  | 10-scf00394 | 10 |

|              |    |        |             |         |             |    |
|--------------|----|--------|-------------|---------|-------------|----|
| AX-158247640 | 20 | 65.255 | KV452983.1  | 657191  | 10-scf00394 | 10 |
| AX-157750166 | 20 | 65.255 | KV452983.1  | 1176518 | 10-scf00394 | 10 |
| AX-158248290 | 20 | 65.255 | KV452983.1  | 1506054 | 10-scf00394 | 10 |
| AX-158247339 | 20 | 65.289 | KV452983.1  | 352238  | 10-scf00394 | 10 |
| AX-157756356 | 20 | 65.289 | KV452983.1  | 361391  | 10-scf00394 | 10 |
| AX-158247350 | 20 | 65.289 | KV452983.1  | 366149  | 10-scf00394 | 10 |
| AX-158247351 | 20 | 65.289 | KV452983.1  | 366682  | 10-scf00394 | 10 |
| AX-158247416 | 20 | 65.289 | KV452983.1  | 428487  | 10-scf00394 | 10 |
| AX-158247378 | 20 | 65.325 | KV452983.1  | 392218  | 10-scf00394 | 10 |
| AX-158247383 | 20 | 65.351 | KV452983.1  | 395539  | 10-scf00394 | 10 |
| AX-158247122 | 20 | 65.386 | KV452983.1  | 140509  | 10-scf00394 | 10 |
| AX-158247168 | 20 | 65.386 | KV452983.1  | 181837  | 10-scf00394 | 10 |
| AX-158415746 | 20 | 65.386 | KV452983.1  | 341721  | 10-scf00394 | 10 |
| AX-158247374 | 20 | 65.386 | KV452983.1  | 389737  | 10-scf00394 | 10 |
| AX-157859801 | 20 | 65.386 | KV452983.1  | 407986  | 10-scf00394 | 10 |
| AX-158423352 | 20 | 65.386 | KV452983.1  | 410881  | 10-scf00394 | 10 |
| AX-158247397 | 20 | 65.386 | KV452983.1  | 412796  | 10-scf00394 | 10 |
| AX-158247399 | 20 | 65.386 | KV452983.1  | 413960  | 10-scf00394 | 10 |
| AX-158247406 | 20 | 65.386 | KV452983.1  | 418178  | 10-scf00394 | 10 |
| AX-158247422 | 20 | 65.386 | KV452983.1  | 435020  | 10-scf00394 | 10 |
| AX-157696893 | 20 | 65.386 | KV452983.1  | 1312521 | 10-scf00394 | 10 |
| AX-157711871 | 20 | 65.386 | 3ML01025928 | 1799    | scf01537_1  | UN |
| AX-157704401 | 20 | 65.386 | 3ML01025955 | 2158    | scf01564_1  | UN |
| AX-157711872 | 20 | 65.386 | 3ML01025955 | 2301    | scf01564_1  | UN |
| AX-158247453 | 20 | 65.451 | KV452983.1  | 464830  | 10-scf00394 | 10 |
| AX-158245540 | 20 | 65.517 | KV452981.1  | 2237960 | 10-scf00393 | 10 |
| AX-158246494 | 20 | 65.517 | KV452981.1  | 3492399 | 10-scf00393 | 10 |
| AX-157841760 | 20 | 65.517 | KV452981.1  | 3583473 | 10-scf00393 | 10 |
| AX-158246666 | 20 | 65.517 | KV452981.1  | 3707127 | 10-scf00393 | 10 |
| AX-158246691 | 20 | 65.517 | KV452981.1  | 3756801 | 10-scf00393 | 10 |
| AX-157867306 | 20 | 65.517 | KV452981.1  | 3773821 | 10-scf00393 | 10 |
| AX-158246744 | 20 | 65.517 | KV452981.1  | 3858380 | 10-scf00393 | 10 |
| AX-158246757 | 20 | 65.517 | KV452981.1  | 3873675 | 10-scf00393 | 10 |
| AX-158247029 | 20 | 65.517 | KV452983.1  | 14633   | 10-scf00394 | 10 |
| AX-158247134 | 20 | 65.517 | KV452983.1  | 154422  | 10-scf00394 | 10 |
| AX-158247150 | 20 | 65.517 | KV452983.1  | 167960  | 10-scf00394 | 10 |
| AX-158247152 | 20 | 65.517 | KV452983.1  | 169156  | 10-scf00394 | 10 |
| AX-158247153 | 20 | 65.517 | KV452983.1  | 169923  | 10-scf00394 | 10 |
| AX-158247154 | 20 | 65.517 | KV452983.1  | 170135  | 10-scf00394 | 10 |
| AX-158247156 | 20 | 65.517 | KV452983.1  | 172115  | 10-scf00394 | 10 |
| AX-158247157 | 20 | 65.517 | KV452983.1  | 172404  | 10-scf00394 | 10 |
| AX-158247158 | 20 | 65.517 | KV452983.1  | 173465  | 10-scf00394 | 10 |
| AX-158247160 | 20 | 65.517 | KV452983.1  | 174951  | 10-scf00394 | 10 |
| AX-158247164 | 20 | 65.517 | KV452983.1  | 177678  | 10-scf00394 | 10 |
| AX-158247166 | 20 | 65.517 | KV452983.1  | 179645  | 10-scf00394 | 10 |
| AX-158394377 | 20 | 65.517 | KV452983.1  | 180068  | 10-scf00394 | 10 |
| AX-158247167 | 20 | 65.517 | KV452983.1  | 180229  | 10-scf00394 | 10 |
| AX-158247170 | 20 | 65.517 | KV452983.1  | 184100  | 10-scf00394 | 10 |
| AX-158247171 | 20 | 65.517 | KV452983.1  | 185061  | 10-scf00394 | 10 |
| AX-158247173 | 20 | 65.517 | KV452983.1  | 186502  | 10-scf00394 | 10 |
| AX-158247174 | 20 | 65.517 | KV452983.1  | 186978  | 10-scf00394 | 10 |

|              |    |        |            |        |             |    |
|--------------|----|--------|------------|--------|-------------|----|
| AX-158247176 | 20 | 65.517 | KV452983.1 | 188512 | 10-scf00394 | 10 |
| AX-158247178 | 20 | 65.517 | KV452983.1 | 190054 | 10-scf00394 | 10 |
| AX-158394378 | 20 | 65.517 | KV452983.1 | 191354 | 10-scf00394 | 10 |
| AX-158247180 | 20 | 65.517 | KV452983.1 | 192678 | 10-scf00394 | 10 |
| AX-158247182 | 20 | 65.517 | KV452983.1 | 194782 | 10-scf00394 | 10 |
| AX-158247183 | 20 | 65.517 | KV452983.1 | 195199 | 10-scf00394 | 10 |
| AX-158415742 | 20 | 65.517 | KV452983.1 | 196089 | 10-scf00394 | 10 |
| AX-158415743 | 20 | 65.517 | KV452983.1 | 196292 | 10-scf00394 | 10 |
| AX-158247186 | 20 | 65.517 | KV452983.1 | 196921 | 10-scf00394 | 10 |
| AX-158247192 | 20 | 65.517 | KV452983.1 | 200964 | 10-scf00394 | 10 |
| AX-158247196 | 20 | 65.517 | KV452983.1 | 204553 | 10-scf00394 | 10 |
| AX-158247198 | 20 | 65.517 | KV452983.1 | 207936 | 10-scf00394 | 10 |
| AX-158247199 | 20 | 65.517 | KV452983.1 | 208654 | 10-scf00394 | 10 |
| AX-158247202 | 20 | 65.517 | KV452983.1 | 212079 | 10-scf00394 | 10 |
| AX-158247203 | 20 | 65.517 | KV452983.1 | 212938 | 10-scf00394 | 10 |
| AX-158247204 | 20 | 65.517 | KV452983.1 | 215073 | 10-scf00394 | 10 |
| AX-158247205 | 20 | 65.517 | KV452983.1 | 215454 | 10-scf00394 | 10 |
| AX-158247206 | 20 | 65.517 | KV452983.1 | 216648 | 10-scf00394 | 10 |
| AX-158247207 | 20 | 65.517 | KV452983.1 | 218977 | 10-scf00394 | 10 |
| AX-158247208 | 20 | 65.517 | KV452983.1 | 219395 | 10-scf00394 | 10 |
| AX-158247211 | 20 | 65.517 | KV452983.1 | 223401 | 10-scf00394 | 10 |
| AX-158247213 | 20 | 65.517 | KV452983.1 | 225166 | 10-scf00394 | 10 |
| AX-158247216 | 20 | 65.517 | KV452983.1 | 228124 | 10-scf00394 | 10 |
| AX-157771593 | 20 | 65.517 | KV452983.1 | 231640 | 10-scf00394 | 10 |
| AX-158247219 | 20 | 65.517 | KV452983.1 | 233126 | 10-scf00394 | 10 |
| AX-158247221 | 20 | 65.517 | KV452983.1 | 233774 | 10-scf00394 | 10 |
| AX-158247226 | 20 | 65.517 | KV452983.1 | 238027 | 10-scf00394 | 10 |
| AX-158247227 | 20 | 65.517 | KV452983.1 | 238948 | 10-scf00394 | 10 |
| AX-158247228 | 20 | 65.517 | KV452983.1 | 240176 | 10-scf00394 | 10 |
| AX-158247229 | 20 | 65.517 | KV452983.1 | 240573 | 10-scf00394 | 10 |
| AX-158247230 | 20 | 65.517 | KV452983.1 | 241065 | 10-scf00394 | 10 |
| AX-158247232 | 20 | 65.517 | KV452983.1 | 242940 | 10-scf00394 | 10 |
| AX-158247234 | 20 | 65.517 | KV452983.1 | 246397 | 10-scf00394 | 10 |
| AX-157841841 | 20 | 65.517 | KV452983.1 | 246441 | 10-scf00394 | 10 |
| AX-158247236 | 20 | 65.517 | KV452983.1 | 248373 | 10-scf00394 | 10 |
| AX-158247237 | 20 | 65.517 | KV452983.1 | 249429 | 10-scf00394 | 10 |
| AX-158247238 | 20 | 65.517 | KV452983.1 | 250239 | 10-scf00394 | 10 |
| AX-158247239 | 20 | 65.517 | KV452983.1 | 250800 | 10-scf00394 | 10 |
| AX-158247240 | 20 | 65.517 | KV452983.1 | 251180 | 10-scf00394 | 10 |
| AX-158247241 | 20 | 65.517 | KV452983.1 | 251828 | 10-scf00394 | 10 |
| AX-158247242 | 20 | 65.517 | KV452983.1 | 254148 | 10-scf00394 | 10 |
| AX-158247244 | 20 | 65.517 | KV452983.1 | 261959 | 10-scf00394 | 10 |
| AX-158247245 | 20 | 65.517 | KV452983.1 | 264659 | 10-scf00394 | 10 |
| AX-158247246 | 20 | 65.517 | KV452983.1 | 266016 | 10-scf00394 | 10 |
| AX-158247247 | 20 | 65.517 | KV452983.1 | 266582 | 10-scf00394 | 10 |
| AX-158247250 | 20 | 65.517 | KV452983.1 | 267979 | 10-scf00394 | 10 |
| AX-158247253 | 20 | 65.517 | KV452983.1 | 271370 | 10-scf00394 | 10 |
| AX-158247254 | 20 | 65.517 | KV452983.1 | 272430 | 10-scf00394 | 10 |
| AX-158247257 | 20 | 65.517 | KV452983.1 | 276283 | 10-scf00394 | 10 |
| AX-158247258 | 20 | 65.517 | KV452983.1 | 276861 | 10-scf00394 | 10 |
| AX-158247259 | 20 | 65.517 | KV452983.1 | 277635 | 10-scf00394 | 10 |

|              |    |        |            |        |             |    |
|--------------|----|--------|------------|--------|-------------|----|
| AX-158247260 | 20 | 65.517 | KV452983.1 | 278248 | 10-scf00394 | 10 |
| AX-158247261 | 20 | 65.517 | KV452983.1 | 279229 | 10-scf00394 | 10 |
| AX-158247262 | 20 | 65.517 | KV452983.1 | 281559 | 10-scf00394 | 10 |
| AX-158247263 | 20 | 65.517 | KV452983.1 | 282440 | 10-scf00394 | 10 |
| AX-158247264 | 20 | 65.517 | KV452983.1 | 282984 | 10-scf00394 | 10 |
| AX-158247267 | 20 | 65.517 | KV452983.1 | 285897 | 10-scf00394 | 10 |
| AX-158247268 | 20 | 65.517 | KV452983.1 | 286747 | 10-scf00394 | 10 |
| AX-158247269 | 20 | 65.517 | KV452983.1 | 287594 | 10-scf00394 | 10 |
| AX-158247273 | 20 | 65.517 | KV452983.1 | 290390 | 10-scf00394 | 10 |
| AX-158247274 | 20 | 65.517 | KV452983.1 | 291152 | 10-scf00394 | 10 |
| AX-158247275 | 20 | 65.517 | KV452983.1 | 292193 | 10-scf00394 | 10 |
| AX-158247276 | 20 | 65.517 | KV452983.1 | 293010 | 10-scf00394 | 10 |
| AX-158247277 | 20 | 65.517 | KV452983.1 | 293612 | 10-scf00394 | 10 |
| AX-158247278 | 20 | 65.517 | KV452983.1 | 294694 | 10-scf00394 | 10 |
| AX-158247279 | 20 | 65.517 | KV452983.1 | 295480 | 10-scf00394 | 10 |
| AX-158247280 | 20 | 65.517 | KV452983.1 | 296617 | 10-scf00394 | 10 |
| AX-158247281 | 20 | 65.517 | KV452983.1 | 297922 | 10-scf00394 | 10 |
| AX-158247283 | 20 | 65.517 | KV452983.1 | 302020 | 10-scf00394 | 10 |
| AX-158247284 | 20 | 65.517 | KV452983.1 | 303632 | 10-scf00394 | 10 |
| AX-158247286 | 20 | 65.517 | KV452983.1 | 304479 | 10-scf00394 | 10 |
| AX-158247287 | 20 | 65.517 | KV452983.1 | 304934 | 10-scf00394 | 10 |
| AX-158247291 | 20 | 65.517 | KV452983.1 | 308575 | 10-scf00394 | 10 |
| AX-158247292 | 20 | 65.517 | KV452983.1 | 309259 | 10-scf00394 | 10 |
| AX-158247293 | 20 | 65.517 | KV452983.1 | 312234 | 10-scf00394 | 10 |
| AX-158247294 | 20 | 65.517 | KV452983.1 | 313422 | 10-scf00394 | 10 |
| AX-158247296 | 20 | 65.517 | KV452983.1 | 316306 | 10-scf00394 | 10 |
| AX-158247297 | 20 | 65.517 | KV452983.1 | 317005 | 10-scf00394 | 10 |
| AX-158247300 | 20 | 65.517 | KV452983.1 | 319555 | 10-scf00394 | 10 |
| AX-158247305 | 20 | 65.517 | KV452983.1 | 323736 | 10-scf00394 | 10 |
| AX-158247307 | 20 | 65.517 | KV452983.1 | 325363 | 10-scf00394 | 10 |
| AX-158247311 | 20 | 65.517 | KV452983.1 | 330510 | 10-scf00394 | 10 |
| AX-158247320 | 20 | 65.517 | KV452983.1 | 337964 | 10-scf00394 | 10 |
| AX-158247322 | 20 | 65.517 | KV452983.1 | 339145 | 10-scf00394 | 10 |
| AX-158247324 | 20 | 65.517 | KV452983.1 | 340204 | 10-scf00394 | 10 |
| AX-158394382 | 20 | 65.517 | KV452983.1 | 340744 | 10-scf00394 | 10 |
| AX-158247326 | 20 | 65.517 | KV452983.1 | 341815 | 10-scf00394 | 10 |
| AX-158247328 | 20 | 65.517 | KV452983.1 | 343633 | 10-scf00394 | 10 |
| AX-158415747 | 20 | 65.517 | KV452983.1 | 344485 | 10-scf00394 | 10 |
| AX-158247329 | 20 | 65.517 | KV452983.1 | 345135 | 10-scf00394 | 10 |
| AX-158247330 | 20 | 65.517 | KV452983.1 | 345492 | 10-scf00394 | 10 |
| AX-158247331 | 20 | 65.517 | KV452983.1 | 347618 | 10-scf00394 | 10 |
| AX-158247332 | 20 | 65.517 | KV452983.1 | 348099 | 10-scf00394 | 10 |
| AX-158247336 | 20 | 65.517 | KV452983.1 | 350451 | 10-scf00394 | 10 |
| AX-158247337 | 20 | 65.517 | KV452983.1 | 351353 | 10-scf00394 | 10 |
| AX-158247338 | 20 | 65.517 | KV452983.1 | 351715 | 10-scf00394 | 10 |
| AX-158247340 | 20 | 65.517 | KV452983.1 | 353962 | 10-scf00394 | 10 |
| AX-158247341 | 20 | 65.517 | KV452983.1 | 355669 | 10-scf00394 | 10 |
| AX-158247342 | 20 | 65.517 | KV452983.1 | 356471 | 10-scf00394 | 10 |
| AX-158247346 | 20 | 65.517 | KV452983.1 | 363258 | 10-scf00394 | 10 |
| AX-158247348 | 20 | 65.517 | KV452983.1 | 365026 | 10-scf00394 | 10 |
| AX-158247352 | 20 | 65.517 | KV452983.1 | 368743 | 10-scf00394 | 10 |



|              |    |        |            |        |             |    |
|--------------|----|--------|------------|--------|-------------|----|
| AX-158247354 | 20 | 65.517 | KV452983.1 | 369752 | 10-scf00394 | 10 |
| AX-158247355 | 20 | 65.517 | KV452983.1 | 370973 | 10-scf00394 | 10 |
| AX-158394383 | 20 | 65.517 | KV452983.1 | 372103 | 10-scf00394 | 10 |
| AX-158247359 | 20 | 65.517 | KV452983.1 | 374890 | 10-scf00394 | 10 |
| AX-158247360 | 20 | 65.517 | KV452983.1 | 375378 | 10-scf00394 | 10 |
| AX-158415748 | 20 | 65.517 | KV452983.1 | 375868 | 10-scf00394 | 10 |
| AX-158415749 | 20 | 65.517 | KV452983.1 | 375952 | 10-scf00394 | 10 |
| AX-158247361 | 20 | 65.517 | KV452983.1 | 376595 | 10-scf00394 | 10 |
| AX-158247362 | 20 | 65.517 | KV452983.1 | 377061 | 10-scf00394 | 10 |
| AX-158247364 | 20 | 65.517 | KV452983.1 | 379304 | 10-scf00394 | 10 |
| AX-158247365 | 20 | 65.517 | KV452983.1 | 381039 | 10-scf00394 | 10 |
| AX-158247368 | 20 | 65.517 | KV452983.1 | 383759 | 10-scf00394 | 10 |
| AX-158247369 | 20 | 65.517 | KV452983.1 | 384592 | 10-scf00394 | 10 |
| AX-158247370 | 20 | 65.517 | KV452983.1 | 384681 | 10-scf00394 | 10 |
| AX-158394385 | 20 | 65.517 | KV452983.1 | 384743 | 10-scf00394 | 10 |
| AX-158394386 | 20 | 65.517 | KV452983.1 | 390516 | 10-scf00394 | 10 |
| AX-158247375 | 20 | 65.517 | KV452983.1 | 390598 | 10-scf00394 | 10 |
| AX-158247376 | 20 | 65.517 | KV452983.1 | 391014 | 10-scf00394 | 10 |
| AX-158247377 | 20 | 65.517 | KV452983.1 | 391512 | 10-scf00394 | 10 |
| AX-158247379 | 20 | 65.517 | KV452983.1 | 392967 | 10-scf00394 | 10 |
| AX-158247381 | 20 | 65.517 | KV452983.1 | 394272 | 10-scf00394 | 10 |
| AX-158247382 | 20 | 65.517 | KV452983.1 | 394774 | 10-scf00394 | 10 |
| AX-158394387 | 20 | 65.517 | KV452983.1 | 396012 | 10-scf00394 | 10 |
| AX-157710885 | 20 | 65.517 | KV452983.1 | 397842 | 10-scf00394 | 10 |
| AX-158247384 | 20 | 65.517 | KV452983.1 | 398649 | 10-scf00394 | 10 |
| AX-158247385 | 20 | 65.517 | KV452983.1 | 399545 | 10-scf00394 | 10 |
| AX-158394388 | 20 | 65.517 | KV452983.1 | 401437 | 10-scf00394 | 10 |
| AX-158247387 | 20 | 65.517 | KV452983.1 | 403030 | 10-scf00394 | 10 |
| AX-158247389 | 20 | 65.517 | KV452983.1 | 403673 | 10-scf00394 | 10 |
| AX-158247390 | 20 | 65.517 | KV452983.1 | 404173 | 10-scf00394 | 10 |
| AX-158247394 | 20 | 65.517 | KV452983.1 | 409310 | 10-scf00394 | 10 |
| AX-158247396 | 20 | 65.517 | KV452983.1 | 411046 | 10-scf00394 | 10 |
| AX-158247398 | 20 | 65.517 | KV452983.1 | 413184 | 10-scf00394 | 10 |
| AX-158247401 | 20 | 65.517 | KV452983.1 | 415697 | 10-scf00394 | 10 |
| AX-158247403 | 20 | 65.517 | KV452983.1 | 416749 | 10-scf00394 | 10 |
| AX-158247407 | 20 | 65.517 | KV452983.1 | 419520 | 10-scf00394 | 10 |
| AX-158247412 | 20 | 65.517 | KV452983.1 | 423613 | 10-scf00394 | 10 |
| AX-158247413 | 20 | 65.517 | KV452983.1 | 423964 | 10-scf00394 | 10 |
| AX-158247415 | 20 | 65.517 | KV452983.1 | 425891 | 10-scf00394 | 10 |
| AX-158247419 | 20 | 65.517 | KV452983.1 | 432014 | 10-scf00394 | 10 |
| AX-158419043 | 20 | 65.517 | KV452983.1 | 434391 | 10-scf00394 | 10 |
| AX-158247421 | 20 | 65.517 | KV452983.1 | 434498 | 10-scf00394 | 10 |
| AX-158247425 | 20 | 65.517 | KV452983.1 | 436666 | 10-scf00394 | 10 |
| AX-158247426 | 20 | 65.517 | KV452983.1 | 438795 | 10-scf00394 | 10 |
| AX-158247427 | 20 | 65.517 | KV452983.1 | 439958 | 10-scf00394 | 10 |
| AX-158247428 | 20 | 65.517 | KV452983.1 | 440626 | 10-scf00394 | 10 |
| AX-158247429 | 20 | 65.517 | KV452983.1 | 440897 | 10-scf00394 | 10 |
| AX-158247430 | 20 | 65.517 | KV452983.1 | 441416 | 10-scf00394 | 10 |
| AX-158247431 | 20 | 65.517 | KV452983.1 | 442380 | 10-scf00394 | 10 |
| AX-158247432 | 20 | 65.517 | KV452983.1 | 443377 | 10-scf00394 | 10 |
| AX-158247434 | 20 | 65.517 | KV452983.1 | 444888 | 10-scf00394 | 10 |

|              |    |        |            |        |             |    |
|--------------|----|--------|------------|--------|-------------|----|
| AX-158247435 | 20 | 65.517 | KV452983.1 | 445400 | 10-scf00394 | 10 |
| AX-158247436 | 20 | 65.517 | KV452983.1 | 447026 | 10-scf00394 | 10 |
| AX-158247438 | 20 | 65.517 | KV452983.1 | 449752 | 10-scf00394 | 10 |
| AX-158247439 | 20 | 65.517 | KV452983.1 | 450342 | 10-scf00394 | 10 |
| AX-158247440 | 20 | 65.517 | KV452983.1 | 452038 | 10-scf00394 | 10 |
| AX-158247442 | 20 | 65.517 | KV452983.1 | 453458 | 10-scf00394 | 10 |
| AX-158247443 | 20 | 65.517 | KV452983.1 | 454493 | 10-scf00394 | 10 |
| AX-158247447 | 20 | 65.517 | KV452983.1 | 457758 | 10-scf00394 | 10 |
| AX-158247448 | 20 | 65.517 | KV452983.1 | 458588 | 10-scf00394 | 10 |
| AX-158247450 | 20 | 65.517 | KV452983.1 | 460416 | 10-scf00394 | 10 |
| AX-158247451 | 20 | 65.517 | KV452983.1 | 462497 | 10-scf00394 | 10 |
| AX-158247452 | 20 | 65.517 | KV452983.1 | 463807 | 10-scf00394 | 10 |
| AX-158247454 | 20 | 65.517 | KV452983.1 | 468042 | 10-scf00394 | 10 |
| AX-158247455 | 20 | 65.517 | KV452983.1 | 468640 | 10-scf00394 | 10 |
| AX-158247458 | 20 | 65.517 | KV452983.1 | 471767 | 10-scf00394 | 10 |
| AX-158247459 | 20 | 65.517 | KV452983.1 | 472148 | 10-scf00394 | 10 |
| AX-158247460 | 20 | 65.517 | KV452983.1 | 472671 | 10-scf00394 | 10 |
| AX-158247461 | 20 | 65.517 | KV452983.1 | 473083 | 10-scf00394 | 10 |
| AX-158247462 | 20 | 65.517 | KV452983.1 | 473839 | 10-scf00394 | 10 |
| AX-158247463 | 20 | 65.517 | KV452983.1 | 474540 | 10-scf00394 | 10 |
| AX-158394391 | 20 | 65.517 | KV452983.1 | 476190 | 10-scf00394 | 10 |
| AX-158247470 | 20 | 65.517 | KV452983.1 | 480954 | 10-scf00394 | 10 |
| AX-158247471 | 20 | 65.517 | KV452983.1 | 481955 | 10-scf00394 | 10 |
| AX-158247472 | 20 | 65.517 | KV452983.1 | 482511 | 10-scf00394 | 10 |
| AX-158247474 | 20 | 65.517 | KV452983.1 | 483678 | 10-scf00394 | 10 |
| AX-158247477 | 20 | 65.517 | KV452983.1 | 488655 | 10-scf00394 | 10 |
| AX-158247480 | 20 | 65.517 | KV452983.1 | 490567 | 10-scf00394 | 10 |
| AX-158247481 | 20 | 65.517 | KV452983.1 | 491024 | 10-scf00394 | 10 |
| AX-158247482 | 20 | 65.517 | KV452983.1 | 492091 | 10-scf00394 | 10 |
| AX-157711519 | 20 | 65.517 | KV452983.1 | 494878 | 10-scf00394 | 10 |
| AX-158247487 | 20 | 65.517 | KV452983.1 | 499356 | 10-scf00394 | 10 |
| AX-157872717 | 20 | 65.517 | KV452983.1 | 499741 | 10-scf00394 | 10 |
| AX-158247488 | 20 | 65.517 | KV452983.1 | 503255 | 10-scf00394 | 10 |
| AX-158247489 | 20 | 65.517 | KV452983.1 | 503763 | 10-scf00394 | 10 |
| AX-158247490 | 20 | 65.517 | KV452983.1 | 504263 | 10-scf00394 | 10 |
| AX-157859802 | 20 | 65.517 | KV452983.1 | 504426 | 10-scf00394 | 10 |
| AX-158247491 | 20 | 65.517 | KV452983.1 | 504599 | 10-scf00394 | 10 |
| AX-158247492 | 20 | 65.517 | KV452983.1 | 506106 | 10-scf00394 | 10 |
| AX-158247494 | 20 | 65.517 | KV452983.1 | 508381 | 10-scf00394 | 10 |
| AX-158247495 | 20 | 65.517 | KV452983.1 | 510215 | 10-scf00394 | 10 |
| AX-158419044 | 20 | 65.517 | KV452983.1 | 518634 | 10-scf00394 | 10 |
| AX-158247510 | 20 | 65.517 | KV452983.1 | 525207 | 10-scf00394 | 10 |
| AX-158247523 | 20 | 65.517 | KV452983.1 | 537028 | 10-scf00394 | 10 |
| AX-158247542 | 20 | 65.517 | KV452983.1 | 557661 | 10-scf00394 | 10 |
| AX-158247575 | 20 | 65.517 | KV452983.1 | 590589 | 10-scf00394 | 10 |
| AX-157859803 | 20 | 65.517 | KV452983.1 | 597140 | 10-scf00394 | 10 |
| AX-158247582 | 20 | 65.517 | KV452983.1 | 597384 | 10-scf00394 | 10 |
| AX-158247590 | 20 | 65.517 | KV452983.1 | 606487 | 10-scf00394 | 10 |
| AX-158247591 | 20 | 65.517 | KV452983.1 | 606997 | 10-scf00394 | 10 |
| AX-158247592 | 20 | 65.517 | KV452983.1 | 607944 | 10-scf00394 | 10 |
| AX-158247597 | 20 | 65.517 | KV452983.1 | 612444 | 10-scf00394 | 10 |

|              |    |        |            |         |             |    |
|--------------|----|--------|------------|---------|-------------|----|
| AX-157754966 | 20 | 65.517 | KV452983.1 | 616933  | 10-scf00394 | 10 |
| AX-158247613 | 20 | 65.517 | KV452983.1 | 626627  | 10-scf00394 | 10 |
| AX-158247626 | 20 | 65.517 | KV452983.1 | 644257  | 10-scf00394 | 10 |
| AX-158387007 | 20 | 65.517 | KV452983.1 | 666283  | 10-scf00394 | 10 |
| AX-158247648 | 20 | 65.517 | KV452983.1 | 670819  | 10-scf00394 | 10 |
| AX-158247649 | 20 | 65.517 | KV452983.1 | 671656  | 10-scf00394 | 10 |
| AX-158247658 | 20 | 65.517 | KV452983.1 | 676765  | 10-scf00394 | 10 |
| AX-158247670 | 20 | 65.517 | KV452983.1 | 690934  | 10-scf00394 | 10 |
| AX-158247671 | 20 | 65.517 | KV452983.1 | 691406  | 10-scf00394 | 10 |
| AX-158247672 | 20 | 65.517 | KV452983.1 | 691841  | 10-scf00394 | 10 |
| AX-158247689 | 20 | 65.517 | KV452983.1 | 705355  | 10-scf00394 | 10 |
| AX-158247704 | 20 | 65.517 | KV452983.1 | 721356  | 10-scf00394 | 10 |
| AX-158247709 | 20 | 65.517 | KV452983.1 | 727627  | 10-scf00394 | 10 |
| AX-158247710 | 20 | 65.517 | KV452983.1 | 728074  | 10-scf00394 | 10 |
| AX-158247767 | 20 | 65.517 | KV452983.1 | 802063  | 10-scf00394 | 10 |
| AX-158247813 | 20 | 65.517 | KV452983.1 | 873891  | 10-scf00394 | 10 |
| AX-157887583 | 20 | 65.517 | KV452983.1 | 885402  | 10-scf00394 | 10 |
| AX-158247822 | 20 | 65.517 | KV452983.1 | 887468  | 10-scf00394 | 10 |
| AX-158247835 | 20 | 65.517 | KV452983.1 | 904834  | 10-scf00394 | 10 |
| AX-158247837 | 20 | 65.517 | KV452983.1 | 909753  | 10-scf00394 | 10 |
| AX-158394432 | 20 | 65.517 | KV452983.1 | 911226  | 10-scf00394 | 10 |
| AX-158247876 | 20 | 65.517 | KV452983.1 | 953047  | 10-scf00394 | 10 |
| AX-158247897 | 20 | 65.517 | KV452983.1 | 979217  | 10-scf00394 | 10 |
| AX-158247898 | 20 | 65.517 | KV452983.1 | 980727  | 10-scf00394 | 10 |
| AX-158247908 | 20 | 65.517 | KV452983.1 | 999380  | 10-scf00394 | 10 |
| AX-158247910 | 20 | 65.517 | KV452983.1 | 1001864 | 10-scf00394 | 10 |
| AX-158247915 | 20 | 65.517 | KV452983.1 | 1004041 | 10-scf00394 | 10 |
| AX-158247931 | 20 | 65.517 | KV452983.1 | 1027516 | 10-scf00394 | 10 |
| AX-158247933 | 20 | 65.517 | KV452983.1 | 1028356 | 10-scf00394 | 10 |
| AX-158247935 | 20 | 65.517 | KV452983.1 | 1029888 | 10-scf00394 | 10 |
| AX-158247937 | 20 | 65.517 | KV452983.1 | 1031054 | 10-scf00394 | 10 |
| AX-157887584 | 20 | 65.517 | KV452983.1 | 1032875 | 10-scf00394 | 10 |
| AX-157841855 | 20 | 65.517 | KV452983.1 | 1052547 | 10-scf00394 | 10 |
| AX-158247960 | 20 | 65.517 | KV452983.1 | 1065286 | 10-scf00394 | 10 |
| AX-158247964 | 20 | 65.517 | KV452983.1 | 1068689 | 10-scf00394 | 10 |
| AX-158247967 | 20 | 65.517 | KV452983.1 | 1073727 | 10-scf00394 | 10 |
| AX-158247984 | 20 | 65.517 | KV452983.1 | 1088563 | 10-scf00394 | 10 |
| AX-158247987 | 20 | 65.517 | KV452983.1 | 1091520 | 10-scf00394 | 10 |
| AX-158247988 | 20 | 65.517 | KV452983.1 | 1092435 | 10-scf00394 | 10 |
| AX-158247989 | 20 | 65.517 | KV452983.1 | 1094477 | 10-scf00394 | 10 |
| AX-158247991 | 20 | 65.517 | KV452983.1 | 1095655 | 10-scf00394 | 10 |
| AX-158247992 | 20 | 65.517 | KV452983.1 | 1096165 | 10-scf00394 | 10 |
| AX-158248019 | 20 | 65.517 | KV452983.1 | 1121213 | 10-scf00394 | 10 |
| AX-158248029 | 20 | 65.517 | KV452983.1 | 1140627 | 10-scf00394 | 10 |
| AX-158248045 | 20 | 65.517 | KV452983.1 | 1153719 | 10-scf00394 | 10 |
| AX-158248046 | 20 | 65.517 | KV452983.1 | 1154074 | 10-scf00394 | 10 |
| AX-158248048 | 20 | 65.517 | KV452983.1 | 1156303 | 10-scf00394 | 10 |
| AX-158248056 | 20 | 65.517 | KV452983.1 | 1162138 | 10-scf00394 | 10 |
| AX-158248083 | 20 | 65.517 | KV452983.1 | 1192626 | 10-scf00394 | 10 |
| AX-158248088 | 20 | 65.517 | KV452983.1 | 1196831 | 10-scf00394 | 10 |
| AX-157841864 | 20 | 65.517 | KV452983.1 | 1198723 | 10-scf00394 | 10 |

|              |    |        |            |         |             |    |
|--------------|----|--------|------------|---------|-------------|----|
| AX-157841865 | 20 | 65.517 | KV452983.1 | 1199053 | 10-scf00394 | 10 |
| AX-158248092 | 20 | 65.517 | KV452983.1 | 1202980 | 10-scf00394 | 10 |
| AX-157841867 | 20 | 65.517 | KV452983.1 | 1205756 | 10-scf00394 | 10 |
| AX-157841869 | 20 | 65.517 | KV452983.1 | 1206984 | 10-scf00394 | 10 |
| AX-158248093 | 20 | 65.517 | KV452983.1 | 1207291 | 10-scf00394 | 10 |
| AX-158248094 | 20 | 65.517 | KV452983.1 | 1208576 | 10-scf00394 | 10 |
| AX-158248095 | 20 | 65.517 | KV452983.1 | 1208790 | 10-scf00394 | 10 |
| AX-158248096 | 20 | 65.517 | KV452983.1 | 1210853 | 10-scf00394 | 10 |
| AX-157867322 | 20 | 65.517 | KV452983.1 | 1211279 | 10-scf00394 | 10 |
| AX-157841870 | 20 | 65.517 | KV452983.1 | 1213910 | 10-scf00394 | 10 |
| AX-158248097 | 20 | 65.517 | KV452983.1 | 1214441 | 10-scf00394 | 10 |
| AX-158248098 | 20 | 65.517 | KV452983.1 | 1215405 | 10-scf00394 | 10 |
| AX-158248099 | 20 | 65.517 | KV452983.1 | 1216753 | 10-scf00394 | 10 |
| AX-158248100 | 20 | 65.517 | KV452983.1 | 1217168 | 10-scf00394 | 10 |
| AX-157749068 | 20 | 65.517 | KV452983.1 | 1225130 | 10-scf00394 | 10 |
| AX-157841871 | 20 | 65.517 | KV452983.1 | 1226287 | 10-scf00394 | 10 |
| AX-158248109 | 20 | 65.517 | KV452983.1 | 1226642 | 10-scf00394 | 10 |
| AX-158248110 | 20 | 65.517 | KV452983.1 | 1227022 | 10-scf00394 | 10 |
| AX-158248111 | 20 | 65.517 | KV452983.1 | 1228176 | 10-scf00394 | 10 |
| AX-158248112 | 20 | 65.517 | KV452983.1 | 1229294 | 10-scf00394 | 10 |
| AX-157841873 | 20 | 65.517 | KV452983.1 | 1242101 | 10-scf00394 | 10 |
| AX-157738476 | 20 | 65.517 | KV452983.1 | 1244193 | 10-scf00394 | 10 |
| AX-158248124 | 20 | 65.517 | KV452983.1 | 1245815 | 10-scf00394 | 10 |
| AX-158248131 | 20 | 65.517 | KV452983.1 | 1252006 | 10-scf00394 | 10 |
| AX-158248136 | 20 | 65.517 | KV452983.1 | 1257513 | 10-scf00394 | 10 |
| AX-157743662 | 20 | 65.517 | KV452983.1 | 1261379 | 10-scf00394 | 10 |
| AX-158248140 | 20 | 65.517 | KV452983.1 | 1262428 | 10-scf00394 | 10 |
| AX-157841876 | 20 | 65.517 | KV452983.1 | 1303713 | 10-scf00394 | 10 |
| AX-158248154 | 20 | 65.517 | KV452983.1 | 1304305 | 10-scf00394 | 10 |
| AX-158248156 | 20 | 65.517 | KV452983.1 | 1305301 | 10-scf00394 | 10 |
| AX-158248161 | 20 | 65.517 | KV452983.1 | 1310553 | 10-scf00394 | 10 |
| AX-158248164 | 20 | 65.517 | KV452983.1 | 1316241 | 10-scf00394 | 10 |
| AX-157727629 | 20 | 65.517 | KV452983.1 | 1316649 | 10-scf00394 | 10 |
| AX-158248165 | 20 | 65.517 | KV452983.1 | 1317457 | 10-scf00394 | 10 |
| AX-158248166 | 20 | 65.517 | KV452983.1 | 1318417 | 10-scf00394 | 10 |
| AX-158248167 | 20 | 65.517 | KV452983.1 | 1318622 | 10-scf00394 | 10 |
| AX-158248170 | 20 | 65.517 | KV452983.1 | 1325661 | 10-scf00394 | 10 |
| AX-157841882 | 20 | 65.517 | KV452983.1 | 1331887 | 10-scf00394 | 10 |
| AX-157841883 | 20 | 65.517 | KV452983.1 | 1333220 | 10-scf00394 | 10 |
| AX-157841884 | 20 | 65.517 | KV452983.1 | 1344002 | 10-scf00394 | 10 |
| AX-158248177 | 20 | 65.517 | KV452983.1 | 1345310 | 10-scf00394 | 10 |
| AX-157841885 | 20 | 65.517 | KV452983.1 | 1349784 | 10-scf00394 | 10 |
| AX-158248180 | 20 | 65.517 | KV452983.1 | 1350143 | 10-scf00394 | 10 |
| AX-157841886 | 20 | 65.517 | KV452983.1 | 1358279 | 10-scf00394 | 10 |
| AX-158248184 | 20 | 65.517 | KV452983.1 | 1360078 | 10-scf00394 | 10 |
| AX-158248187 | 20 | 65.517 | KV452983.1 | 1365843 | 10-scf00394 | 10 |
| AX-157745397 | 20 | 65.517 | KV452983.1 | 1366986 | 10-scf00394 | 10 |
| AX-158248191 | 20 | 65.517 | KV452983.1 | 1370507 | 10-scf00394 | 10 |
| AX-158248193 | 20 | 65.517 | KV452983.1 | 1376729 | 10-scf00394 | 10 |
| AX-158248198 | 20 | 65.517 | KV452983.1 | 1384022 | 10-scf00394 | 10 |
| AX-158248199 | 20 | 65.517 | KV452983.1 | 1385674 | 10-scf00394 | 10 |

|              |    |        |             |         |             |    |
|--------------|----|--------|-------------|---------|-------------|----|
| AX-157841888 | 20 | 65.517 | KV452983.1  | 1393957 | 10-scf00394 | 10 |
| AX-158248209 | 20 | 65.517 | KV452983.1  | 1396420 | 10-scf00394 | 10 |
| AX-158248213 | 20 | 65.517 | KV452983.1  | 1402111 | 10-scf00394 | 10 |
| AX-158248215 | 20 | 65.517 | KV452983.1  | 1403466 | 10-scf00394 | 10 |
| AX-158248224 | 20 | 65.517 | KV452983.1  | 1420667 | 10-scf00394 | 10 |
| AX-158248231 | 20 | 65.517 | KV452983.1  | 1439505 | 10-scf00394 | 10 |
| AX-158248233 | 20 | 65.517 | KV452983.1  | 1441913 | 10-scf00394 | 10 |
| AX-158248247 | 20 | 65.517 | KV452983.1  | 1462846 | 10-scf00394 | 10 |
| AX-158248256 | 20 | 65.517 | KV452983.1  | 1475461 | 10-scf00394 | 10 |
| AX-158248259 | 20 | 65.517 | KV452983.1  | 1478012 | 10-scf00394 | 10 |
| AX-158248261 | 20 | 65.517 | KV452983.1  | 1479957 | 10-scf00394 | 10 |
| AX-158248265 | 20 | 65.517 | KV452983.1  | 1486132 | 10-scf00394 | 10 |
| AX-158248266 | 20 | 65.517 | KV452983.1  | 1488126 | 10-scf00394 | 10 |
| AX-158248267 | 20 | 65.517 | KV452983.1  | 1488969 | 10-scf00394 | 10 |
| AX-158248269 | 20 | 65.517 | KV452983.1  | 1490516 | 10-scf00394 | 10 |
| AX-158248270 | 20 | 65.517 | KV452983.1  | 1490867 | 10-scf00394 | 10 |
| AX-158248272 | 20 | 65.517 | KV452983.1  | 1492027 | 10-scf00394 | 10 |
| AX-158248273 | 20 | 65.517 | KV452983.1  | 1492636 | 10-scf00394 | 10 |
| AX-158248279 | 20 | 65.517 | KV452983.1  | 1497016 | 10-scf00394 | 10 |
| AX-158248305 | 20 | 65.517 | KV452983.1  | 1522053 | 10-scf00394 | 10 |
| AX-158248436 | 20 | 65.517 | KV452983.1  | 1693572 | 10-scf00394 | 10 |
| AX-157687938 | 20 | 65.517 | KV453655.1  | 1493    | scf01111    | UN |
| AX-157706099 | 20 | 65.517 | 3ML01031606 | 352     | scf07223_1  | UN |
| AX-158248200 | 20 | 65.539 | KV452983.1  | 1387796 | 10-scf00394 | 10 |
| AX-158247485 | 20 | 65.626 | KV452983.1  | 495290  | 10-scf00394 | 10 |
| AX-158248202 | 20 | 65.626 | KV452983.1  | 1390738 | 10-scf00394 | 10 |
| AX-158248206 | 20 | 65.626 | KV452983.1  | 1394202 | 10-scf00394 | 10 |
| AX-158248211 | 20 | 65.626 | KV452983.1  | 1397661 | 10-scf00394 | 10 |
| AX-158248212 | 20 | 65.626 | KV452983.1  | 1399989 | 10-scf00394 | 10 |
| AX-158248220 | 20 | 65.626 | KV452983.1  | 1413031 | 10-scf00394 | 10 |
| AX-158248221 | 20 | 65.626 | KV452983.1  | 1415613 | 10-scf00394 | 10 |
| AX-158248223 | 20 | 65.626 | KV452983.1  | 1419249 | 10-scf00394 | 10 |
| AX-158248424 | 20 | 65.626 | KV452983.1  | 1680938 | 10-scf00394 | 10 |
| AX-158248589 | 20 | 65.626 | KV452983.1  | 1865534 | 10-scf00394 | 10 |
| AX-158248229 | 20 | 65.669 | KV452983.1  | 1438262 | 10-scf00394 | 10 |
| AX-157755360 | 20 | 65.72  | KV452983.1  | 1441369 | 10-scf00394 | 10 |
| AX-157887581 | 20 | 65.735 | KV452983.1  | 676578  | 10-scf00394 | 10 |
| AX-157887582 | 20 | 65.735 | KV452983.1  | 677138  | 10-scf00394 | 10 |
| AX-158248232 | 20 | 65.735 | KV452983.1  | 1441509 | 10-scf00394 | 10 |
| AX-158248281 | 20 | 65.735 | KV452983.1  | 1499166 | 10-scf00394 | 10 |
| AX-158248282 | 20 | 65.735 | KV452983.1  | 1499759 | 10-scf00394 | 10 |
| AX-158248287 | 20 | 65.735 | KV452983.1  | 1504099 | 10-scf00394 | 10 |
| AX-158248277 | 20 | 65.736 | KV452983.1  | 1495630 | 10-scf00394 | 10 |
| AX-158248307 | 20 | 65.736 | KV452983.1  | 1525000 | 10-scf00394 | 10 |
| AX-158248312 | 20 | 65.736 | KV452983.1  | 1530643 | 10-scf00394 | 10 |
| AX-158248313 | 20 | 65.736 | KV452983.1  | 1531268 | 10-scf00394 | 10 |
| AX-157841902 | 20 | 65.736 | KV452983.1  | 1891519 | 10-scf00394 | 10 |
| AX-158248610 | 20 | 65.736 | KV452983.1  | 1892623 | 10-scf00394 | 10 |
| AX-158248291 | 20 | 66.063 | KV452983.1  | 1506681 | 10-scf00394 | 10 |
| AX-158248323 | 20 | 66.063 | KV452983.1  | 1542262 | 10-scf00394 | 10 |
| AX-158248324 | 20 | 66.063 | KV452983.1  | 1543014 | 10-scf00394 | 10 |

|              |    |        |            |         |             |    |
|--------------|----|--------|------------|---------|-------------|----|
| AX-158248325 | 20 | 66.063 | KV452983.1 | 1543577 | 10-scf00394 | 10 |
| AX-158248329 | 20 | 66.063 | KV452983.1 | 1547038 | 10-scf00394 | 10 |
| AX-157725737 | 20 | 66.063 | KV452983.1 | 1547617 | 10-scf00394 | 10 |
| AX-158248337 | 20 | 66.063 | KV452983.1 | 1559251 | 10-scf00394 | 10 |
| AX-158248338 | 20 | 66.063 | KV452983.1 | 1559629 | 10-scf00394 | 10 |
| AX-158248390 | 20 | 66.063 | KV452983.1 | 1636293 | 10-scf00394 | 10 |
| AX-158248422 | 20 | 66.063 | KV452983.1 | 1675085 | 10-scf00394 | 10 |
| AX-157841900 | 20 | 66.063 | KV452983.1 | 1861254 | 10-scf00394 | 10 |
| AX-157841926 | 20 | 66.063 | KV452983.1 | 2091644 | 10-scf00394 | 10 |
| AX-157701797 | 20 | 66.063 | DX087867.1 | 78      | 10-scf00394 | UN |
| AX-158248332 | 20 | 66.118 | KV452983.1 | 1553824 | 10-scf00394 | 10 |
| AX-158246695 | 20 | 66.172 | KV452981.1 | 3765803 | 10-scf00393 | 10 |
| AX-157774320 | 20 | 66.172 | KV452983.1 | 218317  | 10-scf00394 | 10 |
| AX-158247445 | 20 | 66.172 | KV452983.1 | 455823  | 10-scf00394 | 10 |
| AX-157841852 | 20 | 66.172 | KV452983.1 | 1041947 | 10-scf00394 | 10 |
| AX-158381004 | 20 | 66.172 | KV452983.1 | 1114892 | 10-scf00394 | 10 |
| AX-158248335 | 20 | 66.172 | KV452983.1 | 1555269 | 10-scf00394 | 10 |
| AX-158248339 | 20 | 66.172 | KV452983.1 | 1560982 | 10-scf00394 | 10 |
| AX-157722828 | 20 | 66.172 | KV452983.1 | 1566323 | 10-scf00394 | 10 |
| AX-157724216 | 20 | 66.172 | KV452983.1 | 1570745 | 10-scf00394 | 10 |
| AX-158248344 | 20 | 66.172 | KV452983.1 | 1574128 | 10-scf00394 | 10 |
| AX-158248348 | 20 | 66.172 | KV452983.1 | 1577861 | 10-scf00394 | 10 |
| AX-158248349 | 20 | 66.172 | KV452983.1 | 1579579 | 10-scf00394 | 10 |
| AX-158248351 | 20 | 66.172 | KV452983.1 | 1582425 | 10-scf00394 | 10 |
| AX-158248352 | 20 | 66.172 | KV452983.1 | 1585380 | 10-scf00394 | 10 |
| AX-158248353 | 20 | 66.172 | KV452983.1 | 1587134 | 10-scf00394 | 10 |
| AX-158248354 | 20 | 66.172 | KV452983.1 | 1587379 | 10-scf00394 | 10 |
| AX-158248356 | 20 | 66.172 | KV452983.1 | 1588385 | 10-scf00394 | 10 |
| AX-158248388 | 20 | 66.172 | KV452983.1 | 1635355 | 10-scf00394 | 10 |
| AX-157733535 | 20 | 66.172 | KV452983.1 | 1854305 | 10-scf00394 | 10 |
| AX-158248649 | 20 | 66.172 | KV452983.1 | 1951721 | 10-scf00394 | 10 |
| AX-158248706 | 20 | 66.172 | KV452983.1 | 2027134 | 10-scf00394 | 10 |
| AX-158394465 | 20 | 66.172 | KV452983.1 | 2191113 | 10-scf00394 | 10 |
| AX-158248898 | 20 | 66.172 | KV452983.1 | 2314825 | 10-scf00394 | 10 |
| AX-158249198 | 20 | 66.172 | KV452983.1 | 2683810 | 10-scf00394 | 10 |
| AX-157841975 | 20 | 66.172 | KV452983.1 | 2698257 | 10-scf00394 | 10 |
| AX-158249238 | 20 | 66.172 | KV452983.1 | 2736105 | 10-scf00394 | 10 |
| AX-157718738 | 20 | 66.172 | KV452983.1 | 2941393 | 10-scf00394 | 10 |
| AX-158249438 | 20 | 66.172 | KV452983.1 | 2975767 | 10-scf00394 | 10 |
| AX-157842013 | 20 | 66.172 | KV452983.1 | 3046546 | 10-scf00394 | 10 |
| AX-158249568 | 20 | 66.172 | KV452983.1 | 3137815 | 10-scf00394 | 10 |
| AX-158249569 | 20 | 66.172 | KV452983.1 | 3138996 | 10-scf00394 | 10 |
| AX-158249614 | 20 | 66.172 | KV452983.1 | 3188476 | 10-scf00394 | 10 |
| AX-158248360 | 20 | 66.281 | KV452983.1 | 1595912 | 10-scf00394 | 10 |
| AX-158248361 | 20 | 66.281 | KV452983.1 | 1596395 | 10-scf00394 | 10 |
| AX-158248621 | 20 | 66.281 | KV452983.1 | 1910976 | 10-scf00394 | 10 |
| AX-158248713 | 20 | 66.281 | KV452983.1 | 2036536 | 10-scf00394 | 10 |
| AX-158249630 | 20 | 66.281 | KV452983.1 | 3212123 | 10-scf00394 | 10 |
| AX-158248359 | 20 | 66.291 | KV452983.1 | 1594351 | 10-scf00394 | 10 |
| AX-157859807 | 20 | 66.291 | KV452983.1 | 1603222 | 10-scf00394 | 10 |
| AX-158248430 | 20 | 66.291 | KV452983.1 | 1688704 | 10-scf00394 | 10 |

|              |    |        |            |         |             |    |
|--------------|----|--------|------------|---------|-------------|----|
| AX-158248367 | 20 | 66.301 | KV452983.1 | 1605634 | 10-scf00394 | 10 |
| AX-158248568 | 20 | 66.301 | KV452983.1 | 1840117 | 10-scf00394 | 10 |
| AX-158248605 | 20 | 66.301 | KV452983.1 | 1885345 | 10-scf00394 | 10 |
| AX-158248368 | 20 | 66.315 | KV452983.1 | 1606411 | 10-scf00394 | 10 |
| AX-158248370 | 20 | 66.33  | KV452983.1 | 1608057 | 10-scf00394 | 10 |
| AX-158248371 | 20 | 66.341 | KV452983.1 | 1608515 | 10-scf00394 | 10 |
| AX-158248372 | 20 | 66.341 | KV452983.1 | 1609034 | 10-scf00394 | 10 |
| AX-158248380 | 20 | 66.341 | KV452983.1 | 1619961 | 10-scf00394 | 10 |
| AX-158248373 | 20 | 66.356 | KV452983.1 | 1612400 | 10-scf00394 | 10 |
| AX-158249263 | 20 | 66.356 | KV452983.1 | 2765093 | 10-scf00394 | 10 |
| AX-157859808 | 20 | 66.37  | KV452983.1 | 1612978 | 10-scf00394 | 10 |
| AX-158248374 | 20 | 66.382 | KV452983.1 | 1613118 | 10-scf00394 | 10 |
| AX-158247475 | 20 | 66.39  | KV452983.1 | 486062  | 10-scf00394 | 10 |
| AX-158247476 | 20 | 66.39  | KV452983.1 | 486585  | 10-scf00394 | 10 |
| AX-157887586 | 20 | 66.39  | KV452983.1 | 1613966 | 10-scf00394 | 10 |
| AX-158248375 | 20 | 66.39  | KV452983.1 | 1614056 | 10-scf00394 | 10 |
| AX-158248377 | 20 | 66.39  | KV452983.1 | 1616135 | 10-scf00394 | 10 |
| AX-158248381 | 20 | 66.39  | KV452983.1 | 1621475 | 10-scf00394 | 10 |
| AX-158248383 | 20 | 66.39  | KV452983.1 | 1624974 | 10-scf00394 | 10 |
| AX-158248391 | 20 | 66.39  | KV452983.1 | 1636856 | 10-scf00394 | 10 |
| AX-157773837 | 20 | 66.39  | KV452983.1 | 1636894 | 10-scf00394 | 10 |
| AX-157724910 | 20 | 66.39  | KV452983.1 | 1639598 | 10-scf00394 | 10 |
| AX-158248397 | 20 | 66.5   | KV452983.1 | 1646744 | 10-scf00394 | 10 |
| AX-158248399 | 20 | 66.609 | KV452983.1 | 1648942 | 10-scf00394 | 10 |
| AX-158248401 | 20 | 66.609 | KV452983.1 | 1651505 | 10-scf00394 | 10 |
| AX-158248404 | 20 | 66.609 | KV452983.1 | 1653199 | 10-scf00394 | 10 |
| AX-158248405 | 20 | 66.609 | KV452983.1 | 1656595 | 10-scf00394 | 10 |
| AX-158248408 | 20 | 66.609 | KV452983.1 | 1660405 | 10-scf00394 | 10 |
| AX-158248419 | 20 | 66.609 | KV452983.1 | 1671559 | 10-scf00394 | 10 |
| AX-158248421 | 20 | 66.609 | KV452983.1 | 1672400 | 10-scf00394 | 10 |
| AX-158248473 | 20 | 66.609 | KV452983.1 | 1740717 | 10-scf00394 | 10 |
| AX-158248427 | 20 | 66.718 | KV452983.1 | 1684692 | 10-scf00394 | 10 |
| AX-158248432 | 20 | 66.718 | KV452983.1 | 1691014 | 10-scf00394 | 10 |
| AX-158248445 | 20 | 66.718 | KV452983.1 | 1706562 | 10-scf00394 | 10 |
| AX-158248447 | 20 | 66.718 | KV452983.1 | 1708137 | 10-scf00394 | 10 |
| AX-158248449 | 20 | 66.718 | KV452983.1 | 1711717 | 10-scf00394 | 10 |
| AX-158248510 | 20 | 66.718 | KV452983.1 | 1774372 | 10-scf00394 | 10 |
| AX-158248586 | 20 | 66.718 | KV452983.1 | 1858823 | 10-scf00394 | 10 |
| AX-158248618 | 20 | 66.718 | KV452983.1 | 1907536 | 10-scf00394 | 10 |
| AX-158248683 | 20 | 66.718 | KV452983.1 | 2000779 | 10-scf00394 | 10 |
| AX-158248693 | 20 | 66.718 | KV452983.1 | 2011835 | 10-scf00394 | 10 |
| AX-158248740 | 20 | 66.718 | KV452983.1 | 2073238 | 10-scf00394 | 10 |
| AX-157775142 | 20 | 66.827 | KV452983.1 | 1598635 | 10-scf00394 | 10 |
| AX-157841890 | 20 | 66.827 | KV452983.1 | 1614904 | 10-scf00394 | 10 |
| AX-158248394 | 20 | 66.827 | KV452983.1 | 1645254 | 10-scf00394 | 10 |
| AX-158248411 | 20 | 66.827 | KV452983.1 | 1662661 | 10-scf00394 | 10 |
| AX-158248413 | 20 | 66.827 | KV452983.1 | 1665631 | 10-scf00394 | 10 |
| AX-158248416 | 20 | 66.827 | KV452983.1 | 1668735 | 10-scf00394 | 10 |
| AX-158248417 | 20 | 66.827 | KV452983.1 | 1669328 | 10-scf00394 | 10 |
| AX-158248418 | 20 | 66.827 | KV452983.1 | 1671168 | 10-scf00394 | 10 |
| AX-157772488 | 20 | 66.827 | KV452983.1 | 1689458 | 10-scf00394 | 10 |

|              |    |        |            |         |             |    |
|--------------|----|--------|------------|---------|-------------|----|
| AX-158248433 | 20 | 66.827 | KV452983.1 | 1691444 | 10-scf00394 | 10 |
| AX-158248435 | 20 | 66.827 | KV452983.1 | 1692564 | 10-scf00394 | 10 |
| AX-158248444 | 20 | 66.827 | KV452983.1 | 1705477 | 10-scf00394 | 10 |
| AX-158248446 | 20 | 66.827 | KV452983.1 | 1707043 | 10-scf00394 | 10 |
| AX-158248450 | 20 | 66.827 | KV452983.1 | 1713244 | 10-scf00394 | 10 |
| AX-158248452 | 20 | 66.827 | KV452983.1 | 1715909 | 10-scf00394 | 10 |
| AX-158248453 | 20 | 66.827 | KV452983.1 | 1717678 | 10-scf00394 | 10 |
| AX-158248454 | 20 | 66.827 | KV452983.1 | 1718884 | 10-scf00394 | 10 |
| AX-158248456 | 20 | 66.827 | KV452983.1 | 1721080 | 10-scf00394 | 10 |
| AX-158248458 | 20 | 66.827 | KV452983.1 | 1724286 | 10-scf00394 | 10 |
| AX-158248459 | 20 | 66.827 | KV452983.1 | 1724726 | 10-scf00394 | 10 |
| AX-158248460 | 20 | 66.827 | KV452983.1 | 1725262 | 10-scf00394 | 10 |
| AX-158248461 | 20 | 66.827 | KV452983.1 | 1725804 | 10-scf00394 | 10 |
| AX-158248462 | 20 | 66.827 | KV452983.1 | 1726715 | 10-scf00394 | 10 |
| AX-158248463 | 20 | 66.827 | KV452983.1 | 1729560 | 10-scf00394 | 10 |
| AX-158248464 | 20 | 66.827 | KV452983.1 | 1731208 | 10-scf00394 | 10 |
| AX-158248465 | 20 | 66.827 | KV452983.1 | 1734147 | 10-scf00394 | 10 |
| AX-158248467 | 20 | 66.827 | KV452983.1 | 1735039 | 10-scf00394 | 10 |
| AX-158248471 | 20 | 66.827 | KV452983.1 | 1738504 | 10-scf00394 | 10 |
| AX-158248472 | 20 | 66.827 | KV452983.1 | 1739781 | 10-scf00394 | 10 |
| AX-158248474 | 20 | 66.827 | KV452983.1 | 1741913 | 10-scf00394 | 10 |
| AX-158248475 | 20 | 66.827 | KV452983.1 | 1742334 | 10-scf00394 | 10 |
| AX-158248477 | 20 | 66.827 | KV452983.1 | 1743808 | 10-scf00394 | 10 |
| AX-158248478 | 20 | 66.827 | KV452983.1 | 1744078 | 10-scf00394 | 10 |
| AX-157716328 | 20 | 66.827 | KV452983.1 | 1744194 | 10-scf00394 | 10 |
| AX-158248480 | 20 | 66.827 | KV452983.1 | 1747311 | 10-scf00394 | 10 |
| AX-158248481 | 20 | 66.827 | KV452983.1 | 1747629 | 10-scf00394 | 10 |
| AX-158248484 | 20 | 66.827 | KV452983.1 | 1749877 | 10-scf00394 | 10 |
| AX-158248486 | 20 | 66.827 | KV452983.1 | 1750904 | 10-scf00394 | 10 |
| AX-158248487 | 20 | 66.827 | KV452983.1 | 1752398 | 10-scf00394 | 10 |
| AX-158248491 | 20 | 66.827 | KV452983.1 | 1756403 | 10-scf00394 | 10 |
| AX-158248493 | 20 | 66.827 | KV452983.1 | 1757358 | 10-scf00394 | 10 |
| AX-158248494 | 20 | 66.827 | KV452983.1 | 1758156 | 10-scf00394 | 10 |
| AX-157887587 | 20 | 66.827 | KV452983.1 | 1758372 | 10-scf00394 | 10 |
| AX-157841891 | 20 | 66.827 | KV452983.1 | 1758831 | 10-scf00394 | 10 |
| AX-158248496 | 20 | 66.827 | KV452983.1 | 1760838 | 10-scf00394 | 10 |
| AX-158248497 | 20 | 66.827 | KV452983.1 | 1761311 | 10-scf00394 | 10 |
| AX-158248498 | 20 | 66.827 | KV452983.1 | 1761987 | 10-scf00394 | 10 |
| AX-158248499 | 20 | 66.827 | KV452983.1 | 1763061 | 10-scf00394 | 10 |
| AX-158248500 | 20 | 66.827 | KV452983.1 | 1763733 | 10-scf00394 | 10 |
| AX-158248501 | 20 | 66.827 | KV452983.1 | 1764129 | 10-scf00394 | 10 |
| AX-158248502 | 20 | 66.827 | KV452983.1 | 1765010 | 10-scf00394 | 10 |
| AX-158248503 | 20 | 66.827 | KV452983.1 | 1768067 | 10-scf00394 | 10 |
| AX-157741543 | 20 | 66.827 | KV452983.1 | 1768342 | 10-scf00394 | 10 |
| AX-158248504 | 20 | 66.827 | KV452983.1 | 1768468 | 10-scf00394 | 10 |
| AX-158248505 | 20 | 66.827 | KV452983.1 | 1770319 | 10-scf00394 | 10 |
| AX-158248506 | 20 | 66.827 | KV452983.1 | 1772529 | 10-scf00394 | 10 |
| AX-158248507 | 20 | 66.827 | KV452983.1 | 1773218 | 10-scf00394 | 10 |
| AX-158248508 | 20 | 66.827 | KV452983.1 | 1773779 | 10-scf00394 | 10 |
| AX-158248509 | 20 | 66.827 | KV452983.1 | 1774020 | 10-scf00394 | 10 |
| AX-158248511 | 20 | 66.827 | KV452983.1 | 1776164 | 10-scf00394 | 10 |



|              |    |        |            |         |             |    |
|--------------|----|--------|------------|---------|-------------|----|
| AX-158248512 | 20 | 66.827 | KV452983.1 | 1777295 | 10-scf00394 | 10 |
| AX-158248513 | 20 | 66.827 | KV452983.1 | 1778677 | 10-scf00394 | 10 |
| AX-158248515 | 20 | 66.827 | KV452983.1 | 1780938 | 10-scf00394 | 10 |
| AX-157743309 | 20 | 66.827 | KV452983.1 | 1782195 | 10-scf00394 | 10 |
| AX-158248517 | 20 | 66.827 | KV452983.1 | 1782693 | 10-scf00394 | 10 |
| AX-158248518 | 20 | 66.827 | KV452983.1 | 1783345 | 10-scf00394 | 10 |
| AX-158248523 | 20 | 66.827 | KV452983.1 | 1787567 | 10-scf00394 | 10 |
| AX-158248524 | 20 | 66.827 | KV452983.1 | 1787794 | 10-scf00394 | 10 |
| AX-157841893 | 20 | 66.827 | KV452983.1 | 1793756 | 10-scf00394 | 10 |
| AX-158248529 | 20 | 66.827 | KV452983.1 | 1794053 | 10-scf00394 | 10 |
| AX-158248530 | 20 | 66.827 | KV452983.1 | 1794485 | 10-scf00394 | 10 |
| AX-157774720 | 20 | 66.827 | KV452983.1 | 1795110 | 10-scf00394 | 10 |
| AX-158248531 | 20 | 66.827 | KV452983.1 | 1795976 | 10-scf00394 | 10 |
| AX-158248532 | 20 | 66.827 | KV452983.1 | 1796390 | 10-scf00394 | 10 |
| AX-157841894 | 20 | 66.827 | KV452983.1 | 1796878 | 10-scf00394 | 10 |
| AX-158248534 | 20 | 66.827 | KV452983.1 | 1798105 | 10-scf00394 | 10 |
| AX-157841895 | 20 | 66.827 | KV452983.1 | 1799957 | 10-scf00394 | 10 |
| AX-158248535 | 20 | 66.827 | KV452983.1 | 1801316 | 10-scf00394 | 10 |
| AX-158248536 | 20 | 66.827 | KV452983.1 | 1806616 | 10-scf00394 | 10 |
| AX-158248539 | 20 | 66.827 | KV452983.1 | 1808841 | 10-scf00394 | 10 |
| AX-158248540 | 20 | 66.827 | KV452983.1 | 1809144 | 10-scf00394 | 10 |
| AX-158248541 | 20 | 66.827 | KV452983.1 | 1809812 | 10-scf00394 | 10 |
| AX-157841896 | 20 | 66.827 | KV452983.1 | 1811537 | 10-scf00394 | 10 |
| AX-157841897 | 20 | 66.827 | KV452983.1 | 1812164 | 10-scf00394 | 10 |
| AX-158248543 | 20 | 66.827 | KV452983.1 | 1812330 | 10-scf00394 | 10 |
| AX-158248544 | 20 | 66.827 | KV452983.1 | 1815600 | 10-scf00394 | 10 |
| AX-158248546 | 20 | 66.827 | KV452983.1 | 1817088 | 10-scf00394 | 10 |
| AX-158248548 | 20 | 66.827 | KV452983.1 | 1819866 | 10-scf00394 | 10 |
| AX-158248550 | 20 | 66.827 | KV452983.1 | 1821285 | 10-scf00394 | 10 |
| AX-158248551 | 20 | 66.827 | KV452983.1 | 1821965 | 10-scf00394 | 10 |
| AX-158248552 | 20 | 66.827 | KV452983.1 | 1824665 | 10-scf00394 | 10 |
| AX-158248553 | 20 | 66.827 | KV452983.1 | 1825159 | 10-scf00394 | 10 |
| AX-158248556 | 20 | 66.827 | KV452983.1 | 1827314 | 10-scf00394 | 10 |
| AX-158248557 | 20 | 66.827 | KV452983.1 | 1828305 | 10-scf00394 | 10 |
| AX-158248559 | 20 | 66.827 | KV452983.1 | 1829943 | 10-scf00394 | 10 |
| AX-158248560 | 20 | 66.827 | KV452983.1 | 1830514 | 10-scf00394 | 10 |
| AX-158248561 | 20 | 66.827 | KV452983.1 | 1831950 | 10-scf00394 | 10 |
| AX-158248562 | 20 | 66.827 | KV452983.1 | 1832421 | 10-scf00394 | 10 |
| AX-158248563 | 20 | 66.827 | KV452983.1 | 1832890 | 10-scf00394 | 10 |
| AX-158248575 | 20 | 66.827 | KV452983.1 | 1845713 | 10-scf00394 | 10 |
| AX-158248577 | 20 | 66.827 | KV452983.1 | 1849233 | 10-scf00394 | 10 |
| AX-158248578 | 20 | 66.827 | KV452983.1 | 1850325 | 10-scf00394 | 10 |
| AX-158248579 | 20 | 66.827 | KV452983.1 | 1850906 | 10-scf00394 | 10 |
| AX-158248588 | 20 | 66.827 | KV452983.1 | 1864749 | 10-scf00394 | 10 |
| AX-158248592 | 20 | 66.827 | KV452983.1 | 1869118 | 10-scf00394 | 10 |
| AX-158248593 | 20 | 66.827 | KV452983.1 | 1870689 | 10-scf00394 | 10 |
| AX-158248594 | 20 | 66.827 | KV452983.1 | 1870933 | 10-scf00394 | 10 |
| AX-158248601 | 20 | 66.827 | KV452983.1 | 1879965 | 10-scf00394 | 10 |
| AX-158248603 | 20 | 66.827 | KV452983.1 | 1882222 | 10-scf00394 | 10 |
| AX-158248607 | 20 | 66.827 | KV452983.1 | 1887291 | 10-scf00394 | 10 |
| AX-158248608 | 20 | 66.827 | KV452983.1 | 1887860 | 10-scf00394 | 10 |

|              |    |        |            |         |             |    |
|--------------|----|--------|------------|---------|-------------|----|
| AX-158248612 | 20 | 66.827 | KV452983.1 | 1898680 | 10-scf00394 | 10 |
| AX-158248614 | 20 | 66.827 | KV452983.1 | 1902779 | 10-scf00394 | 10 |
| AX-158248625 | 20 | 66.827 | KV452983.1 | 1913946 | 10-scf00394 | 10 |
| AX-157715110 | 20 | 66.827 | KV452983.1 | 1917226 | 10-scf00394 | 10 |
| AX-158248630 | 20 | 66.827 | KV452983.1 | 1924813 | 10-scf00394 | 10 |
| AX-158248637 | 20 | 66.827 | KV452983.1 | 1930865 | 10-scf00394 | 10 |
| AX-158248679 | 20 | 66.827 | KV452983.1 | 1994022 | 10-scf00394 | 10 |
| AX-158248685 | 20 | 66.827 | KV452983.1 | 2002506 | 10-scf00394 | 10 |
| AX-158248687 | 20 | 66.827 | KV452983.1 | 2003567 | 10-scf00394 | 10 |
| AX-158248689 | 20 | 66.827 | KV452983.1 | 2004867 | 10-scf00394 | 10 |
| AX-157719528 | 20 | 66.827 | KV452983.1 | 2015834 | 10-scf00394 | 10 |
| AX-158248698 | 20 | 66.827 | KV452983.1 | 2019899 | 10-scf00394 | 10 |
| AX-157841919 | 20 | 66.827 | KV452983.1 | 2037605 | 10-scf00394 | 10 |
| AX-158248723 | 20 | 66.827 | KV452983.1 | 2052947 | 10-scf00394 | 10 |
| AX-158248737 | 20 | 66.827 | KV452983.1 | 2067767 | 10-scf00394 | 10 |
| AX-158248746 | 20 | 66.827 | KV452983.1 | 2080584 | 10-scf00394 | 10 |
| AX-158248769 | 20 | 66.827 | KV452983.1 | 2113215 | 10-scf00394 | 10 |
| AX-158248845 | 20 | 66.827 | KV452983.1 | 2244033 | 10-scf00394 | 10 |
| AX-158249214 | 20 | 66.827 | KV452983.1 | 2711677 | 10-scf00394 | 10 |
| AX-158249574 | 20 | 66.827 | KV452983.1 | 3143632 | 10-scf00394 | 10 |
| AX-158248483 | 20 | 66.878 | KV452983.1 | 1748972 | 10-scf00394 | 10 |
| AX-158248566 | 20 | 66.878 | KV452983.1 | 1838514 | 10-scf00394 | 10 |
| AX-158248569 | 20 | 66.93  | KV452983.1 | 1841122 | 10-scf00394 | 10 |
| AX-157713962 | 20 | 66.93  | KV452983.1 | 1844272 | 10-scf00394 | 10 |
| AX-158248574 | 20 | 66.93  | KV452983.1 | 1845097 | 10-scf00394 | 10 |
| AX-158248488 | 20 | 67.032 | KV452983.1 | 1753259 | 10-scf00394 | 10 |
| AX-158248490 | 20 | 67.032 | KV452983.1 | 1755709 | 10-scf00394 | 10 |
| AX-157867327 | 20 | 67.032 | KV452983.1 | 1776499 | 10-scf00394 | 10 |
| AX-157841892 | 20 | 67.032 | KV452983.1 | 1790189 | 10-scf00394 | 10 |
| AX-158248570 | 20 | 67.032 | KV452983.1 | 1841676 | 10-scf00394 | 10 |
| AX-158248580 | 20 | 67.032 | KV452983.1 | 1851336 | 10-scf00394 | 10 |
| AX-158248581 | 20 | 67.032 | KV452983.1 | 1853867 | 10-scf00394 | 10 |
| AX-158248582 | 20 | 67.032 | KV452983.1 | 1854372 | 10-scf00394 | 10 |
| AX-158248583 | 20 | 67.032 | KV452983.1 | 1855380 | 10-scf00394 | 10 |
| AX-158248595 | 20 | 67.032 | KV452983.1 | 1871233 | 10-scf00394 | 10 |
| AX-158248597 | 20 | 67.032 | KV452983.1 | 1874184 | 10-scf00394 | 10 |
| AX-158248598 | 20 | 67.032 | KV452983.1 | 1875036 | 10-scf00394 | 10 |
| AX-158248599 | 20 | 67.032 | KV452983.1 | 1875579 | 10-scf00394 | 10 |
| AX-158248600 | 20 | 67.032 | KV452983.1 | 1876642 | 10-scf00394 | 10 |
| AX-157859809 | 20 | 67.032 | KV452983.1 | 1879477 | 10-scf00394 | 10 |
| AX-158248602 | 20 | 67.032 | KV452983.1 | 1880538 | 10-scf00394 | 10 |
| AX-157841903 | 20 | 67.032 | KV452983.1 | 1901521 | 10-scf00394 | 10 |
| AX-158248613 | 20 | 67.032 | KV452983.1 | 1902324 | 10-scf00394 | 10 |
| AX-158248616 | 20 | 67.032 | KV452983.1 | 1904614 | 10-scf00394 | 10 |
| AX-158248617 | 20 | 67.032 | KV452983.1 | 1906264 | 10-scf00394 | 10 |
| AX-158248624 | 20 | 67.032 | KV452983.1 | 1913684 | 10-scf00394 | 10 |
| AX-158248631 | 20 | 67.032 | KV452983.1 | 1925043 | 10-scf00394 | 10 |
| AX-158248636 | 20 | 67.032 | KV452983.1 | 1927677 | 10-scf00394 | 10 |
| AX-158248638 | 20 | 67.032 | KV452983.1 | 1932347 | 10-scf00394 | 10 |
| AX-158248699 | 20 | 67.032 | KV452983.1 | 2020241 | 10-scf00394 | 10 |
| AX-158248700 | 20 | 67.032 | KV452983.1 | 2020585 | 10-scf00394 | 10 |

|              |    |        |            |         |             |    |
|--------------|----|--------|------------|---------|-------------|----|
| AX-158248749 | 20 | 67.032 | KV452983.1 | 2081949 | 10-scf00394 | 10 |
| AX-157775596 | 20 | 67.032 | KV452983.1 | 2102545 | 10-scf00394 | 10 |
| AX-158248516 | 20 | 67.153 | KV452983.1 | 1781585 | 10-scf00394 | 10 |
| AX-158248609 | 20 | 67.153 | KV452983.1 | 1891350 | 10-scf00394 | 10 |
| AX-158248629 | 20 | 67.153 | KV452983.1 | 1923049 | 10-scf00394 | 10 |
| AX-158248641 | 20 | 67.153 | KV452983.1 | 1934607 | 10-scf00394 | 10 |
| AX-158248642 | 20 | 67.153 | KV452983.1 | 1938208 | 10-scf00394 | 10 |
| AX-158248652 | 20 | 67.153 | KV452983.1 | 1955167 | 10-scf00394 | 10 |
| AX-158248692 | 20 | 67.153 | KV452983.1 | 2011215 | 10-scf00394 | 10 |
| AX-158248647 | 20 | 67.25  | KV452983.1 | 1950889 | 10-scf00394 | 10 |
| AX-157748367 | 20 | 67.25  | KV452983.1 | 1954221 | 10-scf00394 | 10 |
| AX-158248654 | 20 | 67.25  | KV452983.1 | 1956202 | 10-scf00394 | 10 |
| AX-158248656 | 20 | 67.25  | KV452983.1 | 1957956 | 10-scf00394 | 10 |
| AX-158248658 | 20 | 67.25  | KV452983.1 | 1961147 | 10-scf00394 | 10 |
| AX-157841912 | 20 | 67.577 | KV452983.1 | 1967842 | 10-scf00394 | 10 |
| AX-157841914 | 20 | 67.577 | KV452983.1 | 1970958 | 10-scf00394 | 10 |
| AX-158248707 | 20 | 67.577 | KV452983.1 | 2027572 | 10-scf00394 | 10 |
| AX-158248659 | 20 | 67.578 | KV452983.1 | 1970660 | 10-scf00394 | 10 |
| AX-158248661 | 20 | 67.578 | KV452983.1 | 1972290 | 10-scf00394 | 10 |
| AX-157867329 | 20 | 67.578 | KV452983.1 | 1973521 | 10-scf00394 | 10 |
| AX-158248663 | 20 | 67.578 | KV452983.1 | 1976232 | 10-scf00394 | 10 |
| AX-158248664 | 20 | 67.578 | KV452983.1 | 1976894 | 10-scf00394 | 10 |
| AX-157841916 | 20 | 67.578 | KV452983.1 | 1983720 | 10-scf00394 | 10 |
| AX-158248672 | 20 | 67.578 | KV452983.1 | 1986359 | 10-scf00394 | 10 |
| AX-158248676 | 20 | 67.578 | KV452983.1 | 1989056 | 10-scf00394 | 10 |
| AX-158248677 | 20 | 67.578 | KV452983.1 | 1990166 | 10-scf00394 | 10 |
| AX-158248681 | 20 | 67.578 | KV452983.1 | 1997802 | 10-scf00394 | 10 |
| AX-158248697 | 20 | 67.578 | KV452983.1 | 2019371 | 10-scf00394 | 10 |
| AX-158248701 | 20 | 67.578 | KV452983.1 | 2021423 | 10-scf00394 | 10 |
| AX-158248702 | 20 | 67.578 | KV452983.1 | 2021929 | 10-scf00394 | 10 |
| AX-157867331 | 20 | 67.578 | KV452983.1 | 2022465 | 10-scf00394 | 10 |
| AX-158248705 | 20 | 67.578 | KV452983.1 | 2025080 | 10-scf00394 | 10 |
| AX-158248715 | 20 | 67.578 | KV452983.1 | 2040545 | 10-scf00394 | 10 |
| AX-158248757 | 20 | 67.578 | KV452983.1 | 2099076 | 10-scf00394 | 10 |
| AX-157841917 | 20 | 67.603 | KV452983.1 | 2001856 | 10-scf00394 | 10 |
| AX-157841905 | 20 | 67.613 | KV452983.1 | 1918760 | 10-scf00394 | 10 |
| AX-158248684 | 20 | 67.613 | KV452983.1 | 2002162 | 10-scf00394 | 10 |
| AX-158248688 | 20 | 67.613 | KV452983.1 | 2003894 | 10-scf00394 | 10 |
| AX-158248690 | 20 | 67.613 | KV452983.1 | 2006051 | 10-scf00394 | 10 |
| AX-158415775 | 20 | 67.613 | KV452983.1 | 2034670 | 10-scf00394 | 10 |
| AX-158248686 | 20 | 67.625 | KV452983.1 | 2002950 | 10-scf00394 | 10 |
| AX-158248696 | 20 | 67.639 | KV452983.1 | 2019151 | 10-scf00394 | 10 |
| AX-158248704 | 20 | 67.654 | KV452983.1 | 2023780 | 10-scf00394 | 10 |
| AX-158248584 | 20 | 67.662 | KV452983.1 | 1855961 | 10-scf00394 | 10 |
| AX-158248708 | 20 | 67.662 | KV452983.1 | 2028467 | 10-scf00394 | 10 |
| AX-157773436 | 20 | 67.662 | KV452983.1 | 2030165 | 10-scf00394 | 10 |
| AX-158248709 | 20 | 67.669 | KV452983.1 | 2028875 | 10-scf00394 | 10 |
| AX-158248716 | 20 | 67.679 | KV452983.1 | 2045167 | 10-scf00394 | 10 |
| AX-158248717 | 20 | 67.687 | KV452983.1 | 2045838 | 10-scf00394 | 10 |
| AX-158248718 | 20 | 67.687 | KV452983.1 | 2047033 | 10-scf00394 | 10 |
| AX-157841921 | 20 | 67.687 | KV452983.1 | 2047420 | 10-scf00394 | 10 |

|              |    |        |            |         |             |    |
|--------------|----|--------|------------|---------|-------------|----|
| AX-158248726 | 20 | 67.687 | KV452983.1 | 2055273 | 10-scf00394 | 10 |
| AX-158248728 | 20 | 67.687 | KV452983.1 | 2056385 | 10-scf00394 | 10 |
| AX-158248729 | 20 | 67.687 | KV452983.1 | 2058080 | 10-scf00394 | 10 |
| AX-158248735 | 20 | 67.687 | KV452983.1 | 2066901 | 10-scf00394 | 10 |
| AX-158248736 | 20 | 67.687 | KV452983.1 | 2067442 | 10-scf00394 | 10 |
| AX-157841923 | 20 | 67.687 | KV452983.1 | 2070940 | 10-scf00394 | 10 |
| AX-157887588 | 20 | 67.687 | KV452983.1 | 2082045 | 10-scf00394 | 10 |
| AX-158248750 | 20 | 67.687 | KV452983.1 | 2085936 | 10-scf00394 | 10 |
| AX-157841925 | 20 | 67.687 | KV452983.1 | 2086757 | 10-scf00394 | 10 |
| AX-158248747 | 20 | 67.796 | KV452983.1 | 2081042 | 10-scf00394 | 10 |
| AX-158248755 | 20 | 67.829 | KV452983.1 | 2097612 | 10-scf00394 | 10 |
| AX-158248768 | 20 | 67.829 | KV452983.1 | 2112587 | 10-scf00394 | 10 |
| AX-158248785 | 20 | 67.829 | KV452983.1 | 2126420 | 10-scf00394 | 10 |
| AX-158248756 | 20 | 67.869 | KV452983.1 | 2098612 | 10-scf00394 | 10 |
| AX-158248766 | 20 | 67.905 | KV452983.1 | 2111466 | 10-scf00394 | 10 |
| AX-157745193 | 20 | 67.905 | KV452983.1 | 2116839 | 10-scf00394 | 10 |
| AX-158248772 | 20 | 67.905 | KV452983.1 | 2117522 | 10-scf00394 | 10 |
| AX-158248774 | 20 | 67.905 | KV452983.1 | 2119909 | 10-scf00394 | 10 |
| AX-157716257 | 20 | 67.905 | KV452983.1 | 2120120 | 10-scf00394 | 10 |
| AX-157710058 | 20 | 67.905 | KV452983.1 | 2121567 | 10-scf00394 | 10 |
| AX-158248779 | 20 | 67.905 | KV452983.1 | 2123169 | 10-scf00394 | 10 |
| AX-158248784 | 20 | 67.905 | KV452983.1 | 2125902 | 10-scf00394 | 10 |
| AX-158248787 | 20 | 67.905 | KV452983.1 | 2129016 | 10-scf00394 | 10 |
| AX-157753216 | 20 | 67.905 | KV452983.1 | 2132025 | 10-scf00394 | 10 |
| AX-157859812 | 20 | 67.905 | KV452983.1 | 2139311 | 10-scf00394 | 10 |
| AX-158248793 | 20 | 67.905 | KV452983.1 | 2140929 | 10-scf00394 | 10 |
| AX-157772157 | 20 | 67.905 | KV452983.1 | 2144702 | 10-scf00394 | 10 |
| AX-158248794 | 20 | 67.905 | KV452983.1 | 2145115 | 10-scf00394 | 10 |
| AX-158248823 | 20 | 67.905 | KV452983.1 | 2180404 | 10-scf00394 | 10 |
| AX-158248858 | 20 | 67.905 | KV452983.1 | 2265432 | 10-scf00394 | 10 |
| AX-158248860 | 20 | 67.905 | KV452983.1 | 2266036 | 10-scf00394 | 10 |
| AX-158248881 | 20 | 67.905 | KV452983.1 | 2290665 | 10-scf00394 | 10 |
| AX-157753650 | 20 | 67.905 | KV452983.1 | 2730294 | 10-scf00394 | 10 |
| AX-158249419 | 20 | 67.905 | KV452983.1 | 2960848 | 10-scf00394 | 10 |
| AX-158249443 | 20 | 67.905 | KV452983.1 | 2981446 | 10-scf00394 | 10 |
| AX-157689972 | 20 | 67.905 |            | 82      | scf17615    | UN |
| AX-158248314 | 20 | 68.015 | KV452983.1 | 1531783 | 10-scf00394 | 10 |
| AX-158248547 | 20 | 68.015 | KV452983.1 | 1819154 | 10-scf00394 | 10 |
| AX-158248714 | 20 | 68.015 | KV452983.1 | 2036917 | 10-scf00394 | 10 |
| AX-158248720 | 20 | 68.015 | KV452983.1 | 2048710 | 10-scf00394 | 10 |
| AX-158248731 | 20 | 68.015 | KV452983.1 | 2061638 | 10-scf00394 | 10 |
| AX-158248739 | 20 | 68.015 | KV452983.1 | 2070237 | 10-scf00394 | 10 |
| AX-158248742 | 20 | 68.015 | KV452983.1 | 2075623 | 10-scf00394 | 10 |
| AX-158248764 | 20 | 68.015 | KV452983.1 | 2109010 | 10-scf00394 | 10 |
| AX-158248765 | 20 | 68.015 | KV452983.1 | 2110148 | 10-scf00394 | 10 |
| AX-158248767 | 20 | 68.015 | KV452983.1 | 2112014 | 10-scf00394 | 10 |
| AX-157863822 | 20 | 68.015 | KV452983.1 | 2114214 | 10-scf00394 | 10 |
| AX-158248777 | 20 | 68.015 | KV452983.1 | 2121870 | 10-scf00394 | 10 |
| AX-158248796 | 20 | 68.015 | KV452983.1 | 2146898 | 10-scf00394 | 10 |
| AX-158248801 | 20 | 68.015 | KV452983.1 | 2155989 | 10-scf00394 | 10 |
| AX-157841931 | 20 | 68.015 | KV452983.1 | 2157318 | 10-scf00394 | 10 |

|              |    |        |            |         |             |    |
|--------------|----|--------|------------|---------|-------------|----|
| AX-158248803 | 20 | 68.015 | KV452983.1 | 2158602 | 10-scf00394 | 10 |
| AX-158248804 | 20 | 68.015 | KV452983.1 | 2158720 | 10-scf00394 | 10 |
| AX-157841933 | 20 | 68.015 | KV452983.1 | 2161242 | 10-scf00394 | 10 |
| AX-158248810 | 20 | 68.015 | KV452983.1 | 2166293 | 10-scf00394 | 10 |
| AX-158248811 | 20 | 68.015 | KV452983.1 | 2167345 | 10-scf00394 | 10 |
| AX-158248813 | 20 | 68.015 | KV452983.1 | 2168622 | 10-scf00394 | 10 |
| AX-157841934 | 20 | 68.015 | KV452983.1 | 2169047 | 10-scf00394 | 10 |
| AX-158248816 | 20 | 68.015 | KV452983.1 | 2173949 | 10-scf00394 | 10 |
| AX-158248819 | 20 | 68.015 | KV452983.1 | 2179079 | 10-scf00394 | 10 |
| AX-158248821 | 20 | 68.015 | KV452983.1 | 2179852 | 10-scf00394 | 10 |
| AX-157841935 | 20 | 68.015 | KV452983.1 | 2183757 | 10-scf00394 | 10 |
| AX-158248827 | 20 | 68.015 | KV452983.1 | 2194172 | 10-scf00394 | 10 |
| AX-157775383 | 20 | 68.015 | KV452983.1 | 2194453 | 10-scf00394 | 10 |
| AX-157841937 | 20 | 68.015 | KV452983.1 | 2196384 | 10-scf00394 | 10 |
| AX-158248829 | 20 | 68.015 | KV452983.1 | 2201586 | 10-scf00394 | 10 |
| AX-157841940 | 20 | 68.015 | KV452983.1 | 2210976 | 10-scf00394 | 10 |
| AX-157718861 | 20 | 68.015 | KV452983.1 | 2211851 | 10-scf00394 | 10 |
| AX-158248831 | 20 | 68.015 | KV452983.1 | 2212692 | 10-scf00394 | 10 |
| AX-158248834 | 20 | 68.015 | KV452983.1 | 2219402 | 10-scf00394 | 10 |
| AX-157887589 | 20 | 68.015 | KV452983.1 | 2243527 | 10-scf00394 | 10 |
| AX-158248847 | 20 | 68.015 | KV452983.1 | 2246763 | 10-scf00394 | 10 |
| AX-158248850 | 20 | 68.015 | KV452983.1 | 2253685 | 10-scf00394 | 10 |
| AX-157841943 | 20 | 68.015 | KV452983.1 | 2275529 | 10-scf00394 | 10 |
| AX-158248873 | 20 | 68.015 | KV452983.1 | 2278903 | 10-scf00394 | 10 |
| AX-157713604 | 20 | 68.015 | KV452983.1 | 2280930 | 10-scf00394 | 10 |
| AX-158249080 | 20 | 68.015 | KV452983.1 | 2540707 | 10-scf00394 | 10 |
| AX-158248830 | 20 | 68.072 | KV452983.1 | 2202703 | 10-scf00394 | 10 |
| AX-158248836 | 20 | 68.124 | KV452983.1 | 2225433 | 10-scf00394 | 10 |
| AX-158248838 | 20 | 68.166 | KV452983.1 | 2229345 | 10-scf00394 | 10 |
| AX-158248878 | 20 | 68.166 | KV452983.1 | 2285897 | 10-scf00394 | 10 |
| AX-158248837 | 20 | 68.233 | KV452983.1 | 2226187 | 10-scf00394 | 10 |
| AX-158248840 | 20 | 68.233 | KV452983.1 | 2237786 | 10-scf00394 | 10 |
| AX-158248841 | 20 | 68.233 | KV452983.1 | 2238301 | 10-scf00394 | 10 |
| AX-158248842 | 20 | 68.233 | KV452983.1 | 2240238 | 10-scf00394 | 10 |
| AX-158248844 | 20 | 68.233 | KV452983.1 | 2243134 | 10-scf00394 | 10 |
| AX-157727555 | 20 | 68.233 | KV452983.1 | 2254604 | 10-scf00394 | 10 |
| AX-158248854 | 20 | 68.233 | KV452983.1 | 2259687 | 10-scf00394 | 10 |
| AX-158248861 | 20 | 68.233 | KV452983.1 | 2266715 | 10-scf00394 | 10 |
| AX-158248862 | 20 | 68.233 | KV452983.1 | 2269452 | 10-scf00394 | 10 |
| AX-158248867 | 20 | 68.233 | KV452983.1 | 2272409 | 10-scf00394 | 10 |
| AX-158248868 | 20 | 68.233 | KV452983.1 | 2272763 | 10-scf00394 | 10 |
| AX-158248872 | 20 | 68.233 | KV452983.1 | 2277231 | 10-scf00394 | 10 |
| AX-157841944 | 20 | 68.233 | KV452983.1 | 2281006 | 10-scf00394 | 10 |
| AX-158248875 | 20 | 68.233 | KV452983.1 | 2281065 | 10-scf00394 | 10 |
| AX-158248877 | 20 | 68.233 | KV452983.1 | 2282430 | 10-scf00394 | 10 |
| AX-158248879 | 20 | 68.233 | KV452983.1 | 2289091 | 10-scf00394 | 10 |
| AX-158248882 | 20 | 68.233 | KV452983.1 | 2292769 | 10-scf00394 | 10 |
| AX-158248883 | 20 | 68.233 | KV452983.1 | 2296407 | 10-scf00394 | 10 |
| AX-158248884 | 20 | 68.233 | KV452983.1 | 2297229 | 10-scf00394 | 10 |
| AX-158248885 | 20 | 68.233 | KV452983.1 | 2297408 | 10-scf00394 | 10 |
| AX-157740602 | 20 | 68.233 | KV452983.1 | 2301034 | 10-scf00394 | 10 |

|              |    |        |             |         |             |    |
|--------------|----|--------|-------------|---------|-------------|----|
| AX-158248887 | 20 | 68.233 | KV452983.1  | 2302717 | 10-scf00394 | 10 |
| AX-158248891 | 20 | 68.233 | KV452983.1  | 2307246 | 10-scf00394 | 10 |
| AX-157841949 | 20 | 68.233 | KV452983.1  | 2315236 | 10-scf00394 | 10 |
| AX-158248899 | 20 | 68.233 | KV452983.1  | 2316288 | 10-scf00394 | 10 |
| AX-158248905 | 20 | 68.233 | KV452983.1  | 2326546 | 10-scf00394 | 10 |
| AX-157841961 | 20 | 68.233 | KV452983.1  | 2432351 | 10-scf00394 | 10 |
| AX-158249002 | 20 | 68.233 | KV452983.1  | 2445030 | 10-scf00394 | 10 |
| AX-158249094 | 20 | 68.233 | KV452983.1  | 2557331 | 10-scf00394 | 10 |
| AX-158249150 | 20 | 68.233 | KV452983.1  | 2625394 | 10-scf00394 | 10 |
| AX-158249152 | 20 | 68.233 | KV452983.1  | 2626657 | 10-scf00394 | 10 |
| AX-158249192 | 20 | 68.233 | KV452983.1  | 2678476 | 10-scf00394 | 10 |
| AX-158249211 | 20 | 68.233 | KV452983.1  | 2704932 | 10-scf00394 | 10 |
| AX-158249233 | 20 | 68.233 | KV452983.1  | 2728668 | 10-scf00394 | 10 |
| AX-158249241 | 20 | 68.233 | KV452983.1  | 2737721 | 10-scf00394 | 10 |
| AX-158249249 | 20 | 68.233 | KV452983.1  | 2748322 | 10-scf00394 | 10 |
| AX-158249287 | 20 | 68.233 | KV452983.1  | 2787180 | 10-scf00394 | 10 |
| AX-157841996 | 20 | 68.233 | KV452983.1  | 2830058 | 10-scf00394 | 10 |
| AX-157707382 | 20 | 68.233 | 3ML01034153 | 153     | scf09824_1  | UN |
| AX-158248805 | 20 | 68.265 | KV452983.1  | 2159282 | 10-scf00394 | 10 |
| AX-157841932 | 20 | 68.265 | KV452983.1  | 2159326 | 10-scf00394 | 10 |
| AX-158248888 | 20 | 68.265 | KV452983.1  | 2304260 | 10-scf00394 | 10 |
| AX-158248889 | 20 | 68.287 | KV452983.1  | 2305841 | 10-scf00394 | 10 |
| AX-158248857 | 20 | 68.312 | KV452983.1  | 2265074 | 10-scf00394 | 10 |
| AX-157745745 | 20 | 68.312 | KV452983.1  | 2286456 | 10-scf00394 | 10 |
| AX-158248890 | 20 | 68.312 | KV452983.1  | 2306324 | 10-scf00394 | 10 |
| AX-158248904 | 20 | 68.312 | KV452983.1  | 2326071 | 10-scf00394 | 10 |
| AX-158248978 | 20 | 68.312 | KV452983.1  | 2415488 | 10-scf00394 | 10 |
| AX-158249226 | 20 | 68.312 | KV452983.1  | 2723845 | 10-scf00394 | 10 |
| AX-158249236 | 20 | 68.312 | KV452983.1  | 2732617 | 10-scf00394 | 10 |
| AX-157841978 | 20 | 68.312 | KV452983.1  | 2737281 | 10-scf00394 | 10 |
| AX-157841981 | 20 | 68.312 | KV452983.1  | 2749346 | 10-scf00394 | 10 |
| AX-158415795 | 20 | 68.312 | KV452983.1  | 2809161 | 10-scf00394 | 10 |
| AX-158248897 | 20 | 68.342 | KV452983.1  | 2314528 | 10-scf00394 | 10 |
| AX-158248900 | 20 | 68.379 | KV452983.1  | 2316836 | 10-scf00394 | 10 |
| AX-158249157 | 20 | 68.379 | KV452983.1  | 2633100 | 10-scf00394 | 10 |
| AX-157841950 | 20 | 68.525 | KV452983.1  | 2322128 | 10-scf00394 | 10 |
| AX-158248906 | 20 | 68.525 | KV452983.1  | 2327205 | 10-scf00394 | 10 |
| AX-158248908 | 20 | 68.565 | KV452983.1  | 2330231 | 10-scf00394 | 10 |
| AX-158248982 | 20 | 68.565 | KV452983.1  | 2419796 | 10-scf00394 | 10 |
| AX-158248910 | 20 | 68.67  | KV452983.1  | 2332075 | 10-scf00394 | 10 |
| AX-158248911 | 20 | 68.67  | KV452983.1  | 2333977 | 10-scf00394 | 10 |
| AX-158248912 | 20 | 68.67  | KV452983.1  | 2334831 | 10-scf00394 | 10 |
| AX-158248913 | 20 | 68.67  | KV452983.1  | 2335576 | 10-scf00394 | 10 |
| AX-158248914 | 20 | 68.67  | KV452983.1  | 2337347 | 10-scf00394 | 10 |
| AX-158248922 | 20 | 68.67  | KV452983.1  | 2346176 | 10-scf00394 | 10 |
| AX-158248916 | 20 | 68.725 | KV452983.1  | 2340083 | 10-scf00394 | 10 |
| AX-158248915 | 20 | 68.78  | KV452983.1  | 2339777 | 10-scf00394 | 10 |
| AX-158248918 | 20 | 68.78  | KV452983.1  | 2341960 | 10-scf00394 | 10 |
| AX-158248919 | 20 | 68.78  | KV452983.1  | 2343567 | 10-scf00394 | 10 |
| AX-158248923 | 20 | 68.78  | KV452983.1  | 2346638 | 10-scf00394 | 10 |
| AX-158248925 | 20 | 68.78  | KV452983.1  | 2348083 | 10-scf00394 | 10 |

|              |    |        |            |         |             |    |
|--------------|----|--------|------------|---------|-------------|----|
| AX-158248926 | 20 | 68.78  | KV452983.1 | 2348555 | 10-scf00394 | 10 |
| AX-158248929 | 20 | 68.78  | KV452983.1 | 2351513 | 10-scf00394 | 10 |
| AX-158381008 | 20 | 68.78  | KV452983.1 | 2352146 | 10-scf00394 | 10 |
| AX-158248932 | 20 | 68.78  | KV452983.1 | 2354055 | 10-scf00394 | 10 |
| AX-158248936 | 20 | 68.78  | KV452983.1 | 2356128 | 10-scf00394 | 10 |
| AX-158248939 | 20 | 68.78  | KV452983.1 | 2359388 | 10-scf00394 | 10 |
| AX-158248941 | 20 | 68.78  | KV452983.1 | 2362668 | 10-scf00394 | 10 |
| AX-158248942 | 20 | 68.78  | KV452983.1 | 2363244 | 10-scf00394 | 10 |
| AX-158248945 | 20 | 68.78  | KV452983.1 | 2364446 | 10-scf00394 | 10 |
| AX-158248946 | 20 | 68.78  | KV452983.1 | 2365993 | 10-scf00394 | 10 |
| AX-158248947 | 20 | 68.78  | KV452983.1 | 2367313 | 10-scf00394 | 10 |
| AX-157749134 | 20 | 68.78  | KV452983.1 | 2368503 | 10-scf00394 | 10 |
| AX-158248953 | 20 | 68.78  | KV452983.1 | 2372139 | 10-scf00394 | 10 |
| AX-158249022 | 20 | 68.78  | KV452983.1 | 2460821 | 10-scf00394 | 10 |
| AX-158249073 | 20 | 68.78  | KV452983.1 | 2532655 | 10-scf00394 | 10 |
| AX-158249078 | 20 | 68.78  | KV452983.1 | 2538880 | 10-scf00394 | 10 |
| AX-158249106 | 20 | 68.78  | KV452983.1 | 2575971 | 10-scf00394 | 10 |
| AX-158249113 | 20 | 68.78  | KV452983.1 | 2583354 | 10-scf00394 | 10 |
| AX-157841972 | 20 | 68.78  | KV452983.1 | 2682944 | 10-scf00394 | 10 |
| AX-158249217 | 20 | 68.78  | KV452983.1 | 2714629 | 10-scf00394 | 10 |
| AX-158249278 | 20 | 68.78  | KV452983.1 | 2775923 | 10-scf00394 | 10 |
| AX-158249283 | 20 | 68.78  | KV452983.1 | 2781184 | 10-scf00394 | 10 |
| AX-158249284 | 20 | 68.78  | KV452983.1 | 2781460 | 10-scf00394 | 10 |
| AX-158249289 | 20 | 68.78  | KV452983.1 | 2789052 | 10-scf00394 | 10 |
| AX-158249306 | 20 | 68.78  | KV452983.1 | 2822207 | 10-scf00394 | 10 |
| AX-158249317 | 20 | 68.78  | KV452983.1 | 2843765 | 10-scf00394 | 10 |
| AX-158249328 | 20 | 68.78  | KV452983.1 | 2855790 | 10-scf00394 | 10 |
| AX-158249380 | 20 | 68.78  | KV452983.1 | 2912123 | 10-scf00394 | 10 |
| AX-158249389 | 20 | 68.78  | KV452983.1 | 2921376 | 10-scf00394 | 10 |
| AX-157842015 | 20 | 68.78  | KV452983.1 | 3049888 | 10-scf00394 | 10 |
| AX-157745016 | 20 | 68.78  | KV452983.1 | 3061191 | 10-scf00394 | 10 |
| AX-158249567 | 20 | 68.78  | KV452983.1 | 3136809 | 10-scf00394 | 10 |
| AX-158248954 | 20 | 68.795 | KV452983.1 | 2372702 | 10-scf00394 | 10 |
| AX-158248955 | 20 | 68.811 | KV452983.1 | 2373669 | 10-scf00394 | 10 |
| AX-158249011 | 20 | 68.811 | KV452983.1 | 2451586 | 10-scf00394 | 10 |
| AX-158248956 | 20 | 68.824 | KV452983.1 | 2374112 | 10-scf00394 | 10 |
| AX-158248957 | 20 | 68.836 | KV452983.1 | 2374502 | 10-scf00394 | 10 |
| AX-158248938 | 20 | 68.85  | KV452983.1 | 2358208 | 10-scf00394 | 10 |
| AX-158248961 | 20 | 68.85  | KV452983.1 | 2379284 | 10-scf00394 | 10 |
| AX-158248962 | 20 | 68.85  | KV452983.1 | 2379918 | 10-scf00394 | 10 |
| AX-158248968 | 20 | 68.85  | KV452983.1 | 2396772 | 10-scf00394 | 10 |
| AX-158248965 | 20 | 68.869 | KV452983.1 | 2385789 | 10-scf00394 | 10 |
| AX-158248428 | 20 | 68.889 | KV452983.1 | 1686930 | 10-scf00394 | 10 |
| AX-158248622 | 20 | 68.889 | KV452983.1 | 1911769 | 10-scf00394 | 10 |
| AX-158248651 | 20 | 68.889 | KV452983.1 | 1954180 | 10-scf00394 | 10 |
| AX-158248783 | 20 | 68.889 | KV452983.1 | 2125473 | 10-scf00394 | 10 |
| AX-158248822 | 20 | 68.889 | KV452983.1 | 2180090 | 10-scf00394 | 10 |
| AX-157841938 | 20 | 68.889 | KV452983.1 | 2206341 | 10-scf00394 | 10 |
| AX-157744200 | 20 | 68.889 | KV452983.1 | 2206567 | 10-scf00394 | 10 |
| AX-157841939 | 20 | 68.889 | KV452983.1 | 2206604 | 10-scf00394 | 10 |
| AX-157841955 | 20 | 68.889 | KV452983.1 | 2386032 | 10-scf00394 | 10 |

|              |    |        |            |         |             |    |
|--------------|----|--------|------------|---------|-------------|----|
| AX-158248967 | 20 | 68.889 | KV452983.1 | 2394765 | 10-scf00394 | 10 |
| AX-158248969 | 20 | 68.889 | KV452983.1 | 2398816 | 10-scf00394 | 10 |
| AX-157841958 | 20 | 68.889 | KV452983.1 | 2400415 | 10-scf00394 | 10 |
| AX-158248981 | 20 | 68.889 | KV452983.1 | 2417193 | 10-scf00394 | 10 |
| AX-158248983 | 20 | 68.889 | KV452983.1 | 2420350 | 10-scf00394 | 10 |
| AX-158248985 | 20 | 68.889 | KV452983.1 | 2422001 | 10-scf00394 | 10 |
| AX-158419058 | 20 | 68.889 | KV452983.1 | 2424038 | 10-scf00394 | 10 |
| AX-158248988 | 20 | 68.889 | KV452983.1 | 2428665 | 10-scf00394 | 10 |
| AX-158248990 | 20 | 68.889 | KV452983.1 | 2430667 | 10-scf00394 | 10 |
| AX-158249092 | 20 | 68.889 | KV452983.1 | 2553059 | 10-scf00394 | 10 |
| AX-158249151 | 20 | 68.889 | KV452983.1 | 2626171 | 10-scf00394 | 10 |
| AX-158249244 | 20 | 68.889 | KV452983.1 | 2740608 | 10-scf00394 | 10 |
| AX-158249335 | 20 | 68.889 | KV452983.1 | 2863393 | 10-scf00394 | 10 |
| AX-158249517 | 20 | 68.889 | KV452983.1 | 3070935 | 10-scf00394 | 10 |
| AX-158249533 | 20 | 68.889 | KV452983.1 | 3099378 | 10-scf00394 | 10 |
| AX-158249637 | 20 | 68.889 | KV452983.1 | 3216146 | 10-scf00394 | 10 |
| AX-158248402 | 20 | 68.895 | KV452983.1 | 1651958 | 10-scf00394 | 10 |
| AX-158248993 | 20 | 68.895 | KV452983.1 | 2433858 | 10-scf00394 | 10 |
| AX-158249120 | 20 | 68.895 | KV452983.1 | 2589458 | 10-scf00394 | 10 |
| AX-158249172 | 20 | 68.895 | KV452983.1 | 2657912 | 10-scf00394 | 10 |
| AX-158248895 | 20 | 68.912 | KV452983.1 | 2313653 | 10-scf00394 | 10 |
| AX-158248917 | 20 | 68.912 | KV452983.1 | 2341352 | 10-scf00394 | 10 |
| AX-158248921 | 20 | 68.912 | KV452983.1 | 2344685 | 10-scf00394 | 10 |
| AX-158410818 | 20 | 68.912 | KV452983.1 | 2350040 | 10-scf00394 | 10 |
| AX-158248928 | 20 | 68.912 | KV452983.1 | 2350771 | 10-scf00394 | 10 |
| AX-158248935 | 20 | 68.912 | KV452983.1 | 2355341 | 10-scf00394 | 10 |
| AX-158248974 | 20 | 68.912 | KV452983.1 | 2412177 | 10-scf00394 | 10 |
| AX-158248977 | 20 | 68.912 | KV452983.1 | 2414083 | 10-scf00394 | 10 |
| AX-158248994 | 20 | 68.912 | KV452983.1 | 2438198 | 10-scf00394 | 10 |
| AX-158249007 | 20 | 68.912 | KV452983.1 | 2449234 | 10-scf00394 | 10 |
| AX-158249013 | 20 | 68.912 | KV452983.1 | 2455655 | 10-scf00394 | 10 |
| AX-158249017 | 20 | 68.912 | KV452983.1 | 2456837 | 10-scf00394 | 10 |
| AX-158249018 | 20 | 68.912 | KV452983.1 | 2457054 | 10-scf00394 | 10 |
| AX-158249021 | 20 | 68.912 | KV452983.1 | 2460015 | 10-scf00394 | 10 |
| AX-158249025 | 20 | 68.912 | KV452983.1 | 2462831 | 10-scf00394 | 10 |
| AX-158249026 | 20 | 68.912 | KV452983.1 | 2463974 | 10-scf00394 | 10 |
| AX-158249027 | 20 | 68.912 | KV452983.1 | 2465317 | 10-scf00394 | 10 |
| AX-158249029 | 20 | 68.912 | KV452983.1 | 2467526 | 10-scf00394 | 10 |
| AX-158249031 | 20 | 68.912 | KV452983.1 | 2470835 | 10-scf00394 | 10 |
| AX-158249034 | 20 | 68.912 | KV452983.1 | 2476279 | 10-scf00394 | 10 |
| AX-158249039 | 20 | 68.912 | KV452983.1 | 2483783 | 10-scf00394 | 10 |
| AX-158249046 | 20 | 68.912 | KV452983.1 | 2494011 | 10-scf00394 | 10 |
| AX-158249049 | 20 | 68.912 | KV452983.1 | 2496332 | 10-scf00394 | 10 |
| AX-158249063 | 20 | 68.912 | KV452983.1 | 2517112 | 10-scf00394 | 10 |
| AX-158249086 | 20 | 68.912 | KV452983.1 | 2546212 | 10-scf00394 | 10 |
| AX-158249098 | 20 | 68.912 | KV452983.1 | 2564573 | 10-scf00394 | 10 |
| AX-158394469 | 20 | 68.912 | KV452983.1 | 2567380 | 10-scf00394 | 10 |
| AX-158249101 | 20 | 68.912 | KV452983.1 | 2568596 | 10-scf00394 | 10 |
| AX-158249111 | 20 | 68.912 | KV452983.1 | 2581805 | 10-scf00394 | 10 |
| AX-158249112 | 20 | 68.912 | KV452983.1 | 2583001 | 10-scf00394 | 10 |
| AX-158249122 | 20 | 68.912 | KV452983.1 | 2591010 | 10-scf00394 | 10 |



|              |    |        |            |         |             |    |
|--------------|----|--------|------------|---------|-------------|----|
| AX-158249128 | 20 | 68.912 | KV452983.1 | 2596412 | 10-scf00394 | 10 |
| AX-158249140 | 20 | 68.912 | KV452983.1 | 2618419 | 10-scf00394 | 10 |
| AX-158249144 | 20 | 68.912 | KV452983.1 | 2621718 | 10-scf00394 | 10 |
| AX-158249161 | 20 | 68.912 | KV452983.1 | 2638878 | 10-scf00394 | 10 |
| AX-158249182 | 20 | 68.912 | KV452983.1 | 2671373 | 10-scf00394 | 10 |
| AX-158249239 | 20 | 68.912 | KV452983.1 | 2736360 | 10-scf00394 | 10 |
| AX-158249270 | 20 | 68.912 | KV452983.1 | 2769420 | 10-scf00394 | 10 |
| AX-158249291 | 20 | 68.912 | KV452983.1 | 2790811 | 10-scf00394 | 10 |
| AX-158249356 | 20 | 68.912 | KV452983.1 | 2883244 | 10-scf00394 | 10 |
| AX-158249364 | 20 | 68.912 | KV452983.1 | 2891698 | 10-scf00394 | 10 |
| AX-158249005 | 20 | 68.939 | KV452983.1 | 2447433 | 10-scf00394 | 10 |
| AX-158249014 | 20 | 68.97  | KV452983.1 | 2455899 | 10-scf00394 | 10 |
| AX-158248924 | 20 | 68.998 | KV452983.1 | 2347070 | 10-scf00394 | 10 |
| AX-158248934 | 20 | 68.998 | KV452983.1 | 2355160 | 10-scf00394 | 10 |
| AX-158248960 | 20 | 68.998 | KV452983.1 | 2377040 | 10-scf00394 | 10 |
| AX-158248963 | 20 | 68.998 | KV452983.1 | 2380231 | 10-scf00394 | 10 |
| AX-158248964 | 20 | 68.998 | KV452983.1 | 2385027 | 10-scf00394 | 10 |
| AX-158248971 | 20 | 68.998 | KV452983.1 | 2406412 | 10-scf00394 | 10 |
| AX-158248973 | 20 | 68.998 | KV452983.1 | 2408608 | 10-scf00394 | 10 |
| AX-157841959 | 20 | 68.998 | KV452983.1 | 2428987 | 10-scf00394 | 10 |
| AX-158248995 | 20 | 68.998 | KV452983.1 | 2439003 | 10-scf00394 | 10 |
| AX-157841962 | 20 | 68.998 | KV452983.1 | 2439627 | 10-scf00394 | 10 |
| AX-158249009 | 20 | 68.998 | KV452983.1 | 2450308 | 10-scf00394 | 10 |
| AX-157841963 | 20 | 68.998 | KV452983.1 | 2454073 | 10-scf00394 | 10 |
| AX-158249015 | 20 | 68.998 | KV452983.1 | 2456202 | 10-scf00394 | 10 |
| AX-158249016 | 20 | 68.998 | KV452983.1 | 2456524 | 10-scf00394 | 10 |
| AX-158249019 | 20 | 68.998 | KV452983.1 | 2458933 | 10-scf00394 | 10 |
| AX-158249020 | 20 | 68.998 | KV452983.1 | 2459454 | 10-scf00394 | 10 |
| AX-157841964 | 20 | 68.998 | KV452983.1 | 2461157 | 10-scf00394 | 10 |
| AX-158249028 | 20 | 68.998 | KV452983.1 | 2466489 | 10-scf00394 | 10 |
| AX-158249032 | 20 | 68.998 | KV452983.1 | 2471657 | 10-scf00394 | 10 |
| AX-158249033 | 20 | 68.998 | KV452983.1 | 2475770 | 10-scf00394 | 10 |
| AX-158249037 | 20 | 68.998 | KV452983.1 | 2477760 | 10-scf00394 | 10 |
| AX-158249041 | 20 | 68.998 | KV452983.1 | 2486655 | 10-scf00394 | 10 |
| AX-158249042 | 20 | 68.998 | KV452983.1 | 2487891 | 10-scf00394 | 10 |
| AX-158249043 | 20 | 68.998 | KV452983.1 | 2490631 | 10-scf00394 | 10 |
| AX-158249048 | 20 | 68.998 | KV452983.1 | 2495651 | 10-scf00394 | 10 |
| AX-158249052 | 20 | 68.998 | KV452983.1 | 2501095 | 10-scf00394 | 10 |
| AX-158249053 | 20 | 68.998 | KV452983.1 | 2502580 | 10-scf00394 | 10 |
| AX-158249054 | 20 | 68.998 | KV452983.1 | 2505563 | 10-scf00394 | 10 |
| AX-158249056 | 20 | 68.998 | KV452983.1 | 2507098 | 10-scf00394 | 10 |
| AX-157749383 | 20 | 68.998 | KV452983.1 | 2507865 | 10-scf00394 | 10 |
| AX-158249057 | 20 | 68.998 | KV452983.1 | 2509966 | 10-scf00394 | 10 |
| AX-158249058 | 20 | 68.998 | KV452983.1 | 2510611 | 10-scf00394 | 10 |
| AX-158249059 | 20 | 68.998 | KV452983.1 | 2510994 | 10-scf00394 | 10 |
| AX-158249060 | 20 | 68.998 | KV452983.1 | 2511476 | 10-scf00394 | 10 |
| AX-158249061 | 20 | 68.998 | KV452983.1 | 2515541 | 10-scf00394 | 10 |
| AX-158249064 | 20 | 68.998 | KV452983.1 | 2519509 | 10-scf00394 | 10 |
| AX-158249067 | 20 | 68.998 | KV452983.1 | 2525240 | 10-scf00394 | 10 |
| AX-157859816 | 20 | 68.998 | KV452983.1 | 2528291 | 10-scf00394 | 10 |
| AX-158249069 | 20 | 68.998 | KV452983.1 | 2528646 | 10-scf00394 | 10 |

|              |    |        |            |         |             |    |
|--------------|----|--------|------------|---------|-------------|----|
| AX-158249070 | 20 | 68.998 | KV452983.1 | 2529929 | 10-scf00394 | 10 |
| AX-158249071 | 20 | 68.998 | KV452983.1 | 2531769 | 10-scf00394 | 10 |
| AX-158249075 | 20 | 68.998 | KV452983.1 | 2534131 | 10-scf00394 | 10 |
| AX-157697371 | 20 | 68.998 | KV452983.1 | 2538167 | 10-scf00394 | 10 |
| AX-158249096 | 20 | 68.998 | KV452983.1 | 2561605 | 10-scf00394 | 10 |
| AX-158249100 | 20 | 68.998 | KV452983.1 | 2566204 | 10-scf00394 | 10 |
| AX-158249105 | 20 | 68.998 | KV452983.1 | 2574206 | 10-scf00394 | 10 |
| AX-158249108 | 20 | 68.998 | KV452983.1 | 2577727 | 10-scf00394 | 10 |
| AX-158249110 | 20 | 68.998 | KV452983.1 | 2579460 | 10-scf00394 | 10 |
| AX-158249115 | 20 | 68.998 | KV452983.1 | 2584388 | 10-scf00394 | 10 |
| AX-158249119 | 20 | 68.998 | KV452983.1 | 2587916 | 10-scf00394 | 10 |
| AX-158249121 | 20 | 68.998 | KV452983.1 | 2590183 | 10-scf00394 | 10 |
| AX-158249124 | 20 | 68.998 | KV452983.1 | 2593453 | 10-scf00394 | 10 |
| AX-158249127 | 20 | 68.998 | KV452983.1 | 2595354 | 10-scf00394 | 10 |
| AX-158249129 | 20 | 68.998 | KV452983.1 | 2597094 | 10-scf00394 | 10 |
| AX-158415787 | 20 | 68.998 | KV452983.1 | 2604167 | 10-scf00394 | 10 |
| AX-158249132 | 20 | 68.998 | KV452983.1 | 2605333 | 10-scf00394 | 10 |
| AX-158249133 | 20 | 68.998 | KV452983.1 | 2605667 | 10-scf00394 | 10 |
| AX-157755304 | 20 | 68.998 | KV452983.1 | 2610004 | 10-scf00394 | 10 |
| AX-157770628 | 20 | 68.998 | KV452983.1 | 2611828 | 10-scf00394 | 10 |
| AX-158249137 | 20 | 68.998 | KV452983.1 | 2612266 | 10-scf00394 | 10 |
| AX-158249138 | 20 | 68.998 | KV452983.1 | 2615032 | 10-scf00394 | 10 |
| AX-158249139 | 20 | 68.998 | KV452983.1 | 2617449 | 10-scf00394 | 10 |
| AX-157749054 | 20 | 68.998 | KV452983.1 | 2617953 | 10-scf00394 | 10 |
| AX-158249142 | 20 | 68.998 | KV452983.1 | 2620521 | 10-scf00394 | 10 |
| AX-158249147 | 20 | 68.998 | KV452983.1 | 2624027 | 10-scf00394 | 10 |
| AX-158249153 | 20 | 68.998 | KV452983.1 | 2628211 | 10-scf00394 | 10 |
| AX-158249155 | 20 | 68.998 | KV452983.1 | 2631168 | 10-scf00394 | 10 |
| AX-158249156 | 20 | 68.998 | KV452983.1 | 2632562 | 10-scf00394 | 10 |
| AX-158249163 | 20 | 68.998 | KV452983.1 | 2641248 | 10-scf00394 | 10 |
| AX-157841969 | 20 | 68.998 | KV452983.1 | 2642464 | 10-scf00394 | 10 |
| AX-158249164 | 20 | 68.998 | KV452983.1 | 2646385 | 10-scf00394 | 10 |
| AX-158249165 | 20 | 68.998 | KV452983.1 | 2648261 | 10-scf00394 | 10 |
| AX-158249166 | 20 | 68.998 | KV452983.1 | 2649074 | 10-scf00394 | 10 |
| AX-158249168 | 20 | 68.998 | KV452983.1 | 2652551 | 10-scf00394 | 10 |
| AX-158249170 | 20 | 68.998 | KV452983.1 | 2655081 | 10-scf00394 | 10 |
| AX-158249171 | 20 | 68.998 | KV452983.1 | 2656392 | 10-scf00394 | 10 |
| AX-157721200 | 20 | 68.998 | KV452983.1 | 2662401 | 10-scf00394 | 10 |
| AX-157753921 | 20 | 68.998 | KV452983.1 | 2662964 | 10-scf00394 | 10 |
| AX-158249174 | 20 | 68.998 | KV452983.1 | 2663085 | 10-scf00394 | 10 |
| AX-158249178 | 20 | 68.998 | KV452983.1 | 2666816 | 10-scf00394 | 10 |
| AX-158249180 | 20 | 68.998 | KV452983.1 | 2669749 | 10-scf00394 | 10 |
| AX-158249186 | 20 | 68.998 | KV452983.1 | 2674235 | 10-scf00394 | 10 |
| AX-158249190 | 20 | 68.998 | KV452983.1 | 2677576 | 10-scf00394 | 10 |
| AX-158249202 | 20 | 68.998 | KV452983.1 | 2689767 | 10-scf00394 | 10 |
| AX-158249205 | 20 | 68.998 | KV452983.1 | 2694381 | 10-scf00394 | 10 |
| AX-158249219 | 20 | 68.998 | KV452983.1 | 2716133 | 10-scf00394 | 10 |
| AX-158249225 | 20 | 68.998 | KV452983.1 | 2722983 | 10-scf00394 | 10 |
| AX-157841979 | 20 | 68.998 | KV452983.1 | 2738575 | 10-scf00394 | 10 |
| AX-157841980 | 20 | 68.998 | KV452983.1 | 2743541 | 10-scf00394 | 10 |
| AX-158249250 | 20 | 68.998 | KV452983.1 | 2748513 | 10-scf00394 | 10 |

|              |    |        |            |         |             |    |
|--------------|----|--------|------------|---------|-------------|----|
| AX-158249251 | 20 | 68.998 | KV452983.1 | 2749803 | 10-scf00394 | 10 |
| AX-158249253 | 20 | 68.998 | KV452983.1 | 2755597 | 10-scf00394 | 10 |
| AX-158249255 | 20 | 68.998 | KV452983.1 | 2757665 | 10-scf00394 | 10 |
| AX-158249274 | 20 | 68.998 | KV452983.1 | 2772590 | 10-scf00394 | 10 |
| AX-157841984 | 20 | 68.998 | KV452983.1 | 2789626 | 10-scf00394 | 10 |
| AX-158249295 | 20 | 68.998 | KV452983.1 | 2795178 | 10-scf00394 | 10 |
| AX-157772926 | 20 | 68.998 | KV452983.1 | 2813658 | 10-scf00394 | 10 |
| AX-157841992 | 20 | 68.998 | KV452983.1 | 2820709 | 10-scf00394 | 10 |
| AX-158249318 | 20 | 68.998 | KV452983.1 | 2844747 | 10-scf00394 | 10 |
| AX-157842000 | 20 | 68.998 | KV452983.1 | 2853055 | 10-scf00394 | 10 |
| AX-158381010 | 20 | 68.998 | KV452983.1 | 2867327 | 10-scf00394 | 10 |
| AX-158249341 | 20 | 68.998 | KV452983.1 | 2870679 | 10-scf00394 | 10 |
| AX-157859818 | 20 | 68.998 | KV452983.1 | 2870933 | 10-scf00394 | 10 |
| AX-158249342 | 20 | 68.998 | KV452983.1 | 2871775 | 10-scf00394 | 10 |
| AX-157842008 | 20 | 68.998 | KV452983.1 | 2883494 | 10-scf00394 | 10 |
| AX-158249357 | 20 | 68.998 | KV452983.1 | 2884773 | 10-scf00394 | 10 |
| AX-158249498 | 20 | 68.998 | KV452983.1 | 3043294 | 10-scf00394 | 10 |
| AX-158249515 | 20 | 68.998 | KV452983.1 | 3068327 | 10-scf00394 | 10 |
| AX-158249544 | 20 | 68.998 | KV452983.1 | 3109321 | 10-scf00394 | 10 |
| AX-158249545 | 20 | 68.998 | KV452983.1 | 3110817 | 10-scf00394 | 10 |
| AX-158249559 | 20 | 68.998 | KV452983.1 | 3123853 | 10-scf00394 | 10 |
| AX-158249077 | 20 | 69.022 | KV452983.1 | 2536816 | 10-scf00394 | 10 |
| AX-158249175 | 20 | 69.022 | KV452983.1 | 2663639 | 10-scf00394 | 10 |
| AX-158249176 | 20 | 69.068 | KV452983.1 | 2663953 | 10-scf00394 | 10 |
| AX-158248931 | 20 | 69.107 | KV452983.1 | 2353594 | 10-scf00394 | 10 |
| AX-158248972 | 20 | 69.107 | KV452983.1 | 2407468 | 10-scf00394 | 10 |
| AX-158248980 | 20 | 69.107 | KV452983.1 | 2416695 | 10-scf00394 | 10 |
| AX-158249003 | 20 | 69.107 | KV452983.1 | 2445621 | 10-scf00394 | 10 |
| AX-158249097 | 20 | 69.107 | KV452983.1 | 2563147 | 10-scf00394 | 10 |
| AX-158249143 | 20 | 69.107 | KV452983.1 | 2621376 | 10-scf00394 | 10 |
| AX-158249189 | 20 | 69.107 | KV452983.1 | 2677089 | 10-scf00394 | 10 |
| AX-158249191 | 20 | 69.107 | KV452983.1 | 2678159 | 10-scf00394 | 10 |
| AX-158249193 | 20 | 69.107 | KV452983.1 | 2679228 | 10-scf00394 | 10 |
| AX-158249195 | 20 | 69.107 | KV452983.1 | 2681216 | 10-scf00394 | 10 |
| AX-158249199 | 20 | 69.107 | KV452983.1 | 2685103 | 10-scf00394 | 10 |
| AX-158249200 | 20 | 69.107 | KV452983.1 | 2685864 | 10-scf00394 | 10 |
| AX-158249201 | 20 | 69.107 | KV452983.1 | 2687955 | 10-scf00394 | 10 |
| AX-157743390 | 20 | 69.107 | KV452983.1 | 2688923 | 10-scf00394 | 10 |
| AX-157713522 | 20 | 69.107 | KV452983.1 | 2689971 | 10-scf00394 | 10 |
| AX-158249203 | 20 | 69.107 | KV452983.1 | 2691534 | 10-scf00394 | 10 |
| AX-158249204 | 20 | 69.107 | KV452983.1 | 2691806 | 10-scf00394 | 10 |
| AX-158249206 | 20 | 69.107 | KV452983.1 | 2695016 | 10-scf00394 | 10 |
| AX-157841973 | 20 | 69.107 | KV452983.1 | 2695696 | 10-scf00394 | 10 |
| AX-158249209 | 20 | 69.107 | KV452983.1 | 2701887 | 10-scf00394 | 10 |
| AX-157887594 | 20 | 69.107 | KV452983.1 | 2703570 | 10-scf00394 | 10 |
| AX-158249212 | 20 | 69.107 | KV452983.1 | 2705327 | 10-scf00394 | 10 |
| AX-158249220 | 20 | 69.107 | KV452983.1 | 2716796 | 10-scf00394 | 10 |
| AX-158249222 | 20 | 69.107 | KV452983.1 | 2719264 | 10-scf00394 | 10 |
| AX-158415789 | 20 | 69.107 | KV452983.1 | 2719866 | 10-scf00394 | 10 |
| AX-158415790 | 20 | 69.107 | KV452983.1 | 2719922 | 10-scf00394 | 10 |
| AX-158249223 | 20 | 69.107 | KV452983.1 | 2720436 | 10-scf00394 | 10 |

|              |    |        |            |         |             |    |
|--------------|----|--------|------------|---------|-------------|----|
| AX-158249224 | 20 | 69.107 | KV452983.1 | 2722306 | 10-scf00394 | 10 |
| AX-158249228 | 20 | 69.107 | KV452983.1 | 2725021 | 10-scf00394 | 10 |
| AX-158249229 | 20 | 69.107 | KV452983.1 | 2725140 | 10-scf00394 | 10 |
| AX-157750547 | 20 | 69.107 | KV452983.1 | 2730829 | 10-scf00394 | 10 |
| AX-158415791 | 20 | 69.107 | KV452983.1 | 2731860 | 10-scf00394 | 10 |
| AX-158249245 | 20 | 69.107 | KV452983.1 | 2741303 | 10-scf00394 | 10 |
| AX-158249246 | 20 | 69.107 | KV452983.1 | 2745743 | 10-scf00394 | 10 |
| AX-157867336 | 20 | 69.107 | KV452983.1 | 2747264 | 10-scf00394 | 10 |
| AX-158249248 | 20 | 69.107 | KV452983.1 | 2747886 | 10-scf00394 | 10 |
| AX-157841982 | 20 | 69.107 | KV452983.1 | 2752539 | 10-scf00394 | 10 |
| AX-158249256 | 20 | 69.107 | KV452983.1 | 2758086 | 10-scf00394 | 10 |
| AX-158249257 | 20 | 69.107 | KV452983.1 | 2758378 | 10-scf00394 | 10 |
| AX-158249259 | 20 | 69.107 | KV452983.1 | 2760979 | 10-scf00394 | 10 |
| AX-158249262 | 20 | 69.107 | KV452983.1 | 2764823 | 10-scf00394 | 10 |
| AX-157880176 | 20 | 69.107 | KV452983.1 | 2765861 | 10-scf00394 | 10 |
| AX-158249265 | 20 | 69.107 | KV452983.1 | 2766917 | 10-scf00394 | 10 |
| AX-158249266 | 20 | 69.107 | KV452983.1 | 2767207 | 10-scf00394 | 10 |
| AX-158249269 | 20 | 69.107 | KV452983.1 | 2768747 | 10-scf00394 | 10 |
| AX-158249273 | 20 | 69.107 | KV452983.1 | 2771477 | 10-scf00394 | 10 |
| AX-158249280 | 20 | 69.107 | KV452983.1 | 2778052 | 10-scf00394 | 10 |
| AX-158249281 | 20 | 69.107 | KV452983.1 | 2778965 | 10-scf00394 | 10 |
| AX-158249285 | 20 | 69.107 | KV452983.1 | 2785545 | 10-scf00394 | 10 |
| AX-158249286 | 20 | 69.107 | KV452983.1 | 2786000 | 10-scf00394 | 10 |
| AX-158249288 | 20 | 69.107 | KV452983.1 | 2787306 | 10-scf00394 | 10 |
| AX-158249290 | 20 | 69.107 | KV452983.1 | 2789341 | 10-scf00394 | 10 |
| AX-158249292 | 20 | 69.107 | KV452983.1 | 2791516 | 10-scf00394 | 10 |
| AX-157749359 | 20 | 69.107 | KV452983.1 | 2792613 | 10-scf00394 | 10 |
| AX-157841986 | 20 | 69.107 | KV452983.1 | 2794122 | 10-scf00394 | 10 |
| AX-158249293 | 20 | 69.107 | KV452983.1 | 2794404 | 10-scf00394 | 10 |
| AX-158249294 | 20 | 69.107 | KV452983.1 | 2794799 | 10-scf00394 | 10 |
| AX-158249296 | 20 | 69.107 | KV452983.1 | 2795726 | 10-scf00394 | 10 |
| AX-157841987 | 20 | 69.107 | KV452983.1 | 2799065 | 10-scf00394 | 10 |
| AX-158249297 | 20 | 69.107 | KV452983.1 | 2802005 | 10-scf00394 | 10 |
| AX-158249300 | 20 | 69.107 | KV452983.1 | 2812625 | 10-scf00394 | 10 |
| AX-158249302 | 20 | 69.107 | KV452983.1 | 2814042 | 10-scf00394 | 10 |
| AX-157841990 | 20 | 69.107 | KV452983.1 | 2817986 | 10-scf00394 | 10 |
| AX-157742263 | 20 | 69.107 | KV452983.1 | 2818754 | 10-scf00394 | 10 |
| AX-157841991 | 20 | 69.107 | KV452983.1 | 2820009 | 10-scf00394 | 10 |
| AX-157748089 | 20 | 69.107 | KV452983.1 | 2820353 | 10-scf00394 | 10 |
| AX-158249307 | 20 | 69.107 | KV452983.1 | 2825597 | 10-scf00394 | 10 |
| AX-158249308 | 20 | 69.107 | KV452983.1 | 2828800 | 10-scf00394 | 10 |
| AX-158249310 | 20 | 69.107 | KV452983.1 | 2836577 | 10-scf00394 | 10 |
| AX-158249311 | 20 | 69.107 | KV452983.1 | 2837031 | 10-scf00394 | 10 |
| AX-158249315 | 20 | 69.107 | KV452983.1 | 2841818 | 10-scf00394 | 10 |
| AX-157745335 | 20 | 69.107 | KV452983.1 | 2842166 | 10-scf00394 | 10 |
| AX-158249319 | 20 | 69.107 | KV452983.1 | 2845124 | 10-scf00394 | 10 |
| AX-158249320 | 20 | 69.107 | KV452983.1 | 2845452 | 10-scf00394 | 10 |
| AX-158249322 | 20 | 69.107 | KV452983.1 | 2847652 | 10-scf00394 | 10 |
| AX-158249323 | 20 | 69.107 | KV452983.1 | 2848632 | 10-scf00394 | 10 |
| AX-158249326 | 20 | 69.107 | KV452983.1 | 2854223 | 10-scf00394 | 10 |
| AX-158249339 | 20 | 69.107 | KV452983.1 | 2869660 | 10-scf00394 | 10 |

|              |    |        |            |         |             |    |
|--------------|----|--------|------------|---------|-------------|----|
| AX-157842006 | 20 | 69.107 | KV452983.1 | 2869725 | 10-scf00394 | 10 |
| AX-158249386 | 20 | 69.107 | KV452983.1 | 2916848 | 10-scf00394 | 10 |
| AX-158249551 | 20 | 69.107 | KV452983.1 | 3115037 | 10-scf00394 | 10 |
| AX-158249324 | 20 | 69.187 | KV452983.1 | 2849493 | 10-scf00394 | 10 |
| AX-158249010 | 20 | 69.216 | KV452983.1 | 2450885 | 10-scf00394 | 10 |
| AX-158249130 | 20 | 69.216 | KV452983.1 | 2602095 | 10-scf00394 | 10 |
| AX-158249188 | 20 | 69.216 | KV452983.1 | 2675188 | 10-scf00394 | 10 |
| AX-158249210 | 20 | 69.216 | KV452983.1 | 2704672 | 10-scf00394 | 10 |
| AX-158249247 | 20 | 69.216 | KV452983.1 | 2746338 | 10-scf00394 | 10 |
| AX-158249314 | 20 | 69.216 | KV452983.1 | 2838342 | 10-scf00394 | 10 |
| AX-158249325 | 20 | 69.216 | KV452983.1 | 2853156 | 10-scf00394 | 10 |
| AX-157773919 | 20 | 69.216 | KV452983.1 | 2853665 | 10-scf00394 | 10 |
| AX-158249331 | 20 | 69.216 | KV452983.1 | 2861266 | 10-scf00394 | 10 |
| AX-158249333 | 20 | 69.216 | KV452983.1 | 2862634 | 10-scf00394 | 10 |
| AX-158249334 | 20 | 69.216 | KV452983.1 | 2862764 | 10-scf00394 | 10 |
| AX-157842002 | 20 | 69.216 | KV452983.1 | 2863455 | 10-scf00394 | 10 |
| AX-157842003 | 20 | 69.216 | KV452983.1 | 2864164 | 10-scf00394 | 10 |
| AX-157842004 | 20 | 69.216 | KV452983.1 | 2864547 | 10-scf00394 | 10 |
| AX-157747064 | 20 | 69.216 | KV452983.1 | 2865243 | 10-scf00394 | 10 |
| AX-158415797 | 20 | 69.216 | KV452983.1 | 2865824 | 10-scf00394 | 10 |
| AX-157842005 | 20 | 69.216 | KV452983.1 | 2868162 | 10-scf00394 | 10 |
| AX-158249340 | 20 | 69.216 | KV452983.1 | 2870254 | 10-scf00394 | 10 |
| AX-157842007 | 20 | 69.216 | KV452983.1 | 2873444 | 10-scf00394 | 10 |
| AX-158249345 | 20 | 69.216 | KV452983.1 | 2875174 | 10-scf00394 | 10 |
| AX-158249347 | 20 | 69.216 | KV452983.1 | 2876139 | 10-scf00394 | 10 |
| AX-158249348 | 20 | 69.216 | KV452983.1 | 2877512 | 10-scf00394 | 10 |
| AX-158249349 | 20 | 69.216 | KV452983.1 | 2877826 | 10-scf00394 | 10 |
| AX-158249350 | 20 | 69.216 | KV452983.1 | 2878935 | 10-scf00394 | 10 |
| AX-158249351 | 20 | 69.216 | KV452983.1 | 2879473 | 10-scf00394 | 10 |
| AX-158249353 | 20 | 69.216 | KV452983.1 | 2881235 | 10-scf00394 | 10 |
| AX-158249354 | 20 | 69.216 | KV452983.1 | 2882071 | 10-scf00394 | 10 |
| AX-158249355 | 20 | 69.216 | KV452983.1 | 2882745 | 10-scf00394 | 10 |
| AX-158249361 | 20 | 69.216 | KV452983.1 | 2888745 | 10-scf00394 | 10 |
| AX-158249362 | 20 | 69.216 | KV452983.1 | 2889153 | 10-scf00394 | 10 |
| AX-158249378 | 20 | 69.216 | KV452983.1 | 2911301 | 10-scf00394 | 10 |
| AX-158249402 | 20 | 69.216 | KV452983.1 | 2943355 | 10-scf00394 | 10 |
| AX-158249406 | 20 | 69.216 | KV452983.1 | 2949418 | 10-scf00394 | 10 |
| AX-158249437 | 20 | 69.216 | KV452983.1 | 2975568 | 10-scf00394 | 10 |
| AX-158249439 | 20 | 69.216 | KV452983.1 | 2977381 | 10-scf00394 | 10 |
| AX-157842026 | 20 | 69.216 | KV452983.1 | 3174344 | 10-scf00394 | 10 |
| AX-158249646 | 20 | 69.216 | KV452983.1 | 3225881 | 10-scf00394 | 10 |
| AX-158249375 | 20 | 69.326 | KV452983.1 | 2910073 | 10-scf00394 | 10 |
| AX-158249376 | 20 | 69.326 | KV452983.1 | 2910277 | 10-scf00394 | 10 |
| AX-158249377 | 20 | 69.326 | KV452983.1 | 2910713 | 10-scf00394 | 10 |
| AX-158249379 | 20 | 69.326 | KV452983.1 | 2911750 | 10-scf00394 | 10 |
| AX-158249383 | 20 | 69.326 | KV452983.1 | 2914313 | 10-scf00394 | 10 |
| AX-158249384 | 20 | 69.326 | KV452983.1 | 2914911 | 10-scf00394 | 10 |
| AX-158249390 | 20 | 69.326 | KV452983.1 | 2921929 | 10-scf00394 | 10 |
| AX-158249352 | 20 | 69.544 | KV452983.1 | 2880198 | 10-scf00394 | 10 |
| AX-158249392 | 20 | 69.544 | KV452983.1 | 2926204 | 10-scf00394 | 10 |
| AX-158249393 | 20 | 69.544 | KV452983.1 | 2927826 | 10-scf00394 | 10 |

|              |    |        |            |         |             |    |
|--------------|----|--------|------------|---------|-------------|----|
| AX-158249396 | 20 | 69.544 | KV452983.1 | 2935833 | 10-scf00394 | 10 |
| AX-158249398 | 20 | 69.544 | KV452983.1 | 2936955 | 10-scf00394 | 10 |
| AX-158249400 | 20 | 69.544 | KV452983.1 | 2938154 | 10-scf00394 | 10 |
| AX-157713515 | 20 | 69.544 | KV452983.1 | 2941873 | 10-scf00394 | 10 |
| AX-158249404 | 20 | 69.544 | KV452983.1 | 2945637 | 10-scf00394 | 10 |
| AX-158249408 | 20 | 69.544 | KV452983.1 | 2951139 | 10-scf00394 | 10 |
| AX-158249409 | 20 | 69.544 | KV452983.1 | 2951970 | 10-scf00394 | 10 |
| AX-158249411 | 20 | 69.544 | KV452983.1 | 2953277 | 10-scf00394 | 10 |
| AX-158249413 | 20 | 69.544 | KV452983.1 | 2956110 | 10-scf00394 | 10 |
| AX-158249414 | 20 | 69.544 | KV452983.1 | 2956550 | 10-scf00394 | 10 |
| AX-158249416 | 20 | 69.544 | KV452983.1 | 2958137 | 10-scf00394 | 10 |
| AX-158249417 | 20 | 69.544 | KV452983.1 | 2959144 | 10-scf00394 | 10 |
| AX-158249422 | 20 | 69.544 | KV452983.1 | 2963970 | 10-scf00394 | 10 |
| AX-158249424 | 20 | 69.544 | KV452983.1 | 2965180 | 10-scf00394 | 10 |
| AX-158249425 | 20 | 69.544 | KV452983.1 | 2967194 | 10-scf00394 | 10 |
| AX-158249435 | 20 | 69.544 | KV452983.1 | 2974097 | 10-scf00394 | 10 |
| AX-158249442 | 20 | 69.544 | KV452983.1 | 2980827 | 10-scf00394 | 10 |
| AX-158249461 | 20 | 69.544 | KV452983.1 | 2996378 | 10-scf00394 | 10 |
| AX-158249519 | 20 | 69.544 | KV452983.1 | 3075183 | 10-scf00394 | 10 |
| AX-157842021 | 20 | 69.544 | KV452983.1 | 3090251 | 10-scf00394 | 10 |
| AX-158249571 | 20 | 69.544 | KV452983.1 | 3140977 | 10-scf00394 | 10 |
| AX-158249444 | 20 | 69.632 | KV452983.1 | 2982081 | 10-scf00394 | 10 |
| AX-157859819 | 20 | 69.696 | KV452983.1 | 2960931 | 10-scf00394 | 10 |
| AX-158249449 | 20 | 69.696 | KV452983.1 | 2986075 | 10-scf00394 | 10 |
| AX-158249487 | 20 | 69.696 | KV452983.1 | 3023104 | 10-scf00394 | 10 |
| AX-157714478 | 20 | 69.696 | KV452983.1 | 3139424 | 10-scf00394 | 10 |
| AX-158249570 | 20 | 69.696 | KV452983.1 | 3140731 | 10-scf00394 | 10 |
| AX-158249399 | 20 | 69.762 | KV452983.1 | 2937726 | 10-scf00394 | 10 |
| AX-158249456 | 20 | 69.762 | KV452983.1 | 2991718 | 10-scf00394 | 10 |
| AX-158249465 | 20 | 69.762 | KV452983.1 | 2999633 | 10-scf00394 | 10 |
| AX-158249468 | 20 | 69.762 | KV452983.1 | 3001914 | 10-scf00394 | 10 |
| AX-158249471 | 20 | 69.762 | KV452983.1 | 3004326 | 10-scf00394 | 10 |
| AX-158249476 | 20 | 69.762 | KV452983.1 | 3009503 | 10-scf00394 | 10 |
| AX-158249478 | 20 | 69.762 | KV452983.1 | 3010486 | 10-scf00394 | 10 |
| AX-158249479 | 20 | 69.762 | KV452983.1 | 3010592 | 10-scf00394 | 10 |
| AX-158249480 | 20 | 69.762 | KV452983.1 | 3011244 | 10-scf00394 | 10 |
| AX-157748459 | 20 | 69.762 | KV452983.1 | 3012664 | 10-scf00394 | 10 |
| AX-158415801 | 20 | 69.762 | KV452983.1 | 3013257 | 10-scf00394 | 10 |
| AX-158410822 | 20 | 69.762 | KV452983.1 | 3013408 | 10-scf00394 | 10 |
| AX-158249481 | 20 | 69.762 | KV452983.1 | 3015441 | 10-scf00394 | 10 |
| AX-158249482 | 20 | 69.762 | KV452983.1 | 3017002 | 10-scf00394 | 10 |
| AX-157842011 | 20 | 69.762 | KV452983.1 | 3017833 | 10-scf00394 | 10 |
| AX-158249484 | 20 | 69.762 | KV452983.1 | 3019903 | 10-scf00394 | 10 |
| AX-157717520 | 20 | 69.762 | KV452983.1 | 3024071 | 10-scf00394 | 10 |
| AX-158249503 | 20 | 69.762 | KV452983.1 | 3052455 | 10-scf00394 | 10 |
| AX-158249507 | 20 | 69.762 | KV452983.1 | 3056520 | 10-scf00394 | 10 |
| AX-158249510 | 20 | 69.762 | KV452983.1 | 3059825 | 10-scf00394 | 10 |
| AX-158249511 | 20 | 69.762 | KV452983.1 | 3060826 | 10-scf00394 | 10 |
| AX-157867340 | 20 | 69.796 | KV452983.1 | 3020619 | 10-scf00394 | 10 |
| AX-158249453 | 20 | 69.839 | KV452983.1 | 2988715 | 10-scf00394 | 10 |
| AX-158249454 | 20 | 69.839 | KV452983.1 | 2990037 | 10-scf00394 | 10 |

|              |    |        |            |         |             |    |
|--------------|----|--------|------------|---------|-------------|----|
| AX-158249466 | 20 | 69.839 | KV452983.1 | 3000191 | 10-scf00394 | 10 |
| AX-157739751 | 20 | 69.839 | KV452983.1 | 3043923 | 10-scf00394 | 10 |
| AX-158415806 | 20 | 69.839 | KV452983.1 | 3051552 | 10-scf00394 | 10 |
| AX-158249458 | 20 | 69.872 | KV452983.1 | 2993540 | 10-scf00394 | 10 |
| AX-158249460 | 20 | 69.872 | KV452983.1 | 2995105 | 10-scf00394 | 10 |
| AX-158249485 | 20 | 69.872 | KV452983.1 | 3021326 | 10-scf00394 | 10 |
| AX-157714318 | 20 | 69.872 | KV452983.1 | 3048015 | 10-scf00394 | 10 |
| AX-157842016 | 20 | 69.872 | KV452983.1 | 3054135 | 10-scf00394 | 10 |
| AX-158249505 | 20 | 69.925 | KV452983.1 | 3055000 | 10-scf00394 | 10 |
| AX-158249394 | 20 | 69.981 | KV452983.1 | 2928625 | 10-scf00394 | 10 |
| AX-158249395 | 20 | 69.981 | KV452983.1 | 2931784 | 10-scf00394 | 10 |
| AX-158249448 | 20 | 69.981 | KV452983.1 | 2985311 | 10-scf00394 | 10 |
| AX-158249450 | 20 | 69.981 | KV452983.1 | 2986921 | 10-scf00394 | 10 |
| AX-158249467 | 20 | 69.981 | KV452983.1 | 3001425 | 10-scf00394 | 10 |
| AX-158249469 | 20 | 69.981 | KV452983.1 | 3003297 | 10-scf00394 | 10 |
| AX-158249474 | 20 | 69.981 | KV452983.1 | 3006714 | 10-scf00394 | 10 |
| AX-158249512 | 20 | 69.981 | KV452983.1 | 3063498 | 10-scf00394 | 10 |
| AX-157842017 | 20 | 69.981 | KV452983.1 | 3063883 | 10-scf00394 | 10 |
| AX-157887597 | 20 | 69.981 | KV452983.1 | 3065407 | 10-scf00394 | 10 |
| AX-157867341 | 20 | 69.981 | KV452983.1 | 3072564 | 10-scf00394 | 10 |
| AX-158249518 | 20 | 69.981 | KV452983.1 | 3073748 | 10-scf00394 | 10 |
| AX-158249523 | 20 | 69.981 | KV452983.1 | 3079399 | 10-scf00394 | 10 |
| AX-157718988 | 20 | 69.981 | KV452983.1 | 3079981 | 10-scf00394 | 10 |
| AX-157842019 | 20 | 69.981 | KV452983.1 | 3084119 | 10-scf00394 | 10 |
| AX-157738894 | 20 | 69.981 | KV452983.1 | 3085795 | 10-scf00394 | 10 |
| AX-157716209 | 20 | 69.981 | KV452983.1 | 3086377 | 10-scf00394 | 10 |
| AX-157842020 | 20 | 69.981 | KV452983.1 | 3086871 | 10-scf00394 | 10 |
| AX-157746309 | 20 | 69.981 | KV452983.1 | 3091071 | 10-scf00394 | 10 |
| AX-158249526 | 20 | 69.981 | KV452983.1 | 3092399 | 10-scf00394 | 10 |
| AX-158249527 | 20 | 69.981 | KV452983.1 | 3093295 | 10-scf00394 | 10 |
| AX-158249528 | 20 | 69.981 | KV452983.1 | 3094153 | 10-scf00394 | 10 |
| AX-158249529 | 20 | 69.981 | KV452983.1 | 3095298 | 10-scf00394 | 10 |
| AX-158249530 | 20 | 69.981 | KV452983.1 | 3095783 | 10-scf00394 | 10 |
| AX-158249531 | 20 | 69.981 | KV452983.1 | 3096714 | 10-scf00394 | 10 |
| AX-158249536 | 20 | 69.981 | KV452983.1 | 3100876 | 10-scf00394 | 10 |
| AX-158249539 | 20 | 69.981 | KV452983.1 | 3103952 | 10-scf00394 | 10 |
| AX-158249542 | 20 | 69.981 | KV452983.1 | 3106929 | 10-scf00394 | 10 |
| AX-158249549 | 20 | 69.981 | KV452983.1 | 3113439 | 10-scf00394 | 10 |
| AX-158249550 | 20 | 69.981 | KV452983.1 | 3114042 | 10-scf00394 | 10 |
| AX-158249558 | 20 | 69.981 | KV452983.1 | 3122903 | 10-scf00394 | 10 |
| AX-158249564 | 20 | 69.981 | KV452983.1 | 3128730 | 10-scf00394 | 10 |
| AX-158415808 | 20 | 69.981 | KV452983.1 | 3132341 | 10-scf00394 | 10 |
| AX-157701384 | 20 | 69.981 | KV452983.1 | 3132377 | 10-scf00394 | 10 |
| AX-158249573 | 20 | 69.981 | KV452983.1 | 3143113 | 10-scf00394 | 10 |
| AX-158249575 | 20 | 69.981 | KV452983.1 | 3144290 | 10-scf00394 | 10 |
| AX-158249576 | 20 | 69.981 | KV452983.1 | 3145729 | 10-scf00394 | 10 |
| AX-157842025 | 20 | 69.981 | KV452983.1 | 3148901 | 10-scf00394 | 10 |
| AX-158249578 | 20 | 69.981 | KV452983.1 | 3148954 | 10-scf00394 | 10 |
| AX-158249580 | 20 | 69.981 | KV452983.1 | 3151130 | 10-scf00394 | 10 |
| AX-158249581 | 20 | 69.981 | KV452983.1 | 3151775 | 10-scf00394 | 10 |
| AX-158249582 | 20 | 69.981 | KV452983.1 | 3152143 | 10-scf00394 | 10 |

|              |    |        |            |         |             |    |
|--------------|----|--------|------------|---------|-------------|----|
| AX-158249631 | 20 | 69.981 | KV452983.1 | 3213479 | 10-scf00394 | 10 |
| AX-158249589 | 20 | 70.09  | KV452983.1 | 3160949 | 10-scf00394 | 10 |
| AX-158249593 | 20 | 70.09  | KV452983.1 | 3163255 | 10-scf00394 | 10 |
| AX-158249594 | 20 | 70.09  | KV452983.1 | 3163965 | 10-scf00394 | 10 |
| AX-158249595 | 20 | 70.09  | KV452983.1 | 3164638 | 10-scf00394 | 10 |
| AX-158249597 | 20 | 70.09  | KV452983.1 | 3166605 | 10-scf00394 | 10 |
| AX-158249601 | 20 | 70.09  | KV452983.1 | 3169191 | 10-scf00394 | 10 |
| AX-158249603 | 20 | 70.09  | KV452983.1 | 3172274 | 10-scf00394 | 10 |
| AX-157745112 | 20 | 70.09  | KV452983.1 | 3173328 | 10-scf00394 | 10 |
| AX-158249619 | 20 | 70.09  | KV452983.1 | 3199878 | 10-scf00394 | 10 |
| AX-158249636 | 20 | 70.09  | KV452983.1 | 3215697 | 10-scf00394 | 10 |
| AX-157842028 | 20 | 70.11  | KV452983.1 | 3181900 | 10-scf00394 | 10 |
| AX-158249615 | 20 | 70.138 | KV452983.1 | 3190279 | 10-scf00394 | 10 |
| AX-158249679 | 20 | 70.138 | KV452983.1 | 3265105 | 10-scf00394 | 10 |
| AX-158249621 | 20 | 70.167 | KV452983.1 | 3200765 | 10-scf00394 | 10 |
| AX-157859817 | 20 | 70.2   | KV452983.1 | 2807161 | 10-scf00394 | 10 |
| AX-158249598 | 20 | 70.2   | KV452983.1 | 3167223 | 10-scf00394 | 10 |
| AX-158249624 | 20 | 70.2   | KV452983.1 | 3203579 | 10-scf00394 | 10 |
| AX-158249625 | 20 | 70.2   | KV452983.1 | 3204326 | 10-scf00394 | 10 |
| AX-157842031 | 20 | 70.2   | KV452983.1 | 3209118 | 10-scf00394 | 10 |
| AX-158249629 | 20 | 70.2   | KV452983.1 | 3210509 | 10-scf00394 | 10 |
| AX-157773480 | 20 | 70.2   | KV452983.1 | 3211071 | 10-scf00394 | 10 |
| AX-158249634 | 20 | 70.2   | KV452983.1 | 3214847 | 10-scf00394 | 10 |
| AX-158249635 | 20 | 70.2   | KV452983.1 | 3215164 | 10-scf00394 | 10 |
| AX-158249608 | 20 | 70.253 | KV452983.1 | 3176928 | 10-scf00394 | 10 |
| AX-158249611 | 20 | 70.253 | KV452983.1 | 3179356 | 10-scf00394 | 10 |
| AX-157842027 | 20 | 70.253 | KV452983.1 | 3180958 | 10-scf00394 | 10 |
| AX-158249613 | 20 | 70.253 | KV452983.1 | 3186820 | 10-scf00394 | 10 |
| AX-158249616 | 20 | 70.253 | KV452983.1 | 3196173 | 10-scf00394 | 10 |
| AX-158249622 | 20 | 70.253 | KV452983.1 | 3201005 | 10-scf00394 | 10 |
| AX-157747045 | 20 | 70.253 | KV452983.1 | 3216447 | 10-scf00394 | 10 |
| AX-157715728 | 20 | 70.309 | KV452983.1 | 3225079 | 10-scf00394 | 10 |
| AX-157842033 | 20 | 70.309 | KV452983.1 | 3226107 | 10-scf00394 | 10 |
| AX-158249649 | 20 | 70.309 | KV452983.1 | 3228648 | 10-scf00394 | 10 |
| AX-157842034 | 20 | 70.309 | KV452983.1 | 3229705 | 10-scf00394 | 10 |
| AX-158249647 | 20 | 70.32  | KV452983.1 | 3226572 | 10-scf00394 | 10 |
| AX-157842036 | 20 | 70.366 | KV452983.1 | 3232854 | 10-scf00394 | 10 |
| AX-158249640 | 20 | 70.418 | KV452983.1 | 3217315 | 10-scf00394 | 10 |
| AX-158249645 | 20 | 70.418 | KV452983.1 | 3225676 | 10-scf00394 | 10 |
| AX-158249650 | 20 | 70.418 | KV452983.1 | 3235300 | 10-scf00394 | 10 |
| AX-158249651 | 20 | 70.418 | KV452983.1 | 3236501 | 10-scf00394 | 10 |
| AX-158249652 | 20 | 70.418 | KV452983.1 | 3237118 | 10-scf00394 | 10 |
| AX-158249653 | 20 | 70.418 | KV452983.1 | 3237568 | 10-scf00394 | 10 |
| AX-158249654 | 20 | 70.418 | KV452983.1 | 3237945 | 10-scf00394 | 10 |
| AX-158249655 | 20 | 70.418 | KV452983.1 | 3239107 | 10-scf00394 | 10 |
| AX-158249656 | 20 | 70.418 | KV452983.1 | 3240573 | 10-scf00394 | 10 |
| AX-158249658 | 20 | 70.418 | KV452983.1 | 3242124 | 10-scf00394 | 10 |
| AX-158249660 | 20 | 70.418 | KV452983.1 | 3243506 | 10-scf00394 | 10 |
| AX-157773358 | 20 | 70.418 | KV452983.1 | 3248643 | 10-scf00394 | 10 |
| AX-158249667 | 20 | 70.418 | KV452983.1 | 3253209 | 10-scf00394 | 10 |
| AX-157741066 | 20 | 70.418 | KV452983.1 | 3254366 | 10-scf00394 | 10 |



|              |    |        |             |         |             |    |
|--------------|----|--------|-------------|---------|-------------|----|
| AX-158249668 | 20 | 70.418 | KV452983.1  | 3255920 | 10-scf00394 | 10 |
| AX-158249670 | 20 | 70.418 | KV452983.1  | 3257535 | 10-scf00394 | 10 |
| AX-158249671 | 20 | 70.418 | KV452983.1  | 3258112 | 10-scf00394 | 10 |
| AX-158249673 | 20 | 70.418 | KV452983.1  | 3260773 | 10-scf00394 | 10 |
| AX-158249674 | 20 | 70.418 | KV452983.1  | 3261462 | 10-scf00394 | 10 |
| AX-158249675 | 20 | 70.418 | KV452983.1  | 3261887 | 10-scf00394 | 10 |
| AX-158387032 | 20 | 70.418 | KV452983.1  | 3262426 | 10-scf00394 | 10 |
| AX-158249676 | 20 | 70.418 | KV452983.1  | 3262486 | 10-scf00394 | 10 |
| AX-157842038 | 20 | 70.418 | KV452983.1  | 3262536 | 10-scf00394 | 10 |
| AX-158249677 | 20 | 70.418 | KV452983.1  | 3263039 | 10-scf00394 | 10 |
| AX-158249678 | 20 | 70.418 | KV452983.1  | 3264416 | 10-scf00394 | 10 |
| AX-158249683 | 20 | 70.418 | KV452983.1  | 3270325 | 10-scf00394 | 10 |
| AX-158249684 | 20 | 70.418 | KV452983.1  | 3270841 | 10-scf00394 | 10 |
| AX-158249688 | 20 | 70.418 | KV452983.1  | 3274171 | 10-scf00394 | 10 |
| AX-158249689 | 20 | 70.418 | KV452983.1  | 3275663 | 10-scf00394 | 10 |
| AX-158249690 | 20 | 70.418 | KV452983.1  | 3276178 | 10-scf00394 | 10 |
| AX-158415810 | 20 | 70.418 | KV452983.1  | 3280716 | 10-scf00394 | 10 |
| AX-158249704 | 20 | 70.418 | KV452983.1  | 3292147 | 10-scf00394 | 10 |
| AX-158249739 | 20 | 70.418 | KV452983.1  | 3330433 | 10-scf00394 | 10 |
| AX-158249740 | 20 | 70.418 | KV452983.1  | 3333813 | 10-scf00394 | 10 |
| AX-158249746 | 20 | 70.418 | KV452983.1  | 3339446 | 10-scf00394 | 10 |
| AX-158249748 | 20 | 70.418 | KV452983.1  | 3340759 | 10-scf00394 | 10 |
| AX-158249753 | 20 | 70.418 | KV452983.1  | 3347023 | 10-scf00394 | 10 |
| AX-158249759 | 20 | 70.418 | KV452983.1  | 3356665 | 10-scf00394 | 10 |
| AX-158249762 | 20 | 70.418 | KV452983.1  | 3358866 | 10-scf00394 | 10 |
| AX-158249773 | 20 | 70.418 | KV452983.1  | 3372522 | 10-scf00394 | 10 |
| AX-158381013 | 20 | 70.418 | KV452983.1  | 3374327 | 10-scf00394 | 10 |
| AX-158249802 | 20 | 70.418 | KV452983.1  | 3402748 | 10-scf00394 | 10 |
| AX-157725930 | 20 | 70.418 | KV452983.1  | 3404273 | 10-scf00394 | 10 |
| AX-157749933 | 20 | 70.418 | KV452983.1  | 3412924 | 10-scf00394 | 10 |
| AX-158249808 | 20 | 70.418 | KV452983.1  | 3414683 | 10-scf00394 | 10 |
| AX-158249913 | 20 | 70.418 | KV452983.1  | 3549196 | 10-scf00394 | 10 |
| AX-157688421 | 20 | 70.418 | 3ML01026123 | 1329    | scf01721_1  | UN |
| AX-158249693 | 20 | 70.528 | KV452983.1  | 3279618 | 10-scf00394 | 10 |
| AX-158415811 | 20 | 70.528 | KV452983.1  | 3280751 | 10-scf00394 | 10 |
| AX-158249694 | 20 | 70.528 | KV452983.1  | 3280787 | 10-scf00394 | 10 |
| AX-158249695 | 20 | 70.528 | KV452983.1  | 3282395 | 10-scf00394 | 10 |
| AX-157842039 | 20 | 70.528 | KV452983.1  | 3282571 | 10-scf00394 | 10 |
| AX-157867342 | 20 | 70.528 | KV452983.1  | 3286001 | 10-scf00394 | 10 |
| AX-158249698 | 20 | 70.528 | KV452983.1  | 3286908 | 10-scf00394 | 10 |
| AX-158249699 | 20 | 70.528 | KV452983.1  | 3288202 | 10-scf00394 | 10 |
| AX-158249700 | 20 | 70.528 | KV452983.1  | 3288379 | 10-scf00394 | 10 |
| AX-158249701 | 20 | 70.528 | KV452983.1  | 3289247 | 10-scf00394 | 10 |
| AX-158249702 | 20 | 70.528 | KV452983.1  | 3290261 | 10-scf00394 | 10 |
| AX-158249703 | 20 | 70.528 | KV452983.1  | 3291021 | 10-scf00394 | 10 |
| AX-158249706 | 20 | 70.528 | KV452983.1  | 3293890 | 10-scf00394 | 10 |
| AX-158249708 | 20 | 70.528 | KV452983.1  | 3296200 | 10-scf00394 | 10 |
| AX-158249709 | 20 | 70.528 | KV452983.1  | 3296557 | 10-scf00394 | 10 |
| AX-158249710 | 20 | 70.528 | KV452983.1  | 3298025 | 10-scf00394 | 10 |
| AX-158249711 | 20 | 70.528 | KV452983.1  | 3299489 | 10-scf00394 | 10 |
| AX-158249712 | 20 | 70.528 | KV452983.1  | 3300191 | 10-scf00394 | 10 |

|              |    |        |             |         |             |    |
|--------------|----|--------|-------------|---------|-------------|----|
| AX-158249713 | 20 | 70.528 | KV452983.1  | 3301161 | 10-scf00394 | 10 |
| AX-158249714 | 20 | 70.528 | KV452983.1  | 3302341 | 10-scf00394 | 10 |
| AX-158249715 | 20 | 70.528 | KV452983.1  | 3302549 | 10-scf00394 | 10 |
| AX-158249718 | 20 | 70.528 | KV452983.1  | 3305314 | 10-scf00394 | 10 |
| AX-157758866 | 20 | 70.528 | KV452983.1  | 3306932 | 10-scf00394 | 10 |
| AX-158249719 | 20 | 70.528 | KV452983.1  | 3307462 | 10-scf00394 | 10 |
| AX-158249721 | 20 | 70.528 | KV452983.1  | 3309727 | 10-scf00394 | 10 |
| AX-158249725 | 20 | 70.528 | KV452983.1  | 3313321 | 10-scf00394 | 10 |
| AX-158249729 | 20 | 70.528 | KV452983.1  | 3316419 | 10-scf00394 | 10 |
| AX-157770624 | 20 | 70.528 | KV452983.1  | 3318946 | 10-scf00394 | 10 |
| AX-158249734 | 20 | 70.528 | KV452983.1  | 3323587 | 10-scf00394 | 10 |
| AX-158249744 | 20 | 70.528 | KV452983.1  | 3337855 | 10-scf00394 | 10 |
| AX-158249722 | 20 | 70.558 | KV452983.1  | 3310650 | 10-scf00394 | 10 |
| AX-158249723 | 20 | 70.596 | KV452983.1  | 3311462 | 10-scf00394 | 10 |
| AX-157742234 | 20 | 70.596 | KV452983.1  | 3314155 | 10-scf00394 | 10 |
| AX-158249720 | 20 | 70.637 | KV452983.1  | 3308082 | 10-scf00394 | 10 |
| AX-158249724 | 20 | 70.637 | KV452983.1  | 3312730 | 10-scf00394 | 10 |
| AX-158249730 | 20 | 70.637 | KV452983.1  | 3317376 | 10-scf00394 | 10 |
| AX-158249731 | 20 | 70.637 | KV452983.1  | 3318422 | 10-scf00394 | 10 |
| AX-158249732 | 20 | 70.637 | KV452983.1  | 3320402 | 10-scf00394 | 10 |
| AX-158249736 | 20 | 70.637 | KV452983.1  | 3326796 | 10-scf00394 | 10 |
| AX-158249737 | 20 | 70.644 | KV452983.1  | 3328684 | 10-scf00394 | 10 |
| AX-157699273 | 20 | 70.664 | KV452983.1  | 3332061 | 10-scf00394 | 10 |
| AX-158249741 | 20 | 70.686 | KV452983.1  | 3335370 | 10-scf00394 | 10 |
| AX-157725757 | 20 | 70.706 | KV452983.1  | 3335772 | 10-scf00394 | 10 |
| AX-158249743 | 20 | 70.726 | KV452983.1  | 3337293 | 10-scf00394 | 10 |
| AX-158249751 | 20 | 70.726 | KV452983.1  | 3342831 | 10-scf00394 | 10 |
| AX-158249697 | 20 | 70.746 | KV452983.1  | 3286321 | 10-scf00394 | 10 |
| AX-158249750 | 20 | 70.746 | KV452983.1  | 3342033 | 10-scf00394 | 10 |
| AX-158249754 | 20 | 70.746 | KV452983.1  | 3348260 | 10-scf00394 | 10 |
| AX-158249755 | 20 | 70.746 | KV452983.1  | 3348851 | 10-scf00394 | 10 |
| AX-157716093 | 20 | 70.746 | KV452983.1  | 3349752 | 10-scf00394 | 10 |
| AX-158249757 | 20 | 70.746 | KV452983.1  | 3351637 | 10-scf00394 | 10 |
| AX-158249758 | 20 | 70.855 | KV452983.1  | 3355413 | 10-scf00394 | 10 |
| AX-158249760 | 20 | 70.96  | KV452983.1  | 3357043 | 10-scf00394 | 10 |
| AX-157842035 | 20 | 71.074 | KV452983.1  | 3232134 | 10-scf00394 | 10 |
| AX-158249767 | 20 | 71.074 | KV452983.1  | 3365855 | 10-scf00394 | 10 |
| AX-158249770 | 20 | 71.074 | KV452983.1  | 3367765 | 10-scf00394 | 10 |
| AX-157688423 | 20 | 71.074 | 3ML01026123 | 2005    | scf01721_1  | UN |
| AX-158249763 | 20 | 71.08  | KV452983.1  | 3361640 | 10-scf00394 | 10 |
| AX-158249774 | 20 | 71.08  | KV452983.1  | 3373061 | 10-scf00394 | 10 |
| AX-158249798 | 20 | 71.08  | KV452983.1  | 3399416 | 10-scf00394 | 10 |
| AX-158249799 | 20 | 71.08  | KV452983.1  | 3400345 | 10-scf00394 | 10 |
| AX-158249800 | 20 | 71.08  | KV452983.1  | 3400778 | 10-scf00394 | 10 |
| AX-158249776 | 20 | 71.103 | KV452983.1  | 3374442 | 10-scf00394 | 10 |
| AX-158249780 | 20 | 71.126 | KV452983.1  | 3379567 | 10-scf00394 | 10 |
| AX-158249764 | 20 | 71.151 | KV452983.1  | 3362535 | 10-scf00394 | 10 |
| AX-158249783 | 20 | 71.151 | KV452983.1  | 3386700 | 10-scf00394 | 10 |
| AX-158249784 | 20 | 71.166 | KV452983.1  | 3388740 | 10-scf00394 | 10 |
| AX-158249781 | 20 | 71.183 | KV452983.1  | 3382706 | 10-scf00394 | 10 |
| AX-158249786 | 20 | 71.183 | KV452983.1  | 3389598 | 10-scf00394 | 10 |

|              |    |        |            |         |             |    |
|--------------|----|--------|------------|---------|-------------|----|
| AX-158249788 | 20 | 71.183 | KV452983.1 | 3391496 | 10-scf00394 | 10 |
| AX-158249789 | 20 | 71.183 | KV452983.1 | 3391872 | 10-scf00394 | 10 |
| AX-158249791 | 20 | 71.183 | KV452983.1 | 3393597 | 10-scf00394 | 10 |
| AX-158249792 | 20 | 71.183 | KV452983.1 | 3394013 | 10-scf00394 | 10 |
| AX-157756409 | 20 | 71.183 | KV452983.1 | 3395645 | 10-scf00394 | 10 |
| AX-158249795 | 20 | 71.183 | KV452983.1 | 3395814 | 10-scf00394 | 10 |
| AX-158249796 | 20 | 71.183 | KV452983.1 | 3397266 | 10-scf00394 | 10 |
| AX-158249797 | 20 | 71.183 | KV452983.1 | 3398671 | 10-scf00394 | 10 |
| AX-158249805 | 20 | 71.292 | KV452983.1 | 3408938 | 10-scf00394 | 10 |
| AX-158249807 | 20 | 71.292 | KV452983.1 | 3413903 | 10-scf00394 | 10 |
| AX-158249810 | 20 | 71.292 | KV452983.1 | 3415304 | 10-scf00394 | 10 |
| AX-158249812 | 20 | 71.292 | KV452983.1 | 3416480 | 10-scf00394 | 10 |
| AX-158249814 | 20 | 71.292 | KV452983.1 | 3417755 | 10-scf00394 | 10 |
| AX-158249815 | 20 | 71.292 | KV452983.1 | 3418259 | 10-scf00394 | 10 |
| AX-158249816 | 20 | 71.292 | KV452983.1 | 3418621 | 10-scf00394 | 10 |
| AX-158249817 | 20 | 71.292 | KV452983.1 | 3419220 | 10-scf00394 | 10 |
| AX-158249818 | 20 | 71.292 | KV452983.1 | 3420796 | 10-scf00394 | 10 |
| AX-158249820 | 20 | 71.292 | KV452983.1 | 3423581 | 10-scf00394 | 10 |
| AX-158249821 | 20 | 71.292 | KV452983.1 | 3425661 | 10-scf00394 | 10 |
| AX-158249822 | 20 | 71.292 | KV452983.1 | 3426221 | 10-scf00394 | 10 |
| AX-158249823 | 20 | 71.292 | KV452983.1 | 3426803 | 10-scf00394 | 10 |
| AX-158249824 | 20 | 71.292 | KV452983.1 | 3429374 | 10-scf00394 | 10 |
| AX-158249825 | 20 | 71.292 | KV452983.1 | 3430303 | 10-scf00394 | 10 |
| AX-158249831 | 20 | 71.292 | KV452983.1 | 3439416 | 10-scf00394 | 10 |
| AX-158249832 | 20 | 71.292 | KV452983.1 | 3440881 | 10-scf00394 | 10 |
| AX-158249854 | 20 | 71.292 | KV452983.1 | 3471082 | 10-scf00394 | 10 |
| AX-158249826 | 20 | 71.349 | KV452983.1 | 3431042 | 10-scf00394 | 10 |
| AX-158249772 | 20 | 71.511 | KV452983.1 | 3371985 | 10-scf00394 | 10 |
| AX-158249828 | 20 | 71.511 | KV452983.1 | 3433583 | 10-scf00394 | 10 |
| AX-158249829 | 20 | 71.511 | KV452983.1 | 3438204 | 10-scf00394 | 10 |
| AX-158249838 | 20 | 71.511 | KV452983.1 | 3450145 | 10-scf00394 | 10 |
| AX-158249839 | 20 | 71.511 | KV452983.1 | 3450720 | 10-scf00394 | 10 |
| AX-158249840 | 20 | 71.511 | KV452983.1 | 3451428 | 10-scf00394 | 10 |
| AX-158249844 | 20 | 71.511 | KV452983.1 | 3455880 | 10-scf00394 | 10 |
| AX-157842040 | 20 | 71.511 | KV452983.1 | 3457514 | 10-scf00394 | 10 |
| AX-158249846 | 20 | 71.511 | KV452983.1 | 3461543 | 10-scf00394 | 10 |
| AX-157755416 | 20 | 71.511 | KV452983.1 | 3461803 | 10-scf00394 | 10 |
| AX-157710616 | 20 | 71.579 | KV452983.1 | 3462126 | 10-scf00394 | 10 |
| AX-158249849 | 20 | 71.675 | KV452983.1 | 3466749 | 10-scf00394 | 10 |
| AX-158249857 | 20 | 71.675 | KV452983.1 | 3477983 | 10-scf00394 | 10 |
| AX-157709482 | 20 | 71.675 | KV452983.1 | 3480035 | 10-scf00394 | 10 |
| AX-158249870 | 20 | 71.675 | KV452983.1 | 3498518 | 10-scf00394 | 10 |
| AX-158249890 | 20 | 71.675 | KV452983.1 | 3521760 | 10-scf00394 | 10 |
| AX-158249861 | 20 | 71.838 | KV452983.1 | 3485205 | 10-scf00394 | 10 |
| AX-158249862 | 20 | 71.838 | KV452983.1 | 3485692 | 10-scf00394 | 10 |
| AX-158249875 | 20 | 71.838 | KV452983.1 | 3504111 | 10-scf00394 | 10 |
| AX-158249884 | 20 | 71.838 | KV452983.1 | 3516278 | 10-scf00394 | 10 |
| AX-158249902 | 20 | 71.838 | KV452983.1 | 3533292 | 10-scf00394 | 10 |
| AX-158249834 | 20 | 71.839 | KV452983.1 | 3444781 | 10-scf00394 | 10 |
| AX-158249845 | 20 | 71.839 | KV452983.1 | 3457472 | 10-scf00394 | 10 |
| AX-158249863 | 20 | 71.839 | KV452983.1 | 3486220 | 10-scf00394 | 10 |

|              |    |        |            |         |             |    |
|--------------|----|--------|------------|---------|-------------|----|
| AX-158249868 | 20 | 71.839 | KV452983.1 | 3493214 | 10-scf00394 | 10 |
| AX-158249869 | 20 | 71.839 | KV452983.1 | 3496214 | 10-scf00394 | 10 |
| AX-157887600 | 20 | 71.839 | KV452983.1 | 3499838 | 10-scf00394 | 10 |
| AX-158249872 | 20 | 71.839 | KV452983.1 | 3500667 | 10-scf00394 | 10 |
| AX-158249873 | 20 | 71.839 | KV452983.1 | 3502834 | 10-scf00394 | 10 |
| AX-158249874 | 20 | 71.839 | KV452983.1 | 3503338 | 10-scf00394 | 10 |
| AX-158249878 | 20 | 71.839 | KV452983.1 | 3508952 | 10-scf00394 | 10 |
| AX-158249879 | 20 | 71.839 | KV452983.1 | 3509367 | 10-scf00394 | 10 |
| AX-158249881 | 20 | 71.839 | KV452983.1 | 3513311 | 10-scf00394 | 10 |
| AX-158249886 | 20 | 71.839 | KV452983.1 | 3517961 | 10-scf00394 | 10 |
| AX-158249887 | 20 | 71.839 | KV452983.1 | 3518810 | 10-scf00394 | 10 |
| AX-158249889 | 20 | 71.839 | KV452983.1 | 3520328 | 10-scf00394 | 10 |
| AX-158249891 | 20 | 71.839 | KV452983.1 | 3522874 | 10-scf00394 | 10 |
| AX-158249892 | 20 | 71.839 | KV452983.1 | 3523934 | 10-scf00394 | 10 |
| AX-158249899 | 20 | 71.839 | KV452983.1 | 3529692 | 10-scf00394 | 10 |
| AX-158249900 | 20 | 71.839 | KV452983.1 | 3530154 | 10-scf00394 | 10 |
| AX-158394471 | 20 | 71.839 | KV452983.1 | 3533544 | 10-scf00394 | 10 |
| AX-158249904 | 20 | 71.839 | KV452983.1 | 3536357 | 10-scf00394 | 10 |
| AX-158249911 | 20 | 71.839 | KV452983.1 | 3545186 | 10-scf00394 | 10 |
| AX-158249912 | 20 | 71.839 | KV452983.1 | 3548655 | 10-scf00394 | 10 |
| AX-158249914 | 20 | 71.839 | KV452983.1 | 3550373 | 10-scf00394 | 10 |
| AX-158249916 | 20 | 71.839 | KV452983.1 | 3553277 | 10-scf00394 | 10 |
| AX-158249917 | 20 | 71.839 | KV452983.1 | 3554280 | 10-scf00394 | 10 |
| AX-158249918 | 20 | 71.839 | KV452983.1 | 3555363 | 10-scf00394 | 10 |
| AX-158249919 | 20 | 71.839 | KV452983.1 | 3555853 | 10-scf00394 | 10 |
| AX-158249920 | 20 | 71.839 | KV452983.1 | 3556458 | 10-scf00394 | 10 |
| AX-158249921 | 20 | 71.839 | KV452983.1 | 3557310 | 10-scf00394 | 10 |
| AX-158249922 | 20 | 71.839 | KV452983.1 | 3558160 | 10-scf00394 | 10 |
| AX-158250076 | 20 | 71.839 | KV452983.1 | 3733292 | 10-scf00394 | 10 |
| AX-158250231 | 20 | 71.839 | KV452985.1 | 56262   | 10-scf00396 | 10 |
| AX-158250345 | 20 | 71.839 | KV452985.1 | 521589  | 10-scf00396 | 10 |
| AX-158250404 | 20 | 71.839 | KV452985.1 | 582776  | 10-scf00396 | 10 |
| AX-158250451 | 20 | 71.839 | KV452985.1 | 645404  | 10-scf00396 | 10 |
| AX-158250453 | 20 | 71.839 | KV452985.1 | 646425  | 10-scf00396 | 10 |
| AX-158250456 | 20 | 71.839 | KV452985.1 | 649779  | 10-scf00396 | 10 |
| AX-158250522 | 20 | 71.839 | KV452985.1 | 753029  | 10-scf00396 | 10 |
| AX-158250599 | 20 | 71.839 | KV452985.1 | 872854  | 10-scf00396 | 10 |
| AX-158249923 | 20 | 72.049 | KV452983.1 | 3559329 | 10-scf00394 | 10 |
| AX-158250429 | 20 | 72.049 | KV452985.1 | 612910  | 10-scf00396 | 10 |
| AX-158250430 | 20 | 72.049 | KV452985.1 | 613318  | 10-scf00396 | 10 |
| AX-158249925 | 20 | 72.065 | KV452983.1 | 3560279 | 10-scf00394 | 10 |
| AX-158249927 | 20 | 72.273 | KV452983.1 | 3562231 | 10-scf00394 | 10 |
| AX-158250473 | 20 | 72.273 | KV452985.1 | 677492  | 10-scf00396 | 10 |
| AX-158249928 | 20 | 72.275 | KV452983.1 | 3565107 | 10-scf00394 | 10 |
| AX-158250356 | 20 | 72.275 | KV452985.1 | 532753  | 10-scf00396 | 10 |
| AX-158249931 | 20 | 72.277 | KV452983.1 | 3569963 | 10-scf00394 | 10 |
| AX-158249855 | 20 | 72.603 | KV452983.1 | 3472362 | 10-scf00394 | 10 |
| AX-158249934 | 20 | 72.603 | KV452983.1 | 3573053 | 10-scf00394 | 10 |
| AX-158249939 | 20 | 72.603 | KV452983.1 | 3577958 | 10-scf00394 | 10 |
| AX-158249942 | 20 | 72.603 | KV452983.1 | 3584439 | 10-scf00394 | 10 |
| AX-158249944 | 20 | 72.603 | KV452983.1 | 3587058 | 10-scf00394 | 10 |

|              |    |        |            |         |             |    |
|--------------|----|--------|------------|---------|-------------|----|
| AX-157859823 | 20 | 72.603 | KV452983.1 | 3587308 | 10-scf00394 | 10 |
| AX-158249950 | 20 | 72.603 | KV452983.1 | 3593452 | 10-scf00394 | 10 |
| AX-158249951 | 20 | 72.603 | KV452983.1 | 3594050 | 10-scf00394 | 10 |
| AX-157726681 | 20 | 72.603 | KV452983.1 | 3595049 | 10-scf00394 | 10 |
| AX-158249953 | 20 | 72.603 | KV452983.1 | 3595642 | 10-scf00394 | 10 |
| AX-158249958 | 20 | 72.603 | KV452983.1 | 3601257 | 10-scf00394 | 10 |
| AX-158249959 | 20 | 72.603 | KV452983.1 | 3601388 | 10-scf00394 | 10 |
| AX-158249960 | 20 | 72.603 | KV452983.1 | 3603912 | 10-scf00394 | 10 |
| AX-158249962 | 20 | 72.603 | KV452983.1 | 3605738 | 10-scf00394 | 10 |
| AX-158249965 | 20 | 72.603 | KV452983.1 | 3609607 | 10-scf00394 | 10 |
| AX-158249977 | 20 | 72.603 | KV452983.1 | 3622204 | 10-scf00394 | 10 |
| AX-158249980 | 20 | 72.603 | KV452983.1 | 3624061 | 10-scf00394 | 10 |
| AX-158249981 | 20 | 72.603 | KV452983.1 | 3625226 | 10-scf00394 | 10 |
| AX-158249988 | 20 | 72.603 | KV452983.1 | 3634336 | 10-scf00394 | 10 |
| AX-158249990 | 20 | 72.603 | KV452983.1 | 3635303 | 10-scf00394 | 10 |
| AX-158249991 | 20 | 72.603 | KV452983.1 | 3636393 | 10-scf00394 | 10 |
| AX-158249992 | 20 | 72.603 | KV452983.1 | 3637518 | 10-scf00394 | 10 |
| AX-158249995 | 20 | 72.603 | KV452983.1 | 3640920 | 10-scf00394 | 10 |
| AX-158249996 | 20 | 72.603 | KV452983.1 | 3641257 | 10-scf00394 | 10 |
| AX-158250000 | 20 | 72.603 | KV452983.1 | 3645414 | 10-scf00394 | 10 |
| AX-158250002 | 20 | 72.603 | KV452983.1 | 3647506 | 10-scf00394 | 10 |
| AX-158250006 | 20 | 72.603 | KV452983.1 | 3654099 | 10-scf00394 | 10 |
| AX-158250008 | 20 | 72.603 | KV452983.1 | 3655255 | 10-scf00394 | 10 |
| AX-158250009 | 20 | 72.603 | KV452983.1 | 3655641 | 10-scf00394 | 10 |
| AX-158250010 | 20 | 72.603 | KV452983.1 | 3656081 | 10-scf00394 | 10 |
| AX-158250011 | 20 | 72.603 | KV452983.1 | 3656822 | 10-scf00394 | 10 |
| AX-158250012 | 20 | 72.603 | KV452983.1 | 3657368 | 10-scf00394 | 10 |
| AX-158250013 | 20 | 72.603 | KV452983.1 | 3658310 | 10-scf00394 | 10 |
| AX-158250014 | 20 | 72.603 | KV452983.1 | 3659704 | 10-scf00394 | 10 |
| AX-158250015 | 20 | 72.603 | KV452983.1 | 3660146 | 10-scf00394 | 10 |
| AX-158250016 | 20 | 72.603 | KV452983.1 | 3660574 | 10-scf00394 | 10 |
| AX-158250017 | 20 | 72.603 | KV452983.1 | 3661661 | 10-scf00394 | 10 |
| AX-158250018 | 20 | 72.603 | KV452983.1 | 3663193 | 10-scf00394 | 10 |
| AX-158250019 | 20 | 72.603 | KV452983.1 | 3664719 | 10-scf00394 | 10 |
| AX-158250073 | 20 | 72.603 | KV452983.1 | 3729626 | 10-scf00394 | 10 |
| AX-158250110 | 20 | 72.603 | KV452983.1 | 3785158 | 10-scf00394 | 10 |
| AX-158250111 | 20 | 72.603 | KV452983.1 | 3785551 | 10-scf00394 | 10 |
| AX-158250112 | 20 | 72.603 | KV452983.1 | 3786299 | 10-scf00394 | 10 |
| AX-158250264 | 20 | 72.603 | KV452985.1 | 221886  | 10-scf00396 | 10 |
| AX-158250269 | 20 | 72.603 | KV452985.1 | 251460  | 10-scf00396 | 10 |
| AX-158250275 | 20 | 72.603 | KV452985.1 | 278118  | 10-scf00396 | 10 |
| AX-158250298 | 20 | 72.603 | KV452985.1 | 356272  | 10-scf00396 | 10 |
| AX-158250303 | 20 | 72.603 | KV452985.1 | 367621  | 10-scf00396 | 10 |
| AX-158250334 | 20 | 72.603 | KV452985.1 | 503639  | 10-scf00396 | 10 |
| AX-158250344 | 20 | 72.603 | KV452985.1 | 520458  | 10-scf00396 | 10 |
| AX-157721312 | 20 | 72.603 | KV452985.1 | 577300  | 10-scf00396 | 10 |
| AX-158250403 | 20 | 72.603 | KV452985.1 | 581986  | 10-scf00396 | 10 |
| AX-158250421 | 20 | 72.603 | KV452985.1 | 602447  | 10-scf00396 | 10 |
| AX-158250423 | 20 | 72.603 | KV452985.1 | 605627  | 10-scf00396 | 10 |
| AX-158250446 | 20 | 72.603 | KV452985.1 | 638427  | 10-scf00396 | 10 |
| AX-158250449 | 20 | 72.603 | KV452985.1 | 644478  | 10-scf00396 | 10 |

|              |    |        |            |         |             |    |
|--------------|----|--------|------------|---------|-------------|----|
| AX-158250450 | 20 | 72.603 | KV452985.1 | 645007  | 10-scf00396 | 10 |
| AX-158250454 | 20 | 72.603 | KV452985.1 | 646708  | 10-scf00396 | 10 |
| AX-158250455 | 20 | 72.603 | KV452985.1 | 648767  | 10-scf00396 | 10 |
| AX-158250457 | 20 | 72.603 | KV452985.1 | 651069  | 10-scf00396 | 10 |
| AX-158415845 | 20 | 72.603 | KV452985.1 | 659494  | 10-scf00396 | 10 |
| AX-158250468 | 20 | 72.603 | KV452985.1 | 664545  | 10-scf00396 | 10 |
| AX-158250476 | 20 | 72.603 | KV452985.1 | 681670  | 10-scf00396 | 10 |
| AX-158250483 | 20 | 72.603 | KV452985.1 | 692201  | 10-scf00396 | 10 |
| AX-158250521 | 20 | 72.603 | KV452985.1 | 751967  | 10-scf00396 | 10 |
| AX-158250527 | 20 | 72.603 | KV452985.1 | 760451  | 10-scf00396 | 10 |
| AX-158250538 | 20 | 72.603 | KV452985.1 | 789190  | 10-scf00396 | 10 |
| AX-158250545 | 20 | 72.603 | KV452985.1 | 794253  | 10-scf00396 | 10 |
| AX-158250555 | 20 | 72.603 | KV452985.1 | 806411  | 10-scf00396 | 10 |
| AX-158249612 | 20 | 72.712 | KV452983.1 | 3182948 | 10-scf00394 | 10 |
| AX-158249859 | 20 | 72.712 | KV452983.1 | 3481172 | 10-scf00394 | 10 |
| AX-158249935 | 20 | 72.712 | KV452983.1 | 3573988 | 10-scf00394 | 10 |
| AX-158249970 | 20 | 72.712 | KV452983.1 | 3614819 | 10-scf00394 | 10 |
| AX-158415819 | 20 | 72.712 | KV452983.1 | 3627605 | 10-scf00394 | 10 |
| AX-158250022 | 20 | 72.712 | KV452983.1 | 3666995 | 10-scf00394 | 10 |
| AX-158250026 | 20 | 72.712 | KV452983.1 | 3671727 | 10-scf00394 | 10 |
| AX-158250027 | 20 | 72.712 | KV452983.1 | 3672937 | 10-scf00394 | 10 |
| AX-158250028 | 20 | 72.712 | KV452983.1 | 3674293 | 10-scf00394 | 10 |
| AX-158250029 | 20 | 72.712 | KV452983.1 | 3674851 | 10-scf00394 | 10 |
| AX-158250031 | 20 | 72.712 | KV452983.1 | 3679900 | 10-scf00394 | 10 |
| AX-158250032 | 20 | 72.712 | KV452983.1 | 3683118 | 10-scf00394 | 10 |
| AX-158415821 | 20 | 72.712 | KV452983.1 | 3685041 | 10-scf00394 | 10 |
| AX-158415822 | 20 | 72.712 | KV452983.1 | 3685267 | 10-scf00394 | 10 |
| AX-158250033 | 20 | 72.712 | KV452983.1 | 3685897 | 10-scf00394 | 10 |
| AX-158250034 | 20 | 72.712 | KV452983.1 | 3687227 | 10-scf00394 | 10 |
| AX-158250036 | 20 | 72.712 | KV452983.1 | 3689670 | 10-scf00394 | 10 |
| AX-158250039 | 20 | 72.712 | KV452983.1 | 3692451 | 10-scf00394 | 10 |
| AX-158250042 | 20 | 72.712 | KV452983.1 | 3695751 | 10-scf00394 | 10 |
| AX-158250044 | 20 | 72.712 | KV452983.1 | 3699003 | 10-scf00394 | 10 |
| AX-158250045 | 20 | 72.712 | KV452983.1 | 3699487 | 10-scf00394 | 10 |
| AX-158250046 | 20 | 72.712 | KV452983.1 | 3699848 | 10-scf00394 | 10 |
| AX-158250047 | 20 | 72.712 | KV452983.1 | 3700493 | 10-scf00394 | 10 |
| AX-158250049 | 20 | 72.712 | KV452983.1 | 3703173 | 10-scf00394 | 10 |
| AX-158250054 | 20 | 72.712 | KV452983.1 | 3710321 | 10-scf00394 | 10 |
| AX-158250055 | 20 | 72.712 | KV452983.1 | 3711903 | 10-scf00394 | 10 |
| AX-158250057 | 20 | 72.712 | KV452983.1 | 3713683 | 10-scf00394 | 10 |
| AX-158250059 | 20 | 72.712 | KV452983.1 | 3716759 | 10-scf00394 | 10 |
| AX-158250060 | 20 | 72.712 | KV452983.1 | 3717840 | 10-scf00394 | 10 |
| AX-158250148 | 20 | 72.712 | KV452983.1 | 3821687 | 10-scf00394 | 10 |
| AX-158423364 | 20 | 72.712 | KV452985.1 | 339224  | 10-scf00396 | 10 |
| AX-158250324 | 20 | 72.712 | KV452985.1 | 463053  | 10-scf00396 | 10 |
| AX-158250346 | 20 | 72.712 | KV452985.1 | 522122  | 10-scf00396 | 10 |
| AX-158250348 | 20 | 72.712 | KV452985.1 | 523614  | 10-scf00396 | 10 |
| AX-158250349 | 20 | 72.712 | KV452985.1 | 524473  | 10-scf00396 | 10 |
| AX-158250352 | 20 | 72.712 | KV452985.1 | 529882  | 10-scf00396 | 10 |
| AX-158250354 | 20 | 72.712 | KV452985.1 | 532006  | 10-scf00396 | 10 |
| AX-158249969 | 20 | 72.737 | KV452983.1 | 3614113 | 10-scf00394 | 10 |

|              |    |        |            |         |             |    |
|--------------|----|--------|------------|---------|-------------|----|
| AX-158250038 | 20 | 72.737 | KV452983.1 | 3691504 | 10-scf00394 | 10 |
| AX-158250074 | 20 | 72.737 | KV452983.1 | 3730425 | 10-scf00394 | 10 |
| AX-158250493 | 20 | 72.737 | KV452985.1 | 710738  | 10-scf00396 | 10 |
| AX-158250546 | 20 | 72.737 | KV452985.1 | 794312  | 10-scf00396 | 10 |
| AX-158250565 | 20 | 72.737 | KV452985.1 | 819463  | 10-scf00396 | 10 |
| AX-157771148 | 20 | 72.737 | KV452985.1 | 869866  | 10-scf00396 | 10 |
| AX-157723950 | 20 | 72.756 | KV452983.1 | 3731061 | 10-scf00394 | 10 |
| AX-158250078 | 20 | 72.765 | KV452983.1 | 3734309 | 10-scf00394 | 10 |
| AX-158249876 | 20 | 72.781 | KV452983.1 | 3504498 | 10-scf00394 | 10 |
| AX-158250085 | 20 | 72.781 | KV452983.1 | 3744018 | 10-scf00394 | 10 |
| AX-158250174 | 20 | 72.781 | KV452983.1 | 3878304 | 10-scf00394 | 10 |
| AX-158250193 | 20 | 72.781 | KV452983.1 | 3936387 | 10-scf00394 | 10 |
| AX-158250199 | 20 | 72.781 | KV452983.1 | 3991326 | 10-scf00394 | 10 |
| AX-157842045 | 20 | 72.784 | KV452983.1 | 3647186 | 10-scf00394 | 10 |
| AX-158250095 | 20 | 72.784 | KV452983.1 | 3767517 | 10-scf00394 | 10 |
| AX-157752740 | 20 | 72.784 | KV452983.1 | 3770051 | 10-scf00394 | 10 |
| AX-158250097 | 20 | 72.784 | KV452983.1 | 3771370 | 10-scf00394 | 10 |
| AX-158250099 | 20 | 72.784 | KV452983.1 | 3772431 | 10-scf00394 | 10 |
| AX-158250101 | 20 | 72.784 | KV452983.1 | 3775792 | 10-scf00394 | 10 |
| AX-158250120 | 20 | 72.784 | KV452983.1 | 3792144 | 10-scf00394 | 10 |
| AX-158250135 | 20 | 72.784 | KV452983.1 | 3807183 | 10-scf00394 | 10 |
| AX-158250137 | 20 | 72.784 | KV452983.1 | 3812051 | 10-scf00394 | 10 |
| AX-158250139 | 20 | 72.784 | KV452983.1 | 3813704 | 10-scf00394 | 10 |
| AX-158250154 | 20 | 72.784 | KV452983.1 | 3828886 | 10-scf00394 | 10 |
| AX-158250164 | 20 | 72.784 | KV452983.1 | 3840186 | 10-scf00394 | 10 |
| AX-158250178 | 20 | 72.784 | KV452983.1 | 3894185 | 10-scf00394 | 10 |
| AX-158250179 | 20 | 72.784 | KV452983.1 | 3896663 | 10-scf00394 | 10 |
| AX-158250180 | 20 | 72.784 | KV452983.1 | 3898295 | 10-scf00394 | 10 |
| AX-158250181 | 20 | 72.784 | KV452983.1 | 3899526 | 10-scf00394 | 10 |
| AX-158250182 | 20 | 72.784 | KV452983.1 | 3900972 | 10-scf00394 | 10 |
| AX-158250184 | 20 | 72.784 | KV452983.1 | 3901758 | 10-scf00394 | 10 |
| AX-158250187 | 20 | 72.784 | KV452983.1 | 3905009 | 10-scf00394 | 10 |
| AX-158250189 | 20 | 72.784 | KV452983.1 | 3909744 | 10-scf00394 | 10 |
| AX-157880187 | 20 | 72.784 | KV452983.1 | 3992132 | 10-scf00394 | 10 |
| AX-157880193 | 20 | 72.784 | KV452985.1 | 5877    | 10-scf00396 | 10 |
| AX-157842051 | 20 | 72.784 | KV452985.1 | 22022   | 10-scf00396 | 10 |
| AX-157880196 | 20 | 72.784 | KV452985.1 | 38927   | 10-scf00396 | 10 |
| AX-157880199 | 20 | 72.784 | KV452985.1 | 88785   | 10-scf00396 | 10 |
| AX-157880200 | 20 | 72.784 | KV452985.1 | 121327  | 10-scf00396 | 10 |
| AX-157842053 | 20 | 72.784 | KV452985.1 | 126633  | 10-scf00396 | 10 |
| AX-157880202 | 20 | 72.784 | KV452985.1 | 131753  | 10-scf00396 | 10 |
| AX-158250249 | 20 | 72.784 | KV452985.1 | 167008  | 10-scf00396 | 10 |
| AX-158250250 | 20 | 72.784 | KV452985.1 | 168648  | 10-scf00396 | 10 |
| AX-157880203 | 20 | 72.784 | KV452985.1 | 200485  | 10-scf00396 | 10 |
| AX-158250258 | 20 | 72.784 | KV452985.1 | 200991  | 10-scf00396 | 10 |
| AX-158415836 | 20 | 72.784 | KV452985.1 | 207385  | 10-scf00396 | 10 |
| AX-158250268 | 20 | 72.784 | KV452985.1 | 243620  | 10-scf00396 | 10 |
| AX-158250271 | 20 | 72.784 | KV452985.1 | 255908  | 10-scf00396 | 10 |
| AX-157880204 | 20 | 72.784 | KV452985.1 | 260453  | 10-scf00396 | 10 |
| AX-157880205 | 20 | 72.784 | KV452985.1 | 292105  | 10-scf00396 | 10 |
| AX-158250279 | 20 | 72.784 | KV452985.1 | 304998  | 10-scf00396 | 10 |

|              |    |        |            |         |             |    |
|--------------|----|--------|------------|---------|-------------|----|
| AX-158250284 | 20 | 72.784 | KV452985.1 | 338050  | 10-scf00396 | 10 |
| AX-158250286 | 20 | 72.784 | KV452985.1 | 341631  | 10-scf00396 | 10 |
| AX-157880214 | 20 | 72.784 | KV452985.1 | 476160  | 10-scf00396 | 10 |
| AX-158250365 | 20 | 72.784 | KV452985.1 | 545232  | 10-scf00396 | 10 |
| AX-158250367 | 20 | 72.784 | KV452985.1 | 548610  | 10-scf00396 | 10 |
| AX-158250396 | 20 | 72.784 | KV452985.1 | 573718  | 10-scf00396 | 10 |
| AX-158250458 | 20 | 72.784 | KV452985.1 | 652554  | 10-scf00396 | 10 |
| AX-158250478 | 20 | 72.784 | KV452985.1 | 684947  | 10-scf00396 | 10 |
| AX-158250547 | 20 | 72.784 | KV452985.1 | 795005  | 10-scf00396 | 10 |
| AX-158250552 | 20 | 72.784 | KV452985.1 | 804286  | 10-scf00396 | 10 |
| AX-158250554 | 20 | 72.784 | KV452985.1 | 805446  | 10-scf00396 | 10 |
| AX-158250100 | 20 | 72.789 | KV452983.1 | 3773417 | 10-scf00394 | 10 |
| AX-158249978 | 20 | 72.797 | KV452983.1 | 3622989 | 10-scf00394 | 10 |
| AX-158249983 | 20 | 72.797 | KV452983.1 | 3629328 | 10-scf00394 | 10 |
| AX-158250021 | 20 | 72.797 | KV452983.1 | 3666437 | 10-scf00394 | 10 |
| AX-158250024 | 20 | 72.797 | KV452983.1 | 3669264 | 10-scf00394 | 10 |
| AX-158250025 | 20 | 72.797 | KV452983.1 | 3670413 | 10-scf00394 | 10 |
| AX-158250062 | 20 | 72.797 | KV452983.1 | 3718925 | 10-scf00394 | 10 |
| AX-158250102 | 20 | 72.797 | KV452983.1 | 3776927 | 10-scf00394 | 10 |
| AX-158250118 | 20 | 72.797 | KV452983.1 | 3790176 | 10-scf00394 | 10 |
| AX-158250141 | 20 | 72.797 | KV452983.1 | 3814695 | 10-scf00394 | 10 |
| AX-158250151 | 20 | 72.797 | KV452983.1 | 3825873 | 10-scf00394 | 10 |
| AX-158250171 | 20 | 72.797 | KV452983.1 | 3868513 | 10-scf00394 | 10 |
| AX-158250197 | 20 | 72.797 | KV452983.1 | 3951718 | 10-scf00394 | 10 |
| AX-158250202 | 20 | 72.797 | KV452983.1 | 3993695 | 10-scf00394 | 10 |
| AX-158250221 | 20 | 72.797 | KV452983.1 | 4090334 | 10-scf00394 | 10 |
| AX-158250223 | 20 | 72.797 | KV452983.1 | 4095809 | 10-scf00394 | 10 |
| AX-158250230 | 20 | 72.797 | KV452985.1 | 32248   | 10-scf00396 | 10 |
| AX-158250237 | 20 | 72.797 | KV452985.1 | 114831  | 10-scf00396 | 10 |
| AX-158250239 | 20 | 72.797 | KV452985.1 | 132261  | 10-scf00396 | 10 |
| AX-158250241 | 20 | 72.797 | KV452985.1 | 133628  | 10-scf00396 | 10 |
| AX-158250243 | 20 | 72.797 | KV452985.1 | 143111  | 10-scf00396 | 10 |
| AX-158415834 | 20 | 72.797 | KV452985.1 | 173110  | 10-scf00396 | 10 |
| AX-158250274 | 20 | 72.797 | KV452985.1 | 276252  | 10-scf00396 | 10 |
| AX-158250277 | 20 | 72.797 | KV452985.1 | 293146  | 10-scf00396 | 10 |
| AX-158250289 | 20 | 72.797 | KV452985.1 | 343837  | 10-scf00396 | 10 |
| AX-158250292 | 20 | 72.797 | KV452985.1 | 347311  | 10-scf00396 | 10 |
| AX-158250297 | 20 | 72.797 | KV452985.1 | 355545  | 10-scf00396 | 10 |
| AX-158250304 | 20 | 72.797 | KV452985.1 | 372797  | 10-scf00396 | 10 |
| AX-157753850 | 20 | 72.797 | KV452985.1 | 379502  | 10-scf00396 | 10 |
| AX-158250331 | 20 | 72.797 | KV452985.1 | 495786  | 10-scf00396 | 10 |
| AX-158250335 | 20 | 72.797 | KV452985.1 | 505129  | 10-scf00396 | 10 |
| AX-158250350 | 20 | 72.797 | KV452985.1 | 528567  | 10-scf00396 | 10 |
| AX-158250353 | 20 | 72.797 | KV452985.1 | 530645  | 10-scf00396 | 10 |
| AX-158250357 | 20 | 72.797 | KV452985.1 | 534138  | 10-scf00396 | 10 |
| AX-158250115 | 20 | 72.798 | KV452983.1 | 3788278 | 10-scf00394 | 10 |
| AX-158250116 | 20 | 72.798 | KV452983.1 | 3788436 | 10-scf00394 | 10 |
| AX-158250177 | 20 | 72.798 | KV452983.1 | 3889909 | 10-scf00394 | 10 |
| AX-158250218 | 20 | 72.798 | KV452983.1 | 4064407 | 10-scf00394 | 10 |
| AX-158250273 | 20 | 72.798 | KV452985.1 | 275767  | 10-scf00396 | 10 |
| AX-158250302 | 20 | 72.798 | KV452985.1 | 365760  | 10-scf00396 | 10 |



|              |    |        |            |         |             |    |
|--------------|----|--------|------------|---------|-------------|----|
| AX-158250359 | 20 | 72.798 | KV452985.1 | 537522  | 10-scf00396 | 10 |
| AX-158250134 | 20 | 72.801 | KV452983.1 | 3805505 | 10-scf00394 | 10 |
| AX-158250138 | 20 | 72.804 | KV452983.1 | 3812920 | 10-scf00394 | 10 |
| AX-158249997 | 20 | 72.81  | KV452983.1 | 3641892 | 10-scf00394 | 10 |
| AX-158250170 | 20 | 72.81  | KV452983.1 | 3863136 | 10-scf00394 | 10 |
| AX-157842047 | 20 | 72.815 | KV452983.1 | 3883952 | 10-scf00394 | 10 |
| AX-158249963 | 20 | 72.821 | KV452983.1 | 3608263 | 10-scf00394 | 10 |
| AX-157749857 | 20 | 72.821 | KV452983.1 | 3885593 | 10-scf00394 | 10 |
| AX-158250203 | 20 | 72.821 | KV452983.1 | 3994461 | 10-scf00394 | 10 |
| AX-158250205 | 20 | 72.821 | KV452983.1 | 4011561 | 10-scf00394 | 10 |
| AX-158250209 | 20 | 72.821 | KV452983.1 | 4021442 | 10-scf00394 | 10 |
| AX-158250212 | 20 | 72.821 | KV452983.1 | 4035242 | 10-scf00394 | 10 |
| AX-158250213 | 20 | 72.821 | KV452983.1 | 4035611 | 10-scf00394 | 10 |
| AX-158250214 | 20 | 72.821 | KV452983.1 | 4040481 | 10-scf00394 | 10 |
| AX-158250215 | 20 | 72.821 | KV452983.1 | 4042018 | 10-scf00394 | 10 |
| AX-158250225 | 20 | 72.821 | KV452985.1 | 10611   | 10-scf00396 | 10 |
| AX-157727077 | 20 | 72.821 | KV452985.1 | 87369   | 10-scf00396 | 10 |
| AX-158250236 | 20 | 72.821 | KV452985.1 | 98294   | 10-scf00396 | 10 |
| AX-158250358 | 20 | 72.821 | KV452985.1 | 536473  | 10-scf00396 | 10 |
| AX-157719074 | 20 | 72.822 | KV452983.1 | 3609987 | 10-scf00394 | 10 |
| AX-158250048 | 20 | 72.822 | KV452983.1 | 3702403 | 10-scf00394 | 10 |
| AX-158250066 | 20 | 72.822 | KV452983.1 | 3724023 | 10-scf00394 | 10 |
| AX-158250232 | 20 | 72.822 | KV452985.1 | 58724   | 10-scf00396 | 10 |
| AX-158250233 | 20 | 72.822 | KV452985.1 | 59844   | 10-scf00396 | 10 |
| AX-157726391 | 20 | 72.822 | KV452985.1 | 142384  | 10-scf00396 | 10 |
| AX-158250254 | 20 | 72.822 | KV452985.1 | 190478  | 10-scf00396 | 10 |
| AX-158250256 | 20 | 72.822 | KV452985.1 | 197854  | 10-scf00396 | 10 |
| AX-158250262 | 20 | 72.822 | KV452985.1 | 216683  | 10-scf00396 | 10 |
| AX-158419075 | 20 | 72.822 | KV452985.1 | 287698  | 10-scf00396 | 10 |
| AX-158419076 | 20 | 72.822 | KV452985.1 | 302634  | 10-scf00396 | 10 |
| AX-158250287 | 20 | 72.822 | KV452985.1 | 342530  | 10-scf00396 | 10 |
| AX-158250288 | 20 | 72.822 | KV452985.1 | 343230  | 10-scf00396 | 10 |
| AX-158250291 | 20 | 72.822 | KV452985.1 | 346046  | 10-scf00396 | 10 |
| AX-158250311 | 20 | 72.822 | KV452985.1 | 390679  | 10-scf00396 | 10 |
| AX-157721078 | 20 | 72.822 | KV452985.1 | 391591  | 10-scf00396 | 10 |
| AX-158250312 | 20 | 72.822 | KV452985.1 | 392987  | 10-scf00396 | 10 |
| AX-158250313 | 20 | 72.822 | KV452985.1 | 406440  | 10-scf00396 | 10 |
| AX-158250319 | 20 | 72.822 | KV452985.1 | 443052  | 10-scf00396 | 10 |
| AX-158250327 | 20 | 72.822 | KV452985.1 | 473087  | 10-scf00396 | 10 |
| AX-158250550 | 20 | 72.822 | KV452985.1 | 797644  | 10-scf00396 | 10 |
| AX-158250329 | 20 | 72.823 | KV452985.1 | 489501  | 10-scf00396 | 10 |
| AX-157887604 | 20 | 72.823 | KV452985.1 | 492518  | 10-scf00396 | 10 |
| AX-158250343 | 20 | 72.824 | KV452985.1 | 519797  | 10-scf00396 | 10 |
| AX-158250347 | 20 | 72.824 | KV452985.1 | 522547  | 10-scf00396 | 10 |
| AX-158250374 | 20 | 72.859 | KV452985.1 | 557565  | 10-scf00396 | 10 |
| AX-158250375 | 20 | 72.859 | KV452985.1 | 559322  | 10-scf00396 | 10 |
| AX-158250410 | 20 | 72.886 | KV452985.1 | 588994  | 10-scf00396 | 10 |
| AX-158250426 | 20 | 72.928 | KV452985.1 | 610309  | 10-scf00396 | 10 |
| AX-158250438 | 20 | 72.97  | KV452985.1 | 630710  | 10-scf00396 | 10 |
| AX-158250442 | 20 | 73.021 | KV452985.1 | 633496  | 10-scf00396 | 10 |
| AX-158250441 | 20 | 73.068 | KV452985.1 | 633030  | 10-scf00396 | 10 |

|              |    |        |            |         |             |    |
|--------------|----|--------|------------|---------|-------------|----|
| AX-158250443 | 20 | 73.068 | KV452985.1 | 634777  | 10-scf00396 | 10 |
| AX-158249926 | 20 | 73.113 | KV452983.1 | 3562024 | 10-scf00394 | 10 |
| AX-158250427 | 20 | 73.113 | KV452985.1 | 610671  | 10-scf00396 | 10 |
| AX-158250428 | 20 | 73.113 | KV452985.1 | 612535  | 10-scf00396 | 10 |
| AX-158250431 | 20 | 73.113 | KV452985.1 | 613758  | 10-scf00396 | 10 |
| AX-158250432 | 20 | 73.113 | KV452985.1 | 619322  | 10-scf00396 | 10 |
| AX-158250433 | 20 | 73.113 | KV452985.1 | 620167  | 10-scf00396 | 10 |
| AX-158250434 | 20 | 73.113 | KV452985.1 | 622865  | 10-scf00396 | 10 |
| AX-158250436 | 20 | 73.113 | KV452985.1 | 628969  | 10-scf00396 | 10 |
| AX-158250440 | 20 | 73.113 | KV452985.1 | 632353  | 10-scf00396 | 10 |
| AX-158250452 | 20 | 73.113 | KV452985.1 | 645839  | 10-scf00396 | 10 |
| AX-158250463 | 20 | 73.113 | KV452985.1 | 660608  | 10-scf00396 | 10 |
| AX-157842056 | 20 | 73.113 | KV452985.1 | 666772  | 10-scf00396 | 10 |
| AX-158250469 | 20 | 73.113 | KV452985.1 | 669481  | 10-scf00396 | 10 |
| AX-158250470 | 20 | 73.113 | KV452985.1 | 674248  | 10-scf00396 | 10 |
| AX-158250474 | 20 | 73.113 | KV452985.1 | 680175  | 10-scf00396 | 10 |
| AX-158250484 | 20 | 73.113 | KV452985.1 | 692789  | 10-scf00396 | 10 |
| AX-158250486 | 20 | 73.113 | KV452985.1 | 694654  | 10-scf00396 | 10 |
| AX-158250487 | 20 | 73.113 | KV452985.1 | 694966  | 10-scf00396 | 10 |
| AX-157872733 | 20 | 73.113 | KV452985.1 | 696864  | 10-scf00396 | 10 |
| AX-158250489 | 20 | 73.113 | KV452985.1 | 701194  | 10-scf00396 | 10 |
| AX-158250490 | 20 | 73.113 | KV452985.1 | 702292  | 10-scf00396 | 10 |
| AX-158250491 | 20 | 73.113 | KV452985.1 | 704085  | 10-scf00396 | 10 |
| AX-158250498 | 20 | 73.113 | KV452985.1 | 716602  | 10-scf00396 | 10 |
| AX-158250506 | 20 | 73.113 | KV452985.1 | 730230  | 10-scf00396 | 10 |
| AX-158250509 | 20 | 73.113 | KV452985.1 | 733932  | 10-scf00396 | 10 |
| AX-158250510 | 20 | 73.113 | KV452985.1 | 735992  | 10-scf00396 | 10 |
| AX-158250512 | 20 | 73.113 | KV452985.1 | 737612  | 10-scf00396 | 10 |
| AX-158250513 | 20 | 73.113 | KV452985.1 | 740536  | 10-scf00396 | 10 |
| AX-158250515 | 20 | 73.113 | KV452985.1 | 745921  | 10-scf00396 | 10 |
| AX-157842057 | 20 | 73.113 | KV452985.1 | 746688  | 10-scf00396 | 10 |
| AX-158250571 | 20 | 73.113 | KV452985.1 | 828409  | 10-scf00396 | 10 |
| AX-158249949 | 20 | 73.259 | KV452983.1 | 3591853 | 10-scf00394 | 10 |
| AX-157748193 | 20 | 73.259 | KV452985.1 | 754532  | 10-scf00396 | 10 |
| AX-157842058 | 20 | 73.259 | KV452985.1 | 754721  | 10-scf00396 | 10 |
| AX-158250524 | 20 | 73.259 | KV452985.1 | 756071  | 10-scf00396 | 10 |
| AX-158250525 | 20 | 73.259 | KV452985.1 | 757001  | 10-scf00396 | 10 |
| AX-157717359 | 20 | 73.259 | KV452985.1 | 768468  | 10-scf00396 | 10 |
| AX-158250531 | 20 | 73.259 | KV452985.1 | 773789  | 10-scf00396 | 10 |
| AX-158250533 | 20 | 73.259 | KV452985.1 | 780823  | 10-scf00396 | 10 |
| AX-157842059 | 20 | 73.259 | KV452985.1 | 785023  | 10-scf00396 | 10 |
| AX-158250535 | 20 | 73.259 | KV452985.1 | 785325  | 10-scf00396 | 10 |
| AX-157842061 | 20 | 73.259 | KV452985.1 | 790689  | 10-scf00396 | 10 |
| AX-158250548 | 20 | 73.259 | KV452985.1 | 796272  | 10-scf00396 | 10 |
| AX-158250556 | 20 | 73.259 | KV452985.1 | 807098  | 10-scf00396 | 10 |
| AX-158250558 | 20 | 73.259 | KV452985.1 | 808231  | 10-scf00396 | 10 |
| AX-157757856 | 20 | 73.259 | KV452985.1 | 811428  | 10-scf00396 | 10 |
| AX-158250568 | 20 | 73.259 | KV452985.1 | 822547  | 10-scf00396 | 10 |
| AX-158250573 | 20 | 73.259 | KV452985.1 | 829473  | 10-scf00396 | 10 |
| AX-158250559 | 20 | 73.477 | KV452985.1 | 813049  | 10-scf00396 | 10 |
| AX-158250562 | 20 | 73.477 | KV452985.1 | 814916  | 10-scf00396 | 10 |

|              |    |        |            |         |             |    |
|--------------|----|--------|------------|---------|-------------|----|
| AX-158250563 | 20 | 73.477 | KV452985.1 | 815703  | 10-scf00396 | 10 |
| AX-158250564 | 20 | 73.477 | KV452985.1 | 816444  | 10-scf00396 | 10 |
| AX-158250566 | 20 | 73.477 | KV452985.1 | 819980  | 10-scf00396 | 10 |
| AX-158250579 | 20 | 73.477 | KV452985.1 | 842411  | 10-scf00396 | 10 |
| AX-158250567 | 20 | 73.478 | KV452985.1 | 820560  | 10-scf00396 | 10 |
| AX-158250586 | 20 | 73.478 | KV452985.1 | 854191  | 10-scf00396 | 10 |
| AX-158250632 | 20 | 73.478 | KV452985.1 | 932327  | 10-scf00396 | 10 |
| AX-158250655 | 20 | 73.478 | KV452985.1 | 967685  | 10-scf00396 | 10 |
| AX-158250569 | 20 | 73.485 | KV452985.1 | 823549  | 10-scf00396 | 10 |
| AX-158250570 | 20 | 73.487 | KV452985.1 | 827207  | 10-scf00396 | 10 |
| AX-158250572 | 20 | 73.487 | KV452985.1 | 829054  | 10-scf00396 | 10 |
| AX-158250574 | 20 | 73.488 | KV452985.1 | 832466  | 10-scf00396 | 10 |
| AX-158250575 | 20 | 73.547 | KV452985.1 | 835688  | 10-scf00396 | 10 |
| AX-157880218 | 20 | 73.612 | KV452985.1 | 839652  | 10-scf00396 | 10 |
| AX-158250577 | 20 | 73.612 | KV452985.1 | 840591  | 10-scf00396 | 10 |
| AX-158250578 | 20 | 73.612 | KV452985.1 | 842150  | 10-scf00396 | 10 |
| AX-157842062 | 20 | 73.612 | KV452985.1 | 853990  | 10-scf00396 | 10 |
| AX-158250587 | 20 | 73.612 | KV452985.1 | 856152  | 10-scf00396 | 10 |
| AX-157771835 | 20 | 73.612 | KV452985.1 | 857860  | 10-scf00396 | 10 |
| AX-157842063 | 20 | 73.89  | KV452985.1 | 867344  | 10-scf00396 | 10 |
| AX-158250596 | 20 | 73.89  | KV452985.1 | 868426  | 10-scf00396 | 10 |
| AX-157758321 | 20 | 74.001 | KV452985.1 | 868947  | 10-scf00396 | 10 |
| AX-158250605 | 20 | 74.001 | KV452985.1 | 891372  | 10-scf00396 | 10 |
| AX-157842067 | 20 | 74.001 | KV452985.1 | 894653  | 10-scf00396 | 10 |
| AX-158250598 | 20 | 74.005 | KV452985.1 | 871613  | 10-scf00396 | 10 |
| AX-157842064 | 20 | 74.009 | KV452985.1 | 882007  | 10-scf00396 | 10 |
| AX-158250608 | 20 | 74.316 | KV452985.1 | 895469  | 10-scf00396 | 10 |
| AX-158250609 | 20 | 74.316 | KV452985.1 | 897921  | 10-scf00396 | 10 |
| AX-158250610 | 20 | 74.316 | KV452985.1 | 898131  | 10-scf00396 | 10 |
| AX-158250612 | 20 | 74.316 | KV452985.1 | 903102  | 10-scf00396 | 10 |
| AX-158250621 | 20 | 74.316 | KV452985.1 | 915656  | 10-scf00396 | 10 |
| AX-158250676 | 20 | 74.316 | KV452985.1 | 1002161 | 10-scf00396 | 10 |
| AX-157750116 | 20 | 74.397 | KV452985.1 | 904339  | 10-scf00396 | 10 |
| AX-157842066 | 20 | 74.46  | KV452985.1 | 891836  | 10-scf00396 | 10 |
| AX-158250614 | 20 | 74.46  | KV452985.1 | 906587  | 10-scf00396 | 10 |
| AX-157842068 | 20 | 74.46  | KV452985.1 | 909820  | 10-scf00396 | 10 |
| AX-158250615 | 20 | 74.46  | KV452985.1 | 909921  | 10-scf00396 | 10 |
| AX-158394477 | 20 | 74.46  | KV452985.1 | 910900  | 10-scf00396 | 10 |
| AX-157842069 | 20 | 74.514 | KV452985.1 | 912476  | 10-scf00396 | 10 |
| AX-158250620 | 20 | 74.57  | KV452985.1 | 915134  | 10-scf00396 | 10 |
| AX-158250622 | 20 | 74.679 | KV452985.1 | 916854  | 10-scf00396 | 10 |
| AX-157721169 | 20 | 74.679 | KV452985.1 | 917304  | 10-scf00396 | 10 |
| AX-158250623 | 20 | 74.679 | KV452985.1 | 917947  | 10-scf00396 | 10 |
| AX-157859830 | 20 | 74.679 | KV452985.1 | 924277  | 10-scf00396 | 10 |
| AX-158250626 | 20 | 74.734 | KV452985.1 | 921816  | 10-scf00396 | 10 |
| AX-158250627 | 20 | 74.788 | KV452985.1 | 923710  | 10-scf00396 | 10 |
| AX-157707611 | 20 | 74.788 | KV452985.1 | 923837  | 10-scf00396 | 10 |
| AX-158250628 | 20 | 74.788 | KV452985.1 | 924630  | 10-scf00396 | 10 |
| AX-158250629 | 20 | 74.788 | KV452985.1 | 925350  | 10-scf00396 | 10 |
| AX-158250631 | 20 | 75.007 | KV452985.1 | 931802  | 10-scf00396 | 10 |
| AX-157842070 | 20 | 75.007 | KV452985.1 | 933310  | 10-scf00396 | 10 |

|              |    |        |            |         |             |    |
|--------------|----|--------|------------|---------|-------------|----|
| AX-157842071 | 20 | 75.007 | KV452985.1 | 933951  | 10-scf00396 | 10 |
| AX-158250634 | 20 | 75.007 | KV452985.1 | 935574  | 10-scf00396 | 10 |
| AX-157715001 | 20 | 75.007 | KV452985.1 | 935997  | 10-scf00396 | 10 |
| AX-158394478 | 20 | 75.007 | KV452985.1 | 938220  | 10-scf00396 | 10 |
| AX-158250636 | 20 | 75.116 | KV452985.1 | 937418  | 10-scf00396 | 10 |
| AX-158250638 | 20 | 75.116 | KV452985.1 | 941208  | 10-scf00396 | 10 |
| AX-158250639 | 20 | 75.116 | KV452985.1 | 942354  | 10-scf00396 | 10 |
| AX-157842073 | 20 | 75.116 | KV452985.1 | 946616  | 10-scf00396 | 10 |
| AX-158250641 | 20 | 75.116 | KV452985.1 | 947811  | 10-scf00396 | 10 |
| AX-158250640 | 20 | 75.28  | KV452985.1 | 947632  | 10-scf00396 | 10 |
| AX-158250643 | 20 | 75.28  | KV452985.1 | 951066  | 10-scf00396 | 10 |
| AX-158250647 | 20 | 75.443 | KV452985.1 | 952397  | 10-scf00396 | 10 |
| AX-158250648 | 20 | 75.444 | KV452985.1 | 954264  | 10-scf00396 | 10 |
| AX-158250649 | 20 | 75.444 | KV452985.1 | 954520  | 10-scf00396 | 10 |
| AX-158250650 | 20 | 75.444 | KV452985.1 | 955239  | 10-scf00396 | 10 |
| AX-158250651 | 20 | 75.444 | KV452985.1 | 955573  | 10-scf00396 | 10 |
| AX-158250652 | 20 | 75.444 | KV452985.1 | 956929  | 10-scf00396 | 10 |
| AX-158250653 | 20 | 75.444 | KV452985.1 | 957939  | 10-scf00396 | 10 |
| AX-157717661 | 20 | 75.444 | KV452985.1 | 960278  | 10-scf00396 | 10 |
| AX-157842074 | 20 | 75.444 | KV452985.1 | 961291  | 10-scf00396 | 10 |
| AX-157774888 | 20 | 75.444 | KV452985.1 | 967025  | 10-scf00396 | 10 |
| AX-158250657 | 20 | 75.444 | KV452985.1 | 969950  | 10-scf00396 | 10 |
| AX-158250658 | 20 | 75.444 | KV452985.1 | 971436  | 10-scf00396 | 10 |
| AX-157842076 | 20 | 75.444 | KV452985.1 | 973101  | 10-scf00396 | 10 |
| AX-157867348 | 20 | 75.444 | KV452985.1 | 973333  | 10-scf00396 | 10 |
| AX-158250662 | 20 | 75.444 | KV452985.1 | 975717  | 10-scf00396 | 10 |
| AX-157735179 | 20 | 75.444 | KV452985.1 | 977461  | 10-scf00396 | 10 |
| AX-158250664 | 20 | 75.444 | KV452985.1 | 981159  | 10-scf00396 | 10 |
| AX-158250666 | 20 | 75.444 | KV452985.1 | 982267  | 10-scf00396 | 10 |
| AX-157842077 | 20 | 75.444 | KV452985.1 | 985040  | 10-scf00396 | 10 |
| AX-158250668 | 20 | 75.444 | KV452985.1 | 988266  | 10-scf00396 | 10 |
| AX-157842078 | 20 | 75.444 | KV452985.1 | 992625  | 10-scf00396 | 10 |
| AX-157739474 | 20 | 75.444 | KV452985.1 | 993213  | 10-scf00396 | 10 |
| AX-158250670 | 20 | 75.444 | KV452985.1 | 993552  | 10-scf00396 | 10 |
| AX-157748128 | 20 | 75.444 | KV452985.1 | 1006647 | 10-scf00396 | 10 |
| AX-157887607 | 20 | 75.498 | KV452985.1 | 940850  | 10-scf00396 | 10 |
| AX-158250667 | 20 | 75.498 | KV452985.1 | 985435  | 10-scf00396 | 10 |
| AX-157774561 | 20 | 75.498 | KV452985.1 | 994978  | 10-scf00396 | 10 |
| AX-158250687 | 20 | 75.498 | KV452985.1 | 1015918 | 10-scf00396 | 10 |
| AX-158250681 | 20 | 75.662 | KV452985.1 | 1006993 | 10-scf00396 | 10 |
| AX-158250682 | 20 | 75.662 | KV452985.1 | 1007462 | 10-scf00396 | 10 |
| AX-158250684 | 20 | 75.662 | KV452985.1 | 1008926 | 10-scf00396 | 10 |
| AX-157842080 | 20 | 75.662 | KV452985.1 | 1011979 | 10-scf00396 | 10 |
| AX-157842081 | 20 | 75.763 | KV452985.1 | 1013137 | 10-scf00396 | 10 |
| AX-158250663 | 20 | 75.935 | KV452985.1 | 979602  | 10-scf00396 | 10 |
| AX-158250686 | 20 | 75.935 | KV452985.1 | 1015702 | 10-scf00396 | 10 |
| AX-158250689 | 20 | 75.935 | KV452985.1 | 1019088 | 10-scf00396 | 10 |
| AX-158250690 | 20 | 76.065 | KV452985.1 | 1019588 | 10-scf00396 | 10 |
| AX-158250691 | 20 | 76.208 | KV452985.1 | 1021775 | 10-scf00396 | 10 |
| AX-158250693 | 20 | 76.208 | KV452985.1 | 1023963 | 10-scf00396 | 10 |
| AX-158250696 | 20 | 76.208 | KV452985.1 | 1025849 | 10-scf00396 | 10 |

|              |    |        |            |         |             |    |
|--------------|----|--------|------------|---------|-------------|----|
| AX-158250697 | 20 | 76.208 | KV452985.1 | 1026262 | 10-scf00396 | 10 |
| AX-158250700 | 20 | 76.208 | KV452985.1 | 1030021 | 10-scf00396 | 10 |
| AX-158250698 | 20 | 76.209 | KV452985.1 | 1026741 | 10-scf00396 | 10 |
| AX-158250699 | 20 | 76.209 | KV452985.1 | 1027752 | 10-scf00396 | 10 |
| AX-157748374 | 20 | 76.209 | KV452985.1 | 1033316 | 10-scf00396 | 10 |
| AX-158250704 | 20 | 76.211 | KV452985.1 | 1034725 | 10-scf00396 | 10 |
| AX-158250705 | 20 | 76.212 | KV452985.1 | 1037610 | 10-scf00396 | 10 |
| AX-157717017 | 20 | 76.466 | KV452985.1 | 1038654 | 10-scf00396 | 10 |
| AX-157749596 | 20 | 76.466 | KV452985.1 | 1045967 | 10-scf00396 | 10 |
| AX-158250708 | 20 | 76.466 | KV452985.1 | 1046994 | 10-scf00396 | 10 |
| AX-157872735 | 20 | 76.466 | KV452985.1 | 1049108 | 10-scf00396 | 10 |
| AX-157719246 | 20 | 76.719 | KV452985.1 | 1050035 | 10-scf00396 | 10 |
| AX-158250711 | 20 | 76.719 | KV452985.1 | 1050094 | 10-scf00396 | 10 |
| AX-157867350 | 20 | 76.719 | KV452985.1 | 1050526 | 10-scf00396 | 10 |
| AX-157859831 | 20 | 76.719 | KV452985.1 | 1082944 | 10-scf00396 | 10 |
| AX-158250712 | 20 | 76.72  | KV452985.1 | 1050849 | 10-scf00396 | 10 |
| AX-158250740 | 20 | 76.72  | KV452985.1 | 1098925 | 10-scf00396 | 10 |
| AX-157770823 | 20 | 76.847 | KV452985.1 | 1052539 | 10-scf00396 | 10 |
| AX-157842082 | 20 | 76.847 | KV452985.1 | 1054122 | 10-scf00396 | 10 |
| AX-158250713 | 20 | 76.847 | KV452985.1 | 1054656 | 10-scf00396 | 10 |
| AX-158250714 | 20 | 76.907 | KV452985.1 | 1056694 | 10-scf00396 | 10 |
| AX-158250715 | 20 | 76.974 | KV452985.1 | 1060965 | 10-scf00396 | 10 |
| AX-158250716 | 20 | 76.974 | KV452985.1 | 1062410 | 10-scf00396 | 10 |
| AX-157717748 | 20 | 76.974 | KV452985.1 | 1064569 | 10-scf00396 | 10 |
| AX-158250718 | 20 | 76.974 | KV452985.1 | 1065268 | 10-scf00396 | 10 |
| AX-158250719 | 20 | 76.974 | KV452985.1 | 1067080 | 10-scf00396 | 10 |
| AX-158250722 | 20 | 76.974 | KV452985.1 | 1070811 | 10-scf00396 | 10 |
| AX-158250723 | 20 | 76.974 | KV452985.1 | 1072074 | 10-scf00396 | 10 |
| AX-158250724 | 20 | 76.974 | KV452985.1 | 1072297 | 10-scf00396 | 10 |
| AX-158415855 | 20 | 76.974 | KV452985.1 | 1073245 | 10-scf00396 | 10 |
| AX-157842083 | 20 | 76.974 | KV452985.1 | 1073299 | 10-scf00396 | 10 |
| AX-158250725 | 20 | 76.974 | KV452985.1 | 1074178 | 10-scf00396 | 10 |
| AX-158250727 | 20 | 76.974 | KV452985.1 | 1082168 | 10-scf00396 | 10 |
| AX-158250728 | 20 | 76.974 | KV452985.1 | 1083742 | 10-scf00396 | 10 |
| AX-158250729 | 20 | 76.974 | KV452985.1 | 1084515 | 10-scf00396 | 10 |
| AX-158250739 | 20 | 76.974 | KV452985.1 | 1095720 | 10-scf00396 | 10 |
| AX-158250733 | 20 | 77.084 | KV452985.1 | 1089345 | 10-scf00396 | 10 |
| AX-158250734 | 20 | 77.084 | KV452985.1 | 1089673 | 10-scf00396 | 10 |
| AX-158250735 | 20 | 77.084 | KV452985.1 | 1090421 | 10-scf00396 | 10 |
| AX-158250737 | 20 | 77.084 | KV452985.1 | 1092212 | 10-scf00396 | 10 |
| AX-157715261 | 20 | 77.084 | KV452985.1 | 1097068 | 10-scf00396 | 10 |
| AX-157713899 | 20 | 77.084 | KV452985.1 | 1099935 | 10-scf00396 | 10 |
| AX-158250744 | 20 | 77.084 | KV452985.1 | 1110749 | 10-scf00396 | 10 |
| AX-157842084 | 20 | 77.085 | KV452985.1 | 1114838 | 10-scf00396 | 10 |
| AX-157842085 | 20 | 77.088 | KV452985.1 | 1117995 | 10-scf00396 | 10 |
| AX-158250748 | 20 | 77.52  | KV452985.1 | 1118987 | 10-scf00396 | 10 |
| AX-158250752 | 20 | 77.52  | KV452985.1 | 1123095 | 10-scf00396 | 10 |
| AX-158250759 | 20 | 77.553 | KV452985.1 | 1126467 | 10-scf00396 | 10 |
| AX-157747442 | 20 | 77.583 | KV452985.1 | 1128490 | 10-scf00396 | 10 |
| AX-158250761 | 20 | 77.63  | KV452985.1 | 1130174 | 10-scf00396 | 10 |
| AX-158250762 | 20 | 77.63  | KV452985.1 | 1131366 | 10-scf00396 | 10 |

|              |    |        |            |         |             |    |
|--------------|----|--------|------------|---------|-------------|----|
| AX-158250764 | 20 | 77.63  | KV452985.1 | 1132238 | 10-scf00396 | 10 |
| AX-158250766 | 20 | 77.63  | KV452985.1 | 1133827 | 10-scf00396 | 10 |
| AX-158250773 | 20 | 77.63  | KV452985.1 | 1143311 | 10-scf00396 | 10 |
| AX-157842087 | 20 | 77.63  | KV452985.1 | 1146810 | 10-scf00396 | 10 |
| AX-158250781 | 20 | 77.63  | KV452985.1 | 1159341 | 10-scf00396 | 10 |
| AX-158250751 | 20 | 77.644 | KV452985.1 | 1121091 | 10-scf00396 | 10 |
| AX-158250772 | 20 | 77.644 | KV452985.1 | 1143053 | 10-scf00396 | 10 |
| AX-158250774 | 20 | 77.644 | KV452985.1 | 1143703 | 10-scf00396 | 10 |
| AX-157842089 | 20 | 77.644 | KV452985.1 | 1148949 | 10-scf00396 | 10 |
| AX-158250786 | 20 | 77.644 | KV452986.1 | 156     | 10-scf00397 | 10 |
| AX-158250826 | 20 | 77.644 | KV452986.1 | 45248   | 10-scf00397 | 10 |
| AX-158250778 | 20 | 77.663 | KV452985.1 | 1151695 | 10-scf00396 | 10 |
| AX-157842090 | 20 | 77.683 | KV452985.1 | 1153552 | 10-scf00396 | 10 |
| AX-158250780 | 20 | 77.703 | KV452985.1 | 1157430 | 10-scf00396 | 10 |
| AX-158250707 | 20 | 77.719 | KV452985.1 | 1046497 | 10-scf00396 | 10 |
| AX-158250746 | 20 | 77.719 | KV452985.1 | 1115473 | 10-scf00396 | 10 |
| AX-158250782 | 20 | 77.719 | KV452985.1 | 1162286 | 10-scf00396 | 10 |
| AX-158250790 | 20 | 77.719 | KV452986.1 | 1848    | 10-scf00397 | 10 |
| AX-157758639 | 20 | 77.719 | KV452986.1 | 30099   | 10-scf00397 | 10 |
| AX-158415856 | 20 | 77.739 | KV452985.1 | 1113841 | 10-scf00396 | 10 |
| AX-157721627 | 20 | 77.739 | KV452985.1 | 1124345 | 10-scf00396 | 10 |
| AX-158250755 | 20 | 77.739 | KV452985.1 | 1124425 | 10-scf00396 | 10 |
| AX-158250756 | 20 | 77.739 | KV452985.1 | 1125653 | 10-scf00396 | 10 |
| AX-158250757 | 20 | 77.739 | KV452985.1 | 1125884 | 10-scf00396 | 10 |
| AX-158250760 | 20 | 77.739 | KV452985.1 | 1129134 | 10-scf00396 | 10 |
| AX-158250777 | 20 | 77.739 | KV452985.1 | 1146323 | 10-scf00396 | 10 |
| AX-157880223 | 20 | 77.739 | KV452985.1 | 1147489 | 10-scf00396 | 10 |
| AX-157842088 | 20 | 77.739 | KV452985.1 | 1147822 | 10-scf00396 | 10 |
| AX-157842092 | 20 | 77.739 | KV452985.1 | 1160604 | 10-scf00396 | 10 |
| AX-158250783 | 20 | 77.739 | KV452985.1 | 1165032 | 10-scf00396 | 10 |
| AX-158250787 | 20 | 77.739 | KV452986.1 | 629     | 10-scf00397 | 10 |
| AX-158250789 | 20 | 77.739 | KV452986.1 | 1228    | 10-scf00397 | 10 |
| AX-157774566 | 20 | 77.739 | KV452986.1 | 3362    | 10-scf00397 | 10 |
| AX-158250791 | 20 | 77.739 | KV452986.1 | 4238    | 10-scf00397 | 10 |
| AX-158250792 | 20 | 77.739 | KV452986.1 | 7449    | 10-scf00397 | 10 |
| AX-158250793 | 20 | 77.739 | KV452986.1 | 7788    | 10-scf00397 | 10 |
| AX-158250794 | 20 | 77.739 | KV452986.1 | 7992    | 10-scf00397 | 10 |
| AX-158250795 | 20 | 77.739 | KV452986.1 | 8077    | 10-scf00397 | 10 |
| AX-158250797 | 20 | 77.739 | KV452986.1 | 9676    | 10-scf00397 | 10 |
| AX-157842094 | 20 | 77.739 | KV452986.1 | 13432   | 10-scf00397 | 10 |
| AX-158250799 | 20 | 77.739 | KV452986.1 | 14187   | 10-scf00397 | 10 |
| AX-158250801 | 20 | 77.739 | KV452986.1 | 15068   | 10-scf00397 | 10 |
| AX-158250802 | 20 | 77.739 | KV452986.1 | 15338   | 10-scf00397 | 10 |
| AX-157842098 | 20 | 77.739 | KV452986.1 | 34167   | 10-scf00397 | 10 |
| AX-158250836 | 20 | 77.739 | KV452986.1 | 63413   | 10-scf00397 | 10 |
| AX-157859832 | 20 | 77.739 | KV452986.1 | 73192   | 10-scf00397 | 10 |
| AX-157842099 | 20 | 77.849 | KV452986.1 | 34825   | 10-scf00397 | 10 |
| AX-157842102 | 20 | 77.957 | KV452986.1 | 50291   | 10-scf00397 | 10 |
| AX-157842103 | 20 | 77.957 | KV452986.1 | 52722   | 10-scf00397 | 10 |
| AX-157842104 | 20 | 77.957 | KV452986.1 | 52903   | 10-scf00397 | 10 |
| AX-158250830 | 20 | 77.957 | KV452986.1 | 55578   | 10-scf00397 | 10 |

|              |    |        |            |        |             |    |
|--------------|----|--------|------------|--------|-------------|----|
| AX-158250831 | 20 | 77.957 | KV452986.1 | 55921  | 10-scf00397 | 10 |
| AX-158250832 | 20 | 77.957 | KV452986.1 | 57255  | 10-scf00397 | 10 |
| AX-158250833 | 20 | 77.957 | KV452986.1 | 57516  | 10-scf00397 | 10 |
| AX-158250834 | 20 | 77.957 | KV452986.1 | 57926  | 10-scf00397 | 10 |
| AX-158250835 | 20 | 77.957 | KV452986.1 | 58309  | 10-scf00397 | 10 |
| AX-157693583 | 20 | 77.957 | KV452986.1 | 59033  | 10-scf00397 | 10 |
| AX-157842105 | 20 | 77.957 | KV452986.1 | 60841  | 10-scf00397 | 10 |
| AX-157717526 | 20 | 77.957 | KV452986.1 | 62171  | 10-scf00397 | 10 |
| AX-157842106 | 20 | 77.957 | KV452986.1 | 62865  | 10-scf00397 | 10 |
| AX-158250839 | 20 | 77.957 | KV452986.1 | 65385  | 10-scf00397 | 10 |
| AX-157842108 | 20 | 77.957 | KV452986.1 | 66838  | 10-scf00397 | 10 |
| AX-157709203 | 20 | 77.957 | KV452986.1 | 70642  | 10-scf00397 | 10 |
| AX-158250842 | 20 | 77.957 | KV452986.1 | 72184  | 10-scf00397 | 10 |
| AX-157872737 | 20 | 77.957 | KV452986.1 | 72583  | 10-scf00397 | 10 |
| AX-157842110 | 20 | 77.957 | KV452986.1 | 73660  | 10-scf00397 | 10 |
| AX-158250843 | 20 | 77.957 | KV452986.1 | 77454  | 10-scf00397 | 10 |
| AX-157842111 | 20 | 77.957 | KV452986.1 | 81044  | 10-scf00397 | 10 |
| AX-158250846 | 20 | 77.957 | KV452986.1 | 86395  | 10-scf00397 | 10 |
| AX-157745157 | 20 | 77.957 | KV452986.1 | 88732  | 10-scf00397 | 10 |
| AX-157747955 | 20 | 78.005 | KV452986.1 | 79562  | 10-scf00397 | 10 |
| AX-158250848 | 20 | 78.005 | KV452986.1 | 92613  | 10-scf00397 | 10 |
| AX-158250851 | 20 | 78.176 | KV452986.1 | 99152  | 10-scf00397 | 10 |
| AX-158250852 | 20 | 78.394 | KV452986.1 | 100475 | 10-scf00397 | 10 |
| AX-158250853 | 20 | 78.394 | KV452986.1 | 101497 | 10-scf00397 | 10 |
| AX-157743279 | 20 | 78.394 | KV452986.1 | 102800 | 10-scf00397 | 10 |
| AX-158387047 | 20 | 78.394 | KV452986.1 | 103721 | 10-scf00397 | 10 |
| AX-158250855 | 20 | 78.722 | KV452986.1 | 114953 | 10-scf00397 | 10 |
| AX-158250858 | 20 | 78.722 | KV452986.1 | 119004 | 10-scf00397 | 10 |
| AX-158250859 | 20 | 78.722 | KV452986.1 | 119466 | 10-scf00397 | 10 |
| AX-158250860 | 20 | 78.722 | KV452986.1 | 120599 | 10-scf00397 | 10 |
| AX-158250863 | 20 | 78.722 | KV452986.1 | 122578 | 10-scf00397 | 10 |
| AX-158250875 | 20 | 79.159 | KV452986.1 | 143091 | 10-scf00397 | 10 |
| AX-158250877 | 20 | 79.159 | KV452986.1 | 144014 | 10-scf00397 | 10 |
| AX-158250879 | 20 | 79.159 | KV452986.1 | 145338 | 10-scf00397 | 10 |
| AX-158250880 | 20 | 79.159 | KV452986.1 | 145693 | 10-scf00397 | 10 |
| AX-158250881 | 20 | 79.159 | KV452986.1 | 146657 | 10-scf00397 | 10 |
| AX-158250882 | 20 | 79.159 | KV452986.1 | 147282 | 10-scf00397 | 10 |
| AX-157842115 | 20 | 79.159 | KV452986.1 | 151660 | 10-scf00397 | 10 |
| AX-157842116 | 20 | 79.159 | KV452986.1 | 155167 | 10-scf00397 | 10 |
| AX-158250884 | 20 | 79.159 | KV452986.1 | 155751 | 10-scf00397 | 10 |
| AX-158250885 | 20 | 79.159 | KV452986.1 | 157383 | 10-scf00397 | 10 |
| AX-158250886 | 20 | 79.159 | KV452986.1 | 157757 | 10-scf00397 | 10 |
| AX-158250887 | 20 | 79.159 | KV452986.1 | 158086 | 10-scf00397 | 10 |
| AX-158250889 | 20 | 79.159 | KV452986.1 | 159637 | 10-scf00397 | 10 |
| AX-158250890 | 20 | 79.159 | KV452986.1 | 160310 | 10-scf00397 | 10 |
| AX-157752935 | 20 | 79.159 | KV452986.1 | 161016 | 10-scf00397 | 10 |
| AX-158250892 | 20 | 79.159 | KV452986.1 | 161085 | 10-scf00397 | 10 |
| AX-158250899 | 20 | 79.159 | KV452986.1 | 167112 | 10-scf00397 | 10 |
| AX-158250893 | 20 | 79.162 | KV452986.1 | 161950 | 10-scf00397 | 10 |
| AX-158250896 | 20 | 79.163 | KV452986.1 | 162917 | 10-scf00397 | 10 |
| AX-157757302 | 20 | 79.603 | KV452986.1 | 170087 | 10-scf00397 | 10 |

|              |    |        |            |        |             |    |
|--------------|----|--------|------------|--------|-------------|----|
| AX-158250903 | 20 | 79.607 | KV452986.1 | 172449 | 10-scf00397 | 10 |
| AX-158250905 | 20 | 79.633 | KV452986.1 | 173558 | 10-scf00397 | 10 |
| AX-158250907 | 20 | 79.923 | KV452986.1 | 175852 | 10-scf00397 | 10 |
| AX-158250935 | 20 | 79.923 | KV452986.1 | 220815 | 10-scf00397 | 10 |
| AX-158250891 | 20 | 79.924 | KV452986.1 | 160784 | 10-scf00397 | 10 |
| AX-158250900 | 20 | 79.924 | KV452986.1 | 167958 | 10-scf00397 | 10 |
| AX-158250912 | 20 | 79.924 | KV452986.1 | 182916 | 10-scf00397 | 10 |
| AX-158415862 | 20 | 79.924 | KV452986.1 | 209231 | 10-scf00397 | 10 |
| AX-158250911 | 20 | 79.925 | KV452986.1 | 182201 | 10-scf00397 | 10 |
| AX-158250916 | 20 | 79.925 | KV452986.1 | 190907 | 10-scf00397 | 10 |
| AX-158250917 | 20 | 79.925 | KV452986.1 | 194003 | 10-scf00397 | 10 |
| AX-158250918 | 20 | 79.925 | KV452986.1 | 194469 | 10-scf00397 | 10 |
| AX-158250919 | 20 | 79.925 | KV452986.1 | 195213 | 10-scf00397 | 10 |
| AX-158250920 | 20 | 79.925 | KV452986.1 | 196806 | 10-scf00397 | 10 |
| AX-158250921 | 20 | 79.925 | KV452986.1 | 197285 | 10-scf00397 | 10 |
| AX-158250922 | 20 | 79.925 | KV452986.1 | 197969 | 10-scf00397 | 10 |
| AX-158250923 | 20 | 79.925 | KV452986.1 | 198344 | 10-scf00397 | 10 |
| AX-158250924 | 20 | 79.925 | KV452986.1 | 200888 | 10-scf00397 | 10 |
| AX-158250925 | 20 | 79.925 | KV452986.1 | 201136 | 10-scf00397 | 10 |
| AX-157717268 | 20 | 79.925 | KV452986.1 | 202729 | 10-scf00397 | 10 |
| AX-158250927 | 20 | 79.925 | KV452986.1 | 203386 | 10-scf00397 | 10 |
| AX-157749877 | 20 | 79.925 | KV452986.1 | 213370 | 10-scf00397 | 10 |
| AX-157771662 | 20 | 79.925 | KV452986.1 | 214604 | 10-scf00397 | 10 |
| AX-158250932 | 20 | 79.925 | KV452986.1 | 215070 | 10-scf00397 | 10 |
| AX-158250934 | 20 | 79.925 | KV452986.1 | 218838 | 10-scf00397 | 10 |
| AX-158250942 | 20 | 79.925 | KV452986.1 | 226421 | 10-scf00397 | 10 |
| AX-158250943 | 20 | 79.925 | KV452986.1 | 226984 | 10-scf00397 | 10 |
| AX-158250944 | 20 | 79.925 | KV452986.1 | 227440 | 10-scf00397 | 10 |
| AX-158381018 | 20 | 79.925 | KV452986.1 | 227491 | 10-scf00397 | 10 |
| AX-158250936 | 20 | 80.034 | KV452986.1 | 221150 | 10-scf00397 | 10 |
| AX-158250938 | 20 | 80.034 | KV452986.1 | 221868 | 10-scf00397 | 10 |
| AX-158250939 | 20 | 80.034 | KV452986.1 | 222124 | 10-scf00397 | 10 |
| AX-158250948 | 20 | 80.04  | KV452986.1 | 232514 | 10-scf00397 | 10 |
| AX-158250950 | 20 | 80.25  | KV452986.1 | 234703 | 10-scf00397 | 10 |
| AX-158250951 | 20 | 80.25  | KV452986.1 | 234914 | 10-scf00397 | 10 |
| AX-158250952 | 20 | 80.25  | KV452986.1 | 237851 | 10-scf00397 | 10 |
| AX-158250954 | 20 | 80.472 | KV452986.1 | 239482 | 10-scf00397 | 10 |
| AX-158250956 | 20 | 80.472 | KV452986.1 | 240741 | 10-scf00397 | 10 |
| AX-158423366 | 20 | 80.472 | KV452986.1 | 243378 | 10-scf00397 | 10 |
| AX-158250959 | 20 | 80.472 | KV452986.1 | 244977 | 10-scf00397 | 10 |
| AX-158250960 | 20 | 80.472 | KV452986.1 | 246508 | 10-scf00397 | 10 |
| AX-157842119 | 20 | 80.663 | KV452986.1 | 251146 | 10-scf00397 | 10 |
| AX-158250981 | 20 | 80.968 | KV452986.1 | 276263 | 10-scf00397 | 10 |
| AX-157842122 | 20 | 80.969 | KV452986.1 | 277643 | 10-scf00397 | 10 |
| AX-158250983 | 20 | 80.981 | KV452986.1 | 281091 | 10-scf00397 | 10 |
| AX-158250930 | 20 | 81.175 | KV452986.1 | 211142 | 10-scf00397 | 10 |
| AX-158250931 | 20 | 81.175 | KV452986.1 | 211587 | 10-scf00397 | 10 |
| AX-157717618 | 20 | 81.175 | KV452986.1 | 223037 | 10-scf00397 | 10 |
| AX-157867353 | 20 | 81.175 | KV452986.1 | 282194 | 10-scf00397 | 10 |
| AX-157842124 | 20 | 81.175 | KV452986.1 | 283176 | 10-scf00397 | 10 |
| AX-158250984 | 20 | 81.175 | KV452986.1 | 283632 | 10-scf00397 | 10 |



|              |    |        |            |        |             |    |
|--------------|----|--------|------------|--------|-------------|----|
| AX-158250985 | 20 | 81.175 | KV452986.1 | 284677 | 10-scf00397 | 10 |
| AX-158250987 | 20 | 81.175 | KV452986.1 | 288250 | 10-scf00397 | 10 |
| AX-158250988 | 20 | 81.175 | KV452986.1 | 288804 | 10-scf00397 | 10 |
| AX-158250989 | 20 | 81.175 | KV452986.1 | 290382 | 10-scf00397 | 10 |
| AX-158250990 | 20 | 81.175 | KV452986.1 | 290485 | 10-scf00397 | 10 |
| AX-158387049 | 20 | 81.175 | KV452986.1 | 291030 | 10-scf00397 | 10 |
| AX-158250992 | 20 | 81.175 | KV452986.1 | 292236 | 10-scf00397 | 10 |
| AX-157715666 | 20 | 81.175 | KV452986.1 | 293809 | 10-scf00397 | 10 |
| AX-158251005 | 20 | 81.175 | KV452986.1 | 312175 | 10-scf00397 | 10 |
| AX-158250995 | 20 | 81.456 | KV452986.1 | 297095 | 10-scf00397 | 10 |
| AX-158250996 | 20 | 81.456 | KV452986.1 | 297480 | 10-scf00397 | 10 |
| AX-158250999 | 20 | 81.456 | KV452986.1 | 301208 | 10-scf00397 | 10 |
| AX-158251000 | 20 | 81.456 | KV452986.1 | 301985 | 10-scf00397 | 10 |
| AX-158251001 | 20 | 81.456 | KV452986.1 | 302578 | 10-scf00397 | 10 |
| AX-157842125 | 20 | 81.456 | KV452986.1 | 308845 | 10-scf00397 | 10 |
| AX-158251004 | 20 | 81.456 | KV452986.1 | 310024 | 10-scf00397 | 10 |
| AX-157842126 | 20 | 81.456 | KV452986.1 | 311569 | 10-scf00397 | 10 |
| AX-158251007 | 20 | 81.456 | KV452986.1 | 316452 | 10-scf00397 | 10 |
| AX-158251009 | 20 | 81.456 | KV452986.1 | 317694 | 10-scf00397 | 10 |
| AX-158251012 | 20 | 81.456 | KV452986.1 | 321787 | 10-scf00397 | 10 |
| AX-158251016 | 20 | 81.456 | KV452986.1 | 324613 | 10-scf00397 | 10 |
| AX-157842129 | 20 | 81.456 | KV452986.1 | 339951 | 10-scf00397 | 10 |
| AX-158251075 | 20 | 81.456 | KV452986.1 | 413855 | 10-scf00397 | 10 |
| AX-158251008 | 20 | 81.674 | KV452986.1 | 316939 | 10-scf00397 | 10 |
| AX-158251013 | 20 | 81.674 | KV452986.1 | 323195 | 10-scf00397 | 10 |
| AX-158251017 | 20 | 81.674 | KV452986.1 | 325661 | 10-scf00397 | 10 |
| AX-158251018 | 20 | 81.674 | KV452986.1 | 327694 | 10-scf00397 | 10 |
| AX-157842127 | 20 | 81.674 | KV452986.1 | 330471 | 10-scf00397 | 10 |
| AX-157721585 | 20 | 81.674 | KV452986.1 | 332807 | 10-scf00397 | 10 |
| AX-158251020 | 20 | 81.674 | KV452986.1 | 335044 | 10-scf00397 | 10 |
| AX-158251021 | 20 | 81.674 | KV452986.1 | 338127 | 10-scf00397 | 10 |
| AX-158251024 | 20 | 81.674 | KV452986.1 | 343353 | 10-scf00397 | 10 |
| AX-157713201 | 20 | 81.674 | KV452986.1 | 344354 | 10-scf00397 | 10 |
| AX-157773353 | 20 | 81.674 | KV452986.1 | 347831 | 10-scf00397 | 10 |
| AX-157842148 | 20 | 81.674 | KV452986.1 | 527417 | 10-scf00397 | 10 |
| AX-158251136 | 20 | 81.674 | KV452986.1 | 538863 | 10-scf00397 | 10 |
| AX-157774690 | 20 | 81.692 | KV452986.1 | 350080 | 10-scf00397 | 10 |
| AX-158251028 | 20 | 81.718 | KV452986.1 | 356636 | 10-scf00397 | 10 |
| AX-158251029 | 20 | 81.742 | KV452986.1 | 356875 | 10-scf00397 | 10 |
| AX-158251031 | 20 | 81.766 | KV452986.1 | 357503 | 10-scf00397 | 10 |
| AX-158251034 | 20 | 81.784 | KV452986.1 | 360886 | 10-scf00397 | 10 |
| AX-157725888 | 20 | 81.784 | KV452986.1 | 361783 | 10-scf00397 | 10 |
| AX-157842132 | 20 | 81.784 | KV452986.1 | 362259 | 10-scf00397 | 10 |
| AX-157842133 | 20 | 81.784 | KV452986.1 | 363535 | 10-scf00397 | 10 |
| AX-158251035 | 20 | 81.784 | KV452986.1 | 363993 | 10-scf00397 | 10 |
| AX-158251045 | 20 | 81.784 | KV452986.1 | 374048 | 10-scf00397 | 10 |
| AX-158251046 | 20 | 81.784 | KV452986.1 | 375903 | 10-scf00397 | 10 |
| AX-158251048 | 20 | 81.784 | KV452986.1 | 378313 | 10-scf00397 | 10 |
| AX-158251049 | 20 | 81.784 | KV452986.1 | 379910 | 10-scf00397 | 10 |
| AX-157842134 | 20 | 81.784 | KV452986.1 | 382216 | 10-scf00397 | 10 |
| AX-158251056 | 20 | 81.784 | KV452986.1 | 385918 | 10-scf00397 | 10 |

|              |    |        |            |        |             |    |
|--------------|----|--------|------------|--------|-------------|----|
| AX-158251055 | 20 | 81.797 | KV452986.1 | 385757 | 10-scf00397 | 10 |
| AX-158251060 | 20 | 81.797 | KV452986.1 | 390627 | 10-scf00397 | 10 |
| AX-158251061 | 20 | 81.797 | KV452986.1 | 391842 | 10-scf00397 | 10 |
| AX-157708624 | 20 | 81.804 | KV452986.1 | 345138 | 10-scf00397 | 10 |
| AX-157842130 | 20 | 81.804 | KV452986.1 | 348699 | 10-scf00397 | 10 |
| AX-158251059 | 20 | 81.804 | KV452986.1 | 389002 | 10-scf00397 | 10 |
| AX-158251066 | 20 | 81.804 | KV452986.1 | 399849 | 10-scf00397 | 10 |
| AX-158251210 | 20 | 81.804 | KV452986.1 | 651282 | 10-scf00397 | 10 |
| AX-157842136 | 20 | 81.807 | KV452986.1 | 393442 | 10-scf00397 | 10 |
| AX-158251063 | 20 | 81.81  | KV452986.1 | 394759 | 10-scf00397 | 10 |
| AX-157842138 | 20 | 81.825 | KV452986.1 | 396845 | 10-scf00397 | 10 |
| AX-158251014 | 20 | 81.84  | KV452986.1 | 323402 | 10-scf00397 | 10 |
| AX-157842128 | 20 | 81.84  | KV452986.1 | 337170 | 10-scf00397 | 10 |
| AX-158251030 | 20 | 81.84  | KV452986.1 | 357194 | 10-scf00397 | 10 |
| AX-158251037 | 20 | 81.84  | KV452986.1 | 366284 | 10-scf00397 | 10 |
| AX-158251067 | 20 | 81.84  | KV452986.1 | 400529 | 10-scf00397 | 10 |
| AX-158251073 | 20 | 81.853 | KV452986.1 | 411109 | 10-scf00397 | 10 |
| AX-157740698 | 20 | 81.863 | KV452986.1 | 416283 | 10-scf00397 | 10 |
| AX-158251077 | 20 | 81.893 | KV452986.1 | 421716 | 10-scf00397 | 10 |
| AX-158251078 | 20 | 81.951 | KV452986.1 | 423026 | 10-scf00397 | 10 |
| AX-158251079 | 20 | 82.002 | KV452986.1 | 424914 | 10-scf00397 | 10 |
| AX-158251080 | 20 | 82.002 | KV452986.1 | 428681 | 10-scf00397 | 10 |
| AX-158251081 | 20 | 82.002 | KV452986.1 | 429949 | 10-scf00397 | 10 |
| AX-158251082 | 20 | 82.002 | KV452986.1 | 432212 | 10-scf00397 | 10 |
| AX-158251084 | 20 | 82.002 | KV452986.1 | 436410 | 10-scf00397 | 10 |
| AX-158251090 | 20 | 82.002 | KV452986.1 | 442416 | 10-scf00397 | 10 |
| AX-158251092 | 20 | 82.002 | KV452986.1 | 444713 | 10-scf00397 | 10 |
| AX-157725865 | 20 | 82.002 | KV452986.1 | 445345 | 10-scf00397 | 10 |
| AX-158251093 | 20 | 82.002 | KV452986.1 | 445708 | 10-scf00397 | 10 |
| AX-158251094 | 20 | 82.002 | KV452986.1 | 446514 | 10-scf00397 | 10 |
| AX-158251095 | 20 | 82.002 | KV452986.1 | 447817 | 10-scf00397 | 10 |
| AX-157842142 | 20 | 82.002 | KV452986.1 | 450571 | 10-scf00397 | 10 |
| AX-158415870 | 20 | 82.002 | KV452986.1 | 452974 | 10-scf00397 | 10 |
| AX-158251101 | 20 | 82.002 | KV452986.1 | 456760 | 10-scf00397 | 10 |
| AX-158251102 | 20 | 82.002 | KV452986.1 | 457387 | 10-scf00397 | 10 |
| AX-158251105 | 20 | 82.002 | KV452986.1 | 462803 | 10-scf00397 | 10 |
| AX-157749702 | 20 | 82.002 | KV452986.1 | 473575 | 10-scf00397 | 10 |
| AX-157713999 | 20 | 82.002 | KV452986.1 | 477818 | 10-scf00397 | 10 |
| AX-158251118 | 20 | 82.002 | KV452986.1 | 511306 | 10-scf00397 | 10 |
| AX-157842154 | 20 | 82.002 | KV452986.1 | 580673 | 10-scf00397 | 10 |
| AX-157842157 | 20 | 82.002 | KV452986.1 | 609554 | 10-scf00397 | 10 |
| AX-158251237 | 20 | 82.002 | KV452986.1 | 680669 | 10-scf00397 | 10 |
| AX-158251104 | 20 | 82.016 | KV452986.1 | 459769 | 10-scf00397 | 10 |
| AX-158251114 | 20 | 82.016 | KV452986.1 | 508137 | 10-scf00397 | 10 |
| AX-158251117 | 20 | 82.016 | KV452986.1 | 510627 | 10-scf00397 | 10 |
| AX-158251177 | 20 | 82.016 | KV452986.1 | 586257 | 10-scf00397 | 10 |
| AX-157880228 | 20 | 82.028 | KV452986.1 | 497237 | 10-scf00397 | 10 |
| AX-158251111 | 20 | 82.04  | KV452986.1 | 502075 | 10-scf00397 | 10 |
| AX-157755771 | 20 | 82.04  | KV452986.1 | 531524 | 10-scf00397 | 10 |
| AX-157842144 | 20 | 82.049 | KV452986.1 | 507129 | 10-scf00397 | 10 |
| AX-158251113 | 20 | 82.063 | KV452986.1 | 507930 | 10-scf00397 | 10 |

|              |    |        |            |        |             |    |
|--------------|----|--------|------------|--------|-------------|----|
| AX-158251116 | 20 | 82.085 | KV452986.1 | 509748 | 10-scf00397 | 10 |
| AX-158251065 | 20 | 82.111 | KV452986.1 | 398900 | 10-scf00397 | 10 |
| AX-158251086 | 20 | 82.111 | KV452986.1 | 439901 | 10-scf00397 | 10 |
| AX-157842145 | 20 | 82.111 | KV452986.1 | 516221 | 10-scf00397 | 10 |
| AX-158251119 | 20 | 82.111 | KV452986.1 | 518042 | 10-scf00397 | 10 |
| AX-157842146 | 20 | 82.111 | KV452986.1 | 518968 | 10-scf00397 | 10 |
| AX-158251121 | 20 | 82.111 | KV452986.1 | 520861 | 10-scf00397 | 10 |
| AX-158251122 | 20 | 82.111 | KV452986.1 | 521203 | 10-scf00397 | 10 |
| AX-157880229 | 20 | 82.111 | KV452986.1 | 522466 | 10-scf00397 | 10 |
| AX-158251125 | 20 | 82.111 | KV452986.1 | 525519 | 10-scf00397 | 10 |
| AX-158251126 | 20 | 82.111 | KV452986.1 | 525913 | 10-scf00397 | 10 |
| AX-158251127 | 20 | 82.111 | KV452986.1 | 526665 | 10-scf00397 | 10 |
| AX-157842149 | 20 | 82.111 | KV452986.1 | 528361 | 10-scf00397 | 10 |
| AX-158251138 | 20 | 82.111 | KV452986.1 | 539776 | 10-scf00397 | 10 |
| AX-158251142 | 20 | 82.111 | KV452986.1 | 544300 | 10-scf00397 | 10 |
| AX-158251143 | 20 | 82.111 | KV452986.1 | 545843 | 10-scf00397 | 10 |
| AX-158251144 | 20 | 82.111 | KV452986.1 | 548128 | 10-scf00397 | 10 |
| AX-158251145 | 20 | 82.111 | KV452986.1 | 550506 | 10-scf00397 | 10 |
| AX-158251146 | 20 | 82.111 | KV452986.1 | 552170 | 10-scf00397 | 10 |
| AX-158251149 | 20 | 82.111 | KV452986.1 | 554041 | 10-scf00397 | 10 |
| AX-157842150 | 20 | 82.111 | KV452986.1 | 554938 | 10-scf00397 | 10 |
| AX-158251151 | 20 | 82.111 | KV452986.1 | 558607 | 10-scf00397 | 10 |
| AX-157723657 | 20 | 82.111 | KV452986.1 | 560358 | 10-scf00397 | 10 |
| AX-157842151 | 20 | 82.111 | KV452986.1 | 560743 | 10-scf00397 | 10 |
| AX-157758269 | 20 | 82.111 | KV452986.1 | 562278 | 10-scf00397 | 10 |
| AX-158251154 | 20 | 82.111 | KV452986.1 | 565913 | 10-scf00397 | 10 |
| AX-158251155 | 20 | 82.111 | KV452986.1 | 567000 | 10-scf00397 | 10 |
| AX-158251158 | 20 | 82.276 | KV452986.1 | 568962 | 10-scf00397 | 10 |
| AX-158251171 | 20 | 82.33  | KV452986.1 | 581632 | 10-scf00397 | 10 |
| AX-158251172 | 20 | 82.33  | KV452986.1 | 582843 | 10-scf00397 | 10 |
| AX-158251173 | 20 | 82.33  | KV452986.1 | 583262 | 10-scf00397 | 10 |
| AX-158251176 | 20 | 82.33  | KV452986.1 | 585235 | 10-scf00397 | 10 |
| AX-157842155 | 20 | 82.33  | KV452986.1 | 587765 | 10-scf00397 | 10 |
| AX-158251179 | 20 | 82.33  | KV452986.1 | 591053 | 10-scf00397 | 10 |
| AX-158251228 | 20 | 82.33  | KV452986.1 | 671151 | 10-scf00397 | 10 |
| AX-158251181 | 20 | 82.384 | KV452986.1 | 593172 | 10-scf00397 | 10 |
| AX-158251072 | 20 | 82.439 | KV452986.1 | 410026 | 10-scf00397 | 10 |
| AX-158251135 | 20 | 82.439 | KV452986.1 | 536222 | 10-scf00397 | 10 |
| AX-158251180 | 20 | 82.439 | KV452986.1 | 592513 | 10-scf00397 | 10 |
| AX-158251182 | 20 | 82.439 | KV452986.1 | 598743 | 10-scf00397 | 10 |
| AX-158251183 | 20 | 82.439 | KV452986.1 | 599782 | 10-scf00397 | 10 |
| AX-157713474 | 20 | 82.439 | KV452986.1 | 600416 | 10-scf00397 | 10 |
| AX-157842156 | 20 | 82.439 | KV452986.1 | 601689 | 10-scf00397 | 10 |
| AX-157752585 | 20 | 82.439 | KV452986.1 | 601836 | 10-scf00397 | 10 |
| AX-157775052 | 20 | 82.439 | KV452986.1 | 602095 | 10-scf00397 | 10 |
| AX-158251185 | 20 | 82.439 | KV452986.1 | 604034 | 10-scf00397 | 10 |
| AX-158251188 | 20 | 82.439 | KV452986.1 | 606481 | 10-scf00397 | 10 |
| AX-158251189 | 20 | 82.439 | KV452986.1 | 607099 | 10-scf00397 | 10 |
| AX-158415875 | 20 | 82.439 | KV452986.1 | 607144 | 10-scf00397 | 10 |
| AX-158251190 | 20 | 82.439 | KV452986.1 | 608973 | 10-scf00397 | 10 |
| AX-157720781 | 20 | 82.439 | KV452986.1 | 616638 | 10-scf00397 | 10 |

|              |    |        |            |        |             |    |
|--------------|----|--------|------------|--------|-------------|----|
| AX-157727924 | 20 | 82.439 | KV452986.1 | 618634 | 10-scf00397 | 10 |
| AX-157743925 | 20 | 82.439 | KV452986.1 | 619035 | 10-scf00397 | 10 |
| AX-157739451 | 20 | 82.439 | KV452986.1 | 621903 | 10-scf00397 | 10 |
| AX-158251192 | 20 | 82.439 | KV452986.1 | 623559 | 10-scf00397 | 10 |
| AX-158251193 | 20 | 82.439 | KV452986.1 | 628245 | 10-scf00397 | 10 |
| AX-158251195 | 20 | 82.439 | KV452986.1 | 629313 | 10-scf00397 | 10 |
| AX-158251197 | 20 | 82.439 | KV452986.1 | 631258 | 10-scf00397 | 10 |
| AX-158251199 | 20 | 82.439 | KV452986.1 | 632760 | 10-scf00397 | 10 |
| AX-157842161 | 20 | 82.439 | KV452986.1 | 632899 | 10-scf00397 | 10 |
| AX-157842162 | 20 | 82.439 | KV452986.1 | 633430 | 10-scf00397 | 10 |
| AX-158251200 | 20 | 82.439 | KV452986.1 | 635347 | 10-scf00397 | 10 |
| AX-158251202 | 20 | 82.439 | KV452986.1 | 635986 | 10-scf00397 | 10 |
| AX-157842163 | 20 | 82.439 | KV452986.1 | 639347 | 10-scf00397 | 10 |
| AX-158251204 | 20 | 82.439 | KV452986.1 | 644057 | 10-scf00397 | 10 |
| AX-158251206 | 20 | 82.439 | KV452986.1 | 646515 | 10-scf00397 | 10 |
| AX-157773587 | 20 | 82.439 | KV452986.1 | 646977 | 10-scf00397 | 10 |
| AX-157708536 | 20 | 82.439 | KV452986.1 | 648599 | 10-scf00397 | 10 |
| AX-158251211 | 20 | 82.439 | KV452986.1 | 653847 | 10-scf00397 | 10 |
| AX-157714255 | 20 | 82.439 | KV452986.1 | 663240 | 10-scf00397 | 10 |
| AX-158251207 | 20 | 82.445 | KV452986.1 | 647837 | 10-scf00397 | 10 |
| AX-158251212 | 20 | 82.569 | KV452986.1 | 654141 | 10-scf00397 | 10 |
| AX-158251281 | 20 | 82.569 | KV452986.1 | 725812 | 10-scf00397 | 10 |
| AX-158251288 | 20 | 82.569 | KV452986.1 | 735764 | 10-scf00397 | 10 |
| AX-157842158 | 20 | 82.7   | KV452986.1 | 625850 | 10-scf00397 | 10 |
| AX-158251215 | 20 | 82.7   | KV452986.1 | 659061 | 10-scf00397 | 10 |
| AX-158251216 | 20 | 82.7   | KV452986.1 | 659406 | 10-scf00397 | 10 |
| AX-158251219 | 20 | 82.7   | KV452986.1 | 661685 | 10-scf00397 | 10 |
| AX-158251217 | 20 | 82.701 | KV452986.1 | 660009 | 10-scf00397 | 10 |
| AX-157757710 | 20 | 82.701 | KV452986.1 | 704220 | 10-scf00397 | 10 |
| AX-157721792 | 20 | 82.868 | KV452986.1 | 662494 | 10-scf00397 | 10 |
| AX-158251229 | 20 | 82.897 | KV452986.1 | 671819 | 10-scf00397 | 10 |
| AX-158251230 | 20 | 82.897 | KV452986.1 | 672815 | 10-scf00397 | 10 |
| AX-158251222 | 20 | 83.095 | KV452986.1 | 664738 | 10-scf00397 | 10 |
| AX-158251225 | 20 | 83.095 | KV452986.1 | 667843 | 10-scf00397 | 10 |
| AX-158251231 | 20 | 83.095 | KV452986.1 | 675098 | 10-scf00397 | 10 |
| AX-158251233 | 20 | 83.095 | KV452986.1 | 677196 | 10-scf00397 | 10 |
| AX-158251234 | 20 | 83.095 | KV452986.1 | 679665 | 10-scf00397 | 10 |
| AX-158251235 | 20 | 83.095 | KV452986.1 | 679940 | 10-scf00397 | 10 |
| AX-158251240 | 20 | 83.095 | KV452986.1 | 685532 | 10-scf00397 | 10 |
| AX-158251243 | 20 | 83.095 | KV452986.1 | 687469 | 10-scf00397 | 10 |
| AX-158251244 | 20 | 83.095 | KV452986.1 | 688414 | 10-scf00397 | 10 |
| AX-158251247 | 20 | 83.095 | KV452986.1 | 691691 | 10-scf00397 | 10 |
| AX-158251252 | 20 | 83.095 | KV452986.1 | 698612 | 10-scf00397 | 10 |
| AX-157738672 | 20 | 83.095 | KV452986.1 | 710115 | 10-scf00397 | 10 |
| AX-158251277 | 20 | 83.095 | KV452986.1 | 720925 | 10-scf00397 | 10 |
| AX-157859836 | 20 | 83.095 | KV452986.1 | 732355 | 10-scf00397 | 10 |
| AX-157842166 | 20 | 83.095 | KV452986.1 | 732989 | 10-scf00397 | 10 |
| AX-158251248 | 20 | 83.103 | KV452986.1 | 693524 | 10-scf00397 | 10 |
| AX-158251251 | 20 | 83.36  | KV452986.1 | 698053 | 10-scf00397 | 10 |
| AX-158251253 | 20 | 83.391 | KV452986.1 | 699430 | 10-scf00397 | 10 |
| AX-158251270 | 20 | 83.391 | KV452986.1 | 714654 | 10-scf00397 | 10 |

|              |    |        |            |        |             |    |
|--------------|----|--------|------------|--------|-------------|----|
| AX-158251257 | 20 | 83.424 | KV452986.1 | 704826 | 10-scf00397 | 10 |
| AX-157867357 | 20 | 83.458 | KV452986.1 | 705558 | 10-scf00397 | 10 |
| AX-158251242 | 20 | 83.494 | KV452986.1 | 687097 | 10-scf00397 | 10 |
| AX-158251246 | 20 | 83.494 | KV452986.1 | 689491 | 10-scf00397 | 10 |
| AX-158251260 | 20 | 83.494 | KV452986.1 | 707592 | 10-scf00397 | 10 |
| AX-158251261 | 20 | 83.494 | KV452986.1 | 708037 | 10-scf00397 | 10 |
| AX-158251263 | 20 | 83.494 | KV452986.1 | 709199 | 10-scf00397 | 10 |
| AX-158251264 | 20 | 83.494 | KV452986.1 | 709562 | 10-scf00397 | 10 |
| AX-158251268 | 20 | 83.494 | KV452986.1 | 713880 | 10-scf00397 | 10 |
| AX-158251273 | 20 | 83.494 | KV452986.1 | 718219 | 10-scf00397 | 10 |
| AX-157842165 | 20 | 83.494 | KV452986.1 | 718910 | 10-scf00397 | 10 |
| AX-158251274 | 20 | 83.628 | KV452986.1 | 719786 | 10-scf00397 | 10 |
| AX-158251275 | 20 | 83.628 | KV452986.1 | 720427 | 10-scf00397 | 10 |
| AX-158251276 | 20 | 83.723 | KV452986.1 | 720883 | 10-scf00397 | 10 |
| AX-158251279 | 20 | 83.846 | KV452986.1 | 724490 | 10-scf00397 | 10 |
| AX-158251283 | 20 | 83.846 | KV452986.1 | 730001 | 10-scf00397 | 10 |
| AX-158251285 | 20 | 83.846 | KV452986.1 | 732618 | 10-scf00397 | 10 |
| AX-157740600 | 20 | 83.846 | KV452986.1 | 804054 | 10-scf00397 | 10 |
| AX-158251284 | 20 | 83.933 | KV452986.1 | 730847 | 10-scf00397 | 10 |
| AX-158251286 | 20 | 83.972 | KV452986.1 | 733213 | 10-scf00397 | 10 |
| AX-158251291 | 20 | 84.216 | KV452986.1 | 739778 | 10-scf00397 | 10 |
| AX-158251294 | 20 | 84.298 | KV452986.1 | 742783 | 10-scf00397 | 10 |
| AX-158251295 | 20 | 84.298 | KV452986.1 | 743684 | 10-scf00397 | 10 |
| AX-158251297 | 20 | 84.298 | KV452986.1 | 744454 | 10-scf00397 | 10 |
| AX-158251298 | 20 | 84.298 | KV452986.1 | 746497 | 10-scf00397 | 10 |
| AX-158251299 | 20 | 84.298 | KV452986.1 | 746909 | 10-scf00397 | 10 |
| AX-158251300 | 20 | 84.298 | KV452986.1 | 747418 | 10-scf00397 | 10 |
| AX-158251301 | 20 | 84.298 | KV452986.1 | 748139 | 10-scf00397 | 10 |
| AX-157887610 | 20 | 84.299 | KV452986.1 | 751432 | 10-scf00397 | 10 |
| AX-158251304 | 20 | 84.383 | KV452986.1 | 751564 | 10-scf00397 | 10 |
| AX-158251305 | 20 | 84.452 | KV452986.1 | 753021 | 10-scf00397 | 10 |
| AX-158251306 | 20 | 84.626 | KV452986.1 | 755240 | 10-scf00397 | 10 |
| AX-158251307 | 20 | 84.626 | KV452986.1 | 755872 | 10-scf00397 | 10 |
| AX-158251308 | 20 | 84.626 | KV452986.1 | 756375 | 10-scf00397 | 10 |
| AX-158251311 | 20 | 84.626 | KV452986.1 | 758786 | 10-scf00397 | 10 |
| AX-158251314 | 20 | 84.626 | KV452986.1 | 761671 | 10-scf00397 | 10 |
| AX-158251316 | 20 | 84.626 | KV452986.1 | 763712 | 10-scf00397 | 10 |
| AX-158394484 | 20 | 84.626 | KV452986.1 | 765026 | 10-scf00397 | 10 |
| AX-158251317 | 20 | 84.626 | KV452986.1 | 765160 | 10-scf00397 | 10 |
| AX-158251318 | 20 | 84.626 | KV452986.1 | 768517 | 10-scf00397 | 10 |
| AX-158251321 | 20 | 84.626 | KV452986.1 | 771176 | 10-scf00397 | 10 |
| AX-158251322 | 20 | 84.626 | KV452986.1 | 771883 | 10-scf00397 | 10 |
| AX-158251323 | 20 | 84.626 | KV452986.1 | 772404 | 10-scf00397 | 10 |
| AX-158251325 | 20 | 84.626 | KV452986.1 | 773367 | 10-scf00397 | 10 |
| AX-157707725 | 20 | 84.626 | KV452986.1 | 777459 | 10-scf00397 | 10 |
| AX-157867358 | 20 | 84.626 | KV452986.1 | 777888 | 10-scf00397 | 10 |
| AX-158251328 | 20 | 84.626 | KV452986.1 | 781564 | 10-scf00397 | 10 |
| AX-158251320 | 20 | 84.845 | KV452986.1 | 770118 | 10-scf00397 | 10 |
| AX-158251327 | 20 | 84.845 | KV452986.1 | 779701 | 10-scf00397 | 10 |
| AX-158251329 | 20 | 84.845 | KV452986.1 | 781781 | 10-scf00397 | 10 |
| AX-158251330 | 20 | 84.845 | KV452986.1 | 782048 | 10-scf00397 | 10 |

|              |    |        |            |        |             |    |
|--------------|----|--------|------------|--------|-------------|----|
| AX-158251332 | 20 | 84.845 | KV452986.1 | 783093 | 10-scf00397 | 10 |
| AX-158251333 | 20 | 84.845 | KV452986.1 | 783324 | 10-scf00397 | 10 |
| AX-157741011 | 20 | 84.845 | KV452986.1 | 783394 | 10-scf00397 | 10 |
| AX-157749019 | 20 | 84.845 | KV452986.1 | 785789 | 10-scf00397 | 10 |
| AX-158251335 | 20 | 84.845 | KV452986.1 | 786341 | 10-scf00397 | 10 |
| AX-158251336 | 20 | 84.845 | KV452986.1 | 786855 | 10-scf00397 | 10 |
| AX-157740594 | 20 | 84.845 | KV452986.1 | 787001 | 10-scf00397 | 10 |
| AX-158251339 | 20 | 84.845 | KV452986.1 | 787699 | 10-scf00397 | 10 |
| AX-157842168 | 20 | 84.845 | KV452986.1 | 794536 | 10-scf00397 | 10 |
| AX-157842167 | 20 | 84.875 | KV452986.1 | 790780 | 10-scf00397 | 10 |
| AX-157717054 | 20 | 84.875 | KV452986.1 | 812247 | 10-scf00397 | 10 |
| AX-158251319 | 20 | 84.909 | KV452986.1 | 769197 | 10-scf00397 | 10 |
| AX-157718674 | 20 | 84.909 | KV452986.1 | 802969 | 10-scf00397 | 10 |
| AX-157859837 | 20 | 84.954 | KV452986.1 | 785665 | 10-scf00397 | 10 |
| AX-158251348 | 20 | 84.954 | KV452986.1 | 804972 | 10-scf00397 | 10 |
| AX-158251349 | 20 | 84.954 | KV452986.1 | 806697 | 10-scf00397 | 10 |
| AX-158251351 | 20 | 84.954 | KV452986.1 | 813150 | 10-scf00397 | 10 |
| AX-158251352 | 20 | 84.954 | KV452986.1 | 815914 | 10-scf00397 | 10 |
| AX-158251353 | 20 | 84.954 | KV452986.1 | 817828 | 10-scf00397 | 10 |
| AX-157741600 | 20 | 84.954 | KV452986.1 | 820339 | 10-scf00397 | 10 |
| AX-158251354 | 20 | 84.954 | KV452986.1 | 820436 | 10-scf00397 | 10 |
| AX-157867361 | 20 | 84.954 | KV452986.1 | 843772 | 10-scf00397 | 10 |
| AX-158251376 | 20 | 84.954 | KV452986.1 | 850298 | 10-scf00397 | 10 |
| AX-158251356 | 20 | 84.967 | KV452986.1 | 824960 | 10-scf00397 | 10 |
| AX-158251358 | 20 | 85.003 | KV452986.1 | 828838 | 10-scf00397 | 10 |
| AX-157842169 | 20 | 85.035 | KV452986.1 | 804688 | 10-scf00397 | 10 |
| AX-157842170 | 20 | 85.035 | KV452986.1 | 808300 | 10-scf00397 | 10 |
| AX-158251359 | 20 | 85.035 | KV452986.1 | 830933 | 10-scf00397 | 10 |
| AX-158251361 | 20 | 85.046 | KV452986.1 | 833831 | 10-scf00397 | 10 |
| AX-158251363 | 20 | 85.063 | KV452986.1 | 836838 | 10-scf00397 | 10 |
| AX-158251365 | 20 | 85.063 | KV452986.1 | 838472 | 10-scf00397 | 10 |
| AX-157758936 | 20 | 85.063 | KV452986.1 | 841978 | 10-scf00397 | 10 |
| AX-158251367 | 20 | 85.12  | KV452986.1 | 840288 | 10-scf00397 | 10 |
| AX-158251368 | 20 | 85.172 | KV452986.1 | 841370 | 10-scf00397 | 10 |
| AX-158251369 | 20 | 85.172 | KV452986.1 | 841637 | 10-scf00397 | 10 |
| AX-157842172 | 20 | 85.172 | KV452986.1 | 841832 | 10-scf00397 | 10 |
| AX-158251371 | 20 | 85.172 | KV452986.1 | 842364 | 10-scf00397 | 10 |
| AX-158251374 | 20 | 85.172 | KV452986.1 | 846868 | 10-scf00397 | 10 |
| AX-158251380 | 20 | 85.172 | KV452986.1 | 852647 | 10-scf00397 | 10 |
| AX-158251381 | 20 | 85.212 | KV452986.1 | 854332 | 10-scf00397 | 10 |
| AX-158251385 | 20 | 85.296 | KV452986.1 | 856999 | 10-scf00397 | 10 |
| AX-158251372 | 20 | 85.391 | KV452986.1 | 842589 | 10-scf00397 | 10 |
| AX-158387057 | 20 | 85.391 | KV452986.1 | 858092 | 10-scf00397 | 10 |
| AX-158251386 | 20 | 85.391 | KV452986.1 | 858253 | 10-scf00397 | 10 |
| AX-157880232 | 20 | 85.391 | KV452986.1 | 861280 | 10-scf00397 | 10 |
| AX-158251391 | 20 | 85.391 | KV452986.1 | 862269 | 10-scf00397 | 10 |
| AX-158251393 | 20 | 85.391 | KV452986.1 | 866224 | 10-scf00397 | 10 |
| AX-158251394 | 20 | 85.718 | KV452986.1 | 867590 | 10-scf00397 | 10 |
| AX-158251398 | 20 | 85.719 | KV452986.1 | 871829 | 10-scf00397 | 10 |
| AX-157755593 | 20 | 85.719 | KV452986.1 | 873158 | 10-scf00397 | 10 |
| AX-157872744 | 20 | 85.719 | KV452986.1 | 876361 | 10-scf00397 | 10 |

|              |    |        |            |        |             |    |
|--------------|----|--------|------------|--------|-------------|----|
| AX-158251400 | 20 | 85.719 | KV452986.1 | 876726 | 10-scf00397 | 10 |
| AX-157842174 | 20 | 85.719 | KV452986.1 | 877698 | 10-scf00397 | 10 |
| AX-158251401 | 20 | 85.719 | KV452986.1 | 878603 | 10-scf00397 | 10 |
| AX-158251403 | 20 | 85.719 | KV452986.1 | 882111 | 10-scf00397 | 10 |
| AX-157842175 | 20 | 85.719 | KV452986.1 | 884983 | 10-scf00397 | 10 |
| AX-158251408 | 20 | 85.719 | KV452986.1 | 886821 | 10-scf00397 | 10 |
| AX-158251402 | 20 | 85.764 | KV452986.1 | 880229 | 10-scf00397 | 10 |
| AX-158251406 | 20 | 85.816 | KV452986.1 | 883988 | 10-scf00397 | 10 |
| AX-158251410 | 20 | 85.901 | KV452986.1 | 887758 | 10-scf00397 | 10 |
| AX-158251414 | 20 | 85.901 | KV452986.1 | 894143 | 10-scf00397 | 10 |
| AX-158251413 | 20 | 85.923 | KV452986.1 | 892700 | 10-scf00397 | 10 |
| AX-158251439 | 20 | 85.923 | KV452986.1 | 944993 | 10-scf00397 | 10 |
| AX-158251409 | 20 | 85.937 | KV452986.1 | 887047 | 10-scf00397 | 10 |
| AX-158251416 | 20 | 85.937 | KV452986.1 | 896593 | 10-scf00397 | 10 |
| AX-157842179 | 20 | 85.937 | KV452986.1 | 897799 | 10-scf00397 | 10 |
| AX-158251417 | 20 | 85.937 | KV452986.1 | 897948 | 10-scf00397 | 10 |
| AX-158251418 | 20 | 85.937 | KV452986.1 | 898560 | 10-scf00397 | 10 |
| AX-158251420 | 20 | 85.937 | KV452986.1 | 899271 | 10-scf00397 | 10 |
| AX-157842180 | 20 | 85.937 | KV452986.1 | 899696 | 10-scf00397 | 10 |
| AX-157842181 | 20 | 85.937 | KV452986.1 | 901344 | 10-scf00397 | 10 |
| AX-158251425 | 20 | 85.937 | KV452986.1 | 916807 | 10-scf00397 | 10 |
| AX-157842183 | 20 | 85.938 | KV452986.1 | 905423 | 10-scf00397 | 10 |
| AX-158251424 | 20 | 86.342 | KV452986.1 | 914802 | 10-scf00397 | 10 |
| AX-158251427 | 20 | 86.342 | KV452986.1 | 921642 | 10-scf00397 | 10 |
| AX-157842186 | 20 | 86.342 | KV452986.1 | 923988 | 10-scf00397 | 10 |
| AX-157842187 | 20 | 86.342 | KV452986.1 | 930117 | 10-scf00397 | 10 |
| AX-157744063 | 20 | 86.619 | KV452986.1 | 927057 | 10-scf00397 | 10 |
| AX-158251429 | 20 | 86.619 | KV452986.1 | 927255 | 10-scf00397 | 10 |
| AX-157723893 | 20 | 86.619 | KV452986.1 | 929981 | 10-scf00397 | 10 |
| AX-158251430 | 20 | 86.619 | KV452986.1 | 931417 | 10-scf00397 | 10 |
| AX-157714381 | 20 | 86.619 | KV452986.1 | 931776 | 10-scf00397 | 10 |
| AX-158251432 | 20 | 86.619 | KV452986.1 | 933710 | 10-scf00397 | 10 |
| AX-158251435 | 20 | 86.619 | KV452986.1 | 936045 | 10-scf00397 | 10 |
| AX-157750704 | 20 | 86.619 | KV452986.1 | 940846 | 10-scf00397 | 10 |
| AX-157842188 | 20 | 86.622 | KV452986.1 | 936862 | 10-scf00397 | 10 |
| AX-158251436 | 20 | 86.625 | KV452986.1 | 938510 | 10-scf00397 | 10 |
| AX-158251437 | 20 | 86.708 | KV452986.1 | 941851 | 10-scf00397 | 10 |
| AX-158251438 | 20 | 86.813 | KV452986.1 | 942632 | 10-scf00397 | 10 |
| AX-158415884 | 20 | 87.101 | KV452986.1 | 947380 | 10-scf00397 | 10 |
| AX-158251441 | 20 | 87.101 | KV452986.1 | 949907 | 10-scf00397 | 10 |
| AX-158251442 | 20 | 87.107 | KV452986.1 | 950700 | 10-scf00397 | 10 |
| AX-158251448 | 20 | 87.142 | KV452986.1 | 958080 | 10-scf00397 | 10 |
| AX-158251449 | 20 | 87.142 | KV452986.1 | 960548 | 10-scf00397 | 10 |
| AX-158251450 | 20 | 87.142 | KV452986.1 | 961836 | 10-scf00397 | 10 |
| AX-158251451 | 20 | 87.142 | KV452986.1 | 962636 | 10-scf00397 | 10 |
| AX-158251452 | 20 | 87.36  | KV452986.1 | 966814 | 10-scf00397 | 10 |
| AX-158251456 | 20 | 87.36  | KV452986.1 | 971277 | 10-scf00397 | 10 |
| AX-157880233 | 20 | 87.36  | KV452986.1 | 974171 | 10-scf00397 | 10 |
| AX-158251459 | 20 | 87.36  | KV452986.1 | 975091 | 10-scf00397 | 10 |
| AX-158251462 | 20 | 87.36  | KV452986.1 | 976856 | 10-scf00397 | 10 |
| AX-158251465 | 20 | 87.36  | KV452986.1 | 979636 | 10-scf00397 | 10 |

|              |    |        |            |         |               |    |
|--------------|----|--------|------------|---------|---------------|----|
| AX-158251466 | 20 | 87.36  | KV452986.1 | 980414  | 10-scf00397   | 10 |
| AX-158251468 | 20 | 87.36  | KV452986.1 | 983575  | 10-scf00397   | 10 |
| AX-158251469 | 20 | 87.36  | KV452986.1 | 985099  | 10-scf00397   | 10 |
| AX-158394485 | 20 | 87.36  | KV452986.1 | 987190  | 10-scf00397   | 10 |
| AX-158251475 | 20 | 87.36  | KV452986.1 | 995392  | 10-scf00397   | 10 |
| AX-158251471 | 20 | 87.579 | KV452986.1 | 988804  | 10-scf00397   | 10 |
| AX-158251472 | 20 | 87.689 | KV452986.1 | 993933  | 10-scf00397   | 10 |
| AX-158251473 | 20 | 87.741 | KV452986.1 | 994734  | 10-scf00397   | 10 |
| AX-158251474 | 20 | 87.798 | KV452986.1 | 995222  | 10-scf00397   | 10 |
| AX-158251476 | 20 | 87.798 | KV452986.1 | 996030  | 10-scf00397   | 10 |
| AX-158410854 | 20 | 87.798 | KV452986.1 | 996947  | 10-scf00397   | 10 |
| AX-158394486 | 20 | 87.798 | KV452986.1 | 998126  | 10-scf00397   | 10 |
| AX-158251477 | 20 | 88.186 | KV452986.1 | 999586  | 10-scf00397   | 10 |
| AX-158251479 | 20 | 88.186 | KV452986.1 | 1003448 | 10-scf00397   | 10 |
| AX-158251480 | 20 | 88.341 | KV452986.1 | 1005953 | 10-scf00397   | 10 |
| AX-158251422 | 20 | 88.39  | KV452986.1 | 908350  | 10-scf00397   | 10 |
| AX-157695693 | 20 | 88.39  | KV452986.1 | 1008308 | 10-scf00397   | 10 |
| AX-157756491 | 20 | 88.39  | KV452986.1 | 1062922 | 10-scf00397   | 10 |
| AX-157696982 | 20 | 88.39  | FI867339.1 | 43      | ORI212 lctalu | UN |
| AX-158251483 | 20 | 88.495 | KV452986.1 | 1013103 | 10-scf00397   | 10 |
| AX-158251484 | 20 | 88.495 | KV452986.1 | 1016146 | 10-scf00397   | 10 |
| AX-158251485 | 20 | 88.497 | KV452986.1 | 1016596 | 10-scf00397   | 10 |
| AX-158251486 | 20 | 88.501 | KV452986.1 | 1018186 | 10-scf00397   | 10 |
| AX-158251490 | 20 | 89.001 | KV452986.1 | 1030447 | 10-scf00397   | 10 |
| AX-158251492 | 20 | 89.001 | KV452986.1 | 1033932 | 10-scf00397   | 10 |
| AX-158251493 | 20 | 89.042 | KV452986.1 | 1036686 | 10-scf00397   | 10 |
| AX-157773217 | 20 | 89.065 | KV452986.1 | 1040041 | 10-scf00397   | 10 |
| AX-157721726 | 20 | 89.065 | KV452986.1 | 1041702 | 10-scf00397   | 10 |
| AX-158251497 | 20 | 89.087 | KV452986.1 | 1042260 | 10-scf00397   | 10 |
| AX-158387058 | 20 | 89.11  | KV452986.1 | 1042945 | 10-scf00397   | 10 |
| AX-158251498 | 20 | 89.11  | KV452986.1 | 1043119 | 10-scf00397   | 10 |
| AX-158251501 | 20 | 89.11  | KV452986.1 | 1046231 | 10-scf00397   | 10 |
| AX-158251503 | 20 | 89.11  | KV452986.1 | 1049333 | 10-scf00397   | 10 |
| AX-157771163 | 20 | 89.11  | KV452986.1 | 1049553 | 10-scf00397   | 10 |
| AX-158251504 | 20 | 89.11  | KV452986.1 | 1050239 | 10-scf00397   | 10 |
| AX-158251505 | 20 | 89.11  | KV452986.1 | 1050789 | 10-scf00397   | 10 |
| AX-158251506 | 20 | 89.11  | KV452986.1 | 1055631 | 10-scf00397   | 10 |
| AX-158251515 | 20 | 89.11  | KV452986.1 | 1069130 | 10-scf00397   | 10 |
| AX-158251533 | 20 | 89.11  | KV452986.1 | 1096731 | 10-scf00397   | 10 |
| AX-158251517 | 20 | 89.52  | KV452986.1 | 1073274 | 10-scf00397   | 10 |
| AX-158251518 | 20 | 89.52  | KV452986.1 | 1073449 | 10-scf00397   | 10 |
| AX-158251519 | 20 | 89.52  | KV452986.1 | 1074169 | 10-scf00397   | 10 |
| AX-158251520 | 20 | 89.52  | KV452986.1 | 1074457 | 10-scf00397   | 10 |
| AX-158251521 | 20 | 89.648 | KV452986.1 | 1076898 | 10-scf00397   | 10 |
| AX-158251523 | 20 | 89.652 | KV452986.1 | 1083599 | 10-scf00397   | 10 |
| AX-158251524 | 20 | 89.655 | KV452986.1 | 1085882 | 10-scf00397   | 10 |
| AX-158251525 | 20 | 89.656 | KV452986.1 | 1086814 | 10-scf00397   | 10 |
| AX-158251528 | 20 | 89.656 | KV452986.1 | 1088432 | 10-scf00397   | 10 |
| AX-158251529 | 20 | 89.656 | KV452986.1 | 1091508 | 10-scf00397   | 10 |
| AX-158251531 | 20 | 89.666 | KV452986.1 | 1094246 | 10-scf00397   | 10 |
| AX-158251538 | 20 | 89.666 | KV452986.1 | 1105735 | 10-scf00397   | 10 |



|              |    |        |            |         |             |    |
|--------------|----|--------|------------|---------|-------------|----|
| AX-157755408 | 20 | 89.731 | KV452986.1 | 1096261 | 10-scf00397 | 10 |
| AX-158251534 | 20 | 89.818 | KV452986.1 | 1099138 | 10-scf00397 | 10 |
| AX-158251535 | 20 | 89.818 | KV452986.1 | 1102239 | 10-scf00397 | 10 |
| AX-158251540 | 20 | 89.818 | KV452986.1 | 1107135 | 10-scf00397 | 10 |
| AX-158423368 | 20 | 90.067 | KV452986.1 | 1131947 | 10-scf00397 | 10 |
| AX-158251556 | 20 | 90.309 | KV452986.1 | 1138148 | 10-scf00397 | 10 |
| AX-158251550 | 20 | 90.313 | KV452986.1 | 1130961 | 10-scf00397 | 10 |
| AX-158251554 | 20 | 90.313 | KV452986.1 | 1137356 | 10-scf00397 | 10 |
| AX-158251558 | 20 | 90.313 | KV452986.1 | 1141470 | 10-scf00397 | 10 |
| AX-158251561 | 20 | 90.313 | KV452986.1 | 1145802 | 10-scf00397 | 10 |
| AX-158251565 | 20 | 90.313 | KV452986.1 | 1153296 | 10-scf00397 | 10 |
| AX-158251570 | 20 | 90.313 | KV452986.1 | 1160781 | 10-scf00397 | 10 |
| AX-158251580 | 20 | 90.313 | KV452986.1 | 1170986 | 10-scf00397 | 10 |
| AX-158251586 | 20 | 90.313 | KV452986.1 | 1181400 | 10-scf00397 | 10 |
| AX-158251587 | 20 | 90.313 | KV452986.1 | 1182113 | 10-scf00397 | 10 |
| AX-158251588 | 20 | 90.313 | KV452986.1 | 1183588 | 10-scf00397 | 10 |
| AX-158251589 | 20 | 90.313 | KV452986.1 | 1188703 | 10-scf00397 | 10 |
| AX-158251590 | 20 | 90.313 | KV452986.1 | 1188970 | 10-scf00397 | 10 |
| AX-158251591 | 20 | 90.313 | KV452986.1 | 1194687 | 10-scf00397 | 10 |
| AX-158251594 | 20 | 90.313 | KV452986.1 | 1196134 | 10-scf00397 | 10 |
| AX-158251598 | 20 | 90.313 | KV452986.1 | 1199823 | 10-scf00397 | 10 |
| AX-158251602 | 20 | 90.313 | KV452986.1 | 1205855 | 10-scf00397 | 10 |
| AX-158251603 | 20 | 90.313 | KV452986.1 | 1209201 | 10-scf00397 | 10 |
| AX-157745301 | 20 | 90.313 | KV452986.1 | 1210652 | 10-scf00397 | 10 |
| AX-158251604 | 20 | 90.313 | KV452986.1 | 1212579 | 10-scf00397 | 10 |
| AX-158251605 | 20 | 90.313 | KV452986.1 | 1212726 | 10-scf00397 | 10 |
| AX-157744766 | 20 | 90.313 | KV452986.1 | 1213544 | 10-scf00397 | 10 |
| AX-158415898 | 20 | 90.313 | KV452986.1 | 1213692 | 10-scf00397 | 10 |
| AX-158415899 | 20 | 90.313 | KV452986.1 | 1213827 | 10-scf00397 | 10 |
| AX-158251606 | 20 | 90.313 | KV452986.1 | 1214648 | 10-scf00397 | 10 |
| AX-158251631 | 20 | 90.313 | KV452986.1 | 1304851 | 10-scf00397 | 10 |
| AX-158415902 | 20 | 90.313 | KV452986.1 | 1306506 | 10-scf00397 | 10 |
| AX-157724551 | 20 | 90.313 | KV452988.1 | 441937  | 10-scf00398 | 10 |
| AX-158252028 | 20 | 90.313 | KV452988.1 | 524489  | 10-scf00398 | 10 |
| AX-158253153 | 20 | 90.313 | KV452990.1 | 183520  | 10-scf00400 | 10 |
| AX-157714662 | 20 | 90.313 | KV452990.1 | 208890  | 10-scf00400 | 10 |
| AX-157775212 | 20 | 90.313 | KV452990.1 | 234717  | 10-scf00400 | 10 |
| AX-158253194 | 20 | 90.313 | KV452990.1 | 256904  | 10-scf00400 | 10 |
| AX-158253203 | 20 | 90.313 | KV452993.1 | 10197   | 10-scf00401 | 10 |
| AX-158253219 | 20 | 90.313 | KV452993.1 | 31324   | 10-scf00401 | 10 |
| AX-158253220 | 20 | 90.313 | KV452993.1 | 32006   | 10-scf00401 | 10 |
| AX-158253245 | 20 | 90.313 | KV452993.1 | 84882   | 10-scf00401 | 10 |
| AX-158253246 | 20 | 90.313 | KV452993.1 | 85614   | 10-scf00401 | 10 |
| AX-158253250 | 20 | 90.313 | KV452993.1 | 91200   | 10-scf00401 | 10 |
| AX-158253257 | 20 | 90.313 | KV452993.1 | 101198  | 10-scf00401 | 10 |
| AX-158253290 | 20 | 90.313 | KV452993.1 | 166390  | 10-scf00401 | 10 |
| AX-158253296 | 20 | 90.313 | KV452993.1 | 174436  | 10-scf00401 | 10 |
| AX-158253324 | 20 | 90.313 | KV452993.1 | 247013  | 10-scf00401 | 10 |
| AX-158253334 | 20 | 90.313 | KV452993.1 | 276701  | 10-scf00401 | 10 |
| AX-158253342 | 20 | 90.313 | KV452993.1 | 290798  | 10-scf00401 | 10 |
| AX-158253344 | 20 | 90.313 | KV452993.1 | 292177  | 10-scf00401 | 10 |

|              |    |        |            |         |             |    |
|--------------|----|--------|------------|---------|-------------|----|
| AX-158253350 | 20 | 90.313 | KV452993.1 | 295656  | 10-scf00401 | 10 |
| AX-158253354 | 20 | 90.313 | KV452993.1 | 299878  | 10-scf00401 | 10 |
| AX-158253506 | 20 | 90.313 | KV452991.1 | 58145   | 10-scf00403 | 10 |
| AX-158251654 | 20 | 90.385 | KV452986.1 | 1394076 | 10-scf00397 | 10 |
| AX-158253369 | 20 | 92.388 | KV452987.1 | 4724    | 10-scf00402 | 10 |
| AX-158253376 | 20 | 92.388 | KV452987.1 | 14089   | 10-scf00402 | 10 |
| AX-158253379 | 20 | 92.388 | KV452987.1 | 18912   | 10-scf00402 | 10 |
| AX-157842313 | 20 | 92.388 | KV452987.1 | 19874   | 10-scf00402 | 10 |
| AX-158251582 | 20 | 92.391 | KV452986.1 | 1175283 | 10-scf00397 | 10 |
| AX-157842199 | 20 | 92.391 | KV452988.1 | 15142   | 10-scf00398 | 10 |
| AX-157771739 | 20 | 92.391 | KV452988.1 | 46764   | 10-scf00398 | 10 |
| AX-158251697 | 20 | 92.391 | KV452988.1 | 64348   | 10-scf00398 | 10 |
| AX-158251700 | 20 | 92.391 | KV452988.1 | 75501   | 10-scf00398 | 10 |
| AX-158251714 | 20 | 92.391 | KV452988.1 | 104688  | 10-scf00398 | 10 |
| AX-157842203 | 20 | 92.391 | KV452988.1 | 108657  | 10-scf00398 | 10 |
| AX-158251724 | 20 | 92.391 | KV452988.1 | 111513  | 10-scf00398 | 10 |
| AX-158251737 | 20 | 92.391 | KV452988.1 | 127885  | 10-scf00398 | 10 |
| AX-158251742 | 20 | 92.391 | KV452988.1 | 133600  | 10-scf00398 | 10 |
| AX-158251756 | 20 | 92.391 | KV452988.1 | 157092  | 10-scf00398 | 10 |
| AX-158251768 | 20 | 92.391 | KV452988.1 | 173673  | 10-scf00398 | 10 |
| AX-158251770 | 20 | 92.391 | KV452988.1 | 174802  | 10-scf00398 | 10 |
| AX-157725031 | 20 | 92.391 | KV452988.1 | 181803  | 10-scf00398 | 10 |
| AX-157723949 | 20 | 92.391 | KV452988.1 | 189256  | 10-scf00398 | 10 |
| AX-158251786 | 20 | 92.391 | KV452988.1 | 197306  | 10-scf00398 | 10 |
| AX-158251799 | 20 | 92.391 | KV452988.1 | 215073  | 10-scf00398 | 10 |
| AX-158251804 | 20 | 92.391 | KV452988.1 | 218331  | 10-scf00398 | 10 |
| AX-158251805 | 20 | 92.391 | KV452988.1 | 219603  | 10-scf00398 | 10 |
| AX-158251810 | 20 | 92.391 | KV452988.1 | 224614  | 10-scf00398 | 10 |
| AX-158251812 | 20 | 92.391 | KV452988.1 | 227821  | 10-scf00398 | 10 |
| AX-158251813 | 20 | 92.391 | KV452988.1 | 228542  | 10-scf00398 | 10 |
| AX-158251821 | 20 | 92.391 | KV452988.1 | 241664  | 10-scf00398 | 10 |
| AX-158251823 | 20 | 92.391 | KV452988.1 | 242436  | 10-scf00398 | 10 |
| AX-158251826 | 20 | 92.391 | KV452988.1 | 244275  | 10-scf00398 | 10 |
| AX-158251834 | 20 | 92.391 | KV452988.1 | 249239  | 10-scf00398 | 10 |
| AX-158251835 | 20 | 92.391 | KV452988.1 | 249834  | 10-scf00398 | 10 |
| AX-158251840 | 20 | 92.391 | KV452988.1 | 253295  | 10-scf00398 | 10 |
| AX-157704207 | 20 | 92.391 | KV452988.1 | 256355  | 10-scf00398 | 10 |
| AX-158251849 | 20 | 92.391 | KV452988.1 | 261248  | 10-scf00398 | 10 |
| AX-158251851 | 20 | 92.391 | KV452988.1 | 262276  | 10-scf00398 | 10 |
| AX-158251852 | 20 | 92.391 | KV452988.1 | 262780  | 10-scf00398 | 10 |
| AX-158251855 | 20 | 92.391 | KV452988.1 | 265312  | 10-scf00398 | 10 |
| AX-158251859 | 20 | 92.391 | KV452988.1 | 268070  | 10-scf00398 | 10 |
| AX-158415914 | 20 | 92.391 | KV452988.1 | 291058  | 10-scf00398 | 10 |
| AX-158251900 | 20 | 92.391 | KV452988.1 | 319401  | 10-scf00398 | 10 |
| AX-157709417 | 20 | 92.391 | KV452988.1 | 320913  | 10-scf00398 | 10 |
| AX-158251906 | 20 | 92.391 | KV452988.1 | 326482  | 10-scf00398 | 10 |
| AX-158251907 | 20 | 92.391 | KV452988.1 | 328170  | 10-scf00398 | 10 |
| AX-158251931 | 20 | 92.391 | KV452988.1 | 363665  | 10-scf00398 | 10 |
| AX-158251933 | 20 | 92.391 | KV452988.1 | 365050  | 10-scf00398 | 10 |
| AX-158251935 | 20 | 92.391 | KV452988.1 | 366685  | 10-scf00398 | 10 |
| AX-158251944 | 20 | 92.391 | KV452988.1 | 375618  | 10-scf00398 | 10 |

|              |    |        |            |         |             |    |
|--------------|----|--------|------------|---------|-------------|----|
| AX-158251945 | 20 | 92.391 | KV452988.1 | 376410  | 10-scf00398 | 10 |
| AX-158251948 | 20 | 92.391 | KV452988.1 | 381882  | 10-scf00398 | 10 |
| AX-158251953 | 20 | 92.391 | KV452988.1 | 386923  | 10-scf00398 | 10 |
| AX-158251956 | 20 | 92.391 | KV452988.1 | 392666  | 10-scf00398 | 10 |
| AX-158251961 | 20 | 92.391 | KV452988.1 | 398682  | 10-scf00398 | 10 |
| AX-158251965 | 20 | 92.391 | KV452988.1 | 401420  | 10-scf00398 | 10 |
| AX-158251967 | 20 | 92.391 | KV452988.1 | 408518  | 10-scf00398 | 10 |
| AX-158251968 | 20 | 92.391 | KV452988.1 | 409107  | 10-scf00398 | 10 |
| AX-157880235 | 20 | 92.391 | KV452988.1 | 412922  | 10-scf00398 | 10 |
| AX-158251971 | 20 | 92.391 | KV452988.1 | 415262  | 10-scf00398 | 10 |
| AX-158251981 | 20 | 92.391 | KV452988.1 | 424598  | 10-scf00398 | 10 |
| AX-158251982 | 20 | 92.391 | KV452988.1 | 428372  | 10-scf00398 | 10 |
| AX-158251983 | 20 | 92.391 | KV452988.1 | 429335  | 10-scf00398 | 10 |
| AX-158251985 | 20 | 92.391 | KV452988.1 | 431289  | 10-scf00398 | 10 |
| AX-157744221 | 20 | 92.391 | KV452988.1 | 438486  | 10-scf00398 | 10 |
| AX-158251993 | 20 | 92.391 | KV452988.1 | 443092  | 10-scf00398 | 10 |
| AX-158251994 | 20 | 92.391 | KV452988.1 | 443230  | 10-scf00398 | 10 |
| AX-158252000 | 20 | 92.391 | KV452988.1 | 455150  | 10-scf00398 | 10 |
| AX-157842218 | 20 | 92.391 | KV452988.1 | 457095  | 10-scf00398 | 10 |
| AX-158252012 | 20 | 92.391 | KV452988.1 | 486779  | 10-scf00398 | 10 |
| AX-158252017 | 20 | 92.391 | KV452988.1 | 491131  | 10-scf00398 | 10 |
| AX-158252019 | 20 | 92.391 | KV452988.1 | 494107  | 10-scf00398 | 10 |
| AX-158252020 | 20 | 92.391 | KV452988.1 | 499653  | 10-scf00398 | 10 |
| AX-157739606 | 20 | 92.391 | KV452988.1 | 529283  | 10-scf00398 | 10 |
| AX-157842237 | 20 | 92.391 | KV452989.1 | 393781  | 10-scf00399 | 10 |
| AX-158252435 | 20 | 92.391 | KV452989.1 | 683781  | 10-scf00399 | 10 |
| AX-158252874 | 20 | 92.391 | KV452989.1 | 1364980 | 10-scf00399 | 10 |
| AX-158252898 | 20 | 92.391 | KV452989.1 | 1424913 | 10-scf00399 | 10 |
| AX-158253041 | 20 | 92.391 | KV452990.1 | 11447   | 10-scf00400 | 10 |
| AX-157842301 | 20 | 92.391 | KV452990.1 | 42229   | 10-scf00400 | 10 |
| AX-158253057 | 20 | 92.391 | KV452990.1 | 42676   | 10-scf00400 | 10 |
| AX-157740050 | 20 | 92.391 | KV452990.1 | 198940  | 10-scf00400 | 10 |
| AX-157842305 | 20 | 92.391 | KV452990.1 | 236279  | 10-scf00400 | 10 |
| AX-157755905 | 20 | 92.391 | KV452993.1 | 110806  | 10-scf00401 | 10 |
| AX-158253286 | 20 | 92.391 | KV452993.1 | 162748  | 10-scf00401 | 10 |
| AX-158423381 | 20 | 92.391 | KV452993.1 | 164011  | 10-scf00401 | 10 |
| AX-158253316 | 20 | 92.391 | KV452993.1 | 232449  | 10-scf00401 | 10 |
| AX-158253367 | 20 | 92.391 | KV452987.1 | 2702    | 10-scf00402 | 10 |
| AX-158253382 | 20 | 92.391 | KV452987.1 | 20247   | 10-scf00402 | 10 |
| AX-158253392 | 20 | 92.391 | KV452987.1 | 40681   | 10-scf00402 | 10 |
| AX-158253393 | 20 | 92.391 | KV452987.1 | 41177   | 10-scf00402 | 10 |
| AX-158253394 | 20 | 92.391 | KV452987.1 | 41593   | 10-scf00402 | 10 |
| AX-158253398 | 20 | 92.391 | KV452987.1 | 47505   | 10-scf00402 | 10 |
| AX-158253399 | 20 | 92.391 | KV452987.1 | 48147   | 10-scf00402 | 10 |
| AX-158253401 | 20 | 92.391 | KV452987.1 | 49908   | 10-scf00402 | 10 |
| AX-158253415 | 20 | 92.391 | KV452987.1 | 77049   | 10-scf00402 | 10 |
| AX-157842317 | 20 | 92.391 | KV452987.1 | 88081   | 10-scf00402 | 10 |
| AX-158253421 | 20 | 92.391 | KV452987.1 | 90039   | 10-scf00402 | 10 |
| AX-158253493 | 20 | 92.391 | KV452991.1 | 1592    | 10-scf00403 | 10 |
| AX-158415979 | 20 | 92.391 | KV452991.1 | 18475   | 10-scf00403 | 10 |
| AX-158387085 | 20 | 92.391 | KV452991.1 | 36473   | 10-scf00403 | 10 |

|              |    |        |             |         |             |    |
|--------------|----|--------|-------------|---------|-------------|----|
| AX-157714054 | 20 | 92.391 | KV452991.1  | 70768   | 10-scf00403 | 10 |
| AX-158253515 | 20 | 92.391 | KV452991.1  | 71007   | 10-scf00403 | 10 |
| AX-158253517 | 20 | 92.391 | KV452991.1  | 73462   | 10-scf00403 | 10 |
| AX-158253518 | 20 | 92.391 | KV452991.1  | 74149   | 10-scf00403 | 10 |
| AX-157687554 | 20 | 92.391 | 3ML01025017 | 8964    | scf00926_1  | UN |
| AX-157688527 | 20 | 92.391 | 3ML01026379 | 1285    | scf01974_1  | UN |
| AX-157689623 | 20 | 92.391 | 3ML01030866 | 330     | scf06470_1  | UN |
| AX-158253408 | 20 | 92.563 | KV452987.1  | 60774   | 10-scf00402 | 10 |
| AX-158251665 | 20 | 93.224 | KV452988.1  | 11647   | 10-scf00398 | 10 |
| AX-158252490 | 20 | 93.224 | KV452989.1  | 767770  | 10-scf00399 | 10 |
| AX-157842267 | 20 | 93.224 | KV452989.1  | 773175  | 10-scf00399 | 10 |
| AX-157747044 | 20 | 93.224 | KV452989.1  | 784549  | 10-scf00399 | 10 |
| AX-158252611 | 20 | 93.224 | KV452989.1  | 940862  | 10-scf00399 | 10 |
| AX-157842276 | 20 | 93.224 | KV452989.1  | 1223970 | 10-scf00399 | 10 |
| AX-158253407 | 20 | 93.224 | KV452987.1  | 57770   | 10-scf00402 | 10 |
| AX-158253460 | 20 | 93.224 | KV452987.1  | 195411  | 10-scf00402 | 10 |
| AX-157842330 | 20 | 93.224 | KV452987.1  | 206362  | 10-scf00402 | 10 |
| AX-158253463 | 20 | 93.224 | KV452987.1  | 208183  | 10-scf00402 | 10 |
| AX-158253470 | 20 | 93.224 | KV452987.1  | 233364  | 10-scf00402 | 10 |
| AX-158387084 | 20 | 93.224 | KV452987.1  | 234232  | 10-scf00402 | 10 |
| AX-158253476 | 20 | 93.224 | KV452987.1  | 251230  | 10-scf00402 | 10 |
| AX-158253477 | 20 | 93.224 | KV452987.1  | 255722  | 10-scf00402 | 10 |
| AX-158251761 | 20 | 93.456 | KV452988.1  | 163949  | 10-scf00398 | 10 |
| AX-158251869 | 20 | 94.19  | KV452988.1  | 281567  | 10-scf00398 | 10 |
| AX-158252087 | 20 | 94.19  | KV452989.1  | 108484  | 10-scf00399 | 10 |
| AX-158252088 | 20 | 94.19  | KV452989.1  | 109649  | 10-scf00399 | 10 |
| AX-157775515 | 20 | 94.19  | KV452989.1  | 113322  | 10-scf00399 | 10 |
| AX-158252090 | 20 | 94.19  | KV452989.1  | 123171  | 10-scf00399 | 10 |
| AX-158415928 | 20 | 94.19  | KV452989.1  | 123868  | 10-scf00399 | 10 |
| AX-158252092 | 20 | 94.19  | KV452989.1  | 125294  | 10-scf00399 | 10 |
| AX-158252093 | 20 | 94.19  | KV452989.1  | 127210  | 10-scf00399 | 10 |
| AX-158252095 | 20 | 94.19  | KV452989.1  | 129448  | 10-scf00399 | 10 |
| AX-158252096 | 20 | 94.19  | KV452989.1  | 131077  | 10-scf00399 | 10 |
| AX-158252098 | 20 | 94.19  | KV452989.1  | 133235  | 10-scf00399 | 10 |
| AX-158252100 | 20 | 94.19  | KV452989.1  | 135852  | 10-scf00399 | 10 |
| AX-158252102 | 20 | 94.19  | KV452989.1  | 142460  | 10-scf00399 | 10 |
| AX-158252104 | 20 | 94.19  | KV452989.1  | 149561  | 10-scf00399 | 10 |
| AX-158252105 | 20 | 94.19  | KV452989.1  | 150376  | 10-scf00399 | 10 |
| AX-158252107 | 20 | 94.19  | KV452989.1  | 151271  | 10-scf00399 | 10 |
| AX-158252108 | 20 | 94.19  | KV452989.1  | 151569  | 10-scf00399 | 10 |
| AX-158252109 | 20 | 94.19  | KV452989.1  | 153520  | 10-scf00399 | 10 |
| AX-158252111 | 20 | 94.19  | KV452989.1  | 156221  | 10-scf00399 | 10 |
| AX-158252112 | 20 | 94.19  | KV452989.1  | 156672  | 10-scf00399 | 10 |
| AX-158252113 | 20 | 94.19  | KV452989.1  | 159538  | 10-scf00399 | 10 |
| AX-158252119 | 20 | 94.19  | KV452989.1  | 167070  | 10-scf00399 | 10 |
| AX-158252121 | 20 | 94.19  | KV452989.1  | 170400  | 10-scf00399 | 10 |
| AX-158252125 | 20 | 94.19  | KV452989.1  | 177597  | 10-scf00399 | 10 |
| AX-158252133 | 20 | 94.19  | KV452989.1  | 187935  | 10-scf00399 | 10 |
| AX-158252136 | 20 | 94.19  | KV452989.1  | 190935  | 10-scf00399 | 10 |
| AX-157739829 | 20 | 94.19  | KV452989.1  | 194747  | 10-scf00399 | 10 |
| AX-158252268 | 20 | 94.19  | KV452989.1  | 373371  | 10-scf00399 | 10 |

|              |    |        |             |        |             |    |
|--------------|----|--------|-------------|--------|-------------|----|
| AX-158252271 | 20 | 94.19  | KV452989.1  | 376024 | 10-scf00399 | 10 |
| AX-157688630 | 20 | 94.19  | 3ML01026601 | 1461   | scf02199_1  | UN |
| AX-158252110 | 20 | 94.351 | KV452989.1  | 154576 | 10-scf00399 | 10 |
| AX-158252138 | 20 | 94.804 | KV452989.1  | 193313 | 10-scf00399 | 10 |
| AX-158252155 | 20 | 95.31  | KV452989.1  | 222737 | 10-scf00399 | 10 |
| AX-158252156 | 20 | 95.337 | KV452989.1  | 227127 | 10-scf00399 | 10 |
| AX-158252159 | 20 | 95.337 | KV452989.1  | 230258 | 10-scf00399 | 10 |
| AX-158252160 | 20 | 95.337 | KV452989.1  | 231673 | 10-scf00399 | 10 |
| AX-158252164 | 20 | 95.337 | KV452989.1  | 239626 | 10-scf00399 | 10 |
| AX-158252166 | 20 | 95.337 | KV452989.1  | 241716 | 10-scf00399 | 10 |
| AX-158252168 | 20 | 95.337 | KV452989.1  | 243034 | 10-scf00399 | 10 |
| AX-158252169 | 20 | 95.337 | KV452989.1  | 247528 | 10-scf00399 | 10 |
| AX-158252172 | 20 | 95.337 | KV452989.1  | 251568 | 10-scf00399 | 10 |
| AX-158252173 | 20 | 95.337 | KV452989.1  | 253171 | 10-scf00399 | 10 |
| AX-158252177 | 20 | 95.337 | KV452989.1  | 257125 | 10-scf00399 | 10 |
| AX-158252178 | 20 | 95.337 | KV452989.1  | 257734 | 10-scf00399 | 10 |
| AX-158252180 | 20 | 95.337 | KV452989.1  | 259744 | 10-scf00399 | 10 |
| AX-158415935 | 20 | 95.337 | KV452989.1  | 276797 | 10-scf00399 | 10 |
| AX-158252214 | 20 | 95.337 | KV452989.1  | 315839 | 10-scf00399 | 10 |
| AX-158252217 | 20 | 95.337 | KV452989.1  | 317366 | 10-scf00399 | 10 |
| AX-157725452 | 20 | 95.337 | KV452989.1  | 318540 | 10-scf00399 | 10 |
| AX-158252220 | 20 | 95.337 | KV452989.1  | 320453 | 10-scf00399 | 10 |
| AX-158252221 | 20 | 95.337 | KV452989.1  | 321217 | 10-scf00399 | 10 |
| AX-158252222 | 20 | 95.337 | KV452989.1  | 321591 | 10-scf00399 | 10 |
| AX-158252228 | 20 | 95.337 | KV452989.1  | 327340 | 10-scf00399 | 10 |
| AX-157880237 | 20 | 95.337 | KV452989.1  | 328473 | 10-scf00399 | 10 |
| AX-158252235 | 20 | 95.337 | KV452989.1  | 333874 | 10-scf00399 | 10 |
| AX-158252236 | 20 | 95.337 | KV452989.1  | 334828 | 10-scf00399 | 10 |
| AX-158252237 | 20 | 95.337 | KV452989.1  | 335207 | 10-scf00399 | 10 |
| AX-157755759 | 20 | 95.337 | KV452989.1  | 339248 | 10-scf00399 | 10 |
| AX-158252242 | 20 | 95.337 | KV452989.1  | 341503 | 10-scf00399 | 10 |
| AX-158252243 | 20 | 95.337 | KV452989.1  | 342965 | 10-scf00399 | 10 |
| AX-157842240 | 20 | 95.337 | KV452989.1  | 417911 | 10-scf00399 | 10 |
| AX-158252244 | 20 | 95.35  | KV452989.1  | 343772 | 10-scf00399 | 10 |
| AX-158252230 | 20 | 95.402 | KV452989.1  | 329430 | 10-scf00399 | 10 |
| AX-158252245 | 20 | 95.402 | KV452989.1  | 344800 | 10-scf00399 | 10 |
| AX-157842253 | 20 | 95.402 | KV452989.1  | 505012 | 10-scf00399 | 10 |
| AX-158252383 | 20 | 95.402 | KV452989.1  | 588560 | 10-scf00399 | 10 |
| AX-158252384 | 20 | 95.402 | KV452989.1  | 589104 | 10-scf00399 | 10 |
| AX-157859852 | 20 | 95.402 | KV452989.1  | 636453 | 10-scf00399 | 10 |
| AX-157842261 | 20 | 95.402 | KV452989.1  | 637285 | 10-scf00399 | 10 |
| AX-158251711 | 20 | 95.456 | KV452988.1  | 102655 | 10-scf00398 | 10 |
| AX-158252255 | 20 | 95.456 | KV452989.1  | 357930 | 10-scf00399 | 10 |
| AX-158252258 | 20 | 95.456 | KV452989.1  | 362074 | 10-scf00399 | 10 |
| AX-158252259 | 20 | 95.456 | KV452989.1  | 362996 | 10-scf00399 | 10 |
| AX-158252265 | 20 | 95.456 | KV452989.1  | 366680 | 10-scf00399 | 10 |
| AX-158252272 | 20 | 95.456 | KV452989.1  | 376645 | 10-scf00399 | 10 |
| AX-158252216 | 20 | 95.567 | KV452989.1  | 316925 | 10-scf00399 | 10 |
| AX-158252274 | 20 | 95.567 | KV452989.1  | 378351 | 10-scf00399 | 10 |
| AX-158415937 | 20 | 95.694 | KV452989.1  | 342377 | 10-scf00399 | 10 |
| AX-158387066 | 20 | 95.694 | KV452989.1  | 380796 | 10-scf00399 | 10 |

|              |    |        |             |         |             |    |
|--------------|----|--------|-------------|---------|-------------|----|
| AX-158252277 | 20 | 95.694 | KV452989.1  | 387028  | 10-scf00399 | 10 |
| AX-158252279 | 20 | 95.694 | KV452989.1  | 388921  | 10-scf00399 | 10 |
| AX-158252281 | 20 | 95.694 | KV452989.1  | 392112  | 10-scf00399 | 10 |
| AX-158252284 | 20 | 95.694 | KV452989.1  | 401287  | 10-scf00399 | 10 |
| AX-158252287 | 20 | 95.694 | KV452989.1  | 404477  | 10-scf00399 | 10 |
| AX-158252289 | 20 | 95.694 | KV452989.1  | 406617  | 10-scf00399 | 10 |
| AX-157842239 | 20 | 95.694 | KV452989.1  | 407144  | 10-scf00399 | 10 |
| AX-158252300 | 20 | 95.694 | KV452989.1  | 423970  | 10-scf00399 | 10 |
| AX-157719473 | 20 | 95.694 | KV452989.1  | 437457  | 10-scf00399 | 10 |
| AX-157773065 | 20 | 95.694 | KV452989.1  | 439244  | 10-scf00399 | 10 |
| AX-157842242 | 20 | 95.694 | KV452989.1  | 442276  | 10-scf00399 | 10 |
| AX-157842243 | 20 | 95.694 | KV452989.1  | 453494  | 10-scf00399 | 10 |
| AX-157842244 | 20 | 95.694 | KV452989.1  | 453713  | 10-scf00399 | 10 |
| AX-157842245 | 20 | 95.694 | KV452989.1  | 456939  | 10-scf00399 | 10 |
| AX-157711273 | 20 | 95.694 | KV452989.1  | 457641  | 10-scf00399 | 10 |
| AX-157713093 | 20 | 95.694 | KV452989.1  | 463758  | 10-scf00399 | 10 |
| AX-158252312 | 20 | 95.694 | KV452989.1  | 464641  | 10-scf00399 | 10 |
| AX-158252314 | 20 | 95.694 | KV452989.1  | 466764  | 10-scf00399 | 10 |
| AX-157842249 | 20 | 95.694 | KV452989.1  | 477876  | 10-scf00399 | 10 |
| AX-158252423 | 20 | 95.694 | KV452989.1  | 662001  | 10-scf00399 | 10 |
| AX-157842274 | 20 | 95.694 | KV452989.1  | 1197688 | 10-scf00399 | 10 |
| AX-157707060 | 20 | 95.694 | 3ML01033426 | 100     | scf09075_1  | UN |
| AX-158252318 | 20 | 95.731 | KV452989.1  | 470110  | 10-scf00399 | 10 |
| AX-158252320 | 20 | 95.77  | KV452989.1  | 471758  | 10-scf00399 | 10 |
| AX-157842247 | 20 | 95.797 | KV452989.1  | 474391  | 10-scf00399 | 10 |
| AX-157842248 | 20 | 95.828 | KV452989.1  | 475430  | 10-scf00399 | 10 |
| AX-158252321 | 20 | 95.87  | KV452989.1  | 476070  | 10-scf00399 | 10 |
| AX-158252292 | 20 | 95.913 | KV452989.1  | 412107  | 10-scf00399 | 10 |
| AX-158252297 | 20 | 95.913 | KV452989.1  | 417596  | 10-scf00399 | 10 |
| AX-158252302 | 20 | 95.913 | KV452989.1  | 432016  | 10-scf00399 | 10 |
| AX-158252327 | 20 | 95.913 | KV452989.1  | 487539  | 10-scf00399 | 10 |
| AX-157842250 | 20 | 95.913 | KV452989.1  | 489508  | 10-scf00399 | 10 |
| AX-158252332 | 20 | 95.913 | KV452989.1  | 493249  | 10-scf00399 | 10 |
| AX-158252338 | 20 | 95.913 | KV452989.1  | 497552  | 10-scf00399 | 10 |
| AX-157842251 | 20 | 95.913 | KV452989.1  | 502428  | 10-scf00399 | 10 |
| AX-157842252 | 20 | 95.913 | KV452989.1  | 503667  | 10-scf00399 | 10 |
| AX-157710907 | 20 | 95.913 | KV452989.1  | 514283  | 10-scf00399 | 10 |
| AX-157842254 | 20 | 95.913 | KV452989.1  | 516718  | 10-scf00399 | 10 |
| AX-157741001 | 20 | 95.913 | KV452989.1  | 522429  | 10-scf00399 | 10 |
| AX-158252351 | 20 | 95.913 | KV452989.1  | 525098  | 10-scf00399 | 10 |
| AX-158252354 | 20 | 95.913 | KV452989.1  | 526465  | 10-scf00399 | 10 |
| AX-158252355 | 20 | 95.913 | KV452989.1  | 526816  | 10-scf00399 | 10 |
| AX-158252358 | 20 | 95.913 | KV452989.1  | 531469  | 10-scf00399 | 10 |
| AX-158252359 | 20 | 95.913 | KV452989.1  | 532877  | 10-scf00399 | 10 |
| AX-158252360 | 20 | 95.913 | KV452989.1  | 536812  | 10-scf00399 | 10 |
| AX-158252369 | 20 | 95.913 | KV452989.1  | 565146  | 10-scf00399 | 10 |
| AX-158252373 | 20 | 95.913 | KV452989.1  | 570929  | 10-scf00399 | 10 |
| AX-157745273 | 20 | 96.131 | KV452989.1  | 577866  | 10-scf00399 | 10 |
| AX-158387067 | 20 | 96.131 | KV452989.1  | 578596  | 10-scf00399 | 10 |
| AX-157745701 | 20 | 96.35  | KV452988.1  | 326931  | 10-scf00398 | 10 |
| AX-157842238 | 20 | 96.35  | KV452989.1  | 398588  | 10-scf00399 | 10 |

|              |    |        |             |         |             |    |
|--------------|----|--------|-------------|---------|-------------|----|
| AX-158252381 | 20 | 96.35  | KV452989.1  | 587890  | 10-scf00399 | 10 |
| AX-158252389 | 20 | 96.35  | KV452989.1  | 594266  | 10-scf00399 | 10 |
| AX-158252391 | 20 | 96.35  | KV452989.1  | 595515  | 10-scf00399 | 10 |
| AX-158252393 | 20 | 96.35  | KV452989.1  | 597424  | 10-scf00399 | 10 |
| AX-157842260 | 20 | 96.35  | KV452989.1  | 617071  | 10-scf00399 | 10 |
| AX-158252407 | 20 | 96.35  | KV452989.1  | 630538  | 10-scf00399 | 10 |
| AX-158252409 | 20 | 96.35  | KV452989.1  | 634652  | 10-scf00399 | 10 |
| AX-158252411 | 20 | 96.35  | KV452989.1  | 640404  | 10-scf00399 | 10 |
| AX-157707017 | 20 | 96.35  | 3ML01033339 | 317     | scf08985_1  | UN |
| AX-157707018 | 20 | 96.35  | 3ML01033339 | 444     | scf08985_1  | UN |
| AX-158252413 | 20 | 96.422 | KV452989.1  | 642458  | 10-scf00399 | 10 |
| AX-158252132 | 20 | 96.459 | KV452989.1  | 183582  | 10-scf00399 | 10 |
| AX-158252414 | 20 | 96.459 | KV452989.1  | 643176  | 10-scf00399 | 10 |
| AX-158252415 | 20 | 96.459 | KV452989.1  | 643404  | 10-scf00399 | 10 |
| AX-158252416 | 20 | 96.459 | KV452989.1  | 648241  | 10-scf00399 | 10 |
| AX-158252417 | 20 | 96.459 | KV452989.1  | 648584  | 10-scf00399 | 10 |
| AX-158252418 | 20 | 96.459 | KV452989.1  | 650008  | 10-scf00399 | 10 |
| AX-157708395 | 20 | 96.459 | KV452989.1  | 1054740 | 10-scf00399 | 10 |
| AX-158252424 | 20 | 96.568 | KV452989.1  | 667394  | 10-scf00399 | 10 |
| AX-158252431 | 20 | 96.568 | KV452989.1  | 676490  | 10-scf00399 | 10 |
| AX-158252433 | 20 | 96.568 | KV452989.1  | 679138  | 10-scf00399 | 10 |
| AX-158252439 | 20 | 96.568 | KV452989.1  | 687726  | 10-scf00399 | 10 |
| AX-158252401 | 20 | 96.623 | KV452989.1  | 615943  | 10-scf00399 | 10 |
| AX-158252440 | 20 | 96.623 | KV452989.1  | 688523  | 10-scf00399 | 10 |
| AX-158252441 | 20 | 96.623 | KV452989.1  | 689506  | 10-scf00399 | 10 |
| AX-158252443 | 20 | 96.678 | KV452989.1  | 693409  | 10-scf00399 | 10 |
| AX-158252444 | 20 | 96.678 | KV452989.1  | 694097  | 10-scf00399 | 10 |
| AX-158252446 | 20 | 96.678 | KV452989.1  | 695148  | 10-scf00399 | 10 |
| AX-158252447 | 20 | 96.678 | KV452989.1  | 696327  | 10-scf00399 | 10 |
| AX-158252454 | 20 | 96.678 | KV452989.1  | 702982  | 10-scf00399 | 10 |
| AX-157775768 | 20 | 96.678 | KV452989.1  | 711274  | 10-scf00399 | 10 |
| AX-158252465 | 20 | 96.678 | KV452989.1  | 713003  | 10-scf00399 | 10 |
| AX-158252470 | 20 | 96.678 | KV452989.1  | 721458  | 10-scf00399 | 10 |
| AX-158251656 | 20 | 97.77  | KV452988.1  | 2636    | 10-scf00398 | 10 |
| AX-158251672 | 20 | 97.77  | KV452988.1  | 21974   | 10-scf00398 | 10 |
| AX-158251686 | 20 | 97.77  | KV452988.1  | 49207   | 10-scf00398 | 10 |
| AX-157842204 | 20 | 97.77  | KV452988.1  | 110114  | 10-scf00398 | 10 |
| AX-158251726 | 20 | 97.77  | KV452988.1  | 118537  | 10-scf00398 | 10 |
| AX-158251728 | 20 | 97.77  | KV452988.1  | 119194  | 10-scf00398 | 10 |
| AX-158251729 | 20 | 97.77  | KV452988.1  | 119402  | 10-scf00398 | 10 |
| AX-158251730 | 20 | 97.77  | KV452988.1  | 121059  | 10-scf00398 | 10 |
| AX-157747253 | 20 | 97.77  | KV452988.1  | 124446  | 10-scf00398 | 10 |
| AX-158251734 | 20 | 97.77  | KV452988.1  | 126652  | 10-scf00398 | 10 |
| AX-158251735 | 20 | 97.77  | KV452988.1  | 127025  | 10-scf00398 | 10 |
| AX-158251736 | 20 | 97.77  | KV452988.1  | 127780  | 10-scf00398 | 10 |
| AX-158251745 | 20 | 97.77  | KV452988.1  | 135740  | 10-scf00398 | 10 |
| AX-158251749 | 20 | 97.77  | KV452988.1  | 140508  | 10-scf00398 | 10 |
| AX-158251837 | 20 | 97.77  | KV452988.1  | 251138  | 10-scf00398 | 10 |
| AX-158251858 | 20 | 97.77  | KV452988.1  | 267432  | 10-scf00398 | 10 |
| AX-158251860 | 20 | 97.77  | KV452988.1  | 268689  | 10-scf00398 | 10 |
| AX-158251876 | 20 | 97.77  | KV452988.1  | 289632  | 10-scf00398 | 10 |

|              |    |        |             |         |             |    |
|--------------|----|--------|-------------|---------|-------------|----|
| AX-158251884 | 20 | 97.77  | KV452988.1  | 296389  | 10-scf00398 | 10 |
| AX-158251886 | 20 | 97.77  | KV452988.1  | 298624  | 10-scf00398 | 10 |
| AX-158251902 | 20 | 97.77  | KV452988.1  | 321889  | 10-scf00398 | 10 |
| AX-158251942 | 20 | 97.77  | KV452988.1  | 374805  | 10-scf00398 | 10 |
| AX-157726877 | 20 | 97.77  | KV452988.1  | 468604  | 10-scf00398 | 10 |
| AX-158252029 | 20 | 97.77  | KV452988.1  | 531335  | 10-scf00398 | 10 |
| AX-157748300 | 20 | 97.77  | KV452989.1  | 803538  | 10-scf00399 | 10 |
| AX-158252529 | 20 | 97.77  | KV452989.1  | 819985  | 10-scf00399 | 10 |
| AX-158252580 | 20 | 97.77  | KV452989.1  | 887527  | 10-scf00399 | 10 |
| AX-158252757 | 20 | 97.77  | KV452989.1  | 1164540 | 10-scf00399 | 10 |
| AX-158252778 | 20 | 97.77  | KV452989.1  | 1198132 | 10-scf00399 | 10 |
| AX-158252786 | 20 | 97.77  | KV452989.1  | 1213353 | 10-scf00399 | 10 |
| AX-157842280 | 20 | 97.77  | KV452989.1  | 1237252 | 10-scf00399 | 10 |
| AX-158252827 | 20 | 97.77  | KV452989.1  | 1282240 | 10-scf00399 | 10 |
| AX-158252830 | 20 | 97.77  | KV452989.1  | 1285754 | 10-scf00399 | 10 |
| AX-157717656 | 20 | 97.77  | KV452989.1  | 1297559 | 10-scf00399 | 10 |
| AX-158252877 | 20 | 97.77  | KV452989.1  | 1373223 | 10-scf00399 | 10 |
| AX-157842292 | 20 | 97.77  | KV452989.1  | 1471666 | 10-scf00399 | 10 |
| AX-158253465 | 20 | 97.77  | KV452987.1  | 217310  | 10-scf00402 | 10 |
| AX-157705197 | 20 | 97.77  | 3ML01028960 | 536     | scf04577_1  | UN |
| AX-158252482 | 20 | 98.862 | KV452989.1  | 744730  | 10-scf00399 | 10 |
| AX-158252483 | 20 | 98.862 | KV452989.1  | 745226  | 10-scf00399 | 10 |
| AX-158252457 | 20 | 99.017 | KV452989.1  | 705137  | 10-scf00399 | 10 |
| AX-158252485 | 20 | 99.017 | KV452989.1  | 746858  | 10-scf00399 | 10 |
| AX-157842266 | 20 | 99.079 | KV452989.1  | 772915  | 10-scf00399 | 10 |
| AX-158252495 | 20 | 99.081 | KV452989.1  | 771129  | 10-scf00399 | 10 |
| AX-158252497 | 20 | 99.081 | KV452989.1  | 774092  | 10-scf00399 | 10 |
| AX-158252499 | 20 | 99.081 | KV452989.1  | 775598  | 10-scf00399 | 10 |
| AX-158252500 | 20 | 99.081 | KV452989.1  | 777128  | 10-scf00399 | 10 |
| AX-158252511 | 20 | 99.081 | KV452989.1  | 789511  | 10-scf00399 | 10 |
| AX-158252512 | 20 | 99.081 | KV452989.1  | 789766  | 10-scf00399 | 10 |
| AX-158252513 | 20 | 99.081 | KV452989.1  | 791354  | 10-scf00399 | 10 |
| AX-157842268 | 20 | 99.081 | KV452989.1  | 793185  | 10-scf00399 | 10 |
| AX-158252517 | 20 | 99.081 | KV452989.1  | 796315  | 10-scf00399 | 10 |
| AX-158252519 | 20 | 99.081 | KV452989.1  | 799322  | 10-scf00399 | 10 |
| AX-158252520 | 20 | 99.081 | KV452989.1  | 799557  | 10-scf00399 | 10 |
| AX-158252541 | 20 | 99.081 | KV452989.1  | 840908  | 10-scf00399 | 10 |
| AX-158252554 | 20 | 99.081 | KV452989.1  | 863487  | 10-scf00399 | 10 |
| AX-158252557 | 20 | 99.081 | KV452989.1  | 864919  | 10-scf00399 | 10 |
| AX-158252564 | 20 | 99.081 | KV452989.1  | 867903  | 10-scf00399 | 10 |
| AX-158252566 | 20 | 99.081 | KV452989.1  | 868976  | 10-scf00399 | 10 |
| AX-158252570 | 20 | 99.081 | KV452989.1  | 874697  | 10-scf00399 | 10 |
| AX-158252571 | 20 | 99.081 | KV452989.1  | 875833  | 10-scf00399 | 10 |
| AX-158252573 | 20 | 99.081 | KV452989.1  | 876478  | 10-scf00399 | 10 |
| AX-158252577 | 20 | 99.081 | KV452989.1  | 884198  | 10-scf00399 | 10 |
| AX-158252582 | 20 | 99.081 | KV452989.1  | 892114  | 10-scf00399 | 10 |
| AX-158252585 | 20 | 99.081 | KV452989.1  | 899034  | 10-scf00399 | 10 |
| AX-158252588 | 20 | 99.081 | KV452989.1  | 916325  | 10-scf00399 | 10 |
| AX-158252593 | 20 | 99.081 | KV452989.1  | 919168  | 10-scf00399 | 10 |
| AX-157755868 | 20 | 99.081 | KV452989.1  | 921265  | 10-scf00399 | 10 |
| AX-158252612 | 20 | 99.081 | KV452989.1  | 943616  | 10-scf00399 | 10 |



|              |    |        |            |         |             |    |
|--------------|----|--------|------------|---------|-------------|----|
| AX-157742791 | 20 | 99.081 | KV452989.1 | 963390  | 10-scf00399 | 10 |
| AX-157872749 | 20 | 99.081 | KV452989.1 | 983124  | 10-scf00399 | 10 |
| AX-158252652 | 20 | 99.081 | KV452989.1 | 1020356 | 10-scf00399 | 10 |
| AX-158252653 | 20 | 99.081 | KV452989.1 | 1020842 | 10-scf00399 | 10 |
| AX-158252676 | 20 | 99.081 | KV452989.1 | 1052998 | 10-scf00399 | 10 |
| AX-158252683 | 20 | 99.081 | KV452989.1 | 1062900 | 10-scf00399 | 10 |
| AX-158252732 | 20 | 99.081 | KV452989.1 | 1130976 | 10-scf00399 | 10 |
| AX-158252801 | 20 | 99.081 | KV452989.1 | 1234221 | 10-scf00399 | 10 |
| AX-158252900 | 20 | 99.081 | KV452989.1 | 1431639 | 10-scf00399 | 10 |
| AX-158252591 | 20 | 99.082 | KV452989.1 | 917965  | 10-scf00399 | 10 |
| AX-158252623 | 20 | 99.082 | KV452989.1 | 964874  | 10-scf00399 | 10 |
| AX-158252688 | 20 | 99.082 | KV452989.1 | 1068481 | 10-scf00399 | 10 |
| AX-158252711 | 20 | 99.082 | KV452989.1 | 1100901 | 10-scf00399 | 10 |
| AX-158251673 | 20 | 100.5  | KV452988.1 | 24517   | 10-scf00398 | 10 |
| AX-158251696 | 20 | 100.5  | KV452988.1 | 63383   | 10-scf00398 | 10 |
| AX-158251713 | 20 | 100.5  | KV452988.1 | 103556  | 10-scf00398 | 10 |
| AX-158251719 | 20 | 100.5  | KV452988.1 | 108356  | 10-scf00398 | 10 |
| AX-158251731 | 20 | 100.5  | KV452988.1 | 123725  | 10-scf00398 | 10 |
| AX-158251739 | 20 | 100.5  | KV452988.1 | 132851  | 10-scf00398 | 10 |
| AX-158251759 | 20 | 100.5  | KV452988.1 | 163071  | 10-scf00398 | 10 |
| AX-158251778 | 20 | 100.5  | KV452988.1 | 187874  | 10-scf00398 | 10 |
| AX-158251792 | 20 | 100.5  | KV452988.1 | 204156  | 10-scf00398 | 10 |
| AX-158251808 | 20 | 100.5  | KV452988.1 | 223585  | 10-scf00398 | 10 |
| AX-158251815 | 20 | 100.5  | KV452988.1 | 234773  | 10-scf00398 | 10 |
| AX-157754118 | 20 | 100.5  | KV452988.1 | 244061  | 10-scf00398 | 10 |
| AX-158251827 | 20 | 100.5  | KV452988.1 | 244949  | 10-scf00398 | 10 |
| AX-157740901 | 20 | 100.5  | KV452988.1 | 248193  | 10-scf00398 | 10 |
| AX-158251832 | 20 | 100.5  | KV452988.1 | 248707  | 10-scf00398 | 10 |
| AX-158251839 | 20 | 100.5  | KV452988.1 | 252871  | 10-scf00398 | 10 |
| AX-158251844 | 20 | 100.5  | KV452988.1 | 258852  | 10-scf00398 | 10 |
| AX-158251848 | 20 | 100.5  | KV452988.1 | 260514  | 10-scf00398 | 10 |
| AX-158251854 | 20 | 100.5  | KV452988.1 | 265002  | 10-scf00398 | 10 |
| AX-158251867 | 20 | 100.5  | KV452988.1 | 278815  | 10-scf00398 | 10 |
| AX-158251874 | 20 | 100.5  | KV452988.1 | 285724  | 10-scf00398 | 10 |
| AX-158251875 | 20 | 100.5  | KV452988.1 | 288778  | 10-scf00398 | 10 |
| AX-158251880 | 20 | 100.5  | KV452988.1 | 294267  | 10-scf00398 | 10 |
| AX-158251885 | 20 | 100.5  | KV452988.1 | 297740  | 10-scf00398 | 10 |
| AX-158251887 | 20 | 100.5  | KV452988.1 | 300381  | 10-scf00398 | 10 |
| AX-158251888 | 20 | 100.5  | KV452988.1 | 300993  | 10-scf00398 | 10 |
| AX-158251889 | 20 | 100.5  | KV452988.1 | 306022  | 10-scf00398 | 10 |
| AX-158251909 | 20 | 100.5  | KV452988.1 | 334363  | 10-scf00398 | 10 |
| AX-158251910 | 20 | 100.5  | KV452988.1 | 335220  | 10-scf00398 | 10 |
| AX-158251912 | 20 | 100.5  | KV452988.1 | 336204  | 10-scf00398 | 10 |
| AX-158415918 | 20 | 100.5  | KV452988.1 | 337561  | 10-scf00398 | 10 |
| AX-158251918 | 20 | 100.5  | KV452988.1 | 343220  | 10-scf00398 | 10 |
| AX-158251921 | 20 | 100.5  | KV452988.1 | 347320  | 10-scf00398 | 10 |
| AX-157842210 | 20 | 100.5  | KV452988.1 | 350579  | 10-scf00398 | 10 |
| AX-158251924 | 20 | 100.5  | KV452988.1 | 355386  | 10-scf00398 | 10 |
| AX-158251925 | 20 | 100.5  | KV452988.1 | 356603  | 10-scf00398 | 10 |
| AX-158251929 | 20 | 100.5  | KV452988.1 | 361595  | 10-scf00398 | 10 |
| AX-158251930 | 20 | 100.5  | KV452988.1 | 362394  | 10-scf00398 | 10 |

|              |    |        |             |         |             |    |
|--------------|----|--------|-------------|---------|-------------|----|
| AX-157756576 | 20 | 100.5  | KV452988.1  | 365997  | 10-scf00398 | 10 |
| AX-158251936 | 20 | 100.5  | KV452988.1  | 367011  | 10-scf00398 | 10 |
| AX-158251938 | 20 | 100.5  | KV452988.1  | 368697  | 10-scf00398 | 10 |
| AX-158251939 | 20 | 100.5  | KV452988.1  | 371959  | 10-scf00398 | 10 |
| AX-158251947 | 20 | 100.5  | KV452988.1  | 380290  | 10-scf00398 | 10 |
| AX-157750597 | 20 | 100.5  | KV452988.1  | 385445  | 10-scf00398 | 10 |
| AX-158251951 | 20 | 100.5  | KV452988.1  | 385778  | 10-scf00398 | 10 |
| AX-158251954 | 20 | 100.5  | KV452988.1  | 389689  | 10-scf00398 | 10 |
| AX-158251957 | 20 | 100.5  | KV452988.1  | 393229  | 10-scf00398 | 10 |
| AX-158251958 | 20 | 100.5  | KV452988.1  | 395625  | 10-scf00398 | 10 |
| AX-158251962 | 20 | 100.5  | KV452988.1  | 399067  | 10-scf00398 | 10 |
| AX-158251963 | 20 | 100.5  | KV452988.1  | 399730  | 10-scf00398 | 10 |
| AX-158251969 | 20 | 100.5  | KV452988.1  | 414060  | 10-scf00398 | 10 |
| AX-158251970 | 20 | 100.5  | KV452988.1  | 414635  | 10-scf00398 | 10 |
| AX-158251979 | 20 | 100.5  | KV452988.1  | 423500  | 10-scf00398 | 10 |
| AX-157842219 | 20 | 100.5  | KV452988.1  | 466711  | 10-scf00398 | 10 |
| AX-158252005 | 20 | 100.5  | KV452988.1  | 472323  | 10-scf00398 | 10 |
| AX-158252026 | 20 | 100.5  | KV452988.1  | 520822  | 10-scf00398 | 10 |
| AX-157859849 | 20 | 100.5  | KV452988.1  | 522258  | 10-scf00398 | 10 |
| AX-158252871 | 20 | 100.5  | KV452989.1  | 1358894 | 10-scf00399 | 10 |
| AX-158252886 | 20 | 100.5  | KV452989.1  | 1386836 | 10-scf00399 | 10 |
| AX-158253122 | 20 | 100.5  | KV452990.1  | 148897  | 10-scf00400 | 10 |
| AX-158253335 | 20 | 100.5  | KV452993.1  | 279593  | 10-scf00401 | 10 |
| AX-158253397 | 20 | 100.5  | KV452987.1  | 45924   | 10-scf00402 | 10 |
| AX-158387087 | 20 | 100.5  | KV452991.1  | 68234   | 10-scf00403 | 10 |
| AX-158253522 | 20 | 100.5  | KV452991.1  | 81449   | 10-scf00403 | 10 |
| AX-158253524 | 20 | 100.5  | KV452991.1  | 82846   | 10-scf00403 | 10 |
| AX-158253526 | 20 | 100.5  | KV452991.1  | 86476   | 10-scf00403 | 10 |
| AX-158253534 | 20 | 100.5  | KV452991.1  | 99681   | 10-scf00403 | 10 |
| AX-158253535 | 20 | 100.5  | KV452991.1  | 100620  | 10-scf00403 | 10 |
| AX-158253537 | 20 | 100.5  | KV452991.1  | 110824  | 10-scf00403 | 10 |
| AX-157773859 | 20 | 100.5  | KV452991.1  | 112233  | 10-scf00403 | 10 |
| AX-158253538 | 20 | 100.5  | KV452991.1  | 113651  | 10-scf00403 | 10 |
| AX-158253540 | 20 | 100.5  | KV452991.1  | 126135  | 10-scf00403 | 10 |
| AX-157689286 | 20 | 100.5  | 3ML01028972 | 707     | scf04589_1  | UN |
| AX-158252410 | 20 | 101.92 | KV452989.1  | 635511  | 10-scf00399 | 10 |
| AX-158252436 | 20 | 101.92 | KV452989.1  | 685025  | 10-scf00399 | 10 |
| AX-157755707 | 20 | 101.92 | KV452989.1  | 716625  | 10-scf00399 | 10 |
| AX-157716535 | 20 | 101.92 | KV452989.1  | 735789  | 10-scf00399 | 10 |
| AX-158252488 | 20 | 101.92 | KV452989.1  | 764766  | 10-scf00399 | 10 |
| AX-158252491 | 20 | 101.92 | KV452989.1  | 768557  | 10-scf00399 | 10 |
| AX-158252507 | 20 | 101.92 | KV452989.1  | 786302  | 10-scf00399 | 10 |
| AX-158252508 | 20 | 101.92 | KV452989.1  | 788376  | 10-scf00399 | 10 |
| AX-158252510 | 20 | 101.92 | KV452989.1  | 789031  | 10-scf00399 | 10 |
| AX-158252524 | 20 | 101.92 | KV452989.1  | 811202  | 10-scf00399 | 10 |
| AX-158252548 | 20 | 101.92 | KV452989.1  | 854808  | 10-scf00399 | 10 |
| AX-157743378 | 20 | 101.92 | KV452989.1  | 862034  | 10-scf00399 | 10 |
| AX-158252553 | 20 | 101.92 | KV452989.1  | 862545  | 10-scf00399 | 10 |
| AX-158252558 | 20 | 101.92 | KV452989.1  | 865168  | 10-scf00399 | 10 |
| AX-158252565 | 20 | 101.92 | KV452989.1  | 868454  | 10-scf00399 | 10 |
| AX-157713406 | 20 | 101.92 | KV452989.1  | 871951  | 10-scf00399 | 10 |

|              |    |        |            |         |             |    |
|--------------|----|--------|------------|---------|-------------|----|
| AX-158252572 | 20 | 101.92 | KV452989.1 | 876063  | 10-scf00399 | 10 |
| AX-158252575 | 20 | 101.92 | KV452989.1 | 881686  | 10-scf00399 | 10 |
| AX-158252579 | 20 | 101.92 | KV452989.1 | 885118  | 10-scf00399 | 10 |
| AX-157770978 | 20 | 101.92 | KV452989.1 | 898667  | 10-scf00399 | 10 |
| AX-158252589 | 20 | 101.92 | KV452989.1 | 917008  | 10-scf00399 | 10 |
| AX-158252590 | 20 | 101.92 | KV452989.1 | 917438  | 10-scf00399 | 10 |
| AX-158252602 | 20 | 101.92 | KV452989.1 | 931675  | 10-scf00399 | 10 |
| AX-157726754 | 20 | 101.92 | KV452989.1 | 934735  | 10-scf00399 | 10 |
| AX-158252620 | 20 | 101.92 | KV452989.1 | 961896  | 10-scf00399 | 10 |
| AX-158252621 | 20 | 101.92 | KV452989.1 | 962138  | 10-scf00399 | 10 |
| AX-157754982 | 20 | 101.92 | KV452989.1 | 963995  | 10-scf00399 | 10 |
| AX-158252627 | 20 | 101.92 | KV452989.1 | 975244  | 10-scf00399 | 10 |
| AX-158252628 | 20 | 101.92 | KV452989.1 | 975718  | 10-scf00399 | 10 |
| AX-158252632 | 20 | 101.92 | KV452989.1 | 984752  | 10-scf00399 | 10 |
| AX-158252634 | 20 | 101.92 | KV452989.1 | 986436  | 10-scf00399 | 10 |
| AX-158252635 | 20 | 101.92 | KV452989.1 | 987176  | 10-scf00399 | 10 |
| AX-158252636 | 20 | 101.92 | KV452989.1 | 987345  | 10-scf00399 | 10 |
| AX-158252639 | 20 | 101.92 | KV452989.1 | 992141  | 10-scf00399 | 10 |
| AX-158252646 | 20 | 101.92 | KV452989.1 | 1008686 | 10-scf00399 | 10 |
| AX-158252655 | 20 | 101.92 | KV452989.1 | 1023855 | 10-scf00399 | 10 |
| AX-158387080 | 20 | 101.92 | KV452989.1 | 1030574 | 10-scf00399 | 10 |
| AX-158252658 | 20 | 101.92 | KV452989.1 | 1031326 | 10-scf00399 | 10 |
| AX-158252659 | 20 | 101.92 | KV452989.1 | 1032983 | 10-scf00399 | 10 |
| AX-158252664 | 20 | 101.92 | KV452989.1 | 1038670 | 10-scf00399 | 10 |
| AX-158252665 | 20 | 101.92 | KV452989.1 | 1039129 | 10-scf00399 | 10 |
| AX-158252666 | 20 | 101.92 | KV452989.1 | 1041119 | 10-scf00399 | 10 |
| AX-158252668 | 20 | 101.92 | KV452989.1 | 1043943 | 10-scf00399 | 10 |
| AX-158252679 | 20 | 101.92 | KV452989.1 | 1056072 | 10-scf00399 | 10 |
| AX-157842272 | 20 | 101.92 | KV452989.1 | 1057487 | 10-scf00399 | 10 |
| AX-158252681 | 20 | 101.92 | KV452989.1 | 1060730 | 10-scf00399 | 10 |
| AX-157887634 | 20 | 101.92 | KV452989.1 | 1064200 | 10-scf00399 | 10 |
| AX-158252684 | 20 | 101.92 | KV452989.1 | 1064235 | 10-scf00399 | 10 |
| AX-158252694 | 20 | 101.92 | KV452989.1 | 1075340 | 10-scf00399 | 10 |
| AX-158415947 | 20 | 101.92 | KV452989.1 | 1076599 | 10-scf00399 | 10 |
| AX-158252704 | 20 | 101.92 | KV452989.1 | 1086774 | 10-scf00399 | 10 |
| AX-158423378 | 20 | 101.92 | KV452989.1 | 1093308 | 10-scf00399 | 10 |
| AX-158252714 | 20 | 101.92 | KV452989.1 | 1102626 | 10-scf00399 | 10 |
| AX-158252724 | 20 | 101.92 | KV452989.1 | 1117968 | 10-scf00399 | 10 |
| AX-158252728 | 20 | 101.92 | KV452989.1 | 1125671 | 10-scf00399 | 10 |
| AX-158252731 | 20 | 101.92 | KV452989.1 | 1128555 | 10-scf00399 | 10 |
| AX-158252736 | 20 | 101.92 | KV452989.1 | 1132530 | 10-scf00399 | 10 |
| AX-158252739 | 20 | 101.92 | KV452989.1 | 1135916 | 10-scf00399 | 10 |
| AX-158252741 | 20 | 101.92 | KV452989.1 | 1138036 | 10-scf00399 | 10 |
| AX-158252747 | 20 | 101.92 | KV452989.1 | 1151027 | 10-scf00399 | 10 |
| AX-158252749 | 20 | 101.92 | KV452989.1 | 1153593 | 10-scf00399 | 10 |
| AX-158252755 | 20 | 101.92 | KV452989.1 | 1158846 | 10-scf00399 | 10 |
| AX-158252758 | 20 | 101.92 | KV452989.1 | 1165918 | 10-scf00399 | 10 |
| AX-158252760 | 20 | 101.92 | KV452989.1 | 1169243 | 10-scf00399 | 10 |
| AX-157745382 | 20 | 101.92 | KV452989.1 | 1179526 | 10-scf00399 | 10 |
| AX-158252766 | 20 | 101.92 | KV452989.1 | 1180535 | 10-scf00399 | 10 |
| AX-157859860 | 20 | 101.92 | KV452989.1 | 1181370 | 10-scf00399 | 10 |

|              |    |         |            |         |             |    |
|--------------|----|---------|------------|---------|-------------|----|
| AX-158252767 | 20 | 101.92  | KV452989.1 | 1181688 | 10-scf00399 | 10 |
| AX-158252770 | 20 | 101.92  | KV452989.1 | 1185569 | 10-scf00399 | 10 |
| AX-158252771 | 20 | 101.92  | KV452989.1 | 1186983 | 10-scf00399 | 10 |
| AX-158252773 | 20 | 101.92  | KV452989.1 | 1188170 | 10-scf00399 | 10 |
| AX-158252774 | 20 | 101.92  | KV452989.1 | 1190496 | 10-scf00399 | 10 |
| AX-158252780 | 20 | 101.92  | KV452989.1 | 1208367 | 10-scf00399 | 10 |
| AX-158252782 | 20 | 101.92  | KV452989.1 | 1209684 | 10-scf00399 | 10 |
| AX-158252785 | 20 | 101.92  | KV452989.1 | 1211911 | 10-scf00399 | 10 |
| AX-158252787 | 20 | 101.92  | KV452989.1 | 1214452 | 10-scf00399 | 10 |
| AX-158252788 | 20 | 101.92  | KV452989.1 | 1215313 | 10-scf00399 | 10 |
| AX-158252789 | 20 | 101.92  | KV452989.1 | 1217103 | 10-scf00399 | 10 |
| AX-157842277 | 20 | 101.92  | KV452989.1 | 1225019 | 10-scf00399 | 10 |
| AX-158252894 | 20 | 101.92  | KV452989.1 | 1408416 | 10-scf00399 | 10 |
| AX-157713501 | 20 | 101.92  | KV452989.1 | 1481394 | 10-scf00399 | 10 |
| AX-158253425 | 20 | 101.92  | KV452987.1 | 106105  | 10-scf00402 | 10 |
| AX-158253479 | 20 | 101.92  | KV452987.1 | 265316  | 10-scf00402 | 10 |
| AX-158253489 | 20 | 101.92  | KV452987.1 | 317213  | 10-scf00402 | 10 |
| AX-158251699 | 20 | 102.029 | KV452988.1 | 72301   | 10-scf00398 | 10 |
| AX-158251705 | 20 | 102.029 | KV452988.1 | 88110   | 10-scf00398 | 10 |
| AX-158251715 | 20 | 102.029 | KV452988.1 | 105251  | 10-scf00398 | 10 |
| AX-158252798 | 20 | 102.029 | KV452989.1 | 1228335 | 10-scf00399 | 10 |
| AX-158252799 | 20 | 102.029 | KV452989.1 | 1228586 | 10-scf00399 | 10 |
| AX-157714081 | 20 | 102.029 | KV452989.1 | 1228862 | 10-scf00399 | 10 |
| AX-158252811 | 20 | 102.029 | KV452989.1 | 1250447 | 10-scf00399 | 10 |
| AX-158252812 | 20 | 102.029 | KV452989.1 | 1250846 | 10-scf00399 | 10 |
| AX-157719198 | 20 | 102.029 | KV452989.1 | 1255384 | 10-scf00399 | 10 |
| AX-158252835 | 20 | 102.029 | KV452989.1 | 1293097 | 10-scf00399 | 10 |
| AX-158252854 | 20 | 102.029 | KV452989.1 | 1329591 | 10-scf00399 | 10 |
| AX-158252896 | 20 | 102.029 | KV452989.1 | 1422713 | 10-scf00399 | 10 |
| AX-158252713 | 20 | 102.248 | KV452989.1 | 1102182 | 10-scf00399 | 10 |
| AX-158252752 | 20 | 102.248 | KV452989.1 | 1156600 | 10-scf00399 | 10 |
| AX-158252836 | 20 | 102.248 | KV452989.1 | 1299857 | 10-scf00399 | 10 |
| AX-158252837 | 20 | 102.248 | KV452989.1 | 1301197 | 10-scf00399 | 10 |
| AX-157719550 | 20 | 102.248 | KV452989.1 | 1302917 | 10-scf00399 | 10 |
| AX-158252842 | 20 | 102.248 | KV452989.1 | 1310417 | 10-scf00399 | 10 |
| AX-158252847 | 20 | 102.248 | KV452989.1 | 1319423 | 10-scf00399 | 10 |
| AX-158252848 | 20 | 102.248 | KV452989.1 | 1320523 | 10-scf00399 | 10 |
| AX-158252851 | 20 | 102.248 | KV452989.1 | 1326493 | 10-scf00399 | 10 |
| AX-158252853 | 20 | 102.248 | KV452989.1 | 1328271 | 10-scf00399 | 10 |
| AX-158252518 | 20 | 102.307 | KV452989.1 | 797794  | 10-scf00399 | 10 |
| AX-158252523 | 20 | 102.307 | KV452989.1 | 808738  | 10-scf00399 | 10 |
| AX-158252866 | 20 | 102.307 | KV452989.1 | 1351806 | 10-scf00399 | 10 |
| AX-158252888 | 20 | 102.307 | KV452989.1 | 1392873 | 10-scf00399 | 10 |
| AX-158252891 | 20 | 102.307 | KV452989.1 | 1401345 | 10-scf00399 | 10 |
| AX-158252932 | 20 | 102.307 | KV452989.1 | 1494443 | 10-scf00399 | 10 |
| AX-158419113 | 20 | 102.307 | KV452989.1 | 1496031 | 10-scf00399 | 10 |
| AX-158252868 | 20 | 102.357 | KV452989.1 | 1352776 | 10-scf00399 | 10 |
| AX-158252870 | 20 | 102.357 | KV452989.1 | 1356322 | 10-scf00399 | 10 |
| AX-157887638 | 20 | 102.466 | KV452989.1 | 1364833 | 10-scf00399 | 10 |
| AX-158252876 | 20 | 102.466 | KV452989.1 | 1367375 | 10-scf00399 | 10 |
| AX-158252879 | 20 | 102.466 | KV452989.1 | 1379233 | 10-scf00399 | 10 |

|              |    |         |            |         |             |    |
|--------------|----|---------|------------|---------|-------------|----|
| AX-158252880 | 20 | 102.466 | KV452989.1 | 1380515 | 10-scf00399 | 10 |
| AX-158252881 | 20 | 102.466 | KV452989.1 | 1380873 | 10-scf00399 | 10 |
| AX-157842285 | 20 | 102.466 | KV452989.1 | 1383677 | 10-scf00399 | 10 |
| AX-158252887 | 20 | 102.466 | KV452989.1 | 1388644 | 10-scf00399 | 10 |
| AX-158253391 | 20 | 102.466 | KV452987.1 | 38377   | 10-scf00402 | 10 |
| AX-158251718 | 20 | 102.467 | KV452988.1 | 107978  | 10-scf00398 | 10 |
| AX-158252889 | 20 | 102.467 | KV452989.1 | 1394410 | 10-scf00399 | 10 |
| AX-158253174 | 20 | 102.467 | KV452990.1 | 222758  | 10-scf00400 | 10 |
| AX-158253236 | 20 | 102.467 | KV452993.1 | 59985   | 10-scf00401 | 10 |
| AX-157719448 | 20 | 102.467 | KV452993.1 | 149665  | 10-scf00401 | 10 |
| AX-158253355 | 20 | 102.467 | KV452993.1 | 300656  | 10-scf00401 | 10 |
| AX-158252904 | 20 | 102.468 | KV452989.1 | 1436283 | 10-scf00399 | 10 |
| AX-158251830 | 20 | 102.469 | KV452988.1 | 247283  | 10-scf00398 | 10 |
| AX-157842209 | 20 | 102.469 | KV452988.1 | 331257  | 10-scf00398 | 10 |
| AX-158252905 | 20 | 102.469 | KV452989.1 | 1437370 | 10-scf00399 | 10 |
| AX-158252909 | 20 | 102.469 | KV452989.1 | 1444758 | 10-scf00399 | 10 |
| AX-158252928 | 20 | 102.469 | KV452989.1 | 1486059 | 10-scf00399 | 10 |
| AX-158251722 | 20 | 103.45  | KV452988.1 | 110074  | 10-scf00398 | 10 |
| AX-158251797 | 20 | 103.45  | KV452988.1 | 213676  | 10-scf00398 | 10 |
| AX-158251820 | 20 | 103.45  | KV452988.1 | 240812  | 10-scf00398 | 10 |
| AX-158251836 | 20 | 103.45  | KV452988.1 | 250735  | 10-scf00398 | 10 |
| AX-158251871 | 20 | 103.45  | KV452988.1 | 284018  | 10-scf00398 | 10 |
| AX-158251972 | 20 | 103.45  | KV452988.1 | 415918  | 10-scf00398 | 10 |
| AX-158251975 | 20 | 103.45  | KV452988.1 | 417693  | 10-scf00398 | 10 |
| AX-158251977 | 20 | 103.45  | KV452988.1 | 421434  | 10-scf00398 | 10 |
| AX-158251986 | 20 | 103.45  | KV452988.1 | 431753  | 10-scf00398 | 10 |
| AX-158252007 | 20 | 103.45  | KV452988.1 | 474544  | 10-scf00398 | 10 |
| AX-158394511 | 20 | 103.45  | KV452990.1 | 17225   | 10-scf00400 | 10 |
| AX-158253062 | 20 | 103.45  | KV452990.1 | 52371   | 10-scf00400 | 10 |
| AX-158253529 | 20 | 103.45  | KV452991.1 | 94027   | 10-scf00403 | 10 |
| AX-158253533 | 20 | 103.45  | KV452991.1 | 98991   | 10-scf00403 | 10 |
| AX-158253536 | 20 | 103.45  | KV452991.1 | 105273  | 10-scf00403 | 10 |
| AX-158410914 | 20 | 103.45  | KV452991.1 | 110410  | 10-scf00403 | 10 |
| AX-158415985 | 20 | 103.45  | KV452991.1 | 116615  | 10-scf00403 | 10 |
| AX-158253043 | 20 | 103.559 | KV452990.1 | 14781   | 10-scf00400 | 10 |
| AX-158253052 | 20 | 103.559 | KV452990.1 | 33596   | 10-scf00400 | 10 |
| AX-158253053 | 20 | 103.559 | KV452990.1 | 36055   | 10-scf00400 | 10 |
| AX-158253056 | 20 | 103.559 | KV452990.1 | 39440   | 10-scf00400 | 10 |
| AX-158253058 | 20 | 103.559 | KV452990.1 | 43676   | 10-scf00400 | 10 |
| AX-158253496 | 20 | 103.559 | KV452991.1 | 10189   | 10-scf00403 | 10 |
| AX-158415982 | 20 | 103.559 | KV452991.1 | 71888   | 10-scf00403 | 10 |
| AX-157708992 | 20 | 103.886 | KV452990.1 | 58925   | 10-scf00400 | 10 |
| AX-158253065 | 20 | 103.887 | KV452990.1 | 60327   | 10-scf00400 | 10 |
| AX-158253066 | 20 | 103.887 | KV452990.1 | 60817   | 10-scf00400 | 10 |
| AX-158253068 | 20 | 103.887 | KV452990.1 | 63048   | 10-scf00400 | 10 |
| AX-157755862 | 20 | 103.887 | KV452990.1 | 72603   | 10-scf00400 | 10 |
| AX-158253072 | 20 | 103.887 | KV452990.1 | 73230   | 10-scf00400 | 10 |
| AX-158253074 | 20 | 103.887 | KV452990.1 | 75177   | 10-scf00400 | 10 |
| AX-158253075 | 20 | 103.887 | KV452990.1 | 76011   | 10-scf00400 | 10 |
| AX-157722037 | 20 | 103.887 | KV452990.1 | 76927   | 10-scf00400 | 10 |
| AX-158253076 | 20 | 103.887 | KV452990.1 | 77928   | 10-scf00400 | 10 |

|              |    |         |            |        |             |    |
|--------------|----|---------|------------|--------|-------------|----|
| AX-158253077 | 20 | 103.887 | KV452990.1 | 78132  | 10-scf00400 | 10 |
| AX-158253078 | 20 | 103.887 | KV452990.1 | 79898  | 10-scf00400 | 10 |
| AX-158253080 | 20 | 103.887 | KV452990.1 | 81720  | 10-scf00400 | 10 |
| AX-158253081 | 20 | 103.887 | KV452990.1 | 83038  | 10-scf00400 | 10 |
| AX-158415960 | 20 | 103.887 | KV452990.1 | 93134  | 10-scf00400 | 10 |
| AX-158415961 | 20 | 103.887 | KV452990.1 | 93678  | 10-scf00400 | 10 |
| AX-158253102 | 20 | 103.887 | KV452990.1 | 118414 | 10-scf00400 | 10 |
| AX-157859869 | 20 | 103.887 | KV452990.1 | 122865 | 10-scf00400 | 10 |
| AX-158253109 | 20 | 103.887 | KV452990.1 | 127329 | 10-scf00400 | 10 |
| AX-158253110 | 20 | 103.887 | KV452990.1 | 129210 | 10-scf00400 | 10 |
| AX-158251988 | 20 | 103.933 | KV452988.1 | 435814 | 10-scf00398 | 10 |
| AX-157719094 | 20 | 103.933 | KV452993.1 | 87452  | 10-scf00401 | 10 |
| AX-158253089 | 20 | 103.996 | KV452990.1 | 99502  | 10-scf00400 | 10 |
| AX-158253091 | 20 | 103.996 | KV452990.1 | 102603 | 10-scf00400 | 10 |
| AX-158253092 | 20 | 103.996 | KV452990.1 | 104737 | 10-scf00400 | 10 |
| AX-158253095 | 20 | 103.996 | KV452990.1 | 110717 | 10-scf00400 | 10 |
| AX-158253096 | 20 | 103.996 | KV452990.1 | 111213 | 10-scf00400 | 10 |
| AX-157699230 | 20 | 103.996 | KV452990.1 | 111894 | 10-scf00400 | 10 |
| AX-158253097 | 20 | 103.996 | KV452990.1 | 113331 | 10-scf00400 | 10 |
| AX-158253098 | 20 | 103.996 | KV452990.1 | 114262 | 10-scf00400 | 10 |
| AX-157842302 | 20 | 103.996 | KV452990.1 | 114903 | 10-scf00400 | 10 |
| AX-158253104 | 20 | 103.996 | KV452990.1 | 118821 | 10-scf00400 | 10 |
| AX-158253105 | 20 | 103.996 | KV452990.1 | 119859 | 10-scf00400 | 10 |
| AX-158415962 | 20 | 103.996 | KV452990.1 | 120541 | 10-scf00400 | 10 |
| AX-158253107 | 20 | 103.996 | KV452990.1 | 124258 | 10-scf00400 | 10 |
| AX-158253115 | 20 | 104.322 | KV452990.1 | 139904 | 10-scf00400 | 10 |
| AX-158253118 | 20 | 104.323 | KV452990.1 | 142334 | 10-scf00400 | 10 |
| AX-158253120 | 20 | 104.323 | KV452990.1 | 147472 | 10-scf00400 | 10 |
| AX-158253121 | 20 | 104.323 | KV452990.1 | 147763 | 10-scf00400 | 10 |
| AX-157722309 | 20 | 104.323 | KV452990.1 | 148315 | 10-scf00400 | 10 |
| AX-158253071 | 20 | 104.324 | KV452990.1 | 68714  | 10-scf00400 | 10 |
| AX-158253114 | 20 | 104.324 | KV452990.1 | 136722 | 10-scf00400 | 10 |
| AX-158253131 | 20 | 104.324 | KV452990.1 | 163331 | 10-scf00400 | 10 |
| AX-158253132 | 20 | 104.324 | KV452990.1 | 165179 | 10-scf00400 | 10 |
| AX-158253133 | 20 | 104.324 | KV452990.1 | 165987 | 10-scf00400 | 10 |
| AX-158253136 | 20 | 104.324 | KV452990.1 | 167886 | 10-scf00400 | 10 |
| AX-158253140 | 20 | 104.324 | KV452990.1 | 173481 | 10-scf00400 | 10 |
| AX-158253144 | 20 | 104.324 | KV452990.1 | 176042 | 10-scf00400 | 10 |
| AX-158253145 | 20 | 104.324 | KV452990.1 | 176458 | 10-scf00400 | 10 |
| AX-158253239 | 20 | 104.324 | KV452993.1 | 65492  | 10-scf00401 | 10 |
| AX-158394515 | 20 | 104.324 | KV452993.1 | 105666 | 10-scf00401 | 10 |
| AX-158251816 | 20 | 104.542 | KV452988.1 | 236908 | 10-scf00398 | 10 |
| AX-158251893 | 20 | 104.542 | KV452988.1 | 309857 | 10-scf00398 | 10 |
| AX-158251894 | 20 | 104.542 | KV452988.1 | 312992 | 10-scf00398 | 10 |
| AX-157716669 | 20 | 104.542 | KV452988.1 | 452771 | 10-scf00398 | 10 |
| AX-158253146 | 20 | 104.542 | KV452990.1 | 177765 | 10-scf00400 | 10 |
| AX-158253147 | 20 | 104.542 | KV452990.1 | 178198 | 10-scf00400 | 10 |
| AX-158253154 | 20 | 104.542 | KV452990.1 | 186652 | 10-scf00400 | 10 |
| AX-158253157 | 20 | 104.542 | KV452990.1 | 189914 | 10-scf00400 | 10 |
| AX-158253160 | 20 | 104.542 | KV452990.1 | 192846 | 10-scf00400 | 10 |
| AX-158253161 | 20 | 104.542 | KV452990.1 | 194348 | 10-scf00400 | 10 |

|              |    |         |            |         |             |    |
|--------------|----|---------|------------|---------|-------------|----|
| AX-157842315 | 20 | 104.542 | KV452987.1 | 65912   | 10-scf00402 | 10 |
| AX-158415975 | 20 | 104.542 | KV452987.1 | 66440   | 10-scf00402 | 10 |
| AX-158253166 | 20 | 104.62  | KV452990.1 | 199352  | 10-scf00400 | 10 |
| AX-158253172 | 20 | 104.689 | KV452990.1 | 211118  | 10-scf00400 | 10 |
| AX-158253178 | 20 | 104.689 | KV452990.1 | 234154  | 10-scf00400 | 10 |
| AX-157716762 | 20 | 104.761 | KV452990.1 | 233665  | 10-scf00400 | 10 |
| AX-158253181 | 20 | 104.761 | KV452990.1 | 239759  | 10-scf00400 | 10 |
| AX-157726354 | 20 | 104.761 | KV452990.1 | 241144  | 10-scf00400 | 10 |
| AX-157719135 | 20 | 104.761 | KV452990.1 | 241895  | 10-scf00400 | 10 |
| AX-158253182 | 20 | 104.761 | KV452990.1 | 242816  | 10-scf00400 | 10 |
| AX-158253184 | 20 | 104.761 | KV452990.1 | 246510  | 10-scf00400 | 10 |
| AX-158253190 | 20 | 104.761 | KV452990.1 | 254329  | 10-scf00400 | 10 |
| AX-158253195 | 20 | 104.761 | KV452990.1 | 262072  | 10-scf00400 | 10 |
| AX-158253207 | 20 | 104.761 | KV452993.1 | 19635   | 10-scf00401 | 10 |
| AX-158253208 | 20 | 104.761 | KV452993.1 | 21121   | 10-scf00401 | 10 |
| AX-158251642 | 20 | 104.833 | KV452986.1 | 1359516 | 10-scf00397 | 10 |
| AX-158253197 | 20 | 104.833 | KV452990.1 | 263497  | 10-scf00400 | 10 |
| AX-158253289 | 20 | 104.833 | KV452993.1 | 165095  | 10-scf00401 | 10 |
| AX-158251904 | 20 | 105.868 | KV452988.1 | 324969  | 10-scf00398 | 10 |
| AX-158253510 | 20 | 105.868 | KV452991.1 | 63804   | 10-scf00403 | 10 |
| AX-158253514 | 20 | 105.868 | KV452991.1 | 69979   | 10-scf00403 | 10 |
| AX-158253520 | 20 | 105.868 | KV452991.1 | 78181   | 10-scf00403 | 10 |
| AX-158253521 | 20 | 105.868 | KV452991.1 | 79252   | 10-scf00403 | 10 |
| AX-157842340 | 20 | 105.872 | KV452991.1 | 104158  | 10-scf00403 | 10 |
| AX-157842341 | 20 | 105.876 | KV452991.1 | 106962  | 10-scf00403 | 10 |
| AX-158253138 | 20 | 107.064 | KV452990.1 | 171447  | 10-scf00400 | 10 |
| AX-157842306 | 20 | 107.064 | KV452993.1 | 8641    | 10-scf00401 | 10 |
| AX-158253149 | 20 | 107.065 | KV452990.1 | 179257  | 10-scf00400 | 10 |
| AX-158253169 | 20 | 107.065 | KV452990.1 | 206002  | 10-scf00400 | 10 |
| AX-158253202 | 20 | 107.065 | KV452993.1 | 9954    | 10-scf00401 | 10 |
| AX-158253204 | 20 | 107.065 | KV452993.1 | 15868   | 10-scf00401 | 10 |
| AX-158410905 | 20 | 107.065 | KV452993.1 | 21074   | 10-scf00401 | 10 |
| AX-158253216 | 20 | 107.065 | KV452993.1 | 28349   | 10-scf00401 | 10 |
| AX-158253217 | 20 | 107.065 | KV452993.1 | 29934   | 10-scf00401 | 10 |
| AX-157754978 | 20 | 107.065 | KV452993.1 | 39086   | 10-scf00401 | 10 |
| AX-158253223 | 20 | 107.065 | KV452993.1 | 39818   | 10-scf00401 | 10 |
| AX-158253224 | 20 | 107.065 | KV452993.1 | 40205   | 10-scf00401 | 10 |
| AX-158253225 | 20 | 107.065 | KV452993.1 | 43511   | 10-scf00401 | 10 |
| AX-158251562 | 20 | 107.175 | KV452986.1 | 1146569 | 10-scf00397 | 10 |
| AX-158251566 | 20 | 107.175 | KV452986.1 | 1154759 | 10-scf00397 | 10 |
| AX-158251584 | 20 | 107.175 | KV452986.1 | 1178760 | 10-scf00397 | 10 |
| AX-158251597 | 20 | 107.175 | KV452986.1 | 1198293 | 10-scf00397 | 10 |
| AX-157842192 | 20 | 107.175 | KV452986.1 | 1202536 | 10-scf00397 | 10 |
| AX-158251600 | 20 | 107.175 | KV452986.1 | 1203050 | 10-scf00397 | 10 |
| AX-158253064 | 20 | 107.175 | KV452990.1 | 59803   | 10-scf00400 | 10 |
| AX-158253189 | 20 | 107.175 | KV452990.1 | 253133  | 10-scf00400 | 10 |
| AX-158415963 | 20 | 107.175 | KV452993.1 | 48605   | 10-scf00401 | 10 |
| AX-158253231 | 20 | 107.175 | KV452993.1 | 49457   | 10-scf00401 | 10 |
| AX-158253235 | 20 | 107.175 | KV452993.1 | 57693   | 10-scf00401 | 10 |
| AX-158253240 | 20 | 107.175 | KV452993.1 | 65871   | 10-scf00401 | 10 |
| AX-158253241 | 20 | 107.175 | KV452993.1 | 67196   | 10-scf00401 | 10 |

|              |    |         |            |         |             |    |
|--------------|----|---------|------------|---------|-------------|----|
| AX-158253242 | 20 | 107.175 | KV452993.1 | 73443   | 10-scf00401 | 10 |
| AX-158415964 | 20 | 107.175 | KV452993.1 | 76482   | 10-scf00401 | 10 |
| AX-157842310 | 20 | 107.175 | KV452993.1 | 81700   | 10-scf00401 | 10 |
| AX-158253251 | 20 | 107.175 | KV452993.1 | 96164   | 10-scf00401 | 10 |
| AX-158253252 | 20 | 107.175 | KV452993.1 | 96794   | 10-scf00401 | 10 |
| AX-158253254 | 20 | 107.175 | KV452993.1 | 99197   | 10-scf00401 | 10 |
| AX-158253255 | 20 | 107.175 | KV452993.1 | 99884   | 10-scf00401 | 10 |
| AX-158253258 | 20 | 107.175 | KV452993.1 | 102587  | 10-scf00401 | 10 |
| AX-158253263 | 20 | 107.175 | KV452993.1 | 112011  | 10-scf00401 | 10 |
| AX-158253270 | 20 | 107.175 | KV452993.1 | 124230  | 10-scf00401 | 10 |
| AX-158253275 | 20 | 107.175 | KV452993.1 | 133136  | 10-scf00401 | 10 |
| AX-158253278 | 20 | 107.175 | KV452993.1 | 138881  | 10-scf00401 | 10 |
| AX-158394518 | 20 | 107.175 | KV452993.1 | 143395  | 10-scf00401 | 10 |
| AX-158253280 | 20 | 107.175 | KV452993.1 | 147854  | 10-scf00401 | 10 |
| AX-158415965 | 20 | 107.175 | KV452993.1 | 150657  | 10-scf00401 | 10 |
| AX-158415966 | 20 | 107.175 | KV452993.1 | 151251  | 10-scf00401 | 10 |
| AX-158415967 | 20 | 107.175 | KV452993.1 | 151632  | 10-scf00401 | 10 |
| AX-157773659 | 20 | 107.175 | KV452993.1 | 151687  | 10-scf00401 | 10 |
| AX-158253283 | 20 | 107.175 | KV452993.1 | 157250  | 10-scf00401 | 10 |
| AX-158253284 | 20 | 107.175 | KV452993.1 | 158433  | 10-scf00401 | 10 |
| AX-158253304 | 20 | 107.175 | KV452993.1 | 195197  | 10-scf00401 | 10 |
| AX-158253311 | 20 | 107.175 | KV452993.1 | 204329  | 10-scf00401 | 10 |
| AX-158253312 | 20 | 107.175 | KV452993.1 | 205395  | 10-scf00401 | 10 |
| AX-158253313 | 20 | 107.175 | KV452993.1 | 217227  | 10-scf00401 | 10 |
| AX-158253329 | 20 | 107.175 | KV452993.1 | 257535  | 10-scf00401 | 10 |
| AX-158253230 | 20 | 107.284 | KV452993.1 | 48739   | 10-scf00401 | 10 |
| AX-157842311 | 20 | 107.284 | KV452993.1 | 98520   | 10-scf00401 | 10 |
| AX-158253287 | 20 | 107.284 | KV452993.1 | 163348  | 10-scf00401 | 10 |
| AX-158253303 | 20 | 107.284 | KV452993.1 | 194825  | 10-scf00401 | 10 |
| AX-158253315 | 20 | 107.284 | KV452993.1 | 231874  | 10-scf00401 | 10 |
| AX-158253352 | 20 | 107.284 | KV452993.1 | 298093  | 10-scf00401 | 10 |
| AX-158253306 | 20 | 107.317 | KV452993.1 | 199879  | 10-scf00401 | 10 |
| AX-158253309 | 20 | 107.353 | KV452993.1 | 202570  | 10-scf00401 | 10 |
| AX-158251569 | 20 | 107.393 | KV452986.1 | 1160522 | 10-scf00397 | 10 |
| AX-158251578 | 20 | 107.393 | KV452986.1 | 1169235 | 10-scf00397 | 10 |
| AX-158253218 | 20 | 107.393 | KV452993.1 | 30385   | 10-scf00401 | 10 |
| AX-158253244 | 20 | 107.393 | KV452993.1 | 84598   | 10-scf00401 | 10 |
| AX-158253253 | 20 | 107.393 | KV452993.1 | 98559   | 10-scf00401 | 10 |
| AX-158253276 | 20 | 107.393 | KV452993.1 | 137111  | 10-scf00401 | 10 |
| AX-158253314 | 20 | 107.393 | KV452993.1 | 223642  | 10-scf00401 | 10 |
| AX-157741595 | 20 | 107.393 | KV452993.1 | 224030  | 10-scf00401 | 10 |
| AX-158253317 | 20 | 107.393 | KV452993.1 | 232803  | 10-scf00401 | 10 |
| AX-157859872 | 20 | 107.393 | KV452993.1 | 233788  | 10-scf00401 | 10 |
| AX-158253321 | 20 | 107.393 | KV452993.1 | 243739  | 10-scf00401 | 10 |
| AX-158253322 | 20 | 107.393 | KV452993.1 | 244958  | 10-scf00401 | 10 |
| AX-158253323 | 20 | 107.393 | KV452993.1 | 246407  | 10-scf00401 | 10 |
| AX-158253333 | 20 | 107.393 | KV452993.1 | 268848  | 10-scf00401 | 10 |
| AX-158253340 | 20 | 107.393 | KV452993.1 | 289690  | 10-scf00401 | 10 |
| AX-158253345 | 20 | 107.393 | KV452993.1 | 293125  | 10-scf00401 | 10 |
| AX-158253346 | 20 | 107.393 | KV452993.1 | 293448  | 10-scf00401 | 10 |
| AX-158253347 | 20 | 107.393 | KV452993.1 | 293680  | 10-scf00401 | 10 |



|              |    |         |            |         |             |    |
|--------------|----|---------|------------|---------|-------------|----|
| AX-158253348 | 20 | 107.393 | KV452993.1 | 294503  | 10-scf00401 | 10 |
| AX-158253351 | 20 | 107.393 | KV452993.1 | 296251  | 10-scf00401 | 10 |
| AX-158253353 | 20 | 107.393 | KV452993.1 | 298728  | 10-scf00401 | 10 |
| AX-158253356 | 20 | 107.393 | KV452993.1 | 301522  | 10-scf00401 | 10 |
| AX-158253360 | 20 | 107.397 | KV452993.1 | 305220  | 10-scf00401 | 10 |
| AX-158253083 | 20 | 107.406 | KV452990.1 | 84996   | 10-scf00400 | 10 |
| AX-158253365 | 20 | 107.406 | KV452993.1 | 322593  | 10-scf00401 | 10 |
| AX-157687210 | 20 | 109.776 | KV452992.1 | 6818    | 10-scf00822 | 10 |
| AX-158251667 | 20 | 110.144 | KV452988.1 | 12622   | 10-scf00398 | 10 |
| AX-158251668 | 20 | 110.144 | KV452988.1 | 12681   | 10-scf00398 | 10 |
| AX-157708275 | 20 | 110.144 | KV452988.1 | 21093   | 10-scf00398 | 10 |
| AX-158251676 | 20 | 110.144 | KV452988.1 | 33581   | 10-scf00398 | 10 |
| AX-158251685 | 20 | 110.144 | KV452988.1 | 48186   | 10-scf00398 | 10 |
| AX-158251689 | 20 | 110.144 | KV452988.1 | 53574   | 10-scf00398 | 10 |
| AX-158251692 | 20 | 110.144 | KV452988.1 | 55505   | 10-scf00398 | 10 |
| AX-158251695 | 20 | 110.144 | KV452988.1 | 62670   | 10-scf00398 | 10 |
| AX-158251698 | 20 | 110.144 | KV452988.1 | 69866   | 10-scf00398 | 10 |
| AX-158251701 | 20 | 110.144 | KV452988.1 | 75901   | 10-scf00398 | 10 |
| AX-158251707 | 20 | 110.144 | KV452988.1 | 91412   | 10-scf00398 | 10 |
| AX-158251868 | 20 | 110.144 | KV452988.1 | 280581  | 10-scf00398 | 10 |
| AX-158251905 | 20 | 110.144 | KV452988.1 | 325450  | 10-scf00398 | 10 |
| AX-158251960 | 20 | 110.144 | KV452988.1 | 396807  | 10-scf00398 | 10 |
| AX-157842217 | 20 | 110.144 | KV452988.1 | 428075  | 10-scf00398 | 10 |
| AX-158252438 | 20 | 110.144 | KV452989.1 | 686829  | 10-scf00399 | 10 |
| AX-158252532 | 20 | 110.144 | KV452989.1 | 826326  | 10-scf00399 | 10 |
| AX-158252534 | 20 | 110.144 | KV452989.1 | 827561  | 10-scf00399 | 10 |
| AX-157724683 | 20 | 110.144 | KV452989.1 | 1268360 | 10-scf00399 | 10 |
| AX-158252831 | 20 | 110.144 | KV452989.1 | 1287743 | 10-scf00399 | 10 |
| AX-158252922 | 20 | 110.144 | KV452989.1 | 1475053 | 10-scf00399 | 10 |
| AX-158252923 | 20 | 110.144 | KV452989.1 | 1475695 | 10-scf00399 | 10 |
| AX-158253383 | 20 | 110.144 | KV452987.1 | 21368   | 10-scf00402 | 10 |
| AX-157741379 | 20 | 110.144 | KV452987.1 | 45586   | 10-scf00402 | 10 |
| AX-158253417 | 20 | 110.144 | KV452987.1 | 78824   | 10-scf00402 | 10 |
| AX-158253418 | 20 | 110.144 | KV452987.1 | 86890   | 10-scf00402 | 10 |
| AX-158253430 | 20 | 110.144 | KV452987.1 | 122852  | 10-scf00402 | 10 |
| AX-158253439 | 20 | 110.144 | KV452987.1 | 144897  | 10-scf00402 | 10 |
| AX-158253440 | 20 | 110.144 | KV452987.1 | 145162  | 10-scf00402 | 10 |
| AX-157842335 | 20 | 110.144 | KV452987.1 | 236431  | 10-scf00402 | 10 |
| AX-158253474 | 20 | 110.144 | KV452987.1 | 242462  | 10-scf00402 | 10 |
| AX-158253482 | 20 | 110.144 | KV452987.1 | 282129  | 10-scf00402 | 10 |
| AX-158253608 | 21 | 0       | KV453204.1 | 7528    | 21-scf00405 | 21 |
| AX-157720644 | 21 | 0       | KV453201.1 | 17177   | 21-scf00406 | 21 |
| AX-158253725 | 21 | 0       | KV453201.1 | 25321   | 21-scf00406 | 21 |
| AX-157759046 | 21 | 0       | KV453201.1 | 28823   | 21-scf00406 | 21 |
| AX-158253545 | 21 | 0       | KV453200.1 | 33104   | 21-scf00407 | 21 |
| AX-158253546 | 21 | 0       | KV453200.1 | 33828   | 21-scf00407 | 21 |
| AX-158253549 | 21 | 0       | KV453200.1 | 39205   | 21-scf00407 | 21 |
| AX-157842342 | 21 | 0.003   | KV453200.1 | 42511   | 21-scf00407 | 21 |
| AX-158253667 | 21 | 0.106   | KV453204.1 | 90667   | 21-scf00405 | 21 |
| AX-157718165 | 21 | 0.106   | KV453200.1 | 42870   | 21-scf00407 | 21 |
| AX-158253556 | 21 | 0.106   | KV453200.1 | 70131   | 21-scf00407 | 21 |

|              |    |       |             |        |             |    |
|--------------|----|-------|-------------|--------|-------------|----|
| AX-158253558 | 21 | 0.106 | KV453200.1  | 72009  | 21-scf00407 | 21 |
| AX-158253561 | 21 | 0.106 | KV453200.1  | 75613  | 21-scf00407 | 21 |
| AX-158253562 | 21 | 0.106 | KV453200.1  | 76875  | 21-scf00407 | 21 |
| AX-157872757 | 21 | 0.106 | KV453200.1  | 96334  | 21-scf00407 | 21 |
| AX-157842345 | 21 | 0.106 | KV453200.1  | 98646  | 21-scf00407 | 21 |
| AX-157842346 | 21 | 0.106 | KV453200.1  | 105595 | 21-scf00407 | 21 |
| AX-157717311 | 21 | 0.106 | KV453200.1  | 106164 | 21-scf00407 | 21 |
| AX-158253566 | 21 | 0.106 | KV453200.1  | 107512 | 21-scf00407 | 21 |
| AX-158253568 | 21 | 0.106 | KV453200.1  | 112601 | 21-scf00407 | 21 |
| AX-158253570 | 21 | 0.106 | KV453200.1  | 130769 | 21-scf00407 | 21 |
| AX-158253571 | 21 | 0.106 | KV453200.1  | 134041 | 21-scf00407 | 21 |
| AX-158253572 | 21 | 0.106 | KV453200.1  | 135090 | 21-scf00407 | 21 |
| AX-157872758 | 21 | 0.106 | KV453200.1  | 141331 | 21-scf00407 | 21 |
| AX-158253577 | 21 | 0.106 | KV453200.1  | 155899 | 21-scf00407 | 21 |
| AX-158253579 | 21 | 0.106 | KV453200.1  | 160340 | 21-scf00407 | 21 |
| AX-158253581 | 21 | 0.106 | KV453200.1  | 169376 | 21-scf00407 | 21 |
| AX-157714793 | 21 | 0.106 | KV453200.1  | 179426 | 21-scf00407 | 21 |
| AX-158253583 | 21 | 0.106 | KV453200.1  | 179587 | 21-scf00407 | 21 |
| AX-158253584 | 21 | 0.106 | KV453200.1  | 182028 | 21-scf00407 | 21 |
| AX-158253585 | 21 | 0.106 | KV453200.1  | 182744 | 21-scf00407 | 21 |
| AX-158253586 | 21 | 0.106 | KV453200.1  | 188619 | 21-scf00407 | 21 |
| AX-158253587 | 21 | 0.106 | KV453200.1  | 188927 | 21-scf00407 | 21 |
| AX-158253589 | 21 | 0.106 | KV453200.1  | 198276 | 21-scf00407 | 21 |
| AX-158253590 | 21 | 0.106 | KV453200.1  | 201168 | 21-scf00407 | 21 |
| AX-157842352 | 21 | 0.106 | KV453200.1  | 204259 | 21-scf00407 | 21 |
| AX-158253591 | 21 | 0.106 | KV453200.1  | 205536 | 21-scf00407 | 21 |
| AX-158253593 | 21 | 0.106 | KV453200.1  | 210676 | 21-scf00407 | 21 |
| AX-158253594 | 21 | 0.106 | KV453200.1  | 212594 | 21-scf00407 | 21 |
| AX-158253595 | 21 | 0.106 | KV453200.1  | 213043 | 21-scf00407 | 21 |
| AX-158253596 | 21 | 0.106 | KV453200.1  | 213472 | 21-scf00407 | 21 |
| AX-158253597 | 21 | 0.106 | KV453200.1  | 214639 | 21-scf00407 | 21 |
| AX-158253598 | 21 | 0.106 | KV453200.1  | 223444 | 21-scf00407 | 21 |
| AX-158253599 | 21 | 0.106 | KV453200.1  | 224513 | 21-scf00407 | 21 |
| AX-158415996 | 21 | 0.106 | KV453200.1  | 240286 | 21-scf00407 | 21 |
| AX-158253601 | 21 | 0.106 | KV453200.1  | 243337 | 21-scf00407 | 21 |
| AX-157842354 | 21 | 0.106 | KV453200.1  | 255233 | 21-scf00407 | 21 |
| AX-157689873 | 21 | 0.106 | 3ML01034127 | 456    | scf09798_1  | UN |
| AX-157680732 | 21 | 0.215 | KV453200.1  | 20979  | 21-scf00407 | 21 |
| AX-157683972 | 21 | 0.215 | KV453200.1  | 22991  | 21-scf00407 | 21 |
| AX-157680731 | 21 | 0.215 | KV453200.1  | 24100  | 21-scf00407 | 21 |
| AX-157683988 | 21 | 0.324 | KV453200.1  | 611    | 21-scf00407 | 21 |
| AX-157683987 | 21 | 0.324 | KV453200.1  | 915    | 21-scf00407 | 21 |
| AX-157683985 | 21 | 0.324 | KV453200.1  | 1536   | 21-scf00407 | 21 |
| AX-157683983 | 21 | 0.324 | KV453200.1  | 4643   | 21-scf00407 | 21 |
| AX-157683982 | 21 | 0.324 | KV453200.1  | 6919   | 21-scf00407 | 21 |
| AX-157683980 | 21 | 0.324 | KV453200.1  | 8277   | 21-scf00407 | 21 |
| AX-157683979 | 21 | 0.324 | KV453200.1  | 9191   | 21-scf00407 | 21 |
| AX-157683978 | 21 | 0.324 | KV453200.1  | 10618  | 21-scf00407 | 21 |
| AX-157680733 | 21 | 0.324 | KV453200.1  | 17941  | 21-scf00407 | 21 |
| AX-157683974 | 21 | 0.324 | KV453200.1  | 20597  | 21-scf00407 | 21 |
| AX-158253637 | 21 | 0.543 | KV453204.1  | 57219  | 21-scf00405 | 21 |

|              |    |       |            |        |             |    |
|--------------|----|-------|------------|--------|-------------|----|
| AX-158253668 | 21 | 0.543 | KV453204.1 | 91379  | 21-scf00405 | 21 |
| AX-158253681 | 21 | 0.543 | KV453204.1 | 130494 | 21-scf00405 | 21 |
| AX-157842367 | 21 | 0.543 | KV453204.1 | 158557 | 21-scf00405 | 21 |
| AX-158253707 | 21 | 0.543 | KV453201.1 | 1384   | 21-scf00406 | 21 |
| AX-158253708 | 21 | 0.543 | KV453201.1 | 2661   | 21-scf00406 | 21 |
| AX-158253709 | 21 | 0.543 | KV453201.1 | 4256   | 21-scf00406 | 21 |
| AX-158253710 | 21 | 0.543 | KV453201.1 | 5611   | 21-scf00406 | 21 |
| AX-158253711 | 21 | 0.543 | KV453201.1 | 6840   | 21-scf00406 | 21 |
| AX-158253713 | 21 | 0.543 | KV453201.1 | 7960   | 21-scf00406 | 21 |
| AX-158253714 | 21 | 0.543 | KV453201.1 | 8372   | 21-scf00406 | 21 |
| AX-157751068 | 21 | 0.543 | KV453201.1 | 9130   | 21-scf00406 | 21 |
| AX-157723254 | 21 | 0.543 | KV453201.1 | 9643   | 21-scf00406 | 21 |
| AX-157842369 | 21 | 0.543 | KV453201.1 | 9703   | 21-scf00406 | 21 |
| AX-157748348 | 21 | 0.543 | KV453201.1 | 12384  | 21-scf00406 | 21 |
| AX-158253718 | 21 | 0.543 | KV453201.1 | 15536  | 21-scf00406 | 21 |
| AX-158253719 | 21 | 0.543 | KV453201.1 | 16005  | 21-scf00406 | 21 |
| AX-158253720 | 21 | 0.543 | KV453201.1 | 16769  | 21-scf00406 | 21 |
| AX-158253723 | 21 | 0.543 | KV453201.1 | 22309  | 21-scf00406 | 21 |
| AX-158253727 | 21 | 0.543 | KV453201.1 | 28677  | 21-scf00406 | 21 |
| AX-158253728 | 21 | 0.543 | KV453201.1 | 29145  | 21-scf00406 | 21 |
| AX-157801450 | 21 | 0.543 | KV453201.1 | 29831  | 21-scf00406 | 21 |
| AX-158253729 | 21 | 0.543 | KV453201.1 | 30252  | 21-scf00406 | 21 |
| AX-158253730 | 21 | 0.543 | KV453201.1 | 30972  | 21-scf00406 | 21 |
| AX-158253731 | 21 | 0.543 | KV453201.1 | 32244  | 21-scf00406 | 21 |
| AX-158253732 | 21 | 0.543 | KV453201.1 | 34279  | 21-scf00406 | 21 |
| AX-157867378 | 21 | 0.543 | KV453201.1 | 35554  | 21-scf00406 | 21 |
| AX-157872760 | 21 | 0.543 | KV453201.1 | 44541  | 21-scf00406 | 21 |
| AX-157859891 | 21 | 0.543 | KV453201.1 | 45527  | 21-scf00406 | 21 |
| AX-158253739 | 21 | 0.543 | KV453201.1 | 47907  | 21-scf00406 | 21 |
| AX-158253740 | 21 | 0.543 | KV453201.1 | 48885  | 21-scf00406 | 21 |
| AX-157842373 | 21 | 0.543 | KV453201.1 | 49464  | 21-scf00406 | 21 |
| AX-158253743 | 21 | 0.543 | KV453201.1 | 50952  | 21-scf00406 | 21 |
| AX-158253744 | 21 | 0.543 | KV453201.1 | 51395  | 21-scf00406 | 21 |
| AX-158253748 | 21 | 0.543 | KV453201.1 | 54827  | 21-scf00406 | 21 |
| AX-158253749 | 21 | 0.543 | KV453201.1 | 55706  | 21-scf00406 | 21 |
| AX-157746327 | 21 | 0.543 | KV453201.1 | 56263  | 21-scf00406 | 21 |
| AX-157751823 | 21 | 0.543 | KV453201.1 | 58844  | 21-scf00406 | 21 |
| AX-158253547 | 21 | 0.543 | KV453200.1 | 34227  | 21-scf00407 | 21 |
| AX-158415997 | 21 | 0.543 | KV453200.1 | 241794 | 21-scf00407 | 21 |
| AX-157690010 | 21 | 0.543 |            | 70     | scf20800    | UN |
| AX-158253752 | 21 | 0.707 | KV453201.1 | 61698  | 21-scf00406 | 21 |
| AX-158253753 | 21 | 0.707 | KV453201.1 | 63799  | 21-scf00406 | 21 |
| AX-157727604 | 21 | 0.707 | KV453201.1 | 64123  | 21-scf00406 | 21 |
| AX-158253754 | 21 | 0.707 | KV453201.1 | 64752  | 21-scf00406 | 21 |
| AX-158253625 | 21 | 0.871 | KV453204.1 | 35948  | 21-scf00405 | 21 |
| AX-158253633 | 21 | 0.871 | KV453204.1 | 50818  | 21-scf00405 | 21 |
| AX-158253736 | 21 | 0.871 | KV453201.1 | 38272  | 21-scf00406 | 21 |
| AX-158253746 | 21 | 0.871 | KV453201.1 | 53775  | 21-scf00406 | 21 |
| AX-158253755 | 21 | 0.871 | KV453201.1 | 69700  | 21-scf00406 | 21 |
| AX-158253757 | 21 | 0.871 | KV453201.1 | 70678  | 21-scf00406 | 21 |
| AX-158253759 | 21 | 0.871 | KV453201.1 | 76225  | 21-scf00406 | 21 |

|              |    |       |            |        |             |    |
|--------------|----|-------|------------|--------|-------------|----|
| AX-157681164 | 21 | 0.871 | KV453201.1 | 79259  | 21-scf00406 | 21 |
| AX-157681623 | 21 | 0.871 | KV453201.1 | 81189  | 21-scf00406 | 21 |
| AX-157680284 | 21 | 0.871 | KV453201.1 | 83249  | 21-scf00406 | 21 |
| AX-157684045 | 21 | 0.871 | KV453201.1 | 84731  | 21-scf00406 | 21 |
| AX-157684042 | 21 | 0.871 | KV453201.1 | 90262  | 21-scf00406 | 21 |
| AX-157684010 | 21 | 0.871 | KV453203.1 | 9787   | 21-scf00408 | 21 |
| AX-157680126 | 21 | 0.98  | KV453203.1 | 52127  | 21-scf00408 | 21 |
| AX-157684014 | 21 | 0.98  | KV453202.1 | 2217   | 21-scf00409 | 21 |
| AX-157684017 | 21 | 0.98  | KV453202.1 | 6216   | 21-scf00409 | 21 |
| AX-157684022 | 21 | 0.98  | KV453202.1 | 24132  | 21-scf00409 | 21 |
| AX-157684024 | 21 | 0.98  | KV453202.1 | 26515  | 21-scf00409 | 21 |
| AX-157684030 | 21 | 0.98  | KV453202.1 | 31696  | 21-scf00409 | 21 |
| AX-157684032 | 21 | 0.98  | KV453202.1 | 32462  | 21-scf00409 | 21 |
| AX-157684034 | 21 | 0.98  | KV453202.1 | 34826  | 21-scf00409 | 21 |
| AX-157683990 | 21 | 1.025 | KV453203.1 | 36437  | 21-scf00408 | 21 |
| AX-157757595 | 21 | 1.039 | KV453204.1 | 40733  | 21-scf00405 | 21 |
| AX-157680253 | 21 | 1.039 | KV453203.1 | 35888  | 21-scf00408 | 21 |
| AX-157683993 | 21 | 1.067 | KV453203.1 | 31861  | 21-scf00408 | 21 |
| AX-158419135 | 21 | 1.089 | KV453204.1 | 129125 | 21-scf00405 | 21 |
| AX-158253756 | 21 | 1.089 | KV453201.1 | 70208  | 21-scf00406 | 21 |
| AX-157684011 | 21 | 1.089 | KV453203.1 | 705    | 21-scf00408 | 21 |
| AX-157684008 | 21 | 1.089 | KV453203.1 | 16641  | 21-scf00408 | 21 |
| AX-157684007 | 21 | 1.089 | KV453203.1 | 19026  | 21-scf00408 | 21 |
| AX-157684004 | 21 | 1.089 | KV453203.1 | 20055  | 21-scf00408 | 21 |
| AX-157684003 | 21 | 1.089 | KV453203.1 | 21231  | 21-scf00408 | 21 |
| AX-157684000 | 21 | 1.089 | KV453203.1 | 24918  | 21-scf00408 | 21 |
| AX-157683997 | 21 | 1.089 | KV453203.1 | 27036  | 21-scf00408 | 21 |
| AX-157683994 | 21 | 1.089 | KV453203.1 | 30766  | 21-scf00408 | 21 |
| AX-157684026 | 21 | 1.089 | KV453202.1 | 27346  | 21-scf00409 | 21 |
| AX-158253605 | 21 | 1.417 | KV453204.1 | 1787   | 21-scf00405 | 21 |
| AX-157717411 | 21 | 1.417 | KV453204.1 | 3128   | 21-scf00405 | 21 |
| AX-158253606 | 21 | 1.417 | KV453204.1 | 4005   | 21-scf00405 | 21 |
| AX-158253722 | 21 | 1.417 | KV453201.1 | 21218  | 21-scf00406 | 21 |
| AX-157842372 | 21 | 1.417 | KV453201.1 | 34890  | 21-scf00406 | 21 |
| AX-157757362 | 21 | 1.417 | KV453201.1 | 35111  | 21-scf00406 | 21 |
| AX-158253733 | 21 | 1.417 | KV453201.1 | 35198  | 21-scf00406 | 21 |
| AX-158253735 | 21 | 1.417 | KV453201.1 | 36948  | 21-scf00406 | 21 |
| AX-158253738 | 21 | 1.417 | KV453201.1 | 43035  | 21-scf00406 | 21 |
| AX-158253745 | 21 | 1.417 | KV453201.1 | 51810  | 21-scf00406 | 21 |
| AX-158253750 | 21 | 1.417 | KV453201.1 | 57156  | 21-scf00406 | 21 |
| AX-158253751 | 21 | 1.417 | KV453201.1 | 58370  | 21-scf00406 | 21 |
| AX-157684025 | 21 | 1.417 | KV453202.1 | 27213  | 21-scf00409 | 21 |
| AX-158253609 | 21 | 1.538 | KV453204.1 | 7982   | 21-scf00405 | 21 |
| AX-158253610 | 21 | 1.538 | KV453204.1 | 9485   | 21-scf00405 | 21 |
| AX-158253611 | 21 | 1.538 | KV453204.1 | 10429  | 21-scf00405 | 21 |
| AX-158253613 | 21 | 1.538 | KV453204.1 | 11515  | 21-scf00405 | 21 |
| AX-158253616 | 21 | 1.538 | KV453204.1 | 20576  | 21-scf00405 | 21 |
| AX-158253617 | 21 | 1.674 | KV453204.1 | 21764  | 21-scf00405 | 21 |
| AX-157842355 | 21 | 2.623 | KV453204.1 | 24836  | 21-scf00405 | 21 |
| AX-158253623 | 21 | 2.623 | KV453204.1 | 31646  | 21-scf00405 | 21 |
| AX-157842356 | 21 | 2.623 | KV453204.1 | 32600  | 21-scf00405 | 21 |

|              |    |       |             |        |             |    |
|--------------|----|-------|-------------|--------|-------------|----|
| AX-158253624 | 21 | 2.623 | KV453204.1  | 32991  | 21-scf00405 | 21 |
| AX-158253626 | 21 | 2.623 | KV453204.1  | 38441  | 21-scf00405 | 21 |
| AX-158253628 | 21 | 2.623 | KV453204.1  | 44962  | 21-scf00405 | 21 |
| AX-158253638 | 21 | 2.77  | KV453204.1  | 57859  | 21-scf00405 | 21 |
| AX-157842358 | 21 | 2.77  | KV453204.1  | 58126  | 21-scf00405 | 21 |
| AX-158253639 | 21 | 2.77  | KV453204.1  | 58395  | 21-scf00405 | 21 |
| AX-157718938 | 21 | 2.77  | KV453204.1  | 59201  | 21-scf00405 | 21 |
| AX-157842359 | 21 | 2.77  | KV453204.1  | 59809  | 21-scf00405 | 21 |
| AX-158253640 | 21 | 2.77  | KV453204.1  | 60331  | 21-scf00405 | 21 |
| AX-158253641 | 21 | 2.77  | KV453204.1  | 60594  | 21-scf00405 | 21 |
| AX-158253646 | 21 | 2.77  | KV453204.1  | 65122  | 21-scf00405 | 21 |
| AX-158253647 | 21 | 2.77  | KV453204.1  | 65320  | 21-scf00405 | 21 |
| AX-157738839 | 21 | 2.77  | KV453204.1  | 71447  | 21-scf00405 | 21 |
| AX-157867376 | 21 | 2.77  | KV453204.1  | 142948 | 21-scf00405 | 21 |
| AX-158253690 | 21 | 2.77  | KV453204.1  | 147885 | 21-scf00405 | 21 |
| AX-157716387 | 21 | 2.77  | KV453204.1  | 151070 | 21-scf00405 | 21 |
| AX-157692487 | 21 | 2.77  | KV453204.1  | 164139 | 21-scf00405 | 21 |
| AX-158253704 | 21 | 2.77  | KV453204.1  | 170107 | 21-scf00405 | 21 |
| AX-157684018 | 21 | 2.77  | KV453202.1  | 6526   | 21-scf00409 | 21 |
| AX-157684039 | 21 | 2.77  | KV453202.1  | 39219  | 21-scf00409 | 21 |
| AX-157689809 | 21 | 2.77  | 3ML01032785 | 146    | scf08414_1  | UN |
| AX-158253651 | 21 | 3.054 | KV453204.1  | 76462  | 21-scf00405 | 21 |
| AX-158253634 | 21 | 3.057 | KV453204.1  | 52583  | 21-scf00405 | 21 |
| AX-158253635 | 21 | 3.057 | KV453204.1  | 52976  | 21-scf00405 | 21 |
| AX-157842361 | 21 | 3.057 | KV453204.1  | 63372  | 21-scf00405 | 21 |
| AX-157716160 | 21 | 3.057 | KV453204.1  | 69763  | 21-scf00405 | 21 |
| AX-157723519 | 21 | 3.057 | KV453204.1  | 80067  | 21-scf00405 | 21 |
| AX-158253674 | 21 | 3.057 | KV453204.1  | 103600 | 21-scf00405 | 21 |
| AX-158253691 | 21 | 3.057 | KV453204.1  | 148543 | 21-scf00405 | 21 |
| AX-157688228 | 21 | 3.057 | KV453201.1  | 97478  | 21-scf00406 | 21 |
| AX-158253658 | 21 | 3.061 | KV453204.1  | 84291  | 21-scf00405 | 21 |
| AX-158253659 | 21 | 3.061 | KV453204.1  | 84666  | 21-scf00405 | 21 |
| AX-158253663 | 21 | 3.061 | KV453204.1  | 87862  | 21-scf00405 | 21 |
| AX-158253665 | 21 | 3.061 | KV453204.1  | 88960  | 21-scf00405 | 21 |
| AX-158253666 | 21 | 3.061 | KV453204.1  | 89942  | 21-scf00405 | 21 |
| AX-158253669 | 21 | 3.061 | KV453204.1  | 93049  | 21-scf00405 | 21 |
| AX-158253670 | 21 | 3.061 | KV453204.1  | 93871  | 21-scf00405 | 21 |
| AX-157747732 | 21 | 3.17  | KV453204.1  | 95767  | 21-scf00405 | 21 |
| AX-158253672 | 21 | 3.17  | KV453204.1  | 98380  | 21-scf00405 | 21 |
| AX-158253678 | 21 | 3.17  | KV453204.1  | 126107 | 21-scf00405 | 21 |
| AX-158253679 | 21 | 3.17  | KV453204.1  | 127362 | 21-scf00405 | 21 |
| AX-158253683 | 21 | 3.17  | KV453204.1  | 135438 | 21-scf00405 | 21 |
| AX-157714696 | 21 | 3.17  | KV453204.1  | 137987 | 21-scf00405 | 21 |
| AX-158253684 | 21 | 3.17  | KV453204.1  | 138582 | 21-scf00405 | 21 |
| AX-158253686 | 21 | 3.17  | KV453204.1  | 140620 | 21-scf00405 | 21 |
| AX-158253687 | 21 | 3.17  | KV453204.1  | 141872 | 21-scf00405 | 21 |
| AX-158253689 | 21 | 3.17  | KV453204.1  | 142684 | 21-scf00405 | 21 |
| AX-158253692 | 21 | 3.17  | KV453204.1  | 149519 | 21-scf00405 | 21 |
| AX-158253695 | 21 | 3.17  | KV453204.1  | 157562 | 21-scf00405 | 21 |
| AX-158253700 | 21 | 3.17  | KV453204.1  | 162826 | 21-scf00405 | 21 |
| AX-158253701 | 21 | 3.17  | KV453204.1  | 163553 | 21-scf00405 | 21 |

|              |    |       |             |        |             |    |
|--------------|----|-------|-------------|--------|-------------|----|
| AX-158253702 | 21 | 3.17  | KV453204.1  | 168483 | 21-scf00405 | 21 |
| AX-158253706 | 21 | 3.17  | KV453204.1  | 173671 | 21-scf00405 | 21 |
| AX-157859892 | 21 | 3.17  | KV453201.1  | 66604  | 21-scf00406 | 21 |
| AX-157684013 | 21 | 3.17  | KV453202.1  | 1448   | 21-scf00409 | 21 |
| AX-157684020 | 21 | 3.17  | KV453202.1  | 18377  | 21-scf00409 | 21 |
| AX-157684021 | 21 | 3.17  | KV453202.1  | 23263  | 21-scf00409 | 21 |
| AX-157684028 | 21 | 3.17  | KV453202.1  | 31226  | 21-scf00409 | 21 |
| AX-157684035 | 21 | 3.17  | KV453202.1  | 35487  | 21-scf00409 | 21 |
| AX-157688794 | 21 | 3.17  | 3ML01027066 | 1180   | scf02670_1  | UN |
| AX-157689648 | 21 | 3.17  | 3ML01031118 | 627    | scf06724_1  | UN |
| AX-158253761 | 21 | 3.895 | KV453205.1  | 694    | 21-scf00412 | 21 |
| AX-157842378 | 21 | 3.895 | KV453205.1  | 13505  | 21-scf00412 | 21 |
| AX-158253768 | 21 | 3.895 | KV453205.1  | 17292  | 21-scf00412 | 21 |
| AX-158253769 | 21 | 3.895 | KV453205.1  | 17758  | 21-scf00412 | 21 |
| AX-158253770 | 21 | 3.895 | KV453205.1  | 18183  | 21-scf00412 | 21 |
| AX-158253779 | 21 | 3.895 | KV453205.1  | 41839  | 21-scf00412 | 21 |
| AX-158253771 | 21 | 4.016 | KV453205.1  | 19400  | 21-scf00412 | 21 |
| AX-158253772 | 21 | 4.016 | KV453205.1  | 21708  | 21-scf00412 | 21 |
| AX-158253773 | 21 | 4.016 | KV453205.1  | 22424  | 21-scf00412 | 21 |
| AX-157887646 | 21 | 4.063 | KV453205.1  | 31695  | 21-scf00412 | 21 |
| AX-158416008 | 21 | 4.171 | KV453205.1  | 37502  | 21-scf00412 | 21 |
| AX-158253792 | 21 | 4.171 | KV453205.1  | 62761  | 21-scf00412 | 21 |
| AX-158253627 | 21 | 4.26  | KV453204.1  | 39269  | 21-scf00405 | 21 |
| AX-158253551 | 21 | 4.26  | KV453200.1  | 54932  | 21-scf00407 | 21 |
| AX-157679968 | 21 | 4.26  | KV453203.1  | 40500  | 21-scf00408 | 21 |
| AX-158253777 | 21 | 4.26  | KV453205.1  | 34100  | 21-scf00412 | 21 |
| AX-157746722 | 21 | 4.26  | KV453205.1  | 39279  | 21-scf00412 | 21 |
| AX-158253781 | 21 | 4.26  | KV453205.1  | 43953  | 21-scf00412 | 21 |
| AX-158253782 | 21 | 4.26  | KV453205.1  | 45139  | 21-scf00412 | 21 |
| AX-158253798 | 21 | 4.26  | KV453205.1  | 72444  | 21-scf00412 | 21 |
| AX-158253802 | 21 | 4.26  | KV453205.1  | 76852  | 21-scf00412 | 21 |
| AX-158253812 | 21 | 4.26  | KV453207.1  | 16894  | 21-scf00413 | 21 |
| AX-158253839 | 21 | 4.26  | KV453207.1  | 56570  | 21-scf00413 | 21 |
| AX-158253846 | 21 | 4.26  | KV453207.1  | 79016  | 21-scf00413 | 21 |
| AX-158253921 | 21 | 4.26  | KV453208.1  | 146255 | 21-scf00414 | 21 |
| AX-157842405 | 21 | 4.26  | KV453208.1  | 174423 | 21-scf00414 | 21 |
| AX-158253939 | 21 | 4.26  | KV453208.1  | 179285 | 21-scf00414 | 21 |
| AX-158253780 | 21 | 4.262 | KV453205.1  | 42939  | 21-scf00412 | 21 |
| AX-158253804 | 21 | 4.262 | KV453205.1  | 78787  | 21-scf00412 | 21 |
| AX-158253862 | 21 | 4.262 | KV453208.1  | 56992  | 21-scf00414 | 21 |
| AX-157842390 | 21 | 4.262 | KV453208.1  | 66426  | 21-scf00414 | 21 |
| AX-157842392 | 21 | 4.262 | KV453208.1  | 68980  | 21-scf00414 | 21 |
| AX-158253870 | 21 | 4.262 | KV453208.1  | 69372  | 21-scf00414 | 21 |
| AX-158253873 | 21 | 4.262 | KV453208.1  | 74875  | 21-scf00414 | 21 |
| AX-158253874 | 21 | 4.262 | KV453208.1  | 76201  | 21-scf00414 | 21 |
| AX-158253875 | 21 | 4.262 | KV453208.1  | 77154  | 21-scf00414 | 21 |
| AX-158253876 | 21 | 4.262 | KV453208.1  | 78020  | 21-scf00414 | 21 |
| AX-158253878 | 21 | 4.262 | KV453208.1  | 79974  | 21-scf00414 | 21 |
| AX-158253879 | 21 | 4.262 | KV453208.1  | 80871  | 21-scf00414 | 21 |
| AX-158253881 | 21 | 4.262 | KV453208.1  | 84034  | 21-scf00414 | 21 |
| AX-158253883 | 21 | 4.262 | KV453208.1  | 85944  | 21-scf00414 | 21 |

|              |    |       |             |        |             |    |
|--------------|----|-------|-------------|--------|-------------|----|
| AX-158253885 | 21 | 4.262 | KV453208.1  | 87169  | 21-scf00414 | 21 |
| AX-157842395 | 21 | 4.262 | KV453208.1  | 122029 | 21-scf00414 | 21 |
| AX-157687904 | 21 | 4.262 | KV453206.1  | 2076   | 21-scf01089 | 21 |
| AX-157687281 | 21 | 4.262 | 3ML01024819 | 4336   | scf00841_1  | UN |
| AX-157687284 | 21 | 4.262 | 3ML01024819 | 9970   | scf00841_1  | UN |
| AX-157687476 | 21 | 4.262 | KV453530.1  | 5493   | scf00895    | UN |
| AX-158253785 | 21 | 4.263 | KV453205.1  | 52058  | 21-scf00412 | 21 |
| AX-157842380 | 21 | 4.295 | KV453205.1  | 55900  | 21-scf00412 | 21 |
| AX-158253789 | 21 | 4.326 | KV453205.1  | 60960  | 21-scf00412 | 21 |
| AX-158253791 | 21 | 4.346 | KV453205.1  | 61862  | 21-scf00412 | 21 |
| AX-157774708 | 21 | 4.372 | KV453205.1  | 62398  | 21-scf00412 | 21 |
| AX-158416010 | 21 | 4.372 | KV453205.1  | 64105  | 21-scf00412 | 21 |
| AX-158423391 | 21 | 4.372 | KV453205.1  | 64252  | 21-scf00412 | 21 |
| AX-158419139 | 21 | 4.372 | KV453205.1  | 64384  | 21-scf00412 | 21 |
| AX-158253793 | 21 | 4.372 | KV453205.1  | 65599  | 21-scf00412 | 21 |
| AX-157756906 | 21 | 4.372 | KV453207.1  | 67235  | 21-scf00413 | 21 |
| AX-158253848 | 21 | 4.372 | KV453207.1  | 82838  | 21-scf00413 | 21 |
| AX-158253796 | 21 | 4.481 | KV453205.1  | 70075  | 21-scf00412 | 21 |
| AX-158253797 | 21 | 4.481 | KV453205.1  | 70490  | 21-scf00412 | 21 |
| AX-157772517 | 21 | 4.481 | KV453205.1  | 73323  | 21-scf00412 | 21 |
| AX-158253800 | 21 | 4.481 | KV453205.1  | 74393  | 21-scf00412 | 21 |
| AX-157842382 | 21 | 4.481 | KV453205.1  | 76488  | 21-scf00412 | 21 |
| AX-158253803 | 21 | 4.481 | KV453205.1  | 77207  | 21-scf00412 | 21 |
| AX-157713977 | 21 | 4.481 | KV453207.1  | 21824  | 21-scf00413 | 21 |
| AX-158253818 | 21 | 4.481 | KV453207.1  | 23573  | 21-scf00413 | 21 |
| AX-158253819 | 21 | 4.481 | KV453207.1  | 26025  | 21-scf00413 | 21 |
| AX-158253821 | 21 | 4.481 | KV453207.1  | 30668  | 21-scf00413 | 21 |
| AX-158253822 | 21 | 4.481 | KV453207.1  | 31216  | 21-scf00413 | 21 |
| AX-158253827 | 21 | 4.481 | KV453207.1  | 37987  | 21-scf00413 | 21 |
| AX-158253829 | 21 | 4.481 | KV453207.1  | 41170  | 21-scf00413 | 21 |
| AX-158253830 | 21 | 4.481 | KV453207.1  | 42205  | 21-scf00413 | 21 |
| AX-158253831 | 21 | 4.481 | KV453207.1  | 42505  | 21-scf00413 | 21 |
| AX-158253832 | 21 | 4.481 | KV453207.1  | 44256  | 21-scf00413 | 21 |
| AX-157723845 | 21 | 4.481 | KV453207.1  | 45570  | 21-scf00413 | 21 |
| AX-158253833 | 21 | 4.481 | KV453207.1  | 46250  | 21-scf00413 | 21 |
| AX-158253834 | 21 | 4.481 | KV453207.1  | 48926  | 21-scf00413 | 21 |
| AX-158253836 | 21 | 4.481 | KV453207.1  | 51328  | 21-scf00413 | 21 |
| AX-158253841 | 21 | 4.481 | KV453207.1  | 59051  | 21-scf00413 | 21 |
| AX-158253842 | 21 | 4.481 | KV453207.1  | 60738  | 21-scf00413 | 21 |
| AX-158253844 | 21 | 4.481 | KV453207.1  | 65954  | 21-scf00413 | 21 |
| AX-158253845 | 21 | 4.481 | KV453207.1  | 67527  | 21-scf00413 | 21 |
| AX-158253849 | 21 | 4.481 | KV453207.1  | 83025  | 21-scf00413 | 21 |
| AX-158253950 | 21 | 4.481 | KV453208.1  | 204863 | 21-scf00414 | 21 |
| AX-157842407 | 21 | 4.481 | KV453208.1  | 213965 | 21-scf00414 | 21 |
| AX-157867382 | 21 | 4.481 | KV453208.1  | 238387 | 21-scf00414 | 21 |
| AX-158416018 | 21 | 4.481 | KV453208.1  | 245716 | 21-scf00414 | 21 |
| AX-158253858 | 21 | 4.522 | KV453208.1  | 50405  | 21-scf00414 | 21 |
| AX-158253866 | 21 | 4.562 | KV453208.1  | 63988  | 21-scf00414 | 21 |
| AX-158253880 | 21 | 4.562 | KV453208.1  | 83252  | 21-scf00414 | 21 |
| AX-158253863 | 21 | 4.598 | KV453208.1  | 61244  | 21-scf00414 | 21 |
| AX-158253867 | 21 | 4.598 | KV453208.1  | 64688  | 21-scf00414 | 21 |

|              |    |       |            |        |             |    |
|--------------|----|-------|------------|--------|-------------|----|
| AX-157842389 | 21 | 4.598 | KV453208.1 | 65577  | 21-scf00414 | 21 |
| AX-158253877 | 21 | 4.598 | KV453208.1 | 79606  | 21-scf00414 | 21 |
| AX-158253868 | 21 | 4.669 | KV453208.1 | 65634  | 21-scf00414 | 21 |
| AX-158253869 | 21 | 4.73  | KV453208.1 | 66037  | 21-scf00414 | 21 |
| AX-158253882 | 21 | 4.768 | KV453208.1 | 84427  | 21-scf00414 | 21 |
| AX-158253618 | 21 | 4.809 | KV453204.1 | 24409  | 21-scf00405 | 21 |
| AX-158253620 | 21 | 4.809 | KV453204.1 | 28212  | 21-scf00405 | 21 |
| AX-158253760 | 21 | 4.809 | KV453205.1 | 403    | 21-scf00412 | 21 |
| AX-158253763 | 21 | 4.809 | KV453205.1 | 3534   | 21-scf00412 | 21 |
| AX-157842377 | 21 | 4.809 | KV453205.1 | 4658   | 21-scf00412 | 21 |
| AX-158253764 | 21 | 4.809 | KV453205.1 | 10461  | 21-scf00412 | 21 |
| AX-158253886 | 21 | 4.809 | KV453208.1 | 89453  | 21-scf00414 | 21 |
| AX-158253887 | 21 | 4.809 | KV453208.1 | 89941  | 21-scf00414 | 21 |
| AX-158253888 | 21 | 4.809 | KV453208.1 | 90573  | 21-scf00414 | 21 |
| AX-157842393 | 21 | 4.809 | KV453208.1 | 93223  | 21-scf00414 | 21 |
| AX-157758577 | 21 | 4.809 | KV453208.1 | 97172  | 21-scf00414 | 21 |
| AX-158253891 | 21 | 4.809 | KV453208.1 | 102049 | 21-scf00414 | 21 |
| AX-158253892 | 21 | 4.809 | KV453208.1 | 103962 | 21-scf00414 | 21 |
| AX-158253893 | 21 | 4.809 | KV453208.1 | 104754 | 21-scf00414 | 21 |
| AX-158253894 | 21 | 4.809 | KV453208.1 | 104881 | 21-scf00414 | 21 |
| AX-157745904 | 21 | 4.809 | KV453208.1 | 105196 | 21-scf00414 | 21 |
| AX-158253897 | 21 | 4.809 | KV453208.1 | 105983 | 21-scf00414 | 21 |
| AX-158253898 | 21 | 4.809 | KV453208.1 | 106446 | 21-scf00414 | 21 |
| AX-157769129 | 21 | 4.809 | KV453208.1 | 109533 | 21-scf00414 | 21 |
| AX-158253899 | 21 | 4.809 | KV453208.1 | 109683 | 21-scf00414 | 21 |
| AX-158253900 | 21 | 4.809 | KV453208.1 | 110413 | 21-scf00414 | 21 |
| AX-158253902 | 21 | 4.809 | KV453208.1 | 113150 | 21-scf00414 | 21 |
| AX-157842394 | 21 | 4.809 | KV453208.1 | 113430 | 21-scf00414 | 21 |
| AX-158253904 | 21 | 4.809 | KV453208.1 | 118506 | 21-scf00414 | 21 |
| AX-158253907 | 21 | 4.809 | KV453208.1 | 120828 | 21-scf00414 | 21 |
| AX-158416015 | 21 | 4.809 | KV453208.1 | 127720 | 21-scf00414 | 21 |
| AX-158253911 | 21 | 4.809 | KV453208.1 | 129264 | 21-scf00414 | 21 |
| AX-158253912 | 21 | 4.809 | KV453208.1 | 129703 | 21-scf00414 | 21 |
| AX-157842396 | 21 | 4.809 | KV453208.1 | 130222 | 21-scf00414 | 21 |
| AX-158253914 | 21 | 4.809 | KV453208.1 | 131101 | 21-scf00414 | 21 |
| AX-158253915 | 21 | 4.809 | KV453208.1 | 133059 | 21-scf00414 | 21 |
| AX-158253916 | 21 | 4.809 | KV453208.1 | 135007 | 21-scf00414 | 21 |
| AX-158253918 | 21 | 4.809 | KV453208.1 | 138384 | 21-scf00414 | 21 |
| AX-157842397 | 21 | 4.809 | KV453208.1 | 138419 | 21-scf00414 | 21 |
| AX-157842401 | 21 | 4.809 | KV453208.1 | 144326 | 21-scf00414 | 21 |
| AX-157715093 | 21 | 4.809 | KV453208.1 | 148348 | 21-scf00414 | 21 |
| AX-158253925 | 21 | 4.809 | KV453208.1 | 151292 | 21-scf00414 | 21 |
| AX-158253926 | 21 | 4.809 | KV453208.1 | 152426 | 21-scf00414 | 21 |
| AX-158253929 | 21 | 4.809 | KV453208.1 | 161816 | 21-scf00414 | 21 |
| AX-158253932 | 21 | 4.809 | KV453208.1 | 168434 | 21-scf00414 | 21 |
| AX-158253933 | 21 | 4.809 | KV453208.1 | 169245 | 21-scf00414 | 21 |
| AX-157746664 | 21 | 4.809 | KV453208.1 | 170975 | 21-scf00414 | 21 |
| AX-157867381 | 21 | 4.809 | KV453208.1 | 173522 | 21-scf00414 | 21 |
| AX-158253940 | 21 | 4.809 | KV453208.1 | 181558 | 21-scf00414 | 21 |
| AX-158253947 | 21 | 4.809 | KV453208.1 | 194987 | 21-scf00414 | 21 |
| AX-158253937 | 21 | 4.918 | KV453208.1 | 178726 | 21-scf00414 | 21 |



|              |    |       |            |        |             |    |
|--------------|----|-------|------------|--------|-------------|----|
| AX-158253938 | 21 | 4.925 | KV453208.1 | 178864 | 21-scf00414 | 21 |
| AX-158253942 | 21 | 4.925 | KV453208.1 | 182345 | 21-scf00414 | 21 |
| AX-158253859 | 21 | 4.931 | KV453208.1 | 51796  | 21-scf00414 | 21 |
| AX-158253943 | 21 | 4.931 | KV453208.1 | 183130 | 21-scf00414 | 21 |
| AX-158253847 | 21 | 5.06  | KV453207.1 | 80297  | 21-scf00413 | 21 |
| AX-158253889 | 21 | 5.06  | KV453208.1 | 98276  | 21-scf00414 | 21 |
| AX-158253922 | 21 | 5.06  | KV453208.1 | 146597 | 21-scf00414 | 21 |
| AX-158253930 | 21 | 5.06  | KV453208.1 | 162809 | 21-scf00414 | 21 |
| AX-158253931 | 21 | 5.06  | KV453208.1 | 163632 | 21-scf00414 | 21 |
| AX-158253948 | 21 | 5.06  | KV453208.1 | 197051 | 21-scf00414 | 21 |
| AX-158253953 | 21 | 5.354 | KV453208.1 | 209593 | 21-scf00414 | 21 |
| AX-158253954 | 21 | 5.354 | KV453208.1 | 210654 | 21-scf00414 | 21 |
| AX-158253934 | 21 | 5.355 | KV453208.1 | 170396 | 21-scf00414 | 21 |
| AX-157842404 | 21 | 5.355 | KV453208.1 | 171140 | 21-scf00414 | 21 |
| AX-158253951 | 21 | 5.355 | KV453208.1 | 205107 | 21-scf00414 | 21 |
| AX-158253955 | 21 | 5.355 | KV453208.1 | 212295 | 21-scf00414 | 21 |
| AX-157842406 | 21 | 5.355 | KV453208.1 | 212772 | 21-scf00414 | 21 |
| AX-158253956 | 21 | 5.355 | KV453208.1 | 213127 | 21-scf00414 | 21 |
| AX-158253957 | 21 | 5.355 | KV453208.1 | 214405 | 21-scf00414 | 21 |
| AX-157842408 | 21 | 5.355 | KV453208.1 | 214886 | 21-scf00414 | 21 |
| AX-158253958 | 21 | 5.355 | KV453208.1 | 217746 | 21-scf00414 | 21 |
| AX-157859894 | 21 | 5.355 | KV453208.1 | 218843 | 21-scf00414 | 21 |
| AX-158253966 | 21 | 5.355 | KV453208.1 | 229212 | 21-scf00414 | 21 |
| AX-158253967 | 21 | 5.355 | KV453208.1 | 230442 | 21-scf00414 | 21 |
| AX-158416017 | 21 | 5.355 | KV453208.1 | 245395 | 21-scf00414 | 21 |
| AX-158253960 | 21 | 5.406 | KV453208.1 | 225340 | 21-scf00414 | 21 |
| AX-158253963 | 21 | 5.465 | KV453208.1 | 228131 | 21-scf00414 | 21 |
| AX-158253964 | 21 | 5.465 | KV453208.1 | 228366 | 21-scf00414 | 21 |
| AX-158253965 | 21 | 5.465 | KV453208.1 | 228638 | 21-scf00414 | 21 |
| AX-158253968 | 21 | 5.465 | KV453208.1 | 230843 | 21-scf00414 | 21 |
| AX-158253972 | 21 | 5.465 | KV453208.1 | 235370 | 21-scf00414 | 21 |
| AX-158253973 | 21 | 5.465 | KV453208.1 | 236220 | 21-scf00414 | 21 |
| AX-158253976 | 21 | 5.465 | KV453208.1 | 243859 | 21-scf00414 | 21 |
| AX-158416016 | 21 | 5.465 | KV453208.1 | 245290 | 21-scf00414 | 21 |
| AX-158253977 | 21 | 5.465 | KV453208.1 | 248646 | 21-scf00414 | 21 |
| AX-158416020 | 21 | 5.467 | KV453208.1 | 246121 | 21-scf00414 | 21 |
| AX-158253983 | 21 | 5.756 | KV453208.1 | 258546 | 21-scf00414 | 21 |
| AX-158253985 | 21 | 5.756 | KV453208.1 | 259973 | 21-scf00414 | 21 |
| AX-158253989 | 21 | 5.899 | KV453208.1 | 263781 | 21-scf00414 | 21 |
| AX-158254072 | 21 | 5.899 | KV453209.1 | 73759  | 21-scf00415 | 21 |
| AX-158253997 | 21 | 5.9   | KV453208.1 | 279752 | 21-scf00414 | 21 |
| AX-158253986 | 21 | 5.901 | KV453208.1 | 260591 | 21-scf00414 | 21 |
| AX-158253998 | 21 | 5.901 | KV453208.1 | 280725 | 21-scf00414 | 21 |
| AX-158253999 | 21 | 5.901 | KV453208.1 | 281445 | 21-scf00414 | 21 |
| AX-158254000 | 21 | 5.901 | KV453208.1 | 282858 | 21-scf00414 | 21 |
| AX-158254001 | 21 | 5.901 | KV453208.1 | 284057 | 21-scf00414 | 21 |
| AX-158254005 | 21 | 5.901 | KV453208.1 | 289877 | 21-scf00414 | 21 |
| AX-157842413 | 21 | 5.901 | KV453208.1 | 291109 | 21-scf00414 | 21 |
| AX-158253987 | 21 | 6.011 | KV453208.1 | 261310 | 21-scf00414 | 21 |
| AX-158254007 | 21 | 6.011 | KV453208.1 | 299293 | 21-scf00414 | 21 |
| AX-158254008 | 21 | 6.011 | KV453208.1 | 299674 | 21-scf00414 | 21 |

|              |    |       |             |        |             |    |
|--------------|----|-------|-------------|--------|-------------|----|
| AX-158254010 | 21 | 6.011 | KV453208.1  | 302828 | 21-scf00414 | 21 |
| AX-158254011 | 21 | 6.12  | KV453208.1  | 303196 | 21-scf00414 | 21 |
| AX-158254012 | 21 | 6.12  | KV453208.1  | 303887 | 21-scf00414 | 21 |
| AX-157752213 | 21 | 6.12  | KV453208.1  | 309031 | 21-scf00414 | 21 |
| AX-157842414 | 21 | 6.12  | KV453209.1  | 1783   | 21-scf00415 | 21 |
| AX-157689259 | 21 | 6.12  | 3ML01028882 | 573    | scf04497_1  | UN |
| AX-158254018 | 21 | 6.338 | KV453209.1  | 4567   | 21-scf00415 | 21 |
| AX-157775037 | 21 | 6.338 | KV453209.1  | 4810   | 21-scf00415 | 21 |
| AX-158254021 | 21 | 6.396 | KV453209.1  | 7169   | 21-scf00415 | 21 |
| AX-158254054 | 21 | 6.396 | KV453209.1  | 50204  | 21-scf00415 | 21 |
| AX-158254023 | 21 | 6.448 | KV453209.1  | 10598  | 21-scf00415 | 21 |
| AX-158254024 | 21 | 6.448 | KV453209.1  | 11210  | 21-scf00415 | 21 |
| AX-158254025 | 21 | 6.448 | KV453209.1  | 11918  | 21-scf00415 | 21 |
| AX-158254027 | 21 | 6.448 | KV453209.1  | 12571  | 21-scf00415 | 21 |
| AX-158254028 | 21 | 6.448 | KV453209.1  | 14793  | 21-scf00415 | 21 |
| AX-158254029 | 21 | 6.448 | KV453209.1  | 15664  | 21-scf00415 | 21 |
| AX-157842416 | 21 | 6.448 | KV453209.1  | 18101  | 21-scf00415 | 21 |
| AX-158254031 | 21 | 6.448 | KV453209.1  | 19957  | 21-scf00415 | 21 |
| AX-158254032 | 21 | 6.448 | KV453209.1  | 23891  | 21-scf00415 | 21 |
| AX-157842420 | 21 | 6.448 | KV453209.1  | 25054  | 21-scf00415 | 21 |
| AX-157872770 | 21 | 6.448 | KV453209.1  | 25366  | 21-scf00415 | 21 |
| AX-157750633 | 21 | 6.448 | KV453209.1  | 28392  | 21-scf00415 | 21 |
| AX-158254037 | 21 | 6.666 | KV453209.1  | 33977  | 21-scf00415 | 21 |
| AX-158254038 | 21 | 6.666 | KV453209.1  | 35102  | 21-scf00415 | 21 |
| AX-157750364 | 21 | 6.666 | KV453209.1  | 35635  | 21-scf00415 | 21 |
| AX-158254042 | 21 | 6.666 | KV453209.1  | 41167  | 21-scf00415 | 21 |
| AX-158254043 | 21 | 6.666 | KV453209.1  | 41665  | 21-scf00415 | 21 |
| AX-157719753 | 21 | 6.885 | KV453209.1  | 20730  | 21-scf00415 | 21 |
| AX-158254044 | 21 | 6.885 | KV453209.1  | 42952  | 21-scf00415 | 21 |
| AX-158254045 | 21 | 6.885 | KV453209.1  | 44784  | 21-scf00415 | 21 |
| AX-157842424 | 21 | 6.885 | KV453209.1  | 44839  | 21-scf00415 | 21 |
| AX-158254047 | 21 | 6.885 | KV453209.1  | 46721  | 21-scf00415 | 21 |
| AX-158254048 | 21 | 6.885 | KV453209.1  | 46900  | 21-scf00415 | 21 |
| AX-158254049 | 21 | 6.885 | KV453209.1  | 47463  | 21-scf00415 | 21 |
| AX-158254055 | 21 | 6.994 | KV453209.1  | 50847  | 21-scf00415 | 21 |
| AX-158254059 | 21 | 6.994 | KV453209.1  | 53568  | 21-scf00415 | 21 |
| AX-157842426 | 21 | 7.103 | KV453209.1  | 53873  | 21-scf00415 | 21 |
| AX-158254060 | 21 | 7.103 | KV453209.1  | 58836  | 21-scf00415 | 21 |
| AX-158254061 | 21 | 7.103 | KV453209.1  | 59332  | 21-scf00415 | 21 |
| AX-158254062 | 21 | 7.103 | KV453209.1  | 60046  | 21-scf00415 | 21 |
| AX-158254067 | 21 | 7.322 | KV453209.1  | 66169  | 21-scf00415 | 21 |
| AX-157842429 | 21 | 7.322 | KV453209.1  | 66459  | 21-scf00415 | 21 |
| AX-158254068 | 21 | 7.322 | KV453209.1  | 67341  | 21-scf00415 | 21 |
| AX-158254069 | 21 | 7.322 | KV453209.1  | 69964  | 21-scf00415 | 21 |
| AX-158254070 | 21 | 7.322 | KV453209.1  | 71084  | 21-scf00415 | 21 |
| AX-157757103 | 21 | 7.322 | KV453209.1  | 72808  | 21-scf00415 | 21 |
| AX-158254071 | 21 | 7.322 | KV453209.1  | 72901  | 21-scf00415 | 21 |
| AX-158254074 | 21 | 7.322 | KV453209.1  | 75107  | 21-scf00415 | 21 |
| AX-158254075 | 21 | 7.322 | KV453209.1  | 75817  | 21-scf00415 | 21 |
| AX-158254076 | 21 | 7.322 | KV453209.1  | 76580  | 21-scf00415 | 21 |
| AX-158254078 | 21 | 7.322 | KV453209.1  | 77908  | 21-scf00415 | 21 |

|              |    |       |             |        |             |    |
|--------------|----|-------|-------------|--------|-------------|----|
| AX-157712011 | 21 | 7.322 | 3ML01031328 | 594    | scf06937_1  | UN |
| AX-158254077 | 21 | 7.372 | KV453209.1  | 77248  | 21-scf00415 | 21 |
| AX-158254079 | 21 | 7.41  | KV453209.1  | 80903  | 21-scf00415 | 21 |
| AX-157713131 | 21 | 7.448 | KV453209.1  | 82911  | 21-scf00415 | 21 |
| AX-158254081 | 21 | 7.483 | KV453209.1  | 83094  | 21-scf00415 | 21 |
| AX-158254082 | 21 | 7.498 | KV453209.1  | 85421  | 21-scf00415 | 21 |
| AX-157720022 | 21 | 7.512 | KV453209.1  | 39676  | 21-scf00415 | 21 |
| AX-158254085 | 21 | 7.512 | KV453209.1  | 87615  | 21-scf00415 | 21 |
| AX-158254065 | 21 | 7.54  | KV453209.1  | 62965  | 21-scf00415 | 21 |
| AX-158254087 | 21 | 7.54  | KV453209.1  | 90073  | 21-scf00415 | 21 |
| AX-158254088 | 21 | 7.54  | KV453209.1  | 90665  | 21-scf00415 | 21 |
| AX-158254089 | 21 | 7.54  | KV453209.1  | 92023  | 21-scf00415 | 21 |
| AX-158254090 | 21 | 7.54  | KV453209.1  | 92692  | 21-scf00415 | 21 |
| AX-158254091 | 21 | 7.54  | KV453209.1  | 94060  | 21-scf00415 | 21 |
| AX-158254092 | 21 | 7.54  | KV453209.1  | 94453  | 21-scf00415 | 21 |
| AX-158254096 | 21 | 7.54  | KV453209.1  | 99510  | 21-scf00415 | 21 |
| AX-158254097 | 21 | 7.54  | KV453209.1  | 99808  | 21-scf00415 | 21 |
| AX-158254098 | 21 | 7.54  | KV453209.1  | 102058 | 21-scf00415 | 21 |
| AX-158254099 | 21 | 7.54  | KV453209.1  | 103143 | 21-scf00415 | 21 |
| AX-157842431 | 21 | 7.54  | KV453209.1  | 104333 | 21-scf00415 | 21 |
| AX-158254100 | 21 | 7.54  | KV453209.1  | 104971 | 21-scf00415 | 21 |
| AX-158254103 | 21 | 7.63  | KV453209.1  | 111117 | 21-scf00415 | 21 |
| AX-158254105 | 21 | 7.666 | KV453209.1  | 112407 | 21-scf00415 | 21 |
| AX-157842434 | 21 | 7.759 | KV453209.1  | 115289 | 21-scf00415 | 21 |
| AX-157842435 | 21 | 7.759 | KV453209.1  | 117199 | 21-scf00415 | 21 |
| AX-157775857 | 21 | 7.759 | KV453209.1  | 120964 | 21-scf00415 | 21 |
| AX-158254109 | 21 | 7.759 | KV453209.1  | 124254 | 21-scf00415 | 21 |
| AX-158254111 | 21 | 7.759 | KV453209.1  | 126811 | 21-scf00415 | 21 |
| AX-158254112 | 21 | 7.759 | KV453209.1  | 127284 | 21-scf00415 | 21 |
| AX-158254113 | 21 | 7.759 | KV453209.1  | 127650 | 21-scf00415 | 21 |
| AX-157696010 | 21 | 7.759 | KV453209.1  | 138637 | 21-scf00415 | 21 |
| AX-158254171 | 21 | 7.759 | KV453209.1  | 222867 | 21-scf00415 | 21 |
| AX-157842437 | 21 | 7.895 | KV453209.1  | 130932 | 21-scf00415 | 21 |
| AX-157773215 | 21 | 7.895 | KV453209.1  | 131191 | 21-scf00415 | 21 |
| AX-157842438 | 21 | 8.032 | KV453209.1  | 134656 | 21-scf00415 | 21 |
| AX-158254120 | 21 | 8.032 | KV453209.1  | 137358 | 21-scf00415 | 21 |
| AX-158254121 | 21 | 8.032 | KV453209.1  | 138504 | 21-scf00415 | 21 |
| AX-158254123 | 21 | 8.169 | KV453209.1  | 140887 | 21-scf00415 | 21 |
| AX-158254126 | 21 | 8.221 | KV453209.1  | 146118 | 21-scf00415 | 21 |
| AX-158254066 | 21 | 8.265 | KV453209.1  | 64722  | 21-scf00415 | 21 |
| AX-157880252 | 21 | 8.265 | KV453209.1  | 147681 | 21-scf00415 | 21 |
| AX-158254128 | 21 | 8.265 | KV453209.1  | 148368 | 21-scf00415 | 21 |
| AX-158254129 | 21 | 8.265 | KV453209.1  | 149747 | 21-scf00415 | 21 |
| AX-158254140 | 21 | 8.265 | KV453209.1  | 164809 | 21-scf00415 | 21 |
| AX-158254015 | 21 | 8.305 | KV453208.1  | 308778 | 21-scf00414 | 21 |
| AX-158254050 | 21 | 8.305 | KV453209.1  | 47913  | 21-scf00415 | 21 |
| AX-158254107 | 21 | 8.305 | KV453209.1  | 114347 | 21-scf00415 | 21 |
| AX-158254131 | 21 | 8.305 | KV453209.1  | 153441 | 21-scf00415 | 21 |
| AX-158254138 | 21 | 8.305 | KV453209.1  | 163338 | 21-scf00415 | 21 |
| AX-158254139 | 21 | 8.305 | KV453209.1  | 164249 | 21-scf00415 | 21 |
| AX-157750987 | 21 | 8.305 | KV453209.1  | 165769 | 21-scf00415 | 21 |

|              |    |       |            |        |             |    |
|--------------|----|-------|------------|--------|-------------|----|
| AX-158254142 | 21 | 8.305 | KV453209.1 | 171628 | 21-scf00415 | 21 |
| AX-157723296 | 21 | 8.305 | KV453209.1 | 188901 | 21-scf00415 | 21 |
| AX-158254145 | 21 | 8.335 | KV453209.1 | 177551 | 21-scf00415 | 21 |
| AX-157842440 | 21 | 8.376 | KV453209.1 | 177759 | 21-scf00415 | 21 |
| AX-158254175 | 21 | 8.376 | KV453209.1 | 228234 | 21-scf00415 | 21 |
| AX-158254146 | 21 | 8.414 | KV453209.1 | 178125 | 21-scf00415 | 21 |
| AX-158254147 | 21 | 8.414 | KV453209.1 | 179631 | 21-scf00415 | 21 |
| AX-158254151 | 21 | 8.414 | KV453209.1 | 184744 | 21-scf00415 | 21 |
| AX-158254153 | 21 | 8.414 | KV453209.1 | 190928 | 21-scf00415 | 21 |
| AX-158254158 | 21 | 8.414 | KV453209.1 | 203378 | 21-scf00415 | 21 |
| AX-158254156 | 21 | 8.524 | KV453209.1 | 195986 | 21-scf00415 | 21 |
| AX-158254160 | 21 | 8.524 | KV453209.1 | 205733 | 21-scf00415 | 21 |
| AX-158254161 | 21 | 8.589 | KV453209.1 | 206315 | 21-scf00415 | 21 |
| AX-158254094 | 21 | 8.633 | KV453209.1 | 95087  | 21-scf00415 | 21 |
| AX-158254162 | 21 | 8.633 | KV453209.1 | 209148 | 21-scf00415 | 21 |
| AX-158254165 | 21 | 8.633 | KV453209.1 | 213450 | 21-scf00415 | 21 |
| AX-157744887 | 21 | 8.633 | KV453209.1 | 214357 | 21-scf00415 | 21 |
| AX-157887648 | 21 | 8.633 | KV453209.1 | 215612 | 21-scf00415 | 21 |
| AX-157753877 | 21 | 8.633 | KV453209.1 | 215757 | 21-scf00415 | 21 |
| AX-157772665 | 21 | 8.851 | KV453209.1 | 169233 | 21-scf00415 | 21 |
| AX-158254169 | 21 | 8.851 | KV453209.1 | 221573 | 21-scf00415 | 21 |
| AX-158254170 | 21 | 8.851 | KV453209.1 | 222512 | 21-scf00415 | 21 |
| AX-158254173 | 21 | 8.851 | KV453209.1 | 224131 | 21-scf00415 | 21 |
| AX-158254178 | 21 | 8.86  | KV453209.1 | 232830 | 21-scf00415 | 21 |
| AX-157710714 | 21 | 9.123 | KV453209.1 | 233503 | 21-scf00415 | 21 |
| AX-158387091 | 21 | 9.123 | KV453209.1 | 234016 | 21-scf00415 | 21 |
| AX-158254181 | 21 | 9.123 | KV453209.1 | 235588 | 21-scf00415 | 21 |
| AX-158254182 | 21 | 9.123 | KV453209.1 | 235929 | 21-scf00415 | 21 |
| AX-158254183 | 21 | 9.26  | KV453209.1 | 237051 | 21-scf00415 | 21 |
| AX-158254186 | 21 | 9.26  | KV453209.1 | 239127 | 21-scf00415 | 21 |
| AX-158254176 | 21 | 9.398 | KV453209.1 | 231998 | 21-scf00415 | 21 |
| AX-158254187 | 21 | 9.398 | KV453209.1 | 241589 | 21-scf00415 | 21 |
| AX-158254188 | 21 | 9.398 | KV453209.1 | 243792 | 21-scf00415 | 21 |
| AX-158254189 | 21 | 9.398 | KV453209.1 | 245330 | 21-scf00415 | 21 |
| AX-158254191 | 21 | 9.398 | KV453209.1 | 246544 | 21-scf00415 | 21 |
| AX-158254196 | 21 | 9.398 | KV453209.1 | 250467 | 21-scf00415 | 21 |
| AX-158254197 | 21 | 9.398 | KV453209.1 | 250913 | 21-scf00415 | 21 |
| AX-158254199 | 21 | 9.398 | KV453209.1 | 252169 | 21-scf00415 | 21 |
| AX-158254200 | 21 | 9.398 | KV453209.1 | 252867 | 21-scf00415 | 21 |
| AX-158254202 | 21 | 9.398 | KV453209.1 | 254867 | 21-scf00415 | 21 |
| AX-158254203 | 21 | 9.398 | KV453209.1 | 255409 | 21-scf00415 | 21 |
| AX-158254205 | 21 | 9.398 | KV453209.1 | 256451 | 21-scf00415 | 21 |
| AX-158254214 | 21 | 9.398 | KV453209.1 | 266917 | 21-scf00415 | 21 |
| AX-158254215 | 21 | 9.398 | KV453209.1 | 268203 | 21-scf00415 | 21 |
| AX-158254217 | 21 | 9.398 | KV453209.1 | 268747 | 21-scf00415 | 21 |
| AX-158254225 | 21 | 9.398 | KV453209.1 | 274585 | 21-scf00415 | 21 |
| AX-158254267 | 21 | 9.398 | KV453210.1 | 52512  | 21-scf00416 | 21 |
| AX-157842458 | 21 | 9.398 | KV453210.1 | 60524  | 21-scf00416 | 21 |
| AX-158254315 | 21 | 9.398 | KV453211.1 | 37202  | 21-scf00417 | 21 |
| AX-158254347 | 21 | 9.398 | KV453211.1 | 80503  | 21-scf00417 | 21 |
| AX-158254207 | 21 | 9.507 | KV453209.1 | 259721 | 21-scf00415 | 21 |

|              |    |       |            |        |             |    |
|--------------|----|-------|------------|--------|-------------|----|
| AX-157872772 | 21 | 9.507 | KV453209.1 | 260927 | 21-scf00415 | 21 |
| AX-158254208 | 21 | 9.507 | KV453209.1 | 261538 | 21-scf00415 | 21 |
| AX-158254209 | 21 | 9.507 | KV453209.1 | 262795 | 21-scf00415 | 21 |
| AX-158254212 | 21 | 9.507 | KV453209.1 | 265916 | 21-scf00415 | 21 |
| AX-158254231 | 21 | 9.507 | KV453209.1 | 282689 | 21-scf00415 | 21 |
| AX-158254264 | 21 | 9.507 | KV453210.1 | 51208  | 21-scf00416 | 21 |
| AX-158254213 | 21 | 9.627 | KV453209.1 | 266257 | 21-scf00415 | 21 |
| AX-158254218 | 21 | 9.665 | KV453209.1 | 269156 | 21-scf00415 | 21 |
| AX-158254251 | 21 | 9.665 | KV453210.1 | 34712  | 21-scf00416 | 21 |
| AX-158254268 | 21 | 9.665 | KV453210.1 | 52995  | 21-scf00416 | 21 |
| AX-158254222 | 21 | 9.696 | KV453209.1 | 271435 | 21-scf00415 | 21 |
| AX-158254223 | 21 | 9.725 | KV453209.1 | 272828 | 21-scf00415 | 21 |
| AX-158254229 | 21 | 9.725 | KV453209.1 | 278284 | 21-scf00415 | 21 |
| AX-157725037 | 21 | 9.725 | KV453209.1 | 278630 | 21-scf00415 | 21 |
| AX-158254230 | 21 | 9.725 | KV453209.1 | 279769 | 21-scf00415 | 21 |
| AX-157842445 | 21 | 9.725 | KV453209.1 | 279957 | 21-scf00415 | 21 |
| AX-157842446 | 21 | 9.782 | KV453209.1 | 280637 | 21-scf00415 | 21 |
| AX-158254228 | 21 | 9.835 | KV453209.1 | 277440 | 21-scf00415 | 21 |
| AX-158254243 | 21 | 9.835 | KV453210.1 | 22133  | 21-scf00416 | 21 |
| AX-157842450 | 21 | 9.835 | KV453210.1 | 24430  | 21-scf00416 | 21 |
| AX-158254247 | 21 | 9.835 | KV453210.1 | 26296  | 21-scf00416 | 21 |
| AX-158254248 | 21 | 9.835 | KV453210.1 | 28549  | 21-scf00416 | 21 |
| AX-158254249 | 21 | 9.835 | KV453210.1 | 29507  | 21-scf00416 | 21 |
| AX-157738401 | 21 | 9.835 | KV453210.1 | 31233  | 21-scf00416 | 21 |
| AX-158419140 | 21 | 9.835 | KV453210.1 | 33373  | 21-scf00416 | 21 |
| AX-157718782 | 21 | 9.835 | KV453210.1 | 34002  | 21-scf00416 | 21 |
| AX-158254252 | 21 | 9.835 | KV453210.1 | 35257  | 21-scf00416 | 21 |
| AX-158254253 | 21 | 9.835 | KV453210.1 | 36444  | 21-scf00416 | 21 |
| AX-157842452 | 21 | 9.835 | KV453210.1 | 38325  | 21-scf00416 | 21 |
| AX-158254254 | 21 | 9.835 | KV453210.1 | 39082  | 21-scf00416 | 21 |
| AX-158254255 | 21 | 9.835 | KV453210.1 | 42711  | 21-scf00416 | 21 |
| AX-158254257 | 21 | 9.835 | KV453210.1 | 44413  | 21-scf00416 | 21 |
| AX-157872773 | 21 | 9.835 | KV453210.1 | 45416  | 21-scf00416 | 21 |
| AX-158254260 | 21 | 9.835 | KV453210.1 | 46867  | 21-scf00416 | 21 |
| AX-158254263 | 21 | 9.835 | KV453210.1 | 49148  | 21-scf00416 | 21 |
| AX-158254265 | 21 | 9.835 | KV453210.1 | 51816  | 21-scf00416 | 21 |
| AX-158254272 | 21 | 9.835 | KV453210.1 | 59878  | 21-scf00416 | 21 |
| AX-158254273 | 21 | 9.835 | KV453210.1 | 60485  | 21-scf00416 | 21 |
| AX-157733040 | 21 | 9.835 | KV453210.1 | 63431  | 21-scf00416 | 21 |
| AX-157842459 | 21 | 9.835 | KV453210.1 | 63811  | 21-scf00416 | 21 |
| AX-157774133 | 21 | 9.835 | KV453210.1 | 68032  | 21-scf00416 | 21 |
| AX-158254276 | 21 | 9.835 | KV453210.1 | 68404  | 21-scf00416 | 21 |
| AX-158254277 | 21 | 9.835 | KV453210.1 | 70258  | 21-scf00416 | 21 |
| AX-158254280 | 21 | 9.835 | KV453210.1 | 72156  | 21-scf00416 | 21 |
| AX-158254284 | 21 | 9.835 | KV453210.1 | 81401  | 21-scf00416 | 21 |
| AX-158254304 | 21 | 9.835 | KV453211.1 | 27670  | 21-scf00417 | 21 |
| AX-158254328 | 21 | 9.835 | KV453211.1 | 61843  | 21-scf00417 | 21 |
| AX-158254232 | 21 | 9.913 | KV453209.1 | 284590 | 21-scf00415 | 21 |
| AX-158254285 | 21 | 9.913 | KV453210.1 | 81540  | 21-scf00416 | 21 |
| AX-158254310 | 21 | 9.913 | KV453211.1 | 32539  | 21-scf00417 | 21 |
| AX-158254313 | 21 | 9.913 | KV453211.1 | 34186  | 21-scf00417 | 21 |

|              |    |        |            |        |             |    |
|--------------|----|--------|------------|--------|-------------|----|
| AX-158254294 | 21 | 9.987  | KV453211.1 | 7900   | 21-scf00417 | 21 |
| AX-158254295 | 21 | 9.987  | KV453211.1 | 9567   | 21-scf00417 | 21 |
| AX-157859896 | 21 | 10.053 | KV453211.1 | 11217  | 21-scf00417 | 21 |
| AX-157753621 | 21 | 10.053 | KV453211.1 | 16777  | 21-scf00417 | 21 |
| AX-157713381 | 21 | 10.11  | KV453211.1 | 15460  | 21-scf00417 | 21 |
| AX-158254301 | 21 | 10.162 | KV453211.1 | 19964  | 21-scf00417 | 21 |
| AX-157842460 | 21 | 10.162 | KV453211.1 | 20754  | 21-scf00417 | 21 |
| AX-158254302 | 21 | 10.162 | KV453211.1 | 22092  | 21-scf00417 | 21 |
| AX-158254305 | 21 | 10.162 | KV453211.1 | 28127  | 21-scf00417 | 21 |
| AX-157708278 | 21 | 10.162 | KV453211.1 | 30046  | 21-scf00417 | 21 |
| AX-158254307 | 21 | 10.162 | KV453211.1 | 30801  | 21-scf00417 | 21 |
| AX-157709009 | 21 | 10.162 | KV453211.1 | 32762  | 21-scf00417 | 21 |
| AX-158254312 | 21 | 10.162 | KV453211.1 | 33492  | 21-scf00417 | 21 |
| AX-157746799 | 21 | 10.162 | KV453211.1 | 33583  | 21-scf00417 | 21 |
| AX-158254314 | 21 | 10.162 | KV453211.1 | 36197  | 21-scf00417 | 21 |
| AX-157746540 | 21 | 10.162 | KV453211.1 | 39543  | 21-scf00417 | 21 |
| AX-158254319 | 21 | 10.162 | KV453211.1 | 40268  | 21-scf00417 | 21 |
| AX-157751631 | 21 | 10.162 | KV453211.1 | 41222  | 21-scf00417 | 21 |
| AX-158254323 | 21 | 10.162 | KV453211.1 | 49832  | 21-scf00417 | 21 |
| AX-158254321 | 21 | 10.169 | KV453211.1 | 48164  | 21-scf00417 | 21 |
| AX-157773913 | 21 | 10.224 | KV453211.1 | 51249  | 21-scf00417 | 21 |
| AX-158254324 | 21 | 10.283 | KV453211.1 | 52742  | 21-scf00417 | 21 |
| AX-158254325 | 21 | 10.283 | KV453211.1 | 56668  | 21-scf00417 | 21 |
| AX-157887650 | 21 | 10.283 | KV453211.1 | 56914  | 21-scf00417 | 21 |
| AX-158254326 | 21 | 10.283 | KV453211.1 | 58904  | 21-scf00417 | 21 |
| AX-158254327 | 21 | 10.294 | KV453211.1 | 59606  | 21-scf00417 | 21 |
| AX-157880254 | 21 | 10.819 | KV453211.1 | 74914  | 21-scf00417 | 21 |
| AX-158254344 | 21 | 10.819 | KV453211.1 | 77782  | 21-scf00417 | 21 |
| AX-158254345 | 21 | 10.819 | KV453211.1 | 78734  | 21-scf00417 | 21 |
| AX-158381026 | 21 | 10.819 | KV453211.1 | 80772  | 21-scf00417 | 21 |
| AX-158254368 | 21 | 10.819 | KV453211.1 | 117071 | 21-scf00417 | 21 |
| AX-158254340 | 21 | 10.95  | KV453211.1 | 73803  | 21-scf00417 | 21 |
| AX-158254350 | 21 | 10.95  | KV453211.1 | 84014  | 21-scf00417 | 21 |
| AX-158254351 | 21 | 10.95  | KV453211.1 | 86630  | 21-scf00417 | 21 |
| AX-157748695 | 21 | 10.95  | KV453211.1 | 88344  | 21-scf00417 | 21 |
| AX-158254352 | 21 | 10.95  | KV453211.1 | 89383  | 21-scf00417 | 21 |
| AX-158254353 | 21 | 10.95  | KV453211.1 | 91678  | 21-scf00417 | 21 |
| AX-157713627 | 21 | 10.95  | KV453211.1 | 92928  | 21-scf00417 | 21 |
| AX-157842462 | 21 | 10.95  | KV453211.1 | 92985  | 21-scf00417 | 21 |
| AX-157774564 | 21 | 10.95  | KV453211.1 | 95743  | 21-scf00417 | 21 |
| AX-157842463 | 21 | 10.95  | KV453211.1 | 96323  | 21-scf00417 | 21 |
| AX-158254356 | 21 | 10.95  | KV453211.1 | 101622 | 21-scf00417 | 21 |
| AX-158254357 | 21 | 10.95  | KV453211.1 | 104029 | 21-scf00417 | 21 |
| AX-158254359 | 21 | 10.95  | KV453211.1 | 108563 | 21-scf00417 | 21 |
| AX-158254367 | 21 | 10.95  | KV453211.1 | 116742 | 21-scf00417 | 21 |
| AX-157842466 | 21 | 10.95  | KV453211.1 | 119294 | 21-scf00417 | 21 |
| AX-158254371 | 21 | 10.95  | KV453211.1 | 120875 | 21-scf00417 | 21 |
| AX-158387093 | 21 | 10.95  | KV453211.1 | 137905 | 21-scf00417 | 21 |
| AX-158254346 | 21 | 10.985 | KV453211.1 | 79802  | 21-scf00417 | 21 |
| AX-157719994 | 21 | 10.985 | KV453211.1 | 86777  | 21-scf00417 | 21 |
| AX-157743313 | 21 | 10.985 | KV453211.1 | 108461 | 21-scf00417 | 21 |

|              |    |        |            |        |             |    |
|--------------|----|--------|------------|--------|-------------|----|
| AX-158254361 | 21 | 11.022 | KV453211.1 | 109864 | 21-scf00417 | 21 |
| AX-158254372 | 21 | 11.06  | KV453211.1 | 124521 | 21-scf00417 | 21 |
| AX-157754163 | 21 | 11.06  | KV453211.1 | 125707 | 21-scf00417 | 21 |
| AX-158254374 | 21 | 11.06  | KV453211.1 | 126155 | 21-scf00417 | 21 |
| AX-158254382 | 21 | 11.06  | KV453211.1 | 140552 | 21-scf00417 | 21 |
| AX-158254364 | 21 | 11.171 | KV453211.1 | 111335 | 21-scf00417 | 21 |
| AX-158254379 | 21 | 11.171 | KV453211.1 | 137795 | 21-scf00417 | 21 |
| AX-157859897 | 21 | 11.177 | KV453211.1 | 141878 | 21-scf00417 | 21 |
| AX-157842465 | 21 | 11.431 | KV453211.1 | 98383  | 21-scf00417 | 21 |
| AX-158254354 | 21 | 11.431 | KV453211.1 | 98540  | 21-scf00417 | 21 |
| AX-158254384 | 21 | 11.431 | KV453211.1 | 144165 | 21-scf00417 | 21 |
| AX-158254385 | 21 | 11.431 | KV453211.1 | 144488 | 21-scf00417 | 21 |
| AX-158254386 | 21 | 11.431 | KV453211.1 | 145287 | 21-scf00417 | 21 |
| AX-158254387 | 21 | 11.431 | KV453211.1 | 145880 | 21-scf00417 | 21 |
| AX-158254409 | 21 | 11.431 | KV453211.1 | 168322 | 21-scf00417 | 21 |
| AX-158254391 | 21 | 11.818 | KV453211.1 | 148635 | 21-scf00417 | 21 |
| AX-158254403 | 21 | 11.879 | KV453211.1 | 159736 | 21-scf00417 | 21 |
| AX-158254405 | 21 | 11.879 | KV453211.1 | 163390 | 21-scf00417 | 21 |
| AX-158254407 | 21 | 11.879 | KV453211.1 | 165297 | 21-scf00417 | 21 |
| AX-158254408 | 21 | 11.884 | KV453211.1 | 165928 | 21-scf00417 | 21 |
| AX-158254412 | 21 | 12.33  | KV453211.1 | 170354 | 21-scf00417 | 21 |
| AX-158254413 | 21 | 12.331 | KV453211.1 | 170786 | 21-scf00417 | 21 |
| AX-158254414 | 21 | 12.334 | KV453211.1 | 171137 | 21-scf00417 | 21 |
| AX-157720502 | 21 | 12.338 | KV453211.1 | 174145 | 21-scf00417 | 21 |
| AX-158254411 | 21 | 12.34  | KV453211.1 | 169705 | 21-scf00417 | 21 |
| AX-158254418 | 21 | 12.34  | KV453211.1 | 175605 | 21-scf00417 | 21 |
| AX-158254421 | 21 | 12.34  | KV453211.1 | 178132 | 21-scf00417 | 21 |
| AX-158254423 | 21 | 12.34  | KV453211.1 | 179996 | 21-scf00417 | 21 |
| AX-157772422 | 21 | 12.34  | KV453211.1 | 187626 | 21-scf00417 | 21 |
| AX-158254425 | 21 | 12.592 | KV453211.1 | 181924 | 21-scf00417 | 21 |
| AX-158381027 | 21 | 12.592 | KV453211.1 | 191396 | 21-scf00417 | 21 |
| AX-157842471 | 21 | 12.592 | KV453211.1 | 206703 | 21-scf00417 | 21 |
| AX-157859899 | 21 | 12.657 | KV453211.1 | 185706 | 21-scf00417 | 21 |
| AX-157771372 | 21 | 12.657 | KV453211.1 | 199801 | 21-scf00417 | 21 |
| AX-158254454 | 21 | 12.657 | KV453211.1 | 218414 | 21-scf00417 | 21 |
| AX-158254482 | 21 | 12.657 | KV453211.1 | 257550 | 21-scf00417 | 21 |
| AX-158254485 | 21 | 12.657 | KV453211.1 | 262489 | 21-scf00417 | 21 |
| AX-158254508 | 21 | 12.657 | KV453211.1 | 290530 | 21-scf00417 | 21 |
| AX-158254537 | 21 | 12.657 | KV453211.1 | 322057 | 21-scf00417 | 21 |
| AX-158254424 | 21 | 12.721 | KV453211.1 | 180996 | 21-scf00417 | 21 |
| AX-158254428 | 21 | 12.721 | KV453211.1 | 186170 | 21-scf00417 | 21 |
| AX-158254431 | 21 | 12.721 | KV453211.1 | 189635 | 21-scf00417 | 21 |
| AX-158254444 | 21 | 12.721 | KV453211.1 | 205696 | 21-scf00417 | 21 |
| AX-158254475 | 21 | 12.721 | KV453211.1 | 251205 | 21-scf00417 | 21 |
| AX-158254436 | 21 | 12.753 | KV453211.1 | 196495 | 21-scf00417 | 21 |
| AX-158254437 | 21 | 12.783 | KV453211.1 | 196792 | 21-scf00417 | 21 |
| AX-158254438 | 21 | 12.812 | KV453211.1 | 199266 | 21-scf00417 | 21 |
| AX-158254439 | 21 | 12.85  | KV453211.1 | 200156 | 21-scf00417 | 21 |
| AX-158254440 | 21 | 12.85  | KV453211.1 | 200889 | 21-scf00417 | 21 |
| AX-157716485 | 21 | 12.978 | KV453211.1 | 204335 | 21-scf00417 | 21 |
| AX-157709622 | 21 | 12.978 | KV453211.1 | 204762 | 21-scf00417 | 21 |

|              |    |        |             |        |             |    |
|--------------|----|--------|-------------|--------|-------------|----|
| AX-158254445 | 21 | 12.978 | KV453211.1  | 206367 | 21-scf00417 | 21 |
| AX-158254448 | 21 | 12.978 | KV453211.1  | 208209 | 21-scf00417 | 21 |
| AX-158254450 | 21 | 12.978 | KV453211.1  | 209580 | 21-scf00417 | 21 |
| AX-158254452 | 21 | 12.978 | KV453211.1  | 212832 | 21-scf00417 | 21 |
| AX-158254453 | 21 | 13.493 | KV453211.1  | 217603 | 21-scf00417 | 21 |
| AX-158254456 | 21 | 13.993 | KV453211.1  | 223157 | 21-scf00417 | 21 |
| AX-158254457 | 21 | 14.246 | KV453211.1  | 224703 | 21-scf00417 | 21 |
| AX-158254459 | 21 | 14.246 | KV453211.1  | 226543 | 21-scf00417 | 21 |
| AX-158254462 | 21 | 14.246 | KV453211.1  | 231063 | 21-scf00417 | 21 |
| AX-157722185 | 21 | 14.403 | KV453211.1  | 236172 | 21-scf00417 | 21 |
| AX-158254470 | 21 | 14.409 | KV453211.1  | 247660 | 21-scf00417 | 21 |
| AX-158254471 | 21 | 14.409 | KV453211.1  | 248142 | 21-scf00417 | 21 |
| AX-158254473 | 21 | 14.409 | KV453211.1  | 249544 | 21-scf00417 | 21 |
| AX-158254476 | 21 | 14.409 | KV453211.1  | 252164 | 21-scf00417 | 21 |
| AX-158254480 | 21 | 14.635 | KV453211.1  | 255200 | 21-scf00417 | 21 |
| AX-158254484 | 21 | 14.689 | KV453211.1  | 261625 | 21-scf00417 | 21 |
| AX-158254487 | 21 | 14.689 | KV453211.1  | 266726 | 21-scf00417 | 21 |
| AX-157739958 | 21 | 14.689 | KV453211.1  | 271742 | 21-scf00417 | 21 |
| AX-158254493 | 21 | 14.689 | KV453211.1  | 273578 | 21-scf00417 | 21 |
| AX-157705545 | 21 | 14.689 | 3ML01030195 | 250    | scf05788_1  | UN |
| AX-158254496 | 21 | 14.919 | KV453211.1  | 278572 | 21-scf00417 | 21 |
| AX-157859900 | 21 | 14.92  | KV453211.1  | 281695 | 21-scf00417 | 21 |
| AX-158254502 | 21 | 14.92  | KV453211.1  | 283306 | 21-scf00417 | 21 |
| AX-158254503 | 21 | 14.92  | KV453211.1  | 283673 | 21-scf00417 | 21 |
| AX-158419141 | 21 | 14.92  | KV453211.1  | 286964 | 21-scf00417 | 21 |
| AX-158254478 | 21 | 14.961 | KV453211.1  | 254091 | 21-scf00417 | 21 |
| AX-158254512 | 21 | 14.961 | KV453211.1  | 296099 | 21-scf00417 | 21 |
| AX-158254529 | 21 | 14.961 | KV453211.1  | 313232 | 21-scf00417 | 21 |
| AX-158254518 | 21 | 15.306 | KV453211.1  | 304464 | 21-scf00417 | 21 |
| AX-158254523 | 21 | 15.306 | KV453211.1  | 308278 | 21-scf00417 | 21 |
| AX-158254526 | 21 | 15.306 | KV453211.1  | 309911 | 21-scf00417 | 21 |
| AX-158387099 | 21 | 15.306 | KV453211.1  | 311172 | 21-scf00417 | 21 |
| AX-158254528 | 21 | 15.306 | KV453211.1  | 313032 | 21-scf00417 | 21 |
| AX-158254533 | 21 | 15.306 | KV453211.1  | 319213 | 21-scf00417 | 21 |
| AX-158254536 | 21 | 15.306 | KV453211.1  | 321591 | 21-scf00417 | 21 |
| AX-158254539 | 21 | 15.306 | KV453211.1  | 326086 | 21-scf00417 | 21 |
| AX-158254551 | 21 | 15.306 | KV453211.1  | 339236 | 21-scf00417 | 21 |
| AX-158254532 | 21 | 15.381 | KV453211.1  | 318582 | 21-scf00417 | 21 |
| AX-158254535 | 21 | 15.435 | KV453211.1  | 320997 | 21-scf00417 | 21 |
| AX-158254541 | 21 | 15.564 | KV453211.1  | 327207 | 21-scf00417 | 21 |
| AX-157754489 | 21 | 15.564 | KV453211.1  | 328862 | 21-scf00417 | 21 |
| AX-158254547 | 21 | 15.564 | KV453211.1  | 335510 | 21-scf00417 | 21 |
| AX-158254549 | 21 | 15.564 | KV453211.1  | 337568 | 21-scf00417 | 21 |
| AX-157738774 | 21 | 15.564 | KV453211.1  | 338170 | 21-scf00417 | 21 |
| AX-158254553 | 21 | 15.693 | KV453211.1  | 340909 | 21-scf00417 | 21 |
| AX-157723543 | 21 | 15.693 | KV453211.1  | 343872 | 21-scf00417 | 21 |
| AX-158416028 | 21 | 15.693 | KV453211.1  | 344586 | 21-scf00417 | 21 |
| AX-157753045 | 21 | 15.693 | KV453211.1  | 351790 | 21-scf00417 | 21 |
| AX-158254560 | 21 | 15.693 | KV453211.1  | 354246 | 21-scf00417 | 21 |
| AX-157758307 | 21 | 15.693 | KV453211.1  | 355581 | 21-scf00417 | 21 |
| AX-158254562 | 21 | 15.693 | KV453211.1  | 356570 | 21-scf00417 | 21 |



|              |    |        |            |        |             |    |
|--------------|----|--------|------------|--------|-------------|----|
| AX-157842473 | 21 | 15.693 | KV453211.1 | 374664 | 21-scf00417 | 21 |
| AX-158254580 | 21 | 15.693 | KV453211.1 | 377501 | 21-scf00417 | 21 |
| AX-158254582 | 21 | 15.693 | KV453211.1 | 378941 | 21-scf00417 | 21 |
| AX-158254566 | 21 | 15.726 | KV453211.1 | 360982 | 21-scf00417 | 21 |
| AX-158254573 | 21 | 15.757 | KV453211.1 | 365654 | 21-scf00417 | 21 |
| AX-158254574 | 21 | 15.786 | KV453211.1 | 367148 | 21-scf00417 | 21 |
| AX-158254575 | 21 | 15.822 | KV453211.1 | 368445 | 21-scf00417 | 21 |
| AX-157744020 | 21 | 15.822 | KV453211.1 | 373787 | 21-scf00417 | 21 |
| AX-157770873 | 21 | 15.822 | KV453211.1 | 375329 | 21-scf00417 | 21 |
| AX-157842474 | 21 | 15.951 | KV453211.1 | 379229 | 21-scf00417 | 21 |
| AX-158254583 | 21 | 15.954 | KV453211.1 | 379649 | 21-scf00417 | 21 |
| AX-158254571 | 21 | 16.128 | KV453211.1 | 364259 | 21-scf00417 | 21 |
| AX-158254589 | 21 | 16.128 | KV453211.1 | 385589 | 21-scf00417 | 21 |
| AX-158254591 | 21 | 16.13  | KV453211.1 | 393423 | 21-scf00417 | 21 |
| AX-158254592 | 21 | 16.487 | KV453211.1 | 397582 | 21-scf00417 | 21 |
| AX-157842475 | 21 | 16.488 | KV453211.1 | 398536 | 21-scf00417 | 21 |
| AX-157842476 | 21 | 16.489 | KV453211.1 | 404721 | 21-scf00417 | 21 |
| AX-158254595 | 21 | 16.489 | KV453211.1 | 408196 | 21-scf00417 | 21 |
| AX-157739237 | 21 | 16.831 | KV453211.1 | 411813 | 21-scf00417 | 21 |
| AX-158254598 | 21 | 16.862 | KV453211.1 | 414126 | 21-scf00417 | 21 |
| AX-158254599 | 21 | 16.862 | KV453211.1 | 418280 | 21-scf00417 | 21 |
| AX-158254602 | 21 | 17.374 | KV453211.1 | 427609 | 21-scf00417 | 21 |
| AX-157752074 | 21 | 17.546 | KV453211.1 | 435576 | 21-scf00417 | 21 |
| AX-158254604 | 21 | 17.546 | KV453211.1 | 436071 | 21-scf00417 | 21 |
| AX-158254660 | 21 | 17.546 | KV453211.1 | 544768 | 21-scf00417 | 21 |
| AX-158254607 | 21 | 17.887 | KV453211.1 | 444413 | 21-scf00417 | 21 |
| AX-158254609 | 21 | 17.887 | KV453211.1 | 447034 | 21-scf00417 | 21 |
| AX-158254610 | 21 | 17.887 | KV453211.1 | 450676 | 21-scf00417 | 21 |
| AX-158254611 | 21 | 17.887 | KV453211.1 | 451942 | 21-scf00417 | 21 |
| AX-158254612 | 21 | 17.887 | KV453211.1 | 453340 | 21-scf00417 | 21 |
| AX-157774975 | 21 | 17.887 | KV453211.1 | 458546 | 21-scf00417 | 21 |
| AX-158254615 | 21 | 17.888 | KV453211.1 | 460849 | 21-scf00417 | 21 |
| AX-158254616 | 21 | 17.889 | KV453211.1 | 461252 | 21-scf00417 | 21 |
| AX-158254619 | 21 | 18.128 | KV453211.1 | 469453 | 21-scf00417 | 21 |
| AX-158254625 | 21 | 18.27  | KV453211.1 | 479519 | 21-scf00417 | 21 |
| AX-157842482 | 21 | 18.27  | KV453211.1 | 482118 | 21-scf00417 | 21 |
| AX-158254627 | 21 | 18.27  | KV453211.1 | 482676 | 21-scf00417 | 21 |
| AX-158254628 | 21 | 18.27  | KV453211.1 | 483072 | 21-scf00417 | 21 |
| AX-158254631 | 21 | 18.27  | KV453211.1 | 491273 | 21-scf00417 | 21 |
| AX-158254633 | 21 | 18.27  | KV453211.1 | 494501 | 21-scf00417 | 21 |
| AX-158254635 | 21 | 18.651 | KV453211.1 | 497004 | 21-scf00417 | 21 |
| AX-158254636 | 21 | 18.651 | KV453211.1 | 497660 | 21-scf00417 | 21 |
| AX-158254663 | 21 | 18.651 | KV453211.1 | 548901 | 21-scf00417 | 21 |
| AX-158254630 | 21 | 18.652 | KV453211.1 | 488614 | 21-scf00417 | 21 |
| AX-157723401 | 21 | 18.652 | KV453211.1 | 510701 | 21-scf00417 | 21 |
| AX-158416033 | 21 | 18.652 | KV453211.1 | 511985 | 21-scf00417 | 21 |
| AX-158254640 | 21 | 18.652 | KV453211.1 | 513326 | 21-scf00417 | 21 |
| AX-158254641 | 21 | 18.652 | KV453211.1 | 513569 | 21-scf00417 | 21 |
| AX-158254643 | 21 | 18.786 | KV453211.1 | 515547 | 21-scf00417 | 21 |
| AX-158254645 | 21 | 18.786 | KV453211.1 | 517173 | 21-scf00417 | 21 |
| AX-158254646 | 21 | 18.786 | KV453211.1 | 520885 | 21-scf00417 | 21 |

|              |    |        |            |        |                |    |
|--------------|----|--------|------------|--------|----------------|----|
| AX-158381029 | 21 | 18.786 | KV453211.1 | 522062 | 21-scf00417    | 21 |
| AX-158254648 | 21 | 18.786 | KV453211.1 | 522606 | 21-scf00417    | 21 |
| AX-158416034 | 21 | 18.786 | KV453211.1 | 524246 | 21-scf00417    | 21 |
| AX-158254652 | 21 | 18.786 | KV453211.1 | 531423 | 21-scf00417    | 21 |
| AX-158254653 | 21 | 18.786 | KV453211.1 | 532649 | 21-scf00417    | 21 |
| AX-158254654 | 21 | 18.786 | KV453211.1 | 534570 | 21-scf00417    | 21 |
| AX-157842486 | 21 | 18.786 | KV453211.1 | 543014 | 21-scf00417    | 21 |
| AX-158254664 | 21 | 18.786 | KV453211.1 | 550499 | 21-scf00417    | 21 |
| AX-158254670 | 21 | 18.786 | KV453211.1 | 558280 | 21-scf00417    | 21 |
| AX-158254671 | 21 | 18.786 | KV453211.1 | 561439 | 21-scf00417    | 21 |
| AX-157842487 | 21 | 19.186 | KV453211.1 | 553024 | 21-scf00417    | 21 |
| AX-158254666 | 21 | 19.186 | KV453211.1 | 555433 | 21-scf00417    | 21 |
| AX-158254668 | 21 | 19.189 | KV453211.1 | 557310 | 21-scf00417    | 21 |
| AX-158254659 | 21 | 19.236 | KV453211.1 | 543281 | 21-scf00417    | 21 |
| AX-158254669 | 21 | 19.236 | KV453211.1 | 557711 | 21-scf00417    | 21 |
| AX-158254672 | 21 | 19.635 | KV453211.1 | 562294 | 21-scf00417    | 21 |
| AX-158254676 | 21 | 19.635 | KV453211.1 | 568974 | 21-scf00417    | 21 |
| AX-158254678 | 21 | 19.635 | KV453211.1 | 570509 | 21-scf00417    | 21 |
| AX-157745481 | 21 | 19.635 | KV453211.1 | 573787 | 21-scf00417    | 21 |
| AX-158254682 | 21 | 20.146 | KV453211.1 | 580856 | 21-scf00417    | 21 |
| AX-158254684 | 21 | 20.146 | KV453211.1 | 584432 | 21-scf00417    | 21 |
| AX-158254685 | 21 | 20.401 | KV453211.1 | 586475 | 21-scf00417    | 21 |
| AX-158254686 | 21 | 20.401 | KV453211.1 | 587237 | 21-scf00417    | 21 |
| AX-157753876 | 21 | 20.401 | KV453211.1 | 588919 | 21-scf00417    | 21 |
| AX-158254688 | 21 | 20.401 | KV453211.1 | 591020 | 21-scf00417    | 21 |
| AX-158254689 | 21 | 20.401 | KV453211.1 | 592167 | 21-scf00417    | 21 |
| AX-158254691 | 21 | 20.401 | KV453211.1 | 593592 | 21-scf00417    | 21 |
| AX-158254692 | 21 | 20.401 | KV453211.1 | 593917 | 21-scf00417    | 21 |
| AX-158254694 | 21 | 20.401 | KV453211.1 | 595057 | 21-scf00417    | 21 |
| AX-158254697 | 21 | 20.401 | KV453211.1 | 597529 | 21-scf00417    | 21 |
| AX-158254698 | 21 | 20.401 | KV453211.1 | 597896 | 21-scf00417    | 21 |
| AX-158254700 | 21 | 20.401 | KV453211.1 | 600981 | 21-scf00417    | 21 |
| AX-158254753 | 21 | 20.401 | KV453211.1 | 711143 | 21-scf00417    | 21 |
| AX-158254786 | 21 | 20.401 | KV453211.1 | 775453 | 21-scf00417    | 21 |
| AX-157694024 | 21 | 20.401 | FI883481.1 | 205    | IORI212 lctalk | UN |
| AX-158254703 | 21 | 20.448 | KV453211.1 | 608175 | 21-scf00417    | 21 |
| AX-158254705 | 21 | 20.619 | KV453211.1 | 613254 | 21-scf00417    | 21 |
| AX-157739922 | 21 | 20.619 | KV453211.1 | 615045 | 21-scf00417    | 21 |
| AX-158254707 | 21 | 20.619 | KV453211.1 | 615161 | 21-scf00417    | 21 |
| AX-157719655 | 21 | 20.619 | KV453211.1 | 616908 | 21-scf00417    | 21 |
| AX-158254709 | 21 | 20.66  | KV453211.1 | 617752 | 21-scf00417    | 21 |
| AX-158254710 | 21 | 20.696 | KV453211.1 | 618822 | 21-scf00417    | 21 |
| AX-158254744 | 21 | 20.696 | KV453211.1 | 695575 | 21-scf00417    | 21 |
| AX-158254711 | 21 | 20.729 | KV453211.1 | 620380 | 21-scf00417    | 21 |
| AX-158254714 | 21 | 20.765 | KV453211.1 | 623322 | 21-scf00417    | 21 |
| AX-158416037 | 21 | 20.776 | KV453211.1 | 628525 | 21-scf00417    | 21 |
| AX-158254717 | 21 | 20.794 | KV453211.1 | 629248 | 21-scf00417    | 21 |
| AX-158394534 | 21 | 20.803 | KV453211.1 | 634092 | 21-scf00417    | 21 |
| AX-158254723 | 21 | 20.819 | KV453211.1 | 642740 | 21-scf00417    | 21 |
| AX-158254725 | 21 | 20.819 | KV453211.1 | 644393 | 21-scf00417    | 21 |
| AX-158254806 | 21 | 20.819 | KV453211.1 | 800680 | 21-scf00417    | 21 |

|              |    |        |            |        |                |    |
|--------------|----|--------|------------|--------|----------------|----|
| AX-157842515 | 21 | 20.819 | KV453211.1 | 879311 | 21-scf00417    | 21 |
| AX-158254712 | 21 | 20.838 | KV453211.1 | 620603 | 21-scf00417    | 21 |
| AX-157842490 | 21 | 20.838 | KV453211.1 | 636725 | 21-scf00417    | 21 |
| AX-158254726 | 21 | 20.838 | KV453211.1 | 649948 | 21-scf00417    | 21 |
| AX-158254727 | 21 | 20.838 | KV453211.1 | 654683 | 21-scf00417    | 21 |
| AX-158254735 | 21 | 20.838 | KV453211.1 | 676082 | 21-scf00417    | 21 |
| AX-158254738 | 21 | 20.838 | KV453211.1 | 684228 | 21-scf00417    | 21 |
| AX-158254739 | 21 | 20.838 | KV453211.1 | 684588 | 21-scf00417    | 21 |
| AX-157842493 | 21 | 20.838 | KV453211.1 | 688464 | 21-scf00417    | 21 |
| AX-158254741 | 21 | 20.838 | KV453211.1 | 692791 | 21-scf00417    | 21 |
| AX-158254742 | 21 | 20.838 | KV453211.1 | 693758 | 21-scf00417    | 21 |
| AX-158254743 | 21 | 20.838 | KV453211.1 | 693999 | 21-scf00417    | 21 |
| AX-157842494 | 21 | 20.838 | KV453211.1 | 695427 | 21-scf00417    | 21 |
| AX-158254752 | 21 | 20.838 | KV453211.1 | 710120 | 21-scf00417    | 21 |
| AX-157842499 | 21 | 20.838 | KV453211.1 | 728800 | 21-scf00417    | 21 |
| AX-157704247 | 21 | 20.838 | DX103160.1 | 238    | IORI212 lctalu | UN |
| AX-158254746 | 21 | 20.947 | KV453211.1 | 701694 | 21-scf00417    | 21 |
| AX-158254748 | 21 | 20.947 | KV453211.1 | 704127 | 21-scf00417    | 21 |
| AX-157744048 | 21 | 20.947 | KV453211.1 | 704183 | 21-scf00417    | 21 |
| AX-157842498 | 21 | 20.947 | KV453211.1 | 726177 | 21-scf00417    | 21 |
| AX-158254760 | 21 | 20.947 | KV453211.1 | 726553 | 21-scf00417    | 21 |
| AX-158254761 | 21 | 20.947 | KV453211.1 | 726821 | 21-scf00417    | 21 |
| AX-158254762 | 21 | 20.947 | KV453211.1 | 727795 | 21-scf00417    | 21 |
| AX-157715467 | 21 | 20.947 | KV453211.1 | 730177 | 21-scf00417    | 21 |
| AX-157715731 | 21 | 20.947 | KV453211.1 | 733100 | 21-scf00417    | 21 |
| AX-158254764 | 21 | 20.947 | KV453211.1 | 737149 | 21-scf00417    | 21 |
| AX-157842501 | 21 | 20.947 | KV453211.1 | 740882 | 21-scf00417    | 21 |
| AX-158254767 | 21 | 20.947 | KV453211.1 | 741867 | 21-scf00417    | 21 |
| AX-158254773 | 21 | 20.947 | KV453211.1 | 750795 | 21-scf00417    | 21 |
| AX-157842504 | 21 | 20.947 | KV453211.1 | 763746 | 21-scf00417    | 21 |
| AX-157717393 | 21 | 20.947 | KV453211.1 | 764099 | 21-scf00417    | 21 |
| AX-158254780 | 21 | 20.947 | KV453211.1 | 765353 | 21-scf00417    | 21 |
| AX-157842506 | 21 | 20.947 | KV453211.1 | 770380 | 21-scf00417    | 21 |
| AX-158254784 | 21 | 20.947 | KV453211.1 | 774220 | 21-scf00417    | 21 |
| AX-158254787 | 21 | 20.947 | KV453211.1 | 775719 | 21-scf00417    | 21 |
| AX-158254790 | 21 | 20.947 | KV453211.1 | 777564 | 21-scf00417    | 21 |
| AX-158254785 | 21 | 21.013 | KV453211.1 | 775177 | 21-scf00417    | 21 |
| AX-158254792 | 21 | 21.076 | KV453211.1 | 781177 | 21-scf00417    | 21 |
| AX-158254793 | 21 | 21.139 | KV453211.1 | 783447 | 21-scf00417    | 21 |
| AX-158254832 | 21 | 21.139 | KV453211.1 | 833916 | 21-scf00417    | 21 |
| AX-158254863 | 21 | 21.139 | KV453211.1 | 889241 | 21-scf00417    | 21 |
| AX-158254867 | 21 | 21.139 | KV453211.1 | 898157 | 21-scf00417    | 21 |
| AX-158254893 | 21 | 21.139 | KV453211.1 | 945545 | 21-scf00417    | 21 |
| AX-158254795 | 21 | 21.22  | KV453211.1 | 789716 | 21-scf00417    | 21 |
| AX-158254797 | 21 | 21.221 | KV453211.1 | 791515 | 21-scf00417    | 21 |
| AX-158254798 | 21 | 21.221 | KV453211.1 | 791948 | 21-scf00417    | 21 |
| AX-158254834 | 21 | 21.221 | KV453211.1 | 836323 | 21-scf00417    | 21 |
| AX-158254805 | 21 | 21.493 | KV453211.1 | 799984 | 21-scf00417    | 21 |
| AX-158254810 | 21 | 21.493 | KV453211.1 | 806903 | 21-scf00417    | 21 |
| AX-158254811 | 21 | 21.493 | KV453211.1 | 807183 | 21-scf00417    | 21 |
| AX-157756819 | 21 | 21.493 | KV453211.1 | 807753 | 21-scf00417    | 21 |

|              |    |        |            |        |             |    |
|--------------|----|--------|------------|--------|-------------|----|
| AX-158254813 | 21 | 21.493 | KV453211.1 | 809047 | 21-scf00417 | 21 |
| AX-157872776 | 21 | 21.493 | KV453211.1 | 809816 | 21-scf00417 | 21 |
| AX-158254815 | 21 | 21.493 | KV453211.1 | 811801 | 21-scf00417 | 21 |
| AX-158254816 | 21 | 21.493 | KV453211.1 | 812616 | 21-scf00417 | 21 |
| AX-158254817 | 21 | 21.493 | KV453211.1 | 813252 | 21-scf00417 | 21 |
| AX-158254819 | 21 | 21.493 | KV453211.1 | 814744 | 21-scf00417 | 21 |
| AX-158254820 | 21 | 21.493 | KV453211.1 | 815823 | 21-scf00417 | 21 |
| AX-158254825 | 21 | 21.493 | KV453211.1 | 823886 | 21-scf00417 | 21 |
| AX-158254829 | 21 | 21.493 | KV453211.1 | 826269 | 21-scf00417 | 21 |
| AX-157842507 | 21 | 21.493 | KV453211.1 | 826557 | 21-scf00417 | 21 |
| AX-157757594 | 21 | 21.493 | KV453211.1 | 827644 | 21-scf00417 | 21 |
| AX-158254831 | 21 | 21.493 | KV453211.1 | 829213 | 21-scf00417 | 21 |
| AX-157759007 | 21 | 21.493 | KV453211.1 | 832374 | 21-scf00417 | 21 |
| AX-157842508 | 21 | 21.493 | KV453211.1 | 834935 | 21-scf00417 | 21 |
| AX-158254839 | 21 | 21.493 | KV453211.1 | 838588 | 21-scf00417 | 21 |
| AX-157695931 | 21 | 21.493 | KV453211.1 | 878258 | 21-scf00417 | 21 |
| AX-158254836 | 21 | 21.532 | KV453211.1 | 837536 | 21-scf00417 | 21 |
| AX-158254838 | 21 | 21.559 | KV453211.1 | 838254 | 21-scf00417 | 21 |
| AX-158254840 | 21 | 21.587 | KV453211.1 | 842117 | 21-scf00417 | 21 |
| AX-158416040 | 21 | 21.712 | KV453211.1 | 840130 | 21-scf00417 | 21 |
| AX-158254841 | 21 | 21.712 | KV453211.1 | 843322 | 21-scf00417 | 21 |
| AX-157756214 | 21 | 21.712 | KV453211.1 | 845190 | 21-scf00417 | 21 |
| AX-157749833 | 21 | 21.712 | KV453211.1 | 849619 | 21-scf00417 | 21 |
| AX-158254843 | 21 | 21.712 | KV453211.1 | 851372 | 21-scf00417 | 21 |
| AX-157842511 | 21 | 21.712 | KV453211.1 | 854163 | 21-scf00417 | 21 |
| AX-158254845 | 21 | 21.712 | KV453211.1 | 854412 | 21-scf00417 | 21 |
| AX-158254846 | 21 | 21.712 | KV453211.1 | 854883 | 21-scf00417 | 21 |
| AX-157715537 | 21 | 21.712 | KV453211.1 | 857317 | 21-scf00417 | 21 |
| AX-158254850 | 21 | 21.712 | KV453211.1 | 859169 | 21-scf00417 | 21 |
| AX-157735893 | 21 | 21.712 | KV453211.1 | 862235 | 21-scf00417 | 21 |
| AX-157842512 | 21 | 21.712 | KV453211.1 | 862552 | 21-scf00417 | 21 |
| AX-157842514 | 21 | 21.712 | KV453211.1 | 863850 | 21-scf00417 | 21 |
| AX-158381031 | 21 | 21.712 | KV453211.1 | 867282 | 21-scf00417 | 21 |
| AX-158254854 | 21 | 21.712 | KV453211.1 | 868519 | 21-scf00417 | 21 |
| AX-157721127 | 21 | 21.712 | KV453211.1 | 870062 | 21-scf00417 | 21 |
| AX-157740643 | 21 | 21.712 | KV453211.1 | 878129 | 21-scf00417 | 21 |
| AX-158254875 | 21 | 21.712 | KV453211.1 | 911169 | 21-scf00417 | 21 |
| AX-157872778 | 21 | 21.712 | KV453211.1 | 935020 | 21-scf00417 | 21 |
| AX-158254920 | 21 | 21.712 | KV453211.1 | 975908 | 21-scf00417 | 21 |
| AX-158254814 | 21 | 21.93  | KV453211.1 | 810213 | 21-scf00417 | 21 |
| AX-158254826 | 21 | 21.93  | KV453211.1 | 824572 | 21-scf00417 | 21 |
| AX-157745599 | 21 | 21.93  | KV453211.1 | 886793 | 21-scf00417 | 21 |
| AX-158254862 | 21 | 21.93  | KV453211.1 | 889033 | 21-scf00417 | 21 |
| AX-157744403 | 21 | 21.93  | KV453211.1 | 894320 | 21-scf00417 | 21 |
| AX-157739521 | 21 | 21.93  | KV453211.1 | 895040 | 21-scf00417 | 21 |
| AX-158254866 | 21 | 21.93  | KV453211.1 | 896354 | 21-scf00417 | 21 |
| AX-157774021 | 21 | 21.93  | KV453211.1 | 898438 | 21-scf00417 | 21 |
| AX-158254868 | 21 | 21.93  | KV453211.1 | 899356 | 21-scf00417 | 21 |
| AX-157842520 | 21 | 21.93  | KV453211.1 | 901238 | 21-scf00417 | 21 |
| AX-158254870 | 21 | 21.93  | KV453211.1 | 903368 | 21-scf00417 | 21 |
| AX-157842521 | 21 | 21.93  | KV453211.1 | 903963 | 21-scf00417 | 21 |

|              |    |        |            |         |             |    |
|--------------|----|--------|------------|---------|-------------|----|
| AX-157842522 | 21 | 21.93  | KV453211.1 | 906974  | 21-scf00417 | 21 |
| AX-158254872 | 21 | 21.93  | KV453211.1 | 907841  | 21-scf00417 | 21 |
| AX-158254874 | 21 | 21.93  | KV453211.1 | 910002  | 21-scf00417 | 21 |
| AX-158254876 | 21 | 21.93  | KV453211.1 | 913307  | 21-scf00417 | 21 |
| AX-158254878 | 21 | 21.93  | KV453211.1 | 915205  | 21-scf00417 | 21 |
| AX-158254888 | 21 | 21.93  | KV453211.1 | 933495  | 21-scf00417 | 21 |
| AX-158254890 | 21 | 21.93  | KV453211.1 | 938295  | 21-scf00417 | 21 |
| AX-157842523 | 21 | 21.93  | KV453211.1 | 938581  | 21-scf00417 | 21 |
| AX-157842525 | 21 | 21.93  | KV453211.1 | 939112  | 21-scf00417 | 21 |
| AX-157722655 | 21 | 21.93  | KV453211.1 | 940081  | 21-scf00417 | 21 |
| AX-158254891 | 21 | 21.93  | KV453211.1 | 941971  | 21-scf00417 | 21 |
| AX-158254892 | 21 | 21.93  | KV453211.1 | 942061  | 21-scf00417 | 21 |
| AX-158254895 | 21 | 21.988 | KV453211.1 | 947039  | 21-scf00417 | 21 |
| AX-158254898 | 21 | 22.04  | KV453211.1 | 952699  | 21-scf00417 | 21 |
| AX-158254899 | 21 | 22.04  | KV453211.1 | 953186  | 21-scf00417 | 21 |
| AX-158254900 | 21 | 22.093 | KV453211.1 | 953815  | 21-scf00417 | 21 |
| AX-158254901 | 21 | 22.148 | KV453211.1 | 955832  | 21-scf00417 | 21 |
| AX-158254902 | 21 | 22.148 | KV453211.1 | 956182  | 21-scf00417 | 21 |
| AX-158254880 | 21 | 22.206 | KV453211.1 | 916986  | 21-scf00417 | 21 |
| AX-158254904 | 21 | 22.206 | KV453211.1 | 958638  | 21-scf00417 | 21 |
| AX-157747546 | 21 | 22.258 | KV453211.1 | 754619  | 21-scf00417 | 21 |
| AX-158254906 | 21 | 22.258 | KV453211.1 | 959591  | 21-scf00417 | 21 |
| AX-158254908 | 21 | 22.258 | KV453211.1 | 963095  | 21-scf00417 | 21 |
| AX-158254909 | 21 | 22.258 | KV453211.1 | 963571  | 21-scf00417 | 21 |
| AX-158254913 | 21 | 22.258 | KV453211.1 | 965996  | 21-scf00417 | 21 |
| AX-158254916 | 21 | 22.258 | KV453211.1 | 970502  | 21-scf00417 | 21 |
| AX-158254917 | 21 | 22.258 | KV453211.1 | 972633  | 21-scf00417 | 21 |
| AX-158254918 | 21 | 22.258 | KV453211.1 | 973406  | 21-scf00417 | 21 |
| AX-158254919 | 21 | 22.26  | KV453211.1 | 974659  | 21-scf00417 | 21 |
| AX-158254922 | 21 | 22.576 | KV453211.1 | 979229  | 21-scf00417 | 21 |
| AX-158254927 | 21 | 22.577 | KV453211.1 | 981963  | 21-scf00417 | 21 |
| AX-157739948 | 21 | 22.602 | KV453211.1 | 982698  | 21-scf00417 | 21 |
| AX-158254928 | 21 | 22.602 | KV453211.1 | 982980  | 21-scf00417 | 21 |
| AX-158254930 | 21 | 22.602 | KV453211.1 | 985706  | 21-scf00417 | 21 |
| AX-158254935 | 21 | 22.602 | KV453211.1 | 990828  | 21-scf00417 | 21 |
| AX-158254937 | 21 | 22.602 | KV453211.1 | 995091  | 21-scf00417 | 21 |
| AX-158254941 | 21 | 22.607 | KV453211.1 | 1004572 | 21-scf00417 | 21 |
| AX-158254944 | 21 | 22.607 | KV453211.1 | 1011246 | 21-scf00417 | 21 |
| AX-158254950 | 21 | 22.607 | KV453211.1 | 1019722 | 21-scf00417 | 21 |
| AX-158254960 | 21 | 22.607 | KV453211.1 | 1050192 | 21-scf00417 | 21 |
| AX-158381032 | 21 | 22.879 | KV453211.1 | 1008419 | 21-scf00417 | 21 |
| AX-158254936 | 21 | 23.133 | KV453211.1 | 994446  | 21-scf00417 | 21 |
| AX-158254943 | 21 | 23.133 | KV453211.1 | 1008211 | 21-scf00417 | 21 |
| AX-158254946 | 21 | 23.133 | KV453211.1 | 1015598 | 21-scf00417 | 21 |
| AX-158254953 | 21 | 23.133 | KV453211.1 | 1025130 | 21-scf00417 | 21 |
| AX-157770912 | 21 | 23.133 | KV453211.1 | 1025842 | 21-scf00417 | 21 |
| AX-158254954 | 21 | 23.133 | KV453211.1 | 1027042 | 21-scf00417 | 21 |
| AX-157887664 | 21 | 23.133 | KV453211.1 | 1028023 | 21-scf00417 | 21 |
| AX-158254955 | 21 | 23.133 | KV453211.1 | 1031596 | 21-scf00417 | 21 |
| AX-157719559 | 21 | 23.391 | KV453211.1 | 705625  | 21-scf00417 | 21 |
| AX-158254956 | 21 | 23.391 | KV453211.1 | 1043997 | 21-scf00417 | 21 |

|              |    |        |             |         |             |    |
|--------------|----|--------|-------------|---------|-------------|----|
| AX-158254972 | 21 | 23.391 | KV453211.1  | 1076290 | 21-scf00417 | 21 |
| AX-158254975 | 21 | 23.391 | KV453211.1  | 1085723 | 21-scf00417 | 21 |
| AX-157688719 | 21 | 23.391 | 3ML01026839 | 687     | scf02442_1  | UN |
| AX-158254957 | 21 | 23.392 | KV453211.1  | 1045936 | 21-scf00417 | 21 |
| AX-158254958 | 21 | 23.392 | KV453211.1  | 1047171 | 21-scf00417 | 21 |
| AX-158254961 | 21 | 23.393 | KV453211.1  | 1057294 | 21-scf00417 | 21 |
| AX-158254966 | 21 | 23.393 | KV453211.1  | 1066165 | 21-scf00417 | 21 |
| AX-158254968 | 21 | 23.831 | KV453211.1  | 1070839 | 21-scf00417 | 21 |
| AX-158254971 | 21 | 23.832 | KV453211.1  | 1074613 | 21-scf00417 | 21 |
| AX-158254974 | 21 | 23.994 | KV453211.1  | 1080435 | 21-scf00417 | 21 |
| AX-157773468 | 21 | 24.214 | KV453211.1  | 1083206 | 21-scf00417 | 21 |
| AX-158254976 | 21 | 24.501 | KV453211.1  | 1086127 | 21-scf00417 | 21 |
| AX-158254977 | 21 | 24.502 | KV453211.1  | 1086545 | 21-scf00417 | 21 |
| AX-158254978 | 21 | 24.502 | KV453211.1  | 1088570 | 21-scf00417 | 21 |
| AX-157859905 | 21 | 24.502 | KV453211.1  | 1089492 | 21-scf00417 | 21 |
| AX-158254979 | 21 | 24.502 | KV453211.1  | 1090548 | 21-scf00417 | 21 |
| AX-158254982 | 21 | 24.773 | KV453211.1  | 1094165 | 21-scf00417 | 21 |
| AX-158254983 | 21 | 24.773 | KV453211.1  | 1095549 | 21-scf00417 | 21 |
| AX-158254984 | 21 | 24.773 | KV453211.1  | 1098193 | 21-scf00417 | 21 |
| AX-158254986 | 21 | 24.773 | KV453211.1  | 1101094 | 21-scf00417 | 21 |
| AX-157696543 | 21 | 24.773 | KV453211.1  | 1101275 | 21-scf00417 | 21 |
| AX-158254989 | 21 | 24.773 | KV453211.1  | 1108641 | 21-scf00417 | 21 |
| AX-158254993 | 21 | 24.773 | KV453211.1  | 1113631 | 21-scf00417 | 21 |
| AX-158254990 | 21 | 24.882 | KV453211.1  | 1109358 | 21-scf00417 | 21 |
| AX-157739991 | 21 | 24.992 | KV453211.1  | 1094636 | 21-scf00417 | 21 |
| AX-158254994 | 21 | 24.992 | KV453211.1  | 1114864 | 21-scf00417 | 21 |
| AX-158254995 | 21 | 24.992 | KV453211.1  | 1118919 | 21-scf00417 | 21 |
| AX-158254996 | 21 | 24.992 | KV453211.1  | 1119813 | 21-scf00417 | 21 |
| AX-157751209 | 21 | 24.992 | KV453211.1  | 1122385 | 21-scf00417 | 21 |
| AX-157754903 | 21 | 24.992 | KV453211.1  | 1125002 | 21-scf00417 | 21 |
| AX-158255000 | 21 | 24.992 | KV453211.1  | 1127290 | 21-scf00417 | 21 |
| AX-158255001 | 21 | 24.992 | KV453211.1  | 1128066 | 21-scf00417 | 21 |
| AX-158255002 | 21 | 24.992 | KV453211.1  | 1134084 | 21-scf00417 | 21 |
| AX-158255003 | 21 | 25.21  | KV453211.1  | 1136625 | 21-scf00417 | 21 |
| AX-158255005 | 21 | 25.21  | KV453211.1  | 1140092 | 21-scf00417 | 21 |
| AX-158255006 | 21 | 25.21  | KV453211.1  | 1140527 | 21-scf00417 | 21 |
| AX-158255007 | 21 | 25.374 | KV453211.1  | 1141736 | 21-scf00417 | 21 |
| AX-158255008 | 21 | 25.445 | KV453211.1  | 1143319 | 21-scf00417 | 21 |
| AX-158255009 | 21 | 25.538 | KV453211.1  | 1144575 | 21-scf00417 | 21 |
| AX-158255010 | 21 | 25.538 | KV453211.1  | 1146384 | 21-scf00417 | 21 |
| AX-158381033 | 21 | 25.538 | KV453211.1  | 1147727 | 21-scf00417 | 21 |
| AX-158255012 | 21 | 25.538 | KV453211.1  | 1147896 | 21-scf00417 | 21 |
| AX-158255014 | 21 | 25.538 | KV453211.1  | 1151427 | 21-scf00417 | 21 |
| AX-158255015 | 21 | 25.538 | KV453211.1  | 1152883 | 21-scf00417 | 21 |
| AX-158255017 | 21 | 25.538 | KV453211.1  | 1159326 | 21-scf00417 | 21 |
| AX-158255020 | 21 | 25.538 | KV453211.1  | 1161379 | 21-scf00417 | 21 |
| AX-157770674 | 21 | 25.538 | KV453211.1  | 1164174 | 21-scf00417 | 21 |
| AX-158255023 | 21 | 25.538 | KV453211.1  | 1167101 | 21-scf00417 | 21 |
| AX-157719760 | 21 | 25.653 | KV453211.1  | 1169094 | 21-scf00417 | 21 |
| AX-158255024 | 21 | 25.753 | KV453211.1  | 1170932 | 21-scf00417 | 21 |
| AX-158255025 | 21 | 25.892 | KV453211.1  | 1171576 | 21-scf00417 | 21 |

|              |    |        |            |         |             |    |
|--------------|----|--------|------------|---------|-------------|----|
| AX-157775914 | 21 | 25.961 | KV453211.1 | 1171842 | 21-scf00417 | 21 |
| AX-158255027 | 21 | 26.156 | KV453211.1 | 1175012 | 21-scf00417 | 21 |
| AX-158255029 | 21 | 26.156 | KV453211.1 | 1176775 | 21-scf00417 | 21 |
| AX-158255032 | 21 | 26.156 | KV453211.1 | 1184192 | 21-scf00417 | 21 |
| AX-158255033 | 21 | 26.156 | KV453211.1 | 1185432 | 21-scf00417 | 21 |
| AX-157719740 | 21 | 26.242 | KV453211.1 | 1180834 | 21-scf00417 | 21 |
| AX-158255036 | 21 | 26.242 | KV453211.1 | 1190460 | 21-scf00417 | 21 |
| AX-158255038 | 21 | 26.305 | KV453211.1 | 1192222 | 21-scf00417 | 21 |
| AX-158255041 | 21 | 26.305 | KV453211.1 | 1196373 | 21-scf00417 | 21 |
| AX-158255042 | 21 | 26.305 | KV453211.1 | 1196762 | 21-scf00417 | 21 |
| AX-158255044 | 21 | 26.305 | KV453211.1 | 1199459 | 21-scf00417 | 21 |
| AX-158255046 | 21 | 26.305 | KV453211.1 | 1201829 | 21-scf00417 | 21 |
| AX-158255052 | 21 | 26.305 | KV453211.1 | 1209329 | 21-scf00417 | 21 |
| AX-158255054 | 21 | 26.305 | KV453211.1 | 1210978 | 21-scf00417 | 21 |
| AX-158255056 | 21 | 26.305 | KV453211.1 | 1211729 | 21-scf00417 | 21 |
| AX-158255075 | 21 | 26.305 | KV453211.1 | 1235819 | 21-scf00417 | 21 |
| AX-158255086 | 21 | 26.305 | KV453211.1 | 1250435 | 21-scf00417 | 21 |
| AX-158255059 | 21 | 26.487 | KV453211.1 | 1216779 | 21-scf00417 | 21 |
| AX-157775632 | 21 | 26.488 | KV453211.1 | 1217159 | 21-scf00417 | 21 |
| AX-158255065 | 21 | 26.852 | KV453211.1 | 1222660 | 21-scf00417 | 21 |
| AX-158255066 | 21 | 26.852 | KV453211.1 | 1224280 | 21-scf00417 | 21 |
| AX-158255068 | 21 | 26.852 | KV453211.1 | 1227543 | 21-scf00417 | 21 |
| AX-158255069 | 21 | 26.852 | KV453211.1 | 1229055 | 21-scf00417 | 21 |
| AX-158255083 | 21 | 26.852 | KV453211.1 | 1243502 | 21-scf00417 | 21 |
| AX-158255043 | 21 | 26.886 | KV453211.1 | 1197284 | 21-scf00417 | 21 |
| AX-158255049 | 21 | 26.886 | KV453211.1 | 1203883 | 21-scf00417 | 21 |
| AX-158255060 | 21 | 26.886 | KV453211.1 | 1218110 | 21-scf00417 | 21 |
| AX-158255071 | 21 | 26.886 | KV453211.1 | 1232083 | 21-scf00417 | 21 |
| AX-158255073 | 21 | 26.886 | KV453211.1 | 1234386 | 21-scf00417 | 21 |
| AX-158414289 | 21 | 26.961 | KV453211.1 | 1198439 | 21-scf00417 | 21 |
| AX-158255076 | 21 | 26.961 | KV453211.1 | 1236292 | 21-scf00417 | 21 |
| AX-158255078 | 21 | 26.961 | KV453211.1 | 1237462 | 21-scf00417 | 21 |
| AX-158255080 | 21 | 26.961 | KV453211.1 | 1241109 | 21-scf00417 | 21 |
| AX-157713113 | 21 | 26.961 | KV453211.1 | 1243917 | 21-scf00417 | 21 |
| AX-158255087 | 21 | 26.961 | KV453211.1 | 1251190 | 21-scf00417 | 21 |
| AX-158255088 | 21 | 26.961 | KV453211.1 | 1252760 | 21-scf00417 | 21 |
| AX-158255089 | 21 | 27.179 | KV453211.1 | 1255340 | 21-scf00417 | 21 |
| AX-158255090 | 21 | 27.179 | KV453211.1 | 1256141 | 21-scf00417 | 21 |
| AX-158255092 | 21 | 27.179 | KV453211.1 | 1257565 | 21-scf00417 | 21 |
| AX-158255093 | 21 | 27.179 | KV453211.1 | 1258280 | 21-scf00417 | 21 |
| AX-158255094 | 21 | 27.179 | KV453211.1 | 1258961 | 21-scf00417 | 21 |
| AX-158255096 | 21 | 27.248 | KV453211.1 | 1261195 | 21-scf00417 | 21 |
| AX-158255097 | 21 | 27.342 | KV453211.1 | 1262556 | 21-scf00417 | 21 |
| AX-158255101 | 21 | 27.506 | KV453211.1 | 1268029 | 21-scf00417 | 21 |
| AX-158255104 | 21 | 27.506 | KV453211.1 | 1276253 | 21-scf00417 | 21 |
| AX-158255103 | 21 | 27.765 | KV453211.1 | 1270272 | 21-scf00417 | 21 |
| AX-157887668 | 21 | 27.945 | KV453211.1 | 1275296 | 21-scf00417 | 21 |
| AX-158255105 | 21 | 27.945 | KV453211.1 | 1277202 | 21-scf00417 | 21 |
| AX-158255108 | 21 | 27.945 | KV453211.1 | 1280042 | 21-scf00417 | 21 |
| AX-158255109 | 21 | 27.945 | KV453211.1 | 1280632 | 21-scf00417 | 21 |
| AX-158255110 | 21 | 27.945 | KV453211.1 | 1281208 | 21-scf00417 | 21 |

|              |    |        |             |         |             |    |
|--------------|----|--------|-------------|---------|-------------|----|
| AX-158255112 | 21 | 27.945 | KV453211.1  | 1285388 | 21-scf00417 | 21 |
| AX-158255116 | 21 | 27.945 | KV453211.1  | 1291674 | 21-scf00417 | 21 |
| AX-157739801 | 21 | 27.945 | KV453211.1  | 1303926 | 21-scf00417 | 21 |
| AX-158255124 | 21 | 27.945 | KV453211.1  | 1310069 | 21-scf00417 | 21 |
| AX-158255113 | 21 | 27.946 | KV453211.1  | 1286190 | 21-scf00417 | 21 |
| AX-158255120 | 21 | 27.946 | KV453211.1  | 1305060 | 21-scf00417 | 21 |
| AX-157709406 | 21 | 27.946 | KV453211.1  | 1305431 | 21-scf00417 | 21 |
| AX-158255122 | 21 | 28.271 | KV453211.1  | 1308553 | 21-scf00417 | 21 |
| AX-158255125 | 21 | 28.273 | KV453211.1  | 1311843 | 21-scf00417 | 21 |
| AX-158255131 | 21 | 28.273 | KV453211.1  | 1318843 | 21-scf00417 | 21 |
| AX-158255132 | 21 | 28.273 | KV453211.1  | 1321324 | 21-scf00417 | 21 |
| AX-157720158 | 21 | 28.546 | KV453211.1  | 1322731 | 21-scf00417 | 21 |
| AX-158255133 | 21 | 28.546 | KV453211.1  | 1323009 | 21-scf00417 | 21 |
| AX-158255135 | 21 | 28.546 | KV453211.1  | 1324715 | 21-scf00417 | 21 |
| AX-157742495 | 21 | 28.546 | KV453211.1  | 1329502 | 21-scf00417 | 21 |
| AX-158255138 | 21 | 28.546 | KV453211.1  | 1330010 | 21-scf00417 | 21 |
| AX-158255139 | 21 | 28.546 | KV453211.1  | 1330550 | 21-scf00417 | 21 |
| AX-158255143 | 21 | 28.546 | KV453211.1  | 1335578 | 21-scf00417 | 21 |
| AX-158255140 | 21 | 28.637 | KV453211.1  | 1332560 | 21-scf00417 | 21 |
| AX-158255141 | 21 | 28.696 | KV453211.1  | 1333550 | 21-scf00417 | 21 |
| AX-157872781 | 21 | 28.819 | KV453211.1  | 1325968 | 21-scf00417 | 21 |
| AX-158255142 | 21 | 28.819 | KV453211.1  | 1334894 | 21-scf00417 | 21 |
| AX-158255144 | 21 | 28.819 | KV453211.1  | 1338139 | 21-scf00417 | 21 |
| AX-158255147 | 21 | 28.819 | KV453211.1  | 1340528 | 21-scf00417 | 21 |
| AX-158255148 | 21 | 28.819 | KV453211.1  | 1341270 | 21-scf00417 | 21 |
| AX-158255152 | 21 | 28.819 | KV453211.1  | 1343578 | 21-scf00417 | 21 |
| AX-158255153 | 21 | 28.819 | KV453211.1  | 1344293 | 21-scf00417 | 21 |
| AX-157842529 | 21 | 28.819 | KV453211.1  | 1346609 | 21-scf00417 | 21 |
| AX-157759100 | 21 | 28.819 | KV453211.1  | 1348395 | 21-scf00417 | 21 |
| AX-158255156 | 21 | 28.819 | KV453211.1  | 1351589 | 21-scf00417 | 21 |
| AX-158255149 | 21 | 28.966 | KV453211.1  | 1341632 | 21-scf00417 | 21 |
| AX-157755489 | 21 | 28.966 | KV453211.1  | 1352462 | 21-scf00417 | 21 |
| AX-158255159 | 21 | 29.038 | KV453211.1  | 1357673 | 21-scf00417 | 21 |
| AX-158255160 | 21 | 29.147 | KV453211.1  | 1359184 | 21-scf00417 | 21 |
| AX-158255163 | 21 | 29.147 | KV453211.1  | 1364429 | 21-scf00417 | 21 |
| AX-158255164 | 21 | 29.557 | KV453211.1  | 1365553 | 21-scf00417 | 21 |
| AX-158255166 | 21 | 29.59  | KV453211.1  | 1367665 | 21-scf00417 | 21 |
| AX-158255167 | 21 | 29.59  | KV453211.1  | 1368383 | 21-scf00417 | 21 |
| AX-158255169 | 21 | 29.855 | KV453211.1  | 1373037 | 21-scf00417 | 21 |
| AX-158255170 | 21 | 29.855 | KV453211.1  | 1375150 | 21-scf00417 | 21 |
| AX-158255171 | 21 | 30.327 | KV453211.1  | 1376266 | 21-scf00417 | 21 |
| AX-157859907 | 21 | 30.327 | KV453211.1  | 1376774 | 21-scf00417 | 21 |
| AX-158255172 | 21 | 30.327 | KV453211.1  | 1379101 | 21-scf00417 | 21 |
| AX-157707539 | 21 | 30.327 | 3ML01034516 | 234     | scf10192_1  | UN |
| AX-158255174 | 21 | 30.386 | KV453211.1  | 1381126 | 21-scf00417 | 21 |
| AX-158255177 | 21 | 30.438 | KV453211.1  | 1386048 | 21-scf00417 | 21 |
| AX-157887671 | 21 | 30.458 | KV453211.1  | 1392347 | 21-scf00417 | 21 |
| AX-158255181 | 21 | 30.459 | KV453211.1  | 1391135 | 21-scf00417 | 21 |
| AX-158255183 | 21 | 30.459 | KV453211.1  | 1393988 | 21-scf00417 | 21 |
| AX-158255173 | 21 | 30.46  | KV453211.1  | 1379573 | 21-scf00417 | 21 |
| AX-158381035 | 21 | 30.46  | KV453211.1  | 1397694 | 21-scf00417 | 21 |



|              |    |        |            |         |             |    |
|--------------|----|--------|------------|---------|-------------|----|
| AX-158255186 | 21 | 30.46  | KV453211.1 | 1398048 | 21-scf00417 | 21 |
| AX-157757108 | 21 | 30.46  | KV453211.1 | 1403830 | 21-scf00417 | 21 |
| AX-158255192 | 21 | 30.46  | KV453211.1 | 1404462 | 21-scf00417 | 21 |
| AX-158255178 | 21 | 30.517 | KV453211.1 | 1387110 | 21-scf00417 | 21 |
| AX-158255194 | 21 | 30.517 | KV453211.1 | 1405424 | 21-scf00417 | 21 |
| AX-158255195 | 21 | 30.569 | KV453211.1 | 1406703 | 21-scf00417 | 21 |
| AX-158255196 | 21 | 30.627 | KV453211.1 | 1408108 | 21-scf00417 | 21 |
| AX-158255188 | 21 | 30.679 | KV453211.1 | 1398969 | 21-scf00417 | 21 |
| AX-158255198 | 21 | 30.679 | KV453211.1 | 1410625 | 21-scf00417 | 21 |
| AX-157708414 | 21 | 30.679 | KV453211.1 | 1411710 | 21-scf00417 | 21 |
| AX-158255200 | 21 | 30.679 | KV453211.1 | 1412294 | 21-scf00417 | 21 |
| AX-158255202 | 21 | 30.679 | KV453211.1 | 1414766 | 21-scf00417 | 21 |
| AX-158255203 | 21 | 30.679 | KV453211.1 | 1415905 | 21-scf00417 | 21 |
| AX-157775677 | 21 | 30.679 | KV453211.1 | 1416795 | 21-scf00417 | 21 |
| AX-158255205 | 21 | 30.679 | KV453211.1 | 1418044 | 21-scf00417 | 21 |
| AX-158255207 | 21 | 30.971 | KV453211.1 | 1419314 | 21-scf00417 | 21 |
| AX-158394543 | 21 | 31.113 | KV453211.1 | 1423219 | 21-scf00417 | 21 |
| AX-158255209 | 21 | 31.116 | KV453211.1 | 1423268 | 21-scf00417 | 21 |
| AX-158255213 | 21 | 31.116 | KV453211.1 | 1429318 | 21-scf00417 | 21 |
| AX-157745744 | 21 | 31.116 | KV453211.1 | 1429795 | 21-scf00417 | 21 |
| AX-158255214 | 21 | 31.116 | KV453211.1 | 1429895 | 21-scf00417 | 21 |
| AX-157752256 | 21 | 31.116 | KV453211.1 | 1433040 | 21-scf00417 | 21 |
| AX-158255264 | 21 | 31.116 | KV453211.1 | 1512694 | 21-scf00417 | 21 |
| AX-157740484 | 21 | 31.443 | KV453211.1 | 1434356 | 21-scf00417 | 21 |
| AX-158255227 | 21 | 31.443 | KV453211.1 | 1447722 | 21-scf00417 | 21 |
| AX-158255230 | 21 | 31.443 | KV453211.1 | 1450446 | 21-scf00417 | 21 |
| AX-157738800 | 21 | 31.443 | KV453211.1 | 1453755 | 21-scf00417 | 21 |
| AX-158255234 | 21 | 31.443 | KV453211.1 | 1457333 | 21-scf00417 | 21 |
| AX-158255236 | 21 | 31.443 | KV453211.1 | 1458259 | 21-scf00417 | 21 |
| AX-157867390 | 21 | 31.443 | KV453211.1 | 1525405 | 21-scf00417 | 21 |
| AX-158255235 | 21 | 31.495 | KV453211.1 | 1457697 | 21-scf00417 | 21 |
| AX-158255222 | 21 | 31.553 | KV453211.1 | 1440241 | 21-scf00417 | 21 |
| AX-158255239 | 21 | 31.553 | KV453211.1 | 1462841 | 21-scf00417 | 21 |
| AX-158255240 | 21 | 31.553 | KV453211.1 | 1464164 | 21-scf00417 | 21 |
| AX-158255242 | 21 | 31.553 | KV453211.1 | 1465855 | 21-scf00417 | 21 |
| AX-157753749 | 21 | 31.553 | KV453211.1 | 1466146 | 21-scf00417 | 21 |
| AX-158255243 | 21 | 31.553 | KV453211.1 | 1467006 | 21-scf00417 | 21 |
| AX-158255244 | 21 | 31.553 | KV453211.1 | 1468263 | 21-scf00417 | 21 |
| AX-158255246 | 21 | 31.553 | KV453211.1 | 1476343 | 21-scf00417 | 21 |
| AX-158255250 | 21 | 31.662 | KV453211.1 | 1481482 | 21-scf00417 | 21 |
| AX-158255251 | 21 | 31.662 | KV453211.1 | 1483482 | 21-scf00417 | 21 |
| AX-158255252 | 21 | 31.662 | KV453211.1 | 1485089 | 21-scf00417 | 21 |
| AX-158255254 | 21 | 31.663 | KV453211.1 | 1486440 | 21-scf00417 | 21 |
| AX-158255255 | 21 | 31.663 | KV453211.1 | 1488170 | 21-scf00417 | 21 |
| AX-158255245 | 21 | 31.726 | KV453211.1 | 1474674 | 21-scf00417 | 21 |
| AX-158255257 | 21 | 31.726 | KV453211.1 | 1492758 | 21-scf00417 | 21 |
| AX-158255258 | 21 | 31.86  | KV453211.1 | 1493676 | 21-scf00417 | 21 |
| AX-158255260 | 21 | 31.988 | KV453211.1 | 1500141 | 21-scf00417 | 21 |
| AX-157748508 | 21 | 31.993 | KV453211.1 | 1502646 | 21-scf00417 | 21 |
| AX-158394545 | 21 | 31.993 | KV453211.1 | 1507074 | 21-scf00417 | 21 |
| AX-158255266 | 21 | 32.209 | KV453211.1 | 1514904 | 21-scf00417 | 21 |

|              |    |        |            |         |             |    |
|--------------|----|--------|------------|---------|-------------|----|
| AX-157872782 | 21 | 32.209 | KV453211.1 | 1516504 | 21-scf00417 | 21 |
| AX-158255268 | 21 | 32.209 | KV453211.1 | 1517809 | 21-scf00417 | 21 |
| AX-158381036 | 21 | 32.314 | KV453211.1 | 1517915 | 21-scf00417 | 21 |
| AX-158255269 | 21 | 32.427 | KV453211.1 | 1518836 | 21-scf00417 | 21 |
| AX-158255271 | 21 | 32.427 | KV453211.1 | 1521965 | 21-scf00417 | 21 |
| AX-158255272 | 21 | 32.427 | KV453211.1 | 1522596 | 21-scf00417 | 21 |
| AX-157842531 | 21 | 32.427 | KV453211.1 | 1526085 | 21-scf00417 | 21 |
| AX-158255281 | 21 | 32.646 | KV453211.1 | 1538330 | 21-scf00417 | 21 |
| AX-158255282 | 21 | 32.646 | KV453211.1 | 1539562 | 21-scf00417 | 21 |
| AX-158255283 | 21 | 32.646 | KV453211.1 | 1543464 | 21-scf00417 | 21 |
| AX-158255285 | 21 | 32.646 | KV453211.1 | 1545105 | 21-scf00417 | 21 |
| AX-157750101 | 21 | 32.646 | KV453211.1 | 1545740 | 21-scf00417 | 21 |
| AX-158255287 | 21 | 32.678 | KV453211.1 | 1548445 | 21-scf00417 | 21 |
| AX-158255274 | 21 | 32.81  | KV453211.1 | 1524940 | 21-scf00417 | 21 |
| AX-158255286 | 21 | 32.81  | KV453211.1 | 1548154 | 21-scf00417 | 21 |
| AX-158255290 | 21 | 32.81  | KV453211.1 | 1549682 | 21-scf00417 | 21 |
| AX-157872784 | 21 | 32.974 | KV453211.1 | 1551915 | 21-scf00417 | 21 |
| AX-157716280 | 21 | 32.974 | KV453211.1 | 1552682 | 21-scf00417 | 21 |
| AX-157872785 | 21 | 33.01  | KV453211.1 | 1554057 | 21-scf00417 | 21 |
| AX-158255292 | 21 | 33.05  | KV453211.1 | 1558041 | 21-scf00417 | 21 |
| AX-158255293 | 21 | 33.083 | KV453211.1 | 1559871 | 21-scf00417 | 21 |
| AX-158255295 | 21 | 33.083 | KV453211.1 | 1561197 | 21-scf00417 | 21 |
| AX-158255296 | 21 | 33.083 | KV453211.1 | 1562699 | 21-scf00417 | 21 |
| AX-158255297 | 21 | 33.083 | KV453211.1 | 1565075 | 21-scf00417 | 21 |
| AX-158255298 | 21 | 33.265 | KV453211.1 | 1572002 | 21-scf00417 | 21 |
| AX-158255299 | 21 | 33.265 | KV453211.1 | 1573014 | 21-scf00417 | 21 |
| AX-158255301 | 21 | 33.63  | KV453211.1 | 1576137 | 21-scf00417 | 21 |
| AX-158255304 | 21 | 33.63  | KV453211.1 | 1578352 | 21-scf00417 | 21 |
| AX-158255305 | 21 | 33.63  | KV453211.1 | 1579168 | 21-scf00417 | 21 |
| AX-157842533 | 21 | 33.63  | KV453211.1 | 1579703 | 21-scf00417 | 21 |
| AX-157713442 | 21 | 33.63  | KV453211.1 | 1582891 | 21-scf00417 | 21 |
| AX-158255306 | 21 | 33.63  | KV453211.1 | 1583839 | 21-scf00417 | 21 |
| AX-158255307 | 21 | 33.63  | KV453211.1 | 1584992 | 21-scf00417 | 21 |
| AX-158255310 | 21 | 33.63  | KV453211.1 | 1587696 | 21-scf00417 | 21 |
| AX-158255328 | 21 | 33.63  | KV453211.1 | 1610670 | 21-scf00417 | 21 |
| AX-157720075 | 21 | 33.677 | KV453211.1 | 1585786 | 21-scf00417 | 21 |
| AX-158255309 | 21 | 33.739 | KV453211.1 | 1587089 | 21-scf00417 | 21 |
| AX-157887675 | 21 | 33.739 | KV453211.1 | 1587487 | 21-scf00417 | 21 |
| AX-157723537 | 21 | 33.739 | KV453211.1 | 1589485 | 21-scf00417 | 21 |
| AX-157719348 | 21 | 33.739 | KV453211.1 | 1591310 | 21-scf00417 | 21 |
| AX-158255312 | 21 | 33.739 | KV453211.1 | 1592521 | 21-scf00417 | 21 |
| AX-158255315 | 21 | 33.739 | KV453211.1 | 1594127 | 21-scf00417 | 21 |
| AX-158255323 | 21 | 33.739 | KV453211.1 | 1603178 | 21-scf00417 | 21 |
| AX-158255326 | 21 | 33.739 | KV453211.1 | 1609196 | 21-scf00417 | 21 |
| AX-158255335 | 21 | 33.739 | KV453211.1 | 1620206 | 21-scf00417 | 21 |
| AX-158255316 | 21 | 33.74  | KV453211.1 | 1594516 | 21-scf00417 | 21 |
| AX-158255319 | 21 | 33.815 | KV453211.1 | 1599408 | 21-scf00417 | 21 |
| AX-158255320 | 21 | 33.884 | KV453211.1 | 1600757 | 21-scf00417 | 21 |
| AX-158255303 | 21 | 33.885 | KV453211.1 | 1577404 | 21-scf00417 | 21 |
| AX-158255321 | 21 | 33.885 | KV453211.1 | 1601768 | 21-scf00417 | 21 |
| AX-158255330 | 21 | 33.885 | KV453211.1 | 1613108 | 21-scf00417 | 21 |

|              |    |        |             |         |             |    |
|--------------|----|--------|-------------|---------|-------------|----|
| AX-158255325 | 21 | 34.009 | KV453211.1  | 1608671 | 21-scf00417 | 21 |
| AX-158255327 | 21 | 34.176 | KV453211.1  | 1610168 | 21-scf00417 | 21 |
| AX-158255332 | 21 | 34.176 | KV453211.1  | 1614751 | 21-scf00417 | 21 |
| AX-157719168 | 21 | 34.176 | KV453211.1  | 1616420 | 21-scf00417 | 21 |
| AX-158255333 | 21 | 34.176 | KV453211.1  | 1617776 | 21-scf00417 | 21 |
| AX-158255336 | 21 | 34.176 | KV453211.1  | 1621934 | 21-scf00417 | 21 |
| AX-157887676 | 21 | 34.176 | KV453211.1  | 1622548 | 21-scf00417 | 21 |
| AX-157773829 | 21 | 34.176 | KV453211.1  | 1623736 | 21-scf00417 | 21 |
| AX-158255338 | 21 | 34.176 | KV453211.1  | 1627032 | 21-scf00417 | 21 |
| AX-158255339 | 21 | 34.176 | KV453211.1  | 1628839 | 21-scf00417 | 21 |
| AX-157758882 | 21 | 34.285 | KV453211.1  | 1629661 | 21-scf00417 | 21 |
| AX-158255340 | 21 | 34.285 | KV453211.1  | 1630575 | 21-scf00417 | 21 |
| AX-157859910 | 21 | 34.285 | KV453211.1  | 1631065 | 21-scf00417 | 21 |
| AX-158255341 | 21 | 34.285 | KV453211.1  | 1631199 | 21-scf00417 | 21 |
| AX-158255342 | 21 | 34.285 | KV453211.1  | 1631632 | 21-scf00417 | 21 |
| AX-158255344 | 21 | 34.285 | KV453211.1  | 1632465 | 21-scf00417 | 21 |
| AX-158255345 | 21 | 34.285 | KV453211.1  | 1634509 | 21-scf00417 | 21 |
| AX-158255372 | 21 | 34.285 | KV453211.1  | 1680057 | 21-scf00417 | 21 |
| AX-158255347 | 21 | 34.379 | KV453211.1  | 1643269 | 21-scf00417 | 21 |
| AX-158255352 | 21 | 34.504 | KV453211.1  | 1649558 | 21-scf00417 | 21 |
| AX-158255353 | 21 | 34.504 | KV453211.1  | 1650585 | 21-scf00417 | 21 |
| AX-157842537 | 21 | 34.504 | KV453211.1  | 1651642 | 21-scf00417 | 21 |
| AX-158255354 | 21 | 34.504 | KV453211.1  | 1651852 | 21-scf00417 | 21 |
| AX-158255370 | 21 | 34.504 | KV453211.1  | 1673940 | 21-scf00417 | 21 |
| AX-158255356 | 21 | 34.56  | KV453211.1  | 1656489 | 21-scf00417 | 21 |
| AX-157887677 | 21 | 34.613 | KV453211.1  | 1646998 | 21-scf00417 | 21 |
| AX-158255357 | 21 | 34.613 | KV453211.1  | 1657172 | 21-scf00417 | 21 |
| AX-157750797 | 21 | 34.613 | KV453211.1  | 1660362 | 21-scf00417 | 21 |
| AX-158255360 | 21 | 34.613 | KV453211.1  | 1661749 | 21-scf00417 | 21 |
| AX-158255361 | 21 | 34.613 | KV453211.1  | 1662320 | 21-scf00417 | 21 |
| AX-158255363 | 21 | 34.613 | KV453211.1  | 1665384 | 21-scf00417 | 21 |
| AX-158255364 | 21 | 34.613 | KV453211.1  | 1666845 | 21-scf00417 | 21 |
| AX-158255365 | 21 | 34.613 | KV453211.1  | 1667269 | 21-scf00417 | 21 |
| AX-157842539 | 21 | 34.613 | KV453211.1  | 1667915 | 21-scf00417 | 21 |
| AX-158255366 | 21 | 34.613 | KV453211.1  | 1668485 | 21-scf00417 | 21 |
| AX-158255367 | 21 | 34.613 | KV453211.1  | 1670744 | 21-scf00417 | 21 |
| AX-158255373 | 21 | 34.613 | KV453211.1  | 1680831 | 21-scf00417 | 21 |
| AX-157707009 | 21 | 34.613 | 3ML01033330 | 204     | scf08976_1  | UN |
| AX-158255369 | 21 | 34.68  | KV453211.1  | 1672266 | 21-scf00417 | 21 |
| AX-158255359 | 21 | 34.745 | KV453211.1  | 1659837 | 21-scf00417 | 21 |
| AX-157771356 | 21 | 34.745 | KV453211.1  | 1674263 | 21-scf00417 | 21 |
| AX-158255376 | 21 | 34.745 | KV453211.1  | 1685414 | 21-scf00417 | 21 |
| AX-158255379 | 21 | 34.745 | KV453211.1  | 1687488 | 21-scf00417 | 21 |
| AX-158255374 | 21 | 34.831 | KV453211.1  | 1682033 | 21-scf00417 | 21 |
| AX-158255375 | 21 | 34.831 | KV453211.1  | 1682527 | 21-scf00417 | 21 |
| AX-157701904 | 21 | 34.831 | KV453211.1  | 1685658 | 21-scf00417 | 21 |
| AX-158255380 | 21 | 34.831 | KV453211.1  | 1688100 | 21-scf00417 | 21 |
| AX-158255381 | 21 | 34.831 | KV453211.1  | 1688579 | 21-scf00417 | 21 |
| AX-157726922 | 21 | 34.831 | KV453211.1  | 1696048 | 21-scf00417 | 21 |
| AX-158255383 | 21 | 34.831 | KV453211.1  | 1696673 | 21-scf00417 | 21 |
| AX-158255384 | 21 | 34.831 | KV453211.1  | 1698398 | 21-scf00417 | 21 |

|              |    |        |            |         |             |    |
|--------------|----|--------|------------|---------|-------------|----|
| AX-158255385 | 21 | 34.831 | KV453211.1 | 1699172 | 21-scf00417 | 21 |
| AX-158255387 | 21 | 34.831 | KV453211.1 | 1701744 | 21-scf00417 | 21 |
| AX-158255389 | 21 | 34.944 | KV453211.1 | 1705250 | 21-scf00417 | 21 |
| AX-158255390 | 21 | 35.05  | KV453211.1 | 1707117 | 21-scf00417 | 21 |
| AX-158255392 | 21 | 35.487 | KV453211.1 | 1712028 | 21-scf00417 | 21 |
| AX-158255393 | 21 | 35.488 | KV453211.1 | 1712486 | 21-scf00417 | 21 |
| AX-158255394 | 21 | 35.488 | KV453211.1 | 1713080 | 21-scf00417 | 21 |
| AX-158255395 | 21 | 35.488 | KV453211.1 | 1714612 | 21-scf00417 | 21 |
| AX-158255397 | 21 | 35.488 | KV453211.1 | 1715164 | 21-scf00417 | 21 |
| AX-158416050 | 21 | 35.488 | KV453211.1 | 1715840 | 21-scf00417 | 21 |
| AX-158255400 | 21 | 35.488 | KV453211.1 | 1720750 | 21-scf00417 | 21 |
| AX-158255402 | 21 | 35.509 | KV453211.1 | 1723799 | 21-scf00417 | 21 |
| AX-158255403 | 21 | 35.532 | KV453211.1 | 1724457 | 21-scf00417 | 21 |
| AX-157872787 | 21 | 35.559 | KV453211.1 | 1726085 | 21-scf00417 | 21 |
| AX-158255398 | 21 | 35.597 | KV453211.1 | 1719490 | 21-scf00417 | 21 |
| AX-158255406 | 21 | 35.597 | KV453211.1 | 1726444 | 21-scf00417 | 21 |
| AX-158255407 | 21 | 35.597 | KV453211.1 | 1727301 | 21-scf00417 | 21 |
| AX-158255408 | 21 | 35.597 | KV453211.1 | 1727366 | 21-scf00417 | 21 |
| AX-158255409 | 21 | 35.597 | KV453211.1 | 1728038 | 21-scf00417 | 21 |
| AX-158255410 | 21 | 35.597 | KV453211.1 | 1728640 | 21-scf00417 | 21 |
| AX-157717047 | 21 | 35.597 | KV453211.1 | 1729142 | 21-scf00417 | 21 |
| AX-158255411 | 21 | 35.597 | KV453211.1 | 1729766 | 21-scf00417 | 21 |
| AX-158255424 | 21 | 35.597 | KV453211.1 | 1750560 | 21-scf00417 | 21 |
| AX-157842543 | 21 | 35.597 | KV453211.1 | 1753149 | 21-scf00417 | 21 |
| AX-158255412 | 21 | 35.815 | KV453211.1 | 1731096 | 21-scf00417 | 21 |
| AX-157842541 | 21 | 35.815 | KV453211.1 | 1733178 | 21-scf00417 | 21 |
| AX-158255416 | 21 | 35.815 | KV453211.1 | 1735563 | 21-scf00417 | 21 |
| AX-157750747 | 21 | 35.815 | KV453211.1 | 1737130 | 21-scf00417 | 21 |
| AX-158255418 | 21 | 35.815 | KV453211.1 | 1738568 | 21-scf00417 | 21 |
| AX-157752386 | 21 | 35.815 | KV453211.1 | 1739549 | 21-scf00417 | 21 |
| AX-158255419 | 21 | 35.815 | KV453211.1 | 1739737 | 21-scf00417 | 21 |
| AX-158255421 | 21 | 36.033 | KV453211.1 | 1745001 | 21-scf00417 | 21 |
| AX-158255422 | 21 | 36.033 | KV453211.1 | 1745337 | 21-scf00417 | 21 |
| AX-158255423 | 21 | 36.033 | KV453211.1 | 1748489 | 21-scf00417 | 21 |
| AX-158255425 | 21 | 36.033 | KV453211.1 | 1751370 | 21-scf00417 | 21 |
| AX-158255426 | 21 | 36.033 | KV453211.1 | 1752045 | 21-scf00417 | 21 |
| AX-158255429 | 21 | 36.033 | KV453211.1 | 1755352 | 21-scf00417 | 21 |
| AX-158255433 | 21 | 36.033 | KV453211.1 | 1759193 | 21-scf00417 | 21 |
| AX-157775563 | 21 | 36.033 | KV453211.1 | 1761557 | 21-scf00417 | 21 |
| AX-158255436 | 21 | 36.197 | KV453211.1 | 1763318 | 21-scf00417 | 21 |
| AX-158255437 | 21 | 36.281 | KV453211.1 | 1763691 | 21-scf00417 | 21 |
| AX-158255440 | 21 | 36.361 | KV453211.1 | 1765453 | 21-scf00417 | 21 |
| AX-157859912 | 21 | 36.361 | KV453211.1 | 1767317 | 21-scf00417 | 21 |
| AX-158255442 | 21 | 36.361 | KV453211.1 | 1767715 | 21-scf00417 | 21 |
| AX-158255446 | 21 | 36.361 | KV453211.1 | 1772266 | 21-scf00417 | 21 |
| AX-157723762 | 21 | 36.361 | KV453211.1 | 1773108 | 21-scf00417 | 21 |
| AX-158255448 | 21 | 36.361 | KV453211.1 | 1774268 | 21-scf00417 | 21 |
| AX-158255449 | 21 | 36.361 | KV453211.1 | 1774860 | 21-scf00417 | 21 |
| AX-158255451 | 21 | 36.361 | KV453211.1 | 1776217 | 21-scf00417 | 21 |
| AX-158255453 | 21 | 36.361 | KV453211.1 | 1777203 | 21-scf00417 | 21 |
| AX-158410989 | 21 | 36.361 | KV453211.1 | 1778618 | 21-scf00417 | 21 |

|              |    |        |            |         |                |    |
|--------------|----|--------|------------|---------|----------------|----|
| AX-158255456 | 21 | 36.361 | KV453211.1 | 1778697 | 21-scf00417    | 21 |
| AX-158255457 | 21 | 36.361 | KV453211.1 | 1779752 | 21-scf00417    | 21 |
| AX-158416054 | 21 | 36.361 | KV453211.1 | 1780536 | 21-scf00417    | 21 |
| AX-158255458 | 21 | 36.361 | KV453211.1 | 1781414 | 21-scf00417    | 21 |
| AX-157680305 | 21 | 36.361 |            | 49      | scf18523       | UN |
| AX-157887679 | 21 | 36.445 | KV453211.1 | 1785404 | 21-scf00417    | 21 |
| AX-158255460 | 21 | 36.525 | KV453211.1 | 1785463 | 21-scf00417    | 21 |
| AX-158255462 | 21 | 36.525 | KV453211.1 | 1786786 | 21-scf00417    | 21 |
| AX-158255463 | 21 | 36.525 | KV453211.1 | 1787966 | 21-scf00417    | 21 |
| AX-158255467 | 21 | 36.606 | KV453211.1 | 1790116 | 21-scf00417    | 21 |
| AX-158255466 | 21 | 36.689 | KV453211.1 | 1789743 | 21-scf00417    | 21 |
| AX-158255468 | 21 | 36.689 | KV453211.1 | 1791515 | 21-scf00417    | 21 |
| AX-157859913 | 21 | 36.689 | KV453211.1 | 1791656 | 21-scf00417    | 21 |
| AX-158255470 | 21 | 36.689 | KV453211.1 | 1793060 | 21-scf00417    | 21 |
| AX-158255471 | 21 | 36.689 | KV453211.1 | 1793768 | 21-scf00417    | 21 |
| AX-158255472 | 21 | 36.689 | KV453211.1 | 1794477 | 21-scf00417    | 21 |
| AX-158255473 | 21 | 36.689 | KV453211.1 | 1795174 | 21-scf00417    | 21 |
| AX-158255475 | 21 | 36.689 | KV453211.1 | 1797414 | 21-scf00417    | 21 |
| AX-158255477 | 21 | 36.689 | KV453211.1 | 1799558 | 21-scf00417    | 21 |
| AX-157771323 | 21 | 36.689 | KV453211.1 | 1799933 | 21-scf00417    | 21 |
| AX-157771543 | 21 | 36.689 | KV453211.1 | 1800797 | 21-scf00417    | 21 |
| AX-158255482 | 21 | 36.689 | KV453211.1 | 1805708 | 21-scf00417    | 21 |
| AX-158255484 | 21 | 36.689 | KV453211.1 | 1806801 | 21-scf00417    | 21 |
| AX-157740747 | 21 | 36.689 | KV453211.1 | 1807847 | 21-scf00417    | 21 |
| AX-158255478 | 21 | 36.691 | KV453211.1 | 1802200 | 21-scf00417    | 21 |
| AX-158255485 | 21 | 37.096 | KV453211.1 | 1808392 | 21-scf00417    | 21 |
| AX-158255486 | 21 | 37.099 | KV453211.1 | 1809460 | 21-scf00417    | 21 |
| AX-158255491 | 21 | 37.1   | KV453211.1 | 1814520 | 21-scf00417    | 21 |
| AX-158255496 | 21 | 37.1   | KV453211.1 | 1818130 | 21-scf00417    | 21 |
| AX-158255501 | 21 | 37.1   | KV453211.1 | 1823995 | 21-scf00417    | 21 |
| AX-157872788 | 21 | 37.102 | KV453211.1 | 1811795 | 21-scf00417    | 21 |
| AX-158255492 | 21 | 37.102 | KV453211.1 | 1814724 | 21-scf00417    | 21 |
| AX-158255493 | 21 | 37.103 | KV453211.1 | 1815337 | 21-scf00417    | 21 |
| AX-158255498 | 21 | 37.304 | KV453211.1 | 1820677 | 21-scf00417    | 21 |
| AX-158255499 | 21 | 37.304 | KV453211.1 | 1821609 | 21-scf00417    | 21 |
| AX-157755804 | 21 | 37.406 | KV453211.1 | 1826551 | 21-scf00417    | 21 |
| AX-158255525 | 21 | 38.509 | KV453211.1 | 1854733 | 21-scf00417    | 21 |
| AX-157842545 | 21 | 38.509 | KV453211.1 | 1857358 | 21-scf00417    | 21 |
| AX-157715112 | 21 | 38.658 | KV453211.1 | 1857754 | 21-scf00417    | 21 |
| AX-158381039 | 21 | 38.658 | KV453211.1 | 1858947 | 21-scf00417    | 21 |
| AX-158255529 | 21 | 38.658 | KV453211.1 | 1859185 | 21-scf00417    | 21 |
| AX-158255530 | 21 | 38.658 | KV453211.1 | 1860745 | 21-scf00417    | 21 |
| AX-158255532 | 21 | 38.658 | KV453211.1 | 1861884 | 21-scf00417    | 21 |
| AX-158255534 | 21 | 38.658 | KV453211.1 | 1864611 | 21-scf00417    | 21 |
| AX-158255535 | 21 | 38.658 | KV453211.1 | 1865175 | 21-scf00417    | 21 |
| AX-158255536 | 21 | 38.664 | KV453211.1 | 1866674 | 21-scf00417    | 21 |
| AX-157695991 | 21 | 38.664 | FI885449.1 | 76      | 4ORI212 lctalt | UN |
| AX-158255537 | 21 | 38.671 | KV453211.1 | 1867474 | 21-scf00417    | 21 |
| AX-158255538 | 21 | 38.678 | KV453211.1 | 1868230 | 21-scf00417    | 21 |
| AX-158255539 | 21 | 38.785 | KV453211.1 | 1869152 | 21-scf00417    | 21 |
| AX-158387126 | 21 | 38.785 | KV453211.1 | 1871906 | 21-scf00417    | 21 |

|              |    |        |            |         |             |    |
|--------------|----|--------|------------|---------|-------------|----|
| AX-158255542 | 21 | 38.785 | KV453211.1 | 1874552 | 21-scf00417 | 21 |
| AX-158255544 | 21 | 38.785 | KV453211.1 | 1876122 | 21-scf00417 | 21 |
| AX-157719625 | 21 | 38.785 | KV453211.1 | 1882769 | 21-scf00417 | 21 |
| AX-158255549 | 21 | 39.134 | KV453211.1 | 1884921 | 21-scf00417 | 21 |
| AX-158255550 | 21 | 39.137 | KV453211.1 | 1886169 | 21-scf00417 | 21 |
| AX-158255554 | 21 | 39.314 | KV453211.1 | 1893511 | 21-scf00417 | 21 |
| AX-158255555 | 21 | 39.314 | KV453211.1 | 1893708 | 21-scf00417 | 21 |
| AX-158255556 | 21 | 39.314 | KV453211.1 | 1894581 | 21-scf00417 | 21 |
| AX-158255558 | 21 | 39.314 | KV453211.1 | 1895856 | 21-scf00417 | 21 |
| AX-157739194 | 21 | 39.314 | KV453211.1 | 1896897 | 21-scf00417 | 21 |
| AX-158255562 | 21 | 39.641 | KV453211.1 | 1903294 | 21-scf00417 | 21 |
| AX-158255565 | 21 | 39.641 | KV453211.1 | 1911029 | 21-scf00417 | 21 |
| AX-158255566 | 21 | 39.642 | KV453211.1 | 1911697 | 21-scf00417 | 21 |
| AX-158255563 | 21 | 39.788 | KV453211.1 | 1905319 | 21-scf00417 | 21 |
| AX-158255568 | 21 | 39.788 | KV453211.1 | 1914293 | 21-scf00417 | 21 |
| AX-158255569 | 21 | 39.788 | KV453211.1 | 1915158 | 21-scf00417 | 21 |
| AX-158255570 | 21 | 39.788 | KV453211.1 | 1915850 | 21-scf00417 | 21 |
| AX-158255572 | 21 | 39.788 | KV453211.1 | 1919135 | 21-scf00417 | 21 |
| AX-158255576 | 21 | 39.788 | KV453211.1 | 1923400 | 21-scf00417 | 21 |
| AX-157880282 | 21 | 39.788 | KV453211.1 | 1956375 | 21-scf00417 | 21 |
| AX-158255577 | 21 | 40.074 | KV453211.1 | 1924187 | 21-scf00417 | 21 |
| AX-158255578 | 21 | 40.075 | KV453211.1 | 1924309 | 21-scf00417 | 21 |
| AX-158255580 | 21 | 40.078 | KV453211.1 | 1926478 | 21-scf00417 | 21 |
| AX-157754567 | 21 | 40.078 | KV453211.1 | 1927851 | 21-scf00417 | 21 |
| AX-158255596 | 21 | 40.078 | KV453211.1 | 1942599 | 21-scf00417 | 21 |
| AX-158394548 | 21 | 40.078 | KV453211.1 | 1942668 | 21-scf00417 | 21 |
| AX-158255597 | 21 | 40.078 | KV453211.1 | 1943953 | 21-scf00417 | 21 |
| AX-158255599 | 21 | 40.078 | KV453211.1 | 1947209 | 21-scf00417 | 21 |
| AX-158255600 | 21 | 40.078 | KV453211.1 | 1947695 | 21-scf00417 | 21 |
| AX-158255601 | 21 | 40.078 | KV453211.1 | 1948868 | 21-scf00417 | 21 |
| AX-158255603 | 21 | 40.078 | KV453211.1 | 1953444 | 21-scf00417 | 21 |
| AX-157842549 | 21 | 40.078 | KV453211.1 | 1954678 | 21-scf00417 | 21 |
| AX-158255606 | 21 | 40.078 | KV453211.1 | 1955905 | 21-scf00417 | 21 |
| AX-158255607 | 21 | 40.078 | KV453211.1 | 1956332 | 21-scf00417 | 21 |
| AX-157842550 | 21 | 40.078 | KV453211.1 | 1956819 | 21-scf00417 | 21 |
| AX-158255633 | 21 | 40.078 | KV453211.1 | 2019847 | 21-scf00417 | 21 |
| AX-158255605 | 21 | 40.406 | KV453211.1 | 1954905 | 21-scf00417 | 21 |
| AX-158255608 | 21 | 40.406 | KV453211.1 | 1960558 | 21-scf00417 | 21 |
| AX-158255610 | 21 | 40.406 | KV453211.1 | 1962718 | 21-scf00417 | 21 |
| AX-157880284 | 21 | 40.406 | KV453211.1 | 1964138 | 21-scf00417 | 21 |
| AX-158255611 | 21 | 40.406 | KV453211.1 | 1965549 | 21-scf00417 | 21 |
| AX-158255613 | 21 | 40.406 | KV453211.1 | 1967972 | 21-scf00417 | 21 |
| AX-158255614 | 21 | 40.406 | KV453211.1 | 1968402 | 21-scf00417 | 21 |
| AX-158255615 | 21 | 40.406 | KV453211.1 | 1968742 | 21-scf00417 | 21 |
| AX-158255616 | 21 | 40.406 | KV453211.1 | 1972859 | 21-scf00417 | 21 |
| AX-157842551 | 21 | 40.515 | KV453211.1 | 1973758 | 21-scf00417 | 21 |
| AX-158255617 | 21 | 40.515 | KV453211.1 | 1974000 | 21-scf00417 | 21 |
| AX-157842552 | 21 | 40.516 | KV453211.1 | 1975062 | 21-scf00417 | 21 |
| AX-158255621 | 21 | 40.843 | KV453211.1 | 1982478 | 21-scf00417 | 21 |
| AX-158255622 | 21 | 40.843 | KV453211.1 | 1988186 | 21-scf00417 | 21 |
| AX-158255624 | 21 | 40.843 | KV453211.1 | 1991037 | 21-scf00417 | 21 |

|              |    |        |            |         |             |    |
|--------------|----|--------|------------|---------|-------------|----|
| AX-158255625 | 21 | 40.843 | KV453211.1 | 1991296 | 21-scf00417 | 21 |
| AX-158255626 | 21 | 40.843 | KV453211.1 | 1997565 | 21-scf00417 | 21 |
| AX-158255628 | 21 | 40.843 | KV453211.1 | 2002945 | 21-scf00417 | 21 |
| AX-158255630 | 21 | 40.882 | KV453211.1 | 2005287 | 21-scf00417 | 21 |
| AX-157719234 | 21 | 40.913 | KV453211.1 | 2006259 | 21-scf00417 | 21 |
| AX-158255619 | 21 | 40.952 | KV453211.1 | 1978001 | 21-scf00417 | 21 |
| AX-157842554 | 21 | 40.952 | KV453211.1 | 1988466 | 21-scf00417 | 21 |
| AX-157703721 | 21 | 40.952 | KV453211.1 | 2006724 | 21-scf00417 | 21 |
| AX-158255631 | 21 | 40.952 | KV453211.1 | 2009527 | 21-scf00417 | 21 |
| AX-158255634 | 21 | 40.952 | KV453211.1 | 2021024 | 21-scf00417 | 21 |
| AX-158255637 | 21 | 40.952 | KV453211.1 | 2025366 | 21-scf00417 | 21 |
| AX-158255639 | 21 | 40.952 | KV453211.1 | 2027655 | 21-scf00417 | 21 |
| AX-158255640 | 21 | 40.952 | KV453211.1 | 2030261 | 21-scf00417 | 21 |
| AX-158255642 | 21 | 40.952 | KV453211.1 | 2031087 | 21-scf00417 | 21 |
| AX-158255644 | 21 | 40.952 | KV453211.1 | 2032568 | 21-scf00417 | 21 |
| AX-157753790 | 21 | 40.952 | KV453211.1 | 2032904 | 21-scf00417 | 21 |
| AX-158255647 | 21 | 40.952 | KV453211.1 | 2036613 | 21-scf00417 | 21 |
| AX-157842556 | 21 | 40.952 | KV453211.1 | 2037634 | 21-scf00417 | 21 |
| AX-157723039 | 21 | 40.952 | KV453211.1 | 2041394 | 21-scf00417 | 21 |
| AX-158255651 | 21 | 40.952 | KV453211.1 | 2044143 | 21-scf00417 | 21 |
| AX-157842557 | 21 | 40.952 | KV453211.1 | 2045714 | 21-scf00417 | 21 |
| AX-158255652 | 21 | 40.952 | KV453211.1 | 2046019 | 21-scf00417 | 21 |
| AX-158255656 | 21 | 40.952 | KV453211.1 | 2049377 | 21-scf00417 | 21 |
| AX-157707864 | 21 | 40.952 | KV453211.1 | 2051008 | 21-scf00417 | 21 |
| AX-158255657 | 21 | 40.952 | KV453211.1 | 2051489 | 21-scf00417 | 21 |
| AX-158255658 | 21 | 40.952 | KV453211.1 | 2052097 | 21-scf00417 | 21 |
| AX-158255660 | 21 | 40.952 | KV453211.1 | 2053331 | 21-scf00417 | 21 |
| AX-158255661 | 21 | 40.952 | KV453211.1 | 2053730 | 21-scf00417 | 21 |
| AX-158255672 | 21 | 40.952 | KV453211.1 | 2066154 | 21-scf00417 | 21 |
| AX-157758293 | 21 | 40.952 | KV453211.1 | 2095695 | 21-scf00417 | 21 |
| AX-157716326 | 21 | 40.952 | KV453211.1 | 2105992 | 21-scf00417 | 21 |
| AX-157842562 | 21 | 40.952 | KV453211.1 | 2110574 | 21-scf00417 | 21 |
| AX-158255713 | 21 | 40.952 | KV453211.1 | 2112932 | 21-scf00417 | 21 |
| AX-158255663 | 21 | 41.061 | KV453211.1 | 2055622 | 21-scf00417 | 21 |
| AX-158255665 | 21 | 41.061 | KV453211.1 | 2058152 | 21-scf00417 | 21 |
| AX-158255668 | 21 | 41.061 | KV453211.1 | 2060045 | 21-scf00417 | 21 |
| AX-157722784 | 21 | 41.061 | KV453211.1 | 2060329 | 21-scf00417 | 21 |
| AX-158416060 | 21 | 41.061 | KV453211.1 | 2062933 | 21-scf00417 | 21 |
| AX-158419152 | 21 | 41.061 | KV453211.1 | 2062970 | 21-scf00417 | 21 |
| AX-158255671 | 21 | 41.061 | KV453211.1 | 2065543 | 21-scf00417 | 21 |
| AX-158255673 | 21 | 41.061 | KV453211.1 | 2066844 | 21-scf00417 | 21 |
| AX-158255674 | 21 | 41.061 | KV453211.1 | 2067594 | 21-scf00417 | 21 |
| AX-158255675 | 21 | 41.061 | KV453211.1 | 2068858 | 21-scf00417 | 21 |
| AX-158255676 | 21 | 41.061 | KV453211.1 | 2070484 | 21-scf00417 | 21 |
| AX-158255655 | 21 | 41.098 | KV453211.1 | 2048332 | 21-scf00417 | 21 |
| AX-158255677 | 21 | 41.098 | KV453211.1 | 2071130 | 21-scf00417 | 21 |
| AX-158255681 | 21 | 41.098 | KV453211.1 | 2075051 | 21-scf00417 | 21 |
| AX-157717384 | 21 | 41.098 | KV453211.1 | 2097227 | 21-scf00417 | 21 |
| AX-158255679 | 21 | 41.115 | KV453211.1 | 2072999 | 21-scf00417 | 21 |
| AX-158255680 | 21 | 41.17  | KV453211.1 | 2073499 | 21-scf00417 | 21 |
| AX-158255682 | 21 | 41.17  | KV453211.1 | 2075939 | 21-scf00417 | 21 |

|              |    |        |            |         |             |    |
|--------------|----|--------|------------|---------|-------------|----|
| AX-158255683 | 21 | 41.17  | KV453211.1 | 2076378 | 21-scf00417 | 21 |
| AX-157842558 | 21 | 41.17  | KV453211.1 | 2076667 | 21-scf00417 | 21 |
| AX-157740574 | 21 | 41.17  | KV453211.1 | 2076736 | 21-scf00417 | 21 |
| AX-158255685 | 21 | 41.17  | KV453211.1 | 2078334 | 21-scf00417 | 21 |
| AX-158255686 | 21 | 41.17  | KV453211.1 | 2078889 | 21-scf00417 | 21 |
| AX-158255688 | 21 | 41.17  | KV453211.1 | 2082429 | 21-scf00417 | 21 |
| AX-158255684 | 21 | 41.279 | KV453211.1 | 2077119 | 21-scf00417 | 21 |
| AX-158255689 | 21 | 41.279 | KV453211.1 | 2084568 | 21-scf00417 | 21 |
| AX-158255692 | 21 | 41.279 | KV453211.1 | 2087218 | 21-scf00417 | 21 |
| AX-158255693 | 21 | 41.279 | KV453211.1 | 2088088 | 21-scf00417 | 21 |
| AX-158255694 | 21 | 41.279 | KV453211.1 | 2089572 | 21-scf00417 | 21 |
| AX-158255695 | 21 | 41.279 | KV453211.1 | 2090349 | 21-scf00417 | 21 |
| AX-158255696 | 21 | 41.279 | KV453211.1 | 2091980 | 21-scf00417 | 21 |
| AX-158255698 | 21 | 41.314 | KV453211.1 | 2093473 | 21-scf00417 | 21 |
| AX-158255701 | 21 | 41.336 | KV453211.1 | 2096302 | 21-scf00417 | 21 |
| AX-157768403 | 21 | 41.389 | KV453211.1 | 2045353 | 21-scf00417 | 21 |
| AX-157842561 | 21 | 41.389 | KV453211.1 | 2098544 | 21-scf00417 | 21 |
| AX-158255702 | 21 | 41.389 | KV453211.1 | 2098791 | 21-scf00417 | 21 |
| AX-158255705 | 21 | 41.389 | KV453211.1 | 2104617 | 21-scf00417 | 21 |
| AX-158255706 | 21 | 41.389 | KV453211.1 | 2106490 | 21-scf00417 | 21 |
| AX-158255707 | 21 | 41.389 | KV453211.1 | 2107020 | 21-scf00417 | 21 |
| AX-158255708 | 21 | 41.389 | KV453211.1 | 2107441 | 21-scf00417 | 21 |
| AX-158255709 | 21 | 41.389 | KV453211.1 | 2108049 | 21-scf00417 | 21 |
| AX-158255710 | 21 | 41.389 | KV453211.1 | 2108553 | 21-scf00417 | 21 |
| AX-157740219 | 21 | 41.389 | KV453211.1 | 2110640 | 21-scf00417 | 21 |
| AX-158255714 | 21 | 41.389 | KV453211.1 | 2116019 | 21-scf00417 | 21 |
| AX-157842563 | 21 | 41.389 | KV453211.1 | 2116397 | 21-scf00417 | 21 |
| AX-157774448 | 21 | 41.389 | KV453211.1 | 2122584 | 21-scf00417 | 21 |
| AX-158255717 | 21 | 41.389 | KV453211.1 | 2123708 | 21-scf00417 | 21 |
| AX-158255718 | 21 | 41.389 | KV453211.1 | 2124143 | 21-scf00417 | 21 |
| AX-158255722 | 21 | 41.389 | KV453211.1 | 2127203 | 21-scf00417 | 21 |
| AX-158255724 | 21 | 41.389 | KV453211.1 | 2128961 | 21-scf00417 | 21 |
| AX-158255730 | 21 | 41.389 | KV453211.1 | 2139627 | 21-scf00417 | 21 |
| AX-158255735 | 21 | 41.389 | KV453211.1 | 2144927 | 21-scf00417 | 21 |
| AX-158255744 | 21 | 41.389 | KV453211.1 | 2154800 | 21-scf00417 | 21 |
| AX-158255725 | 21 | 41.61  | KV453211.1 | 2130263 | 21-scf00417 | 21 |
| AX-158255732 | 21 | 41.61  | KV453211.1 | 2141734 | 21-scf00417 | 21 |
| AX-158255734 | 21 | 41.61  | KV453211.1 | 2144012 | 21-scf00417 | 21 |
| AX-158255751 | 21 | 41.61  | KV453211.1 | 2165005 | 21-scf00417 | 21 |
| AX-158255762 | 21 | 41.61  | KV453211.1 | 2174371 | 21-scf00417 | 21 |
| AX-157880285 | 21 | 41.61  | KV453211.1 | 2184395 | 21-scf00417 | 21 |
| AX-158255736 | 21 | 41.716 | KV453211.1 | 2145537 | 21-scf00417 | 21 |
| AX-158255737 | 21 | 41.716 | KV453211.1 | 2146278 | 21-scf00417 | 21 |
| AX-158255738 | 21 | 41.716 | KV453211.1 | 2147581 | 21-scf00417 | 21 |
| AX-158255740 | 21 | 41.716 | KV453211.1 | 2152082 | 21-scf00417 | 21 |
| AX-158255741 | 21 | 41.716 | KV453211.1 | 2152349 | 21-scf00417 | 21 |
| AX-158255742 | 21 | 41.716 | KV453211.1 | 2153461 | 21-scf00417 | 21 |
| AX-158255743 | 21 | 41.716 | KV453211.1 | 2154020 | 21-scf00417 | 21 |
| AX-158255745 | 21 | 41.716 | KV453211.1 | 2156728 | 21-scf00417 | 21 |
| AX-157842565 | 21 | 41.716 | KV453211.1 | 2159156 | 21-scf00417 | 21 |
| AX-158255746 | 21 | 41.716 | KV453211.1 | 2159268 | 21-scf00417 | 21 |



|              |    |        |            |         |             |    |
|--------------|----|--------|------------|---------|-------------|----|
| AX-158255748 | 21 | 41.716 | KV453211.1 | 2161805 | 21-scf00417 | 21 |
| AX-158255749 | 21 | 41.716 | KV453211.1 | 2162741 | 21-scf00417 | 21 |
| AX-158255750 | 21 | 41.716 | KV453211.1 | 2163143 | 21-scf00417 | 21 |
| AX-158255752 | 21 | 41.716 | KV453211.1 | 2165604 | 21-scf00417 | 21 |
| AX-158255760 | 21 | 41.716 | KV453211.1 | 2172153 | 21-scf00417 | 21 |
| AX-158255753 | 21 | 41.922 | KV453211.1 | 2167438 | 21-scf00417 | 21 |
| AX-158255757 | 21 | 41.922 | KV453211.1 | 2170113 | 21-scf00417 | 21 |
| AX-158255758 | 21 | 41.922 | KV453211.1 | 2171417 | 21-scf00417 | 21 |
| AX-158255761 | 21 | 41.922 | KV453211.1 | 2173297 | 21-scf00417 | 21 |
| AX-157743337 | 21 | 41.947 | KV453211.1 | 2173822 | 21-scf00417 | 21 |
| AX-157695398 | 21 | 41.947 | KV453211.1 | 2173906 | 21-scf00417 | 21 |
| AX-158255765 | 21 | 42.044 | KV453211.1 | 2178156 | 21-scf00417 | 21 |
| AX-158255766 | 21 | 42.044 | KV453211.1 | 2178314 | 21-scf00417 | 21 |
| AX-157842567 | 21 | 42.153 | KV453211.1 | 2185552 | 21-scf00417 | 21 |
| AX-157709886 | 21 | 42.153 | KV453211.1 | 2187850 | 21-scf00417 | 21 |
| AX-157867397 | 21 | 42.214 | KV453211.1 | 2185919 | 21-scf00417 | 21 |
| AX-158255767 | 21 | 42.262 | KV453211.1 | 2188048 | 21-scf00417 | 21 |
| AX-158255769 | 21 | 42.262 | KV453211.1 | 2190724 | 21-scf00417 | 21 |
| AX-157722874 | 21 | 42.262 | KV453211.1 | 2190901 | 21-scf00417 | 21 |
| AX-158255770 | 21 | 42.262 | KV453211.1 | 2191010 | 21-scf00417 | 21 |
| AX-158255776 | 21 | 42.318 | KV453211.1 | 2196010 | 21-scf00417 | 21 |
| AX-158255755 | 21 | 42.372 | KV453211.1 | 2168708 | 21-scf00417 | 21 |
| AX-158255756 | 21 | 42.372 | KV453211.1 | 2169596 | 21-scf00417 | 21 |
| AX-158255771 | 21 | 42.372 | KV453211.1 | 2191335 | 21-scf00417 | 21 |
| AX-158255778 | 21 | 42.372 | KV453211.1 | 2197643 | 21-scf00417 | 21 |
| AX-158255779 | 21 | 42.372 | KV453211.1 | 2198789 | 21-scf00417 | 21 |
| AX-158255780 | 21 | 42.372 | KV453211.1 | 2199190 | 21-scf00417 | 21 |
| AX-158255781 | 21 | 42.372 | KV453211.1 | 2199629 | 21-scf00417 | 21 |
| AX-158255782 | 21 | 42.372 | KV453211.1 | 2200323 | 21-scf00417 | 21 |
| AX-157740888 | 21 | 42.372 | KV453211.1 | 2201306 | 21-scf00417 | 21 |
| AX-158255783 | 21 | 42.372 | KV453211.1 | 2201364 | 21-scf00417 | 21 |
| AX-158255784 | 21 | 42.372 | KV453211.1 | 2202695 | 21-scf00417 | 21 |
| AX-158255789 | 21 | 42.372 | KV453211.1 | 2209330 | 21-scf00417 | 21 |
| AX-157842569 | 21 | 42.372 | KV453211.1 | 2228235 | 21-scf00417 | 21 |
| AX-157842570 | 21 | 42.372 | KV453211.1 | 2232543 | 21-scf00417 | 21 |
| AX-158381041 | 21 | 42.59  | KV453211.1 | 2202130 | 21-scf00417 | 21 |
| AX-158255790 | 21 | 42.59  | KV453211.1 | 2210039 | 21-scf00417 | 21 |
| AX-158255792 | 21 | 42.59  | KV453211.1 | 2212352 | 21-scf00417 | 21 |
| AX-158416062 | 21 | 42.59  | KV453211.1 | 2213409 | 21-scf00417 | 21 |
| AX-158255793 | 21 | 42.59  | KV453211.1 | 2213597 | 21-scf00417 | 21 |
| AX-157721852 | 21 | 42.59  | KV453211.1 | 2215005 | 21-scf00417 | 21 |
| AX-158255797 | 21 | 42.59  | KV453211.1 | 2219351 | 21-scf00417 | 21 |
| AX-158255803 | 21 | 42.59  | KV453211.1 | 2229983 | 21-scf00417 | 21 |
| AX-158255799 | 21 | 42.63  | KV453211.1 | 2219891 | 21-scf00417 | 21 |
| AX-158255801 | 21 | 42.656 | KV453211.1 | 2227706 | 21-scf00417 | 21 |
| AX-158255805 | 21 | 42.666 | KV453211.1 | 2233137 | 21-scf00417 | 21 |
| AX-158255715 | 21 | 42.699 | KV453211.1 | 2116590 | 21-scf00417 | 21 |
| AX-158255800 | 21 | 42.699 | KV453211.1 | 2223978 | 21-scf00417 | 21 |
| AX-157867399 | 21 | 42.699 | KV453211.1 | 2239343 | 21-scf00417 | 21 |
| AX-157722934 | 21 | 42.699 | KV453211.1 | 2240001 | 21-scf00417 | 21 |
| AX-158255808 | 21 | 42.699 | KV453211.1 | 2240174 | 21-scf00417 | 21 |

|              |    |        |            |         |             |    |
|--------------|----|--------|------------|---------|-------------|----|
| AX-157721435 | 21 | 42.699 | KV453211.1 | 2241013 | 21-scf00417 | 21 |
| AX-157722508 | 21 | 42.699 | KV453211.1 | 2275917 | 21-scf00417 | 21 |
| AX-157741119 | 21 | 42.918 | KV453211.1 | 2217303 | 21-scf00417 | 21 |
| AX-158255806 | 21 | 42.918 | KV453211.1 | 2238876 | 21-scf00417 | 21 |
| AX-158255812 | 21 | 42.918 | KV453211.1 | 2242684 | 21-scf00417 | 21 |
| AX-158255814 | 21 | 42.918 | KV453211.1 | 2244280 | 21-scf00417 | 21 |
| AX-157724819 | 21 | 42.918 | KV453211.1 | 2246731 | 21-scf00417 | 21 |
| AX-158255817 | 21 | 42.918 | KV453211.1 | 2250711 | 21-scf00417 | 21 |
| AX-158255818 | 21 | 42.918 | KV453211.1 | 2251500 | 21-scf00417 | 21 |
| AX-158255819 | 21 | 42.918 | KV453211.1 | 2252258 | 21-scf00417 | 21 |
| AX-158255823 | 21 | 42.918 | KV453211.1 | 2255370 | 21-scf00417 | 21 |
| AX-158255824 | 21 | 42.918 | KV453211.1 | 2257055 | 21-scf00417 | 21 |
| AX-158255825 | 21 | 42.918 | KV453211.1 | 2259123 | 21-scf00417 | 21 |
| AX-157842571 | 21 | 42.918 | KV453211.1 | 2260282 | 21-scf00417 | 21 |
| AX-158255826 | 21 | 42.918 | KV453211.1 | 2260434 | 21-scf00417 | 21 |
| AX-158255827 | 21 | 42.918 | KV453211.1 | 2260925 | 21-scf00417 | 21 |
| AX-158255832 | 21 | 42.918 | KV453211.1 | 2267241 | 21-scf00417 | 21 |
| AX-158255833 | 21 | 42.918 | KV453211.1 | 2269994 | 21-scf00417 | 21 |
| AX-158255834 | 21 | 42.918 | KV453211.1 | 2270321 | 21-scf00417 | 21 |
| AX-158255835 | 21 | 42.918 | KV453211.1 | 2271078 | 21-scf00417 | 21 |
| AX-158255836 | 21 | 42.918 | KV453211.1 | 2271460 | 21-scf00417 | 21 |
| AX-157757798 | 21 | 42.918 | KV453211.1 | 2272156 | 21-scf00417 | 21 |
| AX-158255838 | 21 | 42.918 | KV453211.1 | 2273059 | 21-scf00417 | 21 |
| AX-158255839 | 21 | 42.918 | KV453211.1 | 2275292 | 21-scf00417 | 21 |
| AX-157738326 | 21 | 42.918 | KV453211.1 | 2279091 | 21-scf00417 | 21 |
| AX-158419154 | 21 | 42.918 | KV453211.1 | 2284479 | 21-scf00417 | 21 |
| AX-158255845 | 21 | 42.918 | KV453211.1 | 2285572 | 21-scf00417 | 21 |
| AX-158255863 | 21 | 42.918 | KV453211.1 | 2309881 | 21-scf00417 | 21 |
| AX-157747780 | 21 | 42.918 | KV453211.1 | 2314970 | 21-scf00417 | 21 |
| AX-158255816 | 21 | 43.027 | KV453211.1 | 2249755 | 21-scf00417 | 21 |
| AX-158255821 | 21 | 43.027 | KV453211.1 | 2253845 | 21-scf00417 | 21 |
| AX-158255840 | 21 | 43.027 | KV453211.1 | 2277631 | 21-scf00417 | 21 |
| AX-158255843 | 21 | 43.027 | KV453211.1 | 2281706 | 21-scf00417 | 21 |
| AX-158255844 | 21 | 43.027 | KV453211.1 | 2282790 | 21-scf00417 | 21 |
| AX-157771380 | 21 | 43.027 | KV453211.1 | 2283856 | 21-scf00417 | 21 |
| AX-158394554 | 21 | 43.027 | KV453211.1 | 2284263 | 21-scf00417 | 21 |
| AX-158255846 | 21 | 43.027 | KV453211.1 | 2287121 | 21-scf00417 | 21 |
| AX-158255847 | 21 | 43.027 | KV453211.1 | 2287685 | 21-scf00417 | 21 |
| AX-158255848 | 21 | 43.027 | KV453211.1 | 2288504 | 21-scf00417 | 21 |
| AX-158255853 | 21 | 43.08  | KV453211.1 | 2293411 | 21-scf00417 | 21 |
| AX-158255854 | 21 | 43.136 | KV453211.1 | 2294325 | 21-scf00417 | 21 |
| AX-158255855 | 21 | 43.136 | KV453211.1 | 2295229 | 21-scf00417 | 21 |
| AX-158394555 | 21 | 43.136 | KV453211.1 | 2297591 | 21-scf00417 | 21 |
| AX-158255858 | 21 | 43.136 | KV453211.1 | 2300445 | 21-scf00417 | 21 |
| AX-158255860 | 21 | 43.136 | KV453211.1 | 2302777 | 21-scf00417 | 21 |
| AX-158255861 | 21 | 43.136 | KV453211.1 | 2305452 | 21-scf00417 | 21 |
| AX-158255866 | 21 | 43.136 | KV453211.1 | 2312963 | 21-scf00417 | 21 |
| AX-157887683 | 21 | 43.136 | KV453211.1 | 2320610 | 21-scf00417 | 21 |
| AX-158255869 | 21 | 43.136 | KV453211.1 | 2323037 | 21-scf00417 | 21 |
| AX-158255870 | 21 | 43.136 | KV453211.1 | 2325991 | 21-scf00417 | 21 |
| AX-157751108 | 21 | 43.136 | KV453211.1 | 2328304 | 21-scf00417 | 21 |

|              |    |        |             |         |             |    |
|--------------|----|--------|-------------|---------|-------------|----|
| AX-157696251 | 21 | 43.136 | KV453211.1  | 2328652 | 21-scf00417 | 21 |
| AX-158255880 | 21 | 43.136 | KV453211.1  | 2340392 | 21-scf00417 | 21 |
| AX-158255889 | 21 | 43.136 | KV453211.1  | 2349251 | 21-scf00417 | 21 |
| AX-157705165 | 21 | 43.136 | 3ML01029157 | 626     | scf04777_1  | UN |
| AX-158255871 | 21 | 43.259 | KV453211.1  | 2328781 | 21-scf00417 | 21 |
| AX-158255873 | 21 | 43.354 | KV453211.1  | 2332579 | 21-scf00417 | 21 |
| AX-158255876 | 21 | 43.354 | KV453211.1  | 2337734 | 21-scf00417 | 21 |
| AX-158255883 | 21 | 43.354 | KV453211.1  | 2343115 | 21-scf00417 | 21 |
| AX-158255884 | 21 | 43.354 | KV453211.1  | 2344191 | 21-scf00417 | 21 |
| AX-158255887 | 21 | 43.354 | KV453211.1  | 2347307 | 21-scf00417 | 21 |
| AX-158255890 | 21 | 43.354 | KV453211.1  | 2349508 | 21-scf00417 | 21 |
| AX-158255892 | 21 | 43.354 | KV453211.1  | 2351027 | 21-scf00417 | 21 |
| AX-158255893 | 21 | 43.354 | KV453211.1  | 2352017 | 21-scf00417 | 21 |
| AX-158255894 | 21 | 43.354 | KV453211.1  | 2352263 | 21-scf00417 | 21 |
| AX-158255905 | 21 | 43.354 | KV453211.1  | 2373857 | 21-scf00417 | 21 |
| AX-158255897 | 21 | 43.573 | KV453211.1  | 2359567 | 21-scf00417 | 21 |
| AX-158255898 | 21 | 43.573 | KV453211.1  | 2360331 | 21-scf00417 | 21 |
| AX-157747453 | 21 | 43.7   | KV453211.1  | 2364107 | 21-scf00417 | 21 |
| AX-158255900 | 21 | 43.791 | KV453211.1  | 2364836 | 21-scf00417 | 21 |
| AX-158255901 | 21 | 43.791 | KV453211.1  | 2366985 | 21-scf00417 | 21 |
| AX-158255902 | 21 | 43.791 | KV453211.1  | 2367672 | 21-scf00417 | 21 |
| AX-158255903 | 21 | 43.791 | KV453211.1  | 2370096 | 21-scf00417 | 21 |
| AX-157842579 | 21 | 43.851 | KV453211.1  | 2374757 | 21-scf00417 | 21 |
| AX-157842584 | 21 | 43.851 | KV453211.1  | 2405255 | 21-scf00417 | 21 |
| AX-158255907 | 21 | 43.9   | KV453211.1  | 2377154 | 21-scf00417 | 21 |
| AX-158255908 | 21 | 43.9   | KV453211.1  | 2378181 | 21-scf00417 | 21 |
| AX-157867400 | 21 | 43.9   | KV453211.1  | 2378432 | 21-scf00417 | 21 |
| AX-158255909 | 21 | 43.9   | KV453211.1  | 2380342 | 21-scf00417 | 21 |
| AX-157842580 | 21 | 43.9   | KV453211.1  | 2382604 | 21-scf00417 | 21 |
| AX-157842581 | 21 | 43.9   | KV453211.1  | 2384007 | 21-scf00417 | 21 |
| AX-158255911 | 21 | 43.9   | KV453211.1  | 2384904 | 21-scf00417 | 21 |
| AX-157842582 | 21 | 43.9   | KV453211.1  | 2386698 | 21-scf00417 | 21 |
| AX-158255912 | 21 | 43.9   | KV453211.1  | 2389142 | 21-scf00417 | 21 |
| AX-158255920 | 21 | 43.9   | KV453211.1  | 2404104 | 21-scf00417 | 21 |
| AX-158255927 | 21 | 43.9   | KV453211.1  | 2411927 | 21-scf00417 | 21 |
| AX-158255918 | 21 | 43.905 | KV453211.1  | 2401703 | 21-scf00417 | 21 |
| AX-157714311 | 21 | 43.905 | KV453211.1  | 2402058 | 21-scf00417 | 21 |
| AX-158255919 | 21 | 43.911 | KV453211.1  | 2402639 | 21-scf00417 | 21 |
| AX-158255921 | 21 | 44.19  | KV453211.1  | 2405531 | 21-scf00417 | 21 |
| AX-157771326 | 21 | 44.338 | KV453211.1  | 2357317 | 21-scf00417 | 21 |
| AX-157742609 | 21 | 44.338 | KV453211.1  | 2366226 | 21-scf00417 | 21 |
| AX-158255924 | 21 | 44.338 | KV453211.1  | 2408802 | 21-scf00417 | 21 |
| AX-158255928 | 21 | 44.338 | KV453211.1  | 2415440 | 21-scf00417 | 21 |
| AX-158255929 | 21 | 44.338 | KV453211.1  | 2415893 | 21-scf00417 | 21 |
| AX-157724718 | 21 | 44.338 | KV453211.1  | 2418404 | 21-scf00417 | 21 |
| AX-158255935 | 21 | 44.338 | KV453211.1  | 2422159 | 21-scf00417 | 21 |
| AX-158255936 | 21 | 44.338 | KV453211.1  | 2423105 | 21-scf00417 | 21 |
| AX-157842585 | 21 | 44.338 | KV453211.1  | 2425055 | 21-scf00417 | 21 |
| AX-158255937 | 21 | 44.338 | KV453211.1  | 2425425 | 21-scf00417 | 21 |
| AX-157842586 | 21 | 44.338 | KV453211.1  | 2425878 | 21-scf00417 | 21 |
| AX-158255940 | 21 | 44.338 | KV453211.1  | 2427898 | 21-scf00417 | 21 |

|              |    |        |            |         |             |    |
|--------------|----|--------|------------|---------|-------------|----|
| AX-158255941 | 21 | 44.338 | KV453211.1 | 2428837 | 21-scf00417 | 21 |
| AX-158255945 | 21 | 44.338 | KV453211.1 | 2436546 | 21-scf00417 | 21 |
| AX-158255975 | 21 | 44.338 | KV453211.1 | 2479200 | 21-scf00417 | 21 |
| AX-158256019 | 21 | 44.338 | KV453211.1 | 2551520 | 21-scf00417 | 21 |
| AX-158256065 | 21 | 44.338 | KV453211.1 | 2634042 | 21-scf00417 | 21 |
| AX-158256106 | 21 | 44.338 | KV453211.1 | 2683800 | 21-scf00417 | 21 |
| AX-158255942 | 21 | 44.386 | KV453211.1 | 2431447 | 21-scf00417 | 21 |
| AX-157842587 | 21 | 44.447 | KV453211.1 | 2432473 | 21-scf00417 | 21 |
| AX-157718102 | 21 | 44.447 | KV453211.1 | 2435617 | 21-scf00417 | 21 |
| AX-158255922 | 21 | 44.556 | KV453211.1 | 2406000 | 21-scf00417 | 21 |
| AX-158255931 | 21 | 44.556 | KV453211.1 | 2416903 | 21-scf00417 | 21 |
| AX-158255943 | 21 | 44.556 | KV453211.1 | 2432294 | 21-scf00417 | 21 |
| AX-158255947 | 21 | 44.556 | KV453211.1 | 2438108 | 21-scf00417 | 21 |
| AX-158410996 | 21 | 44.556 | KV453211.1 | 2438730 | 21-scf00417 | 21 |
| AX-158255948 | 21 | 44.556 | KV453211.1 | 2439499 | 21-scf00417 | 21 |
| AX-158255949 | 21 | 44.556 | KV453211.1 | 2441705 | 21-scf00417 | 21 |
| AX-157753943 | 21 | 44.556 | KV453211.1 | 2443874 | 21-scf00417 | 21 |
| AX-158255950 | 21 | 44.556 | KV453211.1 | 2445256 | 21-scf00417 | 21 |
| AX-158255952 | 21 | 44.556 | KV453211.1 | 2447263 | 21-scf00417 | 21 |
| AX-158255954 | 21 | 44.556 | KV453211.1 | 2450356 | 21-scf00417 | 21 |
| AX-157842590 | 21 | 44.556 | KV453211.1 | 2451190 | 21-scf00417 | 21 |
| AX-158255956 | 21 | 44.556 | KV453211.1 | 2453559 | 21-scf00417 | 21 |
| AX-158255958 | 21 | 44.556 | KV453211.1 | 2455577 | 21-scf00417 | 21 |
| AX-157842591 | 21 | 44.556 | KV453211.1 | 2456800 | 21-scf00417 | 21 |
| AX-157842592 | 21 | 44.556 | KV453211.1 | 2457689 | 21-scf00417 | 21 |
| AX-158255960 | 21 | 44.556 | KV453211.1 | 2462172 | 21-scf00417 | 21 |
| AX-158255961 | 21 | 44.556 | KV453211.1 | 2463208 | 21-scf00417 | 21 |
| AX-158255963 | 21 | 44.556 | KV453211.1 | 2465437 | 21-scf00417 | 21 |
| AX-158255967 | 21 | 44.556 | KV453211.1 | 2468707 | 21-scf00417 | 21 |
| AX-158255969 | 21 | 44.556 | KV453211.1 | 2471888 | 21-scf00417 | 21 |
| AX-158255970 | 21 | 44.556 | KV453211.1 | 2472252 | 21-scf00417 | 21 |
| AX-157842593 | 21 | 44.556 | KV453211.1 | 2472897 | 21-scf00417 | 21 |
| AX-158255973 | 21 | 44.556 | KV453211.1 | 2477120 | 21-scf00417 | 21 |
| AX-158255974 | 21 | 44.556 | KV453211.1 | 2477779 | 21-scf00417 | 21 |
| AX-158255977 | 21 | 44.556 | KV453211.1 | 2481404 | 21-scf00417 | 21 |
| AX-158255979 | 21 | 44.739 | KV453211.1 | 2484134 | 21-scf00417 | 21 |
| AX-158255980 | 21 | 44.739 | KV453211.1 | 2486594 | 21-scf00417 | 21 |
| AX-158255983 | 21 | 44.74  | KV453211.1 | 2492259 | 21-scf00417 | 21 |
| AX-158255985 | 21 | 44.741 | KV453211.1 | 2496936 | 21-scf00417 | 21 |
| AX-157709211 | 21 | 45.102 | KV453211.1 | 2499829 | 21-scf00417 | 21 |
| AX-158255987 | 21 | 45.102 | KV453211.1 | 2501991 | 21-scf00417 | 21 |
| AX-157887685 | 21 | 45.102 | KV453211.1 | 2503001 | 21-scf00417 | 21 |
| AX-158255988 | 21 | 45.102 | KV453211.1 | 2503304 | 21-scf00417 | 21 |
| AX-158255994 | 21 | 45.102 | KV453211.1 | 2516447 | 21-scf00417 | 21 |
| AX-158255996 | 21 | 45.102 | KV453211.1 | 2518862 | 21-scf00417 | 21 |
| AX-158256003 | 21 | 45.102 | KV453211.1 | 2528001 | 21-scf00417 | 21 |
| AX-158256010 | 21 | 45.102 | KV453211.1 | 2536225 | 21-scf00417 | 21 |
| AX-158256022 | 21 | 45.102 | KV453211.1 | 2554544 | 21-scf00417 | 21 |
| AX-158256088 | 21 | 45.102 | KV453211.1 | 2666098 | 21-scf00417 | 21 |
| AX-158256128 | 21 | 45.102 | KV453211.1 | 2729965 | 21-scf00417 | 21 |
| AX-158256132 | 21 | 45.102 | KV453211.1 | 2735073 | 21-scf00417 | 21 |

|              |    |        |            |         |             |    |
|--------------|----|--------|------------|---------|-------------|----|
| AX-158256133 | 21 | 45.102 | KV453211.1 | 2735602 | 21-scf00417 | 21 |
| AX-158256134 | 21 | 45.102 | KV453211.1 | 2736821 | 21-scf00417 | 21 |
| AX-157752700 | 21 | 45.102 | KV453211.1 | 2739229 | 21-scf00417 | 21 |
| AX-157707808 | 21 | 45.102 | KV453211.1 | 2748513 | 21-scf00417 | 21 |
| AX-158256188 | 21 | 45.102 | KV453211.1 | 2802693 | 21-scf00417 | 21 |
| AX-158256212 | 21 | 45.102 | KV453211.1 | 2831075 | 21-scf00417 | 21 |
| AX-158255997 | 21 | 45.169 | KV453211.1 | 2521829 | 21-scf00417 | 21 |
| AX-158255998 | 21 | 45.169 | KV453211.1 | 2524548 | 21-scf00417 | 21 |
| AX-158256000 | 21 | 45.169 | KV453211.1 | 2525614 | 21-scf00417 | 21 |
| AX-158256015 | 21 | 45.169 | KV453211.1 | 2545572 | 21-scf00417 | 21 |
| AX-157842607 | 21 | 45.169 | KV453211.1 | 2720792 | 21-scf00417 | 21 |
| AX-158256002 | 21 | 45.211 | KV453211.1 | 2526503 | 21-scf00417 | 21 |
| AX-158256004 | 21 | 45.211 | KV453211.1 | 2528480 | 21-scf00417 | 21 |
| AX-158256005 | 21 | 45.211 | KV453211.1 | 2531980 | 21-scf00417 | 21 |
| AX-158256006 | 21 | 45.211 | KV453211.1 | 2532488 | 21-scf00417 | 21 |
| AX-158256007 | 21 | 45.211 | KV453211.1 | 2533922 | 21-scf00417 | 21 |
| AX-158256009 | 21 | 45.211 | KV453211.1 | 2535554 | 21-scf00417 | 21 |
| AX-158256012 | 21 | 45.211 | KV453211.1 | 2540803 | 21-scf00417 | 21 |
| AX-158256016 | 21 | 45.211 | KV453211.1 | 2547240 | 21-scf00417 | 21 |
| AX-158256017 | 21 | 45.244 | KV453211.1 | 2549656 | 21-scf00417 | 21 |
| AX-158256020 | 21 | 45.282 | KV453211.1 | 2552284 | 21-scf00417 | 21 |
| AX-158256021 | 21 | 45.321 | KV453211.1 | 2553429 | 21-scf00417 | 21 |
| AX-157722249 | 21 | 45.321 | KV453211.1 | 2554001 | 21-scf00417 | 21 |
| AX-158256023 | 21 | 45.321 | KV453211.1 | 2556148 | 21-scf00417 | 21 |
| AX-158256024 | 21 | 45.321 | KV453211.1 | 2556506 | 21-scf00417 | 21 |
| AX-158256025 | 21 | 45.321 | KV453211.1 | 2557054 | 21-scf00417 | 21 |
| AX-158256028 | 21 | 45.321 | KV453211.1 | 2559860 | 21-scf00417 | 21 |
| AX-158256035 | 21 | 45.321 | KV453211.1 | 2572397 | 21-scf00417 | 21 |
| AX-157842606 | 21 | 45.321 | KV453211.1 | 2719097 | 21-scf00417 | 21 |
| AX-158256173 | 21 | 45.321 | KV453211.1 | 2785693 | 21-scf00417 | 21 |
| AX-158256256 | 21 | 45.321 | KV453211.1 | 2879519 | 21-scf00417 | 21 |
| AX-158255986 | 21 | 45.539 | KV453211.1 | 2498407 | 21-scf00417 | 21 |
| AX-158255992 | 21 | 45.539 | KV453211.1 | 2509979 | 21-scf00417 | 21 |
| AX-158256029 | 21 | 45.539 | KV453211.1 | 2560822 | 21-scf00417 | 21 |
| AX-157842595 | 21 | 45.539 | KV453211.1 | 2568705 | 21-scf00417 | 21 |
| AX-158256032 | 21 | 45.539 | KV453211.1 | 2568806 | 21-scf00417 | 21 |
| AX-158256033 | 21 | 45.539 | KV453211.1 | 2570414 | 21-scf00417 | 21 |
| AX-158256034 | 21 | 45.539 | KV453211.1 | 2570849 | 21-scf00417 | 21 |
| AX-157755544 | 21 | 45.539 | KV453211.1 | 2571850 | 21-scf00417 | 21 |
| AX-158256036 | 21 | 45.539 | KV453211.1 | 2573797 | 21-scf00417 | 21 |
| AX-158256038 | 21 | 45.539 | KV453211.1 | 2577507 | 21-scf00417 | 21 |
| AX-158256040 | 21 | 45.539 | KV453211.1 | 2578474 | 21-scf00417 | 21 |
| AX-158256041 | 21 | 45.539 | KV453211.1 | 2579034 | 21-scf00417 | 21 |
| AX-158256045 | 21 | 45.539 | KV453211.1 | 2586194 | 21-scf00417 | 21 |
| AX-158256046 | 21 | 45.539 | KV453211.1 | 2587103 | 21-scf00417 | 21 |
| AX-158256047 | 21 | 45.539 | KV453211.1 | 2588002 | 21-scf00417 | 21 |
| AX-158256049 | 21 | 45.539 | KV453211.1 | 2591317 | 21-scf00417 | 21 |
| AX-158256053 | 21 | 45.539 | KV453211.1 | 2595696 | 21-scf00417 | 21 |
| AX-157743626 | 21 | 45.539 | KV453211.1 | 2603522 | 21-scf00417 | 21 |
| AX-157842596 | 21 | 45.539 | KV453211.1 | 2604332 | 21-scf00417 | 21 |
| AX-158256055 | 21 | 45.539 | KV453211.1 | 2609865 | 21-scf00417 | 21 |

|              |    |        |            |         |             |    |
|--------------|----|--------|------------|---------|-------------|----|
| AX-158387135 | 21 | 45.539 | KV453211.1 | 2620656 | 21-scf00417 | 21 |
| AX-157756347 | 21 | 45.539 | KV453211.1 | 2625492 | 21-scf00417 | 21 |
| AX-158256061 | 21 | 45.539 | KV453211.1 | 2626285 | 21-scf00417 | 21 |
| AX-158256064 | 21 | 45.539 | KV453211.1 | 2631510 | 21-scf00417 | 21 |
| AX-158256066 | 21 | 45.539 | KV453211.1 | 2635167 | 21-scf00417 | 21 |
| AX-157842598 | 21 | 45.539 | KV453211.1 | 2635415 | 21-scf00417 | 21 |
| AX-157747232 | 21 | 45.539 | KV453211.1 | 2636029 | 21-scf00417 | 21 |
| AX-157751570 | 21 | 45.539 | KV453211.1 | 2638622 | 21-scf00417 | 21 |
| AX-157693101 | 21 | 45.539 | KV453211.1 | 2639919 | 21-scf00417 | 21 |
| AX-158256068 | 21 | 45.539 | KV453211.1 | 2640329 | 21-scf00417 | 21 |
| AX-158256069 | 21 | 45.539 | KV453211.1 | 2640685 | 21-scf00417 | 21 |
| AX-158256070 | 21 | 45.539 | KV453211.1 | 2641383 | 21-scf00417 | 21 |
| AX-158256074 | 21 | 45.539 | KV453211.1 | 2645553 | 21-scf00417 | 21 |
| AX-158256075 | 21 | 45.539 | KV453211.1 | 2645801 | 21-scf00417 | 21 |
| AX-158256079 | 21 | 45.539 | KV453211.1 | 2651317 | 21-scf00417 | 21 |
| AX-158256080 | 21 | 45.539 | KV453211.1 | 2652638 | 21-scf00417 | 21 |
| AX-158256081 | 21 | 45.539 | KV453211.1 | 2654757 | 21-scf00417 | 21 |
| AX-158256083 | 21 | 45.539 | KV453211.1 | 2656107 | 21-scf00417 | 21 |
| AX-158256085 | 21 | 45.539 | KV453211.1 | 2657577 | 21-scf00417 | 21 |
| AX-158256087 | 21 | 45.539 | KV453211.1 | 2664085 | 21-scf00417 | 21 |
| AX-158256090 | 21 | 45.539 | KV453211.1 | 2668296 | 21-scf00417 | 21 |
| AX-158256091 | 21 | 45.539 | KV453211.1 | 2668554 | 21-scf00417 | 21 |
| AX-158256092 | 21 | 45.539 | KV453211.1 | 2669420 | 21-scf00417 | 21 |
| AX-157842601 | 21 | 45.539 | KV453211.1 | 2669800 | 21-scf00417 | 21 |
| AX-158256093 | 21 | 45.539 | KV453211.1 | 2671845 | 21-scf00417 | 21 |
| AX-157842602 | 21 | 45.539 | KV453211.1 | 2671941 | 21-scf00417 | 21 |
| AX-158256097 | 21 | 45.539 | KV453211.1 | 2674937 | 21-scf00417 | 21 |
| AX-158256101 | 21 | 45.539 | KV453211.1 | 2678274 | 21-scf00417 | 21 |
| AX-158256102 | 21 | 45.539 | KV453211.1 | 2679382 | 21-scf00417 | 21 |
| AX-158256103 | 21 | 45.539 | KV453211.1 | 2680885 | 21-scf00417 | 21 |
| AX-158256104 | 21 | 45.539 | KV453211.1 | 2681324 | 21-scf00417 | 21 |
| AX-158256107 | 21 | 45.539 | KV453211.1 | 2685196 | 21-scf00417 | 21 |
| AX-158256108 | 21 | 45.539 | KV453211.1 | 2686042 | 21-scf00417 | 21 |
| AX-158394557 | 21 | 45.539 | KV453211.1 | 2688279 | 21-scf00417 | 21 |
| AX-157842603 | 21 | 45.539 | KV453211.1 | 2688859 | 21-scf00417 | 21 |
| AX-158387136 | 21 | 45.539 | KV453211.1 | 2690055 | 21-scf00417 | 21 |
| AX-157842604 | 21 | 45.539 | KV453211.1 | 2692097 | 21-scf00417 | 21 |
| AX-158256113 | 21 | 45.539 | KV453211.1 | 2693757 | 21-scf00417 | 21 |
| AX-157842605 | 21 | 45.539 | KV453211.1 | 2694172 | 21-scf00417 | 21 |
| AX-158256114 | 21 | 45.539 | KV453211.1 | 2694808 | 21-scf00417 | 21 |
| AX-158256115 | 21 | 45.539 | KV453211.1 | 2695535 | 21-scf00417 | 21 |
| AX-158256116 | 21 | 45.539 | KV453211.1 | 2700146 | 21-scf00417 | 21 |
| AX-158256117 | 21 | 45.539 | KV453211.1 | 2701281 | 21-scf00417 | 21 |
| AX-158256118 | 21 | 45.539 | KV453211.1 | 2706161 | 21-scf00417 | 21 |
| AX-158256119 | 21 | 45.539 | KV453211.1 | 2712487 | 21-scf00417 | 21 |
| AX-157746408 | 21 | 45.539 | KV453211.1 | 2717930 | 21-scf00417 | 21 |
| AX-158256121 | 21 | 45.539 | KV453211.1 | 2719578 | 21-scf00417 | 21 |
| AX-158256122 | 21 | 45.539 | KV453211.1 | 2719808 | 21-scf00417 | 21 |
| AX-158256124 | 21 | 45.539 | KV453211.1 | 2722589 | 21-scf00417 | 21 |
| AX-158256125 | 21 | 45.539 | KV453211.1 | 2724462 | 21-scf00417 | 21 |
| AX-157749247 | 21 | 45.539 | KV453211.1 | 2725741 | 21-scf00417 | 21 |

|              |    |        |            |         |             |    |
|--------------|----|--------|------------|---------|-------------|----|
| AX-158256126 | 21 | 45.539 | KV453211.1 | 2727009 | 21-scf00417 | 21 |
| AX-158256127 | 21 | 45.539 | KV453211.1 | 2729197 | 21-scf00417 | 21 |
| AX-158256129 | 21 | 45.539 | KV453211.1 | 2731350 | 21-scf00417 | 21 |
| AX-158256130 | 21 | 45.539 | KV453211.1 | 2732328 | 21-scf00417 | 21 |
| AX-158256136 | 21 | 45.539 | KV453211.1 | 2739661 | 21-scf00417 | 21 |
| AX-158256137 | 21 | 45.539 | KV453211.1 | 2740477 | 21-scf00417 | 21 |
| AX-158256138 | 21 | 45.539 | KV453211.1 | 2741147 | 21-scf00417 | 21 |
| AX-158256142 | 21 | 45.539 | KV453211.1 | 2744197 | 21-scf00417 | 21 |
| AX-158256143 | 21 | 45.539 | KV453211.1 | 2745739 | 21-scf00417 | 21 |
| AX-158256145 | 21 | 45.539 | KV453211.1 | 2747089 | 21-scf00417 | 21 |
| AX-158256152 | 21 | 45.539 | KV453211.1 | 2757728 | 21-scf00417 | 21 |
| AX-158256153 | 21 | 45.539 | KV453211.1 | 2758329 | 21-scf00417 | 21 |
| AX-158256155 | 21 | 45.539 | KV453211.1 | 2760313 | 21-scf00417 | 21 |
| AX-157755507 | 21 | 45.539 | KV453211.1 | 2762198 | 21-scf00417 | 21 |
| AX-158256159 | 21 | 45.539 | KV453211.1 | 2765017 | 21-scf00417 | 21 |
| AX-158256160 | 21 | 45.539 | KV453211.1 | 2765749 | 21-scf00417 | 21 |
| AX-158256162 | 21 | 45.539 | KV453211.1 | 2769194 | 21-scf00417 | 21 |
| AX-158256163 | 21 | 45.539 | KV453211.1 | 2770751 | 21-scf00417 | 21 |
| AX-158256167 | 21 | 45.539 | KV453211.1 | 2776493 | 21-scf00417 | 21 |
| AX-158256168 | 21 | 45.539 | KV453211.1 | 2777007 | 21-scf00417 | 21 |
| AX-157741853 | 21 | 45.539 | KV453211.1 | 2778788 | 21-scf00417 | 21 |
| AX-158256169 | 21 | 45.539 | KV453211.1 | 2779226 | 21-scf00417 | 21 |
| AX-158256171 | 21 | 45.539 | KV453211.1 | 2780128 | 21-scf00417 | 21 |
| AX-158256172 | 21 | 45.539 | KV453211.1 | 2782765 | 21-scf00417 | 21 |
| AX-158256175 | 21 | 45.539 | KV453211.1 | 2788740 | 21-scf00417 | 21 |
| AX-158256177 | 21 | 45.539 | KV453211.1 | 2791406 | 21-scf00417 | 21 |
| AX-158256178 | 21 | 45.539 | KV453211.1 | 2791690 | 21-scf00417 | 21 |
| AX-158256179 | 21 | 45.539 | KV453211.1 | 2792179 | 21-scf00417 | 21 |
| AX-158256180 | 21 | 45.539 | KV453211.1 | 2792733 | 21-scf00417 | 21 |
| AX-157842609 | 21 | 45.539 | KV453211.1 | 2794186 | 21-scf00417 | 21 |
| AX-158256181 | 21 | 45.539 | KV453211.1 | 2795988 | 21-scf00417 | 21 |
| AX-158256182 | 21 | 45.539 | KV453211.1 | 2796639 | 21-scf00417 | 21 |
| AX-158256186 | 21 | 45.539 | KV453211.1 | 2801098 | 21-scf00417 | 21 |
| AX-158256187 | 21 | 45.539 | KV453211.1 | 2802077 | 21-scf00417 | 21 |
| AX-158256190 | 21 | 45.539 | KV453211.1 | 2804185 | 21-scf00417 | 21 |
| AX-158256192 | 21 | 45.539 | KV453211.1 | 2805589 | 21-scf00417 | 21 |
| AX-158256193 | 21 | 45.539 | KV453211.1 | 2806872 | 21-scf00417 | 21 |
| AX-158256215 | 21 | 45.539 | KV453211.1 | 2834318 | 21-scf00417 | 21 |
| AX-158256229 | 21 | 45.539 | KV453211.1 | 2847826 | 21-scf00417 | 21 |
| AX-158256230 | 21 | 45.539 | KV453211.1 | 2848972 | 21-scf00417 | 21 |
| AX-158256233 | 21 | 45.539 | KV453211.1 | 2852279 | 21-scf00417 | 21 |
| AX-158256238 | 21 | 45.539 | KV453211.1 | 2857886 | 21-scf00417 | 21 |
| AX-157724585 | 21 | 45.539 | KV453211.1 | 2859010 | 21-scf00417 | 21 |
| AX-158256249 | 21 | 45.539 | KV453211.1 | 2870986 | 21-scf00417 | 21 |
| AX-158256273 | 21 | 45.539 | KV453211.1 | 2896939 | 21-scf00417 | 21 |
| AX-158256282 | 21 | 45.539 | KV453211.1 | 2906278 | 21-scf00417 | 21 |
| AX-158256286 | 21 | 45.539 | KV453211.1 | 2914439 | 21-scf00417 | 21 |
| AX-158256291 | 21 | 45.539 | KV453211.1 | 2921740 | 21-scf00417 | 21 |
| AX-158256306 | 21 | 45.539 | KV453211.1 | 2937345 | 21-scf00417 | 21 |
| AX-158256309 | 21 | 45.539 | KV453211.1 | 2942321 | 21-scf00417 | 21 |
| AX-158256310 | 21 | 45.539 | KV453211.1 | 2943142 | 21-scf00417 | 21 |

|              |    |        |             |         |             |    |
|--------------|----|--------|-------------|---------|-------------|----|
| AX-158256312 | 21 | 45.539 | KV453211.1  | 2944489 | 21-scf00417 | 21 |
| AX-158256314 | 21 | 45.539 | KV453211.1  | 2946047 | 21-scf00417 | 21 |
| AX-158256315 | 21 | 45.539 | KV453211.1  | 2946471 | 21-scf00417 | 21 |
| AX-158256316 | 21 | 45.539 | KV453211.1  | 2947077 | 21-scf00417 | 21 |
| AX-158256321 | 21 | 45.539 | KV453211.1  | 2958594 | 21-scf00417 | 21 |
| AX-158256323 | 21 | 45.539 | KV453211.1  | 2960724 | 21-scf00417 | 21 |
| AX-158256326 | 21 | 45.539 | KV453211.1  | 2962126 | 21-scf00417 | 21 |
| AX-158256327 | 21 | 45.539 | KV453211.1  | 2963714 | 21-scf00417 | 21 |
| AX-158256359 | 21 | 45.539 | KV453211.1  | 3012905 | 21-scf00417 | 21 |
| AX-158256360 | 21 | 45.539 | KV453211.1  | 3014644 | 21-scf00417 | 21 |
| AX-158256369 | 21 | 45.539 | KV453211.1  | 3028027 | 21-scf00417 | 21 |
| AX-158256387 | 21 | 45.539 | KV453211.1  | 3049155 | 21-scf00417 | 21 |
| AX-157707037 | 21 | 45.539 | 3ML01033376 | 187     | scf09023_1  | UN |
| AX-158256195 | 21 | 45.599 | KV453211.1  | 2808165 | 21-scf00417 | 21 |
| AX-157859916 | 21 | 45.648 | KV453211.1  | 2621849 | 21-scf00417 | 21 |
| AX-158256197 | 21 | 45.648 | KV453211.1  | 2811450 | 21-scf00417 | 21 |
| AX-158256200 | 21 | 45.648 | KV453211.1  | 2815504 | 21-scf00417 | 21 |
| AX-158256202 | 21 | 45.648 | KV453211.1  | 2819301 | 21-scf00417 | 21 |
| AX-158256203 | 21 | 45.648 | KV453211.1  | 2819851 | 21-scf00417 | 21 |
| AX-157739028 | 21 | 45.648 | KV453211.1  | 2834985 | 21-scf00417 | 21 |
| AX-158256216 | 21 | 45.648 | KV453211.1  | 2835409 | 21-scf00417 | 21 |
| AX-158256217 | 21 | 45.648 | KV453211.1  | 2835610 | 21-scf00417 | 21 |
| AX-158256219 | 21 | 45.648 | KV453211.1  | 2836915 | 21-scf00417 | 21 |
| AX-158256221 | 21 | 45.648 | KV453211.1  | 2838656 | 21-scf00417 | 21 |
| AX-158256223 | 21 | 45.648 | KV453211.1  | 2840130 | 21-scf00417 | 21 |
| AX-158256226 | 21 | 45.648 | KV453211.1  | 2845049 | 21-scf00417 | 21 |
| AX-158256227 | 21 | 45.648 | KV453211.1  | 2845503 | 21-scf00417 | 21 |
| AX-158256231 | 21 | 45.648 | KV453211.1  | 2850115 | 21-scf00417 | 21 |
| AX-158256235 | 21 | 45.648 | KV453211.1  | 2855094 | 21-scf00417 | 21 |
| AX-158256236 | 21 | 45.648 | KV453211.1  | 2855589 | 21-scf00417 | 21 |
| AX-158256260 | 21 | 45.648 | KV453211.1  | 2883134 | 21-scf00417 | 21 |
| AX-158256276 | 21 | 45.648 | KV453211.1  | 2901795 | 21-scf00417 | 21 |
| AX-158256281 | 21 | 45.648 | KV453211.1  | 2905843 | 21-scf00417 | 21 |
| AX-157740549 | 21 | 45.648 | KV453211.1  | 2915774 | 21-scf00417 | 21 |
| AX-158256289 | 21 | 45.648 | KV453211.1  | 2918254 | 21-scf00417 | 21 |
| AX-157880301 | 21 | 45.648 | KV453211.1  | 2950584 | 21-scf00417 | 21 |
| AX-158256330 | 21 | 45.648 | KV453211.1  | 2967435 | 21-scf00417 | 21 |
| AX-158256404 | 21 | 45.648 | KV453211.1  | 3068175 | 21-scf00417 | 21 |
| AX-157756367 | 21 | 45.757 | KV453211.1  | 2720184 | 21-scf00417 | 21 |
| AX-158256123 | 21 | 45.757 | KV453211.1  | 2721657 | 21-scf00417 | 21 |
| AX-157709020 | 21 | 45.757 | KV453211.1  | 2736331 | 21-scf00417 | 21 |
| AX-158256170 | 21 | 45.757 | KV453211.1  | 2779706 | 21-scf00417 | 21 |
| AX-157880299 | 21 | 45.757 | KV453211.1  | 2857201 | 21-scf00417 | 21 |
| AX-158256239 | 21 | 45.757 | KV453211.1  | 2858900 | 21-scf00417 | 21 |
| AX-158256241 | 21 | 45.757 | KV453211.1  | 2863032 | 21-scf00417 | 21 |
| AX-158256242 | 21 | 45.757 | KV453211.1  | 2865358 | 21-scf00417 | 21 |
| AX-158256245 | 21 | 45.757 | KV453211.1  | 2867728 | 21-scf00417 | 21 |
| AX-158256247 | 21 | 45.757 | KV453211.1  | 2869745 | 21-scf00417 | 21 |
| AX-158256250 | 21 | 45.757 | KV453211.1  | 2871353 | 21-scf00417 | 21 |
| AX-158256251 | 21 | 45.757 | KV453211.1  | 2873080 | 21-scf00417 | 21 |
| AX-158256252 | 21 | 45.757 | KV453211.1  | 2873167 | 21-scf00417 | 21 |



|              |    |        |            |         |             |    |
|--------------|----|--------|------------|---------|-------------|----|
| AX-158256253 | 21 | 45.757 | KV453211.1 | 2874017 | 21-scf00417 | 21 |
| AX-158256254 | 21 | 45.757 | KV453211.1 | 2877872 | 21-scf00417 | 21 |
| AX-158256257 | 21 | 45.757 | KV453211.1 | 2880759 | 21-scf00417 | 21 |
| AX-158256258 | 21 | 45.757 | KV453211.1 | 2882125 | 21-scf00417 | 21 |
| AX-158256259 | 21 | 45.757 | KV453211.1 | 2882711 | 21-scf00417 | 21 |
| AX-158394560 | 21 | 45.757 | KV453211.1 | 2885847 | 21-scf00417 | 21 |
| AX-158256263 | 21 | 45.757 | KV453211.1 | 2886394 | 21-scf00417 | 21 |
| AX-158256266 | 21 | 45.757 | KV453211.1 | 2888859 | 21-scf00417 | 21 |
| AX-158256267 | 21 | 45.757 | KV453211.1 | 2889772 | 21-scf00417 | 21 |
| AX-158256268 | 21 | 45.757 | KV453211.1 | 2890189 | 21-scf00417 | 21 |
| AX-158256270 | 21 | 45.757 | KV453211.1 | 2893778 | 21-scf00417 | 21 |
| AX-158256271 | 21 | 45.757 | KV453211.1 | 2894058 | 21-scf00417 | 21 |
| AX-158256272 | 21 | 45.757 | KV453211.1 | 2894602 | 21-scf00417 | 21 |
| AX-158256275 | 21 | 45.757 | KV453211.1 | 2898042 | 21-scf00417 | 21 |
| AX-158256277 | 21 | 45.757 | KV453211.1 | 2902222 | 21-scf00417 | 21 |
| AX-157702963 | 21 | 45.757 | KV453211.1 | 2903062 | 21-scf00417 | 21 |
| AX-158256280 | 21 | 45.757 | KV453211.1 | 2904763 | 21-scf00417 | 21 |
| AX-158256283 | 21 | 45.757 | KV453211.1 | 2906766 | 21-scf00417 | 21 |
| AX-158256284 | 21 | 45.757 | KV453211.1 | 2910292 | 21-scf00417 | 21 |
| AX-158256290 | 21 | 45.757 | KV453211.1 | 2919664 | 21-scf00417 | 21 |
| AX-158256292 | 21 | 45.757 | KV453211.1 | 2922618 | 21-scf00417 | 21 |
| AX-158256294 | 21 | 45.757 | KV453211.1 | 2924317 | 21-scf00417 | 21 |
| AX-158256295 | 21 | 45.757 | KV453211.1 | 2926750 | 21-scf00417 | 21 |
| AX-158256296 | 21 | 45.757 | KV453211.1 | 2928387 | 21-scf00417 | 21 |
| AX-157880300 | 21 | 45.757 | KV453211.1 | 2929085 | 21-scf00417 | 21 |
| AX-158256299 | 21 | 45.757 | KV453211.1 | 2930657 | 21-scf00417 | 21 |
| AX-158256301 | 21 | 45.757 | KV453211.1 | 2931268 | 21-scf00417 | 21 |
| AX-158256302 | 21 | 45.757 | KV453211.1 | 2931795 | 21-scf00417 | 21 |
| AX-158256303 | 21 | 45.757 | KV453211.1 | 2931958 | 21-scf00417 | 21 |
| AX-158256305 | 21 | 45.757 | KV453211.1 | 2936176 | 21-scf00417 | 21 |
| AX-158256307 | 21 | 45.757 | KV453211.1 | 2938034 | 21-scf00417 | 21 |
| AX-158381044 | 21 | 45.757 | KV453211.1 | 2943383 | 21-scf00417 | 21 |
| AX-158256313 | 21 | 45.757 | KV453211.1 | 2945277 | 21-scf00417 | 21 |
| AX-158256318 | 21 | 45.757 | KV453211.1 | 2950300 | 21-scf00417 | 21 |
| AX-157842610 | 21 | 45.757 | KV453211.1 | 2964087 | 21-scf00417 | 21 |
| AX-158256336 | 21 | 45.757 | KV453211.1 | 2974277 | 21-scf00417 | 21 |
| AX-158256429 | 21 | 45.757 | KV453211.1 | 3107137 | 21-scf00417 | 21 |
| AX-158256473 | 21 | 45.757 | KV453211.1 | 3171359 | 21-scf00417 | 21 |
| AX-158256319 | 21 | 45.808 | KV453211.1 | 2955420 | 21-scf00417 | 21 |
| AX-158256320 | 21 | 45.867 | KV453211.1 | 2956585 | 21-scf00417 | 21 |
| AX-158256324 | 21 | 45.867 | KV453211.1 | 2961439 | 21-scf00417 | 21 |
| AX-158256325 | 21 | 45.867 | KV453211.1 | 2961538 | 21-scf00417 | 21 |
| AX-158256322 | 21 | 45.929 | KV453211.1 | 2959137 | 21-scf00417 | 21 |
| AX-158256328 | 21 | 45.929 | KV453211.1 | 2965472 | 21-scf00417 | 21 |
| AX-158256331 | 21 | 45.976 | KV453211.1 | 2967978 | 21-scf00417 | 21 |
| AX-158256332 | 21 | 45.976 | KV453211.1 | 2970979 | 21-scf00417 | 21 |
| AX-158256335 | 21 | 45.976 | KV453211.1 | 2973692 | 21-scf00417 | 21 |
| AX-158256337 | 21 | 45.976 | KV453211.1 | 2974779 | 21-scf00417 | 21 |
| AX-157842612 | 21 | 45.976 | KV453211.1 | 2974939 | 21-scf00417 | 21 |
| AX-158256340 | 21 | 45.976 | KV453211.1 | 2983513 | 21-scf00417 | 21 |
| AX-158256342 | 21 | 45.976 | KV453211.1 | 2986069 | 21-scf00417 | 21 |

|              |    |        |             |         |             |    |
|--------------|----|--------|-------------|---------|-------------|----|
| AX-158256345 | 21 | 45.976 | KV453211.1  | 2990494 | 21-scf00417 | 21 |
| AX-158256346 | 21 | 45.976 | KV453211.1  | 2993278 | 21-scf00417 | 21 |
| AX-157710581 | 21 | 46.114 | KV453211.1  | 2874921 | 21-scf00417 | 21 |
| AX-157842613 | 21 | 46.903 | KV453211.1  | 2998157 | 21-scf00417 | 21 |
| AX-157704586 | 21 | 46.969 | 3ML01026672 | 1574    | scf02271_1  | UN |
| AX-157842615 | 21 | 47.073 | KV453211.1  | 3045242 | 21-scf00417 | 21 |
| AX-158256386 | 21 | 47.073 | KV453211.1  | 3047817 | 21-scf00417 | 21 |
| AX-157704587 | 21 | 47.073 | 3ML01026672 | 264     | scf02271_1  | UN |
| AX-158256354 | 21 | 47.083 | KV453211.1  | 3005411 | 21-scf00417 | 21 |
| AX-158256355 | 21 | 47.086 | KV453211.1  | 3006147 | 21-scf00417 | 21 |
| AX-158256388 | 21 | 47.086 | KV453211.1  | 3049688 | 21-scf00417 | 21 |
| AX-158256402 | 21 | 47.086 | KV453211.1  | 3066241 | 21-scf00417 | 21 |
| AX-158256357 | 21 | 47.088 | KV453211.1  | 3006981 | 21-scf00417 | 21 |
| AX-158256361 | 21 | 47.089 | KV453211.1  | 3017038 | 21-scf00417 | 21 |
| AX-158256363 | 21 | 47.09  | KV453211.1  | 3018344 | 21-scf00417 | 21 |
| AX-158256382 | 21 | 47.09  | KV453211.1  | 3042103 | 21-scf00417 | 21 |
| AX-158256148 | 21 | 47.091 | KV453211.1  | 2752583 | 21-scf00417 | 21 |
| AX-158256365 | 21 | 47.091 | KV453211.1  | 3021125 | 21-scf00417 | 21 |
| AX-158256366 | 21 | 47.091 | KV453211.1  | 3025308 | 21-scf00417 | 21 |
| AX-158256371 | 21 | 47.091 | KV453211.1  | 3029272 | 21-scf00417 | 21 |
| AX-158381045 | 21 | 47.091 | KV453211.1  | 3183732 | 21-scf00417 | 21 |
| AX-157775517 | 21 | 47.091 | KV453211.1  | 3236413 | 21-scf00417 | 21 |
| AX-158256350 | 21 | 47.092 | KV453211.1  | 3002796 | 21-scf00417 | 21 |
| AX-157867402 | 21 | 47.092 | KV453211.1  | 3016701 | 21-scf00417 | 21 |
| AX-158256372 | 21 | 47.092 | KV453211.1  | 3032073 | 21-scf00417 | 21 |
| AX-158256375 | 21 | 47.093 | KV453211.1  | 3035067 | 21-scf00417 | 21 |
| AX-158256378 | 21 | 47.094 | KV453211.1  | 3037362 | 21-scf00417 | 21 |
| AX-158256379 | 21 | 47.094 | KV453211.1  | 3037813 | 21-scf00417 | 21 |
| AX-158256383 | 21 | 47.095 | KV453211.1  | 3042561 | 21-scf00417 | 21 |
| AX-158256385 | 21 | 47.096 | KV453211.1  | 3046571 | 21-scf00417 | 21 |
| AX-158256391 | 21 | 47.096 | KV453211.1  | 3052265 | 21-scf00417 | 21 |
| AX-158256394 | 21 | 47.097 | KV453211.1  | 3056225 | 21-scf00417 | 21 |
| AX-158256395 | 21 | 47.107 | KV453211.1  | 3057853 | 21-scf00417 | 21 |
| AX-158256399 | 21 | 47.107 | KV453211.1  | 3060771 | 21-scf00417 | 21 |
| AX-158387140 | 21 | 47.115 | KV453211.1  | 3060962 | 21-scf00417 | 21 |
| AX-158256400 | 21 | 47.128 | KV453211.1  | 3061866 | 21-scf00417 | 21 |
| AX-158256401 | 21 | 47.143 | KV453211.1  | 3064769 | 21-scf00417 | 21 |
| AX-158256406 | 21 | 47.156 | KV453211.1  | 3074341 | 21-scf00417 | 21 |
| AX-158256407 | 21 | 47.167 | KV453211.1  | 3074747 | 21-scf00417 | 21 |
| AX-158256411 | 21 | 47.18  | KV453211.1  | 3077818 | 21-scf00417 | 21 |
| AX-158256412 | 21 | 47.836 | KV453211.1  | 3079946 | 21-scf00417 | 21 |
| AX-157717108 | 21 | 47.836 | KV453211.1  | 3080833 | 21-scf00417 | 21 |
| AX-158256419 | 21 | 48.543 | KV453211.1  | 3098039 | 21-scf00417 | 21 |
| AX-157753434 | 21 | 48.571 | KV453211.1  | 3099478 | 21-scf00417 | 21 |
| AX-158256415 | 21 | 48.572 | KV453211.1  | 3089392 | 21-scf00417 | 21 |
| AX-158256423 | 21 | 48.572 | KV453211.1  | 3103659 | 21-scf00417 | 21 |
| AX-158256447 | 21 | 48.572 | KV453211.1  | 3135078 | 21-scf00417 | 21 |
| AX-158256426 | 21 | 48.573 | KV453211.1  | 3105677 | 21-scf00417 | 21 |
| AX-158256431 | 21 | 48.573 | KV453211.1  | 3110254 | 21-scf00417 | 21 |
| AX-158256445 | 21 | 48.573 | KV453211.1  | 3131561 | 21-scf00417 | 21 |
| AX-157842620 | 21 | 48.573 | KV453211.1  | 3134824 | 21-scf00417 | 21 |

|              |    |        |            |         |             |    |
|--------------|----|--------|------------|---------|-------------|----|
| AX-157842618 | 21 | 48.574 | KV453211.1 | 3110790 | 21-scf00417 | 21 |
| AX-158256433 | 21 | 48.575 | KV453211.1 | 3113334 | 21-scf00417 | 21 |
| AX-158256475 | 21 | 48.575 | KV453211.1 | 3172931 | 21-scf00417 | 21 |
| AX-157745288 | 21 | 48.575 | KV453211.1 | 3175209 | 21-scf00417 | 21 |
| AX-158256435 | 21 | 48.577 | KV453211.1 | 3114896 | 21-scf00417 | 21 |
| AX-158256438 | 21 | 48.578 | KV453211.1 | 3118012 | 21-scf00417 | 21 |
| AX-158256439 | 21 | 48.578 | KV453211.1 | 3122140 | 21-scf00417 | 21 |
| AX-158256440 | 21 | 48.579 | KV453211.1 | 3123653 | 21-scf00417 | 21 |
| AX-157842619 | 21 | 48.58  | KV453211.1 | 3125336 | 21-scf00417 | 21 |
| AX-158256444 | 21 | 48.581 | KV453211.1 | 3128637 | 21-scf00417 | 21 |
| AX-158256418 | 21 | 48.846 | KV453211.1 | 3095982 | 21-scf00417 | 21 |
| AX-158256452 | 21 | 48.846 | KV453211.1 | 3139399 | 21-scf00417 | 21 |
| AX-158256453 | 21 | 48.846 | KV453211.1 | 3141473 | 21-scf00417 | 21 |
| AX-158256459 | 21 | 49.1   | KV453211.1 | 3147245 | 21-scf00417 | 21 |
| AX-158256461 | 21 | 49.31  | KV453211.1 | 3149438 | 21-scf00417 | 21 |
| AX-158256462 | 21 | 49.31  | KV453211.1 | 3149906 | 21-scf00417 | 21 |
| AX-158256470 | 21 | 49.31  | KV453211.1 | 3165035 | 21-scf00417 | 21 |
| AX-158256422 | 21 | 49.311 | KV453211.1 | 3102133 | 21-scf00417 | 21 |
| AX-158256424 | 21 | 49.311 | KV453211.1 | 3104311 | 21-scf00417 | 21 |
| AX-158256430 | 21 | 49.311 | KV453211.1 | 3109694 | 21-scf00417 | 21 |
| AX-158256471 | 21 | 49.311 | KV453211.1 | 3167433 | 21-scf00417 | 21 |
| AX-157880304 | 21 | 49.311 | KV453211.1 | 3175387 | 21-scf00417 | 21 |
| AX-158256504 | 21 | 49.311 | KV453211.1 | 3208785 | 21-scf00417 | 21 |
| AX-158256428 | 21 | 49.312 | KV453211.1 | 3106729 | 21-scf00417 | 21 |
| AX-158256432 | 21 | 49.312 | KV453211.1 | 3112149 | 21-scf00417 | 21 |
| AX-157887692 | 21 | 49.312 | KV453211.1 | 3126880 | 21-scf00417 | 21 |
| AX-157720657 | 21 | 49.312 | KV453211.1 | 3131293 | 21-scf00417 | 21 |
| AX-158256458 | 21 | 49.312 | KV453211.1 | 3146367 | 21-scf00417 | 21 |
| AX-158256464 | 21 | 49.312 | KV453211.1 | 3153550 | 21-scf00417 | 21 |
| AX-158256468 | 21 | 49.312 | KV453211.1 | 3159261 | 21-scf00417 | 21 |
| AX-158256479 | 21 | 49.312 | KV453211.1 | 3179288 | 21-scf00417 | 21 |
| AX-158256480 | 21 | 49.312 | KV453211.1 | 3179887 | 21-scf00417 | 21 |
| AX-158256481 | 21 | 49.312 | KV453211.1 | 3180723 | 21-scf00417 | 21 |
| AX-158256486 | 21 | 49.312 | KV453211.1 | 3185588 | 21-scf00417 | 21 |
| AX-158256490 | 21 | 49.312 | KV453211.1 | 3193789 | 21-scf00417 | 21 |
| AX-158256489 | 21 | 49.313 | KV453211.1 | 3190784 | 21-scf00417 | 21 |
| AX-157842625 | 21 | 49.476 | KV453211.1 | 3198751 | 21-scf00417 | 21 |
| AX-158256493 | 21 | 49.638 | KV453211.1 | 3200214 | 21-scf00417 | 21 |
| AX-158256500 | 21 | 49.638 | KV453211.1 | 3205810 | 21-scf00417 | 21 |
| AX-158256497 | 21 | 49.664 | KV453211.1 | 3203411 | 21-scf00417 | 21 |
| AX-158256472 | 21 | 49.665 | KV453211.1 | 3168510 | 21-scf00417 | 21 |
| AX-158256496 | 21 | 49.665 | KV453211.1 | 3202925 | 21-scf00417 | 21 |
| AX-158256498 | 21 | 49.665 | KV453211.1 | 3204363 | 21-scf00417 | 21 |
| AX-158256501 | 21 | 49.665 | KV453211.1 | 3206628 | 21-scf00417 | 21 |
| AX-158256502 | 21 | 49.678 | KV453211.1 | 3207320 | 21-scf00417 | 21 |
| AX-158256507 | 21 | 49.688 | KV453211.1 | 3211662 | 21-scf00417 | 21 |
| AX-158256484 | 21 | 50.212 | KV453211.1 | 3183666 | 21-scf00417 | 21 |
| AX-158256514 | 21 | 50.212 | KV453211.1 | 3219370 | 21-scf00417 | 21 |
| AX-158256520 | 21 | 50.212 | KV453211.1 | 3231360 | 21-scf00417 | 21 |
| AX-158256529 | 21 | 50.212 | KV453211.1 | 3240471 | 21-scf00417 | 21 |
| AX-158256515 | 21 | 50.352 | KV453211.1 | 3221744 | 21-scf00417 | 21 |

|              |    |        |            |         |             |    |
|--------------|----|--------|------------|---------|-------------|----|
| AX-158256538 | 21 | 50.352 | KV453211.1 | 3258459 | 21-scf00417 | 21 |
| AX-158256517 | 21 | 50.362 | KV453211.1 | 3223658 | 21-scf00417 | 21 |
| AX-158256518 | 21 | 50.372 | KV453211.1 | 3226840 | 21-scf00417 | 21 |
| AX-157713767 | 21 | 50.372 | KV453211.1 | 3228092 | 21-scf00417 | 21 |
| AX-158256519 | 21 | 50.372 | KV453211.1 | 3230873 | 21-scf00417 | 21 |
| AX-158256526 | 21 | 50.372 | KV453211.1 | 3236779 | 21-scf00417 | 21 |
| AX-158256510 | 21 | 50.373 | KV453211.1 | 3216501 | 21-scf00417 | 21 |
| AX-158387147 | 21 | 50.373 | KV453211.1 | 3232506 | 21-scf00417 | 21 |
| AX-158256522 | 21 | 50.373 | KV453211.1 | 3233013 | 21-scf00417 | 21 |
| AX-158256523 | 21 | 50.373 | KV453211.1 | 3233814 | 21-scf00417 | 21 |
| AX-158256527 | 21 | 50.373 | KV453211.1 | 3237633 | 21-scf00417 | 21 |
| AX-158256532 | 21 | 50.583 | KV453211.1 | 3245901 | 21-scf00417 | 21 |
| AX-158256466 | 21 | 50.829 | KV453211.1 | 3157664 | 21-scf00417 | 21 |
| AX-158256485 | 21 | 50.829 | KV453211.1 | 3184559 | 21-scf00417 | 21 |
| AX-158256506 | 21 | 50.829 | KV453211.1 | 3210081 | 21-scf00417 | 21 |
| AX-158256528 | 21 | 50.829 | KV453211.1 | 3238620 | 21-scf00417 | 21 |
| AX-158256533 | 21 | 50.829 | KV453211.1 | 3246382 | 21-scf00417 | 21 |
| AX-158256534 | 21 | 50.931 | KV453211.1 | 3247551 | 21-scf00417 | 21 |
| AX-158256535 | 21 | 51.374 | KV453211.1 | 3252412 | 21-scf00417 | 21 |
| AX-158256536 | 21 | 51.434 | KV453211.1 | 3254510 | 21-scf00417 | 21 |
| AX-157746318 | 21 | 51.434 | KV453211.1 | 3256406 | 21-scf00417 | 21 |
| AX-157771293 | 21 | 51.435 | KV453211.1 | 3257302 | 21-scf00417 | 21 |
| AX-158256540 | 21 | 51.44  | KV453211.1 | 3260135 | 21-scf00417 | 21 |
| AX-158256541 | 21 | 51.979 | KV453211.1 | 3261248 | 21-scf00417 | 21 |
| AX-158256543 | 21 | 52.232 | KV453211.1 | 3264991 | 21-scf00417 | 21 |
| AX-158256544 | 21 | 52.459 | KV453211.1 | 3265441 | 21-scf00417 | 21 |
| AX-158256530 | 21 | 52.466 | KV453211.1 | 3241334 | 21-scf00417 | 21 |
| AX-157859918 | 21 | 52.466 | KV453211.1 | 3268346 | 21-scf00417 | 21 |
| AX-158256549 | 21 | 52.466 | KV453211.1 | 3277841 | 21-scf00417 | 21 |
| AX-158256551 | 21 | 52.466 | KV453211.1 | 3280006 | 21-scf00417 | 21 |
| AX-158256546 | 21 | 52.496 | KV453211.1 | 3270311 | 21-scf00417 | 21 |
| AX-157722669 | 21 | 52.496 | KV453211.1 | 3270767 | 21-scf00417 | 21 |
| AX-158256548 | 21 | 52.496 | KV453211.1 | 3275896 | 21-scf00417 | 21 |
| AX-158387150 | 21 | 52.496 | KV453211.1 | 3276197 | 21-scf00417 | 21 |
| AX-158256550 | 21 | 52.496 | KV453211.1 | 3278634 | 21-scf00417 | 21 |
| AX-158256612 | 21 | 52.496 | KV453211.1 | 3379895 | 21-scf00417 | 21 |
| AX-158256553 | 21 | 52.497 | KV453211.1 | 3284132 | 21-scf00417 | 21 |
| AX-158256558 | 21 | 52.497 | KV453211.1 | 3291155 | 21-scf00417 | 21 |
| AX-158256560 | 21 | 52.497 | KV453211.1 | 3297542 | 21-scf00417 | 21 |
| AX-158256566 | 21 | 52.78  | KV453211.1 | 3306330 | 21-scf00417 | 21 |
| AX-158256568 | 21 | 52.848 | KV453211.1 | 3308185 | 21-scf00417 | 21 |
| AX-158256569 | 21 | 52.848 | KV453211.1 | 3309532 | 21-scf00417 | 21 |
| AX-158256570 | 21 | 52.848 | KV453211.1 | 3310893 | 21-scf00417 | 21 |
| AX-158256571 | 21 | 52.848 | KV453211.1 | 3311354 | 21-scf00417 | 21 |
| AX-158256572 | 21 | 52.849 | KV453211.1 | 3314864 | 21-scf00417 | 21 |
| AX-158256573 | 21 | 52.849 | KV453211.1 | 3317877 | 21-scf00417 | 21 |
| AX-158256574 | 21 | 52.849 | KV453211.1 | 3322430 | 21-scf00417 | 21 |
| AX-158256554 | 21 | 53.201 | KV453211.1 | 3286024 | 21-scf00417 | 21 |
| AX-157863845 | 21 | 53.201 | KV453211.1 | 3323379 | 21-scf00417 | 21 |
| AX-158256575 | 21 | 53.201 | KV453211.1 | 3324216 | 21-scf00417 | 21 |
| AX-158256577 | 21 | 53.201 | KV453211.1 | 3326819 | 21-scf00417 | 21 |

|              |    |        |            |         |             |    |
|--------------|----|--------|------------|---------|-------------|----|
| AX-157746934 | 21 | 53.201 | KV453211.1 | 3327758 | 21-scf00417 | 21 |
| AX-158256578 | 21 | 53.201 | KV453211.1 | 3328421 | 21-scf00417 | 21 |
| AX-158256582 | 21 | 53.201 | KV453211.1 | 3333024 | 21-scf00417 | 21 |
| AX-158256593 | 21 | 53.201 | KV453211.1 | 3351924 | 21-scf00417 | 21 |
| AX-158256579 | 21 | 53.202 | KV453211.1 | 3328765 | 21-scf00417 | 21 |
| AX-158256581 | 21 | 53.202 | KV453211.1 | 3330922 | 21-scf00417 | 21 |
| AX-158256583 | 21 | 53.554 | KV453211.1 | 3333635 | 21-scf00417 | 21 |
| AX-157842628 | 21 | 53.554 | KV453211.1 | 3336203 | 21-scf00417 | 21 |
| AX-158256576 | 21 | 53.738 | KV453211.1 | 3325273 | 21-scf00417 | 21 |
| AX-158256586 | 21 | 53.738 | KV453211.1 | 3338721 | 21-scf00417 | 21 |
| AX-158256596 | 21 | 53.738 | KV453211.1 | 3354413 | 21-scf00417 | 21 |
| AX-158256587 | 21 | 53.906 | KV453211.1 | 3340316 | 21-scf00417 | 21 |
| AX-158256591 | 21 | 53.906 | KV453211.1 | 3346529 | 21-scf00417 | 21 |
| AX-158256604 | 21 | 53.906 | KV453211.1 | 3368638 | 21-scf00417 | 21 |
| AX-158256606 | 21 | 53.906 | KV453211.1 | 3372730 | 21-scf00417 | 21 |
| AX-158256622 | 21 | 53.906 | KV453211.1 | 3391458 | 21-scf00417 | 21 |
| AX-158256654 | 21 | 53.906 | KV453211.1 | 3432553 | 21-scf00417 | 21 |
| AX-158256658 | 21 | 53.906 | KV453211.1 | 3439406 | 21-scf00417 | 21 |
| AX-157725126 | 21 | 53.906 | KV453211.1 | 3439565 | 21-scf00417 | 21 |
| AX-158256592 | 21 | 53.922 | KV453211.1 | 3348434 | 21-scf00417 | 21 |
| AX-158256595 | 21 | 53.937 | KV453211.1 | 3353239 | 21-scf00417 | 21 |
| AX-158256588 | 21 | 53.953 | KV453211.1 | 3342364 | 21-scf00417 | 21 |
| AX-158256599 | 21 | 53.953 | KV453211.1 | 3356760 | 21-scf00417 | 21 |
| AX-158256602 | 21 | 54.58  | KV453211.1 | 3366869 | 21-scf00417 | 21 |
| AX-158256607 | 21 | 54.612 | KV453211.1 | 3374090 | 21-scf00417 | 21 |
| AX-158256610 | 21 | 54.612 | KV453211.1 | 3377193 | 21-scf00417 | 21 |
| AX-157757284 | 21 | 54.63  | KV453211.1 | 3378307 | 21-scf00417 | 21 |
| AX-158256615 | 21 | 54.642 | KV453211.1 | 3384114 | 21-scf00417 | 21 |
| AX-158256616 | 21 | 55.168 | KV453211.1 | 3386498 | 21-scf00417 | 21 |
| AX-158256621 | 21 | 55.168 | KV453211.1 | 3391023 | 21-scf00417 | 21 |
| AX-158387153 | 21 | 55.168 | KV453211.1 | 3392500 | 21-scf00417 | 21 |
| AX-158256634 | 21 | 55.168 | KV453211.1 | 3410812 | 21-scf00417 | 21 |
| AX-158256624 | 21 | 55.178 | KV453211.1 | 3395713 | 21-scf00417 | 21 |
| AX-158256625 | 21 | 55.189 | KV453211.1 | 3396292 | 21-scf00417 | 21 |
| AX-158256627 | 21 | 55.789 | KV453211.1 | 3398611 | 21-scf00417 | 21 |
| AX-158387154 | 21 | 56.259 | KV453211.1 | 3402193 | 21-scf00417 | 21 |
| AX-158256629 | 21 | 56.389 | KV453211.1 | 3402584 | 21-scf00417 | 21 |
| AX-157772427 | 21 | 56.389 | KV453211.1 | 3404441 | 21-scf00417 | 21 |
| AX-158256631 | 21 | 56.389 | KV453211.1 | 3406649 | 21-scf00417 | 21 |
| AX-158256632 | 21 | 56.389 | KV453211.1 | 3408781 | 21-scf00417 | 21 |
| AX-158256647 | 21 | 56.389 | KV453211.1 | 3426911 | 21-scf00417 | 21 |
| AX-157887695 | 21 | 56.39  | KV453211.1 | 3408612 | 21-scf00417 | 21 |
| AX-158256633 | 21 | 56.39  | KV453211.1 | 3409483 | 21-scf00417 | 21 |
| AX-158256635 | 21 | 56.39  | KV453211.1 | 3411184 | 21-scf00417 | 21 |
| AX-158256630 | 21 | 56.391 | KV453211.1 | 3405932 | 21-scf00417 | 21 |
| AX-158256636 | 21 | 56.391 | KV453211.1 | 3412837 | 21-scf00417 | 21 |
| AX-158256637 | 21 | 56.391 | KV453211.1 | 3413360 | 21-scf00417 | 21 |
| AX-158256641 | 21 | 56.391 | KV453211.1 | 3418854 | 21-scf00417 | 21 |
| AX-158256642 | 21 | 56.391 | KV453211.1 | 3419874 | 21-scf00417 | 21 |
| AX-158256646 | 21 | 56.391 | KV453211.1 | 3425847 | 21-scf00417 | 21 |
| AX-158256648 | 21 | 56.392 | KV453211.1 | 3427267 | 21-scf00417 | 21 |

|              |    |        |            |         |             |    |
|--------------|----|--------|------------|---------|-------------|----|
| AX-158256649 | 21 | 56.392 | KV453211.1 | 3428044 | 21-scf00417 | 21 |
| AX-158256650 | 21 | 56.393 | KV453211.1 | 3429125 | 21-scf00417 | 21 |
| AX-158256651 | 21 | 56.393 | KV453211.1 | 3431096 | 21-scf00417 | 21 |
| AX-158256652 | 21 | 56.395 | KV453211.1 | 3431639 | 21-scf00417 | 21 |
| AX-158394566 | 21 | 56.396 | KV453211.1 | 3407086 | 21-scf00417 | 21 |
| AX-158256645 | 21 | 56.396 | KV453211.1 | 3423395 | 21-scf00417 | 21 |
| AX-158394567 | 21 | 56.396 | KV453211.1 | 3432718 | 21-scf00417 | 21 |
| AX-158256656 | 21 | 56.396 | KV453211.1 | 3435987 | 21-scf00417 | 21 |
| AX-158256688 | 21 | 56.396 | KV453211.1 | 3489283 | 21-scf00417 | 21 |
| AX-158256733 | 21 | 56.396 | KV453211.1 | 3561924 | 21-scf00417 | 21 |
| AX-157872796 | 21 | 56.396 | KV453211.1 | 3654619 | 21-scf00417 | 21 |
| AX-158256803 | 21 | 56.396 | KV453211.1 | 3672000 | 21-scf00417 | 21 |
| AX-158256657 | 21 | 56.413 | KV453211.1 | 3438307 | 21-scf00417 | 21 |
| AX-158381047 | 21 | 57.429 | KV453211.1 | 3438381 | 21-scf00417 | 21 |
| AX-158256659 | 21 | 58.143 | KV453211.1 | 3440607 | 21-scf00417 | 21 |
| AX-158256668 | 21 | 58.143 | KV453211.1 | 3462571 | 21-scf00417 | 21 |
| AX-157721892 | 21 | 58.209 | KV453211.1 | 3447466 | 21-scf00417 | 21 |
| AX-157880309 | 21 | 58.21  | KV453211.1 | 3447723 | 21-scf00417 | 21 |
| AX-158256661 | 21 | 58.364 | KV453211.1 | 3447766 | 21-scf00417 | 21 |
| AX-158256662 | 21 | 58.384 | KV453211.1 | 3450292 | 21-scf00417 | 21 |
| AX-158256663 | 21 | 58.384 | KV453211.1 | 3452016 | 21-scf00417 | 21 |
| AX-158387156 | 21 | 58.563 | KV453211.1 | 3457056 | 21-scf00417 | 21 |
| AX-158256667 | 21 | 58.916 | KV453211.1 | 3461479 | 21-scf00417 | 21 |
| AX-158256664 | 21 | 58.917 | KV453211.1 | 3457404 | 21-scf00417 | 21 |
| AX-158256674 | 21 | 58.917 | KV453211.1 | 3470057 | 21-scf00417 | 21 |
| AX-158256675 | 21 | 58.917 | KV453211.1 | 3471333 | 21-scf00417 | 21 |
| AX-158256709 | 21 | 58.917 | KV453211.1 | 3528414 | 21-scf00417 | 21 |
| AX-158257061 | 21 | 58.917 | KV453211.1 | 3968621 | 21-scf00417 | 21 |
| AX-158256682 | 21 | 59.021 | KV453211.1 | 3481034 | 21-scf00417 | 21 |
| AX-158256683 | 21 | 59.272 | KV453211.1 | 3482050 | 21-scf00417 | 21 |
| AX-158256689 | 21 | 59.273 | KV453211.1 | 3490209 | 21-scf00417 | 21 |
| AX-158256690 | 21 | 59.277 | KV453211.1 | 3490727 | 21-scf00417 | 21 |
| AX-158256680 | 21 | 59.278 | KV453211.1 | 3479681 | 21-scf00417 | 21 |
| AX-158256686 | 21 | 59.278 | KV453211.1 | 3486120 | 21-scf00417 | 21 |
| AX-158256693 | 21 | 59.278 | KV453211.1 | 3493138 | 21-scf00417 | 21 |
| AX-157842631 | 21 | 59.278 | KV453211.1 | 3509725 | 21-scf00417 | 21 |
| AX-157710474 | 21 | 59.279 | KV453211.1 | 3494041 | 21-scf00417 | 21 |
| AX-158256694 | 21 | 59.28  | KV453211.1 | 3494696 | 21-scf00417 | 21 |
| AX-158256685 | 21 | 59.281 | KV453211.1 | 3484815 | 21-scf00417 | 21 |
| AX-157859919 | 21 | 59.281 | KV453211.1 | 3496870 | 21-scf00417 | 21 |
| AX-158256670 | 21 | 59.336 | KV453211.1 | 3463958 | 21-scf00417 | 21 |
| AX-158256696 | 21 | 59.336 | KV453211.1 | 3498375 | 21-scf00417 | 21 |
| AX-158256703 | 21 | 59.336 | KV453211.1 | 3510507 | 21-scf00417 | 21 |
| AX-157842633 | 21 | 59.396 | KV453211.1 | 3523241 | 21-scf00417 | 21 |
| AX-158256712 | 21 | 59.396 | KV453211.1 | 3534178 | 21-scf00417 | 21 |
| AX-157717423 | 21 | 59.672 | KV453211.1 | 3528154 | 21-scf00417 | 21 |
| AX-158256710 | 21 | 59.672 | KV453211.1 | 3528845 | 21-scf00417 | 21 |
| AX-158256711 | 21 | 59.672 | KV453211.1 | 3532155 | 21-scf00417 | 21 |
| AX-158256726 | 21 | 59.672 | KV453211.1 | 3554137 | 21-scf00417 | 21 |
| AX-157727712 | 21 | 59.672 | KV453211.1 | 3566716 | 21-scf00417 | 21 |
| AX-157867403 | 21 | 59.672 | KV453211.1 | 3578745 | 21-scf00417 | 21 |

|              |    |        |            |         |             |    |
|--------------|----|--------|------------|---------|-------------|----|
| AX-158256725 | 21 | 59.677 | KV453211.1 | 3552906 | 21-scf00417 | 21 |
| AX-157842632 | 21 | 59.682 | KV453211.1 | 3520611 | 21-scf00417 | 21 |
| AX-157772470 | 21 | 59.682 | KV453211.1 | 3564966 | 21-scf00417 | 21 |
| AX-158256735 | 21 | 59.682 | KV453211.1 | 3566055 | 21-scf00417 | 21 |
| AX-158256747 | 21 | 59.682 | KV453211.1 | 3584086 | 21-scf00417 | 21 |
| AX-158256753 | 21 | 59.682 | KV453211.1 | 3596039 | 21-scf00417 | 21 |
| AX-158256765 | 21 | 59.682 | KV453211.1 | 3616008 | 21-scf00417 | 21 |
| AX-158256771 | 21 | 59.682 | KV453211.1 | 3620937 | 21-scf00417 | 21 |
| AX-157842642 | 21 | 59.682 | KV453211.1 | 3637275 | 21-scf00417 | 21 |
| AX-157842637 | 21 | 59.689 | KV453211.1 | 3566995 | 21-scf00417 | 21 |
| AX-158256736 | 21 | 59.695 | KV453211.1 | 3569007 | 21-scf00417 | 21 |
| AX-158256737 | 21 | 59.697 | KV453211.1 | 3570412 | 21-scf00417 | 21 |
| AX-158256738 | 21 | 59.697 | KV453211.1 | 3571594 | 21-scf00417 | 21 |
| AX-157842640 | 21 | 59.698 | KV453211.1 | 3572764 | 21-scf00417 | 21 |
| AX-158256739 | 21 | 59.699 | KV453211.1 | 3573350 | 21-scf00417 | 21 |
| AX-158256745 | 21 | 60.086 | KV453211.1 | 3581950 | 21-scf00417 | 21 |
| AX-158256748 | 21 | 60.087 | KV453211.1 | 3584783 | 21-scf00417 | 21 |
| AX-157842641 | 21 | 60.474 | KV453211.1 | 3589422 | 21-scf00417 | 21 |
| AX-158256760 | 21 | 60.474 | KV453211.1 | 3607256 | 21-scf00417 | 21 |
| AX-158256749 | 21 | 60.475 | KV453211.1 | 3585960 | 21-scf00417 | 21 |
| AX-158256754 | 21 | 60.475 | KV453211.1 | 3598779 | 21-scf00417 | 21 |
| AX-158256756 | 21 | 60.475 | KV453211.1 | 3600221 | 21-scf00417 | 21 |
| AX-158256758 | 21 | 60.861 | KV453211.1 | 3605245 | 21-scf00417 | 21 |
| AX-158256769 | 21 | 60.863 | KV453211.1 | 3619193 | 21-scf00417 | 21 |
| AX-158256770 | 21 | 60.954 | KV453211.1 | 3620069 | 21-scf00417 | 21 |
| AX-158256759 | 21 | 61.071 | KV453211.1 | 3606646 | 21-scf00417 | 21 |
| AX-157887696 | 21 | 61.071 | KV453211.1 | 3623993 | 21-scf00417 | 21 |
| AX-158416074 | 21 | 61.071 | KV453211.1 | 3687943 | 21-scf00417 | 21 |
| AX-158256812 | 21 | 61.071 | KV453211.1 | 3688356 | 21-scf00417 | 21 |
| AX-158256863 | 21 | 61.071 | KV453211.1 | 3731252 | 21-scf00417 | 21 |
| AX-158256777 | 21 | 61.163 | KV453211.1 | 3626670 | 21-scf00417 | 21 |
| AX-158256778 | 21 | 61.253 | KV453211.1 | 3627194 | 21-scf00417 | 21 |
| AX-157747094 | 21 | 61.254 | KV453211.1 | 3633355 | 21-scf00417 | 21 |
| AX-158256783 | 21 | 61.255 | KV453211.1 | 3639225 | 21-scf00417 | 21 |
| AX-158256784 | 21 | 61.255 | KV453211.1 | 3641238 | 21-scf00417 | 21 |
| AX-158256793 | 21 | 61.255 | KV453211.1 | 3659753 | 21-scf00417 | 21 |
| AX-158394569 | 21 | 61.256 | KV453211.1 | 3606845 | 21-scf00417 | 21 |
| AX-158256773 | 21 | 61.256 | KV453211.1 | 3622405 | 21-scf00417 | 21 |
| AX-158256774 | 21 | 61.256 | KV453211.1 | 3624110 | 21-scf00417 | 21 |
| AX-158256776 | 21 | 61.256 | KV453211.1 | 3626433 | 21-scf00417 | 21 |
| AX-158256779 | 21 | 61.256 | KV453211.1 | 3629533 | 21-scf00417 | 21 |
| AX-158256786 | 21 | 61.256 | KV453211.1 | 3645598 | 21-scf00417 | 21 |
| AX-158256787 | 21 | 61.256 | KV453211.1 | 3646376 | 21-scf00417 | 21 |
| AX-158256788 | 21 | 61.256 | KV453211.1 | 3651031 | 21-scf00417 | 21 |
| AX-158256790 | 21 | 61.256 | KV453211.1 | 3655790 | 21-scf00417 | 21 |
| AX-158256801 | 21 | 61.256 | KV453211.1 | 3669232 | 21-scf00417 | 21 |
| AX-157769258 | 21 | 61.256 | KV453211.1 | 3674778 | 21-scf00417 | 21 |
| AX-158256816 | 21 | 61.256 | KV453211.1 | 3691850 | 21-scf00417 | 21 |
| AX-158256828 | 21 | 61.256 | KV453211.1 | 3701597 | 21-scf00417 | 21 |
| AX-157755816 | 21 | 61.256 | KV453211.1 | 3704356 | 21-scf00417 | 21 |
| AX-158256878 | 21 | 61.256 | KV453211.1 | 3745880 | 21-scf00417 | 21 |

|              |    |        |            |         |             |    |
|--------------|----|--------|------------|---------|-------------|----|
| AX-158256792 | 21 | 61.257 | KV453211.1 | 3657399 | 21-scf00417 | 21 |
| AX-158256912 | 21 | 61.257 | KV453211.1 | 3775561 | 21-scf00417 | 21 |
| AX-158256913 | 21 | 61.257 | KV453211.1 | 3776178 | 21-scf00417 | 21 |
| AX-158256959 | 21 | 61.257 | KV453211.1 | 3841156 | 21-scf00417 | 21 |
| AX-158256975 | 21 | 61.257 | KV453211.1 | 3859763 | 21-scf00417 | 21 |
| AX-157756506 | 21 | 61.258 | KV453211.1 | 3665516 | 21-scf00417 | 21 |
| AX-158256807 | 21 | 61.259 | KV453211.1 | 3677555 | 21-scf00417 | 21 |
| AX-158256775 | 21 | 61.26  | KV453211.1 | 3625062 | 21-scf00417 | 21 |
| AX-158256805 | 21 | 61.26  | KV453211.1 | 3673272 | 21-scf00417 | 21 |
| AX-157757287 | 21 | 61.26  | KV453211.1 | 3674352 | 21-scf00417 | 21 |
| AX-158256808 | 21 | 61.26  | KV453211.1 | 3681391 | 21-scf00417 | 21 |
| AX-158256809 | 21 | 61.26  | KV453211.1 | 3682282 | 21-scf00417 | 21 |
| AX-158256819 | 21 | 61.26  | KV453211.1 | 3694349 | 21-scf00417 | 21 |
| AX-158256840 | 21 | 61.26  | KV453211.1 | 3712240 | 21-scf00417 | 21 |
| AX-158256853 | 21 | 61.26  | KV453211.1 | 3722215 | 21-scf00417 | 21 |
| AX-158256864 | 21 | 61.26  | KV453211.1 | 3731822 | 21-scf00417 | 21 |
| AX-158256873 | 21 | 61.26  | KV453211.1 | 3741642 | 21-scf00417 | 21 |
| AX-158256883 | 21 | 61.26  | KV453211.1 | 3749522 | 21-scf00417 | 21 |
| AX-158256884 | 21 | 61.26  | KV453211.1 | 3750101 | 21-scf00417 | 21 |
| AX-158256886 | 21 | 61.26  | KV453211.1 | 3751075 | 21-scf00417 | 21 |
| AX-158256910 | 21 | 61.26  | KV453211.1 | 3774486 | 21-scf00417 | 21 |
| AX-158256960 | 21 | 61.26  | KV453211.1 | 3842261 | 21-scf00417 | 21 |
| AX-157842630 | 21 | 61.261 | KV453211.1 | 3504250 | 21-scf00417 | 21 |
| AX-158256755 | 21 | 61.261 | KV453211.1 | 3599169 | 21-scf00417 | 21 |
| AX-158256761 | 21 | 61.261 | KV453211.1 | 3609977 | 21-scf00417 | 21 |
| AX-158256789 | 21 | 61.261 | KV453211.1 | 3651472 | 21-scf00417 | 21 |
| AX-158256823 | 21 | 61.261 | KV453211.1 | 3697541 | 21-scf00417 | 21 |
| AX-158256923 | 21 | 61.261 | KV453211.1 | 3792526 | 21-scf00417 | 21 |
| AX-158256824 | 21 | 61.262 | KV453211.1 | 3698456 | 21-scf00417 | 21 |
| AX-158256831 | 21 | 61.663 | KV453211.1 | 3704730 | 21-scf00417 | 21 |
| AX-158256844 | 21 | 62.039 | KV453211.1 | 3713936 | 21-scf00417 | 21 |
| AX-158256846 | 21 | 62.04  | KV453211.1 | 3715239 | 21-scf00417 | 21 |
| AX-158256862 | 21 | 62.041 | KV453211.1 | 3730287 | 21-scf00417 | 21 |
| AX-158256842 | 21 | 62.042 | KV453211.1 | 3713299 | 21-scf00417 | 21 |
| AX-158256861 | 21 | 62.042 | KV453211.1 | 3730003 | 21-scf00417 | 21 |
| AX-158256865 | 21 | 62.042 | KV453211.1 | 3733068 | 21-scf00417 | 21 |
| AX-158256845 | 21 | 62.044 | KV453211.1 | 3715020 | 21-scf00417 | 21 |
| AX-158256867 | 21 | 62.044 | KV453211.1 | 3734554 | 21-scf00417 | 21 |
| AX-158256869 | 21 | 62.044 | KV453211.1 | 3736071 | 21-scf00417 | 21 |
| AX-158256871 | 21 | 62.045 | KV453211.1 | 3739403 | 21-scf00417 | 21 |
| AX-158256875 | 21 | 62.046 | KV453211.1 | 3743107 | 21-scf00417 | 21 |
| AX-158256881 | 21 | 62.046 | KV453211.1 | 3748056 | 21-scf00417 | 21 |
| AX-158256882 | 21 | 62.046 | KV453211.1 | 3748533 | 21-scf00417 | 21 |
| AX-158256885 | 21 | 62.046 | KV453211.1 | 3750601 | 21-scf00417 | 21 |
| AX-157880325 | 21 | 62.046 | KV453211.1 | 3763700 | 21-scf00417 | 21 |
| AX-158256926 | 21 | 62.046 | KV453211.1 | 3794716 | 21-scf00417 | 21 |
| AX-158256887 | 21 | 62.047 | KV453211.1 | 3752225 | 21-scf00417 | 21 |
| AX-158256889 | 21 | 62.048 | KV453211.1 | 3753361 | 21-scf00417 | 21 |
| AX-158256890 | 21 | 62.049 | KV453211.1 | 3755108 | 21-scf00417 | 21 |
| AX-158256901 | 21 | 62.049 | KV453211.1 | 3764525 | 21-scf00417 | 21 |
| AX-158256772 | 21 | 62.05  | KV453211.1 | 3621331 | 21-scf00417 | 21 |



|              |    |        |             |         |             |    |
|--------------|----|--------|-------------|---------|-------------|----|
| AX-157739326 | 21 | 62.05  | KV453211.1  | 3755446 | 21-scf00417 | 21 |
| AX-158256894 | 21 | 62.051 | KV453211.1  | 3758081 | 21-scf00417 | 21 |
| AX-158256895 | 21 | 62.053 | KV453211.1  | 3758594 | 21-scf00417 | 21 |
| AX-158256896 | 21 | 62.149 | KV453211.1  | 3759743 | 21-scf00417 | 21 |
| AX-158256898 | 21 | 62.3   | KV453211.1  | 3762549 | 21-scf00417 | 21 |
| AX-158256900 | 21 | 62.3   | KV453211.1  | 3763897 | 21-scf00417 | 21 |
| AX-158256911 | 21 | 62.3   | KV453211.1  | 3775056 | 21-scf00417 | 21 |
| AX-158256841 | 21 | 62.44  | KV453211.1  | 3712738 | 21-scf00417 | 21 |
| AX-158256899 | 21 | 62.44  | KV453211.1  | 3763735 | 21-scf00417 | 21 |
| AX-158256903 | 21 | 62.44  | KV453211.1  | 3766837 | 21-scf00417 | 21 |
| AX-158256907 | 21 | 62.44  | KV453211.1  | 3772461 | 21-scf00417 | 21 |
| AX-158256914 | 21 | 62.44  | KV453211.1  | 3777486 | 21-scf00417 | 21 |
| AX-158256916 | 21 | 62.604 | KV453211.1  | 3781072 | 21-scf00417 | 21 |
| AX-158256917 | 21 | 62.828 | KV453211.1  | 3781999 | 21-scf00417 | 21 |
| AX-158256918 | 21 | 62.828 | KV453211.1  | 3782780 | 21-scf00417 | 21 |
| AX-157706152 | 21 | 62.956 | 3ML01031723 | 252     | scf07343_1  | UN |
| AX-158256930 | 21 | 63.085 | KV453211.1  | 3799994 | 21-scf00417 | 21 |
| AX-157859920 | 21 | 63.22  | KV453211.1  | 3813516 | 21-scf00417 | 21 |
| AX-157704852 | 21 | 63.22  | 3ML01027647 | 531     | scf03253_1  | UN |
| AX-157706151 | 21 | 63.22  | 3ML01031723 | 214     | scf07343_1  | UN |
| AX-158256935 | 21 | 63.221 | KV453211.1  | 3810108 | 21-scf00417 | 21 |
| AX-157704853 | 21 | 63.221 | 3ML01027647 | 95      | scf03253_1  | UN |
| AX-158256936 | 21 | 63.222 | KV453211.1  | 3811708 | 21-scf00417 | 21 |
| AX-158256937 | 21 | 63.223 | KV453211.1  | 3812266 | 21-scf00417 | 21 |
| AX-158256952 | 21 | 63.223 | KV453211.1  | 3832273 | 21-scf00417 | 21 |
| AX-158256940 | 21 | 63.611 | KV453211.1  | 3814822 | 21-scf00417 | 21 |
| AX-157887697 | 21 | 63.612 | KV453211.1  | 3816190 | 21-scf00417 | 21 |
| AX-158256941 | 21 | 63.613 | KV453211.1  | 3817243 | 21-scf00417 | 21 |
| AX-158256942 | 21 | 63.614 | KV453211.1  | 3817901 | 21-scf00417 | 21 |
| AX-158256944 | 21 | 63.616 | KV453211.1  | 3818916 | 21-scf00417 | 21 |
| AX-158256949 | 21 | 63.617 | KV453211.1  | 3827424 | 21-scf00417 | 21 |
| AX-158256938 | 21 | 63.633 | KV453211.1  | 3813265 | 21-scf00417 | 21 |
| AX-158256950 | 21 | 63.633 | KV453211.1  | 3830472 | 21-scf00417 | 21 |
| AX-158257412 | 21 | 63.633 | KV453211.1  | 4545114 | 21-scf00417 | 21 |
| AX-158256956 | 21 | 64.364 | KV453211.1  | 3837867 | 21-scf00417 | 21 |
| AX-158256972 | 21 | 64.364 | KV453211.1  | 3856321 | 21-scf00417 | 21 |
| AX-158256957 | 21 | 64.396 | KV453211.1  | 3839123 | 21-scf00417 | 21 |
| AX-157756437 | 21 | 64.397 | KV453211.1  | 3846345 | 21-scf00417 | 21 |
| AX-158256964 | 21 | 64.398 | KV453211.1  | 3847746 | 21-scf00417 | 21 |
| AX-158256978 | 21 | 64.398 | KV453211.1  | 3868038 | 21-scf00417 | 21 |
| AX-157684047 | 21 | 64.398 | KV453212.1  | 639     | 21-scf00418 | 21 |
| AX-158256802 | 21 | 64.4   | KV453211.1  | 3670521 | 21-scf00417 | 21 |
| AX-158256804 | 21 | 64.4   | KV453211.1  | 3672689 | 21-scf00417 | 21 |
| AX-158256833 | 21 | 64.4   | KV453211.1  | 3705862 | 21-scf00417 | 21 |
| AX-158256860 | 21 | 64.4   | KV453211.1  | 3728872 | 21-scf00417 | 21 |
| AX-158256965 | 21 | 64.4   | KV453211.1  | 3848720 | 21-scf00417 | 21 |
| AX-158256979 | 21 | 64.4   | KV453211.1  | 3869641 | 21-scf00417 | 21 |
| AX-158257372 | 21 | 64.4   | KV453211.1  | 4501355 | 21-scf00417 | 21 |
| AX-157756893 | 21 | 64.401 | KV453211.1  | 3836053 | 21-scf00417 | 21 |
| AX-158256969 | 21 | 64.401 | KV453211.1  | 3852589 | 21-scf00417 | 21 |
| AX-158256970 | 21 | 64.401 | KV453211.1  | 3853824 | 21-scf00417 | 21 |

|              |    |        |             |         |             |    |
|--------------|----|--------|-------------|---------|-------------|----|
| AX-158257324 | 21 | 64.401 | KV453211.1  | 4408905 | 21-scf00417 | 21 |
| AX-158257366 | 21 | 64.401 | KV453211.1  | 4497636 | 21-scf00417 | 21 |
| AX-158257405 | 21 | 64.401 | KV453211.1  | 4539876 | 21-scf00417 | 21 |
| AX-158256973 | 21 | 64.402 | KV453211.1  | 3857161 | 21-scf00417 | 21 |
| AX-158256980 | 21 | 64.403 | KV453211.1  | 3871399 | 21-scf00417 | 21 |
| AX-158256976 | 21 | 64.404 | KV453211.1  | 3863325 | 21-scf00417 | 21 |
| AX-158256977 | 21 | 64.404 | KV453211.1  | 3865791 | 21-scf00417 | 21 |
| AX-158256982 | 21 | 64.404 | KV453211.1  | 3872560 | 21-scf00417 | 21 |
| AX-158256990 | 21 | 64.404 | KV453211.1  | 3877146 | 21-scf00417 | 21 |
| AX-158256991 | 21 | 64.404 | KV453211.1  | 3877609 | 21-scf00417 | 21 |
| AX-158256992 | 21 | 64.404 | KV453211.1  | 3879608 | 21-scf00417 | 21 |
| AX-158256993 | 21 | 64.404 | KV453211.1  | 3880287 | 21-scf00417 | 21 |
| AX-158256994 | 21 | 64.404 | KV453211.1  | 3880850 | 21-scf00417 | 21 |
| AX-157842646 | 21 | 64.404 | KV453211.1  | 3885017 | 21-scf00417 | 21 |
| AX-158257015 | 21 | 64.404 | KV453211.1  | 3909776 | 21-scf00417 | 21 |
| AX-158257343 | 21 | 64.404 | KV453211.1  | 4446645 | 21-scf00417 | 21 |
| AX-158257000 | 21 | 64.513 | KV453211.1  | 3894780 | 21-scf00417 | 21 |
| AX-158257003 | 21 | 64.513 | KV453211.1  | 3897866 | 21-scf00417 | 21 |
| AX-157706496 | 21 | 64.513 | 3ML01032341 | 171     | scf07956_1  | UN |
| AX-158256855 | 21 | 64.623 | KV453211.1  | 3724100 | 21-scf00417 | 21 |
| AX-158256919 | 21 | 64.623 | KV453211.1  | 3784213 | 21-scf00417 | 21 |
| AX-158256981 | 21 | 64.623 | KV453211.1  | 3871756 | 21-scf00417 | 21 |
| AX-158256985 | 21 | 64.623 | KV453211.1  | 3874711 | 21-scf00417 | 21 |
| AX-158256989 | 21 | 64.623 | KV453211.1  | 3876623 | 21-scf00417 | 21 |
| AX-158256995 | 21 | 64.623 | KV453211.1  | 3882486 | 21-scf00417 | 21 |
| AX-158256998 | 21 | 64.623 | KV453211.1  | 3891689 | 21-scf00417 | 21 |
| AX-158257004 | 21 | 64.623 | KV453211.1  | 3898355 | 21-scf00417 | 21 |
| AX-158257005 | 21 | 64.623 | KV453211.1  | 3899000 | 21-scf00417 | 21 |
| AX-158257006 | 21 | 64.623 | KV453211.1  | 3899808 | 21-scf00417 | 21 |
| AX-158257008 | 21 | 64.623 | KV453211.1  | 3901828 | 21-scf00417 | 21 |
| AX-158257010 | 21 | 64.623 | KV453211.1  | 3904220 | 21-scf00417 | 21 |
| AX-158257011 | 21 | 64.623 | KV453211.1  | 3905200 | 21-scf00417 | 21 |
| AX-158257012 | 21 | 64.623 | KV453211.1  | 3906176 | 21-scf00417 | 21 |
| AX-158257014 | 21 | 64.623 | KV453211.1  | 3908419 | 21-scf00417 | 21 |
| AX-157755375 | 21 | 64.623 | KV453211.1  | 3910532 | 21-scf00417 | 21 |
| AX-158257018 | 21 | 64.623 | KV453211.1  | 3915106 | 21-scf00417 | 21 |
| AX-158257021 | 21 | 64.623 | KV453211.1  | 3918409 | 21-scf00417 | 21 |
| AX-158257022 | 21 | 64.623 | KV453211.1  | 3919188 | 21-scf00417 | 21 |
| AX-158257023 | 21 | 64.623 | KV453211.1  | 3920114 | 21-scf00417 | 21 |
| AX-158257026 | 21 | 64.623 | KV453211.1  | 3921875 | 21-scf00417 | 21 |
| AX-158257029 | 21 | 64.623 | KV453211.1  | 3924978 | 21-scf00417 | 21 |
| AX-158257030 | 21 | 64.623 | KV453211.1  | 3925553 | 21-scf00417 | 21 |
| AX-158257031 | 21 | 64.623 | KV453211.1  | 3927177 | 21-scf00417 | 21 |
| AX-158257032 | 21 | 64.623 | KV453211.1  | 3928313 | 21-scf00417 | 21 |
| AX-158257033 | 21 | 64.623 | KV453211.1  | 3930101 | 21-scf00417 | 21 |
| AX-158257034 | 21 | 64.623 | KV453211.1  | 3930646 | 21-scf00417 | 21 |
| AX-157727398 | 21 | 64.623 | KV453211.1  | 3930887 | 21-scf00417 | 21 |
| AX-157887699 | 21 | 64.623 | KV453211.1  | 3937729 | 21-scf00417 | 21 |
| AX-158257039 | 21 | 64.623 | KV453211.1  | 3939515 | 21-scf00417 | 21 |
| AX-158257049 | 21 | 64.623 | KV453211.1  | 3952119 | 21-scf00417 | 21 |
| AX-158257052 | 21 | 64.623 | KV453211.1  | 3954661 | 21-scf00417 | 21 |

|              |    |        |            |         |             |    |
|--------------|----|--------|------------|---------|-------------|----|
| AX-158257053 | 21 | 64.623 | KV453211.1 | 3955785 | 21-scf00417 | 21 |
| AX-158257055 | 21 | 64.623 | KV453211.1 | 3958387 | 21-scf00417 | 21 |
| AX-158257058 | 21 | 64.623 | KV453211.1 | 3963521 | 21-scf00417 | 21 |
| AX-158257059 | 21 | 64.623 | KV453211.1 | 3963829 | 21-scf00417 | 21 |
| AX-158257060 | 21 | 64.623 | KV453211.1 | 3967528 | 21-scf00417 | 21 |
| AX-158257062 | 21 | 64.623 | KV453211.1 | 3969518 | 21-scf00417 | 21 |
| AX-158257063 | 21 | 64.623 | KV453211.1 | 3971269 | 21-scf00417 | 21 |
| AX-158257064 | 21 | 64.623 | KV453211.1 | 3971885 | 21-scf00417 | 21 |
| AX-158257067 | 21 | 64.623 | KV453211.1 | 3974157 | 21-scf00417 | 21 |
| AX-157756585 | 21 | 64.623 | KV453211.1 | 3974338 | 21-scf00417 | 21 |
| AX-158257068 | 21 | 64.623 | KV453211.1 | 3975137 | 21-scf00417 | 21 |
| AX-158257069 | 21 | 64.623 | KV453211.1 | 3975621 | 21-scf00417 | 21 |
| AX-158257070 | 21 | 64.623 | KV453211.1 | 3975988 | 21-scf00417 | 21 |
| AX-158257071 | 21 | 64.623 | KV453211.1 | 3976339 | 21-scf00417 | 21 |
| AX-158257072 | 21 | 64.623 | KV453211.1 | 3976968 | 21-scf00417 | 21 |
| AX-158257073 | 21 | 64.623 | KV453211.1 | 3978199 | 21-scf00417 | 21 |
| AX-158257074 | 21 | 64.623 | KV453211.1 | 3978648 | 21-scf00417 | 21 |
| AX-158257075 | 21 | 64.623 | KV453211.1 | 3981070 | 21-scf00417 | 21 |
| AX-158257076 | 21 | 64.623 | KV453211.1 | 3981678 | 21-scf00417 | 21 |
| AX-157775226 | 21 | 64.623 | KV453211.1 | 3982649 | 21-scf00417 | 21 |
| AX-158257078 | 21 | 64.623 | KV453211.1 | 3983283 | 21-scf00417 | 21 |
| AX-158257079 | 21 | 64.623 | KV453211.1 | 3986328 | 21-scf00417 | 21 |
| AX-158257080 | 21 | 64.623 | KV453211.1 | 3987180 | 21-scf00417 | 21 |
| AX-158257081 | 21 | 64.623 | KV453211.1 | 3988155 | 21-scf00417 | 21 |
| AX-158257083 | 21 | 64.623 | KV453211.1 | 3990967 | 21-scf00417 | 21 |
| AX-158257084 | 21 | 64.623 | KV453211.1 | 3991651 | 21-scf00417 | 21 |
| AX-158257085 | 21 | 64.623 | KV453211.1 | 3992460 | 21-scf00417 | 21 |
| AX-158257087 | 21 | 64.623 | KV453211.1 | 3993464 | 21-scf00417 | 21 |
| AX-157741737 | 21 | 64.623 | KV453211.1 | 3995585 | 21-scf00417 | 21 |
| AX-157726163 | 21 | 64.623 | KV453211.1 | 3998279 | 21-scf00417 | 21 |
| AX-158257089 | 21 | 64.623 | KV453211.1 | 4001663 | 21-scf00417 | 21 |
| AX-158257090 | 21 | 64.623 | KV453211.1 | 4002060 | 21-scf00417 | 21 |
| AX-158257091 | 21 | 64.623 | KV453211.1 | 4002640 | 21-scf00417 | 21 |
| AX-158257092 | 21 | 64.623 | KV453211.1 | 4003055 | 21-scf00417 | 21 |
| AX-158257093 | 21 | 64.623 | KV453211.1 | 4003664 | 21-scf00417 | 21 |
| AX-158257095 | 21 | 64.623 | KV453211.1 | 4007557 | 21-scf00417 | 21 |
| AX-158257097 | 21 | 64.623 | KV453211.1 | 4008535 | 21-scf00417 | 21 |
| AX-158257106 | 21 | 64.623 | KV453211.1 | 4020840 | 21-scf00417 | 21 |
| AX-158257109 | 21 | 64.623 | KV453211.1 | 4023429 | 21-scf00417 | 21 |
| AX-158257119 | 21 | 64.623 | KV453211.1 | 4035325 | 21-scf00417 | 21 |
| AX-158257145 | 21 | 64.623 | KV453211.1 | 4069116 | 21-scf00417 | 21 |
| AX-158257157 | 21 | 64.623 | KV453211.1 | 4087361 | 21-scf00417 | 21 |
| AX-158257173 | 21 | 64.623 | KV453211.1 | 4111111 | 21-scf00417 | 21 |
| AX-158257175 | 21 | 64.623 | KV453211.1 | 4113871 | 21-scf00417 | 21 |
| AX-158257176 | 21 | 64.623 | KV453211.1 | 4114913 | 21-scf00417 | 21 |
| AX-158257203 | 21 | 64.623 | KV453211.1 | 4146573 | 21-scf00417 | 21 |
| AX-158257221 | 21 | 64.623 | KV453211.1 | 4162654 | 21-scf00417 | 21 |
| AX-158257229 | 21 | 64.623 | KV453211.1 | 4174494 | 21-scf00417 | 21 |
| AX-158257297 | 21 | 64.623 | KV453211.1 | 4338939 | 21-scf00417 | 21 |
| AX-158257301 | 21 | 64.623 | KV453211.1 | 4342579 | 21-scf00417 | 21 |
| AX-157842667 | 21 | 64.623 | KV453211.1 | 4365694 | 21-scf00417 | 21 |

|              |    |        |            |         |             |    |
|--------------|----|--------|------------|---------|-------------|----|
| AX-158257327 | 21 | 64.623 | KV453211.1 | 4413799 | 21-scf00417 | 21 |
| AX-158257328 | 21 | 64.623 | KV453211.1 | 4415303 | 21-scf00417 | 21 |
| AX-158257331 | 21 | 64.623 | KV453211.1 | 4421523 | 21-scf00417 | 21 |
| AX-158257332 | 21 | 64.623 | KV453211.1 | 4423269 | 21-scf00417 | 21 |
| AX-158416097 | 21 | 64.623 | KV453211.1 | 4426573 | 21-scf00417 | 21 |
| AX-158257341 | 21 | 64.623 | KV453211.1 | 4444333 | 21-scf00417 | 21 |
| AX-158257342 | 21 | 64.623 | KV453211.1 | 4445657 | 21-scf00417 | 21 |
| AX-158257344 | 21 | 64.623 | KV453211.1 | 4447652 | 21-scf00417 | 21 |
| AX-157842672 | 21 | 64.623 | KV453211.1 | 4450506 | 21-scf00417 | 21 |
| AX-158257346 | 21 | 64.623 | KV453211.1 | 4454307 | 21-scf00417 | 21 |
| AX-158257350 | 21 | 64.623 | KV453211.1 | 4465582 | 21-scf00417 | 21 |
| AX-158257354 | 21 | 64.623 | KV453211.1 | 4473770 | 21-scf00417 | 21 |
| AX-158257355 | 21 | 64.623 | KV453211.1 | 4474038 | 21-scf00417 | 21 |
| AX-158257381 | 21 | 64.623 | KV453211.1 | 4516072 | 21-scf00417 | 21 |
| AX-157842694 | 21 | 64.623 | KV453211.1 | 4618588 | 21-scf00417 | 21 |
| AX-158257536 | 21 | 64.623 | KV453211.1 | 4735104 | 21-scf00417 | 21 |
| AX-158257572 | 21 | 64.623 | KV453211.1 | 4787542 | 21-scf00417 | 21 |
| AX-157717098 | 21 | 64.623 | KV453211.1 | 4793867 | 21-scf00417 | 21 |
| AX-157842708 | 21 | 64.623 | KV453211.1 | 4797401 | 21-scf00417 | 21 |
| AX-158258099 | 21 | 64.623 | KV453211.1 | 5525647 | 21-scf00417 | 21 |
| AX-157684054 | 21 | 64.623 | KV453212.1 | 9135    | 21-scf00418 | 21 |
| AX-157684055 | 21 | 64.623 | KV453212.1 | 10014   | 21-scf00418 | 21 |
| AX-157684058 | 21 | 64.623 | KV453212.1 | 12213   | 21-scf00418 | 21 |
| AX-157680308 | 21 | 64.623 | KV453212.1 | 25731   | 21-scf00418 | 21 |
| AX-157684068 | 21 | 64.623 | KV453212.1 | 27951   | 21-scf00418 | 21 |
| AX-158257142 | 21 | 64.95  | KV453211.1 | 4066492 | 21-scf00417 | 21 |
| AX-158257144 | 21 | 64.95  | KV453211.1 | 4067726 | 21-scf00417 | 21 |
| AX-158257146 | 21 | 64.95  | KV453211.1 | 4069918 | 21-scf00417 | 21 |
| AX-158257148 | 21 | 64.95  | KV453211.1 | 4074094 | 21-scf00417 | 21 |
| AX-158257149 | 21 | 64.95  | KV453211.1 | 4074992 | 21-scf00417 | 21 |
| AX-158257338 | 21 | 64.95  | KV453211.1 | 4434885 | 21-scf00417 | 21 |
| AX-158257150 | 21 | 64.975 | KV453211.1 | 4077198 | 21-scf00417 | 21 |
| AX-158257167 | 21 | 64.975 | KV453211.1 | 4104553 | 21-scf00417 | 21 |
| AX-157774042 | 21 | 64.975 | KV453211.1 | 4519997 | 21-scf00417 | 21 |
| AX-158257152 | 21 | 64.997 | KV453211.1 | 4080352 | 21-scf00417 | 21 |
| AX-157880343 | 21 | 64.997 | KV453211.1 | 4665194 | 21-scf00417 | 21 |
| AX-158257154 | 21 | 65.059 | KV453211.1 | 4083011 | 21-scf00417 | 21 |
| AX-158257155 | 21 | 65.059 | KV453211.1 | 4084625 | 21-scf00417 | 21 |
| AX-158394572 | 21 | 65.059 | KV453211.1 | 4086200 | 21-scf00417 | 21 |
| AX-158257156 | 21 | 65.059 | KV453211.1 | 4086548 | 21-scf00417 | 21 |
| AX-158257158 | 21 | 65.059 | KV453211.1 | 4087655 | 21-scf00417 | 21 |
| AX-158416079 | 21 | 65.059 | KV453211.1 | 4090888 | 21-scf00417 | 21 |
| AX-158416080 | 21 | 65.059 | KV453211.1 | 4091444 | 21-scf00417 | 21 |
| AX-158416082 | 21 | 65.059 | KV453211.1 | 4094485 | 21-scf00417 | 21 |
| AX-157684066 | 21 | 65.059 | KV453212.1 | 21942   | 21-scf00418 | 21 |
| AX-158256834 | 21 | 65.168 | KV453211.1 | 3706306 | 21-scf00417 | 21 |
| AX-158256847 | 21 | 65.168 | KV453211.1 | 3716578 | 21-scf00417 | 21 |
| AX-158411012 | 21 | 65.168 | KV453211.1 | 3788336 | 21-scf00417 | 21 |
| AX-157775014 | 21 | 65.168 | KV453211.1 | 3794278 | 21-scf00417 | 21 |
| AX-158256943 | 21 | 65.168 | KV453211.1 | 3818292 | 21-scf00417 | 21 |
| AX-158416076 | 21 | 65.168 | KV453211.1 | 3893071 | 21-scf00417 | 21 |

|              |    |        |            |         |             |    |
|--------------|----|--------|------------|---------|-------------|----|
| AX-158257041 | 21 | 65.168 | KV453211.1 | 3940921 | 21-scf00417 | 21 |
| AX-158257096 | 21 | 65.168 | KV453211.1 | 4008095 | 21-scf00417 | 21 |
| AX-158257098 | 21 | 65.168 | KV453211.1 | 4009531 | 21-scf00417 | 21 |
| AX-158257101 | 21 | 65.168 | KV453211.1 | 4014018 | 21-scf00417 | 21 |
| AX-158257102 | 21 | 65.168 | KV453211.1 | 4014240 | 21-scf00417 | 21 |
| AX-158257103 | 21 | 65.168 | KV453211.1 | 4015608 | 21-scf00417 | 21 |
| AX-158387164 | 21 | 65.168 | KV453211.1 | 4021090 | 21-scf00417 | 21 |
| AX-158257107 | 21 | 65.168 | KV453211.1 | 4021323 | 21-scf00417 | 21 |
| AX-158257108 | 21 | 65.168 | KV453211.1 | 4022328 | 21-scf00417 | 21 |
| AX-158257110 | 21 | 65.168 | KV453211.1 | 4023871 | 21-scf00417 | 21 |
| AX-158257111 | 21 | 65.168 | KV453211.1 | 4024704 | 21-scf00417 | 21 |
| AX-158257112 | 21 | 65.168 | KV453211.1 | 4026389 | 21-scf00417 | 21 |
| AX-158257113 | 21 | 65.168 | KV453211.1 | 4027086 | 21-scf00417 | 21 |
| AX-158257114 | 21 | 65.168 | KV453211.1 | 4027695 | 21-scf00417 | 21 |
| AX-158257115 | 21 | 65.168 | KV453211.1 | 4027903 | 21-scf00417 | 21 |
| AX-158257116 | 21 | 65.168 | KV453211.1 | 4029370 | 21-scf00417 | 21 |
| AX-158257121 | 21 | 65.168 | KV453211.1 | 4036321 | 21-scf00417 | 21 |
| AX-157710021 | 21 | 65.168 | KV453211.1 | 4043501 | 21-scf00417 | 21 |
| AX-158257125 | 21 | 65.168 | KV453211.1 | 4044153 | 21-scf00417 | 21 |
| AX-158257131 | 21 | 65.168 | KV453211.1 | 4047966 | 21-scf00417 | 21 |
| AX-158416081 | 21 | 65.168 | KV453211.1 | 4091499 | 21-scf00417 | 21 |
| AX-158257170 | 21 | 65.168 | KV453211.1 | 4108318 | 21-scf00417 | 21 |
| AX-158257171 | 21 | 65.168 | KV453211.1 | 4109630 | 21-scf00417 | 21 |
| AX-158257172 | 21 | 65.168 | KV453211.1 | 4110240 | 21-scf00417 | 21 |
| AX-158257174 | 21 | 65.168 | KV453211.1 | 4112845 | 21-scf00417 | 21 |
| AX-158257177 | 21 | 65.168 | KV453211.1 | 4115904 | 21-scf00417 | 21 |
| AX-158257178 | 21 | 65.168 | KV453211.1 | 4117409 | 21-scf00417 | 21 |
| AX-158257180 | 21 | 65.168 | KV453211.1 | 4119713 | 21-scf00417 | 21 |
| AX-158257182 | 21 | 65.168 | KV453211.1 | 4121704 | 21-scf00417 | 21 |
| AX-158257183 | 21 | 65.168 | KV453211.1 | 4122159 | 21-scf00417 | 21 |
| AX-158257184 | 21 | 65.168 | KV453211.1 | 4122884 | 21-scf00417 | 21 |
| AX-158257185 | 21 | 65.168 | KV453211.1 | 4123085 | 21-scf00417 | 21 |
| AX-158257186 | 21 | 65.168 | KV453211.1 | 4123674 | 21-scf00417 | 21 |
| AX-158257187 | 21 | 65.168 | KV453211.1 | 4124345 | 21-scf00417 | 21 |
| AX-158257188 | 21 | 65.168 | KV453211.1 | 4125551 | 21-scf00417 | 21 |
| AX-158257189 | 21 | 65.168 | KV453211.1 | 4125937 | 21-scf00417 | 21 |
| AX-158257190 | 21 | 65.168 | KV453211.1 | 4129194 | 21-scf00417 | 21 |
| AX-158257191 | 21 | 65.168 | KV453211.1 | 4131421 | 21-scf00417 | 21 |
| AX-158257192 | 21 | 65.168 | KV453211.1 | 4132698 | 21-scf00417 | 21 |
| AX-158394573 | 21 | 65.168 | KV453211.1 | 4133703 | 21-scf00417 | 21 |
| AX-158257193 | 21 | 65.168 | KV453211.1 | 4134719 | 21-scf00417 | 21 |
| AX-158257194 | 21 | 65.168 | KV453211.1 | 4135084 | 21-scf00417 | 21 |
| AX-158257195 | 21 | 65.168 | KV453211.1 | 4137286 | 21-scf00417 | 21 |
| AX-158257196 | 21 | 65.168 | KV453211.1 | 4138267 | 21-scf00417 | 21 |
| AX-158257197 | 21 | 65.168 | KV453211.1 | 4138900 | 21-scf00417 | 21 |
| AX-158257198 | 21 | 65.168 | KV453211.1 | 4140112 | 21-scf00417 | 21 |
| AX-158257199 | 21 | 65.168 | KV453211.1 | 4140476 | 21-scf00417 | 21 |
| AX-158257200 | 21 | 65.168 | KV453211.1 | 4141137 | 21-scf00417 | 21 |
| AX-158257201 | 21 | 65.168 | KV453211.1 | 4142279 | 21-scf00417 | 21 |
| AX-158257202 | 21 | 65.168 | KV453211.1 | 4144520 | 21-scf00417 | 21 |
| AX-158394574 | 21 | 65.168 | KV453211.1 | 4148346 | 21-scf00417 | 21 |

|              |    |        |            |         |             |    |
|--------------|----|--------|------------|---------|-------------|----|
| AX-158257207 | 21 | 65.168 | KV453211.1 | 4149324 | 21-scf00417 | 21 |
| AX-158257208 | 21 | 65.168 | KV453211.1 | 4149734 | 21-scf00417 | 21 |
| AX-158257209 | 21 | 65.168 | KV453211.1 | 4150888 | 21-scf00417 | 21 |
| AX-158257210 | 21 | 65.168 | KV453211.1 | 4151583 | 21-scf00417 | 21 |
| AX-158257211 | 21 | 65.168 | KV453211.1 | 4152467 | 21-scf00417 | 21 |
| AX-158257212 | 21 | 65.168 | KV453211.1 | 4153124 | 21-scf00417 | 21 |
| AX-158257213 | 21 | 65.168 | KV453211.1 | 4154684 | 21-scf00417 | 21 |
| AX-158257214 | 21 | 65.168 | KV453211.1 | 4155510 | 21-scf00417 | 21 |
| AX-158257215 | 21 | 65.168 | KV453211.1 | 4155973 | 21-scf00417 | 21 |
| AX-158257217 | 21 | 65.168 | KV453211.1 | 4158386 | 21-scf00417 | 21 |
| AX-158257220 | 21 | 65.168 | KV453211.1 | 4161233 | 21-scf00417 | 21 |
| AX-158257223 | 21 | 65.168 | KV453211.1 | 4165219 | 21-scf00417 | 21 |
| AX-158257226 | 21 | 65.168 | KV453211.1 | 4169418 | 21-scf00417 | 21 |
| AX-158257228 | 21 | 65.168 | KV453211.1 | 4170545 | 21-scf00417 | 21 |
| AX-158257230 | 21 | 65.168 | KV453211.1 | 4175523 | 21-scf00417 | 21 |
| AX-158257231 | 21 | 65.168 | KV453211.1 | 4176568 | 21-scf00417 | 21 |
| AX-158257233 | 21 | 65.168 | KV453211.1 | 4188076 | 21-scf00417 | 21 |
| AX-157880333 | 21 | 65.168 | KV453211.1 | 4188295 | 21-scf00417 | 21 |
| AX-157842648 | 21 | 65.168 | KV453211.1 | 4189759 | 21-scf00417 | 21 |
| AX-158257235 | 21 | 65.168 | KV453211.1 | 4191463 | 21-scf00417 | 21 |
| AX-157842649 | 21 | 65.168 | KV453211.1 | 4191680 | 21-scf00417 | 21 |
| AX-158257236 | 21 | 65.168 | KV453211.1 | 4192534 | 21-scf00417 | 21 |
| AX-158416086 | 21 | 65.168 | KV453211.1 | 4193580 | 21-scf00417 | 21 |
| AX-157842650 | 21 | 65.168 | KV453211.1 | 4197019 | 21-scf00417 | 21 |
| AX-157842651 | 21 | 65.168 | KV453211.1 | 4198777 | 21-scf00417 | 21 |
| AX-157842653 | 21 | 65.168 | KV453211.1 | 4214154 | 21-scf00417 | 21 |
| AX-158257240 | 21 | 65.168 | KV453211.1 | 4217412 | 21-scf00417 | 21 |
| AX-158257241 | 21 | 65.168 | KV453211.1 | 4220327 | 21-scf00417 | 21 |
| AX-158257242 | 21 | 65.168 | KV453211.1 | 4221851 | 21-scf00417 | 21 |
| AX-158257243 | 21 | 65.168 | KV453211.1 | 4223812 | 21-scf00417 | 21 |
| AX-158257244 | 21 | 65.168 | KV453211.1 | 4224021 | 21-scf00417 | 21 |
| AX-157863847 | 21 | 65.168 | KV453211.1 | 4227844 | 21-scf00417 | 21 |
| AX-157842655 | 21 | 65.168 | KV453211.1 | 4229262 | 21-scf00417 | 21 |
| AX-158257245 | 21 | 65.168 | KV453211.1 | 4229790 | 21-scf00417 | 21 |
| AX-158257249 | 21 | 65.168 | KV453211.1 | 4241154 | 21-scf00417 | 21 |
| AX-158257252 | 21 | 65.168 | KV453211.1 | 4247017 | 21-scf00417 | 21 |
| AX-158257253 | 21 | 65.168 | KV453211.1 | 4247459 | 21-scf00417 | 21 |
| AX-158257254 | 21 | 65.168 | KV453211.1 | 4248421 | 21-scf00417 | 21 |
| AX-158257255 | 21 | 65.168 | KV453211.1 | 4248884 | 21-scf00417 | 21 |
| AX-157887705 | 21 | 65.168 | KV453211.1 | 4249208 | 21-scf00417 | 21 |
| AX-158257256 | 21 | 65.168 | KV453211.1 | 4252344 | 21-scf00417 | 21 |
| AX-158257258 | 21 | 65.168 | KV453211.1 | 4253334 | 21-scf00417 | 21 |
| AX-158257260 | 21 | 65.168 | KV453211.1 | 4255591 | 21-scf00417 | 21 |
| AX-158257261 | 21 | 65.168 | KV453211.1 | 4257600 | 21-scf00417 | 21 |
| AX-158257262 | 21 | 65.168 | KV453211.1 | 4261323 | 21-scf00417 | 21 |
| AX-158257263 | 21 | 65.168 | KV453211.1 | 4262220 | 21-scf00417 | 21 |
| AX-158257264 | 21 | 65.168 | KV453211.1 | 4264080 | 21-scf00417 | 21 |
| AX-158257265 | 21 | 65.168 | KV453211.1 | 4264651 | 21-scf00417 | 21 |
| AX-157701589 | 21 | 65.168 | KV453211.1 | 4266170 | 21-scf00417 | 21 |
| AX-157842657 | 21 | 65.168 | KV453211.1 | 4266663 | 21-scf00417 | 21 |
| AX-158394575 | 21 | 65.168 | KV453211.1 | 4267583 | 21-scf00417 | 21 |

|              |    |        |            |         |             |    |
|--------------|----|--------|------------|---------|-------------|----|
| AX-158257267 | 21 | 65.168 | KV453211.1 | 4267660 | 21-scf00417 | 21 |
| AX-158257268 | 21 | 65.168 | KV453211.1 | 4268869 | 21-scf00417 | 21 |
| AX-158257269 | 21 | 65.168 | KV453211.1 | 4269441 | 21-scf00417 | 21 |
| AX-158387168 | 21 | 65.168 | KV453211.1 | 4271713 | 21-scf00417 | 21 |
| AX-158257270 | 21 | 65.168 | KV453211.1 | 4271772 | 21-scf00417 | 21 |
| AX-158257272 | 21 | 65.168 | KV453211.1 | 4274607 | 21-scf00417 | 21 |
| AX-158257273 | 21 | 65.168 | KV453211.1 | 4275106 | 21-scf00417 | 21 |
| AX-157717726 | 21 | 65.168 | KV453211.1 | 4277203 | 21-scf00417 | 21 |
| AX-157713592 | 21 | 65.168 | KV453211.1 | 4282026 | 21-scf00417 | 21 |
| AX-158257276 | 21 | 65.168 | KV453211.1 | 4283007 | 21-scf00417 | 21 |
| AX-157842660 | 21 | 65.168 | KV453211.1 | 4283532 | 21-scf00417 | 21 |
| AX-158257277 | 21 | 65.168 | KV453211.1 | 4287707 | 21-scf00417 | 21 |
| AX-157842661 | 21 | 65.168 | KV453211.1 | 4288759 | 21-scf00417 | 21 |
| AX-157842662 | 21 | 65.168 | KV453211.1 | 4292869 | 21-scf00417 | 21 |
| AX-158257279 | 21 | 65.168 | KV453211.1 | 4294120 | 21-scf00417 | 21 |
| AX-157872798 | 21 | 65.168 | KV453211.1 | 4296324 | 21-scf00417 | 21 |
| AX-158257281 | 21 | 65.168 | KV453211.1 | 4296757 | 21-scf00417 | 21 |
| AX-158257282 | 21 | 65.168 | KV453211.1 | 4306927 | 21-scf00417 | 21 |
| AX-158416089 | 21 | 65.168 | KV453211.1 | 4308913 | 21-scf00417 | 21 |
| AX-158257283 | 21 | 65.168 | KV453211.1 | 4312237 | 21-scf00417 | 21 |
| AX-158257285 | 21 | 65.168 | KV453211.1 | 4316610 | 21-scf00417 | 21 |
| AX-158394576 | 21 | 65.168 | KV453211.1 | 4316957 | 21-scf00417 | 21 |
| AX-158257287 | 21 | 65.168 | KV453211.1 | 4320677 | 21-scf00417 | 21 |
| AX-158257288 | 21 | 65.168 | KV453211.1 | 4321484 | 21-scf00417 | 21 |
| AX-158257289 | 21 | 65.168 | KV453211.1 | 4323156 | 21-scf00417 | 21 |
| AX-158257290 | 21 | 65.168 | KV453211.1 | 4325021 | 21-scf00417 | 21 |
| AX-158257291 | 21 | 65.168 | KV453211.1 | 4328231 | 21-scf00417 | 21 |
| AX-158257292 | 21 | 65.168 | KV453211.1 | 4328481 | 21-scf00417 | 21 |
| AX-158416091 | 21 | 65.168 | KV453211.1 | 4329637 | 21-scf00417 | 21 |
| AX-158257295 | 21 | 65.168 | KV453211.1 | 4333377 | 21-scf00417 | 21 |
| AX-158257298 | 21 | 65.168 | KV453211.1 | 4339488 | 21-scf00417 | 21 |
| AX-158257299 | 21 | 65.168 | KV453211.1 | 4341778 | 21-scf00417 | 21 |
| AX-158257300 | 21 | 65.168 | KV453211.1 | 4342224 | 21-scf00417 | 21 |
| AX-158257304 | 21 | 65.168 | KV453211.1 | 4348126 | 21-scf00417 | 21 |
| AX-157842665 | 21 | 65.168 | KV453211.1 | 4351050 | 21-scf00417 | 21 |
| AX-158257306 | 21 | 65.168 | KV453211.1 | 4351137 | 21-scf00417 | 21 |
| AX-158257311 | 21 | 65.168 | KV453211.1 | 4366104 | 21-scf00417 | 21 |
| AX-158257314 | 21 | 65.168 | KV453211.1 | 4374823 | 21-scf00417 | 21 |
| AX-157842668 | 21 | 65.168 | KV453211.1 | 4378095 | 21-scf00417 | 21 |
| AX-157842669 | 21 | 65.168 | KV453211.1 | 4379209 | 21-scf00417 | 21 |
| AX-158257315 | 21 | 65.168 | KV453211.1 | 4380996 | 21-scf00417 | 21 |
| AX-157714296 | 21 | 65.168 | KV453211.1 | 4382047 | 21-scf00417 | 21 |
| AX-158257316 | 21 | 65.168 | KV453211.1 | 4383532 | 21-scf00417 | 21 |
| AX-158257317 | 21 | 65.168 | KV453211.1 | 4383909 | 21-scf00417 | 21 |
| AX-157872799 | 21 | 65.168 | KV453211.1 | 4387168 | 21-scf00417 | 21 |
| AX-158257319 | 21 | 65.168 | KV453211.1 | 4390265 | 21-scf00417 | 21 |
| AX-158257320 | 21 | 65.168 | KV453211.1 | 4391241 | 21-scf00417 | 21 |
| AX-158257321 | 21 | 65.168 | KV453211.1 | 4396331 | 21-scf00417 | 21 |
| AX-157867409 | 21 | 65.168 | KV453211.1 | 4397429 | 21-scf00417 | 21 |
| AX-157872800 | 21 | 65.168 | KV453211.1 | 4398159 | 21-scf00417 | 21 |
| AX-158416095 | 21 | 65.168 | KV453211.1 | 4399360 | 21-scf00417 | 21 |

|              |    |        |            |         |             |    |
|--------------|----|--------|------------|---------|-------------|----|
| AX-158416096 | 21 | 65.168 | KV453211.1 | 4399837 | 21-scf00417 | 21 |
| AX-158257322 | 21 | 65.168 | KV453211.1 | 4402951 | 21-scf00417 | 21 |
| AX-157859921 | 21 | 65.168 | KV453211.1 | 4405032 | 21-scf00417 | 21 |
| AX-158257325 | 21 | 65.168 | KV453211.1 | 4409576 | 21-scf00417 | 21 |
| AX-158257326 | 21 | 65.168 | KV453211.1 | 4412003 | 21-scf00417 | 21 |
| AX-157842670 | 21 | 65.168 | KV453211.1 | 4414089 | 21-scf00417 | 21 |
| AX-158257330 | 21 | 65.168 | KV453211.1 | 4419279 | 21-scf00417 | 21 |
| AX-157880340 | 21 | 65.168 | KV453211.1 | 4419688 | 21-scf00417 | 21 |
| AX-158257334 | 21 | 65.168 | KV453211.1 | 4429761 | 21-scf00417 | 21 |
| AX-158257335 | 21 | 65.168 | KV453211.1 | 4432244 | 21-scf00417 | 21 |
| AX-158257345 | 21 | 65.168 | KV453211.1 | 4452679 | 21-scf00417 | 21 |
| AX-157842673 | 21 | 65.168 | KV453211.1 | 4455477 | 21-scf00417 | 21 |
| AX-158257347 | 21 | 65.168 | KV453211.1 | 4459778 | 21-scf00417 | 21 |
| AX-157842674 | 21 | 65.168 | KV453211.1 | 4460913 | 21-scf00417 | 21 |
| AX-158257348 | 21 | 65.168 | KV453211.1 | 4462037 | 21-scf00417 | 21 |
| AX-158257349 | 21 | 65.168 | KV453211.1 | 4464817 | 21-scf00417 | 21 |
| AX-157872801 | 21 | 65.168 | KV453211.1 | 4468827 | 21-scf00417 | 21 |
| AX-158257352 | 21 | 65.168 | KV453211.1 | 4469702 | 21-scf00417 | 21 |
| AX-158416099 | 21 | 65.168 | KV453211.1 | 4478992 | 21-scf00417 | 21 |
| AX-158257357 | 21 | 65.168 | KV453211.1 | 4480682 | 21-scf00417 | 21 |
| AX-158257358 | 21 | 65.168 | KV453211.1 | 4483367 | 21-scf00417 | 21 |
| AX-158257359 | 21 | 65.168 | KV453211.1 | 4485677 | 21-scf00417 | 21 |
| AX-158257360 | 21 | 65.168 | KV453211.1 | 4488539 | 21-scf00417 | 21 |
| AX-158257361 | 21 | 65.168 | KV453211.1 | 4488920 | 21-scf00417 | 21 |
| AX-157887706 | 21 | 65.168 | KV453211.1 | 4490211 | 21-scf00417 | 21 |
| AX-158257363 | 21 | 65.168 | KV453211.1 | 4493331 | 21-scf00417 | 21 |
| AX-158257365 | 21 | 65.168 | KV453211.1 | 4494484 | 21-scf00417 | 21 |
| AX-158257368 | 21 | 65.168 | KV453211.1 | 4499408 | 21-scf00417 | 21 |
| AX-158257369 | 21 | 65.168 | KV453211.1 | 4499723 | 21-scf00417 | 21 |
| AX-158257370 | 21 | 65.168 | KV453211.1 | 4500112 | 21-scf00417 | 21 |
| AX-158257375 | 21 | 65.168 | KV453211.1 | 4504360 | 21-scf00417 | 21 |
| AX-157887707 | 21 | 65.168 | KV453211.1 | 4514351 | 21-scf00417 | 21 |
| AX-158257382 | 21 | 65.168 | KV453211.1 | 4518331 | 21-scf00417 | 21 |
| AX-157842679 | 21 | 65.168 | KV453211.1 | 4519150 | 21-scf00417 | 21 |
| AX-157842680 | 21 | 65.168 | KV453211.1 | 4520345 | 21-scf00417 | 21 |
| AX-157880341 | 21 | 65.168 | KV453211.1 | 4521439 | 21-scf00417 | 21 |
| AX-158257384 | 21 | 65.168 | KV453211.1 | 4522444 | 21-scf00417 | 21 |
| AX-157717739 | 21 | 65.168 | KV453211.1 | 4525761 | 21-scf00417 | 21 |
| AX-158257388 | 21 | 65.168 | KV453211.1 | 4526789 | 21-scf00417 | 21 |
| AX-158257392 | 21 | 65.168 | KV453211.1 | 4528578 | 21-scf00417 | 21 |
| AX-157722926 | 21 | 65.168 | KV453211.1 | 4529087 | 21-scf00417 | 21 |
| AX-158257395 | 21 | 65.168 | KV453211.1 | 4533568 | 21-scf00417 | 21 |
| AX-158257396 | 21 | 65.168 | KV453211.1 | 4533913 | 21-scf00417 | 21 |
| AX-158257406 | 21 | 65.168 | KV453211.1 | 4540168 | 21-scf00417 | 21 |
| AX-158257411 | 21 | 65.168 | KV453211.1 | 4543861 | 21-scf00417 | 21 |
| AX-157842681 | 21 | 65.168 | KV453211.1 | 4544619 | 21-scf00417 | 21 |
| AX-158257413 | 21 | 65.168 | KV453211.1 | 4545519 | 21-scf00417 | 21 |
| AX-158257414 | 21 | 65.168 | KV453211.1 | 4547957 | 21-scf00417 | 21 |
| AX-158257415 | 21 | 65.168 | KV453211.1 | 4548477 | 21-scf00417 | 21 |
| AX-158257416 | 21 | 65.168 | KV453211.1 | 4549765 | 21-scf00417 | 21 |
| AX-158257417 | 21 | 65.168 | KV453211.1 | 4551377 | 21-scf00417 | 21 |



|              |    |        |            |         |             |    |
|--------------|----|--------|------------|---------|-------------|----|
| AX-157842682 | 21 | 65.168 | KV453211.1 | 4552598 | 21-scf00417 | 21 |
| AX-157842683 | 21 | 65.168 | KV453211.1 | 4552828 | 21-scf00417 | 21 |
| AX-158257418 | 21 | 65.168 | KV453211.1 | 4552984 | 21-scf00417 | 21 |
| AX-158257419 | 21 | 65.168 | KV453211.1 | 4553786 | 21-scf00417 | 21 |
| AX-158257420 | 21 | 65.168 | KV453211.1 | 4555467 | 21-scf00417 | 21 |
| AX-158381052 | 21 | 65.168 | KV453211.1 | 4555604 | 21-scf00417 | 21 |
| AX-158257421 | 21 | 65.168 | KV453211.1 | 4556258 | 21-scf00417 | 21 |
| AX-158257422 | 21 | 65.168 | KV453211.1 | 4556808 | 21-scf00417 | 21 |
| AX-158257423 | 21 | 65.168 | KV453211.1 | 4557314 | 21-scf00417 | 21 |
| AX-157842684 | 21 | 65.168 | KV453211.1 | 4557769 | 21-scf00417 | 21 |
| AX-158257424 | 21 | 65.168 | KV453211.1 | 4562114 | 21-scf00417 | 21 |
| AX-158257425 | 21 | 65.168 | KV453211.1 | 4562868 | 21-scf00417 | 21 |
| AX-157707975 | 21 | 65.168 | KV453211.1 | 4563208 | 21-scf00417 | 21 |
| AX-158257426 | 21 | 65.168 | KV453211.1 | 4565593 | 21-scf00417 | 21 |
| AX-158257428 | 21 | 65.168 | KV453211.1 | 4567844 | 21-scf00417 | 21 |
| AX-158257429 | 21 | 65.168 | KV453211.1 | 4568879 | 21-scf00417 | 21 |
| AX-158257430 | 21 | 65.168 | KV453211.1 | 4569422 | 21-scf00417 | 21 |
| AX-158257432 | 21 | 65.168 | KV453211.1 | 4572013 | 21-scf00417 | 21 |
| AX-158257434 | 21 | 65.168 | KV453211.1 | 4574578 | 21-scf00417 | 21 |
| AX-158257437 | 21 | 65.168 | KV453211.1 | 4581505 | 21-scf00417 | 21 |
| AX-158257440 | 21 | 65.168 | KV453211.1 | 4584722 | 21-scf00417 | 21 |
| AX-157842686 | 21 | 65.168 | KV453211.1 | 4588940 | 21-scf00417 | 21 |
| AX-158257442 | 21 | 65.168 | KV453211.1 | 4589311 | 21-scf00417 | 21 |
| AX-158257447 | 21 | 65.168 | KV453211.1 | 4592660 | 21-scf00417 | 21 |
| AX-158257448 | 21 | 65.168 | KV453211.1 | 4595784 | 21-scf00417 | 21 |
| AX-158257449 | 21 | 65.168 | KV453211.1 | 4596571 | 21-scf00417 | 21 |
| AX-158257450 | 21 | 65.168 | KV453211.1 | 4596738 | 21-scf00417 | 21 |
| AX-158257452 | 21 | 65.168 | KV453211.1 | 4600460 | 21-scf00417 | 21 |
| AX-158257455 | 21 | 65.168 | KV453211.1 | 4604875 | 21-scf00417 | 21 |
| AX-158257456 | 21 | 65.168 | KV453211.1 | 4607098 | 21-scf00417 | 21 |
| AX-158257458 | 21 | 65.168 | KV453211.1 | 4612931 | 21-scf00417 | 21 |
| AX-157842692 | 21 | 65.168 | KV453211.1 | 4617027 | 21-scf00417 | 21 |
| AX-157842693 | 21 | 65.168 | KV453211.1 | 4617892 | 21-scf00417 | 21 |
| AX-158257459 | 21 | 65.168 | KV453211.1 | 4618984 | 21-scf00417 | 21 |
| AX-158257460 | 21 | 65.168 | KV453211.1 | 4619503 | 21-scf00417 | 21 |
| AX-158257463 | 21 | 65.168 | KV453211.1 | 4622550 | 21-scf00417 | 21 |
| AX-158257464 | 21 | 65.168 | KV453211.1 | 4624955 | 21-scf00417 | 21 |
| AX-157712268 | 21 | 65.168 | KV453211.1 | 4628733 | 21-scf00417 | 21 |
| AX-158257468 | 21 | 65.168 | KV453211.1 | 4637095 | 21-scf00417 | 21 |
| AX-158257469 | 21 | 65.168 | KV453211.1 | 4637390 | 21-scf00417 | 21 |
| AX-157713162 | 21 | 65.168 | KV453211.1 | 4638482 | 21-scf00417 | 21 |
| AX-158257471 | 21 | 65.168 | KV453211.1 | 4643092 | 21-scf00417 | 21 |
| AX-158257473 | 21 | 65.168 | KV453211.1 | 4652957 | 21-scf00417 | 21 |
| AX-158257474 | 21 | 65.168 | KV453211.1 | 4653401 | 21-scf00417 | 21 |
| AX-158257482 | 21 | 65.168 | KV453211.1 | 4666007 | 21-scf00417 | 21 |
| AX-157842697 | 21 | 65.168 | KV453211.1 | 4666773 | 21-scf00417 | 21 |
| AX-158257485 | 21 | 65.168 | KV453211.1 | 4669223 | 21-scf00417 | 21 |
| AX-158257514 | 21 | 65.168 | KV453211.1 | 4709229 | 21-scf00417 | 21 |
| AX-158257531 | 21 | 65.168 | KV453211.1 | 4729335 | 21-scf00417 | 21 |
| AX-158257535 | 21 | 65.168 | KV453211.1 | 4734426 | 21-scf00417 | 21 |
| AX-158257539 | 21 | 65.168 | KV453211.1 | 4737935 | 21-scf00417 | 21 |

|              |    |        |             |         |             |    |
|--------------|----|--------|-------------|---------|-------------|----|
| AX-158257548 | 21 | 65.168 | KV453211.1  | 4757574 | 21-scf00417 | 21 |
| AX-158257557 | 21 | 65.168 | KV453211.1  | 4767913 | 21-scf00417 | 21 |
| AX-158257567 | 21 | 65.168 | KV453211.1  | 4783130 | 21-scf00417 | 21 |
| AX-158257579 | 21 | 65.168 | KV453211.1  | 4798836 | 21-scf00417 | 21 |
| AX-157842710 | 21 | 65.168 | KV453211.1  | 4818800 | 21-scf00417 | 21 |
| AX-157887709 | 21 | 65.168 | KV453211.1  | 4856972 | 21-scf00417 | 21 |
| AX-158257674 | 21 | 65.168 | KV453211.1  | 4908816 | 21-scf00417 | 21 |
| AX-157700413 | 21 | 65.168 | KV453211.1  | 5077347 | 21-scf00417 | 21 |
| AX-157712113 | 21 | 65.168 | KV453211.1  | 5152892 | 21-scf00417 | 21 |
| AX-158257966 | 21 | 65.168 | KV453211.1  | 5310137 | 21-scf00417 | 21 |
| AX-157684052 | 21 | 65.168 | KV453212.1  | 4014    | 21-scf00418 | 21 |
| AX-158423414 | 21 | 65.168 | KV453212.1  | 6558    | 21-scf00418 | 21 |
| AX-157684059 | 21 | 65.168 | KV453212.1  | 13206   | 21-scf00418 | 21 |
| AX-157684060 | 21 | 65.168 | KV453212.1  | 13826   | 21-scf00418 | 21 |
| AX-157684065 | 21 | 65.168 | KV453212.1  | 20913   | 21-scf00418 | 21 |
| AX-157689196 | 21 | 65.168 | 3ML01028585 | 777     | scf04196_1  | UN |
| AX-157706359 | 21 | 65.168 | 3ML01032132 | 564     | scf07745_1  | UN |
| AX-157743891 | 21 | 65.217 | KV453211.1  | 4660078 | 21-scf00417 | 21 |
| AX-158257478 | 21 | 65.234 | KV453211.1  | 4660777 | 21-scf00417 | 21 |
| AX-158257479 | 21 | 65.278 | KV453211.1  | 4662080 | 21-scf00417 | 21 |
| AX-158257480 | 21 | 65.278 | KV453211.1  | 4664340 | 21-scf00417 | 21 |
| AX-158257483 | 21 | 65.278 | KV453211.1  | 4666343 | 21-scf00417 | 21 |
| AX-157842700 | 21 | 65.278 | KV453211.1  | 4692939 | 21-scf00417 | 21 |
| AX-157842698 | 21 | 65.305 | KV453211.1  | 4667392 | 21-scf00417 | 21 |
| AX-157842702 | 21 | 65.305 | KV453211.1  | 4719875 | 21-scf00417 | 21 |
| AX-157842647 | 21 | 65.333 | KV453211.1  | 4111674 | 21-scf00417 | 21 |
| AX-158257487 | 21 | 65.333 | KV453211.1  | 4669877 | 21-scf00417 | 21 |
| AX-158257492 | 21 | 65.333 | KV453211.1  | 4679366 | 21-scf00417 | 21 |
| AX-158257523 | 21 | 65.333 | KV453211.1  | 4721417 | 21-scf00417 | 21 |
| AX-158257555 | 21 | 65.333 | KV453211.1  | 4765871 | 21-scf00417 | 21 |
| AX-158257556 | 21 | 65.333 | KV453211.1  | 4767555 | 21-scf00417 | 21 |
| AX-158257606 | 21 | 65.333 | KV453211.1  | 4829025 | 21-scf00417 | 21 |
| AX-158257490 | 21 | 65.345 | KV453211.1  | 4672808 | 21-scf00417 | 21 |
| AX-157719691 | 21 | 65.356 | KV453211.1  | 4674831 | 21-scf00417 | 21 |
| AX-158257484 | 21 | 65.367 | KV453211.1  | 4668253 | 21-scf00417 | 21 |
| AX-158257491 | 21 | 65.367 | KV453211.1  | 4678566 | 21-scf00417 | 21 |
| AX-158257566 | 21 | 65.367 | KV453211.1  | 4781763 | 21-scf00417 | 21 |
| AX-158257094 | 21 | 65.387 | KV453211.1  | 4005244 | 21-scf00417 | 21 |
| AX-158257232 | 21 | 65.387 | KV453211.1  | 4187646 | 21-scf00417 | 21 |
| AX-157842654 | 21 | 65.387 | KV453211.1  | 4222764 | 21-scf00417 | 21 |
| AX-158257246 | 21 | 65.387 | KV453211.1  | 4232063 | 21-scf00417 | 21 |
| AX-157842656 | 21 | 65.387 | KV453211.1  | 4232575 | 21-scf00417 | 21 |
| AX-158257251 | 21 | 65.387 | KV453211.1  | 4243489 | 21-scf00417 | 21 |
| AX-158257313 | 21 | 65.387 | KV453211.1  | 4370305 | 21-scf00417 | 21 |
| AX-158257340 | 21 | 65.387 | KV453211.1  | 4436493 | 21-scf00417 | 21 |
| AX-158257367 | 21 | 65.387 | KV453211.1  | 4498932 | 21-scf00417 | 21 |
| AX-158257376 | 21 | 65.387 | KV453211.1  | 4507407 | 21-scf00417 | 21 |
| AX-158257407 | 21 | 65.387 | KV453211.1  | 4540778 | 21-scf00417 | 21 |
| AX-158257409 | 21 | 65.387 | KV453211.1  | 4542202 | 21-scf00417 | 21 |
| AX-157842690 | 21 | 65.387 | KV453211.1  | 4608584 | 21-scf00417 | 21 |
| AX-158257486 | 21 | 65.387 | KV453211.1  | 4669574 | 21-scf00417 | 21 |

|              |    |        |             |         |             |    |
|--------------|----|--------|-------------|---------|-------------|----|
| AX-157716819 | 21 | 65.387 | KV453211.1  | 4683075 | 21-scf00417 | 21 |
| AX-158257493 | 21 | 65.387 | KV453211.1  | 4684112 | 21-scf00417 | 21 |
| AX-158257495 | 21 | 65.387 | KV453211.1  | 4686587 | 21-scf00417 | 21 |
| AX-158257496 | 21 | 65.387 | KV453211.1  | 4688824 | 21-scf00417 | 21 |
| AX-158257497 | 21 | 65.387 | KV453211.1  | 4689046 | 21-scf00417 | 21 |
| AX-158257498 | 21 | 65.387 | KV453211.1  | 4689561 | 21-scf00417 | 21 |
| AX-158257500 | 21 | 65.387 | KV453211.1  | 4691939 | 21-scf00417 | 21 |
| AX-158257501 | 21 | 65.387 | KV453211.1  | 4693825 | 21-scf00417 | 21 |
| AX-158257504 | 21 | 65.387 | KV453211.1  | 4696145 | 21-scf00417 | 21 |
| AX-158257505 | 21 | 65.387 | KV453211.1  | 4696876 | 21-scf00417 | 21 |
| AX-158257507 | 21 | 65.387 | KV453211.1  | 4698719 | 21-scf00417 | 21 |
| AX-158257508 | 21 | 65.387 | KV453211.1  | 4699380 | 21-scf00417 | 21 |
| AX-158257510 | 21 | 65.387 | KV453211.1  | 4702347 | 21-scf00417 | 21 |
| AX-158257511 | 21 | 65.387 | KV453211.1  | 4703818 | 21-scf00417 | 21 |
| AX-158257513 | 21 | 65.387 | KV453211.1  | 4708762 | 21-scf00417 | 21 |
| AX-158257515 | 21 | 65.387 | KV453211.1  | 4709555 | 21-scf00417 | 21 |
| AX-158257516 | 21 | 65.387 | KV453211.1  | 4712131 | 21-scf00417 | 21 |
| AX-158257517 | 21 | 65.387 | KV453211.1  | 4713227 | 21-scf00417 | 21 |
| AX-157842701 | 21 | 65.387 | KV453211.1  | 4715324 | 21-scf00417 | 21 |
| AX-158257519 | 21 | 65.387 | KV453211.1  | 4718691 | 21-scf00417 | 21 |
| AX-158257520 | 21 | 65.387 | KV453211.1  | 4719057 | 21-scf00417 | 21 |
| AX-158257522 | 21 | 65.387 | KV453211.1  | 4721182 | 21-scf00417 | 21 |
| AX-158257525 | 21 | 65.387 | KV453211.1  | 4722722 | 21-scf00417 | 21 |
| AX-158257534 | 21 | 65.387 | KV453211.1  | 4733924 | 21-scf00417 | 21 |
| AX-157708344 | 21 | 65.387 | KV453211.1  | 4736948 | 21-scf00417 | 21 |
| AX-158257546 | 21 | 65.387 | KV453211.1  | 4754276 | 21-scf00417 | 21 |
| AX-158257575 | 21 | 65.387 | KV453211.1  | 4790192 | 21-scf00417 | 21 |
| AX-158257576 | 21 | 65.387 | KV453211.1  | 4790759 | 21-scf00417 | 21 |
| AX-158257577 | 21 | 65.387 | KV453211.1  | 4792604 | 21-scf00417 | 21 |
| AX-158257604 | 21 | 65.387 | KV453211.1  | 4826463 | 21-scf00417 | 21 |
| AX-158257611 | 21 | 65.387 | KV453211.1  | 4833982 | 21-scf00417 | 21 |
| AX-157842867 | 21 | 65.387 | KV453211.1  | 7273774 | 21-scf00417 | 21 |
| AX-157707323 | 21 | 65.387 | 3ML01034013 | 483     | scf09683_1  | UN |
| AX-158257303 | 21 | 65.499 | KV453211.1  | 4345578 | 21-scf00417 | 21 |
| AX-158257544 | 21 | 65.499 | KV453211.1  | 4748256 | 21-scf00417 | 21 |
| AX-157842652 | 21 | 65.605 | KV453211.1  | 4208270 | 21-scf00417 | 21 |
| AX-158257547 | 21 | 65.605 | KV453211.1  | 4754816 | 21-scf00417 | 21 |
| AX-157754169 | 21 | 65.605 | KV453211.1  | 4755634 | 21-scf00417 | 21 |
| AX-158257554 | 21 | 65.605 | KV453211.1  | 4763015 | 21-scf00417 | 21 |
| AX-158257558 | 21 | 65.605 | KV453211.1  | 4769778 | 21-scf00417 | 21 |
| AX-157723063 | 21 | 65.605 | KV453211.1  | 4771582 | 21-scf00417 | 21 |
| AX-158257563 | 21 | 65.605 | KV453211.1  | 4776740 | 21-scf00417 | 21 |
| AX-158257565 | 21 | 65.605 | KV453211.1  | 4778815 | 21-scf00417 | 21 |
| AX-158257568 | 21 | 65.605 | KV453211.1  | 4784776 | 21-scf00417 | 21 |
| AX-158257569 | 21 | 65.605 | KV453211.1  | 4785590 | 21-scf00417 | 21 |
| AX-158257570 | 21 | 65.605 | KV453211.1  | 4785648 | 21-scf00417 | 21 |
| AX-158257571 | 21 | 65.605 | KV453211.1  | 4786671 | 21-scf00417 | 21 |
| AX-157842705 | 21 | 65.605 | KV453211.1  | 4786927 | 21-scf00417 | 21 |
| AX-157750114 | 21 | 65.605 | KV453211.1  | 4788241 | 21-scf00417 | 21 |
| AX-158257574 | 21 | 65.605 | KV453211.1  | 4788864 | 21-scf00417 | 21 |
| AX-157842706 | 21 | 65.605 | KV453211.1  | 4789082 | 21-scf00417 | 21 |

|              |    |        |            |         |             |    |
|--------------|----|--------|------------|---------|-------------|----|
| AX-157842707 | 21 | 65.605 | KV453211.1 | 4789840 | 21-scf00417 | 21 |
| AX-158257581 | 21 | 65.605 | KV453211.1 | 4801377 | 21-scf00417 | 21 |
| AX-158257582 | 21 | 65.605 | KV453211.1 | 4802217 | 21-scf00417 | 21 |
| AX-158257583 | 21 | 65.605 | KV453211.1 | 4802574 | 21-scf00417 | 21 |
| AX-158257585 | 21 | 65.605 | KV453211.1 | 4803539 | 21-scf00417 | 21 |
| AX-158394578 | 21 | 65.605 | KV453211.1 | 4898107 | 21-scf00417 | 21 |
| AX-158419162 | 21 | 65.605 | KV453211.1 | 4961757 | 21-scf00417 | 21 |
| AX-158257977 | 21 | 65.605 | KV453211.1 | 5331523 | 21-scf00417 | 21 |
| AX-158258169 | 21 | 65.605 | KV453211.1 | 5649178 | 21-scf00417 | 21 |
| AX-158257586 | 21 | 65.665 | KV453211.1 | 4803832 | 21-scf00417 | 21 |
| AX-158257435 | 21 | 65.677 | KV453211.1 | 4575413 | 21-scf00417 | 21 |
| AX-158257573 | 21 | 65.677 | KV453211.1 | 4788651 | 21-scf00417 | 21 |
| AX-158257587 | 21 | 65.677 | KV453211.1 | 4805223 | 21-scf00417 | 21 |
| AX-158257601 | 21 | 65.677 | KV453211.1 | 4823388 | 21-scf00417 | 21 |
| AX-158257707 | 21 | 65.677 | KV453211.1 | 4934523 | 21-scf00417 | 21 |
| AX-158257593 | 21 | 65.715 | KV453211.1 | 4813659 | 21-scf00417 | 21 |
| AX-157842711 | 21 | 65.715 | KV453211.1 | 4819637 | 21-scf00417 | 21 |
| AX-158257602 | 21 | 65.715 | KV453211.1 | 4824333 | 21-scf00417 | 21 |
| AX-158257613 | 21 | 65.715 | KV453211.1 | 4835649 | 21-scf00417 | 21 |
| AX-157755935 | 21 | 65.715 | KV453211.1 | 4837773 | 21-scf00417 | 21 |
| AX-158257616 | 21 | 65.715 | KV453211.1 | 4839943 | 21-scf00417 | 21 |
| AX-158257617 | 21 | 65.715 | KV453211.1 | 4840883 | 21-scf00417 | 21 |
| AX-158257622 | 21 | 65.715 | KV453211.1 | 4850256 | 21-scf00417 | 21 |
| AX-158257625 | 21 | 65.715 | KV453211.1 | 4854939 | 21-scf00417 | 21 |
| AX-158257627 | 21 | 65.715 | KV453211.1 | 4858616 | 21-scf00417 | 21 |
| AX-158257635 | 21 | 65.715 | KV453211.1 | 4866611 | 21-scf00417 | 21 |
| AX-158257637 | 21 | 65.715 | KV453211.1 | 4868657 | 21-scf00417 | 21 |
| AX-158257638 | 21 | 65.715 | KV453211.1 | 4869188 | 21-scf00417 | 21 |
| AX-158257639 | 21 | 65.715 | KV453211.1 | 4870356 | 21-scf00417 | 21 |
| AX-158257640 | 21 | 65.715 | KV453211.1 | 4873123 | 21-scf00417 | 21 |
| AX-158257767 | 21 | 65.715 | KV453211.1 | 4999517 | 21-scf00417 | 21 |
| AX-157842725 | 21 | 65.715 | KV453211.1 | 5229496 | 21-scf00417 | 21 |
| AX-158257927 | 21 | 65.715 | KV453211.1 | 5250679 | 21-scf00417 | 21 |
| AX-157714874 | 21 | 65.715 | KV453211.1 | 5343530 | 21-scf00417 | 21 |
| AX-157842743 | 21 | 65.715 | KV453211.1 | 5346254 | 21-scf00417 | 21 |
| AX-158258114 | 21 | 65.715 | KV453211.1 | 5555571 | 21-scf00417 | 21 |
| AX-157842696 | 21 | 65.824 | KV453211.1 | 4644739 | 21-scf00417 | 21 |
| AX-158257591 | 21 | 65.824 | KV453211.1 | 4807946 | 21-scf00417 | 21 |
| AX-158257605 | 21 | 65.824 | KV453211.1 | 4828517 | 21-scf00417 | 21 |
| AX-158257607 | 21 | 65.824 | KV453211.1 | 4829447 | 21-scf00417 | 21 |
| AX-158257615 | 21 | 65.824 | KV453211.1 | 4839002 | 21-scf00417 | 21 |
| AX-158257619 | 21 | 65.824 | KV453211.1 | 4846311 | 21-scf00417 | 21 |
| AX-158257620 | 21 | 65.824 | KV453211.1 | 4848200 | 21-scf00417 | 21 |
| AX-158257623 | 21 | 65.824 | KV453211.1 | 4851892 | 21-scf00417 | 21 |
| AX-158257628 | 21 | 65.824 | KV453211.1 | 4860778 | 21-scf00417 | 21 |
| AX-158257629 | 21 | 65.824 | KV453211.1 | 4861641 | 21-scf00417 | 21 |
| AX-158257630 | 21 | 65.824 | KV453211.1 | 4862303 | 21-scf00417 | 21 |
| AX-158257633 | 21 | 65.824 | KV453211.1 | 4864167 | 21-scf00417 | 21 |
| AX-158257634 | 21 | 65.824 | KV453211.1 | 4865322 | 21-scf00417 | 21 |
| AX-158257641 | 21 | 65.824 | KV453211.1 | 4874043 | 21-scf00417 | 21 |
| AX-158257643 | 21 | 65.824 | KV453211.1 | 4875588 | 21-scf00417 | 21 |

|              |    |        |            |         |             |    |
|--------------|----|--------|------------|---------|-------------|----|
| AX-158257644 | 21 | 65.824 | KV453211.1 | 4876345 | 21-scf00417 | 21 |
| AX-158257645 | 21 | 65.824 | KV453211.1 | 4877059 | 21-scf00417 | 21 |
| AX-158257646 | 21 | 65.824 | KV453211.1 | 4878757 | 21-scf00417 | 21 |
| AX-158257648 | 21 | 65.824 | KV453211.1 | 4879735 | 21-scf00417 | 21 |
| AX-158257649 | 21 | 65.824 | KV453211.1 | 4880637 | 21-scf00417 | 21 |
| AX-158257650 | 21 | 65.824 | KV453211.1 | 4882226 | 21-scf00417 | 21 |
| AX-158257652 | 21 | 65.824 | KV453211.1 | 4883563 | 21-scf00417 | 21 |
| AX-158257654 | 21 | 65.824 | KV453211.1 | 4885313 | 21-scf00417 | 21 |
| AX-158257655 | 21 | 65.824 | KV453211.1 | 4886001 | 21-scf00417 | 21 |
| AX-158257656 | 21 | 65.824 | KV453211.1 | 4886810 | 21-scf00417 | 21 |
| AX-158257658 | 21 | 65.824 | KV453211.1 | 4889971 | 21-scf00417 | 21 |
| AX-158257660 | 21 | 65.824 | KV453211.1 | 4890715 | 21-scf00417 | 21 |
| AX-158257661 | 21 | 65.824 | KV453211.1 | 4891339 | 21-scf00417 | 21 |
| AX-158257662 | 21 | 65.824 | KV453211.1 | 4891759 | 21-scf00417 | 21 |
| AX-158257663 | 21 | 65.824 | KV453211.1 | 4892155 | 21-scf00417 | 21 |
| AX-158257665 | 21 | 65.824 | KV453211.1 | 4894447 | 21-scf00417 | 21 |
| AX-158257666 | 21 | 65.824 | KV453211.1 | 4894749 | 21-scf00417 | 21 |
| AX-158257667 | 21 | 65.824 | KV453211.1 | 4896136 | 21-scf00417 | 21 |
| AX-157842713 | 21 | 65.824 | KV453211.1 | 4896370 | 21-scf00417 | 21 |
| AX-158257670 | 21 | 65.824 | KV453211.1 | 4901561 | 21-scf00417 | 21 |
| AX-158257672 | 21 | 65.824 | KV453211.1 | 4907596 | 21-scf00417 | 21 |
| AX-158257673 | 21 | 65.824 | KV453211.1 | 4908718 | 21-scf00417 | 21 |
| AX-158257675 | 21 | 65.824 | KV453211.1 | 4909395 | 21-scf00417 | 21 |
| AX-158257676 | 21 | 65.824 | KV453211.1 | 4909863 | 21-scf00417 | 21 |
| AX-158257677 | 21 | 65.824 | KV453211.1 | 4910127 | 21-scf00417 | 21 |
| AX-158257678 | 21 | 65.824 | KV453211.1 | 4911863 | 21-scf00417 | 21 |
| AX-158257679 | 21 | 65.824 | KV453211.1 | 4912241 | 21-scf00417 | 21 |
| AX-158257680 | 21 | 65.824 | KV453211.1 | 4913238 | 21-scf00417 | 21 |
| AX-158257681 | 21 | 65.824 | KV453211.1 | 4914228 | 21-scf00417 | 21 |
| AX-158257682 | 21 | 65.824 | KV453211.1 | 4914718 | 21-scf00417 | 21 |
| AX-158257683 | 21 | 65.824 | KV453211.1 | 4915051 | 21-scf00417 | 21 |
| AX-158257684 | 21 | 65.824 | KV453211.1 | 4915698 | 21-scf00417 | 21 |
| AX-157775466 | 21 | 65.824 | KV453211.1 | 4916607 | 21-scf00417 | 21 |
| AX-158257687 | 21 | 65.824 | KV453211.1 | 4917372 | 21-scf00417 | 21 |
| AX-158257689 | 21 | 65.824 | KV453211.1 | 4917933 | 21-scf00417 | 21 |
| AX-158257690 | 21 | 65.824 | KV453211.1 | 4919537 | 21-scf00417 | 21 |
| AX-158257691 | 21 | 65.824 | KV453211.1 | 4919876 | 21-scf00417 | 21 |
| AX-158257692 | 21 | 65.824 | KV453211.1 | 4920138 | 21-scf00417 | 21 |
| AX-158257693 | 21 | 65.824 | KV453211.1 | 4923018 | 21-scf00417 | 21 |
| AX-158257701 | 21 | 65.824 | KV453211.1 | 4929056 | 21-scf00417 | 21 |
| AX-158257711 | 21 | 65.824 | KV453211.1 | 4937337 | 21-scf00417 | 21 |
| AX-158257713 | 21 | 65.824 | KV453211.1 | 4939507 | 21-scf00417 | 21 |
| AX-158257752 | 21 | 65.824 | KV453211.1 | 4980104 | 21-scf00417 | 21 |
| AX-158411024 | 21 | 65.824 | KV453211.1 | 4987097 | 21-scf00417 | 21 |
| AX-158257802 | 21 | 65.824 | KV453211.1 | 5038853 | 21-scf00417 | 21 |
| AX-158257861 | 21 | 65.824 | KV453211.1 | 5151772 | 21-scf00417 | 21 |
| AX-157842723 | 21 | 65.824 | KV453211.1 | 5197542 | 21-scf00417 | 21 |
| AX-158257923 | 21 | 65.824 | KV453211.1 | 5247320 | 21-scf00417 | 21 |
| AX-158257924 | 21 | 65.824 | KV453211.1 | 5247929 | 21-scf00417 | 21 |
| AX-158257962 | 21 | 65.824 | KV453211.1 | 5302045 | 21-scf00417 | 21 |
| AX-158257982 | 21 | 65.824 | KV453211.1 | 5343172 | 21-scf00417 | 21 |

|              |    |        |            |         |             |    |
|--------------|----|--------|------------|---------|-------------|----|
| AX-158257999 | 21 | 65.824 | KV453211.1 | 5361315 | 21-scf00417 | 21 |
| AX-158258003 | 21 | 65.824 | KV453211.1 | 5364604 | 21-scf00417 | 21 |
| AX-158258127 | 21 | 65.824 | KV453211.1 | 5589804 | 21-scf00417 | 21 |
| AX-157842822 | 21 | 65.824 | KV453211.1 | 6752481 | 21-scf00417 | 21 |
| AX-158259156 | 21 | 65.824 | KV453211.1 | 6934310 | 21-scf00417 | 21 |
| AX-158260111 | 21 | 65.824 | KV453211.1 | 8512141 | 21-scf00417 | 21 |
| AX-158257695 | 21 | 65.841 | KV453211.1 | 4924130 | 21-scf00417 | 21 |
| AX-158257696 | 21 | 65.86  | KV453211.1 | 4924359 | 21-scf00417 | 21 |
| AX-158257697 | 21 | 65.874 | KV453211.1 | 4925447 | 21-scf00417 | 21 |
| AX-158257698 | 21 | 65.892 | KV453211.1 | 4926473 | 21-scf00417 | 21 |
| AX-157699927 | 21 | 65.911 | KV453211.1 | 4926738 | 21-scf00417 | 21 |
| AX-158257578 | 21 | 65.933 | KV453211.1 | 4796377 | 21-scf00417 | 21 |
| AX-157842712 | 21 | 65.933 | KV453211.1 | 4825157 | 21-scf00417 | 21 |
| AX-158387171 | 21 | 65.933 | KV453211.1 | 4825288 | 21-scf00417 | 21 |
| AX-158257603 | 21 | 65.933 | KV453211.1 | 4825854 | 21-scf00417 | 21 |
| AX-158257647 | 21 | 65.933 | KV453211.1 | 4879243 | 21-scf00417 | 21 |
| AX-158257669 | 21 | 65.933 | KV453211.1 | 4899626 | 21-scf00417 | 21 |
| AX-158257671 | 21 | 65.933 | KV453211.1 | 4901714 | 21-scf00417 | 21 |
| AX-158257685 | 21 | 65.933 | KV453211.1 | 4916110 | 21-scf00417 | 21 |
| AX-158257699 | 21 | 65.933 | KV453211.1 | 4928128 | 21-scf00417 | 21 |
| AX-158257700 | 21 | 65.933 | KV453211.1 | 4928377 | 21-scf00417 | 21 |
| AX-158257702 | 21 | 65.933 | KV453211.1 | 4929457 | 21-scf00417 | 21 |
| AX-158257704 | 21 | 65.933 | KV453211.1 | 4930674 | 21-scf00417 | 21 |
| AX-157707710 | 21 | 65.933 | KV453211.1 | 4931240 | 21-scf00417 | 21 |
| AX-158257706 | 21 | 65.933 | KV453211.1 | 4933947 | 21-scf00417 | 21 |
| AX-158257709 | 21 | 65.933 | KV453211.1 | 4936553 | 21-scf00417 | 21 |
| AX-158257712 | 21 | 65.933 | KV453211.1 | 4938732 | 21-scf00417 | 21 |
| AX-158257718 | 21 | 65.933 | KV453211.1 | 4945229 | 21-scf00417 | 21 |
| AX-157842714 | 21 | 65.933 | KV453211.1 | 4946241 | 21-scf00417 | 21 |
| AX-157842715 | 21 | 65.933 | KV453211.1 | 4946400 | 21-scf00417 | 21 |
| AX-158257720 | 21 | 65.933 | KV453211.1 | 4946529 | 21-scf00417 | 21 |
| AX-158257722 | 21 | 65.933 | KV453211.1 | 4947951 | 21-scf00417 | 21 |
| AX-158257724 | 21 | 65.933 | KV453211.1 | 4953941 | 21-scf00417 | 21 |
| AX-158257725 | 21 | 65.933 | KV453211.1 | 4954193 | 21-scf00417 | 21 |
| AX-158257726 | 21 | 65.933 | KV453211.1 | 4954736 | 21-scf00417 | 21 |
| AX-158257727 | 21 | 65.933 | KV453211.1 | 4955415 | 21-scf00417 | 21 |
| AX-158257728 | 21 | 65.933 | KV453211.1 | 4956233 | 21-scf00417 | 21 |
| AX-158257729 | 21 | 65.933 | KV453211.1 | 4956506 | 21-scf00417 | 21 |
| AX-157887711 | 21 | 65.933 | KV453211.1 | 4957353 | 21-scf00417 | 21 |
| AX-158257731 | 21 | 65.933 | KV453211.1 | 4962388 | 21-scf00417 | 21 |
| AX-158257732 | 21 | 65.933 | KV453211.1 | 4962712 | 21-scf00417 | 21 |
| AX-158257733 | 21 | 65.933 | KV453211.1 | 4963088 | 21-scf00417 | 21 |
| AX-158257734 | 21 | 65.933 | KV453211.1 | 4963805 | 21-scf00417 | 21 |
| AX-158257735 | 21 | 65.933 | KV453211.1 | 4963918 | 21-scf00417 | 21 |
| AX-158257736 | 21 | 65.933 | KV453211.1 | 4964964 | 21-scf00417 | 21 |
| AX-158257737 | 21 | 65.933 | KV453211.1 | 4965693 | 21-scf00417 | 21 |
| AX-158257738 | 21 | 65.933 | KV453211.1 | 4966323 | 21-scf00417 | 21 |
| AX-158257739 | 21 | 65.933 | KV453211.1 | 4966933 | 21-scf00417 | 21 |
| AX-158257740 | 21 | 65.933 | KV453211.1 | 4967513 | 21-scf00417 | 21 |
| AX-158257741 | 21 | 65.933 | KV453211.1 | 4968327 | 21-scf00417 | 21 |
| AX-158257742 | 21 | 65.933 | KV453211.1 | 4969485 | 21-scf00417 | 21 |

|              |    |        |            |         |             |    |
|--------------|----|--------|------------|---------|-------------|----|
| AX-158257743 | 21 | 65.933 | KV453211.1 | 4970136 | 21-scf00417 | 21 |
| AX-158257745 | 21 | 65.933 | KV453211.1 | 4972205 | 21-scf00417 | 21 |
| AX-157887712 | 21 | 65.933 | KV453211.1 | 4974297 | 21-scf00417 | 21 |
| AX-158257747 | 21 | 65.933 | KV453211.1 | 4975156 | 21-scf00417 | 21 |
| AX-158257748 | 21 | 65.933 | KV453211.1 | 4976507 | 21-scf00417 | 21 |
| AX-158257749 | 21 | 65.933 | KV453211.1 | 4976991 | 21-scf00417 | 21 |
| AX-158257750 | 21 | 65.933 | KV453211.1 | 4977684 | 21-scf00417 | 21 |
| AX-158257751 | 21 | 65.933 | KV453211.1 | 4979325 | 21-scf00417 | 21 |
| AX-158257753 | 21 | 65.933 | KV453211.1 | 4980984 | 21-scf00417 | 21 |
| AX-158257754 | 21 | 65.933 | KV453211.1 | 4983066 | 21-scf00417 | 21 |
| AX-158416107 | 21 | 65.933 | KV453211.1 | 4984286 | 21-scf00417 | 21 |
| AX-158257755 | 21 | 65.933 | KV453211.1 | 4984364 | 21-scf00417 | 21 |
| AX-158394580 | 21 | 65.933 | KV453211.1 | 4984716 | 21-scf00417 | 21 |
| AX-158257756 | 21 | 65.933 | KV453211.1 | 4985053 | 21-scf00417 | 21 |
| AX-158257757 | 21 | 65.933 | KV453211.1 | 4986459 | 21-scf00417 | 21 |
| AX-158257758 | 21 | 65.933 | KV453211.1 | 4991112 | 21-scf00417 | 21 |
| AX-158257759 | 21 | 65.933 | KV453211.1 | 4991557 | 21-scf00417 | 21 |
| AX-158257760 | 21 | 65.933 | KV453211.1 | 4992403 | 21-scf00417 | 21 |
| AX-158257762 | 21 | 65.933 | KV453211.1 | 4993568 | 21-scf00417 | 21 |
| AX-158257763 | 21 | 65.933 | KV453211.1 | 4994260 | 21-scf00417 | 21 |
| AX-158257764 | 21 | 65.933 | KV453211.1 | 4995885 | 21-scf00417 | 21 |
| AX-158257766 | 21 | 65.933 | KV453211.1 | 4998914 | 21-scf00417 | 21 |
| AX-158257771 | 21 | 65.933 | KV453211.1 | 5001846 | 21-scf00417 | 21 |
| AX-158257772 | 21 | 65.933 | KV453211.1 | 5002558 | 21-scf00417 | 21 |
| AX-158257773 | 21 | 65.933 | KV453211.1 | 5003841 | 21-scf00417 | 21 |
| AX-158257774 | 21 | 65.933 | KV453211.1 | 5005043 | 21-scf00417 | 21 |
| AX-158257775 | 21 | 65.933 | KV453211.1 | 5005607 | 21-scf00417 | 21 |
| AX-158394581 | 21 | 65.933 | KV453211.1 | 5005888 | 21-scf00417 | 21 |
| AX-158257776 | 21 | 65.933 | KV453211.1 | 5008240 | 21-scf00417 | 21 |
| AX-158257777 | 21 | 65.933 | KV453211.1 | 5008791 | 21-scf00417 | 21 |
| AX-158257778 | 21 | 65.933 | KV453211.1 | 5009367 | 21-scf00417 | 21 |
| AX-158257780 | 21 | 65.933 | KV453211.1 | 5010200 | 21-scf00417 | 21 |
| AX-158257781 | 21 | 65.933 | KV453211.1 | 5011995 | 21-scf00417 | 21 |
| AX-158257782 | 21 | 65.933 | KV453211.1 | 5014891 | 21-scf00417 | 21 |
| AX-158257783 | 21 | 65.933 | KV453211.1 | 5019102 | 21-scf00417 | 21 |
| AX-158257784 | 21 | 65.933 | KV453211.1 | 5019695 | 21-scf00417 | 21 |
| AX-158257785 | 21 | 65.933 | KV453211.1 | 5020188 | 21-scf00417 | 21 |
| AX-158257786 | 21 | 65.933 | KV453211.1 | 5020636 | 21-scf00417 | 21 |
| AX-158394582 | 21 | 65.933 | KV453211.1 | 5020810 | 21-scf00417 | 21 |
| AX-158257787 | 21 | 65.933 | KV453211.1 | 5021963 | 21-scf00417 | 21 |
| AX-158257788 | 21 | 65.933 | KV453211.1 | 5022598 | 21-scf00417 | 21 |
| AX-158257790 | 21 | 65.933 | KV453211.1 | 5025008 | 21-scf00417 | 21 |
| AX-158257791 | 21 | 65.933 | KV453211.1 | 5026126 | 21-scf00417 | 21 |
| AX-158257792 | 21 | 65.933 | KV453211.1 | 5026633 | 21-scf00417 | 21 |
| AX-158257793 | 21 | 65.933 | KV453211.1 | 5027354 | 21-scf00417 | 21 |
| AX-158257794 | 21 | 65.933 | KV453211.1 | 5027987 | 21-scf00417 | 21 |
| AX-158257795 | 21 | 65.933 | KV453211.1 | 5028637 | 21-scf00417 | 21 |
| AX-158257796 | 21 | 65.933 | KV453211.1 | 5029392 | 21-scf00417 | 21 |
| AX-157842717 | 21 | 65.933 | KV453211.1 | 5033188 | 21-scf00417 | 21 |
| AX-157842718 | 21 | 65.933 | KV453211.1 | 5033356 | 21-scf00417 | 21 |
| AX-158257798 | 21 | 65.933 | KV453211.1 | 5033532 | 21-scf00417 | 21 |

|              |    |        |            |         |             |    |
|--------------|----|--------|------------|---------|-------------|----|
| AX-158416108 | 21 | 65.933 | KV453211.1 | 5033960 | 21-scf00417 | 21 |
| AX-158257799 | 21 | 65.933 | KV453211.1 | 5034237 | 21-scf00417 | 21 |
| AX-158257800 | 21 | 65.933 | KV453211.1 | 5035300 | 21-scf00417 | 21 |
| AX-158257801 | 21 | 65.933 | KV453211.1 | 5036504 | 21-scf00417 | 21 |
| AX-158257803 | 21 | 65.933 | KV453211.1 | 5039298 | 21-scf00417 | 21 |
| AX-158257805 | 21 | 65.933 | KV453211.1 | 5041004 | 21-scf00417 | 21 |
| AX-158257806 | 21 | 65.933 | KV453211.1 | 5041860 | 21-scf00417 | 21 |
| AX-158257807 | 21 | 65.933 | KV453211.1 | 5043377 | 21-scf00417 | 21 |
| AX-158257808 | 21 | 65.933 | KV453211.1 | 5043638 | 21-scf00417 | 21 |
| AX-158257810 | 21 | 65.933 | KV453211.1 | 5046048 | 21-scf00417 | 21 |
| AX-158416111 | 21 | 65.933 | KV453211.1 | 5046498 | 21-scf00417 | 21 |
| AX-158257811 | 21 | 65.933 | KV453211.1 | 5047620 | 21-scf00417 | 21 |
| AX-158257812 | 21 | 65.933 | KV453211.1 | 5048619 | 21-scf00417 | 21 |
| AX-158257813 | 21 | 65.933 | KV453211.1 | 5049171 | 21-scf00417 | 21 |
| AX-158257814 | 21 | 65.933 | KV453211.1 | 5050927 | 21-scf00417 | 21 |
| AX-158416112 | 21 | 65.933 | KV453211.1 | 5051202 | 21-scf00417 | 21 |
| AX-158257818 | 21 | 65.933 | KV453211.1 | 5073584 | 21-scf00417 | 21 |
| AX-158257820 | 21 | 65.933 | KV453211.1 | 5083505 | 21-scf00417 | 21 |
| AX-158257823 | 21 | 65.933 | KV453211.1 | 5087854 | 21-scf00417 | 21 |
| AX-158419164 | 21 | 65.933 | KV453211.1 | 5092149 | 21-scf00417 | 21 |
| AX-158257826 | 21 | 65.933 | KV453211.1 | 5095987 | 21-scf00417 | 21 |
| AX-158257827 | 21 | 65.933 | KV453211.1 | 5099972 | 21-scf00417 | 21 |
| AX-158257828 | 21 | 65.933 | KV453211.1 | 5100689 | 21-scf00417 | 21 |
| AX-158257829 | 21 | 65.933 | KV453211.1 | 5101327 | 21-scf00417 | 21 |
| AX-158257832 | 21 | 65.933 | KV453211.1 | 5108878 | 21-scf00417 | 21 |
| AX-158257833 | 21 | 65.933 | KV453211.1 | 5109402 | 21-scf00417 | 21 |
| AX-158257834 | 21 | 65.933 | KV453211.1 | 5109865 | 21-scf00417 | 21 |
| AX-158387175 | 21 | 65.933 | KV453211.1 | 5110549 | 21-scf00417 | 21 |
| AX-158257835 | 21 | 65.933 | KV453211.1 | 5111106 | 21-scf00417 | 21 |
| AX-158257836 | 21 | 65.933 | KV453211.1 | 5111807 | 21-scf00417 | 21 |
| AX-158257837 | 21 | 65.933 | KV453211.1 | 5112635 | 21-scf00417 | 21 |
| AX-158257838 | 21 | 65.933 | KV453211.1 | 5113261 | 21-scf00417 | 21 |
| AX-157842719 | 21 | 65.933 | KV453211.1 | 5114140 | 21-scf00417 | 21 |
| AX-158411028 | 21 | 65.933 | KV453211.1 | 5114465 | 21-scf00417 | 21 |
| AX-158257840 | 21 | 65.933 | KV453211.1 | 5115493 | 21-scf00417 | 21 |
| AX-158257841 | 21 | 65.933 | KV453211.1 | 5118589 | 21-scf00417 | 21 |
| AX-158257842 | 21 | 65.933 | KV453211.1 | 5119883 | 21-scf00417 | 21 |
| AX-158257843 | 21 | 65.933 | KV453211.1 | 5120783 | 21-scf00417 | 21 |
| AX-158257844 | 21 | 65.933 | KV453211.1 | 5121761 | 21-scf00417 | 21 |
| AX-158416115 | 21 | 65.933 | KV453211.1 | 5123243 | 21-scf00417 | 21 |
| AX-158257847 | 21 | 65.933 | KV453211.1 | 5129725 | 21-scf00417 | 21 |
| AX-158257848 | 21 | 65.933 | KV453211.1 | 5130633 | 21-scf00417 | 21 |
| AX-158257849 | 21 | 65.933 | KV453211.1 | 5132258 | 21-scf00417 | 21 |
| AX-157694266 | 21 | 65.933 | KV453211.1 | 5132842 | 21-scf00417 | 21 |
| AX-158257850 | 21 | 65.933 | KV453211.1 | 5134877 | 21-scf00417 | 21 |
| AX-158257851 | 21 | 65.933 | KV453211.1 | 5135359 | 21-scf00417 | 21 |
| AX-157842720 | 21 | 65.933 | KV453211.1 | 5136516 | 21-scf00417 | 21 |
| AX-158257853 | 21 | 65.933 | KV453211.1 | 5140412 | 21-scf00417 | 21 |
| AX-158257854 | 21 | 65.933 | KV453211.1 | 5141408 | 21-scf00417 | 21 |
| AX-158257855 | 21 | 65.933 | KV453211.1 | 5141782 | 21-scf00417 | 21 |
| AX-158257857 | 21 | 65.933 | KV453211.1 | 5143006 | 21-scf00417 | 21 |



|              |    |        |            |         |             |    |
|--------------|----|--------|------------|---------|-------------|----|
| AX-158257858 | 21 | 65.933 | KV453211.1 | 5146891 | 21-scf00417 | 21 |
| AX-158419165 | 21 | 65.933 | KV453211.1 | 5147186 | 21-scf00417 | 21 |
| AX-158257860 | 21 | 65.933 | KV453211.1 | 5150039 | 21-scf00417 | 21 |
| AX-158257863 | 21 | 65.933 | KV453211.1 | 5159241 | 21-scf00417 | 21 |
| AX-157842721 | 21 | 65.933 | KV453211.1 | 5163557 | 21-scf00417 | 21 |
| AX-158257865 | 21 | 65.933 | KV453211.1 | 5164898 | 21-scf00417 | 21 |
| AX-158257866 | 21 | 65.933 | KV453211.1 | 5166938 | 21-scf00417 | 21 |
| AX-158257867 | 21 | 65.933 | KV453211.1 | 5167677 | 21-scf00417 | 21 |
| AX-158257868 | 21 | 65.933 | KV453211.1 | 5168470 | 21-scf00417 | 21 |
| AX-157859927 | 21 | 65.933 | KV453211.1 | 5170094 | 21-scf00417 | 21 |
| AX-158257878 | 21 | 65.933 | KV453211.1 | 5184758 | 21-scf00417 | 21 |
| AX-158257881 | 21 | 65.933 | KV453211.1 | 5190612 | 21-scf00417 | 21 |
| AX-158257882 | 21 | 65.933 | KV453211.1 | 5191639 | 21-scf00417 | 21 |
| AX-158257883 | 21 | 65.933 | KV453211.1 | 5192312 | 21-scf00417 | 21 |
| AX-158257885 | 21 | 65.933 | KV453211.1 | 5194558 | 21-scf00417 | 21 |
| AX-158257886 | 21 | 65.933 | KV453211.1 | 5196560 | 21-scf00417 | 21 |
| AX-158257887 | 21 | 65.933 | KV453211.1 | 5196945 | 21-scf00417 | 21 |
| AX-158257888 | 21 | 65.933 | KV453211.1 | 5198044 | 21-scf00417 | 21 |
| AX-158257889 | 21 | 65.933 | KV453211.1 | 5199986 | 21-scf00417 | 21 |
| AX-158257890 | 21 | 65.933 | KV453211.1 | 5202822 | 21-scf00417 | 21 |
| AX-158257891 | 21 | 65.933 | KV453211.1 | 5203061 | 21-scf00417 | 21 |
| AX-158257892 | 21 | 65.933 | KV453211.1 | 5204912 | 21-scf00417 | 21 |
| AX-157842724 | 21 | 65.933 | KV453211.1 | 5205235 | 21-scf00417 | 21 |
| AX-158257893 | 21 | 65.933 | KV453211.1 | 5207257 | 21-scf00417 | 21 |
| AX-158257894 | 21 | 65.933 | KV453211.1 | 5208692 | 21-scf00417 | 21 |
| AX-158257896 | 21 | 65.933 | KV453211.1 | 5210980 | 21-scf00417 | 21 |
| AX-158257897 | 21 | 65.933 | KV453211.1 | 5211465 | 21-scf00417 | 21 |
| AX-158257898 | 21 | 65.933 | KV453211.1 | 5212923 | 21-scf00417 | 21 |
| AX-158257899 | 21 | 65.933 | KV453211.1 | 5213676 | 21-scf00417 | 21 |
| AX-157859930 | 21 | 65.933 | KV453211.1 | 5214614 | 21-scf00417 | 21 |
| AX-158257900 | 21 | 65.933 | KV453211.1 | 5216852 | 21-scf00417 | 21 |
| AX-158257906 | 21 | 65.933 | KV453211.1 | 5221616 | 21-scf00417 | 21 |
| AX-158257908 | 21 | 65.933 | KV453211.1 | 5225217 | 21-scf00417 | 21 |
| AX-158257910 | 21 | 65.933 | KV453211.1 | 5228988 | 21-scf00417 | 21 |
| AX-157842726 | 21 | 65.933 | KV453211.1 | 5230390 | 21-scf00417 | 21 |
| AX-158257911 | 21 | 65.933 | KV453211.1 | 5231059 | 21-scf00417 | 21 |
| AX-158257912 | 21 | 65.933 | KV453211.1 | 5232517 | 21-scf00417 | 21 |
| AX-158257913 | 21 | 65.933 | KV453211.1 | 5233533 | 21-scf00417 | 21 |
| AX-158257914 | 21 | 65.933 | KV453211.1 | 5233841 | 21-scf00417 | 21 |
| AX-158257915 | 21 | 65.933 | KV453211.1 | 5234266 | 21-scf00417 | 21 |
| AX-158257916 | 21 | 65.933 | KV453211.1 | 5239301 | 21-scf00417 | 21 |
| AX-158257917 | 21 | 65.933 | KV453211.1 | 5239797 | 21-scf00417 | 21 |
| AX-158257918 | 21 | 65.933 | KV453211.1 | 5240669 | 21-scf00417 | 21 |
| AX-157842727 | 21 | 65.933 | KV453211.1 | 5243763 | 21-scf00417 | 21 |
| AX-157842728 | 21 | 65.933 | KV453211.1 | 5244340 | 21-scf00417 | 21 |
| AX-158257920 | 21 | 65.933 | KV453211.1 | 5244534 | 21-scf00417 | 21 |
| AX-157859931 | 21 | 65.933 | KV453211.1 | 5244627 | 21-scf00417 | 21 |
| AX-158257921 | 21 | 65.933 | KV453211.1 | 5245663 | 21-scf00417 | 21 |
| AX-158257922 | 21 | 65.933 | KV453211.1 | 5246944 | 21-scf00417 | 21 |
| AX-157842729 | 21 | 65.933 | KV453211.1 | 5247244 | 21-scf00417 | 21 |
| AX-158257926 | 21 | 65.933 | KV453211.1 | 5249515 | 21-scf00417 | 21 |

|              |    |        |            |         |             |    |
|--------------|----|--------|------------|---------|-------------|----|
| AX-157750962 | 21 | 65.933 | KV453211.1 | 5251913 | 21-scf00417 | 21 |
| AX-158381054 | 21 | 65.933 | KV453211.1 | 5253091 | 21-scf00417 | 21 |
| AX-158257944 | 21 | 65.933 | KV453211.1 | 5276689 | 21-scf00417 | 21 |
| AX-157880348 | 21 | 65.933 | KV453211.1 | 5277653 | 21-scf00417 | 21 |
| AX-158257947 | 21 | 65.933 | KV453211.1 | 5278776 | 21-scf00417 | 21 |
| AX-158257949 | 21 | 65.933 | KV453211.1 | 5281683 | 21-scf00417 | 21 |
| AX-158257950 | 21 | 65.933 | KV453211.1 | 5285370 | 21-scf00417 | 21 |
| AX-158257951 | 21 | 65.933 | KV453211.1 | 5287167 | 21-scf00417 | 21 |
| AX-157708126 | 21 | 65.933 | KV453211.1 | 5289514 | 21-scf00417 | 21 |
| AX-158257955 | 21 | 65.933 | KV453211.1 | 5290636 | 21-scf00417 | 21 |
| AX-158257957 | 21 | 65.933 | KV453211.1 | 5293568 | 21-scf00417 | 21 |
| AX-158257958 | 21 | 65.933 | KV453211.1 | 5294282 | 21-scf00417 | 21 |
| AX-157842735 | 21 | 65.933 | KV453211.1 | 5305720 | 21-scf00417 | 21 |
| AX-158257963 | 21 | 65.933 | KV453211.1 | 5307654 | 21-scf00417 | 21 |
| AX-158257964 | 21 | 65.933 | KV453211.1 | 5309003 | 21-scf00417 | 21 |
| AX-158257965 | 21 | 65.933 | KV453211.1 | 5309754 | 21-scf00417 | 21 |
| AX-158257969 | 21 | 65.933 | KV453211.1 | 5314164 | 21-scf00417 | 21 |
| AX-157842739 | 21 | 65.933 | KV453211.1 | 5316811 | 21-scf00417 | 21 |
| AX-158257972 | 21 | 65.933 | KV453211.1 | 5319007 | 21-scf00417 | 21 |
| AX-158257974 | 21 | 65.933 | KV453211.1 | 5320285 | 21-scf00417 | 21 |
| AX-157842740 | 21 | 65.933 | KV453211.1 | 5327629 | 21-scf00417 | 21 |
| AX-157842741 | 21 | 65.933 | KV453211.1 | 5329046 | 21-scf00417 | 21 |
| AX-157801689 | 21 | 65.933 | KV453211.1 | 5331854 | 21-scf00417 | 21 |
| AX-158257978 | 21 | 65.933 | KV453211.1 | 5332896 | 21-scf00417 | 21 |
| AX-158257979 | 21 | 65.933 | KV453211.1 | 5334972 | 21-scf00417 | 21 |
| AX-157760647 | 21 | 65.933 | KV453211.1 | 5337214 | 21-scf00417 | 21 |
| AX-158257981 | 21 | 65.933 | KV453211.1 | 5341571 | 21-scf00417 | 21 |
| AX-158257983 | 21 | 65.933 | KV453211.1 | 5343932 | 21-scf00417 | 21 |
| AX-158257984 | 21 | 65.933 | KV453211.1 | 5344408 | 21-scf00417 | 21 |
| AX-157842742 | 21 | 65.933 | KV453211.1 | 5345850 | 21-scf00417 | 21 |
| AX-158257986 | 21 | 65.933 | KV453211.1 | 5350074 | 21-scf00417 | 21 |
| AX-157859934 | 21 | 65.933 | KV453211.1 | 5353131 | 21-scf00417 | 21 |
| AX-158257989 | 21 | 65.933 | KV453211.1 | 5355334 | 21-scf00417 | 21 |
| AX-158257990 | 21 | 65.933 | KV453211.1 | 5355724 | 21-scf00417 | 21 |
| AX-158257992 | 21 | 65.933 | KV453211.1 | 5357230 | 21-scf00417 | 21 |
| AX-158257993 | 21 | 65.933 | KV453211.1 | 5359097 | 21-scf00417 | 21 |
| AX-158257996 | 21 | 65.933 | KV453211.1 | 5360446 | 21-scf00417 | 21 |
| AX-158257998 | 21 | 65.933 | KV453211.1 | 5360946 | 21-scf00417 | 21 |
| AX-158258000 | 21 | 65.933 | KV453211.1 | 5361749 | 21-scf00417 | 21 |
| AX-158258002 | 21 | 65.933 | KV453211.1 | 5364183 | 21-scf00417 | 21 |
| AX-158258005 | 21 | 65.933 | KV453211.1 | 5366895 | 21-scf00417 | 21 |
| AX-158258007 | 21 | 65.933 | KV453211.1 | 5368810 | 21-scf00417 | 21 |
| AX-157842745 | 21 | 65.933 | KV453211.1 | 5374046 | 21-scf00417 | 21 |
| AX-158258018 | 21 | 65.933 | KV453211.1 | 5382508 | 21-scf00417 | 21 |
| AX-158258019 | 21 | 65.933 | KV453211.1 | 5383471 | 21-scf00417 | 21 |
| AX-158258046 | 21 | 65.933 | KV453211.1 | 5427120 | 21-scf00417 | 21 |
| AX-158258047 | 21 | 65.933 | KV453211.1 | 5435468 | 21-scf00417 | 21 |
| AX-158258064 | 21 | 65.933 | KV453211.1 | 5482517 | 21-scf00417 | 21 |
| AX-158258070 | 21 | 65.933 | KV453211.1 | 5491879 | 21-scf00417 | 21 |
| AX-157880357 | 21 | 65.933 | KV453211.1 | 5530321 | 21-scf00417 | 21 |
| AX-158258101 | 21 | 65.933 | KV453211.1 | 5532250 | 21-scf00417 | 21 |

|              |    |        |            |         |             |    |
|--------------|----|--------|------------|---------|-------------|----|
| AX-158258106 | 21 | 65.933 | KV453211.1 | 5539069 | 21-scf00417 | 21 |
| AX-158258110 | 21 | 65.933 | KV453211.1 | 5544083 | 21-scf00417 | 21 |
| AX-158258119 | 21 | 65.933 | KV453211.1 | 5567563 | 21-scf00417 | 21 |
| AX-158258155 | 21 | 65.933 | KV453211.1 | 5622544 | 21-scf00417 | 21 |
| AX-158258156 | 21 | 65.933 | KV453211.1 | 5623667 | 21-scf00417 | 21 |
| AX-158258186 | 21 | 65.933 | KV453211.1 | 5671803 | 21-scf00417 | 21 |
| AX-158258401 | 21 | 65.933 | KV453211.1 | 5977474 | 21-scf00417 | 21 |
| AX-158387187 | 21 | 65.933 | KV453211.1 | 6007822 | 21-scf00417 | 21 |
| AX-157721720 | 21 | 65.933 | KV453211.1 | 6772072 | 21-scf00417 | 21 |
| AX-158259076 | 21 | 65.933 | KV453211.1 | 6817078 | 21-scf00417 | 21 |
| AX-157842854 | 21 | 65.933 | KV453211.1 | 7120098 | 21-scf00417 | 21 |
| AX-158259378 | 21 | 65.933 | KV453211.1 | 7383048 | 21-scf00417 | 21 |
| AX-158259403 | 21 | 65.933 | KV453211.1 | 7432785 | 21-scf00417 | 21 |
| AX-158259547 | 21 | 65.933 | KV453211.1 | 7674799 | 21-scf00417 | 21 |
| AX-158259617 | 21 | 65.933 | KV453211.1 | 7774559 | 21-scf00417 | 21 |
| AX-158260108 | 21 | 65.933 | KV453211.1 | 8511503 | 21-scf00417 | 21 |
| AX-157757086 | 21 | 65.933 | KV453211.1 | 8606876 | 21-scf00417 | 21 |
| AX-158258021 | 21 | 65.971 | KV453211.1 | 5384275 | 21-scf00417 | 21 |
| AX-158257524 | 21 | 66.042 | KV453211.1 | 4721784 | 21-scf00417 | 21 |
| AX-158257529 | 21 | 66.042 | KV453211.1 | 4724825 | 21-scf00417 | 21 |
| AX-157842703 | 21 | 66.042 | KV453211.1 | 4757745 | 21-scf00417 | 21 |
| AX-158257761 | 21 | 66.042 | KV453211.1 | 4993035 | 21-scf00417 | 21 |
| AX-158257765 | 21 | 66.042 | KV453211.1 | 4998390 | 21-scf00417 | 21 |
| AX-158257769 | 21 | 66.042 | KV453211.1 | 5001089 | 21-scf00417 | 21 |
| AX-158257770 | 21 | 66.042 | KV453211.1 | 5001388 | 21-scf00417 | 21 |
| AX-158257831 | 21 | 66.042 | KV453211.1 | 5104155 | 21-scf00417 | 21 |
| AX-158257839 | 21 | 66.042 | KV453211.1 | 5114908 | 21-scf00417 | 21 |
| AX-158257859 | 21 | 66.042 | KV453211.1 | 5148433 | 21-scf00417 | 21 |
| AX-158257864 | 21 | 66.042 | KV453211.1 | 5164468 | 21-scf00417 | 21 |
| AX-157740138 | 21 | 66.042 | KV453211.1 | 5234134 | 21-scf00417 | 21 |
| AX-158257945 | 21 | 66.042 | KV453211.1 | 5277282 | 21-scf00417 | 21 |
| AX-158387177 | 21 | 66.042 | KV453211.1 | 5277562 | 21-scf00417 | 21 |
| AX-158257946 | 21 | 66.042 | KV453211.1 | 5278015 | 21-scf00417 | 21 |
| AX-157842732 | 21 | 66.042 | KV453211.1 | 5279097 | 21-scf00417 | 21 |
| AX-158257948 | 21 | 66.042 | KV453211.1 | 5279484 | 21-scf00417 | 21 |
| AX-158257991 | 21 | 66.042 | KV453211.1 | 5356175 | 21-scf00417 | 21 |
| AX-158257995 | 21 | 66.042 | KV453211.1 | 5360145 | 21-scf00417 | 21 |
| AX-158257997 | 21 | 66.042 | KV453211.1 | 5360763 | 21-scf00417 | 21 |
| AX-158258009 | 21 | 66.042 | KV453211.1 | 5371281 | 21-scf00417 | 21 |
| AX-158258017 | 21 | 66.042 | KV453211.1 | 5381981 | 21-scf00417 | 21 |
| AX-157842747 | 21 | 66.042 | KV453211.1 | 5382927 | 21-scf00417 | 21 |
| AX-158258020 | 21 | 66.042 | KV453211.1 | 5383872 | 21-scf00417 | 21 |
| AX-158258025 | 21 | 66.042 | KV453211.1 | 5389680 | 21-scf00417 | 21 |
| AX-158258029 | 21 | 66.042 | KV453211.1 | 5394642 | 21-scf00417 | 21 |
| AX-158258040 | 21 | 66.042 | KV453211.1 | 5411645 | 21-scf00417 | 21 |
| AX-158258041 | 21 | 66.042 | KV453211.1 | 5412182 | 21-scf00417 | 21 |
| AX-158258042 | 21 | 66.042 | KV453211.1 | 5415500 | 21-scf00417 | 21 |
| AX-157842749 | 21 | 66.042 | KV453211.1 | 5425565 | 21-scf00417 | 21 |
| AX-158258048 | 21 | 66.042 | KV453211.1 | 5437878 | 21-scf00417 | 21 |
| AX-158258051 | 21 | 66.042 | KV453211.1 | 5439746 | 21-scf00417 | 21 |
| AX-158258052 | 21 | 66.042 | KV453211.1 | 5441401 | 21-scf00417 | 21 |

|              |    |        |            |         |             |    |
|--------------|----|--------|------------|---------|-------------|----|
| AX-158258053 | 21 | 66.042 | KV453211.1 | 5442400 | 21-scf00417 | 21 |
| AX-158258054 | 21 | 66.042 | KV453211.1 | 5444261 | 21-scf00417 | 21 |
| AX-157880352 | 21 | 66.042 | KV453211.1 | 5467721 | 21-scf00417 | 21 |
| AX-157880353 | 21 | 66.042 | KV453211.1 | 5471324 | 21-scf00417 | 21 |
| AX-157842750 | 21 | 66.042 | KV453211.1 | 5481286 | 21-scf00417 | 21 |
| AX-158258065 | 21 | 66.042 | KV453211.1 | 5484780 | 21-scf00417 | 21 |
| AX-158258067 | 21 | 66.042 | KV453211.1 | 5486482 | 21-scf00417 | 21 |
| AX-158258071 | 21 | 66.042 | KV453211.1 | 5493389 | 21-scf00417 | 21 |
| AX-157739257 | 21 | 66.042 | KV453211.1 | 5493821 | 21-scf00417 | 21 |
| AX-158258072 | 21 | 66.042 | KV453211.1 | 5494405 | 21-scf00417 | 21 |
| AX-158258073 | 21 | 66.042 | KV453211.1 | 5494867 | 21-scf00417 | 21 |
| AX-158387179 | 21 | 66.042 | KV453211.1 | 5495216 | 21-scf00417 | 21 |
| AX-158258075 | 21 | 66.042 | KV453211.1 | 5497164 | 21-scf00417 | 21 |
| AX-158258077 | 21 | 66.042 | KV453211.1 | 5498833 | 21-scf00417 | 21 |
| AX-158258079 | 21 | 66.042 | KV453211.1 | 5503029 | 21-scf00417 | 21 |
| AX-158416122 | 21 | 66.042 | KV453211.1 | 5504075 | 21-scf00417 | 21 |
| AX-158258080 | 21 | 66.042 | KV453211.1 | 5505404 | 21-scf00417 | 21 |
| AX-158258082 | 21 | 66.042 | KV453211.1 | 5506641 | 21-scf00417 | 21 |
| AX-157774548 | 21 | 66.042 | KV453211.1 | 5507257 | 21-scf00417 | 21 |
| AX-158258086 | 21 | 66.042 | KV453211.1 | 5512755 | 21-scf00417 | 21 |
| AX-158258087 | 21 | 66.042 | KV453211.1 | 5513462 | 21-scf00417 | 21 |
| AX-158258139 | 21 | 66.042 | KV453211.1 | 5604131 | 21-scf00417 | 21 |
| AX-158258783 | 21 | 66.042 | KV453211.1 | 6428629 | 21-scf00417 | 21 |
| AX-158258789 | 21 | 66.042 | KV453211.1 | 6438944 | 21-scf00417 | 21 |
| AX-157842794 | 21 | 66.042 | KV453211.1 | 6460155 | 21-scf00417 | 21 |
| AX-158259016 | 21 | 66.042 | KV453211.1 | 6717861 | 21-scf00417 | 21 |
| AX-158259165 | 21 | 66.042 | KV453211.1 | 6950583 | 21-scf00417 | 21 |
| AX-157842844 | 21 | 66.042 | KV453211.1 | 7026412 | 21-scf00417 | 21 |
| AX-158259254 | 21 | 66.042 | KV453211.1 | 7145146 | 21-scf00417 | 21 |
| AX-158257816 | 21 | 66.151 | KV453211.1 | 5059219 | 21-scf00417 | 21 |
| AX-158423403 | 21 | 66.151 | KV453211.1 | 5068007 | 21-scf00417 | 21 |
| AX-158257822 | 21 | 66.151 | KV453211.1 | 5086740 | 21-scf00417 | 21 |
| AX-158257928 | 21 | 66.151 | KV453211.1 | 5253223 | 21-scf00417 | 21 |
| AX-157842738 | 21 | 66.151 | KV453211.1 | 5315990 | 21-scf00417 | 21 |
| AX-158258001 | 21 | 66.151 | KV453211.1 | 5363767 | 21-scf00417 | 21 |
| AX-158258013 | 21 | 66.151 | KV453211.1 | 5378833 | 21-scf00417 | 21 |
| AX-158258039 | 21 | 66.151 | KV453211.1 | 5408151 | 21-scf00417 | 21 |
| AX-158258044 | 21 | 66.151 | KV453211.1 | 5418087 | 21-scf00417 | 21 |
| AX-158258056 | 21 | 66.151 | KV453211.1 | 5449257 | 21-scf00417 | 21 |
| AX-158258083 | 21 | 66.151 | KV453211.1 | 5507112 | 21-scf00417 | 21 |
| AX-158258089 | 21 | 66.151 | KV453211.1 | 5515709 | 21-scf00417 | 21 |
| AX-158258090 | 21 | 66.151 | KV453211.1 | 5516527 | 21-scf00417 | 21 |
| AX-158258091 | 21 | 66.151 | KV453211.1 | 5517084 | 21-scf00417 | 21 |
| AX-158258093 | 21 | 66.151 | KV453211.1 | 5518293 | 21-scf00417 | 21 |
| AX-158258094 | 21 | 66.151 | KV453211.1 | 5518537 | 21-scf00417 | 21 |
| AX-158258100 | 21 | 66.151 | KV453211.1 | 5528935 | 21-scf00417 | 21 |
| AX-158258104 | 21 | 66.151 | KV453211.1 | 5537105 | 21-scf00417 | 21 |
| AX-158258105 | 21 | 66.151 | KV453211.1 | 5537919 | 21-scf00417 | 21 |
| AX-158394586 | 21 | 66.151 | KV453211.1 | 5540121 | 21-scf00417 | 21 |
| AX-158258107 | 21 | 66.151 | KV453211.1 | 5540722 | 21-scf00417 | 21 |
| AX-158258108 | 21 | 66.151 | KV453211.1 | 5541269 | 21-scf00417 | 21 |

|              |    |        |            |         |             |    |
|--------------|----|--------|------------|---------|-------------|----|
| AX-158258111 | 21 | 66.151 | KV453211.1 | 5545167 | 21-scf00417 | 21 |
| AX-158394587 | 21 | 66.151 | KV453211.1 | 5548418 | 21-scf00417 | 21 |
| AX-157752768 | 21 | 66.151 | KV453211.1 | 5548516 | 21-scf00417 | 21 |
| AX-157709664 | 21 | 66.151 | KV453211.1 | 5550357 | 21-scf00417 | 21 |
| AX-157722059 | 21 | 66.151 | KV453211.1 | 5552325 | 21-scf00417 | 21 |
| AX-158387180 | 21 | 66.151 | KV453211.1 | 5555152 | 21-scf00417 | 21 |
| AX-158258116 | 21 | 66.151 | KV453211.1 | 5564876 | 21-scf00417 | 21 |
| AX-158394588 | 21 | 66.151 | KV453211.1 | 5565047 | 21-scf00417 | 21 |
| AX-158258117 | 21 | 66.151 | KV453211.1 | 5565555 | 21-scf00417 | 21 |
| AX-158258118 | 21 | 66.151 | KV453211.1 | 5565777 | 21-scf00417 | 21 |
| AX-158258121 | 21 | 66.151 | KV453211.1 | 5575838 | 21-scf00417 | 21 |
| AX-158387182 | 21 | 66.151 | KV453211.1 | 5577142 | 21-scf00417 | 21 |
| AX-158258124 | 21 | 66.151 | KV453211.1 | 5582559 | 21-scf00417 | 21 |
| AX-158258125 | 21 | 66.151 | KV453211.1 | 5584737 | 21-scf00417 | 21 |
| AX-158394589 | 21 | 66.151 | KV453211.1 | 5587363 | 21-scf00417 | 21 |
| AX-158258126 | 21 | 66.151 | KV453211.1 | 5587567 | 21-scf00417 | 21 |
| AX-158258129 | 21 | 66.151 | KV453211.1 | 5590760 | 21-scf00417 | 21 |
| AX-158258130 | 21 | 66.151 | KV453211.1 | 5591318 | 21-scf00417 | 21 |
| AX-158258131 | 21 | 66.151 | KV453211.1 | 5591897 | 21-scf00417 | 21 |
| AX-158381056 | 21 | 66.151 | KV453211.1 | 5594515 | 21-scf00417 | 21 |
| AX-158258132 | 21 | 66.151 | KV453211.1 | 5595639 | 21-scf00417 | 21 |
| AX-157739037 | 21 | 66.151 | KV453211.1 | 5596873 | 21-scf00417 | 21 |
| AX-158258136 | 21 | 66.151 | KV453211.1 | 5600358 | 21-scf00417 | 21 |
| AX-158258137 | 21 | 66.151 | KV453211.1 | 5601402 | 21-scf00417 | 21 |
| AX-158394590 | 21 | 66.151 | KV453211.1 | 5602680 | 21-scf00417 | 21 |
| AX-158258138 | 21 | 66.151 | KV453211.1 | 5603335 | 21-scf00417 | 21 |
| AX-158258140 | 21 | 66.151 | KV453211.1 | 5604473 | 21-scf00417 | 21 |
| AX-158258141 | 21 | 66.151 | KV453211.1 | 5605409 | 21-scf00417 | 21 |
| AX-158258142 | 21 | 66.151 | KV453211.1 | 5605947 | 21-scf00417 | 21 |
| AX-158258143 | 21 | 66.151 | KV453211.1 | 5607464 | 21-scf00417 | 21 |
| AX-158394591 | 21 | 66.151 | KV453211.1 | 5608665 | 21-scf00417 | 21 |
| AX-158258146 | 21 | 66.151 | KV453211.1 | 5610695 | 21-scf00417 | 21 |
| AX-158258151 | 21 | 66.151 | KV453211.1 | 5616963 | 21-scf00417 | 21 |
| AX-158387183 | 21 | 66.151 | KV453211.1 | 5617470 | 21-scf00417 | 21 |
| AX-158258154 | 21 | 66.151 | KV453211.1 | 5619451 | 21-scf00417 | 21 |
| AX-158258157 | 21 | 66.151 | KV453211.1 | 5624285 | 21-scf00417 | 21 |
| AX-158258158 | 21 | 66.151 | KV453211.1 | 5625967 | 21-scf00417 | 21 |
| AX-158258160 | 21 | 66.151 | KV453211.1 | 5629433 | 21-scf00417 | 21 |
| AX-158258161 | 21 | 66.151 | KV453211.1 | 5630407 | 21-scf00417 | 21 |
| AX-158258162 | 21 | 66.151 | KV453211.1 | 5631092 | 21-scf00417 | 21 |
| AX-157750180 | 21 | 66.151 | KV453211.1 | 5653346 | 21-scf00417 | 21 |
| AX-158258170 | 21 | 66.151 | KV453211.1 | 5654322 | 21-scf00417 | 21 |
| AX-158258171 | 21 | 66.151 | KV453211.1 | 5654648 | 21-scf00417 | 21 |
| AX-158387184 | 21 | 66.151 | KV453211.1 | 5654711 | 21-scf00417 | 21 |
| AX-158258172 | 21 | 66.151 | KV453211.1 | 5655471 | 21-scf00417 | 21 |
| AX-157842751 | 21 | 66.151 | KV453211.1 | 5656739 | 21-scf00417 | 21 |
| AX-158258174 | 21 | 66.151 | KV453211.1 | 5658238 | 21-scf00417 | 21 |
| AX-157709675 | 21 | 66.151 | KV453211.1 | 5659573 | 21-scf00417 | 21 |
| AX-158258176 | 21 | 66.151 | KV453211.1 | 5659891 | 21-scf00417 | 21 |
| AX-157842752 | 21 | 66.151 | KV453211.1 | 5660636 | 21-scf00417 | 21 |
| AX-158258177 | 21 | 66.151 | KV453211.1 | 5661802 | 21-scf00417 | 21 |

|              |    |        |            |         |             |    |
|--------------|----|--------|------------|---------|-------------|----|
| AX-158258184 | 21 | 66.151 | KV453211.1 | 5670573 | 21-scf00417 | 21 |
| AX-158258222 | 21 | 66.151 | KV453211.1 | 5734925 | 21-scf00417 | 21 |
| AX-158258707 | 21 | 66.151 | KV453211.1 | 6330724 | 21-scf00417 | 21 |
| AX-158259271 | 21 | 66.151 | KV453211.1 | 7169533 | 21-scf00417 | 21 |
| AX-157842861 | 21 | 66.151 | KV453211.1 | 7222370 | 21-scf00417 | 21 |
| AX-158257746 | 21 | 66.37  | KV453211.1 | 4973598 | 21-scf00417 | 21 |
| AX-158257779 | 21 | 66.37  | KV453211.1 | 5009804 | 21-scf00417 | 21 |
| AX-158257943 | 21 | 66.37  | KV453211.1 | 5276049 | 21-scf00417 | 21 |
| AX-158258180 | 21 | 66.37  | KV453211.1 | 5664723 | 21-scf00417 | 21 |
| AX-158258183 | 21 | 66.37  | KV453211.1 | 5668994 | 21-scf00417 | 21 |
| AX-158258188 | 21 | 66.37  | KV453211.1 | 5673845 | 21-scf00417 | 21 |
| AX-158258191 | 21 | 66.37  | KV453211.1 | 5682723 | 21-scf00417 | 21 |
| AX-158258197 | 21 | 66.37  | KV453211.1 | 5693885 | 21-scf00417 | 21 |
| AX-158258198 | 21 | 66.37  | KV453211.1 | 5695181 | 21-scf00417 | 21 |
| AX-158258203 | 21 | 66.37  | KV453211.1 | 5702832 | 21-scf00417 | 21 |
| AX-157756333 | 21 | 66.37  | KV453211.1 | 5703578 | 21-scf00417 | 21 |
| AX-158258213 | 21 | 66.37  | KV453211.1 | 5718530 | 21-scf00417 | 21 |
| AX-158258216 | 21 | 66.37  | KV453211.1 | 5723432 | 21-scf00417 | 21 |
| AX-157722222 | 21 | 66.37  | KV453211.1 | 5726226 | 21-scf00417 | 21 |
| AX-158258221 | 21 | 66.37  | KV453211.1 | 5734568 | 21-scf00417 | 21 |
| AX-157842753 | 21 | 66.37  | KV453211.1 | 5740318 | 21-scf00417 | 21 |
| AX-158258228 | 21 | 66.37  | KV453211.1 | 5744082 | 21-scf00417 | 21 |
| AX-158258229 | 21 | 66.37  | KV453211.1 | 5745250 | 21-scf00417 | 21 |
| AX-158258234 | 21 | 66.37  | KV453211.1 | 5753463 | 21-scf00417 | 21 |
| AX-158258235 | 21 | 66.37  | KV453211.1 | 5755318 | 21-scf00417 | 21 |
| AX-158258236 | 21 | 66.37  | KV453211.1 | 5757426 | 21-scf00417 | 21 |
| AX-158258243 | 21 | 66.37  | KV453211.1 | 5768550 | 21-scf00417 | 21 |
| AX-158258245 | 21 | 66.37  | KV453211.1 | 5770907 | 21-scf00417 | 21 |
| AX-158258249 | 21 | 66.37  | KV453211.1 | 5773504 | 21-scf00417 | 21 |
| AX-158258250 | 21 | 66.37  | KV453211.1 | 5776753 | 21-scf00417 | 21 |
| AX-158258251 | 21 | 66.37  | KV453211.1 | 5781082 | 21-scf00417 | 21 |
| AX-158258252 | 21 | 66.37  | KV453211.1 | 5781751 | 21-scf00417 | 21 |
| AX-158258254 | 21 | 66.37  | KV453211.1 | 5788470 | 21-scf00417 | 21 |
| AX-158258255 | 21 | 66.37  | KV453211.1 | 5789955 | 21-scf00417 | 21 |
| AX-158258257 | 21 | 66.37  | KV453211.1 | 5792397 | 21-scf00417 | 21 |
| AX-158258262 | 21 | 66.37  | KV453211.1 | 5798254 | 21-scf00417 | 21 |
| AX-158258263 | 21 | 66.37  | KV453211.1 | 5799147 | 21-scf00417 | 21 |
| AX-158258264 | 21 | 66.37  | KV453211.1 | 5800396 | 21-scf00417 | 21 |
| AX-158258266 | 21 | 66.37  | KV453211.1 | 5802335 | 21-scf00417 | 21 |
| AX-158258267 | 21 | 66.37  | KV453211.1 | 5802765 | 21-scf00417 | 21 |
| AX-158258268 | 21 | 66.37  | KV453211.1 | 5803517 | 21-scf00417 | 21 |
| AX-158258271 | 21 | 66.37  | KV453211.1 | 5811693 | 21-scf00417 | 21 |
| AX-158258273 | 21 | 66.37  | KV453211.1 | 5815401 | 21-scf00417 | 21 |
| AX-158258274 | 21 | 66.37  | KV453211.1 | 5815771 | 21-scf00417 | 21 |
| AX-158258275 | 21 | 66.37  | KV453211.1 | 5816864 | 21-scf00417 | 21 |
| AX-158258276 | 21 | 66.37  | KV453211.1 | 5819297 | 21-scf00417 | 21 |
| AX-158258278 | 21 | 66.37  | KV453211.1 | 5821079 | 21-scf00417 | 21 |
| AX-158258279 | 21 | 66.37  | KV453211.1 | 5823185 | 21-scf00417 | 21 |
| AX-158258286 | 21 | 66.37  | KV453211.1 | 5829379 | 21-scf00417 | 21 |
| AX-158258288 | 21 | 66.37  | KV453211.1 | 5831404 | 21-scf00417 | 21 |
| AX-158258291 | 21 | 66.37  | KV453211.1 | 5832494 | 21-scf00417 | 21 |

|              |    |       |            |         |             |    |
|--------------|----|-------|------------|---------|-------------|----|
| AX-158258293 | 21 | 66.37 | KV453211.1 | 5833968 | 21-scf00417 | 21 |
| AX-158258294 | 21 | 66.37 | KV453211.1 | 5834544 | 21-scf00417 | 21 |
| AX-158258296 | 21 | 66.37 | KV453211.1 | 5837495 | 21-scf00417 | 21 |
| AX-158258304 | 21 | 66.37 | KV453211.1 | 5844320 | 21-scf00417 | 21 |
| AX-158258308 | 21 | 66.37 | KV453211.1 | 5850952 | 21-scf00417 | 21 |
| AX-158258309 | 21 | 66.37 | KV453211.1 | 5852172 | 21-scf00417 | 21 |
| AX-158258311 | 21 | 66.37 | KV453211.1 | 5856630 | 21-scf00417 | 21 |
| AX-158258317 | 21 | 66.37 | KV453211.1 | 5864048 | 21-scf00417 | 21 |
| AX-158258318 | 21 | 66.37 | KV453211.1 | 5864951 | 21-scf00417 | 21 |
| AX-158258320 | 21 | 66.37 | KV453211.1 | 5867055 | 21-scf00417 | 21 |
| AX-158258321 | 21 | 66.37 | KV453211.1 | 5867583 | 21-scf00417 | 21 |
| AX-158258323 | 21 | 66.37 | KV453211.1 | 5869419 | 21-scf00417 | 21 |
| AX-158258326 | 21 | 66.37 | KV453211.1 | 5877781 | 21-scf00417 | 21 |
| AX-158258328 | 21 | 66.37 | KV453211.1 | 5881275 | 21-scf00417 | 21 |
| AX-158258330 | 21 | 66.37 | KV453211.1 | 5882280 | 21-scf00417 | 21 |
| AX-158258332 | 21 | 66.37 | KV453211.1 | 5888427 | 21-scf00417 | 21 |
| AX-158258335 | 21 | 66.37 | KV453211.1 | 5890775 | 21-scf00417 | 21 |
| AX-158258336 | 21 | 66.37 | KV453211.1 | 5891384 | 21-scf00417 | 21 |
| AX-158258337 | 21 | 66.37 | KV453211.1 | 5895891 | 21-scf00417 | 21 |
| AX-158258339 | 21 | 66.37 | KV453211.1 | 5902657 | 21-scf00417 | 21 |
| AX-158258340 | 21 | 66.37 | KV453211.1 | 5904644 | 21-scf00417 | 21 |
| AX-158258341 | 21 | 66.37 | KV453211.1 | 5906710 | 21-scf00417 | 21 |
| AX-158394595 | 21 | 66.37 | KV453211.1 | 5909528 | 21-scf00417 | 21 |
| AX-157759039 | 21 | 66.37 | KV453211.1 | 5919103 | 21-scf00417 | 21 |
| AX-158381058 | 21 | 66.37 | KV453211.1 | 5925302 | 21-scf00417 | 21 |
| AX-158258364 | 21 | 66.37 | KV453211.1 | 5935856 | 21-scf00417 | 21 |
| AX-158258365 | 21 | 66.37 | KV453211.1 | 5936792 | 21-scf00417 | 21 |
| AX-158258366 | 21 | 66.37 | KV453211.1 | 5936993 | 21-scf00417 | 21 |
| AX-158258368 | 21 | 66.37 | KV453211.1 | 5938928 | 21-scf00417 | 21 |
| AX-158258369 | 21 | 66.37 | KV453211.1 | 5939411 | 21-scf00417 | 21 |
| AX-158258370 | 21 | 66.37 | KV453211.1 | 5941826 | 21-scf00417 | 21 |
| AX-158258371 | 21 | 66.37 | KV453211.1 | 5942069 | 21-scf00417 | 21 |
| AX-158258373 | 21 | 66.37 | KV453211.1 | 5943320 | 21-scf00417 | 21 |
| AX-158258374 | 21 | 66.37 | KV453211.1 | 5943552 | 21-scf00417 | 21 |
| AX-158258375 | 21 | 66.37 | KV453211.1 | 5944882 | 21-scf00417 | 21 |
| AX-158258376 | 21 | 66.37 | KV453211.1 | 5945366 | 21-scf00417 | 21 |
| AX-158258377 | 21 | 66.37 | KV453211.1 | 5945725 | 21-scf00417 | 21 |
| AX-157756883 | 21 | 66.37 | KV453211.1 | 5951233 | 21-scf00417 | 21 |
| AX-158258382 | 21 | 66.37 | KV453211.1 | 5952968 | 21-scf00417 | 21 |
| AX-158258384 | 21 | 66.37 | KV453211.1 | 5958222 | 21-scf00417 | 21 |
| AX-158258386 | 21 | 66.37 | KV453211.1 | 5959817 | 21-scf00417 | 21 |
| AX-157842763 | 21 | 66.37 | KV453211.1 | 5960690 | 21-scf00417 | 21 |
| AX-158258388 | 21 | 66.37 | KV453211.1 | 5962089 | 21-scf00417 | 21 |
| AX-158258391 | 21 | 66.37 | KV453211.1 | 5963702 | 21-scf00417 | 21 |
| AX-158258392 | 21 | 66.37 | KV453211.1 | 5964061 | 21-scf00417 | 21 |
| AX-157720799 | 21 | 66.37 | KV453211.1 | 5966730 | 21-scf00417 | 21 |
| AX-158258395 | 21 | 66.37 | KV453211.1 | 5970299 | 21-scf00417 | 21 |
| AX-157748225 | 21 | 66.37 | KV453211.1 | 5972571 | 21-scf00417 | 21 |
| AX-158258397 | 21 | 66.37 | KV453211.1 | 5973425 | 21-scf00417 | 21 |
| AX-158258398 | 21 | 66.37 | KV453211.1 | 5974328 | 21-scf00417 | 21 |
| AX-158258399 | 21 | 66.37 | KV453211.1 | 5975927 | 21-scf00417 | 21 |

|              |    |       |            |         |             |    |
|--------------|----|-------|------------|---------|-------------|----|
| AX-158258402 | 21 | 66.37 | KV453211.1 | 5977516 | 21-scf00417 | 21 |
| AX-158258404 | 21 | 66.37 | KV453211.1 | 5979292 | 21-scf00417 | 21 |
| AX-158258408 | 21 | 66.37 | KV453211.1 | 5985610 | 21-scf00417 | 21 |
| AX-158258409 | 21 | 66.37 | KV453211.1 | 5987608 | 21-scf00417 | 21 |
| AX-158258410 | 21 | 66.37 | KV453211.1 | 5987955 | 21-scf00417 | 21 |
| AX-158258411 | 21 | 66.37 | KV453211.1 | 5989807 | 21-scf00417 | 21 |
| AX-157842764 | 21 | 66.37 | KV453211.1 | 5989878 | 21-scf00417 | 21 |
| AX-158258412 | 21 | 66.37 | KV453211.1 | 5990574 | 21-scf00417 | 21 |
| AX-158258413 | 21 | 66.37 | KV453211.1 | 5991271 | 21-scf00417 | 21 |
| AX-158258416 | 21 | 66.37 | KV453211.1 | 5995365 | 21-scf00417 | 21 |
| AX-158258417 | 21 | 66.37 | KV453211.1 | 5996096 | 21-scf00417 | 21 |
| AX-158258418 | 21 | 66.37 | KV453211.1 | 5997157 | 21-scf00417 | 21 |
| AX-158394596 | 21 | 66.37 | KV453211.1 | 5997419 | 21-scf00417 | 21 |
| AX-158258419 | 21 | 66.37 | KV453211.1 | 5999758 | 21-scf00417 | 21 |
| AX-158258420 | 21 | 66.37 | KV453211.1 | 6000782 | 21-scf00417 | 21 |
| AX-158258421 | 21 | 66.37 | KV453211.1 | 6001599 | 21-scf00417 | 21 |
| AX-158258423 | 21 | 66.37 | KV453211.1 | 6004129 | 21-scf00417 | 21 |
| AX-158258424 | 21 | 66.37 | KV453211.1 | 6004900 | 21-scf00417 | 21 |
| AX-158258425 | 21 | 66.37 | KV453211.1 | 6005874 | 21-scf00417 | 21 |
| AX-158258426 | 21 | 66.37 | KV453211.1 | 6006356 | 21-scf00417 | 21 |
| AX-158258428 | 21 | 66.37 | KV453211.1 | 6008040 | 21-scf00417 | 21 |
| AX-158258431 | 21 | 66.37 | KV453211.1 | 6009900 | 21-scf00417 | 21 |
| AX-158258437 | 21 | 66.37 | KV453211.1 | 6016351 | 21-scf00417 | 21 |
| AX-158258438 | 21 | 66.37 | KV453211.1 | 6017346 | 21-scf00417 | 21 |
| AX-158258440 | 21 | 66.37 | KV453211.1 | 6018767 | 21-scf00417 | 21 |
| AX-158258442 | 21 | 66.37 | KV453211.1 | 6020994 | 21-scf00417 | 21 |
| AX-158258446 | 21 | 66.37 | KV453211.1 | 6024975 | 21-scf00417 | 21 |
| AX-158258447 | 21 | 66.37 | KV453211.1 | 6026154 | 21-scf00417 | 21 |
| AX-158258448 | 21 | 66.37 | KV453211.1 | 6026744 | 21-scf00417 | 21 |
| AX-158258453 | 21 | 66.37 | KV453211.1 | 6031254 | 21-scf00417 | 21 |
| AX-158258457 | 21 | 66.37 | KV453211.1 | 6037514 | 21-scf00417 | 21 |
| AX-158258458 | 21 | 66.37 | KV453211.1 | 6038017 | 21-scf00417 | 21 |
| AX-158258461 | 21 | 66.37 | KV453211.1 | 6040066 | 21-scf00417 | 21 |
| AX-158258462 | 21 | 66.37 | KV453211.1 | 6040782 | 21-scf00417 | 21 |
| AX-158258464 | 21 | 66.37 | KV453211.1 | 6043486 | 21-scf00417 | 21 |
| AX-158258467 | 21 | 66.37 | KV453211.1 | 6046310 | 21-scf00417 | 21 |
| AX-158258475 | 21 | 66.37 | KV453211.1 | 6051553 | 21-scf00417 | 21 |
| AX-158258482 | 21 | 66.37 | KV453211.1 | 6057089 | 21-scf00417 | 21 |
| AX-158258489 | 21 | 66.37 | KV453211.1 | 6065677 | 21-scf00417 | 21 |
| AX-158258493 | 21 | 66.37 | KV453211.1 | 6070174 | 21-scf00417 | 21 |
| AX-158258498 | 21 | 66.37 | KV453211.1 | 6076963 | 21-scf00417 | 21 |
| AX-158258499 | 21 | 66.37 | KV453211.1 | 6077749 | 21-scf00417 | 21 |
| AX-158258500 | 21 | 66.37 | KV453211.1 | 6077895 | 21-scf00417 | 21 |
| AX-158416133 | 21 | 66.37 | KV453211.1 | 6079771 | 21-scf00417 | 21 |
| AX-158258503 | 21 | 66.37 | KV453211.1 | 6080885 | 21-scf00417 | 21 |
| AX-158258505 | 21 | 66.37 | KV453211.1 | 6081874 | 21-scf00417 | 21 |
| AX-158258506 | 21 | 66.37 | KV453211.1 | 6082260 | 21-scf00417 | 21 |
| AX-157872808 | 21 | 66.37 | KV453211.1 | 6082621 | 21-scf00417 | 21 |
| AX-158258507 | 21 | 66.37 | KV453211.1 | 6082742 | 21-scf00417 | 21 |
| AX-158258508 | 21 | 66.37 | KV453211.1 | 6083560 | 21-scf00417 | 21 |
| AX-158258510 | 21 | 66.37 | KV453211.1 | 6087640 | 21-scf00417 | 21 |



|              |    |        |            |         |             |    |
|--------------|----|--------|------------|---------|-------------|----|
| AX-158258511 | 21 | 66.37  | KV453211.1 | 6087885 | 21-scf00417 | 21 |
| AX-158258516 | 21 | 66.37  | KV453211.1 | 6089742 | 21-scf00417 | 21 |
| AX-158258517 | 21 | 66.37  | KV453211.1 | 6090123 | 21-scf00417 | 21 |
| AX-158258518 | 21 | 66.37  | KV453211.1 | 6090970 | 21-scf00417 | 21 |
| AX-158258519 | 21 | 66.37  | KV453211.1 | 6094176 | 21-scf00417 | 21 |
| AX-158258520 | 21 | 66.37  | KV453211.1 | 6095758 | 21-scf00417 | 21 |
| AX-158258523 | 21 | 66.37  | KV453211.1 | 6097148 | 21-scf00417 | 21 |
| AX-158258525 | 21 | 66.37  | KV453211.1 | 6097649 | 21-scf00417 | 21 |
| AX-158258527 | 21 | 66.37  | KV453211.1 | 6098416 | 21-scf00417 | 21 |
| AX-158258528 | 21 | 66.37  | KV453211.1 | 6099352 | 21-scf00417 | 21 |
| AX-158258531 | 21 | 66.37  | KV453211.1 | 6101457 | 21-scf00417 | 21 |
| AX-158258532 | 21 | 66.37  | KV453211.1 | 6101992 | 21-scf00417 | 21 |
| AX-158258533 | 21 | 66.37  | KV453211.1 | 6102656 | 21-scf00417 | 21 |
| AX-158258563 | 21 | 66.37  | KV453211.1 | 6147894 | 21-scf00417 | 21 |
| AX-158258606 | 21 | 66.37  | KV453211.1 | 6201688 | 21-scf00417 | 21 |
| AX-158258652 | 21 | 66.37  | KV453211.1 | 6255586 | 21-scf00417 | 21 |
| AX-158258671 | 21 | 66.37  | KV453211.1 | 6286031 | 21-scf00417 | 21 |
| AX-157842776 | 21 | 66.37  | KV453211.1 | 6364672 | 21-scf00417 | 21 |
| AX-158258763 | 21 | 66.37  | KV453211.1 | 6407083 | 21-scf00417 | 21 |
| AX-157842816 | 21 | 66.37  | KV453211.1 | 6737035 | 21-scf00417 | 21 |
| AX-157880363 | 21 | 66.37  | KV453211.1 | 6764815 | 21-scf00417 | 21 |
| AX-157842828 | 21 | 66.37  | KV453211.1 | 6794946 | 21-scf00417 | 21 |
| AX-158259073 | 21 | 66.37  | KV453211.1 | 6803573 | 21-scf00417 | 21 |
| AX-158259074 | 21 | 66.37  | KV453211.1 | 6805321 | 21-scf00417 | 21 |
| AX-158259088 | 21 | 66.37  | KV453211.1 | 6831434 | 21-scf00417 | 21 |
| AX-158259112 | 21 | 66.37  | KV453211.1 | 6861532 | 21-scf00417 | 21 |
| AX-158259161 | 21 | 66.37  | KV453211.1 | 6942240 | 21-scf00417 | 21 |
| AX-157872817 | 21 | 66.37  | KV453211.1 | 6969182 | 21-scf00417 | 21 |
| AX-158259222 | 21 | 66.37  | KV453211.1 | 7055972 | 21-scf00417 | 21 |
| AX-158259223 | 21 | 66.37  | KV453211.1 | 7056936 | 21-scf00417 | 21 |
| AX-158259274 | 21 | 66.37  | KV453211.1 | 7171750 | 21-scf00417 | 21 |
| AX-158259283 | 21 | 66.37  | KV453211.1 | 7182844 | 21-scf00417 | 21 |
| AX-158259357 | 21 | 66.37  | KV453211.1 | 7347293 | 21-scf00417 | 21 |
| AX-158259422 | 21 | 66.37  | KV453211.1 | 7462107 | 21-scf00417 | 21 |
| AX-158259482 | 21 | 66.37  | KV453211.1 | 7575013 | 21-scf00417 | 21 |
| AX-158259025 | 21 | 66.406 | KV453211.1 | 6729048 | 21-scf00417 | 21 |
| AX-158258057 | 21 | 66.479 | KV453211.1 | 5453019 | 21-scf00417 | 21 |
| AX-158258165 | 21 | 66.479 | KV453211.1 | 5637282 | 21-scf00417 | 21 |
| AX-158258185 | 21 | 66.479 | KV453211.1 | 5671368 | 21-scf00417 | 21 |
| AX-158258200 | 21 | 66.479 | KV453211.1 | 5697328 | 21-scf00417 | 21 |
| AX-158258205 | 21 | 66.479 | KV453211.1 | 5705348 | 21-scf00417 | 21 |
| AX-157842770 | 21 | 66.479 | KV453211.1 | 6159578 | 21-scf00417 | 21 |
| AX-157842771 | 21 | 66.479 | KV453211.1 | 6181477 | 21-scf00417 | 21 |
| AX-158258598 | 21 | 66.479 | KV453211.1 | 6190974 | 21-scf00417 | 21 |
| AX-158258609 | 21 | 66.479 | KV453211.1 | 6205933 | 21-scf00417 | 21 |
| AX-158258614 | 21 | 66.479 | KV453211.1 | 6214865 | 21-scf00417 | 21 |
| AX-158258621 | 21 | 66.479 | KV453211.1 | 6220162 | 21-scf00417 | 21 |
| AX-158258677 | 21 | 66.479 | KV453211.1 | 6297528 | 21-scf00417 | 21 |
| AX-158258706 | 21 | 66.479 | KV453211.1 | 6328954 | 21-scf00417 | 21 |
| AX-158258793 | 21 | 66.479 | KV453211.1 | 6442740 | 21-scf00417 | 21 |
| AX-158258802 | 21 | 66.479 | KV453211.1 | 6456033 | 21-scf00417 | 21 |

|              |    |        |            |         |             |    |
|--------------|----|--------|------------|---------|-------------|----|
| AX-158258814 | 21 | 66.479 | KV453211.1 | 6473052 | 21-scf00417 | 21 |
| AX-158258883 | 21 | 66.479 | KV453211.1 | 6554489 | 21-scf00417 | 21 |
| AX-158258961 | 21 | 66.479 | KV453211.1 | 6646955 | 21-scf00417 | 21 |
| AX-158258980 | 21 | 66.479 | KV453211.1 | 6674353 | 21-scf00417 | 21 |
| AX-158258987 | 21 | 66.479 | KV453211.1 | 6679995 | 21-scf00417 | 21 |
| AX-158259012 | 21 | 66.479 | KV453211.1 | 6713515 | 21-scf00417 | 21 |
| AX-158387196 | 21 | 66.479 | KV453211.1 | 6747236 | 21-scf00417 | 21 |
| AX-157842821 | 21 | 66.479 | KV453211.1 | 6749258 | 21-scf00417 | 21 |
| AX-158259036 | 21 | 66.479 | KV453211.1 | 6753098 | 21-scf00417 | 21 |
| AX-158259037 | 21 | 66.479 | KV453211.1 | 6753664 | 21-scf00417 | 21 |
| AX-158259039 | 21 | 66.479 | KV453211.1 | 6754595 | 21-scf00417 | 21 |
| AX-158259040 | 21 | 66.479 | KV453211.1 | 6758354 | 21-scf00417 | 21 |
| AX-158259055 | 21 | 66.479 | KV453211.1 | 6775270 | 21-scf00417 | 21 |
| AX-158259056 | 21 | 66.479 | KV453211.1 | 6776943 | 21-scf00417 | 21 |
| AX-158259058 | 21 | 66.479 | KV453211.1 | 6779766 | 21-scf00417 | 21 |
| AX-158259059 | 21 | 66.479 | KV453211.1 | 6781442 | 21-scf00417 | 21 |
| AX-158259063 | 21 | 66.479 | KV453211.1 | 6784804 | 21-scf00417 | 21 |
| AX-158259077 | 21 | 66.479 | KV453211.1 | 6817559 | 21-scf00417 | 21 |
| AX-158259084 | 21 | 66.479 | KV453211.1 | 6827064 | 21-scf00417 | 21 |
| AX-157842831 | 21 | 66.479 | KV453211.1 | 6834580 | 21-scf00417 | 21 |
| AX-158259095 | 21 | 66.479 | KV453211.1 | 6840111 | 21-scf00417 | 21 |
| AX-158259145 | 21 | 66.479 | KV453211.1 | 6897269 | 21-scf00417 | 21 |
| AX-157750469 | 21 | 66.479 | KV453211.1 | 6928236 | 21-scf00417 | 21 |
| AX-158259157 | 21 | 66.479 | KV453211.1 | 6935157 | 21-scf00417 | 21 |
| AX-158259167 | 21 | 66.479 | KV453211.1 | 6951644 | 21-scf00417 | 21 |
| AX-157842836 | 21 | 66.479 | KV453211.1 | 6955157 | 21-scf00417 | 21 |
| AX-158411064 | 21 | 66.479 | KV453211.1 | 6958529 | 21-scf00417 | 21 |
| AX-158259171 | 21 | 66.479 | KV453211.1 | 6961090 | 21-scf00417 | 21 |
| AX-158259172 | 21 | 66.479 | KV453211.1 | 6962937 | 21-scf00417 | 21 |
| AX-158259174 | 21 | 66.479 | KV453211.1 | 6966364 | 21-scf00417 | 21 |
| AX-158259177 | 21 | 66.479 | KV453211.1 | 6975502 | 21-scf00417 | 21 |
| AX-157842837 | 21 | 66.479 | KV453211.1 | 6975965 | 21-scf00417 | 21 |
| AX-158259181 | 21 | 66.479 | KV453211.1 | 6978910 | 21-scf00417 | 21 |
| AX-158259182 | 21 | 66.479 | KV453211.1 | 6982440 | 21-scf00417 | 21 |
| AX-158259217 | 21 | 66.479 | KV453211.1 | 7045696 | 21-scf00417 | 21 |
| AX-158259218 | 21 | 66.479 | KV453211.1 | 7047976 | 21-scf00417 | 21 |
| AX-157842846 | 21 | 66.479 | KV453211.1 | 7073195 | 21-scf00417 | 21 |
| AX-158259226 | 21 | 66.479 | KV453211.1 | 7081232 | 21-scf00417 | 21 |
| AX-158259227 | 21 | 66.479 | KV453211.1 | 7083676 | 21-scf00417 | 21 |
| AX-158259230 | 21 | 66.479 | KV453211.1 | 7093839 | 21-scf00417 | 21 |
| AX-157842847 | 21 | 66.479 | KV453211.1 | 7096499 | 21-scf00417 | 21 |
| AX-158259231 | 21 | 66.479 | KV453211.1 | 7096537 | 21-scf00417 | 21 |
| AX-157842848 | 21 | 66.479 | KV453211.1 | 7097123 | 21-scf00417 | 21 |
| AX-158259235 | 21 | 66.479 | KV453211.1 | 7108485 | 21-scf00417 | 21 |
| AX-157842851 | 21 | 66.479 | KV453211.1 | 7112209 | 21-scf00417 | 21 |
| AX-157842853 | 21 | 66.479 | KV453211.1 | 7119349 | 21-scf00417 | 21 |
| AX-158259240 | 21 | 66.479 | KV453211.1 | 7125179 | 21-scf00417 | 21 |
| AX-158259242 | 21 | 66.479 | KV453211.1 | 7127562 | 21-scf00417 | 21 |
| AX-158259244 | 21 | 66.479 | KV453211.1 | 7131013 | 21-scf00417 | 21 |
| AX-158394610 | 21 | 66.479 | KV453211.1 | 7135432 | 21-scf00417 | 21 |
| AX-158259248 | 21 | 66.479 | KV453211.1 | 7137063 | 21-scf00417 | 21 |

|              |    |        |            |         |             |    |
|--------------|----|--------|------------|---------|-------------|----|
| AX-158259249 | 21 | 66.479 | KV453211.1 | 7137422 | 21-scf00417 | 21 |
| AX-158259250 | 21 | 66.479 | KV453211.1 | 7138481 | 21-scf00417 | 21 |
| AX-158259251 | 21 | 66.479 | KV453211.1 | 7139967 | 21-scf00417 | 21 |
| AX-158259253 | 21 | 66.479 | KV453211.1 | 7141531 | 21-scf00417 | 21 |
| AX-158259258 | 21 | 66.479 | KV453211.1 | 7151783 | 21-scf00417 | 21 |
| AX-158259263 | 21 | 66.479 | KV453211.1 | 7157099 | 21-scf00417 | 21 |
| AX-158259264 | 21 | 66.479 | KV453211.1 | 7157331 | 21-scf00417 | 21 |
| AX-158259265 | 21 | 66.479 | KV453211.1 | 7158528 | 21-scf00417 | 21 |
| AX-158259266 | 21 | 66.479 | KV453211.1 | 7158892 | 21-scf00417 | 21 |
| AX-158259267 | 21 | 66.479 | KV453211.1 | 7159755 | 21-scf00417 | 21 |
| AX-158259268 | 21 | 66.479 | KV453211.1 | 7162811 | 21-scf00417 | 21 |
| AX-158259269 | 21 | 66.479 | KV453211.1 | 7164829 | 21-scf00417 | 21 |
| AX-158259270 | 21 | 66.479 | KV453211.1 | 7167390 | 21-scf00417 | 21 |
| AX-157741290 | 21 | 66.479 | KV453211.1 | 7168644 | 21-scf00417 | 21 |
| AX-158259276 | 21 | 66.479 | KV453211.1 | 7172937 | 21-scf00417 | 21 |
| AX-157842856 | 21 | 66.479 | KV453211.1 | 7173784 | 21-scf00417 | 21 |
| AX-158259281 | 21 | 66.479 | KV453211.1 | 7177009 | 21-scf00417 | 21 |
| AX-158259282 | 21 | 66.479 | KV453211.1 | 7177831 | 21-scf00417 | 21 |
| AX-158262501 | 21 | 66.479 | KV453213.1 | 2665982 | 21-scf00419 | 21 |
| AX-158262696 | 21 | 66.479 | KV453213.1 | 2928131 | 21-scf00419 | 21 |
| AX-158262732 | 21 | 66.479 | KV453213.1 | 2962719 | 21-scf00419 | 21 |
| AX-157752498 | 21 | 66.479 | KV453213.1 | 3169655 | 21-scf00419 | 21 |
| AX-158263070 | 21 | 66.479 | KV453213.1 | 3363359 | 21-scf00419 | 21 |
| AX-157755053 | 21 | 66.479 | KV453213.1 | 3539875 | 21-scf00419 | 21 |
| AX-158423407 | 21 | 66.48  | KV453211.1 | 7208360 | 21-scf00417 | 21 |
| AX-158259292 | 21 | 66.805 | KV453211.1 | 7212878 | 21-scf00417 | 21 |
| AX-158259293 | 21 | 66.806 | KV453211.1 | 7221331 | 21-scf00417 | 21 |
| AX-158259294 | 21 | 66.806 | KV453211.1 | 7222954 | 21-scf00417 | 21 |
| AX-158259295 | 21 | 66.806 | KV453211.1 | 7223621 | 21-scf00417 | 21 |
| AX-158381062 | 21 | 66.806 | KV453211.1 | 7227417 | 21-scf00417 | 21 |
| AX-157842862 | 21 | 66.806 | KV453211.1 | 7227860 | 21-scf00417 | 21 |
| AX-158259300 | 21 | 66.806 | KV453211.1 | 7234338 | 21-scf00417 | 21 |
| AX-158259297 | 21 | 66.916 | KV453211.1 | 7229956 | 21-scf00417 | 21 |
| AX-157750810 | 21 | 66.916 | KV453211.1 | 7230011 | 21-scf00417 | 21 |
| AX-158259298 | 21 | 66.916 | KV453211.1 | 7230538 | 21-scf00417 | 21 |
| AX-158259301 | 21 | 66.916 | KV453211.1 | 7234562 | 21-scf00417 | 21 |
| AX-157717615 | 21 | 66.916 | KV453211.1 | 7236929 | 21-scf00417 | 21 |
| AX-158259302 | 21 | 66.916 | KV453211.1 | 7237791 | 21-scf00417 | 21 |
| AX-157709043 | 21 | 66.916 | KV453211.1 | 7238033 | 21-scf00417 | 21 |
| AX-158259304 | 21 | 66.916 | KV453211.1 | 7242271 | 21-scf00417 | 21 |
| AX-158259305 | 21 | 66.916 | KV453211.1 | 7243664 | 21-scf00417 | 21 |
| AX-158259337 | 21 | 66.916 | KV453211.1 | 7316052 | 21-scf00417 | 21 |
| AX-158259341 | 21 | 66.916 | KV453211.1 | 7326484 | 21-scf00417 | 21 |
| AX-158259382 | 21 | 66.916 | KV453211.1 | 7390110 | 21-scf00417 | 21 |
| AX-157745117 | 21 | 66.916 | KV453211.1 | 7400715 | 21-scf00417 | 21 |
| AX-157842865 | 21 | 66.972 | KV453211.1 | 7249280 | 21-scf00417 | 21 |
| AX-158259308 | 21 | 67.025 | KV453211.1 | 7254315 | 21-scf00417 | 21 |
| AX-157771972 | 21 | 67.025 | KV453211.1 | 7257830 | 21-scf00417 | 21 |
| AX-158259311 | 21 | 67.025 | KV453211.1 | 7258045 | 21-scf00417 | 21 |
| AX-158259313 | 21 | 67.025 | KV453211.1 | 7260881 | 21-scf00417 | 21 |
| AX-158259324 | 21 | 67.025 | KV453211.1 | 7282000 | 21-scf00417 | 21 |

|              |    |        |            |         |             |    |
|--------------|----|--------|------------|---------|-------------|----|
| AX-158259424 | 21 | 67.025 | KV453211.1 | 7470105 | 21-scf00417 | 21 |
| AX-158259319 | 21 | 67.134 | KV453211.1 | 7269853 | 21-scf00417 | 21 |
| AX-157771536 | 21 | 67.243 | KV453211.1 | 4889305 | 21-scf00417 | 21 |
| AX-158387173 | 21 | 67.243 | KV453211.1 | 4897176 | 21-scf00417 | 21 |
| AX-158416106 | 21 | 67.243 | KV453211.1 | 4962332 | 21-scf00417 | 21 |
| AX-157754012 | 21 | 67.243 | KV453211.1 | 5215038 | 21-scf00417 | 21 |
| AX-158258033 | 21 | 67.243 | KV453211.1 | 5398012 | 21-scf00417 | 21 |
| AX-158258217 | 21 | 67.243 | KV453211.1 | 5726080 | 21-scf00417 | 21 |
| AX-157867416 | 21 | 67.243 | KV453211.1 | 5758973 | 21-scf00417 | 21 |
| AX-158258313 | 21 | 67.243 | KV453211.1 | 5858727 | 21-scf00417 | 21 |
| AX-158258314 | 21 | 67.243 | KV453211.1 | 5859397 | 21-scf00417 | 21 |
| AX-157880367 | 21 | 67.243 | KV453211.1 | 6844768 | 21-scf00417 | 21 |
| AX-157880368 | 21 | 67.243 | KV453211.1 | 6846854 | 21-scf00417 | 21 |
| AX-158259208 | 21 | 67.243 | KV453211.1 | 7021389 | 21-scf00417 | 21 |
| AX-158259229 | 21 | 67.243 | KV453211.1 | 7091688 | 21-scf00417 | 21 |
| AX-157887719 | 21 | 67.243 | KV453211.1 | 7098601 | 21-scf00417 | 21 |
| AX-157842868 | 21 | 67.243 | KV453211.1 | 7278113 | 21-scf00417 | 21 |
| AX-158259325 | 21 | 67.243 | KV453211.1 | 7286073 | 21-scf00417 | 21 |
| AX-157726445 | 21 | 67.243 | KV453211.1 | 7286168 | 21-scf00417 | 21 |
| AX-157747034 | 21 | 67.243 | KV453211.1 | 7288209 | 21-scf00417 | 21 |
| AX-158259327 | 21 | 67.243 | KV453211.1 | 7289063 | 21-scf00417 | 21 |
| AX-158259332 | 21 | 67.243 | KV453211.1 | 7295711 | 21-scf00417 | 21 |
| AX-158259334 | 21 | 67.243 | KV453211.1 | 7303134 | 21-scf00417 | 21 |
| AX-158259340 | 21 | 67.243 | KV453211.1 | 7324788 | 21-scf00417 | 21 |
| AX-157768232 | 21 | 67.243 | KV453211.1 | 7328029 | 21-scf00417 | 21 |
| AX-158259347 | 21 | 67.243 | KV453211.1 | 7331608 | 21-scf00417 | 21 |
| AX-157859948 | 21 | 67.243 | KV453211.1 | 7333685 | 21-scf00417 | 21 |
| AX-158259351 | 21 | 67.243 | KV453211.1 | 7336592 | 21-scf00417 | 21 |
| AX-157708424 | 21 | 67.243 | KV453211.1 | 7336718 | 21-scf00417 | 21 |
| AX-158259352 | 21 | 67.243 | KV453211.1 | 7342610 | 21-scf00417 | 21 |
| AX-158259353 | 21 | 67.243 | KV453211.1 | 7344103 | 21-scf00417 | 21 |
| AX-158259354 | 21 | 67.243 | KV453211.1 | 7344375 | 21-scf00417 | 21 |
| AX-158259359 | 21 | 67.243 | KV453211.1 | 7354010 | 21-scf00417 | 21 |
| AX-158259360 | 21 | 67.243 | KV453211.1 | 7356855 | 21-scf00417 | 21 |
| AX-158259361 | 21 | 67.243 | KV453211.1 | 7357359 | 21-scf00417 | 21 |
| AX-158259362 | 21 | 67.243 | KV453211.1 | 7358306 | 21-scf00417 | 21 |
| AX-158259363 | 21 | 67.243 | KV453211.1 | 7358851 | 21-scf00417 | 21 |
| AX-158259365 | 21 | 67.243 | KV453211.1 | 7361979 | 21-scf00417 | 21 |
| AX-158259366 | 21 | 67.243 | KV453211.1 | 7363343 | 21-scf00417 | 21 |
| AX-158381063 | 21 | 67.243 | KV453211.1 | 7363863 | 21-scf00417 | 21 |
| AX-158411068 | 21 | 67.243 | KV453211.1 | 7364482 | 21-scf00417 | 21 |
| AX-158416159 | 21 | 67.243 | KV453211.1 | 7364521 | 21-scf00417 | 21 |
| AX-158416160 | 21 | 67.243 | KV453211.1 | 7364767 | 21-scf00417 | 21 |
| AX-158416161 | 21 | 67.243 | KV453211.1 | 7364890 | 21-scf00417 | 21 |
| AX-158259367 | 21 | 67.243 | KV453211.1 | 7369769 | 21-scf00417 | 21 |
| AX-158259373 | 21 | 67.243 | KV453211.1 | 7377400 | 21-scf00417 | 21 |
| AX-158259376 | 21 | 67.243 | KV453211.1 | 7378806 | 21-scf00417 | 21 |
| AX-157722396 | 21 | 67.243 | KV453211.1 | 7389427 | 21-scf00417 | 21 |
| AX-158259381 | 21 | 67.243 | KV453211.1 | 7389520 | 21-scf00417 | 21 |
| AX-157700193 | 21 | 67.243 | KV453211.1 | 7396336 | 21-scf00417 | 21 |
| AX-157842877 | 21 | 67.243 | KV453211.1 | 7402335 | 21-scf00417 | 21 |

|              |    |        |            |         |             |    |
|--------------|----|--------|------------|---------|-------------|----|
| AX-158259385 | 21 | 67.243 | KV453211.1 | 7403720 | 21-scf00417 | 21 |
| AX-158259387 | 21 | 67.243 | KV453211.1 | 7406014 | 21-scf00417 | 21 |
| AX-158259402 | 21 | 67.243 | KV453211.1 | 7432301 | 21-scf00417 | 21 |
| AX-158259409 | 21 | 67.243 | KV453211.1 | 7443848 | 21-scf00417 | 21 |
| AX-158259411 | 21 | 67.243 | KV453211.1 | 7445598 | 21-scf00417 | 21 |
| AX-157863858 | 21 | 67.243 | KV453211.1 | 7469482 | 21-scf00417 | 21 |
| AX-158259444 | 21 | 67.243 | KV453211.1 | 7501085 | 21-scf00417 | 21 |
| AX-158259450 | 21 | 67.243 | KV453211.1 | 7516758 | 21-scf00417 | 21 |
| AX-158259465 | 21 | 67.243 | KV453211.1 | 7547954 | 21-scf00417 | 21 |
| AX-157842899 | 21 | 67.243 | KV453211.1 | 7614096 | 21-scf00417 | 21 |
| AX-158259706 | 21 | 67.243 | KV453211.1 | 7937164 | 21-scf00417 | 21 |
| AX-158259984 | 21 | 67.243 | KV453211.1 | 8345740 | 21-scf00417 | 21 |
| AX-158260263 | 21 | 67.243 | KV453211.1 | 8740878 | 21-scf00417 | 21 |
| AX-157694262 | 21 | 67.243 | KV453211.1 | 8756967 | 21-scf00417 | 21 |
| AX-158258390 | 21 | 67.353 | KV453211.1 | 5963232 | 21-scf00417 | 21 |
| AX-158259042 | 21 | 67.353 | KV453211.1 | 6758902 | 21-scf00417 | 21 |
| AX-158259309 | 21 | 67.353 | KV453211.1 | 7255569 | 21-scf00417 | 21 |
| AX-158259317 | 21 | 67.353 | KV453211.1 | 7267617 | 21-scf00417 | 21 |
| AX-158259343 | 21 | 67.353 | KV453211.1 | 7327594 | 21-scf00417 | 21 |
| AX-158259364 | 21 | 67.353 | KV453211.1 | 7359575 | 21-scf00417 | 21 |
| AX-158416158 | 21 | 67.353 | KV453211.1 | 7364098 | 21-scf00417 | 21 |
| AX-158259374 | 21 | 67.353 | KV453211.1 | 7378087 | 21-scf00417 | 21 |
| AX-158259375 | 21 | 67.353 | KV453211.1 | 7378408 | 21-scf00417 | 21 |
| AX-157743919 | 21 | 67.353 | KV453211.1 | 7386761 | 21-scf00417 | 21 |
| AX-158259386 | 21 | 67.353 | KV453211.1 | 7404930 | 21-scf00417 | 21 |
| AX-158259390 | 21 | 67.353 | KV453211.1 | 7408634 | 21-scf00417 | 21 |
| AX-158259391 | 21 | 67.353 | KV453211.1 | 7409434 | 21-scf00417 | 21 |
| AX-157867418 | 21 | 67.353 | KV453211.1 | 7409775 | 21-scf00417 | 21 |
| AX-158259392 | 21 | 67.353 | KV453211.1 | 7410002 | 21-scf00417 | 21 |
| AX-158259393 | 21 | 67.353 | KV453211.1 | 7411689 | 21-scf00417 | 21 |
| AX-158259394 | 21 | 67.353 | KV453211.1 | 7412676 | 21-scf00417 | 21 |
| AX-157867419 | 21 | 67.353 | KV453211.1 | 7416423 | 21-scf00417 | 21 |
| AX-158259396 | 21 | 67.353 | KV453211.1 | 7417809 | 21-scf00417 | 21 |
| AX-158416166 | 21 | 67.353 | KV453211.1 | 7425948 | 21-scf00417 | 21 |
| AX-157743504 | 21 | 67.353 | KV453211.1 | 7430760 | 21-scf00417 | 21 |
| AX-158259408 | 21 | 67.353 | KV453211.1 | 7439144 | 21-scf00417 | 21 |
| AX-157867420 | 21 | 67.353 | KV453211.1 | 7446403 | 21-scf00417 | 21 |
| AX-158259412 | 21 | 67.353 | KV453211.1 | 7447164 | 21-scf00417 | 21 |
| AX-158259413 | 21 | 67.353 | KV453211.1 | 7451031 | 21-scf00417 | 21 |
| AX-158259416 | 21 | 67.353 | KV453211.1 | 7454860 | 21-scf00417 | 21 |
| AX-158259417 | 21 | 67.353 | KV453211.1 | 7456831 | 21-scf00417 | 21 |
| AX-158259418 | 21 | 67.353 | KV453211.1 | 7457593 | 21-scf00417 | 21 |
| AX-157714841 | 21 | 67.353 | KV453211.1 | 7457980 | 21-scf00417 | 21 |
| AX-158259419 | 21 | 67.353 | KV453211.1 | 7458351 | 21-scf00417 | 21 |
| AX-158259425 | 21 | 67.353 | KV453211.1 | 7470463 | 21-scf00417 | 21 |
| AX-158259426 | 21 | 67.353 | KV453211.1 | 7470914 | 21-scf00417 | 21 |
| AX-158259428 | 21 | 67.353 | KV453211.1 | 7476936 | 21-scf00417 | 21 |
| AX-157842879 | 21 | 67.353 | KV453211.1 | 7478979 | 21-scf00417 | 21 |
| AX-158259430 | 21 | 67.353 | KV453211.1 | 7479769 | 21-scf00417 | 21 |
| AX-158259437 | 21 | 67.353 | KV453211.1 | 7490855 | 21-scf00417 | 21 |
| AX-158259448 | 21 | 67.353 | KV453211.1 | 7511783 | 21-scf00417 | 21 |

|              |    |        |             |         |             |    |
|--------------|----|--------|-------------|---------|-------------|----|
| AX-158259460 | 21 | 67.353 | KV453211.1  | 7535090 | 21-scf00417 | 21 |
| AX-158259476 | 21 | 67.353 | KV453211.1  | 7567684 | 21-scf00417 | 21 |
| AX-158259558 | 21 | 67.353 | KV453211.1  | 7691753 | 21-scf00417 | 21 |
| AX-158259431 | 21 | 67.439 | KV453211.1  | 7480374 | 21-scf00417 | 21 |
| AX-158259372 | 21 | 67.497 | KV453211.1  | 7374781 | 21-scf00417 | 21 |
| AX-158259433 | 21 | 67.497 | KV453211.1  | 7483146 | 21-scf00417 | 21 |
| AX-158257721 | 21 | 67.571 | KV453211.1  | 4947500 | 21-scf00417 | 21 |
| AX-158259421 | 21 | 67.571 | KV453211.1  | 7461824 | 21-scf00417 | 21 |
| AX-157867421 | 21 | 67.571 | KV453211.1  | 7481104 | 21-scf00417 | 21 |
| AX-157867422 | 21 | 67.571 | KV453211.1  | 7512107 | 21-scf00417 | 21 |
| AX-157710198 | 21 | 67.571 | KV453211.1  | 7520681 | 21-scf00417 | 21 |
| AX-158387200 | 21 | 67.571 | KV453211.1  | 7522746 | 21-scf00417 | 21 |
| AX-158259452 | 21 | 67.571 | KV453211.1  | 7524148 | 21-scf00417 | 21 |
| AX-157842882 | 21 | 67.571 | KV453211.1  | 7524555 | 21-scf00417 | 21 |
| AX-157727221 | 21 | 67.571 | KV453211.1  | 7524998 | 21-scf00417 | 21 |
| AX-158259453 | 21 | 67.571 | KV453211.1  | 7525503 | 21-scf00417 | 21 |
| AX-157722189 | 21 | 67.571 | KV453211.1  | 7527296 | 21-scf00417 | 21 |
| AX-158259456 | 21 | 67.571 | KV453211.1  | 7529926 | 21-scf00417 | 21 |
| AX-157842884 | 21 | 67.571 | KV453211.1  | 7530422 | 21-scf00417 | 21 |
| AX-158259457 | 21 | 67.571 | KV453211.1  | 7530629 | 21-scf00417 | 21 |
| AX-158259459 | 21 | 67.571 | KV453211.1  | 7533250 | 21-scf00417 | 21 |
| AX-158259462 | 21 | 67.571 | KV453211.1  | 7539811 | 21-scf00417 | 21 |
| AX-158259467 | 21 | 67.571 | KV453211.1  | 7550113 | 21-scf00417 | 21 |
| AX-158259468 | 21 | 67.571 | KV453211.1  | 7551838 | 21-scf00417 | 21 |
| AX-158259469 | 21 | 67.571 | KV453211.1  | 7554311 | 21-scf00417 | 21 |
| AX-158259470 | 21 | 67.571 | KV453211.1  | 7556512 | 21-scf00417 | 21 |
| AX-158259471 | 21 | 67.571 | KV453211.1  | 7556863 | 21-scf00417 | 21 |
| AX-158416167 | 21 | 67.571 | KV453211.1  | 7559332 | 21-scf00417 | 21 |
| AX-157842885 | 21 | 67.571 | KV453211.1  | 7560361 | 21-scf00417 | 21 |
| AX-158259478 | 21 | 67.571 | KV453211.1  | 7572972 | 21-scf00417 | 21 |
| AX-158259479 | 21 | 67.571 | KV453211.1  | 7573284 | 21-scf00417 | 21 |
| AX-158259480 | 21 | 67.571 | KV453211.1  | 7573706 | 21-scf00417 | 21 |
| AX-157842888 | 21 | 67.571 | KV453211.1  | 7575492 | 21-scf00417 | 21 |
| AX-157842889 | 21 | 67.571 | KV453211.1  | 7577721 | 21-scf00417 | 21 |
| AX-158259483 | 21 | 67.571 | KV453211.1  | 7578563 | 21-scf00417 | 21 |
| AX-157744243 | 21 | 67.571 | KV453211.1  | 7579641 | 21-scf00417 | 21 |
| AX-158259489 | 21 | 67.571 | KV453211.1  | 7586186 | 21-scf00417 | 21 |
| AX-157842891 | 21 | 67.571 | KV453211.1  | 7586435 | 21-scf00417 | 21 |
| AX-158259490 | 21 | 67.571 | KV453211.1  | 7587038 | 21-scf00417 | 21 |
| AX-158259491 | 21 | 67.571 | KV453211.1  | 7589036 | 21-scf00417 | 21 |
| AX-158259492 | 21 | 67.571 | KV453211.1  | 7590045 | 21-scf00417 | 21 |
| AX-158259493 | 21 | 67.571 | KV453211.1  | 7591118 | 21-scf00417 | 21 |
| AX-158259496 | 21 | 67.571 | KV453211.1  | 7594656 | 21-scf00417 | 21 |
| AX-157842896 | 21 | 67.571 | KV453211.1  | 7595181 | 21-scf00417 | 21 |
| AX-158259497 | 21 | 67.571 | KV453211.1  | 7600353 | 21-scf00417 | 21 |
| AX-157842898 | 21 | 67.571 | KV453211.1  | 7613667 | 21-scf00417 | 21 |
| AX-157707322 | 21 | 67.618 | 3ML01034012 | 106     | scf09682_1  | UN |
| AX-157723993 | 21 | 67.68  | KV453211.1  | 7553709 | 21-scf00417 | 21 |
| AX-157842897 | 21 | 67.68  | KV453211.1  | 7605037 | 21-scf00417 | 21 |
| AX-158259498 | 21 | 67.68  | KV453211.1  | 7606303 | 21-scf00417 | 21 |
| AX-158259499 | 21 | 67.68  | KV453211.1  | 7609105 | 21-scf00417 | 21 |

|              |    |        |            |         |             |    |
|--------------|----|--------|------------|---------|-------------|----|
| AX-158259500 | 21 | 67.68  | KV453211.1 | 7609715 | 21-scf00417 | 21 |
| AX-158259502 | 21 | 67.68  | KV453211.1 | 7611641 | 21-scf00417 | 21 |
| AX-157755774 | 21 | 67.68  | KV453211.1 | 7611730 | 21-scf00417 | 21 |
| AX-158259503 | 21 | 67.68  | KV453211.1 | 7611936 | 21-scf00417 | 21 |
| AX-158259506 | 21 | 68.007 | KV453211.1 | 7619936 | 21-scf00417 | 21 |
| AX-158259507 | 21 | 68.008 | KV453211.1 | 7621163 | 21-scf00417 | 21 |
| AX-157872824 | 21 | 68.008 | KV453211.1 | 7624600 | 21-scf00417 | 21 |
| AX-158259508 | 21 | 68.064 | KV453211.1 | 7626532 | 21-scf00417 | 21 |
| AX-158416169 | 21 | 68.117 | KV453211.1 | 7618269 | 21-scf00417 | 21 |
| AX-157755135 | 21 | 68.117 | KV453211.1 | 7630435 | 21-scf00417 | 21 |
| AX-157859950 | 21 | 68.117 | KV453211.1 | 7630817 | 21-scf00417 | 21 |
| AX-157714558 | 21 | 68.117 | KV453211.1 | 7634318 | 21-scf00417 | 21 |
| AX-158259517 | 21 | 68.117 | KV453211.1 | 7635584 | 21-scf00417 | 21 |
| AX-158259521 | 21 | 68.117 | KV453211.1 | 7638945 | 21-scf00417 | 21 |
| AX-158259526 | 21 | 68.117 | KV453211.1 | 7642655 | 21-scf00417 | 21 |
| AX-158259527 | 21 | 68.117 | KV453211.1 | 7643230 | 21-scf00417 | 21 |
| AX-157842900 | 21 | 68.117 | KV453211.1 | 7644030 | 21-scf00417 | 21 |
| AX-157842902 | 21 | 68.118 | KV453211.1 | 7654703 | 21-scf00417 | 21 |
| AX-158259531 | 21 | 68.535 | KV453211.1 | 7655963 | 21-scf00417 | 21 |
| AX-158259533 | 21 | 68.535 | KV453211.1 | 7657689 | 21-scf00417 | 21 |
| AX-158259534 | 21 | 68.535 | KV453211.1 | 7661009 | 21-scf00417 | 21 |
| AX-158259535 | 21 | 68.535 | KV453211.1 | 7661822 | 21-scf00417 | 21 |
| AX-158259536 | 21 | 68.535 | KV453211.1 | 7662244 | 21-scf00417 | 21 |
| AX-158259539 | 21 | 68.535 | KV453211.1 | 7665976 | 21-scf00417 | 21 |
| AX-158259540 | 21 | 68.567 | KV453211.1 | 7667073 | 21-scf00417 | 21 |
| AX-158259541 | 21 | 68.602 | KV453211.1 | 7668004 | 21-scf00417 | 21 |
| AX-158259542 | 21 | 68.628 | KV453211.1 | 7668079 | 21-scf00417 | 21 |
| AX-157727668 | 21 | 68.65  | KV453211.1 | 7665067 | 21-scf00417 | 21 |
| AX-158259543 | 21 | 68.65  | KV453211.1 | 7671016 | 21-scf00417 | 21 |
| AX-158259544 | 21 | 68.674 | KV453211.1 | 7671301 | 21-scf00417 | 21 |
| AX-158259548 | 21 | 68.674 | KV453211.1 | 7674872 | 21-scf00417 | 21 |
| AX-157719431 | 21 | 68.953 | KV453211.1 | 7678153 | 21-scf00417 | 21 |
| AX-158259553 | 21 | 68.953 | KV453211.1 | 7684161 | 21-scf00417 | 21 |
| AX-158259551 | 21 | 69.004 | KV453211.1 | 7683059 | 21-scf00417 | 21 |
| AX-158259554 | 21 | 69.053 | KV453211.1 | 7684598 | 21-scf00417 | 21 |
| AX-158387201 | 21 | 69.092 | KV453211.1 | 7684816 | 21-scf00417 | 21 |
| AX-158259555 | 21 | 69.092 | KV453211.1 | 7686492 | 21-scf00417 | 21 |
| AX-158259557 | 21 | 69.151 | KV453211.1 | 7689601 | 21-scf00417 | 21 |
| AX-157887720 | 21 | 69.191 | KV453211.1 | 7690209 | 21-scf00417 | 21 |
| AX-158257238 | 21 | 69.231 | KV453211.1 | 4213246 | 21-scf00417 | 21 |
| AX-158257730 | 21 | 69.231 | KV453211.1 | 4960575 | 21-scf00417 | 21 |
| AX-157757170 | 21 | 69.231 | KV453211.1 | 5593776 | 21-scf00417 | 21 |
| AX-157842869 | 21 | 69.231 | KV453211.1 | 7296972 | 21-scf00417 | 21 |
| AX-158259550 | 21 | 69.231 | KV453211.1 | 7681141 | 21-scf00417 | 21 |
| AX-158259556 | 21 | 69.231 | KV453211.1 | 7688929 | 21-scf00417 | 21 |
| AX-158259561 | 21 | 69.231 | KV453211.1 | 7695719 | 21-scf00417 | 21 |
| AX-158259562 | 21 | 69.231 | KV453211.1 | 7696609 | 21-scf00417 | 21 |
| AX-158259564 | 21 | 69.231 | KV453211.1 | 7701227 | 21-scf00417 | 21 |
| AX-158259566 | 21 | 69.231 | KV453211.1 | 7704549 | 21-scf00417 | 21 |
| AX-158259568 | 21 | 69.231 | KV453211.1 | 7706122 | 21-scf00417 | 21 |
| AX-158259569 | 21 | 69.231 | KV453211.1 | 7706651 | 21-scf00417 | 21 |

|              |    |        |            |         |             |    |
|--------------|----|--------|------------|---------|-------------|----|
| AX-158259570 | 21 | 69.231 | KV453211.1 | 7707279 | 21-scf00417 | 21 |
| AX-158259572 | 21 | 69.231 | KV453211.1 | 7708552 | 21-scf00417 | 21 |
| AX-158259573 | 21 | 69.231 | KV453211.1 | 7709270 | 21-scf00417 | 21 |
| AX-158259574 | 21 | 69.231 | KV453211.1 | 7709800 | 21-scf00417 | 21 |
| AX-158259576 | 21 | 69.231 | KV453211.1 | 7710885 | 21-scf00417 | 21 |
| AX-158259577 | 21 | 69.231 | KV453211.1 | 7711590 | 21-scf00417 | 21 |
| AX-157859951 | 21 | 69.231 | KV453211.1 | 7712867 | 21-scf00417 | 21 |
| AX-158259578 | 21 | 69.231 | KV453211.1 | 7713371 | 21-scf00417 | 21 |
| AX-158259579 | 21 | 69.231 | KV453211.1 | 7714570 | 21-scf00417 | 21 |
| AX-158259583 | 21 | 69.231 | KV453211.1 | 7722989 | 21-scf00417 | 21 |
| AX-157880379 | 21 | 69.37  | KV453211.1 | 7717721 | 21-scf00417 | 21 |
| AX-158259581 | 21 | 69.37  | KV453211.1 | 7718202 | 21-scf00417 | 21 |
| AX-158259585 | 21 | 69.37  | KV453211.1 | 7725379 | 21-scf00417 | 21 |
| AX-158259586 | 21 | 69.37  | KV453211.1 | 7725855 | 21-scf00417 | 21 |
| AX-158259742 | 21 | 69.37  | KV453211.1 | 8001342 | 21-scf00417 | 21 |
| AX-158259744 | 21 | 69.37  | KV453211.1 | 8003669 | 21-scf00417 | 21 |
| AX-158259582 | 21 | 69.371 | KV453211.1 | 7722193 | 21-scf00417 | 21 |
| AX-158259584 | 21 | 69.371 | KV453211.1 | 7724087 | 21-scf00417 | 21 |
| AX-158259588 | 21 | 69.371 | KV453211.1 | 7727024 | 21-scf00417 | 21 |
| AX-158259589 | 21 | 69.649 | KV453211.1 | 7732791 | 21-scf00417 | 21 |
| AX-158259592 | 21 | 69.649 | KV453211.1 | 7738295 | 21-scf00417 | 21 |
| AX-158259608 | 21 | 69.649 | KV453211.1 | 7759611 | 21-scf00417 | 21 |
| AX-158259612 | 21 | 69.649 | KV453211.1 | 7762722 | 21-scf00417 | 21 |
| AX-158259614 | 21 | 69.649 | KV453211.1 | 7768769 | 21-scf00417 | 21 |
| AX-158259615 | 21 | 69.649 | KV453211.1 | 7771358 | 21-scf00417 | 21 |
| AX-158259616 | 21 | 69.649 | KV453211.1 | 7774021 | 21-scf00417 | 21 |
| AX-158259618 | 21 | 69.649 | KV453211.1 | 7775041 | 21-scf00417 | 21 |
| AX-158259620 | 21 | 69.649 | KV453211.1 | 7775816 | 21-scf00417 | 21 |
| AX-158259622 | 21 | 69.649 | KV453211.1 | 7777482 | 21-scf00417 | 21 |
| AX-158259626 | 21 | 69.649 | KV453211.1 | 7783751 | 21-scf00417 | 21 |
| AX-158259710 | 21 | 69.649 | KV453211.1 | 7941093 | 21-scf00417 | 21 |
| AX-158259625 | 21 | 69.696 | KV453211.1 | 7782460 | 21-scf00417 | 21 |
| AX-158259628 | 21 | 69.696 | KV453211.1 | 7786474 | 21-scf00417 | 21 |
| AX-158259639 | 21 | 69.696 | KV453211.1 | 7817685 | 21-scf00417 | 21 |
| AX-158416171 | 21 | 69.742 | KV453211.1 | 7792350 | 21-scf00417 | 21 |
| AX-157880380 | 21 | 69.758 | KV453211.1 | 7795687 | 21-scf00417 | 21 |
| AX-157842905 | 21 | 69.758 | KV453211.1 | 7803806 | 21-scf00417 | 21 |
| AX-158259721 | 21 | 69.758 | KV453211.1 | 7956381 | 21-scf00417 | 21 |
| AX-158259722 | 21 | 69.758 | KV453211.1 | 7956652 | 21-scf00417 | 21 |
| AX-158259749 | 21 | 69.758 | KV453211.1 | 8009018 | 21-scf00417 | 21 |
| AX-158259750 | 21 | 69.758 | KV453211.1 | 8009912 | 21-scf00417 | 21 |
| AX-158259753 | 21 | 69.758 | KV453211.1 | 8014174 | 21-scf00417 | 21 |
| AX-158259786 | 21 | 69.758 | KV453211.1 | 8070415 | 21-scf00417 | 21 |
| AX-158259644 | 21 | 69.867 | KV453211.1 | 7825678 | 21-scf00417 | 21 |
| AX-157842908 | 21 | 69.867 | KV453211.1 | 7826343 | 21-scf00417 | 21 |
| AX-158259645 | 21 | 69.867 | KV453211.1 | 7827226 | 21-scf00417 | 21 |
| AX-158259652 | 21 | 69.867 | KV453211.1 | 7846170 | 21-scf00417 | 21 |
| AX-157774039 | 21 | 69.867 | KV453211.1 | 7850993 | 21-scf00417 | 21 |
| AX-158259655 | 21 | 69.867 | KV453211.1 | 7851409 | 21-scf00417 | 21 |
| AX-158259657 | 21 | 69.867 | KV453211.1 | 7859068 | 21-scf00417 | 21 |
| AX-158259659 | 21 | 69.867 | KV453211.1 | 7860140 | 21-scf00417 | 21 |



|              |    |        |            |         |                |    |
|--------------|----|--------|------------|---------|----------------|----|
| AX-158259661 | 21 | 69.867 | KV453211.1 | 7862521 | 21-scf00417    | 21 |
| AX-158259662 | 21 | 69.867 | KV453211.1 | 7863012 | 21-scf00417    | 21 |
| AX-158259667 | 21 | 69.867 | KV453211.1 | 7869651 | 21-scf00417    | 21 |
| AX-158259668 | 21 | 69.867 | KV453211.1 | 7870702 | 21-scf00417    | 21 |
| AX-158259669 | 21 | 69.867 | KV453211.1 | 7871629 | 21-scf00417    | 21 |
| AX-158259671 | 21 | 69.867 | KV453211.1 | 7872799 | 21-scf00417    | 21 |
| AX-158259673 | 21 | 69.867 | KV453211.1 | 7876502 | 21-scf00417    | 21 |
| AX-158259675 | 21 | 69.867 | KV453211.1 | 7885516 | 21-scf00417    | 21 |
| AX-157750961 | 21 | 69.867 | KV453211.1 | 7886131 | 21-scf00417    | 21 |
| AX-158259638 | 21 | 69.921 | KV453211.1 | 7810542 | 21-scf00417    | 21 |
| AX-158259647 | 21 | 69.921 | KV453211.1 | 7830284 | 21-scf00417    | 21 |
| AX-158259677 | 21 | 69.921 | KV453211.1 | 7889486 | 21-scf00417    | 21 |
| AX-158259679 | 21 | 69.921 | KV453211.1 | 7893746 | 21-scf00417    | 21 |
| AX-158259681 | 21 | 69.921 | KV453211.1 | 7895036 | 21-scf00417    | 21 |
| AX-158259683 | 21 | 69.921 | KV453211.1 | 7900365 | 21-scf00417    | 21 |
| AX-158259685 | 21 | 69.921 | KV453211.1 | 7904508 | 21-scf00417    | 21 |
| AX-158259686 | 21 | 69.921 | KV453211.1 | 7905027 | 21-scf00417    | 21 |
| AX-158259687 | 21 | 69.921 | KV453211.1 | 7905731 | 21-scf00417    | 21 |
| AX-158259691 | 21 | 69.976 | KV453211.1 | 7915676 | 21-scf00417    | 21 |
| AX-158259695 | 21 | 70.024 | KV453211.1 | 7920784 | 21-scf00417    | 21 |
| AX-158259697 | 21 | 70.086 | KV453211.1 | 7924683 | 21-scf00417    | 21 |
| AX-158259700 | 21 | 70.086 | KV453211.1 | 7929164 | 21-scf00417    | 21 |
| AX-158259703 | 21 | 70.086 | KV453211.1 | 7934444 | 21-scf00417    | 21 |
| AX-158259707 | 21 | 70.086 | KV453211.1 | 7938537 | 21-scf00417    | 21 |
| AX-158259708 | 21 | 70.086 | KV453211.1 | 7939126 | 21-scf00417    | 21 |
| AX-158259711 | 21 | 70.086 | KV453211.1 | 7941696 | 21-scf00417    | 21 |
| AX-158259713 | 21 | 70.086 | KV453211.1 | 7944253 | 21-scf00417    | 21 |
| AX-157710268 | 21 | 70.086 | KV453211.1 | 7945435 | 21-scf00417    | 21 |
| AX-158259715 | 21 | 70.086 | KV453211.1 | 7947325 | 21-scf00417    | 21 |
| AX-158259716 | 21 | 70.086 | KV453211.1 | 7948531 | 21-scf00417    | 21 |
| AX-158259718 | 21 | 70.086 | KV453211.1 | 7953481 | 21-scf00417    | 21 |
| AX-158259719 | 21 | 70.086 | KV453211.1 | 7953805 | 21-scf00417    | 21 |
| AX-158259724 | 21 | 70.132 | KV453211.1 | 7958612 | 21-scf00417    | 21 |
| AX-158259726 | 21 | 70.195 | KV453211.1 | 7963971 | 21-scf00417    | 21 |
| AX-158259727 | 21 | 70.195 | KV453211.1 | 7965086 | 21-scf00417    | 21 |
| AX-157842872 | 21 | 70.304 | KV453211.1 | 7310279 | 21-scf00417    | 21 |
| AX-158259735 | 21 | 70.304 | KV453211.1 | 7979376 | 21-scf00417    | 21 |
| AX-158259736 | 21 | 70.304 | KV453211.1 | 7980093 | 21-scf00417    | 21 |
| AX-157880382 | 21 | 70.304 | KV453211.1 | 7993514 | 21-scf00417    | 21 |
| AX-157842916 | 21 | 70.304 | KV453211.1 | 7994496 | 21-scf00417    | 21 |
| AX-157774176 | 21 | 70.304 | KV453211.1 | 7997277 | 21-scf00417    | 21 |
| AX-157842921 | 21 | 70.304 | KV453211.1 | 7999891 | 21-scf00417    | 21 |
| AX-157842922 | 21 | 70.304 | KV453211.1 | 8001064 | 21-scf00417    | 21 |
| AX-157698311 | 21 | 70.304 | KV453211.1 | 8001108 | 21-scf00417    | 21 |
| AX-158260016 | 21 | 70.304 | KV453211.1 | 8388359 | 21-scf00417    | 21 |
| AX-158260058 | 21 | 70.304 | KV453211.1 | 8451639 | 21-scf00417    | 21 |
| AX-157699451 | 21 | 70.304 | FI893702.1 | 488     | 4ORI212 lctalt | UN |
| AX-158259745 | 21 | 70.363 | KV453211.1 | 8004550 | 21-scf00417    | 21 |
| AX-158259379 | 21 | 70.413 | KV453211.1 | 7383576 | 21-scf00417    | 21 |
| AX-158259525 | 21 | 70.413 | KV453211.1 | 7642449 | 21-scf00417    | 21 |
| AX-158259714 | 21 | 70.413 | KV453211.1 | 7946608 | 21-scf00417    | 21 |

|              |    |        |            |         |             |    |
|--------------|----|--------|------------|---------|-------------|----|
| AX-158387203 | 21 | 70.413 | KV453211.1 | 7961381 | 21-scf00417 | 21 |
| AX-158259730 | 21 | 70.413 | KV453211.1 | 7966894 | 21-scf00417 | 21 |
| AX-158259731 | 21 | 70.413 | KV453211.1 | 7968445 | 21-scf00417 | 21 |
| AX-157842913 | 21 | 70.413 | KV453211.1 | 7982056 | 21-scf00417 | 21 |
| AX-157842914 | 21 | 70.413 | KV453211.1 | 7985385 | 21-scf00417 | 21 |
| AX-158259752 | 21 | 70.413 | KV453211.1 | 8012234 | 21-scf00417 | 21 |
| AX-158259754 | 21 | 70.413 | KV453211.1 | 8014613 | 21-scf00417 | 21 |
| AX-158259755 | 21 | 70.413 | KV453211.1 | 8020349 | 21-scf00417 | 21 |
| AX-158259756 | 21 | 70.413 | KV453211.1 | 8020848 | 21-scf00417 | 21 |
| AX-158259757 | 21 | 70.413 | KV453211.1 | 8023896 | 21-scf00417 | 21 |
| AX-157746074 | 21 | 70.413 | KV453211.1 | 8024918 | 21-scf00417 | 21 |
| AX-158259758 | 21 | 70.413 | KV453211.1 | 8028622 | 21-scf00417 | 21 |
| AX-158259759 | 21 | 70.413 | KV453211.1 | 8031149 | 21-scf00417 | 21 |
| AX-158259760 | 21 | 70.413 | KV453211.1 | 8032500 | 21-scf00417 | 21 |
| AX-158259762 | 21 | 70.413 | KV453211.1 | 8034317 | 21-scf00417 | 21 |
| AX-157713212 | 21 | 70.413 | KV453211.1 | 8037449 | 21-scf00417 | 21 |
| AX-158259764 | 21 | 70.413 | KV453211.1 | 8038373 | 21-scf00417 | 21 |
| AX-158259765 | 21 | 70.413 | KV453211.1 | 8038771 | 21-scf00417 | 21 |
| AX-158259768 | 21 | 70.413 | KV453211.1 | 8040422 | 21-scf00417 | 21 |
| AX-157742662 | 21 | 70.413 | KV453211.1 | 8045089 | 21-scf00417 | 21 |
| AX-158259772 | 21 | 70.413 | KV453211.1 | 8045150 | 21-scf00417 | 21 |
| AX-158259773 | 21 | 70.413 | KV453211.1 | 8047043 | 21-scf00417 | 21 |
| AX-158259774 | 21 | 70.413 | KV453211.1 | 8048478 | 21-scf00417 | 21 |
| AX-157842925 | 21 | 70.413 | KV453211.1 | 8050487 | 21-scf00417 | 21 |
| AX-157739799 | 21 | 70.413 | KV453211.1 | 8050653 | 21-scf00417 | 21 |
| AX-158259778 | 21 | 70.413 | KV453211.1 | 8055366 | 21-scf00417 | 21 |
| AX-157771088 | 21 | 70.413 | KV453211.1 | 8057370 | 21-scf00417 | 21 |
| AX-158259780 | 21 | 70.413 | KV453211.1 | 8058946 | 21-scf00417 | 21 |
| AX-157746015 | 21 | 70.413 | KV453211.1 | 8062873 | 21-scf00417 | 21 |
| AX-157717246 | 21 | 70.413 | KV453211.1 | 8063925 | 21-scf00417 | 21 |
| AX-157730097 | 21 | 70.413 | KV453211.1 | 8064164 | 21-scf00417 | 21 |
| AX-158259784 | 21 | 70.413 | KV453211.1 | 8066245 | 21-scf00417 | 21 |
| AX-158259787 | 21 | 70.413 | KV453211.1 | 8074635 | 21-scf00417 | 21 |
| AX-158259788 | 21 | 70.413 | KV453211.1 | 8075239 | 21-scf00417 | 21 |
| AX-158259789 | 21 | 70.413 | KV453211.1 | 8076348 | 21-scf00417 | 21 |
| AX-158259791 | 21 | 70.413 | KV453211.1 | 8078397 | 21-scf00417 | 21 |
| AX-158259792 | 21 | 70.413 | KV453211.1 | 8078891 | 21-scf00417 | 21 |
| AX-158259794 | 21 | 70.413 | KV453211.1 | 8081052 | 21-scf00417 | 21 |
| AX-158259795 | 21 | 70.413 | KV453211.1 | 8083194 | 21-scf00417 | 21 |
| AX-158259796 | 21 | 70.413 | KV453211.1 | 8085688 | 21-scf00417 | 21 |
| AX-158259824 | 21 | 70.413 | KV453211.1 | 8126274 | 21-scf00417 | 21 |
| AX-158259827 | 21 | 70.413 | KV453211.1 | 8128994 | 21-scf00417 | 21 |
| AX-158259842 | 21 | 70.413 | KV453211.1 | 8156397 | 21-scf00417 | 21 |
| AX-158259875 | 21 | 70.413 | KV453211.1 | 8203326 | 21-scf00417 | 21 |
| AX-158259885 | 21 | 70.413 | KV453211.1 | 8216987 | 21-scf00417 | 21 |
| AX-157744371 | 21 | 70.413 | KV453211.1 | 8229667 | 21-scf00417 | 21 |
| AX-158260008 | 21 | 70.413 | KV453211.1 | 8368287 | 21-scf00417 | 21 |
| AX-157842952 | 21 | 70.413 | KV453211.1 | 8400078 | 21-scf00417 | 21 |
| AX-158260029 | 21 | 70.413 | KV453211.1 | 8405226 | 21-scf00417 | 21 |
| AX-158257909 | 21 | 70.632 | KV453211.1 | 5226705 | 21-scf00417 | 21 |
| AX-158258389 | 21 | 70.632 | KV453211.1 | 5962464 | 21-scf00417 | 21 |

|              |    |        |            |         |             |    |
|--------------|----|--------|------------|---------|-------------|----|
| AX-158258607 | 21 | 70.632 | KV453211.1 | 6204276 | 21-scf00417 | 21 |
| AX-158258965 | 21 | 70.632 | KV453211.1 | 6650508 | 21-scf00417 | 21 |
| AX-157842811 | 21 | 70.632 | KV453211.1 | 6653239 | 21-scf00417 | 21 |
| AX-158259280 | 21 | 70.632 | KV453211.1 | 7176458 | 21-scf00417 | 21 |
| AX-158259761 | 21 | 70.632 | KV453211.1 | 8033434 | 21-scf00417 | 21 |
| AX-158259799 | 21 | 70.632 | KV453211.1 | 8087610 | 21-scf00417 | 21 |
| AX-158259807 | 21 | 70.632 | KV453211.1 | 8099807 | 21-scf00417 | 21 |
| AX-158259808 | 21 | 70.632 | KV453211.1 | 8100064 | 21-scf00417 | 21 |
| AX-157842927 | 21 | 70.632 | KV453211.1 | 8102287 | 21-scf00417 | 21 |
| AX-158259812 | 21 | 70.632 | KV453211.1 | 8107542 | 21-scf00417 | 21 |
| AX-158259813 | 21 | 70.632 | KV453211.1 | 8109058 | 21-scf00417 | 21 |
| AX-158259814 | 21 | 70.632 | KV453211.1 | 8113099 | 21-scf00417 | 21 |
| AX-158259815 | 21 | 70.632 | KV453211.1 | 8113395 | 21-scf00417 | 21 |
| AX-158259816 | 21 | 70.632 | KV453211.1 | 8113822 | 21-scf00417 | 21 |
| AX-158259817 | 21 | 70.632 | KV453211.1 | 8115217 | 21-scf00417 | 21 |
| AX-157716059 | 21 | 70.632 | KV453211.1 | 8116280 | 21-scf00417 | 21 |
| AX-158259818 | 21 | 70.632 | KV453211.1 | 8116649 | 21-scf00417 | 21 |
| AX-158259819 | 21 | 70.632 | KV453211.1 | 8117461 | 21-scf00417 | 21 |
| AX-157715935 | 21 | 70.632 | KV453211.1 | 8117634 | 21-scf00417 | 21 |
| AX-157842928 | 21 | 70.632 | KV453211.1 | 8118117 | 21-scf00417 | 21 |
| AX-158259821 | 21 | 70.632 | KV453211.1 | 8118646 | 21-scf00417 | 21 |
| AX-158259822 | 21 | 70.632 | KV453211.1 | 8120422 | 21-scf00417 | 21 |
| AX-158259823 | 21 | 70.632 | KV453211.1 | 8121788 | 21-scf00417 | 21 |
| AX-157842930 | 21 | 70.632 | KV453211.1 | 8127580 | 21-scf00417 | 21 |
| AX-157842931 | 21 | 70.632 | KV453211.1 | 8128398 | 21-scf00417 | 21 |
| AX-158259829 | 21 | 70.632 | KV453211.1 | 8132369 | 21-scf00417 | 21 |
| AX-158259830 | 21 | 70.632 | KV453211.1 | 8133534 | 21-scf00417 | 21 |
| AX-157746608 | 21 | 70.632 | KV453211.1 | 8133938 | 21-scf00417 | 21 |
| AX-157842932 | 21 | 70.632 | KV453211.1 | 8134675 | 21-scf00417 | 21 |
| AX-158259832 | 21 | 70.632 | KV453211.1 | 8137701 | 21-scf00417 | 21 |
| AX-158259840 | 21 | 70.632 | KV453211.1 | 8149515 | 21-scf00417 | 21 |
| AX-158259841 | 21 | 70.632 | KV453211.1 | 8154038 | 21-scf00417 | 21 |
| AX-157859952 | 21 | 70.632 | KV453211.1 | 8154880 | 21-scf00417 | 21 |
| AX-158259848 | 21 | 70.632 | KV453211.1 | 8163751 | 21-scf00417 | 21 |
| AX-157842935 | 21 | 70.632 | KV453211.1 | 8165384 | 21-scf00417 | 21 |
| AX-158259849 | 21 | 70.632 | KV453211.1 | 8166212 | 21-scf00417 | 21 |
| AX-158259850 | 21 | 70.632 | KV453211.1 | 8167097 | 21-scf00417 | 21 |
| AX-157842937 | 21 | 70.632 | KV453211.1 | 8168025 | 21-scf00417 | 21 |
| AX-157715929 | 21 | 70.632 | KV453211.1 | 8168219 | 21-scf00417 | 21 |
| AX-158259852 | 21 | 70.632 | KV453211.1 | 8169975 | 21-scf00417 | 21 |
| AX-158259853 | 21 | 70.632 | KV453211.1 | 8170425 | 21-scf00417 | 21 |
| AX-157716882 | 21 | 70.632 | KV453211.1 | 8170527 | 21-scf00417 | 21 |
| AX-158259854 | 21 | 70.632 | KV453211.1 | 8171992 | 21-scf00417 | 21 |
| AX-158259856 | 21 | 70.632 | KV453211.1 | 8180596 | 21-scf00417 | 21 |
| AX-158259858 | 21 | 70.632 | KV453211.1 | 8183851 | 21-scf00417 | 21 |
| AX-158259861 | 21 | 70.632 | KV453211.1 | 8186638 | 21-scf00417 | 21 |
| AX-158259862 | 21 | 70.632 | KV453211.1 | 8187154 | 21-scf00417 | 21 |
| AX-158416178 | 21 | 70.632 | KV453211.1 | 8188264 | 21-scf00417 | 21 |
| AX-158259863 | 21 | 70.632 | KV453211.1 | 8188605 | 21-scf00417 | 21 |
| AX-158259864 | 21 | 70.632 | KV453211.1 | 8189102 | 21-scf00417 | 21 |
| AX-158259973 | 21 | 70.632 | KV453211.1 | 8337676 | 21-scf00417 | 21 |

|              |    |        |            |         |             |    |
|--------------|----|--------|------------|---------|-------------|----|
| AX-158260218 | 21 | 70.632 | KV453211.1 | 8676194 | 21-scf00417 | 21 |
| AX-158260247 | 21 | 70.632 | KV453211.1 | 8724174 | 21-scf00417 | 21 |
| AX-158260342 | 21 | 70.632 | KV453211.1 | 8867063 | 21-scf00417 | 21 |
| AX-158259866 | 21 | 70.741 | KV453211.1 | 8193144 | 21-scf00417 | 21 |
| AX-158259945 | 21 | 70.741 | KV453211.1 | 8310117 | 21-scf00417 | 21 |
| AX-158258890 | 21 | 70.85  | KV453211.1 | 6564800 | 21-scf00417 | 21 |
| AX-158259732 | 21 | 70.85  | KV453211.1 | 7977743 | 21-scf00417 | 21 |
| AX-158259733 | 21 | 70.85  | KV453211.1 | 7978064 | 21-scf00417 | 21 |
| AX-158259734 | 21 | 70.85  | KV453211.1 | 7978283 | 21-scf00417 | 21 |
| AX-158259738 | 21 | 70.85  | KV453211.1 | 7982144 | 21-scf00417 | 21 |
| AX-157842923 | 21 | 70.85  | KV453211.1 | 8007357 | 21-scf00417 | 21 |
| AX-158259769 | 21 | 70.85  | KV453211.1 | 8041012 | 21-scf00417 | 21 |
| AX-158259775 | 21 | 70.85  | KV453211.1 | 8049268 | 21-scf00417 | 21 |
| AX-157842926 | 21 | 70.85  | KV453211.1 | 8061773 | 21-scf00417 | 21 |
| AX-158259798 | 21 | 70.85  | KV453211.1 | 8087190 | 21-scf00417 | 21 |
| AX-158259833 | 21 | 70.85  | KV453211.1 | 8138404 | 21-scf00417 | 21 |
| AX-158259845 | 21 | 70.85  | KV453211.1 | 8160389 | 21-scf00417 | 21 |
| AX-158259846 | 21 | 70.85  | KV453211.1 | 8161031 | 21-scf00417 | 21 |
| AX-158259851 | 21 | 70.85  | KV453211.1 | 8169408 | 21-scf00417 | 21 |
| AX-158259867 | 21 | 70.85  | KV453211.1 | 8194464 | 21-scf00417 | 21 |
| AX-158259869 | 21 | 70.85  | KV453211.1 | 8195718 | 21-scf00417 | 21 |
| AX-158259871 | 21 | 70.85  | KV453211.1 | 8197484 | 21-scf00417 | 21 |
| AX-158259873 | 21 | 70.85  | KV453211.1 | 8199437 | 21-scf00417 | 21 |
| AX-157773991 | 21 | 70.85  | KV453211.1 | 8201242 | 21-scf00417 | 21 |
| AX-158259876 | 21 | 70.85  | KV453211.1 | 8203913 | 21-scf00417 | 21 |
| AX-157842938 | 21 | 70.85  | KV453211.1 | 8209499 | 21-scf00417 | 21 |
| AX-158259884 | 21 | 70.85  | KV453211.1 | 8214980 | 21-scf00417 | 21 |
| AX-158259886 | 21 | 70.85  | KV453211.1 | 8217477 | 21-scf00417 | 21 |
| AX-158259887 | 21 | 70.85  | KV453211.1 | 8218194 | 21-scf00417 | 21 |
| AX-157715106 | 21 | 70.85  | KV453211.1 | 8227484 | 21-scf00417 | 21 |
| AX-158259892 | 21 | 70.85  | KV453211.1 | 8231879 | 21-scf00417 | 21 |
| AX-157715079 | 21 | 70.85  | KV453211.1 | 8232897 | 21-scf00417 | 21 |
| AX-157744782 | 21 | 70.85  | KV453211.1 | 8233826 | 21-scf00417 | 21 |
| AX-158259893 | 21 | 70.85  | KV453211.1 | 8235899 | 21-scf00417 | 21 |
| AX-157867425 | 21 | 70.85  | KV453211.1 | 8238743 | 21-scf00417 | 21 |
| AX-158259894 | 21 | 70.85  | KV453211.1 | 8239166 | 21-scf00417 | 21 |
| AX-158259895 | 21 | 70.85  | KV453211.1 | 8239366 | 21-scf00417 | 21 |
| AX-158259896 | 21 | 70.85  | KV453211.1 | 8239762 | 21-scf00417 | 21 |
| AX-158259899 | 21 | 70.85  | KV453211.1 | 8242914 | 21-scf00417 | 21 |
| AX-158259900 | 21 | 70.85  | KV453211.1 | 8244388 | 21-scf00417 | 21 |
| AX-158259906 | 21 | 70.85  | KV453211.1 | 8251200 | 21-scf00417 | 21 |
| AX-158259907 | 21 | 70.85  | KV453211.1 | 8251997 | 21-scf00417 | 21 |
| AX-158416180 | 21 | 70.85  | KV453211.1 | 8254250 | 21-scf00417 | 21 |
| AX-158259908 | 21 | 70.85  | KV453211.1 | 8256598 | 21-scf00417 | 21 |
| AX-158259910 | 21 | 70.85  | KV453211.1 | 8257946 | 21-scf00417 | 21 |
| AX-158259911 | 21 | 70.85  | KV453211.1 | 8258236 | 21-scf00417 | 21 |
| AX-158411078 | 21 | 70.85  | KV453211.1 | 8258656 | 21-scf00417 | 21 |
| AX-158259912 | 21 | 70.85  | KV453211.1 | 8259669 | 21-scf00417 | 21 |
| AX-158259914 | 21 | 70.85  | KV453211.1 | 8265187 | 21-scf00417 | 21 |
| AX-158259915 | 21 | 70.85  | KV453211.1 | 8266000 | 21-scf00417 | 21 |
| AX-158259917 | 21 | 70.85  | KV453211.1 | 8268868 | 21-scf00417 | 21 |

|              |    |        |            |         |             |    |
|--------------|----|--------|------------|---------|-------------|----|
| AX-157842944 | 21 | 70.85  | KV453211.1 | 8275100 | 21-scf00417 | 21 |
| AX-158259923 | 21 | 70.85  | KV453211.1 | 8282247 | 21-scf00417 | 21 |
| AX-158259924 | 21 | 70.85  | KV453211.1 | 8282564 | 21-scf00417 | 21 |
| AX-158259926 | 21 | 70.85  | KV453211.1 | 8286260 | 21-scf00417 | 21 |
| AX-158259927 | 21 | 70.85  | KV453211.1 | 8286571 | 21-scf00417 | 21 |
| AX-158259929 | 21 | 70.85  | KV453211.1 | 8289225 | 21-scf00417 | 21 |
| AX-158259930 | 21 | 70.85  | KV453211.1 | 8289915 | 21-scf00417 | 21 |
| AX-157842945 | 21 | 70.85  | KV453211.1 | 8291674 | 21-scf00417 | 21 |
| AX-158259935 | 21 | 70.85  | KV453211.1 | 8293467 | 21-scf00417 | 21 |
| AX-158259936 | 21 | 70.85  | KV453211.1 | 8293900 | 21-scf00417 | 21 |
| AX-158259937 | 21 | 70.85  | KV453211.1 | 8294616 | 21-scf00417 | 21 |
| AX-157842946 | 21 | 70.85  | KV453211.1 | 8295544 | 21-scf00417 | 21 |
| AX-157717281 | 21 | 70.85  | KV453211.1 | 8295664 | 21-scf00417 | 21 |
| AX-158259940 | 21 | 70.85  | KV453211.1 | 8306378 | 21-scf00417 | 21 |
| AX-158259944 | 21 | 70.85  | KV453211.1 | 8308996 | 21-scf00417 | 21 |
| AX-158259946 | 21 | 70.85  | KV453211.1 | 8311263 | 21-scf00417 | 21 |
| AX-158259949 | 21 | 70.85  | KV453211.1 | 8315054 | 21-scf00417 | 21 |
| AX-158259952 | 21 | 70.85  | KV453211.1 | 8317609 | 21-scf00417 | 21 |
| AX-158259956 | 21 | 70.85  | KV453211.1 | 8322065 | 21-scf00417 | 21 |
| AX-158259958 | 21 | 70.85  | KV453211.1 | 8324311 | 21-scf00417 | 21 |
| AX-158259960 | 21 | 70.85  | KV453211.1 | 8326730 | 21-scf00417 | 21 |
| AX-158259963 | 21 | 70.85  | KV453211.1 | 8330004 | 21-scf00417 | 21 |
| AX-158259964 | 21 | 70.85  | KV453211.1 | 8330859 | 21-scf00417 | 21 |
| AX-158259970 | 21 | 70.85  | KV453211.1 | 8336134 | 21-scf00417 | 21 |
| AX-158259972 | 21 | 70.85  | KV453211.1 | 8336737 | 21-scf00417 | 21 |
| AX-158259974 | 21 | 70.85  | KV453211.1 | 8338698 | 21-scf00417 | 21 |
| AX-158259975 | 21 | 70.85  | KV453211.1 | 8339075 | 21-scf00417 | 21 |
| AX-158259977 | 21 | 70.85  | KV453211.1 | 8340049 | 21-scf00417 | 21 |
| AX-158259980 | 21 | 70.85  | KV453211.1 | 8342373 | 21-scf00417 | 21 |
| AX-158259981 | 21 | 70.85  | KV453211.1 | 8342674 | 21-scf00417 | 21 |
| AX-158259982 | 21 | 70.85  | KV453211.1 | 8343584 | 21-scf00417 | 21 |
| AX-158259996 | 21 | 70.85  | KV453211.1 | 8357133 | 21-scf00417 | 21 |
| AX-158260001 | 21 | 70.85  | KV453211.1 | 8360436 | 21-scf00417 | 21 |
| AX-157842951 | 21 | 70.85  | KV453211.1 | 8390397 | 21-scf00417 | 21 |
| AX-158260062 | 21 | 70.85  | KV453211.1 | 8459606 | 21-scf00417 | 21 |
| AX-158260068 | 21 | 70.85  | KV453211.1 | 8466867 | 21-scf00417 | 21 |
| AX-158260072 | 21 | 70.85  | KV453211.1 | 8469416 | 21-scf00417 | 21 |
| AX-158260073 | 21 | 70.85  | KV453211.1 | 8471332 | 21-scf00417 | 21 |
| AX-158260087 | 21 | 70.85  | KV453211.1 | 8482561 | 21-scf00417 | 21 |
| AX-158260181 | 21 | 70.85  | KV453211.1 | 8625129 | 21-scf00417 | 21 |
| AX-158259986 | 21 | 70.874 | KV453211.1 | 8346953 | 21-scf00417 | 21 |
| AX-157872832 | 21 | 70.896 | KV453211.1 | 8352477 | 21-scf00417 | 21 |
| AX-158259992 | 21 | 70.927 | KV453211.1 | 8352723 | 21-scf00417 | 21 |
| AX-158258820 | 21 | 70.959 | KV453211.1 | 6476770 | 21-scf00417 | 21 |
| AX-158258822 | 21 | 70.959 | KV453211.1 | 6479073 | 21-scf00417 | 21 |
| AX-158259449 | 21 | 70.959 | KV453211.1 | 7513750 | 21-scf00417 | 21 |
| AX-157842917 | 21 | 70.959 | KV453211.1 | 7995998 | 21-scf00417 | 21 |
| AX-158259801 | 21 | 70.959 | KV453211.1 | 8093844 | 21-scf00417 | 21 |
| AX-158259804 | 21 | 70.959 | KV453211.1 | 8096828 | 21-scf00417 | 21 |
| AX-158259834 | 21 | 70.959 | KV453211.1 | 8139037 | 21-scf00417 | 21 |
| AX-158259874 | 21 | 70.959 | KV453211.1 | 8200669 | 21-scf00417 | 21 |

|              |    |        |            |         |             |    |
|--------------|----|--------|------------|---------|-------------|----|
| AX-158259880 | 21 | 70.959 | KV453211.1 | 8209841 | 21-scf00417 | 21 |
| AX-158259913 | 21 | 70.959 | KV453211.1 | 8261121 | 21-scf00417 | 21 |
| AX-158259918 | 21 | 70.959 | KV453211.1 | 8269896 | 21-scf00417 | 21 |
| AX-157842942 | 21 | 70.959 | KV453211.1 | 8270085 | 21-scf00417 | 21 |
| AX-158259928 | 21 | 70.959 | KV453211.1 | 8287891 | 21-scf00417 | 21 |
| AX-158259951 | 21 | 70.959 | KV453211.1 | 8316598 | 21-scf00417 | 21 |
| AX-158259953 | 21 | 70.959 | KV453211.1 | 8319696 | 21-scf00417 | 21 |
| AX-158259954 | 21 | 70.959 | KV453211.1 | 8320419 | 21-scf00417 | 21 |
| AX-158259961 | 21 | 70.959 | KV453211.1 | 8327775 | 21-scf00417 | 21 |
| AX-158259968 | 21 | 70.959 | KV453211.1 | 8334406 | 21-scf00417 | 21 |
| AX-158259971 | 21 | 70.959 | KV453211.1 | 8336464 | 21-scf00417 | 21 |
| AX-157740239 | 21 | 70.959 | KV453211.1 | 8339727 | 21-scf00417 | 21 |
| AX-158259983 | 21 | 70.959 | KV453211.1 | 8343916 | 21-scf00417 | 21 |
| AX-158259998 | 21 | 70.959 | KV453211.1 | 8358186 | 21-scf00417 | 21 |
| AX-158259999 | 21 | 70.959 | KV453211.1 | 8359536 | 21-scf00417 | 21 |
| AX-158260000 | 21 | 70.959 | KV453211.1 | 8360053 | 21-scf00417 | 21 |
| AX-158260002 | 21 | 70.959 | KV453211.1 | 8361108 | 21-scf00417 | 21 |
| AX-158260003 | 21 | 70.959 | KV453211.1 | 8362096 | 21-scf00417 | 21 |
| AX-158260004 | 21 | 70.959 | KV453211.1 | 8363334 | 21-scf00417 | 21 |
| AX-158260005 | 21 | 70.959 | KV453211.1 | 8364422 | 21-scf00417 | 21 |
| AX-158260006 | 21 | 70.959 | KV453211.1 | 8364833 | 21-scf00417 | 21 |
| AX-158260007 | 21 | 70.959 | KV453211.1 | 8367199 | 21-scf00417 | 21 |
| AX-158260009 | 21 | 70.959 | KV453211.1 | 8371370 | 21-scf00417 | 21 |
| AX-158260010 | 21 | 70.959 | KV453211.1 | 8371929 | 21-scf00417 | 21 |
| AX-158260011 | 21 | 70.959 | KV453211.1 | 8372856 | 21-scf00417 | 21 |
| AX-157842949 | 21 | 70.959 | KV453211.1 | 8377360 | 21-scf00417 | 21 |
| AX-158260012 | 21 | 70.959 | KV453211.1 | 8381185 | 21-scf00417 | 21 |
| AX-157842950 | 21 | 70.959 | KV453211.1 | 8382252 | 21-scf00417 | 21 |
| AX-158260013 | 21 | 70.959 | KV453211.1 | 8386597 | 21-scf00417 | 21 |
| AX-158260014 | 21 | 70.959 | KV453211.1 | 8387223 | 21-scf00417 | 21 |
| AX-158260015 | 21 | 70.959 | KV453211.1 | 8387772 | 21-scf00417 | 21 |
| AX-157724954 | 21 | 70.959 | KV453211.1 | 8389283 | 21-scf00417 | 21 |
| AX-158260017 | 21 | 70.959 | KV453211.1 | 8391785 | 21-scf00417 | 21 |
| AX-158260018 | 21 | 70.959 | KV453211.1 | 8393615 | 21-scf00417 | 21 |
| AX-157872833 | 21 | 70.959 | KV453211.1 | 8394422 | 21-scf00417 | 21 |
| AX-158260020 | 21 | 70.959 | KV453211.1 | 8396713 | 21-scf00417 | 21 |
| AX-158260021 | 21 | 70.959 | KV453211.1 | 8397262 | 21-scf00417 | 21 |
| AX-157757038 | 21 | 70.959 | KV453211.1 | 8398423 | 21-scf00417 | 21 |
| AX-157842953 | 21 | 70.959 | KV453211.1 | 8400339 | 21-scf00417 | 21 |
| AX-158260025 | 21 | 70.959 | KV453211.1 | 8402371 | 21-scf00417 | 21 |
| AX-157859953 | 21 | 70.959 | KV453211.1 | 8402816 | 21-scf00417 | 21 |
| AX-158260027 | 21 | 70.959 | KV453211.1 | 8403355 | 21-scf00417 | 21 |
| AX-158260034 | 21 | 70.959 | KV453211.1 | 8414085 | 21-scf00417 | 21 |
| AX-158260035 | 21 | 70.959 | KV453211.1 | 8421796 | 21-scf00417 | 21 |
| AX-158260036 | 21 | 70.959 | KV453211.1 | 8422820 | 21-scf00417 | 21 |
| AX-158260039 | 21 | 70.959 | KV453211.1 | 8427819 | 21-scf00417 | 21 |
| AX-158260041 | 21 | 70.959 | KV453211.1 | 8430481 | 21-scf00417 | 21 |
| AX-158260042 | 21 | 70.959 | KV453211.1 | 8431319 | 21-scf00417 | 21 |
| AX-158260053 | 21 | 70.959 | KV453211.1 | 8447910 | 21-scf00417 | 21 |
| AX-158260055 | 21 | 70.959 | KV453211.1 | 8450107 | 21-scf00417 | 21 |
| AX-158381068 | 21 | 70.959 | KV453211.1 | 8450240 | 21-scf00417 | 21 |

|              |    |        |            |         |                |    |
|--------------|----|--------|------------|---------|----------------|----|
| AX-158260057 | 21 | 70.959 | KV453211.1 | 8451131 | 21-scf00417    | 21 |
| AX-157842956 | 21 | 70.959 | KV453211.1 | 8453006 | 21-scf00417    | 21 |
| AX-157842957 | 21 | 70.959 | KV453211.1 | 8453596 | 21-scf00417    | 21 |
| AX-158260059 | 21 | 70.959 | KV453211.1 | 8454735 | 21-scf00417    | 21 |
| AX-157842958 | 21 | 70.959 | KV453211.1 | 8457269 | 21-scf00417    | 21 |
| AX-158260061 | 21 | 70.959 | KV453211.1 | 8458144 | 21-scf00417    | 21 |
| AX-158260063 | 21 | 70.959 | KV453211.1 | 8460870 | 21-scf00417    | 21 |
| AX-158260065 | 21 | 70.959 | KV453211.1 | 8462242 | 21-scf00417    | 21 |
| AX-158260066 | 21 | 70.959 | KV453211.1 | 8463935 | 21-scf00417    | 21 |
| AX-158260067 | 21 | 70.959 | KV453211.1 | 8465752 | 21-scf00417    | 21 |
| AX-158260069 | 21 | 70.959 | KV453211.1 | 8467509 | 21-scf00417    | 21 |
| AX-158260071 | 21 | 70.959 | KV453211.1 | 8468709 | 21-scf00417    | 21 |
| AX-158260075 | 21 | 70.959 | KV453211.1 | 8473063 | 21-scf00417    | 21 |
| AX-158260076 | 21 | 70.959 | KV453211.1 | 8473823 | 21-scf00417    | 21 |
| AX-158260077 | 21 | 70.959 | KV453211.1 | 8474500 | 21-scf00417    | 21 |
| AX-158260078 | 21 | 70.959 | KV453211.1 | 8475130 | 21-scf00417    | 21 |
| AX-158260082 | 21 | 70.959 | KV453211.1 | 8479176 | 21-scf00417    | 21 |
| AX-158260085 | 21 | 70.959 | KV453211.1 | 8481548 | 21-scf00417    | 21 |
| AX-158260088 | 21 | 70.959 | KV453211.1 | 8484453 | 21-scf00417    | 21 |
| AX-158260089 | 21 | 70.959 | KV453211.1 | 8486520 | 21-scf00417    | 21 |
| AX-158260090 | 21 | 70.959 | KV453211.1 | 8487829 | 21-scf00417    | 21 |
| AX-158260091 | 21 | 70.959 | KV453211.1 | 8488384 | 21-scf00417    | 21 |
| AX-158260093 | 21 | 70.959 | KV453211.1 | 8490624 | 21-scf00417    | 21 |
| AX-158260094 | 21 | 70.959 | KV453211.1 | 8491343 | 21-scf00417    | 21 |
| AX-158260095 | 21 | 70.959 | KV453211.1 | 8492206 | 21-scf00417    | 21 |
| AX-157771294 | 21 | 70.959 | KV453211.1 | 8492418 | 21-scf00417    | 21 |
| AX-157721863 | 21 | 70.959 | KV453211.1 | 8496381 | 21-scf00417    | 21 |
| AX-158260098 | 21 | 70.959 | KV453211.1 | 8496956 | 21-scf00417    | 21 |
| AX-158260099 | 21 | 70.959 | KV453211.1 | 8498729 | 21-scf00417    | 21 |
| AX-158260114 | 21 | 70.959 | KV453211.1 | 8515017 | 21-scf00417    | 21 |
| AX-158260124 | 21 | 70.959 | KV453211.1 | 8521549 | 21-scf00417    | 21 |
| AX-158260191 | 21 | 70.959 | KV453211.1 | 8634120 | 21-scf00417    | 21 |
| AX-158260204 | 21 | 70.959 | KV453211.1 | 8653688 | 21-scf00417    | 21 |
| AX-158260264 | 21 | 70.959 | KV453211.1 | 8741314 | 21-scf00417    | 21 |
| AX-158260266 | 21 | 70.959 | KV453211.1 | 8744318 | 21-scf00417    | 21 |
| AX-157704168 | 21 | 70.959 | DX102736.1 | 593     | IORI212 Ictalu | UN |
| AX-158260101 | 21 | 71.003 | KV453211.1 | 8503029 | 21-scf00417    | 21 |
| AX-158259897 | 21 | 71.069 | KV453211.1 | 8240351 | 21-scf00417    | 21 |
| AX-158260103 | 21 | 71.069 | KV453211.1 | 8504242 | 21-scf00417    | 21 |
| AX-158260104 | 21 | 71.069 | KV453211.1 | 8504444 | 21-scf00417    | 21 |
| AX-157742996 | 21 | 71.069 | KV453211.1 | 8505734 | 21-scf00417    | 21 |
| AX-158260107 | 21 | 71.069 | KV453211.1 | 8509233 | 21-scf00417    | 21 |
| AX-158260113 | 21 | 71.069 | KV453211.1 | 8512690 | 21-scf00417    | 21 |
| AX-158260117 | 21 | 71.069 | KV453211.1 | 8516942 | 21-scf00417    | 21 |
| AX-157719096 | 21 | 71.069 | KV453211.1 | 8518105 | 21-scf00417    | 21 |
| AX-158260120 | 21 | 71.069 | KV453211.1 | 8519445 | 21-scf00417    | 21 |
| AX-158260121 | 21 | 71.069 | KV453211.1 | 8519822 | 21-scf00417    | 21 |
| AX-158260122 | 21 | 71.069 | KV453211.1 | 8520562 | 21-scf00417    | 21 |
| AX-158260123 | 21 | 71.114 | KV453211.1 | 8521395 | 21-scf00417    | 21 |
| AX-158259997 | 21 | 71.178 | KV453211.1 | 8357419 | 21-scf00417    | 21 |
| AX-158260127 | 21 | 71.178 | KV453211.1 | 8532033 | 21-scf00417    | 21 |

|              |    |        |            |         |             |    |
|--------------|----|--------|------------|---------|-------------|----|
| AX-158260128 | 21 | 71.178 | KV453211.1 | 8533584 | 21-scf00417 | 21 |
| AX-158260130 | 21 | 71.287 | KV453211.1 | 8534866 | 21-scf00417 | 21 |
| AX-158260131 | 21 | 71.344 | KV453211.1 | 8536579 | 21-scf00417 | 21 |
| AX-157727110 | 21 | 71.396 | KV453211.1 | 8543484 | 21-scf00417 | 21 |
| AX-158260133 | 21 | 71.396 | KV453211.1 | 8545766 | 21-scf00417 | 21 |
| AX-158260135 | 21 | 71.396 | KV453211.1 | 8549134 | 21-scf00417 | 21 |
| AX-157880393 | 21 | 71.396 | KV453211.1 | 8554872 | 21-scf00417 | 21 |
| AX-158260140 | 21 | 71.452 | KV453211.1 | 8557453 | 21-scf00417 | 21 |
| AX-157726397 | 21 | 71.506 | KV453211.1 | 6114458 | 21-scf00417 | 21 |
| AX-158259741 | 21 | 71.506 | KV453211.1 | 7995116 | 21-scf00417 | 21 |
| AX-157842918 | 21 | 71.506 | KV453211.1 | 7996544 | 21-scf00417 | 21 |
| AX-157842920 | 21 | 71.506 | KV453211.1 | 7997838 | 21-scf00417 | 21 |
| AX-158259746 | 21 | 71.506 | KV453211.1 | 8004970 | 21-scf00417 | 21 |
| AX-158259847 | 21 | 71.506 | KV453211.1 | 8163062 | 21-scf00417 | 21 |
| AX-158260137 | 21 | 71.506 | KV453211.1 | 8551599 | 21-scf00417 | 21 |
| AX-158260139 | 21 | 71.506 | KV453211.1 | 8556450 | 21-scf00417 | 21 |
| AX-158260141 | 21 | 71.506 | KV453211.1 | 8558731 | 21-scf00417 | 21 |
| AX-158260143 | 21 | 71.506 | KV453211.1 | 8561623 | 21-scf00417 | 21 |
| AX-158260144 | 21 | 71.506 | KV453211.1 | 8569213 | 21-scf00417 | 21 |
| AX-158260145 | 21 | 71.506 | KV453211.1 | 8570825 | 21-scf00417 | 21 |
| AX-158260148 | 21 | 71.506 | KV453211.1 | 8575549 | 21-scf00417 | 21 |
| AX-158260151 | 21 | 71.506 | KV453211.1 | 8588979 | 21-scf00417 | 21 |
| AX-158260152 | 21 | 71.506 | KV453211.1 | 8589220 | 21-scf00417 | 21 |
| AX-158260154 | 21 | 71.506 | KV453211.1 | 8590347 | 21-scf00417 | 21 |
| AX-158260159 | 21 | 71.506 | KV453211.1 | 8596576 | 21-scf00417 | 21 |
| AX-158260160 | 21 | 71.506 | KV453211.1 | 8598606 | 21-scf00417 | 21 |
| AX-158260161 | 21 | 71.506 | KV453211.1 | 8599402 | 21-scf00417 | 21 |
| AX-158260162 | 21 | 71.506 | KV453211.1 | 8600326 | 21-scf00417 | 21 |
| AX-158260163 | 21 | 71.506 | KV453211.1 | 8601383 | 21-scf00417 | 21 |
| AX-158260164 | 21 | 71.506 | KV453211.1 | 8602112 | 21-scf00417 | 21 |
| AX-158260165 | 21 | 71.506 | KV453211.1 | 8602431 | 21-scf00417 | 21 |
| AX-158260166 | 21 | 71.506 | KV453211.1 | 8606195 | 21-scf00417 | 21 |
| AX-158260167 | 21 | 71.506 | KV453211.1 | 8608323 | 21-scf00417 | 21 |
| AX-157887726 | 21 | 71.506 | KV453211.1 | 8608659 | 21-scf00417 | 21 |
| AX-158260168 | 21 | 71.506 | KV453211.1 | 8609402 | 21-scf00417 | 21 |
| AX-158260169 | 21 | 71.506 | KV453211.1 | 8610119 | 21-scf00417 | 21 |
| AX-158260170 | 21 | 71.506 | KV453211.1 | 8610579 | 21-scf00417 | 21 |
| AX-158260171 | 21 | 71.506 | KV453211.1 | 8611069 | 21-scf00417 | 21 |
| AX-158260172 | 21 | 71.506 | KV453211.1 | 8611159 | 21-scf00417 | 21 |
| AX-157842961 | 21 | 71.506 | KV453211.1 | 8613822 | 21-scf00417 | 21 |
| AX-158260174 | 21 | 71.506 | KV453211.1 | 8613935 | 21-scf00417 | 21 |
| AX-158260175 | 21 | 71.506 | KV453211.1 | 8614669 | 21-scf00417 | 21 |
| AX-158260177 | 21 | 71.506 | KV453211.1 | 8618339 | 21-scf00417 | 21 |
| AX-158260178 | 21 | 71.506 | KV453211.1 | 8620525 | 21-scf00417 | 21 |
| AX-158260179 | 21 | 71.506 | KV453211.1 | 8621078 | 21-scf00417 | 21 |
| AX-157725959 | 21 | 71.506 | KV453211.1 | 8622367 | 21-scf00417 | 21 |
| AX-158260183 | 21 | 71.506 | KV453211.1 | 8626218 | 21-scf00417 | 21 |
| AX-158260184 | 21 | 71.506 | KV453211.1 | 8629427 | 21-scf00417 | 21 |
| AX-158260187 | 21 | 71.506 | KV453211.1 | 8631112 | 21-scf00417 | 21 |
| AX-158260189 | 21 | 71.506 | KV453211.1 | 8632797 | 21-scf00417 | 21 |
| AX-158260190 | 21 | 71.506 | KV453211.1 | 8633725 | 21-scf00417 | 21 |



|              |    |        |            |         |             |    |
|--------------|----|--------|------------|---------|-------------|----|
| AX-158260193 | 21 | 71.506 | KV453211.1 | 8635062 | 21-scf00417 | 21 |
| AX-158260195 | 21 | 71.506 | KV453211.1 | 8635987 | 21-scf00417 | 21 |
| AX-157723776 | 21 | 71.506 | KV453211.1 | 8636069 | 21-scf00417 | 21 |
| AX-158260196 | 21 | 71.506 | KV453211.1 | 8636989 | 21-scf00417 | 21 |
| AX-158260197 | 21 | 71.506 | KV453211.1 | 8639729 | 21-scf00417 | 21 |
| AX-157842963 | 21 | 71.506 | KV453211.1 | 8640572 | 21-scf00417 | 21 |
| AX-157741854 | 21 | 71.506 | KV453211.1 | 8646189 | 21-scf00417 | 21 |
| AX-158260203 | 21 | 71.506 | KV453211.1 | 8651027 | 21-scf00417 | 21 |
| AX-158260206 | 21 | 71.506 | KV453211.1 | 8654983 | 21-scf00417 | 21 |
| AX-158260208 | 21 | 71.506 | KV453211.1 | 8656059 | 21-scf00417 | 21 |
| AX-158260209 | 21 | 71.506 | KV453211.1 | 8656864 | 21-scf00417 | 21 |
| AX-157872836 | 21 | 71.506 | KV453211.1 | 8661180 | 21-scf00417 | 21 |
| AX-158260212 | 21 | 71.506 | KV453211.1 | 8661612 | 21-scf00417 | 21 |
| AX-158260213 | 21 | 71.506 | KV453211.1 | 8661947 | 21-scf00417 | 21 |
| AX-157842964 | 21 | 71.506 | KV453211.1 | 8663918 | 21-scf00417 | 21 |
| AX-157842965 | 21 | 71.506 | KV453211.1 | 8665211 | 21-scf00417 | 21 |
| AX-157842966 | 21 | 71.506 | KV453211.1 | 8666959 | 21-scf00417 | 21 |
| AX-158260217 | 21 | 71.506 | KV453211.1 | 8672120 | 21-scf00417 | 21 |
| AX-157747361 | 21 | 71.506 | KV453211.1 | 8673084 | 21-scf00417 | 21 |
| AX-158260219 | 21 | 71.506 | KV453211.1 | 8677535 | 21-scf00417 | 21 |
| AX-158260220 | 21 | 71.506 | KV453211.1 | 8686244 | 21-scf00417 | 21 |
| AX-158260221 | 21 | 71.506 | KV453211.1 | 8686825 | 21-scf00417 | 21 |
| AX-157842970 | 21 | 71.506 | KV453211.1 | 8691414 | 21-scf00417 | 21 |
| AX-158260224 | 21 | 71.506 | KV453211.1 | 8691506 | 21-scf00417 | 21 |
| AX-158260226 | 21 | 71.506 | KV453211.1 | 8693609 | 21-scf00417 | 21 |
| AX-158260227 | 21 | 71.506 | KV453211.1 | 8694734 | 21-scf00417 | 21 |
| AX-158260228 | 21 | 71.506 | KV453211.1 | 8695005 | 21-scf00417 | 21 |
| AX-157748093 | 21 | 71.506 | KV453211.1 | 8698929 | 21-scf00417 | 21 |
| AX-157872839 | 21 | 71.506 | KV453211.1 | 8699193 | 21-scf00417 | 21 |
| AX-158260231 | 21 | 71.506 | KV453211.1 | 8699320 | 21-scf00417 | 21 |
| AX-158260232 | 21 | 71.506 | KV453211.1 | 8699779 | 21-scf00417 | 21 |
| AX-158260233 | 21 | 71.506 | KV453211.1 | 8699844 | 21-scf00417 | 21 |
| AX-158260234 | 21 | 71.506 | KV453211.1 | 8700098 | 21-scf00417 | 21 |
| AX-157842971 | 21 | 71.506 | KV453211.1 | 8702730 | 21-scf00417 | 21 |
| AX-157880394 | 21 | 71.506 | KV453211.1 | 8703619 | 21-scf00417 | 21 |
| AX-158260260 | 21 | 71.506 | KV453211.1 | 8737593 | 21-scf00417 | 21 |
| AX-157741227 | 21 | 71.669 | KV453211.1 | 8703407 | 21-scf00417 | 21 |
| AX-157758175 | 21 | 71.669 | KV453211.1 | 8707233 | 21-scf00417 | 21 |
| AX-158260239 | 21 | 71.833 | KV453211.1 | 8711104 | 21-scf00417 | 21 |
| AX-158260241 | 21 | 71.833 | KV453211.1 | 8712429 | 21-scf00417 | 21 |
| AX-158260242 | 21 | 71.833 | KV453211.1 | 8714598 | 21-scf00417 | 21 |
| AX-158260243 | 21 | 71.833 | KV453211.1 | 8719495 | 21-scf00417 | 21 |
| AX-157880395 | 21 | 71.833 | KV453211.1 | 8719632 | 21-scf00417 | 21 |
| AX-158260180 | 21 | 72.052 | KV453211.1 | 8624924 | 21-scf00417 | 21 |
| AX-158260248 | 21 | 72.052 | KV453211.1 | 8725966 | 21-scf00417 | 21 |
| AX-158260258 | 21 | 72.052 | KV453211.1 | 8736306 | 21-scf00417 | 21 |
| AX-158260261 | 21 | 72.052 | KV453211.1 | 8738389 | 21-scf00417 | 21 |
| AX-158260265 | 21 | 72.052 | KV453211.1 | 8743756 | 21-scf00417 | 21 |
| AX-158260267 | 21 | 72.052 | KV453211.1 | 8745670 | 21-scf00417 | 21 |
| AX-158260268 | 21 | 72.052 | KV453211.1 | 8746343 | 21-scf00417 | 21 |
| AX-158260269 | 21 | 72.052 | KV453211.1 | 8747044 | 21-scf00417 | 21 |

|              |    |        |            |         |             |    |
|--------------|----|--------|------------|---------|-------------|----|
| AX-158260270 | 21 | 72.052 | KV453211.1 | 8747550 | 21-scf00417 | 21 |
| AX-158260272 | 21 | 72.052 | KV453211.1 | 8750115 | 21-scf00417 | 21 |
| AX-157842972 | 21 | 72.052 | KV453211.1 | 8752443 | 21-scf00417 | 21 |
| AX-158260275 | 21 | 72.052 | KV453211.1 | 8754661 | 21-scf00417 | 21 |
| AX-158260276 | 21 | 72.052 | KV453211.1 | 8755553 | 21-scf00417 | 21 |
| AX-158260280 | 21 | 72.052 | KV453211.1 | 8759649 | 21-scf00417 | 21 |
| AX-158260281 | 21 | 72.052 | KV453211.1 | 8760513 | 21-scf00417 | 21 |
| AX-158260277 | 21 | 72.108 | KV453211.1 | 8757654 | 21-scf00417 | 21 |
| AX-158257659 | 21 | 72.161 | KV453211.1 | 4890329 | 21-scf00417 | 21 |
| AX-158260279 | 21 | 72.161 | KV453211.1 | 8758870 | 21-scf00417 | 21 |
| AX-158260282 | 21 | 72.161 | KV453211.1 | 8763026 | 21-scf00417 | 21 |
| AX-158260289 | 21 | 72.161 | KV453211.1 | 8773084 | 21-scf00417 | 21 |
| AX-158260292 | 21 | 72.161 | KV453211.1 | 8774364 | 21-scf00417 | 21 |
| AX-157741053 | 21 | 72.161 | KV453211.1 | 8776693 | 21-scf00417 | 21 |
| AX-158260294 | 21 | 72.161 | KV453211.1 | 8776824 | 21-scf00417 | 21 |
| AX-157718765 | 21 | 72.161 | KV453211.1 | 8783200 | 21-scf00417 | 21 |
| AX-158260298 | 21 | 72.161 | KV453211.1 | 8786177 | 21-scf00417 | 21 |
| AX-158260300 | 21 | 72.161 | KV453211.1 | 8788302 | 21-scf00417 | 21 |
| AX-158260301 | 21 | 72.161 | KV453211.1 | 8788769 | 21-scf00417 | 21 |
| AX-158260303 | 21 | 72.161 | KV453211.1 | 8789691 | 21-scf00417 | 21 |
| AX-158260304 | 21 | 72.161 | KV453211.1 | 8792328 | 21-scf00417 | 21 |
| AX-158260305 | 21 | 72.161 | KV453211.1 | 8793029 | 21-scf00417 | 21 |
| AX-158260308 | 21 | 72.161 | KV453211.1 | 8798625 | 21-scf00417 | 21 |
| AX-158260309 | 21 | 72.161 | KV453211.1 | 8798920 | 21-scf00417 | 21 |
| AX-158260310 | 21 | 72.161 | KV453211.1 | 8799955 | 21-scf00417 | 21 |
| AX-158260311 | 21 | 72.161 | KV453211.1 | 8802118 | 21-scf00417 | 21 |
| AX-158260312 | 21 | 72.161 | KV453211.1 | 8803295 | 21-scf00417 | 21 |
| AX-158260313 | 21 | 72.161 | KV453211.1 | 8803789 | 21-scf00417 | 21 |
| AX-158260315 | 21 | 72.161 | KV453211.1 | 8804918 | 21-scf00417 | 21 |
| AX-158260316 | 21 | 72.161 | KV453211.1 | 8805819 | 21-scf00417 | 21 |
| AX-157755401 | 21 | 72.161 | KV453211.1 | 8810207 | 21-scf00417 | 21 |
| AX-158260322 | 21 | 72.161 | KV453211.1 | 8819484 | 21-scf00417 | 21 |
| AX-158260324 | 21 | 72.161 | KV453211.1 | 8823324 | 21-scf00417 | 21 |
| AX-158260329 | 21 | 72.161 | KV453211.1 | 8829192 | 21-scf00417 | 21 |
| AX-157728713 | 21 | 72.161 | KV453211.1 | 8831378 | 21-scf00417 | 21 |
| AX-157842974 | 21 | 72.161 | KV453211.1 | 8832791 | 21-scf00417 | 21 |
| AX-157842976 | 21 | 72.161 | KV453211.1 | 8835792 | 21-scf00417 | 21 |
| AX-158260330 | 21 | 72.161 | KV453211.1 | 8836582 | 21-scf00417 | 21 |
| AX-158260331 | 21 | 72.161 | KV453211.1 | 8837564 | 21-scf00417 | 21 |
| AX-158260332 | 21 | 72.161 | KV453211.1 | 8838022 | 21-scf00417 | 21 |
| AX-157756051 | 21 | 72.161 | KV453211.1 | 8840283 | 21-scf00417 | 21 |
| AX-158260335 | 21 | 72.161 | KV453211.1 | 8840430 | 21-scf00417 | 21 |
| AX-158260347 | 21 | 72.161 | KV453211.1 | 8872100 | 21-scf00417 | 21 |
| AX-158260349 | 21 | 72.161 | KV453211.1 | 8873829 | 21-scf00417 | 21 |
| AX-158260362 | 21 | 72.161 | KV453211.1 | 8892253 | 21-scf00417 | 21 |
| AX-158260369 | 21 | 72.161 | KV453211.1 | 8898966 | 21-scf00417 | 21 |
| AX-158260412 | 21 | 72.161 | KV453211.1 | 8962844 | 21-scf00417 | 21 |
| AX-158260251 | 21 | 72.182 | KV453211.1 | 8730158 | 21-scf00417 | 21 |
| AX-157842978 | 21 | 72.182 | KV453211.1 | 8840947 | 21-scf00417 | 21 |
| AX-157872840 | 21 | 72.182 | KV453211.1 | 8843095 | 21-scf00417 | 21 |
| AX-157887732 | 21 | 72.182 | KV453211.1 | 8888133 | 21-scf00417 | 21 |

|              |    |        |            |         |             |    |
|--------------|----|--------|------------|---------|-------------|----|
| AX-158260336 | 21 | 72.202 | KV453211.1 | 8843405 | 21-scf00417 | 21 |
| AX-158260321 | 21 | 72.231 | KV453211.1 | 8818235 | 21-scf00417 | 21 |
| AX-158260338 | 21 | 72.231 | KV453211.1 | 8854309 | 21-scf00417 | 21 |
| AX-158260344 | 21 | 72.253 | KV453211.1 | 8869466 | 21-scf00417 | 21 |
| AX-158260345 | 21 | 72.27  | KV453211.1 | 8870705 | 21-scf00417 | 21 |
| AX-158260346 | 21 | 72.27  | KV453211.1 | 8871593 | 21-scf00417 | 21 |
| AX-158260350 | 21 | 72.27  | KV453211.1 | 8876809 | 21-scf00417 | 21 |
| AX-158260353 | 21 | 72.27  | KV453211.1 | 8880487 | 21-scf00417 | 21 |
| AX-158260355 | 21 | 72.27  | KV453211.1 | 8882306 | 21-scf00417 | 21 |
| AX-158260356 | 21 | 72.27  | KV453211.1 | 8883386 | 21-scf00417 | 21 |
| AX-158260357 | 21 | 72.27  | KV453211.1 | 8883911 | 21-scf00417 | 21 |
| AX-158260358 | 21 | 72.27  | KV453211.1 | 8884888 | 21-scf00417 | 21 |
| AX-158387209 | 21 | 72.27  | KV453211.1 | 8891617 | 21-scf00417 | 21 |
| AX-158260361 | 21 | 72.27  | KV453211.1 | 8891893 | 21-scf00417 | 21 |
| AX-158260363 | 21 | 72.27  | KV453211.1 | 8892899 | 21-scf00417 | 21 |
| AX-158260365 | 21 | 72.27  | KV453211.1 | 8894554 | 21-scf00417 | 21 |
| AX-158260371 | 21 | 72.27  | KV453211.1 | 8902827 | 21-scf00417 | 21 |
| AX-157720149 | 21 | 72.27  | KV453211.1 | 8904969 | 21-scf00417 | 21 |
| AX-158260373 | 21 | 72.33  | KV453211.1 | 8906501 | 21-scf00417 | 21 |
| AX-158259777 | 21 | 72.379 | KV453211.1 | 8050792 | 21-scf00417 | 21 |
| AX-158387207 | 21 | 72.379 | KV453211.1 | 8735431 | 21-scf00417 | 21 |
| AX-158416195 | 21 | 72.379 | KV453211.1 | 8782215 | 21-scf00417 | 21 |
| AX-158260333 | 21 | 72.379 | KV453211.1 | 8839149 | 21-scf00417 | 21 |
| AX-158260337 | 21 | 72.379 | KV453211.1 | 8852350 | 21-scf00417 | 21 |
| AX-158260341 | 21 | 72.379 | KV453211.1 | 8865889 | 21-scf00417 | 21 |
| AX-158260354 | 21 | 72.379 | KV453211.1 | 8881740 | 21-scf00417 | 21 |
| AX-158416198 | 21 | 72.379 | KV453211.1 | 8905818 | 21-scf00417 | 21 |
| AX-158260375 | 21 | 72.379 | KV453211.1 | 8908433 | 21-scf00417 | 21 |
| AX-158416199 | 21 | 72.379 | KV453211.1 | 8909659 | 21-scf00417 | 21 |
| AX-158260376 | 21 | 72.379 | KV453211.1 | 8910170 | 21-scf00417 | 21 |
| AX-158260380 | 21 | 72.379 | KV453211.1 | 8919195 | 21-scf00417 | 21 |
| AX-158260381 | 21 | 72.379 | KV453211.1 | 8919896 | 21-scf00417 | 21 |
| AX-157749182 | 21 | 72.379 | KV453211.1 | 8920392 | 21-scf00417 | 21 |
| AX-158260382 | 21 | 72.379 | KV453211.1 | 8921274 | 21-scf00417 | 21 |
| AX-158260383 | 21 | 72.379 | KV453211.1 | 8922152 | 21-scf00417 | 21 |
| AX-158260384 | 21 | 72.379 | KV453211.1 | 8923123 | 21-scf00417 | 21 |
| AX-158260385 | 21 | 72.379 | KV453211.1 | 8923539 | 21-scf00417 | 21 |
| AX-158260386 | 21 | 72.379 | KV453211.1 | 8926079 | 21-scf00417 | 21 |
| AX-157754260 | 21 | 72.379 | KV453211.1 | 8926542 | 21-scf00417 | 21 |
| AX-158260387 | 21 | 72.379 | KV453211.1 | 8927875 | 21-scf00417 | 21 |
| AX-158260388 | 21 | 72.379 | KV453211.1 | 8928531 | 21-scf00417 | 21 |
| AX-158260391 | 21 | 72.379 | KV453211.1 | 8930257 | 21-scf00417 | 21 |
| AX-157710844 | 21 | 72.379 | KV453211.1 | 8933568 | 21-scf00417 | 21 |
| AX-158260394 | 21 | 72.379 | KV453211.1 | 8934466 | 21-scf00417 | 21 |
| AX-158260396 | 21 | 72.379 | KV453211.1 | 8936967 | 21-scf00417 | 21 |
| AX-158260397 | 21 | 72.379 | KV453211.1 | 8938192 | 21-scf00417 | 21 |
| AX-157741014 | 21 | 72.379 | KV453211.1 | 8939663 | 21-scf00417 | 21 |
| AX-158260400 | 21 | 72.379 | KV453211.1 | 8944039 | 21-scf00417 | 21 |
| AX-158260403 | 21 | 72.379 | KV453211.1 | 8948311 | 21-scf00417 | 21 |
| AX-158260405 | 21 | 72.379 | KV453211.1 | 8950571 | 21-scf00417 | 21 |
| AX-158260406 | 21 | 72.379 | KV453211.1 | 8951431 | 21-scf00417 | 21 |

|              |    |        |             |         |             |    |
|--------------|----|--------|-------------|---------|-------------|----|
| AX-158260407 | 21 | 72.379 | KV453211.1  | 8952022 | 21-scf00417 | 21 |
| AX-158260410 | 21 | 72.379 | KV453211.1  | 8959283 | 21-scf00417 | 21 |
| AX-158260418 | 21 | 72.379 | KV453211.1  | 8970788 | 21-scf00417 | 21 |
| AX-158260477 | 21 | 72.379 | KV453213.1  | 33522   | 21-scf00419 | 21 |
| AX-157706135 | 21 | 72.379 | 3ML01031681 | 220     | scf07300_1  | UN |
| AX-158260286 | 21 | 72.598 | KV453211.1  | 8766967 | 21-scf00417 | 21 |
| AX-158260306 | 21 | 72.598 | KV453211.1  | 8794702 | 21-scf00417 | 21 |
| AX-158260339 | 21 | 72.598 | KV453211.1  | 8855297 | 21-scf00417 | 21 |
| AX-158260415 | 21 | 72.598 | KV453211.1  | 8966838 | 21-scf00417 | 21 |
| AX-158260417 | 21 | 72.598 | KV453211.1  | 8968976 | 21-scf00417 | 21 |
| AX-158260419 | 21 | 72.598 | KV453211.1  | 8975075 | 21-scf00417 | 21 |
| AX-158260420 | 21 | 72.598 | KV453211.1  | 8975895 | 21-scf00417 | 21 |
| AX-158260422 | 21 | 72.598 | KV453211.1  | 8982407 | 21-scf00417 | 21 |
| AX-158260425 | 21 | 72.598 | KV453211.1  | 8985199 | 21-scf00417 | 21 |
| AX-158264455 | 21 | 72.598 | KV453213.1  | 4813583 | 21-scf00419 | 21 |
| AX-158264790 | 21 | 72.598 | KV453213.1  | 5218540 | 21-scf00419 | 21 |
| AX-158260426 | 21 | 72.816 | KV453211.1  | 8987443 | 21-scf00417 | 21 |
| AX-158260427 | 21 | 72.816 | KV453211.1  | 8989585 | 21-scf00417 | 21 |
| AX-158260429 | 21 | 72.816 | KV453211.1  | 8990926 | 21-scf00417 | 21 |
| AX-158260430 | 21 | 72.86  | KV453211.1  | 8991004 | 21-scf00417 | 21 |
| AX-158260434 | 21 | 72.885 | KV453211.1  | 8993649 | 21-scf00417 | 21 |
| AX-158260435 | 21 | 72.925 | KV453211.1  | 8995849 | 21-scf00417 | 21 |
| AX-158259635 | 21 | 73.035 | KV453211.1  | 7801684 | 21-scf00417 | 21 |
| AX-157842947 | 21 | 73.035 | KV453211.1  | 8297249 | 21-scf00417 | 21 |
| AX-158260431 | 21 | 73.035 | KV453211.1  | 8992198 | 21-scf00417 | 21 |
| AX-158260436 | 21 | 73.035 | KV453211.1  | 8997025 | 21-scf00417 | 21 |
| AX-158260438 | 21 | 73.035 | KV453211.1  | 8997715 | 21-scf00417 | 21 |
| AX-158260439 | 21 | 73.035 | KV453211.1  | 8998604 | 21-scf00417 | 21 |
| AX-158260440 | 21 | 73.035 | KV453211.1  | 9001235 | 21-scf00417 | 21 |
| AX-158260442 | 21 | 73.035 | KV453211.1  | 9002986 | 21-scf00417 | 21 |
| AX-158260444 | 21 | 73.035 | KV453211.1  | 9004320 | 21-scf00417 | 21 |
| AX-158260445 | 21 | 73.035 | KV453211.1  | 9004775 | 21-scf00417 | 21 |
| AX-158260446 | 21 | 73.035 | KV453211.1  | 9006660 | 21-scf00417 | 21 |
| AX-158260447 | 21 | 73.035 | KV453211.1  | 9007022 | 21-scf00417 | 21 |
| AX-158260449 | 21 | 73.035 | KV453211.1  | 9009503 | 21-scf00417 | 21 |
| AX-158260452 | 21 | 73.035 | KV453211.1  | 9015099 | 21-scf00417 | 21 |
| AX-158260456 | 21 | 73.035 | KV453211.1  | 9023029 | 21-scf00417 | 21 |
| AX-158260484 | 21 | 73.035 | KV453213.1  | 42560   | 21-scf00419 | 21 |
| AX-158260491 | 21 | 73.035 | KV453213.1  | 50279   | 21-scf00419 | 21 |
| AX-158260495 | 21 | 73.035 | KV453213.1  | 53026   | 21-scf00419 | 21 |
| AX-158260451 | 21 | 73.253 | KV453211.1  | 9011978 | 21-scf00417 | 21 |
| AX-158260458 | 21 | 73.253 | KV453211.1  | 9027343 | 21-scf00417 | 21 |
| AX-158260460 | 21 | 73.253 | KV453211.1  | 9028194 | 21-scf00417 | 21 |
| AX-158260464 | 21 | 73.253 | KV453213.1  | 6225    | 21-scf00419 | 21 |
| AX-158260465 | 21 | 73.253 | KV453213.1  | 7032    | 21-scf00419 | 21 |
| AX-158260470 | 21 | 73.253 | KV453213.1  | 12367   | 21-scf00419 | 21 |
| AX-158260475 | 21 | 73.253 | KV453213.1  | 19376   | 21-scf00419 | 21 |
| AX-158260478 | 21 | 73.282 | KV453213.1  | 38354   | 21-scf00419 | 21 |
| AX-158260479 | 21 | 73.304 | KV453213.1  | 38561   | 21-scf00419 | 21 |
| AX-158260483 | 21 | 73.329 | KV453213.1  | 41888   | 21-scf00419 | 21 |
| AX-158260486 | 21 | 73.368 | KV453213.1  | 44456   | 21-scf00419 | 21 |

|              |    |        |            |         |             |    |
|--------------|----|--------|------------|---------|-------------|----|
| AX-158260487 | 21 | 73.408 | KV453213.1 | 46007   | 21-scf00419 | 21 |
| AX-158260488 | 21 | 73.443 | KV453213.1 | 47921   | 21-scf00419 | 21 |
| AX-157842980 | 21 | 73.471 | KV453213.1 | 60271   | 21-scf00419 | 21 |
| AX-157842981 | 21 | 73.492 | KV453213.1 | 60718   | 21-scf00419 | 21 |
| AX-158260512 | 21 | 73.492 | KV453213.1 | 79877   | 21-scf00419 | 21 |
| AX-158260514 | 21 | 73.492 | KV453213.1 | 84165   | 21-scf00419 | 21 |
| AX-158260585 | 21 | 73.492 | KV453213.1 | 180744  | 21-scf00419 | 21 |
| AX-157842982 | 21 | 73.529 | KV453213.1 | 60757   | 21-scf00419 | 21 |
| AX-157713157 | 21 | 73.581 | KV453213.1 | 74410   | 21-scf00419 | 21 |
| AX-158260510 | 21 | 73.581 | KV453213.1 | 77811   | 21-scf00419 | 21 |
| AX-157772606 | 21 | 73.581 | KV453213.1 | 84793   | 21-scf00419 | 21 |
| AX-157842989 | 21 | 73.581 | KV453213.1 | 86625   | 21-scf00419 | 21 |
| AX-158260515 | 21 | 73.581 | KV453213.1 | 87911   | 21-scf00419 | 21 |
| AX-157842990 | 21 | 73.581 | KV453213.1 | 88123   | 21-scf00419 | 21 |
| AX-158260516 | 21 | 73.581 | KV453213.1 | 88594   | 21-scf00419 | 21 |
| AX-158260517 | 21 | 73.581 | KV453213.1 | 88901   | 21-scf00419 | 21 |
| AX-158260518 | 21 | 73.581 | KV453213.1 | 89386   | 21-scf00419 | 21 |
| AX-158260521 | 21 | 73.581 | KV453213.1 | 92889   | 21-scf00419 | 21 |
| AX-158260522 | 21 | 73.581 | KV453213.1 | 94868   | 21-scf00419 | 21 |
| AX-158260523 | 21 | 73.581 | KV453213.1 | 96788   | 21-scf00419 | 21 |
| AX-157750788 | 21 | 73.581 | KV453213.1 | 97369   | 21-scf00419 | 21 |
| AX-158260524 | 21 | 73.581 | KV453213.1 | 97897   | 21-scf00419 | 21 |
| AX-158260525 | 21 | 73.581 | KV453213.1 | 98374   | 21-scf00419 | 21 |
| AX-157842992 | 21 | 73.581 | KV453213.1 | 99343   | 21-scf00419 | 21 |
| AX-158260526 | 21 | 73.581 | KV453213.1 | 99765   | 21-scf00419 | 21 |
| AX-157842993 | 21 | 73.581 | KV453213.1 | 100586  | 21-scf00419 | 21 |
| AX-158260534 | 21 | 73.581 | KV453213.1 | 106996  | 21-scf00419 | 21 |
| AX-158260535 | 21 | 73.581 | KV453213.1 | 107208  | 21-scf00419 | 21 |
| AX-158260536 | 21 | 73.581 | KV453213.1 | 107481  | 21-scf00419 | 21 |
| AX-158260544 | 21 | 73.581 | KV453213.1 | 115239  | 21-scf00419 | 21 |
| AX-158260545 | 21 | 73.581 | KV453213.1 | 116877  | 21-scf00419 | 21 |
| AX-158260547 | 21 | 73.581 | KV453213.1 | 118215  | 21-scf00419 | 21 |
| AX-157842996 | 21 | 73.581 | KV453213.1 | 119640  | 21-scf00419 | 21 |
| AX-157842997 | 21 | 73.581 | KV453213.1 | 122729  | 21-scf00419 | 21 |
| AX-157758084 | 21 | 73.581 | KV453213.1 | 125700  | 21-scf00419 | 21 |
| AX-157842998 | 21 | 73.581 | KV453213.1 | 125741  | 21-scf00419 | 21 |
| AX-158260551 | 21 | 73.581 | KV453213.1 | 126459  | 21-scf00419 | 21 |
| AX-157746026 | 21 | 73.581 | KV453213.1 | 132012  | 21-scf00419 | 21 |
| AX-158260584 | 21 | 73.581 | KV453213.1 | 178189  | 21-scf00419 | 21 |
| AX-158260602 | 21 | 73.581 | KV453213.1 | 204039  | 21-scf00419 | 21 |
| AX-158260702 | 21 | 73.581 | KV453213.1 | 316377  | 21-scf00419 | 21 |
| AX-158260739 | 21 | 73.581 | KV453213.1 | 358495  | 21-scf00419 | 21 |
| AX-158387217 | 21 | 73.581 | KV453213.1 | 420001  | 21-scf00419 | 21 |
| AX-158262218 | 21 | 73.581 | KV453213.1 | 2354752 | 21-scf00419 | 21 |
| AX-158260554 | 21 | 73.624 | KV453213.1 | 133819  | 21-scf00419 | 21 |
| AX-157713936 | 21 | 73.745 | KV453213.1 | 76710   | 21-scf00419 | 21 |
| AX-158260513 | 21 | 73.745 | KV453213.1 | 82871   | 21-scf00419 | 21 |
| AX-157758657 | 21 | 73.745 | KV453213.1 | 101741  | 21-scf00419 | 21 |
| AX-158260541 | 21 | 73.745 | KV453213.1 | 111778  | 21-scf00419 | 21 |
| AX-157843000 | 21 | 73.745 | KV453213.1 | 136452  | 21-scf00419 | 21 |
| AX-157843001 | 21 | 73.745 | KV453213.1 | 136987  | 21-scf00419 | 21 |

|              |    |        |            |        |             |    |
|--------------|----|--------|------------|--------|-------------|----|
| AX-158260556 | 21 | 73.745 | KV453213.1 | 137571 | 21-scf00419 | 21 |
| AX-158411093 | 21 | 73.745 | KV453213.1 | 144350 | 21-scf00419 | 21 |
| AX-158260559 | 21 | 73.745 | KV453213.1 | 145411 | 21-scf00419 | 21 |
| AX-157859958 | 21 | 73.745 | KV453213.1 | 145660 | 21-scf00419 | 21 |
| AX-158260560 | 21 | 73.745 | KV453213.1 | 145806 | 21-scf00419 | 21 |
| AX-158260562 | 21 | 73.745 | KV453213.1 | 147571 | 21-scf00419 | 21 |
| AX-158260564 | 21 | 73.745 | KV453213.1 | 151568 | 21-scf00419 | 21 |
| AX-158260565 | 21 | 73.745 | KV453213.1 | 152301 | 21-scf00419 | 21 |
| AX-158260569 | 21 | 73.745 | KV453213.1 | 155542 | 21-scf00419 | 21 |
| AX-158260571 | 21 | 73.745 | KV453213.1 | 157524 | 21-scf00419 | 21 |
| AX-157843002 | 21 | 73.745 | KV453213.1 | 163919 | 21-scf00419 | 21 |
| AX-158260578 | 21 | 73.745 | KV453213.1 | 168897 | 21-scf00419 | 21 |
| AX-158260579 | 21 | 73.745 | KV453213.1 | 170971 | 21-scf00419 | 21 |
| AX-158260580 | 21 | 73.745 | KV453213.1 | 172561 | 21-scf00419 | 21 |
| AX-158260582 | 21 | 73.745 | KV453213.1 | 176408 | 21-scf00419 | 21 |
| AX-158260583 | 21 | 73.745 | KV453213.1 | 177237 | 21-scf00419 | 21 |
| AX-158260587 | 21 | 73.745 | KV453213.1 | 184714 | 21-scf00419 | 21 |
| AX-158260588 | 21 | 73.745 | KV453213.1 | 186366 | 21-scf00419 | 21 |
| AX-158260590 | 21 | 73.745 | KV453213.1 | 193258 | 21-scf00419 | 21 |
| AX-158260594 | 21 | 73.745 | KV453213.1 | 197331 | 21-scf00419 | 21 |
| AX-158260596 | 21 | 73.745 | KV453213.1 | 198534 | 21-scf00419 | 21 |
| AX-158260597 | 21 | 73.745 | KV453213.1 | 199260 | 21-scf00419 | 21 |
| AX-158260598 | 21 | 73.745 | KV453213.1 | 199674 | 21-scf00419 | 21 |
| AX-158260622 | 21 | 73.745 | KV453213.1 | 229723 | 21-scf00419 | 21 |
| AX-158260695 | 21 | 73.745 | KV453213.1 | 309429 | 21-scf00419 | 21 |
| AX-158260699 | 21 | 73.745 | KV453213.1 | 314879 | 21-scf00419 | 21 |
| AX-158260844 | 21 | 73.745 | KV453213.1 | 477033 | 21-scf00419 | 21 |
| AX-158260845 | 21 | 73.745 | KV453213.1 | 478500 | 21-scf00419 | 21 |
| AX-158260599 | 21 | 73.907 | KV453213.1 | 200483 | 21-scf00419 | 21 |
| AX-158260603 | 21 | 73.908 | KV453213.1 | 204481 | 21-scf00419 | 21 |
| AX-157843006 | 21 | 73.908 | KV453213.1 | 204937 | 21-scf00419 | 21 |
| AX-158260607 | 21 | 73.908 | KV453213.1 | 207948 | 21-scf00419 | 21 |
| AX-157718049 | 21 | 73.908 | KV453213.1 | 209432 | 21-scf00419 | 21 |
| AX-158260543 | 21 | 73.922 | KV453213.1 | 114900 | 21-scf00419 | 21 |
| AX-158260591 | 21 | 73.922 | KV453213.1 | 195437 | 21-scf00419 | 21 |
| AX-158260592 | 21 | 73.922 | KV453213.1 | 196032 | 21-scf00419 | 21 |
| AX-158260611 | 21 | 73.922 | KV453213.1 | 212215 | 21-scf00419 | 21 |
| AX-158260612 | 21 | 73.922 | KV453213.1 | 212885 | 21-scf00419 | 21 |
| AX-158260605 | 21 | 73.941 | KV453213.1 | 206288 | 21-scf00419 | 21 |
| AX-158260609 | 21 | 73.941 | KV453213.1 | 211126 | 21-scf00419 | 21 |
| AX-158423416 | 21 | 73.941 | KV453213.1 | 222355 | 21-scf00419 | 21 |
| AX-158423417 | 21 | 73.963 | KV453213.1 | 223252 | 21-scf00419 | 21 |
| AX-158260621 | 21 | 73.988 | KV453213.1 | 227625 | 21-scf00419 | 21 |
| AX-158260600 | 21 | 74.018 | KV453213.1 | 201193 | 21-scf00419 | 21 |
| AX-158260613 | 21 | 74.018 | KV453213.1 | 213797 | 21-scf00419 | 21 |
| AX-158260616 | 21 | 74.018 | KV453213.1 | 215571 | 21-scf00419 | 21 |
| AX-158416210 | 21 | 74.018 | KV453213.1 | 221496 | 21-scf00419 | 21 |
| AX-157843007 | 21 | 74.018 | KV453213.1 | 231290 | 21-scf00419 | 21 |
| AX-157716745 | 21 | 74.018 | KV453213.1 | 231648 | 21-scf00419 | 21 |
| AX-158260623 | 21 | 74.018 | KV453213.1 | 233546 | 21-scf00419 | 21 |
| AX-158260624 | 21 | 74.018 | KV453213.1 | 233767 | 21-scf00419 | 21 |

|              |    |        |            |         |             |    |
|--------------|----|--------|------------|---------|-------------|----|
| AX-157843009 | 21 | 74.018 | KV453213.1 | 239900  | 21-scf00419 | 21 |
| AX-158260628 | 21 | 74.018 | KV453213.1 | 240107  | 21-scf00419 | 21 |
| AX-158260630 | 21 | 74.018 | KV453213.1 | 241130  | 21-scf00419 | 21 |
| AX-158260636 | 21 | 74.018 | KV453213.1 | 250282  | 21-scf00419 | 21 |
| AX-158260674 | 21 | 74.018 | KV453213.1 | 290799  | 21-scf00419 | 21 |
| AX-158260637 | 21 | 74.069 | KV453213.1 | 252040  | 21-scf00419 | 21 |
| AX-158261387 | 21 | 74.069 | KV453213.1 | 1174312 | 21-scf00419 | 21 |
| AX-158261390 | 21 | 74.069 | KV453213.1 | 1186790 | 21-scf00419 | 21 |
| AX-157843081 | 21 | 74.069 | KV453213.1 | 1300860 | 21-scf00419 | 21 |
| AX-158261487 | 21 | 74.069 | KV453213.1 | 1338063 | 21-scf00419 | 21 |
| AX-158261725 | 21 | 74.069 | KV453213.1 | 1700582 | 21-scf00419 | 21 |
| AX-158261761 | 21 | 74.069 | KV453213.1 | 1755999 | 21-scf00419 | 21 |
| AX-158261949 | 21 | 74.069 | KV453213.1 | 2010484 | 21-scf00419 | 21 |
| AX-158261957 | 21 | 74.069 | KV453213.1 | 2022641 | 21-scf00419 | 21 |
| AX-158261965 | 21 | 74.069 | KV453213.1 | 2036355 | 21-scf00419 | 21 |
| AX-158261974 | 21 | 74.069 | KV453213.1 | 2045561 | 21-scf00419 | 21 |
| AX-157872884 | 21 | 74.069 | KV453213.1 | 2406198 | 21-scf00419 | 21 |
| AX-158260501 | 21 | 74.127 | KV453213.1 | 67434   | 21-scf00419 | 21 |
| AX-158260505 | 21 | 74.127 | KV453213.1 | 70082   | 21-scf00419 | 21 |
| AX-158260540 | 21 | 74.127 | KV453213.1 | 111366  | 21-scf00419 | 21 |
| AX-158260570 | 21 | 74.127 | KV453213.1 | 156413  | 21-scf00419 | 21 |
| AX-158260572 | 21 | 74.127 | KV453213.1 | 158785  | 21-scf00419 | 21 |
| AX-158260575 | 21 | 74.127 | KV453213.1 | 163027  | 21-scf00419 | 21 |
| AX-158260620 | 21 | 74.127 | KV453213.1 | 226297  | 21-scf00419 | 21 |
| AX-158260626 | 21 | 74.127 | KV453213.1 | 236495  | 21-scf00419 | 21 |
| AX-158260627 | 21 | 74.127 | KV453213.1 | 239477  | 21-scf00419 | 21 |
| AX-157843010 | 21 | 74.127 | KV453213.1 | 241412  | 21-scf00419 | 21 |
| AX-158260634 | 21 | 74.127 | KV453213.1 | 248584  | 21-scf00419 | 21 |
| AX-158260664 | 21 | 74.127 | KV453213.1 | 282900  | 21-scf00419 | 21 |
| AX-158260665 | 21 | 74.127 | KV453213.1 | 283344  | 21-scf00419 | 21 |
| AX-157872844 | 21 | 74.127 | KV453213.1 | 286958  | 21-scf00419 | 21 |
| AX-158260671 | 21 | 74.127 | KV453213.1 | 289656  | 21-scf00419 | 21 |
| AX-158260672 | 21 | 74.127 | KV453213.1 | 289966  | 21-scf00419 | 21 |
| AX-158260676 | 21 | 74.127 | KV453213.1 | 293000  | 21-scf00419 | 21 |
| AX-158260677 | 21 | 74.127 | KV453213.1 | 293888  | 21-scf00419 | 21 |
| AX-158260679 | 21 | 74.127 | KV453213.1 | 295236  | 21-scf00419 | 21 |
| AX-158260680 | 21 | 74.127 | KV453213.1 | 296171  | 21-scf00419 | 21 |
| AX-158260684 | 21 | 74.127 | KV453213.1 | 298814  | 21-scf00419 | 21 |
| AX-158260685 | 21 | 74.127 | KV453213.1 | 299772  | 21-scf00419 | 21 |
| AX-158260688 | 21 | 74.127 | KV453213.1 | 301999  | 21-scf00419 | 21 |
| AX-158260700 | 21 | 74.127 | KV453213.1 | 315354  | 21-scf00419 | 21 |
| AX-158260703 | 21 | 74.127 | KV453213.1 | 317513  | 21-scf00419 | 21 |
| AX-158260704 | 21 | 74.127 | KV453213.1 | 319889  | 21-scf00419 | 21 |
| AX-158260708 | 21 | 74.127 | KV453213.1 | 325729  | 21-scf00419 | 21 |
| AX-158260717 | 21 | 74.127 | KV453213.1 | 338181  | 21-scf00419 | 21 |
| AX-158260718 | 21 | 74.127 | KV453213.1 | 339627  | 21-scf00419 | 21 |
| AX-158260721 | 21 | 74.127 | KV453213.1 | 344459  | 21-scf00419 | 21 |
| AX-158260722 | 21 | 74.127 | KV453213.1 | 345837  | 21-scf00419 | 21 |
| AX-158260725 | 21 | 74.127 | KV453213.1 | 347757  | 21-scf00419 | 21 |
| AX-158260726 | 21 | 74.127 | KV453213.1 | 348164  | 21-scf00419 | 21 |
| AX-158260727 | 21 | 74.127 | KV453213.1 | 348672  | 21-scf00419 | 21 |

|              |    |        |            |         |             |    |
|--------------|----|--------|------------|---------|-------------|----|
| AX-158260730 | 21 | 74.127 | KV453213.1 | 352904  | 21-scf00419 | 21 |
| AX-158260731 | 21 | 74.127 | KV453213.1 | 353797  | 21-scf00419 | 21 |
| AX-158260732 | 21 | 74.127 | KV453213.1 | 354531  | 21-scf00419 | 21 |
| AX-158260738 | 21 | 74.127 | KV453213.1 | 358418  | 21-scf00419 | 21 |
| AX-157760905 | 21 | 74.127 | KV453213.1 | 364132  | 21-scf00419 | 21 |
| AX-158260747 | 21 | 74.127 | KV453213.1 | 371461  | 21-scf00419 | 21 |
| AX-158260748 | 21 | 74.127 | KV453213.1 | 371869  | 21-scf00419 | 21 |
| AX-158260755 | 21 | 74.127 | KV453213.1 | 378330  | 21-scf00419 | 21 |
| AX-158419195 | 21 | 74.127 | KV453213.1 | 380396  | 21-scf00419 | 21 |
| AX-158260757 | 21 | 74.127 | KV453213.1 | 385765  | 21-scf00419 | 21 |
| AX-158260758 | 21 | 74.127 | KV453213.1 | 386310  | 21-scf00419 | 21 |
| AX-158260759 | 21 | 74.127 | KV453213.1 | 386664  | 21-scf00419 | 21 |
| AX-158260760 | 21 | 74.127 | KV453213.1 | 387496  | 21-scf00419 | 21 |
| AX-158260761 | 21 | 74.127 | KV453213.1 | 388793  | 21-scf00419 | 21 |
| AX-158260762 | 21 | 74.127 | KV453213.1 | 389917  | 21-scf00419 | 21 |
| AX-158260763 | 21 | 74.127 | KV453213.1 | 391870  | 21-scf00419 | 21 |
| AX-158260764 | 21 | 74.127 | KV453213.1 | 392667  | 21-scf00419 | 21 |
| AX-158260767 | 21 | 74.127 | KV453213.1 | 394439  | 21-scf00419 | 21 |
| AX-158260772 | 21 | 74.127 | KV453213.1 | 398451  | 21-scf00419 | 21 |
| AX-158260779 | 21 | 74.127 | KV453213.1 | 404761  | 21-scf00419 | 21 |
| AX-158260791 | 21 | 74.127 | KV453213.1 | 415887  | 21-scf00419 | 21 |
| AX-158260793 | 21 | 74.127 | KV453213.1 | 416913  | 21-scf00419 | 21 |
| AX-158260801 | 21 | 74.127 | KV453213.1 | 424091  | 21-scf00419 | 21 |
| AX-158260809 | 21 | 74.127 | KV453213.1 | 430198  | 21-scf00419 | 21 |
| AX-158260812 | 21 | 74.127 | KV453213.1 | 433543  | 21-scf00419 | 21 |
| AX-158260813 | 21 | 74.127 | KV453213.1 | 434256  | 21-scf00419 | 21 |
| AX-158260814 | 21 | 74.127 | KV453213.1 | 434609  | 21-scf00419 | 21 |
| AX-158260816 | 21 | 74.127 | KV453213.1 | 436777  | 21-scf00419 | 21 |
| AX-158260824 | 21 | 74.127 | KV453213.1 | 447872  | 21-scf00419 | 21 |
| AX-158260828 | 21 | 74.127 | KV453213.1 | 452798  | 21-scf00419 | 21 |
| AX-158260829 | 21 | 74.127 | KV453213.1 | 453394  | 21-scf00419 | 21 |
| AX-158260832 | 21 | 74.127 | KV453213.1 | 456638  | 21-scf00419 | 21 |
| AX-158260833 | 21 | 74.127 | KV453213.1 | 459150  | 21-scf00419 | 21 |
| AX-158260837 | 21 | 74.127 | KV453213.1 | 468998  | 21-scf00419 | 21 |
| AX-158260839 | 21 | 74.127 | KV453213.1 | 472506  | 21-scf00419 | 21 |
| AX-158260843 | 21 | 74.127 | KV453213.1 | 476447  | 21-scf00419 | 21 |
| AX-158260846 | 21 | 74.127 | KV453213.1 | 479337  | 21-scf00419 | 21 |
| AX-158260847 | 21 | 74.127 | KV453213.1 | 480040  | 21-scf00419 | 21 |
| AX-158260849 | 21 | 74.127 | KV453213.1 | 480978  | 21-scf00419 | 21 |
| AX-158260850 | 21 | 74.127 | KV453213.1 | 481399  | 21-scf00419 | 21 |
| AX-158260854 | 21 | 74.127 | KV453213.1 | 484932  | 21-scf00419 | 21 |
| AX-157843022 | 21 | 74.127 | KV453213.1 | 490249  | 21-scf00419 | 21 |
| AX-158260926 | 21 | 74.127 | KV453213.1 | 583585  | 21-scf00419 | 21 |
| AX-158260937 | 21 | 74.127 | KV453213.1 | 605080  | 21-scf00419 | 21 |
| AX-158261042 | 21 | 74.127 | KV453213.1 | 723091  | 21-scf00419 | 21 |
| AX-157756068 | 21 | 74.127 | KV453213.1 | 753771  | 21-scf00419 | 21 |
| AX-158261162 | 21 | 74.127 | KV453213.1 | 865481  | 21-scf00419 | 21 |
| AX-158261168 | 21 | 74.127 | KV453213.1 | 869688  | 21-scf00419 | 21 |
| AX-158261254 | 21 | 74.127 | KV453213.1 | 1008183 | 21-scf00419 | 21 |
| AX-157771157 | 21 | 74.127 | KV453213.1 | 1012328 | 21-scf00419 | 21 |
| AX-158416250 | 21 | 74.127 | KV453213.1 | 1185019 | 21-scf00419 | 21 |



|              |    |        |            |         |             |    |
|--------------|----|--------|------------|---------|-------------|----|
| AX-158261553 | 21 | 74.127 | KV453213.1 | 1424556 | 21-scf00419 | 21 |
| AX-158261637 | 21 | 74.127 | KV453213.1 | 1521286 | 21-scf00419 | 21 |
| AX-158261729 | 21 | 74.127 | KV453213.1 | 1708142 | 21-scf00419 | 21 |
| AX-158261787 | 21 | 74.127 | KV453213.1 | 1801335 | 21-scf00419 | 21 |
| AX-158261792 | 21 | 74.127 | KV453213.1 | 1808498 | 21-scf00419 | 21 |
| AX-158261817 | 21 | 74.127 | KV453213.1 | 1836190 | 21-scf00419 | 21 |
| AX-158262270 | 21 | 74.127 | KV453213.1 | 2402563 | 21-scf00419 | 21 |
| AX-158262475 | 21 | 74.127 | KV453213.1 | 2641919 | 21-scf00419 | 21 |
| AX-158262477 | 21 | 74.127 | KV453213.1 | 2642785 | 21-scf00419 | 21 |
| AX-158262547 | 21 | 74.127 | KV453213.1 | 2721626 | 21-scf00419 | 21 |
| AX-158262566 | 21 | 74.127 | KV453213.1 | 2743771 | 21-scf00419 | 21 |
| AX-158262601 | 21 | 74.127 | KV453213.1 | 2781875 | 21-scf00419 | 21 |
| AX-158262605 | 21 | 74.127 | KV453213.1 | 2791309 | 21-scf00419 | 21 |
| AX-158262668 | 21 | 74.127 | KV453213.1 | 2895542 | 21-scf00419 | 21 |
| AX-158263060 | 21 | 74.127 | KV453213.1 | 3348751 | 21-scf00419 | 21 |
| AX-158263123 | 21 | 74.127 | KV453213.1 | 3410743 | 21-scf00419 | 21 |
| AX-158263245 | 21 | 74.127 | KV453213.1 | 3526995 | 21-scf00419 | 21 |
| AX-158263270 | 21 | 74.127 | KV453213.1 | 3546466 | 21-scf00419 | 21 |
| AX-158263283 | 21 | 74.127 | KV453213.1 | 3560387 | 21-scf00419 | 21 |
| AX-158263288 | 21 | 74.127 | KV453213.1 | 3567633 | 21-scf00419 | 21 |
| AX-157843194 | 21 | 74.127 | KV453213.1 | 3595779 | 21-scf00419 | 21 |
| AX-158263322 | 21 | 74.127 | KV453213.1 | 3609946 | 21-scf00419 | 21 |
| AX-158263336 | 21 | 74.127 | KV453213.1 | 3623673 | 21-scf00419 | 21 |
| AX-158263392 | 21 | 74.127 | KV453213.1 | 3676822 | 21-scf00419 | 21 |
| AX-158263463 | 21 | 74.127 | KV453213.1 | 3740474 | 21-scf00419 | 21 |
| AX-158263492 | 21 | 74.127 | KV453213.1 | 3761166 | 21-scf00419 | 21 |
| AX-158263542 | 21 | 74.127 | KV453213.1 | 3806926 | 21-scf00419 | 21 |
| AX-158263593 | 21 | 74.127 | KV453213.1 | 3852013 | 21-scf00419 | 21 |
| AX-158263709 | 21 | 74.127 | KV453213.1 | 4019242 | 21-scf00419 | 21 |
| AX-158263797 | 21 | 74.127 | KV453213.1 | 4117295 | 21-scf00419 | 21 |
| AX-158263840 | 21 | 74.127 | KV453213.1 | 4158087 | 21-scf00419 | 21 |
| AX-158263967 | 21 | 74.127 | KV453213.1 | 4290234 | 21-scf00419 | 21 |
| AX-158264090 | 21 | 74.127 | KV453213.1 | 4435259 | 21-scf00419 | 21 |
| AX-158264176 | 21 | 74.127 | KV453213.1 | 4542032 | 21-scf00419 | 21 |
| AX-158264181 | 21 | 74.127 | KV453213.1 | 4543812 | 21-scf00419 | 21 |
| AX-158264407 | 21 | 74.127 | KV453213.1 | 4762575 | 21-scf00419 | 21 |
| AX-158264453 | 21 | 74.127 | KV453213.1 | 4810833 | 21-scf00419 | 21 |
| AX-157843023 | 21 | 74.189 | KV453213.1 | 490996  | 21-scf00419 | 21 |
| AX-158260507 | 21 | 74.236 | KV453213.1 | 72566   | 21-scf00419 | 21 |
| AX-157739072 | 21 | 74.236 | KV453213.1 | 111134  | 21-scf00419 | 21 |
| AX-158260542 | 21 | 74.236 | KV453213.1 | 113837  | 21-scf00419 | 21 |
| AX-158260567 | 21 | 74.236 | KV453213.1 | 154086  | 21-scf00419 | 21 |
| AX-158260635 | 21 | 74.236 | KV453213.1 | 248850  | 21-scf00419 | 21 |
| AX-158260663 | 21 | 74.236 | KV453213.1 | 281744  | 21-scf00419 | 21 |
| AX-158260691 | 21 | 74.236 | KV453213.1 | 305404  | 21-scf00419 | 21 |
| AX-157843018 | 21 | 74.236 | KV453213.1 | 306241  | 21-scf00419 | 21 |
| AX-158260698 | 21 | 74.236 | KV453213.1 | 314377  | 21-scf00419 | 21 |
| AX-158260710 | 21 | 74.236 | KV453213.1 | 327851  | 21-scf00419 | 21 |
| AX-158260716 | 21 | 74.236 | KV453213.1 | 334862  | 21-scf00419 | 21 |
| AX-158260723 | 21 | 74.236 | KV453213.1 | 346972  | 21-scf00419 | 21 |
| AX-158260746 | 21 | 74.236 | KV453213.1 | 371024  | 21-scf00419 | 21 |

|              |    |        |            |        |             |    |
|--------------|----|--------|------------|--------|-------------|----|
| AX-158260752 | 21 | 74.236 | KV453213.1 | 375019 | 21-scf00419 | 21 |
| AX-158260810 | 21 | 74.236 | KV453213.1 | 430833 | 21-scf00419 | 21 |
| AX-158260820 | 21 | 74.236 | KV453213.1 | 443602 | 21-scf00419 | 21 |
| AX-158260822 | 21 | 74.236 | KV453213.1 | 446435 | 21-scf00419 | 21 |
| AX-158260836 | 21 | 74.236 | KV453213.1 | 467174 | 21-scf00419 | 21 |
| AX-158260842 | 21 | 74.236 | KV453213.1 | 476040 | 21-scf00419 | 21 |
| AX-157723320 | 21 | 74.236 | KV453213.1 | 493022 | 21-scf00419 | 21 |
| AX-158260859 | 21 | 74.236 | KV453213.1 | 493497 | 21-scf00419 | 21 |
| AX-157859963 | 21 | 74.236 | KV453213.1 | 494419 | 21-scf00419 | 21 |
| AX-158260863 | 21 | 74.236 | KV453213.1 | 502451 | 21-scf00419 | 21 |
| AX-158260864 | 21 | 74.236 | KV453213.1 | 503758 | 21-scf00419 | 21 |
| AX-157738427 | 21 | 74.236 | KV453213.1 | 504722 | 21-scf00419 | 21 |
| AX-158260866 | 21 | 74.236 | KV453213.1 | 505262 | 21-scf00419 | 21 |
| AX-158260870 | 21 | 74.236 | KV453213.1 | 511941 | 21-scf00419 | 21 |
| AX-158260871 | 21 | 74.236 | KV453213.1 | 512483 | 21-scf00419 | 21 |
| AX-158260873 | 21 | 74.236 | KV453213.1 | 514738 | 21-scf00419 | 21 |
| AX-158260874 | 21 | 74.236 | KV453213.1 | 515284 | 21-scf00419 | 21 |
| AX-158260876 | 21 | 74.236 | KV453213.1 | 518628 | 21-scf00419 | 21 |
| AX-158260878 | 21 | 74.236 | KV453213.1 | 520999 | 21-scf00419 | 21 |
| AX-158260884 | 21 | 74.236 | KV453213.1 | 527618 | 21-scf00419 | 21 |
| AX-158260885 | 21 | 74.236 | KV453213.1 | 528563 | 21-scf00419 | 21 |
| AX-158260886 | 21 | 74.236 | KV453213.1 | 529189 | 21-scf00419 | 21 |
| AX-158416218 | 21 | 74.236 | KV453213.1 | 530060 | 21-scf00419 | 21 |
| AX-158260887 | 21 | 74.236 | KV453213.1 | 531100 | 21-scf00419 | 21 |
| AX-158260890 | 21 | 74.236 | KV453213.1 | 533246 | 21-scf00419 | 21 |
| AX-158260891 | 21 | 74.236 | KV453213.1 | 534928 | 21-scf00419 | 21 |
| AX-158260895 | 21 | 74.236 | KV453213.1 | 539377 | 21-scf00419 | 21 |
| AX-157748479 | 21 | 74.236 | KV453213.1 | 541855 | 21-scf00419 | 21 |
| AX-158260900 | 21 | 74.236 | KV453213.1 | 545803 | 21-scf00419 | 21 |
| AX-158381074 | 21 | 74.236 | KV453213.1 | 548070 | 21-scf00419 | 21 |
| AX-157770648 | 21 | 74.236 | KV453213.1 | 551347 | 21-scf00419 | 21 |
| AX-158260905 | 21 | 74.236 | KV453213.1 | 555329 | 21-scf00419 | 21 |
| AX-158260906 | 21 | 74.236 | KV453213.1 | 556274 | 21-scf00419 | 21 |
| AX-158260907 | 21 | 74.236 | KV453213.1 | 557255 | 21-scf00419 | 21 |
| AX-158260912 | 21 | 74.236 | KV453213.1 | 562792 | 21-scf00419 | 21 |
| AX-158260915 | 21 | 74.236 | KV453213.1 | 569921 | 21-scf00419 | 21 |
| AX-158260916 | 21 | 74.236 | KV453213.1 | 571474 | 21-scf00419 | 21 |
| AX-158260917 | 21 | 74.236 | KV453213.1 | 578580 | 21-scf00419 | 21 |
| AX-158416220 | 21 | 74.236 | KV453213.1 | 579089 | 21-scf00419 | 21 |
| AX-158260919 | 21 | 74.236 | KV453213.1 | 579660 | 21-scf00419 | 21 |
| AX-158260921 | 21 | 74.236 | KV453213.1 | 580654 | 21-scf00419 | 21 |
| AX-158260923 | 21 | 74.236 | KV453213.1 | 581814 | 21-scf00419 | 21 |
| AX-158260925 | 21 | 74.236 | KV453213.1 | 582822 | 21-scf00419 | 21 |
| AX-157716735 | 21 | 74.236 | KV453213.1 | 588520 | 21-scf00419 | 21 |
| AX-157747508 | 21 | 74.236 | KV453213.1 | 593779 | 21-scf00419 | 21 |
| AX-158260928 | 21 | 74.236 | KV453213.1 | 595066 | 21-scf00419 | 21 |
| AX-157744550 | 21 | 74.236 | KV453213.1 | 599309 | 21-scf00419 | 21 |
| AX-158260932 | 21 | 74.236 | KV453213.1 | 599868 | 21-scf00419 | 21 |
| AX-157843030 | 21 | 74.236 | KV453213.1 | 602599 | 21-scf00419 | 21 |
| AX-158260934 | 21 | 74.236 | KV453213.1 | 603978 | 21-scf00419 | 21 |
| AX-158260935 | 21 | 74.236 | KV453213.1 | 604549 | 21-scf00419 | 21 |

|              |    |        |            |         |             |    |
|--------------|----|--------|------------|---------|-------------|----|
| AX-158260936 | 21 | 74.236 | KV453213.1 | 604865  | 21-scf00419 | 21 |
| AX-158416223 | 21 | 74.236 | KV453213.1 | 605787  | 21-scf00419 | 21 |
| AX-158260938 | 21 | 74.236 | KV453213.1 | 608564  | 21-scf00419 | 21 |
| AX-158260940 | 21 | 74.236 | KV453213.1 | 610515  | 21-scf00419 | 21 |
| AX-158261053 | 21 | 74.236 | KV453213.1 | 738840  | 21-scf00419 | 21 |
| AX-158262072 | 21 | 74.236 | KV453213.1 | 2179753 | 21-scf00419 | 21 |
| AX-158260432 | 21 | 74.454 | KV453211.1 | 8992857 | 21-scf00417 | 21 |
| AX-158260492 | 21 | 74.454 | KV453213.1 | 51391   | 21-scf00419 | 21 |
| AX-157842986 | 21 | 74.454 | KV453213.1 | 69249   | 21-scf00419 | 21 |
| AX-158260729 | 21 | 74.454 | KV453213.1 | 350563  | 21-scf00419 | 21 |
| AX-158260789 | 21 | 74.454 | KV453213.1 | 414285  | 21-scf00419 | 21 |
| AX-158260943 | 21 | 74.454 | KV453213.1 | 619048  | 21-scf00419 | 21 |
| AX-158260944 | 21 | 74.454 | KV453213.1 | 619527  | 21-scf00419 | 21 |
| AX-158260947 | 21 | 74.454 | KV453213.1 | 622373  | 21-scf00419 | 21 |
| AX-158260949 | 21 | 74.454 | KV453213.1 | 623932  | 21-scf00419 | 21 |
| AX-158260950 | 21 | 74.454 | KV453213.1 | 624583  | 21-scf00419 | 21 |
| AX-158260955 | 21 | 74.454 | KV453213.1 | 630505  | 21-scf00419 | 21 |
| AX-157843033 | 21 | 74.454 | KV453213.1 | 634404  | 21-scf00419 | 21 |
| AX-158260959 | 21 | 74.454 | KV453213.1 | 634656  | 21-scf00419 | 21 |
| AX-158260961 | 21 | 74.454 | KV453213.1 | 635813  | 21-scf00419 | 21 |
| AX-158260962 | 21 | 74.454 | KV453213.1 | 636095  | 21-scf00419 | 21 |
| AX-158260963 | 21 | 74.454 | KV453213.1 | 637541  | 21-scf00419 | 21 |
| AX-158260965 | 21 | 74.454 | KV453213.1 | 638262  | 21-scf00419 | 21 |
| AX-158260967 | 21 | 74.454 | KV453213.1 | 641733  | 21-scf00419 | 21 |
| AX-158260971 | 21 | 74.454 | KV453213.1 | 645505  | 21-scf00419 | 21 |
| AX-158260972 | 21 | 74.454 | KV453213.1 | 646288  | 21-scf00419 | 21 |
| AX-158260973 | 21 | 74.454 | KV453213.1 | 647089  | 21-scf00419 | 21 |
| AX-158260976 | 21 | 74.454 | KV453213.1 | 649459  | 21-scf00419 | 21 |
| AX-158260977 | 21 | 74.454 | KV453213.1 | 651252  | 21-scf00419 | 21 |
| AX-158260981 | 21 | 74.454 | KV453213.1 | 652737  | 21-scf00419 | 21 |
| AX-158260984 | 21 | 74.454 | KV453213.1 | 654754  | 21-scf00419 | 21 |
| AX-158260988 | 21 | 74.454 | KV453213.1 | 660987  | 21-scf00419 | 21 |
| AX-158260994 | 21 | 74.454 | KV453213.1 | 667476  | 21-scf00419 | 21 |
| AX-158260995 | 21 | 74.454 | KV453213.1 | 668379  | 21-scf00419 | 21 |
| AX-158261000 | 21 | 74.454 | KV453213.1 | 675216  | 21-scf00419 | 21 |
| AX-157718796 | 21 | 74.454 | KV453213.1 | 675882  | 21-scf00419 | 21 |
| AX-158261003 | 21 | 74.454 | KV453213.1 | 681985  | 21-scf00419 | 21 |
| AX-158261004 | 21 | 74.454 | KV453213.1 | 682946  | 21-scf00419 | 21 |
| AX-158261008 | 21 | 74.454 | KV453213.1 | 687476  | 21-scf00419 | 21 |
| AX-158261012 | 21 | 74.454 | KV453213.1 | 690111  | 21-scf00419 | 21 |
| AX-158261013 | 21 | 74.454 | KV453213.1 | 690474  | 21-scf00419 | 21 |
| AX-158261015 | 21 | 74.454 | KV453213.1 | 691838  | 21-scf00419 | 21 |
| AX-158261031 | 21 | 74.454 | KV453213.1 | 714085  | 21-scf00419 | 21 |
| AX-158261049 | 21 | 74.454 | KV453213.1 | 731982  | 21-scf00419 | 21 |
| AX-158261063 | 21 | 74.454 | KV453213.1 | 752224  | 21-scf00419 | 21 |
| AX-158419208 | 21 | 74.454 | KV453213.1 | 763761  | 21-scf00419 | 21 |
| AX-158261153 | 21 | 74.454 | KV453213.1 | 855085  | 21-scf00419 | 21 |
| AX-158261296 | 21 | 74.454 | KV453213.1 | 1069998 | 21-scf00419 | 21 |
| AX-157713483 | 21 | 74.454 | KV453213.1 | 1598770 | 21-scf00419 | 21 |
| AX-158261814 | 21 | 74.454 | KV453213.1 | 1833903 | 21-scf00419 | 21 |
| AX-158261816 | 21 | 74.454 | KV453213.1 | 1834383 | 21-scf00419 | 21 |

|              |    |        |            |         |             |    |
|--------------|----|--------|------------|---------|-------------|----|
| AX-158261832 | 21 | 74.454 | KV453213.1 | 1880233 | 21-scf00419 | 21 |
| AX-158261837 | 21 | 74.454 | KV453213.1 | 1883622 | 21-scf00419 | 21 |
| AX-158394662 | 21 | 74.454 | KV453213.1 | 1894441 | 21-scf00419 | 21 |
| AX-158261950 | 21 | 74.454 | KV453213.1 | 2014523 | 21-scf00419 | 21 |
| AX-158416282 | 21 | 74.454 | KV453213.1 | 2186506 | 21-scf00419 | 21 |
| AX-158416284 | 21 | 74.454 | KV453213.1 | 2197307 | 21-scf00419 | 21 |
| AX-158262086 | 21 | 74.454 | KV453213.1 | 2199633 | 21-scf00419 | 21 |
| AX-157843128 | 21 | 74.454 | KV453213.1 | 2401115 | 21-scf00419 | 21 |
| AX-158262271 | 21 | 74.454 | KV453213.1 | 2403101 | 21-scf00419 | 21 |
| AX-158262377 | 21 | 74.454 | KV453213.1 | 2505583 | 21-scf00419 | 21 |
| AX-158262840 | 21 | 74.454 | KV453213.1 | 3094425 | 21-scf00419 | 21 |
| AX-158416312 | 21 | 74.454 | KV453213.1 | 3153178 | 21-scf00419 | 21 |
| AX-158262885 | 21 | 74.454 | KV453213.1 | 3173196 | 21-scf00419 | 21 |
| AX-157756501 | 21 | 74.454 | KV453213.1 | 3550153 | 21-scf00419 | 21 |
| AX-158263722 | 21 | 74.454 | KV453213.1 | 4034228 | 21-scf00419 | 21 |
| AX-158263736 | 21 | 74.454 | KV453213.1 | 4046561 | 21-scf00419 | 21 |
| AX-158394730 | 21 | 74.454 | KV453213.1 | 4052592 | 21-scf00419 | 21 |
| AX-158263744 | 21 | 74.454 | KV453213.1 | 4052884 | 21-scf00419 | 21 |
| AX-157843203 | 21 | 74.454 | KV453213.1 | 4056577 | 21-scf00419 | 21 |
| AX-158263763 | 21 | 74.454 | KV453213.1 | 4081393 | 21-scf00419 | 21 |
| AX-158263766 | 21 | 74.454 | KV453213.1 | 4083358 | 21-scf00419 | 21 |
| AX-158263770 | 21 | 74.454 | KV453213.1 | 4086522 | 21-scf00419 | 21 |
| AX-158263771 | 21 | 74.454 | KV453213.1 | 4087030 | 21-scf00419 | 21 |
| AX-158263772 | 21 | 74.454 | KV453213.1 | 4087923 | 21-scf00419 | 21 |
| AX-158263776 | 21 | 74.454 | KV453213.1 | 4092778 | 21-scf00419 | 21 |
| AX-158263780 | 21 | 74.454 | KV453213.1 | 4095344 | 21-scf00419 | 21 |
| AX-158263811 | 21 | 74.454 | KV453213.1 | 4131480 | 21-scf00419 | 21 |
| AX-158263815 | 21 | 74.454 | KV453213.1 | 4136816 | 21-scf00419 | 21 |
| AX-158263831 | 21 | 74.454 | KV453213.1 | 4149789 | 21-scf00419 | 21 |
| AX-158263847 | 21 | 74.454 | KV453213.1 | 4164747 | 21-scf00419 | 21 |
| AX-158263850 | 21 | 74.454 | KV453213.1 | 4165668 | 21-scf00419 | 21 |
| AX-158263861 | 21 | 74.454 | KV453213.1 | 4178818 | 21-scf00419 | 21 |
| AX-158264088 | 21 | 74.454 | KV453213.1 | 4432656 | 21-scf00419 | 21 |
| AX-158264092 | 21 | 74.454 | KV453213.1 | 4442455 | 21-scf00419 | 21 |
| AX-157872907 | 21 | 74.454 | KV453213.1 | 4446227 | 21-scf00419 | 21 |
| AX-157872908 | 21 | 74.454 | KV453213.1 | 4446477 | 21-scf00419 | 21 |
| AX-158264117 | 21 | 74.454 | KV453213.1 | 4471472 | 21-scf00419 | 21 |
| AX-158264131 | 21 | 74.454 | KV453213.1 | 4485310 | 21-scf00419 | 21 |
| AX-158264138 | 21 | 74.454 | KV453213.1 | 4493920 | 21-scf00419 | 21 |
| AX-158264139 | 21 | 74.454 | KV453213.1 | 4494463 | 21-scf00419 | 21 |
| AX-158264149 | 21 | 74.454 | KV453213.1 | 4509722 | 21-scf00419 | 21 |
| AX-158264240 | 21 | 74.454 | KV453213.1 | 4593208 | 21-scf00419 | 21 |
| AX-158264255 | 21 | 74.454 | KV453213.1 | 4604030 | 21-scf00419 | 21 |
| AX-158416367 | 21 | 74.454 | KV453213.1 | 4637618 | 21-scf00419 | 21 |
| AX-158264294 | 21 | 74.454 | KV453213.1 | 4643423 | 21-scf00419 | 21 |
| AX-158264297 | 21 | 74.454 | KV453213.1 | 4646235 | 21-scf00419 | 21 |
| AX-158264383 | 21 | 74.454 | KV453213.1 | 4730958 | 21-scf00419 | 21 |
| AX-158264386 | 21 | 74.454 | KV453213.1 | 4734066 | 21-scf00419 | 21 |
| AX-158264427 | 21 | 74.454 | KV453213.1 | 4785602 | 21-scf00419 | 21 |
| AX-158264433 | 21 | 74.454 | KV453213.1 | 4792263 | 21-scf00419 | 21 |
| AX-158264460 | 21 | 74.454 | KV453213.1 | 4819107 | 21-scf00419 | 21 |

|              |    |        |            |         |             |    |
|--------------|----|--------|------------|---------|-------------|----|
| AX-158264463 | 21 | 74.454 | KV453213.1 | 4820590 | 21-scf00419 | 21 |
| AX-157738510 | 21 | 74.454 | KV453213.1 | 5362372 | 21-scf00419 | 21 |
| AX-158261009 | 21 | 74.477 | KV453213.1 | 688158  | 21-scf00419 | 21 |
| AX-158261828 | 21 | 74.477 | KV453213.1 | 1870106 | 21-scf00419 | 21 |
| AX-158261014 | 21 | 74.503 | KV453213.1 | 690919  | 21-scf00419 | 21 |
| AX-158261460 | 21 | 74.503 | KV453213.1 | 1299513 | 21-scf00419 | 21 |
| AX-157726412 | 21 | 74.53  | KV453213.1 | 572279  | 21-scf00419 | 21 |
| AX-158261018 | 21 | 74.53  | KV453213.1 | 693653  | 21-scf00419 | 21 |
| AX-157843071 | 21 | 74.53  | KV453213.1 | 1193551 | 21-scf00419 | 21 |
| AX-158259989 | 21 | 74.564 | KV453211.1 | 8349791 | 21-scf00417 | 21 |
| AX-158260946 | 21 | 74.564 | KV453213.1 | 621519  | 21-scf00419 | 21 |
| AX-158261030 | 21 | 74.564 | KV453213.1 | 711814  | 21-scf00419 | 21 |
| AX-158261035 | 21 | 74.564 | KV453213.1 | 718654  | 21-scf00419 | 21 |
| AX-158261037 | 21 | 74.564 | KV453213.1 | 719813  | 21-scf00419 | 21 |
| AX-158261043 | 21 | 74.564 | KV453213.1 | 724097  | 21-scf00419 | 21 |
| AX-158261046 | 21 | 74.564 | KV453213.1 | 729728  | 21-scf00419 | 21 |
| AX-158261048 | 21 | 74.564 | KV453213.1 | 731199  | 21-scf00419 | 21 |
| AX-158261051 | 21 | 74.564 | KV453213.1 | 734025  | 21-scf00419 | 21 |
| AX-158261055 | 21 | 74.564 | KV453213.1 | 741500  | 21-scf00419 | 21 |
| AX-158261056 | 21 | 74.564 | KV453213.1 | 742996  | 21-scf00419 | 21 |
| AX-158261057 | 21 | 74.564 | KV453213.1 | 743218  | 21-scf00419 | 21 |
| AX-158261058 | 21 | 74.564 | KV453213.1 | 744531  | 21-scf00419 | 21 |
| AX-158261060 | 21 | 74.564 | KV453213.1 | 746064  | 21-scf00419 | 21 |
| AX-158261061 | 21 | 74.564 | KV453213.1 | 749060  | 21-scf00419 | 21 |
| AX-158261066 | 21 | 74.564 | KV453213.1 | 755461  | 21-scf00419 | 21 |
| AX-158261072 | 21 | 74.564 | KV453213.1 | 760952  | 21-scf00419 | 21 |
| AX-158261073 | 21 | 74.564 | KV453213.1 | 761741  | 21-scf00419 | 21 |
| AX-158261074 | 21 | 74.564 | KV453213.1 | 764098  | 21-scf00419 | 21 |
| AX-158261078 | 21 | 74.564 | KV453213.1 | 773614  | 21-scf00419 | 21 |
| AX-158261079 | 21 | 74.564 | KV453213.1 | 773960  | 21-scf00419 | 21 |
| AX-158261080 | 21 | 74.564 | KV453213.1 | 774559  | 21-scf00419 | 21 |
| AX-158261081 | 21 | 74.564 | KV453213.1 | 777140  | 21-scf00419 | 21 |
| AX-158411097 | 21 | 74.564 | KV453213.1 | 777474  | 21-scf00419 | 21 |
| AX-158416228 | 21 | 74.564 | KV453213.1 | 777543  | 21-scf00419 | 21 |
| AX-158416229 | 21 | 74.564 | KV453213.1 | 777614  | 21-scf00419 | 21 |
| AX-158261083 | 21 | 74.564 | KV453213.1 | 779358  | 21-scf00419 | 21 |
| AX-158261084 | 21 | 74.564 | KV453213.1 | 780836  | 21-scf00419 | 21 |
| AX-158261085 | 21 | 74.564 | KV453213.1 | 781509  | 21-scf00419 | 21 |
| AX-158261086 | 21 | 74.564 | KV453213.1 | 782248  | 21-scf00419 | 21 |
| AX-158261087 | 21 | 74.564 | KV453213.1 | 782650  | 21-scf00419 | 21 |
| AX-158261088 | 21 | 74.564 | KV453213.1 | 783094  | 21-scf00419 | 21 |
| AX-158416230 | 21 | 74.564 | KV453213.1 | 783375  | 21-scf00419 | 21 |
| AX-158261089 | 21 | 74.564 | KV453213.1 | 784187  | 21-scf00419 | 21 |
| AX-158416231 | 21 | 74.564 | KV453213.1 | 785515  | 21-scf00419 | 21 |
| AX-158261091 | 21 | 74.564 | KV453213.1 | 786889  | 21-scf00419 | 21 |
| AX-158261092 | 21 | 74.564 | KV453213.1 | 787394  | 21-scf00419 | 21 |
| AX-158261094 | 21 | 74.564 | KV453213.1 | 789088  | 21-scf00419 | 21 |
| AX-158261095 | 21 | 74.564 | KV453213.1 | 789532  | 21-scf00419 | 21 |
| AX-158261096 | 21 | 74.564 | KV453213.1 | 790274  | 21-scf00419 | 21 |
| AX-158261097 | 21 | 74.564 | KV453213.1 | 790678  | 21-scf00419 | 21 |
| AX-158261098 | 21 | 74.564 | KV453213.1 | 791592  | 21-scf00419 | 21 |

|              |    |        |            |         |             |    |
|--------------|----|--------|------------|---------|-------------|----|
| AX-158261099 | 21 | 74.564 | KV453213.1 | 792035  | 21-scf00419 | 21 |
| AX-158261100 | 21 | 74.564 | KV453213.1 | 793568  | 21-scf00419 | 21 |
| AX-158261101 | 21 | 74.564 | KV453213.1 | 795258  | 21-scf00419 | 21 |
| AX-158261318 | 21 | 74.564 | KV453213.1 | 1098780 | 21-scf00419 | 21 |
| AX-158262065 | 21 | 74.564 | KV453213.1 | 2163682 | 21-scf00419 | 21 |
| AX-158259513 | 21 | 74.673 | KV453211.1 | 7633311 | 21-scf00417 | 21 |
| AX-158261021 | 21 | 74.673 | KV453213.1 | 699485  | 21-scf00419 | 21 |
| AX-158261034 | 21 | 74.673 | KV453213.1 | 717996  | 21-scf00419 | 21 |
| AX-158416225 | 21 | 74.673 | KV453213.1 | 723236  | 21-scf00419 | 21 |
| AX-158261077 | 21 | 74.673 | KV453213.1 | 772904  | 21-scf00419 | 21 |
| AX-158261102 | 21 | 74.673 | KV453213.1 | 796949  | 21-scf00419 | 21 |
| AX-158261103 | 21 | 74.673 | KV453213.1 | 798197  | 21-scf00419 | 21 |
| AX-158261104 | 21 | 74.673 | KV453213.1 | 799045  | 21-scf00419 | 21 |
| AX-158261105 | 21 | 74.673 | KV453213.1 | 799507  | 21-scf00419 | 21 |
| AX-158261106 | 21 | 74.673 | KV453213.1 | 800944  | 21-scf00419 | 21 |
| AX-157726264 | 21 | 74.673 | KV453213.1 | 801575  | 21-scf00419 | 21 |
| AX-157843039 | 21 | 74.673 | KV453213.1 | 801858  | 21-scf00419 | 21 |
| AX-157712653 | 21 | 74.673 | KV453213.1 | 802957  | 21-scf00419 | 21 |
| AX-158261109 | 21 | 74.673 | KV453213.1 | 804853  | 21-scf00419 | 21 |
| AX-157859967 | 21 | 74.673 | KV453213.1 | 806252  | 21-scf00419 | 21 |
| AX-158261110 | 21 | 74.673 | KV453213.1 | 806415  | 21-scf00419 | 21 |
| AX-158261111 | 21 | 74.673 | KV453213.1 | 806773  | 21-scf00419 | 21 |
| AX-158261112 | 21 | 74.673 | KV453213.1 | 807247  | 21-scf00419 | 21 |
| AX-158416232 | 21 | 74.673 | KV453213.1 | 808348  | 21-scf00419 | 21 |
| AX-158261119 | 21 | 74.673 | KV453213.1 | 814779  | 21-scf00419 | 21 |
| AX-158261120 | 21 | 74.673 | KV453213.1 | 815375  | 21-scf00419 | 21 |
| AX-158261121 | 21 | 74.673 | KV453213.1 | 816589  | 21-scf00419 | 21 |
| AX-158394622 | 21 | 74.673 | KV453213.1 | 818960  | 21-scf00419 | 21 |
| AX-158261123 | 21 | 74.673 | KV453213.1 | 819437  | 21-scf00419 | 21 |
| AX-157843040 | 21 | 74.673 | KV453213.1 | 821550  | 21-scf00419 | 21 |
| AX-158261124 | 21 | 74.673 | KV453213.1 | 822104  | 21-scf00419 | 21 |
| AX-158261125 | 21 | 74.673 | KV453213.1 | 822583  | 21-scf00419 | 21 |
| AX-158261127 | 21 | 74.673 | KV453213.1 | 823200  | 21-scf00419 | 21 |
| AX-158261128 | 21 | 74.673 | KV453213.1 | 824103  | 21-scf00419 | 21 |
| AX-158261131 | 21 | 74.673 | KV453213.1 | 827989  | 21-scf00419 | 21 |
| AX-158261132 | 21 | 74.673 | KV453213.1 | 828395  | 21-scf00419 | 21 |
| AX-158261134 | 21 | 74.673 | KV453213.1 | 829929  | 21-scf00419 | 21 |
| AX-158261138 | 21 | 74.673 | KV453213.1 | 833380  | 21-scf00419 | 21 |
| AX-158261139 | 21 | 74.673 | KV453213.1 | 836342  | 21-scf00419 | 21 |
| AX-157755782 | 21 | 74.673 | KV453213.1 | 836999  | 21-scf00419 | 21 |
| AX-158261140 | 21 | 74.673 | KV453213.1 | 837486  | 21-scf00419 | 21 |
| AX-157843041 | 21 | 74.673 | KV453213.1 | 843699  | 21-scf00419 | 21 |
| AX-158261145 | 21 | 74.673 | KV453213.1 | 846585  | 21-scf00419 | 21 |
| AX-158261190 | 21 | 74.673 | KV453213.1 | 909012  | 21-scf00419 | 21 |
| AX-158261403 | 21 | 74.673 | KV453213.1 | 1205919 | 21-scf00419 | 21 |
| AX-158261406 | 21 | 74.673 | KV453213.1 | 1210164 | 21-scf00419 | 21 |
| AX-158261432 | 21 | 74.673 | KV453213.1 | 1258344 | 21-scf00419 | 21 |
| AX-157843077 | 21 | 74.673 | KV453213.1 | 1276951 | 21-scf00419 | 21 |
| AX-158261452 | 21 | 74.673 | KV453213.1 | 1281647 | 21-scf00419 | 21 |
| AX-158261485 | 21 | 74.673 | KV453213.1 | 1335457 | 21-scf00419 | 21 |
| AX-158261537 | 21 | 74.673 | KV453213.1 | 1409685 | 21-scf00419 | 21 |

|              |    |        |            |         |             |    |
|--------------|----|--------|------------|---------|-------------|----|
| AX-158261676 | 21 | 74.673 | KV453213.1 | 1620809 | 21-scf00419 | 21 |
| AX-158261688 | 21 | 74.673 | KV453213.1 | 1646227 | 21-scf00419 | 21 |
| AX-158261760 | 21 | 74.673 | KV453213.1 | 1754660 | 21-scf00419 | 21 |
| AX-158261820 | 21 | 74.673 | KV453213.1 | 1847599 | 21-scf00419 | 21 |
| AX-158261861 | 21 | 74.673 | KV453213.1 | 1914448 | 21-scf00419 | 21 |
| AX-158261868 | 21 | 74.673 | KV453213.1 | 1923383 | 21-scf00419 | 21 |
| AX-158261870 | 21 | 74.673 | KV453213.1 | 1925666 | 21-scf00419 | 21 |
| AX-158261872 | 21 | 74.673 | KV453213.1 | 1927342 | 21-scf00419 | 21 |
| AX-158261873 | 21 | 74.673 | KV453213.1 | 1927487 | 21-scf00419 | 21 |
| AX-158261876 | 21 | 74.673 | KV453213.1 | 1931803 | 21-scf00419 | 21 |
| AX-158261877 | 21 | 74.673 | KV453213.1 | 1934989 | 21-scf00419 | 21 |
| AX-158261878 | 21 | 74.673 | KV453213.1 | 1935364 | 21-scf00419 | 21 |
| AX-158261879 | 21 | 74.673 | KV453213.1 | 1937309 | 21-scf00419 | 21 |
| AX-158261881 | 21 | 74.673 | KV453213.1 | 1939797 | 21-scf00419 | 21 |
| AX-158261882 | 21 | 74.673 | KV453213.1 | 1940493 | 21-scf00419 | 21 |
| AX-158261885 | 21 | 74.673 | KV453213.1 | 1944093 | 21-scf00419 | 21 |
| AX-158261886 | 21 | 74.673 | KV453213.1 | 1945478 | 21-scf00419 | 21 |
| AX-158261889 | 21 | 74.673 | KV453213.1 | 1948075 | 21-scf00419 | 21 |
| AX-158261890 | 21 | 74.673 | KV453213.1 | 1948460 | 21-scf00419 | 21 |
| AX-158261894 | 21 | 74.673 | KV453213.1 | 1954163 | 21-scf00419 | 21 |
| AX-158261902 | 21 | 74.673 | KV453213.1 | 1960987 | 21-scf00419 | 21 |
| AX-158261907 | 21 | 74.673 | KV453213.1 | 1964688 | 21-scf00419 | 21 |
| AX-158261909 | 21 | 74.673 | KV453213.1 | 1965919 | 21-scf00419 | 21 |
| AX-158261912 | 21 | 74.673 | KV453213.1 | 1969125 | 21-scf00419 | 21 |
| AX-158261917 | 21 | 74.673 | KV453213.1 | 1974018 | 21-scf00419 | 21 |
| AX-158261919 | 21 | 74.673 | KV453213.1 | 1977980 | 21-scf00419 | 21 |
| AX-158261921 | 21 | 74.673 | KV453213.1 | 1979313 | 21-scf00419 | 21 |
| AX-158261922 | 21 | 74.673 | KV453213.1 | 1980057 | 21-scf00419 | 21 |
| AX-158261924 | 21 | 74.673 | KV453213.1 | 1981645 | 21-scf00419 | 21 |
| AX-158261926 | 21 | 74.673 | KV453213.1 | 1982853 | 21-scf00419 | 21 |
| AX-158261940 | 21 | 74.673 | KV453213.1 | 2000430 | 21-scf00419 | 21 |
| AX-158261946 | 21 | 74.673 | KV453213.1 | 2005617 | 21-scf00419 | 21 |
| AX-158262046 | 21 | 74.673 | KV453213.1 | 2139531 | 21-scf00419 | 21 |
| AX-158262047 | 21 | 74.673 | KV453213.1 | 2140209 | 21-scf00419 | 21 |
| AX-158262066 | 21 | 74.673 | KV453213.1 | 2168421 | 21-scf00419 | 21 |
| AX-158261151 | 21 | 74.782 | KV453213.1 | 853218  | 21-scf00419 | 21 |
| AX-158261159 | 21 | 74.839 | KV453213.1 | 861752  | 21-scf00419 | 21 |
| AX-158260532 | 21 | 74.891 | KV453213.1 | 106436  | 21-scf00419 | 21 |
| AX-157842999 | 21 | 74.891 | KV453213.1 | 133581  | 21-scf00419 | 21 |
| AX-157887734 | 21 | 74.891 | KV453213.1 | 406852  | 21-scf00419 | 21 |
| AX-158260817 | 21 | 74.891 | KV453213.1 | 437278  | 21-scf00419 | 21 |
| AX-158261059 | 21 | 74.891 | KV453213.1 | 745370  | 21-scf00419 | 21 |
| AX-158261067 | 21 | 74.891 | KV453213.1 | 756345  | 21-scf00419 | 21 |
| AX-158261122 | 21 | 74.891 | KV453213.1 | 818319  | 21-scf00419 | 21 |
| AX-158261152 | 21 | 74.891 | KV453213.1 | 853966  | 21-scf00419 | 21 |
| AX-158261161 | 21 | 74.891 | KV453213.1 | 864792  | 21-scf00419 | 21 |
| AX-158261163 | 21 | 74.891 | KV453213.1 | 866230  | 21-scf00419 | 21 |
| AX-158261164 | 21 | 74.891 | KV453213.1 | 866800  | 21-scf00419 | 21 |
| AX-158261167 | 21 | 74.891 | KV453213.1 | 868653  | 21-scf00419 | 21 |
| AX-157749597 | 21 | 74.891 | KV453213.1 | 871943  | 21-scf00419 | 21 |
| AX-157751907 | 21 | 74.891 | KV453213.1 | 877635  | 21-scf00419 | 21 |

|              |    |        |            |         |             |    |
|--------------|----|--------|------------|---------|-------------|----|
| AX-158261172 | 21 | 74.891 | KV453213.1 | 878194  | 21-scf00419 | 21 |
| AX-158261173 | 21 | 74.891 | KV453213.1 | 880210  | 21-scf00419 | 21 |
| AX-157843043 | 21 | 74.891 | KV453213.1 | 899548  | 21-scf00419 | 21 |
| AX-158261185 | 21 | 74.891 | KV453213.1 | 903968  | 21-scf00419 | 21 |
| AX-158261189 | 21 | 74.891 | KV453213.1 | 908202  | 21-scf00419 | 21 |
| AX-157843046 | 21 | 74.891 | KV453213.1 | 910722  | 21-scf00419 | 21 |
| AX-158261192 | 21 | 74.891 | KV453213.1 | 913404  | 21-scf00419 | 21 |
| AX-158261197 | 21 | 74.891 | KV453213.1 | 920214  | 21-scf00419 | 21 |
| AX-157859971 | 21 | 74.891 | KV453213.1 | 960656  | 21-scf00419 | 21 |
| AX-158261228 | 21 | 74.891 | KV453213.1 | 966171  | 21-scf00419 | 21 |
| AX-157887738 | 21 | 74.891 | KV453213.1 | 1014835 | 21-scf00419 | 21 |
| AX-158261266 | 21 | 74.891 | KV453213.1 | 1031454 | 21-scf00419 | 21 |
| AX-158261273 | 21 | 74.891 | KV453213.1 | 1039193 | 21-scf00419 | 21 |
| AX-158261274 | 21 | 74.891 | KV453213.1 | 1040111 | 21-scf00419 | 21 |
| AX-157843067 | 21 | 74.891 | KV453213.1 | 1057121 | 21-scf00419 | 21 |
| AX-158261286 | 21 | 74.891 | KV453213.1 | 1062538 | 21-scf00419 | 21 |
| AX-158261287 | 21 | 74.891 | KV453213.1 | 1062905 | 21-scf00419 | 21 |
| AX-158261294 | 21 | 74.891 | KV453213.1 | 1068426 | 21-scf00419 | 21 |
| AX-157887739 | 21 | 74.891 | KV453213.1 | 1076884 | 21-scf00419 | 21 |
| AX-158261309 | 21 | 74.891 | KV453213.1 | 1088130 | 21-scf00419 | 21 |
| AX-158261333 | 21 | 74.891 | KV453213.1 | 1111522 | 21-scf00419 | 21 |
| AX-158261419 | 21 | 74.891 | KV453213.1 | 1229549 | 21-scf00419 | 21 |
| AX-158261495 | 21 | 74.891 | KV453213.1 | 1347423 | 21-scf00419 | 21 |
| AX-158261569 | 21 | 74.891 | KV453213.1 | 1440579 | 21-scf00419 | 21 |
| AX-158261646 | 21 | 74.891 | KV453213.1 | 1554075 | 21-scf00419 | 21 |
| AX-158261682 | 21 | 74.891 | KV453213.1 | 1635112 | 21-scf00419 | 21 |
| AX-158261698 | 21 | 74.891 | KV453213.1 | 1656507 | 21-scf00419 | 21 |
| AX-158261699 | 21 | 74.891 | KV453213.1 | 1657093 | 21-scf00419 | 21 |
| AX-158261786 | 21 | 74.891 | KV453213.1 | 1799858 | 21-scf00419 | 21 |
| AX-157872881 | 21 | 74.891 | KV453213.1 | 1835694 | 21-scf00419 | 21 |
| AX-158394658 | 21 | 74.891 | KV453213.1 | 1850319 | 21-scf00419 | 21 |
| AX-158262013 | 21 | 74.891 | KV453213.1 | 2100292 | 21-scf00419 | 21 |
| AX-158262017 | 21 | 74.891 | KV453213.1 | 2103622 | 21-scf00419 | 21 |
| AX-158262018 | 21 | 74.891 | KV453213.1 | 2104888 | 21-scf00419 | 21 |
| AX-158262020 | 21 | 74.891 | KV453213.1 | 2105855 | 21-scf00419 | 21 |
| AX-158262244 | 21 | 74.891 | KV453213.1 | 2374541 | 21-scf00419 | 21 |
| AX-158394688 | 21 | 74.891 | KV453213.1 | 2433131 | 21-scf00419 | 21 |
| AX-158262620 | 21 | 74.891 | KV453213.1 | 2812173 | 21-scf00419 | 21 |
| AX-158264898 | 21 | 74.891 | KV453213.1 | 5330393 | 21-scf00419 | 21 |
| AX-157880463 | 21 | 74.891 | KV453213.1 | 5382527 | 21-scf00419 | 21 |
| AX-158264943 | 21 | 74.891 | KV453213.1 | 5408191 | 21-scf00419 | 21 |
| AX-158261205 | 21 | 75.001 | KV453213.1 | 930253  | 21-scf00419 | 21 |
| AX-158261207 | 21 | 75.001 | KV453213.1 | 932776  | 21-scf00419 | 21 |
| AX-157842934 | 21 | 75.11  | KV453211.1 | 8143312 | 21-scf00417 | 21 |
| AX-157842983 | 21 | 75.11  | KV453213.1 | 62941   | 21-scf00419 | 21 |
| AX-158260666 | 21 | 75.11  | KV453213.1 | 284414  | 21-scf00419 | 21 |
| AX-158260941 | 21 | 75.11  | KV453213.1 | 612753  | 21-scf00419 | 21 |
| AX-157843031 | 21 | 75.11  | KV453213.1 | 614076  | 21-scf00419 | 21 |
| AX-158260951 | 21 | 75.11  | KV453213.1 | 625629  | 21-scf00419 | 21 |
| AX-158260952 | 21 | 75.11  | KV453213.1 | 627288  | 21-scf00419 | 21 |
| AX-158260953 | 21 | 75.11  | KV453213.1 | 627475  | 21-scf00419 | 21 |



|              |    |       |            |        |             |    |
|--------------|----|-------|------------|--------|-------------|----|
| AX-158260954 | 21 | 75.11 | KV453213.1 | 629388 | 21-scf00419 | 21 |
| AX-158260956 | 21 | 75.11 | KV453213.1 | 631821 | 21-scf00419 | 21 |
| AX-158260957 | 21 | 75.11 | KV453213.1 | 632494 | 21-scf00419 | 21 |
| AX-158260958 | 21 | 75.11 | KV453213.1 | 632850 | 21-scf00419 | 21 |
| AX-158260964 | 21 | 75.11 | KV453213.1 | 637977 | 21-scf00419 | 21 |
| AX-158260968 | 21 | 75.11 | KV453213.1 | 642513 | 21-scf00419 | 21 |
| AX-158260974 | 21 | 75.11 | KV453213.1 | 647373 | 21-scf00419 | 21 |
| AX-158260975 | 21 | 75.11 | KV453213.1 | 648292 | 21-scf00419 | 21 |
| AX-158260978 | 21 | 75.11 | KV453213.1 | 651593 | 21-scf00419 | 21 |
| AX-158260979 | 21 | 75.11 | KV453213.1 | 652055 | 21-scf00419 | 21 |
| AX-158260985 | 21 | 75.11 | KV453213.1 | 655110 | 21-scf00419 | 21 |
| AX-158260986 | 21 | 75.11 | KV453213.1 | 655622 | 21-scf00419 | 21 |
| AX-158387219 | 21 | 75.11 | KV453213.1 | 656028 | 21-scf00419 | 21 |
| AX-158260992 | 21 | 75.11 | KV453213.1 | 664763 | 21-scf00419 | 21 |
| AX-158260993 | 21 | 75.11 | KV453213.1 | 667021 | 21-scf00419 | 21 |
| AX-158260996 | 21 | 75.11 | KV453213.1 | 670083 | 21-scf00419 | 21 |
| AX-158387220 | 21 | 75.11 | KV453213.1 | 673206 | 21-scf00419 | 21 |
| AX-158261002 | 21 | 75.11 | KV453213.1 | 681470 | 21-scf00419 | 21 |
| AX-158261006 | 21 | 75.11 | KV453213.1 | 684478 | 21-scf00419 | 21 |
| AX-158261010 | 21 | 75.11 | KV453213.1 | 688968 | 21-scf00419 | 21 |
| AX-158261016 | 21 | 75.11 | KV453213.1 | 692645 | 21-scf00419 | 21 |
| AX-158261032 | 21 | 75.11 | KV453213.1 | 716538 | 21-scf00419 | 21 |
| AX-157710160 | 21 | 75.11 | KV453213.1 | 746952 | 21-scf00419 | 21 |
| AX-158261075 | 21 | 75.11 | KV453213.1 | 766837 | 21-scf00419 | 21 |
| AX-158394621 | 21 | 75.11 | KV453213.1 | 809174 | 21-scf00419 | 21 |
| AX-158261141 | 21 | 75.11 | KV453213.1 | 840260 | 21-scf00419 | 21 |
| AX-158261154 | 21 | 75.11 | KV453213.1 | 855294 | 21-scf00419 | 21 |
| AX-158261158 | 21 | 75.11 | KV453213.1 | 859903 | 21-scf00419 | 21 |
| AX-158394624 | 21 | 75.11 | KV453213.1 | 860325 | 21-scf00419 | 21 |
| AX-157859968 | 21 | 75.11 | KV453213.1 | 864009 | 21-scf00419 | 21 |
| AX-158261169 | 21 | 75.11 | KV453213.1 | 870127 | 21-scf00419 | 21 |
| AX-158261170 | 21 | 75.11 | KV453213.1 | 875269 | 21-scf00419 | 21 |
| AX-158261174 | 21 | 75.11 | KV453213.1 | 880751 | 21-scf00419 | 21 |
| AX-158261175 | 21 | 75.11 | KV453213.1 | 881546 | 21-scf00419 | 21 |
| AX-158261176 | 21 | 75.11 | KV453213.1 | 882902 | 21-scf00419 | 21 |
| AX-158261178 | 21 | 75.11 | KV453213.1 | 883272 | 21-scf00419 | 21 |
| AX-157872848 | 21 | 75.11 | KV453213.1 | 883553 | 21-scf00419 | 21 |
| AX-157872849 | 21 | 75.11 | KV453213.1 | 883837 | 21-scf00419 | 21 |
| AX-157872850 | 21 | 75.11 | KV453213.1 | 884151 | 21-scf00419 | 21 |
| AX-157859969 | 21 | 75.11 | KV453213.1 | 884837 | 21-scf00419 | 21 |
| AX-158261180 | 21 | 75.11 | KV453213.1 | 891912 | 21-scf00419 | 21 |
| AX-158261182 | 21 | 75.11 | KV453213.1 | 896942 | 21-scf00419 | 21 |
| AX-157843044 | 21 | 75.11 | KV453213.1 | 899940 | 21-scf00419 | 21 |
| AX-157859970 | 21 | 75.11 | KV453213.1 | 907429 | 21-scf00419 | 21 |
| AX-157872851 | 21 | 75.11 | KV453213.1 | 911363 | 21-scf00419 | 21 |
| AX-157880408 | 21 | 75.11 | KV453213.1 | 911815 | 21-scf00419 | 21 |
| AX-158261193 | 21 | 75.11 | KV453213.1 | 913901 | 21-scf00419 | 21 |
| AX-158261194 | 21 | 75.11 | KV453213.1 | 916276 | 21-scf00419 | 21 |
| AX-158261195 | 21 | 75.11 | KV453213.1 | 917829 | 21-scf00419 | 21 |
| AX-158261196 | 21 | 75.11 | KV453213.1 | 918698 | 21-scf00419 | 21 |
| AX-158261198 | 21 | 75.11 | KV453213.1 | 921100 | 21-scf00419 | 21 |

|              |    |       |            |         |             |    |
|--------------|----|-------|------------|---------|-------------|----|
| AX-158261199 | 21 | 75.11 | KV453213.1 | 922550  | 21-scf00419 | 21 |
| AX-158261200 | 21 | 75.11 | KV453213.1 | 922917  | 21-scf00419 | 21 |
| AX-158261201 | 21 | 75.11 | KV453213.1 | 927648  | 21-scf00419 | 21 |
| AX-158261202 | 21 | 75.11 | KV453213.1 | 928740  | 21-scf00419 | 21 |
| AX-158394625 | 21 | 75.11 | KV453213.1 | 930071  | 21-scf00419 | 21 |
| AX-158261206 | 21 | 75.11 | KV453213.1 | 932344  | 21-scf00419 | 21 |
| AX-158261208 | 21 | 75.11 | KV453213.1 | 934465  | 21-scf00419 | 21 |
| AX-158261209 | 21 | 75.11 | KV453213.1 | 936879  | 21-scf00419 | 21 |
| AX-158261210 | 21 | 75.11 | KV453213.1 | 941810  | 21-scf00419 | 21 |
| AX-158261211 | 21 | 75.11 | KV453213.1 | 941943  | 21-scf00419 | 21 |
| AX-158261212 | 21 | 75.11 | KV453213.1 | 943669  | 21-scf00419 | 21 |
| AX-158261213 | 21 | 75.11 | KV453213.1 | 944853  | 21-scf00419 | 21 |
| AX-158261214 | 21 | 75.11 | KV453213.1 | 946009  | 21-scf00419 | 21 |
| AX-158261215 | 21 | 75.11 | KV453213.1 | 946953  | 21-scf00419 | 21 |
| AX-158419213 | 21 | 75.11 | KV453213.1 | 948003  | 21-scf00419 | 21 |
| AX-158416236 | 21 | 75.11 | KV453213.1 | 948398  | 21-scf00419 | 21 |
| AX-158261219 | 21 | 75.11 | KV453213.1 | 949232  | 21-scf00419 | 21 |
| AX-158261220 | 21 | 75.11 | KV453213.1 | 949971  | 21-scf00419 | 21 |
| AX-157843047 | 21 | 75.11 | KV453213.1 | 951175  | 21-scf00419 | 21 |
| AX-158261221 | 21 | 75.11 | KV453213.1 | 951813  | 21-scf00419 | 21 |
| AX-157749064 | 21 | 75.11 | KV453213.1 | 952708  | 21-scf00419 | 21 |
| AX-157872852 | 21 | 75.11 | KV453213.1 | 955408  | 21-scf00419 | 21 |
| AX-158261222 | 21 | 75.11 | KV453213.1 | 955580  | 21-scf00419 | 21 |
| AX-158261223 | 21 | 75.11 | KV453213.1 | 956261  | 21-scf00419 | 21 |
| AX-157872853 | 21 | 75.11 | KV453213.1 | 959603  | 21-scf00419 | 21 |
| AX-158261226 | 21 | 75.11 | KV453213.1 | 961876  | 21-scf00419 | 21 |
| AX-158261227 | 21 | 75.11 | KV453213.1 | 965525  | 21-scf00419 | 21 |
| AX-157843050 | 21 | 75.11 | KV453213.1 | 977236  | 21-scf00419 | 21 |
| AX-157843052 | 21 | 75.11 | KV453213.1 | 979351  | 21-scf00419 | 21 |
| AX-158261232 | 21 | 75.11 | KV453213.1 | 982467  | 21-scf00419 | 21 |
| AX-158261234 | 21 | 75.11 | KV453213.1 | 985244  | 21-scf00419 | 21 |
| AX-158261241 | 21 | 75.11 | KV453213.1 | 990928  | 21-scf00419 | 21 |
| AX-157716824 | 21 | 75.11 | KV453213.1 | 998945  | 21-scf00419 | 21 |
| AX-158261248 | 21 | 75.11 | KV453213.1 | 1001571 | 21-scf00419 | 21 |
| AX-158261249 | 21 | 75.11 | KV453213.1 | 1003979 | 21-scf00419 | 21 |
| AX-157722755 | 21 | 75.11 | KV453213.1 | 1013888 | 21-scf00419 | 21 |
| AX-158261260 | 21 | 75.11 | KV453213.1 | 1017212 | 21-scf00419 | 21 |
| AX-158261265 | 21 | 75.11 | KV453213.1 | 1030460 | 21-scf00419 | 21 |
| AX-158261272 | 21 | 75.11 | KV453213.1 | 1035960 | 21-scf00419 | 21 |
| AX-158261275 | 21 | 75.11 | KV453213.1 | 1040834 | 21-scf00419 | 21 |
| AX-157843064 | 21 | 75.11 | KV453213.1 | 1044306 | 21-scf00419 | 21 |
| AX-157843065 | 21 | 75.11 | KV453213.1 | 1046586 | 21-scf00419 | 21 |
| AX-157708726 | 21 | 75.11 | KV453213.1 | 1046906 | 21-scf00419 | 21 |
| AX-158261278 | 21 | 75.11 | KV453213.1 | 1048619 | 21-scf00419 | 21 |
| AX-158261280 | 21 | 75.11 | KV453213.1 | 1053215 | 21-scf00419 | 21 |
| AX-158261282 | 21 | 75.11 | KV453213.1 | 1054409 | 21-scf00419 | 21 |
| AX-158261288 | 21 | 75.11 | KV453213.1 | 1063290 | 21-scf00419 | 21 |
| AX-158381076 | 21 | 75.11 | KV453213.1 | 1063586 | 21-scf00419 | 21 |
| AX-158261289 | 21 | 75.11 | KV453213.1 | 1064684 | 21-scf00419 | 21 |
| AX-158419216 | 21 | 75.11 | KV453213.1 | 1064892 | 21-scf00419 | 21 |
| AX-158261291 | 21 | 75.11 | KV453213.1 | 1065752 | 21-scf00419 | 21 |

|              |    |       |            |         |             |    |
|--------------|----|-------|------------|---------|-------------|----|
| AX-158261292 | 21 | 75.11 | KV453213.1 | 1066235 | 21-scf00419 | 21 |
| AX-157708621 | 21 | 75.11 | KV453213.1 | 1067619 | 21-scf00419 | 21 |
| AX-158261297 | 21 | 75.11 | KV453213.1 | 1073137 | 21-scf00419 | 21 |
| AX-158261298 | 21 | 75.11 | KV453213.1 | 1074118 | 21-scf00419 | 21 |
| AX-157747499 | 21 | 75.11 | KV453213.1 | 1075634 | 21-scf00419 | 21 |
| AX-158261299 | 21 | 75.11 | KV453213.1 | 1076018 | 21-scf00419 | 21 |
| AX-158394627 | 21 | 75.11 | KV453213.1 | 1076505 | 21-scf00419 | 21 |
| AX-158261300 | 21 | 75.11 | KV453213.1 | 1077424 | 21-scf00419 | 21 |
| AX-158261301 | 21 | 75.11 | KV453213.1 | 1078010 | 21-scf00419 | 21 |
| AX-158261302 | 21 | 75.11 | KV453213.1 | 1078850 | 21-scf00419 | 21 |
| AX-158394628 | 21 | 75.11 | KV453213.1 | 1080020 | 21-scf00419 | 21 |
| AX-157710469 | 21 | 75.11 | KV453213.1 | 1081084 | 21-scf00419 | 21 |
| AX-157710468 | 21 | 75.11 | KV453213.1 | 1081165 | 21-scf00419 | 21 |
| AX-158261306 | 21 | 75.11 | KV453213.1 | 1086141 | 21-scf00419 | 21 |
| AX-158261307 | 21 | 75.11 | KV453213.1 | 1086762 | 21-scf00419 | 21 |
| AX-158261308 | 21 | 75.11 | KV453213.1 | 1087199 | 21-scf00419 | 21 |
| AX-158261311 | 21 | 75.11 | KV453213.1 | 1089837 | 21-scf00419 | 21 |
| AX-158261312 | 21 | 75.11 | KV453213.1 | 1089951 | 21-scf00419 | 21 |
| AX-157843068 | 21 | 75.11 | KV453213.1 | 1091090 | 21-scf00419 | 21 |
| AX-158261313 | 21 | 75.11 | KV453213.1 | 1091385 | 21-scf00419 | 21 |
| AX-158261315 | 21 | 75.11 | KV453213.1 | 1094333 | 21-scf00419 | 21 |
| AX-158261316 | 21 | 75.11 | KV453213.1 | 1096465 | 21-scf00419 | 21 |
| AX-158261317 | 21 | 75.11 | KV453213.1 | 1098184 | 21-scf00419 | 21 |
| AX-158394629 | 21 | 75.11 | KV453213.1 | 1098228 | 21-scf00419 | 21 |
| AX-158394630 | 21 | 75.11 | KV453213.1 | 1099994 | 21-scf00419 | 21 |
| AX-158261319 | 21 | 75.11 | KV453213.1 | 1100275 | 21-scf00419 | 21 |
| AX-158261320 | 21 | 75.11 | KV453213.1 | 1100330 | 21-scf00419 | 21 |
| AX-158394631 | 21 | 75.11 | KV453213.1 | 1104347 | 21-scf00419 | 21 |
| AX-158261327 | 21 | 75.11 | KV453213.1 | 1104799 | 21-scf00419 | 21 |
| AX-158261328 | 21 | 75.11 | KV453213.1 | 1106078 | 21-scf00419 | 21 |
| AX-158261329 | 21 | 75.11 | KV453213.1 | 1107412 | 21-scf00419 | 21 |
| AX-158261330 | 21 | 75.11 | KV453213.1 | 1107868 | 21-scf00419 | 21 |
| AX-158261331 | 21 | 75.11 | KV453213.1 | 1108822 | 21-scf00419 | 21 |
| AX-158261350 | 21 | 75.11 | KV453213.1 | 1134309 | 21-scf00419 | 21 |
| AX-158261370 | 21 | 75.11 | KV453213.1 | 1157268 | 21-scf00419 | 21 |
| AX-158261371 | 21 | 75.11 | KV453213.1 | 1157826 | 21-scf00419 | 21 |
| AX-158261410 | 21 | 75.11 | KV453213.1 | 1215153 | 21-scf00419 | 21 |
| AX-158261451 | 21 | 75.11 | KV453213.1 | 1279832 | 21-scf00419 | 21 |
| AX-158261464 | 21 | 75.11 | KV453213.1 | 1304981 | 21-scf00419 | 21 |
| AX-158261468 | 21 | 75.11 | KV453213.1 | 1313485 | 21-scf00419 | 21 |
| AX-157843082 | 21 | 75.11 | KV453213.1 | 1316699 | 21-scf00419 | 21 |
| AX-158261477 | 21 | 75.11 | KV453213.1 | 1324532 | 21-scf00419 | 21 |
| AX-158261499 | 21 | 75.11 | KV453213.1 | 1356892 | 21-scf00419 | 21 |
| AX-158261509 | 21 | 75.11 | KV453213.1 | 1371179 | 21-scf00419 | 21 |
| AX-158261512 | 21 | 75.11 | KV453213.1 | 1377076 | 21-scf00419 | 21 |
| AX-158261527 | 21 | 75.11 | KV453213.1 | 1394912 | 21-scf00419 | 21 |
| AX-158261533 | 21 | 75.11 | KV453213.1 | 1403212 | 21-scf00419 | 21 |
| AX-158261546 | 21 | 75.11 | KV453213.1 | 1417215 | 21-scf00419 | 21 |
| AX-158394640 | 21 | 75.11 | KV453213.1 | 1474021 | 21-scf00419 | 21 |
| AX-158261611 | 21 | 75.11 | KV453213.1 | 1480663 | 21-scf00419 | 21 |
| AX-158416273 | 21 | 75.11 | KV453213.1 | 1612367 | 21-scf00419 | 21 |

|              |    |        |            |         |             |    |
|--------------|----|--------|------------|---------|-------------|----|
| AX-158261678 | 21 | 75.11  | KV453213.1 | 1624923 | 21-scf00419 | 21 |
| AX-157726605 | 21 | 75.11  | KV453213.1 | 1719719 | 21-scf00419 | 21 |
| AX-158261892 | 21 | 75.11  | KV453213.1 | 1949913 | 21-scf00419 | 21 |
| AX-158261962 | 21 | 75.11  | KV453213.1 | 2031408 | 21-scf00419 | 21 |
| AX-158261987 | 21 | 75.11  | KV453213.1 | 2066599 | 21-scf00419 | 21 |
| AX-158262029 | 21 | 75.11  | KV453213.1 | 2116871 | 21-scf00419 | 21 |
| AX-158262096 | 21 | 75.11  | KV453213.1 | 2216335 | 21-scf00419 | 21 |
| AX-158262143 | 21 | 75.11  | KV453213.1 | 2267759 | 21-scf00419 | 21 |
| AX-157843125 | 21 | 75.11  | KV453213.1 | 2311160 | 21-scf00419 | 21 |
| AX-158262333 | 21 | 75.11  | KV453213.1 | 2460539 | 21-scf00419 | 21 |
| AX-158262343 | 21 | 75.11  | KV453213.1 | 2467571 | 21-scf00419 | 21 |
| AX-158262348 | 21 | 75.11  | KV453213.1 | 2476277 | 21-scf00419 | 21 |
| AX-158262413 | 21 | 75.11  | KV453213.1 | 2553338 | 21-scf00419 | 21 |
| AX-158262419 | 21 | 75.11  | KV453213.1 | 2564014 | 21-scf00419 | 21 |
| AX-158264413 | 21 | 75.11  | KV453213.1 | 4771903 | 21-scf00419 | 21 |
| AX-158261047 | 21 | 75.219 | KV453213.1 | 730403  | 21-scf00419 | 21 |
| AX-157843036 | 21 | 75.219 | KV453213.1 | 746794  | 21-scf00419 | 21 |
| AX-158381075 | 21 | 75.219 | KV453213.1 | 758657  | 21-scf00419 | 21 |
| AX-158261157 | 21 | 75.219 | KV453213.1 | 858610  | 21-scf00419 | 21 |
| AX-158261184 | 21 | 75.219 | KV453213.1 | 899383  | 21-scf00419 | 21 |
| AX-158261321 | 21 | 75.219 | KV453213.1 | 1101030 | 21-scf00419 | 21 |
| AX-158261322 | 21 | 75.219 | KV453213.1 | 1101600 | 21-scf00419 | 21 |
| AX-158261323 | 21 | 75.219 | KV453213.1 | 1102638 | 21-scf00419 | 21 |
| AX-158261325 | 21 | 75.219 | KV453213.1 | 1102925 | 21-scf00419 | 21 |
| AX-158261326 | 21 | 75.219 | KV453213.1 | 1103997 | 21-scf00419 | 21 |
| AX-158261332 | 21 | 75.219 | KV453213.1 | 1110622 | 21-scf00419 | 21 |
| AX-157714630 | 21 | 75.219 | KV453213.1 | 1122252 | 21-scf00419 | 21 |
| AX-158261342 | 21 | 75.219 | KV453213.1 | 1123263 | 21-scf00419 | 21 |
| AX-158261365 | 21 | 75.219 | KV453213.1 | 1151057 | 21-scf00419 | 21 |
| AX-158261383 | 21 | 75.219 | KV453213.1 | 1169072 | 21-scf00419 | 21 |
| AX-158261385 | 21 | 75.219 | KV453213.1 | 1170576 | 21-scf00419 | 21 |
| AX-158261391 | 21 | 75.219 | KV453213.1 | 1191115 | 21-scf00419 | 21 |
| AX-158261392 | 21 | 75.219 | KV453213.1 | 1192267 | 21-scf00419 | 21 |
| AX-158261400 | 21 | 75.219 | KV453213.1 | 1202376 | 21-scf00419 | 21 |
| AX-157715392 | 21 | 75.219 | KV453213.1 | 1211651 | 21-scf00419 | 21 |
| AX-158261408 | 21 | 75.219 | KV453213.1 | 1213740 | 21-scf00419 | 21 |
| AX-158261409 | 21 | 75.219 | KV453213.1 | 1214059 | 21-scf00419 | 21 |
| AX-158261414 | 21 | 75.219 | KV453213.1 | 1220623 | 21-scf00419 | 21 |
| AX-158261415 | 21 | 75.219 | KV453213.1 | 1223110 | 21-scf00419 | 21 |
| AX-158261416 | 21 | 75.219 | KV453213.1 | 1223824 | 21-scf00419 | 21 |
| AX-158261417 | 21 | 75.219 | KV453213.1 | 1225078 | 21-scf00419 | 21 |
| AX-157727746 | 21 | 75.219 | KV453213.1 | 1226261 | 21-scf00419 | 21 |
| AX-158261418 | 21 | 75.219 | KV453213.1 | 1228737 | 21-scf00419 | 21 |
| AX-157755254 | 21 | 75.219 | KV453213.1 | 1233526 | 21-scf00419 | 21 |
| AX-158261421 | 21 | 75.219 | KV453213.1 | 1236057 | 21-scf00419 | 21 |
| AX-158261423 | 21 | 75.219 | KV453213.1 | 1246263 | 21-scf00419 | 21 |
| AX-158261426 | 21 | 75.219 | KV453213.1 | 1248149 | 21-scf00419 | 21 |
| AX-158261427 | 21 | 75.219 | KV453213.1 | 1249254 | 21-scf00419 | 21 |
| AX-158261435 | 21 | 75.219 | KV453213.1 | 1261239 | 21-scf00419 | 21 |
| AX-157843073 | 21 | 75.219 | KV453213.1 | 1264168 | 21-scf00419 | 21 |
| AX-157843074 | 21 | 75.219 | KV453213.1 | 1267424 | 21-scf00419 | 21 |

|              |    |        |            |         |             |    |
|--------------|----|--------|------------|---------|-------------|----|
| AX-157843076 | 21 | 75.219 | KV453213.1 | 1268709 | 21-scf00419 | 21 |
| AX-158261440 | 21 | 75.219 | KV453213.1 | 1269388 | 21-scf00419 | 21 |
| AX-158381077 | 21 | 75.219 | KV453213.1 | 1269508 | 21-scf00419 | 21 |
| AX-158261442 | 21 | 75.219 | KV453213.1 | 1270469 | 21-scf00419 | 21 |
| AX-158261443 | 21 | 75.219 | KV453213.1 | 1272595 | 21-scf00419 | 21 |
| AX-158261444 | 21 | 75.219 | KV453213.1 | 1273016 | 21-scf00419 | 21 |
| AX-157843078 | 21 | 75.219 | KV453213.1 | 1278017 | 21-scf00419 | 21 |
| AX-158261449 | 21 | 75.219 | KV453213.1 | 1278559 | 21-scf00419 | 21 |
| AX-158261453 | 21 | 75.219 | KV453213.1 | 1282412 | 21-scf00419 | 21 |
| AX-157843079 | 21 | 75.219 | KV453213.1 | 1283591 | 21-scf00419 | 21 |
| AX-158261455 | 21 | 75.219 | KV453213.1 | 1287837 | 21-scf00419 | 21 |
| AX-158261456 | 21 | 75.219 | KV453213.1 | 1290981 | 21-scf00419 | 21 |
| AX-158261457 | 21 | 75.219 | KV453213.1 | 1291830 | 21-scf00419 | 21 |
| AX-158261458 | 21 | 75.219 | KV453213.1 | 1293843 | 21-scf00419 | 21 |
| AX-157756103 | 21 | 75.219 | KV453213.1 | 1307481 | 21-scf00419 | 21 |
| AX-158261466 | 21 | 75.219 | KV453213.1 | 1309115 | 21-scf00419 | 21 |
| AX-158261472 | 21 | 75.219 | KV453213.1 | 1317749 | 21-scf00419 | 21 |
| AX-158261475 | 21 | 75.219 | KV453213.1 | 1321516 | 21-scf00419 | 21 |
| AX-158261479 | 21 | 75.219 | KV453213.1 | 1328024 | 21-scf00419 | 21 |
| AX-158261480 | 21 | 75.219 | KV453213.1 | 1328753 | 21-scf00419 | 21 |
| AX-158261484 | 21 | 75.219 | KV453213.1 | 1334401 | 21-scf00419 | 21 |
| AX-158261486 | 21 | 75.219 | KV453213.1 | 1336899 | 21-scf00419 | 21 |
| AX-158261488 | 21 | 75.219 | KV453213.1 | 1339158 | 21-scf00419 | 21 |
| AX-157753114 | 21 | 75.219 | KV453213.1 | 1339500 | 21-scf00419 | 21 |
| AX-157843084 | 21 | 75.219 | KV453213.1 | 1341421 | 21-scf00419 | 21 |
| AX-158261491 | 21 | 75.219 | KV453213.1 | 1342995 | 21-scf00419 | 21 |
| AX-157843086 | 21 | 75.219 | KV453213.1 | 1343640 | 21-scf00419 | 21 |
| AX-157843087 | 21 | 75.219 | KV453213.1 | 1347486 | 21-scf00419 | 21 |
| AX-157843089 | 21 | 75.219 | KV453213.1 | 1349651 | 21-scf00419 | 21 |
| AX-158261497 | 21 | 75.219 | KV453213.1 | 1351297 | 21-scf00419 | 21 |
| AX-157843090 | 21 | 75.219 | KV453213.1 | 1351394 | 21-scf00419 | 21 |
| AX-157843091 | 21 | 75.219 | KV453213.1 | 1355094 | 21-scf00419 | 21 |
| AX-157801945 | 21 | 75.219 | KV453213.1 | 1355723 | 21-scf00419 | 21 |
| AX-157843092 | 21 | 75.219 | KV453213.1 | 1356089 | 21-scf00419 | 21 |
| AX-157843093 | 21 | 75.219 | KV453213.1 | 1361477 | 21-scf00419 | 21 |
| AX-157801951 | 21 | 75.219 | KV453213.1 | 1362083 | 21-scf00419 | 21 |
| AX-157773282 | 21 | 75.219 | KV453213.1 | 1364198 | 21-scf00419 | 21 |
| AX-157843094 | 21 | 75.219 | KV453213.1 | 1364398 | 21-scf00419 | 21 |
| AX-158261502 | 21 | 75.219 | KV453213.1 | 1365278 | 21-scf00419 | 21 |
| AX-157859988 | 21 | 75.219 | KV453213.1 | 1365895 | 21-scf00419 | 21 |
| AX-158261505 | 21 | 75.219 | KV453213.1 | 1367966 | 21-scf00419 | 21 |
| AX-158394636 | 21 | 75.219 | KV453213.1 | 1368380 | 21-scf00419 | 21 |
| AX-158261506 | 21 | 75.219 | KV453213.1 | 1368829 | 21-scf00419 | 21 |
| AX-158261507 | 21 | 75.219 | KV453213.1 | 1369740 | 21-scf00419 | 21 |
| AX-158261516 | 21 | 75.219 | KV453213.1 | 1380275 | 21-scf00419 | 21 |
| AX-158261517 | 21 | 75.219 | KV453213.1 | 1380970 | 21-scf00419 | 21 |
| AX-158261519 | 21 | 75.219 | KV453213.1 | 1383823 | 21-scf00419 | 21 |
| AX-158261520 | 21 | 75.219 | KV453213.1 | 1384756 | 21-scf00419 | 21 |
| AX-157738676 | 21 | 75.219 | KV453213.1 | 1387316 | 21-scf00419 | 21 |
| AX-158261521 | 21 | 75.219 | KV453213.1 | 1388450 | 21-scf00419 | 21 |
| AX-158261526 | 21 | 75.219 | KV453213.1 | 1393967 | 21-scf00419 | 21 |

|              |    |        |            |         |             |    |
|--------------|----|--------|------------|---------|-------------|----|
| AX-158261530 | 21 | 75.219 | KV453213.1 | 1397600 | 21-scf00419 | 21 |
| AX-158416261 | 21 | 75.219 | KV453213.1 | 1398780 | 21-scf00419 | 21 |
| AX-158416262 | 21 | 75.219 | KV453213.1 | 1399221 | 21-scf00419 | 21 |
| AX-158416263 | 21 | 75.219 | KV453213.1 | 1399766 | 21-scf00419 | 21 |
| AX-157859989 | 21 | 75.219 | KV453213.1 | 1400197 | 21-scf00419 | 21 |
| AX-157859990 | 21 | 75.219 | KV453213.1 | 1400987 | 21-scf00419 | 21 |
| AX-157801954 | 21 | 75.219 | KV453213.1 | 1401297 | 21-scf00419 | 21 |
| AX-157859991 | 21 | 75.219 | KV453213.1 | 1401466 | 21-scf00419 | 21 |
| AX-158261535 | 21 | 75.219 | KV453213.1 | 1407537 | 21-scf00419 | 21 |
| AX-157698698 | 21 | 75.219 | KV453213.1 | 1408342 | 21-scf00419 | 21 |
| AX-158394637 | 21 | 75.219 | KV453213.1 | 1409612 | 21-scf00419 | 21 |
| AX-158416264 | 21 | 75.219 | KV453213.1 | 1410272 | 21-scf00419 | 21 |
| AX-158416265 | 21 | 75.219 | KV453213.1 | 1410719 | 21-scf00419 | 21 |
| AX-158261538 | 21 | 75.219 | KV453213.1 | 1410924 | 21-scf00419 | 21 |
| AX-158261540 | 21 | 75.219 | KV453213.1 | 1413419 | 21-scf00419 | 21 |
| AX-158261544 | 21 | 75.219 | KV453213.1 | 1415547 | 21-scf00419 | 21 |
| AX-158261545 | 21 | 75.219 | KV453213.1 | 1416552 | 21-scf00419 | 21 |
| AX-157859992 | 21 | 75.219 | KV453213.1 | 1416844 | 21-scf00419 | 21 |
| AX-157859993 | 21 | 75.219 | KV453213.1 | 1417514 | 21-scf00419 | 21 |
| AX-157859994 | 21 | 75.219 | KV453213.1 | 1418127 | 21-scf00419 | 21 |
| AX-158394638 | 21 | 75.219 | KV453213.1 | 1418261 | 21-scf00419 | 21 |
| AX-158261547 | 21 | 75.219 | KV453213.1 | 1419447 | 21-scf00419 | 21 |
| AX-158387226 | 21 | 75.219 | KV453213.1 | 1420453 | 21-scf00419 | 21 |
| AX-158261550 | 21 | 75.219 | KV453213.1 | 1421423 | 21-scf00419 | 21 |
| AX-158261551 | 21 | 75.219 | KV453213.1 | 1422887 | 21-scf00419 | 21 |
| AX-158261554 | 21 | 75.219 | KV453213.1 | 1424745 | 21-scf00419 | 21 |
| AX-157867433 | 21 | 75.219 | KV453213.1 | 1426023 | 21-scf00419 | 21 |
| AX-158261555 | 21 | 75.219 | KV453213.1 | 1426568 | 21-scf00419 | 21 |
| AX-158261557 | 21 | 75.219 | KV453213.1 | 1428145 | 21-scf00419 | 21 |
| AX-157843097 | 21 | 75.219 | KV453213.1 | 1429781 | 21-scf00419 | 21 |
| AX-158261560 | 21 | 75.219 | KV453213.1 | 1431483 | 21-scf00419 | 21 |
| AX-158261561 | 21 | 75.219 | KV453213.1 | 1433191 | 21-scf00419 | 21 |
| AX-157859995 | 21 | 75.219 | KV453213.1 | 1435988 | 21-scf00419 | 21 |
| AX-157859996 | 21 | 75.219 | KV453213.1 | 1436342 | 21-scf00419 | 21 |
| AX-158261563 | 21 | 75.219 | KV453213.1 | 1436512 | 21-scf00419 | 21 |
| AX-158261564 | 21 | 75.219 | KV453213.1 | 1436997 | 21-scf00419 | 21 |
| AX-157859997 | 21 | 75.219 | KV453213.1 | 1437678 | 21-scf00419 | 21 |
| AX-158261565 | 21 | 75.219 | KV453213.1 | 1437744 | 21-scf00419 | 21 |
| AX-157859998 | 21 | 75.219 | KV453213.1 | 1440477 | 21-scf00419 | 21 |
| AX-158261570 | 21 | 75.219 | KV453213.1 | 1441902 | 21-scf00419 | 21 |
| AX-158261571 | 21 | 75.219 | KV453213.1 | 1443691 | 21-scf00419 | 21 |
| AX-158261572 | 21 | 75.219 | KV453213.1 | 1444236 | 21-scf00419 | 21 |
| AX-158261573 | 21 | 75.219 | KV453213.1 | 1444593 | 21-scf00419 | 21 |
| AX-158261574 | 21 | 75.219 | KV453213.1 | 1445618 | 21-scf00419 | 21 |
| AX-158261576 | 21 | 75.219 | KV453213.1 | 1446387 | 21-scf00419 | 21 |
| AX-158261577 | 21 | 75.219 | KV453213.1 | 1446910 | 21-scf00419 | 21 |
| AX-158261578 | 21 | 75.219 | KV453213.1 | 1447920 | 21-scf00419 | 21 |
| AX-158261579 | 21 | 75.219 | KV453213.1 | 1448464 | 21-scf00419 | 21 |
| AX-157745657 | 21 | 75.219 | KV453213.1 | 1450178 | 21-scf00419 | 21 |
| AX-158261582 | 21 | 75.219 | KV453213.1 | 1451398 | 21-scf00419 | 21 |
| AX-158261583 | 21 | 75.219 | KV453213.1 | 1451789 | 21-scf00419 | 21 |

|              |    |        |            |         |             |    |
|--------------|----|--------|------------|---------|-------------|----|
| AX-158261584 | 21 | 75.219 | KV453213.1 | 1451889 | 21-scf00419 | 21 |
| AX-158261585 | 21 | 75.219 | KV453213.1 | 1452294 | 21-scf00419 | 21 |
| AX-157860000 | 21 | 75.219 | KV453213.1 | 1452472 | 21-scf00419 | 21 |
| AX-157860001 | 21 | 75.219 | KV453213.1 | 1452932 | 21-scf00419 | 21 |
| AX-157860002 | 21 | 75.219 | KV453213.1 | 1453285 | 21-scf00419 | 21 |
| AX-157860003 | 21 | 75.219 | KV453213.1 | 1453690 | 21-scf00419 | 21 |
| AX-157860004 | 21 | 75.219 | KV453213.1 | 1453888 | 21-scf00419 | 21 |
| AX-157843098 | 21 | 75.219 | KV453213.1 | 1454004 | 21-scf00419 | 21 |
| AX-158261587 | 21 | 75.219 | KV453213.1 | 1455141 | 21-scf00419 | 21 |
| AX-158416266 | 21 | 75.219 | KV453213.1 | 1455885 | 21-scf00419 | 21 |
| AX-158394639 | 21 | 75.219 | KV453213.1 | 1456180 | 21-scf00419 | 21 |
| AX-158261588 | 21 | 75.219 | KV453213.1 | 1456791 | 21-scf00419 | 21 |
| AX-158261589 | 21 | 75.219 | KV453213.1 | 1457259 | 21-scf00419 | 21 |
| AX-158261590 | 21 | 75.219 | KV453213.1 | 1457709 | 21-scf00419 | 21 |
| AX-158261591 | 21 | 75.219 | KV453213.1 | 1458160 | 21-scf00419 | 21 |
| AX-157860005 | 21 | 75.219 | KV453213.1 | 1460131 | 21-scf00419 | 21 |
| AX-157860006 | 21 | 75.219 | KV453213.1 | 1461115 | 21-scf00419 | 21 |
| AX-158261592 | 21 | 75.219 | KV453213.1 | 1461465 | 21-scf00419 | 21 |
| AX-158261593 | 21 | 75.219 | KV453213.1 | 1461964 | 21-scf00419 | 21 |
| AX-157887745 | 21 | 75.219 | KV453213.1 | 1462855 | 21-scf00419 | 21 |
| AX-157860007 | 21 | 75.219 | KV453213.1 | 1463302 | 21-scf00419 | 21 |
| AX-157860008 | 21 | 75.219 | KV453213.1 | 1464249 | 21-scf00419 | 21 |
| AX-158261595 | 21 | 75.219 | KV453213.1 | 1464289 | 21-scf00419 | 21 |
| AX-158261596 | 21 | 75.219 | KV453213.1 | 1464984 | 21-scf00419 | 21 |
| AX-158261597 | 21 | 75.219 | KV453213.1 | 1465447 | 21-scf00419 | 21 |
| AX-158261599 | 21 | 75.219 | KV453213.1 | 1468216 | 21-scf00419 | 21 |
| AX-158261601 | 21 | 75.219 | KV453213.1 | 1470265 | 21-scf00419 | 21 |
| AX-158261602 | 21 | 75.219 | KV453213.1 | 1471234 | 21-scf00419 | 21 |
| AX-158261603 | 21 | 75.219 | KV453213.1 | 1471691 | 21-scf00419 | 21 |
| AX-158261604 | 21 | 75.219 | KV453213.1 | 1472135 | 21-scf00419 | 21 |
| AX-157872860 | 21 | 75.219 | KV453213.1 | 1472432 | 21-scf00419 | 21 |
| AX-158261605 | 21 | 75.219 | KV453213.1 | 1472728 | 21-scf00419 | 21 |
| AX-158261606 | 21 | 75.219 | KV453213.1 | 1473420 | 21-scf00419 | 21 |
| AX-158261607 | 21 | 75.219 | KV453213.1 | 1473954 | 21-scf00419 | 21 |
| AX-158261608 | 21 | 75.219 | KV453213.1 | 1474562 | 21-scf00419 | 21 |
| AX-158261609 | 21 | 75.219 | KV453213.1 | 1476511 | 21-scf00419 | 21 |
| AX-158394641 | 21 | 75.219 | KV453213.1 | 1477129 | 21-scf00419 | 21 |
| AX-158261610 | 21 | 75.219 | KV453213.1 | 1477840 | 21-scf00419 | 21 |
| AX-158394642 | 21 | 75.219 | KV453213.1 | 1479865 | 21-scf00419 | 21 |
| AX-158261613 | 21 | 75.219 | KV453213.1 | 1484080 | 21-scf00419 | 21 |
| AX-157872862 | 21 | 75.219 | KV453213.1 | 1484348 | 21-scf00419 | 21 |
| AX-158381078 | 21 | 75.219 | KV453213.1 | 1487180 | 21-scf00419 | 21 |
| AX-157749609 | 21 | 75.219 | KV453213.1 | 1489160 | 21-scf00419 | 21 |
| AX-157843100 | 21 | 75.219 | KV453213.1 | 1491833 | 21-scf00419 | 21 |
| AX-157744709 | 21 | 75.219 | KV453213.1 | 1493649 | 21-scf00419 | 21 |
| AX-158261617 | 21 | 75.219 | KV453213.1 | 1494345 | 21-scf00419 | 21 |
| AX-157719394 | 21 | 75.219 | KV453213.1 | 1496023 | 21-scf00419 | 21 |
| AX-158394643 | 21 | 75.219 | KV453213.1 | 1498005 | 21-scf00419 | 21 |
| AX-158261621 | 21 | 75.219 | KV453213.1 | 1499246 | 21-scf00419 | 21 |
| AX-158261622 | 21 | 75.219 | KV453213.1 | 1500124 | 21-scf00419 | 21 |
| AX-158261624 | 21 | 75.219 | KV453213.1 | 1503377 | 21-scf00419 | 21 |

|              |    |        |            |         |             |    |
|--------------|----|--------|------------|---------|-------------|----|
| AX-158261625 | 21 | 75.219 | KV453213.1 | 1504958 | 21-scf00419 | 21 |
| AX-158261626 | 21 | 75.219 | KV453213.1 | 1505554 | 21-scf00419 | 21 |
| AX-158261627 | 21 | 75.219 | KV453213.1 | 1506673 | 21-scf00419 | 21 |
| AX-157843103 | 21 | 75.219 | KV453213.1 | 1508361 | 21-scf00419 | 21 |
| AX-157843104 | 21 | 75.219 | KV453213.1 | 1508602 | 21-scf00419 | 21 |
| AX-158261628 | 21 | 75.219 | KV453213.1 | 1512142 | 21-scf00419 | 21 |
| AX-158261630 | 21 | 75.219 | KV453213.1 | 1513097 | 21-scf00419 | 21 |
| AX-158394644 | 21 | 75.219 | KV453213.1 | 1515470 | 21-scf00419 | 21 |
| AX-158416268 | 21 | 75.219 | KV453213.1 | 1515876 | 21-scf00419 | 21 |
| AX-158261632 | 21 | 75.219 | KV453213.1 | 1517414 | 21-scf00419 | 21 |
| AX-158261633 | 21 | 75.219 | KV453213.1 | 1518209 | 21-scf00419 | 21 |
| AX-158261636 | 21 | 75.219 | KV453213.1 | 1520150 | 21-scf00419 | 21 |
| AX-158261640 | 21 | 75.219 | KV453213.1 | 1526733 | 21-scf00419 | 21 |
| AX-157694552 | 21 | 75.219 | KV453213.1 | 1537953 | 21-scf00419 | 21 |
| AX-158261643 | 21 | 75.219 | KV453213.1 | 1541059 | 21-scf00419 | 21 |
| AX-158261726 | 21 | 75.219 | KV453213.1 | 1701886 | 21-scf00419 | 21 |
| AX-158262023 | 21 | 75.219 | KV453213.1 | 2107508 | 21-scf00419 | 21 |
| AX-158262093 | 21 | 75.219 | KV453213.1 | 2211897 | 21-scf00419 | 21 |
| AX-158262539 | 21 | 75.219 | KV453213.1 | 2710712 | 21-scf00419 | 21 |
| AX-158261645 | 21 | 75.272 | KV453213.1 | 1549053 | 21-scf00419 | 21 |
| AX-157752452 | 21 | 75.315 | KV453213.1 | 1549167 | 21-scf00419 | 21 |
| AX-158260537 | 21 | 75.328 | KV453213.1 | 107680  | 21-scf00419 | 21 |
| AX-158260553 | 21 | 75.328 | KV453213.1 | 132978  | 21-scf00419 | 21 |
| AX-158260734 | 21 | 75.328 | KV453213.1 | 356094  | 21-scf00419 | 21 |
| AX-158261052 | 21 | 75.328 | KV453213.1 | 735908  | 21-scf00419 | 21 |
| AX-158261129 | 21 | 75.328 | KV453213.1 | 824905  | 21-scf00419 | 21 |
| AX-158261130 | 21 | 75.328 | KV453213.1 | 827722  | 21-scf00419 | 21 |
| AX-158261216 | 21 | 75.328 | KV453213.1 | 947624  | 21-scf00419 | 21 |
| AX-158261338 | 21 | 75.328 | KV453213.1 | 1116923 | 21-scf00419 | 21 |
| AX-158261355 | 21 | 75.328 | KV453213.1 | 1139958 | 21-scf00419 | 21 |
| AX-158261361 | 21 | 75.328 | KV453213.1 | 1144253 | 21-scf00419 | 21 |
| AX-158261447 | 21 | 75.328 | KV453213.1 | 1277587 | 21-scf00419 | 21 |
| AX-158261450 | 21 | 75.328 | KV453213.1 | 1279224 | 21-scf00419 | 21 |
| AX-158261459 | 21 | 75.328 | KV453213.1 | 1298341 | 21-scf00419 | 21 |
| AX-158261461 | 21 | 75.328 | KV453213.1 | 1300442 | 21-scf00419 | 21 |
| AX-158261462 | 21 | 75.328 | KV453213.1 | 1301517 | 21-scf00419 | 21 |
| AX-158261498 | 21 | 75.328 | KV453213.1 | 1355057 | 21-scf00419 | 21 |
| AX-158261518 | 21 | 75.328 | KV453213.1 | 1382177 | 21-scf00419 | 21 |
| AX-158261524 | 21 | 75.328 | KV453213.1 | 1391635 | 21-scf00419 | 21 |
| AX-157887743 | 21 | 75.328 | KV453213.1 | 1443831 | 21-scf00419 | 21 |
| AX-158261618 | 21 | 75.328 | KV453213.1 | 1495090 | 21-scf00419 | 21 |
| AX-158261620 | 21 | 75.328 | KV453213.1 | 1498183 | 21-scf00419 | 21 |
| AX-157843101 | 21 | 75.328 | KV453213.1 | 1499723 | 21-scf00419 | 21 |
| AX-158261623 | 21 | 75.328 | KV453213.1 | 1500969 | 21-scf00419 | 21 |
| AX-157843106 | 21 | 75.328 | KV453213.1 | 1549610 | 21-scf00419 | 21 |
| AX-157872864 | 21 | 75.328 | KV453213.1 | 1554862 | 21-scf00419 | 21 |
| AX-158261649 | 21 | 75.328 | KV453213.1 | 1560109 | 21-scf00419 | 21 |
| AX-157715895 | 21 | 75.328 | KV453213.1 | 1565189 | 21-scf00419 | 21 |
| AX-158261651 | 21 | 75.328 | KV453213.1 | 1566873 | 21-scf00419 | 21 |
| AX-158261655 | 21 | 75.328 | KV453213.1 | 1573760 | 21-scf00419 | 21 |
| AX-158261657 | 21 | 75.328 | KV453213.1 | 1576804 | 21-scf00419 | 21 |



|              |    |        |            |         |             |    |
|--------------|----|--------|------------|---------|-------------|----|
| AX-158261659 | 21 | 75.328 | KV453213.1 | 1579683 | 21-scf00419 | 21 |
| AX-158261661 | 21 | 75.328 | KV453213.1 | 1582479 | 21-scf00419 | 21 |
| AX-157710404 | 21 | 75.328 | KV453213.1 | 1582689 | 21-scf00419 | 21 |
| AX-158261664 | 21 | 75.328 | KV453213.1 | 1585510 | 21-scf00419 | 21 |
| AX-158261666 | 21 | 75.328 | KV453213.1 | 1594530 | 21-scf00419 | 21 |
| AX-158261667 | 21 | 75.328 | KV453213.1 | 1597563 | 21-scf00419 | 21 |
| AX-158416272 | 21 | 75.328 | KV453213.1 | 1611997 | 21-scf00419 | 21 |
| AX-158261677 | 21 | 75.328 | KV453213.1 | 1621227 | 21-scf00419 | 21 |
| AX-158261684 | 21 | 75.328 | KV453213.1 | 1640485 | 21-scf00419 | 21 |
| AX-158261685 | 21 | 75.328 | KV453213.1 | 1640891 | 21-scf00419 | 21 |
| AX-158261687 | 21 | 75.328 | KV453213.1 | 1645674 | 21-scf00419 | 21 |
| AX-158261691 | 21 | 75.328 | KV453213.1 | 1647414 | 21-scf00419 | 21 |
| AX-158261693 | 21 | 75.328 | KV453213.1 | 1649372 | 21-scf00419 | 21 |
| AX-158261707 | 21 | 75.328 | KV453213.1 | 1668503 | 21-scf00419 | 21 |
| AX-158261709 | 21 | 75.328 | KV453213.1 | 1669839 | 21-scf00419 | 21 |
| AX-157753623 | 21 | 75.328 | KV453213.1 | 1673487 | 21-scf00419 | 21 |
| AX-158261712 | 21 | 75.328 | KV453213.1 | 1684332 | 21-scf00419 | 21 |
| AX-157752208 | 21 | 75.328 | KV453213.1 | 1685009 | 21-scf00419 | 21 |
| AX-158261715 | 21 | 75.328 | KV453213.1 | 1686880 | 21-scf00419 | 21 |
| AX-158261720 | 21 | 75.328 | KV453213.1 | 1695903 | 21-scf00419 | 21 |
| AX-158261723 | 21 | 75.328 | KV453213.1 | 1698860 | 21-scf00419 | 21 |
| AX-158261728 | 21 | 75.328 | KV453213.1 | 1706051 | 21-scf00419 | 21 |
| AX-158261731 | 21 | 75.328 | KV453213.1 | 1714602 | 21-scf00419 | 21 |
| AX-158261732 | 21 | 75.328 | KV453213.1 | 1715722 | 21-scf00419 | 21 |
| AX-158261735 | 21 | 75.328 | KV453213.1 | 1720214 | 21-scf00419 | 21 |
| AX-158261738 | 21 | 75.328 | KV453213.1 | 1724448 | 21-scf00419 | 21 |
| AX-158261740 | 21 | 75.328 | KV453213.1 | 1729153 | 21-scf00419 | 21 |
| AX-157843116 | 21 | 75.328 | KV453213.1 | 1736768 | 21-scf00419 | 21 |
| AX-158261749 | 21 | 75.328 | KV453213.1 | 1736999 | 21-scf00419 | 21 |
| AX-158261750 | 21 | 75.328 | KV453213.1 | 1739545 | 21-scf00419 | 21 |
| AX-158261751 | 21 | 75.328 | KV453213.1 | 1740222 | 21-scf00419 | 21 |
| AX-158261763 | 21 | 75.328 | KV453213.1 | 1760123 | 21-scf00419 | 21 |
| AX-158261764 | 21 | 75.328 | KV453213.1 | 1760963 | 21-scf00419 | 21 |
| AX-158261766 | 21 | 75.328 | KV453213.1 | 1765121 | 21-scf00419 | 21 |
| AX-158261767 | 21 | 75.328 | KV453213.1 | 1765827 | 21-scf00419 | 21 |
| AX-158261770 | 21 | 75.328 | KV453213.1 | 1772976 | 21-scf00419 | 21 |
| AX-158261771 | 21 | 75.328 | KV453213.1 | 1775844 | 21-scf00419 | 21 |
| AX-158261772 | 21 | 75.328 | KV453213.1 | 1776956 | 21-scf00419 | 21 |
| AX-158394655 | 21 | 75.328 | KV453213.1 | 1788839 | 21-scf00419 | 21 |
| AX-158261778 | 21 | 75.328 | KV453213.1 | 1789498 | 21-scf00419 | 21 |
| AX-158261779 | 21 | 75.328 | KV453213.1 | 1790177 | 21-scf00419 | 21 |
| AX-158261781 | 21 | 75.328 | KV453213.1 | 1793573 | 21-scf00419 | 21 |
| AX-158419220 | 21 | 75.328 | KV453213.1 | 1794436 | 21-scf00419 | 21 |
| AX-158261782 | 21 | 75.328 | KV453213.1 | 1794837 | 21-scf00419 | 21 |
| AX-158261785 | 21 | 75.328 | KV453213.1 | 1798941 | 21-scf00419 | 21 |
| AX-158261788 | 21 | 75.328 | KV453213.1 | 1802410 | 21-scf00419 | 21 |
| AX-158261789 | 21 | 75.328 | KV453213.1 | 1804853 | 21-scf00419 | 21 |
| AX-158261790 | 21 | 75.328 | KV453213.1 | 1806147 | 21-scf00419 | 21 |
| AX-157872879 | 21 | 75.328 | KV453213.1 | 1815017 | 21-scf00419 | 21 |
| AX-158261797 | 21 | 75.328 | KV453213.1 | 1816730 | 21-scf00419 | 21 |
| AX-158261799 | 21 | 75.328 | KV453213.1 | 1818619 | 21-scf00419 | 21 |

|              |    |        |            |         |             |    |
|--------------|----|--------|------------|---------|-------------|----|
| AX-158261801 | 21 | 75.328 | KV453213.1 | 1820000 | 21-scf00419 | 21 |
| AX-158261802 | 21 | 75.328 | KV453213.1 | 1820348 | 21-scf00419 | 21 |
| AX-158261803 | 21 | 75.328 | KV453213.1 | 1821988 | 21-scf00419 | 21 |
| AX-158381080 | 21 | 75.328 | KV453213.1 | 1840224 | 21-scf00419 | 21 |
| AX-158261819 | 21 | 75.328 | KV453213.1 | 1844779 | 21-scf00419 | 21 |
| AX-158261823 | 21 | 75.328 | KV453213.1 | 1861241 | 21-scf00419 | 21 |
| AX-158261824 | 21 | 75.328 | KV453213.1 | 1862680 | 21-scf00419 | 21 |
| AX-158261826 | 21 | 75.328 | KV453213.1 | 1868290 | 21-scf00419 | 21 |
| AX-158261839 | 21 | 75.328 | KV453213.1 | 1886322 | 21-scf00419 | 21 |
| AX-158261845 | 21 | 75.328 | KV453213.1 | 1893570 | 21-scf00419 | 21 |
| AX-158261849 | 21 | 75.328 | KV453213.1 | 1898538 | 21-scf00419 | 21 |
| AX-158261851 | 21 | 75.328 | KV453213.1 | 1900781 | 21-scf00419 | 21 |
| AX-158261853 | 21 | 75.328 | KV453213.1 | 1902653 | 21-scf00419 | 21 |
| AX-158261854 | 21 | 75.328 | KV453213.1 | 1905034 | 21-scf00419 | 21 |
| AX-158394664 | 21 | 75.328 | KV453213.1 | 1910740 | 21-scf00419 | 21 |
| AX-157773905 | 21 | 75.328 | KV453213.1 | 1910895 | 21-scf00419 | 21 |
| AX-158261858 | 21 | 75.328 | KV453213.1 | 1911702 | 21-scf00419 | 21 |
| AX-158261860 | 21 | 75.328 | KV453213.1 | 1913048 | 21-scf00419 | 21 |
| AX-158261862 | 21 | 75.328 | KV453213.1 | 1915328 | 21-scf00419 | 21 |
| AX-158261864 | 21 | 75.328 | KV453213.1 | 1918216 | 21-scf00419 | 21 |
| AX-158261869 | 21 | 75.328 | KV453213.1 | 1924968 | 21-scf00419 | 21 |
| AX-158261871 | 21 | 75.328 | KV453213.1 | 1926937 | 21-scf00419 | 21 |
| AX-158261874 | 21 | 75.328 | KV453213.1 | 1927977 | 21-scf00419 | 21 |
| AX-158261875 | 21 | 75.328 | KV453213.1 | 1928415 | 21-scf00419 | 21 |
| AX-158261880 | 21 | 75.328 | KV453213.1 | 1939035 | 21-scf00419 | 21 |
| AX-158261887 | 21 | 75.328 | KV453213.1 | 1945896 | 21-scf00419 | 21 |
| AX-158261896 | 21 | 75.328 | KV453213.1 | 1955511 | 21-scf00419 | 21 |
| AX-158261897 | 21 | 75.328 | KV453213.1 | 1956606 | 21-scf00419 | 21 |
| AX-158261899 | 21 | 75.328 | KV453213.1 | 1957984 | 21-scf00419 | 21 |
| AX-158261900 | 21 | 75.328 | KV453213.1 | 1958449 | 21-scf00419 | 21 |
| AX-157757838 | 21 | 75.328 | KV453213.1 | 1959076 | 21-scf00419 | 21 |
| AX-158261903 | 21 | 75.328 | KV453213.1 | 1961371 | 21-scf00419 | 21 |
| AX-158261904 | 21 | 75.328 | KV453213.1 | 1962673 | 21-scf00419 | 21 |
| AX-158261905 | 21 | 75.328 | KV453213.1 | 1963520 | 21-scf00419 | 21 |
| AX-158261906 | 21 | 75.328 | KV453213.1 | 1963972 | 21-scf00419 | 21 |
| AX-158261908 | 21 | 75.328 | KV453213.1 | 1965417 | 21-scf00419 | 21 |
| AX-158261910 | 21 | 75.328 | KV453213.1 | 1967921 | 21-scf00419 | 21 |
| AX-158261911 | 21 | 75.328 | KV453213.1 | 1968774 | 21-scf00419 | 21 |
| AX-158261913 | 21 | 75.328 | KV453213.1 | 1969891 | 21-scf00419 | 21 |
| AX-158261914 | 21 | 75.328 | KV453213.1 | 1970501 | 21-scf00419 | 21 |
| AX-158261915 | 21 | 75.328 | KV453213.1 | 1972881 | 21-scf00419 | 21 |
| AX-158261916 | 21 | 75.328 | KV453213.1 | 1973671 | 21-scf00419 | 21 |
| AX-158261923 | 21 | 75.328 | KV453213.1 | 1980811 | 21-scf00419 | 21 |
| AX-158261925 | 21 | 75.328 | KV453213.1 | 1982091 | 21-scf00419 | 21 |
| AX-158261929 | 21 | 75.328 | KV453213.1 | 1985715 | 21-scf00419 | 21 |
| AX-158261930 | 21 | 75.328 | KV453213.1 | 1986913 | 21-scf00419 | 21 |
| AX-158261931 | 21 | 75.328 | KV453213.1 | 1987508 | 21-scf00419 | 21 |
| AX-158261933 | 21 | 75.328 | KV453213.1 | 1991693 | 21-scf00419 | 21 |
| AX-158261936 | 21 | 75.328 | KV453213.1 | 1993057 | 21-scf00419 | 21 |
| AX-158261937 | 21 | 75.328 | KV453213.1 | 1996383 | 21-scf00419 | 21 |
| AX-158261941 | 21 | 75.328 | KV453213.1 | 2001112 | 21-scf00419 | 21 |

|              |    |        |            |         |             |    |
|--------------|----|--------|------------|---------|-------------|----|
| AX-158261942 | 21 | 75.328 | KV453213.1 | 2001738 | 21-scf00419 | 21 |
| AX-158261944 | 21 | 75.328 | KV453213.1 | 2003843 | 21-scf00419 | 21 |
| AX-158261947 | 21 | 75.328 | KV453213.1 | 2006687 | 21-scf00419 | 21 |
| AX-158261948 | 21 | 75.328 | KV453213.1 | 2009165 | 21-scf00419 | 21 |
| AX-158419226 | 21 | 75.328 | KV453213.1 | 2011159 | 21-scf00419 | 21 |
| AX-158261952 | 21 | 75.328 | KV453213.1 | 2017033 | 21-scf00419 | 21 |
| AX-158261955 | 21 | 75.328 | KV453213.1 | 2019402 | 21-scf00419 | 21 |
| AX-158261958 | 21 | 75.328 | KV453213.1 | 2025196 | 21-scf00419 | 21 |
| AX-158261960 | 21 | 75.328 | KV453213.1 | 2030019 | 21-scf00419 | 21 |
| AX-158261964 | 21 | 75.328 | KV453213.1 | 2034850 | 21-scf00419 | 21 |
| AX-158261966 | 21 | 75.328 | KV453213.1 | 2038580 | 21-scf00419 | 21 |
| AX-158261967 | 21 | 75.328 | KV453213.1 | 2039901 | 21-scf00419 | 21 |
| AX-158261968 | 21 | 75.328 | KV453213.1 | 2040597 | 21-scf00419 | 21 |
| AX-158261970 | 21 | 75.328 | KV453213.1 | 2042544 | 21-scf00419 | 21 |
| AX-158261971 | 21 | 75.328 | KV453213.1 | 2043099 | 21-scf00419 | 21 |
| AX-158261973 | 21 | 75.328 | KV453213.1 | 2044739 | 21-scf00419 | 21 |
| AX-158261975 | 21 | 75.328 | KV453213.1 | 2047301 | 21-scf00419 | 21 |
| AX-158261978 | 21 | 75.328 | KV453213.1 | 2050829 | 21-scf00419 | 21 |
| AX-158381081 | 21 | 75.328 | KV453213.1 | 2056395 | 21-scf00419 | 21 |
| AX-158261985 | 21 | 75.328 | KV453213.1 | 2061594 | 21-scf00419 | 21 |
| AX-157843119 | 21 | 75.328 | KV453213.1 | 2073994 | 21-scf00419 | 21 |
| AX-157843120 | 21 | 75.328 | KV453213.1 | 2074873 | 21-scf00419 | 21 |
| AX-158261992 | 21 | 75.328 | KV453213.1 | 2075041 | 21-scf00419 | 21 |
| AX-158394675 | 21 | 75.328 | KV453213.1 | 2080518 | 21-scf00419 | 21 |
| AX-158394678 | 21 | 75.328 | KV453213.1 | 2090849 | 21-scf00419 | 21 |
| AX-158262011 | 21 | 75.328 | KV453213.1 | 2091862 | 21-scf00419 | 21 |
| AX-158262015 | 21 | 75.328 | KV453213.1 | 2101885 | 21-scf00419 | 21 |
| AX-158262022 | 21 | 75.328 | KV453213.1 | 2107345 | 21-scf00419 | 21 |
| AX-158262025 | 21 | 75.328 | KV453213.1 | 2112901 | 21-scf00419 | 21 |
| AX-158262027 | 21 | 75.328 | KV453213.1 | 2114276 | 21-scf00419 | 21 |
| AX-158262028 | 21 | 75.328 | KV453213.1 | 2116001 | 21-scf00419 | 21 |
| AX-158262030 | 21 | 75.328 | KV453213.1 | 2117808 | 21-scf00419 | 21 |
| AX-158262033 | 21 | 75.328 | KV453213.1 | 2119963 | 21-scf00419 | 21 |
| AX-158262038 | 21 | 75.328 | KV453213.1 | 2123748 | 21-scf00419 | 21 |
| AX-158262039 | 21 | 75.328 | KV453213.1 | 2124125 | 21-scf00419 | 21 |
| AX-158411141 | 21 | 75.328 | KV453213.1 | 2150107 | 21-scf00419 | 21 |
| AX-158381082 | 21 | 75.328 | KV453213.1 | 2266542 | 21-scf00419 | 21 |
| AX-158262162 | 21 | 75.328 | KV453213.1 | 2289606 | 21-scf00419 | 21 |
| AX-158262177 | 21 | 75.328 | KV453213.1 | 2306011 | 21-scf00419 | 21 |
| AX-158262202 | 21 | 75.328 | KV453213.1 | 2344254 | 21-scf00419 | 21 |
| AX-158262216 | 21 | 75.328 | KV453213.1 | 2353606 | 21-scf00419 | 21 |
| AX-158262219 | 21 | 75.328 | KV453213.1 | 2355496 | 21-scf00419 | 21 |
| AX-158262259 | 21 | 75.328 | KV453213.1 | 2390441 | 21-scf00419 | 21 |
| AX-158262262 | 21 | 75.328 | KV453213.1 | 2392570 | 21-scf00419 | 21 |
| AX-158262264 | 21 | 75.328 | KV453213.1 | 2395603 | 21-scf00419 | 21 |
| AX-157759710 | 21 | 75.328 | KV453213.1 | 2401783 | 21-scf00419 | 21 |
| AX-158262272 | 21 | 75.328 | KV453213.1 | 2403394 | 21-scf00419 | 21 |
| AX-158262277 | 21 | 75.328 | KV453213.1 | 2409879 | 21-scf00419 | 21 |
| AX-158262302 | 21 | 75.328 | KV453213.1 | 2430014 | 21-scf00419 | 21 |
| AX-158262313 | 21 | 75.328 | KV453213.1 | 2438340 | 21-scf00419 | 21 |
| AX-158262315 | 21 | 75.328 | KV453213.1 | 2441427 | 21-scf00419 | 21 |

|              |    |        |            |         |             |    |
|--------------|----|--------|------------|---------|-------------|----|
| AX-158416291 | 21 | 75.328 | KV453213.1 | 2448501 | 21-scf00419 | 21 |
| AX-158262325 | 21 | 75.328 | KV453213.1 | 2451351 | 21-scf00419 | 21 |
| AX-158262328 | 21 | 75.328 | KV453213.1 | 2452784 | 21-scf00419 | 21 |
| AX-157843130 | 21 | 75.328 | KV453213.1 | 2454557 | 21-scf00419 | 21 |
| AX-158262338 | 21 | 75.328 | KV453213.1 | 2464279 | 21-scf00419 | 21 |
| AX-158262351 | 21 | 75.328 | KV453213.1 | 2478554 | 21-scf00419 | 21 |
| AX-158262365 | 21 | 75.328 | KV453213.1 | 2489868 | 21-scf00419 | 21 |
| AX-158262372 | 21 | 75.328 | KV453213.1 | 2501955 | 21-scf00419 | 21 |
| AX-158262380 | 21 | 75.328 | KV453213.1 | 2508164 | 21-scf00419 | 21 |
| AX-158394691 | 21 | 75.328 | KV453213.1 | 2573882 | 21-scf00419 | 21 |
| AX-157880423 | 21 | 75.328 | KV453213.1 | 2671167 | 21-scf00419 | 21 |
| AX-158262552 | 21 | 75.328 | KV453213.1 | 2728122 | 21-scf00419 | 21 |
| AX-158263984 | 21 | 75.328 | KV453213.1 | 4306904 | 21-scf00419 | 21 |
| AX-158264737 | 21 | 75.328 | KV453213.1 | 5164531 | 21-scf00419 | 21 |
| AX-158264761 | 21 | 75.328 | KV453213.1 | 5190029 | 21-scf00419 | 21 |
| AX-158264786 | 21 | 75.328 | KV453213.1 | 5212196 | 21-scf00419 | 21 |
| AX-158261979 | 21 | 75.349 | KV453213.1 | 2051808 | 21-scf00419 | 21 |
| AX-158394666 | 21 | 75.369 | KV453213.1 | 1935761 | 21-scf00419 | 21 |
| AX-158261997 | 21 | 75.369 | KV453213.1 | 2081283 | 21-scf00419 | 21 |
| AX-158262332 | 21 | 75.369 | KV453213.1 | 2459625 | 21-scf00419 | 21 |
| AX-158262003 | 21 | 75.379 | KV453213.1 | 2085429 | 21-scf00419 | 21 |
| AX-158262021 | 21 | 75.4   | KV453213.1 | 2106447 | 21-scf00419 | 21 |
| AX-158419227 | 21 | 75.421 | KV453213.1 | 2122783 | 21-scf00419 | 21 |
| AX-158261396 | 21 | 75.437 | KV453213.1 | 1199481 | 21-scf00419 | 21 |
| AX-158261401 | 21 | 75.437 | KV453213.1 | 1204328 | 21-scf00419 | 21 |
| AX-158261481 | 21 | 75.437 | KV453213.1 | 1331138 | 21-scf00419 | 21 |
| AX-158261552 | 21 | 75.437 | KV453213.1 | 1424238 | 21-scf00419 | 21 |
| AX-157887744 | 21 | 75.437 | KV453213.1 | 1444182 | 21-scf00419 | 21 |
| AX-158261716 | 21 | 75.437 | KV453213.1 | 1687372 | 21-scf00419 | 21 |
| AX-157843115 | 21 | 75.437 | KV453213.1 | 1709926 | 21-scf00419 | 21 |
| AX-158261784 | 21 | 75.437 | KV453213.1 | 1798044 | 21-scf00419 | 21 |
| AX-157726394 | 21 | 75.437 | KV453213.1 | 1811418 | 21-scf00419 | 21 |
| AX-158261794 | 21 | 75.437 | KV453213.1 | 1813504 | 21-scf00419 | 21 |
| AX-158261795 | 21 | 75.437 | KV453213.1 | 1815925 | 21-scf00419 | 21 |
| AX-158261796 | 21 | 75.437 | KV453213.1 | 1816251 | 21-scf00419 | 21 |
| AX-158261800 | 21 | 75.437 | KV453213.1 | 1819696 | 21-scf00419 | 21 |
| AX-158262053 | 21 | 75.437 | KV453213.1 | 2148013 | 21-scf00419 | 21 |
| AX-158262055 | 21 | 75.437 | KV453213.1 | 2153475 | 21-scf00419 | 21 |
| AX-158262056 | 21 | 75.437 | KV453213.1 | 2154230 | 21-scf00419 | 21 |
| AX-158262058 | 21 | 75.437 | KV453213.1 | 2155824 | 21-scf00419 | 21 |
| AX-158262060 | 21 | 75.437 | KV453213.1 | 2158069 | 21-scf00419 | 21 |
| AX-158262063 | 21 | 75.437 | KV453213.1 | 2162020 | 21-scf00419 | 21 |
| AX-158262064 | 21 | 75.437 | KV453213.1 | 2162394 | 21-scf00419 | 21 |
| AX-158262067 | 21 | 75.437 | KV453213.1 | 2169523 | 21-scf00419 | 21 |
| AX-158262070 | 21 | 75.437 | KV453213.1 | 2176681 | 21-scf00419 | 21 |
| AX-158262123 | 21 | 75.437 | KV453213.1 | 2244802 | 21-scf00419 | 21 |
| AX-157843147 | 21 | 75.437 | KV453213.1 | 2656998 | 21-scf00419 | 21 |
| AX-158262538 | 21 | 75.437 | KV453213.1 | 2709244 | 21-scf00419 | 21 |
| AX-158264459 | 21 | 75.437 | KV453213.1 | 4816190 | 21-scf00419 | 21 |
| AX-158264919 | 21 | 75.437 | KV453213.1 | 5375522 | 21-scf00419 | 21 |
| AX-158260441 | 21 | 75.547 | KV453211.1 | 9002060 | 21-scf00417 | 21 |

|              |    |        |            |         |             |    |
|--------------|----|--------|------------|---------|-------------|----|
| AX-157756362 | 21 | 75.547 | KV453213.1 | 321259  | 21-scf00419 | 21 |
| AX-158260720 | 21 | 75.547 | KV453213.1 | 343429  | 21-scf00419 | 21 |
| AX-158261293 | 21 | 75.547 | KV453213.1 | 1066801 | 21-scf00419 | 21 |
| AX-157872863 | 21 | 75.547 | KV453213.1 | 1551493 | 21-scf00419 | 21 |
| AX-158261647 | 21 | 75.547 | KV453213.1 | 1554500 | 21-scf00419 | 21 |
| AX-157843109 | 21 | 75.547 | KV453213.1 | 1558165 | 21-scf00419 | 21 |
| AX-157747496 | 21 | 75.547 | KV453213.1 | 1558332 | 21-scf00419 | 21 |
| AX-158394645 | 21 | 75.547 | KV453213.1 | 1560463 | 21-scf00419 | 21 |
| AX-158261656 | 21 | 75.547 | KV453213.1 | 1576091 | 21-scf00419 | 21 |
| AX-157872865 | 21 | 75.547 | KV453213.1 | 1577540 | 21-scf00419 | 21 |
| AX-157872866 | 21 | 75.547 | KV453213.1 | 1579289 | 21-scf00419 | 21 |
| AX-157710403 | 21 | 75.547 | KV453213.1 | 1582749 | 21-scf00419 | 21 |
| AX-158394646 | 21 | 75.547 | KV453213.1 | 1589216 | 21-scf00419 | 21 |
| AX-157748167 | 21 | 75.547 | KV453213.1 | 1593435 | 21-scf00419 | 21 |
| AX-157843111 | 21 | 75.547 | KV453213.1 | 1597388 | 21-scf00419 | 21 |
| AX-158261679 | 21 | 75.547 | KV453213.1 | 1626489 | 21-scf00419 | 21 |
| AX-158261680 | 21 | 75.547 | KV453213.1 | 1628989 | 21-scf00419 | 21 |
| AX-158261681 | 21 | 75.547 | KV453213.1 | 1629759 | 21-scf00419 | 21 |
| AX-158261686 | 21 | 75.547 | KV453213.1 | 1642154 | 21-scf00419 | 21 |
| AX-158261694 | 21 | 75.547 | KV453213.1 | 1652516 | 21-scf00419 | 21 |
| AX-157872867 | 21 | 75.547 | KV453213.1 | 1655083 | 21-scf00419 | 21 |
| AX-158261704 | 21 | 75.547 | KV453213.1 | 1663860 | 21-scf00419 | 21 |
| AX-158261730 | 21 | 75.547 | KV453213.1 | 1711799 | 21-scf00419 | 21 |
| AX-158261834 | 21 | 75.547 | KV453213.1 | 1881083 | 21-scf00419 | 21 |
| AX-158261838 | 21 | 75.547 | KV453213.1 | 1884153 | 21-scf00419 | 21 |
| AX-157843117 | 21 | 75.547 | KV453213.1 | 1904332 | 21-scf00419 | 21 |
| AX-158261855 | 21 | 75.547 | KV453213.1 | 1905211 | 21-scf00419 | 21 |
| AX-158394663 | 21 | 75.547 | KV453213.1 | 1906132 | 21-scf00419 | 21 |
| AX-158261863 | 21 | 75.547 | KV453213.1 | 1916252 | 21-scf00419 | 21 |
| AX-158394665 | 21 | 75.547 | KV453213.1 | 1917506 | 21-scf00419 | 21 |
| AX-158394667 | 21 | 75.547 | KV453213.1 | 1937647 | 21-scf00419 | 21 |
| AX-158261883 | 21 | 75.547 | KV453213.1 | 1941171 | 21-scf00419 | 21 |
| AX-158261893 | 21 | 75.547 | KV453213.1 | 1950853 | 21-scf00419 | 21 |
| AX-158261895 | 21 | 75.547 | KV453213.1 | 1954608 | 21-scf00419 | 21 |
| AX-158261898 | 21 | 75.547 | KV453213.1 | 1957408 | 21-scf00419 | 21 |
| AX-158261920 | 21 | 75.547 | KV453213.1 | 1978641 | 21-scf00419 | 21 |
| AX-158394668 | 21 | 75.547 | KV453213.1 | 1979146 | 21-scf00419 | 21 |
| AX-158261928 | 21 | 75.547 | KV453213.1 | 1985153 | 21-scf00419 | 21 |
| AX-158261934 | 21 | 75.547 | KV453213.1 | 1992230 | 21-scf00419 | 21 |
| AX-158261935 | 21 | 75.547 | KV453213.1 | 1992617 | 21-scf00419 | 21 |
| AX-158261943 | 21 | 75.547 | KV453213.1 | 2002987 | 21-scf00419 | 21 |
| AX-158261945 | 21 | 75.547 | KV453213.1 | 2004581 | 21-scf00419 | 21 |
| AX-158394671 | 21 | 75.547 | KV453213.1 | 2009700 | 21-scf00419 | 21 |
| AX-158394672 | 21 | 75.547 | KV453213.1 | 2012153 | 21-scf00419 | 21 |
| AX-158261951 | 21 | 75.547 | KV453213.1 | 2015081 | 21-scf00419 | 21 |
| AX-158261954 | 21 | 75.547 | KV453213.1 | 2018231 | 21-scf00419 | 21 |
| AX-158394673 | 21 | 75.547 | KV453213.1 | 2026942 | 21-scf00419 | 21 |
| AX-158261959 | 21 | 75.547 | KV453213.1 | 2027593 | 21-scf00419 | 21 |
| AX-158261961 | 21 | 75.547 | KV453213.1 | 2030990 | 21-scf00419 | 21 |
| AX-158394674 | 21 | 75.547 | KV453213.1 | 2031617 | 21-scf00419 | 21 |
| AX-158261977 | 21 | 75.547 | KV453213.1 | 2049627 | 21-scf00419 | 21 |

|              |    |        |            |         |             |    |
|--------------|----|--------|------------|---------|-------------|----|
| AX-158261981 | 21 | 75.547 | KV453213.1 | 2053117 | 21-scf00419 | 21 |
| AX-158261982 | 21 | 75.547 | KV453213.1 | 2055767 | 21-scf00419 | 21 |
| AX-158261984 | 21 | 75.547 | KV453213.1 | 2059647 | 21-scf00419 | 21 |
| AX-158261986 | 21 | 75.547 | KV453213.1 | 2062412 | 21-scf00419 | 21 |
| AX-158261989 | 21 | 75.547 | KV453213.1 | 2071654 | 21-scf00419 | 21 |
| AX-158394676 | 21 | 75.547 | KV453213.1 | 2082185 | 21-scf00419 | 21 |
| AX-158262000 | 21 | 75.547 | KV453213.1 | 2083100 | 21-scf00419 | 21 |
| AX-158262004 | 21 | 75.547 | KV453213.1 | 2085818 | 21-scf00419 | 21 |
| AX-158394677 | 21 | 75.547 | KV453213.1 | 2085907 | 21-scf00419 | 21 |
| AX-158262006 | 21 | 75.547 | KV453213.1 | 2088287 | 21-scf00419 | 21 |
| AX-158262007 | 21 | 75.547 | KV453213.1 | 2089019 | 21-scf00419 | 21 |
| AX-158262009 | 21 | 75.547 | KV453213.1 | 2089874 | 21-scf00419 | 21 |
| AX-158262010 | 21 | 75.547 | KV453213.1 | 2090416 | 21-scf00419 | 21 |
| AX-157707812 | 21 | 75.547 | KV453213.1 | 2134137 | 21-scf00419 | 21 |
| AX-157703897 | 21 | 75.547 | KV453213.1 | 2137393 | 21-scf00419 | 21 |
| AX-158262049 | 21 | 75.547 | KV453213.1 | 2141460 | 21-scf00419 | 21 |
| AX-158262050 | 21 | 75.547 | KV453213.1 | 2143153 | 21-scf00419 | 21 |
| AX-158262073 | 21 | 75.547 | KV453213.1 | 2185668 | 21-scf00419 | 21 |
| AX-158262074 | 21 | 75.547 | KV453213.1 | 2187554 | 21-scf00419 | 21 |
| AX-158262075 | 21 | 75.547 | KV453213.1 | 2188927 | 21-scf00419 | 21 |
| AX-158262076 | 21 | 75.547 | KV453213.1 | 2189827 | 21-scf00419 | 21 |
| AX-158262077 | 21 | 75.547 | KV453213.1 | 2192511 | 21-scf00419 | 21 |
| AX-158262078 | 21 | 75.547 | KV453213.1 | 2193209 | 21-scf00419 | 21 |
| AX-158262079 | 21 | 75.547 | KV453213.1 | 2194645 | 21-scf00419 | 21 |
| AX-158262080 | 21 | 75.547 | KV453213.1 | 2195531 | 21-scf00419 | 21 |
| AX-158262081 | 21 | 75.547 | KV453213.1 | 2196154 | 21-scf00419 | 21 |
| AX-158416283 | 21 | 75.547 | KV453213.1 | 2197009 | 21-scf00419 | 21 |
| AX-158262083 | 21 | 75.547 | KV453213.1 | 2198025 | 21-scf00419 | 21 |
| AX-158262084 | 21 | 75.547 | KV453213.1 | 2198577 | 21-scf00419 | 21 |
| AX-158262089 | 21 | 75.547 | KV453213.1 | 2206588 | 21-scf00419 | 21 |
| AX-158262091 | 21 | 75.547 | KV453213.1 | 2207873 | 21-scf00419 | 21 |
| AX-158262103 | 21 | 75.547 | KV453213.1 | 2222632 | 21-scf00419 | 21 |
| AX-157746631 | 21 | 75.547 | KV453213.1 | 2223510 | 21-scf00419 | 21 |
| AX-158262104 | 21 | 75.547 | KV453213.1 | 2224192 | 21-scf00419 | 21 |
| AX-158262105 | 21 | 75.547 | KV453213.1 | 2224782 | 21-scf00419 | 21 |
| AX-158262108 | 21 | 75.547 | KV453213.1 | 2226970 | 21-scf00419 | 21 |
| AX-158262109 | 21 | 75.547 | KV453213.1 | 2228104 | 21-scf00419 | 21 |
| AX-158262112 | 21 | 75.547 | KV453213.1 | 2230572 | 21-scf00419 | 21 |
| AX-157887768 | 21 | 75.547 | KV453213.1 | 2233674 | 21-scf00419 | 21 |
| AX-158262120 | 21 | 75.547 | KV453213.1 | 2242235 | 21-scf00419 | 21 |
| AX-158262129 | 21 | 75.547 | KV453213.1 | 2253893 | 21-scf00419 | 21 |
| AX-158394684 | 21 | 75.547 | KV453213.1 | 2254630 | 21-scf00419 | 21 |
| AX-158262131 | 21 | 75.547 | KV453213.1 | 2256384 | 21-scf00419 | 21 |
| AX-158262133 | 21 | 75.547 | KV453213.1 | 2257446 | 21-scf00419 | 21 |
| AX-158262136 | 21 | 75.547 | KV453213.1 | 2259551 | 21-scf00419 | 21 |
| AX-158262139 | 21 | 75.547 | KV453213.1 | 2264184 | 21-scf00419 | 21 |
| AX-158262141 | 21 | 75.547 | KV453213.1 | 2266098 | 21-scf00419 | 21 |
| AX-158262142 | 21 | 75.547 | KV453213.1 | 2266686 | 21-scf00419 | 21 |
| AX-158262144 | 21 | 75.547 | KV453213.1 | 2268453 | 21-scf00419 | 21 |
| AX-158262147 | 21 | 75.547 | KV453213.1 | 2272100 | 21-scf00419 | 21 |
| AX-158262150 | 21 | 75.547 | KV453213.1 | 2276688 | 21-scf00419 | 21 |

|              |    |        |            |         |             |    |
|--------------|----|--------|------------|---------|-------------|----|
| AX-158262152 | 21 | 75.547 | KV453213.1 | 2277558 | 21-scf00419 | 21 |
| AX-158262153 | 21 | 75.547 | KV453213.1 | 2278597 | 21-scf00419 | 21 |
| AX-158262155 | 21 | 75.547 | KV453213.1 | 2280647 | 21-scf00419 | 21 |
| AX-158262156 | 21 | 75.547 | KV453213.1 | 2282396 | 21-scf00419 | 21 |
| AX-158262157 | 21 | 75.547 | KV453213.1 | 2282954 | 21-scf00419 | 21 |
| AX-158262158 | 21 | 75.547 | KV453213.1 | 2283414 | 21-scf00419 | 21 |
| AX-158262160 | 21 | 75.547 | KV453213.1 | 2285405 | 21-scf00419 | 21 |
| AX-158262161 | 21 | 75.547 | KV453213.1 | 2287870 | 21-scf00419 | 21 |
| AX-158262163 | 21 | 75.547 | KV453213.1 | 2290984 | 21-scf00419 | 21 |
| AX-157843123 | 21 | 75.547 | KV453213.1 | 2291729 | 21-scf00419 | 21 |
| AX-158262164 | 21 | 75.547 | KV453213.1 | 2293351 | 21-scf00419 | 21 |
| AX-158262165 | 21 | 75.547 | KV453213.1 | 2294144 | 21-scf00419 | 21 |
| AX-158262166 | 21 | 75.547 | KV453213.1 | 2294735 | 21-scf00419 | 21 |
| AX-158262168 | 21 | 75.547 | KV453213.1 | 2296819 | 21-scf00419 | 21 |
| AX-158262169 | 21 | 75.547 | KV453213.1 | 2297564 | 21-scf00419 | 21 |
| AX-158262170 | 21 | 75.547 | KV453213.1 | 2298217 | 21-scf00419 | 21 |
| AX-158262171 | 21 | 75.547 | KV453213.1 | 2298888 | 21-scf00419 | 21 |
| AX-158262173 | 21 | 75.547 | KV453213.1 | 2302611 | 21-scf00419 | 21 |
| AX-158262174 | 21 | 75.547 | KV453213.1 | 2304473 | 21-scf00419 | 21 |
| AX-158262178 | 21 | 75.547 | KV453213.1 | 2306662 | 21-scf00419 | 21 |
| AX-158262179 | 21 | 75.547 | KV453213.1 | 2310133 | 21-scf00419 | 21 |
| AX-157724988 | 21 | 75.547 | KV453213.1 | 2314950 | 21-scf00419 | 21 |
| AX-158262180 | 21 | 75.547 | KV453213.1 | 2315550 | 21-scf00419 | 21 |
| AX-158262181 | 21 | 75.547 | KV453213.1 | 2318919 | 21-scf00419 | 21 |
| AX-158262182 | 21 | 75.547 | KV453213.1 | 2323067 | 21-scf00419 | 21 |
| AX-158262183 | 21 | 75.547 | KV453213.1 | 2324396 | 21-scf00419 | 21 |
| AX-158262186 | 21 | 75.547 | KV453213.1 | 2326877 | 21-scf00419 | 21 |
| AX-158262187 | 21 | 75.547 | KV453213.1 | 2327335 | 21-scf00419 | 21 |
| AX-158262189 | 21 | 75.547 | KV453213.1 | 2330636 | 21-scf00419 | 21 |
| AX-158262190 | 21 | 75.547 | KV453213.1 | 2331450 | 21-scf00419 | 21 |
| AX-158416288 | 21 | 75.547 | KV453213.1 | 2333370 | 21-scf00419 | 21 |
| AX-158262192 | 21 | 75.547 | KV453213.1 | 2334051 | 21-scf00419 | 21 |
| AX-158262194 | 21 | 75.547 | KV453213.1 | 2337314 | 21-scf00419 | 21 |
| AX-158262195 | 21 | 75.547 | KV453213.1 | 2338461 | 21-scf00419 | 21 |
| AX-158262196 | 21 | 75.547 | KV453213.1 | 2339096 | 21-scf00419 | 21 |
| AX-158262199 | 21 | 75.547 | KV453213.1 | 2342248 | 21-scf00419 | 21 |
| AX-158262201 | 21 | 75.547 | KV453213.1 | 2343947 | 21-scf00419 | 21 |
| AX-158262203 | 21 | 75.547 | KV453213.1 | 2346003 | 21-scf00419 | 21 |
| AX-158262204 | 21 | 75.547 | KV453213.1 | 2346456 | 21-scf00419 | 21 |
| AX-158262205 | 21 | 75.547 | KV453213.1 | 2347177 | 21-scf00419 | 21 |
| AX-158262206 | 21 | 75.547 | KV453213.1 | 2347960 | 21-scf00419 | 21 |
| AX-158262207 | 21 | 75.547 | KV453213.1 | 2348492 | 21-scf00419 | 21 |
| AX-158262208 | 21 | 75.547 | KV453213.1 | 2348901 | 21-scf00419 | 21 |
| AX-158262209 | 21 | 75.547 | KV453213.1 | 2350370 | 21-scf00419 | 21 |
| AX-158262210 | 21 | 75.547 | KV453213.1 | 2351072 | 21-scf00419 | 21 |
| AX-158262211 | 21 | 75.547 | KV453213.1 | 2351473 | 21-scf00419 | 21 |
| AX-158262212 | 21 | 75.547 | KV453213.1 | 2351863 | 21-scf00419 | 21 |
| AX-158262213 | 21 | 75.547 | KV453213.1 | 2352316 | 21-scf00419 | 21 |
| AX-158262214 | 21 | 75.547 | KV453213.1 | 2352849 | 21-scf00419 | 21 |
| AX-158262215 | 21 | 75.547 | KV453213.1 | 2353408 | 21-scf00419 | 21 |
| AX-158262217 | 21 | 75.547 | KV453213.1 | 2354025 | 21-scf00419 | 21 |

|              |    |        |            |         |             |    |
|--------------|----|--------|------------|---------|-------------|----|
| AX-158262221 | 21 | 75.547 | KV453213.1 | 2357344 | 21-scf00419 | 21 |
| AX-158262222 | 21 | 75.547 | KV453213.1 | 2357736 | 21-scf00419 | 21 |
| AX-158262223 | 21 | 75.547 | KV453213.1 | 2359002 | 21-scf00419 | 21 |
| AX-158394686 | 21 | 75.547 | KV453213.1 | 2360147 | 21-scf00419 | 21 |
| AX-158262226 | 21 | 75.547 | KV453213.1 | 2361104 | 21-scf00419 | 21 |
| AX-158262227 | 21 | 75.547 | KV453213.1 | 2362360 | 21-scf00419 | 21 |
| AX-158262228 | 21 | 75.547 | KV453213.1 | 2362713 | 21-scf00419 | 21 |
| AX-158262229 | 21 | 75.547 | KV453213.1 | 2363156 | 21-scf00419 | 21 |
| AX-158262230 | 21 | 75.547 | KV453213.1 | 2363779 | 21-scf00419 | 21 |
| AX-158262231 | 21 | 75.547 | KV453213.1 | 2364210 | 21-scf00419 | 21 |
| AX-158262232 | 21 | 75.547 | KV453213.1 | 2364594 | 21-scf00419 | 21 |
| AX-158262234 | 21 | 75.547 | KV453213.1 | 2365499 | 21-scf00419 | 21 |
| AX-158262235 | 21 | 75.547 | KV453213.1 | 2366202 | 21-scf00419 | 21 |
| AX-158262236 | 21 | 75.547 | KV453213.1 | 2367112 | 21-scf00419 | 21 |
| AX-157724693 | 21 | 75.547 | KV453213.1 | 2368103 | 21-scf00419 | 21 |
| AX-158262238 | 21 | 75.547 | KV453213.1 | 2369292 | 21-scf00419 | 21 |
| AX-158262239 | 21 | 75.547 | KV453213.1 | 2369846 | 21-scf00419 | 21 |
| AX-158262240 | 21 | 75.547 | KV453213.1 | 2370860 | 21-scf00419 | 21 |
| AX-158262242 | 21 | 75.547 | KV453213.1 | 2372333 | 21-scf00419 | 21 |
| AX-158262243 | 21 | 75.547 | KV453213.1 | 2372510 | 21-scf00419 | 21 |
| AX-158394687 | 21 | 75.547 | KV453213.1 | 2373436 | 21-scf00419 | 21 |
| AX-158262245 | 21 | 75.547 | KV453213.1 | 2375127 | 21-scf00419 | 21 |
| AX-158262246 | 21 | 75.547 | KV453213.1 | 2375706 | 21-scf00419 | 21 |
| AX-158262247 | 21 | 75.547 | KV453213.1 | 2376095 | 21-scf00419 | 21 |
| AX-158262248 | 21 | 75.547 | KV453213.1 | 2378850 | 21-scf00419 | 21 |
| AX-158262249 | 21 | 75.547 | KV453213.1 | 2379386 | 21-scf00419 | 21 |
| AX-158262250 | 21 | 75.547 | KV453213.1 | 2379924 | 21-scf00419 | 21 |
| AX-158262251 | 21 | 75.547 | KV453213.1 | 2380958 | 21-scf00419 | 21 |
| AX-157755825 | 21 | 75.547 | KV453213.1 | 2381591 | 21-scf00419 | 21 |
| AX-158262253 | 21 | 75.547 | KV453213.1 | 2382938 | 21-scf00419 | 21 |
| AX-158262255 | 21 | 75.547 | KV453213.1 | 2388174 | 21-scf00419 | 21 |
| AX-158262257 | 21 | 75.547 | KV453213.1 | 2389687 | 21-scf00419 | 21 |
| AX-158262260 | 21 | 75.547 | KV453213.1 | 2390813 | 21-scf00419 | 21 |
| AX-158262261 | 21 | 75.547 | KV453213.1 | 2392053 | 21-scf00419 | 21 |
| AX-158262263 | 21 | 75.547 | KV453213.1 | 2393056 | 21-scf00419 | 21 |
| AX-158262265 | 21 | 75.547 | KV453213.1 | 2397071 | 21-scf00419 | 21 |
| AX-158262266 | 21 | 75.547 | KV453213.1 | 2399736 | 21-scf00419 | 21 |
| AX-157843126 | 21 | 75.547 | KV453213.1 | 2400836 | 21-scf00419 | 21 |
| AX-158262267 | 21 | 75.547 | KV453213.1 | 2401436 | 21-scf00419 | 21 |
| AX-158262268 | 21 | 75.547 | KV453213.1 | 2401854 | 21-scf00419 | 21 |
| AX-158262269 | 21 | 75.547 | KV453213.1 | 2402478 | 21-scf00419 | 21 |
| AX-158262273 | 21 | 75.547 | KV453213.1 | 2403545 | 21-scf00419 | 21 |
| AX-158262275 | 21 | 75.547 | KV453213.1 | 2404429 | 21-scf00419 | 21 |
| AX-158262276 | 21 | 75.547 | KV453213.1 | 2405968 | 21-scf00419 | 21 |
| AX-158262278 | 21 | 75.547 | KV453213.1 | 2410656 | 21-scf00419 | 21 |
| AX-158262282 | 21 | 75.547 | KV453213.1 | 2413832 | 21-scf00419 | 21 |
| AX-158262283 | 21 | 75.547 | KV453213.1 | 2414171 | 21-scf00419 | 21 |
| AX-158262286 | 21 | 75.547 | KV453213.1 | 2416046 | 21-scf00419 | 21 |
| AX-158262290 | 21 | 75.547 | KV453213.1 | 2421447 | 21-scf00419 | 21 |
| AX-158262291 | 21 | 75.547 | KV453213.1 | 2422158 | 21-scf00419 | 21 |
| AX-158262292 | 21 | 75.547 | KV453213.1 | 2422605 | 21-scf00419 | 21 |



|              |    |        |            |         |             |    |
|--------------|----|--------|------------|---------|-------------|----|
| AX-158262293 | 21 | 75.547 | KV453213.1 | 2423039 | 21-scf00419 | 21 |
| AX-158262294 | 21 | 75.547 | KV453213.1 | 2424387 | 21-scf00419 | 21 |
| AX-158262296 | 21 | 75.547 | KV453213.1 | 2426736 | 21-scf00419 | 21 |
| AX-158262297 | 21 | 75.547 | KV453213.1 | 2427214 | 21-scf00419 | 21 |
| AX-158262298 | 21 | 75.547 | KV453213.1 | 2427688 | 21-scf00419 | 21 |
| AX-158262300 | 21 | 75.547 | KV453213.1 | 2428914 | 21-scf00419 | 21 |
| AX-158262303 | 21 | 75.547 | KV453213.1 | 2430422 | 21-scf00419 | 21 |
| AX-158262304 | 21 | 75.547 | KV453213.1 | 2431076 | 21-scf00419 | 21 |
| AX-158262305 | 21 | 75.547 | KV453213.1 | 2432358 | 21-scf00419 | 21 |
| AX-158262306 | 21 | 75.547 | KV453213.1 | 2432847 | 21-scf00419 | 21 |
| AX-158262308 | 21 | 75.547 | KV453213.1 | 2433959 | 21-scf00419 | 21 |
| AX-158262309 | 21 | 75.547 | KV453213.1 | 2434394 | 21-scf00419 | 21 |
| AX-158262310 | 21 | 75.547 | KV453213.1 | 2435633 | 21-scf00419 | 21 |
| AX-158262311 | 21 | 75.547 | KV453213.1 | 2436339 | 21-scf00419 | 21 |
| AX-158262312 | 21 | 75.547 | KV453213.1 | 2437252 | 21-scf00419 | 21 |
| AX-157872885 | 21 | 75.547 | KV453213.1 | 2443012 | 21-scf00419 | 21 |
| AX-158262317 | 21 | 75.547 | KV453213.1 | 2443706 | 21-scf00419 | 21 |
| AX-158411145 | 21 | 75.547 | KV453213.1 | 2448761 | 21-scf00419 | 21 |
| AX-158262321 | 21 | 75.547 | KV453213.1 | 2449115 | 21-scf00419 | 21 |
| AX-158262322 | 21 | 75.547 | KV453213.1 | 2450369 | 21-scf00419 | 21 |
| AX-158262323 | 21 | 75.547 | KV453213.1 | 2450574 | 21-scf00419 | 21 |
| AX-158262324 | 21 | 75.547 | KV453213.1 | 2450946 | 21-scf00419 | 21 |
| AX-158262326 | 21 | 75.547 | KV453213.1 | 2451647 | 21-scf00419 | 21 |
| AX-158262329 | 21 | 75.547 | KV453213.1 | 2453803 | 21-scf00419 | 21 |
| AX-157843131 | 21 | 75.547 | KV453213.1 | 2454607 | 21-scf00419 | 21 |
| AX-158262330 | 21 | 75.547 | KV453213.1 | 2455037 | 21-scf00419 | 21 |
| AX-158262331 | 21 | 75.547 | KV453213.1 | 2456180 | 21-scf00419 | 21 |
| AX-158262334 | 21 | 75.547 | KV453213.1 | 2460861 | 21-scf00419 | 21 |
| AX-158262335 | 21 | 75.547 | KV453213.1 | 2461234 | 21-scf00419 | 21 |
| AX-157872887 | 21 | 75.547 | KV453213.1 | 2461839 | 21-scf00419 | 21 |
| AX-158262336 | 21 | 75.547 | KV453213.1 | 2463722 | 21-scf00419 | 21 |
| AX-158262337 | 21 | 75.547 | KV453213.1 | 2463933 | 21-scf00419 | 21 |
| AX-157843132 | 21 | 75.547 | KV453213.1 | 2464725 | 21-scf00419 | 21 |
| AX-158262339 | 21 | 75.547 | KV453213.1 | 2465969 | 21-scf00419 | 21 |
| AX-158262340 | 21 | 75.547 | KV453213.1 | 2466108 | 21-scf00419 | 21 |
| AX-158262341 | 21 | 75.547 | KV453213.1 | 2466735 | 21-scf00419 | 21 |
| AX-158262342 | 21 | 75.547 | KV453213.1 | 2467347 | 21-scf00419 | 21 |
| AX-157872888 | 21 | 75.547 | KV453213.1 | 2468355 | 21-scf00419 | 21 |
| AX-158262345 | 21 | 75.547 | KV453213.1 | 2473694 | 21-scf00419 | 21 |
| AX-158262346 | 21 | 75.547 | KV453213.1 | 2474133 | 21-scf00419 | 21 |
| AX-158262349 | 21 | 75.547 | KV453213.1 | 2477574 | 21-scf00419 | 21 |
| AX-158262352 | 21 | 75.547 | KV453213.1 | 2478906 | 21-scf00419 | 21 |
| AX-158262353 | 21 | 75.547 | KV453213.1 | 2479305 | 21-scf00419 | 21 |
| AX-158262355 | 21 | 75.547 | KV453213.1 | 2481978 | 21-scf00419 | 21 |
| AX-158262356 | 21 | 75.547 | KV453213.1 | 2483143 | 21-scf00419 | 21 |
| AX-158262357 | 21 | 75.547 | KV453213.1 | 2483613 | 21-scf00419 | 21 |
| AX-158262358 | 21 | 75.547 | KV453213.1 | 2484159 | 21-scf00419 | 21 |
| AX-158262359 | 21 | 75.547 | KV453213.1 | 2484701 | 21-scf00419 | 21 |
| AX-158262360 | 21 | 75.547 | KV453213.1 | 2485475 | 21-scf00419 | 21 |
| AX-158262361 | 21 | 75.547 | KV453213.1 | 2486322 | 21-scf00419 | 21 |
| AX-158262362 | 21 | 75.547 | KV453213.1 | 2487396 | 21-scf00419 | 21 |

|              |    |        |            |         |             |    |
|--------------|----|--------|------------|---------|-------------|----|
| AX-158262363 | 21 | 75.547 | KV453213.1 | 2488180 | 21-scf00419 | 21 |
| AX-157843134 | 21 | 75.547 | KV453213.1 | 2488929 | 21-scf00419 | 21 |
| AX-158262364 | 21 | 75.547 | KV453213.1 | 2489195 | 21-scf00419 | 21 |
| AX-158262366 | 21 | 75.547 | KV453213.1 | 2490475 | 21-scf00419 | 21 |
| AX-158262367 | 21 | 75.547 | KV453213.1 | 2491117 | 21-scf00419 | 21 |
| AX-157860011 | 21 | 75.547 | KV453213.1 | 2493647 | 21-scf00419 | 21 |
| AX-158262368 | 21 | 75.547 | KV453213.1 | 2495130 | 21-scf00419 | 21 |
| AX-158262369 | 21 | 75.547 | KV453213.1 | 2495634 | 21-scf00419 | 21 |
| AX-158262370 | 21 | 75.547 | KV453213.1 | 2496562 | 21-scf00419 | 21 |
| AX-158262371 | 21 | 75.547 | KV453213.1 | 2500120 | 21-scf00419 | 21 |
| AX-158262373 | 21 | 75.547 | KV453213.1 | 2502719 | 21-scf00419 | 21 |
| AX-158262374 | 21 | 75.547 | KV453213.1 | 2503458 | 21-scf00419 | 21 |
| AX-158262378 | 21 | 75.547 | KV453213.1 | 2506200 | 21-scf00419 | 21 |
| AX-158262379 | 21 | 75.547 | KV453213.1 | 2507589 | 21-scf00419 | 21 |
| AX-158262381 | 21 | 75.547 | KV453213.1 | 2508701 | 21-scf00419 | 21 |
| AX-157872889 | 21 | 75.547 | KV453213.1 | 2509050 | 21-scf00419 | 21 |
| AX-158262382 | 21 | 75.547 | KV453213.1 | 2509495 | 21-scf00419 | 21 |
| AX-158262383 | 21 | 75.547 | KV453213.1 | 2510430 | 21-scf00419 | 21 |
| AX-158262384 | 21 | 75.547 | KV453213.1 | 2511080 | 21-scf00419 | 21 |
| AX-158262386 | 21 | 75.547 | KV453213.1 | 2513992 | 21-scf00419 | 21 |
| AX-158262389 | 21 | 75.547 | KV453213.1 | 2518467 | 21-scf00419 | 21 |
| AX-157843135 | 21 | 75.547 | KV453213.1 | 2519012 | 21-scf00419 | 21 |
| AX-158262390 | 21 | 75.547 | KV453213.1 | 2519200 | 21-scf00419 | 21 |
| AX-157843136 | 21 | 75.547 | KV453213.1 | 2519584 | 21-scf00419 | 21 |
| AX-157843137 | 21 | 75.547 | KV453213.1 | 2520164 | 21-scf00419 | 21 |
| AX-157843139 | 21 | 75.547 | KV453213.1 | 2520455 | 21-scf00419 | 21 |
| AX-158262391 | 21 | 75.547 | KV453213.1 | 2520759 | 21-scf00419 | 21 |
| AX-157843141 | 21 | 75.547 | KV453213.1 | 2521991 | 21-scf00419 | 21 |
| AX-158262395 | 21 | 75.547 | KV453213.1 | 2524813 | 21-scf00419 | 21 |
| AX-158262396 | 21 | 75.547 | KV453213.1 | 2525278 | 21-scf00419 | 21 |
| AX-158262397 | 21 | 75.547 | KV453213.1 | 2526040 | 21-scf00419 | 21 |
| AX-158262398 | 21 | 75.547 | KV453213.1 | 2527450 | 21-scf00419 | 21 |
| AX-158262399 | 21 | 75.547 | KV453213.1 | 2527939 | 21-scf00419 | 21 |
| AX-158262401 | 21 | 75.547 | KV453213.1 | 2531346 | 21-scf00419 | 21 |
| AX-158262402 | 21 | 75.547 | KV453213.1 | 2533474 | 21-scf00419 | 21 |
| AX-158262403 | 21 | 75.547 | KV453213.1 | 2538597 | 21-scf00419 | 21 |
| AX-158262404 | 21 | 75.547 | KV453213.1 | 2539260 | 21-scf00419 | 21 |
| AX-158262405 | 21 | 75.547 | KV453213.1 | 2540852 | 21-scf00419 | 21 |
| AX-158262406 | 21 | 75.547 | KV453213.1 | 2544092 | 21-scf00419 | 21 |
| AX-158262408 | 21 | 75.547 | KV453213.1 | 2546378 | 21-scf00419 | 21 |
| AX-158262409 | 21 | 75.547 | KV453213.1 | 2547459 | 21-scf00419 | 21 |
| AX-158262410 | 21 | 75.547 | KV453213.1 | 2550112 | 21-scf00419 | 21 |
| AX-158262411 | 21 | 75.547 | KV453213.1 | 2551109 | 21-scf00419 | 21 |
| AX-158262414 | 21 | 75.547 | KV453213.1 | 2554278 | 21-scf00419 | 21 |
| AX-158262418 | 21 | 75.547 | KV453213.1 | 2561913 | 21-scf00419 | 21 |
| AX-158262420 | 21 | 75.547 | KV453213.1 | 2566812 | 21-scf00419 | 21 |
| AX-158262424 | 21 | 75.547 | KV453213.1 | 2576050 | 21-scf00419 | 21 |
| AX-158262425 | 21 | 75.547 | KV453213.1 | 2576979 | 21-scf00419 | 21 |
| AX-158262426 | 21 | 75.547 | KV453213.1 | 2579408 | 21-scf00419 | 21 |
| AX-158262427 | 21 | 75.547 | KV453213.1 | 2580525 | 21-scf00419 | 21 |
| AX-158262428 | 21 | 75.547 | KV453213.1 | 2581006 | 21-scf00419 | 21 |

|              |    |        |            |         |             |    |
|--------------|----|--------|------------|---------|-------------|----|
| AX-158262437 | 21 | 75.547 | KV453213.1 | 2597338 | 21-scf00419 | 21 |
| AX-158262439 | 21 | 75.547 | KV453213.1 | 2601298 | 21-scf00419 | 21 |
| AX-158262440 | 21 | 75.547 | KV453213.1 | 2601796 | 21-scf00419 | 21 |
| AX-158262441 | 21 | 75.547 | KV453213.1 | 2602232 | 21-scf00419 | 21 |
| AX-158262442 | 21 | 75.547 | KV453213.1 | 2603497 | 21-scf00419 | 21 |
| AX-158262443 | 21 | 75.547 | KV453213.1 | 2604028 | 21-scf00419 | 21 |
| AX-157703998 | 21 | 75.547 | KV453213.1 | 2604337 | 21-scf00419 | 21 |
| AX-158262445 | 21 | 75.547 | KV453213.1 | 2609760 | 21-scf00419 | 21 |
| AX-158262446 | 21 | 75.547 | KV453213.1 | 2610780 | 21-scf00419 | 21 |
| AX-158262448 | 21 | 75.547 | KV453213.1 | 2614802 | 21-scf00419 | 21 |
| AX-158262450 | 21 | 75.547 | KV453213.1 | 2616652 | 21-scf00419 | 21 |
| AX-158262451 | 21 | 75.547 | KV453213.1 | 2617884 | 21-scf00419 | 21 |
| AX-158262456 | 21 | 75.547 | KV453213.1 | 2622874 | 21-scf00419 | 21 |
| AX-157843144 | 21 | 75.547 | KV453213.1 | 2628692 | 21-scf00419 | 21 |
| AX-157758275 | 21 | 75.547 | KV453213.1 | 2630942 | 21-scf00419 | 21 |
| AX-158262472 | 21 | 75.547 | KV453213.1 | 2640578 | 21-scf00419 | 21 |
| AX-158262473 | 21 | 75.547 | KV453213.1 | 2641201 | 21-scf00419 | 21 |
| AX-158262488 | 21 | 75.547 | KV453213.1 | 2655834 | 21-scf00419 | 21 |
| AX-158262493 | 21 | 75.547 | KV453213.1 | 2658426 | 21-scf00419 | 21 |
| AX-158262508 | 21 | 75.547 | KV453213.1 | 2671474 | 21-scf00419 | 21 |
| AX-158262585 | 21 | 75.547 | KV453213.1 | 2766449 | 21-scf00419 | 21 |
| AX-157880426 | 21 | 75.547 | KV453213.1 | 2772966 | 21-scf00419 | 21 |
| AX-157843162 | 21 | 75.547 | KV453213.1 | 2799296 | 21-scf00419 | 21 |
| AX-158262648 | 21 | 75.547 | KV453213.1 | 2866327 | 21-scf00419 | 21 |
| AX-158394729 | 21 | 75.547 | KV453213.1 | 4046700 | 21-scf00419 | 21 |
| AX-158263751 | 21 | 75.547 | KV453213.1 | 4059632 | 21-scf00419 | 21 |
| AX-157843204 | 21 | 75.547 | KV453213.1 | 4065805 | 21-scf00419 | 21 |
| AX-158263777 | 21 | 75.547 | KV453213.1 | 4093719 | 21-scf00419 | 21 |
| AX-158263779 | 21 | 75.547 | KV453213.1 | 4094786 | 21-scf00419 | 21 |
| AX-158263783 | 21 | 75.547 | KV453213.1 | 4098367 | 21-scf00419 | 21 |
| AX-158263785 | 21 | 75.547 | KV453213.1 | 4101321 | 21-scf00419 | 21 |
| AX-158394734 | 21 | 75.547 | KV453213.1 | 4119268 | 21-scf00419 | 21 |
| AX-158263798 | 21 | 75.547 | KV453213.1 | 4119581 | 21-scf00419 | 21 |
| AX-158394736 | 21 | 75.547 | KV453213.1 | 4129083 | 21-scf00419 | 21 |
| AX-158419237 | 21 | 75.547 | KV453213.1 | 4132897 | 21-scf00419 | 21 |
| AX-158416340 | 21 | 75.547 | KV453213.1 | 4133160 | 21-scf00419 | 21 |
| AX-158394738 | 21 | 75.547 | KV453213.1 | 4167579 | 21-scf00419 | 21 |
| AX-157843207 | 21 | 75.547 | KV453213.1 | 4171632 | 21-scf00419 | 21 |
| AX-157755223 | 21 | 75.547 | KV453213.1 | 4328024 | 21-scf00419 | 21 |
| AX-158394752 | 21 | 75.547 | KV453213.1 | 4406695 | 21-scf00419 | 21 |
| AX-158264106 | 21 | 75.547 | KV453213.1 | 4458622 | 21-scf00419 | 21 |
| AX-158264107 | 21 | 75.547 | KV453213.1 | 4459699 | 21-scf00419 | 21 |
| AX-158264137 | 21 | 75.547 | KV453213.1 | 4491263 | 21-scf00419 | 21 |
| AX-158264185 | 21 | 75.547 | KV453213.1 | 4547160 | 21-scf00419 | 21 |
| AX-158264215 | 21 | 75.547 | KV453213.1 | 4573772 | 21-scf00419 | 21 |
| AX-158264274 | 21 | 75.547 | KV453213.1 | 4625642 | 21-scf00419 | 21 |
| AX-158264306 | 21 | 75.547 | KV453213.1 | 4658049 | 21-scf00419 | 21 |
| AX-158264350 | 21 | 75.547 | KV453213.1 | 4696759 | 21-scf00419 | 21 |
| AX-158264362 | 21 | 75.547 | KV453213.1 | 4712372 | 21-scf00419 | 21 |
| AX-158264406 | 21 | 75.547 | KV453213.1 | 4761664 | 21-scf00419 | 21 |
| AX-158264470 | 21 | 75.547 | KV453213.1 | 4825673 | 21-scf00419 | 21 |

|              |    |        |             |         |             |    |
|--------------|----|--------|-------------|---------|-------------|----|
| AX-157707094 | 21 | 75.547 | 3ML01033499 | 205     | scf09151_1  | UN |
| AX-158416293 | 21 | 75.548 | KV453213.1  | 2602644 | 21-scf00419 | 21 |
| AX-158261399 | 21 | 75.549 | KV453213.1  | 1202142 | 21-scf00419 | 21 |
| AX-157718076 | 21 | 75.549 | KV453213.1  | 1238835 | 21-scf00419 | 21 |
| AX-158262444 | 21 | 75.549 | KV453213.1  | 2607921 | 21-scf00419 | 21 |
| AX-158262453 | 21 | 75.704 | KV453213.1  | 2619487 | 21-scf00419 | 21 |
| AX-158262454 | 21 | 75.765 | KV453213.1  | 2620843 | 21-scf00419 | 21 |
| AX-158262465 | 21 | 75.765 | KV453213.1  | 2633396 | 21-scf00419 | 21 |
| AX-158262467 | 21 | 75.765 | KV453213.1  | 2635282 | 21-scf00419 | 21 |
| AX-158262468 | 21 | 75.765 | KV453213.1  | 2636173 | 21-scf00419 | 21 |
| AX-157717770 | 21 | 75.808 | KV453213.1  | 2638143 | 21-scf00419 | 21 |
| AX-158394660 | 21 | 75.846 | KV453213.1  | 1860077 | 21-scf00419 | 21 |
| AX-158262457 | 21 | 75.846 | KV453213.1  | 2625223 | 21-scf00419 | 21 |
| AX-158262480 | 21 | 75.846 | KV453213.1  | 2643792 | 21-scf00419 | 21 |
| AX-158262482 | 21 | 75.874 | KV453213.1  | 2649012 | 21-scf00419 | 21 |
| AX-157708798 | 21 | 75.912 | KV453213.1  | 2653205 | 21-scf00419 | 21 |
| AX-158262062 | 21 | 75.984 | KV453213.1  | 2161344 | 21-scf00419 | 21 |
| AX-158262092 | 21 | 75.984 | KV453213.1  | 2211207 | 21-scf00419 | 21 |
| AX-158262101 | 21 | 75.984 | KV453213.1  | 2221052 | 21-scf00419 | 21 |
| AX-158262486 | 21 | 75.984 | KV453213.1  | 2654537 | 21-scf00419 | 21 |
| AX-158262487 | 21 | 75.984 | KV453213.1  | 2654714 | 21-scf00419 | 21 |
| AX-158262491 | 21 | 75.984 | KV453213.1  | 2657567 | 21-scf00419 | 21 |
| AX-158262492 | 21 | 75.984 | KV453213.1  | 2657922 | 21-scf00419 | 21 |
| AX-158262495 | 21 | 75.984 | KV453213.1  | 2660162 | 21-scf00419 | 21 |
| AX-158262497 | 21 | 75.984 | KV453213.1  | 2662230 | 21-scf00419 | 21 |
| AX-158262505 | 21 | 75.984 | KV453213.1  | 2670123 | 21-scf00419 | 21 |
| AX-158262510 | 21 | 75.984 | KV453213.1  | 2672752 | 21-scf00419 | 21 |
| AX-158262513 | 21 | 75.984 | KV453213.1  | 2675323 | 21-scf00419 | 21 |
| AX-158262514 | 21 | 75.984 | KV453213.1  | 2676400 | 21-scf00419 | 21 |
| AX-158262516 | 21 | 75.984 | KV453213.1  | 2678381 | 21-scf00419 | 21 |
| AX-158262517 | 21 | 75.984 | KV453213.1  | 2681603 | 21-scf00419 | 21 |
| AX-158262518 | 21 | 75.984 | KV453213.1  | 2682657 | 21-scf00419 | 21 |
| AX-158262520 | 21 | 75.984 | KV453213.1  | 2684769 | 21-scf00419 | 21 |
| AX-157843150 | 21 | 75.984 | KV453213.1  | 2703700 | 21-scf00419 | 21 |
| AX-158262252 | 21 | 76.014 | KV453213.1  | 2382162 | 21-scf00419 | 21 |
| AX-158262254 | 21 | 76.014 | KV453213.1  | 2387325 | 21-scf00419 | 21 |
| AX-157758126 | 21 | 76.014 | KV453213.1  | 2398354 | 21-scf00419 | 21 |
| AX-158262287 | 21 | 76.014 | KV453213.1  | 2416310 | 21-scf00419 | 21 |
| AX-157860010 | 21 | 76.014 | KV453213.1  | 2489022 | 21-scf00419 | 21 |
| AX-158262407 | 21 | 76.014 | KV453213.1  | 2545079 | 21-scf00419 | 21 |
| AX-157867437 | 21 | 76.014 | KV453213.1  | 2578922 | 21-scf00419 | 21 |
| AX-158262462 | 21 | 76.014 | KV453213.1  | 2629099 | 21-scf00419 | 21 |
| AX-158262507 | 21 | 76.014 | KV453213.1  | 2671010 | 21-scf00419 | 21 |
| AX-157843149 | 21 | 76.014 | KV453213.1  | 2681679 | 21-scf00419 | 21 |
| AX-158262533 | 21 | 76.014 | KV453213.1  | 2697729 | 21-scf00419 | 21 |
| AX-158264341 | 21 | 76.014 | KV453213.1  | 4686885 | 21-scf00419 | 21 |
| AX-158262524 | 21 | 76.093 | KV453213.1  | 2689525 | 21-scf00419 | 21 |
| AX-158262536 | 21 | 76.132 | KV453213.1  | 2707752 | 21-scf00419 | 21 |
| AX-158262557 | 21 | 76.132 | KV453213.1  | 2735050 | 21-scf00419 | 21 |
| AX-157843151 | 21 | 76.169 | KV453213.1  | 2708335 | 21-scf00419 | 21 |
| AX-158262537 | 21 | 76.202 | KV453213.1  | 2708816 | 21-scf00419 | 21 |

|              |    |        |            |         |             |    |
|--------------|----|--------|------------|---------|-------------|----|
| AX-158262546 | 21 | 76.202 | KV453213.1 | 2718073 | 21-scf00419 | 21 |
| AX-157843153 | 21 | 76.202 | KV453213.1 | 2721511 | 21-scf00419 | 21 |
| AX-157751933 | 21 | 76.202 | KV453213.1 | 2722515 | 21-scf00419 | 21 |
| AX-158262548 | 21 | 76.202 | KV453213.1 | 2723178 | 21-scf00419 | 21 |
| AX-158262549 | 21 | 76.202 | KV453213.1 | 2724973 | 21-scf00419 | 21 |
| AX-157758062 | 21 | 76.202 | KV453213.1 | 2727992 | 21-scf00419 | 21 |
| AX-158262555 | 21 | 76.202 | KV453213.1 | 2732825 | 21-scf00419 | 21 |
| AX-158262556 | 21 | 76.202 | KV453213.1 | 2734635 | 21-scf00419 | 21 |
| AX-158262558 | 21 | 76.202 | KV453213.1 | 2735294 | 21-scf00419 | 21 |
| AX-157843156 | 21 | 76.202 | KV453213.1 | 2737339 | 21-scf00419 | 21 |
| AX-158262560 | 21 | 76.202 | KV453213.1 | 2738208 | 21-scf00419 | 21 |
| AX-158262561 | 21 | 76.202 | KV453213.1 | 2738850 | 21-scf00419 | 21 |
| AX-158381085 | 21 | 76.202 | KV453213.1 | 2739987 | 21-scf00419 | 21 |
| AX-158262563 | 21 | 76.202 | KV453213.1 | 2740052 | 21-scf00419 | 21 |
| AX-158262569 | 21 | 76.202 | KV453213.1 | 2745305 | 21-scf00419 | 21 |
| AX-158262570 | 21 | 76.202 | KV453213.1 | 2746136 | 21-scf00419 | 21 |
| AX-158262571 | 21 | 76.202 | KV453213.1 | 2748352 | 21-scf00419 | 21 |
| AX-158262575 | 21 | 76.202 | KV453213.1 | 2755410 | 21-scf00419 | 21 |
| AX-158262576 | 21 | 76.202 | KV453213.1 | 2755876 | 21-scf00419 | 21 |
| AX-158262577 | 21 | 76.202 | KV453213.1 | 2756408 | 21-scf00419 | 21 |
| AX-158262579 | 21 | 76.202 | KV453213.1 | 2760405 | 21-scf00419 | 21 |
| AX-158262580 | 21 | 76.202 | KV453213.1 | 2760692 | 21-scf00419 | 21 |
| AX-157720273 | 21 | 76.202 | KV453213.1 | 2763142 | 21-scf00419 | 21 |
| AX-158262581 | 21 | 76.202 | KV453213.1 | 2763256 | 21-scf00419 | 21 |
| AX-158262584 | 21 | 76.202 | KV453213.1 | 2765645 | 21-scf00419 | 21 |
| AX-158262588 | 21 | 76.202 | KV453213.1 | 2768233 | 21-scf00419 | 21 |
| AX-158262589 | 21 | 76.202 | KV453213.1 | 2768489 | 21-scf00419 | 21 |
| AX-158262593 | 21 | 76.202 | KV453213.1 | 2771187 | 21-scf00419 | 21 |
| AX-158262595 | 21 | 76.202 | KV453213.1 | 2772559 | 21-scf00419 | 21 |
| AX-157843161 | 21 | 76.202 | KV453213.1 | 2776646 | 21-scf00419 | 21 |
| AX-158262597 | 21 | 76.202 | KV453213.1 | 2777391 | 21-scf00419 | 21 |
| AX-157758177 | 21 | 76.202 | KV453213.1 | 2845160 | 21-scf00419 | 21 |
| AX-158262641 | 21 | 76.202 | KV453213.1 | 2845901 | 21-scf00419 | 21 |
| AX-158262642 | 21 | 76.202 | KV453213.1 | 2848116 | 21-scf00419 | 21 |
| AX-158262765 | 21 | 76.202 | KV453213.1 | 2992780 | 21-scf00419 | 21 |
| AX-158262603 | 21 | 76.311 | KV453213.1 | 2788473 | 21-scf00419 | 21 |
| AX-158416295 | 21 | 76.311 | KV453213.1 | 2796605 | 21-scf00419 | 21 |
| AX-157713282 | 21 | 76.372 | KV453213.1 | 2802302 | 21-scf00419 | 21 |
| AX-158262617 | 21 | 76.372 | KV453213.1 | 2804149 | 21-scf00419 | 21 |
| AX-158262612 | 21 | 76.42  | KV453213.1 | 2795928 | 21-scf00419 | 21 |
| AX-158262616 | 21 | 76.42  | KV453213.1 | 2803524 | 21-scf00419 | 21 |
| AX-158262618 | 21 | 76.47  | KV453213.1 | 2805336 | 21-scf00419 | 21 |
| AX-158262664 | 21 | 76.47  | KV453213.1 | 2891013 | 21-scf00419 | 21 |
| AX-158263253 | 21 | 76.47  | KV453213.1 | 3531765 | 21-scf00419 | 21 |
| AX-157843159 | 21 | 76.53  | KV453213.1 | 2775328 | 21-scf00419 | 21 |
| AX-158262624 | 21 | 76.53  | KV453213.1 | 2815856 | 21-scf00419 | 21 |
| AX-158262628 | 21 | 76.53  | KV453213.1 | 2817830 | 21-scf00419 | 21 |
| AX-158262631 | 21 | 76.53  | KV453213.1 | 2820024 | 21-scf00419 | 21 |
| AX-158262633 | 21 | 76.53  | KV453213.1 | 2823228 | 21-scf00419 | 21 |
| AX-158262636 | 21 | 76.53  | KV453213.1 | 2828546 | 21-scf00419 | 21 |
| AX-158262637 | 21 | 76.53  | KV453213.1 | 2829304 | 21-scf00419 | 21 |

|              |    |        |            |         |             |    |
|--------------|----|--------|------------|---------|-------------|----|
| AX-158262643 | 21 | 76.578 | KV453213.1 | 2850892 | 21-scf00419 | 21 |
| AX-158261818 | 21 | 76.639 | KV453213.1 | 1840767 | 21-scf00419 | 21 |
| AX-158381084 | 21 | 76.639 | KV453213.1 | 2669591 | 21-scf00419 | 21 |
| AX-158262529 | 21 | 76.639 | KV453213.1 | 2692099 | 21-scf00419 | 21 |
| AX-158262600 | 21 | 76.639 | KV453213.1 | 2781315 | 21-scf00419 | 21 |
| AX-158262623 | 21 | 76.639 | KV453213.1 | 2814252 | 21-scf00419 | 21 |
| AX-158262644 | 21 | 76.639 | KV453213.1 | 2857755 | 21-scf00419 | 21 |
| AX-157707938 | 21 | 76.639 | KV453213.1 | 2859863 | 21-scf00419 | 21 |
| AX-158262647 | 21 | 76.639 | KV453213.1 | 2864095 | 21-scf00419 | 21 |
| AX-157843164 | 21 | 76.639 | KV453213.1 | 2869113 | 21-scf00419 | 21 |
| AX-157867440 | 21 | 76.639 | KV453213.1 | 2875746 | 21-scf00419 | 21 |
| AX-158262653 | 21 | 76.639 | KV453213.1 | 2876365 | 21-scf00419 | 21 |
| AX-157726270 | 21 | 76.639 | KV453213.1 | 2876930 | 21-scf00419 | 21 |
| AX-158262657 | 21 | 76.639 | KV453213.1 | 2880760 | 21-scf00419 | 21 |
| AX-158262658 | 21 | 76.639 | KV453213.1 | 2884796 | 21-scf00419 | 21 |
| AX-158262659 | 21 | 76.639 | KV453213.1 | 2885342 | 21-scf00419 | 21 |
| AX-158262662 | 21 | 76.639 | KV453213.1 | 2889389 | 21-scf00419 | 21 |
| AX-158262630 | 21 | 76.748 | KV453213.1 | 2818864 | 21-scf00419 | 21 |
| AX-158262640 | 21 | 76.748 | KV453213.1 | 2836760 | 21-scf00419 | 21 |
| AX-158262645 | 21 | 76.748 | KV453213.1 | 2859302 | 21-scf00419 | 21 |
| AX-158262646 | 21 | 76.748 | KV453213.1 | 2860762 | 21-scf00419 | 21 |
| AX-158262670 | 21 | 76.748 | KV453213.1 | 2902634 | 21-scf00419 | 21 |
| AX-158262671 | 21 | 76.748 | KV453213.1 | 2904342 | 21-scf00419 | 21 |
| AX-158262673 | 21 | 76.748 | KV453213.1 | 2907396 | 21-scf00419 | 21 |
| AX-157843166 | 21 | 76.748 | KV453213.1 | 2910301 | 21-scf00419 | 21 |
| AX-158262676 | 21 | 76.748 | KV453213.1 | 2912441 | 21-scf00419 | 21 |
| AX-158262677 | 21 | 76.748 | KV453213.1 | 2913325 | 21-scf00419 | 21 |
| AX-158262678 | 21 | 76.748 | KV453213.1 | 2913934 | 21-scf00419 | 21 |
| AX-158262680 | 21 | 76.748 | KV453213.1 | 2914587 | 21-scf00419 | 21 |
| AX-158262681 | 21 | 76.748 | KV453213.1 | 2915207 | 21-scf00419 | 21 |
| AX-157772009 | 21 | 76.748 | KV453213.1 | 2916773 | 21-scf00419 | 21 |
| AX-158262683 | 21 | 76.748 | KV453213.1 | 2918025 | 21-scf00419 | 21 |
| AX-158262684 | 21 | 76.748 | KV453213.1 | 2918607 | 21-scf00419 | 21 |
| AX-158262697 | 21 | 76.748 | KV453213.1 | 2929371 | 21-scf00419 | 21 |
| AX-158262698 | 21 | 76.748 | KV453213.1 | 2929833 | 21-scf00419 | 21 |
| AX-158262699 | 21 | 76.748 | KV453213.1 | 2930461 | 21-scf00419 | 21 |
| AX-158262700 | 21 | 76.748 | KV453213.1 | 2931217 | 21-scf00419 | 21 |
| AX-158262704 | 21 | 76.748 | KV453213.1 | 2934287 | 21-scf00419 | 21 |
| AX-158262710 | 21 | 76.748 | KV453213.1 | 2939663 | 21-scf00419 | 21 |
| AX-158262711 | 21 | 76.748 | KV453213.1 | 2940666 | 21-scf00419 | 21 |
| AX-158262713 | 21 | 76.748 | KV453213.1 | 2941943 | 21-scf00419 | 21 |
| AX-158262714 | 21 | 76.748 | KV453213.1 | 2942064 | 21-scf00419 | 21 |
| AX-158262715 | 21 | 76.748 | KV453213.1 | 2942957 | 21-scf00419 | 21 |
| AX-158262716 | 21 | 76.748 | KV453213.1 | 2944959 | 21-scf00419 | 21 |
| AX-158262717 | 21 | 76.748 | KV453213.1 | 2945476 | 21-scf00419 | 21 |
| AX-158262718 | 21 | 76.748 | KV453213.1 | 2946151 | 21-scf00419 | 21 |
| AX-158387237 | 21 | 76.748 | KV453213.1 | 2947291 | 21-scf00419 | 21 |
| AX-158262720 | 21 | 76.748 | KV453213.1 | 2948767 | 21-scf00419 | 21 |
| AX-158262724 | 21 | 76.748 | KV453213.1 | 2951081 | 21-scf00419 | 21 |
| AX-158262730 | 21 | 76.748 | KV453213.1 | 2958852 | 21-scf00419 | 21 |
| AX-158262774 | 21 | 76.748 | KV453213.1 | 3004270 | 21-scf00419 | 21 |

|              |    |        |            |         |             |    |
|--------------|----|--------|------------|---------|-------------|----|
| AX-158262889 | 21 | 76.748 | KV453213.1 | 3176206 | 21-scf00419 | 21 |
| AX-158262525 | 21 | 76.796 | KV453213.1 | 2689968 | 21-scf00419 | 21 |
| AX-158262729 | 21 | 76.796 | KV453213.1 | 2958552 | 21-scf00419 | 21 |
| AX-158262731 | 21 | 76.82  | KV453213.1 | 2960505 | 21-scf00419 | 21 |
| AX-158260593 | 21 | 76.857 | KV453213.1 | 196807  | 21-scf00419 | 21 |
| AX-158262726 | 21 | 76.857 | KV453213.1 | 2955744 | 21-scf00419 | 21 |
| AX-158262733 | 21 | 76.857 | KV453213.1 | 2963208 | 21-scf00419 | 21 |
| AX-158262736 | 21 | 76.857 | KV453213.1 | 2965119 | 21-scf00419 | 21 |
| AX-158262737 | 21 | 76.857 | KV453213.1 | 2966793 | 21-scf00419 | 21 |
| AX-158262739 | 21 | 76.857 | KV453213.1 | 2967602 | 21-scf00419 | 21 |
| AX-157843173 | 21 | 76.857 | KV453213.1 | 3040863 | 21-scf00419 | 21 |
| AX-158263571 | 21 | 76.857 | KV453213.1 | 3833068 | 21-scf00419 | 21 |
| AX-158262740 | 21 | 76.878 | KV453213.1 | 2969351 | 21-scf00419 | 21 |
| AX-158262761 | 21 | 76.878 | KV453213.1 | 2990638 | 21-scf00419 | 21 |
| AX-158262762 | 21 | 76.878 | KV453213.1 | 2990860 | 21-scf00419 | 21 |
| AX-158262810 | 21 | 76.878 | KV453213.1 | 3058868 | 21-scf00419 | 21 |
| AX-158262752 | 21 | 76.894 | KV453213.1 | 2981100 | 21-scf00419 | 21 |
| AX-158262755 | 21 | 76.922 | KV453213.1 | 2985212 | 21-scf00419 | 21 |
| AX-157708280 | 21 | 76.95  | KV453213.1 | 2687136 | 21-scf00419 | 21 |
| AX-158262757 | 21 | 76.95  | KV453213.1 | 2986840 | 21-scf00419 | 21 |
| AX-158259610 | 21 | 76.967 | KV453211.1 | 7760433 | 21-scf00417 | 21 |
| AX-158260924 | 21 | 76.967 | KV453213.1 | 582614  | 21-scf00419 | 21 |
| AX-158262590 | 21 | 76.967 | KV453213.1 | 2768877 | 21-scf00419 | 21 |
| AX-158262735 | 21 | 76.967 | KV453213.1 | 2964087 | 21-scf00419 | 21 |
| AX-158262741 | 21 | 76.967 | KV453213.1 | 2970289 | 21-scf00419 | 21 |
| AX-158262745 | 21 | 76.967 | KV453213.1 | 2975095 | 21-scf00419 | 21 |
| AX-158262758 | 21 | 76.967 | KV453213.1 | 2988402 | 21-scf00419 | 21 |
| AX-158262759 | 21 | 76.967 | KV453213.1 | 2990030 | 21-scf00419 | 21 |
| AX-158262766 | 21 | 76.967 | KV453213.1 | 2993564 | 21-scf00419 | 21 |
| AX-157716361 | 21 | 76.967 | KV453213.1 | 2998759 | 21-scf00419 | 21 |
| AX-158262769 | 21 | 76.967 | KV453213.1 | 2999098 | 21-scf00419 | 21 |
| AX-158262771 | 21 | 76.967 | KV453213.1 | 3001064 | 21-scf00419 | 21 |
| AX-158262772 | 21 | 76.967 | KV453213.1 | 3001466 | 21-scf00419 | 21 |
| AX-157727035 | 21 | 76.967 | KV453213.1 | 3006824 | 21-scf00419 | 21 |
| AX-158262778 | 21 | 76.967 | KV453213.1 | 3009324 | 21-scf00419 | 21 |
| AX-158262779 | 21 | 76.967 | KV453213.1 | 3010557 | 21-scf00419 | 21 |
| AX-158262781 | 21 | 76.967 | KV453213.1 | 3013605 | 21-scf00419 | 21 |
| AX-157843168 | 21 | 76.967 | KV453213.1 | 3017837 | 21-scf00419 | 21 |
| AX-157843169 | 21 | 76.967 | KV453213.1 | 3018070 | 21-scf00419 | 21 |
| AX-158262784 | 21 | 76.967 | KV453213.1 | 3024174 | 21-scf00419 | 21 |
| AX-158262786 | 21 | 76.967 | KV453213.1 | 3025787 | 21-scf00419 | 21 |
| AX-158262791 | 21 | 76.967 | KV453213.1 | 3033102 | 21-scf00419 | 21 |
| AX-157748725 | 21 | 76.967 | KV453213.1 | 3034013 | 21-scf00419 | 21 |
| AX-157843172 | 21 | 76.967 | KV453213.1 | 3035515 | 21-scf00419 | 21 |
| AX-158262793 | 21 | 76.967 | KV453213.1 | 3037983 | 21-scf00419 | 21 |
| AX-158262795 | 21 | 76.967 | KV453213.1 | 3040215 | 21-scf00419 | 21 |
| AX-158262799 | 21 | 76.967 | KV453213.1 | 3046957 | 21-scf00419 | 21 |
| AX-158262800 | 21 | 76.967 | KV453213.1 | 3047785 | 21-scf00419 | 21 |
| AX-158262802 | 21 | 76.967 | KV453213.1 | 3050871 | 21-scf00419 | 21 |
| AX-158262831 | 21 | 76.967 | KV453213.1 | 3087265 | 21-scf00419 | 21 |
| AX-158262996 | 21 | 76.967 | KV453213.1 | 3275913 | 21-scf00419 | 21 |

|              |    |        |            |         |             |    |
|--------------|----|--------|------------|---------|-------------|----|
| AX-158263025 | 21 | 76.967 | KV453213.1 | 3314669 | 21-scf00419 | 21 |
| AX-157867446 | 21 | 77.076 | KV453213.1 | 3051906 | 21-scf00419 | 21 |
| AX-158416305 | 21 | 77.076 | KV453213.1 | 3055963 | 21-scf00419 | 21 |
| AX-157775586 | 21 | 77.076 | KV453213.1 | 3061611 | 21-scf00419 | 21 |
| AX-158263372 | 21 | 77.076 | KV453213.1 | 3658189 | 21-scf00419 | 21 |
| AX-157700763 | 21 | 77.076 | KV453213.1 | 3984117 | 21-scf00419 | 21 |
| AX-158263705 | 21 | 77.076 | KV453213.1 | 4014748 | 21-scf00419 | 21 |
| AX-158262728 | 21 | 77.185 | KV453213.1 | 2956844 | 21-scf00419 | 21 |
| AX-158262744 | 21 | 77.185 | KV453213.1 | 2974277 | 21-scf00419 | 21 |
| AX-158262814 | 21 | 77.185 | KV453213.1 | 3066802 | 21-scf00419 | 21 |
| AX-158262815 | 21 | 77.185 | KV453213.1 | 3067239 | 21-scf00419 | 21 |
| AX-157754383 | 21 | 77.185 | KV453213.1 | 3072569 | 21-scf00419 | 21 |
| AX-158262820 | 21 | 77.185 | KV453213.1 | 3074832 | 21-scf00419 | 21 |
| AX-157752025 | 21 | 77.185 | KV453213.1 | 3075398 | 21-scf00419 | 21 |
| AX-158262821 | 21 | 77.185 | KV453213.1 | 3076241 | 21-scf00419 | 21 |
| AX-157773752 | 21 | 77.185 | KV453213.1 | 3077021 | 21-scf00419 | 21 |
| AX-158262824 | 21 | 77.185 | KV453213.1 | 3080573 | 21-scf00419 | 21 |
| AX-158262825 | 21 | 77.185 | KV453213.1 | 3081444 | 21-scf00419 | 21 |
| AX-158262828 | 21 | 77.185 | KV453213.1 | 3084952 | 21-scf00419 | 21 |
| AX-157843178 | 21 | 77.185 | KV453213.1 | 3085008 | 21-scf00419 | 21 |
| AX-158394692 | 21 | 77.185 | KV453213.1 | 3085432 | 21-scf00419 | 21 |
| AX-158262830 | 21 | 77.185 | KV453213.1 | 3086518 | 21-scf00419 | 21 |
| AX-158262839 | 21 | 77.185 | KV453213.1 | 3093257 | 21-scf00419 | 21 |
| AX-157843182 | 21 | 77.185 | KV453213.1 | 3112000 | 21-scf00419 | 21 |
| AX-158262852 | 21 | 77.185 | KV453213.1 | 3113220 | 21-scf00419 | 21 |
| AX-157843183 | 21 | 77.185 | KV453213.1 | 3116832 | 21-scf00419 | 21 |
| AX-158262853 | 21 | 77.185 | KV453213.1 | 3118827 | 21-scf00419 | 21 |
| AX-158262854 | 21 | 77.185 | KV453213.1 | 3119120 | 21-scf00419 | 21 |
| AX-157745248 | 21 | 77.185 | KV453213.1 | 3121489 | 21-scf00419 | 21 |
| AX-157843184 | 21 | 77.185 | KV453213.1 | 3122254 | 21-scf00419 | 21 |
| AX-158262858 | 21 | 77.185 | KV453213.1 | 3133409 | 21-scf00419 | 21 |
| AX-158262861 | 21 | 77.185 | KV453213.1 | 3137536 | 21-scf00419 | 21 |
| AX-158262862 | 21 | 77.185 | KV453213.1 | 3137959 | 21-scf00419 | 21 |
| AX-158262864 | 21 | 77.185 | KV453213.1 | 3142195 | 21-scf00419 | 21 |
| AX-157843186 | 21 | 77.185 | KV453213.1 | 3157458 | 21-scf00419 | 21 |
| AX-158264112 | 21 | 77.185 | KV453213.1 | 4465776 | 21-scf00419 | 21 |
| AX-157724774 | 21 | 77.403 | KV453213.1 | 881144  | 21-scf00419 | 21 |
| AX-157745821 | 21 | 77.403 | KV453213.1 | 895982  | 21-scf00419 | 21 |
| AX-158261809 | 21 | 77.403 | KV453213.1 | 1827623 | 21-scf00419 | 21 |
| AX-158261846 | 21 | 77.403 | KV453213.1 | 1894400 | 21-scf00419 | 21 |
| AX-158262061 | 21 | 77.403 | KV453213.1 | 2160728 | 21-scf00419 | 21 |
| AX-157747617 | 21 | 77.403 | KV453213.1 | 2675717 | 21-scf00419 | 21 |
| AX-158262856 | 21 | 77.403 | KV453213.1 | 3130118 | 21-scf00419 | 21 |
| AX-158262860 | 21 | 77.403 | KV453213.1 | 3137195 | 21-scf00419 | 21 |
| AX-158262866 | 21 | 77.403 | KV453213.1 | 3144710 | 21-scf00419 | 21 |
| AX-158262869 | 21 | 77.403 | KV453213.1 | 3152429 | 21-scf00419 | 21 |
| AX-158262870 | 21 | 77.403 | KV453213.1 | 3152672 | 21-scf00419 | 21 |
| AX-158262872 | 21 | 77.403 | KV453213.1 | 3154037 | 21-scf00419 | 21 |
| AX-158262875 | 21 | 77.403 | KV453213.1 | 3157362 | 21-scf00419 | 21 |
| AX-158262879 | 21 | 77.403 | KV453213.1 | 3162653 | 21-scf00419 | 21 |
| AX-158262882 | 21 | 77.403 | KV453213.1 | 3165250 | 21-scf00419 | 21 |



|              |    |        |            |         |             |    |
|--------------|----|--------|------------|---------|-------------|----|
| AX-157739053 | 21 | 77.403 | KV453213.1 | 3168792 | 21-scf00419 | 21 |
| AX-158262886 | 21 | 77.403 | KV453213.1 | 3174508 | 21-scf00419 | 21 |
| AX-158262888 | 21 | 77.403 | KV453213.1 | 3175693 | 21-scf00419 | 21 |
| AX-158262979 | 21 | 77.403 | KV453213.1 | 3259899 | 21-scf00419 | 21 |
| AX-158262983 | 21 | 77.403 | KV453213.1 | 3263490 | 21-scf00419 | 21 |
| AX-158263029 | 21 | 77.403 | KV453213.1 | 3321784 | 21-scf00419 | 21 |
| AX-158263720 | 21 | 77.403 | KV453213.1 | 4032300 | 21-scf00419 | 21 |
| AX-158263731 | 21 | 77.403 | KV453213.1 | 4040703 | 21-scf00419 | 21 |
| AX-158263737 | 21 | 77.403 | KV453213.1 | 4047204 | 21-scf00419 | 21 |
| AX-158263758 | 21 | 77.403 | KV453213.1 | 4074028 | 21-scf00419 | 21 |
| AX-158263773 | 21 | 77.403 | KV453213.1 | 4089317 | 21-scf00419 | 21 |
| AX-158263784 | 21 | 77.403 | KV453213.1 | 4100858 | 21-scf00419 | 21 |
| AX-158263832 | 21 | 77.403 | KV453213.1 | 4150453 | 21-scf00419 | 21 |
| AX-158263839 | 21 | 77.403 | KV453213.1 | 4155828 | 21-scf00419 | 21 |
| AX-158263851 | 21 | 77.403 | KV453213.1 | 4166286 | 21-scf00419 | 21 |
| AX-158264083 | 21 | 77.403 | KV453213.1 | 4427501 | 21-scf00419 | 21 |
| AX-158264085 | 21 | 77.403 | KV453213.1 | 4429819 | 21-scf00419 | 21 |
| AX-158264089 | 21 | 77.403 | KV453213.1 | 4432933 | 21-scf00419 | 21 |
| AX-158264105 | 21 | 77.403 | KV453213.1 | 4456066 | 21-scf00419 | 21 |
| AX-158264115 | 21 | 77.403 | KV453213.1 | 4467566 | 21-scf00419 | 21 |
| AX-158264128 | 21 | 77.403 | KV453213.1 | 4481481 | 21-scf00419 | 21 |
| AX-158416353 | 21 | 77.403 | KV453213.1 | 4490274 | 21-scf00419 | 21 |
| AX-158264182 | 21 | 77.403 | KV453213.1 | 4545012 | 21-scf00419 | 21 |
| AX-158264324 | 21 | 77.403 | KV453213.1 | 4672399 | 21-scf00419 | 21 |
| AX-158264355 | 21 | 77.403 | KV453213.1 | 4700940 | 21-scf00419 | 21 |
| AX-158264359 | 21 | 77.403 | KV453213.1 | 4705448 | 21-scf00419 | 21 |
| AX-158264380 | 21 | 77.403 | KV453213.1 | 4726390 | 21-scf00419 | 21 |
| AX-158264391 | 21 | 77.403 | KV453213.1 | 4740525 | 21-scf00419 | 21 |
| AX-158264397 | 21 | 77.403 | KV453213.1 | 4745312 | 21-scf00419 | 21 |
| AX-158264429 | 21 | 77.403 | KV453213.1 | 4786951 | 21-scf00419 | 21 |
| AX-158264437 | 21 | 77.403 | KV453213.1 | 4795006 | 21-scf00419 | 21 |
| AX-158394784 | 21 | 77.403 | KV453213.1 | 4989820 | 21-scf00419 | 21 |
| AX-158261023 | 21 | 77.46  | KV453213.1 | 702555  | 21-scf00419 | 21 |
| AX-158262880 | 21 | 77.46  | KV453213.1 | 3163516 | 21-scf00419 | 21 |
| AX-158262891 | 21 | 77.46  | KV453213.1 | 3179718 | 21-scf00419 | 21 |
| AX-158262897 | 21 | 77.46  | KV453213.1 | 3188430 | 21-scf00419 | 21 |
| AX-158262925 | 21 | 77.46  | KV453213.1 | 3212691 | 21-scf00419 | 21 |
| AX-158263042 | 21 | 77.46  | KV453213.1 | 3331268 | 21-scf00419 | 21 |
| AX-158263044 | 21 | 77.46  | KV453213.1 | 3333900 | 21-scf00419 | 21 |
| AX-158263049 | 21 | 77.46  | KV453213.1 | 3339720 | 21-scf00419 | 21 |
| AX-158263051 | 21 | 77.46  | KV453213.1 | 3341253 | 21-scf00419 | 21 |
| AX-158263052 | 21 | 77.46  | KV453213.1 | 3342356 | 21-scf00419 | 21 |
| AX-157710455 | 21 | 77.46  | KV453213.1 | 3344285 | 21-scf00419 | 21 |
| AX-157843193 | 21 | 77.46  | KV453213.1 | 3347488 | 21-scf00419 | 21 |
| AX-158263059 | 21 | 77.46  | KV453213.1 | 3347825 | 21-scf00419 | 21 |
| AX-158263061 | 21 | 77.46  | KV453213.1 | 3350539 | 21-scf00419 | 21 |
| AX-158263062 | 21 | 77.46  | KV453213.1 | 3352002 | 21-scf00419 | 21 |
| AX-158263063 | 21 | 77.46  | KV453213.1 | 3353549 | 21-scf00419 | 21 |
| AX-158263064 | 21 | 77.46  | KV453213.1 | 3354526 | 21-scf00419 | 21 |
| AX-158263065 | 21 | 77.46  | KV453213.1 | 3355815 | 21-scf00419 | 21 |
| AX-158263066 | 21 | 77.46  | KV453213.1 | 3358077 | 21-scf00419 | 21 |

|              |    |       |            |         |             |    |
|--------------|----|-------|------------|---------|-------------|----|
| AX-158263068 | 21 | 77.46 | KV453213.1 | 3362144 | 21-scf00419 | 21 |
| AX-158263072 | 21 | 77.46 | KV453213.1 | 3364958 | 21-scf00419 | 21 |
| AX-158263073 | 21 | 77.46 | KV453213.1 | 3365780 | 21-scf00419 | 21 |
| AX-158263076 | 21 | 77.46 | KV453213.1 | 3367912 | 21-scf00419 | 21 |
| AX-158263077 | 21 | 77.46 | KV453213.1 | 3368364 | 21-scf00419 | 21 |
| AX-158263082 | 21 | 77.46 | KV453213.1 | 3372933 | 21-scf00419 | 21 |
| AX-158263083 | 21 | 77.46 | KV453213.1 | 3373663 | 21-scf00419 | 21 |
| AX-158263092 | 21 | 77.46 | KV453213.1 | 3381976 | 21-scf00419 | 21 |
| AX-158263093 | 21 | 77.46 | KV453213.1 | 3382660 | 21-scf00419 | 21 |
| AX-158263094 | 21 | 77.46 | KV453213.1 | 3383501 | 21-scf00419 | 21 |
| AX-158263096 | 21 | 77.46 | KV453213.1 | 3385114 | 21-scf00419 | 21 |
| AX-158263097 | 21 | 77.46 | KV453213.1 | 3385991 | 21-scf00419 | 21 |
| AX-158263099 | 21 | 77.46 | KV453213.1 | 3387671 | 21-scf00419 | 21 |
| AX-158263102 | 21 | 77.46 | KV453213.1 | 3389053 | 21-scf00419 | 21 |
| AX-158263103 | 21 | 77.46 | KV453213.1 | 3389460 | 21-scf00419 | 21 |
| AX-158263104 | 21 | 77.46 | KV453213.1 | 3389892 | 21-scf00419 | 21 |
| AX-158263106 | 21 | 77.46 | KV453213.1 | 3391502 | 21-scf00419 | 21 |
| AX-158263107 | 21 | 77.46 | KV453213.1 | 3391924 | 21-scf00419 | 21 |
| AX-158263109 | 21 | 77.46 | KV453213.1 | 3393406 | 21-scf00419 | 21 |
| AX-158263113 | 21 | 77.46 | KV453213.1 | 3400344 | 21-scf00419 | 21 |
| AX-158263115 | 21 | 77.46 | KV453213.1 | 3403015 | 21-scf00419 | 21 |
| AX-158263116 | 21 | 77.46 | KV453213.1 | 3403496 | 21-scf00419 | 21 |
| AX-158263118 | 21 | 77.46 | KV453213.1 | 3406000 | 21-scf00419 | 21 |
| AX-158416320 | 21 | 77.46 | KV453213.1 | 3409344 | 21-scf00419 | 21 |
| AX-158263126 | 21 | 77.46 | KV453213.1 | 3413464 | 21-scf00419 | 21 |
| AX-158263131 | 21 | 77.46 | KV453213.1 | 3418635 | 21-scf00419 | 21 |
| AX-158263134 | 21 | 77.46 | KV453213.1 | 3423174 | 21-scf00419 | 21 |
| AX-158263140 | 21 | 77.46 | KV453213.1 | 3427284 | 21-scf00419 | 21 |
| AX-158263142 | 21 | 77.46 | KV453213.1 | 3429012 | 21-scf00419 | 21 |
| AX-158263144 | 21 | 77.46 | KV453213.1 | 3430412 | 21-scf00419 | 21 |
| AX-158263148 | 21 | 77.46 | KV453213.1 | 3433218 | 21-scf00419 | 21 |
| AX-158263150 | 21 | 77.46 | KV453213.1 | 3435005 | 21-scf00419 | 21 |
| AX-158263155 | 21 | 77.46 | KV453213.1 | 3439050 | 21-scf00419 | 21 |
| AX-158263158 | 21 | 77.46 | KV453213.1 | 3441640 | 21-scf00419 | 21 |
| AX-158263161 | 21 | 77.46 | KV453213.1 | 3445304 | 21-scf00419 | 21 |
| AX-158263162 | 21 | 77.46 | KV453213.1 | 3445719 | 21-scf00419 | 21 |
| AX-158263163 | 21 | 77.46 | KV453213.1 | 3448110 | 21-scf00419 | 21 |
| AX-158263165 | 21 | 77.46 | KV453213.1 | 3449053 | 21-scf00419 | 21 |
| AX-158263166 | 21 | 77.46 | KV453213.1 | 3449654 | 21-scf00419 | 21 |
| AX-158394704 | 21 | 77.46 | KV453213.1 | 3450524 | 21-scf00419 | 21 |
| AX-158263168 | 21 | 77.46 | KV453213.1 | 3452170 | 21-scf00419 | 21 |
| AX-158263171 | 21 | 77.46 | KV453213.1 | 3453900 | 21-scf00419 | 21 |
| AX-158394705 | 21 | 77.46 | KV453213.1 | 3455333 | 21-scf00419 | 21 |
| AX-158263172 | 21 | 77.46 | KV453213.1 | 3456269 | 21-scf00419 | 21 |
| AX-158394706 | 21 | 77.46 | KV453213.1 | 3457826 | 21-scf00419 | 21 |
| AX-158263182 | 21 | 77.46 | KV453213.1 | 3471290 | 21-scf00419 | 21 |
| AX-158263195 | 21 | 77.46 | KV453213.1 | 3482381 | 21-scf00419 | 21 |
| AX-158263198 | 21 | 77.46 | KV453213.1 | 3485589 | 21-scf00419 | 21 |
| AX-158263199 | 21 | 77.46 | KV453213.1 | 3486551 | 21-scf00419 | 21 |
| AX-158263204 | 21 | 77.46 | KV453213.1 | 3490749 | 21-scf00419 | 21 |
| AX-158263207 | 21 | 77.46 | KV453213.1 | 3492310 | 21-scf00419 | 21 |

|              |    |       |            |         |             |    |
|--------------|----|-------|------------|---------|-------------|----|
| AX-158263215 | 21 | 77.46 | KV453213.1 | 3499316 | 21-scf00419 | 21 |
| AX-158263221 | 21 | 77.46 | KV453213.1 | 3507466 | 21-scf00419 | 21 |
| AX-158263222 | 21 | 77.46 | KV453213.1 | 3507849 | 21-scf00419 | 21 |
| AX-158263225 | 21 | 77.46 | KV453213.1 | 3510106 | 21-scf00419 | 21 |
| AX-158263229 | 21 | 77.46 | KV453213.1 | 3513923 | 21-scf00419 | 21 |
| AX-158263230 | 21 | 77.46 | KV453213.1 | 3514700 | 21-scf00419 | 21 |
| AX-158263233 | 21 | 77.46 | KV453213.1 | 3517584 | 21-scf00419 | 21 |
| AX-158263236 | 21 | 77.46 | KV453213.1 | 3519640 | 21-scf00419 | 21 |
| AX-158263239 | 21 | 77.46 | KV453213.1 | 3522802 | 21-scf00419 | 21 |
| AX-158263241 | 21 | 77.46 | KV453213.1 | 3523810 | 21-scf00419 | 21 |
| AX-158263246 | 21 | 77.46 | KV453213.1 | 3527813 | 21-scf00419 | 21 |
| AX-158263249 | 21 | 77.46 | KV453213.1 | 3529585 | 21-scf00419 | 21 |
| AX-158263254 | 21 | 77.46 | KV453213.1 | 3532941 | 21-scf00419 | 21 |
| AX-158263256 | 21 | 77.46 | KV453213.1 | 3533641 | 21-scf00419 | 21 |
| AX-158263259 | 21 | 77.46 | KV453213.1 | 3536833 | 21-scf00419 | 21 |
| AX-158263266 | 21 | 77.46 | KV453213.1 | 3542745 | 21-scf00419 | 21 |
| AX-158263267 | 21 | 77.46 | KV453213.1 | 3543091 | 21-scf00419 | 21 |
| AX-158263268 | 21 | 77.46 | KV453213.1 | 3545010 | 21-scf00419 | 21 |
| AX-158263271 | 21 | 77.46 | KV453213.1 | 3547208 | 21-scf00419 | 21 |
| AX-158263272 | 21 | 77.46 | KV453213.1 | 3547398 | 21-scf00419 | 21 |
| AX-158263274 | 21 | 77.46 | KV453213.1 | 3548944 | 21-scf00419 | 21 |
| AX-158263278 | 21 | 77.46 | KV453213.1 | 3553078 | 21-scf00419 | 21 |
| AX-158263284 | 21 | 77.46 | KV453213.1 | 3562842 | 21-scf00419 | 21 |
| AX-158263286 | 21 | 77.46 | KV453213.1 | 3565022 | 21-scf00419 | 21 |
| AX-158263287 | 21 | 77.46 | KV453213.1 | 3566104 | 21-scf00419 | 21 |
| AX-158263291 | 21 | 77.46 | KV453213.1 | 3571259 | 21-scf00419 | 21 |
| AX-158263292 | 21 | 77.46 | KV453213.1 | 3573544 | 21-scf00419 | 21 |
| AX-158263296 | 21 | 77.46 | KV453213.1 | 3579504 | 21-scf00419 | 21 |
| AX-158263298 | 21 | 77.46 | KV453213.1 | 3581046 | 21-scf00419 | 21 |
| AX-158263302 | 21 | 77.46 | KV453213.1 | 3588881 | 21-scf00419 | 21 |
| AX-158263304 | 21 | 77.46 | KV453213.1 | 3592259 | 21-scf00419 | 21 |
| AX-158263310 | 21 | 77.46 | KV453213.1 | 3599016 | 21-scf00419 | 21 |
| AX-158263311 | 21 | 77.46 | KV453213.1 | 3599720 | 21-scf00419 | 21 |
| AX-158263313 | 21 | 77.46 | KV453213.1 | 3601901 | 21-scf00419 | 21 |
| AX-158263315 | 21 | 77.46 | KV453213.1 | 3603995 | 21-scf00419 | 21 |
| AX-158263316 | 21 | 77.46 | KV453213.1 | 3604553 | 21-scf00419 | 21 |
| AX-158263320 | 21 | 77.46 | KV453213.1 | 3608939 | 21-scf00419 | 21 |
| AX-158263321 | 21 | 77.46 | KV453213.1 | 3609731 | 21-scf00419 | 21 |
| AX-158263324 | 21 | 77.46 | KV453213.1 | 3613074 | 21-scf00419 | 21 |
| AX-158416324 | 21 | 77.46 | KV453213.1 | 3614888 | 21-scf00419 | 21 |
| AX-158416325 | 21 | 77.46 | KV453213.1 | 3615600 | 21-scf00419 | 21 |
| AX-158263326 | 21 | 77.46 | KV453213.1 | 3615635 | 21-scf00419 | 21 |
| AX-158263327 | 21 | 77.46 | KV453213.1 | 3616041 | 21-scf00419 | 21 |
| AX-157843195 | 21 | 77.46 | KV453213.1 | 3616202 | 21-scf00419 | 21 |
| AX-158263328 | 21 | 77.46 | KV453213.1 | 3616571 | 21-scf00419 | 21 |
| AX-157737194 | 21 | 77.46 | KV453213.1 | 3619255 | 21-scf00419 | 21 |
| AX-158263333 | 21 | 77.46 | KV453213.1 | 3620620 | 21-scf00419 | 21 |
| AX-158263338 | 21 | 77.46 | KV453213.1 | 3625451 | 21-scf00419 | 21 |
| AX-158263340 | 21 | 77.46 | KV453213.1 | 3627968 | 21-scf00419 | 21 |
| AX-158263343 | 21 | 77.46 | KV453213.1 | 3630261 | 21-scf00419 | 21 |
| AX-158263345 | 21 | 77.46 | KV453213.1 | 3631264 | 21-scf00419 | 21 |

|              |    |       |            |         |             |    |
|--------------|----|-------|------------|---------|-------------|----|
| AX-157843197 | 21 | 77.46 | KV453213.1 | 3631697 | 21-scf00419 | 21 |
| AX-158263346 | 21 | 77.46 | KV453213.1 | 3631755 | 21-scf00419 | 21 |
| AX-158263348 | 21 | 77.46 | KV453213.1 | 3635681 | 21-scf00419 | 21 |
| AX-158394709 | 21 | 77.46 | KV453213.1 | 3636317 | 21-scf00419 | 21 |
| AX-158263350 | 21 | 77.46 | KV453213.1 | 3636913 | 21-scf00419 | 21 |
| AX-158263352 | 21 | 77.46 | KV453213.1 | 3638569 | 21-scf00419 | 21 |
| AX-158394710 | 21 | 77.46 | KV453213.1 | 3638723 | 21-scf00419 | 21 |
| AX-158263359 | 21 | 77.46 | KV453213.1 | 3643553 | 21-scf00419 | 21 |
| AX-158263360 | 21 | 77.46 | KV453213.1 | 3644138 | 21-scf00419 | 21 |
| AX-158263362 | 21 | 77.46 | KV453213.1 | 3646107 | 21-scf00419 | 21 |
| AX-158263364 | 21 | 77.46 | KV453213.1 | 3647531 | 21-scf00419 | 21 |
| AX-158263367 | 21 | 77.46 | KV453213.1 | 3652581 | 21-scf00419 | 21 |
| AX-158263373 | 21 | 77.46 | KV453213.1 | 3658920 | 21-scf00419 | 21 |
| AX-158263374 | 21 | 77.46 | KV453213.1 | 3659223 | 21-scf00419 | 21 |
| AX-158263375 | 21 | 77.46 | KV453213.1 | 3659897 | 21-scf00419 | 21 |
| AX-158263376 | 21 | 77.46 | KV453213.1 | 3662364 | 21-scf00419 | 21 |
| AX-158263377 | 21 | 77.46 | KV453213.1 | 3662881 | 21-scf00419 | 21 |
| AX-158263382 | 21 | 77.46 | KV453213.1 | 3668966 | 21-scf00419 | 21 |
| AX-158263384 | 21 | 77.46 | KV453213.1 | 3669859 | 21-scf00419 | 21 |
| AX-158416327 | 21 | 77.46 | KV453213.1 | 3672274 | 21-scf00419 | 21 |
| AX-158263388 | 21 | 77.46 | KV453213.1 | 3674419 | 21-scf00419 | 21 |
| AX-158263389 | 21 | 77.46 | KV453213.1 | 3674993 | 21-scf00419 | 21 |
| AX-158263390 | 21 | 77.46 | KV453213.1 | 3675469 | 21-scf00419 | 21 |
| AX-158263391 | 21 | 77.46 | KV453213.1 | 3676467 | 21-scf00419 | 21 |
| AX-158263394 | 21 | 77.46 | KV453213.1 | 3680443 | 21-scf00419 | 21 |
| AX-158263402 | 21 | 77.46 | KV453213.1 | 3687105 | 21-scf00419 | 21 |
| AX-158263406 | 21 | 77.46 | KV453213.1 | 3691177 | 21-scf00419 | 21 |
| AX-158263409 | 21 | 77.46 | KV453213.1 | 3693087 | 21-scf00419 | 21 |
| AX-158263411 | 21 | 77.46 | KV453213.1 | 3694128 | 21-scf00419 | 21 |
| AX-158263414 | 21 | 77.46 | KV453213.1 | 3697713 | 21-scf00419 | 21 |
| AX-158263417 | 21 | 77.46 | KV453213.1 | 3700759 | 21-scf00419 | 21 |
| AX-158263422 | 21 | 77.46 | KV453213.1 | 3704170 | 21-scf00419 | 21 |
| AX-158263423 | 21 | 77.46 | KV453213.1 | 3704569 | 21-scf00419 | 21 |
| AX-157860021 | 21 | 77.46 | KV453213.1 | 3705012 | 21-scf00419 | 21 |
| AX-158394713 | 21 | 77.46 | KV453213.1 | 3705774 | 21-scf00419 | 21 |
| AX-158263429 | 21 | 77.46 | KV453213.1 | 3708606 | 21-scf00419 | 21 |
| AX-157872893 | 21 | 77.46 | KV453213.1 | 3709635 | 21-scf00419 | 21 |
| AX-157872894 | 21 | 77.46 | KV453213.1 | 3711707 | 21-scf00419 | 21 |
| AX-158263433 | 21 | 77.46 | KV453213.1 | 3712888 | 21-scf00419 | 21 |
| AX-158263436 | 21 | 77.46 | KV453213.1 | 3718854 | 21-scf00419 | 21 |
| AX-158263443 | 21 | 77.46 | KV453213.1 | 3724845 | 21-scf00419 | 21 |
| AX-158263444 | 21 | 77.46 | KV453213.1 | 3725062 | 21-scf00419 | 21 |
| AX-158263446 | 21 | 77.46 | KV453213.1 | 3727058 | 21-scf00419 | 21 |
| AX-158263453 | 21 | 77.46 | KV453213.1 | 3733395 | 21-scf00419 | 21 |
| AX-158263456 | 21 | 77.46 | KV453213.1 | 3734990 | 21-scf00419 | 21 |
| AX-157872896 | 21 | 77.46 | KV453213.1 | 3736193 | 21-scf00419 | 21 |
| AX-158263461 | 21 | 77.46 | KV453213.1 | 3738205 | 21-scf00419 | 21 |
| AX-158263462 | 21 | 77.46 | KV453213.1 | 3740085 | 21-scf00419 | 21 |
| AX-158263464 | 21 | 77.46 | KV453213.1 | 3740794 | 21-scf00419 | 21 |
| AX-158263465 | 21 | 77.46 | KV453213.1 | 3741286 | 21-scf00419 | 21 |
| AX-157872897 | 21 | 77.46 | KV453213.1 | 3743610 | 21-scf00419 | 21 |

|              |    |       |            |         |             |    |
|--------------|----|-------|------------|---------|-------------|----|
| AX-158263466 | 21 | 77.46 | KV453213.1 | 3744114 | 21-scf00419 | 21 |
| AX-158263467 | 21 | 77.46 | KV453213.1 | 3746598 | 21-scf00419 | 21 |
| AX-158263469 | 21 | 77.46 | KV453213.1 | 3747367 | 21-scf00419 | 21 |
| AX-158263470 | 21 | 77.46 | KV453213.1 | 3749793 | 21-scf00419 | 21 |
| AX-158263472 | 21 | 77.46 | KV453213.1 | 3750967 | 21-scf00419 | 21 |
| AX-158263474 | 21 | 77.46 | KV453213.1 | 3752306 | 21-scf00419 | 21 |
| AX-158263476 | 21 | 77.46 | KV453213.1 | 3753291 | 21-scf00419 | 21 |
| AX-158263477 | 21 | 77.46 | KV453213.1 | 3753615 | 21-scf00419 | 21 |
| AX-158263482 | 21 | 77.46 | KV453213.1 | 3755741 | 21-scf00419 | 21 |
| AX-158263489 | 21 | 77.46 | KV453213.1 | 3760076 | 21-scf00419 | 21 |
| AX-158263490 | 21 | 77.46 | KV453213.1 | 3760416 | 21-scf00419 | 21 |
| AX-158263493 | 21 | 77.46 | KV453213.1 | 3761831 | 21-scf00419 | 21 |
| AX-158263497 | 21 | 77.46 | KV453213.1 | 3767921 | 21-scf00419 | 21 |
| AX-158263500 | 21 | 77.46 | KV453213.1 | 3770802 | 21-scf00419 | 21 |
| AX-158263501 | 21 | 77.46 | KV453213.1 | 3771068 | 21-scf00419 | 21 |
| AX-158263504 | 21 | 77.46 | KV453213.1 | 3773836 | 21-scf00419 | 21 |
| AX-158263508 | 21 | 77.46 | KV453213.1 | 3779241 | 21-scf00419 | 21 |
| AX-158263509 | 21 | 77.46 | KV453213.1 | 3779640 | 21-scf00419 | 21 |
| AX-158263514 | 21 | 77.46 | KV453213.1 | 3783621 | 21-scf00419 | 21 |
| AX-158263516 | 21 | 77.46 | KV453213.1 | 3786262 | 21-scf00419 | 21 |
| AX-158263517 | 21 | 77.46 | KV453213.1 | 3786652 | 21-scf00419 | 21 |
| AX-158263518 | 21 | 77.46 | KV453213.1 | 3787945 | 21-scf00419 | 21 |
| AX-158263521 | 21 | 77.46 | KV453213.1 | 3789904 | 21-scf00419 | 21 |
| AX-158263523 | 21 | 77.46 | KV453213.1 | 3791504 | 21-scf00419 | 21 |
| AX-158263524 | 21 | 77.46 | KV453213.1 | 3792836 | 21-scf00419 | 21 |
| AX-158263525 | 21 | 77.46 | KV453213.1 | 3793267 | 21-scf00419 | 21 |
| AX-158263527 | 21 | 77.46 | KV453213.1 | 3794597 | 21-scf00419 | 21 |
| AX-158263528 | 21 | 77.46 | KV453213.1 | 3795323 | 21-scf00419 | 21 |
| AX-158263529 | 21 | 77.46 | KV453213.1 | 3796332 | 21-scf00419 | 21 |
| AX-158263531 | 21 | 77.46 | KV453213.1 | 3797151 | 21-scf00419 | 21 |
| AX-158263532 | 21 | 77.46 | KV453213.1 | 3799077 | 21-scf00419 | 21 |
| AX-158263533 | 21 | 77.46 | KV453213.1 | 3799623 | 21-scf00419 | 21 |
| AX-158263534 | 21 | 77.46 | KV453213.1 | 3800141 | 21-scf00419 | 21 |
| AX-158263535 | 21 | 77.46 | KV453213.1 | 3800881 | 21-scf00419 | 21 |
| AX-158263539 | 21 | 77.46 | KV453213.1 | 3804344 | 21-scf00419 | 21 |
| AX-158263541 | 21 | 77.46 | KV453213.1 | 3805791 | 21-scf00419 | 21 |
| AX-157860022 | 21 | 77.46 | KV453213.1 | 3805848 | 21-scf00419 | 21 |
| AX-158394715 | 21 | 77.46 | KV453213.1 | 3806766 | 21-scf00419 | 21 |
| AX-158263543 | 21 | 77.46 | KV453213.1 | 3807521 | 21-scf00419 | 21 |
| AX-158263549 | 21 | 77.46 | KV453213.1 | 3812756 | 21-scf00419 | 21 |
| AX-158263551 | 21 | 77.46 | KV453213.1 | 3814182 | 21-scf00419 | 21 |
| AX-158263553 | 21 | 77.46 | KV453213.1 | 3815068 | 21-scf00419 | 21 |
| AX-158263554 | 21 | 77.46 | KV453213.1 | 3815798 | 21-scf00419 | 21 |
| AX-158263556 | 21 | 77.46 | KV453213.1 | 3817908 | 21-scf00419 | 21 |
| AX-158263558 | 21 | 77.46 | KV453213.1 | 3820137 | 21-scf00419 | 21 |
| AX-158263559 | 21 | 77.46 | KV453213.1 | 3821163 | 21-scf00419 | 21 |
| AX-158263560 | 21 | 77.46 | KV453213.1 | 3821624 | 21-scf00419 | 21 |
| AX-158263561 | 21 | 77.46 | KV453213.1 | 3823687 | 21-scf00419 | 21 |
| AX-158263563 | 21 | 77.46 | KV453213.1 | 3824174 | 21-scf00419 | 21 |
| AX-158263565 | 21 | 77.46 | KV453213.1 | 3824996 | 21-scf00419 | 21 |
| AX-158263566 | 21 | 77.46 | KV453213.1 | 3826401 | 21-scf00419 | 21 |

|              |    |       |            |         |             |    |
|--------------|----|-------|------------|---------|-------------|----|
| AX-158263569 | 21 | 77.46 | KV453213.1 | 3830367 | 21-scf00419 | 21 |
| AX-158263572 | 21 | 77.46 | KV453213.1 | 3833446 | 21-scf00419 | 21 |
| AX-158263573 | 21 | 77.46 | KV453213.1 | 3834401 | 21-scf00419 | 21 |
| AX-158263574 | 21 | 77.46 | KV453213.1 | 3835483 | 21-scf00419 | 21 |
| AX-158263575 | 21 | 77.46 | KV453213.1 | 3838875 | 21-scf00419 | 21 |
| AX-158263583 | 21 | 77.46 | KV453213.1 | 3844490 | 21-scf00419 | 21 |
| AX-158263584 | 21 | 77.46 | KV453213.1 | 3844745 | 21-scf00419 | 21 |
| AX-158263585 | 21 | 77.46 | KV453213.1 | 3845970 | 21-scf00419 | 21 |
| AX-158263587 | 21 | 77.46 | KV453213.1 | 3847482 | 21-scf00419 | 21 |
| AX-158263588 | 21 | 77.46 | KV453213.1 | 3848685 | 21-scf00419 | 21 |
| AX-158263591 | 21 | 77.46 | KV453213.1 | 3850836 | 21-scf00419 | 21 |
| AX-158263592 | 21 | 77.46 | KV453213.1 | 3851356 | 21-scf00419 | 21 |
| AX-158263594 | 21 | 77.46 | KV453213.1 | 3854027 | 21-scf00419 | 21 |
| AX-158263595 | 21 | 77.46 | KV453213.1 | 3854413 | 21-scf00419 | 21 |
| AX-158263599 | 21 | 77.46 | KV453213.1 | 3858073 | 21-scf00419 | 21 |
| AX-158263600 | 21 | 77.46 | KV453213.1 | 3859403 | 21-scf00419 | 21 |
| AX-158263601 | 21 | 77.46 | KV453213.1 | 3860189 | 21-scf00419 | 21 |
| AX-158263602 | 21 | 77.46 | KV453213.1 | 3860745 | 21-scf00419 | 21 |
| AX-158263603 | 21 | 77.46 | KV453213.1 | 3860941 | 21-scf00419 | 21 |
| AX-158263604 | 21 | 77.46 | KV453213.1 | 3865721 | 21-scf00419 | 21 |
| AX-158263606 | 21 | 77.46 | KV453213.1 | 3868163 | 21-scf00419 | 21 |
| AX-158263608 | 21 | 77.46 | KV453213.1 | 3875416 | 21-scf00419 | 21 |
| AX-158394718 | 21 | 77.46 | KV453213.1 | 3876228 | 21-scf00419 | 21 |
| AX-158263610 | 21 | 77.46 | KV453213.1 | 3877628 | 21-scf00419 | 21 |
| AX-158263611 | 21 | 77.46 | KV453213.1 | 3879725 | 21-scf00419 | 21 |
| AX-158263613 | 21 | 77.46 | KV453213.1 | 3882396 | 21-scf00419 | 21 |
| AX-158263614 | 21 | 77.46 | KV453213.1 | 3882906 | 21-scf00419 | 21 |
| AX-158263615 | 21 | 77.46 | KV453213.1 | 3883912 | 21-scf00419 | 21 |
| AX-158263617 | 21 | 77.46 | KV453213.1 | 3885585 | 21-scf00419 | 21 |
| AX-158263619 | 21 | 77.46 | KV453213.1 | 3888343 | 21-scf00419 | 21 |
| AX-158263620 | 21 | 77.46 | KV453213.1 | 3889271 | 21-scf00419 | 21 |
| AX-158263621 | 21 | 77.46 | KV453213.1 | 3889726 | 21-scf00419 | 21 |
| AX-158263623 | 21 | 77.46 | KV453213.1 | 3891153 | 21-scf00419 | 21 |
| AX-158263624 | 21 | 77.46 | KV453213.1 | 3891438 | 21-scf00419 | 21 |
| AX-158263629 | 21 | 77.46 | KV453213.1 | 3895159 | 21-scf00419 | 21 |
| AX-158263632 | 21 | 77.46 | KV453213.1 | 3898280 | 21-scf00419 | 21 |
| AX-158394719 | 21 | 77.46 | KV453213.1 | 3899565 | 21-scf00419 | 21 |
| AX-158263635 | 21 | 77.46 | KV453213.1 | 3903477 | 21-scf00419 | 21 |
| AX-158263636 | 21 | 77.46 | KV453213.1 | 3904346 | 21-scf00419 | 21 |
| AX-158263637 | 21 | 77.46 | KV453213.1 | 3905028 | 21-scf00419 | 21 |
| AX-158394720 | 21 | 77.46 | KV453213.1 | 3906534 | 21-scf00419 | 21 |
| AX-158263639 | 21 | 77.46 | KV453213.1 | 3907936 | 21-scf00419 | 21 |
| AX-158263642 | 21 | 77.46 | KV453213.1 | 3911587 | 21-scf00419 | 21 |
| AX-158263644 | 21 | 77.46 | KV453213.1 | 3913190 | 21-scf00419 | 21 |
| AX-158263645 | 21 | 77.46 | KV453213.1 | 3913730 | 21-scf00419 | 21 |
| AX-158394721 | 21 | 77.46 | KV453213.1 | 3915454 | 21-scf00419 | 21 |
| AX-158263648 | 21 | 77.46 | KV453213.1 | 3916321 | 21-scf00419 | 21 |
| AX-158263649 | 21 | 77.46 | KV453213.1 | 3917704 | 21-scf00419 | 21 |
| AX-158263655 | 21 | 77.46 | KV453213.1 | 3925396 | 21-scf00419 | 21 |
| AX-158394722 | 21 | 77.46 | KV453213.1 | 3928087 | 21-scf00419 | 21 |
| AX-158263657 | 21 | 77.46 | KV453213.1 | 3928616 | 21-scf00419 | 21 |

|              |    |        |            |         |             |    |
|--------------|----|--------|------------|---------|-------------|----|
| AX-158263659 | 21 | 77.46  | KV453213.1 | 3930806 | 21-scf00419 | 21 |
| AX-158263662 | 21 | 77.46  | KV453213.1 | 3935765 | 21-scf00419 | 21 |
| AX-158263666 | 21 | 77.46  | KV453213.1 | 3938964 | 21-scf00419 | 21 |
| AX-157872899 | 21 | 77.46  | KV453213.1 | 3939513 | 21-scf00419 | 21 |
| AX-157872900 | 21 | 77.46  | KV453213.1 | 3946985 | 21-scf00419 | 21 |
| AX-157872901 | 21 | 77.46  | KV453213.1 | 3947196 | 21-scf00419 | 21 |
| AX-158394723 | 21 | 77.46  | KV453213.1 | 3947585 | 21-scf00419 | 21 |
| AX-158263669 | 21 | 77.46  | KV453213.1 | 3948602 | 21-scf00419 | 21 |
| AX-158263670 | 21 | 77.46  | KV453213.1 | 3949680 | 21-scf00419 | 21 |
| AX-158263672 | 21 | 77.46  | KV453213.1 | 3952665 | 21-scf00419 | 21 |
| AX-158263675 | 21 | 77.46  | KV453213.1 | 3955005 | 21-scf00419 | 21 |
| AX-158263676 | 21 | 77.46  | KV453213.1 | 3956887 | 21-scf00419 | 21 |
| AX-158263682 | 21 | 77.46  | KV453213.1 | 3967552 | 21-scf00419 | 21 |
| AX-158263683 | 21 | 77.46  | KV453213.1 | 3968358 | 21-scf00419 | 21 |
| AX-158263685 | 21 | 77.46  | KV453213.1 | 3969365 | 21-scf00419 | 21 |
| AX-158263689 | 21 | 77.46  | KV453213.1 | 3973473 | 21-scf00419 | 21 |
| AX-158394724 | 21 | 77.46  | KV453213.1 | 3974177 | 21-scf00419 | 21 |
| AX-158263694 | 21 | 77.46  | KV453213.1 | 3980199 | 21-scf00419 | 21 |
| AX-158263698 | 21 | 77.46  | KV453213.1 | 3988115 | 21-scf00419 | 21 |
| AX-157710536 | 21 | 77.46  | KV453213.1 | 3991238 | 21-scf00419 | 21 |
| AX-157710537 | 21 | 77.46  | KV453213.1 | 3991336 | 21-scf00419 | 21 |
| AX-158263704 | 21 | 77.46  | KV453213.1 | 4011655 | 21-scf00419 | 21 |
| AX-158394725 | 21 | 77.46  | KV453213.1 | 4016993 | 21-scf00419 | 21 |
| AX-158263706 | 21 | 77.46  | KV453213.1 | 4017441 | 21-scf00419 | 21 |
| AX-158394726 | 21 | 77.46  | KV453213.1 | 4021219 | 21-scf00419 | 21 |
| AX-158394727 | 21 | 77.46  | KV453213.1 | 4025335 | 21-scf00419 | 21 |
| AX-158263716 | 21 | 77.46  | KV453213.1 | 4027233 | 21-scf00419 | 21 |
| AX-158264478 | 21 | 77.46  | KV453213.1 | 4835177 | 21-scf00419 | 21 |
| AX-157872919 | 21 | 77.46  | KV453213.1 | 4841200 | 21-scf00419 | 21 |
| AX-158264481 | 21 | 77.46  | KV453213.1 | 4842147 | 21-scf00419 | 21 |
| AX-158264483 | 21 | 77.46  | KV453213.1 | 4844877 | 21-scf00419 | 21 |
| AX-157727514 | 21 | 77.513 | KV453213.1 | 3179194 | 21-scf00419 | 21 |
| AX-158262893 | 21 | 77.513 | KV453213.1 | 3185075 | 21-scf00419 | 21 |
| AX-158262894 | 21 | 77.513 | KV453213.1 | 3185457 | 21-scf00419 | 21 |
| AX-158262895 | 21 | 77.513 | KV453213.1 | 3186433 | 21-scf00419 | 21 |
| AX-158262901 | 21 | 77.513 | KV453213.1 | 3191605 | 21-scf00419 | 21 |
| AX-158262903 | 21 | 77.513 | KV453213.1 | 3192269 | 21-scf00419 | 21 |
| AX-158262905 | 21 | 77.513 | KV453213.1 | 3193177 | 21-scf00419 | 21 |
| AX-158262907 | 21 | 77.513 | KV453213.1 | 3194877 | 21-scf00419 | 21 |
| AX-158262908 | 21 | 77.513 | KV453213.1 | 3197132 | 21-scf00419 | 21 |
| AX-158262911 | 21 | 77.513 | KV453213.1 | 3200834 | 21-scf00419 | 21 |
| AX-158262912 | 21 | 77.513 | KV453213.1 | 3201134 | 21-scf00419 | 21 |
| AX-158262918 | 21 | 77.513 | KV453213.1 | 3205292 | 21-scf00419 | 21 |
| AX-158262919 | 21 | 77.513 | KV453213.1 | 3207166 | 21-scf00419 | 21 |
| AX-158262964 | 21 | 77.513 | KV453213.1 | 3244021 | 21-scf00419 | 21 |
| AX-158394697 | 21 | 77.513 | KV453213.1 | 3309500 | 21-scf00419 | 21 |
| AX-158263046 | 21 | 77.513 | KV453213.1 | 3335749 | 21-scf00419 | 21 |
| AX-158263101 | 21 | 77.513 | KV453213.1 | 3388585 | 21-scf00419 | 21 |
| AX-158264756 | 21 | 77.513 | KV453213.1 | 5185445 | 21-scf00419 | 21 |
| AX-158264757 | 21 | 77.513 | KV453213.1 | 5186061 | 21-scf00419 | 21 |
| AX-158262923 | 21 | 77.536 | KV453213.1 | 3211510 | 21-scf00419 | 21 |

|              |    |        |            |         |             |    |
|--------------|----|--------|------------|---------|-------------|----|
| AX-158262933 | 21 | 77.562 | KV453213.1 | 3219648 | 21-scf00419 | 21 |
| AX-158262950 | 21 | 77.578 | KV453213.1 | 3234417 | 21-scf00419 | 21 |
| AX-158262951 | 21 | 77.609 | KV453213.1 | 3234960 | 21-scf00419 | 21 |
| AX-158262797 | 21 | 77.622 | KV453213.1 | 3043758 | 21-scf00419 | 21 |
| AX-158262798 | 21 | 77.622 | KV453213.1 | 3045064 | 21-scf00419 | 21 |
| AX-158262835 | 21 | 77.622 | KV453213.1 | 3090346 | 21-scf00419 | 21 |
| AX-158262915 | 21 | 77.622 | KV453213.1 | 3203824 | 21-scf00419 | 21 |
| AX-158262963 | 21 | 77.622 | KV453213.1 | 3243432 | 21-scf00419 | 21 |
| AX-158262986 | 21 | 77.622 | KV453213.1 | 3267005 | 21-scf00419 | 21 |
| AX-158262992 | 21 | 77.622 | KV453213.1 | 3273204 | 21-scf00419 | 21 |
| AX-158263006 | 21 | 77.622 | KV453213.1 | 3281934 | 21-scf00419 | 21 |
| AX-158263007 | 21 | 77.622 | KV453213.1 | 3282787 | 21-scf00419 | 21 |
| AX-158263008 | 21 | 77.622 | KV453213.1 | 3283459 | 21-scf00419 | 21 |
| AX-158263009 | 21 | 77.622 | KV453213.1 | 3284251 | 21-scf00419 | 21 |
| AX-158263010 | 21 | 77.622 | KV453213.1 | 3284877 | 21-scf00419 | 21 |
| AX-158263022 | 21 | 77.622 | KV453213.1 | 3303759 | 21-scf00419 | 21 |
| AX-158416316 | 21 | 77.622 | KV453213.1 | 3305686 | 21-scf00419 | 21 |
| AX-158416317 | 21 | 77.622 | KV453213.1 | 3305840 | 21-scf00419 | 21 |
| AX-157751656 | 21 | 77.622 | KV453213.1 | 3309669 | 21-scf00419 | 21 |
| AX-158263033 | 21 | 77.622 | KV453213.1 | 3325013 | 21-scf00419 | 21 |
| AX-158263047 | 21 | 77.622 | KV453213.1 | 3337472 | 21-scf00419 | 21 |
| AX-158263054 | 21 | 77.622 | KV453213.1 | 3344624 | 21-scf00419 | 21 |
| AX-158263056 | 21 | 77.622 | KV453213.1 | 3345730 | 21-scf00419 | 21 |
| AX-158263057 | 21 | 77.622 | KV453213.1 | 3346248 | 21-scf00419 | 21 |
| AX-158394701 | 21 | 77.622 | KV453213.1 | 3346635 | 21-scf00419 | 21 |
| AX-158263058 | 21 | 77.622 | KV453213.1 | 3347082 | 21-scf00419 | 21 |
| AX-158263084 | 21 | 77.622 | KV453213.1 | 3376152 | 21-scf00419 | 21 |
| AX-158263552 | 21 | 77.622 | KV453213.1 | 3814650 | 21-scf00419 | 21 |
| AX-158263590 | 21 | 77.622 | KV453213.1 | 3850307 | 21-scf00419 | 21 |
| AX-158264487 | 21 | 77.622 | KV453213.1 | 4850420 | 21-scf00419 | 21 |
| AX-158264912 | 21 | 77.622 | KV453213.1 | 5357260 | 21-scf00419 | 21 |
| AX-158263086 | 21 | 77.719 | KV453213.1 | 3377500 | 21-scf00419 | 21 |
| AX-158263095 | 21 | 77.719 | KV453213.1 | 3384367 | 21-scf00419 | 21 |
| AX-158263098 | 21 | 77.719 | KV453213.1 | 3386788 | 21-scf00419 | 21 |
| AX-158260697 | 21 | 77.817 | KV453213.1 | 312776  | 21-scf00419 | 21 |
| AX-158262008 | 21 | 77.817 | KV453213.1 | 2089392 | 21-scf00419 | 21 |
| AX-158262723 | 21 | 77.817 | KV453213.1 | 2949975 | 21-scf00419 | 21 |
| AX-158262801 | 21 | 77.817 | KV453213.1 | 3048997 | 21-scf00419 | 21 |
| AX-158262973 | 21 | 77.817 | KV453213.1 | 3253303 | 21-scf00419 | 21 |
| AX-158263087 | 21 | 77.817 | KV453213.1 | 3378130 | 21-scf00419 | 21 |
| AX-158263088 | 21 | 77.817 | KV453213.1 | 3378794 | 21-scf00419 | 21 |
| AX-158263108 | 21 | 77.817 | KV453213.1 | 3392516 | 21-scf00419 | 21 |
| AX-158263133 | 21 | 77.817 | KV453213.1 | 3422818 | 21-scf00419 | 21 |
| AX-158263137 | 21 | 77.817 | KV453213.1 | 3425510 | 21-scf00419 | 21 |
| AX-158263138 | 21 | 77.817 | KV453213.1 | 3426146 | 21-scf00419 | 21 |
| AX-158263141 | 21 | 77.817 | KV453213.1 | 3428594 | 21-scf00419 | 21 |
| AX-158263145 | 21 | 77.817 | KV453213.1 | 3430939 | 21-scf00419 | 21 |
| AX-158263147 | 21 | 77.817 | KV453213.1 | 3431909 | 21-scf00419 | 21 |
| AX-158263149 | 21 | 77.817 | KV453213.1 | 3434418 | 21-scf00419 | 21 |
| AX-158263153 | 21 | 77.817 | KV453213.1 | 3436914 | 21-scf00419 | 21 |
| AX-158263157 | 21 | 77.817 | KV453213.1 | 3440927 | 21-scf00419 | 21 |



|              |    |        |            |         |             |    |
|--------------|----|--------|------------|---------|-------------|----|
| AX-158263164 | 21 | 77.817 | KV453213.1 | 3448656 | 21-scf00419 | 21 |
| AX-158263205 | 21 | 77.817 | KV453213.1 | 3491338 | 21-scf00419 | 21 |
| AX-158263365 | 21 | 77.817 | KV453213.1 | 3650238 | 21-scf00419 | 21 |
| AX-157843198 | 21 | 77.817 | KV453213.1 | 3666940 | 21-scf00419 | 21 |
| AX-158263397 | 21 | 77.817 | KV453213.1 | 3683918 | 21-scf00419 | 21 |
| AX-158263515 | 21 | 77.817 | KV453213.1 | 3785327 | 21-scf00419 | 21 |
| AX-158263715 | 21 | 77.817 | KV453213.1 | 4026879 | 21-scf00419 | 21 |
| AX-158264029 | 21 | 77.817 | KV453213.1 | 4362988 | 21-scf00419 | 21 |
| AX-158264177 | 21 | 77.817 | KV453213.1 | 4542386 | 21-scf00419 | 21 |
| AX-158264271 | 21 | 77.817 | KV453213.1 | 4620957 | 21-scf00419 | 21 |
| AX-158264273 | 21 | 77.817 | KV453213.1 | 4622464 | 21-scf00419 | 21 |
| AX-158264339 | 21 | 77.817 | KV453213.1 | 4685733 | 21-scf00419 | 21 |
| AX-158264734 | 21 | 77.817 | KV453213.1 | 5162899 | 21-scf00419 | 21 |
| AX-158264736 | 21 | 77.817 | KV453213.1 | 5164171 | 21-scf00419 | 21 |
| AX-158264738 | 21 | 77.817 | KV453213.1 | 5165751 | 21-scf00419 | 21 |
| AX-158264747 | 21 | 77.817 | KV453213.1 | 5177570 | 21-scf00419 | 21 |
| AX-158264758 | 21 | 77.817 | KV453213.1 | 5188479 | 21-scf00419 | 21 |
| AX-158264762 | 21 | 77.817 | KV453213.1 | 5191078 | 21-scf00419 | 21 |
| AX-158264767 | 21 | 77.817 | KV453213.1 | 5195084 | 21-scf00419 | 21 |
| AX-158264769 | 21 | 77.817 | KV453213.1 | 5196622 | 21-scf00419 | 21 |
| AX-158264770 | 21 | 77.817 | KV453213.1 | 5198795 | 21-scf00419 | 21 |
| AX-158264773 | 21 | 77.817 | KV453213.1 | 5200995 | 21-scf00419 | 21 |
| AX-158264777 | 21 | 77.817 | KV453213.1 | 5203350 | 21-scf00419 | 21 |
| AX-158264779 | 21 | 77.817 | KV453213.1 | 5204589 | 21-scf00419 | 21 |
| AX-158264787 | 21 | 77.817 | KV453213.1 | 5212562 | 21-scf00419 | 21 |
| AX-158264793 | 21 | 77.817 | KV453213.1 | 5221227 | 21-scf00419 | 21 |
| AX-158264794 | 21 | 77.817 | KV453213.1 | 5221994 | 21-scf00419 | 21 |
| AX-158264795 | 21 | 77.817 | KV453213.1 | 5222114 | 21-scf00419 | 21 |
| AX-158264797 | 21 | 77.817 | KV453213.1 | 5223322 | 21-scf00419 | 21 |
| AX-158264802 | 21 | 77.817 | KV453213.1 | 5228244 | 21-scf00419 | 21 |
| AX-158264995 | 21 | 77.817 | KV453213.1 | 5463661 | 21-scf00419 | 21 |
| AX-158263167 | 21 | 77.837 | KV453213.1 | 3451813 | 21-scf00419 | 21 |
| AX-158262512 | 21 | 77.857 | KV453213.1 | 2674402 | 21-scf00419 | 21 |
| AX-158263170 | 21 | 77.857 | KV453213.1 | 3453297 | 21-scf00419 | 21 |
| AX-158264749 | 21 | 77.857 | KV453213.1 | 5179747 | 21-scf00419 | 21 |
| AX-158263176 | 21 | 77.88  | KV453213.1 | 3466386 | 21-scf00419 | 21 |
| AX-158381088 | 21 | 77.902 | KV453213.1 | 3270258 | 21-scf00419 | 21 |
| AX-158263180 | 21 | 77.902 | KV453213.1 | 3469749 | 21-scf00419 | 21 |
| AX-158262962 | 21 | 77.926 | KV453213.1 | 3242956 | 21-scf00419 | 21 |
| AX-158262966 | 21 | 77.926 | KV453213.1 | 3246426 | 21-scf00419 | 21 |
| AX-158262974 | 21 | 77.926 | KV453213.1 | 3254627 | 21-scf00419 | 21 |
| AX-158262990 | 21 | 77.926 | KV453213.1 | 3271388 | 21-scf00419 | 21 |
| AX-158263038 | 21 | 77.926 | KV453213.1 | 3329477 | 21-scf00419 | 21 |
| AX-157723880 | 21 | 77.926 | KV453213.1 | 3417956 | 21-scf00419 | 21 |
| AX-158387242 | 21 | 77.926 | KV453213.1 | 3454630 | 21-scf00419 | 21 |
| AX-158263181 | 21 | 77.926 | KV453213.1 | 3470312 | 21-scf00419 | 21 |
| AX-158263184 | 21 | 77.926 | KV453213.1 | 3472567 | 21-scf00419 | 21 |
| AX-158263185 | 21 | 77.926 | KV453213.1 | 3473092 | 21-scf00419 | 21 |
| AX-157860019 | 21 | 77.926 | KV453213.1 | 3473152 | 21-scf00419 | 21 |
| AX-158263188 | 21 | 77.926 | KV453213.1 | 3475773 | 21-scf00419 | 21 |
| AX-158263189 | 21 | 77.926 | KV453213.1 | 3476394 | 21-scf00419 | 21 |

|              |    |        |            |         |             |    |
|--------------|----|--------|------------|---------|-------------|----|
| AX-158263192 | 21 | 77.926 | KV453213.1 | 3479304 | 21-scf00419 | 21 |
| AX-157754140 | 21 | 77.926 | KV453213.1 | 3482980 | 21-scf00419 | 21 |
| AX-158263200 | 21 | 77.926 | KV453213.1 | 3487315 | 21-scf00419 | 21 |
| AX-158263209 | 21 | 77.926 | KV453213.1 | 3494205 | 21-scf00419 | 21 |
| AX-158263211 | 21 | 77.926 | KV453213.1 | 3497074 | 21-scf00419 | 21 |
| AX-158263212 | 21 | 77.926 | KV453213.1 | 3497495 | 21-scf00419 | 21 |
| AX-158263216 | 21 | 77.926 | KV453213.1 | 3501378 | 21-scf00419 | 21 |
| AX-158263217 | 21 | 77.926 | KV453213.1 | 3501750 | 21-scf00419 | 21 |
| AX-158263219 | 21 | 77.926 | KV453213.1 | 3503121 | 21-scf00419 | 21 |
| AX-158263226 | 21 | 77.926 | KV453213.1 | 3510834 | 21-scf00419 | 21 |
| AX-158263232 | 21 | 77.926 | KV453213.1 | 3515747 | 21-scf00419 | 21 |
| AX-157724873 | 21 | 77.926 | KV453213.1 | 3520340 | 21-scf00419 | 21 |
| AX-158394707 | 21 | 77.926 | KV453213.1 | 3521928 | 21-scf00419 | 21 |
| AX-158263240 | 21 | 77.926 | KV453213.1 | 3523513 | 21-scf00419 | 21 |
| AX-158263243 | 21 | 77.926 | KV453213.1 | 3526159 | 21-scf00419 | 21 |
| AX-158263247 | 21 | 77.926 | KV453213.1 | 3528527 | 21-scf00419 | 21 |
| AX-158263264 | 21 | 77.927 | KV453213.1 | 3541586 | 21-scf00419 | 21 |
| AX-158416321 | 21 | 77.927 | KV453213.1 | 3546124 | 21-scf00419 | 21 |
| AX-158263282 | 21 | 77.927 | KV453213.1 | 3559938 | 21-scf00419 | 21 |
| AX-158263305 | 21 | 77.983 | KV453213.1 | 3592665 | 21-scf00419 | 21 |
| AX-158263308 | 21 | 77.983 | KV453213.1 | 3595094 | 21-scf00419 | 21 |
| AX-158262977 | 21 | 78.04  | KV453213.1 | 3257325 | 21-scf00419 | 21 |
| AX-158263080 | 21 | 78.04  | KV453213.1 | 3371767 | 21-scf00419 | 21 |
| AX-158263214 | 21 | 78.04  | KV453213.1 | 3498955 | 21-scf00419 | 21 |
| AX-158263318 | 21 | 78.04  | KV453213.1 | 3606924 | 21-scf00419 | 21 |
| AX-158263319 | 21 | 78.04  | KV453213.1 | 3607620 | 21-scf00419 | 21 |
| AX-158263329 | 21 | 78.04  | KV453213.1 | 3618055 | 21-scf00419 | 21 |
| AX-158263342 | 21 | 78.04  | KV453213.1 | 3629674 | 21-scf00419 | 21 |
| AX-158263356 | 21 | 78.04  | KV453213.1 | 3642074 | 21-scf00419 | 21 |
| AX-158263358 | 21 | 78.04  | KV453213.1 | 3643159 | 21-scf00419 | 21 |
| AX-158263363 | 21 | 78.04  | KV453213.1 | 3647258 | 21-scf00419 | 21 |
| AX-158263368 | 21 | 78.04  | KV453213.1 | 3653163 | 21-scf00419 | 21 |
| AX-158394711 | 21 | 78.04  | KV453213.1 | 3656513 | 21-scf00419 | 21 |
| AX-158263371 | 21 | 78.04  | KV453213.1 | 3657614 | 21-scf00419 | 21 |
| AX-158263378 | 21 | 78.04  | KV453213.1 | 3663337 | 21-scf00419 | 21 |
| AX-158263380 | 21 | 78.04  | KV453213.1 | 3666619 | 21-scf00419 | 21 |
| AX-158263413 | 21 | 78.04  | KV453213.1 | 3696905 | 21-scf00419 | 21 |
| AX-158263415 | 21 | 78.04  | KV453213.1 | 3698162 | 21-scf00419 | 21 |
| AX-158263416 | 21 | 78.04  | KV453213.1 | 3699430 | 21-scf00419 | 21 |
| AX-158263419 | 21 | 78.04  | KV453213.1 | 3701986 | 21-scf00419 | 21 |
| AX-158263420 | 21 | 78.04  | KV453213.1 | 3702905 | 21-scf00419 | 21 |
| AX-158263427 | 21 | 78.04  | KV453213.1 | 3707158 | 21-scf00419 | 21 |
| AX-158263435 | 21 | 78.04  | KV453213.1 | 3717580 | 21-scf00419 | 21 |
| AX-157725365 | 21 | 78.04  | KV453213.1 | 3719330 | 21-scf00419 | 21 |
| AX-158263439 | 21 | 78.04  | KV453213.1 | 3721394 | 21-scf00419 | 21 |
| AX-157756548 | 21 | 78.04  | KV453213.1 | 3721478 | 21-scf00419 | 21 |
| AX-158263441 | 21 | 78.04  | KV453213.1 | 3722563 | 21-scf00419 | 21 |
| AX-158263450 | 21 | 78.04  | KV453213.1 | 3731019 | 21-scf00419 | 21 |
| AX-158263471 | 21 | 78.04  | KV453213.1 | 3750141 | 21-scf00419 | 21 |
| AX-158263475 | 21 | 78.04  | KV453213.1 | 3753046 | 21-scf00419 | 21 |
| AX-158263479 | 21 | 78.04  | KV453213.1 | 3754415 | 21-scf00419 | 21 |

|              |    |        |            |         |             |    |
|--------------|----|--------|------------|---------|-------------|----|
| AX-158263480 | 21 | 78.04  | KV453213.1 | 3755051 | 21-scf00419 | 21 |
| AX-158263484 | 21 | 78.04  | KV453213.1 | 3756847 | 21-scf00419 | 21 |
| AX-158263485 | 21 | 78.04  | KV453213.1 | 3757527 | 21-scf00419 | 21 |
| AX-158263487 | 21 | 78.04  | KV453213.1 | 3758569 | 21-scf00419 | 21 |
| AX-157727315 | 21 | 78.04  | KV453213.1 | 3775378 | 21-scf00419 | 21 |
| AX-158263512 | 21 | 78.04  | KV453213.1 | 3781689 | 21-scf00419 | 21 |
| AX-158263520 | 21 | 78.04  | KV453213.1 | 3789668 | 21-scf00419 | 21 |
| AX-158394714 | 21 | 78.04  | KV453213.1 | 3794421 | 21-scf00419 | 21 |
| AX-158263954 | 21 | 78.04  | KV453213.1 | 4276405 | 21-scf00419 | 21 |
| AX-157773758 | 21 | 78.04  | KV453213.1 | 4537322 | 21-scf00419 | 21 |
| AX-158381094 | 21 | 78.04  | KV453213.1 | 4597469 | 21-scf00419 | 21 |
| AX-158263530 | 21 | 78.046 | KV453213.1 | 3796890 | 21-scf00419 | 21 |
| AX-158263537 | 21 | 78.053 | KV453213.1 | 3801663 | 21-scf00419 | 21 |
| AX-158263538 | 21 | 78.059 | KV453213.1 | 3803074 | 21-scf00419 | 21 |
| AX-158263546 | 21 | 78.065 | KV453213.1 | 3810989 | 21-scf00419 | 21 |
| AX-158263547 | 21 | 78.071 | KV453213.1 | 3811427 | 21-scf00419 | 21 |
| AX-158263135 | 21 | 78.076 | KV453213.1 | 3423659 | 21-scf00419 | 21 |
| AX-158263562 | 21 | 78.076 | KV453213.1 | 3823752 | 21-scf00419 | 21 |
| AX-158264482 | 21 | 78.076 | KV453213.1 | 4843729 | 21-scf00419 | 21 |
| AX-158263568 | 21 | 78.082 | KV453213.1 | 3829545 | 21-scf00419 | 21 |
| AX-158263570 | 21 | 78.087 | KV453213.1 | 3831708 | 21-scf00419 | 21 |
| AX-158263577 | 21 | 78.092 | KV453213.1 | 3839948 | 21-scf00419 | 21 |
| AX-158263579 | 21 | 78.093 | KV453213.1 | 3841395 | 21-scf00419 | 21 |
| AX-158264035 | 21 | 78.093 | KV453213.1 | 4367224 | 21-scf00419 | 21 |
| AX-157860035 | 21 | 78.093 | KV453213.1 | 4813848 | 21-scf00419 | 21 |
| AX-158264619 | 21 | 78.093 | KV453213.1 | 5013044 | 21-scf00419 | 21 |
| AX-158264701 | 21 | 78.093 | KV453213.1 | 5101225 | 21-scf00419 | 21 |
| AX-158264865 | 21 | 78.093 | KV453213.1 | 5293682 | 21-scf00419 | 21 |
| AX-158264928 | 21 | 78.093 | KV453213.1 | 5385365 | 21-scf00419 | 21 |
| AX-157843266 | 21 | 78.093 | KV453213.1 | 5405652 | 21-scf00419 | 21 |
| AX-158263581 | 21 | 78.094 | KV453213.1 | 3842981 | 21-scf00419 | 21 |
| AX-158263586 | 21 | 78.098 | KV453213.1 | 3846608 | 21-scf00419 | 21 |
| AX-158263597 | 21 | 78.101 | KV453213.1 | 3856326 | 21-scf00419 | 21 |
| AX-158394700 | 21 | 78.104 | KV453213.1 | 3339949 | 21-scf00419 | 21 |
| AX-158263120 | 21 | 78.104 | KV453213.1 | 3407979 | 21-scf00419 | 21 |
| AX-158263127 | 21 | 78.104 | KV453213.1 | 3414479 | 21-scf00419 | 21 |
| AX-158263143 | 21 | 78.104 | KV453213.1 | 3429707 | 21-scf00419 | 21 |
| AX-158263154 | 21 | 78.104 | KV453213.1 | 3437795 | 21-scf00419 | 21 |
| AX-158263173 | 21 | 78.104 | KV453213.1 | 3457300 | 21-scf00419 | 21 |
| AX-158263174 | 21 | 78.104 | KV453213.1 | 3458156 | 21-scf00419 | 21 |
| AX-158263179 | 21 | 78.104 | KV453213.1 | 3468532 | 21-scf00419 | 21 |
| AX-158263218 | 21 | 78.104 | KV453213.1 | 3502810 | 21-scf00419 | 21 |
| AX-158263223 | 21 | 78.104 | KV453213.1 | 3508361 | 21-scf00419 | 21 |
| AX-158263242 | 21 | 78.104 | KV453213.1 | 3525046 | 21-scf00419 | 21 |
| AX-158263250 | 21 | 78.104 | KV453213.1 | 3529960 | 21-scf00419 | 21 |
| AX-158263314 | 21 | 78.104 | KV453213.1 | 3602939 | 21-scf00419 | 21 |
| AX-158263325 | 21 | 78.104 | KV453213.1 | 3615051 | 21-scf00419 | 21 |
| AX-158263337 | 21 | 78.104 | KV453213.1 | 3624566 | 21-scf00419 | 21 |
| AX-158263339 | 21 | 78.104 | KV453213.1 | 3626994 | 21-scf00419 | 21 |
| AX-158263349 | 21 | 78.104 | KV453213.1 | 3636494 | 21-scf00419 | 21 |
| AX-158263361 | 21 | 78.104 | KV453213.1 | 3645377 | 21-scf00419 | 21 |

|              |    |        |            |         |             |    |
|--------------|----|--------|------------|---------|-------------|----|
| AX-158263400 | 21 | 78.104 | KV453213.1 | 3685552 | 21-scf00419 | 21 |
| AX-158263410 | 21 | 78.104 | KV453213.1 | 3693592 | 21-scf00419 | 21 |
| AX-158263418 | 21 | 78.104 | KV453213.1 | 3701447 | 21-scf00419 | 21 |
| AX-158263424 | 21 | 78.104 | KV453213.1 | 3704835 | 21-scf00419 | 21 |
| AX-158263425 | 21 | 78.104 | KV453213.1 | 3705649 | 21-scf00419 | 21 |
| AX-158263430 | 21 | 78.104 | KV453213.1 | 3709050 | 21-scf00419 | 21 |
| AX-158263451 | 21 | 78.104 | KV453213.1 | 3731433 | 21-scf00419 | 21 |
| AX-158263454 | 21 | 78.104 | KV453213.1 | 3733844 | 21-scf00419 | 21 |
| AX-158263457 | 21 | 78.104 | KV453213.1 | 3735880 | 21-scf00419 | 21 |
| AX-157872898 | 21 | 78.104 | KV453213.1 | 3744625 | 21-scf00419 | 21 |
| AX-158263495 | 21 | 78.104 | KV453213.1 | 3765792 | 21-scf00419 | 21 |
| AX-158263499 | 21 | 78.104 | KV453213.1 | 3770040 | 21-scf00419 | 21 |
| AX-158263545 | 21 | 78.104 | KV453213.1 | 3810587 | 21-scf00419 | 21 |
| AX-158263548 | 21 | 78.104 | KV453213.1 | 3812277 | 21-scf00419 | 21 |
| AX-158263550 | 21 | 78.104 | KV453213.1 | 3813215 | 21-scf00419 | 21 |
| AX-158263578 | 21 | 78.104 | KV453213.1 | 3840507 | 21-scf00419 | 21 |
| AX-158263582 | 21 | 78.104 | KV453213.1 | 3843716 | 21-scf00419 | 21 |
| AX-158263596 | 21 | 78.104 | KV453213.1 | 3855049 | 21-scf00419 | 21 |
| AX-158394717 | 21 | 78.104 | KV453213.1 | 3864665 | 21-scf00419 | 21 |
| AX-158263609 | 21 | 78.104 | KV453213.1 | 3875700 | 21-scf00419 | 21 |
| AX-158263633 | 21 | 78.104 | KV453213.1 | 3899700 | 21-scf00419 | 21 |
| AX-158263640 | 21 | 78.104 | KV453213.1 | 3909086 | 21-scf00419 | 21 |
| AX-158263650 | 21 | 78.104 | KV453213.1 | 3918758 | 21-scf00419 | 21 |
| AX-157843201 | 21 | 78.104 | KV453213.1 | 3931751 | 21-scf00419 | 21 |
| AX-158263677 | 21 | 78.104 | KV453213.1 | 3961520 | 21-scf00419 | 21 |
| AX-158263692 | 21 | 78.104 | KV453213.1 | 3976618 | 21-scf00419 | 21 |
| AX-158263696 | 21 | 78.104 | KV453213.1 | 3986167 | 21-scf00419 | 21 |
| AX-158263701 | 21 | 78.104 | KV453213.1 | 4010051 | 21-scf00419 | 21 |
| AX-158263702 | 21 | 78.104 | KV453213.1 | 4010515 | 21-scf00419 | 21 |
| AX-158263717 | 21 | 78.104 | KV453213.1 | 4027595 | 21-scf00419 | 21 |
| AX-157872918 | 21 | 78.104 | KV453213.1 | 4840372 | 21-scf00419 | 21 |
| AX-158263618 | 21 | 78.109 | KV453213.1 | 3887934 | 21-scf00419 | 21 |
| AX-158263651 | 21 | 78.114 | KV453213.1 | 3918959 | 21-scf00419 | 21 |
| AX-158262984 | 21 | 78.119 | KV453213.1 | 3263946 | 21-scf00419 | 21 |
| AX-158263653 | 21 | 78.119 | KV453213.1 | 3921795 | 21-scf00419 | 21 |
| AX-158263667 | 21 | 78.125 | KV453213.1 | 3944167 | 21-scf00419 | 21 |
| AX-158263671 | 21 | 78.13  | KV453213.1 | 3951983 | 21-scf00419 | 21 |
| AX-158263681 | 21 | 78.135 | KV453213.1 | 3966547 | 21-scf00419 | 21 |
| AX-158263078 | 21 | 78.138 | KV453213.1 | 3369812 | 21-scf00419 | 21 |
| AX-158263690 | 21 | 78.138 | KV453213.1 | 3973956 | 21-scf00419 | 21 |
| AX-158263697 | 21 | 78.142 | KV453213.1 | 3987190 | 21-scf00419 | 21 |
| AX-158263703 | 21 | 78.146 | KV453213.1 | 4011148 | 21-scf00419 | 21 |
| AX-158261454 | 21 | 78.149 | KV453213.1 | 1285856 | 21-scf00419 | 21 |
| AX-158261598 | 21 | 78.149 | KV453213.1 | 1465987 | 21-scf00419 | 21 |
| AX-158261998 | 21 | 78.149 | KV453213.1 | 2081880 | 21-scf00419 | 21 |
| AX-158394680 | 21 | 78.149 | KV453213.1 | 2233205 | 21-scf00419 | 21 |
| AX-158262137 | 21 | 78.149 | KV453213.1 | 2261146 | 21-scf00419 | 21 |
| AX-158262167 | 21 | 78.149 | KV453213.1 | 2295662 | 21-scf00419 | 21 |
| AX-158262274 | 21 | 78.149 | KV453213.1 | 2403888 | 21-scf00419 | 21 |
| AX-158262898 | 21 | 78.149 | KV453213.1 | 3189525 | 21-scf00419 | 21 |
| AX-158262906 | 21 | 78.149 | KV453213.1 | 3194241 | 21-scf00419 | 21 |

|              |    |        |            |         |             |    |
|--------------|----|--------|------------|---------|-------------|----|
| AX-158262927 | 21 | 78.149 | KV453213.1 | 3214392 | 21-scf00419 | 21 |
| AX-158262931 | 21 | 78.149 | KV453213.1 | 3218049 | 21-scf00419 | 21 |
| AX-157843191 | 21 | 78.149 | KV453213.1 | 3285320 | 21-scf00419 | 21 |
| AX-158263043 | 21 | 78.149 | KV453213.1 | 3331978 | 21-scf00419 | 21 |
| AX-158263048 | 21 | 78.149 | KV453213.1 | 3338520 | 21-scf00419 | 21 |
| AX-158263055 | 21 | 78.149 | KV453213.1 | 3345230 | 21-scf00419 | 21 |
| AX-158263071 | 21 | 78.149 | KV453213.1 | 3364197 | 21-scf00419 | 21 |
| AX-158263074 | 21 | 78.149 | KV453213.1 | 3366516 | 21-scf00419 | 21 |
| AX-158263075 | 21 | 78.149 | KV453213.1 | 3367477 | 21-scf00419 | 21 |
| AX-158263089 | 21 | 78.149 | KV453213.1 | 3379318 | 21-scf00419 | 21 |
| AX-158263100 | 21 | 78.149 | KV453213.1 | 3388091 | 21-scf00419 | 21 |
| AX-158263105 | 21 | 78.149 | KV453213.1 | 3390720 | 21-scf00419 | 21 |
| AX-158263110 | 21 | 78.149 | KV453213.1 | 3394205 | 21-scf00419 | 21 |
| AX-158263112 | 21 | 78.149 | KV453213.1 | 3398141 | 21-scf00419 | 21 |
| AX-158263128 | 21 | 78.149 | KV453213.1 | 3416183 | 21-scf00419 | 21 |
| AX-158263136 | 21 | 78.149 | KV453213.1 | 3424564 | 21-scf00419 | 21 |
| AX-158263151 | 21 | 78.149 | KV453213.1 | 3435926 | 21-scf00419 | 21 |
| AX-158263152 | 21 | 78.149 | KV453213.1 | 3436586 | 21-scf00419 | 21 |
| AX-158394702 | 21 | 78.149 | KV453213.1 | 3436745 | 21-scf00419 | 21 |
| AX-158263156 | 21 | 78.149 | KV453213.1 | 3439943 | 21-scf00419 | 21 |
| AX-158263159 | 21 | 78.149 | KV453213.1 | 3443877 | 21-scf00419 | 21 |
| AX-158263160 | 21 | 78.149 | KV453213.1 | 3444237 | 21-scf00419 | 21 |
| AX-158394703 | 21 | 78.149 | KV453213.1 | 3444543 | 21-scf00419 | 21 |
| AX-158263177 | 21 | 78.149 | KV453213.1 | 3466790 | 21-scf00419 | 21 |
| AX-158263193 | 21 | 78.149 | KV453213.1 | 3481322 | 21-scf00419 | 21 |
| AX-158263227 | 21 | 78.149 | KV453213.1 | 3511653 | 21-scf00419 | 21 |
| AX-158263235 | 21 | 78.149 | KV453213.1 | 3518870 | 21-scf00419 | 21 |
| AX-158263248 | 21 | 78.149 | KV453213.1 | 3529131 | 21-scf00419 | 21 |
| AX-158263251 | 21 | 78.149 | KV453213.1 | 3530482 | 21-scf00419 | 21 |
| AX-158263252 | 21 | 78.149 | KV453213.1 | 3530855 | 21-scf00419 | 21 |
| AX-158263257 | 21 | 78.149 | KV453213.1 | 3534444 | 21-scf00419 | 21 |
| AX-158263261 | 21 | 78.149 | KV453213.1 | 3539145 | 21-scf00419 | 21 |
| AX-158263262 | 21 | 78.149 | KV453213.1 | 3540019 | 21-scf00419 | 21 |
| AX-158263265 | 21 | 78.149 | KV453213.1 | 3541663 | 21-scf00419 | 21 |
| AX-158263277 | 21 | 78.149 | KV453213.1 | 3551162 | 21-scf00419 | 21 |
| AX-158263279 | 21 | 78.149 | KV453213.1 | 3557699 | 21-scf00419 | 21 |
| AX-158263290 | 21 | 78.149 | KV453213.1 | 3570508 | 21-scf00419 | 21 |
| AX-158263294 | 21 | 78.149 | KV453213.1 | 3574718 | 21-scf00419 | 21 |
| AX-158263301 | 21 | 78.149 | KV453213.1 | 3587824 | 21-scf00419 | 21 |
| AX-158263317 | 21 | 78.149 | KV453213.1 | 3606101 | 21-scf00419 | 21 |
| AX-158263332 | 21 | 78.149 | KV453213.1 | 3620170 | 21-scf00419 | 21 |
| AX-158263334 | 21 | 78.149 | KV453213.1 | 3621177 | 21-scf00419 | 21 |
| AX-158416326 | 21 | 78.149 | KV453213.1 | 3629593 | 21-scf00419 | 21 |
| AX-158263347 | 21 | 78.149 | KV453213.1 | 3632076 | 21-scf00419 | 21 |
| AX-158263357 | 21 | 78.149 | KV453213.1 | 3642718 | 21-scf00419 | 21 |
| AX-158263370 | 21 | 78.149 | KV453213.1 | 3657039 | 21-scf00419 | 21 |
| AX-158263383 | 21 | 78.149 | KV453213.1 | 3669496 | 21-scf00419 | 21 |
| AX-158263393 | 21 | 78.149 | KV453213.1 | 3679524 | 21-scf00419 | 21 |
| AX-158263396 | 21 | 78.149 | KV453213.1 | 3682885 | 21-scf00419 | 21 |
| AX-158263398 | 21 | 78.149 | KV453213.1 | 3684400 | 21-scf00419 | 21 |
| AX-157860020 | 21 | 78.149 | KV453213.1 | 3685869 | 21-scf00419 | 21 |

|              |    |        |            |         |             |    |
|--------------|----|--------|------------|---------|-------------|----|
| AX-158263407 | 21 | 78.149 | KV453213.1 | 3691821 | 21-scf00419 | 21 |
| AX-158394712 | 21 | 78.149 | KV453213.1 | 3692269 | 21-scf00419 | 21 |
| AX-158263408 | 21 | 78.149 | KV453213.1 | 3692619 | 21-scf00419 | 21 |
| AX-158263428 | 21 | 78.149 | KV453213.1 | 3707886 | 21-scf00419 | 21 |
| AX-158263438 | 21 | 78.149 | KV453213.1 | 3720234 | 21-scf00419 | 21 |
| AX-158416329 | 21 | 78.149 | KV453213.1 | 3724435 | 21-scf00419 | 21 |
| AX-157872895 | 21 | 78.149 | KV453213.1 | 3725600 | 21-scf00419 | 21 |
| AX-158263449 | 21 | 78.149 | KV453213.1 | 3730355 | 21-scf00419 | 21 |
| AX-158263458 | 21 | 78.149 | KV453213.1 | 3736483 | 21-scf00419 | 21 |
| AX-158263473 | 21 | 78.149 | KV453213.1 | 3751642 | 21-scf00419 | 21 |
| AX-158263483 | 21 | 78.149 | KV453213.1 | 3756512 | 21-scf00419 | 21 |
| AX-158263486 | 21 | 78.149 | KV453213.1 | 3757726 | 21-scf00419 | 21 |
| AX-158263491 | 21 | 78.149 | KV453213.1 | 3760630 | 21-scf00419 | 21 |
| AX-158263598 | 21 | 78.149 | KV453213.1 | 3856988 | 21-scf00419 | 21 |
| AX-158263622 | 21 | 78.149 | KV453213.1 | 3890276 | 21-scf00419 | 21 |
| AX-158263625 | 21 | 78.149 | KV453213.1 | 3892224 | 21-scf00419 | 21 |
| AX-158263627 | 21 | 78.149 | KV453213.1 | 3894152 | 21-scf00419 | 21 |
| AX-158263628 | 21 | 78.149 | KV453213.1 | 3894945 | 21-scf00419 | 21 |
| AX-158263630 | 21 | 78.149 | KV453213.1 | 3895939 | 21-scf00419 | 21 |
| AX-158263646 | 21 | 78.149 | KV453213.1 | 3914677 | 21-scf00419 | 21 |
| AX-158263647 | 21 | 78.149 | KV453213.1 | 3915575 | 21-scf00419 | 21 |
| AX-158263654 | 21 | 78.149 | KV453213.1 | 3922744 | 21-scf00419 | 21 |
| AX-158263656 | 21 | 78.149 | KV453213.1 | 3926892 | 21-scf00419 | 21 |
| AX-158263661 | 21 | 78.149 | KV453213.1 | 3933896 | 21-scf00419 | 21 |
| AX-158263663 | 21 | 78.149 | KV453213.1 | 3936699 | 21-scf00419 | 21 |
| AX-158263665 | 21 | 78.149 | KV453213.1 | 3937494 | 21-scf00419 | 21 |
| AX-158263673 | 21 | 78.149 | KV453213.1 | 3953081 | 21-scf00419 | 21 |
| AX-158263674 | 21 | 78.149 | KV453213.1 | 3954193 | 21-scf00419 | 21 |
| AX-158263680 | 21 | 78.149 | KV453213.1 | 3965245 | 21-scf00419 | 21 |
| AX-158263686 | 21 | 78.149 | KV453213.1 | 3970720 | 21-scf00419 | 21 |
| AX-158263687 | 21 | 78.149 | KV453213.1 | 3971440 | 21-scf00419 | 21 |
| AX-158263695 | 21 | 78.149 | KV453213.1 | 3981815 | 21-scf00419 | 21 |
| AX-158263700 | 21 | 78.149 | KV453213.1 | 3990814 | 21-scf00419 | 21 |
| AX-158263707 | 21 | 78.149 | KV453213.1 | 4018532 | 21-scf00419 | 21 |
| AX-158263708 | 21 | 78.149 | KV453213.1 | 4019167 | 21-scf00419 | 21 |
| AX-158263710 | 21 | 78.149 | KV453213.1 | 4021184 | 21-scf00419 | 21 |
| AX-158263711 | 21 | 78.149 | KV453213.1 | 4022289 | 21-scf00419 | 21 |
| AX-157754535 | 21 | 78.149 | KV453213.1 | 4023688 | 21-scf00419 | 21 |
| AX-158263714 | 21 | 78.149 | KV453213.1 | 4026308 | 21-scf00419 | 21 |
| AX-158263718 | 21 | 78.149 | KV453213.1 | 4028338 | 21-scf00419 | 21 |
| AX-158263719 | 21 | 78.149 | KV453213.1 | 4030713 | 21-scf00419 | 21 |
| AX-158263721 | 21 | 78.149 | KV453213.1 | 4033354 | 21-scf00419 | 21 |
| AX-158263724 | 21 | 78.149 | KV453213.1 | 4035200 | 21-scf00419 | 21 |
| AX-158263725 | 21 | 78.149 | KV453213.1 | 4037047 | 21-scf00419 | 21 |
| AX-158263727 | 21 | 78.149 | KV453213.1 | 4038621 | 21-scf00419 | 21 |
| AX-158263729 | 21 | 78.149 | KV453213.1 | 4039436 | 21-scf00419 | 21 |
| AX-158263730 | 21 | 78.149 | KV453213.1 | 4039954 | 21-scf00419 | 21 |
| AX-158263733 | 21 | 78.149 | KV453213.1 | 4044344 | 21-scf00419 | 21 |
| AX-158263734 | 21 | 78.149 | KV453213.1 | 4045127 | 21-scf00419 | 21 |
| AX-158263735 | 21 | 78.149 | KV453213.1 | 4045618 | 21-scf00419 | 21 |
| AX-158263739 | 21 | 78.149 | KV453213.1 | 4047979 | 21-scf00419 | 21 |

|              |    |        |            |         |             |    |
|--------------|----|--------|------------|---------|-------------|----|
| AX-157696494 | 21 | 78.149 | KV453213.1 | 4053270 | 21-scf00419 | 21 |
| AX-158263747 | 21 | 78.149 | KV453213.1 | 4056081 | 21-scf00419 | 21 |
| AX-158263749 | 21 | 78.149 | KV453213.1 | 4057526 | 21-scf00419 | 21 |
| AX-158263750 | 21 | 78.149 | KV453213.1 | 4058170 | 21-scf00419 | 21 |
| AX-157715375 | 21 | 78.149 | KV453213.1 | 4060541 | 21-scf00419 | 21 |
| AX-158263754 | 21 | 78.149 | KV453213.1 | 4063464 | 21-scf00419 | 21 |
| AX-157872902 | 21 | 78.149 | KV453213.1 | 4064162 | 21-scf00419 | 21 |
| AX-158263755 | 21 | 78.149 | KV453213.1 | 4067756 | 21-scf00419 | 21 |
| AX-158263756 | 21 | 78.149 | KV453213.1 | 4068839 | 21-scf00419 | 21 |
| AX-158263757 | 21 | 78.149 | KV453213.1 | 4073470 | 21-scf00419 | 21 |
| AX-158263759 | 21 | 78.149 | KV453213.1 | 4077087 | 21-scf00419 | 21 |
| AX-158263760 | 21 | 78.149 | KV453213.1 | 4079051 | 21-scf00419 | 21 |
| AX-158263761 | 21 | 78.149 | KV453213.1 | 4079744 | 21-scf00419 | 21 |
| AX-157860026 | 21 | 78.149 | KV453213.1 | 4079942 | 21-scf00419 | 21 |
| AX-158263765 | 21 | 78.149 | KV453213.1 | 4082768 | 21-scf00419 | 21 |
| AX-158263767 | 21 | 78.149 | KV453213.1 | 4083791 | 21-scf00419 | 21 |
| AX-158263769 | 21 | 78.149 | KV453213.1 | 4085999 | 21-scf00419 | 21 |
| AX-158394731 | 21 | 78.149 | KV453213.1 | 4086298 | 21-scf00419 | 21 |
| AX-157750625 | 21 | 78.149 | KV453213.1 | 4090120 | 21-scf00419 | 21 |
| AX-157843205 | 21 | 78.149 | KV453213.1 | 4090440 | 21-scf00419 | 21 |
| AX-158263774 | 21 | 78.149 | KV453213.1 | 4091195 | 21-scf00419 | 21 |
| AX-158263775 | 21 | 78.149 | KV453213.1 | 4091755 | 21-scf00419 | 21 |
| AX-158263782 | 21 | 78.149 | KV453213.1 | 4097180 | 21-scf00419 | 21 |
| AX-158394733 | 21 | 78.149 | KV453213.1 | 4097967 | 21-scf00419 | 21 |
| AX-158263786 | 21 | 78.149 | KV453213.1 | 4101873 | 21-scf00419 | 21 |
| AX-158263787 | 21 | 78.149 | KV453213.1 | 4102669 | 21-scf00419 | 21 |
| AX-158263788 | 21 | 78.149 | KV453213.1 | 4103572 | 21-scf00419 | 21 |
| AX-158416338 | 21 | 78.149 | KV453213.1 | 4103770 | 21-scf00419 | 21 |
| AX-158263789 | 21 | 78.149 | KV453213.1 | 4104808 | 21-scf00419 | 21 |
| AX-158263790 | 21 | 78.149 | KV453213.1 | 4105218 | 21-scf00419 | 21 |
| AX-158263791 | 21 | 78.149 | KV453213.1 | 4105616 | 21-scf00419 | 21 |
| AX-158263793 | 21 | 78.149 | KV453213.1 | 4110057 | 21-scf00419 | 21 |
| AX-158263796 | 21 | 78.149 | KV453213.1 | 4115376 | 21-scf00419 | 21 |
| AX-158263799 | 21 | 78.149 | KV453213.1 | 4120290 | 21-scf00419 | 21 |
| AX-158263801 | 21 | 78.149 | KV453213.1 | 4122823 | 21-scf00419 | 21 |
| AX-158263802 | 21 | 78.149 | KV453213.1 | 4123772 | 21-scf00419 | 21 |
| AX-158263803 | 21 | 78.149 | KV453213.1 | 4125139 | 21-scf00419 | 21 |
| AX-158263805 | 21 | 78.149 | KV453213.1 | 4126065 | 21-scf00419 | 21 |
| AX-158263806 | 21 | 78.149 | KV453213.1 | 4126430 | 21-scf00419 | 21 |
| AX-158263807 | 21 | 78.149 | KV453213.1 | 4127374 | 21-scf00419 | 21 |
| AX-158394735 | 21 | 78.149 | KV453213.1 | 4127975 | 21-scf00419 | 21 |
| AX-158263809 | 21 | 78.149 | KV453213.1 | 4129231 | 21-scf00419 | 21 |
| AX-158416339 | 21 | 78.149 | KV453213.1 | 4131440 | 21-scf00419 | 21 |
| AX-158263814 | 21 | 78.149 | KV453213.1 | 4136604 | 21-scf00419 | 21 |
| AX-158394737 | 21 | 78.149 | KV453213.1 | 4140162 | 21-scf00419 | 21 |
| AX-158263821 | 21 | 78.149 | KV453213.1 | 4140235 | 21-scf00419 | 21 |
| AX-158263822 | 21 | 78.149 | KV453213.1 | 4140434 | 21-scf00419 | 21 |
| AX-158263824 | 21 | 78.149 | KV453213.1 | 4142193 | 21-scf00419 | 21 |
| AX-158419238 | 21 | 78.149 | KV453213.1 | 4142350 | 21-scf00419 | 21 |
| AX-158263826 | 21 | 78.149 | KV453213.1 | 4143390 | 21-scf00419 | 21 |
| AX-158263829 | 21 | 78.149 | KV453213.1 | 4148369 | 21-scf00419 | 21 |

|              |    |        |            |         |             |    |
|--------------|----|--------|------------|---------|-------------|----|
| AX-158263834 | 21 | 78.149 | KV453213.1 | 4152477 | 21-scf00419 | 21 |
| AX-158263835 | 21 | 78.149 | KV453213.1 | 4153013 | 21-scf00419 | 21 |
| AX-158263838 | 21 | 78.149 | KV453213.1 | 4155102 | 21-scf00419 | 21 |
| AX-158263841 | 21 | 78.149 | KV453213.1 | 4159471 | 21-scf00419 | 21 |
| AX-158263842 | 21 | 78.149 | KV453213.1 | 4159835 | 21-scf00419 | 21 |
| AX-158263843 | 21 | 78.149 | KV453213.1 | 4160852 | 21-scf00419 | 21 |
| AX-158263844 | 21 | 78.149 | KV453213.1 | 4161873 | 21-scf00419 | 21 |
| AX-158263845 | 21 | 78.149 | KV453213.1 | 4162257 | 21-scf00419 | 21 |
| AX-158263846 | 21 | 78.149 | KV453213.1 | 4163498 | 21-scf00419 | 21 |
| AX-158263848 | 21 | 78.149 | KV453213.1 | 4165214 | 21-scf00419 | 21 |
| AX-158263849 | 21 | 78.149 | KV453213.1 | 4165623 | 21-scf00419 | 21 |
| AX-158263854 | 21 | 78.149 | KV453213.1 | 4168410 | 21-scf00419 | 21 |
| AX-158263855 | 21 | 78.149 | KV453213.1 | 4169160 | 21-scf00419 | 21 |
| AX-158263856 | 21 | 78.149 | KV453213.1 | 4172039 | 21-scf00419 | 21 |
| AX-158263857 | 21 | 78.149 | KV453213.1 | 4172500 | 21-scf00419 | 21 |
| AX-158263859 | 21 | 78.149 | KV453213.1 | 4173794 | 21-scf00419 | 21 |
| AX-158263860 | 21 | 78.149 | KV453213.1 | 4177818 | 21-scf00419 | 21 |
| AX-158263862 | 21 | 78.149 | KV453213.1 | 4179581 | 21-scf00419 | 21 |
| AX-158263863 | 21 | 78.149 | KV453213.1 | 4180100 | 21-scf00419 | 21 |
| AX-158264053 | 21 | 78.149 | KV453213.1 | 4397256 | 21-scf00419 | 21 |
| AX-158264054 | 21 | 78.149 | KV453213.1 | 4397890 | 21-scf00419 | 21 |
| AX-158264056 | 21 | 78.149 | KV453213.1 | 4400191 | 21-scf00419 | 21 |
| AX-158264067 | 21 | 78.149 | KV453213.1 | 4412774 | 21-scf00419 | 21 |
| AX-158264069 | 21 | 78.149 | KV453213.1 | 4414019 | 21-scf00419 | 21 |
| AX-157860030 | 21 | 78.149 | KV453213.1 | 4423832 | 21-scf00419 | 21 |
| AX-158264082 | 21 | 78.149 | KV453213.1 | 4424706 | 21-scf00419 | 21 |
| AX-157872905 | 21 | 78.149 | KV453213.1 | 4427247 | 21-scf00419 | 21 |
| AX-158264086 | 21 | 78.149 | KV453213.1 | 4430444 | 21-scf00419 | 21 |
| AX-158264087 | 21 | 78.149 | KV453213.1 | 4432089 | 21-scf00419 | 21 |
| AX-158264091 | 21 | 78.149 | KV453213.1 | 4435661 | 21-scf00419 | 21 |
| AX-158264093 | 21 | 78.149 | KV453213.1 | 4443324 | 21-scf00419 | 21 |
| AX-158264094 | 21 | 78.149 | KV453213.1 | 4444223 | 21-scf00419 | 21 |
| AX-158264099 | 21 | 78.149 | KV453213.1 | 4449182 | 21-scf00419 | 21 |
| AX-157872909 | 21 | 78.149 | KV453213.1 | 4450115 | 21-scf00419 | 21 |
| AX-158264103 | 21 | 78.149 | KV453213.1 | 4451558 | 21-scf00419 | 21 |
| AX-157872910 | 21 | 78.149 | KV453213.1 | 4454172 | 21-scf00419 | 21 |
| AX-158264109 | 21 | 78.149 | KV453213.1 | 4464166 | 21-scf00419 | 21 |
| AX-158264111 | 21 | 78.149 | KV453213.1 | 4465120 | 21-scf00419 | 21 |
| AX-158264119 | 21 | 78.149 | KV453213.1 | 4472381 | 21-scf00419 | 21 |
| AX-158264120 | 21 | 78.149 | KV453213.1 | 4473569 | 21-scf00419 | 21 |
| AX-158264122 | 21 | 78.149 | KV453213.1 | 4475125 | 21-scf00419 | 21 |
| AX-158264125 | 21 | 78.149 | KV453213.1 | 4476871 | 21-scf00419 | 21 |
| AX-158264129 | 21 | 78.149 | KV453213.1 | 4484059 | 21-scf00419 | 21 |
| AX-158264130 | 21 | 78.149 | KV453213.1 | 4484925 | 21-scf00419 | 21 |
| AX-158264133 | 21 | 78.149 | KV453213.1 | 4486374 | 21-scf00419 | 21 |
| AX-158394753 | 21 | 78.149 | KV453213.1 | 4491948 | 21-scf00419 | 21 |
| AX-158264142 | 21 | 78.149 | KV453213.1 | 4499176 | 21-scf00419 | 21 |
| AX-158264144 | 21 | 78.149 | KV453213.1 | 4501925 | 21-scf00419 | 21 |
| AX-158264147 | 21 | 78.149 | KV453213.1 | 4504694 | 21-scf00419 | 21 |
| AX-158416356 | 21 | 78.149 | KV453213.1 | 4506941 | 21-scf00419 | 21 |
| AX-158416357 | 21 | 78.149 | KV453213.1 | 4507272 | 21-scf00419 | 21 |



|              |    |        |            |         |             |    |
|--------------|----|--------|------------|---------|-------------|----|
| AX-158416361 | 21 | 78.149 | KV453213.1 | 4508547 | 21-scf00419 | 21 |
| AX-158416362 | 21 | 78.149 | KV453213.1 | 4508820 | 21-scf00419 | 21 |
| AX-157843212 | 21 | 78.149 | KV453213.1 | 4509584 | 21-scf00419 | 21 |
| AX-158264151 | 21 | 78.149 | KV453213.1 | 4511545 | 21-scf00419 | 21 |
| AX-158264152 | 21 | 78.149 | KV453213.1 | 4512444 | 21-scf00419 | 21 |
| AX-158264155 | 21 | 78.149 | KV453213.1 | 4517933 | 21-scf00419 | 21 |
| AX-158264156 | 21 | 78.149 | KV453213.1 | 4518630 | 21-scf00419 | 21 |
| AX-157872912 | 21 | 78.149 | KV453213.1 | 4519462 | 21-scf00419 | 21 |
| AX-158264167 | 21 | 78.149 | KV453213.1 | 4532782 | 21-scf00419 | 21 |
| AX-158264174 | 21 | 78.149 | KV453213.1 | 4540412 | 21-scf00419 | 21 |
| AX-158264184 | 21 | 78.149 | KV453213.1 | 4546770 | 21-scf00419 | 21 |
| AX-158264186 | 21 | 78.149 | KV453213.1 | 4547781 | 21-scf00419 | 21 |
| AX-158264187 | 21 | 78.149 | KV453213.1 | 4548057 | 21-scf00419 | 21 |
| AX-158264189 | 21 | 78.149 | KV453213.1 | 4549211 | 21-scf00419 | 21 |
| AX-158264196 | 21 | 78.149 | KV453213.1 | 4553865 | 21-scf00419 | 21 |
| AX-158264206 | 21 | 78.149 | KV453213.1 | 4567666 | 21-scf00419 | 21 |
| AX-158264207 | 21 | 78.149 | KV453213.1 | 4568191 | 21-scf00419 | 21 |
| AX-158264212 | 21 | 78.149 | KV453213.1 | 4571630 | 21-scf00419 | 21 |
| AX-158264217 | 21 | 78.149 | KV453213.1 | 4575007 | 21-scf00419 | 21 |
| AX-158264218 | 21 | 78.149 | KV453213.1 | 4575455 | 21-scf00419 | 21 |
| AX-158264219 | 21 | 78.149 | KV453213.1 | 4577017 | 21-scf00419 | 21 |
| AX-158264226 | 21 | 78.149 | KV453213.1 | 4582483 | 21-scf00419 | 21 |
| AX-158264228 | 21 | 78.149 | KV453213.1 | 4583051 | 21-scf00419 | 21 |
| AX-157725613 | 21 | 78.149 | KV453213.1 | 4584101 | 21-scf00419 | 21 |
| AX-157872914 | 21 | 78.149 | KV453213.1 | 4584640 | 21-scf00419 | 21 |
| AX-158264232 | 21 | 78.149 | KV453213.1 | 4586640 | 21-scf00419 | 21 |
| AX-158264233 | 21 | 78.149 | KV453213.1 | 4587277 | 21-scf00419 | 21 |
| AX-158264234 | 21 | 78.149 | KV453213.1 | 4588181 | 21-scf00419 | 21 |
| AX-158264243 | 21 | 78.149 | KV453213.1 | 4595599 | 21-scf00419 | 21 |
| AX-158264244 | 21 | 78.149 | KV453213.1 | 4595886 | 21-scf00419 | 21 |
| AX-158264245 | 21 | 78.149 | KV453213.1 | 4596163 | 21-scf00419 | 21 |
| AX-157694231 | 21 | 78.149 | KV453213.1 | 4597193 | 21-scf00419 | 21 |
| AX-158264248 | 21 | 78.149 | KV453213.1 | 4598013 | 21-scf00419 | 21 |
| AX-158264249 | 21 | 78.149 | KV453213.1 | 4598382 | 21-scf00419 | 21 |
| AX-158264259 | 21 | 78.149 | KV453213.1 | 4606266 | 21-scf00419 | 21 |
| AX-158264269 | 21 | 78.149 | KV453213.1 | 4617928 | 21-scf00419 | 21 |
| AX-158264270 | 21 | 78.149 | KV453213.1 | 4619132 | 21-scf00419 | 21 |
| AX-158264272 | 21 | 78.149 | KV453213.1 | 4622108 | 21-scf00419 | 21 |
| AX-158264277 | 21 | 78.149 | KV453213.1 | 4629091 | 21-scf00419 | 21 |
| AX-158264289 | 21 | 78.149 | KV453213.1 | 4637841 | 21-scf00419 | 21 |
| AX-158264291 | 21 | 78.149 | KV453213.1 | 4640011 | 21-scf00419 | 21 |
| AX-158264292 | 21 | 78.149 | KV453213.1 | 4640779 | 21-scf00419 | 21 |
| AX-158264293 | 21 | 78.149 | KV453213.1 | 4642375 | 21-scf00419 | 21 |
| AX-158264300 | 21 | 78.149 | KV453213.1 | 4649797 | 21-scf00419 | 21 |
| AX-158264302 | 21 | 78.149 | KV453213.1 | 4651077 | 21-scf00419 | 21 |
| AX-157709781 | 21 | 78.149 | KV453213.1 | 4652391 | 21-scf00419 | 21 |
| AX-158264303 | 21 | 78.149 | KV453213.1 | 4652484 | 21-scf00419 | 21 |
| AX-158264304 | 21 | 78.149 | KV453213.1 | 4656531 | 21-scf00419 | 21 |
| AX-158264305 | 21 | 78.149 | KV453213.1 | 4657319 | 21-scf00419 | 21 |
| AX-158264319 | 21 | 78.149 | KV453213.1 | 4668213 | 21-scf00419 | 21 |
| AX-158264354 | 21 | 78.149 | KV453213.1 | 4699398 | 21-scf00419 | 21 |

|              |    |        |            |         |               |    |
|--------------|----|--------|------------|---------|---------------|----|
| AX-158264357 | 21 | 78.149 | KV453213.1 | 4702428 | 21-scf00419   | 21 |
| AX-158264358 | 21 | 78.149 | KV453213.1 | 4705047 | 21-scf00419   | 21 |
| AX-158264363 | 21 | 78.149 | KV453213.1 | 4712986 | 21-scf00419   | 21 |
| AX-158264366 | 21 | 78.149 | KV453213.1 | 4715399 | 21-scf00419   | 21 |
| AX-158264367 | 21 | 78.149 | KV453213.1 | 4716068 | 21-scf00419   | 21 |
| AX-158264371 | 21 | 78.149 | KV453213.1 | 4719636 | 21-scf00419   | 21 |
| AX-158264378 | 21 | 78.149 | KV453213.1 | 4725544 | 21-scf00419   | 21 |
| AX-158394757 | 21 | 78.149 | KV453213.1 | 4732006 | 21-scf00419   | 21 |
| AX-157709481 | 21 | 78.149 | KV453213.1 | 4736465 | 21-scf00419   | 21 |
| AX-158264389 | 21 | 78.149 | KV453213.1 | 4739374 | 21-scf00419   | 21 |
| AX-158264392 | 21 | 78.149 | KV453213.1 | 4741907 | 21-scf00419   | 21 |
| AX-158264394 | 21 | 78.149 | KV453213.1 | 4743201 | 21-scf00419   | 21 |
| AX-158264400 | 21 | 78.149 | KV453213.1 | 4752296 | 21-scf00419   | 21 |
| AX-158264401 | 21 | 78.149 | KV453213.1 | 4752686 | 21-scf00419   | 21 |
| AX-158394758 | 21 | 78.149 | KV453213.1 | 4754612 | 21-scf00419   | 21 |
| AX-158264403 | 21 | 78.149 | KV453213.1 | 4754878 | 21-scf00419   | 21 |
| AX-157843216 | 21 | 78.149 | KV453213.1 | 4761246 | 21-scf00419   | 21 |
| AX-158264409 | 21 | 78.149 | KV453213.1 | 4767161 | 21-scf00419   | 21 |
| AX-158394759 | 21 | 78.149 | KV453213.1 | 4770610 | 21-scf00419   | 21 |
| AX-158264414 | 21 | 78.149 | KV453213.1 | 4772970 | 21-scf00419   | 21 |
| AX-158264419 | 21 | 78.149 | KV453213.1 | 4781051 | 21-scf00419   | 21 |
| AX-157710818 | 21 | 78.149 | KV453213.1 | 4786506 | 21-scf00419   | 21 |
| AX-158264440 | 21 | 78.149 | KV453213.1 | 4798608 | 21-scf00419   | 21 |
| AX-158264441 | 21 | 78.149 | KV453213.1 | 4802946 | 21-scf00419   | 21 |
| AX-158394760 | 21 | 78.149 | KV453213.1 | 4804033 | 21-scf00419   | 21 |
| AX-158264445 | 21 | 78.149 | KV453213.1 | 4805643 | 21-scf00419   | 21 |
| AX-158264452 | 21 | 78.149 | KV453213.1 | 4810335 | 21-scf00419   | 21 |
| AX-158264454 | 21 | 78.149 | KV453213.1 | 4812468 | 21-scf00419   | 21 |
| AX-158264461 | 21 | 78.149 | KV453213.1 | 4819624 | 21-scf00419   | 21 |
| AX-158264462 | 21 | 78.149 | KV453213.1 | 4820076 | 21-scf00419   | 21 |
| AX-158264469 | 21 | 78.149 | KV453213.1 | 4825229 | 21-scf00419   | 21 |
| AX-158394761 | 21 | 78.149 | KV453213.1 | 4825939 | 21-scf00419   | 21 |
| AX-158264472 | 21 | 78.149 | KV453213.1 | 4826184 | 21-scf00419   | 21 |
| AX-158264473 | 21 | 78.149 | KV453213.1 | 4827084 | 21-scf00419   | 21 |
| AX-158264593 | 21 | 78.149 | KV453213.1 | 4986298 | 21-scf00419   | 21 |
| AX-158264754 | 21 | 78.149 | KV453213.1 | 5183335 | 21-scf00419   | 21 |
| AX-157700130 | 21 | 78.149 | FI857899.1 | 552     | ORI212 lctalu | UN |
| AX-157709117 | 21 | 78.149 |            | 43      | scf14510      | UN |
| AX-158261539 | 21 | 78.258 | KV453213.1 | 1412446 | 21-scf00419   | 21 |
| AX-158261808 | 21 | 78.258 | KV453213.1 | 1827035 | 21-scf00419   | 21 |
| AX-158263778 | 21 | 78.258 | KV453213.1 | 4094163 | 21-scf00419   | 21 |
| AX-158394732 | 21 | 78.258 | KV453213.1 | 4096035 | 21-scf00419   | 21 |
| AX-158263808 | 21 | 78.258 | KV453213.1 | 4128534 | 21-scf00419   | 21 |
| AX-158263816 | 21 | 78.258 | KV453213.1 | 4137536 | 21-scf00419   | 21 |
| AX-158261581 | 21 | 78.368 | KV453213.1 | 1449735 | 21-scf00419   | 21 |
| AX-158261963 | 21 | 78.368 | KV453213.1 | 2034039 | 21-scf00419   | 21 |
| AX-157867448 | 21 | 78.368 | KV453213.1 | 3098942 | 21-scf00419   | 21 |
| AX-158262844 | 21 | 78.368 | KV453213.1 | 3102945 | 21-scf00419   | 21 |
| AX-158262845 | 21 | 78.368 | KV453213.1 | 3103557 | 21-scf00419   | 21 |
| AX-158262849 | 21 | 78.368 | KV453213.1 | 3105729 | 21-scf00419   | 21 |
| AX-158262850 | 21 | 78.368 | KV453213.1 | 3107956 | 21-scf00419   | 21 |

|              |    |        |            |         |             |    |
|--------------|----|--------|------------|---------|-------------|----|
| AX-158263366 | 21 | 78.368 | KV453213.1 | 3650616 | 21-scf00419 | 21 |
| AX-157723351 | 21 | 78.368 | KV453213.1 | 3762345 | 21-scf00419 | 21 |
| AX-158263616 | 21 | 78.368 | KV453213.1 | 3884931 | 21-scf00419 | 21 |
| AX-158263688 | 21 | 78.368 | KV453213.1 | 3972323 | 21-scf00419 | 21 |
| AX-158263691 | 21 | 78.368 | KV453213.1 | 3974617 | 21-scf00419 | 21 |
| AX-158263728 | 21 | 78.368 | KV453213.1 | 4039166 | 21-scf00419 | 21 |
| AX-158263746 | 21 | 78.368 | KV453213.1 | 4055449 | 21-scf00419 | 21 |
| AX-158263748 | 21 | 78.368 | KV453213.1 | 4057045 | 21-scf00419 | 21 |
| AX-158263752 | 21 | 78.368 | KV453213.1 | 4061817 | 21-scf00419 | 21 |
| AX-158263764 | 21 | 78.368 | KV453213.1 | 4082033 | 21-scf00419 | 21 |
| AX-158263800 | 21 | 78.368 | KV453213.1 | 4121959 | 21-scf00419 | 21 |
| AX-158263817 | 21 | 78.368 | KV453213.1 | 4138175 | 21-scf00419 | 21 |
| AX-158263818 | 21 | 78.368 | KV453213.1 | 4138755 | 21-scf00419 | 21 |
| AX-158263823 | 21 | 78.368 | KV453213.1 | 4141300 | 21-scf00419 | 21 |
| AX-158263827 | 21 | 78.368 | KV453213.1 | 4146398 | 21-scf00419 | 21 |
| AX-158263828 | 21 | 78.368 | KV453213.1 | 4147849 | 21-scf00419 | 21 |
| AX-158263830 | 21 | 78.368 | KV453213.1 | 4149049 | 21-scf00419 | 21 |
| AX-158263883 | 21 | 78.368 | KV453213.1 | 4202345 | 21-scf00419 | 21 |
| AX-158263908 | 21 | 78.368 | KV453213.1 | 4231306 | 21-scf00419 | 21 |
| AX-158263910 | 21 | 78.368 | KV453213.1 | 4233292 | 21-scf00419 | 21 |
| AX-158263914 | 21 | 78.368 | KV453213.1 | 4235778 | 21-scf00419 | 21 |
| AX-158263980 | 21 | 78.368 | KV453213.1 | 4304015 | 21-scf00419 | 21 |
| AX-158264001 | 21 | 78.368 | KV453213.1 | 4326445 | 21-scf00419 | 21 |
| AX-158264009 | 21 | 78.368 | KV453213.1 | 4336924 | 21-scf00419 | 21 |
| AX-158264018 | 21 | 78.368 | KV453213.1 | 4345171 | 21-scf00419 | 21 |
| AX-158264022 | 21 | 78.368 | KV453213.1 | 4353930 | 21-scf00419 | 21 |
| AX-157722993 | 21 | 78.368 | KV453213.1 | 4356837 | 21-scf00419 | 21 |
| AX-158264030 | 21 | 78.368 | KV453213.1 | 4363610 | 21-scf00419 | 21 |
| AX-158264033 | 21 | 78.368 | KV453213.1 | 4365615 | 21-scf00419 | 21 |
| AX-157843210 | 21 | 78.368 | KV453213.1 | 4367981 | 21-scf00419 | 21 |
| AX-158264039 | 21 | 78.368 | KV453213.1 | 4371796 | 21-scf00419 | 21 |
| AX-158264043 | 21 | 78.368 | KV453213.1 | 4383986 | 21-scf00419 | 21 |
| AX-158264047 | 21 | 78.368 | KV453213.1 | 4390731 | 21-scf00419 | 21 |
| AX-158264048 | 21 | 78.368 | KV453213.1 | 4391423 | 21-scf00419 | 21 |
| AX-158264052 | 21 | 78.368 | KV453213.1 | 4395055 | 21-scf00419 | 21 |
| AX-158264071 | 21 | 78.368 | KV453213.1 | 4415595 | 21-scf00419 | 21 |
| AX-158264074 | 21 | 78.368 | KV453213.1 | 4417743 | 21-scf00419 | 21 |
| AX-158264100 | 21 | 78.368 | KV453213.1 | 4449849 | 21-scf00419 | 21 |
| AX-158264102 | 21 | 78.368 | KV453213.1 | 4451114 | 21-scf00419 | 21 |
| AX-158264108 | 21 | 78.368 | KV453213.1 | 4460161 | 21-scf00419 | 21 |
| AX-158264110 | 21 | 78.368 | KV453213.1 | 4464588 | 21-scf00419 | 21 |
| AX-158416352 | 21 | 78.368 | KV453213.1 | 4468988 | 21-scf00419 | 21 |
| AX-158264123 | 21 | 78.368 | KV453213.1 | 4475925 | 21-scf00419 | 21 |
| AX-158264124 | 21 | 78.368 | KV453213.1 | 4476260 | 21-scf00419 | 21 |
| AX-158387250 | 21 | 78.368 | KV453213.1 | 4485874 | 21-scf00419 | 21 |
| AX-158264136 | 21 | 78.368 | KV453213.1 | 4490068 | 21-scf00419 | 21 |
| AX-158264140 | 21 | 78.368 | KV453213.1 | 4495344 | 21-scf00419 | 21 |
| AX-158264143 | 21 | 78.368 | KV453213.1 | 4500328 | 21-scf00419 | 21 |
| AX-158264145 | 21 | 78.368 | KV453213.1 | 4503055 | 21-scf00419 | 21 |
| AX-158394754 | 21 | 78.368 | KV453213.1 | 4504126 | 21-scf00419 | 21 |
| AX-158264161 | 21 | 78.368 | KV453213.1 | 4524018 | 21-scf00419 | 21 |

|              |    |        |            |         |             |    |
|--------------|----|--------|------------|---------|-------------|----|
| AX-158394755 | 21 | 78.368 | KV453213.1 | 4526391 | 21-scf00419 | 21 |
| AX-157843213 | 21 | 78.368 | KV453213.1 | 4528303 | 21-scf00419 | 21 |
| AX-158264165 | 21 | 78.368 | KV453213.1 | 4529557 | 21-scf00419 | 21 |
| AX-158264175 | 21 | 78.368 | KV453213.1 | 4541811 | 21-scf00419 | 21 |
| AX-157727013 | 21 | 78.368 | KV453213.1 | 4542435 | 21-scf00419 | 21 |
| AX-158264178 | 21 | 78.368 | KV453213.1 | 4542605 | 21-scf00419 | 21 |
| AX-158264183 | 21 | 78.368 | KV453213.1 | 4545406 | 21-scf00419 | 21 |
| AX-158264190 | 21 | 78.368 | KV453213.1 | 4551080 | 21-scf00419 | 21 |
| AX-158264192 | 21 | 78.368 | KV453213.1 | 4551768 | 21-scf00419 | 21 |
| AX-158264193 | 21 | 78.368 | KV453213.1 | 4552361 | 21-scf00419 | 21 |
| AX-158264195 | 21 | 78.368 | KV453213.1 | 4553183 | 21-scf00419 | 21 |
| AX-158264213 | 21 | 78.368 | KV453213.1 | 4572901 | 21-scf00419 | 21 |
| AX-158264221 | 21 | 78.368 | KV453213.1 | 4579028 | 21-scf00419 | 21 |
| AX-158264231 | 21 | 78.368 | KV453213.1 | 4585239 | 21-scf00419 | 21 |
| AX-157754135 | 21 | 78.368 | KV453213.1 | 4588109 | 21-scf00419 | 21 |
| AX-158264235 | 21 | 78.368 | KV453213.1 | 4588972 | 21-scf00419 | 21 |
| AX-158264237 | 21 | 78.368 | KV453213.1 | 4591300 | 21-scf00419 | 21 |
| AX-158264239 | 21 | 78.368 | KV453213.1 | 4592330 | 21-scf00419 | 21 |
| AX-158264242 | 21 | 78.368 | KV453213.1 | 4594881 | 21-scf00419 | 21 |
| AX-158264253 | 21 | 78.368 | KV453213.1 | 4601999 | 21-scf00419 | 21 |
| AX-158264257 | 21 | 78.368 | KV453213.1 | 4605067 | 21-scf00419 | 21 |
| AX-158264260 | 21 | 78.368 | KV453213.1 | 4606600 | 21-scf00419 | 21 |
| AX-157725920 | 21 | 78.368 | KV453213.1 | 4608323 | 21-scf00419 | 21 |
| AX-158264267 | 21 | 78.368 | KV453213.1 | 4616539 | 21-scf00419 | 21 |
| AX-158416366 | 21 | 78.368 | KV453213.1 | 4637423 | 21-scf00419 | 21 |
| AX-158264323 | 21 | 78.368 | KV453213.1 | 4671945 | 21-scf00419 | 21 |
| AX-158264327 | 21 | 78.368 | KV453213.1 | 4674157 | 21-scf00419 | 21 |
| AX-158264336 | 21 | 78.368 | KV453213.1 | 4682940 | 21-scf00419 | 21 |
| AX-158264344 | 21 | 78.368 | KV453213.1 | 4689367 | 21-scf00419 | 21 |
| AX-158264369 | 21 | 78.368 | KV453213.1 | 4717129 | 21-scf00419 | 21 |
| AX-158264390 | 21 | 78.368 | KV453213.1 | 4740096 | 21-scf00419 | 21 |
| AX-157718302 | 21 | 78.368 | KV453213.1 | 4781534 | 21-scf00419 | 21 |
| AX-158264436 | 21 | 78.368 | KV453213.1 | 4793581 | 21-scf00419 | 21 |
| AX-158264457 | 21 | 78.368 | KV453213.1 | 4814782 | 21-scf00419 | 21 |
| AX-157843232 | 21 | 78.368 | KV453213.1 | 4917986 | 21-scf00419 | 21 |
| AX-158264580 | 21 | 78.368 | KV453213.1 | 4970246 | 21-scf00419 | 21 |
| AX-158264759 | 21 | 78.368 | KV453213.1 | 5189084 | 21-scf00419 | 21 |
| AX-158264798 | 21 | 78.368 | KV453213.1 | 5224378 | 21-scf00419 | 21 |
| AX-158411175 | 21 | 78.368 | KV453213.1 | 5259884 | 21-scf00419 | 21 |
| AX-158264276 | 21 | 78.393 | KV453213.1 | 4628411 | 21-scf00419 | 21 |
| AX-158264278 | 21 | 78.403 | KV453213.1 | 4629726 | 21-scf00419 | 21 |
| AX-158264279 | 21 | 78.415 | KV453213.1 | 4630786 | 21-scf00419 | 21 |
| AX-157843179 | 21 | 78.437 | KV453213.1 | 3094131 | 21-scf00419 | 21 |
| AX-158263795 | 21 | 78.437 | KV453213.1 | 4111641 | 21-scf00419 | 21 |
| AX-158263915 | 21 | 78.437 | KV453213.1 | 4236347 | 21-scf00419 | 21 |
| AX-158263928 | 21 | 78.437 | KV453213.1 | 4248553 | 21-scf00419 | 21 |
| AX-158264010 | 21 | 78.437 | KV453213.1 | 4337374 | 21-scf00419 | 21 |
| AX-158264101 | 21 | 78.437 | KV453213.1 | 4450643 | 21-scf00419 | 21 |
| AX-158264118 | 21 | 78.437 | KV453213.1 | 4471605 | 21-scf00419 | 21 |
| AX-158264263 | 21 | 78.437 | KV453213.1 | 4610072 | 21-scf00419 | 21 |
| AX-158264282 | 21 | 78.437 | KV453213.1 | 4632708 | 21-scf00419 | 21 |

|              |    |        |            |         |             |    |
|--------------|----|--------|------------|---------|-------------|----|
| AX-158264388 | 21 | 78.437 | KV453213.1 | 4738057 | 21-scf00419 | 21 |
| AX-158264434 | 21 | 78.437 | KV453213.1 | 4792633 | 21-scf00419 | 21 |
| AX-158264435 | 21 | 78.437 | KV453213.1 | 4793026 | 21-scf00419 | 21 |
| AX-158264496 | 21 | 78.437 | KV453213.1 | 4857798 | 21-scf00419 | 21 |
| AX-158264500 | 21 | 78.437 | KV453213.1 | 4858771 | 21-scf00419 | 21 |
| AX-158264501 | 21 | 78.437 | KV453213.1 | 4859407 | 21-scf00419 | 21 |
| AX-158264611 | 21 | 78.437 | KV453213.1 | 5006886 | 21-scf00419 | 21 |
| AX-158264659 | 21 | 78.437 | KV453213.1 | 5057581 | 21-scf00419 | 21 |
| AX-157745359 | 21 | 78.437 | KV453213.1 | 5123625 | 21-scf00419 | 21 |
| AX-158264818 | 21 | 78.437 | KV453213.1 | 5248543 | 21-scf00419 | 21 |
| AX-158264878 | 21 | 78.437 | KV453213.1 | 5302811 | 21-scf00419 | 21 |
| AX-158264922 | 21 | 78.437 | KV453213.1 | 5379673 | 21-scf00419 | 21 |
| AX-158264287 | 21 | 78.449 | KV453213.1 | 4636822 | 21-scf00419 | 21 |
| AX-157887789 | 21 | 78.461 | KV453213.1 | 4644465 | 21-scf00419 | 21 |
| AX-158260252 | 21 | 78.477 | KV453211.1 | 8730666 | 21-scf00417 | 21 |
| AX-158261616 | 21 | 78.477 | KV453213.1 | 1487697 | 21-scf00419 | 21 |
| AX-158261833 | 21 | 78.477 | KV453213.1 | 1880646 | 21-scf00419 | 21 |
| AX-158262085 | 21 | 78.477 | KV453213.1 | 2199012 | 21-scf00419 | 21 |
| AX-158262892 | 21 | 78.477 | KV453213.1 | 3180220 | 21-scf00419 | 21 |
| AX-158262968 | 21 | 78.477 | KV453213.1 | 3248533 | 21-scf00419 | 21 |
| AX-158263079 | 21 | 78.477 | KV453213.1 | 3371162 | 21-scf00419 | 21 |
| AX-158263081 | 21 | 78.477 | KV453213.1 | 3372402 | 21-scf00419 | 21 |
| AX-158263341 | 21 | 78.477 | KV453213.1 | 3628701 | 21-scf00419 | 21 |
| AX-158263351 | 21 | 78.477 | KV453213.1 | 3637431 | 21-scf00419 | 21 |
| AX-158381090 | 21 | 78.477 | KV453213.1 | 3697152 | 21-scf00419 | 21 |
| AX-158263421 | 21 | 78.477 | KV453213.1 | 3703669 | 21-scf00419 | 21 |
| AX-158263468 | 21 | 78.477 | KV453213.1 | 3747032 | 21-scf00419 | 21 |
| AX-158263496 | 21 | 78.477 | KV453213.1 | 3767573 | 21-scf00419 | 21 |
| AX-158263498 | 21 | 78.477 | KV453213.1 | 3769202 | 21-scf00419 | 21 |
| AX-158263506 | 21 | 78.477 | KV453213.1 | 3777935 | 21-scf00419 | 21 |
| AX-158263536 | 21 | 78.477 | KV453213.1 | 3801190 | 21-scf00419 | 21 |
| AX-158263589 | 21 | 78.477 | KV453213.1 | 3849732 | 21-scf00419 | 21 |
| AX-158263652 | 21 | 78.477 | KV453213.1 | 3920864 | 21-scf00419 | 21 |
| AX-157887786 | 21 | 78.477 | KV453213.1 | 4009819 | 21-scf00419 | 21 |
| AX-158263723 | 21 | 78.477 | KV453213.1 | 4034922 | 21-scf00419 | 21 |
| AX-158263740 | 21 | 78.477 | KV453213.1 | 4049252 | 21-scf00419 | 21 |
| AX-158263742 | 21 | 78.477 | KV453213.1 | 4051435 | 21-scf00419 | 21 |
| AX-157843202 | 21 | 78.477 | KV453213.1 | 4051604 | 21-scf00419 | 21 |
| AX-157872903 | 21 | 78.477 | KV453213.1 | 4065526 | 21-scf00419 | 21 |
| AX-158263819 | 21 | 78.477 | KV453213.1 | 4139109 | 21-scf00419 | 21 |
| AX-158264020 | 21 | 78.477 | KV453213.1 | 4348679 | 21-scf00419 | 21 |
| AX-158264023 | 21 | 78.477 | KV453213.1 | 4356221 | 21-scf00419 | 21 |
| AX-158264024 | 21 | 78.477 | KV453213.1 | 4357255 | 21-scf00419 | 21 |
| AX-158264025 | 21 | 78.477 | KV453213.1 | 4357852 | 21-scf00419 | 21 |
| AX-158264036 | 21 | 78.477 | KV453213.1 | 4368097 | 21-scf00419 | 21 |
| AX-158264037 | 21 | 78.477 | KV453213.1 | 4368663 | 21-scf00419 | 21 |
| AX-158394749 | 21 | 78.477 | KV453213.1 | 4369406 | 21-scf00419 | 21 |
| AX-158416349 | 21 | 78.477 | KV453213.1 | 4381246 | 21-scf00419 | 21 |
| AX-158264045 | 21 | 78.477 | KV453213.1 | 4388152 | 21-scf00419 | 21 |
| AX-158264046 | 21 | 78.477 | KV453213.1 | 4389822 | 21-scf00419 | 21 |
| AX-158394750 | 21 | 78.477 | KV453213.1 | 4391628 | 21-scf00419 | 21 |

|              |    |        |            |         |             |    |
|--------------|----|--------|------------|---------|-------------|----|
| AX-158264050 | 21 | 78.477 | KV453213.1 | 4392446 | 21-scf00419 | 21 |
| AX-158264055 | 21 | 78.477 | KV453213.1 | 4398663 | 21-scf00419 | 21 |
| AX-157860029 | 21 | 78.477 | KV453213.1 | 4398936 | 21-scf00419 | 21 |
| AX-158264104 | 21 | 78.477 | KV453213.1 | 4455116 | 21-scf00419 | 21 |
| AX-158264113 | 21 | 78.477 | KV453213.1 | 4466389 | 21-scf00419 | 21 |
| AX-158264114 | 21 | 78.477 | KV453213.1 | 4467112 | 21-scf00419 | 21 |
| AX-158264116 | 21 | 78.477 | KV453213.1 | 4469968 | 21-scf00419 | 21 |
| AX-158264127 | 21 | 78.477 | KV453213.1 | 4478925 | 21-scf00419 | 21 |
| AX-158264132 | 21 | 78.477 | KV453213.1 | 4485923 | 21-scf00419 | 21 |
| AX-158264171 | 21 | 78.477 | KV453213.1 | 4535968 | 21-scf00419 | 21 |
| AX-158264199 | 21 | 78.477 | KV453213.1 | 4560785 | 21-scf00419 | 21 |
| AX-158264200 | 21 | 78.477 | KV453213.1 | 4561072 | 21-scf00419 | 21 |
| AX-158264201 | 21 | 78.477 | KV453213.1 | 4561847 | 21-scf00419 | 21 |
| AX-158264202 | 21 | 78.477 | KV453213.1 | 4562537 | 21-scf00419 | 21 |
| AX-158264203 | 21 | 78.477 | KV453213.1 | 4562841 | 21-scf00419 | 21 |
| AX-157843214 | 21 | 78.477 | KV453213.1 | 4563526 | 21-scf00419 | 21 |
| AX-158264214 | 21 | 78.477 | KV453213.1 | 4573049 | 21-scf00419 | 21 |
| AX-158264220 | 21 | 78.477 | KV453213.1 | 4578650 | 21-scf00419 | 21 |
| AX-158264238 | 21 | 78.477 | KV453213.1 | 4591959 | 21-scf00419 | 21 |
| AX-158264250 | 21 | 78.477 | KV453213.1 | 4599217 | 21-scf00419 | 21 |
| AX-158264251 | 21 | 78.477 | KV453213.1 | 4599833 | 21-scf00419 | 21 |
| AX-157727071 | 21 | 78.477 | KV453213.1 | 4603816 | 21-scf00419 | 21 |
| AX-158264258 | 21 | 78.477 | KV453213.1 | 4606196 | 21-scf00419 | 21 |
| AX-158264265 | 21 | 78.477 | KV453213.1 | 4613432 | 21-scf00419 | 21 |
| AX-158264280 | 21 | 78.477 | KV453213.1 | 4631510 | 21-scf00419 | 21 |
| AX-158264288 | 21 | 78.477 | KV453213.1 | 4637052 | 21-scf00419 | 21 |
| AX-158264290 | 21 | 78.477 | KV453213.1 | 4638590 | 21-scf00419 | 21 |
| AX-158264298 | 21 | 78.477 | KV453213.1 | 4648512 | 21-scf00419 | 21 |
| AX-158264307 | 21 | 78.477 | KV453213.1 | 4659473 | 21-scf00419 | 21 |
| AX-158387252 | 21 | 78.477 | KV453213.1 | 4661851 | 21-scf00419 | 21 |
| AX-158264318 | 21 | 78.477 | KV453213.1 | 4667020 | 21-scf00419 | 21 |
| AX-158264329 | 21 | 78.477 | KV453213.1 | 4675902 | 21-scf00419 | 21 |
| AX-158264334 | 21 | 78.477 | KV453213.1 | 4680860 | 21-scf00419 | 21 |
| AX-158264335 | 21 | 78.477 | KV453213.1 | 4682479 | 21-scf00419 | 21 |
| AX-158264340 | 21 | 78.477 | KV453213.1 | 4686376 | 21-scf00419 | 21 |
| AX-158264343 | 21 | 78.477 | KV453213.1 | 4688821 | 21-scf00419 | 21 |
| AX-158264345 | 21 | 78.477 | KV453213.1 | 4690531 | 21-scf00419 | 21 |
| AX-158264347 | 21 | 78.477 | KV453213.1 | 4691627 | 21-scf00419 | 21 |
| AX-158264352 | 21 | 78.477 | KV453213.1 | 4698629 | 21-scf00419 | 21 |
| AX-158264356 | 21 | 78.477 | KV453213.1 | 4701691 | 21-scf00419 | 21 |
| AX-158264368 | 21 | 78.477 | KV453213.1 | 4716474 | 21-scf00419 | 21 |
| AX-158264376 | 21 | 78.477 | KV453213.1 | 4723476 | 21-scf00419 | 21 |
| AX-158394756 | 21 | 78.477 | KV453213.1 | 4725221 | 21-scf00419 | 21 |
| AX-158264387 | 21 | 78.477 | KV453213.1 | 4735804 | 21-scf00419 | 21 |
| AX-158264399 | 21 | 78.477 | KV453213.1 | 4748808 | 21-scf00419 | 21 |
| AX-158264402 | 21 | 78.477 | KV453213.1 | 4753328 | 21-scf00419 | 21 |
| AX-157707932 | 21 | 78.477 | KV453213.1 | 4753926 | 21-scf00419 | 21 |
| AX-157755995 | 21 | 78.477 | KV453213.1 | 4756533 | 21-scf00419 | 21 |
| AX-158416371 | 21 | 78.477 | KV453213.1 | 4760476 | 21-scf00419 | 21 |
| AX-158264405 | 21 | 78.477 | KV453213.1 | 4760715 | 21-scf00419 | 21 |
| AX-158264410 | 21 | 78.477 | KV453213.1 | 4768779 | 21-scf00419 | 21 |

|              |    |        |            |         |                |    |
|--------------|----|--------|------------|---------|----------------|----|
| AX-158264411 | 21 | 78.477 | KV453213.1 | 4769501 | 21-scf00419    | 21 |
| AX-158264418 | 21 | 78.477 | KV453213.1 | 4778555 | 21-scf00419    | 21 |
| AX-158264420 | 21 | 78.477 | KV453213.1 | 4781359 | 21-scf00419    | 21 |
| AX-158264421 | 21 | 78.477 | KV453213.1 | 4782279 | 21-scf00419    | 21 |
| AX-157843218 | 21 | 78.477 | KV453213.1 | 4783754 | 21-scf00419    | 21 |
| AX-158264423 | 21 | 78.477 | KV453213.1 | 4784191 | 21-scf00419    | 21 |
| AX-158264439 | 21 | 78.477 | KV453213.1 | 4796312 | 21-scf00419    | 21 |
| AX-158264448 | 21 | 78.477 | KV453213.1 | 4806915 | 21-scf00419    | 21 |
| AX-158264458 | 21 | 78.477 | KV453213.1 | 4815201 | 21-scf00419    | 21 |
| AX-158264464 | 21 | 78.477 | KV453213.1 | 4820953 | 21-scf00419    | 21 |
| AX-158264466 | 21 | 78.477 | KV453213.1 | 4822216 | 21-scf00419    | 21 |
| AX-158264475 | 21 | 78.477 | KV453213.1 | 4831043 | 21-scf00419    | 21 |
| AX-158264486 | 21 | 78.477 | KV453213.1 | 4850129 | 21-scf00419    | 21 |
| AX-158264544 | 21 | 78.477 | KV453213.1 | 4926258 | 21-scf00419    | 21 |
| AX-158264621 | 21 | 78.477 | KV453213.1 | 5016166 | 21-scf00419    | 21 |
| AX-158264664 | 21 | 78.477 | KV453213.1 | 5061804 | 21-scf00419    | 21 |
| AX-158264740 | 21 | 78.477 | KV453213.1 | 5169022 | 21-scf00419    | 21 |
| AX-158264745 | 21 | 78.477 | KV453213.1 | 5174578 | 21-scf00419    | 21 |
| AX-158264776 | 21 | 78.477 | KV453213.1 | 5202889 | 21-scf00419    | 21 |
| AX-158387266 | 21 | 78.477 | KV453213.1 | 5227676 | 21-scf00419    | 21 |
| AX-158264874 | 21 | 78.477 | KV453213.1 | 5300677 | 21-scf00419    | 21 |
| AX-157716716 | 21 | 78.477 | KV453213.1 | 5309033 | 21-scf00419    | 21 |
| AX-158264886 | 21 | 78.477 | KV453213.1 | 5313913 | 21-scf00419    | 21 |
| AX-158264911 | 21 | 78.477 | KV453213.1 | 5355859 | 21-scf00419    | 21 |
| AX-158264931 | 21 | 78.477 | KV453213.1 | 5387036 | 21-scf00419    | 21 |
| AX-158264935 | 21 | 78.477 | KV453213.1 | 5393604 | 21-scf00419    | 21 |
| AX-158264966 | 21 | 78.477 | KV453213.1 | 5434642 | 21-scf00419    | 21 |
| AX-157843272 | 21 | 78.477 | KV453213.1 | 5478469 | 21-scf00419    | 21 |
| AX-158265026 | 21 | 78.477 | KV453213.1 | 5488779 | 21-scf00419    | 21 |
| AX-158265052 | 21 | 78.477 | KV453213.1 | 5524956 | 21-scf00419    | 21 |
| AX-158265056 | 21 | 78.477 | KV453213.1 | 5531465 | 21-scf00419    | 21 |
| AX-158381100 | 21 | 78.477 | KV453213.1 | 5744471 | 21-scf00419    | 21 |
| AX-158265265 | 21 | 78.477 | KV453213.1 | 5774215 | 21-scf00419    | 21 |
| AX-158265283 | 21 | 78.477 | KV453213.1 | 5801246 | 21-scf00419    | 21 |
| AX-158265971 | 21 | 78.477 | KV453213.1 | 6776166 | 21-scf00419    | 21 |
| AX-157703347 | 21 | 78.477 | DX097793.1 | 458     | IORI212 Ictalu | UN |
| AX-158260538 | 21 | 78.586 | KV453213.1 | 110095  | 21-scf00419    | 21 |
| AX-158260546 | 21 | 78.586 | KV453213.1 | 117246  | 21-scf00419    | 21 |
| AX-157843003 | 21 | 78.586 | KV453213.1 | 176206  | 21-scf00419    | 21 |
| AX-158260733 | 21 | 78.586 | KV453213.1 | 355326  | 21-scf00419    | 21 |
| AX-157872847 | 21 | 78.586 | KV453213.1 | 621813  | 21-scf00419    | 21 |
| AX-158260991 | 21 | 78.586 | KV453213.1 | 663925  | 21-scf00419    | 21 |
| AX-158260998 | 21 | 78.586 | KV453213.1 | 672131  | 21-scf00419    | 21 |
| AX-158261090 | 21 | 78.586 | KV453213.1 | 784980  | 21-scf00419    | 21 |
| AX-158261156 | 21 | 78.586 | KV453213.1 | 857258  | 21-scf00419    | 21 |
| AX-157843056 | 21 | 78.586 | KV453213.1 | 992533  | 21-scf00419    | 21 |
| AX-158261531 | 21 | 78.586 | KV453213.1 | 1398084 | 21-scf00419    | 21 |
| AX-158261548 | 21 | 78.586 | KV453213.1 | 1419978 | 21-scf00419    | 21 |
| AX-158261774 | 21 | 78.586 | KV453213.1 | 1778855 | 21-scf00419    | 21 |
| AX-158262172 | 21 | 78.586 | KV453213.1 | 2301769 | 21-scf00419    | 21 |
| AX-157843142 | 21 | 78.586 | KV453213.1 | 2528597 | 21-scf00419    | 21 |

|              |    |        |            |         |             |    |
|--------------|----|--------|------------|---------|-------------|----|
| AX-157749338 | 21 | 78.586 | KV453213.1 | 2769626 | 21-scf00419 | 21 |
| AX-157880427 | 21 | 78.586 | KV453213.1 | 2783820 | 21-scf00419 | 21 |
| AX-158262669 | 21 | 78.586 | KV453213.1 | 2901055 | 21-scf00419 | 21 |
| AX-158262816 | 21 | 78.586 | KV453213.1 | 3067827 | 21-scf00419 | 21 |
| AX-157843181 | 21 | 78.586 | KV453213.1 | 3110119 | 21-scf00419 | 21 |
| AX-158262899 | 21 | 78.586 | KV453213.1 | 3190023 | 21-scf00419 | 21 |
| AX-158262902 | 21 | 78.586 | KV453213.1 | 3191840 | 21-scf00419 | 21 |
| AX-158262904 | 21 | 78.586 | KV453213.1 | 3192566 | 21-scf00419 | 21 |
| AX-158262913 | 21 | 78.586 | KV453213.1 | 3201344 | 21-scf00419 | 21 |
| AX-158262914 | 21 | 78.586 | KV453213.1 | 3202416 | 21-scf00419 | 21 |
| AX-158262916 | 21 | 78.586 | KV453213.1 | 3204036 | 21-scf00419 | 21 |
| AX-158262917 | 21 | 78.586 | KV453213.1 | 3204894 | 21-scf00419 | 21 |
| AX-158262920 | 21 | 78.586 | KV453213.1 | 3208080 | 21-scf00419 | 21 |
| AX-158262921 | 21 | 78.586 | KV453213.1 | 3209879 | 21-scf00419 | 21 |
| AX-158262922 | 21 | 78.586 | KV453213.1 | 3210099 | 21-scf00419 | 21 |
| AX-158262924 | 21 | 78.586 | KV453213.1 | 3212238 | 21-scf00419 | 21 |
| AX-158262926 | 21 | 78.586 | KV453213.1 | 3213485 | 21-scf00419 | 21 |
| AX-158262930 | 21 | 78.586 | KV453213.1 | 3216957 | 21-scf00419 | 21 |
| AX-158262932 | 21 | 78.586 | KV453213.1 | 3218677 | 21-scf00419 | 21 |
| AX-158262934 | 21 | 78.586 | KV453213.1 | 3220587 | 21-scf00419 | 21 |
| AX-158262936 | 21 | 78.586 | KV453213.1 | 3222377 | 21-scf00419 | 21 |
| AX-158262938 | 21 | 78.586 | KV453213.1 | 3224708 | 21-scf00419 | 21 |
| AX-158262940 | 21 | 78.586 | KV453213.1 | 3226166 | 21-scf00419 | 21 |
| AX-158262941 | 21 | 78.586 | KV453213.1 | 3226708 | 21-scf00419 | 21 |
| AX-157843189 | 21 | 78.586 | KV453213.1 | 3227626 | 21-scf00419 | 21 |
| AX-158262943 | 21 | 78.586 | KV453213.1 | 3227834 | 21-scf00419 | 21 |
| AX-158262944 | 21 | 78.586 | KV453213.1 | 3228279 | 21-scf00419 | 21 |
| AX-158262946 | 21 | 78.586 | KV453213.1 | 3230952 | 21-scf00419 | 21 |
| AX-158262947 | 21 | 78.586 | KV453213.1 | 3231621 | 21-scf00419 | 21 |
| AX-158262948 | 21 | 78.586 | KV453213.1 | 3232623 | 21-scf00419 | 21 |
| AX-158262949 | 21 | 78.586 | KV453213.1 | 3233855 | 21-scf00419 | 21 |
| AX-158416314 | 21 | 78.586 | KV453213.1 | 3235985 | 21-scf00419 | 21 |
| AX-158262954 | 21 | 78.586 | KV453213.1 | 3237663 | 21-scf00419 | 21 |
| AX-158262955 | 21 | 78.586 | KV453213.1 | 3238256 | 21-scf00419 | 21 |
| AX-158262956 | 21 | 78.586 | KV453213.1 | 3238877 | 21-scf00419 | 21 |
| AX-158262957 | 21 | 78.586 | KV453213.1 | 3239382 | 21-scf00419 | 21 |
| AX-158262959 | 21 | 78.586 | KV453213.1 | 3240532 | 21-scf00419 | 21 |
| AX-158262960 | 21 | 78.586 | KV453213.1 | 3241370 | 21-scf00419 | 21 |
| AX-158262961 | 21 | 78.586 | KV453213.1 | 3242362 | 21-scf00419 | 21 |
| AX-158394694 | 21 | 78.586 | KV453213.1 | 3242500 | 21-scf00419 | 21 |
| AX-158262965 | 21 | 78.586 | KV453213.1 | 3245986 | 21-scf00419 | 21 |
| AX-158262967 | 21 | 78.586 | KV453213.1 | 3247481 | 21-scf00419 | 21 |
| AX-158262969 | 21 | 78.586 | KV453213.1 | 3249549 | 21-scf00419 | 21 |
| AX-157693901 | 21 | 78.586 | KV453213.1 | 3254062 | 21-scf00419 | 21 |
| AX-158262976 | 21 | 78.586 | KV453213.1 | 3256746 | 21-scf00419 | 21 |
| AX-158262981 | 21 | 78.586 | KV453213.1 | 3261201 | 21-scf00419 | 21 |
| AX-158262985 | 21 | 78.586 | KV453213.1 | 3264882 | 21-scf00419 | 21 |
| AX-158262987 | 21 | 78.586 | KV453213.1 | 3267512 | 21-scf00419 | 21 |
| AX-158262988 | 21 | 78.586 | KV453213.1 | 3267945 | 21-scf00419 | 21 |
| AX-158262989 | 21 | 78.586 | KV453213.1 | 3270929 | 21-scf00419 | 21 |
| AX-158262993 | 21 | 78.586 | KV453213.1 | 3274017 | 21-scf00419 | 21 |



|              |    |        |            |         |             |    |
|--------------|----|--------|------------|---------|-------------|----|
| AX-158262994 | 21 | 78.586 | KV453213.1 | 3274513 | 21-scf00419 | 21 |
| AX-158262995 | 21 | 78.586 | KV453213.1 | 3274924 | 21-scf00419 | 21 |
| AX-158262998 | 21 | 78.586 | KV453213.1 | 3277532 | 21-scf00419 | 21 |
| AX-158262999 | 21 | 78.586 | KV453213.1 | 3277838 | 21-scf00419 | 21 |
| AX-158263000 | 21 | 78.586 | KV453213.1 | 3278128 | 21-scf00419 | 21 |
| AX-158263001 | 21 | 78.586 | KV453213.1 | 3278369 | 21-scf00419 | 21 |
| AX-157843190 | 21 | 78.586 | KV453213.1 | 3278888 | 21-scf00419 | 21 |
| AX-158263003 | 21 | 78.586 | KV453213.1 | 3279814 | 21-scf00419 | 21 |
| AX-158263004 | 21 | 78.586 | KV453213.1 | 3280148 | 21-scf00419 | 21 |
| AX-158263005 | 21 | 78.586 | KV453213.1 | 3281102 | 21-scf00419 | 21 |
| AX-158263011 | 21 | 78.586 | KV453213.1 | 3286326 | 21-scf00419 | 21 |
| AX-158263013 | 21 | 78.586 | KV453213.1 | 3288200 | 21-scf00419 | 21 |
| AX-158263015 | 21 | 78.586 | KV453213.1 | 3290946 | 21-scf00419 | 21 |
| AX-158263024 | 21 | 78.586 | KV453213.1 | 3306181 | 21-scf00419 | 21 |
| AX-157843192 | 21 | 78.586 | KV453213.1 | 3306331 | 21-scf00419 | 21 |
| AX-158263026 | 21 | 78.586 | KV453213.1 | 3318241 | 21-scf00419 | 21 |
| AX-158394698 | 21 | 78.586 | KV453213.1 | 3319404 | 21-scf00419 | 21 |
| AX-158263030 | 21 | 78.586 | KV453213.1 | 3322362 | 21-scf00419 | 21 |
| AX-158263032 | 21 | 78.586 | KV453213.1 | 3324083 | 21-scf00419 | 21 |
| AX-158263034 | 21 | 78.586 | KV453213.1 | 3326013 | 21-scf00419 | 21 |
| AX-158263037 | 21 | 78.586 | KV453213.1 | 3328188 | 21-scf00419 | 21 |
| AX-158263039 | 21 | 78.586 | KV453213.1 | 3329771 | 21-scf00419 | 21 |
| AX-158263069 | 21 | 78.586 | KV453213.1 | 3363006 | 21-scf00419 | 21 |
| AX-157756394 | 21 | 78.586 | KV453213.1 | 3527452 | 21-scf00419 | 21 |
| AX-158263299 | 21 | 78.586 | KV453213.1 | 3585763 | 21-scf00419 | 21 |
| AX-158263300 | 21 | 78.586 | KV453213.1 | 3586371 | 21-scf00419 | 21 |
| AX-157843196 | 21 | 78.586 | KV453213.1 | 3630332 | 21-scf00419 | 21 |
| AX-158263353 | 21 | 78.586 | KV453213.1 | 3639178 | 21-scf00419 | 21 |
| AX-157723439 | 21 | 78.586 | KV453213.1 | 3671685 | 21-scf00419 | 21 |
| AX-158263385 | 21 | 78.586 | KV453213.1 | 3672767 | 21-scf00419 | 21 |
| AX-158263442 | 21 | 78.586 | KV453213.1 | 3723887 | 21-scf00419 | 21 |
| AX-158263557 | 21 | 78.586 | KV453213.1 | 3818284 | 21-scf00419 | 21 |
| AX-158263564 | 21 | 78.586 | KV453213.1 | 3824604 | 21-scf00419 | 21 |
| AX-158263612 | 21 | 78.586 | KV453213.1 | 3881085 | 21-scf00419 | 21 |
| AX-158263631 | 21 | 78.586 | KV453213.1 | 3896770 | 21-scf00419 | 21 |
| AX-157860024 | 21 | 78.586 | KV453213.1 | 3948878 | 21-scf00419 | 21 |
| AX-158263792 | 21 | 78.586 | KV453213.1 | 4106649 | 21-scf00419 | 21 |
| AX-158264028 | 21 | 78.586 | KV453213.1 | 4361804 | 21-scf00419 | 21 |
| AX-158264034 | 21 | 78.586 | KV453213.1 | 4366294 | 21-scf00419 | 21 |
| AX-158264044 | 21 | 78.586 | KV453213.1 | 4386541 | 21-scf00419 | 21 |
| AX-158264148 | 21 | 78.586 | KV453213.1 | 4506672 | 21-scf00419 | 21 |
| AX-158416360 | 21 | 78.586 | KV453213.1 | 4508226 | 21-scf00419 | 21 |
| AX-158264227 | 21 | 78.586 | KV453213.1 | 4582787 | 21-scf00419 | 21 |
| AX-158264252 | 21 | 78.586 | KV453213.1 | 4601294 | 21-scf00419 | 21 |
| AX-158264281 | 21 | 78.586 | KV453213.1 | 4632199 | 21-scf00419 | 21 |
| AX-158264286 | 21 | 78.586 | KV453213.1 | 4636179 | 21-scf00419 | 21 |
| AX-157843215 | 21 | 78.586 | KV453213.1 | 4641243 | 21-scf00419 | 21 |
| AX-157741560 | 21 | 78.586 | KV453213.1 | 4641608 | 21-scf00419 | 21 |
| AX-158264301 | 21 | 78.586 | KV453213.1 | 4650535 | 21-scf00419 | 21 |
| AX-157887790 | 21 | 78.586 | KV453213.1 | 4653612 | 21-scf00419 | 21 |
| AX-158264315 | 21 | 78.586 | KV453213.1 | 4663731 | 21-scf00419 | 21 |

|              |    |        |            |         |             |    |
|--------------|----|--------|------------|---------|-------------|----|
| AX-158264317 | 21 | 78.586 | KV453213.1 | 4665516 | 21-scf00419 | 21 |
| AX-158264321 | 21 | 78.586 | KV453213.1 | 4669411 | 21-scf00419 | 21 |
| AX-158264331 | 21 | 78.586 | KV453213.1 | 4677053 | 21-scf00419 | 21 |
| AX-158264337 | 21 | 78.586 | KV453213.1 | 4684105 | 21-scf00419 | 21 |
| AX-158387254 | 21 | 78.586 | KV453213.1 | 4695758 | 21-scf00419 | 21 |
| AX-158387255 | 21 | 78.586 | KV453213.1 | 4709194 | 21-scf00419 | 21 |
| AX-158264364 | 21 | 78.586 | KV453213.1 | 4713551 | 21-scf00419 | 21 |
| AX-158264375 | 21 | 78.586 | KV453213.1 | 4723095 | 21-scf00419 | 21 |
| AX-157860032 | 21 | 78.586 | KV453213.1 | 4729450 | 21-scf00419 | 21 |
| AX-157707931 | 21 | 78.586 | KV453213.1 | 4753742 | 21-scf00419 | 21 |
| AX-157860033 | 21 | 78.586 | KV453213.1 | 4761428 | 21-scf00419 | 21 |
| AX-157860034 | 21 | 78.586 | KV453213.1 | 4762183 | 21-scf00419 | 21 |
| AX-158387257 | 21 | 78.586 | KV453213.1 | 4765466 | 21-scf00419 | 21 |
| AX-158264412 | 21 | 78.586 | KV453213.1 | 4770846 | 21-scf00419 | 21 |
| AX-158264424 | 21 | 78.586 | KV453213.1 | 4784334 | 21-scf00419 | 21 |
| AX-158264442 | 21 | 78.586 | KV453213.1 | 4803752 | 21-scf00419 | 21 |
| AX-158387258 | 21 | 78.586 | KV453213.1 | 4808570 | 21-scf00419 | 21 |
| AX-158264477 | 21 | 78.586 | KV453213.1 | 4832589 | 21-scf00419 | 21 |
| AX-158264484 | 21 | 78.586 | KV453213.1 | 4848578 | 21-scf00419 | 21 |
| AX-158264517 | 21 | 78.586 | KV453213.1 | 4878091 | 21-scf00419 | 21 |
| AX-157872923 | 21 | 78.586 | KV453213.1 | 4887405 | 21-scf00419 | 21 |
| AX-158264528 | 21 | 78.586 | KV453213.1 | 4892698 | 21-scf00419 | 21 |
| AX-157843233 | 21 | 78.586 | KV453213.1 | 4921682 | 21-scf00419 | 21 |
| AX-157843234 | 21 | 78.586 | KV453213.1 | 4923831 | 21-scf00419 | 21 |
| AX-157712982 | 21 | 78.586 | KV453213.1 | 4924735 | 21-scf00419 | 21 |
| AX-158394768 | 21 | 78.586 | KV453213.1 | 4928424 | 21-scf00419 | 21 |
| AX-158264545 | 21 | 78.586 | KV453213.1 | 4928767 | 21-scf00419 | 21 |
| AX-158264546 | 21 | 78.586 | KV453213.1 | 4929154 | 21-scf00419 | 21 |
| AX-158264548 | 21 | 78.586 | KV453213.1 | 4930270 | 21-scf00419 | 21 |
| AX-158264550 | 21 | 78.586 | KV453213.1 | 4933251 | 21-scf00419 | 21 |
| AX-158394770 | 21 | 78.586 | KV453213.1 | 4935497 | 21-scf00419 | 21 |
| AX-158264551 | 21 | 78.586 | KV453213.1 | 4937952 | 21-scf00419 | 21 |
| AX-158264553 | 21 | 78.586 | KV453213.1 | 4939714 | 21-scf00419 | 21 |
| AX-158264554 | 21 | 78.586 | KV453213.1 | 4940683 | 21-scf00419 | 21 |
| AX-158394772 | 21 | 78.586 | KV453213.1 | 4941914 | 21-scf00419 | 21 |
| AX-158264560 | 21 | 78.586 | KV453213.1 | 4945632 | 21-scf00419 | 21 |
| AX-158381096 | 21 | 78.586 | KV453213.1 | 4946015 | 21-scf00419 | 21 |
| AX-158264561 | 21 | 78.586 | KV453213.1 | 4946129 | 21-scf00419 | 21 |
| AX-158264562 | 21 | 78.586 | KV453213.1 | 4948338 | 21-scf00419 | 21 |
| AX-158264563 | 21 | 78.586 | KV453213.1 | 4948861 | 21-scf00419 | 21 |
| AX-157770630 | 21 | 78.586 | KV453213.1 | 4949334 | 21-scf00419 | 21 |
| AX-158264564 | 21 | 78.586 | KV453213.1 | 4949864 | 21-scf00419 | 21 |
| AX-158264568 | 21 | 78.586 | KV453213.1 | 4954620 | 21-scf00419 | 21 |
| AX-158264570 | 21 | 78.586 | KV453213.1 | 4958005 | 21-scf00419 | 21 |
| AX-158264572 | 21 | 78.586 | KV453213.1 | 4963923 | 21-scf00419 | 21 |
| AX-158394778 | 21 | 78.586 | KV453213.1 | 4964564 | 21-scf00419 | 21 |
| AX-158264574 | 21 | 78.586 | KV453213.1 | 4965020 | 21-scf00419 | 21 |
| AX-158264584 | 21 | 78.586 | KV453213.1 | 4976321 | 21-scf00419 | 21 |
| AX-158264585 | 21 | 78.586 | KV453213.1 | 4977273 | 21-scf00419 | 21 |
| AX-158264586 | 21 | 78.586 | KV453213.1 | 4977777 | 21-scf00419 | 21 |
| AX-158264587 | 21 | 78.586 | KV453213.1 | 4978294 | 21-scf00419 | 21 |

|              |    |        |            |         |             |    |
|--------------|----|--------|------------|---------|-------------|----|
| AX-158264589 | 21 | 78.586 | KV453213.1 | 4980764 | 21-scf00419 | 21 |
| AX-158394782 | 21 | 78.586 | KV453213.1 | 4981038 | 21-scf00419 | 21 |
| AX-158264591 | 21 | 78.586 | KV453213.1 | 4984899 | 21-scf00419 | 21 |
| AX-158264594 | 21 | 78.586 | KV453213.1 | 4986821 | 21-scf00419 | 21 |
| AX-158264599 | 21 | 78.586 | KV453213.1 | 4991784 | 21-scf00419 | 21 |
| AX-158264602 | 21 | 78.586 | KV453213.1 | 4993121 | 21-scf00419 | 21 |
| AX-158264604 | 21 | 78.586 | KV453213.1 | 4994501 | 21-scf00419 | 21 |
| AX-158264605 | 21 | 78.586 | KV453213.1 | 4995182 | 21-scf00419 | 21 |
| AX-157755998 | 21 | 78.586 | KV453213.1 | 4995916 | 21-scf00419 | 21 |
| AX-158264610 | 21 | 78.586 | KV453213.1 | 5006253 | 21-scf00419 | 21 |
| AX-158264612 | 21 | 78.586 | KV453213.1 | 5008275 | 21-scf00419 | 21 |
| AX-158264613 | 21 | 78.586 | KV453213.1 | 5008805 | 21-scf00419 | 21 |
| AX-158394786 | 21 | 78.586 | KV453213.1 | 5009197 | 21-scf00419 | 21 |
| AX-158264614 | 21 | 78.586 | KV453213.1 | 5010013 | 21-scf00419 | 21 |
| AX-158264615 | 21 | 78.586 | KV453213.1 | 5010375 | 21-scf00419 | 21 |
| AX-158264617 | 21 | 78.586 | KV453213.1 | 5011769 | 21-scf00419 | 21 |
| AX-158264618 | 21 | 78.586 | KV453213.1 | 5012199 | 21-scf00419 | 21 |
| AX-158264620 | 21 | 78.586 | KV453213.1 | 5014069 | 21-scf00419 | 21 |
| AX-158264626 | 21 | 78.586 | KV453213.1 | 5023396 | 21-scf00419 | 21 |
| AX-158264627 | 21 | 78.586 | KV453213.1 | 5023913 | 21-scf00419 | 21 |
| AX-158264628 | 21 | 78.586 | KV453213.1 | 5024880 | 21-scf00419 | 21 |
| AX-158264632 | 21 | 78.586 | KV453213.1 | 5028592 | 21-scf00419 | 21 |
| AX-158264634 | 21 | 78.586 | KV453213.1 | 5030310 | 21-scf00419 | 21 |
| AX-158264636 | 21 | 78.586 | KV453213.1 | 5031686 | 21-scf00419 | 21 |
| AX-157698205 | 21 | 78.586 | KV453213.1 | 5032461 | 21-scf00419 | 21 |
| AX-158264637 | 21 | 78.586 | KV453213.1 | 5033104 | 21-scf00419 | 21 |
| AX-157699464 | 21 | 78.586 | KV453213.1 | 5036066 | 21-scf00419 | 21 |
| AX-158264639 | 21 | 78.586 | KV453213.1 | 5037376 | 21-scf00419 | 21 |
| AX-158264643 | 21 | 78.586 | KV453213.1 | 5039682 | 21-scf00419 | 21 |
| AX-158264645 | 21 | 78.586 | KV453213.1 | 5041600 | 21-scf00419 | 21 |
| AX-158264646 | 21 | 78.586 | KV453213.1 | 5042109 | 21-scf00419 | 21 |
| AX-158264648 | 21 | 78.586 | KV453213.1 | 5045384 | 21-scf00419 | 21 |
| AX-158264650 | 21 | 78.586 | KV453213.1 | 5047531 | 21-scf00419 | 21 |
| AX-158264651 | 21 | 78.586 | KV453213.1 | 5047937 | 21-scf00419 | 21 |
| AX-158264652 | 21 | 78.586 | KV453213.1 | 5049636 | 21-scf00419 | 21 |
| AX-158264654 | 21 | 78.586 | KV453213.1 | 5050967 | 21-scf00419 | 21 |
| AX-158264660 | 21 | 78.586 | KV453213.1 | 5058209 | 21-scf00419 | 21 |
| AX-158264663 | 21 | 78.586 | KV453213.1 | 5060688 | 21-scf00419 | 21 |
| AX-158264666 | 21 | 78.586 | KV453213.1 | 5064227 | 21-scf00419 | 21 |
| AX-157880459 | 21 | 78.586 | KV453213.1 | 5064689 | 21-scf00419 | 21 |
| AX-157872927 | 21 | 78.586 | KV453213.1 | 5065280 | 21-scf00419 | 21 |
| AX-158264675 | 21 | 78.586 | KV453213.1 | 5074821 | 21-scf00419 | 21 |
| AX-158264676 | 21 | 78.586 | KV453213.1 | 5077005 | 21-scf00419 | 21 |
| AX-157843238 | 21 | 78.586 | KV453213.1 | 5085481 | 21-scf00419 | 21 |
| AX-158264685 | 21 | 78.586 | KV453213.1 | 5085845 | 21-scf00419 | 21 |
| AX-158264686 | 21 | 78.586 | KV453213.1 | 5086794 | 21-scf00419 | 21 |
| AX-158264688 | 21 | 78.586 | KV453213.1 | 5088137 | 21-scf00419 | 21 |
| AX-158264691 | 21 | 78.586 | KV453213.1 | 5091671 | 21-scf00419 | 21 |
| AX-158264693 | 21 | 78.586 | KV453213.1 | 5093336 | 21-scf00419 | 21 |
| AX-158264694 | 21 | 78.586 | KV453213.1 | 5094043 | 21-scf00419 | 21 |
| AX-158264697 | 21 | 78.586 | KV453213.1 | 5097200 | 21-scf00419 | 21 |

|              |    |        |            |         |             |    |
|--------------|----|--------|------------|---------|-------------|----|
| AX-157843239 | 21 | 78.586 | KV453213.1 | 5100653 | 21-scf00419 | 21 |
| AX-158264704 | 21 | 78.586 | KV453213.1 | 5104622 | 21-scf00419 | 21 |
| AX-158264705 | 21 | 78.586 | KV453213.1 | 5107002 | 21-scf00419 | 21 |
| AX-158264707 | 21 | 78.586 | KV453213.1 | 5107755 | 21-scf00419 | 21 |
| AX-158264709 | 21 | 78.586 | KV453213.1 | 5111234 | 21-scf00419 | 21 |
| AX-158387264 | 21 | 78.586 | KV453213.1 | 5121944 | 21-scf00419 | 21 |
| AX-158264714 | 21 | 78.586 | KV453213.1 | 5130686 | 21-scf00419 | 21 |
| AX-158264717 | 21 | 78.586 | KV453213.1 | 5133881 | 21-scf00419 | 21 |
| AX-158264718 | 21 | 78.586 | KV453213.1 | 5135234 | 21-scf00419 | 21 |
| AX-158264719 | 21 | 78.586 | KV453213.1 | 5136531 | 21-scf00419 | 21 |
| AX-157715934 | 21 | 78.586 | KV453213.1 | 5136935 | 21-scf00419 | 21 |
| AX-158264723 | 21 | 78.586 | KV453213.1 | 5144092 | 21-scf00419 | 21 |
| AX-158264727 | 21 | 78.586 | KV453213.1 | 5153894 | 21-scf00419 | 21 |
| AX-157843244 | 21 | 78.586 | KV453213.1 | 5156964 | 21-scf00419 | 21 |
| AX-158264729 | 21 | 78.586 | KV453213.1 | 5158093 | 21-scf00419 | 21 |
| AX-158264730 | 21 | 78.586 | KV453213.1 | 5158677 | 21-scf00419 | 21 |
| AX-157843245 | 21 | 78.586 | KV453213.1 | 5158986 | 21-scf00419 | 21 |
| AX-157843246 | 21 | 78.586 | KV453213.1 | 5159626 | 21-scf00419 | 21 |
| AX-158264732 | 21 | 78.586 | KV453213.1 | 5161181 | 21-scf00419 | 21 |
| AX-158264733 | 21 | 78.586 | KV453213.1 | 5161867 | 21-scf00419 | 21 |
| AX-158264742 | 21 | 78.586 | KV453213.1 | 5170731 | 21-scf00419 | 21 |
| AX-158264743 | 21 | 78.586 | KV453213.1 | 5171868 | 21-scf00419 | 21 |
| AX-158264751 | 21 | 78.586 | KV453213.1 | 5181234 | 21-scf00419 | 21 |
| AX-158264760 | 21 | 78.586 | KV453213.1 | 5189298 | 21-scf00419 | 21 |
| AX-158264768 | 21 | 78.586 | KV453213.1 | 5195686 | 21-scf00419 | 21 |
| AX-157880461 | 21 | 78.586 | KV453213.1 | 5200056 | 21-scf00419 | 21 |
| AX-158264775 | 21 | 78.586 | KV453213.1 | 5202510 | 21-scf00419 | 21 |
| AX-158264780 | 21 | 78.586 | KV453213.1 | 5204987 | 21-scf00419 | 21 |
| AX-158264792 | 21 | 78.586 | KV453213.1 | 5220100 | 21-scf00419 | 21 |
| AX-157843247 | 21 | 78.586 | KV453213.1 | 5226600 | 21-scf00419 | 21 |
| AX-158264814 | 21 | 78.586 | KV453213.1 | 5242869 | 21-scf00419 | 21 |
| AX-158264815 | 21 | 78.586 | KV453213.1 | 5243669 | 21-scf00419 | 21 |
| AX-158264816 | 21 | 78.586 | KV453213.1 | 5244173 | 21-scf00419 | 21 |
| AX-158264817 | 21 | 78.586 | KV453213.1 | 5245486 | 21-scf00419 | 21 |
| AX-158264823 | 21 | 78.586 | KV453213.1 | 5257503 | 21-scf00419 | 21 |
| AX-158264824 | 21 | 78.586 | KV453213.1 | 5257973 | 21-scf00419 | 21 |
| AX-158264828 | 21 | 78.586 | KV453213.1 | 5261684 | 21-scf00419 | 21 |
| AX-158264831 | 21 | 78.586 | KV453213.1 | 5262712 | 21-scf00419 | 21 |
| AX-158264833 | 21 | 78.586 | KV453213.1 | 5264113 | 21-scf00419 | 21 |
| AX-158264835 | 21 | 78.586 | KV453213.1 | 5265746 | 21-scf00419 | 21 |
| AX-157843251 | 21 | 78.586 | KV453213.1 | 5266043 | 21-scf00419 | 21 |
| AX-158264837 | 21 | 78.586 | KV453213.1 | 5268283 | 21-scf00419 | 21 |
| AX-158264838 | 21 | 78.586 | KV453213.1 | 5268910 | 21-scf00419 | 21 |
| AX-158264839 | 21 | 78.586 | KV453213.1 | 5269620 | 21-scf00419 | 21 |
| AX-158264840 | 21 | 78.586 | KV453213.1 | 5270036 | 21-scf00419 | 21 |
| AX-158264841 | 21 | 78.586 | KV453213.1 | 5270247 | 21-scf00419 | 21 |
| AX-158264842 | 21 | 78.586 | KV453213.1 | 5270581 | 21-scf00419 | 21 |
| AX-157867453 | 21 | 78.586 | KV453213.1 | 5271011 | 21-scf00419 | 21 |
| AX-158264843 | 21 | 78.586 | KV453213.1 | 5271954 | 21-scf00419 | 21 |
| AX-158264844 | 21 | 78.586 | KV453213.1 | 5272635 | 21-scf00419 | 21 |
| AX-158264845 | 21 | 78.586 | KV453213.1 | 5273252 | 21-scf00419 | 21 |

|              |    |        |            |         |             |    |
|--------------|----|--------|------------|---------|-------------|----|
| AX-158264846 | 21 | 78.586 | KV453213.1 | 5274326 | 21-scf00419 | 21 |
| AX-158264847 | 21 | 78.586 | KV453213.1 | 5277301 | 21-scf00419 | 21 |
| AX-158264848 | 21 | 78.586 | KV453213.1 | 5278545 | 21-scf00419 | 21 |
| AX-158264852 | 21 | 78.586 | KV453213.1 | 5283765 | 21-scf00419 | 21 |
| AX-158264853 | 21 | 78.586 | KV453213.1 | 5284047 | 21-scf00419 | 21 |
| AX-158264854 | 21 | 78.586 | KV453213.1 | 5284894 | 21-scf00419 | 21 |
| AX-158264855 | 21 | 78.586 | KV453213.1 | 5286581 | 21-scf00419 | 21 |
| AX-158264858 | 21 | 78.586 | KV453213.1 | 5289270 | 21-scf00419 | 21 |
| AX-158264859 | 21 | 78.586 | KV453213.1 | 5290182 | 21-scf00419 | 21 |
| AX-158264860 | 21 | 78.586 | KV453213.1 | 5291146 | 21-scf00419 | 21 |
| AX-158264869 | 21 | 78.586 | KV453213.1 | 5298227 | 21-scf00419 | 21 |
| AX-158264870 | 21 | 78.586 | KV453213.1 | 5298617 | 21-scf00419 | 21 |
| AX-158264871 | 21 | 78.586 | KV453213.1 | 5299000 | 21-scf00419 | 21 |
| AX-158264872 | 21 | 78.586 | KV453213.1 | 5299298 | 21-scf00419 | 21 |
| AX-157843252 | 21 | 78.586 | KV453213.1 | 5299542 | 21-scf00419 | 21 |
| AX-158264876 | 21 | 78.586 | KV453213.1 | 5301329 | 21-scf00419 | 21 |
| AX-158264879 | 21 | 78.586 | KV453213.1 | 5304542 | 21-scf00419 | 21 |
| AX-158264880 | 21 | 78.586 | KV453213.1 | 5304748 | 21-scf00419 | 21 |
| AX-158264882 | 21 | 78.586 | KV453213.1 | 5305597 | 21-scf00419 | 21 |
| AX-158264883 | 21 | 78.586 | KV453213.1 | 5306802 | 21-scf00419 | 21 |
| AX-158264885 | 21 | 78.586 | KV453213.1 | 5313111 | 21-scf00419 | 21 |
| AX-158264888 | 21 | 78.586 | KV453213.1 | 5315059 | 21-scf00419 | 21 |
| AX-158264889 | 21 | 78.586 | KV453213.1 | 5315868 | 21-scf00419 | 21 |
| AX-157843254 | 21 | 78.586 | KV453213.1 | 5316305 | 21-scf00419 | 21 |
| AX-158264891 | 21 | 78.586 | KV453213.1 | 5318432 | 21-scf00419 | 21 |
| AX-158264895 | 21 | 78.586 | KV453213.1 | 5326507 | 21-scf00419 | 21 |
| AX-158264896 | 21 | 78.586 | KV453213.1 | 5327883 | 21-scf00419 | 21 |
| AX-157843259 | 21 | 78.586 | KV453213.1 | 5330441 | 21-scf00419 | 21 |
| AX-157843260 | 21 | 78.586 | KV453213.1 | 5332414 | 21-scf00419 | 21 |
| AX-158264902 | 21 | 78.586 | KV453213.1 | 5335004 | 21-scf00419 | 21 |
| AX-158264903 | 21 | 78.586 | KV453213.1 | 5338197 | 21-scf00419 | 21 |
| AX-158264904 | 21 | 78.586 | KV453213.1 | 5338687 | 21-scf00419 | 21 |
| AX-157718633 | 21 | 78.586 | KV453213.1 | 5339086 | 21-scf00419 | 21 |
| AX-157722865 | 21 | 78.586 | KV453213.1 | 5343455 | 21-scf00419 | 21 |
| AX-158264906 | 21 | 78.586 | KV453213.1 | 5344037 | 21-scf00419 | 21 |
| AX-157843261 | 21 | 78.586 | KV453213.1 | 5348183 | 21-scf00419 | 21 |
| AX-157843262 | 21 | 78.586 | KV453213.1 | 5349148 | 21-scf00419 | 21 |
| AX-158264907 | 21 | 78.586 | KV453213.1 | 5349464 | 21-scf00419 | 21 |
| AX-158264908 | 21 | 78.586 | KV453213.1 | 5352799 | 21-scf00419 | 21 |
| AX-158264909 | 21 | 78.586 | KV453213.1 | 5353905 | 21-scf00419 | 21 |
| AX-157843264 | 21 | 78.586 | KV453213.1 | 5362114 | 21-scf00419 | 21 |
| AX-158264916 | 21 | 78.586 | KV453213.1 | 5369820 | 21-scf00419 | 21 |
| AX-158264917 | 21 | 78.586 | KV453213.1 | 5371986 | 21-scf00419 | 21 |
| AX-158264923 | 21 | 78.586 | KV453213.1 | 5380082 | 21-scf00419 | 21 |
| AX-158264926 | 21 | 78.586 | KV453213.1 | 5383848 | 21-scf00419 | 21 |
| AX-158264929 | 21 | 78.586 | KV453213.1 | 5386050 | 21-scf00419 | 21 |
| AX-158264930 | 21 | 78.586 | KV453213.1 | 5386352 | 21-scf00419 | 21 |
| AX-158264937 | 21 | 78.586 | KV453213.1 | 5401520 | 21-scf00419 | 21 |
| AX-158264951 | 21 | 78.586 | KV453213.1 | 5413556 | 21-scf00419 | 21 |
| AX-158265000 | 21 | 78.586 | KV453213.1 | 5469307 | 21-scf00419 | 21 |
| AX-158265024 | 21 | 78.586 | KV453213.1 | 5486691 | 21-scf00419 | 21 |

|              |    |        |            |         |             |    |
|--------------|----|--------|------------|---------|-------------|----|
| AX-157718237 | 21 | 78.586 | KV453213.1 | 6389413 | 21-scf00419 | 21 |
| AX-158265689 | 21 | 78.586 | KV453213.1 | 6425283 | 21-scf00419 | 21 |
| AX-158265993 | 21 | 78.586 | KV453213.1 | 6814619 | 21-scf00419 | 21 |
| AX-158264938 | 21 | 78.879 | KV453213.1 | 5401899 | 21-scf00419 | 21 |
| AX-158264939 | 21 | 78.879 | KV453213.1 | 5402957 | 21-scf00419 | 21 |
| AX-158264942 | 21 | 79.019 | KV453213.1 | 5407404 | 21-scf00419 | 21 |
| AX-158264944 | 21 | 79.023 | KV453213.1 | 5409005 | 21-scf00419 | 21 |
| AX-158264547 | 21 | 79.132 | KV453213.1 | 4929905 | 21-scf00419 | 21 |
| AX-158264771 | 21 | 79.132 | KV453213.1 | 5199665 | 21-scf00419 | 21 |
| AX-157756992 | 21 | 79.132 | KV453213.1 | 5329076 | 21-scf00419 | 21 |
| AX-158264948 | 21 | 79.132 | KV453213.1 | 5410904 | 21-scf00419 | 21 |
| AX-158264949 | 21 | 79.132 | KV453213.1 | 5412670 | 21-scf00419 | 21 |
| AX-158264954 | 21 | 79.132 | KV453213.1 | 5417727 | 21-scf00419 | 21 |
| AX-157747425 | 21 | 79.132 | KV453213.1 | 5420177 | 21-scf00419 | 21 |
| AX-157721382 | 21 | 79.132 | KV453213.1 | 5421510 | 21-scf00419 | 21 |
| AX-158264957 | 21 | 79.132 | KV453213.1 | 5422222 | 21-scf00419 | 21 |
| AX-158264958 | 21 | 79.132 | KV453213.1 | 5423153 | 21-scf00419 | 21 |
| AX-157843270 | 21 | 79.132 | KV453213.1 | 5424194 | 21-scf00419 | 21 |
| AX-157887801 | 21 | 79.132 | KV453213.1 | 5444233 | 21-scf00419 | 21 |
| AX-158264964 | 21 | 79.171 | KV453213.1 | 5432907 | 21-scf00419 | 21 |
| AX-157746880 | 21 | 79.21  | KV453213.1 | 5423815 | 21-scf00419 | 21 |
| AX-158264967 | 21 | 79.21  | KV453213.1 | 5435665 | 21-scf00419 | 21 |
| AX-158264971 | 21 | 79.21  | KV453213.1 | 5437943 | 21-scf00419 | 21 |
| AX-158264970 | 21 | 79.242 | KV453213.1 | 5437513 | 21-scf00419 | 21 |
| AX-158264973 | 21 | 79.242 | KV453213.1 | 5441513 | 21-scf00419 | 21 |
| AX-158264976 | 21 | 79.242 | KV453213.1 | 5443332 | 21-scf00419 | 21 |
| AX-158264978 | 21 | 79.242 | KV453213.1 | 5444855 | 21-scf00419 | 21 |
| AX-158264983 | 21 | 79.242 | KV453213.1 | 5449546 | 21-scf00419 | 21 |
| AX-158265295 | 21 | 79.242 | KV453213.1 | 5819717 | 21-scf00419 | 21 |
| AX-158264984 | 21 | 79.301 | KV453213.1 | 5450079 | 21-scf00419 | 21 |
| AX-157867456 | 21 | 79.301 | KV453213.1 | 5476741 | 21-scf00419 | 21 |
| AX-158264986 | 21 | 79.351 | KV453213.1 | 5453060 | 21-scf00419 | 21 |
| AX-158264991 | 21 | 79.351 | KV453213.1 | 5460456 | 21-scf00419 | 21 |
| AX-158264993 | 21 | 79.351 | KV453213.1 | 5462492 | 21-scf00419 | 21 |
| AX-158264997 | 21 | 79.351 | KV453213.1 | 5468143 | 21-scf00419 | 21 |
| AX-158264998 | 21 | 79.351 | KV453213.1 | 5468425 | 21-scf00419 | 21 |
| AX-158265001 | 21 | 79.351 | KV453213.1 | 5469860 | 21-scf00419 | 21 |
| AX-158265002 | 21 | 79.351 | KV453213.1 | 5470293 | 21-scf00419 | 21 |
| AX-158265010 | 21 | 79.351 | KV453213.1 | 5477404 | 21-scf00419 | 21 |
| AX-158265033 | 21 | 79.351 | KV453213.1 | 5496218 | 21-scf00419 | 21 |
| AX-158265003 | 21 | 79.367 | KV453213.1 | 5471729 | 21-scf00419 | 21 |
| AX-158264857 | 21 | 79.389 | KV453213.1 | 5288386 | 21-scf00419 | 21 |
| AX-158264884 | 21 | 79.389 | KV453213.1 | 5308341 | 21-scf00419 | 21 |
| AX-158265004 | 21 | 79.389 | KV453213.1 | 5472477 | 21-scf00419 | 21 |
| AX-158265008 | 21 | 79.416 | KV453213.1 | 5476178 | 21-scf00419 | 21 |
| AX-158265009 | 21 | 79.422 | KV453213.1 | 5477120 | 21-scf00419 | 21 |
| AX-158265016 | 21 | 79.46  | KV453213.1 | 5483227 | 21-scf00419 | 21 |
| AX-157753198 | 21 | 79.46  | KV453213.1 | 5485107 | 21-scf00419 | 21 |
| AX-158265020 | 21 | 79.46  | KV453213.1 | 5485596 | 21-scf00419 | 21 |
| AX-157843273 | 21 | 79.46  | KV453213.1 | 5494801 | 21-scf00419 | 21 |
| AX-158265034 | 21 | 79.46  | KV453213.1 | 5497129 | 21-scf00419 | 21 |

|              |    |        |            |         |             |    |
|--------------|----|--------|------------|---------|-------------|----|
| AX-157843320 | 21 | 79.46  | KV453213.1 | 6132999 | 21-scf00419 | 21 |
| AX-158264992 | 21 | 79.483 | KV453213.1 | 5461263 | 21-scf00419 | 21 |
| AX-158264999 | 21 | 79.483 | KV453213.1 | 5468817 | 21-scf00419 | 21 |
| AX-158265035 | 21 | 79.483 | KV453213.1 | 5498275 | 21-scf00419 | 21 |
| AX-158265087 | 21 | 79.483 | KV453213.1 | 5571367 | 21-scf00419 | 21 |
| AX-158265599 | 21 | 79.483 | KV453213.1 | 6290617 | 21-scf00419 | 21 |
| AX-158265036 | 21 | 79.49  | KV453213.1 | 5499830 | 21-scf00419 | 21 |
| AX-158265040 | 21 | 79.569 | KV453213.1 | 5505388 | 21-scf00419 | 21 |
| AX-158265041 | 21 | 79.569 | KV453213.1 | 5506115 | 21-scf00419 | 21 |
| AX-158265044 | 21 | 79.569 | KV453213.1 | 5507937 | 21-scf00419 | 21 |
| AX-158265045 | 21 | 79.569 | KV453213.1 | 5509525 | 21-scf00419 | 21 |
| AX-158265047 | 21 | 79.569 | KV453213.1 | 5513538 | 21-scf00419 | 21 |
| AX-158265049 | 21 | 79.569 | KV453213.1 | 5522225 | 21-scf00419 | 21 |
| AX-158265048 | 21 | 79.623 | KV453213.1 | 5520766 | 21-scf00419 | 21 |
| AX-157880467 | 21 | 79.661 | KV453213.1 | 5524524 | 21-scf00419 | 21 |
| AX-157860038 | 21 | 79.705 | KV453213.1 | 5531085 | 21-scf00419 | 21 |
| AX-157718960 | 21 | 79.73  | KV453213.1 | 5535816 | 21-scf00419 | 21 |
| AX-158265059 | 21 | 79.793 | KV453213.1 | 5537584 | 21-scf00419 | 21 |
| AX-157742041 | 21 | 79.852 | KV453213.1 | 5539766 | 21-scf00419 | 21 |
| AX-158265062 | 21 | 79.875 | KV453213.1 | 5541898 | 21-scf00419 | 21 |
| AX-158265063 | 21 | 79.875 | KV453213.1 | 5542521 | 21-scf00419 | 21 |
| AX-157725104 | 21 | 79.882 | KV453213.1 | 5544516 | 21-scf00419 | 21 |
| AX-158265070 | 21 | 79.889 | KV453213.1 | 5548697 | 21-scf00419 | 21 |
| AX-158265019 | 21 | 79.897 | KV453213.1 | 5485026 | 21-scf00419 | 21 |
| AX-158265071 | 21 | 79.897 | KV453213.1 | 5552432 | 21-scf00419 | 21 |
| AX-158265074 | 21 | 79.897 | KV453213.1 | 5556267 | 21-scf00419 | 21 |
| AX-158265076 | 21 | 79.897 | KV453213.1 | 5560322 | 21-scf00419 | 21 |
| AX-158265077 | 21 | 79.897 | KV453213.1 | 5561663 | 21-scf00419 | 21 |
| AX-158265078 | 21 | 79.897 | KV453213.1 | 5562975 | 21-scf00419 | 21 |
| AX-158265080 | 21 | 79.897 | KV453213.1 | 5564460 | 21-scf00419 | 21 |
| AX-158265081 | 21 | 79.897 | KV453213.1 | 5565532 | 21-scf00419 | 21 |
| AX-158265084 | 21 | 79.897 | KV453213.1 | 5567836 | 21-scf00419 | 21 |
| AX-158265086 | 21 | 79.897 | KV453213.1 | 5570606 | 21-scf00419 | 21 |
| AX-158265088 | 21 | 80.006 | KV453213.1 | 5571584 | 21-scf00419 | 21 |
| AX-157738786 | 21 | 80.006 | KV453213.1 | 5572267 | 21-scf00419 | 21 |
| AX-158265089 | 21 | 80.006 | KV453213.1 | 5572983 | 21-scf00419 | 21 |
| AX-158265090 | 21 | 80.006 | KV453213.1 | 5573422 | 21-scf00419 | 21 |
| AX-158265092 | 21 | 80.006 | KV453213.1 | 5576534 | 21-scf00419 | 21 |
| AX-158265094 | 21 | 80.006 | KV453213.1 | 5578973 | 21-scf00419 | 21 |
| AX-157843275 | 21 | 80.006 | KV453213.1 | 5579291 | 21-scf00419 | 21 |
| AX-158265095 | 21 | 80.006 | KV453213.1 | 5579857 | 21-scf00419 | 21 |
| AX-157860041 | 21 | 80.006 | KV453213.1 | 5584390 | 21-scf00419 | 21 |
| AX-158265099 | 21 | 80.006 | KV453213.1 | 5585310 | 21-scf00419 | 21 |
| AX-157750871 | 21 | 80.006 | KV453213.1 | 5585827 | 21-scf00419 | 21 |
| AX-158265101 | 21 | 80.006 | KV453213.1 | 5591065 | 21-scf00419 | 21 |
| AX-157843276 | 21 | 80.006 | KV453213.1 | 5592598 | 21-scf00419 | 21 |
| AX-158265103 | 21 | 80.006 | KV453213.1 | 5593699 | 21-scf00419 | 21 |
| AX-158387270 | 21 | 80.006 | KV453213.1 | 5596603 | 21-scf00419 | 21 |
| AX-158265267 | 21 | 80.006 | KV453213.1 | 5778775 | 21-scf00419 | 21 |
| AX-157771005 | 21 | 80.116 | KV453213.1 | 5599297 | 21-scf00419 | 21 |
| AX-158265116 | 21 | 80.116 | KV453213.1 | 5608047 | 21-scf00419 | 21 |

|              |    |        |            |         |             |    |
|--------------|----|--------|------------|---------|-------------|----|
| AX-158265307 | 21 | 80.116 | KV453213.1 | 5829900 | 21-scf00419 | 21 |
| AX-158265336 | 21 | 80.116 | KV453213.1 | 5869501 | 21-scf00419 | 21 |
| AX-158265395 | 21 | 80.116 | KV453213.1 | 5937856 | 21-scf00419 | 21 |
| AX-158265398 | 21 | 80.116 | KV453213.1 | 5938719 | 21-scf00419 | 21 |
| AX-158265534 | 21 | 80.116 | KV453213.1 | 6212101 | 21-scf00419 | 21 |
| AX-158265110 | 21 | 80.164 | KV453213.1 | 5604729 | 21-scf00419 | 21 |
| AX-158265113 | 21 | 80.225 | KV453213.1 | 5605793 | 21-scf00419 | 21 |
| AX-158265115 | 21 | 80.225 | KV453213.1 | 5607561 | 21-scf00419 | 21 |
| AX-158265119 | 21 | 80.225 | KV453213.1 | 5610232 | 21-scf00419 | 21 |
| AX-158265126 | 21 | 80.334 | KV453213.1 | 5617512 | 21-scf00419 | 21 |
| AX-158265127 | 21 | 80.334 | KV453213.1 | 5618597 | 21-scf00419 | 21 |
| AX-158265130 | 21 | 80.334 | KV453213.1 | 5621368 | 21-scf00419 | 21 |
| AX-158265132 | 21 | 80.334 | KV453213.1 | 5622669 | 21-scf00419 | 21 |
| AX-158265133 | 21 | 80.334 | KV453213.1 | 5624130 | 21-scf00419 | 21 |
| AX-158265136 | 21 | 80.334 | KV453213.1 | 5626929 | 21-scf00419 | 21 |
| AX-158265144 | 21 | 80.553 | KV453213.1 | 5638124 | 21-scf00419 | 21 |
| AX-158265145 | 21 | 80.553 | KV453213.1 | 5639622 | 21-scf00419 | 21 |
| AX-158265150 | 21 | 80.553 | KV453213.1 | 5643011 | 21-scf00419 | 21 |
| AX-158265154 | 21 | 80.553 | KV453213.1 | 5647781 | 21-scf00419 | 21 |
| AX-158265158 | 21 | 80.553 | KV453213.1 | 5652035 | 21-scf00419 | 21 |
| AX-158265160 | 21 | 80.553 | KV453213.1 | 5653468 | 21-scf00419 | 21 |
| AX-157725387 | 21 | 80.553 | KV453213.1 | 5654724 | 21-scf00419 | 21 |
| AX-158265163 | 21 | 80.553 | KV453213.1 | 5656504 | 21-scf00419 | 21 |
| AX-158265166 | 21 | 80.553 | KV453213.1 | 5658048 | 21-scf00419 | 21 |
| AX-158265167 | 21 | 80.553 | KV453213.1 | 5659197 | 21-scf00419 | 21 |
| AX-158265171 | 21 | 80.553 | KV453213.1 | 5663308 | 21-scf00419 | 21 |
| AX-158265172 | 21 | 80.553 | KV453213.1 | 5664534 | 21-scf00419 | 21 |
| AX-158265173 | 21 | 80.553 | KV453213.1 | 5665578 | 21-scf00419 | 21 |
| AX-158265176 | 21 | 80.553 | KV453213.1 | 5667824 | 21-scf00419 | 21 |
| AX-158265177 | 21 | 80.553 | KV453213.1 | 5668621 | 21-scf00419 | 21 |
| AX-158265179 | 21 | 80.553 | KV453213.1 | 5672180 | 21-scf00419 | 21 |
| AX-158381099 | 21 | 80.553 | KV453213.1 | 5673876 | 21-scf00419 | 21 |
| AX-158265182 | 21 | 80.553 | KV453213.1 | 5674255 | 21-scf00419 | 21 |
| AX-158265186 | 21 | 80.553 | KV453213.1 | 5678276 | 21-scf00419 | 21 |
| AX-157722134 | 21 | 80.553 | KV453213.1 | 5683073 | 21-scf00419 | 21 |
| AX-158265194 | 21 | 80.553 | KV453213.1 | 5692169 | 21-scf00419 | 21 |
| AX-158265195 | 21 | 80.553 | KV453213.1 | 5692604 | 21-scf00419 | 21 |
| AX-158265197 | 21 | 80.553 | KV453213.1 | 5693501 | 21-scf00419 | 21 |
| AX-158265206 | 21 | 80.553 | KV453213.1 | 5704523 | 21-scf00419 | 21 |
| AX-158265233 | 21 | 80.553 | KV453213.1 | 5733604 | 21-scf00419 | 21 |
| AX-158387278 | 21 | 80.553 | KV453213.1 | 5771998 | 21-scf00419 | 21 |
| AX-158265325 | 21 | 80.553 | KV453213.1 | 5856999 | 21-scf00419 | 21 |
| AX-158265629 | 21 | 80.553 | KV453213.1 | 6325131 | 21-scf00419 | 21 |
| AX-158265021 | 21 | 80.662 | KV453213.1 | 5485915 | 21-scf00419 | 21 |
| AX-158265165 | 21 | 80.662 | KV453213.1 | 5657578 | 21-scf00419 | 21 |
| AX-158265189 | 21 | 80.662 | KV453213.1 | 5680833 | 21-scf00419 | 21 |
| AX-158265203 | 21 | 80.662 | KV453213.1 | 5698061 | 21-scf00419 | 21 |
| AX-157726064 | 21 | 80.662 | KV453213.1 | 5698616 | 21-scf00419 | 21 |
| AX-157751385 | 21 | 80.662 | KV453213.1 | 5699060 | 21-scf00419 | 21 |
| AX-158265205 | 21 | 80.662 | KV453213.1 | 5703338 | 21-scf00419 | 21 |
| AX-158265207 | 21 | 80.662 | KV453213.1 | 5706915 | 21-scf00419 | 21 |



|              |    |        |            |         |             |    |
|--------------|----|--------|------------|---------|-------------|----|
| AX-158265208 | 21 | 80.662 | KV453213.1 | 5709323 | 21-scf00419 | 21 |
| AX-158265209 | 21 | 80.662 | KV453213.1 | 5709934 | 21-scf00419 | 21 |
| AX-158265210 | 21 | 80.662 | KV453213.1 | 5711574 | 21-scf00419 | 21 |
| AX-158265217 | 21 | 80.662 | KV453213.1 | 5720857 | 21-scf00419 | 21 |
| AX-158265218 | 21 | 80.662 | KV453213.1 | 5721969 | 21-scf00419 | 21 |
| AX-158265223 | 21 | 80.662 | KV453213.1 | 5726413 | 21-scf00419 | 21 |
| AX-158265224 | 21 | 80.662 | KV453213.1 | 5728627 | 21-scf00419 | 21 |
| AX-158265225 | 21 | 80.662 | KV453213.1 | 5729288 | 21-scf00419 | 21 |
| AX-157860043 | 21 | 80.662 | KV453213.1 | 5836334 | 21-scf00419 | 21 |
| AX-158265403 | 21 | 80.662 | KV453213.1 | 5956190 | 21-scf00419 | 21 |
| AX-157843325 | 21 | 80.662 | KV453213.1 | 6169097 | 21-scf00419 | 21 |
| AX-158265606 | 21 | 80.662 | KV453213.1 | 6296935 | 21-scf00419 | 21 |
| AX-158265870 | 21 | 80.662 | KV453213.1 | 6663035 | 21-scf00419 | 21 |
| AX-158265234 | 21 | 80.713 | KV453213.1 | 5734173 | 21-scf00419 | 21 |
| AX-158265236 | 21 | 80.77  | KV453213.1 | 5736713 | 21-scf00419 | 21 |
| AX-158265204 | 21 | 80.88  | KV453213.1 | 5701771 | 21-scf00419 | 21 |
| AX-158265220 | 21 | 80.88  | KV453213.1 | 5723471 | 21-scf00419 | 21 |
| AX-158265231 | 21 | 80.88  | KV453213.1 | 5732874 | 21-scf00419 | 21 |
| AX-158265246 | 21 | 80.88  | KV453213.1 | 5751467 | 21-scf00419 | 21 |
| AX-158265252 | 21 | 80.88  | KV453213.1 | 5759025 | 21-scf00419 | 21 |
| AX-158265253 | 21 | 80.88  | KV453213.1 | 5760318 | 21-scf00419 | 21 |
| AX-157753643 | 21 | 80.88  | KV453213.1 | 5763140 | 21-scf00419 | 21 |
| AX-158265255 | 21 | 80.88  | KV453213.1 | 5763569 | 21-scf00419 | 21 |
| AX-158265257 | 21 | 80.88  | KV453213.1 | 5767108 | 21-scf00419 | 21 |
| AX-158265260 | 21 | 80.88  | KV453213.1 | 5769604 | 21-scf00419 | 21 |
| AX-158265261 | 21 | 80.88  | KV453213.1 | 5770207 | 21-scf00419 | 21 |
| AX-158265266 | 21 | 80.88  | KV453213.1 | 5778555 | 21-scf00419 | 21 |
| AX-158265272 | 21 | 80.88  | KV453213.1 | 5789867 | 21-scf00419 | 21 |
| AX-158265273 | 21 | 80.88  | KV453213.1 | 5790904 | 21-scf00419 | 21 |
| AX-158265274 | 21 | 80.88  | KV453213.1 | 5791337 | 21-scf00419 | 21 |
| AX-158265275 | 21 | 80.88  | KV453213.1 | 5792499 | 21-scf00419 | 21 |
| AX-158265276 | 21 | 80.88  | KV453213.1 | 5793057 | 21-scf00419 | 21 |
| AX-158265291 | 21 | 80.911 | KV453213.1 | 5815472 | 21-scf00419 | 21 |
| AX-158265305 | 21 | 80.992 | KV453213.1 | 5828796 | 21-scf00419 | 21 |
| AX-158265306 | 21 | 81.075 | KV453213.1 | 5829037 | 21-scf00419 | 21 |
| AX-158265270 | 21 | 81.154 | KV453213.1 | 5787694 | 21-scf00419 | 21 |
| AX-158265313 | 21 | 81.154 | KV453213.1 | 5837524 | 21-scf00419 | 21 |
| AX-158265317 | 21 | 81.154 | KV453213.1 | 5839692 | 21-scf00419 | 21 |
| AX-158265322 | 21 | 81.154 | KV453213.1 | 5849139 | 21-scf00419 | 21 |
| AX-157843280 | 21 | 81.245 | KV453213.1 | 5856037 | 21-scf00419 | 21 |
| AX-157843281 | 21 | 81.34  | KV453213.1 | 5858166 | 21-scf00419 | 21 |
| AX-158262288 | 21 | 81.428 | KV453213.1 | 2416757 | 21-scf00419 | 21 |
| AX-158265017 | 21 | 81.428 | KV453213.1 | 5484202 | 21-scf00419 | 21 |
| AX-158265032 | 21 | 81.428 | KV453213.1 | 5495846 | 21-scf00419 | 21 |
| AX-157754856 | 21 | 81.428 | KV453213.1 | 5496760 | 21-scf00419 | 21 |
| AX-158265037 | 21 | 81.428 | KV453213.1 | 5500505 | 21-scf00419 | 21 |
| AX-157716341 | 21 | 81.428 | KV453213.1 | 5521665 | 21-scf00419 | 21 |
| AX-158265067 | 21 | 81.428 | KV453213.1 | 5545647 | 21-scf00419 | 21 |
| AX-157843274 | 21 | 81.428 | KV453213.1 | 5577278 | 21-scf00419 | 21 |
| AX-158265121 | 21 | 81.428 | KV453213.1 | 5611830 | 21-scf00419 | 21 |
| AX-158265134 | 21 | 81.428 | KV453213.1 | 5625643 | 21-scf00419 | 21 |

|              |    |        |            |         |             |    |
|--------------|----|--------|------------|---------|-------------|----|
| AX-158265137 | 21 | 81.428 | KV453213.1 | 5627736 | 21-scf00419 | 21 |
| AX-158265140 | 21 | 81.428 | KV453213.1 | 5631424 | 21-scf00419 | 21 |
| AX-158265153 | 21 | 81.428 | KV453213.1 | 5645935 | 21-scf00419 | 21 |
| AX-158265162 | 21 | 81.428 | KV453213.1 | 5655828 | 21-scf00419 | 21 |
| AX-158265174 | 21 | 81.428 | KV453213.1 | 5666399 | 21-scf00419 | 21 |
| AX-158265196 | 21 | 81.428 | KV453213.1 | 5692798 | 21-scf00419 | 21 |
| AX-158265199 | 21 | 81.428 | KV453213.1 | 5694831 | 21-scf00419 | 21 |
| AX-157756373 | 21 | 81.428 | KV453213.1 | 5708546 | 21-scf00419 | 21 |
| AX-158265221 | 21 | 81.428 | KV453213.1 | 5724168 | 21-scf00419 | 21 |
| AX-158265245 | 21 | 81.428 | KV453213.1 | 5750866 | 21-scf00419 | 21 |
| AX-158265247 | 21 | 81.428 | KV453213.1 | 5753795 | 21-scf00419 | 21 |
| AX-158265250 | 21 | 81.428 | KV453213.1 | 5757019 | 21-scf00419 | 21 |
| AX-157843277 | 21 | 81.428 | KV453213.1 | 5800814 | 21-scf00419 | 21 |
| AX-158265289 | 21 | 81.428 | KV453213.1 | 5811636 | 21-scf00419 | 21 |
| AX-158423438 | 21 | 81.428 | KV453213.1 | 5816278 | 21-scf00419 | 21 |
| AX-158265293 | 21 | 81.428 | KV453213.1 | 5816846 | 21-scf00419 | 21 |
| AX-158265294 | 21 | 81.428 | KV453213.1 | 5817542 | 21-scf00419 | 21 |
| AX-158265314 | 21 | 81.428 | KV453213.1 | 5838138 | 21-scf00419 | 21 |
| AX-158265329 | 21 | 81.428 | KV453213.1 | 5862377 | 21-scf00419 | 21 |
| AX-158265330 | 21 | 81.428 | KV453213.1 | 5862791 | 21-scf00419 | 21 |
| AX-158265331 | 21 | 81.428 | KV453213.1 | 5865408 | 21-scf00419 | 21 |
| AX-157843283 | 21 | 81.428 | KV453213.1 | 5867251 | 21-scf00419 | 21 |
| AX-157773419 | 21 | 81.428 | KV453213.1 | 5868605 | 21-scf00419 | 21 |
| AX-157843284 | 21 | 81.428 | KV453213.1 | 5868967 | 21-scf00419 | 21 |
| AX-158265339 | 21 | 81.428 | KV453213.1 | 5873882 | 21-scf00419 | 21 |
| AX-158265341 | 21 | 81.428 | KV453213.1 | 5874661 | 21-scf00419 | 21 |
| AX-158265343 | 21 | 81.428 | KV453213.1 | 5875303 | 21-scf00419 | 21 |
| AX-158265344 | 21 | 81.428 | KV453213.1 | 5875847 | 21-scf00419 | 21 |
| AX-158265345 | 21 | 81.428 | KV453213.1 | 5876022 | 21-scf00419 | 21 |
| AX-158265346 | 21 | 81.428 | KV453213.1 | 5876426 | 21-scf00419 | 21 |
| AX-157774416 | 21 | 81.428 | KV453213.1 | 5877662 | 21-scf00419 | 21 |
| AX-158265350 | 21 | 81.428 | KV453213.1 | 5880056 | 21-scf00419 | 21 |
| AX-157843287 | 21 | 81.428 | KV453213.1 | 5880663 | 21-scf00419 | 21 |
| AX-158387281 | 21 | 81.428 | KV453213.1 | 5882870 | 21-scf00419 | 21 |
| AX-158265352 | 21 | 81.428 | KV453213.1 | 5883701 | 21-scf00419 | 21 |
| AX-158265353 | 21 | 81.428 | KV453213.1 | 5884213 | 21-scf00419 | 21 |
| AX-158265355 | 21 | 81.428 | KV453213.1 | 5885927 | 21-scf00419 | 21 |
| AX-158265358 | 21 | 81.428 | KV453213.1 | 5887098 | 21-scf00419 | 21 |
| AX-158265361 | 21 | 81.428 | KV453213.1 | 5891178 | 21-scf00419 | 21 |
| AX-158265375 | 21 | 81.428 | KV453213.1 | 5912128 | 21-scf00419 | 21 |
| AX-157843291 | 21 | 81.428 | KV453213.1 | 5912337 | 21-scf00419 | 21 |
| AX-158265376 | 21 | 81.428 | KV453213.1 | 5912589 | 21-scf00419 | 21 |
| AX-157744653 | 21 | 81.428 | KV453213.1 | 5915235 | 21-scf00419 | 21 |
| AX-158265379 | 21 | 81.428 | KV453213.1 | 5918293 | 21-scf00419 | 21 |
| AX-158265382 | 21 | 81.428 | KV453213.1 | 5920738 | 21-scf00419 | 21 |
| AX-158265385 | 21 | 81.428 | KV453213.1 | 5925178 | 21-scf00419 | 21 |
| AX-158265387 | 21 | 81.428 | KV453213.1 | 5926986 | 21-scf00419 | 21 |
| AX-158265388 | 21 | 81.428 | KV453213.1 | 5927719 | 21-scf00419 | 21 |
| AX-158265390 | 21 | 81.428 | KV453213.1 | 5929220 | 21-scf00419 | 21 |
| AX-158265392 | 21 | 81.428 | KV453213.1 | 5933371 | 21-scf00419 | 21 |
| AX-158265393 | 21 | 81.428 | KV453213.1 | 5933708 | 21-scf00419 | 21 |

|              |    |        |            |         |             |    |
|--------------|----|--------|------------|---------|-------------|----|
| AX-158265397 | 21 | 81.428 | KV453213.1 | 5938569 | 21-scf00419 | 21 |
| AX-158265404 | 21 | 81.428 | KV453213.1 | 5957473 | 21-scf00419 | 21 |
| AX-158265407 | 21 | 81.428 | KV453213.1 | 5960185 | 21-scf00419 | 21 |
| AX-157759056 | 21 | 81.428 | KV453213.1 | 5960674 | 21-scf00419 | 21 |
| AX-157843297 | 21 | 81.428 | KV453213.1 | 5960742 | 21-scf00419 | 21 |
| AX-158265408 | 21 | 81.428 | KV453213.1 | 5961006 | 21-scf00419 | 21 |
| AX-157843298 | 21 | 81.428 | KV453213.1 | 5962101 | 21-scf00419 | 21 |
| AX-157843300 | 21 | 81.428 | KV453213.1 | 5968422 | 21-scf00419 | 21 |
| AX-157843303 | 21 | 81.428 | KV453213.1 | 5987211 | 21-scf00419 | 21 |
| AX-158265415 | 21 | 81.428 | KV453213.1 | 5987992 | 21-scf00419 | 21 |
| AX-158265418 | 21 | 81.428 | KV453213.1 | 5992222 | 21-scf00419 | 21 |
| AX-157722731 | 21 | 81.428 | KV453213.1 | 5994584 | 21-scf00419 | 21 |
| AX-158265432 | 21 | 81.428 | KV453213.1 | 6011281 | 21-scf00419 | 21 |
| AX-158265453 | 21 | 81.428 | KV453213.1 | 6059419 | 21-scf00419 | 21 |
| AX-158265454 | 21 | 81.428 | KV453213.1 | 6060087 | 21-scf00419 | 21 |
| AX-158265459 | 21 | 81.428 | KV453213.1 | 6075096 | 21-scf00419 | 21 |
| AX-158265468 | 21 | 81.428 | KV453213.1 | 6100049 | 21-scf00419 | 21 |
| AX-158265469 | 21 | 81.428 | KV453213.1 | 6101752 | 21-scf00419 | 21 |
| AX-158265471 | 21 | 81.428 | KV453213.1 | 6104519 | 21-scf00419 | 21 |
| AX-157843309 | 21 | 81.428 | KV453213.1 | 6105846 | 21-scf00419 | 21 |
| AX-157843310 | 21 | 81.428 | KV453213.1 | 6106160 | 21-scf00419 | 21 |
| AX-157721122 | 21 | 81.428 | KV453213.1 | 6107167 | 21-scf00419 | 21 |
| AX-157887809 | 21 | 81.428 | KV453213.1 | 6108492 | 21-scf00419 | 21 |
| AX-157843311 | 21 | 81.428 | KV453213.1 | 6109292 | 21-scf00419 | 21 |
| AX-158265477 | 21 | 81.428 | KV453213.1 | 6121413 | 21-scf00419 | 21 |
| AX-157843317 | 21 | 81.428 | KV453213.1 | 6123417 | 21-scf00419 | 21 |
| AX-157843318 | 21 | 81.428 | KV453213.1 | 6123974 | 21-scf00419 | 21 |
| AX-157843319 | 21 | 81.428 | KV453213.1 | 6124077 | 21-scf00419 | 21 |
| AX-157773067 | 21 | 81.428 | KV453213.1 | 6124608 | 21-scf00419 | 21 |
| AX-157716981 | 21 | 81.428 | KV453213.1 | 6127807 | 21-scf00419 | 21 |
| AX-158265482 | 21 | 81.428 | KV453213.1 | 6128765 | 21-scf00419 | 21 |
| AX-158265483 | 21 | 81.428 | KV453213.1 | 6130350 | 21-scf00419 | 21 |
| AX-158265484 | 21 | 81.428 | KV453213.1 | 6131437 | 21-scf00419 | 21 |
| AX-158265485 | 21 | 81.428 | KV453213.1 | 6132380 | 21-scf00419 | 21 |
| AX-157843324 | 21 | 81.428 | KV453213.1 | 6168778 | 21-scf00419 | 21 |
| AX-158265505 | 21 | 81.428 | KV453213.1 | 6168862 | 21-scf00419 | 21 |
| AX-158265506 | 21 | 81.428 | KV453213.1 | 6169553 | 21-scf00419 | 21 |
| AX-158265507 | 21 | 81.428 | KV453213.1 | 6170062 | 21-scf00419 | 21 |
| AX-157843326 | 21 | 81.428 | KV453213.1 | 6171063 | 21-scf00419 | 21 |
| AX-158265511 | 21 | 81.428 | KV453213.1 | 6178566 | 21-scf00419 | 21 |
| AX-158265516 | 21 | 81.428 | KV453213.1 | 6190670 | 21-scf00419 | 21 |
| AX-157843331 | 21 | 81.428 | KV453213.1 | 6198278 | 21-scf00419 | 21 |
| AX-157843333 | 21 | 81.428 | KV453213.1 | 6215114 | 21-scf00419 | 21 |
| AX-158387283 | 21 | 81.428 | KV453213.1 | 6236056 | 21-scf00419 | 21 |
| AX-157843336 | 21 | 81.428 | KV453213.1 | 6247600 | 21-scf00419 | 21 |
| AX-158265564 | 21 | 81.428 | KV453213.1 | 6252817 | 21-scf00419 | 21 |
| AX-158265566 | 21 | 81.428 | KV453213.1 | 6253778 | 21-scf00419 | 21 |
| AX-158265568 | 21 | 81.428 | KV453213.1 | 6255035 | 21-scf00419 | 21 |
| AX-158265571 | 21 | 81.428 | KV453213.1 | 6259507 | 21-scf00419 | 21 |
| AX-157843342 | 21 | 81.428 | KV453213.1 | 6282323 | 21-scf00419 | 21 |
| AX-158265604 | 21 | 81.428 | KV453213.1 | 6295704 | 21-scf00419 | 21 |

|              |    |        |            |         |             |    |
|--------------|----|--------|------------|---------|-------------|----|
| AX-158265608 | 21 | 81.428 | KV453213.1 | 6302725 | 21-scf00419 | 21 |
| AX-158265609 | 21 | 81.428 | KV453213.1 | 6302901 | 21-scf00419 | 21 |
| AX-157744447 | 21 | 81.428 | KV453213.1 | 6304811 | 21-scf00419 | 21 |
| AX-157843346 | 21 | 81.428 | KV453213.1 | 6305878 | 21-scf00419 | 21 |
| AX-158265618 | 21 | 81.428 | KV453213.1 | 6312808 | 21-scf00419 | 21 |
| AX-157843347 | 21 | 81.428 | KV453213.1 | 6318962 | 21-scf00419 | 21 |
| AX-158265640 | 21 | 81.428 | KV453213.1 | 6335478 | 21-scf00419 | 21 |
| AX-158265644 | 21 | 81.428 | KV453213.1 | 6339410 | 21-scf00419 | 21 |
| AX-158265693 | 21 | 81.428 | KV453213.1 | 6429374 | 21-scf00419 | 21 |
| AX-158265701 | 21 | 81.428 | KV453213.1 | 6438448 | 21-scf00419 | 21 |
| AX-158265711 | 21 | 81.428 | KV453213.1 | 6446239 | 21-scf00419 | 21 |
| AX-158265736 | 21 | 81.428 | KV453213.1 | 6487567 | 21-scf00419 | 21 |
| AX-158265787 | 21 | 81.428 | KV453213.1 | 6561076 | 21-scf00419 | 21 |
| AX-158265803 | 21 | 81.428 | KV453213.1 | 6576380 | 21-scf00419 | 21 |
| AX-158265815 | 21 | 81.428 | KV453213.1 | 6588147 | 21-scf00419 | 21 |
| AX-158265823 | 21 | 81.428 | KV453213.1 | 6598456 | 21-scf00419 | 21 |
| AX-158265906 | 21 | 81.428 | KV453213.1 | 6708398 | 21-scf00419 | 21 |
| AX-158265957 | 21 | 81.428 | KV453213.1 | 6765166 | 21-scf00419 | 21 |
| AX-158265972 | 21 | 81.428 | KV453213.1 | 6776718 | 21-scf00419 | 21 |
| AX-158265982 | 21 | 81.428 | KV453213.1 | 6792771 | 21-scf00419 | 21 |
| AX-158265989 | 21 | 81.428 | KV453213.1 | 6810585 | 21-scf00419 | 21 |
| AX-158265510 | 21 | 81.474 | KV453213.1 | 6177806 | 21-scf00419 | 21 |
| AX-158262953 | 21 | 81.537 | KV453213.1 | 3237434 | 21-scf00419 | 21 |
| AX-158264575 | 21 | 81.537 | KV453213.1 | 4966009 | 21-scf00419 | 21 |
| AX-158264655 | 21 | 81.537 | KV453213.1 | 5052176 | 21-scf00419 | 21 |
| AX-158264668 | 21 | 81.537 | KV453213.1 | 5069047 | 21-scf00419 | 21 |
| AX-158264689 | 21 | 81.537 | KV453213.1 | 5089277 | 21-scf00419 | 21 |
| AX-157872928 | 21 | 81.537 | KV453213.1 | 5098457 | 21-scf00419 | 21 |
| AX-157843240 | 21 | 81.537 | KV453213.1 | 5125863 | 21-scf00419 | 21 |
| AX-158264724 | 21 | 81.537 | KV453213.1 | 5146472 | 21-scf00419 | 21 |
| AX-158264861 | 21 | 81.537 | KV453213.1 | 5291598 | 21-scf00419 | 21 |
| AX-157753509 | 21 | 81.537 | KV453213.1 | 5549820 | 21-scf00419 | 21 |
| AX-158265230 | 21 | 81.537 | KV453213.1 | 5732386 | 21-scf00419 | 21 |
| AX-157772302 | 21 | 81.537 | KV453213.1 | 5750378 | 21-scf00419 | 21 |
| AX-158265256 | 21 | 81.537 | KV453213.1 | 5766568 | 21-scf00419 | 21 |
| AX-158265285 | 21 | 81.537 | KV453213.1 | 5806137 | 21-scf00419 | 21 |
| AX-158265303 | 21 | 81.537 | KV453213.1 | 5825903 | 21-scf00419 | 21 |
| AX-158265328 | 21 | 81.537 | KV453213.1 | 5861114 | 21-scf00419 | 21 |
| AX-158265333 | 21 | 81.537 | KV453213.1 | 5866427 | 21-scf00419 | 21 |
| AX-158265334 | 21 | 81.537 | KV453213.1 | 5868008 | 21-scf00419 | 21 |
| AX-158265348 | 21 | 81.537 | KV453213.1 | 5878480 | 21-scf00419 | 21 |
| AX-158265380 | 21 | 81.537 | KV453213.1 | 5918812 | 21-scf00419 | 21 |
| AX-157843296 | 21 | 81.537 | KV453213.1 | 5919412 | 21-scf00419 | 21 |
| AX-158265381 | 21 | 81.537 | KV453213.1 | 5919737 | 21-scf00419 | 21 |
| AX-157709593 | 21 | 81.537 | KV453213.1 | 5944628 | 21-scf00419 | 21 |
| AX-158265402 | 21 | 81.537 | KV453213.1 | 5954067 | 21-scf00419 | 21 |
| AX-158416394 | 21 | 81.537 | KV453213.1 | 5957163 | 21-scf00419 | 21 |
| AX-157740614 | 21 | 81.537 | KV453213.1 | 5969416 | 21-scf00419 | 21 |
| AX-157843301 | 21 | 81.537 | KV453213.1 | 5973280 | 21-scf00419 | 21 |
| AX-158265411 | 21 | 81.537 | KV453213.1 | 5978039 | 21-scf00419 | 21 |
| AX-158265413 | 21 | 81.537 | KV453213.1 | 5985179 | 21-scf00419 | 21 |

|              |    |        |            |         |             |    |
|--------------|----|--------|------------|---------|-------------|----|
| AX-158265414 | 21 | 81.537 | KV453213.1 | 5986540 | 21-scf00419 | 21 |
| AX-157880479 | 21 | 81.537 | KV453213.1 | 6084238 | 21-scf00419 | 21 |
| AX-157843313 | 21 | 81.537 | KV453213.1 | 6110575 | 21-scf00419 | 21 |
| AX-157718644 | 21 | 81.537 | KV453213.1 | 6118095 | 21-scf00419 | 21 |
| AX-158265480 | 21 | 81.537 | KV453213.1 | 6124947 | 21-scf00419 | 21 |
| AX-158265486 | 21 | 81.537 | KV453213.1 | 6135663 | 21-scf00419 | 21 |
| AX-157746298 | 21 | 81.537 | KV453213.1 | 6182978 | 21-scf00419 | 21 |
| AX-157741540 | 21 | 81.537 | KV453213.1 | 6186428 | 21-scf00419 | 21 |
| AX-157741686 | 21 | 81.537 | KV453213.1 | 6187440 | 21-scf00419 | 21 |
| AX-158265514 | 21 | 81.537 | KV453213.1 | 6188654 | 21-scf00419 | 21 |
| AX-157843330 | 21 | 81.537 | KV453213.1 | 6191520 | 21-scf00419 | 21 |
| AX-158265518 | 21 | 81.537 | KV453213.1 | 6191685 | 21-scf00419 | 21 |
| AX-158423440 | 21 | 81.537 | KV453213.1 | 6192485 | 21-scf00419 | 21 |
| AX-158265520 | 21 | 81.537 | KV453213.1 | 6193916 | 21-scf00419 | 21 |
| AX-158265523 | 21 | 81.537 | KV453213.1 | 6196675 | 21-scf00419 | 21 |
| AX-158265526 | 21 | 81.537 | KV453213.1 | 6202409 | 21-scf00419 | 21 |
| AX-157739591 | 21 | 81.537 | KV453213.1 | 6203550 | 21-scf00419 | 21 |
| AX-158265527 | 21 | 81.537 | KV453213.1 | 6204516 | 21-scf00419 | 21 |
| AX-157860046 | 21 | 81.537 | KV453213.1 | 6204710 | 21-scf00419 | 21 |
| AX-158265529 | 21 | 81.537 | KV453213.1 | 6206651 | 21-scf00419 | 21 |
| AX-158265531 | 21 | 81.537 | KV453213.1 | 6208682 | 21-scf00419 | 21 |
| AX-158265533 | 21 | 81.537 | KV453213.1 | 6211398 | 21-scf00419 | 21 |
| AX-158265538 | 21 | 81.537 | KV453213.1 | 6217573 | 21-scf00419 | 21 |
| AX-158265539 | 21 | 81.537 | KV453213.1 | 6218220 | 21-scf00419 | 21 |
| AX-158265541 | 21 | 81.537 | KV453213.1 | 6219845 | 21-scf00419 | 21 |
| AX-158265542 | 21 | 81.537 | KV453213.1 | 6220344 | 21-scf00419 | 21 |
| AX-158265544 | 21 | 81.537 | KV453213.1 | 6222035 | 21-scf00419 | 21 |
| AX-158265545 | 21 | 81.537 | KV453213.1 | 6222568 | 21-scf00419 | 21 |
| AX-158265546 | 21 | 81.537 | KV453213.1 | 6223779 | 21-scf00419 | 21 |
| AX-158265551 | 21 | 81.537 | KV453213.1 | 6233423 | 21-scf00419 | 21 |
| AX-157752969 | 21 | 81.537 | KV453213.1 | 6233967 | 21-scf00419 | 21 |
| AX-158265554 | 21 | 81.537 | KV453213.1 | 6238001 | 21-scf00419 | 21 |
| AX-158265557 | 21 | 81.537 | KV453213.1 | 6243272 | 21-scf00419 | 21 |
| AX-158265558 | 21 | 81.537 | KV453213.1 | 6243789 | 21-scf00419 | 21 |
| AX-158265559 | 21 | 81.537 | KV453213.1 | 6244788 | 21-scf00419 | 21 |
| AX-158265560 | 21 | 81.537 | KV453213.1 | 6245102 | 21-scf00419 | 21 |
| AX-158265561 | 21 | 81.537 | KV453213.1 | 6245785 | 21-scf00419 | 21 |
| AX-158265562 | 21 | 81.537 | KV453213.1 | 6246537 | 21-scf00419 | 21 |
| AX-158265563 | 21 | 81.537 | KV453213.1 | 6248259 | 21-scf00419 | 21 |
| AX-157749894 | 21 | 81.537 | KV453213.1 | 6248972 | 21-scf00419 | 21 |
| AX-157755945 | 21 | 81.537 | KV453213.1 | 6249461 | 21-scf00419 | 21 |
| AX-158265569 | 21 | 81.537 | KV453213.1 | 6257799 | 21-scf00419 | 21 |
| AX-158265573 | 21 | 81.537 | KV453213.1 | 6261012 | 21-scf00419 | 21 |
| AX-158265576 | 21 | 81.537 | KV453213.1 | 6264692 | 21-scf00419 | 21 |
| AX-158265579 | 21 | 81.537 | KV453213.1 | 6271423 | 21-scf00419 | 21 |
| AX-158265580 | 21 | 81.537 | KV453213.1 | 6271917 | 21-scf00419 | 21 |
| AX-158265581 | 21 | 81.537 | KV453213.1 | 6272561 | 21-scf00419 | 21 |
| AX-158265583 | 21 | 81.537 | KV453213.1 | 6274355 | 21-scf00419 | 21 |
| AX-158265584 | 21 | 81.537 | KV453213.1 | 6275006 | 21-scf00419 | 21 |
| AX-158265586 | 21 | 81.537 | KV453213.1 | 6276704 | 21-scf00419 | 21 |
| AX-158265587 | 21 | 81.537 | KV453213.1 | 6277057 | 21-scf00419 | 21 |

|              |    |        |            |         |             |    |
|--------------|----|--------|------------|---------|-------------|----|
| AX-158265588 | 21 | 81.537 | KV453213.1 | 6277484 | 21-scf00419 | 21 |
| AX-158265589 | 21 | 81.537 | KV453213.1 | 6278069 | 21-scf00419 | 21 |
| AX-158265591 | 21 | 81.537 | KV453213.1 | 6279228 | 21-scf00419 | 21 |
| AX-158265592 | 21 | 81.537 | KV453213.1 | 6279683 | 21-scf00419 | 21 |
| AX-158265593 | 21 | 81.537 | KV453213.1 | 6280555 | 21-scf00419 | 21 |
| AX-158265594 | 21 | 81.537 | KV453213.1 | 6281093 | 21-scf00419 | 21 |
| AX-157843340 | 21 | 81.537 | KV453213.1 | 6281445 | 21-scf00419 | 21 |
| AX-157843341 | 21 | 81.537 | KV453213.1 | 6282280 | 21-scf00419 | 21 |
| AX-158265596 | 21 | 81.537 | KV453213.1 | 6286434 | 21-scf00419 | 21 |
| AX-158265600 | 21 | 81.537 | KV453213.1 | 6291010 | 21-scf00419 | 21 |
| AX-157860049 | 21 | 81.537 | KV453213.1 | 6291062 | 21-scf00419 | 21 |
| AX-158265603 | 21 | 81.537 | KV453213.1 | 6293720 | 21-scf00419 | 21 |
| AX-157843345 | 21 | 81.537 | KV453213.1 | 6295558 | 21-scf00419 | 21 |
| AX-158265613 | 21 | 81.537 | KV453213.1 | 6307330 | 21-scf00419 | 21 |
| AX-158265616 | 21 | 81.537 | KV453213.1 | 6310468 | 21-scf00419 | 21 |
| AX-157872939 | 21 | 81.537 | KV453213.1 | 6312154 | 21-scf00419 | 21 |
| AX-158265624 | 21 | 81.537 | KV453213.1 | 6316855 | 21-scf00419 | 21 |
| AX-158265625 | 21 | 81.537 | KV453213.1 | 6317478 | 21-scf00419 | 21 |
| AX-157843350 | 21 | 81.537 | KV453213.1 | 6325439 | 21-scf00419 | 21 |
| AX-157880483 | 21 | 81.537 | KV453213.1 | 6327291 | 21-scf00419 | 21 |
| AX-158265633 | 21 | 81.537 | KV453213.1 | 6329155 | 21-scf00419 | 21 |
| AX-158265634 | 21 | 81.537 | KV453213.1 | 6330986 | 21-scf00419 | 21 |
| AX-158265641 | 21 | 81.537 | KV453213.1 | 6337657 | 21-scf00419 | 21 |
| AX-158265643 | 21 | 81.537 | KV453213.1 | 6339048 | 21-scf00419 | 21 |
| AX-157749751 | 21 | 81.537 | KV453213.1 | 6340869 | 21-scf00419 | 21 |
| AX-157843353 | 21 | 81.537 | KV453213.1 | 6341045 | 21-scf00419 | 21 |
| AX-158265646 | 21 | 81.537 | KV453213.1 | 6342461 | 21-scf00419 | 21 |
| AX-158265648 | 21 | 81.537 | KV453213.1 | 6343376 | 21-scf00419 | 21 |
| AX-157843356 | 21 | 81.537 | KV453213.1 | 6344934 | 21-scf00419 | 21 |
| AX-157843358 | 21 | 81.537 | KV453213.1 | 6351691 | 21-scf00419 | 21 |
| AX-158265670 | 21 | 81.537 | KV453213.1 | 6384401 | 21-scf00419 | 21 |
| AX-157693102 | 21 | 81.537 | KV453213.1 | 6398757 | 21-scf00419 | 21 |
| AX-157843365 | 21 | 81.537 | KV453213.1 | 6402617 | 21-scf00419 | 21 |
| AX-158265692 | 21 | 81.537 | KV453213.1 | 6428085 | 21-scf00419 | 21 |
| AX-158387286 | 21 | 81.537 | KV453213.1 | 6451545 | 21-scf00419 | 21 |
| AX-158265927 | 21 | 81.537 | KV453213.1 | 6725741 | 21-scf00419 | 21 |
| AX-157843409 | 21 | 81.537 | KV453213.1 | 6734338 | 21-scf00419 | 21 |
| AX-157843417 | 21 | 81.537 | KV453213.1 | 6786641 | 21-scf00419 | 21 |
| AX-158265980 | 21 | 81.537 | KV453213.1 | 6789748 | 21-scf00419 | 21 |
| AX-158266063 | 21 | 81.537 | KV453213.1 | 6911055 | 21-scf00419 | 21 |
| AX-158265642 | 21 | 81.581 | KV453213.1 | 6338444 | 21-scf00419 | 21 |
| AX-158265649 | 21 | 81.633 | KV453213.1 | 6343879 | 21-scf00419 | 21 |
| AX-158265022 | 21 | 81.646 | KV453213.1 | 5486175 | 21-scf00419 | 21 |
| AX-158265226 | 21 | 81.646 | KV453213.1 | 5729698 | 21-scf00419 | 21 |
| AX-158265241 | 21 | 81.646 | KV453213.1 | 5744096 | 21-scf00419 | 21 |
| AX-158265326 | 21 | 81.646 | KV453213.1 | 5857864 | 21-scf00419 | 21 |
| AX-158265540 | 21 | 81.646 | KV453213.1 | 6219408 | 21-scf00419 | 21 |
| AX-158265543 | 21 | 81.646 | KV453213.1 | 6221186 | 21-scf00419 | 21 |
| AX-158265574 | 21 | 81.646 | KV453213.1 | 6262484 | 21-scf00419 | 21 |
| AX-158265582 | 21 | 81.646 | KV453213.1 | 6273383 | 21-scf00419 | 21 |
| AX-157860048 | 21 | 81.646 | KV453213.1 | 6286986 | 21-scf00419 | 21 |

|              |    |        |            |         |             |    |
|--------------|----|--------|------------|---------|-------------|----|
| AX-158265614 | 21 | 81.646 | KV453213.1 | 6309121 | 21-scf00419 | 21 |
| AX-158265631 | 21 | 81.646 | KV453213.1 | 6326947 | 21-scf00419 | 21 |
| AX-157745847 | 21 | 81.646 | KV453213.1 | 6331678 | 21-scf00419 | 21 |
| AX-158265650 | 21 | 81.646 | KV453213.1 | 6347284 | 21-scf00419 | 21 |
| AX-158265652 | 21 | 81.646 | KV453213.1 | 6352162 | 21-scf00419 | 21 |
| AX-157843359 | 21 | 81.646 | KV453213.1 | 6355063 | 21-scf00419 | 21 |
| AX-158265656 | 21 | 81.646 | KV453213.1 | 6357116 | 21-scf00419 | 21 |
| AX-157716498 | 21 | 81.646 | KV453213.1 | 6358133 | 21-scf00419 | 21 |
| AX-158265663 | 21 | 81.646 | KV453213.1 | 6374774 | 21-scf00419 | 21 |
| AX-157750830 | 21 | 81.646 | KV453213.1 | 6375431 | 21-scf00419 | 21 |
| AX-158265664 | 21 | 81.646 | KV453213.1 | 6376506 | 21-scf00419 | 21 |
| AX-158265665 | 21 | 81.646 | KV453213.1 | 6381342 | 21-scf00419 | 21 |
| AX-158265666 | 21 | 81.646 | KV453213.1 | 6381700 | 21-scf00419 | 21 |
| AX-158265668 | 21 | 81.646 | KV453213.1 | 6383267 | 21-scf00419 | 21 |
| AX-158265669 | 21 | 81.646 | KV453213.1 | 6383500 | 21-scf00419 | 21 |
| AX-157716798 | 21 | 81.646 | KV453213.1 | 6385685 | 21-scf00419 | 21 |
| AX-157843361 | 21 | 81.646 | KV453213.1 | 6390465 | 21-scf00419 | 21 |
| AX-158265673 | 21 | 81.646 | KV453213.1 | 6393522 | 21-scf00419 | 21 |
| AX-158265674 | 21 | 81.646 | KV453213.1 | 6393887 | 21-scf00419 | 21 |
| AX-158265675 | 21 | 81.646 | KV453213.1 | 6395331 | 21-scf00419 | 21 |
| AX-157843363 | 21 | 81.646 | KV453213.1 | 6395998 | 21-scf00419 | 21 |
| AX-157716686 | 21 | 81.646 | KV453213.1 | 6397426 | 21-scf00419 | 21 |
| AX-157843364 | 21 | 81.646 | KV453213.1 | 6400139 | 21-scf00419 | 21 |
| AX-158265677 | 21 | 81.646 | KV453213.1 | 6400444 | 21-scf00419 | 21 |
| AX-158265678 | 21 | 81.646 | KV453213.1 | 6401707 | 21-scf00419 | 21 |
| AX-158265679 | 21 | 81.646 | KV453213.1 | 6402114 | 21-scf00419 | 21 |
| AX-157843366 | 21 | 81.646 | KV453213.1 | 6404405 | 21-scf00419 | 21 |
| AX-158265705 | 21 | 81.646 | KV453213.1 | 6440837 | 21-scf00419 | 21 |
| AX-157690642 | 21 | 81.646 | KV453213.1 | 6444777 | 21-scf00419 | 21 |
| AX-158265709 | 21 | 81.646 | KV453213.1 | 6444955 | 21-scf00419 | 21 |
| AX-158265722 | 21 | 81.646 | KV453213.1 | 6465016 | 21-scf00419 | 21 |
| AX-158265898 | 21 | 81.646 | KV453213.1 | 6697797 | 21-scf00419 | 21 |
| AX-157709511 | 21 | 81.646 | KV453213.1 | 6731124 | 21-scf00419 | 21 |
| AX-157843339 | 21 | 81.755 | KV453213.1 | 6257471 | 21-scf00419 | 21 |
| AX-157843370 | 21 | 81.755 | KV453213.1 | 6430882 | 21-scf00419 | 21 |
| AX-158265694 | 21 | 81.755 | KV453213.1 | 6431912 | 21-scf00419 | 21 |
| AX-158265695 | 21 | 81.755 | KV453213.1 | 6432481 | 21-scf00419 | 21 |
| AX-158265696 | 21 | 81.755 | KV453213.1 | 6434017 | 21-scf00419 | 21 |
| AX-158265699 | 21 | 81.755 | KV453213.1 | 6436003 | 21-scf00419 | 21 |
| AX-158265703 | 21 | 81.755 | KV453213.1 | 6439698 | 21-scf00419 | 21 |
| AX-158265704 | 21 | 81.755 | KV453213.1 | 6440182 | 21-scf00419 | 21 |
| AX-158265706 | 21 | 81.755 | KV453213.1 | 6441882 | 21-scf00419 | 21 |
| AX-158265708 | 21 | 81.755 | KV453213.1 | 6443467 | 21-scf00419 | 21 |
| AX-158265702 | 21 | 81.853 | KV453213.1 | 6439023 | 21-scf00419 | 21 |
| AX-158265710 | 21 | 81.853 | KV453213.1 | 6445668 | 21-scf00419 | 21 |
| AX-158265858 | 21 | 81.853 | KV453213.1 | 6655424 | 21-scf00419 | 21 |
| AX-158265720 | 21 | 81.931 | KV453213.1 | 6463031 | 21-scf00419 | 21 |
| AX-158265723 | 21 | 82.082 | KV453213.1 | 6473511 | 21-scf00419 | 21 |
| AX-158265727 | 21 | 82.082 | KV453213.1 | 6479363 | 21-scf00419 | 21 |
| AX-158265522 | 21 | 82.083 | KV453213.1 | 6195950 | 21-scf00419 | 21 |
| AX-158265671 | 21 | 82.083 | KV453213.1 | 6387245 | 21-scf00419 | 21 |

|              |    |        |            |         |             |    |
|--------------|----|--------|------------|---------|-------------|----|
| AX-158265700 | 21 | 82.083 | KV453213.1 | 6437044 | 21-scf00419 | 21 |
| AX-157843371 | 21 | 82.083 | KV453213.1 | 6441231 | 21-scf00419 | 21 |
| AX-158265729 | 21 | 82.083 | KV453213.1 | 6480196 | 21-scf00419 | 21 |
| AX-158265732 | 21 | 82.083 | KV453213.1 | 6483414 | 21-scf00419 | 21 |
| AX-158265733 | 21 | 82.083 | KV453213.1 | 6483951 | 21-scf00419 | 21 |
| AX-158265734 | 21 | 82.083 | KV453213.1 | 6484464 | 21-scf00419 | 21 |
| AX-158265739 | 21 | 82.083 | KV453213.1 | 6498294 | 21-scf00419 | 21 |
| AX-158265741 | 21 | 82.083 | KV453213.1 | 6502336 | 21-scf00419 | 21 |
| AX-158265742 | 21 | 82.083 | KV453213.1 | 6504619 | 21-scf00419 | 21 |
| AX-158265744 | 21 | 82.083 | KV453213.1 | 6506517 | 21-scf00419 | 21 |
| AX-158265746 | 21 | 82.083 | KV453213.1 | 6507360 | 21-scf00419 | 21 |
| AX-158265747 | 21 | 82.083 | KV453213.1 | 6512611 | 21-scf00419 | 21 |
| AX-158265748 | 21 | 82.083 | KV453213.1 | 6514493 | 21-scf00419 | 21 |
| AX-158265749 | 21 | 82.083 | KV453213.1 | 6515892 | 21-scf00419 | 21 |
| AX-158265750 | 21 | 82.083 | KV453213.1 | 6518123 | 21-scf00419 | 21 |
| AX-158265755 | 21 | 82.083 | KV453213.1 | 6523395 | 21-scf00419 | 21 |
| AX-158265757 | 21 | 82.083 | KV453213.1 | 6524296 | 21-scf00419 | 21 |
| AX-158265760 | 21 | 82.083 | KV453213.1 | 6528043 | 21-scf00419 | 21 |
| AX-157843379 | 21 | 82.083 | KV453213.1 | 6530559 | 21-scf00419 | 21 |
| AX-158265762 | 21 | 82.083 | KV453213.1 | 6530891 | 21-scf00419 | 21 |
| AX-158265763 | 21 | 82.083 | KV453213.1 | 6531994 | 21-scf00419 | 21 |
| AX-158265765 | 21 | 82.083 | KV453213.1 | 6533044 | 21-scf00419 | 21 |
| AX-158265766 | 21 | 82.083 | KV453213.1 | 6533756 | 21-scf00419 | 21 |
| AX-158265767 | 21 | 82.083 | KV453213.1 | 6534279 | 21-scf00419 | 21 |
| AX-157716588 | 21 | 82.083 | KV453213.1 | 6535859 | 21-scf00419 | 21 |
| AX-157843382 | 21 | 82.083 | KV453213.1 | 6537073 | 21-scf00419 | 21 |
| AX-157843383 | 21 | 82.083 | KV453213.1 | 6538701 | 21-scf00419 | 21 |
| AX-158265770 | 21 | 82.083 | KV453213.1 | 6540043 | 21-scf00419 | 21 |
| AX-157739304 | 21 | 82.083 | KV453213.1 | 6543298 | 21-scf00419 | 21 |
| AX-157843386 | 21 | 82.083 | KV453213.1 | 6561490 | 21-scf00419 | 21 |
| AX-158265802 | 21 | 82.083 | KV453213.1 | 6574754 | 21-scf00419 | 21 |
| AX-158265843 | 21 | 82.083 | KV453213.1 | 6627519 | 21-scf00419 | 21 |
| AX-157749721 | 21 | 82.083 | KV453213.1 | 6630136 | 21-scf00419 | 21 |
| AX-158265761 | 21 | 82.192 | KV453213.1 | 6529847 | 21-scf00419 | 21 |
| AX-158265777 | 21 | 82.192 | KV453213.1 | 6548090 | 21-scf00419 | 21 |
| AX-158265778 | 21 | 82.192 | KV453213.1 | 6549754 | 21-scf00419 | 21 |
| AX-157843385 | 21 | 82.192 | KV453213.1 | 6549990 | 21-scf00419 | 21 |
| AX-158265779 | 21 | 82.192 | KV453213.1 | 6550308 | 21-scf00419 | 21 |
| AX-158265783 | 21 | 82.192 | KV453213.1 | 6556117 | 21-scf00419 | 21 |
| AX-158265835 | 21 | 82.192 | KV453213.1 | 6617999 | 21-scf00419 | 21 |
| AX-158265782 | 21 | 82.204 | KV453213.1 | 6555406 | 21-scf00419 | 21 |
| AX-158265776 | 21 | 82.215 | KV453213.1 | 6547784 | 21-scf00419 | 21 |
| AX-158265784 | 21 | 82.215 | KV453213.1 | 6556881 | 21-scf00419 | 21 |
| AX-158265785 | 21 | 82.215 | KV453213.1 | 6557375 | 21-scf00419 | 21 |
| AX-158265786 | 21 | 82.215 | KV453213.1 | 6559738 | 21-scf00419 | 21 |
| AX-157843394 | 21 | 82.215 | KV453213.1 | 6589433 | 21-scf00419 | 21 |
| AX-158265788 | 21 | 82.239 | KV453213.1 | 6561918 | 21-scf00419 | 21 |
| AX-158265791 | 21 | 82.265 | KV453213.1 | 6564807 | 21-scf00419 | 21 |
| AX-157843390 | 21 | 82.265 | KV453213.1 | 6570927 | 21-scf00419 | 21 |
| AX-157714812 | 21 | 82.265 | KV453213.1 | 6581128 | 21-scf00419 | 21 |
| AX-158265809 | 21 | 82.265 | KV453213.1 | 6584184 | 21-scf00419 | 21 |



|              |    |        |            |         |             |    |
|--------------|----|--------|------------|---------|-------------|----|
| AX-157843402 | 21 | 82.265 | KV453213.1 | 6653611 | 21-scf00419 | 21 |
| AX-158265798 | 21 | 82.281 | KV453213.1 | 6572146 | 21-scf00419 | 21 |
| AX-158423441 | 21 | 82.301 | KV453213.1 | 6197395 | 21-scf00419 | 21 |
| AX-157843377 | 21 | 82.301 | KV453213.1 | 6488345 | 21-scf00419 | 21 |
| AX-157741768 | 21 | 82.301 | KV453213.1 | 6502797 | 21-scf00419 | 21 |
| AX-158265764 | 21 | 82.301 | KV453213.1 | 6532490 | 21-scf00419 | 21 |
| AX-158265780 | 21 | 82.301 | KV453213.1 | 6550502 | 21-scf00419 | 21 |
| AX-158265799 | 21 | 82.301 | KV453213.1 | 6572531 | 21-scf00419 | 21 |
| AX-158265801 | 21 | 82.301 | KV453213.1 | 6573391 | 21-scf00419 | 21 |
| AX-157843391 | 21 | 82.301 | KV453213.1 | 6575610 | 21-scf00419 | 21 |
| AX-157843392 | 21 | 82.301 | KV453213.1 | 6578717 | 21-scf00419 | 21 |
| AX-158265806 | 21 | 82.301 | KV453213.1 | 6580383 | 21-scf00419 | 21 |
| AX-158265807 | 21 | 82.301 | KV453213.1 | 6582551 | 21-scf00419 | 21 |
| AX-158265812 | 21 | 82.301 | KV453213.1 | 6585154 | 21-scf00419 | 21 |
| AX-158265814 | 21 | 82.301 | KV453213.1 | 6588017 | 21-scf00419 | 21 |
| AX-157843393 | 21 | 82.301 | KV453213.1 | 6589093 | 21-scf00419 | 21 |
| AX-157843395 | 21 | 82.301 | KV453213.1 | 6590567 | 21-scf00419 | 21 |
| AX-158265869 | 21 | 82.301 | KV453213.1 | 6662674 | 21-scf00419 | 21 |
| AX-157843405 | 21 | 82.301 | KV453213.1 | 6674394 | 21-scf00419 | 21 |
| AX-157843328 | 21 | 82.323 | KV453213.1 | 6172895 | 21-scf00419 | 21 |
| AX-158265759 | 21 | 82.323 | KV453213.1 | 6526513 | 21-scf00419 | 21 |
| AX-157872940 | 21 | 82.323 | KV453213.1 | 6554335 | 21-scf00419 | 21 |
| AX-158265817 | 21 | 82.323 | KV453213.1 | 6590697 | 21-scf00419 | 21 |
| AX-158265854 | 21 | 82.323 | KV453213.1 | 6652822 | 21-scf00419 | 21 |
| AX-158265816 | 21 | 82.35  | KV453213.1 | 6590283 | 21-scf00419 | 21 |
| AX-158265824 | 21 | 82.35  | KV453213.1 | 6599735 | 21-scf00419 | 21 |
| AX-158265827 | 21 | 82.379 | KV453213.1 | 6603621 | 21-scf00419 | 21 |
| AX-158265908 | 21 | 82.379 | KV453213.1 | 6709170 | 21-scf00419 | 21 |
| AX-158265837 | 21 | 82.411 | KV453213.1 | 6619751 | 21-scf00419 | 21 |
| AX-158265838 | 21 | 82.411 | KV453213.1 | 6620983 | 21-scf00419 | 21 |
| AX-158265839 | 21 | 82.411 | KV453213.1 | 6621806 | 21-scf00419 | 21 |
| AX-157716567 | 21 | 82.411 | KV453213.1 | 6624057 | 21-scf00419 | 21 |
| AX-158265850 | 21 | 82.411 | KV453213.1 | 6641028 | 21-scf00419 | 21 |
| AX-157843403 | 21 | 82.411 | KV453213.1 | 6654777 | 21-scf00419 | 21 |
| AX-158265857 | 21 | 82.411 | KV453213.1 | 6654936 | 21-scf00419 | 21 |
| AX-157773848 | 21 | 82.411 | KV453213.1 | 6693272 | 21-scf00419 | 21 |
| AX-158265911 | 21 | 82.411 | KV453213.1 | 6711856 | 21-scf00419 | 21 |
| AX-157843398 | 21 | 82.435 | KV453213.1 | 6624137 | 21-scf00419 | 21 |
| AX-158265841 | 21 | 82.46  | KV453213.1 | 6624582 | 21-scf00419 | 21 |
| AX-157739572 | 21 | 82.484 | KV453213.1 | 6625941 | 21-scf00419 | 21 |
| AX-158265726 | 21 | 82.503 | KV453213.1 | 6477413 | 21-scf00419 | 21 |
| AX-158265771 | 21 | 82.503 | KV453213.1 | 6540427 | 21-scf00419 | 21 |
| AX-158265805 | 21 | 82.503 | KV453213.1 | 6577963 | 21-scf00419 | 21 |
| AX-158265820 | 21 | 82.503 | KV453213.1 | 6592716 | 21-scf00419 | 21 |
| AX-158265844 | 21 | 82.503 | KV453213.1 | 6628187 | 21-scf00419 | 21 |
| AX-158265829 | 21 | 82.52  | KV453213.1 | 6611317 | 21-scf00419 | 21 |
| AX-157709735 | 21 | 82.52  | KV453213.1 | 6613612 | 21-scf00419 | 21 |
| AX-157843400 | 21 | 82.52  | KV453213.1 | 6635054 | 21-scf00419 | 21 |
| AX-158265848 | 21 | 82.52  | KV453213.1 | 6638961 | 21-scf00419 | 21 |
| AX-158265849 | 21 | 82.52  | KV453213.1 | 6639713 | 21-scf00419 | 21 |
| AX-157843401 | 21 | 82.52  | KV453213.1 | 6647621 | 21-scf00419 | 21 |

|              |    |        |            |         |             |    |
|--------------|----|--------|------------|---------|-------------|----|
| AX-158265853 | 21 | 82.52  | KV453213.1 | 6650905 | 21-scf00419 | 21 |
| AX-158265856 | 21 | 82.52  | KV453213.1 | 6654416 | 21-scf00419 | 21 |
| AX-158265861 | 21 | 82.52  | KV453213.1 | 6656769 | 21-scf00419 | 21 |
| AX-158265863 | 21 | 82.52  | KV453213.1 | 6657703 | 21-scf00419 | 21 |
| AX-158265864 | 21 | 82.52  | KV453213.1 | 6658680 | 21-scf00419 | 21 |
| AX-158265865 | 21 | 82.52  | KV453213.1 | 6659147 | 21-scf00419 | 21 |
| AX-158265866 | 21 | 82.52  | KV453213.1 | 6660377 | 21-scf00419 | 21 |
| AX-158265867 | 21 | 82.52  | KV453213.1 | 6660810 | 21-scf00419 | 21 |
| AX-158265868 | 21 | 82.52  | KV453213.1 | 6661146 | 21-scf00419 | 21 |
| AX-158265871 | 21 | 82.52  | KV453213.1 | 6665336 | 21-scf00419 | 21 |
| AX-158265872 | 21 | 82.52  | KV453213.1 | 6665691 | 21-scf00419 | 21 |
| AX-158265874 | 21 | 82.52  | KV453213.1 | 6666838 | 21-scf00419 | 21 |
| AX-158265875 | 21 | 82.52  | KV453213.1 | 6667205 | 21-scf00419 | 21 |
| AX-158265876 | 21 | 82.52  | KV453213.1 | 6668328 | 21-scf00419 | 21 |
| AX-158265877 | 21 | 82.52  | KV453213.1 | 6669383 | 21-scf00419 | 21 |
| AX-158265878 | 21 | 82.52  | KV453213.1 | 6670544 | 21-scf00419 | 21 |
| AX-157738477 | 21 | 82.52  | KV453213.1 | 6672106 | 21-scf00419 | 21 |
| AX-158265879 | 21 | 82.52  | KV453213.1 | 6673607 | 21-scf00419 | 21 |
| AX-158265882 | 21 | 82.52  | KV453213.1 | 6678528 | 21-scf00419 | 21 |
| AX-158265888 | 21 | 82.52  | KV453213.1 | 6685004 | 21-scf00419 | 21 |
| AX-158416419 | 21 | 82.52  | KV453213.1 | 6686025 | 21-scf00419 | 21 |
| AX-158265889 | 21 | 82.52  | KV453213.1 | 6686145 | 21-scf00419 | 21 |
| AX-158265890 | 21 | 82.52  | KV453213.1 | 6687270 | 21-scf00419 | 21 |
| AX-158265896 | 21 | 82.52  | KV453213.1 | 6696069 | 21-scf00419 | 21 |
| AX-158265901 | 21 | 82.52  | KV453213.1 | 6702318 | 21-scf00419 | 21 |
| AX-158265931 | 21 | 82.52  | KV453213.1 | 6729420 | 21-scf00419 | 21 |
| AX-158265899 | 21 | 82.57  | KV453213.1 | 6698321 | 21-scf00419 | 21 |
| AX-158265902 | 21 | 82.63  | KV453213.1 | 6703471 | 21-scf00419 | 21 |
| AX-158265903 | 21 | 82.63  | KV453213.1 | 6706771 | 21-scf00419 | 21 |
| AX-158264987 | 21 | 82.74  | KV453213.1 | 5453900 | 21-scf00419 | 21 |
| AX-158265235 | 21 | 82.74  | KV453213.1 | 5735226 | 21-scf00419 | 21 |
| AX-158265537 | 21 | 82.74  | KV453213.1 | 6216805 | 21-scf00419 | 21 |
| AX-157749142 | 21 | 82.74  | KV453213.1 | 6641642 | 21-scf00419 | 21 |
| AX-158265881 | 21 | 82.74  | KV453213.1 | 6675550 | 21-scf00419 | 21 |
| AX-158265897 | 21 | 82.74  | KV453213.1 | 6697078 | 21-scf00419 | 21 |
| AX-158265904 | 21 | 82.74  | KV453213.1 | 6707416 | 21-scf00419 | 21 |
| AX-158265907 | 21 | 82.74  | KV453213.1 | 6708811 | 21-scf00419 | 21 |
| AX-158265912 | 21 | 82.74  | KV453213.1 | 6713843 | 21-scf00419 | 21 |
| AX-158265915 | 21 | 82.74  | KV453213.1 | 6715563 | 21-scf00419 | 21 |
| AX-158265917 | 21 | 82.74  | KV453213.1 | 6717895 | 21-scf00419 | 21 |
| AX-158265918 | 21 | 82.74  | KV453213.1 | 6718388 | 21-scf00419 | 21 |
| AX-158265924 | 21 | 82.885 | KV453213.1 | 6724203 | 21-scf00419 | 21 |
| AX-158265933 | 21 | 82.885 | KV453213.1 | 6731892 | 21-scf00419 | 21 |
| AX-158265936 | 21 | 82.885 | KV453213.1 | 6733771 | 21-scf00419 | 21 |
| AX-158265941 | 21 | 83.175 | KV453213.1 | 6739821 | 21-scf00419 | 21 |
| AX-157721408 | 21 | 83.175 | KV453213.1 | 6742840 | 21-scf00419 | 21 |
| AX-157843412 | 21 | 83.175 | KV453213.1 | 6743315 | 21-scf00419 | 21 |
| AX-157771226 | 21 | 83.175 | KV453213.1 | 6743907 | 21-scf00419 | 21 |
| AX-158416420 | 21 | 83.175 | KV453213.1 | 6748809 | 21-scf00419 | 21 |
| AX-158265943 | 21 | 83.175 | KV453213.1 | 6749507 | 21-scf00419 | 21 |
| AX-158265944 | 21 | 83.175 | KV453213.1 | 6750546 | 21-scf00419 | 21 |

|              |    |        |            |         |             |    |
|--------------|----|--------|------------|---------|-------------|----|
| AX-158265946 | 21 | 83.175 | KV453213.1 | 6754018 | 21-scf00419 | 21 |
| AX-158265954 | 21 | 83.175 | KV453213.1 | 6761621 | 21-scf00419 | 21 |
| AX-158265955 | 21 | 83.175 | KV453213.1 | 6763252 | 21-scf00419 | 21 |
| AX-158265959 | 21 | 83.175 | KV453213.1 | 6767779 | 21-scf00419 | 21 |
| AX-158265961 | 21 | 83.175 | KV453213.1 | 6770316 | 21-scf00419 | 21 |
| AX-158265964 | 21 | 83.175 | KV453213.1 | 6772918 | 21-scf00419 | 21 |
| AX-158265965 | 21 | 83.175 | KV453213.1 | 6773231 | 21-scf00419 | 21 |
| AX-158265970 | 21 | 83.175 | KV453213.1 | 6775847 | 21-scf00419 | 21 |
| AX-157739894 | 21 | 83.175 | KV453213.1 | 6788594 | 21-scf00419 | 21 |
| AX-158265951 | 21 | 83.284 | KV453213.1 | 6758595 | 21-scf00419 | 21 |
| AX-158416422 | 21 | 83.284 | KV453213.1 | 6763780 | 21-scf00419 | 21 |
| AX-158416423 | 21 | 83.284 | KV453213.1 | 6781088 | 21-scf00419 | 21 |
| AX-158265976 | 21 | 83.284 | KV453213.1 | 6782340 | 21-scf00419 | 21 |
| AX-157872942 | 21 | 83.284 | KV453213.1 | 6784659 | 21-scf00419 | 21 |
| AX-158265978 | 21 | 83.284 | KV453213.1 | 6785751 | 21-scf00419 | 21 |
| AX-157843418 | 21 | 83.284 | KV453213.1 | 6788499 | 21-scf00419 | 21 |
| AX-157843419 | 21 | 83.284 | KV453213.1 | 6789973 | 21-scf00419 | 21 |
| AX-157843421 | 21 | 83.284 | KV453213.1 | 6793213 | 21-scf00419 | 21 |
| AX-158265983 | 21 | 83.284 | KV453213.1 | 6793791 | 21-scf00419 | 21 |
| AX-158265986 | 21 | 83.284 | KV453213.1 | 6806498 | 21-scf00419 | 21 |
| AX-157843422 | 21 | 83.284 | KV453213.1 | 6806699 | 21-scf00419 | 21 |
| AX-158265987 | 21 | 83.284 | KV453213.1 | 6807704 | 21-scf00419 | 21 |
| AX-158265988 | 21 | 83.284 | KV453213.1 | 6809154 | 21-scf00419 | 21 |
| AX-158265990 | 21 | 83.284 | KV453213.1 | 6811127 | 21-scf00419 | 21 |
| AX-158265992 | 21 | 83.284 | KV453213.1 | 6812776 | 21-scf00419 | 21 |
| AX-158265994 | 21 | 83.284 | KV453213.1 | 6815572 | 21-scf00419 | 21 |
| AX-158265996 | 21 | 83.284 | KV453213.1 | 6817023 | 21-scf00419 | 21 |
| AX-157843423 | 21 | 83.327 | KV453213.1 | 6817670 | 21-scf00419 | 21 |
| AX-158265997 | 21 | 83.348 | KV453213.1 | 6818057 | 21-scf00419 | 21 |
| AX-157736470 | 21 | 83.394 | KV453213.1 | 6820618 | 21-scf00419 | 21 |
| AX-158266000 | 21 | 83.394 | KV453213.1 | 6822217 | 21-scf00419 | 21 |
| AX-158266001 | 21 | 83.394 | KV453213.1 | 6823915 | 21-scf00419 | 21 |
| AX-158416424 | 21 | 83.394 | KV453213.1 | 6824308 | 21-scf00419 | 21 |
| AX-157756860 | 21 | 83.394 | KV453213.1 | 6825285 | 21-scf00419 | 21 |
| AX-158266002 | 21 | 83.394 | KV453213.1 | 6834831 | 21-scf00419 | 21 |
| AX-158266004 | 21 | 83.436 | KV453213.1 | 6839090 | 21-scf00419 | 21 |
| AX-158266005 | 21 | 83.503 | KV453213.1 | 6841337 | 21-scf00419 | 21 |
| AX-158266006 | 21 | 83.503 | KV453213.1 | 6842109 | 21-scf00419 | 21 |
| AX-158266009 | 21 | 83.503 | KV453213.1 | 6844447 | 21-scf00419 | 21 |
| AX-158266011 | 21 | 83.503 | KV453213.1 | 6845303 | 21-scf00419 | 21 |
| AX-158266013 | 21 | 83.503 | KV453213.1 | 6852137 | 21-scf00419 | 21 |
| AX-158266025 | 21 | 83.503 | KV453213.1 | 6865202 | 21-scf00419 | 21 |
| AX-158266015 | 21 | 83.94  | KV453213.1 | 6854848 | 21-scf00419 | 21 |
| AX-158266016 | 21 | 83.94  | KV453213.1 | 6855390 | 21-scf00419 | 21 |
| AX-158416426 | 21 | 83.94  | KV453213.1 | 6857742 | 21-scf00419 | 21 |
| AX-158266017 | 21 | 83.94  | KV453213.1 | 6858520 | 21-scf00419 | 21 |
| AX-158266019 | 21 | 83.94  | KV453213.1 | 6860126 | 21-scf00419 | 21 |
| AX-158266020 | 21 | 83.94  | KV453213.1 | 6860385 | 21-scf00419 | 21 |
| AX-158266021 | 21 | 83.94  | KV453213.1 | 6861634 | 21-scf00419 | 21 |
| AX-158266022 | 21 | 83.94  | KV453213.1 | 6862209 | 21-scf00419 | 21 |
| AX-158266023 | 21 | 83.94  | KV453213.1 | 6862606 | 21-scf00419 | 21 |

|              |    |        |            |         |               |    |
|--------------|----|--------|------------|---------|---------------|----|
| AX-157867462 | 21 | 83.94  | KV453213.1 | 6863744 | 21-scf00419   | 21 |
| AX-158266024 | 21 | 83.94  | KV453213.1 | 6864278 | 21-scf00419   | 21 |
| AX-158266030 | 21 | 83.94  | KV453213.1 | 6871948 | 21-scf00419   | 21 |
| AX-158266034 | 21 | 83.94  | KV453213.1 | 6873622 | 21-scf00419   | 21 |
| AX-158266018 | 21 | 84.159 | KV453213.1 | 6859906 | 21-scf00419   | 21 |
| AX-158266031 | 21 | 84.159 | KV453213.1 | 6872249 | 21-scf00419   | 21 |
| AX-158266033 | 21 | 84.159 | KV453213.1 | 6873240 | 21-scf00419   | 21 |
| AX-158266038 | 21 | 84.159 | KV453213.1 | 6879099 | 21-scf00419   | 21 |
| AX-157717180 | 21 | 84.159 | KV453213.1 | 6879698 | 21-scf00419   | 21 |
| AX-158266176 | 21 | 84.159 | KV453213.1 | 7060321 | 21-scf00419   | 21 |
| AX-158266041 | 21 | 84.377 | KV453213.1 | 6884776 | 21-scf00419   | 21 |
| AX-158266043 | 21 | 84.377 | KV453213.1 | 6885466 | 21-scf00419   | 21 |
| AX-158266045 | 21 | 84.377 | KV453213.1 | 6886237 | 21-scf00419   | 21 |
| AX-158266047 | 21 | 84.377 | KV453213.1 | 6888633 | 21-scf00419   | 21 |
| AX-158266048 | 21 | 84.377 | KV453213.1 | 6889852 | 21-scf00419   | 21 |
| AX-157843425 | 21 | 84.377 | KV453213.1 | 6890557 | 21-scf00419   | 21 |
| AX-158266054 | 21 | 84.377 | KV453213.1 | 6898585 | 21-scf00419   | 21 |
| AX-157843426 | 21 | 84.377 | KV453213.1 | 6902936 | 21-scf00419   | 21 |
| AX-157747168 | 21 | 84.486 | KV453213.1 | 6904878 | 21-scf00419   | 21 |
| AX-158266057 | 21 | 84.486 | KV453213.1 | 6905100 | 21-scf00419   | 21 |
| AX-158266058 | 21 | 84.486 | KV453213.1 | 6907529 | 21-scf00419   | 21 |
| AX-158266059 | 21 | 84.486 | KV453213.1 | 6908547 | 21-scf00419   | 21 |
| AX-158266067 | 21 | 84.511 | KV453213.1 | 6917870 | 21-scf00419   | 21 |
| AX-158266060 | 21 | 84.537 | KV453213.1 | 6908893 | 21-scf00419   | 21 |
| AX-157716487 | 21 | 84.537 | KV453213.1 | 6921796 | 21-scf00419   | 21 |
| AX-158266069 | 21 | 84.567 | KV453213.1 | 6922940 | 21-scf00419   | 21 |
| AX-158266039 | 21 | 84.596 | KV453213.1 | 6880982 | 21-scf00419   | 21 |
| AX-157719529 | 21 | 84.596 | KV453213.1 | 6919741 | 21-scf00419   | 21 |
| AX-158266075 | 21 | 84.596 | KV453213.1 | 6927185 | 21-scf00419   | 21 |
| AX-158266079 | 21 | 84.596 | KV453213.1 | 6932076 | 21-scf00419   | 21 |
| AX-158266080 | 21 | 84.596 | KV453213.1 | 6934023 | 21-scf00419   | 21 |
| AX-158416430 | 21 | 84.596 | KV453213.1 | 6937733 | 21-scf00419   | 21 |
| AX-158266068 | 21 | 84.633 | KV453213.1 | 6918206 | 21-scf00419   | 21 |
| AX-158266076 | 21 | 84.633 | KV453213.1 | 6927870 | 21-scf00419   | 21 |
| AX-158266078 | 21 | 84.633 | KV453213.1 | 6931208 | 21-scf00419   | 21 |
| AX-158266084 | 21 | 84.633 | KV453213.1 | 6941390 | 21-scf00419   | 21 |
| AX-158266194 | 21 | 84.633 | KV453213.1 | 7080923 | 21-scf00419   | 21 |
| AX-158266089 | 21 | 84.705 | KV453213.1 | 6947054 | 21-scf00419   | 21 |
| AX-158266091 | 21 | 84.705 | KV453213.1 | 6949528 | 21-scf00419   | 21 |
| AX-158266092 | 21 | 84.705 | KV453213.1 | 6951512 | 21-scf00419   | 21 |
| AX-158266114 | 21 | 84.705 | KV453213.1 | 6979166 | 21-scf00419   | 21 |
| AX-158266603 | 21 | 84.705 | KV453213.1 | 7554116 | 21-scf00419   | 21 |
| AX-157693798 | 21 | 84.705 | FI864014.1 | 382     | ORI212 lctalu | UN |
| AX-158266094 | 21 | 84.754 | KV453213.1 | 6953241 | 21-scf00419   | 21 |
| AX-158266104 | 21 | 84.813 | KV453213.1 | 6965673 | 21-scf00419   | 21 |
| AX-158266105 | 21 | 84.864 | KV453213.1 | 6966482 | 21-scf00419   | 21 |
| AX-158266065 | 21 | 84.924 | KV453213.1 | 6916607 | 21-scf00419   | 21 |
| AX-158266090 | 21 | 84.924 | KV453213.1 | 6947418 | 21-scf00419   | 21 |
| AX-158266093 | 21 | 84.924 | KV453213.1 | 6952565 | 21-scf00419   | 21 |
| AX-158266109 | 21 | 84.924 | KV453213.1 | 6972319 | 21-scf00419   | 21 |
| AX-158266110 | 21 | 84.924 | KV453213.1 | 6974085 | 21-scf00419   | 21 |

|              |    |        |            |         |             |    |
|--------------|----|--------|------------|---------|-------------|----|
| AX-157773205 | 21 | 84.924 | KV453213.1 | 6976758 | 21-scf00419 | 21 |
| AX-158266113 | 21 | 84.924 | KV453213.1 | 6978161 | 21-scf00419 | 21 |
| AX-158266119 | 21 | 84.924 | KV453213.1 | 6986738 | 21-scf00419 | 21 |
| AX-158266128 | 21 | 84.924 | KV453213.1 | 6997407 | 21-scf00419 | 21 |
| AX-157723418 | 21 | 84.924 | KV453213.1 | 6999663 | 21-scf00419 | 21 |
| AX-158266132 | 21 | 84.924 | KV453213.1 | 7004899 | 21-scf00419 | 21 |
| AX-158266136 | 21 | 84.924 | KV453213.1 | 7008616 | 21-scf00419 | 21 |
| AX-158266140 | 21 | 84.924 | KV453213.1 | 7012214 | 21-scf00419 | 21 |
| AX-158266142 | 21 | 84.924 | KV453213.1 | 7016818 | 21-scf00419 | 21 |
| AX-158266143 | 21 | 84.924 | KV453213.1 | 7017332 | 21-scf00419 | 21 |
| AX-158266145 | 21 | 84.924 | KV453213.1 | 7018712 | 21-scf00419 | 21 |
| AX-158266146 | 21 | 84.924 | KV453213.1 | 7018919 | 21-scf00419 | 21 |
| AX-158266148 | 21 | 84.924 | KV453213.1 | 7019769 | 21-scf00419 | 21 |
| AX-158266149 | 21 | 84.924 | KV453213.1 | 7021304 | 21-scf00419 | 21 |
| AX-158266150 | 21 | 84.924 | KV453213.1 | 7022575 | 21-scf00419 | 21 |
| AX-158266151 | 21 | 84.924 | KV453213.1 | 7022962 | 21-scf00419 | 21 |
| AX-158266153 | 21 | 84.924 | KV453213.1 | 7025512 | 21-scf00419 | 21 |
| AX-158266157 | 21 | 84.924 | KV453213.1 | 7031720 | 21-scf00419 | 21 |
| AX-158266158 | 21 | 84.924 | KV453213.1 | 7033904 | 21-scf00419 | 21 |
| AX-158266159 | 21 | 84.924 | KV453213.1 | 7035379 | 21-scf00419 | 21 |
| AX-158266167 | 21 | 84.924 | KV453213.1 | 7046968 | 21-scf00419 | 21 |
| AX-158266168 | 21 | 84.924 | KV453213.1 | 7047146 | 21-scf00419 | 21 |
| AX-158266169 | 21 | 84.924 | KV453213.1 | 7049249 | 21-scf00419 | 21 |
| AX-158266172 | 21 | 84.924 | KV453213.1 | 7052362 | 21-scf00419 | 21 |
| AX-158266174 | 21 | 84.924 | KV453213.1 | 7058458 | 21-scf00419 | 21 |
| AX-158266179 | 21 | 84.924 | KV453213.1 | 7064357 | 21-scf00419 | 21 |
| AX-158266238 | 21 | 84.924 | KV453213.1 | 7145369 | 21-scf00419 | 21 |
| AX-158266512 | 21 | 84.924 | KV453213.1 | 7432493 | 21-scf00419 | 21 |
| AX-158266185 | 21 | 84.947 | KV453213.1 | 7072442 | 21-scf00419 | 21 |
| AX-158266196 | 21 | 84.986 | KV453213.1 | 7083010 | 21-scf00419 | 21 |
| AX-158266144 | 21 | 85.021 | KV453213.1 | 7018440 | 21-scf00419 | 21 |
| AX-158266197 | 21 | 85.021 | KV453213.1 | 7089869 | 21-scf00419 | 21 |
| AX-158266129 | 21 | 85.033 | KV453213.1 | 7000591 | 21-scf00419 | 21 |
| AX-158266152 | 21 | 85.033 | KV453213.1 | 7023777 | 21-scf00419 | 21 |
| AX-157843429 | 21 | 85.033 | KV453213.1 | 7074025 | 21-scf00419 | 21 |
| AX-158266198 | 21 | 85.033 | KV453213.1 | 7090375 | 21-scf00419 | 21 |
| AX-158416435 | 21 | 85.033 | KV453213.1 | 7095031 | 21-scf00419 | 21 |
| AX-158266201 | 21 | 85.033 | KV453213.1 | 7096542 | 21-scf00419 | 21 |
| AX-158266203 | 21 | 85.033 | KV453213.1 | 7098489 | 21-scf00419 | 21 |
| AX-158266227 | 21 | 85.033 | KV453213.1 | 7129361 | 21-scf00419 | 21 |
| AX-158266206 | 21 | 85.142 | KV453213.1 | 7100088 | 21-scf00419 | 21 |
| AX-157753973 | 21 | 85.142 | KV453213.1 | 7105649 | 21-scf00419 | 21 |
| AX-158266210 | 21 | 85.142 | KV453213.1 | 7108525 | 21-scf00419 | 21 |
| AX-158266213 | 21 | 85.142 | KV453213.1 | 7111587 | 21-scf00419 | 21 |
| AX-157774635 | 21 | 85.142 | KV453213.1 | 7114577 | 21-scf00419 | 21 |
| AX-157843430 | 21 | 85.251 | KV453213.1 | 7081504 | 21-scf00419 | 21 |
| AX-158266217 | 21 | 85.251 | KV453213.1 | 7117074 | 21-scf00419 | 21 |
| AX-158266218 | 21 | 85.251 | KV453213.1 | 7117507 | 21-scf00419 | 21 |
| AX-158266219 | 21 | 85.251 | KV453213.1 | 7119258 | 21-scf00419 | 21 |
| AX-158266350 | 21 | 85.251 | KV453213.1 | 7270769 | 21-scf00419 | 21 |
| AX-158266220 | 21 | 85.335 | KV453213.1 | 7121275 | 21-scf00419 | 21 |

|              |    |        |            |         |             |    |
|--------------|----|--------|------------|---------|-------------|----|
| AX-157751867 | 21 | 85.355 | KV453213.1 | 7123972 | 21-scf00419 | 21 |
| AX-158266222 | 21 | 85.373 | KV453213.1 | 7124018 | 21-scf00419 | 21 |
| AX-157843428 | 21 | 85.423 | KV453213.1 | 7066256 | 21-scf00419 | 21 |
| AX-157843431 | 21 | 85.423 | KV453213.1 | 7101693 | 21-scf00419 | 21 |
| AX-158266224 | 21 | 85.423 | KV453213.1 | 7126666 | 21-scf00419 | 21 |
| AX-158266163 | 21 | 85.47  | KV453213.1 | 7043663 | 21-scf00419 | 21 |
| AX-158266181 | 21 | 85.47  | KV453213.1 | 7067718 | 21-scf00419 | 21 |
| AX-158266184 | 21 | 85.47  | KV453213.1 | 7070046 | 21-scf00419 | 21 |
| AX-157741704 | 21 | 85.47  | KV453213.1 | 7125834 | 21-scf00419 | 21 |
| AX-158266225 | 21 | 85.47  | KV453213.1 | 7127145 | 21-scf00419 | 21 |
| AX-158266226 | 21 | 85.47  | KV453213.1 | 7128565 | 21-scf00419 | 21 |
| AX-157843432 | 21 | 85.47  | KV453213.1 | 7130268 | 21-scf00419 | 21 |
| AX-158266231 | 21 | 85.47  | KV453213.1 | 7132911 | 21-scf00419 | 21 |
| AX-158266234 | 21 | 85.47  | KV453213.1 | 7135532 | 21-scf00419 | 21 |
| AX-157887813 | 21 | 85.47  | KV453213.1 | 7139981 | 21-scf00419 | 21 |
| AX-157843433 | 21 | 85.47  | KV453213.1 | 7140568 | 21-scf00419 | 21 |
| AX-158266258 | 21 | 85.47  | KV453213.1 | 7169398 | 21-scf00419 | 21 |
| AX-158266280 | 21 | 85.47  | KV453213.1 | 7199868 | 21-scf00419 | 21 |
| AX-158266284 | 21 | 85.47  | KV453213.1 | 7207284 | 21-scf00419 | 21 |
| AX-158266288 | 21 | 85.47  | KV453213.1 | 7210359 | 21-scf00419 | 21 |
| AX-158266289 | 21 | 85.47  | KV453213.1 | 7210910 | 21-scf00419 | 21 |
| AX-158266346 | 21 | 85.47  | KV453213.1 | 7268211 | 21-scf00419 | 21 |
| AX-158266106 | 21 | 85.579 | KV453213.1 | 6967209 | 21-scf00419 | 21 |
| AX-158266230 | 21 | 85.579 | KV453213.1 | 7132388 | 21-scf00419 | 21 |
| AX-157757968 | 21 | 85.579 | KV453213.1 | 7141601 | 21-scf00419 | 21 |
| AX-158266241 | 21 | 85.579 | KV453213.1 | 7150753 | 21-scf00419 | 21 |
| AX-158266242 | 21 | 85.579 | KV453213.1 | 7152253 | 21-scf00419 | 21 |
| AX-158266245 | 21 | 85.579 | KV453213.1 | 7155749 | 21-scf00419 | 21 |
| AX-158266248 | 21 | 85.579 | KV453213.1 | 7159937 | 21-scf00419 | 21 |
| AX-158266249 | 21 | 85.579 | KV453213.1 | 7160871 | 21-scf00419 | 21 |
| AX-158266250 | 21 | 85.579 | KV453213.1 | 7161237 | 21-scf00419 | 21 |
| AX-158266255 | 21 | 85.579 | KV453213.1 | 7166877 | 21-scf00419 | 21 |
| AX-158266256 | 21 | 85.579 | KV453213.1 | 7167516 | 21-scf00419 | 21 |
| AX-158266259 | 21 | 85.579 | KV453213.1 | 7170089 | 21-scf00419 | 21 |
| AX-158266262 | 21 | 85.579 | KV453213.1 | 7176094 | 21-scf00419 | 21 |
| AX-158266263 | 21 | 85.579 | KV453213.1 | 7177307 | 21-scf00419 | 21 |
| AX-158266264 | 21 | 85.579 | KV453213.1 | 7178214 | 21-scf00419 | 21 |
| AX-158266265 | 21 | 85.579 | KV453213.1 | 7178918 | 21-scf00419 | 21 |
| AX-158266267 | 21 | 85.579 | KV453213.1 | 7182202 | 21-scf00419 | 21 |
| AX-158266268 | 21 | 85.579 | KV453213.1 | 7183062 | 21-scf00419 | 21 |
| AX-158266269 | 21 | 85.579 | KV453213.1 | 7184908 | 21-scf00419 | 21 |
| AX-158266270 | 21 | 85.579 | KV453213.1 | 7186200 | 21-scf00419 | 21 |
| AX-158266272 | 21 | 85.579 | KV453213.1 | 7188624 | 21-scf00419 | 21 |
| AX-157752124 | 21 | 85.579 | KV453213.1 | 7201064 | 21-scf00419 | 21 |
| AX-158266282 | 21 | 85.579 | KV453213.1 | 7202306 | 21-scf00419 | 21 |
| AX-158266337 | 21 | 85.579 | KV453213.1 | 7259519 | 21-scf00419 | 21 |
| AX-157843436 | 21 | 85.688 | KV453213.1 | 7188919 | 21-scf00419 | 21 |
| AX-158266273 | 21 | 85.688 | KV453213.1 | 7189277 | 21-scf00419 | 21 |
| AX-157774980 | 21 | 85.688 | KV453213.1 | 7195161 | 21-scf00419 | 21 |
| AX-158266279 | 21 | 85.688 | KV453213.1 | 7198493 | 21-scf00419 | 21 |
| AX-158266281 | 21 | 85.688 | KV453213.1 | 7202046 | 21-scf00419 | 21 |

|              |    |        |            |         |             |    |
|--------------|----|--------|------------|---------|-------------|----|
| AX-157843437 | 21 | 85.688 | KV453213.1 | 7203451 | 21-scf00419 | 21 |
| AX-158266285 | 21 | 85.743 | KV453213.1 | 7207716 | 21-scf00419 | 21 |
| AX-157693521 | 21 | 85.797 | KV453213.1 | 7112793 | 21-scf00419 | 21 |
| AX-157843435 | 21 | 85.797 | KV453213.1 | 7152622 | 21-scf00419 | 21 |
| AX-158266293 | 21 | 85.797 | KV453213.1 | 7214588 | 21-scf00419 | 21 |
| AX-158266297 | 21 | 85.797 | KV453213.1 | 7217033 | 21-scf00419 | 21 |
| AX-158266301 | 21 | 85.797 | KV453213.1 | 7221100 | 21-scf00419 | 21 |
| AX-157714331 | 21 | 85.823 | KV453213.1 | 7222714 | 21-scf00419 | 21 |
| AX-158266305 | 21 | 85.849 | KV453213.1 | 7224047 | 21-scf00419 | 21 |
| AX-158266237 | 21 | 85.873 | KV453213.1 | 7140458 | 21-scf00419 | 21 |
| AX-157740866 | 21 | 85.873 | KV453213.1 | 7231070 | 21-scf00419 | 21 |
| AX-158266317 | 21 | 85.873 | KV453213.1 | 7241894 | 21-scf00419 | 21 |
| AX-158266307 | 21 | 85.893 | KV453213.1 | 7226554 | 21-scf00419 | 21 |
| AX-157709745 | 21 | 85.893 | KV453213.1 | 7232962 | 21-scf00419 | 21 |
| AX-158266221 | 21 | 85.907 | KV453213.1 | 7123148 | 21-scf00419 | 21 |
| AX-158266311 | 21 | 85.907 | KV453213.1 | 7234869 | 21-scf00419 | 21 |
| AX-158266312 | 21 | 85.907 | KV453213.1 | 7235521 | 21-scf00419 | 21 |
| AX-158266313 | 21 | 85.907 | KV453213.1 | 7236229 | 21-scf00419 | 21 |
| AX-158266314 | 21 | 85.907 | KV453213.1 | 7238019 | 21-scf00419 | 21 |
| AX-158266315 | 21 | 85.907 | KV453213.1 | 7239675 | 21-scf00419 | 21 |
| AX-158266318 | 21 | 85.907 | KV453213.1 | 7242274 | 21-scf00419 | 21 |
| AX-158381108 | 21 | 85.907 | KV453213.1 | 7242571 | 21-scf00419 | 21 |
| AX-158266319 | 21 | 85.907 | KV453213.1 | 7242807 | 21-scf00419 | 21 |
| AX-158266322 | 21 | 85.907 | KV453213.1 | 7244884 | 21-scf00419 | 21 |
| AX-158266323 | 21 | 85.907 | KV453213.1 | 7245579 | 21-scf00419 | 21 |
| AX-158266325 | 21 | 86.016 | KV453213.1 | 7246993 | 21-scf00419 | 21 |
| AX-157887814 | 21 | 86.125 | KV453213.1 | 7247276 | 21-scf00419 | 21 |
| AX-158266327 | 21 | 86.125 | KV453213.1 | 7247762 | 21-scf00419 | 21 |
| AX-158266329 | 21 | 86.125 | KV453213.1 | 7249435 | 21-scf00419 | 21 |
| AX-158266330 | 21 | 86.125 | KV453213.1 | 7249745 | 21-scf00419 | 21 |
| AX-158266331 | 21 | 86.125 | KV453213.1 | 7250421 | 21-scf00419 | 21 |
| AX-158266332 | 21 | 86.125 | KV453213.1 | 7250884 | 21-scf00419 | 21 |
| AX-158266540 | 21 | 86.125 | KV453213.1 | 7465811 | 21-scf00419 | 21 |
| AX-158266333 | 21 | 86.234 | KV453213.1 | 7255600 | 21-scf00419 | 21 |
| AX-158266340 | 21 | 86.234 | KV453213.1 | 7262167 | 21-scf00419 | 21 |
| AX-158266342 | 21 | 86.234 | KV453213.1 | 7264059 | 21-scf00419 | 21 |
| AX-158266347 | 21 | 86.234 | KV453213.1 | 7268631 | 21-scf00419 | 21 |
| AX-158266351 | 21 | 86.526 | KV453213.1 | 7271261 | 21-scf00419 | 21 |
| AX-157843438 | 21 | 86.526 | KV453213.1 | 7271552 | 21-scf00419 | 21 |
| AX-157843439 | 21 | 86.526 | KV453213.1 | 7271604 | 21-scf00419 | 21 |
| AX-158266355 | 21 | 86.526 | KV453213.1 | 7273273 | 21-scf00419 | 21 |
| AX-158266357 | 21 | 86.526 | KV453213.1 | 7275794 | 21-scf00419 | 21 |
| AX-158266361 | 21 | 86.669 | KV453213.1 | 7278920 | 21-scf00419 | 21 |
| AX-158266298 | 21 | 86.672 | KV453213.1 | 7218024 | 21-scf00419 | 21 |
| AX-158266353 | 21 | 86.672 | KV453213.1 | 7272220 | 21-scf00419 | 21 |
| AX-158266354 | 21 | 86.672 | KV453213.1 | 7272835 | 21-scf00419 | 21 |
| AX-158416440 | 21 | 86.672 | KV453213.1 | 7278982 | 21-scf00419 | 21 |
| AX-158266363 | 21 | 86.672 | KV453213.1 | 7281347 | 21-scf00419 | 21 |
| AX-158266364 | 21 | 86.672 | KV453213.1 | 7281873 | 21-scf00419 | 21 |
| AX-157751803 | 21 | 86.672 | KV453213.1 | 7285300 | 21-scf00419 | 21 |
| AX-157843441 | 21 | 86.672 | KV453213.1 | 7290870 | 21-scf00419 | 21 |

|              |    |        |            |         |             |    |
|--------------|----|--------|------------|---------|-------------|----|
| AX-158266373 | 21 | 86.672 | KV453213.1 | 7292590 | 21-scf00419 | 21 |
| AX-158266374 | 21 | 86.672 | KV453213.1 | 7293768 | 21-scf00419 | 21 |
| AX-158266376 | 21 | 86.672 | KV453213.1 | 7294741 | 21-scf00419 | 21 |
| AX-158266377 | 21 | 86.672 | KV453213.1 | 7295592 | 21-scf00419 | 21 |
| AX-158266379 | 21 | 86.672 | KV453213.1 | 7297441 | 21-scf00419 | 21 |
| AX-158266380 | 21 | 86.672 | KV453213.1 | 7297850 | 21-scf00419 | 21 |
| AX-158266387 | 21 | 86.672 | KV453213.1 | 7304824 | 21-scf00419 | 21 |
| AX-158266391 | 21 | 86.672 | KV453213.1 | 7310899 | 21-scf00419 | 21 |
| AX-158266396 | 21 | 86.672 | KV453213.1 | 7314457 | 21-scf00419 | 21 |
| AX-158266398 | 21 | 86.672 | KV453213.1 | 7316643 | 21-scf00419 | 21 |
| AX-158266400 | 21 | 86.672 | KV453213.1 | 7320199 | 21-scf00419 | 21 |
| AX-158266521 | 21 | 86.672 | KV453213.1 | 7448799 | 21-scf00419 | 21 |
| AX-158379007 | 21 | 86.672 | KV453213.1 | 7474875 | 21-scf00419 | 21 |
| AX-158381109 | 21 | 86.673 | KV453213.1 | 7320342 | 21-scf00419 | 21 |
| AX-158266405 | 21 | 86.835 | KV453213.1 | 7325324 | 21-scf00419 | 21 |
| AX-158266406 | 21 | 86.835 | KV453213.1 | 7327848 | 21-scf00419 | 21 |
| AX-158267084 | 21 | 86.835 | KV453213.1 | 8205036 | 21-scf00419 | 21 |
| AX-158266088 | 21 | 86.999 | KV453213.1 | 6945107 | 21-scf00419 | 21 |
| AX-158266097 | 21 | 86.999 | KV453213.1 | 6956068 | 21-scf00419 | 21 |
| AX-158266099 | 21 | 86.999 | KV453213.1 | 6960729 | 21-scf00419 | 21 |
| AX-158266107 | 21 | 86.999 | KV453213.1 | 6968473 | 21-scf00419 | 21 |
| AX-158266116 | 21 | 86.999 | KV453213.1 | 6981192 | 21-scf00419 | 21 |
| AX-158266131 | 21 | 86.999 | KV453213.1 | 7003696 | 21-scf00419 | 21 |
| AX-158266138 | 21 | 86.999 | KV453213.1 | 7009980 | 21-scf00419 | 21 |
| AX-158266147 | 21 | 86.999 | KV453213.1 | 7019263 | 21-scf00419 | 21 |
| AX-158266171 | 21 | 86.999 | KV453213.1 | 7051334 | 21-scf00419 | 21 |
| AX-158266204 | 21 | 86.999 | KV453213.1 | 7099215 | 21-scf00419 | 21 |
| AX-158266309 | 21 | 86.999 | KV453213.1 | 7233424 | 21-scf00419 | 21 |
| AX-158266366 | 21 | 86.999 | KV453213.1 | 7284706 | 21-scf00419 | 21 |
| AX-158266367 | 21 | 86.999 | KV453213.1 | 7287650 | 21-scf00419 | 21 |
| AX-158266401 | 21 | 86.999 | KV453213.1 | 7320857 | 21-scf00419 | 21 |
| AX-158266402 | 21 | 86.999 | KV453213.1 | 7321561 | 21-scf00419 | 21 |
| AX-158266403 | 21 | 86.999 | KV453213.1 | 7323067 | 21-scf00419 | 21 |
| AX-157748218 | 21 | 86.999 | KV453213.1 | 7332965 | 21-scf00419 | 21 |
| AX-157843444 | 21 | 86.999 | KV453213.1 | 7333038 | 21-scf00419 | 21 |
| AX-158266408 | 21 | 86.999 | KV453213.1 | 7333997 | 21-scf00419 | 21 |
| AX-158266409 | 21 | 86.999 | KV453213.1 | 7334454 | 21-scf00419 | 21 |
| AX-157708416 | 21 | 86.999 | KV453213.1 | 7335679 | 21-scf00419 | 21 |
| AX-157696159 | 21 | 86.999 | KV453213.1 | 7336853 | 21-scf00419 | 21 |
| AX-158266412 | 21 | 86.999 | KV453213.1 | 7337399 | 21-scf00419 | 21 |
| AX-158266413 | 21 | 86.999 | KV453213.1 | 7339397 | 21-scf00419 | 21 |
| AX-158266416 | 21 | 86.999 | KV453213.1 | 7344428 | 21-scf00419 | 21 |
| AX-158266417 | 21 | 86.999 | KV453213.1 | 7346017 | 21-scf00419 | 21 |
| AX-158266421 | 21 | 86.999 | KV453213.1 | 7349639 | 21-scf00419 | 21 |
| AX-158266422 | 21 | 86.999 | KV453213.1 | 7351033 | 21-scf00419 | 21 |
| AX-158266425 | 21 | 86.999 | KV453213.1 | 7353689 | 21-scf00419 | 21 |
| AX-158266433 | 21 | 86.999 | KV453213.1 | 7359542 | 21-scf00419 | 21 |
| AX-158266439 | 21 | 86.999 | KV453213.1 | 7367030 | 21-scf00419 | 21 |
| AX-158266440 | 21 | 86.999 | KV453213.1 | 7367673 | 21-scf00419 | 21 |
| AX-158266441 | 21 | 86.999 | KV453213.1 | 7368289 | 21-scf00419 | 21 |
| AX-157751144 | 21 | 86.999 | KV453213.1 | 7368535 | 21-scf00419 | 21 |



|              |    |        |            |         |             |    |
|--------------|----|--------|------------|---------|-------------|----|
| AX-157739347 | 21 | 86.999 | KV453213.1 | 7369131 | 21-scf00419 | 21 |
| AX-157766207 | 21 | 86.999 | KV453213.1 | 7370376 | 21-scf00419 | 21 |
| AX-158266444 | 21 | 86.999 | KV453213.1 | 7370614 | 21-scf00419 | 21 |
| AX-158266445 | 21 | 86.999 | KV453213.1 | 7374168 | 21-scf00419 | 21 |
| AX-158266447 | 21 | 86.999 | KV453213.1 | 7375813 | 21-scf00419 | 21 |
| AX-158266448 | 21 | 86.999 | KV453213.1 | 7376296 | 21-scf00419 | 21 |
| AX-158266451 | 21 | 86.999 | KV453213.1 | 7378274 | 21-scf00419 | 21 |
| AX-158266453 | 21 | 86.999 | KV453213.1 | 7381202 | 21-scf00419 | 21 |
| AX-158266456 | 21 | 86.999 | KV453213.1 | 7384159 | 21-scf00419 | 21 |
| AX-157872948 | 21 | 86.999 | KV453213.1 | 7386409 | 21-scf00419 | 21 |
| AX-158266464 | 21 | 86.999 | KV453213.1 | 7388860 | 21-scf00419 | 21 |
| AX-158266466 | 21 | 86.999 | KV453213.1 | 7389975 | 21-scf00419 | 21 |
| AX-158266470 | 21 | 86.999 | KV453213.1 | 7392769 | 21-scf00419 | 21 |
| AX-158266473 | 21 | 86.999 | KV453213.1 | 7394310 | 21-scf00419 | 21 |
| AX-158266474 | 21 | 86.999 | KV453213.1 | 7394683 | 21-scf00419 | 21 |
| AX-158266476 | 21 | 86.999 | KV453213.1 | 7396002 | 21-scf00419 | 21 |
| AX-158266477 | 21 | 86.999 | KV453213.1 | 7396221 | 21-scf00419 | 21 |
| AX-158266478 | 21 | 86.999 | KV453213.1 | 7396639 | 21-scf00419 | 21 |
| AX-158266479 | 21 | 86.999 | KV453213.1 | 7397006 | 21-scf00419 | 21 |
| AX-158266480 | 21 | 86.999 | KV453213.1 | 7397819 | 21-scf00419 | 21 |
| AX-158266481 | 21 | 86.999 | KV453213.1 | 7398263 | 21-scf00419 | 21 |
| AX-158266484 | 21 | 86.999 | KV453213.1 | 7399867 | 21-scf00419 | 21 |
| AX-158266485 | 21 | 86.999 | KV453213.1 | 7401016 | 21-scf00419 | 21 |
| AX-157772013 | 21 | 86.999 | KV453213.1 | 7404492 | 21-scf00419 | 21 |
| AX-158266487 | 21 | 86.999 | KV453213.1 | 7404572 | 21-scf00419 | 21 |
| AX-157774776 | 21 | 86.999 | KV453213.1 | 7412711 | 21-scf00419 | 21 |
| AX-157843447 | 21 | 86.999 | KV453213.1 | 7413025 | 21-scf00419 | 21 |
| AX-158266498 | 21 | 86.999 | KV453213.1 | 7418941 | 21-scf00419 | 21 |
| AX-157744389 | 21 | 86.999 | KV453213.1 | 7425463 | 21-scf00419 | 21 |
| AX-157843449 | 21 | 86.999 | KV453213.1 | 7428583 | 21-scf00419 | 21 |
| AX-158266513 | 21 | 86.999 | KV453213.1 | 7434592 | 21-scf00419 | 21 |
| AX-158266518 | 21 | 86.999 | KV453213.1 | 7443020 | 21-scf00419 | 21 |
| AX-158266529 | 21 | 86.999 | KV453213.1 | 7456412 | 21-scf00419 | 21 |
| AX-158266655 | 21 | 86.999 | KV453213.1 | 7613218 | 21-scf00419 | 21 |
| AX-158266658 | 21 | 86.999 | KV453213.1 | 7616787 | 21-scf00419 | 21 |
| AX-158266375 | 21 | 87.017 | KV453213.1 | 7294171 | 21-scf00419 | 21 |
| AX-158266410 | 21 | 87.017 | KV453213.1 | 7334835 | 21-scf00419 | 21 |
| AX-158266415 | 21 | 87.017 | KV453213.1 | 7341260 | 21-scf00419 | 21 |
| AX-158266496 | 21 | 87.017 | KV453213.1 | 7417462 | 21-scf00419 | 21 |
| AX-158266507 | 21 | 87.017 | KV453213.1 | 7423660 | 21-scf00419 | 21 |
| AX-158266501 | 21 | 87.04  | KV453213.1 | 7419881 | 21-scf00419 | 21 |
| AX-157746271 | 21 | 87.076 | KV453213.1 | 7426585 | 21-scf00419 | 21 |
| AX-157750403 | 21 | 87.108 | KV453213.1 | 7255154 | 21-scf00419 | 21 |
| AX-158266430 | 21 | 87.108 | KV453213.1 | 7356851 | 21-scf00419 | 21 |
| AX-158266461 | 21 | 87.108 | KV453213.1 | 7387595 | 21-scf00419 | 21 |
| AX-157843448 | 21 | 87.108 | KV453213.1 | 7426769 | 21-scf00419 | 21 |
| AX-158266510 | 21 | 87.108 | KV453213.1 | 7428969 | 21-scf00419 | 21 |
| AX-158266511 | 21 | 87.108 | KV453213.1 | 7430125 | 21-scf00419 | 21 |
| AX-157775165 | 21 | 87.327 | KV453213.1 | 7402314 | 21-scf00419 | 21 |
| AX-157872950 | 21 | 87.327 | KV453213.1 | 7412164 | 21-scf00419 | 21 |
| AX-157744592 | 21 | 87.327 | KV453213.1 | 7423407 | 21-scf00419 | 21 |

|              |    |        |            |         |             |    |
|--------------|----|--------|------------|---------|-------------|----|
| AX-158379002 | 21 | 87.327 | KV453213.1 | 7431832 | 21-scf00419 | 21 |
| AX-158379004 | 21 | 87.327 | KV453213.1 | 7438495 | 21-scf00419 | 21 |
| AX-158266519 | 21 | 87.327 | KV453213.1 | 7445976 | 21-scf00419 | 21 |
| AX-157724084 | 21 | 87.327 | KV453213.1 | 7447359 | 21-scf00419 | 21 |
| AX-158266389 | 21 | 87.436 | KV453213.1 | 7308615 | 21-scf00419 | 21 |
| AX-158266523 | 21 | 87.436 | KV453213.1 | 7450314 | 21-scf00419 | 21 |
| AX-158266526 | 21 | 87.436 | KV453213.1 | 7452486 | 21-scf00419 | 21 |
| AX-158266543 | 21 | 87.436 | KV453213.1 | 7470688 | 21-scf00419 | 21 |
| AX-158266527 | 21 | 87.545 | KV453213.1 | 7453909 | 21-scf00419 | 21 |
| AX-158266538 | 21 | 87.545 | KV453213.1 | 7464349 | 21-scf00419 | 21 |
| AX-158266539 | 21 | 87.545 | KV453213.1 | 7465207 | 21-scf00419 | 21 |
| AX-158266452 | 21 | 87.654 | KV453213.1 | 7378631 | 21-scf00419 | 21 |
| AX-158379006 | 21 | 87.654 | KV453213.1 | 7454020 | 21-scf00419 | 21 |
| AX-158266531 | 21 | 87.654 | KV453213.1 | 7458054 | 21-scf00419 | 21 |
| AX-158266544 | 21 | 87.654 | KV453213.1 | 7472794 | 21-scf00419 | 21 |
| AX-158266550 | 21 | 87.654 | KV453213.1 | 7478341 | 21-scf00419 | 21 |
| AX-158266553 | 21 | 87.654 | KV453213.1 | 7481383 | 21-scf00419 | 21 |
| AX-157843453 | 21 | 87.654 | KV453213.1 | 7484783 | 21-scf00419 | 21 |
| AX-158266560 | 21 | 87.654 | KV453213.1 | 7488564 | 21-scf00419 | 21 |
| AX-158266562 | 21 | 87.654 | KV453213.1 | 7490892 | 21-scf00419 | 21 |
| AX-158266564 | 21 | 87.654 | KV453213.1 | 7493700 | 21-scf00419 | 21 |
| AX-158266565 | 21 | 87.654 | KV453213.1 | 7494431 | 21-scf00419 | 21 |
| AX-158266566 | 21 | 87.654 | KV453213.1 | 7494690 | 21-scf00419 | 21 |
| AX-157880501 | 21 | 87.654 | KV453213.1 | 7496132 | 21-scf00419 | 21 |
| AX-158266568 | 21 | 87.654 | KV453213.1 | 7496174 | 21-scf00419 | 21 |
| AX-157725368 | 21 | 87.654 | KV453213.1 | 7499294 | 21-scf00419 | 21 |
| AX-158266571 | 21 | 87.654 | KV453213.1 | 7504074 | 21-scf00419 | 21 |
| AX-158266572 | 21 | 87.654 | KV453213.1 | 7504245 | 21-scf00419 | 21 |
| AX-158266574 | 21 | 87.654 | KV453213.1 | 7509940 | 21-scf00419 | 21 |
| AX-157843455 | 21 | 87.654 | KV453213.1 | 7510346 | 21-scf00419 | 21 |
| AX-158266578 | 21 | 87.654 | KV453213.1 | 7512399 | 21-scf00419 | 21 |
| AX-158394801 | 21 | 87.654 | KV453213.1 | 7514861 | 21-scf00419 | 21 |
| AX-158266583 | 21 | 87.654 | KV453213.1 | 7521703 | 21-scf00419 | 21 |
| AX-158266584 | 21 | 87.654 | KV453213.1 | 7522177 | 21-scf00419 | 21 |
| AX-158266586 | 21 | 87.654 | KV453213.1 | 7526159 | 21-scf00419 | 21 |
| AX-158266587 | 21 | 87.654 | KV453213.1 | 7527262 | 21-scf00419 | 21 |
| AX-158266591 | 21 | 87.654 | KV453213.1 | 7532436 | 21-scf00419 | 21 |
| AX-158266593 | 21 | 87.654 | KV453213.1 | 7533865 | 21-scf00419 | 21 |
| AX-158266594 | 21 | 87.654 | KV453213.1 | 7536397 | 21-scf00419 | 21 |
| AX-158266595 | 21 | 87.654 | KV453213.1 | 7536893 | 21-scf00419 | 21 |
| AX-158266597 | 21 | 87.654 | KV453213.1 | 7538976 | 21-scf00419 | 21 |
| AX-157843456 | 21 | 87.654 | KV453213.1 | 7541445 | 21-scf00419 | 21 |
| AX-158266606 | 21 | 87.654 | KV453213.1 | 7558281 | 21-scf00419 | 21 |
| AX-158266607 | 21 | 87.654 | KV453213.1 | 7559164 | 21-scf00419 | 21 |
| AX-158266609 | 21 | 87.654 | KV453213.1 | 7560776 | 21-scf00419 | 21 |
| AX-157701074 | 21 | 87.654 | KV453213.1 | 7561063 | 21-scf00419 | 21 |
| AX-157748455 | 21 | 87.654 | KV453213.1 | 7561198 | 21-scf00419 | 21 |
| AX-158266610 | 21 | 87.654 | KV453213.1 | 7562882 | 21-scf00419 | 21 |
| AX-158266611 | 21 | 87.654 | KV453213.1 | 7563739 | 21-scf00419 | 21 |
| AX-158266612 | 21 | 87.654 | KV453213.1 | 7564544 | 21-scf00419 | 21 |
| AX-158266614 | 21 | 87.654 | KV453213.1 | 7566115 | 21-scf00419 | 21 |

|              |    |        |            |         |             |    |
|--------------|----|--------|------------|---------|-------------|----|
| AX-158266616 | 21 | 87.654 | KV453213.1 | 7566946 | 21-scf00419 | 21 |
| AX-157753880 | 21 | 87.654 | KV453213.1 | 7569509 | 21-scf00419 | 21 |
| AX-158266620 | 21 | 87.654 | KV453213.1 | 7573083 | 21-scf00419 | 21 |
| AX-158266621 | 21 | 87.654 | KV453213.1 | 7575715 | 21-scf00419 | 21 |
| AX-157720757 | 21 | 87.654 | KV453213.1 | 7576562 | 21-scf00419 | 21 |
| AX-158266622 | 21 | 87.654 | KV453213.1 | 7577084 | 21-scf00419 | 21 |
| AX-158266626 | 21 | 87.654 | KV453213.1 | 7582613 | 21-scf00419 | 21 |
| AX-158266628 | 21 | 87.654 | KV453213.1 | 7586381 | 21-scf00419 | 21 |
| AX-157772743 | 21 | 87.654 | KV453213.1 | 7586752 | 21-scf00419 | 21 |
| AX-158266629 | 21 | 87.654 | KV453213.1 | 7587622 | 21-scf00419 | 21 |
| AX-158266630 | 21 | 87.654 | KV453213.1 | 7588761 | 21-scf00419 | 21 |
| AX-158266631 | 21 | 87.654 | KV453213.1 | 7590873 | 21-scf00419 | 21 |
| AX-158266639 | 21 | 87.654 | KV453213.1 | 7602355 | 21-scf00419 | 21 |
| AX-158266640 | 21 | 87.654 | KV453213.1 | 7602897 | 21-scf00419 | 21 |
| AX-158266642 | 21 | 87.654 | KV453213.1 | 7603734 | 21-scf00419 | 21 |
| AX-158266643 | 21 | 87.654 | KV453213.1 | 7604162 | 21-scf00419 | 21 |
| AX-158266645 | 21 | 87.654 | KV453213.1 | 7606147 | 21-scf00419 | 21 |
| AX-158266646 | 21 | 87.654 | KV453213.1 | 7607031 | 21-scf00419 | 21 |
| AX-158266647 | 21 | 87.654 | KV453213.1 | 7607759 | 21-scf00419 | 21 |
| AX-158266648 | 21 | 87.654 | KV453213.1 | 7608232 | 21-scf00419 | 21 |
| AX-157745751 | 21 | 87.654 | KV453213.1 | 7608311 | 21-scf00419 | 21 |
| AX-158266649 | 21 | 87.654 | KV453213.1 | 7609161 | 21-scf00419 | 21 |
| AX-158266650 | 21 | 87.654 | KV453213.1 | 7609453 | 21-scf00419 | 21 |
| AX-158266651 | 21 | 87.654 | KV453213.1 | 7609926 | 21-scf00419 | 21 |
| AX-158266652 | 21 | 87.654 | KV453213.1 | 7610427 | 21-scf00419 | 21 |
| AX-158266656 | 21 | 87.654 | KV453213.1 | 7614024 | 21-scf00419 | 21 |
| AX-158266662 | 21 | 87.654 | KV453213.1 | 7620372 | 21-scf00419 | 21 |
| AX-158266663 | 21 | 87.654 | KV453213.1 | 7620944 | 21-scf00419 | 21 |
| AX-158266664 | 21 | 87.654 | KV453213.1 | 7622062 | 21-scf00419 | 21 |
| AX-158266666 | 21 | 87.654 | KV453213.1 | 7623592 | 21-scf00419 | 21 |
| AX-158266667 | 21 | 87.654 | KV453213.1 | 7624055 | 21-scf00419 | 21 |
| AX-158266668 | 21 | 87.654 | KV453213.1 | 7624580 | 21-scf00419 | 21 |
| AX-158266669 | 21 | 87.654 | KV453213.1 | 7625383 | 21-scf00419 | 21 |
| AX-158266671 | 21 | 87.654 | KV453213.1 | 7631075 | 21-scf00419 | 21 |
| AX-158266672 | 21 | 87.654 | KV453213.1 | 7631470 | 21-scf00419 | 21 |
| AX-158266673 | 21 | 87.654 | KV453213.1 | 7632728 | 21-scf00419 | 21 |
| AX-158266674 | 21 | 87.654 | KV453213.1 | 7633506 | 21-scf00419 | 21 |
| AX-157860057 | 21 | 87.654 | KV453213.1 | 7640478 | 21-scf00419 | 21 |
| AX-158266675 | 21 | 87.654 | KV453213.1 | 7645084 | 21-scf00419 | 21 |
| AX-158266676 | 21 | 87.654 | KV453213.1 | 7646032 | 21-scf00419 | 21 |
| AX-158266678 | 21 | 87.654 | KV453213.1 | 7662500 | 21-scf00419 | 21 |
| AX-158266680 | 21 | 87.654 | KV453213.1 | 7663854 | 21-scf00419 | 21 |
| AX-158266681 | 21 | 87.654 | KV453213.1 | 7665000 | 21-scf00419 | 21 |
| AX-158266682 | 21 | 87.654 | KV453213.1 | 7666475 | 21-scf00419 | 21 |
| AX-158266683 | 21 | 87.654 | KV453213.1 | 7667845 | 21-scf00419 | 21 |
| AX-158266684 | 21 | 87.654 | KV453213.1 | 7668967 | 21-scf00419 | 21 |
| AX-158266685 | 21 | 87.654 | KV453213.1 | 7669561 | 21-scf00419 | 21 |
| AX-158266686 | 21 | 87.654 | KV453213.1 | 7669782 | 21-scf00419 | 21 |
| AX-158266692 | 21 | 87.654 | KV453213.1 | 7676331 | 21-scf00419 | 21 |
| AX-158266694 | 21 | 87.654 | KV453213.1 | 7683319 | 21-scf00419 | 21 |
| AX-158266696 | 21 | 87.654 | KV453213.1 | 7684954 | 21-scf00419 | 21 |

|              |    |        |            |         |             |    |
|--------------|----|--------|------------|---------|-------------|----|
| AX-158416443 | 21 | 87.654 | KV453213.1 | 7688811 | 21-scf00419 | 21 |
| AX-157843461 | 21 | 87.654 | KV453213.1 | 7689940 | 21-scf00419 | 21 |
| AX-158266699 | 21 | 87.654 | KV453213.1 | 7691677 | 21-scf00419 | 21 |
| AX-158266702 | 21 | 87.654 | KV453213.1 | 7701962 | 21-scf00419 | 21 |
| AX-158266704 | 21 | 87.654 | KV453213.1 | 7703805 | 21-scf00419 | 21 |
| AX-158266707 | 21 | 87.654 | KV453213.1 | 7706763 | 21-scf00419 | 21 |
| AX-158266708 | 21 | 87.654 | KV453213.1 | 7707966 | 21-scf00419 | 21 |
| AX-158266709 | 21 | 87.654 | KV453213.1 | 7708487 | 21-scf00419 | 21 |
| AX-158266710 | 21 | 87.654 | KV453213.1 | 7708938 | 21-scf00419 | 21 |
| AX-157843463 | 21 | 87.654 | KV453213.1 | 7710423 | 21-scf00419 | 21 |
| AX-158266712 | 21 | 87.654 | KV453213.1 | 7710530 | 21-scf00419 | 21 |
| AX-158266714 | 21 | 87.654 | KV453213.1 | 7712396 | 21-scf00419 | 21 |
| AX-158266715 | 21 | 87.654 | KV453213.1 | 7718994 | 21-scf00419 | 21 |
| AX-158266716 | 21 | 87.654 | KV453213.1 | 7719615 | 21-scf00419 | 21 |
| AX-158266717 | 21 | 87.654 | KV453213.1 | 7720233 | 21-scf00419 | 21 |
| AX-158266718 | 21 | 87.654 | KV453213.1 | 7720405 | 21-scf00419 | 21 |
| AX-158266719 | 21 | 87.654 | KV453213.1 | 7720882 | 21-scf00419 | 21 |
| AX-158266721 | 21 | 87.654 | KV453213.1 | 7722537 | 21-scf00419 | 21 |
| AX-157843466 | 21 | 87.654 | KV453213.1 | 7726419 | 21-scf00419 | 21 |
| AX-158266736 | 21 | 87.654 | KV453213.1 | 7748193 | 21-scf00419 | 21 |
| AX-158266737 | 21 | 87.654 | KV453213.1 | 7749608 | 21-scf00419 | 21 |
| AX-158266827 | 21 | 87.654 | KV453213.1 | 7872407 | 21-scf00419 | 21 |
| AX-158266885 | 21 | 87.654 | KV453213.1 | 7936910 | 21-scf00419 | 21 |
| AX-157843475 | 21 | 87.654 | KV453213.1 | 7967391 | 21-scf00419 | 21 |
| AX-158267019 | 21 | 87.654 | KV453213.1 | 8109043 | 21-scf00419 | 21 |
| AX-158267032 | 21 | 87.654 | KV453213.1 | 8125510 | 21-scf00419 | 21 |
| AX-157843482 | 21 | 87.654 | KV453213.1 | 8148368 | 21-scf00419 | 21 |
| AX-158267108 | 21 | 87.654 | KV453213.1 | 8247206 | 21-scf00419 | 21 |
| AX-158266532 | 21 | 87.764 | KV453213.1 | 7459069 | 21-scf00419 | 21 |
| AX-158266580 | 21 | 87.764 | KV453213.1 | 7516759 | 21-scf00419 | 21 |
| AX-158266727 | 21 | 87.764 | KV453213.1 | 7734172 | 21-scf00419 | 21 |
| AX-158266729 | 21 | 87.764 | KV453213.1 | 7737156 | 21-scf00419 | 21 |
| AX-158266732 | 21 | 87.764 | KV453213.1 | 7743448 | 21-scf00419 | 21 |
| AX-158266745 | 21 | 87.764 | KV453213.1 | 7762080 | 21-scf00419 | 21 |
| AX-158266794 | 21 | 87.764 | KV453213.1 | 7819807 | 21-scf00419 | 21 |
| AX-158266751 | 21 | 87.982 | KV453213.1 | 7768244 | 21-scf00419 | 21 |
| AX-158266752 | 21 | 87.982 | KV453213.1 | 7769130 | 21-scf00419 | 21 |
| AX-158266754 | 21 | 87.982 | KV453213.1 | 7771746 | 21-scf00419 | 21 |
| AX-158266755 | 21 | 87.982 | KV453213.1 | 7771990 | 21-scf00419 | 21 |
| AX-158266758 | 21 | 87.982 | KV453213.1 | 7774411 | 21-scf00419 | 21 |
| AX-158266759 | 21 | 87.982 | KV453213.1 | 7774666 | 21-scf00419 | 21 |
| AX-158266761 | 21 | 87.982 | KV453213.1 | 7777232 | 21-scf00419 | 21 |
| AX-158266792 | 21 | 87.982 | KV453213.1 | 7817804 | 21-scf00419 | 21 |
| AX-157718056 | 21 | 88.091 | KV453213.1 | 7360252 | 21-scf00419 | 21 |
| AX-158266738 | 21 | 88.091 | KV453213.1 | 7752627 | 21-scf00419 | 21 |
| AX-158266749 | 21 | 88.091 | KV453213.1 | 7766708 | 21-scf00419 | 21 |
| AX-157867469 | 21 | 88.091 | KV453213.1 | 7767242 | 21-scf00419 | 21 |
| AX-158266764 | 21 | 88.091 | KV453213.1 | 7780301 | 21-scf00419 | 21 |
| AX-158266765 | 21 | 88.091 | KV453213.1 | 7781817 | 21-scf00419 | 21 |
| AX-157887817 | 21 | 88.091 | KV453213.1 | 7783996 | 21-scf00419 | 21 |
| AX-158266766 | 21 | 88.091 | KV453213.1 | 7785218 | 21-scf00419 | 21 |

|              |    |        |            |         |             |    |
|--------------|----|--------|------------|---------|-------------|----|
| AX-158266770 | 21 | 88.091 | KV453213.1 | 7789095 | 21-scf00419 | 21 |
| AX-158266773 | 21 | 88.091 | KV453213.1 | 7793710 | 21-scf00419 | 21 |
| AX-157758143 | 21 | 88.091 | KV453213.1 | 7799031 | 21-scf00419 | 21 |
| AX-158266782 | 21 | 88.091 | KV453213.1 | 7804195 | 21-scf00419 | 21 |
| AX-158266784 | 21 | 88.091 | KV453213.1 | 7807183 | 21-scf00419 | 21 |
| AX-158266786 | 21 | 88.091 | KV453213.1 | 7808492 | 21-scf00419 | 21 |
| AX-158266787 | 21 | 88.091 | KV453213.1 | 7808785 | 21-scf00419 | 21 |
| AX-158266789 | 21 | 88.091 | KV453213.1 | 7811162 | 21-scf00419 | 21 |
| AX-158266790 | 21 | 88.091 | KV453213.1 | 7815821 | 21-scf00419 | 21 |
| AX-158266791 | 21 | 88.091 | KV453213.1 | 7816539 | 21-scf00419 | 21 |
| AX-157725339 | 21 | 88.091 | KV453213.1 | 7822246 | 21-scf00419 | 21 |
| AX-157887818 | 21 | 88.091 | KV453213.1 | 7823991 | 21-scf00419 | 21 |
| AX-158266797 | 21 | 88.091 | KV453213.1 | 7824668 | 21-scf00419 | 21 |
| AX-158266798 | 21 | 88.091 | KV453213.1 | 7825053 | 21-scf00419 | 21 |
| AX-158266799 | 21 | 88.091 | KV453213.1 | 7826388 | 21-scf00419 | 21 |
| AX-157770957 | 21 | 88.31  | KV453213.1 | 7434070 | 21-scf00419 | 21 |
| AX-158266619 | 21 | 88.31  | KV453213.1 | 7572499 | 21-scf00419 | 21 |
| AX-158266695 | 21 | 88.31  | KV453213.1 | 7683852 | 21-scf00419 | 21 |
| AX-158266756 | 21 | 88.31  | KV453213.1 | 7773776 | 21-scf00419 | 21 |
| AX-158266762 | 21 | 88.31  | KV453213.1 | 7778240 | 21-scf00419 | 21 |
| AX-158266763 | 21 | 88.31  | KV453213.1 | 7779592 | 21-scf00419 | 21 |
| AX-158266779 | 21 | 88.31  | KV453213.1 | 7798385 | 21-scf00419 | 21 |
| AX-158387297 | 21 | 88.31  | KV453213.1 | 7803740 | 21-scf00419 | 21 |
| AX-157843468 | 21 | 88.31  | KV453213.1 | 7806767 | 21-scf00419 | 21 |
| AX-157741398 | 21 | 88.31  | KV453213.1 | 7821873 | 21-scf00419 | 21 |
| AX-157720355 | 21 | 88.31  | KV453213.1 | 7836753 | 21-scf00419 | 21 |
| AX-158381111 | 21 | 88.31  | KV453213.1 | 7837091 | 21-scf00419 | 21 |
| AX-158266806 | 21 | 88.31  | KV453213.1 | 7840319 | 21-scf00419 | 21 |
| AX-158266807 | 21 | 88.31  | KV453213.1 | 7844193 | 21-scf00419 | 21 |
| AX-158266808 | 21 | 88.31  | KV453213.1 | 7844910 | 21-scf00419 | 21 |
| AX-158266812 | 21 | 88.31  | KV453213.1 | 7849650 | 21-scf00419 | 21 |
| AX-158266813 | 21 | 88.31  | KV453213.1 | 7850275 | 21-scf00419 | 21 |
| AX-158266814 | 21 | 88.31  | KV453213.1 | 7851143 | 21-scf00419 | 21 |
| AX-158266819 | 21 | 88.31  | KV453213.1 | 7859667 | 21-scf00419 | 21 |
| AX-158266820 | 21 | 88.31  | KV453213.1 | 7860540 | 21-scf00419 | 21 |
| AX-157723684 | 21 | 88.31  | KV453213.1 | 7861382 | 21-scf00419 | 21 |
| AX-157725618 | 21 | 88.31  | KV453213.1 | 7862716 | 21-scf00419 | 21 |
| AX-158266822 | 21 | 88.31  | KV453213.1 | 7864162 | 21-scf00419 | 21 |
| AX-158266824 | 21 | 88.31  | KV453213.1 | 7867580 | 21-scf00419 | 21 |
| AX-158266825 | 21 | 88.31  | KV453213.1 | 7869098 | 21-scf00419 | 21 |
| AX-158266826 | 21 | 88.31  | KV453213.1 | 7869585 | 21-scf00419 | 21 |
| AX-158266828 | 21 | 88.31  | KV453213.1 | 7874221 | 21-scf00419 | 21 |
| AX-158266829 | 21 | 88.31  | KV453213.1 | 7876035 | 21-scf00419 | 21 |
| AX-158266832 | 21 | 88.31  | KV453213.1 | 7878834 | 21-scf00419 | 21 |
| AX-158266834 | 21 | 88.31  | KV453213.1 | 7880697 | 21-scf00419 | 21 |
| AX-158266838 | 21 | 88.31  | KV453213.1 | 7884500 | 21-scf00419 | 21 |
| AX-157725480 | 21 | 88.31  | KV453213.1 | 7891680 | 21-scf00419 | 21 |
| AX-158266843 | 21 | 88.31  | KV453213.1 | 7892975 | 21-scf00419 | 21 |
| AX-158266844 | 21 | 88.31  | KV453213.1 | 7893859 | 21-scf00419 | 21 |
| AX-157843470 | 21 | 88.31  | KV453213.1 | 7894684 | 21-scf00419 | 21 |
| AX-158266846 | 21 | 88.31  | KV453213.1 | 7896680 | 21-scf00419 | 21 |

|              |    |       |            |         |             |    |
|--------------|----|-------|------------|---------|-------------|----|
| AX-158266854 | 21 | 88.31 | KV453213.1 | 7903620 | 21-scf00419 | 21 |
| AX-158266857 | 21 | 88.31 | KV453213.1 | 7906087 | 21-scf00419 | 21 |
| AX-158266859 | 21 | 88.31 | KV453213.1 | 7909327 | 21-scf00419 | 21 |
| AX-157709418 | 21 | 88.31 | KV453213.1 | 7910538 | 21-scf00419 | 21 |
| AX-158266861 | 21 | 88.31 | KV453213.1 | 7910981 | 21-scf00419 | 21 |
| AX-158266863 | 21 | 88.31 | KV453213.1 | 7912833 | 21-scf00419 | 21 |
| AX-158266865 | 21 | 88.31 | KV453213.1 | 7914247 | 21-scf00419 | 21 |
| AX-158266867 | 21 | 88.31 | KV453213.1 | 7915074 | 21-scf00419 | 21 |
| AX-158266868 | 21 | 88.31 | KV453213.1 | 7916560 | 21-scf00419 | 21 |
| AX-158266872 | 21 | 88.31 | KV453213.1 | 7920025 | 21-scf00419 | 21 |
| AX-158266873 | 21 | 88.31 | KV453213.1 | 7920905 | 21-scf00419 | 21 |
| AX-158266874 | 21 | 88.31 | KV453213.1 | 7921365 | 21-scf00419 | 21 |
| AX-158266875 | 21 | 88.31 | KV453213.1 | 7921752 | 21-scf00419 | 21 |
| AX-158266879 | 21 | 88.31 | KV453213.1 | 7927334 | 21-scf00419 | 21 |
| AX-158266881 | 21 | 88.31 | KV453213.1 | 7930881 | 21-scf00419 | 21 |
| AX-158266883 | 21 | 88.31 | KV453213.1 | 7932221 | 21-scf00419 | 21 |
| AX-158266892 | 21 | 88.31 | KV453213.1 | 7943788 | 21-scf00419 | 21 |
| AX-158266896 | 21 | 88.31 | KV453213.1 | 7950552 | 21-scf00419 | 21 |
| AX-158266897 | 21 | 88.31 | KV453213.1 | 7951494 | 21-scf00419 | 21 |
| AX-158266899 | 21 | 88.31 | KV453213.1 | 7955698 | 21-scf00419 | 21 |
| AX-158266900 | 21 | 88.31 | KV453213.1 | 7956206 | 21-scf00419 | 21 |
| AX-158266901 | 21 | 88.31 | KV453213.1 | 7956757 | 21-scf00419 | 21 |
| AX-157843474 | 21 | 88.31 | KV453213.1 | 7960272 | 21-scf00419 | 21 |
| AX-158266913 | 21 | 88.31 | KV453213.1 | 7971891 | 21-scf00419 | 21 |
| AX-158266916 | 21 | 88.31 | KV453213.1 | 7974403 | 21-scf00419 | 21 |
| AX-158266917 | 21 | 88.31 | KV453213.1 | 7975785 | 21-scf00419 | 21 |
| AX-158266918 | 21 | 88.31 | KV453213.1 | 7978211 | 21-scf00419 | 21 |
| AX-158266919 | 21 | 88.31 | KV453213.1 | 7980910 | 21-scf00419 | 21 |
| AX-158266920 | 21 | 88.31 | KV453213.1 | 7982536 | 21-scf00419 | 21 |
| AX-158266921 | 21 | 88.31 | KV453213.1 | 7983278 | 21-scf00419 | 21 |
| AX-157710335 | 21 | 88.31 | KV453213.1 | 7983757 | 21-scf00419 | 21 |
| AX-158266922 | 21 | 88.31 | KV453213.1 | 7984394 | 21-scf00419 | 21 |
| AX-158266923 | 21 | 88.31 | KV453213.1 | 7985100 | 21-scf00419 | 21 |
| AX-158266924 | 21 | 88.31 | KV453213.1 | 7986004 | 21-scf00419 | 21 |
| AX-157750756 | 21 | 88.31 | KV453213.1 | 7986909 | 21-scf00419 | 21 |
| AX-158266925 | 21 | 88.31 | KV453213.1 | 7988515 | 21-scf00419 | 21 |
| AX-157773597 | 21 | 88.31 | KV453213.1 | 7989170 | 21-scf00419 | 21 |
| AX-158266928 | 21 | 88.31 | KV453213.1 | 7990616 | 21-scf00419 | 21 |
| AX-158266936 | 21 | 88.31 | KV453213.1 | 7998454 | 21-scf00419 | 21 |
| AX-157843478 | 21 | 88.31 | KV453213.1 | 8002640 | 21-scf00419 | 21 |
| AX-158266941 | 21 | 88.31 | KV453213.1 | 8006023 | 21-scf00419 | 21 |
| AX-158266942 | 21 | 88.31 | KV453213.1 | 8007042 | 21-scf00419 | 21 |
| AX-158266946 | 21 | 88.31 | KV453213.1 | 8009285 | 21-scf00419 | 21 |
| AX-158266947 | 21 | 88.31 | KV453213.1 | 8009974 | 21-scf00419 | 21 |
| AX-157750424 | 21 | 88.31 | KV453213.1 | 8012562 | 21-scf00419 | 21 |
| AX-158266950 | 21 | 88.31 | KV453213.1 | 8013460 | 21-scf00419 | 21 |
| AX-158266952 | 21 | 88.31 | KV453213.1 | 8015361 | 21-scf00419 | 21 |
| AX-158266953 | 21 | 88.31 | KV453213.1 | 8016168 | 21-scf00419 | 21 |
| AX-158266954 | 21 | 88.31 | KV453213.1 | 8019152 | 21-scf00419 | 21 |
| AX-158266955 | 21 | 88.31 | KV453213.1 | 8020947 | 21-scf00419 | 21 |
| AX-158266956 | 21 | 88.31 | KV453213.1 | 8021296 | 21-scf00419 | 21 |

|              |    |        |            |         |             |    |
|--------------|----|--------|------------|---------|-------------|----|
| AX-158266957 | 21 | 88.31  | KV453213.1 | 8023754 | 21-scf00419 | 21 |
| AX-157740416 | 21 | 88.31  | KV453213.1 | 8028523 | 21-scf00419 | 21 |
| AX-158266963 | 21 | 88.31  | KV453213.1 | 8030591 | 21-scf00419 | 21 |
| AX-158266964 | 21 | 88.31  | KV453213.1 | 8031402 | 21-scf00419 | 21 |
| AX-157727699 | 21 | 88.31  | KV453213.1 | 8036283 | 21-scf00419 | 21 |
| AX-158266969 | 21 | 88.31  | KV453213.1 | 8038211 | 21-scf00419 | 21 |
| AX-158266971 | 21 | 88.31  | KV453213.1 | 8039780 | 21-scf00419 | 21 |
| AX-158267043 | 21 | 88.31  | KV453213.1 | 8140486 | 21-scf00419 | 21 |
| AX-158267081 | 21 | 88.31  | KV453213.1 | 8196112 | 21-scf00419 | 21 |
| AX-158266962 | 21 | 88.326 | KV453213.1 | 8029972 | 21-scf00419 | 21 |
| AX-158266869 | 21 | 88.375 | KV453213.1 | 7916717 | 21-scf00419 | 21 |
| AX-158266937 | 21 | 88.375 | KV453213.1 | 7998939 | 21-scf00419 | 21 |
| AX-157712987 | 21 | 88.375 | KV453213.1 | 8036755 | 21-scf00419 | 21 |
| AX-158266949 | 21 | 88.419 | KV453213.1 | 8012197 | 21-scf00419 | 21 |
| AX-158266951 | 21 | 88.419 | KV453213.1 | 8014330 | 21-scf00419 | 21 |
| AX-158266973 | 21 | 88.419 | KV453213.1 | 8044769 | 21-scf00419 | 21 |
| AX-158266978 | 21 | 88.419 | KV453213.1 | 8051286 | 21-scf00419 | 21 |
| AX-158266981 | 21 | 88.528 | KV453213.1 | 8055133 | 21-scf00419 | 21 |
| AX-158266982 | 21 | 88.528 | KV453213.1 | 8056113 | 21-scf00419 | 21 |
| AX-158266983 | 21 | 88.528 | KV453213.1 | 8057071 | 21-scf00419 | 21 |
| AX-158266986 | 21 | 88.528 | KV453213.1 | 8060327 | 21-scf00419 | 21 |
| AX-158266522 | 21 | 88.637 | KV453213.1 | 7449679 | 21-scf00419 | 21 |
| AX-158266525 | 21 | 88.637 | KV453213.1 | 7451776 | 21-scf00419 | 21 |
| AX-158266830 | 21 | 88.637 | KV453213.1 | 7876941 | 21-scf00419 | 21 |
| AX-158266860 | 21 | 88.637 | KV453213.1 | 7910010 | 21-scf00419 | 21 |
| AX-157843479 | 21 | 88.637 | KV453213.1 | 8064471 | 21-scf00419 | 21 |
| AX-158266990 | 21 | 88.637 | KV453213.1 | 8066036 | 21-scf00419 | 21 |
| AX-158266994 | 21 | 88.637 | KV453213.1 | 8069172 | 21-scf00419 | 21 |
| AX-158266996 | 21 | 88.637 | KV453213.1 | 8070197 | 21-scf00419 | 21 |
| AX-158266998 | 21 | 88.637 | KV453213.1 | 8070795 | 21-scf00419 | 21 |
| AX-158267002 | 21 | 88.637 | KV453213.1 | 8083363 | 21-scf00419 | 21 |
| AX-158267003 | 21 | 88.637 | KV453213.1 | 8084384 | 21-scf00419 | 21 |
| AX-158267023 | 21 | 88.637 | KV453213.1 | 8113948 | 21-scf00419 | 21 |
| AX-158267005 | 21 | 88.711 | KV453213.1 | 8087063 | 21-scf00419 | 21 |
| AX-158266823 | 21 | 88.747 | KV453213.1 | 7866172 | 21-scf00419 | 21 |
| AX-158267006 | 21 | 88.747 | KV453213.1 | 8088619 | 21-scf00419 | 21 |
| AX-158267007 | 21 | 88.747 | KV453213.1 | 8088812 | 21-scf00419 | 21 |
| AX-158267008 | 21 | 88.747 | KV453213.1 | 8091599 | 21-scf00419 | 21 |
| AX-158267010 | 21 | 88.747 | KV453213.1 | 8092816 | 21-scf00419 | 21 |
| AX-158267011 | 21 | 88.747 | KV453213.1 | 8097090 | 21-scf00419 | 21 |
| AX-158267012 | 21 | 88.747 | KV453213.1 | 8098686 | 21-scf00419 | 21 |
| AX-158267025 | 21 | 88.747 | KV453213.1 | 8115720 | 21-scf00419 | 21 |
| AX-158267026 | 21 | 88.747 | KV453213.1 | 8116794 | 21-scf00419 | 21 |
| AX-158267027 | 21 | 88.747 | KV453213.1 | 8118665 | 21-scf00419 | 21 |
| AX-158267028 | 21 | 88.747 | KV453213.1 | 8119463 | 21-scf00419 | 21 |
| AX-158267034 | 21 | 88.789 | KV453213.1 | 8131937 | 21-scf00419 | 21 |
| AX-157750090 | 21 | 88.816 | KV453213.1 | 8133068 | 21-scf00419 | 21 |
| AX-157733063 | 21 | 88.856 | KV453213.1 | 8134131 | 21-scf00419 | 21 |
| AX-158267037 | 21 | 88.856 | KV453213.1 | 8134522 | 21-scf00419 | 21 |
| AX-158267040 | 21 | 88.856 | KV453213.1 | 8136584 | 21-scf00419 | 21 |
| AX-158267041 | 21 | 88.856 | KV453213.1 | 8137166 | 21-scf00419 | 21 |

|              |    |        |            |         |             |    |
|--------------|----|--------|------------|---------|-------------|----|
| AX-158267042 | 21 | 88.856 | KV453213.1 | 8138328 | 21-scf00419 | 21 |
| AX-157843480 | 21 | 88.856 | KV453213.1 | 8142369 | 21-scf00419 | 21 |
| AX-158267046 | 21 | 88.856 | KV453213.1 | 8143052 | 21-scf00419 | 21 |
| AX-157843481 | 21 | 88.856 | KV453213.1 | 8143711 | 21-scf00419 | 21 |
| AX-158267049 | 21 | 88.856 | KV453213.1 | 8144950 | 21-scf00419 | 21 |
| AX-158266902 | 21 | 88.965 | KV453213.1 | 7959029 | 21-scf00419 | 21 |
| AX-158266915 | 21 | 88.965 | KV453213.1 | 7973169 | 21-scf00419 | 21 |
| AX-158267071 | 21 | 88.965 | KV453213.1 | 8181647 | 21-scf00419 | 21 |
| AX-158267073 | 21 | 88.965 | KV453213.1 | 8182714 | 21-scf00419 | 21 |
| AX-158267074 | 21 | 88.965 | KV453213.1 | 8186663 | 21-scf00419 | 21 |
| AX-158267075 | 21 | 88.965 | KV453213.1 | 8186797 | 21-scf00419 | 21 |
| AX-158267077 | 21 | 88.965 | KV453213.1 | 8189322 | 21-scf00419 | 21 |
| AX-158267083 | 21 | 88.965 | KV453213.1 | 8201079 | 21-scf00419 | 21 |
| AX-157867471 | 21 | 88.965 | KV453213.1 | 8204775 | 21-scf00419 | 21 |
| AX-157843487 | 21 | 88.965 | KV453213.1 | 8216142 | 21-scf00419 | 21 |
| AX-158267088 | 21 | 88.965 | KV453213.1 | 8216506 | 21-scf00419 | 21 |
| AX-158267090 | 21 | 88.965 | KV453213.1 | 8219017 | 21-scf00419 | 21 |
| AX-157860061 | 21 | 88.965 | KV453213.1 | 8225017 | 21-scf00419 | 21 |
| AX-158267092 | 21 | 88.965 | KV453213.1 | 8226767 | 21-scf00419 | 21 |
| AX-158267095 | 21 | 88.965 | KV453213.1 | 8229774 | 21-scf00419 | 21 |
| AX-158267099 | 21 | 88.965 | KV453213.1 | 8234034 | 21-scf00419 | 21 |
| AX-158267127 | 21 | 88.965 | KV453213.1 | 8269412 | 21-scf00419 | 21 |
| AX-158267129 | 21 | 88.965 | KV453213.1 | 8275445 | 21-scf00419 | 21 |
| AX-157753377 | 21 | 89.074 | KV453213.1 | 7931291 | 21-scf00419 | 21 |
| AX-158266966 | 21 | 89.074 | KV453213.1 | 8032200 | 21-scf00419 | 21 |
| AX-158267029 | 21 | 89.074 | KV453213.1 | 8120110 | 21-scf00419 | 21 |
| AX-158267097 | 21 | 89.074 | KV453213.1 | 8232662 | 21-scf00419 | 21 |
| AX-158267098 | 21 | 89.074 | KV453213.1 | 8233434 | 21-scf00419 | 21 |
| AX-158267100 | 21 | 89.074 | KV453213.1 | 8234830 | 21-scf00419 | 21 |
| AX-158267103 | 21 | 89.074 | KV453213.1 | 8241120 | 21-scf00419 | 21 |
| AX-158267104 | 21 | 89.074 | KV453213.1 | 8242671 | 21-scf00419 | 21 |
| AX-158267107 | 21 | 89.074 | KV453213.1 | 8245304 | 21-scf00419 | 21 |
| AX-157860062 | 21 | 89.074 | KV453213.1 | 8252823 | 21-scf00419 | 21 |
| AX-158267115 | 21 | 89.074 | KV453213.1 | 8253856 | 21-scf00419 | 21 |
| AX-158267140 | 21 | 89.074 | KV453213.1 | 8296289 | 21-scf00419 | 21 |
| AX-158387302 | 21 | 89.074 | KV453213.1 | 8299898 | 21-scf00419 | 21 |
| AX-158267152 | 21 | 89.074 | KV453213.1 | 8313294 | 21-scf00419 | 21 |
| AX-158267184 | 21 | 89.074 | KV453213.1 | 8345818 | 21-scf00419 | 21 |
| AX-158267220 | 21 | 89.074 | KV453213.1 | 8399936 | 21-scf00419 | 21 |
| AX-158267245 | 21 | 89.074 | KV453213.1 | 8431187 | 21-scf00419 | 21 |
| AX-158267246 | 21 | 89.074 | KV453213.1 | 8431271 | 21-scf00419 | 21 |
| AX-158267254 | 21 | 89.074 | KV453213.1 | 8443521 | 21-scf00419 | 21 |
| AX-158267259 | 21 | 89.074 | KV453213.1 | 8451766 | 21-scf00419 | 21 |
| AX-157717498 | 21 | 89.074 | KV453213.1 | 8492766 | 21-scf00419 | 21 |
| AX-158267116 | 21 | 89.095 | KV453213.1 | 8255107 | 21-scf00419 | 21 |
| AX-158267080 | 21 | 89.183 | KV453213.1 | 8194240 | 21-scf00419 | 21 |
| AX-158267093 | 21 | 89.183 | KV453213.1 | 8227196 | 21-scf00419 | 21 |
| AX-158267118 | 21 | 89.183 | KV453213.1 | 8256929 | 21-scf00419 | 21 |
| AX-158267123 | 21 | 89.183 | KV453213.1 | 8259552 | 21-scf00419 | 21 |
| AX-158267125 | 21 | 89.183 | KV453213.1 | 8261836 | 21-scf00419 | 21 |
| AX-157843489 | 21 | 89.183 | KV453213.1 | 8276505 | 21-scf00419 | 21 |



|              |    |        |            |         |             |    |
|--------------|----|--------|------------|---------|-------------|----|
| AX-158267133 | 21 | 89.183 | KV453213.1 | 8278402 | 21-scf00419 | 21 |
| AX-158268015 | 21 | 89.183 | KV453215.1 | 22957   | 21-scf00420 | 21 |
| AX-158268017 | 21 | 89.183 | KV453215.1 | 28798   | 21-scf00420 | 21 |
| AX-158268018 | 21 | 89.183 | KV453215.1 | 34037   | 21-scf00420 | 21 |
| AX-158268021 | 21 | 89.183 | KV453215.1 | 42046   | 21-scf00420 | 21 |
| AX-158268027 | 21 | 89.183 | KV453215.1 | 64798   | 21-scf00420 | 21 |
| AX-158268030 | 21 | 89.183 | KV453215.1 | 85389   | 21-scf00420 | 21 |
| AX-158268031 | 21 | 89.183 | KV453215.1 | 86126   | 21-scf00420 | 21 |
| AX-158268033 | 21 | 89.183 | KV453215.1 | 99564   | 21-scf00420 | 21 |
| AX-158268035 | 21 | 89.183 | KV453215.1 | 104349  | 21-scf00420 | 21 |
| AX-157724007 | 21 | 89.183 | KV453215.1 | 116776  | 21-scf00420 | 21 |
| AX-158268042 | 21 | 89.183 | KV453215.1 | 118048  | 21-scf00420 | 21 |
| AX-157717183 | 21 | 89.183 | KV453215.1 | 121460  | 21-scf00420 | 21 |
| AX-158268046 | 21 | 89.183 | KV453215.1 | 137797  | 21-scf00420 | 21 |
| AX-158268047 | 21 | 89.183 | KV453215.1 | 138582  | 21-scf00420 | 21 |
| AX-157717691 | 21 | 89.183 | KV453215.1 | 143627  | 21-scf00420 | 21 |
| AX-158266849 | 21 | 89.298 | KV453213.1 | 7898740 | 21-scf00419 | 21 |
| AX-157843490 | 21 | 89.298 | KV453213.1 | 8293140 | 21-scf00419 | 21 |
| AX-158266976 | 21 | 89.402 | KV453213.1 | 8049077 | 21-scf00419 | 21 |
| AX-157709654 | 21 | 89.402 | KV453213.1 | 8254329 | 21-scf00419 | 21 |
| AX-157860063 | 21 | 89.402 | KV453213.1 | 8297918 | 21-scf00419 | 21 |
| AX-158267143 | 21 | 89.402 | KV453213.1 | 8299147 | 21-scf00419 | 21 |
| AX-158416446 | 21 | 89.402 | KV453213.1 | 8299627 | 21-scf00419 | 21 |
| AX-158267144 | 21 | 89.402 | KV453213.1 | 8300542 | 21-scf00419 | 21 |
| AX-158267145 | 21 | 89.402 | KV453213.1 | 8302498 | 21-scf00419 | 21 |
| AX-157843491 | 21 | 89.402 | KV453213.1 | 8302719 | 21-scf00419 | 21 |
| AX-158267149 | 21 | 89.402 | KV453213.1 | 8311424 | 21-scf00419 | 21 |
| AX-158267153 | 21 | 89.402 | KV453213.1 | 8314096 | 21-scf00419 | 21 |
| AX-157745440 | 21 | 89.402 | KV453213.1 | 8315567 | 21-scf00419 | 21 |
| AX-158267155 | 21 | 89.402 | KV453213.1 | 8316210 | 21-scf00419 | 21 |
| AX-158267156 | 21 | 89.402 | KV453213.1 | 8316427 | 21-scf00419 | 21 |
| AX-157843494 | 21 | 89.402 | KV453213.1 | 8316884 | 21-scf00419 | 21 |
| AX-158267157 | 21 | 89.402 | KV453213.1 | 8318151 | 21-scf00419 | 21 |
| AX-158267158 | 21 | 89.402 | KV453213.1 | 8319192 | 21-scf00419 | 21 |
| AX-157745150 | 21 | 89.402 | KV453213.1 | 8319600 | 21-scf00419 | 21 |
| AX-158267159 | 21 | 89.402 | KV453213.1 | 8320065 | 21-scf00419 | 21 |
| AX-158267160 | 21 | 89.402 | KV453213.1 | 8320267 | 21-scf00419 | 21 |
| AX-158267161 | 21 | 89.402 | KV453213.1 | 8320755 | 21-scf00419 | 21 |
| AX-158267167 | 21 | 89.402 | KV453213.1 | 8324156 | 21-scf00419 | 21 |
| AX-157771329 | 21 | 89.402 | KV453213.1 | 8343932 | 21-scf00419 | 21 |
| AX-157725184 | 21 | 89.402 | KV453213.1 | 8488410 | 21-scf00419 | 21 |
| AX-158267320 | 21 | 89.402 | KV453213.1 | 8531465 | 21-scf00419 | 21 |
| AX-158267349 | 21 | 89.402 | KV453213.1 | 8574321 | 21-scf00419 | 21 |
| AX-158267367 | 21 | 89.402 | KV453213.1 | 8597130 | 21-scf00419 | 21 |
| AX-158267379 | 21 | 89.402 | KV453213.1 | 8617025 | 21-scf00419 | 21 |
| AX-157712136 | 21 | 89.511 | KV453213.1 | 8321150 | 21-scf00419 | 21 |
| AX-158267163 | 21 | 89.511 | KV453213.1 | 8321655 | 21-scf00419 | 21 |
| AX-158267166 | 21 | 89.511 | KV453213.1 | 8323714 | 21-scf00419 | 21 |
| AX-157714635 | 21 | 89.511 | KV453213.1 | 8325789 | 21-scf00419 | 21 |
| AX-158267169 | 21 | 89.511 | KV453213.1 | 8326829 | 21-scf00419 | 21 |
| AX-157843495 | 21 | 89.511 | KV453213.1 | 8327246 | 21-scf00419 | 21 |

|              |    |        |            |         |             |    |
|--------------|----|--------|------------|---------|-------------|----|
| AX-157749689 | 21 | 89.511 | KV453213.1 | 8328840 | 21-scf00419 | 21 |
| AX-158267170 | 21 | 89.511 | KV453213.1 | 8329308 | 21-scf00419 | 21 |
| AX-158267171 | 21 | 89.511 | KV453213.1 | 8330438 | 21-scf00419 | 21 |
| AX-158267172 | 21 | 89.511 | KV453213.1 | 8330659 | 21-scf00419 | 21 |
| AX-158267176 | 21 | 89.511 | KV453213.1 | 8335016 | 21-scf00419 | 21 |
| AX-158267177 | 21 | 89.511 | KV453213.1 | 8335740 | 21-scf00419 | 21 |
| AX-157709285 | 21 | 89.511 | KV453213.1 | 8337111 | 21-scf00419 | 21 |
| AX-157843496 | 21 | 89.511 | KV453213.1 | 8337286 | 21-scf00419 | 21 |
| AX-158267180 | 21 | 89.511 | KV453213.1 | 8341115 | 21-scf00419 | 21 |
| AX-157843497 | 21 | 89.511 | KV453213.1 | 8341341 | 21-scf00419 | 21 |
| AX-158267181 | 21 | 89.511 | KV453213.1 | 8342398 | 21-scf00419 | 21 |
| AX-157722294 | 21 | 89.511 | KV453213.1 | 8343318 | 21-scf00419 | 21 |
| AX-158267182 | 21 | 89.511 | KV453213.1 | 8344457 | 21-scf00419 | 21 |
| AX-158267419 | 21 | 89.511 | KV453213.1 | 8663599 | 21-scf00419 | 21 |
| AX-157715950 | 21 | 89.511 | KV453213.1 | 9233186 | 21-scf00419 | 21 |
| AX-158267085 | 21 | 89.729 | KV453213.1 | 8209262 | 21-scf00419 | 21 |
| AX-158267114 | 21 | 89.729 | KV453213.1 | 8253767 | 21-scf00419 | 21 |
| AX-157867473 | 21 | 89.729 | KV453213.1 | 8330223 | 21-scf00419 | 21 |
| AX-157843499 | 21 | 89.729 | KV453213.1 | 8351330 | 21-scf00419 | 21 |
| AX-158267188 | 21 | 89.729 | KV453213.1 | 8359864 | 21-scf00419 | 21 |
| AX-158267189 | 21 | 89.729 | KV453213.1 | 8360528 | 21-scf00419 | 21 |
| AX-158267195 | 21 | 89.729 | KV453213.1 | 8367815 | 21-scf00419 | 21 |
| AX-158267197 | 21 | 89.729 | KV453213.1 | 8368865 | 21-scf00419 | 21 |
| AX-158267199 | 21 | 89.729 | KV453213.1 | 8371809 | 21-scf00419 | 21 |
| AX-158267202 | 21 | 89.729 | KV453213.1 | 8376917 | 21-scf00419 | 21 |
| AX-158267203 | 21 | 89.729 | KV453213.1 | 8377853 | 21-scf00419 | 21 |
| AX-158267207 | 21 | 89.729 | KV453213.1 | 8381822 | 21-scf00419 | 21 |
| AX-158267214 | 21 | 89.729 | KV453213.1 | 8392148 | 21-scf00419 | 21 |
| AX-158267216 | 21 | 89.729 | KV453213.1 | 8393735 | 21-scf00419 | 21 |
| AX-157843502 | 21 | 89.729 | KV453213.1 | 8398784 | 21-scf00419 | 21 |
| AX-158267218 | 21 | 89.729 | KV453213.1 | 8399041 | 21-scf00419 | 21 |
| AX-158267219 | 21 | 89.729 | KV453213.1 | 8399472 | 21-scf00419 | 21 |
| AX-158267221 | 21 | 89.729 | KV453213.1 | 8400738 | 21-scf00419 | 21 |
| AX-158267222 | 21 | 89.729 | KV453213.1 | 8401444 | 21-scf00419 | 21 |
| AX-157758229 | 21 | 89.729 | KV453213.1 | 8402513 | 21-scf00419 | 21 |
| AX-158267228 | 21 | 89.729 | KV453213.1 | 8409284 | 21-scf00419 | 21 |
| AX-157721045 | 21 | 89.729 | KV453213.1 | 8412654 | 21-scf00419 | 21 |
| AX-158267235 | 21 | 89.729 | KV453213.1 | 8415400 | 21-scf00419 | 21 |
| AX-157771966 | 21 | 89.729 | KV453213.1 | 8417938 | 21-scf00419 | 21 |
| AX-158267236 | 21 | 89.729 | KV453213.1 | 8418624 | 21-scf00419 | 21 |
| AX-157860064 | 21 | 89.729 | KV453213.1 | 8419166 | 21-scf00419 | 21 |
| AX-157726118 | 21 | 89.729 | KV453213.1 | 8421452 | 21-scf00419 | 21 |
| AX-157738896 | 21 | 89.729 | KV453213.1 | 8424680 | 21-scf00419 | 21 |
| AX-158267240 | 21 | 89.729 | KV453213.1 | 8425729 | 21-scf00419 | 21 |
| AX-158267241 | 21 | 89.729 | KV453213.1 | 8427154 | 21-scf00419 | 21 |
| AX-158267243 | 21 | 89.729 | KV453213.1 | 8428863 | 21-scf00419 | 21 |
| AX-158267250 | 21 | 89.729 | KV453213.1 | 8437809 | 21-scf00419 | 21 |
| AX-158267252 | 21 | 89.729 | KV453213.1 | 8439597 | 21-scf00419 | 21 |
| AX-157718727 | 21 | 89.729 | KV453213.1 | 8443062 | 21-scf00419 | 21 |
| AX-158267256 | 21 | 89.729 | KV453213.1 | 8446285 | 21-scf00419 | 21 |
| AX-158267261 | 21 | 89.729 | KV453213.1 | 8456058 | 21-scf00419 | 21 |

|              |    |        |            |         |             |    |
|--------------|----|--------|------------|---------|-------------|----|
| AX-158267263 | 21 | 89.729 | KV453213.1 | 8459018 | 21-scf00419 | 21 |
| AX-158267267 | 21 | 89.729 | KV453213.1 | 8464444 | 21-scf00419 | 21 |
| AX-158267269 | 21 | 89.729 | KV453213.1 | 8467616 | 21-scf00419 | 21 |
| AX-158267270 | 21 | 89.729 | KV453213.1 | 8470158 | 21-scf00419 | 21 |
| AX-158267272 | 21 | 89.729 | KV453213.1 | 8471567 | 21-scf00419 | 21 |
| AX-158267275 | 21 | 89.729 | KV453213.1 | 8473914 | 21-scf00419 | 21 |
| AX-158267277 | 21 | 89.729 | KV453213.1 | 8476860 | 21-scf00419 | 21 |
| AX-158267278 | 21 | 89.729 | KV453213.1 | 8477641 | 21-scf00419 | 21 |
| AX-158267281 | 21 | 89.729 | KV453213.1 | 8479190 | 21-scf00419 | 21 |
| AX-158267282 | 21 | 89.729 | KV453213.1 | 8479663 | 21-scf00419 | 21 |
| AX-158267283 | 21 | 89.729 | KV453213.1 | 8480979 | 21-scf00419 | 21 |
| AX-158267284 | 21 | 89.729 | KV453213.1 | 8482698 | 21-scf00419 | 21 |
| AX-158267289 | 21 | 89.729 | KV453213.1 | 8487031 | 21-scf00419 | 21 |
| AX-158267290 | 21 | 89.729 | KV453213.1 | 8487495 | 21-scf00419 | 21 |
| AX-158267292 | 21 | 89.729 | KV453213.1 | 8489277 | 21-scf00419 | 21 |
| AX-157722419 | 21 | 89.729 | KV453213.1 | 8491136 | 21-scf00419 | 21 |
| AX-157860066 | 21 | 89.729 | KV453213.1 | 8493328 | 21-scf00419 | 21 |
| AX-158267298 | 21 | 89.729 | KV453213.1 | 8501861 | 21-scf00419 | 21 |
| AX-158267299 | 21 | 89.729 | KV453213.1 | 8505046 | 21-scf00419 | 21 |
| AX-158267303 | 21 | 89.729 | KV453213.1 | 8509237 | 21-scf00419 | 21 |
| AX-158267305 | 21 | 89.729 | KV453213.1 | 8510374 | 21-scf00419 | 21 |
| AX-158381115 | 21 | 89.729 | KV453213.1 | 8514257 | 21-scf00419 | 21 |
| AX-158267309 | 21 | 89.729 | KV453213.1 | 8514345 | 21-scf00419 | 21 |
| AX-158267310 | 21 | 89.729 | KV453213.1 | 8515269 | 21-scf00419 | 21 |
| AX-158267312 | 21 | 89.729 | KV453213.1 | 8516979 | 21-scf00419 | 21 |
| AX-158267316 | 21 | 89.729 | KV453213.1 | 8522332 | 21-scf00419 | 21 |
| AX-158267318 | 21 | 89.729 | KV453213.1 | 8530436 | 21-scf00419 | 21 |
| AX-157721961 | 21 | 89.729 | KV453213.1 | 8540115 | 21-scf00419 | 21 |
| AX-158267326 | 21 | 89.729 | KV453213.1 | 8541642 | 21-scf00419 | 21 |
| AX-158267361 | 21 | 89.729 | KV453213.1 | 8589057 | 21-scf00419 | 21 |
| AX-158267380 | 21 | 89.729 | KV453213.1 | 8617592 | 21-scf00419 | 21 |
| AX-158267391 | 21 | 89.729 | KV453213.1 | 8627619 | 21-scf00419 | 21 |
| AX-158267429 | 21 | 89.729 | KV453213.1 | 8679216 | 21-scf00419 | 21 |
| AX-158267455 | 21 | 89.729 | KV453213.1 | 8718727 | 21-scf00419 | 21 |
| AX-157741292 | 21 | 89.729 | KV453213.1 | 9112013 | 21-scf00419 | 21 |
| AX-158267734 | 21 | 89.729 | KV453213.1 | 9132717 | 21-scf00419 | 21 |
| AX-158267193 | 21 | 89.781 | KV453213.1 | 8364769 | 21-scf00419 | 21 |
| AX-157724762 | 21 | 89.781 | KV453213.1 | 8414865 | 21-scf00419 | 21 |
| AX-158267317 | 21 | 89.781 | KV453213.1 | 8528839 | 21-scf00419 | 21 |
| AX-158267319 | 21 | 89.781 | KV453213.1 | 8530933 | 21-scf00419 | 21 |
| AX-158267382 | 21 | 89.781 | KV453213.1 | 8619445 | 21-scf00419 | 21 |
| AX-157725194 | 21 | 89.839 | KV453213.1 | 8497563 | 21-scf00419 | 21 |
| AX-157708221 | 21 | 89.839 | KV453213.1 | 8500264 | 21-scf00419 | 21 |
| AX-158267341 | 21 | 89.839 | KV453213.1 | 8558317 | 21-scf00419 | 21 |
| AX-158267346 | 21 | 89.839 | KV453213.1 | 8572246 | 21-scf00419 | 21 |
| AX-158267347 | 21 | 89.839 | KV453213.1 | 8573173 | 21-scf00419 | 21 |
| AX-158267348 | 21 | 89.839 | KV453213.1 | 8573823 | 21-scf00419 | 21 |
| AX-158267350 | 21 | 89.839 | KV453213.1 | 8574934 | 21-scf00419 | 21 |
| AX-157719285 | 21 | 89.839 | KV453213.1 | 8575292 | 21-scf00419 | 21 |
| AX-158267354 | 21 | 89.839 | KV453213.1 | 8579921 | 21-scf00419 | 21 |
| AX-158267356 | 21 | 89.839 | KV453213.1 | 8583240 | 21-scf00419 | 21 |

|              |    |        |            |         |                |    |
|--------------|----|--------|------------|---------|----------------|----|
| AX-158387306 | 21 | 89.892 | KV453213.1 | 8602800 | 21-scf00419    | 21 |
| AX-158267372 | 21 | 89.948 | KV453213.1 | 8604096 | 21-scf00419    | 21 |
| AX-157718190 | 21 | 89.948 | KV453213.1 | 8608586 | 21-scf00419    | 21 |
| AX-157725222 | 21 | 89.948 | KV453213.1 | 8612163 | 21-scf00419    | 21 |
| AX-158267377 | 21 | 89.948 | KV453213.1 | 8615206 | 21-scf00419    | 21 |
| AX-158267383 | 21 | 89.948 | KV453213.1 | 8620267 | 21-scf00419    | 21 |
| AX-158267385 | 21 | 89.948 | KV453213.1 | 8622278 | 21-scf00419    | 21 |
| AX-158267389 | 21 | 89.948 | KV453213.1 | 8625466 | 21-scf00419    | 21 |
| AX-158267393 | 21 | 89.948 | KV453213.1 | 8629420 | 21-scf00419    | 21 |
| AX-157717895 | 21 | 89.948 | KV453213.1 | 8629986 | 21-scf00419    | 21 |
| AX-158267483 | 21 | 89.948 | KV453213.1 | 8757954 | 21-scf00419    | 21 |
| AX-158267394 | 21 | 90.045 | KV453213.1 | 8632113 | 21-scf00419    | 21 |
| AX-157710476 | 21 | 90.051 | KV453213.1 | 8322035 | 21-scf00419    | 21 |
| AX-158267390 | 21 | 90.051 | KV453213.1 | 8626726 | 21-scf00419    | 21 |
| AX-158267396 | 21 | 90.051 | KV453213.1 | 8634765 | 21-scf00419    | 21 |
| AX-158267439 | 21 | 90.051 | KV453213.1 | 8695097 | 21-scf00419    | 21 |
| AX-157843498 | 21 | 90.057 | KV453213.1 | 8343622 | 21-scf00419    | 21 |
| AX-158267192 | 21 | 90.057 | KV453213.1 | 8363812 | 21-scf00419    | 21 |
| AX-158267208 | 21 | 90.057 | KV453213.1 | 8384563 | 21-scf00419    | 21 |
| AX-158267215 | 21 | 90.057 | KV453213.1 | 8392836 | 21-scf00419    | 21 |
| AX-158267296 | 21 | 90.057 | KV453213.1 | 8499284 | 21-scf00419    | 21 |
| AX-158267365 | 21 | 90.057 | KV453213.1 | 8596060 | 21-scf00419    | 21 |
| AX-158267381 | 21 | 90.057 | KV453213.1 | 8619031 | 21-scf00419    | 21 |
| AX-158267397 | 21 | 90.057 | KV453213.1 | 8635901 | 21-scf00419    | 21 |
| AX-157772101 | 21 | 90.057 | KV453213.1 | 8637004 | 21-scf00419    | 21 |
| AX-158267398 | 21 | 90.057 | KV453213.1 | 8640860 | 21-scf00419    | 21 |
| AX-157769798 | 21 | 90.057 | KV453213.1 | 8641174 | 21-scf00419    | 21 |
| AX-158267399 | 21 | 90.057 | KV453213.1 | 8641359 | 21-scf00419    | 21 |
| AX-158267400 | 21 | 90.057 | KV453213.1 | 8642583 | 21-scf00419    | 21 |
| AX-158267401 | 21 | 90.057 | KV453213.1 | 8643998 | 21-scf00419    | 21 |
| AX-158267402 | 21 | 90.057 | KV453213.1 | 8645118 | 21-scf00419    | 21 |
| AX-158267403 | 21 | 90.057 | KV453213.1 | 8646170 | 21-scf00419    | 21 |
| AX-157747521 | 21 | 90.057 | KV453213.1 | 8648693 | 21-scf00419    | 21 |
| AX-157715156 | 21 | 90.057 | KV453213.1 | 8653322 | 21-scf00419    | 21 |
| AX-158267410 | 21 | 90.057 | KV453213.1 | 8655049 | 21-scf00419    | 21 |
| AX-158267412 | 21 | 90.057 | KV453213.1 | 8657238 | 21-scf00419    | 21 |
| AX-158267415 | 21 | 90.057 | KV453213.1 | 8659870 | 21-scf00419    | 21 |
| AX-157867475 | 21 | 90.057 | KV453213.1 | 8660142 | 21-scf00419    | 21 |
| AX-158267416 | 21 | 90.057 | KV453213.1 | 8661532 | 21-scf00419    | 21 |
| AX-158267417 | 21 | 90.057 | KV453213.1 | 8661944 | 21-scf00419    | 21 |
| AX-158267418 | 21 | 90.057 | KV453213.1 | 8662440 | 21-scf00419    | 21 |
| AX-158267421 | 21 | 90.057 | KV453213.1 | 8667246 | 21-scf00419    | 21 |
| AX-158267423 | 21 | 90.057 | KV453213.1 | 8669437 | 21-scf00419    | 21 |
| AX-158267427 | 21 | 90.057 | KV453213.1 | 8678383 | 21-scf00419    | 21 |
| AX-158267428 | 21 | 90.057 | KV453213.1 | 8678847 | 21-scf00419    | 21 |
| AX-158267430 | 21 | 90.057 | KV453213.1 | 8680970 | 21-scf00419    | 21 |
| AX-158267431 | 21 | 90.057 | KV453213.1 | 8682397 | 21-scf00419    | 21 |
| AX-158267443 | 21 | 90.057 | KV453213.1 | 8697835 | 21-scf00419    | 21 |
| AX-157702569 | 21 | 90.057 | DX092926.1 | 561     | IORI212 lctalk | UN |
| AX-158267432 | 21 | 90.109 | KV453213.1 | 8684115 | 21-scf00419    | 21 |
| AX-158267434 | 21 | 90.166 | KV453213.1 | 8686836 | 21-scf00419    | 21 |

|              |    |        |            |         |             |    |
|--------------|----|--------|------------|---------|-------------|----|
| AX-158267435 | 21 | 90.166 | KV453213.1 | 8689076 | 21-scf00419 | 21 |
| AX-158267438 | 21 | 90.166 | KV453213.1 | 8694403 | 21-scf00419 | 21 |
| AX-158267440 | 21 | 90.166 | KV453213.1 | 8695589 | 21-scf00419 | 21 |
| AX-158267445 | 21 | 90.166 | KV453213.1 | 8702922 | 21-scf00419 | 21 |
| AX-158267448 | 21 | 90.166 | KV453213.1 | 8706059 | 21-scf00419 | 21 |
| AX-158267450 | 21 | 90.166 | KV453213.1 | 8709024 | 21-scf00419 | 21 |
| AX-158267484 | 21 | 90.166 | KV453213.1 | 8763061 | 21-scf00419 | 21 |
| AX-158267449 | 21 | 90.221 | KV453213.1 | 8708833 | 21-scf00419 | 21 |
| AX-158267451 | 21 | 90.221 | KV453213.1 | 8709969 | 21-scf00419 | 21 |
| AX-158267452 | 21 | 90.221 | KV453213.1 | 8710832 | 21-scf00419 | 21 |
| AX-158267538 | 21 | 90.221 | KV453213.1 | 8845505 | 21-scf00419 | 21 |
| AX-158267564 | 21 | 90.221 | KV453213.1 | 8876663 | 21-scf00419 | 21 |
| AX-158267404 | 21 | 90.276 | KV453213.1 | 8647076 | 21-scf00419 | 21 |
| AX-158267414 | 21 | 90.276 | KV453213.1 | 8659239 | 21-scf00419 | 21 |
| AX-157757773 | 21 | 90.276 | KV453213.1 | 8713851 | 21-scf00419 | 21 |
| AX-158267454 | 21 | 90.276 | KV453213.1 | 8714832 | 21-scf00419 | 21 |
| AX-158267457 | 21 | 90.276 | KV453213.1 | 8723599 | 21-scf00419 | 21 |
| AX-158267459 | 21 | 90.276 | KV453213.1 | 8725737 | 21-scf00419 | 21 |
| AX-158267460 | 21 | 90.276 | KV453213.1 | 8726676 | 21-scf00419 | 21 |
| AX-158267462 | 21 | 90.276 | KV453213.1 | 8727754 | 21-scf00419 | 21 |
| AX-158267463 | 21 | 90.276 | KV453213.1 | 8728753 | 21-scf00419 | 21 |
| AX-157718262 | 21 | 90.276 | KV453213.1 | 8729898 | 21-scf00419 | 21 |
| AX-158267464 | 21 | 90.276 | KV453213.1 | 8731290 | 21-scf00419 | 21 |
| AX-158267465 | 21 | 90.276 | KV453213.1 | 8731697 | 21-scf00419 | 21 |
| AX-158267466 | 21 | 90.276 | KV453213.1 | 8732134 | 21-scf00419 | 21 |
| AX-158267468 | 21 | 90.276 | KV453213.1 | 8733892 | 21-scf00419 | 21 |
| AX-158267469 | 21 | 90.276 | KV453213.1 | 8735150 | 21-scf00419 | 21 |
| AX-158267470 | 21 | 90.276 | KV453213.1 | 8736492 | 21-scf00419 | 21 |
| AX-158267473 | 21 | 90.276 | KV453213.1 | 8741847 | 21-scf00419 | 21 |
| AX-158267475 | 21 | 90.276 | KV453213.1 | 8746422 | 21-scf00419 | 21 |
| AX-158267476 | 21 | 90.276 | KV453213.1 | 8747765 | 21-scf00419 | 21 |
| AX-157715133 | 21 | 90.276 | KV453213.1 | 8750227 | 21-scf00419 | 21 |
| AX-158267478 | 21 | 90.276 | KV453213.1 | 8752090 | 21-scf00419 | 21 |
| AX-158267479 | 21 | 90.276 | KV453213.1 | 8753030 | 21-scf00419 | 21 |
| AX-158267485 | 21 | 90.276 | KV453213.1 | 8763990 | 21-scf00419 | 21 |
| AX-158267494 | 21 | 90.276 | KV453213.1 | 8776135 | 21-scf00419 | 21 |
| AX-158267504 | 21 | 90.276 | KV453213.1 | 8786015 | 21-scf00419 | 21 |
| AX-158267506 | 21 | 90.276 | KV453213.1 | 8790333 | 21-scf00419 | 21 |
| AX-157860073 | 21 | 90.276 | KV453213.1 | 8822637 | 21-scf00419 | 21 |
| AX-157739664 | 21 | 90.276 | KV453213.1 | 8882482 | 21-scf00419 | 21 |
| AX-158267649 | 21 | 90.276 | KV453213.1 | 8983272 | 21-scf00419 | 21 |
| AX-158267795 | 21 | 90.276 | KV453213.1 | 9240122 | 21-scf00419 | 21 |
| AX-158267850 | 21 | 90.276 | KV453213.1 | 9325208 | 21-scf00419 | 21 |
| AX-158268084 | 21 | 90.276 | KV453215.1 | 327717  | 21-scf00420 | 21 |
| AX-158267142 | 21 | 90.385 | KV453213.1 | 8298766 | 21-scf00419 | 21 |
| AX-158267335 | 21 | 90.385 | KV453213.1 | 8551674 | 21-scf00419 | 21 |
| AX-158267433 | 21 | 90.385 | KV453213.1 | 8686445 | 21-scf00419 | 21 |
| AX-158267436 | 21 | 90.385 | KV453213.1 | 8690027 | 21-scf00419 | 21 |
| AX-158267442 | 21 | 90.385 | KV453213.1 | 8696547 | 21-scf00419 | 21 |
| AX-158267447 | 21 | 90.385 | KV453213.1 | 8705227 | 21-scf00419 | 21 |
| AX-158267467 | 21 | 90.385 | KV453213.1 | 8732777 | 21-scf00419 | 21 |

|              |    |        |            |         |             |    |
|--------------|----|--------|------------|---------|-------------|----|
| AX-158267471 | 21 | 90.385 | KV453213.1 | 8737150 | 21-scf00419 | 21 |
| AX-158267490 | 21 | 90.385 | KV453213.1 | 8772157 | 21-scf00419 | 21 |
| AX-158267491 | 21 | 90.385 | KV453213.1 | 8772654 | 21-scf00419 | 21 |
| AX-157860068 | 21 | 90.385 | KV453213.1 | 8776919 | 21-scf00419 | 21 |
| AX-158267496 | 21 | 90.385 | KV453213.1 | 8777460 | 21-scf00419 | 21 |
| AX-158267498 | 21 | 90.385 | KV453213.1 | 8779140 | 21-scf00419 | 21 |
| AX-158267499 | 21 | 90.385 | KV453213.1 | 8780654 | 21-scf00419 | 21 |
| AX-157716905 | 21 | 90.385 | KV453213.1 | 8783868 | 21-scf00419 | 21 |
| AX-158267502 | 21 | 90.385 | KV453213.1 | 8784704 | 21-scf00419 | 21 |
| AX-158267503 | 21 | 90.385 | KV453213.1 | 8785371 | 21-scf00419 | 21 |
| AX-157739494 | 21 | 90.385 | KV453213.1 | 8787594 | 21-scf00419 | 21 |
| AX-158267505 | 21 | 90.385 | KV453213.1 | 8788395 | 21-scf00419 | 21 |
| AX-158267507 | 21 | 90.385 | KV453213.1 | 8793046 | 21-scf00419 | 21 |
| AX-158267513 | 21 | 90.385 | KV453213.1 | 8805160 | 21-scf00419 | 21 |
| AX-157843508 | 21 | 90.385 | KV453213.1 | 8805206 | 21-scf00419 | 21 |
| AX-158267514 | 21 | 90.385 | KV453213.1 | 8805796 | 21-scf00419 | 21 |
| AX-158267516 | 21 | 90.385 | KV453213.1 | 8807380 | 21-scf00419 | 21 |
| AX-158267520 | 21 | 90.385 | KV453213.1 | 8813112 | 21-scf00419 | 21 |
| AX-157860071 | 21 | 90.385 | KV453213.1 | 8814495 | 21-scf00419 | 21 |
| AX-157887825 | 21 | 90.385 | KV453213.1 | 8816666 | 21-scf00419 | 21 |
| AX-158267523 | 21 | 90.385 | KV453213.1 | 8818556 | 21-scf00419 | 21 |
| AX-158267524 | 21 | 90.385 | KV453213.1 | 8821127 | 21-scf00419 | 21 |
| AX-158267527 | 21 | 90.385 | KV453213.1 | 8827347 | 21-scf00419 | 21 |
| AX-158267529 | 21 | 90.385 | KV453213.1 | 8828418 | 21-scf00419 | 21 |
| AX-158267530 | 21 | 90.385 | KV453213.1 | 8829524 | 21-scf00419 | 21 |
| AX-158267531 | 21 | 90.385 | KV453213.1 | 8831337 | 21-scf00419 | 21 |
| AX-157741954 | 21 | 90.385 | KV453213.1 | 8838117 | 21-scf00419 | 21 |
| AX-158267534 | 21 | 90.385 | KV453213.1 | 8841380 | 21-scf00419 | 21 |
| AX-157772259 | 21 | 90.385 | KV453213.1 | 8843358 | 21-scf00419 | 21 |
| AX-158267536 | 21 | 90.385 | KV453213.1 | 8844212 | 21-scf00419 | 21 |
| AX-158267539 | 21 | 90.385 | KV453213.1 | 8846243 | 21-scf00419 | 21 |
| AX-158267568 | 21 | 90.385 | KV453213.1 | 8879810 | 21-scf00419 | 21 |
| AX-158267587 | 21 | 90.385 | KV453213.1 | 8903470 | 21-scf00419 | 21 |
| AX-158267614 | 21 | 90.385 | KV453213.1 | 8946184 | 21-scf00419 | 21 |
| AX-158267661 | 21 | 90.385 | KV453213.1 | 8995942 | 21-scf00419 | 21 |
| AX-158267696 | 21 | 90.385 | KV453213.1 | 9072247 | 21-scf00419 | 21 |
| AX-158267728 | 21 | 90.385 | KV453213.1 | 9115093 | 21-scf00419 | 21 |
| AX-158267745 | 21 | 90.385 | KV453213.1 | 9141852 | 21-scf00419 | 21 |
| AX-158267547 | 21 | 90.712 | KV453213.1 | 8857022 | 21-scf00419 | 21 |
| AX-157843509 | 21 | 90.712 | KV453213.1 | 8864286 | 21-scf00419 | 21 |
| AX-158267481 | 21 | 90.821 | KV453213.1 | 8754953 | 21-scf00419 | 21 |
| AX-158267495 | 21 | 90.821 | KV453213.1 | 8776841 | 21-scf00419 | 21 |
| AX-158267546 | 21 | 90.821 | KV453213.1 | 8853349 | 21-scf00419 | 21 |
| AX-158267560 | 21 | 90.821 | KV453213.1 | 8873434 | 21-scf00419 | 21 |
| AX-158381117 | 21 | 90.821 | KV453213.1 | 8873515 | 21-scf00419 | 21 |
| AX-158387320 | 21 | 90.821 | KV453213.1 | 8873671 | 21-scf00419 | 21 |
| AX-158394810 | 21 | 90.821 | KV453213.1 | 8873777 | 21-scf00419 | 21 |
| AX-158267561 | 21 | 90.821 | KV453213.1 | 8873889 | 21-scf00419 | 21 |
| AX-158267563 | 21 | 90.821 | KV453213.1 | 8875351 | 21-scf00419 | 21 |
| AX-158267566 | 21 | 90.821 | KV453213.1 | 8878673 | 21-scf00419 | 21 |
| AX-157771656 | 21 | 90.821 | KV453213.1 | 8881026 | 21-scf00419 | 21 |

|              |    |        |            |         |             |    |
|--------------|----|--------|------------|---------|-------------|----|
| AX-158267570 | 21 | 90.821 | KV453213.1 | 8881650 | 21-scf00419 | 21 |
| AX-158267598 | 21 | 90.821 | KV453213.1 | 8917798 | 21-scf00419 | 21 |
| AX-158267720 | 21 | 90.821 | KV453213.1 | 9106540 | 21-scf00419 | 21 |
| AX-158267725 | 21 | 90.821 | KV453213.1 | 9113779 | 21-scf00419 | 21 |
| AX-158267482 | 21 | 90.846 | KV453213.1 | 8755495 | 21-scf00419 | 21 |
| AX-158267551 | 21 | 90.846 | KV453213.1 | 8860974 | 21-scf00419 | 21 |
| AX-158267567 | 21 | 90.846 | KV453213.1 | 8879321 | 21-scf00419 | 21 |
| AX-158267574 | 21 | 90.846 | KV453213.1 | 8890321 | 21-scf00419 | 21 |
| AX-158267575 | 21 | 90.846 | KV453213.1 | 8890787 | 21-scf00419 | 21 |
| AX-157771369 | 21 | 90.846 | KV453213.1 | 8938170 | 21-scf00419 | 21 |
| AX-158267703 | 21 | 90.846 | KV453213.1 | 9089509 | 21-scf00419 | 21 |
| AX-158267735 | 21 | 90.846 | KV453213.1 | 9133840 | 21-scf00419 | 21 |
| AX-157843510 | 21 | 90.931 | KV453213.1 | 8891119 | 21-scf00419 | 21 |
| AX-158267579 | 21 | 90.931 | KV453213.1 | 8893920 | 21-scf00419 | 21 |
| AX-157843512 | 21 | 90.931 | KV453213.1 | 8899437 | 21-scf00419 | 21 |
| AX-158267583 | 21 | 90.931 | KV453213.1 | 8900194 | 21-scf00419 | 21 |
| AX-158267584 | 21 | 90.931 | KV453213.1 | 8902233 | 21-scf00419 | 21 |
| AX-157843513 | 21 | 90.931 | KV453213.1 | 8902334 | 21-scf00419 | 21 |
| AX-158267589 | 21 | 90.931 | KV453213.1 | 8904476 | 21-scf00419 | 21 |
| AX-158267591 | 21 | 90.931 | KV453213.1 | 8907031 | 21-scf00419 | 21 |
| AX-157748100 | 21 | 90.931 | KV453213.1 | 8908300 | 21-scf00419 | 21 |
| AX-157843515 | 21 | 90.931 | KV453213.1 | 8917986 | 21-scf00419 | 21 |
| AX-157843520 | 21 | 90.931 | KV453213.1 | 8968314 | 21-scf00419 | 21 |
| AX-157843527 | 21 | 90.931 | KV453213.1 | 9005603 | 21-scf00419 | 21 |
| AX-158267667 | 21 | 90.931 | KV453213.1 | 9006788 | 21-scf00419 | 21 |
| AX-158267680 | 21 | 90.931 | KV453213.1 | 9033695 | 21-scf00419 | 21 |
| AX-158267693 | 21 | 90.931 | KV453213.1 | 9065261 | 21-scf00419 | 21 |
| AX-157843543 | 21 | 90.931 | KV453213.1 | 9091137 | 21-scf00419 | 21 |
| AX-158267709 | 21 | 90.931 | KV453213.1 | 9095411 | 21-scf00419 | 21 |
| AX-158267808 | 21 | 90.931 | KV453213.1 | 9266986 | 21-scf00419 | 21 |
| AX-157755359 | 21 | 90.931 | KV453213.1 | 9362296 | 21-scf00419 | 21 |
| AX-158267593 | 21 | 90.978 | KV453213.1 | 8910324 | 21-scf00419 | 21 |
| AX-158267607 | 21 | 91.04  | KV453213.1 | 8932299 | 21-scf00419 | 21 |
| AX-158381118 | 21 | 91.04  | KV453213.1 | 8934779 | 21-scf00419 | 21 |
| AX-157771857 | 21 | 91.04  | KV453213.1 | 8935674 | 21-scf00419 | 21 |
| AX-158267610 | 21 | 91.04  | KV453213.1 | 8941573 | 21-scf00419 | 21 |
| AX-157860077 | 21 | 91.04  | KV453213.1 | 8944497 | 21-scf00419 | 21 |
| AX-158267621 | 21 | 91.04  | KV453213.1 | 8953752 | 21-scf00419 | 21 |
| AX-158267622 | 21 | 91.04  | KV453213.1 | 8955835 | 21-scf00419 | 21 |
| AX-158267628 | 21 | 91.04  | KV453213.1 | 8960625 | 21-scf00419 | 21 |
| AX-158267631 | 21 | 91.04  | KV453213.1 | 8964896 | 21-scf00419 | 21 |
| AX-157843519 | 21 | 91.04  | KV453213.1 | 8964989 | 21-scf00419 | 21 |
| AX-158267634 | 21 | 91.04  | KV453213.1 | 8967323 | 21-scf00419 | 21 |
| AX-158267635 | 21 | 91.04  | KV453213.1 | 8969388 | 21-scf00419 | 21 |
| AX-157723349 | 21 | 91.04  | KV453213.1 | 8971030 | 21-scf00419 | 21 |
| AX-157843521 | 21 | 91.04  | KV453213.1 | 8971662 | 21-scf00419 | 21 |
| AX-158267636 | 21 | 91.04  | KV453213.1 | 8972378 | 21-scf00419 | 21 |
| AX-158267638 | 21 | 91.04  | KV453213.1 | 8974168 | 21-scf00419 | 21 |
| AX-158267639 | 21 | 91.04  | KV453213.1 | 8974403 | 21-scf00419 | 21 |
| AX-157757171 | 21 | 91.04  | KV453213.1 | 8975511 | 21-scf00419 | 21 |
| AX-158267640 | 21 | 91.04  | KV453213.1 | 8977209 | 21-scf00419 | 21 |

|              |    |        |            |         |             |    |
|--------------|----|--------|------------|---------|-------------|----|
| AX-158267642 | 21 | 91.04  | KV453213.1 | 8978948 | 21-scf00419 | 21 |
| AX-158267655 | 21 | 91.04  | KV453213.1 | 8989122 | 21-scf00419 | 21 |
| AX-158267647 | 21 | 91.097 | KV453213.1 | 8982099 | 21-scf00419 | 21 |
| AX-158267612 | 21 | 91.109 | KV453213.1 | 8944932 | 21-scf00419 | 21 |
| AX-158267653 | 21 | 91.109 | KV453213.1 | 8988264 | 21-scf00419 | 21 |
| AX-157843534 | 21 | 91.109 | KV453213.1 | 9063630 | 21-scf00419 | 21 |
| AX-158267854 | 21 | 91.109 | KV453213.1 | 9334627 | 21-scf00419 | 21 |
| AX-158267922 | 21 | 91.109 | KV453213.1 | 9439168 | 21-scf00419 | 21 |
| AX-157843578 | 21 | 91.109 | KV453213.1 | 9610951 | 21-scf00419 | 21 |
| AX-158268129 | 21 | 91.109 | KV453215.1 | 434077  | 21-scf00420 | 21 |
| AX-158268188 | 21 | 91.109 | KV453215.1 | 553894  | 21-scf00420 | 21 |
| AX-158268192 | 21 | 91.109 | KV453215.1 | 560940  | 21-scf00420 | 21 |
| AX-158267573 | 21 | 91.149 | KV453213.1 | 8887589 | 21-scf00419 | 21 |
| AX-158267643 | 21 | 91.149 | KV453213.1 | 8979659 | 21-scf00419 | 21 |
| AX-157843524 | 21 | 91.149 | KV453213.1 | 8987533 | 21-scf00419 | 21 |
| AX-157755560 | 21 | 91.149 | KV453213.1 | 8987863 | 21-scf00419 | 21 |
| AX-157720713 | 21 | 91.149 | KV453213.1 | 8990256 | 21-scf00419 | 21 |
| AX-158267657 | 21 | 91.149 | KV453213.1 | 8992216 | 21-scf00419 | 21 |
| AX-158267660 | 21 | 91.149 | KV453213.1 | 8995253 | 21-scf00419 | 21 |
| AX-157843525 | 21 | 91.149 | KV453213.1 | 8996636 | 21-scf00419 | 21 |
| AX-157843526 | 21 | 91.149 | KV453213.1 | 8997219 | 21-scf00419 | 21 |
| AX-158267668 | 21 | 91.149 | KV453213.1 | 9007633 | 21-scf00419 | 21 |
| AX-158267669 | 21 | 91.149 | KV453213.1 | 9008215 | 21-scf00419 | 21 |
| AX-158267673 | 21 | 91.149 | KV453213.1 | 9018683 | 21-scf00419 | 21 |
| AX-158267675 | 21 | 91.149 | KV453213.1 | 9026210 | 21-scf00419 | 21 |
| AX-158267677 | 21 | 91.149 | KV453213.1 | 9029835 | 21-scf00419 | 21 |
| AX-158267678 | 21 | 91.149 | KV453213.1 | 9031375 | 21-scf00419 | 21 |
| AX-158267683 | 21 | 91.149 | KV453213.1 | 9037506 | 21-scf00419 | 21 |
| AX-158267690 | 21 | 91.149 | KV453213.1 | 9054658 | 21-scf00419 | 21 |
| AX-157843533 | 21 | 91.149 | KV453213.1 | 9055559 | 21-scf00419 | 21 |
| AX-158267691 | 21 | 91.149 | KV453213.1 | 9060696 | 21-scf00419 | 21 |
| AX-158411237 | 21 | 91.149 | KV453213.1 | 9062164 | 21-scf00419 | 21 |
| AX-157843535 | 21 | 91.149 | KV453213.1 | 9064535 | 21-scf00419 | 21 |
| AX-158267692 | 21 | 91.149 | KV453213.1 | 9064708 | 21-scf00419 | 21 |
| AX-157843536 | 21 | 91.149 | KV453213.1 | 9065405 | 21-scf00419 | 21 |
| AX-157744883 | 21 | 91.149 | KV453213.1 | 9075179 | 21-scf00419 | 21 |
| AX-157843538 | 21 | 91.149 | KV453213.1 | 9076294 | 21-scf00419 | 21 |
| AX-157843539 | 21 | 91.149 | KV453213.1 | 9076649 | 21-scf00419 | 21 |
| AX-157772451 | 21 | 91.149 | KV453213.1 | 9076866 | 21-scf00419 | 21 |
| AX-158416464 | 21 | 91.149 | KV453213.1 | 9079686 | 21-scf00419 | 21 |
| AX-157843541 | 21 | 91.149 | KV453213.1 | 9082266 | 21-scf00419 | 21 |
| AX-158267704 | 21 | 91.149 | KV453213.1 | 9090046 | 21-scf00419 | 21 |
| AX-157843542 | 21 | 91.149 | KV453213.1 | 9090899 | 21-scf00419 | 21 |
| AX-157771784 | 21 | 91.149 | KV453213.1 | 9091043 | 21-scf00419 | 21 |
| AX-158267705 | 21 | 91.149 | KV453213.1 | 9091591 | 21-scf00419 | 21 |
| AX-158267706 | 21 | 91.149 | KV453213.1 | 9094335 | 21-scf00419 | 21 |
| AX-158267707 | 21 | 91.149 | KV453213.1 | 9094809 | 21-scf00419 | 21 |
| AX-158267708 | 21 | 91.149 | KV453213.1 | 9095058 | 21-scf00419 | 21 |
| AX-158267710 | 21 | 91.149 | KV453213.1 | 9097440 | 21-scf00419 | 21 |
| AX-158267712 | 21 | 91.149 | KV453213.1 | 9098347 | 21-scf00419 | 21 |
| AX-158267713 | 21 | 91.149 | KV453213.1 | 9098694 | 21-scf00419 | 21 |



|              |    |        |             |         |             |    |
|--------------|----|--------|-------------|---------|-------------|----|
| AX-158267714 | 21 | 91.149 | KV453213.1  | 9099094 | 21-scf00419 | 21 |
| AX-158267716 | 21 | 91.149 | KV453213.1  | 9100507 | 21-scf00419 | 21 |
| AX-158267717 | 21 | 91.149 | KV453213.1  | 9101022 | 21-scf00419 | 21 |
| AX-158267724 | 21 | 91.149 | KV453213.1  | 9113558 | 21-scf00419 | 21 |
| AX-158267726 | 21 | 91.149 | KV453213.1  | 9114303 | 21-scf00419 | 21 |
| AX-158267730 | 21 | 91.149 | KV453213.1  | 9118510 | 21-scf00419 | 21 |
| AX-158267731 | 21 | 91.149 | KV453213.1  | 9119626 | 21-scf00419 | 21 |
| AX-157754710 | 21 | 91.149 | KV453213.1  | 9125038 | 21-scf00419 | 21 |
| AX-157716493 | 21 | 91.149 | KV453213.1  | 9125828 | 21-scf00419 | 21 |
| AX-158267732 | 21 | 91.149 | KV453213.1  | 9126795 | 21-scf00419 | 21 |
| AX-157843546 | 21 | 91.149 | KV453213.1  | 9128045 | 21-scf00419 | 21 |
| AX-157771385 | 21 | 91.149 | KV453213.1  | 9129783 | 21-scf00419 | 21 |
| AX-158267733 | 21 | 91.149 | KV453213.1  | 9132439 | 21-scf00419 | 21 |
| AX-158267736 | 21 | 91.149 | KV453213.1  | 9134155 | 21-scf00419 | 21 |
| AX-158267737 | 21 | 91.149 | KV453213.1  | 9134563 | 21-scf00419 | 21 |
| AX-158267738 | 21 | 91.149 | KV453213.1  | 9135120 | 21-scf00419 | 21 |
| AX-158267739 | 21 | 91.149 | KV453213.1  | 9135391 | 21-scf00419 | 21 |
| AX-158267740 | 21 | 91.149 | KV453213.1  | 9135942 | 21-scf00419 | 21 |
| AX-158267742 | 21 | 91.149 | KV453213.1  | 9138199 | 21-scf00419 | 21 |
| AX-158267743 | 21 | 91.149 | KV453213.1  | 9139333 | 21-scf00419 | 21 |
| AX-157758559 | 21 | 91.149 | KV453213.1  | 9140762 | 21-scf00419 | 21 |
| AX-158267744 | 21 | 91.149 | KV453213.1  | 9141581 | 21-scf00419 | 21 |
| AX-158267749 | 21 | 91.149 | KV453213.1  | 9149302 | 21-scf00419 | 21 |
| AX-158267755 | 21 | 91.149 | KV453213.1  | 9158844 | 21-scf00419 | 21 |
| AX-158267756 | 21 | 91.149 | KV453213.1  | 9159256 | 21-scf00419 | 21 |
| AX-158267782 | 21 | 91.149 | KV453213.1  | 9209892 | 21-scf00419 | 21 |
| AX-158267784 | 21 | 91.149 | KV453213.1  | 9213923 | 21-scf00419 | 21 |
| AX-158267787 | 21 | 91.149 | KV453213.1  | 9227223 | 21-scf00419 | 21 |
| AX-157843569 | 21 | 91.149 | KV453213.1  | 9317421 | 21-scf00419 | 21 |
| AX-158267889 | 21 | 91.149 | KV453213.1  | 9374330 | 21-scf00419 | 21 |
| AX-158267891 | 21 | 91.149 | KV453213.1  | 9377611 | 21-scf00419 | 21 |
| AX-158267912 | 21 | 91.149 | KV453213.1  | 9416025 | 21-scf00419 | 21 |
| AX-158267938 | 21 | 91.149 | KV453213.1  | 9476626 | 21-scf00419 | 21 |
| AX-158267941 | 21 | 91.149 | KV453213.1  | 9485165 | 21-scf00419 | 21 |
| AX-158267942 | 21 | 91.149 | KV453213.1  | 9487707 | 21-scf00419 | 21 |
| AX-158268052 | 21 | 91.149 | KV453215.1  | 169777  | 21-scf00420 | 21 |
| AX-158268053 | 21 | 91.149 | KV453215.1  | 169984  | 21-scf00420 | 21 |
| AX-158268065 | 21 | 91.149 | KV453215.1  | 215115  | 21-scf00420 | 21 |
| AX-157722346 | 21 | 91.149 | KV453215.1  | 249705  | 21-scf00420 | 21 |
| AX-158268097 | 21 | 91.149 | KV453215.1  | 365663  | 21-scf00420 | 21 |
| AX-158268106 | 21 | 91.149 | KV453215.1  | 381344  | 21-scf00420 | 21 |
| AX-158268107 | 21 | 91.149 | KV453215.1  | 384848  | 21-scf00420 | 21 |
| AX-157714788 | 21 | 91.149 | KV453215.1  | 384895  | 21-scf00420 | 21 |
| AX-157711388 | 21 | 91.149 | KV453215.1  | 387499  | 21-scf00420 | 21 |
| AX-158268110 | 21 | 91.149 | KV453215.1  | 389927  | 21-scf00420 | 21 |
| AX-158268113 | 21 | 91.149 | KV453215.1  | 394731  | 21-scf00420 | 21 |
| AX-158268114 | 21 | 91.149 | KV453215.1  | 398049  | 21-scf00420 | 21 |
| AX-157705749 | 21 | 91.149 | 3ML01030776 | 774     | scf06378_1  | UN |
| AX-157843492 | 21 | 91.258 | KV453213.1  | 8304569 | 21-scf00419 | 21 |
| AX-158267659 | 21 | 91.258 | KV453213.1  | 8993725 | 21-scf00419 | 21 |
| AX-158267748 | 21 | 91.258 | KV453213.1  | 9147998 | 21-scf00419 | 21 |

|              |    |        |            |         |             |    |
|--------------|----|--------|------------|---------|-------------|----|
| AX-157759030 | 21 | 91.258 | KV453213.1 | 9163441 | 21-scf00419 | 21 |
| AX-157739624 | 21 | 91.258 | KV453213.1 | 9169321 | 21-scf00419 | 21 |
| AX-158267761 | 21 | 91.258 | KV453213.1 | 9169702 | 21-scf00419 | 21 |
| AX-157843552 | 21 | 91.258 | KV453213.1 | 9172439 | 21-scf00419 | 21 |
| AX-158267763 | 21 | 91.258 | KV453213.1 | 9172945 | 21-scf00419 | 21 |
| AX-157843553 | 21 | 91.258 | KV453213.1 | 9187224 | 21-scf00419 | 21 |
| AX-158267772 | 21 | 91.258 | KV453213.1 | 9202026 | 21-scf00419 | 21 |
| AX-158267775 | 21 | 91.258 | KV453213.1 | 9205954 | 21-scf00419 | 21 |
| AX-158267776 | 21 | 91.258 | KV453213.1 | 9206015 | 21-scf00419 | 21 |
| AX-158267777 | 21 | 91.258 | KV453213.1 | 9206359 | 21-scf00419 | 21 |
| AX-158267778 | 21 | 91.258 | KV453213.1 | 9208404 | 21-scf00419 | 21 |
| AX-157843558 | 21 | 91.258 | KV453213.1 | 9216701 | 21-scf00419 | 21 |
| AX-157716421 | 21 | 91.258 | KV453213.1 | 9216872 | 21-scf00419 | 21 |
| AX-157843559 | 21 | 91.258 | KV453213.1 | 9217476 | 21-scf00419 | 21 |
| AX-158267785 | 21 | 91.258 | KV453213.1 | 9217653 | 21-scf00419 | 21 |
| AX-158267794 | 21 | 91.258 | KV453213.1 | 9239671 | 21-scf00419 | 21 |
| AX-157843561 | 21 | 91.258 | KV453213.1 | 9253430 | 21-scf00419 | 21 |
| AX-158267943 | 21 | 91.258 | KV453213.1 | 9488972 | 21-scf00419 | 21 |
| AX-158267799 | 21 | 91.295 | KV453213.1 | 9246782 | 21-scf00419 | 21 |
| AX-158267686 | 21 | 91.301 | KV453213.1 | 9045576 | 21-scf00419 | 21 |
| AX-158267750 | 21 | 91.301 | KV453213.1 | 9150645 | 21-scf00419 | 21 |
| AX-158267752 | 21 | 91.301 | KV453213.1 | 9154457 | 21-scf00419 | 21 |
| AX-158267780 | 21 | 91.301 | KV453213.1 | 9208924 | 21-scf00419 | 21 |
| AX-157747153 | 21 | 91.301 | KV453213.1 | 9249461 | 21-scf00419 | 21 |
| AX-157843562 | 21 | 91.301 | KV453213.1 | 9255860 | 21-scf00419 | 21 |
| AX-157843563 | 21 | 91.301 | KV453213.1 | 9262289 | 21-scf00419 | 21 |
| AX-158267824 | 21 | 91.301 | KV453213.1 | 9296547 | 21-scf00419 | 21 |
| AX-158267866 | 21 | 91.301 | KV453213.1 | 9349236 | 21-scf00419 | 21 |
| AX-157843587 | 21 | 91.301 | KV453215.1 | 120736  | 21-scf00420 | 21 |
| AX-158267565 | 21 | 91.332 | KV453213.1 | 8877918 | 21-scf00419 | 21 |
| AX-158267577 | 21 | 91.332 | KV453213.1 | 8892165 | 21-scf00419 | 21 |
| AX-158381119 | 21 | 91.332 | KV453213.1 | 9162606 | 21-scf00419 | 21 |
| AX-158267801 | 21 | 91.332 | KV453213.1 | 9248580 | 21-scf00419 | 21 |
| AX-158267806 | 21 | 91.332 | KV453213.1 | 9258058 | 21-scf00419 | 21 |
| AX-158267789 | 21 | 91.367 | KV453213.1 | 9228642 | 21-scf00419 | 21 |
| AX-157715608 | 21 | 91.367 | KV453213.1 | 9236797 | 21-scf00419 | 21 |
| AX-158267798 | 21 | 91.367 | KV453213.1 | 9245322 | 21-scf00419 | 21 |
| AX-158267800 | 21 | 91.367 | KV453213.1 | 9247010 | 21-scf00419 | 21 |
| AX-158267807 | 21 | 91.367 | KV453213.1 | 9260792 | 21-scf00419 | 21 |
| AX-158381120 | 21 | 91.367 | KV453213.1 | 9262336 | 21-scf00419 | 21 |
| AX-157775174 | 21 | 91.367 | KV453213.1 | 9274698 | 21-scf00419 | 21 |
| AX-158267815 | 21 | 91.367 | KV453213.1 | 9276858 | 21-scf00419 | 21 |
| AX-158267817 | 21 | 91.367 | KV453213.1 | 9285764 | 21-scf00419 | 21 |
| AX-157843567 | 21 | 91.367 | KV453213.1 | 9287833 | 21-scf00419 | 21 |
| AX-158267819 | 21 | 91.367 | KV453213.1 | 9290345 | 21-scf00419 | 21 |
| AX-158267821 | 21 | 91.367 | KV453213.1 | 9292341 | 21-scf00419 | 21 |
| AX-158416465 | 21 | 91.367 | KV453213.1 | 9293379 | 21-scf00419 | 21 |
| AX-158267822 | 21 | 91.367 | KV453213.1 | 9294671 | 21-scf00419 | 21 |
| AX-158267823 | 21 | 91.367 | KV453213.1 | 9295502 | 21-scf00419 | 21 |
| AX-158267828 | 21 | 91.367 | KV453213.1 | 9299304 | 21-scf00419 | 21 |
| AX-158267829 | 21 | 91.367 | KV453213.1 | 9299760 | 21-scf00419 | 21 |

|              |    |        |            |         |             |    |
|--------------|----|--------|------------|---------|-------------|----|
| AX-157843568 | 21 | 91.367 | KV453213.1 | 9305163 | 21-scf00419 | 21 |
| AX-158267834 | 21 | 91.367 | KV453213.1 | 9306300 | 21-scf00419 | 21 |
| AX-157750722 | 21 | 91.367 | KV453213.1 | 9307739 | 21-scf00419 | 21 |
| AX-158267837 | 21 | 91.367 | KV453213.1 | 9309103 | 21-scf00419 | 21 |
| AX-158267859 | 21 | 91.367 | KV453213.1 | 9340847 | 21-scf00419 | 21 |
| AX-158267897 | 21 | 91.367 | KV453213.1 | 9383763 | 21-scf00419 | 21 |
| AX-158267900 | 21 | 91.367 | KV453213.1 | 9388856 | 21-scf00419 | 21 |
| AX-158267964 | 21 | 91.367 | KV453213.1 | 9527340 | 21-scf00419 | 21 |
| AX-157699439 | 21 | 91.367 | KV453213.1 | 9628650 | 21-scf00419 | 21 |
| AX-158268010 | 21 | 91.367 | KV453215.1 | 12065   | 21-scf00420 | 21 |
| AX-158268012 | 21 | 91.367 | KV453215.1 | 13445   | 21-scf00420 | 21 |
| AX-158268019 | 21 | 91.367 | KV453215.1 | 34836   | 21-scf00420 | 21 |
| AX-158268020 | 21 | 91.367 | KV453215.1 | 38250   | 21-scf00420 | 21 |
| AX-158268024 | 21 | 91.367 | KV453215.1 | 57414   | 21-scf00420 | 21 |
| AX-158268026 | 21 | 91.367 | KV453215.1 | 60665   | 21-scf00420 | 21 |
| AX-158268028 | 21 | 91.367 | KV453215.1 | 66214   | 21-scf00420 | 21 |
| AX-158268040 | 21 | 91.367 | KV453215.1 | 116041  | 21-scf00420 | 21 |
| AX-158268049 | 21 | 91.367 | KV453215.1 | 151347  | 21-scf00420 | 21 |
| AX-158394811 | 21 | 91.367 | KV453215.1 | 162456  | 21-scf00420 | 21 |
| AX-158268051 | 21 | 91.367 | KV453215.1 | 167046  | 21-scf00420 | 21 |
| AX-158268055 | 21 | 91.367 | KV453215.1 | 181007  | 21-scf00420 | 21 |
| AX-158394812 | 21 | 91.367 | KV453215.1 | 204716  | 21-scf00420 | 21 |
| AX-158268080 | 21 | 91.367 | KV453215.1 | 320062  | 21-scf00420 | 21 |
| AX-158268102 | 21 | 91.367 | KV453215.1 | 375401  | 21-scf00420 | 21 |
| AX-158268122 | 21 | 91.367 | KV453215.1 | 417594  | 21-scf00420 | 21 |
| AX-158268130 | 21 | 91.367 | KV453215.1 | 434476  | 21-scf00420 | 21 |
| AX-157723098 | 21 | 91.367 | KV453215.1 | 516299  | 21-scf00420 | 21 |
| AX-158268166 | 21 | 91.367 | KV453215.1 | 517803  | 21-scf00420 | 21 |
| AX-157746782 | 21 | 91.436 | KV453213.1 | 9319373 | 21-scf00419 | 21 |
| AX-157725159 | 21 | 91.477 | KV453213.1 | 8793678 | 21-scf00419 | 21 |
| AX-158267541 | 21 | 91.477 | KV453213.1 | 8847322 | 21-scf00419 | 21 |
| AX-158267556 | 21 | 91.477 | KV453213.1 | 8869655 | 21-scf00419 | 21 |
| AX-157746768 | 21 | 91.477 | KV453213.1 | 8997621 | 21-scf00419 | 21 |
| AX-157843549 | 21 | 91.477 | KV453213.1 | 9157514 | 21-scf00419 | 21 |
| AX-158267757 | 21 | 91.477 | KV453213.1 | 9159579 | 21-scf00419 | 21 |
| AX-157843551 | 21 | 91.477 | KV453213.1 | 9170932 | 21-scf00419 | 21 |
| AX-158267765 | 21 | 91.477 | KV453213.1 | 9174533 | 21-scf00419 | 21 |
| AX-158267767 | 21 | 91.477 | KV453213.1 | 9175345 | 21-scf00419 | 21 |
| AX-157843557 | 21 | 91.477 | KV453213.1 | 9195447 | 21-scf00419 | 21 |
| AX-158267771 | 21 | 91.477 | KV453213.1 | 9200995 | 21-scf00419 | 21 |
| AX-158267786 | 21 | 91.477 | KV453213.1 | 9220404 | 21-scf00419 | 21 |
| AX-157741726 | 21 | 91.477 | KV453213.1 | 9225454 | 21-scf00419 | 21 |
| AX-158267788 | 21 | 91.477 | KV453213.1 | 9228183 | 21-scf00419 | 21 |
| AX-158267805 | 21 | 91.477 | KV453213.1 | 9256369 | 21-scf00419 | 21 |
| AX-157843564 | 21 | 91.477 | KV453213.1 | 9265303 | 21-scf00419 | 21 |
| AX-158267809 | 21 | 91.477 | KV453213.1 | 9267663 | 21-scf00419 | 21 |
| AX-157843566 | 21 | 91.477 | KV453213.1 | 9276610 | 21-scf00419 | 21 |
| AX-158267818 | 21 | 91.477 | KV453213.1 | 9286150 | 21-scf00419 | 21 |
| AX-158267826 | 21 | 91.477 | KV453213.1 | 9297797 | 21-scf00419 | 21 |
| AX-158267831 | 21 | 91.477 | KV453213.1 | 9300451 | 21-scf00419 | 21 |
| AX-157709529 | 21 | 91.477 | KV453213.1 | 9303530 | 21-scf00419 | 21 |

|              |    |        |            |         |             |    |
|--------------|----|--------|------------|---------|-------------|----|
| AX-157709530 | 21 | 91.477 | KV453213.1 | 9303643 | 21-scf00419 | 21 |
| AX-158267835 | 21 | 91.477 | KV453213.1 | 9307816 | 21-scf00419 | 21 |
| AX-158267836 | 21 | 91.477 | KV453213.1 | 9308837 | 21-scf00419 | 21 |
| AX-158267845 | 21 | 91.477 | KV453213.1 | 9318060 | 21-scf00419 | 21 |
| AX-158267848 | 21 | 91.477 | KV453213.1 | 9320275 | 21-scf00419 | 21 |
| AX-158267856 | 21 | 91.477 | KV453213.1 | 9336049 | 21-scf00419 | 21 |
| AX-158267857 | 21 | 91.477 | KV453213.1 | 9337739 | 21-scf00419 | 21 |
| AX-158267858 | 21 | 91.477 | KV453213.1 | 9338312 | 21-scf00419 | 21 |
| AX-157771461 | 21 | 91.477 | KV453213.1 | 9339929 | 21-scf00419 | 21 |
| AX-158267862 | 21 | 91.477 | KV453213.1 | 9347035 | 21-scf00419 | 21 |
| AX-158267863 | 21 | 91.477 | KV453213.1 | 9347620 | 21-scf00419 | 21 |
| AX-158267864 | 21 | 91.477 | KV453213.1 | 9348043 | 21-scf00419 | 21 |
| AX-158267870 | 21 | 91.477 | KV453213.1 | 9354418 | 21-scf00419 | 21 |
| AX-158267871 | 21 | 91.477 | KV453213.1 | 9355006 | 21-scf00419 | 21 |
| AX-158267876 | 21 | 91.477 | KV453213.1 | 9357947 | 21-scf00419 | 21 |
| AX-158267877 | 21 | 91.477 | KV453213.1 | 9358848 | 21-scf00419 | 21 |
| AX-158267879 | 21 | 91.477 | KV453213.1 | 9360182 | 21-scf00419 | 21 |
| AX-158267885 | 21 | 91.477 | KV453213.1 | 9369782 | 21-scf00419 | 21 |
| AX-158267886 | 21 | 91.477 | KV453213.1 | 9370212 | 21-scf00419 | 21 |
| AX-158267887 | 21 | 91.477 | KV453213.1 | 9370880 | 21-scf00419 | 21 |
| AX-158267892 | 21 | 91.477 | KV453213.1 | 9378361 | 21-scf00419 | 21 |
| AX-158267894 | 21 | 91.477 | KV453213.1 | 9380558 | 21-scf00419 | 21 |
| AX-158267895 | 21 | 91.477 | KV453213.1 | 9381026 | 21-scf00419 | 21 |
| AX-158411248 | 21 | 91.477 | KV453213.1 | 9382935 | 21-scf00419 | 21 |
| AX-158267898 | 21 | 91.477 | KV453213.1 | 9385319 | 21-scf00419 | 21 |
| AX-158267902 | 21 | 91.477 | KV453213.1 | 9390734 | 21-scf00419 | 21 |
| AX-158416469 | 21 | 91.477 | KV453213.1 | 9392069 | 21-scf00419 | 21 |
| AX-158419275 | 21 | 91.477 | KV453213.1 | 9409124 | 21-scf00419 | 21 |
| AX-157843573 | 21 | 91.477 | KV453213.1 | 9421124 | 21-scf00419 | 21 |
| AX-157843575 | 21 | 91.477 | KV453213.1 | 9424218 | 21-scf00419 | 21 |
| AX-158416472 | 21 | 91.477 | KV453213.1 | 9441335 | 21-scf00419 | 21 |
| AX-158267926 | 21 | 91.477 | KV453213.1 | 9453953 | 21-scf00419 | 21 |
| AX-158267928 | 21 | 91.477 | KV453213.1 | 9455195 | 21-scf00419 | 21 |
| AX-158267929 | 21 | 91.477 | KV453213.1 | 9456321 | 21-scf00419 | 21 |
| AX-158267932 | 21 | 91.477 | KV453213.1 | 9464371 | 21-scf00419 | 21 |
| AX-158267934 | 21 | 91.477 | KV453213.1 | 9473162 | 21-scf00419 | 21 |
| AX-158267935 | 21 | 91.477 | KV453213.1 | 9473863 | 21-scf00419 | 21 |
| AX-158267936 | 21 | 91.477 | KV453213.1 | 9475405 | 21-scf00419 | 21 |
| AX-158267944 | 21 | 91.477 | KV453213.1 | 9490370 | 21-scf00419 | 21 |
| AX-158416475 | 21 | 91.477 | KV453213.1 | 9490876 | 21-scf00419 | 21 |
| AX-158267952 | 21 | 91.477 | KV453213.1 | 9504002 | 21-scf00419 | 21 |
| AX-158267953 | 21 | 91.477 | KV453213.1 | 9506177 | 21-scf00419 | 21 |
| AX-158267954 | 21 | 91.477 | KV453213.1 | 9508824 | 21-scf00419 | 21 |
| AX-157725220 | 21 | 91.477 | KV453213.1 | 9518561 | 21-scf00419 | 21 |
| AX-158267959 | 21 | 91.477 | KV453213.1 | 9523080 | 21-scf00419 | 21 |
| AX-158267960 | 21 | 91.477 | KV453213.1 | 9523926 | 21-scf00419 | 21 |
| AX-158267965 | 21 | 91.477 | KV453213.1 | 9533198 | 21-scf00419 | 21 |
| AX-158267966 | 21 | 91.477 | KV453213.1 | 9534146 | 21-scf00419 | 21 |
| AX-158267970 | 21 | 91.477 | KV453213.1 | 9554183 | 21-scf00419 | 21 |
| AX-158267971 | 21 | 91.477 | KV453213.1 | 9556201 | 21-scf00419 | 21 |
| AX-158267973 | 21 | 91.477 | KV453213.1 | 9565805 | 21-scf00419 | 21 |

|              |    |        |            |         |             |    |
|--------------|----|--------|------------|---------|-------------|----|
| AX-158267975 | 21 | 91.477 | KV453213.1 | 9574849 | 21-scf00419 | 21 |
| AX-158267977 | 21 | 91.477 | KV453213.1 | 9578814 | 21-scf00419 | 21 |
| AX-158267981 | 21 | 91.477 | KV453213.1 | 9605577 | 21-scf00419 | 21 |
| AX-158267982 | 21 | 91.477 | KV453213.1 | 9608359 | 21-scf00419 | 21 |
| AX-158267983 | 21 | 91.477 | KV453213.1 | 9611221 | 21-scf00419 | 21 |
| AX-158267984 | 21 | 91.477 | KV453213.1 | 9613169 | 21-scf00419 | 21 |
| AX-158267986 | 21 | 91.477 | KV453213.1 | 9619943 | 21-scf00419 | 21 |
| AX-158416478 | 21 | 91.477 | KV453213.1 | 9622129 | 21-scf00419 | 21 |
| AX-158267987 | 21 | 91.477 | KV453213.1 | 9623624 | 21-scf00419 | 21 |
| AX-158267989 | 21 | 91.477 | KV453213.1 | 9627073 | 21-scf00419 | 21 |
| AX-158267990 | 21 | 91.477 | KV453213.1 | 9627614 | 21-scf00419 | 21 |
| AX-158267991 | 21 | 91.477 | KV453213.1 | 9629115 | 21-scf00419 | 21 |
| AX-158267993 | 21 | 91.477 | KV453213.1 | 9631953 | 21-scf00419 | 21 |
| AX-158267994 | 21 | 91.477 | KV453213.1 | 9633393 | 21-scf00419 | 21 |
| AX-157843579 | 21 | 91.477 | KV453213.1 | 9638255 | 21-scf00419 | 21 |
| AX-158267997 | 21 | 91.477 | KV453213.1 | 9642238 | 21-scf00419 | 21 |
| AX-158267998 | 21 | 91.477 | KV453213.1 | 9642967 | 21-scf00419 | 21 |
| AX-157843580 | 21 | 91.477 | KV453213.1 | 9645326 | 21-scf00419 | 21 |
| AX-158267999 | 21 | 91.477 | KV453213.1 | 9645375 | 21-scf00419 | 21 |
| AX-157843581 | 21 | 91.477 | KV453213.1 | 9645623 | 21-scf00419 | 21 |
| AX-158268000 | 21 | 91.477 | KV453213.1 | 9645988 | 21-scf00419 | 21 |
| AX-158268001 | 21 | 91.477 | KV453213.1 | 9646266 | 21-scf00419 | 21 |
| AX-158268003 | 21 | 91.477 | KV453213.1 | 9649194 | 21-scf00419 | 21 |
| AX-158268007 | 21 | 91.477 | KV453213.1 | 9659138 | 21-scf00419 | 21 |
| AX-157843583 | 21 | 91.477 | KV453215.1 | 3917    | 21-scf00420 | 21 |
| AX-158268009 | 21 | 91.477 | KV453215.1 | 11317   | 21-scf00420 | 21 |
| AX-158268011 | 21 | 91.477 | KV453215.1 | 12646   | 21-scf00420 | 21 |
| AX-158268013 | 21 | 91.477 | KV453215.1 | 15256   | 21-scf00420 | 21 |
| AX-158416481 | 21 | 91.477 | KV453215.1 | 15687   | 21-scf00420 | 21 |
| AX-157747090 | 21 | 91.477 | KV453215.1 | 41906   | 21-scf00420 | 21 |
| AX-158268023 | 21 | 91.477 | KV453215.1 | 54250   | 21-scf00420 | 21 |
| AX-158268025 | 21 | 91.477 | KV453215.1 | 57961   | 21-scf00420 | 21 |
| AX-157843584 | 21 | 91.477 | KV453215.1 | 58958   | 21-scf00420 | 21 |
| AX-158268032 | 21 | 91.477 | KV453215.1 | 88281   | 21-scf00420 | 21 |
| AX-157726883 | 21 | 91.477 | KV453215.1 | 103025  | 21-scf00420 | 21 |
| AX-158268034 | 21 | 91.477 | KV453215.1 | 103464  | 21-scf00420 | 21 |
| AX-158268037 | 21 | 91.477 | KV453215.1 | 108449  | 21-scf00420 | 21 |
| AX-158268039 | 21 | 91.477 | KV453215.1 | 109811  | 21-scf00420 | 21 |
| AX-158268043 | 21 | 91.477 | KV453215.1 | 119025  | 21-scf00420 | 21 |
| AX-157843586 | 21 | 91.477 | KV453215.1 | 119964  | 21-scf00420 | 21 |
| AX-158268045 | 21 | 91.477 | KV453215.1 | 123467  | 21-scf00420 | 21 |
| AX-158268048 | 21 | 91.477 | KV453215.1 | 150741  | 21-scf00420 | 21 |
| AX-157750608 | 21 | 91.477 | KV453215.1 | 170512  | 21-scf00420 | 21 |
| AX-157872964 | 21 | 91.477 | KV453215.1 | 171346  | 21-scf00420 | 21 |
| AX-157745022 | 21 | 91.477 | KV453215.1 | 176266  | 21-scf00420 | 21 |
| AX-157843588 | 21 | 91.477 | KV453215.1 | 182203  | 21-scf00420 | 21 |
| AX-158268058 | 21 | 91.477 | KV453215.1 | 184883  | 21-scf00420 | 21 |
| AX-158268066 | 21 | 91.477 | KV453215.1 | 233724  | 21-scf00420 | 21 |
| AX-158268067 | 21 | 91.477 | KV453215.1 | 257382  | 21-scf00420 | 21 |
| AX-158268069 | 21 | 91.477 | KV453215.1 | 283156  | 21-scf00420 | 21 |
| AX-158268071 | 21 | 91.477 | KV453215.1 | 291914  | 21-scf00420 | 21 |

|              |    |        |            |        |             |    |
|--------------|----|--------|------------|--------|-------------|----|
| AX-157843593 | 21 | 91.477 | KV453215.1 | 292816 | 21-scf00420 | 21 |
| AX-158268072 | 21 | 91.477 | KV453215.1 | 293833 | 21-scf00420 | 21 |
| AX-158268074 | 21 | 91.477 | KV453215.1 | 305927 | 21-scf00420 | 21 |
| AX-158268075 | 21 | 91.477 | KV453215.1 | 310985 | 21-scf00420 | 21 |
| AX-158268079 | 21 | 91.477 | KV453215.1 | 316530 | 21-scf00420 | 21 |
| AX-158268081 | 21 | 91.477 | KV453215.1 | 321553 | 21-scf00420 | 21 |
| AX-158268082 | 21 | 91.477 | KV453215.1 | 324010 | 21-scf00420 | 21 |
| AX-158268086 | 21 | 91.477 | KV453215.1 | 336860 | 21-scf00420 | 21 |
| AX-158268089 | 21 | 91.477 | KV453215.1 | 342402 | 21-scf00420 | 21 |
| AX-157743634 | 21 | 91.477 | KV453215.1 | 387325 | 21-scf00420 | 21 |
| AX-158268109 | 21 | 91.477 | KV453215.1 | 389116 | 21-scf00420 | 21 |
| AX-158268117 | 21 | 91.477 | KV453215.1 | 403030 | 21-scf00420 | 21 |
| AX-158268119 | 21 | 91.477 | KV453215.1 | 405503 | 21-scf00420 | 21 |
| AX-158268120 | 21 | 91.477 | KV453215.1 | 405837 | 21-scf00420 | 21 |
| AX-157843598 | 21 | 91.477 | KV453215.1 | 444776 | 21-scf00420 | 21 |
| AX-158268135 | 21 | 91.477 | KV453215.1 | 450341 | 21-scf00420 | 21 |
| AX-158268139 | 21 | 91.477 | KV453215.1 | 456584 | 21-scf00420 | 21 |
| AX-158419285 | 21 | 91.477 | KV453215.1 | 476010 | 21-scf00420 | 21 |
| AX-158268146 | 21 | 91.477 | KV453215.1 | 481080 | 21-scf00420 | 21 |
| AX-158268147 | 21 | 91.477 | KV453215.1 | 481455 | 21-scf00420 | 21 |
| AX-158268148 | 21 | 91.477 | KV453215.1 | 484249 | 21-scf00420 | 21 |
| AX-158268149 | 21 | 91.477 | KV453215.1 | 485588 | 21-scf00420 | 21 |
| AX-158268151 | 21 | 91.477 | KV453215.1 | 487880 | 21-scf00420 | 21 |
| AX-158268152 | 21 | 91.477 | KV453215.1 | 488534 | 21-scf00420 | 21 |
| AX-158268153 | 21 | 91.477 | KV453215.1 | 488756 | 21-scf00420 | 21 |
| AX-158268154 | 21 | 91.477 | KV453215.1 | 489225 | 21-scf00420 | 21 |
| AX-158268155 | 21 | 91.477 | KV453215.1 | 490787 | 21-scf00420 | 21 |
| AX-158268156 | 21 | 91.477 | KV453215.1 | 491002 | 21-scf00420 | 21 |
| AX-158268157 | 21 | 91.477 | KV453215.1 | 491623 | 21-scf00420 | 21 |
| AX-158268159 | 21 | 91.477 | KV453215.1 | 495221 | 21-scf00420 | 21 |
| AX-158268160 | 21 | 91.477 | KV453215.1 | 496178 | 21-scf00420 | 21 |
| AX-158268161 | 21 | 91.477 | KV453215.1 | 501172 | 21-scf00420 | 21 |
| AX-158268162 | 21 | 91.477 | KV453215.1 | 502041 | 21-scf00420 | 21 |
| AX-157843599 | 21 | 91.477 | KV453215.1 | 503985 | 21-scf00420 | 21 |
| AX-157772368 | 21 | 91.477 | KV453215.1 | 507452 | 21-scf00420 | 21 |
| AX-158268168 | 21 | 91.477 | KV453215.1 | 523213 | 21-scf00420 | 21 |
| AX-157843600 | 21 | 91.477 | KV453215.1 | 525245 | 21-scf00420 | 21 |
| AX-157843601 | 21 | 91.477 | KV453215.1 | 528518 | 21-scf00420 | 21 |
| AX-158268169 | 21 | 91.477 | KV453215.1 | 530043 | 21-scf00420 | 21 |
| AX-158268170 | 21 | 91.477 | KV453215.1 | 530986 | 21-scf00420 | 21 |
| AX-157727951 | 21 | 91.477 | KV453215.1 | 536646 | 21-scf00420 | 21 |
| AX-158268172 | 21 | 91.477 | KV453215.1 | 538230 | 21-scf00420 | 21 |
| AX-158268173 | 21 | 91.477 | KV453215.1 | 538923 | 21-scf00420 | 21 |
| AX-158268177 | 21 | 91.477 | KV453215.1 | 543063 | 21-scf00420 | 21 |
| AX-158268179 | 21 | 91.477 | KV453215.1 | 543970 | 21-scf00420 | 21 |
| AX-158268180 | 21 | 91.477 | KV453215.1 | 544351 | 21-scf00420 | 21 |
| AX-158268181 | 21 | 91.477 | KV453215.1 | 546366 | 21-scf00420 | 21 |
| AX-158268186 | 21 | 91.477 | KV453215.1 | 550977 | 21-scf00420 | 21 |
| AX-158268189 | 21 | 91.477 | KV453215.1 | 555346 | 21-scf00420 | 21 |
| AX-158268193 | 21 | 91.477 | KV453215.1 | 562188 | 21-scf00420 | 21 |
| AX-158268198 | 21 | 91.477 | KV453215.1 | 572209 | 21-scf00420 | 21 |

|              |    |        |             |        |                |    |
|--------------|----|--------|-------------|--------|----------------|----|
| AX-158268199 | 21 | 91.477 | KV453215.1  | 574618 | 21-scf00420    | 21 |
| AX-158268201 | 21 | 91.477 | KV453215.1  | 575952 | 21-scf00420    | 21 |
| AX-158268204 | 21 | 91.477 | KV453215.1  | 577411 | 21-scf00420    | 21 |
| AX-158268206 | 21 | 91.477 | KV453215.1  | 579007 | 21-scf00420    | 21 |
| AX-158268208 | 21 | 91.477 | KV453215.1  | 581020 | 21-scf00420    | 21 |
| AX-158268213 | 21 | 91.477 | KV453215.1  | 585934 | 21-scf00420    | 21 |
| AX-158268214 | 21 | 91.477 | KV453215.1  | 586191 | 21-scf00420    | 21 |
| AX-158268215 | 21 | 91.477 | KV453215.1  | 586493 | 21-scf00420    | 21 |
| AX-158268216 | 21 | 91.477 | KV453215.1  | 587521 | 21-scf00420    | 21 |
| AX-158268219 | 21 | 91.477 | KV453215.1  | 590052 | 21-scf00420    | 21 |
| AX-157843604 | 21 | 91.477 | KV453215.1  | 591476 | 21-scf00420    | 21 |
| AX-158268221 | 21 | 91.477 | KV453215.1  | 592116 | 21-scf00420    | 21 |
| AX-158268224 | 21 | 91.477 | KV453215.1  | 594964 | 21-scf00420    | 21 |
| AX-157843605 | 21 | 91.477 | KV453215.1  | 595287 | 21-scf00420    | 21 |
| AX-158420734 | 21 | 91.477 | KV453214.1  | 91441  | 21-scf00623    | 21 |
| AX-157703266 | 21 | 91.477 | DX097311.1  | 295    | IORI212 lctalu | UN |
| AX-158416493 | 22 | 0      | KV453098.1  | 128581 | 17-scf00422    | 17 |
| AX-157755091 | 22 | 0      | KV453104.1  | 79665  | 17-scf00425    | 17 |
| AX-157687954 | 22 | 0      | 3ML01025364 | 4996   | scf01115_1     | UN |
| AX-158268334 | 22 | 0.292  | KV453098.1  | 117293 | 17-scf00422    | 17 |
| AX-158268323 | 22 | 0.294  | KV453098.1  | 95486  | 17-scf00422    | 17 |
| AX-158268324 | 22 | 0.294  | KV453098.1  | 96375  | 17-scf00422    | 17 |
| AX-158268325 | 22 | 0.294  | KV453098.1  | 97546  | 17-scf00422    | 17 |
| AX-158268327 | 22 | 0.294  | KV453098.1  | 102850 | 17-scf00422    | 17 |
| AX-158268328 | 22 | 0.294  | KV453098.1  | 104909 | 17-scf00422    | 17 |
| AX-158268331 | 22 | 0.294  | KV453098.1  | 112810 | 17-scf00422    | 17 |
| AX-157867483 | 22 | 0.294  | KV453104.1  | 510    | 17-scf00425    | 17 |
| AX-157721666 | 22 | 0.294  | KV453104.1  | 36474  | 17-scf00425    | 17 |
| AX-157687952 | 22 | 0.294  | 3ML01025364 | 2462   | scf01115_1     | UN |
| AX-158268257 | 22 | 0.403  | KV453099.1  | 65412  | 17-scf00421    | 17 |
| AX-158268300 | 22 | 0.403  | KV453098.1  | 68158  | 17-scf00422    | 17 |
| AX-158268301 | 22 | 0.403  | KV453098.1  | 68682  | 17-scf00422    | 17 |
| AX-158268302 | 22 | 0.403  | KV453098.1  | 70874  | 17-scf00422    | 17 |
| AX-158268304 | 22 | 0.403  | KV453098.1  | 72215  | 17-scf00422    | 17 |
| AX-158268310 | 22 | 0.403  | KV453098.1  | 77661  | 17-scf00422    | 17 |
| AX-158268311 | 22 | 0.403  | KV453098.1  | 78869  | 17-scf00422    | 17 |
| AX-158268299 | 22 | 0.479  | KV453098.1  | 64831  | 17-scf00422    | 17 |
| AX-158268297 | 22 | 0.55   | KV453098.1  | 61203  | 17-scf00422    | 17 |
| AX-157843609 | 22 | 0.622  | KV453099.1  | 79647  | 17-scf00421    | 17 |
| AX-157748229 | 22 | 0.622  | KV453098.1  | 34070  | 17-scf00422    | 17 |
| AX-158268290 | 22 | 0.622  | KV453098.1  | 38484  | 17-scf00422    | 17 |
| AX-158268291 | 22 | 0.622  | KV453098.1  | 39332  | 17-scf00422    | 17 |
| AX-158394816 | 22 | 0.622  | KV453098.1  | 41311  | 17-scf00422    | 17 |
| AX-158268296 | 22 | 0.622  | KV453098.1  | 53884  | 17-scf00422    | 17 |
| AX-157751296 | 22 | 0.622  | KV453104.1  | 75715  | 17-scf00425    | 17 |
| AX-158268612 | 22 | 0.622  | KV453105.1  | 146196 | 17-scf00427    | 17 |
| AX-158268240 | 22 | 0.731  | KV453099.1  | 34142  | 17-scf00421    | 17 |
| AX-158268241 | 22 | 0.731  | KV453099.1  | 36307  | 17-scf00421    | 17 |
| AX-158268275 | 22 | 0.731  | KV453098.1  | 13891  | 17-scf00422    | 17 |
| AX-157748710 | 22 | 0.731  | KV453098.1  | 14414  | 17-scf00422    | 17 |
| AX-158268277 | 22 | 0.731  | KV453098.1  | 22783  | 17-scf00422    | 17 |

|              |    |       |            |        |             |    |
|--------------|----|-------|------------|--------|-------------|----|
| AX-158268279 | 22 | 0.731 | KV453098.1 | 25657  | 17-scf00422 | 17 |
| AX-158268280 | 22 | 0.731 | KV453098.1 | 26664  | 17-scf00422 | 17 |
| AX-158268282 | 22 | 0.731 | KV453098.1 | 27654  | 17-scf00422 | 17 |
| AX-158268286 | 22 | 0.731 | KV453098.1 | 29856  | 17-scf00422 | 17 |
| AX-158268303 | 22 | 0.731 | KV453098.1 | 71779  | 17-scf00422 | 17 |
| AX-158268305 | 22 | 0.731 | KV453098.1 | 72702  | 17-scf00422 | 17 |
| AX-158268326 | 22 | 0.731 | KV453098.1 | 100255 | 17-scf00422 | 17 |
| AX-158268329 | 22 | 0.731 | KV453098.1 | 107264 | 17-scf00422 | 17 |
| AX-158268345 | 22 | 0.731 | KV453103.1 | 23019  | 17-scf00423 | 17 |
| AX-158268365 | 22 | 0.731 | KV453103.1 | 65143  | 17-scf00423 | 17 |
| AX-158268373 | 22 | 0.731 | KV453103.1 | 75732  | 17-scf00423 | 17 |
| AX-158268386 | 22 | 0.731 | KV453103.1 | 90960  | 17-scf00423 | 17 |
| AX-158268395 | 22 | 0.731 | KV453103.1 | 99262  | 17-scf00423 | 17 |
| AX-158268482 | 22 | 0.731 | KV453101.1 | 74630  | 17-scf00424 | 17 |
| AX-158268486 | 22 | 0.731 | KV453101.1 | 87826  | 17-scf00424 | 17 |
| AX-157684073 | 22 | 0.731 | KV453100.1 | 8130   | 17-scf00426 | 17 |
| AX-157684070 | 22 | 0.731 | KV453100.1 | 14241  | 17-scf00426 | 17 |
| AX-157681759 | 22 | 0.731 | KV453100.1 | 25438  | 17-scf00426 | 17 |
| AX-158268272 | 22 | 0.77  | KV453098.1 | 4448   | 17-scf00422 | 17 |
| AX-157714218 | 22 | 0.841 | KV453098.1 | 2025   | 17-scf00422 | 17 |
| AX-158268270 | 22 | 0.841 | KV453098.1 | 2760   | 17-scf00422 | 17 |
| AX-157684075 | 22 | 1.923 | KV453100.1 | 2249   | 17-scf00426 | 17 |
| AX-157680737 | 22 | 1.923 | KV453100.1 | 14043  | 17-scf00426 | 17 |
| AX-157687973 | 22 | 1.923 | KV453102.1 | 91     | 17-scf01132 | 17 |
| AX-158268226 | 22 | 2.044 | KV453099.1 | 4490   | 17-scf00421 | 17 |
| AX-158268227 | 22 | 2.044 | KV453099.1 | 6061   | 17-scf00421 | 17 |
| AX-158268229 | 22 | 2.044 | KV453099.1 | 7963   | 17-scf00421 | 17 |
| AX-158268230 | 22 | 2.044 | KV453099.1 | 10105  | 17-scf00421 | 17 |
| AX-158268231 | 22 | 2.044 | KV453099.1 | 21128  | 17-scf00421 | 17 |
| AX-158268232 | 22 | 2.044 | KV453099.1 | 21809  | 17-scf00421 | 17 |
| AX-158268236 | 22 | 2.044 | KV453099.1 | 26828  | 17-scf00421 | 17 |
| AX-158268238 | 22 | 2.044 | KV453099.1 | 28484  | 17-scf00421 | 17 |
| AX-157709474 | 22 | 2.044 | KV453099.1 | 34973  | 17-scf00421 | 17 |
| AX-158268245 | 22 | 2.044 | KV453099.1 | 39972  | 17-scf00421 | 17 |
| AX-158268246 | 22 | 2.044 | KV453099.1 | 41742  | 17-scf00421 | 17 |
| AX-158268543 | 22 | 2.044 | KV453104.1 | 72500  | 17-scf00425 | 17 |
| AX-158268561 | 22 | 2.044 | KV453104.1 | 105813 | 17-scf00425 | 17 |
| AX-158268571 | 22 | 2.044 | KV453104.1 | 118718 | 17-scf00425 | 17 |
| AX-158268247 | 22 | 2.104 | KV453099.1 | 43889  | 17-scf00421 | 17 |
| AX-158268554 | 22 | 2.104 | KV453104.1 | 94533  | 17-scf00425 | 17 |
| AX-158268249 | 22 | 2.153 | KV453099.1 | 47283  | 17-scf00421 | 17 |
| AX-158268250 | 22 | 2.153 | KV453099.1 | 49131  | 17-scf00421 | 17 |
| AX-158268251 | 22 | 2.153 | KV453099.1 | 56326  | 17-scf00421 | 17 |
| AX-158268256 | 22 | 2.153 | KV453099.1 | 60212  | 17-scf00421 | 17 |
| AX-157744302 | 22 | 2.153 | KV453099.1 | 61771  | 17-scf00421 | 17 |
| AX-157843606 | 22 | 2.153 | KV453099.1 | 64572  | 17-scf00421 | 17 |
| AX-158268258 | 22 | 2.153 | KV453099.1 | 66579  | 17-scf00421 | 17 |
| AX-157843607 | 22 | 2.153 | KV453099.1 | 67381  | 17-scf00421 | 17 |
| AX-157742141 | 22 | 2.153 | KV453099.1 | 73221  | 17-scf00421 | 17 |
| AX-157843608 | 22 | 2.153 | KV453099.1 | 74607  | 17-scf00421 | 17 |
| AX-158268260 | 22 | 2.153 | KV453099.1 | 77433  | 17-scf00421 | 17 |



|              |    |       |             |        |             |    |
|--------------|----|-------|-------------|--------|-------------|----|
| AX-158268262 | 22 | 2.153 | KV453099.1  | 83822  | 17-scf00421 | 17 |
| AX-157843611 | 22 | 2.153 | KV453099.1  | 88570  | 17-scf00421 | 17 |
| AX-157843612 | 22 | 2.153 | KV453099.1  | 89219  | 17-scf00421 | 17 |
| AX-158268265 | 22 | 2.153 | KV453099.1  | 94857  | 17-scf00421 | 17 |
| AX-158268266 | 22 | 2.153 | KV453099.1  | 96173  | 17-scf00421 | 17 |
| AX-158268267 | 22 | 2.153 | KV453099.1  | 97474  | 17-scf00421 | 17 |
| AX-158268268 | 22 | 2.153 | KV453099.1  | 99758  | 17-scf00421 | 17 |
| AX-157721515 | 22 | 2.153 | KV453099.1  | 102924 | 17-scf00421 | 17 |
| AX-158268308 | 22 | 2.153 | KV453098.1  | 75248  | 17-scf00422 | 17 |
| AX-158268318 | 22 | 2.153 | KV453098.1  | 90443  | 17-scf00422 | 17 |
| AX-158268330 | 22 | 2.153 | KV453098.1  | 107925 | 17-scf00422 | 17 |
| AX-157770706 | 22 | 2.153 | KV453101.1  | 603    | 17-scf00424 | 17 |
| AX-158268466 | 22 | 2.153 | KV453101.1  | 6815   | 17-scf00424 | 17 |
| AX-158268469 | 22 | 2.153 | KV453101.1  | 36783  | 17-scf00424 | 17 |
| AX-158268471 | 22 | 2.153 | KV453101.1  | 43489  | 17-scf00424 | 17 |
| AX-158268473 | 22 | 2.153 | KV453101.1  | 51312  | 17-scf00424 | 17 |
| AX-158268474 | 22 | 2.153 | KV453101.1  | 53746  | 17-scf00424 | 17 |
| AX-157843634 | 22 | 2.153 | KV453101.1  | 55337  | 17-scf00424 | 17 |
| AX-158268475 | 22 | 2.153 | KV453101.1  | 59741  | 17-scf00424 | 17 |
| AX-158268476 | 22 | 2.153 | KV453101.1  | 60690  | 17-scf00424 | 17 |
| AX-158268477 | 22 | 2.153 | KV453101.1  | 62112  | 17-scf00424 | 17 |
| AX-158268478 | 22 | 2.153 | KV453101.1  | 63117  | 17-scf00424 | 17 |
| AX-157742606 | 22 | 2.153 | KV453101.1  | 68153  | 17-scf00424 | 17 |
| AX-158268480 | 22 | 2.153 | KV453101.1  | 70155  | 17-scf00424 | 17 |
| AX-158268481 | 22 | 2.153 | KV453101.1  | 70603  | 17-scf00424 | 17 |
| AX-157860085 | 22 | 2.153 | KV453101.1  | 72713  | 17-scf00424 | 17 |
| AX-158268483 | 22 | 2.153 | KV453101.1  | 84909  | 17-scf00424 | 17 |
| AX-158268484 | 22 | 2.153 | KV453101.1  | 86238  | 17-scf00424 | 17 |
| AX-158268485 | 22 | 2.153 | KV453101.1  | 87378  | 17-scf00424 | 17 |
| AX-158268489 | 22 | 2.153 | KV453101.1  | 93288  | 17-scf00424 | 17 |
| AX-158268495 | 22 | 2.153 | KV453101.1  | 119716 | 17-scf00424 | 17 |
| AX-157860086 | 22 | 2.153 | KV453101.1  | 134062 | 17-scf00424 | 17 |
| AX-158268501 | 22 | 2.153 | KV453101.1  | 144835 | 17-scf00424 | 17 |
| AX-158268504 | 22 | 2.153 | KV453101.1  | 167974 | 17-scf00424 | 17 |
| AX-158268506 | 22 | 2.153 | KV453101.1  | 173689 | 17-scf00424 | 17 |
| AX-157716339 | 22 | 2.153 | KV453101.1  | 173729 | 17-scf00424 | 17 |
| AX-157843641 | 22 | 2.153 | KV453104.1  | 73583  | 17-scf00425 | 17 |
| AX-157708481 | 22 | 2.153 | KV453104.1  | 103278 | 17-scf00425 | 17 |
| AX-158268569 | 22 | 2.153 | KV453104.1  | 115475 | 17-scf00425 | 17 |
| AX-158268572 | 22 | 2.153 | KV453104.1  | 119578 | 17-scf00425 | 17 |
| AX-157684074 | 22 | 2.153 | KV453100.1  | 6143   | 17-scf00426 | 17 |
| AX-157681375 | 22 | 2.153 | KV453100.1  | 6505   | 17-scf00426 | 17 |
| AX-157687975 | 22 | 2.153 | KV453102.1  | 1810   | 17-scf01132 | 17 |
| AX-157704584 | 22 | 2.153 | 3ML01026668 | 1393   | scf02267_1  | UN |
| AX-158268342 | 22 | 3.354 | KV453103.1  | 12081  | 17-scf00423 | 17 |
| AX-157843619 | 22 | 3.354 | KV453103.1  | 18878  | 17-scf00423 | 17 |
| AX-157843620 | 22 | 3.354 | KV453103.1  | 23980  | 17-scf00423 | 17 |
| AX-158268346 | 22 | 3.354 | KV453103.1  | 24894  | 17-scf00423 | 17 |
| AX-158268441 | 22 | 3.354 | KV453103.1  | 180376 | 17-scf00423 | 17 |
| AX-158268293 | 22 | 3.464 | KV453098.1  | 45337  | 17-scf00422 | 17 |
| AX-158268352 | 22 | 3.464 | KV453103.1  | 39329  | 17-scf00423 | 17 |

|              |    |       |            |        |             |    |
|--------------|----|-------|------------|--------|-------------|----|
| AX-157843621 | 22 | 3.464 | KV453103.1 | 43122  | 17-scf00423 | 17 |
| AX-158268353 | 22 | 3.464 | KV453103.1 | 44752  | 17-scf00423 | 17 |
| AX-157843622 | 22 | 3.464 | KV453103.1 | 51235  | 17-scf00423 | 17 |
| AX-158268358 | 22 | 3.464 | KV453103.1 | 58733  | 17-scf00423 | 17 |
| AX-158268359 | 22 | 3.464 | KV453103.1 | 59547  | 17-scf00423 | 17 |
| AX-158268363 | 22 | 3.464 | KV453103.1 | 63785  | 17-scf00423 | 17 |
| AX-158268369 | 22 | 3.464 | KV453103.1 | 69474  | 17-scf00423 | 17 |
| AX-158268371 | 22 | 3.464 | KV453103.1 | 71926  | 17-scf00423 | 17 |
| AX-158268372 | 22 | 3.464 | KV453103.1 | 74754  | 17-scf00423 | 17 |
| AX-157860083 | 22 | 3.464 | KV453103.1 | 76323  | 17-scf00423 | 17 |
| AX-158268374 | 22 | 3.464 | KV453103.1 | 79233  | 17-scf00423 | 17 |
| AX-158268375 | 22 | 3.464 | KV453103.1 | 82001  | 17-scf00423 | 17 |
| AX-158268377 | 22 | 3.464 | KV453103.1 | 83678  | 17-scf00423 | 17 |
| AX-158268379 | 22 | 3.464 | KV453103.1 | 85137  | 17-scf00423 | 17 |
| AX-158268407 | 22 | 3.464 | KV453103.1 | 122684 | 17-scf00423 | 17 |
| AX-157880534 | 22 | 3.464 | KV453105.1 | 232774 | 17-scf00427 | 17 |
| AX-158268760 | 22 | 3.464 | KV453105.1 | 397877 | 17-scf00427 | 17 |
| AX-158268378 | 22 | 3.499 | KV453103.1 | 84427  | 17-scf00423 | 17 |
| AX-158268381 | 22 | 3.499 | KV453103.1 | 86805  | 17-scf00423 | 17 |
| AX-158268382 | 22 | 3.499 | KV453103.1 | 87509  | 17-scf00423 | 17 |
| AX-158268349 | 22 | 3.523 | KV453103.1 | 36728  | 17-scf00423 | 17 |
| AX-158268388 | 22 | 3.523 | KV453103.1 | 94141  | 17-scf00423 | 17 |
| AX-157710162 | 22 | 3.533 | KV453103.1 | 19829  | 17-scf00423 | 17 |
| AX-158268362 | 22 | 3.533 | KV453103.1 | 61961  | 17-scf00423 | 17 |
| AX-158268394 | 22 | 3.533 | KV453103.1 | 98584  | 17-scf00423 | 17 |
| AX-158268447 | 22 | 3.533 | KV453103.1 | 200827 | 17-scf00423 | 17 |
| AX-158268461 | 22 | 3.533 | KV453103.1 | 221943 | 17-scf00423 | 17 |
| AX-158268747 | 22 | 3.533 | KV453105.1 | 382656 | 17-scf00427 | 17 |
| AX-158268782 | 22 | 3.533 | KV453105.1 | 421344 | 17-scf00427 | 17 |
| AX-158268396 | 22 | 3.552 | KV453103.1 | 100376 | 17-scf00423 | 17 |
| AX-158268398 | 22 | 3.573 | KV453103.1 | 104343 | 17-scf00423 | 17 |
| AX-158268399 | 22 | 3.573 | KV453103.1 | 106048 | 17-scf00423 | 17 |
| AX-158268316 | 22 | 3.619 | KV453098.1 | 87736  | 17-scf00422 | 17 |
| AX-158268344 | 22 | 3.619 | KV453103.1 | 17569  | 17-scf00423 | 17 |
| AX-158268357 | 22 | 3.619 | KV453103.1 | 57730  | 17-scf00423 | 17 |
| AX-158268389 | 22 | 3.619 | KV453103.1 | 94757  | 17-scf00423 | 17 |
| AX-158268393 | 22 | 3.619 | KV453103.1 | 97557  | 17-scf00423 | 17 |
| AX-158268403 | 22 | 3.619 | KV453103.1 | 110528 | 17-scf00423 | 17 |
| AX-158268411 | 22 | 3.619 | KV453103.1 | 128774 | 17-scf00423 | 17 |
| AX-158268412 | 22 | 3.619 | KV453103.1 | 129241 | 17-scf00423 | 17 |
| AX-158268818 | 22 | 3.619 | KV453106.1 | 22424  | 17-scf00428 | 17 |
| AX-158268874 | 22 | 3.619 | KV453106.1 | 136253 | 17-scf00428 | 17 |
| AX-158416521 | 22 | 3.619 | KV453106.1 | 144094 | 17-scf00428 | 17 |
| AX-158268878 | 22 | 3.619 | KV453106.1 | 144691 | 17-scf00428 | 17 |
| AX-158268880 | 22 | 3.619 | KV453106.1 | 146179 | 17-scf00428 | 17 |
| AX-158268885 | 22 | 3.619 | KV453106.1 | 154733 | 17-scf00428 | 17 |
| AX-157750564 | 22 | 3.682 | KV453103.1 | 113135 | 17-scf00423 | 17 |
| AX-158268410 | 22 | 3.682 | KV453103.1 | 127422 | 17-scf00423 | 17 |
| AX-157746530 | 22 | 3.682 | KV453103.1 | 130595 | 17-scf00423 | 17 |
| AX-158268413 | 22 | 3.682 | KV453103.1 | 131776 | 17-scf00423 | 17 |
| AX-158268421 | 22 | 3.805 | KV453103.1 | 146260 | 17-scf00423 | 17 |

|              |    |       |             |        |             |    |
|--------------|----|-------|-------------|--------|-------------|----|
| AX-158268234 | 22 | 3.901 | KV453099.1  | 22794  | 17-scf00421 | 17 |
| AX-158268295 | 22 | 3.901 | KV453098.1  | 51666  | 17-scf00422 | 17 |
| AX-158268313 | 22 | 3.901 | KV453098.1  | 83702  | 17-scf00422 | 17 |
| AX-158268420 | 22 | 3.901 | KV453103.1  | 143286 | 17-scf00423 | 17 |
| AX-158268426 | 22 | 3.901 | KV453103.1  | 153727 | 17-scf00423 | 17 |
| AX-158268431 | 22 | 3.901 | KV453103.1  | 157301 | 17-scf00423 | 17 |
| AX-158268432 | 22 | 3.901 | KV453103.1  | 158673 | 17-scf00423 | 17 |
| AX-158268436 | 22 | 3.901 | KV453103.1  | 168604 | 17-scf00423 | 17 |
| AX-157723962 | 22 | 3.901 | KV453103.1  | 170329 | 17-scf00423 | 17 |
| AX-158268437 | 22 | 3.901 | KV453103.1  | 170931 | 17-scf00423 | 17 |
| AX-158268438 | 22 | 3.901 | KV453103.1  | 171849 | 17-scf00423 | 17 |
| AX-158268440 | 22 | 3.901 | KV453103.1  | 173644 | 17-scf00423 | 17 |
| AX-157843630 | 22 | 3.901 | KV453103.1  | 173714 | 17-scf00423 | 17 |
| AX-157758030 | 22 | 3.901 | KV453103.1  | 175682 | 17-scf00423 | 17 |
| AX-157843631 | 22 | 3.901 | KV453103.1  | 175940 | 17-scf00423 | 17 |
| AX-158268442 | 22 | 3.901 | KV453103.1  | 181198 | 17-scf00423 | 17 |
| AX-158268448 | 22 | 3.901 | KV453103.1  | 202181 | 17-scf00423 | 17 |
| AX-158268456 | 22 | 3.901 | KV453103.1  | 214756 | 17-scf00423 | 17 |
| AX-158387334 | 22 | 3.901 | KV453104.1  | 16454  | 17-scf00425 | 17 |
| AX-158268530 | 22 | 3.901 | KV453104.1  | 34562  | 17-scf00425 | 17 |
| AX-157860088 | 22 | 3.901 | KV453105.1  | 161575 | 17-scf00427 | 17 |
| AX-157843654 | 22 | 3.901 | KV453105.1  | 187777 | 17-scf00427 | 17 |
| AX-158268643 | 22 | 3.901 | KV453105.1  | 196287 | 17-scf00427 | 17 |
| AX-158268644 | 22 | 3.901 | KV453105.1  | 198833 | 17-scf00427 | 17 |
| AX-158268647 | 22 | 3.901 | KV453105.1  | 201587 | 17-scf00427 | 17 |
| AX-158268663 | 22 | 3.901 | KV453105.1  | 217828 | 17-scf00427 | 17 |
| AX-158268669 | 22 | 3.901 | KV453105.1  | 234937 | 17-scf00427 | 17 |
| AX-158268673 | 22 | 3.901 | KV453105.1  | 249713 | 17-scf00427 | 17 |
| AX-158268691 | 22 | 3.901 | KV453105.1  | 287749 | 17-scf00427 | 17 |
| AX-157887845 | 22 | 3.901 | KV453105.1  | 311515 | 17-scf00427 | 17 |
| AX-158268744 | 22 | 3.901 | KV453105.1  | 379567 | 17-scf00427 | 17 |
| AX-158268785 | 22 | 3.901 | KV453105.1  | 426584 | 17-scf00427 | 17 |
| AX-158268800 | 22 | 3.901 | KV453105.1  | 446515 | 17-scf00427 | 17 |
| AX-158268833 | 22 | 3.901 | KV453106.1  | 49389  | 17-scf00428 | 17 |
| AX-158268842 | 22 | 3.901 | KV453106.1  | 56794  | 17-scf00428 | 17 |
| AX-158416519 | 22 | 3.901 | KV453106.1  | 80147  | 17-scf00428 | 17 |
| AX-158268854 | 22 | 3.901 | KV453106.1  | 85775  | 17-scf00428 | 17 |
| AX-158394820 | 22 | 3.901 | KV453106.1  | 93208  | 17-scf00428 | 17 |
| AX-158268890 | 22 | 3.901 | KV453106.1  | 164586 | 17-scf00428 | 17 |
| AX-158268893 | 22 | 3.901 | KV453106.1  | 178281 | 17-scf00428 | 17 |
| AX-158268900 | 22 | 3.901 | KV453106.1  | 199504 | 17-scf00428 | 17 |
| AX-157687953 | 22 | 3.901 | 3ML01025364 | 4882   | scf01115_1  | UN |
| AX-158268449 | 22 | 3.96  | KV453103.1  | 202500 | 17-scf00423 | 17 |
| AX-158268376 | 22 | 4.018 | KV453103.1  | 82814  | 17-scf00423 | 17 |
| AX-158268383 | 22 | 4.018 | KV453103.1  | 87884  | 17-scf00423 | 17 |
| AX-158268391 | 22 | 4.018 | KV453103.1  | 96051  | 17-scf00423 | 17 |
| AX-158268450 | 22 | 4.018 | KV453103.1  | 204020 | 17-scf00423 | 17 |
| AX-158268451 | 22 | 4.018 | KV453103.1  | 208397 | 17-scf00423 | 17 |
| AX-158268454 | 22 | 4.018 | KV453103.1  | 210718 | 17-scf00423 | 17 |
| AX-158416497 | 22 | 4.018 | KV453103.1  | 212787 | 17-scf00423 | 17 |
| AX-158268458 | 22 | 4.018 | KV453103.1  | 218826 | 17-scf00423 | 17 |

|              |    |       |            |        |             |    |
|--------------|----|-------|------------|--------|-------------|----|
| AX-158268705 | 22 | 4.018 | KV453105.1 | 303464 | 17-scf00427 | 17 |
| AX-158268339 | 22 | 5.539 | KV453098.1 | 131495 | 17-scf00422 | 17 |
| AX-158268508 | 22 | 5.539 | KV453104.1 | 3115   | 17-scf00425 | 17 |
| AX-158268514 | 22 | 5.539 | KV453104.1 | 9079   | 17-scf00425 | 17 |
| AX-158268515 | 22 | 5.539 | KV453104.1 | 9584   | 17-scf00425 | 17 |
| AX-158268516 | 22 | 5.539 | KV453104.1 | 9969   | 17-scf00425 | 17 |
| AX-157724245 | 22 | 5.539 | KV453104.1 | 12193  | 17-scf00425 | 17 |
| AX-158268518 | 22 | 5.539 | KV453104.1 | 13036  | 17-scf00425 | 17 |
| AX-158268528 | 22 | 5.539 | KV453104.1 | 34005  | 17-scf00425 | 17 |
| AX-158268510 | 22 | 5.597 | KV453104.1 | 5745   | 17-scf00425 | 17 |
| AX-158268520 | 22 | 5.597 | KV453104.1 | 13872  | 17-scf00425 | 17 |
| AX-158268264 | 22 | 5.648 | KV453099.1 | 91657  | 17-scf00421 | 17 |
| AX-158268343 | 22 | 5.648 | KV453103.1 | 15137  | 17-scf00423 | 17 |
| AX-158268415 | 22 | 5.648 | KV453103.1 | 133422 | 17-scf00423 | 17 |
| AX-158268521 | 22 | 5.648 | KV453104.1 | 16125  | 17-scf00425 | 17 |
| AX-158268522 | 22 | 5.648 | KV453104.1 | 24679  | 17-scf00425 | 17 |
| AX-158268523 | 22 | 5.648 | KV453104.1 | 27135  | 17-scf00425 | 17 |
| AX-158268524 | 22 | 5.648 | KV453104.1 | 27594  | 17-scf00425 | 17 |
| AX-158268525 | 22 | 5.648 | KV453104.1 | 29316  | 17-scf00425 | 17 |
| AX-158268529 | 22 | 5.648 | KV453104.1 | 34303  | 17-scf00425 | 17 |
| AX-158268532 | 22 | 5.648 | KV453104.1 | 43315  | 17-scf00425 | 17 |
| AX-158268533 | 22 | 5.648 | KV453104.1 | 43963  | 17-scf00425 | 17 |
| AX-158268535 | 22 | 5.648 | KV453104.1 | 46761  | 17-scf00425 | 17 |
| AX-158268536 | 22 | 5.648 | KV453104.1 | 47854  | 17-scf00425 | 17 |
| AX-158268537 | 22 | 5.648 | KV453104.1 | 54023  | 17-scf00425 | 17 |
| AX-157887834 | 22 | 5.758 | KV453099.1 | 22628  | 17-scf00421 | 17 |
| AX-157714641 | 22 | 5.758 | KV453104.1 | 65688  | 17-scf00425 | 17 |
| AX-158268541 | 22 | 5.758 | KV453104.1 | 68529  | 17-scf00425 | 17 |
| AX-158268542 | 22 | 5.758 | KV453104.1 | 70177  | 17-scf00425 | 17 |
| AX-158268544 | 22 | 5.758 | KV453104.1 | 73368  | 17-scf00425 | 17 |
| AX-158268549 | 22 | 5.758 | KV453104.1 | 89300  | 17-scf00425 | 17 |
| AX-157773842 | 22 | 5.758 | KV453104.1 | 109308 | 17-scf00425 | 17 |
| AX-158268567 | 22 | 5.758 | KV453104.1 | 113561 | 17-scf00425 | 17 |
| AX-158268570 | 22 | 5.758 | KV453104.1 | 118353 | 17-scf00425 | 17 |
| AX-158268503 | 22 | 5.794 | KV453101.1 | 153969 | 17-scf00424 | 17 |
| AX-158268550 | 22 | 5.794 | KV453104.1 | 90334  | 17-scf00425 | 17 |
| AX-158268556 | 22 | 5.833 | KV453104.1 | 95741  | 17-scf00425 | 17 |
| AX-158268322 | 22 | 5.843 | KV453098.1 | 94634  | 17-scf00422 | 17 |
| AX-158268557 | 22 | 5.843 | KV453104.1 | 97192  | 17-scf00425 | 17 |
| AX-158268604 | 22 | 7.484 | KV453105.1 | 116361 | 17-scf00427 | 17 |
| AX-158268428 | 22 | 7.509 | KV453103.1 | 155360 | 17-scf00423 | 17 |
| AX-158268434 | 22 | 7.509 | KV453103.1 | 162488 | 17-scf00423 | 17 |
| AX-157774599 | 22 | 7.509 | KV453103.1 | 178121 | 17-scf00423 | 17 |
| AX-157742634 | 22 | 7.509 | KV453103.1 | 199064 | 17-scf00423 | 17 |
| AX-158268452 | 22 | 7.509 | KV453103.1 | 209070 | 17-scf00423 | 17 |
| AX-158268605 | 22 | 7.509 | KV453105.1 | 117344 | 17-scf00427 | 17 |
| AX-158268617 | 22 | 7.509 | KV453105.1 | 155144 | 17-scf00427 | 17 |
| AX-157843649 | 22 | 7.509 | KV453105.1 | 155660 | 17-scf00427 | 17 |
| AX-158268624 | 22 | 7.509 | KV453105.1 | 159889 | 17-scf00427 | 17 |
| AX-157843650 | 22 | 7.509 | KV453105.1 | 160439 | 17-scf00427 | 17 |
| AX-158268625 | 22 | 7.509 | KV453105.1 | 162359 | 17-scf00427 | 17 |

|              |    |       |             |        |             |    |
|--------------|----|-------|-------------|--------|-------------|----|
| AX-157843651 | 22 | 7.509 | KV453105.1  | 163107 | 17-scf00427 | 17 |
| AX-158268626 | 22 | 7.509 | KV453105.1  | 164017 | 17-scf00427 | 17 |
| AX-158268627 | 22 | 7.509 | KV453105.1  | 166555 | 17-scf00427 | 17 |
| AX-157843652 | 22 | 7.509 | KV453105.1  | 170666 | 17-scf00427 | 17 |
| AX-158268641 | 22 | 7.509 | KV453105.1  | 195401 | 17-scf00427 | 17 |
| AX-158268646 | 22 | 7.509 | KV453105.1  | 200490 | 17-scf00427 | 17 |
| AX-158268649 | 22 | 7.509 | KV453105.1  | 203049 | 17-scf00427 | 17 |
| AX-158268651 | 22 | 7.509 | KV453105.1  | 205372 | 17-scf00427 | 17 |
| AX-158268652 | 22 | 7.509 | KV453105.1  | 206464 | 17-scf00427 | 17 |
| AX-158268653 | 22 | 7.509 | KV453105.1  | 206999 | 17-scf00427 | 17 |
| AX-157688919 | 22 | 7.509 | 3ML01027495 | 949    | scf03101_1  | UN |
| AX-158268405 | 22 | 7.618 | KV453103.1  | 120510 | 17-scf00423 | 17 |
| AX-158268424 | 22 | 7.618 | KV453103.1  | 151910 | 17-scf00423 | 17 |
| AX-158268435 | 22 | 7.618 | KV453103.1  | 165913 | 17-scf00423 | 17 |
| AX-158268446 | 22 | 7.618 | KV453103.1  | 195174 | 17-scf00423 | 17 |
| AX-158268615 | 22 | 7.618 | KV453105.1  | 152753 | 17-scf00427 | 17 |
| AX-158268620 | 22 | 7.618 | KV453105.1  | 157603 | 17-scf00427 | 17 |
| AX-158268623 | 22 | 7.618 | KV453105.1  | 159188 | 17-scf00427 | 17 |
| AX-157843653 | 22 | 7.618 | KV453105.1  | 180029 | 17-scf00427 | 17 |
| AX-157740177 | 22 | 7.618 | KV453105.1  | 202809 | 17-scf00427 | 17 |
| AX-158268657 | 22 | 7.618 | KV453105.1  | 211629 | 17-scf00427 | 17 |
| AX-158268658 | 22 | 7.618 | KV453105.1  | 212165 | 17-scf00427 | 17 |
| AX-157750176 | 22 | 7.618 | KV453105.1  | 212298 | 17-scf00427 | 17 |
| AX-158268659 | 22 | 7.618 | KV453105.1  | 213076 | 17-scf00427 | 17 |
| AX-158268660 | 22 | 7.618 | KV453105.1  | 213579 | 17-scf00427 | 17 |
| AX-158268661 | 22 | 7.618 | KV453105.1  | 214472 | 17-scf00427 | 17 |
| AX-157756693 | 22 | 7.618 | KV453105.1  | 216759 | 17-scf00427 | 17 |
| AX-158268668 | 22 | 7.618 | KV453105.1  | 234338 | 17-scf00427 | 17 |
| AX-158387335 | 22 | 7.618 | KV453105.1  | 248261 | 17-scf00427 | 17 |
| AX-158268674 | 22 | 7.618 | KV453105.1  | 250727 | 17-scf00427 | 17 |
| AX-158268675 | 22 | 7.618 | KV453105.1  | 252652 | 17-scf00427 | 17 |
| AX-157752794 | 22 | 7.618 | KV453105.1  | 253365 | 17-scf00427 | 17 |
| AX-157743114 | 22 | 7.618 | KV453105.1  | 263269 | 17-scf00427 | 17 |
| AX-158268694 | 22 | 7.618 | KV453105.1  | 289962 | 17-scf00427 | 17 |
| AX-158268695 | 22 | 7.618 | KV453105.1  | 291406 | 17-scf00427 | 17 |
| AX-158268696 | 22 | 7.618 | KV453105.1  | 292111 | 17-scf00427 | 17 |
| AX-158268699 | 22 | 7.618 | KV453105.1  | 296261 | 17-scf00427 | 17 |
| AX-158268701 | 22 | 7.618 | KV453105.1  | 301073 | 17-scf00427 | 17 |
| AX-158268703 | 22 | 7.618 | KV453105.1  | 301815 | 17-scf00427 | 17 |
| AX-158268704 | 22 | 7.618 | KV453105.1  | 302959 | 17-scf00427 | 17 |
| AX-157887844 | 22 | 7.618 | KV453105.1  | 306873 | 17-scf00427 | 17 |
| AX-158268709 | 22 | 7.618 | KV453105.1  | 308199 | 17-scf00427 | 17 |
| AX-158268711 | 22 | 7.618 | KV453105.1  | 309406 | 17-scf00427 | 17 |
| AX-158268715 | 22 | 7.618 | KV453105.1  | 315420 | 17-scf00427 | 17 |
| AX-158268838 | 22 | 7.618 | KV453106.1  | 52902  | 17-scf00428 | 17 |
| AX-158268913 | 22 | 7.618 | KV453106.1  | 275193 | 17-scf00428 | 17 |
| AX-157843672 | 22 | 7.618 | KV453106.1  | 276048 | 17-scf00428 | 17 |
| AX-158268915 | 22 | 7.618 | KV453106.1  | 277088 | 17-scf00428 | 17 |
| AX-158268917 | 22 | 7.618 | KV453106.1  | 279562 | 17-scf00428 | 17 |
| AX-157706250 | 22 | 7.618 | 3ML01031895 | 140    | scf07517_1  | UN |
| AX-158268698 | 22 | 7.689 | KV453105.1  | 293197 | 17-scf00427 | 17 |

|              |    |       |            |        |             |    |
|--------------|----|-------|------------|--------|-------------|----|
| AX-158268722 | 22 | 7.689 | KV453105.1 | 336123 | 17-scf00427 | 17 |
| AX-157843623 | 22 | 7.727 | KV453103.1 | 55762  | 17-scf00423 | 17 |
| AX-158268444 | 22 | 7.727 | KV453103.1 | 191305 | 17-scf00423 | 17 |
| AX-158268445 | 22 | 7.727 | KV453103.1 | 192801 | 17-scf00423 | 17 |
| AX-157860084 | 22 | 7.727 | KV453103.1 | 207950 | 17-scf00423 | 17 |
| AX-158268453 | 22 | 7.727 | KV453103.1 | 209325 | 17-scf00423 | 17 |
| AX-158268603 | 22 | 7.727 | KV453105.1 | 115953 | 17-scf00427 | 17 |
| AX-157843648 | 22 | 7.727 | KV453105.1 | 154736 | 17-scf00427 | 17 |
| AX-158268618 | 22 | 7.727 | KV453105.1 | 156203 | 17-scf00427 | 17 |
| AX-158268671 | 22 | 7.727 | KV453105.1 | 245590 | 17-scf00427 | 17 |
| AX-158268724 | 22 | 7.727 | KV453105.1 | 337845 | 17-scf00427 | 17 |
| AX-158268725 | 22 | 7.727 | KV453105.1 | 339882 | 17-scf00427 | 17 |
| AX-158268726 | 22 | 7.727 | KV453105.1 | 341404 | 17-scf00427 | 17 |
| AX-158268730 | 22 | 7.727 | KV453105.1 | 350999 | 17-scf00427 | 17 |
| AX-158268735 | 22 | 7.727 | KV453105.1 | 363942 | 17-scf00427 | 17 |
| AX-158268736 | 22 | 7.727 | KV453105.1 | 364661 | 17-scf00427 | 17 |
| AX-158268740 | 22 | 7.727 | KV453105.1 | 374957 | 17-scf00427 | 17 |
| AX-158268741 | 22 | 7.727 | KV453105.1 | 376034 | 17-scf00427 | 17 |
| AX-158268742 | 22 | 7.727 | KV453105.1 | 377812 | 17-scf00427 | 17 |
| AX-158268743 | 22 | 7.727 | KV453105.1 | 378953 | 17-scf00427 | 17 |
| AX-158268752 | 22 | 7.727 | KV453105.1 | 386806 | 17-scf00427 | 17 |
| AX-158268753 | 22 | 7.727 | KV453105.1 | 387023 | 17-scf00427 | 17 |
| AX-158268754 | 22 | 7.727 | KV453105.1 | 387429 | 17-scf00427 | 17 |
| AX-157708216 | 22 | 7.727 | KV453105.1 | 430832 | 17-scf00427 | 17 |
| AX-158268788 | 22 | 7.727 | KV453105.1 | 431930 | 17-scf00427 | 17 |
| AX-158268799 | 22 | 7.727 | KV453105.1 | 445663 | 17-scf00427 | 17 |
| AX-158268849 | 22 | 7.727 | KV453106.1 | 74341  | 17-scf00428 | 17 |
| AX-158268851 | 22 | 7.727 | KV453106.1 | 79897  | 17-scf00428 | 17 |
| AX-158268852 | 22 | 7.727 | KV453106.1 | 81248  | 17-scf00428 | 17 |
| AX-158268853 | 22 | 7.727 | KV453106.1 | 85403  | 17-scf00428 | 17 |
| AX-158268855 | 22 | 7.727 | KV453106.1 | 86144  | 17-scf00428 | 17 |
| AX-158268857 | 22 | 7.727 | KV453106.1 | 94521  | 17-scf00428 | 17 |
| AX-158416523 | 22 | 7.727 | KV453106.1 | 258332 | 17-scf00428 | 17 |
| AX-157725440 | 22 | 7.741 | KV453105.1 | 389491 | 17-scf00427 | 17 |
| AX-158268757 | 22 | 7.761 | KV453105.1 | 392381 | 17-scf00427 | 17 |
| AX-158268768 | 22 | 7.778 | KV453105.1 | 404719 | 17-scf00427 | 17 |
| AX-158268774 | 22 | 7.791 | KV453105.1 | 412607 | 17-scf00427 | 17 |
| AX-157843666 | 22 | 7.808 | KV453105.1 | 416973 | 17-scf00427 | 17 |
| AX-158268786 | 22 | 7.824 | KV453105.1 | 427549 | 17-scf00427 | 17 |
| AX-158268404 | 22 | 7.837 | KV453103.1 | 114706 | 17-scf00423 | 17 |
| AX-158268443 | 22 | 7.837 | KV453103.1 | 186425 | 17-scf00423 | 17 |
| AX-158268621 | 22 | 7.837 | KV453105.1 | 157930 | 17-scf00427 | 17 |
| AX-158268622 | 22 | 7.837 | KV453105.1 | 158191 | 17-scf00427 | 17 |
| AX-158268666 | 22 | 7.837 | KV453105.1 | 231129 | 17-scf00427 | 17 |
| AX-157843664 | 22 | 7.837 | KV453105.1 | 318281 | 17-scf00427 | 17 |
| AX-158268716 | 22 | 7.837 | KV453105.1 | 320299 | 17-scf00427 | 17 |
| AX-157843665 | 22 | 7.837 | KV453105.1 | 322236 | 17-scf00427 | 17 |
| AX-158268771 | 22 | 7.837 | KV453105.1 | 409047 | 17-scf00427 | 17 |
| AX-158268772 | 22 | 7.837 | KV453105.1 | 410813 | 17-scf00427 | 17 |
| AX-158268787 | 22 | 7.837 | KV453105.1 | 428353 | 17-scf00427 | 17 |
| AX-158268793 | 22 | 7.837 | KV453105.1 | 437354 | 17-scf00427 | 17 |

|              |    |       |            |        |             |    |
|--------------|----|-------|------------|--------|-------------|----|
| AX-158268803 | 22 | 7.837 | KV453105.1 | 450487 | 17-scf00427 | 17 |
| AX-158268804 | 22 | 7.837 | KV453105.1 | 450981 | 17-scf00427 | 17 |
| AX-158268805 | 22 | 7.837 | KV453105.1 | 452272 | 17-scf00427 | 17 |
| AX-158268809 | 22 | 7.837 | KV453106.1 | 10573  | 17-scf00428 | 17 |
| AX-158268814 | 22 | 7.837 | KV453106.1 | 20407  | 17-scf00428 | 17 |
| AX-158268816 | 22 | 7.837 | KV453106.1 | 21102  | 17-scf00428 | 17 |
| AX-158268817 | 22 | 7.837 | KV453106.1 | 21241  | 17-scf00428 | 17 |
| AX-158268825 | 22 | 7.837 | KV453106.1 | 42182  | 17-scf00428 | 17 |
| AX-158268829 | 22 | 7.837 | KV453106.1 | 46688  | 17-scf00428 | 17 |
| AX-158268831 | 22 | 7.837 | KV453106.1 | 47683  | 17-scf00428 | 17 |
| AX-158268832 | 22 | 7.837 | KV453106.1 | 48429  | 17-scf00428 | 17 |
| AX-158268834 | 22 | 7.837 | KV453106.1 | 49809  | 17-scf00428 | 17 |
| AX-158268835 | 22 | 7.837 | KV453106.1 | 50508  | 17-scf00428 | 17 |
| AX-158268836 | 22 | 7.837 | KV453106.1 | 51109  | 17-scf00428 | 17 |
| AX-158268839 | 22 | 7.837 | KV453106.1 | 53586  | 17-scf00428 | 17 |
| AX-158268875 | 22 | 7.837 | KV453106.1 | 138717 | 17-scf00428 | 17 |
| AX-158268879 | 22 | 7.837 | KV453106.1 | 145524 | 17-scf00428 | 17 |
| AX-158268881 | 22 | 7.837 | KV453106.1 | 146633 | 17-scf00428 | 17 |
| AX-158268883 | 22 | 7.837 | KV453106.1 | 149462 | 17-scf00428 | 17 |
| AX-158268892 | 22 | 7.837 | KV453106.1 | 175910 | 17-scf00428 | 17 |
| AX-158268929 | 22 | 7.837 | KV453106.1 | 298909 | 17-scf00428 | 17 |
| AX-157843655 | 22 | 7.946 | KV453105.1 | 194064 | 17-scf00427 | 17 |
| AX-157843659 | 22 | 7.946 | KV453105.1 | 259692 | 17-scf00427 | 17 |
| AX-158268723 | 22 | 7.946 | KV453105.1 | 337481 | 17-scf00427 | 17 |
| AX-157887847 | 22 | 7.946 | KV453105.1 | 349913 | 17-scf00427 | 17 |
| AX-158268734 | 22 | 7.946 | KV453105.1 | 362392 | 17-scf00427 | 17 |
| AX-158268756 | 22 | 7.946 | KV453105.1 | 391607 | 17-scf00427 | 17 |
| AX-158268767 | 22 | 7.946 | KV453105.1 | 404095 | 17-scf00427 | 17 |
| AX-158268773 | 22 | 7.946 | KV453105.1 | 412488 | 17-scf00427 | 17 |
| AX-158268775 | 22 | 7.946 | KV453105.1 | 413267 | 17-scf00427 | 17 |
| AX-158268776 | 22 | 7.946 | KV453105.1 | 414105 | 17-scf00427 | 17 |
| AX-158268777 | 22 | 7.946 | KV453105.1 | 414941 | 17-scf00427 | 17 |
| AX-158268779 | 22 | 7.946 | KV453105.1 | 418635 | 17-scf00427 | 17 |
| AX-158268789 | 22 | 7.946 | KV453105.1 | 433352 | 17-scf00427 | 17 |
| AX-158268791 | 22 | 7.946 | KV453105.1 | 435819 | 17-scf00427 | 17 |
| AX-158268797 | 22 | 7.946 | KV453105.1 | 440409 | 17-scf00427 | 17 |
| AX-158268806 | 22 | 7.946 | KV453105.1 | 452787 | 17-scf00427 | 17 |
| AX-158268811 | 22 | 7.946 | KV453106.1 | 12700  | 17-scf00428 | 17 |
| AX-158268826 | 22 | 7.946 | KV453106.1 | 44165  | 17-scf00428 | 17 |
| AX-158268827 | 22 | 7.946 | KV453106.1 | 44951  | 17-scf00428 | 17 |
| AX-157843670 | 22 | 7.946 | KV453106.1 | 45328  | 17-scf00428 | 17 |
| AX-157720056 | 22 | 7.946 | KV453106.1 | 98506  | 17-scf00428 | 17 |
| AX-158387339 | 22 | 7.946 | KV453106.1 | 118233 | 17-scf00428 | 17 |
| AX-158268896 | 22 | 7.946 | KV453106.1 | 189401 | 17-scf00428 | 17 |
| AX-158268897 | 22 | 7.946 | KV453106.1 | 190224 | 17-scf00428 | 17 |
| AX-158268898 | 22 | 7.946 | KV453106.1 | 190907 | 17-scf00428 | 17 |
| AX-158268899 | 22 | 7.946 | KV453106.1 | 191321 | 17-scf00428 | 17 |
| AX-158268903 | 22 | 7.946 | KV453106.1 | 256496 | 17-scf00428 | 17 |
| AX-158268905 | 22 | 7.946 | KV453106.1 | 262904 | 17-scf00428 | 17 |
| AX-158268907 | 22 | 7.946 | KV453106.1 | 264153 | 17-scf00428 | 17 |
| AX-158268912 | 22 | 7.946 | KV453106.1 | 271034 | 17-scf00428 | 17 |

|              |    |       |            |        |             |    |
|--------------|----|-------|------------|--------|-------------|----|
| AX-157843671 | 22 | 7.946 | KV453106.1 | 274146 | 17-scf00428 | 17 |
| AX-157843673 | 22 | 7.946 | KV453106.1 | 276848 | 17-scf00428 | 17 |
| AX-158268916 | 22 | 7.946 | KV453106.1 | 278921 | 17-scf00428 | 17 |
| AX-158268918 | 22 | 7.946 | KV453106.1 | 280394 | 17-scf00428 | 17 |
| AX-158268919 | 22 | 7.946 | KV453106.1 | 282117 | 17-scf00428 | 17 |
| AX-158268920 | 22 | 7.946 | KV453106.1 | 284164 | 17-scf00428 | 17 |
| AX-158268922 | 22 | 7.946 | KV453106.1 | 285481 | 17-scf00428 | 17 |
| AX-158268923 | 22 | 7.946 | KV453106.1 | 285951 | 17-scf00428 | 17 |
| AX-158268924 | 22 | 7.946 | KV453106.1 | 291003 | 17-scf00428 | 17 |
| AX-158268926 | 22 | 7.946 | KV453106.1 | 296078 | 17-scf00428 | 17 |
| AX-158268927 | 22 | 7.946 | KV453106.1 | 296552 | 17-scf00428 | 17 |
| AX-158268930 | 22 | 7.946 | KV453106.1 | 299368 | 17-scf00428 | 17 |
| AX-158268931 | 22 | 7.946 | KV453106.1 | 300944 | 17-scf00428 | 17 |
| AX-158268933 | 22 | 7.946 | KV453106.1 | 302721 | 17-scf00428 | 17 |
| AX-158268934 | 22 | 7.946 | KV453106.1 | 303811 | 17-scf00428 | 17 |
| AX-158268937 | 22 | 7.946 | KV453106.1 | 305182 | 17-scf00428 | 17 |
| AX-158268938 | 22 | 7.946 | KV453106.1 | 309320 | 17-scf00428 | 17 |
| AX-158268939 | 22 | 7.946 | KV453106.1 | 310058 | 17-scf00428 | 17 |
| AX-158268944 | 22 | 7.946 | KV453106.1 | 313840 | 17-scf00428 | 17 |
| AX-158268949 | 22 | 7.946 | KV453106.1 | 317981 | 17-scf00428 | 17 |
| AX-158268952 | 22 | 7.946 | KV453106.1 | 321192 | 17-scf00428 | 17 |
| AX-158268953 | 22 | 7.946 | KV453106.1 | 323087 | 17-scf00428 | 17 |
| AX-158268954 | 22 | 7.946 | KV453106.1 | 323694 | 17-scf00428 | 17 |
| AX-158268955 | 22 | 7.946 | KV453106.1 | 323990 | 17-scf00428 | 17 |
| AX-158268957 | 22 | 7.946 | KV453106.1 | 325373 | 17-scf00428 | 17 |
| AX-158268974 | 22 | 7.946 | KV453106.1 | 342725 | 17-scf00428 | 17 |
| AX-158268988 | 22 | 7.946 | KV453106.1 | 356599 | 17-scf00428 | 17 |
| AX-158268989 | 22 | 7.946 | KV453106.1 | 357112 | 17-scf00428 | 17 |
| AX-158269006 | 22 | 7.946 | KV453106.1 | 378567 | 17-scf00428 | 17 |
| AX-158269022 | 22 | 7.946 | KV453106.1 | 400717 | 17-scf00428 | 17 |
| AX-158269024 | 22 | 7.946 | KV453106.1 | 402808 | 17-scf00428 | 17 |
| AX-158269025 | 22 | 7.946 | KV453106.1 | 403664 | 17-scf00428 | 17 |
| AX-158268936 | 22 | 8.011 | KV453106.1 | 304813 | 17-scf00428 | 17 |
| AX-158268950 | 22 | 8.011 | KV453106.1 | 319547 | 17-scf00428 | 17 |
| AX-158268769 | 22 | 8.071 | KV453105.1 | 405344 | 17-scf00427 | 17 |
| AX-158268823 | 22 | 8.071 | KV453106.1 | 40803  | 17-scf00428 | 17 |
| AX-158268858 | 22 | 8.071 | KV453106.1 | 97902  | 17-scf00428 | 17 |
| AX-158268956 | 22 | 8.071 | KV453106.1 | 324268 | 17-scf00428 | 17 |
| AX-158268958 | 22 | 8.165 | KV453106.1 | 325967 | 17-scf00428 | 17 |
| AX-158268960 | 22 | 8.165 | KV453106.1 | 327603 | 17-scf00428 | 17 |
| AX-158268961 | 22 | 8.165 | KV453106.1 | 328219 | 17-scf00428 | 17 |
| AX-158268766 | 22 | 8.383 | KV453105.1 | 402759 | 17-scf00427 | 17 |
| AX-158268906 | 22 | 8.383 | KV453106.1 | 263620 | 17-scf00428 | 17 |
| AX-158268963 | 22 | 8.383 | KV453106.1 | 331021 | 17-scf00428 | 17 |
| AX-158268966 | 22 | 8.383 | KV453106.1 | 334400 | 17-scf00428 | 17 |
| AX-158268967 | 22 | 8.383 | KV453106.1 | 334760 | 17-scf00428 | 17 |
| AX-158268968 | 22 | 8.383 | KV453106.1 | 335351 | 17-scf00428 | 17 |
| AX-158268969 | 22 | 8.383 | KV453106.1 | 336741 | 17-scf00428 | 17 |
| AX-158268973 | 22 | 8.383 | KV453106.1 | 341176 | 17-scf00428 | 17 |
| AX-158268976 | 22 | 8.383 | KV453106.1 | 343870 | 17-scf00428 | 17 |
| AX-158268979 | 22 | 8.383 | KV453106.1 | 347260 | 17-scf00428 | 17 |



|              |    |       |            |        |             |    |
|--------------|----|-------|------------|--------|-------------|----|
| AX-158268983 | 22 | 8.383 | KV453106.1 | 350874 | 17-scf00428 | 17 |
| AX-158268986 | 22 | 8.383 | KV453106.1 | 355128 | 17-scf00428 | 17 |
| AX-158268987 | 22 | 8.383 | KV453106.1 | 356086 | 17-scf00428 | 17 |
| AX-158268991 | 22 | 8.383 | KV453106.1 | 359872 | 17-scf00428 | 17 |
| AX-158268992 | 22 | 8.383 | KV453106.1 | 360236 | 17-scf00428 | 17 |
| AX-158268994 | 22 | 8.383 | KV453106.1 | 364832 | 17-scf00428 | 17 |
| AX-158268996 | 22 | 8.383 | KV453106.1 | 366190 | 17-scf00428 | 17 |
| AX-158268997 | 22 | 8.383 | KV453106.1 | 367093 | 17-scf00428 | 17 |
| AX-158269004 | 22 | 8.383 | KV453106.1 | 377386 | 17-scf00428 | 17 |
| AX-158269005 | 22 | 8.383 | KV453106.1 | 377802 | 17-scf00428 | 17 |
| AX-158269007 | 22 | 8.383 | KV453106.1 | 380262 | 17-scf00428 | 17 |
| AX-158269008 | 22 | 8.383 | KV453106.1 | 381117 | 17-scf00428 | 17 |
| AX-158269010 | 22 | 8.383 | KV453106.1 | 382709 | 17-scf00428 | 17 |
| AX-158269015 | 22 | 8.383 | KV453106.1 | 391955 | 17-scf00428 | 17 |
| AX-158269016 | 22 | 8.383 | KV453106.1 | 392434 | 17-scf00428 | 17 |
| AX-158269017 | 22 | 8.383 | KV453106.1 | 393534 | 17-scf00428 | 17 |
| AX-158269019 | 22 | 8.383 | KV453106.1 | 394970 | 17-scf00428 | 17 |
| AX-157689935 | 22 | 8.383 |            | 106    | scf14060    | UN |
| AX-158269018 | 22 | 8.418 | KV453106.1 | 393872 | 17-scf00428 | 17 |
| AX-158269020 | 22 | 8.492 | KV453106.1 | 397440 | 17-scf00428 | 17 |
| AX-157716624 | 22 | 8.492 | KV453106.1 | 399071 | 17-scf00428 | 17 |
| AX-158269023 | 22 | 8.492 | KV453106.1 | 401717 | 17-scf00428 | 17 |
| AX-158269026 | 22 | 8.492 | KV453106.1 | 404706 | 17-scf00428 | 17 |
| AX-158269027 | 22 | 8.492 | KV453106.1 | 405804 | 17-scf00428 | 17 |
| AX-157742306 | 22 | 8.492 | KV453106.1 | 408382 | 17-scf00428 | 17 |
| AX-158269032 | 22 | 8.492 | KV453106.1 | 412609 | 17-scf00428 | 17 |
| AX-157727190 | 22 | 8.782 | KV453106.1 | 415185 | 17-scf00428 | 17 |
| AX-158269034 | 22 | 8.782 | KV453106.1 | 417500 | 17-scf00428 | 17 |
| AX-157696547 | 22 | 8.853 | KV453106.1 | 423347 | 17-scf00428 | 17 |
| AX-158268982 | 22 | 8.929 | KV453106.1 | 350203 | 17-scf00428 | 17 |
| AX-158269035 | 22 | 8.929 | KV453106.1 | 419867 | 17-scf00428 | 17 |
| AX-158269038 | 22 | 8.929 | KV453106.1 | 423460 | 17-scf00428 | 17 |
| AX-158269040 | 22 | 8.929 | KV453106.1 | 426105 | 17-scf00428 | 17 |
| AX-158269043 | 22 | 8.929 | KV453106.1 | 430462 | 17-scf00428 | 17 |
| AX-158269046 | 22 | 8.929 | KV453106.1 | 433839 | 17-scf00428 | 17 |
| AX-157757092 | 22 | 8.93  | KV453106.1 | 435491 | 17-scf00428 | 17 |
| AX-158269049 | 22 | 8.93  | KV453106.1 | 438831 | 17-scf00428 | 17 |
| AX-158269050 | 22 | 8.93  | KV453106.1 | 439214 | 17-scf00428 | 17 |
| AX-158269051 | 22 | 8.93  | KV453106.1 | 439600 | 17-scf00428 | 17 |
| AX-157719398 | 22 | 8.93  | KV453106.1 | 446448 | 17-scf00428 | 17 |
| AX-158269057 | 22 | 9.475 | KV453106.1 | 450518 | 17-scf00428 | 17 |
| AX-158269058 | 22 | 9.475 | KV453106.1 | 451173 | 17-scf00428 | 17 |
| AX-158269059 | 22 | 9.518 | KV453106.1 | 452228 | 17-scf00428 | 17 |
| AX-157757275 | 22 | 9.554 | KV453106.1 | 452592 | 17-scf00428 | 17 |
| AX-158269056 | 22 | 9.584 | KV453106.1 | 446782 | 17-scf00428 | 17 |
| AX-158269063 | 22 | 9.584 | KV453106.1 | 456663 | 17-scf00428 | 17 |
| AX-158269064 | 22 | 9.584 | KV453106.1 | 457615 | 17-scf00428 | 17 |
| AX-158269065 | 22 | 9.584 | KV453106.1 | 458286 | 17-scf00428 | 17 |
| AX-158269066 | 22 | 9.584 | KV453106.1 | 458609 | 17-scf00428 | 17 |
| AX-158269069 | 22 | 9.584 | KV453106.1 | 460586 | 17-scf00428 | 17 |
| AX-158269071 | 22 | 9.584 | KV453106.1 | 462619 | 17-scf00428 | 17 |

|              |    |        |             |        |                 |    |
|--------------|----|--------|-------------|--------|-----------------|----|
| AX-158269072 | 22 | 9.584  | KV453106.1  | 464123 | 17-scf00428     | 17 |
| AX-158269073 | 22 | 9.584  | KV453106.1  | 468422 | 17-scf00428     | 17 |
| AX-158269074 | 22 | 9.584  | KV453106.1  | 469745 | 17-scf00428     | 17 |
| AX-157705871 | 22 | 9.584  | 3ML01031123 | 339    | scf06729_1      | UN |
| AX-158269075 | 22 | 9.585  | KV453106.1  | 471028 | 17-scf00428     | 17 |
| AX-158269077 | 22 | 9.585  | KV453106.1  | 472308 | 17-scf00428     | 17 |
| AX-158269083 | 22 | 9.585  | KV453106.1  | 475202 | 17-scf00428     | 17 |
| AX-158269092 | 22 | 9.585  | KV453106.1  | 483769 | 17-scf00428     | 17 |
| AX-158269061 | 22 | 9.803  | KV453106.1  | 453363 | 17-scf00428     | 17 |
| AX-157709827 | 22 | 9.803  | KV453106.1  | 455344 | 17-scf00428     | 17 |
| AX-158269080 | 22 | 9.803  | KV453106.1  | 473586 | 17-scf00428     | 17 |
| AX-158269084 | 22 | 9.803  | KV453106.1  | 475925 | 17-scf00428     | 17 |
| AX-158269086 | 22 | 9.803  | KV453106.1  | 480501 | 17-scf00428     | 17 |
| AX-158269087 | 22 | 9.803  | KV453106.1  | 481068 | 17-scf00428     | 17 |
| AX-158269088 | 22 | 9.803  | KV453106.1  | 481387 | 17-scf00428     | 17 |
| AX-158269093 | 22 | 9.803  | KV453106.1  | 484006 | 17-scf00428     | 17 |
| AX-158269096 | 22 | 9.803  | KV453106.1  | 488715 | 17-scf00428     | 17 |
| AX-158269124 | 22 | 9.803  | KV453106.1  | 520573 | 17-scf00428     | 17 |
| AX-158269167 | 22 | 9.803  | KV453106.1  | 564918 | 17-scf00428     | 17 |
| AX-158269053 | 22 | 10.021 | KV453106.1  | 443795 | 17-scf00428     | 17 |
| AX-158269079 | 22 | 10.021 | KV453106.1  | 473078 | 17-scf00428     | 17 |
| AX-158269100 | 22 | 10.021 | KV453106.1  | 492940 | 17-scf00428     | 17 |
| AX-158269104 | 22 | 10.021 | KV453106.1  | 495857 | 17-scf00428     | 17 |
| AX-158269105 | 22 | 10.021 | KV453106.1  | 496613 | 17-scf00428     | 17 |
| AX-158269106 | 22 | 10.021 | KV453106.1  | 499300 | 17-scf00428     | 17 |
| AX-158269107 | 22 | 10.021 | KV453106.1  | 499867 | 17-scf00428     | 17 |
| AX-158269116 | 22 | 10.021 | KV453106.1  | 510743 | 17-scf00428     | 17 |
| AX-157723414 | 22 | 10.021 | KV453106.1  | 516236 | 17-scf00428     | 17 |
| AX-158269126 | 22 | 10.021 | KV453106.1  | 522036 | 17-scf00428     | 17 |
| AX-158269151 | 22 | 10.021 | KV453106.1  | 548896 | 17-scf00428     | 17 |
| AX-158269036 | 22 | 10.062 | KV453106.1  | 420542 | 17-scf00428     | 17 |
| AX-158269120 | 22 | 10.062 | KV453106.1  | 516734 | 17-scf00428     | 17 |
| AX-158269098 | 22 | 10.13  | KV453106.1  | 491422 | 17-scf00428     | 17 |
| AX-158269101 | 22 | 10.13  | KV453106.1  | 493957 | 17-scf00428     | 17 |
| AX-158269102 | 22 | 10.13  | KV453106.1  | 494350 | 17-scf00428     | 17 |
| AX-158269121 | 22 | 10.13  | KV453106.1  | 517096 | 17-scf00428     | 17 |
| AX-158269122 | 22 | 10.13  | KV453106.1  | 519211 | 17-scf00428     | 17 |
| AX-158269138 | 22 | 10.13  | KV453106.1  | 532262 | 17-scf00428     | 17 |
| AX-158269123 | 22 | 10.15  | KV453106.1  | 519701 | 17-scf00428     | 17 |
| AX-158269127 | 22 | 10.167 | KV453106.1  | 522773 | 17-scf00428     | 17 |
| AX-158269128 | 22 | 10.185 | KV453106.1  | 523569 | 17-scf00428     | 17 |
| AX-158269129 | 22 | 10.204 | KV453106.1  | 524621 | 17-scf00428     | 17 |
| AX-158269132 | 22 | 10.223 | KV453106.1  | 528298 | 17-scf00428     | 17 |
| AX-158269133 | 22 | 10.24  | KV453106.1  | 529016 | 17-scf00428     | 17 |
| AX-158269135 | 22 | 10.24  | KV453106.1  | 530265 | 17-scf00428     | 17 |
| AX-158269108 | 22 | 10.531 | KV453106.1  | 500266 | 17-scf00428     | 17 |
| AX-158269141 | 22 | 10.531 | KV453106.1  | 536350 | 17-scf00428     | 17 |
| AX-157843677 | 22 | 10.531 | KV453106.1  | 538969 | 17-scf00428     | 17 |
| AX-158269143 | 22 | 10.531 | KV453106.1  | 539844 | 17-scf00428     | 17 |
| AX-157702212 | 22 | 10.531 | DX090580.1  | 436    | -HORI212 lctalk | UN |
| AX-158269145 | 22 | 10.676 | KV453106.1  | 541727 | 17-scf00428     | 17 |

|              |    |        |            |        |             |    |
|--------------|----|--------|------------|--------|-------------|----|
| AX-158269146 | 22 | 10.676 | KV453106.1 | 542148 | 17-scf00428 | 17 |
| AX-158269148 | 22 | 10.676 | KV453106.1 | 543816 | 17-scf00428 | 17 |
| AX-158269149 | 22 | 10.676 | KV453106.1 | 544397 | 17-scf00428 | 17 |
| AX-157727328 | 22 | 10.716 | KV453106.1 | 545964 | 17-scf00428 | 17 |
| AX-158269152 | 22 | 10.786 | KV453106.1 | 550814 | 17-scf00428 | 17 |
| AX-158269153 | 22 | 10.786 | KV453106.1 | 551281 | 17-scf00428 | 17 |
| AX-157722460 | 22 | 10.786 | KV453106.1 | 551843 | 17-scf00428 | 17 |
| AX-157843678 | 22 | 10.786 | KV453106.1 | 552224 | 17-scf00428 | 17 |
| AX-157738807 | 22 | 10.786 | KV453106.1 | 553577 | 17-scf00428 | 17 |
| AX-158269155 | 22 | 10.786 | KV453106.1 | 555082 | 17-scf00428 | 17 |
| AX-158269157 | 22 | 10.786 | KV453106.1 | 557029 | 17-scf00428 | 17 |
| AX-157843680 | 22 | 10.786 | KV453106.1 | 559357 | 17-scf00428 | 17 |
| AX-157860093 | 22 | 10.786 | KV453106.1 | 563241 | 17-scf00428 | 17 |
| AX-158269166 | 22 | 10.786 | KV453106.1 | 564538 | 17-scf00428 | 17 |
| AX-158269170 | 22 | 10.786 | KV453106.1 | 572449 | 17-scf00428 | 17 |
| AX-158416526 | 22 | 11.004 | KV453106.1 | 567168 | 17-scf00428 | 17 |
| AX-157843682 | 22 | 11.004 | KV453106.1 | 571247 | 17-scf00428 | 17 |
| AX-158269169 | 22 | 11.004 | KV453106.1 | 571833 | 17-scf00428 | 17 |
| AX-158269171 | 22 | 11.004 | KV453106.1 | 574340 | 17-scf00428 | 17 |
| AX-158269173 | 22 | 11.035 | KV453106.1 | 578973 | 17-scf00428 | 17 |
| AX-158269174 | 22 | 11.084 | KV453106.1 | 579682 | 17-scf00428 | 17 |
| AX-158269175 | 22 | 11.113 | KV453106.1 | 580037 | 17-scf00428 | 17 |
| AX-157755582 | 22 | 11.113 | KV453106.1 | 581320 | 17-scf00428 | 17 |
| AX-158269178 | 22 | 11.113 | KV453106.1 | 583766 | 17-scf00428 | 17 |
| AX-158269179 | 22 | 11.176 | KV453106.1 | 584351 | 17-scf00428 | 17 |
| AX-158269180 | 22 | 11.222 | KV453106.1 | 584966 | 17-scf00428 | 17 |
| AX-157774743 | 22 | 11.222 | KV453106.1 | 585374 | 17-scf00428 | 17 |
| AX-158269181 | 22 | 11.222 | KV453106.1 | 586220 | 17-scf00428 | 17 |
| AX-158269182 | 22 | 11.271 | KV453106.1 | 587318 | 17-scf00428 | 17 |
| AX-158269184 | 22 | 11.332 | KV453106.1 | 589637 | 17-scf00428 | 17 |
| AX-158269192 | 22 | 11.332 | KV453106.1 | 595687 | 17-scf00428 | 17 |
| AX-158269186 | 22 | 11.348 | KV453106.1 | 590813 | 17-scf00428 | 17 |
| AX-157880540 | 22 | 11.383 | KV453106.1 | 593628 | 17-scf00428 | 17 |
| AX-157758412 | 22 | 11.402 | KV453106.1 | 603560 | 17-scf00428 | 17 |
| AX-158269197 | 22 | 11.402 | KV453106.1 | 604092 | 17-scf00428 | 17 |
| AX-158269199 | 22 | 11.413 | KV453106.1 | 606506 | 17-scf00428 | 17 |
| AX-158269200 | 22 | 11.427 | KV453106.1 | 606834 | 17-scf00428 | 17 |
| AX-157745698 | 22 | 11.442 | KV453106.1 | 597425 | 17-scf00428 | 17 |
| AX-158269196 | 22 | 11.442 | KV453106.1 | 603798 | 17-scf00428 | 17 |
| AX-158269201 | 22 | 11.442 | KV453106.1 | 607878 | 17-scf00428 | 17 |
| AX-158381126 | 22 | 11.442 | KV453106.1 | 610256 | 17-scf00428 | 17 |
| AX-158269203 | 22 | 11.442 | KV453106.1 | 611330 | 17-scf00428 | 17 |
| AX-158269205 | 22 | 11.442 | KV453106.1 | 613150 | 17-scf00428 | 17 |
| AX-157843684 | 22 | 11.442 | KV453106.1 | 616247 | 17-scf00428 | 17 |
| AX-158269207 | 22 | 11.442 | KV453106.1 | 617226 | 17-scf00428 | 17 |
| AX-158269189 | 22 | 11.769 | KV453106.1 | 592790 | 17-scf00428 | 17 |
| AX-158269212 | 22 | 11.769 | KV453106.1 | 622417 | 17-scf00428 | 17 |
| AX-158269213 | 22 | 11.769 | KV453106.1 | 622805 | 17-scf00428 | 17 |
| AX-158269214 | 22 | 11.769 | KV453106.1 | 623778 | 17-scf00428 | 17 |
| AX-158269217 | 22 | 11.769 | KV453106.1 | 625920 | 17-scf00428 | 17 |
| AX-158269223 | 22 | 11.878 | KV453106.1 | 629555 | 17-scf00428 | 17 |

|              |    |        |            |        |             |    |
|--------------|----|--------|------------|--------|-------------|----|
| AX-158269225 | 22 | 11.988 | KV453106.1 | 630586 | 17-scf00428 | 17 |
| AX-157742542 | 22 | 11.988 | KV453106.1 | 631279 | 17-scf00428 | 17 |
| AX-157771906 | 22 | 11.988 | KV453106.1 | 636576 | 17-scf00428 | 17 |
| AX-158269211 | 22 | 12.114 | KV453106.1 | 620935 | 17-scf00428 | 17 |
| AX-158269227 | 22 | 12.114 | KV453106.1 | 631334 | 17-scf00428 | 17 |
| AX-158269236 | 22 | 12.114 | KV453106.1 | 642164 | 17-scf00428 | 17 |
| AX-158269237 | 22 | 12.114 | KV453106.1 | 642494 | 17-scf00428 | 17 |
| AX-157712967 | 22 | 12.206 | KV453106.1 | 619058 | 17-scf00428 | 17 |
| AX-158269221 | 22 | 12.206 | KV453106.1 | 628766 | 17-scf00428 | 17 |
| AX-158269222 | 22 | 12.206 | KV453106.1 | 629090 | 17-scf00428 | 17 |
| AX-158269239 | 22 | 12.206 | KV453106.1 | 643000 | 17-scf00428 | 17 |
| AX-158269242 | 22 | 12.206 | KV453106.1 | 648392 | 17-scf00428 | 17 |
| AX-158269243 | 22 | 12.206 | KV453106.1 | 649333 | 17-scf00428 | 17 |
| AX-157843686 | 22 | 12.206 | KV453106.1 | 656515 | 17-scf00428 | 17 |
| AX-158269246 | 22 | 12.206 | KV453106.1 | 656741 | 17-scf00428 | 17 |
| AX-157752019 | 22 | 12.206 | KV453106.1 | 660076 | 17-scf00428 | 17 |
| AX-157843690 | 22 | 12.319 | KV453106.1 | 673376 | 17-scf00428 | 17 |
| AX-158269258 | 22 | 12.425 | KV453106.1 | 682189 | 17-scf00428 | 17 |
| AX-158269259 | 22 | 12.425 | KV453106.1 | 682572 | 17-scf00428 | 17 |
| AX-157843691 | 22 | 12.425 | KV453106.1 | 683664 | 17-scf00428 | 17 |
| AX-158269261 | 22 | 12.425 | KV453106.1 | 687266 | 17-scf00428 | 17 |
| AX-157843692 | 22 | 12.425 | KV453106.1 | 687384 | 17-scf00428 | 17 |
| AX-157860096 | 22 | 12.616 | KV453106.1 | 687907 | 17-scf00428 | 17 |
| AX-158269267 | 22 | 12.999 | KV453106.1 | 694969 | 17-scf00428 | 17 |
| AX-158269268 | 22 | 13.191 | KV453106.1 | 698071 | 17-scf00428 | 17 |
| AX-158269274 | 22 | 13.191 | KV453106.1 | 703969 | 17-scf00428 | 17 |
| AX-157707820 | 22 | 13.191 | KV453106.1 | 710800 | 17-scf00428 | 17 |
| AX-157707819 | 22 | 13.191 | KV453106.1 | 710893 | 17-scf00428 | 17 |
| AX-158269281 | 22 | 13.191 | KV453106.1 | 714467 | 17-scf00428 | 17 |
| AX-157843693 | 22 | 13.191 | KV453106.1 | 714635 | 17-scf00428 | 17 |
| AX-158269284 | 22 | 13.191 | KV453106.1 | 719021 | 17-scf00428 | 17 |
| AX-158269286 | 22 | 13.191 | KV453106.1 | 724955 | 17-scf00428 | 17 |
| AX-158269289 | 22 | 13.191 | KV453106.1 | 727596 | 17-scf00428 | 17 |
| AX-158269291 | 22 | 13.191 | KV453106.1 | 731196 | 17-scf00428 | 17 |
| AX-158416529 | 22 | 13.191 | KV453106.1 | 747313 | 17-scf00428 | 17 |
| AX-158269334 | 22 | 13.191 | KV453106.1 | 779180 | 17-scf00428 | 17 |
| AX-158269337 | 22 | 13.191 | KV453106.1 | 782755 | 17-scf00428 | 17 |
| AX-158269297 | 22 | 13.225 | KV453106.1 | 736788 | 17-scf00428 | 17 |
| AX-158269276 | 22 | 13.283 | KV453106.1 | 706526 | 17-scf00428 | 17 |
| AX-158269300 | 22 | 13.283 | KV453106.1 | 738695 | 17-scf00428 | 17 |
| AX-158416530 | 22 | 13.283 | KV453106.1 | 747555 | 17-scf00428 | 17 |
| AX-158269301 | 22 | 13.287 | KV453106.1 | 739754 | 17-scf00428 | 17 |
| AX-158269302 | 22 | 13.29  | KV453106.1 | 740992 | 17-scf00428 | 17 |
| AX-158269307 | 22 | 13.29  | KV453106.1 | 744626 | 17-scf00428 | 17 |
| AX-157773327 | 22 | 13.29  | KV453106.1 | 779925 | 17-scf00428 | 17 |
| AX-158269303 | 22 | 13.294 | KV453106.1 | 742364 | 17-scf00428 | 17 |
| AX-158269298 | 22 | 13.296 | KV453106.1 | 737442 | 17-scf00428 | 17 |
| AX-158269306 | 22 | 13.296 | KV453106.1 | 744032 | 17-scf00428 | 17 |
| AX-158269279 | 22 | 13.3   | KV453106.1 | 711757 | 17-scf00428 | 17 |
| AX-158269308 | 22 | 13.3   | KV453106.1 | 745483 | 17-scf00428 | 17 |
| AX-158269309 | 22 | 13.3   | KV453106.1 | 746007 | 17-scf00428 | 17 |

|              |    |        |            |        |             |    |
|--------------|----|--------|------------|--------|-------------|----|
| AX-158269312 | 22 | 13.3   | KV453106.1 | 749106 | 17-scf00428 | 17 |
| AX-158269313 | 22 | 13.3   | KV453106.1 | 749858 | 17-scf00428 | 17 |
| AX-158269315 | 22 | 13.3   | KV453106.1 | 754215 | 17-scf00428 | 17 |
| AX-158269316 | 22 | 13.3   | KV453106.1 | 757533 | 17-scf00428 | 17 |
| AX-158269317 | 22 | 13.3   | KV453106.1 | 758288 | 17-scf00428 | 17 |
| AX-158269318 | 22 | 13.3   | KV453106.1 | 759512 | 17-scf00428 | 17 |
| AX-158269320 | 22 | 13.3   | KV453106.1 | 763527 | 17-scf00428 | 17 |
| AX-157710201 | 22 | 13.398 | KV453106.1 | 768818 | 17-scf00428 | 17 |
| AX-158269324 | 22 | 13.398 | KV453106.1 | 769577 | 17-scf00428 | 17 |
| AX-158269327 | 22 | 13.516 | KV453106.1 | 771456 | 17-scf00428 | 17 |
| AX-158269328 | 22 | 13.516 | KV453106.1 | 772693 | 17-scf00428 | 17 |
| AX-158269330 | 22 | 13.516 | KV453106.1 | 774162 | 17-scf00428 | 17 |
| AX-158269345 | 22 | 13.516 | KV453106.1 | 791169 | 17-scf00428 | 17 |
| AX-158269336 | 22 | 13.732 | KV453106.1 | 781378 | 17-scf00428 | 17 |
| AX-157771852 | 22 | 13.736 | KV453106.1 | 784499 | 17-scf00428 | 17 |
| AX-158269343 | 22 | 13.741 | KV453106.1 | 789797 | 17-scf00428 | 17 |
| AX-158269344 | 22 | 13.742 | KV453106.1 | 790331 | 17-scf00428 | 17 |
| AX-158269347 | 22 | 13.892 | KV453106.1 | 793037 | 17-scf00428 | 17 |
| AX-158269348 | 22 | 14.041 | KV453106.1 | 793930 | 17-scf00428 | 17 |
| AX-158269356 | 22 | 14.058 | KV453106.1 | 800546 | 17-scf00428 | 17 |
| AX-158269357 | 22 | 14.058 | KV453106.1 | 801276 | 17-scf00428 | 17 |
| AX-158269397 | 22 | 14.058 | KV453106.1 | 850458 | 17-scf00428 | 17 |
| AX-158269358 | 22 | 14.097 | KV453106.1 | 803707 | 17-scf00428 | 17 |
| AX-158269359 | 22 | 14.097 | KV453106.1 | 804434 | 17-scf00428 | 17 |
| AX-158269360 | 22 | 14.097 | KV453106.1 | 806032 | 17-scf00428 | 17 |
| AX-157738479 | 22 | 14.098 | KV453106.1 | 805233 | 17-scf00428 | 17 |
| AX-158269366 | 22 | 14.098 | KV453106.1 | 812685 | 17-scf00428 | 17 |
| AX-157710643 | 22 | 14.232 | KV453106.1 | 844811 | 17-scf00428 | 17 |
| AX-158269365 | 22 | 14.393 | KV453106.1 | 811466 | 17-scf00428 | 17 |
| AX-158269367 | 22 | 14.393 | KV453106.1 | 813306 | 17-scf00428 | 17 |
| AX-158269368 | 22 | 14.393 | KV453106.1 | 815390 | 17-scf00428 | 17 |
| AX-158269369 | 22 | 14.393 | KV453106.1 | 816989 | 17-scf00428 | 17 |
| AX-158269370 | 22 | 14.394 | KV453106.1 | 817796 | 17-scf00428 | 17 |
| AX-158269388 | 22 | 14.72  | KV453106.1 | 838969 | 17-scf00428 | 17 |
| AX-158269354 | 22 | 14.721 | KV453106.1 | 798703 | 17-scf00428 | 17 |
| AX-158269390 | 22 | 14.721 | KV453106.1 | 843403 | 17-scf00428 | 17 |
| AX-158269391 | 22 | 14.721 | KV453106.1 | 843846 | 17-scf00428 | 17 |
| AX-157843694 | 22 | 14.721 | KV453106.1 | 844575 | 17-scf00428 | 17 |
| AX-158269392 | 22 | 14.721 | KV453106.1 | 844646 | 17-scf00428 | 17 |
| AX-158269393 | 22 | 14.721 | KV453106.1 | 845912 | 17-scf00428 | 17 |
| AX-158269394 | 22 | 14.721 | KV453106.1 | 846602 | 17-scf00428 | 17 |
| AX-158269396 | 22 | 14.983 | KV453106.1 | 847931 | 17-scf00428 | 17 |
| AX-158269399 | 22 | 15.207 | KV453106.1 | 851353 | 17-scf00428 | 17 |
| AX-157718980 | 22 | 15.207 | KV453106.1 | 853001 | 17-scf00428 | 17 |
| AX-158269401 | 22 | 15.23  | KV453106.1 | 853384 | 17-scf00428 | 17 |
| AX-157738366 | 22 | 15.591 | KV453106.1 | 854543 | 17-scf00428 | 17 |
| AX-158269404 | 22 | 15.594 | KV453106.1 | 857549 | 17-scf00428 | 17 |
| AX-157719320 | 22 | 15.596 | KV453106.1 | 860975 | 17-scf00428 | 17 |
| AX-157771392 | 22 | 15.596 | KV453106.1 | 862435 | 17-scf00428 | 17 |
| AX-158269410 | 22 | 15.596 | KV453106.1 | 863624 | 17-scf00428 | 17 |
| AX-158269411 | 22 | 15.596 | KV453106.1 | 863755 | 17-scf00428 | 17 |

|              |    |        |            |         |             |    |
|--------------|----|--------|------------|---------|-------------|----|
| AX-157726765 | 22 | 15.596 | KV453106.1 | 864994  | 17-scf00428 | 17 |
| AX-158269412 | 22 | 15.596 | KV453106.1 | 865504  | 17-scf00428 | 17 |
| AX-158269414 | 22 | 15.596 | KV453106.1 | 867042  | 17-scf00428 | 17 |
| AX-158269416 | 22 | 15.596 | KV453106.1 | 868340  | 17-scf00428 | 17 |
| AX-158269415 | 22 | 15.815 | KV453106.1 | 867770  | 17-scf00428 | 17 |
| AX-158269418 | 22 | 15.815 | KV453106.1 | 870514  | 17-scf00428 | 17 |
| AX-158269419 | 22 | 15.815 | KV453106.1 | 871861  | 17-scf00428 | 17 |
| AX-158269421 | 22 | 15.815 | KV453106.1 | 873163  | 17-scf00428 | 17 |
| AX-158269423 | 22 | 15.815 | KV453106.1 | 874094  | 17-scf00428 | 17 |
| AX-158269424 | 22 | 15.815 | KV453106.1 | 874892  | 17-scf00428 | 17 |
| AX-158269425 | 22 | 15.815 | KV453106.1 | 876470  | 17-scf00428 | 17 |
| AX-158269428 | 22 | 15.815 | KV453106.1 | 880492  | 17-scf00428 | 17 |
| AX-158269430 | 22 | 15.815 | KV453106.1 | 882224  | 17-scf00428 | 17 |
| AX-158416536 | 22 | 15.815 | KV453106.1 | 885212  | 17-scf00428 | 17 |
| AX-158269433 | 22 | 15.815 | KV453106.1 | 886496  | 17-scf00428 | 17 |
| AX-157720088 | 22 | 15.815 | KV453106.1 | 890056  | 17-scf00428 | 17 |
| AX-157843695 | 22 | 15.815 | KV453106.1 | 891242  | 17-scf00428 | 17 |
| AX-157887853 | 22 | 15.815 | KV453106.1 | 895534  | 17-scf00428 | 17 |
| AX-158269445 | 22 | 15.815 | KV453106.1 | 910071  | 17-scf00428 | 17 |
| AX-158269436 | 22 | 16.033 | KV453106.1 | 898731  | 17-scf00428 | 17 |
| AX-158269437 | 22 | 16.033 | KV453106.1 | 898938  | 17-scf00428 | 17 |
| AX-158269438 | 22 | 16.142 | KV453106.1 | 900302  | 17-scf00428 | 17 |
| AX-158411307 | 22 | 16.142 | KV453106.1 | 904108  | 17-scf00428 | 17 |
| AX-157843697 | 22 | 16.142 | KV453106.1 | 904971  | 17-scf00428 | 17 |
| AX-158269440 | 22 | 16.149 | KV453106.1 | 905668  | 17-scf00428 | 17 |
| AX-158269442 | 22 | 16.221 | KV453106.1 | 906769  | 17-scf00428 | 17 |
| AX-158269449 | 22 | 16.288 | KV453106.1 | 913313  | 17-scf00428 | 17 |
| AX-158269454 | 22 | 16.288 | KV453106.1 | 918624  | 17-scf00428 | 17 |
| AX-158269455 | 22 | 16.288 | KV453106.1 | 921106  | 17-scf00428 | 17 |
| AX-158269456 | 22 | 16.288 | KV453106.1 | 922051  | 17-scf00428 | 17 |
| AX-158269451 | 22 | 16.579 | KV453106.1 | 914390  | 17-scf00428 | 17 |
| AX-158269457 | 22 | 16.579 | KV453106.1 | 923722  | 17-scf00428 | 17 |
| AX-158269458 | 22 | 16.579 | KV453106.1 | 924298  | 17-scf00428 | 17 |
| AX-157739533 | 22 | 16.579 | KV453106.1 | 934626  | 17-scf00428 | 17 |
| AX-157843698 | 22 | 16.579 | KV453106.1 | 934664  | 17-scf00428 | 17 |
| AX-158269466 | 22 | 16.579 | KV453106.1 | 940971  | 17-scf00428 | 17 |
| AX-158269467 | 22 | 16.579 | KV453106.1 | 943473  | 17-scf00428 | 17 |
| AX-158269471 | 22 | 16.579 | KV453106.1 | 946818  | 17-scf00428 | 17 |
| AX-157867487 | 22 | 16.688 | KV453106.1 | 940341  | 17-scf00428 | 17 |
| AX-157843701 | 22 | 16.688 | KV453106.1 | 941716  | 17-scf00428 | 17 |
| AX-157723558 | 22 | 16.732 | KV453106.1 | 932458  | 17-scf00428 | 17 |
| AX-158269468 | 22 | 16.732 | KV453106.1 | 944605  | 17-scf00428 | 17 |
| AX-158269469 | 22 | 16.798 | KV453106.1 | 944913  | 17-scf00428 | 17 |
| AX-158269470 | 22 | 16.846 | KV453106.1 | 946565  | 17-scf00428 | 17 |
| AX-158269476 | 22 | 16.846 | KV453106.1 | 968241  | 17-scf00428 | 17 |
| AX-158269481 | 22 | 16.846 | KV453106.1 | 980346  | 17-scf00428 | 17 |
| AX-158269525 | 22 | 16.846 | KV453106.1 | 1032611 | 17-scf00428 | 17 |
| AX-157751544 | 22 | 16.907 | KV453106.1 | 951165  | 17-scf00428 | 17 |
| AX-157843705 | 22 | 16.907 | KV453106.1 | 957390  | 17-scf00428 | 17 |
| AX-158269472 | 22 | 16.907 | KV453106.1 | 960821  | 17-scf00428 | 17 |
| AX-157721278 | 22 | 16.907 | KV453106.1 | 964546  | 17-scf00428 | 17 |

|              |    |        |            |         |             |    |
|--------------|----|--------|------------|---------|-------------|----|
| AX-158269475 | 22 | 16.907 | KV453106.1 | 966398  | 17-scf00428 | 17 |
| AX-158269477 | 22 | 16.907 | KV453106.1 | 970662  | 17-scf00428 | 17 |
| AX-157843706 | 22 | 16.907 | KV453106.1 | 971779  | 17-scf00428 | 17 |
| AX-158269478 | 22 | 16.907 | KV453106.1 | 971992  | 17-scf00428 | 17 |
| AX-157750828 | 22 | 16.907 | KV453106.1 | 972835  | 17-scf00428 | 17 |
| AX-158269463 | 22 | 16.927 | KV453106.1 | 930570  | 17-scf00428 | 17 |
| AX-157750317 | 22 | 16.927 | KV453106.1 | 973847  | 17-scf00428 | 17 |
| AX-158269479 | 22 | 16.982 | KV453106.1 | 972331  | 17-scf00428 | 17 |
| AX-157747287 | 22 | 16.982 | KV453106.1 | 974749  | 17-scf00428 | 17 |
| AX-157713559 | 22 | 17.016 | KV453106.1 | 976620  | 17-scf00428 | 17 |
| AX-157843707 | 22 | 17.016 | KV453106.1 | 981264  | 17-scf00428 | 17 |
| AX-158269483 | 22 | 17.016 | KV453106.1 | 982264  | 17-scf00428 | 17 |
| AX-158269484 | 22 | 17.016 | KV453106.1 | 984222  | 17-scf00428 | 17 |
| AX-158269486 | 22 | 17.016 | KV453106.1 | 989592  | 17-scf00428 | 17 |
| AX-158269499 | 22 | 17.016 | KV453106.1 | 1010130 | 17-scf00428 | 17 |
| AX-157860099 | 22 | 17.126 | KV453106.1 | 982594  | 17-scf00428 | 17 |
| AX-158269487 | 22 | 17.126 | KV453106.1 | 991040  | 17-scf00428 | 17 |
| AX-157843711 | 22 | 17.126 | KV453106.1 | 994783  | 17-scf00428 | 17 |
| AX-157843712 | 22 | 17.126 | KV453106.1 | 998078  | 17-scf00428 | 17 |
| AX-158269495 | 22 | 17.126 | KV453106.1 | 1006971 | 17-scf00428 | 17 |
| AX-158269496 | 22 | 17.126 | KV453106.1 | 1007575 | 17-scf00428 | 17 |
| AX-158269497 | 22 | 17.126 | KV453106.1 | 1008222 | 17-scf00428 | 17 |
| AX-158269498 | 22 | 17.126 | KV453106.1 | 1008831 | 17-scf00428 | 17 |
| AX-158269501 | 22 | 17.126 | KV453106.1 | 1010918 | 17-scf00428 | 17 |
| AX-158269504 | 22 | 17.235 | KV453106.1 | 1015295 | 17-scf00428 | 17 |
| AX-158269493 | 22 | 17.344 | KV453106.1 | 1004649 | 17-scf00428 | 17 |
| AX-158269505 | 22 | 17.344 | KV453106.1 | 1016044 | 17-scf00428 | 17 |
| AX-157880542 | 22 | 17.344 | KV453106.1 | 1016464 | 17-scf00428 | 17 |
| AX-158269508 | 22 | 17.344 | KV453106.1 | 1019209 | 17-scf00428 | 17 |
| AX-158269510 | 22 | 17.344 | KV453106.1 | 1020676 | 17-scf00428 | 17 |
| AX-158269512 | 22 | 17.344 | KV453106.1 | 1022775 | 17-scf00428 | 17 |
| AX-158269513 | 22 | 17.344 | KV453106.1 | 1023919 | 17-scf00428 | 17 |
| AX-158269515 | 22 | 17.344 | KV453106.1 | 1025670 | 17-scf00428 | 17 |
| AX-158269516 | 22 | 17.344 | KV453106.1 | 1025808 | 17-scf00428 | 17 |
| AX-158269518 | 22 | 17.344 | KV453106.1 | 1027220 | 17-scf00428 | 17 |
| AX-158269519 | 22 | 17.344 | KV453106.1 | 1028241 | 17-scf00428 | 17 |
| AX-158269521 | 22 | 17.344 | KV453106.1 | 1029912 | 17-scf00428 | 17 |
| AX-158269522 | 22 | 17.344 | KV453106.1 | 1030266 | 17-scf00428 | 17 |
| AX-158269524 | 22 | 17.344 | KV453106.1 | 1031544 | 17-scf00428 | 17 |
| AX-158269526 | 22 | 17.344 | KV453106.1 | 1033662 | 17-scf00428 | 17 |
| AX-158269527 | 22 | 17.344 | KV453106.1 | 1036113 | 17-scf00428 | 17 |
| AX-158269529 | 22 | 17.344 | KV453106.1 | 1037391 | 17-scf00428 | 17 |
| AX-158269530 | 22 | 17.344 | KV453106.1 | 1037852 | 17-scf00428 | 17 |
| AX-158269539 | 22 | 17.344 | KV453106.1 | 1050398 | 17-scf00428 | 17 |
| AX-157843714 | 22 | 17.761 | KV453106.1 | 1038614 | 17-scf00428 | 17 |
| AX-158269531 | 22 | 17.764 | KV453106.1 | 1041925 | 17-scf00428 | 17 |
| AX-158269532 | 22 | 17.766 | KV453106.1 | 1042301 | 17-scf00428 | 17 |
| AX-158269535 | 22 | 17.768 | KV453106.1 | 1045333 | 17-scf00428 | 17 |
| AX-158269536 | 22 | 17.77  | KV453106.1 | 1046765 | 17-scf00428 | 17 |
| AX-158269533 | 22 | 17.791 | KV453106.1 | 1043050 | 17-scf00428 | 17 |
| AX-157716098 | 22 | 17.791 | KV453106.1 | 1051072 | 17-scf00428 | 17 |

|              |    |        |            |         |             |    |
|--------------|----|--------|------------|---------|-------------|----|
| AX-158269540 | 22 | 17.791 | KV453106.1 | 1052278 | 17-scf00428 | 17 |
| AX-158269541 | 22 | 17.791 | KV453106.1 | 1055861 | 17-scf00428 | 17 |
| AX-158269542 | 22 | 17.921 | KV453106.1 | 1057798 | 17-scf00428 | 17 |
| AX-157843717 | 22 | 17.993 | KV453106.1 | 1060827 | 17-scf00428 | 17 |
| AX-158269547 | 22 | 18.005 | KV453106.1 | 1064814 | 17-scf00428 | 17 |
| AX-158269548 | 22 | 18.005 | KV453106.1 | 1065428 | 17-scf00428 | 17 |
| AX-158269551 | 22 | 18.012 | KV453106.1 | 1070645 | 17-scf00428 | 17 |
| AX-157724908 | 22 | 18.523 | KV453106.1 | 1074854 | 17-scf00428 | 17 |
| AX-158269554 | 22 | 18.523 | KV453106.1 | 1075598 | 17-scf00428 | 17 |
| AX-158394824 | 22 | 18.568 | KV453106.1 | 1076000 | 17-scf00428 | 17 |
| AX-158269556 | 22 | 18.618 | KV453106.1 | 1076822 | 17-scf00428 | 17 |
| AX-158269557 | 22 | 18.655 | KV453106.1 | 1078456 | 17-scf00428 | 17 |
| AX-158269558 | 22 | 18.655 | KV453106.1 | 1080570 | 17-scf00428 | 17 |
| AX-158269559 | 22 | 18.655 | KV453106.1 | 1085922 | 17-scf00428 | 17 |
| AX-158269560 | 22 | 18.655 | KV453106.1 | 1087572 | 17-scf00428 | 17 |
| AX-158269563 | 22 | 18.655 | KV453106.1 | 1091323 | 17-scf00428 | 17 |
| AX-158269564 | 22 | 18.655 | KV453106.1 | 1091644 | 17-scf00428 | 17 |
| AX-158416541 | 22 | 18.655 | KV453106.1 | 1093576 | 17-scf00428 | 17 |
| AX-158269566 | 22 | 18.655 | KV453106.1 | 1095409 | 17-scf00428 | 17 |
| AX-158269571 | 22 | 18.655 | KV453106.1 | 1099237 | 17-scf00428 | 17 |
| AX-158269568 | 22 | 18.873 | KV453106.1 | 1096786 | 17-scf00428 | 17 |
| AX-158269572 | 22 | 18.873 | KV453106.1 | 1099593 | 17-scf00428 | 17 |
| AX-158269573 | 22 | 18.873 | KV453106.1 | 1100329 | 17-scf00428 | 17 |
| AX-158269575 | 22 | 18.873 | KV453106.1 | 1102031 | 17-scf00428 | 17 |
| AX-158269579 | 22 | 18.873 | KV453106.1 | 1105467 | 17-scf00428 | 17 |
| AX-158269580 | 22 | 18.873 | KV453106.1 | 1106381 | 17-scf00428 | 17 |
| AX-158416540 | 22 | 19.201 | KV453106.1 | 1093325 | 17-scf00428 | 17 |
| AX-158269577 | 22 | 19.201 | KV453106.1 | 1103686 | 17-scf00428 | 17 |
| AX-158269582 | 22 | 19.201 | KV453106.1 | 1110585 | 17-scf00428 | 17 |
| AX-158269584 | 22 | 19.201 | KV453106.1 | 1111950 | 17-scf00428 | 17 |
| AX-158269585 | 22 | 19.201 | KV453106.1 | 1112355 | 17-scf00428 | 17 |
| AX-158269586 | 22 | 19.201 | KV453106.1 | 1113397 | 17-scf00428 | 17 |
| AX-158269587 | 22 | 19.201 | KV453106.1 | 1114084 | 17-scf00428 | 17 |
| AX-158269591 | 22 | 19.201 | KV453106.1 | 1117773 | 17-scf00428 | 17 |
| AX-158269593 | 22 | 19.201 | KV453106.1 | 1120092 | 17-scf00428 | 17 |
| AX-158269594 | 22 | 19.201 | KV453106.1 | 1122626 | 17-scf00428 | 17 |
| AX-158269612 | 22 | 19.201 | KV453106.1 | 1136205 | 17-scf00428 | 17 |
| AX-157843720 | 22 | 19.201 | KV453106.1 | 1138775 | 17-scf00428 | 17 |
| AX-158269622 | 22 | 19.201 | KV453106.1 | 1147768 | 17-scf00428 | 17 |
| AX-158269595 | 22 | 19.385 | KV453106.1 | 1124773 | 17-scf00428 | 17 |
| AX-157725213 | 22 | 19.738 | KV453106.1 | 1126842 | 17-scf00428 | 17 |
| AX-158269598 | 22 | 19.747 | KV453106.1 | 1128341 | 17-scf00428 | 17 |
| AX-158269599 | 22 | 19.747 | KV453106.1 | 1129019 | 17-scf00428 | 17 |
| AX-158269600 | 22 | 19.747 | KV453106.1 | 1129262 | 17-scf00428 | 17 |
| AX-157739325 | 22 | 19.747 | KV453106.1 | 1131343 | 17-scf00428 | 17 |
| AX-158269605 | 22 | 19.747 | KV453106.1 | 1131666 | 17-scf00428 | 17 |
| AX-158416542 | 22 | 19.747 | KV453106.1 | 1132874 | 17-scf00428 | 17 |
| AX-158269607 | 22 | 19.747 | KV453106.1 | 1133221 | 17-scf00428 | 17 |
| AX-158269608 | 22 | 19.747 | KV453106.1 | 1133441 | 17-scf00428 | 17 |
| AX-158269610 | 22 | 19.747 | KV453106.1 | 1134802 | 17-scf00428 | 17 |
| AX-158269611 | 22 | 19.747 | KV453106.1 | 1135314 | 17-scf00428 | 17 |



|              |    |        |            |         |             |    |
|--------------|----|--------|------------|---------|-------------|----|
| AX-158269613 | 22 | 19.747 | KV453106.1 | 1136494 | 17-scf00428 | 17 |
| AX-158269614 | 22 | 19.747 | KV453106.1 | 1137392 | 17-scf00428 | 17 |
| AX-158269601 | 22 | 19.75  | KV453106.1 | 1129313 | 17-scf00428 | 17 |
| AX-158269615 | 22 | 19.75  | KV453106.1 | 1138352 | 17-scf00428 | 17 |
| AX-158269616 | 22 | 19.75  | KV453106.1 | 1139329 | 17-scf00428 | 17 |
| AX-157867489 | 22 | 20.038 | KV453106.1 | 1140684 | 17-scf00428 | 17 |
| AX-158269618 | 22 | 20.038 | KV453106.1 | 1142307 | 17-scf00428 | 17 |
| AX-158269619 | 22 | 20.038 | KV453106.1 | 1143521 | 17-scf00428 | 17 |
| AX-158269620 | 22 | 20.038 | KV453106.1 | 1143863 | 17-scf00428 | 17 |
| AX-157724482 | 22 | 20.038 | KV453106.1 | 1149500 | 17-scf00428 | 17 |
| AX-158269624 | 22 | 20.111 | KV453106.1 | 1148925 | 17-scf00428 | 17 |
| AX-158269625 | 22 | 20.111 | KV453106.1 | 1149206 | 17-scf00428 | 17 |
| AX-158269626 | 22 | 20.184 | KV453106.1 | 1149883 | 17-scf00428 | 17 |
| AX-158269627 | 22 | 20.184 | KV453106.1 | 1151817 | 17-scf00428 | 17 |
| AX-158269630 | 22 | 20.184 | KV453106.1 | 1155529 | 17-scf00428 | 17 |
| AX-158269631 | 22 | 20.184 | KV453106.1 | 1159031 | 17-scf00428 | 17 |
| AX-158269632 | 22 | 20.184 | KV453106.1 | 1162428 | 17-scf00428 | 17 |
| AX-158269635 | 22 | 20.293 | KV453106.1 | 1165428 | 17-scf00428 | 17 |
| AX-158269636 | 22 | 20.308 | KV453106.1 | 1165657 | 17-scf00428 | 17 |
| AX-158269639 | 22 | 20.345 | KV453106.1 | 1169128 | 17-scf00428 | 17 |
| AX-158269628 | 22 | 20.394 | KV453106.1 | 1154577 | 17-scf00428 | 17 |
| AX-158269641 | 22 | 20.394 | KV453106.1 | 1171260 | 17-scf00428 | 17 |
| AX-157721536 | 22 | 20.403 | KV453106.1 | 1154281 | 17-scf00428 | 17 |
| AX-157843724 | 22 | 20.403 | KV453106.1 | 1156584 | 17-scf00428 | 17 |
| AX-157716074 | 22 | 20.403 | KV453106.1 | 1168765 | 17-scf00428 | 17 |
| AX-158269642 | 22 | 20.403 | KV453106.1 | 1171980 | 17-scf00428 | 17 |
| AX-158269644 | 22 | 20.403 | KV453106.1 | 1173609 | 17-scf00428 | 17 |
| AX-157715780 | 22 | 20.403 | KV453106.1 | 1174333 | 17-scf00428 | 17 |
| AX-158269645 | 22 | 20.403 | KV453106.1 | 1174726 | 17-scf00428 | 17 |
| AX-157867490 | 22 | 20.512 | KV453106.1 | 1175249 | 17-scf00428 | 17 |
| AX-158269647 | 22 | 20.73  | KV453106.1 | 1176766 | 17-scf00428 | 17 |
| AX-157863890 | 22 | 20.73  | KV453106.1 | 1177576 | 17-scf00428 | 17 |
| AX-157772924 | 22 | 20.73  | KV453106.1 | 1180863 | 17-scf00428 | 17 |
| AX-158381130 | 22 | 20.73  | KV453106.1 | 1180910 | 17-scf00428 | 17 |
| AX-158269649 | 22 | 20.758 | KV453106.1 | 1183192 | 17-scf00428 | 17 |
| AX-158269650 | 22 | 20.785 | KV453106.1 | 1184977 | 17-scf00428 | 17 |
| AX-158269651 | 22 | 20.814 | KV453106.1 | 1187302 | 17-scf00428 | 17 |
| AX-158269652 | 22 | 20.84  | KV453106.1 | 1187944 | 17-scf00428 | 17 |
| AX-158269655 | 22 | 20.84  | KV453106.1 | 1190003 | 17-scf00428 | 17 |
| AX-158269658 | 22 | 20.84  | KV453106.1 | 1193219 | 17-scf00428 | 17 |
| AX-158269659 | 22 | 20.949 | KV453106.1 | 1194837 | 17-scf00428 | 17 |
| AX-158269660 | 22 | 20.949 | KV453106.1 | 1195045 | 17-scf00428 | 17 |
| AX-158269664 | 22 | 20.949 | KV453106.1 | 1197148 | 17-scf00428 | 17 |
| AX-158269665 | 22 | 20.949 | KV453106.1 | 1198228 | 17-scf00428 | 17 |
| AX-157843727 | 22 | 20.949 | KV453106.1 | 1233199 | 17-scf00428 | 17 |
| AX-158269667 | 22 | 21.058 | KV453106.1 | 1199791 | 17-scf00428 | 17 |
| AX-158269668 | 22 | 21.058 | KV453106.1 | 1200274 | 17-scf00428 | 17 |
| AX-158269672 | 22 | 21.386 | KV453106.1 | 1208031 | 17-scf00428 | 17 |
| AX-157721737 | 22 | 21.386 | KV453106.1 | 1209255 | 17-scf00428 | 17 |
| AX-158416543 | 22 | 21.386 | KV453106.1 | 1209704 | 17-scf00428 | 17 |
| AX-158269675 | 22 | 21.386 | KV453106.1 | 1211560 | 17-scf00428 | 17 |

|              |    |        |            |         |             |    |
|--------------|----|--------|------------|---------|-------------|----|
| AX-158269677 | 22 | 21.386 | KV453106.1 | 1213297 | 17-scf00428 | 17 |
| AX-158269681 | 22 | 21.386 | KV453106.1 | 1216601 | 17-scf00428 | 17 |
| AX-158269683 | 22 | 21.386 | KV453106.1 | 1220163 | 17-scf00428 | 17 |
| AX-158269684 | 22 | 21.386 | KV453106.1 | 1221244 | 17-scf00428 | 17 |
| AX-157720464 | 22 | 21.386 | KV453106.1 | 1222524 | 17-scf00428 | 17 |
| AX-158269685 | 22 | 21.386 | KV453106.1 | 1223591 | 17-scf00428 | 17 |
| AX-158269686 | 22 | 21.386 | KV453106.1 | 1224587 | 17-scf00428 | 17 |
| AX-158269690 | 22 | 21.421 | KV453106.1 | 1228371 | 17-scf00428 | 17 |
| AX-158269693 | 22 | 21.47  | KV453106.1 | 1232247 | 17-scf00428 | 17 |
| AX-158269694 | 22 | 21.495 | KV453106.1 | 1233470 | 17-scf00428 | 17 |
| AX-158269695 | 22 | 21.495 | KV453106.1 | 1234509 | 17-scf00428 | 17 |
| AX-158269697 | 22 | 21.55  | KV453106.1 | 1238420 | 17-scf00428 | 17 |
| AX-158269699 | 22 | 21.604 | KV453106.1 | 1240732 | 17-scf00428 | 17 |
| AX-157843728 | 22 | 21.604 | KV453106.1 | 1242748 | 17-scf00428 | 17 |
| AX-157843729 | 22 | 21.604 | KV453106.1 | 1246841 | 17-scf00428 | 17 |
| AX-158269701 | 22 | 21.604 | KV453106.1 | 1247642 | 17-scf00428 | 17 |
| AX-157843730 | 22 | 21.604 | KV453106.1 | 1248358 | 17-scf00428 | 17 |
| AX-157738965 | 22 | 22.02  | KV453106.1 | 1251916 | 17-scf00428 | 17 |
| AX-157867491 | 22 | 22.296 | KV453106.1 | 1251544 | 17-scf00428 | 17 |
| AX-157843731 | 22 | 22.296 | KV453106.1 | 1254888 | 17-scf00428 | 17 |
| AX-157774659 | 22 | 22.296 | KV453106.1 | 1255357 | 17-scf00428 | 17 |
| AX-158269703 | 22 | 22.296 | KV453106.1 | 1257815 | 17-scf00428 | 17 |
| AX-158269704 | 22 | 22.296 | KV453106.1 | 1259048 | 17-scf00428 | 17 |
| AX-158269711 | 22 | 22.296 | KV453106.1 | 1267889 | 17-scf00428 | 17 |
| AX-158269712 | 22 | 22.296 | KV453106.1 | 1268511 | 17-scf00428 | 17 |
| AX-158269714 | 22 | 22.296 | KV453106.1 | 1270922 | 17-scf00428 | 17 |
| AX-158269716 | 22 | 22.296 | KV453106.1 | 1272861 | 17-scf00428 | 17 |
| AX-158269718 | 22 | 22.296 | KV453106.1 | 1277547 | 17-scf00428 | 17 |
| AX-158269719 | 22 | 22.296 | KV453106.1 | 1277903 | 17-scf00428 | 17 |
| AX-158269721 | 22 | 22.296 | KV453106.1 | 1279337 | 17-scf00428 | 17 |
| AX-157843733 | 22 | 22.296 | KV453106.1 | 1288345 | 17-scf00428 | 17 |
| AX-158269729 | 22 | 22.296 | KV453106.1 | 1291482 | 17-scf00428 | 17 |
| AX-157867493 | 22 | 22.296 | KV453106.1 | 1292980 | 17-scf00428 | 17 |
| AX-158269735 | 22 | 22.296 | KV453106.1 | 1300694 | 17-scf00428 | 17 |
| AX-158269736 | 22 | 22.296 | KV453106.1 | 1302556 | 17-scf00428 | 17 |
| AX-158269737 | 22 | 22.296 | KV453106.1 | 1302831 | 17-scf00428 | 17 |
| AX-158269739 | 22 | 22.296 | KV453106.1 | 1304609 | 17-scf00428 | 17 |
| AX-158269740 | 22 | 22.296 | KV453106.1 | 1305310 | 17-scf00428 | 17 |
| AX-158269741 | 22 | 22.296 | KV453106.1 | 1305744 | 17-scf00428 | 17 |
| AX-158269742 | 22 | 22.296 | KV453106.1 | 1307056 | 17-scf00428 | 17 |
| AX-158269743 | 22 | 22.296 | KV453106.1 | 1307305 | 17-scf00428 | 17 |
| AX-158269747 | 22 | 22.296 | KV453106.1 | 1310033 | 17-scf00428 | 17 |
| AX-158269752 | 22 | 22.296 | KV453106.1 | 1315888 | 17-scf00428 | 17 |
| AX-158269759 | 22 | 22.296 | KV453106.1 | 1321364 | 17-scf00428 | 17 |
| AX-157772812 | 22 | 22.297 | KV453106.1 | 1290968 | 17-scf00428 | 17 |
| AX-158416545 | 22 | 22.297 | KV453106.1 | 1309924 | 17-scf00428 | 17 |
| AX-158269748 | 22 | 22.297 | KV453106.1 | 1311890 | 17-scf00428 | 17 |
| AX-157872974 | 22 | 22.572 | KV453106.1 | 1164980 | 17-scf00428 | 17 |
| AX-157860100 | 22 | 22.572 | KV453106.1 | 1199266 | 17-scf00428 | 17 |
| AX-157725322 | 22 | 22.572 | KV453106.1 | 1312287 | 17-scf00428 | 17 |
| AX-158269750 | 22 | 22.572 | KV453106.1 | 1314532 | 17-scf00428 | 17 |

|              |    |        |            |         |             |    |
|--------------|----|--------|------------|---------|-------------|----|
| AX-158269751 | 22 | 22.572 | KV453106.1 | 1314912 | 17-scf00428 | 17 |
| AX-158269765 | 22 | 22.853 | KV453106.1 | 1332953 | 17-scf00428 | 17 |
| AX-158269696 | 22 | 23.099 | KV453106.1 | 1234807 | 17-scf00428 | 17 |
| AX-158269731 | 22 | 23.099 | KV453106.1 | 1292686 | 17-scf00428 | 17 |
| AX-157757107 | 22 | 23.099 | KV453106.1 | 1311131 | 17-scf00428 | 17 |
| AX-157752312 | 22 | 23.099 | KV453106.1 | 1329826 | 17-scf00428 | 17 |
| AX-157721780 | 22 | 23.099 | KV453106.1 | 1331143 | 17-scf00428 | 17 |
| AX-158269766 | 22 | 23.099 | KV453106.1 | 1333752 | 17-scf00428 | 17 |
| AX-158269773 | 22 | 23.099 | KV453106.1 | 1339405 | 17-scf00428 | 17 |
| AX-158269779 | 22 | 23.099 | KV453106.1 | 1347908 | 17-scf00428 | 17 |
| AX-158269768 | 22 | 23.134 | KV453106.1 | 1334893 | 17-scf00428 | 17 |
| AX-158269771 | 22 | 23.134 | KV453106.1 | 1337197 | 17-scf00428 | 17 |
| AX-158416548 | 22 | 23.134 | KV453106.1 | 1338388 | 17-scf00428 | 17 |
| AX-158269767 | 22 | 23.135 | KV453106.1 | 1334291 | 17-scf00428 | 17 |
| AX-158269770 | 22 | 23.135 | KV453106.1 | 1335550 | 17-scf00428 | 17 |
| AX-158269772 | 22 | 23.135 | KV453106.1 | 1338778 | 17-scf00428 | 17 |
| AX-158269777 | 22 | 23.135 | KV453106.1 | 1343642 | 17-scf00428 | 17 |
| AX-158269778 | 22 | 23.135 | KV453106.1 | 1347035 | 17-scf00428 | 17 |
| AX-158269780 | 22 | 23.136 | KV453106.1 | 1349132 | 17-scf00428 | 17 |
| AX-158269781 | 22 | 23.137 | KV453106.1 | 1351625 | 17-scf00428 | 17 |
| AX-157753326 | 22 | 24.643 | KV453106.1 | 1374021 | 17-scf00428 | 17 |
| AX-158269799 | 22 | 24.644 | KV453106.1 | 1377091 | 17-scf00428 | 17 |
| AX-158269800 | 22 | 24.644 | KV453106.1 | 1377594 | 17-scf00428 | 17 |
| AX-157713572 | 22 | 24.644 | KV453106.1 | 1378886 | 17-scf00428 | 17 |
| AX-158269801 | 22 | 24.644 | KV453106.1 | 1379413 | 17-scf00428 | 17 |
| AX-158269805 | 22 | 24.646 | KV453106.1 | 1383207 | 17-scf00428 | 17 |
| AX-158269809 | 22 | 24.705 | KV453106.1 | 1388678 | 17-scf00428 | 17 |
| AX-158269806 | 22 | 24.92  | KV453106.1 | 1383654 | 17-scf00428 | 17 |
| AX-158269808 | 22 | 24.92  | KV453106.1 | 1385743 | 17-scf00428 | 17 |
| AX-158269810 | 22 | 24.92  | KV453106.1 | 1390437 | 17-scf00428 | 17 |
| AX-157724834 | 22 | 24.92  | KV453106.1 | 1390677 | 17-scf00428 | 17 |
| AX-157721711 | 22 | 24.92  | KV453106.1 | 1392526 | 17-scf00428 | 17 |
| AX-158269813 | 22 | 24.92  | KV453106.1 | 1394482 | 17-scf00428 | 17 |
| AX-158269814 | 22 | 24.92  | KV453106.1 | 1394923 | 17-scf00428 | 17 |
| AX-158269816 | 22 | 24.92  | KV453106.1 | 1396445 | 17-scf00428 | 17 |
| AX-157860101 | 22 | 24.92  | KV453106.1 | 1396496 | 17-scf00428 | 17 |
| AX-158394828 | 22 | 24.92  | KV453106.1 | 1407601 | 17-scf00428 | 17 |
| AX-158269824 | 22 | 25.058 | KV453106.1 | 1406949 | 17-scf00428 | 17 |
| AX-158269825 | 22 | 25.058 | KV453106.1 | 1407981 | 17-scf00428 | 17 |
| AX-157843735 | 22 | 25.058 | KV453106.1 | 1408020 | 17-scf00428 | 17 |
| AX-158269828 | 22 | 25.058 | KV453106.1 | 1412213 | 17-scf00428 | 17 |
| AX-158269830 | 22 | 25.058 | KV453106.1 | 1416135 | 17-scf00428 | 17 |
| AX-158269839 | 22 | 25.721 | KV453106.1 | 1433352 | 17-scf00428 | 17 |
| AX-158269842 | 22 | 25.749 | KV453106.1 | 1437124 | 17-scf00428 | 17 |
| AX-158269843 | 22 | 26.002 | KV453106.1 | 1438513 | 17-scf00428 | 17 |
| AX-158269850 | 22 | 26.209 | KV453106.1 | 1449971 | 17-scf00428 | 17 |
| AX-158269851 | 22 | 26.21  | KV453106.1 | 1450677 | 17-scf00428 | 17 |
| AX-158269852 | 22 | 26.594 | KV453106.1 | 1452227 | 17-scf00428 | 17 |
| AX-158269856 | 22 | 26.615 | KV453106.1 | 1462232 | 17-scf00428 | 17 |
| AX-158269857 | 22 | 26.808 | KV453106.1 | 1463472 | 17-scf00428 | 17 |
| AX-158416552 | 22 | 26.836 | KV453106.1 | 1458821 | 17-scf00428 | 17 |

|              |    |        |            |         |             |    |
|--------------|----|--------|------------|---------|-------------|----|
| AX-158394831 | 22 | 26.836 | KV453106.1 | 1464564 | 17-scf00428 | 17 |
| AX-158269858 | 22 | 26.836 | KV453106.1 | 1465032 | 17-scf00428 | 17 |
| AX-158269862 | 22 | 27.12  | KV453106.1 | 1472146 | 17-scf00428 | 17 |
| AX-158269864 | 22 | 27.23  | KV453106.1 | 1473602 | 17-scf00428 | 17 |
| AX-158269867 | 22 | 27.23  | KV453106.1 | 1476199 | 17-scf00428 | 17 |
| AX-158269872 | 22 | 27.23  | KV453106.1 | 1488910 | 17-scf00428 | 17 |
| AX-158269868 | 22 | 27.246 | KV453106.1 | 1478002 | 17-scf00428 | 17 |
| AX-158269869 | 22 | 27.27  | KV453106.1 | 1480187 | 17-scf00428 | 17 |
| AX-158269871 | 22 | 27.279 | KV453106.1 | 1483312 | 17-scf00428 | 17 |
| AX-158269873 | 22 | 27.547 | KV453106.1 | 1491135 | 17-scf00428 | 17 |
| AX-158269874 | 22 | 27.823 | KV453106.1 | 1492986 | 17-scf00428 | 17 |
| AX-158269876 | 22 | 27.823 | KV453106.1 | 1496630 | 17-scf00428 | 17 |
| AX-158269877 | 22 | 27.823 | KV453106.1 | 1498662 | 17-scf00428 | 17 |
| AX-158269881 | 22 | 27.823 | KV453106.1 | 1503194 | 17-scf00428 | 17 |
| AX-158269882 | 22 | 27.823 | KV453106.1 | 1503588 | 17-scf00428 | 17 |
| AX-158269883 | 22 | 27.823 | KV453106.1 | 1504143 | 17-scf00428 | 17 |
| AX-158269884 | 22 | 27.823 | KV453106.1 | 1505778 | 17-scf00428 | 17 |
| AX-157750060 | 22 | 27.823 | KV453106.1 | 1507205 | 17-scf00428 | 17 |
| AX-157740472 | 22 | 27.823 | KV453106.1 | 1508392 | 17-scf00428 | 17 |
| AX-157726238 | 22 | 28.026 | KV453106.1 | 1513508 | 17-scf00428 | 17 |
| AX-158269887 | 22 | 28.099 | KV453106.1 | 1515974 | 17-scf00428 | 17 |
| AX-158269892 | 22 | 28.099 | KV453106.1 | 1525778 | 17-scf00428 | 17 |
| AX-158269893 | 22 | 28.099 | KV453106.1 | 1526965 | 17-scf00428 | 17 |
| AX-158269894 | 22 | 28.1   | KV453106.1 | 1527992 | 17-scf00428 | 17 |
| AX-158269895 | 22 | 28.318 | KV453106.1 | 1528930 | 17-scf00428 | 17 |
| AX-158269886 | 22 | 28.535 | KV453106.1 | 1515235 | 17-scf00428 | 17 |
| AX-158269888 | 22 | 28.535 | KV453106.1 | 1516497 | 17-scf00428 | 17 |
| AX-158269890 | 22 | 28.535 | KV453106.1 | 1521778 | 17-scf00428 | 17 |
| AX-158269897 | 22 | 28.535 | KV453106.1 | 1530301 | 17-scf00428 | 17 |
| AX-158269898 | 22 | 28.535 | KV453106.1 | 1531369 | 17-scf00428 | 17 |
| AX-158269899 | 22 | 28.535 | KV453106.1 | 1534737 | 17-scf00428 | 17 |
| AX-158269900 | 22 | 28.538 | KV453106.1 | 1535609 | 17-scf00428 | 17 |
| AX-158269903 | 22 | 28.539 | KV453106.1 | 1538521 | 17-scf00428 | 17 |
| AX-157720693 | 22 | 28.863 | KV453106.1 | 1540624 | 17-scf00428 | 17 |
| AX-158269905 | 22 | 28.864 | KV453106.1 | 1541855 | 17-scf00428 | 17 |
| AX-158269906 | 22 | 28.864 | KV453106.1 | 1542246 | 17-scf00428 | 17 |
| AX-158269907 | 22 | 28.864 | KV453106.1 | 1543418 | 17-scf00428 | 17 |
| AX-158269908 | 22 | 28.864 | KV453106.1 | 1543827 | 17-scf00428 | 17 |
| AX-158269910 | 22 | 28.864 | KV453106.1 | 1546017 | 17-scf00428 | 17 |
| AX-157741431 | 22 | 28.864 | KV453106.1 | 1547402 | 17-scf00428 | 17 |
| AX-158269912 | 22 | 28.865 | KV453106.1 | 1549115 | 17-scf00428 | 17 |
| AX-158269913 | 22 | 29.263 | KV453106.1 | 1549860 | 17-scf00428 | 17 |
| AX-158269914 | 22 | 29.266 | KV453106.1 | 1550847 | 17-scf00428 | 17 |
| AX-158269915 | 22 | 29.266 | KV453106.1 | 1553286 | 17-scf00428 | 17 |
| AX-158269917 | 22 | 29.266 | KV453106.1 | 1557468 | 17-scf00428 | 17 |
| AX-158269918 | 22 | 29.266 | KV453106.1 | 1558227 | 17-scf00428 | 17 |
| AX-157721014 | 22 | 29.266 | KV453106.1 | 1560133 | 17-scf00428 | 17 |
| AX-157775389 | 22 | 29.461 | KV453106.1 | 1562805 | 17-scf00428 | 17 |
| AX-158269925 | 22 | 29.668 | KV453106.1 | 1568228 | 17-scf00428 | 17 |
| AX-158269922 | 22 | 29.669 | KV453106.1 | 1564576 | 17-scf00428 | 17 |
| AX-158269923 | 22 | 29.669 | KV453106.1 | 1565065 | 17-scf00428 | 17 |

|              |    |        |            |         |             |    |
|--------------|----|--------|------------|---------|-------------|----|
| AX-158269924 | 22 | 29.669 | KV453106.1 | 1565684 | 17-scf00428 | 17 |
| AX-158269926 | 22 | 29.669 | KV453106.1 | 1569043 | 17-scf00428 | 17 |
| AX-158269927 | 22 | 29.669 | KV453106.1 | 1570969 | 17-scf00428 | 17 |
| AX-158269932 | 22 | 29.669 | KV453106.1 | 1573486 | 17-scf00428 | 17 |
| AX-158269934 | 22 | 29.669 | KV453106.1 | 1577163 | 17-scf00428 | 17 |
| AX-158269935 | 22 | 29.669 | KV453106.1 | 1578748 | 17-scf00428 | 17 |
| AX-158269936 | 22 | 29.669 | KV453106.1 | 1579898 | 17-scf00428 | 17 |
| AX-158269940 | 22 | 29.669 | KV453106.1 | 1585061 | 17-scf00428 | 17 |
| AX-158269944 | 22 | 29.669 | KV453106.1 | 1589593 | 17-scf00428 | 17 |
| AX-158269942 | 22 | 29.934 | KV453106.1 | 1586421 | 17-scf00428 | 17 |
| AX-157748340 | 22 | 30.219 | KV453106.1 | 1594387 | 17-scf00428 | 17 |
| AX-157741232 | 22 | 30.476 | KV453106.1 | 1591538 | 17-scf00428 | 17 |
| AX-158269947 | 22 | 30.476 | KV453106.1 | 1594976 | 17-scf00428 | 17 |
| AX-158269949 | 22 | 30.476 | KV453106.1 | 1595697 | 17-scf00428 | 17 |
| AX-158269951 | 22 | 30.476 | KV453106.1 | 1597173 | 17-scf00428 | 17 |
| AX-158269952 | 22 | 30.476 | KV453106.1 | 1598834 | 17-scf00428 | 17 |
| AX-158269954 | 22 | 30.476 | KV453106.1 | 1600885 | 17-scf00428 | 17 |
| AX-158269955 | 22 | 30.479 | KV453106.1 | 1601748 | 17-scf00428 | 17 |
| AX-158419307 | 22 | 30.667 | KV453106.1 | 1606156 | 17-scf00428 | 17 |
| AX-157755943 | 22 | 30.685 | KV453106.1 | 1606611 | 17-scf00428 | 17 |
| AX-158381133 | 22 | 30.873 | KV453106.1 | 1609781 | 17-scf00428 | 17 |
| AX-158269961 | 22 | 30.873 | KV453106.1 | 1614056 | 17-scf00428 | 17 |
| AX-158269962 | 22 | 31.278 | KV453106.1 | 1614523 | 17-scf00428 | 17 |
| AX-158269965 | 22 | 31.282 | KV453106.1 | 1617182 | 17-scf00428 | 17 |
| AX-157880548 | 22 | 31.282 | KV453106.1 | 1618084 | 17-scf00428 | 17 |
| AX-158269967 | 22 | 31.282 | KV453106.1 | 1618332 | 17-scf00428 | 17 |
| AX-158269969 | 22 | 31.392 | KV453106.1 | 1621419 | 17-scf00428 | 17 |
| AX-157756553 | 22 | 31.392 | KV453106.1 | 1624022 | 17-scf00428 | 17 |
| AX-158269972 | 22 | 31.392 | KV453106.1 | 1626859 | 17-scf00428 | 17 |
| AX-158269973 | 22 | 31.393 | KV453106.1 | 1629117 | 17-scf00428 | 17 |
| AX-158269975 | 22 | 31.393 | KV453106.1 | 1631308 | 17-scf00428 | 17 |
| AX-157843737 | 22 | 31.556 | KV453106.1 | 1633928 | 17-scf00428 | 17 |
| AX-158269977 | 22 | 31.626 | KV453106.1 | 1637162 | 17-scf00428 | 17 |
| AX-158269979 | 22 | 31.626 | KV453106.1 | 1639537 | 17-scf00428 | 17 |
| AX-158269980 | 22 | 31.643 | KV453106.1 | 1640795 | 17-scf00428 | 17 |
| AX-157843736 | 22 | 31.72  | KV453106.1 | 1633866 | 17-scf00428 | 17 |
| AX-158269982 | 22 | 31.72  | KV453106.1 | 1642381 | 17-scf00428 | 17 |
| AX-158269984 | 22 | 31.72  | KV453106.1 | 1643924 | 17-scf00428 | 17 |
| AX-158269985 | 22 | 31.72  | KV453106.1 | 1644259 | 17-scf00428 | 17 |
| AX-158269986 | 22 | 31.72  | KV453106.1 | 1644918 | 17-scf00428 | 17 |
| AX-157843739 | 22 | 31.72  | KV453106.1 | 1674295 | 17-scf00428 | 17 |
| AX-158270014 | 22 | 31.72  | KV453106.1 | 1677923 | 17-scf00428 | 17 |
| AX-158269988 | 22 | 31.721 | KV453106.1 | 1646688 | 17-scf00428 | 17 |
| AX-158269987 | 22 | 32.048 | KV453106.1 | 1646273 | 17-scf00428 | 17 |
| AX-157756766 | 22 | 32.048 | KV453106.1 | 1649039 | 17-scf00428 | 17 |
| AX-158269991 | 22 | 32.048 | KV453106.1 | 1652357 | 17-scf00428 | 17 |
| AX-158269993 | 22 | 32.048 | KV453106.1 | 1653620 | 17-scf00428 | 17 |
| AX-158269997 | 22 | 32.048 | KV453106.1 | 1656825 | 17-scf00428 | 17 |
| AX-157749687 | 22 | 32.048 | KV453106.1 | 1658330 | 17-scf00428 | 17 |
| AX-158381134 | 22 | 32.048 | KV453106.1 | 1658969 | 17-scf00428 | 17 |
| AX-158269999 | 22 | 32.048 | KV453106.1 | 1659008 | 17-scf00428 | 17 |

|              |    |        |            |         |             |    |
|--------------|----|--------|------------|---------|-------------|----|
| AX-158270000 | 22 | 32.048 | KV453106.1 | 1659940 | 17-scf00428 | 17 |
| AX-158270001 | 22 | 32.266 | KV453106.1 | 1660603 | 17-scf00428 | 17 |
| AX-158270002 | 22 | 32.266 | KV453106.1 | 1661139 | 17-scf00428 | 17 |
| AX-158270003 | 22 | 32.266 | KV453106.1 | 1661623 | 17-scf00428 | 17 |
| AX-157719060 | 22 | 32.313 | KV453106.1 | 1666515 | 17-scf00428 | 17 |
| AX-158270005 | 22 | 32.375 | KV453106.1 | 1667015 | 17-scf00428 | 17 |
| AX-158270006 | 22 | 32.375 | KV453106.1 | 1668456 | 17-scf00428 | 17 |
| AX-158270015 | 22 | 32.375 | KV453106.1 | 1680133 | 17-scf00428 | 17 |
| AX-158270007 | 22 | 32.433 | KV453106.1 | 1670670 | 17-scf00428 | 17 |
| AX-158269989 | 22 | 32.484 | KV453106.1 | 1650039 | 17-scf00428 | 17 |
| AX-158270009 | 22 | 32.484 | KV453106.1 | 1672161 | 17-scf00428 | 17 |
| AX-158270010 | 22 | 32.484 | KV453106.1 | 1672391 | 17-scf00428 | 17 |
| AX-157843740 | 22 | 32.484 | KV453106.1 | 1676428 | 17-scf00428 | 17 |
| AX-158270012 | 22 | 32.484 | KV453106.1 | 1677053 | 17-scf00428 | 17 |
| AX-158270013 | 22 | 32.484 | KV453106.1 | 1677342 | 17-scf00428 | 17 |
| AX-157843742 | 22 | 32.497 | KV453106.1 | 1679348 | 17-scf00428 | 17 |
| AX-157743343 | 22 | 32.751 | KV453106.1 | 1686121 | 17-scf00428 | 17 |
| AX-158270019 | 22 | 32.751 | KV453106.1 | 1686419 | 17-scf00428 | 17 |
| AX-157750894 | 22 | 32.751 | KV453106.1 | 1687000 | 17-scf00428 | 17 |
| AX-158270022 | 22 | 32.751 | KV453106.1 | 1688613 | 17-scf00428 | 17 |
| AX-158270023 | 22 | 32.751 | KV453106.1 | 1690782 | 17-scf00428 | 17 |
| AX-157704188 | 22 | 33.072 | KV453106.1 | 1693990 | 17-scf00428 | 17 |
| AX-158270027 | 22 | 33.417 | KV453106.1 | 1694537 | 17-scf00428 | 17 |
| AX-158270028 | 22 | 33.551 | KV453106.1 | 1695429 | 17-scf00428 | 17 |
| AX-158270029 | 22 | 33.563 | KV453106.1 | 1695847 | 17-scf00428 | 17 |
| AX-157746087 | 22 | 33.573 | KV453106.1 | 1698541 | 17-scf00428 | 17 |
| AX-158270030 | 22 | 33.58  | KV453106.1 | 1699997 | 17-scf00428 | 17 |
| AX-158270031 | 22 | 33.58  | KV453106.1 | 1700401 | 17-scf00428 | 17 |
| AX-158270032 | 22 | 33.58  | KV453106.1 | 1701469 | 17-scf00428 | 17 |
| AX-158270033 | 22 | 33.58  | KV453106.1 | 1702464 | 17-scf00428 | 17 |
| AX-158270034 | 22 | 33.58  | KV453106.1 | 1703247 | 17-scf00428 | 17 |
| AX-157717382 | 22 | 33.58  | KV453106.1 | 1704127 | 17-scf00428 | 17 |
| AX-157748468 | 22 | 33.58  | KV453106.1 | 1708976 | 17-scf00428 | 17 |
| AX-157843744 | 22 | 33.58  | KV453106.1 | 1709975 | 17-scf00428 | 17 |
| AX-158270038 | 22 | 33.58  | KV453106.1 | 1710022 | 17-scf00428 | 17 |
| AX-158270039 | 22 | 33.58  | KV453106.1 | 1710901 | 17-scf00428 | 17 |
| AX-158270040 | 22 | 33.58  | KV453106.1 | 1711292 | 17-scf00428 | 17 |
| AX-158270041 | 22 | 33.58  | KV453106.1 | 1712005 | 17-scf00428 | 17 |
| AX-158270042 | 22 | 33.58  | KV453106.1 | 1713154 | 17-scf00428 | 17 |
| AX-158270044 | 22 | 33.58  | KV453106.1 | 1717683 | 17-scf00428 | 17 |
| AX-158270047 | 22 | 33.58  | KV453106.1 | 1721365 | 17-scf00428 | 17 |
| AX-158270050 | 22 | 33.58  | KV453106.1 | 1723255 | 17-scf00428 | 17 |
| AX-158270051 | 22 | 33.58  | KV453106.1 | 1723827 | 17-scf00428 | 17 |
| AX-158270052 | 22 | 33.58  | KV453106.1 | 1724544 | 17-scf00428 | 17 |
| AX-158270054 | 22 | 33.58  | KV453106.1 | 1726103 | 17-scf00428 | 17 |
| AX-158270055 | 22 | 33.58  | KV453106.1 | 1726759 | 17-scf00428 | 17 |
| AX-158270058 | 22 | 33.58  | KV453106.1 | 1734455 | 17-scf00428 | 17 |
| AX-158419310 | 22 | 34.125 | KV453106.1 | 1730589 | 17-scf00428 | 17 |
| AX-158270062 | 22 | 34.126 | KV453106.1 | 1739914 | 17-scf00428 | 17 |
| AX-158270063 | 22 | 34.126 | KV453106.1 | 1740611 | 17-scf00428 | 17 |
| AX-158270064 | 22 | 34.126 | KV453106.1 | 1742308 | 17-scf00428 | 17 |

|              |    |        |            |         |             |    |
|--------------|----|--------|------------|---------|-------------|----|
| AX-158270065 | 22 | 34.126 | KV453106.1 | 1743660 | 17-scf00428 | 17 |
| AX-158270068 | 22 | 34.126 | KV453106.1 | 1745391 | 17-scf00428 | 17 |
| AX-158270069 | 22 | 34.126 | KV453106.1 | 1745977 | 17-scf00428 | 17 |
| AX-158270070 | 22 | 34.162 | KV453106.1 | 1747098 | 17-scf00428 | 17 |
| AX-158270071 | 22 | 34.196 | KV453106.1 | 1747813 | 17-scf00428 | 17 |
| AX-158270073 | 22 | 34.234 | KV453106.1 | 1749173 | 17-scf00428 | 17 |
| AX-157843745 | 22 | 34.234 | KV453106.1 | 1749680 | 17-scf00428 | 17 |
| AX-158270076 | 22 | 34.343 | KV453106.1 | 1752405 | 17-scf00428 | 17 |
| AX-158270077 | 22 | 34.343 | KV453106.1 | 1753466 | 17-scf00428 | 17 |
| AX-158270078 | 22 | 34.344 | KV453106.1 | 1753884 | 17-scf00428 | 17 |
| AX-158270079 | 22 | 34.547 | KV453106.1 | 1757364 | 17-scf00428 | 17 |
| AX-157712175 | 22 | 34.547 | KV453106.1 | 1763007 | 17-scf00428 | 17 |
| AX-158270082 | 22 | 34.562 | KV453106.1 | 1764534 | 17-scf00428 | 17 |
| AX-157745054 | 22 | 34.578 | KV453106.1 | 1757481 | 17-scf00428 | 17 |
| AX-157753169 | 22 | 34.578 | KV453106.1 | 1764856 | 17-scf00428 | 17 |
| AX-158270083 | 22 | 34.578 | KV453106.1 | 1766677 | 17-scf00428 | 17 |
| AX-157721922 | 22 | 34.578 | KV453106.1 | 1767145 | 17-scf00428 | 17 |
| AX-158270085 | 22 | 34.782 | KV453106.1 | 1768495 | 17-scf00428 | 17 |
| AX-158270087 | 22 | 34.891 | KV453106.1 | 1771419 | 17-scf00428 | 17 |
| AX-158270088 | 22 | 34.891 | KV453106.1 | 1772540 | 17-scf00428 | 17 |
| AX-158270090 | 22 | 34.891 | KV453106.1 | 1774752 | 17-scf00428 | 17 |
| AX-158270091 | 22 | 34.891 | KV453106.1 | 1775503 | 17-scf00428 | 17 |
| AX-158270092 | 22 | 34.891 | KV453106.1 | 1776282 | 17-scf00428 | 17 |
| AX-158270097 | 22 | 34.891 | KV453106.1 | 1780927 | 17-scf00428 | 17 |
| AX-158270099 | 22 | 34.891 | KV453106.1 | 1783651 | 17-scf00428 | 17 |
| AX-158270102 | 22 | 35.055 | KV453106.1 | 1791339 | 17-scf00428 | 17 |
| AX-158270108 | 22 | 35.218 | KV453106.1 | 1796398 | 17-scf00428 | 17 |
| AX-158270109 | 22 | 35.219 | KV453106.1 | 1797609 | 17-scf00428 | 17 |
| AX-158270110 | 22 | 35.219 | KV453106.1 | 1798386 | 17-scf00428 | 17 |
| AX-158387354 | 22 | 35.219 | KV453106.1 | 1798726 | 17-scf00428 | 17 |
| AX-158270111 | 22 | 35.328 | KV453106.1 | 1799947 | 17-scf00428 | 17 |
| AX-158270112 | 22 | 35.328 | KV453106.1 | 1801041 | 17-scf00428 | 17 |
| AX-158423459 | 22 | 35.328 | KV453106.1 | 1801644 | 17-scf00428 | 17 |
| AX-158270114 | 22 | 35.328 | KV453106.1 | 1805382 | 17-scf00428 | 17 |
| AX-157843747 | 22 | 35.328 | KV453106.1 | 1806709 | 17-scf00428 | 17 |
| AX-158270117 | 22 | 35.328 | KV453106.1 | 1809298 | 17-scf00428 | 17 |
| AX-157887862 | 22 | 35.328 | KV453106.1 | 1810967 | 17-scf00428 | 17 |
| AX-158270122 | 22 | 35.328 | KV453106.1 | 1815719 | 17-scf00428 | 17 |
| AX-158270123 | 22 | 35.328 | KV453106.1 | 1817143 | 17-scf00428 | 17 |
| AX-158270128 | 22 | 35.328 | KV453106.1 | 1824769 | 17-scf00428 | 17 |
| AX-158270125 | 22 | 35.329 | KV453106.1 | 1821613 | 17-scf00428 | 17 |
| AX-157843748 | 22 | 35.671 | KV453106.1 | 1828069 | 17-scf00428 | 17 |
| AX-158270131 | 22 | 35.671 | KV453106.1 | 1829054 | 17-scf00428 | 17 |
| AX-158270121 | 22 | 35.672 | KV453106.1 | 1814077 | 17-scf00428 | 17 |
| AX-158270132 | 22 | 35.672 | KV453106.1 | 1830360 | 17-scf00428 | 17 |
| AX-157721285 | 22 | 36.014 | KV453106.1 | 1833658 | 17-scf00428 | 17 |
| AX-158270136 | 22 | 36.015 | KV453106.1 | 1834896 | 17-scf00428 | 17 |
| AX-158270138 | 22 | 36.015 | KV453106.1 | 1837933 | 17-scf00428 | 17 |
| AX-158270139 | 22 | 36.06  | KV453106.1 | 1838639 | 17-scf00428 | 17 |
| AX-158270141 | 22 | 36.101 | KV453106.1 | 1841366 | 17-scf00428 | 17 |
| AX-158270143 | 22 | 36.138 | KV453106.1 | 1842236 | 17-scf00428 | 17 |

|              |    |        |            |         |             |    |
|--------------|----|--------|------------|---------|-------------|----|
| AX-158381135 | 22 | 36.187 | KV453106.1 | 1842504 | 17-scf00428 | 17 |
| AX-158270144 | 22 | 36.187 | KV453106.1 | 1843774 | 17-scf00428 | 17 |
| AX-158270145 | 22 | 36.187 | KV453106.1 | 1844260 | 17-scf00428 | 17 |
| AX-158270147 | 22 | 36.187 | KV453106.1 | 1846267 | 17-scf00428 | 17 |
| AX-158270149 | 22 | 36.295 | KV453106.1 | 1848642 | 17-scf00428 | 17 |
| AX-158270153 | 22 | 36.316 | KV453106.1 | 1854250 | 17-scf00428 | 17 |
| AX-158270155 | 22 | 36.415 | KV453106.1 | 1857437 | 17-scf00428 | 17 |
| AX-158270157 | 22 | 36.533 | KV453106.1 | 1860192 | 17-scf00428 | 17 |
| AX-158270158 | 22 | 36.586 | KV453106.1 | 1863340 | 17-scf00428 | 17 |
| AX-158270160 | 22 | 36.641 | KV453106.1 | 1866507 | 17-scf00428 | 17 |
| AX-158270161 | 22 | 36.641 | KV453106.1 | 1867511 | 17-scf00428 | 17 |
| AX-158270164 | 22 | 36.641 | KV453106.1 | 1869279 | 17-scf00428 | 17 |
| AX-158270166 | 22 | 36.646 | KV453106.1 | 1872100 | 17-scf00428 | 17 |
| AX-157747772 | 22 | 36.776 | KV453106.1 | 1873349 | 17-scf00428 | 17 |
| AX-158416559 | 22 | 36.913 | KV453106.1 | 1874483 | 17-scf00428 | 17 |
| AX-157843749 | 22 | 36.913 | KV453106.1 | 1875789 | 17-scf00428 | 17 |
| AX-158270148 | 22 | 37.187 | KV453106.1 | 1847047 | 17-scf00428 | 17 |
| AX-158270170 | 22 | 37.187 | KV453106.1 | 1880003 | 17-scf00428 | 17 |
| AX-158270171 | 22 | 37.187 | KV453106.1 | 1881586 | 17-scf00428 | 17 |
| AX-158270175 | 22 | 37.187 | KV453106.1 | 1884852 | 17-scf00428 | 17 |
| AX-158270176 | 22 | 37.187 | KV453106.1 | 1885930 | 17-scf00428 | 17 |
| AX-158270178 | 22 | 37.187 | KV453106.1 | 1886570 | 17-scf00428 | 17 |
| AX-158270179 | 22 | 37.187 | KV453106.1 | 1887616 | 17-scf00428 | 17 |
| AX-158270180 | 22 | 37.187 | KV453106.1 | 1888374 | 17-scf00428 | 17 |
| AX-158270181 | 22 | 37.187 | KV453106.1 | 1889399 | 17-scf00428 | 17 |
| AX-158270183 | 22 | 37.187 | KV453106.1 | 1890518 | 17-scf00428 | 17 |
| AX-158270184 | 22 | 37.406 | KV453106.1 | 1892259 | 17-scf00428 | 17 |
| AX-158270189 | 22 | 37.624 | KV453106.1 | 1896161 | 17-scf00428 | 17 |
| AX-158270190 | 22 | 37.624 | KV453106.1 | 1896956 | 17-scf00428 | 17 |
| AX-157727724 | 22 | 37.624 | KV453106.1 | 1902260 | 17-scf00428 | 17 |
| AX-158270191 | 22 | 37.624 | KV453106.1 | 1904059 | 17-scf00428 | 17 |
| AX-157751699 | 22 | 37.624 | KV453106.1 | 1905199 | 17-scf00428 | 17 |
| AX-157713125 | 22 | 37.624 | KV453106.1 | 1906051 | 17-scf00428 | 17 |
| AX-157843751 | 22 | 37.626 | KV453106.1 | 1899826 | 17-scf00428 | 17 |
| AX-157754149 | 22 | 37.626 | KV453106.1 | 1901707 | 17-scf00428 | 17 |
| AX-158270193 | 22 | 37.626 | KV453106.1 | 1907637 | 17-scf00428 | 17 |
| AX-157843753 | 22 | 38.169 | KV453106.1 | 1908459 | 17-scf00428 | 17 |
| AX-157754659 | 22 | 38.169 | KV453106.1 | 1931974 | 17-scf00428 | 17 |
| AX-158270214 | 22 | 38.169 | KV453106.1 | 1945938 | 17-scf00428 | 17 |
| AX-158270196 | 22 | 38.177 | KV453106.1 | 1918424 | 17-scf00428 | 17 |
| AX-157843756 | 22 | 38.177 | KV453106.1 | 1920572 | 17-scf00428 | 17 |
| AX-158270199 | 22 | 38.177 | KV453106.1 | 1921633 | 17-scf00428 | 17 |
| AX-157843758 | 22 | 38.177 | KV453106.1 | 1922458 | 17-scf00428 | 17 |
| AX-158270216 | 22 | 38.177 | KV453106.1 | 1949653 | 17-scf00428 | 17 |
| AX-158270202 | 22 | 38.405 | KV453106.1 | 1924228 | 17-scf00428 | 17 |
| AX-158270207 | 22 | 38.405 | KV453106.1 | 1929277 | 17-scf00428 | 17 |
| AX-158270208 | 22 | 38.405 | KV453106.1 | 1929849 | 17-scf00428 | 17 |
| AX-158270218 | 22 | 38.417 | KV453106.1 | 1951925 | 17-scf00428 | 17 |
| AX-158270222 | 22 | 38.417 | KV453106.1 | 1955510 | 17-scf00428 | 17 |
| AX-157843754 | 22 | 38.418 | KV453106.1 | 1913301 | 17-scf00428 | 17 |
| AX-158270223 | 22 | 38.418 | KV453106.1 | 1958937 | 17-scf00428 | 17 |



|              |    |        |            |         |                |    |
|--------------|----|--------|------------|---------|----------------|----|
| AX-158270211 | 22 | 38.739 | KV453106.1 | 1934920 | 17-scf00428    | 17 |
| AX-158270226 | 22 | 38.739 | KV453106.1 | 1960640 | 17-scf00428    | 17 |
| AX-157860104 | 22 | 38.739 | KV453106.1 | 1961576 | 17-scf00428    | 17 |
| AX-157744545 | 22 | 38.739 | KV453106.1 | 1968096 | 17-scf00428    | 17 |
| AX-158270230 | 22 | 38.739 | KV453106.1 | 1968681 | 17-scf00428    | 17 |
| AX-158270231 | 22 | 38.739 | KV453106.1 | 1969651 | 17-scf00428    | 17 |
| AX-158270233 | 22 | 38.739 | KV453106.1 | 1970776 | 17-scf00428    | 17 |
| AX-158270237 | 22 | 38.789 | KV453106.1 | 1976466 | 17-scf00428    | 17 |
| AX-158270238 | 22 | 38.831 | KV453106.1 | 1977451 | 17-scf00428    | 17 |
| AX-158270221 | 22 | 38.892 | KV453106.1 | 1954690 | 17-scf00428    | 17 |
| AX-158270242 | 22 | 38.892 | KV453106.1 | 1981946 | 17-scf00428    | 17 |
| AX-158270247 | 22 | 38.892 | KV453106.1 | 1988082 | 17-scf00428    | 17 |
| AX-158270244 | 22 | 38.957 | KV453106.1 | 1984907 | 17-scf00428    | 17 |
| AX-158270245 | 22 | 39.142 | KV453106.1 | 1986124 | 17-scf00428    | 17 |
| AX-158270205 | 22 | 39.286 | KV453106.1 | 1926972 | 17-scf00428    | 17 |
| AX-157745577 | 22 | 39.286 | KV453106.1 | 1995594 | 17-scf00428    | 17 |
| AX-158270251 | 22 | 39.286 | KV453106.1 | 1997622 | 17-scf00428    | 17 |
| AX-158270254 | 22 | 39.652 | KV453106.1 | 2002227 | 17-scf00428    | 17 |
| AX-158270257 | 22 | 39.834 | KV453106.1 | 2007394 | 17-scf00428    | 17 |
| AX-158270258 | 22 | 39.834 | KV453106.1 | 2008472 | 17-scf00428    | 17 |
| AX-158270259 | 22 | 39.834 | KV453106.1 | 2009773 | 17-scf00428    | 17 |
| AX-158270260 | 22 | 39.834 | KV453106.1 | 2011779 | 17-scf00428    | 17 |
| AX-157843764 | 22 | 39.834 | KV453106.1 | 2025433 | 17-scf00428    | 17 |
| AX-157775235 | 22 | 39.835 | KV453106.1 | 2015690 | 17-scf00428    | 17 |
| AX-158270263 | 22 | 40.068 | KV453106.1 | 2016375 | 17-scf00428    | 17 |
| AX-157843774 | 22 | 40.114 | KV453106.1 | 2061240 | 17-scf00428    | 17 |
| AX-157843775 | 22 | 40.662 | KV453106.1 | 2061789 | 17-scf00428    | 17 |
| AX-157843776 | 22 | 40.673 | KV453106.1 | 2062163 | 17-scf00428    | 17 |
| AX-157843777 | 22 | 40.681 | KV453106.1 | 2064139 | 17-scf00428    | 17 |
| AX-158270295 | 22 | 40.739 | KV453106.1 | 2064749 | 17-scf00428    | 17 |
| AX-158270296 | 22 | 40.739 | KV453106.1 | 2065120 | 17-scf00428    | 17 |
| AX-158270300 | 22 | 40.929 | KV453106.1 | 2071902 | 17-scf00428    | 17 |
| AX-158270301 | 22 | 40.929 | KV453106.1 | 2072858 | 17-scf00428    | 17 |
| AX-158270303 | 22 | 40.929 | KV453106.1 | 2074369 | 17-scf00428    | 17 |
| AX-158411329 | 22 | 40.929 | KV453106.1 | 2075872 | 17-scf00428    | 17 |
| AX-158270306 | 22 | 41.147 | KV453106.1 | 2079249 | 17-scf00428    | 17 |
| AX-158270299 | 22 | 41.148 | KV453106.1 | 2070013 | 17-scf00428    | 17 |
| AX-158270305 | 22 | 41.148 | KV453106.1 | 2077404 | 17-scf00428    | 17 |
| AX-158270308 | 22 | 41.148 | KV453106.1 | 2082878 | 17-scf00428    | 17 |
| AX-158270309 | 22 | 41.148 | KV453106.1 | 2083177 | 17-scf00428    | 17 |
| AX-158270310 | 22 | 41.148 | KV453106.1 | 2083287 | 17-scf00428    | 17 |
| AX-158270311 | 22 | 41.148 | KV453106.1 | 2084589 | 17-scf00428    | 17 |
| AX-158270312 | 22 | 41.148 | KV453106.1 | 2085138 | 17-scf00428    | 17 |
| AX-158270318 | 22 | 41.151 | KV453106.1 | 2092695 | 17-scf00428    | 17 |
| AX-158270319 | 22 | 41.586 | KV453106.1 | 2093527 | 17-scf00428    | 17 |
| AX-158270320 | 22 | 41.586 | KV453106.1 | 2095132 | 17-scf00428    | 17 |
| AX-157697837 | 22 | 41.699 | FI880864.1 | 353     | 10RI212 lctalt | UN |
| AX-158270327 | 22 | 42.017 | KV453106.1 | 2103608 | 17-scf00428    | 17 |
| AX-158270322 | 22 | 42.023 | KV453106.1 | 2099201 | 17-scf00428    | 17 |
| AX-158270328 | 22 | 42.023 | KV453106.1 | 2105594 | 17-scf00428    | 17 |
| AX-158270329 | 22 | 42.023 | KV453106.1 | 2106959 | 17-scf00428    | 17 |

|              |    |        |            |         |             |    |
|--------------|----|--------|------------|---------|-------------|----|
| AX-158270330 | 22 | 42.023 | KV453106.1 | 2108518 | 17-scf00428 | 17 |
| AX-158270331 | 22 | 42.023 | KV453106.1 | 2109275 | 17-scf00428 | 17 |
| AX-158416564 | 22 | 42.023 | KV453106.1 | 2112383 | 17-scf00428 | 17 |
| AX-158270332 | 22 | 42.023 | KV453106.1 | 2113280 | 17-scf00428 | 17 |
| AX-157843780 | 22 | 42.023 | KV453106.1 | 2116693 | 17-scf00428 | 17 |
| AX-157722725 | 22 | 42.023 | KV453106.1 | 2116729 | 17-scf00428 | 17 |
| AX-158270333 | 22 | 42.023 | KV453106.1 | 2117544 | 17-scf00428 | 17 |
| AX-158270334 | 22 | 42.023 | KV453106.1 | 2118619 | 17-scf00428 | 17 |
| AX-158270337 | 22 | 42.023 | KV453106.1 | 2125702 | 17-scf00428 | 17 |
| AX-158270339 | 22 | 42.023 | KV453106.1 | 2127077 | 17-scf00428 | 17 |
| AX-158270341 | 22 | 42.124 | KV453106.1 | 2128749 | 17-scf00428 | 17 |
| AX-157843781 | 22 | 42.296 | KV453106.1 | 2129109 | 17-scf00428 | 17 |
| AX-158270342 | 22 | 42.296 | KV453106.1 | 2133752 | 17-scf00428 | 17 |
| AX-158270343 | 22 | 42.296 | KV453106.1 | 2134257 | 17-scf00428 | 17 |
| AX-158270345 | 22 | 42.296 | KV453106.1 | 2135613 | 17-scf00428 | 17 |
| AX-157737961 | 22 | 42.569 | KV453106.1 | 2135771 | 17-scf00428 | 17 |
| AX-158270346 | 22 | 42.569 | KV453106.1 | 2136361 | 17-scf00428 | 17 |
| AX-158270347 | 22 | 42.569 | KV453106.1 | 2137677 | 17-scf00428 | 17 |
| AX-157725210 | 22 | 42.569 | KV453106.1 | 2138635 | 17-scf00428 | 17 |
| AX-157843783 | 22 | 42.569 | KV453106.1 | 2141097 | 17-scf00428 | 17 |
| AX-158270350 | 22 | 42.569 | KV453106.1 | 2141839 | 17-scf00428 | 17 |
| AX-158419313 | 22 | 42.569 | KV453106.1 | 2142096 | 17-scf00428 | 17 |
| AX-157843784 | 22 | 42.569 | KV453106.1 | 2143850 | 17-scf00428 | 17 |
| AX-158381138 | 22 | 42.806 | KV453106.1 | 2148118 | 17-scf00428 | 17 |
| AX-158270356 | 22 | 42.806 | KV453106.1 | 2149820 | 17-scf00428 | 17 |
| AX-157746590 | 22 | 42.806 | KV453106.1 | 2153144 | 17-scf00428 | 17 |
| AX-158270361 | 22 | 43.003 | KV453106.1 | 2156448 | 17-scf00428 | 17 |
| AX-158270366 | 22 | 43.395 | KV453106.1 | 2160428 | 17-scf00428 | 17 |
| AX-158270367 | 22 | 43.397 | KV453106.1 | 2160867 | 17-scf00428 | 17 |
| AX-158270368 | 22 | 43.397 | KV453106.1 | 2161972 | 17-scf00428 | 17 |
| AX-158270370 | 22 | 43.663 | KV453106.1 | 2164561 | 17-scf00428 | 17 |
| AX-158387356 | 22 | 43.816 | KV453106.1 | 2167889 | 17-scf00428 | 17 |
| AX-157751353 | 22 | 44.052 | KV453106.1 | 2169894 | 17-scf00428 | 17 |
| AX-157702669 | 22 | 44.115 | KV453106.1 | 2172555 | 17-scf00428 | 17 |
| AX-157843787 | 22 | 44.323 | KV453106.1 | 2173924 | 17-scf00428 | 17 |
| AX-158270378 | 22 | 44.323 | KV453106.1 | 2174303 | 17-scf00428 | 17 |
| AX-158270381 | 22 | 44.323 | KV453106.1 | 2177339 | 17-scf00428 | 17 |
| AX-158270382 | 22 | 44.323 | KV453106.1 | 2178829 | 17-scf00428 | 17 |
| AX-158270384 | 22 | 44.323 | KV453106.1 | 2180349 | 17-scf00428 | 17 |
| AX-157748752 | 22 | 44.323 | KV453106.1 | 2208154 | 17-scf00428 | 17 |
| AX-158270387 | 22 | 44.4   | KV453106.1 | 2185717 | 17-scf00428 | 17 |
| AX-158270388 | 22 | 44.465 | KV453106.1 | 2186609 | 17-scf00428 | 17 |
| AX-157843788 | 22 | 44.541 | KV453106.1 | 2188850 | 17-scf00428 | 17 |
| AX-158270389 | 22 | 44.541 | KV453106.1 | 2189049 | 17-scf00428 | 17 |
| AX-158270390 | 22 | 44.541 | KV453106.1 | 2189371 | 17-scf00428 | 17 |
| AX-158270392 | 22 | 44.541 | KV453106.1 | 2190725 | 17-scf00428 | 17 |
| AX-158270393 | 22 | 44.541 | KV453106.1 | 2192717 | 17-scf00428 | 17 |
| AX-158270396 | 22 | 44.541 | KV453106.1 | 2196315 | 17-scf00428 | 17 |
| AX-158270401 | 22 | 44.541 | KV453106.1 | 2201196 | 17-scf00428 | 17 |
| AX-158270402 | 22 | 44.541 | KV453106.1 | 2202885 | 17-scf00428 | 17 |
| AX-158270403 | 22 | 44.76  | KV453106.1 | 2203753 | 17-scf00428 | 17 |

|              |    |        |            |         |             |    |
|--------------|----|--------|------------|---------|-------------|----|
| AX-158270406 | 22 | 44.979 | KV453106.1 | 2217391 | 17-scf00428 | 17 |
| AX-158270410 | 22 | 45.088 | KV453106.1 | 2223471 | 17-scf00428 | 17 |
| AX-158270414 | 22 | 45.088 | KV453106.1 | 2225796 | 17-scf00428 | 17 |
| AX-158270415 | 22 | 45.088 | KV453106.1 | 2229074 | 17-scf00428 | 17 |
| AX-158270418 | 22 | 45.088 | KV453106.1 | 2232413 | 17-scf00428 | 17 |
| AX-158270420 | 22 | 45.088 | KV453106.1 | 2237730 | 17-scf00428 | 17 |
| AX-157843792 | 22 | 45.409 | KV453106.1 | 2239108 | 17-scf00428 | 17 |
| AX-158270422 | 22 | 45.409 | KV453106.1 | 2239212 | 17-scf00428 | 17 |
| AX-158270432 | 22 | 45.409 | KV453106.1 | 2252958 | 17-scf00428 | 17 |
| AX-158270428 | 22 | 45.732 | KV453106.1 | 2249074 | 17-scf00428 | 17 |
| AX-158270431 | 22 | 45.751 | KV453106.1 | 2252601 | 17-scf00428 | 17 |
| AX-158270438 | 22 | 46.403 | KV453106.1 | 2263844 | 17-scf00428 | 17 |
| AX-158270439 | 22 | 46.403 | KV453106.1 | 2264520 | 17-scf00428 | 17 |
| AX-158270440 | 22 | 46.403 | KV453106.1 | 2264645 | 17-scf00428 | 17 |
| AX-158270441 | 22 | 46.403 | KV453106.1 | 2265286 | 17-scf00428 | 17 |
| AX-158270444 | 22 | 46.403 | KV453106.1 | 2268634 | 17-scf00428 | 17 |
| AX-158270448 | 22 | 46.441 | KV453106.1 | 2274417 | 17-scf00428 | 17 |
| AX-158270474 | 22 | 46.441 | KV453107.1 | 37832   | 17-scf00429 | 17 |
| AX-158270472 | 22 | 46.557 | KV453107.1 | 31695   | 17-scf00429 | 17 |
| AX-158270475 | 22 | 46.557 | KV453107.1 | 38148   | 17-scf00429 | 17 |
| AX-158270490 | 22 | 46.557 | KV453107.1 | 55995   | 17-scf00429 | 17 |
| AX-158270477 | 22 | 46.863 | KV453107.1 | 40583   | 17-scf00429 | 17 |
| AX-158270479 | 22 | 46.863 | KV453107.1 | 44243   | 17-scf00429 | 17 |
| AX-158270485 | 22 | 47.169 | KV453107.1 | 51662   | 17-scf00429 | 17 |
| AX-158270487 | 22 | 47.169 | KV453107.1 | 52794   | 17-scf00429 | 17 |
| AX-158381139 | 22 | 47.169 | KV453107.1 | 54270   | 17-scf00429 | 17 |
| AX-157770719 | 22 | 47.169 | KV453107.1 | 54765   | 17-scf00429 | 17 |
| AX-158270501 | 22 | 47.169 | KV453107.1 | 67047   | 17-scf00429 | 17 |
| AX-158270495 | 22 | 47.292 | KV453107.1 | 64085   | 17-scf00429 | 17 |
| AX-158270502 | 22 | 47.292 | KV453107.1 | 67267   | 17-scf00429 | 17 |
| AX-157748881 | 22 | 47.389 | KV453107.1 | 69309   | 17-scf00429 | 17 |
| AX-157843795 | 22 | 47.604 | KV453107.1 | 70424   | 17-scf00429 | 17 |
| AX-158270517 | 22 | 47.604 | KV453107.1 | 90621   | 17-scf00429 | 17 |
| AX-158270494 | 22 | 47.606 | KV453107.1 | 60331   | 17-scf00429 | 17 |
| AX-158270511 | 22 | 47.606 | KV453107.1 | 81581   | 17-scf00429 | 17 |
| AX-158416577 | 22 | 47.606 | KV453107.1 | 83653   | 17-scf00429 | 17 |
| AX-157745508 | 22 | 47.606 | KV453107.1 | 84196   | 17-scf00429 | 17 |
| AX-157867498 | 22 | 47.606 | KV453107.1 | 87116   | 17-scf00429 | 17 |
| AX-158270515 | 22 | 47.606 | KV453107.1 | 88877   | 17-scf00429 | 17 |
| AX-158270516 | 22 | 47.606 | KV453107.1 | 89576   | 17-scf00429 | 17 |
| AX-158270519 | 22 | 47.606 | KV453107.1 | 91487   | 17-scf00429 | 17 |
| AX-158270521 | 22 | 47.606 | KV453107.1 | 93916   | 17-scf00429 | 17 |
| AX-158270524 | 22 | 47.606 | KV453107.1 | 96733   | 17-scf00429 | 17 |
| AX-158394842 | 22 | 47.606 | KV453107.1 | 96906   | 17-scf00429 | 17 |
| AX-158270526 | 22 | 47.606 | KV453107.1 | 97933   | 17-scf00429 | 17 |
| AX-158270529 | 22 | 47.898 | KV453107.1 | 101068  | 17-scf00429 | 17 |
| AX-157697998 | 22 | 47.898 | KV453107.1 | 101655  | 17-scf00429 | 17 |
| AX-158270531 | 22 | 47.898 | KV453107.1 | 102644  | 17-scf00429 | 17 |
| AX-157772070 | 22 | 47.898 | KV453107.1 | 104411  | 17-scf00429 | 17 |
| AX-157843799 | 22 | 48.189 | KV453107.1 | 107811  | 17-scf00429 | 17 |
| AX-158270533 | 22 | 48.189 | KV453107.1 | 108131  | 17-scf00429 | 17 |

|              |    |        |             |        |             |    |
|--------------|----|--------|-------------|--------|-------------|----|
| AX-158381140 | 22 | 48.335 | KV453107.1  | 110425 | 17-scf00429 | 17 |
| AX-158270546 | 22 | 48.335 | KV453109.1  | 2326   | 17-scf00430 | 17 |
| AX-158270538 | 22 | 48.481 | KV453107.1  | 113796 | 17-scf00429 | 17 |
| AX-158270541 | 22 | 48.481 | KV453107.1  | 116861 | 17-scf00429 | 17 |
| AX-158270542 | 22 | 48.481 | KV453107.1  | 119207 | 17-scf00429 | 17 |
| AX-158270547 | 22 | 48.482 | KV453109.1  | 3665   | 17-scf00430 | 17 |
| AX-158270548 | 22 | 48.482 | KV453109.1  | 5392   | 17-scf00430 | 17 |
| AX-157843803 | 22 | 48.486 | KV453109.1  | 7005   | 17-scf00430 | 17 |
| AX-158270552 | 22 | 48.495 | KV453109.1  | 10754  | 17-scf00430 | 17 |
| AX-158270553 | 22 | 48.81  | KV453109.1  | 12963  | 17-scf00430 | 17 |
| AX-158270554 | 22 | 48.856 | KV453109.1  | 13600  | 17-scf00430 | 17 |
| AX-158270556 | 22 | 48.916 | KV453109.1  | 19249  | 17-scf00430 | 17 |
| AX-158270561 | 22 | 48.974 | KV453109.1  | 27026  | 17-scf00430 | 17 |
| AX-158270560 | 22 | 49.137 | KV453109.1  | 26104  | 17-scf00430 | 17 |
| AX-158270563 | 22 | 49.137 | KV453109.1  | 27739  | 17-scf00430 | 17 |
| AX-158270565 | 22 | 49.137 | KV453109.1  | 29736  | 17-scf00430 | 17 |
| AX-158270566 | 22 | 49.137 | KV453109.1  | 30293  | 17-scf00430 | 17 |
| AX-158270572 | 22 | 49.137 | KV453109.1  | 38396  | 17-scf00430 | 17 |
| AX-158270573 | 22 | 49.137 | KV453109.1  | 39190  | 17-scf00430 | 17 |
| AX-158270574 | 22 | 49.137 | KV453109.1  | 40819  | 17-scf00430 | 17 |
| AX-157707491 | 22 | 49.137 | 3ML01034393 | 273    | scf10067_1  | UN |
| AX-157843801 | 22 | 49.356 | KV453109.1  | 1859   | 17-scf00430 | 17 |
| AX-157843805 | 22 | 49.356 | KV453109.1  | 21563  | 17-scf00430 | 17 |
| AX-158270580 | 22 | 49.356 | KV453109.1  | 45982  | 17-scf00430 | 17 |
| AX-158270581 | 22 | 49.356 | KV453109.1  | 46591  | 17-scf00430 | 17 |
| AX-158270583 | 22 | 49.356 | KV453109.1  | 48707  | 17-scf00430 | 17 |
| AX-158270585 | 22 | 49.356 | KV453109.1  | 50231  | 17-scf00430 | 17 |
| AX-158270612 | 22 | 49.356 | KV453109.1  | 82875  | 17-scf00430 | 17 |
| AX-158270614 | 22 | 49.356 | KV453109.1  | 86453  | 17-scf00430 | 17 |
| AX-158270589 | 22 | 49.621 | KV453109.1  | 53357  | 17-scf00430 | 17 |
| AX-157758525 | 22 | 49.621 | KV453109.1  | 56998  | 17-scf00430 | 17 |
| AX-157843806 | 22 | 49.621 | KV453109.1  | 57083  | 17-scf00430 | 17 |
| AX-158270591 | 22 | 49.982 | KV453109.1  | 59433  | 17-scf00430 | 17 |
| AX-158270593 | 22 | 49.982 | KV453109.1  | 61336  | 17-scf00430 | 17 |
| AX-158270595 | 22 | 49.982 | KV453109.1  | 62988  | 17-scf00430 | 17 |
| AX-158270596 | 22 | 49.982 | KV453109.1  | 64978  | 17-scf00430 | 17 |
| AX-158387360 | 22 | 49.982 | KV453109.1  | 66857  | 17-scf00430 | 17 |
| AX-158270605 | 22 | 49.982 | KV453109.1  | 74177  | 17-scf00430 | 17 |
| AX-158270619 | 22 | 49.982 | KV453109.1  | 91769  | 17-scf00430 | 17 |
| AX-158270636 | 22 | 49.982 | KV453109.1  | 107493 | 17-scf00430 | 17 |
| AX-158270641 | 22 | 49.982 | KV453109.1  | 116229 | 17-scf00430 | 17 |
| AX-158270647 | 22 | 49.982 | KV453109.1  | 122934 | 17-scf00430 | 17 |
| AX-158270606 | 22 | 50.119 | KV453109.1  | 74913  | 17-scf00430 | 17 |
| AX-158270610 | 22 | 50.121 | KV453109.1  | 81101  | 17-scf00430 | 17 |
| AX-158270611 | 22 | 50.121 | KV453109.1  | 81339  | 17-scf00430 | 17 |
| AX-157843807 | 22 | 50.121 | KV453109.1  | 85740  | 17-scf00430 | 17 |
| AX-158270608 | 22 | 50.339 | KV453109.1  | 77457  | 17-scf00430 | 17 |
| AX-158270616 | 22 | 50.339 | KV453109.1  | 88162  | 17-scf00430 | 17 |
| AX-158270618 | 22 | 50.339 | KV453109.1  | 89847  | 17-scf00430 | 17 |
| AX-158270622 | 22 | 50.339 | KV453109.1  | 94585  | 17-scf00430 | 17 |
| AX-158270624 | 22 | 50.339 | KV453109.1  | 95263  | 17-scf00430 | 17 |

|              |    |        |            |        |             |    |
|--------------|----|--------|------------|--------|-------------|----|
| AX-158270626 | 22 | 50.339 | KV453109.1 | 96178  | 17-scf00430 | 17 |
| AX-158270628 | 22 | 50.339 | KV453109.1 | 98765  | 17-scf00430 | 17 |
| AX-158270633 | 22 | 50.339 | KV453109.1 | 105859 | 17-scf00430 | 17 |
| AX-158270638 | 22 | 50.339 | KV453109.1 | 111157 | 17-scf00430 | 17 |
| AX-158270634 | 22 | 50.34  | KV453109.1 | 106547 | 17-scf00430 | 17 |
| AX-158270615 | 22 | 50.558 | KV453109.1 | 87562  | 17-scf00430 | 17 |
| AX-158270635 | 22 | 50.558 | KV453109.1 | 107251 | 17-scf00430 | 17 |
| AX-157751587 | 22 | 50.558 | KV453109.1 | 109142 | 17-scf00430 | 17 |
| AX-158270637 | 22 | 50.558 | KV453109.1 | 110285 | 17-scf00430 | 17 |
| AX-158270640 | 22 | 50.558 | KV453109.1 | 115191 | 17-scf00430 | 17 |
| AX-158270642 | 22 | 50.558 | KV453109.1 | 117726 | 17-scf00430 | 17 |
| AX-158270643 | 22 | 50.558 | KV453109.1 | 118781 | 17-scf00430 | 17 |
| AX-158270645 | 22 | 50.558 | KV453109.1 | 120922 | 17-scf00430 | 17 |
| AX-158270651 | 22 | 50.558 | KV453109.1 | 126937 | 17-scf00430 | 17 |
| AX-158270685 | 22 | 50.558 | KV453109.1 | 168625 | 17-scf00430 | 17 |
| AX-158270652 | 22 | 50.603 | KV453109.1 | 128893 | 17-scf00430 | 17 |
| AX-157722527 | 22 | 50.603 | KV453109.1 | 157943 | 17-scf00430 | 17 |
| AX-158270655 | 22 | 50.639 | KV453109.1 | 130838 | 17-scf00430 | 17 |
| AX-157843808 | 22 | 50.667 | KV453109.1 | 92085  | 17-scf00430 | 17 |
| AX-158270620 | 22 | 50.667 | KV453109.1 | 92486  | 17-scf00430 | 17 |
| AX-158270648 | 22 | 50.667 | KV453109.1 | 122999 | 17-scf00430 | 17 |
| AX-158270658 | 22 | 50.667 | KV453109.1 | 134404 | 17-scf00430 | 17 |
| AX-158270659 | 22 | 50.667 | KV453109.1 | 135223 | 17-scf00430 | 17 |
| AX-158270663 | 22 | 50.667 | KV453109.1 | 138936 | 17-scf00430 | 17 |
| AX-158270664 | 22 | 50.667 | KV453109.1 | 139857 | 17-scf00430 | 17 |
| AX-158270666 | 22 | 50.667 | KV453109.1 | 142045 | 17-scf00430 | 17 |
| AX-158270668 | 22 | 50.667 | KV453109.1 | 143955 | 17-scf00430 | 17 |
| AX-158270670 | 22 | 50.667 | KV453109.1 | 149199 | 17-scf00430 | 17 |
| AX-158270674 | 22 | 50.667 | KV453109.1 | 152578 | 17-scf00430 | 17 |
| AX-158270675 | 22 | 50.667 | KV453109.1 | 154890 | 17-scf00430 | 17 |
| AX-158270676 | 22 | 50.667 | KV453109.1 | 156276 | 17-scf00430 | 17 |
| AX-158270677 | 22 | 50.667 | KV453109.1 | 157033 | 17-scf00430 | 17 |
| AX-158270680 | 22 | 50.667 | KV453109.1 | 159972 | 17-scf00430 | 17 |
| AX-157843809 | 22 | 50.667 | KV453109.1 | 161404 | 17-scf00430 | 17 |
| AX-157724593 | 22 | 50.667 | KV453109.1 | 164185 | 17-scf00430 | 17 |
| AX-158270682 | 22 | 50.667 | KV453109.1 | 166543 | 17-scf00430 | 17 |
| AX-158270683 | 22 | 50.667 | KV453109.1 | 166636 | 17-scf00430 | 17 |
| AX-157775373 | 22 | 50.758 | KV453109.1 | 153217 | 17-scf00430 | 17 |
| AX-158270686 | 22 | 50.758 | KV453109.1 | 168989 | 17-scf00430 | 17 |
| AX-158270696 | 22 | 50.831 | KV453109.1 | 186331 | 17-scf00430 | 17 |
| AX-158270697 | 22 | 50.915 | KV453109.1 | 188529 | 17-scf00430 | 17 |
| AX-158270698 | 22 | 50.994 | KV453109.1 | 189833 | 17-scf00430 | 17 |
| AX-158270699 | 22 | 50.994 | KV453109.1 | 191047 | 17-scf00430 | 17 |
| AX-158270703 | 22 | 50.994 | KV453109.1 | 196430 | 17-scf00430 | 17 |
| AX-158270681 | 22 | 50.995 | KV453109.1 | 163862 | 17-scf00430 | 17 |
| AX-158270702 | 22 | 50.995 | KV453109.1 | 196058 | 17-scf00430 | 17 |
| AX-157709475 | 22 | 50.995 | KV453109.1 | 200023 | 17-scf00430 | 17 |
| AX-158270705 | 22 | 50.995 | KV453109.1 | 200410 | 17-scf00430 | 17 |
| AX-158270706 | 22 | 50.995 | KV453109.1 | 200771 | 17-scf00430 | 17 |
| AX-158270708 | 22 | 50.995 | KV453109.1 | 202756 | 17-scf00430 | 17 |
| AX-158270710 | 22 | 50.996 | KV453109.1 | 204193 | 17-scf00430 | 17 |

|              |    |        |             |        |             |    |
|--------------|----|--------|-------------|--------|-------------|----|
| AX-158270712 | 22 | 50.997 | KV453109.1  | 205053 | 17-scf00430 | 17 |
| AX-157706204 | 22 | 50.997 | 3ML01032185 | 502    | scf07801_1  | UN |
| AX-158270721 | 22 | 51.208 | KV453109.1  | 221149 | 17-scf00430 | 17 |
| AX-158270711 | 22 | 51.396 | KV453109.1  | 204672 | 17-scf00430 | 17 |
| AX-158270723 | 22 | 51.396 | KV453109.1  | 226991 | 17-scf00430 | 17 |
| AX-158416581 | 22 | 51.512 | KV453109.1  | 229154 | 17-scf00430 | 17 |
| AX-157709941 | 22 | 51.512 | KV453109.1  | 231147 | 17-scf00430 | 17 |
| AX-158270727 | 22 | 51.87  | KV453109.1  | 233329 | 17-scf00430 | 17 |
| AX-158270729 | 22 | 51.871 | KV453109.1  | 235881 | 17-scf00430 | 17 |
| AX-158270731 | 22 | 51.871 | KV453109.1  | 237010 | 17-scf00430 | 17 |
| AX-158419317 | 22 | 51.871 | KV453109.1  | 238382 | 17-scf00430 | 17 |
| AX-158394843 | 22 | 51.871 | KV453109.1  | 247367 | 17-scf00430 | 17 |
| AX-158270738 | 22 | 51.887 | KV453109.1  | 249240 | 17-scf00430 | 17 |
| AX-158270741 | 22 | 51.887 | KV453109.1  | 253531 | 17-scf00430 | 17 |
| AX-157746082 | 22 | 51.949 | KV453109.1  | 257580 | 17-scf00430 | 17 |
| AX-158270743 | 22 | 52.005 | KV453109.1  | 260995 | 17-scf00430 | 17 |
| AX-157843810 | 22 | 52.005 | KV453109.1  | 263548 | 17-scf00430 | 17 |
| AX-158270746 | 22 | 52.005 | KV453109.1  | 269753 | 17-scf00430 | 17 |
| AX-158270748 | 22 | 52.867 | KV453109.1  | 274034 | 17-scf00430 | 17 |
| AX-158270750 | 22 | 52.955 | KV453109.1  | 275160 | 17-scf00430 | 17 |
| AX-158270753 | 22 | 52.961 | KV453109.1  | 279857 | 17-scf00430 | 17 |
| AX-158270749 | 22 | 52.967 | KV453109.1  | 274742 | 17-scf00430 | 17 |
| AX-158270758 | 22 | 52.967 | KV453109.1  | 283523 | 17-scf00430 | 17 |
| AX-158270759 | 22 | 52.967 | KV453109.1  | 284967 | 17-scf00430 | 17 |
| AX-157719293 | 22 | 52.967 | KV453109.1  | 285577 | 17-scf00430 | 17 |
| AX-158270760 | 22 | 52.967 | KV453109.1  | 287648 | 17-scf00430 | 17 |
| AX-157707614 | 22 | 52.967 | KV453109.1  | 289341 | 17-scf00430 | 17 |
| AX-158270762 | 22 | 52.967 | KV453109.1  | 291752 | 17-scf00430 | 17 |
| AX-158270763 | 22 | 52.967 | KV453109.1  | 292265 | 17-scf00430 | 17 |
| AX-157747000 | 22 | 52.967 | KV453109.1  | 297793 | 17-scf00430 | 17 |
| AX-158270765 | 22 | 52.967 | KV453109.1  | 300558 | 17-scf00430 | 17 |
| AX-158270766 | 22 | 52.967 | KV453109.1  | 300995 | 17-scf00430 | 17 |
| AX-157746413 | 22 | 52.967 | KV453109.1  | 302577 | 17-scf00430 | 17 |
| AX-158270768 | 22 | 52.967 | KV453109.1  | 304580 | 17-scf00430 | 17 |
| AX-158270769 | 22 | 52.967 | KV453109.1  | 305318 | 17-scf00430 | 17 |
| AX-158270770 | 22 | 52.967 | KV453109.1  | 305949 | 17-scf00430 | 17 |
| AX-158270772 | 22 | 53.076 | KV453109.1  | 309534 | 17-scf00430 | 17 |
| AX-157843811 | 22 | 53.076 | KV453109.1  | 310142 | 17-scf00430 | 17 |
| AX-157709029 | 22 | 53.513 | KV453109.1  | 317930 | 17-scf00430 | 17 |
| AX-158270780 | 22 | 53.513 | KV453109.1  | 332765 | 17-scf00430 | 17 |
| AX-157708377 | 22 | 53.513 | KV453109.1  | 333986 | 17-scf00430 | 17 |
| AX-157714199 | 22 | 53.513 | KV453109.1  | 334260 | 17-scf00430 | 17 |
| AX-157749179 | 22 | 53.513 | KV453109.1  | 336690 | 17-scf00430 | 17 |
| AX-157715153 | 22 | 53.513 | KV453109.1  | 346441 | 17-scf00430 | 17 |
| AX-158411346 | 22 | 53.513 | KV453109.1  | 614536 | 17-scf00430 | 17 |
| AX-158270783 | 22 | 53.548 | KV453109.1  | 338912 | 17-scf00430 | 17 |
| AX-158270788 | 22 | 53.622 | KV453109.1  | 343908 | 17-scf00430 | 17 |
| AX-158270790 | 22 | 53.622 | KV453109.1  | 344833 | 17-scf00430 | 17 |
| AX-157691069 | 22 | 53.622 | KV453109.1  | 346181 | 17-scf00430 | 17 |
| AX-158270792 | 22 | 53.622 | KV453109.1  | 346506 | 17-scf00430 | 17 |
| AX-157718600 | 22 | 53.622 | KV453109.1  | 574156 | 17-scf00430 | 17 |

|              |    |        |             |        |             |    |
|--------------|----|--------|-------------|--------|-------------|----|
| AX-157843828 | 22 | 53.622 | KV453109.1  | 584338 | 17-scf00430 | 17 |
| AX-158270798 | 22 | 53.841 | KV453109.1  | 364619 | 17-scf00430 | 17 |
| AX-158270799 | 22 | 53.841 | KV453109.1  | 365815 | 17-scf00430 | 17 |
| AX-158270803 | 22 | 53.841 | KV453109.1  | 374947 | 17-scf00430 | 17 |
| AX-158270804 | 22 | 53.841 | KV453109.1  | 375325 | 17-scf00430 | 17 |
| AX-158270883 | 22 | 53.841 | KV453109.1  | 485533 | 17-scf00430 | 17 |
| AX-158270944 | 22 | 53.841 | KV453109.1  | 580466 | 17-scf00430 | 17 |
| AX-157706970 | 22 | 53.841 | 3ML01033262 | 188    | scf08903_1  | UN |
| AX-158270812 | 22 | 53.95  | KV453109.1  | 388781 | 17-scf00430 | 17 |
| AX-158270813 | 22 | 53.95  | KV453109.1  | 389314 | 17-scf00430 | 17 |
| AX-158270824 | 22 | 53.95  | KV453109.1  | 401954 | 17-scf00430 | 17 |
| AX-158270833 | 22 | 53.95  | KV453109.1  | 412525 | 17-scf00430 | 17 |
| AX-157721654 | 22 | 53.95  | KV453109.1  | 418765 | 17-scf00430 | 17 |
| AX-158270844 | 22 | 53.95  | KV453109.1  | 424369 | 17-scf00430 | 17 |
| AX-158270845 | 22 | 53.95  | KV453109.1  | 425448 | 17-scf00430 | 17 |
| AX-158270846 | 22 | 53.95  | KV453109.1  | 426102 | 17-scf00430 | 17 |
| AX-158270850 | 22 | 53.95  | KV453109.1  | 432884 | 17-scf00430 | 17 |
| AX-158270852 | 22 | 53.95  | KV453109.1  | 434295 | 17-scf00430 | 17 |
| AX-157843819 | 22 | 53.95  | KV453109.1  | 435381 | 17-scf00430 | 17 |
| AX-158270856 | 22 | 53.95  | KV453109.1  | 440617 | 17-scf00430 | 17 |
| AX-158270857 | 22 | 53.95  | KV453109.1  | 440944 | 17-scf00430 | 17 |
| AX-158270870 | 22 | 53.95  | KV453109.1  | 462400 | 17-scf00430 | 17 |
| AX-158270874 | 22 | 53.95  | KV453109.1  | 470170 | 17-scf00430 | 17 |
| AX-158270876 | 22 | 53.95  | KV453109.1  | 478968 | 17-scf00430 | 17 |
| AX-158270878 | 22 | 53.95  | KV453109.1  | 481232 | 17-scf00430 | 17 |
| AX-158270881 | 22 | 53.95  | KV453109.1  | 484392 | 17-scf00430 | 17 |
| AX-158270882 | 22 | 53.95  | KV453109.1  | 485107 | 17-scf00430 | 17 |
| AX-158270884 | 22 | 53.95  | KV453109.1  | 486117 | 17-scf00430 | 17 |
| AX-158270885 | 22 | 53.95  | KV453109.1  | 486756 | 17-scf00430 | 17 |
| AX-158270886 | 22 | 53.95  | KV453109.1  | 486999 | 17-scf00430 | 17 |
| AX-158270887 | 22 | 53.95  | KV453109.1  | 487764 | 17-scf00430 | 17 |
| AX-158270888 | 22 | 53.95  | KV453109.1  | 490526 | 17-scf00430 | 17 |
| AX-158270890 | 22 | 53.95  | KV453109.1  | 494011 | 17-scf00430 | 17 |
| AX-158270896 | 22 | 53.95  | KV453109.1  | 509279 | 17-scf00430 | 17 |
| AX-158270897 | 22 | 53.95  | KV453109.1  | 509655 | 17-scf00430 | 17 |
| AX-158270898 | 22 | 53.95  | KV453109.1  | 510051 | 17-scf00430 | 17 |
| AX-158270900 | 22 | 53.95  | KV453109.1  | 516319 | 17-scf00430 | 17 |
| AX-157843823 | 22 | 53.95  | KV453109.1  | 519819 | 17-scf00430 | 17 |
| AX-158270902 | 22 | 53.95  | KV453109.1  | 525396 | 17-scf00430 | 17 |
| AX-158270903 | 22 | 53.95  | KV453109.1  | 526688 | 17-scf00430 | 17 |
| AX-158270904 | 22 | 53.95  | KV453109.1  | 527282 | 17-scf00430 | 17 |
| AX-157770960 | 22 | 53.95  | KV453109.1  | 527957 | 17-scf00430 | 17 |
| AX-158270907 | 22 | 53.95  | KV453109.1  | 532516 | 17-scf00430 | 17 |
| AX-158270909 | 22 | 53.95  | KV453109.1  | 534165 | 17-scf00430 | 17 |
| AX-157762754 | 22 | 53.95  | KV453109.1  | 535059 | 17-scf00430 | 17 |
| AX-158270911 | 22 | 53.95  | KV453109.1  | 536706 | 17-scf00430 | 17 |
| AX-157880556 | 22 | 53.95  | KV453109.1  | 543125 | 17-scf00430 | 17 |
| AX-158270917 | 22 | 53.95  | KV453109.1  | 548059 | 17-scf00430 | 17 |
| AX-157758120 | 22 | 53.95  | KV453109.1  | 550036 | 17-scf00430 | 17 |
| AX-158270925 | 22 | 53.95  | KV453109.1  | 553343 | 17-scf00430 | 17 |
| AX-157843826 | 22 | 53.95  | KV453109.1  | 554943 | 17-scf00430 | 17 |

|              |    |        |            |        |             |    |
|--------------|----|--------|------------|--------|-------------|----|
| AX-158270930 | 22 | 53.95  | KV453109.1 | 561315 | 17-scf00430 | 17 |
| AX-157727627 | 22 | 53.95  | KV453109.1 | 562240 | 17-scf00430 | 17 |
| AX-158270931 | 22 | 53.95  | KV453109.1 | 565178 | 17-scf00430 | 17 |
| AX-158270932 | 22 | 53.95  | KV453109.1 | 567217 | 17-scf00430 | 17 |
| AX-158270933 | 22 | 53.95  | KV453109.1 | 567582 | 17-scf00430 | 17 |
| AX-158270936 | 22 | 53.95  | KV453109.1 | 570538 | 17-scf00430 | 17 |
| AX-157772826 | 22 | 53.95  | KV453109.1 | 581741 | 17-scf00430 | 17 |
| AX-158270945 | 22 | 53.95  | KV453109.1 | 583008 | 17-scf00430 | 17 |
| AX-158270955 | 22 | 53.95  | KV453109.1 | 600533 | 17-scf00430 | 17 |
| AX-158270877 | 22 | 54.168 | KV453109.1 | 479403 | 17-scf00430 | 17 |
| AX-158270938 | 22 | 54.168 | KV453109.1 | 571021 | 17-scf00430 | 17 |
| AX-157738947 | 22 | 54.168 | KV453109.1 | 572416 | 17-scf00430 | 17 |
| AX-158270948 | 22 | 54.168 | KV453109.1 | 593544 | 17-scf00430 | 17 |
| AX-158270950 | 22 | 54.168 | KV453109.1 | 597506 | 17-scf00430 | 17 |
| AX-157773136 | 22 | 54.168 | KV453109.1 | 597553 | 17-scf00430 | 17 |
| AX-158270953 | 22 | 54.168 | KV453109.1 | 599158 | 17-scf00430 | 17 |
| AX-157753706 | 22 | 54.168 | KV453109.1 | 599456 | 17-scf00430 | 17 |
| AX-158270954 | 22 | 54.168 | KV453109.1 | 599767 | 17-scf00430 | 17 |
| AX-157860110 | 22 | 54.168 | KV453109.1 | 601390 | 17-scf00430 | 17 |
| AX-158270956 | 22 | 54.168 | KV453109.1 | 601829 | 17-scf00430 | 17 |
| AX-158270958 | 22 | 54.168 | KV453109.1 | 603325 | 17-scf00430 | 17 |
| AX-157717045 | 22 | 54.168 | KV453109.1 | 604263 | 17-scf00430 | 17 |
| AX-158270962 | 22 | 54.168 | KV453109.1 | 612489 | 17-scf00430 | 17 |
| AX-158271017 | 22 | 55.306 | KV453109.1 | 666576 | 17-scf00430 | 17 |
| AX-158271018 | 22 | 55.485 | KV453109.1 | 667119 | 17-scf00430 | 17 |
| AX-158271054 | 22 | 56.365 | KV453109.1 | 708746 | 17-scf00430 | 17 |
| AX-158271057 | 22 | 56.408 | KV453109.1 | 714363 | 17-scf00430 | 17 |
| AX-158271037 | 22 | 56.449 | KV453109.1 | 689375 | 17-scf00430 | 17 |
| AX-158271052 | 22 | 56.449 | KV453109.1 | 705536 | 17-scf00430 | 17 |
| AX-158271060 | 22 | 56.449 | KV453109.1 | 716180 | 17-scf00430 | 17 |
| AX-157741843 | 22 | 56.449 | KV453109.1 | 766332 | 17-scf00430 | 17 |
| AX-158271067 | 22 | 56.486 | KV453109.1 | 720397 | 17-scf00430 | 17 |
| AX-158271074 | 22 | 56.525 | KV453109.1 | 727948 | 17-scf00430 | 17 |
| AX-158271077 | 22 | 56.572 | KV453109.1 | 730858 | 17-scf00430 | 17 |
| AX-158271093 | 22 | 56.741 | KV453109.1 | 750941 | 17-scf00430 | 17 |
| AX-158271095 | 22 | 56.809 | KV453109.1 | 755027 | 17-scf00430 | 17 |
| AX-158271097 | 22 | 57.2   | KV453109.1 | 756155 | 17-scf00430 | 17 |
| AX-158271105 | 22 | 57.936 | KV453109.1 | 768025 | 17-scf00430 | 17 |
| AX-158271152 | 22 | 57.936 | KV453109.1 | 821587 | 17-scf00430 | 17 |
| AX-158271153 | 22 | 57.936 | KV453109.1 | 822160 | 17-scf00430 | 17 |
| AX-158271157 | 22 | 57.936 | KV453109.1 | 826401 | 17-scf00430 | 17 |
| AX-157750716 | 22 | 57.936 | KV453109.1 | 862158 | 17-scf00430 | 17 |
| AX-158271022 | 22 | 58.041 | KV453109.1 | 672115 | 17-scf00430 | 17 |
| AX-158271104 | 22 | 58.041 | KV453109.1 | 765198 | 17-scf00430 | 17 |
| AX-158271109 | 22 | 58.041 | KV453109.1 | 771614 | 17-scf00430 | 17 |
| AX-158271113 | 22 | 58.138 | KV453109.1 | 780083 | 17-scf00430 | 17 |
| AX-158271121 | 22 | 58.234 | KV453109.1 | 788221 | 17-scf00430 | 17 |
| AX-158271123 | 22 | 58.839 | KV453109.1 | 794145 | 17-scf00430 | 17 |
| AX-158271146 | 22 | 58.863 | KV453109.1 | 812836 | 17-scf00430 | 17 |
| AX-158271163 | 22 | 58.863 | KV453109.1 | 834730 | 17-scf00430 | 17 |
| AX-157843831 | 22 | 58.863 | KV453109.1 | 889755 | 17-scf00430 | 17 |



|              |    |        |             |         |             |    |
|--------------|----|--------|-------------|---------|-------------|----|
| AX-158271177 | 22 | 58.864 | KV453109.1  | 846548  | 17-scf00430 | 17 |
| AX-157772357 | 22 | 58.906 | KV453109.1  | 847477  | 17-scf00430 | 17 |
| AX-158271181 | 22 | 58.906 | KV453109.1  | 852145  | 17-scf00430 | 17 |
| AX-158271182 | 22 | 59.331 | KV453109.1  | 852968  | 17-scf00430 | 17 |
| AX-158271133 | 22 | 59.341 | KV453109.1  | 802771  | 17-scf00430 | 17 |
| AX-158271194 | 22 | 59.341 | KV453109.1  | 868673  | 17-scf00430 | 17 |
| AX-158271198 | 22 | 59.341 | KV453109.1  | 874572  | 17-scf00430 | 17 |
| AX-158271608 | 22 | 59.341 | KV453109.1  | 1394181 | 17-scf00430 | 17 |
| AX-158271614 | 22 | 59.341 | KV453109.1  | 1407192 | 17-scf00430 | 17 |
| AX-158272044 | 22 | 59.341 | KV453109.1  | 2010912 | 17-scf00430 | 17 |
| AX-158271199 | 22 | 59.347 | KV453109.1  | 875132  | 17-scf00430 | 17 |
| AX-158271202 | 22 | 59.357 | KV453109.1  | 878498  | 17-scf00430 | 17 |
| AX-158271204 | 22 | 59.367 | KV453109.1  | 880029  | 17-scf00430 | 17 |
| AX-158271216 | 22 | 59.428 | KV453109.1  | 892707  | 17-scf00430 | 17 |
| AX-158271226 | 22 | 59.443 | KV453109.1  | 903688  | 17-scf00430 | 17 |
| AX-158271231 | 22 | 60.348 | KV453109.1  | 909746  | 17-scf00430 | 17 |
| AX-158271232 | 22 | 60.421 | KV453109.1  | 912374  | 17-scf00430 | 17 |
| AX-158270937 | 22 | 60.425 | KV453109.1  | 570759  | 17-scf00430 | 17 |
| AX-158271013 | 22 | 60.425 | KV453109.1  | 662063  | 17-scf00430 | 17 |
| AX-157880557 | 22 | 60.425 | KV453109.1  | 700023  | 17-scf00430 | 17 |
| AX-158271048 | 22 | 60.425 | KV453109.1  | 701838  | 17-scf00430 | 17 |
| AX-157754428 | 22 | 60.425 | KV453109.1  | 706020  | 17-scf00430 | 17 |
| AX-158271135 | 22 | 60.425 | KV453109.1  | 803981  | 17-scf00430 | 17 |
| AX-158271165 | 22 | 60.425 | KV453109.1  | 836020  | 17-scf00430 | 17 |
| AX-158271217 | 22 | 60.425 | KV453109.1  | 893613  | 17-scf00430 | 17 |
| AX-158271238 | 22 | 60.425 | KV453109.1  | 917094  | 17-scf00430 | 17 |
| AX-158271291 | 22 | 60.425 | KV453109.1  | 1002845 | 17-scf00430 | 17 |
| AX-158271317 | 22 | 60.425 | KV453109.1  | 1035403 | 17-scf00430 | 17 |
| AX-158271331 | 22 | 60.425 | KV453109.1  | 1053722 | 17-scf00430 | 17 |
| AX-158271353 | 22 | 60.425 | KV453109.1  | 1076768 | 17-scf00430 | 17 |
| AX-157738651 | 22 | 60.425 | KV453109.1  | 1089992 | 17-scf00430 | 17 |
| AX-158271637 | 22 | 60.425 | KV453109.1  | 1446384 | 17-scf00430 | 17 |
| AX-158271640 | 22 | 60.425 | KV453109.1  | 1448518 | 17-scf00430 | 17 |
| AX-158271667 | 22 | 60.425 | KV453109.1  | 1478597 | 17-scf00430 | 17 |
| AX-158271692 | 22 | 60.425 | KV453109.1  | 1504034 | 17-scf00430 | 17 |
| AX-158271713 | 22 | 60.425 | KV453109.1  | 1530130 | 17-scf00430 | 17 |
| AX-158271720 | 22 | 60.425 | KV453109.1  | 1536016 | 17-scf00430 | 17 |
| AX-158271772 | 22 | 60.425 | KV453109.1  | 1591678 | 17-scf00430 | 17 |
| AX-158271775 | 22 | 60.425 | KV453109.1  | 1596449 | 17-scf00430 | 17 |
| AX-158271829 | 22 | 60.425 | KV453109.1  | 1668243 | 17-scf00430 | 17 |
| AX-157745511 | 22 | 60.425 | KV453109.1  | 1673077 | 17-scf00430 | 17 |
| AX-158271880 | 22 | 60.425 | KV453109.1  | 1752528 | 17-scf00430 | 17 |
| AX-158271888 | 22 | 60.425 | KV453109.1  | 1761118 | 17-scf00430 | 17 |
| AX-157843871 | 22 | 60.425 | KV453109.1  | 1885117 | 17-scf00430 | 17 |
| AX-158271980 | 22 | 60.425 | KV453109.1  | 1902331 | 17-scf00430 | 17 |
| AX-158272017 | 22 | 60.425 | KV453109.1  | 1967608 | 17-scf00430 | 17 |
| AX-158272098 | 22 | 60.425 | KV453109.1  | 2076164 | 17-scf00430 | 17 |
| AX-158277098 | 22 | 60.425 | KV453116.1  | 983737  | 17-scf00437 | 17 |
| AX-158277645 | 22 | 60.425 | KV453116.1  | 1557667 | 17-scf00437 | 17 |
| AX-157687991 | 22 | 60.425 | 3ML01025401 | 5678    | scf01141_1  | UN |
| AX-157705456 | 22 | 60.425 | 3ML01029836 | 708     | scf05458_1  | UN |

|              |    |        |            |         |             |    |
|--------------|----|--------|------------|---------|-------------|----|
| AX-158271246 | 22 | 60.426 | KV453109.1 | 928868  | 17-scf00430 | 17 |
| AX-158271247 | 22 | 60.427 | KV453109.1 | 930072  | 17-scf00430 | 17 |
| AX-158271240 | 22 | 60.428 | KV453109.1 | 922826  | 17-scf00430 | 17 |
| AX-158271241 | 22 | 60.428 | KV453109.1 | 923235  | 17-scf00430 | 17 |
| AX-158271248 | 22 | 60.428 | KV453109.1 | 930993  | 17-scf00430 | 17 |
| AX-157726383 | 22 | 60.428 | KV453109.1 | 933555  | 17-scf00430 | 17 |
| AX-158271280 | 22 | 60.428 | KV453109.1 | 975779  | 17-scf00430 | 17 |
| AX-158271281 | 22 | 60.429 | KV453109.1 | 977568  | 17-scf00430 | 17 |
| AX-158271285 | 22 | 60.433 | KV453109.1 | 983578  | 17-scf00430 | 17 |
| AX-158271288 | 22 | 60.439 | KV453109.1 | 992329  | 17-scf00430 | 17 |
| AX-158271295 | 22 | 60.692 | KV453109.1 | 1007432 | 17-scf00430 | 17 |
| AX-158271297 | 22 | 60.906 | KV453109.1 | 1009262 | 17-scf00430 | 17 |
| AX-158271304 | 22 | 60.912 | KV453109.1 | 1024264 | 17-scf00430 | 17 |
| AX-158271323 | 22 | 60.912 | KV453109.1 | 1039160 | 17-scf00430 | 17 |
| AX-158271339 | 22 | 62.274 | KV453109.1 | 1062307 | 17-scf00430 | 17 |
| AX-158271355 | 22 | 62.274 | KV453109.1 | 1077633 | 17-scf00430 | 17 |
| AX-158271318 | 22 | 62.314 | KV453109.1 | 1035809 | 17-scf00430 | 17 |
| AX-158271337 | 22 | 62.314 | KV453109.1 | 1060468 | 17-scf00430 | 17 |
| AX-158271349 | 22 | 62.314 | KV453109.1 | 1070607 | 17-scf00430 | 17 |
| AX-158271358 | 22 | 62.331 | KV453109.1 | 1082539 | 17-scf00430 | 17 |
| AX-158271409 | 22 | 63.864 | KV453109.1 | 1140618 | 17-scf00430 | 17 |
| AX-158271423 | 22 | 63.879 | KV453109.1 | 1161735 | 17-scf00430 | 17 |
| AX-157771795 | 22 | 63.88  | KV453109.1 | 1161185 | 17-scf00430 | 17 |
| AX-158271426 | 22 | 63.88  | KV453109.1 | 1168574 | 17-scf00430 | 17 |
| AX-157713523 | 22 | 63.88  | KV453109.1 | 1176859 | 17-scf00430 | 17 |
| AX-158271434 | 22 | 63.88  | KV453109.1 | 1179945 | 17-scf00430 | 17 |
| AX-158271437 | 22 | 63.881 | KV453109.1 | 1181307 | 17-scf00430 | 17 |
| AX-158271438 | 22 | 63.881 | KV453109.1 | 1181719 | 17-scf00430 | 17 |
| AX-158271439 | 22 | 63.881 | KV453109.1 | 1182431 | 17-scf00430 | 17 |
| AX-158271440 | 22 | 63.881 | KV453109.1 | 1183892 | 17-scf00430 | 17 |
| AX-158271450 | 22 | 63.881 | KV453109.1 | 1192953 | 17-scf00430 | 17 |
| AX-158271459 | 22 | 63.881 | KV453109.1 | 1205663 | 17-scf00430 | 17 |
| AX-158271461 | 22 | 63.906 | KV453109.1 | 1206752 | 17-scf00430 | 17 |
| AX-158271462 | 22 | 63.951 | KV453109.1 | 1206970 | 17-scf00430 | 17 |
| AX-157721165 | 22 | 64.234 | KV453109.1 | 1223865 | 17-scf00430 | 17 |
| AX-158271485 | 22 | 64.236 | KV453109.1 | 1237481 | 17-scf00430 | 17 |
| AX-157720833 | 22 | 64.236 | KV453109.1 | 1249769 | 17-scf00430 | 17 |
| AX-158271497 | 22 | 64.236 | KV453109.1 | 1254017 | 17-scf00430 | 17 |
| AX-158271501 | 22 | 64.51  | KV453109.1 | 1261306 | 17-scf00430 | 17 |
| AX-157845160 | 22 | 64.51  | KV453114.1 | 837000  | 17-scf00439 | 17 |
| AX-158271511 | 22 | 64.587 | KV453109.1 | 1274481 | 17-scf00430 | 17 |
| AX-158271191 | 22 | 64.667 | KV453109.1 | 866232  | 17-scf00430 | 17 |
| AX-158271513 | 22 | 64.667 | KV453109.1 | 1275876 | 17-scf00430 | 17 |
| AX-158271518 | 22 | 64.768 | KV453109.1 | 1281987 | 17-scf00430 | 17 |
| AX-158394864 | 22 | 64.876 | KV453109.1 | 1288098 | 17-scf00430 | 17 |
| AX-158271541 | 22 | 64.984 | KV453109.1 | 1308615 | 17-scf00430 | 17 |
| AX-158271407 | 22 | 65.086 | KV453109.1 | 1139274 | 17-scf00430 | 17 |
| AX-158271542 | 22 | 65.086 | KV453109.1 | 1309518 | 17-scf00430 | 17 |
| AX-158271548 | 22 | 65.086 | KV453109.1 | 1316703 | 17-scf00430 | 17 |
| AX-158271549 | 22 | 65.086 | KV453109.1 | 1317581 | 17-scf00430 | 17 |
| AX-158271550 | 22 | 65.086 | KV453109.1 | 1319643 | 17-scf00430 | 17 |

|              |    |        |             |         |             |    |
|--------------|----|--------|-------------|---------|-------------|----|
| AX-158271551 | 22 | 65.086 | KV453109.1  | 1321613 | 17-scf00430 | 17 |
| AX-158271630 | 22 | 65.086 | KV453109.1  | 1428275 | 17-scf00430 | 17 |
| AX-158271706 | 22 | 65.086 | KV453109.1  | 1518059 | 17-scf00430 | 17 |
| AX-157768525 | 22 | 65.086 | KV453109.1  | 1851563 | 17-scf00430 | 17 |
| AX-158272021 | 22 | 65.086 | KV453109.1  | 1971658 | 17-scf00430 | 17 |
| AX-158271562 | 22 | 65.102 | KV453109.1  | 1338832 | 17-scf00430 | 17 |
| AX-158271588 | 22 | 65.462 | KV453109.1  | 1369000 | 17-scf00430 | 17 |
| AX-158271593 | 22 | 65.462 | KV453109.1  | 1374681 | 17-scf00430 | 17 |
| AX-157723867 | 22 | 65.654 | KV453109.1  | 1405700 | 17-scf00430 | 17 |
| AX-158271624 | 22 | 65.654 | KV453109.1  | 1419867 | 17-scf00430 | 17 |
| AX-158271610 | 22 | 65.662 | KV453109.1  | 1397884 | 17-scf00430 | 17 |
| AX-158271611 | 22 | 65.662 | KV453109.1  | 1401664 | 17-scf00430 | 17 |
| AX-158271618 | 22 | 65.662 | KV453109.1  | 1413836 | 17-scf00430 | 17 |
| AX-157743053 | 22 | 65.662 | KV453109.1  | 1420407 | 17-scf00430 | 17 |
| AX-158271626 | 22 | 65.662 | KV453109.1  | 1422952 | 17-scf00430 | 17 |
| AX-158271635 | 22 | 65.662 | KV453109.1  | 1441233 | 17-scf00430 | 17 |
| AX-157707534 | 22 | 65.662 | 3ML01034506 | 368     | scf10182_1  | UN |
| AX-158271679 | 22 | 66.651 | KV453109.1  | 1493829 | 17-scf00430 | 17 |
| AX-158271704 | 22 | 66.651 | KV453109.1  | 1516651 | 17-scf00430 | 17 |
| AX-158271689 | 22 | 66.656 | KV453109.1  | 1501803 | 17-scf00430 | 17 |
| AX-158271690 | 22 | 66.656 | KV453109.1  | 1502946 | 17-scf00430 | 17 |
| AX-158271697 | 22 | 66.8   | KV453109.1  | 1507852 | 17-scf00430 | 17 |
| AX-157742908 | 22 | 66.8   | KV453109.1  | 1513063 | 17-scf00430 | 17 |
| AX-158271700 | 22 | 66.8   | KV453109.1  | 1513783 | 17-scf00430 | 17 |
| AX-158271709 | 22 | 66.8   | KV453109.1  | 1521361 | 17-scf00430 | 17 |
| AX-158271421 | 22 | 67.085 | KV453109.1  | 1157148 | 17-scf00430 | 17 |
| AX-158271560 | 22 | 67.085 | KV453109.1  | 1335945 | 17-scf00430 | 17 |
| AX-157753035 | 22 | 67.085 | KV453109.1  | 1424336 | 17-scf00430 | 17 |
| AX-158271750 | 22 | 67.085 | KV453109.1  | 1561631 | 17-scf00430 | 17 |
| AX-158271758 | 22 | 67.085 | KV453109.1  | 1569795 | 17-scf00430 | 17 |
| AX-158271759 | 22 | 67.085 | KV453109.1  | 1571379 | 17-scf00430 | 17 |
| AX-158271764 | 22 | 67.085 | KV453109.1  | 1574654 | 17-scf00430 | 17 |
| AX-157757396 | 22 | 67.085 | KV453109.1  | 1590730 | 17-scf00430 | 17 |
| AX-158271778 | 22 | 67.085 | KV453109.1  | 1599029 | 17-scf00430 | 17 |
| AX-158271808 | 22 | 67.085 | KV453109.1  | 1626438 | 17-scf00430 | 17 |
| AX-158272425 | 22 | 67.085 | KV453111.1  | 434648  | 17-scf00432 | 17 |
| AX-158287073 | 22 | 67.085 | KV453114.1  | 613880  | 17-scf00439 | 17 |
| AX-157707315 | 22 | 67.085 | 3ML01033984 | 36      | scf09653_1  | UN |
| AX-158270964 | 22 | 67.228 | KV453109.1  | 614107  | 17-scf00430 | 17 |
| AX-158271310 | 22 | 67.228 | KV453109.1  | 1028985 | 17-scf00430 | 17 |
| AX-158271478 | 22 | 67.228 | KV453109.1  | 1225529 | 17-scf00430 | 17 |
| AX-158271798 | 22 | 67.228 | KV453109.1  | 1618777 | 17-scf00430 | 17 |
| AX-158271801 | 22 | 67.228 | KV453109.1  | 1620412 | 17-scf00430 | 17 |
| AX-158271803 | 22 | 67.228 | KV453109.1  | 1622174 | 17-scf00430 | 17 |
| AX-158271814 | 22 | 67.228 | KV453109.1  | 1635084 | 17-scf00430 | 17 |
| AX-157843843 | 22 | 67.228 | KV453109.1  | 1638407 | 17-scf00430 | 17 |
| AX-158271818 | 22 | 67.228 | KV453109.1  | 1639517 | 17-scf00430 | 17 |
| AX-158271842 | 22 | 67.228 | KV453109.1  | 1690966 | 17-scf00430 | 17 |
| AX-158271844 | 22 | 67.228 | KV453109.1  | 1691758 | 17-scf00430 | 17 |
| AX-158271850 | 22 | 67.228 | KV453109.1  | 1694810 | 17-scf00430 | 17 |
| AX-158271852 | 22 | 67.228 | KV453109.1  | 1695838 | 17-scf00430 | 17 |

|              |    |        |            |         |             |    |
|--------------|----|--------|------------|---------|-------------|----|
| AX-158271861 | 22 | 67.228 | KV453109.1 | 1721097 | 17-scf00430 | 17 |
| AX-158271870 | 22 | 67.228 | KV453109.1 | 1734666 | 17-scf00430 | 17 |
| AX-158271898 | 22 | 67.228 | KV453109.1 | 1770196 | 17-scf00430 | 17 |
| AX-157843855 | 22 | 67.228 | KV453109.1 | 1772933 | 17-scf00430 | 17 |
| AX-158271900 | 22 | 67.228 | KV453109.1 | 1774828 | 17-scf00430 | 17 |
| AX-158271901 | 22 | 67.228 | KV453109.1 | 1776131 | 17-scf00430 | 17 |
| AX-158271902 | 22 | 67.228 | KV453109.1 | 1777676 | 17-scf00430 | 17 |
| AX-157843856 | 22 | 67.228 | KV453109.1 | 1778359 | 17-scf00430 | 17 |
| AX-158271907 | 22 | 67.228 | KV453109.1 | 1789158 | 17-scf00430 | 17 |
| AX-158271908 | 22 | 67.228 | KV453109.1 | 1789604 | 17-scf00430 | 17 |
| AX-157802527 | 22 | 67.228 | KV453109.1 | 1793561 | 17-scf00430 | 17 |
| AX-158271909 | 22 | 67.228 | KV453109.1 | 1795043 | 17-scf00430 | 17 |
| AX-157775396 | 22 | 67.228 | KV453109.1 | 1795557 | 17-scf00430 | 17 |
| AX-158271910 | 22 | 67.228 | KV453109.1 | 1798880 | 17-scf00430 | 17 |
| AX-158271911 | 22 | 67.228 | KV453109.1 | 1799437 | 17-scf00430 | 17 |
| AX-158271912 | 22 | 67.228 | KV453109.1 | 1800569 | 17-scf00430 | 17 |
| AX-158271941 | 22 | 67.228 | KV453109.1 | 1841988 | 17-scf00430 | 17 |
| AX-158272049 | 22 | 67.228 | KV453109.1 | 2021140 | 17-scf00430 | 17 |
| AX-157843885 | 22 | 67.228 | KV453109.1 | 2034668 | 17-scf00430 | 17 |
| AX-158272282 | 22 | 67.228 | KV453111.1 | 223926  | 17-scf00432 | 17 |
| AX-158272385 | 22 | 67.228 | KV453111.1 | 368633  | 17-scf00432 | 17 |
| AX-158272539 | 22 | 67.228 | KV453111.1 | 555242  | 17-scf00432 | 17 |
| AX-158272136 | 22 | 67.361 | KV453111.1 | 37310   | 17-scf00432 | 17 |
| AX-158272138 | 22 | 67.361 | KV453111.1 | 37756   | 17-scf00432 | 17 |
| AX-158272142 | 22 | 67.361 | KV453111.1 | 43437   | 17-scf00432 | 17 |
| AX-158272143 | 22 | 67.361 | KV453111.1 | 45385   | 17-scf00432 | 17 |
| AX-158272149 | 22 | 67.658 | KV453111.1 | 53447   | 17-scf00432 | 17 |
| AX-158272710 | 22 | 67.658 | KV453111.1 | 737046  | 17-scf00432 | 17 |
| AX-157843942 | 22 | 67.658 | KV453111.1 | 783608  | 17-scf00432 | 17 |
| AX-158271299 | 22 | 67.732 | KV453109.1 | 1011429 | 17-scf00430 | 17 |
| AX-157843901 | 22 | 67.732 | KV453111.1 | 111279  | 17-scf00432 | 17 |
| AX-157843848 | 22 | 67.733 | KV453109.1 | 1683444 | 17-scf00430 | 17 |
| AX-157709852 | 22 | 67.733 | KV453109.1 | 1982028 | 17-scf00430 | 17 |
| AX-158272079 | 22 | 67.733 | KV453109.1 | 2046373 | 17-scf00430 | 17 |
| AX-158272103 | 22 | 67.733 | KV453109.1 | 2081446 | 17-scf00430 | 17 |
| AX-157843894 | 22 | 67.733 | KV453111.1 | 15239   | 17-scf00432 | 17 |
| AX-158272133 | 22 | 67.733 | KV453111.1 | 35446   | 17-scf00432 | 17 |
| AX-158272254 | 22 | 67.733 | KV453111.1 | 190073  | 17-scf00432 | 17 |
| AX-157843911 | 22 | 67.733 | KV453111.1 | 190578  | 17-scf00432 | 17 |
| AX-158272292 | 22 | 67.733 | KV453111.1 | 247950  | 17-scf00432 | 17 |
| AX-158272206 | 22 | 67.816 | KV453111.1 | 127540  | 17-scf00432 | 17 |
| AX-158272231 | 22 | 67.93  | KV453111.1 | 164111  | 17-scf00432 | 17 |
| AX-158416627 | 22 | 68.055 | KV453111.1 | 185535  | 17-scf00432 | 17 |
| AX-158271835 | 22 | 68.25  | KV453109.1 | 1682602 | 17-scf00430 | 17 |
| AX-158271978 | 22 | 68.25  | KV453109.1 | 1901164 | 17-scf00430 | 17 |
| AX-158272183 | 22 | 68.25  | KV453111.1 | 97756   | 17-scf00432 | 17 |
| AX-158272253 | 22 | 68.25  | KV453111.1 | 189856  | 17-scf00432 | 17 |
| AX-157756640 | 22 | 68.25  | KV453111.1 | 207124  | 17-scf00432 | 17 |
| AX-157843857 | 22 | 68.324 | KV453109.1 | 1783625 | 17-scf00430 | 17 |
| AX-158272015 | 22 | 68.324 | KV453109.1 | 1966810 | 17-scf00430 | 17 |
| AX-158272108 | 22 | 68.324 | KV453111.1 | 2678    | 17-scf00432 | 17 |

|              |    |        |             |         |               |    |
|--------------|----|--------|-------------|---------|---------------|----|
| AX-158272362 | 22 | 68.324 | KV453111.1  | 340155  | 17-scf00432   | 17 |
| AX-157843924 | 22 | 68.324 | KV453111.1  | 348553  | 17-scf00432   | 17 |
| AX-157843925 | 22 | 68.324 | KV453111.1  | 352988  | 17-scf00432   | 17 |
| AX-158272379 | 22 | 68.324 | KV453111.1  | 359096  | 17-scf00432   | 17 |
| AX-158272384 | 22 | 68.324 | KV453111.1  | 368082  | 17-scf00432   | 17 |
| AX-158272686 | 22 | 68.324 | KV453111.1  | 707328  | 17-scf00432   | 17 |
| AX-158272746 | 22 | 68.324 | KV453111.1  | 780096  | 17-scf00432   | 17 |
| AX-158272751 | 22 | 68.324 | KV453111.1  | 790338  | 17-scf00432   | 17 |
| AX-158271619 | 22 | 68.405 | KV453109.1  | 1414232 | 17-scf00430   | 17 |
| AX-158271661 | 22 | 68.405 | KV453109.1  | 1471841 | 17-scf00430   | 17 |
| AX-158272024 | 22 | 68.405 | KV453109.1  | 1973516 | 17-scf00430   | 17 |
| AX-158272298 | 22 | 68.405 | KV453111.1  | 255897  | 17-scf00432   | 17 |
| AX-157722283 | 22 | 68.405 | KV453111.1  | 844722  | 17-scf00432   | 17 |
| AX-157698055 | 22 | 68.405 | FI862659.1  | 345     | ORI212 lctalu | UN |
| AX-158271371 | 22 | 68.466 | KV453109.1  | 1099415 | 17-scf00430   | 17 |
| AX-158271622 | 22 | 68.466 | KV453109.1  | 1418048 | 17-scf00430   | 17 |
| AX-157843880 | 22 | 68.466 | KV453109.1  | 2011263 | 17-scf00430   | 17 |
| AX-157744827 | 22 | 68.466 | KV453109.1  | 2011567 | 17-scf00430   | 17 |
| AX-158272046 | 22 | 68.466 | KV453109.1  | 2019226 | 17-scf00430   | 17 |
| AX-157843902 | 22 | 68.466 | KV453111.1  | 115570  | 17-scf00432   | 17 |
| AX-157715245 | 22 | 68.466 | KV453111.1  | 116360  | 17-scf00432   | 17 |
| AX-158272424 | 22 | 68.466 | KV453111.1  | 432170  | 17-scf00432   | 17 |
| AX-158272593 | 22 | 68.466 | KV453111.1  | 610759  | 17-scf00432   | 17 |
| AX-158272611 | 22 | 68.466 | KV453111.1  | 633402  | 17-scf00432   | 17 |
| AX-158271733 | 22 | 68.551 | KV453109.1  | 1543574 | 17-scf00430   | 17 |
| AX-158271974 | 22 | 68.551 | KV453109.1  | 1891090 | 17-scf00430   | 17 |
| AX-157843877 | 22 | 68.551 | KV453109.1  | 1981839 | 17-scf00430   | 17 |
| AX-157843881 | 22 | 68.551 | KV453109.1  | 2017777 | 17-scf00430   | 17 |
| AX-157743143 | 22 | 68.551 | KV453109.1  | 2058289 | 17-scf00430   | 17 |
| AX-158272426 | 22 | 68.551 | KV453111.1  | 435191  | 17-scf00432   | 17 |
| AX-158272430 | 22 | 68.551 | KV453111.1  | 439495  | 17-scf00432   | 17 |
| AX-157749451 | 22 | 68.551 | KV453111.1  | 442959  | 17-scf00432   | 17 |
| AX-158272480 | 22 | 68.551 | KV453111.1  | 492856  | 17-scf00432   | 17 |
| AX-158272493 | 22 | 68.551 | KV453111.1  | 505592  | 17-scf00432   | 17 |
| AX-158272508 | 22 | 68.551 | KV453111.1  | 523317  | 17-scf00432   | 17 |
| AX-157725842 | 22 | 68.551 | KV453111.1  | 547737  | 17-scf00432   | 17 |
| AX-158272536 | 22 | 68.551 | KV453111.1  | 553885  | 17-scf00432   | 17 |
| AX-158272547 | 22 | 68.551 | KV453111.1  | 566649  | 17-scf00432   | 17 |
| AX-158272565 | 22 | 68.551 | KV453111.1  | 584981  | 17-scf00432   | 17 |
| AX-158272583 | 22 | 68.551 | KV453111.1  | 600104  | 17-scf00432   | 17 |
| AX-158272584 | 22 | 68.551 | KV453111.1  | 600764  | 17-scf00432   | 17 |
| AX-157706291 | 22 | 68.551 | 3ML01031993 | 156     | scf07610_1    | UN |
| AX-158272075 | 22 | 68.652 | KV453109.1  | 2043160 | 17-scf00430   | 17 |
| AX-158271746 | 22 | 68.75  | KV453109.1  | 1558251 | 17-scf00430   | 17 |
| AX-158271807 | 22 | 68.75  | KV453109.1  | 1625734 | 17-scf00430   | 17 |
| AX-158272065 | 22 | 68.75  | KV453109.1  | 2034427 | 17-scf00430   | 17 |
| AX-158272076 | 22 | 68.75  | KV453109.1  | 2044130 | 17-scf00430   | 17 |
| AX-158272077 | 22 | 68.75  | KV453109.1  | 2044368 | 17-scf00430   | 17 |
| AX-158272132 | 22 | 68.75  | KV453111.1  | 35100   | 17-scf00432   | 17 |
| AX-158272141 | 22 | 68.75  | KV453111.1  | 42932   | 17-scf00432   | 17 |
| AX-157843845 | 22 | 68.85  | KV453109.1  | 1641878 | 17-scf00430   | 17 |

|              |    |        |            |         |             |    |
|--------------|----|--------|------------|---------|-------------|----|
| AX-158271824 | 22 | 68.85  | KV453109.1 | 1654376 | 17-scf00430 | 17 |
| AX-158272041 | 22 | 68.85  | KV453109.1 | 2006625 | 17-scf00430 | 17 |
| AX-158272053 | 22 | 68.85  | KV453109.1 | 2025749 | 17-scf00430 | 17 |
| AX-158272097 | 22 | 68.85  | KV453109.1 | 2074866 | 17-scf00430 | 17 |
| AX-158272139 | 22 | 68.85  | KV453111.1 | 38501   | 17-scf00432 | 17 |
| AX-158272104 | 22 | 69.13  | KV453109.1 | 2082230 | 17-scf00430 | 17 |
| AX-158273831 | 22 | 69.13  | KV453110.1 | 22198   | 17-scf00433 | 17 |
| AX-158273850 | 22 | 69.13  | KV453110.1 | 50956   | 17-scf00433 | 17 |
| AX-158273879 | 22 | 69.13  | KV453110.1 | 92413   | 17-scf00433 | 17 |
| AX-158394875 | 22 | 69.749 | KV453111.1 | 216905  | 17-scf00432 | 17 |
| AX-158272286 | 22 | 70.448 | KV453111.1 | 235012  | 17-scf00432 | 17 |
| AX-158272296 | 22 | 70.666 | KV453111.1 | 251969  | 17-scf00432 | 17 |
| AX-158271408 | 22 | 71.364 | KV453109.1 | 1140212 | 17-scf00430 | 17 |
| AX-158271431 | 22 | 71.364 | KV453109.1 | 1177976 | 17-scf00430 | 17 |
| AX-157754869 | 22 | 71.364 | KV453109.1 | 1687870 | 17-scf00430 | 17 |
| AX-158272018 | 22 | 71.364 | KV453109.1 | 1967828 | 17-scf00430 | 17 |
| AX-158272027 | 22 | 71.364 | KV453109.1 | 1975662 | 17-scf00430 | 17 |
| AX-158272058 | 22 | 71.364 | KV453109.1 | 2029238 | 17-scf00430 | 17 |
| AX-158272059 | 22 | 71.364 | KV453109.1 | 2031264 | 17-scf00430 | 17 |
| AX-158272101 | 22 | 71.364 | KV453109.1 | 2078309 | 17-scf00430 | 17 |
| AX-158272131 | 22 | 71.364 | KV453111.1 | 32872   | 17-scf00432 | 17 |
| AX-158272263 | 22 | 71.364 | KV453111.1 | 198149  | 17-scf00432 | 17 |
| AX-158272306 | 22 | 71.364 | KV453111.1 | 263427  | 17-scf00432 | 17 |
| AX-158272310 | 22 | 71.364 | KV453111.1 | 266625  | 17-scf00432 | 17 |
| AX-158272402 | 22 | 71.364 | KV453111.1 | 382749  | 17-scf00432 | 17 |
| AX-157715846 | 22 | 71.364 | KV453111.1 | 396622  | 17-scf00432 | 17 |
| AX-158272435 | 22 | 71.364 | KV453111.1 | 446471  | 17-scf00432 | 17 |
| AX-158272756 | 22 | 71.364 | KV453111.1 | 796560  | 17-scf00432 | 17 |
| AX-158272314 | 22 | 71.998 | KV453111.1 | 271019  | 17-scf00432 | 17 |
| AX-158419337 | 22 | 72.56  | KV453111.1 | 298923  | 17-scf00432 | 17 |
| AX-158272334 | 22 | 73.094 | KV453111.1 | 299836  | 17-scf00432 | 17 |
| AX-158272012 | 22 | 73.569 | KV453109.1 | 1963960 | 17-scf00430 | 17 |
| AX-158272023 | 22 | 73.569 | KV453109.1 | 1972317 | 17-scf00430 | 17 |
| AX-157719490 | 22 | 73.569 | KV453109.1 | 2042974 | 17-scf00430 | 17 |
| AX-157843926 | 22 | 73.569 | KV453111.1 | 360072  | 17-scf00432 | 17 |
| AX-158272389 | 22 | 73.569 | KV453111.1 | 371269  | 17-scf00432 | 17 |
| AX-157713351 | 22 | 73.569 | KV453111.1 | 425760  | 17-scf00432 | 17 |
| AX-158272422 | 22 | 73.569 | KV453111.1 | 426667  | 17-scf00432 | 17 |
| AX-157843933 | 22 | 73.569 | KV453111.1 | 430297  | 17-scf00432 | 17 |
| AX-158272427 | 22 | 73.569 | KV453111.1 | 435951  | 17-scf00432 | 17 |
| AX-158272428 | 22 | 73.569 | KV453111.1 | 436764  | 17-scf00432 | 17 |
| AX-158272434 | 22 | 73.569 | KV453111.1 | 445696  | 17-scf00432 | 17 |
| AX-158272437 | 22 | 73.569 | KV453111.1 | 448131  | 17-scf00432 | 17 |
| AX-157843934 | 22 | 73.569 | KV453111.1 | 462594  | 17-scf00432 | 17 |
| AX-158272458 | 22 | 73.569 | KV453111.1 | 468186  | 17-scf00432 | 17 |
| AX-158272505 | 22 | 73.569 | KV453111.1 | 520391  | 17-scf00432 | 17 |
| AX-158272538 | 22 | 73.569 | KV453111.1 | 555072  | 17-scf00432 | 17 |
| AX-158272558 | 22 | 73.569 | KV453111.1 | 579327  | 17-scf00432 | 17 |
| AX-158272561 | 22 | 73.569 | KV453111.1 | 581838  | 17-scf00432 | 17 |
| AX-158272640 | 22 | 73.569 | KV453111.1 | 664503  | 17-scf00432 | 17 |
| AX-158272654 | 22 | 73.569 | KV453111.1 | 681654  | 17-scf00432 | 17 |

|              |    |        |            |         |             |    |
|--------------|----|--------|------------|---------|-------------|----|
| AX-158272658 | 22 | 73.569 | KV453111.1 | 683921  | 17-scf00432 | 17 |
| AX-158411381 | 22 | 73.569 | KV453111.1 | 685341  | 17-scf00432 | 17 |
| AX-158272661 | 22 | 73.569 | KV453111.1 | 685406  | 17-scf00432 | 17 |
| AX-158272662 | 22 | 73.569 | KV453111.1 | 686150  | 17-scf00432 | 17 |
| AX-158272668 | 22 | 73.569 | KV453111.1 | 690441  | 17-scf00432 | 17 |
| AX-158272669 | 22 | 73.569 | KV453111.1 | 691317  | 17-scf00432 | 17 |
| AX-157743401 | 22 | 73.569 | KV453111.1 | 715948  | 17-scf00432 | 17 |
| AX-158272697 | 22 | 73.569 | KV453111.1 | 717287  | 17-scf00432 | 17 |
| AX-158272709 | 22 | 73.569 | KV453111.1 | 735950  | 17-scf00432 | 17 |
| AX-158272735 | 22 | 73.569 | KV453111.1 | 765364  | 17-scf00432 | 17 |
| AX-158272741 | 22 | 73.569 | KV453111.1 | 771710  | 17-scf00432 | 17 |
| AX-157722604 | 22 | 73.569 | KV453111.1 | 774072  | 17-scf00432 | 17 |
| AX-158272744 | 22 | 73.739 | KV453111.1 | 776255  | 17-scf00432 | 17 |
| AX-157873017 | 22 | 73.909 | KV453111.1 | 792729  | 17-scf00432 | 17 |
| AX-158272772 | 22 | 73.967 | KV453111.1 | 812680  | 17-scf00432 | 17 |
| AX-158272475 | 22 | 74.115 | KV453111.1 | 485559  | 17-scf00432 | 17 |
| AX-158272614 | 22 | 74.115 | KV453111.1 | 634595  | 17-scf00432 | 17 |
| AX-158272778 | 22 | 74.115 | KV453111.1 | 819152  | 17-scf00432 | 17 |
| AX-158272805 | 22 | 75.322 | KV453111.1 | 850069  | 17-scf00432 | 17 |
| AX-158272390 | 22 | 75.43  | KV453111.1 | 371922  | 17-scf00432 | 17 |
| AX-158272807 | 22 | 75.43  | KV453111.1 | 850872  | 17-scf00432 | 17 |
| AX-158272814 | 22 | 75.867 | KV453111.1 | 863745  | 17-scf00432 | 17 |
| AX-158285088 | 22 | 75.867 | KV453114.1 | 3022484 | 17-scf00439 | 17 |
| AX-158286273 | 22 | 75.867 | KV453114.1 | 4477594 | 17-scf00439 | 17 |
| AX-158272818 | 22 | 76.294 | KV453111.1 | 867734  | 17-scf00432 | 17 |
| AX-158272837 | 22 | 76.327 | KV453111.1 | 887497  | 17-scf00432 | 17 |
| AX-158272845 | 22 | 76.635 | KV453111.1 | 896897  | 17-scf00432 | 17 |
| AX-158272891 | 22 | 76.959 | KV453111.1 | 958014  | 17-scf00432 | 17 |
| AX-158272893 | 22 | 77.208 | KV453111.1 | 961144  | 17-scf00432 | 17 |
| AX-158272921 | 22 | 77.217 | KV453111.1 | 994862  | 17-scf00432 | 17 |
| AX-158273136 | 22 | 77.217 | KV453111.1 | 1249108 | 17-scf00432 | 17 |
| AX-158286152 | 22 | 77.217 | KV453114.1 | 4332803 | 17-scf00439 | 17 |
| AX-158272922 | 22 | 77.251 | KV453111.1 | 995805  | 17-scf00432 | 17 |
| AX-158271682 | 22 | 77.292 | KV453109.1 | 1496013 | 17-scf00430 | 17 |
| AX-158272279 | 22 | 77.292 | KV453111.1 | 218522  | 17-scf00432 | 17 |
| AX-158272924 | 22 | 77.292 | KV453111.1 | 996981  | 17-scf00432 | 17 |
| AX-158272930 | 22 | 77.292 | KV453111.1 | 1005251 | 17-scf00432 | 17 |
| AX-158285834 | 22 | 77.292 | KV453114.1 | 3872374 | 17-scf00439 | 17 |
| AX-158272934 | 22 | 77.327 | KV453111.1 | 1010249 | 17-scf00432 | 17 |
| AX-158272951 | 22 | 77.356 | KV453111.1 | 1035117 | 17-scf00432 | 17 |
| AX-158272955 | 22 | 78.183 | KV453111.1 | 1037902 | 17-scf00432 | 17 |
| AX-158272967 | 22 | 78.228 | KV453111.1 | 1048466 | 17-scf00432 | 17 |
| AX-158272993 | 22 | 78.277 | KV453111.1 | 1072081 | 17-scf00432 | 17 |
| AX-158273020 | 22 | 78.307 | KV453111.1 | 1108433 | 17-scf00432 | 17 |
| AX-158273044 | 22 | 79.132 | KV453111.1 | 1142561 | 17-scf00432 | 17 |
| AX-157715994 | 22 | 79.132 | KV453114.1 | 240691  | 17-scf00439 | 17 |
| AX-158284542 | 22 | 79.132 | KV453114.1 | 2425284 | 17-scf00439 | 17 |
| AX-157739662 | 22 | 79.567 | KV453111.1 | 1162184 | 17-scf00432 | 17 |
| AX-158273091 | 22 | 79.996 | KV453111.1 | 1194879 | 17-scf00432 | 17 |
| AX-157714337 | 22 | 80.031 | KV453111.1 | 1119496 | 17-scf00432 | 17 |
| AX-157843959 | 22 | 80.031 | KV453111.1 | 1198068 | 17-scf00432 | 17 |

|              |    |        |            |         |             |    |
|--------------|----|--------|------------|---------|-------------|----|
| AX-157887990 | 22 | 80.031 | KV453114.1 | 4112413 | 17-scf00439 | 17 |
| AX-158273105 | 22 | 80.058 | KV453111.1 | 1213739 | 17-scf00432 | 17 |
| AX-157718064 | 22 | 80.082 | KV453111.1 | 1214448 | 17-scf00432 | 17 |
| AX-157747493 | 22 | 80.116 | KV453111.1 | 1226425 | 17-scf00432 | 17 |
| AX-157719367 | 22 | 80.147 | KV453111.1 | 1241284 | 17-scf00432 | 17 |
| AX-157843971 | 22 | 80.147 | KV453111.1 | 1427078 | 17-scf00432 | 17 |
| AX-158286418 | 22 | 80.147 | KV453114.1 | 4625522 | 17-scf00439 | 17 |
| AX-157742969 | 22 | 80.147 | KV453114.1 | 4817101 | 17-scf00439 | 17 |
| AX-157695103 | 22 | 80.172 | KV453111.1 | 256178  | 17-scf00432 | 17 |
| AX-158273008 | 22 | 80.172 | KV453111.1 | 1093822 | 17-scf00432 | 17 |
| AX-158273128 | 22 | 80.172 | KV453111.1 | 1242454 | 17-scf00432 | 17 |
| AX-158273224 | 22 | 80.172 | KV453111.1 | 1367916 | 17-scf00432 | 17 |
| AX-158273271 | 22 | 80.172 | KV453111.1 | 1421327 | 17-scf00432 | 17 |
| AX-158273307 | 22 | 80.172 | KV453111.1 | 1455096 | 17-scf00432 | 17 |
| AX-157844878 | 22 | 80.172 | KV453114.1 | 2054416 | 17-scf00439 | 17 |
| AX-158284261 | 22 | 80.172 | KV453114.1 | 2136114 | 17-scf00439 | 17 |
| AX-158284361 | 22 | 80.172 | KV453114.1 | 2241956 | 17-scf00439 | 17 |
| AX-158284563 | 22 | 80.172 | KV453114.1 | 2447079 | 17-scf00439 | 17 |
| AX-158285137 | 22 | 80.172 | KV453114.1 | 3074298 | 17-scf00439 | 17 |
| AX-158285855 | 22 | 80.172 | KV453114.1 | 3888710 | 17-scf00439 | 17 |
| AX-158285899 | 22 | 80.172 | KV453114.1 | 3932337 | 17-scf00439 | 17 |
| AX-158286242 | 22 | 80.172 | KV453114.1 | 4451561 | 17-scf00439 | 17 |
| AX-158286438 | 22 | 80.172 | KV453114.1 | 4650795 | 17-scf00439 | 17 |
| AX-158286491 | 22 | 80.172 | KV453114.1 | 4703818 | 17-scf00439 | 17 |
| AX-158286493 | 22 | 80.172 | KV453114.1 | 4705096 | 17-scf00439 | 17 |
| AX-158286495 | 22 | 80.172 | KV453114.1 | 4707478 | 17-scf00439 | 17 |
| AX-157873336 | 22 | 80.172 | KV453114.1 | 4714799 | 17-scf00439 | 17 |
| AX-158286626 | 22 | 80.172 | KV453114.1 | 4839619 | 17-scf00439 | 17 |
| AX-158286629 | 22 | 80.172 | KV453114.1 | 4841625 | 17-scf00439 | 17 |
| AX-157845177 | 22 | 80.172 | KV453112.1 | 3099    | 17-scf00440 | 17 |
| AX-158287432 | 22 | 80.172 | KV453112.1 | 43303   | 17-scf00440 | 17 |
| AX-158287448 | 22 | 80.172 | KV453112.1 | 85913   | 17-scf00440 | 17 |
| AX-157684085 | 22 | 80.172 | KV453113.1 | 11224   | 17-scf00441 | 17 |
| AX-157680075 | 22 | 80.172 | KV453113.1 | 16406   | 17-scf00441 | 17 |
| AX-157724067 | 22 | 80.225 | KV453114.1 | 4503427 | 17-scf00439 | 17 |
| AX-158286223 | 22 | 80.278 | KV453114.1 | 4427853 | 17-scf00439 | 17 |
| AX-157701818 | 22 | 80.331 | KV453109.1 | 1276638 | 17-scf00430 | 17 |
| AX-158287231 | 22 | 80.331 | KV453114.1 | 793832  | 17-scf00439 | 17 |
| AX-158285254 | 22 | 80.331 | KV453114.1 | 3206715 | 17-scf00439 | 17 |
| AX-158285268 | 22 | 80.331 | KV453114.1 | 3224271 | 17-scf00439 | 17 |
| AX-157745019 | 22 | 80.331 | KV453114.1 | 4366073 | 17-scf00439 | 17 |
| AX-158286187 | 22 | 80.331 | KV453114.1 | 4386900 | 17-scf00439 | 17 |
| AX-158271206 | 22 | 80.377 | KV453109.1 | 881870  | 17-scf00430 | 17 |
| AX-158272946 | 22 | 80.377 | KV453111.1 | 1030539 | 17-scf00432 | 17 |
| AX-158273001 | 22 | 80.377 | KV453111.1 | 1084321 | 17-scf00432 | 17 |
| AX-158273042 | 22 | 80.377 | KV453111.1 | 1137901 | 17-scf00432 | 17 |
| AX-158273150 | 22 | 80.377 | KV453111.1 | 1269999 | 17-scf00432 | 17 |
| AX-158273153 | 22 | 80.377 | KV453111.1 | 1273086 | 17-scf00432 | 17 |
| AX-158283243 | 22 | 80.377 | KV453114.1 | 1072574 | 17-scf00439 | 17 |
| AX-158283244 | 22 | 80.377 | KV453114.1 | 1075128 | 17-scf00439 | 17 |
| AX-157844811 | 22 | 80.377 | KV453114.1 | 1075371 | 17-scf00439 | 17 |



|              |    |        |            |         |             |    |
|--------------|----|--------|------------|---------|-------------|----|
| AX-158283246 | 22 | 80.377 | KV453114.1 | 1076795 | 17-scf00439 | 17 |
| AX-158283247 | 22 | 80.377 | KV453114.1 | 1077511 | 17-scf00439 | 17 |
| AX-158283840 | 22 | 80.377 | KV453114.1 | 1698249 | 17-scf00439 | 17 |
| AX-158283858 | 22 | 80.377 | KV453114.1 | 1716988 | 17-scf00439 | 17 |
| AX-157742680 | 22 | 80.377 | KV453114.1 | 1717326 | 17-scf00439 | 17 |
| AX-157844838 | 22 | 80.377 | KV453114.1 | 1717571 | 17-scf00439 | 17 |
| AX-158283862 | 22 | 80.377 | KV453114.1 | 1719138 | 17-scf00439 | 17 |
| AX-158284113 | 22 | 80.377 | KV453114.1 | 1994002 | 17-scf00439 | 17 |
| AX-158285081 | 22 | 80.377 | KV453114.1 | 3016295 | 17-scf00439 | 17 |
| AX-157844985 | 22 | 80.377 | KV453114.1 | 3256580 | 17-scf00439 | 17 |
| AX-158286168 | 22 | 80.377 | KV453114.1 | 4360154 | 17-scf00439 | 17 |
| AX-158273340 | 22 | 80.409 | KV453111.1 | 1493504 | 17-scf00432 | 17 |
| AX-157873329 | 22 | 80.409 | KV453114.1 | 4335217 | 17-scf00439 | 17 |
| AX-157845057 | 22 | 80.409 | KV453114.1 | 4336145 | 17-scf00439 | 17 |
| AX-158286155 | 22 | 80.409 | KV453114.1 | 4341186 | 17-scf00439 | 17 |
| AX-158286159 | 22 | 80.409 | KV453114.1 | 4343298 | 17-scf00439 | 17 |
| AX-158286165 | 22 | 80.409 | KV453114.1 | 4353142 | 17-scf00439 | 17 |
| AX-157699111 | 22 | 80.409 | KV453114.1 | 4482021 | 17-scf00439 | 17 |
| AX-158286368 | 22 | 80.409 | KV453114.1 | 4581676 | 17-scf00439 | 17 |
| AX-157845103 | 22 | 80.409 | KV453114.1 | 4710757 | 17-scf00439 | 17 |
| AX-157750294 | 22 | 80.409 | KV453114.1 | 4764824 | 17-scf00439 | 17 |
| AX-157699628 | 22 | 80.409 | KV453114.1 | 4780918 | 17-scf00439 | 17 |
| AX-158286638 | 22 | 80.409 | KV453114.1 | 4849171 | 17-scf00439 | 17 |
| AX-158286151 | 22 | 80.576 | KV453114.1 | 4332214 | 17-scf00439 | 17 |
| AX-157845045 | 22 | 80.736 | KV453114.1 | 4279878 | 17-scf00439 | 17 |
| AX-157845043 | 22 | 80.765 | KV453114.1 | 4278704 | 17-scf00439 | 17 |
| AX-158286074 | 22 | 80.776 | KV453114.1 | 4223299 | 17-scf00439 | 17 |
| AX-157743652 | 22 | 80.807 | KV453114.1 | 4208357 | 17-scf00439 | 17 |
| AX-158286050 | 22 | 80.837 | KV453114.1 | 4134687 | 17-scf00439 | 17 |
| AX-158286048 | 22 | 80.867 | KV453114.1 | 4131155 | 17-scf00439 | 17 |
| AX-158285978 | 22 | 80.879 | KV453114.1 | 4027659 | 17-scf00439 | 17 |
| AX-158285974 | 22 | 80.891 | KV453114.1 | 4025462 | 17-scf00439 | 17 |
| AX-158285971 | 22 | 80.904 | KV453114.1 | 4023562 | 17-scf00439 | 17 |
| AX-158285946 | 22 | 80.932 | KV453114.1 | 4001512 | 17-scf00439 | 17 |
| AX-158285924 | 22 | 80.964 | KV453114.1 | 3966527 | 17-scf00439 | 17 |
| AX-158285910 | 22 | 80.994 | KV453114.1 | 3946741 | 17-scf00439 | 17 |
| AX-157747345 | 22 | 81.031 | KV453114.1 | 3815458 | 17-scf00439 | 17 |
| AX-157743643 | 22 | 81.064 | KV453114.1 | 3214280 | 17-scf00439 | 17 |
| AX-157844981 | 22 | 81.064 | KV453114.1 | 3227450 | 17-scf00439 | 17 |
| AX-158285348 | 22 | 81.064 | KV453114.1 | 3320725 | 17-scf00439 | 17 |
| AX-158285489 | 22 | 81.064 | KV453114.1 | 3475451 | 17-scf00439 | 17 |
| AX-158285495 | 22 | 81.064 | KV453114.1 | 3481597 | 17-scf00439 | 17 |
| AX-158285579 | 22 | 81.064 | KV453114.1 | 3578904 | 17-scf00439 | 17 |
| AX-158285623 | 22 | 81.064 | KV453114.1 | 3629042 | 17-scf00439 | 17 |
| AX-158285637 | 22 | 81.064 | KV453114.1 | 3651042 | 17-scf00439 | 17 |
| AX-158285672 | 22 | 81.064 | KV453114.1 | 3693889 | 17-scf00439 | 17 |
| AX-158285710 | 22 | 81.064 | KV453114.1 | 3738424 | 17-scf00439 | 17 |
| AX-158285741 | 22 | 81.064 | KV453114.1 | 3768320 | 17-scf00439 | 17 |
| AX-158285759 | 22 | 81.064 | KV453114.1 | 3790641 | 17-scf00439 | 17 |
| AX-158271115 | 22 | 81.065 | KV453109.1 | 782020  | 17-scf00430 | 17 |
| AX-158271125 | 22 | 81.065 | KV453109.1 | 795865  | 17-scf00430 | 17 |

|              |    |        |            |         |             |    |
|--------------|----|--------|------------|---------|-------------|----|
| AX-158271151 | 22 | 81.065 | KV453109.1 | 821334  | 17-scf00430 | 17 |
| AX-158271228 | 22 | 81.065 | KV453109.1 | 907415  | 17-scf00430 | 17 |
| AX-158271242 | 22 | 81.065 | KV453109.1 | 923769  | 17-scf00430 | 17 |
| AX-158271469 | 22 | 81.065 | KV453109.1 | 1214038 | 17-scf00430 | 17 |
| AX-158271565 | 22 | 81.065 | KV453109.1 | 1342860 | 17-scf00430 | 17 |
| AX-158271681 | 22 | 81.065 | KV453109.1 | 1495836 | 17-scf00430 | 17 |
| AX-158271762 | 22 | 81.065 | KV453109.1 | 1572993 | 17-scf00430 | 17 |
| AX-158271780 | 22 | 81.065 | KV453109.1 | 1601635 | 17-scf00430 | 17 |
| AX-158271892 | 22 | 81.065 | KV453109.1 | 1764844 | 17-scf00430 | 17 |
| AX-158272204 | 22 | 81.065 | KV453111.1 | 122950  | 17-scf00432 | 17 |
| AX-158272820 | 22 | 81.065 | KV453111.1 | 868876  | 17-scf00432 | 17 |
| AX-158273066 | 22 | 81.065 | KV453111.1 | 1166663 | 17-scf00432 | 17 |
| AX-158273316 | 22 | 81.065 | KV453111.1 | 1467275 | 17-scf00432 | 17 |
| AX-158273385 | 22 | 81.065 | KV453111.1 | 1551919 | 17-scf00432 | 17 |
| AX-158394911 | 22 | 81.065 | KV453111.1 | 1564157 | 17-scf00432 | 17 |
| AX-158273561 | 22 | 81.065 | KV453111.1 | 1744724 | 17-scf00432 | 17 |
| AX-158273569 | 22 | 81.065 | KV453111.1 | 1751868 | 17-scf00432 | 17 |
| AX-158394922 | 22 | 81.065 | KV453111.1 | 1853913 | 17-scf00432 | 17 |
| AX-158273688 | 22 | 81.065 | KV453111.1 | 1885294 | 17-scf00432 | 17 |
| AX-158286747 | 22 | 81.065 | KV453114.1 | 133977  | 17-scf00439 | 17 |
| AX-158286848 | 22 | 81.065 | KV453114.1 | 250300  | 17-scf00439 | 17 |
| AX-158286934 | 22 | 81.065 | KV453114.1 | 354330  | 17-scf00439 | 17 |
| AX-158286993 | 22 | 81.065 | KV453114.1 | 448775  | 17-scf00439 | 17 |
| AX-158287010 | 22 | 81.065 | KV453114.1 | 505604  | 17-scf00439 | 17 |
| AX-158287011 | 22 | 81.065 | KV453114.1 | 506031  | 17-scf00439 | 17 |
| AX-158287090 | 22 | 81.065 | KV453114.1 | 648337  | 17-scf00439 | 17 |
| AX-158287173 | 22 | 81.065 | KV453114.1 | 742486  | 17-scf00439 | 17 |
| AX-158287291 | 22 | 81.065 | KV453114.1 | 874685  | 17-scf00439 | 17 |
| AX-158287324 | 22 | 81.065 | KV453114.1 | 917850  | 17-scf00439 | 17 |
| AX-158287347 | 22 | 81.065 | KV453114.1 | 943131  | 17-scf00439 | 17 |
| AX-158283272 | 22 | 81.065 | KV453114.1 | 1135644 | 17-scf00439 | 17 |
| AX-158283309 | 22 | 81.065 | KV453114.1 | 1177951 | 17-scf00439 | 17 |
| AX-158283371 | 22 | 81.065 | KV453114.1 | 1237113 | 17-scf00439 | 17 |
| AX-158283445 | 22 | 81.065 | KV453114.1 | 1321368 | 17-scf00439 | 17 |
| AX-158283473 | 22 | 81.065 | KV453114.1 | 1342485 | 17-scf00439 | 17 |
| AX-158284220 | 22 | 81.065 | KV453114.1 | 2088815 | 17-scf00439 | 17 |
| AX-158284368 | 22 | 81.065 | KV453114.1 | 2252678 | 17-scf00439 | 17 |
| AX-158284646 | 22 | 81.065 | KV453114.1 | 2523369 | 17-scf00439 | 17 |
| AX-158284901 | 22 | 81.065 | KV453114.1 | 2826436 | 17-scf00439 | 17 |
| AX-158284945 | 22 | 81.065 | KV453114.1 | 2863365 | 17-scf00439 | 17 |
| AX-158285192 | 22 | 81.065 | KV453114.1 | 3142333 | 17-scf00439 | 17 |
| AX-158285310 | 22 | 81.065 | KV453114.1 | 3267008 | 17-scf00439 | 17 |
| AX-157844996 | 22 | 81.065 | KV453114.1 | 3347475 | 17-scf00439 | 17 |
| AX-158285377 | 22 | 81.065 | KV453114.1 | 3350061 | 17-scf00439 | 17 |
| AX-158285391 | 22 | 81.065 | KV453114.1 | 3362215 | 17-scf00439 | 17 |
| AX-158285402 | 22 | 81.065 | KV453114.1 | 3376427 | 17-scf00439 | 17 |
| AX-157844999 | 22 | 81.065 | KV453114.1 | 3377609 | 17-scf00439 | 17 |
| AX-157845000 | 22 | 81.065 | KV453114.1 | 3390950 | 17-scf00439 | 17 |
| AX-158285414 | 22 | 81.065 | KV453114.1 | 3392880 | 17-scf00439 | 17 |
| AX-158417076 | 22 | 81.065 | KV453114.1 | 3394627 | 17-scf00439 | 17 |
| AX-158285435 | 22 | 81.065 | KV453114.1 | 3420530 | 17-scf00439 | 17 |

|              |    |        |            |         |             |    |
|--------------|----|--------|------------|---------|-------------|----|
| AX-158285446 | 22 | 81.065 | KV453114.1 | 3436289 | 17-scf00439 | 17 |
| AX-158285486 | 22 | 81.065 | KV453114.1 | 3472292 | 17-scf00439 | 17 |
| AX-158285510 | 22 | 81.065 | KV453114.1 | 3496775 | 17-scf00439 | 17 |
| AX-158285598 | 22 | 81.065 | KV453114.1 | 3605584 | 17-scf00439 | 17 |
| AX-158285727 | 22 | 81.065 | KV453114.1 | 3755335 | 17-scf00439 | 17 |
| AX-158285736 | 22 | 81.065 | KV453114.1 | 3763054 | 17-scf00439 | 17 |
| AX-158285765 | 22 | 81.065 | KV453114.1 | 3795993 | 17-scf00439 | 17 |
| AX-158285784 | 22 | 81.065 | KV453114.1 | 3821697 | 17-scf00439 | 17 |
| AX-158285841 | 22 | 81.065 | KV453114.1 | 3878045 | 17-scf00439 | 17 |
| AX-158285908 | 22 | 81.065 | KV453114.1 | 3945006 | 17-scf00439 | 17 |
| AX-158285949 | 22 | 81.065 | KV453114.1 | 4003153 | 17-scf00439 | 17 |
| AX-158286015 | 22 | 81.065 | KV453114.1 | 4079761 | 17-scf00439 | 17 |
| AX-158286140 | 22 | 81.065 | KV453114.1 | 4321691 | 17-scf00439 | 17 |
| AX-158286252 | 22 | 81.065 | KV453114.1 | 4457778 | 17-scf00439 | 17 |
| AX-158286473 | 22 | 81.065 | KV453114.1 | 4693124 | 17-scf00439 | 17 |
| AX-158285352 | 22 | 81.073 | KV453114.1 | 3325980 | 17-scf00439 | 17 |
| AX-158285351 | 22 | 81.076 | KV453114.1 | 3324671 | 17-scf00439 | 17 |
| AX-158285328 | 22 | 81.079 | KV453114.1 | 3284839 | 17-scf00439 | 17 |
| AX-158283255 | 22 | 81.081 | KV453114.1 | 1091100 | 17-scf00439 | 17 |
| AX-158285321 | 22 | 81.081 | KV453114.1 | 3279768 | 17-scf00439 | 17 |
| AX-158285308 | 22 | 81.082 | KV453114.1 | 3266018 | 17-scf00439 | 17 |
| AX-158285331 | 22 | 81.082 | KV453114.1 | 3286246 | 17-scf00439 | 17 |
| AX-158285382 | 22 | 81.082 | KV453114.1 | 3353935 | 17-scf00439 | 17 |
| AX-158271071 | 22 | 81.083 | KV453109.1 | 724115  | 17-scf00430 | 17 |
| AX-158287105 | 22 | 81.083 | KV453114.1 | 668470  | 17-scf00439 | 17 |
| AX-158283852 | 22 | 81.083 | KV453114.1 | 1711491 | 17-scf00439 | 17 |
| AX-158285307 | 22 | 81.083 | KV453114.1 | 3264710 | 17-scf00439 | 17 |
| AX-158285238 | 22 | 81.155 | KV453114.1 | 3192308 | 17-scf00439 | 17 |
| AX-158271822 | 22 | 81.224 | KV453109.1 | 1653035 | 17-scf00430 | 17 |
| AX-157843921 | 22 | 81.224 | KV453111.1 | 290588  | 17-scf00432 | 17 |
| AX-158273336 | 22 | 81.224 | KV453111.1 | 1489953 | 17-scf00432 | 17 |
| AX-158273490 | 22 | 81.224 | KV453111.1 | 1657287 | 17-scf00432 | 17 |
| AX-158287348 | 22 | 81.224 | KV453114.1 | 943530  | 17-scf00439 | 17 |
| AX-157754965 | 22 | 81.224 | KV453114.1 | 1262077 | 17-scf00439 | 17 |
| AX-158283583 | 22 | 81.224 | KV453114.1 | 1450772 | 17-scf00439 | 17 |
| AX-158283682 | 22 | 81.224 | KV453114.1 | 1548496 | 17-scf00439 | 17 |
| AX-158283724 | 22 | 81.224 | KV453114.1 | 1585137 | 17-scf00439 | 17 |
| AX-158283891 | 22 | 81.224 | KV453114.1 | 1746363 | 17-scf00439 | 17 |
| AX-157873275 | 22 | 81.224 | KV453114.1 | 1764309 | 17-scf00439 | 17 |
| AX-158283920 | 22 | 81.224 | KV453114.1 | 1783667 | 17-scf00439 | 17 |
| AX-158283952 | 22 | 81.224 | KV453114.1 | 1823115 | 17-scf00439 | 17 |
| AX-158283957 | 22 | 81.224 | KV453114.1 | 1827109 | 17-scf00439 | 17 |
| AX-158283966 | 22 | 81.224 | KV453114.1 | 1835285 | 17-scf00439 | 17 |
| AX-158283970 | 22 | 81.224 | KV453114.1 | 1840199 | 17-scf00439 | 17 |
| AX-158283988 | 22 | 81.224 | KV453114.1 | 1855937 | 17-scf00439 | 17 |
| AX-158284025 | 22 | 81.224 | KV453114.1 | 1903577 | 17-scf00439 | 17 |
| AX-158284037 | 22 | 81.224 | KV453114.1 | 1922457 | 17-scf00439 | 17 |
| AX-158284877 | 22 | 81.224 | KV453114.1 | 2802942 | 17-scf00439 | 17 |
| AX-158284894 | 22 | 81.224 | KV453114.1 | 2819310 | 17-scf00439 | 17 |
| AX-158285205 | 22 | 81.224 | KV453114.1 | 3154120 | 17-scf00439 | 17 |
| AX-158285206 | 22 | 81.224 | KV453114.1 | 3156554 | 17-scf00439 | 17 |

|              |    |        |            |         |             |    |
|--------------|----|--------|------------|---------|-------------|----|
| AX-158417068 | 22 | 81.224 | KV453114.1 | 3179083 | 17-scf00439 | 17 |
| AX-158285355 | 22 | 81.224 | KV453114.1 | 3327572 | 17-scf00439 | 17 |
| AX-158285380 | 22 | 81.224 | KV453114.1 | 3353388 | 17-scf00439 | 17 |
| AX-158285600 | 22 | 81.224 | KV453114.1 | 3607947 | 17-scf00439 | 17 |
| AX-158285831 | 22 | 81.224 | KV453114.1 | 3867665 | 17-scf00439 | 17 |
| AX-158285850 | 22 | 81.224 | KV453114.1 | 3884635 | 17-scf00439 | 17 |
| AX-158286429 | 22 | 81.224 | KV453114.1 | 4640187 | 17-scf00439 | 17 |
| AX-158285185 | 22 | 81.318 | KV453114.1 | 3138248 | 17-scf00439 | 17 |
| AX-158285136 | 22 | 81.419 | KV453114.1 | 3074054 | 17-scf00439 | 17 |
| AX-158285131 | 22 | 81.521 | KV453114.1 | 3067012 | 17-scf00439 | 17 |
| AX-158416623 | 22 | 81.622 | KV453109.1 | 2020278 | 17-scf00430 | 17 |
| AX-158287070 | 22 | 81.622 | KV453114.1 | 611374  | 17-scf00439 | 17 |
| AX-157844948 | 22 | 81.622 | KV453114.1 | 2899459 | 17-scf00439 | 17 |
| AX-158271414 | 22 | 81.716 | KV453109.1 | 1146903 | 17-scf00430 | 17 |
| AX-158284985 | 22 | 81.716 | KV453114.1 | 2896985 | 17-scf00439 | 17 |
| AX-157771957 | 22 | 81.716 | KV453114.1 | 2902949 | 17-scf00439 | 17 |
| AX-158285057 | 22 | 81.716 | KV453114.1 | 2987752 | 17-scf00439 | 17 |
| AX-158285078 | 22 | 81.716 | KV453114.1 | 3011589 | 17-scf00439 | 17 |
| AX-158284934 | 22 | 81.719 | KV453114.1 | 2854455 | 17-scf00439 | 17 |
| AX-158286874 | 22 | 81.723 | KV453114.1 | 276145  | 17-scf00439 | 17 |
| AX-158286881 | 22 | 81.723 | KV453114.1 | 280126  | 17-scf00439 | 17 |
| AX-158283273 | 22 | 81.723 | KV453114.1 | 1135860 | 17-scf00439 | 17 |
| AX-158283282 | 22 | 81.723 | KV453114.1 | 1146524 | 17-scf00439 | 17 |
| AX-158283396 | 22 | 81.723 | KV453114.1 | 1259351 | 17-scf00439 | 17 |
| AX-158283523 | 22 | 81.723 | KV453114.1 | 1390654 | 17-scf00439 | 17 |
| AX-158283530 | 22 | 81.723 | KV453114.1 | 1399939 | 17-scf00439 | 17 |
| AX-158283531 | 22 | 81.723 | KV453114.1 | 1400600 | 17-scf00439 | 17 |
| AX-158283532 | 22 | 81.723 | KV453114.1 | 1401862 | 17-scf00439 | 17 |
| AX-158283540 | 22 | 81.723 | KV453114.1 | 1411996 | 17-scf00439 | 17 |
| AX-158283541 | 22 | 81.723 | KV453114.1 | 1412545 | 17-scf00439 | 17 |
| AX-158283543 | 22 | 81.723 | KV453114.1 | 1414372 | 17-scf00439 | 17 |
| AX-158283545 | 22 | 81.723 | KV453114.1 | 1416497 | 17-scf00439 | 17 |
| AX-158283547 | 22 | 81.723 | KV453114.1 | 1417996 | 17-scf00439 | 17 |
| AX-158283548 | 22 | 81.723 | KV453114.1 | 1419158 | 17-scf00439 | 17 |
| AX-158283550 | 22 | 81.723 | KV453114.1 | 1420955 | 17-scf00439 | 17 |
| AX-158283552 | 22 | 81.723 | KV453114.1 | 1422318 | 17-scf00439 | 17 |
| AX-158283553 | 22 | 81.723 | KV453114.1 | 1422956 | 17-scf00439 | 17 |
| AX-158283559 | 22 | 81.723 | KV453114.1 | 1427765 | 17-scf00439 | 17 |
| AX-158283561 | 22 | 81.723 | KV453114.1 | 1431218 | 17-scf00439 | 17 |
| AX-158283563 | 22 | 81.723 | KV453114.1 | 1433199 | 17-scf00439 | 17 |
| AX-158283564 | 22 | 81.723 | KV453114.1 | 1434669 | 17-scf00439 | 17 |
| AX-158283565 | 22 | 81.723 | KV453114.1 | 1436748 | 17-scf00439 | 17 |
| AX-158283566 | 22 | 81.723 | KV453114.1 | 1437130 | 17-scf00439 | 17 |
| AX-158283568 | 22 | 81.723 | KV453114.1 | 1439318 | 17-scf00439 | 17 |
| AX-158283571 | 22 | 81.723 | KV453114.1 | 1442679 | 17-scf00439 | 17 |
| AX-158283573 | 22 | 81.723 | KV453114.1 | 1443925 | 17-scf00439 | 17 |
| AX-158283574 | 22 | 81.723 | KV453114.1 | 1444402 | 17-scf00439 | 17 |
| AX-158283578 | 22 | 81.723 | KV453114.1 | 1447410 | 17-scf00439 | 17 |
| AX-158283582 | 22 | 81.723 | KV453114.1 | 1450068 | 17-scf00439 | 17 |
| AX-157844832 | 22 | 81.723 | KV453114.1 | 1450893 | 17-scf00439 | 17 |
| AX-158283584 | 22 | 81.723 | KV453114.1 | 1451460 | 17-scf00439 | 17 |

|              |    |        |            |         |             |    |
|--------------|----|--------|------------|---------|-------------|----|
| AX-158283605 | 22 | 81.723 | KV453114.1 | 1469166 | 17-scf00439 | 17 |
| AX-158283608 | 22 | 81.723 | KV453114.1 | 1472403 | 17-scf00439 | 17 |
| AX-158283610 | 22 | 81.723 | KV453114.1 | 1474171 | 17-scf00439 | 17 |
| AX-158283611 | 22 | 81.723 | KV453114.1 | 1474775 | 17-scf00439 | 17 |
| AX-158283615 | 22 | 81.723 | KV453114.1 | 1481475 | 17-scf00439 | 17 |
| AX-158283620 | 22 | 81.723 | KV453114.1 | 1486196 | 17-scf00439 | 17 |
| AX-158283626 | 22 | 81.723 | KV453114.1 | 1493139 | 17-scf00439 | 17 |
| AX-158283627 | 22 | 81.723 | KV453114.1 | 1493760 | 17-scf00439 | 17 |
| AX-158283628 | 22 | 81.723 | KV453114.1 | 1494287 | 17-scf00439 | 17 |
| AX-158283631 | 22 | 81.723 | KV453114.1 | 1497220 | 17-scf00439 | 17 |
| AX-158283632 | 22 | 81.723 | KV453114.1 | 1497713 | 17-scf00439 | 17 |
| AX-158283634 | 22 | 81.723 | KV453114.1 | 1500117 | 17-scf00439 | 17 |
| AX-158283636 | 22 | 81.723 | KV453114.1 | 1502033 | 17-scf00439 | 17 |
| AX-158283637 | 22 | 81.723 | KV453114.1 | 1502889 | 17-scf00439 | 17 |
| AX-158283646 | 22 | 81.723 | KV453114.1 | 1510027 | 17-scf00439 | 17 |
| AX-158283655 | 22 | 81.723 | KV453114.1 | 1522000 | 17-scf00439 | 17 |
| AX-158283656 | 22 | 81.723 | KV453114.1 | 1523103 | 17-scf00439 | 17 |
| AX-158283658 | 22 | 81.723 | KV453114.1 | 1524220 | 17-scf00439 | 17 |
| AX-158283663 | 22 | 81.723 | KV453114.1 | 1527496 | 17-scf00439 | 17 |
| AX-158283664 | 22 | 81.723 | KV453114.1 | 1527925 | 17-scf00439 | 17 |
| AX-158283666 | 22 | 81.723 | KV453114.1 | 1530698 | 17-scf00439 | 17 |
| AX-158283668 | 22 | 81.723 | KV453114.1 | 1532267 | 17-scf00439 | 17 |
| AX-158283670 | 22 | 81.723 | KV453114.1 | 1533967 | 17-scf00439 | 17 |
| AX-158283671 | 22 | 81.723 | KV453114.1 | 1534570 | 17-scf00439 | 17 |
| AX-158283681 | 22 | 81.723 | KV453114.1 | 1547848 | 17-scf00439 | 17 |
| AX-158283689 | 22 | 81.723 | KV453114.1 | 1554676 | 17-scf00439 | 17 |
| AX-158283692 | 22 | 81.723 | KV453114.1 | 1557354 | 17-scf00439 | 17 |
| AX-158283693 | 22 | 81.723 | KV453114.1 | 1558562 | 17-scf00439 | 17 |
| AX-158283694 | 22 | 81.723 | KV453114.1 | 1559255 | 17-scf00439 | 17 |
| AX-158283695 | 22 | 81.723 | KV453114.1 | 1560303 | 17-scf00439 | 17 |
| AX-158283698 | 22 | 81.723 | KV453114.1 | 1561894 | 17-scf00439 | 17 |
| AX-158283699 | 22 | 81.723 | KV453114.1 | 1562648 | 17-scf00439 | 17 |
| AX-158283700 | 22 | 81.723 | KV453114.1 | 1563373 | 17-scf00439 | 17 |
| AX-158283703 | 22 | 81.723 | KV453114.1 | 1565930 | 17-scf00439 | 17 |
| AX-158283704 | 22 | 81.723 | KV453114.1 | 1566352 | 17-scf00439 | 17 |
| AX-158283706 | 22 | 81.723 | KV453114.1 | 1568378 | 17-scf00439 | 17 |
| AX-158283710 | 22 | 81.723 | KV453114.1 | 1573987 | 17-scf00439 | 17 |
| AX-158283711 | 22 | 81.723 | KV453114.1 | 1574371 | 17-scf00439 | 17 |
| AX-158283717 | 22 | 81.723 | KV453114.1 | 1581182 | 17-scf00439 | 17 |
| AX-158283725 | 22 | 81.723 | KV453114.1 | 1585401 | 17-scf00439 | 17 |
| AX-158283728 | 22 | 81.723 | KV453114.1 | 1587204 | 17-scf00439 | 17 |
| AX-158283729 | 22 | 81.723 | KV453114.1 | 1587912 | 17-scf00439 | 17 |
| AX-158283731 | 22 | 81.723 | KV453114.1 | 1589345 | 17-scf00439 | 17 |
| AX-158283732 | 22 | 81.723 | KV453114.1 | 1590068 | 17-scf00439 | 17 |
| AX-158283733 | 22 | 81.723 | KV453114.1 | 1590960 | 17-scf00439 | 17 |
| AX-158283734 | 22 | 81.723 | KV453114.1 | 1592250 | 17-scf00439 | 17 |
| AX-158283735 | 22 | 81.723 | KV453114.1 | 1593613 | 17-scf00439 | 17 |
| AX-158283737 | 22 | 81.723 | KV453114.1 | 1596938 | 17-scf00439 | 17 |
| AX-158283741 | 22 | 81.723 | KV453114.1 | 1599187 | 17-scf00439 | 17 |
| AX-158283742 | 22 | 81.723 | KV453114.1 | 1600902 | 17-scf00439 | 17 |
| AX-158283743 | 22 | 81.723 | KV453114.1 | 1601599 | 17-scf00439 | 17 |

|              |    |        |            |         |             |    |
|--------------|----|--------|------------|---------|-------------|----|
| AX-158283746 | 22 | 81.723 | KV453114.1 | 1603122 | 17-scf00439 | 17 |
| AX-158283750 | 22 | 81.723 | KV453114.1 | 1606860 | 17-scf00439 | 17 |
| AX-158283752 | 22 | 81.723 | KV453114.1 | 1610445 | 17-scf00439 | 17 |
| AX-158283779 | 22 | 81.723 | KV453114.1 | 1631363 | 17-scf00439 | 17 |
| AX-158283781 | 22 | 81.723 | KV453114.1 | 1636114 | 17-scf00439 | 17 |
| AX-158283782 | 22 | 81.723 | KV453114.1 | 1638094 | 17-scf00439 | 17 |
| AX-158283784 | 22 | 81.723 | KV453114.1 | 1640685 | 17-scf00439 | 17 |
| AX-158283785 | 22 | 81.723 | KV453114.1 | 1642342 | 17-scf00439 | 17 |
| AX-158283794 | 22 | 81.723 | KV453114.1 | 1653510 | 17-scf00439 | 17 |
| AX-158283795 | 22 | 81.723 | KV453114.1 | 1653877 | 17-scf00439 | 17 |
| AX-158283805 | 22 | 81.723 | KV453114.1 | 1666451 | 17-scf00439 | 17 |
| AX-158283828 | 22 | 81.723 | KV453114.1 | 1685702 | 17-scf00439 | 17 |
| AX-158283832 | 22 | 81.723 | KV453114.1 | 1689129 | 17-scf00439 | 17 |
| AX-158283839 | 22 | 81.723 | KV453114.1 | 1697026 | 17-scf00439 | 17 |
| AX-158283841 | 22 | 81.723 | KV453114.1 | 1698800 | 17-scf00439 | 17 |
| AX-158283845 | 22 | 81.723 | KV453114.1 | 1703018 | 17-scf00439 | 17 |
| AX-158283851 | 22 | 81.723 | KV453114.1 | 1710392 | 17-scf00439 | 17 |
| AX-158283853 | 22 | 81.723 | KV453114.1 | 1711839 | 17-scf00439 | 17 |
| AX-158417026 | 22 | 81.723 | KV453114.1 | 1715044 | 17-scf00439 | 17 |
| AX-158283860 | 22 | 81.723 | KV453114.1 | 1718286 | 17-scf00439 | 17 |
| AX-158283863 | 22 | 81.723 | KV453114.1 | 1720316 | 17-scf00439 | 17 |
| AX-158283864 | 22 | 81.723 | KV453114.1 | 1720664 | 17-scf00439 | 17 |
| AX-158283873 | 22 | 81.723 | KV453114.1 | 1729888 | 17-scf00439 | 17 |
| AX-158283880 | 22 | 81.723 | KV453114.1 | 1734777 | 17-scf00439 | 17 |
| AX-158283884 | 22 | 81.723 | KV453114.1 | 1737554 | 17-scf00439 | 17 |
| AX-158283889 | 22 | 81.723 | KV453114.1 | 1744020 | 17-scf00439 | 17 |
| AX-158283893 | 22 | 81.723 | KV453114.1 | 1748245 | 17-scf00439 | 17 |
| AX-157844845 | 22 | 81.723 | KV453114.1 | 1760577 | 17-scf00439 | 17 |
| AX-158283898 | 22 | 81.723 | KV453114.1 | 1763831 | 17-scf00439 | 17 |
| AX-158283900 | 22 | 81.723 | KV453114.1 | 1764721 | 17-scf00439 | 17 |
| AX-158283903 | 22 | 81.723 | KV453114.1 | 1769365 | 17-scf00439 | 17 |
| AX-158283907 | 22 | 81.723 | KV453114.1 | 1772109 | 17-scf00439 | 17 |
| AX-158283908 | 22 | 81.723 | KV453114.1 | 1772534 | 17-scf00439 | 17 |
| AX-158283909 | 22 | 81.723 | KV453114.1 | 1773331 | 17-scf00439 | 17 |
| AX-157844846 | 22 | 81.723 | KV453114.1 | 1774450 | 17-scf00439 | 17 |
| AX-158283912 | 22 | 81.723 | KV453114.1 | 1777145 | 17-scf00439 | 17 |
| AX-158283916 | 22 | 81.723 | KV453114.1 | 1780351 | 17-scf00439 | 17 |
| AX-157844848 | 22 | 81.723 | KV453114.1 | 1800529 | 17-scf00439 | 17 |
| AX-158283932 | 22 | 81.723 | KV453114.1 | 1801324 | 17-scf00439 | 17 |
| AX-158283933 | 22 | 81.723 | KV453114.1 | 1802013 | 17-scf00439 | 17 |
| AX-158283934 | 22 | 81.723 | KV453114.1 | 1802449 | 17-scf00439 | 17 |
| AX-158283935 | 22 | 81.723 | KV453114.1 | 1802756 | 17-scf00439 | 17 |
| AX-158283937 | 22 | 81.723 | KV453114.1 | 1804275 | 17-scf00439 | 17 |
| AX-158283939 | 22 | 81.723 | KV453114.1 | 1806762 | 17-scf00439 | 17 |
| AX-158283941 | 22 | 81.723 | KV453114.1 | 1808757 | 17-scf00439 | 17 |
| AX-158283942 | 22 | 81.723 | KV453114.1 | 1809891 | 17-scf00439 | 17 |
| AX-157844849 | 22 | 81.723 | KV453114.1 | 1811431 | 17-scf00439 | 17 |
| AX-158283943 | 22 | 81.723 | KV453114.1 | 1812057 | 17-scf00439 | 17 |
| AX-158283944 | 22 | 81.723 | KV453114.1 | 1812289 | 17-scf00439 | 17 |
| AX-158283946 | 22 | 81.723 | KV453114.1 | 1813840 | 17-scf00439 | 17 |
| AX-157873277 | 22 | 81.723 | KV453114.1 | 1816436 | 17-scf00439 | 17 |

|              |    |        |            |         |             |    |
|--------------|----|--------|------------|---------|-------------|----|
| AX-158283951 | 22 | 81.723 | KV453114.1 | 1821485 | 17-scf00439 | 17 |
| AX-158283953 | 22 | 81.723 | KV453114.1 | 1824326 | 17-scf00439 | 17 |
| AX-158283954 | 22 | 81.723 | KV453114.1 | 1824780 | 17-scf00439 | 17 |
| AX-158283956 | 22 | 81.723 | KV453114.1 | 1826702 | 17-scf00439 | 17 |
| AX-157873278 | 22 | 81.723 | KV453114.1 | 1829336 | 17-scf00439 | 17 |
| AX-158283961 | 22 | 81.723 | KV453114.1 | 1830545 | 17-scf00439 | 17 |
| AX-158283977 | 22 | 81.723 | KV453114.1 | 1845824 | 17-scf00439 | 17 |
| AX-158283978 | 22 | 81.723 | KV453114.1 | 1846257 | 17-scf00439 | 17 |
| AX-158283981 | 22 | 81.723 | KV453114.1 | 1848124 | 17-scf00439 | 17 |
| AX-157844853 | 22 | 81.723 | KV453114.1 | 1850367 | 17-scf00439 | 17 |
| AX-157844854 | 22 | 81.723 | KV453114.1 | 1851577 | 17-scf00439 | 17 |
| AX-158283986 | 22 | 81.723 | KV453114.1 | 1854960 | 17-scf00439 | 17 |
| AX-158283989 | 22 | 81.723 | KV453114.1 | 1857163 | 17-scf00439 | 17 |
| AX-158283993 | 22 | 81.723 | KV453114.1 | 1865252 | 17-scf00439 | 17 |
| AX-158283996 | 22 | 81.723 | KV453114.1 | 1868110 | 17-scf00439 | 17 |
| AX-158283997 | 22 | 81.723 | KV453114.1 | 1868876 | 17-scf00439 | 17 |
| AX-158283999 | 22 | 81.723 | KV453114.1 | 1870101 | 17-scf00439 | 17 |
| AX-157844855 | 22 | 81.723 | KV453114.1 | 1872502 | 17-scf00439 | 17 |
| AX-158284003 | 22 | 81.723 | KV453114.1 | 1877749 | 17-scf00439 | 17 |
| AX-158284004 | 22 | 81.723 | KV453114.1 | 1878721 | 17-scf00439 | 17 |
| AX-158284008 | 22 | 81.723 | KV453114.1 | 1882952 | 17-scf00439 | 17 |
| AX-158284014 | 22 | 81.723 | KV453114.1 | 1888951 | 17-scf00439 | 17 |
| AX-157873280 | 22 | 81.723 | KV453114.1 | 1890742 | 17-scf00439 | 17 |
| AX-158284015 | 22 | 81.723 | KV453114.1 | 1891087 | 17-scf00439 | 17 |
| AX-158284016 | 22 | 81.723 | KV453114.1 | 1891599 | 17-scf00439 | 17 |
| AX-158284019 | 22 | 81.723 | KV453114.1 | 1894530 | 17-scf00439 | 17 |
| AX-158284020 | 22 | 81.723 | KV453114.1 | 1895454 | 17-scf00439 | 17 |
| AX-158284022 | 22 | 81.723 | KV453114.1 | 1897799 | 17-scf00439 | 17 |
| AX-158284026 | 22 | 81.723 | KV453114.1 | 1905452 | 17-scf00439 | 17 |
| AX-158284028 | 22 | 81.723 | KV453114.1 | 1907279 | 17-scf00439 | 17 |
| AX-158284029 | 22 | 81.723 | KV453114.1 | 1910859 | 17-scf00439 | 17 |
| AX-158417033 | 22 | 81.723 | KV453114.1 | 1914200 | 17-scf00439 | 17 |
| AX-158284032 | 22 | 81.723 | KV453114.1 | 1915742 | 17-scf00439 | 17 |
| AX-158284033 | 22 | 81.723 | KV453114.1 | 1916779 | 17-scf00439 | 17 |
| AX-158284036 | 22 | 81.723 | KV453114.1 | 1920947 | 17-scf00439 | 17 |
| AX-158284046 | 22 | 81.723 | KV453114.1 | 1930556 | 17-scf00439 | 17 |
| AX-158284054 | 22 | 81.723 | KV453114.1 | 1938854 | 17-scf00439 | 17 |
| AX-158284058 | 22 | 81.723 | KV453114.1 | 1942662 | 17-scf00439 | 17 |
| AX-158284060 | 22 | 81.723 | KV453114.1 | 1943551 | 17-scf00439 | 17 |
| AX-158284062 | 22 | 81.723 | KV453114.1 | 1944898 | 17-scf00439 | 17 |
| AX-157701175 | 22 | 81.723 | KV453114.1 | 1950566 | 17-scf00439 | 17 |
| AX-158284070 | 22 | 81.723 | KV453114.1 | 1952590 | 17-scf00439 | 17 |
| AX-158284072 | 22 | 81.723 | KV453114.1 | 1954801 | 17-scf00439 | 17 |
| AX-158284073 | 22 | 81.723 | KV453114.1 | 1955066 | 17-scf00439 | 17 |
| AX-158284079 | 22 | 81.723 | KV453114.1 | 1960798 | 17-scf00439 | 17 |
| AX-158284080 | 22 | 81.723 | KV453114.1 | 1964174 | 17-scf00439 | 17 |
| AX-158284082 | 22 | 81.723 | KV453114.1 | 1966546 | 17-scf00439 | 17 |
| AX-158284085 | 22 | 81.723 | KV453114.1 | 1969177 | 17-scf00439 | 17 |
| AX-158284090 | 22 | 81.723 | KV453114.1 | 1972304 | 17-scf00439 | 17 |
| AX-158284099 | 22 | 81.723 | KV453114.1 | 1978841 | 17-scf00439 | 17 |
| AX-158284152 | 22 | 81.723 | KV453114.1 | 2023014 | 17-scf00439 | 17 |

|              |    |        |            |         |             |    |
|--------------|----|--------|------------|---------|-------------|----|
| AX-158284191 | 22 | 81.723 | KV453114.1 | 2063617 | 17-scf00439 | 17 |
| AX-158284193 | 22 | 81.723 | KV453114.1 | 2066950 | 17-scf00439 | 17 |
| AX-157767553 | 22 | 81.723 | KV453114.1 | 2243949 | 17-scf00439 | 17 |
| AX-158284727 | 22 | 81.723 | KV453114.1 | 2617037 | 17-scf00439 | 17 |
| AX-158284804 | 22 | 81.723 | KV453114.1 | 2721762 | 17-scf00439 | 17 |
| AX-158284847 | 22 | 81.723 | KV453114.1 | 2772595 | 17-scf00439 | 17 |
| AX-158284913 | 22 | 81.723 | KV453114.1 | 2834563 | 17-scf00439 | 17 |
| AX-158284914 | 22 | 81.723 | KV453114.1 | 2834861 | 17-scf00439 | 17 |
| AX-157709501 | 22 | 81.723 | KV453114.1 | 3235340 | 17-scf00439 | 17 |
| AX-158285360 | 22 | 81.723 | KV453114.1 | 3332549 | 17-scf00439 | 17 |
| AX-157844995 | 22 | 81.723 | KV453114.1 | 3347009 | 17-scf00439 | 17 |
| AX-157844997 | 22 | 81.723 | KV453114.1 | 3350711 | 17-scf00439 | 17 |
| AX-158285445 | 22 | 81.723 | KV453114.1 | 3435427 | 17-scf00439 | 17 |
| AX-158285570 | 22 | 81.723 | KV453114.1 | 3568377 | 17-scf00439 | 17 |
| AX-157751815 | 22 | 81.723 | KV453114.1 | 3800659 | 17-scf00439 | 17 |
| AX-158270940 | 22 | 81.724 | KV453109.1 | 573683  | 17-scf00430 | 17 |
| AX-157718320 | 22 | 81.724 | KV453109.1 | 671386  | 17-scf00430 | 17 |
| AX-158271041 | 22 | 81.724 | KV453109.1 | 693394  | 17-scf00430 | 17 |
| AX-158271078 | 22 | 81.724 | KV453109.1 | 731715  | 17-scf00430 | 17 |
| AX-158271193 | 22 | 81.724 | KV453109.1 | 867887  | 17-scf00430 | 17 |
| AX-157725684 | 22 | 81.724 | KV453109.1 | 998125  | 17-scf00430 | 17 |
| AX-158271363 | 22 | 81.724 | KV453109.1 | 1090930 | 17-scf00430 | 17 |
| AX-158271393 | 22 | 81.724 | KV453109.1 | 1121739 | 17-scf00430 | 17 |
| AX-158271425 | 22 | 81.724 | KV453109.1 | 1163615 | 17-scf00430 | 17 |
| AX-158271435 | 22 | 81.724 | KV453109.1 | 1180240 | 17-scf00430 | 17 |
| AX-158271443 | 22 | 81.724 | KV453109.1 | 1186784 | 17-scf00430 | 17 |
| AX-157843837 | 22 | 81.724 | KV453109.1 | 1288905 | 17-scf00430 | 17 |
| AX-158423467 | 22 | 81.724 | KV453109.1 | 1524847 | 17-scf00430 | 17 |
| AX-158271849 | 22 | 81.724 | KV453109.1 | 1694680 | 17-scf00430 | 17 |
| AX-158271968 | 22 | 81.724 | KV453109.1 | 1883204 | 17-scf00430 | 17 |
| AX-158271991 | 22 | 81.724 | KV453109.1 | 1926244 | 17-scf00430 | 17 |
| AX-158272001 | 22 | 81.724 | KV453109.1 | 1949799 | 17-scf00430 | 17 |
| AX-158272457 | 22 | 81.724 | KV453111.1 | 467316  | 17-scf00432 | 17 |
| AX-158272657 | 22 | 81.724 | KV453111.1 | 683208  | 17-scf00432 | 17 |
| AX-158272759 | 22 | 81.724 | KV453111.1 | 799357  | 17-scf00432 | 17 |
| AX-158272848 | 22 | 81.724 | KV453111.1 | 906829  | 17-scf00432 | 17 |
| AX-158272945 | 22 | 81.724 | KV453111.1 | 1027534 | 17-scf00432 | 17 |
| AX-158273157 | 22 | 81.724 | KV453111.1 | 1282373 | 17-scf00432 | 17 |
| AX-158273211 | 22 | 81.724 | KV453111.1 | 1354231 | 17-scf00432 | 17 |
| AX-158273250 | 22 | 81.724 | KV453111.1 | 1393433 | 17-scf00432 | 17 |
| AX-158273278 | 22 | 81.724 | KV453111.1 | 1427602 | 17-scf00432 | 17 |
| AX-157717734 | 22 | 81.724 | KV453111.1 | 1428024 | 17-scf00432 | 17 |
| AX-158273288 | 22 | 81.724 | KV453111.1 | 1436591 | 17-scf00432 | 17 |
| AX-158273381 | 22 | 81.724 | KV453111.1 | 1548133 | 17-scf00432 | 17 |
| AX-158273506 | 22 | 81.724 | KV453111.1 | 1670867 | 17-scf00432 | 17 |
| AX-158273640 | 22 | 81.724 | KV453111.1 | 1829215 | 17-scf00432 | 17 |
| AX-158273738 | 22 | 81.724 | KV453111.1 | 1923111 | 17-scf00432 | 17 |
| AX-158286791 | 22 | 81.724 | KV453114.1 | 181017  | 17-scf00439 | 17 |
| AX-158286811 | 22 | 81.724 | KV453114.1 | 202563  | 17-scf00439 | 17 |
| AX-158287117 | 22 | 81.724 | KV453114.1 | 679241  | 17-scf00439 | 17 |
| AX-158287129 | 22 | 81.724 | KV453114.1 | 692936  | 17-scf00439 | 17 |



|              |    |        |            |         |             |    |
|--------------|----|--------|------------|---------|-------------|----|
| AX-158287140 | 22 | 81.724 | KV453114.1 | 711525  | 17-scf00439 | 17 |
| AX-158287162 | 22 | 81.724 | KV453114.1 | 733814  | 17-scf00439 | 17 |
| AX-158287165 | 22 | 81.724 | KV453114.1 | 736905  | 17-scf00439 | 17 |
| AX-158287206 | 22 | 81.724 | KV453114.1 | 773375  | 17-scf00439 | 17 |
| AX-157845158 | 22 | 81.724 | KV453114.1 | 807230  | 17-scf00439 | 17 |
| AX-158283405 | 22 | 81.724 | KV453114.1 | 1268876 | 17-scf00439 | 17 |
| AX-158283453 | 22 | 81.724 | KV453114.1 | 1326245 | 17-scf00439 | 17 |
| AX-158283484 | 22 | 81.724 | KV453114.1 | 1353751 | 17-scf00439 | 17 |
| AX-158283514 | 22 | 81.724 | KV453114.1 | 1383839 | 17-scf00439 | 17 |
| AX-157844833 | 22 | 81.724 | KV453114.1 | 1467281 | 17-scf00439 | 17 |
| AX-157747025 | 22 | 81.724 | KV453114.1 | 1862759 | 17-scf00439 | 17 |
| AX-158283994 | 22 | 81.724 | KV453114.1 | 1865829 | 17-scf00439 | 17 |
| AX-158284064 | 22 | 81.724 | KV453114.1 | 1948514 | 17-scf00439 | 17 |
| AX-158284177 | 22 | 81.724 | KV453114.1 | 2047936 | 17-scf00439 | 17 |
| AX-158284243 | 22 | 81.724 | KV453114.1 | 2116448 | 17-scf00439 | 17 |
| AX-158284326 | 22 | 81.724 | KV453114.1 | 2199745 | 17-scf00439 | 17 |
| AX-157722008 | 22 | 81.724 | KV453114.1 | 2202350 | 17-scf00439 | 17 |
| AX-158284330 | 22 | 81.724 | KV453114.1 | 2202913 | 17-scf00439 | 17 |
| AX-158284617 | 22 | 81.724 | KV453114.1 | 2497734 | 17-scf00439 | 17 |
| AX-158284620 | 22 | 81.724 | KV453114.1 | 2501835 | 17-scf00439 | 17 |
| AX-157756514 | 22 | 81.724 | KV453114.1 | 2540946 | 17-scf00439 | 17 |
| AX-158284711 | 22 | 81.724 | KV453114.1 | 2582513 | 17-scf00439 | 17 |
| AX-157757844 | 22 | 81.724 | KV453114.1 | 2591581 | 17-scf00439 | 17 |
| AX-157717189 | 22 | 81.724 | KV453114.1 | 2593964 | 17-scf00439 | 17 |
| AX-158284721 | 22 | 81.724 | KV453114.1 | 2607309 | 17-scf00439 | 17 |
| AX-158284748 | 22 | 81.724 | KV453114.1 | 2656319 | 17-scf00439 | 17 |
| AX-158284795 | 22 | 81.724 | KV453114.1 | 2713572 | 17-scf00439 | 17 |
| AX-158284964 | 22 | 81.724 | KV453114.1 | 2881941 | 17-scf00439 | 17 |
| AX-158417057 | 22 | 81.724 | KV453114.1 | 2937436 | 17-scf00439 | 17 |
| AX-158285032 | 22 | 81.724 | KV453114.1 | 2960851 | 17-scf00439 | 17 |
| AX-158285106 | 22 | 81.724 | KV453114.1 | 3045353 | 17-scf00439 | 17 |
| AX-158285184 | 22 | 81.724 | KV453114.1 | 3137548 | 17-scf00439 | 17 |
| AX-158285198 | 22 | 81.724 | KV453114.1 | 3147400 | 17-scf00439 | 17 |
| AX-158285216 | 22 | 81.724 | KV453114.1 | 3169060 | 17-scf00439 | 17 |
| AX-157747610 | 22 | 81.724 | KV453114.1 | 3179504 | 17-scf00439 | 17 |
| AX-158285230 | 22 | 81.724 | KV453114.1 | 3182618 | 17-scf00439 | 17 |
| AX-158285325 | 22 | 81.724 | KV453114.1 | 3281324 | 17-scf00439 | 17 |
| AX-157752042 | 22 | 81.724 | KV453114.1 | 3361571 | 17-scf00439 | 17 |
| AX-158285420 | 22 | 81.724 | KV453114.1 | 3401870 | 17-scf00439 | 17 |
| AX-158285607 | 22 | 81.724 | KV453114.1 | 3614902 | 17-scf00439 | 17 |
| AX-158285639 | 22 | 81.724 | KV453114.1 | 3652956 | 17-scf00439 | 17 |
| AX-158285679 | 22 | 81.724 | KV453114.1 | 3699938 | 17-scf00439 | 17 |
| AX-158285681 | 22 | 81.724 | KV453114.1 | 3701947 | 17-scf00439 | 17 |
| AX-158285718 | 22 | 81.724 | KV453114.1 | 3747086 | 17-scf00439 | 17 |
| AX-158285731 | 22 | 81.724 | KV453114.1 | 3760027 | 17-scf00439 | 17 |
| AX-158285947 | 22 | 81.724 | KV453114.1 | 4001842 | 17-scf00439 | 17 |
| AX-158286023 | 22 | 81.724 | KV453114.1 | 4089807 | 17-scf00439 | 17 |
| AX-157845030 | 22 | 81.724 | KV453114.1 | 4100450 | 17-scf00439 | 17 |
| AX-158286031 | 22 | 81.724 | KV453114.1 | 4101487 | 17-scf00439 | 17 |
| AX-158286046 | 22 | 81.724 | KV453114.1 | 4126701 | 17-scf00439 | 17 |
| AX-158286047 | 22 | 81.724 | KV453114.1 | 4127076 | 17-scf00439 | 17 |

|              |    |        |            |         |             |    |
|--------------|----|--------|------------|---------|-------------|----|
| AX-158286129 | 22 | 81.724 | KV453114.1 | 4311195 | 17-scf00439 | 17 |
| AX-158286264 | 22 | 81.724 | KV453114.1 | 4468727 | 17-scf00439 | 17 |
| AX-158286422 | 22 | 81.724 | KV453114.1 | 4628932 | 17-scf00439 | 17 |
| AX-158286521 | 22 | 81.724 | KV453114.1 | 4733373 | 17-scf00439 | 17 |
| AX-158286567 | 22 | 81.724 | KV453114.1 | 4785601 | 17-scf00439 | 17 |
| AX-158417048 | 22 | 81.725 | KV453114.1 | 2512999 | 17-scf00439 | 17 |
| AX-158284633 | 22 | 81.725 | KV453114.1 | 2513894 | 17-scf00439 | 17 |
| AX-158284638 | 22 | 81.725 | KV453114.1 | 2516749 | 17-scf00439 | 17 |
| AX-158284621 | 22 | 81.726 | KV453114.1 | 2503097 | 17-scf00439 | 17 |
| AX-158284630 | 22 | 81.726 | KV453114.1 | 2510890 | 17-scf00439 | 17 |
| AX-157771633 | 22 | 81.727 | KV453111.1 | 362957  | 17-scf00432 | 17 |
| AX-158283640 | 22 | 81.727 | KV453114.1 | 1505329 | 17-scf00439 | 17 |
| AX-158283821 | 22 | 81.727 | KV453114.1 | 1680100 | 17-scf00439 | 17 |
| AX-158283871 | 22 | 81.727 | KV453114.1 | 1728565 | 17-scf00439 | 17 |
| AX-158283875 | 22 | 81.727 | KV453114.1 | 1731454 | 17-scf00439 | 17 |
| AX-157748898 | 22 | 81.727 | KV453114.1 | 1734470 | 17-scf00439 | 17 |
| AX-157749153 | 22 | 81.727 | KV453114.1 | 1735350 | 17-scf00439 | 17 |
| AX-158283885 | 22 | 81.727 | KV453114.1 | 1739660 | 17-scf00439 | 17 |
| AX-157748268 | 22 | 81.727 | KV453114.1 | 1802247 | 17-scf00439 | 17 |
| AX-157757461 | 22 | 81.727 | KV453114.1 | 2326421 | 17-scf00439 | 17 |
| AX-158284524 | 22 | 81.727 | KV453114.1 | 2403308 | 17-scf00439 | 17 |
| AX-158284537 | 22 | 81.727 | KV453114.1 | 2420633 | 17-scf00439 | 17 |
| AX-158284557 | 22 | 81.727 | KV453114.1 | 2442930 | 17-scf00439 | 17 |
| AX-158284562 | 22 | 81.727 | KV453114.1 | 2446653 | 17-scf00439 | 17 |
| AX-158283570 | 22 | 81.728 | KV453114.1 | 1442039 | 17-scf00439 | 17 |
| AX-158283778 | 22 | 81.728 | KV453114.1 | 1630198 | 17-scf00439 | 17 |
| AX-158284030 | 22 | 81.728 | KV453114.1 | 1912897 | 17-scf00439 | 17 |
| AX-158284055 | 22 | 81.728 | KV453114.1 | 1939553 | 17-scf00439 | 17 |
| AX-158284056 | 22 | 81.728 | KV453114.1 | 1940192 | 17-scf00439 | 17 |
| AX-158284068 | 22 | 81.728 | KV453114.1 | 1951630 | 17-scf00439 | 17 |
| AX-158284307 | 22 | 81.728 | KV453114.1 | 2188049 | 17-scf00439 | 17 |
| AX-158284314 | 22 | 81.728 | KV453114.1 | 2192257 | 17-scf00439 | 17 |
| AX-157844901 | 22 | 81.728 | KV453114.1 | 2311512 | 17-scf00439 | 17 |
| AX-158284437 | 22 | 81.728 | KV453114.1 | 2315904 | 17-scf00439 | 17 |
| AX-158284439 | 22 | 81.728 | KV453114.1 | 2319081 | 17-scf00439 | 17 |
| AX-158284445 | 22 | 81.728 | KV453114.1 | 2323347 | 17-scf00439 | 17 |
| AX-158284446 | 22 | 81.728 | KV453114.1 | 2323879 | 17-scf00439 | 17 |
| AX-158284450 | 22 | 81.728 | KV453114.1 | 2327327 | 17-scf00439 | 17 |
| AX-158284452 | 22 | 81.728 | KV453114.1 | 2328005 | 17-scf00439 | 17 |
| AX-157748540 | 22 | 81.728 | KV453114.1 | 2340020 | 17-scf00439 | 17 |
| AX-158284461 | 22 | 81.728 | KV453114.1 | 2341637 | 17-scf00439 | 17 |
| AX-158284464 | 22 | 81.728 | KV453114.1 | 2343287 | 17-scf00439 | 17 |
| AX-158284939 | 22 | 81.728 | KV453114.1 | 2859692 | 17-scf00439 | 17 |
| AX-158285576 | 22 | 81.728 | KV453114.1 | 3575259 | 17-scf00439 | 17 |
| AX-158285842 | 22 | 81.728 | KV453114.1 | 3878751 | 17-scf00439 | 17 |
| AX-158285844 | 22 | 81.728 | KV453114.1 | 3880744 | 17-scf00439 | 17 |
| AX-158272817 | 22 | 81.729 | KV453111.1 | 867133  | 17-scf00432 | 17 |
| AX-158272876 | 22 | 81.729 | KV453111.1 | 939255  | 17-scf00432 | 17 |
| AX-158272979 | 22 | 81.729 | KV453111.1 | 1060522 | 17-scf00432 | 17 |
| AX-158273060 | 22 | 81.729 | KV453111.1 | 1162332 | 17-scf00432 | 17 |
| AX-158273746 | 22 | 81.729 | KV453111.1 | 1934067 | 17-scf00432 | 17 |

|              |    |        |             |         |             |    |
|--------------|----|--------|-------------|---------|-------------|----|
| AX-158287303 | 22 | 81.729 | KV453114.1  | 890940  | 17-scf00439 | 17 |
| AX-157844877 | 22 | 81.729 | KV453114.1  | 2053740 | 17-scf00439 | 17 |
| AX-158284184 | 22 | 81.729 | KV453114.1  | 2055072 | 17-scf00439 | 17 |
| AX-157844879 | 22 | 81.729 | KV453114.1  | 2055332 | 17-scf00439 | 17 |
| AX-158284259 | 22 | 81.729 | KV453114.1  | 2133849 | 17-scf00439 | 17 |
| AX-158284267 | 22 | 81.729 | KV453114.1  | 2145296 | 17-scf00439 | 17 |
| AX-157844890 | 22 | 81.729 | KV453114.1  | 2222561 | 17-scf00439 | 17 |
| AX-158284349 | 22 | 81.729 | KV453114.1  | 2226545 | 17-scf00439 | 17 |
| AX-158284351 | 22 | 81.729 | KV453114.1  | 2228994 | 17-scf00439 | 17 |
| AX-158284435 | 22 | 81.729 | KV453114.1  | 2313315 | 17-scf00439 | 17 |
| AX-158285012 | 22 | 81.729 | KV453114.1  | 2942448 | 17-scf00439 | 17 |
| AX-158285269 | 22 | 81.729 | KV453114.1  | 3225083 | 17-scf00439 | 17 |
| AX-158285632 | 22 | 81.729 | KV453114.1  | 3642651 | 17-scf00439 | 17 |
| AX-157722096 | 22 | 81.729 | KV453114.1  | 3673063 | 17-scf00439 | 17 |
| AX-158285656 | 22 | 81.729 | KV453114.1  | 3675485 | 17-scf00439 | 17 |
| AX-158285859 | 22 | 81.729 | KV453114.1  | 3892782 | 17-scf00439 | 17 |
| AX-158285891 | 22 | 81.729 | KV453114.1  | 3921508 | 17-scf00439 | 17 |
| AX-158285894 | 22 | 81.729 | KV453114.1  | 3924635 | 17-scf00439 | 17 |
| AX-158286432 | 22 | 81.729 | KV453114.1  | 4645201 | 17-scf00439 | 17 |
| AX-158286539 | 22 | 81.729 | KV453114.1  | 4751994 | 17-scf00439 | 17 |
| AX-158284309 | 22 | 81.73  | KV453114.1  | 2188871 | 17-scf00439 | 17 |
| AX-158284331 | 22 | 81.73  | KV453114.1  | 2203665 | 17-scf00439 | 17 |
| AX-157750050 | 22 | 81.73  | KV453114.1  | 2220496 | 17-scf00439 | 17 |
| AX-158284348 | 22 | 81.73  | KV453114.1  | 2225612 | 17-scf00439 | 17 |
| AX-158284350 | 22 | 81.73  | KV453114.1  | 2228594 | 17-scf00439 | 17 |
| AX-158284357 | 22 | 81.73  | KV453114.1  | 2238034 | 17-scf00439 | 17 |
| AX-158284358 | 22 | 81.73  | KV453114.1  | 2239917 | 17-scf00439 | 17 |
| AX-158284438 | 22 | 81.73  | KV453114.1  | 2316927 | 17-scf00439 | 17 |
| AX-158285055 | 22 | 81.73  | KV453114.1  | 2986762 | 17-scf00439 | 17 |
| AX-158285060 | 22 | 81.73  | KV453114.1  | 2993442 | 17-scf00439 | 17 |
| AX-158284282 | 22 | 81.752 | KV453114.1  | 2159483 | 17-scf00439 | 17 |
| AX-158271122 | 22 | 82.067 | KV453109.1  | 792272  | 17-scf00430 | 17 |
| AX-158271895 | 22 | 82.067 | KV453109.1  | 1768597 | 17-scf00430 | 17 |
| AX-158283705 | 22 | 82.067 | KV453114.1  | 1566739 | 17-scf00439 | 17 |
| AX-158283770 | 22 | 82.067 | KV453114.1  | 1624256 | 17-scf00439 | 17 |
| AX-158283918 | 22 | 82.067 | KV453114.1  | 1781583 | 17-scf00439 | 17 |
| AX-158283945 | 22 | 82.067 | KV453114.1  | 1812535 | 17-scf00439 | 17 |
| AX-158283968 | 22 | 82.067 | KV453114.1  | 1837636 | 17-scf00439 | 17 |
| AX-158283975 | 22 | 82.067 | KV453114.1  | 1844797 | 17-scf00439 | 17 |
| AX-158284066 | 22 | 82.067 | KV453114.1  | 1950370 | 17-scf00439 | 17 |
| AX-158284081 | 22 | 82.067 | KV453114.1  | 1965811 | 17-scf00439 | 17 |
| AX-157688729 | 22 | 82.374 | 3ML01026860 | 844     | scf02462_1  | UN |
| AX-158284065 | 22 | 82.404 | KV453114.1  | 1949637 | 17-scf00439 | 17 |
| AX-158284051 | 22 | 82.515 | KV453114.1  | 1936201 | 17-scf00439 | 17 |
| AX-158284035 | 22 | 82.627 | KV453114.1  | 1920026 | 17-scf00439 | 17 |
| AX-158273492 | 22 | 82.742 | KV453111.1  | 1658517 | 17-scf00432 | 17 |
| AX-158273643 | 22 | 82.742 | KV453111.1  | 1833709 | 17-scf00432 | 17 |
| AX-158278202 | 22 | 82.742 | KV453116.1  | 2345195 | 17-scf00437 | 17 |
| AX-158278359 | 22 | 82.742 | KV453116.1  | 2539895 | 17-scf00437 | 17 |
| AX-158278364 | 22 | 82.742 | KV453116.1  | 2545718 | 17-scf00437 | 17 |
| AX-158278468 | 22 | 82.742 | KV453116.1  | 2652416 | 17-scf00437 | 17 |

|              |    |        |             |         |             |    |
|--------------|----|--------|-------------|---------|-------------|----|
| AX-158279003 | 22 | 82.742 | KV453116.1  | 3417909 | 17-scf00437 | 17 |
| AX-158286674 | 22 | 82.742 | KV453114.1  | 32301   | 17-scf00439 | 17 |
| AX-158286720 | 22 | 82.742 | KV453114.1  | 91886   | 17-scf00439 | 17 |
| AX-157845116 | 22 | 82.742 | KV453114.1  | 98669   | 17-scf00439 | 17 |
| AX-158286778 | 22 | 82.742 | KV453114.1  | 167367  | 17-scf00439 | 17 |
| AX-158286785 | 22 | 82.742 | KV453114.1  | 174673  | 17-scf00439 | 17 |
| AX-158286818 | 22 | 82.742 | KV453114.1  | 216626  | 17-scf00439 | 17 |
| AX-158286835 | 22 | 82.742 | KV453114.1  | 234735  | 17-scf00439 | 17 |
| AX-158286851 | 22 | 82.742 | KV453114.1  | 254496  | 17-scf00439 | 17 |
| AX-158286852 | 22 | 82.742 | KV453114.1  | 256280  | 17-scf00439 | 17 |
| AX-158286875 | 22 | 82.742 | KV453114.1  | 276417  | 17-scf00439 | 17 |
| AX-158286877 | 22 | 82.742 | KV453114.1  | 277381  | 17-scf00439 | 17 |
| AX-157845143 | 22 | 82.742 | KV453114.1  | 414522  | 17-scf00439 | 17 |
| AX-158287100 | 22 | 82.742 | KV453114.1  | 665002  | 17-scf00439 | 17 |
| AX-158287110 | 22 | 82.742 | KV453114.1  | 671292  | 17-scf00439 | 17 |
| AX-158287314 | 22 | 82.742 | KV453114.1  | 901371  | 17-scf00439 | 17 |
| AX-158284387 | 22 | 82.742 | KV453114.1  | 2272923 | 17-scf00439 | 17 |
| AX-157705665 | 22 | 82.742 | 3ML01030564 | 321     | scf06164_1  | UN |
| AX-158271088 | 22 | 83     | KV453109.1  | 746634  | 17-scf00430 | 17 |
| AX-158271287 | 22 | 83     | KV453109.1  | 989233  | 17-scf00430 | 17 |
| AX-158272057 | 22 | 83     | KV453109.1  | 2028269 | 17-scf00430 | 17 |
| AX-158419336 | 22 | 83     | KV453111.1  | 269601  | 17-scf00432 | 17 |
| AX-158272487 | 22 | 83     | KV453111.1  | 499358  | 17-scf00432 | 17 |
| AX-158272740 | 22 | 83     | KV453111.1  | 771129  | 17-scf00432 | 17 |
| AX-158272861 | 22 | 83     | KV453111.1  | 919574  | 17-scf00432 | 17 |
| AX-158273161 | 22 | 83     | KV453111.1  | 1288422 | 17-scf00432 | 17 |
| AX-158273355 | 22 | 83     | KV453111.1  | 1509604 | 17-scf00432 | 17 |
| AX-158273471 | 22 | 83     | KV453111.1  | 1634945 | 17-scf00432 | 17 |
| AX-158273499 | 22 | 83     | KV453111.1  | 1664158 | 17-scf00432 | 17 |
| AX-158273630 | 22 | 83     | KV453111.1  | 1815892 | 17-scf00432 | 17 |
| AX-158273762 | 22 | 83     | KV453111.1  | 1950691 | 17-scf00432 | 17 |
| AX-157843984 | 22 | 83     | KV453111.1  | 1980556 | 17-scf00432 | 17 |
| AX-158394992 | 22 | 83     | KV453115.1  | 26670   | 17-scf00436 | 17 |
| AX-157873055 | 22 | 83     | KV453116.1  | 29539   | 17-scf00437 | 17 |
| AX-158276407 | 22 | 83     | KV453116.1  | 97379   | 17-scf00437 | 17 |
| AX-157844134 | 22 | 83     | KV453116.1  | 153764  | 17-scf00437 | 17 |
| AX-157860145 | 22 | 83     | KV453116.1  | 164684  | 17-scf00437 | 17 |
| AX-158276666 | 22 | 83     | KV453116.1  | 440776  | 17-scf00437 | 17 |
| AX-158276675 | 22 | 83     | KV453116.1  | 451689  | 17-scf00437 | 17 |
| AX-158276720 | 22 | 83     | KV453116.1  | 510021  | 17-scf00437 | 17 |
| AX-158276735 | 22 | 83     | KV453116.1  | 524729  | 17-scf00437 | 17 |
| AX-157756218 | 22 | 83     | KV453116.1  | 530143  | 17-scf00437 | 17 |
| AX-158276756 | 22 | 83     | KV453116.1  | 566151  | 17-scf00437 | 17 |
| AX-158276757 | 22 | 83     | KV453116.1  | 566976  | 17-scf00437 | 17 |
| AX-158276774 | 22 | 83     | KV453116.1  | 589930  | 17-scf00437 | 17 |
| AX-158276811 | 22 | 83     | KV453116.1  | 643036  | 17-scf00437 | 17 |
| AX-157740898 | 22 | 83     | KV453116.1  | 646453  | 17-scf00437 | 17 |
| AX-157707670 | 22 | 83     | KV453116.1  | 2134871 | 17-scf00437 | 17 |
| AX-158278108 | 22 | 83     | KV453116.1  | 2232373 | 17-scf00437 | 17 |
| AX-157844327 | 22 | 83     | KV453116.1  | 2469395 | 17-scf00437 | 17 |
| AX-157844337 | 22 | 83     | KV453116.1  | 2686808 | 17-scf00437 | 17 |

|              |    |        |            |         |             |    |
|--------------|----|--------|------------|---------|-------------|----|
| AX-158278583 | 22 | 83     | KV453116.1 | 2788604 | 17-scf00437 | 17 |
| AX-158395077 | 22 | 83     | KV453116.1 | 2819238 | 17-scf00437 | 17 |
| AX-158279475 | 22 | 83     | KV453116.1 | 4102931 | 17-scf00437 | 17 |
| AX-158279528 | 22 | 83     | KV453116.1 | 4157554 | 17-scf00437 | 17 |
| AX-158279592 | 22 | 83     | KV453116.1 | 4225313 | 17-scf00437 | 17 |
| AX-158279759 | 22 | 83     | KV453116.1 | 4393533 | 17-scf00437 | 17 |
| AX-158279861 | 22 | 83     | KV453116.1 | 4505391 | 17-scf00437 | 17 |
| AX-157844508 | 22 | 83     | KV453116.1 | 4910497 | 17-scf00437 | 17 |
| AX-158280365 | 22 | 83     | KV453116.1 | 5082842 | 17-scf00437 | 17 |
| AX-158280377 | 22 | 83     | KV453116.1 | 5093393 | 17-scf00437 | 17 |
| AX-158280452 | 22 | 83     | KV453116.1 | 5215012 | 17-scf00437 | 17 |
| AX-158280588 | 22 | 83     | KV453116.1 | 5393393 | 17-scf00437 | 17 |
| AX-158280624 | 22 | 83     | KV453116.1 | 5436398 | 17-scf00437 | 17 |
| AX-158416905 | 22 | 83     | KV453116.1 | 5714477 | 17-scf00437 | 17 |
| AX-158280922 | 22 | 83     | KV453116.1 | 5876914 | 17-scf00437 | 17 |
| AX-158281252 | 22 | 83     | KV453116.1 | 6271373 | 17-scf00437 | 17 |
| AX-158281668 | 22 | 83     | KV453116.1 | 6950505 | 17-scf00437 | 17 |
| AX-158282611 | 22 | 83     | KV453116.1 | 8301355 | 17-scf00437 | 17 |
| AX-158282683 | 22 | 83     | KV453116.1 | 8390048 | 17-scf00437 | 17 |
| AX-158283011 | 22 | 83     | KV453116.1 | 8816745 | 17-scf00437 | 17 |
| AX-158286653 | 22 | 83     | KV453114.1 | 16818   | 17-scf00439 | 17 |
| AX-158287074 | 22 | 83     | KV453114.1 | 614669  | 17-scf00439 | 17 |
| AX-158287196 | 22 | 83     | KV453114.1 | 764577  | 17-scf00439 | 17 |
| AX-158287274 | 22 | 83     | KV453114.1 | 849632  | 17-scf00439 | 17 |
| AX-158287280 | 22 | 83     | KV453114.1 | 853419  | 17-scf00439 | 17 |
| AX-158381206 | 22 | 83     | KV453114.1 | 2484306 | 17-scf00439 | 17 |
| AX-158284615 | 22 | 83     | KV453114.1 | 2496489 | 17-scf00439 | 17 |
| AX-158284874 | 22 | 83     | KV453114.1 | 2801074 | 17-scf00439 | 17 |
| AX-158285099 | 22 | 83     | KV453114.1 | 3034130 | 17-scf00439 | 17 |
| AX-158285312 | 22 | 83     | KV453114.1 | 3269144 | 17-scf00439 | 17 |
| AX-158285319 | 22 | 83     | KV453114.1 | 3275358 | 17-scf00439 | 17 |
| AX-158285371 | 22 | 83     | KV453114.1 | 3341504 | 17-scf00439 | 17 |
| AX-158285673 | 22 | 83     | KV453114.1 | 3694582 | 17-scf00439 | 17 |
| AX-158285804 | 22 | 83     | KV453114.1 | 3842382 | 17-scf00439 | 17 |
| AX-158285873 | 22 | 83     | KV453114.1 | 3903374 | 17-scf00439 | 17 |
| AX-158286003 | 22 | 83     | KV453114.1 | 4066646 | 17-scf00439 | 17 |
| AX-158286090 | 22 | 83     | KV453114.1 | 4248922 | 17-scf00439 | 17 |
| AX-158286183 | 22 | 83     | KV453114.1 | 4381272 | 17-scf00439 | 17 |
| AX-157845092 | 22 | 83     | KV453114.1 | 4619039 | 17-scf00439 | 17 |
| AX-158272465 | 22 | 83.258 | KV453111.1 | 475282  | 17-scf00432 | 17 |
| AX-158394903 | 22 | 83.258 | KV453111.1 | 1159131 | 17-scf00432 | 17 |
| AX-158273070 | 22 | 83.258 | KV453111.1 | 1170861 | 17-scf00432 | 17 |
| AX-158273560 | 22 | 83.258 | KV453111.1 | 1743668 | 17-scf00432 | 17 |
| AX-158276362 | 22 | 83.258 | KV453116.1 | 29155   | 17-scf00437 | 17 |
| AX-158276365 | 22 | 83.258 | KV453116.1 | 35355   | 17-scf00437 | 17 |
| AX-158276474 | 22 | 83.258 | KV453116.1 | 185733  | 17-scf00437 | 17 |
| AX-157844178 | 22 | 83.258 | KV453116.1 | 712357  | 17-scf00437 | 17 |
| AX-158276908 | 22 | 83.258 | KV453116.1 | 756069  | 17-scf00437 | 17 |
| AX-158276929 | 22 | 83.258 | KV453116.1 | 787027  | 17-scf00437 | 17 |
| AX-158276949 | 22 | 83.258 | KV453116.1 | 823505  | 17-scf00437 | 17 |
| AX-157757574 | 22 | 83.258 | KV453116.1 | 861314  | 17-scf00437 | 17 |

|              |    |        |            |         |             |    |
|--------------|----|--------|------------|---------|-------------|----|
| AX-158277052 | 22 | 83.258 | KV453116.1 | 939943  | 17-scf00437 | 17 |
| AX-158277077 | 22 | 83.258 | KV453116.1 | 964595  | 17-scf00437 | 17 |
| AX-158277096 | 22 | 83.258 | KV453116.1 | 983143  | 17-scf00437 | 17 |
| AX-158277104 | 22 | 83.258 | KV453116.1 | 989325  | 17-scf00437 | 17 |
| AX-158277251 | 22 | 83.258 | KV453116.1 | 1139742 | 17-scf00437 | 17 |
| AX-158277259 | 22 | 83.258 | KV453116.1 | 1154651 | 17-scf00437 | 17 |
| AX-158277286 | 22 | 83.258 | KV453116.1 | 1185051 | 17-scf00437 | 17 |
| AX-158277332 | 22 | 83.258 | KV453116.1 | 1225651 | 17-scf00437 | 17 |
| AX-158416811 | 22 | 83.258 | KV453116.1 | 1333860 | 17-scf00437 | 17 |
| AX-157844225 | 22 | 83.258 | KV453116.1 | 1364119 | 17-scf00437 | 17 |
| AX-158277454 | 22 | 83.258 | KV453116.1 | 1365469 | 17-scf00437 | 17 |
| AX-158277467 | 22 | 83.258 | KV453116.1 | 1376625 | 17-scf00437 | 17 |
| AX-158277498 | 22 | 83.258 | KV453116.1 | 1408488 | 17-scf00437 | 17 |
| AX-158277505 | 22 | 83.258 | KV453116.1 | 1413806 | 17-scf00437 | 17 |
| AX-158277539 | 22 | 83.258 | KV453116.1 | 1445705 | 17-scf00437 | 17 |
| AX-158277543 | 22 | 83.258 | KV453116.1 | 1447307 | 17-scf00437 | 17 |
| AX-158277625 | 22 | 83.258 | KV453116.1 | 1531719 | 17-scf00437 | 17 |
| AX-157844226 | 22 | 83.258 | KV453116.1 | 1548215 | 17-scf00437 | 17 |
| AX-158277660 | 22 | 83.258 | KV453116.1 | 1572898 | 17-scf00437 | 17 |
| AX-158277691 | 22 | 83.258 | KV453116.1 | 1605089 | 17-scf00437 | 17 |
| AX-157844230 | 22 | 83.258 | KV453116.1 | 1627369 | 17-scf00437 | 17 |
| AX-158277873 | 22 | 83.258 | KV453116.1 | 1888109 | 17-scf00437 | 17 |
| AX-158277965 | 22 | 83.258 | KV453116.1 | 2023292 | 17-scf00437 | 17 |
| AX-157844270 | 22 | 83.258 | KV453116.1 | 2035896 | 17-scf00437 | 17 |
| AX-158277973 | 22 | 83.258 | KV453116.1 | 2040800 | 17-scf00437 | 17 |
| AX-158277984 | 22 | 83.258 | KV453116.1 | 2055769 | 17-scf00437 | 17 |
| AX-158277985 | 22 | 83.258 | KV453116.1 | 2056016 | 17-scf00437 | 17 |
| AX-158278303 | 22 | 83.258 | KV453116.1 | 2481995 | 17-scf00437 | 17 |
| AX-158278633 | 22 | 83.258 | KV453116.1 | 2849860 | 17-scf00437 | 17 |
| AX-158278670 | 22 | 83.258 | KV453116.1 | 2902919 | 17-scf00437 | 17 |
| AX-158278815 | 22 | 83.258 | KV453116.1 | 3106892 | 17-scf00437 | 17 |
| AX-158279541 | 22 | 83.258 | KV453116.1 | 4170762 | 17-scf00437 | 17 |
| AX-158280442 | 22 | 83.258 | KV453116.1 | 5199699 | 17-scf00437 | 17 |
| AX-158280559 | 22 | 83.258 | KV453116.1 | 5349824 | 17-scf00437 | 17 |
| AX-158281068 | 22 | 83.258 | KV453116.1 | 6062387 | 17-scf00437 | 17 |
| AX-158281848 | 22 | 83.258 | KV453116.1 | 7291684 | 17-scf00437 | 17 |
| AX-158282205 | 22 | 83.258 | KV453116.1 | 7751329 | 17-scf00437 | 17 |
| AX-158282958 | 22 | 83.258 | KV453116.1 | 8749415 | 17-scf00437 | 17 |
| AX-158287327 | 22 | 83.258 | KV453114.1 | 923397  | 17-scf00439 | 17 |
| AX-158283288 | 22 | 83.258 | KV453114.1 | 1160167 | 17-scf00439 | 17 |
| AX-158283298 | 22 | 83.258 | KV453114.1 | 1169113 | 17-scf00439 | 17 |
| AX-158419478 | 22 | 83.258 | KV453114.1 | 2588027 | 17-scf00439 | 17 |
| AX-157844928 | 22 | 83.258 | KV453114.1 | 2699241 | 17-scf00439 | 17 |
| AX-158285408 | 22 | 83.258 | KV453114.1 | 3384209 | 17-scf00439 | 17 |
| AX-158285472 | 22 | 83.258 | KV453114.1 | 3457677 | 17-scf00439 | 17 |
| AX-158285646 | 22 | 83.258 | KV453114.1 | 3657744 | 17-scf00439 | 17 |
| AX-158285795 | 22 | 83.258 | KV453114.1 | 3836107 | 17-scf00439 | 17 |
| AX-158286619 | 22 | 83.258 | KV453114.1 | 4834437 | 17-scf00439 | 17 |
| AX-158286637 | 22 | 83.258 | KV453114.1 | 4848487 | 17-scf00439 | 17 |
| AX-158272316 | 22 | 83.259 | KV453111.1 | 272158  | 17-scf00432 | 17 |
| AX-158276904 | 22 | 83.259 | KV453116.1 | 748345  | 17-scf00437 | 17 |

|              |    |        |            |         |             |    |
|--------------|----|--------|------------|---------|-------------|----|
| AX-158276934 | 22 | 83.259 | KV453116.1 | 796517  | 17-scf00437 | 17 |
| AX-158277663 | 22 | 83.259 | KV453116.1 | 1575703 | 17-scf00437 | 17 |
| AX-158277741 | 22 | 83.259 | KV453116.1 | 1672249 | 17-scf00437 | 17 |
| AX-158277742 | 22 | 83.259 | KV453116.1 | 1672739 | 17-scf00437 | 17 |
| AX-158277766 | 22 | 83.259 | KV453116.1 | 1705913 | 17-scf00437 | 17 |
| AX-158277906 | 22 | 83.259 | KV453116.1 | 1935936 | 17-scf00437 | 17 |
| AX-157844273 | 22 | 83.259 | KV453116.1 | 2051829 | 17-scf00437 | 17 |
| AX-158278087 | 22 | 83.259 | KV453116.1 | 2207987 | 17-scf00437 | 17 |
| AX-158278561 | 22 | 83.259 | KV453116.1 | 2758992 | 17-scf00437 | 17 |
| AX-158279070 | 22 | 83.259 | KV453116.1 | 3485321 | 17-scf00437 | 17 |
| AX-158279530 | 22 | 83.259 | KV453116.1 | 4158993 | 17-scf00437 | 17 |
| AX-158280512 | 22 | 83.259 | KV453116.1 | 5284234 | 17-scf00437 | 17 |
| AX-158280773 | 22 | 83.259 | KV453116.1 | 5706062 | 17-scf00437 | 17 |
| AX-158281173 | 22 | 83.259 | KV453116.1 | 6182322 | 17-scf00437 | 17 |
| AX-158282260 | 22 | 83.259 | KV453116.1 | 7829464 | 17-scf00437 | 17 |
| AX-158282336 | 22 | 83.259 | KV453116.1 | 7924580 | 17-scf00437 | 17 |
| AX-158277819 | 22 | 83.279 | KV453116.1 | 1778952 | 17-scf00437 | 17 |
| AX-158277833 | 22 | 83.3   | KV453116.1 | 1804426 | 17-scf00437 | 17 |
| AX-158277856 | 22 | 83.321 | KV453116.1 | 1854262 | 17-scf00437 | 17 |
| AX-157873257 | 22 | 83.321 | KV453116.1 | 8943414 | 17-scf00437 | 17 |
| AX-158277862 | 22 | 83.343 | KV453116.1 | 1861530 | 17-scf00437 | 17 |
| AX-157844245 | 22 | 83.367 | KV453116.1 | 1893023 | 17-scf00437 | 17 |
| AX-157844250 | 22 | 83.389 | KV453116.1 | 1897717 | 17-scf00437 | 17 |
| AX-157844253 | 22 | 83.466 | KV453116.1 | 1932056 | 17-scf00437 | 17 |
| AX-157873081 | 22 | 83.63  | KV453116.1 | 1995306 | 17-scf00437 | 17 |
| AX-158277961 | 22 | 83.801 | KV453116.1 | 2016423 | 17-scf00437 | 17 |
| AX-158277992 | 22 | 83.955 | KV453116.1 | 2084415 | 17-scf00437 | 17 |
| AX-158277993 | 22 | 83.96  | KV453116.1 | 2084984 | 17-scf00437 | 17 |
| AX-158278025 | 22 | 83.96  | KV453116.1 | 2114723 | 17-scf00437 | 17 |
| AX-158419409 | 22 | 83.96  | KV453116.1 | 4002947 | 17-scf00437 | 17 |
| AX-158280299 | 22 | 83.96  | KV453116.1 | 5005747 | 17-scf00437 | 17 |
| AX-158282243 | 22 | 83.96  | KV453116.1 | 7801873 | 17-scf00437 | 17 |
| AX-158284356 | 22 | 83.96  | KV453114.1 | 2236416 | 17-scf00439 | 17 |
| AX-158277996 | 22 | 83.966 | KV453116.1 | 2087731 | 17-scf00437 | 17 |
| AX-157758029 | 22 | 83.975 | KV453116.1 | 2094008 | 17-scf00437 | 17 |
| AX-157844274 | 22 | 83.984 | KV453116.1 | 2099790 | 17-scf00437 | 17 |
| AX-158278017 | 22 | 83.984 | KV453116.1 | 2105423 | 17-scf00437 | 17 |
| AX-157739424 | 22 | 83.998 | KV453116.1 | 2100602 | 17-scf00437 | 17 |
| AX-158278014 | 22 | 84.013 | KV453116.1 | 2102908 | 17-scf00437 | 17 |
| AX-158277836 | 22 | 84.027 | KV453116.1 | 1810402 | 17-scf00437 | 17 |
| AX-158278050 | 22 | 84.027 | KV453116.1 | 2143583 | 17-scf00437 | 17 |
| AX-158278058 | 22 | 84.027 | KV453116.1 | 2152289 | 17-scf00437 | 17 |
| AX-158411469 | 22 | 84.027 | KV453116.1 | 2153890 | 17-scf00437 | 17 |
| AX-158278064 | 22 | 84.027 | KV453116.1 | 2167507 | 17-scf00437 | 17 |
| AX-157708947 | 22 | 84.027 | KV453116.1 | 2254909 | 17-scf00437 | 17 |
| AX-158278178 | 22 | 84.027 | KV453116.1 | 2309664 | 17-scf00437 | 17 |
| AX-158278185 | 22 | 84.027 | KV453116.1 | 2322404 | 17-scf00437 | 17 |
| AX-158278186 | 22 | 84.027 | KV453116.1 | 2322847 | 17-scf00437 | 17 |
| AX-158278187 | 22 | 84.027 | KV453116.1 | 2324124 | 17-scf00437 | 17 |
| AX-158278188 | 22 | 84.027 | KV453116.1 | 2324402 | 17-scf00437 | 17 |
| AX-158278287 | 22 | 84.027 | KV453116.1 | 2460245 | 17-scf00437 | 17 |

|              |    |        |            |         |             |    |
|--------------|----|--------|------------|---------|-------------|----|
| AX-158278738 | 22 | 84.027 | KV453116.1 | 2988549 | 17-scf00437 | 17 |
| AX-157715169 | 22 | 84.027 | KV453116.1 | 3002649 | 17-scf00437 | 17 |
| AX-158283164 | 22 | 84.027 | KV453116.1 | 9021265 | 17-scf00437 | 17 |
| AX-157844304 | 22 | 84.192 | KV453116.1 | 2331250 | 17-scf00437 | 17 |
| AX-158278192 | 22 | 84.326 | KV453116.1 | 2334657 | 17-scf00437 | 17 |
| AX-158274092 | 22 | 84.355 | KV453121.1 | 112939  | 17-scf00435 | 17 |
| AX-158274420 | 22 | 84.355 | KV453121.1 | 624817  | 17-scf00435 | 17 |
| AX-158275233 | 22 | 84.355 | KV453121.1 | 1680601 | 17-scf00435 | 17 |
| AX-158381163 | 22 | 84.355 | KV453116.1 | 299553  | 17-scf00437 | 17 |
| AX-157844163 | 22 | 84.355 | KV453116.1 | 377571  | 17-scf00437 | 17 |
| AX-158276838 | 22 | 84.355 | KV453116.1 | 680635  | 17-scf00437 | 17 |
| AX-158277455 | 22 | 84.355 | KV453116.1 | 1365597 | 17-scf00437 | 17 |
| AX-158277858 | 22 | 84.355 | KV453116.1 | 1855382 | 17-scf00437 | 17 |
| AX-158277898 | 22 | 84.355 | KV453116.1 | 1921597 | 17-scf00437 | 17 |
| AX-158277987 | 22 | 84.355 | KV453116.1 | 2060675 | 17-scf00437 | 17 |
| AX-157844305 | 22 | 84.355 | KV453116.1 | 2339023 | 17-scf00437 | 17 |
| AX-157744878 | 22 | 84.355 | KV453116.1 | 2340530 | 17-scf00437 | 17 |
| AX-157844307 | 22 | 84.355 | KV453116.1 | 2342323 | 17-scf00437 | 17 |
| AX-158278206 | 22 | 84.355 | KV453116.1 | 2348450 | 17-scf00437 | 17 |
| AX-158278207 | 22 | 84.355 | KV453116.1 | 2349860 | 17-scf00437 | 17 |
| AX-158278209 | 22 | 84.355 | KV453116.1 | 2351489 | 17-scf00437 | 17 |
| AX-158278237 | 22 | 84.355 | KV453116.1 | 2387438 | 17-scf00437 | 17 |
| AX-158278238 | 22 | 84.355 | KV453116.1 | 2387790 | 17-scf00437 | 17 |
| AX-158278266 | 22 | 84.355 | KV453116.1 | 2416969 | 17-scf00437 | 17 |
| AX-157844326 | 22 | 84.355 | KV453116.1 | 2466789 | 17-scf00437 | 17 |
| AX-158278389 | 22 | 84.355 | KV453116.1 | 2575623 | 17-scf00437 | 17 |
| AX-158279055 | 22 | 84.355 | KV453116.1 | 3472336 | 17-scf00437 | 17 |
| AX-158280203 | 22 | 84.355 | KV453116.1 | 4896576 | 17-scf00437 | 17 |
| AX-158280282 | 22 | 84.355 | KV453116.1 | 4979868 | 17-scf00437 | 17 |
| AX-158280514 | 22 | 84.355 | KV453116.1 | 5287000 | 17-scf00437 | 17 |
| AX-157845035 | 22 | 84.355 | KV453114.1 | 4152230 | 17-scf00439 | 17 |
| AX-158286423 | 22 | 84.355 | KV453114.1 | 4630390 | 17-scf00439 | 17 |
| AX-158286443 | 22 | 84.355 | KV453114.1 | 4654331 | 17-scf00439 | 17 |
| AX-158286602 | 22 | 84.355 | KV453114.1 | 4818112 | 17-scf00439 | 17 |
| AX-158287484 | 22 | 84.355 | KV453120.1 | 39941   | 17-scf00444 | 17 |
| AX-157853478 | 22 | 84.355 | KV453123.1 | 60188   | 17-scf00635 | 17 |
| AX-158287582 | 22 | 84.355 | KV453123.1 | 338867  | 17-scf00635 | 17 |
| AX-158276350 | 22 | 84.464 | KV453116.1 | 8725    | 17-scf00437 | 17 |
| AX-158276513 | 22 | 84.464 | KV453116.1 | 228957  | 17-scf00437 | 17 |
| AX-158276552 | 22 | 84.464 | KV453116.1 | 283599  | 17-scf00437 | 17 |
| AX-158276607 | 22 | 84.464 | KV453116.1 | 348728  | 17-scf00437 | 17 |
| AX-157844161 | 22 | 84.464 | KV453116.1 | 363187  | 17-scf00437 | 17 |
| AX-158276643 | 22 | 84.464 | KV453116.1 | 406013  | 17-scf00437 | 17 |
| AX-157727246 | 22 | 84.464 | KV453116.1 | 470311  | 17-scf00437 | 17 |
| AX-157769478 | 22 | 84.464 | KV453116.1 | 588922  | 17-scf00437 | 17 |
| AX-157741448 | 22 | 84.464 | KV453116.1 | 699045  | 17-scf00437 | 17 |
| AX-158277007 | 22 | 84.464 | KV453116.1 | 891416  | 17-scf00437 | 17 |
| AX-158277109 | 22 | 84.464 | KV453116.1 | 993140  | 17-scf00437 | 17 |
| AX-158277957 | 22 | 84.464 | KV453116.1 | 2011846 | 17-scf00437 | 17 |
| AX-157746687 | 22 | 84.464 | KV453116.1 | 2358585 | 17-scf00437 | 17 |
| AX-158278231 | 22 | 84.464 | KV453116.1 | 2381920 | 17-scf00437 | 17 |



|              |    |        |            |         |             |    |
|--------------|----|--------|------------|---------|-------------|----|
| AX-158278248 | 22 | 84.464 | KV453116.1 | 2401096 | 17-scf00437 | 17 |
| AX-158278281 | 22 | 84.464 | KV453116.1 | 2450842 | 17-scf00437 | 17 |
| AX-157844323 | 22 | 84.464 | KV453116.1 | 2453151 | 17-scf00437 | 17 |
| AX-158278283 | 22 | 84.464 | KV453116.1 | 2456491 | 17-scf00437 | 17 |
| AX-158278284 | 22 | 84.464 | KV453116.1 | 2457479 | 17-scf00437 | 17 |
| AX-158278296 | 22 | 84.464 | KV453116.1 | 2478045 | 17-scf00437 | 17 |
| AX-158278302 | 22 | 84.464 | KV453116.1 | 2480943 | 17-scf00437 | 17 |
| AX-158278313 | 22 | 84.464 | KV453116.1 | 2496087 | 17-scf00437 | 17 |
| AX-158278323 | 22 | 84.464 | KV453116.1 | 2503851 | 17-scf00437 | 17 |
| AX-157844330 | 22 | 84.464 | KV453116.1 | 2505106 | 17-scf00437 | 17 |
| AX-158278328 | 22 | 84.464 | KV453116.1 | 2508493 | 17-scf00437 | 17 |
| AX-157844331 | 22 | 84.464 | KV453116.1 | 2515754 | 17-scf00437 | 17 |
| AX-158278333 | 22 | 84.464 | KV453116.1 | 2516856 | 17-scf00437 | 17 |
| AX-158278345 | 22 | 84.464 | KV453116.1 | 2529066 | 17-scf00437 | 17 |
| AX-158278346 | 22 | 84.464 | KV453116.1 | 2529340 | 17-scf00437 | 17 |
| AX-158278349 | 22 | 84.464 | KV453116.1 | 2530866 | 17-scf00437 | 17 |
| AX-158278352 | 22 | 84.464 | KV453116.1 | 2533784 | 17-scf00437 | 17 |
| AX-157757661 | 22 | 84.464 | KV453116.1 | 2553228 | 17-scf00437 | 17 |
| AX-158278369 | 22 | 84.464 | KV453116.1 | 2554859 | 17-scf00437 | 17 |
| AX-158278381 | 22 | 84.464 | KV453116.1 | 2567637 | 17-scf00437 | 17 |
| AX-158278408 | 22 | 84.464 | KV453116.1 | 2590534 | 17-scf00437 | 17 |
| AX-158278420 | 22 | 84.464 | KV453116.1 | 2603304 | 17-scf00437 | 17 |
| AX-158278424 | 22 | 84.464 | KV453116.1 | 2606482 | 17-scf00437 | 17 |
| AX-157757027 | 22 | 84.464 | KV453116.1 | 2607751 | 17-scf00437 | 17 |
| AX-158278432 | 22 | 84.464 | KV453116.1 | 2614925 | 17-scf00437 | 17 |
| AX-158278434 | 22 | 84.464 | KV453116.1 | 2619118 | 17-scf00437 | 17 |
| AX-157844335 | 22 | 84.464 | KV453116.1 | 2674551 | 17-scf00437 | 17 |
| AX-157844351 | 22 | 84.464 | KV453116.1 | 2808981 | 17-scf00437 | 17 |
| AX-158278617 | 22 | 84.464 | KV453116.1 | 2828920 | 17-scf00437 | 17 |
| AX-158278681 | 22 | 84.464 | KV453116.1 | 2913269 | 17-scf00437 | 17 |
| AX-158278837 | 22 | 84.464 | KV453116.1 | 3136370 | 17-scf00437 | 17 |
| AX-158278892 | 22 | 84.464 | KV453116.1 | 3260229 | 17-scf00437 | 17 |
| AX-158279063 | 22 | 84.464 | KV453116.1 | 3478814 | 17-scf00437 | 17 |
| AX-158279082 | 22 | 84.464 | KV453116.1 | 3495280 | 17-scf00437 | 17 |
| AX-157844513 | 22 | 84.464 | KV453116.1 | 4948513 | 17-scf00437 | 17 |
| AX-158280257 | 22 | 84.464 | KV453116.1 | 4955129 | 17-scf00437 | 17 |
| AX-158280270 | 22 | 84.464 | KV453116.1 | 4972448 | 17-scf00437 | 17 |
| AX-158280444 | 22 | 84.464 | KV453116.1 | 5201109 | 17-scf00437 | 17 |
| AX-158280610 | 22 | 84.464 | KV453116.1 | 5423894 | 17-scf00437 | 17 |
| AX-158280621 | 22 | 84.464 | KV453116.1 | 5433743 | 17-scf00437 | 17 |
| AX-157775240 | 22 | 84.464 | KV453116.1 | 5824724 | 17-scf00437 | 17 |
| AX-158280960 | 22 | 84.464 | KV453116.1 | 5926490 | 17-scf00437 | 17 |
| AX-158280988 | 22 | 84.464 | KV453116.1 | 5955120 | 17-scf00437 | 17 |
| AX-158281021 | 22 | 84.464 | KV453116.1 | 6003028 | 17-scf00437 | 17 |
| AX-157702522 | 22 | 84.464 | KV453116.1 | 6150761 | 17-scf00437 | 17 |
| AX-158281200 | 22 | 84.464 | KV453116.1 | 6209556 | 17-scf00437 | 17 |
| AX-157694158 | 22 | 84.464 | KV453116.1 | 6944430 | 17-scf00437 | 17 |
| AX-158281799 | 22 | 84.464 | KV453116.1 | 7201214 | 17-scf00437 | 17 |
| AX-158281802 | 22 | 84.464 | KV453116.1 | 7203074 | 17-scf00437 | 17 |
| AX-158281876 | 22 | 84.464 | KV453116.1 | 7324175 | 17-scf00437 | 17 |
| AX-157844683 | 22 | 84.464 | KV453116.1 | 7606362 | 17-scf00437 | 17 |

|              |    |        |            |         |             |    |
|--------------|----|--------|------------|---------|-------------|----|
| AX-158282158 | 22 | 84.464 | KV453116.1 | 7698365 | 17-scf00437 | 17 |
| AX-158282202 | 22 | 84.464 | KV453116.1 | 7741879 | 17-scf00437 | 17 |
| AX-158282403 | 22 | 84.464 | KV453116.1 | 7988674 | 17-scf00437 | 17 |
| AX-158282655 | 22 | 84.464 | KV453116.1 | 8360030 | 17-scf00437 | 17 |
| AX-158282822 | 22 | 84.464 | KV453116.1 | 8583469 | 17-scf00437 | 17 |
| AX-158278488 | 22 | 84.567 | KV453116.1 | 2673093 | 17-scf00437 | 17 |
| AX-158276459 | 22 | 84.683 | KV453116.1 | 159350  | 17-scf00437 | 17 |
| AX-158276472 | 22 | 84.683 | KV453116.1 | 182977  | 17-scf00437 | 17 |
| AX-158276888 | 22 | 84.683 | KV453116.1 | 730093  | 17-scf00437 | 17 |
| AX-158276916 | 22 | 84.683 | KV453116.1 | 770519  | 17-scf00437 | 17 |
| AX-157887930 | 22 | 84.683 | KV453116.1 | 790817  | 17-scf00437 | 17 |
| AX-158277139 | 22 | 84.683 | KV453116.1 | 1029916 | 17-scf00437 | 17 |
| AX-158277466 | 22 | 84.683 | KV453116.1 | 1374730 | 17-scf00437 | 17 |
| AX-158416819 | 22 | 84.683 | KV453116.1 | 1647870 | 17-scf00437 | 17 |
| AX-158277963 | 22 | 84.683 | KV453116.1 | 2018943 | 17-scf00437 | 17 |
| AX-158278074 | 22 | 84.683 | KV453116.1 | 2193452 | 17-scf00437 | 17 |
| AX-158278316 | 22 | 84.683 | KV453116.1 | 2497593 | 17-scf00437 | 17 |
| AX-158278457 | 22 | 84.683 | KV453116.1 | 2639354 | 17-scf00437 | 17 |
| AX-158278483 | 22 | 84.683 | KV453116.1 | 2667618 | 17-scf00437 | 17 |
| AX-157745890 | 22 | 84.683 | KV453116.1 | 2701075 | 17-scf00437 | 17 |
| AX-157844341 | 22 | 84.683 | KV453116.1 | 2701981 | 17-scf00437 | 17 |
| AX-157715196 | 22 | 84.683 | KV453116.1 | 2704291 | 17-scf00437 | 17 |
| AX-157714525 | 22 | 84.683 | KV453116.1 | 2705866 | 17-scf00437 | 17 |
| AX-158278512 | 22 | 84.683 | KV453116.1 | 2706087 | 17-scf00437 | 17 |
| AX-158278519 | 22 | 84.683 | KV453116.1 | 2710830 | 17-scf00437 | 17 |
| AX-158278522 | 22 | 84.683 | KV453116.1 | 2716485 | 17-scf00437 | 17 |
| AX-158278530 | 22 | 84.683 | KV453116.1 | 2722826 | 17-scf00437 | 17 |
| AX-158278531 | 22 | 84.683 | KV453116.1 | 2723439 | 17-scf00437 | 17 |
| AX-158278538 | 22 | 84.683 | KV453116.1 | 2730176 | 17-scf00437 | 17 |
| AX-158278539 | 22 | 84.683 | KV453116.1 | 2731718 | 17-scf00437 | 17 |
| AX-158278542 | 22 | 84.683 | KV453116.1 | 2738540 | 17-scf00437 | 17 |
| AX-157844346 | 22 | 84.683 | KV453116.1 | 2747698 | 17-scf00437 | 17 |
| AX-158278550 | 22 | 84.683 | KV453116.1 | 2748221 | 17-scf00437 | 17 |
| AX-157774227 | 22 | 84.683 | KV453116.1 | 2748938 | 17-scf00437 | 17 |
| AX-158278554 | 22 | 84.683 | KV453116.1 | 2749756 | 17-scf00437 | 17 |
| AX-157717409 | 22 | 84.683 | KV453116.1 | 2758309 | 17-scf00437 | 17 |
| AX-158278586 | 22 | 84.683 | KV453116.1 | 2791242 | 17-scf00437 | 17 |
| AX-158278597 | 22 | 84.683 | KV453116.1 | 2805428 | 17-scf00437 | 17 |
| AX-157844353 | 22 | 84.683 | KV453116.1 | 2833130 | 17-scf00437 | 17 |
| AX-158278622 | 22 | 84.683 | KV453116.1 | 2836979 | 17-scf00437 | 17 |
| AX-158278636 | 22 | 84.683 | KV453116.1 | 2856827 | 17-scf00437 | 17 |
| AX-158278644 | 22 | 84.683 | KV453116.1 | 2864188 | 17-scf00437 | 17 |
| AX-157844357 | 22 | 84.683 | KV453116.1 | 2867814 | 17-scf00437 | 17 |
| AX-158278648 | 22 | 84.683 | KV453116.1 | 2870371 | 17-scf00437 | 17 |
| AX-158278649 | 22 | 84.683 | KV453116.1 | 2871156 | 17-scf00437 | 17 |
| AX-158278660 | 22 | 84.683 | KV453116.1 | 2883526 | 17-scf00437 | 17 |
| AX-157844364 | 22 | 84.683 | KV453116.1 | 2890858 | 17-scf00437 | 17 |
| AX-158278664 | 22 | 84.683 | KV453116.1 | 2891070 | 17-scf00437 | 17 |
| AX-157748533 | 22 | 84.683 | KV453116.1 | 2893736 | 17-scf00437 | 17 |
| AX-157844366 | 22 | 84.683 | KV453116.1 | 2893894 | 17-scf00437 | 17 |
| AX-157844367 | 22 | 84.683 | KV453116.1 | 2894200 | 17-scf00437 | 17 |

|              |    |        |            |         |                |    |
|--------------|----|--------|------------|---------|----------------|----|
| AX-158278665 | 22 | 84.683 | KV453116.1 | 2894481 | 17-scf00437    | 17 |
| AX-157844368 | 22 | 84.683 | KV453116.1 | 2896663 | 17-scf00437    | 17 |
| AX-158278667 | 22 | 84.683 | KV453116.1 | 2897482 | 17-scf00437    | 17 |
| AX-158278675 | 22 | 84.683 | KV453116.1 | 2907497 | 17-scf00437    | 17 |
| AX-158278677 | 22 | 84.683 | KV453116.1 | 2908413 | 17-scf00437    | 17 |
| AX-158278723 | 22 | 84.683 | KV453116.1 | 2978229 | 17-scf00437    | 17 |
| AX-157744210 | 22 | 84.683 | KV453116.1 | 2978966 | 17-scf00437    | 17 |
| AX-158278744 | 22 | 84.683 | KV453116.1 | 2994931 | 17-scf00437    | 17 |
| AX-157844382 | 22 | 84.683 | KV453116.1 | 2996604 | 17-scf00437    | 17 |
| AX-158278809 | 22 | 84.683 | KV453116.1 | 3101078 | 17-scf00437    | 17 |
| AX-158278829 | 22 | 84.683 | KV453116.1 | 3126601 | 17-scf00437    | 17 |
| AX-158278877 | 22 | 84.683 | KV453116.1 | 3207697 | 17-scf00437    | 17 |
| AX-158278886 | 22 | 84.683 | KV453116.1 | 3243048 | 17-scf00437    | 17 |
| AX-158278964 | 22 | 84.683 | KV453116.1 | 3374194 | 17-scf00437    | 17 |
| AX-157755232 | 22 | 84.683 | KV453116.1 | 4027864 | 17-scf00437    | 17 |
| AX-158279494 | 22 | 84.683 | KV453116.1 | 4125340 | 17-scf00437    | 17 |
| AX-158279612 | 22 | 84.683 | KV453116.1 | 4242631 | 17-scf00437    | 17 |
| AX-158279625 | 22 | 84.683 | KV453116.1 | 4252319 | 17-scf00437    | 17 |
| AX-158280166 | 22 | 84.683 | KV453116.1 | 4842605 | 17-scf00437    | 17 |
| AX-158280182 | 22 | 84.683 | KV453116.1 | 4865679 | 17-scf00437    | 17 |
| AX-158280545 | 22 | 84.683 | KV453116.1 | 5330543 | 17-scf00437    | 17 |
| AX-158280556 | 22 | 84.683 | KV453116.1 | 5345660 | 17-scf00437    | 17 |
| AX-158280791 | 22 | 84.683 | KV453116.1 | 5732364 | 17-scf00437    | 17 |
| AX-158281180 | 22 | 84.683 | KV453116.1 | 6188642 | 17-scf00437    | 17 |
| AX-158281408 | 22 | 84.683 | KV453116.1 | 6497804 | 17-scf00437    | 17 |
| AX-158281921 | 22 | 84.683 | KV453116.1 | 7385465 | 17-scf00437    | 17 |
| AX-158281936 | 22 | 84.683 | KV453116.1 | 7406061 | 17-scf00437    | 17 |
| AX-157720959 | 22 | 84.683 | KV453116.1 | 7502682 | 17-scf00437    | 17 |
| AX-158282042 | 22 | 84.683 | KV453116.1 | 7517356 | 17-scf00437    | 17 |
| AX-158282060 | 22 | 84.683 | KV453116.1 | 7539566 | 17-scf00437    | 17 |
| AX-158282212 | 22 | 84.683 | KV453116.1 | 7765150 | 17-scf00437    | 17 |
| AX-158282228 | 22 | 84.683 | KV453116.1 | 7781896 | 17-scf00437    | 17 |
| AX-158282570 | 22 | 84.683 | KV453116.1 | 8245166 | 17-scf00437    | 17 |
| AX-158282593 | 22 | 84.683 | KV453116.1 | 8284083 | 17-scf00437    | 17 |
| AX-158282761 | 22 | 84.683 | KV453116.1 | 8507514 | 17-scf00437    | 17 |
| AX-158282765 | 22 | 84.683 | KV453116.1 | 8514839 | 17-scf00437    | 17 |
| AX-157860155 | 22 | 84.683 | KV453116.1 | 8760988 | 17-scf00437    | 17 |
| AX-158416994 | 22 | 84.683 | KV453116.1 | 8802808 | 17-scf00437    | 17 |
| AX-157844775 | 22 | 84.683 | KV453116.1 | 8870443 | 17-scf00437    | 17 |
| AX-157712484 | 22 | 84.683 | FI859397.1 | 51      | IORI212 lctalu | UN |
| AX-158278787 | 22 | 84.788 | KV453116.1 | 3073224 | 17-scf00437    | 17 |
| AX-158395085 | 22 | 84.882 | KV453116.1 | 3123909 | 17-scf00437    | 17 |
| AX-158278696 | 22 | 84.958 | KV453116.1 | 2935907 | 17-scf00437    | 17 |
| AX-157844384 | 22 | 84.958 | KV453116.1 | 3005088 | 17-scf00437    | 17 |
| AX-157844385 | 22 | 84.958 | KV453116.1 | 3005528 | 17-scf00437    | 17 |
| AX-157716331 | 22 | 84.958 | KV453116.1 | 3240586 | 17-scf00437    | 17 |
| AX-158278913 | 22 | 84.958 | KV453116.1 | 3290076 | 17-scf00437    | 17 |
| AX-158278947 | 22 | 84.958 | KV453116.1 | 3342355 | 17-scf00437    | 17 |
| AX-158278955 | 22 | 84.958 | KV453116.1 | 3356679 | 17-scf00437    | 17 |
| AX-158279429 | 22 | 84.958 | KV453116.1 | 4055473 | 17-scf00437    | 17 |
| AX-158277815 | 22 | 85.095 | KV453116.1 | 1775383 | 17-scf00437    | 17 |

|              |    |        |            |         |             |    |
|--------------|----|--------|------------|---------|-------------|----|
| AX-157755391 | 22 | 85.095 | KV453116.1 | 3391601 | 17-scf00437 | 17 |
| AX-158279012 | 22 | 85.095 | KV453116.1 | 3427066 | 17-scf00437 | 17 |
| AX-157844429 | 22 | 85.095 | KV453116.1 | 3428679 | 17-scf00437 | 17 |
| AX-158279013 | 22 | 85.095 | KV453116.1 | 3430551 | 17-scf00437 | 17 |
| AX-158279014 | 22 | 85.095 | KV453116.1 | 3430949 | 17-scf00437 | 17 |
| AX-158279025 | 22 | 85.095 | KV453116.1 | 3439932 | 17-scf00437 | 17 |
| AX-158279031 | 22 | 85.095 | KV453116.1 | 3443771 | 17-scf00437 | 17 |
| AX-158278870 | 22 | 85.209 | KV453116.1 | 3191945 | 17-scf00437 | 17 |
| AX-158395091 | 22 | 85.209 | KV453116.1 | 3433167 | 17-scf00437 | 17 |
| AX-158278917 | 22 | 85.396 | KV453116.1 | 3296391 | 17-scf00437 | 17 |
| AX-158279059 | 22 | 85.396 | KV453116.1 | 3476217 | 17-scf00437 | 17 |
| AX-158280002 | 22 | 85.396 | KV453116.1 | 4655907 | 17-scf00437 | 17 |
| AX-157756061 | 22 | 85.396 | KV453116.1 | 4675983 | 17-scf00437 | 17 |
| AX-158280028 | 22 | 85.396 | KV453116.1 | 4679054 | 17-scf00437 | 17 |
| AX-158280112 | 22 | 85.396 | KV453116.1 | 4785524 | 17-scf00437 | 17 |
| AX-158279071 | 22 | 85.422 | KV453116.1 | 3486027 | 17-scf00437 | 17 |
| AX-158279076 | 22 | 85.453 | KV453116.1 | 3491833 | 17-scf00437 | 17 |
| AX-158278515 | 22 | 85.477 | KV453116.1 | 2708400 | 17-scf00437 | 17 |
| AX-158279079 | 22 | 85.477 | KV453116.1 | 3493913 | 17-scf00437 | 17 |
| AX-158280843 | 22 | 85.477 | KV453116.1 | 5791965 | 17-scf00437 | 17 |
| AX-158281392 | 22 | 85.477 | KV453116.1 | 6475125 | 17-scf00437 | 17 |
| AX-158281695 | 22 | 85.477 | KV453116.1 | 6989173 | 17-scf00437 | 17 |
| AX-158281897 | 22 | 85.477 | KV453116.1 | 7356672 | 17-scf00437 | 17 |
| AX-158282406 | 22 | 85.477 | KV453116.1 | 7990583 | 17-scf00437 | 17 |
| AX-158282685 | 22 | 85.477 | KV453116.1 | 8398901 | 17-scf00437 | 17 |
| AX-157746558 | 22 | 85.477 | KV453114.1 | 4506208 | 17-scf00439 | 17 |
| AX-158279097 | 22 | 85.501 | KV453116.1 | 3508384 | 17-scf00437 | 17 |
| AX-158279098 | 22 | 85.531 | KV453116.1 | 3511343 | 17-scf00437 | 17 |
| AX-158274883 | 22 | 85.557 | KV453121.1 | 1238268 | 17-scf00435 | 17 |
| AX-158275221 | 22 | 85.557 | KV453121.1 | 1670563 | 17-scf00435 | 17 |
| AX-158381161 | 22 | 85.557 | KV453121.1 | 1697093 | 17-scf00435 | 17 |
| AX-158416746 | 22 | 85.557 | KV453115.1 | 180133  | 17-scf00436 | 17 |
| AX-158275654 | 22 | 85.557 | KV453115.1 | 216450  | 17-scf00436 | 17 |
| AX-157844070 | 22 | 85.557 | KV453115.1 | 443058  | 17-scf00436 | 17 |
| AX-157747517 | 22 | 85.557 | KV453115.1 | 443869  | 17-scf00436 | 17 |
| AX-157873048 | 22 | 85.557 | KV453115.1 | 447569  | 17-scf00436 | 17 |
| AX-157844073 | 22 | 85.557 | KV453115.1 | 470507  | 17-scf00436 | 17 |
| AX-158275860 | 22 | 85.557 | KV453115.1 | 472610  | 17-scf00436 | 17 |
| AX-158275861 | 22 | 85.557 | KV453115.1 | 473048  | 17-scf00436 | 17 |
| AX-158275862 | 22 | 85.557 | KV453115.1 | 473952  | 17-scf00436 | 17 |
| AX-158416756 | 22 | 85.557 | KV453115.1 | 482118  | 17-scf00436 | 17 |
| AX-158276399 | 22 | 85.557 | KV453116.1 | 87339   | 17-scf00437 | 17 |
| AX-157717415 | 22 | 85.557 | KV453116.1 | 148777  | 17-scf00437 | 17 |
| AX-157844137 | 22 | 85.557 | KV453116.1 | 171745  | 17-scf00437 | 17 |
| AX-158276705 | 22 | 85.557 | KV453116.1 | 483044  | 17-scf00437 | 17 |
| AX-158276930 | 22 | 85.557 | KV453116.1 | 789017  | 17-scf00437 | 17 |
| AX-158276965 | 22 | 85.557 | KV453116.1 | 841537  | 17-scf00437 | 17 |
| AX-158277091 | 22 | 85.557 | KV453116.1 | 980524  | 17-scf00437 | 17 |
| AX-158277105 | 22 | 85.557 | KV453116.1 | 990222  | 17-scf00437 | 17 |
| AX-158277163 | 22 | 85.557 | KV453116.1 | 1059027 | 17-scf00437 | 17 |
| AX-158277179 | 22 | 85.557 | KV453116.1 | 1077611 | 17-scf00437 | 17 |

|              |    |        |            |         |             |    |
|--------------|----|--------|------------|---------|-------------|----|
| AX-158277330 | 22 | 85.557 | KV453116.1 | 1224923 | 17-scf00437 | 17 |
| AX-158277389 | 22 | 85.557 | KV453116.1 | 1287294 | 17-scf00437 | 17 |
| AX-158277434 | 22 | 85.557 | KV453116.1 | 1345499 | 17-scf00437 | 17 |
| AX-158277734 | 22 | 85.557 | KV453116.1 | 1662547 | 17-scf00437 | 17 |
| AX-157745405 | 22 | 85.557 | KV453116.1 | 1951823 | 17-scf00437 | 17 |
| AX-158277989 | 22 | 85.557 | KV453116.1 | 2068732 | 17-scf00437 | 17 |
| AX-158278007 | 22 | 85.557 | KV453116.1 | 2097059 | 17-scf00437 | 17 |
| AX-158278125 | 22 | 85.557 | KV453116.1 | 2256426 | 17-scf00437 | 17 |
| AX-158278135 | 22 | 85.557 | KV453116.1 | 2266349 | 17-scf00437 | 17 |
| AX-158278169 | 22 | 85.557 | KV453116.1 | 2302462 | 17-scf00437 | 17 |
| AX-158278227 | 22 | 85.557 | KV453116.1 | 2378078 | 17-scf00437 | 17 |
| AX-158278300 | 22 | 85.557 | KV453116.1 | 2479633 | 17-scf00437 | 17 |
| AX-158278392 | 22 | 85.557 | KV453116.1 | 2577117 | 17-scf00437 | 17 |
| AX-158278405 | 22 | 85.557 | KV453116.1 | 2587976 | 17-scf00437 | 17 |
| AX-158278489 | 22 | 85.557 | KV453116.1 | 2673812 | 17-scf00437 | 17 |
| AX-157880625 | 22 | 85.557 | KV453116.1 | 2752243 | 17-scf00437 | 17 |
| AX-157714800 | 22 | 85.557 | KV453116.1 | 2806671 | 17-scf00437 | 17 |
| AX-158278621 | 22 | 85.557 | KV453116.1 | 2835371 | 17-scf00437 | 17 |
| AX-158278652 | 22 | 85.557 | KV453116.1 | 2875132 | 17-scf00437 | 17 |
| AX-157717831 | 22 | 85.557 | KV453116.1 | 2882626 | 17-scf00437 | 17 |
| AX-157844377 | 22 | 85.557 | KV453116.1 | 2968860 | 17-scf00437 | 17 |
| AX-158278743 | 22 | 85.557 | KV453116.1 | 2994017 | 17-scf00437 | 17 |
| AX-157873095 | 22 | 85.557 | KV453116.1 | 3018968 | 17-scf00437 | 17 |
| AX-158278764 | 22 | 85.557 | KV453116.1 | 3036549 | 17-scf00437 | 17 |
| AX-157887936 | 22 | 85.557 | KV453116.1 | 3238236 | 17-scf00437 | 17 |
| AX-157844416 | 22 | 85.557 | KV453116.1 | 3283079 | 17-scf00437 | 17 |
| AX-158278928 | 22 | 85.557 | KV453116.1 | 3318424 | 17-scf00437 | 17 |
| AX-158278994 | 22 | 85.557 | KV453116.1 | 3408484 | 17-scf00437 | 17 |
| AX-158278999 | 22 | 85.557 | KV453116.1 | 3414207 | 17-scf00437 | 17 |
| AX-158279068 | 22 | 85.557 | KV453116.1 | 3483881 | 17-scf00437 | 17 |
| AX-158279099 | 22 | 85.557 | KV453116.1 | 3511977 | 17-scf00437 | 17 |
| AX-157844434 | 22 | 85.557 | KV453116.1 | 3515682 | 17-scf00437 | 17 |
| AX-158279126 | 22 | 85.557 | KV453116.1 | 3543912 | 17-scf00437 | 17 |
| AX-157713616 | 22 | 85.557 | KV453116.1 | 3550982 | 17-scf00437 | 17 |
| AX-158279132 | 22 | 85.557 | KV453116.1 | 3551499 | 17-scf00437 | 17 |
| AX-157844435 | 22 | 85.557 | KV453116.1 | 3551733 | 17-scf00437 | 17 |
| AX-158279155 | 22 | 85.557 | KV453116.1 | 3581464 | 17-scf00437 | 17 |
| AX-158279171 | 22 | 85.557 | KV453116.1 | 3614849 | 17-scf00437 | 17 |
| AX-158279189 | 22 | 85.557 | KV453116.1 | 3670797 | 17-scf00437 | 17 |
| AX-158279206 | 22 | 85.557 | KV453116.1 | 3694054 | 17-scf00437 | 17 |
| AX-158279208 | 22 | 85.557 | KV453116.1 | 3696394 | 17-scf00437 | 17 |
| AX-158279214 | 22 | 85.557 | KV453116.1 | 3710136 | 17-scf00437 | 17 |
| AX-158279217 | 22 | 85.557 | KV453116.1 | 3718996 | 17-scf00437 | 17 |
| AX-158279218 | 22 | 85.557 | KV453116.1 | 3719451 | 17-scf00437 | 17 |
| AX-158279219 | 22 | 85.557 | KV453116.1 | 3723639 | 17-scf00437 | 17 |
| AX-158279241 | 22 | 85.557 | KV453116.1 | 3778375 | 17-scf00437 | 17 |
| AX-157747650 | 22 | 85.557 | KV453116.1 | 3790699 | 17-scf00437 | 17 |
| AX-158279245 | 22 | 85.557 | KV453116.1 | 3791525 | 17-scf00437 | 17 |
| AX-158279247 | 22 | 85.557 | KV453116.1 | 3794551 | 17-scf00437 | 17 |
| AX-158279260 | 22 | 85.557 | KV453116.1 | 3808979 | 17-scf00437 | 17 |
| AX-158279280 | 22 | 85.557 | KV453116.1 | 3839119 | 17-scf00437 | 17 |

|              |    |        |            |         |             |    |
|--------------|----|--------|------------|---------|-------------|----|
| AX-158279299 | 22 | 85.557 | KV453116.1 | 3913044 | 17-scf00437 | 17 |
| AX-157873136 | 22 | 85.557 | KV453116.1 | 3930815 | 17-scf00437 | 17 |
| AX-158279316 | 22 | 85.557 | KV453116.1 | 3946791 | 17-scf00437 | 17 |
| AX-158279320 | 22 | 85.557 | KV453116.1 | 3951462 | 17-scf00437 | 17 |
| AX-158279321 | 22 | 85.557 | KV453116.1 | 3951769 | 17-scf00437 | 17 |
| AX-157747739 | 22 | 85.557 | KV453116.1 | 3960019 | 17-scf00437 | 17 |
| AX-158279354 | 22 | 85.557 | KV453116.1 | 3991707 | 17-scf00437 | 17 |
| AX-157757952 | 22 | 85.557 | KV453116.1 | 4004954 | 17-scf00437 | 17 |
| AX-158279382 | 22 | 85.557 | KV453116.1 | 4024515 | 17-scf00437 | 17 |
| AX-158279383 | 22 | 85.557 | KV453116.1 | 4025256 | 17-scf00437 | 17 |
| AX-158279384 | 22 | 85.557 | KV453116.1 | 4025699 | 17-scf00437 | 17 |
| AX-158279386 | 22 | 85.557 | KV453116.1 | 4026965 | 17-scf00437 | 17 |
| AX-158279422 | 22 | 85.557 | KV453116.1 | 4049346 | 17-scf00437 | 17 |
| AX-158279428 | 22 | 85.557 | KV453116.1 | 4054404 | 17-scf00437 | 17 |
| AX-158279452 | 22 | 85.557 | KV453116.1 | 4082187 | 17-scf00437 | 17 |
| AX-158279485 | 22 | 85.557 | KV453116.1 | 4117197 | 17-scf00437 | 17 |
| AX-158279499 | 22 | 85.557 | KV453116.1 | 4128130 | 17-scf00437 | 17 |
| AX-158279500 | 22 | 85.557 | KV453116.1 | 4129209 | 17-scf00437 | 17 |
| AX-158279509 | 22 | 85.557 | KV453116.1 | 4138785 | 17-scf00437 | 17 |
| AX-157713668 | 22 | 85.557 | KV453116.1 | 4145843 | 17-scf00437 | 17 |
| AX-158279515 | 22 | 85.557 | KV453116.1 | 4148517 | 17-scf00437 | 17 |
| AX-158279537 | 22 | 85.557 | KV453116.1 | 4168281 | 17-scf00437 | 17 |
| AX-158279540 | 22 | 85.557 | KV453116.1 | 4170100 | 17-scf00437 | 17 |
| AX-158279550 | 22 | 85.557 | KV453116.1 | 4184227 | 17-scf00437 | 17 |
| AX-158279551 | 22 | 85.557 | KV453116.1 | 4184467 | 17-scf00437 | 17 |
| AX-158279560 | 22 | 85.557 | KV453116.1 | 4196901 | 17-scf00437 | 17 |
| AX-158416875 | 22 | 85.557 | KV453116.1 | 4196978 | 17-scf00437 | 17 |
| AX-158279571 | 22 | 85.557 | KV453116.1 | 4204973 | 17-scf00437 | 17 |
| AX-158279613 | 22 | 85.557 | KV453116.1 | 4243136 | 17-scf00437 | 17 |
| AX-157709292 | 22 | 85.557 | KV453116.1 | 4248370 | 17-scf00437 | 17 |
| AX-158279689 | 22 | 85.557 | KV453116.1 | 4319367 | 17-scf00437 | 17 |
| AX-158279829 | 22 | 85.557 | KV453116.1 | 4470052 | 17-scf00437 | 17 |
| AX-158279830 | 22 | 85.557 | KV453116.1 | 4470810 | 17-scf00437 | 17 |
| AX-158279853 | 22 | 85.557 | KV453116.1 | 4496924 | 17-scf00437 | 17 |
| AX-158279868 | 22 | 85.557 | KV453116.1 | 4510884 | 17-scf00437 | 17 |
| AX-158279881 | 22 | 85.557 | KV453116.1 | 4528275 | 17-scf00437 | 17 |
| AX-158279926 | 22 | 85.557 | KV453116.1 | 4564066 | 17-scf00437 | 17 |
| AX-158279947 | 22 | 85.557 | KV453116.1 | 4592943 | 17-scf00437 | 17 |
| AX-158279988 | 22 | 85.557 | KV453116.1 | 4644487 | 17-scf00437 | 17 |
| AX-158279994 | 22 | 85.557 | KV453116.1 | 4651624 | 17-scf00437 | 17 |
| AX-157887944 | 22 | 85.557 | KV453116.1 | 4658537 | 17-scf00437 | 17 |
| AX-158280005 | 22 | 85.557 | KV453116.1 | 4659061 | 17-scf00437 | 17 |
| AX-158280022 | 22 | 85.557 | KV453116.1 | 4676562 | 17-scf00437 | 17 |
| AX-157844487 | 22 | 85.557 | KV453116.1 | 4684428 | 17-scf00437 | 17 |
| AX-158280038 | 22 | 85.557 | KV453116.1 | 4688366 | 17-scf00437 | 17 |
| AX-157844490 | 22 | 85.557 | KV453116.1 | 4693270 | 17-scf00437 | 17 |
| AX-158416890 | 22 | 85.557 | KV453116.1 | 4737207 | 17-scf00437 | 17 |
| AX-158280094 | 22 | 85.557 | KV453116.1 | 4758986 | 17-scf00437 | 17 |
| AX-158280095 | 22 | 85.557 | KV453116.1 | 4759634 | 17-scf00437 | 17 |
| AX-158280099 | 22 | 85.557 | KV453116.1 | 4763049 | 17-scf00437 | 17 |
| AX-157844493 | 22 | 85.557 | KV453116.1 | 4769365 | 17-scf00437 | 17 |

|              |    |        |            |         |             |    |
|--------------|----|--------|------------|---------|-------------|----|
| AX-157844494 | 22 | 85.557 | KV453116.1 | 4771000 | 17-scf00437 | 17 |
| AX-158280126 | 22 | 85.557 | KV453116.1 | 4804606 | 17-scf00437 | 17 |
| AX-158280149 | 22 | 85.557 | KV453116.1 | 4827935 | 17-scf00437 | 17 |
| AX-158280171 | 22 | 85.557 | KV453116.1 | 4852150 | 17-scf00437 | 17 |
| AX-158280180 | 22 | 85.557 | KV453116.1 | 4863511 | 17-scf00437 | 17 |
| AX-158280183 | 22 | 85.557 | KV453116.1 | 4869757 | 17-scf00437 | 17 |
| AX-158280184 | 22 | 85.557 | KV453116.1 | 4869974 | 17-scf00437 | 17 |
| AX-158280196 | 22 | 85.557 | KV453116.1 | 4890114 | 17-scf00437 | 17 |
| AX-157844506 | 22 | 85.557 | KV453116.1 | 4893780 | 17-scf00437 | 17 |
| AX-158280236 | 22 | 85.557 | KV453116.1 | 4933204 | 17-scf00437 | 17 |
| AX-158280242 | 22 | 85.557 | KV453116.1 | 4936835 | 17-scf00437 | 17 |
| AX-157844512 | 22 | 85.557 | KV453116.1 | 4939476 | 17-scf00437 | 17 |
| AX-158280267 | 22 | 85.557 | KV453116.1 | 4965472 | 17-scf00437 | 17 |
| AX-157725083 | 22 | 85.557 | KV453116.1 | 4965548 | 17-scf00437 | 17 |
| AX-157747195 | 22 | 85.557 | KV453116.1 | 4985476 | 17-scf00437 | 17 |
| AX-157844519 | 22 | 85.557 | KV453116.1 | 5031851 | 17-scf00437 | 17 |
| AX-157844520 | 22 | 85.557 | KV453116.1 | 5034159 | 17-scf00437 | 17 |
| AX-158395144 | 22 | 85.557 | KV453116.1 | 5058800 | 17-scf00437 | 17 |
| AX-158280372 | 22 | 85.557 | KV453116.1 | 5089407 | 17-scf00437 | 17 |
| AX-158280375 | 22 | 85.557 | KV453116.1 | 5092931 | 17-scf00437 | 17 |
| AX-157844528 | 22 | 85.557 | KV453116.1 | 5098283 | 17-scf00437 | 17 |
| AX-157873163 | 22 | 85.557 | KV453116.1 | 5117763 | 17-scf00437 | 17 |
| AX-158416896 | 22 | 85.557 | KV453116.1 | 5157600 | 17-scf00437 | 17 |
| AX-158280419 | 22 | 85.557 | KV453116.1 | 5158858 | 17-scf00437 | 17 |
| AX-157844534 | 22 | 85.557 | KV453116.1 | 5217021 | 17-scf00437 | 17 |
| AX-158280454 | 22 | 85.557 | KV453116.1 | 5217477 | 17-scf00437 | 17 |
| AX-158280510 | 22 | 85.557 | KV453116.1 | 5282688 | 17-scf00437 | 17 |
| AX-158280518 | 22 | 85.557 | KV453116.1 | 5296461 | 17-scf00437 | 17 |
| AX-158280543 | 22 | 85.557 | KV453116.1 | 5328101 | 17-scf00437 | 17 |
| AX-157844539 | 22 | 85.557 | KV453116.1 | 5400415 | 17-scf00437 | 17 |
| AX-158280593 | 22 | 85.557 | KV453116.1 | 5404437 | 17-scf00437 | 17 |
| AX-158280613 | 22 | 85.557 | KV453116.1 | 5428581 | 17-scf00437 | 17 |
| AX-158280620 | 22 | 85.557 | KV453116.1 | 5432803 | 17-scf00437 | 17 |
| AX-158416901 | 22 | 85.557 | KV453116.1 | 5441010 | 17-scf00437 | 17 |
| AX-157873175 | 22 | 85.557 | KV453116.1 | 5441425 | 17-scf00437 | 17 |
| AX-157730528 | 22 | 85.557 | KV453116.1 | 5443273 | 17-scf00437 | 17 |
| AX-157695157 | 22 | 85.557 | KV453116.1 | 5455564 | 17-scf00437 | 17 |
| AX-158280641 | 22 | 85.557 | KV453116.1 | 5468959 | 17-scf00437 | 17 |
| AX-158280642 | 22 | 85.557 | KV453116.1 | 5477555 | 17-scf00437 | 17 |
| AX-158419418 | 22 | 85.557 | KV453116.1 | 5478442 | 17-scf00437 | 17 |
| AX-158280643 | 22 | 85.557 | KV453116.1 | 5481543 | 17-scf00437 | 17 |
| AX-158280645 | 22 | 85.557 | KV453116.1 | 5491284 | 17-scf00437 | 17 |
| AX-158280646 | 22 | 85.557 | KV453116.1 | 5495723 | 17-scf00437 | 17 |
| AX-158280647 | 22 | 85.557 | KV453116.1 | 5498648 | 17-scf00437 | 17 |
| AX-158280648 | 22 | 85.557 | KV453116.1 | 5499293 | 17-scf00437 | 17 |
| AX-158280649 | 22 | 85.557 | KV453116.1 | 5505622 | 17-scf00437 | 17 |
| AX-158280652 | 22 | 85.557 | KV453116.1 | 5507955 | 17-scf00437 | 17 |
| AX-157753461 | 22 | 85.557 | KV453116.1 | 5515299 | 17-scf00437 | 17 |
| AX-158280658 | 22 | 85.557 | KV453116.1 | 5515999 | 17-scf00437 | 17 |
| AX-158280659 | 22 | 85.557 | KV453116.1 | 5518394 | 17-scf00437 | 17 |
| AX-157844544 | 22 | 85.557 | KV453116.1 | 5528371 | 17-scf00437 | 17 |

|              |    |        |            |         |             |    |
|--------------|----|--------|------------|---------|-------------|----|
| AX-158280665 | 22 | 85.557 | KV453116.1 | 5532384 | 17-scf00437 | 17 |
| AX-158280666 | 22 | 85.557 | KV453116.1 | 5534699 | 17-scf00437 | 17 |
| AX-157803018 | 22 | 85.557 | KV453116.1 | 5538301 | 17-scf00437 | 17 |
| AX-158280667 | 22 | 85.557 | KV453116.1 | 5539128 | 17-scf00437 | 17 |
| AX-158280668 | 22 | 85.557 | KV453116.1 | 5543948 | 17-scf00437 | 17 |
| AX-158280670 | 22 | 85.557 | KV453116.1 | 5552362 | 17-scf00437 | 17 |
| AX-157696044 | 22 | 85.557 | KV453116.1 | 5565807 | 17-scf00437 | 17 |
| AX-158280675 | 22 | 85.557 | KV453116.1 | 5566436 | 17-scf00437 | 17 |
| AX-157844545 | 22 | 85.557 | KV453116.1 | 5571915 | 17-scf00437 | 17 |
| AX-158280679 | 22 | 85.557 | KV453116.1 | 5578449 | 17-scf00437 | 17 |
| AX-158280680 | 22 | 85.557 | KV453116.1 | 5581939 | 17-scf00437 | 17 |
| AX-157844546 | 22 | 85.557 | KV453116.1 | 5582622 | 17-scf00437 | 17 |
| AX-158280681 | 22 | 85.557 | KV453116.1 | 5583944 | 17-scf00437 | 17 |
| AX-158411501 | 22 | 85.557 | KV453116.1 | 5584555 | 17-scf00437 | 17 |
| AX-157694234 | 22 | 85.557 | KV453116.1 | 5591637 | 17-scf00437 | 17 |
| AX-158280684 | 22 | 85.557 | KV453116.1 | 5593509 | 17-scf00437 | 17 |
| AX-158280740 | 22 | 85.557 | KV453116.1 | 5671910 | 17-scf00437 | 17 |
| AX-158280744 | 22 | 85.557 | KV453116.1 | 5673821 | 17-scf00437 | 17 |
| AX-158280745 | 22 | 85.557 | KV453116.1 | 5674410 | 17-scf00437 | 17 |
| AX-158280748 | 22 | 85.557 | KV453116.1 | 5677177 | 17-scf00437 | 17 |
| AX-158280772 | 22 | 85.557 | KV453116.1 | 5705548 | 17-scf00437 | 17 |
| AX-158280798 | 22 | 85.557 | KV453116.1 | 5739377 | 17-scf00437 | 17 |
| AX-158280802 | 22 | 85.557 | KV453116.1 | 5741934 | 17-scf00437 | 17 |
| AX-157844548 | 22 | 85.557 | KV453116.1 | 5744212 | 17-scf00437 | 17 |
| AX-158280837 | 22 | 85.557 | KV453116.1 | 5785556 | 17-scf00437 | 17 |
| AX-158280865 | 22 | 85.557 | KV453116.1 | 5810579 | 17-scf00437 | 17 |
| AX-158280866 | 22 | 85.557 | KV453116.1 | 5813430 | 17-scf00437 | 17 |
| AX-158280887 | 22 | 85.557 | KV453116.1 | 5836442 | 17-scf00437 | 17 |
| AX-158280893 | 22 | 85.557 | KV453116.1 | 5840586 | 17-scf00437 | 17 |
| AX-158280896 | 22 | 85.557 | KV453116.1 | 5843693 | 17-scf00437 | 17 |
| AX-158280897 | 22 | 85.557 | KV453116.1 | 5844502 | 17-scf00437 | 17 |
| AX-158280899 | 22 | 85.557 | KV453116.1 | 5845816 | 17-scf00437 | 17 |
| AX-158280904 | 22 | 85.557 | KV453116.1 | 5851797 | 17-scf00437 | 17 |
| AX-158280906 | 22 | 85.557 | KV453116.1 | 5853997 | 17-scf00437 | 17 |
| AX-158281046 | 22 | 85.557 | KV453116.1 | 6034894 | 17-scf00437 | 17 |
| AX-158281074 | 22 | 85.557 | KV453116.1 | 6066757 | 17-scf00437 | 17 |
| AX-158281075 | 22 | 85.557 | KV453116.1 | 6067214 | 17-scf00437 | 17 |
| AX-158281076 | 22 | 85.557 | KV453116.1 | 6068545 | 17-scf00437 | 17 |
| AX-158281077 | 22 | 85.557 | KV453116.1 | 6069099 | 17-scf00437 | 17 |
| AX-158281099 | 22 | 85.557 | KV453116.1 | 6091791 | 17-scf00437 | 17 |
| AX-157727967 | 22 | 85.557 | KV453116.1 | 6121265 | 17-scf00437 | 17 |
| AX-157844571 | 22 | 85.557 | KV453116.1 | 6155365 | 17-scf00437 | 17 |
| AX-158281161 | 22 | 85.557 | KV453116.1 | 6165620 | 17-scf00437 | 17 |
| AX-158416922 | 22 | 85.557 | KV453116.1 | 6181901 | 17-scf00437 | 17 |
| AX-158281179 | 22 | 85.557 | KV453116.1 | 6187732 | 17-scf00437 | 17 |
| AX-158281193 | 22 | 85.557 | KV453116.1 | 6201250 | 17-scf00437 | 17 |
| AX-158281221 | 22 | 85.557 | KV453116.1 | 6242675 | 17-scf00437 | 17 |
| AX-157758068 | 22 | 85.557 | KV453116.1 | 6286807 | 17-scf00437 | 17 |
| AX-158281275 | 22 | 85.557 | KV453116.1 | 6304742 | 17-scf00437 | 17 |
| AX-158281328 | 22 | 85.557 | KV453116.1 | 6374402 | 17-scf00437 | 17 |
| AX-158281367 | 22 | 85.557 | KV453116.1 | 6447256 | 17-scf00437 | 17 |



|              |    |        |            |         |             |    |
|--------------|----|--------|------------|---------|-------------|----|
| AX-158281368 | 22 | 85.557 | KV453116.1 | 6448433 | 17-scf00437 | 17 |
| AX-158281369 | 22 | 85.557 | KV453116.1 | 6449049 | 17-scf00437 | 17 |
| AX-157727376 | 22 | 85.557 | KV453116.1 | 6464678 | 17-scf00437 | 17 |
| AX-158281424 | 22 | 85.557 | KV453116.1 | 6514734 | 17-scf00437 | 17 |
| AX-157769883 | 22 | 85.557 | KV453116.1 | 6646967 | 17-scf00437 | 17 |
| AX-158281497 | 22 | 85.557 | KV453116.1 | 6668013 | 17-scf00437 | 17 |
| AX-158281498 | 22 | 85.557 | KV453116.1 | 6668730 | 17-scf00437 | 17 |
| AX-158281500 | 22 | 85.557 | KV453116.1 | 6671507 | 17-scf00437 | 17 |
| AX-158281543 | 22 | 85.557 | KV453116.1 | 6752155 | 17-scf00437 | 17 |
| AX-158281544 | 22 | 85.557 | KV453116.1 | 6753067 | 17-scf00437 | 17 |
| AX-158281554 | 22 | 85.557 | KV453116.1 | 6765479 | 17-scf00437 | 17 |
| AX-158281572 | 22 | 85.557 | KV453116.1 | 6795490 | 17-scf00437 | 17 |
| AX-158281583 | 22 | 85.557 | KV453116.1 | 6811226 | 17-scf00437 | 17 |
| AX-158281585 | 22 | 85.557 | KV453116.1 | 6815176 | 17-scf00437 | 17 |
| AX-158281654 | 22 | 85.557 | KV453116.1 | 6937776 | 17-scf00437 | 17 |
| AX-158281664 | 22 | 85.557 | KV453116.1 | 6947826 | 17-scf00437 | 17 |
| AX-158281705 | 22 | 85.557 | KV453116.1 | 7005269 | 17-scf00437 | 17 |
| AX-157746881 | 22 | 85.557 | KV453116.1 | 7021557 | 17-scf00437 | 17 |
| AX-157714242 | 22 | 85.557 | KV453116.1 | 7065706 | 17-scf00437 | 17 |
| AX-157844624 | 22 | 85.557 | KV453116.1 | 7101420 | 17-scf00437 | 17 |
| AX-158281756 | 22 | 85.557 | KV453116.1 | 7102138 | 17-scf00437 | 17 |
| AX-158281757 | 22 | 85.557 | KV453116.1 | 7103013 | 17-scf00437 | 17 |
| AX-158281764 | 22 | 85.557 | KV453116.1 | 7126656 | 17-scf00437 | 17 |
| AX-158281789 | 22 | 85.557 | KV453116.1 | 7177887 | 17-scf00437 | 17 |
| AX-158281842 | 22 | 85.557 | KV453116.1 | 7279933 | 17-scf00437 | 17 |
| AX-157844654 | 22 | 85.557 | KV453116.1 | 7281210 | 17-scf00437 | 17 |
| AX-158281912 | 22 | 85.557 | KV453116.1 | 7369490 | 17-scf00437 | 17 |
| AX-157844663 | 22 | 85.557 | KV453116.1 | 7373727 | 17-scf00437 | 17 |
| AX-158281929 | 22 | 85.557 | KV453116.1 | 7397472 | 17-scf00437 | 17 |
| AX-157751616 | 22 | 85.557 | KV453116.1 | 7440268 | 17-scf00437 | 17 |
| AX-158282024 | 22 | 85.557 | KV453116.1 | 7498487 | 17-scf00437 | 17 |
| AX-157844676 | 22 | 85.557 | KV453116.1 | 7577306 | 17-scf00437 | 17 |
| AX-158282128 | 22 | 85.557 | KV453116.1 | 7643777 | 17-scf00437 | 17 |
| AX-157844688 | 22 | 85.557 | KV453116.1 | 7697452 | 17-scf00437 | 17 |
| AX-157716998 | 22 | 85.557 | KV453116.1 | 7740002 | 17-scf00437 | 17 |
| AX-158282217 | 22 | 85.557 | KV453116.1 | 7769275 | 17-scf00437 | 17 |
| AX-158282234 | 22 | 85.557 | KV453116.1 | 7791180 | 17-scf00437 | 17 |
| AX-157887962 | 22 | 85.557 | KV453116.1 | 7879333 | 17-scf00437 | 17 |
| AX-157844703 | 22 | 85.557 | KV453116.1 | 7883686 | 17-scf00437 | 17 |
| AX-157844705 | 22 | 85.557 | KV453116.1 | 7888724 | 17-scf00437 | 17 |
| AX-158282501 | 22 | 85.557 | KV453116.1 | 8139044 | 17-scf00437 | 17 |
| AX-158282588 | 22 | 85.557 | KV453116.1 | 8280015 | 17-scf00437 | 17 |
| AX-158282589 | 22 | 85.557 | KV453116.1 | 8281681 | 17-scf00437 | 17 |
| AX-158282591 | 22 | 85.557 | KV453116.1 | 8282881 | 17-scf00437 | 17 |
| AX-157745549 | 22 | 85.557 | KV453116.1 | 8369951 | 17-scf00437 | 17 |
| AX-157844756 | 22 | 85.557 | KV453116.1 | 8402147 | 17-scf00437 | 17 |
| AX-158282753 | 22 | 85.557 | KV453116.1 | 8496818 | 17-scf00437 | 17 |
| AX-158282780 | 22 | 85.557 | KV453116.1 | 8529993 | 17-scf00437 | 17 |
| AX-158286320 | 22 | 85.557 | KV453114.1 | 4534952 | 17-scf00439 | 17 |
| AX-158286364 | 22 | 85.557 | KV453114.1 | 4576432 | 17-scf00439 | 17 |
| AX-157684111 | 22 | 85.557 | KV453118.1 | 13172   | 17-scf00443 | 17 |

|              |    |        |            |         |                |    |
|--------------|----|--------|------------|---------|----------------|----|
| AX-157693880 | 22 | 85.557 | FI895641.1 | 213     | -ORI212 lctali | UN |
| AX-158280923 | 22 | 85.609 | KV453116.1 | 5879960 | 17-scf00437    | 17 |
| AX-158280938 | 22 | 85.667 | KV453116.1 | 5894552 | 17-scf00437    | 17 |
| AX-158416914 | 22 | 85.667 | KV453116.1 | 5928779 | 17-scf00437    | 17 |
| AX-158280989 | 22 | 85.667 | KV453116.1 | 5955538 | 17-scf00437    | 17 |
| AX-158281003 | 22 | 85.667 | KV453116.1 | 5983351 | 17-scf00437    | 17 |
| AX-158281005 | 22 | 85.667 | KV453116.1 | 5985109 | 17-scf00437    | 17 |
| AX-158281019 | 22 | 85.667 | KV453116.1 | 5999224 | 17-scf00437    | 17 |
| AX-158281040 | 22 | 85.667 | KV453116.1 | 6028931 | 17-scf00437    | 17 |
| AX-158281044 | 22 | 85.667 | KV453116.1 | 6031904 | 17-scf00437    | 17 |
| AX-158281047 | 22 | 85.667 | KV453116.1 | 6035317 | 17-scf00437    | 17 |
| AX-158281108 | 22 | 85.667 | KV453116.1 | 6098490 | 17-scf00437    | 17 |
| AX-158281111 | 22 | 85.667 | KV453116.1 | 6102200 | 17-scf00437    | 17 |
| AX-158281116 | 22 | 85.719 | KV453116.1 | 6106096 | 17-scf00437    | 17 |
| AX-158416832 | 22 | 85.776 | KV453116.1 | 2607103 | 17-scf00437    | 17 |
| AX-158278564 | 22 | 85.776 | KV453116.1 | 2761213 | 17-scf00437    | 17 |
| AX-157844452 | 22 | 85.776 | KV453116.1 | 3793105 | 17-scf00437    | 17 |
| AX-158279338 | 22 | 85.776 | KV453116.1 | 3976820 | 17-scf00437    | 17 |
| AX-158279425 | 22 | 85.776 | KV453116.1 | 4052792 | 17-scf00437    | 17 |
| AX-158279519 | 22 | 85.776 | KV453116.1 | 4152055 | 17-scf00437    | 17 |
| AX-158279520 | 22 | 85.776 | KV453116.1 | 4152362 | 17-scf00437    | 17 |
| AX-158279577 | 22 | 85.776 | KV453116.1 | 4209351 | 17-scf00437    | 17 |
| AX-157723631 | 22 | 85.776 | KV453116.1 | 4222322 | 17-scf00437    | 17 |
| AX-158280151 | 22 | 85.776 | KV453116.1 | 4829500 | 17-scf00437    | 17 |
| AX-157764576 | 22 | 85.776 | KV453116.1 | 6119302 | 17-scf00437    | 17 |
| AX-158281136 | 22 | 85.776 | KV453116.1 | 6141878 | 17-scf00437    | 17 |
| AX-158281137 | 22 | 85.776 | KV453116.1 | 6142330 | 17-scf00437    | 17 |
| AX-158281149 | 22 | 85.776 | KV453116.1 | 6155994 | 17-scf00437    | 17 |
| AX-158281156 | 22 | 85.776 | KV453116.1 | 6162227 | 17-scf00437    | 17 |
| AX-157775252 | 22 | 85.776 | KV453116.1 | 6171972 | 17-scf00437    | 17 |
| AX-158281164 | 22 | 85.776 | KV453116.1 | 6172995 | 17-scf00437    | 17 |
| AX-158281176 | 22 | 85.776 | KV453116.1 | 6185906 | 17-scf00437    | 17 |
| AX-158281178 | 22 | 85.776 | KV453116.1 | 6187374 | 17-scf00437    | 17 |
| AX-158281183 | 22 | 85.776 | KV453116.1 | 6191429 | 17-scf00437    | 17 |
| AX-158281263 | 22 | 85.776 | KV453116.1 | 6285069 | 17-scf00437    | 17 |
| AX-158281265 | 22 | 85.776 | KV453116.1 | 6286972 | 17-scf00437    | 17 |
| AX-158281266 | 22 | 85.776 | KV453116.1 | 6287160 | 17-scf00437    | 17 |
| AX-158281274 | 22 | 85.776 | KV453116.1 | 6302433 | 17-scf00437    | 17 |
| AX-158416924 | 22 | 85.776 | KV453116.1 | 6303580 | 17-scf00437    | 17 |
| AX-158281277 | 22 | 85.776 | KV453116.1 | 6306991 | 17-scf00437    | 17 |
| AX-158281278 | 22 | 85.776 | KV453116.1 | 6307453 | 17-scf00437    | 17 |
| AX-158281279 | 22 | 85.776 | KV453116.1 | 6309795 | 17-scf00437    | 17 |
| AX-158281281 | 22 | 85.776 | KV453116.1 | 6311273 | 17-scf00437    | 17 |
| AX-157873182 | 22 | 85.776 | KV453116.1 | 6313377 | 17-scf00437    | 17 |
| AX-157873184 | 22 | 85.776 | KV453116.1 | 6314639 | 17-scf00437    | 17 |
| AX-157873185 | 22 | 85.776 | KV453116.1 | 6315734 | 17-scf00437    | 17 |
| AX-158281283 | 22 | 85.776 | KV453116.1 | 6316019 | 17-scf00437    | 17 |
| AX-158281289 | 22 | 85.776 | KV453116.1 | 6322294 | 17-scf00437    | 17 |
| AX-157873189 | 22 | 85.776 | KV453116.1 | 6326218 | 17-scf00437    | 17 |
| AX-158281293 | 22 | 85.776 | KV453116.1 | 6327172 | 17-scf00437    | 17 |
| AX-158281297 | 22 | 85.776 | KV453116.1 | 6331154 | 17-scf00437    | 17 |

|              |    |        |            |         |             |    |
|--------------|----|--------|------------|---------|-------------|----|
| AX-158281299 | 22 | 85.776 | KV453116.1 | 6334624 | 17-scf00437 | 17 |
| AX-158416926 | 22 | 85.776 | KV453116.1 | 6339518 | 17-scf00437 | 17 |
| AX-158281301 | 22 | 85.776 | KV453116.1 | 6340628 | 17-scf00437 | 17 |
| AX-158281302 | 22 | 85.776 | KV453116.1 | 6341237 | 17-scf00437 | 17 |
| AX-158281303 | 22 | 85.776 | KV453116.1 | 6341647 | 17-scf00437 | 17 |
| AX-158281516 | 22 | 85.776 | KV453116.1 | 6691131 | 17-scf00437 | 17 |
| AX-157844619 | 22 | 85.776 | KV453116.1 | 7001971 | 17-scf00437 | 17 |
| AX-157713647 | 22 | 85.776 | KV453116.1 | 7002289 | 17-scf00437 | 17 |
| AX-158281704 | 22 | 85.776 | KV453116.1 | 7002364 | 17-scf00437 | 17 |
| AX-157771527 | 22 | 85.776 | KV453116.1 | 7599659 | 17-scf00437 | 17 |
| AX-158276933 | 22 | 85.885 | KV453116.1 | 793317  | 17-scf00437 | 17 |
| AX-158277196 | 22 | 85.885 | KV453116.1 | 1088732 | 17-scf00437 | 17 |
| AX-158277230 | 22 | 85.885 | KV453116.1 | 1119274 | 17-scf00437 | 17 |
| AX-157747343 | 22 | 85.885 | KV453116.1 | 2326548 | 17-scf00437 | 17 |
| AX-158278271 | 22 | 85.885 | KV453116.1 | 2428946 | 17-scf00437 | 17 |
| AX-158278668 | 22 | 85.885 | KV453116.1 | 2900220 | 17-scf00437 | 17 |
| AX-158278731 | 22 | 85.885 | KV453116.1 | 2984635 | 17-scf00437 | 17 |
| AX-158278846 | 22 | 85.885 | KV453116.1 | 3144263 | 17-scf00437 | 17 |
| AX-158278852 | 22 | 85.885 | KV453116.1 | 3148598 | 17-scf00437 | 17 |
| AX-158278903 | 22 | 85.885 | KV453116.1 | 3278868 | 17-scf00437 | 17 |
| AX-158278966 | 22 | 85.885 | KV453116.1 | 3375288 | 17-scf00437 | 17 |
| AX-158279029 | 22 | 85.885 | KV453116.1 | 3443162 | 17-scf00437 | 17 |
| AX-158279124 | 22 | 85.885 | KV453116.1 | 3541146 | 17-scf00437 | 17 |
| AX-158279141 | 22 | 85.885 | KV453116.1 | 3565176 | 17-scf00437 | 17 |
| AX-157873115 | 22 | 85.885 | KV453116.1 | 3567431 | 17-scf00437 | 17 |
| AX-157740206 | 22 | 85.885 | KV453116.1 | 3796133 | 17-scf00437 | 17 |
| AX-157715504 | 22 | 85.885 | KV453116.1 | 3920123 | 17-scf00437 | 17 |
| AX-158279394 | 22 | 85.885 | KV453116.1 | 4033407 | 17-scf00437 | 17 |
| AX-158279930 | 22 | 85.885 | KV453116.1 | 4567868 | 17-scf00437 | 17 |
| AX-158280092 | 22 | 85.885 | KV453116.1 | 4756842 | 17-scf00437 | 17 |
| AX-158280096 | 22 | 85.885 | KV453116.1 | 4760653 | 17-scf00437 | 17 |
| AX-158381181 | 22 | 85.885 | KV453116.1 | 4761692 | 17-scf00437 | 17 |
| AX-157722198 | 22 | 85.885 | KV453116.1 | 4774702 | 17-scf00437 | 17 |
| AX-158280130 | 22 | 85.885 | KV453116.1 | 4809332 | 17-scf00437 | 17 |
| AX-158280163 | 22 | 85.885 | KV453116.1 | 4839045 | 17-scf00437 | 17 |
| AX-157844509 | 22 | 85.885 | KV453116.1 | 4911246 | 17-scf00437 | 17 |
| AX-158280226 | 22 | 85.885 | KV453116.1 | 4923045 | 17-scf00437 | 17 |
| AX-157757466 | 22 | 85.885 | KV453116.1 | 4937371 | 17-scf00437 | 17 |
| AX-158280260 | 22 | 85.885 | KV453116.1 | 4957386 | 17-scf00437 | 17 |
| AX-158280766 | 22 | 85.885 | KV453116.1 | 5694353 | 17-scf00437 | 17 |
| AX-158280891 | 22 | 85.885 | KV453116.1 | 5839487 | 17-scf00437 | 17 |
| AX-158281083 | 22 | 85.885 | KV453116.1 | 6074055 | 17-scf00437 | 17 |
| AX-157771750 | 22 | 85.885 | KV453116.1 | 6145755 | 17-scf00437 | 17 |
| AX-158281143 | 22 | 85.885 | KV453116.1 | 6148707 | 17-scf00437 | 17 |
| AX-158281150 | 22 | 85.885 | KV453116.1 | 6158287 | 17-scf00437 | 17 |
| AX-158281165 | 22 | 85.885 | KV453116.1 | 6173377 | 17-scf00437 | 17 |
| AX-157754840 | 22 | 85.885 | KV453116.1 | 6180411 | 17-scf00437 | 17 |
| AX-158281187 | 22 | 85.885 | KV453116.1 | 6195006 | 17-scf00437 | 17 |
| AX-158281239 | 22 | 85.885 | KV453116.1 | 6258339 | 17-scf00437 | 17 |
| AX-157844573 | 22 | 85.885 | KV453116.1 | 6267068 | 17-scf00437 | 17 |
| AX-157697306 | 22 | 85.885 | KV453116.1 | 6344368 | 17-scf00437 | 17 |

|              |    |        |            |         |             |    |
|--------------|----|--------|------------|---------|-------------|----|
| AX-158281305 | 22 | 85.885 | KV453116.1 | 6345740 | 17-scf00437 | 17 |
| AX-158281306 | 22 | 85.885 | KV453116.1 | 6346504 | 17-scf00437 | 17 |
| AX-158281307 | 22 | 85.885 | KV453116.1 | 6347130 | 17-scf00437 | 17 |
| AX-158281310 | 22 | 85.885 | KV453116.1 | 6352027 | 17-scf00437 | 17 |
| AX-157873192 | 22 | 85.885 | KV453116.1 | 6355345 | 17-scf00437 | 17 |
| AX-158281316 | 22 | 85.885 | KV453116.1 | 6357870 | 17-scf00437 | 17 |
| AX-157844575 | 22 | 85.885 | KV453116.1 | 6361216 | 17-scf00437 | 17 |
| AX-157844576 | 22 | 85.885 | KV453116.1 | 6361376 | 17-scf00437 | 17 |
| AX-158281317 | 22 | 85.885 | KV453116.1 | 6362119 | 17-scf00437 | 17 |
| AX-158281318 | 22 | 85.885 | KV453116.1 | 6363803 | 17-scf00437 | 17 |
| AX-157873193 | 22 | 85.885 | KV453116.1 | 6364220 | 17-scf00437 | 17 |
| AX-158281319 | 22 | 85.885 | KV453116.1 | 6368312 | 17-scf00437 | 17 |
| AX-158281324 | 22 | 85.885 | KV453116.1 | 6370315 | 17-scf00437 | 17 |
| AX-157880649 | 22 | 85.885 | KV453116.1 | 6371861 | 17-scf00437 | 17 |
| AX-158281331 | 22 | 85.885 | KV453116.1 | 6377792 | 17-scf00437 | 17 |
| AX-158281332 | 22 | 85.885 | KV453116.1 | 6380615 | 17-scf00437 | 17 |
| AX-157887952 | 22 | 85.885 | KV453116.1 | 6381053 | 17-scf00437 | 17 |
| AX-158281333 | 22 | 85.885 | KV453116.1 | 6383314 | 17-scf00437 | 17 |
| AX-157743734 | 22 | 85.885 | KV453116.1 | 6384729 | 17-scf00437 | 17 |
| AX-158416928 | 22 | 85.885 | KV453116.1 | 6390639 | 17-scf00437 | 17 |
| AX-158281334 | 22 | 85.885 | KV453116.1 | 6391646 | 17-scf00437 | 17 |
| AX-158281335 | 22 | 85.885 | KV453116.1 | 6393696 | 17-scf00437 | 17 |
| AX-158281336 | 22 | 85.885 | KV453116.1 | 6394619 | 17-scf00437 | 17 |
| AX-158281338 | 22 | 85.885 | KV453116.1 | 6398311 | 17-scf00437 | 17 |
| AX-157873197 | 22 | 85.885 | KV453116.1 | 6399116 | 17-scf00437 | 17 |
| AX-157873198 | 22 | 85.885 | KV453116.1 | 6401156 | 17-scf00437 | 17 |
| AX-158281342 | 22 | 85.885 | KV453116.1 | 6401529 | 17-scf00437 | 17 |
| AX-158281344 | 22 | 85.885 | KV453116.1 | 6404604 | 17-scf00437 | 17 |
| AX-158281346 | 22 | 85.885 | KV453116.1 | 6407373 | 17-scf00437 | 17 |
| AX-158281347 | 22 | 85.885 | KV453116.1 | 6408878 | 17-scf00437 | 17 |
| AX-158281348 | 22 | 85.885 | KV453116.1 | 6409929 | 17-scf00437 | 17 |
| AX-157844579 | 22 | 85.885 | KV453116.1 | 6412185 | 17-scf00437 | 17 |
| AX-158281351 | 22 | 85.885 | KV453116.1 | 6416990 | 17-scf00437 | 17 |
| AX-158281353 | 22 | 85.885 | KV453116.1 | 6426857 | 17-scf00437 | 17 |
| AX-157753264 | 22 | 85.885 | KV453116.1 | 6427406 | 17-scf00437 | 17 |
| AX-158281356 | 22 | 85.885 | KV453116.1 | 6429988 | 17-scf00437 | 17 |
| AX-158281357 | 22 | 85.885 | KV453116.1 | 6430481 | 17-scf00437 | 17 |
| AX-158281358 | 22 | 85.885 | KV453116.1 | 6430993 | 17-scf00437 | 17 |
| AX-158281359 | 22 | 85.885 | KV453116.1 | 6431262 | 17-scf00437 | 17 |
| AX-157873200 | 22 | 85.885 | KV453116.1 | 6432141 | 17-scf00437 | 17 |
| AX-157873201 | 22 | 85.885 | KV453116.1 | 6434187 | 17-scf00437 | 17 |
| AX-158281361 | 22 | 85.885 | KV453116.1 | 6436122 | 17-scf00437 | 17 |
| AX-158281365 | 22 | 85.885 | KV453116.1 | 6445210 | 17-scf00437 | 17 |
| AX-158281366 | 22 | 85.885 | KV453116.1 | 6446253 | 17-scf00437 | 17 |
| AX-158281370 | 22 | 85.885 | KV453116.1 | 6449850 | 17-scf00437 | 17 |
| AX-158281372 | 22 | 85.885 | KV453116.1 | 6451878 | 17-scf00437 | 17 |
| AX-158281378 | 22 | 85.885 | KV453116.1 | 6458281 | 17-scf00437 | 17 |
| AX-158281381 | 22 | 85.885 | KV453116.1 | 6460096 | 17-scf00437 | 17 |
| AX-158281384 | 22 | 85.885 | KV453116.1 | 6463188 | 17-scf00437 | 17 |
| AX-158281385 | 22 | 85.885 | KV453116.1 | 6465222 | 17-scf00437 | 17 |
| AX-158281386 | 22 | 85.885 | KV453116.1 | 6465993 | 17-scf00437 | 17 |

|              |    |        |            |         |             |    |
|--------------|----|--------|------------|---------|-------------|----|
| AX-158281393 | 22 | 85.885 | KV453116.1 | 6475620 | 17-scf00437 | 17 |
| AX-157697056 | 22 | 85.885 | KV453116.1 | 6479317 | 17-scf00437 | 17 |
| AX-158281394 | 22 | 85.885 | KV453116.1 | 6483244 | 17-scf00437 | 17 |
| AX-157873204 | 22 | 85.885 | KV453116.1 | 6483743 | 17-scf00437 | 17 |
| AX-158281395 | 22 | 85.885 | KV453116.1 | 6484030 | 17-scf00437 | 17 |
| AX-158281397 | 22 | 85.885 | KV453116.1 | 6487292 | 17-scf00437 | 17 |
| AX-158281400 | 22 | 85.885 | KV453116.1 | 6489669 | 17-scf00437 | 17 |
| AX-157718888 | 22 | 85.885 | KV453116.1 | 6489910 | 17-scf00437 | 17 |
| AX-158281401 | 22 | 85.885 | KV453116.1 | 6490739 | 17-scf00437 | 17 |
| AX-158281404 | 22 | 85.885 | KV453116.1 | 6492491 | 17-scf00437 | 17 |
| AX-158281406 | 22 | 85.885 | KV453116.1 | 6495183 | 17-scf00437 | 17 |
| AX-158281407 | 22 | 85.885 | KV453116.1 | 6496817 | 17-scf00437 | 17 |
| AX-158281410 | 22 | 85.885 | KV453116.1 | 6499377 | 17-scf00437 | 17 |
| AX-158281413 | 22 | 85.885 | KV453116.1 | 6503156 | 17-scf00437 | 17 |
| AX-158281414 | 22 | 85.885 | KV453116.1 | 6503593 | 17-scf00437 | 17 |
| AX-158281416 | 22 | 85.885 | KV453116.1 | 6505337 | 17-scf00437 | 17 |
| AX-158416929 | 22 | 85.885 | KV453116.1 | 6508371 | 17-scf00437 | 17 |
| AX-158281419 | 22 | 85.885 | KV453116.1 | 6510513 | 17-scf00437 | 17 |
| AX-158281420 | 22 | 85.885 | KV453116.1 | 6511102 | 17-scf00437 | 17 |
| AX-158281421 | 22 | 85.885 | KV453116.1 | 6512113 | 17-scf00437 | 17 |
| AX-158281425 | 22 | 85.885 | KV453116.1 | 6515029 | 17-scf00437 | 17 |
| AX-158281427 | 22 | 85.885 | KV453116.1 | 6519799 | 17-scf00437 | 17 |
| AX-158281429 | 22 | 85.885 | KV453116.1 | 6526816 | 17-scf00437 | 17 |
| AX-157741719 | 22 | 85.885 | KV453116.1 | 6529399 | 17-scf00437 | 17 |
| AX-157713943 | 22 | 85.885 | KV453116.1 | 6529886 | 17-scf00437 | 17 |
| AX-158416930 | 22 | 85.885 | KV453116.1 | 6529989 | 17-scf00437 | 17 |
| AX-158281431 | 22 | 85.885 | KV453116.1 | 6538266 | 17-scf00437 | 17 |
| AX-158281433 | 22 | 85.885 | KV453116.1 | 6544814 | 17-scf00437 | 17 |
| AX-158281434 | 22 | 85.885 | KV453116.1 | 6546102 | 17-scf00437 | 17 |
| AX-157737842 | 22 | 85.885 | KV453116.1 | 6547365 | 17-scf00437 | 17 |
| AX-158281438 | 22 | 85.885 | KV453116.1 | 6551010 | 17-scf00437 | 17 |
| AX-158281440 | 22 | 85.885 | KV453116.1 | 6553161 | 17-scf00437 | 17 |
| AX-158281441 | 22 | 85.885 | KV453116.1 | 6553998 | 17-scf00437 | 17 |
| AX-158281442 | 22 | 85.885 | KV453116.1 | 6554903 | 17-scf00437 | 17 |
| AX-157873209 | 22 | 85.885 | KV453116.1 | 6559310 | 17-scf00437 | 17 |
| AX-157844584 | 22 | 85.885 | KV453116.1 | 6559691 | 17-scf00437 | 17 |
| AX-158416931 | 22 | 85.885 | KV453116.1 | 6560969 | 17-scf00437 | 17 |
| AX-157743257 | 22 | 85.885 | KV453116.1 | 6565341 | 17-scf00437 | 17 |
| AX-158281446 | 22 | 85.885 | KV453116.1 | 6565880 | 17-scf00437 | 17 |
| AX-158281447 | 22 | 85.885 | KV453116.1 | 6570008 | 17-scf00437 | 17 |
| AX-157844587 | 22 | 85.885 | KV453116.1 | 6570064 | 17-scf00437 | 17 |
| AX-158281448 | 22 | 85.885 | KV453116.1 | 6571281 | 17-scf00437 | 17 |
| AX-158281451 | 22 | 85.885 | KV453116.1 | 6573117 | 17-scf00437 | 17 |
| AX-157844588 | 22 | 85.885 | KV453116.1 | 6574075 | 17-scf00437 | 17 |
| AX-158281453 | 22 | 85.885 | KV453116.1 | 6578865 | 17-scf00437 | 17 |
| AX-158281454 | 22 | 85.885 | KV453116.1 | 6579595 | 17-scf00437 | 17 |
| AX-157873210 | 22 | 85.885 | KV453116.1 | 6581408 | 17-scf00437 | 17 |
| AX-158281455 | 22 | 85.885 | KV453116.1 | 6582448 | 17-scf00437 | 17 |
| AX-158281456 | 22 | 85.885 | KV453116.1 | 6583035 | 17-scf00437 | 17 |
| AX-157873211 | 22 | 85.885 | KV453116.1 | 6584781 | 17-scf00437 | 17 |
| AX-158281459 | 22 | 85.885 | KV453116.1 | 6585493 | 17-scf00437 | 17 |

|              |    |        |            |         |             |    |
|--------------|----|--------|------------|---------|-------------|----|
| AX-158281460 | 22 | 85.885 | KV453116.1 | 6586277 | 17-scf00437 | 17 |
| AX-157873212 | 22 | 85.885 | KV453116.1 | 6589122 | 17-scf00437 | 17 |
| AX-158281463 | 22 | 85.885 | KV453116.1 | 6590889 | 17-scf00437 | 17 |
| AX-158281464 | 22 | 85.885 | KV453116.1 | 6591571 | 17-scf00437 | 17 |
| AX-158281465 | 22 | 85.885 | KV453116.1 | 6592217 | 17-scf00437 | 17 |
| AX-158281467 | 22 | 85.885 | KV453116.1 | 6595406 | 17-scf00437 | 17 |
| AX-158281472 | 22 | 85.885 | KV453116.1 | 6601872 | 17-scf00437 | 17 |
| AX-158281474 | 22 | 85.885 | KV453116.1 | 6604381 | 17-scf00437 | 17 |
| AX-157873214 | 22 | 85.885 | KV453116.1 | 6615721 | 17-scf00437 | 17 |
| AX-158281476 | 22 | 85.885 | KV453116.1 | 6616095 | 17-scf00437 | 17 |
| AX-157873215 | 22 | 85.885 | KV453116.1 | 6616810 | 17-scf00437 | 17 |
| AX-158281477 | 22 | 85.885 | KV453116.1 | 6617439 | 17-scf00437 | 17 |
| AX-158281479 | 22 | 85.885 | KV453116.1 | 6622491 | 17-scf00437 | 17 |
| AX-158281481 | 22 | 85.885 | KV453116.1 | 6624750 | 17-scf00437 | 17 |
| AX-158281484 | 22 | 85.885 | KV453116.1 | 6633384 | 17-scf00437 | 17 |
| AX-158281485 | 22 | 85.885 | KV453116.1 | 6638301 | 17-scf00437 | 17 |
| AX-158281487 | 22 | 85.885 | KV453116.1 | 6641936 | 17-scf00437 | 17 |
| AX-158281488 | 22 | 85.885 | KV453116.1 | 6648244 | 17-scf00437 | 17 |
| AX-158281489 | 22 | 85.885 | KV453116.1 | 6650745 | 17-scf00437 | 17 |
| AX-157873216 | 22 | 85.885 | KV453116.1 | 6651147 | 17-scf00437 | 17 |
| AX-157873217 | 22 | 85.885 | KV453116.1 | 6654323 | 17-scf00437 | 17 |
| AX-157873218 | 22 | 85.885 | KV453116.1 | 6654473 | 17-scf00437 | 17 |
| AX-157873220 | 22 | 85.885 | KV453116.1 | 6655645 | 17-scf00437 | 17 |
| AX-157844593 | 22 | 85.885 | KV453116.1 | 6655995 | 17-scf00437 | 17 |
| AX-157844594 | 22 | 85.885 | KV453116.1 | 6663019 | 17-scf00437 | 17 |
| AX-158281494 | 22 | 85.885 | KV453116.1 | 6664003 | 17-scf00437 | 17 |
| AX-158281495 | 22 | 85.885 | KV453116.1 | 6664858 | 17-scf00437 | 17 |
| AX-158281496 | 22 | 85.885 | KV453116.1 | 6665119 | 17-scf00437 | 17 |
| AX-157873223 | 22 | 85.885 | KV453116.1 | 6665704 | 17-scf00437 | 17 |
| AX-157844595 | 22 | 85.885 | KV453116.1 | 6665992 | 17-scf00437 | 17 |
| AX-157873224 | 22 | 85.885 | KV453116.1 | 6668934 | 17-scf00437 | 17 |
| AX-158281499 | 22 | 85.885 | KV453116.1 | 6670578 | 17-scf00437 | 17 |
| AX-158281501 | 22 | 85.885 | KV453116.1 | 6672420 | 17-scf00437 | 17 |
| AX-158281502 | 22 | 85.885 | KV453116.1 | 6673572 | 17-scf00437 | 17 |
| AX-158281503 | 22 | 85.885 | KV453116.1 | 6674123 | 17-scf00437 | 17 |
| AX-158281505 | 22 | 85.885 | KV453116.1 | 6675173 | 17-scf00437 | 17 |
| AX-158281506 | 22 | 85.885 | KV453116.1 | 6676506 | 17-scf00437 | 17 |
| AX-158281507 | 22 | 85.885 | KV453116.1 | 6685035 | 17-scf00437 | 17 |
| AX-158281509 | 22 | 85.885 | KV453116.1 | 6685938 | 17-scf00437 | 17 |
| AX-158281514 | 22 | 85.885 | KV453116.1 | 6688309 | 17-scf00437 | 17 |
| AX-157715364 | 22 | 85.885 | KV453116.1 | 6692035 | 17-scf00437 | 17 |
| AX-158281517 | 22 | 85.885 | KV453116.1 | 6693835 | 17-scf00437 | 17 |
| AX-158281518 | 22 | 85.885 | KV453116.1 | 6695529 | 17-scf00437 | 17 |
| AX-157873225 | 22 | 85.885 | KV453116.1 | 6696707 | 17-scf00437 | 17 |
| AX-158281521 | 22 | 85.885 | KV453116.1 | 6705234 | 17-scf00437 | 17 |
| AX-158281527 | 22 | 85.885 | KV453116.1 | 6724541 | 17-scf00437 | 17 |
| AX-158281529 | 22 | 85.885 | KV453116.1 | 6729359 | 17-scf00437 | 17 |
| AX-158281530 | 22 | 85.885 | KV453116.1 | 6729880 | 17-scf00437 | 17 |
| AX-158281531 | 22 | 85.885 | KV453116.1 | 6730776 | 17-scf00437 | 17 |
| AX-158281533 | 22 | 85.885 | KV453116.1 | 6735171 | 17-scf00437 | 17 |
| AX-158281535 | 22 | 85.885 | KV453116.1 | 6740612 | 17-scf00437 | 17 |

|              |    |        |            |         |             |    |
|--------------|----|--------|------------|---------|-------------|----|
| AX-157723144 | 22 | 85.885 | KV453116.1 | 6741864 | 17-scf00437 | 17 |
| AX-157803065 | 22 | 85.885 | KV453116.1 | 6743266 | 17-scf00437 | 17 |
| AX-158419428 | 22 | 85.885 | KV453116.1 | 6744122 | 17-scf00437 | 17 |
| AX-158281538 | 22 | 85.885 | KV453116.1 | 6746274 | 17-scf00437 | 17 |
| AX-158281539 | 22 | 85.885 | KV453116.1 | 6746943 | 17-scf00437 | 17 |
| AX-158281542 | 22 | 85.885 | KV453116.1 | 6751773 | 17-scf00437 | 17 |
| AX-158281545 | 22 | 85.885 | KV453116.1 | 6754015 | 17-scf00437 | 17 |
| AX-158281547 | 22 | 85.885 | KV453116.1 | 6754866 | 17-scf00437 | 17 |
| AX-158281549 | 22 | 85.885 | KV453116.1 | 6756028 | 17-scf00437 | 17 |
| AX-157746962 | 22 | 85.885 | KV453116.1 | 6759715 | 17-scf00437 | 17 |
| AX-157873226 | 22 | 85.885 | KV453116.1 | 6772570 | 17-scf00437 | 17 |
| AX-157873227 | 22 | 85.885 | KV453116.1 | 6773675 | 17-scf00437 | 17 |
| AX-157720258 | 22 | 85.885 | KV453116.1 | 6775321 | 17-scf00437 | 17 |
| AX-158281559 | 22 | 85.885 | KV453116.1 | 6775557 | 17-scf00437 | 17 |
| AX-158281560 | 22 | 85.885 | KV453116.1 | 6776488 | 17-scf00437 | 17 |
| AX-158281561 | 22 | 85.885 | KV453116.1 | 6777855 | 17-scf00437 | 17 |
| AX-158281562 | 22 | 85.885 | KV453116.1 | 6778881 | 17-scf00437 | 17 |
| AX-157873228 | 22 | 85.885 | KV453116.1 | 6779988 | 17-scf00437 | 17 |
| AX-158281564 | 22 | 85.885 | KV453116.1 | 6787498 | 17-scf00437 | 17 |
| AX-158281567 | 22 | 85.885 | KV453116.1 | 6789672 | 17-scf00437 | 17 |
| AX-157873229 | 22 | 85.885 | KV453116.1 | 6791623 | 17-scf00437 | 17 |
| AX-158281569 | 22 | 85.885 | KV453116.1 | 6793074 | 17-scf00437 | 17 |
| AX-157873231 | 22 | 85.885 | KV453116.1 | 6800923 | 17-scf00437 | 17 |
| AX-158281576 | 22 | 85.885 | KV453116.1 | 6803797 | 17-scf00437 | 17 |
| AX-158281577 | 22 | 85.885 | KV453116.1 | 6804232 | 17-scf00437 | 17 |
| AX-158281578 | 22 | 85.885 | KV453116.1 | 6806974 | 17-scf00437 | 17 |
| AX-158281580 | 22 | 85.885 | KV453116.1 | 6809182 | 17-scf00437 | 17 |
| AX-158281582 | 22 | 85.885 | KV453116.1 | 6810278 | 17-scf00437 | 17 |
| AX-158281586 | 22 | 85.885 | KV453116.1 | 6816912 | 17-scf00437 | 17 |
| AX-158281597 | 22 | 85.885 | KV453116.1 | 6837689 | 17-scf00437 | 17 |
| AX-158281598 | 22 | 85.885 | KV453116.1 | 6838189 | 17-scf00437 | 17 |
| AX-158416936 | 22 | 85.885 | KV453116.1 | 6847433 | 17-scf00437 | 17 |
| AX-158423513 | 22 | 85.885 | KV453116.1 | 6847921 | 17-scf00437 | 17 |
| AX-158281600 | 22 | 85.885 | KV453116.1 | 6851506 | 17-scf00437 | 17 |
| AX-157740899 | 22 | 85.885 | KV453116.1 | 6852273 | 17-scf00437 | 17 |
| AX-158281601 | 22 | 85.885 | KV453116.1 | 6853025 | 17-scf00437 | 17 |
| AX-158281602 | 22 | 85.885 | KV453116.1 | 6853517 | 17-scf00437 | 17 |
| AX-158281603 | 22 | 85.885 | KV453116.1 | 6854187 | 17-scf00437 | 17 |
| AX-157844604 | 22 | 85.885 | KV453116.1 | 6855838 | 17-scf00437 | 17 |
| AX-158281604 | 22 | 85.885 | KV453116.1 | 6858061 | 17-scf00437 | 17 |
| AX-157844607 | 22 | 85.885 | KV453116.1 | 6860871 | 17-scf00437 | 17 |
| AX-158281611 | 22 | 85.885 | KV453116.1 | 6866875 | 17-scf00437 | 17 |
| AX-158281613 | 22 | 85.885 | KV453116.1 | 6871277 | 17-scf00437 | 17 |
| AX-157844608 | 22 | 85.885 | KV453116.1 | 6878390 | 17-scf00437 | 17 |
| AX-158281621 | 22 | 85.885 | KV453116.1 | 6882058 | 17-scf00437 | 17 |
| AX-158281626 | 22 | 85.885 | KV453116.1 | 6895310 | 17-scf00437 | 17 |
| AX-158281627 | 22 | 85.885 | KV453116.1 | 6896075 | 17-scf00437 | 17 |
| AX-158281628 | 22 | 85.885 | KV453116.1 | 6896357 | 17-scf00437 | 17 |
| AX-158281630 | 22 | 85.885 | KV453116.1 | 6897515 | 17-scf00437 | 17 |
| AX-158281632 | 22 | 85.885 | KV453116.1 | 6898772 | 17-scf00437 | 17 |
| AX-158281637 | 22 | 85.885 | KV453116.1 | 6906170 | 17-scf00437 | 17 |

|              |    |        |             |         |                 |    |
|--------------|----|--------|-------------|---------|-----------------|----|
| AX-158281638 | 22 | 85.885 | KV453116.1  | 6907542 | 17-scf00437     | 17 |
| AX-158281639 | 22 | 85.885 | KV453116.1  | 6908801 | 17-scf00437     | 17 |
| AX-158281641 | 22 | 85.885 | KV453116.1  | 6910047 | 17-scf00437     | 17 |
| AX-158281643 | 22 | 85.885 | KV453116.1  | 6917761 | 17-scf00437     | 17 |
| AX-158281667 | 22 | 85.885 | KV453116.1  | 6950004 | 17-scf00437     | 17 |
| AX-158281713 | 22 | 85.885 | KV453116.1  | 7018943 | 17-scf00437     | 17 |
| AX-158281729 | 22 | 85.885 | KV453116.1  | 7057096 | 17-scf00437     | 17 |
| AX-157772716 | 22 | 85.885 | KV453116.1  | 7176337 | 17-scf00437     | 17 |
| AX-158281804 | 22 | 85.885 | KV453116.1  | 7206747 | 17-scf00437     | 17 |
| AX-158281813 | 22 | 85.885 | KV453116.1  | 7227344 | 17-scf00437     | 17 |
| AX-157844651 | 22 | 85.885 | KV453116.1  | 7248728 | 17-scf00437     | 17 |
| AX-157751393 | 22 | 85.885 | KV453116.1  | 7273113 | 17-scf00437     | 17 |
| AX-158281852 | 22 | 85.885 | KV453116.1  | 7294536 | 17-scf00437     | 17 |
| AX-158281872 | 22 | 85.885 | KV453116.1  | 7316944 | 17-scf00437     | 17 |
| AX-158281877 | 22 | 85.885 | KV453116.1  | 7324701 | 17-scf00437     | 17 |
| AX-158281894 | 22 | 85.885 | KV453116.1  | 7352400 | 17-scf00437     | 17 |
| AX-158281950 | 22 | 85.885 | KV453116.1  | 7418047 | 17-scf00437     | 17 |
| AX-158282097 | 22 | 85.885 | KV453116.1  | 7587778 | 17-scf00437     | 17 |
| AX-157764868 | 22 | 85.885 | KV453116.1  | 7813181 | 17-scf00437     | 17 |
| AX-158282367 | 22 | 85.885 | KV453116.1  | 7953692 | 17-scf00437     | 17 |
| AX-158282965 | 22 | 85.885 | KV453116.1  | 8758581 | 17-scf00437     | 17 |
| AX-158283008 | 22 | 85.885 | KV453116.1  | 8809437 | 17-scf00437     | 17 |
| AX-158286598 | 22 | 85.885 | KV453114.1  | 4814515 | 17-scf00439     | 17 |
| AX-157702356 | 22 | 85.885 | DX091427.1  | 56      | -HORI212 lctalt | UN |
| AX-157712055 | 22 | 85.885 | 3ML01032692 | 476     | scf08319_1      | UN |
| AX-158281646 | 22 | 85.994 | KV453116.1  | 6924690 | 17-scf00437     | 17 |
| AX-158281653 | 22 | 85.994 | KV453116.1  | 6937188 | 17-scf00437     | 17 |
| AX-158281655 | 22 | 85.994 | KV453116.1  | 6938040 | 17-scf00437     | 17 |
| AX-158281665 | 22 | 86.022 | KV453116.1  | 6948284 | 17-scf00437     | 17 |
| AX-157873041 | 22 | 86.046 | KV453121.1  | 1655521 | 17-scf00435     | 17 |
| AX-158276424 | 22 | 86.046 | KV453116.1  | 114706  | 17-scf00437     | 17 |
| AX-157718692 | 22 | 86.046 | KV453116.1  | 201147  | 17-scf00437     | 17 |
| AX-158276606 | 22 | 86.046 | KV453116.1  | 346324  | 17-scf00437     | 17 |
| AX-158276788 | 22 | 86.046 | KV453116.1  | 605380  | 17-scf00437     | 17 |
| AX-158276937 | 22 | 86.046 | KV453116.1  | 799952  | 17-scf00437     | 17 |
| AX-158276939 | 22 | 86.046 | KV453116.1  | 806345  | 17-scf00437     | 17 |
| AX-158277150 | 22 | 86.046 | KV453116.1  | 1048345 | 17-scf00437     | 17 |
| AX-158277273 | 22 | 86.046 | KV453116.1  | 1170012 | 17-scf00437     | 17 |
| AX-158277279 | 22 | 86.046 | KV453116.1  | 1179246 | 17-scf00437     | 17 |
| AX-158277288 | 22 | 86.046 | KV453116.1  | 1186476 | 17-scf00437     | 17 |
| AX-158277298 | 22 | 86.046 | KV453116.1  | 1197019 | 17-scf00437     | 17 |
| AX-158277357 | 22 | 86.046 | KV453116.1  | 1251290 | 17-scf00437     | 17 |
| AX-158277534 | 22 | 86.046 | KV453116.1  | 1442666 | 17-scf00437     | 17 |
| AX-158277881 | 22 | 86.046 | KV453116.1  | 1896429 | 17-scf00437     | 17 |
| AX-158277951 | 22 | 86.046 | KV453116.1  | 1998894 | 17-scf00437     | 17 |
| AX-157844313 | 22 | 86.046 | KV453116.1  | 2417586 | 17-scf00437     | 17 |
| AX-158278319 | 22 | 86.046 | KV453116.1  | 2500667 | 17-scf00437     | 17 |
| AX-158278402 | 22 | 86.046 | KV453116.1  | 2584834 | 17-scf00437     | 17 |
| AX-158278469 | 22 | 86.046 | KV453116.1  | 2653162 | 17-scf00437     | 17 |
| AX-157703259 | 22 | 86.046 | KV453116.1  | 2687968 | 17-scf00437     | 17 |
| AX-157844342 | 22 | 86.046 | KV453116.1  | 2727495 | 17-scf00437     | 17 |



|              |    |        |            |         |             |    |
|--------------|----|--------|------------|---------|-------------|----|
| AX-158278543 | 22 | 86.046 | KV453116.1 | 2740905 | 17-scf00437 | 17 |
| AX-157844349 | 22 | 86.046 | KV453116.1 | 2783966 | 17-scf00437 | 17 |
| AX-158278582 | 22 | 86.046 | KV453116.1 | 2788025 | 17-scf00437 | 17 |
| AX-158278729 | 22 | 86.046 | KV453116.1 | 2983471 | 17-scf00437 | 17 |
| AX-158278762 | 22 | 86.046 | KV453116.1 | 3030036 | 17-scf00437 | 17 |
| AX-158278765 | 22 | 86.046 | KV453116.1 | 3038126 | 17-scf00437 | 17 |
| AX-158278912 | 22 | 86.046 | KV453116.1 | 3289242 | 17-scf00437 | 17 |
| AX-157710037 | 22 | 86.046 | KV453116.1 | 3290427 | 17-scf00437 | 17 |
| AX-158279002 | 22 | 86.046 | KV453116.1 | 3416860 | 17-scf00437 | 17 |
| AX-158279043 | 22 | 86.046 | KV453116.1 | 3459276 | 17-scf00437 | 17 |
| AX-158279050 | 22 | 86.046 | KV453116.1 | 3467102 | 17-scf00437 | 17 |
| AX-158279080 | 22 | 86.046 | KV453116.1 | 3494485 | 17-scf00437 | 17 |
| AX-157873117 | 22 | 86.046 | KV453116.1 | 3577739 | 17-scf00437 | 17 |
| AX-157844438 | 22 | 86.046 | KV453116.1 | 3579548 | 17-scf00437 | 17 |
| AX-158279168 | 22 | 86.046 | KV453116.1 | 3606127 | 17-scf00437 | 17 |
| AX-158279170 | 22 | 86.046 | KV453116.1 | 3611759 | 17-scf00437 | 17 |
| AX-158279460 | 22 | 86.046 | KV453116.1 | 4088080 | 17-scf00437 | 17 |
| AX-158279568 | 22 | 86.046 | KV453116.1 | 4202948 | 17-scf00437 | 17 |
| AX-158279758 | 22 | 86.046 | KV453116.1 | 4392943 | 17-scf00437 | 17 |
| AX-158279832 | 22 | 86.046 | KV453116.1 | 4474483 | 17-scf00437 | 17 |
| AX-158279860 | 22 | 86.046 | KV453116.1 | 4505064 | 17-scf00437 | 17 |
| AX-158279961 | 22 | 86.046 | KV453116.1 | 4620620 | 17-scf00437 | 17 |
| AX-158279962 | 22 | 86.046 | KV453116.1 | 4620830 | 17-scf00437 | 17 |
| AX-158279965 | 22 | 86.046 | KV453116.1 | 4622199 | 17-scf00437 | 17 |
| AX-158279967 | 22 | 86.046 | KV453116.1 | 4624255 | 17-scf00437 | 17 |
| AX-158279969 | 22 | 86.046 | KV453116.1 | 4624590 | 17-scf00437 | 17 |
| AX-158279998 | 22 | 86.046 | KV453116.1 | 4654688 | 17-scf00437 | 17 |
| AX-158280008 | 22 | 86.046 | KV453116.1 | 4661450 | 17-scf00437 | 17 |
| AX-158280014 | 22 | 86.046 | KV453116.1 | 4667743 | 17-scf00437 | 17 |
| AX-157844486 | 22 | 86.046 | KV453116.1 | 4684268 | 17-scf00437 | 17 |
| AX-158280049 | 22 | 86.046 | KV453116.1 | 4699231 | 17-scf00437 | 17 |
| AX-157770968 | 22 | 86.046 | KV453116.1 | 4722514 | 17-scf00437 | 17 |
| AX-158280068 | 22 | 86.046 | KV453116.1 | 4723287 | 17-scf00437 | 17 |
| AX-158280073 | 22 | 86.046 | KV453116.1 | 4728690 | 17-scf00437 | 17 |
| AX-158280079 | 22 | 86.046 | KV453116.1 | 4737088 | 17-scf00437 | 17 |
| AX-158280083 | 22 | 86.046 | KV453116.1 | 4741843 | 17-scf00437 | 17 |
| AX-158280085 | 22 | 86.046 | KV453116.1 | 4744902 | 17-scf00437 | 17 |
| AX-158280159 | 22 | 86.046 | KV453116.1 | 4834383 | 17-scf00437 | 17 |
| AX-158280162 | 22 | 86.046 | KV453116.1 | 4838356 | 17-scf00437 | 17 |
| AX-157844501 | 22 | 86.046 | KV453116.1 | 4851071 | 17-scf00437 | 17 |
| AX-158280181 | 22 | 86.046 | KV453116.1 | 4864147 | 17-scf00437 | 17 |
| AX-158280185 | 22 | 86.046 | KV453116.1 | 4871555 | 17-scf00437 | 17 |
| AX-158280186 | 22 | 86.046 | KV453116.1 | 4872678 | 17-scf00437 | 17 |
| AX-157873150 | 22 | 86.046 | KV453116.1 | 4881169 | 17-scf00437 | 17 |
| AX-158280191 | 22 | 86.046 | KV453116.1 | 4883124 | 17-scf00437 | 17 |
| AX-158280197 | 22 | 86.046 | KV453116.1 | 4890476 | 17-scf00437 | 17 |
| AX-158280217 | 22 | 86.046 | KV453116.1 | 4911902 | 17-scf00437 | 17 |
| AX-158280219 | 22 | 86.046 | KV453116.1 | 4913291 | 17-scf00437 | 17 |
| AX-158280252 | 22 | 86.046 | KV453116.1 | 4949730 | 17-scf00437 | 17 |
| AX-158280266 | 22 | 86.046 | KV453116.1 | 4965195 | 17-scf00437 | 17 |
| AX-158280294 | 22 | 86.046 | KV453116.1 | 4996324 | 17-scf00437 | 17 |

|              |    |        |            |         |             |    |
|--------------|----|--------|------------|---------|-------------|----|
| AX-158280321 | 22 | 86.046 | KV453116.1 | 5025756 | 17-scf00437 | 17 |
| AX-158280326 | 22 | 86.046 | KV453116.1 | 5030943 | 17-scf00437 | 17 |
| AX-158280548 | 22 | 86.046 | KV453116.1 | 5335329 | 17-scf00437 | 17 |
| AX-158280570 | 22 | 86.046 | KV453116.1 | 5372912 | 17-scf00437 | 17 |
| AX-157844542 | 22 | 86.046 | KV453116.1 | 5437774 | 17-scf00437 | 17 |
| AX-158280848 | 22 | 86.046 | KV453116.1 | 5796330 | 17-scf00437 | 17 |
| AX-158280925 | 22 | 86.046 | KV453116.1 | 5883532 | 17-scf00437 | 17 |
| AX-158280939 | 22 | 86.046 | KV453116.1 | 5896003 | 17-scf00437 | 17 |
| AX-158280951 | 22 | 86.046 | KV453116.1 | 5915772 | 17-scf00437 | 17 |
| AX-158280952 | 22 | 86.046 | KV453116.1 | 5917114 | 17-scf00437 | 17 |
| AX-157844554 | 22 | 86.046 | KV453116.1 | 5930105 | 17-scf00437 | 17 |
| AX-158416915 | 22 | 86.046 | KV453116.1 | 5933931 | 17-scf00437 | 17 |
| AX-158280991 | 22 | 86.046 | KV453116.1 | 5957560 | 17-scf00437 | 17 |
| AX-158281032 | 22 | 86.046 | KV453116.1 | 6021522 | 17-scf00437 | 17 |
| AX-158281041 | 22 | 86.046 | KV453116.1 | 6029838 | 17-scf00437 | 17 |
| AX-158281079 | 22 | 86.046 | KV453116.1 | 6070847 | 17-scf00437 | 17 |
| AX-158281095 | 22 | 86.046 | KV453116.1 | 6086455 | 17-scf00437 | 17 |
| AX-158281104 | 22 | 86.046 | KV453116.1 | 6095748 | 17-scf00437 | 17 |
| AX-157746518 | 22 | 86.046 | KV453116.1 | 6135944 | 17-scf00437 | 17 |
| AX-158281138 | 22 | 86.046 | KV453116.1 | 6142727 | 17-scf00437 | 17 |
| AX-158281140 | 22 | 86.046 | KV453116.1 | 6143166 | 17-scf00437 | 17 |
| AX-158281158 | 22 | 86.046 | KV453116.1 | 6163065 | 17-scf00437 | 17 |
| AX-158281159 | 22 | 86.046 | KV453116.1 | 6164115 | 17-scf00437 | 17 |
| AX-158281166 | 22 | 86.046 | KV453116.1 | 6175069 | 17-scf00437 | 17 |
| AX-158281167 | 22 | 86.046 | KV453116.1 | 6175754 | 17-scf00437 | 17 |
| AX-158281168 | 22 | 86.046 | KV453116.1 | 6176821 | 17-scf00437 | 17 |
| AX-158281170 | 22 | 86.046 | KV453116.1 | 6178387 | 17-scf00437 | 17 |
| AX-158281204 | 22 | 86.046 | KV453116.1 | 6217854 | 17-scf00437 | 17 |
| AX-158281255 | 22 | 86.046 | KV453116.1 | 6274449 | 17-scf00437 | 17 |
| AX-158281258 | 22 | 86.046 | KV453116.1 | 6277950 | 17-scf00437 | 17 |
| AX-158281286 | 22 | 86.046 | KV453116.1 | 6320195 | 17-scf00437 | 17 |
| AX-158416935 | 22 | 86.046 | KV453116.1 | 6834559 | 17-scf00437 | 17 |
| AX-158281596 | 22 | 86.046 | KV453116.1 | 6836114 | 17-scf00437 | 17 |
| AX-158281599 | 22 | 86.046 | KV453116.1 | 6850706 | 17-scf00437 | 17 |
| AX-158281648 | 22 | 86.046 | KV453116.1 | 6926476 | 17-scf00437 | 17 |
| AX-158281649 | 22 | 86.046 | KV453116.1 | 6927045 | 17-scf00437 | 17 |
| AX-158281651 | 22 | 86.046 | KV453116.1 | 6929199 | 17-scf00437 | 17 |
| AX-157844617 | 22 | 86.046 | KV453116.1 | 6933817 | 17-scf00437 | 17 |
| AX-158281657 | 22 | 86.046 | KV453116.1 | 6941394 | 17-scf00437 | 17 |
| AX-158281659 | 22 | 86.046 | KV453116.1 | 6942225 | 17-scf00437 | 17 |
| AX-157707973 | 22 | 86.046 | KV453116.1 | 6942899 | 17-scf00437 | 17 |
| AX-158281661 | 22 | 86.046 | KV453116.1 | 6944736 | 17-scf00437 | 17 |
| AX-158281663 | 22 | 86.046 | KV453116.1 | 6947176 | 17-scf00437 | 17 |
| AX-158281666 | 22 | 86.046 | KV453116.1 | 6949772 | 17-scf00437 | 17 |
| AX-158281673 | 22 | 86.046 | KV453116.1 | 6961814 | 17-scf00437 | 17 |
| AX-158281676 | 22 | 86.046 | KV453116.1 | 6966538 | 17-scf00437 | 17 |
| AX-158281680 | 22 | 86.046 | KV453116.1 | 6968903 | 17-scf00437 | 17 |
| AX-158281688 | 22 | 86.046 | KV453116.1 | 6976673 | 17-scf00437 | 17 |
| AX-158281693 | 22 | 86.046 | KV453116.1 | 6983533 | 17-scf00437 | 17 |
| AX-158281739 | 22 | 86.046 | KV453116.1 | 7072711 | 17-scf00437 | 17 |
| AX-157844623 | 22 | 86.046 | KV453116.1 | 7076909 | 17-scf00437 | 17 |

|              |    |        |             |         |             |    |
|--------------|----|--------|-------------|---------|-------------|----|
| AX-158281762 | 22 | 86.046 | KV453116.1  | 7120697 | 17-scf00437 | 17 |
| AX-158281766 | 22 | 86.046 | KV453116.1  | 7129787 | 17-scf00437 | 17 |
| AX-158281795 | 22 | 86.046 | KV453116.1  | 7193013 | 17-scf00437 | 17 |
| AX-157844656 | 22 | 86.046 | KV453116.1  | 7283140 | 17-scf00437 | 17 |
| AX-158281926 | 22 | 86.046 | KV453116.1  | 7391300 | 17-scf00437 | 17 |
| AX-158281945 | 22 | 86.046 | KV453116.1  | 7412464 | 17-scf00437 | 17 |
| AX-158282011 | 22 | 86.046 | KV453116.1  | 7486698 | 17-scf00437 | 17 |
| AX-158282027 | 22 | 86.046 | KV453116.1  | 7500109 | 17-scf00437 | 17 |
| AX-158282245 | 22 | 86.046 | KV453116.1  | 7805908 | 17-scf00437 | 17 |
| AX-158282292 | 22 | 86.046 | KV453116.1  | 7876125 | 17-scf00437 | 17 |
| AX-158282378 | 22 | 86.046 | KV453116.1  | 7961137 | 17-scf00437 | 17 |
| AX-158282567 | 22 | 86.046 | KV453116.1  | 8242103 | 17-scf00437 | 17 |
| AX-158282590 | 22 | 86.046 | KV453116.1  | 8282335 | 17-scf00437 | 17 |
| AX-158282628 | 22 | 86.046 | KV453116.1  | 8325983 | 17-scf00437 | 17 |
| AX-158282766 | 22 | 86.046 | KV453116.1  | 8515717 | 17-scf00437 | 17 |
| AX-158282784 | 22 | 86.046 | KV453116.1  | 8534173 | 17-scf00437 | 17 |
| AX-158283026 | 22 | 86.046 | KV453116.1  | 8830384 | 17-scf00437 | 17 |
| AX-158417101 | 22 | 86.046 | KV453114.1  | 4662676 | 17-scf00439 | 17 |
| AX-157701093 | 22 | 86.046 | KV453114.1  | 4757167 | 17-scf00439 | 17 |
| AX-157705167 | 22 | 86.046 | 3ML01028836 | 977     | scf04451_1  | UN |
| AX-157705192 | 22 | 86.046 | 3ML01028953 | 923     | scf04570_1  | UN |
| AX-158281717 | 22 | 86.071 | KV453116.1  | 7033251 | 17-scf00437 | 17 |
| AX-158281730 | 22 | 86.092 | KV453116.1  | 7059479 | 17-scf00437 | 17 |
| AX-158281732 | 22 | 86.146 | KV453116.1  | 7063283 | 17-scf00437 | 17 |
| AX-158281735 | 22 | 86.208 | KV453116.1  | 7065129 | 17-scf00437 | 17 |
| AX-157844633 | 22 | 86.264 | KV453116.1  | 7141173 | 17-scf00437 | 17 |
| AX-158277135 | 22 | 86.322 | KV453116.1  | 1024658 | 17-scf00437 | 17 |
| AX-158277857 | 22 | 86.322 | KV453116.1  | 1854885 | 17-scf00437 | 17 |
| AX-158277908 | 22 | 86.322 | KV453116.1  | 1941271 | 17-scf00437 | 17 |
| AX-157844257 | 22 | 86.322 | KV453116.1  | 1959814 | 17-scf00437 | 17 |
| AX-158278394 | 22 | 86.322 | KV453116.1  | 2577913 | 17-scf00437 | 17 |
| AX-158278439 | 22 | 86.322 | KV453116.1  | 2624085 | 17-scf00437 | 17 |
| AX-158278503 | 22 | 86.322 | KV453116.1  | 2694257 | 17-scf00437 | 17 |
| AX-157746466 | 22 | 86.322 | KV453116.1  | 2896927 | 17-scf00437 | 17 |
| AX-158278766 | 22 | 86.322 | KV453116.1  | 3038493 | 17-scf00437 | 17 |
| AX-158395088 | 22 | 86.322 | KV453116.1  | 3142534 | 17-scf00437 | 17 |
| AX-158278855 | 22 | 86.322 | KV453116.1  | 3151716 | 17-scf00437 | 17 |
| AX-158278856 | 22 | 86.322 | KV453116.1  | 3151945 | 17-scf00437 | 17 |
| AX-157726365 | 22 | 86.322 | KV453116.1  | 3237091 | 17-scf00437 | 17 |
| AX-158278914 | 22 | 86.322 | KV453116.1  | 3291273 | 17-scf00437 | 17 |
| AX-157844427 | 22 | 86.322 | KV453116.1  | 3423342 | 17-scf00437 | 17 |
| AX-158279074 | 22 | 86.322 | KV453116.1  | 3487998 | 17-scf00437 | 17 |
| AX-158279727 | 22 | 86.322 | KV453116.1  | 4357229 | 17-scf00437 | 17 |
| AX-158279851 | 22 | 86.322 | KV453116.1  | 4494705 | 17-scf00437 | 17 |
| AX-158279933 | 22 | 86.322 | KV453116.1  | 4570508 | 17-scf00437 | 17 |
| AX-158279949 | 22 | 86.322 | KV453116.1  | 4595920 | 17-scf00437 | 17 |
| AX-158280202 | 22 | 86.322 | KV453116.1  | 4896280 | 17-scf00437 | 17 |
| AX-158280362 | 22 | 86.322 | KV453116.1  | 5080508 | 17-scf00437 | 17 |
| AX-157752830 | 22 | 86.322 | KV453116.1  | 5086550 | 17-scf00437 | 17 |
| AX-158280433 | 22 | 86.322 | KV453116.1  | 5181764 | 17-scf00437 | 17 |
| AX-157844536 | 22 | 86.322 | KV453116.1  | 5285330 | 17-scf00437 | 17 |

|              |    |        |            |         |             |    |
|--------------|----|--------|------------|---------|-------------|----|
| AX-158280536 | 22 | 86.322 | KV453116.1 | 5319045 | 17-scf00437 | 17 |
| AX-157724931 | 22 | 86.322 | KV453116.1 | 5332559 | 17-scf00437 | 17 |
| AX-158280783 | 22 | 86.322 | KV453116.1 | 5721891 | 17-scf00437 | 17 |
| AX-158411505 | 22 | 86.322 | KV453116.1 | 5976289 | 17-scf00437 | 17 |
| AX-158281504 | 22 | 86.322 | KV453116.1 | 6674557 | 17-scf00437 | 17 |
| AX-157844634 | 22 | 86.322 | KV453116.1 | 7143533 | 17-scf00437 | 17 |
| AX-158281776 | 22 | 86.322 | KV453116.1 | 7159938 | 17-scf00437 | 17 |
| AX-157844636 | 22 | 86.322 | KV453116.1 | 7165405 | 17-scf00437 | 17 |
| AX-157844637 | 22 | 86.322 | KV453116.1 | 7166074 | 17-scf00437 | 17 |
| AX-157749799 | 22 | 86.322 | KV453116.1 | 7166677 | 17-scf00437 | 17 |
| AX-157844638 | 22 | 86.322 | KV453116.1 | 7167930 | 17-scf00437 | 17 |
| AX-158281784 | 22 | 86.322 | KV453116.1 | 7172966 | 17-scf00437 | 17 |
| AX-158281785 | 22 | 86.322 | KV453116.1 | 7174390 | 17-scf00437 | 17 |
| AX-158281788 | 22 | 86.322 | KV453116.1 | 7177395 | 17-scf00437 | 17 |
| AX-157717537 | 22 | 86.322 | KV453116.1 | 7201253 | 17-scf00437 | 17 |
| AX-158281801 | 22 | 86.322 | KV453116.1 | 7202639 | 17-scf00437 | 17 |
| AX-157717835 | 22 | 86.322 | KV453116.1 | 7208025 | 17-scf00437 | 17 |
| AX-158281806 | 22 | 86.322 | KV453116.1 | 7209120 | 17-scf00437 | 17 |
| AX-158281809 | 22 | 86.322 | KV453116.1 | 7216321 | 17-scf00437 | 17 |
| AX-158281822 | 22 | 86.322 | KV453116.1 | 7242555 | 17-scf00437 | 17 |
| AX-157844650 | 22 | 86.322 | KV453116.1 | 7244909 | 17-scf00437 | 17 |
| AX-158281825 | 22 | 86.322 | KV453116.1 | 7247706 | 17-scf00437 | 17 |
| AX-157860150 | 22 | 86.322 | KV453116.1 | 7256631 | 17-scf00437 | 17 |
| AX-157844652 | 22 | 86.322 | KV453116.1 | 7257470 | 17-scf00437 | 17 |
| AX-158281837 | 22 | 86.322 | KV453116.1 | 7264218 | 17-scf00437 | 17 |
| AX-158281844 | 22 | 86.322 | KV453116.1 | 7287853 | 17-scf00437 | 17 |
| AX-158281847 | 22 | 86.322 | KV453116.1 | 7291404 | 17-scf00437 | 17 |
| AX-158281887 | 22 | 86.322 | KV453116.1 | 7341546 | 17-scf00437 | 17 |
| AX-158281990 | 22 | 86.322 | KV453116.1 | 7466587 | 17-scf00437 | 17 |
| AX-158282420 | 22 | 86.322 | KV453116.1 | 8011611 | 17-scf00437 | 17 |
| AX-158282644 | 22 | 86.322 | KV453116.1 | 8340162 | 17-scf00437 | 17 |
| AX-158286532 | 22 | 86.322 | KV453114.1 | 4742642 | 17-scf00439 | 17 |
| AX-158286583 | 22 | 86.322 | KV453114.1 | 4802747 | 17-scf00439 | 17 |
| AX-158277977 | 22 | 86.432 | KV453116.1 | 2044136 | 17-scf00437 | 17 |
| AX-158278730 | 22 | 86.432 | KV453116.1 | 2984066 | 17-scf00437 | 17 |
| AX-158279028 | 22 | 86.432 | KV453116.1 | 3442413 | 17-scf00437 | 17 |
| AX-158280179 | 22 | 86.432 | KV453116.1 | 4862667 | 17-scf00437 | 17 |
| AX-158281807 | 22 | 86.432 | KV453116.1 | 7209693 | 17-scf00437 | 17 |
| AX-158281821 | 22 | 86.432 | KV453116.1 | 7241836 | 17-scf00437 | 17 |
| AX-158281854 | 22 | 86.432 | KV453116.1 | 7295321 | 17-scf00437 | 17 |
| AX-158281863 | 22 | 86.432 | KV453116.1 | 7305270 | 17-scf00437 | 17 |
| AX-158281884 | 22 | 86.432 | KV453116.1 | 7338229 | 17-scf00437 | 17 |
| AX-158281952 | 22 | 86.432 | KV453116.1 | 7424567 | 17-scf00437 | 17 |
| AX-158281953 | 22 | 86.432 | KV453116.1 | 7424995 | 17-scf00437 | 17 |
| AX-157844659 | 22 | 86.434 | KV453116.1 | 7306295 | 17-scf00437 | 17 |
| AX-158276785 | 22 | 86.442 | KV453116.1 | 601123  | 17-scf00437 | 17 |
| AX-158279688 | 22 | 86.442 | KV453116.1 | 4318174 | 17-scf00437 | 17 |
| AX-158281866 | 22 | 86.442 | KV453116.1 | 7309296 | 17-scf00437 | 17 |
| AX-158279073 | 22 | 86.448 | KV453116.1 | 3487379 | 17-scf00437 | 17 |
| AX-158281868 | 22 | 86.448 | KV453116.1 | 7312549 | 17-scf00437 | 17 |
| AX-158275257 | 22 | 86.451 | KV453121.1 | 1696032 | 17-scf00435 | 17 |

|              |    |        |            |         |             |    |
|--------------|----|--------|------------|---------|-------------|----|
| AX-158279442 | 22 | 86.451 | KV453116.1 | 4069231 | 17-scf00437 | 17 |
| AX-158281874 | 22 | 86.451 | KV453116.1 | 7318418 | 17-scf00437 | 17 |
| AX-158282313 | 22 | 86.451 | KV453116.1 | 7903744 | 17-scf00437 | 17 |
| AX-158282462 | 22 | 86.451 | KV453116.1 | 8079455 | 17-scf00437 | 17 |
| AX-158283183 | 22 | 86.451 | KV453116.1 | 9047522 | 17-scf00437 | 17 |
| AX-158281882 | 22 | 86.452 | KV453116.1 | 7332249 | 17-scf00437 | 17 |
| AX-158281883 | 22 | 86.497 | KV453116.1 | 7334686 | 17-scf00437 | 17 |
| AX-157723136 | 22 | 86.556 | KV453116.1 | 7367855 | 17-scf00437 | 17 |
| AX-158274333 | 22 | 86.559 | KV453121.1 | 494881  | 17-scf00435 | 17 |
| AX-158276653 | 22 | 86.559 | KV453116.1 | 419108  | 17-scf00437 | 17 |
| AX-158280495 | 22 | 86.559 | KV453116.1 | 5264528 | 17-scf00437 | 17 |
| AX-158281915 | 22 | 86.559 | KV453116.1 | 7376165 | 17-scf00437 | 17 |
| AX-158281916 | 22 | 86.559 | KV453116.1 | 7376922 | 17-scf00437 | 17 |
| AX-158281932 | 22 | 86.559 | KV453116.1 | 7400494 | 17-scf00437 | 17 |
| AX-158281987 | 22 | 86.559 | KV453116.1 | 7462278 | 17-scf00437 | 17 |
| AX-157844666 | 22 | 86.559 | KV453116.1 | 7462396 | 17-scf00437 | 17 |
| AX-158282057 | 22 | 86.559 | KV453116.1 | 7534160 | 17-scf00437 | 17 |
| AX-158282811 | 22 | 86.559 | KV453116.1 | 8573965 | 17-scf00437 | 17 |
| AX-158281956 | 22 | 86.623 | KV453116.1 | 7428900 | 17-scf00437 | 17 |
| AX-158276619 | 22 | 86.691 | KV453116.1 | 368630  | 17-scf00437 | 17 |
| AX-158277306 | 22 | 86.691 | KV453116.1 | 1204481 | 17-scf00437 | 17 |
| AX-158278419 | 22 | 86.691 | KV453116.1 | 2602912 | 17-scf00437 | 17 |
| AX-158278509 | 22 | 86.691 | KV453116.1 | 2703200 | 17-scf00437 | 17 |
| AX-157844450 | 22 | 86.691 | KV453116.1 | 3770754 | 17-scf00437 | 17 |
| AX-158279239 | 22 | 86.691 | KV453116.1 | 3774045 | 17-scf00437 | 17 |
| AX-158279549 | 22 | 86.691 | KV453116.1 | 4183354 | 17-scf00437 | 17 |
| AX-158279627 | 22 | 86.691 | KV453116.1 | 4253488 | 17-scf00437 | 17 |
| AX-158280190 | 22 | 86.691 | KV453116.1 | 4882427 | 17-scf00437 | 17 |
| AX-158280457 | 22 | 86.691 | KV453116.1 | 5219310 | 17-scf00437 | 17 |
| AX-158280534 | 22 | 86.691 | KV453116.1 | 5317261 | 17-scf00437 | 17 |
| AX-158281845 | 22 | 86.691 | KV453116.1 | 7290654 | 17-scf00437 | 17 |
| AX-158281954 | 22 | 86.691 | KV453116.1 | 7425951 | 17-scf00437 | 17 |
| AX-158281955 | 22 | 86.691 | KV453116.1 | 7427628 | 17-scf00437 | 17 |
| AX-158281959 | 22 | 86.691 | KV453116.1 | 7432251 | 17-scf00437 | 17 |
| AX-157753405 | 22 | 86.691 | KV453116.1 | 7436173 | 17-scf00437 | 17 |
| AX-158281966 | 22 | 86.691 | KV453116.1 | 7443246 | 17-scf00437 | 17 |
| AX-158281975 | 22 | 86.691 | KV453116.1 | 7451173 | 17-scf00437 | 17 |
| AX-158281979 | 22 | 86.691 | KV453116.1 | 7452778 | 17-scf00437 | 17 |
| AX-157753721 | 22 | 86.691 | KV453116.1 | 7454336 | 17-scf00437 | 17 |
| AX-158281985 | 22 | 86.691 | KV453116.1 | 7460800 | 17-scf00437 | 17 |
| AX-158282002 | 22 | 86.691 | KV453116.1 | 7479294 | 17-scf00437 | 17 |
| AX-158282022 | 22 | 86.691 | KV453116.1 | 7497259 | 17-scf00437 | 17 |
| AX-158282029 | 22 | 86.691 | KV453116.1 | 7501306 | 17-scf00437 | 17 |
| AX-158282063 | 22 | 86.691 | KV453116.1 | 7541321 | 17-scf00437 | 17 |
| AX-158282070 | 22 | 86.691 | KV453116.1 | 7551434 | 17-scf00437 | 17 |
| AX-157699823 | 22 | 86.691 | KV453116.1 | 8061235 | 17-scf00437 | 17 |
| AX-158286533 | 22 | 86.691 | KV453114.1 | 4744114 | 17-scf00439 | 17 |
| AX-158281998 | 22 | 86.745 | KV453116.1 | 7473947 | 17-scf00437 | 17 |
| AX-157753532 | 22 | 86.779 | KV453116.1 | 7474834 | 17-scf00437 | 17 |
| AX-158416823 | 22 | 86.823 | KV453116.1 | 1853282 | 17-scf00437 | 17 |
| AX-157751841 | 22 | 86.823 | KV453116.1 | 7472415 | 17-scf00437 | 17 |

|              |    |        |            |         |             |    |
|--------------|----|--------|------------|---------|-------------|----|
| AX-158282001 | 22 | 86.823 | KV453116.1 | 7478513 | 17-scf00437 | 17 |
| AX-158282005 | 22 | 86.823 | KV453116.1 | 7482788 | 17-scf00437 | 17 |
| AX-158282008 | 22 | 86.823 | KV453116.1 | 7485584 | 17-scf00437 | 17 |
| AX-158282012 | 22 | 86.823 | KV453116.1 | 7486910 | 17-scf00437 | 17 |
| AX-158282026 | 22 | 86.823 | KV453116.1 | 7499941 | 17-scf00437 | 17 |
| AX-157844667 | 22 | 86.823 | KV453116.1 | 7510212 | 17-scf00437 | 17 |
| AX-158282044 | 22 | 86.823 | KV453116.1 | 7519465 | 17-scf00437 | 17 |
| AX-157844671 | 22 | 86.823 | KV453116.1 | 7523038 | 17-scf00437 | 17 |
| AX-158282047 | 22 | 86.823 | KV453116.1 | 7523680 | 17-scf00437 | 17 |
| AX-158282052 | 22 | 86.823 | KV453116.1 | 7529619 | 17-scf00437 | 17 |
| AX-157844120 | 22 | 87.087 | KV453116.1 | 26283   | 17-scf00437 | 17 |
| AX-158278490 | 22 | 87.087 | KV453116.1 | 2674139 | 17-scf00437 | 17 |
| AX-158280004 | 22 | 87.087 | KV453116.1 | 4657935 | 17-scf00437 | 17 |
| AX-158280293 | 22 | 87.087 | KV453116.1 | 4995040 | 17-scf00437 | 17 |
| AX-158281024 | 22 | 87.087 | KV453116.1 | 6011318 | 17-scf00437 | 17 |
| AX-158282013 | 22 | 87.087 | KV453116.1 | 7487375 | 17-scf00437 | 17 |
| AX-158282088 | 22 | 87.087 | KV453116.1 | 7576399 | 17-scf00437 | 17 |
| AX-157844678 | 22 | 87.087 | KV453116.1 | 7581187 | 17-scf00437 | 17 |
| AX-158282094 | 22 | 87.087 | KV453116.1 | 7583383 | 17-scf00437 | 17 |
| AX-158282103 | 22 | 87.087 | KV453116.1 | 7599013 | 17-scf00437 | 17 |
| AX-157740254 | 22 | 87.087 | KV453116.1 | 7600680 | 17-scf00437 | 17 |
| AX-157844682 | 22 | 87.087 | KV453116.1 | 7602547 | 17-scf00437 | 17 |
| AX-158282104 | 22 | 87.087 | KV453116.1 | 7603628 | 17-scf00437 | 17 |
| AX-157756573 | 22 | 87.087 | KV453116.1 | 7614690 | 17-scf00437 | 17 |
| AX-157746326 | 22 | 87.087 | KV453116.1 | 7625925 | 17-scf00437 | 17 |
| AX-158282126 | 22 | 87.087 | KV453116.1 | 7641770 | 17-scf00437 | 17 |
| AX-158282129 | 22 | 87.087 | KV453116.1 | 7644728 | 17-scf00437 | 17 |
| AX-158282130 | 22 | 87.087 | KV453116.1 | 7646150 | 17-scf00437 | 17 |
| AX-158282131 | 22 | 87.087 | KV453116.1 | 7646781 | 17-scf00437 | 17 |
| AX-158282132 | 22 | 87.087 | KV453116.1 | 7647593 | 17-scf00437 | 17 |
| AX-158282134 | 22 | 87.087 | KV453116.1 | 7648710 | 17-scf00437 | 17 |
| AX-158282135 | 22 | 87.087 | KV453116.1 | 7651334 | 17-scf00437 | 17 |
| AX-158282140 | 22 | 87.087 | KV453116.1 | 7658548 | 17-scf00437 | 17 |
| AX-157722529 | 22 | 87.087 | KV453116.1 | 7658786 | 17-scf00437 | 17 |
| AX-158282141 | 22 | 87.087 | KV453116.1 | 7659461 | 17-scf00437 | 17 |
| AX-158282144 | 22 | 87.087 | KV453116.1 | 7665238 | 17-scf00437 | 17 |
| AX-158282146 | 22 | 87.087 | KV453116.1 | 7670071 | 17-scf00437 | 17 |
| AX-158282148 | 22 | 87.087 | KV453116.1 | 7675965 | 17-scf00437 | 17 |
| AX-158282443 | 22 | 87.087 | KV453116.1 | 8055422 | 17-scf00437 | 17 |
| AX-158282470 | 22 | 87.087 | KV453116.1 | 8088857 | 17-scf00437 | 17 |
| AX-157844721 | 22 | 87.087 | KV453116.1 | 8090063 | 17-scf00437 | 17 |
| AX-158282472 | 22 | 87.087 | KV453116.1 | 8090874 | 17-scf00437 | 17 |
| AX-158282478 | 22 | 87.087 | KV453116.1 | 8107531 | 17-scf00437 | 17 |
| AX-158282482 | 22 | 87.087 | KV453116.1 | 8110002 | 17-scf00437 | 17 |
| AX-158282487 | 22 | 87.087 | KV453116.1 | 8115001 | 17-scf00437 | 17 |
| AX-158282491 | 22 | 87.087 | KV453116.1 | 8118975 | 17-scf00437 | 17 |
| AX-158276421 | 22 | 87.141 | KV453116.1 | 111684  | 17-scf00437 | 17 |
| AX-158282142 | 22 | 87.141 | KV453116.1 | 7662729 | 17-scf00437 | 17 |
| AX-158282033 | 22 | 87.196 | KV453116.1 | 7504585 | 17-scf00437 | 17 |
| AX-158282121 | 22 | 87.196 | KV453116.1 | 7632233 | 17-scf00437 | 17 |
| AX-158282151 | 22 | 87.196 | KV453116.1 | 7682473 | 17-scf00437 | 17 |

|              |    |        |            |         |             |    |
|--------------|----|--------|------------|---------|-------------|----|
| AX-158282154 | 22 | 87.196 | KV453116.1 | 7692037 | 17-scf00437 | 17 |
| AX-158282169 | 22 | 87.196 | KV453116.1 | 7710205 | 17-scf00437 | 17 |
| AX-157844689 | 22 | 87.196 | KV453116.1 | 7717389 | 17-scf00437 | 17 |
| AX-158282198 | 22 | 87.196 | KV453116.1 | 7737743 | 17-scf00437 | 17 |
| AX-158282227 | 22 | 87.196 | KV453116.1 | 7781302 | 17-scf00437 | 17 |
| AX-158282244 | 22 | 87.196 | KV453116.1 | 7802459 | 17-scf00437 | 17 |
| AX-158381192 | 22 | 87.196 | KV453116.1 | 7839044 | 17-scf00437 | 17 |
| AX-158282279 | 22 | 87.196 | KV453116.1 | 7860520 | 17-scf00437 | 17 |
| AX-157714847 | 22 | 87.196 | KV453116.1 | 7873293 | 17-scf00437 | 17 |
| AX-158282291 | 22 | 87.196 | KV453116.1 | 7874588 | 17-scf00437 | 17 |
| AX-157708747 | 22 | 87.196 | KV453116.1 | 7936177 | 17-scf00437 | 17 |
| AX-158282353 | 22 | 87.196 | KV453116.1 | 7937637 | 17-scf00437 | 17 |
| AX-158282447 | 22 | 87.196 | KV453116.1 | 8063680 | 17-scf00437 | 17 |
| AX-157844735 | 22 | 87.196 | KV453116.1 | 8270155 | 17-scf00437 | 17 |
| AX-158282636 | 22 | 87.196 | KV453116.1 | 8331029 | 17-scf00437 | 17 |
| AX-158282206 | 22 | 87.232 | KV453116.1 | 7754205 | 17-scf00437 | 17 |
| AX-158282235 | 22 | 87.271 | KV453116.1 | 7791744 | 17-scf00437 | 17 |
| AX-158276450 | 22 | 87.306 | KV453116.1 | 145781  | 17-scf00437 | 17 |
| AX-158276509 | 22 | 87.306 | KV453116.1 | 225738  | 17-scf00437 | 17 |
| AX-158276754 | 22 | 87.306 | KV453116.1 | 563601  | 17-scf00437 | 17 |
| AX-158276928 | 22 | 87.306 | KV453116.1 | 786403  | 17-scf00437 | 17 |
| AX-158277356 | 22 | 87.306 | KV453116.1 | 1248066 | 17-scf00437 | 17 |
| AX-158277483 | 22 | 87.306 | KV453116.1 | 1389854 | 17-scf00437 | 17 |
| AX-158277630 | 22 | 87.306 | KV453116.1 | 1536167 | 17-scf00437 | 17 |
| AX-158277633 | 22 | 87.306 | KV453116.1 | 1542818 | 17-scf00437 | 17 |
| AX-158277705 | 22 | 87.306 | KV453116.1 | 1623620 | 17-scf00437 | 17 |
| AX-158277949 | 22 | 87.306 | KV453116.1 | 1997576 | 17-scf00437 | 17 |
| AX-158278076 | 22 | 87.306 | KV453116.1 | 2194430 | 17-scf00437 | 17 |
| AX-158395071 | 22 | 87.306 | KV453116.1 | 2246697 | 17-scf00437 | 17 |
| AX-158278171 | 22 | 87.306 | KV453116.1 | 2304707 | 17-scf00437 | 17 |
| AX-158278172 | 22 | 87.306 | KV453116.1 | 2305549 | 17-scf00437 | 17 |
| AX-158278324 | 22 | 87.306 | KV453116.1 | 2504775 | 17-scf00437 | 17 |
| AX-158278484 | 22 | 87.306 | KV453116.1 | 2669137 | 17-scf00437 | 17 |
| AX-157844340 | 22 | 87.306 | KV453116.1 | 2698888 | 17-scf00437 | 17 |
| AX-158278533 | 22 | 87.306 | KV453116.1 | 2725947 | 17-scf00437 | 17 |
| AX-157774083 | 22 | 87.306 | KV453116.1 | 2752329 | 17-scf00437 | 17 |
| AX-158278725 | 22 | 87.306 | KV453116.1 | 2979601 | 17-scf00437 | 17 |
| AX-158278798 | 22 | 87.306 | KV453116.1 | 3086737 | 17-scf00437 | 17 |
| AX-158278951 | 22 | 87.306 | KV453116.1 | 3346924 | 17-scf00437 | 17 |
| AX-158278952 | 22 | 87.306 | KV453116.1 | 3348449 | 17-scf00437 | 17 |
| AX-158278981 | 22 | 87.306 | KV453116.1 | 3388786 | 17-scf00437 | 17 |
| AX-158279096 | 22 | 87.306 | KV453116.1 | 3508048 | 17-scf00437 | 17 |
| AX-157844437 | 22 | 87.306 | KV453116.1 | 3558582 | 17-scf00437 | 17 |
| AX-158279284 | 22 | 87.306 | KV453116.1 | 3848687 | 17-scf00437 | 17 |
| AX-158279366 | 22 | 87.306 | KV453116.1 | 4009080 | 17-scf00437 | 17 |
| AX-158416870 | 22 | 87.306 | KV453116.1 | 4059127 | 17-scf00437 | 17 |
| AX-158279516 | 22 | 87.306 | KV453116.1 | 4149140 | 17-scf00437 | 17 |
| AX-158279608 | 22 | 87.306 | KV453116.1 | 4239372 | 17-scf00437 | 17 |
| AX-158279696 | 22 | 87.306 | KV453116.1 | 4324391 | 17-scf00437 | 17 |
| AX-158279742 | 22 | 87.306 | KV453116.1 | 4373061 | 17-scf00437 | 17 |
| AX-158279966 | 22 | 87.306 | KV453116.1 | 4622965 | 17-scf00437 | 17 |

|              |    |        |            |         |             |    |
|--------------|----|--------|------------|---------|-------------|----|
| AX-158280019 | 22 | 87.306 | KV453116.1 | 4673814 | 17-scf00437 | 17 |
| AX-158280031 | 22 | 87.306 | KV453116.1 | 4680777 | 17-scf00437 | 17 |
| AX-157873146 | 22 | 87.306 | KV453116.1 | 4704397 | 17-scf00437 | 17 |
| AX-158280153 | 22 | 87.306 | KV453116.1 | 4831008 | 17-scf00437 | 17 |
| AX-158280276 | 22 | 87.306 | KV453116.1 | 4975344 | 17-scf00437 | 17 |
| AX-157844529 | 22 | 87.306 | KV453116.1 | 5107717 | 17-scf00437 | 17 |
| AX-158280455 | 22 | 87.306 | KV453116.1 | 5217885 | 17-scf00437 | 17 |
| AX-158280481 | 22 | 87.306 | KV453116.1 | 5242197 | 17-scf00437 | 17 |
| AX-158280493 | 22 | 87.306 | KV453116.1 | 5258665 | 17-scf00437 | 17 |
| AX-158280598 | 22 | 87.306 | KV453116.1 | 5410606 | 17-scf00437 | 17 |
| AX-158280704 | 22 | 87.306 | KV453116.1 | 5623564 | 17-scf00437 | 17 |
| AX-158280810 | 22 | 87.306 | KV453116.1 | 5750546 | 17-scf00437 | 17 |
| AX-158280860 | 22 | 87.306 | KV453116.1 | 5807421 | 17-scf00437 | 17 |
| AX-158281026 | 22 | 87.306 | KV453116.1 | 6012496 | 17-scf00437 | 17 |
| AX-158281064 | 22 | 87.306 | KV453116.1 | 6057591 | 17-scf00437 | 17 |
| AX-158281163 | 22 | 87.306 | KV453116.1 | 6167879 | 17-scf00437 | 17 |
| AX-158281251 | 22 | 87.306 | KV453116.1 | 6270712 | 17-scf00437 | 17 |
| AX-158281650 | 22 | 87.306 | KV453116.1 | 6927634 | 17-scf00437 | 17 |
| AX-157844618 | 22 | 87.306 | KV453116.1 | 6939479 | 17-scf00437 | 17 |
| AX-158281692 | 22 | 87.306 | KV453116.1 | 6981119 | 17-scf00437 | 17 |
| AX-158281753 | 22 | 87.306 | KV453116.1 | 7087839 | 17-scf00437 | 17 |
| AX-157844629 | 22 | 87.306 | KV453116.1 | 7110766 | 17-scf00437 | 17 |
| AX-157844662 | 22 | 87.306 | KV453116.1 | 7351337 | 17-scf00437 | 17 |
| AX-158416952 | 22 | 87.306 | KV453116.1 | 7505707 | 17-scf00437 | 17 |
| AX-158282090 | 22 | 87.306 | KV453116.1 | 7577445 | 17-scf00437 | 17 |
| AX-157844677 | 22 | 87.306 | KV453116.1 | 7579186 | 17-scf00437 | 17 |
| AX-157867562 | 22 | 87.306 | KV453116.1 | 7582973 | 17-scf00437 | 17 |
| AX-157749156 | 22 | 87.306 | KV453116.1 | 7618140 | 17-scf00437 | 17 |
| AX-158282114 | 22 | 87.306 | KV453116.1 | 7624844 | 17-scf00437 | 17 |
| AX-158282163 | 22 | 87.306 | KV453116.1 | 7705078 | 17-scf00437 | 17 |
| AX-157771012 | 22 | 87.306 | KV453116.1 | 7705694 | 17-scf00437 | 17 |
| AX-158282189 | 22 | 87.306 | KV453116.1 | 7728662 | 17-scf00437 | 17 |
| AX-157844691 | 22 | 87.306 | KV453116.1 | 7747116 | 17-scf00437 | 17 |
| AX-157754025 | 22 | 87.306 | KV453116.1 | 7794037 | 17-scf00437 | 17 |
| AX-157844694 | 22 | 87.306 | KV453116.1 | 7794609 | 17-scf00437 | 17 |
| AX-158282242 | 22 | 87.306 | KV453116.1 | 7799924 | 17-scf00437 | 17 |
| AX-158282247 | 22 | 87.306 | KV453116.1 | 7807550 | 17-scf00437 | 17 |
| AX-158282264 | 22 | 87.306 | KV453116.1 | 7832311 | 17-scf00437 | 17 |
| AX-158282271 | 22 | 87.306 | KV453116.1 | 7840906 | 17-scf00437 | 17 |
| AX-158282272 | 22 | 87.306 | KV453116.1 | 7844695 | 17-scf00437 | 17 |
| AX-158416961 | 22 | 87.306 | KV453116.1 | 7849062 | 17-scf00437 | 17 |
| AX-158282290 | 22 | 87.306 | KV453116.1 | 7874263 | 17-scf00437 | 17 |
| AX-158282294 | 22 | 87.306 | KV453116.1 | 7881709 | 17-scf00437 | 17 |
| AX-158282297 | 22 | 87.306 | KV453116.1 | 7884754 | 17-scf00437 | 17 |
| AX-158282299 | 22 | 87.306 | KV453116.1 | 7887303 | 17-scf00437 | 17 |
| AX-158282306 | 22 | 87.306 | KV453116.1 | 7894940 | 17-scf00437 | 17 |
| AX-158282307 | 22 | 87.306 | KV453116.1 | 7895803 | 17-scf00437 | 17 |
| AX-158282309 | 22 | 87.306 | KV453116.1 | 7898006 | 17-scf00437 | 17 |
| AX-158282346 | 22 | 87.306 | KV453116.1 | 7932281 | 17-scf00437 | 17 |
| AX-158282350 | 22 | 87.306 | KV453116.1 | 7935500 | 17-scf00437 | 17 |
| AX-158282351 | 22 | 87.306 | KV453116.1 | 7936016 | 17-scf00437 | 17 |



|              |    |        |            |         |             |    |
|--------------|----|--------|------------|---------|-------------|----|
| AX-158282375 | 22 | 87.306 | KV453116.1 | 7957894 | 17-scf00437 | 17 |
| AX-158282382 | 22 | 87.306 | KV453116.1 | 7965063 | 17-scf00437 | 17 |
| AX-158282387 | 22 | 87.306 | KV453116.1 | 7971043 | 17-scf00437 | 17 |
| AX-158282390 | 22 | 87.306 | KV453116.1 | 7973942 | 17-scf00437 | 17 |
| AX-158282393 | 22 | 87.306 | KV453116.1 | 7978784 | 17-scf00437 | 17 |
| AX-157844709 | 22 | 87.306 | KV453116.1 | 7980907 | 17-scf00437 | 17 |
| AX-157844710 | 22 | 87.306 | KV453116.1 | 7981116 | 17-scf00437 | 17 |
| AX-158282395 | 22 | 87.306 | KV453116.1 | 7982579 | 17-scf00437 | 17 |
| AX-158282401 | 22 | 87.306 | KV453116.1 | 7987329 | 17-scf00437 | 17 |
| AX-158282408 | 22 | 87.306 | KV453116.1 | 7993020 | 17-scf00437 | 17 |
| AX-158282425 | 22 | 87.306 | KV453116.1 | 8018254 | 17-scf00437 | 17 |
| AX-158282432 | 22 | 87.306 | KV453116.1 | 8025792 | 17-scf00437 | 17 |
| AX-158282434 | 22 | 87.306 | KV453116.1 | 8029725 | 17-scf00437 | 17 |
| AX-157773328 | 22 | 87.306 | KV453116.1 | 8051886 | 17-scf00437 | 17 |
| AX-158282442 | 22 | 87.306 | KV453116.1 | 8053576 | 17-scf00437 | 17 |
| AX-158282444 | 22 | 87.306 | KV453116.1 | 8055913 | 17-scf00437 | 17 |
| AX-158282454 | 22 | 87.306 | KV453116.1 | 8069756 | 17-scf00437 | 17 |
| AX-158282455 | 22 | 87.306 | KV453116.1 | 8070126 | 17-scf00437 | 17 |
| AX-158282464 | 22 | 87.306 | KV453116.1 | 8083765 | 17-scf00437 | 17 |
| AX-158282465 | 22 | 87.306 | KV453116.1 | 8084516 | 17-scf00437 | 17 |
| AX-158282474 | 22 | 87.306 | KV453116.1 | 8095261 | 17-scf00437 | 17 |
| AX-157844722 | 22 | 87.306 | KV453116.1 | 8105628 | 17-scf00437 | 17 |
| AX-158282513 | 22 | 87.306 | KV453116.1 | 8155568 | 17-scf00437 | 17 |
| AX-157772894 | 22 | 87.306 | KV453116.1 | 8163406 | 17-scf00437 | 17 |
| AX-158282520 | 22 | 87.306 | KV453116.1 | 8164997 | 17-scf00437 | 17 |
| AX-158282522 | 22 | 87.306 | KV453116.1 | 8167488 | 17-scf00437 | 17 |
| AX-158282584 | 22 | 87.306 | KV453116.1 | 8272543 | 17-scf00437 | 17 |
| AX-158282598 | 22 | 87.306 | KV453116.1 | 8288709 | 17-scf00437 | 17 |
| AX-158282604 | 22 | 87.306 | KV453116.1 | 8293621 | 17-scf00437 | 17 |
| AX-158282625 | 22 | 87.306 | KV453116.1 | 8317465 | 17-scf00437 | 17 |
| AX-158282638 | 22 | 87.306 | KV453116.1 | 8333526 | 17-scf00437 | 17 |
| AX-158282639 | 22 | 87.306 | KV453116.1 | 8334013 | 17-scf00437 | 17 |
| AX-158282641 | 22 | 87.306 | KV453116.1 | 8338947 | 17-scf00437 | 17 |
| AX-158282643 | 22 | 87.306 | KV453116.1 | 8339654 | 17-scf00437 | 17 |
| AX-158282645 | 22 | 87.306 | KV453116.1 | 8340636 | 17-scf00437 | 17 |
| AX-158282646 | 22 | 87.306 | KV453116.1 | 8340954 | 17-scf00437 | 17 |
| AX-158282647 | 22 | 87.306 | KV453116.1 | 8342167 | 17-scf00437 | 17 |
| AX-158282649 | 22 | 87.306 | KV453116.1 | 8349272 | 17-scf00437 | 17 |
| AX-158282654 | 22 | 87.306 | KV453116.1 | 8358795 | 17-scf00437 | 17 |
| AX-157860153 | 22 | 87.306 | KV453116.1 | 8365497 | 17-scf00437 | 17 |
| AX-158282665 | 22 | 87.306 | KV453116.1 | 8373142 | 17-scf00437 | 17 |
| AX-158282668 | 22 | 87.306 | KV453116.1 | 8375241 | 17-scf00437 | 17 |
| AX-158282675 | 22 | 87.306 | KV453116.1 | 8384259 | 17-scf00437 | 17 |
| AX-158282680 | 22 | 87.306 | KV453116.1 | 8387586 | 17-scf00437 | 17 |
| AX-157844750 | 22 | 87.306 | KV453116.1 | 8393526 | 17-scf00437 | 17 |
| AX-157844755 | 22 | 87.306 | KV453116.1 | 8400686 | 17-scf00437 | 17 |
| AX-158283039 | 22 | 87.306 | KV453116.1 | 8849707 | 17-scf00437 | 17 |
| AX-158283062 | 22 | 87.306 | KV453116.1 | 8869686 | 17-scf00437 | 17 |
| AX-158286407 | 22 | 87.306 | KV453114.1 | 4614845 | 17-scf00439 | 17 |
| AX-157701092 | 22 | 87.306 | KV453114.1 | 4757078 | 17-scf00439 | 17 |
| AX-157845109 | 22 | 87.306 | KV453114.1 | 4769456 | 17-scf00439 | 17 |

|              |    |        |            |         |             |    |
|--------------|----|--------|------------|---------|-------------|----|
| AX-158287674 | 22 | 87.306 | KV453123.1 | 228632  | 17-scf00635 | 17 |
| AX-158282688 | 22 | 87.415 | KV453116.1 | 8407451 | 17-scf00437 | 17 |
| AX-158278560 | 22 | 87.47  | KV453116.1 | 2758623 | 17-scf00437 | 17 |
| AX-158278632 | 22 | 87.47  | KV453116.1 | 2849639 | 17-scf00437 | 17 |
| AX-158278942 | 22 | 87.47  | KV453116.1 | 3336386 | 17-scf00437 | 17 |
| AX-158281121 | 22 | 87.47  | KV453116.1 | 6112580 | 17-scf00437 | 17 |
| AX-158281270 | 22 | 87.47  | KV453116.1 | 6292343 | 17-scf00437 | 17 |
| AX-158281350 | 22 | 87.47  | KV453116.1 | 6415767 | 17-scf00437 | 17 |
| AX-158281443 | 22 | 87.47  | KV453116.1 | 6557715 | 17-scf00437 | 17 |
| AX-158281444 | 22 | 87.47  | KV453116.1 | 6558924 | 17-scf00437 | 17 |
| AX-158282043 | 22 | 87.47  | KV453116.1 | 7518818 | 17-scf00437 | 17 |
| AX-158282693 | 22 | 87.47  | KV453116.1 | 8414267 | 17-scf00437 | 17 |
| AX-157844757 | 22 | 87.47  | KV453116.1 | 8414673 | 17-scf00437 | 17 |
| AX-158286377 | 22 | 87.47  | KV453114.1 | 4590290 | 17-scf00439 | 17 |
| AX-158286437 | 22 | 87.47  | KV453114.1 | 4649473 | 17-scf00439 | 17 |
| AX-158286589 | 22 | 87.47  | KV453114.1 | 4806977 | 17-scf00439 | 17 |
| AX-158276401 | 22 | 87.524 | KV453116.1 | 89061   | 17-scf00437 | 17 |
| AX-158277365 | 22 | 87.524 | KV453116.1 | 1262417 | 17-scf00437 | 17 |
| AX-158277490 | 22 | 87.524 | KV453116.1 | 1397863 | 17-scf00437 | 17 |
| AX-158277496 | 22 | 87.524 | KV453116.1 | 1407684 | 17-scf00437 | 17 |
| AX-157844271 | 22 | 87.524 | KV453116.1 | 2037991 | 17-scf00437 | 17 |
| AX-158278558 | 22 | 87.524 | KV453116.1 | 2755189 | 17-scf00437 | 17 |
| AX-158278661 | 22 | 87.524 | KV453116.1 | 2885949 | 17-scf00437 | 17 |
| AX-157844381 | 22 | 87.524 | KV453116.1 | 2977934 | 17-scf00437 | 17 |
| AX-158279165 | 22 | 87.524 | KV453116.1 | 3602340 | 17-scf00437 | 17 |
| AX-158279351 | 22 | 87.524 | KV453116.1 | 3986703 | 17-scf00437 | 17 |
| AX-158279704 | 22 | 87.524 | KV453116.1 | 4334871 | 17-scf00437 | 17 |
| AX-158280302 | 22 | 87.524 | KV453116.1 | 5008221 | 17-scf00437 | 17 |
| AX-158280342 | 22 | 87.524 | KV453116.1 | 5059714 | 17-scf00437 | 17 |
| AX-157844530 | 22 | 87.524 | KV453116.1 | 5108373 | 17-scf00437 | 17 |
| AX-157752054 | 22 | 87.524 | KV453116.1 | 7231143 | 17-scf00437 | 17 |
| AX-158282304 | 22 | 87.524 | KV453116.1 | 7893122 | 17-scf00437 | 17 |
| AX-158282383 | 22 | 87.524 | KV453116.1 | 7965678 | 17-scf00437 | 17 |
| AX-158282396 | 22 | 87.524 | KV453116.1 | 7982905 | 17-scf00437 | 17 |
| AX-157844712 | 22 | 87.524 | KV453116.1 | 7987842 | 17-scf00437 | 17 |
| AX-158282402 | 22 | 87.524 | KV453116.1 | 7988092 | 17-scf00437 | 17 |
| AX-158282409 | 22 | 87.524 | KV453116.1 | 7993975 | 17-scf00437 | 17 |
| AX-157702384 | 22 | 87.524 | KV453116.1 | 8023530 | 17-scf00437 | 17 |
| AX-158282600 | 22 | 87.524 | KV453116.1 | 8289678 | 17-scf00437 | 17 |
| AX-158282601 | 22 | 87.524 | KV453116.1 | 8290486 | 17-scf00437 | 17 |
| AX-158282657 | 22 | 87.524 | KV453116.1 | 8360880 | 17-scf00437 | 17 |
| AX-158282671 | 22 | 87.524 | KV453116.1 | 8378714 | 17-scf00437 | 17 |
| AX-157844751 | 22 | 87.524 | KV453116.1 | 8395005 | 17-scf00437 | 17 |
| AX-158282702 | 22 | 87.524 | KV453116.1 | 8430254 | 17-scf00437 | 17 |
| AX-158282703 | 22 | 87.524 | KV453116.1 | 8431118 | 17-scf00437 | 17 |
| AX-158282705 | 22 | 87.524 | KV453116.1 | 8433978 | 17-scf00437 | 17 |
| AX-158282722 | 22 | 87.524 | KV453116.1 | 8452313 | 17-scf00437 | 17 |
| AX-158282724 | 22 | 87.524 | KV453116.1 | 8454537 | 17-scf00437 | 17 |
| AX-158282727 | 22 | 87.524 | KV453116.1 | 8457154 | 17-scf00437 | 17 |
| AX-157710754 | 22 | 87.524 | KV453116.1 | 8462120 | 17-scf00437 | 17 |
| AX-158282736 | 22 | 87.524 | KV453116.1 | 8470343 | 17-scf00437 | 17 |

|              |    |        |            |         |             |    |
|--------------|----|--------|------------|---------|-------------|----|
| AX-158282739 | 22 | 87.524 | KV453116.1 | 8477183 | 17-scf00437 | 17 |
| AX-157742208 | 22 | 87.524 | KV453116.1 | 8486311 | 17-scf00437 | 17 |
| AX-157750084 | 22 | 87.524 | KV453116.1 | 8486891 | 17-scf00437 | 17 |
| AX-158282747 | 22 | 87.524 | KV453116.1 | 8489708 | 17-scf00437 | 17 |
| AX-157774688 | 22 | 87.524 | KV453116.1 | 8555769 | 17-scf00437 | 17 |
| AX-157845077 | 22 | 87.524 | KV453114.1 | 4517997 | 17-scf00439 | 17 |
| AX-158286358 | 22 | 87.524 | KV453114.1 | 4572605 | 17-scf00439 | 17 |
| AX-158286411 | 22 | 87.524 | KV453114.1 | 4617252 | 17-scf00439 | 17 |
| AX-158286421 | 22 | 87.524 | KV453114.1 | 4628501 | 17-scf00439 | 17 |
| AX-158286568 | 22 | 87.524 | KV453114.1 | 4786306 | 17-scf00439 | 17 |
| AX-158282748 | 22 | 87.526 | KV453116.1 | 8490900 | 17-scf00437 | 17 |
| AX-157772460 | 22 | 87.528 | KV453116.1 | 8502243 | 17-scf00437 | 17 |
| AX-158282758 | 22 | 87.531 | KV453116.1 | 8504940 | 17-scf00437 | 17 |
| AX-158278718 | 22 | 87.919 | KV453116.1 | 2969318 | 17-scf00437 | 17 |
| AX-158278784 | 22 | 87.919 | KV453116.1 | 3065985 | 17-scf00437 | 17 |
| AX-158278988 | 22 | 87.919 | KV453116.1 | 3396580 | 17-scf00437 | 17 |
| AX-158280115 | 22 | 87.919 | KV453116.1 | 4787663 | 17-scf00437 | 17 |
| AX-157723305 | 22 | 87.919 | KV453116.1 | 4897057 | 17-scf00437 | 17 |
| AX-157754802 | 22 | 87.919 | KV453116.1 | 5970651 | 17-scf00437 | 17 |
| AX-157725675 | 22 | 87.919 | KV453116.1 | 6480473 | 17-scf00437 | 17 |
| AX-158281691 | 22 | 87.919 | KV453116.1 | 6978347 | 17-scf00437 | 17 |
| AX-158282677 | 22 | 87.919 | KV453116.1 | 8385013 | 17-scf00437 | 17 |
| AX-158282760 | 22 | 87.919 | KV453116.1 | 8507049 | 17-scf00437 | 17 |
| AX-158282776 | 22 | 87.922 | KV453116.1 | 8525224 | 17-scf00437 | 17 |
| AX-158282777 | 22 | 87.922 | KV453116.1 | 8526602 | 17-scf00437 | 17 |
| AX-158282778 | 22 | 87.922 | KV453116.1 | 8527716 | 17-scf00437 | 17 |
| AX-158282779 | 22 | 87.922 | KV453116.1 | 8529259 | 17-scf00437 | 17 |
| AX-158274841 | 22 | 87.925 | KV453121.1 | 1179640 | 17-scf00435 | 17 |
| AX-158276878 | 22 | 87.925 | KV453116.1 | 720599  | 17-scf00437 | 17 |
| AX-158277045 | 22 | 87.925 | KV453116.1 | 934991  | 17-scf00437 | 17 |
| AX-157873064 | 22 | 87.925 | KV453116.1 | 940373  | 17-scf00437 | 17 |
| AX-158277171 | 22 | 87.925 | KV453116.1 | 1066791 | 17-scf00437 | 17 |
| AX-158277178 | 22 | 87.925 | KV453116.1 | 1076261 | 17-scf00437 | 17 |
| AX-158395039 | 22 | 87.925 | KV453116.1 | 1179735 | 17-scf00437 | 17 |
| AX-158277380 | 22 | 87.925 | KV453116.1 | 1280862 | 17-scf00437 | 17 |
| AX-158277401 | 22 | 87.925 | KV453116.1 | 1309841 | 17-scf00437 | 17 |
| AX-158395041 | 22 | 87.925 | KV453116.1 | 1391353 | 17-scf00437 | 17 |
| AX-158277620 | 22 | 87.925 | KV453116.1 | 1527825 | 17-scf00437 | 17 |
| AX-157701181 | 22 | 87.925 | KV453116.1 | 1538273 | 17-scf00437 | 17 |
| AX-158277634 | 22 | 87.925 | KV453116.1 | 1543280 | 17-scf00437 | 17 |
| AX-158395062 | 22 | 87.925 | KV453116.1 | 1742371 | 17-scf00437 | 17 |
| AX-157844301 | 22 | 87.925 | KV453116.1 | 2310531 | 17-scf00437 | 17 |
| AX-158278235 | 22 | 87.925 | KV453116.1 | 2384915 | 17-scf00437 | 17 |
| AX-158278294 | 22 | 87.925 | KV453116.1 | 2477565 | 17-scf00437 | 17 |
| AX-158278872 | 22 | 87.925 | KV453116.1 | 3198035 | 17-scf00437 | 17 |
| AX-158278931 | 22 | 87.925 | KV453116.1 | 3325892 | 17-scf00437 | 17 |
| AX-158279523 | 22 | 87.925 | KV453116.1 | 4154613 | 17-scf00437 | 17 |
| AX-158279580 | 22 | 87.925 | KV453116.1 | 4213212 | 17-scf00437 | 17 |
| AX-158280214 | 22 | 87.925 | KV453116.1 | 4905464 | 17-scf00437 | 17 |
| AX-158280286 | 22 | 87.925 | KV453116.1 | 4983191 | 17-scf00437 | 17 |
| AX-158280578 | 22 | 87.925 | KV453116.1 | 5382438 | 17-scf00437 | 17 |

|              |    |        |            |         |             |    |
|--------------|----|--------|------------|---------|-------------|----|
| AX-157844538 | 22 | 87.925 | KV453116.1 | 5396612 | 17-scf00437 | 17 |
| AX-158280614 | 22 | 87.925 | KV453116.1 | 5429198 | 17-scf00437 | 17 |
| AX-158280617 | 22 | 87.925 | KV453116.1 | 5431205 | 17-scf00437 | 17 |
| AX-158280884 | 22 | 87.925 | KV453116.1 | 5834302 | 17-scf00437 | 17 |
| AX-158281059 | 22 | 87.925 | KV453116.1 | 6051066 | 17-scf00437 | 17 |
| AX-158281091 | 22 | 87.925 | KV453116.1 | 6082456 | 17-scf00437 | 17 |
| AX-158281682 | 22 | 87.925 | KV453116.1 | 6971046 | 17-scf00437 | 17 |
| AX-158281861 | 22 | 87.925 | KV453116.1 | 7300071 | 17-scf00437 | 17 |
| AX-158281873 | 22 | 87.925 | KV453116.1 | 7317658 | 17-scf00437 | 17 |
| AX-158281943 | 22 | 87.925 | KV453116.1 | 7410414 | 17-scf00437 | 17 |
| AX-158281970 | 22 | 87.925 | KV453116.1 | 7446776 | 17-scf00437 | 17 |
| AX-158282179 | 22 | 87.925 | KV453116.1 | 7720626 | 17-scf00437 | 17 |
| AX-158282397 | 22 | 87.925 | KV453116.1 | 7983184 | 17-scf00437 | 17 |
| AX-158282775 | 22 | 87.925 | KV453116.1 | 8523720 | 17-scf00437 | 17 |
| AX-158282801 | 22 | 87.925 | KV453116.1 | 8557979 | 17-scf00437 | 17 |
| AX-158282804 | 22 | 87.925 | KV453116.1 | 8561545 | 17-scf00437 | 17 |
| AX-158282807 | 22 | 87.925 | KV453116.1 | 8565847 | 17-scf00437 | 17 |
| AX-158282829 | 22 | 87.925 | KV453116.1 | 8594546 | 17-scf00437 | 17 |
| AX-157771632 | 22 | 87.925 | KV453116.1 | 8604633 | 17-scf00437 | 17 |
| AX-158282846 | 22 | 87.925 | KV453116.1 | 8611194 | 17-scf00437 | 17 |
| AX-158282852 | 22 | 87.925 | KV453116.1 | 8621037 | 17-scf00437 | 17 |
| AX-157867570 | 22 | 87.925 | KV453116.1 | 8623401 | 17-scf00437 | 17 |
| AX-158282952 | 22 | 87.925 | KV453116.1 | 8743446 | 17-scf00437 | 17 |
| AX-158282962 | 22 | 87.925 | KV453116.1 | 8753050 | 17-scf00437 | 17 |
| AX-158283020 | 22 | 87.925 | KV453116.1 | 8824307 | 17-scf00437 | 17 |
| AX-158286448 | 22 | 87.925 | KV453114.1 | 4658240 | 17-scf00439 | 17 |
| AX-157686339 | 22 | 87.925 | KV453393.1 | 30217   | scf00685    | UN |
| AX-158282814 | 22 | 87.987 | KV453116.1 | 8575476 | 17-scf00437 | 17 |
| AX-158282876 | 22 | 87.987 | KV453116.1 | 8647473 | 17-scf00437 | 17 |
| AX-158416986 | 22 | 87.987 | KV453116.1 | 8656041 | 17-scf00437 | 17 |
| AX-158282964 | 22 | 87.987 | KV453116.1 | 8757498 | 17-scf00437 | 17 |
| AX-158277638 | 22 | 88.056 | KV453116.1 | 1551003 | 17-scf00437 | 17 |
| AX-158278996 | 22 | 88.056 | KV453116.1 | 3410972 | 17-scf00437 | 17 |
| AX-158282086 | 22 | 88.056 | KV453116.1 | 7572220 | 17-scf00437 | 17 |
| AX-157844761 | 22 | 88.056 | KV453116.1 | 8575928 | 17-scf00437 | 17 |
| AX-158282828 | 22 | 88.056 | KV453116.1 | 8593811 | 17-scf00437 | 17 |
| AX-158282890 | 22 | 88.056 | KV453116.1 | 8668030 | 17-scf00437 | 17 |
| AX-158286281 | 22 | 88.056 | KV453114.1 | 4483535 | 17-scf00439 | 17 |
| AX-158276778 | 22 | 88.125 | KV453116.1 | 591662  | 17-scf00437 | 17 |
| AX-158277361 | 22 | 88.125 | KV453116.1 | 1259492 | 17-scf00437 | 17 |
| AX-158277719 | 22 | 88.125 | KV453116.1 | 1637702 | 17-scf00437 | 17 |
| AX-157725268 | 22 | 88.125 | KV453116.1 | 2347544 | 17-scf00437 | 17 |
| AX-157844391 | 22 | 88.125 | KV453116.1 | 3030977 | 17-scf00437 | 17 |
| AX-158278773 | 22 | 88.125 | KV453116.1 | 3050555 | 17-scf00437 | 17 |
| AX-158278801 | 22 | 88.125 | KV453116.1 | 3090794 | 17-scf00437 | 17 |
| AX-157873098 | 22 | 88.125 | KV453116.1 | 3172641 | 17-scf00437 | 17 |
| AX-158278939 | 22 | 88.125 | KV453116.1 | 3333882 | 17-scf00437 | 17 |
| AX-157725897 | 22 | 88.125 | KV453116.1 | 3445139 | 17-scf00437 | 17 |
| AX-158279446 | 22 | 88.125 | KV453116.1 | 4076662 | 17-scf00437 | 17 |
| AX-158279892 | 22 | 88.125 | KV453116.1 | 4535622 | 17-scf00437 | 17 |
| AX-157844484 | 22 | 88.125 | KV453116.1 | 4648905 | 17-scf00437 | 17 |

|              |    |        |            |         |             |    |
|--------------|----|--------|------------|---------|-------------|----|
| AX-158280097 | 22 | 88.125 | KV453116.1 | 4761609 | 17-scf00437 | 17 |
| AX-158280263 | 22 | 88.125 | KV453116.1 | 4962775 | 17-scf00437 | 17 |
| AX-158280325 | 22 | 88.125 | KV453116.1 | 5030498 | 17-scf00437 | 17 |
| AX-158280340 | 22 | 88.125 | KV453116.1 | 5057998 | 17-scf00437 | 17 |
| AX-158280385 | 22 | 88.125 | KV453116.1 | 5115596 | 17-scf00437 | 17 |
| AX-158280446 | 22 | 88.125 | KV453116.1 | 5207217 | 17-scf00437 | 17 |
| AX-158280827 | 22 | 88.125 | KV453116.1 | 5776464 | 17-scf00437 | 17 |
| AX-158280949 | 22 | 88.125 | KV453116.1 | 5913908 | 17-scf00437 | 17 |
| AX-158281097 | 22 | 88.125 | KV453116.1 | 6089316 | 17-scf00437 | 17 |
| AX-158281114 | 22 | 88.125 | KV453116.1 | 6104173 | 17-scf00437 | 17 |
| AX-158281287 | 22 | 88.125 | KV453116.1 | 6321372 | 17-scf00437 | 17 |
| AX-158281326 | 22 | 88.125 | KV453116.1 | 6372613 | 17-scf00437 | 17 |
| AX-158281740 | 22 | 88.125 | KV453116.1 | 7074501 | 17-scf00437 | 17 |
| AX-158281828 | 22 | 88.125 | KV453116.1 | 7252525 | 17-scf00437 | 17 |
| AX-158281858 | 22 | 88.125 | KV453116.1 | 7297728 | 17-scf00437 | 17 |
| AX-157844669 | 22 | 88.125 | KV453116.1 | 7520950 | 17-scf00437 | 17 |
| AX-158416954 | 22 | 88.125 | KV453116.1 | 7757808 | 17-scf00437 | 17 |
| AX-158282707 | 22 | 88.125 | KV453116.1 | 8435433 | 17-scf00437 | 17 |
| AX-157707597 | 22 | 88.125 | KV453116.1 | 8563800 | 17-scf00437 | 17 |
| AX-158282820 | 22 | 88.125 | KV453116.1 | 8580088 | 17-scf00437 | 17 |
| AX-157752876 | 22 | 88.125 | KV453116.1 | 8580349 | 17-scf00437 | 17 |
| AX-157844763 | 22 | 88.125 | KV453116.1 | 8583880 | 17-scf00437 | 17 |
| AX-158282823 | 22 | 88.125 | KV453116.1 | 8587455 | 17-scf00437 | 17 |
| AX-157844766 | 22 | 88.125 | KV453116.1 | 8589641 | 17-scf00437 | 17 |
| AX-158282824 | 22 | 88.125 | KV453116.1 | 8590248 | 17-scf00437 | 17 |
| AX-158282835 | 22 | 88.125 | KV453116.1 | 8598533 | 17-scf00437 | 17 |
| AX-157844768 | 22 | 88.125 | KV453116.1 | 8615216 | 17-scf00437 | 17 |
| AX-157741575 | 22 | 88.125 | KV453116.1 | 8615985 | 17-scf00437 | 17 |
| AX-158416981 | 22 | 88.125 | KV453116.1 | 8622042 | 17-scf00437 | 17 |
| AX-158416982 | 22 | 88.125 | KV453116.1 | 8622424 | 17-scf00437 | 17 |
| AX-158282862 | 22 | 88.125 | KV453116.1 | 8633279 | 17-scf00437 | 17 |
| AX-158282865 | 22 | 88.125 | KV453116.1 | 8639838 | 17-scf00437 | 17 |
| AX-158282870 | 22 | 88.125 | KV453116.1 | 8643501 | 17-scf00437 | 17 |
| AX-158282882 | 22 | 88.125 | KV453116.1 | 8656562 | 17-scf00437 | 17 |
| AX-158282903 | 22 | 88.125 | KV453116.1 | 8683700 | 17-scf00437 | 17 |
| AX-158282917 | 22 | 88.125 | KV453116.1 | 8696351 | 17-scf00437 | 17 |
| AX-158282932 | 22 | 88.125 | KV453116.1 | 8712379 | 17-scf00437 | 17 |
| AX-158282878 | 22 | 88.155 | KV453116.1 | 8649046 | 17-scf00437 | 17 |
| AX-158276491 | 22 | 88.326 | KV453116.1 | 207166  | 17-scf00437 | 17 |
| AX-158276604 | 22 | 88.326 | KV453116.1 | 338186  | 17-scf00437 | 17 |
| AX-158276659 | 22 | 88.326 | KV453116.1 | 431022  | 17-scf00437 | 17 |
| AX-158277776 | 22 | 88.326 | KV453116.1 | 1716398 | 17-scf00437 | 17 |
| AX-158278096 | 22 | 88.326 | KV453116.1 | 2215531 | 17-scf00437 | 17 |
| AX-158278183 | 22 | 88.326 | KV453116.1 | 2318701 | 17-scf00437 | 17 |
| AX-158278623 | 22 | 88.326 | KV453116.1 | 2838358 | 17-scf00437 | 17 |
| AX-158279267 | 22 | 88.326 | KV453116.1 | 3815526 | 17-scf00437 | 17 |
| AX-158279314 | 22 | 88.326 | KV453116.1 | 3945516 | 17-scf00437 | 17 |
| AX-158279856 | 22 | 88.326 | KV453116.1 | 4501329 | 17-scf00437 | 17 |
| AX-158279995 | 22 | 88.326 | KV453116.1 | 4652184 | 17-scf00437 | 17 |
| AX-158280382 | 22 | 88.326 | KV453116.1 | 5099481 | 17-scf00437 | 17 |
| AX-158280544 | 22 | 88.326 | KV453116.1 | 5330161 | 17-scf00437 | 17 |

|              |    |        |            |         |             |    |
|--------------|----|--------|------------|---------|-------------|----|
| AX-157751773 | 22 | 88.326 | KV453116.1 | 8652356 | 17-scf00437 | 17 |
| AX-158411558 | 22 | 88.326 | KV453116.1 | 8656371 | 17-scf00437 | 17 |
| AX-158282885 | 22 | 88.326 | KV453116.1 | 8661390 | 17-scf00437 | 17 |
| AX-158283160 | 22 | 88.326 | KV453116.1 | 9015608 | 17-scf00437 | 17 |
| AX-158286351 | 22 | 88.326 | KV453114.1 | 4564804 | 17-scf00439 | 17 |
| AX-157722073 | 22 | 88.437 | KV453116.1 | 8607667 | 17-scf00437 | 17 |
| AX-157844770 | 22 | 88.437 | KV453116.1 | 8669241 | 17-scf00437 | 17 |
| AX-158282912 | 22 | 88.437 | KV453116.1 | 8693029 | 17-scf00437 | 17 |
| AX-158282891 | 22 | 88.527 | KV453116.1 | 8670084 | 17-scf00437 | 17 |
| AX-158282892 | 22 | 88.585 | KV453116.1 | 8672385 | 17-scf00437 | 17 |
| AX-158282916 | 22 | 88.585 | KV453116.1 | 8695673 | 17-scf00437 | 17 |
| AX-158282896 | 22 | 88.658 | KV453116.1 | 8675370 | 17-scf00437 | 17 |
| AX-158275568 | 22 | 88.727 | KV453115.1 | 63514   | 17-scf00436 | 17 |
| AX-158276503 | 22 | 88.727 | KV453116.1 | 219183  | 17-scf00437 | 17 |
| AX-157721132 | 22 | 88.727 | KV453116.1 | 375875  | 17-scf00437 | 17 |
| AX-158277000 | 22 | 88.727 | KV453116.1 | 883123  | 17-scf00437 | 17 |
| AX-158277338 | 22 | 88.727 | KV453116.1 | 1229457 | 17-scf00437 | 17 |
| AX-158277364 | 22 | 88.727 | KV453116.1 | 1261465 | 17-scf00437 | 17 |
| AX-158277368 | 22 | 88.727 | KV453116.1 | 1264817 | 17-scf00437 | 17 |
| AX-158277655 | 22 | 88.727 | KV453116.1 | 1568427 | 17-scf00437 | 17 |
| AX-158395059 | 22 | 88.727 | KV453116.1 | 1707166 | 17-scf00437 | 17 |
| AX-158278174 | 22 | 88.727 | KV453116.1 | 2306986 | 17-scf00437 | 17 |
| AX-157844317 | 22 | 88.727 | KV453116.1 | 2423234 | 17-scf00437 | 17 |
| AX-158278507 | 22 | 88.727 | KV453116.1 | 2700676 | 17-scf00437 | 17 |
| AX-158278858 | 22 | 88.727 | KV453116.1 | 3158505 | 17-scf00437 | 17 |
| AX-158279415 | 22 | 88.727 | KV453116.1 | 4045330 | 17-scf00437 | 17 |
| AX-158279536 | 22 | 88.727 | KV453116.1 | 4167053 | 17-scf00437 | 17 |
| AX-158280916 | 22 | 88.727 | KV453116.1 | 5866971 | 17-scf00437 | 17 |
| AX-158280995 | 22 | 88.727 | KV453116.1 | 5964185 | 17-scf00437 | 17 |
| AX-158282161 | 22 | 88.727 | KV453116.1 | 7704070 | 17-scf00437 | 17 |
| AX-158282225 | 22 | 88.727 | KV453116.1 | 7780163 | 17-scf00437 | 17 |
| AX-158282239 | 22 | 88.727 | KV453116.1 | 7795756 | 17-scf00437 | 17 |
| AX-158282284 | 22 | 88.727 | KV453116.1 | 7868606 | 17-scf00437 | 17 |
| AX-158282328 | 22 | 88.727 | KV453116.1 | 7917859 | 17-scf00437 | 17 |
| AX-158282332 | 22 | 88.727 | KV453116.1 | 7922091 | 17-scf00437 | 17 |
| AX-158282379 | 22 | 88.727 | KV453116.1 | 7961934 | 17-scf00437 | 17 |
| AX-158282466 | 22 | 88.727 | KV453116.1 | 8085295 | 17-scf00437 | 17 |
| AX-158282585 | 22 | 88.727 | KV453116.1 | 8273237 | 17-scf00437 | 17 |
| AX-157844742 | 22 | 88.727 | KV453116.1 | 8324135 | 17-scf00437 | 17 |
| AX-158282661 | 22 | 88.727 | KV453116.1 | 8368700 | 17-scf00437 | 17 |
| AX-158282793 | 22 | 88.727 | KV453116.1 | 8540606 | 17-scf00437 | 17 |
| AX-158282884 | 22 | 88.727 | KV453116.1 | 8659083 | 17-scf00437 | 17 |
| AX-157774202 | 22 | 88.727 | KV453116.1 | 8671292 | 17-scf00437 | 17 |
| AX-157741099 | 22 | 88.727 | KV453116.1 | 8678745 | 17-scf00437 | 17 |
| AX-158282900 | 22 | 88.727 | KV453116.1 | 8679385 | 17-scf00437 | 17 |
| AX-158282922 | 22 | 88.727 | KV453116.1 | 8704685 | 17-scf00437 | 17 |
| AX-158282929 | 22 | 88.727 | KV453116.1 | 8710021 | 17-scf00437 | 17 |
| AX-158282931 | 22 | 88.727 | KV453116.1 | 8712039 | 17-scf00437 | 17 |
| AX-158282944 | 22 | 88.727 | KV453116.1 | 8728744 | 17-scf00437 | 17 |
| AX-158282948 | 22 | 88.727 | KV453116.1 | 8734313 | 17-scf00437 | 17 |
| AX-158282960 | 22 | 88.727 | KV453116.1 | 8751751 | 17-scf00437 | 17 |

|              |    |        |             |         |             |    |
|--------------|----|--------|-------------|---------|-------------|----|
| AX-158282979 | 22 | 88.727 | KV453116.1  | 8774544 | 17-scf00437 | 17 |
| AX-158417000 | 22 | 88.727 | KV453116.1  | 9031452 | 17-scf00437 | 17 |
| AX-158286540 | 22 | 88.727 | KV453114.1  | 4752462 | 17-scf00439 | 17 |
| AX-157689854 | 22 | 88.727 | 3ML01033656 | 186     | scf09315_1  | UN |
| AX-158282843 | 22 | 88.757 | KV453116.1  | 8604804 | 17-scf00437 | 17 |
| AX-158282861 | 22 | 88.757 | KV453116.1  | 8631982 | 17-scf00437 | 17 |
| AX-158381196 | 22 | 88.757 | KV453116.1  | 8647353 | 17-scf00437 | 17 |
| AX-158282908 | 22 | 88.757 | KV453116.1  | 8690232 | 17-scf00437 | 17 |
| AX-158282953 | 22 | 88.757 | KV453116.1  | 8744140 | 17-scf00437 | 17 |
| AX-158277362 | 22 | 88.927 | KV453116.1  | 1260109 | 17-scf00437 | 17 |
| AX-158411556 | 22 | 88.927 | KV453116.1  | 8655828 | 17-scf00437 | 17 |
| AX-158282951 | 22 | 88.927 | KV453116.1  | 8742176 | 17-scf00437 | 17 |
| AX-158282954 | 22 | 88.927 | KV453116.1  | 8745478 | 17-scf00437 | 17 |
| AX-157724253 | 22 | 88.927 | KV453116.1  | 8746706 | 17-scf00437 | 17 |
| AX-158282969 | 22 | 88.927 | KV453116.1  | 8760755 | 17-scf00437 | 17 |
| AX-158411559 | 22 | 88.939 | KV453116.1  | 8761738 | 17-scf00437 | 17 |
| AX-158282972 | 22 | 89.214 | KV453116.1  | 8765620 | 17-scf00437 | 17 |
| AX-158282980 | 22 | 89.216 | KV453116.1  | 8775035 | 17-scf00437 | 17 |
| AX-158278276 | 22 | 89.378 | KV453116.1  | 2441976 | 17-scf00437 | 17 |
| AX-158278706 | 22 | 89.378 | KV453116.1  | 2952996 | 17-scf00437 | 17 |
| AX-157750976 | 22 | 89.378 | KV453116.1  | 3299246 | 17-scf00437 | 17 |
| AX-158279180 | 22 | 89.378 | KV453116.1  | 3639052 | 17-scf00437 | 17 |
| AX-157770184 | 22 | 89.378 | KV453116.1  | 3646448 | 17-scf00437 | 17 |
| AX-158279193 | 22 | 89.378 | KV453116.1  | 3677885 | 17-scf00437 | 17 |
| AX-158279198 | 22 | 89.378 | KV453116.1  | 3683854 | 17-scf00437 | 17 |
| AX-158279207 | 22 | 89.378 | KV453116.1  | 3694676 | 17-scf00437 | 17 |
| AX-158279212 | 22 | 89.378 | KV453116.1  | 3703397 | 17-scf00437 | 17 |
| AX-158279626 | 22 | 89.378 | KV453116.1  | 4252736 | 17-scf00437 | 17 |
| AX-157753407 | 22 | 89.378 | KV453116.1  | 5095326 | 17-scf00437 | 17 |
| AX-158281245 | 22 | 89.378 | KV453116.1  | 6264557 | 17-scf00437 | 17 |
| AX-158281636 | 22 | 89.378 | KV453116.1  | 6902821 | 17-scf00437 | 17 |
| AX-158281924 | 22 | 89.378 | KV453116.1  | 7387320 | 17-scf00437 | 17 |
| AX-158282036 | 22 | 89.378 | KV453116.1  | 7511809 | 17-scf00437 | 17 |
| AX-158282064 | 22 | 89.378 | KV453116.1  | 7542046 | 17-scf00437 | 17 |
| AX-158282084 | 22 | 89.378 | KV453116.1  | 7565877 | 17-scf00437 | 17 |
| AX-158282561 | 22 | 89.378 | KV453116.1  | 8235945 | 17-scf00437 | 17 |
| AX-158381194 | 22 | 89.378 | KV453116.1  | 8245240 | 17-scf00437 | 17 |
| AX-158416983 | 22 | 89.378 | KV453116.1  | 8622471 | 17-scf00437 | 17 |
| AX-157719169 | 22 | 89.378 | KV453116.1  | 8795089 | 17-scf00437 | 17 |
| AX-158277948 | 22 | 89.538 | KV453116.1  | 1997354 | 17-scf00437 | 17 |
| AX-158283001 | 22 | 89.538 | KV453116.1  | 8800341 | 17-scf00437 | 17 |
| AX-157771027 | 22 | 89.538 | KV453116.1  | 8809135 | 17-scf00437 | 17 |
| AX-157844773 | 22 | 89.538 | KV453116.1  | 8810220 | 17-scf00437 | 17 |
| AX-157758736 | 22 | 89.538 | KV453116.1  | 8811457 | 17-scf00437 | 17 |
| AX-157844774 | 22 | 89.538 | KV453116.1  | 8813837 | 17-scf00437 | 17 |
| AX-158283009 | 22 | 89.538 | KV453116.1  | 8815754 | 17-scf00437 | 17 |
| AX-158283012 | 22 | 89.538 | KV453116.1  | 8817382 | 17-scf00437 | 17 |
| AX-158283019 | 22 | 89.538 | KV453116.1  | 8824029 | 17-scf00437 | 17 |
| AX-157844779 | 22 | 89.538 | KV453116.1  | 8894340 | 17-scf00437 | 17 |
| AX-157747539 | 22 | 89.538 | KV453116.1  | 8932863 | 17-scf00437 | 17 |
| AX-157744097 | 22 | 89.538 | KV453116.1  | 9008241 | 17-scf00437 | 17 |

|              |    |        |            |         |             |    |
|--------------|----|--------|------------|---------|-------------|----|
| AX-158277871 | 22 | 89.791 | KV453116.1 | 1883378 | 17-scf00437 | 17 |
| AX-158278423 | 22 | 89.791 | KV453116.1 | 2605822 | 17-scf00437 | 17 |
| AX-158281997 | 22 | 89.791 | KV453116.1 | 7473064 | 17-scf00437 | 17 |
| AX-158282343 | 22 | 89.791 | KV453116.1 | 7929919 | 17-scf00437 | 17 |
| AX-158282898 | 22 | 89.791 | KV453116.1 | 8676418 | 17-scf00437 | 17 |
| AX-158283024 | 22 | 89.791 | KV453116.1 | 8829085 | 17-scf00437 | 17 |
| AX-158283028 | 22 | 89.791 | KV453116.1 | 8835207 | 17-scf00437 | 17 |
| AX-157844780 | 22 | 89.791 | KV453116.1 | 8913028 | 17-scf00437 | 17 |
| AX-158278259 | 22 | 89.792 | KV453116.1 | 2410193 | 17-scf00437 | 17 |
| AX-158280170 | 22 | 89.792 | KV453116.1 | 4850822 | 17-scf00437 | 17 |
| AX-157716247 | 22 | 89.792 | KV453116.1 | 8800846 | 17-scf00437 | 17 |
| AX-158283030 | 22 | 89.792 | KV453116.1 | 8838856 | 17-scf00437 | 17 |
| AX-158283031 | 22 | 89.792 | KV453116.1 | 8839386 | 17-scf00437 | 17 |
| AX-158283097 | 22 | 89.792 | KV453116.1 | 8919954 | 17-scf00437 | 17 |
| AX-158283204 | 22 | 89.792 | KV453116.1 | 9073635 | 17-scf00437 | 17 |
| AX-158283205 | 22 | 89.792 | KV453116.1 | 9074675 | 17-scf00437 | 17 |
| AX-158277994 | 22 | 89.898 | KV453116.1 | 2086543 | 17-scf00437 | 17 |
| AX-158381198 | 22 | 89.898 | KV453116.1 | 8866520 | 17-scf00437 | 17 |
| AX-158283071 | 22 | 90.018 | KV453116.1 | 8887299 | 17-scf00437 | 17 |
| AX-158283073 | 22 | 90.032 | KV453116.1 | 8888466 | 17-scf00437 | 17 |
| AX-158274242 | 22 | 90.041 | KV453121.1 | 336449  | 17-scf00435 | 17 |
| AX-158274652 | 22 | 90.041 | KV453121.1 | 969720  | 17-scf00435 | 17 |
| AX-158275478 | 22 | 90.041 | KV453121.1 | 1952583 | 17-scf00435 | 17 |
| AX-158275486 | 22 | 90.041 | KV453121.1 | 1960189 | 17-scf00435 | 17 |
| AX-158275757 | 22 | 90.041 | KV453115.1 | 334266  | 17-scf00436 | 17 |
| AX-158277429 | 22 | 90.041 | KV453116.1 | 1342018 | 17-scf00437 | 17 |
| AX-158278193 | 22 | 90.041 | KV453116.1 | 2335662 | 17-scf00437 | 17 |
| AX-157747510 | 22 | 90.041 | KV453116.1 | 2343570 | 17-scf00437 | 17 |
| AX-158280110 | 22 | 90.041 | KV453116.1 | 4784571 | 17-scf00437 | 17 |
| AX-158282597 | 22 | 90.041 | KV453116.1 | 8286722 | 17-scf00437 | 17 |
| AX-157844777 | 22 | 90.041 | KV453116.1 | 8882179 | 17-scf00437 | 17 |
| AX-158283074 | 22 | 90.041 | KV453116.1 | 8890228 | 17-scf00437 | 17 |
| AX-158283076 | 22 | 90.041 | KV453116.1 | 8892745 | 17-scf00437 | 17 |
| AX-158283077 | 22 | 90.041 | KV453116.1 | 8897163 | 17-scf00437 | 17 |
| AX-158283078 | 22 | 90.041 | KV453116.1 | 8900907 | 17-scf00437 | 17 |
| AX-158283121 | 22 | 90.041 | KV453116.1 | 8944825 | 17-scf00437 | 17 |
| AX-157686341 | 22 | 90.041 | KV453393.1 | 32386   | scf00685    | UN |
| AX-158280913 | 22 | 90.233 | KV453116.1 | 5865348 | 17-scf00437 | 17 |
| AX-157714924 | 22 | 90.233 | KV453116.1 | 8902627 | 17-scf00437 | 17 |
| AX-158283099 | 22 | 90.289 | KV453116.1 | 8921218 | 17-scf00437 | 17 |
| AX-158283101 | 22 | 90.289 | KV453116.1 | 8924304 | 17-scf00437 | 17 |
| AX-158283117 | 22 | 90.289 | KV453116.1 | 8940946 | 17-scf00437 | 17 |
| AX-157844783 | 22 | 90.289 | KV453116.1 | 8942642 | 17-scf00437 | 17 |
| AX-157697687 | 22 | 90.289 | KV453116.1 | 8955690 | 17-scf00437 | 17 |
| AX-157873258 | 22 | 90.289 | KV453116.1 | 8958288 | 17-scf00437 | 17 |
| AX-157772920 | 22 | 90.289 | KV453116.1 | 8959055 | 17-scf00437 | 17 |
| AX-158395017 | 22 | 90.716 | KV453116.1 | 189939  | 17-scf00437 | 17 |
| AX-158276516 | 22 | 90.716 | KV453116.1 | 235357  | 17-scf00437 | 17 |
| AX-158276927 | 22 | 90.716 | KV453116.1 | 784261  | 17-scf00437 | 17 |
| AX-158277845 | 22 | 90.716 | KV453116.1 | 1836392 | 17-scf00437 | 17 |
| AX-158278028 | 22 | 90.716 | KV453116.1 | 2116168 | 17-scf00437 | 17 |



|              |    |        |             |         |             |    |
|--------------|----|--------|-------------|---------|-------------|----|
| AX-158278298 | 22 | 90.716 | KV453116.1  | 2479069 | 17-scf00437 | 17 |
| AX-158278301 | 22 | 90.716 | KV453116.1  | 2479927 | 17-scf00437 | 17 |
| AX-158278357 | 22 | 90.716 | KV453116.1  | 2538248 | 17-scf00437 | 17 |
| AX-158278362 | 22 | 90.716 | KV453116.1  | 2544708 | 17-scf00437 | 17 |
| AX-158278639 | 22 | 90.716 | KV453116.1  | 2859920 | 17-scf00437 | 17 |
| AX-157873096 | 22 | 90.716 | KV453116.1  | 3070048 | 17-scf00437 | 17 |
| AX-158278907 | 22 | 90.716 | KV453116.1  | 3282997 | 17-scf00437 | 17 |
| AX-158278967 | 22 | 90.716 | KV453116.1  | 3375829 | 17-scf00437 | 17 |
| AX-158279094 | 22 | 90.716 | KV453116.1  | 3506975 | 17-scf00437 | 17 |
| AX-157844459 | 22 | 90.716 | KV453116.1  | 3841683 | 17-scf00437 | 17 |
| AX-158279448 | 22 | 90.716 | KV453116.1  | 4078288 | 17-scf00437 | 17 |
| AX-158279893 | 22 | 90.716 | KV453116.1  | 4536141 | 17-scf00437 | 17 |
| AX-158279948 | 22 | 90.716 | KV453116.1  | 4594911 | 17-scf00437 | 17 |
| AX-158279999 | 22 | 90.716 | KV453116.1  | 4654979 | 17-scf00437 | 17 |
| AX-158280337 | 22 | 90.716 | KV453116.1  | 5053901 | 17-scf00437 | 17 |
| AX-158280504 | 22 | 90.716 | KV453116.1  | 5273384 | 17-scf00437 | 17 |
| AX-158280806 | 22 | 90.716 | KV453116.1  | 5745841 | 17-scf00437 | 17 |
| AX-158280883 | 22 | 90.716 | KV453116.1  | 5832093 | 17-scf00437 | 17 |
| AX-158281006 | 22 | 90.716 | KV453116.1  | 5986079 | 17-scf00437 | 17 |
| AX-158281907 | 22 | 90.716 | KV453116.1  | 7367542 | 17-scf00437 | 17 |
| AX-157844758 | 22 | 90.716 | KV453116.1  | 8440598 | 17-scf00437 | 17 |
| AX-158282886 | 22 | 90.716 | KV453116.1  | 8662320 | 17-scf00437 | 17 |
| AX-158282941 | 22 | 90.716 | KV453116.1  | 8723877 | 17-scf00437 | 17 |
| AX-157721230 | 22 | 90.716 | KV453116.1  | 8985872 | 17-scf00437 | 17 |
| AX-158286550 | 22 | 90.716 | KV453114.1  | 4761287 | 17-scf00439 | 17 |
| AX-157705638 | 22 | 90.716 | 3ML01030494 | 390     | scf06093_1  | UN |
| AX-157706735 | 22 | 90.716 | 3ML01032818 | 464     | scf08448_1  | UN |
| AX-158274101 | 22 | 90.718 | KV453121.1  | 121730  | 17-scf00435 | 17 |
| AX-158274225 | 22 | 90.718 | KV453121.1  | 302584  | 17-scf00435 | 17 |
| AX-158274500 | 22 | 90.718 | KV453121.1  | 735732  | 17-scf00435 | 17 |
| AX-158274869 | 22 | 90.718 | KV453121.1  | 1218460 | 17-scf00435 | 17 |
| AX-158274911 | 22 | 90.718 | KV453121.1  | 1268111 | 17-scf00435 | 17 |
| AX-158274967 | 22 | 90.718 | KV453121.1  | 1335095 | 17-scf00435 | 17 |
| AX-158275033 | 22 | 90.718 | KV453121.1  | 1405985 | 17-scf00435 | 17 |
| AX-157844047 | 22 | 90.718 | KV453121.1  | 1448423 | 17-scf00435 | 17 |
| AX-158275064 | 22 | 90.718 | KV453121.1  | 1448699 | 17-scf00435 | 17 |
| AX-158275076 | 22 | 90.718 | KV453121.1  | 1471028 | 17-scf00435 | 17 |
| AX-158275553 | 22 | 90.718 | KV453115.1  | 34516   | 17-scf00436 | 17 |
| AX-158416742 | 22 | 90.718 | KV453115.1  | 178963  | 17-scf00436 | 17 |
| AX-157702820 | 22 | 90.718 | KV453115.1  | 266337  | 17-scf00436 | 17 |
| AX-158275702 | 22 | 90.718 | KV453115.1  | 266514  | 17-scf00436 | 17 |
| AX-158275710 | 22 | 90.718 | KV453115.1  | 275317  | 17-scf00436 | 17 |
| AX-158275837 | 22 | 90.718 | KV453115.1  | 435101  | 17-scf00436 | 17 |
| AX-157751518 | 22 | 90.718 | KV453115.1  | 882896  | 17-scf00436 | 17 |
| AX-158278565 | 22 | 90.718 | KV453116.1  | 2762875 | 17-scf00437 | 17 |
| AX-158278624 | 22 | 90.718 | KV453116.1  | 2842468 | 17-scf00437 | 17 |
| AX-158278979 | 22 | 90.718 | KV453116.1  | 3385810 | 17-scf00437 | 17 |
| AX-158279296 | 22 | 90.718 | KV453116.1  | 3895175 | 17-scf00437 | 17 |
| AX-158279756 | 22 | 90.718 | KV453116.1  | 4390386 | 17-scf00437 | 17 |
| AX-158279767 | 22 | 90.718 | KV453116.1  | 4404705 | 17-scf00437 | 17 |
| AX-158279889 | 22 | 90.718 | KV453116.1  | 4534558 | 17-scf00437 | 17 |

|              |    |        |             |         |             |    |
|--------------|----|--------|-------------|---------|-------------|----|
| AX-157757448 | 22 | 90.718 | KV453116.1  | 4614166 | 17-scf00437 | 17 |
| AX-158279958 | 22 | 90.718 | KV453116.1  | 4618028 | 17-scf00437 | 17 |
| AX-158281004 | 22 | 90.718 | KV453116.1  | 5984199 | 17-scf00437 | 17 |
| AX-158281379 | 22 | 90.718 | KV453116.1  | 6458778 | 17-scf00437 | 17 |
| AX-158281575 | 22 | 90.718 | KV453116.1  | 6802649 | 17-scf00437 | 17 |
| AX-158281669 | 22 | 90.718 | KV453116.1  | 6951704 | 17-scf00437 | 17 |
| AX-158281672 | 22 | 90.718 | KV453116.1  | 6961319 | 17-scf00437 | 17 |
| AX-158281982 | 22 | 90.718 | KV453116.1  | 7456912 | 17-scf00437 | 17 |
| AX-158282000 | 22 | 90.718 | KV453116.1  | 7475011 | 17-scf00437 | 17 |
| AX-158282077 | 22 | 90.718 | KV453116.1  | 7558243 | 17-scf00437 | 17 |
| AX-158282139 | 22 | 90.718 | KV453116.1  | 7658454 | 17-scf00437 | 17 |
| AX-158381191 | 22 | 90.718 | KV453116.1  | 7744862 | 17-scf00437 | 17 |
| AX-158282581 | 22 | 90.718 | KV453116.1  | 8267914 | 17-scf00437 | 17 |
| AX-158282582 | 22 | 90.718 | KV453116.1  | 8268160 | 17-scf00437 | 17 |
| AX-158282672 | 22 | 90.718 | KV453116.1  | 8379986 | 17-scf00437 | 17 |
| AX-158282730 | 22 | 90.718 | KV453116.1  | 8458329 | 17-scf00437 | 17 |
| AX-158282788 | 22 | 90.718 | KV453116.1  | 8537093 | 17-scf00437 | 17 |
| AX-158283154 | 22 | 90.718 | KV453116.1  | 8996093 | 17-scf00437 | 17 |
| AX-157844797 | 22 | 90.718 | KV453116.1  | 9000349 | 17-scf00437 | 17 |
| AX-157844798 | 22 | 90.718 | KV453116.1  | 9002907 | 17-scf00437 | 17 |
| AX-157887970 | 22 | 90.718 | KV453116.1  | 9025515 | 17-scf00437 | 17 |
| AX-158283198 | 22 | 90.718 | KV453116.1  | 9063508 | 17-scf00437 | 17 |
| AX-158287565 | 22 | 90.718 | KV453123.1  | 362934  | 17-scf00635 | 17 |
| AX-157705400 | 22 | 90.718 | 3ML01029673 | 735     | scf05295_1  | UN |
| AX-157706400 | 22 | 90.718 | 3ML01032187 | 490     | scf07803_1  | UN |
| AX-158283169 | 22 | 90.777 | KV453116.1  | 9026475 | 17-scf00437 | 17 |
| AX-158283171 | 22 | 90.813 | KV453116.1  | 9028995 | 17-scf00437 | 17 |
| AX-158283176 | 22 | 90.873 | KV453116.1  | 9035087 | 17-scf00437 | 17 |
| AX-158283148 | 22 | 90.934 | KV453116.1  | 8987847 | 17-scf00437 | 17 |
| AX-158283177 | 22 | 90.934 | KV453116.1  | 9038122 | 17-scf00437 | 17 |
| AX-158275606 | 22 | 92.896 | KV453115.1  | 130514  | 17-scf00436 | 17 |
| AX-157844028 | 22 | 93.332 | KV453121.1  | 499196  | 17-scf00435 | 17 |
| AX-158394955 | 22 | 93.332 | KV453121.1  | 988951  | 17-scf00435 | 17 |
| AX-158274678 | 22 | 93.332 | KV453121.1  | 990265  | 17-scf00435 | 17 |
| AX-158275060 | 22 | 93.332 | KV453121.1  | 1443734 | 17-scf00435 | 17 |
| AX-158275272 | 22 | 93.332 | KV453121.1  | 1710936 | 17-scf00435 | 17 |
| AX-158275392 | 22 | 93.332 | KV453121.1  | 1840579 | 17-scf00435 | 17 |
| AX-158275599 | 22 | 93.332 | KV453115.1  | 123401  | 17-scf00436 | 17 |
| AX-158275611 | 22 | 93.332 | KV453115.1  | 135029  | 17-scf00436 | 17 |
| AX-157757972 | 22 | 93.332 | KV453115.1  | 149477  | 17-scf00436 | 17 |
| AX-158275632 | 22 | 93.332 | KV453115.1  | 162668  | 17-scf00436 | 17 |
| AX-157721898 | 22 | 93.332 | KV453115.1  | 165624  | 17-scf00436 | 17 |
| AX-158275634 | 22 | 93.332 | KV453115.1  | 167581  | 17-scf00436 | 17 |
| AX-158275638 | 22 | 93.332 | KV453115.1  | 177604  | 17-scf00436 | 17 |
| AX-158416751 | 22 | 93.332 | KV453115.1  | 181198  | 17-scf00436 | 17 |
| AX-157750087 | 22 | 93.332 | KV453115.1  | 182632  | 17-scf00436 | 17 |
| AX-158275644 | 22 | 93.332 | KV453115.1  | 186842  | 17-scf00436 | 17 |
| AX-158275645 | 22 | 93.332 | KV453115.1  | 190742  | 17-scf00436 | 17 |
| AX-158275646 | 22 | 93.332 | KV453115.1  | 191898  | 17-scf00436 | 17 |
| AX-158275647 | 22 | 93.332 | KV453115.1  | 192383  | 17-scf00436 | 17 |
| AX-158275648 | 22 | 93.332 | KV453115.1  | 193306  | 17-scf00436 | 17 |

|              |    |        |            |         |             |    |
|--------------|----|--------|------------|---------|-------------|----|
| AX-157747596 | 22 | 93.332 | KV453115.1 | 193456  | 17-scf00436 | 17 |
| AX-157844055 | 22 | 93.332 | KV453115.1 | 196687  | 17-scf00436 | 17 |
| AX-157844058 | 22 | 93.332 | KV453115.1 | 200190  | 17-scf00436 | 17 |
| AX-157725660 | 22 | 93.332 | KV453115.1 | 205467  | 17-scf00436 | 17 |
| AX-157844059 | 22 | 93.332 | KV453115.1 | 206503  | 17-scf00436 | 17 |
| AX-157844060 | 22 | 93.332 | KV453115.1 | 207276  | 17-scf00436 | 17 |
| AX-158275652 | 22 | 93.332 | KV453115.1 | 209419  | 17-scf00436 | 17 |
| AX-157722411 | 22 | 93.332 | KV453115.1 | 222279  | 17-scf00436 | 17 |
| AX-157844061 | 22 | 93.332 | KV453115.1 | 225418  | 17-scf00436 | 17 |
| AX-158275661 | 22 | 93.332 | KV453115.1 | 226813  | 17-scf00436 | 17 |
| AX-158275668 | 22 | 93.332 | KV453115.1 | 233354  | 17-scf00436 | 17 |
| AX-158275679 | 22 | 93.332 | KV453115.1 | 241750  | 17-scf00436 | 17 |
| AX-157887919 | 22 | 93.332 | KV453115.1 | 243689  | 17-scf00436 | 17 |
| AX-158275684 | 22 | 93.332 | KV453115.1 | 247649  | 17-scf00436 | 17 |
| AX-158275695 | 22 | 93.332 | KV453115.1 | 259152  | 17-scf00436 | 17 |
| AX-158275696 | 22 | 93.332 | KV453115.1 | 260184  | 17-scf00436 | 17 |
| AX-157774046 | 22 | 93.332 | KV453115.1 | 268851  | 17-scf00436 | 17 |
| AX-158275707 | 22 | 93.332 | KV453115.1 | 273446  | 17-scf00436 | 17 |
| AX-158275709 | 22 | 93.332 | KV453115.1 | 274413  | 17-scf00436 | 17 |
| AX-158275711 | 22 | 93.332 | KV453115.1 | 275846  | 17-scf00436 | 17 |
| AX-157742845 | 22 | 93.332 | KV453115.1 | 279813  | 17-scf00436 | 17 |
| AX-158275715 | 22 | 93.332 | KV453115.1 | 280679  | 17-scf00436 | 17 |
| AX-158275716 | 22 | 93.332 | KV453115.1 | 284450  | 17-scf00436 | 17 |
| AX-158275725 | 22 | 93.332 | KV453115.1 | 297245  | 17-scf00436 | 17 |
| AX-158275730 | 22 | 93.332 | KV453115.1 | 304047  | 17-scf00436 | 17 |
| AX-157772921 | 22 | 93.332 | KV453115.1 | 319167  | 17-scf00436 | 17 |
| AX-158275750 | 22 | 93.332 | KV453115.1 | 326031  | 17-scf00436 | 17 |
| AX-158275913 | 22 | 93.332 | KV453115.1 | 556784  | 17-scf00436 | 17 |
| AX-158275950 | 22 | 93.332 | KV453115.1 | 596590  | 17-scf00436 | 17 |
| AX-157873052 | 22 | 93.332 | KV453115.1 | 869525  | 17-scf00436 | 17 |
| AX-158277941 | 22 | 93.332 | KV453116.1 | 1994463 | 17-scf00437 | 17 |
| AX-158278727 | 22 | 93.332 | KV453116.1 | 2982720 | 17-scf00437 | 17 |
| AX-158278923 | 22 | 93.332 | KV453116.1 | 3314719 | 17-scf00437 | 17 |
| AX-158282050 | 22 | 93.332 | KV453116.1 | 7527965 | 17-scf00437 | 17 |
| AX-158287488 | 22 | 93.332 | KV453120.1 | 46657   | 17-scf00444 | 17 |
| AX-158287734 | 22 | 93.332 | KV453123.1 | 152536  | 17-scf00635 | 17 |
| AX-158275202 | 22 | 93.519 | KV453121.1 | 1653332 | 17-scf00435 | 17 |
| AX-158275723 | 22 | 93.519 | KV453115.1 | 296541  | 17-scf00436 | 17 |
| AX-158275724 | 22 | 93.519 | KV453115.1 | 297086  | 17-scf00436 | 17 |
| AX-158275729 | 22 | 93.519 | KV453115.1 | 303659  | 17-scf00436 | 17 |
| AX-158275731 | 22 | 93.519 | KV453115.1 | 304287  | 17-scf00436 | 17 |
| AX-158275742 | 22 | 93.519 | KV453115.1 | 314243  | 17-scf00436 | 17 |
| AX-158275751 | 22 | 93.566 | KV453115.1 | 326966  | 17-scf00436 | 17 |
| AX-158275753 | 22 | 93.876 | KV453115.1 | 328167  | 17-scf00436 | 17 |
| AX-158275755 | 22 | 93.876 | KV453115.1 | 329827  | 17-scf00436 | 17 |
| AX-158274023 | 22 | 94.03  | KV453121.1 | 24933   | 17-scf00435 | 17 |
| AX-158274357 | 22 | 94.03  | KV453121.1 | 537410  | 17-scf00435 | 17 |
| AX-157887906 | 22 | 94.03  | KV453121.1 | 1412753 | 17-scf00435 | 17 |
| AX-158419359 | 22 | 94.03  | KV453121.1 | 1711708 | 17-scf00435 | 17 |
| AX-158275273 | 22 | 94.03  | KV453121.1 | 1712360 | 17-scf00435 | 17 |
| AX-157708118 | 22 | 94.03  | KV453121.1 | 1788111 | 17-scf00435 | 17 |

|              |    |        |            |         |             |    |
|--------------|----|--------|------------|---------|-------------|----|
| AX-158275596 | 22 | 94.03  | KV453115.1 | 119125  | 17-scf00436 | 17 |
| AX-158275601 | 22 | 94.03  | KV453115.1 | 124181  | 17-scf00436 | 17 |
| AX-158275764 | 22 | 94.03  | KV453115.1 | 345002  | 17-scf00436 | 17 |
| AX-157844067 | 22 | 94.03  | KV453115.1 | 354589  | 17-scf00436 | 17 |
| AX-158275773 | 22 | 94.03  | KV453115.1 | 361954  | 17-scf00436 | 17 |
| AX-158275779 | 22 | 94.03  | KV453115.1 | 372283  | 17-scf00436 | 17 |
| AX-158275781 | 22 | 94.03  | KV453115.1 | 374465  | 17-scf00436 | 17 |
| AX-158275803 | 22 | 94.03  | KV453115.1 | 400482  | 17-scf00436 | 17 |
| AX-158275806 | 22 | 94.03  | KV453115.1 | 403136  | 17-scf00436 | 17 |
| AX-158275810 | 22 | 94.03  | KV453115.1 | 406227  | 17-scf00436 | 17 |
| AX-158275812 | 22 | 94.03  | KV453115.1 | 407806  | 17-scf00436 | 17 |
| AX-158395001 | 22 | 94.03  | KV453115.1 | 408685  | 17-scf00436 | 17 |
| AX-158275813 | 22 | 94.03  | KV453115.1 | 409395  | 17-scf00436 | 17 |
| AX-158275818 | 22 | 94.03  | KV453115.1 | 412695  | 17-scf00436 | 17 |
| AX-158275891 | 22 | 94.03  | KV453115.1 | 517683  | 17-scf00436 | 17 |
| AX-158276064 | 22 | 94.03  | KV453115.1 | 754112  | 17-scf00436 | 17 |
| AX-158276077 | 22 | 94.03  | KV453115.1 | 765480  | 17-scf00436 | 17 |
| AX-158276192 | 22 | 94.03  | KV453115.1 | 932487  | 17-scf00436 | 17 |
| AX-158276257 | 22 | 94.03  | KV453115.1 | 1026040 | 17-scf00436 | 17 |
| AX-158276308 | 22 | 94.03  | KV453115.1 | 1108161 | 17-scf00436 | 17 |
| AX-157844292 | 22 | 94.03  | KV453116.1 | 2245228 | 17-scf00437 | 17 |
| AX-158278126 | 22 | 94.03  | KV453116.1 | 2260847 | 17-scf00437 | 17 |
| AX-158279904 | 22 | 94.03  | KV453116.1 | 4542767 | 17-scf00437 | 17 |
| AX-157746379 | 22 | 94.03  | KV453116.1 | 4605488 | 17-scf00437 | 17 |
| AX-158281777 | 22 | 94.03  | KV453116.1 | 7160546 | 17-scf00437 | 17 |
| AX-158282365 | 22 | 94.03  | KV453116.1 | 7950959 | 17-scf00437 | 17 |
| AX-158282529 | 22 | 94.03  | KV453116.1 | 8180167 | 17-scf00437 | 17 |
| AX-158282552 | 22 | 94.03  | KV453116.1 | 8228184 | 17-scf00437 | 17 |
| AX-158282573 | 22 | 94.03  | KV453116.1 | 8250796 | 17-scf00437 | 17 |
| AX-157867525 | 22 | 94.266 | KV453115.1 | 418511  | 17-scf00436 | 17 |
| AX-157860142 | 22 | 94.266 | KV453115.1 | 434452  | 17-scf00436 | 17 |
| AX-157844069 | 22 | 94.266 | KV453115.1 | 442543  | 17-scf00436 | 17 |
| AX-157754938 | 22 | 94.266 | KV453115.1 | 448979  | 17-scf00436 | 17 |
| AX-158275848 | 22 | 94.266 | KV453115.1 | 450483  | 17-scf00436 | 17 |
| AX-158275849 | 22 | 94.266 | KV453115.1 | 451252  | 17-scf00436 | 17 |
| AX-158275851 | 22 | 94.266 | KV453115.1 | 455849  | 17-scf00436 | 17 |
| AX-158411440 | 22 | 94.266 | KV453115.1 | 481904  | 17-scf00436 | 17 |
| AX-158275870 | 22 | 94.266 | KV453115.1 | 484120  | 17-scf00436 | 17 |
| AX-158275871 | 22 | 94.266 | KV453115.1 | 484548  | 17-scf00436 | 17 |
| AX-157745633 | 22 | 94.266 | KV453115.1 | 496581  | 17-scf00436 | 17 |
| AX-157745258 | 22 | 94.266 | KV453115.1 | 500898  | 17-scf00436 | 17 |
| AX-158275880 | 22 | 94.266 | KV453115.1 | 502052  | 17-scf00436 | 17 |
| AX-158275881 | 22 | 94.266 | KV453115.1 | 504381  | 17-scf00436 | 17 |
| AX-158275884 | 22 | 94.266 | KV453115.1 | 506826  | 17-scf00436 | 17 |
| AX-157844076 | 22 | 94.266 | KV453115.1 | 507237  | 17-scf00436 | 17 |
| AX-158275901 | 22 | 94.266 | KV453115.1 | 528965  | 17-scf00436 | 17 |
| AX-157844082 | 22 | 94.266 | KV453115.1 | 543105  | 17-scf00436 | 17 |
| AX-157844083 | 22 | 94.266 | KV453115.1 | 543380  | 17-scf00436 | 17 |
| AX-157844084 | 22 | 94.266 | KV453115.1 | 547261  | 17-scf00436 | 17 |
| AX-158275910 | 22 | 94.266 | KV453115.1 | 552105  | 17-scf00436 | 17 |
| AX-158275911 | 22 | 94.266 | KV453115.1 | 553151  | 17-scf00436 | 17 |

|              |    |        |            |         |             |    |
|--------------|----|--------|------------|---------|-------------|----|
| AX-157747655 | 22 | 94.266 | KV453115.1 | 558840  | 17-scf00436 | 17 |
| AX-157764382 | 22 | 94.266 | KV453115.1 | 563013  | 17-scf00436 | 17 |
| AX-158275927 | 22 | 94.266 | KV453115.1 | 568695  | 17-scf00436 | 17 |
| AX-158275928 | 22 | 94.266 | KV453115.1 | 569364  | 17-scf00436 | 17 |
| AX-158275929 | 22 | 94.266 | KV453115.1 | 569967  | 17-scf00436 | 17 |
| AX-158275933 | 22 | 94.266 | KV453115.1 | 575119  | 17-scf00436 | 17 |
| AX-158275988 | 22 | 94.266 | KV453115.1 | 658617  | 17-scf00436 | 17 |
| AX-157721472 | 22 | 94.266 | KV453115.1 | 711900  | 17-scf00436 | 17 |
| AX-158276027 | 22 | 94.266 | KV453115.1 | 716220  | 17-scf00436 | 17 |
| AX-158276088 | 22 | 94.266 | KV453115.1 | 777257  | 17-scf00436 | 17 |
| AX-158276128 | 22 | 94.266 | KV453115.1 | 853446  | 17-scf00436 | 17 |
| AX-158276131 | 22 | 94.266 | KV453115.1 | 857522  | 17-scf00436 | 17 |
| AX-158278645 | 22 | 94.266 | KV453116.1 | 2864645 | 17-scf00437 | 17 |
| AX-158281439 | 22 | 94.266 | KV453116.1 | 6552370 | 17-scf00437 | 17 |
| AX-158423516 | 22 | 94.266 | KV453116.1 | 8627645 | 17-scf00437 | 17 |
| AX-157746846 | 22 | 94.385 | KV453115.1 | 435233  | 17-scf00436 | 17 |
| AX-158275908 | 22 | 94.385 | KV453115.1 | 550366  | 17-scf00436 | 17 |
| AX-158275912 | 22 | 94.385 | KV453115.1 | 556113  | 17-scf00436 | 17 |
| AX-158275930 | 22 | 94.385 | KV453115.1 | 570557  | 17-scf00436 | 17 |
| AX-157745895 | 22 | 94.385 | KV453115.1 | 600216  | 17-scf00436 | 17 |
| AX-158275962 | 22 | 94.385 | KV453115.1 | 608949  | 17-scf00436 | 17 |
| AX-157717660 | 22 | 94.385 | KV453115.1 | 626487  | 17-scf00436 | 17 |
| AX-158275987 | 22 | 94.385 | KV453115.1 | 654980  | 17-scf00436 | 17 |
| AX-158276057 | 22 | 94.385 | KV453115.1 | 749153  | 17-scf00436 | 17 |
| AX-158276060 | 22 | 94.385 | KV453115.1 | 751938  | 17-scf00436 | 17 |
| AX-158276068 | 22 | 94.385 | KV453115.1 | 756803  | 17-scf00436 | 17 |
| AX-158276113 | 22 | 94.385 | KV453115.1 | 828458  | 17-scf00436 | 17 |
| AX-158276146 | 22 | 94.385 | KV453115.1 | 876028  | 17-scf00436 | 17 |
| AX-158274245 | 22 | 94.503 | KV453121.1 | 343196  | 17-scf00435 | 17 |
| AX-158274999 | 22 | 94.503 | KV453121.1 | 1368986 | 17-scf00435 | 17 |
| AX-158275218 | 22 | 94.503 | KV453121.1 | 1667792 | 17-scf00435 | 17 |
| AX-158275867 | 22 | 94.503 | KV453115.1 | 482398  | 17-scf00436 | 17 |
| AX-158275874 | 22 | 94.503 | KV453115.1 | 489855  | 17-scf00436 | 17 |
| AX-158275877 | 22 | 94.503 | KV453115.1 | 491354  | 17-scf00436 | 17 |
| AX-158275878 | 22 | 94.503 | KV453115.1 | 491839  | 17-scf00436 | 17 |
| AX-158275879 | 22 | 94.503 | KV453115.1 | 500711  | 17-scf00436 | 17 |
| AX-158275887 | 22 | 94.503 | KV453115.1 | 513308  | 17-scf00436 | 17 |
| AX-158275898 | 22 | 94.503 | KV453115.1 | 527641  | 17-scf00436 | 17 |
| AX-158275931 | 22 | 94.503 | KV453115.1 | 572377  | 17-scf00436 | 17 |
| AX-158275935 | 22 | 94.503 | KV453115.1 | 576915  | 17-scf00436 | 17 |
| AX-158275944 | 22 | 94.503 | KV453115.1 | 589992  | 17-scf00436 | 17 |
| AX-158275946 | 22 | 94.503 | KV453115.1 | 594293  | 17-scf00436 | 17 |
| AX-158275947 | 22 | 94.503 | KV453115.1 | 595659  | 17-scf00436 | 17 |
| AX-158275959 | 22 | 94.503 | KV453115.1 | 606290  | 17-scf00436 | 17 |
| AX-158275965 | 22 | 94.503 | KV453115.1 | 610685  | 17-scf00436 | 17 |
| AX-158275973 | 22 | 94.503 | KV453115.1 | 635611  | 17-scf00436 | 17 |
| AX-158275977 | 22 | 94.503 | KV453115.1 | 642982  | 17-scf00436 | 17 |
| AX-158276004 | 22 | 94.503 | KV453115.1 | 684382  | 17-scf00436 | 17 |
| AX-158276006 | 22 | 94.503 | KV453115.1 | 686199  | 17-scf00436 | 17 |
| AX-158276011 | 22 | 94.503 | KV453115.1 | 692172  | 17-scf00436 | 17 |
| AX-158276012 | 22 | 94.503 | KV453115.1 | 692753  | 17-scf00436 | 17 |

|              |    |        |             |         |             |    |
|--------------|----|--------|-------------|---------|-------------|----|
| AX-158276013 | 22 | 94.503 | KV453115.1  | 695339  | 17-scf00436 | 17 |
| AX-158276015 | 22 | 94.503 | KV453115.1  | 698038  | 17-scf00436 | 17 |
| AX-158276034 | 22 | 94.503 | KV453115.1  | 724292  | 17-scf00436 | 17 |
| AX-158276059 | 22 | 94.503 | KV453115.1  | 751076  | 17-scf00436 | 17 |
| AX-158276065 | 22 | 94.503 | KV453115.1  | 754711  | 17-scf00436 | 17 |
| AX-158276069 | 22 | 94.503 | KV453115.1  | 758142  | 17-scf00436 | 17 |
| AX-158276109 | 22 | 94.503 | KV453115.1  | 816453  | 17-scf00436 | 17 |
| AX-157887926 | 22 | 94.503 | KV453115.1  | 855143  | 17-scf00436 | 17 |
| AX-158276150 | 22 | 94.503 | KV453115.1  | 885278  | 17-scf00436 | 17 |
| AX-157844098 | 22 | 94.503 | KV453115.1  | 887607  | 17-scf00436 | 17 |
| AX-158276170 | 22 | 94.503 | KV453115.1  | 910269  | 17-scf00436 | 17 |
| AX-158276172 | 22 | 94.503 | KV453115.1  | 911050  | 17-scf00436 | 17 |
| AX-158276174 | 22 | 94.503 | KV453115.1  | 911548  | 17-scf00436 | 17 |
| AX-157772844 | 22 | 94.503 | KV453115.1  | 916395  | 17-scf00436 | 17 |
| AX-157873051 | 22 | 94.932 | KV453115.1  | 702860  | 17-scf00436 | 17 |
| AX-158274202 | 22 | 94.961 | KV453121.1  | 274258  | 17-scf00435 | 17 |
| AX-157773056 | 22 | 94.961 | KV453115.1  | 306056  | 17-scf00436 | 17 |
| AX-158275790 | 22 | 94.961 | KV453115.1  | 383865  | 17-scf00436 | 17 |
| AX-158275808 | 22 | 94.961 | KV453115.1  | 404413  | 17-scf00436 | 17 |
| AX-158275819 | 22 | 94.961 | KV453115.1  | 413824  | 17-scf00436 | 17 |
| AX-158275833 | 22 | 94.961 | KV453115.1  | 428720  | 17-scf00436 | 17 |
| AX-158275955 | 22 | 94.961 | KV453115.1  | 600901  | 17-scf00436 | 17 |
| AX-158276044 | 22 | 94.961 | KV453115.1  | 734580  | 17-scf00436 | 17 |
| AX-157752165 | 22 | 94.961 | KV453115.1  | 757576  | 17-scf00436 | 17 |
| AX-158276053 | 22 | 94.987 | KV453115.1  | 746129  | 17-scf00436 | 17 |
| AX-158274281 | 22 | 95.022 | KV453121.1  | 388785  | 17-scf00435 | 17 |
| AX-157759568 | 22 | 95.022 | KV453121.1  | 412329  | 17-scf00435 | 17 |
| AX-158274323 | 22 | 95.022 | KV453121.1  | 450573  | 17-scf00435 | 17 |
| AX-158274432 | 22 | 95.022 | KV453121.1  | 640398  | 17-scf00435 | 17 |
| AX-158274793 | 22 | 95.022 | KV453121.1  | 1126417 | 17-scf00435 | 17 |
| AX-158274930 | 22 | 95.022 | KV453121.1  | 1292769 | 17-scf00435 | 17 |
| AX-158274933 | 22 | 95.022 | KV453121.1  | 1295134 | 17-scf00435 | 17 |
| AX-157772878 | 22 | 95.022 | KV453121.1  | 1300694 | 17-scf00435 | 17 |
| AX-158275048 | 22 | 95.022 | KV453121.1  | 1423693 | 17-scf00435 | 17 |
| AX-158275054 | 22 | 95.022 | KV453121.1  | 1435742 | 17-scf00435 | 17 |
| AX-158275343 | 22 | 95.022 | KV453121.1  | 1776731 | 17-scf00435 | 17 |
| AX-158275479 | 22 | 95.022 | KV453121.1  | 1953313 | 17-scf00435 | 17 |
| AX-158275480 | 22 | 95.022 | KV453121.1  | 1953705 | 17-scf00435 | 17 |
| AX-158275844 | 22 | 95.022 | KV453115.1  | 440224  | 17-scf00436 | 17 |
| AX-158276056 | 22 | 95.022 | KV453115.1  | 748336  | 17-scf00436 | 17 |
| AX-158276080 | 22 | 95.022 | KV453115.1  | 767802  | 17-scf00436 | 17 |
| AX-158276086 | 22 | 95.022 | KV453115.1  | 773948  | 17-scf00436 | 17 |
| AX-158276098 | 22 | 95.022 | KV453115.1  | 799060  | 17-scf00436 | 17 |
| AX-158276121 | 22 | 95.022 | KV453115.1  | 842963  | 17-scf00436 | 17 |
| AX-158276160 | 22 | 95.022 | KV453115.1  | 897602  | 17-scf00436 | 17 |
| AX-157873054 | 22 | 95.022 | KV453115.1  | 961294  | 17-scf00436 | 17 |
| AX-158287710 | 22 | 95.022 | KV453123.1  | 180457  | 17-scf00635 | 17 |
| AX-157845195 | 22 | 95.022 | KV453123.1  | 393652  | 17-scf00635 | 17 |
| AX-157845194 | 22 | 95.022 | KV453123.1  | 411483  | 17-scf00635 | 17 |
| AX-158287516 | 22 | 95.022 | KV453123.1  | 424175  | 17-scf00635 | 17 |
| AX-157687761 | 22 | 95.022 | 3ML01025177 | 6828    | scf01004_1  | UN |

|              |    |        |            |         |             |    |
|--------------|----|--------|------------|---------|-------------|----|
| AX-157844025 | 22 | 95.044 | KV453121.1 | 478249  | 17-scf00435 | 17 |
| AX-158416715 | 22 | 95.044 | KV453121.1 | 1010758 | 17-scf00435 | 17 |
| AX-157758196 | 22 | 95.044 | KV453121.1 | 1450662 | 17-scf00435 | 17 |
| AX-158275072 | 22 | 95.044 | KV453121.1 | 1463832 | 17-scf00435 | 17 |
| AX-158275176 | 22 | 95.044 | KV453121.1 | 1610569 | 17-scf00435 | 17 |
| AX-158275177 | 22 | 95.044 | KV453121.1 | 1611141 | 17-scf00435 | 17 |
| AX-158275262 | 22 | 95.044 | KV453121.1 | 1702498 | 17-scf00435 | 17 |
| AX-158275334 | 22 | 95.044 | KV453121.1 | 1767280 | 17-scf00435 | 17 |
| AX-158275433 | 22 | 95.044 | KV453121.1 | 1895648 | 17-scf00435 | 17 |
| AX-158275544 | 22 | 95.044 | KV453115.1 | 24499   | 17-scf00436 | 17 |
| AX-158275574 | 22 | 95.044 | KV453115.1 | 77581   | 17-scf00436 | 17 |
| AX-158275670 | 22 | 95.044 | KV453115.1 | 235560  | 17-scf00436 | 17 |
| AX-158275678 | 22 | 95.044 | KV453115.1 | 241260  | 17-scf00436 | 17 |
| AX-158275693 | 22 | 95.044 | KV453115.1 | 256467  | 17-scf00436 | 17 |
| AX-158275698 | 22 | 95.044 | KV453115.1 | 261676  | 17-scf00436 | 17 |
| AX-158275708 | 22 | 95.044 | KV453115.1 | 274268  | 17-scf00436 | 17 |
| AX-157844065 | 22 | 95.044 | KV453115.1 | 351971  | 17-scf00436 | 17 |
| AX-158275776 | 22 | 95.044 | KV453115.1 | 363588  | 17-scf00436 | 17 |
| AX-158275784 | 22 | 95.044 | KV453115.1 | 377624  | 17-scf00436 | 17 |
| AX-158275846 | 22 | 95.044 | KV453115.1 | 446909  | 17-scf00436 | 17 |
| AX-157717833 | 22 | 95.044 | KV453115.1 | 452170  | 17-scf00436 | 17 |
| AX-158275856 | 22 | 95.044 | KV453115.1 | 464559  | 17-scf00436 | 17 |
| AX-158275858 | 22 | 95.044 | KV453115.1 | 466814  | 17-scf00436 | 17 |
| AX-158275882 | 22 | 95.044 | KV453115.1 | 504651  | 17-scf00436 | 17 |
| AX-157844080 | 22 | 95.044 | KV453115.1 | 534042  | 17-scf00436 | 17 |
| AX-157746982 | 22 | 95.044 | KV453115.1 | 561858  | 17-scf00436 | 17 |
| AX-157844086 | 22 | 95.044 | KV453115.1 | 582055  | 17-scf00436 | 17 |
| AX-158276049 | 22 | 95.044 | KV453115.1 | 743080  | 17-scf00436 | 17 |
| AX-158276074 | 22 | 95.044 | KV453115.1 | 761694  | 17-scf00436 | 17 |
| AX-158276079 | 22 | 95.044 | KV453115.1 | 766059  | 17-scf00436 | 17 |
| AX-158276148 | 22 | 95.044 | KV453115.1 | 883854  | 17-scf00436 | 17 |
| AX-158276167 | 22 | 95.044 | KV453115.1 | 903293  | 17-scf00436 | 17 |
| AX-158277124 | 22 | 95.044 | KV453116.1 | 1009944 | 17-scf00437 | 17 |
| AX-157757887 | 22 | 95.044 | KV453116.1 | 1220829 | 17-scf00437 | 17 |
| AX-157755975 | 22 | 95.044 | KV453116.1 | 1958591 | 17-scf00437 | 17 |
| AX-157724614 | 22 | 95.044 | KV453116.1 | 2125122 | 17-scf00437 | 17 |
| AX-158278037 | 22 | 95.044 | KV453116.1 | 2126398 | 17-scf00437 | 17 |
| AX-157844319 | 22 | 95.044 | KV453116.1 | 2424818 | 17-scf00437 | 17 |
| AX-158278406 | 22 | 95.044 | KV453116.1 | 2588530 | 17-scf00437 | 17 |
| AX-158278518 | 22 | 95.044 | KV453116.1 | 2710571 | 17-scf00437 | 17 |
| AX-157714342 | 22 | 95.044 | KV453116.1 | 2762419 | 17-scf00437 | 17 |
| AX-158278918 | 22 | 95.044 | KV453116.1 | 3297082 | 17-scf00437 | 17 |
| AX-158278921 | 22 | 95.044 | KV453116.1 | 3308481 | 17-scf00437 | 17 |
| AX-158416876 | 22 | 95.044 | KV453116.1 | 4197203 | 17-scf00437 | 17 |
| AX-158281589 | 22 | 95.044 | KV453116.1 | 6829328 | 17-scf00437 | 17 |
| AX-158281751 | 22 | 95.044 | KV453116.1 | 7087157 | 17-scf00437 | 17 |
| AX-158281967 | 22 | 95.044 | KV453116.1 | 7444016 | 17-scf00437 | 17 |
| AX-158282079 | 22 | 95.044 | KV453116.1 | 7559773 | 17-scf00437 | 17 |
| AX-158282091 | 22 | 95.044 | KV453116.1 | 7578372 | 17-scf00437 | 17 |
| AX-158282359 | 22 | 95.044 | KV453116.1 | 7943374 | 17-scf00437 | 17 |
| AX-158282579 | 22 | 95.044 | KV453116.1 | 8265937 | 17-scf00437 | 17 |

|              |    |        |             |         |               |    |
|--------------|----|--------|-------------|---------|---------------|----|
| AX-157745182 | 22 | 95.044 | KV453116.1  | 8635086 | 17-scf00437   | 17 |
| AX-158282933 | 22 | 95.044 | KV453116.1  | 8714159 | 17-scf00437   | 17 |
| AX-158282942 | 22 | 95.044 | KV453116.1  | 8724243 | 17-scf00437   | 17 |
| AX-157747204 | 22 | 95.044 | KV453116.1  | 8734906 | 17-scf00437   | 17 |
| AX-158282956 | 22 | 95.044 | KV453116.1  | 8747903 | 17-scf00437   | 17 |
| AX-158283090 | 22 | 95.044 | KV453116.1  | 8912901 | 17-scf00437   | 17 |
| AX-157844799 | 22 | 95.044 | KV453116.1  | 9005559 | 17-scf00437   | 17 |
| AX-157867585 | 22 | 95.044 | KV453114.1  | 4560197 | 17-scf00439   | 17 |
| AX-158287486 | 22 | 95.044 | KV453120.1  | 41410   | 17-scf00444   | 17 |
| AX-158287722 | 22 | 95.044 | KV453123.1  | 166635  | 17-scf00635   | 17 |
| AX-158287504 | 22 | 95.044 | KV453123.1  | 437483  | 17-scf00635   | 17 |
| AX-157707268 | 22 | 95.044 | 3ML01033861 | 354     | scf09527_1    | UN |
| AX-157746572 | 22 | 95.064 | KV453115.1  | 187889  | 17-scf00436   | 17 |
| AX-158276173 | 22 | 95.064 | KV453115.1  | 911216  | 17-scf00436   | 17 |
| AX-158274100 | 22 | 95.081 | KV453121.1  | 120922  | 17-scf00435   | 17 |
| AX-158274680 | 22 | 95.081 | KV453121.1  | 991181  | 17-scf00435   | 17 |
| AX-158275828 | 22 | 95.081 | KV453115.1  | 422118  | 17-scf00436   | 17 |
| AX-158276162 | 22 | 95.081 | KV453115.1  | 898138  | 17-scf00436   | 17 |
| AX-158276175 | 22 | 95.081 | KV453115.1  | 912372  | 17-scf00436   | 17 |
| AX-158287595 | 22 | 95.081 | KV453123.1  | 327042  | 17-scf00635   | 17 |
| AX-157702677 | 22 | 95.081 | DX093631.1  | 384     | ORI212 lctalu | UN |
| AX-157706399 | 22 | 95.081 | 3ML01032187 | 349     | scf07803_1    | UN |
| AX-158274026 | 22 | 95.409 | KV453121.1  | 28915   | 17-scf00435   | 17 |
| AX-158274087 | 22 | 95.409 | KV453121.1  | 108932  | 17-scf00435   | 17 |
| AX-158274158 | 22 | 95.409 | KV453121.1  | 202726  | 17-scf00435   | 17 |
| AX-158274216 | 22 | 95.409 | KV453121.1  | 290691  | 17-scf00435   | 17 |
| AX-158274311 | 22 | 95.409 | KV453121.1  | 422298  | 17-scf00435   | 17 |
| AX-158274331 | 22 | 95.409 | KV453121.1  | 489517  | 17-scf00435   | 17 |
| AX-158274354 | 22 | 95.409 | KV453121.1  | 535458  | 17-scf00435   | 17 |
| AX-158274374 | 22 | 95.409 | KV453121.1  | 558935  | 17-scf00435   | 17 |
| AX-158275280 | 22 | 95.409 | KV453121.1  | 1721236 | 17-scf00435   | 17 |
| AX-158275337 | 22 | 95.409 | KV453121.1  | 1770655 | 17-scf00435   | 17 |
| AX-158275448 | 22 | 95.409 | KV453121.1  | 1918515 | 17-scf00435   | 17 |
| AX-158275454 | 22 | 95.409 | KV453121.1  | 1928367 | 17-scf00435   | 17 |
| AX-158275529 | 22 | 95.409 | KV453121.1  | 2014707 | 17-scf00435   | 17 |
| AX-158276186 | 22 | 95.409 | KV453115.1  | 925090  | 17-scf00436   | 17 |
| AX-158276189 | 22 | 95.409 | KV453115.1  | 929848  | 17-scf00436   | 17 |
| AX-158276193 | 22 | 95.409 | KV453115.1  | 934389  | 17-scf00436   | 17 |
| AX-158276207 | 22 | 95.409 | KV453115.1  | 955067  | 17-scf00436   | 17 |
| AX-158276209 | 22 | 95.409 | KV453115.1  | 957552  | 17-scf00436   | 17 |
| AX-158276213 | 22 | 95.409 | KV453115.1  | 960045  | 17-scf00436   | 17 |
| AX-157844103 | 22 | 95.409 | KV453115.1  | 963433  | 17-scf00436   | 17 |
| AX-157710979 | 22 | 95.409 | KV453115.1  | 978771  | 17-scf00436   | 17 |
| AX-158276261 | 22 | 95.409 | KV453115.1  | 1032968 | 17-scf00436   | 17 |
| AX-157686863 | 22 | 95.409 | KV453435.1  | 4689    | scf00750      | UN |
| AX-157687645 | 22 | 95.409 | KV453571.1  | 9758    | scf00958      | UN |
| AX-157705707 | 22 | 95.409 | 3ML01030670 | 542     | scf06270_1    | UN |
| AX-157705708 | 22 | 95.409 | 3ML01030670 | 646     | scf06270_1    | UN |
| AX-158274104 | 22 | 95.941 | KV453121.1  | 127857  | 17-scf00435   | 17 |
| AX-158274107 | 22 | 95.941 | KV453121.1  | 131937  | 17-scf00435   | 17 |
| AX-158274147 | 22 | 95.941 | KV453121.1  | 189251  | 17-scf00435   | 17 |



|              |    |        |             |         |             |    |
|--------------|----|--------|-------------|---------|-------------|----|
| AX-157774911 | 22 | 95.941 | KV453121.1  | 206103  | 17-scf00435 | 17 |
| AX-158274450 | 22 | 95.941 | KV453121.1  | 682019  | 17-scf00435 | 17 |
| AX-158274643 | 22 | 95.941 | KV453121.1  | 960864  | 17-scf00435 | 17 |
| AX-158274852 | 22 | 95.941 | KV453121.1  | 1190289 | 17-scf00435 | 17 |
| AX-158274952 | 22 | 95.941 | KV453121.1  | 1313328 | 17-scf00435 | 17 |
| AX-157873043 | 22 | 95.941 | KV453121.1  | 1715159 | 17-scf00435 | 17 |
| AX-158275445 | 22 | 95.941 | KV453121.1  | 1911951 | 17-scf00435 | 17 |
| AX-158275869 | 22 | 95.941 | KV453115.1  | 483608  | 17-scf00436 | 17 |
| AX-157719271 | 22 | 95.941 | KV453115.1  | 631468  | 17-scf00436 | 17 |
| AX-158275999 | 22 | 95.941 | KV453115.1  | 678741  | 17-scf00436 | 17 |
| AX-158276021 | 22 | 95.941 | KV453115.1  | 703122  | 17-scf00436 | 17 |
| AX-157768794 | 22 | 95.941 | KV453115.1  | 778505  | 17-scf00436 | 17 |
| AX-158276237 | 22 | 95.941 | KV453115.1  | 994998  | 17-scf00436 | 17 |
| AX-158276335 | 22 | 95.941 | KV453115.1  | 1149667 | 17-scf00436 | 17 |
| AX-157741878 | 22 | 95.941 | KV453115.1  | 1152433 | 17-scf00436 | 17 |
| AX-158377923 | 22 | 95.941 | KV453123.1  | 13197   | 17-scf00635 | 17 |
| AX-157688408 | 22 | 95.941 | 3ML01026099 | 1194    | scf01698_1  | UN |
| AX-158274109 | 22 | 95.95  | KV453121.1  | 136184  | 17-scf00435 | 17 |
| AX-157750252 | 22 | 95.95  | KV453121.1  | 166999  | 17-scf00435 | 17 |
| AX-158274004 | 22 | 95.963 | KV453121.1  | 9015    | 17-scf00435 | 17 |
| AX-158274006 | 22 | 95.963 | KV453121.1  | 10307   | 17-scf00435 | 17 |
| AX-158274031 | 22 | 95.963 | KV453121.1  | 33694   | 17-scf00435 | 17 |
| AX-158274035 | 22 | 95.963 | KV453121.1  | 38005   | 17-scf00435 | 17 |
| AX-158274036 | 22 | 95.963 | KV453121.1  | 38439   | 17-scf00435 | 17 |
| AX-158274040 | 22 | 95.963 | KV453121.1  | 43154   | 17-scf00435 | 17 |
| AX-158274041 | 22 | 95.963 | KV453121.1  | 44127   | 17-scf00435 | 17 |
| AX-158381148 | 22 | 95.963 | KV453121.1  | 44203   | 17-scf00435 | 17 |
| AX-157887892 | 22 | 95.963 | KV453121.1  | 45884   | 17-scf00435 | 17 |
| AX-158274047 | 22 | 95.963 | KV453121.1  | 49770   | 17-scf00435 | 17 |
| AX-158274062 | 22 | 95.963 | KV453121.1  | 72464   | 17-scf00435 | 17 |
| AX-157860121 | 22 | 95.963 | KV453121.1  | 85372   | 17-scf00435 | 17 |
| AX-158274093 | 22 | 95.963 | KV453121.1  | 114149  | 17-scf00435 | 17 |
| AX-158274112 | 22 | 95.963 | KV453121.1  | 137627  | 17-scf00435 | 17 |
| AX-158274116 | 22 | 95.963 | KV453121.1  | 144871  | 17-scf00435 | 17 |
| AX-157844005 | 22 | 95.963 | KV453121.1  | 144954  | 17-scf00435 | 17 |
| AX-158274119 | 22 | 95.963 | KV453121.1  | 150712  | 17-scf00435 | 17 |
| AX-158274120 | 22 | 95.963 | KV453121.1  | 152124  | 17-scf00435 | 17 |
| AX-158274121 | 22 | 95.963 | KV453121.1  | 153210  | 17-scf00435 | 17 |
| AX-158274125 | 22 | 95.963 | KV453121.1  | 155806  | 17-scf00435 | 17 |
| AX-158274128 | 22 | 95.963 | KV453121.1  | 159041  | 17-scf00435 | 17 |
| AX-158274131 | 22 | 95.963 | KV453121.1  | 162648  | 17-scf00435 | 17 |
| AX-158274132 | 22 | 95.963 | KV453121.1  | 164846  | 17-scf00435 | 17 |
| AX-158416694 | 22 | 95.963 | KV453121.1  | 166817  | 17-scf00435 | 17 |
| AX-158274133 | 22 | 95.963 | KV453121.1  | 167798  | 17-scf00435 | 17 |
| AX-158274136 | 22 | 95.963 | KV453121.1  | 175072  | 17-scf00435 | 17 |
| AX-158274141 | 22 | 95.963 | KV453121.1  | 178406  | 17-scf00435 | 17 |
| AX-158274149 | 22 | 95.963 | KV453121.1  | 191577  | 17-scf00435 | 17 |
| AX-158274165 | 22 | 95.963 | KV453121.1  | 207548  | 17-scf00435 | 17 |
| AX-158274173 | 22 | 95.963 | KV453121.1  | 219516  | 17-scf00435 | 17 |
| AX-157739904 | 22 | 95.963 | KV453121.1  | 243110  | 17-scf00435 | 17 |
| AX-158274226 | 22 | 95.963 | KV453121.1  | 303094  | 17-scf00435 | 17 |

|              |    |        |             |         |             |    |
|--------------|----|--------|-------------|---------|-------------|----|
| AX-158274228 | 22 | 95.963 | KV453121.1  | 308669  | 17-scf00435 | 17 |
| AX-158274448 | 22 | 95.963 | KV453121.1  | 680557  | 17-scf00435 | 17 |
| AX-158275889 | 22 | 95.963 | KV453115.1  | 515272  | 17-scf00436 | 17 |
| AX-158276324 | 22 | 95.963 | KV453115.1  | 1133528 | 17-scf00436 | 17 |
| AX-158276346 | 22 | 95.963 | KV453115.1  | 1186791 | 17-scf00436 | 17 |
| AX-157708224 | 22 | 95.963 | KV453116.1  | 9017159 | 17-scf00437 | 17 |
| AX-157704433 | 22 | 95.963 | 3ML01026088 | 619     | scf01686_1  | UN |
| AX-157775797 | 22 | 96.102 | KV453121.1  | 7793    | 17-scf00435 | 17 |
| AX-158274020 | 22 | 96.102 | KV453121.1  | 23480   | 17-scf00435 | 17 |
| AX-158274037 | 22 | 96.102 | KV453121.1  | 39855   | 17-scf00435 | 17 |
| AX-158274053 | 22 | 96.102 | KV453121.1  | 65380   | 17-scf00435 | 17 |
| AX-158274111 | 22 | 96.102 | KV453121.1  | 137158  | 17-scf00435 | 17 |
| AX-158274123 | 22 | 96.102 | KV453121.1  | 154675  | 17-scf00435 | 17 |
| AX-158274129 | 22 | 96.102 | KV453121.1  | 159928  | 17-scf00435 | 17 |
| AX-158274142 | 22 | 96.102 | KV453121.1  | 178786  | 17-scf00435 | 17 |
| AX-158274143 | 22 | 96.102 | KV453121.1  | 180552  | 17-scf00435 | 17 |
| AX-158274152 | 22 | 96.102 | KV453121.1  | 195291  | 17-scf00435 | 17 |
| AX-158274154 | 22 | 96.102 | KV453121.1  | 198441  | 17-scf00435 | 17 |
| AX-158274174 | 22 | 96.102 | KV453121.1  | 221245  | 17-scf00435 | 17 |
| AX-158274189 | 22 | 96.102 | KV453121.1  | 247053  | 17-scf00435 | 17 |
| AX-157742401 | 22 | 96.102 | KV453121.1  | 253920  | 17-scf00435 | 17 |
| AX-158274192 | 22 | 96.102 | KV453121.1  | 257931  | 17-scf00435 | 17 |
| AX-158274195 | 22 | 96.102 | KV453121.1  | 261160  | 17-scf00435 | 17 |
| AX-158274196 | 22 | 96.102 | KV453121.1  | 262194  | 17-scf00435 | 17 |
| AX-158274198 | 22 | 96.102 | KV453121.1  | 265867  | 17-scf00435 | 17 |
| AX-157743030 | 22 | 96.102 | KV453121.1  | 266591  | 17-scf00435 | 17 |
| AX-157724165 | 22 | 96.102 | KV453121.1  | 271068  | 17-scf00435 | 17 |
| AX-158274211 | 22 | 96.102 | KV453121.1  | 286934  | 17-scf00435 | 17 |
| AX-158274215 | 22 | 96.102 | KV453121.1  | 289186  | 17-scf00435 | 17 |
| AX-158274222 | 22 | 96.102 | KV453121.1  | 297167  | 17-scf00435 | 17 |
| AX-158274223 | 22 | 96.102 | KV453121.1  | 301575  | 17-scf00435 | 17 |
| AX-158274224 | 22 | 96.102 | KV453121.1  | 302001  | 17-scf00435 | 17 |
| AX-158274227 | 22 | 96.102 | KV453121.1  | 303540  | 17-scf00435 | 17 |
| AX-157844010 | 22 | 96.102 | KV453121.1  | 345267  | 17-scf00435 | 17 |
| AX-158274265 | 22 | 96.102 | KV453121.1  | 373993  | 17-scf00435 | 17 |
| AX-158274275 | 22 | 96.102 | KV453121.1  | 383155  | 17-scf00435 | 17 |
| AX-158274330 | 22 | 96.102 | KV453121.1  | 486948  | 17-scf00435 | 17 |
| AX-158274468 | 22 | 96.102 | KV453121.1  | 696626  | 17-scf00435 | 17 |
| AX-158274556 | 22 | 96.102 | KV453121.1  | 818133  | 17-scf00435 | 17 |
| AX-158274668 | 22 | 96.102 | KV453121.1  | 981010  | 17-scf00435 | 17 |
| AX-158274720 | 22 | 96.102 | KV453121.1  | 1038561 | 17-scf00435 | 17 |
| AX-158274824 | 22 | 96.102 | KV453121.1  | 1165700 | 17-scf00435 | 17 |
| AX-158274851 | 22 | 96.102 | KV453121.1  | 1189365 | 17-scf00435 | 17 |
| AX-158274877 | 22 | 96.102 | KV453121.1  | 1231798 | 17-scf00435 | 17 |
| AX-158275154 | 22 | 96.102 | KV453121.1  | 1568699 | 17-scf00435 | 17 |
| AX-158275961 | 22 | 96.102 | KV453115.1  | 608438  | 17-scf00436 | 17 |
| AX-158276194 | 22 | 96.102 | KV453115.1  | 935222  | 17-scf00436 | 17 |
| AX-158276221 | 22 | 96.102 | KV453115.1  | 970911  | 17-scf00436 | 17 |
| AX-157753684 | 22 | 96.102 | KV453115.1  | 990149  | 17-scf00436 | 17 |
| AX-157756714 | 22 | 96.102 | KV453115.1  | 1034329 | 17-scf00436 | 17 |
| AX-158276342 | 22 | 96.102 | KV453115.1  | 1180522 | 17-scf00436 | 17 |

|              |    |        |             |         |             |    |
|--------------|----|--------|-------------|---------|-------------|----|
| AX-158273950 | 22 | 96.494 | KV453108.1  | 86094   | 17-scf00434 | 17 |
| AX-158275325 | 22 | 96.494 | KV453121.1  | 1758858 | 17-scf00435 | 17 |
| AX-158273909 | 22 | 96.738 | KV453108.1  | 27855   | 17-scf00434 | 17 |
| AX-158273923 | 22 | 96.738 | KV453108.1  | 49186   | 17-scf00434 | 17 |
| AX-158274292 | 22 | 96.738 | KV453121.1  | 400683  | 17-scf00435 | 17 |
| AX-158274294 | 22 | 96.738 | KV453121.1  | 401580  | 17-scf00435 | 17 |
| AX-157708391 | 22 | 96.738 | KV453121.1  | 402097  | 17-scf00435 | 17 |
| AX-158274296 | 22 | 96.738 | KV453121.1  | 403123  | 17-scf00435 | 17 |
| AX-158381150 | 22 | 96.738 | KV453121.1  | 419040  | 17-scf00435 | 17 |
| AX-158274310 | 22 | 96.738 | KV453121.1  | 419223  | 17-scf00435 | 17 |
| AX-158274315 | 22 | 96.738 | KV453121.1  | 431215  | 17-scf00435 | 17 |
| AX-157726659 | 22 | 96.738 | KV453121.1  | 439235  | 17-scf00435 | 17 |
| AX-158274320 | 22 | 96.738 | KV453121.1  | 443149  | 17-scf00435 | 17 |
| AX-157844024 | 22 | 96.738 | KV453121.1  | 461571  | 17-scf00435 | 17 |
| AX-158274488 | 22 | 96.738 | KV453121.1  | 716961  | 17-scf00435 | 17 |
| AX-157773524 | 22 | 96.738 | KV453121.1  | 734377  | 17-scf00435 | 17 |
| AX-157887898 | 22 | 96.738 | KV453121.1  | 743654  | 17-scf00435 | 17 |
| AX-158274526 | 22 | 96.738 | KV453121.1  | 769458  | 17-scf00435 | 17 |
| AX-158274583 | 22 | 96.738 | KV453121.1  | 882950  | 17-scf00435 | 17 |
| AX-158274593 | 22 | 96.738 | KV453121.1  | 899414  | 17-scf00435 | 17 |
| AX-158274634 | 22 | 96.738 | KV453121.1  | 952990  | 17-scf00435 | 17 |
| AX-158274654 | 22 | 96.738 | KV453121.1  | 970550  | 17-scf00435 | 17 |
| AX-158274658 | 22 | 96.738 | KV453121.1  | 974065  | 17-scf00435 | 17 |
| AX-157880592 | 22 | 96.738 | KV453121.1  | 1112048 | 17-scf00435 | 17 |
| AX-158274860 | 22 | 96.738 | KV453121.1  | 1205602 | 17-scf00435 | 17 |
| AX-158274944 | 22 | 96.738 | KV453121.1  | 1305704 | 17-scf00435 | 17 |
| AX-158274965 | 22 | 96.738 | KV453121.1  | 1329471 | 17-scf00435 | 17 |
| AX-158274969 | 22 | 96.738 | KV453121.1  | 1338350 | 17-scf00435 | 17 |
| AX-158275038 | 22 | 96.738 | KV453121.1  | 1410302 | 17-scf00435 | 17 |
| AX-158275092 | 22 | 96.738 | KV453121.1  | 1488038 | 17-scf00435 | 17 |
| AX-158275099 | 22 | 96.738 | KV453121.1  | 1497125 | 17-scf00435 | 17 |
| AX-158275119 | 22 | 96.738 | KV453121.1  | 1520881 | 17-scf00435 | 17 |
| AX-158275123 | 22 | 96.738 | KV453121.1  | 1530485 | 17-scf00435 | 17 |
| AX-158275125 | 22 | 96.738 | KV453121.1  | 1531938 | 17-scf00435 | 17 |
| AX-158275178 | 22 | 96.738 | KV453121.1  | 1612266 | 17-scf00435 | 17 |
| AX-158275184 | 22 | 96.738 | KV453121.1  | 1617735 | 17-scf00435 | 17 |
| AX-158275187 | 22 | 96.738 | KV453121.1  | 1620966 | 17-scf00435 | 17 |
| AX-158275189 | 22 | 96.738 | KV453121.1  | 1621857 | 17-scf00435 | 17 |
| AX-158275491 | 22 | 96.738 | KV453121.1  | 1973875 | 17-scf00435 | 17 |
| AX-157745099 | 22 | 96.738 | KV453123.1  | 223939  | 17-scf00635 | 17 |
| AX-157867596 | 22 | 96.738 | KV453123.1  | 288631  | 17-scf00635 | 17 |
| AX-158287578 | 22 | 96.738 | KV453123.1  | 346772  | 17-scf00635 | 17 |
| AX-158287575 | 22 | 96.738 | KV453123.1  | 350643  | 17-scf00635 | 17 |
| AX-158287537 | 22 | 96.738 | KV453123.1  | 393608  | 17-scf00635 | 17 |
| AX-157686867 | 22 | 96.738 | KV453435.1  | 16857   | scf00750    | UN |
| AX-157688501 | 22 | 96.738 | 3ML01026319 | 1199    | scf01914_1  | UN |
| AX-157844013 | 22 | 96.742 | KV453121.1  | 354390  | 17-scf00435 | 17 |
| AX-158275332 | 22 | 96.742 | KV453121.1  | 1765003 | 17-scf00435 | 17 |
| AX-158276000 | 22 | 96.742 | KV453115.1  | 679538  | 17-scf00436 | 17 |
| AX-158287591 | 22 | 96.742 | KV453123.1  | 330294  | 17-scf00635 | 17 |
| AX-157708379 | 22 | 96.747 | KV453121.1  | 354668  | 17-scf00435 | 17 |

|              |    |        |            |         |             |    |
|--------------|----|--------|------------|---------|-------------|----|
| AX-158274257 | 22 | 96.751 | KV453121.1 | 359833  | 17-scf00435 | 17 |
| AX-158274259 | 22 | 96.756 | KV453121.1 | 363470  | 17-scf00435 | 17 |
| AX-158274118 | 22 | 96.761 | KV453121.1 | 148558  | 17-scf00435 | 17 |
| AX-158274169 | 22 | 96.761 | KV453121.1 | 213625  | 17-scf00435 | 17 |
| AX-158274181 | 22 | 96.761 | KV453121.1 | 230624  | 17-scf00435 | 17 |
| AX-157844008 | 22 | 96.761 | KV453121.1 | 328903  | 17-scf00435 | 17 |
| AX-157844017 | 22 | 96.761 | KV453121.1 | 367914  | 17-scf00435 | 17 |
| AX-158274260 | 22 | 96.761 | KV453121.1 | 367950  | 17-scf00435 | 17 |
| AX-157716238 | 22 | 96.761 | KV453121.1 | 368590  | 17-scf00435 | 17 |
| AX-158274638 | 22 | 96.761 | KV453121.1 | 956128  | 17-scf00435 | 17 |
| AX-157697084 | 22 | 96.761 | KV453121.1 | 1227835 | 17-scf00435 | 17 |
| AX-158275095 | 22 | 96.761 | KV453121.1 | 1492239 | 17-scf00435 | 17 |
| AX-158275234 | 22 | 96.761 | KV453121.1 | 1681307 | 17-scf00435 | 17 |
| AX-158275248 | 22 | 96.761 | KV453121.1 | 1690035 | 17-scf00435 | 17 |
| AX-158394988 | 22 | 96.761 | KV453121.1 | 1984872 | 17-scf00435 | 17 |
| AX-158394997 | 22 | 96.761 | KV453115.1 | 260134  | 17-scf00436 | 17 |
| AX-158276161 | 22 | 96.761 | KV453115.1 | 897976  | 17-scf00436 | 17 |
| AX-158287746 | 22 | 96.761 | KV453123.1 | 135198  | 17-scf00635 | 17 |
| AX-157756629 | 22 | 97.048 | KV453121.1 | 191247  | 17-scf00435 | 17 |
| AX-157741283 | 22 | 97.048 | KV453121.1 | 296194  | 17-scf00435 | 17 |
| AX-158274266 | 22 | 97.048 | KV453121.1 | 375273  | 17-scf00435 | 17 |
| AX-158274279 | 22 | 97.048 | KV453121.1 | 385662  | 17-scf00435 | 17 |
| AX-158274326 | 22 | 97.048 | KV453121.1 | 471494  | 17-scf00435 | 17 |
| AX-158274327 | 22 | 97.048 | KV453121.1 | 475617  | 17-scf00435 | 17 |
| AX-157844030 | 22 | 97.048 | KV453121.1 | 542738  | 17-scf00435 | 17 |
| AX-158274361 | 22 | 97.048 | KV453121.1 | 545962  | 17-scf00435 | 17 |
| AX-158274484 | 22 | 97.048 | KV453121.1 | 712339  | 17-scf00435 | 17 |
| AX-158274492 | 22 | 97.048 | KV453121.1 | 718915  | 17-scf00435 | 17 |
| AX-158274531 | 22 | 97.048 | KV453121.1 | 779517  | 17-scf00435 | 17 |
| AX-158274532 | 22 | 97.048 | KV453121.1 | 781037  | 17-scf00435 | 17 |
| AX-158274534 | 22 | 97.048 | KV453121.1 | 783524  | 17-scf00435 | 17 |
| AX-158411401 | 22 | 97.048 | KV453121.1 | 1107259 | 17-scf00435 | 17 |
| AX-158274855 | 22 | 97.048 | KV453121.1 | 1197313 | 17-scf00435 | 17 |
| AX-158381179 | 22 | 97.048 | KV453116.1 | 4066058 | 17-scf00437 | 17 |
| AX-157844027 | 22 | 97.394 | KV453121.1 | 485236  | 17-scf00435 | 17 |
| AX-158274662 | 22 | 97.394 | KV453121.1 | 976990  | 17-scf00435 | 17 |
| AX-158274670 | 22 | 97.394 | KV453121.1 | 984440  | 17-scf00435 | 17 |
| AX-158274671 | 22 | 97.394 | KV453121.1 | 984597  | 17-scf00435 | 17 |
| AX-158274030 | 22 | 97.399 | KV453121.1 | 33075   | 17-scf00435 | 17 |
| AX-158274130 | 22 | 97.399 | KV453121.1 | 162007  | 17-scf00435 | 17 |
| AX-158274187 | 22 | 97.399 | KV453121.1 | 245001  | 17-scf00435 | 17 |
| AX-158274263 | 22 | 97.399 | KV453121.1 | 372396  | 17-scf00435 | 17 |
| AX-157742014 | 22 | 97.399 | KV453121.1 | 564482  | 17-scf00435 | 17 |
| AX-158274387 | 22 | 97.399 | KV453121.1 | 574624  | 17-scf00435 | 17 |
| AX-158274388 | 22 | 97.399 | KV453121.1 | 577483  | 17-scf00435 | 17 |
| AX-158274529 | 22 | 97.399 | KV453121.1 | 771211  | 17-scf00435 | 17 |
| AX-158274630 | 22 | 97.399 | KV453121.1 | 949488  | 17-scf00435 | 17 |
| AX-158274766 | 22 | 97.399 | KV453121.1 | 1095608 | 17-scf00435 | 17 |
| AX-158274771 | 22 | 97.399 | KV453121.1 | 1101402 | 17-scf00435 | 17 |
| AX-157755607 | 22 | 97.399 | KV453121.1 | 1207998 | 17-scf00435 | 17 |
| AX-158275131 | 22 | 97.399 | KV453121.1 | 1538553 | 17-scf00435 | 17 |

|              |    |        |            |         |             |    |
|--------------|----|--------|------------|---------|-------------|----|
| AX-158275136 | 22 | 97.399 | KV453121.1 | 1544105 | 17-scf00435 | 17 |
| AX-158275370 | 22 | 97.399 | KV453121.1 | 1818895 | 17-scf00435 | 17 |
| AX-158275526 | 22 | 97.399 | KV453121.1 | 2012199 | 17-scf00435 | 17 |
| AX-158275852 | 22 | 97.399 | KV453115.1 | 456083  | 17-scf00436 | 17 |
| AX-158275853 | 22 | 97.399 | KV453115.1 | 456806  | 17-scf00436 | 17 |
| AX-157844101 | 22 | 97.399 | KV453115.1 | 894916  | 17-scf00436 | 17 |
| AX-158287492 | 22 | 97.399 | KV453120.1 | 53375   | 17-scf00444 | 17 |
| AX-157684141 | 22 | 97.399 | KV453126.1 | 1728    | 17-scf00447 | 17 |
| AX-158403563 | 22 | 97.412 | FI882233.1 | 532     | 17-scf00444 | UN |
| AX-157708380 | 22 | 97.42  | KV453121.1 | 354861  | 17-scf00435 | 17 |
| AX-158274386 | 22 | 97.42  | KV453121.1 | 574125  | 17-scf00435 | 17 |
| AX-158274390 | 22 | 97.428 | KV453121.1 | 583799  | 17-scf00435 | 17 |
| AX-157844034 | 22 | 97.437 | KV453121.1 | 587648  | 17-scf00435 | 17 |
| AX-158280418 | 22 | 97.437 | KV453116.1 | 5154630 | 17-scf00437 | 17 |
| AX-158274415 | 22 | 97.445 | KV453121.1 | 619342  | 17-scf00435 | 17 |
| AX-158274423 | 22 | 97.454 | KV453121.1 | 626541  | 17-scf00435 | 17 |
| AX-158274873 | 22 | 97.454 | KV453121.1 | 1224156 | 17-scf00435 | 17 |
| AX-157775020 | 22 | 97.454 | KV453123.1 | 26944   | 17-scf00635 | 17 |
| AX-158274447 | 22 | 97.46  | KV453121.1 | 680186  | 17-scf00435 | 17 |
| AX-158274461 | 22 | 97.467 | KV453121.1 | 691646  | 17-scf00435 | 17 |
| AX-158274478 | 22 | 97.474 | KV453121.1 | 704243  | 17-scf00435 | 17 |
| AX-158274324 | 22 | 97.481 | KV453121.1 | 452343  | 17-scf00435 | 17 |
| AX-158274378 | 22 | 97.481 | KV453121.1 | 562887  | 17-scf00435 | 17 |
| AX-158274394 | 22 | 97.481 | KV453121.1 | 588640  | 17-scf00435 | 17 |
| AX-157844035 | 22 | 97.481 | KV453121.1 | 592725  | 17-scf00435 | 17 |
| AX-158274398 | 22 | 97.481 | KV453121.1 | 597540  | 17-scf00435 | 17 |
| AX-158274410 | 22 | 97.481 | KV453121.1 | 609931  | 17-scf00435 | 17 |
| AX-158274503 | 22 | 97.481 | KV453121.1 | 745855  | 17-scf00435 | 17 |
| AX-158274677 | 22 | 97.481 | KV453121.1 | 989479  | 17-scf00435 | 17 |
| AX-158274702 | 22 | 97.481 | KV453121.1 | 1013261 | 17-scf00435 | 17 |
| AX-158274704 | 22 | 97.481 | KV453121.1 | 1014003 | 17-scf00435 | 17 |
| AX-158274844 | 22 | 97.481 | KV453121.1 | 1184243 | 17-scf00435 | 17 |
| AX-157755591 | 22 | 97.481 | KV453121.1 | 1222474 | 17-scf00435 | 17 |
| AX-158274907 | 22 | 97.481 | KV453121.1 | 1264997 | 17-scf00435 | 17 |
| AX-158274973 | 22 | 97.481 | KV453121.1 | 1343824 | 17-scf00435 | 17 |
| AX-158275004 | 22 | 97.481 | KV453121.1 | 1373978 | 17-scf00435 | 17 |
| AX-158275018 | 22 | 97.481 | KV453121.1 | 1392042 | 17-scf00435 | 17 |
| AX-158275023 | 22 | 97.481 | KV453121.1 | 1395698 | 17-scf00435 | 17 |
| AX-158275122 | 22 | 97.481 | KV453121.1 | 1523154 | 17-scf00435 | 17 |
| AX-158381160 | 22 | 97.481 | KV453121.1 | 1581378 | 17-scf00435 | 17 |
| AX-157720433 | 22 | 97.481 | KV453121.1 | 1581422 | 17-scf00435 | 17 |
| AX-157721858 | 22 | 97.481 | KV453121.1 | 1600418 | 17-scf00435 | 17 |
| AX-158275183 | 22 | 97.481 | KV453121.1 | 1616918 | 17-scf00435 | 17 |
| AX-158275188 | 22 | 97.481 | KV453121.1 | 1621414 | 17-scf00435 | 17 |
| AX-158275313 | 22 | 97.481 | KV453121.1 | 1746150 | 17-scf00435 | 17 |
| AX-157726835 | 22 | 97.481 | KV453121.1 | 1763804 | 17-scf00435 | 17 |
| AX-158275331 | 22 | 97.481 | KV453121.1 | 1764314 | 17-scf00435 | 17 |
| AX-158275875 | 22 | 97.481 | KV453115.1 | 490129  | 17-scf00436 | 17 |
| AX-157873244 | 22 | 97.481 | KV453116.1 | 7481448 | 17-scf00437 | 17 |
| AX-158377918 | 22 | 97.481 | KV453123.1 | 1647    | 17-scf00635 | 17 |
| AX-158377971 | 22 | 97.481 | KV453123.1 | 87242   | 17-scf00635 | 17 |

|              |    |        |            |         |             |    |
|--------------|----|--------|------------|---------|-------------|----|
| AX-158287744 | 22 | 97.481 | KV453123.1 | 137857  | 17-scf00635 | 17 |
| AX-158287675 | 22 | 97.481 | KV453123.1 | 228069  | 17-scf00635 | 17 |
| AX-158287653 | 22 | 97.481 | KV453123.1 | 256827  | 17-scf00635 | 17 |
| AX-158287561 | 22 | 97.481 | KV453123.1 | 364335  | 17-scf00635 | 17 |
| AX-158287552 | 22 | 97.481 | KV453123.1 | 371787  | 17-scf00635 | 17 |
| AX-157686427 | 22 | 97.481 | KV453396.1 | 42414   | scf00690    | UN |
| AX-158274016 | 22 | 97.486 | KV453121.1 | 19630   | 17-scf00435 | 17 |
| AX-158274270 | 22 | 97.486 | KV453121.1 | 377994  | 17-scf00435 | 17 |
| AX-157844038 | 22 | 97.486 | KV453121.1 | 742408  | 17-scf00435 | 17 |
| AX-157741936 | 22 | 97.486 | KV453121.1 | 764338  | 17-scf00435 | 17 |
| AX-158416711 | 22 | 97.486 | KV453121.1 | 766436  | 17-scf00435 | 17 |
| AX-158274540 | 22 | 97.486 | KV453121.1 | 795094  | 17-scf00435 | 17 |
| AX-158274565 | 22 | 97.486 | KV453121.1 | 830504  | 17-scf00435 | 17 |
| AX-158274628 | 22 | 97.486 | KV453121.1 | 945931  | 17-scf00435 | 17 |
| AX-158274759 | 22 | 97.486 | KV453121.1 | 1082855 | 17-scf00435 | 17 |
| AX-158274762 | 22 | 97.486 | KV453121.1 | 1086794 | 17-scf00435 | 17 |
| AX-158387397 | 22 | 97.486 | KV453121.1 | 1176040 | 17-scf00435 | 17 |
| AX-158274849 | 22 | 97.486 | KV453121.1 | 1187771 | 17-scf00435 | 17 |
| AX-157721872 | 22 | 97.486 | KV453121.1 | 1284679 | 17-scf00435 | 17 |
| AX-158275864 | 22 | 97.486 | KV453115.1 | 480074  | 17-scf00436 | 17 |
| AX-157742204 | 22 | 97.486 | KV453116.1 | 2888255 | 17-scf00437 | 17 |
| AX-158282568 | 22 | 97.486 | KV453116.1 | 8242612 | 17-scf00437 | 17 |
| AX-158274209 | 22 | 97.491 | KV453121.1 | 284453  | 17-scf00435 | 17 |
| AX-158274233 | 22 | 97.491 | KV453121.1 | 324092  | 17-scf00435 | 17 |
| AX-158274467 | 22 | 97.491 | KV453121.1 | 696134  | 17-scf00435 | 17 |
| AX-158274483 | 22 | 97.491 | KV453121.1 | 711653  | 17-scf00435 | 17 |
| AX-157742321 | 22 | 97.491 | KV453121.1 | 788705  | 17-scf00435 | 17 |
| AX-158274539 | 22 | 97.491 | KV453121.1 | 793647  | 17-scf00435 | 17 |
| AX-158274543 | 22 | 97.491 | KV453121.1 | 798464  | 17-scf00435 | 17 |
| AX-158274546 | 22 | 97.491 | KV453121.1 | 800284  | 17-scf00435 | 17 |
| AX-158274547 | 22 | 97.491 | KV453121.1 | 801437  | 17-scf00435 | 17 |
| AX-158274549 | 22 | 97.491 | KV453121.1 | 803468  | 17-scf00435 | 17 |
| AX-158274552 | 22 | 97.491 | KV453121.1 | 805434  | 17-scf00435 | 17 |
| AX-158274563 | 22 | 97.491 | KV453121.1 | 827087  | 17-scf00435 | 17 |
| AX-158274564 | 22 | 97.491 | KV453121.1 | 828782  | 17-scf00435 | 17 |
| AX-157860125 | 22 | 97.491 | KV453121.1 | 832143  | 17-scf00435 | 17 |
| AX-158274567 | 22 | 97.491 | KV453121.1 | 833337  | 17-scf00435 | 17 |
| AX-158274571 | 22 | 97.491 | KV453121.1 | 838616  | 17-scf00435 | 17 |
| AX-158274573 | 22 | 97.491 | KV453121.1 | 840171  | 17-scf00435 | 17 |
| AX-158274574 | 22 | 97.491 | KV453121.1 | 848818  | 17-scf00435 | 17 |
| AX-158274575 | 22 | 97.491 | KV453121.1 | 849969  | 17-scf00435 | 17 |
| AX-158274576 | 22 | 97.491 | KV453121.1 | 851287  | 17-scf00435 | 17 |
| AX-157860127 | 22 | 97.491 | KV453121.1 | 851956  | 17-scf00435 | 17 |
| AX-158274577 | 22 | 97.491 | KV453121.1 | 853558  | 17-scf00435 | 17 |
| AX-158274585 | 22 | 97.491 | KV453121.1 | 884289  | 17-scf00435 | 17 |
| AX-158274587 | 22 | 97.491 | KV453121.1 | 887688  | 17-scf00435 | 17 |
| AX-158394950 | 22 | 97.491 | KV453121.1 | 899589  | 17-scf00435 | 17 |
| AX-157751062 | 22 | 97.491 | KV453121.1 | 907057  | 17-scf00435 | 17 |
| AX-158381153 | 22 | 97.491 | KV453121.1 | 913236  | 17-scf00435 | 17 |
| AX-158274604 | 22 | 97.491 | KV453121.1 | 917208  | 17-scf00435 | 17 |
| AX-158274607 | 22 | 97.491 | KV453121.1 | 920670  | 17-scf00435 | 17 |

|              |    |        |             |         |             |    |
|--------------|----|--------|-------------|---------|-------------|----|
| AX-158274609 | 22 | 97.491 | KV453121.1  | 923605  | 17-scf00435 | 17 |
| AX-158274612 | 22 | 97.491 | KV453121.1  | 927263  | 17-scf00435 | 17 |
| AX-158419353 | 22 | 97.491 | KV453121.1  | 929522  | 17-scf00435 | 17 |
| AX-158274640 | 22 | 97.491 | KV453121.1  | 959150  | 17-scf00435 | 17 |
| AX-158274641 | 22 | 97.491 | KV453121.1  | 959631  | 17-scf00435 | 17 |
| AX-158274648 | 22 | 97.491 | KV453121.1  | 967708  | 17-scf00435 | 17 |
| AX-158274651 | 22 | 97.491 | KV453121.1  | 969205  | 17-scf00435 | 17 |
| AX-158274659 | 22 | 97.491 | KV453121.1  | 974921  | 17-scf00435 | 17 |
| AX-158381154 | 22 | 97.491 | KV453121.1  | 986942  | 17-scf00435 | 17 |
| AX-158274675 | 22 | 97.491 | KV453121.1  | 987265  | 17-scf00435 | 17 |
| AX-158274726 | 22 | 97.491 | KV453121.1  | 1044754 | 17-scf00435 | 17 |
| AX-158274742 | 22 | 97.491 | KV453121.1  | 1062728 | 17-scf00435 | 17 |
| AX-157755373 | 22 | 97.491 | KV453121.1  | 1064922 | 17-scf00435 | 17 |
| AX-158274751 | 22 | 97.491 | KV453121.1  | 1074873 | 17-scf00435 | 17 |
| AX-158274754 | 22 | 97.491 | KV453121.1  | 1078125 | 17-scf00435 | 17 |
| AX-158274757 | 22 | 97.491 | KV453121.1  | 1080724 | 17-scf00435 | 17 |
| AX-158274765 | 22 | 97.491 | KV453121.1  | 1090513 | 17-scf00435 | 17 |
| AX-158274775 | 22 | 97.491 | KV453121.1  | 1106444 | 17-scf00435 | 17 |
| AX-158274784 | 22 | 97.491 | KV453121.1  | 1117835 | 17-scf00435 | 17 |
| AX-158274790 | 22 | 97.491 | KV453121.1  | 1124136 | 17-scf00435 | 17 |
| AX-158274791 | 22 | 97.491 | KV453121.1  | 1125261 | 17-scf00435 | 17 |
| AX-157860134 | 22 | 97.491 | KV453121.1  | 1137111 | 17-scf00435 | 17 |
| AX-158274799 | 22 | 97.491 | KV453121.1  | 1137562 | 17-scf00435 | 17 |
| AX-158274801 | 22 | 97.491 | KV453121.1  | 1139877 | 17-scf00435 | 17 |
| AX-158274809 | 22 | 97.491 | KV453121.1  | 1149307 | 17-scf00435 | 17 |
| AX-157708785 | 22 | 97.491 | KV453121.1  | 1162833 | 17-scf00435 | 17 |
| AX-158274848 | 22 | 97.491 | KV453121.1  | 1187233 | 17-scf00435 | 17 |
| AX-158274854 | 22 | 97.491 | KV453121.1  | 1191368 | 17-scf00435 | 17 |
| AX-158274865 | 22 | 97.491 | KV453121.1  | 1212624 | 17-scf00435 | 17 |
| AX-158274893 | 22 | 97.491 | KV453121.1  | 1248289 | 17-scf00435 | 17 |
| AX-157724220 | 22 | 97.491 | KV453121.1  | 1328745 | 17-scf00435 | 17 |
| AX-158394978 | 22 | 97.491 | KV453121.1  | 1649288 | 17-scf00435 | 17 |
| AX-158275251 | 22 | 97.491 | KV453121.1  | 1692487 | 17-scf00435 | 17 |
| AX-158275624 | 22 | 97.491 | KV453115.1  | 143484  | 17-scf00436 | 17 |
| AX-158275800 | 22 | 97.491 | KV453115.1  | 398800  | 17-scf00436 | 17 |
| AX-158287491 | 22 | 97.491 | KV453120.1  | 52899   | 17-scf00444 | 17 |
| AX-158287627 | 22 | 97.491 | KV453123.1  | 293655  | 17-scf00635 | 17 |
| AX-157687640 | 22 | 97.491 | KV453571.1  | 2818    | scf00958    | UN |
| AX-157705910 | 22 | 97.491 | 3ML01031211 | 234     | scf06817_1  | UN |
| AX-157705911 | 22 | 97.491 | 3ML01031211 | 521     | scf06817_1  | UN |
| AX-158274150 | 22 | 97.492 | KV453121.1  | 193947  | 17-scf00435 | 17 |
| AX-158274355 | 22 | 97.492 | KV453121.1  | 536678  | 17-scf00435 | 17 |
| AX-158274553 | 22 | 97.492 | KV453121.1  | 810169  | 17-scf00435 | 17 |
| AX-157755392 | 22 | 97.492 | KV453121.1  | 865552  | 17-scf00435 | 17 |
| AX-158274578 | 22 | 97.492 | KV453121.1  | 868126  | 17-scf00435 | 17 |
| AX-158274584 | 22 | 97.492 | KV453121.1  | 883919  | 17-scf00435 | 17 |
| AX-158394949 | 22 | 97.492 | KV453121.1  | 884178  | 17-scf00435 | 17 |
| AX-158274594 | 22 | 97.492 | KV453121.1  | 900202  | 17-scf00435 | 17 |
| AX-157887900 | 22 | 97.492 | KV453121.1  | 917895  | 17-scf00435 | 17 |
| AX-158416712 | 22 | 97.492 | KV453121.1  | 920996  | 17-scf00435 | 17 |
| AX-158274740 | 22 | 97.492 | KV453121.1  | 1061499 | 17-scf00435 | 17 |

|              |    |        |            |         |             |    |
|--------------|----|--------|------------|---------|-------------|----|
| AX-157743024 | 22 | 97.492 | KV453121.1 | 1063778 | 17-scf00435 | 17 |
| AX-158274752 | 22 | 97.492 | KV453121.1 | 1075324 | 17-scf00435 | 17 |
| AX-158381155 | 22 | 97.492 | KV453121.1 | 1086692 | 17-scf00435 | 17 |
| AX-158274769 | 22 | 97.492 | KV453121.1 | 1097854 | 17-scf00435 | 17 |
| AX-158274770 | 22 | 97.492 | KV453121.1 | 1098963 | 17-scf00435 | 17 |
| AX-158274777 | 22 | 97.492 | KV453121.1 | 1109644 | 17-scf00435 | 17 |
| AX-157860132 | 22 | 97.492 | KV453121.1 | 1123393 | 17-scf00435 | 17 |
| AX-158274792 | 22 | 97.492 | KV453121.1 | 1125874 | 17-scf00435 | 17 |
| AX-157751947 | 22 | 97.492 | KV453121.1 | 1151784 | 17-scf00435 | 17 |
| AX-158274817 | 22 | 97.492 | KV453121.1 | 1158089 | 17-scf00435 | 17 |
| AX-158394966 | 22 | 97.492 | KV453121.1 | 1267915 | 17-scf00435 | 17 |
| AX-158274913 | 22 | 97.492 | KV453121.1 | 1274197 | 17-scf00435 | 17 |
| AX-158274924 | 22 | 97.492 | KV453121.1 | 1287082 | 17-scf00435 | 17 |
| AX-158274949 | 22 | 97.492 | KV453121.1 | 1310265 | 17-scf00435 | 17 |
| AX-158274954 | 22 | 97.492 | KV453121.1 | 1315536 | 17-scf00435 | 17 |
| AX-158423482 | 22 | 97.492 | KV453121.1 | 1624181 | 17-scf00435 | 17 |
| AX-158276185 | 22 | 97.492 | KV453115.1 | 923765  | 17-scf00436 | 17 |
| AX-158276199 | 22 | 97.492 | KV453115.1 | 945376  | 17-scf00436 | 17 |
| AX-157740268 | 22 | 97.492 | KV453115.1 | 971466  | 17-scf00436 | 17 |
| AX-157754514 | 22 | 97.492 | KV453115.1 | 1118368 | 17-scf00436 | 17 |
| AX-158274773 | 22 | 97.503 | KV453121.1 | 1104272 | 17-scf00435 | 17 |
| AX-158274774 | 22 | 97.552 | KV453121.1 | 1105453 | 17-scf00435 | 17 |
| AX-158274779 | 22 | 97.597 | KV453121.1 | 1112744 | 17-scf00435 | 17 |
| AX-158274383 | 22 | 97.644 | KV453121.1 | 569426  | 17-scf00435 | 17 |
| AX-158274389 | 22 | 97.644 | KV453121.1 | 578877  | 17-scf00435 | 17 |
| AX-158274619 | 22 | 97.644 | KV453121.1 | 935974  | 17-scf00435 | 17 |
| AX-157727524 | 22 | 97.644 | KV453121.1 | 1093229 | 17-scf00435 | 17 |
| AX-158274787 | 22 | 97.644 | KV453121.1 | 1119935 | 17-scf00435 | 17 |
| AX-158274788 | 22 | 97.644 | KV453121.1 | 1120710 | 17-scf00435 | 17 |
| AX-158274887 | 22 | 97.644 | KV453121.1 | 1240835 | 17-scf00435 | 17 |
| AX-158275101 | 22 | 97.644 | KV453121.1 | 1498007 | 17-scf00435 | 17 |
| AX-158377919 | 22 | 97.644 | KV453123.1 | 2428    | 17-scf00635 | 17 |
| AX-158387487 | 22 | 97.644 | KV453123.1 | 341124  | 17-scf00635 | 17 |
| AX-157686340 | 22 | 97.644 | KV453393.1 | 30694   | scf00685    | UN |
| AX-158274789 | 22 | 97.685 | KV453121.1 | 1122032 | 17-scf00435 | 17 |
| AX-157709495 | 22 | 97.732 | KV453121.1 | 1130710 | 17-scf00435 | 17 |
| AX-158274798 | 22 | 97.78  | KV453121.1 | 1136242 | 17-scf00435 | 17 |
| AX-158274570 | 22 | 97.829 | KV453121.1 | 837782  | 17-scf00435 | 17 |
| AX-158274810 | 22 | 97.829 | KV453121.1 | 1150639 | 17-scf00435 | 17 |
| AX-158274811 | 22 | 97.829 | KV453121.1 | 1153311 | 17-scf00435 | 17 |
| AX-158274213 | 22 | 99.486 | KV453121.1 | 288230  | 17-scf00435 | 17 |
| AX-158274274 | 22 | 99.486 | KV453121.1 | 382318  | 17-scf00435 | 17 |
| AX-157873036 | 22 | 99.486 | KV453121.1 | 567411  | 17-scf00435 | 17 |
| AX-157844037 | 22 | 99.486 | KV453121.1 | 719888  | 17-scf00435 | 17 |
| AX-158274525 | 22 | 99.486 | KV453121.1 | 765889  | 17-scf00435 | 17 |
| AX-158274906 | 22 | 99.486 | KV453121.1 | 1263210 | 17-scf00435 | 17 |
| AX-158275063 | 22 | 99.486 | KV453121.1 | 1444708 | 17-scf00435 | 17 |
| AX-158275304 | 22 | 99.486 | KV453121.1 | 1739478 | 17-scf00435 | 17 |
| AX-158275427 | 22 | 99.486 | KV453121.1 | 1887670 | 17-scf00435 | 17 |
| AX-158275686 | 22 | 99.486 | KV453115.1 | 248966  | 17-scf00436 | 17 |
| AX-158275691 | 22 | 99.486 | KV453115.1 | 253940  | 17-scf00436 | 17 |



|              |    |         |             |         |             |    |
|--------------|----|---------|-------------|---------|-------------|----|
| AX-158276191 | 22 | 99.486  | KV453115.1  | 932063  | 17-scf00436 | 17 |
| AX-157755896 | 22 | 99.486  | KV453116.1  | 2618199 | 17-scf00437 | 17 |
| AX-157844720 | 22 | 99.486  | KV453116.1  | 8070647 | 17-scf00437 | 17 |
| AX-158287463 | 22 | 99.486  | KV453120.1  | 12515   | 17-scf00444 | 17 |
| AX-157684132 | 22 | 99.486  | KV453122.1  | 1763    | 17-scf00445 | 17 |
| AX-157684136 | 22 | 99.486  | KV453122.1  | 7562    | 17-scf00445 | 17 |
| AX-158377930 | 22 | 99.486  | KV453123.1  | 22525   | 17-scf00635 | 17 |
| AX-158287753 | 22 | 99.486  | KV453123.1  | 127999  | 17-scf00635 | 17 |
| AX-158287705 | 22 | 99.486  | KV453123.1  | 186445  | 17-scf00635 | 17 |
| AX-158287663 | 22 | 99.486  | KV453123.1  | 241141  | 17-scf00635 | 17 |
| AX-158287658 | 22 | 99.486  | KV453123.1  | 249769  | 17-scf00635 | 17 |
| AX-158287625 | 22 | 99.486  | KV453123.1  | 295531  | 17-scf00635 | 17 |
| AX-158287623 | 22 | 99.486  | KV453123.1  | 298569  | 17-scf00635 | 17 |
| AX-157703883 | 22 | 99.486  | KV453123.1  | 401504  | 17-scf00635 | 17 |
| AX-157686325 | 22 | 99.486  | KV453393.1  | 11387   | scf00685    | UN |
| AX-157686327 | 22 | 99.486  | KV453393.1  | 13344   | scf00685    | UN |
| AX-157686330 | 22 | 99.486  | KV453393.1  | 20557   | scf00685    | UN |
| AX-157686345 | 22 | 99.486  | KV453393.1  | 50556   | scf00685    | UN |
| AX-157679986 | 22 | 99.486  | KV453393.1  | 52963   | scf00685    | UN |
| AX-157686430 | 22 | 99.486  | KV453396.1  | 46782   | scf00690    | UN |
| AX-157686864 | 22 | 99.486  | KV453435.1  | 6100    | scf00750    | UN |
| AX-157680994 | 22 | 99.486  | KV453501.1  | 5661    | scf00848    | UN |
| AX-157687638 | 22 | 99.486  | KV453571.1  | 962     | scf00958    | UN |
| AX-158274835 | 22 | 100.03  | KV453121.1  | 1174758 | 17-scf00435 | 17 |
| AX-158274837 | 22 | 100.575 | KV453121.1  | 1176558 | 17-scf00435 | 17 |
| AX-158274840 | 22 | 101.071 | KV453121.1  | 1179274 | 17-scf00435 | 17 |
| AX-158274881 | 22 | 101.615 | KV453121.1  | 1237039 | 17-scf00435 | 17 |
| AX-158274899 | 22 | 101.615 | KV453121.1  | 1257174 | 17-scf00435 | 17 |
| AX-158274905 | 22 | 101.615 | KV453121.1  | 1262181 | 17-scf00435 | 17 |
| AX-158274947 | 22 | 101.615 | KV453121.1  | 1309254 | 17-scf00435 | 17 |
| AX-157705265 | 22 | 101.615 | 3ML01029234 | 82      | scf04855_1  | UN |
| AX-157689700 | 22 | 101.615 | 3ML01031454 | 516     | scf07067_1  | UN |
| AX-158274971 | 22 | 101.715 | KV453121.1  | 1342250 | 17-scf00435 | 17 |
| AX-158275016 | 22 | 101.773 | KV453121.1  | 1388844 | 17-scf00435 | 17 |
| AX-158275019 | 22 | 101.875 | KV453121.1  | 1392456 | 17-scf00435 | 17 |
| AX-158275020 | 22 | 101.875 | KV453121.1  | 1393398 | 17-scf00435 | 17 |
| AX-158275021 | 22 | 101.875 | KV453121.1  | 1393869 | 17-scf00435 | 17 |
| AX-158275024 | 22 | 101.875 | KV453121.1  | 1396352 | 17-scf00435 | 17 |
| AX-158275036 | 22 | 101.875 | KV453121.1  | 1409188 | 17-scf00435 | 17 |
| AX-158275045 | 22 | 101.875 | KV453121.1  | 1420733 | 17-scf00435 | 17 |
| AX-158275052 | 22 | 101.875 | KV453121.1  | 1434190 | 17-scf00435 | 17 |
| AX-158275053 | 22 | 101.875 | KV453121.1  | 1434791 | 17-scf00435 | 17 |
| AX-157844045 | 22 | 101.875 | KV453121.1  | 1441800 | 17-scf00435 | 17 |
| AX-157704017 | 22 | 101.875 | KV453121.1  | 1442079 | 17-scf00435 | 17 |
| AX-158275059 | 22 | 101.875 | KV453121.1  | 1443524 | 17-scf00435 | 17 |
| AX-158275105 | 22 | 101.875 | KV453121.1  | 1502013 | 17-scf00435 | 17 |
| AX-157757628 | 22 | 101.875 | KV453121.1  | 1502390 | 17-scf00435 | 17 |
| AX-157773845 | 22 | 101.875 | KV453121.1  | 1507403 | 17-scf00435 | 17 |
| AX-158275126 | 22 | 101.875 | KV453121.1  | 1534437 | 17-scf00435 | 17 |
| AX-158275133 | 22 | 101.875 | KV453121.1  | 1540891 | 17-scf00435 | 17 |
| AX-158381159 | 22 | 101.875 | KV453121.1  | 1549099 | 17-scf00435 | 17 |

|              |    |         |            |         |             |    |
|--------------|----|---------|------------|---------|-------------|----|
| AX-158275197 | 22 | 101.875 | KV453121.1 | 1644736 | 17-scf00435 | 17 |
| AX-158275471 | 22 | 101.875 | KV453121.1 | 1946724 | 17-scf00435 | 17 |
| AX-158275639 | 22 | 101.875 | KV453115.1 | 178170  | 17-scf00436 | 17 |
| AX-157756726 | 22 | 101.875 | KV453116.1 | 6455324 | 17-scf00437 | 17 |
| AX-158282295 | 22 | 101.875 | KV453116.1 | 7881990 | 17-scf00437 | 17 |
| AX-157750409 | 22 | 101.951 | KV453121.1 | 1550776 | 17-scf00435 | 17 |
| AX-158274231 | 22 | 102.019 | KV453121.1 | 315283  | 17-scf00435 | 17 |
| AX-157880588 | 22 | 102.019 | KV453121.1 | 382788  | 17-scf00435 | 17 |
| AX-158274343 | 22 | 102.019 | KV453121.1 | 518049  | 17-scf00435 | 17 |
| AX-158274463 | 22 | 102.019 | KV453121.1 | 692718  | 17-scf00435 | 17 |
| AX-158274482 | 22 | 102.019 | KV453121.1 | 709683  | 17-scf00435 | 17 |
| AX-158274504 | 22 | 102.019 | KV453121.1 | 746204  | 17-scf00435 | 17 |
| AX-158274518 | 22 | 102.019 | KV453121.1 | 757994  | 17-scf00435 | 17 |
| AX-158274625 | 22 | 102.019 | KV453121.1 | 943207  | 17-scf00435 | 17 |
| AX-158274656 | 22 | 102.019 | KV453121.1 | 972596  | 17-scf00435 | 17 |
| AX-158274741 | 22 | 102.019 | KV453121.1 | 1062118 | 17-scf00435 | 17 |
| AX-158274838 | 22 | 102.019 | KV453121.1 | 1177924 | 17-scf00435 | 17 |
| AX-158274897 | 22 | 102.019 | KV453121.1 | 1255494 | 17-scf00435 | 17 |
| AX-158275144 | 22 | 102.019 | KV453121.1 | 1556110 | 17-scf00435 | 17 |
| AX-158416726 | 22 | 102.019 | KV453121.1 | 1620249 | 17-scf00435 | 17 |
| AX-158275190 | 22 | 102.019 | KV453121.1 | 1627180 | 17-scf00435 | 17 |
| AX-158275198 | 22 | 102.019 | KV453121.1 | 1645778 | 17-scf00435 | 17 |
| AX-158275242 | 22 | 102.019 | KV453121.1 | 1686333 | 17-scf00435 | 17 |
| AX-158275456 | 22 | 102.019 | KV453121.1 | 1931092 | 17-scf00435 | 17 |
| AX-158275495 | 22 | 102.019 | KV453121.1 | 1977252 | 17-scf00435 | 17 |
| AX-158275500 | 22 | 102.019 | KV453121.1 | 1985442 | 17-scf00435 | 17 |
| AX-158275627 | 22 | 102.019 | KV453115.1 | 150785  | 17-scf00436 | 17 |
| AX-158275688 | 22 | 102.019 | KV453115.1 | 250121  | 17-scf00436 | 17 |
| AX-158276256 | 22 | 102.019 | KV453115.1 | 1024310 | 17-scf00436 | 17 |
| AX-157684135 | 22 | 102.019 | KV453122.1 | 3430    | 17-scf00445 | 17 |
| AX-158287747 | 22 | 102.019 | KV453123.1 | 133890  | 17-scf00635 | 17 |
| AX-158287701 | 22 | 102.019 | KV453123.1 | 195729  | 17-scf00635 | 17 |
| AX-158287560 | 22 | 102.019 | KV453123.1 | 364961  | 17-scf00635 | 17 |
| AX-157686329 | 22 | 102.019 | KV453393.1 | 19839   | scf00685    | UN |
| AX-158275139 | 22 | 102.025 | KV453121.1 | 1549582 | 17-scf00435 | 17 |
| AX-157721881 | 22 | 102.025 | KV453121.1 | 1559695 | 17-scf00435 | 17 |
| AX-158278656 | 22 | 102.025 | KV453116.1 | 2879920 | 17-scf00437 | 17 |
| AX-158275151 | 22 | 102.068 | KV453121.1 | 1564891 | 17-scf00435 | 17 |
| AX-158274288 | 22 | 102.119 | KV453121.1 | 394612  | 17-scf00435 | 17 |
| AX-158274344 | 22 | 102.119 | KV453121.1 | 521858  | 17-scf00435 | 17 |
| AX-158274464 | 22 | 102.119 | KV453121.1 | 693355  | 17-scf00435 | 17 |
| AX-158274466 | 22 | 102.119 | KV453121.1 | 695593  | 17-scf00435 | 17 |
| AX-158274506 | 22 | 102.119 | KV453121.1 | 747385  | 17-scf00435 | 17 |
| AX-158274512 | 22 | 102.119 | KV453121.1 | 753404  | 17-scf00435 | 17 |
| AX-158274517 | 22 | 102.119 | KV453121.1 | 757334  | 17-scf00435 | 17 |
| AX-158274521 | 22 | 102.119 | KV453121.1 | 760916  | 17-scf00435 | 17 |
| AX-158274621 | 22 | 102.119 | KV453121.1 | 938105  | 17-scf00435 | 17 |
| AX-158274672 | 22 | 102.119 | KV453121.1 | 985603  | 17-scf00435 | 17 |
| AX-158274701 | 22 | 102.119 | KV453121.1 | 1012207 | 17-scf00435 | 17 |
| AX-158274743 | 22 | 102.119 | KV453121.1 | 1067632 | 17-scf00435 | 17 |
| AX-158274853 | 22 | 102.119 | KV453121.1 | 1190886 | 17-scf00435 | 17 |

|              |    |         |            |         |             |    |
|--------------|----|---------|------------|---------|-------------|----|
| AX-158274864 | 22 | 102.119 | KV453121.1 | 1211948 | 17-scf00435 | 17 |
| AX-158416718 | 22 | 102.119 | KV453121.1 | 1221412 | 17-scf00435 | 17 |
| AX-158275077 | 22 | 102.119 | KV453121.1 | 1473820 | 17-scf00435 | 17 |
| AX-158275097 | 22 | 102.119 | KV453121.1 | 1494761 | 17-scf00435 | 17 |
| AX-158275120 | 22 | 102.119 | KV453121.1 | 1521780 | 17-scf00435 | 17 |
| AX-158275129 | 22 | 102.119 | KV453121.1 | 1537007 | 17-scf00435 | 17 |
| AX-158394975 | 22 | 102.119 | KV453121.1 | 1560203 | 17-scf00435 | 17 |
| AX-157738336 | 22 | 102.119 | KV453121.1 | 1566378 | 17-scf00435 | 17 |
| AX-158275159 | 22 | 102.119 | KV453121.1 | 1576914 | 17-scf00435 | 17 |
| AX-158275160 | 22 | 102.119 | KV453121.1 | 1579103 | 17-scf00435 | 17 |
| AX-158275164 | 22 | 102.119 | KV453121.1 | 1585947 | 17-scf00435 | 17 |
| AX-158275168 | 22 | 102.119 | KV453121.1 | 1591654 | 17-scf00435 | 17 |
| AX-157880595 | 22 | 102.119 | KV453121.1 | 1592475 | 17-scf00435 | 17 |
| AX-158275170 | 22 | 102.119 | KV453121.1 | 1593125 | 17-scf00435 | 17 |
| AX-158275185 | 22 | 102.119 | KV453121.1 | 1618317 | 17-scf00435 | 17 |
| AX-158275199 | 22 | 102.119 | KV453121.1 | 1649324 | 17-scf00435 | 17 |
| AX-157747175 | 22 | 102.119 | KV453121.1 | 1651896 | 17-scf00435 | 17 |
| AX-158275231 | 22 | 102.119 | KV453121.1 | 1679134 | 17-scf00435 | 17 |
| AX-158423483 | 22 | 102.119 | KV453121.1 | 1680928 | 17-scf00435 | 17 |
| AX-158275254 | 22 | 102.119 | KV453121.1 | 1693942 | 17-scf00435 | 17 |
| AX-158275335 | 22 | 102.119 | KV453121.1 | 1769517 | 17-scf00435 | 17 |
| AX-158275345 | 22 | 102.119 | KV453121.1 | 1781146 | 17-scf00435 | 17 |
| AX-158275350 | 22 | 102.119 | KV453121.1 | 1791004 | 17-scf00435 | 17 |
| AX-158275359 | 22 | 102.119 | KV453121.1 | 1807147 | 17-scf00435 | 17 |
| AX-158275421 | 22 | 102.119 | KV453121.1 | 1882048 | 17-scf00435 | 17 |
| AX-158275435 | 22 | 102.119 | KV453121.1 | 1896929 | 17-scf00435 | 17 |
| AX-158275441 | 22 | 102.119 | KV453121.1 | 1901775 | 17-scf00435 | 17 |
| AX-158275463 | 22 | 102.119 | KV453121.1 | 1939158 | 17-scf00435 | 17 |
| AX-158275506 | 22 | 102.119 | KV453121.1 | 1992423 | 17-scf00435 | 17 |
| AX-158275507 | 22 | 102.119 | KV453121.1 | 1994184 | 17-scf00435 | 17 |
| AX-158275602 | 22 | 102.119 | KV453115.1 | 125052  | 17-scf00436 | 17 |
| AX-158275741 | 22 | 102.119 | KV453115.1 | 313420  | 17-scf00436 | 17 |
| AX-158275804 | 22 | 102.119 | KV453115.1 | 401648  | 17-scf00436 | 17 |
| AX-158275923 | 22 | 102.119 | KV453115.1 | 566091  | 17-scf00436 | 17 |
| AX-158276095 | 22 | 102.119 | KV453115.1 | 787266  | 17-scf00436 | 17 |
| AX-158276096 | 22 | 102.119 | KV453115.1 | 795168  | 17-scf00436 | 17 |
| AX-158276124 | 22 | 102.119 | KV453115.1 | 846875  | 17-scf00436 | 17 |
| AX-157802701 | 22 | 102.119 | KV453115.1 | 848718  | 17-scf00436 | 17 |
| AX-157844094 | 22 | 102.119 | KV453115.1 | 848901  | 17-scf00436 | 17 |
| AX-157844097 | 22 | 102.119 | KV453115.1 | 865906  | 17-scf00436 | 17 |
| AX-158276145 | 22 | 102.119 | KV453115.1 | 875226  | 17-scf00436 | 17 |
| AX-158276165 | 22 | 102.119 | KV453115.1 | 902526  | 17-scf00436 | 17 |
| AX-158276195 | 22 | 102.119 | KV453115.1 | 937220  | 17-scf00436 | 17 |
| AX-158276339 | 22 | 102.119 | KV453115.1 | 1161330 | 17-scf00436 | 17 |
| AX-158287453 | 22 | 102.119 | KV453120.1 | 1815    | 17-scf00444 | 17 |
| AX-158287455 | 22 | 102.119 | KV453120.1 | 3481    | 17-scf00444 | 17 |
| AX-158287482 | 22 | 102.119 | KV453120.1 | 33998   | 17-scf00444 | 17 |
| AX-158377979 | 22 | 102.119 | KV453123.1 | 93713   | 17-scf00635 | 17 |
| AX-158287721 | 22 | 102.119 | KV453123.1 | 171138  | 17-scf00635 | 17 |
| AX-158287717 | 22 | 102.119 | KV453123.1 | 174341  | 17-scf00635 | 17 |
| AX-158287657 | 22 | 102.119 | KV453123.1 | 251944  | 17-scf00635 | 17 |

|              |    |         |             |         |             |    |
|--------------|----|---------|-------------|---------|-------------|----|
| AX-158381215 | 22 | 102.119 | KV453123.1  | 306193  | 17-scf00635 | 17 |
| AX-158287554 | 22 | 102.119 | KV453123.1  | 369141  | 17-scf00635 | 17 |
| AX-158287538 | 22 | 102.119 | KV453123.1  | 390764  | 17-scf00635 | 17 |
| AX-157687238 | 22 | 102.119 | KV453124.1  | 5730    | 17-scf00829 | 17 |
| AX-157710732 | 22 | 102.119 | KV453124.1  | 9454    | 17-scf00829 | 17 |
| AX-157687240 | 22 | 102.119 | KV453124.1  | 13158   | 17-scf00829 | 17 |
| AX-157686319 | 22 | 102.119 | KV453393.1  | 3728    | scf00685    | UN |
| AX-157686343 | 22 | 102.119 | KV453393.1  | 49271   | scf00685    | UN |
| AX-157686868 | 22 | 102.119 | KV453435.1  | 22316   | scf00750    | UN |
| AX-157688888 | 22 | 102.119 | 3ML01027374 | 370     | scf02980_1  | UN |
| AX-157689879 | 22 | 102.119 | 3ML01034417 | 362     | scf10091_1  | UN |
| AX-158274332 | 22 | 102.12  | KV453121.1  | 492307  | 17-scf00435 | 17 |
| AX-158274902 | 22 | 102.12  | KV453121.1  | 1259335 | 17-scf00435 | 17 |
| AX-158275167 | 22 | 102.12  | KV453121.1  | 1590643 | 17-scf00435 | 17 |
| AX-158275213 | 22 | 102.12  | KV453121.1  | 1663634 | 17-scf00435 | 17 |
| AX-158275214 | 22 | 102.12  | KV453121.1  | 1664416 | 17-scf00435 | 17 |
| AX-158275239 | 22 | 102.12  | KV453121.1  | 1684440 | 17-scf00435 | 17 |
| AX-158275243 | 22 | 102.12  | KV453121.1  | 1686903 | 17-scf00435 | 17 |
| AX-158275278 | 22 | 102.12  | KV453121.1  | 1719687 | 17-scf00435 | 17 |
| AX-158275327 | 22 | 102.12  | KV453121.1  | 1760336 | 17-scf00435 | 17 |
| AX-158275333 | 22 | 102.12  | KV453121.1  | 1765724 | 17-scf00435 | 17 |
| AX-158275362 | 22 | 102.12  | KV453121.1  | 1813178 | 17-scf00435 | 17 |
| AX-158275410 | 22 | 102.12  | KV453121.1  | 1864804 | 17-scf00435 | 17 |
| AX-157710229 | 22 | 102.12  | KV453121.1  | 1865178 | 17-scf00435 | 17 |
| AX-157710228 | 22 | 102.12  | KV453121.1  | 1865227 | 17-scf00435 | 17 |
| AX-158275771 | 22 | 102.12  | KV453115.1  | 358915  | 17-scf00436 | 17 |
| AX-158276001 | 22 | 102.12  | KV453115.1  | 680534  | 17-scf00436 | 17 |
| AX-158275287 | 22 | 102.232 | KV453121.1  | 1728054 | 17-scf00435 | 17 |
| AX-158275305 | 22 | 102.314 | KV453121.1  | 1740064 | 17-scf00435 | 17 |
| AX-158275315 | 22 | 102.704 | KV453121.1  | 1748881 | 17-scf00435 | 17 |
| AX-158275336 | 22 | 103.171 | KV453121.1  | 1770011 | 17-scf00435 | 17 |
| AX-158275354 | 22 | 103.576 | KV453121.1  | 1793405 | 17-scf00435 | 17 |
| AX-158275409 | 22 | 103.594 | KV453121.1  | 1864237 | 17-scf00435 | 17 |
| AX-158419360 | 22 | 103.614 | KV453121.1  | 1865822 | 17-scf00435 | 17 |
| AX-158275528 | 22 | 103.632 | KV453121.1  | 2013123 | 17-scf00435 | 17 |
| AX-157680741 | 22 | 103.652 | KV453122.1  | 6574    | 17-scf00445 | 17 |
| AX-157686415 | 22 | 103.672 | KV453396.1  | 30857   | scf00690    | UN |
| AX-157721123 | 22 | 103.693 | KV453121.1  | 119701  | 17-scf00435 | 17 |
| AX-158274114 | 22 | 103.693 | KV453121.1  | 140965  | 17-scf00435 | 17 |
| AX-157724186 | 22 | 103.693 | KV453121.1  | 208207  | 17-scf00435 | 17 |
| AX-158274240 | 22 | 103.693 | KV453121.1  | 335576  | 17-scf00435 | 17 |
| AX-158274250 | 22 | 103.693 | KV453121.1  | 347978  | 17-scf00435 | 17 |
| AX-158274268 | 22 | 103.693 | KV453121.1  | 376655  | 17-scf00435 | 17 |
| AX-158274304 | 22 | 103.693 | KV453121.1  | 407810  | 17-scf00435 | 17 |
| AX-158274382 | 22 | 103.693 | KV453121.1  | 566876  | 17-scf00435 | 17 |
| AX-158274946 | 22 | 103.693 | KV453121.1  | 1308269 | 17-scf00435 | 17 |
| AX-158275042 | 22 | 103.693 | KV453121.1  | 1416042 | 17-scf00435 | 17 |
| AX-158275046 | 22 | 103.693 | KV453121.1  | 1421138 | 17-scf00435 | 17 |
| AX-158275223 | 22 | 103.693 | KV453121.1  | 1673814 | 17-scf00435 | 17 |
| AX-158275355 | 22 | 103.693 | KV453121.1  | 1795134 | 17-scf00435 | 17 |
| AX-158275817 | 22 | 103.693 | KV453115.1  | 412349  | 17-scf00436 | 17 |

|              |    |         |            |         |             |    |
|--------------|----|---------|------------|---------|-------------|----|
| AX-157740576 | 22 | 103.693 | KV453115.1 | 960806  | 17-scf00436 | 17 |
| AX-157743445 | 22 | 103.693 | KV453116.1 | 983612  | 17-scf00437 | 17 |
| AX-158278201 | 22 | 103.693 | KV453116.1 | 2344978 | 17-scf00437 | 17 |
| AX-158278399 | 22 | 103.693 | KV453116.1 | 2582095 | 17-scf00437 | 17 |
| AX-158278795 | 22 | 103.693 | KV453116.1 | 3082040 | 17-scf00437 | 17 |
| AX-158279118 | 22 | 103.693 | KV453116.1 | 3535083 | 17-scf00437 | 17 |
| AX-158279119 | 22 | 103.693 | KV453116.1 | 3535707 | 17-scf00437 | 17 |
| AX-158282715 | 22 | 103.693 | KV453116.1 | 8444190 | 17-scf00437 | 17 |
| AX-158283187 | 22 | 103.693 | KV453116.1 | 9052071 | 17-scf00437 | 17 |
| AX-158286999 | 22 | 103.693 | KV453114.1 | 459871  | 17-scf00439 | 17 |
| AX-158377939 | 22 | 103.693 | KV453123.1 | 29720   | 17-scf00635 | 17 |
| AX-158424026 | 22 | 103.693 | KV453123.1 | 42944   | 17-scf00635 | 17 |
| AX-158377951 | 22 | 103.693 | KV453123.1 | 61243   | 17-scf00635 | 17 |
| AX-158377968 | 22 | 103.693 | KV453123.1 | 82940   | 17-scf00635 | 17 |
| AX-158287766 | 22 | 103.693 | KV453123.1 | 112897  | 17-scf00635 | 17 |
| AX-158287748 | 22 | 103.693 | KV453123.1 | 133027  | 17-scf00635 | 17 |
| AX-158287743 | 22 | 103.693 | KV453123.1 | 140081  | 17-scf00635 | 17 |
| AX-158287742 | 22 | 103.693 | KV453123.1 | 140314  | 17-scf00635 | 17 |
| AX-158287682 | 22 | 103.693 | KV453123.1 | 217429  | 17-scf00635 | 17 |
| AX-158287669 | 22 | 103.693 | KV453123.1 | 235389  | 17-scf00635 | 17 |
| AX-158287629 | 22 | 103.693 | KV453123.1 | 292147  | 17-scf00635 | 17 |
| AX-158287622 | 22 | 103.693 | KV453123.1 | 298943  | 17-scf00635 | 17 |
| AX-158287604 | 22 | 103.693 | KV453123.1 | 319777  | 17-scf00635 | 17 |
| AX-158287567 | 22 | 103.693 | KV453123.1 | 360939  | 17-scf00635 | 17 |
| AX-158287558 | 22 | 103.693 | KV453123.1 | 365829  | 17-scf00635 | 17 |
| AX-158287553 | 22 | 103.693 | KV453123.1 | 370972  | 17-scf00635 | 17 |
| AX-158287549 | 22 | 103.693 | KV453123.1 | 378592  | 17-scf00635 | 17 |
| AX-157687081 | 22 | 103.693 | KV453125.1 | 9988    | 17-scf00788 | 17 |
| AX-157687095 | 22 | 103.693 | KV453125.1 | 24208   | 17-scf00788 | 17 |
| AX-157680992 | 22 | 103.693 | KV453124.1 | 15148   | 17-scf00829 | 17 |
| AX-157680440 | 22 | 103.693 | KV453396.1 | 24546   | scf00690    | UN |
| AX-157686429 | 22 | 103.693 | KV453396.1 | 46034   | scf00690    | UN |
| AX-158411426 | 22 | 103.989 | KV453121.1 | 1502510 | 17-scf00435 | 17 |
| AX-158377970 | 22 | 103.989 | KV453123.1 | 86906   | 17-scf00635 | 17 |
| AX-158288592 | 23 | 0       | KV453148.1 | 108954  | 19-scf00454 | 19 |
| AX-158288597 | 23 | 0       | KV453148.1 | 114200  | 19-scf00454 | 19 |
| AX-157845319 | 23 | 0       | KV453152.1 | 132543  | 19-scf00455 | 19 |
| AX-158288744 | 23 | 0       | KV453152.1 | 166029  | 19-scf00455 | 19 |
| AX-158291390 | 23 | 0       | KV453150.1 | 71481   | 19-scf00456 | 19 |
| AX-158291506 | 23 | 0       | KV453150.1 | 276432  | 19-scf00456 | 19 |
| AX-158291582 | 23 | 0       | KV453150.1 | 384772  | 19-scf00456 | 19 |
| AX-158291596 | 23 | 0       | KV453150.1 | 399398  | 19-scf00456 | 19 |
| AX-157727277 | 23 | 0.003   | KV453146.1 | 738973  | 19-scf00451 | 19 |
| AX-158288359 | 23 | 0.003   | KV453146.1 | 799274  | 19-scf00451 | 19 |
| AX-158288372 | 23 | 0.003   | KV453146.1 | 810801  | 19-scf00451 | 19 |
| AX-158288610 | 23 | 0.003   | KV453148.1 | 124573  | 19-scf00454 | 19 |
| AX-158288612 | 23 | 0.003   | KV453148.1 | 127200  | 19-scf00454 | 19 |
| AX-157845311 | 23 | 0.003   | KV453148.1 | 136796  | 19-scf00454 | 19 |
| AX-158288633 | 23 | 0.003   | KV453148.1 | 153013  | 19-scf00454 | 19 |
| AX-158288643 | 23 | 0.003   | KV453148.1 | 168943  | 19-scf00454 | 19 |
| AX-157739895 | 23 | 0.003   | KV453148.1 | 205168  | 19-scf00454 | 19 |

|              |    |       |            |        |             |    |
|--------------|----|-------|------------|--------|-------------|----|
| AX-158288721 | 23 | 0.003 | KV453152.1 | 138779 | 19-scf00455 | 19 |
| AX-158288749 | 23 | 0.003 | KV453152.1 | 178590 | 19-scf00455 | 19 |
| AX-158288769 | 23 | 0.003 | KV453152.1 | 210115 | 19-scf00455 | 19 |
| AX-158288770 | 23 | 0.003 | KV453152.1 | 211430 | 19-scf00455 | 19 |
| AX-158289064 | 23 | 0.003 | KV453152.1 | 653661 | 19-scf00455 | 19 |
| AX-158289067 | 23 | 0.003 | KV453152.1 | 655326 | 19-scf00455 | 19 |
| AX-158289069 | 23 | 0.003 | KV453152.1 | 655958 | 19-scf00455 | 19 |
| AX-158289076 | 23 | 0.003 | KV453152.1 | 660692 | 19-scf00455 | 19 |
| AX-158289077 | 23 | 0.003 | KV453152.1 | 661090 | 19-scf00455 | 19 |
| AX-158289118 | 23 | 0.003 | KV453152.1 | 779909 | 19-scf00455 | 19 |
| AX-158291359 | 23 | 0.003 | KV453150.1 | 2589   | 19-scf00456 | 19 |
| AX-158291362 | 23 | 0.003 | KV453150.1 | 5369   | 19-scf00456 | 19 |
| AX-158291393 | 23 | 0.003 | KV453150.1 | 81779  | 19-scf00456 | 19 |
| AX-158291395 | 23 | 0.003 | KV453150.1 | 85308  | 19-scf00456 | 19 |
| AX-158291396 | 23 | 0.003 | KV453150.1 | 85773  | 19-scf00456 | 19 |
| AX-158291397 | 23 | 0.003 | KV453150.1 | 86591  | 19-scf00456 | 19 |
| AX-157715775 | 23 | 0.003 | KV453150.1 | 88582  | 19-scf00456 | 19 |
| AX-158291398 | 23 | 0.003 | KV453150.1 | 88976  | 19-scf00456 | 19 |
| AX-158291399 | 23 | 0.003 | KV453150.1 | 89512  | 19-scf00456 | 19 |
| AX-158291400 | 23 | 0.003 | KV453150.1 | 90696  | 19-scf00456 | 19 |
| AX-158291401 | 23 | 0.003 | KV453150.1 | 99838  | 19-scf00456 | 19 |
| AX-157845581 | 23 | 0.003 | KV453150.1 | 103503 | 19-scf00456 | 19 |
| AX-158291463 | 23 | 0.003 | KV453150.1 | 204642 | 19-scf00456 | 19 |
| AX-158291507 | 23 | 0.003 | KV453150.1 | 276868 | 19-scf00456 | 19 |
| AX-158291510 | 23 | 0.003 | KV453150.1 | 280641 | 19-scf00456 | 19 |
| AX-158291595 | 23 | 0.003 | KV453150.1 | 397755 | 19-scf00456 | 19 |
| AX-157719987 | 23 | 0.003 | KV453150.1 | 417808 | 19-scf00456 | 19 |
| AX-157680899 | 23 | 0.003 | KV453144.1 | 19098  | 19-scf00678 | 19 |
| AX-158288659 | 23 | 0.02  | KV453148.1 | 195332 | 19-scf00454 | 19 |
| AX-158288660 | 23 | 0.02  | KV453148.1 | 195730 | 19-scf00454 | 19 |
| AX-157713076 | 23 | 0.057 | KV453148.1 | 108076 | 19-scf00454 | 19 |
| AX-158288596 | 23 | 0.057 | KV453148.1 | 113269 | 19-scf00454 | 19 |
| AX-158288664 | 23 | 0.057 | KV453148.1 | 203218 | 19-scf00454 | 19 |
| AX-158288665 | 23 | 0.057 | KV453148.1 | 204744 | 19-scf00454 | 19 |
| AX-158291404 | 23 | 0.057 | KV453150.1 | 112062 | 19-scf00456 | 19 |
| AX-158291417 | 23 | 0.057 | KV453150.1 | 144853 | 19-scf00456 | 19 |
| AX-158291451 | 23 | 0.057 | KV453150.1 | 194624 | 19-scf00456 | 19 |
| AX-158291452 | 23 | 0.057 | KV453150.1 | 195198 | 19-scf00456 | 19 |
| AX-158291453 | 23 | 0.057 | KV453150.1 | 195613 | 19-scf00456 | 19 |
| AX-158291537 | 23 | 0.057 | KV453150.1 | 319709 | 19-scf00456 | 19 |
| AX-158291588 | 23 | 0.057 | KV453150.1 | 391597 | 19-scf00456 | 19 |
| AX-158291589 | 23 | 0.057 | KV453150.1 | 392105 | 19-scf00456 | 19 |
| AX-158287826 | 23 | 0.862 | KV453140.1 | 99761  | 19-scf00449 | 19 |
| AX-157686232 | 23 | 0.862 | KV453144.1 | 43233  | 19-scf00678 | 19 |
| AX-157686234 | 23 | 0.926 | KV453144.1 | 44829  | 19-scf00678 | 19 |
| AX-158287805 | 23 | 2.678 | KV453140.1 | 34739  | 19-scf00449 | 19 |
| AX-158287855 | 23 | 2.678 | KV453147.1 | 317784 | 19-scf00450 | 19 |
| AX-158288480 | 23 | 2.678 | KV453147.1 | 438108 | 19-scf00450 | 19 |
| AX-158288486 | 23 | 2.678 | KV453147.1 | 465635 | 19-scf00450 | 19 |
| AX-158288487 | 23 | 2.678 | KV453147.1 | 469264 | 19-scf00450 | 19 |
| AX-158288491 | 23 | 2.678 | KV453147.1 | 503608 | 19-scf00450 | 19 |

|              |    |       |            |        |             |    |
|--------------|----|-------|------------|--------|-------------|----|
| AX-157845302 | 23 | 2.678 | KV453147.1 | 511365 | 19-scf00450 | 19 |
| AX-158288493 | 23 | 2.678 | KV453147.1 | 528802 | 19-scf00450 | 19 |
| AX-158288498 | 23 | 2.678 | KV453147.1 | 564719 | 19-scf00450 | 19 |
| AX-158288499 | 23 | 2.678 | KV453147.1 | 568863 | 19-scf00450 | 19 |
| AX-158288034 | 23 | 2.678 | KV453146.1 | 209833 | 19-scf00451 | 19 |
| AX-158288387 | 23 | 2.678 | KV453141.1 | 17501  | 19-scf00452 | 19 |
| AX-158288395 | 23 | 2.678 | KV453141.1 | 44617  | 19-scf00452 | 19 |
| AX-157755233 | 23 | 2.678 | KV453141.1 | 61595  | 19-scf00452 | 19 |
| AX-158288399 | 23 | 2.678 | KV453141.1 | 83732  | 19-scf00452 | 19 |
| AX-158288411 | 23 | 2.678 | KV453141.1 | 149328 | 19-scf00452 | 19 |
| AX-158288425 | 23 | 2.678 | KV453141.1 | 218038 | 19-scf00452 | 19 |
| AX-158288426 | 23 | 2.678 | KV453141.1 | 221045 | 19-scf00452 | 19 |
| AX-157687246 | 23 | 2.678 | KV453488.1 | 17483  | scf00830    | UN |
| AX-158288424 | 23 | 2.683 | KV453141.1 | 216881 | 19-scf00452 | 19 |
| AX-158287819 | 23 | 2.689 | KV453140.1 | 77677  | 19-scf00449 | 19 |
| AX-158287895 | 23 | 2.689 | KV453147.1 | 116729 | 19-scf00450 | 19 |
| AX-158287856 | 23 | 2.689 | KV453147.1 | 314317 | 19-scf00450 | 19 |
| AX-158287849 | 23 | 2.689 | KV453147.1 | 341483 | 19-scf00450 | 19 |
| AX-158288490 | 23 | 2.689 | KV453147.1 | 482952 | 19-scf00450 | 19 |
| AX-158287931 | 23 | 2.689 | KV453146.1 | 17309  | 19-scf00451 | 19 |
| AX-158287932 | 23 | 2.689 | KV453146.1 | 18526  | 19-scf00451 | 19 |
| AX-158287935 | 23 | 2.689 | KV453146.1 | 22366  | 19-scf00451 | 19 |
| AX-158287945 | 23 | 2.689 | KV453146.1 | 70478  | 19-scf00451 | 19 |
| AX-158287947 | 23 | 2.689 | KV453146.1 | 73859  | 19-scf00451 | 19 |
| AX-158287948 | 23 | 2.689 | KV453146.1 | 77618  | 19-scf00451 | 19 |
| AX-158287951 | 23 | 2.689 | KV453146.1 | 80121  | 19-scf00451 | 19 |
| AX-158287952 | 23 | 2.689 | KV453146.1 | 82241  | 19-scf00451 | 19 |
| AX-158287953 | 23 | 2.689 | KV453146.1 | 83035  | 19-scf00451 | 19 |
| AX-157845234 | 23 | 2.689 | KV453146.1 | 83371  | 19-scf00451 | 19 |
| AX-157845235 | 23 | 2.689 | KV453146.1 | 84609  | 19-scf00451 | 19 |
| AX-157845236 | 23 | 2.689 | KV453146.1 | 86293  | 19-scf00451 | 19 |
| AX-158287955 | 23 | 2.689 | KV453146.1 | 86626  | 19-scf00451 | 19 |
| AX-158287957 | 23 | 2.689 | KV453146.1 | 89494  | 19-scf00451 | 19 |
| AX-158287958 | 23 | 2.689 | KV453146.1 | 90570  | 19-scf00451 | 19 |
| AX-158287960 | 23 | 2.689 | KV453146.1 | 91509  | 19-scf00451 | 19 |
| AX-158287961 | 23 | 2.689 | KV453146.1 | 92213  | 19-scf00451 | 19 |
| AX-158287962 | 23 | 2.689 | KV453146.1 | 93220  | 19-scf00451 | 19 |
| AX-157845237 | 23 | 2.689 | KV453146.1 | 94321  | 19-scf00451 | 19 |
| AX-158287964 | 23 | 2.689 | KV453146.1 | 95921  | 19-scf00451 | 19 |
| AX-158287965 | 23 | 2.689 | KV453146.1 | 96552  | 19-scf00451 | 19 |
| AX-157845238 | 23 | 2.689 | KV453146.1 | 97175  | 19-scf00451 | 19 |
| AX-158287966 | 23 | 2.689 | KV453146.1 | 97383  | 19-scf00451 | 19 |
| AX-158287975 | 23 | 2.689 | KV453146.1 | 110695 | 19-scf00451 | 19 |
| AX-158287979 | 23 | 2.689 | KV453146.1 | 116449 | 19-scf00451 | 19 |
| AX-158287980 | 23 | 2.689 | KV453146.1 | 118826 | 19-scf00451 | 19 |
| AX-158287985 | 23 | 2.689 | KV453146.1 | 132323 | 19-scf00451 | 19 |
| AX-157845241 | 23 | 2.689 | KV453146.1 | 137630 | 19-scf00451 | 19 |
| AX-158287990 | 23 | 2.689 | KV453146.1 | 140072 | 19-scf00451 | 19 |
| AX-157845243 | 23 | 2.689 | KV453146.1 | 146446 | 19-scf00451 | 19 |
| AX-158287993 | 23 | 2.689 | KV453146.1 | 147674 | 19-scf00451 | 19 |
| AX-158287994 | 23 | 2.689 | KV453146.1 | 149058 | 19-scf00451 | 19 |

|              |    |       |            |        |             |    |
|--------------|----|-------|------------|--------|-------------|----|
| AX-158287995 | 23 | 2.689 | KV453146.1 | 154298 | 19-scf00451 | 19 |
| AX-157845244 | 23 | 2.689 | KV453146.1 | 154953 | 19-scf00451 | 19 |
| AX-158287996 | 23 | 2.689 | KV453146.1 | 157081 | 19-scf00451 | 19 |
| AX-157744299 | 23 | 2.689 | KV453146.1 | 159142 | 19-scf00451 | 19 |
| AX-158287999 | 23 | 2.689 | KV453146.1 | 162549 | 19-scf00451 | 19 |
| AX-158288000 | 23 | 2.689 | KV453146.1 | 163801 | 19-scf00451 | 19 |
| AX-158288002 | 23 | 2.689 | KV453146.1 | 164913 | 19-scf00451 | 19 |
| AX-158288003 | 23 | 2.689 | KV453146.1 | 165143 | 19-scf00451 | 19 |
| AX-157709572 | 23 | 2.689 | KV453146.1 | 167962 | 19-scf00451 | 19 |
| AX-158288004 | 23 | 2.689 | KV453146.1 | 168190 | 19-scf00451 | 19 |
| AX-158288005 | 23 | 2.689 | KV453146.1 | 168990 | 19-scf00451 | 19 |
| AX-158288006 | 23 | 2.689 | KV453146.1 | 169929 | 19-scf00451 | 19 |
| AX-158288007 | 23 | 2.689 | KV453146.1 | 170766 | 19-scf00451 | 19 |
| AX-157845245 | 23 | 2.689 | KV453146.1 | 170946 | 19-scf00451 | 19 |
| AX-158288008 | 23 | 2.689 | KV453146.1 | 171302 | 19-scf00451 | 19 |
| AX-158288009 | 23 | 2.689 | KV453146.1 | 174676 | 19-scf00451 | 19 |
| AX-157860189 | 23 | 2.689 | KV453146.1 | 181210 | 19-scf00451 | 19 |
| AX-158288018 | 23 | 2.689 | KV453146.1 | 188059 | 19-scf00451 | 19 |
| AX-158288019 | 23 | 2.689 | KV453146.1 | 188306 | 19-scf00451 | 19 |
| AX-158288020 | 23 | 2.689 | KV453146.1 | 188709 | 19-scf00451 | 19 |
| AX-158288021 | 23 | 2.689 | KV453146.1 | 189276 | 19-scf00451 | 19 |
| AX-158288022 | 23 | 2.689 | KV453146.1 | 191387 | 19-scf00451 | 19 |
| AX-158288027 | 23 | 2.689 | KV453146.1 | 203154 | 19-scf00451 | 19 |
| AX-158288038 | 23 | 2.689 | KV453146.1 | 214740 | 19-scf00451 | 19 |
| AX-158288064 | 23 | 2.689 | KV453146.1 | 267811 | 19-scf00451 | 19 |
| AX-158288065 | 23 | 2.689 | KV453146.1 | 268675 | 19-scf00451 | 19 |
| AX-158288093 | 23 | 2.689 | KV453146.1 | 323497 | 19-scf00451 | 19 |
| AX-158288110 | 23 | 2.689 | KV453146.1 | 355803 | 19-scf00451 | 19 |
| AX-158288113 | 23 | 2.689 | KV453146.1 | 370124 | 19-scf00451 | 19 |
| AX-157748492 | 23 | 2.689 | KV453146.1 | 394629 | 19-scf00451 | 19 |
| AX-158288141 | 23 | 2.689 | KV453146.1 | 457299 | 19-scf00451 | 19 |
| AX-158288145 | 23 | 2.689 | KV453146.1 | 465993 | 19-scf00451 | 19 |
| AX-158288159 | 23 | 2.689 | KV453146.1 | 485102 | 19-scf00451 | 19 |
| AX-158288422 | 23 | 2.689 | KV453141.1 | 211508 | 19-scf00452 | 19 |
| AX-158288428 | 23 | 2.689 | KV453141.1 | 235786 | 19-scf00452 | 19 |
| AX-158288429 | 23 | 2.689 | KV453141.1 | 242477 | 19-scf00452 | 19 |
| AX-158288433 | 23 | 2.689 | KV453141.1 | 254751 | 19-scf00452 | 19 |
| AX-158288434 | 23 | 2.689 | KV453141.1 | 257829 | 19-scf00452 | 19 |
| AX-158288436 | 23 | 2.689 | KV453141.1 | 270364 | 19-scf00452 | 19 |
| AX-158288441 | 23 | 2.689 | KV453141.1 | 294335 | 19-scf00452 | 19 |
| AX-158288446 | 23 | 2.689 | KV453141.1 | 322205 | 19-scf00452 | 19 |
| AX-158288447 | 23 | 2.689 | KV453141.1 | 324480 | 19-scf00452 | 19 |
| AX-158288448 | 23 | 2.689 | KV453141.1 | 332398 | 19-scf00452 | 19 |
| AX-158288449 | 23 | 2.689 | KV453141.1 | 333852 | 19-scf00452 | 19 |
| AX-158288455 | 23 | 2.689 | KV453141.1 | 361995 | 19-scf00452 | 19 |
| AX-157714201 | 23 | 2.689 | KV453141.1 | 382607 | 19-scf00452 | 19 |
| AX-158288458 | 23 | 2.689 | KV453141.1 | 384431 | 19-scf00452 | 19 |
| AX-157845301 | 23 | 2.689 | KV453141.1 | 393591 | 19-scf00452 | 19 |
| AX-158288460 | 23 | 2.689 | KV453141.1 | 394885 | 19-scf00452 | 19 |
| AX-158376321 | 23 | 2.689 | KV453145.1 | 49083  | 19-scf00583 | 19 |
| AX-157685388 | 23 | 2.689 | KV453142.1 | 54630  | 19-scf00614 | 19 |



|              |    |       |             |        |             |    |
|--------------|----|-------|-------------|--------|-------------|----|
| AX-157685392 | 23 | 2.689 | KV453142.1  | 72202  | 19-scf00614 | 19 |
| AX-157685646 | 23 | 2.689 | KV453143.1  | 84635  | 19-scf00629 | 19 |
| AX-157706521 | 23 | 2.689 | 3ML01032371 | 324    | scf07989_1  | UN |
| AX-158288016 | 23 | 2.735 | KV453146.1  | 187042 | 19-scf00451 | 19 |
| AX-157726690 | 23 | 2.752 | KV453146.1  | 194970 | 19-scf00451 | 19 |
| AX-158288044 | 23 | 2.752 | KV453146.1  | 218908 | 19-scf00451 | 19 |
| AX-158288024 | 23 | 2.798 | KV453146.1  | 196859 | 19-scf00451 | 19 |
| AX-158288025 | 23 | 2.798 | KV453146.1  | 199854 | 19-scf00451 | 19 |
| AX-158288032 | 23 | 2.798 | KV453146.1  | 208245 | 19-scf00451 | 19 |
| AX-158288033 | 23 | 2.798 | KV453146.1  | 209227 | 19-scf00451 | 19 |
| AX-158288035 | 23 | 2.798 | KV453146.1  | 210435 | 19-scf00451 | 19 |
| AX-158288037 | 23 | 2.798 | KV453146.1  | 213137 | 19-scf00451 | 19 |
| AX-158288041 | 23 | 2.798 | KV453146.1  | 217264 | 19-scf00451 | 19 |
| AX-158288043 | 23 | 2.798 | KV453146.1  | 218225 | 19-scf00451 | 19 |
| AX-158288046 | 23 | 2.798 | KV453146.1  | 220493 | 19-scf00451 | 19 |
| AX-158288049 | 23 | 2.798 | KV453146.1  | 224753 | 19-scf00451 | 19 |
| AX-158288051 | 23 | 2.798 | KV453146.1  | 226045 | 19-scf00451 | 19 |
| AX-158288057 | 23 | 2.798 | KV453146.1  | 247831 | 19-scf00451 | 19 |
| AX-158288059 | 23 | 2.798 | KV453146.1  | 257637 | 19-scf00451 | 19 |
| AX-158288061 | 23 | 2.798 | KV453146.1  | 264493 | 19-scf00451 | 19 |
| AX-158288068 | 23 | 2.798 | KV453146.1  | 276754 | 19-scf00451 | 19 |
| AX-158288075 | 23 | 2.798 | KV453146.1  | 285003 | 19-scf00451 | 19 |
| AX-157845251 | 23 | 2.798 | KV453146.1  | 286024 | 19-scf00451 | 19 |
| AX-158288078 | 23 | 2.798 | KV453146.1  | 290273 | 19-scf00451 | 19 |
| AX-158288079 | 23 | 2.798 | KV453146.1  | 290494 | 19-scf00451 | 19 |
| AX-157860190 | 23 | 2.798 | KV453146.1  | 295661 | 19-scf00451 | 19 |
| AX-157880720 | 23 | 2.798 | KV453146.1  | 299867 | 19-scf00451 | 19 |
| AX-157845252 | 23 | 2.798 | KV453146.1  | 300416 | 19-scf00451 | 19 |
| AX-158288095 | 23 | 2.798 | KV453146.1  | 325746 | 19-scf00451 | 19 |
| AX-158288102 | 23 | 2.798 | KV453146.1  | 332895 | 19-scf00451 | 19 |
| AX-157745322 | 23 | 2.798 | KV453146.1  | 419746 | 19-scf00451 | 19 |
| AX-157773582 | 23 | 2.798 | KV453146.1  | 431049 | 19-scf00451 | 19 |
| AX-158288085 | 23 | 2.821 | KV453146.1  | 301788 | 19-scf00451 | 19 |
| AX-158288086 | 23 | 2.842 | KV453146.1  | 302251 | 19-scf00451 | 19 |
| AX-158288066 | 23 | 2.863 | KV453146.1  | 275039 | 19-scf00451 | 19 |
| AX-157845253 | 23 | 2.863 | KV453146.1  | 303776 | 19-scf00451 | 19 |
| AX-158288089 | 23 | 2.863 | KV453146.1  | 314206 | 19-scf00451 | 19 |
| AX-158288094 | 23 | 2.879 | KV453146.1  | 324397 | 19-scf00451 | 19 |
| AX-158288097 | 23 | 2.896 | KV453146.1  | 328015 | 19-scf00451 | 19 |
| AX-158288062 | 23 | 2.907 | KV453146.1  | 265755 | 19-scf00451 | 19 |
| AX-158288099 | 23 | 2.907 | KV453146.1  | 330670 | 19-scf00451 | 19 |
| AX-157845255 | 23 | 2.907 | KV453146.1  | 332355 | 19-scf00451 | 19 |
| AX-157845256 | 23 | 2.907 | KV453146.1  | 332426 | 19-scf00451 | 19 |
| AX-157734616 | 23 | 2.907 | KV453146.1  | 344878 | 19-scf00451 | 19 |
| AX-158288108 | 23 | 2.907 | KV453146.1  | 349261 | 19-scf00451 | 19 |
| AX-158417158 | 23 | 2.907 | KV453146.1  | 352270 | 19-scf00451 | 19 |
| AX-158288111 | 23 | 2.907 | KV453146.1  | 366611 | 19-scf00451 | 19 |
| AX-158288112 | 23 | 2.907 | KV453146.1  | 368742 | 19-scf00451 | 19 |
| AX-157845259 | 23 | 2.907 | KV453146.1  | 376254 | 19-scf00451 | 19 |
| AX-158288115 | 23 | 2.907 | KV453146.1  | 382531 | 19-scf00451 | 19 |
| AX-158417160 | 23 | 2.907 | KV453146.1  | 382827 | 19-scf00451 | 19 |

|              |    |       |             |        |             |    |
|--------------|----|-------|-------------|--------|-------------|----|
| AX-158417161 | 23 | 2.907 | KV453146.1  | 383120 | 19-scf00451 | 19 |
| AX-157845260 | 23 | 2.907 | KV453146.1  | 385507 | 19-scf00451 | 19 |
| AX-157845261 | 23 | 2.907 | KV453146.1  | 385816 | 19-scf00451 | 19 |
| AX-158288116 | 23 | 2.907 | KV453146.1  | 387073 | 19-scf00451 | 19 |
| AX-158288121 | 23 | 2.907 | KV453146.1  | 398126 | 19-scf00451 | 19 |
| AX-158288122 | 23 | 2.907 | KV453146.1  | 405201 | 19-scf00451 | 19 |
| AX-157845262 | 23 | 2.907 | KV453146.1  | 408380 | 19-scf00451 | 19 |
| AX-158288126 | 23 | 2.907 | KV453146.1  | 416765 | 19-scf00451 | 19 |
| AX-158288127 | 23 | 2.907 | KV453146.1  | 417835 | 19-scf00451 | 19 |
| AX-158288130 | 23 | 2.907 | KV453146.1  | 431474 | 19-scf00451 | 19 |
| AX-157845268 | 23 | 2.907 | KV453146.1  | 437289 | 19-scf00451 | 19 |
| AX-158288133 | 23 | 2.907 | KV453146.1  | 444871 | 19-scf00451 | 19 |
| AX-157845269 | 23 | 2.907 | KV453146.1  | 469021 | 19-scf00451 | 19 |
| AX-157745259 | 23 | 2.907 | KV453146.1  | 475909 | 19-scf00451 | 19 |
| AX-158288157 | 23 | 2.907 | KV453146.1  | 483277 | 19-scf00451 | 19 |
| AX-158288161 | 23 | 2.907 | KV453146.1  | 487089 | 19-scf00451 | 19 |
| AX-158288194 | 23 | 2.907 | KV453146.1  | 532626 | 19-scf00451 | 19 |
| AX-157845273 | 23 | 2.907 | KV453146.1  | 601015 | 19-scf00451 | 19 |
| AX-158288017 | 23 | 2.963 | KV453146.1  | 187302 | 19-scf00451 | 19 |
| AX-157720890 | 23 | 2.963 | KV453146.1  | 399354 | 19-scf00451 | 19 |
| AX-158288137 | 23 | 2.963 | KV453146.1  | 453480 | 19-scf00451 | 19 |
| AX-158288211 | 23 | 2.963 | KV453146.1  | 563187 | 19-scf00451 | 19 |
| AX-158419513 | 23 | 3.016 | KV453140.1  | 27964  | 19-scf00449 | 19 |
| AX-158417149 | 23 | 3.016 | KV453146.1  | 33065  | 19-scf00451 | 19 |
| AX-158287937 | 23 | 3.016 | KV453146.1  | 58208  | 19-scf00451 | 19 |
| AX-158288143 | 23 | 3.016 | KV453146.1  | 464217 | 19-scf00451 | 19 |
| AX-158288144 | 23 | 3.016 | KV453146.1  | 465113 | 19-scf00451 | 19 |
| AX-158288146 | 23 | 3.016 | KV453146.1  | 466246 | 19-scf00451 | 19 |
| AX-158288148 | 23 | 3.016 | KV453146.1  | 471493 | 19-scf00451 | 19 |
| AX-158288149 | 23 | 3.016 | KV453146.1  | 471852 | 19-scf00451 | 19 |
| AX-158288150 | 23 | 3.016 | KV453146.1  | 473032 | 19-scf00451 | 19 |
| AX-157742479 | 23 | 3.016 | KV453146.1  | 476735 | 19-scf00451 | 19 |
| AX-158288152 | 23 | 3.016 | KV453146.1  | 477988 | 19-scf00451 | 19 |
| AX-158288398 | 23 | 3.016 | KV453141.1  | 77663  | 19-scf00452 | 19 |
| AX-158288402 | 23 | 3.016 | KV453141.1  | 89721  | 19-scf00452 | 19 |
| AX-158288418 | 23 | 3.016 | KV453141.1  | 184811 | 19-scf00452 | 19 |
| AX-158288421 | 23 | 3.016 | KV453141.1  | 210735 | 19-scf00452 | 19 |
| AX-157705801 | 23 | 3.016 | 3ML01030911 | 833    | scf06515_1  | UN |
| AX-157724451 | 23 | 3.235 | KV453146.1  | 480916 | 19-scf00451 | 19 |
| AX-158288158 | 23 | 3.235 | KV453146.1  | 484164 | 19-scf00451 | 19 |
| AX-158288160 | 23 | 3.235 | KV453146.1  | 485849 | 19-scf00451 | 19 |
| AX-157845271 | 23 | 3.235 | KV453146.1  | 486234 | 19-scf00451 | 19 |
| AX-158288168 | 23 | 3.453 | KV453146.1  | 495039 | 19-scf00451 | 19 |
| AX-158288169 | 23 | 3.453 | KV453146.1  | 495735 | 19-scf00451 | 19 |
| AX-158288171 | 23 | 3.453 | KV453146.1  | 497739 | 19-scf00451 | 19 |
| AX-157702582 | 23 | 3.487 | KV453146.1  | 499986 | 19-scf00451 | 19 |
| AX-158288176 | 23 | 3.531 | KV453146.1  | 505685 | 19-scf00451 | 19 |
| AX-158288177 | 23 | 3.548 | KV453146.1  | 507022 | 19-scf00451 | 19 |
| AX-158288182 | 23 | 3.554 | KV453146.1  | 513068 | 19-scf00451 | 19 |
| AX-158288183 | 23 | 3.56  | KV453146.1  | 514946 | 19-scf00451 | 19 |
| AX-158288184 | 23 | 3.56  | KV453146.1  | 516630 | 19-scf00451 | 19 |

|              |    |       |             |        |             |    |
|--------------|----|-------|-------------|--------|-------------|----|
| AX-158288167 | 23 | 3.562 | KV453146.1  | 493946 | 19-scf00451 | 19 |
| AX-157718252 | 23 | 3.562 | KV453146.1  | 507820 | 19-scf00451 | 19 |
| AX-158288181 | 23 | 3.562 | KV453146.1  | 512644 | 19-scf00451 | 19 |
| AX-158288185 | 23 | 3.562 | KV453146.1  | 516750 | 19-scf00451 | 19 |
| AX-158288186 | 23 | 3.562 | KV453146.1  | 517771 | 19-scf00451 | 19 |
| AX-158288188 | 23 | 3.562 | KV453146.1  | 519202 | 19-scf00451 | 19 |
| AX-158288189 | 23 | 3.593 | KV453146.1  | 520078 | 19-scf00451 | 19 |
| AX-158288174 | 23 | 3.672 | KV453146.1  | 502242 | 19-scf00451 | 19 |
| AX-158288191 | 23 | 3.672 | KV453146.1  | 522344 | 19-scf00451 | 19 |
| AX-158288192 | 23 | 3.672 | KV453146.1  | 523908 | 19-scf00451 | 19 |
| AX-157860191 | 23 | 3.672 | KV453146.1  | 525598 | 19-scf00451 | 19 |
| AX-158288193 | 23 | 3.672 | KV453146.1  | 529406 | 19-scf00451 | 19 |
| AX-158288195 | 23 | 3.672 | KV453146.1  | 533973 | 19-scf00451 | 19 |
| AX-157873375 | 23 | 3.672 | KV453146.1  | 538475 | 19-scf00451 | 19 |
| AX-157746005 | 23 | 3.672 | KV453146.1  | 538805 | 19-scf00451 | 19 |
| AX-158288200 | 23 | 3.672 | KV453146.1  | 543248 | 19-scf00451 | 19 |
| AX-158288201 | 23 | 3.672 | KV453146.1  | 544797 | 19-scf00451 | 19 |
| AX-158288163 | 23 | 3.781 | KV453146.1  | 491279 | 19-scf00451 | 19 |
| AX-158288216 | 23 | 3.781 | KV453146.1  | 574576 | 19-scf00451 | 19 |
| AX-158288219 | 23 | 3.781 | KV453146.1  | 578573 | 19-scf00451 | 19 |
| AX-158288220 | 23 | 3.781 | KV453146.1  | 578938 | 19-scf00451 | 19 |
| AX-158417167 | 23 | 3.781 | KV453146.1  | 579101 | 19-scf00451 | 19 |
| AX-158288221 | 23 | 3.781 | KV453146.1  | 580564 | 19-scf00451 | 19 |
| AX-158288218 | 23 | 3.999 | KV453146.1  | 576683 | 19-scf00451 | 19 |
| AX-157880722 | 23 | 3.999 | KV453146.1  | 577360 | 19-scf00451 | 19 |
| AX-158417166 | 23 | 3.999 | KV453146.1  | 578738 | 19-scf00451 | 19 |
| AX-158288225 | 23 | 3.999 | KV453146.1  | 584550 | 19-scf00451 | 19 |
| AX-158288226 | 23 | 3.999 | KV453146.1  | 586014 | 19-scf00451 | 19 |
| AX-158288228 | 23 | 3.999 | KV453146.1  | 588054 | 19-scf00451 | 19 |
| AX-158288229 | 23 | 3.999 | KV453146.1  | 589372 | 19-scf00451 | 19 |
| AX-158288230 | 23 | 3.999 | KV453146.1  | 589638 | 19-scf00451 | 19 |
| AX-158288231 | 23 | 3.999 | KV453146.1  | 589970 | 19-scf00451 | 19 |
| AX-158288232 | 23 | 3.999 | KV453146.1  | 591860 | 19-scf00451 | 19 |
| AX-158288239 | 23 | 3.999 | KV453146.1  | 603307 | 19-scf00451 | 19 |
| AX-157845274 | 23 | 3.999 | KV453146.1  | 603926 | 19-scf00451 | 19 |
| AX-157845279 | 23 | 3.999 | KV453146.1  | 621598 | 19-scf00451 | 19 |
| AX-157888014 | 23 | 3.999 | KV453146.1  | 626759 | 19-scf00451 | 19 |
| AX-157746084 | 23 | 3.999 | KV453146.1  | 699037 | 19-scf00451 | 19 |
| AX-158417172 | 23 | 3.999 | KV453146.1  | 711650 | 19-scf00451 | 19 |
| AX-158288321 | 23 | 3.999 | KV453146.1  | 740703 | 19-scf00451 | 19 |
| AX-157706843 | 23 | 3.999 | 3ML01033310 | 64     | scf08954_1  | UN |
| AX-158288234 | 23 | 4.031 | KV453146.1  | 595146 | 19-scf00451 | 19 |
| AX-158288243 | 23 | 4.031 | KV453146.1  | 618824 | 19-scf00451 | 19 |
| AX-158288235 | 23 | 4.066 | KV453146.1  | 595530 | 19-scf00451 | 19 |
| AX-158288238 | 23 | 4.066 | KV453146.1  | 599453 | 19-scf00451 | 19 |
| AX-157845284 | 23 | 4.066 | KV453146.1  | 652104 | 19-scf00451 | 19 |
| AX-157845285 | 23 | 4.066 | KV453146.1  | 652453 | 19-scf00451 | 19 |
| AX-158288236 | 23 | 4.108 | KV453146.1  | 596527 | 19-scf00451 | 19 |
| AX-157739552 | 23 | 4.109 | KV453146.1  | 600455 | 19-scf00451 | 19 |
| AX-157845275 | 23 | 4.294 | KV453146.1  | 605269 | 19-scf00451 | 19 |
| AX-158288302 | 23 | 4.294 | KV453146.1  | 718413 | 19-scf00451 | 19 |

|              |    |       |            |        |               |    |
|--------------|----|-------|------------|--------|---------------|----|
| AX-157758232 | 23 | 4.294 | KV453146.1 | 720149 | 19-scf00451   | 19 |
| AX-157686233 | 23 | 4.294 | KV453144.1 | 44025  | 19-scf00678   | 19 |
| AX-157758879 | 23 | 4.467 | KV453146.1 | 617356 | 19-scf00451   | 19 |
| AX-158288242 | 23 | 4.467 | KV453146.1 | 618521 | 19-scf00451   | 19 |
| AX-157845277 | 23 | 4.536 | KV453146.1 | 621012 | 19-scf00451   | 19 |
| AX-157845280 | 23 | 4.646 | KV453146.1 | 627695 | 19-scf00451   | 19 |
| AX-157748138 | 23 | 4.646 | KV453146.1 | 630945 | 19-scf00451   | 19 |
| AX-158288251 | 23 | 4.646 | KV453146.1 | 631796 | 19-scf00451   | 19 |
| AX-158288252 | 23 | 4.666 | KV453146.1 | 632081 | 19-scf00451   | 19 |
| AX-158288253 | 23 | 4.666 | KV453146.1 | 632781 | 19-scf00451   | 19 |
| AX-157845282 | 23 | 4.666 | KV453146.1 | 640628 | 19-scf00451   | 19 |
| AX-158288325 | 23 | 4.666 | KV453146.1 | 747012 | 19-scf00451   | 19 |
| AX-158288256 | 23 | 4.871 | KV453146.1 | 639711 | 19-scf00451   | 19 |
| AX-158288257 | 23 | 4.871 | KV453146.1 | 640397 | 19-scf00451   | 19 |
| AX-157845278 | 23 | 4.875 | KV453146.1 | 621245 | 19-scf00451   | 19 |
| AX-158288258 | 23 | 4.875 | KV453146.1 | 647491 | 19-scf00451   | 19 |
| AX-158288266 | 23 | 4.875 | KV453146.1 | 659476 | 19-scf00451   | 19 |
| AX-158288270 | 23 | 5.136 | KV453146.1 | 667380 | 19-scf00451   | 19 |
| AX-157716513 | 23 | 5.188 | KV453146.1 | 668205 | 19-scf00451   | 19 |
| AX-158288272 | 23 | 5.245 | KV453146.1 | 669546 | 19-scf00451   | 19 |
| AX-158288275 | 23 | 5.245 | KV453146.1 | 675007 | 19-scf00451   | 19 |
| AX-158288278 | 23 | 5.245 | KV453146.1 | 677541 | 19-scf00451   | 19 |
| AX-158288279 | 23 | 5.245 | KV453146.1 | 677854 | 19-scf00451   | 19 |
| AX-158288284 | 23 | 5.245 | KV453146.1 | 690463 | 19-scf00451   | 19 |
| AX-157718222 | 23 | 5.245 | KV453146.1 | 692819 | 19-scf00451   | 19 |
| AX-158288291 | 23 | 5.245 | KV453146.1 | 699622 | 19-scf00451   | 19 |
| AX-158288292 | 23 | 5.245 | KV453146.1 | 700587 | 19-scf00451   | 19 |
| AX-158289106 | 23 | 5.245 | KV453152.1 | 753065 | 19-scf00455   | 19 |
| AX-158291579 | 23 | 5.245 | KV453150.1 | 380442 | 19-scf00456   | 19 |
| AX-157692971 | 23 | 5.245 |            | 472    | :194938_g1_i: | UN |
| AX-158288294 | 23 | 5.303 | KV453146.1 | 702714 | 19-scf00451   | 19 |
| AX-158288298 | 23 | 5.303 | KV453146.1 | 706610 | 19-scf00451   | 19 |
| AX-157845288 | 23 | 5.418 | KV453146.1 | 668676 | 19-scf00451   | 19 |
| AX-157873377 | 23 | 5.418 | KV453146.1 | 679469 | 19-scf00451   | 19 |
| AX-157888016 | 23 | 5.418 | KV453146.1 | 681851 | 19-scf00451   | 19 |
| AX-158288290 | 23 | 5.418 | KV453146.1 | 694295 | 19-scf00451   | 19 |
| AX-158288296 | 23 | 5.418 | KV453146.1 | 704116 | 19-scf00451   | 19 |
| AX-158288323 | 23 | 5.418 | KV453146.1 | 745112 | 19-scf00451   | 19 |
| AX-157750554 | 23 | 5.418 | KV453146.1 | 778985 | 19-scf00451   | 19 |
| AX-157751709 | 23 | 5.42  | KV453146.1 | 697315 | 19-scf00451   | 19 |
| AX-158288307 | 23 | 5.42  | KV453146.1 | 723728 | 19-scf00451   | 19 |
| AX-158288309 | 23 | 5.42  | KV453146.1 | 727800 | 19-scf00451   | 19 |
| AX-158288314 | 23 | 5.42  | KV453146.1 | 732613 | 19-scf00451   | 19 |
| AX-158288315 | 23 | 5.42  | KV453146.1 | 733525 | 19-scf00451   | 19 |
| AX-158288317 | 23 | 5.42  | KV453146.1 | 734935 | 19-scf00451   | 19 |
| AX-158288320 | 23 | 5.42  | KV453146.1 | 736982 | 19-scf00451   | 19 |
| AX-158288326 | 23 | 5.42  | KV453146.1 | 748225 | 19-scf00451   | 19 |
| AX-158288328 | 23 | 5.42  | KV453146.1 | 750173 | 19-scf00451   | 19 |
| AX-157758409 | 23 | 5.42  | KV453146.1 | 759023 | 19-scf00451   | 19 |
| AX-158288332 | 23 | 5.42  | KV453146.1 | 761107 | 19-scf00451   | 19 |
| AX-158288336 | 23 | 5.42  | KV453146.1 | 769674 | 19-scf00451   | 19 |

|              |    |       |            |        |             |    |
|--------------|----|-------|------------|--------|-------------|----|
| AX-158288349 | 23 | 5.423 | KV453146.1 | 787538 | 19-scf00451 | 19 |
| AX-158288360 | 23 | 5.425 | KV453146.1 | 799923 | 19-scf00451 | 19 |
| AX-158288362 | 23 | 5.428 | KV453146.1 | 800973 | 19-scf00451 | 19 |
| AX-158287889 | 23 | 5.565 | KV453147.1 | 131858 | 19-scf00450 | 19 |
| AX-158287852 | 23 | 5.565 | KV453147.1 | 329039 | 19-scf00450 | 19 |
| AX-158288488 | 23 | 5.565 | KV453147.1 | 470300 | 19-scf00450 | 19 |
| AX-158419522 | 23 | 5.565 | KV453146.1 | 421698 | 19-scf00451 | 19 |
| AX-158288371 | 23 | 5.565 | KV453146.1 | 810076 | 19-scf00451 | 19 |
| AX-157845286 | 23 | 5.861 | KV453146.1 | 653612 | 19-scf00451 | 19 |
| AX-158288285 | 23 | 5.861 | KV453146.1 | 691099 | 19-scf00451 | 19 |
| AX-157880724 | 23 | 5.861 | KV453146.1 | 711434 | 19-scf00451 | 19 |
| AX-158288313 | 23 | 5.861 | KV453146.1 | 731295 | 19-scf00451 | 19 |
| AX-158288341 | 23 | 5.861 | KV453146.1 | 773748 | 19-scf00451 | 19 |
| AX-158288346 | 23 | 5.861 | KV453146.1 | 781141 | 19-scf00451 | 19 |
| AX-158288353 | 23 | 5.861 | KV453146.1 | 792454 | 19-scf00451 | 19 |
| AX-158288363 | 23 | 5.861 | KV453146.1 | 801781 | 19-scf00451 | 19 |
| AX-158288366 | 23 | 5.861 | KV453146.1 | 804160 | 19-scf00451 | 19 |
| AX-158288370 | 23 | 5.861 | KV453146.1 | 809426 | 19-scf00451 | 19 |
| AX-158288546 | 23 | 5.861 | KV453148.1 | 44312  | 19-scf00454 | 19 |
| AX-158288558 | 23 | 5.861 | KV453148.1 | 60114  | 19-scf00454 | 19 |
| AX-158288571 | 23 | 5.861 | KV453148.1 | 79017  | 19-scf00454 | 19 |
| AX-158288577 | 23 | 5.861 | KV453148.1 | 94241  | 19-scf00454 | 19 |
| AX-158288645 | 23 | 5.861 | KV453148.1 | 170674 | 19-scf00454 | 19 |
| AX-158288647 | 23 | 5.861 | KV453148.1 | 174621 | 19-scf00454 | 19 |
| AX-158288648 | 23 | 5.861 | KV453148.1 | 179770 | 19-scf00454 | 19 |
| AX-158417194 | 23 | 5.861 | KV453148.1 | 184149 | 19-scf00454 | 19 |
| AX-158288656 | 23 | 5.861 | KV453148.1 | 189495 | 19-scf00454 | 19 |
| AX-158288657 | 23 | 5.861 | KV453148.1 | 191660 | 19-scf00454 | 19 |
| AX-158288661 | 23 | 5.861 | KV453148.1 | 196188 | 19-scf00454 | 19 |
| AX-158288662 | 23 | 5.861 | KV453148.1 | 198958 | 19-scf00454 | 19 |
| AX-158288666 | 23 | 5.861 | KV453148.1 | 206240 | 19-scf00454 | 19 |
| AX-158288669 | 23 | 5.861 | KV453148.1 | 210655 | 19-scf00454 | 19 |
| AX-158288670 | 23 | 5.861 | KV453148.1 | 211242 | 19-scf00454 | 19 |
| AX-158417198 | 23 | 5.861 | KV453152.1 | 16529  | 19-scf00455 | 19 |
| AX-157888017 | 23 | 5.861 | KV453152.1 | 54802  | 19-scf00455 | 19 |
| AX-158288706 | 23 | 5.861 | KV453152.1 | 127993 | 19-scf00455 | 19 |
| AX-157845318 | 23 | 5.861 | KV453152.1 | 130473 | 19-scf00455 | 19 |
| AX-158288708 | 23 | 5.861 | KV453152.1 | 131517 | 19-scf00455 | 19 |
| AX-158288710 | 23 | 5.861 | KV453152.1 | 132178 | 19-scf00455 | 19 |
| AX-158288713 | 23 | 5.861 | KV453152.1 | 134143 | 19-scf00455 | 19 |
| AX-157845320 | 23 | 5.861 | KV453152.1 | 134497 | 19-scf00455 | 19 |
| AX-158288714 | 23 | 5.861 | KV453152.1 | 134901 | 19-scf00455 | 19 |
| AX-158288716 | 23 | 5.861 | KV453152.1 | 135630 | 19-scf00455 | 19 |
| AX-158288718 | 23 | 5.861 | KV453152.1 | 136861 | 19-scf00455 | 19 |
| AX-158288719 | 23 | 5.861 | KV453152.1 | 138200 | 19-scf00455 | 19 |
| AX-158288722 | 23 | 5.861 | KV453152.1 | 139847 | 19-scf00455 | 19 |
| AX-158288723 | 23 | 5.861 | KV453152.1 | 140272 | 19-scf00455 | 19 |
| AX-157727866 | 23 | 5.861 | KV453152.1 | 141315 | 19-scf00455 | 19 |
| AX-158288727 | 23 | 5.861 | KV453152.1 | 143381 | 19-scf00455 | 19 |
| AX-158288728 | 23 | 5.861 | KV453152.1 | 147799 | 19-scf00455 | 19 |
| AX-158288729 | 23 | 5.861 | KV453152.1 | 148222 | 19-scf00455 | 19 |

|              |    |       |            |        |             |    |
|--------------|----|-------|------------|--------|-------------|----|
| AX-158288730 | 23 | 5.861 | KV453152.1 | 148651 | 19-scf00455 | 19 |
| AX-158288731 | 23 | 5.861 | KV453152.1 | 150084 | 19-scf00455 | 19 |
| AX-158288733 | 23 | 5.861 | KV453152.1 | 151939 | 19-scf00455 | 19 |
| AX-158288734 | 23 | 5.861 | KV453152.1 | 152687 | 19-scf00455 | 19 |
| AX-158288735 | 23 | 5.861 | KV453152.1 | 153177 | 19-scf00455 | 19 |
| AX-158288736 | 23 | 5.861 | KV453152.1 | 153837 | 19-scf00455 | 19 |
| AX-158288741 | 23 | 5.861 | KV453152.1 | 158863 | 19-scf00455 | 19 |
| AX-158288750 | 23 | 5.861 | KV453152.1 | 178967 | 19-scf00455 | 19 |
| AX-158288751 | 23 | 5.861 | KV453152.1 | 182723 | 19-scf00455 | 19 |
| AX-158288752 | 23 | 5.861 | KV453152.1 | 183623 | 19-scf00455 | 19 |
| AX-158288754 | 23 | 5.861 | KV453152.1 | 184967 | 19-scf00455 | 19 |
| AX-158288757 | 23 | 5.861 | KV453152.1 | 190131 | 19-scf00455 | 19 |
| AX-157880738 | 23 | 5.861 | KV453152.1 | 190576 | 19-scf00455 | 19 |
| AX-157845321 | 23 | 5.861 | KV453152.1 | 203496 | 19-scf00455 | 19 |
| AX-158288767 | 23 | 5.861 | KV453152.1 | 207036 | 19-scf00455 | 19 |
| AX-158288786 | 23 | 5.861 | KV453152.1 | 231229 | 19-scf00455 | 19 |
| AX-158288794 | 23 | 5.861 | KV453152.1 | 237891 | 19-scf00455 | 19 |
| AX-158288797 | 23 | 5.861 | KV453152.1 | 240987 | 19-scf00455 | 19 |
| AX-157880741 | 23 | 5.861 | KV453152.1 | 249435 | 19-scf00455 | 19 |
| AX-158288803 | 23 | 5.861 | KV453152.1 | 251958 | 19-scf00455 | 19 |
| AX-158288805 | 23 | 5.861 | KV453152.1 | 253379 | 19-scf00455 | 19 |
| AX-158288806 | 23 | 5.861 | KV453152.1 | 255197 | 19-scf00455 | 19 |
| AX-158288807 | 23 | 5.861 | KV453152.1 | 256189 | 19-scf00455 | 19 |
| AX-158288808 | 23 | 5.861 | KV453152.1 | 256328 | 19-scf00455 | 19 |
| AX-158288809 | 23 | 5.861 | KV453152.1 | 258110 | 19-scf00455 | 19 |
| AX-158288812 | 23 | 5.861 | KV453152.1 | 260938 | 19-scf00455 | 19 |
| AX-158288813 | 23 | 5.861 | KV453152.1 | 261640 | 19-scf00455 | 19 |
| AX-158288814 | 23 | 5.861 | KV453152.1 | 262368 | 19-scf00455 | 19 |
| AX-158288815 | 23 | 5.861 | KV453152.1 | 264576 | 19-scf00455 | 19 |
| AX-158288817 | 23 | 5.861 | KV453152.1 | 266377 | 19-scf00455 | 19 |
| AX-158288818 | 23 | 5.861 | KV453152.1 | 268050 | 19-scf00455 | 19 |
| AX-158288820 | 23 | 5.861 | KV453152.1 | 270080 | 19-scf00455 | 19 |
| AX-158288822 | 23 | 5.861 | KV453152.1 | 272738 | 19-scf00455 | 19 |
| AX-158288823 | 23 | 5.861 | KV453152.1 | 274026 | 19-scf00455 | 19 |
| AX-158288825 | 23 | 5.861 | KV453152.1 | 275208 | 19-scf00455 | 19 |
| AX-157845324 | 23 | 5.861 | KV453152.1 | 280565 | 19-scf00455 | 19 |
| AX-158288828 | 23 | 5.861 | KV453152.1 | 281530 | 19-scf00455 | 19 |
| AX-157873379 | 23 | 5.861 | KV453152.1 | 284450 | 19-scf00455 | 19 |
| AX-158288833 | 23 | 5.861 | KV453152.1 | 287264 | 19-scf00455 | 19 |
| AX-158288834 | 23 | 5.861 | KV453152.1 | 289677 | 19-scf00455 | 19 |
| AX-158288836 | 23 | 5.861 | KV453152.1 | 291421 | 19-scf00455 | 19 |
| AX-157845325 | 23 | 5.861 | KV453152.1 | 291771 | 19-scf00455 | 19 |
| AX-157754564 | 23 | 5.861 | KV453152.1 | 293552 | 19-scf00455 | 19 |
| AX-158288840 | 23 | 5.861 | KV453152.1 | 294325 | 19-scf00455 | 19 |
| AX-158288842 | 23 | 5.861 | KV453152.1 | 296649 | 19-scf00455 | 19 |
| AX-158288843 | 23 | 5.861 | KV453152.1 | 296909 | 19-scf00455 | 19 |
| AX-158288844 | 23 | 5.861 | KV453152.1 | 297344 | 19-scf00455 | 19 |
| AX-158288845 | 23 | 5.861 | KV453152.1 | 297764 | 19-scf00455 | 19 |
| AX-158288848 | 23 | 5.861 | KV453152.1 | 298853 | 19-scf00455 | 19 |
| AX-158288849 | 23 | 5.861 | KV453152.1 | 299715 | 19-scf00455 | 19 |
| AX-158288850 | 23 | 5.861 | KV453152.1 | 300024 | 19-scf00455 | 19 |

|              |    |       |            |        |             |    |
|--------------|----|-------|------------|--------|-------------|----|
| AX-158288851 | 23 | 5.861 | KV453152.1 | 301096 | 19-scf00455 | 19 |
| AX-158288852 | 23 | 5.861 | KV453152.1 | 303550 | 19-scf00455 | 19 |
| AX-158288857 | 23 | 5.861 | KV453152.1 | 311203 | 19-scf00455 | 19 |
| AX-158288868 | 23 | 5.861 | KV453152.1 | 320645 | 19-scf00455 | 19 |
| AX-157873384 | 23 | 5.861 | KV453152.1 | 321773 | 19-scf00455 | 19 |
| AX-158288871 | 23 | 5.861 | KV453152.1 | 325887 | 19-scf00455 | 19 |
| AX-158288872 | 23 | 5.861 | KV453152.1 | 326115 | 19-scf00455 | 19 |
| AX-158288875 | 23 | 5.861 | KV453152.1 | 327563 | 19-scf00455 | 19 |
| AX-158288876 | 23 | 5.861 | KV453152.1 | 328087 | 19-scf00455 | 19 |
| AX-157748017 | 23 | 5.861 | KV453152.1 | 330470 | 19-scf00455 | 19 |
| AX-158288879 | 23 | 5.861 | KV453152.1 | 333382 | 19-scf00455 | 19 |
| AX-157717390 | 23 | 5.861 | KV453152.1 | 335026 | 19-scf00455 | 19 |
| AX-158288881 | 23 | 5.861 | KV453152.1 | 336315 | 19-scf00455 | 19 |
| AX-157845329 | 23 | 5.861 | KV453152.1 | 339867 | 19-scf00455 | 19 |
| AX-157746206 | 23 | 5.861 | KV453152.1 | 351883 | 19-scf00455 | 19 |
| AX-158288931 | 23 | 5.861 | KV453152.1 | 384091 | 19-scf00455 | 19 |
| AX-157698832 | 23 | 5.861 | KV453152.1 | 385230 | 19-scf00455 | 19 |
| AX-158288932 | 23 | 5.861 | KV453152.1 | 385543 | 19-scf00455 | 19 |
| AX-158288935 | 23 | 5.861 | KV453152.1 | 387760 | 19-scf00455 | 19 |
| AX-158288936 | 23 | 5.861 | KV453152.1 | 388931 | 19-scf00455 | 19 |
| AX-158288954 | 23 | 5.861 | KV453152.1 | 455933 | 19-scf00455 | 19 |
| AX-157845336 | 23 | 5.861 | KV453152.1 | 462074 | 19-scf00455 | 19 |
| AX-158288966 | 23 | 5.861 | KV453152.1 | 483236 | 19-scf00455 | 19 |
| AX-158288967 | 23 | 5.861 | KV453152.1 | 483668 | 19-scf00455 | 19 |
| AX-157845337 | 23 | 5.861 | KV453152.1 | 490171 | 19-scf00455 | 19 |
| AX-158288972 | 23 | 5.861 | KV453152.1 | 490782 | 19-scf00455 | 19 |
| AX-158288974 | 23 | 5.861 | KV453152.1 | 493174 | 19-scf00455 | 19 |
| AX-158288976 | 23 | 5.861 | KV453152.1 | 508522 | 19-scf00455 | 19 |
| AX-158288977 | 23 | 5.861 | KV453152.1 | 508946 | 19-scf00455 | 19 |
| AX-158288978 | 23 | 5.861 | KV453152.1 | 511178 | 19-scf00455 | 19 |
| AX-158288979 | 23 | 5.861 | KV453152.1 | 513426 | 19-scf00455 | 19 |
| AX-158288981 | 23 | 5.861 | KV453152.1 | 516096 | 19-scf00455 | 19 |
| AX-158288983 | 23 | 5.861 | KV453152.1 | 518770 | 19-scf00455 | 19 |
| AX-157744262 | 23 | 5.861 | KV453152.1 | 522751 | 19-scf00455 | 19 |
| AX-158288986 | 23 | 5.861 | KV453152.1 | 524020 | 19-scf00455 | 19 |
| AX-157741160 | 23 | 5.861 | KV453152.1 | 524524 | 19-scf00455 | 19 |
| AX-158288987 | 23 | 5.861 | KV453152.1 | 529496 | 19-scf00455 | 19 |
| AX-157845338 | 23 | 5.861 | KV453152.1 | 532666 | 19-scf00455 | 19 |
| AX-158288991 | 23 | 5.861 | KV453152.1 | 537015 | 19-scf00455 | 19 |
| AX-158288992 | 23 | 5.861 | KV453152.1 | 540896 | 19-scf00455 | 19 |
| AX-158288996 | 23 | 5.861 | KV453152.1 | 546009 | 19-scf00455 | 19 |
| AX-158288997 | 23 | 5.861 | KV453152.1 | 546281 | 19-scf00455 | 19 |
| AX-158417212 | 23 | 5.861 | KV453152.1 | 549261 | 19-scf00455 | 19 |
| AX-158289004 | 23 | 5.861 | KV453152.1 | 556608 | 19-scf00455 | 19 |
| AX-157845343 | 23 | 5.861 | KV453152.1 | 558730 | 19-scf00455 | 19 |
| AX-157845344 | 23 | 5.861 | KV453152.1 | 559562 | 19-scf00455 | 19 |
| AX-158289006 | 23 | 5.861 | KV453152.1 | 560353 | 19-scf00455 | 19 |
| AX-158289007 | 23 | 5.861 | KV453152.1 | 562109 | 19-scf00455 | 19 |
| AX-158289009 | 23 | 5.861 | KV453152.1 | 565768 | 19-scf00455 | 19 |
| AX-157749504 | 23 | 5.861 | KV453152.1 | 566400 | 19-scf00455 | 19 |
| AX-158289011 | 23 | 5.861 | KV453152.1 | 568090 | 19-scf00455 | 19 |

|              |    |       |            |        |             |    |
|--------------|----|-------|------------|--------|-------------|----|
| AX-158289012 | 23 | 5.861 | KV453152.1 | 568985 | 19-scf00455 | 19 |
| AX-157750363 | 23 | 5.861 | KV453152.1 | 571464 | 19-scf00455 | 19 |
| AX-157752573 | 23 | 5.861 | KV453152.1 | 572293 | 19-scf00455 | 19 |
| AX-157845348 | 23 | 5.861 | KV453152.1 | 574575 | 19-scf00455 | 19 |
| AX-158289016 | 23 | 5.861 | KV453152.1 | 575374 | 19-scf00455 | 19 |
| AX-158289017 | 23 | 5.861 | KV453152.1 | 576254 | 19-scf00455 | 19 |
| AX-158289019 | 23 | 5.861 | KV453152.1 | 577813 | 19-scf00455 | 19 |
| AX-158289022 | 23 | 5.861 | KV453152.1 | 582343 | 19-scf00455 | 19 |
| AX-158289028 | 23 | 5.861 | KV453152.1 | 589058 | 19-scf00455 | 19 |
| AX-158289029 | 23 | 5.861 | KV453152.1 | 589749 | 19-scf00455 | 19 |
| AX-158289035 | 23 | 5.861 | KV453152.1 | 597642 | 19-scf00455 | 19 |
| AX-158289036 | 23 | 5.861 | KV453152.1 | 598761 | 19-scf00455 | 19 |
| AX-158289038 | 23 | 5.861 | KV453152.1 | 602655 | 19-scf00455 | 19 |
| AX-158289040 | 23 | 5.861 | KV453152.1 | 607425 | 19-scf00455 | 19 |
| AX-157773885 | 23 | 5.861 | KV453152.1 | 609621 | 19-scf00455 | 19 |
| AX-157717619 | 23 | 5.861 | KV453152.1 | 638086 | 19-scf00455 | 19 |
| AX-158289056 | 23 | 5.861 | KV453152.1 | 640700 | 19-scf00455 | 19 |
| AX-157845355 | 23 | 5.861 | KV453152.1 | 648023 | 19-scf00455 | 19 |
| AX-158289063 | 23 | 5.861 | KV453152.1 | 652145 | 19-scf00455 | 19 |
| AX-157747252 | 23 | 5.861 | KV453152.1 | 653452 | 19-scf00455 | 19 |
| AX-158289065 | 23 | 5.861 | KV453152.1 | 653922 | 19-scf00455 | 19 |
| AX-157845356 | 23 | 5.861 | KV453152.1 | 654426 | 19-scf00455 | 19 |
| AX-158289068 | 23 | 5.861 | KV453152.1 | 655711 | 19-scf00455 | 19 |
| AX-158289071 | 23 | 5.861 | KV453152.1 | 657036 | 19-scf00455 | 19 |
| AX-157745444 | 23 | 5.861 | KV453152.1 | 658229 | 19-scf00455 | 19 |
| AX-158289074 | 23 | 5.861 | KV453152.1 | 658656 | 19-scf00455 | 19 |
| AX-158289075 | 23 | 5.861 | KV453152.1 | 660221 | 19-scf00455 | 19 |
| AX-157748452 | 23 | 5.861 | KV453152.1 | 660622 | 19-scf00455 | 19 |
| AX-158289078 | 23 | 5.861 | KV453152.1 | 665609 | 19-scf00455 | 19 |
| AX-158289080 | 23 | 5.861 | KV453152.1 | 666030 | 19-scf00455 | 19 |
| AX-157845358 | 23 | 5.861 | KV453152.1 | 666968 | 19-scf00455 | 19 |
| AX-158289083 | 23 | 5.861 | KV453152.1 | 668715 | 19-scf00455 | 19 |
| AX-158289084 | 23 | 5.861 | KV453152.1 | 670286 | 19-scf00455 | 19 |
| AX-157753021 | 23 | 5.861 | KV453152.1 | 676663 | 19-scf00455 | 19 |
| AX-158289088 | 23 | 5.861 | KV453152.1 | 677459 | 19-scf00455 | 19 |
| AX-158417221 | 23 | 5.861 | KV453152.1 | 727538 | 19-scf00455 | 19 |
| AX-158289095 | 23 | 5.861 | KV453152.1 | 730725 | 19-scf00455 | 19 |
| AX-158289096 | 23 | 5.861 | KV453152.1 | 731117 | 19-scf00455 | 19 |
| AX-158289105 | 23 | 5.861 | KV453152.1 | 752035 | 19-scf00455 | 19 |
| AX-157755134 | 23 | 5.861 | KV453152.1 | 761736 | 19-scf00455 | 19 |
| AX-158289107 | 23 | 5.861 | KV453152.1 | 762426 | 19-scf00455 | 19 |
| AX-158289109 | 23 | 5.861 | KV453152.1 | 766002 | 19-scf00455 | 19 |
| AX-158289110 | 23 | 5.861 | KV453152.1 | 768575 | 19-scf00455 | 19 |
| AX-158289111 | 23 | 5.861 | KV453152.1 | 771063 | 19-scf00455 | 19 |
| AX-158289112 | 23 | 5.861 | KV453152.1 | 771886 | 19-scf00455 | 19 |
| AX-158417224 | 23 | 5.861 | KV453152.1 | 780507 | 19-scf00455 | 19 |
| AX-158289120 | 23 | 5.861 | KV453152.1 | 794794 | 19-scf00455 | 19 |
| AX-158289121 | 23 | 5.861 | KV453152.1 | 796596 | 19-scf00455 | 19 |
| AX-158289123 | 23 | 5.861 | KV453152.1 | 820192 | 19-scf00455 | 19 |
| AX-158289125 | 23 | 5.861 | KV453152.1 | 822521 | 19-scf00455 | 19 |
| AX-158289126 | 23 | 5.861 | KV453152.1 | 822994 | 19-scf00455 | 19 |



|              |    |       |            |         |             |    |
|--------------|----|-------|------------|---------|-------------|----|
| AX-158289139 | 23 | 5.861 | KV453152.1 | 850356  | 19-scf00455 | 19 |
| AX-157845359 | 23 | 5.861 | KV453152.1 | 863533  | 19-scf00455 | 19 |
| AX-157845360 | 23 | 5.861 | KV453152.1 | 866315  | 19-scf00455 | 19 |
| AX-158289145 | 23 | 5.861 | KV453152.1 | 868258  | 19-scf00455 | 19 |
| AX-158289148 | 23 | 5.861 | KV453152.1 | 870470  | 19-scf00455 | 19 |
| AX-158421239 | 23 | 5.861 | KV453152.1 | 877449  | 19-scf00455 | 19 |
| AX-158289165 | 23 | 5.861 | KV453152.1 | 909529  | 19-scf00455 | 19 |
| AX-158289166 | 23 | 5.861 | KV453152.1 | 910653  | 19-scf00455 | 19 |
| AX-158289168 | 23 | 5.861 | KV453152.1 | 913188  | 19-scf00455 | 19 |
| AX-158289169 | 23 | 5.861 | KV453152.1 | 913429  | 19-scf00455 | 19 |
| AX-157845364 | 23 | 5.861 | KV453152.1 | 916061  | 19-scf00455 | 19 |
| AX-157845368 | 23 | 5.861 | KV453152.1 | 938132  | 19-scf00455 | 19 |
| AX-158289198 | 23 | 5.861 | KV453152.1 | 958981  | 19-scf00455 | 19 |
| AX-158289200 | 23 | 5.861 | KV453152.1 | 961799  | 19-scf00455 | 19 |
| AX-158289202 | 23 | 5.861 | KV453152.1 | 964461  | 19-scf00455 | 19 |
| AX-158289204 | 23 | 5.861 | KV453152.1 | 965383  | 19-scf00455 | 19 |
| AX-157707774 | 23 | 5.861 | KV453152.1 | 984782  | 19-scf00455 | 19 |
| AX-157707773 | 23 | 5.861 | KV453152.1 | 985007  | 19-scf00455 | 19 |
| AX-158289265 | 23 | 5.861 | KV453152.1 | 1040413 | 19-scf00455 | 19 |
| AX-158289465 | 23 | 5.861 | KV453152.1 | 1281728 | 19-scf00455 | 19 |
| AX-158289489 | 23 | 5.861 | KV453152.1 | 1321742 | 19-scf00455 | 19 |
| AX-158289497 | 23 | 5.861 | KV453152.1 | 1334286 | 19-scf00455 | 19 |
| AX-158291361 | 23 | 5.861 | KV453150.1 | 3843    | 19-scf00456 | 19 |
| AX-158291364 | 23 | 5.861 | KV453150.1 | 13685   | 19-scf00456 | 19 |
| AX-158291367 | 23 | 5.861 | KV453150.1 | 19411   | 19-scf00456 | 19 |
| AX-158291378 | 23 | 5.861 | KV453150.1 | 34643   | 19-scf00456 | 19 |
| AX-158291391 | 23 | 5.861 | KV453150.1 | 71944   | 19-scf00456 | 19 |
| AX-158291394 | 23 | 5.861 | KV453150.1 | 83498   | 19-scf00456 | 19 |
| AX-158291402 | 23 | 5.861 | KV453150.1 | 106020  | 19-scf00456 | 19 |
| AX-158291405 | 23 | 5.861 | KV453150.1 | 114035  | 19-scf00456 | 19 |
| AX-158291410 | 23 | 5.861 | KV453150.1 | 132103  | 19-scf00456 | 19 |
| AX-158291412 | 23 | 5.861 | KV453150.1 | 139284  | 19-scf00456 | 19 |
| AX-158291413 | 23 | 5.861 | KV453150.1 | 140134  | 19-scf00456 | 19 |
| AX-158291414 | 23 | 5.861 | KV453150.1 | 140845  | 19-scf00456 | 19 |
| AX-158291416 | 23 | 5.861 | KV453150.1 | 144045  | 19-scf00456 | 19 |
| AX-158291422 | 23 | 5.861 | KV453150.1 | 161074  | 19-scf00456 | 19 |
| AX-158291450 | 23 | 5.861 | KV453150.1 | 193979  | 19-scf00456 | 19 |
| AX-158291490 | 23 | 5.861 | KV453150.1 | 238540  | 19-scf00456 | 19 |
| AX-158291492 | 23 | 5.861 | KV453150.1 | 245296  | 19-scf00456 | 19 |
| AX-158291495 | 23 | 5.861 | KV453150.1 | 257370  | 19-scf00456 | 19 |
| AX-158291502 | 23 | 5.861 | KV453150.1 | 269883  | 19-scf00456 | 19 |
| AX-158291504 | 23 | 5.861 | KV453150.1 | 271966  | 19-scf00456 | 19 |
| AX-158291505 | 23 | 5.861 | KV453150.1 | 275791  | 19-scf00456 | 19 |
| AX-158291529 | 23 | 5.861 | KV453150.1 | 311269  | 19-scf00456 | 19 |
| AX-158291531 | 23 | 5.861 | KV453150.1 | 315549  | 19-scf00456 | 19 |
| AX-158291540 | 23 | 5.861 | KV453150.1 | 322912  | 19-scf00456 | 19 |
| AX-158291552 | 23 | 5.861 | KV453150.1 | 342919  | 19-scf00456 | 19 |
| AX-157888047 | 23 | 5.861 | KV453150.1 | 343665  | 19-scf00456 | 19 |
| AX-158291553 | 23 | 5.861 | KV453150.1 | 344910  | 19-scf00456 | 19 |
| AX-158291554 | 23 | 5.861 | KV453150.1 | 346010  | 19-scf00456 | 19 |
| AX-158291567 | 23 | 5.861 | KV453150.1 | 365591  | 19-scf00456 | 19 |

|              |    |       |            |         |             |    |
|--------------|----|-------|------------|---------|-------------|----|
| AX-158291568 | 23 | 5.861 | KV453150.1 | 366086  | 19-scf00456 | 19 |
| AX-158291569 | 23 | 5.861 | KV453150.1 | 368359  | 19-scf00456 | 19 |
| AX-158291570 | 23 | 5.861 | KV453150.1 | 369196  | 19-scf00456 | 19 |
| AX-158291571 | 23 | 5.861 | KV453150.1 | 370086  | 19-scf00456 | 19 |
| AX-158291574 | 23 | 5.861 | KV453150.1 | 372055  | 19-scf00456 | 19 |
| AX-157726598 | 23 | 5.861 | KV453150.1 | 372354  | 19-scf00456 | 19 |
| AX-157742236 | 23 | 5.861 | KV453150.1 | 375175  | 19-scf00456 | 19 |
| AX-158291577 | 23 | 5.861 | KV453150.1 | 378101  | 19-scf00456 | 19 |
| AX-157771161 | 23 | 5.861 | KV453150.1 | 379510  | 19-scf00456 | 19 |
| AX-158291578 | 23 | 5.861 | KV453150.1 | 379582  | 19-scf00456 | 19 |
| AX-158291580 | 23 | 5.861 | KV453150.1 | 381853  | 19-scf00456 | 19 |
| AX-158291583 | 23 | 5.861 | KV453150.1 | 385715  | 19-scf00456 | 19 |
| AX-158291584 | 23 | 5.861 | KV453150.1 | 386232  | 19-scf00456 | 19 |
| AX-158291591 | 23 | 5.861 | KV453150.1 | 393878  | 19-scf00456 | 19 |
| AX-158291603 | 23 | 5.861 | KV453150.1 | 407527  | 19-scf00456 | 19 |
| AX-157748414 | 23 | 5.861 | KV453150.1 | 410792  | 19-scf00456 | 19 |
| AX-158291608 | 23 | 5.861 | KV453150.1 | 411506  | 19-scf00456 | 19 |
| AX-158381242 | 23 | 5.861 | KV453150.1 | 432012  | 19-scf00456 | 19 |
| AX-158291628 | 23 | 5.861 | KV453150.1 | 439299  | 19-scf00456 | 19 |
| AX-158291629 | 23 | 5.861 | KV453150.1 | 439564  | 19-scf00456 | 19 |
| AX-158291633 | 23 | 5.861 | KV453150.1 | 452129  | 19-scf00456 | 19 |
| AX-158291634 | 23 | 5.861 | KV453150.1 | 452761  | 19-scf00456 | 19 |
| AX-158291635 | 23 | 5.861 | KV453150.1 | 453793  | 19-scf00456 | 19 |
| AX-158294613 | 23 | 5.861 | KV453155.1 | 3556034 | 19-scf00458 | 19 |
| AX-157680374 | 23 | 5.861 | KV453149.1 | 95126   | 19-scf00607 | 19 |
| AX-157685295 | 23 | 5.861 | KV453149.1 | 99684   | 19-scf00607 | 19 |
| AX-157685297 | 23 | 5.861 | KV453149.1 | 100749  | 19-scf00607 | 19 |
| AX-157682193 | 23 | 5.861 | KV453151.1 | 21295   | 19-scf00636 | 19 |
| AX-157686237 | 23 | 5.861 | KV453144.1 | 48423   | 19-scf00678 | 19 |
| AX-157685623 | 23 | 5.861 | KV453368.1 | 76850   | scf00628    | UN |
| AX-157685687 | 23 | 5.861 | KV453370.1 | 17298   | scf00633    | UN |
| AX-157681964 | 23 | 5.861 | KV453370.1 | 26107   | scf00633    | UN |
| AX-157681965 | 23 | 5.861 | KV453370.1 | 46455   | scf00633    | UN |
| AX-157685696 | 23 | 5.861 | KV453370.1 | 58119   | scf00633    | UN |
| AX-158288350 | 23 | 5.925 | KV453146.1 | 788398  | 19-scf00451 | 19 |
| AX-158288965 | 23 | 5.925 | KV453152.1 | 480903  | 19-scf00455 | 19 |
| AX-158289024 | 23 | 5.925 | KV453152.1 | 583440  | 19-scf00455 | 19 |
| AX-158289046 | 23 | 5.925 | KV453152.1 | 617690  | 19-scf00455 | 19 |
| AX-158289153 | 23 | 5.925 | KV453152.1 | 881945  | 19-scf00455 | 19 |
| AX-158289154 | 23 | 5.925 | KV453152.1 | 883027  | 19-scf00455 | 19 |
| AX-157709139 | 23 | 5.925 | KV453152.1 | 883750  | 19-scf00455 | 19 |
| AX-158289155 | 23 | 5.925 | KV453152.1 | 885338  | 19-scf00455 | 19 |
| AX-158289156 | 23 | 5.925 | KV453152.1 | 887167  | 19-scf00455 | 19 |
| AX-158288650 | 23 | 5.995 | KV453148.1 | 182279  | 19-scf00454 | 19 |
| AX-158288663 | 23 | 5.995 | KV453148.1 | 199649  | 19-scf00454 | 19 |
| AX-157845312 | 23 | 5.995 | KV453148.1 | 201162  | 19-scf00454 | 19 |
| AX-158288688 | 23 | 5.995 | KV453152.1 | 109174  | 19-scf00455 | 19 |
| AX-158288705 | 23 | 5.995 | KV453152.1 | 126465  | 19-scf00455 | 19 |
| AX-158288778 | 23 | 5.995 | KV453152.1 | 222739  | 19-scf00455 | 19 |
| AX-158288799 | 23 | 5.995 | KV453152.1 | 242620  | 19-scf00455 | 19 |
| AX-158288860 | 23 | 5.995 | KV453152.1 | 313174  | 19-scf00455 | 19 |

|              |    |       |            |         |             |    |
|--------------|----|-------|------------|---------|-------------|----|
| AX-158288943 | 23 | 5.995 | KV453152.1 | 407360  | 19-scf00455 | 19 |
| AX-157845333 | 23 | 5.995 | KV453152.1 | 409084  | 19-scf00455 | 19 |
| AX-158288944 | 23 | 5.995 | KV453152.1 | 412132  | 19-scf00455 | 19 |
| AX-158288947 | 23 | 5.995 | KV453152.1 | 414829  | 19-scf00455 | 19 |
| AX-157888022 | 23 | 5.995 | KV453152.1 | 421855  | 19-scf00455 | 19 |
| AX-158288950 | 23 | 5.995 | KV453152.1 | 442063  | 19-scf00455 | 19 |
| AX-158288951 | 23 | 5.995 | KV453152.1 | 445658  | 19-scf00455 | 19 |
| AX-158288953 | 23 | 5.995 | KV453152.1 | 453148  | 19-scf00455 | 19 |
| AX-158417209 | 23 | 5.995 | KV453152.1 | 473306  | 19-scf00455 | 19 |
| AX-158288957 | 23 | 5.995 | KV453152.1 | 473935  | 19-scf00455 | 19 |
| AX-158288958 | 23 | 5.995 | KV453152.1 | 474463  | 19-scf00455 | 19 |
| AX-158288959 | 23 | 5.995 | KV453152.1 | 475646  | 19-scf00455 | 19 |
| AX-158288960 | 23 | 5.995 | KV453152.1 | 475914  | 19-scf00455 | 19 |
| AX-158288961 | 23 | 5.995 | KV453152.1 | 476377  | 19-scf00455 | 19 |
| AX-158288963 | 23 | 5.995 | KV453152.1 | 478087  | 19-scf00455 | 19 |
| AX-158417210 | 23 | 5.995 | KV453152.1 | 478239  | 19-scf00455 | 19 |
| AX-158288964 | 23 | 5.995 | KV453152.1 | 480192  | 19-scf00455 | 19 |
| AX-158289005 | 23 | 5.995 | KV453152.1 | 558332  | 19-scf00455 | 19 |
| AX-158289050 | 23 | 5.995 | KV453152.1 | 623603  | 19-scf00455 | 19 |
| AX-158289094 | 23 | 5.995 | KV453152.1 | 730311  | 19-scf00455 | 19 |
| AX-158289115 | 23 | 5.995 | KV453152.1 | 776018  | 19-scf00455 | 19 |
| AX-158289124 | 23 | 5.995 | KV453152.1 | 822050  | 19-scf00455 | 19 |
| AX-157750786 | 23 | 5.995 | KV453152.1 | 920144  | 19-scf00455 | 19 |
| AX-158289173 | 23 | 5.995 | KV453152.1 | 926307  | 19-scf00455 | 19 |
| AX-158289179 | 23 | 5.995 | KV453152.1 | 935168  | 19-scf00455 | 19 |
| AX-158289182 | 23 | 5.995 | KV453152.1 | 937325  | 19-scf00455 | 19 |
| AX-158289187 | 23 | 5.995 | KV453152.1 | 943722  | 19-scf00455 | 19 |
| AX-158289189 | 23 | 5.995 | KV453152.1 | 949315  | 19-scf00455 | 19 |
| AX-158289195 | 23 | 5.995 | KV453152.1 | 954696  | 19-scf00455 | 19 |
| AX-157845369 | 23 | 5.995 | KV453152.1 | 955501  | 19-scf00455 | 19 |
| AX-158289199 | 23 | 5.995 | KV453152.1 | 960789  | 19-scf00455 | 19 |
| AX-158289209 | 23 | 5.995 | KV453152.1 | 971464  | 19-scf00455 | 19 |
| AX-158289211 | 23 | 5.995 | KV453152.1 | 972438  | 19-scf00455 | 19 |
| AX-158289212 | 23 | 5.995 | KV453152.1 | 972830  | 19-scf00455 | 19 |
| AX-158289213 | 23 | 5.995 | KV453152.1 | 974147  | 19-scf00455 | 19 |
| AX-158289214 | 23 | 5.995 | KV453152.1 | 974803  | 19-scf00455 | 19 |
| AX-158289218 | 23 | 5.995 | KV453152.1 | 981586  | 19-scf00455 | 19 |
| AX-158289219 | 23 | 5.995 | KV453152.1 | 982325  | 19-scf00455 | 19 |
| AX-158289225 | 23 | 5.995 | KV453152.1 | 995210  | 19-scf00455 | 19 |
| AX-158289226 | 23 | 5.995 | KV453152.1 | 995975  | 19-scf00455 | 19 |
| AX-158289233 | 23 | 5.995 | KV453152.1 | 1000314 | 19-scf00455 | 19 |
| AX-158417228 | 23 | 5.995 | KV453152.1 | 1024433 | 19-scf00455 | 19 |
| AX-158289330 | 23 | 5.995 | KV453152.1 | 1115760 | 19-scf00455 | 19 |
| AX-158289351 | 23 | 5.995 | KV453152.1 | 1157093 | 19-scf00455 | 19 |
| AX-158289430 | 23 | 5.995 | KV453152.1 | 1234732 | 19-scf00455 | 19 |
| AX-158289436 | 23 | 5.995 | KV453152.1 | 1239235 | 19-scf00455 | 19 |
| AX-158289438 | 23 | 5.995 | KV453152.1 | 1240998 | 19-scf00455 | 19 |
| AX-158289454 | 23 | 5.995 | KV453152.1 | 1259314 | 19-scf00455 | 19 |
| AX-158289460 | 23 | 5.995 | KV453152.1 | 1268443 | 19-scf00455 | 19 |
| AX-158289462 | 23 | 5.995 | KV453152.1 | 1270151 | 19-scf00455 | 19 |
| AX-158417233 | 23 | 5.995 | KV453152.1 | 1309305 | 19-scf00455 | 19 |

|              |    |       |            |         |             |    |
|--------------|----|-------|------------|---------|-------------|----|
| AX-157743311 | 23 | 5.995 | KV453152.1 | 1430295 | 19-scf00455 | 19 |
| AX-157845398 | 23 | 5.995 | KV453152.1 | 1430477 | 19-scf00455 | 19 |
| AX-158291477 | 23 | 5.995 | KV453150.1 | 217574  | 19-scf00456 | 19 |
| AX-158291509 | 23 | 5.995 | KV453150.1 | 279200  | 19-scf00456 | 19 |
| AX-158291511 | 23 | 5.995 | KV453150.1 | 280888  | 19-scf00456 | 19 |
| AX-158291545 | 23 | 5.995 | KV453150.1 | 330509  | 19-scf00456 | 19 |
| AX-158291555 | 23 | 5.995 | KV453150.1 | 346427  | 19-scf00456 | 19 |
| AX-158291557 | 23 | 5.995 | KV453150.1 | 349067  | 19-scf00456 | 19 |
| AX-158291559 | 23 | 5.995 | KV453150.1 | 351252  | 19-scf00456 | 19 |
| AX-158291560 | 23 | 5.995 | KV453150.1 | 354033  | 19-scf00456 | 19 |
| AX-157845593 | 23 | 5.995 | KV453150.1 | 359099  | 19-scf00456 | 19 |
| AX-158291590 | 23 | 5.995 | KV453150.1 | 392589  | 19-scf00456 | 19 |
| AX-158291598 | 23 | 5.995 | KV453150.1 | 400650  | 19-scf00456 | 19 |
| AX-158291602 | 23 | 5.995 | KV453150.1 | 406868  | 19-scf00456 | 19 |
| AX-158291606 | 23 | 5.995 | KV453150.1 | 410481  | 19-scf00456 | 19 |
| AX-157880802 | 23 | 5.995 | KV453150.1 | 425567  | 19-scf00456 | 19 |
| AX-158289393 | 23 | 6.391 | KV453152.1 | 1200857 | 19-scf00455 | 19 |
| AX-158289400 | 23 | 6.397 | KV453152.1 | 1208382 | 19-scf00455 | 19 |
| AX-158289402 | 23 | 6.397 | KV453152.1 | 1210789 | 19-scf00455 | 19 |
| AX-158289407 | 23 | 6.397 | KV453152.1 | 1215822 | 19-scf00455 | 19 |
| AX-158289425 | 23 | 6.397 | KV453152.1 | 1230816 | 19-scf00455 | 19 |
| AX-158289429 | 23 | 6.397 | KV453152.1 | 1234212 | 19-scf00455 | 19 |
| AX-158289431 | 23 | 6.397 | KV453152.1 | 1235831 | 19-scf00455 | 19 |
| AX-158289448 | 23 | 6.397 | KV453152.1 | 1252862 | 19-scf00455 | 19 |
| AX-157845386 | 23 | 6.397 | KV453152.1 | 1257351 | 19-scf00455 | 19 |
| AX-158289452 | 23 | 6.397 | KV453152.1 | 1258309 | 19-scf00455 | 19 |
| AX-158289453 | 23 | 6.397 | KV453152.1 | 1258604 | 19-scf00455 | 19 |
| AX-158289458 | 23 | 6.397 | KV453152.1 | 1265639 | 19-scf00455 | 19 |
| AX-158289459 | 23 | 6.397 | KV453152.1 | 1266213 | 19-scf00455 | 19 |
| AX-157755618 | 23 | 6.397 | KV453152.1 | 1266938 | 19-scf00455 | 19 |
| AX-158289463 | 23 | 6.397 | KV453152.1 | 1279628 | 19-scf00455 | 19 |
| AX-158289464 | 23 | 6.397 | KV453152.1 | 1280617 | 19-scf00455 | 19 |
| AX-158289467 | 23 | 6.397 | KV453152.1 | 1284106 | 19-scf00455 | 19 |
| AX-158289469 | 23 | 6.397 | KV453152.1 | 1288790 | 19-scf00455 | 19 |
| AX-158289470 | 23 | 6.397 | KV453152.1 | 1289363 | 19-scf00455 | 19 |
| AX-158289471 | 23 | 6.397 | KV453152.1 | 1290395 | 19-scf00455 | 19 |
| AX-158289473 | 23 | 6.397 | KV453152.1 | 1291774 | 19-scf00455 | 19 |
| AX-158289474 | 23 | 6.397 | KV453152.1 | 1293148 | 19-scf00455 | 19 |
| AX-157845388 | 23 | 6.397 | KV453152.1 | 1294448 | 19-scf00455 | 19 |
| AX-158289475 | 23 | 6.397 | KV453152.1 | 1294901 | 19-scf00455 | 19 |
| AX-158289477 | 23 | 6.397 | KV453152.1 | 1297794 | 19-scf00455 | 19 |
| AX-157845389 | 23 | 6.397 | KV453152.1 | 1302377 | 19-scf00455 | 19 |
| AX-158289483 | 23 | 6.397 | KV453152.1 | 1314023 | 19-scf00455 | 19 |
| AX-158291357 | 23 | 6.397 | KV453150.1 | 113     | 19-scf00456 | 19 |
| AX-158289032 | 23 | 6.531 | KV453152.1 | 592943  | 19-scf00455 | 19 |
| AX-157845390 | 23 | 6.531 | KV453152.1 | 1318780 | 19-scf00455 | 19 |
| AX-158289487 | 23 | 6.531 | KV453152.1 | 1320705 | 19-scf00455 | 19 |
| AX-158289476 | 23 | 6.97  | KV453152.1 | 1296614 | 19-scf00455 | 19 |
| AX-158289518 | 23 | 6.97  | KV453152.1 | 1366805 | 19-scf00455 | 19 |
| AX-157845391 | 23 | 6.97  | KV453152.1 | 1390655 | 19-scf00455 | 19 |
| AX-158289539 | 23 | 6.97  | KV453152.1 | 1400852 | 19-scf00455 | 19 |

|              |    |       |             |         |             |    |
|--------------|----|-------|-------------|---------|-------------|----|
| AX-158289412 | 23 | 7.071 | KV453152.1  | 1220409 | 19-scf00455 | 19 |
| AX-158289456 | 23 | 7.071 | KV453152.1  | 1262155 | 19-scf00455 | 19 |
| AX-158289484 | 23 | 7.071 | KV453152.1  | 1314557 | 19-scf00455 | 19 |
| AX-158289485 | 23 | 7.071 | KV453152.1  | 1315514 | 19-scf00455 | 19 |
| AX-158417238 | 23 | 7.071 | KV453152.1  | 1374923 | 19-scf00455 | 19 |
| AX-157845394 | 23 | 7.071 | KV453152.1  | 1406776 | 19-scf00455 | 19 |
| AX-157845395 | 23 | 7.071 | KV453152.1  | 1409038 | 19-scf00455 | 19 |
| AX-158289523 | 23 | 7.173 | KV453152.1  | 1377643 | 19-scf00455 | 19 |
| AX-158289517 | 23 | 7.469 | KV453152.1  | 1364138 | 19-scf00455 | 19 |
| AX-158289524 | 23 | 7.469 | KV453152.1  | 1378671 | 19-scf00455 | 19 |
| AX-158289526 | 23 | 7.469 | KV453152.1  | 1384753 | 19-scf00455 | 19 |
| AX-158289527 | 23 | 7.469 | KV453152.1  | 1385261 | 19-scf00455 | 19 |
| AX-158289535 | 23 | 7.469 | KV453152.1  | 1395586 | 19-scf00455 | 19 |
| AX-158289538 | 23 | 7.469 | KV453152.1  | 1400463 | 19-scf00455 | 19 |
| AX-158289540 | 23 | 7.469 | KV453152.1  | 1402909 | 19-scf00455 | 19 |
| AX-158289541 | 23 | 7.469 | KV453152.1  | 1404007 | 19-scf00455 | 19 |
| AX-157845392 | 23 | 7.469 | KV453152.1  | 1405004 | 19-scf00455 | 19 |
| AX-157845393 | 23 | 7.469 | KV453152.1  | 1405119 | 19-scf00455 | 19 |
| AX-157738609 | 23 | 7.469 | KV453152.1  | 1406368 | 19-scf00455 | 19 |
| AX-158289544 | 23 | 7.469 | KV453152.1  | 1417261 | 19-scf00455 | 19 |
| AX-158289546 | 23 | 7.469 | KV453152.1  | 1419181 | 19-scf00455 | 19 |
| AX-158289547 | 23 | 7.469 | KV453152.1  | 1419624 | 19-scf00455 | 19 |
| AX-158289549 | 23 | 7.469 | KV453152.1  | 1420889 | 19-scf00455 | 19 |
| AX-158289557 | 23 | 7.469 | KV453152.1  | 1425920 | 19-scf00455 | 19 |
| AX-157727775 | 23 | 7.469 | KV453152.1  | 1429258 | 19-scf00455 | 19 |
| AX-158289562 | 23 | 7.469 | KV453152.1  | 1439854 | 19-scf00455 | 19 |
| AX-158289563 | 23 | 7.469 | KV453152.1  | 1442215 | 19-scf00455 | 19 |
| AX-158289551 | 23 | 7.511 | KV453152.1  | 1421692 | 19-scf00455 | 19 |
| AX-157845415 | 23 | 7.511 | KV453152.1  | 1546540 | 19-scf00455 | 19 |
| AX-157845396 | 23 | 7.554 | KV453152.1  | 1426413 | 19-scf00455 | 19 |
| AX-158289558 | 23 | 7.603 | KV453152.1  | 1429781 | 19-scf00455 | 19 |
| AX-158289560 | 23 | 7.603 | KV453152.1  | 1435208 | 19-scf00455 | 19 |
| AX-157845399 | 23 | 7.87  | KV453152.1  | 1466536 | 19-scf00455 | 19 |
| AX-158289571 | 23 | 7.87  | KV453152.1  | 1466739 | 19-scf00455 | 19 |
| AX-157845400 | 23 | 7.87  | KV453152.1  | 1467313 | 19-scf00455 | 19 |
| AX-157845401 | 23 | 7.87  | KV453152.1  | 1467481 | 19-scf00455 | 19 |
| AX-158289574 | 23 | 7.87  | KV453152.1  | 1470423 | 19-scf00455 | 19 |
| AX-158289622 | 23 | 7.87  | KV453152.1  | 1531094 | 19-scf00455 | 19 |
| AX-158289699 | 23 | 7.87  | KV453152.1  | 1653351 | 19-scf00455 | 19 |
| AX-157688907 | 23 | 7.928 | 3ML01027431 | 660     | scf03037_1  | UN |
| AX-158289577 | 23 | 8.015 | KV453152.1  | 1476068 | 19-scf00455 | 19 |
| AX-158289578 | 23 | 8.015 | KV453152.1  | 1477864 | 19-scf00455 | 19 |
| AX-157845404 | 23 | 8.048 | KV453152.1  | 1480120 | 19-scf00455 | 19 |
| AX-158289579 | 23 | 8.139 | KV453152.1  | 1481218 | 19-scf00455 | 19 |
| AX-157845405 | 23 | 8.139 | KV453152.1  | 1483706 | 19-scf00455 | 19 |
| AX-158289582 | 23 | 8.139 | KV453152.1  | 1488354 | 19-scf00455 | 19 |
| AX-158289588 | 23 | 8.139 | KV453152.1  | 1493643 | 19-scf00455 | 19 |
| AX-158289580 | 23 | 8.272 | KV453152.1  | 1485174 | 19-scf00455 | 19 |
| AX-157845406 | 23 | 8.272 | KV453152.1  | 1491094 | 19-scf00455 | 19 |
| AX-158289584 | 23 | 8.272 | KV453152.1  | 1491462 | 19-scf00455 | 19 |
| AX-158289586 | 23 | 8.272 | KV453152.1  | 1492043 | 19-scf00455 | 19 |

|              |    |        |            |         |             |    |
|--------------|----|--------|------------|---------|-------------|----|
| AX-157845407 | 23 | 8.272  | KV453152.1 | 1492249 | 19-scf00455 | 19 |
| AX-157845408 | 23 | 8.272  | KV453152.1 | 1492554 | 19-scf00455 | 19 |
| AX-157710090 | 23 | 8.272  | KV453152.1 | 1499774 | 19-scf00455 | 19 |
| AX-158289605 | 23 | 8.272  | KV453152.1 | 1511861 | 19-scf00455 | 19 |
| AX-158289587 | 23 | 8.418  | KV453152.1 | 1493384 | 19-scf00455 | 19 |
| AX-158289590 | 23 | 8.539  | KV453152.1 | 1495607 | 19-scf00455 | 19 |
| AX-158289591 | 23 | 8.539  | KV453152.1 | 1497225 | 19-scf00455 | 19 |
| AX-158289592 | 23 | 8.539  | KV453152.1 | 1498246 | 19-scf00455 | 19 |
| AX-158289594 | 23 | 8.539  | KV453152.1 | 1499479 | 19-scf00455 | 19 |
| AX-158289595 | 23 | 8.539  | KV453152.1 | 1500149 | 19-scf00455 | 19 |
| AX-158289596 | 23 | 8.539  | KV453152.1 | 1501956 | 19-scf00455 | 19 |
| AX-158289597 | 23 | 8.539  | KV453152.1 | 1502513 | 19-scf00455 | 19 |
| AX-158289599 | 23 | 8.539  | KV453152.1 | 1504440 | 19-scf00455 | 19 |
| AX-158289600 | 23 | 8.602  | KV453152.1 | 1505476 | 19-scf00455 | 19 |
| AX-158289602 | 23 | 8.673  | KV453152.1 | 1507940 | 19-scf00455 | 19 |
| AX-158289606 | 23 | 8.718  | KV453152.1 | 1512612 | 19-scf00455 | 19 |
| AX-158289608 | 23 | 8.76   | KV453152.1 | 1513577 | 19-scf00455 | 19 |
| AX-158289610 | 23 | 8.807  | KV453152.1 | 1515090 | 19-scf00455 | 19 |
| AX-158289611 | 23 | 8.807  | KV453152.1 | 1516094 | 19-scf00455 | 19 |
| AX-157721875 | 23 | 8.807  | KV453152.1 | 1517461 | 19-scf00455 | 19 |
| AX-158289614 | 23 | 8.807  | KV453152.1 | 1521586 | 19-scf00455 | 19 |
| AX-158289615 | 23 | 8.807  | KV453152.1 | 1522090 | 19-scf00455 | 19 |
| AX-158289616 | 23 | 8.807  | KV453152.1 | 1522594 | 19-scf00455 | 19 |
| AX-158289618 | 23 | 8.812  | KV453152.1 | 1524154 | 19-scf00455 | 19 |
| AX-157742437 | 23 | 8.817  | KV453152.1 | 1526932 | 19-scf00455 | 19 |
| AX-158289705 | 23 | 8.817  | KV453152.1 | 1661307 | 19-scf00455 | 19 |
| AX-158289620 | 23 | 8.982  | KV453152.1 | 1528140 | 19-scf00455 | 19 |
| AX-158289621 | 23 | 9.028  | KV453152.1 | 1530025 | 19-scf00455 | 19 |
| AX-158289624 | 23 | 9.184  | KV453152.1 | 1532928 | 19-scf00455 | 19 |
| AX-157845410 | 23 | 9.343  | KV453152.1 | 1535528 | 19-scf00455 | 19 |
| AX-157845411 | 23 | 9.343  | KV453152.1 | 1537563 | 19-scf00455 | 19 |
| AX-157845412 | 23 | 9.343  | KV453152.1 | 1538885 | 19-scf00455 | 19 |
| AX-158289625 | 23 | 9.343  | KV453152.1 | 1540227 | 19-scf00455 | 19 |
| AX-158289627 | 23 | 9.865  | KV453152.1 | 1544433 | 19-scf00455 | 19 |
| AX-158289655 | 23 | 9.865  | KV453152.1 | 1588868 | 19-scf00455 | 19 |
| AX-157845413 | 23 | 9.868  | KV453152.1 | 1544687 | 19-scf00455 | 19 |
| AX-157845414 | 23 | 9.876  | KV453152.1 | 1545335 | 19-scf00455 | 19 |
| AX-158289650 | 23 | 9.876  | KV453152.1 | 1582127 | 19-scf00455 | 19 |
| AX-157880749 | 23 | 9.883  | KV453152.1 | 1544179 | 19-scf00455 | 19 |
| AX-158289639 | 23 | 9.883  | KV453152.1 | 1563836 | 19-scf00455 | 19 |
| AX-158289644 | 23 | 9.883  | KV453152.1 | 1573649 | 19-scf00455 | 19 |
| AX-157863947 | 23 | 9.883  | KV453152.1 | 1659213 | 19-scf00455 | 19 |
| AX-158289732 | 23 | 9.883  | KV453152.1 | 1694930 | 19-scf00455 | 19 |
| AX-158289647 | 23 | 10.146 | KV453152.1 | 1578350 | 19-scf00455 | 19 |
| AX-158289648 | 23 | 10.147 | KV453152.1 | 1579941 | 19-scf00455 | 19 |
| AX-158289651 | 23 | 10.147 | KV453152.1 | 1583306 | 19-scf00455 | 19 |
| AX-158289652 | 23 | 10.147 | KV453152.1 | 1584082 | 19-scf00455 | 19 |
| AX-157771767 | 23 | 10.147 | KV453152.1 | 1585288 | 19-scf00455 | 19 |
| AX-158289656 | 23 | 10.147 | KV453152.1 | 1589547 | 19-scf00455 | 19 |
| AX-158289673 | 23 | 10.147 | KV453152.1 | 1613101 | 19-scf00455 | 19 |
| AX-158289675 | 23 | 10.147 | KV453152.1 | 1615927 | 19-scf00455 | 19 |

|              |    |        |            |         |             |    |
|--------------|----|--------|------------|---------|-------------|----|
| AX-158289677 | 23 | 10.147 | KV453152.1 | 1617921 | 19-scf00455 | 19 |
| AX-158289749 | 23 | 10.147 | KV453152.1 | 1719116 | 19-scf00455 | 19 |
| AX-158289679 | 23 | 10.364 | KV453152.1 | 1624272 | 19-scf00455 | 19 |
| AX-157845423 | 23 | 10.365 | KV453152.1 | 1624869 | 19-scf00455 | 19 |
| AX-157731140 | 23 | 10.365 | KV453152.1 | 1626539 | 19-scf00455 | 19 |
| AX-158289681 | 23 | 10.365 | KV453152.1 | 1628958 | 19-scf00455 | 19 |
| AX-158289686 | 23 | 10.497 | KV453152.1 | 1635164 | 19-scf00455 | 19 |
| AX-158289692 | 23 | 10.497 | KV453152.1 | 1644828 | 19-scf00455 | 19 |
| AX-158289689 | 23 | 10.63  | KV453152.1 | 1638552 | 19-scf00455 | 19 |
| AX-158289691 | 23 | 10.63  | KV453152.1 | 1644155 | 19-scf00455 | 19 |
| AX-158289693 | 23 | 10.63  | KV453152.1 | 1645245 | 19-scf00455 | 19 |
| AX-158417243 | 23 | 10.631 | KV453152.1 | 1649874 | 19-scf00455 | 19 |
| AX-158289698 | 23 | 10.991 | KV453152.1 | 1652938 | 19-scf00455 | 19 |
| AX-157845424 | 23 | 10.991 | KV453152.1 | 1655133 | 19-scf00455 | 19 |
| AX-158289695 | 23 | 11.058 | KV453152.1 | 1646936 | 19-scf00455 | 19 |
| AX-158289696 | 23 | 11.058 | KV453152.1 | 1647016 | 19-scf00455 | 19 |
| AX-158289703 | 23 | 11.058 | KV453152.1 | 1656805 | 19-scf00455 | 19 |
| AX-157744985 | 23 | 11.058 | KV453152.1 | 1658800 | 19-scf00455 | 19 |
| AX-158289704 | 23 | 11.111 | KV453152.1 | 1659067 | 19-scf00455 | 19 |
| AX-158289708 | 23 | 11.128 | KV453152.1 | 1664369 | 19-scf00455 | 19 |
| AX-158289711 | 23 | 11.128 | KV453152.1 | 1667970 | 19-scf00455 | 19 |
| AX-158289713 | 23 | 11.129 | KV453152.1 | 1669497 | 19-scf00455 | 19 |
| AX-158289726 | 23 | 11.129 | KV453152.1 | 1686062 | 19-scf00455 | 19 |
| AX-158289688 | 23 | 11.13  | KV453152.1 | 1637760 | 19-scf00455 | 19 |
| AX-158289709 | 23 | 11.13  | KV453152.1 | 1667312 | 19-scf00455 | 19 |
| AX-157845427 | 23 | 11.13  | KV453152.1 | 1670132 | 19-scf00455 | 19 |
| AX-157748812 | 23 | 11.13  | KV453152.1 | 1670288 | 19-scf00455 | 19 |
| AX-157742068 | 23 | 11.13  | KV453152.1 | 1670853 | 19-scf00455 | 19 |
| AX-157845428 | 23 | 11.13  | KV453152.1 | 1671327 | 19-scf00455 | 19 |
| AX-158289714 | 23 | 11.13  | KV453152.1 | 1671371 | 19-scf00455 | 19 |
| AX-158289715 | 23 | 11.13  | KV453152.1 | 1674121 | 19-scf00455 | 19 |
| AX-158289722 | 23 | 11.13  | KV453152.1 | 1680703 | 19-scf00455 | 19 |
| AX-158289724 | 23 | 11.13  | KV453152.1 | 1683960 | 19-scf00455 | 19 |
| AX-158289719 | 23 | 11.142 | KV453152.1 | 1677567 | 19-scf00455 | 19 |
| AX-158289727 | 23 | 11.142 | KV453152.1 | 1688823 | 19-scf00455 | 19 |
| AX-158289737 | 23 | 11.142 | KV453152.1 | 1703491 | 19-scf00455 | 19 |
| AX-157699708 | 23 | 11.184 | KV453152.1 | 1683821 | 19-scf00455 | 19 |
| AX-158289729 | 23 | 11.184 | KV453152.1 | 1691536 | 19-scf00455 | 19 |
| AX-158289730 | 23 | 11.24  | KV453152.1 | 1692956 | 19-scf00455 | 19 |
| AX-157845431 | 23 | 11.24  | KV453152.1 | 1695247 | 19-scf00455 | 19 |
| AX-157753108 | 23 | 11.24  | KV453152.1 | 1698460 | 19-scf00455 | 19 |
| AX-158289735 | 23 | 11.24  | KV453152.1 | 1698517 | 19-scf00455 | 19 |
| AX-158289736 | 23 | 11.24  | KV453152.1 | 1699591 | 19-scf00455 | 19 |
| AX-158289743 | 23 | 11.24  | KV453152.1 | 1706423 | 19-scf00455 | 19 |
| AX-158289744 | 23 | 11.24  | KV453152.1 | 1710439 | 19-scf00455 | 19 |
| AX-158289747 | 23 | 11.24  | KV453152.1 | 1716501 | 19-scf00455 | 19 |
| AX-157845432 | 23 | 11.662 | KV453152.1 | 1719961 | 19-scf00455 | 19 |
| AX-157845433 | 23 | 11.677 | KV453152.1 | 1720211 | 19-scf00455 | 19 |
| AX-157739631 | 23 | 11.677 | KV453152.1 | 1723197 | 19-scf00455 | 19 |
| AX-157845436 | 23 | 12.639 | KV453152.1 | 1735711 | 19-scf00455 | 19 |
| AX-157740184 | 23 | 12.639 | KV453152.1 | 1737459 | 19-scf00455 | 19 |

|              |    |        |            |         |             |    |
|--------------|----|--------|------------|---------|-------------|----|
| AX-158289756 | 23 | 12.643 | KV453152.1 | 1735942 | 19-scf00455 | 19 |
| AX-157747522 | 23 | 12.879 | KV453152.1 | 1679463 | 19-scf00455 | 19 |
| AX-158289741 | 23 | 12.879 | KV453152.1 | 1705610 | 19-scf00455 | 19 |
| AX-158289757 | 23 | 12.879 | KV453152.1 | 1737820 | 19-scf00455 | 19 |
| AX-158289759 | 23 | 12.879 | KV453152.1 | 1743173 | 19-scf00455 | 19 |
| AX-158289760 | 23 | 12.879 | KV453152.1 | 1744107 | 19-scf00455 | 19 |
| AX-158289761 | 23 | 12.879 | KV453152.1 | 1745036 | 19-scf00455 | 19 |
| AX-158289762 | 23 | 12.879 | KV453152.1 | 1747422 | 19-scf00455 | 19 |
| AX-158289763 | 23 | 12.879 | KV453152.1 | 1749598 | 19-scf00455 | 19 |
| AX-158289764 | 23 | 12.879 | KV453152.1 | 1750975 | 19-scf00455 | 19 |
| AX-157724926 | 23 | 12.879 | KV453152.1 | 1751912 | 19-scf00455 | 19 |
| AX-157749887 | 23 | 12.879 | KV453152.1 | 1754159 | 19-scf00455 | 19 |
| AX-158289766 | 23 | 12.879 | KV453152.1 | 1755853 | 19-scf00455 | 19 |
| AX-157845439 | 23 | 12.879 | KV453152.1 | 1756694 | 19-scf00455 | 19 |
| AX-158411652 | 23 | 12.879 | KV453152.1 | 1768635 | 19-scf00455 | 19 |
| AX-158289782 | 23 | 12.879 | KV453152.1 | 1787385 | 19-scf00455 | 19 |
| AX-158289768 | 23 | 13.124 | KV453152.1 | 1760214 | 19-scf00455 | 19 |
| AX-158289769 | 23 | 13.124 | KV453152.1 | 1760703 | 19-scf00455 | 19 |
| AX-158289771 | 23 | 13.139 | KV453152.1 | 1762400 | 19-scf00455 | 19 |
| AX-157845440 | 23 | 13.139 | KV453152.1 | 1802356 | 19-scf00455 | 19 |
| AX-158289775 | 23 | 13.16  | KV453152.1 | 1776054 | 19-scf00455 | 19 |
| AX-158289784 | 23 | 13.405 | KV453152.1 | 1794973 | 19-scf00455 | 19 |
| AX-157715784 | 23 | 13.405 | KV453152.1 | 1797816 | 19-scf00455 | 19 |
| AX-158289785 | 23 | 13.405 | KV453152.1 | 1798427 | 19-scf00455 | 19 |
| AX-158289774 | 23 | 13.535 | KV453152.1 | 1772179 | 19-scf00455 | 19 |
| AX-157771671 | 23 | 13.535 | KV453152.1 | 1802931 | 19-scf00455 | 19 |
| AX-158289788 | 23 | 13.535 | KV453152.1 | 1803195 | 19-scf00455 | 19 |
| AX-158289789 | 23 | 13.535 | KV453152.1 | 1803818 | 19-scf00455 | 19 |
| AX-157724541 | 23 | 13.535 | KV453152.1 | 1818157 | 19-scf00455 | 19 |
| AX-158289790 | 23 | 13.601 | KV453152.1 | 1806729 | 19-scf00455 | 19 |
| AX-158289794 | 23 | 13.633 | KV453152.1 | 1812429 | 19-scf00455 | 19 |
| AX-158289776 | 23 | 13.696 | KV453152.1 | 1777538 | 19-scf00455 | 19 |
| AX-158289798 | 23 | 13.696 | KV453152.1 | 1818983 | 19-scf00455 | 19 |
| AX-158289801 | 23 | 13.754 | KV453152.1 | 1823095 | 19-scf00455 | 19 |
| AX-158419553 | 23 | 13.754 | KV453152.1 | 1842150 | 19-scf00455 | 19 |
| AX-158289797 | 23 | 13.804 | KV453152.1 | 1815792 | 19-scf00455 | 19 |
| AX-158289803 | 23 | 13.804 | KV453152.1 | 1824454 | 19-scf00455 | 19 |
| AX-158289807 | 23 | 13.804 | KV453152.1 | 1829732 | 19-scf00455 | 19 |
| AX-158289792 | 23 | 13.863 | KV453152.1 | 1810698 | 19-scf00455 | 19 |
| AX-158289795 | 23 | 13.863 | KV453152.1 | 1813225 | 19-scf00455 | 19 |
| AX-158289805 | 23 | 13.863 | KV453152.1 | 1827643 | 19-scf00455 | 19 |
| AX-158289806 | 23 | 13.863 | KV453152.1 | 1828370 | 19-scf00455 | 19 |
| AX-157741494 | 23 | 13.863 | KV453152.1 | 1830782 | 19-scf00455 | 19 |
| AX-158289808 | 23 | 13.863 | KV453152.1 | 1836334 | 19-scf00455 | 19 |
| AX-157723663 | 23 | 13.863 | KV453152.1 | 1838783 | 19-scf00455 | 19 |
| AX-158289810 | 23 | 13.863 | KV453152.1 | 1839969 | 19-scf00455 | 19 |
| AX-158289811 | 23 | 13.863 | KV453152.1 | 1841182 | 19-scf00455 | 19 |
| AX-158289814 | 23 | 13.863 | KV453152.1 | 1843074 | 19-scf00455 | 19 |
| AX-158289818 | 23 | 13.863 | KV453152.1 | 1845479 | 19-scf00455 | 19 |
| AX-158289819 | 23 | 13.863 | KV453152.1 | 1846272 | 19-scf00455 | 19 |
| AX-158289820 | 23 | 13.973 | KV453152.1 | 1847315 | 19-scf00455 | 19 |



|              |    |        |            |         |             |    |
|--------------|----|--------|------------|---------|-------------|----|
| AX-158289823 | 23 | 14.082 | KV453152.1 | 1849674 | 19-scf00455 | 19 |
| AX-158289828 | 23 | 14.411 | KV453152.1 | 1857064 | 19-scf00455 | 19 |
| AX-158289832 | 23 | 14.739 | KV453152.1 | 1862127 | 19-scf00455 | 19 |
| AX-158289833 | 23 | 14.739 | KV453152.1 | 1863188 | 19-scf00455 | 19 |
| AX-157775401 | 23 | 14.739 | KV453152.1 | 1863488 | 19-scf00455 | 19 |
| AX-158289838 | 23 | 14.739 | KV453152.1 | 1873486 | 19-scf00455 | 19 |
| AX-158289839 | 23 | 14.739 | KV453152.1 | 1873716 | 19-scf00455 | 19 |
| AX-158289842 | 23 | 14.739 | KV453152.1 | 1875703 | 19-scf00455 | 19 |
| AX-158289843 | 23 | 14.848 | KV453152.1 | 1877849 | 19-scf00455 | 19 |
| AX-158289846 | 23 | 14.848 | KV453152.1 | 1880961 | 19-scf00455 | 19 |
| AX-158289847 | 23 | 14.848 | KV453152.1 | 1883367 | 19-scf00455 | 19 |
| AX-158289856 | 23 | 14.985 | KV453152.1 | 1893775 | 19-scf00455 | 19 |
| AX-158289858 | 23 | 14.985 | KV453152.1 | 1894892 | 19-scf00455 | 19 |
| AX-158289859 | 23 | 14.985 | KV453152.1 | 1895440 | 19-scf00455 | 19 |
| AX-158289860 | 23 | 14.985 | KV453152.1 | 1896227 | 19-scf00455 | 19 |
| AX-158289862 | 23 | 15.19  | KV453152.1 | 1900581 | 19-scf00455 | 19 |
| AX-158289863 | 23 | 15.19  | KV453152.1 | 1901438 | 19-scf00455 | 19 |
| AX-158289825 | 23 | 15.395 | KV453152.1 | 1852009 | 19-scf00455 | 19 |
| AX-158289830 | 23 | 15.395 | KV453152.1 | 1860135 | 19-scf00455 | 19 |
| AX-158289831 | 23 | 15.395 | KV453152.1 | 1860728 | 19-scf00455 | 19 |
| AX-158289834 | 23 | 15.395 | KV453152.1 | 1863528 | 19-scf00455 | 19 |
| AX-158289864 | 23 | 15.395 | KV453152.1 | 1903427 | 19-scf00455 | 19 |
| AX-158289865 | 23 | 15.395 | KV453152.1 | 1904019 | 19-scf00455 | 19 |
| AX-157845446 | 23 | 15.395 | KV453152.1 | 1906396 | 19-scf00455 | 19 |
| AX-158289868 | 23 | 15.504 | KV453152.1 | 1910209 | 19-scf00455 | 19 |
| AX-158289857 | 23 | 15.53  | KV453152.1 | 1893994 | 19-scf00455 | 19 |
| AX-158289871 | 23 | 15.53  | KV453152.1 | 1915684 | 19-scf00455 | 19 |
| AX-157772736 | 23 | 15.53  | KV453152.1 | 1934991 | 19-scf00455 | 19 |
| AX-158289874 | 23 | 15.557 | KV453152.1 | 1917957 | 19-scf00455 | 19 |
| AX-157719202 | 23 | 15.585 | KV453152.1 | 1920201 | 19-scf00455 | 19 |
| AX-157873389 | 23 | 15.613 | KV453152.1 | 1907507 | 19-scf00455 | 19 |
| AX-158381229 | 23 | 15.613 | KV453152.1 | 1926532 | 19-scf00455 | 19 |
| AX-158289884 | 23 | 15.613 | KV453152.1 | 1932008 | 19-scf00455 | 19 |
| AX-158289885 | 23 | 15.643 | KV453152.1 | 1932549 | 19-scf00455 | 19 |
| AX-158289886 | 23 | 15.679 | KV453152.1 | 1934333 | 19-scf00455 | 19 |
| AX-158289887 | 23 | 15.722 | KV453152.1 | 1936513 | 19-scf00455 | 19 |
| AX-158289888 | 23 | 15.791 | KV453152.1 | 1938315 | 19-scf00455 | 19 |
| AX-158289889 | 23 | 15.791 | KV453152.1 | 1941085 | 19-scf00455 | 19 |
| AX-158289836 | 23 | 15.832 | KV453152.1 | 1871379 | 19-scf00455 | 19 |
| AX-158289844 | 23 | 15.832 | KV453152.1 | 1879785 | 19-scf00455 | 19 |
| AX-158289853 | 23 | 15.832 | KV453152.1 | 1890004 | 19-scf00455 | 19 |
| AX-158289854 | 23 | 15.832 | KV453152.1 | 1890400 | 19-scf00455 | 19 |
| AX-157773371 | 23 | 15.832 | KV453152.1 | 1895144 | 19-scf00455 | 19 |
| AX-158289872 | 23 | 15.832 | KV453152.1 | 1916219 | 19-scf00455 | 19 |
| AX-158289876 | 23 | 15.832 | KV453152.1 | 1920243 | 19-scf00455 | 19 |
| AX-158289890 | 23 | 15.832 | KV453152.1 | 1941669 | 19-scf00455 | 19 |
| AX-158419559 | 23 | 15.832 | KV453152.1 | 1944278 | 19-scf00455 | 19 |
| AX-158417248 | 23 | 15.832 | KV453152.1 | 1944366 | 19-scf00455 | 19 |
| AX-158289893 | 23 | 15.832 | KV453152.1 | 1945890 | 19-scf00455 | 19 |
| AX-158289899 | 23 | 15.971 | KV453152.1 | 1955777 | 19-scf00455 | 19 |
| AX-158289901 | 23 | 16.124 | KV453152.1 | 1957938 | 19-scf00455 | 19 |

|              |    |        |            |         |                |    |
|--------------|----|--------|------------|---------|----------------|----|
| AX-158289905 | 23 | 16.124 | KV453152.1 | 1960456 | 19-scf00455    | 19 |
| AX-158289906 | 23 | 16.267 | KV453152.1 | 1961234 | 19-scf00455    | 19 |
| AX-158289877 | 23 | 16.269 | KV453152.1 | 1920967 | 19-scf00455    | 19 |
| AX-158289902 | 23 | 16.269 | KV453152.1 | 1958344 | 19-scf00455    | 19 |
| AX-158289909 | 23 | 16.269 | KV453152.1 | 1963360 | 19-scf00455    | 19 |
| AX-158289910 | 23 | 16.269 | KV453152.1 | 1964908 | 19-scf00455    | 19 |
| AX-158289912 | 23 | 16.269 | KV453152.1 | 1966886 | 19-scf00455    | 19 |
| AX-158289913 | 23 | 16.379 | KV453152.1 | 1969925 | 19-scf00455    | 19 |
| AX-158289898 | 23 | 16.438 | KV453152.1 | 1955217 | 19-scf00455    | 19 |
| AX-158417249 | 23 | 16.438 | KV453152.1 | 1972692 | 19-scf00455    | 19 |
| AX-158289925 | 23 | 16.438 | KV453152.1 | 1984965 | 19-scf00455    | 19 |
| AX-158289916 | 23 | 16.488 | KV453152.1 | 1972833 | 19-scf00455    | 19 |
| AX-158289917 | 23 | 16.488 | KV453152.1 | 1973788 | 19-scf00455    | 19 |
| AX-158289918 | 23 | 16.488 | KV453152.1 | 1974271 | 19-scf00455    | 19 |
| AX-158289919 | 23 | 16.488 | KV453152.1 | 1977173 | 19-scf00455    | 19 |
| AX-158289921 | 23 | 16.488 | KV453152.1 | 1978656 | 19-scf00455    | 19 |
| AX-158289922 | 23 | 16.488 | KV453152.1 | 1980264 | 19-scf00455    | 19 |
| AX-158387506 | 23 | 16.488 | KV453152.1 | 1980418 | 19-scf00455    | 19 |
| AX-158289924 | 23 | 16.488 | KV453152.1 | 1983289 | 19-scf00455    | 19 |
| AX-158289926 | 23 | 16.503 | KV453152.1 | 1985420 | 19-scf00455    | 19 |
| AX-158289928 | 23 | 16.768 | KV453152.1 | 1987250 | 19-scf00455    | 19 |
| AX-158289931 | 23 | 17.063 | KV453152.1 | 1990052 | 19-scf00455    | 19 |
| AX-158289932 | 23 | 17.063 | KV453152.1 | 1991083 | 19-scf00455    | 19 |
| AX-158289933 | 23 | 17.063 | KV453152.1 | 1991759 | 19-scf00455    | 19 |
| AX-158289903 | 23 | 17.254 | KV453152.1 | 1959465 | 19-scf00455    | 19 |
| AX-158289907 | 23 | 17.254 | KV453152.1 | 1962008 | 19-scf00455    | 19 |
| AX-158289923 | 23 | 17.254 | KV453152.1 | 1982881 | 19-scf00455    | 19 |
| AX-157888034 | 23 | 17.254 | KV453152.1 | 1988045 | 19-scf00455    | 19 |
| AX-158289939 | 23 | 17.254 | KV453152.1 | 2001460 | 19-scf00455    | 19 |
| AX-158289940 | 23 | 17.254 | KV453152.1 | 2001698 | 19-scf00455    | 19 |
| AX-157845447 | 23 | 17.254 | KV453152.1 | 2002438 | 19-scf00455    | 19 |
| AX-158289943 | 23 | 17.254 | KV453152.1 | 2007183 | 19-scf00455    | 19 |
| AX-158289944 | 23 | 17.254 | KV453152.1 | 2008947 | 19-scf00455    | 19 |
| AX-158289945 | 23 | 17.254 | KV453152.1 | 2009679 | 19-scf00455    | 19 |
| AX-157696059 | 23 | 17.254 | FI899723.1 | 75      | -ORI212 lctali | UN |
| AX-158289949 | 23 | 17.364 | KV453152.1 | 2012621 | 19-scf00455    | 19 |
| AX-158289950 | 23 | 17.364 | KV453152.1 | 2013149 | 19-scf00455    | 19 |
| AX-158289951 | 23 | 17.364 | KV453152.1 | 2014545 | 19-scf00455    | 19 |
| AX-157867608 | 23 | 17.364 | KV453152.1 | 2038655 | 19-scf00455    | 19 |
| AX-158290029 | 23 | 17.364 | KV453152.1 | 2121158 | 19-scf00455    | 19 |
| AX-158290035 | 23 | 17.364 | KV453152.1 | 2126682 | 19-scf00455    | 19 |
| AX-158290078 | 23 | 17.364 | KV453152.1 | 2183149 | 19-scf00455    | 19 |
| AX-158289952 | 23 | 17.393 | KV453152.1 | 2015224 | 19-scf00455    | 19 |
| AX-157749805 | 23 | 17.42  | KV453152.1 | 2015581 | 19-scf00455    | 19 |
| AX-158289957 | 23 | 17.42  | KV453152.1 | 2028400 | 19-scf00455    | 19 |
| AX-158289963 | 23 | 17.42  | KV453152.1 | 2035189 | 19-scf00455    | 19 |
| AX-158381230 | 23 | 17.449 | KV453152.1 | 2019539 | 19-scf00455    | 19 |
| AX-158290077 | 23 | 17.449 | KV453152.1 | 2181556 | 19-scf00455    | 19 |
| AX-158290086 | 23 | 17.449 | KV453152.1 | 2190411 | 19-scf00455    | 19 |
| AX-158290099 | 23 | 17.449 | KV453152.1 | 2206462 | 19-scf00455    | 19 |
| AX-157718827 | 23 | 17.449 | KV453152.1 | 2221742 | 19-scf00455    | 19 |

|              |    |        |            |         |             |    |
|--------------|----|--------|------------|---------|-------------|----|
| AX-158290141 | 23 | 17.449 | KV453152.1 | 2260309 | 19-scf00455 | 19 |
| AX-158289958 | 23 | 17.473 | KV453152.1 | 2031350 | 19-scf00455 | 19 |
| AX-158289959 | 23 | 17.473 | KV453152.1 | 2031711 | 19-scf00455 | 19 |
| AX-158289964 | 23 | 17.8   | KV453152.1 | 2035662 | 19-scf00455 | 19 |
| AX-158289965 | 23 | 17.8   | KV453152.1 | 2036231 | 19-scf00455 | 19 |
| AX-158289966 | 23 | 17.8   | KV453152.1 | 2037579 | 19-scf00455 | 19 |
| AX-158289976 | 23 | 17.8   | KV453152.1 | 2047448 | 19-scf00455 | 19 |
| AX-157696058 | 23 | 17.8   | FI899723.1 | 356     | 19-scf00455 | UN |
| AX-158289956 | 23 | 17.837 | KV453152.1 | 2027205 | 19-scf00455 | 19 |
| AX-158289969 | 23 | 17.837 | KV453152.1 | 2039228 | 19-scf00455 | 19 |
| AX-158289970 | 23 | 17.91  | KV453152.1 | 2039496 | 19-scf00455 | 19 |
| AX-158289971 | 23 | 17.91  | KV453152.1 | 2040476 | 19-scf00455 | 19 |
| AX-158289972 | 23 | 17.91  | KV453152.1 | 2041143 | 19-scf00455 | 19 |
| AX-158289973 | 23 | 17.91  | KV453152.1 | 2041641 | 19-scf00455 | 19 |
| AX-157845450 | 23 | 17.91  | KV453152.1 | 2043746 | 19-scf00455 | 19 |
| AX-157845451 | 23 | 17.91  | KV453152.1 | 2044176 | 19-scf00455 | 19 |
| AX-158289974 | 23 | 17.91  | KV453152.1 | 2045034 | 19-scf00455 | 19 |
| AX-158289975 | 23 | 17.91  | KV453152.1 | 2046124 | 19-scf00455 | 19 |
| AX-157758066 | 23 | 17.91  | KV453152.1 | 2047874 | 19-scf00455 | 19 |
| AX-158289977 | 23 | 18.128 | KV453152.1 | 2050399 | 19-scf00455 | 19 |
| AX-158289978 | 23 | 18.128 | KV453152.1 | 2050898 | 19-scf00455 | 19 |
| AX-158289980 | 23 | 18.128 | KV453152.1 | 2051650 | 19-scf00455 | 19 |
| AX-158289981 | 23 | 18.128 | KV453152.1 | 2052398 | 19-scf00455 | 19 |
| AX-158289982 | 23 | 18.128 | KV453152.1 | 2053273 | 19-scf00455 | 19 |
| AX-158289986 | 23 | 18.128 | KV453152.1 | 2056142 | 19-scf00455 | 19 |
| AX-158289991 | 23 | 18.128 | KV453152.1 | 2058913 | 19-scf00455 | 19 |
| AX-158289992 | 23 | 18.128 | KV453152.1 | 2059541 | 19-scf00455 | 19 |
| AX-158289993 | 23 | 18.128 | KV453152.1 | 2061015 | 19-scf00455 | 19 |
| AX-157845453 | 23 | 18.128 | KV453152.1 | 2064661 | 19-scf00455 | 19 |
| AX-158289997 | 23 | 18.128 | KV453152.1 | 2067692 | 19-scf00455 | 19 |
| AX-158289999 | 23 | 18.128 | KV453152.1 | 2072354 | 19-scf00455 | 19 |
| AX-157845455 | 23 | 18.128 | KV453152.1 | 2073537 | 19-scf00455 | 19 |
| AX-158290031 | 23 | 18.128 | KV453152.1 | 2122172 | 19-scf00455 | 19 |
| AX-157716253 | 23 | 18.237 | KV453152.1 | 2075869 | 19-scf00455 | 19 |
| AX-158290001 | 23 | 18.237 | KV453152.1 | 2076742 | 19-scf00455 | 19 |
| AX-158290003 | 23 | 18.295 | KV453152.1 | 2081322 | 19-scf00455 | 19 |
| AX-158290004 | 23 | 18.347 | KV453152.1 | 2083044 | 19-scf00455 | 19 |
| AX-158290005 | 23 | 18.409 | KV453152.1 | 2084307 | 19-scf00455 | 19 |
| AX-157845459 | 23 | 18.409 | KV453152.1 | 2133414 | 19-scf00455 | 19 |
| AX-158290009 | 23 | 18.456 | KV453152.1 | 2096160 | 19-scf00455 | 19 |
| AX-157751549 | 23 | 18.456 | KV453152.1 | 2096407 | 19-scf00455 | 19 |
| AX-158290011 | 23 | 18.512 | KV453152.1 | 2098230 | 19-scf00455 | 19 |
| AX-158290012 | 23 | 18.564 | KV453152.1 | 2098540 | 19-scf00455 | 19 |
| AX-158290013 | 23 | 18.564 | KV453152.1 | 2099985 | 19-scf00455 | 19 |
| AX-158290014 | 23 | 18.629 | KV453152.1 | 2101904 | 19-scf00455 | 19 |
| AX-157880756 | 23 | 18.675 | KV453152.1 | 2104247 | 19-scf00455 | 19 |
| AX-158290016 | 23 | 18.675 | KV453152.1 | 2104762 | 19-scf00455 | 19 |
| AX-157714374 | 23 | 18.675 | KV453152.1 | 2108564 | 19-scf00455 | 19 |
| AX-158290020 | 23 | 18.675 | KV453152.1 | 2109329 | 19-scf00455 | 19 |
| AX-157873392 | 23 | 18.675 | KV453152.1 | 2110990 | 19-scf00455 | 19 |
| AX-157845457 | 23 | 18.675 | KV453152.1 | 2113618 | 19-scf00455 | 19 |

|              |    |        |            |         |             |    |
|--------------|----|--------|------------|---------|-------------|----|
| AX-157845458 | 23 | 18.675 | KV453152.1 | 2121645 | 19-scf00455 | 19 |
| AX-158290021 | 23 | 18.716 | KV453152.1 | 2109960 | 19-scf00455 | 19 |
| AX-158290024 | 23 | 18.755 | KV453152.1 | 2114717 | 19-scf00455 | 19 |
| AX-158290025 | 23 | 18.784 | KV453152.1 | 2116147 | 19-scf00455 | 19 |
| AX-158290026 | 23 | 18.784 | KV453152.1 | 2117591 | 19-scf00455 | 19 |
| AX-158290027 | 23 | 18.784 | KV453152.1 | 2118744 | 19-scf00455 | 19 |
| AX-158290028 | 23 | 18.784 | KV453152.1 | 2119246 | 19-scf00455 | 19 |
| AX-158290030 | 23 | 18.784 | KV453152.1 | 2121697 | 19-scf00455 | 19 |
| AX-157880757 | 23 | 18.784 | KV453152.1 | 2123643 | 19-scf00455 | 19 |
| AX-158290037 | 23 | 19.055 | KV453152.1 | 2129182 | 19-scf00455 | 19 |
| AX-157745862 | 23 | 19.149 | KV453152.1 | 2131585 | 19-scf00455 | 19 |
| AX-158290039 | 23 | 19.149 | KV453152.1 | 2132426 | 19-scf00455 | 19 |
| AX-157845460 | 23 | 19.33  | KV453152.1 | 2137074 | 19-scf00455 | 19 |
| AX-158290043 | 23 | 19.33  | KV453152.1 | 2137812 | 19-scf00455 | 19 |
| AX-158290045 | 23 | 19.33  | KV453152.1 | 2142702 | 19-scf00455 | 19 |
| AX-157745352 | 23 | 19.33  | KV453152.1 | 2162060 | 19-scf00455 | 19 |
| AX-158290047 | 23 | 19.387 | KV453152.1 | 2145083 | 19-scf00455 | 19 |
| AX-158290042 | 23 | 19.439 | KV453152.1 | 2135229 | 19-scf00455 | 19 |
| AX-157716879 | 23 | 19.439 | KV453152.1 | 2141474 | 19-scf00455 | 19 |
| AX-157714939 | 23 | 19.439 | KV453152.1 | 2141973 | 19-scf00455 | 19 |
| AX-158290048 | 23 | 19.439 | KV453152.1 | 2146180 | 19-scf00455 | 19 |
| AX-158290049 | 23 | 19.439 | KV453152.1 | 2146321 | 19-scf00455 | 19 |
| AX-157743308 | 23 | 19.439 | KV453152.1 | 2149113 | 19-scf00455 | 19 |
| AX-158290052 | 23 | 19.439 | KV453152.1 | 2152781 | 19-scf00455 | 19 |
| AX-158290053 | 23 | 19.439 | KV453152.1 | 2153082 | 19-scf00455 | 19 |
| AX-158290054 | 23 | 19.439 | KV453152.1 | 2154089 | 19-scf00455 | 19 |
| AX-158290058 | 23 | 19.439 | KV453152.1 | 2155457 | 19-scf00455 | 19 |
| AX-158290062 | 23 | 19.439 | KV453152.1 | 2161308 | 19-scf00455 | 19 |
| AX-157845467 | 23 | 19.439 | KV453152.1 | 2161772 | 19-scf00455 | 19 |
| AX-158290063 | 23 | 19.439 | KV453152.1 | 2162338 | 19-scf00455 | 19 |
| AX-158290075 | 23 | 19.439 | KV453152.1 | 2180360 | 19-scf00455 | 19 |
| AX-158290064 | 23 | 19.471 | KV453152.1 | 2167137 | 19-scf00455 | 19 |
| AX-157845468 | 23 | 19.502 | KV453152.1 | 2171242 | 19-scf00455 | 19 |
| AX-158290070 | 23 | 19.521 | KV453152.1 | 2174192 | 19-scf00455 | 19 |
| AX-158290071 | 23 | 19.537 | KV453152.1 | 2176260 | 19-scf00455 | 19 |
| AX-158290051 | 23 | 19.549 | KV453152.1 | 2150678 | 19-scf00455 | 19 |
| AX-158290066 | 23 | 19.549 | KV453152.1 | 2169934 | 19-scf00455 | 19 |
| AX-157713686 | 23 | 19.549 | KV453152.1 | 2172062 | 19-scf00455 | 19 |
| AX-158290072 | 23 | 19.549 | KV453152.1 | 2178405 | 19-scf00455 | 19 |
| AX-158290073 | 23 | 19.549 | KV453152.1 | 2179035 | 19-scf00455 | 19 |
| AX-158290074 | 23 | 19.549 | KV453152.1 | 2179534 | 19-scf00455 | 19 |
| AX-158290076 | 23 | 19.549 | KV453152.1 | 2180903 | 19-scf00455 | 19 |
| AX-157774381 | 23 | 19.549 | KV453152.1 | 2186528 | 19-scf00455 | 19 |
| AX-158290081 | 23 | 19.549 | KV453152.1 | 2186753 | 19-scf00455 | 19 |
| AX-158290082 | 23 | 19.549 | KV453152.1 | 2187515 | 19-scf00455 | 19 |
| AX-158290083 | 23 | 19.549 | KV453152.1 | 2187676 | 19-scf00455 | 19 |
| AX-158290084 | 23 | 19.549 | KV453152.1 | 2189720 | 19-scf00455 | 19 |
| AX-158290088 | 23 | 19.549 | KV453152.1 | 2197156 | 19-scf00455 | 19 |
| AX-158290090 | 23 | 19.767 | KV453152.1 | 2198889 | 19-scf00455 | 19 |
| AX-158290092 | 23 | 19.767 | KV453152.1 | 2199996 | 19-scf00455 | 19 |
| AX-158290093 | 23 | 19.767 | KV453152.1 | 2200281 | 19-scf00455 | 19 |

|              |    |        |            |         |             |    |
|--------------|----|--------|------------|---------|-------------|----|
| AX-158290094 | 23 | 19.767 | KV453152.1 | 2201732 | 19-scf00455 | 19 |
| AX-157845470 | 23 | 19.986 | KV453152.1 | 2203473 | 19-scf00455 | 19 |
| AX-158290098 | 23 | 20.204 | KV453152.1 | 2205045 | 19-scf00455 | 19 |
| AX-157744027 | 23 | 20.204 | KV453152.1 | 2206159 | 19-scf00455 | 19 |
| AX-157845471 | 23 | 20.204 | KV453152.1 | 2207011 | 19-scf00455 | 19 |
| AX-157697245 | 23 | 20.204 | KV453152.1 | 2207370 | 19-scf00455 | 19 |
| AX-158290101 | 23 | 20.233 | KV453152.1 | 2209434 | 19-scf00455 | 19 |
| AX-158290103 | 23 | 20.261 | KV453152.1 | 2210103 | 19-scf00455 | 19 |
| AX-158290104 | 23 | 20.313 | KV453152.1 | 2211238 | 19-scf00455 | 19 |
| AX-157845473 | 23 | 20.368 | KV453152.1 | 2212955 | 19-scf00455 | 19 |
| AX-157748196 | 23 | 20.423 | KV453152.1 | 2214100 | 19-scf00455 | 19 |
| AX-157772110 | 23 | 20.423 | KV453152.1 | 2215103 | 19-scf00455 | 19 |
| AX-158290107 | 23 | 20.423 | KV453152.1 | 2216809 | 19-scf00455 | 19 |
| AX-158290105 | 23 | 20.427 | KV453152.1 | 2212596 | 19-scf00455 | 19 |
| AX-158290110 | 23 | 20.427 | KV453152.1 | 2220358 | 19-scf00455 | 19 |
| AX-158290111 | 23 | 20.427 | KV453152.1 | 2221474 | 19-scf00455 | 19 |
| AX-157845474 | 23 | 20.558 | KV453152.1 | 2223176 | 19-scf00455 | 19 |
| AX-158290112 | 23 | 20.558 | KV453152.1 | 2226284 | 19-scf00455 | 19 |
| AX-157845475 | 23 | 20.558 | KV453152.1 | 2227568 | 19-scf00455 | 19 |
| AX-158290113 | 23 | 20.558 | KV453152.1 | 2228002 | 19-scf00455 | 19 |
| AX-158290114 | 23 | 20.558 | KV453152.1 | 2228433 | 19-scf00455 | 19 |
| AX-158290118 | 23 | 20.558 | KV453152.1 | 2231565 | 19-scf00455 | 19 |
| AX-158290125 | 23 | 20.695 | KV453152.1 | 2240618 | 19-scf00455 | 19 |
| AX-158290126 | 23 | 20.695 | KV453152.1 | 2241598 | 19-scf00455 | 19 |
| AX-158290127 | 23 | 20.695 | KV453152.1 | 2242107 | 19-scf00455 | 19 |
| AX-158290128 | 23 | 20.695 | KV453152.1 | 2243027 | 19-scf00455 | 19 |
| AX-158290131 | 23 | 20.695 | KV453152.1 | 2247456 | 19-scf00455 | 19 |
| AX-158290132 | 23 | 20.695 | KV453152.1 | 2248337 | 19-scf00455 | 19 |
| AX-158290134 | 23 | 20.695 | KV453152.1 | 2249531 | 19-scf00455 | 19 |
| AX-158290136 | 23 | 20.695 | KV453152.1 | 2252103 | 19-scf00455 | 19 |
| AX-158290174 | 23 | 20.695 | KV453152.1 | 2300634 | 19-scf00455 | 19 |
| AX-158290140 | 23 | 20.969 | KV453152.1 | 2259082 | 19-scf00455 | 19 |
| AX-158290130 | 23 | 20.97  | KV453152.1 | 2244947 | 19-scf00455 | 19 |
| AX-158290144 | 23 | 20.97  | KV453152.1 | 2262588 | 19-scf00455 | 19 |
| AX-158417256 | 23 | 20.97  | KV453152.1 | 2263122 | 19-scf00455 | 19 |
| AX-158290146 | 23 | 20.97  | KV453152.1 | 2264320 | 19-scf00455 | 19 |
| AX-158290149 | 23 | 20.97  | KV453152.1 | 2267630 | 19-scf00455 | 19 |
| AX-158290150 | 23 | 20.97  | KV453152.1 | 2268129 | 19-scf00455 | 19 |
| AX-158290151 | 23 | 20.97  | KV453152.1 | 2271187 | 19-scf00455 | 19 |
| AX-157742657 | 23 | 20.971 | KV453152.1 | 2272957 | 19-scf00455 | 19 |
| AX-158290157 | 23 | 21.333 | KV453152.1 | 2283462 | 19-scf00455 | 19 |
| AX-158290137 | 23 | 21.334 | KV453152.1 | 2254843 | 19-scf00455 | 19 |
| AX-158290158 | 23 | 21.334 | KV453152.1 | 2284179 | 19-scf00455 | 19 |
| AX-158290160 | 23 | 21.334 | KV453152.1 | 2288075 | 19-scf00455 | 19 |
| AX-158290162 | 23 | 21.334 | KV453152.1 | 2289730 | 19-scf00455 | 19 |
| AX-158290165 | 23 | 21.334 | KV453152.1 | 2292908 | 19-scf00455 | 19 |
| AX-158290171 | 23 | 21.334 | KV453152.1 | 2298222 | 19-scf00455 | 19 |
| AX-158290177 | 23 | 21.334 | KV453152.1 | 2304853 | 19-scf00455 | 19 |
| AX-158290175 | 23 | 21.397 | KV453152.1 | 2302024 | 19-scf00455 | 19 |
| AX-158290176 | 23 | 21.469 | KV453152.1 | 2303612 | 19-scf00455 | 19 |
| AX-158290179 | 23 | 21.515 | KV453152.1 | 2312257 | 19-scf00455 | 19 |

|              |    |        |            |         |             |    |
|--------------|----|--------|------------|---------|-------------|----|
| AX-158290180 | 23 | 21.515 | KV453152.1 | 2312865 | 19-scf00455 | 19 |
| AX-158290181 | 23 | 21.515 | KV453152.1 | 2314559 | 19-scf00455 | 19 |
| AX-158290182 | 23 | 21.515 | KV453152.1 | 2316936 | 19-scf00455 | 19 |
| AX-158290183 | 23 | 21.515 | KV453152.1 | 2317304 | 19-scf00455 | 19 |
| AX-158290184 | 23 | 21.515 | KV453152.1 | 2317949 | 19-scf00455 | 19 |
| AX-158290200 | 23 | 21.515 | KV453152.1 | 2331942 | 19-scf00455 | 19 |
| AX-158290203 | 23 | 21.515 | KV453152.1 | 2336685 | 19-scf00455 | 19 |
| AX-158417258 | 23 | 21.734 | KV453152.1 | 2278742 | 19-scf00455 | 19 |
| AX-158290167 | 23 | 21.734 | KV453152.1 | 2293807 | 19-scf00455 | 19 |
| AX-158290187 | 23 | 21.734 | KV453152.1 | 2320945 | 19-scf00455 | 19 |
| AX-158290188 | 23 | 21.734 | KV453152.1 | 2322298 | 19-scf00455 | 19 |
| AX-158290190 | 23 | 21.734 | KV453152.1 | 2326306 | 19-scf00455 | 19 |
| AX-158290193 | 23 | 21.734 | KV453152.1 | 2327761 | 19-scf00455 | 19 |
| AX-158290195 | 23 | 21.734 | KV453152.1 | 2328970 | 19-scf00455 | 19 |
| AX-158290197 | 23 | 21.734 | KV453152.1 | 2329704 | 19-scf00455 | 19 |
| AX-158290198 | 23 | 21.734 | KV453152.1 | 2329983 | 19-scf00455 | 19 |
| AX-158290201 | 23 | 21.734 | KV453152.1 | 2332327 | 19-scf00455 | 19 |
| AX-158290202 | 23 | 21.734 | KV453152.1 | 2335015 | 19-scf00455 | 19 |
| AX-158290204 | 23 | 21.734 | KV453152.1 | 2336913 | 19-scf00455 | 19 |
| AX-157770965 | 23 | 21.734 | KV453152.1 | 2343543 | 19-scf00455 | 19 |
| AX-158290219 | 23 | 21.734 | KV453152.1 | 2358843 | 19-scf00455 | 19 |
| AX-158290227 | 23 | 21.734 | KV453152.1 | 2364639 | 19-scf00455 | 19 |
| AX-158290229 | 23 | 21.734 | KV453152.1 | 2367946 | 19-scf00455 | 19 |
| AX-158290163 | 23 | 21.843 | KV453152.1 | 2290264 | 19-scf00455 | 19 |
| AX-158290194 | 23 | 21.843 | KV453152.1 | 2327841 | 19-scf00455 | 19 |
| AX-158290206 | 23 | 21.843 | KV453152.1 | 2343780 | 19-scf00455 | 19 |
| AX-158290208 | 23 | 21.843 | KV453152.1 | 2345427 | 19-scf00455 | 19 |
| AX-158290211 | 23 | 21.843 | KV453152.1 | 2348268 | 19-scf00455 | 19 |
| AX-158290213 | 23 | 21.843 | KV453152.1 | 2349653 | 19-scf00455 | 19 |
| AX-158290214 | 23 | 21.843 | KV453152.1 | 2351392 | 19-scf00455 | 19 |
| AX-158290220 | 23 | 21.843 | KV453152.1 | 2359039 | 19-scf00455 | 19 |
| AX-158290224 | 23 | 21.843 | KV453152.1 | 2362643 | 19-scf00455 | 19 |
| AX-157773565 | 23 | 21.843 | KV453152.1 | 2365421 | 19-scf00455 | 19 |
| AX-158290228 | 23 | 21.843 | KV453152.1 | 2366862 | 19-scf00455 | 19 |
| AX-158290230 | 23 | 21.843 | KV453152.1 | 2368858 | 19-scf00455 | 19 |
| AX-157749962 | 23 | 21.843 | KV453152.1 | 2369124 | 19-scf00455 | 19 |
| AX-157717681 | 23 | 21.843 | KV453152.1 | 2371401 | 19-scf00455 | 19 |
| AX-158290232 | 23 | 21.843 | KV453152.1 | 2373437 | 19-scf00455 | 19 |
| AX-158290233 | 23 | 21.843 | KV453152.1 | 2373873 | 19-scf00455 | 19 |
| AX-158290241 | 23 | 21.843 | KV453152.1 | 2384793 | 19-scf00455 | 19 |
| AX-158290260 | 23 | 21.843 | KV453152.1 | 2403102 | 19-scf00455 | 19 |
| AX-158290265 | 23 | 21.843 | KV453152.1 | 2408574 | 19-scf00455 | 19 |
| AX-157880760 | 23 | 21.843 | KV453152.1 | 2441449 | 19-scf00455 | 19 |
| AX-158290369 | 23 | 21.843 | KV453152.1 | 2530252 | 19-scf00455 | 19 |
| AX-157845509 | 23 | 21.843 | KV453152.1 | 2698906 | 19-scf00455 | 19 |
| AX-158290566 | 23 | 21.843 | KV453152.1 | 2788100 | 19-scf00455 | 19 |
| AX-158290598 | 23 | 21.843 | KV453152.1 | 2832344 | 19-scf00455 | 19 |
| AX-158290630 | 23 | 21.843 | KV453152.1 | 2871102 | 19-scf00455 | 19 |
| AX-158290218 | 23 | 21.879 | KV453152.1 | 2357999 | 19-scf00455 | 19 |
| AX-158290234 | 23 | 21.879 | KV453152.1 | 2375116 | 19-scf00455 | 19 |
| AX-158381233 | 23 | 21.914 | KV453152.1 | 2375605 | 19-scf00455 | 19 |

|              |    |        |            |         |             |    |
|--------------|----|--------|------------|---------|-------------|----|
| AX-158290243 | 23 | 21.914 | KV453152.1 | 2385683 | 19-scf00455 | 19 |
| AX-158290239 | 23 | 21.952 | KV453152.1 | 2381114 | 19-scf00455 | 19 |
| AX-157860208 | 23 | 22.013 | KV453152.1 | 2381306 | 19-scf00455 | 19 |
| AX-158290242 | 23 | 22.098 | KV453152.1 | 2385026 | 19-scf00455 | 19 |
| AX-158290244 | 23 | 22.098 | KV453152.1 | 2388355 | 19-scf00455 | 19 |
| AX-158290247 | 23 | 22.098 | KV453152.1 | 2391127 | 19-scf00455 | 19 |
| AX-158290248 | 23 | 22.098 | KV453152.1 | 2391436 | 19-scf00455 | 19 |
| AX-158290250 | 23 | 22.098 | KV453152.1 | 2393458 | 19-scf00455 | 19 |
| AX-158290251 | 23 | 22.098 | KV453152.1 | 2393584 | 19-scf00455 | 19 |
| AX-158290252 | 23 | 22.098 | KV453152.1 | 2394470 | 19-scf00455 | 19 |
| AX-158290253 | 23 | 22.098 | KV453152.1 | 2394912 | 19-scf00455 | 19 |
| AX-158290256 | 23 | 22.098 | KV453152.1 | 2398099 | 19-scf00455 | 19 |
| AX-158290257 | 23 | 22.098 | KV453152.1 | 2399069 | 19-scf00455 | 19 |
| AX-158290295 | 23 | 22.098 | KV453152.1 | 2445129 | 19-scf00455 | 19 |
| AX-158290259 | 23 | 22.389 | KV453152.1 | 2402256 | 19-scf00455 | 19 |
| AX-158290261 | 23 | 22.389 | KV453152.1 | 2405776 | 19-scf00455 | 19 |
| AX-158290262 | 23 | 22.389 | KV453152.1 | 2406657 | 19-scf00455 | 19 |
| AX-157880759 | 23 | 22.389 | KV453152.1 | 2406767 | 19-scf00455 | 19 |
| AX-158290264 | 23 | 22.389 | KV453152.1 | 2408037 | 19-scf00455 | 19 |
| AX-158290324 | 23 | 22.389 | KV453152.1 | 2475094 | 19-scf00455 | 19 |
| AX-158290418 | 23 | 22.389 | KV453152.1 | 2599283 | 19-scf00455 | 19 |
| AX-158290267 | 23 | 22.607 | KV453152.1 | 2416478 | 19-scf00455 | 19 |
| AX-158290270 | 23 | 22.607 | KV453152.1 | 2418927 | 19-scf00455 | 19 |
| AX-158290271 | 23 | 22.607 | KV453152.1 | 2420277 | 19-scf00455 | 19 |
| AX-157845481 | 23 | 22.607 | KV453152.1 | 2421577 | 19-scf00455 | 19 |
| AX-158290272 | 23 | 22.607 | KV453152.1 | 2422613 | 19-scf00455 | 19 |
| AX-157845483 | 23 | 22.607 | KV453152.1 | 2426444 | 19-scf00455 | 19 |
| AX-158290274 | 23 | 22.607 | KV453152.1 | 2427869 | 19-scf00455 | 19 |
| AX-158290275 | 23 | 22.607 | KV453152.1 | 2428823 | 19-scf00455 | 19 |
| AX-158290276 | 23 | 22.607 | KV453152.1 | 2430948 | 19-scf00455 | 19 |
| AX-158290281 | 23 | 22.607 | KV453152.1 | 2435914 | 19-scf00455 | 19 |
| AX-157845484 | 23 | 22.607 | KV453152.1 | 2438285 | 19-scf00455 | 19 |
| AX-158290284 | 23 | 22.607 | KV453152.1 | 2439140 | 19-scf00455 | 19 |
| AX-158290285 | 23 | 22.607 | KV453152.1 | 2440098 | 19-scf00455 | 19 |
| AX-158290286 | 23 | 22.607 | KV453152.1 | 2440920 | 19-scf00455 | 19 |
| AX-158290287 | 23 | 22.607 | KV453152.1 | 2441899 | 19-scf00455 | 19 |
| AX-158290288 | 23 | 22.607 | KV453152.1 | 2442265 | 19-scf00455 | 19 |
| AX-158290291 | 23 | 22.607 | KV453152.1 | 2443798 | 19-scf00455 | 19 |
| AX-158290292 | 23 | 22.607 | KV453152.1 | 2444005 | 19-scf00455 | 19 |
| AX-158290293 | 23 | 22.607 | KV453152.1 | 2444216 | 19-scf00455 | 19 |
| AX-158290294 | 23 | 22.607 | KV453152.1 | 2444485 | 19-scf00455 | 19 |
| AX-157845485 | 23 | 22.607 | KV453152.1 | 2446198 | 19-scf00455 | 19 |
| AX-158290296 | 23 | 22.607 | KV453152.1 | 2446557 | 19-scf00455 | 19 |
| AX-158290297 | 23 | 22.607 | KV453152.1 | 2447140 | 19-scf00455 | 19 |
| AX-158290298 | 23 | 22.607 | KV453152.1 | 2447360 | 19-scf00455 | 19 |
| AX-158290301 | 23 | 22.607 | KV453152.1 | 2449164 | 19-scf00455 | 19 |
| AX-158417266 | 23 | 22.607 | KV453152.1 | 2451055 | 19-scf00455 | 19 |
| AX-158290304 | 23 | 22.607 | KV453152.1 | 2451753 | 19-scf00455 | 19 |
| AX-158290307 | 23 | 22.607 | KV453152.1 | 2454462 | 19-scf00455 | 19 |
| AX-158290340 | 23 | 22.607 | KV453152.1 | 2494147 | 19-scf00455 | 19 |
| AX-157845494 | 23 | 22.607 | KV453152.1 | 2520561 | 19-scf00455 | 19 |

|              |    |        |            |         |             |    |
|--------------|----|--------|------------|---------|-------------|----|
| AX-158290385 | 23 | 22.607 | KV453152.1 | 2565351 | 19-scf00455 | 19 |
| AX-158290249 | 23 | 22.717 | KV453152.1 | 2391708 | 19-scf00455 | 19 |
| AX-157867610 | 23 | 22.717 | KV453152.1 | 2424767 | 19-scf00455 | 19 |
| AX-158290278 | 23 | 22.717 | KV453152.1 | 2433253 | 19-scf00455 | 19 |
| AX-158290299 | 23 | 22.717 | KV453152.1 | 2447753 | 19-scf00455 | 19 |
| AX-158290300 | 23 | 22.717 | KV453152.1 | 2448156 | 19-scf00455 | 19 |
| AX-158290308 | 23 | 22.717 | KV453152.1 | 2455160 | 19-scf00455 | 19 |
| AX-158290312 | 23 | 22.717 | KV453152.1 | 2458679 | 19-scf00455 | 19 |
| AX-158290313 | 23 | 22.717 | KV453152.1 | 2459245 | 19-scf00455 | 19 |
| AX-157880761 | 23 | 22.717 | KV453152.1 | 2460243 | 19-scf00455 | 19 |
| AX-158290315 | 23 | 22.717 | KV453152.1 | 2460959 | 19-scf00455 | 19 |
| AX-158290318 | 23 | 22.717 | KV453152.1 | 2468237 | 19-scf00455 | 19 |
| AX-158290322 | 23 | 22.717 | KV453152.1 | 2472663 | 19-scf00455 | 19 |
| AX-158290325 | 23 | 22.717 | KV453152.1 | 2475556 | 19-scf00455 | 19 |
| AX-158290328 | 23 | 22.717 | KV453152.1 | 2477386 | 19-scf00455 | 19 |
| AX-158290332 | 23 | 22.717 | KV453152.1 | 2479520 | 19-scf00455 | 19 |
| AX-158290333 | 23 | 22.717 | KV453152.1 | 2482719 | 19-scf00455 | 19 |
| AX-157703147 | 23 | 22.717 | KV453152.1 | 2483917 | 19-scf00455 | 19 |
| AX-157845489 | 23 | 22.717 | KV453152.1 | 2485928 | 19-scf00455 | 19 |
| AX-158290335 | 23 | 22.717 | KV453152.1 | 2488373 | 19-scf00455 | 19 |
| AX-158290336 | 23 | 22.717 | KV453152.1 | 2488961 | 19-scf00455 | 19 |
| AX-157696004 | 23 | 22.717 | KV453152.1 | 2489442 | 19-scf00455 | 19 |
| AX-158290341 | 23 | 22.717 | KV453152.1 | 2494968 | 19-scf00455 | 19 |
| AX-158290343 | 23 | 22.717 | KV453152.1 | 2496583 | 19-scf00455 | 19 |
| AX-158417268 | 23 | 22.717 | KV453152.1 | 2498834 | 19-scf00455 | 19 |
| AX-158290352 | 23 | 22.717 | KV453152.1 | 2504432 | 19-scf00455 | 19 |
| AX-158290353 | 23 | 22.717 | KV453152.1 | 2504601 | 19-scf00455 | 19 |
| AX-158290354 | 23 | 22.717 | KV453152.1 | 2507296 | 19-scf00455 | 19 |
| AX-157756781 | 23 | 22.717 | KV453152.1 | 2507442 | 19-scf00455 | 19 |
| AX-158290358 | 23 | 22.717 | KV453152.1 | 2512673 | 19-scf00455 | 19 |
| AX-158290359 | 23 | 22.717 | KV453152.1 | 2514146 | 19-scf00455 | 19 |
| AX-158290360 | 23 | 22.717 | KV453152.1 | 2514676 | 19-scf00455 | 19 |
| AX-158290361 | 23 | 22.717 | KV453152.1 | 2515139 | 19-scf00455 | 19 |
| AX-158290363 | 23 | 22.717 | KV453152.1 | 2518935 | 19-scf00455 | 19 |
| AX-157714911 | 23 | 22.717 | KV453152.1 | 2520407 | 19-scf00455 | 19 |
| AX-158290366 | 23 | 22.717 | KV453152.1 | 2523548 | 19-scf00455 | 19 |
| AX-157845495 | 23 | 22.717 | KV453152.1 | 2524465 | 19-scf00455 | 19 |
| AX-157845496 | 23 | 22.717 | KV453152.1 | 2529900 | 19-scf00455 | 19 |
| AX-157845497 | 23 | 22.717 | KV453152.1 | 2531496 | 19-scf00455 | 19 |
| AX-158290372 | 23 | 22.717 | KV453152.1 | 2535922 | 19-scf00455 | 19 |
| AX-158290373 | 23 | 22.717 | KV453152.1 | 2538108 | 19-scf00455 | 19 |
| AX-157739011 | 23 | 22.717 | KV453152.1 | 2540808 | 19-scf00455 | 19 |
| AX-158290379 | 23 | 22.717 | KV453152.1 | 2555480 | 19-scf00455 | 19 |
| AX-157845502 | 23 | 22.717 | KV453152.1 | 2558734 | 19-scf00455 | 19 |
| AX-158290381 | 23 | 22.717 | KV453152.1 | 2559757 | 19-scf00455 | 19 |
| AX-158290386 | 23 | 22.717 | KV453152.1 | 2566247 | 19-scf00455 | 19 |
| AX-158381234 | 23 | 22.717 | KV453152.1 | 2568592 | 19-scf00455 | 19 |
| AX-158417271 | 23 | 22.717 | KV453152.1 | 2573493 | 19-scf00455 | 19 |
| AX-158290394 | 23 | 22.717 | KV453152.1 | 2575636 | 19-scf00455 | 19 |
| AX-158290402 | 23 | 22.717 | KV453152.1 | 2582543 | 19-scf00455 | 19 |
| AX-157845505 | 23 | 22.717 | KV453152.1 | 2589361 | 19-scf00455 | 19 |



|              |    |        |            |         |             |    |
|--------------|----|--------|------------|---------|-------------|----|
| AX-158290419 | 23 | 22.717 | KV453152.1 | 2600684 | 19-scf00455 | 19 |
| AX-158290453 | 23 | 22.717 | KV453152.1 | 2646956 | 19-scf00455 | 19 |
| AX-157845493 | 23 | 22.826 | KV453152.1 | 2518683 | 19-scf00455 | 19 |
| AX-158290388 | 23 | 22.826 | KV453152.1 | 2566874 | 19-scf00455 | 19 |
| AX-158290392 | 23 | 22.826 | KV453152.1 | 2571882 | 19-scf00455 | 19 |
| AX-158290395 | 23 | 22.826 | KV453152.1 | 2576178 | 19-scf00455 | 19 |
| AX-158290396 | 23 | 22.826 | KV453152.1 | 2576489 | 19-scf00455 | 19 |
| AX-158290397 | 23 | 22.826 | KV453152.1 | 2576980 | 19-scf00455 | 19 |
| AX-157746541 | 23 | 22.826 | KV453152.1 | 2577535 | 19-scf00455 | 19 |
| AX-157845503 | 23 | 22.826 | KV453152.1 | 2578174 | 19-scf00455 | 19 |
| AX-158290398 | 23 | 22.826 | KV453152.1 | 2578312 | 19-scf00455 | 19 |
| AX-158290399 | 23 | 22.826 | KV453152.1 | 2580230 | 19-scf00455 | 19 |
| AX-158290400 | 23 | 22.826 | KV453152.1 | 2580802 | 19-scf00455 | 19 |
| AX-158290403 | 23 | 22.826 | KV453152.1 | 2584839 | 19-scf00455 | 19 |
| AX-157845504 | 23 | 22.826 | KV453152.1 | 2586044 | 19-scf00455 | 19 |
| AX-158290406 | 23 | 22.826 | KV453152.1 | 2589109 | 19-scf00455 | 19 |
| AX-158290416 | 23 | 22.826 | KV453152.1 | 2596927 | 19-scf00455 | 19 |
| AX-158290417 | 23 | 22.826 | KV453152.1 | 2597689 | 19-scf00455 | 19 |
| AX-158290422 | 23 | 22.826 | KV453152.1 | 2605378 | 19-scf00455 | 19 |
| AX-158290527 | 23 | 22.826 | KV453152.1 | 2731184 | 19-scf00455 | 19 |
| AX-158290339 | 23 | 23.153 | KV453152.1 | 2492402 | 19-scf00455 | 19 |
| AX-158290342 | 23 | 23.153 | KV453152.1 | 2496171 | 19-scf00455 | 19 |
| AX-158290420 | 23 | 23.153 | KV453152.1 | 2602297 | 19-scf00455 | 19 |
| AX-158290431 | 23 | 23.153 | KV453152.1 | 2616322 | 19-scf00455 | 19 |
| AX-158290432 | 23 | 23.153 | KV453152.1 | 2617369 | 19-scf00455 | 19 |
| AX-158290436 | 23 | 23.153 | KV453152.1 | 2627465 | 19-scf00455 | 19 |
| AX-158290438 | 23 | 23.153 | KV453152.1 | 2628764 | 19-scf00455 | 19 |
| AX-158290440 | 23 | 23.153 | KV453152.1 | 2630529 | 19-scf00455 | 19 |
| AX-158290441 | 23 | 23.153 | KV453152.1 | 2631494 | 19-scf00455 | 19 |
| AX-157860209 | 23 | 23.153 | KV453152.1 | 2634098 | 19-scf00455 | 19 |
| AX-158290444 | 23 | 23.153 | KV453152.1 | 2636620 | 19-scf00455 | 19 |
| AX-157721576 | 23 | 23.153 | KV453152.1 | 2642389 | 19-scf00455 | 19 |
| AX-157774555 | 23 | 23.153 | KV453152.1 | 2642687 | 19-scf00455 | 19 |
| AX-158290449 | 23 | 23.153 | KV453152.1 | 2643539 | 19-scf00455 | 19 |
| AX-158290450 | 23 | 23.153 | KV453152.1 | 2643719 | 19-scf00455 | 19 |
| AX-158290452 | 23 | 23.153 | KV453152.1 | 2646329 | 19-scf00455 | 19 |
| AX-158290458 | 23 | 23.153 | KV453152.1 | 2654063 | 19-scf00455 | 19 |
| AX-158290460 | 23 | 23.153 | KV453152.1 | 2655287 | 19-scf00455 | 19 |
| AX-158290462 | 23 | 23.153 | KV453152.1 | 2656466 | 19-scf00455 | 19 |
| AX-157741428 | 23 | 23.153 | KV453152.1 | 2657030 | 19-scf00455 | 19 |
| AX-158290465 | 23 | 23.153 | KV453152.1 | 2660773 | 19-scf00455 | 19 |
| AX-158290466 | 23 | 23.153 | KV453152.1 | 2665598 | 19-scf00455 | 19 |
| AX-158417273 | 23 | 23.153 | KV453152.1 | 2670939 | 19-scf00455 | 19 |
| AX-158290472 | 23 | 23.153 | KV453152.1 | 2671173 | 19-scf00455 | 19 |
| AX-158290473 | 23 | 23.153 | KV453152.1 | 2671528 | 19-scf00455 | 19 |
| AX-158290475 | 23 | 23.153 | KV453152.1 | 2673064 | 19-scf00455 | 19 |
| AX-158290478 | 23 | 23.153 | KV453152.1 | 2675281 | 19-scf00455 | 19 |
| AX-158290495 | 23 | 23.153 | KV453152.1 | 2697643 | 19-scf00455 | 19 |
| AX-158290522 | 23 | 23.153 | KV453152.1 | 2726425 | 19-scf00455 | 19 |
| AX-158290533 | 23 | 23.153 | KV453152.1 | 2745154 | 19-scf00455 | 19 |
| AX-158290535 | 23 | 23.153 | KV453152.1 | 2748444 | 19-scf00455 | 19 |

|              |    |        |             |         |             |    |
|--------------|----|--------|-------------|---------|-------------|----|
| AX-158290480 | 23 | 23.262 | KV453152.1  | 2676758 | 19-scf00455 | 19 |
| AX-158290483 | 23 | 23.262 | KV453152.1  | 2680418 | 19-scf00455 | 19 |
| AX-157710917 | 23 | 23.262 | KV453152.1  | 2682982 | 19-scf00455 | 19 |
| AX-158290486 | 23 | 23.262 | KV453152.1  | 2683224 | 19-scf00455 | 19 |
| AX-158290493 | 23 | 23.262 | KV453152.1  | 2695307 | 19-scf00455 | 19 |
| AX-158290494 | 23 | 23.262 | KV453152.1  | 2696374 | 19-scf00455 | 19 |
| AX-157706389 | 23 | 23.262 | 3ML01032167 | 84      | scf07781_1  | UN |
| AX-157706388 | 23 | 23.262 | 3ML01032167 | 475     | scf07781_1  | UN |
| AX-158290496 | 23 | 23.297 | KV453152.1  | 2698331 | 19-scf00455 | 19 |
| AX-158417274 | 23 | 23.372 | KV453152.1  | 2699332 | 19-scf00455 | 19 |
| AX-158290497 | 23 | 23.372 | KV453152.1  | 2706493 | 19-scf00455 | 19 |
| AX-158290499 | 23 | 23.372 | KV453152.1  | 2707734 | 19-scf00455 | 19 |
| AX-158290500 | 23 | 23.372 | KV453152.1  | 2708495 | 19-scf00455 | 19 |
| AX-158290521 | 23 | 23.372 | KV453152.1  | 2725083 | 19-scf00455 | 19 |
| AX-157845511 | 23 | 23.427 | KV453152.1  | 2709624 | 19-scf00455 | 19 |
| AX-158290424 | 23 | 23.481 | KV453152.1  | 2607857 | 19-scf00455 | 19 |
| AX-158290457 | 23 | 23.481 | KV453152.1  | 2651000 | 19-scf00455 | 19 |
| AX-158290468 | 23 | 23.481 | KV453152.1  | 2667383 | 19-scf00455 | 19 |
| AX-158290471 | 23 | 23.481 | KV453152.1  | 2669794 | 19-scf00455 | 19 |
| AX-158290476 | 23 | 23.481 | KV453152.1  | 2673639 | 19-scf00455 | 19 |
| AX-158290502 | 23 | 23.481 | KV453152.1  | 2710173 | 19-scf00455 | 19 |
| AX-158290503 | 23 | 23.481 | KV453152.1  | 2710726 | 19-scf00455 | 19 |
| AX-158290511 | 23 | 23.481 | KV453152.1  | 2719168 | 19-scf00455 | 19 |
| AX-158290513 | 23 | 23.481 | KV453152.1  | 2720112 | 19-scf00455 | 19 |
| AX-158290514 | 23 | 23.481 | KV453152.1  | 2720436 | 19-scf00455 | 19 |
| AX-158290516 | 23 | 23.481 | KV453152.1  | 2721762 | 19-scf00455 | 19 |
| AX-158290518 | 23 | 23.481 | KV453152.1  | 2723448 | 19-scf00455 | 19 |
| AX-158290519 | 23 | 23.481 | KV453152.1  | 2724520 | 19-scf00455 | 19 |
| AX-158290520 | 23 | 23.481 | KV453152.1  | 2724867 | 19-scf00455 | 19 |
| AX-158290525 | 23 | 23.481 | KV453152.1  | 2728526 | 19-scf00455 | 19 |
| AX-158290530 | 23 | 23.481 | KV453152.1  | 2737150 | 19-scf00455 | 19 |
| AX-157845513 | 23 | 23.481 | KV453152.1  | 2738544 | 19-scf00455 | 19 |
| AX-158290531 | 23 | 23.481 | KV453152.1  | 2739785 | 19-scf00455 | 19 |
| AX-158290579 | 23 | 23.481 | KV453152.1  | 2806486 | 19-scf00455 | 19 |
| AX-158290534 | 23 | 23.542 | KV453152.1  | 2746283 | 19-scf00455 | 19 |
| AX-158290537 | 23 | 23.59  | KV453152.1  | 2753862 | 19-scf00455 | 19 |
| AX-158290554 | 23 | 23.59  | KV453152.1  | 2774138 | 19-scf00455 | 19 |
| AX-158290591 | 23 | 23.59  | KV453152.1  | 2824800 | 19-scf00455 | 19 |
| AX-158290615 | 23 | 23.59  | KV453152.1  | 2857989 | 19-scf00455 | 19 |
| AX-158290618 | 23 | 23.59  | KV453152.1  | 2860345 | 19-scf00455 | 19 |
| AX-158290667 | 23 | 23.59  | KV453152.1  | 2920228 | 19-scf00455 | 19 |
| AX-158290209 | 23 | 23.647 | KV453152.1  | 2346894 | 19-scf00455 | 19 |
| AX-158290538 | 23 | 23.647 | KV453152.1  | 2754900 | 19-scf00455 | 19 |
| AX-158290623 | 23 | 23.647 | KV453152.1  | 2864469 | 19-scf00455 | 19 |
| AX-157724341 | 23 | 23.699 | KV453152.1  | 2751612 | 19-scf00455 | 19 |
| AX-158290545 | 23 | 23.699 | KV453152.1  | 2763337 | 19-scf00455 | 19 |
| AX-157845514 | 23 | 23.699 | KV453152.1  | 2763648 | 19-scf00455 | 19 |
| AX-158290546 | 23 | 23.699 | KV453152.1  | 2764312 | 19-scf00455 | 19 |
| AX-158290547 | 23 | 23.699 | KV453152.1  | 2765397 | 19-scf00455 | 19 |
| AX-158290553 | 23 | 23.699 | KV453152.1  | 2771618 | 19-scf00455 | 19 |
| AX-157845518 | 23 | 23.699 | KV453152.1  | 2781461 | 19-scf00455 | 19 |

|              |    |        |            |         |             |    |
|--------------|----|--------|------------|---------|-------------|----|
| AX-158290565 | 23 | 23.699 | KV453152.1 | 2787725 | 19-scf00455 | 19 |
| AX-158290567 | 23 | 23.699 | KV453152.1 | 2788950 | 19-scf00455 | 19 |
| AX-158290568 | 23 | 23.699 | KV453152.1 | 2789719 | 19-scf00455 | 19 |
| AX-158290570 | 23 | 23.699 | KV453152.1 | 2792313 | 19-scf00455 | 19 |
| AX-158290581 | 23 | 23.699 | KV453152.1 | 2810076 | 19-scf00455 | 19 |
| AX-158290559 | 23 | 23.809 | KV453152.1 | 2777747 | 19-scf00455 | 19 |
| AX-157880768 | 23 | 23.809 | KV453152.1 | 2777835 | 19-scf00455 | 19 |
| AX-158290573 | 23 | 23.809 | KV453152.1 | 2799259 | 19-scf00455 | 19 |
| AX-157752925 | 23 | 23.809 | KV453152.1 | 2801463 | 19-scf00455 | 19 |
| AX-158290576 | 23 | 23.809 | KV453152.1 | 2804407 | 19-scf00455 | 19 |
| AX-158290577 | 23 | 23.809 | KV453152.1 | 2805020 | 19-scf00455 | 19 |
| AX-158290578 | 23 | 23.809 | KV453152.1 | 2805615 | 19-scf00455 | 19 |
| AX-158290582 | 23 | 23.809 | KV453152.1 | 2811085 | 19-scf00455 | 19 |
| AX-158290584 | 23 | 23.809 | KV453152.1 | 2814193 | 19-scf00455 | 19 |
| AX-157755178 | 23 | 23.809 | KV453152.1 | 2820150 | 19-scf00455 | 19 |
| AX-158290589 | 23 | 23.809 | KV453152.1 | 2822438 | 19-scf00455 | 19 |
| AX-158290587 | 23 | 23.839 | KV453152.1 | 2821123 | 19-scf00455 | 19 |
| AX-158290592 | 23 | 23.862 | KV453152.1 | 2825583 | 19-scf00455 | 19 |
| AX-158290594 | 23 | 23.885 | KV453152.1 | 2827230 | 19-scf00455 | 19 |
| AX-157736809 | 23 | 23.918 | KV453152.1 | 2828573 | 19-scf00455 | 19 |
| AX-158290595 | 23 | 23.977 | KV453152.1 | 2828739 | 19-scf00455 | 19 |
| AX-158290558 | 23 | 24.027 | KV453152.1 | 2776241 | 19-scf00455 | 19 |
| AX-157773041 | 23 | 24.027 | KV453152.1 | 2830668 | 19-scf00455 | 19 |
| AX-158290596 | 23 | 24.027 | KV453152.1 | 2831051 | 19-scf00455 | 19 |
| AX-157888041 | 23 | 24.245 | KV453152.1 | 2839142 | 19-scf00455 | 19 |
| AX-158290603 | 23 | 24.245 | KV453152.1 | 2840692 | 19-scf00455 | 19 |
| AX-158290600 | 23 | 24.294 | KV453152.1 | 2836100 | 19-scf00455 | 19 |
| AX-158290602 | 23 | 24.294 | KV453152.1 | 2839440 | 19-scf00455 | 19 |
| AX-158290613 | 23 | 24.294 | KV453152.1 | 2856359 | 19-scf00455 | 19 |
| AX-158290619 | 23 | 24.355 | KV453152.1 | 2861410 | 19-scf00455 | 19 |
| AX-158290622 | 23 | 24.355 | KV453152.1 | 2863987 | 19-scf00455 | 19 |
| AX-157845523 | 23 | 24.355 | KV453152.1 | 2864844 | 19-scf00455 | 19 |
| AX-158290624 | 23 | 24.355 | KV453152.1 | 2865178 | 19-scf00455 | 19 |
| AX-158290625 | 23 | 24.355 | KV453152.1 | 2866644 | 19-scf00455 | 19 |
| AX-158290626 | 23 | 24.355 | KV453152.1 | 2866862 | 19-scf00455 | 19 |
| AX-158290605 | 23 | 24.39  | KV453152.1 | 2842762 | 19-scf00455 | 19 |
| AX-158290627 | 23 | 24.39  | KV453152.1 | 2867537 | 19-scf00455 | 19 |
| AX-158290635 | 23 | 24.39  | KV453152.1 | 2882731 | 19-scf00455 | 19 |
| AX-158290644 | 23 | 24.39  | KV453152.1 | 2893292 | 19-scf00455 | 19 |
| AX-158290649 | 23 | 24.39  | KV453152.1 | 2898700 | 19-scf00455 | 19 |
| AX-157750205 | 23 | 24.39  | KV453152.1 | 2900161 | 19-scf00455 | 19 |
| AX-158290688 | 23 | 24.39  | KV453152.1 | 2943237 | 19-scf00455 | 19 |
| AX-157740892 | 23 | 24.444 | KV453152.1 | 2872985 | 19-scf00455 | 19 |
| AX-158290634 | 23 | 24.464 | KV453152.1 | 2881907 | 19-scf00455 | 19 |
| AX-158290636 | 23 | 24.464 | KV453152.1 | 2883088 | 19-scf00455 | 19 |
| AX-158290637 | 23 | 24.464 | KV453152.1 | 2884393 | 19-scf00455 | 19 |
| AX-158290641 | 23 | 24.464 | KV453152.1 | 2888952 | 19-scf00455 | 19 |
| AX-158290642 | 23 | 24.464 | KV453152.1 | 2889569 | 19-scf00455 | 19 |
| AX-158290647 | 23 | 24.464 | KV453152.1 | 2896446 | 19-scf00455 | 19 |
| AX-158290648 | 23 | 24.464 | KV453152.1 | 2898153 | 19-scf00455 | 19 |
| AX-158290650 | 23 | 24.464 | KV453152.1 | 2899434 | 19-scf00455 | 19 |

|              |    |        |            |         |             |    |
|--------------|----|--------|------------|---------|-------------|----|
| AX-158290689 | 23 | 24.464 | KV453152.1 | 2944721 | 19-scf00455 | 19 |
| AX-157770740 | 23 | 24.464 | KV453152.1 | 3038746 | 19-scf00455 | 19 |
| AX-158290776 | 23 | 24.464 | KV453152.1 | 3043473 | 19-scf00455 | 19 |
| AX-158291176 | 23 | 24.464 | KV453152.1 | 3539366 | 19-scf00455 | 19 |
| AX-158291217 | 23 | 24.464 | KV453152.1 | 3601429 | 19-scf00455 | 19 |
| AX-157697495 | 23 | 24.464 | KV453152.1 | 3651019 | 19-scf00455 | 19 |
| AX-158290652 | 23 | 24.518 | KV453152.1 | 2901458 | 19-scf00455 | 19 |
| AX-158290645 | 23 | 24.573 | KV453152.1 | 2894183 | 19-scf00455 | 19 |
| AX-157754321 | 23 | 24.573 | KV453152.1 | 2897709 | 19-scf00455 | 19 |
| AX-158290653 | 23 | 24.573 | KV453152.1 | 2901869 | 19-scf00455 | 19 |
| AX-158290662 | 23 | 24.573 | KV453152.1 | 2914851 | 19-scf00455 | 19 |
| AX-158290710 | 23 | 24.573 | KV453152.1 | 2968312 | 19-scf00455 | 19 |
| AX-158290759 | 23 | 24.573 | KV453152.1 | 3020198 | 19-scf00455 | 19 |
| AX-158290810 | 23 | 24.573 | KV453152.1 | 3096826 | 19-scf00455 | 19 |
| AX-158291159 | 23 | 24.573 | KV453152.1 | 3514137 | 19-scf00455 | 19 |
| AX-158291223 | 23 | 24.573 | KV453152.1 | 3613103 | 19-scf00455 | 19 |
| AX-157845575 | 23 | 24.573 | KV453152.1 | 3737959 | 19-scf00455 | 19 |
| AX-158291351 | 23 | 24.573 | KV453152.1 | 3800003 | 19-scf00455 | 19 |
| AX-158290657 | 23 | 24.605 | KV453152.1 | 2905809 | 19-scf00455 | 19 |
| AX-158290692 | 23 | 24.605 | KV453152.1 | 2946775 | 19-scf00455 | 19 |
| AX-158290659 | 23 | 24.622 | KV453152.1 | 2910489 | 19-scf00455 | 19 |
| AX-158290663 | 23 | 24.622 | KV453152.1 | 2915609 | 19-scf00455 | 19 |
| AX-158290725 | 23 | 24.622 | KV453152.1 | 2983261 | 19-scf00455 | 19 |
| AX-158290758 | 23 | 24.622 | KV453152.1 | 3017442 | 19-scf00455 | 19 |
| AX-158290803 | 23 | 24.622 | KV453152.1 | 3082292 | 19-scf00455 | 19 |
| AX-158290989 | 23 | 24.622 | KV453152.1 | 3300678 | 19-scf00455 | 19 |
| AX-158417290 | 23 | 24.622 | KV453152.1 | 3545089 | 19-scf00455 | 19 |
| AX-158290660 | 23 | 24.682 | KV453152.1 | 2912279 | 19-scf00455 | 19 |
| AX-158290661 | 23 | 24.682 | KV453152.1 | 2913911 | 19-scf00455 | 19 |
| AX-158290665 | 23 | 24.713 | KV453152.1 | 2918615 | 19-scf00455 | 19 |
| AX-157845525 | 23 | 24.713 | KV453152.1 | 2921389 | 19-scf00455 | 19 |
| AX-157845526 | 23 | 24.713 | KV453152.1 | 2921430 | 19-scf00455 | 19 |
| AX-158290671 | 23 | 24.741 | KV453152.1 | 2923717 | 19-scf00455 | 19 |
| AX-158290672 | 23 | 24.763 | KV453152.1 | 2925723 | 19-scf00455 | 19 |
| AX-158290673 | 23 | 24.763 | KV453152.1 | 2926598 | 19-scf00455 | 19 |
| AX-158290658 | 23 | 24.792 | KV453152.1 | 2906920 | 19-scf00455 | 19 |
| AX-158290664 | 23 | 24.792 | KV453152.1 | 2917367 | 19-scf00455 | 19 |
| AX-158290666 | 23 | 24.792 | KV453152.1 | 2919384 | 19-scf00455 | 19 |
| AX-158290674 | 23 | 24.792 | KV453152.1 | 2927781 | 19-scf00455 | 19 |
| AX-158290677 | 23 | 24.792 | KV453152.1 | 2929920 | 19-scf00455 | 19 |
| AX-158290681 | 23 | 24.792 | KV453152.1 | 2931939 | 19-scf00455 | 19 |
| AX-158290683 | 23 | 24.792 | KV453152.1 | 2934972 | 19-scf00455 | 19 |
| AX-158290685 | 23 | 24.792 | KV453152.1 | 2936837 | 19-scf00455 | 19 |
| AX-158290690 | 23 | 24.792 | KV453152.1 | 2946132 | 19-scf00455 | 19 |
| AX-157752797 | 23 | 24.792 | KV453152.1 | 2947074 | 19-scf00455 | 19 |
| AX-158290693 | 23 | 24.792 | KV453152.1 | 2947628 | 19-scf00455 | 19 |
| AX-158290694 | 23 | 24.792 | KV453152.1 | 2948173 | 19-scf00455 | 19 |
| AX-158290695 | 23 | 24.792 | KV453152.1 | 2948805 | 19-scf00455 | 19 |
| AX-158290696 | 23 | 24.792 | KV453152.1 | 2949573 | 19-scf00455 | 19 |
| AX-158290699 | 23 | 24.792 | KV453152.1 | 2954407 | 19-scf00455 | 19 |
| AX-158290701 | 23 | 24.792 | KV453152.1 | 2955710 | 19-scf00455 | 19 |

|              |    |        |            |         |                 |    |
|--------------|----|--------|------------|---------|-----------------|----|
| AX-158290702 | 23 | 24.792 | KV453152.1 | 2957206 | 19-scf00455     | 19 |
| AX-158290703 | 23 | 24.792 | KV453152.1 | 2958224 | 19-scf00455     | 19 |
| AX-158290705 | 23 | 24.792 | KV453152.1 | 2961539 | 19-scf00455     | 19 |
| AX-158290708 | 23 | 24.792 | KV453152.1 | 2963579 | 19-scf00455     | 19 |
| AX-158290709 | 23 | 24.792 | KV453152.1 | 2966047 | 19-scf00455     | 19 |
| AX-158290714 | 23 | 24.792 | KV453152.1 | 2971944 | 19-scf00455     | 19 |
| AX-157873400 | 23 | 24.792 | KV453152.1 | 2974748 | 19-scf00455     | 19 |
| AX-158290716 | 23 | 24.792 | KV453152.1 | 2975599 | 19-scf00455     | 19 |
| AX-158290720 | 23 | 24.792 | KV453152.1 | 2978423 | 19-scf00455     | 19 |
| AX-158290721 | 23 | 24.792 | KV453152.1 | 2979126 | 19-scf00455     | 19 |
| AX-158290722 | 23 | 24.792 | KV453152.1 | 2980889 | 19-scf00455     | 19 |
| AX-158290723 | 23 | 24.792 | KV453152.1 | 2981814 | 19-scf00455     | 19 |
| AX-158290727 | 23 | 24.792 | KV453152.1 | 2985976 | 19-scf00455     | 19 |
| AX-158290728 | 23 | 24.792 | KV453152.1 | 2986277 | 19-scf00455     | 19 |
| AX-158290729 | 23 | 24.792 | KV453152.1 | 2986902 | 19-scf00455     | 19 |
| AX-157873401 | 23 | 24.792 | KV453152.1 | 2987630 | 19-scf00455     | 19 |
| AX-158290731 | 23 | 24.792 | KV453152.1 | 2989439 | 19-scf00455     | 19 |
| AX-158290732 | 23 | 24.792 | KV453152.1 | 2990332 | 19-scf00455     | 19 |
| AX-158290734 | 23 | 24.792 | KV453152.1 | 2991637 | 19-scf00455     | 19 |
| AX-158290735 | 23 | 24.792 | KV453152.1 | 2991872 | 19-scf00455     | 19 |
| AX-158290736 | 23 | 24.792 | KV453152.1 | 2993250 | 19-scf00455     | 19 |
| AX-158290737 | 23 | 24.792 | KV453152.1 | 2993971 | 19-scf00455     | 19 |
| AX-158290738 | 23 | 24.792 | KV453152.1 | 2996600 | 19-scf00455     | 19 |
| AX-158290741 | 23 | 24.792 | KV453152.1 | 2997611 | 19-scf00455     | 19 |
| AX-158290742 | 23 | 24.792 | KV453152.1 | 2998807 | 19-scf00455     | 19 |
| AX-158290743 | 23 | 24.792 | KV453152.1 | 3000851 | 19-scf00455     | 19 |
| AX-158290837 | 23 | 24.792 | KV453152.1 | 3128735 | 19-scf00455     | 19 |
| AX-158290867 | 23 | 24.792 | KV453152.1 | 3164441 | 19-scf00455     | 19 |
| AX-158290909 | 23 | 24.792 | KV453152.1 | 3209232 | 19-scf00455     | 19 |
| AX-158290993 | 23 | 24.792 | KV453152.1 | 3307126 | 19-scf00455     | 19 |
| AX-158290994 | 23 | 24.792 | KV453152.1 | 3307607 | 19-scf00455     | 19 |
| AX-158290995 | 23 | 24.792 | KV453152.1 | 3308203 | 19-scf00455     | 19 |
| AX-158290996 | 23 | 24.792 | KV453152.1 | 3310785 | 19-scf00455     | 19 |
| AX-158290997 | 23 | 24.792 | KV453152.1 | 3311154 | 19-scf00455     | 19 |
| AX-158290999 | 23 | 24.792 | KV453152.1 | 3315229 | 19-scf00455     | 19 |
| AX-158291006 | 23 | 24.792 | KV453152.1 | 3322557 | 19-scf00455     | 19 |
| AX-158291030 | 23 | 24.792 | KV453152.1 | 3353068 | 19-scf00455     | 19 |
| AX-158291050 | 23 | 24.792 | KV453152.1 | 3371524 | 19-scf00455     | 19 |
| AX-158291055 | 23 | 24.792 | KV453152.1 | 3378726 | 19-scf00455     | 19 |
| AX-157873404 | 23 | 24.792 | KV453152.1 | 3413261 | 19-scf00455     | 19 |
| AX-158291092 | 23 | 24.792 | KV453152.1 | 3430661 | 19-scf00455     | 19 |
| AX-158291106 | 23 | 24.792 | KV453152.1 | 3446094 | 19-scf00455     | 19 |
| AX-158291133 | 23 | 24.792 | KV453152.1 | 3485508 | 19-scf00455     | 19 |
| AX-158291189 | 23 | 24.792 | KV453152.1 | 3556032 | 19-scf00455     | 19 |
| AX-158291192 | 23 | 24.792 | KV453152.1 | 3558032 | 19-scf00455     | 19 |
| AX-158291227 | 23 | 24.792 | KV453152.1 | 3617501 | 19-scf00455     | 19 |
| AX-157696933 | 23 | 24.792 | FI885618.1 | 110     | -HORI212 lctali | UN |
| AX-158290426 | 23 | 25.01  | KV453152.1 | 2608863 | 19-scf00455     | 19 |
| AX-157873397 | 23 | 25.01  | KV453152.1 | 2686820 | 19-scf00455     | 19 |
| AX-157765017 | 23 | 25.01  | KV453152.1 | 2767339 | 19-scf00455     | 19 |
| AX-157845516 | 23 | 25.01  | KV453152.1 | 2773577 | 19-scf00455     | 19 |

|              |    |       |            |         |             |    |
|--------------|----|-------|------------|---------|-------------|----|
| AX-158290562 | 23 | 25.01 | KV453152.1 | 2783048 | 19-scf00455 | 19 |
| AX-158290571 | 23 | 25.01 | KV453152.1 | 2792898 | 19-scf00455 | 19 |
| AX-158290678 | 23 | 25.01 | KV453152.1 | 2930575 | 19-scf00455 | 19 |
| AX-158290679 | 23 | 25.01 | KV453152.1 | 2931077 | 19-scf00455 | 19 |
| AX-158290698 | 23 | 25.01 | KV453152.1 | 2953795 | 19-scf00455 | 19 |
| AX-158290745 | 23 | 25.01 | KV453152.1 | 3003576 | 19-scf00455 | 19 |
| AX-158290746 | 23 | 25.01 | KV453152.1 | 3004065 | 19-scf00455 | 19 |
| AX-158290748 | 23 | 25.01 | KV453152.1 | 3006394 | 19-scf00455 | 19 |
| AX-158290749 | 23 | 25.01 | KV453152.1 | 3006808 | 19-scf00455 | 19 |
| AX-158290752 | 23 | 25.01 | KV453152.1 | 3010315 | 19-scf00455 | 19 |
| AX-158290753 | 23 | 25.01 | KV453152.1 | 3010654 | 19-scf00455 | 19 |
| AX-157873403 | 23 | 25.01 | KV453152.1 | 3012289 | 19-scf00455 | 19 |
| AX-158290755 | 23 | 25.01 | KV453152.1 | 3013261 | 19-scf00455 | 19 |
| AX-157867615 | 23 | 25.01 | KV453152.1 | 3014150 | 19-scf00455 | 19 |
| AX-158290757 | 23 | 25.01 | KV453152.1 | 3016365 | 19-scf00455 | 19 |
| AX-158417276 | 23 | 25.01 | KV453152.1 | 3017391 | 19-scf00455 | 19 |
| AX-158290760 | 23 | 25.01 | KV453152.1 | 3021961 | 19-scf00455 | 19 |
| AX-158290761 | 23 | 25.01 | KV453152.1 | 3022491 | 19-scf00455 | 19 |
| AX-158290762 | 23 | 25.01 | KV453152.1 | 3023480 | 19-scf00455 | 19 |
| AX-158290763 | 23 | 25.01 | KV453152.1 | 3023731 | 19-scf00455 | 19 |
| AX-158290764 | 23 | 25.01 | KV453152.1 | 3024106 | 19-scf00455 | 19 |
| AX-158290766 | 23 | 25.01 | KV453152.1 | 3024985 | 19-scf00455 | 19 |
| AX-158290767 | 23 | 25.01 | KV453152.1 | 3025603 | 19-scf00455 | 19 |
| AX-158290768 | 23 | 25.01 | KV453152.1 | 3027379 | 19-scf00455 | 19 |
| AX-158290769 | 23 | 25.01 | KV453152.1 | 3027828 | 19-scf00455 | 19 |
| AX-158290770 | 23 | 25.01 | KV453152.1 | 3028049 | 19-scf00455 | 19 |
| AX-157845529 | 23 | 25.01 | KV453152.1 | 3028393 | 19-scf00455 | 19 |
| AX-158290771 | 23 | 25.01 | KV453152.1 | 3033917 | 19-scf00455 | 19 |
| AX-157719878 | 23 | 25.01 | KV453152.1 | 3034339 | 19-scf00455 | 19 |
| AX-158290772 | 23 | 25.01 | KV453152.1 | 3035051 | 19-scf00455 | 19 |
| AX-158290773 | 23 | 25.01 | KV453152.1 | 3035384 | 19-scf00455 | 19 |
| AX-157724884 | 23 | 25.01 | KV453152.1 | 3035777 | 19-scf00455 | 19 |
| AX-158290774 | 23 | 25.01 | KV453152.1 | 3037673 | 19-scf00455 | 19 |
| AX-157699389 | 23 | 25.01 | KV453152.1 | 3038196 | 19-scf00455 | 19 |
| AX-158290775 | 23 | 25.01 | KV453152.1 | 3041831 | 19-scf00455 | 19 |
| AX-158290777 | 23 | 25.01 | KV453152.1 | 3044209 | 19-scf00455 | 19 |
| AX-157845530 | 23 | 25.01 | KV453152.1 | 3044531 | 19-scf00455 | 19 |
| AX-158290778 | 23 | 25.01 | KV453152.1 | 3044718 | 19-scf00455 | 19 |
| AX-158290781 | 23 | 25.01 | KV453152.1 | 3047873 | 19-scf00455 | 19 |
| AX-158290782 | 23 | 25.01 | KV453152.1 | 3048655 | 19-scf00455 | 19 |
| AX-158290784 | 23 | 25.01 | KV453152.1 | 3049600 | 19-scf00455 | 19 |
| AX-158290785 | 23 | 25.01 | KV453152.1 | 3050879 | 19-scf00455 | 19 |
| AX-158290786 | 23 | 25.01 | KV453152.1 | 3051874 | 19-scf00455 | 19 |
| AX-158290787 | 23 | 25.01 | KV453152.1 | 3052546 | 19-scf00455 | 19 |
| AX-158290788 | 23 | 25.01 | KV453152.1 | 3055312 | 19-scf00455 | 19 |
| AX-158290789 | 23 | 25.01 | KV453152.1 | 3062554 | 19-scf00455 | 19 |
| AX-158290791 | 23 | 25.01 | KV453152.1 | 3064245 | 19-scf00455 | 19 |
| AX-158290793 | 23 | 25.01 | KV453152.1 | 3068210 | 19-scf00455 | 19 |
| AX-158290794 | 23 | 25.01 | KV453152.1 | 3069218 | 19-scf00455 | 19 |
| AX-158290795 | 23 | 25.01 | KV453152.1 | 3070019 | 19-scf00455 | 19 |
| AX-158290796 | 23 | 25.01 | KV453152.1 | 3070666 | 19-scf00455 | 19 |

|              |    |       |            |         |             |    |
|--------------|----|-------|------------|---------|-------------|----|
| AX-158290798 | 23 | 25.01 | KV453152.1 | 3075361 | 19-scf00455 | 19 |
| AX-158290800 | 23 | 25.01 | KV453152.1 | 3076004 | 19-scf00455 | 19 |
| AX-157845531 | 23 | 25.01 | KV453152.1 | 3076475 | 19-scf00455 | 19 |
| AX-158290801 | 23 | 25.01 | KV453152.1 | 3076807 | 19-scf00455 | 19 |
| AX-158290802 | 23 | 25.01 | KV453152.1 | 3081138 | 19-scf00455 | 19 |
| AX-157845532 | 23 | 25.01 | KV453152.1 | 3083199 | 19-scf00455 | 19 |
| AX-157860211 | 23 | 25.01 | KV453152.1 | 3083870 | 19-scf00455 | 19 |
| AX-158290805 | 23 | 25.01 | KV453152.1 | 3087926 | 19-scf00455 | 19 |
| AX-158290806 | 23 | 25.01 | KV453152.1 | 3088407 | 19-scf00455 | 19 |
| AX-158290807 | 23 | 25.01 | KV453152.1 | 3089067 | 19-scf00455 | 19 |
| AX-158290808 | 23 | 25.01 | KV453152.1 | 3091491 | 19-scf00455 | 19 |
| AX-158290809 | 23 | 25.01 | KV453152.1 | 3092346 | 19-scf00455 | 19 |
| AX-157775195 | 23 | 25.01 | KV453152.1 | 3094994 | 19-scf00455 | 19 |
| AX-158290811 | 23 | 25.01 | KV453152.1 | 3097903 | 19-scf00455 | 19 |
| AX-158290812 | 23 | 25.01 | KV453152.1 | 3098283 | 19-scf00455 | 19 |
| AX-158290813 | 23 | 25.01 | KV453152.1 | 3098896 | 19-scf00455 | 19 |
| AX-158290814 | 23 | 25.01 | KV453152.1 | 3100166 | 19-scf00455 | 19 |
| AX-157723442 | 23 | 25.01 | KV453152.1 | 3102663 | 19-scf00455 | 19 |
| AX-158290815 | 23 | 25.01 | KV453152.1 | 3103991 | 19-scf00455 | 19 |
| AX-158290816 | 23 | 25.01 | KV453152.1 | 3106508 | 19-scf00455 | 19 |
| AX-158290817 | 23 | 25.01 | KV453152.1 | 3107795 | 19-scf00455 | 19 |
| AX-158290818 | 23 | 25.01 | KV453152.1 | 3108340 | 19-scf00455 | 19 |
| AX-158290820 | 23 | 25.01 | KV453152.1 | 3111499 | 19-scf00455 | 19 |
| AX-158290821 | 23 | 25.01 | KV453152.1 | 3112042 | 19-scf00455 | 19 |
| AX-158290822 | 23 | 25.01 | KV453152.1 | 3112607 | 19-scf00455 | 19 |
| AX-158290823 | 23 | 25.01 | KV453152.1 | 3114019 | 19-scf00455 | 19 |
| AX-158290824 | 23 | 25.01 | KV453152.1 | 3114394 | 19-scf00455 | 19 |
| AX-158290826 | 23 | 25.01 | KV453152.1 | 3117555 | 19-scf00455 | 19 |
| AX-158290827 | 23 | 25.01 | KV453152.1 | 3118057 | 19-scf00455 | 19 |
| AX-158290828 | 23 | 25.01 | KV453152.1 | 3122099 | 19-scf00455 | 19 |
| AX-158290829 | 23 | 25.01 | KV453152.1 | 3122908 | 19-scf00455 | 19 |
| AX-158290838 | 23 | 25.01 | KV453152.1 | 3129211 | 19-scf00455 | 19 |
| AX-158290840 | 23 | 25.01 | KV453152.1 | 3131369 | 19-scf00455 | 19 |
| AX-157743157 | 23 | 25.01 | KV453152.1 | 3132361 | 19-scf00455 | 19 |
| AX-158290844 | 23 | 25.01 | KV453152.1 | 3135175 | 19-scf00455 | 19 |
| AX-157845535 | 23 | 25.01 | KV453152.1 | 3137512 | 19-scf00455 | 19 |
| AX-158290847 | 23 | 25.01 | KV453152.1 | 3137858 | 19-scf00455 | 19 |
| AX-158290848 | 23 | 25.01 | KV453152.1 | 3139906 | 19-scf00455 | 19 |
| AX-158290851 | 23 | 25.01 | KV453152.1 | 3143521 | 19-scf00455 | 19 |
| AX-158290853 | 23 | 25.01 | KV453152.1 | 3147467 | 19-scf00455 | 19 |
| AX-158290855 | 23 | 25.01 | KV453152.1 | 3149199 | 19-scf00455 | 19 |
| AX-158290856 | 23 | 25.01 | KV453152.1 | 3149572 | 19-scf00455 | 19 |
| AX-158290858 | 23 | 25.01 | KV453152.1 | 3153391 | 19-scf00455 | 19 |
| AX-158290860 | 23 | 25.01 | KV453152.1 | 3157580 | 19-scf00455 | 19 |
| AX-158290864 | 23 | 25.01 | KV453152.1 | 3160188 | 19-scf00455 | 19 |
| AX-158290868 | 23 | 25.01 | KV453152.1 | 3165042 | 19-scf00455 | 19 |
| AX-158290870 | 23 | 25.01 | KV453152.1 | 3165911 | 19-scf00455 | 19 |
| AX-158290872 | 23 | 25.01 | KV453152.1 | 3166726 | 19-scf00455 | 19 |
| AX-158290878 | 23 | 25.01 | KV453152.1 | 3175883 | 19-scf00455 | 19 |
| AX-158290880 | 23 | 25.01 | KV453152.1 | 3178943 | 19-scf00455 | 19 |
| AX-158290883 | 23 | 25.01 | KV453152.1 | 3180115 | 19-scf00455 | 19 |

|              |    |       |            |         |             |    |
|--------------|----|-------|------------|---------|-------------|----|
| AX-158290885 | 23 | 25.01 | KV453152.1 | 3181449 | 19-scf00455 | 19 |
| AX-157772093 | 23 | 25.01 | KV453152.1 | 3182250 | 19-scf00455 | 19 |
| AX-158290886 | 23 | 25.01 | KV453152.1 | 3183078 | 19-scf00455 | 19 |
| AX-158290888 | 23 | 25.01 | KV453152.1 | 3184179 | 19-scf00455 | 19 |
| AX-158290889 | 23 | 25.01 | KV453152.1 | 3184745 | 19-scf00455 | 19 |
| AX-158290890 | 23 | 25.01 | KV453152.1 | 3185065 | 19-scf00455 | 19 |
| AX-158290891 | 23 | 25.01 | KV453152.1 | 3186743 | 19-scf00455 | 19 |
| AX-158290892 | 23 | 25.01 | KV453152.1 | 3188268 | 19-scf00455 | 19 |
| AX-158290895 | 23 | 25.01 | KV453152.1 | 3191546 | 19-scf00455 | 19 |
| AX-158290896 | 23 | 25.01 | KV453152.1 | 3192387 | 19-scf00455 | 19 |
| AX-158290897 | 23 | 25.01 | KV453152.1 | 3194237 | 19-scf00455 | 19 |
| AX-158290898 | 23 | 25.01 | KV453152.1 | 3198986 | 19-scf00455 | 19 |
| AX-158290899 | 23 | 25.01 | KV453152.1 | 3199992 | 19-scf00455 | 19 |
| AX-158290900 | 23 | 25.01 | KV453152.1 | 3201054 | 19-scf00455 | 19 |
| AX-158290903 | 23 | 25.01 | KV453152.1 | 3203286 | 19-scf00455 | 19 |
| AX-158290904 | 23 | 25.01 | KV453152.1 | 3204175 | 19-scf00455 | 19 |
| AX-158290905 | 23 | 25.01 | KV453152.1 | 3204706 | 19-scf00455 | 19 |
| AX-158290906 | 23 | 25.01 | KV453152.1 | 3205708 | 19-scf00455 | 19 |
| AX-158290910 | 23 | 25.01 | KV453152.1 | 3210066 | 19-scf00455 | 19 |
| AX-158290912 | 23 | 25.01 | KV453152.1 | 3218591 | 19-scf00455 | 19 |
| AX-158290913 | 23 | 25.01 | KV453152.1 | 3220216 | 19-scf00455 | 19 |
| AX-158290914 | 23 | 25.01 | KV453152.1 | 3220952 | 19-scf00455 | 19 |
| AX-158290915 | 23 | 25.01 | KV453152.1 | 3221574 | 19-scf00455 | 19 |
| AX-158290917 | 23 | 25.01 | KV453152.1 | 3224757 | 19-scf00455 | 19 |
| AX-158290919 | 23 | 25.01 | KV453152.1 | 3226071 | 19-scf00455 | 19 |
| AX-158290920 | 23 | 25.01 | KV453152.1 | 3226824 | 19-scf00455 | 19 |
| AX-158290924 | 23 | 25.01 | KV453152.1 | 3230081 | 19-scf00455 | 19 |
| AX-158290926 | 23 | 25.01 | KV453152.1 | 3233294 | 19-scf00455 | 19 |
| AX-158290927 | 23 | 25.01 | KV453152.1 | 3234947 | 19-scf00455 | 19 |
| AX-158290929 | 23 | 25.01 | KV453152.1 | 3237782 | 19-scf00455 | 19 |
| AX-158290931 | 23 | 25.01 | KV453152.1 | 3238948 | 19-scf00455 | 19 |
| AX-158290932 | 23 | 25.01 | KV453152.1 | 3239381 | 19-scf00455 | 19 |
| AX-158290933 | 23 | 25.01 | KV453152.1 | 3239953 | 19-scf00455 | 19 |
| AX-158290935 | 23 | 25.01 | KV453152.1 | 3242165 | 19-scf00455 | 19 |
| AX-158290941 | 23 | 25.01 | KV453152.1 | 3249441 | 19-scf00455 | 19 |
| AX-157697864 | 23 | 25.01 | KV453152.1 | 3257770 | 19-scf00455 | 19 |
| AX-158290948 | 23 | 25.01 | KV453152.1 | 3258915 | 19-scf00455 | 19 |
| AX-158290950 | 23 | 25.01 | KV453152.1 | 3260411 | 19-scf00455 | 19 |
| AX-158290951 | 23 | 25.01 | KV453152.1 | 3261269 | 19-scf00455 | 19 |
| AX-158290952 | 23 | 25.01 | KV453152.1 | 3262013 | 19-scf00455 | 19 |
| AX-158290953 | 23 | 25.01 | KV453152.1 | 3262296 | 19-scf00455 | 19 |
| AX-158290956 | 23 | 25.01 | KV453152.1 | 3267085 | 19-scf00455 | 19 |
| AX-157755002 | 23 | 25.01 | KV453152.1 | 3269460 | 19-scf00455 | 19 |
| AX-158290958 | 23 | 25.01 | KV453152.1 | 3270490 | 19-scf00455 | 19 |
| AX-158290959 | 23 | 25.01 | KV453152.1 | 3271257 | 19-scf00455 | 19 |
| AX-158290960 | 23 | 25.01 | KV453152.1 | 3271788 | 19-scf00455 | 19 |
| AX-158290962 | 23 | 25.01 | KV453152.1 | 3276374 | 19-scf00455 | 19 |
| AX-158290963 | 23 | 25.01 | KV453152.1 | 3277438 | 19-scf00455 | 19 |
| AX-158290966 | 23 | 25.01 | KV453152.1 | 3280329 | 19-scf00455 | 19 |
| AX-158290967 | 23 | 25.01 | KV453152.1 | 3280762 | 19-scf00455 | 19 |
| AX-158290968 | 23 | 25.01 | KV453152.1 | 3281160 | 19-scf00455 | 19 |



|              |    |       |            |         |             |    |
|--------------|----|-------|------------|---------|-------------|----|
| AX-158290970 | 23 | 25.01 | KV453152.1 | 3282156 | 19-scf00455 | 19 |
| AX-158290971 | 23 | 25.01 | KV453152.1 | 3282586 | 19-scf00455 | 19 |
| AX-158290979 | 23 | 25.01 | KV453152.1 | 3290958 | 19-scf00455 | 19 |
| AX-158290981 | 23 | 25.01 | KV453152.1 | 3292310 | 19-scf00455 | 19 |
| AX-158290984 | 23 | 25.01 | KV453152.1 | 3294419 | 19-scf00455 | 19 |
| AX-158290986 | 23 | 25.01 | KV453152.1 | 3297095 | 19-scf00455 | 19 |
| AX-158417279 | 23 | 25.01 | KV453152.1 | 3297423 | 19-scf00455 | 19 |
| AX-158290988 | 23 | 25.01 | KV453152.1 | 3299790 | 19-scf00455 | 19 |
| AX-158290991 | 23 | 25.01 | KV453152.1 | 3304515 | 19-scf00455 | 19 |
| AX-158417280 | 23 | 25.01 | KV453152.1 | 3310629 | 19-scf00455 | 19 |
| AX-158291000 | 23 | 25.01 | KV453152.1 | 3316373 | 19-scf00455 | 19 |
| AX-158291001 | 23 | 25.01 | KV453152.1 | 3316727 | 19-scf00455 | 19 |
| AX-158291002 | 23 | 25.01 | KV453152.1 | 3317820 | 19-scf00455 | 19 |
| AX-158291003 | 23 | 25.01 | KV453152.1 | 3318813 | 19-scf00455 | 19 |
| AX-158291007 | 23 | 25.01 | KV453152.1 | 3323022 | 19-scf00455 | 19 |
| AX-158417281 | 23 | 25.01 | KV453152.1 | 3324521 | 19-scf00455 | 19 |
| AX-158291011 | 23 | 25.01 | KV453152.1 | 3326779 | 19-scf00455 | 19 |
| AX-158291014 | 23 | 25.01 | KV453152.1 | 3333424 | 19-scf00455 | 19 |
| AX-158291015 | 23 | 25.01 | KV453152.1 | 3336559 | 19-scf00455 | 19 |
| AX-158291019 | 23 | 25.01 | KV453152.1 | 3341256 | 19-scf00455 | 19 |
| AX-158291021 | 23 | 25.01 | KV453152.1 | 3344984 | 19-scf00455 | 19 |
| AX-158291031 | 23 | 25.01 | KV453152.1 | 3353529 | 19-scf00455 | 19 |
| AX-158291037 | 23 | 25.01 | KV453152.1 | 3358017 | 19-scf00455 | 19 |
| AX-158291038 | 23 | 25.01 | KV453152.1 | 3358608 | 19-scf00455 | 19 |
| AX-158291040 | 23 | 25.01 | KV453152.1 | 3360298 | 19-scf00455 | 19 |
| AX-158291041 | 23 | 25.01 | KV453152.1 | 3360995 | 19-scf00455 | 19 |
| AX-158291042 | 23 | 25.01 | KV453152.1 | 3362469 | 19-scf00455 | 19 |
| AX-158291043 | 23 | 25.01 | KV453152.1 | 3363155 | 19-scf00455 | 19 |
| AX-158291044 | 23 | 25.01 | KV453152.1 | 3363711 | 19-scf00455 | 19 |
| AX-158291054 | 23 | 25.01 | KV453152.1 | 3378184 | 19-scf00455 | 19 |
| AX-158291056 | 23 | 25.01 | KV453152.1 | 3379033 | 19-scf00455 | 19 |
| AX-158291057 | 23 | 25.01 | KV453152.1 | 3379501 | 19-scf00455 | 19 |
| AX-158291059 | 23 | 25.01 | KV453152.1 | 3380984 | 19-scf00455 | 19 |
| AX-158291060 | 23 | 25.01 | KV453152.1 | 3382667 | 19-scf00455 | 19 |
| AX-158291062 | 23 | 25.01 | KV453152.1 | 3385139 | 19-scf00455 | 19 |
| AX-158291063 | 23 | 25.01 | KV453152.1 | 3386781 | 19-scf00455 | 19 |
| AX-158291064 | 23 | 25.01 | KV453152.1 | 3388399 | 19-scf00455 | 19 |
| AX-157775501 | 23 | 25.01 | KV453152.1 | 3395700 | 19-scf00455 | 19 |
| AX-157845537 | 23 | 25.01 | KV453152.1 | 3397407 | 19-scf00455 | 19 |
| AX-158291067 | 23 | 25.01 | KV453152.1 | 3397570 | 19-scf00455 | 19 |
| AX-157845538 | 23 | 25.01 | KV453152.1 | 3398924 | 19-scf00455 | 19 |
| AX-158291071 | 23 | 25.01 | KV453152.1 | 3400217 | 19-scf00455 | 19 |
| AX-158291072 | 23 | 25.01 | KV453152.1 | 3401327 | 19-scf00455 | 19 |
| AX-158291073 | 23 | 25.01 | KV453152.1 | 3401969 | 19-scf00455 | 19 |
| AX-158291078 | 23 | 25.01 | KV453152.1 | 3408946 | 19-scf00455 | 19 |
| AX-158291081 | 23 | 25.01 | KV453152.1 | 3410990 | 19-scf00455 | 19 |
| AX-157845541 | 23 | 25.01 | KV453152.1 | 3412600 | 19-scf00455 | 19 |
| AX-158291083 | 23 | 25.01 | KV453152.1 | 3420020 | 19-scf00455 | 19 |
| AX-158291086 | 23 | 25.01 | KV453152.1 | 3424891 | 19-scf00455 | 19 |
| AX-158417284 | 23 | 25.01 | KV453152.1 | 3428004 | 19-scf00455 | 19 |
| AX-158291093 | 23 | 25.01 | KV453152.1 | 3432300 | 19-scf00455 | 19 |

|              |    |        |            |         |                |    |
|--------------|----|--------|------------|---------|----------------|----|
| AX-157845542 | 23 | 25.01  | KV453152.1 | 3437069 | 19-scf00455    | 19 |
| AX-158291098 | 23 | 25.01  | KV453152.1 | 3439121 | 19-scf00455    | 19 |
| AX-158291101 | 23 | 25.01  | KV453152.1 | 3442085 | 19-scf00455    | 19 |
| AX-158291105 | 23 | 25.01  | KV453152.1 | 3445675 | 19-scf00455    | 19 |
| AX-158291109 | 23 | 25.01  | KV453152.1 | 3448071 | 19-scf00455    | 19 |
| AX-158291110 | 23 | 25.01  | KV453152.1 | 3449613 | 19-scf00455    | 19 |
| AX-158291111 | 23 | 25.01  | KV453152.1 | 3452605 | 19-scf00455    | 19 |
| AX-158291114 | 23 | 25.01  | KV453152.1 | 3454539 | 19-scf00455    | 19 |
| AX-158417285 | 23 | 25.01  | KV453152.1 | 3458346 | 19-scf00455    | 19 |
| AX-158417286 | 23 | 25.01  | KV453152.1 | 3458471 | 19-scf00455    | 19 |
| AX-158291117 | 23 | 25.01  | KV453152.1 | 3459552 | 19-scf00455    | 19 |
| AX-157727840 | 23 | 25.01  | KV453152.1 | 3460032 | 19-scf00455    | 19 |
| AX-158291121 | 23 | 25.01  | KV453152.1 | 3464009 | 19-scf00455    | 19 |
| AX-158417287 | 23 | 25.01  | KV453152.1 | 3467020 | 19-scf00455    | 19 |
| AX-157845546 | 23 | 25.01  | KV453152.1 | 3481301 | 19-scf00455    | 19 |
| AX-157845547 | 23 | 25.01  | KV453152.1 | 3481378 | 19-scf00455    | 19 |
| AX-158291130 | 23 | 25.01  | KV453152.1 | 3482760 | 19-scf00455    | 19 |
| AX-157845548 | 23 | 25.01  | KV453152.1 | 3512976 | 19-scf00455    | 19 |
| AX-158291162 | 23 | 25.01  | KV453152.1 | 3516874 | 19-scf00455    | 19 |
| AX-158291164 | 23 | 25.01  | KV453152.1 | 3519213 | 19-scf00455    | 19 |
| AX-158291165 | 23 | 25.01  | KV453152.1 | 3520687 | 19-scf00455    | 19 |
| AX-157845555 | 23 | 25.01  | KV453152.1 | 3532096 | 19-scf00455    | 19 |
| AX-158291174 | 23 | 25.01  | KV453152.1 | 3538697 | 19-scf00455    | 19 |
| AX-158291181 | 23 | 25.01  | KV453152.1 | 3546530 | 19-scf00455    | 19 |
| AX-158291186 | 23 | 25.01  | KV453152.1 | 3553529 | 19-scf00455    | 19 |
| AX-158291190 | 23 | 25.01  | KV453152.1 | 3557499 | 19-scf00455    | 19 |
| AX-158291195 | 23 | 25.01  | KV453152.1 | 3562514 | 19-scf00455    | 19 |
| AX-158291208 | 23 | 25.01  | KV453152.1 | 3593062 | 19-scf00455    | 19 |
| AX-158291209 | 23 | 25.01  | KV453152.1 | 3593576 | 19-scf00455    | 19 |
| AX-158291219 | 23 | 25.01  | KV453152.1 | 3607884 | 19-scf00455    | 19 |
| AX-157698757 | 23 | 25.01  | FI862858.1 | 270     | IORI212 Ictalu | UN |
| AX-158291010 | 23 | 25.119 | KV453152.1 | 3326338 | 19-scf00455    | 19 |
| AX-158291049 | 23 | 25.119 | KV453152.1 | 3369684 | 19-scf00455    | 19 |
| AX-158291123 | 23 | 25.119 | KV453152.1 | 3470114 | 19-scf00455    | 19 |
| AX-158291124 | 23 | 25.119 | KV453152.1 | 3470735 | 19-scf00455    | 19 |
| AX-157845543 | 23 | 25.119 | KV453152.1 | 3471274 | 19-scf00455    | 19 |
| AX-158291125 | 23 | 25.119 | KV453152.1 | 3472132 | 19-scf00455    | 19 |
| AX-157752308 | 23 | 25.119 | KV453152.1 | 3472436 | 19-scf00455    | 19 |
| AX-157845544 | 23 | 25.119 | KV453152.1 | 3473846 | 19-scf00455    | 19 |
| AX-158291127 | 23 | 25.119 | KV453152.1 | 3476706 | 19-scf00455    | 19 |
| AX-158291132 | 23 | 25.119 | KV453152.1 | 3484623 | 19-scf00455    | 19 |
| AX-158291135 | 23 | 25.119 | KV453152.1 | 3488419 | 19-scf00455    | 19 |
| AX-158291140 | 23 | 25.119 | KV453152.1 | 3496924 | 19-scf00455    | 19 |
| AX-158291143 | 23 | 25.119 | KV453152.1 | 3498740 | 19-scf00455    | 19 |
| AX-158291144 | 23 | 25.119 | KV453152.1 | 3501839 | 19-scf00455    | 19 |
| AX-158291145 | 23 | 25.119 | KV453152.1 | 3502801 | 19-scf00455    | 19 |
| AX-158291146 | 23 | 25.119 | KV453152.1 | 3503091 | 19-scf00455    | 19 |
| AX-158291147 | 23 | 25.119 | KV453152.1 | 3505512 | 19-scf00455    | 19 |
| AX-158291150 | 23 | 25.119 | KV453152.1 | 3507104 | 19-scf00455    | 19 |
| AX-158291152 | 23 | 25.119 | KV453152.1 | 3508772 | 19-scf00455    | 19 |
| AX-158291155 | 23 | 25.119 | KV453152.1 | 3511819 | 19-scf00455    | 19 |

|              |    |        |             |         |             |    |
|--------------|----|--------|-------------|---------|-------------|----|
| AX-158291156 | 23 | 25.119 | KV453152.1  | 3512324 | 19-scf00455 | 19 |
| AX-157845549 | 23 | 25.119 | KV453152.1  | 3514527 | 19-scf00455 | 19 |
| AX-157845550 | 23 | 25.119 | KV453152.1  | 3516064 | 19-scf00455 | 19 |
| AX-158291166 | 23 | 25.119 | KV453152.1  | 3521676 | 19-scf00455 | 19 |
| AX-158291167 | 23 | 25.119 | KV453152.1  | 3522783 | 19-scf00455 | 19 |
| AX-158291169 | 23 | 25.119 | KV453152.1  | 3523945 | 19-scf00455 | 19 |
| AX-157747449 | 23 | 25.119 | KV453152.1  | 3533975 | 19-scf00455 | 19 |
| AX-157845556 | 23 | 25.119 | KV453152.1  | 3536525 | 19-scf00455 | 19 |
| AX-158291175 | 23 | 25.119 | KV453152.1  | 3539067 | 19-scf00455 | 19 |
| AX-158291177 | 23 | 25.119 | KV453152.1  | 3540057 | 19-scf00455 | 19 |
| AX-157845557 | 23 | 25.119 | KV453152.1  | 3542019 | 19-scf00455 | 19 |
| AX-158291178 | 23 | 25.119 | KV453152.1  | 3542300 | 19-scf00455 | 19 |
| AX-158291183 | 23 | 25.119 | KV453152.1  | 3548033 | 19-scf00455 | 19 |
| AX-158291184 | 23 | 25.119 | KV453152.1  | 3548535 | 19-scf00455 | 19 |
| AX-158291185 | 23 | 25.119 | KV453152.1  | 3552224 | 19-scf00455 | 19 |
| AX-158291196 | 23 | 25.119 | KV453152.1  | 3564466 | 19-scf00455 | 19 |
| AX-158291198 | 23 | 25.119 | KV453152.1  | 3570908 | 19-scf00455 | 19 |
| AX-158291199 | 23 | 25.119 | KV453152.1  | 3572711 | 19-scf00455 | 19 |
| AX-157706362 | 23 | 25.119 | 3ML01032136 | 620     | scf07749_1  | UN |
| AX-157845551 | 23 | 25.234 | KV453152.1  | 3521264 | 19-scf00455 | 19 |
| AX-158291200 | 23 | 25.234 | KV453152.1  | 3576883 | 19-scf00455 | 19 |
| AX-157746632 | 23 | 25.338 | KV453152.1  | 3579170 | 19-scf00455 | 19 |
| AX-158417291 | 23 | 25.338 | KV453152.1  | 3581089 | 19-scf00455 | 19 |
| AX-158291201 | 23 | 25.356 | KV453152.1  | 3581689 | 19-scf00455 | 19 |
| AX-157845559 | 23 | 25.356 | KV453152.1  | 3583212 | 19-scf00455 | 19 |
| AX-158291203 | 23 | 25.368 | KV453152.1  | 3583591 | 19-scf00455 | 19 |
| AX-157845561 | 23 | 25.368 | KV453152.1  | 3601979 | 19-scf00455 | 19 |
| AX-157724792 | 23 | 25.382 | KV453152.1  | 3586789 | 19-scf00455 | 19 |
| AX-158291136 | 23 | 25.394 | KV453152.1  | 3489273 | 19-scf00455 | 19 |
| AX-158291204 | 23 | 25.394 | KV453152.1  | 3584638 | 19-scf00455 | 19 |
| AX-158417294 | 23 | 25.394 | KV453152.1  | 3587132 | 19-scf00455 | 19 |
| AX-158291231 | 23 | 25.394 | KV453152.1  | 3622306 | 19-scf00455 | 19 |
| AX-158417295 | 23 | 25.404 | KV453152.1  | 3587167 | 19-scf00455 | 19 |
| AX-158417296 | 23 | 25.414 | KV453152.1  | 3587292 | 19-scf00455 | 19 |
| AX-158417297 | 23 | 25.414 | KV453152.1  | 3587744 | 19-scf00455 | 19 |
| AX-157845560 | 23 | 25.423 | KV453152.1  | 3589821 | 19-scf00455 | 19 |
| AX-158291226 | 23 | 25.423 | KV453152.1  | 3617080 | 19-scf00455 | 19 |
| AX-158291207 | 23 | 25.435 | KV453152.1  | 3592821 | 19-scf00455 | 19 |
| AX-158291211 | 23 | 25.447 | KV453152.1  | 3596747 | 19-scf00455 | 19 |
| AX-158291216 | 23 | 25.447 | KV453152.1  | 3601113 | 19-scf00455 | 19 |
| AX-158291218 | 23 | 25.447 | KV453152.1  | 3601910 | 19-scf00455 | 19 |
| AX-157748575 | 23 | 25.447 | KV453152.1  | 3605015 | 19-scf00455 | 19 |
| AX-158291220 | 23 | 25.61  | KV453152.1  | 3608294 | 19-scf00455 | 19 |
| AX-157749048 | 23 | 25.936 | KV453152.1  | 3619022 | 19-scf00455 | 19 |
| AX-158291229 | 23 | 25.936 | KV453152.1  | 3619499 | 19-scf00455 | 19 |
| AX-158291230 | 23 | 25.942 | KV453152.1  | 3621228 | 19-scf00455 | 19 |
| AX-158291234 | 23 | 26.419 | KV453152.1  | 3629625 | 19-scf00455 | 19 |
| AX-158291235 | 23 | 26.655 | KV453152.1  | 3631564 | 19-scf00455 | 19 |
| AX-158291238 | 23 | 26.798 | KV453152.1  | 3637418 | 19-scf00455 | 19 |
| AX-157727891 | 23 | 26.983 | KV453152.1  | 3638043 | 19-scf00455 | 19 |
| AX-157845552 | 23 | 27.166 | KV453152.1  | 3525678 | 19-scf00455 | 19 |

|              |    |        |            |         |             |    |
|--------------|----|--------|------------|---------|-------------|----|
| AX-158291236 | 23 | 27.166 | KV453152.1 | 3632356 | 19-scf00455 | 19 |
| AX-158291241 | 23 | 27.166 | KV453152.1 | 3644029 | 19-scf00455 | 19 |
| AX-158291244 | 23 | 27.166 | KV453152.1 | 3649860 | 19-scf00455 | 19 |
| AX-158291245 | 23 | 27.166 | KV453152.1 | 3651731 | 19-scf00455 | 19 |
| AX-158291273 | 23 | 27.166 | KV453152.1 | 3684640 | 19-scf00455 | 19 |
| AX-158291291 | 23 | 27.166 | KV453152.1 | 3720665 | 19-scf00455 | 19 |
| AX-158291254 | 23 | 27.497 | KV453152.1 | 3659529 | 19-scf00455 | 19 |
| AX-157845564 | 23 | 27.64  | KV453152.1 | 3660099 | 19-scf00455 | 19 |
| AX-157757512 | 23 | 27.64  | KV453152.1 | 3662346 | 19-scf00455 | 19 |
| AX-158291258 | 23 | 27.64  | KV453152.1 | 3666087 | 19-scf00455 | 19 |
| AX-158291259 | 23 | 27.804 | KV453152.1 | 3666854 | 19-scf00455 | 19 |
| AX-158291262 | 23 | 27.804 | KV453152.1 | 3670766 | 19-scf00455 | 19 |
| AX-158291271 | 23 | 27.804 | KV453152.1 | 3679437 | 19-scf00455 | 19 |
| AX-158291264 | 23 | 27.967 | KV453152.1 | 3672259 | 19-scf00455 | 19 |
| AX-157845568 | 23 | 27.968 | KV453152.1 | 3676316 | 19-scf00455 | 19 |
| AX-158291270 | 23 | 27.968 | KV453152.1 | 3678651 | 19-scf00455 | 19 |
| AX-158381239 | 23 | 27.968 | KV453152.1 | 3680968 | 19-scf00455 | 19 |
| AX-158291274 | 23 | 27.968 | KV453152.1 | 3694207 | 19-scf00455 | 19 |
| AX-157845571 | 23 | 27.968 | KV453152.1 | 3695959 | 19-scf00455 | 19 |
| AX-157755803 | 23 | 28.065 | KV453152.1 | 3699410 | 19-scf00455 | 19 |
| AX-157713121 | 23 | 28.186 | KV453152.1 | 3702591 | 19-scf00455 | 19 |
| AX-157744602 | 23 | 28.186 | KV453152.1 | 3704938 | 19-scf00455 | 19 |
| AX-157845574 | 23 | 28.186 | KV453152.1 | 3706896 | 19-scf00455 | 19 |
| AX-158291285 | 23 | 28.186 | KV453152.1 | 3714000 | 19-scf00455 | 19 |
| AX-158291286 | 23 | 28.186 | KV453152.1 | 3714495 | 19-scf00455 | 19 |
| AX-158291289 | 23 | 28.186 | KV453152.1 | 3719783 | 19-scf00455 | 19 |
| AX-158291300 | 23 | 28.186 | KV453152.1 | 3728685 | 19-scf00455 | 19 |
| AX-158291242 | 23 | 28.298 | KV453152.1 | 3644516 | 19-scf00455 | 19 |
| AX-158291301 | 23 | 28.298 | KV453152.1 | 3729714 | 19-scf00455 | 19 |
| AX-158291309 | 23 | 28.405 | KV453152.1 | 3741624 | 19-scf00455 | 19 |
| AX-158291311 | 23 | 28.405 | KV453152.1 | 3744173 | 19-scf00455 | 19 |
| AX-158291239 | 23 | 28.623 | KV453152.1 | 3639965 | 19-scf00455 | 19 |
| AX-158291302 | 23 | 28.623 | KV453152.1 | 3730760 | 19-scf00455 | 19 |
| AX-158291304 | 23 | 28.623 | KV453152.1 | 3736639 | 19-scf00455 | 19 |
| AX-157716482 | 23 | 28.623 | KV453152.1 | 3745200 | 19-scf00455 | 19 |
| AX-158291315 | 23 | 28.623 | KV453152.1 | 3749783 | 19-scf00455 | 19 |
| AX-158291317 | 23 | 28.623 | KV453152.1 | 3751847 | 19-scf00455 | 19 |
| AX-158291318 | 23 | 28.623 | KV453152.1 | 3753873 | 19-scf00455 | 19 |
| AX-158291319 | 23 | 28.623 | KV453152.1 | 3754419 | 19-scf00455 | 19 |
| AX-158291320 | 23 | 28.623 | KV453152.1 | 3757433 | 19-scf00455 | 19 |
| AX-158291321 | 23 | 28.623 | KV453152.1 | 3759233 | 19-scf00455 | 19 |
| AX-158291324 | 23 | 28.623 | KV453152.1 | 3760981 | 19-scf00455 | 19 |
| AX-158291325 | 23 | 28.623 | KV453152.1 | 3761519 | 19-scf00455 | 19 |
| AX-158291326 | 23 | 28.623 | KV453152.1 | 3761737 | 19-scf00455 | 19 |
| AX-157845577 | 23 | 28.623 | KV453152.1 | 3762948 | 19-scf00455 | 19 |
| AX-158291329 | 23 | 28.623 | KV453152.1 | 3765210 | 19-scf00455 | 19 |
| AX-158291330 | 23 | 28.623 | KV453152.1 | 3766035 | 19-scf00455 | 19 |
| AX-158291331 | 23 | 28.623 | KV453152.1 | 3766600 | 19-scf00455 | 19 |
| AX-158291332 | 23 | 28.623 | KV453152.1 | 3769199 | 19-scf00455 | 19 |
| AX-158291334 | 23 | 28.669 | KV453152.1 | 3772722 | 19-scf00455 | 19 |
| AX-158291708 | 23 | 28.669 | KV453155.1 | 91350   | 19-scf00458 | 19 |

|              |    |        |            |         |             |    |
|--------------|----|--------|------------|---------|-------------|----|
| AX-158291045 | 23 | 28.733 | KV453152.1 | 3364745 | 19-scf00455 | 19 |
| AX-158291119 | 23 | 28.733 | KV453152.1 | 3461127 | 19-scf00455 | 19 |
| AX-158291328 | 23 | 28.733 | KV453152.1 | 3763222 | 19-scf00455 | 19 |
| AX-158291335 | 23 | 28.733 | KV453152.1 | 3773236 | 19-scf00455 | 19 |
| AX-157727009 | 23 | 28.733 | KV453152.1 | 3774276 | 19-scf00455 | 19 |
| AX-158291336 | 23 | 28.733 | KV453152.1 | 3775195 | 19-scf00455 | 19 |
| AX-157880799 | 23 | 28.733 | KV453152.1 | 3775345 | 19-scf00455 | 19 |
| AX-158291338 | 23 | 28.733 | KV453152.1 | 3777798 | 19-scf00455 | 19 |
| AX-158291339 | 23 | 28.733 | KV453152.1 | 3778285 | 19-scf00455 | 19 |
| AX-158291345 | 23 | 28.733 | KV453152.1 | 3785117 | 19-scf00455 | 19 |
| AX-158291346 | 23 | 28.733 | KV453152.1 | 3785680 | 19-scf00455 | 19 |
| AX-157684145 | 23 | 28.733 | KV453153.1 | 5516    | 19-scf00457 | 19 |
| AX-158291347 | 23 | 29.278 | KV453152.1 | 3789517 | 19-scf00455 | 19 |
| AX-158291649 | 23 | 29.278 | KV453155.1 | 14428   | 19-scf00458 | 19 |
| AX-158291694 | 23 | 29.278 | KV453155.1 | 71042   | 19-scf00458 | 19 |
| AX-157845607 | 23 | 29.278 | KV453155.1 | 77100   | 19-scf00458 | 19 |
| AX-157845612 | 23 | 29.278 | KV453155.1 | 174699  | 19-scf00458 | 19 |
| AX-158295605 | 23 | 29.278 | KV453154.1 | 2132    | 19-scf00459 | 19 |
| AX-158295609 | 23 | 29.278 | KV453154.1 | 5205    | 19-scf00459 | 19 |
| AX-158295612 | 23 | 29.278 | KV453154.1 | 7493    | 19-scf00459 | 19 |
| AX-158295614 | 23 | 29.278 | KV453154.1 | 9583    | 19-scf00459 | 19 |
| AX-158295618 | 23 | 29.278 | KV453154.1 | 12406   | 19-scf00459 | 19 |
| AX-158295623 | 23 | 29.278 | KV453154.1 | 21262   | 19-scf00459 | 19 |
| AX-158295628 | 23 | 29.279 | KV453154.1 | 27806   | 19-scf00459 | 19 |
| AX-158295629 | 23 | 29.279 | KV453154.1 | 29120   | 19-scf00459 | 19 |
| AX-158291658 | 23 | 29.497 | KV453155.1 | 24255   | 19-scf00458 | 19 |
| AX-157845883 | 23 | 29.497 | KV453154.1 | 39034   | 19-scf00459 | 19 |
| AX-158295638 | 23 | 29.497 | KV453154.1 | 39254   | 19-scf00459 | 19 |
| AX-158295639 | 23 | 29.497 | KV453154.1 | 39902   | 19-scf00459 | 19 |
| AX-158295640 | 23 | 29.497 | KV453154.1 | 40515   | 19-scf00459 | 19 |
| AX-158295641 | 23 | 29.497 | KV453154.1 | 44835   | 19-scf00459 | 19 |
| AX-158295642 | 23 | 29.497 | KV453154.1 | 47993   | 19-scf00459 | 19 |
| AX-158291687 | 23 | 29.498 | KV453155.1 | 64609   | 19-scf00458 | 19 |
| AX-158295643 | 23 | 29.498 | KV453154.1 | 50806   | 19-scf00459 | 19 |
| AX-158295646 | 23 | 29.642 | KV453154.1 | 56513   | 19-scf00459 | 19 |
| AX-158295647 | 23 | 29.642 | KV453154.1 | 56965   | 19-scf00459 | 19 |
| AX-158295648 | 23 | 29.642 | KV453154.1 | 57469   | 19-scf00459 | 19 |
| AX-158295653 | 23 | 29.642 | KV453154.1 | 65550   | 19-scf00459 | 19 |
| AX-158291640 | 23 | 29.805 | KV453155.1 | 4662    | 19-scf00458 | 19 |
| AX-158291641 | 23 | 29.935 | KV453155.1 | 5254    | 19-scf00458 | 19 |
| AX-158291642 | 23 | 29.935 | KV453155.1 | 8060    | 19-scf00458 | 19 |
| AX-158411666 | 23 | 29.935 | KV453155.1 | 8220    | 19-scf00458 | 19 |
| AX-158291643 | 23 | 29.935 | KV453155.1 | 9267    | 19-scf00458 | 19 |
| AX-158291644 | 23 | 29.935 | KV453155.1 | 10497   | 19-scf00458 | 19 |
| AX-158291645 | 23 | 29.935 | KV453155.1 | 11139   | 19-scf00458 | 19 |
| AX-158291653 | 23 | 29.935 | KV453155.1 | 18326   | 19-scf00458 | 19 |
| AX-158291654 | 23 | 29.935 | KV453155.1 | 18999   | 19-scf00458 | 19 |
| AX-158291663 | 23 | 29.935 | KV453155.1 | 32324   | 19-scf00458 | 19 |
| AX-158291664 | 23 | 29.935 | KV453155.1 | 34955   | 19-scf00458 | 19 |
| AX-158291670 | 23 | 29.935 | KV453155.1 | 41146   | 19-scf00458 | 19 |
| AX-158291671 | 23 | 29.935 | KV453155.1 | 42087   | 19-scf00458 | 19 |

|              |    |        |            |         |             |    |
|--------------|----|--------|------------|---------|-------------|----|
| AX-158291673 | 23 | 29.935 | KV453155.1 | 44910   | 19-scf00458 | 19 |
| AX-157845602 | 23 | 29.935 | KV453155.1 | 46178   | 19-scf00458 | 19 |
| AX-157845603 | 23 | 29.935 | KV453155.1 | 48415   | 19-scf00458 | 19 |
| AX-157716544 | 23 | 29.935 | KV453155.1 | 48533   | 19-scf00458 | 19 |
| AX-157696673 | 23 | 29.935 | KV453155.1 | 54278   | 19-scf00458 | 19 |
| AX-158291679 | 23 | 29.935 | KV453155.1 | 54895   | 19-scf00458 | 19 |
| AX-158291683 | 23 | 29.935 | KV453155.1 | 60037   | 19-scf00458 | 19 |
| AX-158291684 | 23 | 29.935 | KV453155.1 | 61086   | 19-scf00458 | 19 |
| AX-158291692 | 23 | 29.935 | KV453155.1 | 68893   | 19-scf00458 | 19 |
| AX-158291709 | 23 | 29.935 | KV453155.1 | 91783   | 19-scf00458 | 19 |
| AX-158291719 | 23 | 29.935 | KV453155.1 | 107219  | 19-scf00458 | 19 |
| AX-158291727 | 23 | 29.935 | KV453155.1 | 113580  | 19-scf00458 | 19 |
| AX-158291728 | 23 | 29.935 | KV453155.1 | 114892  | 19-scf00458 | 19 |
| AX-158291760 | 23 | 29.935 | KV453155.1 | 148910  | 19-scf00458 | 19 |
| AX-158291790 | 23 | 29.935 | KV453155.1 | 183507  | 19-scf00458 | 19 |
| AX-158291814 | 23 | 29.935 | KV453155.1 | 217393  | 19-scf00458 | 19 |
| AX-158291815 | 23 | 29.935 | KV453155.1 | 220922  | 19-scf00458 | 19 |
| AX-157845616 | 23 | 29.935 | KV453155.1 | 245173  | 19-scf00458 | 19 |
| AX-158291861 | 23 | 29.935 | KV453155.1 | 287573  | 19-scf00458 | 19 |
| AX-158291906 | 23 | 29.935 | KV453155.1 | 367565  | 19-scf00458 | 19 |
| AX-158291922 | 23 | 29.935 | KV453155.1 | 382025  | 19-scf00458 | 19 |
| AX-158291978 | 23 | 29.935 | KV453155.1 | 449658  | 19-scf00458 | 19 |
| AX-158292003 | 23 | 29.935 | KV453155.1 | 477281  | 19-scf00458 | 19 |
| AX-158292079 | 23 | 29.935 | KV453155.1 | 561996  | 19-scf00458 | 19 |
| AX-158292089 | 23 | 29.935 | KV453155.1 | 576601  | 19-scf00458 | 19 |
| AX-158292140 | 23 | 29.935 | KV453155.1 | 625293  | 19-scf00458 | 19 |
| AX-158292157 | 23 | 29.935 | KV453155.1 | 639530  | 19-scf00458 | 19 |
| AX-158292175 | 23 | 29.935 | KV453155.1 | 660421  | 19-scf00458 | 19 |
| AX-158292242 | 23 | 29.935 | KV453155.1 | 757377  | 19-scf00458 | 19 |
| AX-158292255 | 23 | 29.935 | KV453155.1 | 771518  | 19-scf00458 | 19 |
| AX-158292353 | 23 | 29.935 | KV453155.1 | 889550  | 19-scf00458 | 19 |
| AX-158292374 | 23 | 29.935 | KV453155.1 | 905731  | 19-scf00458 | 19 |
| AX-158292426 | 23 | 29.935 | KV453155.1 | 989212  | 19-scf00458 | 19 |
| AX-158292468 | 23 | 29.935 | KV453155.1 | 1028121 | 19-scf00458 | 19 |
| AX-158292500 | 23 | 29.935 | KV453155.1 | 1067743 | 19-scf00458 | 19 |
| AX-158292502 | 23 | 29.935 | KV453155.1 | 1069643 | 19-scf00458 | 19 |
| AX-158292512 | 23 | 29.935 | KV453155.1 | 1081501 | 19-scf00458 | 19 |
| AX-158292533 | 23 | 29.935 | KV453155.1 | 1109928 | 19-scf00458 | 19 |
| AX-158292535 | 23 | 29.935 | KV453155.1 | 1111421 | 19-scf00458 | 19 |
| AX-158292557 | 23 | 29.935 | KV453155.1 | 1140355 | 19-scf00458 | 19 |
| AX-158292587 | 23 | 29.935 | KV453155.1 | 1169158 | 19-scf00458 | 19 |
| AX-158292626 | 23 | 29.935 | KV453155.1 | 1219388 | 19-scf00458 | 19 |
| AX-158292677 | 23 | 29.935 | KV453155.1 | 1267725 | 19-scf00458 | 19 |
| AX-158292684 | 23 | 29.935 | KV453155.1 | 1277733 | 19-scf00458 | 19 |
| AX-157845634 | 23 | 29.935 | KV453155.1 | 1297664 | 19-scf00458 | 19 |
| AX-158292729 | 23 | 29.935 | KV453155.1 | 1333818 | 19-scf00458 | 19 |
| AX-158292765 | 23 | 29.935 | KV453155.1 | 1377468 | 19-scf00458 | 19 |
| AX-158292803 | 23 | 29.935 | KV453155.1 | 1435780 | 19-scf00458 | 19 |
| AX-158292959 | 23 | 29.935 | KV453155.1 | 1632854 | 19-scf00458 | 19 |
| AX-157739359 | 23 | 29.935 | KV453155.1 | 2062524 | 19-scf00458 | 19 |
| AX-158293502 | 23 | 29.935 | KV453155.1 | 2178828 | 19-scf00458 | 19 |

|              |    |        |            |         |             |    |
|--------------|----|--------|------------|---------|-------------|----|
| AX-158293517 | 23 | 29.935 | KV453155.1 | 2196146 | 19-scf00458 | 19 |
| AX-157845704 | 23 | 29.935 | KV453155.1 | 2250680 | 19-scf00458 | 19 |
| AX-157888057 | 23 | 29.935 | KV453155.1 | 2291404 | 19-scf00458 | 19 |
| AX-157748822 | 23 | 29.935 | KV453155.1 | 2296626 | 19-scf00458 | 19 |
| AX-158293722 | 23 | 29.935 | KV453155.1 | 2458409 | 19-scf00458 | 19 |
| AX-158293755 | 23 | 29.935 | KV453155.1 | 2500512 | 19-scf00458 | 19 |
| AX-157753491 | 23 | 29.935 | KV453155.1 | 2510054 | 19-scf00458 | 19 |
| AX-158293809 | 23 | 29.935 | KV453155.1 | 2576836 | 19-scf00458 | 19 |
| AX-158293817 | 23 | 29.935 | KV453155.1 | 2584127 | 19-scf00458 | 19 |
| AX-158295607 | 23 | 29.935 | KV453154.1 | 4124    | 19-scf00459 | 19 |
| AX-157742825 | 23 | 29.935 | KV453154.1 | 17434   | 19-scf00459 | 19 |
| AX-157845882 | 23 | 29.935 | KV453154.1 | 18179   | 19-scf00459 | 19 |
| AX-157747386 | 23 | 29.935 | KV453154.1 | 25522   | 19-scf00459 | 19 |
| AX-158295635 | 23 | 29.935 | KV453154.1 | 36047   | 19-scf00459 | 19 |
| AX-158291686 | 23 | 29.998 | KV453155.1 | 62492   | 19-scf00458 | 19 |
| AX-157845606 | 23 | 30.144 | KV453155.1 | 69762   | 19-scf00458 | 19 |
| AX-158291646 | 23 | 30.263 | KV453155.1 | 11901   | 19-scf00458 | 19 |
| AX-157725952 | 23 | 30.263 | KV453155.1 | 34521   | 19-scf00458 | 19 |
| AX-157715651 | 23 | 30.263 | KV453155.1 | 74109   | 19-scf00458 | 19 |
| AX-158291696 | 23 | 30.263 | KV453155.1 | 75254   | 19-scf00458 | 19 |
| AX-158291697 | 23 | 30.263 | KV453155.1 | 75564   | 19-scf00458 | 19 |
| AX-158291699 | 23 | 30.263 | KV453155.1 | 76490   | 19-scf00458 | 19 |
| AX-158291701 | 23 | 30.263 | KV453155.1 | 80195   | 19-scf00458 | 19 |
| AX-158291704 | 23 | 30.263 | KV453155.1 | 88816   | 19-scf00458 | 19 |
| AX-158291707 | 23 | 30.263 | KV453155.1 | 91118   | 19-scf00458 | 19 |
| AX-158291714 | 23 | 30.263 | KV453155.1 | 97090   | 19-scf00458 | 19 |
| AX-158291716 | 23 | 30.263 | KV453155.1 | 100858  | 19-scf00458 | 19 |
| AX-158291717 | 23 | 30.263 | KV453155.1 | 102537  | 19-scf00458 | 19 |
| AX-157775361 | 23 | 30.263 | KV453155.1 | 104159  | 19-scf00458 | 19 |
| AX-158291720 | 23 | 30.263 | KV453155.1 | 107888  | 19-scf00458 | 19 |
| AX-158291721 | 23 | 30.263 | KV453155.1 | 109973  | 19-scf00458 | 19 |
| AX-158291722 | 23 | 30.263 | KV453155.1 | 110504  | 19-scf00458 | 19 |
| AX-158291723 | 23 | 30.263 | KV453155.1 | 110959  | 19-scf00458 | 19 |
| AX-158291735 | 23 | 30.263 | KV453155.1 | 121223  | 19-scf00458 | 19 |
| AX-157726736 | 23 | 30.263 | KV453155.1 | 151226  | 19-scf00458 | 19 |
| AX-158291924 | 23 | 30.263 | KV453155.1 | 383169  | 19-scf00458 | 19 |
| AX-158291990 | 23 | 30.263 | KV453155.1 | 462138  | 19-scf00458 | 19 |
| AX-158292004 | 23 | 30.263 | KV453155.1 | 477640  | 19-scf00458 | 19 |
| AX-158292177 | 23 | 30.263 | KV453155.1 | 662013  | 19-scf00458 | 19 |
| AX-158417335 | 23 | 30.263 | KV453155.1 | 699644  | 19-scf00458 | 19 |
| AX-158292463 | 23 | 30.263 | KV453155.1 | 1025926 | 19-scf00458 | 19 |
| AX-158292487 | 23 | 30.263 | KV453155.1 | 1055994 | 19-scf00458 | 19 |
| AX-158292538 | 23 | 30.263 | KV453155.1 | 1114503 | 19-scf00458 | 19 |
| AX-158292600 | 23 | 30.263 | KV453155.1 | 1183032 | 19-scf00458 | 19 |
| AX-158292602 | 23 | 30.263 | KV453155.1 | 1186543 | 19-scf00458 | 19 |
| AX-158292794 | 23 | 30.263 | KV453155.1 | 1424093 | 19-scf00458 | 19 |
| AX-157845880 | 23 | 30.263 | KV453154.1 | 13580   | 19-scf00459 | 19 |
| AX-158295620 | 23 | 30.263 | KV453154.1 | 13710   | 19-scf00459 | 19 |
| AX-157713720 | 23 | 30.263 | KV453154.1 | 24489   | 19-scf00459 | 19 |
| AX-158403681 | 23 | 30.263 | KV453154.1 | 36004   | 19-scf00459 | 19 |
| AX-158291353 | 23 | 30.331 | KV453152.1 | 3804811 | 19-scf00455 | 19 |

|              |    |        |            |         |             |    |
|--------------|----|--------|------------|---------|-------------|----|
| AX-158291715 | 23 | 30.372 | KV453155.1 | 100226  | 19-scf00458 | 19 |
| AX-158291734 | 23 | 30.372 | KV453155.1 | 120781  | 19-scf00458 | 19 |
| AX-157845610 | 23 | 30.481 | KV453155.1 | 102470  | 19-scf00458 | 19 |
| AX-158291738 | 23 | 30.481 | KV453155.1 | 123836  | 19-scf00458 | 19 |
| AX-158291740 | 23 | 30.481 | KV453155.1 | 126703  | 19-scf00458 | 19 |
| AX-158291741 | 23 | 30.481 | KV453155.1 | 129980  | 19-scf00458 | 19 |
| AX-158291743 | 23 | 30.481 | KV453155.1 | 130816  | 19-scf00458 | 19 |
| AX-158291744 | 23 | 30.481 | KV453155.1 | 133348  | 19-scf00458 | 19 |
| AX-158291749 | 23 | 30.481 | KV453155.1 | 139511  | 19-scf00458 | 19 |
| AX-158291754 | 23 | 30.481 | KV453155.1 | 142869  | 19-scf00458 | 19 |
| AX-158291756 | 23 | 30.481 | KV453155.1 | 145119  | 19-scf00458 | 19 |
| AX-158417319 | 23 | 30.481 | KV453155.1 | 146086  | 19-scf00458 | 19 |
| AX-158291761 | 23 | 30.509 | KV453155.1 | 149305  | 19-scf00458 | 19 |
| AX-158291762 | 23 | 30.509 | KV453155.1 | 152713  | 19-scf00458 | 19 |
| AX-158291899 | 23 | 30.509 | KV453155.1 | 361077  | 19-scf00458 | 19 |
| AX-158291952 | 23 | 30.509 | KV453155.1 | 423740  | 19-scf00458 | 19 |
| AX-158291994 | 23 | 30.509 | KV453155.1 | 465487  | 19-scf00458 | 19 |
| AX-158292143 | 23 | 30.509 | KV453155.1 | 627439  | 19-scf00458 | 19 |
| AX-158292217 | 23 | 30.509 | KV453155.1 | 712721  | 19-scf00458 | 19 |
| AX-158292683 | 23 | 30.509 | KV453155.1 | 1277261 | 19-scf00458 | 19 |
| AX-157757286 | 23 | 30.533 | KV453155.1 | 154666  | 19-scf00458 | 19 |
| AX-158291763 | 23 | 30.556 | KV453155.1 | 155284  | 19-scf00458 | 19 |
| AX-157772756 | 23 | 30.577 | KV453155.1 | 158479  | 19-scf00458 | 19 |
| AX-158291767 | 23 | 30.591 | KV453155.1 | 161283  | 19-scf00458 | 19 |
| AX-158291769 | 23 | 30.591 | KV453155.1 | 163815  | 19-scf00458 | 19 |
| AX-158291771 | 23 | 30.591 | KV453155.1 | 165377  | 19-scf00458 | 19 |
| AX-158291778 | 23 | 30.591 | KV453155.1 | 172636  | 19-scf00458 | 19 |
| AX-158291779 | 23 | 30.591 | KV453155.1 | 172906  | 19-scf00458 | 19 |
| AX-158291782 | 23 | 30.591 | KV453155.1 | 175522  | 19-scf00458 | 19 |
| AX-158292146 | 23 | 30.591 | KV453155.1 | 630860  | 19-scf00458 | 19 |
| AX-158292764 | 23 | 30.591 | KV453155.1 | 1376398 | 19-scf00458 | 19 |
| AX-158291777 | 23 | 30.7   | KV453155.1 | 171916  | 19-scf00458 | 19 |
| AX-158291780 | 23 | 30.7   | KV453155.1 | 173595  | 19-scf00458 | 19 |
| AX-158291795 | 23 | 30.7   | KV453155.1 | 187874  | 19-scf00458 | 19 |
| AX-158291799 | 23 | 30.7   | KV453155.1 | 196273  | 19-scf00458 | 19 |
| AX-158291785 | 23 | 30.76  | KV453155.1 | 177553  | 19-scf00458 | 19 |
| AX-158291786 | 23 | 30.809 | KV453155.1 | 179223  | 19-scf00458 | 19 |
| AX-158291792 | 23 | 30.809 | KV453155.1 | 185381  | 19-scf00458 | 19 |
| AX-158291793 | 23 | 30.809 | KV453155.1 | 186943  | 19-scf00458 | 19 |
| AX-157707903 | 23 | 30.809 | KV453155.1 | 191396  | 19-scf00458 | 19 |
| AX-157845613 | 23 | 30.809 | KV453155.1 | 192574  | 19-scf00458 | 19 |
| AX-158291798 | 23 | 30.809 | KV453155.1 | 194603  | 19-scf00458 | 19 |
| AX-158291800 | 23 | 30.848 | KV453155.1 | 196644  | 19-scf00458 | 19 |
| AX-158291801 | 23 | 30.88  | KV453155.1 | 198288  | 19-scf00458 | 19 |
| AX-158291802 | 23 | 30.927 | KV453155.1 | 198961  | 19-scf00458 | 19 |
| AX-158291803 | 23 | 30.976 | KV453155.1 | 201492  | 19-scf00458 | 19 |
| AX-158291804 | 23 | 31.028 | KV453155.1 | 202601  | 19-scf00458 | 19 |
| AX-158291809 | 23 | 31.028 | KV453155.1 | 207585  | 19-scf00458 | 19 |
| AX-157757937 | 23 | 31.028 | KV453155.1 | 209299  | 19-scf00458 | 19 |
| AX-158291812 | 23 | 31.028 | KV453155.1 | 211578  | 19-scf00458 | 19 |
| AX-157743837 | 23 | 31.028 | KV453155.1 | 219475  | 19-scf00458 | 19 |



|              |    |        |             |         |                |    |
|--------------|----|--------|-------------|---------|----------------|----|
| AX-158291818 | 23 | 31.028 | KV453155.1  | 222030  | 19-scf00458    | 19 |
| AX-158291819 | 23 | 31.028 | KV453155.1  | 222506  | 19-scf00458    | 19 |
| AX-158291820 | 23 | 31.028 | KV453155.1  | 223605  | 19-scf00458    | 19 |
| AX-158291830 | 23 | 31.028 | KV453155.1  | 234158  | 19-scf00458    | 19 |
| AX-158291915 | 23 | 31.028 | KV453155.1  | 375886  | 19-scf00458    | 19 |
| AX-158291919 | 23 | 31.028 | KV453155.1  | 379937  | 19-scf00458    | 19 |
| AX-158291925 | 23 | 31.028 | KV453155.1  | 383617  | 19-scf00458    | 19 |
| AX-158291996 | 23 | 31.028 | KV453155.1  | 468642  | 19-scf00458    | 19 |
| AX-158292025 | 23 | 31.028 | KV453155.1  | 500432  | 19-scf00458    | 19 |
| AX-158292233 | 23 | 31.028 | KV453155.1  | 738604  | 19-scf00458    | 19 |
| AX-158292263 | 23 | 31.028 | KV453155.1  | 783091  | 19-scf00458    | 19 |
| AX-158292277 | 23 | 31.028 | KV453155.1  | 796028  | 19-scf00458    | 19 |
| AX-158292338 | 23 | 31.028 | KV453155.1  | 872712  | 19-scf00458    | 19 |
| AX-158292348 | 23 | 31.028 | KV453155.1  | 886404  | 19-scf00458    | 19 |
| AX-157709437 | 23 | 31.028 | KV453155.1  | 974863  | 19-scf00458    | 19 |
| AX-158292562 | 23 | 31.028 | KV453155.1  | 1148036 | 19-scf00458    | 19 |
| AX-158292669 | 23 | 31.028 | KV453155.1  | 1258891 | 19-scf00458    | 19 |
| AX-158295621 | 23 | 31.028 | KV453154.1  | 14966   | 19-scf00459    | 19 |
| AX-158291834 | 23 | 31.185 | KV453155.1  | 242796  | 19-scf00458    | 19 |
| AX-157705717 | 23 | 31.185 | 3ML01030691 | 564     | scf06291_1     | UN |
| AX-157703398 | 23 | 31.233 | DX098054.1  | 90      | IORI212 lctalu | UN |
| AX-158291839 | 23 | 31.343 | KV453155.1  | 250890  | 19-scf00458    | 19 |
| AX-158381244 | 23 | 31.343 | KV453155.1  | 253907  | 19-scf00458    | 19 |
| AX-157888048 | 23 | 31.343 | KV453155.1  | 255257  | 19-scf00458    | 19 |
| AX-158291845 | 23 | 31.343 | KV453155.1  | 259994  | 19-scf00458    | 19 |
| AX-158291870 | 23 | 31.343 | KV453155.1  | 304940  | 19-scf00458    | 19 |
| AX-158293485 | 23 | 31.343 | KV453155.1  | 2158401 | 19-scf00458    | 19 |
| AX-158291852 | 23 | 31.346 | KV453155.1  | 269431  | 19-scf00458    | 19 |
| AX-158291885 | 23 | 31.346 | KV453155.1  | 339498  | 19-scf00458    | 19 |
| AX-158291886 | 23 | 31.346 | KV453155.1  | 340165  | 19-scf00458    | 19 |
| AX-157753814 | 23 | 31.346 | KV453155.1  | 345169  | 19-scf00458    | 19 |
| AX-158292848 | 23 | 31.346 | KV453155.1  | 1501030 | 19-scf00458    | 19 |
| AX-157715300 | 23 | 31.346 | KV453155.1  | 1507053 | 19-scf00458    | 19 |
| AX-158292853 | 23 | 31.346 | KV453155.1  | 1513607 | 19-scf00458    | 19 |
| AX-157696307 | 23 | 31.346 | KV453155.1  | 1525459 | 19-scf00458    | 19 |
| AX-157845657 | 23 | 31.346 | KV453155.1  | 1553391 | 19-scf00458    | 19 |
| AX-158292898 | 23 | 31.346 | KV453155.1  | 1571397 | 19-scf00458    | 19 |
| AX-158292922 | 23 | 31.346 | KV453155.1  | 1591390 | 19-scf00458    | 19 |
| AX-158292924 | 23 | 31.346 | KV453155.1  | 1592985 | 19-scf00458    | 19 |
| AX-158292933 | 23 | 31.346 | KV453155.1  | 1602142 | 19-scf00458    | 19 |
| AX-158292968 | 23 | 31.346 | KV453155.1  | 1639159 | 19-scf00458    | 19 |
| AX-158292972 | 23 | 31.346 | KV453155.1  | 1645420 | 19-scf00458    | 19 |
| AX-158292981 | 23 | 31.346 | KV453155.1  | 1655920 | 19-scf00458    | 19 |
| AX-158293408 | 23 | 31.346 | KV453155.1  | 2064323 | 19-scf00458    | 19 |
| AX-158293413 | 23 | 31.346 | KV453155.1  | 2068503 | 19-scf00458    | 19 |
| AX-158293758 | 23 | 31.346 | KV453155.1  | 2502482 | 19-scf00458    | 19 |
| AX-158291854 | 23 | 31.74  | KV453155.1  | 275095  | 19-scf00458    | 19 |
| AX-157774072 | 23 | 31.74  | KV453155.1  | 281071  | 19-scf00458    | 19 |
| AX-158291858 | 23 | 31.929 | KV453155.1  | 283012  | 19-scf00458    | 19 |
| AX-158291703 | 23 | 32.119 | KV453155.1  | 84107   | 19-scf00458    | 19 |
| AX-157738456 | 23 | 32.119 | KV453155.1  | 84834   | 19-scf00458    | 19 |

|              |    |        |            |         |             |    |
|--------------|----|--------|------------|---------|-------------|----|
| AX-158291710 | 23 | 32.119 | KV453155.1 | 92723   | 19-scf00458 | 19 |
| AX-158291862 | 23 | 32.119 | KV453155.1 | 288084  | 19-scf00458 | 19 |
| AX-158291865 | 23 | 32.119 | KV453155.1 | 295694  | 19-scf00458 | 19 |
| AX-158291869 | 23 | 32.119 | KV453155.1 | 302061  | 19-scf00458 | 19 |
| AX-158291979 | 23 | 32.119 | KV453155.1 | 450079  | 19-scf00458 | 19 |
| AX-158293538 | 23 | 32.119 | KV453155.1 | 2222348 | 19-scf00458 | 19 |
| AX-157845776 | 23 | 32.119 | KV453155.1 | 3801218 | 19-scf00458 | 19 |
| AX-158294871 | 23 | 32.119 | KV453155.1 | 3867107 | 19-scf00458 | 19 |
| AX-157860400 | 23 | 32.119 | KV453155.1 | 3929504 | 19-scf00458 | 19 |
| AX-157726710 | 23 | 32.129 | KV453155.1 | 329150  | 19-scf00458 | 19 |
| AX-158291884 | 23 | 32.143 | KV453155.1 | 336508  | 19-scf00458 | 19 |
| AX-158291892 | 23 | 32.157 | KV453155.1 | 352091  | 19-scf00458 | 19 |
| AX-158291894 | 23 | 32.171 | KV453155.1 | 354457  | 19-scf00458 | 19 |
| AX-158291902 | 23 | 32.177 | KV453155.1 | 364189  | 19-scf00458 | 19 |
| AX-158291903 | 23 | 32.184 | KV453155.1 | 365237  | 19-scf00458 | 19 |
| AX-158291916 | 23 | 32.191 | KV453155.1 | 377831  | 19-scf00458 | 19 |
| AX-158291936 | 23 | 32.198 | KV453155.1 | 395757  | 19-scf00458 | 19 |
| AX-158292651 | 23 | 32.198 | KV453155.1 | 1242808 | 19-scf00458 | 19 |
| AX-158292825 | 23 | 32.198 | KV453155.1 | 1469930 | 19-scf00458 | 19 |
| AX-157752061 | 23 | 32.211 | KV453155.1 | 411533  | 19-scf00458 | 19 |
| AX-157719653 | 23 | 32.217 | KV453155.1 | 411951  | 19-scf00458 | 19 |
| AX-157723372 | 23 | 32.234 | KV453155.1 | 457154  | 19-scf00458 | 19 |
| AX-158291911 | 23 | 32.247 | KV453155.1 | 371104  | 19-scf00458 | 19 |
| AX-158291932 | 23 | 32.247 | KV453155.1 | 391463  | 19-scf00458 | 19 |
| AX-158291953 | 23 | 32.247 | KV453155.1 | 424221  | 19-scf00458 | 19 |
| AX-157725873 | 23 | 32.247 | KV453155.1 | 466978  | 19-scf00458 | 19 |
| AX-158292125 | 23 | 32.247 | KV453155.1 | 609311  | 19-scf00458 | 19 |
| AX-158292197 | 23 | 32.247 | KV453155.1 | 688451  | 19-scf00458 | 19 |
| AX-158292224 | 23 | 32.247 | KV453155.1 | 721342  | 19-scf00458 | 19 |
| AX-158292228 | 23 | 32.247 | KV453155.1 | 730408  | 19-scf00458 | 19 |
| AX-158292238 | 23 | 32.247 | KV453155.1 | 754774  | 19-scf00458 | 19 |
| AX-158292243 | 23 | 32.247 | KV453155.1 | 758836  | 19-scf00458 | 19 |
| AX-158292280 | 23 | 32.247 | KV453155.1 | 798201  | 19-scf00458 | 19 |
| AX-158292318 | 23 | 32.247 | KV453155.1 | 842230  | 19-scf00458 | 19 |
| AX-158292343 | 23 | 32.247 | KV453155.1 | 878863  | 19-scf00458 | 19 |
| AX-158292354 | 23 | 32.247 | KV453155.1 | 889978  | 19-scf00458 | 19 |
| AX-158292365 | 23 | 32.247 | KV453155.1 | 900378  | 19-scf00458 | 19 |
| AX-158292392 | 23 | 32.247 | KV453155.1 | 952510  | 19-scf00458 | 19 |
| AX-158292408 | 23 | 32.247 | KV453155.1 | 969847  | 19-scf00458 | 19 |
| AX-158292416 | 23 | 32.247 | KV453155.1 | 976446  | 19-scf00458 | 19 |
| AX-158292435 | 23 | 32.247 | KV453155.1 | 998785  | 19-scf00458 | 19 |
| AX-158292448 | 23 | 32.247 | KV453155.1 | 1011836 | 19-scf00458 | 19 |
| AX-158292457 | 23 | 32.247 | KV453155.1 | 1021263 | 19-scf00458 | 19 |
| AX-158292471 | 23 | 32.247 | KV453155.1 | 1029543 | 19-scf00458 | 19 |
| AX-158292475 | 23 | 32.247 | KV453155.1 | 1033999 | 19-scf00458 | 19 |
| AX-158292480 | 23 | 32.247 | KV453155.1 | 1044793 | 19-scf00458 | 19 |
| AX-158292490 | 23 | 32.247 | KV453155.1 | 1059165 | 19-scf00458 | 19 |
| AX-158292518 | 23 | 32.247 | KV453155.1 | 1086081 | 19-scf00458 | 19 |
| AX-158292543 | 23 | 32.247 | KV453155.1 | 1119144 | 19-scf00458 | 19 |
| AX-158292558 | 23 | 32.247 | KV453155.1 | 1141297 | 19-scf00458 | 19 |
| AX-158292564 | 23 | 32.247 | KV453155.1 | 1149434 | 19-scf00458 | 19 |

|              |    |        |             |         |             |    |
|--------------|----|--------|-------------|---------|-------------|----|
| AX-158292591 | 23 | 32.247 | KV453155.1  | 1172968 | 19-scf00458 | 19 |
| AX-158292645 | 23 | 32.247 | KV453155.1  | 1234427 | 19-scf00458 | 19 |
| AX-158292673 | 23 | 32.247 | KV453155.1  | 1262565 | 19-scf00458 | 19 |
| AX-158292685 | 23 | 32.247 | KV453155.1  | 1280327 | 19-scf00458 | 19 |
| AX-158292688 | 23 | 32.247 | KV453155.1  | 1285083 | 19-scf00458 | 19 |
| AX-157714636 | 23 | 32.247 | KV453155.1  | 1287834 | 19-scf00458 | 19 |
| AX-158292691 | 23 | 32.247 | KV453155.1  | 1289632 | 19-scf00458 | 19 |
| AX-158292697 | 23 | 32.247 | KV453155.1  | 1296774 | 19-scf00458 | 19 |
| AX-157742033 | 23 | 32.247 | KV453155.1  | 1353578 | 19-scf00458 | 19 |
| AX-158292767 | 23 | 32.247 | KV453155.1  | 1378664 | 19-scf00458 | 19 |
| AX-157775432 | 23 | 32.247 | KV453155.1  | 1408275 | 19-scf00458 | 19 |
| AX-158292788 | 23 | 32.247 | KV453155.1  | 1411401 | 19-scf00458 | 19 |
| AX-158292791 | 23 | 32.247 | KV453155.1  | 1417936 | 19-scf00458 | 19 |
| AX-157713812 | 23 | 32.247 | KV453155.1  | 1459488 | 19-scf00458 | 19 |
| AX-158292826 | 23 | 32.247 | KV453155.1  | 1470335 | 19-scf00458 | 19 |
| AX-158292843 | 23 | 32.247 | KV453155.1  | 1491951 | 19-scf00458 | 19 |
| AX-158292860 | 23 | 32.247 | KV453155.1  | 1523629 | 19-scf00458 | 19 |
| AX-158293070 | 23 | 32.247 | KV453155.1  | 1724050 | 19-scf00458 | 19 |
| AX-157845668 | 23 | 32.247 | KV453155.1  | 1731017 | 19-scf00458 | 19 |
| AX-157741120 | 23 | 32.247 | KV453155.1  | 1731771 | 19-scf00458 | 19 |
| AX-158293273 | 23 | 32.247 | KV453155.1  | 1951917 | 19-scf00458 | 19 |
| AX-158293274 | 23 | 32.247 | KV453155.1  | 1952241 | 19-scf00458 | 19 |
| AX-158293500 | 23 | 32.247 | KV453155.1  | 2177741 | 19-scf00458 | 19 |
| AX-157703397 | 23 | 32.247 | DX098054.1  | 183     | 19-scf00458 | UN |
| AX-157688863 | 23 | 32.247 | 3ML01027274 | 820     | scf02880_1  | UN |
| AX-158292005 | 23 | 32.263 | KV453155.1  | 478123  | 19-scf00458 | 19 |
| AX-158292009 | 23 | 32.299 | KV453155.1  | 486464  | 19-scf00458 | 19 |
| AX-158292010 | 23 | 32.337 | KV453155.1  | 487334  | 19-scf00458 | 19 |
| AX-158292018 | 23 | 32.373 | KV453155.1  | 496802  | 19-scf00458 | 19 |
| AX-158292022 | 23 | 32.414 | KV453155.1  | 498200  | 19-scf00458 | 19 |
| AX-158291666 | 23 | 32.45  | KV453155.1  | 36805   | 19-scf00458 | 19 |
| AX-158291773 | 23 | 32.45  | KV453155.1  | 166899  | 19-scf00458 | 19 |
| AX-158291836 | 23 | 32.45  | KV453155.1  | 244461  | 19-scf00458 | 19 |
| AX-158291875 | 23 | 32.45  | KV453155.1  | 318426  | 19-scf00458 | 19 |
| AX-158291876 | 23 | 32.45  | KV453155.1  | 320071  | 19-scf00458 | 19 |
| AX-157860217 | 23 | 32.45  | KV453155.1  | 320799  | 19-scf00458 | 19 |
| AX-158291877 | 23 | 32.45  | KV453155.1  | 322660  | 19-scf00458 | 19 |
| AX-157763068 | 23 | 32.45  | KV453155.1  | 323008  | 19-scf00458 | 19 |
| AX-157730966 | 23 | 32.45  | KV453155.1  | 323773  | 19-scf00458 | 19 |
| AX-157713927 | 23 | 32.45  | KV453155.1  | 324062  | 19-scf00458 | 19 |
| AX-157845617 | 23 | 32.45  | KV453155.1  | 324966  | 19-scf00458 | 19 |
| AX-157767449 | 23 | 32.45  | KV453155.1  | 327102  | 19-scf00458 | 19 |
| AX-158291880 | 23 | 32.45  | KV453155.1  | 327212  | 19-scf00458 | 19 |
| AX-158291881 | 23 | 32.45  | KV453155.1  | 328152  | 19-scf00458 | 19 |
| AX-158291887 | 23 | 32.45  | KV453155.1  | 346203  | 19-scf00458 | 19 |
| AX-158291893 | 23 | 32.45  | KV453155.1  | 352632  | 19-scf00458 | 19 |
| AX-157845618 | 23 | 32.45  | KV453155.1  | 355996  | 19-scf00458 | 19 |
| AX-158291928 | 23 | 32.45  | KV453155.1  | 385723  | 19-scf00458 | 19 |
| AX-158291938 | 23 | 32.45  | KV453155.1  | 397450  | 19-scf00458 | 19 |
| AX-158291939 | 23 | 32.45  | KV453155.1  | 400749  | 19-scf00458 | 19 |
| AX-158291944 | 23 | 32.45  | KV453155.1  | 415336  | 19-scf00458 | 19 |

|              |    |       |            |        |             |    |
|--------------|----|-------|------------|--------|-------------|----|
| AX-158291981 | 23 | 32.45 | KV453155.1 | 451361 | 19-scf00458 | 19 |
| AX-158291998 | 23 | 32.45 | KV453155.1 | 471237 | 19-scf00458 | 19 |
| AX-158292001 | 23 | 32.45 | KV453155.1 | 472793 | 19-scf00458 | 19 |
| AX-158292002 | 23 | 32.45 | KV453155.1 | 476653 | 19-scf00458 | 19 |
| AX-158292006 | 23 | 32.45 | KV453155.1 | 478790 | 19-scf00458 | 19 |
| AX-158292008 | 23 | 32.45 | KV453155.1 | 485911 | 19-scf00458 | 19 |
| AX-158292011 | 23 | 32.45 | KV453155.1 | 488288 | 19-scf00458 | 19 |
| AX-158292012 | 23 | 32.45 | KV453155.1 | 488926 | 19-scf00458 | 19 |
| AX-158292013 | 23 | 32.45 | KV453155.1 | 491902 | 19-scf00458 | 19 |
| AX-158292014 | 23 | 32.45 | KV453155.1 | 493045 | 19-scf00458 | 19 |
| AX-158292016 | 23 | 32.45 | KV453155.1 | 494840 | 19-scf00458 | 19 |
| AX-158292019 | 23 | 32.45 | KV453155.1 | 496976 | 19-scf00458 | 19 |
| AX-158292020 | 23 | 32.45 | KV453155.1 | 497434 | 19-scf00458 | 19 |
| AX-158381245 | 23 | 32.45 | KV453155.1 | 497559 | 19-scf00458 | 19 |
| AX-158292021 | 23 | 32.45 | KV453155.1 | 497961 | 19-scf00458 | 19 |
| AX-158292024 | 23 | 32.45 | KV453155.1 | 499458 | 19-scf00458 | 19 |
| AX-158292026 | 23 | 32.45 | KV453155.1 | 502569 | 19-scf00458 | 19 |
| AX-158292027 | 23 | 32.45 | KV453155.1 | 504692 | 19-scf00458 | 19 |
| AX-158292030 | 23 | 32.45 | KV453155.1 | 507202 | 19-scf00458 | 19 |
| AX-158292032 | 23 | 32.45 | KV453155.1 | 508451 | 19-scf00458 | 19 |
| AX-158292033 | 23 | 32.45 | KV453155.1 | 509160 | 19-scf00458 | 19 |
| AX-158292034 | 23 | 32.45 | KV453155.1 | 509533 | 19-scf00458 | 19 |
| AX-157756189 | 23 | 32.45 | KV453155.1 | 511206 | 19-scf00458 | 19 |
| AX-158292035 | 23 | 32.45 | KV453155.1 | 511953 | 19-scf00458 | 19 |
| AX-158292036 | 23 | 32.45 | KV453155.1 | 512738 | 19-scf00458 | 19 |
| AX-158292038 | 23 | 32.45 | KV453155.1 | 514920 | 19-scf00458 | 19 |
| AX-158292040 | 23 | 32.45 | KV453155.1 | 518157 | 19-scf00458 | 19 |
| AX-158292041 | 23 | 32.45 | KV453155.1 | 520208 | 19-scf00458 | 19 |
| AX-158292042 | 23 | 32.45 | KV453155.1 | 520560 | 19-scf00458 | 19 |
| AX-158292043 | 23 | 32.45 | KV453155.1 | 521280 | 19-scf00458 | 19 |
| AX-158292044 | 23 | 32.45 | KV453155.1 | 522838 | 19-scf00458 | 19 |
| AX-158292045 | 23 | 32.45 | KV453155.1 | 524746 | 19-scf00458 | 19 |
| AX-158292046 | 23 | 32.45 | KV453155.1 | 525238 | 19-scf00458 | 19 |
| AX-158292047 | 23 | 32.45 | KV453155.1 | 526650 | 19-scf00458 | 19 |
| AX-158292048 | 23 | 32.45 | KV453155.1 | 528408 | 19-scf00458 | 19 |
| AX-158292049 | 23 | 32.45 | KV453155.1 | 528715 | 19-scf00458 | 19 |
| AX-158292052 | 23 | 32.45 | KV453155.1 | 530722 | 19-scf00458 | 19 |
| AX-158292053 | 23 | 32.45 | KV453155.1 | 531584 | 19-scf00458 | 19 |
| AX-158292054 | 23 | 32.45 | KV453155.1 | 534100 | 19-scf00458 | 19 |
| AX-158292055 | 23 | 32.45 | KV453155.1 | 534873 | 19-scf00458 | 19 |
| AX-158292057 | 23 | 32.45 | KV453155.1 | 537595 | 19-scf00458 | 19 |
| AX-158292058 | 23 | 32.45 | KV453155.1 | 539084 | 19-scf00458 | 19 |
| AX-158292059 | 23 | 32.45 | KV453155.1 | 539598 | 19-scf00458 | 19 |
| AX-158292061 | 23 | 32.45 | KV453155.1 | 540595 | 19-scf00458 | 19 |
| AX-158292062 | 23 | 32.45 | KV453155.1 | 543604 | 19-scf00458 | 19 |
| AX-158292063 | 23 | 32.45 | KV453155.1 | 544365 | 19-scf00458 | 19 |
| AX-158292066 | 23 | 32.45 | KV453155.1 | 547190 | 19-scf00458 | 19 |
| AX-158292073 | 23 | 32.45 | KV453155.1 | 556377 | 19-scf00458 | 19 |
| AX-158292077 | 23 | 32.45 | KV453155.1 | 559221 | 19-scf00458 | 19 |
| AX-158292083 | 23 | 32.45 | KV453155.1 | 564322 | 19-scf00458 | 19 |
| AX-158292087 | 23 | 32.45 | KV453155.1 | 574045 | 19-scf00458 | 19 |

|              |    |       |            |        |             |    |
|--------------|----|-------|------------|--------|-------------|----|
| AX-157758224 | 23 | 32.45 | KV453155.1 | 575871 | 19-scf00458 | 19 |
| AX-158292090 | 23 | 32.45 | KV453155.1 | 577106 | 19-scf00458 | 19 |
| AX-158292100 | 23 | 32.45 | KV453155.1 | 584843 | 19-scf00458 | 19 |
| AX-158292103 | 23 | 32.45 | KV453155.1 | 588415 | 19-scf00458 | 19 |
| AX-158292107 | 23 | 32.45 | KV453155.1 | 592297 | 19-scf00458 | 19 |
| AX-158292108 | 23 | 32.45 | KV453155.1 | 592671 | 19-scf00458 | 19 |
| AX-158292122 | 23 | 32.45 | KV453155.1 | 607357 | 19-scf00458 | 19 |
| AX-158292136 | 23 | 32.45 | KV453155.1 | 621147 | 19-scf00458 | 19 |
| AX-158292142 | 23 | 32.45 | KV453155.1 | 626384 | 19-scf00458 | 19 |
| AX-158292156 | 23 | 32.45 | KV453155.1 | 638540 | 19-scf00458 | 19 |
| AX-158292158 | 23 | 32.45 | KV453155.1 | 640055 | 19-scf00458 | 19 |
| AX-158292167 | 23 | 32.45 | KV453155.1 | 650188 | 19-scf00458 | 19 |
| AX-158292178 | 23 | 32.45 | KV453155.1 | 663390 | 19-scf00458 | 19 |
| AX-158292189 | 23 | 32.45 | KV453155.1 | 674047 | 19-scf00458 | 19 |
| AX-158292203 | 23 | 32.45 | KV453155.1 | 694027 | 19-scf00458 | 19 |
| AX-158292205 | 23 | 32.45 | KV453155.1 | 695608 | 19-scf00458 | 19 |
| AX-158292219 | 23 | 32.45 | KV453155.1 | 714619 | 19-scf00458 | 19 |
| AX-158292221 | 23 | 32.45 | KV453155.1 | 717317 | 19-scf00458 | 19 |
| AX-157715297 | 23 | 32.45 | KV453155.1 | 720609 | 19-scf00458 | 19 |
| AX-158292230 | 23 | 32.45 | KV453155.1 | 732963 | 19-scf00458 | 19 |
| AX-157845619 | 23 | 32.45 | KV453155.1 | 733531 | 19-scf00458 | 19 |
| AX-158292234 | 23 | 32.45 | KV453155.1 | 740188 | 19-scf00458 | 19 |
| AX-158292235 | 23 | 32.45 | KV453155.1 | 745748 | 19-scf00458 | 19 |
| AX-158292249 | 23 | 32.45 | KV453155.1 | 762467 | 19-scf00458 | 19 |
| AX-158292254 | 23 | 32.45 | KV453155.1 | 769858 | 19-scf00458 | 19 |
| AX-158292257 | 23 | 32.45 | KV453155.1 | 773924 | 19-scf00458 | 19 |
| AX-158292262 | 23 | 32.45 | KV453155.1 | 781816 | 19-scf00458 | 19 |
| AX-157719515 | 23 | 32.45 | KV453155.1 | 782410 | 19-scf00458 | 19 |
| AX-158292267 | 23 | 32.45 | KV453155.1 | 786673 | 19-scf00458 | 19 |
| AX-158292273 | 23 | 32.45 | KV453155.1 | 789996 | 19-scf00458 | 19 |
| AX-158292284 | 23 | 32.45 | KV453155.1 | 803146 | 19-scf00458 | 19 |
| AX-158292285 | 23 | 32.45 | KV453155.1 | 803545 | 19-scf00458 | 19 |
| AX-158417338 | 23 | 32.45 | KV453155.1 | 816562 | 19-scf00458 | 19 |
| AX-158417339 | 23 | 32.45 | KV453155.1 | 817851 | 19-scf00458 | 19 |
| AX-158292291 | 23 | 32.45 | KV453155.1 | 817889 | 19-scf00458 | 19 |
| AX-158292298 | 23 | 32.45 | KV453155.1 | 823840 | 19-scf00458 | 19 |
| AX-158292305 | 23 | 32.45 | KV453155.1 | 831177 | 19-scf00458 | 19 |
| AX-158292308 | 23 | 32.45 | KV453155.1 | 835280 | 19-scf00458 | 19 |
| AX-158292313 | 23 | 32.45 | KV453155.1 | 839032 | 19-scf00458 | 19 |
| AX-158292315 | 23 | 32.45 | KV453155.1 | 840619 | 19-scf00458 | 19 |
| AX-158292316 | 23 | 32.45 | KV453155.1 | 840913 | 19-scf00458 | 19 |
| AX-158292324 | 23 | 32.45 | KV453155.1 | 857172 | 19-scf00458 | 19 |
| AX-158419584 | 23 | 32.45 | KV453155.1 | 857817 | 19-scf00458 | 19 |
| AX-158292333 | 23 | 32.45 | KV453155.1 | 864970 | 19-scf00458 | 19 |
| AX-158292342 | 23 | 32.45 | KV453155.1 | 878014 | 19-scf00458 | 19 |
| AX-158292345 | 23 | 32.45 | KV453155.1 | 880910 | 19-scf00458 | 19 |
| AX-158292346 | 23 | 32.45 | KV453155.1 | 881948 | 19-scf00458 | 19 |
| AX-158292349 | 23 | 32.45 | KV453155.1 | 887039 | 19-scf00458 | 19 |
| AX-158292351 | 23 | 32.45 | KV453155.1 | 887912 | 19-scf00458 | 19 |
| AX-158292357 | 23 | 32.45 | KV453155.1 | 894023 | 19-scf00458 | 19 |
| AX-158292362 | 23 | 32.45 | KV453155.1 | 896950 | 19-scf00458 | 19 |

|              |    |       |            |         |             |    |
|--------------|----|-------|------------|---------|-------------|----|
| AX-158292363 | 23 | 32.45 | KV453155.1 | 897599  | 19-scf00458 | 19 |
| AX-158417342 | 23 | 32.45 | KV453155.1 | 898557  | 19-scf00458 | 19 |
| AX-158292366 | 23 | 32.45 | KV453155.1 | 900731  | 19-scf00458 | 19 |
| AX-158292368 | 23 | 32.45 | KV453155.1 | 902474  | 19-scf00458 | 19 |
| AX-158292370 | 23 | 32.45 | KV453155.1 | 903151  | 19-scf00458 | 19 |
| AX-158292371 | 23 | 32.45 | KV453155.1 | 903629  | 19-scf00458 | 19 |
| AX-157756240 | 23 | 32.45 | KV453155.1 | 923388  | 19-scf00458 | 19 |
| AX-158292376 | 23 | 32.45 | KV453155.1 | 924295  | 19-scf00458 | 19 |
| AX-158292378 | 23 | 32.45 | KV453155.1 | 925652  | 19-scf00458 | 19 |
| AX-158292397 | 23 | 32.45 | KV453155.1 | 955409  | 19-scf00458 | 19 |
| AX-158292398 | 23 | 32.45 | KV453155.1 | 955764  | 19-scf00458 | 19 |
| AX-158292403 | 23 | 32.45 | KV453155.1 | 964777  | 19-scf00458 | 19 |
| AX-158292405 | 23 | 32.45 | KV453155.1 | 966497  | 19-scf00458 | 19 |
| AX-158292428 | 23 | 32.45 | KV453155.1 | 990447  | 19-scf00458 | 19 |
| AX-158292430 | 23 | 32.45 | KV453155.1 | 991503  | 19-scf00458 | 19 |
| AX-158292453 | 23 | 32.45 | KV453155.1 | 1017868 | 19-scf00458 | 19 |
| AX-158292455 | 23 | 32.45 | KV453155.1 | 1019201 | 19-scf00458 | 19 |
| AX-158292464 | 23 | 32.45 | KV453155.1 | 1026372 | 19-scf00458 | 19 |
| AX-158292474 | 23 | 32.45 | KV453155.1 | 1033169 | 19-scf00458 | 19 |
| AX-158292478 | 23 | 32.45 | KV453155.1 | 1038484 | 19-scf00458 | 19 |
| AX-157756583 | 23 | 32.45 | KV453155.1 | 1043401 | 19-scf00458 | 19 |
| AX-158292484 | 23 | 32.45 | KV453155.1 | 1051505 | 19-scf00458 | 19 |
| AX-157741117 | 23 | 32.45 | KV453155.1 | 1052038 | 19-scf00458 | 19 |
| AX-158292485 | 23 | 32.45 | KV453155.1 | 1054525 | 19-scf00458 | 19 |
| AX-158292486 | 23 | 32.45 | KV453155.1 | 1054979 | 19-scf00458 | 19 |
| AX-158292492 | 23 | 32.45 | KV453155.1 | 1063472 | 19-scf00458 | 19 |
| AX-158292497 | 23 | 32.45 | KV453155.1 | 1066107 | 19-scf00458 | 19 |
| AX-158292504 | 23 | 32.45 | KV453155.1 | 1071025 | 19-scf00458 | 19 |
| AX-158292513 | 23 | 32.45 | KV453155.1 | 1082001 | 19-scf00458 | 19 |
| AX-157726702 | 23 | 32.45 | KV453155.1 | 1096694 | 19-scf00458 | 19 |
| AX-158292532 | 23 | 32.45 | KV453155.1 | 1109399 | 19-scf00458 | 19 |
| AX-158292536 | 23 | 32.45 | KV453155.1 | 1111716 | 19-scf00458 | 19 |
| AX-158292547 | 23 | 32.45 | KV453155.1 | 1129476 | 19-scf00458 | 19 |
| AX-158292548 | 23 | 32.45 | KV453155.1 | 1129943 | 19-scf00458 | 19 |
| AX-158292553 | 23 | 32.45 | KV453155.1 | 1134838 | 19-scf00458 | 19 |
| AX-158292556 | 23 | 32.45 | KV453155.1 | 1138551 | 19-scf00458 | 19 |
| AX-158292573 | 23 | 32.45 | KV453155.1 | 1158790 | 19-scf00458 | 19 |
| AX-158292575 | 23 | 32.45 | KV453155.1 | 1159858 | 19-scf00458 | 19 |
| AX-158292576 | 23 | 32.45 | KV453155.1 | 1160526 | 19-scf00458 | 19 |
| AX-158292577 | 23 | 32.45 | KV453155.1 | 1161572 | 19-scf00458 | 19 |
| AX-157753801 | 23 | 32.45 | KV453155.1 | 1162939 | 19-scf00458 | 19 |
| AX-158292589 | 23 | 32.45 | KV453155.1 | 1171370 | 19-scf00458 | 19 |
| AX-158292597 | 23 | 32.45 | KV453155.1 | 1179228 | 19-scf00458 | 19 |
| AX-158292604 | 23 | 32.45 | KV453155.1 | 1188249 | 19-scf00458 | 19 |
| AX-158292607 | 23 | 32.45 | KV453155.1 | 1190160 | 19-scf00458 | 19 |
| AX-158292611 | 23 | 32.45 | KV453155.1 | 1197796 | 19-scf00458 | 19 |
| AX-157772933 | 23 | 32.45 | KV453155.1 | 1201910 | 19-scf00458 | 19 |
| AX-158292622 | 23 | 32.45 | KV453155.1 | 1212613 | 19-scf00458 | 19 |
| AX-158292625 | 23 | 32.45 | KV453155.1 | 1218594 | 19-scf00458 | 19 |
| AX-158292629 | 23 | 32.45 | KV453155.1 | 1221239 | 19-scf00458 | 19 |
| AX-157845622 | 23 | 32.45 | KV453155.1 | 1225003 | 19-scf00458 | 19 |

|              |    |       |            |         |             |    |
|--------------|----|-------|------------|---------|-------------|----|
| AX-158292650 | 23 | 32.45 | KV453155.1 | 1238521 | 19-scf00458 | 19 |
| AX-158292667 | 23 | 32.45 | KV453155.1 | 1257547 | 19-scf00458 | 19 |
| AX-157845631 | 23 | 32.45 | KV453155.1 | 1257772 | 19-scf00458 | 19 |
| AX-158292679 | 23 | 32.45 | KV453155.1 | 1269293 | 19-scf00458 | 19 |
| AX-158292681 | 23 | 32.45 | KV453155.1 | 1270698 | 19-scf00458 | 19 |
| AX-157744605 | 23 | 32.45 | KV453155.1 | 1276616 | 19-scf00458 | 19 |
| AX-157845633 | 23 | 32.45 | KV453155.1 | 1288663 | 19-scf00458 | 19 |
| AX-158292694 | 23 | 32.45 | KV453155.1 | 1292206 | 19-scf00458 | 19 |
| AX-158292700 | 23 | 32.45 | KV453155.1 | 1300304 | 19-scf00458 | 19 |
| AX-157715296 | 23 | 32.45 | KV453155.1 | 1307819 | 19-scf00458 | 19 |
| AX-157845635 | 23 | 32.45 | KV453155.1 | 1312235 | 19-scf00458 | 19 |
| AX-157845636 | 23 | 32.45 | KV453155.1 | 1314261 | 19-scf00458 | 19 |
| AX-158292718 | 23 | 32.45 | KV453155.1 | 1320574 | 19-scf00458 | 19 |
| AX-158292719 | 23 | 32.45 | KV453155.1 | 1321237 | 19-scf00458 | 19 |
| AX-157714667 | 23 | 32.45 | KV453155.1 | 1322065 | 19-scf00458 | 19 |
| AX-158292724 | 23 | 32.45 | KV453155.1 | 1330813 | 19-scf00458 | 19 |
| AX-158292727 | 23 | 32.45 | KV453155.1 | 1332803 | 19-scf00458 | 19 |
| AX-157845639 | 23 | 32.45 | KV453155.1 | 1335711 | 19-scf00458 | 19 |
| AX-158292731 | 23 | 32.45 | KV453155.1 | 1335933 | 19-scf00458 | 19 |
| AX-157845640 | 23 | 32.45 | KV453155.1 | 1338761 | 19-scf00458 | 19 |
| AX-158292741 | 23 | 32.45 | KV453155.1 | 1349486 | 19-scf00458 | 19 |
| AX-158292753 | 23 | 32.45 | KV453155.1 | 1366307 | 19-scf00458 | 19 |
| AX-158292758 | 23 | 32.45 | KV453155.1 | 1370582 | 19-scf00458 | 19 |
| AX-158292759 | 23 | 32.45 | KV453155.1 | 1371737 | 19-scf00458 | 19 |
| AX-158292762 | 23 | 32.45 | KV453155.1 | 1373771 | 19-scf00458 | 19 |
| AX-158292766 | 23 | 32.45 | KV453155.1 | 1377932 | 19-scf00458 | 19 |
| AX-157774986 | 23 | 32.45 | KV453155.1 | 1380367 | 19-scf00458 | 19 |
| AX-158292768 | 23 | 32.45 | KV453155.1 | 1380564 | 19-scf00458 | 19 |
| AX-158292774 | 23 | 32.45 | KV453155.1 | 1385430 | 19-scf00458 | 19 |
| AX-157845648 | 23 | 32.45 | KV453155.1 | 1389609 | 19-scf00458 | 19 |
| AX-157715663 | 23 | 32.45 | KV453155.1 | 1427103 | 19-scf00458 | 19 |
| AX-158292802 | 23 | 32.45 | KV453155.1 | 1434697 | 19-scf00458 | 19 |
| AX-158292805 | 23 | 32.45 | KV453155.1 | 1438760 | 19-scf00458 | 19 |
| AX-158292811 | 23 | 32.45 | KV453155.1 | 1445933 | 19-scf00458 | 19 |
| AX-158292814 | 23 | 32.45 | KV453155.1 | 1450359 | 19-scf00458 | 19 |
| AX-158292815 | 23 | 32.45 | KV453155.1 | 1450930 | 19-scf00458 | 19 |
| AX-158292816 | 23 | 32.45 | KV453155.1 | 1451268 | 19-scf00458 | 19 |
| AX-158292819 | 23 | 32.45 | KV453155.1 | 1458106 | 19-scf00458 | 19 |
| AX-158292820 | 23 | 32.45 | KV453155.1 | 1459871 | 19-scf00458 | 19 |
| AX-157756082 | 23 | 32.45 | KV453155.1 | 1461171 | 19-scf00458 | 19 |
| AX-158292828 | 23 | 32.45 | KV453155.1 | 1471536 | 19-scf00458 | 19 |
| AX-158292831 | 23 | 32.45 | KV453155.1 | 1474876 | 19-scf00458 | 19 |
| AX-158292841 | 23 | 32.45 | KV453155.1 | 1491463 | 19-scf00458 | 19 |
| AX-158292842 | 23 | 32.45 | KV453155.1 | 1491523 | 19-scf00458 | 19 |
| AX-158292862 | 23 | 32.45 | KV453155.1 | 1527179 | 19-scf00458 | 19 |
| AX-158292871 | 23 | 32.45 | KV453155.1 | 1536095 | 19-scf00458 | 19 |
| AX-158292878 | 23 | 32.45 | KV453155.1 | 1543314 | 19-scf00458 | 19 |
| AX-158292885 | 23 | 32.45 | KV453155.1 | 1552065 | 19-scf00458 | 19 |
| AX-158292888 | 23 | 32.45 | KV453155.1 | 1558292 | 19-scf00458 | 19 |
| AX-158292893 | 23 | 32.45 | KV453155.1 | 1565510 | 19-scf00458 | 19 |
| AX-158292896 | 23 | 32.45 | KV453155.1 | 1568642 | 19-scf00458 | 19 |

|              |    |       |            |         |             |    |
|--------------|----|-------|------------|---------|-------------|----|
| AX-158292910 | 23 | 32.45 | KV453155.1 | 1582493 | 19-scf00458 | 19 |
| AX-157722958 | 23 | 32.45 | KV453155.1 | 1597872 | 19-scf00458 | 19 |
| AX-158292934 | 23 | 32.45 | KV453155.1 | 1603348 | 19-scf00458 | 19 |
| AX-158292941 | 23 | 32.45 | KV453155.1 | 1611517 | 19-scf00458 | 19 |
| AX-158292943 | 23 | 32.45 | KV453155.1 | 1612619 | 19-scf00458 | 19 |
| AX-158292946 | 23 | 32.45 | KV453155.1 | 1614578 | 19-scf00458 | 19 |
| AX-158292948 | 23 | 32.45 | KV453155.1 | 1616253 | 19-scf00458 | 19 |
| AX-158292956 | 23 | 32.45 | KV453155.1 | 1628656 | 19-scf00458 | 19 |
| AX-158381252 | 23 | 32.45 | KV453155.1 | 1628838 | 19-scf00458 | 19 |
| AX-158292963 | 23 | 32.45 | KV453155.1 | 1634715 | 19-scf00458 | 19 |
| AX-158292964 | 23 | 32.45 | KV453155.1 | 1635306 | 19-scf00458 | 19 |
| AX-158292965 | 23 | 32.45 | KV453155.1 | 1636395 | 19-scf00458 | 19 |
| AX-158292967 | 23 | 32.45 | KV453155.1 | 1638318 | 19-scf00458 | 19 |
| AX-157721046 | 23 | 32.45 | KV453155.1 | 1652205 | 19-scf00458 | 19 |
| AX-158292979 | 23 | 32.45 | KV453155.1 | 1654697 | 19-scf00458 | 19 |
| AX-158292980 | 23 | 32.45 | KV453155.1 | 1655335 | 19-scf00458 | 19 |
| AX-158292990 | 23 | 32.45 | KV453155.1 | 1662542 | 19-scf00458 | 19 |
| AX-158292991 | 23 | 32.45 | KV453155.1 | 1663587 | 19-scf00458 | 19 |
| AX-158293000 | 23 | 32.45 | KV453155.1 | 1672766 | 19-scf00458 | 19 |
| AX-158293004 | 23 | 32.45 | KV453155.1 | 1675850 | 19-scf00458 | 19 |
| AX-158293009 | 23 | 32.45 | KV453155.1 | 1679862 | 19-scf00458 | 19 |
| AX-158293011 | 23 | 32.45 | KV453155.1 | 1683235 | 19-scf00458 | 19 |
| AX-158293018 | 23 | 32.45 | KV453155.1 | 1690427 | 19-scf00458 | 19 |
| AX-158293031 | 23 | 32.45 | KV453155.1 | 1699484 | 19-scf00458 | 19 |
| AX-158293034 | 23 | 32.45 | KV453155.1 | 1702067 | 19-scf00458 | 19 |
| AX-158293036 | 23 | 32.45 | KV453155.1 | 1702620 | 19-scf00458 | 19 |
| AX-158293041 | 23 | 32.45 | KV453155.1 | 1705664 | 19-scf00458 | 19 |
| AX-158293043 | 23 | 32.45 | KV453155.1 | 1707196 | 19-scf00458 | 19 |
| AX-158293048 | 23 | 32.45 | KV453155.1 | 1710064 | 19-scf00458 | 19 |
| AX-158293049 | 23 | 32.45 | KV453155.1 | 1710544 | 19-scf00458 | 19 |
| AX-158293050 | 23 | 32.45 | KV453155.1 | 1710847 | 19-scf00458 | 19 |
| AX-158293051 | 23 | 32.45 | KV453155.1 | 1711035 | 19-scf00458 | 19 |
| AX-158293052 | 23 | 32.45 | KV453155.1 | 1712751 | 19-scf00458 | 19 |
| AX-158293053 | 23 | 32.45 | KV453155.1 | 1714001 | 19-scf00458 | 19 |
| AX-158293054 | 23 | 32.45 | KV453155.1 | 1714320 | 19-scf00458 | 19 |
| AX-158293056 | 23 | 32.45 | KV453155.1 | 1714955 | 19-scf00458 | 19 |
| AX-158417354 | 23 | 32.45 | KV453155.1 | 1715174 | 19-scf00458 | 19 |
| AX-158293057 | 23 | 32.45 | KV453155.1 | 1715558 | 19-scf00458 | 19 |
| AX-158293059 | 23 | 32.45 | KV453155.1 | 1716617 | 19-scf00458 | 19 |
| AX-158293060 | 23 | 32.45 | KV453155.1 | 1717784 | 19-scf00458 | 19 |
| AX-157754999 | 23 | 32.45 | KV453155.1 | 1717882 | 19-scf00458 | 19 |
| AX-158411684 | 23 | 32.45 | KV453155.1 | 1719254 | 19-scf00458 | 19 |
| AX-158293063 | 23 | 32.45 | KV453155.1 | 1720737 | 19-scf00458 | 19 |
| AX-158293064 | 23 | 32.45 | KV453155.1 | 1720980 | 19-scf00458 | 19 |
| AX-158293066 | 23 | 32.45 | KV453155.1 | 1721550 | 19-scf00458 | 19 |
| AX-157845664 | 23 | 32.45 | KV453155.1 | 1721899 | 19-scf00458 | 19 |
| AX-158293067 | 23 | 32.45 | KV453155.1 | 1722282 | 19-scf00458 | 19 |
| AX-157845665 | 23 | 32.45 | KV453155.1 | 1722685 | 19-scf00458 | 19 |
| AX-158293068 | 23 | 32.45 | KV453155.1 | 1723194 | 19-scf00458 | 19 |
| AX-158293069 | 23 | 32.45 | KV453155.1 | 1723742 | 19-scf00458 | 19 |
| AX-158293071 | 23 | 32.45 | KV453155.1 | 1724323 | 19-scf00458 | 19 |



|              |    |       |            |         |             |    |
|--------------|----|-------|------------|---------|-------------|----|
| AX-158293072 | 23 | 32.45 | KV453155.1 | 1724951 | 19-scf00458 | 19 |
| AX-158293073 | 23 | 32.45 | KV453155.1 | 1725466 | 19-scf00458 | 19 |
| AX-158293074 | 23 | 32.45 | KV453155.1 | 1726043 | 19-scf00458 | 19 |
| AX-157845667 | 23 | 32.45 | KV453155.1 | 1726730 | 19-scf00458 | 19 |
| AX-157727941 | 23 | 32.45 | KV453155.1 | 1727173 | 19-scf00458 | 19 |
| AX-157774262 | 23 | 32.45 | KV453155.1 | 1727951 | 19-scf00458 | 19 |
| AX-158293075 | 23 | 32.45 | KV453155.1 | 1728399 | 19-scf00458 | 19 |
| AX-158293076 | 23 | 32.45 | KV453155.1 | 1728707 | 19-scf00458 | 19 |
| AX-158293077 | 23 | 32.45 | KV453155.1 | 1729308 | 19-scf00458 | 19 |
| AX-158293078 | 23 | 32.45 | KV453155.1 | 1729741 | 19-scf00458 | 19 |
| AX-158293079 | 23 | 32.45 | KV453155.1 | 1730244 | 19-scf00458 | 19 |
| AX-158293080 | 23 | 32.45 | KV453155.1 | 1730603 | 19-scf00458 | 19 |
| AX-158293082 | 23 | 32.45 | KV453155.1 | 1732742 | 19-scf00458 | 19 |
| AX-158293084 | 23 | 32.45 | KV453155.1 | 1733875 | 19-scf00458 | 19 |
| AX-158293087 | 23 | 32.45 | KV453155.1 | 1736953 | 19-scf00458 | 19 |
| AX-158293088 | 23 | 32.45 | KV453155.1 | 1738096 | 19-scf00458 | 19 |
| AX-158293089 | 23 | 32.45 | KV453155.1 | 1739106 | 19-scf00458 | 19 |
| AX-158293092 | 23 | 32.45 | KV453155.1 | 1741084 | 19-scf00458 | 19 |
| AX-158293093 | 23 | 32.45 | KV453155.1 | 1742895 | 19-scf00458 | 19 |
| AX-157724168 | 23 | 32.45 | KV453155.1 | 1744445 | 19-scf00458 | 19 |
| AX-158293096 | 23 | 32.45 | KV453155.1 | 1744574 | 19-scf00458 | 19 |
| AX-158293097 | 23 | 32.45 | KV453155.1 | 1746819 | 19-scf00458 | 19 |
| AX-158293098 | 23 | 32.45 | KV453155.1 | 1747378 | 19-scf00458 | 19 |
| AX-158293101 | 23 | 32.45 | KV453155.1 | 1748691 | 19-scf00458 | 19 |
| AX-158293102 | 23 | 32.45 | KV453155.1 | 1749054 | 19-scf00458 | 19 |
| AX-158411685 | 23 | 32.45 | KV453155.1 | 1750317 | 19-scf00458 | 19 |
| AX-158293103 | 23 | 32.45 | KV453155.1 | 1750611 | 19-scf00458 | 19 |
| AX-158293104 | 23 | 32.45 | KV453155.1 | 1751799 | 19-scf00458 | 19 |
| AX-157773133 | 23 | 32.45 | KV453155.1 | 1752774 | 19-scf00458 | 19 |
| AX-158293105 | 23 | 32.45 | KV453155.1 | 1753154 | 19-scf00458 | 19 |
| AX-158293106 | 23 | 32.45 | KV453155.1 | 1753677 | 19-scf00458 | 19 |
| AX-158293107 | 23 | 32.45 | KV453155.1 | 1754627 | 19-scf00458 | 19 |
| AX-157753523 | 23 | 32.45 | KV453155.1 | 1755181 | 19-scf00458 | 19 |
| AX-158293108 | 23 | 32.45 | KV453155.1 | 1755649 | 19-scf00458 | 19 |
| AX-158293109 | 23 | 32.45 | KV453155.1 | 1756270 | 19-scf00458 | 19 |
| AX-158293111 | 23 | 32.45 | KV453155.1 | 1757001 | 19-scf00458 | 19 |
| AX-158293112 | 23 | 32.45 | KV453155.1 | 1757607 | 19-scf00458 | 19 |
| AX-158293113 | 23 | 32.45 | KV453155.1 | 1758121 | 19-scf00458 | 19 |
| AX-158293114 | 23 | 32.45 | KV453155.1 | 1759749 | 19-scf00458 | 19 |
| AX-158293116 | 23 | 32.45 | KV453155.1 | 1760581 | 19-scf00458 | 19 |
| AX-157845669 | 23 | 32.45 | KV453155.1 | 1761401 | 19-scf00458 | 19 |
| AX-158293117 | 23 | 32.45 | KV453155.1 | 1762247 | 19-scf00458 | 19 |
| AX-158293118 | 23 | 32.45 | KV453155.1 | 1762782 | 19-scf00458 | 19 |
| AX-158293119 | 23 | 32.45 | KV453155.1 | 1763468 | 19-scf00458 | 19 |
| AX-158293120 | 23 | 32.45 | KV453155.1 | 1763838 | 19-scf00458 | 19 |
| AX-158293121 | 23 | 32.45 | KV453155.1 | 1764588 | 19-scf00458 | 19 |
| AX-158293125 | 23 | 32.45 | KV453155.1 | 1765921 | 19-scf00458 | 19 |
| AX-158293127 | 23 | 32.45 | KV453155.1 | 1772494 | 19-scf00458 | 19 |
| AX-158293128 | 23 | 32.45 | KV453155.1 | 1772897 | 19-scf00458 | 19 |
| AX-158293129 | 23 | 32.45 | KV453155.1 | 1774533 | 19-scf00458 | 19 |
| AX-158293130 | 23 | 32.45 | KV453155.1 | 1774714 | 19-scf00458 | 19 |

|              |    |       |            |         |             |    |
|--------------|----|-------|------------|---------|-------------|----|
| AX-158293131 | 23 | 32.45 | KV453155.1 | 1775633 | 19-scf00458 | 19 |
| AX-158293132 | 23 | 32.45 | KV453155.1 | 1776051 | 19-scf00458 | 19 |
| AX-158293133 | 23 | 32.45 | KV453155.1 | 1776206 | 19-scf00458 | 19 |
| AX-158293134 | 23 | 32.45 | KV453155.1 | 1777134 | 19-scf00458 | 19 |
| AX-158419592 | 23 | 32.45 | KV453155.1 | 1777629 | 19-scf00458 | 19 |
| AX-157756724 | 23 | 32.45 | KV453155.1 | 1779526 | 19-scf00458 | 19 |
| AX-158293135 | 23 | 32.45 | KV453155.1 | 1781024 | 19-scf00458 | 19 |
| AX-158293136 | 23 | 32.45 | KV453155.1 | 1781541 | 19-scf00458 | 19 |
| AX-158293137 | 23 | 32.45 | KV453155.1 | 1782113 | 19-scf00458 | 19 |
| AX-158293138 | 23 | 32.45 | KV453155.1 | 1782550 | 19-scf00458 | 19 |
| AX-158293139 | 23 | 32.45 | KV453155.1 | 1782911 | 19-scf00458 | 19 |
| AX-158293140 | 23 | 32.45 | KV453155.1 | 1783291 | 19-scf00458 | 19 |
| AX-158293142 | 23 | 32.45 | KV453155.1 | 1783773 | 19-scf00458 | 19 |
| AX-158293146 | 23 | 32.45 | KV453155.1 | 1785633 | 19-scf00458 | 19 |
| AX-157721475 | 23 | 32.45 | KV453155.1 | 1786714 | 19-scf00458 | 19 |
| AX-158293147 | 23 | 32.45 | KV453155.1 | 1786997 | 19-scf00458 | 19 |
| AX-158293148 | 23 | 32.45 | KV453155.1 | 1787424 | 19-scf00458 | 19 |
| AX-158293151 | 23 | 32.45 | KV453155.1 | 1790378 | 19-scf00458 | 19 |
| AX-158293152 | 23 | 32.45 | KV453155.1 | 1791275 | 19-scf00458 | 19 |
| AX-158293153 | 23 | 32.45 | KV453155.1 | 1791705 | 19-scf00458 | 19 |
| AX-158293154 | 23 | 32.45 | KV453155.1 | 1792044 | 19-scf00458 | 19 |
| AX-158293155 | 23 | 32.45 | KV453155.1 | 1793088 | 19-scf00458 | 19 |
| AX-158293156 | 23 | 32.45 | KV453155.1 | 1793818 | 19-scf00458 | 19 |
| AX-158293157 | 23 | 32.45 | KV453155.1 | 1794375 | 19-scf00458 | 19 |
| AX-158293160 | 23 | 32.45 | KV453155.1 | 1799876 | 19-scf00458 | 19 |
| AX-157845673 | 23 | 32.45 | KV453155.1 | 1804351 | 19-scf00458 | 19 |
| AX-157845674 | 23 | 32.45 | KV453155.1 | 1805485 | 19-scf00458 | 19 |
| AX-158293162 | 23 | 32.45 | KV453155.1 | 1807813 | 19-scf00458 | 19 |
| AX-157845676 | 23 | 32.45 | KV453155.1 | 1809555 | 19-scf00458 | 19 |
| AX-158293164 | 23 | 32.45 | KV453155.1 | 1809745 | 19-scf00458 | 19 |
| AX-157721083 | 23 | 32.45 | KV453155.1 | 1812008 | 19-scf00458 | 19 |
| AX-158293165 | 23 | 32.45 | KV453155.1 | 1813156 | 19-scf00458 | 19 |
| AX-158293166 | 23 | 32.45 | KV453155.1 | 1814426 | 19-scf00458 | 19 |
| AX-157845677 | 23 | 32.45 | KV453155.1 | 1815702 | 19-scf00458 | 19 |
| AX-157845678 | 23 | 32.45 | KV453155.1 | 1818286 | 19-scf00458 | 19 |
| AX-158293168 | 23 | 32.45 | KV453155.1 | 1819157 | 19-scf00458 | 19 |
| AX-157743678 | 23 | 32.45 | KV453155.1 | 1819288 | 19-scf00458 | 19 |
| AX-158293169 | 23 | 32.45 | KV453155.1 | 1819869 | 19-scf00458 | 19 |
| AX-157721195 | 23 | 32.45 | KV453155.1 | 1820877 | 19-scf00458 | 19 |
| AX-158293170 | 23 | 32.45 | KV453155.1 | 1822028 | 19-scf00458 | 19 |
| AX-158293171 | 23 | 32.45 | KV453155.1 | 1822311 | 19-scf00458 | 19 |
| AX-157845680 | 23 | 32.45 | KV453155.1 | 1823557 | 19-scf00458 | 19 |
| AX-157743597 | 23 | 32.45 | KV453155.1 | 1823648 | 19-scf00458 | 19 |
| AX-158293173 | 23 | 32.45 | KV453155.1 | 1825382 | 19-scf00458 | 19 |
| AX-158293174 | 23 | 32.45 | KV453155.1 | 1826026 | 19-scf00458 | 19 |
| AX-158293175 | 23 | 32.45 | KV453155.1 | 1826309 | 19-scf00458 | 19 |
| AX-158293176 | 23 | 32.45 | KV453155.1 | 1827313 | 19-scf00458 | 19 |
| AX-157742625 | 23 | 32.45 | KV453155.1 | 1827548 | 19-scf00458 | 19 |
| AX-158293177 | 23 | 32.45 | KV453155.1 | 1828166 | 19-scf00458 | 19 |
| AX-158293179 | 23 | 32.45 | KV453155.1 | 1829924 | 19-scf00458 | 19 |
| AX-158293180 | 23 | 32.45 | KV453155.1 | 1830357 | 19-scf00458 | 19 |

|              |    |       |            |         |             |    |
|--------------|----|-------|------------|---------|-------------|----|
| AX-158293181 | 23 | 32.45 | KV453155.1 | 1831179 | 19-scf00458 | 19 |
| AX-158293182 | 23 | 32.45 | KV453155.1 | 1832164 | 19-scf00458 | 19 |
| AX-157725937 | 23 | 32.45 | KV453155.1 | 1833674 | 19-scf00458 | 19 |
| AX-158293183 | 23 | 32.45 | KV453155.1 | 1834144 | 19-scf00458 | 19 |
| AX-158293184 | 23 | 32.45 | KV453155.1 | 1834479 | 19-scf00458 | 19 |
| AX-158293185 | 23 | 32.45 | KV453155.1 | 1834838 | 19-scf00458 | 19 |
| AX-158293186 | 23 | 32.45 | KV453155.1 | 1835466 | 19-scf00458 | 19 |
| AX-158293187 | 23 | 32.45 | KV453155.1 | 1836042 | 19-scf00458 | 19 |
| AX-158293188 | 23 | 32.45 | KV453155.1 | 1838168 | 19-scf00458 | 19 |
| AX-158293190 | 23 | 32.45 | KV453155.1 | 1844633 | 19-scf00458 | 19 |
| AX-158293191 | 23 | 32.45 | KV453155.1 | 1846519 | 19-scf00458 | 19 |
| AX-158293192 | 23 | 32.45 | KV453155.1 | 1852456 | 19-scf00458 | 19 |
| AX-158293193 | 23 | 32.45 | KV453155.1 | 1854233 | 19-scf00458 | 19 |
| AX-158293194 | 23 | 32.45 | KV453155.1 | 1854832 | 19-scf00458 | 19 |
| AX-158293195 | 23 | 32.45 | KV453155.1 | 1856707 | 19-scf00458 | 19 |
| AX-157845681 | 23 | 32.45 | KV453155.1 | 1856945 | 19-scf00458 | 19 |
| AX-158293196 | 23 | 32.45 | KV453155.1 | 1857578 | 19-scf00458 | 19 |
| AX-158293197 | 23 | 32.45 | KV453155.1 | 1857931 | 19-scf00458 | 19 |
| AX-157723681 | 23 | 32.45 | KV453155.1 | 1858112 | 19-scf00458 | 19 |
| AX-158293198 | 23 | 32.45 | KV453155.1 | 1858843 | 19-scf00458 | 19 |
| AX-158293200 | 23 | 32.45 | KV453155.1 | 1859811 | 19-scf00458 | 19 |
| AX-158293201 | 23 | 32.45 | KV453155.1 | 1859920 | 19-scf00458 | 19 |
| AX-158293202 | 23 | 32.45 | KV453155.1 | 1860388 | 19-scf00458 | 19 |
| AX-158293203 | 23 | 32.45 | KV453155.1 | 1863295 | 19-scf00458 | 19 |
| AX-158293204 | 23 | 32.45 | KV453155.1 | 1863781 | 19-scf00458 | 19 |
| AX-157721937 | 23 | 32.45 | KV453155.1 | 1863868 | 19-scf00458 | 19 |
| AX-158293206 | 23 | 32.45 | KV453155.1 | 1865115 | 19-scf00458 | 19 |
| AX-158293207 | 23 | 32.45 | KV453155.1 | 1866866 | 19-scf00458 | 19 |
| AX-158293208 | 23 | 32.45 | KV453155.1 | 1867549 | 19-scf00458 | 19 |
| AX-158293210 | 23 | 32.45 | KV453155.1 | 1869445 | 19-scf00458 | 19 |
| AX-158293211 | 23 | 32.45 | KV453155.1 | 1869623 | 19-scf00458 | 19 |
| AX-157845682 | 23 | 32.45 | KV453155.1 | 1869963 | 19-scf00458 | 19 |
| AX-158293212 | 23 | 32.45 | KV453155.1 | 1870384 | 19-scf00458 | 19 |
| AX-158293216 | 23 | 32.45 | KV453155.1 | 1873534 | 19-scf00458 | 19 |
| AX-158293218 | 23 | 32.45 | KV453155.1 | 1875395 | 19-scf00458 | 19 |
| AX-158293219 | 23 | 32.45 | KV453155.1 | 1879709 | 19-scf00458 | 19 |
| AX-158293220 | 23 | 32.45 | KV453155.1 | 1881600 | 19-scf00458 | 19 |
| AX-158293228 | 23 | 32.45 | KV453155.1 | 1886353 | 19-scf00458 | 19 |
| AX-158293229 | 23 | 32.45 | KV453155.1 | 1888698 | 19-scf00458 | 19 |
| AX-158293231 | 23 | 32.45 | KV453155.1 | 1891989 | 19-scf00458 | 19 |
| AX-158293234 | 23 | 32.45 | KV453155.1 | 1896903 | 19-scf00458 | 19 |
| AX-158293235 | 23 | 32.45 | KV453155.1 | 1898863 | 19-scf00458 | 19 |
| AX-158293236 | 23 | 32.45 | KV453155.1 | 1900686 | 19-scf00458 | 19 |
| AX-158293237 | 23 | 32.45 | KV453155.1 | 1901001 | 19-scf00458 | 19 |
| AX-158293238 | 23 | 32.45 | KV453155.1 | 1901550 | 19-scf00458 | 19 |
| AX-158293241 | 23 | 32.45 | KV453155.1 | 1905052 | 19-scf00458 | 19 |
| AX-158293242 | 23 | 32.45 | KV453155.1 | 1905813 | 19-scf00458 | 19 |
| AX-158293243 | 23 | 32.45 | KV453155.1 | 1906182 | 19-scf00458 | 19 |
| AX-158293248 | 23 | 32.45 | KV453155.1 | 1921136 | 19-scf00458 | 19 |
| AX-158293249 | 23 | 32.45 | KV453155.1 | 1922865 | 19-scf00458 | 19 |
| AX-158293250 | 23 | 32.45 | KV453155.1 | 1923513 | 19-scf00458 | 19 |

|              |    |       |            |         |             |    |
|--------------|----|-------|------------|---------|-------------|----|
| AX-158293251 | 23 | 32.45 | KV453155.1 | 1925349 | 19-scf00458 | 19 |
| AX-158293252 | 23 | 32.45 | KV453155.1 | 1929486 | 19-scf00458 | 19 |
| AX-158293253 | 23 | 32.45 | KV453155.1 | 1930101 | 19-scf00458 | 19 |
| AX-158293254 | 23 | 32.45 | KV453155.1 | 1930736 | 19-scf00458 | 19 |
| AX-158293255 | 23 | 32.45 | KV453155.1 | 1933600 | 19-scf00458 | 19 |
| AX-158293256 | 23 | 32.45 | KV453155.1 | 1934275 | 19-scf00458 | 19 |
| AX-158293257 | 23 | 32.45 | KV453155.1 | 1934917 | 19-scf00458 | 19 |
| AX-158293258 | 23 | 32.45 | KV453155.1 | 1935421 | 19-scf00458 | 19 |
| AX-158293259 | 23 | 32.45 | KV453155.1 | 1936295 | 19-scf00458 | 19 |
| AX-158293260 | 23 | 32.45 | KV453155.1 | 1938978 | 19-scf00458 | 19 |
| AX-158293261 | 23 | 32.45 | KV453155.1 | 1939725 | 19-scf00458 | 19 |
| AX-158293263 | 23 | 32.45 | KV453155.1 | 1942751 | 19-scf00458 | 19 |
| AX-158293264 | 23 | 32.45 | KV453155.1 | 1944382 | 19-scf00458 | 19 |
| AX-158293266 | 23 | 32.45 | KV453155.1 | 1947857 | 19-scf00458 | 19 |
| AX-158293267 | 23 | 32.45 | KV453155.1 | 1948252 | 19-scf00458 | 19 |
| AX-158293268 | 23 | 32.45 | KV453155.1 | 1948574 | 19-scf00458 | 19 |
| AX-158293269 | 23 | 32.45 | KV453155.1 | 1949248 | 19-scf00458 | 19 |
| AX-158293270 | 23 | 32.45 | KV453155.1 | 1949506 | 19-scf00458 | 19 |
| AX-158293272 | 23 | 32.45 | KV453155.1 | 1951144 | 19-scf00458 | 19 |
| AX-158293275 | 23 | 32.45 | KV453155.1 | 1952622 | 19-scf00458 | 19 |
| AX-158293277 | 23 | 32.45 | KV453155.1 | 1953571 | 19-scf00458 | 19 |
| AX-158293278 | 23 | 32.45 | KV453155.1 | 1953877 | 19-scf00458 | 19 |
| AX-158293279 | 23 | 32.45 | KV453155.1 | 1954522 | 19-scf00458 | 19 |
| AX-157845684 | 23 | 32.45 | KV453155.1 | 1954716 | 19-scf00458 | 19 |
| AX-157845685 | 23 | 32.45 | KV453155.1 | 1955038 | 19-scf00458 | 19 |
| AX-158293280 | 23 | 32.45 | KV453155.1 | 1955333 | 19-scf00458 | 19 |
| AX-158293281 | 23 | 32.45 | KV453155.1 | 1955424 | 19-scf00458 | 19 |
| AX-158293282 | 23 | 32.45 | KV453155.1 | 1955925 | 19-scf00458 | 19 |
| AX-158293283 | 23 | 32.45 | KV453155.1 | 1956317 | 19-scf00458 | 19 |
| AX-158293286 | 23 | 32.45 | KV453155.1 | 1959768 | 19-scf00458 | 19 |
| AX-158293287 | 23 | 32.45 | KV453155.1 | 1960185 | 19-scf00458 | 19 |
| AX-158293293 | 23 | 32.45 | KV453155.1 | 1964615 | 19-scf00458 | 19 |
| AX-158293295 | 23 | 32.45 | KV453155.1 | 1965529 | 19-scf00458 | 19 |
| AX-158293303 | 23 | 32.45 | KV453155.1 | 1972038 | 19-scf00458 | 19 |
| AX-158293325 | 23 | 32.45 | KV453155.1 | 1995283 | 19-scf00458 | 19 |
| AX-158293326 | 23 | 32.45 | KV453155.1 | 1997202 | 19-scf00458 | 19 |
| AX-158293328 | 23 | 32.45 | KV453155.1 | 1999999 | 19-scf00458 | 19 |
| AX-158293330 | 23 | 32.45 | KV453155.1 | 2002219 | 19-scf00458 | 19 |
| AX-158293333 | 23 | 32.45 | KV453155.1 | 2004361 | 19-scf00458 | 19 |
| AX-158293334 | 23 | 32.45 | KV453155.1 | 2004904 | 19-scf00458 | 19 |
| AX-158293336 | 23 | 32.45 | KV453155.1 | 2006386 | 19-scf00458 | 19 |
| AX-158293337 | 23 | 32.45 | KV453155.1 | 2007505 | 19-scf00458 | 19 |
| AX-158293338 | 23 | 32.45 | KV453155.1 | 2008329 | 19-scf00458 | 19 |
| AX-158293339 | 23 | 32.45 | KV453155.1 | 2009075 | 19-scf00458 | 19 |
| AX-158293340 | 23 | 32.45 | KV453155.1 | 2009851 | 19-scf00458 | 19 |
| AX-158293341 | 23 | 32.45 | KV453155.1 | 2011206 | 19-scf00458 | 19 |
| AX-158293343 | 23 | 32.45 | KV453155.1 | 2012627 | 19-scf00458 | 19 |
| AX-158293344 | 23 | 32.45 | KV453155.1 | 2012937 | 19-scf00458 | 19 |
| AX-158293345 | 23 | 32.45 | KV453155.1 | 2014990 | 19-scf00458 | 19 |
| AX-158293347 | 23 | 32.45 | KV453155.1 | 2017506 | 19-scf00458 | 19 |
| AX-157747027 | 23 | 32.45 | KV453155.1 | 2018611 | 19-scf00458 | 19 |

|              |    |       |            |         |             |    |
|--------------|----|-------|------------|---------|-------------|----|
| AX-158293348 | 23 | 32.45 | KV453155.1 | 2019197 | 19-scf00458 | 19 |
| AX-158293349 | 23 | 32.45 | KV453155.1 | 2019674 | 19-scf00458 | 19 |
| AX-158293351 | 23 | 32.45 | KV453155.1 | 2020948 | 19-scf00458 | 19 |
| AX-158293352 | 23 | 32.45 | KV453155.1 | 2022744 | 19-scf00458 | 19 |
| AX-158293353 | 23 | 32.45 | KV453155.1 | 2023855 | 19-scf00458 | 19 |
| AX-158293354 | 23 | 32.45 | KV453155.1 | 2024914 | 19-scf00458 | 19 |
| AX-158293355 | 23 | 32.45 | KV453155.1 | 2025983 | 19-scf00458 | 19 |
| AX-158293356 | 23 | 32.45 | KV453155.1 | 2028821 | 19-scf00458 | 19 |
| AX-158293359 | 23 | 32.45 | KV453155.1 | 2031038 | 19-scf00458 | 19 |
| AX-158293360 | 23 | 32.45 | KV453155.1 | 2033726 | 19-scf00458 | 19 |
| AX-158293362 | 23 | 32.45 | KV453155.1 | 2034869 | 19-scf00458 | 19 |
| AX-158293365 | 23 | 32.45 | KV453155.1 | 2036301 | 19-scf00458 | 19 |
| AX-158293366 | 23 | 32.45 | KV453155.1 | 2037151 | 19-scf00458 | 19 |
| AX-158293367 | 23 | 32.45 | KV453155.1 | 2037345 | 19-scf00458 | 19 |
| AX-158293369 | 23 | 32.45 | KV453155.1 | 2038268 | 19-scf00458 | 19 |
| AX-158293370 | 23 | 32.45 | KV453155.1 | 2038879 | 19-scf00458 | 19 |
| AX-158293371 | 23 | 32.45 | KV453155.1 | 2039412 | 19-scf00458 | 19 |
| AX-158293372 | 23 | 32.45 | KV453155.1 | 2040285 | 19-scf00458 | 19 |
| AX-158293373 | 23 | 32.45 | KV453155.1 | 2040616 | 19-scf00458 | 19 |
| AX-158293379 | 23 | 32.45 | KV453155.1 | 2043817 | 19-scf00458 | 19 |
| AX-157845686 | 23 | 32.45 | KV453155.1 | 2043877 | 19-scf00458 | 19 |
| AX-158293380 | 23 | 32.45 | KV453155.1 | 2044208 | 19-scf00458 | 19 |
| AX-157845687 | 23 | 32.45 | KV453155.1 | 2044820 | 19-scf00458 | 19 |
| AX-158293381 | 23 | 32.45 | KV453155.1 | 2045767 | 19-scf00458 | 19 |
| AX-158293382 | 23 | 32.45 | KV453155.1 | 2046278 | 19-scf00458 | 19 |
| AX-158293384 | 23 | 32.45 | KV453155.1 | 2047747 | 19-scf00458 | 19 |
| AX-158293387 | 23 | 32.45 | KV453155.1 | 2048867 | 19-scf00458 | 19 |
| AX-158293397 | 23 | 32.45 | KV453155.1 | 2056200 | 19-scf00458 | 19 |
| AX-158417358 | 23 | 32.45 | KV453155.1 | 2057038 | 19-scf00458 | 19 |
| AX-158293399 | 23 | 32.45 | KV453155.1 | 2057572 | 19-scf00458 | 19 |
| AX-158293403 | 23 | 32.45 | KV453155.1 | 2060399 | 19-scf00458 | 19 |
| AX-158293405 | 23 | 32.45 | KV453155.1 | 2062054 | 19-scf00458 | 19 |
| AX-158293414 | 23 | 32.45 | KV453155.1 | 2069164 | 19-scf00458 | 19 |
| AX-158293415 | 23 | 32.45 | KV453155.1 | 2069733 | 19-scf00458 | 19 |
| AX-158293416 | 23 | 32.45 | KV453155.1 | 2072753 | 19-scf00458 | 19 |
| AX-158293418 | 23 | 32.45 | KV453155.1 | 2078635 | 19-scf00458 | 19 |
| AX-158293420 | 23 | 32.45 | KV453155.1 | 2081630 | 19-scf00458 | 19 |
| AX-158293421 | 23 | 32.45 | KV453155.1 | 2082961 | 19-scf00458 | 19 |
| AX-158293422 | 23 | 32.45 | KV453155.1 | 2084307 | 19-scf00458 | 19 |
| AX-158293423 | 23 | 32.45 | KV453155.1 | 2085186 | 19-scf00458 | 19 |
| AX-158293426 | 23 | 32.45 | KV453155.1 | 2088850 | 19-scf00458 | 19 |
| AX-158293429 | 23 | 32.45 | KV453155.1 | 2092190 | 19-scf00458 | 19 |
| AX-158293432 | 23 | 32.45 | KV453155.1 | 2093708 | 19-scf00458 | 19 |
| AX-158293434 | 23 | 32.45 | KV453155.1 | 2095680 | 19-scf00458 | 19 |
| AX-158293437 | 23 | 32.45 | KV453155.1 | 2099554 | 19-scf00458 | 19 |
| AX-158293438 | 23 | 32.45 | KV453155.1 | 2100399 | 19-scf00458 | 19 |
| AX-158293440 | 23 | 32.45 | KV453155.1 | 2101342 | 19-scf00458 | 19 |
| AX-158293441 | 23 | 32.45 | KV453155.1 | 2101902 | 19-scf00458 | 19 |
| AX-158293442 | 23 | 32.45 | KV453155.1 | 2102253 | 19-scf00458 | 19 |
| AX-158293443 | 23 | 32.45 | KV453155.1 | 2102651 | 19-scf00458 | 19 |
| AX-158293444 | 23 | 32.45 | KV453155.1 | 2104539 | 19-scf00458 | 19 |

|              |    |       |            |         |             |    |
|--------------|----|-------|------------|---------|-------------|----|
| AX-158293446 | 23 | 32.45 | KV453155.1 | 2105462 | 19-scf00458 | 19 |
| AX-158293449 | 23 | 32.45 | KV453155.1 | 2108335 | 19-scf00458 | 19 |
| AX-157714816 | 23 | 32.45 | KV453155.1 | 2118168 | 19-scf00458 | 19 |
| AX-158293452 | 23 | 32.45 | KV453155.1 | 2119448 | 19-scf00458 | 19 |
| AX-157845689 | 23 | 32.45 | KV453155.1 | 2120402 | 19-scf00458 | 19 |
| AX-158293457 | 23 | 32.45 | KV453155.1 | 2126093 | 19-scf00458 | 19 |
| AX-158293459 | 23 | 32.45 | KV453155.1 | 2128051 | 19-scf00458 | 19 |
| AX-158293461 | 23 | 32.45 | KV453155.1 | 2129979 | 19-scf00458 | 19 |
| AX-158293463 | 23 | 32.45 | KV453155.1 | 2132209 | 19-scf00458 | 19 |
| AX-157860223 | 23 | 32.45 | KV453155.1 | 2132292 | 19-scf00458 | 19 |
| AX-158293464 | 23 | 32.45 | KV453155.1 | 2133649 | 19-scf00458 | 19 |
| AX-158293470 | 23 | 32.45 | KV453155.1 | 2140084 | 19-scf00458 | 19 |
| AX-158293475 | 23 | 32.45 | KV453155.1 | 2146968 | 19-scf00458 | 19 |
| AX-158293477 | 23 | 32.45 | KV453155.1 | 2148529 | 19-scf00458 | 19 |
| AX-158293480 | 23 | 32.45 | KV453155.1 | 2150393 | 19-scf00458 | 19 |
| AX-157845691 | 23 | 32.45 | KV453155.1 | 2151634 | 19-scf00458 | 19 |
| AX-158293482 | 23 | 32.45 | KV453155.1 | 2152567 | 19-scf00458 | 19 |
| AX-157845692 | 23 | 32.45 | KV453155.1 | 2154944 | 19-scf00458 | 19 |
| AX-158293491 | 23 | 32.45 | KV453155.1 | 2166672 | 19-scf00458 | 19 |
| AX-157775739 | 23 | 32.45 | KV453155.1 | 2173966 | 19-scf00458 | 19 |
| AX-158293498 | 23 | 32.45 | KV453155.1 | 2175739 | 19-scf00458 | 19 |
| AX-158293505 | 23 | 32.45 | KV453155.1 | 2184163 | 19-scf00458 | 19 |
| AX-158381255 | 23 | 32.45 | KV453155.1 | 2184351 | 19-scf00458 | 19 |
| AX-158293516 | 23 | 32.45 | KV453155.1 | 2195569 | 19-scf00458 | 19 |
| AX-157845695 | 23 | 32.45 | KV453155.1 | 2196606 | 19-scf00458 | 19 |
| AX-158293521 | 23 | 32.45 | KV453155.1 | 2201187 | 19-scf00458 | 19 |
| AX-157750582 | 23 | 32.45 | KV453155.1 | 2201632 | 19-scf00458 | 19 |
| AX-157845697 | 23 | 32.45 | KV453155.1 | 2210097 | 19-scf00458 | 19 |
| AX-158293527 | 23 | 32.45 | KV453155.1 | 2212322 | 19-scf00458 | 19 |
| AX-158293531 | 23 | 32.45 | KV453155.1 | 2216117 | 19-scf00458 | 19 |
| AX-158293532 | 23 | 32.45 | KV453155.1 | 2218170 | 19-scf00458 | 19 |
| AX-157845700 | 23 | 32.45 | KV453155.1 | 2219402 | 19-scf00458 | 19 |
| AX-158293534 | 23 | 32.45 | KV453155.1 | 2220310 | 19-scf00458 | 19 |
| AX-158293535 | 23 | 32.45 | KV453155.1 | 2220880 | 19-scf00458 | 19 |
| AX-158293537 | 23 | 32.45 | KV453155.1 | 2221947 | 19-scf00458 | 19 |
| AX-158293539 | 23 | 32.45 | KV453155.1 | 2222659 | 19-scf00458 | 19 |
| AX-158293541 | 23 | 32.45 | KV453155.1 | 2223244 | 19-scf00458 | 19 |
| AX-158293542 | 23 | 32.45 | KV453155.1 | 2223589 | 19-scf00458 | 19 |
| AX-157845701 | 23 | 32.45 | KV453155.1 | 2226089 | 19-scf00458 | 19 |
| AX-158293551 | 23 | 32.45 | KV453155.1 | 2234449 | 19-scf00458 | 19 |
| AX-158293552 | 23 | 32.45 | KV453155.1 | 2235990 | 19-scf00458 | 19 |
| AX-158293555 | 23 | 32.45 | KV453155.1 | 2238316 | 19-scf00458 | 19 |
| AX-158293559 | 23 | 32.45 | KV453155.1 | 2241444 | 19-scf00458 | 19 |
| AX-158293564 | 23 | 32.45 | KV453155.1 | 2248989 | 19-scf00458 | 19 |
| AX-157845705 | 23 | 32.45 | KV453155.1 | 2252202 | 19-scf00458 | 19 |
| AX-158293568 | 23 | 32.45 | KV453155.1 | 2258183 | 19-scf00458 | 19 |
| AX-157845707 | 23 | 32.45 | KV453155.1 | 2259646 | 19-scf00458 | 19 |
| AX-157845708 | 23 | 32.45 | KV453155.1 | 2272056 | 19-scf00458 | 19 |
| AX-158293582 | 23 | 32.45 | KV453155.1 | 2277816 | 19-scf00458 | 19 |
| AX-157745072 | 23 | 32.45 | KV453155.1 | 2279848 | 19-scf00458 | 19 |
| AX-158293585 | 23 | 32.45 | KV453155.1 | 2284518 | 19-scf00458 | 19 |

|              |    |        |             |         |             |    |
|--------------|----|--------|-------------|---------|-------------|----|
| AX-157845710 | 23 | 32.45  | KV453155.1  | 2287184 | 19-scf00458 | 19 |
| AX-157845713 | 23 | 32.45  | KV453155.1  | 2294746 | 19-scf00458 | 19 |
| AX-158293612 | 23 | 32.45  | KV453155.1  | 2320499 | 19-scf00458 | 19 |
| AX-158293615 | 23 | 32.45  | KV453155.1  | 2324336 | 19-scf00458 | 19 |
| AX-157740079 | 23 | 32.45  | KV453155.1  | 2334358 | 19-scf00458 | 19 |
| AX-158293637 | 23 | 32.45  | KV453155.1  | 2351431 | 19-scf00458 | 19 |
| AX-158293658 | 23 | 32.45  | KV453155.1  | 2377068 | 19-scf00458 | 19 |
| AX-158293689 | 23 | 32.45  | KV453155.1  | 2415168 | 19-scf00458 | 19 |
| AX-158293690 | 23 | 32.45  | KV453155.1  | 2415597 | 19-scf00458 | 19 |
| AX-158293693 | 23 | 32.45  | KV453155.1  | 2419374 | 19-scf00458 | 19 |
| AX-158293697 | 23 | 32.45  | KV453155.1  | 2423227 | 19-scf00458 | 19 |
| AX-158293828 | 23 | 32.45  | KV453155.1  | 2598258 | 19-scf00458 | 19 |
| AX-157705296 | 23 | 32.45  | 3ML01029333 | 191     | scf04954_1  | UN |
| AX-157705297 | 23 | 32.45  | 3ML01029333 | 258     | scf04954_1  | UN |
| AX-157705298 | 23 | 32.45  | 3ML01029333 | 729     | scf04954_1  | UN |
| AX-157705295 | 23 | 32.45  | 3ML01029333 | 1063    | scf04954_1  | UN |
| AX-158293544 | 23 | 32.476 | KV453155.1  | 2228822 | 19-scf00458 | 19 |
| AX-157771151 | 23 | 32.476 | KV453155.1  | 2281339 | 19-scf00458 | 19 |
| AX-158293547 | 23 | 32.501 | KV453155.1  | 2231208 | 19-scf00458 | 19 |
| AX-158293553 | 23 | 32.513 | KV453155.1  | 2236712 | 19-scf00458 | 19 |
| AX-158293566 | 23 | 32.537 | KV453155.1  | 2255749 | 19-scf00458 | 19 |
| AX-158292836 | 23 | 32.559 | KV453155.1  | 1486941 | 19-scf00458 | 19 |
| AX-158292845 | 23 | 32.559 | KV453155.1  | 1498615 | 19-scf00458 | 19 |
| AX-158292846 | 23 | 32.559 | KV453155.1  | 1498871 | 19-scf00458 | 19 |
| AX-158292847 | 23 | 32.559 | KV453155.1  | 1500069 | 19-scf00458 | 19 |
| AX-157751476 | 23 | 32.559 | KV453155.1  | 1503082 | 19-scf00458 | 19 |
| AX-158292850 | 23 | 32.559 | KV453155.1  | 1503538 | 19-scf00458 | 19 |
| AX-157769764 | 23 | 32.559 | KV453155.1  | 1510017 | 19-scf00458 | 19 |
| AX-158292851 | 23 | 32.559 | KV453155.1  | 1511882 | 19-scf00458 | 19 |
| AX-158292852 | 23 | 32.559 | KV453155.1  | 1512291 | 19-scf00458 | 19 |
| AX-158292854 | 23 | 32.559 | KV453155.1  | 1514965 | 19-scf00458 | 19 |
| AX-158292855 | 23 | 32.559 | KV453155.1  | 1516252 | 19-scf00458 | 19 |
| AX-158292856 | 23 | 32.559 | KV453155.1  | 1518670 | 19-scf00458 | 19 |
| AX-158292857 | 23 | 32.559 | KV453155.1  | 1520701 | 19-scf00458 | 19 |
| AX-158292858 | 23 | 32.559 | KV453155.1  | 1520938 | 19-scf00458 | 19 |
| AX-158292859 | 23 | 32.559 | KV453155.1  | 1521666 | 19-scf00458 | 19 |
| AX-158292863 | 23 | 32.559 | KV453155.1  | 1527542 | 19-scf00458 | 19 |
| AX-158292864 | 23 | 32.559 | KV453155.1  | 1528248 | 19-scf00458 | 19 |
| AX-158292866 | 23 | 32.559 | KV453155.1  | 1532250 | 19-scf00458 | 19 |
| AX-158292867 | 23 | 32.559 | KV453155.1  | 1532785 | 19-scf00458 | 19 |
| AX-158292868 | 23 | 32.559 | KV453155.1  | 1533342 | 19-scf00458 | 19 |
| AX-158292869 | 23 | 32.559 | KV453155.1  | 1534777 | 19-scf00458 | 19 |
| AX-158292870 | 23 | 32.559 | KV453155.1  | 1535326 | 19-scf00458 | 19 |
| AX-158292873 | 23 | 32.559 | KV453155.1  | 1537601 | 19-scf00458 | 19 |
| AX-157723074 | 23 | 32.559 | KV453155.1  | 1538189 | 19-scf00458 | 19 |
| AX-158292874 | 23 | 32.559 | KV453155.1  | 1539299 | 19-scf00458 | 19 |
| AX-158292875 | 23 | 32.559 | KV453155.1  | 1540872 | 19-scf00458 | 19 |
| AX-158292876 | 23 | 32.559 | KV453155.1  | 1541863 | 19-scf00458 | 19 |
| AX-158292877 | 23 | 32.559 | KV453155.1  | 1542587 | 19-scf00458 | 19 |
| AX-158292879 | 23 | 32.559 | KV453155.1  | 1544079 | 19-scf00458 | 19 |
| AX-158292880 | 23 | 32.559 | KV453155.1  | 1545984 | 19-scf00458 | 19 |

|              |    |        |            |         |             |    |
|--------------|----|--------|------------|---------|-------------|----|
| AX-158292881 | 23 | 32.559 | KV453155.1 | 1548391 | 19-scf00458 | 19 |
| AX-158292882 | 23 | 32.559 | KV453155.1 | 1548738 | 19-scf00458 | 19 |
| AX-158292883 | 23 | 32.559 | KV453155.1 | 1549273 | 19-scf00458 | 19 |
| AX-157845658 | 23 | 32.559 | KV453155.1 | 1553898 | 19-scf00458 | 19 |
| AX-158292886 | 23 | 32.559 | KV453155.1 | 1556175 | 19-scf00458 | 19 |
| AX-157845659 | 23 | 32.559 | KV453155.1 | 1560227 | 19-scf00458 | 19 |
| AX-157845660 | 23 | 32.559 | KV453155.1 | 1562782 | 19-scf00458 | 19 |
| AX-158292891 | 23 | 32.559 | KV453155.1 | 1564770 | 19-scf00458 | 19 |
| AX-158292892 | 23 | 32.559 | KV453155.1 | 1565248 | 19-scf00458 | 19 |
| AX-158292894 | 23 | 32.559 | KV453155.1 | 1566175 | 19-scf00458 | 19 |
| AX-158292895 | 23 | 32.559 | KV453155.1 | 1568289 | 19-scf00458 | 19 |
| AX-158292899 | 23 | 32.559 | KV453155.1 | 1572939 | 19-scf00458 | 19 |
| AX-158292900 | 23 | 32.559 | KV453155.1 | 1573324 | 19-scf00458 | 19 |
| AX-158292902 | 23 | 32.559 | KV453155.1 | 1576803 | 19-scf00458 | 19 |
| AX-158292903 | 23 | 32.559 | KV453155.1 | 1577881 | 19-scf00458 | 19 |
| AX-158292905 | 23 | 32.559 | KV453155.1 | 1578976 | 19-scf00458 | 19 |
| AX-158292906 | 23 | 32.559 | KV453155.1 | 1580503 | 19-scf00458 | 19 |
| AX-158292907 | 23 | 32.559 | KV453155.1 | 1581007 | 19-scf00458 | 19 |
| AX-158292908 | 23 | 32.559 | KV453155.1 | 1581312 | 19-scf00458 | 19 |
| AX-158292909 | 23 | 32.559 | KV453155.1 | 1581868 | 19-scf00458 | 19 |
| AX-158292912 | 23 | 32.559 | KV453155.1 | 1584240 | 19-scf00458 | 19 |
| AX-158292914 | 23 | 32.559 | KV453155.1 | 1585437 | 19-scf00458 | 19 |
| AX-158292916 | 23 | 32.559 | KV453155.1 | 1587212 | 19-scf00458 | 19 |
| AX-158292917 | 23 | 32.559 | KV453155.1 | 1587631 | 19-scf00458 | 19 |
| AX-158292918 | 23 | 32.559 | KV453155.1 | 1587824 | 19-scf00458 | 19 |
| AX-158292920 | 23 | 32.559 | KV453155.1 | 1590118 | 19-scf00458 | 19 |
| AX-158292921 | 23 | 32.559 | KV453155.1 | 1590616 | 19-scf00458 | 19 |
| AX-158292923 | 23 | 32.559 | KV453155.1 | 1592155 | 19-scf00458 | 19 |
| AX-158292925 | 23 | 32.559 | KV453155.1 | 1593337 | 19-scf00458 | 19 |
| AX-158292926 | 23 | 32.559 | KV453155.1 | 1593705 | 19-scf00458 | 19 |
| AX-158292927 | 23 | 32.559 | KV453155.1 | 1594428 | 19-scf00458 | 19 |
| AX-158292929 | 23 | 32.559 | KV453155.1 | 1596905 | 19-scf00458 | 19 |
| AX-158292930 | 23 | 32.559 | KV453155.1 | 1598402 | 19-scf00458 | 19 |
| AX-158292931 | 23 | 32.559 | KV453155.1 | 1600662 | 19-scf00458 | 19 |
| AX-158292936 | 23 | 32.559 | KV453155.1 | 1605365 | 19-scf00458 | 19 |
| AX-158292937 | 23 | 32.559 | KV453155.1 | 1606873 | 19-scf00458 | 19 |
| AX-158292939 | 23 | 32.559 | KV453155.1 | 1609330 | 19-scf00458 | 19 |
| AX-158292940 | 23 | 32.559 | KV453155.1 | 1610455 | 19-scf00458 | 19 |
| AX-158292942 | 23 | 32.559 | KV453155.1 | 1612045 | 19-scf00458 | 19 |
| AX-157845662 | 23 | 32.559 | KV453155.1 | 1612313 | 19-scf00458 | 19 |
| AX-158292945 | 23 | 32.559 | KV453155.1 | 1613896 | 19-scf00458 | 19 |
| AX-158292949 | 23 | 32.559 | KV453155.1 | 1616860 | 19-scf00458 | 19 |
| AX-158292952 | 23 | 32.559 | KV453155.1 | 1621481 | 19-scf00458 | 19 |
| AX-158292953 | 23 | 32.559 | KV453155.1 | 1622462 | 19-scf00458 | 19 |
| AX-158292957 | 23 | 32.559 | KV453155.1 | 1630519 | 19-scf00458 | 19 |
| AX-157752946 | 23 | 32.559 | KV453155.1 | 1631807 | 19-scf00458 | 19 |
| AX-158292960 | 23 | 32.559 | KV453155.1 | 1632913 | 19-scf00458 | 19 |
| AX-158292962 | 23 | 32.559 | KV453155.1 | 1634013 | 19-scf00458 | 19 |
| AX-158417350 | 23 | 32.559 | KV453155.1 | 1635958 | 19-scf00458 | 19 |
| AX-158417351 | 23 | 32.559 | KV453155.1 | 1636065 | 19-scf00458 | 19 |
| AX-158417352 | 23 | 32.559 | KV453155.1 | 1637329 | 19-scf00458 | 19 |



|              |    |        |            |         |             |    |
|--------------|----|--------|------------|---------|-------------|----|
| AX-158292966 | 23 | 32.559 | KV453155.1 | 1637425 | 19-scf00458 | 19 |
| AX-158292969 | 23 | 32.559 | KV453155.1 | 1640094 | 19-scf00458 | 19 |
| AX-157703820 | 23 | 32.559 | KV453155.1 | 1644050 | 19-scf00458 | 19 |
| AX-158292973 | 23 | 32.559 | KV453155.1 | 1646443 | 19-scf00458 | 19 |
| AX-158292974 | 23 | 32.559 | KV453155.1 | 1648165 | 19-scf00458 | 19 |
| AX-158292976 | 23 | 32.559 | KV453155.1 | 1650587 | 19-scf00458 | 19 |
| AX-158292977 | 23 | 32.559 | KV453155.1 | 1651424 | 19-scf00458 | 19 |
| AX-158292978 | 23 | 32.559 | KV453155.1 | 1653040 | 19-scf00458 | 19 |
| AX-158292982 | 23 | 32.559 | KV453155.1 | 1656580 | 19-scf00458 | 19 |
| AX-158292983 | 23 | 32.559 | KV453155.1 | 1658212 | 19-scf00458 | 19 |
| AX-158292984 | 23 | 32.559 | KV453155.1 | 1659259 | 19-scf00458 | 19 |
| AX-158292985 | 23 | 32.559 | KV453155.1 | 1660023 | 19-scf00458 | 19 |
| AX-158292986 | 23 | 32.559 | KV453155.1 | 1660726 | 19-scf00458 | 19 |
| AX-158292987 | 23 | 32.559 | KV453155.1 | 1661135 | 19-scf00458 | 19 |
| AX-158292988 | 23 | 32.559 | KV453155.1 | 1661686 | 19-scf00458 | 19 |
| AX-158292989 | 23 | 32.559 | KV453155.1 | 1662105 | 19-scf00458 | 19 |
| AX-158292992 | 23 | 32.559 | KV453155.1 | 1664110 | 19-scf00458 | 19 |
| AX-158292993 | 23 | 32.559 | KV453155.1 | 1664647 | 19-scf00458 | 19 |
| AX-158292994 | 23 | 32.559 | KV453155.1 | 1665119 | 19-scf00458 | 19 |
| AX-158292995 | 23 | 32.559 | KV453155.1 | 1665936 | 19-scf00458 | 19 |
| AX-158292996 | 23 | 32.559 | KV453155.1 | 1667387 | 19-scf00458 | 19 |
| AX-158292998 | 23 | 32.559 | KV453155.1 | 1670673 | 19-scf00458 | 19 |
| AX-158292999 | 23 | 32.559 | KV453155.1 | 1671492 | 19-scf00458 | 19 |
| AX-158293001 | 23 | 32.559 | KV453155.1 | 1673529 | 19-scf00458 | 19 |
| AX-158293002 | 23 | 32.559 | KV453155.1 | 1674998 | 19-scf00458 | 19 |
| AX-158293003 | 23 | 32.559 | KV453155.1 | 1675317 | 19-scf00458 | 19 |
| AX-158293006 | 23 | 32.559 | KV453155.1 | 1677184 | 19-scf00458 | 19 |
| AX-158293007 | 23 | 32.559 | KV453155.1 | 1679075 | 19-scf00458 | 19 |
| AX-158293008 | 23 | 32.559 | KV453155.1 | 1679237 | 19-scf00458 | 19 |
| AX-158293010 | 23 | 32.559 | KV453155.1 | 1681059 | 19-scf00458 | 19 |
| AX-158293012 | 23 | 32.559 | KV453155.1 | 1684587 | 19-scf00458 | 19 |
| AX-158293013 | 23 | 32.559 | KV453155.1 | 1685360 | 19-scf00458 | 19 |
| AX-158293014 | 23 | 32.559 | KV453155.1 | 1686908 | 19-scf00458 | 19 |
| AX-158293015 | 23 | 32.559 | KV453155.1 | 1687801 | 19-scf00458 | 19 |
| AX-158293017 | 23 | 32.559 | KV453155.1 | 1690012 | 19-scf00458 | 19 |
| AX-158293019 | 23 | 32.559 | KV453155.1 | 1692605 | 19-scf00458 | 19 |
| AX-158417353 | 23 | 32.559 | KV453155.1 | 1692883 | 19-scf00458 | 19 |
| AX-158293020 | 23 | 32.559 | KV453155.1 | 1693296 | 19-scf00458 | 19 |
| AX-158293021 | 23 | 32.559 | KV453155.1 | 1693586 | 19-scf00458 | 19 |
| AX-158293022 | 23 | 32.559 | KV453155.1 | 1694502 | 19-scf00458 | 19 |
| AX-158293023 | 23 | 32.559 | KV453155.1 | 1695265 | 19-scf00458 | 19 |
| AX-158293024 | 23 | 32.559 | KV453155.1 | 1696717 | 19-scf00458 | 19 |
| AX-158293025 | 23 | 32.559 | KV453155.1 | 1696947 | 19-scf00458 | 19 |
| AX-158293026 | 23 | 32.559 | KV453155.1 | 1697598 | 19-scf00458 | 19 |
| AX-158293028 | 23 | 32.559 | KV453155.1 | 1698304 | 19-scf00458 | 19 |
| AX-158293029 | 23 | 32.559 | KV453155.1 | 1698858 | 19-scf00458 | 19 |
| AX-158293030 | 23 | 32.559 | KV453155.1 | 1699161 | 19-scf00458 | 19 |
| AX-158293033 | 23 | 32.559 | KV453155.1 | 1700280 | 19-scf00458 | 19 |
| AX-158293035 | 23 | 32.559 | KV453155.1 | 1702413 | 19-scf00458 | 19 |
| AX-158293038 | 23 | 32.559 | KV453155.1 | 1703215 | 19-scf00458 | 19 |
| AX-158293042 | 23 | 32.559 | KV453155.1 | 1705942 | 19-scf00458 | 19 |

|              |    |        |             |         |             |    |
|--------------|----|--------|-------------|---------|-------------|----|
| AX-158293045 | 23 | 32.559 | KV453155.1  | 1708013 | 19-scf00458 | 19 |
| AX-158293046 | 23 | 32.559 | KV453155.1  | 1708593 | 19-scf00458 | 19 |
| AX-158293047 | 23 | 32.559 | KV453155.1  | 1708640 | 19-scf00458 | 19 |
| AX-158293329 | 23 | 32.559 | KV453155.1  | 2000651 | 19-scf00458 | 19 |
| AX-158293417 | 23 | 32.559 | KV453155.1  | 2075532 | 19-scf00458 | 19 |
| AX-158293456 | 23 | 32.559 | KV453155.1  | 2124293 | 19-scf00458 | 19 |
| AX-158293474 | 23 | 32.559 | KV453155.1  | 2145898 | 19-scf00458 | 19 |
| AX-158293476 | 23 | 32.559 | KV453155.1  | 2147731 | 19-scf00458 | 19 |
| AX-157744208 | 23 | 32.559 | KV453155.1  | 2154127 | 19-scf00458 | 19 |
| AX-158293504 | 23 | 32.559 | KV453155.1  | 2182904 | 19-scf00458 | 19 |
| AX-157744462 | 23 | 32.559 | KV453155.1  | 2187057 | 19-scf00458 | 19 |
| AX-158293514 | 23 | 32.559 | KV453155.1  | 2193916 | 19-scf00458 | 19 |
| AX-158293519 | 23 | 32.559 | KV453155.1  | 2198242 | 19-scf00458 | 19 |
| AX-158293520 | 23 | 32.559 | KV453155.1  | 2199373 | 19-scf00458 | 19 |
| AX-158293522 | 23 | 32.559 | KV453155.1  | 2202402 | 19-scf00458 | 19 |
| AX-158293523 | 23 | 32.559 | KV453155.1  | 2203341 | 19-scf00458 | 19 |
| AX-158419596 | 23 | 32.559 | KV453155.1  | 2207234 | 19-scf00458 | 19 |
| AX-157845699 | 23 | 32.559 | KV453155.1  | 2212683 | 19-scf00458 | 19 |
| AX-158293528 | 23 | 32.559 | KV453155.1  | 2213256 | 19-scf00458 | 19 |
| AX-158293529 | 23 | 32.559 | KV453155.1  | 2213752 | 19-scf00458 | 19 |
| AX-158293530 | 23 | 32.559 | KV453155.1  | 2214724 | 19-scf00458 | 19 |
| AX-157873413 | 23 | 32.559 | KV453155.1  | 2251040 | 19-scf00458 | 19 |
| AX-158293571 | 23 | 32.559 | KV453155.1  | 2264536 | 19-scf00458 | 19 |
| AX-158293572 | 23 | 32.559 | KV453155.1  | 2265234 | 19-scf00458 | 19 |
| AX-158293586 | 23 | 32.559 | KV453155.1  | 2286253 | 19-scf00458 | 19 |
| AX-158293587 | 23 | 32.559 | KV453155.1  | 2286845 | 19-scf00458 | 19 |
| AX-157688862 | 23 | 32.559 | 3ML01027274 | 711     | scf02880_1  | UN |
| AX-158291863 | 23 | 32.668 | KV453155.1  | 289147  | 19-scf00458 | 19 |
| AX-158291895 | 23 | 32.668 | KV453155.1  | 356891  | 19-scf00458 | 19 |
| AX-157845671 | 23 | 32.668 | KV453155.1  | 1800316 | 19-scf00458 | 19 |
| AX-158293598 | 23 | 32.668 | KV453155.1  | 2300245 | 19-scf00458 | 19 |
| AX-158293600 | 23 | 32.668 | KV453155.1  | 2300903 | 19-scf00458 | 19 |
| AX-157758740 | 23 | 32.668 | KV453155.1  | 2301100 | 19-scf00458 | 19 |
| AX-158293602 | 23 | 32.668 | KV453155.1  | 2305063 | 19-scf00458 | 19 |
| AX-158293603 | 23 | 32.668 | KV453155.1  | 2305469 | 19-scf00458 | 19 |
| AX-158293609 | 23 | 32.668 | KV453155.1  | 2316636 | 19-scf00458 | 19 |
| AX-158293610 | 23 | 32.668 | KV453155.1  | 2317106 | 19-scf00458 | 19 |
| AX-158293611 | 23 | 32.668 | KV453155.1  | 2319385 | 19-scf00458 | 19 |
| AX-157753664 | 23 | 32.668 | KV453155.1  | 2323258 | 19-scf00458 | 19 |
| AX-158293616 | 23 | 32.668 | KV453155.1  | 2327222 | 19-scf00458 | 19 |
| AX-158293620 | 23 | 32.668 | KV453155.1  | 2329997 | 19-scf00458 | 19 |
| AX-158293621 | 23 | 32.668 | KV453155.1  | 2331226 | 19-scf00458 | 19 |
| AX-158293623 | 23 | 32.668 | KV453155.1  | 2334788 | 19-scf00458 | 19 |
| AX-158293628 | 23 | 32.668 | KV453155.1  | 2342137 | 19-scf00458 | 19 |
| AX-157845717 | 23 | 32.668 | KV453155.1  | 2342281 | 19-scf00458 | 19 |
| AX-158293644 | 23 | 32.668 | KV453155.1  | 2358085 | 19-scf00458 | 19 |
| AX-157715641 | 23 | 32.668 | KV453155.1  | 2422069 | 19-scf00458 | 19 |
| AX-157845651 | 23 | 32.703 | KV453155.1  | 1417811 | 19-scf00458 | 19 |
| AX-158292935 | 23 | 32.703 | KV453155.1  | 1604381 | 19-scf00458 | 19 |
| AX-158293389 | 23 | 32.703 | KV453155.1  | 2051616 | 19-scf00458 | 19 |
| AX-158293400 | 23 | 32.703 | KV453155.1  | 2057903 | 19-scf00458 | 19 |

|              |    |        |            |         |             |    |
|--------------|----|--------|------------|---------|-------------|----|
| AX-158293589 | 23 | 32.703 | KV453155.1 | 2289919 | 19-scf00458 | 19 |
| AX-158293629 | 23 | 32.703 | KV453155.1 | 2342875 | 19-scf00458 | 19 |
| AX-158293655 | 23 | 32.703 | KV453155.1 | 2372469 | 19-scf00458 | 19 |
| AX-158293724 | 23 | 32.703 | KV453155.1 | 2461420 | 19-scf00458 | 19 |
| AX-158293634 | 23 | 32.74  | KV453155.1 | 2349048 | 19-scf00458 | 19 |
| AX-158293635 | 23 | 32.74  | KV453155.1 | 2349525 | 19-scf00458 | 19 |
| AX-158293643 | 23 | 32.74  | KV453155.1 | 2356842 | 19-scf00458 | 19 |
| AX-158293721 | 23 | 32.74  | KV453155.1 | 2458064 | 19-scf00458 | 19 |
| AX-158293777 | 23 | 32.74  | KV453155.1 | 2543248 | 19-scf00458 | 19 |
| AX-158293778 | 23 | 32.74  | KV453155.1 | 2543466 | 19-scf00458 | 19 |
| AX-158293799 | 23 | 32.74  | KV453155.1 | 2564383 | 19-scf00458 | 19 |
| AX-158293801 | 23 | 32.74  | KV453155.1 | 2567747 | 19-scf00458 | 19 |
| AX-158291846 | 23 | 32.778 | KV453155.1 | 261162  | 19-scf00458 | 19 |
| AX-158291896 | 23 | 32.778 | KV453155.1 | 359352  | 19-scf00458 | 19 |
| AX-158291905 | 23 | 32.778 | KV453155.1 | 366850  | 19-scf00458 | 19 |
| AX-158291907 | 23 | 32.778 | KV453155.1 | 368366  | 19-scf00458 | 19 |
| AX-158291910 | 23 | 32.778 | KV453155.1 | 370321  | 19-scf00458 | 19 |
| AX-158291913 | 23 | 32.778 | KV453155.1 | 374110  | 19-scf00458 | 19 |
| AX-158291917 | 23 | 32.778 | KV453155.1 | 378752  | 19-scf00458 | 19 |
| AX-158291920 | 23 | 32.778 | KV453155.1 | 380577  | 19-scf00458 | 19 |
| AX-158291926 | 23 | 32.778 | KV453155.1 | 383844  | 19-scf00458 | 19 |
| AX-158291927 | 23 | 32.778 | KV453155.1 | 384424  | 19-scf00458 | 19 |
| AX-158291929 | 23 | 32.778 | KV453155.1 | 387021  | 19-scf00458 | 19 |
| AX-158291930 | 23 | 32.778 | KV453155.1 | 387872  | 19-scf00458 | 19 |
| AX-158291931 | 23 | 32.778 | KV453155.1 | 388646  | 19-scf00458 | 19 |
| AX-158291934 | 23 | 32.778 | KV453155.1 | 392972  | 19-scf00458 | 19 |
| AX-158291935 | 23 | 32.778 | KV453155.1 | 395002  | 19-scf00458 | 19 |
| AX-158291941 | 23 | 32.778 | KV453155.1 | 405576  | 19-scf00458 | 19 |
| AX-157723900 | 23 | 32.778 | KV453155.1 | 409291  | 19-scf00458 | 19 |
| AX-158291945 | 23 | 32.778 | KV453155.1 | 416484  | 19-scf00458 | 19 |
| AX-158291947 | 23 | 32.778 | KV453155.1 | 418122  | 19-scf00458 | 19 |
| AX-158291949 | 23 | 32.778 | KV453155.1 | 419288  | 19-scf00458 | 19 |
| AX-158291950 | 23 | 32.778 | KV453155.1 | 421237  | 19-scf00458 | 19 |
| AX-158291956 | 23 | 32.778 | KV453155.1 | 426667  | 19-scf00458 | 19 |
| AX-158291957 | 23 | 32.778 | KV453155.1 | 427483  | 19-scf00458 | 19 |
| AX-158291958 | 23 | 32.778 | KV453155.1 | 428321  | 19-scf00458 | 19 |
| AX-158291959 | 23 | 32.778 | KV453155.1 | 429655  | 19-scf00458 | 19 |
| AX-158291966 | 23 | 32.778 | KV453155.1 | 436661  | 19-scf00458 | 19 |
| AX-158291970 | 23 | 32.778 | KV453155.1 | 438966  | 19-scf00458 | 19 |
| AX-158291972 | 23 | 32.778 | KV453155.1 | 440211  | 19-scf00458 | 19 |
| AX-158291974 | 23 | 32.778 | KV453155.1 | 441933  | 19-scf00458 | 19 |
| AX-158291982 | 23 | 32.778 | KV453155.1 | 452545  | 19-scf00458 | 19 |
| AX-158291984 | 23 | 32.778 | KV453155.1 | 455485  | 19-scf00458 | 19 |
| AX-158291985 | 23 | 32.778 | KV453155.1 | 456233  | 19-scf00458 | 19 |
| AX-158291987 | 23 | 32.778 | KV453155.1 | 459865  | 19-scf00458 | 19 |
| AX-158291989 | 23 | 32.778 | KV453155.1 | 461107  | 19-scf00458 | 19 |
| AX-158291992 | 23 | 32.778 | KV453155.1 | 463349  | 19-scf00458 | 19 |
| AX-158291999 | 23 | 32.778 | KV453155.1 | 471846  | 19-scf00458 | 19 |
| AX-158292000 | 23 | 32.778 | KV453155.1 | 472458  | 19-scf00458 | 19 |
| AX-158292029 | 23 | 32.778 | KV453155.1 | 506504  | 19-scf00458 | 19 |
| AX-158292064 | 23 | 32.778 | KV453155.1 | 545514  | 19-scf00458 | 19 |

|              |    |        |            |        |             |    |
|--------------|----|--------|------------|--------|-------------|----|
| AX-158292071 | 23 | 32.778 | KV453155.1 | 554487 | 19-scf00458 | 19 |
| AX-158292075 | 23 | 32.778 | KV453155.1 | 557958 | 19-scf00458 | 19 |
| AX-158292076 | 23 | 32.778 | KV453155.1 | 558643 | 19-scf00458 | 19 |
| AX-157694506 | 23 | 32.778 | KV453155.1 | 559826 | 19-scf00458 | 19 |
| AX-158292080 | 23 | 32.778 | KV453155.1 | 562588 | 19-scf00458 | 19 |
| AX-158292081 | 23 | 32.778 | KV453155.1 | 563278 | 19-scf00458 | 19 |
| AX-158292084 | 23 | 32.778 | KV453155.1 | 565469 | 19-scf00458 | 19 |
| AX-158292086 | 23 | 32.778 | KV453155.1 | 572313 | 19-scf00458 | 19 |
| AX-157860218 | 23 | 32.778 | KV453155.1 | 577861 | 19-scf00458 | 19 |
| AX-158292091 | 23 | 32.778 | KV453155.1 | 578134 | 19-scf00458 | 19 |
| AX-158292092 | 23 | 32.778 | KV453155.1 | 578859 | 19-scf00458 | 19 |
| AX-158292093 | 23 | 32.778 | KV453155.1 | 579933 | 19-scf00458 | 19 |
| AX-158292095 | 23 | 32.778 | KV453155.1 | 581398 | 19-scf00458 | 19 |
| AX-157860219 | 23 | 32.778 | KV453155.1 | 581962 | 19-scf00458 | 19 |
| AX-158292096 | 23 | 32.778 | KV453155.1 | 582364 | 19-scf00458 | 19 |
| AX-158292098 | 23 | 32.778 | KV453155.1 | 583848 | 19-scf00458 | 19 |
| AX-158292099 | 23 | 32.778 | KV453155.1 | 584427 | 19-scf00458 | 19 |
| AX-158292101 | 23 | 32.778 | KV453155.1 | 585261 | 19-scf00458 | 19 |
| AX-158292109 | 23 | 32.778 | KV453155.1 | 595309 | 19-scf00458 | 19 |
| AX-158292110 | 23 | 32.778 | KV453155.1 | 595809 | 19-scf00458 | 19 |
| AX-158292113 | 23 | 32.778 | KV453155.1 | 598500 | 19-scf00458 | 19 |
| AX-157860220 | 23 | 32.778 | KV453155.1 | 598914 | 19-scf00458 | 19 |
| AX-158292114 | 23 | 32.778 | KV453155.1 | 599476 | 19-scf00458 | 19 |
| AX-158292115 | 23 | 32.778 | KV453155.1 | 599881 | 19-scf00458 | 19 |
| AX-158292116 | 23 | 32.778 | KV453155.1 | 601199 | 19-scf00458 | 19 |
| AX-158292117 | 23 | 32.778 | KV453155.1 | 601455 | 19-scf00458 | 19 |
| AX-158292120 | 23 | 32.778 | KV453155.1 | 605841 | 19-scf00458 | 19 |
| AX-158292121 | 23 | 32.778 | KV453155.1 | 606773 | 19-scf00458 | 19 |
| AX-158292127 | 23 | 32.778 | KV453155.1 | 610416 | 19-scf00458 | 19 |
| AX-158292128 | 23 | 32.778 | KV453155.1 | 613163 | 19-scf00458 | 19 |
| AX-158292129 | 23 | 32.778 | KV453155.1 | 613942 | 19-scf00458 | 19 |
| AX-158292138 | 23 | 32.778 | KV453155.1 | 622540 | 19-scf00458 | 19 |
| AX-158292139 | 23 | 32.778 | KV453155.1 | 624128 | 19-scf00458 | 19 |
| AX-158292141 | 23 | 32.778 | KV453155.1 | 625505 | 19-scf00458 | 19 |
| AX-158292144 | 23 | 32.778 | KV453155.1 | 629971 | 19-scf00458 | 19 |
| AX-158292147 | 23 | 32.778 | KV453155.1 | 631744 | 19-scf00458 | 19 |
| AX-158292151 | 23 | 32.778 | KV453155.1 | 634355 | 19-scf00458 | 19 |
| AX-158292152 | 23 | 32.778 | KV453155.1 | 634718 | 19-scf00458 | 19 |
| AX-158292159 | 23 | 32.778 | KV453155.1 | 640411 | 19-scf00458 | 19 |
| AX-158292160 | 23 | 32.778 | KV453155.1 | 640998 | 19-scf00458 | 19 |
| AX-158292162 | 23 | 32.778 | KV453155.1 | 642770 | 19-scf00458 | 19 |
| AX-158292164 | 23 | 32.778 | KV453155.1 | 643965 | 19-scf00458 | 19 |
| AX-158292166 | 23 | 32.778 | KV453155.1 | 649822 | 19-scf00458 | 19 |
| AX-158292169 | 23 | 32.778 | KV453155.1 | 655936 | 19-scf00458 | 19 |
| AX-158292170 | 23 | 32.778 | KV453155.1 | 656316 | 19-scf00458 | 19 |
| AX-157739649 | 23 | 32.778 | KV453155.1 | 660027 | 19-scf00458 | 19 |
| AX-158292176 | 23 | 32.778 | KV453155.1 | 660950 | 19-scf00458 | 19 |
| AX-158292179 | 23 | 32.778 | KV453155.1 | 664600 | 19-scf00458 | 19 |
| AX-158292180 | 23 | 32.778 | KV453155.1 | 665004 | 19-scf00458 | 19 |
| AX-158292182 | 23 | 32.778 | KV453155.1 | 668023 | 19-scf00458 | 19 |
| AX-158292183 | 23 | 32.778 | KV453155.1 | 669807 | 19-scf00458 | 19 |

|              |    |        |            |        |             |    |
|--------------|----|--------|------------|--------|-------------|----|
| AX-158292184 | 23 | 32.778 | KV453155.1 | 670388 | 19-scf00458 | 19 |
| AX-158292185 | 23 | 32.778 | KV453155.1 | 671025 | 19-scf00458 | 19 |
| AX-158292190 | 23 | 32.778 | KV453155.1 | 675168 | 19-scf00458 | 19 |
| AX-158292192 | 23 | 32.778 | KV453155.1 | 677792 | 19-scf00458 | 19 |
| AX-158292193 | 23 | 32.778 | KV453155.1 | 679455 | 19-scf00458 | 19 |
| AX-158292195 | 23 | 32.778 | KV453155.1 | 682022 | 19-scf00458 | 19 |
| AX-158292198 | 23 | 32.778 | KV453155.1 | 689276 | 19-scf00458 | 19 |
| AX-158292201 | 23 | 32.778 | KV453155.1 | 692543 | 19-scf00458 | 19 |
| AX-158292202 | 23 | 32.778 | KV453155.1 | 693202 | 19-scf00458 | 19 |
| AX-158417332 | 23 | 32.778 | KV453155.1 | 693372 | 19-scf00458 | 19 |
| AX-158292204 | 23 | 32.778 | KV453155.1 | 695062 | 19-scf00458 | 19 |
| AX-158292206 | 23 | 32.778 | KV453155.1 | 696063 | 19-scf00458 | 19 |
| AX-158292208 | 23 | 32.778 | KV453155.1 | 699761 | 19-scf00458 | 19 |
| AX-158292211 | 23 | 32.778 | KV453155.1 | 703931 | 19-scf00458 | 19 |
| AX-158292212 | 23 | 32.778 | KV453155.1 | 705964 | 19-scf00458 | 19 |
| AX-158292213 | 23 | 32.778 | KV453155.1 | 707251 | 19-scf00458 | 19 |
| AX-158292215 | 23 | 32.778 | KV453155.1 | 711417 | 19-scf00458 | 19 |
| AX-158292222 | 23 | 32.778 | KV453155.1 | 718761 | 19-scf00458 | 19 |
| AX-158292223 | 23 | 32.778 | KV453155.1 | 719613 | 19-scf00458 | 19 |
| AX-158292225 | 23 | 32.778 | KV453155.1 | 724817 | 19-scf00458 | 19 |
| AX-158292226 | 23 | 32.778 | KV453155.1 | 728227 | 19-scf00458 | 19 |
| AX-158292231 | 23 | 32.778 | KV453155.1 | 733730 | 19-scf00458 | 19 |
| AX-158292232 | 23 | 32.778 | KV453155.1 | 734387 | 19-scf00458 | 19 |
| AX-158292237 | 23 | 32.778 | KV453155.1 | 753818 | 19-scf00458 | 19 |
| AX-158292241 | 23 | 32.778 | KV453155.1 | 756980 | 19-scf00458 | 19 |
| AX-158292246 | 23 | 32.778 | KV453155.1 | 760264 | 19-scf00458 | 19 |
| AX-158292248 | 23 | 32.778 | KV453155.1 | 761732 | 19-scf00458 | 19 |
| AX-158292250 | 23 | 32.778 | KV453155.1 | 763078 | 19-scf00458 | 19 |
| AX-158292252 | 23 | 32.778 | KV453155.1 | 765847 | 19-scf00458 | 19 |
| AX-158292253 | 23 | 32.778 | KV453155.1 | 769441 | 19-scf00458 | 19 |
| AX-158292259 | 23 | 32.778 | KV453155.1 | 777604 | 19-scf00458 | 19 |
| AX-158292260 | 23 | 32.778 | KV453155.1 | 778911 | 19-scf00458 | 19 |
| AX-158292265 | 23 | 32.778 | KV453155.1 | 785548 | 19-scf00458 | 19 |
| AX-158292266 | 23 | 32.778 | KV453155.1 | 786134 | 19-scf00458 | 19 |
| AX-158292269 | 23 | 32.778 | KV453155.1 | 787825 | 19-scf00458 | 19 |
| AX-158292270 | 23 | 32.778 | KV453155.1 | 788250 | 19-scf00458 | 19 |
| AX-158292272 | 23 | 32.778 | KV453155.1 | 788834 | 19-scf00458 | 19 |
| AX-158292274 | 23 | 32.778 | KV453155.1 | 790632 | 19-scf00458 | 19 |
| AX-158292275 | 23 | 32.778 | KV453155.1 | 791329 | 19-scf00458 | 19 |
| AX-158292278 | 23 | 32.778 | KV453155.1 | 797059 | 19-scf00458 | 19 |
| AX-158292281 | 23 | 32.778 | KV453155.1 | 799505 | 19-scf00458 | 19 |
| AX-158292286 | 23 | 32.778 | KV453155.1 | 805303 | 19-scf00458 | 19 |
| AX-158292290 | 23 | 32.778 | KV453155.1 | 811419 | 19-scf00458 | 19 |
| AX-158292292 | 23 | 32.778 | KV453155.1 | 818591 | 19-scf00458 | 19 |
| AX-158292293 | 23 | 32.778 | KV453155.1 | 818698 | 19-scf00458 | 19 |
| AX-158292294 | 23 | 32.778 | KV453155.1 | 820241 | 19-scf00458 | 19 |
| AX-158292300 | 23 | 32.778 | KV453155.1 | 826111 | 19-scf00458 | 19 |
| AX-158292301 | 23 | 32.778 | KV453155.1 | 826871 | 19-scf00458 | 19 |
| AX-158292304 | 23 | 32.778 | KV453155.1 | 830531 | 19-scf00458 | 19 |
| AX-158292306 | 23 | 32.778 | KV453155.1 | 831787 | 19-scf00458 | 19 |
| AX-158292309 | 23 | 32.778 | KV453155.1 | 836113 | 19-scf00458 | 19 |

|              |    |        |            |         |             |    |
|--------------|----|--------|------------|---------|-------------|----|
| AX-158292310 | 23 | 32.778 | KV453155.1 | 836835  | 19-scf00458 | 19 |
| AX-158292311 | 23 | 32.778 | KV453155.1 | 837695  | 19-scf00458 | 19 |
| AX-158292322 | 23 | 32.778 | KV453155.1 | 850278  | 19-scf00458 | 19 |
| AX-158417340 | 23 | 32.778 | KV453155.1 | 855017  | 19-scf00458 | 19 |
| AX-158419585 | 23 | 32.778 | KV453155.1 | 858007  | 19-scf00458 | 19 |
| AX-158292327 | 23 | 32.778 | KV453155.1 | 861952  | 19-scf00458 | 19 |
| AX-158292328 | 23 | 32.778 | KV453155.1 | 862240  | 19-scf00458 | 19 |
| AX-158292329 | 23 | 32.778 | KV453155.1 | 862831  | 19-scf00458 | 19 |
| AX-158292332 | 23 | 32.778 | KV453155.1 | 864117  | 19-scf00458 | 19 |
| AX-158292335 | 23 | 32.778 | KV453155.1 | 866397  | 19-scf00458 | 19 |
| AX-158292336 | 23 | 32.778 | KV453155.1 | 868090  | 19-scf00458 | 19 |
| AX-158292339 | 23 | 32.778 | KV453155.1 | 873105  | 19-scf00458 | 19 |
| AX-158292340 | 23 | 32.778 | KV453155.1 | 876782  | 19-scf00458 | 19 |
| AX-158292341 | 23 | 32.778 | KV453155.1 | 877420  | 19-scf00458 | 19 |
| AX-158292344 | 23 | 32.778 | KV453155.1 | 880144  | 19-scf00458 | 19 |
| AX-158292350 | 23 | 32.778 | KV453155.1 | 887646  | 19-scf00458 | 19 |
| AX-158292352 | 23 | 32.778 | KV453155.1 | 888560  | 19-scf00458 | 19 |
| AX-158292356 | 23 | 32.778 | KV453155.1 | 893544  | 19-scf00458 | 19 |
| AX-158292358 | 23 | 32.778 | KV453155.1 | 894425  | 19-scf00458 | 19 |
| AX-158292360 | 23 | 32.778 | KV453155.1 | 895238  | 19-scf00458 | 19 |
| AX-158292364 | 23 | 32.778 | KV453155.1 | 899191  | 19-scf00458 | 19 |
| AX-158292373 | 23 | 32.778 | KV453155.1 | 904929  | 19-scf00458 | 19 |
| AX-158292379 | 23 | 32.778 | KV453155.1 | 926360  | 19-scf00458 | 19 |
| AX-158292380 | 23 | 32.778 | KV453155.1 | 926886  | 19-scf00458 | 19 |
| AX-158292382 | 23 | 32.778 | KV453155.1 | 929126  | 19-scf00458 | 19 |
| AX-158292383 | 23 | 32.778 | KV453155.1 | 929981  | 19-scf00458 | 19 |
| AX-158292386 | 23 | 32.778 | KV453155.1 | 933563  | 19-scf00458 | 19 |
| AX-158292389 | 23 | 32.778 | KV453155.1 | 943925  | 19-scf00458 | 19 |
| AX-158292393 | 23 | 32.778 | KV453155.1 | 952998  | 19-scf00458 | 19 |
| AX-158292396 | 23 | 32.778 | KV453155.1 | 954878  | 19-scf00458 | 19 |
| AX-158292399 | 23 | 32.778 | KV453155.1 | 956904  | 19-scf00458 | 19 |
| AX-158292401 | 23 | 32.778 | KV453155.1 | 960209  | 19-scf00458 | 19 |
| AX-158292402 | 23 | 32.778 | KV453155.1 | 962674  | 19-scf00458 | 19 |
| AX-158292406 | 23 | 32.778 | KV453155.1 | 967218  | 19-scf00458 | 19 |
| AX-158292407 | 23 | 32.778 | KV453155.1 | 968336  | 19-scf00458 | 19 |
| AX-158292410 | 23 | 32.778 | KV453155.1 | 971333  | 19-scf00458 | 19 |
| AX-158292413 | 23 | 32.778 | KV453155.1 | 973293  | 19-scf00458 | 19 |
| AX-158292414 | 23 | 32.778 | KV453155.1 | 975471  | 19-scf00458 | 19 |
| AX-158292417 | 23 | 32.778 | KV453155.1 | 977068  | 19-scf00458 | 19 |
| AX-158292418 | 23 | 32.778 | KV453155.1 | 977752  | 19-scf00458 | 19 |
| AX-158292419 | 23 | 32.778 | KV453155.1 | 978822  | 19-scf00458 | 19 |
| AX-158292420 | 23 | 32.778 | KV453155.1 | 979613  | 19-scf00458 | 19 |
| AX-158292422 | 23 | 32.778 | KV453155.1 | 983556  | 19-scf00458 | 19 |
| AX-158292423 | 23 | 32.778 | KV453155.1 | 984564  | 19-scf00458 | 19 |
| AX-158292425 | 23 | 32.778 | KV453155.1 | 986876  | 19-scf00458 | 19 |
| AX-158292427 | 23 | 32.778 | KV453155.1 | 989967  | 19-scf00458 | 19 |
| AX-158292429 | 23 | 32.778 | KV453155.1 | 991075  | 19-scf00458 | 19 |
| AX-157845620 | 23 | 32.778 | KV453155.1 | 996077  | 19-scf00458 | 19 |
| AX-158292432 | 23 | 32.778 | KV453155.1 | 996971  | 19-scf00458 | 19 |
| AX-158292440 | 23 | 32.778 | KV453155.1 | 1005383 | 19-scf00458 | 19 |
| AX-158292441 | 23 | 32.778 | KV453155.1 | 1005865 | 19-scf00458 | 19 |

|              |    |        |            |         |             |    |
|--------------|----|--------|------------|---------|-------------|----|
| AX-158292443 | 23 | 32.778 | KV453155.1 | 1006727 | 19-scf00458 | 19 |
| AX-158292444 | 23 | 32.778 | KV453155.1 | 1007706 | 19-scf00458 | 19 |
| AX-158292447 | 23 | 32.778 | KV453155.1 | 1011033 | 19-scf00458 | 19 |
| AX-158292449 | 23 | 32.778 | KV453155.1 | 1013921 | 19-scf00458 | 19 |
| AX-158292451 | 23 | 32.778 | KV453155.1 | 1016762 | 19-scf00458 | 19 |
| AX-158292454 | 23 | 32.778 | KV453155.1 | 1018717 | 19-scf00458 | 19 |
| AX-158292456 | 23 | 32.778 | KV453155.1 | 1020493 | 19-scf00458 | 19 |
| AX-158292458 | 23 | 32.778 | KV453155.1 | 1021403 | 19-scf00458 | 19 |
| AX-158292460 | 23 | 32.778 | KV453155.1 | 1023399 | 19-scf00458 | 19 |
| AX-158292465 | 23 | 32.778 | KV453155.1 | 1026804 | 19-scf00458 | 19 |
| AX-158292467 | 23 | 32.778 | KV453155.1 | 1027724 | 19-scf00458 | 19 |
| AX-158292469 | 23 | 32.778 | KV453155.1 | 1028628 | 19-scf00458 | 19 |
| AX-158292470 | 23 | 32.778 | KV453155.1 | 1029166 | 19-scf00458 | 19 |
| AX-158292472 | 23 | 32.778 | KV453155.1 | 1030448 | 19-scf00458 | 19 |
| AX-158292476 | 23 | 32.778 | KV453155.1 | 1035525 | 19-scf00458 | 19 |
| AX-158292477 | 23 | 32.778 | KV453155.1 | 1035990 | 19-scf00458 | 19 |
| AX-158292481 | 23 | 32.778 | KV453155.1 | 1045228 | 19-scf00458 | 19 |
| AX-158292488 | 23 | 32.778 | KV453155.1 | 1056734 | 19-scf00458 | 19 |
| AX-158292491 | 23 | 32.778 | KV453155.1 | 1060275 | 19-scf00458 | 19 |
| AX-158292493 | 23 | 32.778 | KV453155.1 | 1063948 | 19-scf00458 | 19 |
| AX-158292494 | 23 | 32.778 | KV453155.1 | 1064568 | 19-scf00458 | 19 |
| AX-158292495 | 23 | 32.778 | KV453155.1 | 1065045 | 19-scf00458 | 19 |
| AX-158292499 | 23 | 32.778 | KV453155.1 | 1067003 | 19-scf00458 | 19 |
| AX-158292505 | 23 | 32.778 | KV453155.1 | 1071390 | 19-scf00458 | 19 |
| AX-158292508 | 23 | 32.778 | KV453155.1 | 1076767 | 19-scf00458 | 19 |
| AX-158292509 | 23 | 32.778 | KV453155.1 | 1077439 | 19-scf00458 | 19 |
| AX-158292511 | 23 | 32.778 | KV453155.1 | 1081129 | 19-scf00458 | 19 |
| AX-158292514 | 23 | 32.778 | KV453155.1 | 1082535 | 19-scf00458 | 19 |
| AX-158292515 | 23 | 32.778 | KV453155.1 | 1083535 | 19-scf00458 | 19 |
| AX-158292516 | 23 | 32.778 | KV453155.1 | 1084755 | 19-scf00458 | 19 |
| AX-158292520 | 23 | 32.778 | KV453155.1 | 1087654 | 19-scf00458 | 19 |
| AX-158292521 | 23 | 32.778 | KV453155.1 | 1088393 | 19-scf00458 | 19 |
| AX-158292522 | 23 | 32.778 | KV453155.1 | 1088929 | 19-scf00458 | 19 |
| AX-158292525 | 23 | 32.778 | KV453155.1 | 1091168 | 19-scf00458 | 19 |
| AX-158292526 | 23 | 32.778 | KV453155.1 | 1091660 | 19-scf00458 | 19 |
| AX-158292528 | 23 | 32.778 | KV453155.1 | 1097483 | 19-scf00458 | 19 |
| AX-157754842 | 23 | 32.778 | KV453155.1 | 1098882 | 19-scf00458 | 19 |
| AX-158292529 | 23 | 32.778 | KV453155.1 | 1099641 | 19-scf00458 | 19 |
| AX-158292530 | 23 | 32.778 | KV453155.1 | 1100634 | 19-scf00458 | 19 |
| AX-158292531 | 23 | 32.778 | KV453155.1 | 1107782 | 19-scf00458 | 19 |
| AX-158292540 | 23 | 32.778 | KV453155.1 | 1115379 | 19-scf00458 | 19 |
| AX-158292541 | 23 | 32.778 | KV453155.1 | 1116368 | 19-scf00458 | 19 |
| AX-158292542 | 23 | 32.778 | KV453155.1 | 1117582 | 19-scf00458 | 19 |
| AX-158292544 | 23 | 32.778 | KV453155.1 | 1120074 | 19-scf00458 | 19 |
| AX-158292545 | 23 | 32.778 | KV453155.1 | 1124299 | 19-scf00458 | 19 |
| AX-158292546 | 23 | 32.778 | KV453155.1 | 1125258 | 19-scf00458 | 19 |
| AX-158292550 | 23 | 32.778 | KV453155.1 | 1131081 | 19-scf00458 | 19 |
| AX-158292551 | 23 | 32.778 | KV453155.1 | 1131677 | 19-scf00458 | 19 |
| AX-158292554 | 23 | 32.778 | KV453155.1 | 1135497 | 19-scf00458 | 19 |
| AX-158292559 | 23 | 32.778 | KV453155.1 | 1141557 | 19-scf00458 | 19 |
| AX-158292561 | 23 | 32.778 | KV453155.1 | 1146911 | 19-scf00458 | 19 |

|              |    |        |            |         |             |    |
|--------------|----|--------|------------|---------|-------------|----|
| AX-158292563 | 23 | 32.778 | KV453155.1 | 1148683 | 19-scf00458 | 19 |
| AX-158292565 | 23 | 32.778 | KV453155.1 | 1149871 | 19-scf00458 | 19 |
| AX-158292567 | 23 | 32.778 | KV453155.1 | 1152232 | 19-scf00458 | 19 |
| AX-158292568 | 23 | 32.778 | KV453155.1 | 1152724 | 19-scf00458 | 19 |
| AX-157724348 | 23 | 32.778 | KV453155.1 | 1153270 | 19-scf00458 | 19 |
| AX-158292569 | 23 | 32.778 | KV453155.1 | 1155026 | 19-scf00458 | 19 |
| AX-158292570 | 23 | 32.778 | KV453155.1 | 1155581 | 19-scf00458 | 19 |
| AX-158292571 | 23 | 32.778 | KV453155.1 | 1156096 | 19-scf00458 | 19 |
| AX-158292572 | 23 | 32.778 | KV453155.1 | 1157838 | 19-scf00458 | 19 |
| AX-158292578 | 23 | 32.778 | KV453155.1 | 1162530 | 19-scf00458 | 19 |
| AX-158292579 | 23 | 32.778 | KV453155.1 | 1164199 | 19-scf00458 | 19 |
| AX-158292581 | 23 | 32.778 | KV453155.1 | 1165006 | 19-scf00458 | 19 |
| AX-158292582 | 23 | 32.778 | KV453155.1 | 1165636 | 19-scf00458 | 19 |
| AX-158292584 | 23 | 32.778 | KV453155.1 | 1167131 | 19-scf00458 | 19 |
| AX-158292588 | 23 | 32.778 | KV453155.1 | 1169729 | 19-scf00458 | 19 |
| AX-158292590 | 23 | 32.778 | KV453155.1 | 1172089 | 19-scf00458 | 19 |
| AX-158292592 | 23 | 32.778 | KV453155.1 | 1173469 | 19-scf00458 | 19 |
| AX-158292593 | 23 | 32.778 | KV453155.1 | 1174224 | 19-scf00458 | 19 |
| AX-158292594 | 23 | 32.778 | KV453155.1 | 1174698 | 19-scf00458 | 19 |
| AX-158292595 | 23 | 32.778 | KV453155.1 | 1175285 | 19-scf00458 | 19 |
| AX-158292596 | 23 | 32.778 | KV453155.1 | 1176544 | 19-scf00458 | 19 |
| AX-157709841 | 23 | 32.778 | KV453155.1 | 1180922 | 19-scf00458 | 19 |
| AX-158292601 | 23 | 32.778 | KV453155.1 | 1185296 | 19-scf00458 | 19 |
| AX-158292603 | 23 | 32.778 | KV453155.1 | 1187332 | 19-scf00458 | 19 |
| AX-158292605 | 23 | 32.778 | KV453155.1 | 1188611 | 19-scf00458 | 19 |
| AX-158292609 | 23 | 32.778 | KV453155.1 | 1191705 | 19-scf00458 | 19 |
| AX-158292612 | 23 | 32.778 | KV453155.1 | 1200687 | 19-scf00458 | 19 |
| AX-158292613 | 23 | 32.778 | KV453155.1 | 1202532 | 19-scf00458 | 19 |
| AX-158292615 | 23 | 32.778 | KV453155.1 | 1205847 | 19-scf00458 | 19 |
| AX-158292618 | 23 | 32.778 | KV453155.1 | 1209697 | 19-scf00458 | 19 |
| AX-158292619 | 23 | 32.778 | KV453155.1 | 1210954 | 19-scf00458 | 19 |
| AX-158292620 | 23 | 32.778 | KV453155.1 | 1211482 | 19-scf00458 | 19 |
| AX-158292623 | 23 | 32.778 | KV453155.1 | 1213446 | 19-scf00458 | 19 |
| AX-158292624 | 23 | 32.778 | KV453155.1 | 1217183 | 19-scf00458 | 19 |
| AX-158292627 | 23 | 32.778 | KV453155.1 | 1219980 | 19-scf00458 | 19 |
| AX-158292628 | 23 | 32.778 | KV453155.1 | 1220710 | 19-scf00458 | 19 |
| AX-158292630 | 23 | 32.778 | KV453155.1 | 1221760 | 19-scf00458 | 19 |
| AX-158292631 | 23 | 32.778 | KV453155.1 | 1222595 | 19-scf00458 | 19 |
| AX-158292632 | 23 | 32.778 | KV453155.1 | 1223720 | 19-scf00458 | 19 |
| AX-158292633 | 23 | 32.778 | KV453155.1 | 1224427 | 19-scf00458 | 19 |
| AX-158292634 | 23 | 32.778 | KV453155.1 | 1225219 | 19-scf00458 | 19 |
| AX-158292635 | 23 | 32.778 | KV453155.1 | 1226347 | 19-scf00458 | 19 |
| AX-158292636 | 23 | 32.778 | KV453155.1 | 1226910 | 19-scf00458 | 19 |
| AX-158292637 | 23 | 32.778 | KV453155.1 | 1227575 | 19-scf00458 | 19 |
| AX-158292638 | 23 | 32.778 | KV453155.1 | 1228306 | 19-scf00458 | 19 |
| AX-158292640 | 23 | 32.778 | KV453155.1 | 1230715 | 19-scf00458 | 19 |
| AX-157845624 | 23 | 32.778 | KV453155.1 | 1231693 | 19-scf00458 | 19 |
| AX-158292641 | 23 | 32.778 | KV453155.1 | 1232531 | 19-scf00458 | 19 |
| AX-158292642 | 23 | 32.778 | KV453155.1 | 1232887 | 19-scf00458 | 19 |
| AX-157845626 | 23 | 32.778 | KV453155.1 | 1233292 | 19-scf00458 | 19 |
| AX-158292643 | 23 | 32.778 | KV453155.1 | 1233446 | 19-scf00458 | 19 |



|              |    |        |            |         |             |    |
|--------------|----|--------|------------|---------|-------------|----|
| AX-158292644 | 23 | 32.778 | KV453155.1 | 1233994 | 19-scf00458 | 19 |
| AX-158292647 | 23 | 32.778 | KV453155.1 | 1236352 | 19-scf00458 | 19 |
| AX-158292648 | 23 | 32.778 | KV453155.1 | 1236883 | 19-scf00458 | 19 |
| AX-158292649 | 23 | 32.778 | KV453155.1 | 1237740 | 19-scf00458 | 19 |
| AX-157845627 | 23 | 32.778 | KV453155.1 | 1238812 | 19-scf00458 | 19 |
| AX-157845628 | 23 | 32.778 | KV453155.1 | 1241260 | 19-scf00458 | 19 |
| AX-158292652 | 23 | 32.778 | KV453155.1 | 1243983 | 19-scf00458 | 19 |
| AX-158292653 | 23 | 32.778 | KV453155.1 | 1245029 | 19-scf00458 | 19 |
| AX-158292654 | 23 | 32.778 | KV453155.1 | 1246278 | 19-scf00458 | 19 |
| AX-158292655 | 23 | 32.778 | KV453155.1 | 1248302 | 19-scf00458 | 19 |
| AX-158292656 | 23 | 32.778 | KV453155.1 | 1248913 | 19-scf00458 | 19 |
| AX-158292658 | 23 | 32.778 | KV453155.1 | 1250086 | 19-scf00458 | 19 |
| AX-158292660 | 23 | 32.778 | KV453155.1 | 1251680 | 19-scf00458 | 19 |
| AX-158292663 | 23 | 32.778 | KV453155.1 | 1253924 | 19-scf00458 | 19 |
| AX-158292665 | 23 | 32.778 | KV453155.1 | 1256309 | 19-scf00458 | 19 |
| AX-158292666 | 23 | 32.778 | KV453155.1 | 1256847 | 19-scf00458 | 19 |
| AX-158292670 | 23 | 32.778 | KV453155.1 | 1260508 | 19-scf00458 | 19 |
| AX-158292671 | 23 | 32.778 | KV453155.1 | 1260943 | 19-scf00458 | 19 |
| AX-158292672 | 23 | 32.778 | KV453155.1 | 1261432 | 19-scf00458 | 19 |
| AX-158292675 | 23 | 32.778 | KV453155.1 | 1264999 | 19-scf00458 | 19 |
| AX-158292678 | 23 | 32.778 | KV453155.1 | 1268390 | 19-scf00458 | 19 |
| AX-158292680 | 23 | 32.778 | KV453155.1 | 1270474 | 19-scf00458 | 19 |
| AX-157845632 | 23 | 32.778 | KV453155.1 | 1280485 | 19-scf00458 | 19 |
| AX-158292686 | 23 | 32.778 | KV453155.1 | 1280700 | 19-scf00458 | 19 |
| AX-157745218 | 23 | 32.778 | KV453155.1 | 1283473 | 19-scf00458 | 19 |
| AX-158292692 | 23 | 32.778 | KV453155.1 | 1290141 | 19-scf00458 | 19 |
| AX-158292693 | 23 | 32.778 | KV453155.1 | 1290580 | 19-scf00458 | 19 |
| AX-158292696 | 23 | 32.778 | KV453155.1 | 1295637 | 19-scf00458 | 19 |
| AX-158292698 | 23 | 32.778 | KV453155.1 | 1298326 | 19-scf00458 | 19 |
| AX-158292699 | 23 | 32.778 | KV453155.1 | 1299197 | 19-scf00458 | 19 |
| AX-158292701 | 23 | 32.778 | KV453155.1 | 1300348 | 19-scf00458 | 19 |
| AX-157744707 | 23 | 32.778 | KV453155.1 | 1301162 | 19-scf00458 | 19 |
| AX-158292702 | 23 | 32.778 | KV453155.1 | 1301968 | 19-scf00458 | 19 |
| AX-158292703 | 23 | 32.778 | KV453155.1 | 1302140 | 19-scf00458 | 19 |
| AX-158292704 | 23 | 32.778 | KV453155.1 | 1303225 | 19-scf00458 | 19 |
| AX-158292705 | 23 | 32.778 | KV453155.1 | 1303700 | 19-scf00458 | 19 |
| AX-158292706 | 23 | 32.778 | KV453155.1 | 1304459 | 19-scf00458 | 19 |
| AX-158292707 | 23 | 32.778 | KV453155.1 | 1305299 | 19-scf00458 | 19 |
| AX-158292708 | 23 | 32.778 | KV453155.1 | 1307340 | 19-scf00458 | 19 |
| AX-158292710 | 23 | 32.778 | KV453155.1 | 1311317 | 19-scf00458 | 19 |
| AX-158292711 | 23 | 32.778 | KV453155.1 | 1311600 | 19-scf00458 | 19 |
| AX-158292712 | 23 | 32.778 | KV453155.1 | 1313229 | 19-scf00458 | 19 |
| AX-158292713 | 23 | 32.778 | KV453155.1 | 1315213 | 19-scf00458 | 19 |
| AX-158292714 | 23 | 32.778 | KV453155.1 | 1315851 | 19-scf00458 | 19 |
| AX-158292717 | 23 | 32.778 | KV453155.1 | 1319694 | 19-scf00458 | 19 |
| AX-157845638 | 23 | 32.778 | KV453155.1 | 1319837 | 19-scf00458 | 19 |
| AX-158292720 | 23 | 32.778 | KV453155.1 | 1321670 | 19-scf00458 | 19 |
| AX-158292721 | 23 | 32.778 | KV453155.1 | 1324690 | 19-scf00458 | 19 |
| AX-158292722 | 23 | 32.778 | KV453155.1 | 1327016 | 19-scf00458 | 19 |
| AX-157745913 | 23 | 32.778 | KV453155.1 | 1328760 | 19-scf00458 | 19 |
| AX-158292723 | 23 | 32.778 | KV453155.1 | 1329964 | 19-scf00458 | 19 |

|              |    |        |            |         |             |    |
|--------------|----|--------|------------|---------|-------------|----|
| AX-158292726 | 23 | 32.778 | KV453155.1 | 1332361 | 19-scf00458 | 19 |
| AX-158292733 | 23 | 32.778 | KV453155.1 | 1338910 | 19-scf00458 | 19 |
| AX-158292735 | 23 | 32.778 | KV453155.1 | 1340874 | 19-scf00458 | 19 |
| AX-157748608 | 23 | 32.778 | KV453155.1 | 1343338 | 19-scf00458 | 19 |
| AX-158292736 | 23 | 32.778 | KV453155.1 | 1343833 | 19-scf00458 | 19 |
| AX-157845641 | 23 | 32.778 | KV453155.1 | 1344284 | 19-scf00458 | 19 |
| AX-158292738 | 23 | 32.778 | KV453155.1 | 1345220 | 19-scf00458 | 19 |
| AX-158292740 | 23 | 32.778 | KV453155.1 | 1347737 | 19-scf00458 | 19 |
| AX-157720698 | 23 | 32.778 | KV453155.1 | 1349381 | 19-scf00458 | 19 |
| AX-158292742 | 23 | 32.778 | KV453155.1 | 1350355 | 19-scf00458 | 19 |
| AX-158292744 | 23 | 32.778 | KV453155.1 | 1353966 | 19-scf00458 | 19 |
| AX-158292747 | 23 | 32.778 | KV453155.1 | 1359010 | 19-scf00458 | 19 |
| AX-158292748 | 23 | 32.778 | KV453155.1 | 1359872 | 19-scf00458 | 19 |
| AX-158292752 | 23 | 32.778 | KV453155.1 | 1365909 | 19-scf00458 | 19 |
| AX-157742252 | 23 | 32.778 | KV453155.1 | 1366936 | 19-scf00458 | 19 |
| AX-158292756 | 23 | 32.778 | KV453155.1 | 1368942 | 19-scf00458 | 19 |
| AX-158292763 | 23 | 32.778 | KV453155.1 | 1375037 | 19-scf00458 | 19 |
| AX-157845644 | 23 | 32.778 | KV453155.1 | 1380165 | 19-scf00458 | 19 |
| AX-157845645 | 23 | 32.778 | KV453155.1 | 1380901 | 19-scf00458 | 19 |
| AX-158292769 | 23 | 32.778 | KV453155.1 | 1381852 | 19-scf00458 | 19 |
| AX-158292770 | 23 | 32.778 | KV453155.1 | 1382911 | 19-scf00458 | 19 |
| AX-158292771 | 23 | 32.778 | KV453155.1 | 1383215 | 19-scf00458 | 19 |
| AX-158292773 | 23 | 32.778 | KV453155.1 | 1384675 | 19-scf00458 | 19 |
| AX-158292775 | 23 | 32.778 | KV453155.1 | 1386382 | 19-scf00458 | 19 |
| AX-158292776 | 23 | 32.778 | KV453155.1 | 1386855 | 19-scf00458 | 19 |
| AX-158292777 | 23 | 32.778 | KV453155.1 | 1387070 | 19-scf00458 | 19 |
| AX-157745582 | 23 | 32.778 | KV453155.1 | 1387710 | 19-scf00458 | 19 |
| AX-157845646 | 23 | 32.778 | KV453155.1 | 1388412 | 19-scf00458 | 19 |
| AX-157845647 | 23 | 32.778 | KV453155.1 | 1389433 | 19-scf00458 | 19 |
| AX-158292780 | 23 | 32.778 | KV453155.1 | 1392332 | 19-scf00458 | 19 |
| AX-157845649 | 23 | 32.778 | KV453155.1 | 1397791 | 19-scf00458 | 19 |
| AX-157745269 | 23 | 32.778 | KV453155.1 | 1398683 | 19-scf00458 | 19 |
| AX-158292781 | 23 | 32.778 | KV453155.1 | 1399220 | 19-scf00458 | 19 |
| AX-158292782 | 23 | 32.778 | KV453155.1 | 1400032 | 19-scf00458 | 19 |
| AX-158292784 | 23 | 32.778 | KV453155.1 | 1401813 | 19-scf00458 | 19 |
| AX-158292786 | 23 | 32.778 | KV453155.1 | 1404848 | 19-scf00458 | 19 |
| AX-158292789 | 23 | 32.778 | KV453155.1 | 1411785 | 19-scf00458 | 19 |
| AX-158292792 | 23 | 32.778 | KV453155.1 | 1420551 | 19-scf00458 | 19 |
| AX-158292796 | 23 | 32.778 | KV453155.1 | 1425857 | 19-scf00458 | 19 |
| AX-157747951 | 23 | 32.778 | KV453155.1 | 1426287 | 19-scf00458 | 19 |
| AX-158292797 | 23 | 32.778 | KV453155.1 | 1428856 | 19-scf00458 | 19 |
| AX-158292801 | 23 | 32.778 | KV453155.1 | 1433125 | 19-scf00458 | 19 |
| AX-157845652 | 23 | 32.778 | KV453155.1 | 1434245 | 19-scf00458 | 19 |
| AX-158292806 | 23 | 32.778 | KV453155.1 | 1438923 | 19-scf00458 | 19 |
| AX-158292812 | 23 | 32.778 | KV453155.1 | 1447058 | 19-scf00458 | 19 |
| AX-157845653 | 23 | 32.778 | KV453155.1 | 1456492 | 19-scf00458 | 19 |
| AX-157845654 | 23 | 32.778 | KV453155.1 | 1461789 | 19-scf00458 | 19 |
| AX-158292821 | 23 | 32.778 | KV453155.1 | 1462092 | 19-scf00458 | 19 |
| AX-158292823 | 23 | 32.778 | KV453155.1 | 1466295 | 19-scf00458 | 19 |
| AX-157845655 | 23 | 32.778 | KV453155.1 | 1481025 | 19-scf00458 | 19 |
| AX-158292832 | 23 | 32.778 | KV453155.1 | 1482542 | 19-scf00458 | 19 |

|              |    |        |            |         |             |    |
|--------------|----|--------|------------|---------|-------------|----|
| AX-158292837 | 23 | 32.778 | KV453155.1 | 1488363 | 19-scf00458 | 19 |
| AX-157722547 | 23 | 32.778 | KV453155.1 | 1488614 | 19-scf00458 | 19 |
| AX-158292839 | 23 | 32.778 | KV453155.1 | 1490126 | 19-scf00458 | 19 |
| AX-158292840 | 23 | 32.778 | KV453155.1 | 1490678 | 19-scf00458 | 19 |
| AX-158292844 | 23 | 32.778 | KV453155.1 | 1496904 | 19-scf00458 | 19 |
| AX-158293383 | 23 | 32.778 | KV453155.1 | 2047299 | 19-scf00458 | 19 |
| AX-158293577 | 23 | 32.778 | KV453155.1 | 2273789 | 19-scf00458 | 19 |
| AX-157860224 | 23 | 32.778 | KV453155.1 | 2293676 | 19-scf00458 | 19 |
| AX-157845712 | 23 | 32.778 | KV453155.1 | 2294351 | 19-scf00458 | 19 |
| AX-158293604 | 23 | 32.778 | KV453155.1 | 2305672 | 19-scf00458 | 19 |
| AX-158293638 | 23 | 32.778 | KV453155.1 | 2351961 | 19-scf00458 | 19 |
| AX-158293639 | 23 | 32.778 | KV453155.1 | 2353085 | 19-scf00458 | 19 |
| AX-158293640 | 23 | 32.778 | KV453155.1 | 2353530 | 19-scf00458 | 19 |
| AX-158293642 | 23 | 32.778 | KV453155.1 | 2355825 | 19-scf00458 | 19 |
| AX-157845718 | 23 | 32.778 | KV453155.1 | 2356769 | 19-scf00458 | 19 |
| AX-158293647 | 23 | 32.778 | KV453155.1 | 2361752 | 19-scf00458 | 19 |
| AX-158293649 | 23 | 32.778 | KV453155.1 | 2364712 | 19-scf00458 | 19 |
| AX-158293650 | 23 | 32.778 | KV453155.1 | 2365724 | 19-scf00458 | 19 |
| AX-158293652 | 23 | 32.778 | KV453155.1 | 2368019 | 19-scf00458 | 19 |
| AX-158293653 | 23 | 32.778 | KV453155.1 | 2370197 | 19-scf00458 | 19 |
| AX-158293663 | 23 | 32.778 | KV453155.1 | 2382486 | 19-scf00458 | 19 |
| AX-158293669 | 23 | 32.778 | KV453155.1 | 2388435 | 19-scf00458 | 19 |
| AX-158293670 | 23 | 32.778 | KV453155.1 | 2389652 | 19-scf00458 | 19 |
| AX-158293671 | 23 | 32.778 | KV453155.1 | 2391101 | 19-scf00458 | 19 |
| AX-158293673 | 23 | 32.778 | KV453155.1 | 2392984 | 19-scf00458 | 19 |
| AX-158293675 | 23 | 32.778 | KV453155.1 | 2394539 | 19-scf00458 | 19 |
| AX-158293677 | 23 | 32.778 | KV453155.1 | 2396694 | 19-scf00458 | 19 |
| AX-158293678 | 23 | 32.778 | KV453155.1 | 2397013 | 19-scf00458 | 19 |
| AX-158293682 | 23 | 32.778 | KV453155.1 | 2407531 | 19-scf00458 | 19 |
| AX-158293683 | 23 | 32.778 | KV453155.1 | 2408890 | 19-scf00458 | 19 |
| AX-158293684 | 23 | 32.778 | KV453155.1 | 2410059 | 19-scf00458 | 19 |
| AX-158293685 | 23 | 32.778 | KV453155.1 | 2410797 | 19-scf00458 | 19 |
| AX-158293686 | 23 | 32.778 | KV453155.1 | 2412468 | 19-scf00458 | 19 |
| AX-158293687 | 23 | 32.778 | KV453155.1 | 2412850 | 19-scf00458 | 19 |
| AX-158293688 | 23 | 32.778 | KV453155.1 | 2413717 | 19-scf00458 | 19 |
| AX-157746022 | 23 | 32.778 | KV453155.1 | 2416585 | 19-scf00458 | 19 |
| AX-158293698 | 23 | 32.778 | KV453155.1 | 2423655 | 19-scf00458 | 19 |
| AX-158417366 | 23 | 32.778 | KV453155.1 | 2425391 | 19-scf00458 | 19 |
| AX-158293700 | 23 | 32.778 | KV453155.1 | 2426565 | 19-scf00458 | 19 |
| AX-158293703 | 23 | 32.778 | KV453155.1 | 2430424 | 19-scf00458 | 19 |
| AX-158293704 | 23 | 32.778 | KV453155.1 | 2431430 | 19-scf00458 | 19 |
| AX-158293708 | 23 | 32.778 | KV453155.1 | 2434176 | 19-scf00458 | 19 |
| AX-158293710 | 23 | 32.778 | KV453155.1 | 2438739 | 19-scf00458 | 19 |
| AX-158293712 | 23 | 32.778 | KV453155.1 | 2444013 | 19-scf00458 | 19 |
| AX-158293716 | 23 | 32.778 | KV453155.1 | 2448784 | 19-scf00458 | 19 |
| AX-158293718 | 23 | 32.778 | KV453155.1 | 2450257 | 19-scf00458 | 19 |
| AX-157746580 | 23 | 32.778 | KV453155.1 | 2450703 | 19-scf00458 | 19 |
| AX-158293725 | 23 | 32.778 | KV453155.1 | 2463750 | 19-scf00458 | 19 |
| AX-157773339 | 23 | 32.778 | KV453155.1 | 2478259 | 19-scf00458 | 19 |
| AX-158293734 | 23 | 32.778 | KV453155.1 | 2479916 | 19-scf00458 | 19 |
| AX-158293747 | 23 | 32.778 | KV453155.1 | 2492574 | 19-scf00458 | 19 |

|              |    |        |             |         |             |    |
|--------------|----|--------|-------------|---------|-------------|----|
| AX-157733109 | 23 | 32.778 | KV453155.1  | 2514426 | 19-scf00458 | 19 |
| AX-158293765 | 23 | 32.778 | KV453155.1  | 2519511 | 19-scf00458 | 19 |
| AX-157743864 | 23 | 32.778 | KV453155.1  | 2522349 | 19-scf00458 | 19 |
| AX-158293772 | 23 | 32.778 | KV453155.1  | 2528825 | 19-scf00458 | 19 |
| AX-158293784 | 23 | 32.778 | KV453155.1  | 2546408 | 19-scf00458 | 19 |
| AX-158295606 | 23 | 32.778 | KV453154.1  | 2857    | 19-scf00459 | 19 |
| AX-157727427 | 23 | 32.887 | KV453155.1  | 2470485 | 19-scf00458 | 19 |
| AX-158293727 | 23 | 32.887 | KV453155.1  | 2472385 | 19-scf00458 | 19 |
| AX-158293729 | 23 | 32.887 | KV453155.1  | 2474446 | 19-scf00458 | 19 |
| AX-158293741 | 23 | 32.887 | KV453155.1  | 2486393 | 19-scf00458 | 19 |
| AX-158293745 | 23 | 32.887 | KV453155.1  | 2491332 | 19-scf00458 | 19 |
| AX-158293749 | 23 | 32.887 | KV453155.1  | 2494526 | 19-scf00458 | 19 |
| AX-158293753 | 23 | 32.887 | KV453155.1  | 2499133 | 19-scf00458 | 19 |
| AX-158293761 | 23 | 32.887 | KV453155.1  | 2508060 | 19-scf00458 | 19 |
| AX-158293835 | 23 | 32.887 | KV453155.1  | 2605147 | 19-scf00458 | 19 |
| AX-157845752 | 23 | 32.887 | KV453155.1  | 3209073 | 19-scf00458 | 19 |
| AX-157845844 | 23 | 32.887 | KV453155.1  | 4489786 | 19-scf00458 | 19 |
| AX-157707502 | 23 | 32.887 | 3ML01034415 | 106     | scf10089_1  | UN |
| AX-158293743 | 23 | 32.888 | KV453155.1  | 2489607 | 19-scf00458 | 19 |
| AX-158293762 | 23 | 32.888 | KV453155.1  | 2511692 | 19-scf00458 | 19 |
| AX-158293764 | 23 | 32.888 | KV453155.1  | 2517448 | 19-scf00458 | 19 |
| AX-158293796 | 23 | 32.888 | KV453155.1  | 2563291 | 19-scf00458 | 19 |
| AX-158293766 | 23 | 32.889 | KV453155.1  | 2519817 | 19-scf00458 | 19 |
| AX-158293770 | 23 | 33.214 | KV453155.1  | 2525968 | 19-scf00458 | 19 |
| AX-157714757 | 23 | 33.214 | KV453155.1  | 2535208 | 19-scf00458 | 19 |
| AX-157845725 | 23 | 33.214 | KV453155.1  | 2535651 | 19-scf00458 | 19 |
| AX-157713671 | 23 | 33.214 | KV453155.1  | 2539410 | 19-scf00458 | 19 |
| AX-157845726 | 23 | 33.214 | KV453155.1  | 2543698 | 19-scf00458 | 19 |
| AX-158293781 | 23 | 33.214 | KV453155.1  | 2544849 | 19-scf00458 | 19 |
| AX-158293782 | 23 | 33.214 | KV453155.1  | 2545256 | 19-scf00458 | 19 |
| AX-158293787 | 23 | 33.214 | KV453155.1  | 2548998 | 19-scf00458 | 19 |
| AX-157845727 | 23 | 33.214 | KV453155.1  | 2558505 | 19-scf00458 | 19 |
| AX-158293830 | 23 | 33.214 | KV453155.1  | 2603115 | 19-scf00458 | 19 |
| AX-158294039 | 23 | 33.214 | KV453155.1  | 2859365 | 19-scf00458 | 19 |
| AX-158294260 | 23 | 33.214 | KV453155.1  | 3089959 | 19-scf00458 | 19 |
| AX-158293800 | 23 | 33.255 | KV453155.1  | 2566986 | 19-scf00458 | 19 |
| AX-158293803 | 23 | 33.297 | KV453155.1  | 2568999 | 19-scf00458 | 19 |
| AX-158293807 | 23 | 33.323 | KV453155.1  | 2573902 | 19-scf00458 | 19 |
| AX-158293810 | 23 | 33.323 | KV453155.1  | 2577204 | 19-scf00458 | 19 |
| AX-158293812 | 23 | 33.323 | KV453155.1  | 2578939 | 19-scf00458 | 19 |
| AX-158293820 | 23 | 33.433 | KV453155.1  | 2588068 | 19-scf00458 | 19 |
| AX-158293821 | 23 | 33.433 | KV453155.1  | 2588705 | 19-scf00458 | 19 |
| AX-158417371 | 23 | 33.433 | KV453155.1  | 2589694 | 19-scf00458 | 19 |
| AX-158293834 | 23 | 33.597 | KV453155.1  | 2604779 | 19-scf00458 | 19 |
| AX-158293836 | 23 | 33.597 | KV453155.1  | 2606958 | 19-scf00458 | 19 |
| AX-157723552 | 23 | 33.597 | KV453155.1  | 2607674 | 19-scf00458 | 19 |
| AX-158293863 | 23 | 33.597 | KV453155.1  | 2648895 | 19-scf00458 | 19 |
| AX-158293845 | 23 | 33.76  | KV453155.1  | 2617408 | 19-scf00458 | 19 |
| AX-158293846 | 23 | 33.76  | KV453155.1  | 2618203 | 19-scf00458 | 19 |
| AX-158293847 | 23 | 33.76  | KV453155.1  | 2620208 | 19-scf00458 | 19 |
| AX-158293848 | 23 | 33.76  | KV453155.1  | 2622240 | 19-scf00458 | 19 |

|              |    |        |            |         |             |    |
|--------------|----|--------|------------|---------|-------------|----|
| AX-158293849 | 23 | 33.76  | KV453155.1 | 2624234 | 19-scf00458 | 19 |
| AX-158293850 | 23 | 33.76  | KV453155.1 | 2625438 | 19-scf00458 | 19 |
| AX-157770913 | 23 | 33.76  | KV453155.1 | 2626109 | 19-scf00458 | 19 |
| AX-158293855 | 23 | 33.76  | KV453155.1 | 2634323 | 19-scf00458 | 19 |
| AX-157717795 | 23 | 33.76  | KV453155.1 | 2637191 | 19-scf00458 | 19 |
| AX-158293861 | 23 | 33.76  | KV453155.1 | 2646026 | 19-scf00458 | 19 |
| AX-157845731 | 23 | 33.76  | KV453155.1 | 2647456 | 19-scf00458 | 19 |
| AX-158293878 | 23 | 33.76  | KV453155.1 | 2666855 | 19-scf00458 | 19 |
| AX-158293907 | 23 | 33.76  | KV453155.1 | 2708605 | 19-scf00458 | 19 |
| AX-158293909 | 23 | 33.76  | KV453155.1 | 2711300 | 19-scf00458 | 19 |
| AX-158293789 | 23 | 33.761 | KV453155.1 | 2553003 | 19-scf00458 | 19 |
| AX-157713224 | 23 | 33.761 | KV453155.1 | 2639483 | 19-scf00458 | 19 |
| AX-158293864 | 23 | 33.761 | KV453155.1 | 2649566 | 19-scf00458 | 19 |
| AX-158293865 | 23 | 33.761 | KV453155.1 | 2652069 | 19-scf00458 | 19 |
| AX-158293868 | 23 | 33.761 | KV453155.1 | 2654608 | 19-scf00458 | 19 |
| AX-158293876 | 23 | 33.761 | KV453155.1 | 2662362 | 19-scf00458 | 19 |
| AX-158294123 | 23 | 33.761 | KV453155.1 | 2944167 | 19-scf00458 | 19 |
| AX-157742882 | 23 | 33.761 | KV453155.1 | 3059218 | 19-scf00458 | 19 |
| AX-158294469 | 23 | 33.761 | KV453155.1 | 3349617 | 19-scf00458 | 19 |
| AX-157741962 | 23 | 33.849 | KV453155.1 | 2668057 | 19-scf00458 | 19 |
| AX-157711214 | 23 | 33.924 | KV453155.1 | 2668231 | 19-scf00458 | 19 |
| AX-157845720 | 23 | 34.088 | KV453155.1 | 2429201 | 19-scf00458 | 19 |
| AX-158293831 | 23 | 34.088 | KV453155.1 | 2603335 | 19-scf00458 | 19 |
| AX-157845729 | 23 | 34.088 | KV453155.1 | 2615098 | 19-scf00458 | 19 |
| AX-158293851 | 23 | 34.088 | KV453155.1 | 2627636 | 19-scf00458 | 19 |
| AX-158293871 | 23 | 34.088 | KV453155.1 | 2656854 | 19-scf00458 | 19 |
| AX-158293887 | 23 | 34.088 | KV453155.1 | 2684390 | 19-scf00458 | 19 |
| AX-158293888 | 23 | 34.088 | KV453155.1 | 2684909 | 19-scf00458 | 19 |
| AX-158293894 | 23 | 34.088 | KV453155.1 | 2690071 | 19-scf00458 | 19 |
| AX-158293896 | 23 | 34.088 | KV453155.1 | 2692944 | 19-scf00458 | 19 |
| AX-157750790 | 23 | 34.088 | KV453155.1 | 2695160 | 19-scf00458 | 19 |
| AX-158293897 | 23 | 34.088 | KV453155.1 | 2696204 | 19-scf00458 | 19 |
| AX-157741303 | 23 | 34.088 | KV453155.1 | 2699662 | 19-scf00458 | 19 |
| AX-158293901 | 23 | 34.088 | KV453155.1 | 2700956 | 19-scf00458 | 19 |
| AX-157845735 | 23 | 34.088 | KV453155.1 | 2701064 | 19-scf00458 | 19 |
| AX-158293905 | 23 | 34.088 | KV453155.1 | 2704616 | 19-scf00458 | 19 |
| AX-158293906 | 23 | 34.088 | KV453155.1 | 2705053 | 19-scf00458 | 19 |
| AX-158293911 | 23 | 34.088 | KV453155.1 | 2713899 | 19-scf00458 | 19 |
| AX-158293912 | 23 | 34.088 | KV453155.1 | 2714208 | 19-scf00458 | 19 |
| AX-158293913 | 23 | 34.088 | KV453155.1 | 2714648 | 19-scf00458 | 19 |
| AX-158293915 | 23 | 34.143 | KV453155.1 | 2717161 | 19-scf00458 | 19 |
| AX-158293924 | 23 | 34.197 | KV453155.1 | 2731115 | 19-scf00458 | 19 |
| AX-158293925 | 23 | 34.197 | KV453155.1 | 2732845 | 19-scf00458 | 19 |
| AX-158293923 | 23 | 34.307 | KV453155.1 | 2729908 | 19-scf00458 | 19 |
| AX-157863961 | 23 | 34.307 | KV453155.1 | 2734996 | 19-scf00458 | 19 |
| AX-158293926 | 23 | 34.307 | KV453155.1 | 2735888 | 19-scf00458 | 19 |
| AX-158294185 | 23 | 34.307 | KV453155.1 | 3005890 | 19-scf00458 | 19 |
| AX-157752321 | 23 | 34.307 | KV453155.1 | 3688202 | 19-scf00458 | 19 |
| AX-158294741 | 23 | 34.307 | KV453155.1 | 3707982 | 19-scf00458 | 19 |
| AX-158293927 | 23 | 34.358 | KV453155.1 | 2736299 | 19-scf00458 | 19 |
| AX-158293931 | 23 | 34.358 | KV453155.1 | 2739887 | 19-scf00458 | 19 |

|              |    |        |            |         |             |    |
|--------------|----|--------|------------|---------|-------------|----|
| AX-158293914 | 23 | 34.416 | KV453155.1 | 2715334 | 19-scf00458 | 19 |
| AX-158293919 | 23 | 34.416 | KV453155.1 | 2722664 | 19-scf00458 | 19 |
| AX-158293929 | 23 | 34.416 | KV453155.1 | 2737916 | 19-scf00458 | 19 |
| AX-157748269 | 23 | 34.416 | KV453155.1 | 2747976 | 19-scf00458 | 19 |
| AX-157860226 | 23 | 34.416 | KV453155.1 | 2749028 | 19-scf00458 | 19 |
| AX-158293934 | 23 | 34.416 | KV453155.1 | 2749323 | 19-scf00458 | 19 |
| AX-157860227 | 23 | 34.416 | KV453155.1 | 2753013 | 19-scf00458 | 19 |
| AX-157860228 | 23 | 34.416 | KV453155.1 | 2753104 | 19-scf00458 | 19 |
| AX-158293937 | 23 | 34.416 | KV453155.1 | 2753380 | 19-scf00458 | 19 |
| AX-158293938 | 23 | 34.416 | KV453155.1 | 2753903 | 19-scf00458 | 19 |
| AX-157860229 | 23 | 34.416 | KV453155.1 | 2755328 | 19-scf00458 | 19 |
| AX-158293939 | 23 | 34.416 | KV453155.1 | 2755651 | 19-scf00458 | 19 |
| AX-157860230 | 23 | 34.416 | KV453155.1 | 2755804 | 19-scf00458 | 19 |
| AX-158293941 | 23 | 34.416 | KV453155.1 | 2756712 | 19-scf00458 | 19 |
| AX-158293948 | 23 | 34.416 | KV453155.1 | 2765414 | 19-scf00458 | 19 |
| AX-158293949 | 23 | 34.416 | KV453155.1 | 2766794 | 19-scf00458 | 19 |
| AX-158293950 | 23 | 34.416 | KV453155.1 | 2767538 | 19-scf00458 | 19 |
| AX-158293951 | 23 | 34.416 | KV453155.1 | 2769335 | 19-scf00458 | 19 |
| AX-158293952 | 23 | 34.416 | KV453155.1 | 2771037 | 19-scf00458 | 19 |
| AX-158293953 | 23 | 34.416 | KV453155.1 | 2771472 | 19-scf00458 | 19 |
| AX-157758461 | 23 | 34.416 | KV453155.1 | 2771940 | 19-scf00458 | 19 |
| AX-158293954 | 23 | 34.416 | KV453155.1 | 2773731 | 19-scf00458 | 19 |
| AX-158293957 | 23 | 34.416 | KV453155.1 | 2776747 | 19-scf00458 | 19 |
| AX-158293958 | 23 | 34.416 | KV453155.1 | 2778726 | 19-scf00458 | 19 |
| AX-158293961 | 23 | 34.416 | KV453155.1 | 2782248 | 19-scf00458 | 19 |
| AX-158293962 | 23 | 34.416 | KV453155.1 | 2783000 | 19-scf00458 | 19 |
| AX-158293964 | 23 | 34.416 | KV453155.1 | 2785677 | 19-scf00458 | 19 |
| AX-158293965 | 23 | 34.416 | KV453155.1 | 2787931 | 19-scf00458 | 19 |
| AX-158293968 | 23 | 34.416 | KV453155.1 | 2790572 | 19-scf00458 | 19 |
| AX-158293970 | 23 | 34.416 | KV453155.1 | 2791637 | 19-scf00458 | 19 |
| AX-158293971 | 23 | 34.416 | KV453155.1 | 2793308 | 19-scf00458 | 19 |
| AX-158293972 | 23 | 34.416 | KV453155.1 | 2793800 | 19-scf00458 | 19 |
| AX-158293973 | 23 | 34.416 | KV453155.1 | 2794505 | 19-scf00458 | 19 |
| AX-158293974 | 23 | 34.416 | KV453155.1 | 2795588 | 19-scf00458 | 19 |
| AX-158293975 | 23 | 34.416 | KV453155.1 | 2796801 | 19-scf00458 | 19 |
| AX-158293978 | 23 | 34.416 | KV453155.1 | 2800666 | 19-scf00458 | 19 |
| AX-158293979 | 23 | 34.416 | KV453155.1 | 2801770 | 19-scf00458 | 19 |
| AX-158293981 | 23 | 34.416 | KV453155.1 | 2803861 | 19-scf00458 | 19 |
| AX-158293982 | 23 | 34.416 | KV453155.1 | 2804707 | 19-scf00458 | 19 |
| AX-158293984 | 23 | 34.416 | KV453155.1 | 2808812 | 19-scf00458 | 19 |
| AX-158293985 | 23 | 34.416 | KV453155.1 | 2811064 | 19-scf00458 | 19 |
| AX-158293992 | 23 | 34.416 | KV453155.1 | 2816382 | 19-scf00458 | 19 |
| AX-158293993 | 23 | 34.416 | KV453155.1 | 2817949 | 19-scf00458 | 19 |
| AX-158381261 | 23 | 34.416 | KV453155.1 | 2818018 | 19-scf00458 | 19 |
| AX-157749740 | 23 | 34.416 | KV453155.1 | 2818648 | 19-scf00458 | 19 |
| AX-158294008 | 23 | 34.416 | KV453155.1 | 2827887 | 19-scf00458 | 19 |
| AX-158294017 | 23 | 34.416 | KV453155.1 | 2836997 | 19-scf00458 | 19 |
| AX-158294032 | 23 | 34.416 | KV453155.1 | 2854666 | 19-scf00458 | 19 |
| AX-158294037 | 23 | 34.416 | KV453155.1 | 2857899 | 19-scf00458 | 19 |
| AX-158294050 | 23 | 34.416 | KV453155.1 | 2869894 | 19-scf00458 | 19 |
| AX-158294080 | 23 | 34.416 | KV453155.1 | 2899485 | 19-scf00458 | 19 |

|              |    |        |            |         |             |    |
|--------------|----|--------|------------|---------|-------------|----|
| AX-157722584 | 23 | 34.416 | KV453155.1 | 2902615 | 19-scf00458 | 19 |
| AX-158294111 | 23 | 34.416 | KV453155.1 | 2930291 | 19-scf00458 | 19 |
| AX-158294114 | 23 | 34.416 | KV453155.1 | 2932718 | 19-scf00458 | 19 |
| AX-158294122 | 23 | 34.416 | KV453155.1 | 2943281 | 19-scf00458 | 19 |
| AX-158294147 | 23 | 34.416 | KV453155.1 | 2963946 | 19-scf00458 | 19 |
| AX-158294151 | 23 | 34.416 | KV453155.1 | 2966955 | 19-scf00458 | 19 |
| AX-158294162 | 23 | 34.416 | KV453155.1 | 2981938 | 19-scf00458 | 19 |
| AX-158294177 | 23 | 34.416 | KV453155.1 | 2997497 | 19-scf00458 | 19 |
| AX-157860240 | 23 | 34.416 | KV453155.1 | 3003834 | 19-scf00458 | 19 |
| AX-158294189 | 23 | 34.416 | KV453155.1 | 3009818 | 19-scf00458 | 19 |
| AX-158294193 | 23 | 34.416 | KV453155.1 | 3017011 | 19-scf00458 | 19 |
| AX-158294249 | 23 | 34.416 | KV453155.1 | 3075622 | 19-scf00458 | 19 |
| AX-158294271 | 23 | 34.416 | KV453155.1 | 3098709 | 19-scf00458 | 19 |
| AX-158294329 | 23 | 34.416 | KV453155.1 | 3165356 | 19-scf00458 | 19 |
| AX-158294393 | 23 | 34.416 | KV453155.1 | 3267133 | 19-scf00458 | 19 |
| AX-158294408 | 23 | 34.416 | KV453155.1 | 3281134 | 19-scf00458 | 19 |
| AX-158294419 | 23 | 34.416 | KV453155.1 | 3294046 | 19-scf00458 | 19 |
| AX-158294424 | 23 | 34.416 | KV453155.1 | 3299268 | 19-scf00458 | 19 |
| AX-157860286 | 23 | 34.416 | KV453155.1 | 3301272 | 19-scf00458 | 19 |
| AX-158294443 | 23 | 34.416 | KV453155.1 | 3320649 | 19-scf00458 | 19 |
| AX-158294462 | 23 | 34.416 | KV453155.1 | 3342770 | 19-scf00458 | 19 |
| AX-158294479 | 23 | 34.416 | KV453155.1 | 3360394 | 19-scf00458 | 19 |
| AX-157860302 | 23 | 34.416 | KV453155.1 | 3367994 | 19-scf00458 | 19 |
| AX-158294486 | 23 | 34.416 | KV453155.1 | 3372189 | 19-scf00458 | 19 |
| AX-158294489 | 23 | 34.416 | KV453155.1 | 3374091 | 19-scf00458 | 19 |
| AX-158294510 | 23 | 34.416 | KV453155.1 | 3398754 | 19-scf00458 | 19 |
| AX-157860314 | 23 | 34.416 | KV453155.1 | 3402452 | 19-scf00458 | 19 |
| AX-158294539 | 23 | 34.416 | KV453155.1 | 3437900 | 19-scf00458 | 19 |
| AX-158294547 | 23 | 34.416 | KV453155.1 | 3455802 | 19-scf00458 | 19 |
| AX-158294551 | 23 | 34.416 | KV453155.1 | 3466641 | 19-scf00458 | 19 |
| AX-158294559 | 23 | 34.416 | KV453155.1 | 3476643 | 19-scf00458 | 19 |
| AX-157860329 | 23 | 34.416 | KV453155.1 | 3487504 | 19-scf00458 | 19 |
| AX-158294589 | 23 | 34.416 | KV453155.1 | 3519325 | 19-scf00458 | 19 |
| AX-158294592 | 23 | 34.416 | KV453155.1 | 3521504 | 19-scf00458 | 19 |
| AX-158294598 | 23 | 34.416 | KV453155.1 | 3527182 | 19-scf00458 | 19 |
| AX-158294605 | 23 | 34.416 | KV453155.1 | 3536646 | 19-scf00458 | 19 |
| AX-157744743 | 23 | 34.416 | KV453155.1 | 3540344 | 19-scf00458 | 19 |
| AX-158294609 | 23 | 34.416 | KV453155.1 | 3549404 | 19-scf00458 | 19 |
| AX-158294610 | 23 | 34.416 | KV453155.1 | 3549819 | 19-scf00458 | 19 |
| AX-157860337 | 23 | 34.416 | KV453155.1 | 3552396 | 19-scf00458 | 19 |
| AX-158294627 | 23 | 34.416 | KV453155.1 | 3571061 | 19-scf00458 | 19 |
| AX-158294628 | 23 | 34.416 | KV453155.1 | 3572046 | 19-scf00458 | 19 |
| AX-158294640 | 23 | 34.416 | KV453155.1 | 3587592 | 19-scf00458 | 19 |
| AX-158294643 | 23 | 34.416 | KV453155.1 | 3590880 | 19-scf00458 | 19 |
| AX-157860347 | 23 | 34.416 | KV453155.1 | 3594444 | 19-scf00458 | 19 |
| AX-157860348 | 23 | 34.416 | KV453155.1 | 3595148 | 19-scf00458 | 19 |
| AX-157845766 | 23 | 34.416 | KV453155.1 | 3624991 | 19-scf00458 | 19 |
| AX-158294689 | 23 | 34.416 | KV453155.1 | 3646984 | 19-scf00458 | 19 |
| AX-157845772 | 23 | 34.416 | KV453155.1 | 3677958 | 19-scf00458 | 19 |
| AX-157860374 | 23 | 34.416 | KV453155.1 | 3709638 | 19-scf00458 | 19 |
| AX-158294745 | 23 | 34.416 | KV453155.1 | 3712683 | 19-scf00458 | 19 |

|              |    |        |            |         |             |    |
|--------------|----|--------|------------|---------|-------------|----|
| AX-158294748 | 23 | 34.416 | KV453155.1 | 3716043 | 19-scf00458 | 19 |
| AX-158294751 | 23 | 34.416 | KV453155.1 | 3719180 | 19-scf00458 | 19 |
| AX-158294757 | 23 | 34.416 | KV453155.1 | 3723192 | 19-scf00458 | 19 |
| AX-158294779 | 23 | 34.416 | KV453155.1 | 3746780 | 19-scf00458 | 19 |
| AX-157860389 | 23 | 34.416 | KV453155.1 | 3755625 | 19-scf00458 | 19 |
| AX-157772575 | 23 | 34.416 | KV453155.1 | 3781422 | 19-scf00458 | 19 |
| AX-158294808 | 23 | 34.416 | KV453155.1 | 3783489 | 19-scf00458 | 19 |
| AX-158294809 | 23 | 34.416 | KV453155.1 | 3783886 | 19-scf00458 | 19 |
| AX-158294812 | 23 | 34.416 | KV453155.1 | 3787400 | 19-scf00458 | 19 |
| AX-158294814 | 23 | 34.416 | KV453155.1 | 3790781 | 19-scf00458 | 19 |
| AX-158294815 | 23 | 34.416 | KV453155.1 | 3791684 | 19-scf00458 | 19 |
| AX-157695379 | 23 | 34.416 | KV453155.1 | 3791975 | 19-scf00458 | 19 |
| AX-158294819 | 23 | 34.416 | KV453155.1 | 3797910 | 19-scf00458 | 19 |
| AX-157747939 | 23 | 34.416 | KV453155.1 | 3805541 | 19-scf00458 | 19 |
| AX-157860395 | 23 | 34.416 | KV453155.1 | 3842211 | 19-scf00458 | 19 |
| AX-158294854 | 23 | 34.416 | KV453155.1 | 3846823 | 19-scf00458 | 19 |
| AX-158294855 | 23 | 34.416 | KV453155.1 | 3847496 | 19-scf00458 | 19 |
| AX-158294856 | 23 | 34.416 | KV453155.1 | 3849342 | 19-scf00458 | 19 |
| AX-158294860 | 23 | 34.416 | KV453155.1 | 3855252 | 19-scf00458 | 19 |
| AX-158294866 | 23 | 34.416 | KV453155.1 | 3863078 | 19-scf00458 | 19 |
| AX-158294891 | 23 | 34.416 | KV453155.1 | 3894409 | 19-scf00458 | 19 |
| AX-158294901 | 23 | 34.416 | KV453155.1 | 3908737 | 19-scf00458 | 19 |
| AX-158294904 | 23 | 34.416 | KV453155.1 | 3911542 | 19-scf00458 | 19 |
| AX-157845791 | 23 | 34.416 | KV453155.1 | 3915195 | 19-scf00458 | 19 |
| AX-157880842 | 23 | 34.416 | KV453155.1 | 3932576 | 19-scf00458 | 19 |
| AX-158294014 | 23 | 34.455 | KV453155.1 | 2834612 | 19-scf00458 | 19 |
| AX-158294015 | 23 | 34.492 | KV453155.1 | 2835659 | 19-scf00458 | 19 |
| AX-158293969 | 23 | 34.525 | KV453155.1 | 2791009 | 19-scf00458 | 19 |
| AX-158294019 | 23 | 34.525 | KV453155.1 | 2838680 | 19-scf00458 | 19 |
| AX-158294021 | 23 | 34.525 | KV453155.1 | 2840921 | 19-scf00458 | 19 |
| AX-158417380 | 23 | 34.525 | KV453155.1 | 2842498 | 19-scf00458 | 19 |
| AX-158294031 | 23 | 34.525 | KV453155.1 | 2853674 | 19-scf00458 | 19 |
| AX-158294041 | 23 | 34.525 | KV453155.1 | 2861155 | 19-scf00458 | 19 |
| AX-158294048 | 23 | 34.561 | KV453155.1 | 2868690 | 19-scf00458 | 19 |
| AX-158294061 | 23 | 34.626 | KV453155.1 | 2881123 | 19-scf00458 | 19 |
| AX-158294065 | 23 | 34.688 | KV453155.1 | 2883897 | 19-scf00458 | 19 |
| AX-158294062 | 23 | 34.744 | KV453155.1 | 2882036 | 19-scf00458 | 19 |
| AX-158294068 | 23 | 34.744 | KV453155.1 | 2887465 | 19-scf00458 | 19 |
| AX-157860235 | 23 | 34.744 | KV453155.1 | 2906560 | 19-scf00458 | 19 |
| AX-158294088 | 23 | 34.744 | KV453155.1 | 2909964 | 19-scf00458 | 19 |
| AX-158294090 | 23 | 34.744 | KV453155.1 | 2911883 | 19-scf00458 | 19 |
| AX-158294093 | 23 | 34.744 | KV453155.1 | 2913407 | 19-scf00458 | 19 |
| AX-158294094 | 23 | 34.744 | KV453155.1 | 2913988 | 19-scf00458 | 19 |
| AX-158294098 | 23 | 34.744 | KV453155.1 | 2917256 | 19-scf00458 | 19 |
| AX-158294103 | 23 | 34.744 | KV453155.1 | 2922809 | 19-scf00458 | 19 |
| AX-158294106 | 23 | 34.744 | KV453155.1 | 2924279 | 19-scf00458 | 19 |
| AX-158294108 | 23 | 34.744 | KV453155.1 | 2925725 | 19-scf00458 | 19 |
| AX-158294117 | 23 | 34.744 | KV453155.1 | 2936171 | 19-scf00458 | 19 |
| AX-158294166 | 23 | 34.744 | KV453155.1 | 2985682 | 19-scf00458 | 19 |
| AX-158294167 | 23 | 34.744 | KV453155.1 | 2986622 | 19-scf00458 | 19 |
| AX-158294172 | 23 | 34.744 | KV453155.1 | 2992897 | 19-scf00458 | 19 |



|              |    |        |            |         |             |    |
|--------------|----|--------|------------|---------|-------------|----|
| AX-158294175 | 23 | 34.744 | KV453155.1 | 2996131 | 19-scf00458 | 19 |
| AX-158294176 | 23 | 34.744 | KV453155.1 | 2997126 | 19-scf00458 | 19 |
| AX-158294178 | 23 | 34.744 | KV453155.1 | 2999038 | 19-scf00458 | 19 |
| AX-158294190 | 23 | 34.744 | KV453155.1 | 3011043 | 19-scf00458 | 19 |
| AX-158294198 | 23 | 34.744 | KV453155.1 | 3023231 | 19-scf00458 | 19 |
| AX-158294200 | 23 | 34.744 | KV453155.1 | 3025091 | 19-scf00458 | 19 |
| AX-158294201 | 23 | 34.744 | KV453155.1 | 3025981 | 19-scf00458 | 19 |
| AX-158294211 | 23 | 34.744 | KV453155.1 | 3039743 | 19-scf00458 | 19 |
| AX-158294212 | 23 | 34.744 | KV453155.1 | 3040402 | 19-scf00458 | 19 |
| AX-158294216 | 23 | 34.744 | KV453155.1 | 3043248 | 19-scf00458 | 19 |
| AX-158294217 | 23 | 34.744 | KV453155.1 | 3043696 | 19-scf00458 | 19 |
| AX-158294218 | 23 | 34.744 | KV453155.1 | 3044627 | 19-scf00458 | 19 |
| AX-158294220 | 23 | 34.744 | KV453155.1 | 3046855 | 19-scf00458 | 19 |
| AX-158294232 | 23 | 34.744 | KV453155.1 | 3058489 | 19-scf00458 | 19 |
| AX-157724275 | 23 | 34.744 | KV453155.1 | 3064049 | 19-scf00458 | 19 |
| AX-158294244 | 23 | 34.744 | KV453155.1 | 3070687 | 19-scf00458 | 19 |
| AX-158294245 | 23 | 34.744 | KV453155.1 | 3071142 | 19-scf00458 | 19 |
| AX-158294246 | 23 | 34.744 | KV453155.1 | 3071239 | 19-scf00458 | 19 |
| AX-158417386 | 23 | 34.744 | KV453155.1 | 3071943 | 19-scf00458 | 19 |
| AX-158294247 | 23 | 34.744 | KV453155.1 | 3073633 | 19-scf00458 | 19 |
| AX-158294254 | 23 | 34.744 | KV453155.1 | 3082293 | 19-scf00458 | 19 |
| AX-158294255 | 23 | 34.744 | KV453155.1 | 3083397 | 19-scf00458 | 19 |
| AX-158294299 | 23 | 34.744 | KV453155.1 | 3132456 | 19-scf00458 | 19 |
| AX-158294333 | 23 | 34.744 | KV453155.1 | 3169199 | 19-scf00458 | 19 |
| AX-157860250 | 23 | 34.744 | KV453155.1 | 3199885 | 19-scf00458 | 19 |
| AX-157860258 | 23 | 34.744 | KV453155.1 | 3233748 | 19-scf00458 | 19 |
| AX-157860263 | 23 | 34.744 | KV453155.1 | 3242842 | 19-scf00458 | 19 |
| AX-158294418 | 23 | 34.744 | KV453155.1 | 3292688 | 19-scf00458 | 19 |
| AX-158294431 | 23 | 34.744 | KV453155.1 | 3306939 | 19-scf00458 | 19 |
| AX-158294453 | 23 | 34.744 | KV453155.1 | 3330985 | 19-scf00458 | 19 |
| AX-157860294 | 23 | 34.744 | KV453155.1 | 3333354 | 19-scf00458 | 19 |
| AX-157860311 | 23 | 34.744 | KV453155.1 | 3395601 | 19-scf00458 | 19 |
| AX-158294524 | 23 | 34.744 | KV453155.1 | 3412480 | 19-scf00458 | 19 |
| AX-158294535 | 23 | 34.744 | KV453155.1 | 3423409 | 19-scf00458 | 19 |
| AX-157845759 | 23 | 34.744 | KV453155.1 | 3446421 | 19-scf00458 | 19 |
| AX-158294611 | 23 | 34.744 | KV453155.1 | 3550416 | 19-scf00458 | 19 |
| AX-158294623 | 23 | 34.744 | KV453155.1 | 3565756 | 19-scf00458 | 19 |
| AX-158294637 | 23 | 34.744 | KV453155.1 | 3585081 | 19-scf00458 | 19 |
| AX-157860344 | 23 | 34.744 | KV453155.1 | 3591260 | 19-scf00458 | 19 |
| AX-158294670 | 23 | 34.744 | KV453155.1 | 3623415 | 19-scf00458 | 19 |
| AX-157860350 | 23 | 34.744 | KV453155.1 | 3629927 | 19-scf00458 | 19 |
| AX-157860354 | 23 | 34.744 | KV453155.1 | 3637234 | 19-scf00458 | 19 |
| AX-158294701 | 23 | 34.744 | KV453155.1 | 3665857 | 19-scf00458 | 19 |
| AX-158294706 | 23 | 34.744 | KV453155.1 | 3671208 | 19-scf00458 | 19 |
| AX-158294724 | 23 | 34.744 | KV453155.1 | 3685489 | 19-scf00458 | 19 |
| AX-158417401 | 23 | 34.744 | KV453155.1 | 3692533 | 19-scf00458 | 19 |
| AX-158294802 | 23 | 34.744 | KV453155.1 | 3778229 | 19-scf00458 | 19 |
| AX-158294803 | 23 | 34.744 | KV453155.1 | 3780170 | 19-scf00458 | 19 |
| AX-158294844 | 23 | 34.744 | KV453155.1 | 3829629 | 19-scf00458 | 19 |
| AX-157845745 | 23 | 34.777 | KV453155.1 | 3086807 | 19-scf00458 | 19 |
| AX-158294257 | 23 | 34.815 | KV453155.1 | 3087691 | 19-scf00458 | 19 |

|              |    |        |            |         |             |    |
|--------------|----|--------|------------|---------|-------------|----|
| AX-158294261 | 23 | 34.834 | KV453155.1 | 3091052 | 19-scf00458 | 19 |
| AX-158293804 | 23 | 34.853 | KV453155.1 | 2569572 | 19-scf00458 | 19 |
| AX-158293932 | 23 | 34.853 | KV453155.1 | 2742860 | 19-scf00458 | 19 |
| AX-158293989 | 23 | 34.853 | KV453155.1 | 2814366 | 19-scf00458 | 19 |
| AX-158293995 | 23 | 34.853 | KV453155.1 | 2820496 | 19-scf00458 | 19 |
| AX-158293997 | 23 | 34.853 | KV453155.1 | 2822775 | 19-scf00458 | 19 |
| AX-158293998 | 23 | 34.853 | KV453155.1 | 2822925 | 19-scf00458 | 19 |
| AX-158293999 | 23 | 34.853 | KV453155.1 | 2823351 | 19-scf00458 | 19 |
| AX-158294001 | 23 | 34.853 | KV453155.1 | 2824257 | 19-scf00458 | 19 |
| AX-158294002 | 23 | 34.853 | KV453155.1 | 2824814 | 19-scf00458 | 19 |
| AX-158294003 | 23 | 34.853 | KV453155.1 | 2825186 | 19-scf00458 | 19 |
| AX-158294004 | 23 | 34.853 | KV453155.1 | 2825731 | 19-scf00458 | 19 |
| AX-158294005 | 23 | 34.853 | KV453155.1 | 2826641 | 19-scf00458 | 19 |
| AX-158294007 | 23 | 34.853 | KV453155.1 | 2827394 | 19-scf00458 | 19 |
| AX-158294010 | 23 | 34.853 | KV453155.1 | 2828923 | 19-scf00458 | 19 |
| AX-158294012 | 23 | 34.853 | KV453155.1 | 2830745 | 19-scf00458 | 19 |
| AX-158294013 | 23 | 34.853 | KV453155.1 | 2834332 | 19-scf00458 | 19 |
| AX-158294018 | 23 | 34.853 | KV453155.1 | 2837883 | 19-scf00458 | 19 |
| AX-158294020 | 23 | 34.853 | KV453155.1 | 2839038 | 19-scf00458 | 19 |
| AX-157860232 | 23 | 34.853 | KV453155.1 | 2843407 | 19-scf00458 | 19 |
| AX-158417381 | 23 | 34.853 | KV453155.1 | 2844082 | 19-scf00458 | 19 |
| AX-158294024 | 23 | 34.853 | KV453155.1 | 2847914 | 19-scf00458 | 19 |
| AX-158294025 | 23 | 34.853 | KV453155.1 | 2848718 | 19-scf00458 | 19 |
| AX-158294028 | 23 | 34.853 | KV453155.1 | 2851096 | 19-scf00458 | 19 |
| AX-158294030 | 23 | 34.853 | KV453155.1 | 2852353 | 19-scf00458 | 19 |
| AX-157698497 | 23 | 34.853 | KV453155.1 | 2852967 | 19-scf00458 | 19 |
| AX-158294040 | 23 | 34.853 | KV453155.1 | 2860211 | 19-scf00458 | 19 |
| AX-158294044 | 23 | 34.853 | KV453155.1 | 2864567 | 19-scf00458 | 19 |
| AX-158294047 | 23 | 34.853 | KV453155.1 | 2867755 | 19-scf00458 | 19 |
| AX-157739245 | 23 | 34.853 | KV453155.1 | 2870793 | 19-scf00458 | 19 |
| AX-158294052 | 23 | 34.853 | KV453155.1 | 2870871 | 19-scf00458 | 19 |
| AX-158294054 | 23 | 34.853 | KV453155.1 | 2872369 | 19-scf00458 | 19 |
| AX-158294056 | 23 | 34.853 | KV453155.1 | 2873223 | 19-scf00458 | 19 |
| AX-158294057 | 23 | 34.853 | KV453155.1 | 2875483 | 19-scf00458 | 19 |
| AX-158294059 | 23 | 34.853 | KV453155.1 | 2877234 | 19-scf00458 | 19 |
| AX-158294064 | 23 | 34.853 | KV453155.1 | 2883315 | 19-scf00458 | 19 |
| AX-158294067 | 23 | 34.853 | KV453155.1 | 2886952 | 19-scf00458 | 19 |
| AX-158294071 | 23 | 34.853 | KV453155.1 | 2889527 | 19-scf00458 | 19 |
| AX-158294072 | 23 | 34.853 | KV453155.1 | 2891346 | 19-scf00458 | 19 |
| AX-158294075 | 23 | 34.853 | KV453155.1 | 2894110 | 19-scf00458 | 19 |
| AX-158294076 | 23 | 34.853 | KV453155.1 | 2895021 | 19-scf00458 | 19 |
| AX-158294078 | 23 | 34.853 | KV453155.1 | 2896041 | 19-scf00458 | 19 |
| AX-158294079 | 23 | 34.853 | KV453155.1 | 2899068 | 19-scf00458 | 19 |
| AX-158294082 | 23 | 34.853 | KV453155.1 | 2900486 | 19-scf00458 | 19 |
| AX-158294083 | 23 | 34.853 | KV453155.1 | 2901277 | 19-scf00458 | 19 |
| AX-158294084 | 23 | 34.853 | KV453155.1 | 2901937 | 19-scf00458 | 19 |
| AX-158294085 | 23 | 34.853 | KV453155.1 | 2904111 | 19-scf00458 | 19 |
| AX-158294087 | 23 | 34.853 | KV453155.1 | 2908322 | 19-scf00458 | 19 |
| AX-158294092 | 23 | 34.853 | KV453155.1 | 2912914 | 19-scf00458 | 19 |
| AX-158294096 | 23 | 34.853 | KV453155.1 | 2915931 | 19-scf00458 | 19 |
| AX-158294097 | 23 | 34.853 | KV453155.1 | 2917068 | 19-scf00458 | 19 |

|              |    |        |            |         |             |    |
|--------------|----|--------|------------|---------|-------------|----|
| AX-158294099 | 23 | 34.853 | KV453155.1 | 2918369 | 19-scf00458 | 19 |
| AX-158294100 | 23 | 34.853 | KV453155.1 | 2919321 | 19-scf00458 | 19 |
| AX-158294101 | 23 | 34.853 | KV453155.1 | 2919567 | 19-scf00458 | 19 |
| AX-158294102 | 23 | 34.853 | KV453155.1 | 2921201 | 19-scf00458 | 19 |
| AX-158294105 | 23 | 34.853 | KV453155.1 | 2923645 | 19-scf00458 | 19 |
| AX-158294107 | 23 | 34.853 | KV453155.1 | 2924546 | 19-scf00458 | 19 |
| AX-157726140 | 23 | 34.853 | KV453155.1 | 2926953 | 19-scf00458 | 19 |
| AX-158294109 | 23 | 34.853 | KV453155.1 | 2928789 | 19-scf00458 | 19 |
| AX-158294110 | 23 | 34.853 | KV453155.1 | 2929556 | 19-scf00458 | 19 |
| AX-158294112 | 23 | 34.853 | KV453155.1 | 2930986 | 19-scf00458 | 19 |
| AX-158294116 | 23 | 34.853 | KV453155.1 | 2935075 | 19-scf00458 | 19 |
| AX-158294119 | 23 | 34.853 | KV453155.1 | 2938345 | 19-scf00458 | 19 |
| AX-158294121 | 23 | 34.853 | KV453155.1 | 2942645 | 19-scf00458 | 19 |
| AX-158294124 | 23 | 34.853 | KV453155.1 | 2945229 | 19-scf00458 | 19 |
| AX-158294125 | 23 | 34.853 | KV453155.1 | 2945603 | 19-scf00458 | 19 |
| AX-158294126 | 23 | 34.853 | KV453155.1 | 2946204 | 19-scf00458 | 19 |
| AX-158294129 | 23 | 34.853 | KV453155.1 | 2948528 | 19-scf00458 | 19 |
| AX-158294130 | 23 | 34.853 | KV453155.1 | 2949792 | 19-scf00458 | 19 |
| AX-157860236 | 23 | 34.853 | KV453155.1 | 2950352 | 19-scf00458 | 19 |
| AX-158294133 | 23 | 34.853 | KV453155.1 | 2952906 | 19-scf00458 | 19 |
| AX-158294135 | 23 | 34.853 | KV453155.1 | 2954167 | 19-scf00458 | 19 |
| AX-158294136 | 23 | 34.853 | KV453155.1 | 2954697 | 19-scf00458 | 19 |
| AX-158294139 | 23 | 34.853 | KV453155.1 | 2957489 | 19-scf00458 | 19 |
| AX-158294141 | 23 | 34.853 | KV453155.1 | 2958745 | 19-scf00458 | 19 |
| AX-157860238 | 23 | 34.853 | KV453155.1 | 2962703 | 19-scf00458 | 19 |
| AX-158294149 | 23 | 34.853 | KV453155.1 | 2965268 | 19-scf00458 | 19 |
| AX-158294150 | 23 | 34.853 | KV453155.1 | 2966109 | 19-scf00458 | 19 |
| AX-158294152 | 23 | 34.853 | KV453155.1 | 2967761 | 19-scf00458 | 19 |
| AX-157754686 | 23 | 34.853 | KV453155.1 | 2969824 | 19-scf00458 | 19 |
| AX-158294153 | 23 | 34.853 | KV453155.1 | 2970591 | 19-scf00458 | 19 |
| AX-158294154 | 23 | 34.853 | KV453155.1 | 2971343 | 19-scf00458 | 19 |
| AX-158294155 | 23 | 34.853 | KV453155.1 | 2972405 | 19-scf00458 | 19 |
| AX-158294158 | 23 | 34.853 | KV453155.1 | 2977281 | 19-scf00458 | 19 |
| AX-158294159 | 23 | 34.853 | KV453155.1 | 2978593 | 19-scf00458 | 19 |
| AX-158294161 | 23 | 34.853 | KV453155.1 | 2981492 | 19-scf00458 | 19 |
| AX-158294169 | 23 | 34.853 | KV453155.1 | 2990011 | 19-scf00458 | 19 |
| AX-158294170 | 23 | 34.853 | KV453155.1 | 2990900 | 19-scf00458 | 19 |
| AX-157860239 | 23 | 34.853 | KV453155.1 | 2991184 | 19-scf00458 | 19 |
| AX-158294173 | 23 | 34.853 | KV453155.1 | 2994492 | 19-scf00458 | 19 |
| AX-158294174 | 23 | 34.853 | KV453155.1 | 2994879 | 19-scf00458 | 19 |
| AX-158294180 | 23 | 34.853 | KV453155.1 | 3000096 | 19-scf00458 | 19 |
| AX-158294182 | 23 | 34.853 | KV453155.1 | 3002497 | 19-scf00458 | 19 |
| AX-158294183 | 23 | 34.853 | KV453155.1 | 3002719 | 19-scf00458 | 19 |
| AX-158294184 | 23 | 34.853 | KV453155.1 | 3004634 | 19-scf00458 | 19 |
| AX-158294186 | 23 | 34.853 | KV453155.1 | 3006451 | 19-scf00458 | 19 |
| AX-157860241 | 23 | 34.853 | KV453155.1 | 3007293 | 19-scf00458 | 19 |
| AX-158294187 | 23 | 34.853 | KV453155.1 | 3008247 | 19-scf00458 | 19 |
| AX-158294191 | 23 | 34.853 | KV453155.1 | 3013382 | 19-scf00458 | 19 |
| AX-158294195 | 23 | 34.853 | KV453155.1 | 3020766 | 19-scf00458 | 19 |
| AX-158294197 | 23 | 34.853 | KV453155.1 | 3022545 | 19-scf00458 | 19 |
| AX-158294202 | 23 | 34.853 | KV453155.1 | 3027278 | 19-scf00458 | 19 |

|              |    |        |            |         |             |    |
|--------------|----|--------|------------|---------|-------------|----|
| AX-158294205 | 23 | 34.853 | KV453155.1 | 3030853 | 19-scf00458 | 19 |
| AX-157749488 | 23 | 34.853 | KV453155.1 | 3031397 | 19-scf00458 | 19 |
| AX-158294207 | 23 | 34.853 | KV453155.1 | 3032633 | 19-scf00458 | 19 |
| AX-158294208 | 23 | 34.853 | KV453155.1 | 3033194 | 19-scf00458 | 19 |
| AX-158294209 | 23 | 34.853 | KV453155.1 | 3037576 | 19-scf00458 | 19 |
| AX-158294210 | 23 | 34.853 | KV453155.1 | 3038415 | 19-scf00458 | 19 |
| AX-157845743 | 23 | 34.853 | KV453155.1 | 3039184 | 19-scf00458 | 19 |
| AX-158294213 | 23 | 34.853 | KV453155.1 | 3040811 | 19-scf00458 | 19 |
| AX-158294219 | 23 | 34.853 | KV453155.1 | 3045055 | 19-scf00458 | 19 |
| AX-158294224 | 23 | 34.853 | KV453155.1 | 3049612 | 19-scf00458 | 19 |
| AX-158294225 | 23 | 34.853 | KV453155.1 | 3052498 | 19-scf00458 | 19 |
| AX-158294228 | 23 | 34.853 | KV453155.1 | 3054664 | 19-scf00458 | 19 |
| AX-157860242 | 23 | 34.853 | KV453155.1 | 3056256 | 19-scf00458 | 19 |
| AX-158294231 | 23 | 34.853 | KV453155.1 | 3056712 | 19-scf00458 | 19 |
| AX-157738814 | 23 | 34.853 | KV453155.1 | 3057840 | 19-scf00458 | 19 |
| AX-158294235 | 23 | 34.853 | KV453155.1 | 3062917 | 19-scf00458 | 19 |
| AX-158294237 | 23 | 34.853 | KV453155.1 | 3064580 | 19-scf00458 | 19 |
| AX-158294239 | 23 | 34.853 | KV453155.1 | 3066584 | 19-scf00458 | 19 |
| AX-158294241 | 23 | 34.853 | KV453155.1 | 3067852 | 19-scf00458 | 19 |
| AX-158294248 | 23 | 34.853 | KV453155.1 | 3075233 | 19-scf00458 | 19 |
| AX-158294252 | 23 | 34.853 | KV453155.1 | 3079082 | 19-scf00458 | 19 |
| AX-157860243 | 23 | 34.853 | KV453155.1 | 3084738 | 19-scf00458 | 19 |
| AX-158294264 | 23 | 34.853 | KV453155.1 | 3092887 | 19-scf00458 | 19 |
| AX-158294265 | 23 | 34.853 | KV453155.1 | 3093378 | 19-scf00458 | 19 |
| AX-158294267 | 23 | 34.853 | KV453155.1 | 3095662 | 19-scf00458 | 19 |
| AX-158294268 | 23 | 34.853 | KV453155.1 | 3096795 | 19-scf00458 | 19 |
| AX-158294269 | 23 | 34.853 | KV453155.1 | 3097150 | 19-scf00458 | 19 |
| AX-158294273 | 23 | 34.853 | KV453155.1 | 3100796 | 19-scf00458 | 19 |
| AX-158294274 | 23 | 34.853 | KV453155.1 | 3104906 | 19-scf00458 | 19 |
| AX-158294275 | 23 | 34.853 | KV453155.1 | 3105483 | 19-scf00458 | 19 |
| AX-158294277 | 23 | 34.853 | KV453155.1 | 3108597 | 19-scf00458 | 19 |
| AX-158294280 | 23 | 34.853 | KV453155.1 | 3110933 | 19-scf00458 | 19 |
| AX-158294281 | 23 | 34.853 | KV453155.1 | 3111684 | 19-scf00458 | 19 |
| AX-158294282 | 23 | 34.853 | KV453155.1 | 3112634 | 19-scf00458 | 19 |
| AX-158294285 | 23 | 34.853 | KV453155.1 | 3114336 | 19-scf00458 | 19 |
| AX-158294288 | 23 | 34.853 | KV453155.1 | 3116224 | 19-scf00458 | 19 |
| AX-157860244 | 23 | 34.853 | KV453155.1 | 3116515 | 19-scf00458 | 19 |
| AX-158294290 | 23 | 34.853 | KV453155.1 | 3118714 | 19-scf00458 | 19 |
| AX-158294291 | 23 | 34.853 | KV453155.1 | 3121829 | 19-scf00458 | 19 |
| AX-158294293 | 23 | 34.853 | KV453155.1 | 3125011 | 19-scf00458 | 19 |
| AX-158294294 | 23 | 34.853 | KV453155.1 | 3126393 | 19-scf00458 | 19 |
| AX-158294296 | 23 | 34.853 | KV453155.1 | 3130091 | 19-scf00458 | 19 |
| AX-158294298 | 23 | 34.853 | KV453155.1 | 3131339 | 19-scf00458 | 19 |
| AX-158294302 | 23 | 34.853 | KV453155.1 | 3134456 | 19-scf00458 | 19 |
| AX-158294304 | 23 | 34.853 | KV453155.1 | 3136320 | 19-scf00458 | 19 |
| AX-158294305 | 23 | 34.853 | KV453155.1 | 3137051 | 19-scf00458 | 19 |
| AX-158294308 | 23 | 34.853 | KV453155.1 | 3139650 | 19-scf00458 | 19 |
| AX-158294309 | 23 | 34.853 | KV453155.1 | 3141302 | 19-scf00458 | 19 |
| AX-158294311 | 23 | 34.853 | KV453155.1 | 3146018 | 19-scf00458 | 19 |
| AX-158294312 | 23 | 34.853 | KV453155.1 | 3146463 | 19-scf00458 | 19 |
| AX-158294313 | 23 | 34.853 | KV453155.1 | 3148211 | 19-scf00458 | 19 |

|              |    |        |            |         |             |    |
|--------------|----|--------|------------|---------|-------------|----|
| AX-158294314 | 23 | 34.853 | KV453155.1 | 3148741 | 19-scf00458 | 19 |
| AX-158294315 | 23 | 34.853 | KV453155.1 | 3149278 | 19-scf00458 | 19 |
| AX-158294317 | 23 | 34.853 | KV453155.1 | 3151628 | 19-scf00458 | 19 |
| AX-158294318 | 23 | 34.853 | KV453155.1 | 3153576 | 19-scf00458 | 19 |
| AX-158294319 | 23 | 34.853 | KV453155.1 | 3156160 | 19-scf00458 | 19 |
| AX-158294320 | 23 | 34.853 | KV453155.1 | 3156965 | 19-scf00458 | 19 |
| AX-158294321 | 23 | 34.853 | KV453155.1 | 3157608 | 19-scf00458 | 19 |
| AX-158294322 | 23 | 34.853 | KV453155.1 | 3158832 | 19-scf00458 | 19 |
| AX-158294323 | 23 | 34.853 | KV453155.1 | 3159936 | 19-scf00458 | 19 |
| AX-158294325 | 23 | 34.853 | KV453155.1 | 3162172 | 19-scf00458 | 19 |
| AX-158294326 | 23 | 34.853 | KV453155.1 | 3162955 | 19-scf00458 | 19 |
| AX-158294328 | 23 | 34.853 | KV453155.1 | 3164743 | 19-scf00458 | 19 |
| AX-158294330 | 23 | 34.853 | KV453155.1 | 3165788 | 19-scf00458 | 19 |
| AX-158294331 | 23 | 34.853 | KV453155.1 | 3166397 | 19-scf00458 | 19 |
| AX-158294339 | 23 | 34.853 | KV453155.1 | 3173001 | 19-scf00458 | 19 |
| AX-158294340 | 23 | 34.853 | KV453155.1 | 3176555 | 19-scf00458 | 19 |
| AX-157860247 | 23 | 34.853 | KV453155.1 | 3177421 | 19-scf00458 | 19 |
| AX-158294341 | 23 | 34.853 | KV453155.1 | 3178868 | 19-scf00458 | 19 |
| AX-157845748 | 23 | 34.853 | KV453155.1 | 3181892 | 19-scf00458 | 19 |
| AX-158294342 | 23 | 34.853 | KV453155.1 | 3187204 | 19-scf00458 | 19 |
| AX-157845749 | 23 | 34.853 | KV453155.1 | 3187532 | 19-scf00458 | 19 |
| AX-158294344 | 23 | 34.853 | KV453155.1 | 3192035 | 19-scf00458 | 19 |
| AX-158294345 | 23 | 34.853 | KV453155.1 | 3192405 | 19-scf00458 | 19 |
| AX-157845750 | 23 | 34.853 | KV453155.1 | 3192781 | 19-scf00458 | 19 |
| AX-158417389 | 23 | 34.853 | KV453155.1 | 3195054 | 19-scf00458 | 19 |
| AX-158294348 | 23 | 34.853 | KV453155.1 | 3201964 | 19-scf00458 | 19 |
| AX-158294349 | 23 | 34.853 | KV453155.1 | 3207082 | 19-scf00458 | 19 |
| AX-157860252 | 23 | 34.853 | KV453155.1 | 3207167 | 19-scf00458 | 19 |
| AX-157860253 | 23 | 34.853 | KV453155.1 | 3207268 | 19-scf00458 | 19 |
| AX-158294350 | 23 | 34.853 | KV453155.1 | 3207683 | 19-scf00458 | 19 |
| AX-158294351 | 23 | 34.853 | KV453155.1 | 3208922 | 19-scf00458 | 19 |
| AX-158294352 | 23 | 34.853 | KV453155.1 | 3210157 | 19-scf00458 | 19 |
| AX-157860254 | 23 | 34.853 | KV453155.1 | 3211692 | 19-scf00458 | 19 |
| AX-158294353 | 23 | 34.853 | KV453155.1 | 3213418 | 19-scf00458 | 19 |
| AX-157860255 | 23 | 34.853 | KV453155.1 | 3214143 | 19-scf00458 | 19 |
| AX-158294356 | 23 | 34.853 | KV453155.1 | 3216564 | 19-scf00458 | 19 |
| AX-157860257 | 23 | 34.853 | KV453155.1 | 3224500 | 19-scf00458 | 19 |
| AX-158294358 | 23 | 34.853 | KV453155.1 | 3226565 | 19-scf00458 | 19 |
| AX-158294360 | 23 | 34.853 | KV453155.1 | 3227972 | 19-scf00458 | 19 |
| AX-158294361 | 23 | 34.853 | KV453155.1 | 3228760 | 19-scf00458 | 19 |
| AX-158294362 | 23 | 34.853 | KV453155.1 | 3230675 | 19-scf00458 | 19 |
| AX-158294363 | 23 | 34.853 | KV453155.1 | 3231185 | 19-scf00458 | 19 |
| AX-158294364 | 23 | 34.853 | KV453155.1 | 3233088 | 19-scf00458 | 19 |
| AX-158294366 | 23 | 34.853 | KV453155.1 | 3234647 | 19-scf00458 | 19 |
| AX-158294367 | 23 | 34.853 | KV453155.1 | 3234963 | 19-scf00458 | 19 |
| AX-158294369 | 23 | 34.853 | KV453155.1 | 3236679 | 19-scf00458 | 19 |
| AX-158294370 | 23 | 34.853 | KV453155.1 | 3237465 | 19-scf00458 | 19 |
| AX-157860261 | 23 | 34.853 | KV453155.1 | 3239742 | 19-scf00458 | 19 |
| AX-157860262 | 23 | 34.853 | KV453155.1 | 3242561 | 19-scf00458 | 19 |
| AX-158294373 | 23 | 34.853 | KV453155.1 | 3242895 | 19-scf00458 | 19 |
| AX-158294374 | 23 | 34.853 | KV453155.1 | 3243302 | 19-scf00458 | 19 |

|              |    |        |            |         |             |    |
|--------------|----|--------|------------|---------|-------------|----|
| AX-157860264 | 23 | 34.853 | KV453155.1 | 3243661 | 19-scf00458 | 19 |
| AX-158294375 | 23 | 34.853 | KV453155.1 | 3243730 | 19-scf00458 | 19 |
| AX-158294377 | 23 | 34.853 | KV453155.1 | 3245584 | 19-scf00458 | 19 |
| AX-157860265 | 23 | 34.853 | KV453155.1 | 3248807 | 19-scf00458 | 19 |
| AX-158294378 | 23 | 34.853 | KV453155.1 | 3248878 | 19-scf00458 | 19 |
| AX-157860266 | 23 | 34.853 | KV453155.1 | 3248958 | 19-scf00458 | 19 |
| AX-158294379 | 23 | 34.853 | KV453155.1 | 3249498 | 19-scf00458 | 19 |
| AX-158294380 | 23 | 34.853 | KV453155.1 | 3250014 | 19-scf00458 | 19 |
| AX-158294381 | 23 | 34.853 | KV453155.1 | 3250702 | 19-scf00458 | 19 |
| AX-157702124 | 23 | 34.853 | KV453155.1 | 3251495 | 19-scf00458 | 19 |
| AX-158294383 | 23 | 34.853 | KV453155.1 | 3252806 | 19-scf00458 | 19 |
| AX-158294385 | 23 | 34.853 | KV453155.1 | 3255487 | 19-scf00458 | 19 |
| AX-157860267 | 23 | 34.853 | KV453155.1 | 3255776 | 19-scf00458 | 19 |
| AX-158294386 | 23 | 34.853 | KV453155.1 | 3256474 | 19-scf00458 | 19 |
| AX-158294387 | 23 | 34.853 | KV453155.1 | 3257507 | 19-scf00458 | 19 |
| AX-157860269 | 23 | 34.853 | KV453155.1 | 3258154 | 19-scf00458 | 19 |
| AX-157860270 | 23 | 34.853 | KV453155.1 | 3258744 | 19-scf00458 | 19 |
| AX-157860271 | 23 | 34.853 | KV453155.1 | 3264033 | 19-scf00458 | 19 |
| AX-158294391 | 23 | 34.853 | KV453155.1 | 3264324 | 19-scf00458 | 19 |
| AX-157860272 | 23 | 34.853 | KV453155.1 | 3264822 | 19-scf00458 | 19 |
| AX-158294392 | 23 | 34.853 | KV453155.1 | 3265207 | 19-scf00458 | 19 |
| AX-158294394 | 23 | 34.853 | KV453155.1 | 3267532 | 19-scf00458 | 19 |
| AX-158294395 | 23 | 34.853 | KV453155.1 | 3268006 | 19-scf00458 | 19 |
| AX-158294398 | 23 | 34.853 | KV453155.1 | 3269479 | 19-scf00458 | 19 |
| AX-157860273 | 23 | 34.853 | KV453155.1 | 3271164 | 19-scf00458 | 19 |
| AX-158294399 | 23 | 34.853 | KV453155.1 | 3272145 | 19-scf00458 | 19 |
| AX-157860275 | 23 | 34.853 | KV453155.1 | 3272668 | 19-scf00458 | 19 |
| AX-157860276 | 23 | 34.853 | KV453155.1 | 3272745 | 19-scf00458 | 19 |
| AX-158294400 | 23 | 34.853 | KV453155.1 | 3272878 | 19-scf00458 | 19 |
| AX-158294401 | 23 | 34.853 | KV453155.1 | 3273226 | 19-scf00458 | 19 |
| AX-158294402 | 23 | 34.853 | KV453155.1 | 3274668 | 19-scf00458 | 19 |
| AX-158294403 | 23 | 34.853 | KV453155.1 | 3275407 | 19-scf00458 | 19 |
| AX-158294404 | 23 | 34.853 | KV453155.1 | 3276049 | 19-scf00458 | 19 |
| AX-157860277 | 23 | 34.853 | KV453155.1 | 3276182 | 19-scf00458 | 19 |
| AX-158294405 | 23 | 34.853 | KV453155.1 | 3277706 | 19-scf00458 | 19 |
| AX-158294406 | 23 | 34.853 | KV453155.1 | 3277829 | 19-scf00458 | 19 |
| AX-158294409 | 23 | 34.853 | KV453155.1 | 3281521 | 19-scf00458 | 19 |
| AX-158294410 | 23 | 34.853 | KV453155.1 | 3282028 | 19-scf00458 | 19 |
| AX-157860279 | 23 | 34.853 | KV453155.1 | 3283922 | 19-scf00458 | 19 |
| AX-158294411 | 23 | 34.853 | KV453155.1 | 3284924 | 19-scf00458 | 19 |
| AX-158294412 | 23 | 34.853 | KV453155.1 | 3285990 | 19-scf00458 | 19 |
| AX-158294413 | 23 | 34.853 | KV453155.1 | 3286496 | 19-scf00458 | 19 |
| AX-158294414 | 23 | 34.853 | KV453155.1 | 3287942 | 19-scf00458 | 19 |
| AX-158294415 | 23 | 34.853 | KV453155.1 | 3289026 | 19-scf00458 | 19 |
| AX-158294416 | 23 | 34.853 | KV453155.1 | 3291115 | 19-scf00458 | 19 |
| AX-157860281 | 23 | 34.853 | KV453155.1 | 3293137 | 19-scf00458 | 19 |
| AX-157860282 | 23 | 34.853 | KV453155.1 | 3294542 | 19-scf00458 | 19 |
| AX-157860283 | 23 | 34.853 | KV453155.1 | 3295653 | 19-scf00458 | 19 |
| AX-157860284 | 23 | 34.853 | KV453155.1 | 3298770 | 19-scf00458 | 19 |
| AX-157860285 | 23 | 34.853 | KV453155.1 | 3300760 | 19-scf00458 | 19 |
| AX-158294427 | 23 | 34.853 | KV453155.1 | 3303962 | 19-scf00458 | 19 |

|              |    |        |            |         |             |    |
|--------------|----|--------|------------|---------|-------------|----|
| AX-158294429 | 23 | 34.853 | KV453155.1 | 3305745 | 19-scf00458 | 19 |
| AX-158294433 | 23 | 34.853 | KV453155.1 | 3307845 | 19-scf00458 | 19 |
| AX-157860287 | 23 | 34.853 | KV453155.1 | 3308072 | 19-scf00458 | 19 |
| AX-158294434 | 23 | 34.853 | KV453155.1 | 3308450 | 19-scf00458 | 19 |
| AX-158294435 | 23 | 34.853 | KV453155.1 | 3309728 | 19-scf00458 | 19 |
| AX-158294437 | 23 | 34.853 | KV453155.1 | 3312011 | 19-scf00458 | 19 |
| AX-158294440 | 23 | 34.853 | KV453155.1 | 3316101 | 19-scf00458 | 19 |
| AX-158294441 | 23 | 34.853 | KV453155.1 | 3317347 | 19-scf00458 | 19 |
| AX-158294442 | 23 | 34.853 | KV453155.1 | 3319209 | 19-scf00458 | 19 |
| AX-158294444 | 23 | 34.853 | KV453155.1 | 3321074 | 19-scf00458 | 19 |
| AX-157860289 | 23 | 34.853 | KV453155.1 | 3321616 | 19-scf00458 | 19 |
| AX-157860291 | 23 | 34.853 | KV453155.1 | 3322892 | 19-scf00458 | 19 |
| AX-158294445 | 23 | 34.853 | KV453155.1 | 3324688 | 19-scf00458 | 19 |
| AX-158294446 | 23 | 34.853 | KV453155.1 | 3326038 | 19-scf00458 | 19 |
| AX-158294447 | 23 | 34.853 | KV453155.1 | 3326470 | 19-scf00458 | 19 |
| AX-158294448 | 23 | 34.853 | KV453155.1 | 3326938 | 19-scf00458 | 19 |
| AX-158294449 | 23 | 34.853 | KV453155.1 | 3327492 | 19-scf00458 | 19 |
| AX-158294450 | 23 | 34.853 | KV453155.1 | 3327934 | 19-scf00458 | 19 |
| AX-158294451 | 23 | 34.853 | KV453155.1 | 3329915 | 19-scf00458 | 19 |
| AX-158294452 | 23 | 34.853 | KV453155.1 | 3330623 | 19-scf00458 | 19 |
| AX-158294454 | 23 | 34.853 | KV453155.1 | 3331565 | 19-scf00458 | 19 |
| AX-158294455 | 23 | 34.853 | KV453155.1 | 3332208 | 19-scf00458 | 19 |
| AX-158294457 | 23 | 34.853 | KV453155.1 | 3333492 | 19-scf00458 | 19 |
| AX-158294458 | 23 | 34.853 | KV453155.1 | 3335888 | 19-scf00458 | 19 |
| AX-157860295 | 23 | 34.853 | KV453155.1 | 3337785 | 19-scf00458 | 19 |
| AX-157860296 | 23 | 34.853 | KV453155.1 | 3340097 | 19-scf00458 | 19 |
| AX-158294460 | 23 | 34.853 | KV453155.1 | 3340390 | 19-scf00458 | 19 |
| AX-157860297 | 23 | 34.853 | KV453155.1 | 3340619 | 19-scf00458 | 19 |
| AX-158294463 | 23 | 34.853 | KV453155.1 | 3343559 | 19-scf00458 | 19 |
| AX-158294464 | 23 | 34.853 | KV453155.1 | 3344262 | 19-scf00458 | 19 |
| AX-158294465 | 23 | 34.853 | KV453155.1 | 3344849 | 19-scf00458 | 19 |
| AX-158294466 | 23 | 34.853 | KV453155.1 | 3347977 | 19-scf00458 | 19 |
| AX-158294470 | 23 | 34.853 | KV453155.1 | 3350994 | 19-scf00458 | 19 |
| AX-158294475 | 23 | 34.853 | KV453155.1 | 3358079 | 19-scf00458 | 19 |
| AX-158294476 | 23 | 34.853 | KV453155.1 | 3358944 | 19-scf00458 | 19 |
| AX-158294477 | 23 | 34.853 | KV453155.1 | 3359559 | 19-scf00458 | 19 |
| AX-158294482 | 23 | 34.853 | KV453155.1 | 3365457 | 19-scf00458 | 19 |
| AX-157860301 | 23 | 34.853 | KV453155.1 | 3367915 | 19-scf00458 | 19 |
| AX-158294484 | 23 | 34.853 | KV453155.1 | 3368714 | 19-scf00458 | 19 |
| AX-158417391 | 23 | 34.853 | KV453155.1 | 3370633 | 19-scf00458 | 19 |
| AX-157860303 | 23 | 34.853 | KV453155.1 | 3372663 | 19-scf00458 | 19 |
| AX-157860305 | 23 | 34.853 | KV453155.1 | 3381925 | 19-scf00458 | 19 |
| AX-158294495 | 23 | 34.853 | KV453155.1 | 3383521 | 19-scf00458 | 19 |
| AX-157860306 | 23 | 34.853 | KV453155.1 | 3383799 | 19-scf00458 | 19 |
| AX-158294496 | 23 | 34.853 | KV453155.1 | 3384016 | 19-scf00458 | 19 |
| AX-158294497 | 23 | 34.853 | KV453155.1 | 3384509 | 19-scf00458 | 19 |
| AX-158294498 | 23 | 34.853 | KV453155.1 | 3387039 | 19-scf00458 | 19 |
| AX-158294500 | 23 | 34.853 | KV453155.1 | 3388185 | 19-scf00458 | 19 |
| AX-158294501 | 23 | 34.853 | KV453155.1 | 3388504 | 19-scf00458 | 19 |
| AX-158294502 | 23 | 34.853 | KV453155.1 | 3390940 | 19-scf00458 | 19 |
| AX-158294503 | 23 | 34.853 | KV453155.1 | 3392028 | 19-scf00458 | 19 |

|              |    |        |            |         |             |    |
|--------------|----|--------|------------|---------|-------------|----|
| AX-157860308 | 23 | 34.853 | KV453155.1 | 3393099 | 19-scf00458 | 19 |
| AX-157860309 | 23 | 34.853 | KV453155.1 | 3393561 | 19-scf00458 | 19 |
| AX-158294504 | 23 | 34.853 | KV453155.1 | 3393922 | 19-scf00458 | 19 |
| AX-158294506 | 23 | 34.853 | KV453155.1 | 3395412 | 19-scf00458 | 19 |
| AX-157860312 | 23 | 34.853 | KV453155.1 | 3395843 | 19-scf00458 | 19 |
| AX-158294507 | 23 | 34.853 | KV453155.1 | 3396546 | 19-scf00458 | 19 |
| AX-158294508 | 23 | 34.853 | KV453155.1 | 3396697 | 19-scf00458 | 19 |
| AX-157860313 | 23 | 34.853 | KV453155.1 | 3398182 | 19-scf00458 | 19 |
| AX-158294512 | 23 | 34.853 | KV453155.1 | 3401558 | 19-scf00458 | 19 |
| AX-158294513 | 23 | 34.853 | KV453155.1 | 3402025 | 19-scf00458 | 19 |
| AX-157860315 | 23 | 34.853 | KV453155.1 | 3403072 | 19-scf00458 | 19 |
| AX-158294518 | 23 | 34.853 | KV453155.1 | 3407961 | 19-scf00458 | 19 |
| AX-158294519 | 23 | 34.853 | KV453155.1 | 3408564 | 19-scf00458 | 19 |
| AX-158294522 | 23 | 34.853 | KV453155.1 | 3410811 | 19-scf00458 | 19 |
| AX-158294526 | 23 | 34.853 | KV453155.1 | 3413310 | 19-scf00458 | 19 |
| AX-157860317 | 23 | 34.853 | KV453155.1 | 3414333 | 19-scf00458 | 19 |
| AX-158294527 | 23 | 34.853 | KV453155.1 | 3415098 | 19-scf00458 | 19 |
| AX-158294529 | 23 | 34.853 | KV453155.1 | 3415715 | 19-scf00458 | 19 |
| AX-158294536 | 23 | 34.853 | KV453155.1 | 3424033 | 19-scf00458 | 19 |
| AX-157860318 | 23 | 34.853 | KV453155.1 | 3425059 | 19-scf00458 | 19 |
| AX-158294538 | 23 | 34.853 | KV453155.1 | 3437516 | 19-scf00458 | 19 |
| AX-158294540 | 23 | 34.853 | KV453155.1 | 3438545 | 19-scf00458 | 19 |
| AX-158294541 | 23 | 34.853 | KV453155.1 | 3440660 | 19-scf00458 | 19 |
| AX-157860321 | 23 | 34.853 | KV453155.1 | 3444497 | 19-scf00458 | 19 |
| AX-157860322 | 23 | 34.853 | KV453155.1 | 3444861 | 19-scf00458 | 19 |
| AX-157860323 | 23 | 34.853 | KV453155.1 | 3449244 | 19-scf00458 | 19 |
| AX-157860324 | 23 | 34.853 | KV453155.1 | 3450193 | 19-scf00458 | 19 |
| AX-157860325 | 23 | 34.853 | KV453155.1 | 3456158 | 19-scf00458 | 19 |
| AX-157746825 | 23 | 34.853 | KV453155.1 | 3463478 | 19-scf00458 | 19 |
| AX-158294552 | 23 | 34.853 | KV453155.1 | 3467706 | 19-scf00458 | 19 |
| AX-158294553 | 23 | 34.853 | KV453155.1 | 3467942 | 19-scf00458 | 19 |
| AX-158294558 | 23 | 34.853 | KV453155.1 | 3475227 | 19-scf00458 | 19 |
| AX-157860326 | 23 | 34.853 | KV453155.1 | 3475646 | 19-scf00458 | 19 |
| AX-157860327 | 23 | 34.853 | KV453155.1 | 3476391 | 19-scf00458 | 19 |
| AX-158294561 | 23 | 34.853 | KV453155.1 | 3478915 | 19-scf00458 | 19 |
| AX-157860328 | 23 | 34.853 | KV453155.1 | 3480694 | 19-scf00458 | 19 |
| AX-158294565 | 23 | 34.853 | KV453155.1 | 3484713 | 19-scf00458 | 19 |
| AX-158294568 | 23 | 34.853 | KV453155.1 | 3487121 | 19-scf00458 | 19 |
| AX-157845760 | 23 | 34.853 | KV453155.1 | 3488867 | 19-scf00458 | 19 |
| AX-158294570 | 23 | 34.853 | KV453155.1 | 3489566 | 19-scf00458 | 19 |
| AX-158294571 | 23 | 34.853 | KV453155.1 | 3490007 | 19-scf00458 | 19 |
| AX-158294572 | 23 | 34.853 | KV453155.1 | 3491643 | 19-scf00458 | 19 |
| AX-157845761 | 23 | 34.853 | KV453155.1 | 3492194 | 19-scf00458 | 19 |
| AX-158294573 | 23 | 34.853 | KV453155.1 | 3494106 | 19-scf00458 | 19 |
| AX-158294574 | 23 | 34.853 | KV453155.1 | 3497899 | 19-scf00458 | 19 |
| AX-157744412 | 23 | 34.853 | KV453155.1 | 3498225 | 19-scf00458 | 19 |
| AX-157742816 | 23 | 34.853 | KV453155.1 | 3500030 | 19-scf00458 | 19 |
| AX-158294575 | 23 | 34.853 | KV453155.1 | 3501769 | 19-scf00458 | 19 |
| AX-158294576 | 23 | 34.853 | KV453155.1 | 3502097 | 19-scf00458 | 19 |
| AX-158294578 | 23 | 34.853 | KV453155.1 | 3503392 | 19-scf00458 | 19 |
| AX-158294579 | 23 | 34.853 | KV453155.1 | 3503781 | 19-scf00458 | 19 |



|              |    |        |            |         |             |    |
|--------------|----|--------|------------|---------|-------------|----|
| AX-158294582 | 23 | 34.853 | KV453155.1 | 3510084 | 19-scf00458 | 19 |
| AX-158294586 | 23 | 34.853 | KV453155.1 | 3515268 | 19-scf00458 | 19 |
| AX-158294587 | 23 | 34.853 | KV453155.1 | 3516522 | 19-scf00458 | 19 |
| AX-158294588 | 23 | 34.853 | KV453155.1 | 3517905 | 19-scf00458 | 19 |
| AX-157860333 | 23 | 34.853 | KV453155.1 | 3519419 | 19-scf00458 | 19 |
| AX-158294591 | 23 | 34.853 | KV453155.1 | 3520345 | 19-scf00458 | 19 |
| AX-158294595 | 23 | 34.853 | KV453155.1 | 3525190 | 19-scf00458 | 19 |
| AX-158294601 | 23 | 34.853 | KV453155.1 | 3533044 | 19-scf00458 | 19 |
| AX-157845763 | 23 | 34.853 | KV453155.1 | 3533781 | 19-scf00458 | 19 |
| AX-158294603 | 23 | 34.853 | KV453155.1 | 3535675 | 19-scf00458 | 19 |
| AX-158294606 | 23 | 34.853 | KV453155.1 | 3538239 | 19-scf00458 | 19 |
| AX-157845765 | 23 | 34.853 | KV453155.1 | 3541712 | 19-scf00458 | 19 |
| AX-157769879 | 23 | 34.853 | KV453155.1 | 3547059 | 19-scf00458 | 19 |
| AX-157860336 | 23 | 34.853 | KV453155.1 | 3551139 | 19-scf00458 | 19 |
| AX-158294614 | 23 | 34.853 | KV453155.1 | 3556551 | 19-scf00458 | 19 |
| AX-158294615 | 23 | 34.853 | KV453155.1 | 3557122 | 19-scf00458 | 19 |
| AX-158294616 | 23 | 34.853 | KV453155.1 | 3558069 | 19-scf00458 | 19 |
| AX-158417398 | 23 | 34.853 | KV453155.1 | 3559520 | 19-scf00458 | 19 |
| AX-157860339 | 23 | 34.853 | KV453155.1 | 3561213 | 19-scf00458 | 19 |
| AX-158294619 | 23 | 34.853 | KV453155.1 | 3561971 | 19-scf00458 | 19 |
| AX-158294620 | 23 | 34.853 | KV453155.1 | 3562339 | 19-scf00458 | 19 |
| AX-158294622 | 23 | 34.853 | KV453155.1 | 3563718 | 19-scf00458 | 19 |
| AX-158294624 | 23 | 34.853 | KV453155.1 | 3568394 | 19-scf00458 | 19 |
| AX-158294625 | 23 | 34.853 | KV453155.1 | 3569973 | 19-scf00458 | 19 |
| AX-158294631 | 23 | 34.853 | KV453155.1 | 3577634 | 19-scf00458 | 19 |
| AX-158294633 | 23 | 34.853 | KV453155.1 | 3579262 | 19-scf00458 | 19 |
| AX-158294638 | 23 | 34.853 | KV453155.1 | 3585704 | 19-scf00458 | 19 |
| AX-158294642 | 23 | 34.853 | KV453155.1 | 3590062 | 19-scf00458 | 19 |
| AX-158294644 | 23 | 34.853 | KV453155.1 | 3591038 | 19-scf00458 | 19 |
| AX-157860345 | 23 | 34.853 | KV453155.1 | 3591655 | 19-scf00458 | 19 |
| AX-158294645 | 23 | 34.853 | KV453155.1 | 3592984 | 19-scf00458 | 19 |
| AX-158294648 | 23 | 34.853 | KV453155.1 | 3598385 | 19-scf00458 | 19 |
| AX-158294650 | 23 | 34.853 | KV453155.1 | 3600484 | 19-scf00458 | 19 |
| AX-158294652 | 23 | 34.853 | KV453155.1 | 3603456 | 19-scf00458 | 19 |
| AX-158294656 | 23 | 34.853 | KV453155.1 | 3607977 | 19-scf00458 | 19 |
| AX-157860349 | 23 | 34.853 | KV453155.1 | 3611873 | 19-scf00458 | 19 |
| AX-158294661 | 23 | 34.853 | KV453155.1 | 3615816 | 19-scf00458 | 19 |
| AX-158294664 | 23 | 34.853 | KV453155.1 | 3617388 | 19-scf00458 | 19 |
| AX-158294666 | 23 | 34.853 | KV453155.1 | 3619128 | 19-scf00458 | 19 |
| AX-158294668 | 23 | 34.853 | KV453155.1 | 3621398 | 19-scf00458 | 19 |
| AX-157860351 | 23 | 34.853 | KV453155.1 | 3630079 | 19-scf00458 | 19 |
| AX-157860353 | 23 | 34.853 | KV453155.1 | 3635543 | 19-scf00458 | 19 |
| AX-158294678 | 23 | 34.853 | KV453155.1 | 3635583 | 19-scf00458 | 19 |
| AX-158294679 | 23 | 34.853 | KV453155.1 | 3636495 | 19-scf00458 | 19 |
| AX-157860355 | 23 | 34.853 | KV453155.1 | 3640344 | 19-scf00458 | 19 |
| AX-158294684 | 23 | 34.853 | KV453155.1 | 3641482 | 19-scf00458 | 19 |
| AX-157860356 | 23 | 34.853 | KV453155.1 | 3641837 | 19-scf00458 | 19 |
| AX-157860357 | 23 | 34.853 | KV453155.1 | 3643018 | 19-scf00458 | 19 |
| AX-157860358 | 23 | 34.853 | KV453155.1 | 3644981 | 19-scf00458 | 19 |
| AX-157860359 | 23 | 34.853 | KV453155.1 | 3645799 | 19-scf00458 | 19 |
| AX-157860360 | 23 | 34.853 | KV453155.1 | 3646032 | 19-scf00458 | 19 |

|              |    |        |             |         |                |    |
|--------------|----|--------|-------------|---------|----------------|----|
| AX-158294687 | 23 | 34.853 | KV453155.1  | 3646139 | 19-scf00458    | 19 |
| AX-158294688 | 23 | 34.853 | KV453155.1  | 3646595 | 19-scf00458    | 19 |
| AX-157845768 | 23 | 34.853 | KV453155.1  | 3650225 | 19-scf00458    | 19 |
| AX-157845769 | 23 | 34.853 | KV453155.1  | 3653260 | 19-scf00458    | 19 |
| AX-157860361 | 23 | 34.853 | KV453155.1  | 3654699 | 19-scf00458    | 19 |
| AX-158294693 | 23 | 34.853 | KV453155.1  | 3658206 | 19-scf00458    | 19 |
| AX-158294696 | 23 | 34.853 | KV453155.1  | 3660860 | 19-scf00458    | 19 |
| AX-158294697 | 23 | 34.853 | KV453155.1  | 3661467 | 19-scf00458    | 19 |
| AX-157860365 | 23 | 34.853 | KV453155.1  | 3661748 | 19-scf00458    | 19 |
| AX-158294698 | 23 | 34.853 | KV453155.1  | 3662287 | 19-scf00458    | 19 |
| AX-157860366 | 23 | 34.853 | KV453155.1  | 3662599 | 19-scf00458    | 19 |
| AX-158294699 | 23 | 34.853 | KV453155.1  | 3662998 | 19-scf00458    | 19 |
| AX-158387548 | 23 | 34.853 | KV453155.1  | 3666348 | 19-scf00458    | 19 |
| AX-158294702 | 23 | 34.853 | KV453155.1  | 3667942 | 19-scf00458    | 19 |
| AX-157860367 | 23 | 34.853 | KV453155.1  | 3668238 | 19-scf00458    | 19 |
| AX-157860368 | 23 | 34.853 | KV453155.1  | 3668292 | 19-scf00458    | 19 |
| AX-158294704 | 23 | 34.853 | KV453155.1  | 3669036 | 19-scf00458    | 19 |
| AX-158294705 | 23 | 34.853 | KV453155.1  | 3669770 | 19-scf00458    | 19 |
| AX-158294708 | 23 | 34.853 | KV453155.1  | 3672252 | 19-scf00458    | 19 |
| AX-158294709 | 23 | 34.853 | KV453155.1  | 3672675 | 19-scf00458    | 19 |
| AX-157845770 | 23 | 34.853 | KV453155.1  | 3674426 | 19-scf00458    | 19 |
| AX-158294711 | 23 | 34.853 | KV453155.1  | 3674657 | 19-scf00458    | 19 |
| AX-158294712 | 23 | 34.853 | KV453155.1  | 3675348 | 19-scf00458    | 19 |
| AX-157860370 | 23 | 34.853 | KV453155.1  | 3678195 | 19-scf00458    | 19 |
| AX-158294714 | 23 | 34.853 | KV453155.1  | 3678596 | 19-scf00458    | 19 |
| AX-158294716 | 23 | 34.853 | KV453155.1  | 3679546 | 19-scf00458    | 19 |
| AX-158294717 | 23 | 34.853 | KV453155.1  | 3680145 | 19-scf00458    | 19 |
| AX-158294721 | 23 | 34.853 | KV453155.1  | 3682635 | 19-scf00458    | 19 |
| AX-158294722 | 23 | 34.853 | KV453155.1  | 3683502 | 19-scf00458    | 19 |
| AX-158294725 | 23 | 34.853 | KV453155.1  | 3686189 | 19-scf00458    | 19 |
| AX-158294728 | 23 | 34.853 | KV453155.1  | 3689508 | 19-scf00458    | 19 |
| AX-157845775 | 23 | 34.853 | KV453155.1  | 3690616 | 19-scf00458    | 19 |
| AX-158294731 | 23 | 34.853 | KV453155.1  | 3692368 | 19-scf00458    | 19 |
| AX-157860373 | 23 | 34.853 | KV453155.1  | 3694365 | 19-scf00458    | 19 |
| AX-158294750 | 23 | 34.853 | KV453155.1  | 3718047 | 19-scf00458    | 19 |
| AX-158294752 | 23 | 34.853 | KV453155.1  | 3719570 | 19-scf00458    | 19 |
| AX-157752037 | 23 | 34.853 | KV453155.1  | 3932438 | 19-scf00458    | 19 |
| AX-158294917 | 23 | 34.853 | KV453155.1  | 3933081 | 19-scf00458    | 19 |
| AX-158294959 | 23 | 34.853 | KV453155.1  | 3976195 | 19-scf00458    | 19 |
| AX-158294963 | 23 | 34.853 | KV453155.1  | 3981328 | 19-scf00458    | 19 |
| AX-158294964 | 23 | 34.853 | KV453155.1  | 3982450 | 19-scf00458    | 19 |
| AX-157860406 | 23 | 34.853 | KV453155.1  | 3983769 | 19-scf00458    | 19 |
| AX-157860407 | 23 | 34.853 | KV453155.1  | 3989510 | 19-scf00458    | 19 |
| AX-158296162 | 23 | 34.853 | KV453155.1  | 5480932 | 19-scf00458    | 19 |
| AX-157697345 | 23 | 34.853 | FI866963.1  | 44      | IORI212 lctalu | UN |
| AX-157704496 | 23 | 34.853 | 3ML01026317 | 667     | scf01912_1     | UN |
| AX-157704497 | 23 | 34.853 | 3ML01026317 | 977     | scf01912_1     | UN |
| AX-157704495 | 23 | 34.853 | 3ML01026317 | 1016    | scf01912_1     | UN |
| AX-157705920 | 23 | 34.853 | 3ML01031234 | 162     | scf06840_1     | UN |
| AX-157705922 | 23 | 34.853 | 3ML01031234 | 733     | scf06840_1     | UN |
| AX-157706197 | 23 | 34.853 | 3ML01031803 | 98      | scf07424_1     | UN |

|              |    |        |            |         |             |    |
|--------------|----|--------|------------|---------|-------------|----|
| AX-157845755 | 23 | 35.017 | KV453155.1 | 3392252 | 19-scf00458 | 19 |
| AX-157860316 | 23 | 35.017 | KV453155.1 | 3403130 | 19-scf00458 | 19 |
| AX-157747089 | 23 | 35.181 | KV453155.1 | 2468343 | 19-scf00458 | 19 |
| AX-158293730 | 23 | 35.181 | KV453155.1 | 2475597 | 19-scf00458 | 19 |
| AX-158293775 | 23 | 35.181 | KV453155.1 | 2537542 | 19-scf00458 | 19 |
| AX-158293824 | 23 | 35.181 | KV453155.1 | 2593228 | 19-scf00458 | 19 |
| AX-158293837 | 23 | 35.181 | KV453155.1 | 2609263 | 19-scf00458 | 19 |
| AX-157845728 | 23 | 35.181 | KV453155.1 | 2610386 | 19-scf00458 | 19 |
| AX-157888060 | 23 | 35.181 | KV453155.1 | 2641011 | 19-scf00458 | 19 |
| AX-158293862 | 23 | 35.181 | KV453155.1 | 2647509 | 19-scf00458 | 19 |
| AX-158293881 | 23 | 35.181 | KV453155.1 | 2678791 | 19-scf00458 | 19 |
| AX-158293882 | 23 | 35.181 | KV453155.1 | 2679294 | 19-scf00458 | 19 |
| AX-158293891 | 23 | 35.181 | KV453155.1 | 2686650 | 19-scf00458 | 19 |
| AX-158293904 | 23 | 35.181 | KV453155.1 | 2704015 | 19-scf00458 | 19 |
| AX-157745476 | 23 | 35.181 | KV453155.1 | 2720445 | 19-scf00458 | 19 |
| AX-158293920 | 23 | 35.181 | KV453155.1 | 2723249 | 19-scf00458 | 19 |
| AX-158293943 | 23 | 35.181 | KV453155.1 | 2759056 | 19-scf00458 | 19 |
| AX-158293966 | 23 | 35.181 | KV453155.1 | 2789071 | 19-scf00458 | 19 |
| AX-158293996 | 23 | 35.181 | KV453155.1 | 2821663 | 19-scf00458 | 19 |
| AX-158294006 | 23 | 35.181 | KV453155.1 | 2827001 | 19-scf00458 | 19 |
| AX-158294029 | 23 | 35.181 | KV453155.1 | 2851773 | 19-scf00458 | 19 |
| AX-158294074 | 23 | 35.181 | KV453155.1 | 2893530 | 19-scf00458 | 19 |
| AX-158381262 | 23 | 35.181 | KV453155.1 | 2903485 | 19-scf00458 | 19 |
| AX-157845740 | 23 | 35.181 | KV453155.1 | 2915419 | 19-scf00458 | 19 |
| AX-158294104 | 23 | 35.181 | KV453155.1 | 2923112 | 19-scf00458 | 19 |
| AX-158294138 | 23 | 35.181 | KV453155.1 | 2956064 | 19-scf00458 | 19 |
| AX-158294144 | 23 | 35.181 | KV453155.1 | 2962905 | 19-scf00458 | 19 |
| AX-158294199 | 23 | 35.181 | KV453155.1 | 3023649 | 19-scf00458 | 19 |
| AX-158294204 | 23 | 35.181 | KV453155.1 | 3029324 | 19-scf00458 | 19 |
| AX-157880832 | 23 | 35.181 | KV453155.1 | 3046125 | 19-scf00458 | 19 |
| AX-158294259 | 23 | 35.181 | KV453155.1 | 3089133 | 19-scf00458 | 19 |
| AX-158294306 | 23 | 35.181 | KV453155.1 | 3137658 | 19-scf00458 | 19 |
| AX-158294346 | 23 | 35.181 | KV453155.1 | 3193987 | 19-scf00458 | 19 |
| AX-158294436 | 23 | 35.181 | KV453155.1 | 3311094 | 19-scf00458 | 19 |
| AX-158294459 | 23 | 35.181 | KV453155.1 | 3337578 | 19-scf00458 | 19 |
| AX-158294478 | 23 | 35.181 | KV453155.1 | 3359947 | 19-scf00458 | 19 |
| AX-158294492 | 23 | 35.181 | KV453155.1 | 3380788 | 19-scf00458 | 19 |
| AX-157860310 | 23 | 35.181 | KV453155.1 | 3394705 | 19-scf00458 | 19 |
| AX-158294531 | 23 | 35.181 | KV453155.1 | 3418336 | 19-scf00458 | 19 |
| AX-158294563 | 23 | 35.181 | KV453155.1 | 3482413 | 19-scf00458 | 19 |
| AX-158294584 | 23 | 35.181 | KV453155.1 | 3510931 | 19-scf00458 | 19 |
| AX-157860331 | 23 | 35.181 | KV453155.1 | 3515933 | 19-scf00458 | 19 |
| AX-157860332 | 23 | 35.181 | KV453155.1 | 3517416 | 19-scf00458 | 19 |
| AX-158294590 | 23 | 35.181 | KV453155.1 | 3519637 | 19-scf00458 | 19 |
| AX-158294604 | 23 | 35.181 | KV453155.1 | 3536003 | 19-scf00458 | 19 |
| AX-157860335 | 23 | 35.181 | KV453155.1 | 3536274 | 19-scf00458 | 19 |
| AX-157726260 | 23 | 35.181 | KV453155.1 | 3551568 | 19-scf00458 | 19 |
| AX-158294612 | 23 | 35.181 | KV453155.1 | 3553530 | 19-scf00458 | 19 |
| AX-158294617 | 23 | 35.181 | KV453155.1 | 3558998 | 19-scf00458 | 19 |
| AX-158294618 | 23 | 35.181 | KV453155.1 | 3560797 | 19-scf00458 | 19 |
| AX-157757125 | 23 | 35.181 | KV453155.1 | 3575621 | 19-scf00458 | 19 |

|              |    |        |            |         |             |    |
|--------------|----|--------|------------|---------|-------------|----|
| AX-158294630 | 23 | 35.181 | KV453155.1 | 3576141 | 19-scf00458 | 19 |
| AX-157860341 | 23 | 35.181 | KV453155.1 | 3577418 | 19-scf00458 | 19 |
| AX-157860342 | 23 | 35.181 | KV453155.1 | 3580766 | 19-scf00458 | 19 |
| AX-158294641 | 23 | 35.181 | KV453155.1 | 3589354 | 19-scf00458 | 19 |
| AX-158294658 | 23 | 35.181 | KV453155.1 | 3611658 | 19-scf00458 | 19 |
| AX-158294663 | 23 | 35.181 | KV453155.1 | 3617027 | 19-scf00458 | 19 |
| AX-158294667 | 23 | 35.181 | KV453155.1 | 3619782 | 19-scf00458 | 19 |
| AX-158294673 | 23 | 35.181 | KV453155.1 | 3629409 | 19-scf00458 | 19 |
| AX-158294685 | 23 | 35.181 | KV453155.1 | 3642086 | 19-scf00458 | 19 |
| AX-158294690 | 23 | 35.181 | KV453155.1 | 3647551 | 19-scf00458 | 19 |
| AX-157860362 | 23 | 35.181 | KV453155.1 | 3654744 | 19-scf00458 | 19 |
| AX-158294692 | 23 | 35.181 | KV453155.1 | 3656519 | 19-scf00458 | 19 |
| AX-158294694 | 23 | 35.181 | KV453155.1 | 3658525 | 19-scf00458 | 19 |
| AX-157860363 | 23 | 35.181 | KV453155.1 | 3658687 | 19-scf00458 | 19 |
| AX-158294710 | 23 | 35.181 | KV453155.1 | 3673214 | 19-scf00458 | 19 |
| AX-158294720 | 23 | 35.181 | KV453155.1 | 3682531 | 19-scf00458 | 19 |
| AX-158294733 | 23 | 35.181 | KV453155.1 | 3697509 | 19-scf00458 | 19 |
| AX-158294734 | 23 | 35.181 | KV453155.1 | 3698083 | 19-scf00458 | 19 |
| AX-158294740 | 23 | 35.181 | KV453155.1 | 3706536 | 19-scf00458 | 19 |
| AX-158294744 | 23 | 35.181 | KV453155.1 | 3710121 | 19-scf00458 | 19 |
| AX-158294747 | 23 | 35.181 | KV453155.1 | 3715399 | 19-scf00458 | 19 |
| AX-158294754 | 23 | 35.181 | KV453155.1 | 3721762 | 19-scf00458 | 19 |
| AX-158294755 | 23 | 35.181 | KV453155.1 | 3722304 | 19-scf00458 | 19 |
| AX-158294758 | 23 | 35.181 | KV453155.1 | 3723637 | 19-scf00458 | 19 |
| AX-158294759 | 23 | 35.181 | KV453155.1 | 3724237 | 19-scf00458 | 19 |
| AX-158294763 | 23 | 35.181 | KV453155.1 | 3727879 | 19-scf00458 | 19 |
| AX-158294768 | 23 | 35.181 | KV453155.1 | 3732227 | 19-scf00458 | 19 |
| AX-158294769 | 23 | 35.181 | KV453155.1 | 3733204 | 19-scf00458 | 19 |
| AX-158294771 | 23 | 35.181 | KV453155.1 | 3733837 | 19-scf00458 | 19 |
| AX-158294773 | 23 | 35.181 | KV453155.1 | 3735068 | 19-scf00458 | 19 |
| AX-157860386 | 23 | 35.181 | KV453155.1 | 3741879 | 19-scf00458 | 19 |
| AX-158294778 | 23 | 35.181 | KV453155.1 | 3746033 | 19-scf00458 | 19 |
| AX-157860388 | 23 | 35.181 | KV453155.1 | 3750580 | 19-scf00458 | 19 |
| AX-157860391 | 23 | 35.181 | KV453155.1 | 3767270 | 19-scf00458 | 19 |
| AX-158294800 | 23 | 35.181 | KV453155.1 | 3775865 | 19-scf00458 | 19 |
| AX-158294801 | 23 | 35.181 | KV453155.1 | 3776618 | 19-scf00458 | 19 |
| AX-157753143 | 23 | 35.181 | KV453155.1 | 3793667 | 19-scf00458 | 19 |
| AX-158294818 | 23 | 35.181 | KV453155.1 | 3796056 | 19-scf00458 | 19 |
| AX-158294820 | 23 | 35.181 | KV453155.1 | 3799202 | 19-scf00458 | 19 |
| AX-157721808 | 23 | 35.181 | KV453155.1 | 3800927 | 19-scf00458 | 19 |
| AX-157845777 | 23 | 35.181 | KV453155.1 | 3808400 | 19-scf00458 | 19 |
| AX-158294826 | 23 | 35.181 | KV453155.1 | 3809573 | 19-scf00458 | 19 |
| AX-158294827 | 23 | 35.181 | KV453155.1 | 3811795 | 19-scf00458 | 19 |
| AX-157756091 | 23 | 35.181 | KV453155.1 | 3813350 | 19-scf00458 | 19 |
| AX-158294831 | 23 | 35.181 | KV453155.1 | 3814720 | 19-scf00458 | 19 |
| AX-158294832 | 23 | 35.181 | KV453155.1 | 3815129 | 19-scf00458 | 19 |
| AX-158294837 | 23 | 35.181 | KV453155.1 | 3820710 | 19-scf00458 | 19 |
| AX-158294842 | 23 | 35.181 | KV453155.1 | 3828086 | 19-scf00458 | 19 |
| AX-157845778 | 23 | 35.181 | KV453155.1 | 3830221 | 19-scf00458 | 19 |
| AX-157845779 | 23 | 35.181 | KV453155.1 | 3836813 | 19-scf00458 | 19 |
| AX-158294847 | 23 | 35.181 | KV453155.1 | 3837683 | 19-scf00458 | 19 |

|              |    |        |            |         |               |    |
|--------------|----|--------|------------|---------|---------------|----|
| AX-158294848 | 23 | 35.181 | KV453155.1 | 3837774 | 19-scf00458   | 19 |
| AX-158294849 | 23 | 35.181 | KV453155.1 | 3838579 | 19-scf00458   | 19 |
| AX-157845780 | 23 | 35.181 | KV453155.1 | 3839117 | 19-scf00458   | 19 |
| AX-158294851 | 23 | 35.181 | KV453155.1 | 3840634 | 19-scf00458   | 19 |
| AX-157845781 | 23 | 35.181 | KV453155.1 | 3843444 | 19-scf00458   | 19 |
| AX-158294852 | 23 | 35.181 | KV453155.1 | 3845745 | 19-scf00458   | 19 |
| AX-158294858 | 23 | 35.181 | KV453155.1 | 3850930 | 19-scf00458   | 19 |
| AX-158294864 | 23 | 35.181 | KV453155.1 | 3861032 | 19-scf00458   | 19 |
| AX-158294870 | 23 | 35.181 | KV453155.1 | 3866354 | 19-scf00458   | 19 |
| AX-157845782 | 23 | 35.181 | KV453155.1 | 3871730 | 19-scf00458   | 19 |
| AX-158294875 | 23 | 35.181 | KV453155.1 | 3871949 | 19-scf00458   | 19 |
| AX-158294878 | 23 | 35.181 | KV453155.1 | 3874543 | 19-scf00458   | 19 |
| AX-158294880 | 23 | 35.181 | KV453155.1 | 3875945 | 19-scf00458   | 19 |
| AX-158417407 | 23 | 35.181 | KV453155.1 | 3881485 | 19-scf00458   | 19 |
| AX-158294883 | 23 | 35.181 | KV453155.1 | 3882943 | 19-scf00458   | 19 |
| AX-158294887 | 23 | 35.181 | KV453155.1 | 3887289 | 19-scf00458   | 19 |
| AX-158294895 | 23 | 35.181 | KV453155.1 | 3896968 | 19-scf00458   | 19 |
| AX-158294896 | 23 | 35.181 | KV453155.1 | 3897802 | 19-scf00458   | 19 |
| AX-157845786 | 23 | 35.181 | KV453155.1 | 3900993 | 19-scf00458   | 19 |
| AX-157845792 | 23 | 35.181 | KV453155.1 | 3917332 | 19-scf00458   | 19 |
| AX-158294909 | 23 | 35.181 | KV453155.1 | 3922675 | 19-scf00458   | 19 |
| AX-157715599 | 23 | 35.181 | KV453155.1 | 3927861 | 19-scf00458   | 19 |
| AX-158294913 | 23 | 35.181 | KV453155.1 | 3928395 | 19-scf00458   | 19 |
| AX-157845797 | 23 | 35.181 | KV453155.1 | 3929857 | 19-scf00458   | 19 |
| AX-158294924 | 23 | 35.181 | KV453155.1 | 3938205 | 19-scf00458   | 19 |
| AX-158294925 | 23 | 35.181 | KV453155.1 | 3940338 | 19-scf00458   | 19 |
| AX-158294961 | 23 | 35.181 | KV453155.1 | 3979033 | 19-scf00458   | 19 |
| AX-158294967 | 23 | 35.181 | KV453155.1 | 3985494 | 19-scf00458   | 19 |
| AX-158294982 | 23 | 35.181 | KV453155.1 | 4010643 | 19-scf00458   | 19 |
| AX-158295036 | 23 | 35.181 | KV453155.1 | 4074159 | 19-scf00458   | 19 |
| AX-158295060 | 23 | 35.181 | KV453155.1 | 4115888 | 19-scf00458   | 19 |
| AX-158295171 | 23 | 35.181 | KV453155.1 | 4299601 | 19-scf00458   | 19 |
| AX-157755382 | 23 | 35.181 | KV453155.1 | 4354823 | 19-scf00458   | 19 |
| AX-157845838 | 23 | 35.181 | KV453155.1 | 4460897 | 19-scf00458   | 19 |
| AX-158295244 | 23 | 35.181 | KV453155.1 | 4463148 | 19-scf00458   | 19 |
| AX-158295266 | 23 | 35.181 | KV453155.1 | 4488784 | 19-scf00458   | 19 |
| AX-158295481 | 23 | 35.181 | KV453155.1 | 4788803 | 19-scf00458   | 19 |
| AX-157696594 | 23 | 35.181 | FI860822.1 | 198     | ORI212 lctalu | UN |
| AX-158294869 | 23 | 35.191 | KV453155.1 | 3865714 | 19-scf00458   | 19 |
| AX-157845783 | 23 | 35.212 | KV453155.1 | 3874790 | 19-scf00458   | 19 |
| AX-157845784 | 23 | 35.231 | KV453155.1 | 3875248 | 19-scf00458   | 19 |
| AX-158294882 | 23 | 35.251 | KV453155.1 | 3880811 | 19-scf00458   | 19 |
| AX-157860399 | 23 | 35.271 | KV453155.1 | 3881124 | 19-scf00458   | 19 |
| AX-158294881 | 23 | 35.29  | KV453155.1 | 3879572 | 19-scf00458   | 19 |
| AX-158294889 | 23 | 35.29  | KV453155.1 | 3891520 | 19-scf00458   | 19 |
| AX-158294893 | 23 | 35.29  | KV453155.1 | 3895315 | 19-scf00458   | 19 |
| AX-157723649 | 23 | 35.29  | KV453155.1 | 3902469 | 19-scf00458   | 19 |
| AX-158294903 | 23 | 35.29  | KV453155.1 | 3911249 | 19-scf00458   | 19 |
| AX-157845790 | 23 | 35.29  | KV453155.1 | 3912189 | 19-scf00458   | 19 |
| AX-158294911 | 23 | 35.29  | KV453155.1 | 3926001 | 19-scf00458   | 19 |
| AX-158294912 | 23 | 35.29  | KV453155.1 | 3926118 | 19-scf00458   | 19 |

|              |    |        |            |         |             |    |
|--------------|----|--------|------------|---------|-------------|----|
| AX-157845795 | 23 | 35.29  | KV453155.1 | 3927161 | 19-scf00458 | 19 |
| AX-157845798 | 23 | 35.29  | KV453155.1 | 3934599 | 19-scf00458 | 19 |
| AX-158294919 | 23 | 35.29  | KV453155.1 | 3936479 | 19-scf00458 | 19 |
| AX-158294922 | 23 | 35.343 | KV453155.1 | 3937246 | 19-scf00458 | 19 |
| AX-157860403 | 23 | 35.386 | KV453155.1 | 3949983 | 19-scf00458 | 19 |
| AX-158294168 | 23 | 35.4   | KV453155.1 | 2987473 | 19-scf00458 | 19 |
| AX-158294923 | 23 | 35.4   | KV453155.1 | 3937453 | 19-scf00458 | 19 |
| AX-158294937 | 23 | 35.4   | KV453155.1 | 3952857 | 19-scf00458 | 19 |
| AX-157771444 | 23 | 35.4   | KV453155.1 | 3953980 | 19-scf00458 | 19 |
| AX-158294939 | 23 | 35.4   | KV453155.1 | 3954721 | 19-scf00458 | 19 |
| AX-158294940 | 23 | 35.4   | KV453155.1 | 3955295 | 19-scf00458 | 19 |
| AX-157860404 | 23 | 35.4   | KV453155.1 | 3955983 | 19-scf00458 | 19 |
| AX-158294942 | 23 | 35.4   | KV453155.1 | 3958071 | 19-scf00458 | 19 |
| AX-158294948 | 23 | 35.4   | KV453155.1 | 3961963 | 19-scf00458 | 19 |
| AX-158294952 | 23 | 35.4   | KV453155.1 | 3967916 | 19-scf00458 | 19 |
| AX-158423563 | 23 | 35.4   | KV453155.1 | 3984585 | 19-scf00458 | 19 |
| AX-158294987 | 23 | 35.4   | KV453155.1 | 4014023 | 19-scf00458 | 19 |
| AX-158295041 | 23 | 35.4   | KV453155.1 | 4083110 | 19-scf00458 | 19 |
| AX-158295062 | 23 | 35.4   | KV453155.1 | 4116916 | 19-scf00458 | 19 |
| AX-158295064 | 23 | 35.4   | KV453155.1 | 4118075 | 19-scf00458 | 19 |
| AX-158295067 | 23 | 35.4   | KV453155.1 | 4123429 | 19-scf00458 | 19 |
| AX-157719541 | 23 | 35.4   | KV453155.1 | 4382173 | 19-scf00458 | 19 |
| AX-157845839 | 23 | 35.4   | KV453155.1 | 4462001 | 19-scf00458 | 19 |
| AX-158295426 | 23 | 35.4   | KV453155.1 | 4674217 | 19-scf00458 | 19 |
| AX-157718542 | 23 | 35.4   | KV453155.1 | 6323641 | 19-scf00458 | 19 |
| AX-157860409 | 23 | 35.509 | KV453155.1 | 3991709 | 19-scf00458 | 19 |
| AX-157860410 | 23 | 35.509 | KV453155.1 | 3996702 | 19-scf00458 | 19 |
| AX-158294996 | 23 | 35.509 | KV453155.1 | 4022477 | 19-scf00458 | 19 |
| AX-158294998 | 23 | 35.509 | KV453155.1 | 4027226 | 19-scf00458 | 19 |
| AX-158294999 | 23 | 35.509 | KV453155.1 | 4027712 | 19-scf00458 | 19 |
| AX-158295010 | 23 | 35.509 | KV453155.1 | 4038148 | 19-scf00458 | 19 |
| AX-157845807 | 23 | 35.509 | KV453155.1 | 4041095 | 19-scf00458 | 19 |
| AX-158295016 | 23 | 35.509 | KV453155.1 | 4043215 | 19-scf00458 | 19 |
| AX-158295024 | 23 | 35.509 | KV453155.1 | 4055176 | 19-scf00458 | 19 |
| AX-157758026 | 23 | 35.509 | KV453155.1 | 4082617 | 19-scf00458 | 19 |
| AX-157726912 | 23 | 35.509 | KV453155.1 | 4085675 | 19-scf00458 | 19 |
| AX-158295044 | 23 | 35.509 | KV453155.1 | 4086919 | 19-scf00458 | 19 |
| AX-158295045 | 23 | 35.509 | KV453155.1 | 4089986 | 19-scf00458 | 19 |
| AX-157742627 | 23 | 35.509 | KV453155.1 | 4096566 | 19-scf00458 | 19 |
| AX-158295047 | 23 | 35.509 | KV453155.1 | 4098953 | 19-scf00458 | 19 |
| AX-158295048 | 23 | 35.509 | KV453155.1 | 4099696 | 19-scf00458 | 19 |
| AX-158295049 | 23 | 35.509 | KV453155.1 | 4100332 | 19-scf00458 | 19 |
| AX-158295050 | 23 | 35.509 | KV453155.1 | 4100791 | 19-scf00458 | 19 |
| AX-158295052 | 23 | 35.509 | KV453155.1 | 4102179 | 19-scf00458 | 19 |
| AX-158295054 | 23 | 35.509 | KV453155.1 | 4105453 | 19-scf00458 | 19 |
| AX-158295074 | 23 | 35.509 | KV453155.1 | 4134561 | 19-scf00458 | 19 |
| AX-158295076 | 23 | 35.509 | KV453155.1 | 4140407 | 19-scf00458 | 19 |
| AX-158295077 | 23 | 35.509 | KV453155.1 | 4140802 | 19-scf00458 | 19 |
| AX-158295083 | 23 | 35.509 | KV453155.1 | 4149325 | 19-scf00458 | 19 |
| AX-158295087 | 23 | 35.509 | KV453155.1 | 4152830 | 19-scf00458 | 19 |
| AX-158295108 | 23 | 35.509 | KV453155.1 | 4187415 | 19-scf00458 | 19 |

|              |    |        |            |         |             |    |
|--------------|----|--------|------------|---------|-------------|----|
| AX-157755576 | 23 | 35.509 | KV453155.1 | 4200931 | 19-scf00458 | 19 |
| AX-158295314 | 23 | 35.509 | KV453155.1 | 4530223 | 19-scf00458 | 19 |
| AX-157739046 | 23 | 35.509 | KV453155.1 | 5071611 | 19-scf00458 | 19 |
| AX-158295106 | 23 | 35.554 | KV453155.1 | 4185898 | 19-scf00458 | 19 |
| AX-158381270 | 23 | 35.554 | KV453155.1 | 4405292 | 19-scf00458 | 19 |
| AX-158294140 | 23 | 35.618 | KV453155.1 | 2958175 | 19-scf00458 | 19 |
| AX-158294148 | 23 | 35.618 | KV453155.1 | 2964477 | 19-scf00458 | 19 |
| AX-158294223 | 23 | 35.618 | KV453155.1 | 3048750 | 19-scf00458 | 19 |
| AX-158294250 | 23 | 35.618 | KV453155.1 | 3077208 | 19-scf00458 | 19 |
| AX-158294286 | 23 | 35.618 | KV453155.1 | 3115094 | 19-scf00458 | 19 |
| AX-158294334 | 23 | 35.618 | KV453155.1 | 3169620 | 19-scf00458 | 19 |
| AX-158294359 | 23 | 35.618 | KV453155.1 | 3227600 | 19-scf00458 | 19 |
| AX-158294389 | 23 | 35.618 | KV453155.1 | 3259893 | 19-scf00458 | 19 |
| AX-158294420 | 23 | 35.618 | KV453155.1 | 3295373 | 19-scf00458 | 19 |
| AX-158294426 | 23 | 35.618 | KV453155.1 | 3302838 | 19-scf00458 | 19 |
| AX-158294438 | 23 | 35.618 | KV453155.1 | 3312875 | 19-scf00458 | 19 |
| AX-158294439 | 23 | 35.618 | KV453155.1 | 3313517 | 19-scf00458 | 19 |
| AX-157845753 | 23 | 35.618 | KV453155.1 | 3335119 | 19-scf00458 | 19 |
| AX-157860298 | 23 | 35.618 | KV453155.1 | 3345103 | 19-scf00458 | 19 |
| AX-158294472 | 23 | 35.618 | KV453155.1 | 3354302 | 19-scf00458 | 19 |
| AX-158294480 | 23 | 35.618 | KV453155.1 | 3361303 | 19-scf00458 | 19 |
| AX-158294483 | 23 | 35.618 | KV453155.1 | 3367323 | 19-scf00458 | 19 |
| AX-158294509 | 23 | 35.618 | KV453155.1 | 3397925 | 19-scf00458 | 19 |
| AX-158411737 | 23 | 35.618 | KV453155.1 | 3413438 | 19-scf00458 | 19 |
| AX-158294560 | 23 | 35.618 | KV453155.1 | 3477004 | 19-scf00458 | 19 |
| AX-158294577 | 23 | 35.618 | KV453155.1 | 3502705 | 19-scf00458 | 19 |
| AX-158294608 | 23 | 35.618 | KV453155.1 | 3544309 | 19-scf00458 | 19 |
| AX-157860338 | 23 | 35.618 | KV453155.1 | 3559301 | 19-scf00458 | 19 |
| AX-158294621 | 23 | 35.618 | KV453155.1 | 3563085 | 19-scf00458 | 19 |
| AX-157860346 | 23 | 35.618 | KV453155.1 | 3594058 | 19-scf00458 | 19 |
| AX-158294657 | 23 | 35.618 | KV453155.1 | 3610595 | 19-scf00458 | 19 |
| AX-158294665 | 23 | 35.618 | KV453155.1 | 3618583 | 19-scf00458 | 19 |
| AX-158294671 | 23 | 35.618 | KV453155.1 | 3625338 | 19-scf00458 | 19 |
| AX-157845793 | 23 | 35.618 | KV453155.1 | 3919099 | 19-scf00458 | 19 |
| AX-158294970 | 23 | 35.618 | KV453155.1 | 3992550 | 19-scf00458 | 19 |
| AX-157860411 | 23 | 35.618 | KV453155.1 | 3996757 | 19-scf00458 | 19 |
| AX-158294975 | 23 | 35.618 | KV453155.1 | 3998196 | 19-scf00458 | 19 |
| AX-158294976 | 23 | 35.618 | KV453155.1 | 3998775 | 19-scf00458 | 19 |
| AX-158294977 | 23 | 35.618 | KV453155.1 | 4001775 | 19-scf00458 | 19 |
| AX-158294978 | 23 | 35.618 | KV453155.1 | 4002184 | 19-scf00458 | 19 |
| AX-157845806 | 23 | 35.618 | KV453155.1 | 4003675 | 19-scf00458 | 19 |
| AX-158294984 | 23 | 35.618 | KV453155.1 | 4011713 | 19-scf00458 | 19 |
| AX-158294989 | 23 | 35.618 | KV453155.1 | 4015916 | 19-scf00458 | 19 |
| AX-158294990 | 23 | 35.618 | KV453155.1 | 4016370 | 19-scf00458 | 19 |
| AX-158294991 | 23 | 35.618 | KV453155.1 | 4016740 | 19-scf00458 | 19 |
| AX-158294995 | 23 | 35.618 | KV453155.1 | 4019898 | 19-scf00458 | 19 |
| AX-157751890 | 23 | 35.618 | KV453155.1 | 4022240 | 19-scf00458 | 19 |
| AX-158294997 | 23 | 35.618 | KV453155.1 | 4023133 | 19-scf00458 | 19 |
| AX-158295028 | 23 | 35.618 | KV453155.1 | 4064433 | 19-scf00458 | 19 |
| AX-157774869 | 23 | 35.618 | KV453155.1 | 4069985 | 19-scf00458 | 19 |
| AX-158295034 | 23 | 35.618 | KV453155.1 | 4072493 | 19-scf00458 | 19 |

|              |    |        |            |         |             |    |
|--------------|----|--------|------------|---------|-------------|----|
| AX-158295075 | 23 | 35.618 | KV453155.1 | 4136824 | 19-scf00458 | 19 |
| AX-158295078 | 23 | 35.618 | KV453155.1 | 4140922 | 19-scf00458 | 19 |
| AX-158295084 | 23 | 35.618 | KV453155.1 | 4150502 | 19-scf00458 | 19 |
| AX-158295107 | 23 | 35.618 | KV453155.1 | 4186803 | 19-scf00458 | 19 |
| AX-158295109 | 23 | 35.618 | KV453155.1 | 4187868 | 19-scf00458 | 19 |
| AX-158295118 | 23 | 35.618 | KV453155.1 | 4205118 | 19-scf00458 | 19 |
| AX-158295119 | 23 | 35.618 | KV453155.1 | 4206428 | 19-scf00458 | 19 |
| AX-157753284 | 23 | 35.618 | KV453155.1 | 4229776 | 19-scf00458 | 19 |
| AX-158295132 | 23 | 35.618 | KV453155.1 | 4235527 | 19-scf00458 | 19 |
| AX-158295134 | 23 | 35.618 | KV453155.1 | 4236897 | 19-scf00458 | 19 |
| AX-158295135 | 23 | 35.618 | KV453155.1 | 4237994 | 19-scf00458 | 19 |
| AX-158295136 | 23 | 35.618 | KV453155.1 | 4240537 | 19-scf00458 | 19 |
| AX-158295139 | 23 | 35.618 | KV453155.1 | 4248551 | 19-scf00458 | 19 |
| AX-158295140 | 23 | 35.618 | KV453155.1 | 4248924 | 19-scf00458 | 19 |
| AX-158295150 | 23 | 35.618 | KV453155.1 | 4263370 | 19-scf00458 | 19 |
| AX-158295151 | 23 | 35.618 | KV453155.1 | 4266775 | 19-scf00458 | 19 |
| AX-158295155 | 23 | 35.618 | KV453155.1 | 4272261 | 19-scf00458 | 19 |
| AX-158295157 | 23 | 35.618 | KV453155.1 | 4274287 | 19-scf00458 | 19 |
| AX-158295162 | 23 | 35.618 | KV453155.1 | 4284847 | 19-scf00458 | 19 |
| AX-158295163 | 23 | 35.618 | KV453155.1 | 4285801 | 19-scf00458 | 19 |
| AX-158295164 | 23 | 35.618 | KV453155.1 | 4286815 | 19-scf00458 | 19 |
| AX-158295166 | 23 | 35.618 | KV453155.1 | 4288854 | 19-scf00458 | 19 |
| AX-158295182 | 23 | 35.618 | KV453155.1 | 4337436 | 19-scf00458 | 19 |
| AX-158295184 | 23 | 35.618 | KV453155.1 | 4339812 | 19-scf00458 | 19 |
| AX-157845816 | 23 | 35.618 | KV453155.1 | 4351333 | 19-scf00458 | 19 |
| AX-157845817 | 23 | 35.618 | KV453155.1 | 4354969 | 19-scf00458 | 19 |
| AX-158295196 | 23 | 35.618 | KV453155.1 | 4370865 | 19-scf00458 | 19 |
| AX-158295197 | 23 | 35.618 | KV453155.1 | 4372446 | 19-scf00458 | 19 |
| AX-158295200 | 23 | 35.618 | KV453155.1 | 4377702 | 19-scf00458 | 19 |
| AX-158295213 | 23 | 35.618 | KV453155.1 | 4391485 | 19-scf00458 | 19 |
| AX-157845825 | 23 | 35.618 | KV453155.1 | 4401555 | 19-scf00458 | 19 |
| AX-157845827 | 23 | 35.618 | KV453155.1 | 4409100 | 19-scf00458 | 19 |
| AX-157845828 | 23 | 35.618 | KV453155.1 | 4409943 | 19-scf00458 | 19 |
| AX-157860452 | 23 | 35.618 | KV453155.1 | 4410460 | 19-scf00458 | 19 |
| AX-157714946 | 23 | 35.618 | KV453155.1 | 4410606 | 19-scf00458 | 19 |
| AX-157845829 | 23 | 35.618 | KV453155.1 | 4410906 | 19-scf00458 | 19 |
| AX-157845836 | 23 | 35.618 | KV453155.1 | 4431258 | 19-scf00458 | 19 |
| AX-157888076 | 23 | 35.618 | KV453155.1 | 4499612 | 19-scf00458 | 19 |
| AX-158295312 | 23 | 35.618 | KV453155.1 | 4527518 | 19-scf00458 | 19 |
| AX-158295691 | 23 | 35.618 | KV453155.1 | 4969488 | 19-scf00458 | 19 |
| AX-158295801 | 23 | 35.618 | KV453155.1 | 5113200 | 19-scf00458 | 19 |
| AX-158295918 | 23 | 35.618 | KV453155.1 | 5233262 | 19-scf00458 | 19 |
| AX-158295950 | 23 | 35.618 | KV453155.1 | 5273162 | 19-scf00458 | 19 |
| AX-158296016 | 23 | 35.618 | KV453155.1 | 5337388 | 19-scf00458 | 19 |
| AX-158296093 | 23 | 35.618 | KV453155.1 | 5413768 | 19-scf00458 | 19 |
| AX-158296197 | 23 | 35.618 | KV453155.1 | 5530029 | 19-scf00458 | 19 |
| AX-158296312 | 23 | 35.618 | KV453155.1 | 5649522 | 19-scf00458 | 19 |
| AX-158296466 | 23 | 35.618 | KV453155.1 | 5922392 | 19-scf00458 | 19 |
| AX-158296650 | 23 | 35.618 | KV453155.1 | 6247514 | 19-scf00458 | 19 |
| AX-158296865 | 23 | 35.618 | KV453155.1 | 6553264 | 19-scf00458 | 19 |
| AX-158296866 | 23 | 35.618 | KV453155.1 | 6553594 | 19-scf00458 | 19 |



|              |    |        |             |         |             |    |
|--------------|----|--------|-------------|---------|-------------|----|
| AX-157771603 | 23 | 35.618 | KV453155.1  | 6553893 | 19-scf00458 | 19 |
| AX-158296870 | 23 | 35.618 | KV453155.1  | 6557562 | 19-scf00458 | 19 |
| AX-158297150 | 23 | 35.618 | KV453155.1  | 6867875 | 19-scf00458 | 19 |
| AX-157706163 | 23 | 35.618 | 3ML01031742 | 557     | scf07362_1  | UN |
| AX-158295100 | 23 | 35.683 | KV453155.1  | 4178033 | 19-scf00458 | 19 |
| AX-158295111 | 23 | 35.683 | KV453155.1  | 4188629 | 19-scf00458 | 19 |
| AX-157845826 | 23 | 35.683 | KV453155.1  | 4408826 | 19-scf00458 | 19 |
| AX-158295226 | 23 | 35.683 | KV453155.1  | 4429849 | 19-scf00458 | 19 |
| AX-158295228 | 23 | 35.683 | KV453155.1  | 4434918 | 19-scf00458 | 19 |
| AX-158295231 | 23 | 35.683 | KV453155.1  | 4443164 | 19-scf00458 | 19 |
| AX-157724449 | 23 | 35.683 | KV453155.1  | 4449400 | 19-scf00458 | 19 |
| AX-158295415 | 23 | 35.683 | KV453155.1  | 4642895 | 19-scf00458 | 19 |
| AX-158295723 | 23 | 35.683 | KV453155.1  | 5031678 | 19-scf00458 | 19 |
| AX-158295728 | 23 | 35.683 | KV453155.1  | 5036103 | 19-scf00458 | 19 |
| AX-158295742 | 23 | 35.683 | KV453155.1  | 5048597 | 19-scf00458 | 19 |
| AX-158295749 | 23 | 35.683 | KV453155.1  | 5052377 | 19-scf00458 | 19 |
| AX-158295757 | 23 | 35.683 | KV453155.1  | 5063400 | 19-scf00458 | 19 |
| AX-158295777 | 23 | 35.683 | KV453155.1  | 5089924 | 19-scf00458 | 19 |
| AX-158295781 | 23 | 35.683 | KV453155.1  | 5093166 | 19-scf00458 | 19 |
| AX-158295819 | 23 | 35.683 | KV453155.1  | 5130160 | 19-scf00458 | 19 |
| AX-158295821 | 23 | 35.683 | KV453155.1  | 5131356 | 19-scf00458 | 19 |
| AX-158295822 | 23 | 35.683 | KV453155.1  | 5133153 | 19-scf00458 | 19 |
| AX-158295833 | 23 | 35.683 | KV453155.1  | 5143424 | 19-scf00458 | 19 |
| AX-158295856 | 23 | 35.683 | KV453155.1  | 5170729 | 19-scf00458 | 19 |
| AX-158295864 | 23 | 35.683 | KV453155.1  | 5176698 | 19-scf00458 | 19 |
| AX-158295890 | 23 | 35.683 | KV453155.1  | 5203159 | 19-scf00458 | 19 |
| AX-158295891 | 23 | 35.683 | KV453155.1  | 5204011 | 19-scf00458 | 19 |
| AX-158295970 | 23 | 35.683 | KV453155.1  | 5296284 | 19-scf00458 | 19 |
| AX-158295979 | 23 | 35.683 | KV453155.1  | 5304635 | 19-scf00458 | 19 |
| AX-158295988 | 23 | 35.683 | KV453155.1  | 5311096 | 19-scf00458 | 19 |
| AX-157860495 | 23 | 35.683 | KV453155.1  | 5311162 | 19-scf00458 | 19 |
| AX-158296010 | 23 | 35.683 | KV453155.1  | 5331745 | 19-scf00458 | 19 |
| AX-158296097 | 23 | 35.683 | KV453155.1  | 5417633 | 19-scf00458 | 19 |
| AX-157845922 | 23 | 35.683 | KV453155.1  | 5421165 | 19-scf00458 | 19 |
| AX-158296108 | 23 | 35.683 | KV453155.1  | 5423420 | 19-scf00458 | 19 |
| AX-158296138 | 23 | 35.683 | KV453155.1  | 5453390 | 19-scf00458 | 19 |
| AX-158296164 | 23 | 35.683 | KV453155.1  | 5483733 | 19-scf00458 | 19 |
| AX-157860510 | 23 | 35.683 | KV453155.1  | 5500324 | 19-scf00458 | 19 |
| AX-158296176 | 23 | 35.683 | KV453155.1  | 5504230 | 19-scf00458 | 19 |
| AX-158296192 | 23 | 35.683 | KV453155.1  | 5524637 | 19-scf00458 | 19 |
| AX-157718326 | 23 | 35.683 | KV453155.1  | 5561035 | 19-scf00458 | 19 |
| AX-158296401 | 23 | 35.683 | KV453155.1  | 5801719 | 19-scf00458 | 19 |
| AX-158296402 | 23 | 35.683 | KV453155.1  | 5802289 | 19-scf00458 | 19 |
| AX-158296468 | 23 | 35.683 | KV453155.1  | 5926353 | 19-scf00458 | 19 |
| AX-158297146 | 23 | 35.683 | KV453155.1  | 6864184 | 19-scf00458 | 19 |
| AX-158293852 | 23 | 35.727 | KV453155.1  | 2629980 | 19-scf00458 | 19 |
| AX-158295055 | 23 | 35.727 | KV453155.1  | 4109111 | 19-scf00458 | 19 |
| AX-157738490 | 23 | 35.727 | KV453155.1  | 4125370 | 19-scf00458 | 19 |
| AX-158295117 | 23 | 35.727 | KV453155.1  | 4203852 | 19-scf00458 | 19 |
| AX-157888071 | 23 | 35.727 | KV453155.1  | 4208052 | 19-scf00458 | 19 |
| AX-158295127 | 23 | 35.727 | KV453155.1  | 4225173 | 19-scf00458 | 19 |

|              |    |        |            |         |             |    |
|--------------|----|--------|------------|---------|-------------|----|
| AX-158295130 | 23 | 35.727 | KV453155.1 | 4230180 | 19-scf00458 | 19 |
| AX-158295131 | 23 | 35.727 | KV453155.1 | 4231479 | 19-scf00458 | 19 |
| AX-158295153 | 23 | 35.727 | KV453155.1 | 4270011 | 19-scf00458 | 19 |
| AX-158295172 | 23 | 35.727 | KV453155.1 | 4315409 | 19-scf00458 | 19 |
| AX-158295185 | 23 | 35.727 | KV453155.1 | 4340481 | 19-scf00458 | 19 |
| AX-158295241 | 23 | 35.727 | KV453155.1 | 4454542 | 19-scf00458 | 19 |
| AX-157752484 | 23 | 35.727 | KV453155.1 | 4493545 | 19-scf00458 | 19 |
| AX-158295273 | 23 | 35.727 | KV453155.1 | 4494289 | 19-scf00458 | 19 |
| AX-158295274 | 23 | 35.727 | KV453155.1 | 4494923 | 19-scf00458 | 19 |
| AX-158295278 | 23 | 35.727 | KV453155.1 | 4498749 | 19-scf00458 | 19 |
| AX-158295281 | 23 | 35.727 | KV453155.1 | 4500567 | 19-scf00458 | 19 |
| AX-158295284 | 23 | 35.727 | KV453155.1 | 4502139 | 19-scf00458 | 19 |
| AX-158295313 | 23 | 35.727 | KV453155.1 | 4528516 | 19-scf00458 | 19 |
| AX-158295316 | 23 | 35.727 | KV453155.1 | 4531709 | 19-scf00458 | 19 |
| AX-158295324 | 23 | 35.727 | KV453155.1 | 4539427 | 19-scf00458 | 19 |
| AX-158295326 | 23 | 35.727 | KV453155.1 | 4541283 | 19-scf00458 | 19 |
| AX-158295329 | 23 | 35.727 | KV453155.1 | 4546459 | 19-scf00458 | 19 |
| AX-158295333 | 23 | 35.727 | KV453155.1 | 4552652 | 19-scf00458 | 19 |
| AX-157742502 | 23 | 35.727 | KV453155.1 | 4573429 | 19-scf00458 | 19 |
| AX-158295353 | 23 | 35.727 | KV453155.1 | 4585924 | 19-scf00458 | 19 |
| AX-158295357 | 23 | 35.727 | KV453155.1 | 4589932 | 19-scf00458 | 19 |
| AX-158295360 | 23 | 35.727 | KV453155.1 | 4592356 | 19-scf00458 | 19 |
| AX-158295379 | 23 | 35.727 | KV453155.1 | 4606501 | 19-scf00458 | 19 |
| AX-158295380 | 23 | 35.727 | KV453155.1 | 4607249 | 19-scf00458 | 19 |
| AX-157845849 | 23 | 35.727 | KV453155.1 | 4608972 | 19-scf00458 | 19 |
| AX-158295384 | 23 | 35.727 | KV453155.1 | 4610877 | 19-scf00458 | 19 |
| AX-157771204 | 23 | 35.727 | KV453155.1 | 4611609 | 19-scf00458 | 19 |
| AX-158295403 | 23 | 35.727 | KV453155.1 | 4623386 | 19-scf00458 | 19 |
| AX-158295404 | 23 | 35.727 | KV453155.1 | 4624123 | 19-scf00458 | 19 |
| AX-157845851 | 23 | 35.727 | KV453155.1 | 4625242 | 19-scf00458 | 19 |
| AX-158295405 | 23 | 35.727 | KV453155.1 | 4627275 | 19-scf00458 | 19 |
| AX-158295413 | 23 | 35.727 | KV453155.1 | 4641397 | 19-scf00458 | 19 |
| AX-157722483 | 23 | 35.727 | KV453155.1 | 4694324 | 19-scf00458 | 19 |
| AX-157745908 | 23 | 35.727 | KV453155.1 | 4694807 | 19-scf00458 | 19 |
| AX-158295452 | 23 | 35.727 | KV453155.1 | 4749294 | 19-scf00458 | 19 |
| AX-157880852 | 23 | 35.727 | KV453155.1 | 4864718 | 19-scf00458 | 19 |
| AX-158295759 | 23 | 35.727 | KV453155.1 | 5065218 | 19-scf00458 | 19 |
| AX-157753940 | 23 | 35.727 | KV453155.1 | 5072639 | 19-scf00458 | 19 |
| AX-158295876 | 23 | 35.727 | KV453155.1 | 5191610 | 19-scf00458 | 19 |
| AX-158295877 | 23 | 35.727 | KV453155.1 | 5192343 | 19-scf00458 | 19 |
| AX-158295908 | 23 | 35.727 | KV453155.1 | 5226733 | 19-scf00458 | 19 |
| AX-158295943 | 23 | 35.727 | KV453155.1 | 5261862 | 19-scf00458 | 19 |
| AX-158296014 | 23 | 35.727 | KV453155.1 | 5335835 | 19-scf00458 | 19 |
| AX-158296032 | 23 | 35.727 | KV453155.1 | 5350468 | 19-scf00458 | 19 |
| AX-158296079 | 23 | 35.727 | KV453155.1 | 5402791 | 19-scf00458 | 19 |
| AX-158296129 | 23 | 35.727 | KV453155.1 | 5441490 | 19-scf00458 | 19 |
| AX-157752637 | 23 | 35.727 | KV453155.1 | 5476365 | 19-scf00458 | 19 |
| AX-157845929 | 23 | 35.727 | KV453155.1 | 5554673 | 19-scf00458 | 19 |
| AX-158296224 | 23 | 35.727 | KV453155.1 | 5559087 | 19-scf00458 | 19 |
| AX-158296261 | 23 | 35.727 | KV453155.1 | 5593594 | 19-scf00458 | 19 |
| AX-158296304 | 23 | 35.727 | KV453155.1 | 5638517 | 19-scf00458 | 19 |

|              |    |        |             |         |             |    |
|--------------|----|--------|-------------|---------|-------------|----|
| AX-157803894 | 23 | 35.727 | KV453155.1  | 5646148 | 19-scf00458 | 19 |
| AX-158296313 | 23 | 35.727 | KV453155.1  | 5651614 | 19-scf00458 | 19 |
| AX-158296319 | 23 | 35.727 | KV453155.1  | 5659058 | 19-scf00458 | 19 |
| AX-158296330 | 23 | 35.727 | KV453155.1  | 5669216 | 19-scf00458 | 19 |
| AX-158296364 | 23 | 35.727 | KV453155.1  | 5718580 | 19-scf00458 | 19 |
| AX-158296375 | 23 | 35.727 | KV453155.1  | 5746218 | 19-scf00458 | 19 |
| AX-158296378 | 23 | 35.727 | KV453155.1  | 5749431 | 19-scf00458 | 19 |
| AX-158296382 | 23 | 35.727 | KV453155.1  | 5758946 | 19-scf00458 | 19 |
| AX-157845941 | 23 | 35.727 | KV453155.1  | 5841171 | 19-scf00458 | 19 |
| AX-158296481 | 23 | 35.727 | KV453155.1  | 5950341 | 19-scf00458 | 19 |
| AX-157845985 | 23 | 35.727 | KV453155.1  | 6365678 | 19-scf00458 | 19 |
| AX-158296754 | 23 | 35.727 | KV453155.1  | 6406482 | 19-scf00458 | 19 |
| AX-158381280 | 23 | 35.727 | KV453155.1  | 6463016 | 19-scf00458 | 19 |
| AX-158296858 | 23 | 35.727 | KV453155.1  | 6549343 | 19-scf00458 | 19 |
| AX-158296860 | 23 | 35.727 | KV453155.1  | 6550133 | 19-scf00458 | 19 |
| AX-158296863 | 23 | 35.727 | KV453155.1  | 6552495 | 19-scf00458 | 19 |
| AX-158297165 | 23 | 35.727 | KV453155.1  | 6891118 | 19-scf00458 | 19 |
| AX-157704421 | 23 | 35.727 | 3ML01026011 | 1669    | scf01609_1  | UN |
| AX-158295012 | 23 | 35.774 | KV453155.1  | 4040618 | 19-scf00458 | 19 |
| AX-158295455 | 23 | 35.774 | KV453155.1  | 4758530 | 19-scf00458 | 19 |
| AX-158295464 | 23 | 35.774 | KV453155.1  | 4778275 | 19-scf00458 | 19 |
| AX-158295465 | 23 | 35.774 | KV453155.1  | 4778839 | 19-scf00458 | 19 |
| AX-157739221 | 23 | 35.774 | KV453155.1  | 4783233 | 19-scf00458 | 19 |
| AX-158295578 | 23 | 35.774 | KV453155.1  | 4890316 | 19-scf00458 | 19 |
| AX-158295585 | 23 | 35.774 | KV453155.1  | 4895430 | 19-scf00458 | 19 |
| AX-158295591 | 23 | 35.774 | KV453155.1  | 4904270 | 19-scf00458 | 19 |
| AX-157845925 | 23 | 35.774 | KV453155.1  | 5443068 | 19-scf00458 | 19 |
| AX-158296550 | 23 | 35.774 | KV453155.1  | 6063579 | 19-scf00458 | 19 |
| AX-157845962 | 23 | 35.774 | KV453155.1  | 6240668 | 19-scf00458 | 19 |
| AX-158296672 | 23 | 35.774 | KV453155.1  | 6277500 | 19-scf00458 | 19 |
| AX-158296799 | 23 | 35.774 | KV453155.1  | 6472714 | 19-scf00458 | 19 |
| AX-158296806 | 23 | 35.774 | KV453155.1  | 6484245 | 19-scf00458 | 19 |
| AX-157860603 | 23 | 35.774 | KV453155.1  | 6517205 | 19-scf00458 | 19 |
| AX-158296881 | 23 | 35.774 | KV453155.1  | 6569287 | 19-scf00458 | 19 |
| AX-158417473 | 23 | 35.774 | KV453155.1  | 6608482 | 19-scf00458 | 19 |
| AX-158296940 | 23 | 35.774 | KV453155.1  | 6654339 | 19-scf00458 | 19 |
| AX-158297087 | 23 | 35.774 | KV453155.1  | 6800564 | 19-scf00458 | 19 |
| AX-158299115 | 23 | 35.774 | KV453155.1  | 9472746 | 19-scf00458 | 19 |
| AX-157742613 | 23 | 35.774 | KV453155.1  | 9595656 | 19-scf00458 | 19 |
| AX-158295478 | 23 | 35.805 | KV453155.1  | 4786857 | 19-scf00458 | 19 |
| AX-158295103 | 23 | 35.837 | KV453155.1  | 4182146 | 19-scf00458 | 19 |
| AX-157888072 | 23 | 35.837 | KV453155.1  | 4209292 | 19-scf00458 | 19 |
| AX-158295159 | 23 | 35.837 | KV453155.1  | 4278332 | 19-scf00458 | 19 |
| AX-158295170 | 23 | 35.837 | KV453155.1  | 4299147 | 19-scf00458 | 19 |
| AX-158295190 | 23 | 35.837 | KV453155.1  | 4351718 | 19-scf00458 | 19 |
| AX-158295191 | 23 | 35.837 | KV453155.1  | 4351860 | 19-scf00458 | 19 |
| AX-158295203 | 23 | 35.837 | KV453155.1  | 4380216 | 19-scf00458 | 19 |
| AX-157860445 | 23 | 35.837 | KV453155.1  | 4382216 | 19-scf00458 | 19 |
| AX-158295206 | 23 | 35.837 | KV453155.1  | 4384331 | 19-scf00458 | 19 |
| AX-158295211 | 23 | 35.837 | KV453155.1  | 4388644 | 19-scf00458 | 19 |
| AX-157845823 | 23 | 35.837 | KV453155.1  | 4390833 | 19-scf00458 | 19 |

|              |    |        |            |         |             |    |
|--------------|----|--------|------------|---------|-------------|----|
| AX-157860446 | 23 | 35.837 | KV453155.1 | 4394755 | 19-scf00458 | 19 |
| AX-158295214 | 23 | 35.837 | KV453155.1 | 4397812 | 19-scf00458 | 19 |
| AX-158295215 | 23 | 35.837 | KV453155.1 | 4398222 | 19-scf00458 | 19 |
| AX-157860447 | 23 | 35.837 | KV453155.1 | 4400410 | 19-scf00458 | 19 |
| AX-157860448 | 23 | 35.837 | KV453155.1 | 4400511 | 19-scf00458 | 19 |
| AX-158295217 | 23 | 35.837 | KV453155.1 | 4404763 | 19-scf00458 | 19 |
| AX-157860450 | 23 | 35.837 | KV453155.1 | 4404935 | 19-scf00458 | 19 |
| AX-158295218 | 23 | 35.837 | KV453155.1 | 4407538 | 19-scf00458 | 19 |
| AX-157860451 | 23 | 35.837 | KV453155.1 | 4407830 | 19-scf00458 | 19 |
| AX-158295219 | 23 | 35.837 | KV453155.1 | 4408331 | 19-scf00458 | 19 |
| AX-157860453 | 23 | 35.837 | KV453155.1 | 4419643 | 19-scf00458 | 19 |
| AX-157845832 | 23 | 35.837 | KV453155.1 | 4423789 | 19-scf00458 | 19 |
| AX-157860454 | 23 | 35.837 | KV453155.1 | 4425019 | 19-scf00458 | 19 |
| AX-157845833 | 23 | 35.837 | KV453155.1 | 4425776 | 19-scf00458 | 19 |
| AX-157845835 | 23 | 35.837 | KV453155.1 | 4427531 | 19-scf00458 | 19 |
| AX-158295227 | 23 | 35.837 | KV453155.1 | 4430469 | 19-scf00458 | 19 |
| AX-157860455 | 23 | 35.837 | KV453155.1 | 4435025 | 19-scf00458 | 19 |
| AX-158295319 | 23 | 35.837 | KV453155.1 | 4533748 | 19-scf00458 | 19 |
| AX-158295356 | 23 | 35.837 | KV453155.1 | 4589661 | 19-scf00458 | 19 |
| AX-158295519 | 23 | 35.837 | KV453155.1 | 4829780 | 19-scf00458 | 19 |
| AX-158295520 | 23 | 35.837 | KV453155.1 | 4830228 | 19-scf00458 | 19 |
| AX-158295529 | 23 | 35.837 | KV453155.1 | 4836491 | 19-scf00458 | 19 |
| AX-158295536 | 23 | 35.837 | KV453155.1 | 4845350 | 19-scf00458 | 19 |
| AX-157845869 | 23 | 35.837 | KV453155.1 | 4856764 | 19-scf00458 | 19 |
| AX-157738745 | 23 | 35.837 | KV453155.1 | 4857283 | 19-scf00458 | 19 |
| AX-158295543 | 23 | 35.837 | KV453155.1 | 4857960 | 19-scf00458 | 19 |
| AX-158417433 | 23 | 35.837 | KV453155.1 | 4897386 | 19-scf00458 | 19 |
| AX-158295679 | 23 | 35.837 | KV453155.1 | 4945740 | 19-scf00458 | 19 |
| AX-157720690 | 23 | 35.837 | KV453155.1 | 4979958 | 19-scf00458 | 19 |
| AX-158295697 | 23 | 35.837 | KV453155.1 | 4997446 | 19-scf00458 | 19 |
| AX-158295698 | 23 | 35.837 | KV453155.1 | 4997903 | 19-scf00458 | 19 |
| AX-158295699 | 23 | 35.837 | KV453155.1 | 4999162 | 19-scf00458 | 19 |
| AX-158295701 | 23 | 35.837 | KV453155.1 | 5005098 | 19-scf00458 | 19 |
| AX-157845903 | 23 | 35.837 | KV453155.1 | 5014772 | 19-scf00458 | 19 |
| AX-158295705 | 23 | 35.837 | KV453155.1 | 5015120 | 19-scf00458 | 19 |
| AX-158295706 | 23 | 35.837 | KV453155.1 | 5015686 | 19-scf00458 | 19 |
| AX-158295707 | 23 | 35.837 | KV453155.1 | 5016329 | 19-scf00458 | 19 |
| AX-158295709 | 23 | 35.837 | KV453155.1 | 5020583 | 19-scf00458 | 19 |
| AX-158295713 | 23 | 35.837 | KV453155.1 | 5022671 | 19-scf00458 | 19 |
| AX-157845904 | 23 | 35.837 | KV453155.1 | 5023584 | 19-scf00458 | 19 |
| AX-157860479 | 23 | 35.837 | KV453155.1 | 5023931 | 19-scf00458 | 19 |
| AX-158295714 | 23 | 35.837 | KV453155.1 | 5024389 | 19-scf00458 | 19 |
| AX-157860480 | 23 | 35.837 | KV453155.1 | 5024965 | 19-scf00458 | 19 |
| AX-158295715 | 23 | 35.837 | KV453155.1 | 5025580 | 19-scf00458 | 19 |
| AX-158295716 | 23 | 35.837 | KV453155.1 | 5026004 | 19-scf00458 | 19 |
| AX-158295717 | 23 | 35.837 | KV453155.1 | 5027380 | 19-scf00458 | 19 |
| AX-158295718 | 23 | 35.837 | KV453155.1 | 5027459 | 19-scf00458 | 19 |
| AX-158295720 | 23 | 35.837 | KV453155.1 | 5028299 | 19-scf00458 | 19 |
| AX-158295721 | 23 | 35.837 | KV453155.1 | 5029768 | 19-scf00458 | 19 |
| AX-158295722 | 23 | 35.837 | KV453155.1 | 5030432 | 19-scf00458 | 19 |
| AX-158381273 | 23 | 35.837 | KV453155.1 | 5030484 | 19-scf00458 | 19 |

|              |    |        |            |         |             |    |
|--------------|----|--------|------------|---------|-------------|----|
| AX-158295724 | 23 | 35.837 | KV453155.1 | 5032670 | 19-scf00458 | 19 |
| AX-158295725 | 23 | 35.837 | KV453155.1 | 5034047 | 19-scf00458 | 19 |
| AX-158295726 | 23 | 35.837 | KV453155.1 | 5034459 | 19-scf00458 | 19 |
| AX-157860481 | 23 | 35.837 | KV453155.1 | 5038363 | 19-scf00458 | 19 |
| AX-158295730 | 23 | 35.837 | KV453155.1 | 5039465 | 19-scf00458 | 19 |
| AX-158295734 | 23 | 35.837 | KV453155.1 | 5042497 | 19-scf00458 | 19 |
| AX-158295735 | 23 | 35.837 | KV453155.1 | 5042815 | 19-scf00458 | 19 |
| AX-158295736 | 23 | 35.837 | KV453155.1 | 5044566 | 19-scf00458 | 19 |
| AX-158295737 | 23 | 35.837 | KV453155.1 | 5045349 | 19-scf00458 | 19 |
| AX-158295739 | 23 | 35.837 | KV453155.1 | 5046775 | 19-scf00458 | 19 |
| AX-158295740 | 23 | 35.837 | KV453155.1 | 5047516 | 19-scf00458 | 19 |
| AX-158295745 | 23 | 35.837 | KV453155.1 | 5050520 | 19-scf00458 | 19 |
| AX-158295746 | 23 | 35.837 | KV453155.1 | 5050920 | 19-scf00458 | 19 |
| AX-158295747 | 23 | 35.837 | KV453155.1 | 5051476 | 19-scf00458 | 19 |
| AX-158295748 | 23 | 35.837 | KV453155.1 | 5051877 | 19-scf00458 | 19 |
| AX-158295753 | 23 | 35.837 | KV453155.1 | 5061071 | 19-scf00458 | 19 |
| AX-158295754 | 23 | 35.837 | KV453155.1 | 5061688 | 19-scf00458 | 19 |
| AX-158295755 | 23 | 35.837 | KV453155.1 | 5062380 | 19-scf00458 | 19 |
| AX-158295758 | 23 | 35.837 | KV453155.1 | 5064266 | 19-scf00458 | 19 |
| AX-157803882 | 23 | 35.837 | KV453155.1 | 5066176 | 19-scf00458 | 19 |
| AX-157845912 | 23 | 35.837 | KV453155.1 | 5073655 | 19-scf00458 | 19 |
| AX-158295764 | 23 | 35.837 | KV453155.1 | 5075918 | 19-scf00458 | 19 |
| AX-158295765 | 23 | 35.837 | KV453155.1 | 5076995 | 19-scf00458 | 19 |
| AX-158295766 | 23 | 35.837 | KV453155.1 | 5077754 | 19-scf00458 | 19 |
| AX-158295767 | 23 | 35.837 | KV453155.1 | 5078408 | 19-scf00458 | 19 |
| AX-158295768 | 23 | 35.837 | KV453155.1 | 5079050 | 19-scf00458 | 19 |
| AX-158295769 | 23 | 35.837 | KV453155.1 | 5079348 | 19-scf00458 | 19 |
| AX-158295770 | 23 | 35.837 | KV453155.1 | 5079768 | 19-scf00458 | 19 |
| AX-158411838 | 23 | 35.837 | KV453155.1 | 5080266 | 19-scf00458 | 19 |
| AX-158295773 | 23 | 35.837 | KV453155.1 | 5083483 | 19-scf00458 | 19 |
| AX-158295778 | 23 | 35.837 | KV453155.1 | 5090888 | 19-scf00458 | 19 |
| AX-158295779 | 23 | 35.837 | KV453155.1 | 5091715 | 19-scf00458 | 19 |
| AX-157860483 | 23 | 35.837 | KV453155.1 | 5095719 | 19-scf00458 | 19 |
| AX-158295783 | 23 | 35.837 | KV453155.1 | 5095913 | 19-scf00458 | 19 |
| AX-158295785 | 23 | 35.837 | KV453155.1 | 5097052 | 19-scf00458 | 19 |
| AX-158295786 | 23 | 35.837 | KV453155.1 | 5098075 | 19-scf00458 | 19 |
| AX-158295788 | 23 | 35.837 | KV453155.1 | 5099880 | 19-scf00458 | 19 |
| AX-158295789 | 23 | 35.837 | KV453155.1 | 5100397 | 19-scf00458 | 19 |
| AX-158295790 | 23 | 35.837 | KV453155.1 | 5100862 | 19-scf00458 | 19 |
| AX-158295791 | 23 | 35.837 | KV453155.1 | 5101468 | 19-scf00458 | 19 |
| AX-158295792 | 23 | 35.837 | KV453155.1 | 5102117 | 19-scf00458 | 19 |
| AX-158295796 | 23 | 35.837 | KV453155.1 | 5108633 | 19-scf00458 | 19 |
| AX-158295798 | 23 | 35.837 | KV453155.1 | 5110741 | 19-scf00458 | 19 |
| AX-158295799 | 23 | 35.837 | KV453155.1 | 5111182 | 19-scf00458 | 19 |
| AX-158295803 | 23 | 35.837 | KV453155.1 | 5115809 | 19-scf00458 | 19 |
| AX-158295804 | 23 | 35.837 | KV453155.1 | 5116413 | 19-scf00458 | 19 |
| AX-158295805 | 23 | 35.837 | KV453155.1 | 5116988 | 19-scf00458 | 19 |
| AX-158295806 | 23 | 35.837 | KV453155.1 | 5117439 | 19-scf00458 | 19 |
| AX-158295807 | 23 | 35.837 | KV453155.1 | 5117969 | 19-scf00458 | 19 |
| AX-158295808 | 23 | 35.837 | KV453155.1 | 5118673 | 19-scf00458 | 19 |
| AX-158295809 | 23 | 35.837 | KV453155.1 | 5119202 | 19-scf00458 | 19 |

|              |    |        |            |         |             |    |
|--------------|----|--------|------------|---------|-------------|----|
| AX-158295810 | 23 | 35.837 | KV453155.1 | 5120215 | 19-scf00458 | 19 |
| AX-158295812 | 23 | 35.837 | KV453155.1 | 5123128 | 19-scf00458 | 19 |
| AX-158295814 | 23 | 35.837 | KV453155.1 | 5125029 | 19-scf00458 | 19 |
| AX-158295820 | 23 | 35.837 | KV453155.1 | 5130997 | 19-scf00458 | 19 |
| AX-158295824 | 23 | 35.837 | KV453155.1 | 5135339 | 19-scf00458 | 19 |
| AX-158295826 | 23 | 35.837 | KV453155.1 | 5136180 | 19-scf00458 | 19 |
| AX-158295827 | 23 | 35.837 | KV453155.1 | 5138247 | 19-scf00458 | 19 |
| AX-158295828 | 23 | 35.837 | KV453155.1 | 5138903 | 19-scf00458 | 19 |
| AX-158295829 | 23 | 35.837 | KV453155.1 | 5139362 | 19-scf00458 | 19 |
| AX-158295830 | 23 | 35.837 | KV453155.1 | 5139925 | 19-scf00458 | 19 |
| AX-158295832 | 23 | 35.837 | KV453155.1 | 5142468 | 19-scf00458 | 19 |
| AX-158295834 | 23 | 35.837 | KV453155.1 | 5143824 | 19-scf00458 | 19 |
| AX-158295836 | 23 | 35.837 | KV453155.1 | 5146113 | 19-scf00458 | 19 |
| AX-158295838 | 23 | 35.837 | KV453155.1 | 5148342 | 19-scf00458 | 19 |
| AX-158295839 | 23 | 35.837 | KV453155.1 | 5148962 | 19-scf00458 | 19 |
| AX-158295841 | 23 | 35.837 | KV453155.1 | 5151333 | 19-scf00458 | 19 |
| AX-158295843 | 23 | 35.837 | KV453155.1 | 5153983 | 19-scf00458 | 19 |
| AX-158295844 | 23 | 35.837 | KV453155.1 | 5154819 | 19-scf00458 | 19 |
| AX-158295845 | 23 | 35.837 | KV453155.1 | 5156018 | 19-scf00458 | 19 |
| AX-158295847 | 23 | 35.837 | KV453155.1 | 5157419 | 19-scf00458 | 19 |
| AX-157755255 | 23 | 35.837 | KV453155.1 | 5163758 | 19-scf00458 | 19 |
| AX-158295852 | 23 | 35.837 | KV453155.1 | 5165362 | 19-scf00458 | 19 |
| AX-158295854 | 23 | 35.837 | KV453155.1 | 5167047 | 19-scf00458 | 19 |
| AX-158295855 | 23 | 35.837 | KV453155.1 | 5168576 | 19-scf00458 | 19 |
| AX-158295857 | 23 | 35.837 | KV453155.1 | 5171278 | 19-scf00458 | 19 |
| AX-158295858 | 23 | 35.837 | KV453155.1 | 5172234 | 19-scf00458 | 19 |
| AX-158295860 | 23 | 35.837 | KV453155.1 | 5173678 | 19-scf00458 | 19 |
| AX-158295862 | 23 | 35.837 | KV453155.1 | 5175277 | 19-scf00458 | 19 |
| AX-158295863 | 23 | 35.837 | KV453155.1 | 5175883 | 19-scf00458 | 19 |
| AX-157723814 | 23 | 35.837 | KV453155.1 | 5178507 | 19-scf00458 | 19 |
| AX-158295866 | 23 | 35.837 | KV453155.1 | 5179176 | 19-scf00458 | 19 |
| AX-158295867 | 23 | 35.837 | KV453155.1 | 5179630 | 19-scf00458 | 19 |
| AX-158295868 | 23 | 35.837 | KV453155.1 | 5180071 | 19-scf00458 | 19 |
| AX-158295869 | 23 | 35.837 | KV453155.1 | 5181008 | 19-scf00458 | 19 |
| AX-158295870 | 23 | 35.837 | KV453155.1 | 5181566 | 19-scf00458 | 19 |
| AX-158295871 | 23 | 35.837 | KV453155.1 | 5184577 | 19-scf00458 | 19 |
| AX-158295873 | 23 | 35.837 | KV453155.1 | 5188597 | 19-scf00458 | 19 |
| AX-158295874 | 23 | 35.837 | KV453155.1 | 5190446 | 19-scf00458 | 19 |
| AX-158295880 | 23 | 35.837 | KV453155.1 | 5195530 | 19-scf00458 | 19 |
| AX-158295881 | 23 | 35.837 | KV453155.1 | 5195917 | 19-scf00458 | 19 |
| AX-158295882 | 23 | 35.837 | KV453155.1 | 5196742 | 19-scf00458 | 19 |
| AX-158295885 | 23 | 35.837 | KV453155.1 | 5199313 | 19-scf00458 | 19 |
| AX-158295886 | 23 | 35.837 | KV453155.1 | 5200274 | 19-scf00458 | 19 |
| AX-158295887 | 23 | 35.837 | KV453155.1 | 5200778 | 19-scf00458 | 19 |
| AX-158295889 | 23 | 35.837 | KV453155.1 | 5202181 | 19-scf00458 | 19 |
| AX-158295893 | 23 | 35.837 | KV453155.1 | 5207029 | 19-scf00458 | 19 |
| AX-158295894 | 23 | 35.837 | KV453155.1 | 5207611 | 19-scf00458 | 19 |
| AX-158295896 | 23 | 35.837 | KV453155.1 | 5212379 | 19-scf00458 | 19 |
| AX-158295898 | 23 | 35.837 | KV453155.1 | 5213713 | 19-scf00458 | 19 |
| AX-158295899 | 23 | 35.837 | KV453155.1 | 5214592 | 19-scf00458 | 19 |
| AX-158295900 | 23 | 35.837 | KV453155.1 | 5214967 | 19-scf00458 | 19 |

|              |    |        |            |         |             |    |
|--------------|----|--------|------------|---------|-------------|----|
| AX-158417440 | 23 | 35.837 | KV453155.1 | 5217212 | 19-scf00458 | 19 |
| AX-158295904 | 23 | 35.837 | KV453155.1 | 5220513 | 19-scf00458 | 19 |
| AX-158417442 | 23 | 35.837 | KV453155.1 | 5223097 | 19-scf00458 | 19 |
| AX-158295906 | 23 | 35.837 | KV453155.1 | 5225294 | 19-scf00458 | 19 |
| AX-158295907 | 23 | 35.837 | KV453155.1 | 5226014 | 19-scf00458 | 19 |
| AX-158295910 | 23 | 35.837 | KV453155.1 | 5227994 | 19-scf00458 | 19 |
| AX-158295912 | 23 | 35.837 | KV453155.1 | 5229388 | 19-scf00458 | 19 |
| AX-158295917 | 23 | 35.837 | KV453155.1 | 5232355 | 19-scf00458 | 19 |
| AX-158295920 | 23 | 35.837 | KV453155.1 | 5236645 | 19-scf00458 | 19 |
| AX-158295921 | 23 | 35.837 | KV453155.1 | 5237401 | 19-scf00458 | 19 |
| AX-158295924 | 23 | 35.837 | KV453155.1 | 5239236 | 19-scf00458 | 19 |
| AX-158295925 | 23 | 35.837 | KV453155.1 | 5239937 | 19-scf00458 | 19 |
| AX-158295926 | 23 | 35.837 | KV453155.1 | 5240616 | 19-scf00458 | 19 |
| AX-158295929 | 23 | 35.837 | KV453155.1 | 5244722 | 19-scf00458 | 19 |
| AX-158295932 | 23 | 35.837 | KV453155.1 | 5247510 | 19-scf00458 | 19 |
| AX-158295935 | 23 | 35.837 | KV453155.1 | 5254682 | 19-scf00458 | 19 |
| AX-158295937 | 23 | 35.837 | KV453155.1 | 5256476 | 19-scf00458 | 19 |
| AX-157860485 | 23 | 35.837 | KV453155.1 | 5257128 | 19-scf00458 | 19 |
| AX-158295939 | 23 | 35.837 | KV453155.1 | 5257772 | 19-scf00458 | 19 |
| AX-158295940 | 23 | 35.837 | KV453155.1 | 5258663 | 19-scf00458 | 19 |
| AX-158295941 | 23 | 35.837 | KV453155.1 | 5260880 | 19-scf00458 | 19 |
| AX-158295942 | 23 | 35.837 | KV453155.1 | 5261324 | 19-scf00458 | 19 |
| AX-158295945 | 23 | 35.837 | KV453155.1 | 5265044 | 19-scf00458 | 19 |
| AX-158295946 | 23 | 35.837 | KV453155.1 | 5267727 | 19-scf00458 | 19 |
| AX-158295947 | 23 | 35.837 | KV453155.1 | 5269282 | 19-scf00458 | 19 |
| AX-158295971 | 23 | 35.837 | KV453155.1 | 5297428 | 19-scf00458 | 19 |
| AX-158295972 | 23 | 35.837 | KV453155.1 | 5297865 | 19-scf00458 | 19 |
| AX-157860489 | 23 | 35.837 | KV453155.1 | 5298325 | 19-scf00458 | 19 |
| AX-157860490 | 23 | 35.837 | KV453155.1 | 5298602 | 19-scf00458 | 19 |
| AX-157845916 | 23 | 35.837 | KV453155.1 | 5302721 | 19-scf00458 | 19 |
| AX-157860491 | 23 | 35.837 | KV453155.1 | 5305583 | 19-scf00458 | 19 |
| AX-158295980 | 23 | 35.837 | KV453155.1 | 5305621 | 19-scf00458 | 19 |
| AX-157860492 | 23 | 35.837 | KV453155.1 | 5307781 | 19-scf00458 | 19 |
| AX-157860493 | 23 | 35.837 | KV453155.1 | 5309319 | 19-scf00458 | 19 |
| AX-158295985 | 23 | 35.837 | KV453155.1 | 5309543 | 19-scf00458 | 19 |
| AX-157860494 | 23 | 35.837 | KV453155.1 | 5309868 | 19-scf00458 | 19 |
| AX-158295986 | 23 | 35.837 | KV453155.1 | 5310138 | 19-scf00458 | 19 |
| AX-158295987 | 23 | 35.837 | KV453155.1 | 5310505 | 19-scf00458 | 19 |
| AX-158295989 | 23 | 35.837 | KV453155.1 | 5311944 | 19-scf00458 | 19 |
| AX-158295990 | 23 | 35.837 | KV453155.1 | 5312379 | 19-scf00458 | 19 |
| AX-158295993 | 23 | 35.837 | KV453155.1 | 5315968 | 19-scf00458 | 19 |
| AX-158295995 | 23 | 35.837 | KV453155.1 | 5317416 | 19-scf00458 | 19 |
| AX-157747414 | 23 | 35.837 | KV453155.1 | 5318069 | 19-scf00458 | 19 |
| AX-157860496 | 23 | 35.837 | KV453155.1 | 5318710 | 19-scf00458 | 19 |
| AX-158295996 | 23 | 35.837 | KV453155.1 | 5319193 | 19-scf00458 | 19 |
| AX-158295997 | 23 | 35.837 | KV453155.1 | 5319677 | 19-scf00458 | 19 |
| AX-158295999 | 23 | 35.837 | KV453155.1 | 5320874 | 19-scf00458 | 19 |
| AX-158296000 | 23 | 35.837 | KV453155.1 | 5321213 | 19-scf00458 | 19 |
| AX-158296001 | 23 | 35.837 | KV453155.1 | 5322420 | 19-scf00458 | 19 |
| AX-158296006 | 23 | 35.837 | KV453155.1 | 5327687 | 19-scf00458 | 19 |
| AX-158296007 | 23 | 35.837 | KV453155.1 | 5328573 | 19-scf00458 | 19 |

|              |    |        |            |         |             |    |
|--------------|----|--------|------------|---------|-------------|----|
| AX-157860498 | 23 | 35.837 | KV453155.1 | 5329554 | 19-scf00458 | 19 |
| AX-157860499 | 23 | 35.837 | KV453155.1 | 5330322 | 19-scf00458 | 19 |
| AX-157860500 | 23 | 35.837 | KV453155.1 | 5330380 | 19-scf00458 | 19 |
| AX-158296009 | 23 | 35.837 | KV453155.1 | 5331282 | 19-scf00458 | 19 |
| AX-157860501 | 23 | 35.837 | KV453155.1 | 5332249 | 19-scf00458 | 19 |
| AX-157860502 | 23 | 35.837 | KV453155.1 | 5334033 | 19-scf00458 | 19 |
| AX-158296015 | 23 | 35.837 | KV453155.1 | 5336621 | 19-scf00458 | 19 |
| AX-158296017 | 23 | 35.837 | KV453155.1 | 5339977 | 19-scf00458 | 19 |
| AX-158296019 | 23 | 35.837 | KV453155.1 | 5341694 | 19-scf00458 | 19 |
| AX-158296021 | 23 | 35.837 | KV453155.1 | 5342576 | 19-scf00458 | 19 |
| AX-158296022 | 23 | 35.837 | KV453155.1 | 5343374 | 19-scf00458 | 19 |
| AX-158296023 | 23 | 35.837 | KV453155.1 | 5344136 | 19-scf00458 | 19 |
| AX-158296024 | 23 | 35.837 | KV453155.1 | 5345781 | 19-scf00458 | 19 |
| AX-158296026 | 23 | 35.837 | KV453155.1 | 5347181 | 19-scf00458 | 19 |
| AX-158296027 | 23 | 35.837 | KV453155.1 | 5347549 | 19-scf00458 | 19 |
| AX-158296030 | 23 | 35.837 | KV453155.1 | 5348946 | 19-scf00458 | 19 |
| AX-157860503 | 23 | 35.837 | KV453155.1 | 5350632 | 19-scf00458 | 19 |
| AX-157860504 | 23 | 35.837 | KV453155.1 | 5351966 | 19-scf00458 | 19 |
| AX-158296034 | 23 | 35.837 | KV453155.1 | 5356564 | 19-scf00458 | 19 |
| AX-158296035 | 23 | 35.837 | KV453155.1 | 5357345 | 19-scf00458 | 19 |
| AX-158296036 | 23 | 35.837 | KV453155.1 | 5358062 | 19-scf00458 | 19 |
| AX-157860505 | 23 | 35.837 | KV453155.1 | 5358617 | 19-scf00458 | 19 |
| AX-158296042 | 23 | 35.837 | KV453155.1 | 5363475 | 19-scf00458 | 19 |
| AX-157860506 | 23 | 35.837 | KV453155.1 | 5366507 | 19-scf00458 | 19 |
| AX-158296045 | 23 | 35.837 | KV453155.1 | 5366841 | 19-scf00458 | 19 |
| AX-158381275 | 23 | 35.837 | KV453155.1 | 5368924 | 19-scf00458 | 19 |
| AX-158296047 | 23 | 35.837 | KV453155.1 | 5369177 | 19-scf00458 | 19 |
| AX-158296051 | 23 | 35.837 | KV453155.1 | 5374947 | 19-scf00458 | 19 |
| AX-157718271 | 23 | 35.837 | KV453155.1 | 5377644 | 19-scf00458 | 19 |
| AX-158296053 | 23 | 35.837 | KV453155.1 | 5379648 | 19-scf00458 | 19 |
| AX-158296055 | 23 | 35.837 | KV453155.1 | 5380624 | 19-scf00458 | 19 |
| AX-158296056 | 23 | 35.837 | KV453155.1 | 5382818 | 19-scf00458 | 19 |
| AX-158296057 | 23 | 35.837 | KV453155.1 | 5382983 | 19-scf00458 | 19 |
| AX-158296058 | 23 | 35.837 | KV453155.1 | 5384431 | 19-scf00458 | 19 |
| AX-157845919 | 23 | 35.837 | KV453155.1 | 5385051 | 19-scf00458 | 19 |
| AX-158296060 | 23 | 35.837 | KV453155.1 | 5387061 | 19-scf00458 | 19 |
| AX-158296061 | 23 | 35.837 | KV453155.1 | 5388210 | 19-scf00458 | 19 |
| AX-158296065 | 23 | 35.837 | KV453155.1 | 5393237 | 19-scf00458 | 19 |
| AX-158296073 | 23 | 35.837 | KV453155.1 | 5399729 | 19-scf00458 | 19 |
| AX-158296078 | 23 | 35.837 | KV453155.1 | 5402390 | 19-scf00458 | 19 |
| AX-157860507 | 23 | 35.837 | KV453155.1 | 5405113 | 19-scf00458 | 19 |
| AX-158296083 | 23 | 35.837 | KV453155.1 | 5408927 | 19-scf00458 | 19 |
| AX-158296084 | 23 | 35.837 | KV453155.1 | 5409340 | 19-scf00458 | 19 |
| AX-157727798 | 23 | 35.837 | KV453155.1 | 5409999 | 19-scf00458 | 19 |
| AX-158296087 | 23 | 35.837 | KV453155.1 | 5410382 | 19-scf00458 | 19 |
| AX-158296089 | 23 | 35.837 | KV453155.1 | 5411519 | 19-scf00458 | 19 |
| AX-158296090 | 23 | 35.837 | KV453155.1 | 5411817 | 19-scf00458 | 19 |
| AX-158296091 | 23 | 35.837 | KV453155.1 | 5412612 | 19-scf00458 | 19 |
| AX-158296096 | 23 | 35.837 | KV453155.1 | 5417302 | 19-scf00458 | 19 |
| AX-158296098 | 23 | 35.837 | KV453155.1 | 5418266 | 19-scf00458 | 19 |
| AX-158296100 | 23 | 35.837 | KV453155.1 | 5418983 | 19-scf00458 | 19 |



|              |    |        |            |         |             |    |
|--------------|----|--------|------------|---------|-------------|----|
| AX-158296106 | 23 | 35.837 | KV453155.1 | 5422735 | 19-scf00458 | 19 |
| AX-158296107 | 23 | 35.837 | KV453155.1 | 5423341 | 19-scf00458 | 19 |
| AX-158296109 | 23 | 35.837 | KV453155.1 | 5423802 | 19-scf00458 | 19 |
| AX-158296112 | 23 | 35.837 | KV453155.1 | 5425406 | 19-scf00458 | 19 |
| AX-158296116 | 23 | 35.837 | KV453155.1 | 5427888 | 19-scf00458 | 19 |
| AX-158296118 | 23 | 35.837 | KV453155.1 | 5430310 | 19-scf00458 | 19 |
| AX-157845923 | 23 | 35.837 | KV453155.1 | 5431617 | 19-scf00458 | 19 |
| AX-158296119 | 23 | 35.837 | KV453155.1 | 5433798 | 19-scf00458 | 19 |
| AX-158296124 | 23 | 35.837 | KV453155.1 | 5437455 | 19-scf00458 | 19 |
| AX-158296128 | 23 | 35.837 | KV453155.1 | 5438888 | 19-scf00458 | 19 |
| AX-158296130 | 23 | 35.837 | KV453155.1 | 5442159 | 19-scf00458 | 19 |
| AX-157845924 | 23 | 35.837 | KV453155.1 | 5442808 | 19-scf00458 | 19 |
| AX-158296131 | 23 | 35.837 | KV453155.1 | 5443566 | 19-scf00458 | 19 |
| AX-158296134 | 23 | 35.837 | KV453155.1 | 5449542 | 19-scf00458 | 19 |
| AX-158296135 | 23 | 35.837 | KV453155.1 | 5450346 | 19-scf00458 | 19 |
| AX-158296136 | 23 | 35.837 | KV453155.1 | 5451313 | 19-scf00458 | 19 |
| AX-158296141 | 23 | 35.837 | KV453155.1 | 5457297 | 19-scf00458 | 19 |
| AX-158296144 | 23 | 35.837 | KV453155.1 | 5461831 | 19-scf00458 | 19 |
| AX-158296145 | 23 | 35.837 | KV453155.1 | 5462305 | 19-scf00458 | 19 |
| AX-158296147 | 23 | 35.837 | KV453155.1 | 5465168 | 19-scf00458 | 19 |
| AX-158296151 | 23 | 35.837 | KV453155.1 | 5467804 | 19-scf00458 | 19 |
| AX-158296152 | 23 | 35.837 | KV453155.1 | 5469649 | 19-scf00458 | 19 |
| AX-158296154 | 23 | 35.837 | KV453155.1 | 5470661 | 19-scf00458 | 19 |
| AX-158296157 | 23 | 35.837 | KV453155.1 | 5475221 | 19-scf00458 | 19 |
| AX-157773762 | 23 | 35.837 | KV453155.1 | 5476123 | 19-scf00458 | 19 |
| AX-157860508 | 23 | 35.837 | KV453155.1 | 5479872 | 19-scf00458 | 19 |
| AX-158296166 | 23 | 35.837 | KV453155.1 | 5485273 | 19-scf00458 | 19 |
| AX-158296167 | 23 | 35.837 | KV453155.1 | 5487625 | 19-scf00458 | 19 |
| AX-157860509 | 23 | 35.837 | KV453155.1 | 5491075 | 19-scf00458 | 19 |
| AX-158296170 | 23 | 35.837 | KV453155.1 | 5493195 | 19-scf00458 | 19 |
| AX-158296171 | 23 | 35.837 | KV453155.1 | 5494373 | 19-scf00458 | 19 |
| AX-158296172 | 23 | 35.837 | KV453155.1 | 5494961 | 19-scf00458 | 19 |
| AX-158296173 | 23 | 35.837 | KV453155.1 | 5498727 | 19-scf00458 | 19 |
| AX-158296177 | 23 | 35.837 | KV453155.1 | 5506271 | 19-scf00458 | 19 |
| AX-158296179 | 23 | 35.837 | KV453155.1 | 5507292 | 19-scf00458 | 19 |
| AX-157719274 | 23 | 35.837 | KV453155.1 | 5508738 | 19-scf00458 | 19 |
| AX-158296181 | 23 | 35.837 | KV453155.1 | 5511351 | 19-scf00458 | 19 |
| AX-157845926 | 23 | 35.837 | KV453155.1 | 5512652 | 19-scf00458 | 19 |
| AX-158296182 | 23 | 35.837 | KV453155.1 | 5515322 | 19-scf00458 | 19 |
| AX-158296187 | 23 | 35.837 | KV453155.1 | 5520277 | 19-scf00458 | 19 |
| AX-158296189 | 23 | 35.837 | KV453155.1 | 5522276 | 19-scf00458 | 19 |
| AX-158296193 | 23 | 35.837 | KV453155.1 | 5524902 | 19-scf00458 | 19 |
| AX-158296199 | 23 | 35.837 | KV453155.1 | 5533664 | 19-scf00458 | 19 |
| AX-158296200 | 23 | 35.837 | KV453155.1 | 5534199 | 19-scf00458 | 19 |
| AX-157860511 | 23 | 35.837 | KV453155.1 | 5534441 | 19-scf00458 | 19 |
| AX-158296201 | 23 | 35.837 | KV453155.1 | 5535291 | 19-scf00458 | 19 |
| AX-158296206 | 23 | 35.837 | KV453155.1 | 5540230 | 19-scf00458 | 19 |
| AX-158296207 | 23 | 35.837 | KV453155.1 | 5540590 | 19-scf00458 | 19 |
| AX-158296208 | 23 | 35.837 | KV453155.1 | 5543465 | 19-scf00458 | 19 |
| AX-158296209 | 23 | 35.837 | KV453155.1 | 5544008 | 19-scf00458 | 19 |
| AX-158296210 | 23 | 35.837 | KV453155.1 | 5545769 | 19-scf00458 | 19 |

|              |    |        |            |         |             |    |
|--------------|----|--------|------------|---------|-------------|----|
| AX-158296211 | 23 | 35.837 | KV453155.1 | 5546254 | 19-scf00458 | 19 |
| AX-158296217 | 23 | 35.837 | KV453155.1 | 5552667 | 19-scf00458 | 19 |
| AX-158296219 | 23 | 35.837 | KV453155.1 | 5554466 | 19-scf00458 | 19 |
| AX-157845930 | 23 | 35.837 | KV453155.1 | 5555196 | 19-scf00458 | 19 |
| AX-158296220 | 23 | 35.837 | KV453155.1 | 5555904 | 19-scf00458 | 19 |
| AX-158296221 | 23 | 35.837 | KV453155.1 | 5556547 | 19-scf00458 | 19 |
| AX-158296225 | 23 | 35.837 | KV453155.1 | 5559572 | 19-scf00458 | 19 |
| AX-158296226 | 23 | 35.837 | KV453155.1 | 5560410 | 19-scf00458 | 19 |
| AX-158296228 | 23 | 35.837 | KV453155.1 | 5563185 | 19-scf00458 | 19 |
| AX-157749365 | 23 | 35.837 | KV453155.1 | 5778258 | 19-scf00458 | 19 |
| AX-158296456 | 23 | 35.837 | KV453155.1 | 5905488 | 19-scf00458 | 19 |
| AX-158296877 | 23 | 35.837 | KV453155.1 | 6565243 | 19-scf00458 | 19 |
| AX-157845896 | 23 | 35.946 | KV453155.1 | 4980885 | 19-scf00458 | 19 |
| AX-158295700 | 23 | 35.946 | KV453155.1 | 5003354 | 19-scf00458 | 19 |
| AX-157722347 | 23 | 36.055 | KV453155.1 | 2844872 | 19-scf00458 | 19 |
| AX-158294238 | 23 | 36.055 | KV453155.1 | 3065270 | 19-scf00458 | 19 |
| AX-158294243 | 23 | 36.055 | KV453155.1 | 3068889 | 19-scf00458 | 19 |
| AX-157845800 | 23 | 36.055 | KV453155.1 | 3939320 | 19-scf00458 | 19 |
| AX-158294988 | 23 | 36.055 | KV453155.1 | 4014652 | 19-scf00458 | 19 |
| AX-158295152 | 23 | 36.055 | KV453155.1 | 4268315 | 19-scf00458 | 19 |
| AX-157745106 | 23 | 36.055 | KV453155.1 | 4365824 | 19-scf00458 | 19 |
| AX-158295201 | 23 | 36.055 | KV453155.1 | 4379785 | 19-scf00458 | 19 |
| AX-157860449 | 23 | 36.055 | KV453155.1 | 4400563 | 19-scf00458 | 19 |
| AX-158295304 | 23 | 36.055 | KV453155.1 | 4519453 | 19-scf00458 | 19 |
| AX-158295392 | 23 | 36.055 | KV453155.1 | 4615219 | 19-scf00458 | 19 |
| AX-158295394 | 23 | 36.055 | KV453155.1 | 4616517 | 19-scf00458 | 19 |
| AX-158403695 | 23 | 36.055 | KV453155.1 | 4914547 | 19-scf00458 | 19 |
| AX-158295676 | 23 | 36.055 | KV453155.1 | 4942072 | 19-scf00458 | 19 |
| AX-157845902 | 23 | 36.055 | KV453155.1 | 5006937 | 19-scf00458 | 19 |
| AX-158295703 | 23 | 36.055 | KV453155.1 | 5013138 | 19-scf00458 | 19 |
| AX-158295710 | 23 | 36.055 | KV453155.1 | 5021119 | 19-scf00458 | 19 |
| AX-158295712 | 23 | 36.055 | KV453155.1 | 5022138 | 19-scf00458 | 19 |
| AX-157845905 | 23 | 36.055 | KV453155.1 | 5023707 | 19-scf00458 | 19 |
| AX-158295719 | 23 | 36.055 | KV453155.1 | 5027890 | 19-scf00458 | 19 |
| AX-158295727 | 23 | 36.055 | KV453155.1 | 5035236 | 19-scf00458 | 19 |
| AX-157845906 | 23 | 36.055 | KV453155.1 | 5037163 | 19-scf00458 | 19 |
| AX-157845907 | 23 | 36.055 | KV453155.1 | 5038455 | 19-scf00458 | 19 |
| AX-158295731 | 23 | 36.055 | KV453155.1 | 5039876 | 19-scf00458 | 19 |
| AX-158295738 | 23 | 36.055 | KV453155.1 | 5046185 | 19-scf00458 | 19 |
| AX-158295743 | 23 | 36.055 | KV453155.1 | 5049473 | 19-scf00458 | 19 |
| AX-157860482 | 23 | 36.055 | KV453155.1 | 5062026 | 19-scf00458 | 19 |
| AX-158295756 | 23 | 36.055 | KV453155.1 | 5062762 | 19-scf00458 | 19 |
| AX-158295761 | 23 | 36.055 | KV453155.1 | 5070049 | 19-scf00458 | 19 |
| AX-157845911 | 23 | 36.055 | KV453155.1 | 5071284 | 19-scf00458 | 19 |
| AX-158295763 | 23 | 36.055 | KV453155.1 | 5072580 | 19-scf00458 | 19 |
| AX-158295771 | 23 | 36.055 | KV453155.1 | 5080307 | 19-scf00458 | 19 |
| AX-158295776 | 23 | 36.055 | KV453155.1 | 5087184 | 19-scf00458 | 19 |
| AX-157755021 | 23 | 36.055 | KV453155.1 | 5089235 | 19-scf00458 | 19 |
| AX-158295793 | 23 | 36.055 | KV453155.1 | 5102671 | 19-scf00458 | 19 |
| AX-158295811 | 23 | 36.055 | KV453155.1 | 5121417 | 19-scf00458 | 19 |
| AX-158295815 | 23 | 36.055 | KV453155.1 | 5126450 | 19-scf00458 | 19 |

|              |    |        |            |         |             |    |
|--------------|----|--------|------------|---------|-------------|----|
| AX-158295816 | 23 | 36.055 | KV453155.1 | 5127484 | 19-scf00458 | 19 |
| AX-158295823 | 23 | 36.055 | KV453155.1 | 5134806 | 19-scf00458 | 19 |
| AX-158295837 | 23 | 36.055 | KV453155.1 | 5146665 | 19-scf00458 | 19 |
| AX-158295840 | 23 | 36.055 | KV453155.1 | 5149881 | 19-scf00458 | 19 |
| AX-158295842 | 23 | 36.055 | KV453155.1 | 5152126 | 19-scf00458 | 19 |
| AX-158295846 | 23 | 36.055 | KV453155.1 | 5156652 | 19-scf00458 | 19 |
| AX-157756952 | 23 | 36.055 | KV453155.1 | 5159654 | 19-scf00458 | 19 |
| AX-158295849 | 23 | 36.055 | KV453155.1 | 5160373 | 19-scf00458 | 19 |
| AX-158295850 | 23 | 36.055 | KV453155.1 | 5162157 | 19-scf00458 | 19 |
| AX-158295861 | 23 | 36.055 | KV453155.1 | 5174282 | 19-scf00458 | 19 |
| AX-157845913 | 23 | 36.055 | KV453155.1 | 5177711 | 19-scf00458 | 19 |
| AX-158295875 | 23 | 36.055 | KV453155.1 | 5191168 | 19-scf00458 | 19 |
| AX-158295879 | 23 | 36.055 | KV453155.1 | 5194853 | 19-scf00458 | 19 |
| AX-158295883 | 23 | 36.055 | KV453155.1 | 5197273 | 19-scf00458 | 19 |
| AX-158295884 | 23 | 36.055 | KV453155.1 | 5197646 | 19-scf00458 | 19 |
| AX-158295888 | 23 | 36.055 | KV453155.1 | 5201604 | 19-scf00458 | 19 |
| AX-158295897 | 23 | 36.055 | KV453155.1 | 5212876 | 19-scf00458 | 19 |
| AX-158295902 | 23 | 36.055 | KV453155.1 | 5218014 | 19-scf00458 | 19 |
| AX-158295905 | 23 | 36.055 | KV453155.1 | 5223052 | 19-scf00458 | 19 |
| AX-158295911 | 23 | 36.055 | KV453155.1 | 5228589 | 19-scf00458 | 19 |
| AX-158295913 | 23 | 36.055 | KV453155.1 | 5230272 | 19-scf00458 | 19 |
| AX-158295915 | 23 | 36.055 | KV453155.1 | 5231259 | 19-scf00458 | 19 |
| AX-158295923 | 23 | 36.055 | KV453155.1 | 5238969 | 19-scf00458 | 19 |
| AX-158295927 | 23 | 36.055 | KV453155.1 | 5241195 | 19-scf00458 | 19 |
| AX-158295930 | 23 | 36.055 | KV453155.1 | 5246578 | 19-scf00458 | 19 |
| AX-158295933 | 23 | 36.055 | KV453155.1 | 5251741 | 19-scf00458 | 19 |
| AX-158295973 | 23 | 36.055 | KV453155.1 | 5299627 | 19-scf00458 | 19 |
| AX-158295982 | 23 | 36.055 | KV453155.1 | 5306798 | 19-scf00458 | 19 |
| AX-158295983 | 23 | 36.055 | KV453155.1 | 5307191 | 19-scf00458 | 19 |
| AX-158295998 | 23 | 36.055 | KV453155.1 | 5320257 | 19-scf00458 | 19 |
| AX-157860497 | 23 | 36.055 | KV453155.1 | 5328842 | 19-scf00458 | 19 |
| AX-158296008 | 23 | 36.055 | KV453155.1 | 5330634 | 19-scf00458 | 19 |
| AX-158296013 | 23 | 36.055 | KV453155.1 | 5334750 | 19-scf00458 | 19 |
| AX-158296018 | 23 | 36.055 | KV453155.1 | 5341157 | 19-scf00458 | 19 |
| AX-158296025 | 23 | 36.055 | KV453155.1 | 5346363 | 19-scf00458 | 19 |
| AX-158296028 | 23 | 36.055 | KV453155.1 | 5348100 | 19-scf00458 | 19 |
| AX-158296029 | 23 | 36.055 | KV453155.1 | 5348489 | 19-scf00458 | 19 |
| AX-158296037 | 23 | 36.055 | KV453155.1 | 5360056 | 19-scf00458 | 19 |
| AX-158296038 | 23 | 36.055 | KV453155.1 | 5360471 | 19-scf00458 | 19 |
| AX-158296040 | 23 | 36.055 | KV453155.1 | 5361658 | 19-scf00458 | 19 |
| AX-158296043 | 23 | 36.055 | KV453155.1 | 5364005 | 19-scf00458 | 19 |
| AX-157718044 | 23 | 36.055 | KV453155.1 | 5371017 | 19-scf00458 | 19 |
| AX-157716123 | 23 | 36.055 | KV453155.1 | 5384238 | 19-scf00458 | 19 |
| AX-158296059 | 23 | 36.055 | KV453155.1 | 5386550 | 19-scf00458 | 19 |
| AX-157845920 | 23 | 36.055 | KV453155.1 | 5388444 | 19-scf00458 | 19 |
| AX-157845921 | 23 | 36.055 | KV453155.1 | 5388773 | 19-scf00458 | 19 |
| AX-158296062 | 23 | 36.055 | KV453155.1 | 5391220 | 19-scf00458 | 19 |
| AX-157699336 | 23 | 36.055 | KV453155.1 | 5396905 | 19-scf00458 | 19 |
| AX-158296076 | 23 | 36.055 | KV453155.1 | 5400970 | 19-scf00458 | 19 |
| AX-158296077 | 23 | 36.055 | KV453155.1 | 5401934 | 19-scf00458 | 19 |
| AX-158296085 | 23 | 36.055 | KV453155.1 | 5409674 | 19-scf00458 | 19 |

|              |    |        |            |         |             |    |
|--------------|----|--------|------------|---------|-------------|----|
| AX-158296088 | 23 | 36.055 | KV453155.1 | 5411222 | 19-scf00458 | 19 |
| AX-158296095 | 23 | 36.055 | KV453155.1 | 5416802 | 19-scf00458 | 19 |
| AX-158296101 | 23 | 36.055 | KV453155.1 | 5419484 | 19-scf00458 | 19 |
| AX-157748214 | 23 | 36.055 | KV453155.1 | 5420856 | 19-scf00458 | 19 |
| AX-158296104 | 23 | 36.055 | KV453155.1 | 5421601 | 19-scf00458 | 19 |
| AX-158296111 | 23 | 36.055 | KV453155.1 | 5425051 | 19-scf00458 | 19 |
| AX-158296115 | 23 | 36.055 | KV453155.1 | 5427254 | 19-scf00458 | 19 |
| AX-158296120 | 23 | 36.055 | KV453155.1 | 5434476 | 19-scf00458 | 19 |
| AX-158296121 | 23 | 36.055 | KV453155.1 | 5435891 | 19-scf00458 | 19 |
| AX-158296126 | 23 | 36.055 | KV453155.1 | 5438078 | 19-scf00458 | 19 |
| AX-158296146 | 23 | 36.055 | KV453155.1 | 5463050 | 19-scf00458 | 19 |
| AX-158296163 | 23 | 36.055 | KV453155.1 | 5483183 | 19-scf00458 | 19 |
| AX-158296168 | 23 | 36.055 | KV453155.1 | 5490717 | 19-scf00458 | 19 |
| AX-157742271 | 23 | 36.055 | KV453155.1 | 5493631 | 19-scf00458 | 19 |
| AX-157845927 | 23 | 36.055 | KV453155.1 | 5513096 | 19-scf00458 | 19 |
| AX-158296184 | 23 | 36.055 | KV453155.1 | 5517250 | 19-scf00458 | 19 |
| AX-158296188 | 23 | 36.055 | KV453155.1 | 5520859 | 19-scf00458 | 19 |
| AX-158296191 | 23 | 36.055 | KV453155.1 | 5523698 | 19-scf00458 | 19 |
| AX-158296195 | 23 | 36.055 | KV453155.1 | 5526979 | 19-scf00458 | 19 |
| AX-158296202 | 23 | 36.055 | KV453155.1 | 5535711 | 19-scf00458 | 19 |
| AX-158296203 | 23 | 36.055 | KV453155.1 | 5536369 | 19-scf00458 | 19 |
| AX-158296204 | 23 | 36.055 | KV453155.1 | 5536959 | 19-scf00458 | 19 |
| AX-158296205 | 23 | 36.055 | KV453155.1 | 5539826 | 19-scf00458 | 19 |
| AX-158296212 | 23 | 36.055 | KV453155.1 | 5547322 | 19-scf00458 | 19 |
| AX-158296215 | 23 | 36.055 | KV453155.1 | 5551194 | 19-scf00458 | 19 |
| AX-158296216 | 23 | 36.055 | KV453155.1 | 5551923 | 19-scf00458 | 19 |
| AX-157845931 | 23 | 36.055 | KV453155.1 | 5557726 | 19-scf00458 | 19 |
| AX-158296227 | 23 | 36.055 | KV453155.1 | 5561777 | 19-scf00458 | 19 |
| AX-158296231 | 23 | 36.055 | KV453155.1 | 5568940 | 19-scf00458 | 19 |
| AX-158296249 | 23 | 36.055 | KV453155.1 | 5584834 | 19-scf00458 | 19 |
| AX-158296253 | 23 | 36.055 | KV453155.1 | 5586663 | 19-scf00458 | 19 |
| AX-158296262 | 23 | 36.055 | KV453155.1 | 5595080 | 19-scf00458 | 19 |
| AX-158296274 | 23 | 36.055 | KV453155.1 | 5603356 | 19-scf00458 | 19 |
| AX-158296303 | 23 | 36.055 | KV453155.1 | 5636308 | 19-scf00458 | 19 |
| AX-158296306 | 23 | 36.055 | KV453155.1 | 5641133 | 19-scf00458 | 19 |
| AX-158423567 | 23 | 36.055 | KV453155.1 | 5641763 | 19-scf00458 | 19 |
| AX-158296307 | 23 | 36.055 | KV453155.1 | 5643038 | 19-scf00458 | 19 |
| AX-158296310 | 23 | 36.055 | KV453155.1 | 5647072 | 19-scf00458 | 19 |
| AX-158296314 | 23 | 36.055 | KV453155.1 | 5652726 | 19-scf00458 | 19 |
| AX-158296316 | 23 | 36.055 | KV453155.1 | 5654028 | 19-scf00458 | 19 |
| AX-158296328 | 23 | 36.055 | KV453155.1 | 5666467 | 19-scf00458 | 19 |
| AX-158296332 | 23 | 36.055 | KV453155.1 | 5670731 | 19-scf00458 | 19 |
| AX-158296346 | 23 | 36.055 | KV453155.1 | 5689515 | 19-scf00458 | 19 |
| AX-158296348 | 23 | 36.055 | KV453155.1 | 5694410 | 19-scf00458 | 19 |
| AX-158296354 | 23 | 36.055 | KV453155.1 | 5703029 | 19-scf00458 | 19 |
| AX-158296355 | 23 | 36.055 | KV453155.1 | 5704151 | 19-scf00458 | 19 |
| AX-158296356 | 23 | 36.055 | KV453155.1 | 5708522 | 19-scf00458 | 19 |
| AX-158296362 | 23 | 36.055 | KV453155.1 | 5713749 | 19-scf00458 | 19 |
| AX-158296370 | 23 | 36.055 | KV453155.1 | 5726080 | 19-scf00458 | 19 |
| AX-158296398 | 23 | 36.055 | KV453155.1 | 5791590 | 19-scf00458 | 19 |
| AX-158296415 | 23 | 36.055 | KV453155.1 | 5833570 | 19-scf00458 | 19 |

|              |    |        |            |         |             |    |
|--------------|----|--------|------------|---------|-------------|----|
| AX-157755447 | 23 | 36.055 | KV453155.1 | 6023547 | 19-scf00458 | 19 |
| AX-158296755 | 23 | 36.055 | KV453155.1 | 6407986 | 19-scf00458 | 19 |
| AX-158296788 | 23 | 36.055 | KV453155.1 | 6459116 | 19-scf00458 | 19 |
| AX-157845998 | 23 | 36.055 | KV453155.1 | 6554223 | 19-scf00458 | 19 |
| AX-157845999 | 23 | 36.055 | KV453155.1 | 6554479 | 19-scf00458 | 19 |
| AX-158296886 | 23 | 36.055 | KV453155.1 | 6579679 | 19-scf00458 | 19 |
| AX-157846004 | 23 | 36.055 | KV453155.1 | 6582785 | 19-scf00458 | 19 |
| AX-158296889 | 23 | 36.055 | KV453155.1 | 6585394 | 19-scf00458 | 19 |
| AX-158296899 | 23 | 36.055 | KV453155.1 | 6604792 | 19-scf00458 | 19 |
| AX-158297039 | 23 | 36.055 | KV453155.1 | 6755453 | 19-scf00458 | 19 |
| AX-158381282 | 23 | 36.055 | KV453155.1 | 6780687 | 19-scf00458 | 19 |
| AX-158297064 | 23 | 36.055 | KV453155.1 | 6780798 | 19-scf00458 | 19 |
| AX-158297081 | 23 | 36.055 | KV453155.1 | 6795819 | 19-scf00458 | 19 |
| AX-158297130 | 23 | 36.055 | KV453155.1 | 6849939 | 19-scf00458 | 19 |
| AX-158297133 | 23 | 36.055 | KV453155.1 | 6853114 | 19-scf00458 | 19 |
| AX-158297136 | 23 | 36.055 | KV453155.1 | 6856814 | 19-scf00458 | 19 |
| AX-158297137 | 23 | 36.055 | KV453155.1 | 6857421 | 19-scf00458 | 19 |
| AX-158297143 | 23 | 36.055 | KV453155.1 | 6862509 | 19-scf00458 | 19 |
| AX-157723894 | 23 | 36.055 | KV453155.1 | 6872235 | 19-scf00458 | 19 |
| AX-158297158 | 23 | 36.055 | KV453155.1 | 6884949 | 19-scf00458 | 19 |
| AX-158297161 | 23 | 36.055 | KV453155.1 | 6886262 | 19-scf00458 | 19 |
| AX-158297162 | 23 | 36.055 | KV453155.1 | 6887082 | 19-scf00458 | 19 |
| AX-158297167 | 23 | 36.055 | KV453155.1 | 6892066 | 19-scf00458 | 19 |
| AX-158297168 | 23 | 36.055 | KV453155.1 | 6894267 | 19-scf00458 | 19 |
| AX-158297169 | 23 | 36.055 | KV453155.1 | 6895316 | 19-scf00458 | 19 |
| AX-158297173 | 23 | 36.055 | KV453155.1 | 6899859 | 19-scf00458 | 19 |
| AX-158297174 | 23 | 36.055 | KV453155.1 | 6900886 | 19-scf00458 | 19 |
| AX-158381283 | 23 | 36.055 | KV453155.1 | 6905502 | 19-scf00458 | 19 |
| AX-158297181 | 23 | 36.055 | KV453155.1 | 6908907 | 19-scf00458 | 19 |
| AX-158297203 | 23 | 36.055 | KV453155.1 | 6932933 | 19-scf00458 | 19 |
| AX-157701985 | 23 | 36.055 | DX089046.1 | 216     | 19-scf00458 | UN |
| AX-158296365 | 23 | 36.104 | KV453155.1 | 5719950 | 19-scf00458 | 19 |
| AX-158293870 | 23 | 36.165 | KV453155.1 | 2656199 | 19-scf00458 | 19 |
| AX-158295020 | 23 | 36.165 | KV453155.1 | 4050985 | 19-scf00458 | 19 |
| AX-158295089 | 23 | 36.165 | KV453155.1 | 4154175 | 19-scf00458 | 19 |
| AX-158295093 | 23 | 36.165 | KV453155.1 | 4158609 | 19-scf00458 | 19 |
| AX-158295205 | 23 | 36.165 | KV453155.1 | 4382920 | 19-scf00458 | 19 |
| AX-158295207 | 23 | 36.165 | KV453155.1 | 4386734 | 19-scf00458 | 19 |
| AX-158295223 | 23 | 36.165 | KV453155.1 | 4418074 | 19-scf00458 | 19 |
| AX-158295317 | 23 | 36.165 | KV453155.1 | 4532509 | 19-scf00458 | 19 |
| AX-158295335 | 23 | 36.165 | KV453155.1 | 4557893 | 19-scf00458 | 19 |
| AX-158295347 | 23 | 36.165 | KV453155.1 | 4576179 | 19-scf00458 | 19 |
| AX-158295355 | 23 | 36.165 | KV453155.1 | 4588135 | 19-scf00458 | 19 |
| AX-158295451 | 23 | 36.165 | KV453155.1 | 4747517 | 19-scf00458 | 19 |
| AX-158295456 | 23 | 36.165 | KV453155.1 | 4760548 | 19-scf00458 | 19 |
| AX-158295458 | 23 | 36.165 | KV453155.1 | 4768694 | 19-scf00458 | 19 |
| AX-157845864 | 23 | 36.165 | KV453155.1 | 4777606 | 19-scf00458 | 19 |
| AX-158295472 | 23 | 36.165 | KV453155.1 | 4781653 | 19-scf00458 | 19 |
| AX-158295554 | 23 | 36.165 | KV453155.1 | 4871724 | 19-scf00458 | 19 |
| AX-157845877 | 23 | 36.165 | KV453155.1 | 4899854 | 19-scf00458 | 19 |
| AX-158295675 | 23 | 36.165 | KV453155.1 | 4941387 | 19-scf00458 | 19 |

|              |    |        |            |         |             |    |
|--------------|----|--------|------------|---------|-------------|----|
| AX-158295677 | 23 | 36.165 | KV453155.1 | 4942820 | 19-scf00458 | 19 |
| AX-158295680 | 23 | 36.165 | KV453155.1 | 4946256 | 19-scf00458 | 19 |
| AX-157757342 | 23 | 36.165 | KV453155.1 | 4946968 | 19-scf00458 | 19 |
| AX-158295689 | 23 | 36.165 | KV453155.1 | 4962777 | 19-scf00458 | 19 |
| AX-157758205 | 23 | 36.165 | KV453155.1 | 4973096 | 19-scf00458 | 19 |
| AX-158295961 | 23 | 36.165 | KV453155.1 | 5289454 | 19-scf00458 | 19 |
| AX-157845917 | 23 | 36.165 | KV453155.1 | 5315869 | 19-scf00458 | 19 |
| AX-158296049 | 23 | 36.165 | KV453155.1 | 5373381 | 19-scf00458 | 19 |
| AX-158296254 | 23 | 36.165 | KV453155.1 | 5587232 | 19-scf00458 | 19 |
| AX-158296329 | 23 | 36.165 | KV453155.1 | 5667489 | 19-scf00458 | 19 |
| AX-158296333 | 23 | 36.165 | KV453155.1 | 5671867 | 19-scf00458 | 19 |
| AX-158296352 | 23 | 36.165 | KV453155.1 | 5700283 | 19-scf00458 | 19 |
| AX-157845934 | 23 | 36.165 | KV453155.1 | 5704063 | 19-scf00458 | 19 |
| AX-158296357 | 23 | 36.165 | KV453155.1 | 5708864 | 19-scf00458 | 19 |
| AX-158296359 | 23 | 36.165 | KV453155.1 | 5711867 | 19-scf00458 | 19 |
| AX-158296368 | 23 | 36.165 | KV453155.1 | 5723377 | 19-scf00458 | 19 |
| AX-157721364 | 23 | 36.165 | KV453155.1 | 5741429 | 19-scf00458 | 19 |
| AX-158296376 | 23 | 36.165 | KV453155.1 | 5747459 | 19-scf00458 | 19 |
| AX-158296379 | 23 | 36.165 | KV453155.1 | 5749820 | 19-scf00458 | 19 |
| AX-158296381 | 23 | 36.165 | KV453155.1 | 5752949 | 19-scf00458 | 19 |
| AX-158296383 | 23 | 36.165 | KV453155.1 | 5759428 | 19-scf00458 | 19 |
| AX-158296391 | 23 | 36.165 | KV453155.1 | 5776906 | 19-scf00458 | 19 |
| AX-157845937 | 23 | 36.165 | KV453155.1 | 5788787 | 19-scf00458 | 19 |
| AX-158296397 | 23 | 36.165 | KV453155.1 | 5791501 | 19-scf00458 | 19 |
| AX-157741821 | 23 | 36.165 | KV453155.1 | 5805465 | 19-scf00458 | 19 |
| AX-157740018 | 23 | 36.165 | KV453155.1 | 5813378 | 19-scf00458 | 19 |
| AX-158296409 | 23 | 36.165 | KV453155.1 | 5815217 | 19-scf00458 | 19 |
| AX-157701831 | 23 | 36.165 | KV453155.1 | 5826269 | 19-scf00458 | 19 |
| AX-158296413 | 23 | 36.165 | KV453155.1 | 5831817 | 19-scf00458 | 19 |
| AX-158296414 | 23 | 36.165 | KV453155.1 | 5832496 | 19-scf00458 | 19 |
| AX-158296416 | 23 | 36.165 | KV453155.1 | 5838644 | 19-scf00458 | 19 |
| AX-157845940 | 23 | 36.165 | KV453155.1 | 5840063 | 19-scf00458 | 19 |
| AX-158296418 | 23 | 36.165 | KV453155.1 | 5840323 | 19-scf00458 | 19 |
| AX-158296419 | 23 | 36.165 | KV453155.1 | 5841368 | 19-scf00458 | 19 |
| AX-158296421 | 23 | 36.165 | KV453155.1 | 5844707 | 19-scf00458 | 19 |
| AX-158296423 | 23 | 36.165 | KV453155.1 | 5847329 | 19-scf00458 | 19 |
| AX-158296427 | 23 | 36.165 | KV453155.1 | 5856547 | 19-scf00458 | 19 |
| AX-158296428 | 23 | 36.165 | KV453155.1 | 5856898 | 19-scf00458 | 19 |
| AX-158296429 | 23 | 36.165 | KV453155.1 | 5857368 | 19-scf00458 | 19 |
| AX-158296431 | 23 | 36.165 | KV453155.1 | 5862052 | 19-scf00458 | 19 |
| AX-157860515 | 23 | 36.165 | KV453155.1 | 5863599 | 19-scf00458 | 19 |
| AX-158296436 | 23 | 36.165 | KV453155.1 | 5866719 | 19-scf00458 | 19 |
| AX-157860516 | 23 | 36.165 | KV453155.1 | 5866827 | 19-scf00458 | 19 |
| AX-158296440 | 23 | 36.165 | KV453155.1 | 5876184 | 19-scf00458 | 19 |
| AX-157860517 | 23 | 36.165 | KV453155.1 | 5877445 | 19-scf00458 | 19 |
| AX-158296441 | 23 | 36.165 | KV453155.1 | 5878510 | 19-scf00458 | 19 |
| AX-158296445 | 23 | 36.165 | KV453155.1 | 5881765 | 19-scf00458 | 19 |
| AX-158296449 | 23 | 36.165 | KV453155.1 | 5888623 | 19-scf00458 | 19 |
| AX-158296454 | 23 | 36.165 | KV453155.1 | 5899197 | 19-scf00458 | 19 |
| AX-157860518 | 23 | 36.165 | KV453155.1 | 5901902 | 19-scf00458 | 19 |
| AX-158296455 | 23 | 36.165 | KV453155.1 | 5902573 | 19-scf00458 | 19 |

|              |    |        |            |         |             |    |
|--------------|----|--------|------------|---------|-------------|----|
| AX-158296463 | 23 | 36.165 | KV453155.1 | 5918632 | 19-scf00458 | 19 |
| AX-158296467 | 23 | 36.165 | KV453155.1 | 5924859 | 19-scf00458 | 19 |
| AX-157860520 | 23 | 36.165 | KV453155.1 | 5960950 | 19-scf00458 | 19 |
| AX-158296487 | 23 | 36.165 | KV453155.1 | 5963669 | 19-scf00458 | 19 |
| AX-157774740 | 23 | 36.165 | KV453155.1 | 5967358 | 19-scf00458 | 19 |
| AX-158296489 | 23 | 36.165 | KV453155.1 | 5967762 | 19-scf00458 | 19 |
| AX-158296490 | 23 | 36.165 | KV453155.1 | 5968541 | 19-scf00458 | 19 |
| AX-158296492 | 23 | 36.165 | KV453155.1 | 5973672 | 19-scf00458 | 19 |
| AX-158296493 | 23 | 36.165 | KV453155.1 | 5975109 | 19-scf00458 | 19 |
| AX-158296495 | 23 | 36.165 | KV453155.1 | 5977773 | 19-scf00458 | 19 |
| AX-158296497 | 23 | 36.165 | KV453155.1 | 5979139 | 19-scf00458 | 19 |
| AX-158296498 | 23 | 36.165 | KV453155.1 | 5979634 | 19-scf00458 | 19 |
| AX-158296501 | 23 | 36.165 | KV453155.1 | 5980943 | 19-scf00458 | 19 |
| AX-158296503 | 23 | 36.165 | KV453155.1 | 5982245 | 19-scf00458 | 19 |
| AX-158296505 | 23 | 36.165 | KV453155.1 | 5984188 | 19-scf00458 | 19 |
| AX-157860522 | 23 | 36.165 | KV453155.1 | 5985305 | 19-scf00458 | 19 |
| AX-158296506 | 23 | 36.165 | KV453155.1 | 5987390 | 19-scf00458 | 19 |
| AX-158296507 | 23 | 36.165 | KV453155.1 | 5988184 | 19-scf00458 | 19 |
| AX-158296509 | 23 | 36.165 | KV453155.1 | 5991209 | 19-scf00458 | 19 |
| AX-157860523 | 23 | 36.165 | KV453155.1 | 5991873 | 19-scf00458 | 19 |
| AX-158296511 | 23 | 36.165 | KV453155.1 | 5995951 | 19-scf00458 | 19 |
| AX-158296512 | 23 | 36.165 | KV453155.1 | 5996485 | 19-scf00458 | 19 |
| AX-158296515 | 23 | 36.165 | KV453155.1 | 5999603 | 19-scf00458 | 19 |
| AX-158296516 | 23 | 36.165 | KV453155.1 | 6000301 | 19-scf00458 | 19 |
| AX-158296518 | 23 | 36.165 | KV453155.1 | 6002182 | 19-scf00458 | 19 |
| AX-158296519 | 23 | 36.165 | KV453155.1 | 6006588 | 19-scf00458 | 19 |
| AX-158296521 | 23 | 36.165 | KV453155.1 | 6008871 | 19-scf00458 | 19 |
| AX-157860524 | 23 | 36.165 | KV453155.1 | 6012562 | 19-scf00458 | 19 |
| AX-158296523 | 23 | 36.165 | KV453155.1 | 6014154 | 19-scf00458 | 19 |
| AX-158296524 | 23 | 36.165 | KV453155.1 | 6016345 | 19-scf00458 | 19 |
| AX-158296525 | 23 | 36.165 | KV453155.1 | 6017937 | 19-scf00458 | 19 |
| AX-157860525 | 23 | 36.165 | KV453155.1 | 6019785 | 19-scf00458 | 19 |
| AX-157739727 | 23 | 36.165 | KV453155.1 | 6032418 | 19-scf00458 | 19 |
| AX-158296530 | 23 | 36.165 | KV453155.1 | 6034236 | 19-scf00458 | 19 |
| AX-158296532 | 23 | 36.165 | KV453155.1 | 6036477 | 19-scf00458 | 19 |
| AX-158296533 | 23 | 36.165 | KV453155.1 | 6038523 | 19-scf00458 | 19 |
| AX-157772911 | 23 | 36.165 | KV453155.1 | 6041385 | 19-scf00458 | 19 |
| AX-158296536 | 23 | 36.165 | KV453155.1 | 6045643 | 19-scf00458 | 19 |
| AX-158296537 | 23 | 36.165 | KV453155.1 | 6047905 | 19-scf00458 | 19 |
| AX-158296539 | 23 | 36.165 | KV453155.1 | 6049468 | 19-scf00458 | 19 |
| AX-158296540 | 23 | 36.165 | KV453155.1 | 6050204 | 19-scf00458 | 19 |
| AX-157860526 | 23 | 36.165 | KV453155.1 | 6051934 | 19-scf00458 | 19 |
| AX-157860527 | 23 | 36.165 | KV453155.1 | 6052714 | 19-scf00458 | 19 |
| AX-158296543 | 23 | 36.165 | KV453155.1 | 6055803 | 19-scf00458 | 19 |
| AX-157694045 | 23 | 36.165 | KV453155.1 | 6057132 | 19-scf00458 | 19 |
| AX-158419621 | 23 | 36.165 | KV453155.1 | 6057902 | 19-scf00458 | 19 |
| AX-157860528 | 23 | 36.165 | KV453155.1 | 6058317 | 19-scf00458 | 19 |
| AX-158296547 | 23 | 36.165 | KV453155.1 | 6060645 | 19-scf00458 | 19 |
| AX-158296548 | 23 | 36.165 | KV453155.1 | 6062059 | 19-scf00458 | 19 |
| AX-158296551 | 23 | 36.165 | KV453155.1 | 6063974 | 19-scf00458 | 19 |
| AX-157860529 | 23 | 36.165 | KV453155.1 | 6066118 | 19-scf00458 | 19 |

|              |    |        |            |         |             |    |
|--------------|----|--------|------------|---------|-------------|----|
| AX-158296553 | 23 | 36.165 | KV453155.1 | 6066673 | 19-scf00458 | 19 |
| AX-158296556 | 23 | 36.165 | KV453155.1 | 6073379 | 19-scf00458 | 19 |
| AX-157860532 | 23 | 36.165 | KV453155.1 | 6074411 | 19-scf00458 | 19 |
| AX-158296559 | 23 | 36.165 | KV453155.1 | 6081644 | 19-scf00458 | 19 |
| AX-158296560 | 23 | 36.165 | KV453155.1 | 6083414 | 19-scf00458 | 19 |
| AX-157845946 | 23 | 36.165 | KV453155.1 | 6083937 | 19-scf00458 | 19 |
| AX-158296561 | 23 | 36.165 | KV453155.1 | 6088485 | 19-scf00458 | 19 |
| AX-157860533 | 23 | 36.165 | KV453155.1 | 6089248 | 19-scf00458 | 19 |
| AX-158296562 | 23 | 36.165 | KV453155.1 | 6089786 | 19-scf00458 | 19 |
| AX-157845948 | 23 | 36.165 | KV453155.1 | 6090247 | 19-scf00458 | 19 |
| AX-158296563 | 23 | 36.165 | KV453155.1 | 6090989 | 19-scf00458 | 19 |
| AX-158296565 | 23 | 36.165 | KV453155.1 | 6095723 | 19-scf00458 | 19 |
| AX-157860534 | 23 | 36.165 | KV453155.1 | 6097407 | 19-scf00458 | 19 |
| AX-158296567 | 23 | 36.165 | KV453155.1 | 6097448 | 19-scf00458 | 19 |
| AX-158296568 | 23 | 36.165 | KV453155.1 | 6098175 | 19-scf00458 | 19 |
| AX-157860536 | 23 | 36.165 | KV453155.1 | 6100099 | 19-scf00458 | 19 |
| AX-157757084 | 23 | 36.165 | KV453155.1 | 6100364 | 19-scf00458 | 19 |
| AX-158296570 | 23 | 36.165 | KV453155.1 | 6100883 | 19-scf00458 | 19 |
| AX-158296574 | 23 | 36.165 | KV453155.1 | 6106914 | 19-scf00458 | 19 |
| AX-158417462 | 23 | 36.165 | KV453155.1 | 6107475 | 19-scf00458 | 19 |
| AX-158296575 | 23 | 36.165 | KV453155.1 | 6109603 | 19-scf00458 | 19 |
| AX-158296576 | 23 | 36.165 | KV453155.1 | 6112959 | 19-scf00458 | 19 |
| AX-157748876 | 23 | 36.165 | KV453155.1 | 6119213 | 19-scf00458 | 19 |
| AX-157845950 | 23 | 36.165 | KV453155.1 | 6121362 | 19-scf00458 | 19 |
| AX-157845951 | 23 | 36.165 | KV453155.1 | 6129237 | 19-scf00458 | 19 |
| AX-158296578 | 23 | 36.165 | KV453155.1 | 6130016 | 19-scf00458 | 19 |
| AX-157845952 | 23 | 36.165 | KV453155.1 | 6136761 | 19-scf00458 | 19 |
| AX-157845953 | 23 | 36.165 | KV453155.1 | 6137865 | 19-scf00458 | 19 |
| AX-158296579 | 23 | 36.165 | KV453155.1 | 6138762 | 19-scf00458 | 19 |
| AX-158296582 | 23 | 36.165 | KV453155.1 | 6142967 | 19-scf00458 | 19 |
| AX-158296584 | 23 | 36.165 | KV453155.1 | 6148368 | 19-scf00458 | 19 |
| AX-158296585 | 23 | 36.165 | KV453155.1 | 6148908 | 19-scf00458 | 19 |
| AX-158296586 | 23 | 36.165 | KV453155.1 | 6150119 | 19-scf00458 | 19 |
| AX-157845954 | 23 | 36.165 | KV453155.1 | 6150323 | 19-scf00458 | 19 |
| AX-157845955 | 23 | 36.165 | KV453155.1 | 6155463 | 19-scf00458 | 19 |
| AX-157756812 | 23 | 36.165 | KV453155.1 | 6155776 | 19-scf00458 | 19 |
| AX-158296588 | 23 | 36.165 | KV453155.1 | 6158400 | 19-scf00458 | 19 |
| AX-158296589 | 23 | 36.165 | KV453155.1 | 6158772 | 19-scf00458 | 19 |
| AX-158296590 | 23 | 36.165 | KV453155.1 | 6160820 | 19-scf00458 | 19 |
| AX-158296591 | 23 | 36.165 | KV453155.1 | 6161398 | 19-scf00458 | 19 |
| AX-158296593 | 23 | 36.165 | KV453155.1 | 6163013 | 19-scf00458 | 19 |
| AX-158296594 | 23 | 36.165 | KV453155.1 | 6164904 | 19-scf00458 | 19 |
| AX-158296595 | 23 | 36.165 | KV453155.1 | 6165439 | 19-scf00458 | 19 |
| AX-157845956 | 23 | 36.165 | KV453155.1 | 6165578 | 19-scf00458 | 19 |
| AX-157845957 | 23 | 36.165 | KV453155.1 | 6165615 | 19-scf00458 | 19 |
| AX-158296596 | 23 | 36.165 | KV453155.1 | 6166169 | 19-scf00458 | 19 |
| AX-158296597 | 23 | 36.165 | KV453155.1 | 6168093 | 19-scf00458 | 19 |
| AX-158296598 | 23 | 36.165 | KV453155.1 | 6168564 | 19-scf00458 | 19 |
| AX-158296599 | 23 | 36.165 | KV453155.1 | 6169034 | 19-scf00458 | 19 |
| AX-157860538 | 23 | 36.165 | KV453155.1 | 6169516 | 19-scf00458 | 19 |
| AX-158296600 | 23 | 36.165 | KV453155.1 | 6169989 | 19-scf00458 | 19 |



|              |    |        |            |         |             |    |
|--------------|----|--------|------------|---------|-------------|----|
| AX-158296601 | 23 | 36.165 | KV453155.1 | 6172518 | 19-scf00458 | 19 |
| AX-158296603 | 23 | 36.165 | KV453155.1 | 6174635 | 19-scf00458 | 19 |
| AX-158417464 | 23 | 36.165 | KV453155.1 | 6175203 | 19-scf00458 | 19 |
| AX-158296605 | 23 | 36.165 | KV453155.1 | 6178102 | 19-scf00458 | 19 |
| AX-158296607 | 23 | 36.165 | KV453155.1 | 6179747 | 19-scf00458 | 19 |
| AX-158296608 | 23 | 36.165 | KV453155.1 | 6180779 | 19-scf00458 | 19 |
| AX-157860541 | 23 | 36.165 | KV453155.1 | 6181127 | 19-scf00458 | 19 |
| AX-158296609 | 23 | 36.165 | KV453155.1 | 6182252 | 19-scf00458 | 19 |
| AX-158296610 | 23 | 36.165 | KV453155.1 | 6183558 | 19-scf00458 | 19 |
| AX-158296611 | 23 | 36.165 | KV453155.1 | 6185614 | 19-scf00458 | 19 |
| AX-157735959 | 23 | 36.165 | KV453155.1 | 6188372 | 19-scf00458 | 19 |
| AX-158296616 | 23 | 36.165 | KV453155.1 | 6196577 | 19-scf00458 | 19 |
| AX-158296617 | 23 | 36.165 | KV453155.1 | 6197010 | 19-scf00458 | 19 |
| AX-158296620 | 23 | 36.165 | KV453155.1 | 6200781 | 19-scf00458 | 19 |
| AX-158296621 | 23 | 36.165 | KV453155.1 | 6201706 | 19-scf00458 | 19 |
| AX-158296622 | 23 | 36.165 | KV453155.1 | 6204475 | 19-scf00458 | 19 |
| AX-157860545 | 23 | 36.165 | KV453155.1 | 6207448 | 19-scf00458 | 19 |
| AX-158296624 | 23 | 36.165 | KV453155.1 | 6212706 | 19-scf00458 | 19 |
| AX-157860546 | 23 | 36.165 | KV453155.1 | 6213237 | 19-scf00458 | 19 |
| AX-158296625 | 23 | 36.165 | KV453155.1 | 6213492 | 19-scf00458 | 19 |
| AX-158296626 | 23 | 36.165 | KV453155.1 | 6214097 | 19-scf00458 | 19 |
| AX-158296627 | 23 | 36.165 | KV453155.1 | 6216493 | 19-scf00458 | 19 |
| AX-158296630 | 23 | 36.165 | KV453155.1 | 6218343 | 19-scf00458 | 19 |
| AX-158296632 | 23 | 36.165 | KV453155.1 | 6219570 | 19-scf00458 | 19 |
| AX-158296633 | 23 | 36.165 | KV453155.1 | 6221086 | 19-scf00458 | 19 |
| AX-157845961 | 23 | 36.165 | KV453155.1 | 6224653 | 19-scf00458 | 19 |
| AX-158296635 | 23 | 36.165 | KV453155.1 | 6226704 | 19-scf00458 | 19 |
| AX-158296636 | 23 | 36.165 | KV453155.1 | 6227034 | 19-scf00458 | 19 |
| AX-158296638 | 23 | 36.165 | KV453155.1 | 6228080 | 19-scf00458 | 19 |
| AX-158296639 | 23 | 36.165 | KV453155.1 | 6228437 | 19-scf00458 | 19 |
| AX-157860547 | 23 | 36.165 | KV453155.1 | 6236924 | 19-scf00458 | 19 |
| AX-158296649 | 23 | 36.165 | KV453155.1 | 6246982 | 19-scf00458 | 19 |
| AX-158296652 | 23 | 36.165 | KV453155.1 | 6251538 | 19-scf00458 | 19 |
| AX-158296653 | 23 | 36.165 | KV453155.1 | 6255058 | 19-scf00458 | 19 |
| AX-157860548 | 23 | 36.165 | KV453155.1 | 6255346 | 19-scf00458 | 19 |
| AX-158296655 | 23 | 36.165 | KV453155.1 | 6257103 | 19-scf00458 | 19 |
| AX-158296656 | 23 | 36.165 | KV453155.1 | 6258274 | 19-scf00458 | 19 |
| AX-158296657 | 23 | 36.165 | KV453155.1 | 6259541 | 19-scf00458 | 19 |
| AX-158296660 | 23 | 36.165 | KV453155.1 | 6260922 | 19-scf00458 | 19 |
| AX-158296663 | 23 | 36.165 | KV453155.1 | 6263779 | 19-scf00458 | 19 |
| AX-158296666 | 23 | 36.165 | KV453155.1 | 6265335 | 19-scf00458 | 19 |
| AX-158296667 | 23 | 36.165 | KV453155.1 | 6266140 | 19-scf00458 | 19 |
| AX-157715796 | 23 | 36.165 | KV453155.1 | 6268053 | 19-scf00458 | 19 |
| AX-157845966 | 23 | 36.165 | KV453155.1 | 6268600 | 19-scf00458 | 19 |
| AX-157860549 | 23 | 36.165 | KV453155.1 | 6270843 | 19-scf00458 | 19 |
| AX-157860550 | 23 | 36.165 | KV453155.1 | 6272534 | 19-scf00458 | 19 |
| AX-158296669 | 23 | 36.165 | KV453155.1 | 6274538 | 19-scf00458 | 19 |
| AX-157860551 | 23 | 36.165 | KV453155.1 | 6278733 | 19-scf00458 | 19 |
| AX-157845969 | 23 | 36.165 | KV453155.1 | 6279228 | 19-scf00458 | 19 |
| AX-157710373 | 23 | 36.165 | KV453155.1 | 6279428 | 19-scf00458 | 19 |
| AX-157845970 | 23 | 36.165 | KV453155.1 | 6283859 | 19-scf00458 | 19 |

|              |    |        |            |         |             |    |
|--------------|----|--------|------------|---------|-------------|----|
| AX-158296673 | 23 | 36.165 | KV453155.1 | 6285248 | 19-scf00458 | 19 |
| AX-158296675 | 23 | 36.165 | KV453155.1 | 6287689 | 19-scf00458 | 19 |
| AX-158296676 | 23 | 36.165 | KV453155.1 | 6288403 | 19-scf00458 | 19 |
| AX-157845973 | 23 | 36.165 | KV453155.1 | 6289576 | 19-scf00458 | 19 |
| AX-157845974 | 23 | 36.165 | KV453155.1 | 6292152 | 19-scf00458 | 19 |
| AX-158296679 | 23 | 36.165 | KV453155.1 | 6292311 | 19-scf00458 | 19 |
| AX-158296680 | 23 | 36.165 | KV453155.1 | 6293556 | 19-scf00458 | 19 |
| AX-157860553 | 23 | 36.165 | KV453155.1 | 6294408 | 19-scf00458 | 19 |
| AX-157709479 | 23 | 36.165 | KV453155.1 | 6294540 | 19-scf00458 | 19 |
| AX-157860554 | 23 | 36.165 | KV453155.1 | 6296570 | 19-scf00458 | 19 |
| AX-157845975 | 23 | 36.165 | KV453155.1 | 6296831 | 19-scf00458 | 19 |
| AX-157845976 | 23 | 36.165 | KV453155.1 | 6300382 | 19-scf00458 | 19 |
| AX-158296683 | 23 | 36.165 | KV453155.1 | 6300553 | 19-scf00458 | 19 |
| AX-158296684 | 23 | 36.165 | KV453155.1 | 6301578 | 19-scf00458 | 19 |
| AX-157721214 | 23 | 36.165 | KV453155.1 | 6302693 | 19-scf00458 | 19 |
| AX-157751847 | 23 | 36.165 | KV453155.1 | 6304643 | 19-scf00458 | 19 |
| AX-157743827 | 23 | 36.165 | KV453155.1 | 6305177 | 19-scf00458 | 19 |
| AX-158296686 | 23 | 36.165 | KV453155.1 | 6306097 | 19-scf00458 | 19 |
| AX-158296687 | 23 | 36.165 | KV453155.1 | 6308889 | 19-scf00458 | 19 |
| AX-158296688 | 23 | 36.165 | KV453155.1 | 6309468 | 19-scf00458 | 19 |
| AX-157860555 | 23 | 36.165 | KV453155.1 | 6310928 | 19-scf00458 | 19 |
| AX-158296689 | 23 | 36.165 | KV453155.1 | 6311049 | 19-scf00458 | 19 |
| AX-157860556 | 23 | 36.165 | KV453155.1 | 6311101 | 19-scf00458 | 19 |
| AX-158296690 | 23 | 36.165 | KV453155.1 | 6312899 | 19-scf00458 | 19 |
| AX-157773628 | 23 | 36.165 | KV453155.1 | 6313762 | 19-scf00458 | 19 |
| AX-158296691 | 23 | 36.165 | KV453155.1 | 6315876 | 19-scf00458 | 19 |
| AX-158296692 | 23 | 36.165 | KV453155.1 | 6317472 | 19-scf00458 | 19 |
| AX-158296693 | 23 | 36.165 | KV453155.1 | 6317675 | 19-scf00458 | 19 |
| AX-157860558 | 23 | 36.165 | KV453155.1 | 6321408 | 19-scf00458 | 19 |
| AX-158411899 | 23 | 36.165 | KV453155.1 | 6323447 | 19-scf00458 | 19 |
| AX-158296696 | 23 | 36.165 | KV453155.1 | 6327469 | 19-scf00458 | 19 |
| AX-157860560 | 23 | 36.165 | KV453155.1 | 6330369 | 19-scf00458 | 19 |
| AX-158296697 | 23 | 36.165 | KV453155.1 | 6334269 | 19-scf00458 | 19 |
| AX-158296698 | 23 | 36.165 | KV453155.1 | 6337067 | 19-scf00458 | 19 |
| AX-157860561 | 23 | 36.165 | KV453155.1 | 6338962 | 19-scf00458 | 19 |
| AX-158296699 | 23 | 36.165 | KV453155.1 | 6339293 | 19-scf00458 | 19 |
| AX-158296700 | 23 | 36.165 | KV453155.1 | 6339598 | 19-scf00458 | 19 |
| AX-158419626 | 23 | 36.165 | KV453155.1 | 6341599 | 19-scf00458 | 19 |
| AX-158296701 | 23 | 36.165 | KV453155.1 | 6342794 | 19-scf00458 | 19 |
| AX-157860562 | 23 | 36.165 | KV453155.1 | 6344560 | 19-scf00458 | 19 |
| AX-157845979 | 23 | 36.165 | KV453155.1 | 6345493 | 19-scf00458 | 19 |
| AX-158296703 | 23 | 36.165 | KV453155.1 | 6345612 | 19-scf00458 | 19 |
| AX-157747776 | 23 | 36.165 | KV453155.1 | 6347595 | 19-scf00458 | 19 |
| AX-158296706 | 23 | 36.165 | KV453155.1 | 6351630 | 19-scf00458 | 19 |
| AX-158296707 | 23 | 36.165 | KV453155.1 | 6351881 | 19-scf00458 | 19 |
| AX-157845980 | 23 | 36.165 | KV453155.1 | 6353771 | 19-scf00458 | 19 |
| AX-157845981 | 23 | 36.165 | KV453155.1 | 6354703 | 19-scf00458 | 19 |
| AX-157860564 | 23 | 36.165 | KV453155.1 | 6355934 | 19-scf00458 | 19 |
| AX-157845982 | 23 | 36.165 | KV453155.1 | 6356357 | 19-scf00458 | 19 |
| AX-158296709 | 23 | 36.165 | KV453155.1 | 6356784 | 19-scf00458 | 19 |
| AX-158296710 | 23 | 36.165 | KV453155.1 | 6358204 | 19-scf00458 | 19 |

|              |    |        |            |         |             |    |
|--------------|----|--------|------------|---------|-------------|----|
| AX-158296711 | 23 | 36.165 | KV453155.1 | 6358794 | 19-scf00458 | 19 |
| AX-158296713 | 23 | 36.165 | KV453155.1 | 6359723 | 19-scf00458 | 19 |
| AX-158296714 | 23 | 36.165 | KV453155.1 | 6360423 | 19-scf00458 | 19 |
| AX-158296715 | 23 | 36.165 | KV453155.1 | 6361194 | 19-scf00458 | 19 |
| AX-158296718 | 23 | 36.165 | KV453155.1 | 6363785 | 19-scf00458 | 19 |
| AX-158296719 | 23 | 36.165 | KV453155.1 | 6364603 | 19-scf00458 | 19 |
| AX-157745256 | 23 | 36.165 | KV453155.1 | 6365171 | 19-scf00458 | 19 |
| AX-157845983 | 23 | 36.165 | KV453155.1 | 6365378 | 19-scf00458 | 19 |
| AX-157845984 | 23 | 36.165 | KV453155.1 | 6365430 | 19-scf00458 | 19 |
| AX-158296720 | 23 | 36.165 | KV453155.1 | 6365805 | 19-scf00458 | 19 |
| AX-158296721 | 23 | 36.165 | KV453155.1 | 6366702 | 19-scf00458 | 19 |
| AX-158296722 | 23 | 36.165 | KV453155.1 | 6367221 | 19-scf00458 | 19 |
| AX-158296723 | 23 | 36.165 | KV453155.1 | 6370678 | 19-scf00458 | 19 |
| AX-158296724 | 23 | 36.165 | KV453155.1 | 6371473 | 19-scf00458 | 19 |
| AX-157860567 | 23 | 36.165 | KV453155.1 | 6371638 | 19-scf00458 | 19 |
| AX-158296725 | 23 | 36.165 | KV453155.1 | 6372793 | 19-scf00458 | 19 |
| AX-157845986 | 23 | 36.165 | KV453155.1 | 6376913 | 19-scf00458 | 19 |
| AX-158296726 | 23 | 36.165 | KV453155.1 | 6378041 | 19-scf00458 | 19 |
| AX-158296727 | 23 | 36.165 | KV453155.1 | 6378539 | 19-scf00458 | 19 |
| AX-157845988 | 23 | 36.165 | KV453155.1 | 6380798 | 19-scf00458 | 19 |
| AX-157860568 | 23 | 36.165 | KV453155.1 | 6382753 | 19-scf00458 | 19 |
| AX-158296728 | 23 | 36.165 | KV453155.1 | 6383382 | 19-scf00458 | 19 |
| AX-158296729 | 23 | 36.165 | KV453155.1 | 6385058 | 19-scf00458 | 19 |
| AX-158296730 | 23 | 36.165 | KV453155.1 | 6386321 | 19-scf00458 | 19 |
| AX-158296731 | 23 | 36.165 | KV453155.1 | 6386931 | 19-scf00458 | 19 |
| AX-158296732 | 23 | 36.165 | KV453155.1 | 6388888 | 19-scf00458 | 19 |
| AX-158296734 | 23 | 36.165 | KV453155.1 | 6390558 | 19-scf00458 | 19 |
| AX-158296735 | 23 | 36.165 | KV453155.1 | 6391064 | 19-scf00458 | 19 |
| AX-158296736 | 23 | 36.165 | KV453155.1 | 6391418 | 19-scf00458 | 19 |
| AX-158296737 | 23 | 36.165 | KV453155.1 | 6392489 | 19-scf00458 | 19 |
| AX-158296738 | 23 | 36.165 | KV453155.1 | 6392741 | 19-scf00458 | 19 |
| AX-158296739 | 23 | 36.165 | KV453155.1 | 6394487 | 19-scf00458 | 19 |
| AX-157860570 | 23 | 36.165 | KV453155.1 | 6395856 | 19-scf00458 | 19 |
| AX-158296741 | 23 | 36.165 | KV453155.1 | 6396338 | 19-scf00458 | 19 |
| AX-158296745 | 23 | 36.165 | KV453155.1 | 6397533 | 19-scf00458 | 19 |
| AX-158296746 | 23 | 36.165 | KV453155.1 | 6397904 | 19-scf00458 | 19 |
| AX-157860571 | 23 | 36.165 | KV453155.1 | 6399373 | 19-scf00458 | 19 |
| AX-157845993 | 23 | 36.165 | KV453155.1 | 6420031 | 19-scf00458 | 19 |
| AX-158296774 | 23 | 36.165 | KV453155.1 | 6444859 | 19-scf00458 | 19 |
| AX-157860572 | 23 | 36.165 | KV453155.1 | 6445261 | 19-scf00458 | 19 |
| AX-158296776 | 23 | 36.165 | KV453155.1 | 6445968 | 19-scf00458 | 19 |
| AX-157860573 | 23 | 36.165 | KV453155.1 | 6446599 | 19-scf00458 | 19 |
| AX-158296777 | 23 | 36.165 | KV453155.1 | 6446867 | 19-scf00458 | 19 |
| AX-158296778 | 23 | 36.165 | KV453155.1 | 6447659 | 19-scf00458 | 19 |
| AX-158296779 | 23 | 36.165 | KV453155.1 | 6448343 | 19-scf00458 | 19 |
| AX-158296780 | 23 | 36.165 | KV453155.1 | 6448869 | 19-scf00458 | 19 |
| AX-158296781 | 23 | 36.165 | KV453155.1 | 6449584 | 19-scf00458 | 19 |
| AX-158296782 | 23 | 36.165 | KV453155.1 | 6450628 | 19-scf00458 | 19 |
| AX-158296783 | 23 | 36.165 | KV453155.1 | 6453348 | 19-scf00458 | 19 |
| AX-158296784 | 23 | 36.165 | KV453155.1 | 6455408 | 19-scf00458 | 19 |
| AX-158296786 | 23 | 36.165 | KV453155.1 | 6456912 | 19-scf00458 | 19 |

|              |    |        |            |         |             |    |
|--------------|----|--------|------------|---------|-------------|----|
| AX-157860575 | 23 | 36.165 | KV453155.1 | 6456950 | 19-scf00458 | 19 |
| AX-157860576 | 23 | 36.165 | KV453155.1 | 6457618 | 19-scf00458 | 19 |
| AX-157860577 | 23 | 36.165 | KV453155.1 | 6459222 | 19-scf00458 | 19 |
| AX-157860578 | 23 | 36.165 | KV453155.1 | 6460069 | 19-scf00458 | 19 |
| AX-157860579 | 23 | 36.165 | KV453155.1 | 6461254 | 19-scf00458 | 19 |
| AX-157860580 | 23 | 36.165 | KV453155.1 | 6461476 | 19-scf00458 | 19 |
| AX-158296791 | 23 | 36.165 | KV453155.1 | 6461578 | 19-scf00458 | 19 |
| AX-157860581 | 23 | 36.165 | KV453155.1 | 6463055 | 19-scf00458 | 19 |
| AX-158296793 | 23 | 36.165 | KV453155.1 | 6467082 | 19-scf00458 | 19 |
| AX-158296795 | 23 | 36.165 | KV453155.1 | 6468213 | 19-scf00458 | 19 |
| AX-158296796 | 23 | 36.165 | KV453155.1 | 6469140 | 19-scf00458 | 19 |
| AX-158296797 | 23 | 36.165 | KV453155.1 | 6469658 | 19-scf00458 | 19 |
| AX-158296800 | 23 | 36.165 | KV453155.1 | 6475227 | 19-scf00458 | 19 |
| AX-158296801 | 23 | 36.165 | KV453155.1 | 6475735 | 19-scf00458 | 19 |
| AX-157860584 | 23 | 36.165 | KV453155.1 | 6476561 | 19-scf00458 | 19 |
| AX-157860586 | 23 | 36.165 | KV453155.1 | 6480595 | 19-scf00458 | 19 |
| AX-158296804 | 23 | 36.165 | KV453155.1 | 6482253 | 19-scf00458 | 19 |
| AX-157860587 | 23 | 36.165 | KV453155.1 | 6483511 | 19-scf00458 | 19 |
| AX-157860588 | 23 | 36.165 | KV453155.1 | 6483823 | 19-scf00458 | 19 |
| AX-157860589 | 23 | 36.165 | KV453155.1 | 6485120 | 19-scf00458 | 19 |
| AX-158296808 | 23 | 36.165 | KV453155.1 | 6486765 | 19-scf00458 | 19 |
| AX-157860590 | 23 | 36.165 | KV453155.1 | 6487567 | 19-scf00458 | 19 |
| AX-158296810 | 23 | 36.165 | KV453155.1 | 6487818 | 19-scf00458 | 19 |
| AX-158296812 | 23 | 36.165 | KV453155.1 | 6489320 | 19-scf00458 | 19 |
| AX-158296815 | 23 | 36.165 | KV453155.1 | 6492798 | 19-scf00458 | 19 |
| AX-157860591 | 23 | 36.165 | KV453155.1 | 6493140 | 19-scf00458 | 19 |
| AX-158296816 | 23 | 36.165 | KV453155.1 | 6495224 | 19-scf00458 | 19 |
| AX-157860592 | 23 | 36.165 | KV453155.1 | 6495404 | 19-scf00458 | 19 |
| AX-158296818 | 23 | 36.165 | KV453155.1 | 6497976 | 19-scf00458 | 19 |
| AX-157860594 | 23 | 36.165 | KV453155.1 | 6498243 | 19-scf00458 | 19 |
| AX-158296819 | 23 | 36.165 | KV453155.1 | 6498388 | 19-scf00458 | 19 |
| AX-157860596 | 23 | 36.165 | KV453155.1 | 6499105 | 19-scf00458 | 19 |
| AX-158296820 | 23 | 36.165 | KV453155.1 | 6499678 | 19-scf00458 | 19 |
| AX-158296821 | 23 | 36.165 | KV453155.1 | 6500178 | 19-scf00458 | 19 |
| AX-158296822 | 23 | 36.165 | KV453155.1 | 6501664 | 19-scf00458 | 19 |
| AX-158296823 | 23 | 36.165 | KV453155.1 | 6502634 | 19-scf00458 | 19 |
| AX-158296824 | 23 | 36.165 | KV453155.1 | 6504114 | 19-scf00458 | 19 |
| AX-158296825 | 23 | 36.165 | KV453155.1 | 6507777 | 19-scf00458 | 19 |
| AX-157860598 | 23 | 36.165 | KV453155.1 | 6508217 | 19-scf00458 | 19 |
| AX-158296826 | 23 | 36.165 | KV453155.1 | 6508661 | 19-scf00458 | 19 |
| AX-158296827 | 23 | 36.165 | KV453155.1 | 6509102 | 19-scf00458 | 19 |
| AX-157860600 | 23 | 36.165 | KV453155.1 | 6509875 | 19-scf00458 | 19 |
| AX-157860601 | 23 | 36.165 | KV453155.1 | 6509964 | 19-scf00458 | 19 |
| AX-158296829 | 23 | 36.165 | KV453155.1 | 6510180 | 19-scf00458 | 19 |
| AX-158296830 | 23 | 36.165 | KV453155.1 | 6510256 | 19-scf00458 | 19 |
| AX-157860602 | 23 | 36.165 | KV453155.1 | 6510930 | 19-scf00458 | 19 |
| AX-158296831 | 23 | 36.165 | KV453155.1 | 6511724 | 19-scf00458 | 19 |
| AX-158296832 | 23 | 36.165 | KV453155.1 | 6514939 | 19-scf00458 | 19 |
| AX-158296833 | 23 | 36.165 | KV453155.1 | 6515363 | 19-scf00458 | 19 |
| AX-158296834 | 23 | 36.165 | KV453155.1 | 6517350 | 19-scf00458 | 19 |
| AX-158296835 | 23 | 36.165 | KV453155.1 | 6518110 | 19-scf00458 | 19 |

|              |    |        |            |         |             |    |
|--------------|----|--------|------------|---------|-------------|----|
| AX-158296836 | 23 | 36.165 | KV453155.1 | 6519070 | 19-scf00458 | 19 |
| AX-158296837 | 23 | 36.165 | KV453155.1 | 6520266 | 19-scf00458 | 19 |
| AX-158296838 | 23 | 36.165 | KV453155.1 | 6521307 | 19-scf00458 | 19 |
| AX-158296841 | 23 | 36.165 | KV453155.1 | 6523008 | 19-scf00458 | 19 |
| AX-157845994 | 23 | 36.165 | KV453155.1 | 6525934 | 19-scf00458 | 19 |
| AX-158296842 | 23 | 36.165 | KV453155.1 | 6527110 | 19-scf00458 | 19 |
| AX-157860606 | 23 | 36.165 | KV453155.1 | 6531622 | 19-scf00458 | 19 |
| AX-157845997 | 23 | 36.165 | KV453155.1 | 6534636 | 19-scf00458 | 19 |
| AX-158296846 | 23 | 36.165 | KV453155.1 | 6536121 | 19-scf00458 | 19 |
| AX-157860607 | 23 | 36.165 | KV453155.1 | 6536999 | 19-scf00458 | 19 |
| AX-158296847 | 23 | 36.165 | KV453155.1 | 6537909 | 19-scf00458 | 19 |
| AX-158296848 | 23 | 36.165 | KV453155.1 | 6538166 | 19-scf00458 | 19 |
| AX-158296849 | 23 | 36.165 | KV453155.1 | 6540609 | 19-scf00458 | 19 |
| AX-158296850 | 23 | 36.165 | KV453155.1 | 6541066 | 19-scf00458 | 19 |
| AX-158296852 | 23 | 36.165 | KV453155.1 | 6541749 | 19-scf00458 | 19 |
| AX-157738867 | 23 | 36.165 | KV453155.1 | 6544201 | 19-scf00458 | 19 |
| AX-158296854 | 23 | 36.165 | KV453155.1 | 6545598 | 19-scf00458 | 19 |
| AX-158296859 | 23 | 36.165 | KV453155.1 | 6549783 | 19-scf00458 | 19 |
| AX-158296862 | 23 | 36.165 | KV453155.1 | 6552303 | 19-scf00458 | 19 |
| AX-158296869 | 23 | 36.165 | KV453155.1 | 6557190 | 19-scf00458 | 19 |
| AX-158296871 | 23 | 36.165 | KV453155.1 | 6557728 | 19-scf00458 | 19 |
| AX-157846000 | 23 | 36.165 | KV453155.1 | 6558077 | 19-scf00458 | 19 |
| AX-157846002 | 23 | 36.165 | KV453155.1 | 6560558 | 19-scf00458 | 19 |
| AX-158296873 | 23 | 36.165 | KV453155.1 | 6561219 | 19-scf00458 | 19 |
| AX-158296874 | 23 | 36.165 | KV453155.1 | 6561420 | 19-scf00458 | 19 |
| AX-157860609 | 23 | 36.165 | KV453155.1 | 6561968 | 19-scf00458 | 19 |
| AX-158296875 | 23 | 36.165 | KV453155.1 | 6562880 | 19-scf00458 | 19 |
| AX-157860610 | 23 | 36.165 | KV453155.1 | 6564284 | 19-scf00458 | 19 |
| AX-158296876 | 23 | 36.165 | KV453155.1 | 6564690 | 19-scf00458 | 19 |
| AX-158296879 | 23 | 36.165 | KV453155.1 | 6567004 | 19-scf00458 | 19 |
| AX-157860611 | 23 | 36.165 | KV453155.1 | 6567666 | 19-scf00458 | 19 |
| AX-157860612 | 23 | 36.165 | KV453155.1 | 6568240 | 19-scf00458 | 19 |
| AX-158296885 | 23 | 36.165 | KV453155.1 | 6575084 | 19-scf00458 | 19 |
| AX-157860613 | 23 | 36.165 | KV453155.1 | 6576050 | 19-scf00458 | 19 |
| AX-157860614 | 23 | 36.165 | KV453155.1 | 6577965 | 19-scf00458 | 19 |
| AX-158296888 | 23 | 36.165 | KV453155.1 | 6581274 | 19-scf00458 | 19 |
| AX-157754640 | 23 | 36.165 | KV453155.1 | 6585783 | 19-scf00458 | 19 |
| AX-158296890 | 23 | 36.165 | KV453155.1 | 6585866 | 19-scf00458 | 19 |
| AX-158296891 | 23 | 36.165 | KV453155.1 | 6586044 | 19-scf00458 | 19 |
| AX-158296892 | 23 | 36.165 | KV453155.1 | 6586379 | 19-scf00458 | 19 |
| AX-157846008 | 23 | 36.165 | KV453155.1 | 6597470 | 19-scf00458 | 19 |
| AX-157733041 | 23 | 36.165 | KV453155.1 | 6598135 | 19-scf00458 | 19 |
| AX-158296896 | 23 | 36.165 | KV453155.1 | 6599393 | 19-scf00458 | 19 |
| AX-157860615 | 23 | 36.165 | KV453155.1 | 6601893 | 19-scf00458 | 19 |
| AX-157846010 | 23 | 36.165 | KV453155.1 | 6603683 | 19-scf00458 | 19 |
| AX-157860616 | 23 | 36.165 | KV453155.1 | 6605370 | 19-scf00458 | 19 |
| AX-158296902 | 23 | 36.165 | KV453155.1 | 6607741 | 19-scf00458 | 19 |
| AX-158296903 | 23 | 36.165 | KV453155.1 | 6610826 | 19-scf00458 | 19 |
| AX-157846012 | 23 | 36.165 | KV453155.1 | 6613548 | 19-scf00458 | 19 |
| AX-157846014 | 23 | 36.165 | KV453155.1 | 6615017 | 19-scf00458 | 19 |
| AX-157772217 | 23 | 36.165 | KV453155.1 | 6615206 | 19-scf00458 | 19 |

|              |    |        |             |         |             |    |
|--------------|----|--------|-------------|---------|-------------|----|
| AX-158296904 | 23 | 36.165 | KV453155.1  | 6616557 | 19-scf00458 | 19 |
| AX-157712221 | 23 | 36.165 | KV453155.1  | 6617245 | 19-scf00458 | 19 |
| AX-158296905 | 23 | 36.165 | KV453155.1  | 6618318 | 19-scf00458 | 19 |
| AX-158296907 | 23 | 36.165 | KV453155.1  | 6621351 | 19-scf00458 | 19 |
| AX-158297246 | 23 | 36.165 | KV453155.1  | 6975135 | 19-scf00458 | 19 |
| AX-157693557 | 23 | 36.165 | FI896364.1  | 300     | 19-scf00458 | UN |
| AX-157704513 | 23 | 36.165 | 3ML01026400 | 232     | scf01996_1  | UN |
| AX-157711887 | 23 | 36.165 | 3ML01026400 | 404     | scf01996_1  | UN |
| AX-157704515 | 23 | 36.165 | 3ML01026400 | 933     | scf01996_1  | UN |
| AX-157704512 | 23 | 36.165 | 3ML01026400 | 1131    | scf01996_1  | UN |
| AX-158417458 | 23 | 36.196 | KV453155.1  | 5895658 | 19-scf00458 | 19 |
| AX-158296453 | 23 | 36.231 | KV453155.1  | 5897533 | 19-scf00458 | 19 |
| AX-158295410 | 23 | 36.274 | KV453155.1  | 4637778 | 19-scf00458 | 19 |
| AX-158295420 | 23 | 36.274 | KV453155.1  | 4650952 | 19-scf00458 | 19 |
| AX-158295434 | 23 | 36.274 | KV453155.1  | 4693717 | 19-scf00458 | 19 |
| AX-158295474 | 23 | 36.274 | KV453155.1  | 4784870 | 19-scf00458 | 19 |
| AX-158295476 | 23 | 36.274 | KV453155.1  | 4785599 | 19-scf00458 | 19 |
| AX-157845878 | 23 | 36.274 | KV453155.1  | 4905256 | 19-scf00458 | 19 |
| AX-158295780 | 23 | 36.274 | KV453155.1  | 5092696 | 19-scf00458 | 19 |
| AX-158295795 | 23 | 36.274 | KV453155.1  | 5105023 | 19-scf00458 | 19 |
| AX-158295951 | 23 | 36.274 | KV453155.1  | 5275057 | 19-scf00458 | 19 |
| AX-157860486 | 23 | 36.274 | KV453155.1  | 5277454 | 19-scf00458 | 19 |
| AX-157860487 | 23 | 36.274 | KV453155.1  | 5278244 | 19-scf00458 | 19 |
| AX-158295954 | 23 | 36.274 | KV453155.1  | 5280578 | 19-scf00458 | 19 |
| AX-158295955 | 23 | 36.274 | KV453155.1  | 5282041 | 19-scf00458 | 19 |
| AX-158295957 | 23 | 36.274 | KV453155.1  | 5285190 | 19-scf00458 | 19 |
| AX-158295959 | 23 | 36.274 | KV453155.1  | 5287554 | 19-scf00458 | 19 |
| AX-158295960 | 23 | 36.274 | KV453155.1  | 5288181 | 19-scf00458 | 19 |
| AX-157860488 | 23 | 36.274 | KV453155.1  | 5288691 | 19-scf00458 | 19 |
| AX-157770768 | 23 | 36.274 | KV453155.1  | 5288753 | 19-scf00458 | 19 |
| AX-158295962 | 23 | 36.274 | KV453155.1  | 5289734 | 19-scf00458 | 19 |
| AX-158295964 | 23 | 36.274 | KV453155.1  | 5291855 | 19-scf00458 | 19 |
| AX-158295966 | 23 | 36.274 | KV453155.1  | 5292962 | 19-scf00458 | 19 |
| AX-157845915 | 23 | 36.274 | KV453155.1  | 5293014 | 19-scf00458 | 19 |
| AX-158295968 | 23 | 36.274 | KV453155.1  | 5295298 | 19-scf00458 | 19 |
| AX-158295969 | 23 | 36.274 | KV453155.1  | 5295679 | 19-scf00458 | 19 |
| AX-158296133 | 23 | 36.274 | KV453155.1  | 5445469 | 19-scf00458 | 19 |
| AX-158296232 | 23 | 36.274 | KV453155.1  | 5569522 | 19-scf00458 | 19 |
| AX-158296233 | 23 | 36.274 | KV453155.1  | 5570159 | 19-scf00458 | 19 |
| AX-158296235 | 23 | 36.274 | KV453155.1  | 5571586 | 19-scf00458 | 19 |
| AX-158296236 | 23 | 36.274 | KV453155.1  | 5572400 | 19-scf00458 | 19 |
| AX-158296238 | 23 | 36.274 | KV453155.1  | 5574135 | 19-scf00458 | 19 |
| AX-158296241 | 23 | 36.274 | KV453155.1  | 5578125 | 19-scf00458 | 19 |
| AX-158296242 | 23 | 36.274 | KV453155.1  | 5578863 | 19-scf00458 | 19 |
| AX-158296243 | 23 | 36.274 | KV453155.1  | 5579113 | 19-scf00458 | 19 |
| AX-158296244 | 23 | 36.274 | KV453155.1  | 5579664 | 19-scf00458 | 19 |
| AX-158296248 | 23 | 36.274 | KV453155.1  | 5583754 | 19-scf00458 | 19 |
| AX-158296250 | 23 | 36.274 | KV453155.1  | 5585429 | 19-scf00458 | 19 |
| AX-158296255 | 23 | 36.274 | KV453155.1  | 5588321 | 19-scf00458 | 19 |
| AX-158296257 | 23 | 36.274 | KV453155.1  | 5589807 | 19-scf00458 | 19 |
| AX-158296258 | 23 | 36.274 | KV453155.1  | 5590843 | 19-scf00458 | 19 |

|              |    |        |            |         |             |    |
|--------------|----|--------|------------|---------|-------------|----|
| AX-158296259 | 23 | 36.274 | KV453155.1 | 5591232 | 19-scf00458 | 19 |
| AX-157718728 | 23 | 36.274 | KV453155.1 | 5592679 | 19-scf00458 | 19 |
| AX-157860512 | 23 | 36.274 | KV453155.1 | 5594939 | 19-scf00458 | 19 |
| AX-158296263 | 23 | 36.274 | KV453155.1 | 5595942 | 19-scf00458 | 19 |
| AX-157738784 | 23 | 36.274 | KV453155.1 | 5596343 | 19-scf00458 | 19 |
| AX-158296264 | 23 | 36.274 | KV453155.1 | 5596701 | 19-scf00458 | 19 |
| AX-158296265 | 23 | 36.274 | KV453155.1 | 5597449 | 19-scf00458 | 19 |
| AX-158296266 | 23 | 36.274 | KV453155.1 | 5597854 | 19-scf00458 | 19 |
| AX-158296269 | 23 | 36.274 | KV453155.1 | 5599740 | 19-scf00458 | 19 |
| AX-158296270 | 23 | 36.274 | KV453155.1 | 5601125 | 19-scf00458 | 19 |
| AX-158296272 | 23 | 36.274 | KV453155.1 | 5602338 | 19-scf00458 | 19 |
| AX-158296273 | 23 | 36.274 | KV453155.1 | 5602821 | 19-scf00458 | 19 |
| AX-158296276 | 23 | 36.274 | KV453155.1 | 5604362 | 19-scf00458 | 19 |
| AX-158296281 | 23 | 36.274 | KV453155.1 | 5609084 | 19-scf00458 | 19 |
| AX-158296284 | 23 | 36.274 | KV453155.1 | 5613590 | 19-scf00458 | 19 |
| AX-158296285 | 23 | 36.274 | KV453155.1 | 5615072 | 19-scf00458 | 19 |
| AX-158296290 | 23 | 36.274 | KV453155.1 | 5621107 | 19-scf00458 | 19 |
| AX-158381276 | 23 | 36.274 | KV453155.1 | 5622105 | 19-scf00458 | 19 |
| AX-158296294 | 23 | 36.274 | KV453155.1 | 5624866 | 19-scf00458 | 19 |
| AX-158296297 | 23 | 36.274 | KV453155.1 | 5628346 | 19-scf00458 | 19 |
| AX-158296302 | 23 | 36.274 | KV453155.1 | 5633546 | 19-scf00458 | 19 |
| AX-158296305 | 23 | 36.274 | KV453155.1 | 5639490 | 19-scf00458 | 19 |
| AX-158296308 | 23 | 36.274 | KV453155.1 | 5643717 | 19-scf00458 | 19 |
| AX-158296315 | 23 | 36.274 | KV453155.1 | 5653555 | 19-scf00458 | 19 |
| AX-158296317 | 23 | 36.274 | KV453155.1 | 5656634 | 19-scf00458 | 19 |
| AX-158296324 | 23 | 36.274 | KV453155.1 | 5662766 | 19-scf00458 | 19 |
| AX-158296325 | 23 | 36.274 | KV453155.1 | 5663177 | 19-scf00458 | 19 |
| AX-158296331 | 23 | 36.274 | KV453155.1 | 5669698 | 19-scf00458 | 19 |
| AX-158296334 | 23 | 36.274 | KV453155.1 | 5672272 | 19-scf00458 | 19 |
| AX-158296335 | 23 | 36.274 | KV453155.1 | 5672899 | 19-scf00458 | 19 |
| AX-158296336 | 23 | 36.274 | KV453155.1 | 5673413 | 19-scf00458 | 19 |
| AX-158296343 | 23 | 36.274 | KV453155.1 | 5678465 | 19-scf00458 | 19 |
| AX-157860513 | 23 | 36.274 | KV453155.1 | 5681676 | 19-scf00458 | 19 |
| AX-158296373 | 23 | 36.274 | KV453155.1 | 5737245 | 19-scf00458 | 19 |
| AX-158296384 | 23 | 36.274 | KV453155.1 | 5759994 | 19-scf00458 | 19 |
| AX-158296385 | 23 | 36.274 | KV453155.1 | 5760292 | 19-scf00458 | 19 |
| AX-157845936 | 23 | 36.274 | KV453155.1 | 5772384 | 19-scf00458 | 19 |
| AX-158296392 | 23 | 36.274 | KV453155.1 | 5778817 | 19-scf00458 | 19 |
| AX-158403499 | 23 | 36.274 | KV453155.1 | 5784819 | 19-scf00458 | 19 |
| AX-158296395 | 23 | 36.274 | KV453155.1 | 5789478 | 19-scf00458 | 19 |
| AX-157845938 | 23 | 36.274 | KV453155.1 | 5792002 | 19-scf00458 | 19 |
| AX-158296426 | 23 | 36.274 | KV453155.1 | 5855057 | 19-scf00458 | 19 |
| AX-158296433 | 23 | 36.274 | KV453155.1 | 5863534 | 19-scf00458 | 19 |
| AX-158296444 | 23 | 36.274 | KV453155.1 | 5881198 | 19-scf00458 | 19 |
| AX-158296452 | 23 | 36.274 | KV453155.1 | 5896322 | 19-scf00458 | 19 |
| AX-158296459 | 23 | 36.274 | KV453155.1 | 5908741 | 19-scf00458 | 19 |
| AX-158296460 | 23 | 36.274 | KV453155.1 | 5910492 | 19-scf00458 | 19 |
| AX-158296461 | 23 | 36.274 | KV453155.1 | 5912249 | 19-scf00458 | 19 |
| AX-158296462 | 23 | 36.274 | KV453155.1 | 5913284 | 19-scf00458 | 19 |
| AX-158296470 | 23 | 36.274 | KV453155.1 | 5929921 | 19-scf00458 | 19 |
| AX-157739344 | 23 | 36.274 | KV453155.1 | 5931792 | 19-scf00458 | 19 |

|              |    |        |            |         |             |    |
|--------------|----|--------|------------|---------|-------------|----|
| AX-158296471 | 23 | 36.274 | KV453155.1 | 5932680 | 19-scf00458 | 19 |
| AX-158296472 | 23 | 36.274 | KV453155.1 | 5937706 | 19-scf00458 | 19 |
| AX-158296473 | 23 | 36.274 | KV453155.1 | 5938380 | 19-scf00458 | 19 |
| AX-158296475 | 23 | 36.274 | KV453155.1 | 5940395 | 19-scf00458 | 19 |
| AX-158296479 | 23 | 36.274 | KV453155.1 | 5948726 | 19-scf00458 | 19 |
| AX-158296488 | 23 | 36.274 | KV453155.1 | 5964933 | 19-scf00458 | 19 |
| AX-158296500 | 23 | 36.274 | KV453155.1 | 5980524 | 19-scf00458 | 19 |
| AX-158296502 | 23 | 36.274 | KV453155.1 | 5981779 | 19-scf00458 | 19 |
| AX-158296504 | 23 | 36.274 | KV453155.1 | 5983059 | 19-scf00458 | 19 |
| AX-157845942 | 23 | 36.274 | KV453155.1 | 5989406 | 19-scf00458 | 19 |
| AX-158296508 | 23 | 36.274 | KV453155.1 | 5990627 | 19-scf00458 | 19 |
| AX-158296514 | 23 | 36.274 | KV453155.1 | 5998769 | 19-scf00458 | 19 |
| AX-157754386 | 23 | 36.274 | KV453155.1 | 6004732 | 19-scf00458 | 19 |
| AX-158296522 | 23 | 36.274 | KV453155.1 | 6011238 | 19-scf00458 | 19 |
| AX-157845944 | 23 | 36.274 | KV453155.1 | 6031490 | 19-scf00458 | 19 |
| AX-158296538 | 23 | 36.274 | KV453155.1 | 6048692 | 19-scf00458 | 19 |
| AX-158296544 | 23 | 36.274 | KV453155.1 | 6058043 | 19-scf00458 | 19 |
| AX-158296546 | 23 | 36.274 | KV453155.1 | 6059014 | 19-scf00458 | 19 |
| AX-158296549 | 23 | 36.274 | KV453155.1 | 6062984 | 19-scf00458 | 19 |
| AX-158296552 | 23 | 36.274 | KV453155.1 | 6066022 | 19-scf00458 | 19 |
| AX-157860530 | 23 | 36.274 | KV453155.1 | 6068618 | 19-scf00458 | 19 |
| AX-158296555 | 23 | 36.274 | KV453155.1 | 6069261 | 19-scf00458 | 19 |
| AX-157860531 | 23 | 36.274 | KV453155.1 | 6072469 | 19-scf00458 | 19 |
| AX-158296558 | 23 | 36.274 | KV453155.1 | 6081017 | 19-scf00458 | 19 |
| AX-158296566 | 23 | 36.274 | KV453155.1 | 6096444 | 19-scf00458 | 19 |
| AX-157860535 | 23 | 36.274 | KV453155.1 | 6097507 | 19-scf00458 | 19 |
| AX-158296571 | 23 | 36.274 | KV453155.1 | 6102104 | 19-scf00458 | 19 |
| AX-158296572 | 23 | 36.274 | KV453155.1 | 6103970 | 19-scf00458 | 19 |
| AX-158417463 | 23 | 36.274 | KV453155.1 | 6107514 | 19-scf00458 | 19 |
| AX-157845949 | 23 | 36.274 | KV453155.1 | 6113847 | 19-scf00458 | 19 |
| AX-157773463 | 23 | 36.274 | KV453155.1 | 6121051 | 19-scf00458 | 19 |
| AX-157722662 | 23 | 36.274 | KV453155.1 | 6125498 | 19-scf00458 | 19 |
| AX-157758734 | 23 | 36.274 | KV453155.1 | 6138029 | 19-scf00458 | 19 |
| AX-158296580 | 23 | 36.274 | KV453155.1 | 6141641 | 19-scf00458 | 19 |
| AX-158296581 | 23 | 36.274 | KV453155.1 | 6142036 | 19-scf00458 | 19 |
| AX-158296583 | 23 | 36.274 | KV453155.1 | 6145625 | 19-scf00458 | 19 |
| AX-157860537 | 23 | 36.274 | KV453155.1 | 6161546 | 19-scf00458 | 19 |
| AX-158296592 | 23 | 36.274 | KV453155.1 | 6162374 | 19-scf00458 | 19 |
| AX-158419624 | 23 | 36.274 | KV453155.1 | 6173690 | 19-scf00458 | 19 |
| AX-158296602 | 23 | 36.274 | KV453155.1 | 6174280 | 19-scf00458 | 19 |
| AX-158296604 | 23 | 36.274 | KV453155.1 | 6176415 | 19-scf00458 | 19 |
| AX-157845958 | 23 | 36.274 | KV453155.1 | 6189073 | 19-scf00458 | 19 |
| AX-158296613 | 23 | 36.274 | KV453155.1 | 6189445 | 19-scf00458 | 19 |
| AX-158296614 | 23 | 36.274 | KV453155.1 | 6190699 | 19-scf00458 | 19 |
| AX-157860543 | 23 | 36.274 | KV453155.1 | 6192443 | 19-scf00458 | 19 |
| AX-157860544 | 23 | 36.274 | KV453155.1 | 6193689 | 19-scf00458 | 19 |
| AX-158296619 | 23 | 36.274 | KV453155.1 | 6198530 | 19-scf00458 | 19 |
| AX-157743860 | 23 | 36.274 | KV453155.1 | 6199169 | 19-scf00458 | 19 |
| AX-157845959 | 23 | 36.274 | KV453155.1 | 6205721 | 19-scf00458 | 19 |
| AX-158296623 | 23 | 36.274 | KV453155.1 | 6206938 | 19-scf00458 | 19 |
| AX-158296628 | 23 | 36.274 | KV453155.1 | 6217040 | 19-scf00458 | 19 |



|              |    |        |            |         |             |    |
|--------------|----|--------|------------|---------|-------------|----|
| AX-158417465 | 23 | 36.274 | KV453155.1 | 6224935 | 19-scf00458 | 19 |
| AX-158296637 | 23 | 36.274 | KV453155.1 | 6227447 | 19-scf00458 | 19 |
| AX-158296640 | 23 | 36.274 | KV453155.1 | 6234623 | 19-scf00458 | 19 |
| AX-158296641 | 23 | 36.274 | KV453155.1 | 6235552 | 19-scf00458 | 19 |
| AX-158296643 | 23 | 36.274 | KV453155.1 | 6241253 | 19-scf00458 | 19 |
| AX-158296644 | 23 | 36.274 | KV453155.1 | 6241980 | 19-scf00458 | 19 |
| AX-158296647 | 23 | 36.274 | KV453155.1 | 6245477 | 19-scf00458 | 19 |
| AX-158296648 | 23 | 36.274 | KV453155.1 | 6246003 | 19-scf00458 | 19 |
| AX-157845964 | 23 | 36.274 | KV453155.1 | 6247062 | 19-scf00458 | 19 |
| AX-158296651 | 23 | 36.274 | KV453155.1 | 6248201 | 19-scf00458 | 19 |
| AX-158296658 | 23 | 36.274 | KV453155.1 | 6260138 | 19-scf00458 | 19 |
| AX-158296664 | 23 | 36.274 | KV453155.1 | 6264082 | 19-scf00458 | 19 |
| AX-158296665 | 23 | 36.274 | KV453155.1 | 6264591 | 19-scf00458 | 19 |
| AX-158296671 | 23 | 36.274 | KV453155.1 | 6276789 | 19-scf00458 | 19 |
| AX-157845967 | 23 | 36.274 | KV453155.1 | 6276983 | 19-scf00458 | 19 |
| AX-157845968 | 23 | 36.274 | KV453155.1 | 6278491 | 19-scf00458 | 19 |
| AX-157860552 | 23 | 36.274 | KV453155.1 | 6282918 | 19-scf00458 | 19 |
| AX-158296674 | 23 | 36.274 | KV453155.1 | 6287021 | 19-scf00458 | 19 |
| AX-157845971 | 23 | 36.274 | KV453155.1 | 6287093 | 19-scf00458 | 19 |
| AX-158296682 | 23 | 36.274 | KV453155.1 | 6299213 | 19-scf00458 | 19 |
| AX-157860557 | 23 | 36.274 | KV453155.1 | 6317051 | 19-scf00458 | 19 |
| AX-158296694 | 23 | 36.274 | KV453155.1 | 6320658 | 19-scf00458 | 19 |
| AX-158296695 | 23 | 36.274 | KV453155.1 | 6322068 | 19-scf00458 | 19 |
| AX-157772364 | 23 | 36.274 | KV453155.1 | 6328223 | 19-scf00458 | 19 |
| AX-157845977 | 23 | 36.274 | KV453155.1 | 6337410 | 19-scf00458 | 19 |
| AX-157845978 | 23 | 36.274 | KV453155.1 | 6345153 | 19-scf00458 | 19 |
| AX-158296705 | 23 | 36.274 | KV453155.1 | 6349005 | 19-scf00458 | 19 |
| AX-158296716 | 23 | 36.274 | KV453155.1 | 6361514 | 19-scf00458 | 19 |
| AX-157860565 | 23 | 36.274 | KV453155.1 | 6362752 | 19-scf00458 | 19 |
| AX-158296717 | 23 | 36.274 | KV453155.1 | 6363182 | 19-scf00458 | 19 |
| AX-157860566 | 23 | 36.274 | KV453155.1 | 6364809 | 19-scf00458 | 19 |
| AX-157737354 | 23 | 36.274 | KV453155.1 | 6376391 | 19-scf00458 | 19 |
| AX-157845987 | 23 | 36.274 | KV453155.1 | 6377286 | 19-scf00458 | 19 |
| AX-158296733 | 23 | 36.274 | KV453155.1 | 6389594 | 19-scf00458 | 19 |
| AX-158296743 | 23 | 36.274 | KV453155.1 | 6396905 | 19-scf00458 | 19 |
| AX-157845989 | 23 | 36.274 | KV453155.1 | 6398355 | 19-scf00458 | 19 |
| AX-158296748 | 23 | 36.274 | KV453155.1 | 6399658 | 19-scf00458 | 19 |
| AX-158296749 | 23 | 36.274 | KV453155.1 | 6400417 | 19-scf00458 | 19 |
| AX-157845991 | 23 | 36.274 | KV453155.1 | 6409157 | 19-scf00458 | 19 |
| AX-158296756 | 23 | 36.274 | KV453155.1 | 6409883 | 19-scf00458 | 19 |
| AX-158296757 | 23 | 36.274 | KV453155.1 | 6410094 | 19-scf00458 | 19 |
| AX-158296758 | 23 | 36.274 | KV453155.1 | 6410605 | 19-scf00458 | 19 |
| AX-158417470 | 23 | 36.274 | KV453155.1 | 6411047 | 19-scf00458 | 19 |
| AX-158296760 | 23 | 36.274 | KV453155.1 | 6411642 | 19-scf00458 | 19 |
| AX-158296762 | 23 | 36.274 | KV453155.1 | 6414234 | 19-scf00458 | 19 |
| AX-158296768 | 23 | 36.274 | KV453155.1 | 6421926 | 19-scf00458 | 19 |
| AX-158296770 | 23 | 36.274 | KV453155.1 | 6423480 | 19-scf00458 | 19 |
| AX-158296771 | 23 | 36.274 | KV453155.1 | 6425163 | 19-scf00458 | 19 |
| AX-158296811 | 23 | 36.274 | KV453155.1 | 6488737 | 19-scf00458 | 19 |
| AX-157860593 | 23 | 36.274 | KV453155.1 | 6496903 | 19-scf00458 | 19 |
| AX-157756928 | 23 | 36.274 | KV453155.1 | 6524050 | 19-scf00458 | 19 |

|              |    |        |             |         |             |    |
|--------------|----|--------|-------------|---------|-------------|----|
| AX-158296851 | 23 | 36.274 | KV453155.1  | 6541219 | 19-scf00458 | 19 |
| AX-158296853 | 23 | 36.274 | KV453155.1  | 6542496 | 19-scf00458 | 19 |
| AX-158296884 | 23 | 36.274 | KV453155.1  | 6574445 | 19-scf00458 | 19 |
| AX-157846013 | 23 | 36.274 | KV453155.1  | 6614313 | 19-scf00458 | 19 |
| AX-158297321 | 23 | 36.274 | KV453155.1  | 7069065 | 19-scf00458 | 19 |
| AX-157748109 | 23 | 36.274 | KV453155.1  | 7324086 | 19-scf00458 | 19 |
| AX-157706414 | 23 | 36.274 | 3ML01032202 | 81      | scf07818_1  | UN |
| AX-157707110 | 23 | 36.274 | 3ML01033522 | 150     | scf09177_1  | UN |
| AX-157707526 | 23 | 36.274 | 3ML01034488 | 365     | scf10164_1  | UN |
| AX-158296798 | 23 | 36.284 | KV453155.1  | 6470151 | 19-scf00458 | 19 |
| AX-157752478 | 23 | 36.293 | KV453155.1  | 6473123 | 19-scf00458 | 19 |
| AX-158294857 | 23 | 36.303 | KV453155.1  | 3850108 | 19-scf00458 | 19 |
| AX-158294980 | 23 | 36.303 | KV453155.1  | 4007106 | 19-scf00458 | 19 |
| AX-158295000 | 23 | 36.303 | KV453155.1  | 4028539 | 19-scf00458 | 19 |
| AX-158296681 | 23 | 36.303 | KV453155.1  | 6296423 | 19-scf00458 | 19 |
| AX-158296802 | 23 | 36.303 | KV453155.1  | 6476461 | 19-scf00458 | 19 |
| AX-158296813 | 23 | 36.303 | KV453155.1  | 6490020 | 19-scf00458 | 19 |
| AX-158297284 | 23 | 36.303 | KV453155.1  | 7026694 | 19-scf00458 | 19 |
| AX-158297285 | 23 | 36.303 | KV453155.1  | 7027879 | 19-scf00458 | 19 |
| AX-158297286 | 23 | 36.303 | KV453155.1  | 7030064 | 19-scf00458 | 19 |
| AX-158297291 | 23 | 36.303 | KV453155.1  | 7037403 | 19-scf00458 | 19 |
| AX-158297300 | 23 | 36.303 | KV453155.1  | 7049594 | 19-scf00458 | 19 |
| AX-158297661 | 23 | 36.303 | KV453155.1  | 7543622 | 19-scf00458 | 19 |
| AX-157860597 | 23 | 36.314 | KV453155.1  | 6499150 | 19-scf00458 | 19 |
| AX-158296839 | 23 | 36.325 | KV453155.1  | 6521962 | 19-scf00458 | 19 |
| AX-158296840 | 23 | 36.336 | KV453155.1  | 6522534 | 19-scf00458 | 19 |
| AX-157708864 | 23 | 36.348 | KV453155.1  | 6543110 | 19-scf00458 | 19 |
| AX-158296868 | 23 | 36.36  | KV453155.1  | 6556797 | 19-scf00458 | 19 |
| AX-157753487 | 23 | 36.372 | KV453155.1  | 6563697 | 19-scf00458 | 19 |
| AX-158295674 | 23 | 36.383 | KV453155.1  | 4939975 | 19-scf00458 | 19 |
| AX-158296477 | 23 | 36.383 | KV453155.1  | 5942229 | 19-scf00458 | 19 |
| AX-157747254 | 23 | 36.383 | KV453155.1  | 6402528 | 19-scf00458 | 19 |
| AX-158296761 | 23 | 36.383 | KV453155.1  | 6413036 | 19-scf00458 | 19 |
| AX-158296883 | 23 | 36.383 | KV453155.1  | 6573841 | 19-scf00458 | 19 |
| AX-158419628 | 23 | 36.383 | KV453155.1  | 6578106 | 19-scf00458 | 19 |
| AX-157888082 | 23 | 36.383 | KV453155.1  | 6580070 | 19-scf00458 | 19 |
| AX-157846005 | 23 | 36.383 | KV453155.1  | 6587511 | 19-scf00458 | 19 |
| AX-158296893 | 23 | 36.383 | KV453155.1  | 6587938 | 19-scf00458 | 19 |
| AX-157846006 | 23 | 36.383 | KV453155.1  | 6591822 | 19-scf00458 | 19 |
| AX-157846007 | 23 | 36.383 | KV453155.1  | 6591930 | 19-scf00458 | 19 |
| AX-157846009 | 23 | 36.383 | KV453155.1  | 6600225 | 19-scf00458 | 19 |
| AX-158296897 | 23 | 36.383 | KV453155.1  | 6601410 | 19-scf00458 | 19 |
| AX-158296898 | 23 | 36.383 | KV453155.1  | 6604057 | 19-scf00458 | 19 |
| AX-158296906 | 23 | 36.383 | KV453155.1  | 6620773 | 19-scf00458 | 19 |
| AX-158295262 | 23 | 36.492 | KV453155.1  | 4483458 | 19-scf00458 | 19 |
| AX-158295285 | 23 | 36.492 | KV453155.1  | 4502750 | 19-scf00458 | 19 |
| AX-158295287 | 23 | 36.492 | KV453155.1  | 4503829 | 19-scf00458 | 19 |
| AX-158295292 | 23 | 36.492 | KV453155.1  | 4508731 | 19-scf00458 | 19 |
| AX-158295300 | 23 | 36.492 | KV453155.1  | 4515555 | 19-scf00458 | 19 |
| AX-158295309 | 23 | 36.492 | KV453155.1  | 4524769 | 19-scf00458 | 19 |
| AX-158295336 | 23 | 36.492 | KV453155.1  | 4561384 | 19-scf00458 | 19 |

|              |    |        |            |         |             |    |
|--------------|----|--------|------------|---------|-------------|----|
| AX-158295407 | 23 | 36.492 | KV453155.1 | 4628625 | 19-scf00458 | 19 |
| AX-158296052 | 23 | 36.492 | KV453155.1 | 5379221 | 19-scf00458 | 19 |
| AX-158296139 | 23 | 36.492 | KV453155.1 | 5454555 | 19-scf00458 | 19 |
| AX-158296142 | 23 | 36.492 | KV453155.1 | 5457688 | 19-scf00458 | 19 |
| AX-158296175 | 23 | 36.492 | KV453155.1 | 5502231 | 19-scf00458 | 19 |
| AX-158296396 | 23 | 36.492 | KV453155.1 | 5790246 | 19-scf00458 | 19 |
| AX-158296424 | 23 | 36.492 | KV453155.1 | 5850463 | 19-scf00458 | 19 |
| AX-158296491 | 23 | 36.492 | KV453155.1 | 5969884 | 19-scf00458 | 19 |
| AX-158296789 | 23 | 36.492 | KV453155.1 | 6460604 | 19-scf00458 | 19 |
| AX-158296792 | 23 | 36.492 | KV453155.1 | 6465312 | 19-scf00458 | 19 |
| AX-158296803 | 23 | 36.492 | KV453155.1 | 6477116 | 19-scf00458 | 19 |
| AX-157845996 | 23 | 36.492 | KV453155.1 | 6534162 | 19-scf00458 | 19 |
| AX-157846015 | 23 | 36.492 | KV453155.1 | 6622133 | 19-scf00458 | 19 |
| AX-158296910 | 23 | 36.492 | KV453155.1 | 6622950 | 19-scf00458 | 19 |
| AX-158296915 | 23 | 36.492 | KV453155.1 | 6626588 | 19-scf00458 | 19 |
| AX-158296922 | 23 | 36.492 | KV453155.1 | 6631405 | 19-scf00458 | 19 |
| AX-158296924 | 23 | 36.492 | KV453155.1 | 6635517 | 19-scf00458 | 19 |
| AX-158296927 | 23 | 36.492 | KV453155.1 | 6639453 | 19-scf00458 | 19 |
| AX-158296931 | 23 | 36.492 | KV453155.1 | 6643483 | 19-scf00458 | 19 |
| AX-158296941 | 23 | 36.492 | KV453155.1 | 6655043 | 19-scf00458 | 19 |
| AX-158421643 | 23 | 36.492 | KV453155.1 | 6659193 | 19-scf00458 | 19 |
| AX-157753716 | 23 | 36.492 | KV453155.1 | 6661870 | 19-scf00458 | 19 |
| AX-158296948 | 23 | 36.492 | KV453155.1 | 6664593 | 19-scf00458 | 19 |
| AX-158296949 | 23 | 36.492 | KV453155.1 | 6665570 | 19-scf00458 | 19 |
| AX-157719025 | 23 | 36.492 | KV453155.1 | 6679490 | 19-scf00458 | 19 |
| AX-158296962 | 23 | 36.492 | KV453155.1 | 6679907 | 19-scf00458 | 19 |
| AX-157846024 | 23 | 36.492 | KV453155.1 | 6683216 | 19-scf00458 | 19 |
| AX-158296969 | 23 | 36.492 | KV453155.1 | 6686156 | 19-scf00458 | 19 |
| AX-157699429 | 23 | 36.492 | KV453155.1 | 6686986 | 19-scf00458 | 19 |
| AX-158296975 | 23 | 36.492 | KV453155.1 | 6693601 | 19-scf00458 | 19 |
| AX-158417477 | 23 | 36.492 | KV453155.1 | 6697198 | 19-scf00458 | 19 |
| AX-158296978 | 23 | 36.492 | KV453155.1 | 6699463 | 19-scf00458 | 19 |
| AX-158296979 | 23 | 36.492 | KV453155.1 | 6700798 | 19-scf00458 | 19 |
| AX-158296981 | 23 | 36.492 | KV453155.1 | 6702095 | 19-scf00458 | 19 |
| AX-158296983 | 23 | 36.492 | KV453155.1 | 6703116 | 19-scf00458 | 19 |
| AX-158296987 | 23 | 36.492 | KV453155.1 | 6706868 | 19-scf00458 | 19 |
| AX-158417478 | 23 | 36.492 | KV453155.1 | 6710517 | 19-scf00458 | 19 |
| AX-158296994 | 23 | 36.492 | KV453155.1 | 6717953 | 19-scf00458 | 19 |
| AX-158296996 | 23 | 36.492 | KV453155.1 | 6719683 | 19-scf00458 | 19 |
| AX-157846028 | 23 | 36.492 | KV453155.1 | 6755587 | 19-scf00458 | 19 |
| AX-158297041 | 23 | 36.492 | KV453155.1 | 6756941 | 19-scf00458 | 19 |
| AX-158297042 | 23 | 36.492 | KV453155.1 | 6757421 | 19-scf00458 | 19 |
| AX-158297045 | 23 | 36.492 | KV453155.1 | 6759976 | 19-scf00458 | 19 |
| AX-158297046 | 23 | 36.492 | KV453155.1 | 6760896 | 19-scf00458 | 19 |
| AX-158297052 | 23 | 36.492 | KV453155.1 | 6768818 | 19-scf00458 | 19 |
| AX-158297054 | 23 | 36.492 | KV453155.1 | 6769631 | 19-scf00458 | 19 |
| AX-158297059 | 23 | 36.492 | KV453155.1 | 6773547 | 19-scf00458 | 19 |
| AX-158297060 | 23 | 36.492 | KV453155.1 | 6773965 | 19-scf00458 | 19 |
| AX-157846029 | 23 | 36.492 | KV453155.1 | 6775436 | 19-scf00458 | 19 |
| AX-157846031 | 23 | 36.492 | KV453155.1 | 6781216 | 19-scf00458 | 19 |
| AX-158297102 | 23 | 36.492 | KV453155.1 | 6814044 | 19-scf00458 | 19 |

|              |    |        |            |         |             |    |
|--------------|----|--------|------------|---------|-------------|----|
| AX-157766534 | 23 | 36.492 | KV453155.1 | 6832141 | 19-scf00458 | 19 |
| AX-157846034 | 23 | 36.492 | KV453155.1 | 6848294 | 19-scf00458 | 19 |
| AX-158297160 | 23 | 36.492 | KV453155.1 | 6886135 | 19-scf00458 | 19 |
| AX-157714064 | 23 | 36.492 | KV453155.1 | 6887919 | 19-scf00458 | 19 |
| AX-158297187 | 23 | 36.492 | KV453155.1 | 6915082 | 19-scf00458 | 19 |
| AX-158297189 | 23 | 36.492 | KV453155.1 | 6918103 | 19-scf00458 | 19 |
| AX-158297193 | 23 | 36.492 | KV453155.1 | 6924112 | 19-scf00458 | 19 |
| AX-158297197 | 23 | 36.492 | KV453155.1 | 6927443 | 19-scf00458 | 19 |
| AX-158297219 | 23 | 36.492 | KV453155.1 | 6947318 | 19-scf00458 | 19 |
| AX-157753188 | 23 | 36.492 | KV453155.1 | 7126650 | 19-scf00458 | 19 |
| AX-158299537 | 23 | 36.492 | KV453155.1 | 9927736 | 19-scf00458 | 19 |
| AX-157723927 | 23 | 36.492 | KV453155.1 | 9977795 | 19-scf00458 | 19 |
| AX-158299569 | 23 | 36.492 | KV453155.1 | 9984238 | 19-scf00458 | 19 |
| AX-158297067 | 23 | 36.521 | KV453155.1 | 6784832 | 19-scf00458 | 19 |
| AX-158297069 | 23 | 36.547 | KV453155.1 | 6787105 | 19-scf00458 | 19 |
| AX-157720045 | 23 | 36.547 | KV453155.1 | 7033024 | 19-scf00458 | 19 |
| AX-158297037 | 23 | 36.573 | KV453155.1 | 6754208 | 19-scf00458 | 19 |
| AX-158297061 | 23 | 36.573 | KV453155.1 | 6774639 | 19-scf00458 | 19 |
| AX-158297076 | 23 | 36.573 | KV453155.1 | 6791825 | 19-scf00458 | 19 |
| AX-158297077 | 23 | 36.573 | KV453155.1 | 6792040 | 19-scf00458 | 19 |
| AX-158297080 | 23 | 36.573 | KV453155.1 | 6795053 | 19-scf00458 | 19 |
| AX-158297082 | 23 | 36.573 | KV453155.1 | 6796539 | 19-scf00458 | 19 |
| AX-158297084 | 23 | 36.573 | KV453155.1 | 6798510 | 19-scf00458 | 19 |
| AX-158297085 | 23 | 36.573 | KV453155.1 | 6799261 | 19-scf00458 | 19 |
| AX-158297088 | 23 | 36.573 | KV453155.1 | 6801565 | 19-scf00458 | 19 |
| AX-158297089 | 23 | 36.573 | KV453155.1 | 6801902 | 19-scf00458 | 19 |
| AX-158297092 | 23 | 36.573 | KV453155.1 | 6803315 | 19-scf00458 | 19 |
| AX-158297094 | 23 | 36.573 | KV453155.1 | 6804207 | 19-scf00458 | 19 |
| AX-158297095 | 23 | 36.573 | KV453155.1 | 6805967 | 19-scf00458 | 19 |
| AX-158297098 | 23 | 36.573 | KV453155.1 | 6807793 | 19-scf00458 | 19 |
| AX-158297099 | 23 | 36.573 | KV453155.1 | 6808529 | 19-scf00458 | 19 |
| AX-158297113 | 23 | 36.573 | KV453155.1 | 6829003 | 19-scf00458 | 19 |
| AX-158297144 | 23 | 36.573 | KV453155.1 | 6863331 | 19-scf00458 | 19 |
| AX-158297149 | 23 | 36.573 | KV453155.1 | 6866666 | 19-scf00458 | 19 |
| AX-158297151 | 23 | 36.573 | KV453155.1 | 6869347 | 19-scf00458 | 19 |
| AX-158297152 | 23 | 36.573 | KV453155.1 | 6871661 | 19-scf00458 | 19 |
| AX-158297153 | 23 | 36.573 | KV453155.1 | 6874605 | 19-scf00458 | 19 |
| AX-158297155 | 23 | 36.573 | KV453155.1 | 6876957 | 19-scf00458 | 19 |
| AX-158297157 | 23 | 36.573 | KV453155.1 | 6878685 | 19-scf00458 | 19 |
| AX-158297079 | 23 | 36.587 | KV453155.1 | 6794062 | 19-scf00458 | 19 |
| AX-158294898 | 23 | 36.602 | KV453155.1 | 3904810 | 19-scf00458 | 19 |
| AX-158295258 | 23 | 36.602 | KV453155.1 | 4477979 | 19-scf00458 | 19 |
| AX-158295569 | 23 | 36.602 | KV453155.1 | 4884072 | 19-scf00458 | 19 |
| AX-158295596 | 23 | 36.602 | KV453155.1 | 4910589 | 19-scf00458 | 19 |
| AX-158295601 | 23 | 36.602 | KV453155.1 | 4915964 | 19-scf00458 | 19 |
| AX-158295683 | 23 | 36.602 | KV453155.1 | 4949628 | 19-scf00458 | 19 |
| AX-158295686 | 23 | 36.602 | KV453155.1 | 4953758 | 19-scf00458 | 19 |
| AX-158295690 | 23 | 36.602 | KV453155.1 | 4964086 | 19-scf00458 | 19 |
| AX-157715198 | 23 | 36.602 | KV453155.1 | 4982101 | 19-scf00458 | 19 |
| AX-158295953 | 23 | 36.602 | KV453155.1 | 5278738 | 19-scf00458 | 19 |
| AX-158296280 | 23 | 36.602 | KV453155.1 | 5607483 | 19-scf00458 | 19 |

|              |    |        |            |         |             |    |
|--------------|----|--------|------------|---------|-------------|----|
| AX-158296478 | 23 | 36.602 | KV453155.1 | 5945013 | 19-scf00458 | 19 |
| AX-158296740 | 23 | 36.602 | KV453155.1 | 6395232 | 19-scf00458 | 19 |
| AX-157845990 | 23 | 36.602 | KV453155.1 | 6402982 | 19-scf00458 | 19 |
| AX-158296752 | 23 | 36.602 | KV453155.1 | 6405737 | 19-scf00458 | 19 |
| AX-158296763 | 23 | 36.602 | KV453155.1 | 6414482 | 19-scf00458 | 19 |
| AX-158296809 | 23 | 36.602 | KV453155.1 | 6487242 | 19-scf00458 | 19 |
| AX-158296986 | 23 | 36.602 | KV453155.1 | 6705484 | 19-scf00458 | 19 |
| AX-158297022 | 23 | 36.602 | KV453155.1 | 6738097 | 19-scf00458 | 19 |
| AX-158297090 | 23 | 36.602 | KV453155.1 | 6802546 | 19-scf00458 | 19 |
| AX-158297101 | 23 | 36.602 | KV453155.1 | 6811029 | 19-scf00458 | 19 |
| AX-158297116 | 23 | 36.602 | KV453155.1 | 6831873 | 19-scf00458 | 19 |
| AX-158297121 | 23 | 36.602 | KV453155.1 | 6836963 | 19-scf00458 | 19 |
| AX-158297124 | 23 | 36.602 | KV453155.1 | 6843138 | 19-scf00458 | 19 |
| AX-157846032 | 23 | 36.602 | KV453155.1 | 6844764 | 19-scf00458 | 19 |
| AX-158297226 | 23 | 36.602 | KV453155.1 | 6954200 | 19-scf00458 | 19 |
| AX-157723921 | 23 | 36.602 | KV453155.1 | 7020956 | 19-scf00458 | 19 |
| AX-158297128 | 23 | 36.629 | KV453155.1 | 6847697 | 19-scf00458 | 19 |
| AX-158297129 | 23 | 36.655 | KV453155.1 | 6849229 | 19-scf00458 | 19 |
| AX-158297134 | 23 | 36.68  | KV453155.1 | 6855064 | 19-scf00458 | 19 |
| AX-158297183 | 23 | 36.68  | KV453155.1 | 6910678 | 19-scf00458 | 19 |
| AX-158296908 | 23 | 36.711 | KV453155.1 | 6622096 | 19-scf00458 | 19 |
| AX-158296909 | 23 | 36.711 | KV453155.1 | 6622554 | 19-scf00458 | 19 |
| AX-158296912 | 23 | 36.711 | KV453155.1 | 6624052 | 19-scf00458 | 19 |
| AX-158296913 | 23 | 36.711 | KV453155.1 | 6625145 | 19-scf00458 | 19 |
| AX-158296914 | 23 | 36.711 | KV453155.1 | 6625601 | 19-scf00458 | 19 |
| AX-158296917 | 23 | 36.711 | KV453155.1 | 6627430 | 19-scf00458 | 19 |
| AX-158296919 | 23 | 36.711 | KV453155.1 | 6629785 | 19-scf00458 | 19 |
| AX-158296921 | 23 | 36.711 | KV453155.1 | 6630609 | 19-scf00458 | 19 |
| AX-158296923 | 23 | 36.711 | KV453155.1 | 6632147 | 19-scf00458 | 19 |
| AX-157846016 | 23 | 36.711 | KV453155.1 | 6635060 | 19-scf00458 | 19 |
| AX-157846017 | 23 | 36.711 | KV453155.1 | 6635288 | 19-scf00458 | 19 |
| AX-158296925 | 23 | 36.711 | KV453155.1 | 6636497 | 19-scf00458 | 19 |
| AX-157846018 | 23 | 36.711 | KV453155.1 | 6636731 | 19-scf00458 | 19 |
| AX-158296928 | 23 | 36.711 | KV453155.1 | 6640867 | 19-scf00458 | 19 |
| AX-157846019 | 23 | 36.711 | KV453155.1 | 6641231 | 19-scf00458 | 19 |
| AX-158296929 | 23 | 36.711 | KV453155.1 | 6642515 | 19-scf00458 | 19 |
| AX-158296930 | 23 | 36.711 | KV453155.1 | 6642914 | 19-scf00458 | 19 |
| AX-157746516 | 23 | 36.711 | KV453155.1 | 6645603 | 19-scf00458 | 19 |
| AX-157846020 | 23 | 36.711 | KV453155.1 | 6645747 | 19-scf00458 | 19 |
| AX-158296932 | 23 | 36.711 | KV453155.1 | 6647129 | 19-scf00458 | 19 |
| AX-158296933 | 23 | 36.711 | KV453155.1 | 6648102 | 19-scf00458 | 19 |
| AX-157846021 | 23 | 36.711 | KV453155.1 | 6648184 | 19-scf00458 | 19 |
| AX-158296934 | 23 | 36.711 | KV453155.1 | 6648913 | 19-scf00458 | 19 |
| AX-157846022 | 23 | 36.711 | KV453155.1 | 6649252 | 19-scf00458 | 19 |
| AX-158296935 | 23 | 36.711 | KV453155.1 | 6650294 | 19-scf00458 | 19 |
| AX-158296938 | 23 | 36.711 | KV453155.1 | 6651737 | 19-scf00458 | 19 |
| AX-158296939 | 23 | 36.711 | KV453155.1 | 6653134 | 19-scf00458 | 19 |
| AX-158296942 | 23 | 36.711 | KV453155.1 | 6655401 | 19-scf00458 | 19 |
| AX-158296943 | 23 | 36.711 | KV453155.1 | 6655986 | 19-scf00458 | 19 |
| AX-158296944 | 23 | 36.711 | KV453155.1 | 6659690 | 19-scf00458 | 19 |
| AX-158296945 | 23 | 36.711 | KV453155.1 | 6660270 | 19-scf00458 | 19 |

|              |    |        |            |         |             |    |
|--------------|----|--------|------------|---------|-------------|----|
| AX-158296946 | 23 | 36.711 | KV453155.1 | 6661467 | 19-scf00458 | 19 |
| AX-158296947 | 23 | 36.711 | KV453155.1 | 6663215 | 19-scf00458 | 19 |
| AX-158296950 | 23 | 36.711 | KV453155.1 | 6666373 | 19-scf00458 | 19 |
| AX-158296951 | 23 | 36.711 | KV453155.1 | 6666754 | 19-scf00458 | 19 |
| AX-158296953 | 23 | 36.711 | KV453155.1 | 6668438 | 19-scf00458 | 19 |
| AX-158296954 | 23 | 36.711 | KV453155.1 | 6670723 | 19-scf00458 | 19 |
| AX-158296955 | 23 | 36.711 | KV453155.1 | 6671863 | 19-scf00458 | 19 |
| AX-158296956 | 23 | 36.711 | KV453155.1 | 6672479 | 19-scf00458 | 19 |
| AX-158296957 | 23 | 36.711 | KV453155.1 | 6673762 | 19-scf00458 | 19 |
| AX-157775468 | 23 | 36.711 | KV453155.1 | 6674594 | 19-scf00458 | 19 |
| AX-158296958 | 23 | 36.711 | KV453155.1 | 6675678 | 19-scf00458 | 19 |
| AX-158296959 | 23 | 36.711 | KV453155.1 | 6676387 | 19-scf00458 | 19 |
| AX-158296960 | 23 | 36.711 | KV453155.1 | 6677422 | 19-scf00458 | 19 |
| AX-158296961 | 23 | 36.711 | KV453155.1 | 6678432 | 19-scf00458 | 19 |
| AX-158296963 | 23 | 36.711 | KV453155.1 | 6681331 | 19-scf00458 | 19 |
| AX-157846023 | 23 | 36.711 | KV453155.1 | 6681764 | 19-scf00458 | 19 |
| AX-158296964 | 23 | 36.711 | KV453155.1 | 6683114 | 19-scf00458 | 19 |
| AX-158296965 | 23 | 36.711 | KV453155.1 | 6683991 | 19-scf00458 | 19 |
| AX-158296966 | 23 | 36.711 | KV453155.1 | 6684457 | 19-scf00458 | 19 |
| AX-158296967 | 23 | 36.711 | KV453155.1 | 6684929 | 19-scf00458 | 19 |
| AX-158296968 | 23 | 36.711 | KV453155.1 | 6685459 | 19-scf00458 | 19 |
| AX-158296972 | 23 | 36.711 | KV453155.1 | 6690967 | 19-scf00458 | 19 |
| AX-157846025 | 23 | 36.711 | KV453155.1 | 6692845 | 19-scf00458 | 19 |
| AX-158296980 | 23 | 36.711 | KV453155.1 | 6701289 | 19-scf00458 | 19 |
| AX-158296988 | 23 | 36.711 | KV453155.1 | 6712626 | 19-scf00458 | 19 |
| AX-158296989 | 23 | 36.711 | KV453155.1 | 6713214 | 19-scf00458 | 19 |
| AX-158296990 | 23 | 36.711 | KV453155.1 | 6713750 | 19-scf00458 | 19 |
| AX-158296991 | 23 | 36.711 | KV453155.1 | 6714327 | 19-scf00458 | 19 |
| AX-158296992 | 23 | 36.711 | KV453155.1 | 6716709 | 19-scf00458 | 19 |
| AX-158296995 | 23 | 36.711 | KV453155.1 | 6718696 | 19-scf00458 | 19 |
| AX-158296997 | 23 | 36.711 | KV453155.1 | 6720317 | 19-scf00458 | 19 |
| AX-157846026 | 23 | 36.711 | KV453155.1 | 6721449 | 19-scf00458 | 19 |
| AX-158296999 | 23 | 36.711 | KV453155.1 | 6722061 | 19-scf00458 | 19 |
| AX-158297001 | 23 | 36.711 | KV453155.1 | 6724269 | 19-scf00458 | 19 |
| AX-158297002 | 23 | 36.711 | KV453155.1 | 6725093 | 19-scf00458 | 19 |
| AX-158297043 | 23 | 36.711 | KV453155.1 | 6758193 | 19-scf00458 | 19 |
| AX-158297056 | 23 | 36.711 | KV453155.1 | 6772033 | 19-scf00458 | 19 |
| AX-158297135 | 23 | 36.711 | KV453155.1 | 6856380 | 19-scf00458 | 19 |
| AX-158297138 | 23 | 36.711 | KV453155.1 | 6858357 | 19-scf00458 | 19 |
| AX-158297139 | 23 | 36.711 | KV453155.1 | 6859011 | 19-scf00458 | 19 |
| AX-158297140 | 23 | 36.711 | KV453155.1 | 6859431 | 19-scf00458 | 19 |
| AX-157702152 | 23 | 36.711 | KV453155.1 | 6863423 | 19-scf00458 | 19 |
| AX-158297145 | 23 | 36.711 | KV453155.1 | 6863826 | 19-scf00458 | 19 |
| AX-158297148 | 23 | 36.711 | KV453155.1 | 6865584 | 19-scf00458 | 19 |
| AX-157743419 | 23 | 36.711 | KV453155.1 | 6873206 | 19-scf00458 | 19 |
| AX-158297159 | 23 | 36.711 | KV453155.1 | 6885538 | 19-scf00458 | 19 |
| AX-158297166 | 23 | 36.711 | KV453155.1 | 6891368 | 19-scf00458 | 19 |
| AX-158297171 | 23 | 36.711 | KV453155.1 | 6897809 | 19-scf00458 | 19 |
| AX-158297176 | 23 | 36.711 | KV453155.1 | 6904123 | 19-scf00458 | 19 |
| AX-158297178 | 23 | 36.711 | KV453155.1 | 6905920 | 19-scf00458 | 19 |
| AX-158297184 | 23 | 36.711 | KV453155.1 | 6912296 | 19-scf00458 | 19 |

|              |    |        |            |         |             |    |
|--------------|----|--------|------------|---------|-------------|----|
| AX-158297185 | 23 | 36.711 | KV453155.1 | 6913967 | 19-scf00458 | 19 |
| AX-157774613 | 23 | 36.711 | KV453155.1 | 6914579 | 19-scf00458 | 19 |
| AX-158297194 | 23 | 36.711 | KV453155.1 | 6925380 | 19-scf00458 | 19 |
| AX-157748867 | 23 | 36.711 | KV453155.1 | 6929941 | 19-scf00458 | 19 |
| AX-158297200 | 23 | 36.711 | KV453155.1 | 6930647 | 19-scf00458 | 19 |
| AX-158297201 | 23 | 36.711 | KV453155.1 | 6932068 | 19-scf00458 | 19 |
| AX-158297202 | 23 | 36.711 | KV453155.1 | 6932218 | 19-scf00458 | 19 |
| AX-158297204 | 23 | 36.711 | KV453155.1 | 6933533 | 19-scf00458 | 19 |
| AX-158297205 | 23 | 36.711 | KV453155.1 | 6934042 | 19-scf00458 | 19 |
| AX-158297216 | 23 | 36.711 | KV453155.1 | 6945560 | 19-scf00458 | 19 |
| AX-158297221 | 23 | 36.711 | KV453155.1 | 6948991 | 19-scf00458 | 19 |
| AX-158297222 | 23 | 36.711 | KV453155.1 | 6950081 | 19-scf00458 | 19 |
| AX-157846035 | 23 | 36.711 | KV453155.1 | 6951047 | 19-scf00458 | 19 |
| AX-158297227 | 23 | 36.711 | KV453155.1 | 6955231 | 19-scf00458 | 19 |
| AX-158297231 | 23 | 36.711 | KV453155.1 | 6958659 | 19-scf00458 | 19 |
| AX-157699619 | 23 | 36.711 | FI899297.1 | 277     | 19-scf00458 | UN |
| AX-158297230 | 23 | 36.82  | KV453155.1 | 6957804 | 19-scf00458 | 19 |
| AX-158419631 | 23 | 36.82  | KV453155.1 | 7012784 | 19-scf00458 | 19 |
| AX-158297278 | 23 | 36.82  | KV453155.1 | 7013998 | 19-scf00458 | 19 |
| AX-158297282 | 23 | 36.82  | KV453155.1 | 7022353 | 19-scf00458 | 19 |
| AX-157727830 | 23 | 36.82  | KV453155.1 | 7022880 | 19-scf00458 | 19 |
| AX-158297283 | 23 | 36.82  | KV453155.1 | 7023973 | 19-scf00458 | 19 |
| AX-158296564 | 23 | 36.868 | KV453155.1 | 6094834 | 19-scf00458 | 19 |
| AX-158297234 | 23 | 36.868 | KV453155.1 | 6960465 | 19-scf00458 | 19 |
| AX-158297237 | 23 | 36.868 | KV453155.1 | 6963435 | 19-scf00458 | 19 |
| AX-158297238 | 23 | 36.868 | KV453155.1 | 6967175 | 19-scf00458 | 19 |
| AX-158297239 | 23 | 36.868 | KV453155.1 | 6970664 | 19-scf00458 | 19 |
| AX-158297240 | 23 | 36.868 | KV453155.1 | 6971170 | 19-scf00458 | 19 |
| AX-158297242 | 23 | 36.868 | KV453155.1 | 6972319 | 19-scf00458 | 19 |
| AX-158297243 | 23 | 36.868 | KV453155.1 | 6973456 | 19-scf00458 | 19 |
| AX-158297245 | 23 | 36.868 | KV453155.1 | 6974539 | 19-scf00458 | 19 |
| AX-158297272 | 23 | 36.868 | KV453155.1 | 7005224 | 19-scf00458 | 19 |
| AX-158297303 | 23 | 36.868 | KV453155.1 | 7054432 | 19-scf00458 | 19 |
| AX-158297324 | 23 | 36.868 | KV453155.1 | 7076277 | 19-scf00458 | 19 |
| AX-158297356 | 23 | 36.868 | KV453155.1 | 7112556 | 19-scf00458 | 19 |
| AX-158297164 | 23 | 36.929 | KV453155.1 | 6890477 | 19-scf00458 | 19 |
| AX-158297244 | 23 | 36.929 | KV453155.1 | 6974008 | 19-scf00458 | 19 |
| AX-157846036 | 23 | 36.929 | KV453155.1 | 7002812 | 19-scf00458 | 19 |
| AX-158297273 | 23 | 36.929 | KV453155.1 | 7005683 | 19-scf00458 | 19 |
| AX-158297275 | 23 | 36.929 | KV453155.1 | 7006591 | 19-scf00458 | 19 |
| AX-158297276 | 23 | 36.929 | KV453155.1 | 7009272 | 19-scf00458 | 19 |
| AX-158297277 | 23 | 36.929 | KV453155.1 | 7011044 | 19-scf00458 | 19 |
| AX-158297279 | 23 | 36.929 | KV453155.1 | 7014761 | 19-scf00458 | 19 |
| AX-158297280 | 23 | 36.929 | KV453155.1 | 7016366 | 19-scf00458 | 19 |
| AX-158297281 | 23 | 36.929 | KV453155.1 | 7019797 | 19-scf00458 | 19 |
| AX-157772097 | 23 | 36.929 | KV453155.1 | 7023453 | 19-scf00458 | 19 |
| AX-158297296 | 23 | 36.929 | KV453155.1 | 7043265 | 19-scf00458 | 19 |
| AX-158297297 | 23 | 36.929 | KV453155.1 | 7045108 | 19-scf00458 | 19 |
| AX-157888087 | 23 | 36.929 | KV453155.1 | 7047586 | 19-scf00458 | 19 |
| AX-158297299 | 23 | 36.929 | KV453155.1 | 7048155 | 19-scf00458 | 19 |
| AX-158297305 | 23 | 36.929 | KV453155.1 | 7055474 | 19-scf00458 | 19 |

|              |    |        |            |         |             |    |
|--------------|----|--------|------------|---------|-------------|----|
| AX-158297306 | 23 | 36.929 | KV453155.1 | 7057139 | 19-scf00458 | 19 |
| AX-158297307 | 23 | 36.929 | KV453155.1 | 7058052 | 19-scf00458 | 19 |
| AX-158297309 | 23 | 36.929 | KV453155.1 | 7059343 | 19-scf00458 | 19 |
| AX-158297310 | 23 | 36.929 | KV453155.1 | 7061010 | 19-scf00458 | 19 |
| AX-158297312 | 23 | 36.929 | KV453155.1 | 7063508 | 19-scf00458 | 19 |
| AX-158297349 | 23 | 36.929 | KV453155.1 | 7106120 | 19-scf00458 | 19 |
| AX-157772121 | 23 | 36.929 | KV453155.1 | 7188634 | 19-scf00458 | 19 |
| AX-157846042 | 23 | 36.929 | KV453155.1 | 7194652 | 19-scf00458 | 19 |
| AX-157846046 | 23 | 36.929 | KV453155.1 | 7227690 | 19-scf00458 | 19 |
| AX-157846048 | 23 | 36.929 | KV453155.1 | 7234229 | 19-scf00458 | 19 |
| AX-158297476 | 23 | 36.929 | KV453155.1 | 7256498 | 19-scf00458 | 19 |
| AX-158297485 | 23 | 36.929 | KV453155.1 | 7265457 | 19-scf00458 | 19 |
| AX-157846050 | 23 | 36.929 | KV453155.1 | 7325329 | 19-scf00458 | 19 |
| AX-157740473 | 23 | 36.929 | KV453155.1 | 7325594 | 19-scf00458 | 19 |
| AX-157746483 | 23 | 36.929 | KV453155.1 | 7365695 | 19-scf00458 | 19 |
| AX-158297593 | 23 | 36.929 | KV453155.1 | 7402752 | 19-scf00458 | 19 |
| AX-158297603 | 23 | 36.929 | KV453155.1 | 7419258 | 19-scf00458 | 19 |
| AX-158297604 | 23 | 36.929 | KV453155.1 | 7420039 | 19-scf00458 | 19 |
| AX-158297652 | 23 | 36.929 | KV453155.1 | 7519479 | 19-scf00458 | 19 |
| AX-158297311 | 23 | 36.959 | KV453155.1 | 7062108 | 19-scf00458 | 19 |
| AX-157773275 | 23 | 36.984 | KV453155.1 | 7067952 | 19-scf00458 | 19 |
| AX-158297327 | 23 | 37.01  | KV453155.1 | 7078941 | 19-scf00458 | 19 |
| AX-158297287 | 23 | 37.038 | KV453155.1 | 7032194 | 19-scf00458 | 19 |
| AX-158297315 | 23 | 37.038 | KV453155.1 | 7065355 | 19-scf00458 | 19 |
| AX-158297316 | 23 | 37.038 | KV453155.1 | 7065864 | 19-scf00458 | 19 |
| AX-158297319 | 23 | 37.038 | KV453155.1 | 7068486 | 19-scf00458 | 19 |
| AX-158297320 | 23 | 37.038 | KV453155.1 | 7068620 | 19-scf00458 | 19 |
| AX-158297322 | 23 | 37.038 | KV453155.1 | 7071678 | 19-scf00458 | 19 |
| AX-158297323 | 23 | 37.038 | KV453155.1 | 7073160 | 19-scf00458 | 19 |
| AX-158297325 | 23 | 37.038 | KV453155.1 | 7076973 | 19-scf00458 | 19 |
| AX-158297326 | 23 | 37.038 | KV453155.1 | 7077260 | 19-scf00458 | 19 |
| AX-158297328 | 23 | 37.038 | KV453155.1 | 7080496 | 19-scf00458 | 19 |
| AX-157860619 | 23 | 37.038 | KV453155.1 | 7085634 | 19-scf00458 | 19 |
| AX-158297333 | 23 | 37.038 | KV453155.1 | 7091467 | 19-scf00458 | 19 |
| AX-158297335 | 23 | 37.038 | KV453155.1 | 7092503 | 19-scf00458 | 19 |
| AX-158297337 | 23 | 37.038 | KV453155.1 | 7094265 | 19-scf00458 | 19 |
| AX-158297338 | 23 | 37.038 | KV453155.1 | 7094717 | 19-scf00458 | 19 |
| AX-158297339 | 23 | 37.038 | KV453155.1 | 7095402 | 19-scf00458 | 19 |
| AX-158297340 | 23 | 37.038 | KV453155.1 | 7096069 | 19-scf00458 | 19 |
| AX-158297342 | 23 | 37.038 | KV453155.1 | 7096940 | 19-scf00458 | 19 |
| AX-157708109 | 23 | 37.038 | KV453155.1 | 7101242 | 19-scf00458 | 19 |
| AX-157708110 | 23 | 37.038 | KV453155.1 | 7101339 | 19-scf00458 | 19 |
| AX-158297343 | 23 | 37.038 | KV453155.1 | 7101702 | 19-scf00458 | 19 |
| AX-158297344 | 23 | 37.038 | KV453155.1 | 7102260 | 19-scf00458 | 19 |
| AX-158297345 | 23 | 37.038 | KV453155.1 | 7103334 | 19-scf00458 | 19 |
| AX-158297346 | 23 | 37.038 | KV453155.1 | 7103900 | 19-scf00458 | 19 |
| AX-158297347 | 23 | 37.038 | KV453155.1 | 7104627 | 19-scf00458 | 19 |
| AX-158297351 | 23 | 37.038 | KV453155.1 | 7108380 | 19-scf00458 | 19 |
| AX-158297352 | 23 | 37.038 | KV453155.1 | 7108810 | 19-scf00458 | 19 |
| AX-157860620 | 23 | 37.038 | KV453155.1 | 7109186 | 19-scf00458 | 19 |
| AX-157860621 | 23 | 37.038 | KV453155.1 | 7110744 | 19-scf00458 | 19 |



|              |    |        |            |         |             |    |
|--------------|----|--------|------------|---------|-------------|----|
| AX-158297353 | 23 | 37.038 | KV453155.1 | 7111197 | 19-scf00458 | 19 |
| AX-158297354 | 23 | 37.038 | KV453155.1 | 7111489 | 19-scf00458 | 19 |
| AX-158297355 | 23 | 37.038 | KV453155.1 | 7111951 | 19-scf00458 | 19 |
| AX-158297360 | 23 | 37.038 | KV453155.1 | 7115761 | 19-scf00458 | 19 |
| AX-158297361 | 23 | 37.038 | KV453155.1 | 7116179 | 19-scf00458 | 19 |
| AX-158297362 | 23 | 37.038 | KV453155.1 | 7116675 | 19-scf00458 | 19 |
| AX-158297366 | 23 | 37.038 | KV453155.1 | 7118447 | 19-scf00458 | 19 |
| AX-158297367 | 23 | 37.038 | KV453155.1 | 7121133 | 19-scf00458 | 19 |
| AX-158297368 | 23 | 37.038 | KV453155.1 | 7122275 | 19-scf00458 | 19 |
| AX-157860622 | 23 | 37.038 | KV453155.1 | 7122561 | 19-scf00458 | 19 |
| AX-158297370 | 23 | 37.038 | KV453155.1 | 7125835 | 19-scf00458 | 19 |
| AX-158297372 | 23 | 37.038 | KV453155.1 | 7126471 | 19-scf00458 | 19 |
| AX-158297376 | 23 | 37.038 | KV453155.1 | 7132000 | 19-scf00458 | 19 |
| AX-158297380 | 23 | 37.038 | KV453155.1 | 7134342 | 19-scf00458 | 19 |
| AX-158297384 | 23 | 37.038 | KV453155.1 | 7136428 | 19-scf00458 | 19 |
| AX-158297385 | 23 | 37.038 | KV453155.1 | 7138578 | 19-scf00458 | 19 |
| AX-158297388 | 23 | 37.038 | KV453155.1 | 7143031 | 19-scf00458 | 19 |
| AX-158297389 | 23 | 37.038 | KV453155.1 | 7144698 | 19-scf00458 | 19 |
| AX-158297393 | 23 | 37.038 | KV453155.1 | 7147901 | 19-scf00458 | 19 |
| AX-158297396 | 23 | 37.038 | KV453155.1 | 7150583 | 19-scf00458 | 19 |
| AX-158297397 | 23 | 37.038 | KV453155.1 | 7151043 | 19-scf00458 | 19 |
| AX-158297403 | 23 | 37.038 | KV453155.1 | 7157771 | 19-scf00458 | 19 |
| AX-158297406 | 23 | 37.038 | KV453155.1 | 7159412 | 19-scf00458 | 19 |
| AX-158297407 | 23 | 37.038 | KV453155.1 | 7160191 | 19-scf00458 | 19 |
| AX-158297410 | 23 | 37.038 | KV453155.1 | 7161790 | 19-scf00458 | 19 |
| AX-158297419 | 23 | 37.038 | KV453155.1 | 7175463 | 19-scf00458 | 19 |
| AX-158297422 | 23 | 37.038 | KV453155.1 | 7179409 | 19-scf00458 | 19 |
| AX-158297434 | 23 | 37.038 | KV453155.1 | 7197290 | 19-scf00458 | 19 |
| AX-157846047 | 23 | 37.038 | KV453155.1 | 7230208 | 19-scf00458 | 19 |
| AX-158297640 | 23 | 37.038 | KV453155.1 | 7487044 | 19-scf00458 | 19 |
| AX-158297676 | 23 | 37.038 | KV453155.1 | 7574516 | 19-scf00458 | 19 |
| AX-158297900 | 23 | 37.038 | KV453155.1 | 7831434 | 19-scf00458 | 19 |
| AX-158298274 | 23 | 37.038 | KV453155.1 | 8249517 | 19-scf00458 | 19 |
| AX-158298302 | 23 | 37.038 | KV453155.1 | 8292395 | 19-scf00458 | 19 |
| AX-158298309 | 23 | 37.038 | KV453155.1 | 8300658 | 19-scf00458 | 19 |
| AX-158298351 | 23 | 37.038 | KV453155.1 | 8367963 | 19-scf00458 | 19 |
| AX-158298617 | 23 | 37.038 | KV453155.1 | 8706987 | 19-scf00458 | 19 |
| AX-158298627 | 23 | 37.038 | KV453155.1 | 8716189 | 19-scf00458 | 19 |
| AX-158298641 | 23 | 37.038 | KV453155.1 | 8731723 | 19-scf00458 | 19 |
| AX-157738735 | 23 | 37.038 | KV453155.1 | 8816345 | 19-scf00458 | 19 |
| AX-157846112 | 23 | 37.038 | KV453155.1 | 8829330 | 19-scf00458 | 19 |
| AX-158298871 | 23 | 37.038 | KV453155.1 | 9104687 | 19-scf00458 | 19 |
| AX-158298940 | 23 | 37.038 | KV453155.1 | 9227705 | 19-scf00458 | 19 |
| AX-158298963 | 23 | 37.038 | KV453155.1 | 9286749 | 19-scf00458 | 19 |
| AX-158299081 | 23 | 37.038 | KV453155.1 | 9440284 | 19-scf00458 | 19 |
| AX-158299128 | 23 | 37.038 | KV453155.1 | 9492752 | 19-scf00458 | 19 |
| AX-158299228 | 23 | 37.038 | KV453155.1 | 9595168 | 19-scf00458 | 19 |
| AX-158299254 | 23 | 37.038 | KV453155.1 | 9620727 | 19-scf00458 | 19 |
| AX-158299257 | 23 | 37.038 | KV453155.1 | 9622594 | 19-scf00458 | 19 |
| AX-157846164 | 23 | 37.038 | KV453155.1 | 9768946 | 19-scf00458 | 19 |
| AX-158299461 | 23 | 37.038 | KV453155.1 | 9842357 | 19-scf00458 | 19 |

|              |    |        |            |         |             |    |
|--------------|----|--------|------------|---------|-------------|----|
| AX-158297439 | 23 | 37.054 | KV453155.1 | 7203303 | 19-scf00458 | 19 |
| AX-158297447 | 23 | 37.068 | KV453155.1 | 7215620 | 19-scf00458 | 19 |
| AX-158297454 | 23 | 37.078 | KV453155.1 | 7224049 | 19-scf00458 | 19 |
| AX-157860629 | 23 | 37.087 | KV453155.1 | 7226686 | 19-scf00458 | 19 |
| AX-158297431 | 23 | 37.095 | KV453155.1 | 7195524 | 19-scf00458 | 19 |
| AX-158297432 | 23 | 37.095 | KV453155.1 | 7196356 | 19-scf00458 | 19 |
| AX-158297435 | 23 | 37.095 | KV453155.1 | 7200302 | 19-scf00458 | 19 |
| AX-158297437 | 23 | 37.095 | KV453155.1 | 7201456 | 19-scf00458 | 19 |
| AX-158297438 | 23 | 37.095 | KV453155.1 | 7202483 | 19-scf00458 | 19 |
| AX-158297440 | 23 | 37.095 | KV453155.1 | 7205458 | 19-scf00458 | 19 |
| AX-158297442 | 23 | 37.095 | KV453155.1 | 7206744 | 19-scf00458 | 19 |
| AX-157753164 | 23 | 37.095 | KV453155.1 | 7210022 | 19-scf00458 | 19 |
| AX-158297445 | 23 | 37.095 | KV453155.1 | 7211947 | 19-scf00458 | 19 |
| AX-157754115 | 23 | 37.095 | KV453155.1 | 7212664 | 19-scf00458 | 19 |
| AX-158297446 | 23 | 37.095 | KV453155.1 | 7215314 | 19-scf00458 | 19 |
| AX-158297448 | 23 | 37.095 | KV453155.1 | 7215889 | 19-scf00458 | 19 |
| AX-157860627 | 23 | 37.095 | KV453155.1 | 7219948 | 19-scf00458 | 19 |
| AX-158297453 | 23 | 37.095 | KV453155.1 | 7223266 | 19-scf00458 | 19 |
| AX-157747651 | 23 | 37.095 | KV453155.1 | 7223693 | 19-scf00458 | 19 |
| AX-157860628 | 23 | 37.095 | KV453155.1 | 7223833 | 19-scf00458 | 19 |
| AX-157846045 | 23 | 37.095 | KV453155.1 | 7227374 | 19-scf00458 | 19 |
| AX-158297455 | 23 | 37.095 | KV453155.1 | 7228452 | 19-scf00458 | 19 |
| AX-158297456 | 23 | 37.095 | KV453155.1 | 7231673 | 19-scf00458 | 19 |
| AX-158297457 | 23 | 37.095 | KV453155.1 | 7232228 | 19-scf00458 | 19 |
| AX-158297458 | 23 | 37.095 | KV453155.1 | 7232770 | 19-scf00458 | 19 |
| AX-158297459 | 23 | 37.095 | KV453155.1 | 7233258 | 19-scf00458 | 19 |
| AX-157743061 | 23 | 37.095 | KV453155.1 | 7234728 | 19-scf00458 | 19 |
| AX-158297460 | 23 | 37.095 | KV453155.1 | 7235940 | 19-scf00458 | 19 |
| AX-158297461 | 23 | 37.095 | KV453155.1 | 7236773 | 19-scf00458 | 19 |
| AX-158297462 | 23 | 37.095 | KV453155.1 | 7238083 | 19-scf00458 | 19 |
| AX-157747921 | 23 | 37.095 | KV453155.1 | 7238399 | 19-scf00458 | 19 |
| AX-158297465 | 23 | 37.095 | KV453155.1 | 7241172 | 19-scf00458 | 19 |
| AX-157714410 | 23 | 37.095 | KV453155.1 | 7241904 | 19-scf00458 | 19 |
| AX-158297466 | 23 | 37.095 | KV453155.1 | 7242319 | 19-scf00458 | 19 |
| AX-157714744 | 23 | 37.095 | KV453155.1 | 7246285 | 19-scf00458 | 19 |
| AX-158297468 | 23 | 37.095 | KV453155.1 | 7248564 | 19-scf00458 | 19 |
| AX-158297472 | 23 | 37.095 | KV453155.1 | 7251251 | 19-scf00458 | 19 |
| AX-158297473 | 23 | 37.095 | KV453155.1 | 7252575 | 19-scf00458 | 19 |
| AX-158297477 | 23 | 37.095 | KV453155.1 | 7258325 | 19-scf00458 | 19 |
| AX-158297481 | 23 | 37.095 | KV453155.1 | 7262473 | 19-scf00458 | 19 |
| AX-158297483 | 23 | 37.095 | KV453155.1 | 7263958 | 19-scf00458 | 19 |
| AX-158297489 | 23 | 37.095 | KV453155.1 | 7270077 | 19-scf00458 | 19 |
| AX-157860630 | 23 | 37.095 | KV453155.1 | 7271895 | 19-scf00458 | 19 |
| AX-158297490 | 23 | 37.095 | KV453155.1 | 7272155 | 19-scf00458 | 19 |
| AX-158297492 | 23 | 37.095 | KV453155.1 | 7274404 | 19-scf00458 | 19 |
| AX-158297493 | 23 | 37.095 | KV453155.1 | 7275035 | 19-scf00458 | 19 |
| AX-158297495 | 23 | 37.095 | KV453155.1 | 7278837 | 19-scf00458 | 19 |
| AX-157860631 | 23 | 37.095 | KV453155.1 | 7279388 | 19-scf00458 | 19 |
| AX-158297497 | 23 | 37.095 | KV453155.1 | 7280476 | 19-scf00458 | 19 |
| AX-157860632 | 23 | 37.095 | KV453155.1 | 7281218 | 19-scf00458 | 19 |
| AX-158297498 | 23 | 37.095 | KV453155.1 | 7283942 | 19-scf00458 | 19 |

|              |    |        |            |         |             |    |
|--------------|----|--------|------------|---------|-------------|----|
| AX-158297499 | 23 | 37.095 | KV453155.1 | 7284134 | 19-scf00458 | 19 |
| AX-158297501 | 23 | 37.095 | KV453155.1 | 7285314 | 19-scf00458 | 19 |
| AX-158297503 | 23 | 37.095 | KV453155.1 | 7287081 | 19-scf00458 | 19 |
| AX-157860633 | 23 | 37.095 | KV453155.1 | 7289711 | 19-scf00458 | 19 |
| AX-158297506 | 23 | 37.095 | KV453155.1 | 7289827 | 19-scf00458 | 19 |
| AX-158297508 | 23 | 37.095 | KV453155.1 | 7293255 | 19-scf00458 | 19 |
| AX-158297509 | 23 | 37.095 | KV453155.1 | 7295337 | 19-scf00458 | 19 |
| AX-157693057 | 23 | 37.095 | KV453155.1 | 7297130 | 19-scf00458 | 19 |
| AX-158297513 | 23 | 37.095 | KV453155.1 | 7304902 | 19-scf00458 | 19 |
| AX-158297515 | 23 | 37.095 | KV453155.1 | 7308548 | 19-scf00458 | 19 |
| AX-158297518 | 23 | 37.095 | KV453155.1 | 7310647 | 19-scf00458 | 19 |
| AX-158297519 | 23 | 37.095 | KV453155.1 | 7311232 | 19-scf00458 | 19 |
| AX-158297520 | 23 | 37.095 | KV453155.1 | 7311649 | 19-scf00458 | 19 |
| AX-157860634 | 23 | 37.095 | KV453155.1 | 7311997 | 19-scf00458 | 19 |
| AX-158297522 | 23 | 37.095 | KV453155.1 | 7312877 | 19-scf00458 | 19 |
| AX-158297523 | 23 | 37.095 | KV453155.1 | 7314336 | 19-scf00458 | 19 |
| AX-158297525 | 23 | 37.095 | KV453155.1 | 7320587 | 19-scf00458 | 19 |
| AX-158297528 | 23 | 37.095 | KV453155.1 | 7328290 | 19-scf00458 | 19 |
| AX-158297529 | 23 | 37.095 | KV453155.1 | 7330593 | 19-scf00458 | 19 |
| AX-158297530 | 23 | 37.095 | KV453155.1 | 7330774 | 19-scf00458 | 19 |
| AX-157860636 | 23 | 37.095 | KV453155.1 | 7333223 | 19-scf00458 | 19 |
| AX-158297534 | 23 | 37.095 | KV453155.1 | 7335860 | 19-scf00458 | 19 |
| AX-158297536 | 23 | 37.095 | KV453155.1 | 7339108 | 19-scf00458 | 19 |
| AX-158297539 | 23 | 37.095 | KV453155.1 | 7340239 | 19-scf00458 | 19 |
| AX-158297542 | 23 | 37.095 | KV453155.1 | 7342649 | 19-scf00458 | 19 |
| AX-158297544 | 23 | 37.095 | KV453155.1 | 7346531 | 19-scf00458 | 19 |
| AX-158297546 | 23 | 37.095 | KV453155.1 | 7347427 | 19-scf00458 | 19 |
| AX-158297547 | 23 | 37.095 | KV453155.1 | 7348863 | 19-scf00458 | 19 |
| AX-158297548 | 23 | 37.095 | KV453155.1 | 7350350 | 19-scf00458 | 19 |
| AX-158297549 | 23 | 37.095 | KV453155.1 | 7351030 | 19-scf00458 | 19 |
| AX-158297550 | 23 | 37.095 | KV453155.1 | 7352399 | 19-scf00458 | 19 |
| AX-158297555 | 23 | 37.095 | KV453155.1 | 7357431 | 19-scf00458 | 19 |
| AX-158297558 | 23 | 37.095 | KV453155.1 | 7365287 | 19-scf00458 | 19 |
| AX-157860637 | 23 | 37.095 | KV453155.1 | 7366192 | 19-scf00458 | 19 |
| AX-158297560 | 23 | 37.095 | KV453155.1 | 7367847 | 19-scf00458 | 19 |
| AX-158297561 | 23 | 37.095 | KV453155.1 | 7368353 | 19-scf00458 | 19 |
| AX-158297564 | 23 | 37.095 | KV453155.1 | 7372291 | 19-scf00458 | 19 |
| AX-158297565 | 23 | 37.095 | KV453155.1 | 7377348 | 19-scf00458 | 19 |
| AX-158297568 | 23 | 37.095 | KV453155.1 | 7379531 | 19-scf00458 | 19 |
| AX-157860639 | 23 | 37.095 | KV453155.1 | 7379617 | 19-scf00458 | 19 |
| AX-158297569 | 23 | 37.095 | KV453155.1 | 7380508 | 19-scf00458 | 19 |
| AX-157860640 | 23 | 37.095 | KV453155.1 | 7381196 | 19-scf00458 | 19 |
| AX-158297572 | 23 | 37.095 | KV453155.1 | 7383234 | 19-scf00458 | 19 |
| AX-158297573 | 23 | 37.095 | KV453155.1 | 7384767 | 19-scf00458 | 19 |
| AX-158297574 | 23 | 37.095 | KV453155.1 | 7385512 | 19-scf00458 | 19 |
| AX-158297575 | 23 | 37.095 | KV453155.1 | 7386364 | 19-scf00458 | 19 |
| AX-157739941 | 23 | 37.095 | KV453155.1 | 7386873 | 19-scf00458 | 19 |
| AX-158297576 | 23 | 37.095 | KV453155.1 | 7387457 | 19-scf00458 | 19 |
| AX-158297577 | 23 | 37.095 | KV453155.1 | 7388011 | 19-scf00458 | 19 |
| AX-158297581 | 23 | 37.095 | KV453155.1 | 7391732 | 19-scf00458 | 19 |
| AX-158297584 | 23 | 37.095 | KV453155.1 | 7396911 | 19-scf00458 | 19 |

|              |    |        |             |         |             |    |
|--------------|----|--------|-------------|---------|-------------|----|
| AX-157860641 | 23 | 37.095 | KV453155.1  | 7398587 | 19-scf00458 | 19 |
| AX-158297588 | 23 | 37.095 | KV453155.1  | 7399861 | 19-scf00458 | 19 |
| AX-158297591 | 23 | 37.095 | KV453155.1  | 7401725 | 19-scf00458 | 19 |
| AX-158297592 | 23 | 37.095 | KV453155.1  | 7402174 | 19-scf00458 | 19 |
| AX-158297594 | 23 | 37.095 | KV453155.1  | 7403457 | 19-scf00458 | 19 |
| AX-158297597 | 23 | 37.095 | KV453155.1  | 7407072 | 19-scf00458 | 19 |
| AX-157860642 | 23 | 37.095 | KV453155.1  | 7408404 | 19-scf00458 | 19 |
| AX-158297599 | 23 | 37.095 | KV453155.1  | 7410990 | 19-scf00458 | 19 |
| AX-158297600 | 23 | 37.095 | KV453155.1  | 7412550 | 19-scf00458 | 19 |
| AX-157846054 | 23 | 37.095 | KV453155.1  | 7413749 | 19-scf00458 | 19 |
| AX-158297602 | 23 | 37.095 | KV453155.1  | 7415052 | 19-scf00458 | 19 |
| AX-158297605 | 23 | 37.095 | KV453155.1  | 7420391 | 19-scf00458 | 19 |
| AX-158297607 | 23 | 37.095 | KV453155.1  | 7422330 | 19-scf00458 | 19 |
| AX-157860643 | 23 | 37.095 | KV453155.1  | 7430430 | 19-scf00458 | 19 |
| AX-157860644 | 23 | 37.095 | KV453155.1  | 7435949 | 19-scf00458 | 19 |
| AX-157860647 | 23 | 37.095 | KV453155.1  | 7445389 | 19-scf00458 | 19 |
| AX-157860648 | 23 | 37.095 | KV453155.1  | 7448216 | 19-scf00458 | 19 |
| AX-157860649 | 23 | 37.095 | KV453155.1  | 7459896 | 19-scf00458 | 19 |
| AX-158417492 | 23 | 37.095 | KV453155.1  | 7461207 | 19-scf00458 | 19 |
| AX-157846055 | 23 | 37.095 | KV453155.1  | 7464000 | 19-scf00458 | 19 |
| AX-157860650 | 23 | 37.095 | KV453155.1  | 7470425 | 19-scf00458 | 19 |
| AX-158297633 | 23 | 37.095 | KV453155.1  | 7479233 | 19-scf00458 | 19 |
| AX-158297636 | 23 | 37.095 | KV453155.1  | 7481238 | 19-scf00458 | 19 |
| AX-157860651 | 23 | 37.095 | KV453155.1  | 7482447 | 19-scf00458 | 19 |
| AX-158297638 | 23 | 37.095 | KV453155.1  | 7482482 | 19-scf00458 | 19 |
| AX-157860652 | 23 | 37.095 | KV453155.1  | 7493425 | 19-scf00458 | 19 |
| AX-157860654 | 23 | 37.095 | KV453155.1  | 7499826 | 19-scf00458 | 19 |
| AX-157860657 | 23 | 37.095 | KV453155.1  | 7517030 | 19-scf00458 | 19 |
| AX-157860659 | 23 | 37.095 | KV453155.1  | 7519616 | 19-scf00458 | 19 |
| AX-157860660 | 23 | 37.095 | KV453155.1  | 7520009 | 19-scf00458 | 19 |
| AX-158297653 | 23 | 37.095 | KV453155.1  | 7520906 | 19-scf00458 | 19 |
| AX-157860661 | 23 | 37.095 | KV453155.1  | 7523688 | 19-scf00458 | 19 |
| AX-157706911 | 23 | 37.095 | KV453155.1  | 7524919 | 19-scf00458 | 19 |
| AX-157860662 | 23 | 37.095 | KV453155.1  | 7533431 | 19-scf00458 | 19 |
| AX-158297662 | 23 | 37.095 | KV453155.1  | 7544625 | 19-scf00458 | 19 |
| AX-158297664 | 23 | 37.095 | KV453155.1  | 7551044 | 19-scf00458 | 19 |
| AX-158297666 | 23 | 37.095 | KV453155.1  | 7554641 | 19-scf00458 | 19 |
| AX-158297667 | 23 | 37.095 | KV453155.1  | 7558110 | 19-scf00458 | 19 |
| AX-158297669 | 23 | 37.095 | KV453155.1  | 7561326 | 19-scf00458 | 19 |
| AX-157860663 | 23 | 37.095 | KV453155.1  | 7569918 | 19-scf00458 | 19 |
| AX-157706467 | 23 | 37.095 | 3ML01032296 | 78      | scf07911_1  | UN |
| AX-158297463 | 23 | 37.105 | KV453155.1  | 7240270 | 19-scf00458 | 19 |
| AX-158297423 | 23 | 37.115 | KV453155.1  | 7180043 | 19-scf00458 | 19 |
| AX-157863971 | 23 | 37.115 | KV453155.1  | 7245422 | 19-scf00458 | 19 |
| AX-158297619 | 23 | 37.115 | KV453155.1  | 7441860 | 19-scf00458 | 19 |
| AX-158297491 | 23 | 37.133 | KV453155.1  | 7273585 | 19-scf00458 | 19 |
| AX-158295422 | 23 | 37.148 | KV453155.1  | 4654240 | 19-scf00458 | 19 |
| AX-158296386 | 23 | 37.148 | KV453155.1  | 5765861 | 19-scf00458 | 19 |
| AX-158296403 | 23 | 37.148 | KV453155.1  | 5802935 | 19-scf00458 | 19 |
| AX-157740887 | 23 | 37.148 | KV453155.1  | 5877958 | 19-scf00458 | 19 |
| AX-157698833 | 23 | 37.148 | KV453155.1  | 5886662 | 19-scf00458 | 19 |

|              |    |        |            |         |             |    |
|--------------|----|--------|------------|---------|-------------|----|
| AX-158297211 | 23 | 37.148 | KV453155.1 | 6937531 | 19-scf00458 | 19 |
| AX-158297382 | 23 | 37.148 | KV453155.1 | 7134965 | 19-scf00458 | 19 |
| AX-158297387 | 23 | 37.148 | KV453155.1 | 7142652 | 19-scf00458 | 19 |
| AX-157726196 | 23 | 37.148 | KV453155.1 | 7142883 | 19-scf00458 | 19 |
| AX-158297394 | 23 | 37.148 | KV453155.1 | 7148191 | 19-scf00458 | 19 |
| AX-157860624 | 23 | 37.148 | KV453155.1 | 7148581 | 19-scf00458 | 19 |
| AX-158297398 | 23 | 37.148 | KV453155.1 | 7152666 | 19-scf00458 | 19 |
| AX-157846038 | 23 | 37.148 | KV453155.1 | 7153699 | 19-scf00458 | 19 |
| AX-157724699 | 23 | 37.148 | KV453155.1 | 7156752 | 19-scf00458 | 19 |
| AX-158297408 | 23 | 37.148 | KV453155.1 | 7160358 | 19-scf00458 | 19 |
| AX-157860625 | 23 | 37.148 | KV453155.1 | 7165607 | 19-scf00458 | 19 |
| AX-158297413 | 23 | 37.148 | KV453155.1 | 7168518 | 19-scf00458 | 19 |
| AX-157846039 | 23 | 37.148 | KV453155.1 | 7169550 | 19-scf00458 | 19 |
| AX-158297416 | 23 | 37.148 | KV453155.1 | 7173606 | 19-scf00458 | 19 |
| AX-158297417 | 23 | 37.148 | KV453155.1 | 7174334 | 19-scf00458 | 19 |
| AX-157860626 | 23 | 37.148 | KV453155.1 | 7174689 | 19-scf00458 | 19 |
| AX-158297425 | 23 | 37.148 | KV453155.1 | 7182575 | 19-scf00458 | 19 |
| AX-158297427 | 23 | 37.148 | KV453155.1 | 7188204 | 19-scf00458 | 19 |
| AX-158297444 | 23 | 37.148 | KV453155.1 | 7211023 | 19-scf00458 | 19 |
| AX-158297450 | 23 | 37.148 | KV453155.1 | 7218812 | 19-scf00458 | 19 |
| AX-157717381 | 23 | 37.148 | KV453155.1 | 7227315 | 19-scf00458 | 19 |
| AX-157716176 | 23 | 37.148 | KV453155.1 | 7234146 | 19-scf00458 | 19 |
| AX-158297474 | 23 | 37.148 | KV453155.1 | 7254922 | 19-scf00458 | 19 |
| AX-158297480 | 23 | 37.148 | KV453155.1 | 7260362 | 19-scf00458 | 19 |
| AX-158297494 | 23 | 37.148 | KV453155.1 | 7277755 | 19-scf00458 | 19 |
| AX-158297502 | 23 | 37.148 | KV453155.1 | 7285894 | 19-scf00458 | 19 |
| AX-158297504 | 23 | 37.148 | KV453155.1 | 7288068 | 19-scf00458 | 19 |
| AX-158297505 | 23 | 37.148 | KV453155.1 | 7289043 | 19-scf00458 | 19 |
| AX-158297514 | 23 | 37.148 | KV453155.1 | 7307567 | 19-scf00458 | 19 |
| AX-158297524 | 23 | 37.148 | KV453155.1 | 7316654 | 19-scf00458 | 19 |
| AX-158297526 | 23 | 37.148 | KV453155.1 | 7321176 | 19-scf00458 | 19 |
| AX-157860635 | 23 | 37.148 | KV453155.1 | 7332084 | 19-scf00458 | 19 |
| AX-158297537 | 23 | 37.148 | KV453155.1 | 7339480 | 19-scf00458 | 19 |
| AX-158297538 | 23 | 37.148 | KV453155.1 | 7339670 | 19-scf00458 | 19 |
| AX-158297545 | 23 | 37.148 | KV453155.1 | 7346748 | 19-scf00458 | 19 |
| AX-157846051 | 23 | 37.148 | KV453155.1 | 7349049 | 19-scf00458 | 19 |
| AX-158297553 | 23 | 37.148 | KV453155.1 | 7355079 | 19-scf00458 | 19 |
| AX-157722577 | 23 | 37.148 | KV453155.1 | 7357757 | 19-scf00458 | 19 |
| AX-158297556 | 23 | 37.148 | KV453155.1 | 7361662 | 19-scf00458 | 19 |
| AX-158297557 | 23 | 37.148 | KV453155.1 | 7364201 | 19-scf00458 | 19 |
| AX-157860638 | 23 | 37.148 | KV453155.1 | 7376703 | 19-scf00458 | 19 |
| AX-157757931 | 23 | 37.148 | KV453155.1 | 7376798 | 19-scf00458 | 19 |
| AX-158297567 | 23 | 37.148 | KV453155.1 | 7378495 | 19-scf00458 | 19 |
| AX-158297570 | 23 | 37.148 | KV453155.1 | 7381555 | 19-scf00458 | 19 |
| AX-158297578 | 23 | 37.148 | KV453155.1 | 7388781 | 19-scf00458 | 19 |
| AX-158297580 | 23 | 37.148 | KV453155.1 | 7390209 | 19-scf00458 | 19 |
| AX-158297582 | 23 | 37.148 | KV453155.1 | 7395207 | 19-scf00458 | 19 |
| AX-158297583 | 23 | 37.148 | KV453155.1 | 7396239 | 19-scf00458 | 19 |
| AX-158297585 | 23 | 37.148 | KV453155.1 | 7398104 | 19-scf00458 | 19 |
| AX-157846053 | 23 | 37.148 | KV453155.1 | 7399934 | 19-scf00458 | 19 |
| AX-158297596 | 23 | 37.148 | KV453155.1 | 7405299 | 19-scf00458 | 19 |

|              |    |        |            |         |             |    |
|--------------|----|--------|------------|---------|-------------|----|
| AX-158297606 | 23 | 37.148 | KV453155.1 | 7421739 | 19-scf00458 | 19 |
| AX-158297608 | 23 | 37.148 | KV453155.1 | 7422605 | 19-scf00458 | 19 |
| AX-158297614 | 23 | 37.148 | KV453155.1 | 7432637 | 19-scf00458 | 19 |
| AX-158297615 | 23 | 37.148 | KV453155.1 | 7433899 | 19-scf00458 | 19 |
| AX-158297616 | 23 | 37.148 | KV453155.1 | 7436517 | 19-scf00458 | 19 |
| AX-158297618 | 23 | 37.148 | KV453155.1 | 7440998 | 19-scf00458 | 19 |
| AX-157860645 | 23 | 37.148 | KV453155.1 | 7441945 | 19-scf00458 | 19 |
| AX-157860646 | 23 | 37.148 | KV453155.1 | 7442830 | 19-scf00458 | 19 |
| AX-158297621 | 23 | 37.148 | KV453155.1 | 7445795 | 19-scf00458 | 19 |
| AX-157718675 | 23 | 37.148 | KV453155.1 | 7446876 | 19-scf00458 | 19 |
| AX-158297622 | 23 | 37.148 | KV453155.1 | 7447801 | 19-scf00458 | 19 |
| AX-158297625 | 23 | 37.148 | KV453155.1 | 7456921 | 19-scf00458 | 19 |
| AX-157716880 | 23 | 37.148 | KV453155.1 | 7459239 | 19-scf00458 | 19 |
| AX-158297626 | 23 | 37.148 | KV453155.1 | 7460122 | 19-scf00458 | 19 |
| AX-158297627 | 23 | 37.148 | KV453155.1 | 7461899 | 19-scf00458 | 19 |
| AX-158297628 | 23 | 37.148 | KV453155.1 | 7462955 | 19-scf00458 | 19 |
| AX-158419633 | 23 | 37.148 | KV453155.1 | 7471841 | 19-scf00458 | 19 |
| AX-158297634 | 23 | 37.148 | KV453155.1 | 7480304 | 19-scf00458 | 19 |
| AX-158297637 | 23 | 37.148 | KV453155.1 | 7481822 | 19-scf00458 | 19 |
| AX-158297641 | 23 | 37.148 | KV453155.1 | 7491543 | 19-scf00458 | 19 |
| AX-157860655 | 23 | 37.148 | KV453155.1 | 7503708 | 19-scf00458 | 19 |
| AX-158297645 | 23 | 37.148 | KV453155.1 | 7506725 | 19-scf00458 | 19 |
| AX-157860656 | 23 | 37.148 | KV453155.1 | 7509866 | 19-scf00458 | 19 |
| AX-158297650 | 23 | 37.148 | KV453155.1 | 7516675 | 19-scf00458 | 19 |
| AX-157860658 | 23 | 37.148 | KV453155.1 | 7518533 | 19-scf00458 | 19 |
| AX-158297658 | 23 | 37.148 | KV453155.1 | 7540952 | 19-scf00458 | 19 |
| AX-158297660 | 23 | 37.148 | KV453155.1 | 7543163 | 19-scf00458 | 19 |
| AX-158297665 | 23 | 37.148 | KV453155.1 | 7553575 | 19-scf00458 | 19 |
| AX-158297670 | 23 | 37.148 | KV453155.1 | 7563047 | 19-scf00458 | 19 |
| AX-158297673 | 23 | 37.148 | KV453155.1 | 7571556 | 19-scf00458 | 19 |
| AX-158297674 | 23 | 37.148 | KV453155.1 | 7571835 | 19-scf00458 | 19 |
| AX-158297726 | 23 | 37.148 | KV453155.1 | 7649354 | 19-scf00458 | 19 |
| AX-157846060 | 23 | 37.148 | KV453155.1 | 7679756 | 19-scf00458 | 19 |
| AX-158297779 | 23 | 37.148 | KV453155.1 | 7715207 | 19-scf00458 | 19 |
| AX-158297787 | 23 | 37.148 | KV453155.1 | 7723999 | 19-scf00458 | 19 |
| AX-158297874 | 23 | 37.148 | KV453155.1 | 7806048 | 19-scf00458 | 19 |
| AX-157716165 | 23 | 37.148 | KV453155.1 | 7919833 | 19-scf00458 | 19 |
| AX-158298062 | 23 | 37.148 | KV453155.1 | 7994157 | 19-scf00458 | 19 |
| AX-157718152 | 23 | 37.148 | KV453155.1 | 8175498 | 19-scf00458 | 19 |
| AX-158298268 | 23 | 37.148 | KV453155.1 | 8228046 | 19-scf00458 | 19 |
| AX-158298305 | 23 | 37.148 | KV453155.1 | 8296150 | 19-scf00458 | 19 |
| AX-158298360 | 23 | 37.148 | KV453155.1 | 8385831 | 19-scf00458 | 19 |
| AX-158298395 | 23 | 37.148 | KV453155.1 | 8426627 | 19-scf00458 | 19 |
| AX-158298396 | 23 | 37.148 | KV453155.1 | 8427611 | 19-scf00458 | 19 |
| AX-158298397 | 23 | 37.148 | KV453155.1 | 8430073 | 19-scf00458 | 19 |
| AX-158298411 | 23 | 37.148 | KV453155.1 | 8449231 | 19-scf00458 | 19 |
| AX-158298438 | 23 | 37.148 | KV453155.1 | 8496178 | 19-scf00458 | 19 |
| AX-158298449 | 23 | 37.148 | KV453155.1 | 8519921 | 19-scf00458 | 19 |
| AX-158298484 | 23 | 37.148 | KV453155.1 | 8562039 | 19-scf00458 | 19 |
| AX-158298514 | 23 | 37.148 | KV453155.1 | 8587979 | 19-scf00458 | 19 |
| AX-158298594 | 23 | 37.148 | KV453155.1 | 8670737 | 19-scf00458 | 19 |

|              |    |        |            |         |             |    |
|--------------|----|--------|------------|---------|-------------|----|
| AX-158298658 | 23 | 37.148 | KV453155.1 | 8750715 | 19-scf00458 | 19 |
| AX-157846105 | 23 | 37.148 | KV453155.1 | 8753332 | 19-scf00458 | 19 |
| AX-158298659 | 23 | 37.148 | KV453155.1 | 8755797 | 19-scf00458 | 19 |
| AX-158298663 | 23 | 37.148 | KV453155.1 | 8761046 | 19-scf00458 | 19 |
| AX-158298675 | 23 | 37.148 | KV453155.1 | 8780935 | 19-scf00458 | 19 |
| AX-158298714 | 23 | 37.148 | KV453155.1 | 8816556 | 19-scf00458 | 19 |
| AX-158298726 | 23 | 37.148 | KV453155.1 | 8835504 | 19-scf00458 | 19 |
| AX-158298748 | 23 | 37.148 | KV453155.1 | 8884408 | 19-scf00458 | 19 |
| AX-157873428 | 23 | 37.148 | KV453155.1 | 9149558 | 19-scf00458 | 19 |
| AX-158298928 | 23 | 37.148 | KV453155.1 | 9209319 | 19-scf00458 | 19 |
| AX-158299042 | 23 | 37.148 | KV453155.1 | 9401427 | 19-scf00458 | 19 |
| AX-158299061 | 23 | 37.148 | KV453155.1 | 9414598 | 19-scf00458 | 19 |
| AX-157722940 | 23 | 37.148 | KV453155.1 | 9713390 | 19-scf00458 | 19 |
| AX-158299477 | 23 | 37.148 | KV453155.1 | 9860308 | 19-scf00458 | 19 |
| AX-157748705 | 23 | 37.257 | KV453155.1 | 7187112 | 19-scf00458 | 19 |
| AX-158297507 | 23 | 37.257 | KV453155.1 | 7291003 | 19-scf00458 | 19 |
| AX-158297563 | 23 | 37.257 | KV453155.1 | 7370210 | 19-scf00458 | 19 |
| AX-158297590 | 23 | 37.257 | KV453155.1 | 7401127 | 19-scf00458 | 19 |
| AX-158297675 | 23 | 37.257 | KV453155.1 | 7572737 | 19-scf00458 | 19 |
| AX-158297677 | 23 | 37.257 | KV453155.1 | 7575513 | 19-scf00458 | 19 |
| AX-158297679 | 23 | 37.257 | KV453155.1 | 7577768 | 19-scf00458 | 19 |
| AX-158297680 | 23 | 37.257 | KV453155.1 | 7581999 | 19-scf00458 | 19 |
| AX-157860664 | 23 | 37.257 | KV453155.1 | 7585282 | 19-scf00458 | 19 |
| AX-158297681 | 23 | 37.257 | KV453155.1 | 7586775 | 19-scf00458 | 19 |
| AX-158297682 | 23 | 37.257 | KV453155.1 | 7589862 | 19-scf00458 | 19 |
| AX-158297683 | 23 | 37.257 | KV453155.1 | 7590076 | 19-scf00458 | 19 |
| AX-158297684 | 23 | 37.257 | KV453155.1 | 7590773 | 19-scf00458 | 19 |
| AX-158297686 | 23 | 37.257 | KV453155.1 | 7593790 | 19-scf00458 | 19 |
| AX-158419635 | 23 | 37.257 | KV453155.1 | 7596031 | 19-scf00458 | 19 |
| AX-158417493 | 23 | 37.257 | KV453155.1 | 7596593 | 19-scf00458 | 19 |
| AX-158297688 | 23 | 37.257 | KV453155.1 | 7602769 | 19-scf00458 | 19 |
| AX-158297689 | 23 | 37.257 | KV453155.1 | 7604281 | 19-scf00458 | 19 |
| AX-158297690 | 23 | 37.257 | KV453155.1 | 7605488 | 19-scf00458 | 19 |
| AX-157860665 | 23 | 37.257 | KV453155.1 | 7606333 | 19-scf00458 | 19 |
| AX-157860666 | 23 | 37.257 | KV453155.1 | 7608561 | 19-scf00458 | 19 |
| AX-157860667 | 23 | 37.257 | KV453155.1 | 7608900 | 19-scf00458 | 19 |
| AX-157846056 | 23 | 37.257 | KV453155.1 | 7610015 | 19-scf00458 | 19 |
| AX-158297691 | 23 | 37.257 | KV453155.1 | 7611849 | 19-scf00458 | 19 |
| AX-157722141 | 23 | 37.257 | KV453155.1 | 7614240 | 19-scf00458 | 19 |
| AX-157860668 | 23 | 37.257 | KV453155.1 | 7615418 | 19-scf00458 | 19 |
| AX-158297693 | 23 | 37.257 | KV453155.1 | 7616707 | 19-scf00458 | 19 |
| AX-158297694 | 23 | 37.257 | KV453155.1 | 7617975 | 19-scf00458 | 19 |
| AX-158297696 | 23 | 37.257 | KV453155.1 | 7620512 | 19-scf00458 | 19 |
| AX-157715217 | 23 | 37.257 | KV453155.1 | 7620644 | 19-scf00458 | 19 |
| AX-158297697 | 23 | 37.257 | KV453155.1 | 7621529 | 19-scf00458 | 19 |
| AX-158297698 | 23 | 37.257 | KV453155.1 | 7622365 | 19-scf00458 | 19 |
| AX-158297699 | 23 | 37.257 | KV453155.1 | 7623054 | 19-scf00458 | 19 |
| AX-158297700 | 23 | 37.257 | KV453155.1 | 7623554 | 19-scf00458 | 19 |
| AX-158297701 | 23 | 37.257 | KV453155.1 | 7624668 | 19-scf00458 | 19 |
| AX-158297702 | 23 | 37.257 | KV453155.1 | 7625144 | 19-scf00458 | 19 |
| AX-158297703 | 23 | 37.257 | KV453155.1 | 7626181 | 19-scf00458 | 19 |

|              |    |        |            |         |             |    |
|--------------|----|--------|------------|---------|-------------|----|
| AX-158417494 | 23 | 37.257 | KV453155.1 | 7629695 | 19-scf00458 | 19 |
| AX-158297707 | 23 | 37.257 | KV453155.1 | 7631618 | 19-scf00458 | 19 |
| AX-157860669 | 23 | 37.257 | KV453155.1 | 7632425 | 19-scf00458 | 19 |
| AX-158297709 | 23 | 37.257 | KV453155.1 | 7633250 | 19-scf00458 | 19 |
| AX-158297710 | 23 | 37.257 | KV453155.1 | 7633684 | 19-scf00458 | 19 |
| AX-158297711 | 23 | 37.257 | KV453155.1 | 7634085 | 19-scf00458 | 19 |
| AX-157860670 | 23 | 37.257 | KV453155.1 | 7635352 | 19-scf00458 | 19 |
| AX-158297714 | 23 | 37.257 | KV453155.1 | 7636512 | 19-scf00458 | 19 |
| AX-158297717 | 23 | 37.257 | KV453155.1 | 7640241 | 19-scf00458 | 19 |
| AX-158297719 | 23 | 37.257 | KV453155.1 | 7641461 | 19-scf00458 | 19 |
| AX-158297721 | 23 | 37.257 | KV453155.1 | 7642623 | 19-scf00458 | 19 |
| AX-157846057 | 23 | 37.257 | KV453155.1 | 7642840 | 19-scf00458 | 19 |
| AX-158297722 | 23 | 37.257 | KV453155.1 | 7644013 | 19-scf00458 | 19 |
| AX-158297723 | 23 | 37.257 | KV453155.1 | 7645012 | 19-scf00458 | 19 |
| AX-158297724 | 23 | 37.257 | KV453155.1 | 7645503 | 19-scf00458 | 19 |
| AX-157860671 | 23 | 37.257 | KV453155.1 | 7646462 | 19-scf00458 | 19 |
| AX-158297727 | 23 | 37.257 | KV453155.1 | 7649808 | 19-scf00458 | 19 |
| AX-157860672 | 23 | 37.257 | KV453155.1 | 7650501 | 19-scf00458 | 19 |
| AX-158297728 | 23 | 37.257 | KV453155.1 | 7650909 | 19-scf00458 | 19 |
| AX-158297729 | 23 | 37.257 | KV453155.1 | 7651982 | 19-scf00458 | 19 |
| AX-158297730 | 23 | 37.257 | KV453155.1 | 7652583 | 19-scf00458 | 19 |
| AX-157860673 | 23 | 37.257 | KV453155.1 | 7656004 | 19-scf00458 | 19 |
| AX-158297732 | 23 | 37.257 | KV453155.1 | 7657158 | 19-scf00458 | 19 |
| AX-158297733 | 23 | 37.257 | KV453155.1 | 7658577 | 19-scf00458 | 19 |
| AX-158297734 | 23 | 37.257 | KV453155.1 | 7662800 | 19-scf00458 | 19 |
| AX-158297738 | 23 | 37.257 | KV453155.1 | 7665682 | 19-scf00458 | 19 |
| AX-158297739 | 23 | 37.257 | KV453155.1 | 7666065 | 19-scf00458 | 19 |
| AX-158297743 | 23 | 37.257 | KV453155.1 | 7669029 | 19-scf00458 | 19 |
| AX-158297746 | 23 | 37.257 | KV453155.1 | 7670742 | 19-scf00458 | 19 |
| AX-157745411 | 23 | 37.257 | KV453155.1 | 7671356 | 19-scf00458 | 19 |
| AX-158297748 | 23 | 37.257 | KV453155.1 | 7673188 | 19-scf00458 | 19 |
| AX-157715609 | 23 | 37.257 | KV453155.1 | 7673228 | 19-scf00458 | 19 |
| AX-157860676 | 23 | 37.257 | KV453155.1 | 7673803 | 19-scf00458 | 19 |
| AX-157860677 | 23 | 37.257 | KV453155.1 | 7674291 | 19-scf00458 | 19 |
| AX-157860678 | 23 | 37.257 | KV453155.1 | 7674582 | 19-scf00458 | 19 |
| AX-158297749 | 23 | 37.257 | KV453155.1 | 7676257 | 19-scf00458 | 19 |
| AX-158297752 | 23 | 37.257 | KV453155.1 | 7677637 | 19-scf00458 | 19 |
| AX-157860679 | 23 | 37.257 | KV453155.1 | 7685713 | 19-scf00458 | 19 |
| AX-158423572 | 23 | 37.257 | KV453155.1 | 7687229 | 19-scf00458 | 19 |
| AX-158297756 | 23 | 37.257 | KV453155.1 | 7689189 | 19-scf00458 | 19 |
| AX-158297757 | 23 | 37.257 | KV453155.1 | 7689800 | 19-scf00458 | 19 |
| AX-158297759 | 23 | 37.257 | KV453155.1 | 7691316 | 19-scf00458 | 19 |
| AX-158297760 | 23 | 37.257 | KV453155.1 | 7691627 | 19-scf00458 | 19 |
| AX-158297761 | 23 | 37.257 | KV453155.1 | 7692621 | 19-scf00458 | 19 |
| AX-157744857 | 23 | 37.257 | KV453155.1 | 7693192 | 19-scf00458 | 19 |
| AX-158297762 | 23 | 37.257 | KV453155.1 | 7693301 | 19-scf00458 | 19 |
| AX-158297763 | 23 | 37.257 | KV453155.1 | 7693731 | 19-scf00458 | 19 |
| AX-158297764 | 23 | 37.257 | KV453155.1 | 7695074 | 19-scf00458 | 19 |
| AX-158297765 | 23 | 37.257 | KV453155.1 | 7695308 | 19-scf00458 | 19 |
| AX-157860680 | 23 | 37.257 | KV453155.1 | 7696870 | 19-scf00458 | 19 |
| AX-157860681 | 23 | 37.257 | KV453155.1 | 7699335 | 19-scf00458 | 19 |



|              |    |        |            |         |             |    |
|--------------|----|--------|------------|---------|-------------|----|
| AX-158297769 | 23 | 37.257 | KV453155.1 | 7704402 | 19-scf00458 | 19 |
| AX-158297770 | 23 | 37.257 | KV453155.1 | 7704771 | 19-scf00458 | 19 |
| AX-158297773 | 23 | 37.257 | KV453155.1 | 7709107 | 19-scf00458 | 19 |
| AX-157860682 | 23 | 37.257 | KV453155.1 | 7709787 | 19-scf00458 | 19 |
| AX-158297775 | 23 | 37.257 | KV453155.1 | 7711014 | 19-scf00458 | 19 |
| AX-158297776 | 23 | 37.257 | KV453155.1 | 7711698 | 19-scf00458 | 19 |
| AX-158297777 | 23 | 37.257 | KV453155.1 | 7712255 | 19-scf00458 | 19 |
| AX-157708689 | 23 | 37.257 | KV453155.1 | 7713939 | 19-scf00458 | 19 |
| AX-158297780 | 23 | 37.257 | KV453155.1 | 7715566 | 19-scf00458 | 19 |
| AX-158297782 | 23 | 37.257 | KV453155.1 | 7717823 | 19-scf00458 | 19 |
| AX-158297783 | 23 | 37.257 | KV453155.1 | 7719923 | 19-scf00458 | 19 |
| AX-158297784 | 23 | 37.257 | KV453155.1 | 7721296 | 19-scf00458 | 19 |
| AX-158297786 | 23 | 37.257 | KV453155.1 | 7723611 | 19-scf00458 | 19 |
| AX-158297790 | 23 | 37.257 | KV453155.1 | 7726704 | 19-scf00458 | 19 |
| AX-158297791 | 23 | 37.257 | KV453155.1 | 7727186 | 19-scf00458 | 19 |
| AX-158297792 | 23 | 37.257 | KV453155.1 | 7727528 | 19-scf00458 | 19 |
| AX-158297795 | 23 | 37.257 | KV453155.1 | 7729052 | 19-scf00458 | 19 |
| AX-158297796 | 23 | 37.257 | KV453155.1 | 7729297 | 19-scf00458 | 19 |
| AX-158297797 | 23 | 37.257 | KV453155.1 | 7730497 | 19-scf00458 | 19 |
| AX-157774453 | 23 | 37.257 | KV453155.1 | 7730946 | 19-scf00458 | 19 |
| AX-158297798 | 23 | 37.257 | KV453155.1 | 7733546 | 19-scf00458 | 19 |
| AX-158297799 | 23 | 37.257 | KV453155.1 | 7734407 | 19-scf00458 | 19 |
| AX-158297800 | 23 | 37.257 | KV453155.1 | 7734632 | 19-scf00458 | 19 |
| AX-158297801 | 23 | 37.257 | KV453155.1 | 7736250 | 19-scf00458 | 19 |
| AX-158297804 | 23 | 37.257 | KV453155.1 | 7738529 | 19-scf00458 | 19 |
| AX-158381288 | 23 | 37.257 | KV453155.1 | 7744964 | 19-scf00458 | 19 |
| AX-158297811 | 23 | 37.257 | KV453155.1 | 7746579 | 19-scf00458 | 19 |
| AX-157860683 | 23 | 37.257 | KV453155.1 | 7748345 | 19-scf00458 | 19 |
| AX-157860684 | 23 | 37.257 | KV453155.1 | 7748697 | 19-scf00458 | 19 |
| AX-158297812 | 23 | 37.257 | KV453155.1 | 7748956 | 19-scf00458 | 19 |
| AX-158297813 | 23 | 37.257 | KV453155.1 | 7749353 | 19-scf00458 | 19 |
| AX-157846063 | 23 | 37.257 | KV453155.1 | 7749533 | 19-scf00458 | 19 |
| AX-158297816 | 23 | 37.257 | KV453155.1 | 7753029 | 19-scf00458 | 19 |
| AX-157846065 | 23 | 37.257 | KV453155.1 | 7754678 | 19-scf00458 | 19 |
| AX-158297818 | 23 | 37.257 | KV453155.1 | 7756086 | 19-scf00458 | 19 |
| AX-158297821 | 23 | 37.257 | KV453155.1 | 7759215 | 19-scf00458 | 19 |
| AX-158297822 | 23 | 37.257 | KV453155.1 | 7762280 | 19-scf00458 | 19 |
| AX-158297826 | 23 | 37.257 | KV453155.1 | 7767892 | 19-scf00458 | 19 |
| AX-158297831 | 23 | 37.257 | KV453155.1 | 7774320 | 19-scf00458 | 19 |
| AX-158297834 | 23 | 37.257 | KV453155.1 | 7775584 | 19-scf00458 | 19 |
| AX-158297835 | 23 | 37.257 | KV453155.1 | 7775645 | 19-scf00458 | 19 |
| AX-157860685 | 23 | 37.257 | KV453155.1 | 7778471 | 19-scf00458 | 19 |
| AX-158297838 | 23 | 37.257 | KV453155.1 | 7779111 | 19-scf00458 | 19 |
| AX-158297840 | 23 | 37.257 | KV453155.1 | 7780913 | 19-scf00458 | 19 |
| AX-158297841 | 23 | 37.257 | KV453155.1 | 7781408 | 19-scf00458 | 19 |
| AX-158297842 | 23 | 37.257 | KV453155.1 | 7783884 | 19-scf00458 | 19 |
| AX-158297847 | 23 | 37.257 | KV453155.1 | 7787867 | 19-scf00458 | 19 |
| AX-158297848 | 23 | 37.257 | KV453155.1 | 7788423 | 19-scf00458 | 19 |
| AX-158297852 | 23 | 37.257 | KV453155.1 | 7790272 | 19-scf00458 | 19 |
| AX-158297853 | 23 | 37.257 | KV453155.1 | 7791338 | 19-scf00458 | 19 |
| AX-158297857 | 23 | 37.257 | KV453155.1 | 7797086 | 19-scf00458 | 19 |

|              |    |        |            |         |             |    |
|--------------|----|--------|------------|---------|-------------|----|
| AX-158297859 | 23 | 37.257 | KV453155.1 | 7797893 | 19-scf00458 | 19 |
| AX-158297860 | 23 | 37.257 | KV453155.1 | 7798265 | 19-scf00458 | 19 |
| AX-158297865 | 23 | 37.257 | KV453155.1 | 7800392 | 19-scf00458 | 19 |
| AX-158297869 | 23 | 37.257 | KV453155.1 | 7803191 | 19-scf00458 | 19 |
| AX-158297871 | 23 | 37.257 | KV453155.1 | 7804558 | 19-scf00458 | 19 |
| AX-157846066 | 23 | 37.257 | KV453155.1 | 7804911 | 19-scf00458 | 19 |
| AX-158297873 | 23 | 37.257 | KV453155.1 | 7805388 | 19-scf00458 | 19 |
| AX-158297875 | 23 | 37.257 | KV453155.1 | 7806703 | 19-scf00458 | 19 |
| AX-158297876 | 23 | 37.257 | KV453155.1 | 7807196 | 19-scf00458 | 19 |
| AX-158297878 | 23 | 37.257 | KV453155.1 | 7808324 | 19-scf00458 | 19 |
| AX-158297880 | 23 | 37.257 | KV453155.1 | 7809367 | 19-scf00458 | 19 |
| AX-158297881 | 23 | 37.257 | KV453155.1 | 7810802 | 19-scf00458 | 19 |
| AX-158297884 | 23 | 37.257 | KV453155.1 | 7814034 | 19-scf00458 | 19 |
| AX-156344494 | 23 | 37.257 | KV453155.1 | 7814646 | 19-scf00458 | 19 |
| AX-158297885 | 23 | 37.257 | KV453155.1 | 7815221 | 19-scf00458 | 19 |
| AX-158297888 | 23 | 37.257 | KV453155.1 | 7817908 | 19-scf00458 | 19 |
| AX-158297890 | 23 | 37.257 | KV453155.1 | 7820298 | 19-scf00458 | 19 |
| AX-158297893 | 23 | 37.257 | KV453155.1 | 7824621 | 19-scf00458 | 19 |
| AX-158297894 | 23 | 37.257 | KV453155.1 | 7824989 | 19-scf00458 | 19 |
| AX-158297896 | 23 | 37.257 | KV453155.1 | 7826680 | 19-scf00458 | 19 |
| AX-158297897 | 23 | 37.257 | KV453155.1 | 7827303 | 19-scf00458 | 19 |
| AX-158297898 | 23 | 37.257 | KV453155.1 | 7829136 | 19-scf00458 | 19 |
| AX-158297901 | 23 | 37.257 | KV453155.1 | 7833274 | 19-scf00458 | 19 |
| AX-158297902 | 23 | 37.257 | KV453155.1 | 7834358 | 19-scf00458 | 19 |
| AX-158297903 | 23 | 37.257 | KV453155.1 | 7835287 | 19-scf00458 | 19 |
| AX-158297905 | 23 | 37.257 | KV453155.1 | 7839043 | 19-scf00458 | 19 |
| AX-158297906 | 23 | 37.257 | KV453155.1 | 7841251 | 19-scf00458 | 19 |
| AX-158297908 | 23 | 37.257 | KV453155.1 | 7842640 | 19-scf00458 | 19 |
| AX-158297911 | 23 | 37.257 | KV453155.1 | 7850084 | 19-scf00458 | 19 |
| AX-158297913 | 23 | 37.257 | KV453155.1 | 7850901 | 19-scf00458 | 19 |
| AX-158297914 | 23 | 37.257 | KV453155.1 | 7851614 | 19-scf00458 | 19 |
| AX-158297915 | 23 | 37.257 | KV453155.1 | 7851962 | 19-scf00458 | 19 |
| AX-157725495 | 23 | 37.257 | KV453155.1 | 7853905 | 19-scf00458 | 19 |
| AX-158297917 | 23 | 37.257 | KV453155.1 | 7854410 | 19-scf00458 | 19 |
| AX-158297921 | 23 | 37.257 | KV453155.1 | 7858503 | 19-scf00458 | 19 |
| AX-158297923 | 23 | 37.257 | KV453155.1 | 7859318 | 19-scf00458 | 19 |
| AX-158297924 | 23 | 37.257 | KV453155.1 | 7859754 | 19-scf00458 | 19 |
| AX-158297926 | 23 | 37.257 | KV453155.1 | 7864023 | 19-scf00458 | 19 |
| AX-158297927 | 23 | 37.257 | KV453155.1 | 7864436 | 19-scf00458 | 19 |
| AX-158297928 | 23 | 37.257 | KV453155.1 | 7864941 | 19-scf00458 | 19 |
| AX-158297929 | 23 | 37.257 | KV453155.1 | 7865871 | 19-scf00458 | 19 |
| AX-158297930 | 23 | 37.257 | KV453155.1 | 7867153 | 19-scf00458 | 19 |
| AX-158297931 | 23 | 37.257 | KV453155.1 | 7867888 | 19-scf00458 | 19 |
| AX-158297932 | 23 | 37.257 | KV453155.1 | 7868287 | 19-scf00458 | 19 |
| AX-158297934 | 23 | 37.257 | KV453155.1 | 7869720 | 19-scf00458 | 19 |
| AX-158297935 | 23 | 37.257 | KV453155.1 | 7870375 | 19-scf00458 | 19 |
| AX-157846067 | 23 | 37.257 | KV453155.1 | 7870778 | 19-scf00458 | 19 |
| AX-158297936 | 23 | 37.257 | KV453155.1 | 7871095 | 19-scf00458 | 19 |
| AX-158297937 | 23 | 37.257 | KV453155.1 | 7871831 | 19-scf00458 | 19 |
| AX-158297938 | 23 | 37.257 | KV453155.1 | 7872541 | 19-scf00458 | 19 |
| AX-158297940 | 23 | 37.257 | KV453155.1 | 7875133 | 19-scf00458 | 19 |

|              |    |        |            |         |             |    |
|--------------|----|--------|------------|---------|-------------|----|
| AX-158297943 | 23 | 37.257 | KV453155.1 | 7876656 | 19-scf00458 | 19 |
| AX-158297944 | 23 | 37.257 | KV453155.1 | 7877856 | 19-scf00458 | 19 |
| AX-158297945 | 23 | 37.257 | KV453155.1 | 7879017 | 19-scf00458 | 19 |
| AX-158297946 | 23 | 37.257 | KV453155.1 | 7879204 | 19-scf00458 | 19 |
| AX-158297948 | 23 | 37.257 | KV453155.1 | 7880535 | 19-scf00458 | 19 |
| AX-158297949 | 23 | 37.257 | KV453155.1 | 7880985 | 19-scf00458 | 19 |
| AX-158297950 | 23 | 37.257 | KV453155.1 | 7881704 | 19-scf00458 | 19 |
| AX-157709691 | 23 | 37.257 | KV453155.1 | 7883241 | 19-scf00458 | 19 |
| AX-158297951 | 23 | 37.257 | KV453155.1 | 7883470 | 19-scf00458 | 19 |
| AX-158297952 | 23 | 37.257 | KV453155.1 | 7884195 | 19-scf00458 | 19 |
| AX-157860689 | 23 | 37.257 | KV453155.1 | 7888576 | 19-scf00458 | 19 |
| AX-158297958 | 23 | 37.257 | KV453155.1 | 7889545 | 19-scf00458 | 19 |
| AX-158297960 | 23 | 37.257 | KV453155.1 | 7890743 | 19-scf00458 | 19 |
| AX-158297962 | 23 | 37.257 | KV453155.1 | 7893544 | 19-scf00458 | 19 |
| AX-157742162 | 23 | 37.257 | KV453155.1 | 7894103 | 19-scf00458 | 19 |
| AX-158297967 | 23 | 37.257 | KV453155.1 | 7896490 | 19-scf00458 | 19 |
| AX-158297969 | 23 | 37.257 | KV453155.1 | 7897639 | 19-scf00458 | 19 |
| AX-158417502 | 23 | 37.257 | KV453155.1 | 7898706 | 19-scf00458 | 19 |
| AX-157846069 | 23 | 37.257 | KV453155.1 | 7901966 | 19-scf00458 | 19 |
| AX-158417504 | 23 | 37.257 | KV453155.1 | 7903275 | 19-scf00458 | 19 |
| AX-158297970 | 23 | 37.257 | KV453155.1 | 7904129 | 19-scf00458 | 19 |
| AX-157846070 | 23 | 37.257 | KV453155.1 | 7904308 | 19-scf00458 | 19 |
| AX-157772225 | 23 | 37.257 | KV453155.1 | 7905268 | 19-scf00458 | 19 |
| AX-158297973 | 23 | 37.257 | KV453155.1 | 7906357 | 19-scf00458 | 19 |
| AX-158297974 | 23 | 37.257 | KV453155.1 | 7907269 | 19-scf00458 | 19 |
| AX-158297976 | 23 | 37.257 | KV453155.1 | 7908369 | 19-scf00458 | 19 |
| AX-158297977 | 23 | 37.257 | KV453155.1 | 7909382 | 19-scf00458 | 19 |
| AX-158297980 | 23 | 37.257 | KV453155.1 | 7911934 | 19-scf00458 | 19 |
| AX-158297981 | 23 | 37.257 | KV453155.1 | 7912267 | 19-scf00458 | 19 |
| AX-158297982 | 23 | 37.257 | KV453155.1 | 7912912 | 19-scf00458 | 19 |
| AX-157860691 | 23 | 37.257 | KV453155.1 | 7914753 | 19-scf00458 | 19 |
| AX-157724031 | 23 | 37.257 | KV453155.1 | 7917344 | 19-scf00458 | 19 |
| AX-158297987 | 23 | 37.257 | KV453155.1 | 7917397 | 19-scf00458 | 19 |
| AX-158297990 | 23 | 37.257 | KV453155.1 | 7926228 | 19-scf00458 | 19 |
| AX-158297991 | 23 | 37.257 | KV453155.1 | 7927796 | 19-scf00458 | 19 |
| AX-158297993 | 23 | 37.257 | KV453155.1 | 7928700 | 19-scf00458 | 19 |
| AX-158297994 | 23 | 37.257 | KV453155.1 | 7929051 | 19-scf00458 | 19 |
| AX-158297998 | 23 | 37.257 | KV453155.1 | 7930978 | 19-scf00458 | 19 |
| AX-158297999 | 23 | 37.257 | KV453155.1 | 7931489 | 19-scf00458 | 19 |
| AX-158298000 | 23 | 37.257 | KV453155.1 | 7931854 | 19-scf00458 | 19 |
| AX-158298001 | 23 | 37.257 | KV453155.1 | 7933366 | 19-scf00458 | 19 |
| AX-158298003 | 23 | 37.257 | KV453155.1 | 7935740 | 19-scf00458 | 19 |
| AX-157860693 | 23 | 37.257 | KV453155.1 | 7936307 | 19-scf00458 | 19 |
| AX-158298004 | 23 | 37.257 | KV453155.1 | 7937152 | 19-scf00458 | 19 |
| AX-158298005 | 23 | 37.257 | KV453155.1 | 7938052 | 19-scf00458 | 19 |
| AX-158298010 | 23 | 37.257 | KV453155.1 | 7941182 | 19-scf00458 | 19 |
| AX-158298052 | 23 | 37.257 | KV453155.1 | 7984936 | 19-scf00458 | 19 |
| AX-158298055 | 23 | 37.257 | KV453155.1 | 7988400 | 19-scf00458 | 19 |
| AX-158298117 | 23 | 37.257 | KV453155.1 | 8054335 | 19-scf00458 | 19 |
| AX-158298145 | 23 | 37.257 | KV453155.1 | 8086505 | 19-scf00458 | 19 |
| AX-158298168 | 23 | 37.257 | KV453155.1 | 8114469 | 19-scf00458 | 19 |

|              |    |        |            |         |             |    |
|--------------|----|--------|------------|---------|-------------|----|
| AX-158298183 | 23 | 37.257 | KV453155.1 | 8130331 | 19-scf00458 | 19 |
| AX-158298188 | 23 | 37.257 | KV453155.1 | 8135227 | 19-scf00458 | 19 |
| AX-158298199 | 23 | 37.257 | KV453155.1 | 8148189 | 19-scf00458 | 19 |
| AX-158298206 | 23 | 37.257 | KV453155.1 | 8156408 | 19-scf00458 | 19 |
| AX-158298209 | 23 | 37.257 | KV453155.1 | 8159663 | 19-scf00458 | 19 |
| AX-158298212 | 23 | 37.257 | KV453155.1 | 8163811 | 19-scf00458 | 19 |
| AX-158417511 | 23 | 37.257 | KV453155.1 | 8165871 | 19-scf00458 | 19 |
| AX-158298213 | 23 | 37.257 | KV453155.1 | 8166991 | 19-scf00458 | 19 |
| AX-158298215 | 23 | 37.257 | KV453155.1 | 8169349 | 19-scf00458 | 19 |
| AX-158298216 | 23 | 37.257 | KV453155.1 | 8170379 | 19-scf00458 | 19 |
| AX-158298217 | 23 | 37.257 | KV453155.1 | 8170890 | 19-scf00458 | 19 |
| AX-157749202 | 23 | 37.257 | KV453155.1 | 8171817 | 19-scf00458 | 19 |
| AX-157747579 | 23 | 37.257 | KV453155.1 | 8172957 | 19-scf00458 | 19 |
| AX-157748310 | 23 | 37.257 | KV453155.1 | 8176363 | 19-scf00458 | 19 |
| AX-158298220 | 23 | 37.257 | KV453155.1 | 8178038 | 19-scf00458 | 19 |
| AX-158298221 | 23 | 37.257 | KV453155.1 | 8179184 | 19-scf00458 | 19 |
| AX-158298222 | 23 | 37.257 | KV453155.1 | 8179843 | 19-scf00458 | 19 |
| AX-158298224 | 23 | 37.257 | KV453155.1 | 8182456 | 19-scf00458 | 19 |
| AX-158298227 | 23 | 37.257 | KV453155.1 | 8184602 | 19-scf00458 | 19 |
| AX-158381290 | 23 | 37.257 | KV453155.1 | 8187502 | 19-scf00458 | 19 |
| AX-158298231 | 23 | 37.257 | KV453155.1 | 8187769 | 19-scf00458 | 19 |
| AX-158298233 | 23 | 37.257 | KV453155.1 | 8189833 | 19-scf00458 | 19 |
| AX-158411987 | 23 | 37.257 | KV453155.1 | 8190199 | 19-scf00458 | 19 |
| AX-157749273 | 23 | 37.257 | KV453155.1 | 8190856 | 19-scf00458 | 19 |
| AX-157846081 | 23 | 37.257 | KV453155.1 | 8197429 | 19-scf00458 | 19 |
| AX-158298241 | 23 | 37.257 | KV453155.1 | 8201845 | 19-scf00458 | 19 |
| AX-158298245 | 23 | 37.257 | KV453155.1 | 8204968 | 19-scf00458 | 19 |
| AX-158298246 | 23 | 37.257 | KV453155.1 | 8205355 | 19-scf00458 | 19 |
| AX-158298247 | 23 | 37.257 | KV453155.1 | 8206882 | 19-scf00458 | 19 |
| AX-158298248 | 23 | 37.257 | KV453155.1 | 8207920 | 19-scf00458 | 19 |
| AX-158298250 | 23 | 37.257 | KV453155.1 | 8211328 | 19-scf00458 | 19 |
| AX-158298252 | 23 | 37.257 | KV453155.1 | 8212672 | 19-scf00458 | 19 |
| AX-158298258 | 23 | 37.257 | KV453155.1 | 8218358 | 19-scf00458 | 19 |
| AX-158298260 | 23 | 37.257 | KV453155.1 | 8219642 | 19-scf00458 | 19 |
| AX-158298264 | 23 | 37.257 | KV453155.1 | 8222787 | 19-scf00458 | 19 |
| AX-157860708 | 23 | 37.257 | KV453155.1 | 8223934 | 19-scf00458 | 19 |
| AX-158298267 | 23 | 37.257 | KV453155.1 | 8226665 | 19-scf00458 | 19 |
| AX-158298271 | 23 | 37.257 | KV453155.1 | 8231081 | 19-scf00458 | 19 |
| AX-158298272 | 23 | 37.257 | KV453155.1 | 8238567 | 19-scf00458 | 19 |
| AX-158298273 | 23 | 37.257 | KV453155.1 | 8243411 | 19-scf00458 | 19 |
| AX-158298276 | 23 | 37.257 | KV453155.1 | 8255857 | 19-scf00458 | 19 |
| AX-158298277 | 23 | 37.257 | KV453155.1 | 8258627 | 19-scf00458 | 19 |
| AX-158298279 | 23 | 37.257 | KV453155.1 | 8264520 | 19-scf00458 | 19 |
| AX-157709989 | 23 | 37.257 | KV453155.1 | 8272893 | 19-scf00458 | 19 |
| AX-158298281 | 23 | 37.257 | KV453155.1 | 8273205 | 19-scf00458 | 19 |
| AX-157860712 | 23 | 37.257 | KV453155.1 | 8273971 | 19-scf00458 | 19 |
| AX-158298284 | 23 | 37.257 | KV453155.1 | 8275299 | 19-scf00458 | 19 |
| AX-158298285 | 23 | 37.257 | KV453155.1 | 8276150 | 19-scf00458 | 19 |
| AX-158298286 | 23 | 37.257 | KV453155.1 | 8276582 | 19-scf00458 | 19 |
| AX-158298287 | 23 | 37.257 | KV453155.1 | 8277801 | 19-scf00458 | 19 |
| AX-158298290 | 23 | 37.257 | KV453155.1 | 8280095 | 19-scf00458 | 19 |

|              |    |        |            |         |             |    |
|--------------|----|--------|------------|---------|-------------|----|
| AX-158298297 | 23 | 37.257 | KV453155.1 | 8285593 | 19-scf00458 | 19 |
| AX-157860714 | 23 | 37.257 | KV453155.1 | 8287734 | 19-scf00458 | 19 |
| AX-157860715 | 23 | 37.257 | KV453155.1 | 8290705 | 19-scf00458 | 19 |
| AX-158298310 | 23 | 37.257 | KV453155.1 | 8305076 | 19-scf00458 | 19 |
| AX-157860717 | 23 | 37.257 | KV453155.1 | 8305281 | 19-scf00458 | 19 |
| AX-157860718 | 23 | 37.257 | KV453155.1 | 8305399 | 19-scf00458 | 19 |
| AX-158298312 | 23 | 37.257 | KV453155.1 | 8308064 | 19-scf00458 | 19 |
| AX-157860720 | 23 | 37.257 | KV453155.1 | 8308202 | 19-scf00458 | 19 |
| AX-157860721 | 23 | 37.257 | KV453155.1 | 8309208 | 19-scf00458 | 19 |
| AX-158298314 | 23 | 37.257 | KV453155.1 | 8309798 | 19-scf00458 | 19 |
| AX-157860722 | 23 | 37.257 | KV453155.1 | 8310765 | 19-scf00458 | 19 |
| AX-158298316 | 23 | 37.257 | KV453155.1 | 8311843 | 19-scf00458 | 19 |
| AX-157725427 | 23 | 37.257 | KV453155.1 | 8313639 | 19-scf00458 | 19 |
| AX-158298319 | 23 | 37.257 | KV453155.1 | 8315064 | 19-scf00458 | 19 |
| AX-158298320 | 23 | 37.257 | KV453155.1 | 8315530 | 19-scf00458 | 19 |
| AX-158298321 | 23 | 37.257 | KV453155.1 | 8315945 | 19-scf00458 | 19 |
| AX-158298322 | 23 | 37.257 | KV453155.1 | 8316391 | 19-scf00458 | 19 |
| AX-158298323 | 23 | 37.257 | KV453155.1 | 8317074 | 19-scf00458 | 19 |
| AX-158298325 | 23 | 37.257 | KV453155.1 | 8319208 | 19-scf00458 | 19 |
| AX-158298327 | 23 | 37.257 | KV453155.1 | 8320000 | 19-scf00458 | 19 |
| AX-158298328 | 23 | 37.257 | KV453155.1 | 8320990 | 19-scf00458 | 19 |
| AX-158298330 | 23 | 37.257 | KV453155.1 | 8324220 | 19-scf00458 | 19 |
| AX-158298332 | 23 | 37.257 | KV453155.1 | 8326216 | 19-scf00458 | 19 |
| AX-158298333 | 23 | 37.257 | KV453155.1 | 8329487 | 19-scf00458 | 19 |
| AX-158298334 | 23 | 37.257 | KV453155.1 | 8329660 | 19-scf00458 | 19 |
| AX-158298335 | 23 | 37.257 | KV453155.1 | 8332153 | 19-scf00458 | 19 |
| AX-157860724 | 23 | 37.257 | KV453155.1 | 8334644 | 19-scf00458 | 19 |
| AX-158298339 | 23 | 37.257 | KV453155.1 | 8354044 | 19-scf00458 | 19 |
| AX-158298355 | 23 | 37.257 | KV453155.1 | 8380959 | 19-scf00458 | 19 |
| AX-158298356 | 23 | 37.257 | KV453155.1 | 8381452 | 19-scf00458 | 19 |
| AX-158298359 | 23 | 37.257 | KV453155.1 | 8385239 | 19-scf00458 | 19 |
| AX-158298361 | 23 | 37.257 | KV453155.1 | 8388084 | 19-scf00458 | 19 |
| AX-158298365 | 23 | 37.257 | KV453155.1 | 8391093 | 19-scf00458 | 19 |
| AX-158298366 | 23 | 37.257 | KV453155.1 | 8391463 | 19-scf00458 | 19 |
| AX-158298367 | 23 | 37.257 | KV453155.1 | 8391957 | 19-scf00458 | 19 |
| AX-158298368 | 23 | 37.257 | KV453155.1 | 8392181 | 19-scf00458 | 19 |
| AX-157846084 | 23 | 37.257 | KV453155.1 | 8392923 | 19-scf00458 | 19 |
| AX-158298370 | 23 | 37.257 | KV453155.1 | 8393193 | 19-scf00458 | 19 |
| AX-157846085 | 23 | 37.257 | KV453155.1 | 8393898 | 19-scf00458 | 19 |
| AX-157860727 | 23 | 37.257 | KV453155.1 | 8395358 | 19-scf00458 | 19 |
| AX-157860728 | 23 | 37.257 | KV453155.1 | 8395800 | 19-scf00458 | 19 |
| AX-158298394 | 23 | 37.257 | KV453155.1 | 8426043 | 19-scf00458 | 19 |
| AX-158298401 | 23 | 37.257 | KV453155.1 | 8440652 | 19-scf00458 | 19 |
| AX-158298402 | 23 | 37.257 | KV453155.1 | 8441757 | 19-scf00458 | 19 |
| AX-158298403 | 23 | 37.257 | KV453155.1 | 8442111 | 19-scf00458 | 19 |
| AX-158298404 | 23 | 37.257 | KV453155.1 | 8442420 | 19-scf00458 | 19 |
| AX-158298405 | 23 | 37.257 | KV453155.1 | 8443705 | 19-scf00458 | 19 |
| AX-158298407 | 23 | 37.257 | KV453155.1 | 8445405 | 19-scf00458 | 19 |
| AX-158298408 | 23 | 37.257 | KV453155.1 | 8447763 | 19-scf00458 | 19 |
| AX-158298409 | 23 | 37.257 | KV453155.1 | 8448405 | 19-scf00458 | 19 |
| AX-158298412 | 23 | 37.257 | KV453155.1 | 8449586 | 19-scf00458 | 19 |

|              |    |        |            |         |             |    |
|--------------|----|--------|------------|---------|-------------|----|
| AX-158298413 | 23 | 37.257 | KV453155.1 | 8452001 | 19-scf00458 | 19 |
| AX-158298414 | 23 | 37.257 | KV453155.1 | 8452830 | 19-scf00458 | 19 |
| AX-157846087 | 23 | 37.257 | KV453155.1 | 8453437 | 19-scf00458 | 19 |
| AX-157753298 | 23 | 37.257 | KV453155.1 | 8453606 | 19-scf00458 | 19 |
| AX-158298441 | 23 | 37.257 | KV453155.1 | 8500324 | 19-scf00458 | 19 |
| AX-157860730 | 23 | 37.257 | KV453155.1 | 8519313 | 19-scf00458 | 19 |
| AX-157860732 | 23 | 37.257 | KV453155.1 | 8526764 | 19-scf00458 | 19 |
| AX-158298453 | 23 | 37.257 | KV453155.1 | 8526851 | 19-scf00458 | 19 |
| AX-158298465 | 23 | 37.257 | KV453155.1 | 8539658 | 19-scf00458 | 19 |
| AX-158298466 | 23 | 37.257 | KV453155.1 | 8541522 | 19-scf00458 | 19 |
| AX-158298470 | 23 | 37.257 | KV453155.1 | 8546928 | 19-scf00458 | 19 |
| AX-157860734 | 23 | 37.257 | KV453155.1 | 8547254 | 19-scf00458 | 19 |
| AX-158298471 | 23 | 37.257 | KV453155.1 | 8550203 | 19-scf00458 | 19 |
| AX-158298472 | 23 | 37.257 | KV453155.1 | 8550796 | 19-scf00458 | 19 |
| AX-158298477 | 23 | 37.257 | KV453155.1 | 8557208 | 19-scf00458 | 19 |
| AX-158298479 | 23 | 37.257 | KV453155.1 | 8559374 | 19-scf00458 | 19 |
| AX-158298481 | 23 | 37.257 | KV453155.1 | 8560493 | 19-scf00458 | 19 |
| AX-158298487 | 23 | 37.257 | KV453155.1 | 8563576 | 19-scf00458 | 19 |
| AX-158298492 | 23 | 37.257 | KV453155.1 | 8568411 | 19-scf00458 | 19 |
| AX-158298493 | 23 | 37.257 | KV453155.1 | 8568877 | 19-scf00458 | 19 |
| AX-158298496 | 23 | 37.257 | KV453155.1 | 8572410 | 19-scf00458 | 19 |
| AX-157860737 | 23 | 37.257 | KV453155.1 | 8573696 | 19-scf00458 | 19 |
| AX-158298498 | 23 | 37.257 | KV453155.1 | 8573754 | 19-scf00458 | 19 |
| AX-158298499 | 23 | 37.257 | KV453155.1 | 8574277 | 19-scf00458 | 19 |
| AX-157860738 | 23 | 37.257 | KV453155.1 | 8574689 | 19-scf00458 | 19 |
| AX-158298500 | 23 | 37.257 | KV453155.1 | 8574787 | 19-scf00458 | 19 |
| AX-158298501 | 23 | 37.257 | KV453155.1 | 8575863 | 19-scf00458 | 19 |
| AX-157756145 | 23 | 37.257 | KV453155.1 | 8576705 | 19-scf00458 | 19 |
| AX-158417524 | 23 | 37.257 | KV453155.1 | 8577181 | 19-scf00458 | 19 |
| AX-158417525 | 23 | 37.257 | KV453155.1 | 8577802 | 19-scf00458 | 19 |
| AX-158298505 | 23 | 37.257 | KV453155.1 | 8580604 | 19-scf00458 | 19 |
| AX-158298506 | 23 | 37.257 | KV453155.1 | 8581950 | 19-scf00458 | 19 |
| AX-158298508 | 23 | 37.257 | KV453155.1 | 8584161 | 19-scf00458 | 19 |
| AX-158298513 | 23 | 37.257 | KV453155.1 | 8586572 | 19-scf00458 | 19 |
| AX-158298515 | 23 | 37.257 | KV453155.1 | 8588162 | 19-scf00458 | 19 |
| AX-158298523 | 23 | 37.257 | KV453155.1 | 8601754 | 19-scf00458 | 19 |
| AX-158298525 | 23 | 37.257 | KV453155.1 | 8603686 | 19-scf00458 | 19 |
| AX-158298532 | 23 | 37.257 | KV453155.1 | 8607407 | 19-scf00458 | 19 |
| AX-158298535 | 23 | 37.257 | KV453155.1 | 8612844 | 19-scf00458 | 19 |
| AX-158298539 | 23 | 37.257 | KV453155.1 | 8616498 | 19-scf00458 | 19 |
| AX-157750941 | 23 | 37.257 | KV453155.1 | 8620896 | 19-scf00458 | 19 |
| AX-158298545 | 23 | 37.257 | KV453155.1 | 8623278 | 19-scf00458 | 19 |
| AX-158298547 | 23 | 37.257 | KV453155.1 | 8624939 | 19-scf00458 | 19 |
| AX-158298550 | 23 | 37.257 | KV453155.1 | 8627490 | 19-scf00458 | 19 |
| AX-158298552 | 23 | 37.257 | KV453155.1 | 8630097 | 19-scf00458 | 19 |
| AX-158298553 | 23 | 37.257 | KV453155.1 | 8630925 | 19-scf00458 | 19 |
| AX-157762714 | 23 | 37.257 | KV453155.1 | 8632953 | 19-scf00458 | 19 |
| AX-158298557 | 23 | 37.257 | KV453155.1 | 8633328 | 19-scf00458 | 19 |
| AX-158298558 | 23 | 37.257 | KV453155.1 | 8633740 | 19-scf00458 | 19 |
| AX-158298560 | 23 | 37.257 | KV453155.1 | 8635258 | 19-scf00458 | 19 |
| AX-157713632 | 23 | 37.257 | KV453155.1 | 8637194 | 19-scf00458 | 19 |

|              |    |        |             |         |                |    |
|--------------|----|--------|-------------|---------|----------------|----|
| AX-157846116 | 23 | 37.257 | KV453155.1  | 8882394 | 19-scf00458    | 19 |
| AX-157694825 | 23 | 37.257 | FI869061.1  | 62      | IORI212 lctalu | UN |
| AX-157705520 | 23 | 37.257 | 3ML01030066 | 381     | scf05658_1     | UN |
| AX-157705581 | 23 | 37.257 | 3ML01030294 | 52      | scf05889_1     | UN |
| AX-157706639 | 23 | 37.257 | 3ML01033272 | 293     | scf08913_1     | UN |
| AX-158297712 | 23 | 37.366 | KV453155.1  | 7634817 | 19-scf00458    | 19 |
| AX-158297718 | 23 | 37.366 | KV453155.1  | 7640815 | 19-scf00458    | 19 |
| AX-157714758 | 23 | 37.391 | KV453155.1  | 7657565 | 19-scf00458    | 19 |
| AX-157860675 | 23 | 37.418 | KV453155.1  | 7664956 | 19-scf00458    | 19 |
| AX-158297751 | 23 | 37.448 | KV453155.1  | 7677104 | 19-scf00458    | 19 |
| AX-158297378 | 23 | 37.475 | KV453155.1  | 7133269 | 19-scf00458    | 19 |
| AX-158297449 | 23 | 37.475 | KV453155.1  | 7216141 | 19-scf00458    | 19 |
| AX-158297486 | 23 | 37.475 | KV453155.1  | 7265728 | 19-scf00458    | 19 |
| AX-157888089 | 23 | 37.475 | KV453155.1  | 7274650 | 19-scf00458    | 19 |
| AX-158297510 | 23 | 37.475 | KV453155.1  | 7298396 | 19-scf00458    | 19 |
| AX-158297532 | 23 | 37.475 | KV453155.1  | 7334028 | 19-scf00458    | 19 |
| AX-158297601 | 23 | 37.475 | KV453155.1  | 7414548 | 19-scf00458    | 19 |
| AX-157860653 | 23 | 37.475 | KV453155.1  | 7494284 | 19-scf00458    | 19 |
| AX-158297651 | 23 | 37.475 | KV453155.1  | 7518908 | 19-scf00458    | 19 |
| AX-157846058 | 23 | 37.475 | KV453155.1  | 7678340 | 19-scf00458    | 19 |
| AX-158297754 | 23 | 37.475 | KV453155.1  | 7687803 | 19-scf00458    | 19 |
| AX-158297758 | 23 | 37.475 | KV453155.1  | 7691007 | 19-scf00458    | 19 |
| AX-158297766 | 23 | 37.475 | KV453155.1  | 7696427 | 19-scf00458    | 19 |
| AX-158297767 | 23 | 37.475 | KV453155.1  | 7700632 | 19-scf00458    | 19 |
| AX-158298584 | 23 | 37.475 | KV453155.1  | 8661880 | 19-scf00458    | 19 |
| AX-158298621 | 23 | 37.475 | KV453155.1  | 8712137 | 19-scf00458    | 19 |
| AX-158298622 | 23 | 37.475 | KV453155.1  | 8712349 | 19-scf00458    | 19 |
| AX-158298624 | 23 | 37.475 | KV453155.1  | 8713756 | 19-scf00458    | 19 |
| AX-158298625 | 23 | 37.475 | KV453155.1  | 8714187 | 19-scf00458    | 19 |
| AX-158298626 | 23 | 37.475 | KV453155.1  | 8714998 | 19-scf00458    | 19 |
| AX-158298628 | 23 | 37.475 | KV453155.1  | 8717499 | 19-scf00458    | 19 |
| AX-158298629 | 23 | 37.475 | KV453155.1  | 8717892 | 19-scf00458    | 19 |
| AX-158298634 | 23 | 37.475 | KV453155.1  | 8726434 | 19-scf00458    | 19 |
| AX-157860745 | 23 | 37.475 | KV453155.1  | 8732126 | 19-scf00458    | 19 |
| AX-158298643 | 23 | 37.475 | KV453155.1  | 8732626 | 19-scf00458    | 19 |
| AX-158298647 | 23 | 37.475 | KV453155.1  | 8735990 | 19-scf00458    | 19 |
| AX-158298648 | 23 | 37.475 | KV453155.1  | 8736807 | 19-scf00458    | 19 |
| AX-158298650 | 23 | 37.475 | KV453155.1  | 8738132 | 19-scf00458    | 19 |
| AX-157846102 | 23 | 37.475 | KV453155.1  | 8738638 | 19-scf00458    | 19 |
| AX-157846103 | 23 | 37.475 | KV453155.1  | 8738987 | 19-scf00458    | 19 |
| AX-158297789 | 23 | 37.479 | KV453155.1  | 7726247 | 19-scf00458    | 19 |
| AX-157747995 | 23 | 37.479 | KV453155.1  | 7903677 | 19-scf00458    | 19 |
| AX-157743774 | 23 | 37.662 | KV453155.1  | 7734929 | 19-scf00458    | 19 |
| AX-157716188 | 23 | 37.666 | KV453155.1  | 7744924 | 19-scf00458    | 19 |
| AX-158298228 | 23 | 37.666 | KV453155.1  | 8185573 | 19-scf00458    | 19 |
| AX-158297807 | 23 | 37.669 | KV453155.1  | 7745201 | 19-scf00458    | 19 |
| AX-158297809 | 23 | 37.673 | KV453155.1  | 7745891 | 19-scf00458    | 19 |
| AX-158297904 | 23 | 37.673 | KV453155.1  | 7837544 | 19-scf00458    | 19 |
| AX-158298644 | 23 | 37.673 | KV453155.1  | 8734003 | 19-scf00458    | 19 |
| AX-158297793 | 23 | 37.675 | KV453155.1  | 7728136 | 19-scf00458    | 19 |
| AX-158297819 | 23 | 37.675 | KV453155.1  | 7757424 | 19-scf00458    | 19 |

|              |    |        |            |         |             |    |
|--------------|----|--------|------------|---------|-------------|----|
| AX-158297829 | 23 | 37.675 | KV453155.1 | 7773570 | 19-scf00458 | 19 |
| AX-158297830 | 23 | 37.675 | KV453155.1 | 7773982 | 19-scf00458 | 19 |
| AX-158297837 | 23 | 37.675 | KV453155.1 | 7777946 | 19-scf00458 | 19 |
| AX-158297877 | 23 | 37.675 | KV453155.1 | 7807763 | 19-scf00458 | 19 |
| AX-158297916 | 23 | 37.675 | KV453155.1 | 7853199 | 19-scf00458 | 19 |
| AX-157860688 | 23 | 37.675 | KV453155.1 | 7860681 | 19-scf00458 | 19 |
| AX-158297954 | 23 | 37.675 | KV453155.1 | 7886776 | 19-scf00458 | 19 |
| AX-158297955 | 23 | 37.675 | KV453155.1 | 7887517 | 19-scf00458 | 19 |
| AX-158297964 | 23 | 37.675 | KV453155.1 | 7894696 | 19-scf00458 | 19 |
| AX-158297965 | 23 | 37.675 | KV453155.1 | 7895171 | 19-scf00458 | 19 |
| AX-157748666 | 23 | 37.675 | KV453155.1 | 7918785 | 19-scf00458 | 19 |
| AX-158297995 | 23 | 37.675 | KV453155.1 | 7929683 | 19-scf00458 | 19 |
| AX-158297997 | 23 | 37.675 | KV453155.1 | 7930587 | 19-scf00458 | 19 |
| AX-158298009 | 23 | 37.675 | KV453155.1 | 7940588 | 19-scf00458 | 19 |
| AX-157702761 | 23 | 37.675 | KV453155.1 | 8078785 | 19-scf00458 | 19 |
| AX-157846076 | 23 | 37.675 | KV453155.1 | 8163475 | 19-scf00458 | 19 |
| AX-158298234 | 23 | 37.675 | KV453155.1 | 8190513 | 19-scf00458 | 19 |
| AX-158298256 | 23 | 37.675 | KV453155.1 | 8217476 | 19-scf00458 | 19 |
| AX-158298288 | 23 | 37.675 | KV453155.1 | 8278716 | 19-scf00458 | 19 |
| AX-158298317 | 23 | 37.675 | KV453155.1 | 8312027 | 19-scf00458 | 19 |
| AX-158298329 | 23 | 37.675 | KV453155.1 | 8322342 | 19-scf00458 | 19 |
| AX-158298406 | 23 | 37.675 | KV453155.1 | 8444734 | 19-scf00458 | 19 |
| AX-158298473 | 23 | 37.675 | KV453155.1 | 8553540 | 19-scf00458 | 19 |
| AX-158298474 | 23 | 37.675 | KV453155.1 | 8554193 | 19-scf00458 | 19 |
| AX-158298503 | 23 | 37.675 | KV453155.1 | 8579231 | 19-scf00458 | 19 |
| AX-158298509 | 23 | 37.675 | KV453155.1 | 8584750 | 19-scf00458 | 19 |
| AX-158298533 | 23 | 37.675 | KV453155.1 | 8609811 | 19-scf00458 | 19 |
| AX-158298534 | 23 | 37.675 | KV453155.1 | 8612329 | 19-scf00458 | 19 |
| AX-158298554 | 23 | 37.675 | KV453155.1 | 8631613 | 19-scf00458 | 19 |
| AX-158297833 | 23 | 37.688 | KV453155.1 | 7775259 | 19-scf00458 | 19 |
| AX-157726677 | 23 | 37.695 | KV453155.1 | 7760339 | 19-scf00458 | 19 |
| AX-158297862 | 23 | 37.695 | KV453155.1 | 7799758 | 19-scf00458 | 19 |
| AX-158297887 | 23 | 37.695 | KV453155.1 | 7816162 | 19-scf00458 | 19 |
| AX-158423573 | 23 | 37.695 | KV453155.1 | 7816523 | 19-scf00458 | 19 |
| AX-158297889 | 23 | 37.695 | KV453155.1 | 7819480 | 19-scf00458 | 19 |
| AX-157860686 | 23 | 37.695 | KV453155.1 | 7839841 | 19-scf00458 | 19 |
| AX-158297907 | 23 | 37.695 | KV453155.1 | 7842140 | 19-scf00458 | 19 |
| AX-157860687 | 23 | 37.695 | KV453155.1 | 7856470 | 19-scf00458 | 19 |
| AX-158297918 | 23 | 37.695 | KV453155.1 | 7857092 | 19-scf00458 | 19 |
| AX-158297919 | 23 | 37.695 | KV453155.1 | 7857527 | 19-scf00458 | 19 |
| AX-158297920 | 23 | 37.695 | KV453155.1 | 7858061 | 19-scf00458 | 19 |
| AX-158297925 | 23 | 37.695 | KV453155.1 | 7862760 | 19-scf00458 | 19 |
| AX-158297966 | 23 | 37.695 | KV453155.1 | 7895776 | 19-scf00458 | 19 |
| AX-158297979 | 23 | 37.695 | KV453155.1 | 7910603 | 19-scf00458 | 19 |
| AX-158297992 | 23 | 37.695 | KV453155.1 | 7928196 | 19-scf00458 | 19 |
| AX-158298002 | 23 | 37.695 | KV453155.1 | 7934449 | 19-scf00458 | 19 |
| AX-158298007 | 23 | 37.695 | KV453155.1 | 7938938 | 19-scf00458 | 19 |
| AX-158298226 | 23 | 37.695 | KV453155.1 | 8183441 | 19-scf00458 | 19 |
| AX-158298259 | 23 | 37.695 | KV453155.1 | 8219226 | 19-scf00458 | 19 |
| AX-158298266 | 23 | 37.695 | KV453155.1 | 8225790 | 19-scf00458 | 19 |
| AX-158298306 | 23 | 37.695 | KV453155.1 | 8296826 | 19-scf00458 | 19 |



|              |    |        |            |         |             |    |
|--------------|----|--------|------------|---------|-------------|----|
| AX-158298485 | 23 | 37.695 | KV453155.1 | 8562521 | 19-scf00458 | 19 |
| AX-158297939 | 23 | 38.139 | KV453155.1 | 7874059 | 19-scf00458 | 19 |
| AX-157860690 | 23 | 38.626 | KV453155.1 | 7892342 | 19-scf00458 | 19 |
| AX-157846068 | 23 | 39.11  | KV453155.1 | 7893891 | 19-scf00458 | 19 |
| AX-158297963 | 23 | 39.584 | KV453155.1 | 7894288 | 19-scf00458 | 19 |
| AX-158297972 | 23 | 40.044 | KV453155.1 | 7904641 | 19-scf00458 | 19 |
| AX-158297975 | 23 | 40.503 | KV453155.1 | 7907766 | 19-scf00458 | 19 |
| AX-158298012 | 23 | 40.969 | KV453155.1 | 7942624 | 19-scf00458 | 19 |
| AX-158297774 | 23 | 41.225 | KV453155.1 | 7710004 | 19-scf00458 | 19 |
| AX-158297808 | 23 | 41.225 | KV453155.1 | 7745809 | 19-scf00458 | 19 |
| AX-158297836 | 23 | 41.225 | KV453155.1 | 7776634 | 19-scf00458 | 19 |
| AX-158297922 | 23 | 41.225 | KV453155.1 | 7858904 | 19-scf00458 | 19 |
| AX-158298013 | 23 | 41.225 | KV453155.1 | 7943592 | 19-scf00458 | 19 |
| AX-158298014 | 23 | 41.225 | KV453155.1 | 7944909 | 19-scf00458 | 19 |
| AX-158298015 | 23 | 41.225 | KV453155.1 | 7945190 | 19-scf00458 | 19 |
| AX-158298016 | 23 | 41.225 | KV453155.1 | 7946062 | 19-scf00458 | 19 |
| AX-158298019 | 23 | 41.225 | KV453155.1 | 7948761 | 19-scf00458 | 19 |
| AX-158298020 | 23 | 41.225 | KV453155.1 | 7949355 | 19-scf00458 | 19 |
| AX-158298021 | 23 | 41.225 | KV453155.1 | 7950953 | 19-scf00458 | 19 |
| AX-158298022 | 23 | 41.225 | KV453155.1 | 7951288 | 19-scf00458 | 19 |
| AX-157860694 | 23 | 41.225 | KV453155.1 | 7951872 | 19-scf00458 | 19 |
| AX-158298026 | 23 | 41.225 | KV453155.1 | 7953864 | 19-scf00458 | 19 |
| AX-158298027 | 23 | 41.225 | KV453155.1 | 7954443 | 19-scf00458 | 19 |
| AX-158298030 | 23 | 41.225 | KV453155.1 | 7960012 | 19-scf00458 | 19 |
| AX-158298031 | 23 | 41.225 | KV453155.1 | 7960436 | 19-scf00458 | 19 |
| AX-158298032 | 23 | 41.225 | KV453155.1 | 7961750 | 19-scf00458 | 19 |
| AX-157860695 | 23 | 41.225 | KV453155.1 | 7962135 | 19-scf00458 | 19 |
| AX-158298034 | 23 | 41.225 | KV453155.1 | 7964642 | 19-scf00458 | 19 |
| AX-157860696 | 23 | 41.225 | KV453155.1 | 7966637 | 19-scf00458 | 19 |
| AX-158298036 | 23 | 41.225 | KV453155.1 | 7966696 | 19-scf00458 | 19 |
| AX-158298038 | 23 | 41.225 | KV453155.1 | 7968893 | 19-scf00458 | 19 |
| AX-158298042 | 23 | 41.225 | KV453155.1 | 7973234 | 19-scf00458 | 19 |
| AX-158298043 | 23 | 41.225 | KV453155.1 | 7973924 | 19-scf00458 | 19 |
| AX-158298044 | 23 | 41.225 | KV453155.1 | 7975596 | 19-scf00458 | 19 |
| AX-158298045 | 23 | 41.225 | KV453155.1 | 7976344 | 19-scf00458 | 19 |
| AX-158298046 | 23 | 41.225 | KV453155.1 | 7978951 | 19-scf00458 | 19 |
| AX-158298047 | 23 | 41.225 | KV453155.1 | 7979824 | 19-scf00458 | 19 |
| AX-157860697 | 23 | 41.225 | KV453155.1 | 7984113 | 19-scf00458 | 19 |
| AX-158298051 | 23 | 41.225 | KV453155.1 | 7984400 | 19-scf00458 | 19 |
| AX-158298053 | 23 | 41.225 | KV453155.1 | 7987083 | 19-scf00458 | 19 |
| AX-158298054 | 23 | 41.225 | KV453155.1 | 7987510 | 19-scf00458 | 19 |
| AX-158298058 | 23 | 41.225 | KV453155.1 | 7990044 | 19-scf00458 | 19 |
| AX-157751494 | 23 | 41.225 | KV453155.1 | 7990508 | 19-scf00458 | 19 |
| AX-157846072 | 23 | 41.225 | KV453155.1 | 7990998 | 19-scf00458 | 19 |
| AX-158298059 | 23 | 41.225 | KV453155.1 | 7991047 | 19-scf00458 | 19 |
| AX-158298060 | 23 | 41.225 | KV453155.1 | 7991588 | 19-scf00458 | 19 |
| AX-157846073 | 23 | 41.225 | KV453155.1 | 7993405 | 19-scf00458 | 19 |
| AX-158298061 | 23 | 41.225 | KV453155.1 | 7993461 | 19-scf00458 | 19 |
| AX-158298068 | 23 | 41.225 | KV453155.1 | 8003141 | 19-scf00458 | 19 |
| AX-158298069 | 23 | 41.225 | KV453155.1 | 8003792 | 19-scf00458 | 19 |
| AX-157860698 | 23 | 41.225 | KV453155.1 | 8004097 | 19-scf00458 | 19 |

|              |    |        |            |         |             |    |
|--------------|----|--------|------------|---------|-------------|----|
| AX-158298070 | 23 | 41.225 | KV453155.1 | 8005079 | 19-scf00458 | 19 |
| AX-157860699 | 23 | 41.225 | KV453155.1 | 8007595 | 19-scf00458 | 19 |
| AX-158298074 | 23 | 41.225 | KV453155.1 | 8008427 | 19-scf00458 | 19 |
| AX-158298075 | 23 | 41.225 | KV453155.1 | 8008580 | 19-scf00458 | 19 |
| AX-158298076 | 23 | 41.225 | KV453155.1 | 8011230 | 19-scf00458 | 19 |
| AX-158298077 | 23 | 41.225 | KV453155.1 | 8012226 | 19-scf00458 | 19 |
| AX-158298078 | 23 | 41.225 | KV453155.1 | 8013136 | 19-scf00458 | 19 |
| AX-157860700 | 23 | 41.225 | KV453155.1 | 8013293 | 19-scf00458 | 19 |
| AX-158298081 | 23 | 41.225 | KV453155.1 | 8017056 | 19-scf00458 | 19 |
| AX-157721682 | 23 | 41.225 | KV453155.1 | 8017908 | 19-scf00458 | 19 |
| AX-158298082 | 23 | 41.225 | KV453155.1 | 8018816 | 19-scf00458 | 19 |
| AX-158298083 | 23 | 41.225 | KV453155.1 | 8020212 | 19-scf00458 | 19 |
| AX-158298085 | 23 | 41.225 | KV453155.1 | 8021895 | 19-scf00458 | 19 |
| AX-158298087 | 23 | 41.225 | KV453155.1 | 8023710 | 19-scf00458 | 19 |
| AX-158298088 | 23 | 41.225 | KV453155.1 | 8024298 | 19-scf00458 | 19 |
| AX-158298089 | 23 | 41.225 | KV453155.1 | 8025061 | 19-scf00458 | 19 |
| AX-158298090 | 23 | 41.225 | KV453155.1 | 8025826 | 19-scf00458 | 19 |
| AX-158298092 | 23 | 41.225 | KV453155.1 | 8026758 | 19-scf00458 | 19 |
| AX-158298097 | 23 | 41.225 | KV453155.1 | 8033467 | 19-scf00458 | 19 |
| AX-158298100 | 23 | 41.225 | KV453155.1 | 8039062 | 19-scf00458 | 19 |
| AX-158298104 | 23 | 41.225 | KV453155.1 | 8042375 | 19-scf00458 | 19 |
| AX-158298107 | 23 | 41.225 | KV453155.1 | 8044739 | 19-scf00458 | 19 |
| AX-158298110 | 23 | 41.225 | KV453155.1 | 8048914 | 19-scf00458 | 19 |
| AX-158298111 | 23 | 41.225 | KV453155.1 | 8050390 | 19-scf00458 | 19 |
| AX-158298113 | 23 | 41.225 | KV453155.1 | 8051487 | 19-scf00458 | 19 |
| AX-157860702 | 23 | 41.225 | KV453155.1 | 8052382 | 19-scf00458 | 19 |
| AX-158298115 | 23 | 41.225 | KV453155.1 | 8053096 | 19-scf00458 | 19 |
| AX-158298120 | 23 | 41.225 | KV453155.1 | 8061269 | 19-scf00458 | 19 |
| AX-158298121 | 23 | 41.225 | KV453155.1 | 8061622 | 19-scf00458 | 19 |
| AX-158298122 | 23 | 41.225 | KV453155.1 | 8062189 | 19-scf00458 | 19 |
| AX-157860704 | 23 | 41.225 | KV453155.1 | 8062275 | 19-scf00458 | 19 |
| AX-158298123 | 23 | 41.225 | KV453155.1 | 8062817 | 19-scf00458 | 19 |
| AX-158298130 | 23 | 41.225 | KV453155.1 | 8073557 | 19-scf00458 | 19 |
| AX-158298132 | 23 | 41.225 | KV453155.1 | 8076369 | 19-scf00458 | 19 |
| AX-158298140 | 23 | 41.225 | KV453155.1 | 8082564 | 19-scf00458 | 19 |
| AX-158298142 | 23 | 41.225 | KV453155.1 | 8084106 | 19-scf00458 | 19 |
| AX-158298143 | 23 | 41.225 | KV453155.1 | 8084634 | 19-scf00458 | 19 |
| AX-158298147 | 23 | 41.225 | KV453155.1 | 8087643 | 19-scf00458 | 19 |
| AX-158298148 | 23 | 41.225 | KV453155.1 | 8093804 | 19-scf00458 | 19 |
| AX-158298150 | 23 | 41.225 | KV453155.1 | 8094901 | 19-scf00458 | 19 |
| AX-158298152 | 23 | 41.225 | KV453155.1 | 8096129 | 19-scf00458 | 19 |
| AX-158298156 | 23 | 41.225 | KV453155.1 | 8100000 | 19-scf00458 | 19 |
| AX-158298161 | 23 | 41.225 | KV453155.1 | 8106370 | 19-scf00458 | 19 |
| AX-158298162 | 23 | 41.225 | KV453155.1 | 8106932 | 19-scf00458 | 19 |
| AX-158298163 | 23 | 41.225 | KV453155.1 | 8107282 | 19-scf00458 | 19 |
| AX-158298166 | 23 | 41.225 | KV453155.1 | 8111838 | 19-scf00458 | 19 |
| AX-158298169 | 23 | 41.225 | KV453155.1 | 8116709 | 19-scf00458 | 19 |
| AX-158298170 | 23 | 41.225 | KV453155.1 | 8118934 | 19-scf00458 | 19 |
| AX-157860706 | 23 | 41.225 | KV453155.1 | 8121253 | 19-scf00458 | 19 |
| AX-158298173 | 23 | 41.225 | KV453155.1 | 8121576 | 19-scf00458 | 19 |
| AX-158298174 | 23 | 41.225 | KV453155.1 | 8123009 | 19-scf00458 | 19 |

|              |    |        |            |         |             |    |
|--------------|----|--------|------------|---------|-------------|----|
| AX-158298175 | 23 | 41.225 | KV453155.1 | 8124148 | 19-scf00458 | 19 |
| AX-158298176 | 23 | 41.225 | KV453155.1 | 8124670 | 19-scf00458 | 19 |
| AX-158298177 | 23 | 41.225 | KV453155.1 | 8125466 | 19-scf00458 | 19 |
| AX-158298178 | 23 | 41.225 | KV453155.1 | 8126026 | 19-scf00458 | 19 |
| AX-158298180 | 23 | 41.225 | KV453155.1 | 8128080 | 19-scf00458 | 19 |
| AX-158298182 | 23 | 41.225 | KV453155.1 | 8129726 | 19-scf00458 | 19 |
| AX-158298184 | 23 | 41.225 | KV453155.1 | 8131727 | 19-scf00458 | 19 |
| AX-158298189 | 23 | 41.225 | KV453155.1 | 8135975 | 19-scf00458 | 19 |
| AX-158298190 | 23 | 41.225 | KV453155.1 | 8136872 | 19-scf00458 | 19 |
| AX-158298191 | 23 | 41.225 | KV453155.1 | 8137902 | 19-scf00458 | 19 |
| AX-158298192 | 23 | 41.225 | KV453155.1 | 8138477 | 19-scf00458 | 19 |
| AX-158298193 | 23 | 41.225 | KV453155.1 | 8140296 | 19-scf00458 | 19 |
| AX-157860707 | 23 | 41.225 | KV453155.1 | 8143115 | 19-scf00458 | 19 |
| AX-158298197 | 23 | 41.225 | KV453155.1 | 8145387 | 19-scf00458 | 19 |
| AX-158298198 | 23 | 41.225 | KV453155.1 | 8147024 | 19-scf00458 | 19 |
| AX-158298202 | 23 | 41.225 | KV453155.1 | 8150940 | 19-scf00458 | 19 |
| AX-158298204 | 23 | 41.225 | KV453155.1 | 8155011 | 19-scf00458 | 19 |
| AX-158298205 | 23 | 41.225 | KV453155.1 | 8155448 | 19-scf00458 | 19 |
| AX-158298289 | 23 | 41.225 | KV453155.1 | 8279522 | 19-scf00458 | 19 |
| AX-157846082 | 23 | 41.225 | KV453155.1 | 8350321 | 19-scf00458 | 19 |
| AX-158298364 | 23 | 41.225 | KV453155.1 | 8390721 | 19-scf00458 | 19 |
| AX-157743865 | 23 | 41.225 | KV453155.1 | 8495125 | 19-scf00458 | 19 |
| AX-158298541 | 23 | 41.225 | KV453155.1 | 8618069 | 19-scf00458 | 19 |
| AX-158298017 | 23 | 41.374 | KV453155.1 | 7946951 | 19-scf00458 | 19 |
| AX-158298025 | 23 | 41.489 | KV453155.1 | 7953241 | 19-scf00458 | 19 |
| AX-158298039 | 23 | 41.675 | KV453155.1 | 7970377 | 19-scf00458 | 19 |
| AX-158297996 | 23 | 41.869 | KV453155.1 | 7930126 | 19-scf00458 | 19 |
| AX-158298048 | 23 | 41.869 | KV453155.1 | 7981123 | 19-scf00458 | 19 |
| AX-157846095 | 23 | 41.869 | KV453155.1 | 8710056 | 19-scf00458 | 19 |
| AX-158298079 | 23 | 41.955 | KV453155.1 | 8014466 | 19-scf00458 | 19 |
| AX-158297737 | 23 | 42.029 | KV453155.1 | 7665262 | 19-scf00458 | 19 |
| AX-158297740 | 23 | 42.029 | KV453155.1 | 7666737 | 19-scf00458 | 19 |
| AX-158297741 | 23 | 42.029 | KV453155.1 | 7667648 | 19-scf00458 | 19 |
| AX-158297781 | 23 | 42.029 | KV453155.1 | 7717022 | 19-scf00458 | 19 |
| AX-158297839 | 23 | 42.029 | KV453155.1 | 7780240 | 19-scf00458 | 19 |
| AX-158297988 | 23 | 42.029 | KV453155.1 | 7922198 | 19-scf00458 | 19 |
| AX-158298080 | 23 | 42.029 | KV453155.1 | 8015847 | 19-scf00458 | 19 |
| AX-158298114 | 23 | 42.029 | KV453155.1 | 8051971 | 19-scf00458 | 19 |
| AX-157860725 | 23 | 42.029 | KV453155.1 | 8345528 | 19-scf00458 | 19 |
| AX-158298443 | 23 | 42.029 | KV453155.1 | 8504478 | 19-scf00458 | 19 |
| AX-157860731 | 23 | 42.029 | KV453155.1 | 8521352 | 19-scf00458 | 19 |
| AX-158298450 | 23 | 42.029 | KV453155.1 | 8521837 | 19-scf00458 | 19 |
| AX-158298458 | 23 | 42.029 | KV453155.1 | 8531939 | 19-scf00458 | 19 |
| AX-158298517 | 23 | 42.029 | KV453155.1 | 8591811 | 19-scf00458 | 19 |
| AX-158298527 | 23 | 42.029 | KV453155.1 | 8604802 | 19-scf00458 | 19 |
| AX-158298528 | 23 | 42.029 | KV453155.1 | 8605261 | 19-scf00458 | 19 |
| AX-158298091 | 23 | 42.092 | KV453155.1 | 8026228 | 19-scf00458 | 19 |
| AX-158298101 | 23 | 42.171 | KV453155.1 | 8039932 | 19-scf00458 | 19 |
| AX-158298105 | 23 | 42.171 | KV453155.1 | 8042999 | 19-scf00458 | 19 |
| AX-157860703 | 23 | 42.171 | KV453155.1 | 8057145 | 19-scf00458 | 19 |
| AX-158298160 | 23 | 42.171 | KV453155.1 | 8102418 | 19-scf00458 | 19 |

|              |    |        |            |         |             |    |
|--------------|----|--------|------------|---------|-------------|----|
| AX-158298102 | 23 | 42.559 | KV453155.1 | 8040767 | 19-scf00458 | 19 |
| AX-157749603 | 23 | 42.559 | KV453155.1 | 8047537 | 19-scf00458 | 19 |
| AX-158298116 | 23 | 42.559 | KV453155.1 | 8053713 | 19-scf00458 | 19 |
| AX-158298119 | 23 | 42.559 | KV453155.1 | 8058799 | 19-scf00458 | 19 |
| AX-158298135 | 23 | 42.559 | KV453155.1 | 8079146 | 19-scf00458 | 19 |
| AX-158298136 | 23 | 42.559 | KV453155.1 | 8080215 | 19-scf00458 | 19 |
| AX-158298137 | 23 | 42.559 | KV453155.1 | 8081129 | 19-scf00458 | 19 |
| AX-158298144 | 23 | 42.559 | KV453155.1 | 8085714 | 19-scf00458 | 19 |
| AX-157860705 | 23 | 42.559 | KV453155.1 | 8094141 | 19-scf00458 | 19 |
| AX-158298151 | 23 | 42.559 | KV453155.1 | 8095761 | 19-scf00458 | 19 |
| AX-158298154 | 23 | 42.559 | KV453155.1 | 8098152 | 19-scf00458 | 19 |
| AX-158298157 | 23 | 42.559 | KV453155.1 | 8100765 | 19-scf00458 | 19 |
| AX-158298164 | 23 | 42.559 | KV453155.1 | 8108037 | 19-scf00458 | 19 |
| AX-158298165 | 23 | 42.559 | KV453155.1 | 8109729 | 19-scf00458 | 19 |
| AX-158298171 | 23 | 42.559 | KV453155.1 | 8119868 | 19-scf00458 | 19 |
| AX-158298179 | 23 | 42.559 | KV453155.1 | 8126835 | 19-scf00458 | 19 |
| AX-158298185 | 23 | 42.559 | KV453155.1 | 8132377 | 19-scf00458 | 19 |
| AX-158298211 | 23 | 42.559 | KV453155.1 | 8162263 | 19-scf00458 | 19 |
| AX-157846078 | 23 | 42.559 | KV453155.1 | 8180172 | 19-scf00458 | 19 |
| AX-157735644 | 23 | 42.559 | KV453155.1 | 8184179 | 19-scf00458 | 19 |
| AX-158298235 | 23 | 42.559 | KV453155.1 | 8191233 | 19-scf00458 | 19 |
| AX-158298237 | 23 | 42.559 | KV453155.1 | 8192840 | 19-scf00458 | 19 |
| AX-157720342 | 23 | 42.559 | KV453155.1 | 8216914 | 19-scf00458 | 19 |
| AX-158298291 | 23 | 42.559 | KV453155.1 | 8280640 | 19-scf00458 | 19 |
| AX-158298303 | 23 | 42.559 | KV453155.1 | 8294071 | 19-scf00458 | 19 |
| AX-158298308 | 23 | 42.559 | KV453155.1 | 8300211 | 19-scf00458 | 19 |
| AX-158298331 | 23 | 42.559 | KV453155.1 | 8325098 | 19-scf00458 | 19 |
| AX-157725663 | 23 | 42.559 | KV453155.1 | 8346499 | 19-scf00458 | 19 |
| AX-158298452 | 23 | 42.559 | KV453155.1 | 8526030 | 19-scf00458 | 19 |
| AX-158298455 | 23 | 42.559 | KV453155.1 | 8528012 | 19-scf00458 | 19 |
| AX-158298518 | 23 | 42.559 | KV453155.1 | 8592166 | 19-scf00458 | 19 |
| AX-158298542 | 23 | 42.559 | KV453155.1 | 8618845 | 19-scf00458 | 19 |
| AX-158298580 | 23 | 42.559 | KV453155.1 | 8657781 | 19-scf00458 | 19 |
| AX-157697850 | 23 | 42.622 | KV453155.1 | 8352826 | 19-scf00458 | 19 |
| AX-158298086 | 23 | 42.682 | KV453155.1 | 8022813 | 19-scf00458 | 19 |
| AX-158298106 | 23 | 42.682 | KV453155.1 | 8043899 | 19-scf00458 | 19 |
| AX-158298340 | 23 | 42.682 | KV453155.1 | 8355259 | 19-scf00458 | 19 |
| AX-158295120 | 23 | 42.685 | KV453155.1 | 4209156 | 19-scf00458 | 19 |
| AX-158423564 | 23 | 42.685 | KV453155.1 | 4696967 | 19-scf00458 | 19 |
| AX-158298049 | 23 | 42.685 | KV453155.1 | 7982817 | 19-scf00458 | 19 |
| AX-158298326 | 23 | 42.685 | KV453155.1 | 8319496 | 19-scf00458 | 19 |
| AX-158298342 | 23 | 42.685 | KV453155.1 | 8357265 | 19-scf00458 | 19 |
| AX-157846101 | 23 | 42.685 | KV453155.1 | 8734814 | 19-scf00458 | 19 |
| AX-158299070 | 23 | 42.685 | KV453155.1 | 9424041 | 19-scf00458 | 19 |
| AX-158298369 | 23 | 42.728 | KV453155.1 | 8392679 | 19-scf00458 | 19 |
| AX-158298373 | 23 | 42.737 | KV453155.1 | 8397372 | 19-scf00458 | 19 |
| AX-158298379 | 23 | 42.737 | KV453155.1 | 8400122 | 19-scf00458 | 19 |
| AX-158298375 | 23 | 42.744 | KV453155.1 | 8398399 | 19-scf00458 | 19 |
| AX-158298376 | 23 | 42.756 | KV453155.1 | 8399035 | 19-scf00458 | 19 |
| AX-158297363 | 23 | 42.802 | KV453155.1 | 7117274 | 19-scf00458 | 19 |
| AX-158297383 | 23 | 42.802 | KV453155.1 | 7135385 | 19-scf00458 | 19 |

|              |    |        |            |         |             |    |
|--------------|----|--------|------------|---------|-------------|----|
| AX-158297443 | 23 | 42.802 | KV453155.1 | 7207763 | 19-scf00458 | 19 |
| AX-157722423 | 23 | 42.802 | KV453155.1 | 7428142 | 19-scf00458 | 19 |
| AX-158297642 | 23 | 42.802 | KV453155.1 | 7499908 | 19-scf00458 | 19 |
| AX-158297647 | 23 | 42.802 | KV453155.1 | 7510921 | 19-scf00458 | 19 |
| AX-157752622 | 23 | 42.802 | KV453155.1 | 7844451 | 19-scf00458 | 19 |
| AX-158298033 | 23 | 42.802 | KV453155.1 | 7962846 | 19-scf00458 | 19 |
| AX-158298035 | 23 | 42.802 | KV453155.1 | 7965079 | 19-scf00458 | 19 |
| AX-158298037 | 23 | 42.802 | KV453155.1 | 7967532 | 19-scf00458 | 19 |
| AX-158298103 | 23 | 42.802 | KV453155.1 | 8041640 | 19-scf00458 | 19 |
| AX-158298126 | 23 | 42.802 | KV453155.1 | 8066922 | 19-scf00458 | 19 |
| AX-158298347 | 23 | 42.802 | KV453155.1 | 8362355 | 19-scf00458 | 19 |
| AX-157775173 | 23 | 42.802 | KV453155.1 | 8384509 | 19-scf00458 | 19 |
| AX-157846083 | 23 | 42.802 | KV453155.1 | 8389923 | 19-scf00458 | 19 |
| AX-158298363 | 23 | 42.802 | KV453155.1 | 8390352 | 19-scf00458 | 19 |
| AX-158298377 | 23 | 42.802 | KV453155.1 | 8399317 | 19-scf00458 | 19 |
| AX-158298378 | 23 | 42.802 | KV453155.1 | 8399691 | 19-scf00458 | 19 |
| AX-158298380 | 23 | 42.802 | KV453155.1 | 8400335 | 19-scf00458 | 19 |
| AX-158298381 | 23 | 42.802 | KV453155.1 | 8403973 | 19-scf00458 | 19 |
| AX-158298388 | 23 | 42.802 | KV453155.1 | 8416997 | 19-scf00458 | 19 |
| AX-158298390 | 23 | 42.802 | KV453155.1 | 8418653 | 19-scf00458 | 19 |
| AX-158298391 | 23 | 42.802 | KV453155.1 | 8419949 | 19-scf00458 | 19 |
| AX-158298392 | 23 | 42.802 | KV453155.1 | 8421590 | 19-scf00458 | 19 |
| AX-158298559 | 23 | 42.802 | KV453155.1 | 8634877 | 19-scf00458 | 19 |
| AX-158298645 | 23 | 42.802 | KV453155.1 | 8734619 | 19-scf00458 | 19 |
| AX-157744196 | 23 | 42.802 | KV453155.1 | 8736620 | 19-scf00458 | 19 |
| AX-157722781 | 23 | 42.802 | KV453155.1 | 8753546 | 19-scf00458 | 19 |
| AX-158298715 | 23 | 42.802 | KV453155.1 | 8818833 | 19-scf00458 | 19 |
| AX-158298723 | 23 | 42.802 | KV453155.1 | 8831365 | 19-scf00458 | 19 |
| AX-157739311 | 23 | 42.802 | KV453155.1 | 8836026 | 19-scf00458 | 19 |
| AX-158298802 | 23 | 42.802 | KV453155.1 | 9015590 | 19-scf00458 | 19 |
| AX-158298856 | 23 | 42.802 | KV453155.1 | 9080445 | 19-scf00458 | 19 |
| AX-158298857 | 23 | 42.802 | KV453155.1 | 9080969 | 19-scf00458 | 19 |
| AX-158298858 | 23 | 42.802 | KV453155.1 | 9082014 | 19-scf00458 | 19 |
| AX-158298862 | 23 | 42.802 | KV453155.1 | 9085205 | 19-scf00458 | 19 |
| AX-158298866 | 23 | 42.802 | KV453155.1 | 9091879 | 19-scf00458 | 19 |
| AX-158298931 | 23 | 42.802 | KV453155.1 | 9212869 | 19-scf00458 | 19 |
| AX-158298939 | 23 | 42.802 | KV453155.1 | 9226614 | 19-scf00458 | 19 |
| AX-158298976 | 23 | 42.802 | KV453155.1 | 9315405 | 19-scf00458 | 19 |
| AX-158299184 | 23 | 42.802 | KV453155.1 | 9546995 | 19-scf00458 | 19 |
| AX-158299210 | 23 | 42.802 | KV453155.1 | 9578367 | 19-scf00458 | 19 |
| AX-158299303 | 23 | 42.802 | KV453155.1 | 9671217 | 19-scf00458 | 19 |
| AX-157846089 | 23 | 42.84  | KV453155.1 | 8499028 | 19-scf00458 | 19 |
| AX-158298442 | 23 | 42.878 | KV453155.1 | 8502966 | 19-scf00458 | 19 |
| AX-158298451 | 23 | 42.915 | KV453155.1 | 8525652 | 19-scf00458 | 19 |
| AX-158298454 | 23 | 42.951 | KV453155.1 | 8527559 | 19-scf00458 | 19 |
| AX-157741433 | 23 | 42.984 | KV453155.1 | 8529732 | 19-scf00458 | 19 |
| AX-158298495 | 23 | 43.056 | KV453155.1 | 8571935 | 19-scf00458 | 19 |
| AX-158297687 | 23 | 43.121 | KV453155.1 | 7594782 | 19-scf00458 | 19 |
| AX-158297715 | 23 | 43.121 | KV453155.1 | 7637166 | 19-scf00458 | 19 |
| AX-158297716 | 23 | 43.121 | KV453155.1 | 7637702 | 19-scf00458 | 19 |
| AX-158297843 | 23 | 43.121 | KV453155.1 | 7784794 | 19-scf00458 | 19 |

|              |    |        |            |         |             |    |
|--------------|----|--------|------------|---------|-------------|----|
| AX-158298023 | 23 | 43.121 | KV453155.1 | 7952453 | 19-scf00458 | 19 |
| AX-158298300 | 23 | 43.121 | KV453155.1 | 8288908 | 19-scf00458 | 19 |
| AX-158417515 | 23 | 43.121 | KV453155.1 | 8289744 | 19-scf00458 | 19 |
| AX-158298301 | 23 | 43.121 | KV453155.1 | 8291986 | 19-scf00458 | 19 |
| AX-158298507 | 23 | 43.121 | KV453155.1 | 8583476 | 19-scf00458 | 19 |
| AX-158298511 | 23 | 43.121 | KV453155.1 | 8585899 | 19-scf00458 | 19 |
| AX-158297785 | 23 | 43.198 | KV453155.1 | 7722237 | 19-scf00458 | 19 |
| AX-158298510 | 23 | 43.198 | KV453155.1 | 8585376 | 19-scf00458 | 19 |
| AX-158298524 | 23 | 43.272 | KV453155.1 | 8601949 | 19-scf00458 | 19 |
| AX-157769690 | 23 | 43.318 | KV453155.1 | 8606247 | 19-scf00458 | 19 |
| AX-158298530 | 23 | 43.355 | KV453155.1 | 8606325 | 19-scf00458 | 19 |
| AX-158298531 | 23 | 43.437 | KV453155.1 | 8606692 | 19-scf00458 | 19 |
| AX-157744517 | 23 | 43.512 | KV453155.1 | 8611416 | 19-scf00458 | 19 |
| AX-158298538 | 23 | 43.595 | KV453155.1 | 8615699 | 19-scf00458 | 19 |
| AX-158298543 | 23 | 43.685 | KV453155.1 | 8621685 | 19-scf00458 | 19 |
| AX-158298546 | 23 | 43.775 | KV453155.1 | 8624195 | 19-scf00458 | 19 |
| AX-157860741 | 23 | 43.869 | KV453155.1 | 8634420 | 19-scf00458 | 19 |
| AX-157708500 | 23 | 43.973 | KV453155.1 | 8637783 | 19-scf00458 | 19 |
| AX-158298562 | 23 | 45.38  | KV453155.1 | 8641253 | 19-scf00458 | 19 |
| AX-157846090 | 23 | 45.468 | KV453155.1 | 8638587 | 19-scf00458 | 19 |
| AX-158298561 | 23 | 45.468 | KV453155.1 | 8640450 | 19-scf00458 | 19 |
| AX-157860742 | 23 | 45.468 | KV453155.1 | 8643896 | 19-scf00458 | 19 |
| AX-158298565 | 23 | 45.468 | KV453155.1 | 8643932 | 19-scf00458 | 19 |
| AX-158298566 | 23 | 45.468 | KV453155.1 | 8645285 | 19-scf00458 | 19 |
| AX-158298567 | 23 | 45.468 | KV453155.1 | 8646160 | 19-scf00458 | 19 |
| AX-158298568 | 23 | 45.468 | KV453155.1 | 8647262 | 19-scf00458 | 19 |
| AX-158298570 | 23 | 45.468 | KV453155.1 | 8650170 | 19-scf00458 | 19 |
| AX-158298571 | 23 | 45.468 | KV453155.1 | 8651355 | 19-scf00458 | 19 |
| AX-158298572 | 23 | 45.468 | KV453155.1 | 8651834 | 19-scf00458 | 19 |
| AX-158298576 | 23 | 45.468 | KV453155.1 | 8655024 | 19-scf00458 | 19 |
| AX-158298578 | 23 | 45.468 | KV453155.1 | 8656789 | 19-scf00458 | 19 |
| AX-158298579 | 23 | 45.468 | KV453155.1 | 8656908 | 19-scf00458 | 19 |
| AX-158298581 | 23 | 45.468 | KV453155.1 | 8658232 | 19-scf00458 | 19 |
| AX-158417526 | 23 | 45.468 | KV453155.1 | 8659106 | 19-scf00458 | 19 |
| AX-158298587 | 23 | 45.468 | KV453155.1 | 8664171 | 19-scf00458 | 19 |
| AX-158298588 | 23 | 45.468 | KV453155.1 | 8665146 | 19-scf00458 | 19 |
| AX-158298590 | 23 | 45.468 | KV453155.1 | 8667259 | 19-scf00458 | 19 |
| AX-158298591 | 23 | 45.468 | KV453155.1 | 8668212 | 19-scf00458 | 19 |
| AX-158298592 | 23 | 45.468 | KV453155.1 | 8669071 | 19-scf00458 | 19 |
| AX-158298593 | 23 | 45.468 | KV453155.1 | 8669337 | 19-scf00458 | 19 |
| AX-158298595 | 23 | 45.468 | KV453155.1 | 8672380 | 19-scf00458 | 19 |
| AX-158298596 | 23 | 45.468 | KV453155.1 | 8673442 | 19-scf00458 | 19 |
| AX-158417530 | 23 | 45.468 | KV453155.1 | 8674814 | 19-scf00458 | 19 |
| AX-158298597 | 23 | 45.468 | KV453155.1 | 8676201 | 19-scf00458 | 19 |
| AX-158298598 | 23 | 45.468 | KV453155.1 | 8676600 | 19-scf00458 | 19 |
| AX-158298600 | 23 | 45.468 | KV453155.1 | 8679102 | 19-scf00458 | 19 |
| AX-157749548 | 23 | 45.468 | KV453155.1 | 8679823 | 19-scf00458 | 19 |
| AX-158298601 | 23 | 45.468 | KV453155.1 | 8683351 | 19-scf00458 | 19 |
| AX-158298602 | 23 | 45.468 | KV453155.1 | 8685219 | 19-scf00458 | 19 |
| AX-158298607 | 23 | 45.468 | KV453155.1 | 8698002 | 19-scf00458 | 19 |
| AX-158298608 | 23 | 45.468 | KV453155.1 | 8698270 | 19-scf00458 | 19 |

|              |    |        |            |         |             |    |
|--------------|----|--------|------------|---------|-------------|----|
| AX-158298609 | 23 | 45.468 | KV453155.1 | 8698731 | 19-scf00458 | 19 |
| AX-158298611 | 23 | 45.468 | KV453155.1 | 8703095 | 19-scf00458 | 19 |
| AX-158298612 | 23 | 45.468 | KV453155.1 | 8704526 | 19-scf00458 | 19 |
| AX-157860744 | 23 | 45.468 | KV453155.1 | 8709020 | 19-scf00458 | 19 |
| AX-158298653 | 23 | 45.468 | KV453155.1 | 8742038 | 19-scf00458 | 19 |
| AX-157846104 | 23 | 45.468 | KV453155.1 | 8742551 | 19-scf00458 | 19 |
| AX-158298654 | 23 | 45.468 | KV453155.1 | 8746212 | 19-scf00458 | 19 |
| AX-158298656 | 23 | 45.468 | KV453155.1 | 8747195 | 19-scf00458 | 19 |
| AX-157846107 | 23 | 45.468 | KV453155.1 | 8765612 | 19-scf00458 | 19 |
| AX-157746952 | 23 | 45.468 | KV453155.1 | 8768176 | 19-scf00458 | 19 |
| AX-157846109 | 23 | 45.468 | KV453155.1 | 8768780 | 19-scf00458 | 19 |
| AX-157846110 | 23 | 45.468 | KV453155.1 | 8769608 | 19-scf00458 | 19 |
| AX-158298666 | 23 | 45.468 | KV453155.1 | 8770123 | 19-scf00458 | 19 |
| AX-158298667 | 23 | 45.468 | KV453155.1 | 8771081 | 19-scf00458 | 19 |
| AX-157860747 | 23 | 45.468 | KV453155.1 | 8774562 | 19-scf00458 | 19 |
| AX-158298670 | 23 | 45.468 | KV453155.1 | 8775369 | 19-scf00458 | 19 |
| AX-158298672 | 23 | 45.468 | KV453155.1 | 8778668 | 19-scf00458 | 19 |
| AX-158298676 | 23 | 45.468 | KV453155.1 | 8782229 | 19-scf00458 | 19 |
| AX-158298678 | 23 | 45.468 | KV453155.1 | 8783471 | 19-scf00458 | 19 |
| AX-158298679 | 23 | 45.468 | KV453155.1 | 8784168 | 19-scf00458 | 19 |
| AX-158298680 | 23 | 45.468 | KV453155.1 | 8784789 | 19-scf00458 | 19 |
| AX-157693547 | 23 | 45.468 | KV453155.1 | 8786135 | 19-scf00458 | 19 |
| AX-157757212 | 23 | 45.468 | KV453155.1 | 8788682 | 19-scf00458 | 19 |
| AX-158298699 | 23 | 45.468 | KV453155.1 | 8801414 | 19-scf00458 | 19 |
| AX-158417537 | 23 | 45.468 | KV453155.1 | 8806232 | 19-scf00458 | 19 |
| AX-157747872 | 23 | 45.468 | KV453155.1 | 8944776 | 19-scf00458 | 19 |
| AX-158298774 | 23 | 45.468 | KV453155.1 | 8987253 | 19-scf00458 | 19 |
| AX-158298826 | 23 | 45.468 | KV453155.1 | 9045912 | 19-scf00458 | 19 |
| AX-157747657 | 23 | 45.468 | KV453155.1 | 9050040 | 19-scf00458 | 19 |
| AX-158298569 | 23 | 45.539 | KV453155.1 | 8649114 | 19-scf00458 | 19 |
| AX-157757966 | 23 | 45.611 | KV453155.1 | 8650647 | 19-scf00458 | 19 |
| AX-158298574 | 23 | 45.611 | KV453155.1 | 8653247 | 19-scf00458 | 19 |
| AX-158298669 | 23 | 45.611 | KV453155.1 | 8774963 | 19-scf00458 | 19 |
| AX-158298721 | 23 | 45.611 | KV453155.1 | 8830620 | 19-scf00458 | 19 |
| AX-158298843 | 23 | 45.611 | KV453155.1 | 9065292 | 19-scf00458 | 19 |
| AX-158299062 | 23 | 45.611 | KV453155.1 | 9415138 | 19-scf00458 | 19 |
| AX-158299089 | 23 | 45.611 | KV453155.1 | 9448248 | 19-scf00458 | 19 |
| AX-158299197 | 23 | 45.611 | KV453155.1 | 9559593 | 19-scf00458 | 19 |
| AX-158299277 | 23 | 45.611 | KV453155.1 | 9647792 | 19-scf00458 | 19 |
| AX-158299298 | 23 | 45.611 | KV453155.1 | 9667173 | 19-scf00458 | 19 |
| AX-158298324 | 23 | 45.66  | KV453155.1 | 8318324 | 19-scf00458 | 19 |
| AX-158298460 | 23 | 45.66  | KV453155.1 | 8534579 | 19-scf00458 | 19 |
| AX-158298461 | 23 | 45.66  | KV453155.1 | 8535551 | 19-scf00458 | 19 |
| AX-158298476 | 23 | 45.66  | KV453155.1 | 8556378 | 19-scf00458 | 19 |
| AX-158298494 | 23 | 45.66  | KV453155.1 | 8570890 | 19-scf00458 | 19 |
| AX-158298575 | 23 | 45.66  | KV453155.1 | 8654325 | 19-scf00458 | 19 |
| AX-158298577 | 23 | 45.66  | KV453155.1 | 8656303 | 19-scf00458 | 19 |
| AX-158381292 | 23 | 45.66  | KV453155.1 | 8656378 | 19-scf00458 | 19 |
| AX-158298586 | 23 | 45.66  | KV453155.1 | 8664134 | 19-scf00458 | 19 |
| AX-158298589 | 23 | 45.66  | KV453155.1 | 8666965 | 19-scf00458 | 19 |
| AX-157746481 | 23 | 45.66  | KV453155.1 | 8689241 | 19-scf00458 | 19 |

|              |    |        |            |         |             |    |
|--------------|----|--------|------------|---------|-------------|----|
| AX-158298613 | 23 | 45.66  | KV453155.1 | 8705325 | 19-scf00458 | 19 |
| AX-158298765 | 23 | 45.66  | KV453155.1 | 8948036 | 19-scf00458 | 19 |
| AX-158417527 | 23 | 45.687 | KV453155.1 | 8659297 | 19-scf00458 | 19 |
| AX-158298604 | 23 | 45.782 | KV453155.1 | 8692593 | 19-scf00458 | 19 |
| AX-158298610 | 23 | 45.829 | KV453155.1 | 8701864 | 19-scf00458 | 19 |
| AX-158298615 | 23 | 45.893 | KV453155.1 | 8706049 | 19-scf00458 | 19 |
| AX-157846093 | 23 | 45.973 | KV453155.1 | 8677935 | 19-scf00458 | 19 |
| AX-158298618 | 23 | 45.973 | KV453155.1 | 8707759 | 19-scf00458 | 19 |
| AX-158298668 | 23 | 45.973 | KV453155.1 | 8772168 | 19-scf00458 | 19 |
| AX-158298620 | 23 | 46.022 | KV453155.1 | 8711609 | 19-scf00458 | 19 |
| AX-158298623 | 23 | 46.074 | KV453155.1 | 8713008 | 19-scf00458 | 19 |
| AX-158298631 | 23 | 46.148 | KV453155.1 | 8721755 | 19-scf00458 | 19 |
| AX-157846097 | 23 | 46.217 | KV453155.1 | 8722739 | 19-scf00458 | 19 |
| AX-158298638 | 23 | 46.277 | KV453155.1 | 8728826 | 19-scf00458 | 19 |
| AX-157846098 | 23 | 46.291 | KV453155.1 | 8729992 | 19-scf00458 | 19 |
| AX-157846100 | 23 | 46.345 | KV453155.1 | 8732891 | 19-scf00458 | 19 |
| AX-157845824 | 23 | 46.409 | KV453155.1 | 4394077 | 19-scf00458 | 19 |
| AX-158298652 | 23 | 46.409 | KV453155.1 | 8741359 | 19-scf00458 | 19 |
| AX-158298606 | 23 | 46.453 | KV453155.1 | 8695900 | 19-scf00458 | 19 |
| AX-158298660 | 23 | 46.453 | KV453155.1 | 8756721 | 19-scf00458 | 19 |
| AX-158298635 | 23 | 46.483 | KV453155.1 | 8726704 | 19-scf00458 | 19 |
| AX-157719934 | 23 | 46.483 | KV453155.1 | 8766186 | 19-scf00458 | 19 |
| AX-157860756 | 23 | 46.483 | KV453155.1 | 8896415 | 19-scf00458 | 19 |
| AX-158298664 | 23 | 46.538 | KV453155.1 | 8768738 | 19-scf00458 | 19 |
| AX-158298673 | 23 | 46.622 | KV453155.1 | 8779723 | 19-scf00458 | 19 |
| AX-158298674 | 23 | 46.715 | KV453155.1 | 8780655 | 19-scf00458 | 19 |
| AX-158298671 | 23 | 46.791 | KV453155.1 | 8776558 | 19-scf00458 | 19 |
| AX-158381293 | 23 | 46.791 | KV453155.1 | 8798002 | 19-scf00458 | 19 |
| AX-158298700 | 23 | 46.791 | KV453155.1 | 8802426 | 19-scf00458 | 19 |
| AX-158298772 | 23 | 46.791 | KV453155.1 | 8983737 | 19-scf00458 | 19 |
| AX-158298776 | 23 | 46.791 | KV453155.1 | 8988243 | 19-scf00458 | 19 |
| AX-158299247 | 23 | 46.791 | KV453155.1 | 9615037 | 19-scf00458 | 19 |
| AX-158298702 | 23 | 46.863 | KV453155.1 | 8803831 | 19-scf00458 | 19 |
| AX-158298713 | 23 | 46.928 | KV453155.1 | 8815500 | 19-scf00458 | 19 |
| AX-158298720 | 23 | 46.996 | KV453155.1 | 8826650 | 19-scf00458 | 19 |
| AX-158298734 | 23 | 47.075 | KV453155.1 | 8847549 | 19-scf00458 | 19 |
| AX-158298737 | 23 | 47.151 | KV453155.1 | 8849266 | 19-scf00458 | 19 |
| AX-157757821 | 23 | 47.225 | KV453155.1 | 8856550 | 19-scf00458 | 19 |
| AX-158295424 | 23 | 47.276 | KV453155.1 | 4669886 | 19-scf00458 | 19 |
| AX-158298744 | 23 | 47.276 | KV453155.1 | 8862233 | 19-scf00458 | 19 |
| AX-157713458 | 23 | 47.276 | KV453155.1 | 8947312 | 19-scf00458 | 19 |
| AX-158298773 | 23 | 47.276 | KV453155.1 | 8984880 | 19-scf00458 | 19 |
| AX-157846115 | 23 | 47.323 | KV453155.1 | 8871796 | 19-scf00458 | 19 |
| AX-158296970 | 23 | 47.379 | KV453155.1 | 6688158 | 19-scf00458 | 19 |
| AX-158297091 | 23 | 47.379 | KV453155.1 | 6803016 | 19-scf00458 | 19 |
| AX-158297156 | 23 | 47.379 | KV453155.1 | 6877879 | 19-scf00458 | 19 |
| AX-158297771 | 23 | 47.379 | KV453155.1 | 7705132 | 19-scf00458 | 19 |
| AX-158297814 | 23 | 47.379 | KV453155.1 | 7751053 | 19-scf00458 | 19 |
| AX-158297827 | 23 | 47.379 | KV453155.1 | 7768328 | 19-scf00458 | 19 |
| AX-158297867 | 23 | 47.379 | KV453155.1 | 7802041 | 19-scf00458 | 19 |
| AX-158297882 | 23 | 47.379 | KV453155.1 | 7811520 | 19-scf00458 | 19 |



|              |    |        |            |         |             |    |
|--------------|----|--------|------------|---------|-------------|----|
| AX-158297891 | 23 | 47.379 | KV453155.1 | 7821054 | 19-scf00458 | 19 |
| AX-157738915 | 23 | 47.379 | KV453155.1 | 7844812 | 19-scf00458 | 19 |
| AX-158297912 | 23 | 47.379 | KV453155.1 | 7850409 | 19-scf00458 | 19 |
| AX-158297933 | 23 | 47.379 | KV453155.1 | 7868713 | 19-scf00458 | 19 |
| AX-158297941 | 23 | 47.379 | KV453155.1 | 7875504 | 19-scf00458 | 19 |
| AX-158297942 | 23 | 47.379 | KV453155.1 | 7876114 | 19-scf00458 | 19 |
| AX-158298029 | 23 | 47.379 | KV453155.1 | 7957285 | 19-scf00458 | 19 |
| AX-158298041 | 23 | 47.379 | KV453155.1 | 7971528 | 19-scf00458 | 19 |
| AX-158298063 | 23 | 47.379 | KV453155.1 | 7997219 | 19-scf00458 | 19 |
| AX-158298071 | 23 | 47.379 | KV453155.1 | 8005529 | 19-scf00458 | 19 |
| AX-158298093 | 23 | 47.379 | KV453155.1 | 8028028 | 19-scf00458 | 19 |
| AX-157846074 | 23 | 47.379 | KV453155.1 | 8061566 | 19-scf00458 | 19 |
| AX-158298127 | 23 | 47.379 | KV453155.1 | 8067573 | 19-scf00458 | 19 |
| AX-158298146 | 23 | 47.379 | KV453155.1 | 8087020 | 19-scf00458 | 19 |
| AX-158298158 | 23 | 47.379 | KV453155.1 | 8101340 | 19-scf00458 | 19 |
| AX-158298167 | 23 | 47.379 | KV453155.1 | 8113600 | 19-scf00458 | 19 |
| AX-158298172 | 23 | 47.379 | KV453155.1 | 8120855 | 19-scf00458 | 19 |
| AX-158298187 | 23 | 47.379 | KV453155.1 | 8133356 | 19-scf00458 | 19 |
| AX-158298195 | 23 | 47.379 | KV453155.1 | 8141975 | 19-scf00458 | 19 |
| AX-158298200 | 23 | 47.379 | KV453155.1 | 8149141 | 19-scf00458 | 19 |
| AX-158298203 | 23 | 47.379 | KV453155.1 | 8153735 | 19-scf00458 | 19 |
| AX-157846077 | 23 | 47.379 | KV453155.1 | 8167288 | 19-scf00458 | 19 |
| AX-157745421 | 23 | 47.379 | KV453155.1 | 8181692 | 19-scf00458 | 19 |
| AX-158298223 | 23 | 47.379 | KV453155.1 | 8182075 | 19-scf00458 | 19 |
| AX-158298225 | 23 | 47.379 | KV453155.1 | 8183055 | 19-scf00458 | 19 |
| AX-158298230 | 23 | 47.379 | KV453155.1 | 8186958 | 19-scf00458 | 19 |
| AX-157717111 | 23 | 47.379 | KV453155.1 | 8193910 | 19-scf00458 | 19 |
| AX-158298244 | 23 | 47.379 | KV453155.1 | 8204708 | 19-scf00458 | 19 |
| AX-158298251 | 23 | 47.379 | KV453155.1 | 8212305 | 19-scf00458 | 19 |
| AX-158298292 | 23 | 47.379 | KV453155.1 | 8281027 | 19-scf00458 | 19 |
| AX-158298293 | 23 | 47.379 | KV453155.1 | 8281762 | 19-scf00458 | 19 |
| AX-158298313 | 23 | 47.379 | KV453155.1 | 8309162 | 19-scf00458 | 19 |
| AX-158298315 | 23 | 47.379 | KV453155.1 | 8311236 | 19-scf00458 | 19 |
| AX-157748107 | 23 | 47.379 | KV453155.1 | 8326767 | 19-scf00458 | 19 |
| AX-158298357 | 23 | 47.379 | KV453155.1 | 8381901 | 19-scf00458 | 19 |
| AX-157860726 | 23 | 47.379 | KV453155.1 | 8384919 | 19-scf00458 | 19 |
| AX-158298400 | 23 | 47.379 | KV453155.1 | 8437058 | 19-scf00458 | 19 |
| AX-157860733 | 23 | 47.379 | KV453155.1 | 8536815 | 19-scf00458 | 19 |
| AX-158298497 | 23 | 47.379 | KV453155.1 | 8572994 | 19-scf00458 | 19 |
| AX-157771691 | 23 | 47.379 | KV453155.1 | 8594773 | 19-scf00458 | 19 |
| AX-158298549 | 23 | 47.379 | KV453155.1 | 8626736 | 19-scf00458 | 19 |
| AX-158298551 | 23 | 47.379 | KV453155.1 | 8628504 | 19-scf00458 | 19 |
| AX-158298585 | 23 | 47.379 | KV453155.1 | 8663279 | 19-scf00458 | 19 |
| AX-158298599 | 23 | 47.379 | KV453155.1 | 8676692 | 19-scf00458 | 19 |
| AX-157846092 | 23 | 47.379 | KV453155.1 | 8677743 | 19-scf00458 | 19 |
| AX-157846094 | 23 | 47.379 | KV453155.1 | 8681150 | 19-scf00458 | 19 |
| AX-158298633 | 23 | 47.379 | KV453155.1 | 8724431 | 19-scf00458 | 19 |
| AX-158298639 | 23 | 47.379 | KV453155.1 | 8730287 | 19-scf00458 | 19 |
| AX-158298651 | 23 | 47.379 | KV453155.1 | 8741135 | 19-scf00458 | 19 |
| AX-158298655 | 23 | 47.379 | KV453155.1 | 8746592 | 19-scf00458 | 19 |
| AX-158298657 | 23 | 47.379 | KV453155.1 | 8748400 | 19-scf00458 | 19 |

|              |    |        |            |         |             |    |
|--------------|----|--------|------------|---------|-------------|----|
| AX-157846106 | 23 | 47.379 | KV453155.1 | 8762664 | 19-scf00458 | 19 |
| AX-158298685 | 23 | 47.379 | KV453155.1 | 8789654 | 19-scf00458 | 19 |
| AX-158298686 | 23 | 47.379 | KV453155.1 | 8790972 | 19-scf00458 | 19 |
| AX-158298687 | 23 | 47.379 | KV453155.1 | 8792314 | 19-scf00458 | 19 |
| AX-158298689 | 23 | 47.379 | KV453155.1 | 8794228 | 19-scf00458 | 19 |
| AX-158417536 | 23 | 47.379 | KV453155.1 | 8794558 | 19-scf00458 | 19 |
| AX-158298694 | 23 | 47.379 | KV453155.1 | 8798312 | 19-scf00458 | 19 |
| AX-158298695 | 23 | 47.379 | KV453155.1 | 8799149 | 19-scf00458 | 19 |
| AX-158298697 | 23 | 47.379 | KV453155.1 | 8800441 | 19-scf00458 | 19 |
| AX-158298705 | 23 | 47.379 | KV453155.1 | 8807908 | 19-scf00458 | 19 |
| AX-158298706 | 23 | 47.379 | KV453155.1 | 8808616 | 19-scf00458 | 19 |
| AX-158298709 | 23 | 47.379 | KV453155.1 | 8810860 | 19-scf00458 | 19 |
| AX-158298710 | 23 | 47.379 | KV453155.1 | 8812181 | 19-scf00458 | 19 |
| AX-158298718 | 23 | 47.379 | KV453155.1 | 8825432 | 19-scf00458 | 19 |
| AX-158298719 | 23 | 47.379 | KV453155.1 | 8826016 | 19-scf00458 | 19 |
| AX-158298724 | 23 | 47.379 | KV453155.1 | 8833064 | 19-scf00458 | 19 |
| AX-157860748 | 23 | 47.379 | KV453155.1 | 8834343 | 19-scf00458 | 19 |
| AX-158298725 | 23 | 47.379 | KV453155.1 | 8834919 | 19-scf00458 | 19 |
| AX-158298728 | 23 | 47.379 | KV453155.1 | 8840110 | 19-scf00458 | 19 |
| AX-157860749 | 23 | 47.379 | KV453155.1 | 8840750 | 19-scf00458 | 19 |
| AX-157860750 | 23 | 47.379 | KV453155.1 | 8840895 | 19-scf00458 | 19 |
| AX-158298729 | 23 | 47.379 | KV453155.1 | 8841132 | 19-scf00458 | 19 |
| AX-158298732 | 23 | 47.379 | KV453155.1 | 8843557 | 19-scf00458 | 19 |
| AX-158298733 | 23 | 47.379 | KV453155.1 | 8844362 | 19-scf00458 | 19 |
| AX-158298738 | 23 | 47.379 | KV453155.1 | 8850378 | 19-scf00458 | 19 |
| AX-158298740 | 23 | 47.379 | KV453155.1 | 8851953 | 19-scf00458 | 19 |
| AX-158298742 | 23 | 47.379 | KV453155.1 | 8858273 | 19-scf00458 | 19 |
| AX-157846113 | 23 | 47.379 | KV453155.1 | 8861907 | 19-scf00458 | 19 |
| AX-157846114 | 23 | 47.379 | KV453155.1 | 8864652 | 19-scf00458 | 19 |
| AX-157860751 | 23 | 47.379 | KV453155.1 | 8871869 | 19-scf00458 | 19 |
| AX-158298747 | 23 | 47.379 | KV453155.1 | 8876250 | 19-scf00458 | 19 |
| AX-157846117 | 23 | 47.379 | KV453155.1 | 8887509 | 19-scf00458 | 19 |
| AX-157860752 | 23 | 47.379 | KV453155.1 | 8887732 | 19-scf00458 | 19 |
| AX-157860753 | 23 | 47.379 | KV453155.1 | 8888652 | 19-scf00458 | 19 |
| AX-157846118 | 23 | 47.379 | KV453155.1 | 8889443 | 19-scf00458 | 19 |
| AX-158298749 | 23 | 47.379 | KV453155.1 | 8889822 | 19-scf00458 | 19 |
| AX-157860754 | 23 | 47.379 | KV453155.1 | 8893089 | 19-scf00458 | 19 |
| AX-157860755 | 23 | 47.379 | KV453155.1 | 8893143 | 19-scf00458 | 19 |
| AX-157860757 | 23 | 47.379 | KV453155.1 | 8899230 | 19-scf00458 | 19 |
| AX-157860758 | 23 | 47.379 | KV453155.1 | 8905772 | 19-scf00458 | 19 |
| AX-157846121 | 23 | 47.379 | KV453155.1 | 8905826 | 19-scf00458 | 19 |
| AX-157860759 | 23 | 47.379 | KV453155.1 | 8905879 | 19-scf00458 | 19 |
| AX-157846122 | 23 | 47.379 | KV453155.1 | 8907238 | 19-scf00458 | 19 |
| AX-157710367 | 23 | 47.379 | KV453155.1 | 8908384 | 19-scf00458 | 19 |
| AX-157846123 | 23 | 47.379 | KV453155.1 | 8910975 | 19-scf00458 | 19 |
| AX-157846124 | 23 | 47.379 | KV453155.1 | 8911633 | 19-scf00458 | 19 |
| AX-157846125 | 23 | 47.379 | KV453155.1 | 8912135 | 19-scf00458 | 19 |
| AX-157860760 | 23 | 47.379 | KV453155.1 | 8913025 | 19-scf00458 | 19 |
| AX-157715405 | 23 | 47.379 | KV453155.1 | 8914145 | 19-scf00458 | 19 |
| AX-157860761 | 23 | 47.379 | KV453155.1 | 8915511 | 19-scf00458 | 19 |
| AX-158381294 | 23 | 47.379 | KV453155.1 | 8916475 | 19-scf00458 | 19 |

|              |    |        |            |         |             |    |
|--------------|----|--------|------------|---------|-------------|----|
| AX-158298755 | 23 | 47.379 | KV453155.1 | 8917163 | 19-scf00458 | 19 |
| AX-158298756 | 23 | 47.379 | KV453155.1 | 8918270 | 19-scf00458 | 19 |
| AX-157846127 | 23 | 47.379 | KV453155.1 | 8920635 | 19-scf00458 | 19 |
| AX-157846128 | 23 | 47.379 | KV453155.1 | 8920850 | 19-scf00458 | 19 |
| AX-157846129 | 23 | 47.379 | KV453155.1 | 8922047 | 19-scf00458 | 19 |
| AX-157860762 | 23 | 47.379 | KV453155.1 | 8922672 | 19-scf00458 | 19 |
| AX-158417539 | 23 | 47.379 | KV453155.1 | 8934494 | 19-scf00458 | 19 |
| AX-157846130 | 23 | 47.379 | KV453155.1 | 8936805 | 19-scf00458 | 19 |
| AX-157860763 | 23 | 47.379 | KV453155.1 | 8937248 | 19-scf00458 | 19 |
| AX-158298762 | 23 | 47.379 | KV453155.1 | 8945444 | 19-scf00458 | 19 |
| AX-158298763 | 23 | 47.379 | KV453155.1 | 8947100 | 19-scf00458 | 19 |
| AX-158298764 | 23 | 47.379 | KV453155.1 | 8947766 | 19-scf00458 | 19 |
| AX-157846131 | 23 | 47.379 | KV453155.1 | 8950161 | 19-scf00458 | 19 |
| AX-157717699 | 23 | 47.379 | KV453155.1 | 8950367 | 19-scf00458 | 19 |
| AX-157860764 | 23 | 47.379 | KV453155.1 | 8953416 | 19-scf00458 | 19 |
| AX-158298768 | 23 | 47.379 | KV453155.1 | 8956782 | 19-scf00458 | 19 |
| AX-157846132 | 23 | 47.379 | KV453155.1 | 8961827 | 19-scf00458 | 19 |
| AX-158298769 | 23 | 47.379 | KV453155.1 | 8962084 | 19-scf00458 | 19 |
| AX-157846133 | 23 | 47.379 | KV453155.1 | 8963462 | 19-scf00458 | 19 |
| AX-157846134 | 23 | 47.379 | KV453155.1 | 8967057 | 19-scf00458 | 19 |
| AX-157738389 | 23 | 47.379 | KV453155.1 | 8967380 | 19-scf00458 | 19 |
| AX-157846135 | 23 | 47.379 | KV453155.1 | 8967879 | 19-scf00458 | 19 |
| AX-157846136 | 23 | 47.379 | KV453155.1 | 8969702 | 19-scf00458 | 19 |
| AX-157711130 | 23 | 47.379 | KV453155.1 | 8969887 | 19-scf00458 | 19 |
| AX-157846137 | 23 | 47.379 | KV453155.1 | 8971973 | 19-scf00458 | 19 |
| AX-157846138 | 23 | 47.379 | KV453155.1 | 8975173 | 19-scf00458 | 19 |
| AX-157725672 | 23 | 47.379 | KV453155.1 | 8977294 | 19-scf00458 | 19 |
| AX-158298770 | 23 | 47.379 | KV453155.1 | 8980066 | 19-scf00458 | 19 |
| AX-157860765 | 23 | 47.379 | KV453155.1 | 8980175 | 19-scf00458 | 19 |
| AX-157860766 | 23 | 47.379 | KV453155.1 | 8981260 | 19-scf00458 | 19 |
| AX-158298771 | 23 | 47.379 | KV453155.1 | 8982976 | 19-scf00458 | 19 |
| AX-158298777 | 23 | 47.379 | KV453155.1 | 8990284 | 19-scf00458 | 19 |
| AX-158298779 | 23 | 47.379 | KV453155.1 | 8994818 | 19-scf00458 | 19 |
| AX-158298780 | 23 | 47.379 | KV453155.1 | 8995569 | 19-scf00458 | 19 |
| AX-158298781 | 23 | 47.379 | KV453155.1 | 8996747 | 19-scf00458 | 19 |
| AX-158298784 | 23 | 47.379 | KV453155.1 | 9000270 | 19-scf00458 | 19 |
| AX-158298787 | 23 | 47.379 | KV453155.1 | 9002627 | 19-scf00458 | 19 |
| AX-158298788 | 23 | 47.379 | KV453155.1 | 9003554 | 19-scf00458 | 19 |
| AX-158298789 | 23 | 47.379 | KV453155.1 | 9005224 | 19-scf00458 | 19 |
| AX-158298790 | 23 | 47.379 | KV453155.1 | 9005992 | 19-scf00458 | 19 |
| AX-158298791 | 23 | 47.379 | KV453155.1 | 9006616 | 19-scf00458 | 19 |
| AX-157771045 | 23 | 47.379 | KV453155.1 | 9007152 | 19-scf00458 | 19 |
| AX-158298792 | 23 | 47.379 | KV453155.1 | 9009800 | 19-scf00458 | 19 |
| AX-158298793 | 23 | 47.379 | KV453155.1 | 9010467 | 19-scf00458 | 19 |
| AX-158298795 | 23 | 47.379 | KV453155.1 | 9011322 | 19-scf00458 | 19 |
| AX-158298796 | 23 | 47.379 | KV453155.1 | 9011939 | 19-scf00458 | 19 |
| AX-158298797 | 23 | 47.379 | KV453155.1 | 9012662 | 19-scf00458 | 19 |
| AX-157846139 | 23 | 47.379 | KV453155.1 | 9019048 | 19-scf00458 | 19 |
| AX-158298811 | 23 | 47.379 | KV453155.1 | 9027715 | 19-scf00458 | 19 |
| AX-157846143 | 23 | 47.379 | KV453155.1 | 9043080 | 19-scf00458 | 19 |
| AX-157715180 | 23 | 47.379 | KV453155.1 | 9043392 | 19-scf00458 | 19 |

|              |    |        |             |         |             |    |
|--------------|----|--------|-------------|---------|-------------|----|
| AX-158298827 | 23 | 47.379 | KV453155.1  | 9045979 | 19-scf00458 | 19 |
| AX-157846144 | 23 | 47.379 | KV453155.1  | 9049001 | 19-scf00458 | 19 |
| AX-158298834 | 23 | 47.379 | KV453155.1  | 9052264 | 19-scf00458 | 19 |
| AX-158298848 | 23 | 47.379 | KV453155.1  | 9071765 | 19-scf00458 | 19 |
| AX-158298877 | 23 | 47.379 | KV453155.1  | 9112323 | 19-scf00458 | 19 |
| AX-158298878 | 23 | 47.379 | KV453155.1  | 9119760 | 19-scf00458 | 19 |
| AX-158298879 | 23 | 47.379 | KV453155.1  | 9120923 | 19-scf00458 | 19 |
| AX-158298912 | 23 | 47.379 | KV453155.1  | 9171124 | 19-scf00458 | 19 |
| AX-158298916 | 23 | 47.379 | KV453155.1  | 9176596 | 19-scf00458 | 19 |
| AX-158298930 | 23 | 47.379 | KV453155.1  | 9211720 | 19-scf00458 | 19 |
| AX-157756523 | 23 | 47.379 | KV453155.1  | 9247869 | 19-scf00458 | 19 |
| AX-158299015 | 23 | 47.379 | KV453155.1  | 9374244 | 19-scf00458 | 19 |
| AX-158299076 | 23 | 47.379 | KV453155.1  | 9431740 | 19-scf00458 | 19 |
| AX-158299113 | 23 | 47.379 | KV453155.1  | 9471785 | 19-scf00458 | 19 |
| AX-158298805 | 23 | 47.393 | KV453155.1  | 9018495 | 19-scf00458 | 19 |
| AX-158298814 | 23 | 47.409 | KV453155.1  | 9033594 | 19-scf00458 | 19 |
| AX-158298815 | 23 | 47.427 | KV453155.1  | 9034579 | 19-scf00458 | 19 |
| AX-157860768 | 23 | 47.457 | KV453155.1  | 9025142 | 19-scf00458 | 19 |
| AX-157714122 | 23 | 47.457 | KV453155.1  | 9032805 | 19-scf00458 | 19 |
| AX-158298818 | 23 | 47.457 | KV453155.1  | 9036305 | 19-scf00458 | 19 |
| AX-158298849 | 23 | 47.457 | KV453155.1  | 9072348 | 19-scf00458 | 19 |
| AX-157712981 | 23 | 47.457 | KV453155.1  | 9072485 | 19-scf00458 | 19 |
| AX-158298853 | 23 | 47.457 | KV453155.1  | 9075240 | 19-scf00458 | 19 |
| AX-158298819 | 23 | 47.471 | KV453155.1  | 9037250 | 19-scf00458 | 19 |
| AX-158295046 | 23 | 47.488 | KV453155.1  | 4090365 | 19-scf00458 | 19 |
| AX-158295058 | 23 | 47.488 | KV453155.1  | 4111461 | 19-scf00458 | 19 |
| AX-158298614 | 23 | 47.488 | KV453155.1  | 8705821 | 19-scf00458 | 19 |
| AX-158298821 | 23 | 47.488 | KV453155.1  | 9039150 | 19-scf00458 | 19 |
| AX-157846141 | 23 | 47.488 | KV453155.1  | 9040062 | 19-scf00458 | 19 |
| AX-158298828 | 23 | 47.488 | KV453155.1  | 9046367 | 19-scf00458 | 19 |
| AX-158298831 | 23 | 47.488 | KV453155.1  | 9048254 | 19-scf00458 | 19 |
| AX-158298838 | 23 | 47.488 | KV453155.1  | 9060825 | 19-scf00458 | 19 |
| AX-157774957 | 23 | 47.488 | KV453155.1  | 9063769 | 19-scf00458 | 19 |
| AX-158298852 | 23 | 47.488 | KV453155.1  | 9074984 | 19-scf00458 | 19 |
| AX-158299119 | 23 | 47.488 | KV453155.1  | 9476893 | 19-scf00458 | 19 |
| AX-157705780 | 23 | 47.488 | 3ML01030869 | 482     | scf06473_1  | UN |
| AX-158298649 | 23 | 47.506 | KV453155.1  | 8737631 | 19-scf00458 | 19 |
| AX-157846142 | 23 | 47.506 | KV453155.1  | 9041869 | 19-scf00458 | 19 |
| AX-158298824 | 23 | 47.506 | KV453155.1  | 9042586 | 19-scf00458 | 19 |
| AX-158298840 | 23 | 47.506 | KV453155.1  | 9063551 | 19-scf00458 | 19 |
| AX-157770737 | 23 | 47.506 | KV453155.1  | 9081754 | 19-scf00458 | 19 |
| AX-157860770 | 23 | 47.506 | KV453155.1  | 9102138 | 19-scf00458 | 19 |
| AX-158299206 | 23 | 47.506 | KV453155.1  | 9569831 | 19-scf00458 | 19 |
| AX-158299335 | 23 | 47.506 | KV453155.1  | 9708568 | 19-scf00458 | 19 |
| AX-158298665 | 23 | 47.545 | KV453155.1  | 8769384 | 19-scf00458 | 19 |
| AX-157740802 | 23 | 47.545 | KV453155.1  | 9039251 | 19-scf00458 | 19 |
| AX-157752143 | 23 | 47.545 | KV453155.1  | 9098156 | 19-scf00458 | 19 |
| AX-158298870 | 23 | 47.545 | KV453155.1  | 9100315 | 19-scf00458 | 19 |
| AX-158298947 | 23 | 47.545 | KV453155.1  | 9253255 | 19-scf00458 | 19 |
| AX-158298875 | 23 | 47.581 | KV453155.1  | 9108976 | 19-scf00458 | 19 |
| AX-158294055 | 23 | 47.617 | KV453155.1  | 2872807 | 19-scf00458 | 19 |

|              |    |        |            |         |             |    |
|--------------|----|--------|------------|---------|-------------|----|
| AX-158294069 | 23 | 47.617 | KV453155.1 | 2888042 | 19-scf00458 | 19 |
| AX-158294070 | 23 | 47.617 | KV453155.1 | 2888767 | 19-scf00458 | 19 |
| AX-158294132 | 23 | 47.617 | KV453155.1 | 2951385 | 19-scf00458 | 19 |
| AX-158294206 | 23 | 47.617 | KV453155.1 | 3031840 | 19-scf00458 | 19 |
| AX-158294233 | 23 | 47.617 | KV453155.1 | 3059546 | 19-scf00458 | 19 |
| AX-157860246 | 23 | 47.617 | KV453155.1 | 3141019 | 19-scf00458 | 19 |
| AX-158294327 | 23 | 47.617 | KV453155.1 | 3164082 | 19-scf00458 | 19 |
| AX-157860251 | 23 | 47.617 | KV453155.1 | 3200682 | 19-scf00458 | 19 |
| AX-158294354 | 23 | 47.617 | KV453155.1 | 3213806 | 19-scf00458 | 19 |
| AX-157860256 | 23 | 47.617 | KV453155.1 | 3222023 | 19-scf00458 | 19 |
| AX-157860259 | 23 | 47.617 | KV453155.1 | 3235784 | 19-scf00458 | 19 |
| AX-158294376 | 23 | 47.617 | KV453155.1 | 3244031 | 19-scf00458 | 19 |
| AX-157860280 | 23 | 47.617 | KV453155.1 | 3286110 | 19-scf00458 | 19 |
| AX-157860290 | 23 | 47.617 | KV453155.1 | 3321672 | 19-scf00458 | 19 |
| AX-158294461 | 23 | 47.617 | KV453155.1 | 3341085 | 19-scf00458 | 19 |
| AX-158294490 | 23 | 47.617 | KV453155.1 | 3374556 | 19-scf00458 | 19 |
| AX-157860319 | 23 | 47.617 | KV453155.1 | 3427032 | 19-scf00458 | 19 |
| AX-157769430 | 23 | 47.617 | KV453155.1 | 3431241 | 19-scf00458 | 19 |
| AX-158294543 | 23 | 47.617 | KV453155.1 | 3448719 | 19-scf00458 | 19 |
| AX-158294566 | 23 | 47.617 | KV453155.1 | 3485091 | 19-scf00458 | 19 |
| AX-158294634 | 23 | 47.617 | KV453155.1 | 3581418 | 19-scf00458 | 19 |
| AX-158294651 | 23 | 47.617 | KV453155.1 | 3602910 | 19-scf00458 | 19 |
| AX-158294655 | 23 | 47.617 | KV453155.1 | 3607337 | 19-scf00458 | 19 |
| AX-158294677 | 23 | 47.617 | KV453155.1 | 3632258 | 19-scf00458 | 19 |
| AX-158294682 | 23 | 47.617 | KV453155.1 | 3640164 | 19-scf00458 | 19 |
| AX-157845767 | 23 | 47.617 | KV453155.1 | 3648523 | 19-scf00458 | 19 |
| AX-157860364 | 23 | 47.617 | KV453155.1 | 3660519 | 19-scf00458 | 19 |
| AX-158294703 | 23 | 47.617 | KV453155.1 | 3668637 | 19-scf00458 | 19 |
| AX-157860369 | 23 | 47.617 | KV453155.1 | 3673250 | 19-scf00458 | 19 |
| AX-158294718 | 23 | 47.617 | KV453155.1 | 3680854 | 19-scf00458 | 19 |
| AX-158294960 | 23 | 47.617 | KV453155.1 | 3978449 | 19-scf00458 | 19 |
| AX-158295395 | 23 | 47.617 | KV453155.1 | 4617274 | 19-scf00458 | 19 |
| AX-158298917 | 23 | 47.617 | KV453155.1 | 9178096 | 19-scf00458 | 19 |
| AX-157846152 | 23 | 47.617 | KV453155.1 | 9181736 | 19-scf00458 | 19 |
| AX-157860772 | 23 | 47.617 | KV453155.1 | 9183432 | 19-scf00458 | 19 |
| AX-158298918 | 23 | 47.617 | KV453155.1 | 9184131 | 19-scf00458 | 19 |
| AX-157888099 | 23 | 47.617 | KV453155.1 | 9187204 | 19-scf00458 | 19 |
| AX-157846153 | 23 | 47.617 | KV453155.1 | 9189626 | 19-scf00458 | 19 |
| AX-157846154 | 23 | 47.617 | KV453155.1 | 9192277 | 19-scf00458 | 19 |
| AX-157860774 | 23 | 47.617 | KV453155.1 | 9194702 | 19-scf00458 | 19 |
| AX-157846155 | 23 | 47.617 | KV453155.1 | 9194854 | 19-scf00458 | 19 |
| AX-157860775 | 23 | 47.617 | KV453155.1 | 9199025 | 19-scf00458 | 19 |
| AX-158298923 | 23 | 47.617 | KV453155.1 | 9200297 | 19-scf00458 | 19 |
| AX-157860776 | 23 | 47.617 | KV453155.1 | 9200510 | 19-scf00458 | 19 |
| AX-158298925 | 23 | 47.617 | KV453155.1 | 9205479 | 19-scf00458 | 19 |
| AX-158298927 | 23 | 47.617 | KV453155.1 | 9207881 | 19-scf00458 | 19 |
| AX-158298929 | 23 | 47.617 | KV453155.1 | 9209936 | 19-scf00458 | 19 |
| AX-157860777 | 23 | 47.617 | KV453155.1 | 9212396 | 19-scf00458 | 19 |
| AX-157860778 | 23 | 47.617 | KV453155.1 | 9215518 | 19-scf00458 | 19 |
| AX-157860779 | 23 | 47.617 | KV453155.1 | 9218699 | 19-scf00458 | 19 |
| AX-157860780 | 23 | 47.617 | KV453155.1 | 9219576 | 19-scf00458 | 19 |

|              |    |        |            |         |             |    |
|--------------|----|--------|------------|---------|-------------|----|
| AX-158298935 | 23 | 47.617 | KV453155.1 | 9220055 | 19-scf00458 | 19 |
| AX-158298936 | 23 | 47.617 | KV453155.1 | 9221660 | 19-scf00458 | 19 |
| AX-158298938 | 23 | 47.617 | KV453155.1 | 9225979 | 19-scf00458 | 19 |
| AX-158298941 | 23 | 47.617 | KV453155.1 | 9231527 | 19-scf00458 | 19 |
| AX-157846156 | 23 | 47.617 | KV453155.1 | 9236408 | 19-scf00458 | 19 |
| AX-158298945 | 23 | 47.617 | KV453155.1 | 9250177 | 19-scf00458 | 19 |
| AX-158298948 | 23 | 47.617 | KV453155.1 | 9258660 | 19-scf00458 | 19 |
| AX-158298950 | 23 | 47.617 | KV453155.1 | 9260604 | 19-scf00458 | 19 |
| AX-158298956 | 23 | 47.617 | KV453155.1 | 9271186 | 19-scf00458 | 19 |
| AX-158298967 | 23 | 47.617 | KV453155.1 | 9295433 | 19-scf00458 | 19 |
| AX-157727369 | 23 | 47.617 | KV453155.1 | 9300961 | 19-scf00458 | 19 |
| AX-158298969 | 23 | 47.617 | KV453155.1 | 9301537 | 19-scf00458 | 19 |
| AX-158298970 | 23 | 47.617 | KV453155.1 | 9302378 | 19-scf00458 | 19 |
| AX-158298972 | 23 | 47.617 | KV453155.1 | 9307118 | 19-scf00458 | 19 |
| AX-157880898 | 23 | 47.617 | KV453155.1 | 9332984 | 19-scf00458 | 19 |
| AX-158298986 | 23 | 47.617 | KV453155.1 | 9333548 | 19-scf00458 | 19 |
| AX-158298989 | 23 | 47.617 | KV453155.1 | 9340730 | 19-scf00458 | 19 |
| AX-157753372 | 23 | 47.617 | KV453155.1 | 9342105 | 19-scf00458 | 19 |
| AX-158298995 | 23 | 47.617 | KV453155.1 | 9349667 | 19-scf00458 | 19 |
| AX-158298996 | 23 | 47.617 | KV453155.1 | 9351064 | 19-scf00458 | 19 |
| AX-158299004 | 23 | 47.617 | KV453155.1 | 9361032 | 19-scf00458 | 19 |
| AX-158299024 | 23 | 47.617 | KV453155.1 | 9386933 | 19-scf00458 | 19 |
| AX-158299025 | 23 | 47.617 | KV453155.1 | 9387311 | 19-scf00458 | 19 |
| AX-158299034 | 23 | 47.617 | KV453155.1 | 9394209 | 19-scf00458 | 19 |
| AX-158299036 | 23 | 47.617 | KV453155.1 | 9395221 | 19-scf00458 | 19 |
| AX-158299043 | 23 | 47.617 | KV453155.1 | 9401868 | 19-scf00458 | 19 |
| AX-158417544 | 23 | 47.617 | KV453155.1 | 9402770 | 19-scf00458 | 19 |
| AX-158299048 | 23 | 47.617 | KV453155.1 | 9405128 | 19-scf00458 | 19 |
| AX-158299049 | 23 | 47.617 | KV453155.1 | 9405906 | 19-scf00458 | 19 |
| AX-158299056 | 23 | 47.617 | KV453155.1 | 9410940 | 19-scf00458 | 19 |
| AX-158299058 | 23 | 47.617 | KV453155.1 | 9412035 | 19-scf00458 | 19 |
| AX-158299059 | 23 | 47.617 | KV453155.1 | 9412422 | 19-scf00458 | 19 |
| AX-158299063 | 23 | 47.617 | KV453155.1 | 9415650 | 19-scf00458 | 19 |
| AX-158299065 | 23 | 47.617 | KV453155.1 | 9418715 | 19-scf00458 | 19 |
| AX-158299066 | 23 | 47.617 | KV453155.1 | 9419201 | 19-scf00458 | 19 |
| AX-157738574 | 23 | 47.617 | KV453155.1 | 9419740 | 19-scf00458 | 19 |
| AX-158299067 | 23 | 47.617 | KV453155.1 | 9420464 | 19-scf00458 | 19 |
| AX-157726569 | 23 | 47.617 | KV453155.1 | 9421199 | 19-scf00458 | 19 |
| AX-158299071 | 23 | 47.617 | KV453155.1 | 9425463 | 19-scf00458 | 19 |
| AX-158299072 | 23 | 47.617 | KV453155.1 | 9426452 | 19-scf00458 | 19 |
| AX-158299077 | 23 | 47.617 | KV453155.1 | 9436153 | 19-scf00458 | 19 |
| AX-158299078 | 23 | 47.617 | KV453155.1 | 9438543 | 19-scf00458 | 19 |
| AX-158299079 | 23 | 47.617 | KV453155.1 | 9439017 | 19-scf00458 | 19 |
| AX-158299082 | 23 | 47.617 | KV453155.1 | 9442279 | 19-scf00458 | 19 |
| AX-158299083 | 23 | 47.617 | KV453155.1 | 9443610 | 19-scf00458 | 19 |
| AX-158299084 | 23 | 47.617 | KV453155.1 | 9445337 | 19-scf00458 | 19 |
| AX-158299085 | 23 | 47.617 | KV453155.1 | 9446104 | 19-scf00458 | 19 |
| AX-158299086 | 23 | 47.617 | KV453155.1 | 9446489 | 19-scf00458 | 19 |
| AX-158299087 | 23 | 47.617 | KV453155.1 | 9446948 | 19-scf00458 | 19 |
| AX-158299088 | 23 | 47.617 | KV453155.1 | 9447604 | 19-scf00458 | 19 |
| AX-158299094 | 23 | 47.617 | KV453155.1 | 9451001 | 19-scf00458 | 19 |

|              |    |        |            |         |             |    |
|--------------|----|--------|------------|---------|-------------|----|
| AX-158299095 | 23 | 47.617 | KV453155.1 | 9451873 | 19-scf00458 | 19 |
| AX-158299096 | 23 | 47.617 | KV453155.1 | 9452720 | 19-scf00458 | 19 |
| AX-158299097 | 23 | 47.617 | KV453155.1 | 9453047 | 19-scf00458 | 19 |
| AX-158299098 | 23 | 47.617 | KV453155.1 | 9455242 | 19-scf00458 | 19 |
| AX-158299099 | 23 | 47.617 | KV453155.1 | 9455603 | 19-scf00458 | 19 |
| AX-158299104 | 23 | 47.617 | KV453155.1 | 9459450 | 19-scf00458 | 19 |
| AX-158299105 | 23 | 47.617 | KV453155.1 | 9460209 | 19-scf00458 | 19 |
| AX-158299106 | 23 | 47.617 | KV453155.1 | 9461736 | 19-scf00458 | 19 |
| AX-158299107 | 23 | 47.617 | KV453155.1 | 9462983 | 19-scf00458 | 19 |
| AX-158299110 | 23 | 47.617 | KV453155.1 | 9467728 | 19-scf00458 | 19 |
| AX-158299112 | 23 | 47.617 | KV453155.1 | 9470415 | 19-scf00458 | 19 |
| AX-158299114 | 23 | 47.617 | KV453155.1 | 9472218 | 19-scf00458 | 19 |
| AX-157748946 | 23 | 47.617 | KV453155.1 | 9472333 | 19-scf00458 | 19 |
| AX-158299116 | 23 | 47.617 | KV453155.1 | 9473192 | 19-scf00458 | 19 |
| AX-158299117 | 23 | 47.617 | KV453155.1 | 9473628 | 19-scf00458 | 19 |
| AX-158299122 | 23 | 47.617 | KV453155.1 | 9480634 | 19-scf00458 | 19 |
| AX-158299138 | 23 | 47.617 | KV453155.1 | 9501630 | 19-scf00458 | 19 |
| AX-158299139 | 23 | 47.617 | KV453155.1 | 9502086 | 19-scf00458 | 19 |
| AX-158299140 | 23 | 47.617 | KV453155.1 | 9502658 | 19-scf00458 | 19 |
| AX-158299141 | 23 | 47.617 | KV453155.1 | 9503791 | 19-scf00458 | 19 |
| AX-158299147 | 23 | 47.617 | KV453155.1 | 9512057 | 19-scf00458 | 19 |
| AX-158299148 | 23 | 47.617 | KV453155.1 | 9513226 | 19-scf00458 | 19 |
| AX-158299171 | 23 | 47.617 | KV453155.1 | 9536414 | 19-scf00458 | 19 |
| AX-158299196 | 23 | 47.617 | KV453155.1 | 9559060 | 19-scf00458 | 19 |
| AX-158299201 | 23 | 47.617 | KV453155.1 | 9564465 | 19-scf00458 | 19 |
| AX-158299204 | 23 | 47.617 | KV453155.1 | 9566921 | 19-scf00458 | 19 |
| AX-158299205 | 23 | 47.617 | KV453155.1 | 9569416 | 19-scf00458 | 19 |
| AX-158299207 | 23 | 47.617 | KV453155.1 | 9571904 | 19-scf00458 | 19 |
| AX-158299213 | 23 | 47.617 | KV453155.1 | 9580322 | 19-scf00458 | 19 |
| AX-158299214 | 23 | 47.617 | KV453155.1 | 9581038 | 19-scf00458 | 19 |
| AX-158299215 | 23 | 47.617 | KV453155.1 | 9581280 | 19-scf00458 | 19 |
| AX-158299216 | 23 | 47.617 | KV453155.1 | 9581973 | 19-scf00458 | 19 |
| AX-158299217 | 23 | 47.617 | KV453155.1 | 9582930 | 19-scf00458 | 19 |
| AX-158299222 | 23 | 47.617 | KV453155.1 | 9590691 | 19-scf00458 | 19 |
| AX-158299223 | 23 | 47.617 | KV453155.1 | 9591115 | 19-scf00458 | 19 |
| AX-158299225 | 23 | 47.617 | KV453155.1 | 9592631 | 19-scf00458 | 19 |
| AX-158299226 | 23 | 47.617 | KV453155.1 | 9593235 | 19-scf00458 | 19 |
| AX-158299229 | 23 | 47.617 | KV453155.1 | 9596334 | 19-scf00458 | 19 |
| AX-158299230 | 23 | 47.617 | KV453155.1 | 9597912 | 19-scf00458 | 19 |
| AX-158299231 | 23 | 47.617 | KV453155.1 | 9598459 | 19-scf00458 | 19 |
| AX-158299232 | 23 | 47.617 | KV453155.1 | 9599044 | 19-scf00458 | 19 |
| AX-158299233 | 23 | 47.617 | KV453155.1 | 9599750 | 19-scf00458 | 19 |
| AX-158299234 | 23 | 47.617 | KV453155.1 | 9600108 | 19-scf00458 | 19 |
| AX-158299235 | 23 | 47.617 | KV453155.1 | 9601017 | 19-scf00458 | 19 |
| AX-158299236 | 23 | 47.617 | KV453155.1 | 9601760 | 19-scf00458 | 19 |
| AX-158299237 | 23 | 47.617 | KV453155.1 | 9604170 | 19-scf00458 | 19 |
| AX-158299240 | 23 | 47.617 | KV453155.1 | 9605721 | 19-scf00458 | 19 |
| AX-158299241 | 23 | 47.617 | KV453155.1 | 9606899 | 19-scf00458 | 19 |
| AX-158299243 | 23 | 47.617 | KV453155.1 | 9608136 | 19-scf00458 | 19 |
| AX-158299244 | 23 | 47.617 | KV453155.1 | 9608990 | 19-scf00458 | 19 |
| AX-158299245 | 23 | 47.617 | KV453155.1 | 9609383 | 19-scf00458 | 19 |

|              |    |        |             |         |                |    |
|--------------|----|--------|-------------|---------|----------------|----|
| AX-158299249 | 23 | 47.617 | KV453155.1  | 9616437 | 19-scf00458    | 19 |
| AX-158299251 | 23 | 47.617 | KV453155.1  | 9618473 | 19-scf00458    | 19 |
| AX-158299252 | 23 | 47.617 | KV453155.1  | 9619515 | 19-scf00458    | 19 |
| AX-158299256 | 23 | 47.617 | KV453155.1  | 9622227 | 19-scf00458    | 19 |
| AX-158299258 | 23 | 47.617 | KV453155.1  | 9624142 | 19-scf00458    | 19 |
| AX-158299259 | 23 | 47.617 | KV453155.1  | 9624814 | 19-scf00458    | 19 |
| AX-158299260 | 23 | 47.617 | KV453155.1  | 9625142 | 19-scf00458    | 19 |
| AX-158299263 | 23 | 47.617 | KV453155.1  | 9633125 | 19-scf00458    | 19 |
| AX-157718448 | 23 | 47.617 | KV453155.1  | 9634892 | 19-scf00458    | 19 |
| AX-158299265 | 23 | 47.617 | KV453155.1  | 9636104 | 19-scf00458    | 19 |
| AX-158299267 | 23 | 47.617 | KV453155.1  | 9637143 | 19-scf00458    | 19 |
| AX-158299268 | 23 | 47.617 | KV453155.1  | 9638569 | 19-scf00458    | 19 |
| AX-158299270 | 23 | 47.617 | KV453155.1  | 9641858 | 19-scf00458    | 19 |
| AX-158299271 | 23 | 47.617 | KV453155.1  | 9642028 | 19-scf00458    | 19 |
| AX-158299272 | 23 | 47.617 | KV453155.1  | 9643016 | 19-scf00458    | 19 |
| AX-158299274 | 23 | 47.617 | KV453155.1  | 9644357 | 19-scf00458    | 19 |
| AX-158299276 | 23 | 47.617 | KV453155.1  | 9647214 | 19-scf00458    | 19 |
| AX-158299280 | 23 | 47.617 | KV453155.1  | 9649812 | 19-scf00458    | 19 |
| AX-158299281 | 23 | 47.617 | KV453155.1  | 9650855 | 19-scf00458    | 19 |
| AX-157720014 | 23 | 47.617 | KV453155.1  | 9651362 | 19-scf00458    | 19 |
| AX-158299284 | 23 | 47.617 | KV453155.1  | 9653650 | 19-scf00458    | 19 |
| AX-158299287 | 23 | 47.617 | KV453155.1  | 9658328 | 19-scf00458    | 19 |
| AX-158299289 | 23 | 47.617 | KV453155.1  | 9659765 | 19-scf00458    | 19 |
| AX-158299291 | 23 | 47.617 | KV453155.1  | 9662129 | 19-scf00458    | 19 |
| AX-158299292 | 23 | 47.617 | KV453155.1  | 9662502 | 19-scf00458    | 19 |
| AX-157726796 | 23 | 47.617 | KV453155.1  | 9663384 | 19-scf00458    | 19 |
| AX-158299293 | 23 | 47.617 | KV453155.1  | 9664201 | 19-scf00458    | 19 |
| AX-158299294 | 23 | 47.617 | KV453155.1  | 9664656 | 19-scf00458    | 19 |
| AX-158299295 | 23 | 47.617 | KV453155.1  | 9665312 | 19-scf00458    | 19 |
| AX-158299296 | 23 | 47.617 | KV453155.1  | 9665912 | 19-scf00458    | 19 |
| AX-158299297 | 23 | 47.617 | KV453155.1  | 9666437 | 19-scf00458    | 19 |
| AX-158299299 | 23 | 47.617 | KV453155.1  | 9667539 | 19-scf00458    | 19 |
| AX-158299300 | 23 | 47.617 | KV453155.1  | 9668959 | 19-scf00458    | 19 |
| AX-158299305 | 23 | 47.617 | KV453155.1  | 9675473 | 19-scf00458    | 19 |
| AX-158299307 | 23 | 47.617 | KV453155.1  | 9676286 | 19-scf00458    | 19 |
| AX-158299312 | 23 | 47.617 | KV453155.1  | 9680445 | 19-scf00458    | 19 |
| AX-158299313 | 23 | 47.617 | KV453155.1  | 9681591 | 19-scf00458    | 19 |
| AX-158299314 | 23 | 47.617 | KV453155.1  | 9682165 | 19-scf00458    | 19 |
| AX-157846160 | 23 | 47.617 | KV453155.1  | 9683565 | 19-scf00458    | 19 |
| AX-158299320 | 23 | 47.617 | KV453155.1  | 9689171 | 19-scf00458    | 19 |
| AX-158299322 | 23 | 47.617 | KV453155.1  | 9690180 | 19-scf00458    | 19 |
| AX-158299323 | 23 | 47.617 | KV453155.1  | 9691676 | 19-scf00458    | 19 |
| AX-158299325 | 23 | 47.617 | KV453155.1  | 9692192 | 19-scf00458    | 19 |
| AX-158299328 | 23 | 47.617 | KV453155.1  | 9693742 | 19-scf00458    | 19 |
| AX-158299334 | 23 | 47.617 | KV453155.1  | 9708143 | 19-scf00458    | 19 |
| AX-157888105 | 23 | 47.617 | KV453155.1  | 9747052 | 19-scf00458    | 19 |
| AX-157888106 | 23 | 47.617 | KV453155.1  | 9747138 | 19-scf00458    | 19 |
| AX-157699335 | 23 | 47.617 | FI889767.1  | 181     | -ORI212 lctali | UN |
| AX-157705896 | 23 | 47.617 | 3ML01031190 | 257     | scf06796_1     | UN |
| AX-157706567 | 23 | 47.617 | 3ML01032474 | 484     | scf08095_1     | UN |
| AX-158298563 | 23 | 47.639 | KV453155.1  | 8642560 | 19-scf00458    | 19 |



|              |    |        |            |         |             |    |
|--------------|----|--------|------------|---------|-------------|----|
| AX-158298915 | 23 | 47.639 | KV453155.1 | 9175107 | 19-scf00458 | 19 |
| AX-158298973 | 23 | 47.639 | KV453155.1 | 9308130 | 19-scf00458 | 19 |
| AX-158299073 | 23 | 47.639 | KV453155.1 | 9427509 | 19-scf00458 | 19 |
| AX-158299143 | 23 | 47.639 | KV453155.1 | 9505766 | 19-scf00458 | 19 |
| AX-157860810 | 23 | 47.66  | KV453155.1 | 9440803 | 19-scf00458 | 19 |
| AX-158298933 | 23 | 47.663 | KV453155.1 | 9216047 | 19-scf00458 | 19 |
| AX-157860781 | 23 | 47.663 | KV453155.1 | 9224285 | 19-scf00458 | 19 |
| AX-158298937 | 23 | 47.663 | KV453155.1 | 9225338 | 19-scf00458 | 19 |
| AX-157860783 | 23 | 47.663 | KV453155.1 | 9235163 | 19-scf00458 | 19 |
| AX-157846157 | 23 | 47.663 | KV453155.1 | 9237102 | 19-scf00458 | 19 |
| AX-157860785 | 23 | 47.663 | KV453155.1 | 9240573 | 19-scf00458 | 19 |
| AX-158298942 | 23 | 47.663 | KV453155.1 | 9241044 | 19-scf00458 | 19 |
| AX-157860786 | 23 | 47.663 | KV453155.1 | 9241962 | 19-scf00458 | 19 |
| AX-157860787 | 23 | 47.663 | KV453155.1 | 9242231 | 19-scf00458 | 19 |
| AX-157860788 | 23 | 47.663 | KV453155.1 | 9242282 | 19-scf00458 | 19 |
| AX-158298946 | 23 | 47.663 | KV453155.1 | 9252279 | 19-scf00458 | 19 |
| AX-157860790 | 23 | 47.663 | KV453155.1 | 9255286 | 19-scf00458 | 19 |
| AX-157860793 | 23 | 47.663 | KV453155.1 | 9263615 | 19-scf00458 | 19 |
| AX-157860794 | 23 | 47.663 | KV453155.1 | 9263891 | 19-scf00458 | 19 |
| AX-158298953 | 23 | 47.663 | KV453155.1 | 9266390 | 19-scf00458 | 19 |
| AX-157860796 | 23 | 47.663 | KV453155.1 | 9268204 | 19-scf00458 | 19 |
| AX-157860797 | 23 | 47.663 | KV453155.1 | 9275903 | 19-scf00458 | 19 |
| AX-157860798 | 23 | 47.663 | KV453155.1 | 9279843 | 19-scf00458 | 19 |
| AX-157860799 | 23 | 47.663 | KV453155.1 | 9279930 | 19-scf00458 | 19 |
| AX-158298961 | 23 | 47.663 | KV453155.1 | 9283451 | 19-scf00458 | 19 |
| AX-158298964 | 23 | 47.663 | KV453155.1 | 9287715 | 19-scf00458 | 19 |
| AX-157860802 | 23 | 47.663 | KV453155.1 | 9288013 | 19-scf00458 | 19 |
| AX-158298965 | 23 | 47.663 | KV453155.1 | 9293834 | 19-scf00458 | 19 |
| AX-158299028 | 23 | 47.663 | KV453155.1 | 9388860 | 19-scf00458 | 19 |
| AX-158299033 | 23 | 47.663 | KV453155.1 | 9393413 | 19-scf00458 | 19 |
| AX-158299038 | 23 | 47.663 | KV453155.1 | 9397827 | 19-scf00458 | 19 |
| AX-158299039 | 23 | 47.663 | KV453155.1 | 9399498 | 19-scf00458 | 19 |
| AX-158299040 | 23 | 47.663 | KV453155.1 | 9399905 | 19-scf00458 | 19 |
| AX-158299044 | 23 | 47.663 | KV453155.1 | 9402510 | 19-scf00458 | 19 |
| AX-158299045 | 23 | 47.663 | KV453155.1 | 9403392 | 19-scf00458 | 19 |
| AX-158299046 | 23 | 47.663 | KV453155.1 | 9404005 | 19-scf00458 | 19 |
| AX-158299047 | 23 | 47.663 | KV453155.1 | 9404559 | 19-scf00458 | 19 |
| AX-158299075 | 23 | 47.663 | KV453155.1 | 9431236 | 19-scf00458 | 19 |
| AX-157719187 | 23 | 47.663 | KV453155.1 | 9440705 | 19-scf00458 | 19 |
| AX-158299108 | 23 | 47.663 | KV453155.1 | 9464581 | 19-scf00458 | 19 |
| AX-158299120 | 23 | 47.663 | KV453155.1 | 9479094 | 19-scf00458 | 19 |
| AX-158299149 | 23 | 47.663 | KV453155.1 | 9515844 | 19-scf00458 | 19 |
| AX-158299150 | 23 | 47.663 | KV453155.1 | 9516712 | 19-scf00458 | 19 |
| AX-158299151 | 23 | 47.663 | KV453155.1 | 9518044 | 19-scf00458 | 19 |
| AX-158299153 | 23 | 47.663 | KV453155.1 | 9520005 | 19-scf00458 | 19 |
| AX-158299157 | 23 | 47.663 | KV453155.1 | 9522739 | 19-scf00458 | 19 |
| AX-158299159 | 23 | 47.663 | KV453155.1 | 9524201 | 19-scf00458 | 19 |
| AX-158299161 | 23 | 47.663 | KV453155.1 | 9526354 | 19-scf00458 | 19 |
| AX-158299164 | 23 | 47.663 | KV453155.1 | 9529611 | 19-scf00458 | 19 |
| AX-158299166 | 23 | 47.663 | KV453155.1 | 9530798 | 19-scf00458 | 19 |
| AX-158299168 | 23 | 47.663 | KV453155.1 | 9533247 | 19-scf00458 | 19 |

|              |    |        |            |         |             |    |
|--------------|----|--------|------------|---------|-------------|----|
| AX-158299169 | 23 | 47.663 | KV453155.1 | 9535004 | 19-scf00458 | 19 |
| AX-158299170 | 23 | 47.663 | KV453155.1 | 9535924 | 19-scf00458 | 19 |
| AX-158299172 | 23 | 47.663 | KV453155.1 | 9537771 | 19-scf00458 | 19 |
| AX-158299173 | 23 | 47.663 | KV453155.1 | 9538572 | 19-scf00458 | 19 |
| AX-158299174 | 23 | 47.663 | KV453155.1 | 9539192 | 19-scf00458 | 19 |
| AX-158299175 | 23 | 47.663 | KV453155.1 | 9539776 | 19-scf00458 | 19 |
| AX-158299177 | 23 | 47.663 | KV453155.1 | 9541391 | 19-scf00458 | 19 |
| AX-158299181 | 23 | 47.663 | KV453155.1 | 9544606 | 19-scf00458 | 19 |
| AX-157846158 | 23 | 47.663 | KV453155.1 | 9544869 | 19-scf00458 | 19 |
| AX-158299182 | 23 | 47.663 | KV453155.1 | 9545467 | 19-scf00458 | 19 |
| AX-158299183 | 23 | 47.663 | KV453155.1 | 9546261 | 19-scf00458 | 19 |
| AX-158299186 | 23 | 47.663 | KV453155.1 | 9549589 | 19-scf00458 | 19 |
| AX-158299187 | 23 | 47.663 | KV453155.1 | 9552852 | 19-scf00458 | 19 |
| AX-158299190 | 23 | 47.663 | KV453155.1 | 9555426 | 19-scf00458 | 19 |
| AX-158299212 | 23 | 47.663 | KV453155.1 | 9579622 | 19-scf00458 | 19 |
| AX-158417553 | 23 | 47.663 | KV453155.1 | 9661056 | 19-scf00458 | 19 |
| AX-158299331 | 23 | 47.663 | KV453155.1 | 9704897 | 19-scf00458 | 19 |
| AX-158299407 | 23 | 47.663 | KV453155.1 | 9774015 | 19-scf00458 | 19 |
| AX-158299121 | 23 | 47.685 | KV453155.1 | 9479855 | 19-scf00458 | 19 |
| AX-158299142 | 23 | 47.707 | KV453155.1 | 9504325 | 19-scf00458 | 19 |
| AX-158417550 | 23 | 47.707 | KV453155.1 | 9507977 | 19-scf00458 | 19 |
| AX-158299188 | 23 | 47.707 | KV453155.1 | 9553757 | 19-scf00458 | 19 |
| AX-158299191 | 23 | 47.707 | KV453155.1 | 9556259 | 19-scf00458 | 19 |
| AX-158299209 | 23 | 47.747 | KV453155.1 | 9575526 | 19-scf00458 | 19 |
| AX-158299248 | 23 | 47.791 | KV453155.1 | 9616138 | 19-scf00458 | 19 |
| AX-157726407 | 23 | 47.809 | KV453155.1 | 8820792 | 19-scf00458 | 19 |
| AX-157723326 | 23 | 47.809 | KV453155.1 | 9623463 | 19-scf00458 | 19 |
| AX-158299264 | 23 | 47.847 | KV453155.1 | 9635557 | 19-scf00458 | 19 |
| AX-158299304 | 23 | 47.847 | KV453155.1 | 9673105 | 19-scf00458 | 19 |
| AX-158299269 | 23 | 47.871 | KV453155.1 | 9640252 | 19-scf00458 | 19 |
| AX-158299064 | 23 | 47.895 | KV453155.1 | 9417589 | 19-scf00458 | 19 |
| AX-158299255 | 23 | 47.895 | KV453155.1 | 9621257 | 19-scf00458 | 19 |
| AX-158299301 | 23 | 47.895 | KV453155.1 | 9669673 | 19-scf00458 | 19 |
| AX-157752689 | 23 | 47.895 | KV453155.1 | 9732145 | 19-scf00458 | 19 |
| AX-157757229 | 23 | 47.916 | KV453155.1 | 9068143 | 19-scf00458 | 19 |
| AX-158381296 | 23 | 47.916 | KV453155.1 | 9305546 | 19-scf00458 | 19 |
| AX-158299023 | 23 | 47.916 | KV453155.1 | 9386297 | 19-scf00458 | 19 |
| AX-158299123 | 23 | 47.916 | KV453155.1 | 9481686 | 19-scf00458 | 19 |
| AX-158299124 | 23 | 47.916 | KV453155.1 | 9482053 | 19-scf00458 | 19 |
| AX-158299125 | 23 | 47.916 | KV453155.1 | 9483162 | 19-scf00458 | 19 |
| AX-158299126 | 23 | 47.916 | KV453155.1 | 9487088 | 19-scf00458 | 19 |
| AX-158299127 | 23 | 47.916 | KV453155.1 | 9489612 | 19-scf00458 | 19 |
| AX-158299332 | 23 | 47.916 | KV453155.1 | 9706125 | 19-scf00458 | 19 |
| AX-158299336 | 23 | 47.916 | KV453155.1 | 9709193 | 19-scf00458 | 19 |
| AX-158299338 | 23 | 47.916 | KV453155.1 | 9710907 | 19-scf00458 | 19 |
| AX-158299339 | 23 | 47.916 | KV453155.1 | 9711184 | 19-scf00458 | 19 |
| AX-158299340 | 23 | 47.916 | KV453155.1 | 9712490 | 19-scf00458 | 19 |
| AX-158299341 | 23 | 47.916 | KV453155.1 | 9713512 | 19-scf00458 | 19 |
| AX-158299342 | 23 | 47.916 | KV453155.1 | 9713871 | 19-scf00458 | 19 |
| AX-158299343 | 23 | 47.916 | KV453155.1 | 9714590 | 19-scf00458 | 19 |
| AX-158299344 | 23 | 47.916 | KV453155.1 | 9715810 | 19-scf00458 | 19 |

|              |    |        |             |          |                 |    |
|--------------|----|--------|-------------|----------|-----------------|----|
| AX-158299345 | 23 | 47.916 | KV453155.1  | 9717166  | 19-scf00458     | 19 |
| AX-158299349 | 23 | 47.916 | KV453155.1  | 9720408  | 19-scf00458     | 19 |
| AX-158299350 | 23 | 47.916 | KV453155.1  | 9720807  | 19-scf00458     | 19 |
| AX-157701513 | 23 | 47.916 | KV453155.1  | 9721674  | 19-scf00458     | 19 |
| AX-158299351 | 23 | 47.916 | KV453155.1  | 9721942  | 19-scf00458     | 19 |
| AX-158299352 | 23 | 47.916 | KV453155.1  | 9722279  | 19-scf00458     | 19 |
| AX-158299353 | 23 | 47.916 | KV453155.1  | 9724878  | 19-scf00458     | 19 |
| AX-158299354 | 23 | 47.916 | KV453155.1  | 9725556  | 19-scf00458     | 19 |
| AX-158299355 | 23 | 47.916 | KV453155.1  | 9725927  | 19-scf00458     | 19 |
| AX-158299356 | 23 | 47.916 | KV453155.1  | 9726758  | 19-scf00458     | 19 |
| AX-158299357 | 23 | 47.916 | KV453155.1  | 9727600  | 19-scf00458     | 19 |
| AX-158299358 | 23 | 47.916 | KV453155.1  | 9727933  | 19-scf00458     | 19 |
| AX-158299359 | 23 | 47.916 | KV453155.1  | 9728834  | 19-scf00458     | 19 |
| AX-158299360 | 23 | 47.916 | KV453155.1  | 9729324  | 19-scf00458     | 19 |
| AX-158299361 | 23 | 47.916 | KV453155.1  | 9730111  | 19-scf00458     | 19 |
| AX-158299362 | 23 | 47.916 | KV453155.1  | 9730436  | 19-scf00458     | 19 |
| AX-158299363 | 23 | 47.916 | KV453155.1  | 9731088  | 19-scf00458     | 19 |
| AX-158299364 | 23 | 47.916 | KV453155.1  | 9731705  | 19-scf00458     | 19 |
| AX-157846163 | 23 | 47.916 | KV453155.1  | 9732575  | 19-scf00458     | 19 |
| AX-158299366 | 23 | 47.916 | KV453155.1  | 9733128  | 19-scf00458     | 19 |
| AX-158299367 | 23 | 47.916 | KV453155.1  | 9733345  | 19-scf00458     | 19 |
| AX-158299368 | 23 | 47.916 | KV453155.1  | 9734664  | 19-scf00458     | 19 |
| AX-158299369 | 23 | 47.916 | KV453155.1  | 9736063  | 19-scf00458     | 19 |
| AX-157739702 | 23 | 47.916 | KV453155.1  | 9737245  | 19-scf00458     | 19 |
| AX-158299370 | 23 | 47.916 | KV453155.1  | 9737661  | 19-scf00458     | 19 |
| AX-158299372 | 23 | 47.916 | KV453155.1  | 9738504  | 19-scf00458     | 19 |
| AX-158299373 | 23 | 47.916 | KV453155.1  | 9739378  | 19-scf00458     | 19 |
| AX-158299374 | 23 | 47.916 | KV453155.1  | 9739939  | 19-scf00458     | 19 |
| AX-158381299 | 23 | 47.916 | KV453155.1  | 9740184  | 19-scf00458     | 19 |
| AX-158299376 | 23 | 47.916 | KV453155.1  | 9741561  | 19-scf00458     | 19 |
| AX-158299377 | 23 | 47.916 | KV453155.1  | 9742330  | 19-scf00458     | 19 |
| AX-157725390 | 23 | 47.916 | KV453155.1  | 9742733  | 19-scf00458     | 19 |
| AX-158299380 | 23 | 47.916 | KV453155.1  | 9746149  | 19-scf00458     | 19 |
| AX-158299384 | 23 | 47.916 | KV453155.1  | 9748655  | 19-scf00458     | 19 |
| AX-158299385 | 23 | 47.916 | KV453155.1  | 9749504  | 19-scf00458     | 19 |
| AX-158299386 | 23 | 47.916 | KV453155.1  | 9750353  | 19-scf00458     | 19 |
| AX-158299387 | 23 | 47.916 | KV453155.1  | 9750828  | 19-scf00458     | 19 |
| AX-158299391 | 23 | 47.916 | KV453155.1  | 9754332  | 19-scf00458     | 19 |
| AX-158299392 | 23 | 47.916 | KV453155.1  | 9755456  | 19-scf00458     | 19 |
| AX-158299394 | 23 | 47.916 | KV453155.1  | 9757335  | 19-scf00458     | 19 |
| AX-158299400 | 23 | 47.916 | KV453155.1  | 9764568  | 19-scf00458     | 19 |
| AX-158299403 | 23 | 47.916 | KV453155.1  | 9767392  | 19-scf00458     | 19 |
| AX-158299405 | 23 | 47.916 | KV453155.1  | 9769450  | 19-scf00458     | 19 |
| AX-158299450 | 23 | 47.916 | KV453155.1  | 9818770  | 19-scf00458     | 19 |
| AX-158299598 | 23 | 47.916 | KV453155.1  | 10031203 | 19-scf00458     | 19 |
| AX-157701514 | 23 | 47.916 | DX085944.1  | 52       | 19-ORI212 Ictal | UN |
| AX-157707552 | 23 | 47.916 | 3ML01034537 | 306      | scf10214_1      | UN |
| AX-158298750 | 23 | 47.923 | KV453155.1  | 8891372  | 19-scf00458     | 19 |
| AX-158299060 | 23 | 47.935 | KV453155.1  | 9413860  | 19-scf00458     | 19 |
| AX-158299393 | 23 | 47.935 | KV453155.1  | 9756539  | 19-scf00458     | 19 |
| AX-158299398 | 23 | 47.935 | KV453155.1  | 9763561  | 19-scf00458     | 19 |

|              |    |        |             |          |             |    |
|--------------|----|--------|-------------|----------|-------------|----|
| AX-158299399 | 23 | 47.935 | KV453155.1  | 9764153  | 19-scf00458 | 19 |
| AX-158299402 | 23 | 47.968 | KV453155.1  | 9766768  | 19-scf00458 | 19 |
| AX-158299404 | 23 | 48.002 | KV453155.1  | 9768891  | 19-scf00458 | 19 |
| AX-157846165 | 23 | 48.076 | KV453155.1  | 9770907  | 19-scf00458 | 19 |
| AX-158299412 | 23 | 48.144 | KV453155.1  | 9782097  | 19-scf00458 | 19 |
| AX-158299416 | 23 | 48.144 | KV453155.1  | 9785237  | 19-scf00458 | 19 |
| AX-158299425 | 23 | 48.144 | KV453155.1  | 9793736  | 19-scf00458 | 19 |
| AX-158299426 | 23 | 48.144 | KV453155.1  | 9794379  | 19-scf00458 | 19 |
| AX-158299427 | 23 | 48.144 | KV453155.1  | 9796403  | 19-scf00458 | 19 |
| AX-158299429 | 23 | 48.144 | KV453155.1  | 9798282  | 19-scf00458 | 19 |
| AX-158299431 | 23 | 48.144 | KV453155.1  | 9800055  | 19-scf00458 | 19 |
| AX-158299435 | 23 | 48.144 | KV453155.1  | 9807664  | 19-scf00458 | 19 |
| AX-158299438 | 23 | 48.144 | KV453155.1  | 9809451  | 19-scf00458 | 19 |
| AX-157846166 | 23 | 48.144 | KV453155.1  | 9809493  | 19-scf00458 | 19 |
| AX-158299441 | 23 | 48.144 | KV453155.1  | 9810874  | 19-scf00458 | 19 |
| AX-158299446 | 23 | 48.144 | KV453155.1  | 9814829  | 19-scf00458 | 19 |
| AX-158299452 | 23 | 48.144 | KV453155.1  | 9824095  | 19-scf00458 | 19 |
| AX-157846167 | 23 | 48.144 | KV453155.1  | 9826578  | 19-scf00458 | 19 |
| AX-158299500 | 23 | 48.144 | KV453155.1  | 9890458  | 19-scf00458 | 19 |
| AX-157846176 | 23 | 48.144 | KV453155.1  | 9901182  | 19-scf00458 | 19 |
| AX-158299517 | 23 | 48.144 | KV453155.1  | 9906615  | 19-scf00458 | 19 |
| AX-157846180 | 23 | 48.144 | KV453155.1  | 9936316  | 19-scf00458 | 19 |
| AX-157846181 | 23 | 48.144 | KV453155.1  | 9940258  | 19-scf00458 | 19 |
| AX-158299579 | 23 | 48.144 | KV453155.1  | 10002002 | 19-scf00458 | 19 |
| AX-157705810 | 23 | 48.144 | 3ML01030941 | 118      | scf06545_1  | UN |
| AX-158299457 | 23 | 48.155 | KV453155.1  | 9838845  | 19-scf00458 | 19 |
| AX-157846169 | 23 | 48.168 | KV453155.1  | 9843646  | 19-scf00458 | 19 |
| AX-158299469 | 23 | 48.181 | KV453155.1  | 9852413  | 19-scf00458 | 19 |
| AX-158299470 | 23 | 48.181 | KV453155.1  | 9853247  | 19-scf00458 | 19 |
| AX-158299473 | 23 | 48.181 | KV453155.1  | 9855746  | 19-scf00458 | 19 |
| AX-158299475 | 23 | 48.181 | KV453155.1  | 9857255  | 19-scf00458 | 19 |
| AX-158299487 | 23 | 48.181 | KV453155.1  | 9875733  | 19-scf00458 | 19 |
| AX-158299492 | 23 | 48.181 | KV453155.1  | 9881791  | 19-scf00458 | 19 |
| AX-158299498 | 23 | 48.181 | KV453155.1  | 9887345  | 19-scf00458 | 19 |
| AX-158299519 | 23 | 48.181 | KV453155.1  | 9909225  | 19-scf00458 | 19 |
| AX-158299544 | 23 | 48.181 | KV453155.1  | 9939831  | 19-scf00458 | 19 |
| AX-158299474 | 23 | 48.189 | KV453155.1  | 9855967  | 19-scf00458 | 19 |
| AX-158299476 | 23 | 48.2   | KV453155.1  | 9858624  | 19-scf00458 | 19 |
| AX-157846173 | 23 | 48.226 | KV453155.1  | 9858679  | 19-scf00458 | 19 |
| AX-158297412 | 23 | 48.254 | KV453155.1  | 7165026  | 19-scf00458 | 19 |
| AX-158381297 | 23 | 48.254 | KV453155.1  | 9387527  | 19-scf00458 | 19 |
| AX-158299466 | 23 | 48.254 | KV453155.1  | 9847978  | 19-scf00458 | 19 |
| AX-157713080 | 23 | 48.254 | KV453155.1  | 9859826  | 19-scf00458 | 19 |
| AX-158299481 | 23 | 48.254 | KV453155.1  | 9870854  | 19-scf00458 | 19 |
| AX-158299483 | 23 | 48.254 | KV453155.1  | 9872344  | 19-scf00458 | 19 |
| AX-158299484 | 23 | 48.254 | KV453155.1  | 9873977  | 19-scf00458 | 19 |
| AX-158299499 | 23 | 48.254 | KV453155.1  | 9887751  | 19-scf00458 | 19 |
| AX-158299501 | 23 | 48.254 | KV453155.1  | 9891309  | 19-scf00458 | 19 |
| AX-158299505 | 23 | 48.254 | KV453155.1  | 9895329  | 19-scf00458 | 19 |
| AX-158299506 | 23 | 48.254 | KV453155.1  | 9896122  | 19-scf00458 | 19 |
| AX-158299508 | 23 | 48.254 | KV453155.1  | 9898219  | 19-scf00458 | 19 |

|              |    |        |            |          |             |    |
|--------------|----|--------|------------|----------|-------------|----|
| AX-158299512 | 23 | 48.254 | KV453155.1 | 9902072  | 19-scf00458 | 19 |
| AX-157846178 | 23 | 48.254 | KV453155.1 | 9902234  | 19-scf00458 | 19 |
| AX-157846179 | 23 | 48.254 | KV453155.1 | 9902731  | 19-scf00458 | 19 |
| AX-158299513 | 23 | 48.254 | KV453155.1 | 9902840  | 19-scf00458 | 19 |
| AX-158299516 | 23 | 48.254 | KV453155.1 | 9905376  | 19-scf00458 | 19 |
| AX-158299532 | 23 | 48.254 | KV453155.1 | 9922801  | 19-scf00458 | 19 |
| AX-158299541 | 23 | 48.254 | KV453155.1 | 9933758  | 19-scf00458 | 19 |
| AX-158419668 | 23 | 48.29  | KV453155.1 | 9898871  | 19-scf00458 | 19 |
| AX-158299514 | 23 | 48.29  | KV453155.1 | 9904165  | 19-scf00458 | 19 |
| AX-158299518 | 23 | 48.29  | KV453155.1 | 9907349  | 19-scf00458 | 19 |
| AX-158299520 | 23 | 48.326 | KV453155.1 | 9909732  | 19-scf00458 | 19 |
| AX-158299413 | 23 | 48.363 | KV453155.1 | 9782385  | 19-scf00458 | 19 |
| AX-158299525 | 23 | 48.363 | KV453155.1 | 9912651  | 19-scf00458 | 19 |
| AX-158299527 | 23 | 48.363 | KV453155.1 | 9913732  | 19-scf00458 | 19 |
| AX-158299528 | 23 | 48.363 | KV453155.1 | 9914571  | 19-scf00458 | 19 |
| AX-158299534 | 23 | 48.363 | KV453155.1 | 9926206  | 19-scf00458 | 19 |
| AX-158381300 | 23 | 48.363 | KV453155.1 | 9936168  | 19-scf00458 | 19 |
| AX-158295305 | 23 | 48.581 | KV453155.1 | 4520342  | 19-scf00458 | 19 |
| AX-157867633 | 23 | 48.581 | KV453155.1 | 5793804  | 19-scf00458 | 19 |
| AX-158297341 | 23 | 48.581 | KV453155.1 | 7096484  | 19-scf00458 | 19 |
| AX-157846096 | 23 | 48.581 | KV453155.1 | 8717730  | 19-scf00458 | 19 |
| AX-157716055 | 23 | 48.581 | KV453155.1 | 9939014  | 19-scf00458 | 19 |
| AX-157739106 | 23 | 48.581 | KV453155.1 | 9942065  | 19-scf00458 | 19 |
| AX-157846182 | 23 | 48.581 | KV453155.1 | 9942105  | 19-scf00458 | 19 |
| AX-157860814 | 23 | 48.581 | KV453155.1 | 9943412  | 19-scf00458 | 19 |
| AX-158299547 | 23 | 48.581 | KV453155.1 | 9943989  | 19-scf00458 | 19 |
| AX-157846183 | 23 | 48.581 | KV453155.1 | 9947914  | 19-scf00458 | 19 |
| AX-158299549 | 23 | 48.581 | KV453155.1 | 9948394  | 19-scf00458 | 19 |
| AX-158299550 | 23 | 48.581 | KV453155.1 | 9948691  | 19-scf00458 | 19 |
| AX-158299551 | 23 | 48.581 | KV453155.1 | 9951651  | 19-scf00458 | 19 |
| AX-157726692 | 23 | 48.581 | KV453155.1 | 9953525  | 19-scf00458 | 19 |
| AX-157846184 | 23 | 48.606 | KV453155.1 | 9949955  | 19-scf00458 | 19 |
| AX-158299556 | 23 | 48.691 | KV453155.1 | 9962065  | 19-scf00458 | 19 |
| AX-157716231 | 23 | 48.691 | KV453155.1 | 9962732  | 19-scf00458 | 19 |
| AX-158299557 | 23 | 48.712 | KV453155.1 | 9963103  | 19-scf00458 | 19 |
| AX-158299558 | 23 | 48.74  | KV453155.1 | 9963437  | 19-scf00458 | 19 |
| AX-158299597 | 23 | 48.74  | KV453155.1 | 10030916 | 19-scf00458 | 19 |
| AX-157714328 | 23 | 48.765 | KV453155.1 | 9965965  | 19-scf00458 | 19 |
| AX-158299561 | 23 | 48.765 | KV453155.1 | 9967553  | 19-scf00458 | 19 |
| AX-158299612 | 23 | 48.765 | KV453155.1 | 10054006 | 19-scf00458 | 19 |
| AX-158299395 | 23 | 48.789 | KV453155.1 | 9758303  | 19-scf00458 | 19 |
| AX-158299531 | 23 | 48.789 | KV453155.1 | 9920942  | 19-scf00458 | 19 |
| AX-158299563 | 23 | 48.789 | KV453155.1 | 9970734  | 19-scf00458 | 19 |
| AX-158299573 | 23 | 48.789 | KV453155.1 | 9990877  | 19-scf00458 | 19 |
| AX-158299449 | 23 | 48.8   | KV453155.1 | 9817054  | 19-scf00458 | 19 |
| AX-158299455 | 23 | 48.8   | KV453155.1 | 9836091  | 19-scf00458 | 19 |
| AX-158299460 | 23 | 48.8   | KV453155.1 | 9839912  | 19-scf00458 | 19 |
| AX-158299548 | 23 | 48.8   | KV453155.1 | 9948184  | 19-scf00458 | 19 |
| AX-157873431 | 23 | 48.8   | KV453155.1 | 9968341  | 19-scf00458 | 19 |
| AX-158299566 | 23 | 48.8   | KV453155.1 | 9974357  | 19-scf00458 | 19 |
| AX-158299568 | 23 | 48.8   | KV453155.1 | 9983104  | 19-scf00458 | 19 |

|              |    |        |            |          |             |    |
|--------------|----|--------|------------|----------|-------------|----|
| AX-158299571 | 23 | 48.8   | KV453155.1 | 9986396  | 19-scf00458 | 19 |
| AX-157846187 | 23 | 48.8   | KV453155.1 | 9990592  | 19-scf00458 | 19 |
| AX-158299577 | 23 | 48.8   | KV453155.1 | 9995569  | 19-scf00458 | 19 |
| AX-158299578 | 23 | 48.8   | KV453155.1 | 9997256  | 19-scf00458 | 19 |
| AX-158299580 | 23 | 48.8   | KV453155.1 | 10002703 | 19-scf00458 | 19 |
| AX-157771314 | 23 | 48.8   | KV453155.1 | 10003298 | 19-scf00458 | 19 |
| AX-157860784 | 23 | 49.018 | KV453155.1 | 9240193  | 19-scf00458 | 19 |
| AX-157860789 | 23 | 49.018 | KV453155.1 | 9254185  | 19-scf00458 | 19 |
| AX-158298954 | 23 | 49.018 | KV453155.1 | 9266947  | 19-scf00458 | 19 |
| AX-158298957 | 23 | 49.018 | KV453155.1 | 9272729  | 19-scf00458 | 19 |
| AX-158298958 | 23 | 49.018 | KV453155.1 | 9276913  | 19-scf00458 | 19 |
| AX-157860800 | 23 | 49.018 | KV453155.1 | 9283806  | 19-scf00458 | 19 |
| AX-158299158 | 23 | 49.018 | KV453155.1 | 9523167  | 19-scf00458 | 19 |
| AX-158299165 | 23 | 49.018 | KV453155.1 | 9530305  | 19-scf00458 | 19 |
| AX-158299176 | 23 | 49.018 | KV453155.1 | 9540588  | 19-scf00458 | 19 |
| AX-158299185 | 23 | 49.018 | KV453155.1 | 9547774  | 19-scf00458 | 19 |
| AX-158299192 | 23 | 49.018 | KV453155.1 | 9556641  | 19-scf00458 | 19 |
| AX-158299193 | 23 | 49.018 | KV453155.1 | 9557562  | 19-scf00458 | 19 |
| AX-158299262 | 23 | 49.018 | KV453155.1 | 9630089  | 19-scf00458 | 19 |
| AX-158299408 | 23 | 49.018 | KV453155.1 | 9777094  | 19-scf00458 | 19 |
| AX-158299410 | 23 | 49.018 | KV453155.1 | 9779747  | 19-scf00458 | 19 |
| AX-158299411 | 23 | 49.018 | KV453155.1 | 9780846  | 19-scf00458 | 19 |
| AX-158299414 | 23 | 49.018 | KV453155.1 | 9783160  | 19-scf00458 | 19 |
| AX-158299417 | 23 | 49.018 | KV453155.1 | 9785764  | 19-scf00458 | 19 |
| AX-158299418 | 23 | 49.018 | KV453155.1 | 9786037  | 19-scf00458 | 19 |
| AX-158299419 | 23 | 49.018 | KV453155.1 | 9786708  | 19-scf00458 | 19 |
| AX-158299420 | 23 | 49.018 | KV453155.1 | 9788514  | 19-scf00458 | 19 |
| AX-158299423 | 23 | 49.018 | KV453155.1 | 9791044  | 19-scf00458 | 19 |
| AX-158299424 | 23 | 49.018 | KV453155.1 | 9793218  | 19-scf00458 | 19 |
| AX-158299432 | 23 | 49.018 | KV453155.1 | 9801017  | 19-scf00458 | 19 |
| AX-158299443 | 23 | 49.018 | KV453155.1 | 9812481  | 19-scf00458 | 19 |
| AX-158299444 | 23 | 49.018 | KV453155.1 | 9813705  | 19-scf00458 | 19 |
| AX-158299447 | 23 | 49.018 | KV453155.1 | 9815534  | 19-scf00458 | 19 |
| AX-158299454 | 23 | 49.018 | KV453155.1 | 9828734  | 19-scf00458 | 19 |
| AX-158299456 | 23 | 49.018 | KV453155.1 | 9838037  | 19-scf00458 | 19 |
| AX-158299462 | 23 | 49.018 | KV453155.1 | 9842753  | 19-scf00458 | 19 |
| AX-157846170 | 23 | 49.018 | KV453155.1 | 9844212  | 19-scf00458 | 19 |
| AX-158299463 | 23 | 49.018 | KV453155.1 | 9845069  | 19-scf00458 | 19 |
| AX-158299464 | 23 | 49.018 | KV453155.1 | 9845497  | 19-scf00458 | 19 |
| AX-157846171 | 23 | 49.018 | KV453155.1 | 9845961  | 19-scf00458 | 19 |
| AX-158299465 | 23 | 49.018 | KV453155.1 | 9846805  | 19-scf00458 | 19 |
| AX-158299583 | 23 | 49.018 | KV453155.1 | 10007735 | 19-scf00458 | 19 |
| AX-158299584 | 23 | 49.018 | KV453155.1 | 10009445 | 19-scf00458 | 19 |
| AX-158299585 | 23 | 49.018 | KV453155.1 | 10010527 | 19-scf00458 | 19 |
| AX-158299586 | 23 | 49.018 | KV453155.1 | 10011230 | 19-scf00458 | 19 |
| AX-157771589 | 23 | 49.018 | KV453155.1 | 10011971 | 19-scf00458 | 19 |
| AX-158299590 | 23 | 49.018 | KV453155.1 | 10014414 | 19-scf00458 | 19 |
| AX-158299592 | 23 | 49.018 | KV453155.1 | 10022136 | 19-scf00458 | 19 |
| AX-157757263 | 23 | 49.018 | KV453155.1 | 10032585 | 19-scf00458 | 19 |
| AX-157740124 | 23 | 49.018 | KV453155.1 | 10033028 | 19-scf00458 | 19 |
| AX-158299602 | 23 | 49.018 | KV453155.1 | 10037421 | 19-scf00458 | 19 |

|              |    |        |            |          |             |    |
|--------------|----|--------|------------|----------|-------------|----|
| AX-158299603 | 23 | 49.018 | KV453155.1 | 10039101 | 19-scf00458 | 19 |
| AX-158299604 | 23 | 49.018 | KV453155.1 | 10041138 | 19-scf00458 | 19 |
| AX-158299606 | 23 | 49.018 | KV453155.1 | 10042442 | 19-scf00458 | 19 |
| AX-158299608 | 23 | 49.018 | KV453155.1 | 10046657 | 19-scf00458 | 19 |
| AX-158299609 | 23 | 49.018 | KV453155.1 | 10050031 | 19-scf00458 | 19 |
| AX-158299610 | 23 | 49.018 | KV453155.1 | 10052558 | 19-scf00458 | 19 |
| AX-158299611 | 23 | 49.018 | KV453155.1 | 10053745 | 19-scf00458 | 19 |
| AX-158299613 | 23 | 49.018 | KV453155.1 | 10054704 | 19-scf00458 | 19 |
| AX-158299614 | 23 | 49.018 | KV453155.1 | 10055993 | 19-scf00458 | 19 |
| AX-158299616 | 23 | 49.018 | KV453155.1 | 10058446 | 19-scf00458 | 19 |
| AX-158299617 | 23 | 49.018 | KV453155.1 | 10059691 | 19-scf00458 | 19 |
| AX-158299619 | 23 | 49.018 | KV453155.1 | 10061628 | 19-scf00458 | 19 |
| AX-158299620 | 23 | 49.018 | KV453155.1 | 10062960 | 19-scf00458 | 19 |
| AX-158299622 | 23 | 49.018 | KV453155.1 | 10064341 | 19-scf00458 | 19 |
| AX-158299623 | 23 | 49.018 | KV453155.1 | 10064549 | 19-scf00458 | 19 |
| AX-157740280 | 23 | 49.018 | KV453155.1 | 10067288 | 19-scf00458 | 19 |
| AX-158299624 | 23 | 49.018 | KV453155.1 | 10067940 | 19-scf00458 | 19 |
| AX-158299625 | 23 | 49.018 | KV453155.1 | 10068444 | 19-scf00458 | 19 |
| AX-158299626 | 23 | 49.018 | KV453155.1 | 10070083 | 19-scf00458 | 19 |
| AX-158299628 | 23 | 49.018 | KV453155.1 | 10071696 | 19-scf00458 | 19 |
| AX-158299629 | 23 | 49.018 | KV453155.1 | 10071930 | 19-scf00458 | 19 |
| AX-158299630 | 23 | 49.018 | KV453155.1 | 10072720 | 19-scf00458 | 19 |
| AX-158299631 | 23 | 49.018 | KV453155.1 | 10076536 | 19-scf00458 | 19 |
| AX-158419670 | 23 | 49.018 | KV453155.1 | 10076952 | 19-scf00458 | 19 |
| AX-158299637 | 23 | 49.018 | KV453155.1 | 10091523 | 19-scf00458 | 19 |
| AX-158299641 | 23 | 49.018 | KV453155.1 | 10095058 | 19-scf00458 | 19 |
| AX-158299648 | 23 | 49.018 | KV453155.1 | 10102516 | 19-scf00458 | 19 |
| AX-158299652 | 23 | 49.018 | KV453155.1 | 10105927 | 19-scf00458 | 19 |
| AX-158299654 | 23 | 49.018 | KV453155.1 | 10107357 | 19-scf00458 | 19 |
| AX-158417565 | 23 | 49.018 | KV453155.1 | 10120165 | 19-scf00458 | 19 |
| AX-158299798 | 23 | 49.018 | KV453155.1 | 10319802 | 19-scf00458 | 19 |
| AX-158299799 | 23 | 49.018 | KV453155.1 | 10320145 | 19-scf00458 | 19 |
| AX-158299804 | 23 | 49.018 | KV453155.1 | 10324733 | 19-scf00458 | 19 |
| AX-158299821 | 23 | 49.018 | KV453155.1 | 10348233 | 19-scf00458 | 19 |
| AX-158299581 | 23 | 49.127 | KV453155.1 | 10005913 | 19-scf00458 | 19 |
| AX-157694798 | 23 | 49.127 | KV453155.1 | 10090456 | 19-scf00458 | 19 |
| AX-158299638 | 23 | 49.127 | KV453155.1 | 10091924 | 19-scf00458 | 19 |
| AX-158299640 | 23 | 49.127 | KV453155.1 | 10093484 | 19-scf00458 | 19 |
| AX-157753590 | 23 | 49.127 | KV453155.1 | 10094366 | 19-scf00458 | 19 |
| AX-158299642 | 23 | 49.127 | KV453155.1 | 10096050 | 19-scf00458 | 19 |
| AX-158299644 | 23 | 49.127 | KV453155.1 | 10096926 | 19-scf00458 | 19 |
| AX-158299647 | 23 | 49.127 | KV453155.1 | 10099383 | 19-scf00458 | 19 |
| AX-158299649 | 23 | 49.127 | KV453155.1 | 10103093 | 19-scf00458 | 19 |
| AX-157846193 | 23 | 49.127 | KV453155.1 | 10104490 | 19-scf00458 | 19 |
| AX-158299651 | 23 | 49.127 | KV453155.1 | 10105470 | 19-scf00458 | 19 |
| AX-158299655 | 23 | 49.127 | KV453155.1 | 10107572 | 19-scf00458 | 19 |
| AX-158299661 | 23 | 49.128 | KV453155.1 | 10118433 | 19-scf00458 | 19 |
| AX-158299665 | 23 | 49.454 | KV453155.1 | 10123242 | 19-scf00458 | 19 |
| AX-158299668 | 23 | 49.454 | KV453155.1 | 10126410 | 19-scf00458 | 19 |
| AX-158299671 | 23 | 49.454 | KV453155.1 | 10133561 | 19-scf00458 | 19 |
| AX-158299672 | 23 | 49.454 | KV453155.1 | 10134376 | 19-scf00458 | 19 |

|              |    |        |            |          |             |    |
|--------------|----|--------|------------|----------|-------------|----|
| AX-158299688 | 23 | 49.454 | KV453155.1 | 10158449 | 19-scf00458 | 19 |
| AX-158299765 | 23 | 49.454 | KV453155.1 | 10270723 | 19-scf00458 | 19 |
| AX-157762688 | 23 | 49.454 | KV453155.1 | 10288544 | 19-scf00458 | 19 |
| AX-158299674 | 23 | 49.455 | KV453155.1 | 10138005 | 19-scf00458 | 19 |
| AX-158299676 | 23 | 49.455 | KV453155.1 | 10140969 | 19-scf00458 | 19 |
| AX-158299677 | 23 | 49.483 | KV453155.1 | 10141699 | 19-scf00458 | 19 |
| AX-157753357 | 23 | 49.483 | KV453155.1 | 10147529 | 19-scf00458 | 19 |
| AX-158299653 | 23 | 49.506 | KV453155.1 | 10106319 | 19-scf00458 | 19 |
| AX-158299662 | 23 | 49.506 | KV453155.1 | 10120404 | 19-scf00458 | 19 |
| AX-158299670 | 23 | 49.506 | KV453155.1 | 10129796 | 19-scf00458 | 19 |
| AX-158299678 | 23 | 49.506 | KV453155.1 | 10142710 | 19-scf00458 | 19 |
| AX-158299680 | 23 | 49.506 | KV453155.1 | 10146834 | 19-scf00458 | 19 |
| AX-158299732 | 23 | 49.506 | KV453155.1 | 10218537 | 19-scf00458 | 19 |
| AX-158299681 | 23 | 49.534 | KV453155.1 | 10149410 | 19-scf00458 | 19 |
| AX-158299658 | 23 | 49.564 | KV453155.1 | 10114752 | 19-scf00458 | 19 |
| AX-158299685 | 23 | 49.564 | KV453155.1 | 10156064 | 19-scf00458 | 19 |
| AX-158299689 | 23 | 49.564 | KV453155.1 | 10159224 | 19-scf00458 | 19 |
| AX-157846195 | 23 | 49.564 | KV453155.1 | 10161788 | 19-scf00458 | 19 |
| AX-158299692 | 23 | 49.564 | KV453155.1 | 10164099 | 19-scf00458 | 19 |
| AX-158299695 | 23 | 49.564 | KV453155.1 | 10168047 | 19-scf00458 | 19 |
| AX-157846196 | 23 | 49.564 | KV453155.1 | 10175700 | 19-scf00458 | 19 |
| AX-158299702 | 23 | 49.564 | KV453155.1 | 10183449 | 19-scf00458 | 19 |
| AX-158299703 | 23 | 49.564 | KV453155.1 | 10184762 | 19-scf00458 | 19 |
| AX-158299704 | 23 | 49.564 | KV453155.1 | 10185121 | 19-scf00458 | 19 |
| AX-158299705 | 23 | 49.564 | KV453155.1 | 10185677 | 19-scf00458 | 19 |
| AX-158299707 | 23 | 49.564 | KV453155.1 | 10186791 | 19-scf00458 | 19 |
| AX-158299708 | 23 | 49.564 | KV453155.1 | 10187479 | 19-scf00458 | 19 |
| AX-158299709 | 23 | 49.564 | KV453155.1 | 10187800 | 19-scf00458 | 19 |
| AX-158299710 | 23 | 49.564 | KV453155.1 | 10188313 | 19-scf00458 | 19 |
| AX-158299711 | 23 | 49.564 | KV453155.1 | 10191025 | 19-scf00458 | 19 |
| AX-158299712 | 23 | 49.564 | KV453155.1 | 10192057 | 19-scf00458 | 19 |
| AX-158299714 | 23 | 49.564 | KV453155.1 | 10195870 | 19-scf00458 | 19 |
| AX-157860817 | 23 | 49.564 | KV453155.1 | 10196343 | 19-scf00458 | 19 |
| AX-158299736 | 23 | 49.564 | KV453155.1 | 10220359 | 19-scf00458 | 19 |
| AX-157725909 | 23 | 49.564 | KV453155.1 | 10273710 | 19-scf00458 | 19 |
| AX-158417564 | 23 | 49.673 | KV453155.1 | 10120057 | 19-scf00458 | 19 |
| AX-158299664 | 23 | 49.673 | KV453155.1 | 10122989 | 19-scf00458 | 19 |
| AX-158299667 | 23 | 49.673 | KV453155.1 | 10125314 | 19-scf00458 | 19 |
| AX-158299691 | 23 | 49.673 | KV453155.1 | 10160566 | 19-scf00458 | 19 |
| AX-158299718 | 23 | 49.673 | KV453155.1 | 10201555 | 19-scf00458 | 19 |
| AX-158299720 | 23 | 49.673 | KV453155.1 | 10204163 | 19-scf00458 | 19 |
| AX-158299721 | 23 | 49.673 | KV453155.1 | 10207061 | 19-scf00458 | 19 |
| AX-157846204 | 23 | 49.673 | KV453155.1 | 10213770 | 19-scf00458 | 19 |
| AX-158299728 | 23 | 49.673 | KV453155.1 | 10214127 | 19-scf00458 | 19 |
| AX-157846206 | 23 | 49.673 | KV453155.1 | 10215793 | 19-scf00458 | 19 |
| AX-158299731 | 23 | 49.673 | KV453155.1 | 10217955 | 19-scf00458 | 19 |
| AX-158299734 | 23 | 49.673 | KV453155.1 | 10219465 | 19-scf00458 | 19 |
| AX-158299738 | 23 | 49.673 | KV453155.1 | 10224167 | 19-scf00458 | 19 |
| AX-158299740 | 23 | 49.673 | KV453155.1 | 10225257 | 19-scf00458 | 19 |
| AX-158299741 | 23 | 49.673 | KV453155.1 | 10226123 | 19-scf00458 | 19 |
| AX-158299743 | 23 | 49.673 | KV453155.1 | 10228936 | 19-scf00458 | 19 |



|              |    |        |            |          |             |    |
|--------------|----|--------|------------|----------|-------------|----|
| AX-157747841 | 23 | 49.673 | KV453155.1 | 10235278 | 19-scf00458 | 19 |
| AX-158299747 | 23 | 49.673 | KV453155.1 | 10238846 | 19-scf00458 | 19 |
| AX-158299748 | 23 | 49.673 | KV453155.1 | 10240903 | 19-scf00458 | 19 |
| AX-158299759 | 23 | 49.673 | KV453155.1 | 10259406 | 19-scf00458 | 19 |
| AX-158299760 | 23 | 49.673 | KV453155.1 | 10259992 | 19-scf00458 | 19 |
| AX-158299769 | 23 | 49.673 | KV453155.1 | 10274234 | 19-scf00458 | 19 |
| AX-158299770 | 23 | 49.673 | KV453155.1 | 10274798 | 19-scf00458 | 19 |
| AX-158299772 | 23 | 49.673 | KV453155.1 | 10277190 | 19-scf00458 | 19 |
| AX-158299778 | 23 | 49.673 | KV453155.1 | 10288214 | 19-scf00458 | 19 |
| AX-158299779 | 23 | 49.673 | KV453155.1 | 10289279 | 19-scf00458 | 19 |
| AX-158299780 | 23 | 49.673 | KV453155.1 | 10297031 | 19-scf00458 | 19 |
| AX-158299781 | 23 | 49.673 | KV453155.1 | 10298363 | 19-scf00458 | 19 |
| AX-158299782 | 23 | 49.673 | KV453155.1 | 10299898 | 19-scf00458 | 19 |
| AX-158299783 | 23 | 49.673 | KV453155.1 | 10300629 | 19-scf00458 | 19 |
| AX-158299784 | 23 | 49.673 | KV453155.1 | 10301860 | 19-scf00458 | 19 |
| AX-158299785 | 23 | 49.673 | KV453155.1 | 10302341 | 19-scf00458 | 19 |
| AX-158299792 | 23 | 49.673 | KV453155.1 | 10313889 | 19-scf00458 | 19 |
| AX-158299793 | 23 | 49.673 | KV453155.1 | 10314504 | 19-scf00458 | 19 |
| AX-157748149 | 23 | 49.673 | KV453155.1 | 10314892 | 19-scf00458 | 19 |
| AX-157719034 | 23 | 49.673 | KV453155.1 | 10315611 | 19-scf00458 | 19 |
| AX-158299794 | 23 | 49.673 | KV453155.1 | 10316282 | 19-scf00458 | 19 |
| AX-157846213 | 23 | 49.673 | KV453155.1 | 10317447 | 19-scf00458 | 19 |
| AX-157742902 | 23 | 49.673 | KV453155.1 | 10319083 | 19-scf00458 | 19 |
| AX-158299801 | 23 | 49.673 | KV453155.1 | 10320825 | 19-scf00458 | 19 |
| AX-158299802 | 23 | 49.673 | KV453155.1 | 10321329 | 19-scf00458 | 19 |
| AX-157846214 | 23 | 49.673 | KV453155.1 | 10322178 | 19-scf00458 | 19 |
| AX-158299806 | 23 | 49.673 | KV453155.1 | 10326847 | 19-scf00458 | 19 |
| AX-158299807 | 23 | 49.673 | KV453155.1 | 10329156 | 19-scf00458 | 19 |
| AX-157714595 | 23 | 49.673 | KV453155.1 | 10333354 | 19-scf00458 | 19 |
| AX-158299813 | 23 | 49.673 | KV453155.1 | 10338846 | 19-scf00458 | 19 |
| AX-158421405 | 23 | 49.673 | KV453155.1 | 10349783 | 19-scf00458 | 19 |
| AX-158299829 | 23 | 49.673 | KV453155.1 | 10361631 | 19-scf00458 | 19 |
| AX-158299835 | 23 | 49.673 | KV453155.1 | 10367046 | 19-scf00458 | 19 |
| AX-157867648 | 23 | 49.673 | KV453155.1 | 10408886 | 19-scf00458 | 19 |
| AX-158299894 | 23 | 49.673 | KV453155.1 | 10451410 | 19-scf00458 | 19 |
| AX-158299932 | 23 | 49.673 | KV453155.1 | 10504294 | 19-scf00458 | 19 |
| AX-158299935 | 23 | 49.673 | KV453155.1 | 10505742 | 19-scf00458 | 19 |
| AX-158299962 | 23 | 49.673 | KV453155.1 | 10539784 | 19-scf00458 | 19 |
| AX-158417570 | 23 | 49.673 | KV453155.1 | 10546034 | 19-scf00458 | 19 |
| AX-158299967 | 23 | 49.673 | KV453155.1 | 10547823 | 19-scf00458 | 19 |
| AX-158299970 | 23 | 49.673 | KV453155.1 | 10551085 | 19-scf00458 | 19 |
| AX-158299975 | 23 | 49.673 | KV453155.1 | 10554170 | 19-scf00458 | 19 |
| AX-158300030 | 23 | 49.673 | KV453155.1 | 10616614 | 19-scf00458 | 19 |
| AX-158300105 | 23 | 49.673 | KV453155.1 | 10711070 | 19-scf00458 | 19 |
| AX-158299822 | 23 | 49.704 | KV453155.1 | 10352199 | 19-scf00458 | 19 |
| AX-157867646 | 23 | 49.704 | KV453155.1 | 10360575 | 19-scf00458 | 19 |
| AX-158299833 | 23 | 49.742 | KV453155.1 | 10366053 | 19-scf00458 | 19 |
| AX-158299752 | 23 | 49.783 | KV453155.1 | 10246515 | 19-scf00458 | 19 |
| AX-158299756 | 23 | 49.783 | KV453155.1 | 10254282 | 19-scf00458 | 19 |
| AX-158299773 | 23 | 49.783 | KV453155.1 | 10280681 | 19-scf00458 | 19 |
| AX-157846212 | 23 | 49.783 | KV453155.1 | 10282294 | 19-scf00458 | 19 |

|              |    |        |             |          |             |    |
|--------------|----|--------|-------------|----------|-------------|----|
| AX-158299805 | 23 | 49.783 | KV453155.1  | 10325921 | 19-scf00458 | 19 |
| AX-158299826 | 23 | 49.783 | KV453155.1  | 10355285 | 19-scf00458 | 19 |
| AX-158299830 | 23 | 49.783 | KV453155.1  | 10362077 | 19-scf00458 | 19 |
| AX-158299832 | 23 | 49.783 | KV453155.1  | 10364678 | 19-scf00458 | 19 |
| AX-158299843 | 23 | 49.783 | KV453155.1  | 10373207 | 19-scf00458 | 19 |
| AX-157846220 | 23 | 49.783 | KV453155.1  | 10378536 | 19-scf00458 | 19 |
| AX-158299848 | 23 | 49.783 | KV453155.1  | 10379037 | 19-scf00458 | 19 |
| AX-158299849 | 23 | 49.783 | KV453155.1  | 10379561 | 19-scf00458 | 19 |
| AX-158299852 | 23 | 49.783 | KV453155.1  | 10386143 | 19-scf00458 | 19 |
| AX-158299856 | 23 | 49.783 | KV453155.1  | 10392527 | 19-scf00458 | 19 |
| AX-158299858 | 23 | 49.783 | KV453155.1  | 10393802 | 19-scf00458 | 19 |
| AX-158299860 | 23 | 49.783 | KV453155.1  | 10395998 | 19-scf00458 | 19 |
| AX-158299863 | 23 | 49.783 | KV453155.1  | 10403188 | 19-scf00458 | 19 |
| AX-158299864 | 23 | 49.783 | KV453155.1  | 10403939 | 19-scf00458 | 19 |
| AX-158299866 | 23 | 49.783 | KV453155.1  | 10405891 | 19-scf00458 | 19 |
| AX-157715262 | 23 | 49.783 | KV453155.1  | 10412534 | 19-scf00458 | 19 |
| AX-158299870 | 23 | 49.783 | KV453155.1  | 10414988 | 19-scf00458 | 19 |
| AX-158299872 | 23 | 49.783 | KV453155.1  | 10415979 | 19-scf00458 | 19 |
| AX-158299873 | 23 | 49.783 | KV453155.1  | 10416676 | 19-scf00458 | 19 |
| AX-158299874 | 23 | 49.783 | KV453155.1  | 10416917 | 19-scf00458 | 19 |
| AX-157748819 | 23 | 49.783 | KV453155.1  | 10417498 | 19-scf00458 | 19 |
| AX-158299875 | 23 | 49.783 | KV453155.1  | 10419070 | 19-scf00458 | 19 |
| AX-158299876 | 23 | 49.783 | KV453155.1  | 10419892 | 19-scf00458 | 19 |
| AX-158417567 | 23 | 49.783 | KV453155.1  | 10425648 | 19-scf00458 | 19 |
| AX-158412020 | 23 | 49.783 | KV453155.1  | 10426085 | 19-scf00458 | 19 |
| AX-158299893 | 23 | 49.783 | KV453155.1  | 10446641 | 19-scf00458 | 19 |
| AX-157750692 | 23 | 49.783 | KV453155.1  | 10476015 | 19-scf00458 | 19 |
| AX-158299916 | 23 | 49.783 | KV453155.1  | 10479222 | 19-scf00458 | 19 |
| AX-157888115 | 23 | 49.783 | KV453155.1  | 10493793 | 19-scf00458 | 19 |
| AX-158299950 | 23 | 49.783 | KV453155.1  | 10527409 | 19-scf00458 | 19 |
| AX-158299951 | 23 | 49.783 | KV453155.1  | 10528209 | 19-scf00458 | 19 |
| AX-158299980 | 23 | 49.783 | KV453155.1  | 10561854 | 19-scf00458 | 19 |
| AX-158299981 | 23 | 49.783 | KV453155.1  | 10566264 | 19-scf00458 | 19 |
| AX-158300014 | 23 | 49.783 | KV453155.1  | 10598959 | 19-scf00458 | 19 |
| AX-158300016 | 23 | 49.783 | KV453155.1  | 10601186 | 19-scf00458 | 19 |
| AX-158300019 | 23 | 49.783 | KV453155.1  | 10605387 | 19-scf00458 | 19 |
| AX-158300034 | 23 | 49.783 | KV453155.1  | 10617854 | 19-scf00458 | 19 |
| AX-158300040 | 23 | 49.783 | KV453155.1  | 10626771 | 19-scf00458 | 19 |
| AX-158300065 | 23 | 49.783 | KV453155.1  | 10664042 | 19-scf00458 | 19 |
| AX-158300083 | 23 | 49.783 | KV453155.1  | 10682102 | 19-scf00458 | 19 |
| AX-157712103 | 23 | 49.783 | 3ML01034463 | 343      | scf10138_1  | UN |
| AX-158299666 | 23 | 49.892 | KV453155.1  | 10124845 | 19-scf00458 | 19 |
| AX-158299684 | 23 | 49.892 | KV453155.1  | 10155736 | 19-scf00458 | 19 |
| AX-158299795 | 23 | 49.892 | KV453155.1  | 10316918 | 19-scf00458 | 19 |
| AX-158299818 | 23 | 49.892 | KV453155.1  | 10341553 | 19-scf00458 | 19 |
| AX-158299868 | 23 | 49.892 | KV453155.1  | 10409373 | 19-scf00458 | 19 |
| AX-158299899 | 23 | 49.892 | KV453155.1  | 10457131 | 19-scf00458 | 19 |
| AX-158299902 | 23 | 49.892 | KV453155.1  | 10459090 | 19-scf00458 | 19 |
| AX-158299903 | 23 | 49.892 | KV453155.1  | 10465698 | 19-scf00458 | 19 |
| AX-158299905 | 23 | 49.892 | KV453155.1  | 10467128 | 19-scf00458 | 19 |
| AX-157846224 | 23 | 49.892 | KV453155.1  | 10472363 | 19-scf00458 | 19 |

|              |    |        |            |          |             |    |
|--------------|----|--------|------------|----------|-------------|----|
| AX-158299909 | 23 | 49.892 | KV453155.1 | 10472883 | 19-scf00458 | 19 |
| AX-158299911 | 23 | 49.892 | KV453155.1 | 10473895 | 19-scf00458 | 19 |
| AX-158299915 | 23 | 49.892 | KV453155.1 | 10477136 | 19-scf00458 | 19 |
| AX-157754551 | 23 | 49.892 | KV453155.1 | 10479179 | 19-scf00458 | 19 |
| AX-157846225 | 23 | 49.892 | KV453155.1 | 10496908 | 19-scf00458 | 19 |
| AX-158299939 | 23 | 49.892 | KV453155.1 | 10513363 | 19-scf00458 | 19 |
| AX-158300050 | 23 | 49.892 | KV453155.1 | 10643939 | 19-scf00458 | 19 |
| AX-158299925 | 23 | 49.929 | KV453155.1 | 10496609 | 19-scf00458 | 19 |
| AX-158299963 | 23 | 49.929 | KV453155.1 | 10541283 | 19-scf00458 | 19 |
| AX-158299969 | 23 | 49.929 | KV453155.1 | 10550549 | 19-scf00458 | 19 |
| AX-158300066 | 23 | 49.929 | KV453155.1 | 10664721 | 19-scf00458 | 19 |
| AX-158299927 | 23 | 49.964 | KV453155.1 | 10499775 | 19-scf00458 | 19 |
| AX-158299724 | 23 | 50.001 | KV453155.1 | 10210509 | 19-scf00458 | 19 |
| AX-158299854 | 23 | 50.001 | KV453155.1 | 10389967 | 19-scf00458 | 19 |
| AX-158299904 | 23 | 50.001 | KV453155.1 | 10466578 | 19-scf00458 | 19 |
| AX-158299929 | 23 | 50.001 | KV453155.1 | 10501257 | 19-scf00458 | 19 |
| AX-158299930 | 23 | 50.001 | KV453155.1 | 10502082 | 19-scf00458 | 19 |
| AX-158299931 | 23 | 50.001 | KV453155.1 | 10503658 | 19-scf00458 | 19 |
| AX-158299933 | 23 | 50.001 | KV453155.1 | 10504815 | 19-scf00458 | 19 |
| AX-158299934 | 23 | 50.001 | KV453155.1 | 10505022 | 19-scf00458 | 19 |
| AX-158299936 | 23 | 50.001 | KV453155.1 | 10510084 | 19-scf00458 | 19 |
| AX-158299937 | 23 | 50.001 | KV453155.1 | 10510296 | 19-scf00458 | 19 |
| AX-158299940 | 23 | 50.001 | KV453155.1 | 10514091 | 19-scf00458 | 19 |
| AX-158299943 | 23 | 50.001 | KV453155.1 | 10518544 | 19-scf00458 | 19 |
| AX-158299946 | 23 | 50.001 | KV453155.1 | 10521585 | 19-scf00458 | 19 |
| AX-158299948 | 23 | 50.001 | KV453155.1 | 10522464 | 19-scf00458 | 19 |
| AX-158299949 | 23 | 50.001 | KV453155.1 | 10523974 | 19-scf00458 | 19 |
| AX-158299953 | 23 | 50.001 | KV453155.1 | 10529947 | 19-scf00458 | 19 |
| AX-158299954 | 23 | 50.001 | KV453155.1 | 10530393 | 19-scf00458 | 19 |
| AX-158381303 | 23 | 50.001 | KV453155.1 | 10530798 | 19-scf00458 | 19 |
| AX-158299955 | 23 | 50.001 | KV453155.1 | 10531527 | 19-scf00458 | 19 |
| AX-158299960 | 23 | 50.001 | KV453155.1 | 10537758 | 19-scf00458 | 19 |
| AX-157726861 | 23 | 50.001 | KV453155.1 | 10543049 | 19-scf00458 | 19 |
| AX-158299965 | 23 | 50.001 | KV453155.1 | 10543261 | 19-scf00458 | 19 |
| AX-157721589 | 23 | 50.001 | KV453155.1 | 10544359 | 19-scf00458 | 19 |
| AX-158299966 | 23 | 50.001 | KV453155.1 | 10546886 | 19-scf00458 | 19 |
| AX-157725719 | 23 | 50.001 | KV453155.1 | 10550180 | 19-scf00458 | 19 |
| AX-158299972 | 23 | 50.001 | KV453155.1 | 10552501 | 19-scf00458 | 19 |
| AX-158299974 | 23 | 50.001 | KV453155.1 | 10553362 | 19-scf00458 | 19 |
| AX-158299977 | 23 | 50.001 | KV453155.1 | 10558066 | 19-scf00458 | 19 |
| AX-158299982 | 23 | 50.001 | KV453155.1 | 10567260 | 19-scf00458 | 19 |
| AX-158299984 | 23 | 50.001 | KV453155.1 | 10570014 | 19-scf00458 | 19 |
| AX-158299993 | 23 | 50.001 | KV453155.1 | 10578820 | 19-scf00458 | 19 |
| AX-158300001 | 23 | 50.001 | KV453155.1 | 10585211 | 19-scf00458 | 19 |
| AX-158300002 | 23 | 50.001 | KV453155.1 | 10586584 | 19-scf00458 | 19 |
| AX-158300005 | 23 | 50.001 | KV453155.1 | 10589967 | 19-scf00458 | 19 |
| AX-158300006 | 23 | 50.001 | KV453155.1 | 10590728 | 19-scf00458 | 19 |
| AX-158300007 | 23 | 50.001 | KV453155.1 | 10591346 | 19-scf00458 | 19 |
| AX-158300010 | 23 | 50.001 | KV453155.1 | 10595309 | 19-scf00458 | 19 |
| AX-158300011 | 23 | 50.001 | KV453155.1 | 10596263 | 19-scf00458 | 19 |
| AX-158300013 | 23 | 50.001 | KV453155.1 | 10597506 | 19-scf00458 | 19 |

|              |    |        |            |          |               |    |
|--------------|----|--------|------------|----------|---------------|----|
| AX-157738369 | 23 | 50.001 | KV453155.1 | 10598594 | 19-scf00458   | 19 |
| AX-158300028 | 23 | 50.001 | KV453155.1 | 10615098 | 19-scf00458   | 19 |
| AX-158300037 | 23 | 50.001 | KV453155.1 | 10622153 | 19-scf00458   | 19 |
| AX-158300038 | 23 | 50.001 | KV453155.1 | 10623335 | 19-scf00458   | 19 |
| AX-158300044 | 23 | 50.001 | KV453155.1 | 10633611 | 19-scf00458   | 19 |
| AX-158300049 | 23 | 50.001 | KV453155.1 | 10643178 | 19-scf00458   | 19 |
| AX-158300053 | 23 | 50.001 | KV453155.1 | 10650443 | 19-scf00458   | 19 |
| AX-158300054 | 23 | 50.001 | KV453155.1 | 10651617 | 19-scf00458   | 19 |
| AX-158300084 | 23 | 50.001 | KV453155.1 | 10682507 | 19-scf00458   | 19 |
| AX-158300096 | 23 | 50.001 | KV453155.1 | 10697764 | 19-scf00458   | 19 |
| AX-158300171 | 23 | 50.001 | KV453155.1 | 10789417 | 19-scf00458   | 19 |
| AX-158300190 | 23 | 50.001 | KV453155.1 | 10803374 | 19-scf00458   | 19 |
| AX-158300198 | 23 | 50.001 | KV453155.1 | 10815875 | 19-scf00458   | 19 |
| AX-158300022 | 23 | 50.035 | KV453155.1 | 10611895 | 19-scf00458   | 19 |
| AX-158300042 | 23 | 50.067 | KV453155.1 | 10629446 | 19-scf00458   | 19 |
| AX-157846200 | 23 | 50.11  | KV453155.1 | 10202550 | 19-scf00458   | 19 |
| AX-158299825 | 23 | 50.11  | KV453155.1 | 10355019 | 19-scf00458   | 19 |
| AX-158299920 | 23 | 50.11  | KV453155.1 | 10489985 | 19-scf00458   | 19 |
| AX-157846227 | 23 | 50.11  | KV453155.1 | 10632443 | 19-scf00458   | 19 |
| AX-157846228 | 23 | 50.11  | KV453155.1 | 10633880 | 19-scf00458   | 19 |
| AX-158300045 | 23 | 50.11  | KV453155.1 | 10636523 | 19-scf00458   | 19 |
| AX-157745752 | 23 | 50.11  | KV453155.1 | 10637310 | 19-scf00458   | 19 |
| AX-157846229 | 23 | 50.11  | KV453155.1 | 10638178 | 19-scf00458   | 19 |
| AX-158300046 | 23 | 50.11  | KV453155.1 | 10639114 | 19-scf00458   | 19 |
| AX-157846230 | 23 | 50.11  | KV453155.1 | 10639371 | 19-scf00458   | 19 |
| AX-158300052 | 23 | 50.11  | KV453155.1 | 10647325 | 19-scf00458   | 19 |
| AX-158300056 | 23 | 50.11  | KV453155.1 | 10652732 | 19-scf00458   | 19 |
| AX-158300057 | 23 | 50.11  | KV453155.1 | 10653284 | 19-scf00458   | 19 |
| AX-157741113 | 23 | 50.11  | KV453155.1 | 10655729 | 19-scf00458   | 19 |
| AX-158300063 | 23 | 50.11  | KV453155.1 | 10662860 | 19-scf00458   | 19 |
| AX-158300067 | 23 | 50.11  | KV453155.1 | 10665267 | 19-scf00458   | 19 |
| AX-158300069 | 23 | 50.11  | KV453155.1 | 10667226 | 19-scf00458   | 19 |
| AX-158300070 | 23 | 50.11  | KV453155.1 | 10668680 | 19-scf00458   | 19 |
| AX-158300071 | 23 | 50.11  | KV453155.1 | 10669130 | 19-scf00458   | 19 |
| AX-158300073 | 23 | 50.11  | KV453155.1 | 10670366 | 19-scf00458   | 19 |
| AX-158300074 | 23 | 50.11  | KV453155.1 | 10671205 | 19-scf00458   | 19 |
| AX-158300076 | 23 | 50.11  | KV453155.1 | 10672373 | 19-scf00458   | 19 |
| AX-158300077 | 23 | 50.11  | KV453155.1 | 10674745 | 19-scf00458   | 19 |
| AX-157846237 | 23 | 50.11  | KV453155.1 | 10678846 | 19-scf00458   | 19 |
| AX-158300085 | 23 | 50.11  | KV453155.1 | 10683537 | 19-scf00458   | 19 |
| AX-157754919 | 23 | 50.11  | KV453155.1 | 10693171 | 19-scf00458   | 19 |
| AX-158300121 | 23 | 50.11  | KV453155.1 | 10735249 | 19-scf00458   | 19 |
| AX-157698537 | 23 | 50.11  | FI873432.1 | 497      | ORI212 lctalu | UN |
| AX-158300086 | 23 | 50.222 | KV453155.1 | 10684389 | 19-scf00458   | 19 |
| AX-158300089 | 23 | 50.329 | KV453155.1 | 10686890 | 19-scf00458   | 19 |
| AX-157846238 | 23 | 50.329 | KV453155.1 | 10688508 | 19-scf00458   | 19 |
| AX-158300093 | 23 | 50.329 | KV453155.1 | 10695199 | 19-scf00458   | 19 |
| AX-158300095 | 23 | 50.329 | KV453155.1 | 10697536 | 19-scf00458   | 19 |
| AX-158300104 | 23 | 50.349 | KV453155.1 | 10709814 | 19-scf00458   | 19 |
| AX-158300117 | 23 | 50.349 | KV453155.1 | 10728704 | 19-scf00458   | 19 |
| AX-158300130 | 23 | 50.349 | KV453155.1 | 10741232 | 19-scf00458   | 19 |

|              |    |        |            |          |             |    |
|--------------|----|--------|------------|----------|-------------|----|
| AX-158300146 | 23 | 50.349 | KV453155.1 | 10760283 | 19-scf00458 | 19 |
| AX-158300164 | 23 | 50.349 | KV453155.1 | 10782090 | 19-scf00458 | 19 |
| AX-158300214 | 23 | 50.349 | KV453155.1 | 10833352 | 19-scf00458 | 19 |
| AX-158300245 | 23 | 50.349 | KV453155.1 | 10866081 | 19-scf00458 | 19 |
| AX-158300255 | 23 | 50.349 | KV453155.1 | 10877520 | 19-scf00458 | 19 |
| AX-158300107 | 23 | 50.438 | KV453155.1 | 10714505 | 19-scf00458 | 19 |
| AX-158300109 | 23 | 50.438 | KV453155.1 | 10720527 | 19-scf00458 | 19 |
| AX-158300110 | 23 | 50.438 | KV453155.1 | 10721976 | 19-scf00458 | 19 |
| AX-158300115 | 23 | 50.438 | KV453155.1 | 10726677 | 19-scf00458 | 19 |
| AX-158300119 | 23 | 50.438 | KV453155.1 | 10733057 | 19-scf00458 | 19 |
| AX-158300128 | 23 | 50.438 | KV453155.1 | 10740663 | 19-scf00458 | 19 |
| AX-157708081 | 23 | 50.438 | KV453155.1 | 10741581 | 19-scf00458 | 19 |
| AX-158300132 | 23 | 50.438 | KV453155.1 | 10742651 | 19-scf00458 | 19 |
| AX-158300141 | 23 | 50.438 | KV453155.1 | 10748532 | 19-scf00458 | 19 |
| AX-158300142 | 23 | 50.438 | KV453155.1 | 10757207 | 19-scf00458 | 19 |
| AX-158300180 | 23 | 50.438 | KV453155.1 | 10797588 | 19-scf00458 | 19 |
| AX-157709867 | 23 | 50.496 | KV453155.1 | 10504549 | 19-scf00458 | 19 |
| AX-158300097 | 23 | 50.547 | KV453155.1 | 10699645 | 19-scf00458 | 19 |
| AX-158300102 | 23 | 50.547 | KV453155.1 | 10705835 | 19-scf00458 | 19 |
| AX-157860819 | 23 | 50.547 | KV453155.1 | 10706827 | 19-scf00458 | 19 |
| AX-158300108 | 23 | 50.547 | KV453155.1 | 10718901 | 19-scf00458 | 19 |
| AX-158300133 | 23 | 50.547 | KV453155.1 | 10743959 | 19-scf00458 | 19 |
| AX-157748797 | 23 | 50.547 | KV453155.1 | 10755150 | 19-scf00458 | 19 |
| AX-158300145 | 23 | 50.547 | KV453155.1 | 10759740 | 19-scf00458 | 19 |
| AX-158300151 | 23 | 50.547 | KV453155.1 | 10764486 | 19-scf00458 | 19 |
| AX-158300153 | 23 | 50.547 | KV453155.1 | 10766074 | 19-scf00458 | 19 |
| AX-157726688 | 23 | 50.547 | KV453155.1 | 10768533 | 19-scf00458 | 19 |
| AX-157846242 | 23 | 50.547 | KV453155.1 | 10769404 | 19-scf00458 | 19 |
| AX-158300155 | 23 | 50.547 | KV453155.1 | 10772608 | 19-scf00458 | 19 |
| AX-158300157 | 23 | 50.547 | KV453155.1 | 10773604 | 19-scf00458 | 19 |
| AX-158300158 | 23 | 50.547 | KV453155.1 | 10774802 | 19-scf00458 | 19 |
| AX-157724989 | 23 | 50.547 | KV453155.1 | 10776360 | 19-scf00458 | 19 |
| AX-158300159 | 23 | 50.547 | KV453155.1 | 10776499 | 19-scf00458 | 19 |
| AX-158300162 | 23 | 50.547 | KV453155.1 | 10780716 | 19-scf00458 | 19 |
| AX-158300165 | 23 | 50.547 | KV453155.1 | 10783839 | 19-scf00458 | 19 |
| AX-158300167 | 23 | 50.547 | KV453155.1 | 10785330 | 19-scf00458 | 19 |
| AX-158300170 | 23 | 50.547 | KV453155.1 | 10787874 | 19-scf00458 | 19 |
| AX-158300173 | 23 | 50.547 | KV453155.1 | 10790851 | 19-scf00458 | 19 |
| AX-158300174 | 23 | 50.547 | KV453155.1 | 10792916 | 19-scf00458 | 19 |
| AX-158300175 | 23 | 50.547 | KV453155.1 | 10793965 | 19-scf00458 | 19 |
| AX-158300178 | 23 | 50.547 | KV453155.1 | 10795847 | 19-scf00458 | 19 |
| AX-158300182 | 23 | 50.547 | KV453155.1 | 10798225 | 19-scf00458 | 19 |
| AX-158300184 | 23 | 50.547 | KV453155.1 | 10799361 | 19-scf00458 | 19 |
| AX-158300185 | 23 | 50.547 | KV453155.1 | 10800425 | 19-scf00458 | 19 |
| AX-158300186 | 23 | 50.547 | KV453155.1 | 10800814 | 19-scf00458 | 19 |
| AX-158300187 | 23 | 50.547 | KV453155.1 | 10802052 | 19-scf00458 | 19 |
| AX-158300188 | 23 | 50.547 | KV453155.1 | 10802634 | 19-scf00458 | 19 |
| AX-158300191 | 23 | 50.547 | KV453155.1 | 10804950 | 19-scf00458 | 19 |
| AX-158300193 | 23 | 50.547 | KV453155.1 | 10806385 | 19-scf00458 | 19 |
| AX-158300194 | 23 | 50.547 | KV453155.1 | 10806645 | 19-scf00458 | 19 |
| AX-158300195 | 23 | 50.753 | KV453155.1 | 10810885 | 19-scf00458 | 19 |

|              |    |        |            |          |             |    |
|--------------|----|--------|------------|----------|-------------|----|
| AX-157846245 | 23 | 50.779 | KV453155.1 | 10813098 | 19-scf00458 | 19 |
| AX-158300197 | 23 | 50.779 | KV453155.1 | 10815096 | 19-scf00458 | 19 |
| AX-158300199 | 23 | 50.779 | KV453155.1 | 10819989 | 19-scf00458 | 19 |
| AX-158300202 | 23 | 50.781 | KV453155.1 | 10821492 | 19-scf00458 | 19 |
| AX-158300203 | 23 | 50.782 | KV453155.1 | 10822985 | 19-scf00458 | 19 |
| AX-158300206 | 23 | 51.203 | KV453155.1 | 10826434 | 19-scf00458 | 19 |
| AX-158300209 | 23 | 51.203 | KV453155.1 | 10829394 | 19-scf00458 | 19 |
| AX-158300210 | 23 | 51.203 | KV453155.1 | 10829692 | 19-scf00458 | 19 |
| AX-158300212 | 23 | 51.203 | KV453155.1 | 10830115 | 19-scf00458 | 19 |
| AX-158300228 | 23 | 51.203 | KV453155.1 | 10844878 | 19-scf00458 | 19 |
| AX-157867652 | 23 | 51.203 | KV453155.1 | 10848973 | 19-scf00458 | 19 |
| AX-157846248 | 23 | 51.203 | KV453155.1 | 10859565 | 19-scf00458 | 19 |
| AX-158300249 | 23 | 51.203 | KV453155.1 | 10870651 | 19-scf00458 | 19 |
| AX-157747467 | 23 | 51.204 | KV453155.1 | 10850287 | 19-scf00458 | 19 |
| AX-158300230 | 23 | 51.257 | KV453155.1 | 10851833 | 19-scf00458 | 19 |
| AX-158300231 | 23 | 51.34  | KV453155.1 | 10853544 | 19-scf00458 | 19 |
| AX-158300233 | 23 | 51.34  | KV453155.1 | 10855114 | 19-scf00458 | 19 |
| AX-158300236 | 23 | 51.34  | KV453155.1 | 10857567 | 19-scf00458 | 19 |
| AX-158300239 | 23 | 51.34  | KV453155.1 | 10861709 | 19-scf00458 | 19 |
| AX-158300242 | 23 | 51.34  | KV453155.1 | 10864013 | 19-scf00458 | 19 |
| AX-157741647 | 23 | 51.34  | KV453155.1 | 10907880 | 19-scf00458 | 19 |
| AX-158300237 | 23 | 51.492 | KV453155.1 | 10858929 | 19-scf00458 | 19 |
| AX-158300251 | 23 | 51.494 | KV453155.1 | 10872953 | 19-scf00458 | 19 |
| AX-157723488 | 23 | 51.494 | KV453155.1 | 10875155 | 19-scf00458 | 19 |
| AX-158300254 | 23 | 51.494 | KV453155.1 | 10876520 | 19-scf00458 | 19 |
| AX-158300256 | 23 | 51.494 | KV453155.1 | 10877672 | 19-scf00458 | 19 |
| AX-157771196 | 23 | 51.494 | KV453155.1 | 10884590 | 19-scf00458 | 19 |
| AX-158300257 | 23 | 51.746 | KV453155.1 | 10881273 | 19-scf00458 | 19 |
| AX-157846249 | 23 | 51.75  | KV453155.1 | 10892741 | 19-scf00458 | 19 |
| AX-157846250 | 23 | 51.75  | KV453155.1 | 10893472 | 19-scf00458 | 19 |
| AX-157745598 | 23 | 51.75  | KV453155.1 | 10893526 | 19-scf00458 | 19 |
| AX-158300264 | 23 | 51.75  | KV453155.1 | 10896909 | 19-scf00458 | 19 |
| AX-158300266 | 23 | 51.75  | KV453155.1 | 10899103 | 19-scf00458 | 19 |
| AX-158300267 | 23 | 51.75  | KV453155.1 | 10902902 | 19-scf00458 | 19 |
| AX-158300268 | 23 | 51.75  | KV453155.1 | 10904826 | 19-scf00458 | 19 |
| AX-158300271 | 23 | 51.815 | KV453155.1 | 10914226 | 19-scf00458 | 19 |
| AX-158300272 | 23 | 51.882 | KV453155.1 | 10916150 | 19-scf00458 | 19 |
| AX-158300279 | 23 | 51.882 | KV453155.1 | 10921618 | 19-scf00458 | 19 |
| AX-158300282 | 23 | 52.126 | KV453155.1 | 10924382 | 19-scf00458 | 19 |
| AX-158300284 | 23 | 52.167 | KV453155.1 | 10929890 | 19-scf00458 | 19 |
| AX-158300285 | 23 | 52.167 | KV453155.1 | 10932042 | 19-scf00458 | 19 |
| AX-158300486 | 23 | 52.167 | KV453155.1 | 11226988 | 19-scf00458 | 19 |
| AX-158300286 | 23 | 52.391 | KV453155.1 | 10933875 | 19-scf00458 | 19 |
| AX-158300289 | 23 | 52.406 | KV453155.1 | 10937102 | 19-scf00458 | 19 |
| AX-158300280 | 23 | 52.451 | KV453155.1 | 10921956 | 19-scf00458 | 19 |
| AX-158300287 | 23 | 52.451 | KV453155.1 | 10935882 | 19-scf00458 | 19 |
| AX-158300290 | 23 | 52.451 | KV453155.1 | 10937725 | 19-scf00458 | 19 |
| AX-158300293 | 23 | 52.451 | KV453155.1 | 10941764 | 19-scf00458 | 19 |
| AX-158300303 | 23 | 52.451 | KV453155.1 | 10956699 | 19-scf00458 | 19 |
| AX-158300347 | 23 | 52.451 | KV453155.1 | 11019020 | 19-scf00458 | 19 |
| AX-158300361 | 23 | 52.451 | KV453155.1 | 11034324 | 19-scf00458 | 19 |

|              |    |        |            |          |             |    |
|--------------|----|--------|------------|----------|-------------|----|
| AX-158300403 | 23 | 52.451 | KV453155.1 | 11107119 | 19-scf00458 | 19 |
| AX-158300458 | 23 | 52.451 | KV453155.1 | 11180684 | 19-scf00458 | 19 |
| AX-158300463 | 23 | 52.451 | KV453155.1 | 11192113 | 19-scf00458 | 19 |
| AX-158300466 | 23 | 52.451 | KV453155.1 | 11196605 | 19-scf00458 | 19 |
| AX-158300294 | 23 | 52.515 | KV453155.1 | 10943129 | 19-scf00458 | 19 |
| AX-158300295 | 23 | 52.515 | KV453155.1 | 10943592 | 19-scf00458 | 19 |
| AX-158300296 | 23 | 52.625 | KV453155.1 | 10947873 | 19-scf00458 | 19 |
| AX-158300297 | 23 | 52.625 | KV453155.1 | 10950873 | 19-scf00458 | 19 |
| AX-158300299 | 23 | 52.625 | KV453155.1 | 10951922 | 19-scf00458 | 19 |
| AX-157715187 | 23 | 52.625 | KV453155.1 | 10958168 | 19-scf00458 | 19 |
| AX-158300308 | 23 | 52.625 | KV453155.1 | 10970451 | 19-scf00458 | 19 |
| AX-158300314 | 23 | 52.625 | KV453155.1 | 10977083 | 19-scf00458 | 19 |
| AX-158300415 | 23 | 52.625 | KV453155.1 | 11120303 | 19-scf00458 | 19 |
| AX-158300417 | 23 | 52.625 | KV453155.1 | 11123826 | 19-scf00458 | 19 |
| AX-158300307 | 23 | 52.673 | KV453155.1 | 10969744 | 19-scf00458 | 19 |
| AX-158300315 | 23 | 52.734 | KV453155.1 | 10977550 | 19-scf00458 | 19 |
| AX-158300318 | 23 | 52.734 | KV453155.1 | 10980005 | 19-scf00458 | 19 |
| AX-158300331 | 23 | 52.734 | KV453155.1 | 11000708 | 19-scf00458 | 19 |
| AX-158300332 | 23 | 52.734 | KV453155.1 | 11002425 | 19-scf00458 | 19 |
| AX-157725860 | 23 | 52.734 | KV453155.1 | 11003675 | 19-scf00458 | 19 |
| AX-158300334 | 23 | 52.734 | KV453155.1 | 11004884 | 19-scf00458 | 19 |
| AX-158300336 | 23 | 52.734 | KV453155.1 | 11007453 | 19-scf00458 | 19 |
| AX-158300339 | 23 | 52.734 | KV453155.1 | 11008970 | 19-scf00458 | 19 |
| AX-158300340 | 23 | 52.734 | KV453155.1 | 11010900 | 19-scf00458 | 19 |
| AX-157846254 | 23 | 52.734 | KV453155.1 | 11017702 | 19-scf00458 | 19 |
| AX-158300358 | 23 | 52.734 | KV453155.1 | 11032082 | 19-scf00458 | 19 |
| AX-158300408 | 23 | 52.734 | KV453155.1 | 11110982 | 19-scf00458 | 19 |
| AX-158300346 | 23 | 52.849 | KV453155.1 | 11018892 | 19-scf00458 | 19 |
| AX-158300234 | 23 | 52.952 | KV453155.1 | 10856356 | 19-scf00458 | 19 |
| AX-158300341 | 23 | 52.952 | KV453155.1 | 11014834 | 19-scf00458 | 19 |
| AX-158300343 | 23 | 52.952 | KV453155.1 | 11016238 | 19-scf00458 | 19 |
| AX-158300350 | 23 | 52.952 | KV453155.1 | 11022697 | 19-scf00458 | 19 |
| AX-158300351 | 23 | 52.952 | KV453155.1 | 11026638 | 19-scf00458 | 19 |
| AX-158300355 | 23 | 52.952 | KV453155.1 | 11029382 | 19-scf00458 | 19 |
| AX-157846256 | 23 | 52.952 | KV453155.1 | 11030505 | 19-scf00458 | 19 |
| AX-158300357 | 23 | 52.952 | KV453155.1 | 11031661 | 19-scf00458 | 19 |
| AX-157750603 | 23 | 52.952 | KV453155.1 | 11036931 | 19-scf00458 | 19 |
| AX-158300364 | 23 | 52.952 | KV453155.1 | 11038453 | 19-scf00458 | 19 |
| AX-158300365 | 23 | 52.952 | KV453155.1 | 11038968 | 19-scf00458 | 19 |
| AX-157867655 | 23 | 52.952 | KV453155.1 | 11039455 | 19-scf00458 | 19 |
| AX-158300366 | 23 | 52.952 | KV453155.1 | 11039992 | 19-scf00458 | 19 |
| AX-158300367 | 23 | 52.952 | KV453155.1 | 11040468 | 19-scf00458 | 19 |
| AX-158300368 | 23 | 52.952 | KV453155.1 | 11040929 | 19-scf00458 | 19 |
| AX-158300370 | 23 | 52.952 | KV453155.1 | 11041785 | 19-scf00458 | 19 |
| AX-158300372 | 23 | 52.952 | KV453155.1 | 11044546 | 19-scf00458 | 19 |
| AX-157846257 | 23 | 52.952 | KV453155.1 | 11046225 | 19-scf00458 | 19 |
| AX-157846258 | 23 | 52.952 | KV453155.1 | 11050227 | 19-scf00458 | 19 |
| AX-158300377 | 23 | 52.952 | KV453155.1 | 11051490 | 19-scf00458 | 19 |
| AX-157773039 | 23 | 52.952 | KV453155.1 | 11052336 | 19-scf00458 | 19 |
| AX-158300378 | 23 | 52.952 | KV453155.1 | 11052967 | 19-scf00458 | 19 |
| AX-158300379 | 23 | 52.952 | KV453155.1 | 11054338 | 19-scf00458 | 19 |

|              |    |        |             |          |             |    |
|--------------|----|--------|-------------|----------|-------------|----|
| AX-158300380 | 23 | 52.952 | KV453155.1  | 11054489 | 19-scf00458 | 19 |
| AX-158300382 | 23 | 52.952 | KV453155.1  | 11063119 | 19-scf00458 | 19 |
| AX-158300404 | 23 | 52.952 | KV453155.1  | 11107654 | 19-scf00458 | 19 |
| AX-158300387 | 23 | 53.001 | KV453155.1  | 11079688 | 19-scf00458 | 19 |
| AX-158300397 | 23 | 53.018 | KV453155.1  | 11101884 | 19-scf00458 | 19 |
| AX-158300398 | 23 | 53.035 | KV453155.1  | 11102413 | 19-scf00458 | 19 |
| AX-158300401 | 23 | 53.089 | KV453155.1  | 11105984 | 19-scf00458 | 19 |
| AX-157708571 | 23 | 53.089 | KV453155.1  | 11108603 | 19-scf00458 | 19 |
| AX-158300406 | 23 | 53.089 | KV453155.1  | 11109841 | 19-scf00458 | 19 |
| AX-158381306 | 23 | 53.089 | KV453155.1  | 11111518 | 19-scf00458 | 19 |
| AX-158300412 | 23 | 53.089 | KV453155.1  | 11114903 | 19-scf00458 | 19 |
| AX-157711915 | 23 | 53.089 | 3ML01027360 | 119      | scf02966_1  | UN |
| AX-158300309 | 23 | 53.499 | KV453155.1  | 10971540 | 19-scf00458 | 19 |
| AX-158300374 | 23 | 53.499 | KV453155.1  | 11046725 | 19-scf00458 | 19 |
| AX-157744477 | 23 | 53.499 | KV453155.1  | 11119680 | 19-scf00458 | 19 |
| AX-158300416 | 23 | 53.499 | KV453155.1  | 11122967 | 19-scf00458 | 19 |
| AX-158300424 | 23 | 53.499 | KV453155.1  | 11132952 | 19-scf00458 | 19 |
| AX-158300425 | 23 | 53.499 | KV453155.1  | 11133579 | 19-scf00458 | 19 |
| AX-158300427 | 23 | 53.499 | KV453155.1  | 11136309 | 19-scf00458 | 19 |
| AX-158300430 | 23 | 53.499 | KV453155.1  | 11141705 | 19-scf00458 | 19 |
| AX-158300431 | 23 | 53.499 | KV453155.1  | 11144239 | 19-scf00458 | 19 |
| AX-158300434 | 23 | 53.499 | KV453155.1  | 11149524 | 19-scf00458 | 19 |
| AX-158300435 | 23 | 53.499 | KV453155.1  | 11150426 | 19-scf00458 | 19 |
| AX-158300448 | 23 | 53.499 | KV453155.1  | 11166284 | 19-scf00458 | 19 |
| AX-157775507 | 23 | 53.499 | KV453155.1  | 11181311 | 19-scf00458 | 19 |
| AX-158300461 | 23 | 53.499 | KV453155.1  | 11183568 | 19-scf00458 | 19 |
| AX-158300437 | 23 | 53.608 | KV453155.1  | 11152596 | 19-scf00458 | 19 |
| AX-158300438 | 23 | 53.608 | KV453155.1  | 11153864 | 19-scf00458 | 19 |
| AX-158300445 | 23 | 53.608 | KV453155.1  | 11160404 | 19-scf00458 | 19 |
| AX-158300446 | 23 | 53.608 | KV453155.1  | 11161364 | 19-scf00458 | 19 |
| AX-158300451 | 23 | 53.747 | KV453155.1  | 11172637 | 19-scf00458 | 19 |
| AX-158300453 | 23 | 53.826 | KV453155.1  | 11174809 | 19-scf00458 | 19 |
| AX-158300456 | 23 | 53.826 | KV453155.1  | 11179424 | 19-scf00458 | 19 |
| AX-158300457 | 23 | 53.826 | KV453155.1  | 11180353 | 19-scf00458 | 19 |
| AX-158300459 | 23 | 53.826 | KV453155.1  | 11181234 | 19-scf00458 | 19 |
| AX-157846268 | 23 | 53.826 | KV453155.1  | 11187186 | 19-scf00458 | 19 |
| AX-158300439 | 23 | 53.936 | KV453155.1  | 11154041 | 19-scf00458 | 19 |
| AX-158300450 | 23 | 53.936 | KV453155.1  | 11167631 | 19-scf00458 | 19 |
| AX-158300454 | 23 | 53.936 | KV453155.1  | 11175314 | 19-scf00458 | 19 |
| AX-158300462 | 23 | 53.936 | KV453155.1  | 11188910 | 19-scf00458 | 19 |
| AX-157716959 | 23 | 53.936 | KV453155.1  | 11190065 | 19-scf00458 | 19 |
| AX-157745527 | 23 | 53.936 | KV453155.1  | 11191190 | 19-scf00458 | 19 |
| AX-158300464 | 23 | 53.936 | KV453155.1  | 11192937 | 19-scf00458 | 19 |
| AX-158300465 | 23 | 53.936 | KV453155.1  | 11195568 | 19-scf00458 | 19 |
| AX-158381307 | 23 | 53.936 | KV453155.1  | 11198293 | 19-scf00458 | 19 |
| AX-158300488 | 23 | 53.936 | KV453155.1  | 11229623 | 19-scf00458 | 19 |
| AX-157727558 | 23 | 53.975 | KV453155.1  | 11209100 | 19-scf00458 | 19 |
| AX-158300449 | 23 | 54.014 | KV453155.1  | 11167069 | 19-scf00458 | 19 |
| AX-157846267 | 23 | 54.014 | KV453155.1  | 11185013 | 19-scf00458 | 19 |
| AX-157717455 | 23 | 54.014 | KV453155.1  | 11187587 | 19-scf00458 | 19 |
| AX-158300476 | 23 | 54.014 | KV453155.1  | 11209203 | 19-scf00458 | 19 |



|              |    |        |            |          |             |    |
|--------------|----|--------|------------|----------|-------------|----|
| AX-158300477 | 23 | 54.045 | KV453155.1 | 11209529 | 19-scf00458 | 19 |
| AX-158300480 | 23 | 54.045 | KV453155.1 | 11219126 | 19-scf00458 | 19 |
| AX-158300487 | 23 | 54.045 | KV453155.1 | 11227340 | 19-scf00458 | 19 |
| AX-158300489 | 23 | 54.045 | KV453155.1 | 11231315 | 19-scf00458 | 19 |
| AX-158300428 | 23 | 54.156 | KV453155.1 | 11137302 | 19-scf00458 | 19 |
| AX-158300491 | 23 | 54.156 | KV453155.1 | 11232223 | 19-scf00458 | 19 |
| AX-158300492 | 23 | 54.25  | KV453155.1 | 11235359 | 19-scf00458 | 19 |
| AX-157846271 | 23 | 54.25  | KV453155.1 | 11235764 | 19-scf00458 | 19 |
| AX-158300494 | 23 | 54.25  | KV453155.1 | 11236092 | 19-scf00458 | 19 |
| AX-158300498 | 23 | 54.25  | KV453155.1 | 11238781 | 19-scf00458 | 19 |
| AX-158300499 | 23 | 54.277 | KV453155.1 | 11239346 | 19-scf00458 | 19 |
| AX-158300500 | 23 | 54.277 | KV453155.1 | 11239588 | 19-scf00458 | 19 |
| AX-158300504 | 23 | 54.482 | KV453155.1 | 11247552 | 19-scf00458 | 19 |
| AX-158300505 | 23 | 54.482 | KV453155.1 | 11248940 | 19-scf00458 | 19 |
| AX-157846273 | 23 | 54.482 | KV453155.1 | 11251259 | 19-scf00458 | 19 |
| AX-158300508 | 23 | 54.482 | KV453155.1 | 11252558 | 19-scf00458 | 19 |
| AX-158300511 | 23 | 54.482 | KV453155.1 | 11254461 | 19-scf00458 | 19 |
| AX-158300512 | 23 | 54.482 | KV453155.1 | 11256442 | 19-scf00458 | 19 |
| AX-158300515 | 23 | 54.482 | KV453155.1 | 11260404 | 19-scf00458 | 19 |
| AX-157846274 | 23 | 54.482 | KV453155.1 | 11264328 | 19-scf00458 | 19 |
| AX-158300522 | 23 | 54.482 | KV453155.1 | 11268959 | 19-scf00458 | 19 |
| AX-157846275 | 23 | 54.7   | KV453155.1 | 11270413 | 19-scf00458 | 19 |
| AX-158300523 | 23 | 54.7   | KV453155.1 | 11272227 | 19-scf00458 | 19 |
| AX-158300525 | 23 | 54.7   | KV453155.1 | 11273144 | 19-scf00458 | 19 |
| AX-157846277 | 23 | 54.81  | KV453155.1 | 11274180 | 19-scf00458 | 19 |
| AX-158300519 | 23 | 54.919 | KV453155.1 | 11265939 | 19-scf00458 | 19 |
| AX-158300530 | 23 | 54.919 | KV453155.1 | 11276175 | 19-scf00458 | 19 |
| AX-158300531 | 23 | 54.919 | KV453155.1 | 11276847 | 19-scf00458 | 19 |
| AX-158300533 | 23 | 54.919 | KV453155.1 | 11279262 | 19-scf00458 | 19 |
| AX-158300534 | 23 | 54.919 | KV453155.1 | 11279739 | 19-scf00458 | 19 |
| AX-158300535 | 23 | 54.919 | KV453155.1 | 11281117 | 19-scf00458 | 19 |
| AX-158300542 | 23 | 54.919 | KV453155.1 | 11289107 | 19-scf00458 | 19 |
| AX-158300538 | 23 | 54.973 | KV453155.1 | 11286475 | 19-scf00458 | 19 |
| AX-158300539 | 23 | 55.028 | KV453155.1 | 11288099 | 19-scf00458 | 19 |
| AX-158300541 | 23 | 55.028 | KV453155.1 | 11288995 | 19-scf00458 | 19 |
| AX-158300544 | 23 | 55.137 | KV453155.1 | 11291987 | 19-scf00458 | 19 |
| AX-158300545 | 23 | 55.137 | KV453155.1 | 11292514 | 19-scf00458 | 19 |
| AX-158300547 | 23 | 55.137 | KV453155.1 | 11293569 | 19-scf00458 | 19 |
| AX-157773105 | 23 | 55.356 | KV453155.1 | 11294220 | 19-scf00458 | 19 |
| AX-158300548 | 23 | 55.356 | KV453155.1 | 11294402 | 19-scf00458 | 19 |
| AX-158300549 | 23 | 55.356 | KV453155.1 | 11296290 | 19-scf00458 | 19 |
| AX-157739764 | 23 | 55.356 | KV453155.1 | 11297190 | 19-scf00458 | 19 |
| AX-157846279 | 23 | 55.356 | KV453155.1 | 11298274 | 19-scf00458 | 19 |
| AX-158300552 | 23 | 55.356 | KV453155.1 | 11298860 | 19-scf00458 | 19 |
| AX-158300553 | 23 | 55.356 | KV453155.1 | 11301143 | 19-scf00458 | 19 |
| AX-158300555 | 23 | 55.356 | KV453155.1 | 11302059 | 19-scf00458 | 19 |
| AX-158300556 | 23 | 55.356 | KV453155.1 | 11302421 | 19-scf00458 | 19 |
| AX-158300563 | 23 | 55.356 | KV453155.1 | 11308189 | 19-scf00458 | 19 |
| AX-158300574 | 23 | 55.356 | KV453155.1 | 11321749 | 19-scf00458 | 19 |
| AX-157846280 | 23 | 55.356 | KV453155.1 | 11324696 | 19-scf00458 | 19 |
| AX-158300605 | 23 | 55.356 | KV453155.1 | 11362155 | 19-scf00458 | 19 |

|              |    |        |            |          |             |    |
|--------------|----|--------|------------|----------|-------------|----|
| AX-157860822 | 23 | 55.356 | KV453155.1 | 11392131 | 19-scf00458 | 19 |
| AX-158300557 | 23 | 55.357 | KV453155.1 | 11304417 | 19-scf00458 | 19 |
| AX-158300562 | 23 | 55.357 | KV453155.1 | 11307906 | 19-scf00458 | 19 |
| AX-158300565 | 23 | 55.357 | KV453155.1 | 11308975 | 19-scf00458 | 19 |
| AX-158300566 | 23 | 55.357 | KV453155.1 | 11310722 | 19-scf00458 | 19 |
| AX-158300571 | 23 | 55.357 | KV453155.1 | 11317317 | 19-scf00458 | 19 |
| AX-158300551 | 23 | 55.519 | KV453155.1 | 11298208 | 19-scf00458 | 19 |
| AX-158300573 | 23 | 55.519 | KV453155.1 | 11319752 | 19-scf00458 | 19 |
| AX-158300591 | 23 | 55.519 | KV453155.1 | 11346822 | 19-scf00458 | 19 |
| AX-158300593 | 23 | 55.519 | KV453155.1 | 11348362 | 19-scf00458 | 19 |
| AX-158300621 | 23 | 55.519 | KV453155.1 | 11378331 | 19-scf00458 | 19 |
| AX-158300575 | 23 | 55.684 | KV453155.1 | 11326828 | 19-scf00458 | 19 |
| AX-157751007 | 23 | 55.684 | KV453155.1 | 11330276 | 19-scf00458 | 19 |
| AX-158300578 | 23 | 55.684 | KV453155.1 | 11332110 | 19-scf00458 | 19 |
| AX-158300579 | 23 | 55.684 | KV453155.1 | 11333537 | 19-scf00458 | 19 |
| AX-157880930 | 23 | 55.684 | KV453155.1 | 11333833 | 19-scf00458 | 19 |
| AX-158300581 | 23 | 55.684 | KV453155.1 | 11336538 | 19-scf00458 | 19 |
| AX-158300582 | 23 | 55.684 | KV453155.1 | 11337128 | 19-scf00458 | 19 |
| AX-158300584 | 23 | 55.684 | KV453155.1 | 11339809 | 19-scf00458 | 19 |
| AX-158300585 | 23 | 55.684 | KV453155.1 | 11340325 | 19-scf00458 | 19 |
| AX-158300587 | 23 | 55.684 | KV453155.1 | 11344046 | 19-scf00458 | 19 |
| AX-158300594 | 23 | 55.684 | KV453155.1 | 11349555 | 19-scf00458 | 19 |
| AX-158300592 | 23 | 55.685 | KV453155.1 | 11347384 | 19-scf00458 | 19 |
| AX-158300595 | 23 | 56.111 | KV453155.1 | 11354127 | 19-scf00458 | 19 |
| AX-158300598 | 23 | 56.113 | KV453155.1 | 11359224 | 19-scf00458 | 19 |
| AX-158300604 | 23 | 56.115 | KV453155.1 | 11361781 | 19-scf00458 | 19 |
| AX-158300607 | 23 | 56.117 | KV453155.1 | 11366158 | 19-scf00458 | 19 |
| AX-158300596 | 23 | 56.118 | KV453155.1 | 11356767 | 19-scf00458 | 19 |
| AX-157774716 | 23 | 56.118 | KV453155.1 | 11357424 | 19-scf00458 | 19 |
| AX-158300597 | 23 | 56.118 | KV453155.1 | 11358297 | 19-scf00458 | 19 |
| AX-158300603 | 23 | 56.118 | KV453155.1 | 11361637 | 19-scf00458 | 19 |
| AX-158300608 | 23 | 56.118 | KV453155.1 | 11366654 | 19-scf00458 | 19 |
| AX-158300610 | 23 | 56.118 | KV453155.1 | 11367602 | 19-scf00458 | 19 |
| AX-158300611 | 23 | 56.118 | KV453155.1 | 11368563 | 19-scf00458 | 19 |
| AX-158300613 | 23 | 56.118 | KV453155.1 | 11369412 | 19-scf00458 | 19 |
| AX-158417581 | 23 | 56.118 | KV453155.1 | 11371502 | 19-scf00458 | 19 |
| AX-158417582 | 23 | 56.118 | KV453155.1 | 11371870 | 19-scf00458 | 19 |
| AX-158300614 | 23 | 56.118 | KV453155.1 | 11372797 | 19-scf00458 | 19 |
| AX-158300617 | 23 | 56.118 | KV453155.1 | 11375436 | 19-scf00458 | 19 |
| AX-158300618 | 23 | 56.118 | KV453155.1 | 11375711 | 19-scf00458 | 19 |
| AX-158300619 | 23 | 56.118 | KV453155.1 | 11376842 | 19-scf00458 | 19 |
| AX-158300620 | 23 | 56.118 | KV453155.1 | 11377296 | 19-scf00458 | 19 |
| AX-157880932 | 23 | 56.118 | KV453155.1 | 11379840 | 19-scf00458 | 19 |
| AX-158300623 | 23 | 56.118 | KV453155.1 | 11380938 | 19-scf00458 | 19 |
| AX-158300625 | 23 | 56.118 | KV453155.1 | 11381867 | 19-scf00458 | 19 |
| AX-157757454 | 23 | 56.118 | KV453155.1 | 11382423 | 19-scf00458 | 19 |
| AX-158300627 | 23 | 56.118 | KV453155.1 | 11383767 | 19-scf00458 | 19 |
| AX-158300628 | 23 | 56.118 | KV453155.1 | 11384558 | 19-scf00458 | 19 |
| AX-157771520 | 23 | 56.118 | KV453155.1 | 11391215 | 19-scf00458 | 19 |
| AX-158300633 | 23 | 56.118 | KV453155.1 | 11392704 | 19-scf00458 | 19 |
| AX-157719042 | 23 | 56.118 | KV453155.1 | 11393900 | 19-scf00458 | 19 |

|              |    |        |            |          |             |    |
|--------------|----|--------|------------|----------|-------------|----|
| AX-158300634 | 23 | 56.118 | KV453155.1 | 11395471 | 19-scf00458 | 19 |
| AX-157846282 | 23 | 56.118 | KV453155.1 | 11396249 | 19-scf00458 | 19 |
| AX-158300635 | 23 | 56.118 | KV453155.1 | 11396402 | 19-scf00458 | 19 |
| AX-158300636 | 23 | 56.118 | KV453155.1 | 11398685 | 19-scf00458 | 19 |
| AX-158300646 | 23 | 56.118 | KV453155.1 | 11415970 | 19-scf00458 | 19 |
| AX-158300639 | 23 | 56.263 | KV453155.1 | 11407098 | 19-scf00458 | 19 |
| AX-158300640 | 23 | 56.408 | KV453155.1 | 11408646 | 19-scf00458 | 19 |
| AX-158417584 | 23 | 56.408 | KV453155.1 | 11410955 | 19-scf00458 | 19 |
| AX-158300642 | 23 | 56.408 | KV453155.1 | 11412158 | 19-scf00458 | 19 |
| AX-158300643 | 23 | 56.446 | KV453155.1 | 11413291 | 19-scf00458 | 19 |
| AX-158300602 | 23 | 56.501 | KV453155.1 | 11360497 | 19-scf00458 | 19 |
| AX-157775346 | 23 | 56.501 | KV453155.1 | 11387340 | 19-scf00458 | 19 |
| AX-158300645 | 23 | 56.501 | KV453155.1 | 11414703 | 19-scf00458 | 19 |
| AX-158300647 | 23 | 56.552 | KV453155.1 | 11418072 | 19-scf00458 | 19 |
| AX-158300648 | 23 | 56.552 | KV453155.1 | 11418678 | 19-scf00458 | 19 |
| AX-158300649 | 23 | 56.552 | KV453155.1 | 11419987 | 19-scf00458 | 19 |
| AX-158300650 | 23 | 56.552 | KV453155.1 | 11421439 | 19-scf00458 | 19 |
| AX-158300651 | 23 | 56.552 | KV453155.1 | 11421726 | 19-scf00458 | 19 |
| AX-158300652 | 23 | 56.552 | KV453155.1 | 11423453 | 19-scf00458 | 19 |
| AX-158300653 | 23 | 56.552 | KV453155.1 | 11428809 | 19-scf00458 | 19 |
| AX-157867658 | 23 | 56.552 | KV453155.1 | 11429920 | 19-scf00458 | 19 |
| AX-158300654 | 23 | 56.552 | KV453155.1 | 11432666 | 19-scf00458 | 19 |
| AX-158300656 | 23 | 56.552 | KV453155.1 | 11435545 | 19-scf00458 | 19 |
| AX-158300661 | 23 | 56.552 | KV453155.1 | 11439938 | 19-scf00458 | 19 |
| AX-158300662 | 23 | 56.552 | KV453155.1 | 11440785 | 19-scf00458 | 19 |
| AX-157712996 | 23 | 56.552 | KV453155.1 | 11442876 | 19-scf00458 | 19 |
| AX-157749953 | 23 | 56.552 | KV453155.1 | 11445679 | 19-scf00458 | 19 |
| AX-157880936 | 23 | 56.552 | KV453155.1 | 11446449 | 19-scf00458 | 19 |
| AX-158300671 | 23 | 56.552 | KV453155.1 | 11451839 | 19-scf00458 | 19 |
| AX-158300672 | 23 | 56.552 | KV453155.1 | 11452397 | 19-scf00458 | 19 |
| AX-158300673 | 23 | 56.552 | KV453155.1 | 11453209 | 19-scf00458 | 19 |
| AX-157804106 | 23 | 56.552 | KV453155.1 | 11453796 | 19-scf00458 | 19 |
| AX-158300675 | 23 | 56.552 | KV453155.1 | 11456237 | 19-scf00458 | 19 |
| AX-157727067 | 23 | 56.552 | KV453155.1 | 11457497 | 19-scf00458 | 19 |
| AX-158300678 | 23 | 56.552 | KV453155.1 | 11460024 | 19-scf00458 | 19 |
| AX-158300692 | 23 | 56.552 | KV453155.1 | 11480992 | 19-scf00458 | 19 |
| AX-158300697 | 23 | 56.552 | KV453155.1 | 11486316 | 19-scf00458 | 19 |
| AX-158300708 | 23 | 56.552 | KV453155.1 | 11512743 | 19-scf00458 | 19 |
| AX-158300716 | 23 | 56.552 | KV453155.1 | 11527756 | 19-scf00458 | 19 |
| AX-158300720 | 23 | 56.552 | KV453155.1 | 11531774 | 19-scf00458 | 19 |
| AX-158300664 | 23 | 56.697 | KV453155.1 | 11442117 | 19-scf00458 | 19 |
| AX-158300682 | 23 | 56.697 | KV453155.1 | 11463323 | 19-scf00458 | 19 |
| AX-158300683 | 23 | 56.697 | KV453155.1 | 11464226 | 19-scf00458 | 19 |
| AX-157757958 | 23 | 56.697 | KV453155.1 | 11464823 | 19-scf00458 | 19 |
| AX-158300684 | 23 | 56.697 | KV453155.1 | 11465066 | 19-scf00458 | 19 |
| AX-157713475 | 23 | 56.697 | KV453155.1 | 11467592 | 19-scf00458 | 19 |
| AX-157726191 | 23 | 56.697 | KV453155.1 | 11468413 | 19-scf00458 | 19 |
| AX-158300686 | 23 | 56.697 | KV453155.1 | 11469899 | 19-scf00458 | 19 |
| AX-158300688 | 23 | 56.697 | KV453155.1 | 11474698 | 19-scf00458 | 19 |
| AX-158300689 | 23 | 56.697 | KV453155.1 | 11475157 | 19-scf00458 | 19 |
| AX-158300690 | 23 | 56.697 | KV453155.1 | 11475535 | 19-scf00458 | 19 |

|              |    |        |             |          |             |    |
|--------------|----|--------|-------------|----------|-------------|----|
| AX-158300703 | 23 | 56.697 | KV453155.1  | 11497534 | 19-scf00458 | 19 |
| AX-158300761 | 23 | 56.697 | KV453155.1  | 11592807 | 19-scf00458 | 19 |
| AX-158300762 | 23 | 56.697 | KV453155.1  | 11593158 | 19-scf00458 | 19 |
| AX-157706947 | 23 | 56.697 | 3ML01033203 | 213      | scf08843_1  | UN |
| AX-157706948 | 23 | 56.697 | 3ML01033203 | 341      | scf08843_1  | UN |
| AX-158300693 | 23 | 56.756 | KV453155.1  | 11482799 | 19-scf00458 | 19 |
| AX-158300695 | 23 | 56.78  | KV453155.1  | 11485155 | 19-scf00458 | 19 |
| AX-158300696 | 23 | 56.842 | KV453155.1  | 11485822 | 19-scf00458 | 19 |
| AX-157752382 | 23 | 56.987 | KV453155.1  | 11486572 | 19-scf00458 | 19 |
| AX-158300698 | 23 | 56.987 | KV453155.1  | 11487203 | 19-scf00458 | 19 |
| AX-158300699 | 23 | 56.987 | KV453155.1  | 11490112 | 19-scf00458 | 19 |
| AX-157715482 | 23 | 56.987 | KV453155.1  | 11490814 | 19-scf00458 | 19 |
| AX-158381309 | 23 | 56.987 | KV453155.1  | 11493985 | 19-scf00458 | 19 |
| AX-158300704 | 23 | 56.987 | KV453155.1  | 11499198 | 19-scf00458 | 19 |
| AX-157720078 | 23 | 56.987 | KV453155.1  | 11500760 | 19-scf00458 | 19 |
| AX-157717083 | 23 | 56.987 | KV453155.1  | 11501249 | 19-scf00458 | 19 |
| AX-157757198 | 23 | 56.987 | KV453155.1  | 11503603 | 19-scf00458 | 19 |
| AX-157745459 | 23 | 56.987 | KV453155.1  | 11504207 | 19-scf00458 | 19 |
| AX-158300715 | 23 | 56.987 | KV453155.1  | 11526054 | 19-scf00458 | 19 |
| AX-157752685 | 23 | 56.987 | KV453155.1  | 11535014 | 19-scf00458 | 19 |
| AX-158300725 | 23 | 56.987 | KV453155.1  | 11536816 | 19-scf00458 | 19 |
| AX-157726536 | 23 | 56.987 | KV453155.1  | 11566102 | 19-scf00458 | 19 |
| AX-158300746 | 23 | 56.987 | KV453155.1  | 11569241 | 19-scf00458 | 19 |
| AX-158300768 | 23 | 56.987 | KV453155.1  | 11596687 | 19-scf00458 | 19 |
| AX-158300771 | 23 | 56.987 | KV453155.1  | 11600578 | 19-scf00458 | 19 |
| AX-158300786 | 23 | 56.987 | KV453155.1  | 11621754 | 19-scf00458 | 19 |
| AX-158300709 | 23 | 57.132 | KV453155.1  | 11514147 | 19-scf00458 | 19 |
| AX-158300711 | 23 | 57.132 | KV453155.1  | 11516719 | 19-scf00458 | 19 |
| AX-157846286 | 23 | 57.132 | KV453155.1  | 11522853 | 19-scf00458 | 19 |
| AX-157750673 | 23 | 57.132 | KV453155.1  | 11528376 | 19-scf00458 | 19 |
| AX-158300717 | 23 | 57.132 | KV453155.1  | 11529376 | 19-scf00458 | 19 |
| AX-158300718 | 23 | 57.132 | KV453155.1  | 11530549 | 19-scf00458 | 19 |
| AX-158300722 | 23 | 57.132 | KV453155.1  | 11532760 | 19-scf00458 | 19 |
| AX-158300724 | 23 | 57.132 | KV453155.1  | 11534272 | 19-scf00458 | 19 |
| AX-158300726 | 23 | 57.132 | KV453155.1  | 11537265 | 19-scf00458 | 19 |
| AX-158300729 | 23 | 57.132 | KV453155.1  | 11541886 | 19-scf00458 | 19 |
| AX-158300732 | 23 | 57.132 | KV453155.1  | 11546996 | 19-scf00458 | 19 |
| AX-158300735 | 23 | 57.132 | KV453155.1  | 11548853 | 19-scf00458 | 19 |
| AX-158301107 | 23 | 57.132 | KV453155.1  | 12113560 | 19-scf00458 | 19 |
| AX-158300731 | 23 | 57.556 | KV453155.1  | 11543496 | 19-scf00458 | 19 |
| AX-158300739 | 23 | 57.556 | KV453155.1  | 11557566 | 19-scf00458 | 19 |
| AX-158300742 | 23 | 57.56  | KV453155.1  | 11563866 | 19-scf00458 | 19 |
| AX-158300743 | 23 | 57.56  | KV453155.1  | 11564820 | 19-scf00458 | 19 |
| AX-158300705 | 23 | 57.566 | KV453155.1  | 11506883 | 19-scf00458 | 19 |
| AX-158300719 | 23 | 57.566 | KV453155.1  | 11531187 | 19-scf00458 | 19 |
| AX-158300745 | 23 | 57.566 | KV453155.1  | 11568934 | 19-scf00458 | 19 |
| AX-158417586 | 23 | 57.566 | KV453155.1  | 11569694 | 19-scf00458 | 19 |
| AX-158412027 | 23 | 57.566 | KV453155.1  | 11569758 | 19-scf00458 | 19 |
| AX-157740726 | 23 | 57.566 | KV453155.1  | 11570159 | 19-scf00458 | 19 |
| AX-158300749 | 23 | 57.566 | KV453155.1  | 11574345 | 19-scf00458 | 19 |
| AX-158300751 | 23 | 57.566 | KV453155.1  | 11577459 | 19-scf00458 | 19 |

|              |    |        |            |          |                |    |
|--------------|----|--------|------------|----------|----------------|----|
| AX-158300754 | 23 | 57.566 | KV453155.1 | 11584933 | 19-scf00458    | 19 |
| AX-158300755 | 23 | 57.566 | KV453155.1 | 11585591 | 19-scf00458    | 19 |
| AX-158300759 | 23 | 57.566 | KV453155.1 | 11591337 | 19-scf00458    | 19 |
| AX-158300760 | 23 | 57.566 | KV453155.1 | 11592254 | 19-scf00458    | 19 |
| AX-158300763 | 23 | 57.566 | KV453155.1 | 11594247 | 19-scf00458    | 19 |
| AX-158300765 | 23 | 57.566 | KV453155.1 | 11595408 | 19-scf00458    | 19 |
| AX-158381310 | 23 | 57.566 | KV453155.1 | 11597958 | 19-scf00458    | 19 |
| AX-158421485 | 23 | 57.566 | FI877118.1 | 100      | IORI212 lctalu | UN |
| AX-158300767 | 23 | 57.581 | KV453155.1 | 11596249 | 19-scf00458    | 19 |
| AX-157846290 | 23 | 57.624 | KV453155.1 | 11600513 | 19-scf00458    | 19 |
| AX-158300773 | 23 | 57.666 | KV453155.1 | 11605331 | 19-scf00458    | 19 |
| AX-158300780 | 23 | 57.666 | KV453155.1 | 11616316 | 19-scf00458    | 19 |
| AX-158300774 | 23 | 57.711 | KV453155.1 | 11605444 | 19-scf00458    | 19 |
| AX-158300776 | 23 | 57.758 | KV453155.1 | 11609044 | 19-scf00458    | 19 |
| AX-158300778 | 23 | 57.818 | KV453155.1 | 11611176 | 19-scf00458    | 19 |
| AX-158300782 | 23 | 57.855 | KV453155.1 | 11617084 | 19-scf00458    | 19 |
| AX-158300783 | 23 | 57.855 | KV453155.1 | 11617809 | 19-scf00458    | 19 |
| AX-158300784 | 23 | 57.855 | KV453155.1 | 11619564 | 19-scf00458    | 19 |
| AX-158300788 | 23 | 57.855 | KV453155.1 | 11622603 | 19-scf00458    | 19 |
| AX-158300791 | 23 | 57.855 | KV453155.1 | 11624429 | 19-scf00458    | 19 |
| AX-158300792 | 23 | 57.855 | KV453155.1 | 11625929 | 19-scf00458    | 19 |
| AX-158300794 | 23 | 57.941 | KV453155.1 | 11627626 | 19-scf00458    | 19 |
| AX-158300798 | 23 | 58     | KV453155.1 | 11632883 | 19-scf00458    | 19 |
| AX-158300799 | 23 | 58     | KV453155.1 | 11633711 | 19-scf00458    | 19 |
| AX-158300800 | 23 | 58     | KV453155.1 | 11636195 | 19-scf00458    | 19 |
| AX-158300804 | 23 | 58.145 | KV453155.1 | 11638319 | 19-scf00458    | 19 |
| AX-157846291 | 23 | 58.145 | KV453155.1 | 11642283 | 19-scf00458    | 19 |
| AX-158300806 | 23 | 58.145 | KV453155.1 | 11643756 | 19-scf00458    | 19 |
| AX-157755831 | 23 | 58.145 | KV453155.1 | 11645446 | 19-scf00458    | 19 |
| AX-158300808 | 23 | 58.145 | KV453155.1 | 11646975 | 19-scf00458    | 19 |
| AX-158300826 | 23 | 58.145 | KV453155.1 | 11675378 | 19-scf00458    | 19 |
| AX-157751330 | 23 | 58.29  | KV453155.1 | 11641341 | 19-scf00458    | 19 |
| AX-158300814 | 23 | 58.29  | KV453155.1 | 11657267 | 19-scf00458    | 19 |
| AX-158300815 | 23 | 58.29  | KV453155.1 | 11659181 | 19-scf00458    | 19 |
| AX-158300816 | 23 | 58.29  | KV453155.1 | 11660574 | 19-scf00458    | 19 |
| AX-158300817 | 23 | 58.29  | KV453155.1 | 11662071 | 19-scf00458    | 19 |
| AX-157720049 | 23 | 58.29  | KV453155.1 | 11662930 | 19-scf00458    | 19 |
| AX-157753699 | 23 | 58.29  | KV453155.1 | 11676712 | 19-scf00458    | 19 |
| AX-158300834 | 23 | 58.29  | KV453155.1 | 11688795 | 19-scf00458    | 19 |
| AX-158300848 | 23 | 58.29  | KV453155.1 | 11705806 | 19-scf00458    | 19 |
| AX-158300825 | 23 | 58.579 | KV453155.1 | 11674826 | 19-scf00458    | 19 |
| AX-158300837 | 23 | 58.579 | KV453155.1 | 11690618 | 19-scf00458    | 19 |
| AX-157846293 | 23 | 58.579 | KV453155.1 | 11691253 | 19-scf00458    | 19 |
| AX-157846294 | 23 | 58.579 | KV453155.1 | 11695376 | 19-scf00458    | 19 |
| AX-158300840 | 23 | 58.579 | KV453155.1 | 11698360 | 19-scf00458    | 19 |
| AX-158300841 | 23 | 58.579 | KV453155.1 | 11700095 | 19-scf00458    | 19 |
| AX-158300842 | 23 | 58.579 | KV453155.1 | 11700550 | 19-scf00458    | 19 |
| AX-158300843 | 23 | 58.579 | KV453155.1 | 11701023 | 19-scf00458    | 19 |
| AX-158300847 | 23 | 58.579 | KV453155.1 | 11705380 | 19-scf00458    | 19 |
| AX-158300850 | 23 | 58.579 | KV453155.1 | 11707750 | 19-scf00458    | 19 |
| AX-158300852 | 23 | 58.579 | KV453155.1 | 11709742 | 19-scf00458    | 19 |

|              |    |        |            |          |             |    |
|--------------|----|--------|------------|----------|-------------|----|
| AX-158300853 | 23 | 58.65  | KV453155.1 | 11712263 | 19-scf00458 | 19 |
| AX-158300844 | 23 | 58.724 | KV453155.1 | 11702473 | 19-scf00458 | 19 |
| AX-157741416 | 23 | 58.724 | KV453155.1 | 11713435 | 19-scf00458 | 19 |
| AX-158300856 | 23 | 58.724 | KV453155.1 | 11716872 | 19-scf00458 | 19 |
| AX-158300857 | 23 | 58.724 | KV453155.1 | 11718190 | 19-scf00458 | 19 |
| AX-158300858 | 23 | 58.724 | KV453155.1 | 11718405 | 19-scf00458 | 19 |
| AX-158300859 | 23 | 58.724 | KV453155.1 | 11719741 | 19-scf00458 | 19 |
| AX-158300865 | 23 | 58.868 | KV453155.1 | 11728824 | 19-scf00458 | 19 |
| AX-158300866 | 23 | 58.869 | KV453155.1 | 11732083 | 19-scf00458 | 19 |
| AX-158300893 | 23 | 58.869 | KV453155.1 | 11775768 | 19-scf00458 | 19 |
| AX-157739110 | 23 | 59.158 | KV453155.1 | 11740354 | 19-scf00458 | 19 |
| AX-158300871 | 23 | 59.158 | KV453155.1 | 11741563 | 19-scf00458 | 19 |
| AX-157709477 | 23 | 59.158 | KV453155.1 | 11747913 | 19-scf00458 | 19 |
| AX-157846297 | 23 | 59.158 | KV453155.1 | 11752033 | 19-scf00458 | 19 |
| AX-157846295 | 23 | 59.204 | KV453155.1 | 11743537 | 19-scf00458 | 19 |
| AX-158300877 | 23 | 59.251 | KV453155.1 | 11749801 | 19-scf00458 | 19 |
| AX-158300879 | 23 | 59.303 | KV453155.1 | 11752527 | 19-scf00458 | 19 |
| AX-158300881 | 23 | 59.303 | KV453155.1 | 11755884 | 19-scf00458 | 19 |
| AX-157846299 | 23 | 59.303 | KV453155.1 | 11758115 | 19-scf00458 | 19 |
| AX-158300882 | 23 | 59.303 | KV453155.1 | 11758237 | 19-scf00458 | 19 |
| AX-158300883 | 23 | 59.303 | KV453155.1 | 11758989 | 19-scf00458 | 19 |
| AX-158300885 | 23 | 59.303 | KV453155.1 | 11765478 | 19-scf00458 | 19 |
| AX-158300891 | 23 | 59.303 | KV453155.1 | 11771575 | 19-scf00458 | 19 |
| AX-158300894 | 23 | 59.303 | KV453155.1 | 11776370 | 19-scf00458 | 19 |
| AX-158300897 | 23 | 59.303 | KV453155.1 | 11781534 | 19-scf00458 | 19 |
| AX-158300908 | 23 | 59.303 | KV453155.1 | 11795537 | 19-scf00458 | 19 |
| AX-157708845 | 23 | 59.303 | KV453155.1 | 11838075 | 19-scf00458 | 19 |
| AX-158301030 | 23 | 59.303 | KV453155.1 | 11973608 | 19-scf00458 | 19 |
| AX-158301123 | 23 | 59.303 | KV453155.1 | 12135126 | 19-scf00458 | 19 |
| AX-158300809 | 23 | 59.304 | KV453155.1 | 11647714 | 19-scf00458 | 19 |
| AX-158300901 | 23 | 59.304 | KV453155.1 | 11785972 | 19-scf00458 | 19 |
| AX-158300904 | 23 | 59.304 | KV453155.1 | 11789572 | 19-scf00458 | 19 |
| AX-158300919 | 23 | 59.304 | KV453155.1 | 11816423 | 19-scf00458 | 19 |
| AX-158300902 | 23 | 59.306 | KV453155.1 | 11787480 | 19-scf00458 | 19 |
| AX-158417590 | 23 | 59.306 | KV453155.1 | 11794053 | 19-scf00458 | 19 |
| AX-158300909 | 23 | 59.306 | KV453155.1 | 11796142 | 19-scf00458 | 19 |
| AX-158300912 | 23 | 59.353 | KV453155.1 | 11798781 | 19-scf00458 | 19 |
| AX-157846298 | 23 | 59.393 | KV453155.1 | 11754915 | 19-scf00458 | 19 |
| AX-158300898 | 23 | 59.393 | KV453155.1 | 11783259 | 19-scf00458 | 19 |
| AX-158300913 | 23 | 59.393 | KV453155.1 | 11806692 | 19-scf00458 | 19 |
| AX-158300953 | 23 | 59.393 | KV453155.1 | 11865118 | 19-scf00458 | 19 |
| AX-158300959 | 23 | 59.393 | KV453155.1 | 11873133 | 19-scf00458 | 19 |
| AX-158300916 | 23 | 59.429 | KV453155.1 | 11810546 | 19-scf00458 | 19 |
| AX-157773151 | 23 | 59.475 | KV453155.1 | 11814135 | 19-scf00458 | 19 |
| AX-158300918 | 23 | 59.52  | KV453155.1 | 11815099 | 19-scf00458 | 19 |
| AX-158300875 | 23 | 59.741 | KV453155.1 | 11747373 | 19-scf00458 | 19 |
| AX-158300890 | 23 | 59.741 | KV453155.1 | 11771143 | 19-scf00458 | 19 |
| AX-158300920 | 23 | 59.741 | KV453155.1 | 11816780 | 19-scf00458 | 19 |
| AX-158300921 | 23 | 59.741 | KV453155.1 | 11818238 | 19-scf00458 | 19 |
| AX-158300923 | 23 | 59.741 | KV453155.1 | 11820865 | 19-scf00458 | 19 |
| AX-158300924 | 23 | 59.741 | KV453155.1 | 11823821 | 19-scf00458 | 19 |

|              |    |        |            |          |             |    |
|--------------|----|--------|------------|----------|-------------|----|
| AX-158300925 | 23 | 59.741 | KV453155.1 | 11824462 | 19-scf00458 | 19 |
| AX-157709658 | 23 | 59.741 | KV453155.1 | 11825716 | 19-scf00458 | 19 |
| AX-157725132 | 23 | 59.741 | KV453155.1 | 11826074 | 19-scf00458 | 19 |
| AX-157743596 | 23 | 59.741 | KV453155.1 | 11826231 | 19-scf00458 | 19 |
| AX-158300961 | 23 | 59.741 | KV453155.1 | 11877182 | 19-scf00458 | 19 |
| AX-158300931 | 23 | 59.786 | KV453155.1 | 11832461 | 19-scf00458 | 19 |
| AX-158300819 | 23 | 59.85  | KV453155.1 | 11664746 | 19-scf00458 | 19 |
| AX-158300862 | 23 | 59.85  | KV453155.1 | 11722265 | 19-scf00458 | 19 |
| AX-158300929 | 23 | 59.85  | KV453155.1 | 11829053 | 19-scf00458 | 19 |
| AX-158300930 | 23 | 59.85  | KV453155.1 | 11831877 | 19-scf00458 | 19 |
| AX-158300935 | 23 | 59.85  | KV453155.1 | 11839180 | 19-scf00458 | 19 |
| AX-158300937 | 23 | 59.85  | KV453155.1 | 11840242 | 19-scf00458 | 19 |
| AX-158300938 | 23 | 59.85  | KV453155.1 | 11840930 | 19-scf00458 | 19 |
| AX-158300940 | 23 | 59.85  | KV453155.1 | 11844641 | 19-scf00458 | 19 |
| AX-158300942 | 23 | 59.85  | KV453155.1 | 11846734 | 19-scf00458 | 19 |
| AX-158300945 | 23 | 59.85  | KV453155.1 | 11857060 | 19-scf00458 | 19 |
| AX-158300946 | 23 | 59.85  | KV453155.1 | 11857685 | 19-scf00458 | 19 |
| AX-158300948 | 23 | 59.85  | KV453155.1 | 11858902 | 19-scf00458 | 19 |
| AX-158300951 | 23 | 59.85  | KV453155.1 | 11864062 | 19-scf00458 | 19 |
| AX-158300952 | 23 | 59.85  | KV453155.1 | 11864429 | 19-scf00458 | 19 |
| AX-158300958 | 23 | 59.85  | KV453155.1 | 11872659 | 19-scf00458 | 19 |
| AX-158300962 | 23 | 59.85  | KV453155.1 | 11877707 | 19-scf00458 | 19 |
| AX-158300963 | 23 | 59.85  | KV453155.1 | 11878755 | 19-scf00458 | 19 |
| AX-158300966 | 23 | 59.85  | KV453155.1 | 11881877 | 19-scf00458 | 19 |
| AX-158300969 | 23 | 59.888 | KV453155.1 | 11885432 | 19-scf00458 | 19 |
| AX-158300971 | 23 | 59.908 | KV453155.1 | 11887200 | 19-scf00458 | 19 |
| AX-158300976 | 23 | 59.959 | KV453155.1 | 11894286 | 19-scf00458 | 19 |
| AX-158300977 | 23 | 59.959 | KV453155.1 | 11894889 | 19-scf00458 | 19 |
| AX-158300981 | 23 | 59.959 | KV453155.1 | 11902389 | 19-scf00458 | 19 |
| AX-158300982 | 23 | 59.959 | KV453155.1 | 11903109 | 19-scf00458 | 19 |
| AX-158300983 | 23 | 59.959 | KV453155.1 | 11903613 | 19-scf00458 | 19 |
| AX-158300984 | 23 | 59.978 | KV453155.1 | 11905319 | 19-scf00458 | 19 |
| AX-157724612 | 23 | 59.997 | KV453155.1 | 11889209 | 19-scf00458 | 19 |
| AX-158300985 | 23 | 59.997 | KV453155.1 | 11905693 | 19-scf00458 | 19 |
| AX-158300990 | 23 | 60.016 | KV453155.1 | 11911616 | 19-scf00458 | 19 |
| AX-158300993 | 23 | 60.039 | KV453155.1 | 11920139 | 19-scf00458 | 19 |
| AX-158300928 | 23 | 60.061 | KV453155.1 | 11828532 | 19-scf00458 | 19 |
| AX-158300949 | 23 | 60.061 | KV453155.1 | 11861388 | 19-scf00458 | 19 |
| AX-158300965 | 23 | 60.061 | KV453155.1 | 11879896 | 19-scf00458 | 19 |
| AX-157752146 | 23 | 60.061 | KV453155.1 | 11921831 | 19-scf00458 | 19 |
| AX-158301121 | 23 | 60.061 | KV453155.1 | 12130044 | 19-scf00458 | 19 |
| AX-157754544 | 23 | 60.068 | KV453155.1 | 11922359 | 19-scf00458 | 19 |
| AX-157846301 | 23 | 60.068 | KV453155.1 | 11925660 | 19-scf00458 | 19 |
| AX-158301000 | 23 | 60.068 | KV453155.1 | 11928804 | 19-scf00458 | 19 |
| AX-158301002 | 23 | 60.068 | KV453155.1 | 11932292 | 19-scf00458 | 19 |
| AX-158301020 | 23 | 60.068 | KV453155.1 | 11958485 | 19-scf00458 | 19 |
| AX-158301047 | 23 | 60.068 | KV453155.1 | 11997949 | 19-scf00458 | 19 |
| AX-158301051 | 23 | 60.068 | KV453155.1 | 12002608 | 19-scf00458 | 19 |
| AX-158301056 | 23 | 60.068 | KV453155.1 | 12007000 | 19-scf00458 | 19 |
| AX-157739023 | 23 | 60.068 | KV453155.1 | 12023359 | 19-scf00458 | 19 |
| AX-158301006 | 23 | 60.111 | KV453155.1 | 11937773 | 19-scf00458 | 19 |

|              |    |        |            |          |             |    |
|--------------|----|--------|------------|----------|-------------|----|
| AX-158301012 | 23 | 60.111 | KV453155.1 | 11947936 | 19-scf00458 | 19 |
| AX-158301011 | 23 | 60.158 | KV453155.1 | 11944767 | 19-scf00458 | 19 |
| AX-158301022 | 23 | 60.158 | KV453155.1 | 11961223 | 19-scf00458 | 19 |
| AX-157846307 | 23 | 60.158 | KV453155.1 | 12034910 | 19-scf00458 | 19 |
| AX-158301072 | 23 | 60.158 | KV453155.1 | 12036621 | 19-scf00458 | 19 |
| AX-157747144 | 23 | 60.158 | KV453155.1 | 12196448 | 19-scf00458 | 19 |
| AX-158301176 | 23 | 60.158 | KV453155.1 | 12206099 | 19-scf00458 | 19 |
| AX-158301195 | 23 | 60.158 | KV453155.1 | 12224106 | 19-scf00458 | 19 |
| AX-157846304 | 23 | 60.22  | KV453155.1 | 11955963 | 19-scf00458 | 19 |
| AX-157695772 | 23 | 60.287 | KV453155.1 | 11963810 | 19-scf00458 | 19 |
| AX-158301024 | 23 | 60.287 | KV453155.1 | 11964158 | 19-scf00458 | 19 |
| AX-158301028 | 23 | 60.287 | KV453155.1 | 11971861 | 19-scf00458 | 19 |
| AX-158301029 | 23 | 60.287 | KV453155.1 | 11972353 | 19-scf00458 | 19 |
| AX-158301031 | 23 | 60.287 | KV453155.1 | 11978877 | 19-scf00458 | 19 |
| AX-158301033 | 23 | 60.287 | KV453155.1 | 11980355 | 19-scf00458 | 19 |
| AX-158301035 | 23 | 60.287 | KV453155.1 | 11981637 | 19-scf00458 | 19 |
| AX-158301037 | 23 | 60.287 | KV453155.1 | 11983118 | 19-scf00458 | 19 |
| AX-158301039 | 23 | 60.287 | KV453155.1 | 11985333 | 19-scf00458 | 19 |
| AX-158301046 | 23 | 60.287 | KV453155.1 | 11997614 | 19-scf00458 | 19 |
| AX-158301049 | 23 | 60.287 | KV453155.1 | 11999956 | 19-scf00458 | 19 |
| AX-158301050 | 23 | 60.287 | KV453155.1 | 12001188 | 19-scf00458 | 19 |
| AX-158301052 | 23 | 60.287 | KV453155.1 | 12004092 | 19-scf00458 | 19 |
| AX-158301053 | 23 | 60.287 | KV453155.1 | 12004548 | 19-scf00458 | 19 |
| AX-158301054 | 23 | 60.287 | KV453155.1 | 12005159 | 19-scf00458 | 19 |
| AX-158301058 | 23 | 60.287 | KV453155.1 | 12010111 | 19-scf00458 | 19 |
| AX-158301070 | 23 | 60.287 | KV453155.1 | 12034262 | 19-scf00458 | 19 |
| AX-158301082 | 23 | 60.287 | KV453155.1 | 12050753 | 19-scf00458 | 19 |
| AX-158301084 | 23 | 60.287 | KV453155.1 | 12055175 | 19-scf00458 | 19 |
| AX-158301161 | 23 | 60.287 | KV453155.1 | 12186748 | 19-scf00458 | 19 |
| AX-158301188 | 23 | 60.287 | KV453155.1 | 12217467 | 19-scf00458 | 19 |
| AX-158301189 | 23 | 60.287 | KV453155.1 | 12218667 | 19-scf00458 | 19 |
| AX-158301061 | 23 | 60.396 | KV453155.1 | 12014809 | 19-scf00458 | 19 |
| AX-158301069 | 23 | 60.396 | KV453155.1 | 12030085 | 19-scf00458 | 19 |
| AX-158301078 | 23 | 60.396 | KV453155.1 | 12044299 | 19-scf00458 | 19 |
| AX-157846306 | 23 | 60.429 | KV453155.1 | 12026719 | 19-scf00458 | 19 |
| AX-157860827 | 23 | 60.465 | KV453155.1 | 12033866 | 19-scf00458 | 19 |
| AX-157739254 | 23 | 60.505 | KV453155.1 | 12035448 | 19-scf00458 | 19 |
| AX-158301073 | 23 | 60.505 | KV453155.1 | 12037065 | 19-scf00458 | 19 |
| AX-158301075 | 23 | 60.505 | KV453155.1 | 12041272 | 19-scf00458 | 19 |
| AX-157846308 | 23 | 60.505 | KV453155.1 | 12041496 | 19-scf00458 | 19 |
| AX-158301077 | 23 | 60.505 | KV453155.1 | 12043857 | 19-scf00458 | 19 |
| AX-158301079 | 23 | 60.505 | KV453155.1 | 12046192 | 19-scf00458 | 19 |
| AX-158301080 | 23 | 60.505 | KV453155.1 | 12046948 | 19-scf00458 | 19 |
| AX-157846309 | 23 | 60.505 | KV453155.1 | 12049285 | 19-scf00458 | 19 |
| AX-157860825 | 23 | 60.615 | KV453155.1 | 11893735 | 19-scf00458 | 19 |
| AX-157846300 | 23 | 60.615 | KV453155.1 | 11904426 | 19-scf00458 | 19 |
| AX-158301016 | 23 | 60.615 | KV453155.1 | 11953182 | 19-scf00458 | 19 |
| AX-157713992 | 23 | 60.615 | KV453155.1 | 12047526 | 19-scf00458 | 19 |
| AX-158301081 | 23 | 60.615 | KV453155.1 | 12050097 | 19-scf00458 | 19 |
| AX-158301098 | 23 | 60.615 | KV453155.1 | 12107416 | 19-scf00458 | 19 |
| AX-158301100 | 23 | 60.615 | KV453155.1 | 12108741 | 19-scf00458 | 19 |



|              |    |        |            |          |             |    |
|--------------|----|--------|------------|----------|-------------|----|
| AX-158301101 | 23 | 60.615 | KV453155.1 | 12108994 | 19-scf00458 | 19 |
| AX-158301110 | 23 | 60.615 | KV453155.1 | 12119486 | 19-scf00458 | 19 |
| AX-158301112 | 23 | 60.615 | KV453155.1 | 12120693 | 19-scf00458 | 19 |
| AX-158301115 | 23 | 60.615 | KV453155.1 | 12123015 | 19-scf00458 | 19 |
| AX-158301118 | 23 | 60.615 | KV453155.1 | 12126079 | 19-scf00458 | 19 |
| AX-158301119 | 23 | 60.615 | KV453155.1 | 12128798 | 19-scf00458 | 19 |
| AX-158301122 | 23 | 60.615 | KV453155.1 | 12132840 | 19-scf00458 | 19 |
| AX-158301166 | 23 | 60.615 | KV453155.1 | 12193572 | 19-scf00458 | 19 |
| AX-158301172 | 23 | 60.615 | KV453155.1 | 12201830 | 19-scf00458 | 19 |
| AX-158301185 | 23 | 60.615 | KV453155.1 | 12212943 | 19-scf00458 | 19 |
| AX-158301074 | 23 | 60.833 | KV453155.1 | 12040885 | 19-scf00458 | 19 |
| AX-158301083 | 23 | 60.833 | KV453155.1 | 12051712 | 19-scf00458 | 19 |
| AX-158301085 | 23 | 60.833 | KV453155.1 | 12055976 | 19-scf00458 | 19 |
| AX-158417593 | 23 | 60.833 | KV453155.1 | 12102133 | 19-scf00458 | 19 |
| AX-158301096 | 23 | 60.833 | KV453155.1 | 12105945 | 19-scf00458 | 19 |
| AX-158301097 | 23 | 60.833 | KV453155.1 | 12106477 | 19-scf00458 | 19 |
| AX-157721976 | 23 | 60.833 | KV453155.1 | 12144869 | 19-scf00458 | 19 |
| AX-158301133 | 23 | 60.833 | KV453155.1 | 12147740 | 19-scf00458 | 19 |
| AX-158301134 | 23 | 60.833 | KV453155.1 | 12149733 | 19-scf00458 | 19 |
| AX-158301136 | 23 | 60.833 | KV453155.1 | 12152564 | 19-scf00458 | 19 |
| AX-157846316 | 23 | 60.833 | KV453155.1 | 12155586 | 19-scf00458 | 19 |
| AX-158301141 | 23 | 60.833 | KV453155.1 | 12155957 | 19-scf00458 | 19 |
| AX-158301142 | 23 | 60.833 | KV453155.1 | 12157016 | 19-scf00458 | 19 |
| AX-158301145 | 23 | 60.833 | KV453155.1 | 12161565 | 19-scf00458 | 19 |
| AX-157846319 | 23 | 60.833 | KV453155.1 | 12166535 | 19-scf00458 | 19 |
| AX-158301149 | 23 | 60.833 | KV453155.1 | 12169340 | 19-scf00458 | 19 |
| AX-158301150 | 23 | 60.833 | KV453155.1 | 12170579 | 19-scf00458 | 19 |
| AX-158301155 | 23 | 60.833 | KV453155.1 | 12174106 | 19-scf00458 | 19 |
| AX-157745628 | 23 | 60.833 | KV453155.1 | 12174680 | 19-scf00458 | 19 |
| AX-157745312 | 23 | 60.833 | KV453155.1 | 12175944 | 19-scf00458 | 19 |
| AX-158301157 | 23 | 60.833 | KV453155.1 | 12178694 | 19-scf00458 | 19 |
| AX-157746285 | 23 | 60.833 | KV453155.1 | 12179578 | 19-scf00458 | 19 |
| AX-157746987 | 23 | 60.833 | KV453155.1 | 12182555 | 19-scf00458 | 19 |
| AX-157860828 | 23 | 60.833 | KV453155.1 | 12185007 | 19-scf00458 | 19 |
| AX-158301160 | 23 | 60.833 | KV453155.1 | 12185837 | 19-scf00458 | 19 |
| AX-157746141 | 23 | 60.833 | KV453155.1 | 12186953 | 19-scf00458 | 19 |
| AX-158301163 | 23 | 60.833 | KV453155.1 | 12192490 | 19-scf00458 | 19 |
| AX-158301164 | 23 | 60.833 | KV453155.1 | 12192734 | 19-scf00458 | 19 |
| AX-158301168 | 23 | 60.833 | KV453155.1 | 12194900 | 19-scf00458 | 19 |
| AX-158301169 | 23 | 60.833 | KV453155.1 | 12198998 | 19-scf00458 | 19 |
| AX-158301170 | 23 | 60.833 | KV453155.1 | 12200456 | 19-scf00458 | 19 |
| AX-158301173 | 23 | 60.833 | KV453155.1 | 12203693 | 19-scf00458 | 19 |
| AX-158301175 | 23 | 60.833 | KV453155.1 | 12205770 | 19-scf00458 | 19 |
| AX-158301179 | 23 | 60.833 | KV453155.1 | 12208043 | 19-scf00458 | 19 |
| AX-158301181 | 23 | 60.833 | KV453155.1 | 12210545 | 19-scf00458 | 19 |
| AX-158301182 | 23 | 60.833 | KV453155.1 | 12210949 | 19-scf00458 | 19 |
| AX-158301183 | 23 | 60.833 | KV453155.1 | 12212043 | 19-scf00458 | 19 |
| AX-158301184 | 23 | 60.833 | KV453155.1 | 12212396 | 19-scf00458 | 19 |
| AX-158301186 | 23 | 60.833 | KV453155.1 | 12213286 | 19-scf00458 | 19 |
| AX-157753352 | 23 | 60.833 | KV453155.1 | 12214832 | 19-scf00458 | 19 |
| AX-157722658 | 23 | 60.833 | KV453155.1 | 12218193 | 19-scf00458 | 19 |

|              |    |        |             |          |             |    |
|--------------|----|--------|-------------|----------|-------------|----|
| AX-158301190 | 23 | 60.833 | KV453155.1  | 12219247 | 19-scf00458 | 19 |
| AX-158301191 | 23 | 60.833 | KV453155.1  | 12220595 | 19-scf00458 | 19 |
| AX-157722344 | 23 | 60.833 | KV453155.1  | 12223042 | 19-scf00458 | 19 |
| AX-158301196 | 23 | 60.833 | KV453155.1  | 12225269 | 19-scf00458 | 19 |
| AX-158301204 | 23 | 60.833 | KV453155.1  | 12235952 | 19-scf00458 | 19 |
| AX-158301209 | 23 | 60.833 | KV453155.1  | 12242547 | 19-scf00458 | 19 |
| AX-157710821 | 23 | 60.833 | KV453155.1  | 12247764 | 19-scf00458 | 19 |
| AX-158301217 | 23 | 60.833 | KV453155.1  | 12256099 | 19-scf00458 | 19 |
| AX-157846320 | 23 | 60.833 | KV453155.1  | 12258486 | 19-scf00458 | 19 |
| AX-158301222 | 23 | 60.833 | KV453155.1  | 12265210 | 19-scf00458 | 19 |
| AX-158301225 | 23 | 60.833 | KV453155.1  | 12269788 | 19-scf00458 | 19 |
| AX-157860831 | 23 | 60.833 | KV453155.1  | 12293236 | 19-scf00458 | 19 |
| AX-158301247 | 23 | 60.833 | KV453155.1  | 12301419 | 19-scf00458 | 19 |
| AX-158301253 | 23 | 60.833 | KV453155.1  | 12310509 | 19-scf00458 | 19 |
| AX-157705054 | 23 | 60.833 | 3ML01028435 | 531      | scf04042_1  | UN |
| AX-157711939 | 23 | 60.833 | 3ML01028435 | 945      | scf04042_1  | UN |
| AX-157705053 | 23 | 60.833 | 3ML01028435 | 1080     | scf04042_1  | UN |
| AX-158301207 | 23 | 60.891 | KV453155.1  | 12241421 | 19-scf00458 | 19 |
| AX-158301212 | 23 | 60.942 | KV453155.1  | 12245174 | 19-scf00458 | 19 |
| AX-158301213 | 23 | 60.942 | KV453155.1  | 12247530 | 19-scf00458 | 19 |
| AX-158301214 | 23 | 60.942 | KV453155.1  | 12248135 | 19-scf00458 | 19 |
| AX-158301138 | 23 | 61.051 | KV453155.1  | 12153293 | 19-scf00458 | 19 |
| AX-158301167 | 23 | 61.051 | KV453155.1  | 12194027 | 19-scf00458 | 19 |
| AX-158301219 | 23 | 61.051 | KV453155.1  | 12258573 | 19-scf00458 | 19 |
| AX-158417596 | 23 | 61.051 | KV453155.1  | 12263998 | 19-scf00458 | 19 |
| AX-158301224 | 23 | 61.051 | KV453155.1  | 12267283 | 19-scf00458 | 19 |
| AX-158301229 | 23 | 61.051 | KV453155.1  | 12276237 | 19-scf00458 | 19 |
| AX-158301230 | 23 | 61.051 | KV453155.1  | 12279713 | 19-scf00458 | 19 |
| AX-158301232 | 23 | 61.051 | KV453155.1  | 12281780 | 19-scf00458 | 19 |
| AX-158301233 | 23 | 61.051 | KV453155.1  | 12282264 | 19-scf00458 | 19 |
| AX-158301235 | 23 | 61.051 | KV453155.1  | 12283843 | 19-scf00458 | 19 |
| AX-158301236 | 23 | 61.051 | KV453155.1  | 12286665 | 19-scf00458 | 19 |
| AX-158301238 | 23 | 61.051 | KV453155.1  | 12290611 | 19-scf00458 | 19 |
| AX-158301242 | 23 | 61.051 | KV453155.1  | 12294410 | 19-scf00458 | 19 |
| AX-158301257 | 23 | 61.051 | KV453155.1  | 12319484 | 19-scf00458 | 19 |
| AX-158301246 | 23 | 61.256 | KV453155.1  | 12298970 | 19-scf00458 | 19 |
| AX-158301251 | 23 | 61.284 | KV453155.1  | 12309060 | 19-scf00458 | 19 |
| AX-158301256 | 23 | 61.488 | KV453155.1  | 12318292 | 19-scf00458 | 19 |
| AX-158301262 | 23 | 61.488 | KV453155.1  | 12323785 | 19-scf00458 | 19 |
| AX-158417599 | 23 | 61.488 | KV453155.1  | 12323918 | 19-scf00458 | 19 |
| AX-158301263 | 23 | 61.488 | KV453155.1  | 12325727 | 19-scf00458 | 19 |
| AX-157724544 | 23 | 61.488 | KV453155.1  | 12329908 | 19-scf00458 | 19 |
| AX-157846324 | 23 | 61.695 | KV453155.1  | 12315727 | 19-scf00458 | 19 |
| AX-158301270 | 23 | 61.695 | KV453155.1  | 12345253 | 19-scf00458 | 19 |
| AX-157713496 | 23 | 61.695 | KV453155.1  | 12346226 | 19-scf00458 | 19 |
| AX-157748038 | 23 | 61.695 | KV453155.1  | 12358145 | 19-scf00458 | 19 |
| AX-158301278 | 23 | 61.695 | KV453155.1  | 12361306 | 19-scf00458 | 19 |
| AX-158301271 | 23 | 61.706 | KV453155.1  | 12346688 | 19-scf00458 | 19 |
| AX-157723743 | 23 | 61.719 | KV453155.1  | 12291438 | 19-scf00458 | 19 |
| AX-158301258 | 23 | 61.719 | KV453155.1  | 12319877 | 19-scf00458 | 19 |
| AX-158301264 | 23 | 61.719 | KV453155.1  | 12326451 | 19-scf00458 | 19 |

|              |    |        |            |          |             |    |
|--------------|----|--------|------------|----------|-------------|----|
| AX-157714089 | 23 | 61.719 | KV453155.1 | 12337486 | 19-scf00458 | 19 |
| AX-158301272 | 23 | 61.719 | KV453155.1 | 12346894 | 19-scf00458 | 19 |
| AX-157708878 | 23 | 61.719 | KV453155.1 | 12350683 | 19-scf00458 | 19 |
| AX-158301274 | 23 | 61.719 | KV453155.1 | 12352371 | 19-scf00458 | 19 |
| AX-158301277 | 23 | 61.719 | KV453155.1 | 12353910 | 19-scf00458 | 19 |
| AX-158417600 | 23 | 61.719 | KV453155.1 | 12355842 | 19-scf00458 | 19 |
| AX-157846326 | 23 | 61.719 | KV453155.1 | 12361637 | 19-scf00458 | 19 |
| AX-157846327 | 23 | 61.719 | KV453155.1 | 12361688 | 19-scf00458 | 19 |
| AX-158301279 | 23 | 61.719 | KV453155.1 | 12362954 | 19-scf00458 | 19 |
| AX-157846328 | 23 | 61.719 | KV453155.1 | 12367837 | 19-scf00458 | 19 |
| AX-158301283 | 23 | 61.719 | KV453155.1 | 12368124 | 19-scf00458 | 19 |
| AX-157846329 | 23 | 61.719 | KV453155.1 | 12371086 | 19-scf00458 | 19 |
| AX-158301293 | 23 | 61.719 | KV453155.1 | 12381048 | 19-scf00458 | 19 |
| AX-158301314 | 23 | 61.719 | KV453155.1 | 12416979 | 19-scf00458 | 19 |
| AX-158301292 | 23 | 61.925 | KV453155.1 | 12380304 | 19-scf00458 | 19 |
| AX-158301296 | 23 | 61.955 | KV453155.1 | 12385321 | 19-scf00458 | 19 |
| AX-157751705 | 23 | 61.989 | KV453155.1 | 12387506 | 19-scf00458 | 19 |
| AX-157715341 | 23 | 62.021 | KV453155.1 | 12388682 | 19-scf00458 | 19 |
| AX-158301216 | 23 | 62.034 | KV453155.1 | 12250530 | 19-scf00458 | 19 |
| AX-158301298 | 23 | 62.034 | KV453155.1 | 12389484 | 19-scf00458 | 19 |
| AX-158301300 | 23 | 62.034 | KV453155.1 | 12391491 | 19-scf00458 | 19 |
| AX-157720422 | 23 | 62.034 | KV453155.1 | 12395448 | 19-scf00458 | 19 |
| AX-157846331 | 23 | 62.034 | KV453155.1 | 12395908 | 19-scf00458 | 19 |
| AX-158301306 | 23 | 62.034 | KV453155.1 | 12398414 | 19-scf00458 | 19 |
| AX-158301307 | 23 | 62.034 | KV453155.1 | 12398853 | 19-scf00458 | 19 |
| AX-158301308 | 23 | 62.034 | KV453155.1 | 12400775 | 19-scf00458 | 19 |
| AX-158301309 | 23 | 62.034 | KV453155.1 | 12401833 | 19-scf00458 | 19 |
| AX-158301311 | 23 | 62.034 | KV453155.1 | 12406379 | 19-scf00458 | 19 |
| AX-158301312 | 23 | 62.034 | KV453155.1 | 12407028 | 19-scf00458 | 19 |
| AX-158301322 | 23 | 62.034 | KV453155.1 | 12430621 | 19-scf00458 | 19 |
| AX-158301315 | 23 | 62.249 | KV453155.1 | 12418781 | 19-scf00458 | 19 |
| AX-158301310 | 23 | 62.472 | KV453155.1 | 12402927 | 19-scf00458 | 19 |
| AX-157740147 | 23 | 62.472 | KV453155.1 | 12420557 | 19-scf00458 | 19 |
| AX-158301317 | 23 | 62.472 | KV453155.1 | 12422691 | 19-scf00458 | 19 |
| AX-158381315 | 23 | 62.472 | KV453155.1 | 12422791 | 19-scf00458 | 19 |
| AX-158301318 | 23 | 62.472 | KV453155.1 | 12425126 | 19-scf00458 | 19 |
| AX-158301319 | 23 | 62.472 | KV453155.1 | 12425666 | 19-scf00458 | 19 |
| AX-158301320 | 23 | 62.472 | KV453155.1 | 12426221 | 19-scf00458 | 19 |
| AX-158301321 | 23 | 62.472 | KV453155.1 | 12430120 | 19-scf00458 | 19 |
| AX-158301326 | 23 | 62.472 | KV453155.1 | 12435210 | 19-scf00458 | 19 |
| AX-158301327 | 23 | 62.472 | KV453155.1 | 12438573 | 19-scf00458 | 19 |
| AX-158301328 | 23 | 62.472 | KV453155.1 | 12440348 | 19-scf00458 | 19 |
| AX-158301329 | 23 | 62.472 | KV453155.1 | 12441145 | 19-scf00458 | 19 |
| AX-158301332 | 23 | 62.908 | KV453155.1 | 12446593 | 19-scf00458 | 19 |
| AX-158301334 | 23 | 62.908 | KV453155.1 | 12449360 | 19-scf00458 | 19 |
| AX-158301336 | 23 | 62.908 | KV453155.1 | 12454765 | 19-scf00458 | 19 |
| AX-158301337 | 23 | 62.908 | KV453155.1 | 12457525 | 19-scf00458 | 19 |
| AX-158301338 | 23 | 62.908 | KV453155.1 | 12458067 | 19-scf00458 | 19 |
| AX-157720550 | 23 | 62.908 | KV453155.1 | 12458999 | 19-scf00458 | 19 |
| AX-158301339 | 23 | 62.908 | KV453155.1 | 12465571 | 19-scf00458 | 19 |
| AX-158301340 | 23 | 62.908 | KV453155.1 | 12466064 | 19-scf00458 | 19 |

|              |    |        |            |          |             |    |
|--------------|----|--------|------------|----------|-------------|----|
| AX-157727527 | 23 | 62.908 | KV453155.1 | 12469010 | 19-scf00458 | 19 |
| AX-157746552 | 23 | 62.908 | KV453155.1 | 12474127 | 19-scf00458 | 19 |
| AX-157757082 | 23 | 63.018 | KV453155.1 | 12480098 | 19-scf00458 | 19 |
| AX-158301342 | 23 | 63.018 | KV453155.1 | 12480885 | 19-scf00458 | 19 |
| AX-158301344 | 23 | 63.018 | KV453155.1 | 12481755 | 19-scf00458 | 19 |
| AX-158301330 | 23 | 63.127 | KV453155.1 | 12445275 | 19-scf00458 | 19 |
| AX-157742811 | 23 | 63.127 | KV453155.1 | 12482293 | 19-scf00458 | 19 |
| AX-158301345 | 23 | 63.127 | KV453155.1 | 12482455 | 19-scf00458 | 19 |
| AX-158301346 | 23 | 63.127 | KV453155.1 | 12483523 | 19-scf00458 | 19 |
| AX-158301348 | 23 | 63.127 | KV453155.1 | 12484450 | 19-scf00458 | 19 |
| AX-157709740 | 23 | 63.127 | KV453155.1 | 12485230 | 19-scf00458 | 19 |
| AX-158301351 | 23 | 63.127 | KV453155.1 | 12487844 | 19-scf00458 | 19 |
| AX-158301352 | 23 | 63.127 | KV453155.1 | 12488231 | 19-scf00458 | 19 |
| AX-158301353 | 23 | 63.243 | KV453155.1 | 12488850 | 19-scf00458 | 19 |
| AX-158301354 | 23 | 63.345 | KV453155.1 | 12490270 | 19-scf00458 | 19 |
| AX-158301355 | 23 | 63.345 | KV453155.1 | 12491450 | 19-scf00458 | 19 |
| AX-157754895 | 23 | 63.345 | KV453155.1 | 12495322 | 19-scf00458 | 19 |
| AX-158301357 | 23 | 63.345 | KV453155.1 | 12495497 | 19-scf00458 | 19 |
| AX-158301374 | 23 | 63.345 | KV453155.1 | 12521562 | 19-scf00458 | 19 |
| AX-158301358 | 23 | 63.455 | KV453155.1 | 12500860 | 19-scf00458 | 19 |
| AX-158301359 | 23 | 63.455 | KV453155.1 | 12501952 | 19-scf00458 | 19 |
| AX-158301360 | 23 | 63.455 | KV453155.1 | 12502775 | 19-scf00458 | 19 |
| AX-158301365 | 23 | 63.455 | KV453155.1 | 12506845 | 19-scf00458 | 19 |
| AX-157747120 | 23 | 63.455 | KV453155.1 | 12506971 | 19-scf00458 | 19 |
| AX-157746883 | 23 | 63.455 | KV453155.1 | 12508096 | 19-scf00458 | 19 |
| AX-157738559 | 23 | 63.455 | KV453155.1 | 12508569 | 19-scf00458 | 19 |
| AX-158301366 | 23 | 63.455 | KV453155.1 | 12509597 | 19-scf00458 | 19 |
| AX-158301367 | 23 | 63.455 | KV453155.1 | 12512074 | 19-scf00458 | 19 |
| AX-158301369 | 23 | 63.455 | KV453155.1 | 12513012 | 19-scf00458 | 19 |
| AX-158301395 | 23 | 63.455 | KV453155.1 | 12561242 | 19-scf00458 | 19 |
| AX-158301376 | 23 | 63.627 | KV453155.1 | 12527723 | 19-scf00458 | 19 |
| AX-158301380 | 23 | 63.782 | KV453155.1 | 12535291 | 19-scf00458 | 19 |
| AX-158301381 | 23 | 63.782 | KV453155.1 | 12536904 | 19-scf00458 | 19 |
| AX-158301382 | 23 | 63.782 | KV453155.1 | 12539097 | 19-scf00458 | 19 |
| AX-157846335 | 23 | 63.782 | KV453155.1 | 12539497 | 19-scf00458 | 19 |
| AX-158301383 | 23 | 63.782 | KV453155.1 | 12540729 | 19-scf00458 | 19 |
| AX-158301384 | 23 | 63.782 | KV453155.1 | 12543971 | 19-scf00458 | 19 |
| AX-158301385 | 23 | 63.782 | KV453155.1 | 12544439 | 19-scf00458 | 19 |
| AX-157724377 | 23 | 63.782 | KV453155.1 | 12545214 | 19-scf00458 | 19 |
| AX-157846337 | 23 | 63.782 | KV453155.1 | 12548664 | 19-scf00458 | 19 |
| AX-158301388 | 23 | 63.782 | KV453155.1 | 12549941 | 19-scf00458 | 19 |
| AX-158301391 | 23 | 63.782 | KV453155.1 | 12554424 | 19-scf00458 | 19 |
| AX-157744364 | 23 | 63.782 | KV453155.1 | 12557975 | 19-scf00458 | 19 |
| AX-158301401 | 23 | 63.782 | KV453155.1 | 12570685 | 19-scf00458 | 19 |
| AX-158301430 | 23 | 63.782 | KV453155.1 | 12609659 | 19-scf00458 | 19 |
| AX-158301392 | 23 | 63.857 | KV453155.1 | 12555808 | 19-scf00458 | 19 |
| AX-158301394 | 23 | 63.897 | KV453155.1 | 12560082 | 19-scf00458 | 19 |
| AX-158381317 | 23 | 63.897 | KV453155.1 | 12606951 | 19-scf00458 | 19 |
| AX-157719562 | 23 | 63.897 | KV453155.1 | 12611758 | 19-scf00458 | 19 |
| AX-158301398 | 23 | 63.946 | KV453155.1 | 12564914 | 19-scf00458 | 19 |
| AX-158301399 | 23 | 63.946 | KV453155.1 | 12566417 | 19-scf00458 | 19 |

|              |    |        |            |          |             |    |
|--------------|----|--------|------------|----------|-------------|----|
| AX-158301400 | 23 | 63.946 | KV453155.1 | 12569731 | 19-scf00458 | 19 |
| AX-158301402 | 23 | 64.11  | KV453155.1 | 12571049 | 19-scf00458 | 19 |
| AX-158301403 | 23 | 64.11  | KV453155.1 | 12571536 | 19-scf00458 | 19 |
| AX-158301405 | 23 | 64.11  | KV453155.1 | 12573207 | 19-scf00458 | 19 |
| AX-157773369 | 23 | 64.11  | KV453155.1 | 12574398 | 19-scf00458 | 19 |
| AX-158301406 | 23 | 64.219 | KV453155.1 | 12575180 | 19-scf00458 | 19 |
| AX-158301407 | 23 | 64.219 | KV453155.1 | 12576211 | 19-scf00458 | 19 |
| AX-158301408 | 23 | 64.219 | KV453155.1 | 12576864 | 19-scf00458 | 19 |
| AX-158301411 | 23 | 64.219 | KV453155.1 | 12578454 | 19-scf00458 | 19 |
| AX-157751825 | 23 | 64.219 | KV453155.1 | 12580968 | 19-scf00458 | 19 |
| AX-158301413 | 23 | 64.219 | KV453155.1 | 12581525 | 19-scf00458 | 19 |
| AX-158301414 | 23 | 64.219 | KV453155.1 | 12582146 | 19-scf00458 | 19 |
| AX-157772481 | 23 | 64.22  | KV453155.1 | 12583867 | 19-scf00458 | 19 |
| AX-158301419 | 23 | 64.22  | KV453155.1 | 12587943 | 19-scf00458 | 19 |
| AX-157709438 | 23 | 64.22  | KV453155.1 | 12589562 | 19-scf00458 | 19 |
| AX-157754363 | 23 | 64.22  | KV453155.1 | 12596678 | 19-scf00458 | 19 |
| AX-158301422 | 23 | 64.22  | KV453155.1 | 12597122 | 19-scf00458 | 19 |
| AX-158301424 | 23 | 64.22  | KV453155.1 | 12599548 | 19-scf00458 | 19 |
| AX-158301426 | 23 | 64.221 | KV453155.1 | 12606197 | 19-scf00458 | 19 |
| AX-158301428 | 23 | 64.608 | KV453155.1 | 12608639 | 19-scf00458 | 19 |
| AX-157714571 | 23 | 64.621 | KV453155.1 | 12617330 | 19-scf00458 | 19 |
| AX-158301437 | 23 | 64.876 | KV453155.1 | 12623557 | 19-scf00458 | 19 |
| AX-158301438 | 23 | 64.876 | KV453155.1 | 12624579 | 19-scf00458 | 19 |
| AX-157846333 | 23 | 64.985 | KV453155.1 | 12523145 | 19-scf00458 | 19 |
| AX-157743392 | 23 | 64.985 | KV453155.1 | 12529023 | 19-scf00458 | 19 |
| AX-157860836 | 23 | 64.985 | KV453155.1 | 12610379 | 19-scf00458 | 19 |
| AX-158301445 | 23 | 64.985 | KV453155.1 | 12632652 | 19-scf00458 | 19 |
| AX-158301446 | 23 | 64.985 | KV453155.1 | 12633765 | 19-scf00458 | 19 |
| AX-158301447 | 23 | 64.985 | KV453155.1 | 12634457 | 19-scf00458 | 19 |
| AX-157888139 | 23 | 64.985 | KV453155.1 | 12635188 | 19-scf00458 | 19 |
| AX-158301458 | 23 | 64.985 | KV453155.1 | 12644204 | 19-scf00458 | 19 |
| AX-158301460 | 23 | 64.985 | KV453155.1 | 12646018 | 19-scf00458 | 19 |
| AX-158301443 | 23 | 65.187 | KV453155.1 | 12629801 | 19-scf00458 | 19 |
| AX-158301451 | 23 | 65.187 | KV453155.1 | 12636459 | 19-scf00458 | 19 |
| AX-157742510 | 23 | 65.199 | KV453155.1 | 12638168 | 19-scf00458 | 19 |
| AX-158301454 | 23 | 65.21  | KV453155.1 | 12640051 | 19-scf00458 | 19 |
| AX-157727584 | 23 | 65.223 | KV453155.1 | 12641783 | 19-scf00458 | 19 |
| AX-158301453 | 23 | 65.225 | KV453155.1 | 12639978 | 19-scf00458 | 19 |
| AX-158301459 | 23 | 65.225 | KV453155.1 | 12645155 | 19-scf00458 | 19 |
| AX-158301464 | 23 | 65.638 | KV453155.1 | 12651670 | 19-scf00458 | 19 |
| AX-158301466 | 23 | 65.641 | KV453155.1 | 12652608 | 19-scf00458 | 19 |
| AX-158301469 | 23 | 65.641 | KV453155.1 | 12656348 | 19-scf00458 | 19 |
| AX-158301470 | 23 | 65.641 | KV453155.1 | 12660895 | 19-scf00458 | 19 |
| AX-157760316 | 23 | 65.641 | KV453155.1 | 12713098 | 19-scf00458 | 19 |
| AX-158301471 | 23 | 65.75  | KV453155.1 | 12664225 | 19-scf00458 | 19 |
| AX-158301473 | 23 | 65.75  | KV453155.1 | 12666068 | 19-scf00458 | 19 |
| AX-158301475 | 23 | 65.75  | KV453155.1 | 12668974 | 19-scf00458 | 19 |
| AX-158301474 | 23 | 65.751 | KV453155.1 | 12667694 | 19-scf00458 | 19 |
| AX-158301478 | 23 | 65.839 | KV453155.1 | 12674090 | 19-scf00458 | 19 |
| AX-157880951 | 23 | 65.989 | KV453155.1 | 12676809 | 19-scf00458 | 19 |
| AX-158301482 | 23 | 66.243 | KV453155.1 | 12680314 | 19-scf00458 | 19 |

|              |    |        |            |          |             |    |
|--------------|----|--------|------------|----------|-------------|----|
| AX-157846343 | 23 | 66.243 | KV453155.1 | 12680380 | 19-scf00458 | 19 |
| AX-158301476 | 23 | 66.407 | KV453155.1 | 12672309 | 19-scf00458 | 19 |
| AX-158301477 | 23 | 66.407 | KV453155.1 | 12672720 | 19-scf00458 | 19 |
| AX-158301483 | 23 | 66.407 | KV453155.1 | 12680848 | 19-scf00458 | 19 |
| AX-157846344 | 23 | 66.407 | KV453155.1 | 12685756 | 19-scf00458 | 19 |
| AX-157846346 | 23 | 66.407 | KV453155.1 | 12691339 | 19-scf00458 | 19 |
| AX-158301502 | 23 | 66.407 | KV453155.1 | 12727746 | 19-scf00458 | 19 |
| AX-158301503 | 23 | 66.407 | KV453155.1 | 12728157 | 19-scf00458 | 19 |
| AX-158301505 | 23 | 66.407 | KV453155.1 | 12729783 | 19-scf00458 | 19 |
| AX-157846348 | 23 | 66.407 | KV453155.1 | 12730354 | 19-scf00458 | 19 |
| AX-157739214 | 23 | 66.407 | KV453155.1 | 12731391 | 19-scf00458 | 19 |
| AX-157846349 | 23 | 66.407 | KV453155.1 | 12731438 | 19-scf00458 | 19 |
| AX-157772649 | 23 | 66.407 | KV453155.1 | 12732167 | 19-scf00458 | 19 |
| AX-158301508 | 23 | 66.407 | KV453155.1 | 12733844 | 19-scf00458 | 19 |
| AX-158301511 | 23 | 66.407 | KV453155.1 | 12735412 | 19-scf00458 | 19 |
| AX-158301512 | 23 | 66.407 | KV453155.1 | 12736078 | 19-scf00458 | 19 |
| AX-157846350 | 23 | 66.407 | KV453155.1 | 12737704 | 19-scf00458 | 19 |
| AX-157846351 | 23 | 66.407 | KV453155.1 | 12738194 | 19-scf00458 | 19 |
| AX-158301514 | 23 | 66.407 | KV453155.1 | 12741349 | 19-scf00458 | 19 |
| AX-157775848 | 23 | 66.407 | KV453155.1 | 12741702 | 19-scf00458 | 19 |
| AX-157846353 | 23 | 66.407 | KV453155.1 | 12742532 | 19-scf00458 | 19 |
| AX-157752782 | 23 | 66.407 | KV453155.1 | 12743507 | 19-scf00458 | 19 |
| AX-158419691 | 23 | 66.735 | KV453155.1 | 12749735 | 19-scf00458 | 19 |
| AX-158301519 | 23 | 66.735 | KV453155.1 | 12753594 | 19-scf00458 | 19 |
| AX-158301520 | 23 | 66.735 | KV453155.1 | 12754927 | 19-scf00458 | 19 |
| AX-158301522 | 23 | 66.735 | KV453155.1 | 12756126 | 19-scf00458 | 19 |
| AX-158301524 | 23 | 66.735 | KV453155.1 | 12757299 | 19-scf00458 | 19 |
| AX-158301528 | 23 | 66.735 | KV453155.1 | 12767789 | 19-scf00458 | 19 |
| AX-158301529 | 23 | 66.899 | KV453155.1 | 12768541 | 19-scf00458 | 19 |
| AX-157846355 | 23 | 66.899 | KV453155.1 | 12773556 | 19-scf00458 | 19 |
| AX-158301532 | 23 | 66.899 | KV453155.1 | 12773706 | 19-scf00458 | 19 |
| AX-157772480 | 23 | 67.063 | KV453155.1 | 12760409 | 19-scf00458 | 19 |
| AX-157867664 | 23 | 67.063 | KV453155.1 | 12781965 | 19-scf00458 | 19 |
| AX-158301533 | 23 | 67.063 | KV453155.1 | 12783115 | 19-scf00458 | 19 |
| AX-158301534 | 23 | 67.063 | KV453155.1 | 12783469 | 19-scf00458 | 19 |
| AX-158301535 | 23 | 67.063 | KV453155.1 | 12784801 | 19-scf00458 | 19 |
| AX-157714645 | 23 | 67.063 | KV453155.1 | 12786603 | 19-scf00458 | 19 |
| AX-157846356 | 23 | 67.063 | KV453155.1 | 12793400 | 19-scf00458 | 19 |
| AX-158301539 | 23 | 67.063 | KV453155.1 | 12797148 | 19-scf00458 | 19 |
| AX-158301542 | 23 | 67.063 | KV453155.1 | 12806915 | 19-scf00458 | 19 |
| AX-158301546 | 23 | 67.063 | KV453155.1 | 12812098 | 19-scf00458 | 19 |
| AX-158301544 | 23 | 67.341 | KV453155.1 | 12809584 | 19-scf00458 | 19 |
| AX-157715081 | 23 | 67.343 | KV453155.1 | 12813740 | 19-scf00458 | 19 |
| AX-158301549 | 23 | 67.599 | KV453155.1 | 12816928 | 19-scf00458 | 19 |
| AX-158301550 | 23 | 67.898 | KV453155.1 | 12817751 | 19-scf00458 | 19 |
| AX-158301552 | 23 | 67.898 | KV453155.1 | 12821210 | 19-scf00458 | 19 |
| AX-158301553 | 23 | 67.926 | KV453155.1 | 12821696 | 19-scf00458 | 19 |
| AX-157726444 | 23 | 67.926 | KV453155.1 | 12904573 | 19-scf00458 | 19 |
| AX-158301560 | 23 | 68.037 | KV453155.1 | 12831509 | 19-scf00458 | 19 |
| AX-157758558 | 23 | 68.089 | KV453155.1 | 12837211 | 19-scf00458 | 19 |
| AX-157846357 | 23 | 68.135 | KV453155.1 | 12838229 | 19-scf00458 | 19 |

|              |    |        |            |          |             |    |
|--------------|----|--------|------------|----------|-------------|----|
| AX-158301568 | 23 | 68.135 | KV453155.1 | 12843095 | 19-scf00458 | 19 |
| AX-158301572 | 23 | 68.135 | KV453155.1 | 12848879 | 19-scf00458 | 19 |
| AX-158301564 | 23 | 68.176 | KV453155.1 | 12838460 | 19-scf00458 | 19 |
| AX-158301565 | 23 | 68.176 | KV453155.1 | 12838816 | 19-scf00458 | 19 |
| AX-158301566 | 23 | 68.178 | KV453155.1 | 12839253 | 19-scf00458 | 19 |
| AX-158301570 | 23 | 68.178 | KV453155.1 | 12843900 | 19-scf00458 | 19 |
| AX-157725939 | 23 | 68.594 | KV453155.1 | 12830397 | 19-scf00458 | 19 |
| AX-158381319 | 23 | 68.594 | KV453155.1 | 12843746 | 19-scf00458 | 19 |
| AX-158301586 | 23 | 68.594 | KV453155.1 | 12866028 | 19-scf00458 | 19 |
| AX-157846359 | 23 | 68.594 | KV453155.1 | 12868514 | 19-scf00458 | 19 |
| AX-158301589 | 23 | 68.594 | KV453155.1 | 12868681 | 19-scf00458 | 19 |
| AX-158301592 | 23 | 68.594 | KV453155.1 | 12873795 | 19-scf00458 | 19 |
| AX-158301593 | 23 | 68.813 | KV453155.1 | 12875630 | 19-scf00458 | 19 |
| AX-158301594 | 23 | 68.813 | KV453155.1 | 12876130 | 19-scf00458 | 19 |
| AX-158417610 | 23 | 68.813 | KV453155.1 | 12877460 | 19-scf00458 | 19 |
| AX-158301596 | 23 | 68.813 | KV453155.1 | 12877724 | 19-scf00458 | 19 |
| AX-158301598 | 23 | 69.032 | KV453155.1 | 12883509 | 19-scf00458 | 19 |
| AX-157846360 | 23 | 69.25  | KV453155.1 | 12890270 | 19-scf00458 | 19 |
| AX-158301600 | 23 | 69.25  | KV453155.1 | 12891865 | 19-scf00458 | 19 |
| AX-158301601 | 23 | 69.25  | KV453155.1 | 12894230 | 19-scf00458 | 19 |
| AX-158301607 | 23 | 69.25  | KV453155.1 | 12901232 | 19-scf00458 | 19 |
| AX-158301603 | 23 | 69.36  | KV453155.1 | 12897110 | 19-scf00458 | 19 |
| AX-158301604 | 23 | 69.36  | KV453155.1 | 12898040 | 19-scf00458 | 19 |
| AX-158301605 | 23 | 69.36  | KV453155.1 | 12899985 | 19-scf00458 | 19 |
| AX-158301606 | 23 | 69.469 | KV453155.1 | 12900622 | 19-scf00458 | 19 |
| AX-157749742 | 23 | 69.469 | KV453155.1 | 12902243 | 19-scf00458 | 19 |
| AX-157727029 | 23 | 69.666 | KV453155.1 | 12902975 | 19-scf00458 | 19 |
| AX-158301611 | 23 | 69.833 | KV453155.1 | 12907963 | 19-scf00458 | 19 |
| AX-157720098 | 23 | 69.833 | KV453155.1 | 12909102 | 19-scf00458 | 19 |
| AX-158301614 | 23 | 69.894 | KV453155.1 | 12914807 | 19-scf00458 | 19 |
| AX-158301618 | 23 | 69.894 | KV453155.1 | 12917233 | 19-scf00458 | 19 |
| AX-158301616 | 23 | 70.016 | KV453155.1 | 12916065 | 19-scf00458 | 19 |
| AX-158301619 | 23 | 70.016 | KV453155.1 | 12917739 | 19-scf00458 | 19 |
| AX-158301621 | 23 | 70.016 | KV453155.1 | 12921255 | 19-scf00458 | 19 |
| AX-158301623 | 23 | 70.016 | KV453155.1 | 12924349 | 19-scf00458 | 19 |
| AX-158301627 | 23 | 70.097 | KV453155.1 | 12927261 | 19-scf00458 | 19 |
| AX-157756742 | 23 | 70.18  | KV453155.1 | 12939749 | 19-scf00458 | 19 |
| AX-158301635 | 23 | 70.234 | KV453155.1 | 12944113 | 19-scf00458 | 19 |
| AX-157708383 | 23 | 70.234 | KV453155.1 | 12945239 | 19-scf00458 | 19 |
| AX-158301637 | 23 | 70.234 | KV453155.1 | 12945836 | 19-scf00458 | 19 |
| AX-157714414 | 23 | 70.234 | KV453155.1 | 12946260 | 19-scf00458 | 19 |
| AX-158301640 | 23 | 70.234 | KV453155.1 | 12947819 | 19-scf00458 | 19 |
| AX-158301644 | 23 | 70.234 | KV453155.1 | 12953278 | 19-scf00458 | 19 |
| AX-158301648 | 23 | 70.234 | KV453155.1 | 12956896 | 19-scf00458 | 19 |
| AX-157755185 | 23 | 70.263 | KV453155.1 | 12943443 | 19-scf00458 | 19 |
| AX-158301652 | 23 | 70.263 | KV453155.1 | 12962479 | 19-scf00458 | 19 |
| AX-157725067 | 23 | 70.292 | KV453155.1 | 12968958 | 19-scf00458 | 19 |
| AX-157846366 | 23 | 70.319 | KV453155.1 | 12970852 | 19-scf00458 | 19 |
| AX-157846370 | 23 | 70.319 | KV453155.1 | 13010873 | 19-scf00458 | 19 |
| AX-158301615 | 23 | 70.343 | KV453155.1 | 12915357 | 19-scf00458 | 19 |
| AX-157751042 | 23 | 70.343 | KV453155.1 | 12941489 | 19-scf00458 | 19 |

|              |    |        |            |          |             |    |
|--------------|----|--------|------------|----------|-------------|----|
| AX-157721118 | 23 | 70.343 | KV453155.1 | 12949008 | 19-scf00458 | 19 |
| AX-158301641 | 23 | 70.343 | KV453155.1 | 12949435 | 19-scf00458 | 19 |
| AX-158301649 | 23 | 70.343 | KV453155.1 | 12960227 | 19-scf00458 | 19 |
| AX-158301650 | 23 | 70.343 | KV453155.1 | 12960591 | 19-scf00458 | 19 |
| AX-158301651 | 23 | 70.343 | KV453155.1 | 12961350 | 19-scf00458 | 19 |
| AX-158301656 | 23 | 70.343 | KV453155.1 | 12967208 | 19-scf00458 | 19 |
| AX-158301664 | 23 | 70.343 | KV453155.1 | 12981505 | 19-scf00458 | 19 |
| AX-158301665 | 23 | 70.343 | KV453155.1 | 12982386 | 19-scf00458 | 19 |
| AX-158301667 | 23 | 70.343 | KV453155.1 | 12983989 | 19-scf00458 | 19 |
| AX-158301673 | 23 | 70.343 | KV453155.1 | 12989154 | 19-scf00458 | 19 |
| AX-158301674 | 23 | 70.343 | KV453155.1 | 12989794 | 19-scf00458 | 19 |
| AX-158301677 | 23 | 70.343 | KV453155.1 | 12991867 | 19-scf00458 | 19 |
| AX-158301678 | 23 | 70.343 | KV453155.1 | 12992546 | 19-scf00458 | 19 |
| AX-158301679 | 23 | 70.343 | KV453155.1 | 12993519 | 19-scf00458 | 19 |
| AX-158301682 | 23 | 70.343 | KV453155.1 | 12995833 | 19-scf00458 | 19 |
| AX-158301683 | 23 | 70.343 | KV453155.1 | 12996479 | 19-scf00458 | 19 |
| AX-158301684 | 23 | 70.343 | KV453155.1 | 12997276 | 19-scf00458 | 19 |
| AX-158301685 | 23 | 70.343 | KV453155.1 | 12998600 | 19-scf00458 | 19 |
| AX-158301687 | 23 | 70.343 | KV453155.1 | 12999854 | 19-scf00458 | 19 |
| AX-158301690 | 23 | 70.343 | KV453155.1 | 13004195 | 19-scf00458 | 19 |
| AX-158301691 | 23 | 70.343 | KV453155.1 | 13005795 | 19-scf00458 | 19 |
| AX-158301692 | 23 | 70.343 | KV453155.1 | 13006399 | 19-scf00458 | 19 |
| AX-158301693 | 23 | 70.343 | KV453155.1 | 13007065 | 19-scf00458 | 19 |
| AX-158301694 | 23 | 70.343 | KV453155.1 | 13007771 | 19-scf00458 | 19 |
| AX-157846371 | 23 | 70.343 | KV453155.1 | 13016725 | 19-scf00458 | 19 |
| AX-158301697 | 23 | 70.343 | KV453155.1 | 13017154 | 19-scf00458 | 19 |
| AX-158301698 | 23 | 70.343 | KV453155.1 | 13020714 | 19-scf00458 | 19 |
| AX-158301699 | 23 | 70.343 | KV453155.1 | 13021214 | 19-scf00458 | 19 |
| AX-157846373 | 23 | 70.343 | KV453155.1 | 13023265 | 19-scf00458 | 19 |
| AX-158301700 | 23 | 70.343 | KV453155.1 | 13024745 | 19-scf00458 | 19 |
| AX-158301701 | 23 | 70.343 | KV453155.1 | 13025280 | 19-scf00458 | 19 |
| AX-157860840 | 23 | 70.343 | KV453155.1 | 13027704 | 19-scf00458 | 19 |
| AX-158301702 | 23 | 70.343 | KV453155.1 | 13027769 | 19-scf00458 | 19 |
| AX-158301704 | 23 | 70.343 | KV453155.1 | 13028807 | 19-scf00458 | 19 |
| AX-158301712 | 23 | 70.343 | KV453155.1 | 13038692 | 19-scf00458 | 19 |
| AX-158417613 | 23 | 70.343 | KV453155.1 | 13041280 | 19-scf00458 | 19 |
| AX-158301711 | 23 | 70.562 | KV453155.1 | 13037139 | 19-scf00458 | 19 |
| AX-158301713 | 23 | 70.562 | KV453155.1 | 13039347 | 19-scf00458 | 19 |
| AX-158301716 | 23 | 70.562 | KV453155.1 | 13041016 | 19-scf00458 | 19 |
| AX-158301717 | 23 | 70.562 | KV453155.1 | 13041517 | 19-scf00458 | 19 |
| AX-158301654 | 23 | 70.78  | KV453155.1 | 12963820 | 19-scf00458 | 19 |
| AX-158301719 | 23 | 70.78  | KV453155.1 | 13043412 | 19-scf00458 | 19 |
| AX-158301720 | 23 | 70.78  | KV453155.1 | 13044051 | 19-scf00458 | 19 |
| AX-157723687 | 23 | 70.78  | KV453155.1 | 13048061 | 19-scf00458 | 19 |
| AX-157740705 | 23 | 70.78  | KV453155.1 | 13049051 | 19-scf00458 | 19 |
| AX-158301723 | 23 | 70.78  | KV453155.1 | 13050978 | 19-scf00458 | 19 |
| AX-158301724 | 23 | 70.78  | KV453155.1 | 13052001 | 19-scf00458 | 19 |
| AX-156582796 | 23 | 70.78  | KV453155.1 | 13057770 | 19-scf00458 | 19 |
| AX-158301728 | 23 | 70.78  | KV453155.1 | 13058592 | 19-scf00458 | 19 |
| AX-158301731 | 23 | 70.998 | KV453155.1 | 13062094 | 19-scf00458 | 19 |
| AX-158301732 | 23 | 70.998 | KV453155.1 | 13063512 | 19-scf00458 | 19 |



|              |    |        |            |          |             |    |
|--------------|----|--------|------------|----------|-------------|----|
| AX-158301735 | 23 | 70.998 | KV453155.1 | 13066996 | 19-scf00458 | 19 |
| AX-158301739 | 23 | 70.998 | KV453155.1 | 13070623 | 19-scf00458 | 19 |
| AX-158417615 | 23 | 70.998 | KV453155.1 | 13071236 | 19-scf00458 | 19 |
| AX-158301746 | 23 | 71.028 | KV453155.1 | 13078130 | 19-scf00458 | 19 |
| AX-158301748 | 23 | 71.654 | KV453155.1 | 13080442 | 19-scf00458 | 19 |
| AX-158301749 | 23 | 71.654 | KV453155.1 | 13082826 | 19-scf00458 | 19 |
| AX-158301750 | 23 | 71.654 | KV453155.1 | 13083161 | 19-scf00458 | 19 |
| AX-157846377 | 23 | 71.654 | KV453155.1 | 13084099 | 19-scf00458 | 19 |
| AX-157846378 | 23 | 71.654 | KV453155.1 | 13086408 | 19-scf00458 | 19 |
| AX-158301754 | 23 | 71.654 | KV453155.1 | 13089260 | 19-scf00458 | 19 |
| AX-158301755 | 23 | 71.654 | KV453155.1 | 13091897 | 19-scf00458 | 19 |
| AX-158301756 | 23 | 71.654 | KV453155.1 | 13092261 | 19-scf00458 | 19 |
| AX-158301761 | 23 | 71.654 | KV453155.1 | 13100870 | 19-scf00458 | 19 |
| AX-158301764 | 23 | 71.654 | KV453155.1 | 13108106 | 19-scf00458 | 19 |
| AX-158301770 | 23 | 71.654 | KV453155.1 | 13120414 | 19-scf00458 | 19 |
| AX-157880961 | 23 | 71.654 | KV453155.1 | 13133976 | 19-scf00458 | 19 |
| AX-157888142 | 23 | 71.654 | KV453155.1 | 13149846 | 19-scf00458 | 19 |
| AX-158301762 | 23 | 71.872 | KV453155.1 | 13104033 | 19-scf00458 | 19 |
| AX-158301763 | 23 | 71.872 | KV453155.1 | 13106788 | 19-scf00458 | 19 |
| AX-158301766 | 23 | 71.872 | KV453155.1 | 13109835 | 19-scf00458 | 19 |
| AX-157725267 | 23 | 71.872 | KV453155.1 | 13113770 | 19-scf00458 | 19 |
| AX-158301772 | 23 | 71.922 | KV453155.1 | 13123589 | 19-scf00458 | 19 |
| AX-158301773 | 23 | 71.981 | KV453155.1 | 13126224 | 19-scf00458 | 19 |
| AX-157888140 | 23 | 71.981 | KV453155.1 | 13127656 | 19-scf00458 | 19 |
| AX-157751085 | 23 | 71.981 | KV453155.1 | 13127692 | 19-scf00458 | 19 |
| AX-158301775 | 23 | 71.981 | KV453155.1 | 13129281 | 19-scf00458 | 19 |
| AX-158301778 | 23 | 71.981 | KV453155.1 | 13132117 | 19-scf00458 | 19 |
| AX-158301779 | 23 | 71.981 | KV453155.1 | 13132861 | 19-scf00458 | 19 |
| AX-158301780 | 23 | 71.981 | KV453155.1 | 13133713 | 19-scf00458 | 19 |
| AX-158301784 | 23 | 71.981 | KV453155.1 | 13136695 | 19-scf00458 | 19 |
| AX-158301786 | 23 | 71.981 | KV453155.1 | 13137936 | 19-scf00458 | 19 |
| AX-158301751 | 23 | 72.103 | KV453155.1 | 13084826 | 19-scf00458 | 19 |
| AX-158301752 | 23 | 72.103 | KV453155.1 | 13086187 | 19-scf00458 | 19 |
| AX-158301787 | 23 | 72.103 | KV453155.1 | 13138267 | 19-scf00458 | 19 |
| AX-158301788 | 23 | 72.103 | KV453155.1 | 13140623 | 19-scf00458 | 19 |
| AX-158301789 | 23 | 72.103 | KV453155.1 | 13140884 | 19-scf00458 | 19 |
| AX-158301791 | 23 | 72.103 | KV453155.1 | 13144729 | 19-scf00458 | 19 |
| AX-158301792 | 23 | 72.103 | KV453155.1 | 13145090 | 19-scf00458 | 19 |
| AX-158301793 | 23 | 72.378 | KV453155.1 | 13147021 | 19-scf00458 | 19 |
| AX-158301736 | 23 | 72.382 | KV453155.1 | 13067991 | 19-scf00458 | 19 |
| AX-158301794 | 23 | 72.382 | KV453155.1 | 13148729 | 19-scf00458 | 19 |
| AX-158301809 | 23 | 73.075 | KV453155.1 | 13167820 | 19-scf00458 | 19 |
| AX-158301810 | 23 | 73.075 | KV453155.1 | 13168184 | 19-scf00458 | 19 |
| AX-157772185 | 23 | 73.075 | KV453155.1 | 13168849 | 19-scf00458 | 19 |
| AX-158301811 | 23 | 73.075 | KV453155.1 | 13169997 | 19-scf00458 | 19 |
| AX-158301812 | 23 | 73.075 | KV453155.1 | 13170897 | 19-scf00458 | 19 |
| AX-158301813 | 23 | 73.075 | KV453155.1 | 13171703 | 19-scf00458 | 19 |
| AX-158301814 | 23 | 73.075 | KV453155.1 | 13174044 | 19-scf00458 | 19 |
| AX-158301815 | 23 | 73.075 | KV453155.1 | 13174262 | 19-scf00458 | 19 |
| AX-158301816 | 23 | 73.075 | KV453155.1 | 13175250 | 19-scf00458 | 19 |
| AX-158301817 | 23 | 73.075 | KV453155.1 | 13177102 | 19-scf00458 | 19 |

|              |    |        |            |          |             |    |
|--------------|----|--------|------------|----------|-------------|----|
| AX-158301831 | 23 | 73.075 | KV453155.1 | 13192526 | 19-scf00458 | 19 |
| AX-158301855 | 23 | 73.075 | KV453155.1 | 13223742 | 19-scf00458 | 19 |
| AX-158301820 | 23 | 73.293 | KV453155.1 | 13181037 | 19-scf00458 | 19 |
| AX-158301823 | 23 | 73.293 | KV453155.1 | 13183040 | 19-scf00458 | 19 |
| AX-158301824 | 23 | 73.293 | KV453155.1 | 13183532 | 19-scf00458 | 19 |
| AX-158301827 | 23 | 73.512 | KV453155.1 | 13188108 | 19-scf00458 | 19 |
| AX-158301828 | 23 | 73.621 | KV453155.1 | 13189893 | 19-scf00458 | 19 |
| AX-158301829 | 23 | 73.621 | KV453155.1 | 13190324 | 19-scf00458 | 19 |
| AX-158301834 | 23 | 73.621 | KV453155.1 | 13195820 | 19-scf00458 | 19 |
| AX-158301835 | 23 | 73.621 | KV453155.1 | 13196330 | 19-scf00458 | 19 |
| AX-158301837 | 23 | 73.621 | KV453155.1 | 13198008 | 19-scf00458 | 19 |
| AX-158301838 | 23 | 73.621 | KV453155.1 | 13198553 | 19-scf00458 | 19 |
| AX-158301840 | 23 | 73.621 | KV453155.1 | 13201543 | 19-scf00458 | 19 |
| AX-158301841 | 23 | 73.621 | KV453155.1 | 13202404 | 19-scf00458 | 19 |
| AX-158301842 | 23 | 73.621 | KV453155.1 | 13203237 | 19-scf00458 | 19 |
| AX-158301844 | 23 | 73.621 | KV453155.1 | 13208969 | 19-scf00458 | 19 |
| AX-158301845 | 23 | 73.621 | KV453155.1 | 13210077 | 19-scf00458 | 19 |
| AX-157770888 | 23 | 73.621 | KV453155.1 | 13210741 | 19-scf00458 | 19 |
| AX-158301846 | 23 | 73.621 | KV453155.1 | 13210954 | 19-scf00458 | 19 |
| AX-158301847 | 23 | 73.621 | KV453155.1 | 13211747 | 19-scf00458 | 19 |
| AX-157846383 | 23 | 73.621 | KV453155.1 | 13212646 | 19-scf00458 | 19 |
| AX-157846384 | 23 | 73.621 | KV453155.1 | 13212931 | 19-scf00458 | 19 |
| AX-158301893 | 23 | 73.621 | KV453155.1 | 13286185 | 19-scf00458 | 19 |
| AX-157860841 | 23 | 73.73  | KV453155.1 | 13214090 | 19-scf00458 | 19 |
| AX-158301850 | 23 | 73.73  | KV453155.1 | 13216688 | 19-scf00458 | 19 |
| AX-158301853 | 23 | 73.73  | KV453155.1 | 13222706 | 19-scf00458 | 19 |
| AX-158301856 | 23 | 73.73  | KV453155.1 | 13226274 | 19-scf00458 | 19 |
| AX-157846386 | 23 | 73.73  | KV453155.1 | 13231022 | 19-scf00458 | 19 |
| AX-157750196 | 23 | 73.916 | KV453155.1 | 13241353 | 19-scf00458 | 19 |
| AX-158301861 | 23 | 74.058 | KV453155.1 | 13243101 | 19-scf00458 | 19 |
| AX-158301865 | 23 | 74.058 | KV453155.1 | 13247566 | 19-scf00458 | 19 |
| AX-157749431 | 23 | 74.058 | KV453155.1 | 13254066 | 19-scf00458 | 19 |
| AX-158301873 | 23 | 74.058 | KV453155.1 | 13260213 | 19-scf00458 | 19 |
| AX-158301875 | 23 | 74.058 | KV453155.1 | 13261074 | 19-scf00458 | 19 |
| AX-158301878 | 23 | 74.058 | KV453155.1 | 13263470 | 19-scf00458 | 19 |
| AX-158301851 | 23 | 74.168 | KV453155.1 | 13218766 | 19-scf00458 | 19 |
| AX-158301870 | 23 | 74.168 | KV453155.1 | 13257449 | 19-scf00458 | 19 |
| AX-158301871 | 23 | 74.168 | KV453155.1 | 13259468 | 19-scf00458 | 19 |
| AX-158301872 | 23 | 74.168 | KV453155.1 | 13259844 | 19-scf00458 | 19 |
| AX-158301874 | 23 | 74.168 | KV453155.1 | 13260717 | 19-scf00458 | 19 |
| AX-158301877 | 23 | 74.221 | KV453155.1 | 13262741 | 19-scf00458 | 19 |
| AX-158301879 | 23 | 74.277 | KV453155.1 | 13263724 | 19-scf00458 | 19 |
| AX-158301821 | 23 | 74.496 | KV453155.1 | 13182166 | 19-scf00458 | 19 |
| AX-157846385 | 23 | 74.496 | KV453155.1 | 13230898 | 19-scf00458 | 19 |
| AX-158301881 | 23 | 74.496 | KV453155.1 | 13268893 | 19-scf00458 | 19 |
| AX-158301883 | 23 | 74.496 | KV453155.1 | 13269857 | 19-scf00458 | 19 |
| AX-158301884 | 23 | 74.496 | KV453155.1 | 13270541 | 19-scf00458 | 19 |
| AX-158301889 | 23 | 74.496 | KV453155.1 | 13277410 | 19-scf00458 | 19 |
| AX-157846387 | 23 | 74.496 | KV453155.1 | 13278190 | 19-scf00458 | 19 |
| AX-158301891 | 23 | 74.496 | KV453155.1 | 13284084 | 19-scf00458 | 19 |
| AX-158301892 | 23 | 74.496 | KV453155.1 | 13284440 | 19-scf00458 | 19 |

|              |    |        |            |          |             |    |
|--------------|----|--------|------------|----------|-------------|----|
| AX-157860842 | 23 | 74.496 | KV453155.1 | 13285372 | 19-scf00458 | 19 |
| AX-158301901 | 23 | 74.496 | KV453155.1 | 13297740 | 19-scf00458 | 19 |
| AX-158301894 | 23 | 74.665 | KV453155.1 | 13288886 | 19-scf00458 | 19 |
| AX-158301895 | 23 | 74.665 | KV453155.1 | 13290384 | 19-scf00458 | 19 |
| AX-158301885 | 23 | 74.668 | KV453155.1 | 13271672 | 19-scf00458 | 19 |
| AX-158301896 | 23 | 74.668 | KV453155.1 | 13293931 | 19-scf00458 | 19 |
| AX-158301898 | 23 | 74.948 | KV453155.1 | 13295185 | 19-scf00458 | 19 |
| AX-158301905 | 23 | 75.309 | KV453155.1 | 13306235 | 19-scf00458 | 19 |
| AX-158301906 | 23 | 75.31  | KV453155.1 | 13306818 | 19-scf00458 | 19 |
| AX-158301909 | 23 | 75.398 | KV453155.1 | 13311308 | 19-scf00458 | 19 |
| AX-158301911 | 23 | 75.398 | KV453155.1 | 13312894 | 19-scf00458 | 19 |
| AX-158301917 | 23 | 75.398 | KV453155.1 | 13318481 | 19-scf00458 | 19 |
| AX-158301919 | 23 | 75.776 | KV453155.1 | 13320830 | 19-scf00458 | 19 |
| AX-158301924 | 23 | 75.797 | KV453155.1 | 13326879 | 19-scf00458 | 19 |
| AX-158301925 | 23 | 75.812 | KV453155.1 | 13327221 | 19-scf00458 | 19 |
| AX-157774261 | 23 | 75.812 | KV453155.1 | 13328127 | 19-scf00458 | 19 |
| AX-158301926 | 23 | 75.812 | KV453155.1 | 13328210 | 19-scf00458 | 19 |
| AX-158301928 | 23 | 75.812 | KV453155.1 | 13329819 | 19-scf00458 | 19 |
| AX-157846388 | 23 | 75.812 | KV453155.1 | 13330559 | 19-scf00458 | 19 |
| AX-157880965 | 23 | 75.812 | KV453155.1 | 13331901 | 19-scf00458 | 19 |
| AX-158301931 | 23 | 75.812 | KV453155.1 | 13338270 | 19-scf00458 | 19 |
| AX-158301904 | 23 | 76.14  | KV453155.1 | 13304314 | 19-scf00458 | 19 |
| AX-157846389 | 23 | 76.14  | KV453155.1 | 13333284 | 19-scf00458 | 19 |
| AX-158301934 | 23 | 76.14  | KV453155.1 | 13344140 | 19-scf00458 | 19 |
| AX-158301935 | 23 | 76.14  | KV453155.1 | 13345314 | 19-scf00458 | 19 |
| AX-157708070 | 23 | 76.14  | KV453155.1 | 13346931 | 19-scf00458 | 19 |
| AX-158301937 | 23 | 76.14  | KV453155.1 | 13348023 | 19-scf00458 | 19 |
| AX-158301952 | 23 | 76.14  | KV453155.1 | 13367143 | 19-scf00458 | 19 |
| AX-158301993 | 23 | 76.14  | KV453155.1 | 13441795 | 19-scf00458 | 19 |
| AX-158301938 | 23 | 76.161 | KV453155.1 | 13349453 | 19-scf00458 | 19 |
| AX-158381323 | 23 | 76.192 | KV453155.1 | 13350754 | 19-scf00458 | 19 |
| AX-158301939 | 23 | 76.25  | KV453155.1 | 13351665 | 19-scf00458 | 19 |
| AX-158301940 | 23 | 76.25  | KV453155.1 | 13352510 | 19-scf00458 | 19 |
| AX-158301942 | 23 | 76.25  | KV453155.1 | 13356125 | 19-scf00458 | 19 |
| AX-158301943 | 23 | 76.25  | KV453155.1 | 13356634 | 19-scf00458 | 19 |
| AX-158301944 | 23 | 76.25  | KV453155.1 | 13358437 | 19-scf00458 | 19 |
| AX-158301947 | 23 | 76.25  | KV453155.1 | 13360850 | 19-scf00458 | 19 |
| AX-158301949 | 23 | 76.25  | KV453155.1 | 13361666 | 19-scf00458 | 19 |
| AX-157713430 | 23 | 76.25  | KV453155.1 | 13362427 | 19-scf00458 | 19 |
| AX-158301957 | 23 | 76.25  | KV453155.1 | 13372906 | 19-scf00458 | 19 |
| AX-157880967 | 23 | 76.25  | KV453155.1 | 13377750 | 19-scf00458 | 19 |
| AX-157775310 | 23 | 76.317 | KV453155.1 | 13364601 | 19-scf00458 | 19 |
| AX-157754008 | 23 | 76.359 | KV453155.1 | 13365028 | 19-scf00458 | 19 |
| AX-158301950 | 23 | 76.359 | KV453155.1 | 13365183 | 19-scf00458 | 19 |
| AX-158301953 | 23 | 76.359 | KV453155.1 | 13367872 | 19-scf00458 | 19 |
| AX-158301954 | 23 | 76.44  | KV453155.1 | 13370329 | 19-scf00458 | 19 |
| AX-158301958 | 23 | 76.517 | KV453155.1 | 13374069 | 19-scf00458 | 19 |
| AX-158301962 | 23 | 76.54  | KV453155.1 | 13379388 | 19-scf00458 | 19 |
| AX-158301963 | 23 | 76.705 | KV453155.1 | 13381231 | 19-scf00458 | 19 |
| AX-158301965 | 23 | 76.705 | KV453155.1 | 13382783 | 19-scf00458 | 19 |
| AX-157846392 | 23 | 76.848 | KV453155.1 | 13387048 | 19-scf00458 | 19 |

|              |    |        |             |          |             |    |
|--------------|----|--------|-------------|----------|-------------|----|
| AX-158301968 | 23 | 76.903 | KV453155.1  | 13388815 | 19-scf00458 | 19 |
| AX-157710902 | 23 | 76.903 | KV453155.1  | 13397599 | 19-scf00458 | 19 |
| AX-157743158 | 23 | 76.909 | KV453155.1  | 13399744 | 19-scf00458 | 19 |
| AX-158301971 | 23 | 76.919 | KV453155.1  | 13402805 | 19-scf00458 | 19 |
| AX-158301972 | 23 | 76.928 | KV453155.1  | 13404349 | 19-scf00458 | 19 |
| AX-158301973 | 23 | 77.432 | KV453155.1  | 13409705 | 19-scf00458 | 19 |
| AX-158301974 | 23 | 77.452 | KV453155.1  | 13412079 | 19-scf00458 | 19 |
| AX-157772607 | 23 | 77.452 | KV453155.1  | 13412834 | 19-scf00458 | 19 |
| AX-158301980 | 23 | 77.452 | KV453155.1  | 13419100 | 19-scf00458 | 19 |
| AX-158302005 | 23 | 77.452 | KV453155.1  | 13456599 | 19-scf00458 | 19 |
| AX-158301983 | 23 | 77.561 | KV453155.1  | 13425880 | 19-scf00458 | 19 |
| AX-157880968 | 23 | 77.561 | KV453155.1  | 13429190 | 19-scf00458 | 19 |
| AX-158301987 | 23 | 77.561 | KV453155.1  | 13431173 | 19-scf00458 | 19 |
| AX-158301988 | 23 | 77.561 | KV453155.1  | 13432508 | 19-scf00458 | 19 |
| AX-158301989 | 23 | 77.561 | KV453155.1  | 13435942 | 19-scf00458 | 19 |
| AX-157708436 | 23 | 77.561 | KV453155.1  | 13439708 | 19-scf00458 | 19 |
| AX-158301992 | 23 | 77.561 | KV453155.1  | 13440361 | 19-scf00458 | 19 |
| AX-158301994 | 23 | 77.624 | KV453155.1  | 13442343 | 19-scf00458 | 19 |
| AX-157846395 | 23 | 77.67  | KV453155.1  | 13447366 | 19-scf00458 | 19 |
| AX-158301997 | 23 | 77.67  | KV453155.1  | 13448046 | 19-scf00458 | 19 |
| AX-158302000 | 23 | 77.67  | KV453155.1  | 13452744 | 19-scf00458 | 19 |
| AX-158302001 | 23 | 77.67  | KV453155.1  | 13453412 | 19-scf00458 | 19 |
| AX-158302006 | 23 | 77.67  | KV453155.1  | 13457973 | 19-scf00458 | 19 |
| AX-158302007 | 23 | 77.67  | KV453155.1  | 13459586 | 19-scf00458 | 19 |
| AX-158302009 | 23 | 77.671 | KV453155.1  | 13461745 | 19-scf00458 | 19 |
| AX-158302011 | 23 | 77.675 | KV453155.1  | 13465753 | 19-scf00458 | 19 |
| AX-157880969 | 23 | 78.373 | KV453155.1  | 13474037 | 19-scf00458 | 19 |
| AX-158302021 | 23 | 78.608 | KV453155.1  | 13481459 | 19-scf00458 | 19 |
| AX-158302013 | 23 | 78.657 | KV453155.1  | 13468669 | 19-scf00458 | 19 |
| AX-158302028 | 23 | 78.657 | KV453155.1  | 13496464 | 19-scf00458 | 19 |
| AX-158302029 | 23 | 78.657 | KV453155.1  | 13498519 | 19-scf00458 | 19 |
| AX-158302041 | 23 | 78.657 | KV453155.1  | 13517141 | 19-scf00458 | 19 |
| AX-157724557 | 23 | 78.795 | KV453155.1  | 13496845 | 19-scf00458 | 19 |
| AX-158302030 | 23 | 78.795 | KV453155.1  | 13500274 | 19-scf00458 | 19 |
| AX-158302031 | 23 | 78.795 | KV453155.1  | 13501213 | 19-scf00458 | 19 |
| AX-158302032 | 23 | 78.795 | KV453155.1  | 13501736 | 19-scf00458 | 19 |
| AX-157846396 | 23 | 78.795 | KV453155.1  | 13503486 | 19-scf00458 | 19 |
| AX-158302036 | 23 | 79.168 | KV453155.1  | 13509143 | 19-scf00458 | 19 |
| AX-158302037 | 23 | 79.17  | KV453155.1  | 13509651 | 19-scf00458 | 19 |
| AX-158302039 | 23 | 79.17  | KV453155.1  | 13511287 | 19-scf00458 | 19 |
| AX-157888143 | 23 | 79.17  | KV453155.1  | 13511385 | 19-scf00458 | 19 |
| AX-157719718 | 23 | 79.401 | KV453155.1  | 13511722 | 19-scf00458 | 19 |
| AX-158302057 | 23 | 79.581 | KV453155.1  | 13542993 | 19-scf00458 | 19 |
| AX-157706994 | 23 | 79.581 | 3ML01033300 | 208      | scf08944_1  | UN |
| AX-157719463 | 23 | 79.716 | KV453155.1  | 13523570 | 19-scf00458 | 19 |
| AX-158302045 | 23 | 79.716 | KV453155.1  | 13524486 | 19-scf00458 | 19 |
| AX-158302046 | 23 | 79.716 | KV453155.1  | 13524651 | 19-scf00458 | 19 |
| AX-158302047 | 23 | 79.716 | KV453155.1  | 13526729 | 19-scf00458 | 19 |
| AX-158302049 | 23 | 79.852 | KV453155.1  | 13528679 | 19-scf00458 | 19 |
| AX-158302050 | 23 | 79.852 | KV453155.1  | 13530042 | 19-scf00458 | 19 |
| AX-158302052 | 23 | 79.852 | KV453155.1  | 13537543 | 19-scf00458 | 19 |

|              |    |        |            |          |             |    |
|--------------|----|--------|------------|----------|-------------|----|
| AX-158302054 | 23 | 79.852 | KV453155.1 | 13538461 | 19-scf00458 | 19 |
| AX-158302058 | 23 | 79.852 | KV453155.1 | 13543691 | 19-scf00458 | 19 |
| AX-158302059 | 23 | 79.852 | KV453155.1 | 13547449 | 19-scf00458 | 19 |
| AX-157684155 | 23 | 79.852 | KV453156.1 | 11977    | 19-scf00461 | 19 |
| AX-157688137 | 23 | 79.852 | KV453156.1 | 38407    | 19-scf00461 | 19 |
| AX-157684148 | 23 | 79.949 | KV453156.1 | 33820    | 19-scf00461 | 19 |
| AX-157684150 | 23 | 79.988 | KV453156.1 | 28863    | 19-scf00461 | 19 |
| AX-157681377 | 23 | 79.988 | KV453156.1 | 29146    | 19-scf00461 | 19 |
| AX-158302064 | 23 | 79.988 | KV453157.1 | 6896     | 19-scf00462 | 19 |
| AX-157753649 | 23 | 79.988 | KV453157.1 | 7407     | 19-scf00462 | 19 |
| AX-158302072 | 23 | 79.988 | KV453157.1 | 24073    | 19-scf00462 | 19 |
| AX-157680025 | 23 | 80.054 | KV453156.1 | 24314    | 19-scf00461 | 19 |
| AX-158302015 | 23 | 80.124 | KV453155.1 | 13475909 | 19-scf00458 | 19 |
| AX-157680746 | 23 | 80.124 | KV453156.1 | 4496     | 19-scf00461 | 19 |
| AX-157684158 | 23 | 80.124 | KV453156.1 | 5755     | 19-scf00461 | 19 |
| AX-157684153 | 23 | 80.124 | KV453156.1 | 16308    | 19-scf00461 | 19 |
| AX-157679985 | 23 | 80.124 | KV453156.1 | 20869    | 19-scf00461 | 19 |
| AX-157684161 | 23 | 80.259 | KV453156.1 | 384      | 19-scf00461 | 19 |
| AX-157684159 | 23 | 80.259 | KV453156.1 | 3755     | 19-scf00461 | 19 |
| AX-157713511 | 23 | 80.259 | KV453157.1 | 304      | 19-scf00462 | 19 |
| AX-158302061 | 23 | 80.261 | KV453157.1 | 813      | 19-scf00462 | 19 |
| AX-157720326 | 23 | 80.262 | KV453157.1 | 18059    | 19-scf00462 | 19 |
| AX-158302070 | 23 | 80.263 | KV453157.1 | 21325    | 19-scf00462 | 19 |
| AX-157745967 | 23 | 80.265 | KV453157.1 | 28605    | 19-scf00462 | 19 |
| AX-158302075 | 23 | 80.472 | KV453157.1 | 33125    | 19-scf00462 | 19 |
| AX-158302074 | 23 | 80.667 | KV453157.1 | 31481    | 19-scf00462 | 19 |
| AX-158302076 | 23 | 80.667 | KV453157.1 | 33746    | 19-scf00462 | 19 |
| AX-158302077 | 23 | 80.667 | KV453157.1 | 36221    | 19-scf00462 | 19 |
| AX-158302078 | 23 | 80.667 | KV453157.1 | 39045    | 19-scf00462 | 19 |
| AX-157846398 | 23 | 80.667 | KV453157.1 | 39203    | 19-scf00462 | 19 |
| AX-158302083 | 23 | 80.667 | KV453157.1 | 51567    | 19-scf00462 | 19 |
| AX-157752625 | 23 | 80.67  | KV453157.1 | 63727    | 19-scf00462 | 19 |
| AX-158302088 | 23 | 80.673 | KV453157.1 | 64214    | 19-scf00462 | 19 |
| AX-158302090 | 23 | 81.307 | KV453157.1 | 73941    | 19-scf00462 | 19 |
| AX-158412077 | 23 | 81.619 | KV453157.1 | 75839    | 19-scf00462 | 19 |
| AX-158302089 | 23 | 81.62  | KV453157.1 | 72914    | 19-scf00462 | 19 |
| AX-157755506 | 23 | 81.62  | KV453157.1 | 78816    | 19-scf00462 | 19 |
| AX-158302091 | 23 | 81.621 | KV453157.1 | 80487    | 19-scf00462 | 19 |
| AX-158302092 | 23 | 81.621 | KV453157.1 | 85188    | 19-scf00462 | 19 |
| AX-158302096 | 23 | 81.621 | KV453157.1 | 96731    | 19-scf00462 | 19 |
| AX-158302099 | 23 | 81.621 | KV453157.1 | 100682   | 19-scf00462 | 19 |
| AX-158302100 | 23 | 81.621 | KV453157.1 | 100835   | 19-scf00462 | 19 |
| AX-158423581 | 23 | 81.621 | KV453157.1 | 104261   | 19-scf00462 | 19 |
| AX-157758458 | 23 | 81.621 | KV453157.1 | 104442   | 19-scf00462 | 19 |
| AX-158302105 | 23 | 81.621 | KV453157.1 | 109945   | 19-scf00462 | 19 |
| AX-157846402 | 23 | 82.004 | KV453157.1 | 115905   | 19-scf00462 | 19 |
| AX-158302109 | 23 | 82.066 | KV453157.1 | 120884   | 19-scf00462 | 19 |
| AX-157846403 | 23 | 82.411 | KV453157.1 | 123453   | 19-scf00462 | 19 |
| AX-158302131 | 23 | 82.411 | KV453157.1 | 156785   | 19-scf00462 | 19 |
| AX-157846404 | 23 | 82.438 | KV453157.1 | 126333   | 19-scf00462 | 19 |
| AX-158302114 | 23 | 82.438 | KV453157.1 | 129972   | 19-scf00462 | 19 |

|              |    |        |            |        |             |    |
|--------------|----|--------|------------|--------|-------------|----|
| AX-158302116 | 23 | 82.438 | KV453157.1 | 131104 | 19-scf00462 | 19 |
| AX-158302118 | 23 | 82.438 | KV453157.1 | 137671 | 19-scf00462 | 19 |
| AX-157774970 | 23 | 82.438 | KV453157.1 | 137854 | 19-scf00462 | 19 |
| AX-158302123 | 23 | 82.438 | KV453157.1 | 144147 | 19-scf00462 | 19 |
| AX-158302126 | 23 | 82.438 | KV453157.1 | 150615 | 19-scf00462 | 19 |
| AX-158302127 | 23 | 82.438 | KV453157.1 | 153552 | 19-scf00462 | 19 |
| AX-158302130 | 23 | 82.438 | KV453157.1 | 156290 | 19-scf00462 | 19 |
| AX-157749762 | 23 | 82.438 | KV453157.1 | 164292 | 19-scf00462 | 19 |
| AX-157774793 | 23 | 82.438 | KV453157.1 | 169113 | 19-scf00462 | 19 |
| AX-158302135 | 23 | 82.438 | KV453157.1 | 170061 | 19-scf00462 | 19 |
| AX-158302146 | 23 | 82.438 | KV453157.1 | 183140 | 19-scf00462 | 19 |
| AX-158302153 | 23 | 82.438 | KV453157.1 | 187745 | 19-scf00462 | 19 |
| AX-158302159 | 23 | 82.438 | KV453157.1 | 193679 | 19-scf00462 | 19 |
| AX-158302173 | 23 | 82.438 | KV453157.1 | 208021 | 19-scf00462 | 19 |
| AX-157873451 | 23 | 82.574 | KV453157.1 | 173092 | 19-scf00462 | 19 |
| AX-157745610 | 23 | 82.709 | KV453157.1 | 126234 | 19-scf00462 | 19 |
| AX-158302120 | 23 | 82.709 | KV453157.1 | 140719 | 19-scf00462 | 19 |
| AX-158302137 | 23 | 82.709 | KV453157.1 | 173417 | 19-scf00462 | 19 |
| AX-158302149 | 23 | 82.709 | KV453157.1 | 185383 | 19-scf00462 | 19 |
| AX-157752762 | 23 | 82.709 | KV453157.1 | 186130 | 19-scf00462 | 19 |
| AX-158302151 | 23 | 82.709 | KV453157.1 | 186200 | 19-scf00462 | 19 |
| AX-158302155 | 23 | 82.709 | KV453157.1 | 189170 | 19-scf00462 | 19 |
| AX-158302157 | 23 | 82.709 | KV453157.1 | 191591 | 19-scf00462 | 19 |
| AX-157846411 | 23 | 82.709 | KV453157.1 | 193459 | 19-scf00462 | 19 |
| AX-158302160 | 23 | 82.709 | KV453157.1 | 194395 | 19-scf00462 | 19 |
| AX-158302161 | 23 | 82.709 | KV453157.1 | 195183 | 19-scf00462 | 19 |
| AX-158302163 | 23 | 82.709 | KV453157.1 | 195930 | 19-scf00462 | 19 |
| AX-158302164 | 23 | 82.709 | KV453157.1 | 196890 | 19-scf00462 | 19 |
| AX-158302166 | 23 | 82.709 | KV453157.1 | 200533 | 19-scf00462 | 19 |
| AX-158302167 | 23 | 82.709 | KV453157.1 | 201271 | 19-scf00462 | 19 |
| AX-157888145 | 23 | 82.709 | KV453157.1 | 202743 | 19-scf00462 | 19 |
| AX-158302183 | 23 | 82.981 | KV453157.1 | 223277 | 19-scf00462 | 19 |
| AX-157742576 | 23 | 82.981 | KV453157.1 | 223400 | 19-scf00462 | 19 |
| AX-158302184 | 23 | 82.981 | KV453157.1 | 226415 | 19-scf00462 | 19 |
| AX-158302187 | 23 | 83.06  | KV453157.1 | 229100 | 19-scf00462 | 19 |
| AX-158302188 | 23 | 83.117 | KV453157.1 | 229976 | 19-scf00462 | 19 |
| AX-158302192 | 23 | 83.117 | KV453157.1 | 235282 | 19-scf00462 | 19 |
| AX-158302193 | 23 | 83.117 | KV453157.1 | 235599 | 19-scf00462 | 19 |
| AX-158302194 | 23 | 83.117 | KV453157.1 | 236010 | 19-scf00462 | 19 |
| AX-157846413 | 23 | 83.388 | KV453157.1 | 245810 | 19-scf00462 | 19 |
| AX-158302177 | 23 | 83.389 | KV453157.1 | 215229 | 19-scf00462 | 19 |
| AX-158302199 | 23 | 83.389 | KV453157.1 | 246474 | 19-scf00462 | 19 |
| AX-157846415 | 23 | 83.483 | KV453157.1 | 253388 | 19-scf00462 | 19 |
| AX-158302213 | 23 | 83.483 | KV453157.1 | 263616 | 19-scf00462 | 19 |
| AX-158302225 | 23 | 83.483 | KV453157.1 | 278279 | 19-scf00462 | 19 |
| AX-158302248 | 23 | 83.483 | KV453157.1 | 321367 | 19-scf00462 | 19 |
| AX-158302202 | 23 | 83.66  | KV453157.1 | 254197 | 19-scf00462 | 19 |
| AX-157772519 | 23 | 83.661 | KV453157.1 | 252046 | 19-scf00462 | 19 |
| AX-158302204 | 23 | 83.661 | KV453157.1 | 254816 | 19-scf00462 | 19 |
| AX-157739264 | 23 | 83.661 | KV453157.1 | 255112 | 19-scf00462 | 19 |
| AX-158302206 | 23 | 83.661 | KV453157.1 | 256949 | 19-scf00462 | 19 |

|              |    |        |             |        |             |    |
|--------------|----|--------|-------------|--------|-------------|----|
| AX-158302207 | 23 | 83.661 | KV453157.1  | 258055 | 19-scf00462 | 19 |
| AX-158302209 | 23 | 83.661 | KV453157.1  | 258567 | 19-scf00462 | 19 |
| AX-158302210 | 23 | 83.661 | KV453157.1  | 260551 | 19-scf00462 | 19 |
| AX-158302211 | 23 | 83.661 | KV453157.1  | 261917 | 19-scf00462 | 19 |
| AX-157747303 | 23 | 83.661 | KV453157.1  | 262866 | 19-scf00462 | 19 |
| AX-157846416 | 23 | 83.661 | KV453157.1  | 263129 | 19-scf00462 | 19 |
| AX-158302217 | 23 | 83.661 | KV453157.1  | 267385 | 19-scf00462 | 19 |
| AX-158302219 | 23 | 83.661 | KV453157.1  | 271779 | 19-scf00462 | 19 |
| AX-158302220 | 23 | 83.661 | KV453157.1  | 272916 | 19-scf00462 | 19 |
| AX-158302221 | 23 | 83.661 | KV453157.1  | 273464 | 19-scf00462 | 19 |
| AX-157873452 | 23 | 83.661 | KV453157.1  | 274899 | 19-scf00462 | 19 |
| AX-158302222 | 23 | 83.661 | KV453157.1  | 275311 | 19-scf00462 | 19 |
| AX-158302223 | 23 | 83.661 | KV453157.1  | 275909 | 19-scf00462 | 19 |
| AX-157846420 | 23 | 83.661 | KV453157.1  | 280456 | 19-scf00462 | 19 |
| AX-157715595 | 23 | 83.661 | KV453157.1  | 281795 | 19-scf00462 | 19 |
| AX-158302227 | 23 | 83.661 | KV453157.1  | 282523 | 19-scf00462 | 19 |
| AX-158302228 | 23 | 83.661 | KV453157.1  | 283250 | 19-scf00462 | 19 |
| AX-157707620 | 23 | 83.661 | KV453157.1  | 287944 | 19-scf00462 | 19 |
| AX-157758158 | 23 | 83.661 | KV453157.1  | 291594 | 19-scf00462 | 19 |
| AX-158302233 | 23 | 83.661 | KV453157.1  | 293758 | 19-scf00462 | 19 |
| AX-157749945 | 23 | 83.661 | KV453157.1  | 295514 | 19-scf00462 | 19 |
| AX-157888146 | 23 | 83.661 | KV453157.1  | 295676 | 19-scf00462 | 19 |
| AX-157846422 | 23 | 83.661 | KV453157.1  | 299750 | 19-scf00462 | 19 |
| AX-157681114 | 23 | 83.661 | 3ML01029196 | 313    | scf04817_1  | UN |
| AX-158302235 | 23 | 83.786 | KV453157.1  | 302929 | 19-scf00462 | 19 |
| AX-158302239 | 23 | 83.963 | KV453157.1  | 305905 | 19-scf00462 | 19 |
| AX-158302240 | 23 | 83.963 | KV453157.1  | 307514 | 19-scf00462 | 19 |
| AX-158302246 | 23 | 83.963 | KV453157.1  | 319597 | 19-scf00462 | 19 |
| AX-158302237 | 23 | 84.01  | KV453157.1  | 304653 | 19-scf00462 | 19 |
| AX-158302245 | 23 | 84.01  | KV453157.1  | 316825 | 19-scf00462 | 19 |
| AX-157684162 | 23 | 85.13  | KV453158.1  | 294    | 19-scf00463 | 19 |
| AX-157680381 | 23 | 85.13  | KV453158.1  | 579    | 19-scf00463 | 19 |
| AX-157684166 | 23 | 85.13  | KV453158.1  | 4858   | 19-scf00463 | 19 |
| AX-157684167 | 23 | 85.13  | KV453158.1  | 5318   | 19-scf00463 | 19 |
| AX-157684175 | 23 | 85.13  | KV453158.1  | 15769  | 19-scf00463 | 19 |
| AX-157684168 | 23 | 85.293 | KV453158.1  | 6235   | 19-scf00463 | 19 |
| AX-157684177 | 23 | 85.293 | KV453158.1  | 17934  | 19-scf00463 | 19 |
| AX-157681626 | 23 | 85.293 | KV453158.1  | 28699  | 19-scf00463 | 19 |
| AX-157680747 | 23 | 85.293 | KV453158.1  | 30575  | 19-scf00463 | 19 |
| AX-157684179 | 23 | 85.293 | KV453158.1  | 32041  | 19-scf00463 | 19 |
| AX-157684180 | 23 | 85.293 | KV453158.1  | 33766  | 19-scf00463 | 19 |
| AX-157684182 | 23 | 85.293 | KV453158.1  | 36306  | 19-scf00463 | 19 |
| AX-157684200 | 23 | 85.293 | KV453158.1  | 56035  | 19-scf00463 | 19 |
| AX-157684183 | 23 | 85.502 | KV453158.1  | 36990  | 19-scf00463 | 19 |
| AX-157684184 | 23 | 85.502 | KV453158.1  | 37335  | 19-scf00463 | 19 |
| AX-157679944 | 23 | 85.502 | KV453158.1  | 38343  | 19-scf00463 | 19 |
| AX-157684186 | 23 | 85.545 | KV453158.1  | 39317  | 19-scf00463 | 19 |
| AX-157684171 | 23 | 85.795 | KV453158.1  | 8110   | 19-scf00463 | 19 |
| AX-157684188 | 23 | 85.795 | KV453158.1  | 40439  | 19-scf00463 | 19 |
| AX-157684192 | 23 | 85.88  | KV453158.1  | 45447  | 19-scf00463 | 19 |
| AX-157684193 | 23 | 85.88  | KV453158.1  | 47655  | 19-scf00463 | 19 |

|              |    |        |             |        |             |    |
|--------------|----|--------|-------------|--------|-------------|----|
| AX-157684197 | 23 | 85.88  | KV453158.1  | 53032  | 19-scf00463 | 19 |
| AX-157680326 | 23 | 85.88  | KV453158.1  | 56130  | 19-scf00463 | 19 |
| AX-157758339 | 23 | 87.665 | KV453161.1  | 136114 | 19-scf00466 | 19 |
| AX-158302357 | 23 | 87.665 | KV453163.1  | 73853  | 19-scf00468 | 19 |
| AX-158302262 | 23 | 87.682 | KV453161.1  | 109726 | 19-scf00466 | 19 |
| AX-157846424 | 23 | 87.682 | KV453161.1  | 111820 | 19-scf00466 | 19 |
| AX-158302259 | 23 | 87.682 | KV453161.1  | 114251 | 19-scf00466 | 19 |
| AX-157724703 | 23 | 87.682 | KV453161.1  | 121602 | 19-scf00466 | 19 |
| AX-157679982 | 23 | 87.682 | KV453161.1  | 165231 | 19-scf00466 | 19 |
| AX-158302282 | 23 | 87.859 | KV453161.1  | 73828  | 19-scf00466 | 19 |
| AX-158302269 | 23 | 87.859 | KV453161.1  | 96948  | 19-scf00466 | 19 |
| AX-157846425 | 23 | 87.859 | KV453161.1  | 98348  | 19-scf00466 | 19 |
| AX-158302261 | 23 | 87.859 | KV453161.1  | 112985 | 19-scf00466 | 19 |
| AX-158302257 | 23 | 87.859 | KV453161.1  | 123351 | 19-scf00466 | 19 |
| AX-157684263 | 23 | 87.859 | KV453161.1  | 172884 | 19-scf00466 | 19 |
| AX-158302320 | 23 | 87.859 | KV453163.1  | 4729   | 19-scf00468 | 19 |
| AX-158302346 | 23 | 87.859 | KV453163.1  | 62350  | 19-scf00468 | 19 |
| AX-158302352 | 23 | 87.859 | KV453163.1  | 67775  | 19-scf00468 | 19 |
| AX-158302356 | 23 | 87.859 | KV453163.1  | 73225  | 19-scf00468 | 19 |
| AX-157757537 | 23 | 87.936 | KV453161.1  | 72355  | 19-scf00466 | 19 |
| AX-158417636 | 23 | 87.936 | KV453161.1  | 78851  | 19-scf00466 | 19 |
| AX-158302276 | 23 | 87.936 | KV453161.1  | 87450  | 19-scf00466 | 19 |
| AX-157684256 | 23 | 87.936 | KV453161.1  | 145259 | 19-scf00466 | 19 |
| AX-157684258 | 23 | 87.936 | KV453161.1  | 150074 | 19-scf00466 | 19 |
| AX-158302285 | 23 | 87.962 | KV453161.1  | 71680  | 19-scf00466 | 19 |
| AX-158302283 | 23 | 87.962 | KV453161.1  | 73427  | 19-scf00466 | 19 |
| AX-157693601 | 23 | 87.981 | KV453161.1  | 64705  | 19-scf00466 | 19 |
| AX-158302289 | 23 | 88     | KV453161.1  | 64470  | 19-scf00466 | 19 |
| AX-157684260 | 23 | 88     | KV453161.1  | 166293 | 19-scf00466 | 19 |
| AX-157704591 | 23 | 88     | 3ML01026675 | 755    | scf02274_1  | UN |
| AX-157684206 | 23 | 88.057 | KV453159.1  | 5782   | 19-scf00464 | 19 |
| AX-157681627 | 23 | 88.057 | KV453160.1  | 111140 | 19-scf00465 | 19 |
| AX-157773936 | 23 | 88.057 | KV453161.1  | 13945  | 19-scf00466 | 19 |
| AX-158302313 | 23 | 88.057 | KV453161.1  | 21504  | 19-scf00466 | 19 |
| AX-157747247 | 23 | 88.057 | KV453161.1  | 24803  | 19-scf00466 | 19 |
| AX-158302311 | 23 | 88.057 | KV453161.1  | 25539  | 19-scf00466 | 19 |
| AX-158302308 | 23 | 88.057 | KV453161.1  | 29313  | 19-scf00466 | 19 |
| AX-157867673 | 23 | 88.057 | KV453161.1  | 31703  | 19-scf00466 | 19 |
| AX-158302306 | 23 | 88.057 | KV453161.1  | 36301  | 19-scf00466 | 19 |
| AX-158302305 | 23 | 88.057 | KV453161.1  | 36869  | 19-scf00466 | 19 |
| AX-158302301 | 23 | 88.057 | KV453161.1  | 40759  | 19-scf00466 | 19 |
| AX-158302299 | 23 | 88.057 | KV453161.1  | 41758  | 19-scf00466 | 19 |
| AX-158302296 | 23 | 88.057 | KV453161.1  | 50229  | 19-scf00466 | 19 |
| AX-158302295 | 23 | 88.057 | KV453161.1  | 51295  | 19-scf00466 | 19 |
| AX-158302294 | 23 | 88.057 | KV453161.1  | 54057  | 19-scf00466 | 19 |
| AX-158302292 | 23 | 88.057 | KV453161.1  | 57117  | 19-scf00466 | 19 |
| AX-158302268 | 23 | 88.057 | KV453161.1  | 97583  | 19-scf00466 | 19 |
| AX-157880977 | 23 | 88.057 | KV453161.1  | 106007 | 19-scf00466 | 19 |
| AX-158302349 | 23 | 88.057 | KV453163.1  | 65773  | 19-scf00468 | 19 |
| AX-157684221 | 23 | 88.276 | KV453160.1  | 68918  | 19-scf00465 | 19 |
| AX-157684222 | 23 | 88.276 | KV453160.1  | 70976  | 19-scf00465 | 19 |



|              |    |        |             |        |             |    |
|--------------|----|--------|-------------|--------|-------------|----|
| AX-157684223 | 23 | 88.276 | KV453160.1  | 71895  | 19-scf00465 | 19 |
| AX-157684224 | 23 | 88.276 | KV453160.1  | 73010  | 19-scf00465 | 19 |
| AX-157682168 | 23 | 88.291 | KV453160.1  | 74992  | 19-scf00465 | 19 |
| AX-157684242 | 23 | 88.291 | KV453160.1  | 104573 | 19-scf00465 | 19 |
| AX-157846427 | 23 | 88.291 | KV453161.1  | 37889  | 19-scf00466 | 19 |
| AX-157684226 | 23 | 88.319 | KV453160.1  | 77056  | 19-scf00465 | 19 |
| AX-157684228 | 23 | 88.349 | KV453160.1  | 80166  | 19-scf00465 | 19 |
| AX-157684252 | 23 | 88.349 | KV453160.1  | 110723 | 19-scf00465 | 19 |
| AX-157684229 | 23 | 88.385 | KV453160.1  | 80853  | 19-scf00465 | 19 |
| AX-157684234 | 23 | 88.603 | KV453160.1  | 88481  | 19-scf00465 | 19 |
| AX-157684236 | 23 | 88.603 | KV453160.1  | 93797  | 19-scf00465 | 19 |
| AX-157684237 | 23 | 88.603 | KV453160.1  | 95004  | 19-scf00465 | 19 |
| AX-157684238 | 23 | 88.603 | KV453160.1  | 98900  | 19-scf00465 | 19 |
| AX-157680240 | 23 | 88.603 | KV453160.1  | 100663 | 19-scf00465 | 19 |
| AX-157684240 | 23 | 88.603 | KV453160.1  | 100875 | 19-scf00465 | 19 |
| AX-157680421 | 23 | 88.603 | KV453160.1  | 104966 | 19-scf00465 | 19 |
| AX-157684245 | 23 | 88.603 | KV453160.1  | 107645 | 19-scf00465 | 19 |
| AX-157684247 | 23 | 88.603 | KV453160.1  | 108746 | 19-scf00465 | 19 |
| AX-157684249 | 23 | 88.603 | KV453160.1  | 109198 | 19-scf00465 | 19 |
| AX-157684251 | 23 | 88.603 | KV453160.1  | 109626 | 19-scf00465 | 19 |
| AX-157684254 | 23 | 88.603 | KV453160.1  | 123613 | 19-scf00465 | 19 |
| AX-157689718 | 23 | 88.603 | 3ML01031626 | 238    | scf07243_1  | UN |
| AX-157684264 | 23 | 89.805 | KV453161.1  | 174905 | 19-scf00466 | 19 |
| AX-157681628 | 23 | 89.805 | KV453161.1  | 177669 | 19-scf00466 | 19 |
| AX-157680362 | 23 | 89.805 | KV453161.1  | 184197 | 19-scf00466 | 19 |
| AX-157860848 | 23 | 89.805 | KV453163.1  | 40998  | 19-scf00468 | 19 |
| AX-157684259 | 23 | 89.915 | KV453161.1  | 159076 | 19-scf00466 | 19 |
| AX-157680753 | 23 | 89.915 | KV453161.1  | 178871 | 19-scf00466 | 19 |
| AX-157684271 | 23 | 89.915 | KV453161.1  | 187349 | 19-scf00466 | 19 |
| AX-157684273 | 23 | 89.915 | KV453161.1  | 190656 | 19-scf00466 | 19 |
| AX-157684274 | 23 | 89.915 | KV453161.1  | 194129 | 19-scf00466 | 19 |
| AX-157684278 | 23 | 89.915 | KV453161.1  | 196608 | 19-scf00466 | 19 |
| AX-157684279 | 23 | 89.915 | KV453161.1  | 197112 | 19-scf00466 | 19 |
| AX-157681168 | 23 | 89.915 | KV453161.1  | 198207 | 19-scf00466 | 19 |
| AX-157684282 | 23 | 89.915 | KV453161.1  | 200534 | 19-scf00466 | 19 |
| AX-157684283 | 23 | 89.915 | KV453161.1  | 201815 | 19-scf00466 | 19 |
| AX-157846429 | 23 | 89.915 | KV453163.1  | 3185   | 19-scf00468 | 19 |
| AX-158302322 | 23 | 89.915 | KV453163.1  | 6441   | 19-scf00468 | 19 |
| AX-158302323 | 23 | 89.915 | KV453163.1  | 7009   | 19-scf00468 | 19 |
| AX-158302324 | 23 | 89.915 | KV453163.1  | 7535   | 19-scf00468 | 19 |
| AX-158302325 | 23 | 89.915 | KV453163.1  | 10035  | 19-scf00468 | 19 |
| AX-157752709 | 23 | 89.915 | KV453163.1  | 18763  | 19-scf00468 | 19 |
| AX-157740225 | 23 | 89.915 | KV453163.1  | 21120  | 19-scf00468 | 19 |
| AX-158302331 | 23 | 89.915 | KV453163.1  | 23257  | 19-scf00468 | 19 |
| AX-157713545 | 23 | 89.915 | KV453163.1  | 24154  | 19-scf00468 | 19 |
| AX-158302335 | 23 | 89.915 | KV453163.1  | 32495  | 19-scf00468 | 19 |
| AX-158302408 | 23 | 89.915 | KV453164.1  | 79912  | 19-scf00469 | 19 |
| AX-157704590 | 23 | 89.915 | 3ML01026675 | 1472   | scf02274_1  | UN |
| AX-157684209 | 23 | 90.024 | KV453160.1  | 3132   | 19-scf00465 | 19 |
| AX-158302280 | 23 | 90.024 | KV453161.1  | 81434  | 19-scf00466 | 19 |
| AX-157680751 | 23 | 90.024 | KV453161.1  | 163221 | 19-scf00466 | 19 |

|              |    |        |            |        |             |    |
|--------------|----|--------|------------|--------|-------------|----|
| AX-158302337 | 23 | 90.024 | KV453163.1 | 35889  | 19-scf00468 | 19 |
| AX-158302338 | 23 | 90.024 | KV453163.1 | 38754  | 19-scf00468 | 19 |
| AX-157723686 | 23 | 90.024 | KV453163.1 | 45765  | 19-scf00468 | 19 |
| AX-158302340 | 23 | 90.024 | KV453163.1 | 46151  | 19-scf00468 | 19 |
| AX-158302341 | 23 | 90.024 | KV453163.1 | 58163  | 19-scf00468 | 19 |
| AX-158302343 | 23 | 90.024 | KV453163.1 | 58704  | 19-scf00468 | 19 |
| AX-158302345 | 23 | 90.024 | KV453163.1 | 61109  | 19-scf00468 | 19 |
| AX-158302347 | 23 | 90.024 | KV453163.1 | 63395  | 19-scf00468 | 19 |
| AX-158302359 | 23 | 90.133 | KV453163.1 | 77860  | 19-scf00468 | 19 |
| AX-157846432 | 23 | 90.133 | KV453164.1 | 1798   | 19-scf00469 | 19 |
| AX-158302362 | 23 | 90.133 | KV453164.1 | 2290   | 19-scf00469 | 19 |
| AX-157846433 | 23 | 90.188 | KV453164.1 | 6113   | 19-scf00469 | 19 |
| AX-157772434 | 23 | 90.202 | KV453164.1 | 7723   | 19-scf00469 | 19 |
| AX-158302365 | 23 | 90.219 | KV453164.1 | 10416  | 19-scf00469 | 19 |
| AX-158302344 | 23 | 90.242 | KV453163.1 | 59568  | 19-scf00468 | 19 |
| AX-158302363 | 23 | 90.242 | KV453164.1 | 5163   | 19-scf00469 | 19 |
| AX-158302367 | 23 | 90.242 | KV453164.1 | 15590  | 19-scf00469 | 19 |
| AX-158302369 | 23 | 90.242 | KV453164.1 | 18011  | 19-scf00469 | 19 |
| AX-158302370 | 23 | 90.242 | KV453164.1 | 18753  | 19-scf00469 | 19 |
| AX-158302372 | 23 | 90.296 | KV453164.1 | 21036  | 19-scf00469 | 19 |
| AX-158302394 | 23 | 90.296 | KV453164.1 | 57588  | 19-scf00469 | 19 |
| AX-158302382 | 23 | 90.387 | KV453164.1 | 34172  | 19-scf00469 | 19 |
| AX-158302258 | 23 | 90.461 | KV453161.1 | 118380 | 19-scf00466 | 19 |
| AX-158302339 | 23 | 90.461 | KV453163.1 | 41376  | 19-scf00468 | 19 |
| AX-158302385 | 23 | 90.461 | KV453164.1 | 39603  | 19-scf00469 | 19 |
| AX-158302386 | 23 | 90.461 | KV453164.1 | 43155  | 19-scf00469 | 19 |
| AX-158302387 | 23 | 90.461 | KV453164.1 | 47974  | 19-scf00469 | 19 |
| AX-158302388 | 23 | 90.461 | KV453164.1 | 50870  | 19-scf00469 | 19 |
| AX-158302389 | 23 | 90.461 | KV453164.1 | 54035  | 19-scf00469 | 19 |
| AX-157700688 | 23 | 90.461 | FI875068.1 | 534    | 19-scf00469 | UN |
| AX-158302390 | 23 | 90.462 | KV453164.1 | 55033  | 19-scf00469 | 19 |
| AX-158302393 | 23 | 90.464 | KV453164.1 | 57136  | 19-scf00469 | 19 |
| AX-158302403 | 23 | 90.887 | KV453164.1 | 69487  | 19-scf00469 | 19 |
| AX-158302404 | 23 | 90.89  | KV453164.1 | 72892  | 19-scf00469 | 19 |
| AX-158302407 | 23 | 91.108 | KV453164.1 | 78499  | 19-scf00469 | 19 |
| AX-158302410 | 23 | 91.108 | KV453164.1 | 85445  | 19-scf00469 | 19 |
| AX-158302412 | 23 | 91.108 | KV453164.1 | 89208  | 19-scf00469 | 19 |
| AX-158302413 | 23 | 91.108 | KV453164.1 | 91757  | 19-scf00469 | 19 |
| AX-158302415 | 23 | 91.108 | KV453164.1 | 93600  | 19-scf00469 | 19 |
| AX-158302416 | 23 | 91.109 | KV453164.1 | 95648  | 19-scf00469 | 19 |
| AX-158302418 | 23 | 91.431 | KV453164.1 | 97524  | 19-scf00469 | 19 |
| AX-158302419 | 23 | 91.432 | KV453164.1 | 98139  | 19-scf00469 | 19 |
| AX-158302360 | 23 | 91.433 | KV453163.1 | 79055  | 19-scf00468 | 19 |
| AX-158302361 | 23 | 91.433 | KV453163.1 | 80721  | 19-scf00468 | 19 |
| AX-158302374 | 23 | 91.433 | KV453164.1 | 23059  | 19-scf00469 | 19 |
| AX-158302375 | 23 | 91.433 | KV453164.1 | 23400  | 19-scf00469 | 19 |
| AX-158302376 | 23 | 91.433 | KV453164.1 | 25248  | 19-scf00469 | 19 |
| AX-158302378 | 23 | 91.433 | KV453164.1 | 27793  | 19-scf00469 | 19 |
| AX-158302396 | 23 | 91.433 | KV453164.1 | 61158  | 19-scf00469 | 19 |
| AX-158302398 | 23 | 91.433 | KV453164.1 | 64717  | 19-scf00469 | 19 |
| AX-158302420 | 23 | 91.433 | KV453164.1 | 98433  | 19-scf00469 | 19 |

|              |    |        |            |        |             |    |
|--------------|----|--------|------------|--------|-------------|----|
| AX-158302423 | 23 | 91.433 | KV453164.1 | 104221 | 19-scf00469 | 19 |
| AX-158302424 | 23 | 91.433 | KV453164.1 | 108516 | 19-scf00469 | 19 |
| AX-158302425 | 23 | 91.433 | KV453164.1 | 109061 | 19-scf00469 | 19 |
| AX-158302426 | 23 | 91.433 | KV453164.1 | 109731 | 19-scf00469 | 19 |
| AX-158302428 | 23 | 91.433 | KV453164.1 | 112796 | 19-scf00469 | 19 |
| AX-158302448 | 23 | 91.433 | KV453164.1 | 141156 | 19-scf00469 | 19 |
| AX-158302421 | 23 | 91.477 | KV453164.1 | 99616  | 19-scf00469 | 19 |
| AX-158302429 | 23 | 91.477 | KV453164.1 | 113411 | 19-scf00469 | 19 |
| AX-158302439 | 23 | 91.477 | KV453164.1 | 129239 | 19-scf00469 | 19 |
| AX-158302432 | 23 | 91.808 | KV453164.1 | 119815 | 19-scf00469 | 19 |
| AX-158302436 | 23 | 91.808 | KV453164.1 | 126122 | 19-scf00469 | 19 |
| AX-157688193 | 23 | 91.808 | KV453164.1 | 146717 | 19-scf00469 | 19 |
| AX-157688256 | 23 | 91.808 | KV453164.1 | 150270 | 19-scf00469 | 19 |
| AX-157689751 | 23 | 91.808 | KV453164.1 | 151417 | 19-scf00469 | 19 |
| AX-158302444 | 23 | 91.809 | KV453164.1 | 134548 | 19-scf00469 | 19 |
| AX-157773743 | 23 | 91.809 | KV453164.1 | 141667 | 19-scf00469 | 19 |
| AX-157684286 | 23 | 91.809 | KV453165.1 | 327    | 19-scf00471 | 19 |
| AX-158302450 | 23 | 92.464 | KV453164.1 | 154166 | 19-scf00469 | 19 |
| AX-158302453 | 23 | 92.632 | KV453164.1 | 159182 | 19-scf00469 | 19 |
| AX-158302459 | 23 | 92.632 | KV453164.1 | 170959 | 19-scf00469 | 19 |
| AX-158302451 | 23 | 92.674 | KV453164.1 | 158070 | 19-scf00469 | 19 |
| AX-158302458 | 23 | 92.674 | KV453164.1 | 167245 | 19-scf00469 | 19 |
| AX-157748202 | 23 | 92.674 | KV453164.1 | 170285 | 19-scf00469 | 19 |
| AX-158302463 | 23 | 92.674 | KV453164.1 | 175345 | 19-scf00469 | 19 |
| AX-157744433 | 23 | 92.674 | KV453164.1 | 176846 | 19-scf00469 | 19 |
| AX-158302466 | 23 | 92.674 | KV453164.1 | 180949 | 19-scf00469 | 19 |
| AX-158302467 | 23 | 92.674 | KV453164.1 | 181151 | 19-scf00469 | 19 |
| AX-158302470 | 23 | 92.674 | KV453164.1 | 183854 | 19-scf00469 | 19 |
| AX-158302473 | 23 | 92.674 | KV453164.1 | 188679 | 19-scf00469 | 19 |
| AX-158302474 | 23 | 92.674 | KV453164.1 | 194203 | 19-scf00469 | 19 |
| AX-158302477 | 23 | 92.674 | KV453164.1 | 200905 | 19-scf00469 | 19 |
| AX-158302478 | 23 | 92.674 | KV453164.1 | 201599 | 19-scf00469 | 19 |
| AX-158302479 | 23 | 92.674 | KV453164.1 | 202395 | 19-scf00469 | 19 |
| AX-158302472 | 23 | 92.826 | KV453164.1 | 188136 | 19-scf00469 | 19 |
| AX-158302480 | 23 | 92.826 | KV453164.1 | 203474 | 19-scf00469 | 19 |
| AX-157846436 | 23 | 92.978 | KV453164.1 | 210499 | 19-scf00469 | 19 |
| AX-158302484 | 23 | 92.978 | KV453164.1 | 210699 | 19-scf00469 | 19 |
| AX-157715889 | 23 | 92.978 | KV453164.1 | 213495 | 19-scf00469 | 19 |
| AX-157726554 | 23 | 92.978 | KV453164.1 | 219515 | 19-scf00469 | 19 |
| AX-158302489 | 23 | 92.978 | KV453164.1 | 223810 | 19-scf00469 | 19 |
| AX-158302491 | 23 | 92.978 | KV453164.1 | 228277 | 19-scf00469 | 19 |
| AX-158302495 | 23 | 92.978 | KV453164.1 | 232081 | 19-scf00469 | 19 |
| AX-158412114 | 23 | 92.978 | KV453164.1 | 232283 | 19-scf00469 | 19 |
| AX-158302496 | 23 | 92.978 | KV453164.1 | 232821 | 19-scf00469 | 19 |
| AX-158302465 | 23 | 93.096 | KV453164.1 | 179786 | 19-scf00469 | 19 |
| AX-158302486 | 23 | 93.096 | KV453164.1 | 220841 | 19-scf00469 | 19 |
| AX-158302487 | 23 | 93.096 | KV453164.1 | 222776 | 19-scf00469 | 19 |
| AX-158302500 | 23 | 93.096 | KV453164.1 | 251513 | 19-scf00469 | 19 |
| AX-158302524 | 23 | 93.096 | KV453167.1 | 30017  | 19-scf00472 | 19 |
| AX-158302526 | 23 | 93.096 | KV453167.1 | 31439  | 19-scf00472 | 19 |
| AX-158302547 | 23 | 93.096 | KV453167.1 | 62191  | 19-scf00472 | 19 |

|              |    |        |             |        |             |    |
|--------------|----|--------|-------------|--------|-------------|----|
| AX-157681629 | 23 | 93.096 | KV453166.1  | 15264  | 19-scf00473 | 19 |
| AX-157684324 | 23 | 93.096 | KV453166.1  | 45849  | 19-scf00473 | 19 |
| AX-157684327 | 23 | 93.096 | KV453166.1  | 48007  | 19-scf00473 | 19 |
| AX-157689672 | 23 | 93.096 | 3ML01031246 | 290    | scf06853_1  | UN |
| AX-157867675 | 23 | 93.415 | KV453167.1  | 13516  | 19-scf00472 | 19 |
| AX-157684290 | 23 | 93.415 | KV453166.1  | 1242   | 19-scf00473 | 19 |
| AX-157684291 | 23 | 93.415 | KV453166.1  | 1717   | 19-scf00473 | 19 |
| AX-157684292 | 23 | 93.415 | KV453166.1  | 1905   | 19-scf00473 | 19 |
| AX-158302510 | 23 | 93.453 | KV453167.1  | 10481  | 19-scf00472 | 19 |
| AX-158302516 | 23 | 93.453 | KV453167.1  | 15179  | 19-scf00472 | 19 |
| AX-157684299 | 23 | 93.453 | KV453166.1  | 8907   | 19-scf00473 | 19 |
| AX-157684300 | 23 | 93.453 | KV453166.1  | 9431   | 19-scf00473 | 19 |
| AX-157684311 | 23 | 93.453 | KV453166.1  | 24163  | 19-scf00473 | 19 |
| AX-157684301 | 23 | 93.479 | KV453166.1  | 11457  | 19-scf00473 | 19 |
| AX-157684312 | 23 | 93.479 | KV453166.1  | 25490  | 19-scf00473 | 19 |
| AX-157684304 | 23 | 93.524 | KV453166.1  | 16432  | 19-scf00473 | 19 |
| AX-157684307 | 23 | 93.524 | KV453166.1  | 18884  | 19-scf00473 | 19 |
| AX-157684308 | 23 | 93.524 | KV453166.1  | 20362  | 19-scf00473 | 19 |
| AX-157684309 | 23 | 93.524 | KV453166.1  | 22104  | 19-scf00473 | 19 |
| AX-157684310 | 23 | 93.524 | KV453166.1  | 22795  | 19-scf00473 | 19 |
| AX-157688479 | 23 | 93.57  | 3ML01026273 | 1686   | scf01868_1  | UN |
| AX-157684316 | 23 | 93.599 | KV453166.1  | 32534  | 19-scf00473 | 19 |
| AX-157684318 | 23 | 93.634 | KV453166.1  | 35347  | 19-scf00473 | 19 |
| AX-157684320 | 23 | 93.673 | KV453166.1  | 40018  | 19-scf00473 | 19 |
| AX-158302499 | 23 | 93.712 | KV453164.1  | 245847 | 19-scf00469 | 19 |
| AX-157684322 | 23 | 93.712 | KV453166.1  | 42072  | 19-scf00473 | 19 |
| AX-157684323 | 23 | 93.712 | KV453166.1  | 43709  | 19-scf00473 | 19 |
| AX-158302485 | 23 | 93.743 | KV453164.1  | 211428 | 19-scf00469 | 19 |
| AX-157684325 | 23 | 93.743 | KV453166.1  | 46740  | 19-scf00473 | 19 |
| AX-157684328 | 23 | 93.743 | KV453166.1  | 49256  | 19-scf00473 | 19 |
| AX-157684329 | 23 | 93.743 | KV453166.1  | 51041  | 19-scf00473 | 19 |
| AX-158302503 | 23 | 93.888 | KV453167.1  | 965    | 19-scf00472 | 19 |
| AX-158302509 | 23 | 93.888 | KV453167.1  | 10094  | 19-scf00472 | 19 |
| AX-158302519 | 23 | 93.888 | KV453167.1  | 18966  | 19-scf00472 | 19 |
| AX-158302529 | 23 | 93.888 | KV453167.1  | 34493  | 19-scf00472 | 19 |
| AX-157846437 | 23 | 93.888 | KV453167.1  | 57896  | 19-scf00472 | 19 |
| AX-158302506 | 23 | 93.969 | KV453167.1  | 7664   | 19-scf00472 | 19 |
| AX-158302507 | 23 | 94.176 | KV453167.1  | 9385   | 19-scf00472 | 19 |
| AX-158302508 | 23 | 94.176 | KV453167.1  | 9776   | 19-scf00472 | 19 |
| AX-158302513 | 23 | 94.176 | KV453167.1  | 12211  | 19-scf00472 | 19 |
| AX-157755736 | 23 | 94.176 | KV453167.1  | 30582  | 19-scf00472 | 19 |
| AX-157846439 | 23 | 94.176 | KV453167.1  | 72693  | 19-scf00472 | 19 |
| AX-157684298 | 23 | 94.176 | KV453166.1  | 8132   | 19-scf00473 | 19 |
| AX-157684321 | 23 | 94.176 | KV453166.1  | 41705  | 19-scf00473 | 19 |
| AX-158302515 | 23 | 94.178 | KV453167.1  | 14649  | 19-scf00472 | 19 |
| AX-158302517 | 23 | 94.181 | KV453167.1  | 15767  | 19-scf00472 | 19 |
| AX-158302520 | 23 | 94.181 | KV453167.1  | 19335  | 19-scf00472 | 19 |
| AX-158302521 | 23 | 94.181 | KV453167.1  | 26979  | 19-scf00472 | 19 |
| AX-157772186 | 23 | 94.181 | KV453167.1  | 28182  | 19-scf00472 | 19 |
| AX-158302542 | 23 | 94.181 | KV453167.1  | 54942  | 19-scf00472 | 19 |
| AX-157727691 | 23 | 94.181 | KV453167.1  | 55353  | 19-scf00472 | 19 |

|              |    |        |             |        |             |    |
|--------------|----|--------|-------------|--------|-------------|----|
| AX-158302544 | 23 | 94.181 | KV453167.1  | 56444  | 19-scf00472 | 19 |
| AX-158302545 | 23 | 94.181 | KV453167.1  | 56754  | 19-scf00472 | 19 |
| AX-157846454 | 23 | 94.181 | KV453171.1  | 258881 | 19-scf00474 | 19 |
| AX-158412116 | 23 | 94.476 | KV453167.1  | 66976  | 19-scf00472 | 19 |
| AX-158302549 | 23 | 94.522 | KV453167.1  | 68513  | 19-scf00472 | 19 |
| AX-157846438 | 23 | 94.522 | KV453167.1  | 70930  | 19-scf00472 | 19 |
| AX-158302550 | 23 | 94.522 | KV453167.1  | 72166  | 19-scf00472 | 19 |
| AX-158302553 | 23 | 94.68  | KV453167.1  | 75657  | 19-scf00472 | 19 |
| AX-158302554 | 23 | 94.836 | KV453167.1  | 77051  | 19-scf00472 | 19 |
| AX-157846440 | 23 | 94.836 | KV453167.1  | 82050  | 19-scf00472 | 19 |
| AX-158302557 | 23 | 94.836 | KV453167.1  | 83479  | 19-scf00472 | 19 |
| AX-158302558 | 23 | 94.836 | KV453167.1  | 84432  | 19-scf00472 | 19 |
| AX-157846441 | 23 | 94.836 | KV453167.1  | 86228  | 19-scf00472 | 19 |
| AX-157716663 | 23 | 94.836 | KV453167.1  | 88800  | 19-scf00472 | 19 |
| AX-158302561 | 23 | 94.836 | KV453167.1  | 91249  | 19-scf00472 | 19 |
| AX-158302564 | 23 | 94.836 | KV453167.1  | 94095  | 19-scf00472 | 19 |
| AX-158302565 | 23 | 94.836 | KV453167.1  | 95034  | 19-scf00472 | 19 |
| AX-158302567 | 23 | 94.836 | KV453167.1  | 97131  | 19-scf00472 | 19 |
| AX-158302570 | 23 | 94.836 | KV453167.1  | 101713 | 19-scf00472 | 19 |
| AX-158302575 | 23 | 94.836 | KV453167.1  | 104983 | 19-scf00472 | 19 |
| AX-158302581 | 23 | 94.836 | KV453167.1  | 110793 | 19-scf00472 | 19 |
| AX-158302582 | 23 | 94.836 | KV453167.1  | 112263 | 19-scf00472 | 19 |
| AX-158302603 | 23 | 94.836 | KV453167.1  | 149092 | 19-scf00472 | 19 |
| AX-157684377 | 23 | 94.836 | KV453170.1  | 6340   | 19-scf00477 | 19 |
| AX-157684378 | 23 | 94.836 | KV453170.1  | 7157   | 19-scf00477 | 19 |
| AX-157684379 | 23 | 94.836 | KV453170.1  | 7391   | 19-scf00477 | 19 |
| AX-157684382 | 23 | 94.836 | KV453170.1  | 9119   | 19-scf00477 | 19 |
| AX-158302566 | 23 | 94.945 | KV453167.1  | 96535  | 19-scf00472 | 19 |
| AX-157846442 | 23 | 95.055 | KV453167.1  | 93977  | 19-scf00472 | 19 |
| AX-157888152 | 23 | 95.055 | KV453167.1  | 102680 | 19-scf00472 | 19 |
| AX-158302572 | 23 | 95.055 | KV453167.1  | 103652 | 19-scf00472 | 19 |
| AX-158302573 | 23 | 95.055 | KV453167.1  | 103896 | 19-scf00472 | 19 |
| AX-158302574 | 23 | 95.055 | KV453167.1  | 104098 | 19-scf00472 | 19 |
| AX-158302576 | 23 | 95.055 | KV453167.1  | 106749 | 19-scf00472 | 19 |
| AX-158302580 | 23 | 95.055 | KV453167.1  | 110232 | 19-scf00472 | 19 |
| AX-158302583 | 23 | 95.055 | KV453167.1  | 113170 | 19-scf00472 | 19 |
| AX-158302586 | 23 | 95.055 | KV453167.1  | 115435 | 19-scf00472 | 19 |
| AX-158302590 | 23 | 95.055 | KV453167.1  | 118306 | 19-scf00472 | 19 |
| AX-157846443 | 23 | 95.055 | KV453167.1  | 120077 | 19-scf00472 | 19 |
| AX-157846444 | 23 | 95.055 | KV453167.1  | 121516 | 19-scf00472 | 19 |
| AX-158302592 | 23 | 95.055 | KV453167.1  | 123613 | 19-scf00472 | 19 |
| AX-157873458 | 23 | 95.055 | KV453167.1  | 126995 | 19-scf00472 | 19 |
| AX-158302594 | 23 | 95.055 | KV453167.1  | 131065 | 19-scf00472 | 19 |
| AX-157706569 | 23 | 95.055 | 3ML01032487 | 355    | scf08108_1  | UN |
| AX-157846445 | 23 | 95.089 | KV453167.1  | 121894 | 19-scf00472 | 19 |
| AX-157709550 | 23 | 95.124 | KV453167.1  | 125763 | 19-scf00472 | 19 |
| AX-158302595 | 23 | 95.145 | KV453167.1  | 132385 | 19-scf00472 | 19 |
| AX-158302596 | 23 | 95.168 | KV453167.1  | 133099 | 19-scf00472 | 19 |
| AX-158302600 | 23 | 95.168 | KV453167.1  | 144693 | 19-scf00472 | 19 |
| AX-158302597 | 23 | 95.277 | KV453167.1  | 134020 | 19-scf00472 | 19 |
| AX-158302601 | 23 | 95.332 | KV453167.1  | 145482 | 19-scf00472 | 19 |

|              |    |        |             |        |             |    |
|--------------|----|--------|-------------|--------|-------------|----|
| AX-157749716 | 23 | 95.532 | KV453167.1  | 148158 | 19-scf00472 | 19 |
| AX-158302607 | 23 | 95.532 | KV453167.1  | 154381 | 19-scf00472 | 19 |
| AX-157752692 | 23 | 95.532 | KV453167.1  | 155190 | 19-scf00472 | 19 |
| AX-158302610 | 23 | 95.532 | KV453167.1  | 156620 | 19-scf00472 | 19 |
| AX-158302612 | 23 | 95.532 | KV453167.1  | 160392 | 19-scf00472 | 19 |
| AX-157684335 | 23 | 95.779 | KV453168.1  | 6886   | 19-scf00475 | 19 |
| AX-157684337 | 23 | 95.779 | KV453168.1  | 10139  | 19-scf00475 | 19 |
| AX-157684341 | 23 | 95.779 | KV453168.1  | 16806  | 19-scf00475 | 19 |
| AX-158302578 | 23 | 95.902 | KV453167.1  | 108495 | 19-scf00472 | 19 |
| AX-158302579 | 23 | 95.902 | KV453167.1  | 109565 | 19-scf00472 | 19 |
| AX-158302621 | 23 | 95.902 | KV453171.1  | 5395   | 19-scf00474 | 19 |
| AX-157888153 | 23 | 95.902 | KV453171.1  | 6842   | 19-scf00474 | 19 |
| AX-158302632 | 23 | 95.902 | KV453171.1  | 27688  | 19-scf00474 | 19 |
| AX-158302633 | 23 | 95.902 | KV453171.1  | 30626  | 19-scf00474 | 19 |
| AX-158302648 | 23 | 95.902 | KV453171.1  | 47607  | 19-scf00474 | 19 |
| AX-158302661 | 23 | 95.902 | KV453171.1  | 65304  | 19-scf00474 | 19 |
| AX-157860854 | 23 | 95.902 | KV453171.1  | 103326 | 19-scf00474 | 19 |
| AX-158302681 | 23 | 95.902 | KV453171.1  | 105592 | 19-scf00474 | 19 |
| AX-157888154 | 23 | 95.902 | KV453171.1  | 105891 | 19-scf00474 | 19 |
| AX-158302687 | 23 | 95.902 | KV453171.1  | 112603 | 19-scf00474 | 19 |
| AX-158302689 | 23 | 95.902 | KV453171.1  | 116290 | 19-scf00474 | 19 |
| AX-158302703 | 23 | 95.902 | KV453171.1  | 157354 | 19-scf00474 | 19 |
| AX-158302736 | 23 | 95.902 | KV453171.1  | 206411 | 19-scf00474 | 19 |
| AX-158302745 | 23 | 95.902 | KV453171.1  | 215359 | 19-scf00474 | 19 |
| AX-157684344 | 23 | 95.902 | KV453168.1  | 25138  | 19-scf00475 | 19 |
| AX-157684345 | 23 | 95.902 | KV453168.1  | 25400  | 19-scf00475 | 19 |
| AX-157684347 | 23 | 95.902 | KV453168.1  | 31952  | 19-scf00475 | 19 |
| AX-157684352 | 23 | 95.902 | KV453168.1  | 40017  | 19-scf00475 | 19 |
| AX-157684354 | 23 | 95.902 | KV453168.1  | 43347  | 19-scf00475 | 19 |
| AX-157681631 | 23 | 95.902 | KV453168.1  | 44461  | 19-scf00475 | 19 |
| AX-157684355 | 23 | 95.902 | KV453168.1  | 46833  | 19-scf00475 | 19 |
| AX-157680140 | 23 | 95.902 | KV453168.1  | 49692  | 19-scf00475 | 19 |
| AX-157684356 | 23 | 95.902 | KV453168.1  | 51008  | 19-scf00475 | 19 |
| AX-157684357 | 23 | 95.902 | KV453168.1  | 51867  | 19-scf00475 | 19 |
| AX-157684358 | 23 | 95.902 | KV453168.1  | 57585  | 19-scf00475 | 19 |
| AX-157684362 | 23 | 95.902 | KV453168.1  | 66933  | 19-scf00475 | 19 |
| AX-157684363 | 23 | 95.902 | KV453168.1  | 67875  | 19-scf00475 | 19 |
| AX-157684370 | 23 | 95.902 | KV453168.1  | 77792  | 19-scf00475 | 19 |
| AX-157684371 | 23 | 95.902 | KV453169.1  | 357    | 19-scf00476 | 19 |
| AX-157684372 | 23 | 96.148 | KV453169.1  | 656    | 19-scf00476 | 19 |
| AX-157684375 | 23 | 96.148 | KV453170.1  | 3748   | 19-scf00477 | 19 |
| AX-157684383 | 23 | 96.148 | KV453170.1  | 10433  | 19-scf00477 | 19 |
| AX-157684385 | 23 | 96.148 | KV453170.1  | 11299  | 19-scf00477 | 19 |
| AX-157684389 | 23 | 96.148 | KV453170.1  | 15395  | 19-scf00477 | 19 |
| AX-157684390 | 23 | 96.148 | KV453170.1  | 15886  | 19-scf00477 | 19 |
| AX-157684393 | 23 | 96.148 | KV453170.1  | 17626  | 19-scf00477 | 19 |
| AX-157684395 | 23 | 96.148 | KV453170.1  | 19151  | 19-scf00477 | 19 |
| AX-157680364 | 23 | 96.148 | KV453170.1  | 21896  | 19-scf00477 | 19 |
| AX-157684397 | 23 | 96.148 | KV453170.1  | 23039  | 19-scf00477 | 19 |
| AX-157684399 | 23 | 96.148 | KV453170.1  | 24315  | 19-scf00477 | 19 |
| AX-157706339 | 23 | 96.148 | 3ML01032090 | 619    | scf07703_1  | UN |

|              |    |        |             |        |             |    |
|--------------|----|--------|-------------|--------|-------------|----|
| AX-157689770 | 23 | 96.148 | 3ML01032106 | 478    | scf07719_1  | UN |
| AX-158302619 | 23 | 96.379 | KV453171.1  | 3169   | 19-scf00474 | 19 |
| AX-158302622 | 23 | 96.604 | KV453171.1  | 5841   | 19-scf00474 | 19 |
| AX-157873459 | 23 | 96.608 | KV453171.1  | 9801   | 19-scf00474 | 19 |
| AX-157770178 | 23 | 96.661 | KV453171.1  | 16962  | 19-scf00474 | 19 |
| AX-157846449 | 23 | 96.78  | KV453171.1  | 24490  | 19-scf00474 | 19 |
| AX-158302637 | 23 | 96.914 | KV453171.1  | 33272  | 19-scf00474 | 19 |
| AX-158302638 | 23 | 96.914 | KV453171.1  | 33577  | 19-scf00474 | 19 |
| AX-158302639 | 23 | 96.914 | KV453171.1  | 33812  | 19-scf00474 | 19 |
| AX-158302641 | 23 | 96.914 | KV453171.1  | 34580  | 19-scf00474 | 19 |
| AX-158302644 | 23 | 96.914 | KV453171.1  | 38968  | 19-scf00474 | 19 |
| AX-157846450 | 23 | 96.914 | KV453171.1  | 55423  | 19-scf00474 | 19 |
| AX-158302652 | 23 | 96.914 | KV453171.1  | 56083  | 19-scf00474 | 19 |
| AX-158302653 | 23 | 96.914 | KV453171.1  | 56448  | 19-scf00474 | 19 |
| AX-158302654 | 23 | 96.914 | KV453171.1  | 57089  | 19-scf00474 | 19 |
| AX-158302655 | 23 | 96.914 | KV453171.1  | 58090  | 19-scf00474 | 19 |
| AX-158302656 | 23 | 96.914 | KV453171.1  | 60848  | 19-scf00474 | 19 |
| AX-157768412 | 23 | 96.914 | KV453171.1  | 68415  | 19-scf00474 | 19 |
| AX-157713304 | 23 | 96.914 | KV453171.1  | 98934  | 19-scf00474 | 19 |
| AX-158302695 | 23 | 96.914 | KV453171.1  | 132140 | 19-scf00474 | 19 |
| AX-158302723 | 23 | 96.914 | KV453171.1  | 183346 | 19-scf00474 | 19 |
| AX-158302735 | 23 | 96.914 | KV453171.1  | 205708 | 19-scf00474 | 19 |
| AX-158302660 | 23 | 97.024 | KV453171.1  | 64598  | 19-scf00474 | 19 |
| AX-158302663 | 23 | 97.024 | KV453171.1  | 69988  | 19-scf00474 | 19 |
| AX-158302664 | 23 | 97.024 | KV453171.1  | 70285  | 19-scf00474 | 19 |
| AX-158302666 | 23 | 97.024 | KV453171.1  | 71657  | 19-scf00474 | 19 |
| AX-158302667 | 23 | 97.024 | KV453171.1  | 72048  | 19-scf00474 | 19 |
| AX-157752789 | 23 | 97.024 | KV453171.1  | 82297  | 19-scf00474 | 19 |
| AX-158302672 | 23 | 97.024 | KV453171.1  | 85182  | 19-scf00474 | 19 |
| AX-158302673 | 23 | 97.024 | KV453171.1  | 87114  | 19-scf00474 | 19 |
| AX-158302674 | 23 | 97.024 | KV453171.1  | 87542  | 19-scf00474 | 19 |
| AX-158302679 | 23 | 97.065 | KV453171.1  | 95736  | 19-scf00474 | 19 |
| AX-158302680 | 23 | 97.098 | KV453171.1  | 100246 | 19-scf00474 | 19 |
| AX-158302683 | 23 | 97.098 | KV453171.1  | 107547 | 19-scf00474 | 19 |
| AX-158302726 | 23 | 97.098 | KV453171.1  | 188243 | 19-scf00474 | 19 |
| AX-158302739 | 23 | 97.098 | KV453171.1  | 209674 | 19-scf00474 | 19 |
| AX-158302684 | 23 | 97.133 | KV453171.1  | 108296 | 19-scf00474 | 19 |
| AX-157846451 | 23 | 97.242 | KV453171.1  | 83345  | 19-scf00474 | 19 |
| AX-157846452 | 23 | 97.242 | KV453171.1  | 112452 | 19-scf00474 | 19 |
| AX-158302693 | 23 | 97.242 | KV453171.1  | 129371 | 19-scf00474 | 19 |
| AX-158302698 | 23 | 97.242 | KV453171.1  | 145721 | 19-scf00474 | 19 |
| AX-157860855 | 23 | 97.242 | KV453171.1  | 146974 | 19-scf00474 | 19 |
| AX-158302701 | 23 | 97.242 | KV453171.1  | 155625 | 19-scf00474 | 19 |
| AX-158302702 | 23 | 97.242 | KV453171.1  | 156348 | 19-scf00474 | 19 |
| AX-158302706 | 23 | 97.242 | KV453171.1  | 162517 | 19-scf00474 | 19 |
| AX-158302708 | 23 | 97.242 | KV453171.1  | 163475 | 19-scf00474 | 19 |
| AX-158302709 | 23 | 97.242 | KV453171.1  | 164505 | 19-scf00474 | 19 |
| AX-158302710 | 23 | 97.242 | KV453171.1  | 165837 | 19-scf00474 | 19 |
| AX-158302711 | 23 | 97.242 | KV453171.1  | 167109 | 19-scf00474 | 19 |
| AX-158302716 | 23 | 97.242 | KV453171.1  | 174506 | 19-scf00474 | 19 |
| AX-158302717 | 23 | 97.242 | KV453171.1  | 176102 | 19-scf00474 | 19 |

|              |    |        |             |        |             |    |
|--------------|----|--------|-------------|--------|-------------|----|
| AX-158302718 | 23 | 97.242 | KV453171.1  | 177308 | 19-scf00474 | 19 |
| AX-158302719 | 23 | 97.242 | KV453171.1  | 177795 | 19-scf00474 | 19 |
| AX-158302720 | 23 | 97.242 | KV453171.1  | 178314 | 19-scf00474 | 19 |
| AX-158302721 | 23 | 97.242 | KV453171.1  | 179567 | 19-scf00474 | 19 |
| AX-157888155 | 23 | 97.242 | KV453171.1  | 182158 | 19-scf00474 | 19 |
| AX-158302731 | 23 | 97.242 | KV453171.1  | 193558 | 19-scf00474 | 19 |
| AX-158302734 | 23 | 97.242 | KV453171.1  | 203888 | 19-scf00474 | 19 |
| AX-158302738 | 23 | 97.242 | KV453171.1  | 208971 | 19-scf00474 | 19 |
| AX-158302725 | 23 | 97.3   | KV453171.1  | 185407 | 19-scf00474 | 19 |
| AX-157748461 | 23 | 97.351 | KV453171.1  | 28886  | 19-scf00474 | 19 |
| AX-158302645 | 23 | 97.351 | KV453171.1  | 41016  | 19-scf00474 | 19 |
| AX-158302668 | 23 | 97.351 | KV453171.1  | 76527  | 19-scf00474 | 19 |
| AX-158302704 | 23 | 97.351 | KV453171.1  | 158704 | 19-scf00474 | 19 |
| AX-157754362 | 23 | 97.351 | KV453171.1  | 159424 | 19-scf00474 | 19 |
| AX-157860856 | 23 | 97.351 | KV453171.1  | 185914 | 19-scf00474 | 19 |
| AX-157860857 | 23 | 97.351 | KV453171.1  | 188178 | 19-scf00474 | 19 |
| AX-158302727 | 23 | 97.351 | KV453171.1  | 189543 | 19-scf00474 | 19 |
| AX-157717533 | 23 | 97.351 | KV453171.1  | 194712 | 19-scf00474 | 19 |
| AX-158302732 | 23 | 97.351 | KV453171.1  | 201153 | 19-scf00474 | 19 |
| AX-158302733 | 23 | 97.351 | KV453171.1  | 203160 | 19-scf00474 | 19 |
| AX-158302737 | 23 | 97.351 | KV453171.1  | 207459 | 19-scf00474 | 19 |
| AX-158302740 | 23 | 97.351 | KV453171.1  | 210540 | 19-scf00474 | 19 |
| AX-158302741 | 23 | 97.351 | KV453171.1  | 211427 | 19-scf00474 | 19 |
| AX-158302742 | 23 | 97.351 | KV453171.1  | 211639 | 19-scf00474 | 19 |
| AX-158302749 | 23 | 97.351 | KV453171.1  | 219644 | 19-scf00474 | 19 |
| AX-157846453 | 23 | 97.351 | KV453171.1  | 222837 | 19-scf00474 | 19 |
| AX-157863984 | 23 | 97.351 | KV453171.1  | 267449 | 19-scf00474 | 19 |
| AX-158302772 | 23 | 97.351 | KV453171.1  | 290458 | 19-scf00474 | 19 |
| AX-158302773 | 23 | 97.351 | KV453171.1  | 291143 | 19-scf00474 | 19 |
| AX-157705976 | 23 | 97.351 | 3ML01031346 | 254    | scf06957_1  | UN |
| AX-158302647 | 23 | 97.57  | KV453171.1  | 42964  | 19-scf00474 | 19 |
| AX-158302747 | 23 | 97.57  | KV453171.1  | 216960 | 19-scf00474 | 19 |
| AX-157722997 | 23 | 97.57  | KV453171.1  | 222365 | 19-scf00474 | 19 |
| AX-158302753 | 23 | 97.57  | KV453171.1  | 241961 | 19-scf00474 | 19 |
| AX-158302754 | 23 | 97.57  | KV453171.1  | 243587 | 19-scf00474 | 19 |
| AX-158302755 | 23 | 97.57  | KV453171.1  | 244791 | 19-scf00474 | 19 |
| AX-158302758 | 23 | 97.57  | KV453171.1  | 247692 | 19-scf00474 | 19 |
| AX-158302759 | 23 | 97.57  | KV453171.1  | 248700 | 19-scf00474 | 19 |
| AX-157860858 | 23 | 97.57  | KV453171.1  | 250268 | 19-scf00474 | 19 |
| AX-157846455 | 23 | 97.57  | KV453171.1  | 261701 | 19-scf00474 | 19 |
| AX-158302762 | 23 | 97.57  | KV453171.1  | 265107 | 19-scf00474 | 19 |
| AX-158302764 | 23 | 97.57  | KV453171.1  | 266344 | 19-scf00474 | 19 |
| AX-157873462 | 23 | 97.57  | KV453171.1  | 267807 | 19-scf00474 | 19 |
| AX-158302765 | 23 | 97.57  | KV453171.1  | 270440 | 19-scf00474 | 19 |
| AX-158302766 | 23 | 97.57  | KV453171.1  | 270910 | 19-scf00474 | 19 |
| AX-157860859 | 23 | 97.57  | KV453171.1  | 281068 | 19-scf00474 | 19 |
| AX-157708059 | 23 | 97.57  | KV453171.1  | 281239 | 19-scf00474 | 19 |
| AX-158302770 | 23 | 97.57  | KV453171.1  | 284123 | 19-scf00474 | 19 |
| AX-158302776 | 23 | 97.57  | KV453171.1  | 297135 | 19-scf00474 | 19 |
| AX-157714623 | 23 | 97.57  | KV453171.1  | 298773 | 19-scf00474 | 19 |
| AX-157846458 | 23 | 97.57  | KV453171.1  | 300775 | 19-scf00474 | 19 |



|              |    |        |             |        |             |    |
|--------------|----|--------|-------------|--------|-------------|----|
| AX-158302782 | 23 | 97.57  | KV453171.1  | 308698 | 19-scf00474 | 19 |
| AX-157684417 | 23 | 97.57  | KV453175.1  | 25094  | 19-scf00480 | 19 |
| AX-157686464 | 23 | 97.57  | KV453172.1  | 6027   | 19-scf00693 | 19 |
| AX-158302804 | 23 | 97.57  | KV453173.1  | 77531  | 19-scf06757 | 19 |
| AX-158302800 | 23 | 97.57  | KV453173.1  | 89572  | 19-scf06757 | 19 |
| AX-158302794 | 23 | 97.57  | KV453173.1  | 97065  | 19-scf06757 | 19 |
| AX-157689715 | 23 | 97.57  | 3ML01031611 | 85     | scf07228_1  | UN |
| AX-157686468 | 23 | 97.896 | KV453172.1  | 19706  | 19-scf00693 | 19 |
| AX-157680341 | 23 | 97.897 | KV453176.1  | 20609  | 19-scf00483 | 19 |
| AX-157680911 | 23 | 97.897 | KV453172.1  | 24128  | 19-scf00693 | 19 |
| AX-157686471 | 23 | 97.897 | KV453172.1  | 26812  | 19-scf00693 | 19 |
| AX-157686472 | 23 | 97.897 | KV453172.1  | 27284  | 19-scf00693 | 19 |
| AX-157686474 | 23 | 97.942 | KV453172.1  | 29075  | 19-scf00693 | 19 |
| AX-157680914 | 23 | 97.981 | KV453172.1  | 32471  | 19-scf00693 | 19 |
| AX-158302775 | 23 | 98.006 | KV453171.1  | 293473 | 19-scf00474 | 19 |
| AX-158302784 | 23 | 98.006 | KV453171.1  | 311219 | 19-scf00474 | 19 |
| AX-157680503 | 23 | 98.006 | KV453176.1  | 21075  | 19-scf00483 | 19 |
| AX-158302934 | 23 | 98.006 | KV453180.1  | 99011  | 19-scf00485 | 19 |
| AX-158302951 | 23 | 98.006 | KV453180.1  | 142593 | 19-scf00485 | 19 |
| AX-158302965 | 23 | 98.006 | KV453180.1  | 201011 | 19-scf00485 | 19 |
| AX-158302966 | 23 | 98.006 | KV453180.1  | 206811 | 19-scf00485 | 19 |
| AX-157748022 | 23 | 98.006 | KV453174.1  | 56351  | 19-scf00806 | 19 |
| AX-158302831 | 23 | 98.006 | KV453173.1  | 34346  | 19-scf06757 | 19 |
| AX-158302828 | 23 | 98.006 | KV453173.1  | 45024  | 19-scf06757 | 19 |
| AX-158302823 | 23 | 98.006 | KV453173.1  | 51061  | 19-scf06757 | 19 |
| AX-158302822 | 23 | 98.006 | KV453173.1  | 52118  | 19-scf06757 | 19 |
| AX-158302820 | 23 | 98.006 | KV453173.1  | 56542  | 19-scf06757 | 19 |
| AX-157719632 | 23 | 98.006 | KV453173.1  | 62430  | 19-scf06757 | 19 |
| AX-158302813 | 23 | 98.006 | KV453173.1  | 66848  | 19-scf06757 | 19 |
| AX-158302812 | 23 | 98.006 | KV453173.1  | 67450  | 19-scf06757 | 19 |
| AX-158302803 | 23 | 98.006 | KV453173.1  | 78795  | 19-scf06757 | 19 |
| AX-158302798 | 23 | 98.006 | KV453173.1  | 91552  | 19-scf06757 | 19 |
| AX-158302797 | 23 | 98.006 | KV453173.1  | 92345  | 19-scf06757 | 19 |
| AX-158302785 | 23 | 98.006 | KV453173.1  | 106570 | 19-scf06757 | 19 |
| AX-157689469 | 23 | 98.006 | 3ML01029897 | 307    | scf05519_1  | UN |
| AX-157689716 | 23 | 98.006 | 3ML01031611 | 337    | scf07228_1  | UN |
| AX-158302835 | 23 | 98.015 | KV453173.1  | 28776  | 19-scf06757 | 19 |
| AX-157684482 | 23 | 98.034 | KV453176.1  | 38850  | 19-scf00483 | 19 |
| AX-158302937 | 23 | 98.034 | KV453180.1  | 101777 | 19-scf00485 | 19 |
| AX-157860864 | 23 | 98.034 | KV453173.1  | 10405  | 19-scf06757 | 19 |
| AX-158302839 | 23 | 98.034 | KV453173.1  | 24371  | 19-scf06757 | 19 |
| AX-157684454 | 23 | 98.052 | KV453178.1  | 5851   | 19-scf00481 | 19 |
| AX-158302881 | 23 | 98.052 | KV453174.1  | 91787  | 19-scf00806 | 19 |
| AX-158302840 | 23 | 98.052 | KV453173.1  | 23368  | 19-scf06757 | 19 |
| AX-157717830 | 23 | 98.052 | KV453173.1  | 35896  | 19-scf06757 | 19 |
| AX-157684473 | 23 | 98.062 | KV453176.1  | 19777  | 19-scf00483 | 19 |
| AX-158302842 | 23 | 98.062 | KV453173.1  | 14484  | 19-scf06757 | 19 |
| AX-158302817 | 23 | 98.062 | KV453173.1  | 59377  | 19-scf06757 | 19 |
| AX-157684434 | 23 | 98.076 | KV453178.1  | 61887  | 19-scf00481 | 19 |
| AX-157684458 | 23 | 98.076 | KV453178.1  | 94999  | 19-scf00481 | 19 |
| AX-157680005 | 23 | 98.076 | KV453172.1  | 30625  | 19-scf00693 | 19 |

|              |    |        |            |        |             |    |
|--------------|----|--------|------------|--------|-------------|----|
| AX-157680913 | 23 | 98.076 | KV453172.1 | 31646  | 19-scf00693 | 19 |
| AX-157686476 | 23 | 98.076 | KV453172.1 | 36278  | 19-scf00693 | 19 |
| AX-158302852 | 23 | 98.076 | KV453174.1 | 35126  | 19-scf00806 | 19 |
| AX-158302859 | 23 | 98.076 | KV453174.1 | 53774  | 19-scf00806 | 19 |
| AX-158302860 | 23 | 98.076 | KV453174.1 | 59013  | 19-scf00806 | 19 |
| AX-158302862 | 23 | 98.076 | KV453174.1 | 60902  | 19-scf00806 | 19 |
| AX-157710692 | 23 | 98.076 | KV453174.1 | 66930  | 19-scf00806 | 19 |
| AX-157744080 | 23 | 98.076 | KV453174.1 | 108523 | 19-scf00806 | 19 |
| AX-158302894 | 23 | 98.076 | KV453174.1 | 122702 | 19-scf00806 | 19 |
| AX-158302896 | 23 | 98.076 | KV453174.1 | 124864 | 19-scf00806 | 19 |
| AX-158302846 | 23 | 98.076 | KV453173.1 | 9268   | 19-scf06757 | 19 |
| AX-158302843 | 23 | 98.076 | KV453173.1 | 13716  | 19-scf06757 | 19 |
| AX-157684469 | 23 | 98.088 | KV453176.1 | 10483  | 19-scf00483 | 19 |
| AX-157684476 | 23 | 98.088 | KV453176.1 | 29679  | 19-scf00483 | 19 |
| AX-158302847 | 23 | 98.088 | KV453173.1 | 8116   | 19-scf06757 | 19 |
| AX-158302907 | 23 | 98.096 | KV453174.1 | 135189 | 19-scf00806 | 19 |
| AX-158302906 | 23 | 98.105 | KV453174.1 | 133536 | 19-scf00806 | 19 |
| AX-157684401 | 23 | 98.116 | KV453175.1 | 5122   | 19-scf00480 | 19 |
| AX-157684404 | 23 | 98.116 | KV453175.1 | 7504   | 19-scf00480 | 19 |
| AX-157684406 | 23 | 98.116 | KV453175.1 | 13383  | 19-scf00480 | 19 |
| AX-157684407 | 23 | 98.116 | KV453175.1 | 15186  | 19-scf00480 | 19 |
| AX-157684414 | 23 | 98.116 | KV453175.1 | 22822  | 19-scf00480 | 19 |
| AX-157684415 | 23 | 98.116 | KV453175.1 | 22952  | 19-scf00480 | 19 |
| AX-157680481 | 23 | 98.116 | KV453175.1 | 26139  | 19-scf00480 | 19 |
| AX-157684423 | 23 | 98.116 | KV453175.1 | 30364  | 19-scf00480 | 19 |
| AX-157684425 | 23 | 98.116 | KV453175.1 | 34029  | 19-scf00480 | 19 |
| AX-157680762 | 23 | 98.116 | KV453178.1 | 6627   | 19-scf00481 | 19 |
| AX-157684452 | 23 | 98.116 | KV453178.1 | 15537  | 19-scf00481 | 19 |
| AX-157684449 | 23 | 98.116 | KV453178.1 | 21947  | 19-scf00481 | 19 |
| AX-157681170 | 23 | 98.116 | KV453178.1 | 49889  | 19-scf00481 | 19 |
| AX-157684430 | 23 | 98.116 | KV453178.1 | 67037  | 19-scf00481 | 19 |
| AX-157684427 | 23 | 98.116 | KV453178.1 | 79857  | 19-scf00481 | 19 |
| AX-157684463 | 23 | 98.116 | KV453178.1 | 82042  | 19-scf00481 | 19 |
| AX-157684460 | 23 | 98.116 | KV453178.1 | 89052  | 19-scf00481 | 19 |
| AX-157684468 | 23 | 98.116 | KV453176.1 | 9194   | 19-scf00483 | 19 |
| AX-157684470 | 23 | 98.116 | KV453176.1 | 16142  | 19-scf00483 | 19 |
| AX-157684475 | 23 | 98.116 | KV453176.1 | 24293  | 19-scf00483 | 19 |
| AX-157684483 | 23 | 98.116 | KV453176.1 | 39788  | 19-scf00483 | 19 |
| AX-157680106 | 23 | 98.116 | KV453176.1 | 42113  | 19-scf00483 | 19 |
| AX-157684485 | 23 | 98.116 | KV453176.1 | 45692  | 19-scf00483 | 19 |
| AX-157684487 | 23 | 98.116 | KV453176.1 | 53052  | 19-scf00483 | 19 |
| AX-157680458 | 23 | 98.116 | KV453176.1 | 70226  | 19-scf00483 | 19 |
| AX-158302952 | 23 | 98.116 | KV453180.1 | 147762 | 19-scf00485 | 19 |
| AX-158302958 | 23 | 98.116 | KV453180.1 | 161372 | 19-scf00485 | 19 |
| AX-157686470 | 23 | 98.116 | KV453172.1 | 23396  | 19-scf00693 | 19 |
| AX-157686477 | 23 | 98.116 | KV453172.1 | 37506  | 19-scf00693 | 19 |
| AX-158302855 | 23 | 98.116 | KV453174.1 | 41611  | 19-scf00806 | 19 |
| AX-158302856 | 23 | 98.116 | KV453174.1 | 45825  | 19-scf00806 | 19 |
| AX-157755677 | 23 | 98.116 | KV453174.1 | 48509  | 19-scf00806 | 19 |
| AX-158302861 | 23 | 98.116 | KV453174.1 | 60045  | 19-scf00806 | 19 |
| AX-157717856 | 23 | 98.116 | KV453174.1 | 68459  | 19-scf00806 | 19 |

|              |    |        |            |        |             |    |
|--------------|----|--------|------------|--------|-------------|----|
| AX-158302875 | 23 | 98.116 | KV453174.1 | 79447  | 19-scf00806 | 19 |
| AX-158302879 | 23 | 98.116 | KV453174.1 | 84671  | 19-scf00806 | 19 |
| AX-158302884 | 23 | 98.116 | KV453174.1 | 95469  | 19-scf00806 | 19 |
| AX-157846465 | 23 | 98.116 | KV453174.1 | 101411 | 19-scf00806 | 19 |
| AX-157880994 | 23 | 98.116 | KV453174.1 | 108429 | 19-scf00806 | 19 |
| AX-158302888 | 23 | 98.116 | KV453174.1 | 109973 | 19-scf00806 | 19 |
| AX-158302890 | 23 | 98.116 | KV453174.1 | 111567 | 19-scf00806 | 19 |
| AX-158302891 | 23 | 98.116 | KV453174.1 | 113107 | 19-scf00806 | 19 |
| AX-157752160 | 23 | 98.116 | KV453174.1 | 114881 | 19-scf00806 | 19 |
| AX-158302892 | 23 | 98.116 | KV453174.1 | 115447 | 19-scf00806 | 19 |
| AX-158302902 | 23 | 98.116 | KV453174.1 | 130127 | 19-scf00806 | 19 |
| AX-158302818 | 23 | 98.116 | KV453173.1 | 57890  | 19-scf06757 | 19 |
| AX-158302801 | 23 | 98.116 | KV453173.1 | 87953  | 19-scf06757 | 19 |
| AX-157732076 | 23 | 98.116 | KV453173.1 | 97937  | 19-scf06757 | 19 |
| AX-157687865 | 23 | 98.116 | KV453635.1 | 5940   | scf01067    | UN |
| AX-157681276 | 23 | 98.116 |            | 177    | scf10460    | UN |
| AX-157690003 | 23 | 98.116 |            | 96     | scf20000    | UN |
| AX-158302956 | 23 | 98.264 | KV453180.1 | 158565 | 19-scf00485 | 19 |
| AX-158302957 | 23 | 98.423 | KV453180.1 | 160863 | 19-scf00485 | 19 |
| AX-157685977 | 23 | 98.423 | KV453181.1 | 47366  | 19-scf00660 | 19 |
| AX-158303155 | 24 | 0      | KV453246.1 | 7012   | 24-scf00487 | 24 |
| AX-158303156 | 24 | 1.87   | KV453246.1 | 10691  | 24-scf00487 | 24 |
| AX-158303160 | 24 | 1.913  | KV453246.1 | 23898  | 24-scf00487 | 24 |
| AX-157846492 | 24 | 2.287  | KV453246.1 | 26003  | 24-scf00487 | 24 |
| AX-158303164 | 24 | 2.291  | KV453246.1 | 33989  | 24-scf00487 | 24 |
| AX-158303166 | 24 | 2.301  | KV453246.1 | 37051  | 24-scf00487 | 24 |
| AX-158303169 | 24 | 2.381  | KV453246.1 | 40629  | 24-scf00487 | 24 |
| AX-158303176 | 24 | 2.489  | KV453246.1 | 47327  | 24-scf00487 | 24 |
| AX-158303177 | 24 | 2.489  | KV453246.1 | 47737  | 24-scf00487 | 24 |
| AX-158303231 | 24 | 2.489  | KV453246.1 | 174395 | 24-scf00487 | 24 |
| AX-158303183 | 24 | 2.676  | KV453246.1 | 55775  | 24-scf00487 | 24 |
| AX-158303201 | 24 | 2.676  | KV453246.1 | 95138  | 24-scf00487 | 24 |
| AX-158303205 | 24 | 2.676  | KV453246.1 | 99277  | 24-scf00487 | 24 |
| AX-158303206 | 24 | 2.676  | KV453246.1 | 99854  | 24-scf00487 | 24 |
| AX-158303210 | 24 | 2.676  | KV453246.1 | 103992 | 24-scf00487 | 24 |
| AX-158303213 | 24 | 2.676  | KV453246.1 | 114676 | 24-scf00487 | 24 |
| AX-158303223 | 24 | 2.676  | KV453246.1 | 133450 | 24-scf00487 | 24 |
| AX-158303224 | 24 | 2.676  | KV453246.1 | 136256 | 24-scf00487 | 24 |
| AX-158420780 | 24 | 2.676  | KV453251.1 | 32557  | 24-scf00641 | 24 |
| AX-157685801 | 24 | 2.676  | KV453251.1 | 76448  | 24-scf00641 | 24 |
| AX-157686876 | 24 | 2.676  | KV453247.1 | 20627  | 24-scf00752 | 24 |
| AX-158303531 | 24 | 3.489  | KV453253.1 | 289931 | 24-scf00489 | 24 |
| AX-158303534 | 24 | 3.489  | KV453253.1 | 294099 | 24-scf00489 | 24 |
| AX-157853404 | 24 | 3.489  | KV453249.1 | 156235 | 24-scf00603 | 24 |
| AX-158377312 | 24 | 3.489  | KV453249.1 | 168746 | 24-scf00603 | 24 |
| AX-158379069 | 24 | 3.489  | KV453249.1 | 168969 | 24-scf00603 | 24 |
| AX-158302987 | 24 | 4.155  | KV453245.1 | 18634  | 24-scf00486 | 24 |
| AX-158302988 | 24 | 4.16   | KV453245.1 | 21399  | 24-scf00486 | 24 |
| AX-158303012 | 24 | 4.16   | KV453245.1 | 83991  | 24-scf00486 | 24 |
| AX-158303060 | 24 | 4.16   | KV453245.1 | 170544 | 24-scf00486 | 24 |
| AX-158303329 | 24 | 4.16   | KV453248.1 | 145291 | 24-scf00488 | 24 |

|              |    |       |            |        |             |    |
|--------------|----|-------|------------|--------|-------------|----|
| AX-158302990 | 24 | 4.164 | KV453245.1 | 28881  | 24-scf00486 | 24 |
| AX-158302992 | 24 | 4.593 | KV453245.1 | 32992  | 24-scf00486 | 24 |
| AX-158302993 | 24 | 4.593 | KV453245.1 | 43710  | 24-scf00486 | 24 |
| AX-158302995 | 24 | 4.593 | KV453245.1 | 47851  | 24-scf00486 | 24 |
| AX-157867683 | 24 | 4.593 | KV453245.1 | 112721 | 24-scf00486 | 24 |
| AX-157846475 | 24 | 4.635 | KV453245.1 | 33948  | 24-scf00486 | 24 |
| AX-157846481 | 24 | 4.635 | KV453245.1 | 67864  | 24-scf00486 | 24 |
| AX-158303200 | 24 | 4.635 | KV453246.1 | 89749  | 24-scf00487 | 24 |
| AX-157846479 | 24 | 4.679 | KV453245.1 | 45238  | 24-scf00486 | 24 |
| AX-158302997 | 24 | 4.702 | KV453245.1 | 51808  | 24-scf00486 | 24 |
| AX-158303001 | 24 | 4.702 | KV453245.1 | 56116  | 24-scf00486 | 24 |
| AX-157846480 | 24 | 4.749 | KV453245.1 | 64756  | 24-scf00486 | 24 |
| AX-158303003 | 24 | 4.784 | KV453245.1 | 68222  | 24-scf00486 | 24 |
| AX-158303005 | 24 | 4.812 | KV453245.1 | 69373  | 24-scf00486 | 24 |
| AX-157717497 | 24 | 5.03  | KV453245.1 | 74744  | 24-scf00486 | 24 |
| AX-158303009 | 24 | 5.03  | KV453245.1 | 77535  | 24-scf00486 | 24 |
| AX-158303024 | 24 | 5.249 | KV453245.1 | 107456 | 24-scf00486 | 24 |
| AX-157846482 | 24 | 5.249 | KV453245.1 | 107831 | 24-scf00486 | 24 |
| AX-158303026 | 24 | 5.469 | KV453245.1 | 110857 | 24-scf00486 | 24 |
| AX-157739908 | 24 | 5.688 | KV453245.1 | 115538 | 24-scf00486 | 24 |
| AX-158303079 | 24 | 5.688 | KV453245.1 | 196864 | 24-scf00486 | 24 |
| AX-158302989 | 24 | 5.907 | KV453245.1 | 25597  | 24-scf00486 | 24 |
| AX-158303002 | 24 | 5.907 | KV453245.1 | 62240  | 24-scf00486 | 24 |
| AX-158303033 | 24 | 5.907 | KV453245.1 | 131574 | 24-scf00486 | 24 |
| AX-158303040 | 24 | 5.907 | KV453245.1 | 140513 | 24-scf00486 | 24 |
| AX-158303043 | 24 | 5.907 | KV453245.1 | 143090 | 24-scf00486 | 24 |
| AX-158303044 | 24 | 5.907 | KV453245.1 | 146548 | 24-scf00486 | 24 |
| AX-158303045 | 24 | 5.907 | KV453245.1 | 147143 | 24-scf00486 | 24 |
| AX-158303046 | 24 | 5.907 | KV453245.1 | 151068 | 24-scf00486 | 24 |
| AX-158303048 | 24 | 5.907 | KV453245.1 | 152574 | 24-scf00486 | 24 |
| AX-158303049 | 24 | 5.907 | KV453245.1 | 153469 | 24-scf00486 | 24 |
| AX-158303052 | 24 | 5.907 | KV453245.1 | 156883 | 24-scf00486 | 24 |
| AX-158303053 | 24 | 5.907 | KV453245.1 | 158529 | 24-scf00486 | 24 |
| AX-158303054 | 24 | 5.907 | KV453245.1 | 164054 | 24-scf00486 | 24 |
| AX-158303057 | 24 | 5.907 | KV453245.1 | 168083 | 24-scf00486 | 24 |
| AX-158303059 | 24 | 5.907 | KV453245.1 | 169548 | 24-scf00486 | 24 |
| AX-157846485 | 24 | 5.907 | KV453245.1 | 171888 | 24-scf00486 | 24 |
| AX-158303062 | 24 | 5.907 | KV453245.1 | 173082 | 24-scf00486 | 24 |
| AX-158303064 | 24 | 5.907 | KV453245.1 | 174345 | 24-scf00486 | 24 |
| AX-158303074 | 24 | 5.907 | KV453245.1 | 191021 | 24-scf00486 | 24 |
| AX-158303078 | 24 | 5.907 | KV453245.1 | 196439 | 24-scf00486 | 24 |
| AX-158303087 | 24 | 5.907 | KV453245.1 | 213020 | 24-scf00486 | 24 |
| AX-158303088 | 24 | 5.907 | KV453245.1 | 213717 | 24-scf00486 | 24 |
| AX-158303089 | 24 | 5.907 | KV453245.1 | 214633 | 24-scf00486 | 24 |
| AX-158303094 | 24 | 5.907 | KV453245.1 | 226473 | 24-scf00486 | 24 |
| AX-158303095 | 24 | 5.907 | KV453245.1 | 227446 | 24-scf00486 | 24 |
| AX-157701193 | 24 | 5.907 | KV453245.1 | 228076 | 24-scf00486 | 24 |
| AX-158303100 | 24 | 5.907 | KV453245.1 | 232511 | 24-scf00486 | 24 |
| AX-158303102 | 24 | 5.907 | KV453245.1 | 233403 | 24-scf00486 | 24 |
| AX-158303104 | 24 | 5.907 | KV453245.1 | 236629 | 24-scf00486 | 24 |
| AX-158303106 | 24 | 5.907 | KV453245.1 | 239750 | 24-scf00486 | 24 |

|              |    |        |             |        |             |    |
|--------------|----|--------|-------------|--------|-------------|----|
| AX-158303107 | 24 | 5.907  | KV453245.1  | 242995 | 24-scf00486 | 24 |
| AX-158303108 | 24 | 5.907  | KV453245.1  | 245345 | 24-scf00486 | 24 |
| AX-158303109 | 24 | 5.907  | KV453245.1  | 245763 | 24-scf00486 | 24 |
| AX-158303111 | 24 | 5.907  | KV453245.1  | 247231 | 24-scf00486 | 24 |
| AX-158303112 | 24 | 5.907  | KV453245.1  | 247756 | 24-scf00486 | 24 |
| AX-158303113 | 24 | 5.907  | KV453245.1  | 249696 | 24-scf00486 | 24 |
| AX-158303114 | 24 | 5.907  | KV453245.1  | 252474 | 24-scf00486 | 24 |
| AX-158303115 | 24 | 5.907  | KV453245.1  | 253557 | 24-scf00486 | 24 |
| AX-158303132 | 24 | 5.907  | KV453245.1  | 278224 | 24-scf00486 | 24 |
| AX-158303133 | 24 | 5.907  | KV453245.1  | 278642 | 24-scf00486 | 24 |
| AX-158303134 | 24 | 5.907  | KV453245.1  | 279160 | 24-scf00486 | 24 |
| AX-158303135 | 24 | 5.907  | KV453245.1  | 279551 | 24-scf00486 | 24 |
| AX-158303136 | 24 | 5.907  | KV453245.1  | 283151 | 24-scf00486 | 24 |
| AX-158303137 | 24 | 5.907  | KV453245.1  | 283879 | 24-scf00486 | 24 |
| AX-158303138 | 24 | 5.907  | KV453245.1  | 284476 | 24-scf00486 | 24 |
| AX-157716404 | 24 | 5.907  | KV453245.1  | 285088 | 24-scf00486 | 24 |
| AX-158303140 | 24 | 5.907  | KV453245.1  | 286895 | 24-scf00486 | 24 |
| AX-158417670 | 24 | 5.907  | KV453245.1  | 288605 | 24-scf00486 | 24 |
| AX-158303147 | 24 | 5.907  | KV453245.1  | 294330 | 24-scf00486 | 24 |
| AX-158303336 | 24 | 5.907  | KV453248.1  | 156186 | 24-scf00488 | 24 |
| AX-158303420 | 24 | 5.907  | KV453248.1  | 300255 | 24-scf00488 | 24 |
| AX-157846521 | 24 | 5.907  | KV453248.1  | 376025 | 24-scf00488 | 24 |
| AX-157688314 | 24 | 5.907  | 3ML01025903 | 1573   | scf01512_1  | UN |
| AX-157697220 | 24 | 5.907  | 3ML01025913 | 598    | scf01522_1  | UN |
| AX-158303151 | 24 | 5.909  | KV453245.1  | 307569 | 24-scf00486 | 24 |
| AX-158303152 | 24 | 6.629  | KV453245.1  | 318366 | 24-scf00486 | 24 |
| AX-158303244 | 24 | 7.732  | KV453248.1  | 4133   | 24-scf00488 | 24 |
| AX-157846499 | 24 | 7.98   | KV453248.1  | 8488   | 24-scf00488 | 24 |
| AX-157721437 | 24 | 7.98   | KV453248.1  | 131549 | 24-scf00488 | 24 |
| AX-157713897 | 24 | 7.98   | KV453248.1  | 133251 | 24-scf00488 | 24 |
| AX-157846501 | 24 | 8.028  | KV453248.1  | 9162   | 24-scf00488 | 24 |
| AX-158303247 | 24 | 8.715  | KV453248.1  | 10810  | 24-scf00488 | 24 |
| AX-158303250 | 24 | 8.715  | KV453248.1  | 17089  | 24-scf00488 | 24 |
| AX-157756885 | 24 | 8.715  | KV453248.1  | 17491  | 24-scf00488 | 24 |
| AX-157846502 | 24 | 8.715  | KV453248.1  | 25048  | 24-scf00488 | 24 |
| AX-158303252 | 24 | 9.42   | KV453248.1  | 26389  | 24-scf00488 | 24 |
| AX-158303253 | 24 | 9.423  | KV453248.1  | 27433  | 24-scf00488 | 24 |
| AX-158303254 | 24 | 9.554  | KV453248.1  | 30209  | 24-scf00488 | 24 |
| AX-158303256 | 24 | 9.664  | KV453248.1  | 34803  | 24-scf00488 | 24 |
| AX-158303257 | 24 | 9.664  | KV453248.1  | 36171  | 24-scf00488 | 24 |
| AX-158303265 | 24 | 9.991  | KV453248.1  | 43158  | 24-scf00488 | 24 |
| AX-158303266 | 24 | 9.992  | KV453248.1  | 43871  | 24-scf00488 | 24 |
| AX-158303267 | 24 | 10.02  | KV453248.1  | 44332  | 24-scf00488 | 24 |
| AX-158303269 | 24 | 10.052 | KV453248.1  | 45910  | 24-scf00488 | 24 |
| AX-157740922 | 24 | 10.176 | KV453248.1  | 48633  | 24-scf00488 | 24 |
| AX-158303271 | 24 | 10.32  | KV453248.1  | 51638  | 24-scf00488 | 24 |
| AX-157846505 | 24 | 10.32  | KV453248.1  | 58841  | 24-scf00488 | 24 |
| AX-158303251 | 24 | 10.373 | KV453248.1  | 22341  | 24-scf00488 | 24 |
| AX-158303275 | 24 | 10.373 | KV453248.1  | 59152  | 24-scf00488 | 24 |
| AX-158303294 | 24 | 10.373 | KV453248.1  | 79326  | 24-scf00488 | 24 |
| AX-158303491 | 24 | 10.373 | KV453253.1  | 180915 | 24-scf00489 | 24 |

|              |    |        |            |        |             |    |
|--------------|----|--------|------------|--------|-------------|----|
| AX-158303509 | 24 | 10.373 | KV453253.1 | 241018 | 24-scf00489 | 24 |
| AX-158412136 | 24 | 10.373 | KV453253.1 | 241259 | 24-scf00489 | 24 |
| AX-158303511 | 24 | 10.373 | KV453253.1 | 246411 | 24-scf00489 | 24 |
| AX-158303552 | 24 | 10.373 | KV453253.1 | 336236 | 24-scf00489 | 24 |
| AX-158303554 | 24 | 10.373 | KV453253.1 | 339092 | 24-scf00489 | 24 |
| AX-157846522 | 24 | 10.373 | KV453253.1 | 339524 | 24-scf00489 | 24 |
| AX-158303560 | 24 | 10.373 | KV453253.1 | 351137 | 24-scf00489 | 24 |
| AX-158303689 | 24 | 10.373 | KV453253.1 | 528613 | 24-scf00489 | 24 |
| AX-158303753 | 24 | 10.373 | KV453253.1 | 601042 | 24-scf00489 | 24 |
| AX-158377067 | 24 | 10.373 | KV453244.1 | 31953  | 24-scf00600 | 24 |
| AX-158377818 | 24 | 10.373 | KV453252.1 | 55373  | 24-scf00618 | 24 |
| AX-158377820 | 24 | 10.373 | KV453252.1 | 61377  | 24-scf00618 | 24 |
| AX-157853463 | 24 | 10.373 | KV453252.1 | 62068  | 24-scf00618 | 24 |
| AX-158377835 | 24 | 10.373 | KV453252.1 | 95621  | 24-scf00618 | 24 |
| AX-158303255 | 24 | 10.429 | KV453248.1 | 31560  | 24-scf00488 | 24 |
| AX-158303285 | 24 | 10.429 | KV453248.1 | 71704  | 24-scf00488 | 24 |
| AX-158303287 | 24 | 10.429 | KV453248.1 | 72779  | 24-scf00488 | 24 |
| AX-158303289 | 24 | 10.429 | KV453248.1 | 73715  | 24-scf00488 | 24 |
| AX-158303290 | 24 | 10.429 | KV453248.1 | 76253  | 24-scf00488 | 24 |
| AX-157752855 | 24 | 10.429 | KV453248.1 | 86165  | 24-scf00488 | 24 |
| AX-157713334 | 24 | 10.429 | KV453248.1 | 90866  | 24-scf00488 | 24 |
| AX-157744238 | 24 | 10.429 | KV453248.1 | 91762  | 24-scf00488 | 24 |
| AX-158303302 | 24 | 10.429 | KV453248.1 | 101116 | 24-scf00488 | 24 |
| AX-158303243 | 24 | 13.162 | KV453248.1 | 2537   | 24-scf00488 | 24 |
| AX-157738373 | 24 | 13.162 | KV453248.1 | 106679 | 24-scf00488 | 24 |
| AX-158303303 | 24 | 13.162 | KV453248.1 | 110393 | 24-scf00488 | 24 |
| AX-158303305 | 24 | 13.162 | KV453248.1 | 113640 | 24-scf00488 | 24 |
| AX-158303312 | 24 | 13.162 | KV453248.1 | 122556 | 24-scf00488 | 24 |
| AX-158303314 | 24 | 13.162 | KV453248.1 | 126419 | 24-scf00488 | 24 |
| AX-158303313 | 24 | 13.225 | KV453248.1 | 122860 | 24-scf00488 | 24 |
| AX-158303316 | 24 | 13.272 | KV453248.1 | 133514 | 24-scf00488 | 24 |
| AX-158303318 | 24 | 13.272 | KV453248.1 | 137215 | 24-scf00488 | 24 |
| AX-157846513 | 24 | 13.272 | KV453248.1 | 138123 | 24-scf00488 | 24 |
| AX-158303319 | 24 | 13.272 | KV453248.1 | 138721 | 24-scf00488 | 24 |
| AX-158303325 | 24 | 13.272 | KV453248.1 | 141834 | 24-scf00488 | 24 |
| AX-158303345 | 24 | 13.272 | KV453248.1 | 174198 | 24-scf00488 | 24 |
| AX-158303245 | 24 | 13.328 | KV453248.1 | 4381   | 24-scf00488 | 24 |
| AX-158303246 | 24 | 13.328 | KV453248.1 | 7603   | 24-scf00488 | 24 |
| AX-158303326 | 24 | 13.328 | KV453248.1 | 142127 | 24-scf00488 | 24 |
| AX-158303327 | 24 | 13.328 | KV453248.1 | 142368 | 24-scf00488 | 24 |
| AX-158303328 | 24 | 13.344 | KV453248.1 | 145106 | 24-scf00488 | 24 |
| AX-158303067 | 24 | 13.381 | KV453245.1 | 177413 | 24-scf00486 | 24 |
| AX-158303330 | 24 | 13.381 | KV453248.1 | 146233 | 24-scf00488 | 24 |
| AX-158303332 | 24 | 13.381 | KV453248.1 | 147636 | 24-scf00488 | 24 |
| AX-157740671 | 24 | 13.381 | KV453248.1 | 167482 | 24-scf00488 | 24 |
| AX-158303374 | 24 | 13.381 | KV453248.1 | 214969 | 24-scf00488 | 24 |
| AX-158303334 | 24 | 13.49  | KV453248.1 | 152035 | 24-scf00488 | 24 |
| AX-157846517 | 24 | 13.49  | KV453248.1 | 210395 | 24-scf00488 | 24 |
| AX-158303346 | 24 | 13.531 | KV453248.1 | 175055 | 24-scf00488 | 24 |
| AX-157757748 | 24 | 13.6   | KV453248.1 | 176299 | 24-scf00488 | 24 |
| AX-158303350 | 24 | 13.6   | KV453248.1 | 180254 | 24-scf00488 | 24 |

|              |    |        |             |        |             |    |
|--------------|----|--------|-------------|--------|-------------|----|
| AX-158303352 | 24 | 13.6   | KV453248.1  | 185757 | 24-scf00488 | 24 |
| AX-158303351 | 24 | 13.678 | KV453248.1  | 183097 | 24-scf00488 | 24 |
| AX-157860875 | 24 | 13.729 | KV453248.1  | 117453 | 24-scf00488 | 24 |
| AX-158303338 | 24 | 13.729 | KV453248.1  | 159238 | 24-scf00488 | 24 |
| AX-158303353 | 24 | 13.729 | KV453248.1  | 186661 | 24-scf00488 | 24 |
| AX-157758836 | 24 | 13.729 | KV453248.1  | 193673 | 24-scf00488 | 24 |
| AX-158303360 | 24 | 13.729 | KV453248.1  | 197271 | 24-scf00488 | 24 |
| AX-158303361 | 24 | 13.729 | KV453248.1  | 197941 | 24-scf00488 | 24 |
| AX-158303363 | 24 | 13.729 | KV453248.1  | 200751 | 24-scf00488 | 24 |
| AX-158303364 | 24 | 13.729 | KV453248.1  | 201852 | 24-scf00488 | 24 |
| AX-158417675 | 24 | 13.729 | KV453248.1  | 203932 | 24-scf00488 | 24 |
| AX-158303368 | 24 | 13.729 | KV453248.1  | 205190 | 24-scf00488 | 24 |
| AX-157846518 | 24 | 13.729 | KV453248.1  | 238456 | 24-scf00488 | 24 |
| AX-158303393 | 24 | 13.729 | KV453248.1  | 246005 | 24-scf00488 | 24 |
| AX-157750508 | 24 | 13.729 | KV453248.1  | 271578 | 24-scf00488 | 24 |
| AX-158303422 | 24 | 13.729 | KV453248.1  | 303273 | 24-scf00488 | 24 |
| AX-158303369 | 24 | 13.795 | KV453248.1  | 207475 | 24-scf00488 | 24 |
| AX-158303371 | 24 | 13.858 | KV453248.1  | 208289 | 24-scf00488 | 24 |
| AX-157750056 | 24 | 13.858 | KV453248.1  | 221146 | 24-scf00488 | 24 |
| AX-157772085 | 24 | 13.895 | KV453248.1  | 224377 | 24-scf00488 | 24 |
| AX-158303388 | 24 | 13.931 | KV453248.1  | 234585 | 24-scf00488 | 24 |
| AX-157751377 | 24 | 14.154 | KV453248.1  | 235948 | 24-scf00488 | 24 |
| AX-158303399 | 24 | 14.154 | KV453248.1  | 259286 | 24-scf00488 | 24 |
| AX-157867686 | 24 | 14.154 | KV453248.1  | 281140 | 24-scf00488 | 24 |
| AX-158303414 | 24 | 14.154 | KV453248.1  | 284895 | 24-scf00488 | 24 |
| AX-157705567 | 24 | 14.158 | 3ML01030246 | 367    | scf05840_1  | UN |
| AX-158303291 | 24 | 16.243 | KV453248.1  | 76785  | 24-scf00488 | 24 |
| AX-158303296 | 24 | 16.243 | KV453248.1  | 81410  | 24-scf00488 | 24 |
| AX-157846507 | 24 | 16.243 | KV453248.1  | 92919  | 24-scf00488 | 24 |
| AX-158377290 | 24 | 16.243 | KV453249.1  | 112057 | 24-scf00603 | 24 |
| AX-158377295 | 24 | 16.243 | KV453249.1  | 118585 | 24-scf00603 | 24 |
| AX-157710176 | 24 | 16.243 | KV453249.1  | 120454 | 24-scf00603 | 24 |
| AX-158377297 | 24 | 16.243 | KV453249.1  | 126194 | 24-scf00603 | 24 |
| AX-158377298 | 24 | 16.243 | KV453249.1  | 133337 | 24-scf00603 | 24 |
| AX-158377300 | 24 | 16.243 | KV453249.1  | 134762 | 24-scf00603 | 24 |
| AX-158377301 | 24 | 16.243 | KV453249.1  | 135561 | 24-scf00603 | 24 |
| AX-158377305 | 24 | 16.243 | KV453249.1  | 144066 | 24-scf00603 | 24 |
| AX-157853403 | 24 | 16.243 | KV453249.1  | 144367 | 24-scf00603 | 24 |
| AX-158377323 | 24 | 16.243 | KV453249.1  | 189947 | 24-scf00603 | 24 |
| AX-157685843 | 24 | 16.243 | KV453250.1  | 81425  | 24-scf00647 | 24 |
| AX-157685844 | 24 | 16.243 | KV453250.1  | 82141  | 24-scf00647 | 24 |
| AX-157685848 | 24 | 16.243 | KV453250.1  | 88202  | 24-scf00647 | 24 |
| AX-157685851 | 24 | 16.243 | KV453250.1  | 89395  | 24-scf00647 | 24 |
| AX-158303465 | 24 | 17.97  | KV453253.1  | 53454  | 24-scf00489 | 24 |
| AX-158303468 | 24 | 17.97  | KV453253.1  | 76152  | 24-scf00489 | 24 |
| AX-158303524 | 24 | 17.97  | KV453253.1  | 273698 | 24-scf00489 | 24 |
| AX-158303540 | 24 | 17.97  | KV453253.1  | 307858 | 24-scf00489 | 24 |
| AX-158303555 | 24 | 17.97  | KV453253.1  | 339979 | 24-scf00489 | 24 |
| AX-158303556 | 24 | 17.97  | KV453253.1  | 343104 | 24-scf00489 | 24 |
| AX-158303562 | 24 | 17.97  | KV453253.1  | 361534 | 24-scf00489 | 24 |
| AX-158303611 | 24 | 17.97  | KV453253.1  | 419005 | 24-scf00489 | 24 |

|              |    |        |            |        |             |    |
|--------------|----|--------|------------|--------|-------------|----|
| AX-158303623 | 24 | 17.97  | KV453253.1 | 432038 | 24-scf00489 | 24 |
| AX-158303775 | 24 | 17.97  | KV453253.1 | 630303 | 24-scf00489 | 24 |
| AX-157853408 | 24 | 17.97  | KV453249.1 | 175674 | 24-scf00603 | 24 |
| AX-158377319 | 24 | 17.97  | KV453249.1 | 180865 | 24-scf00603 | 24 |
| AX-157720797 | 24 | 17.97  | KV453252.1 | 72325  | 24-scf00618 | 24 |
| AX-158303628 | 24 | 18.011 | KV453253.1 | 436873 | 24-scf00489 | 24 |
| AX-158303618 | 24 | 18.053 | KV453253.1 | 424569 | 24-scf00489 | 24 |
| AX-158303631 | 24 | 18.053 | KV453253.1 | 458369 | 24-scf00489 | 24 |
| AX-158303642 | 24 | 18.053 | KV453253.1 | 478067 | 24-scf00489 | 24 |
| AX-158303767 | 24 | 18.053 | KV453253.1 | 620952 | 24-scf00489 | 24 |
| AX-157739868 | 24 | 18.053 | KV453253.1 | 642821 | 24-scf00489 | 24 |
| AX-158303835 | 24 | 18.053 | KV453253.1 | 717466 | 24-scf00489 | 24 |
| AX-158303866 | 24 | 18.053 | KV453253.1 | 770420 | 24-scf00489 | 24 |
| AX-158303640 | 24 | 18.099 | KV453253.1 | 477111 | 24-scf00489 | 24 |
| AX-158303653 | 24 | 18.099 | KV453253.1 | 491005 | 24-scf00489 | 24 |
| AX-158303657 | 24 | 18.099 | KV453253.1 | 497351 | 24-scf00489 | 24 |
| AX-158303659 | 24 | 18.099 | KV453253.1 | 498061 | 24-scf00489 | 24 |
| AX-158303670 | 24 | 18.099 | KV453253.1 | 507938 | 24-scf00489 | 24 |
| AX-157750129 | 24 | 18.099 | KV453253.1 | 514628 | 24-scf00489 | 24 |
| AX-158303684 | 24 | 18.222 | KV453253.1 | 522197 | 24-scf00489 | 24 |
| AX-158419726 | 24 | 18.227 | KV453253.1 | 526197 | 24-scf00489 | 24 |
| AX-158303687 | 24 | 18.227 | KV453253.1 | 527082 | 24-scf00489 | 24 |
| AX-158303713 | 24 | 18.275 | KV453253.1 | 559230 | 24-scf00489 | 24 |
| AX-158303715 | 24 | 18.288 | KV453253.1 | 560799 | 24-scf00489 | 24 |
| AX-157888162 | 24 | 18.337 | KV453245.1 | 78395  | 24-scf00486 | 24 |
| AX-158303010 | 24 | 18.337 | KV453245.1 | 78607  | 24-scf00486 | 24 |
| AX-158303063 | 24 | 18.337 | KV453245.1 | 173785 | 24-scf00486 | 24 |
| AX-158303071 | 24 | 18.337 | KV453245.1 | 187298 | 24-scf00486 | 24 |
| AX-158303179 | 24 | 18.337 | KV453246.1 | 51897  | 24-scf00487 | 24 |
| AX-158303286 | 24 | 18.337 | KV453248.1 | 72149  | 24-scf00488 | 24 |
| AX-158303321 | 24 | 18.337 | KV453248.1 | 139658 | 24-scf00488 | 24 |
| AX-157881006 | 24 | 18.337 | KV453253.1 | 7091   | 24-scf00489 | 24 |
| AX-157725668 | 24 | 18.337 | KV453253.1 | 82904  | 24-scf00489 | 24 |
| AX-158303470 | 24 | 18.337 | KV453253.1 | 83468  | 24-scf00489 | 24 |
| AX-158303477 | 24 | 18.337 | KV453253.1 | 96797  | 24-scf00489 | 24 |
| AX-158303479 | 24 | 18.337 | KV453253.1 | 116067 | 24-scf00489 | 24 |
| AX-158303482 | 24 | 18.337 | KV453253.1 | 135685 | 24-scf00489 | 24 |
| AX-157774881 | 24 | 18.337 | KV453253.1 | 164837 | 24-scf00489 | 24 |
| AX-157722029 | 24 | 18.337 | KV453253.1 | 170574 | 24-scf00489 | 24 |
| AX-158303520 | 24 | 18.337 | KV453253.1 | 266281 | 24-scf00489 | 24 |
| AX-158303553 | 24 | 18.337 | KV453253.1 | 338526 | 24-scf00489 | 24 |
| AX-158303561 | 24 | 18.337 | KV453253.1 | 355353 | 24-scf00489 | 24 |
| AX-158303564 | 24 | 18.337 | KV453253.1 | 369753 | 24-scf00489 | 24 |
| AX-158303565 | 24 | 18.337 | KV453253.1 | 371969 | 24-scf00489 | 24 |
| AX-158303566 | 24 | 18.337 | KV453253.1 | 375578 | 24-scf00489 | 24 |
| AX-158303567 | 24 | 18.337 | KV453253.1 | 376306 | 24-scf00489 | 24 |
| AX-158303569 | 24 | 18.337 | KV453253.1 | 379101 | 24-scf00489 | 24 |
| AX-158303571 | 24 | 18.337 | KV453253.1 | 382035 | 24-scf00489 | 24 |
| AX-158303572 | 24 | 18.337 | KV453253.1 | 382448 | 24-scf00489 | 24 |
| AX-158303573 | 24 | 18.337 | KV453253.1 | 382813 | 24-scf00489 | 24 |
| AX-158303575 | 24 | 18.337 | KV453253.1 | 384160 | 24-scf00489 | 24 |



|              |    |        |            |        |             |    |
|--------------|----|--------|------------|--------|-------------|----|
| AX-158303577 | 24 | 18.337 | KV453253.1 | 385842 | 24-scf00489 | 24 |
| AX-158303579 | 24 | 18.337 | KV453253.1 | 387569 | 24-scf00489 | 24 |
| AX-158303580 | 24 | 18.337 | KV453253.1 | 389106 | 24-scf00489 | 24 |
| AX-158303581 | 24 | 18.337 | KV453253.1 | 392801 | 24-scf00489 | 24 |
| AX-158303582 | 24 | 18.337 | KV453253.1 | 393354 | 24-scf00489 | 24 |
| AX-158303587 | 24 | 18.337 | KV453253.1 | 397706 | 24-scf00489 | 24 |
| AX-158303588 | 24 | 18.337 | KV453253.1 | 398342 | 24-scf00489 | 24 |
| AX-158303589 | 24 | 18.337 | KV453253.1 | 399159 | 24-scf00489 | 24 |
| AX-158303594 | 24 | 18.337 | KV453253.1 | 402458 | 24-scf00489 | 24 |
| AX-157719809 | 24 | 18.337 | KV453253.1 | 403624 | 24-scf00489 | 24 |
| AX-158303596 | 24 | 18.337 | KV453253.1 | 405508 | 24-scf00489 | 24 |
| AX-158303597 | 24 | 18.337 | KV453253.1 | 406116 | 24-scf00489 | 24 |
| AX-158303603 | 24 | 18.337 | KV453253.1 | 411631 | 24-scf00489 | 24 |
| AX-157772283 | 24 | 18.337 | KV453253.1 | 425481 | 24-scf00489 | 24 |
| AX-158387642 | 24 | 18.337 | KV453253.1 | 497106 | 24-scf00489 | 24 |
| AX-158303658 | 24 | 18.337 | KV453253.1 | 497641 | 24-scf00489 | 24 |
| AX-158303672 | 24 | 18.337 | KV453253.1 | 510930 | 24-scf00489 | 24 |
| AX-158303686 | 24 | 18.337 | KV453253.1 | 525857 | 24-scf00489 | 24 |
| AX-158303704 | 24 | 18.337 | KV453253.1 | 542474 | 24-scf00489 | 24 |
| AX-158303706 | 24 | 18.337 | KV453253.1 | 548901 | 24-scf00489 | 24 |
| AX-158303708 | 24 | 18.337 | KV453253.1 | 550220 | 24-scf00489 | 24 |
| AX-158303711 | 24 | 18.337 | KV453253.1 | 555106 | 24-scf00489 | 24 |
| AX-158303717 | 24 | 18.337 | KV453253.1 | 562734 | 24-scf00489 | 24 |
| AX-158303729 | 24 | 18.337 | KV453253.1 | 576616 | 24-scf00489 | 24 |
| AX-158303733 | 24 | 18.337 | KV453253.1 | 582651 | 24-scf00489 | 24 |
| AX-158303742 | 24 | 18.337 | KV453253.1 | 591580 | 24-scf00489 | 24 |
| AX-158303750 | 24 | 18.337 | KV453253.1 | 597739 | 24-scf00489 | 24 |
| AX-158303759 | 24 | 18.337 | KV453253.1 | 612326 | 24-scf00489 | 24 |
| AX-158303766 | 24 | 18.337 | KV453253.1 | 619975 | 24-scf00489 | 24 |
| AX-158303768 | 24 | 18.337 | KV453253.1 | 622436 | 24-scf00489 | 24 |
| AX-158303774 | 24 | 18.337 | KV453253.1 | 629800 | 24-scf00489 | 24 |
| AX-157846527 | 24 | 18.337 | KV453253.1 | 632395 | 24-scf00489 | 24 |
| AX-158303778 | 24 | 18.337 | KV453253.1 | 637236 | 24-scf00489 | 24 |
| AX-158303791 | 24 | 18.337 | KV453253.1 | 658374 | 24-scf00489 | 24 |
| AX-158303793 | 24 | 18.337 | KV453253.1 | 659194 | 24-scf00489 | 24 |
| AX-158303794 | 24 | 18.337 | KV453253.1 | 661492 | 24-scf00489 | 24 |
| AX-158303796 | 24 | 18.337 | KV453253.1 | 664465 | 24-scf00489 | 24 |
| AX-158303801 | 24 | 18.337 | KV453253.1 | 669275 | 24-scf00489 | 24 |
| AX-158303802 | 24 | 18.337 | KV453253.1 | 669626 | 24-scf00489 | 24 |
| AX-158303804 | 24 | 18.337 | KV453253.1 | 673524 | 24-scf00489 | 24 |
| AX-158303805 | 24 | 18.337 | KV453253.1 | 674178 | 24-scf00489 | 24 |
| AX-158303806 | 24 | 18.337 | KV453253.1 | 675924 | 24-scf00489 | 24 |
| AX-157881032 | 24 | 18.337 | KV453253.1 | 681756 | 24-scf00489 | 24 |
| AX-157888172 | 24 | 18.337 | KV453253.1 | 683909 | 24-scf00489 | 24 |
| AX-158303810 | 24 | 18.337 | KV453253.1 | 684254 | 24-scf00489 | 24 |
| AX-157846528 | 24 | 18.337 | KV453253.1 | 687841 | 24-scf00489 | 24 |
| AX-158303817 | 24 | 18.337 | KV453253.1 | 694009 | 24-scf00489 | 24 |
| AX-157860877 | 24 | 18.337 | KV453253.1 | 694169 | 24-scf00489 | 24 |
| AX-157888173 | 24 | 18.337 | KV453253.1 | 695068 | 24-scf00489 | 24 |
| AX-158303818 | 24 | 18.337 | KV453253.1 | 695735 | 24-scf00489 | 24 |
| AX-158303819 | 24 | 18.337 | KV453253.1 | 696332 | 24-scf00489 | 24 |

|              |    |        |             |        |             |    |
|--------------|----|--------|-------------|--------|-------------|----|
| AX-158303820 | 24 | 18.337 | KV453253.1  | 698102 | 24-scf00489 | 24 |
| AX-158381332 | 24 | 18.337 | KV453253.1  | 698324 | 24-scf00489 | 24 |
| AX-158303829 | 24 | 18.337 | KV453253.1  | 711274 | 24-scf00489 | 24 |
| AX-158303830 | 24 | 18.337 | KV453253.1  | 712074 | 24-scf00489 | 24 |
| AX-158303831 | 24 | 18.337 | KV453253.1  | 712742 | 24-scf00489 | 24 |
| AX-158303838 | 24 | 18.337 | KV453253.1  | 720131 | 24-scf00489 | 24 |
| AX-158303839 | 24 | 18.337 | KV453253.1  | 721007 | 24-scf00489 | 24 |
| AX-158303842 | 24 | 18.337 | KV453253.1  | 723427 | 24-scf00489 | 24 |
| AX-157846529 | 24 | 18.337 | KV453253.1  | 728416 | 24-scf00489 | 24 |
| AX-158303850 | 24 | 18.337 | KV453253.1  | 736856 | 24-scf00489 | 24 |
| AX-158377079 | 24 | 18.337 | KV453244.1  | 53431  | 24-scf00600 | 24 |
| AX-158377080 | 24 | 18.337 | KV453244.1  | 58182  | 24-scf00600 | 24 |
| AX-158377308 | 24 | 18.337 | KV453249.1  | 150762 | 24-scf00603 | 24 |
| AX-158377314 | 24 | 18.337 | KV453249.1  | 169858 | 24-scf00603 | 24 |
| AX-157744973 | 24 | 18.337 | KV453252.1  | 106655 | 24-scf00618 | 24 |
| AX-158377841 | 24 | 18.337 | KV453252.1  | 116783 | 24-scf00618 | 24 |
| AX-158377842 | 24 | 18.337 | KV453252.1  | 117683 | 24-scf00618 | 24 |
| AX-157697922 | 24 | 18.337 | KV453250.1  | 54119  | 24-scf00647 | 24 |
| AX-157685845 | 24 | 18.337 | KV453250.1  | 83005  | 24-scf00647 | 24 |
| AX-157774608 | 24 | 18.555 | KV453253.1  | 623687 | 24-scf00489 | 24 |
| AX-158303846 | 24 | 18.555 | KV453253.1  | 733604 | 24-scf00489 | 24 |
| AX-158303847 | 24 | 18.555 | KV453253.1  | 733986 | 24-scf00489 | 24 |
| AX-158303848 | 24 | 18.555 | KV453253.1  | 735736 | 24-scf00489 | 24 |
| AX-158303851 | 24 | 18.555 | KV453253.1  | 738796 | 24-scf00489 | 24 |
| AX-157860878 | 24 | 18.555 | KV453253.1  | 748321 | 24-scf00489 | 24 |
| AX-158303854 | 24 | 18.555 | KV453253.1  | 750973 | 24-scf00489 | 24 |
| AX-158377248 | 24 | 18.555 | KV453249.1  | 34724  | 24-scf00603 | 24 |
| AX-158303855 | 24 | 18.571 | KV453253.1  | 751422 | 24-scf00489 | 24 |
| AX-158303861 | 24 | 18.584 | KV453253.1  | 756905 | 24-scf00489 | 24 |
| AX-158303862 | 24 | 18.596 | KV453253.1  | 759345 | 24-scf00489 | 24 |
| AX-157706701 | 24 | 18.606 | 3ML01032756 | 205    | scf08385_1  | UN |
| AX-158303853 | 24 | 18.622 | KV453253.1  | 749505 | 24-scf00489 | 24 |
| AX-158303857 | 24 | 18.622 | KV453253.1  | 753461 | 24-scf00489 | 24 |
| AX-158303864 | 24 | 18.622 | KV453253.1  | 766334 | 24-scf00489 | 24 |
| AX-158303865 | 24 | 18.643 | KV453253.1  | 769704 | 24-scf00489 | 24 |
| AX-158303867 | 24 | 18.664 | KV453253.1  | 771043 | 24-scf00489 | 24 |
| AX-158303868 | 24 | 18.664 | KV453253.1  | 771478 | 24-scf00489 | 24 |
| AX-158303871 | 24 | 18.828 | KV453253.1  | 774263 | 24-scf00489 | 24 |
| AX-158303872 | 24 | 18.828 | KV453253.1  | 775113 | 24-scf00489 | 24 |
| AX-158303874 | 24 | 18.828 | KV453253.1  | 777294 | 24-scf00489 | 24 |
| AX-158303875 | 24 | 18.828 | KV453253.1  | 779072 | 24-scf00489 | 24 |
| AX-158303876 | 24 | 18.828 | KV453253.1  | 779722 | 24-scf00489 | 24 |
| AX-158417696 | 24 | 18.828 | KV453253.1  | 781795 | 24-scf00489 | 24 |
| AX-158417697 | 24 | 18.828 | KV453253.1  | 783006 | 24-scf00489 | 24 |
| AX-157727366 | 24 | 18.828 | KV453253.1  | 789809 | 24-scf00489 | 24 |
| AX-158303879 | 24 | 18.828 | KV453253.1  | 795406 | 24-scf00489 | 24 |
| AX-158303880 | 24 | 18.991 | KV453253.1  | 795727 | 24-scf00489 | 24 |
| AX-158417698 | 24 | 18.992 | KV453253.1  | 783042 | 24-scf00489 | 24 |
| AX-158303881 | 24 | 18.992 | KV453253.1  | 796773 | 24-scf00489 | 24 |
| AX-158303883 | 24 | 18.992 | KV453253.1  | 797924 | 24-scf00489 | 24 |
| AX-157846530 | 24 | 18.992 | KV453253.1  | 799541 | 24-scf00489 | 24 |

|              |    |        |            |        |             |    |
|--------------|----|--------|------------|--------|-------------|----|
| AX-158303885 | 24 | 18.992 | KV453253.1 | 801930 | 24-scf00489 | 24 |
| AX-157867689 | 24 | 18.992 | KV453253.1 | 803074 | 24-scf00489 | 24 |
| AX-157749985 | 24 | 18.992 | KV453253.1 | 804770 | 24-scf00489 | 24 |
| AX-158303886 | 24 | 18.992 | KV453253.1 | 808425 | 24-scf00489 | 24 |
| AX-158303889 | 24 | 18.992 | KV453253.1 | 813068 | 24-scf00489 | 24 |
| AX-158303891 | 24 | 18.992 | KV453253.1 | 818465 | 24-scf00489 | 24 |
| AX-158303893 | 24 | 18.992 | KV453253.1 | 821817 | 24-scf00489 | 24 |
| AX-158303895 | 24 | 18.992 | KV453253.1 | 831007 | 24-scf00489 | 24 |
| AX-158303896 | 24 | 18.992 | KV453253.1 | 833510 | 24-scf00489 | 24 |
| AX-158303926 | 24 | 18.992 | KV453253.1 | 876328 | 24-scf00489 | 24 |
| AX-158303943 | 24 | 18.992 | KV453253.1 | 900014 | 24-scf00489 | 24 |
| AX-158304019 | 24 | 18.992 | KV453253.1 | 984998 | 24-scf00489 | 24 |
| AX-158303898 | 24 | 19.12  | KV453253.1 | 836606 | 24-scf00489 | 24 |
| AX-158303900 | 24 | 19.218 | KV453253.1 | 842028 | 24-scf00489 | 24 |
| AX-158303901 | 24 | 19.32  | KV453253.1 | 842602 | 24-scf00489 | 24 |
| AX-158303902 | 24 | 19.32  | KV453253.1 | 845602 | 24-scf00489 | 24 |
| AX-158303903 | 24 | 19.32  | KV453253.1 | 846393 | 24-scf00489 | 24 |
| AX-158303904 | 24 | 19.32  | KV453253.1 | 847539 | 24-scf00489 | 24 |
| AX-158303910 | 24 | 19.32  | KV453253.1 | 854104 | 24-scf00489 | 24 |
| AX-158303911 | 24 | 19.32  | KV453253.1 | 854789 | 24-scf00489 | 24 |
| AX-158303914 | 24 | 19.32  | KV453253.1 | 857677 | 24-scf00489 | 24 |
| AX-158303940 | 24 | 19.32  | KV453253.1 | 895951 | 24-scf00489 | 24 |
| AX-158303972 | 24 | 19.32  | KV453253.1 | 927812 | 24-scf00489 | 24 |
| AX-157720541 | 24 | 19.538 | KV453253.1 | 815112 | 24-scf00489 | 24 |
| AX-158303919 | 24 | 19.538 | KV453253.1 | 864422 | 24-scf00489 | 24 |
| AX-158417700 | 24 | 19.538 | KV453253.1 | 865112 | 24-scf00489 | 24 |
| AX-158303921 | 24 | 19.538 | KV453253.1 | 866977 | 24-scf00489 | 24 |
| AX-158303922 | 24 | 19.538 | KV453253.1 | 869964 | 24-scf00489 | 24 |
| AX-158303923 | 24 | 19.538 | KV453253.1 | 871355 | 24-scf00489 | 24 |
| AX-158303927 | 24 | 19.538 | KV453253.1 | 877672 | 24-scf00489 | 24 |
| AX-158303929 | 24 | 19.538 | KV453253.1 | 881451 | 24-scf00489 | 24 |
| AX-158303932 | 24 | 19.538 | KV453253.1 | 885170 | 24-scf00489 | 24 |
| AX-158303934 | 24 | 19.538 | KV453253.1 | 887149 | 24-scf00489 | 24 |
| AX-158303936 | 24 | 19.538 | KV453253.1 | 891775 | 24-scf00489 | 24 |
| AX-158303947 | 24 | 19.538 | KV453253.1 | 907424 | 24-scf00489 | 24 |
| AX-158303956 | 24 | 19.538 | KV453253.1 | 913635 | 24-scf00489 | 24 |
| AX-158303959 | 24 | 19.538 | KV453253.1 | 915397 | 24-scf00489 | 24 |
| AX-158303960 | 24 | 19.538 | KV453253.1 | 915978 | 24-scf00489 | 24 |
| AX-158303966 | 24 | 19.538 | KV453253.1 | 922292 | 24-scf00489 | 24 |
| AX-158303991 | 24 | 19.538 | KV453253.1 | 954039 | 24-scf00489 | 24 |
| AX-158303935 | 24 | 19.56  | KV453253.1 | 889864 | 24-scf00489 | 24 |
| AX-158303939 | 24 | 19.599 | KV453253.1 | 895213 | 24-scf00489 | 24 |
| AX-158303908 | 24 | 19.647 | KV453253.1 | 853008 | 24-scf00489 | 24 |
| AX-158303933 | 24 | 19.647 | KV453253.1 | 886202 | 24-scf00489 | 24 |
| AX-158303937 | 24 | 19.647 | KV453253.1 | 892495 | 24-scf00489 | 24 |
| AX-158303941 | 24 | 19.647 | KV453253.1 | 896631 | 24-scf00489 | 24 |
| AX-157774249 | 24 | 19.647 | KV453253.1 | 897433 | 24-scf00489 | 24 |
| AX-158303948 | 24 | 19.647 | KV453253.1 | 908184 | 24-scf00489 | 24 |
| AX-158303953 | 24 | 19.647 | KV453253.1 | 911020 | 24-scf00489 | 24 |
| AX-158303958 | 24 | 19.647 | KV453253.1 | 914532 | 24-scf00489 | 24 |
| AX-158303963 | 24 | 19.647 | KV453253.1 | 918903 | 24-scf00489 | 24 |

|              |    |        |            |         |             |    |
|--------------|----|--------|------------|---------|-------------|----|
| AX-158303964 | 24 | 19.647 | KV453253.1 | 919497  | 24-scf00489 | 24 |
| AX-158303970 | 24 | 19.647 | KV453253.1 | 925740  | 24-scf00489 | 24 |
| AX-158303971 | 24 | 19.647 | KV453253.1 | 927027  | 24-scf00489 | 24 |
| AX-157709064 | 24 | 19.647 | KV453253.1 | 932364  | 24-scf00489 | 24 |
| AX-158303976 | 24 | 19.647 | KV453253.1 | 933416  | 24-scf00489 | 24 |
| AX-158303980 | 24 | 19.757 | KV453253.1 | 938485  | 24-scf00489 | 24 |
| AX-158303981 | 24 | 19.787 | KV453253.1 | 939616  | 24-scf00489 | 24 |
| AX-158303982 | 24 | 19.818 | KV453253.1 | 940183  | 24-scf00489 | 24 |
| AX-158303988 | 24 | 19.866 | KV453253.1 | 950497  | 24-scf00489 | 24 |
| AX-158303990 | 24 | 19.866 | KV453253.1 | 952071  | 24-scf00489 | 24 |
| AX-158303992 | 24 | 19.866 | KV453253.1 | 955624  | 24-scf00489 | 24 |
| AX-157846533 | 24 | 19.866 | KV453253.1 | 956565  | 24-scf00489 | 24 |
| AX-157846534 | 24 | 19.866 | KV453253.1 | 958231  | 24-scf00489 | 24 |
| AX-158303993 | 24 | 19.866 | KV453253.1 | 958828  | 24-scf00489 | 24 |
| AX-157860880 | 24 | 19.866 | KV453253.1 | 959211  | 24-scf00489 | 24 |
| AX-157774461 | 24 | 19.867 | KV453253.1 | 960120  | 24-scf00489 | 24 |
| AX-158304004 | 24 | 19.867 | KV453253.1 | 971489  | 24-scf00489 | 24 |
| AX-157773810 | 24 | 19.867 | KV453253.1 | 971688  | 24-scf00489 | 24 |
| AX-158304005 | 24 | 19.867 | KV453253.1 | 971731  | 24-scf00489 | 24 |
| AX-158303055 | 24 | 19.868 | KV453245.1 | 164658  | 24-scf00486 | 24 |
| AX-158303494 | 24 | 19.868 | KV453253.1 | 208402  | 24-scf00489 | 24 |
| AX-158303495 | 24 | 19.868 | KV453253.1 | 210071  | 24-scf00489 | 24 |
| AX-158303995 | 24 | 19.868 | KV453253.1 | 962439  | 24-scf00489 | 24 |
| AX-158417702 | 24 | 19.868 | KV453253.1 | 972389  | 24-scf00489 | 24 |
| AX-158304007 | 24 | 19.868 | KV453253.1 | 973576  | 24-scf00489 | 24 |
| AX-158304011 | 24 | 19.868 | KV453253.1 | 979057  | 24-scf00489 | 24 |
| AX-158304012 | 24 | 19.868 | KV453253.1 | 979631  | 24-scf00489 | 24 |
| AX-158304015 | 24 | 19.869 | KV453253.1 | 981715  | 24-scf00489 | 24 |
| AX-157743229 | 24 | 20.191 | KV453253.1 | 981957  | 24-scf00489 | 24 |
| AX-158304024 | 24 | 20.194 | KV453253.1 | 995706  | 24-scf00489 | 24 |
| AX-158304026 | 24 | 20.194 | KV453253.1 | 996899  | 24-scf00489 | 24 |
| AX-157716200 | 24 | 20.194 | KV453253.1 | 999717  | 24-scf00489 | 24 |
| AX-158304029 | 24 | 20.194 | KV453253.1 | 1002479 | 24-scf00489 | 24 |
| AX-158304031 | 24 | 20.194 | KV453253.1 | 1005247 | 24-scf00489 | 24 |
| AX-158304033 | 24 | 20.194 | KV453253.1 | 1007160 | 24-scf00489 | 24 |
| AX-158304034 | 24 | 20.194 | KV453253.1 | 1007713 | 24-scf00489 | 24 |
| AX-158304035 | 24 | 20.194 | KV453253.1 | 1009690 | 24-scf00489 | 24 |
| AX-158304008 | 24 | 20.227 | KV453253.1 | 975842  | 24-scf00489 | 24 |
| AX-158304036 | 24 | 20.227 | KV453253.1 | 1010707 | 24-scf00489 | 24 |
| AX-158304038 | 24 | 20.263 | KV453253.1 | 1013201 | 24-scf00489 | 24 |
| AX-158304040 | 24 | 20.303 | KV453253.1 | 1015702 | 24-scf00489 | 24 |
| AX-158304042 | 24 | 20.303 | KV453253.1 | 1018967 | 24-scf00489 | 24 |
| AX-158304043 | 24 | 20.373 | KV453253.1 | 1019861 | 24-scf00489 | 24 |
| AX-158304002 | 24 | 20.412 | KV453253.1 | 969342  | 24-scf00489 | 24 |
| AX-157748798 | 24 | 20.412 | KV453253.1 | 985495  | 24-scf00489 | 24 |
| AX-158304044 | 24 | 20.412 | KV453253.1 | 1020392 | 24-scf00489 | 24 |
| AX-157713435 | 24 | 20.412 | KV453253.1 | 1021192 | 24-scf00489 | 24 |
| AX-158304046 | 24 | 20.412 | KV453253.1 | 1022150 | 24-scf00489 | 24 |
| AX-158304047 | 24 | 20.412 | KV453253.1 | 1023891 | 24-scf00489 | 24 |
| AX-158304051 | 24 | 20.412 | KV453253.1 | 1028719 | 24-scf00489 | 24 |
| AX-158304055 | 24 | 20.412 | KV453253.1 | 1034180 | 24-scf00489 | 24 |

|              |    |        |            |         |             |    |
|--------------|----|--------|------------|---------|-------------|----|
| AX-158304056 | 24 | 20.412 | KV453253.1 | 1035007 | 24-scf00489 | 24 |
| AX-158304060 | 24 | 20.412 | KV453253.1 | 1039291 | 24-scf00489 | 24 |
| AX-157846547 | 24 | 20.412 | KV453253.1 | 1142940 | 24-scf00489 | 24 |
| AX-157846554 | 24 | 20.412 | KV453253.1 | 1188164 | 24-scf00489 | 24 |
| AX-158304189 | 24 | 20.412 | KV453253.1 | 1244015 | 24-scf00489 | 24 |
| AX-157846539 | 24 | 20.639 | KV453253.1 | 1040958 | 24-scf00489 | 24 |
| AX-158304062 | 24 | 21.05  | KV453253.1 | 1043705 | 24-scf00489 | 24 |
| AX-158304065 | 24 | 21.087 | KV453253.1 | 1047135 | 24-scf00489 | 24 |
| AX-158304070 | 24 | 21.087 | KV453253.1 | 1051691 | 24-scf00489 | 24 |
| AX-158304071 | 24 | 21.087 | KV453253.1 | 1053290 | 24-scf00489 | 24 |
| AX-158304073 | 24 | 21.087 | KV453253.1 | 1054395 | 24-scf00489 | 24 |
| AX-157756630 | 24 | 21.208 | KV453253.1 | 1058196 | 24-scf00489 | 24 |
| AX-158417705 | 24 | 21.288 | KV453253.1 | 1063059 | 24-scf00489 | 24 |
| AX-158304076 | 24 | 21.288 | KV453253.1 | 1065787 | 24-scf00489 | 24 |
| AX-158304077 | 24 | 21.288 | KV453253.1 | 1066395 | 24-scf00489 | 24 |
| AX-158304078 | 24 | 21.288 | KV453253.1 | 1066582 | 24-scf00489 | 24 |
| AX-158304079 | 24 | 21.288 | KV453253.1 | 1067237 | 24-scf00489 | 24 |
| AX-157744189 | 24 | 21.288 | KV453253.1 | 1072387 | 24-scf00489 | 24 |
| AX-158304087 | 24 | 21.288 | KV453253.1 | 1078084 | 24-scf00489 | 24 |
| AX-158304088 | 24 | 21.288 | KV453253.1 | 1078871 | 24-scf00489 | 24 |
| AX-158304090 | 24 | 21.288 | KV453253.1 | 1081478 | 24-scf00489 | 24 |
| AX-158304091 | 24 | 21.288 | KV453253.1 | 1085366 | 24-scf00489 | 24 |
| AX-158304094 | 24 | 21.288 | KV453253.1 | 1090171 | 24-scf00489 | 24 |
| AX-158304097 | 24 | 21.288 | KV453253.1 | 1092369 | 24-scf00489 | 24 |
| AX-157742496 | 24 | 21.288 | KV453253.1 | 1096143 | 24-scf00489 | 24 |
| AX-158304095 | 24 | 21.304 | KV453253.1 | 1090348 | 24-scf00489 | 24 |
| AX-157846542 | 24 | 21.325 | KV453253.1 | 1072333 | 24-scf00489 | 24 |
| AX-158304089 | 24 | 21.325 | KV453253.1 | 1079756 | 24-scf00489 | 24 |
| AX-158304098 | 24 | 21.325 | KV453253.1 | 1096107 | 24-scf00489 | 24 |
| AX-158304099 | 24 | 21.325 | KV453253.1 | 1099265 | 24-scf00489 | 24 |
| AX-158304134 | 24 | 21.325 | KV453253.1 | 1155483 | 24-scf00489 | 24 |
| AX-157758671 | 24 | 21.325 | KV453253.1 | 1171180 | 24-scf00489 | 24 |
| AX-158304157 | 24 | 21.325 | KV453253.1 | 1192596 | 24-scf00489 | 24 |
| AX-158304103 | 24 | 21.335 | KV453253.1 | 1100216 | 24-scf00489 | 24 |
| AX-157719508 | 24 | 21.357 | KV453253.1 | 1103471 | 24-scf00489 | 24 |
| AX-158304120 | 24 | 21.357 | KV453253.1 | 1133076 | 24-scf00489 | 24 |
| AX-158417715 | 24 | 21.357 | KV453253.1 | 1587135 | 24-scf00489 | 24 |
| AX-158304108 | 24 | 21.377 | KV453253.1 | 1108414 | 24-scf00489 | 24 |
| AX-158304112 | 24 | 21.397 | KV453253.1 | 1119146 | 24-scf00489 | 24 |
| AX-157846545 | 24 | 21.397 | KV453253.1 | 1121227 | 24-scf00489 | 24 |
| AX-158304113 | 24 | 21.397 | KV453253.1 | 1122254 | 24-scf00489 | 24 |
| AX-158304114 | 24 | 21.397 | KV453253.1 | 1122940 | 24-scf00489 | 24 |
| AX-157846546 | 24 | 21.397 | KV453253.1 | 1122982 | 24-scf00489 | 24 |
| AX-157755358 | 24 | 21.397 | KV453253.1 | 1124860 | 24-scf00489 | 24 |
| AX-158304115 | 24 | 21.397 | KV453253.1 | 1125735 | 24-scf00489 | 24 |
| AX-158304118 | 24 | 21.397 | KV453253.1 | 1131428 | 24-scf00489 | 24 |
| AX-158304119 | 24 | 21.397 | KV453253.1 | 1131874 | 24-scf00489 | 24 |
| AX-158304122 | 24 | 21.397 | KV453253.1 | 1136168 | 24-scf00489 | 24 |
| AX-158304123 | 24 | 21.397 | KV453253.1 | 1137039 | 24-scf00489 | 24 |
| AX-158304150 | 24 | 21.397 | KV453253.1 | 1182259 | 24-scf00489 | 24 |
| AX-158304125 | 24 | 21.436 | KV453253.1 | 1140175 | 24-scf00489 | 24 |

|              |    |        |             |         |             |    |
|--------------|----|--------|-------------|---------|-------------|----|
| AX-158304148 | 24 | 21.436 | KV453253.1  | 1176352 | 24-scf00489 | 24 |
| AX-158304171 | 24 | 21.436 | KV453253.1  | 1212222 | 24-scf00489 | 24 |
| AX-158304126 | 24 | 21.482 | KV453253.1  | 1142279 | 24-scf00489 | 24 |
| AX-158304085 | 24 | 21.507 | KV453253.1  | 1075744 | 24-scf00489 | 24 |
| AX-158304092 | 24 | 21.507 | KV453253.1  | 1087370 | 24-scf00489 | 24 |
| AX-158412144 | 24 | 21.507 | KV453253.1  | 1092777 | 24-scf00489 | 24 |
| AX-158304102 | 24 | 21.507 | KV453253.1  | 1100042 | 24-scf00489 | 24 |
| AX-158381335 | 24 | 21.507 | KV453253.1  | 1100409 | 24-scf00489 | 24 |
| AX-157846552 | 24 | 21.507 | KV453253.1  | 1173009 | 24-scf00489 | 24 |
| AX-157846553 | 24 | 21.507 | KV453253.1  | 1173136 | 24-scf00489 | 24 |
| AX-158417707 | 24 | 21.507 | KV453253.1  | 1196279 | 24-scf00489 | 24 |
| AX-157846556 | 24 | 21.507 | KV453253.1  | 1197789 | 24-scf00489 | 24 |
| AX-158304160 | 24 | 21.507 | KV453253.1  | 1200472 | 24-scf00489 | 24 |
| AX-157846557 | 24 | 21.507 | KV453253.1  | 1202123 | 24-scf00489 | 24 |
| AX-158304163 | 24 | 21.507 | KV453253.1  | 1202673 | 24-scf00489 | 24 |
| AX-158304164 | 24 | 21.507 | KV453253.1  | 1203536 | 24-scf00489 | 24 |
| AX-157846566 | 24 | 21.507 | KV453253.1  | 1263753 | 24-scf00489 | 24 |
| AX-157739621 | 24 | 21.616 | KV453253.1  | 1210432 | 24-scf00489 | 24 |
| AX-158304170 | 24 | 21.616 | KV453253.1  | 1211475 | 24-scf00489 | 24 |
| AX-158304173 | 24 | 21.616 | KV453253.1  | 1220609 | 24-scf00489 | 24 |
| AX-158304174 | 24 | 21.616 | KV453253.1  | 1221099 | 24-scf00489 | 24 |
| AX-157846561 | 24 | 21.616 | KV453253.1  | 1221691 | 24-scf00489 | 24 |
| AX-158304175 | 24 | 21.616 | KV453253.1  | 1222940 | 24-scf00489 | 24 |
| AX-157846562 | 24 | 21.616 | KV453253.1  | 1223917 | 24-scf00489 | 24 |
| AX-158423595 | 24 | 21.616 | KV453253.1  | 1225869 | 24-scf00489 | 24 |
| AX-158304177 | 24 | 21.616 | KV453253.1  | 1227081 | 24-scf00489 | 24 |
| AX-158304180 | 24 | 21.616 | KV453253.1  | 1234416 | 24-scf00489 | 24 |
| AX-158304181 | 24 | 21.616 | KV453253.1  | 1237036 | 24-scf00489 | 24 |
| AX-158304182 | 24 | 21.616 | KV453253.1  | 1237285 | 24-scf00489 | 24 |
| AX-158304184 | 24 | 21.616 | KV453253.1  | 1240798 | 24-scf00489 | 24 |
| AX-158304185 | 24 | 21.616 | KV453253.1  | 1241567 | 24-scf00489 | 24 |
| AX-158304187 | 24 | 21.616 | KV453253.1  | 1243401 | 24-scf00489 | 24 |
| AX-158304188 | 24 | 21.616 | KV453253.1  | 1243784 | 24-scf00489 | 24 |
| AX-157707508 | 24 | 21.616 | 3ML01034429 | 330     | scf10104_1  | UN |
| AX-157846559 | 24 | 21.725 | KV453253.1  | 1210355 | 24-scf00489 | 24 |
| AX-157722279 | 24 | 21.725 | KV453253.1  | 1251846 | 24-scf00489 | 24 |
| AX-158304196 | 24 | 21.725 | KV453253.1  | 1252493 | 24-scf00489 | 24 |
| AX-158304197 | 24 | 21.725 | KV453253.1  | 1254795 | 24-scf00489 | 24 |
| AX-158304198 | 24 | 21.725 | KV453253.1  | 1255164 | 24-scf00489 | 24 |
| AX-158304199 | 24 | 21.725 | KV453253.1  | 1255946 | 24-scf00489 | 24 |
| AX-158304201 | 24 | 21.725 | KV453253.1  | 1256471 | 24-scf00489 | 24 |
| AX-158304203 | 24 | 21.725 | KV453253.1  | 1258487 | 24-scf00489 | 24 |
| AX-158304207 | 24 | 21.725 | KV453253.1  | 1261927 | 24-scf00489 | 24 |
| AX-158304209 | 24 | 21.758 | KV453253.1  | 1262996 | 24-scf00489 | 24 |
| AX-157846565 | 24 | 21.779 | KV453253.1  | 1263253 | 24-scf00489 | 24 |
| AX-158304215 | 24 | 21.792 | KV453253.1  | 1274722 | 24-scf00489 | 24 |
| AX-158304168 | 24 | 21.805 | KV453253.1  | 1208519 | 24-scf00489 | 24 |
| AX-158304216 | 24 | 21.805 | KV453253.1  | 1278582 | 24-scf00489 | 24 |
| AX-158304219 | 24 | 21.834 | KV453253.1  | 1283876 | 24-scf00489 | 24 |
| AX-158304220 | 24 | 21.834 | KV453253.1  | 1284278 | 24-scf00489 | 24 |
| AX-158304225 | 24 | 22.265 | KV453253.1  | 1291081 | 24-scf00489 | 24 |

|              |    |        |            |         |             |    |
|--------------|----|--------|------------|---------|-------------|----|
| AX-158304227 | 24 | 22.268 | KV453253.1 | 1301725 | 24-scf00489 | 24 |
| AX-158303979 | 24 | 22.269 | KV453253.1 | 937036  | 24-scf00489 | 24 |
| AX-158303994 | 24 | 22.269 | KV453253.1 | 960788  | 24-scf00489 | 24 |
| AX-157846560 | 24 | 22.269 | KV453253.1 | 1217261 | 24-scf00489 | 24 |
| AX-157723476 | 24 | 22.269 | KV453253.1 | 1298327 | 24-scf00489 | 24 |
| AX-158304230 | 24 | 22.269 | KV453253.1 | 1305271 | 24-scf00489 | 24 |
| AX-158304146 | 24 | 22.271 | KV453253.1 | 1171960 | 24-scf00489 | 24 |
| AX-158304158 | 24 | 22.271 | KV453253.1 | 1195112 | 24-scf00489 | 24 |
| AX-158304159 | 24 | 22.271 | KV453253.1 | 1199734 | 24-scf00489 | 24 |
| AX-158304165 | 24 | 22.271 | KV453253.1 | 1207168 | 24-scf00489 | 24 |
| AX-158304231 | 24 | 22.271 | KV453253.1 | 1305494 | 24-scf00489 | 24 |
| AX-158304232 | 24 | 22.271 | KV453253.1 | 1306398 | 24-scf00489 | 24 |
| AX-158304235 | 24 | 22.271 | KV453253.1 | 1312239 | 24-scf00489 | 24 |
| AX-158304236 | 24 | 22.271 | KV453253.1 | 1314147 | 24-scf00489 | 24 |
| AX-158304237 | 24 | 22.271 | KV453253.1 | 1315352 | 24-scf00489 | 24 |
| AX-158304238 | 24 | 22.271 | KV453253.1 | 1316568 | 24-scf00489 | 24 |
| AX-158304239 | 24 | 22.271 | KV453253.1 | 1317663 | 24-scf00489 | 24 |
| AX-158304240 | 24 | 22.271 | KV453253.1 | 1318388 | 24-scf00489 | 24 |
| AX-158304243 | 24 | 22.271 | KV453253.1 | 1322507 | 24-scf00489 | 24 |
| AX-158304246 | 24 | 22.271 | KV453253.1 | 1327540 | 24-scf00489 | 24 |
| AX-157846568 | 24 | 22.271 | KV453253.1 | 1336668 | 24-scf00489 | 24 |
| AX-158304269 | 24 | 22.271 | KV453253.1 | 1360445 | 24-scf00489 | 24 |
| AX-158304249 | 24 | 22.272 | KV453253.1 | 1333701 | 24-scf00489 | 24 |
| AX-158304250 | 24 | 22.599 | KV453253.1 | 1334387 | 24-scf00489 | 24 |
| AX-158304252 | 24 | 22.599 | KV453253.1 | 1337356 | 24-scf00489 | 24 |
| AX-157775479 | 24 | 22.599 | KV453253.1 | 1341749 | 24-scf00489 | 24 |
| AX-157774115 | 24 | 22.599 | KV453253.1 | 1346983 | 24-scf00489 | 24 |
| AX-157742156 | 24 | 22.816 | KV453253.1 | 1353841 | 24-scf00489 | 24 |
| AX-158304267 | 24 | 22.816 | KV453253.1 | 1357268 | 24-scf00489 | 24 |
| AX-158304268 | 24 | 22.816 | KV453253.1 | 1357628 | 24-scf00489 | 24 |
| AX-158304270 | 24 | 22.816 | KV453253.1 | 1361274 | 24-scf00489 | 24 |
| AX-158304323 | 24 | 22.816 | KV453253.1 | 1440181 | 24-scf00489 | 24 |
| AX-157860883 | 24 | 22.816 | KV453253.1 | 1441126 | 24-scf00489 | 24 |
| AX-158304272 | 24 | 22.817 | KV453253.1 | 1364224 | 24-scf00489 | 24 |
| AX-157749899 | 24 | 23.142 | KV453253.1 | 1369034 | 24-scf00489 | 24 |
| AX-158304299 | 24 | 23.142 | KV453253.1 | 1409673 | 24-scf00489 | 24 |
| AX-158304393 | 24 | 23.142 | KV453253.1 | 1518230 | 24-scf00489 | 24 |
| AX-158304279 | 24 | 23.143 | KV453253.1 | 1378499 | 24-scf00489 | 24 |
| AX-158304274 | 24 | 23.149 | KV453253.1 | 1366171 | 24-scf00489 | 24 |
| AX-158304282 | 24 | 23.149 | KV453253.1 | 1383345 | 24-scf00489 | 24 |
| AX-157739132 | 24 | 23.149 | KV453253.1 | 1384476 | 24-scf00489 | 24 |
| AX-158304285 | 24 | 23.149 | KV453253.1 | 1385559 | 24-scf00489 | 24 |
| AX-158304293 | 24 | 23.149 | KV453253.1 | 1402105 | 24-scf00489 | 24 |
| AX-158304289 | 24 | 23.364 | KV453253.1 | 1395360 | 24-scf00489 | 24 |
| AX-158304290 | 24 | 23.364 | KV453253.1 | 1397885 | 24-scf00489 | 24 |
| AX-158304291 | 24 | 23.364 | KV453253.1 | 1399132 | 24-scf00489 | 24 |
| AX-158304294 | 24 | 23.364 | KV453253.1 | 1403467 | 24-scf00489 | 24 |
| AX-158381336 | 24 | 23.364 | KV453253.1 | 1404130 | 24-scf00489 | 24 |
| AX-158304298 | 24 | 23.364 | KV453253.1 | 1409123 | 24-scf00489 | 24 |
| AX-157846569 | 24 | 23.364 | KV453253.1 | 1411792 | 24-scf00489 | 24 |
| AX-158304444 | 24 | 23.364 | KV453253.1 | 1579954 | 24-scf00489 | 24 |

|              |    |        |            |         |                |    |
|--------------|----|--------|------------|---------|----------------|----|
| AX-158304254 | 24 | 23.365 | KV453253.1 | 1338220 | 24-scf00489    | 24 |
| AX-158304256 | 24 | 23.365 | KV453253.1 | 1341368 | 24-scf00489    | 24 |
| AX-158304283 | 24 | 23.365 | KV453253.1 | 1383713 | 24-scf00489    | 24 |
| AX-158304303 | 24 | 23.365 | KV453253.1 | 1416409 | 24-scf00489    | 24 |
| AX-158304308 | 24 | 23.365 | KV453253.1 | 1422912 | 24-scf00489    | 24 |
| AX-158304309 | 24 | 23.365 | KV453253.1 | 1423671 | 24-scf00489    | 24 |
| AX-158304360 | 24 | 23.365 | KV453253.1 | 1483474 | 24-scf00489    | 24 |
| AX-158304367 | 24 | 23.365 | KV453253.1 | 1490263 | 24-scf00489    | 24 |
| AX-158304373 | 24 | 23.365 | KV453253.1 | 1495306 | 24-scf00489    | 24 |
| AX-158304394 | 24 | 23.365 | KV453253.1 | 1519805 | 24-scf00489    | 24 |
| AX-158304463 | 24 | 23.365 | KV453253.1 | 1602926 | 24-scf00489    | 24 |
| AX-158304479 | 24 | 23.365 | KV453253.1 | 1620529 | 24-scf00489    | 24 |
| AX-158304487 | 24 | 23.365 | KV453253.1 | 1630750 | 24-scf00489    | 24 |
| AX-158304493 | 24 | 23.365 | KV453253.1 | 1640458 | 24-scf00489    | 24 |
| AX-158304542 | 24 | 23.365 | KV453253.1 | 1702547 | 24-scf00489    | 24 |
| AX-158304573 | 24 | 23.365 | KV453253.1 | 1740163 | 24-scf00489    | 24 |
| AX-158304668 | 24 | 23.365 | KV453253.1 | 1861406 | 24-scf00489    | 24 |
| AX-158304710 | 24 | 23.365 | KV453253.1 | 1928755 | 24-scf00489    | 24 |
| AX-158304310 | 24 | 23.388 | KV453253.1 | 1425709 | 24-scf00489    | 24 |
| AX-158304312 | 24 | 23.417 | KV453253.1 | 1427528 | 24-scf00489    | 24 |
| AX-158304315 | 24 | 23.582 | KV453253.1 | 1429148 | 24-scf00489    | 24 |
| AX-157846570 | 24 | 23.582 | KV453253.1 | 1430515 | 24-scf00489    | 24 |
| AX-158304318 | 24 | 23.582 | KV453253.1 | 1431809 | 24-scf00489    | 24 |
| AX-158304320 | 24 | 23.582 | KV453253.1 | 1434907 | 24-scf00489    | 24 |
| AX-158304328 | 24 | 23.582 | KV453253.1 | 1444823 | 24-scf00489    | 24 |
| AX-158417711 | 24 | 23.637 | KV453253.1 | 1426225 | 24-scf00489    | 24 |
| AX-158304332 | 24 | 23.637 | KV453253.1 | 1450014 | 24-scf00489    | 24 |
| AX-158304276 | 24 | 23.691 | KV453253.1 | 1370583 | 24-scf00489    | 24 |
| AX-158304333 | 24 | 23.691 | KV453253.1 | 1450436 | 24-scf00489    | 24 |
| AX-158304334 | 24 | 23.691 | KV453253.1 | 1450797 | 24-scf00489    | 24 |
| AX-158304335 | 24 | 23.691 | KV453253.1 | 1452333 | 24-scf00489    | 24 |
| AX-158304340 | 24 | 23.691 | KV453253.1 | 1459200 | 24-scf00489    | 24 |
| AX-158304350 | 24 | 23.691 | KV453253.1 | 1470339 | 24-scf00489    | 24 |
| AX-157693212 | 24 | 23.691 | FI863724.1 | 85      | IORI212 lctalu | UN |
| AX-158304345 | 24 | 23.778 | KV453253.1 | 1466890 | 24-scf00489    | 24 |
| AX-158304381 | 24 | 23.778 | KV453253.1 | 1501851 | 24-scf00489    | 24 |
| AX-158304425 | 24 | 23.778 | KV453253.1 | 1558879 | 24-scf00489    | 24 |
| AX-158304342 | 24 | 23.856 | KV453253.1 | 1461258 | 24-scf00489    | 24 |
| AX-158304354 | 24 | 23.856 | KV453253.1 | 1475810 | 24-scf00489    | 24 |
| AX-158304358 | 24 | 23.856 | KV453253.1 | 1479187 | 24-scf00489    | 24 |
| AX-158304363 | 24 | 24.019 | KV453253.1 | 1486121 | 24-scf00489    | 24 |
| AX-158304366 | 24 | 24.019 | KV453253.1 | 1489707 | 24-scf00489    | 24 |
| AX-158304375 | 24 | 24.019 | KV453253.1 | 1496803 | 24-scf00489    | 24 |
| AX-158304380 | 24 | 24.019 | KV453253.1 | 1501377 | 24-scf00489    | 24 |
| AX-158304388 | 24 | 24.019 | KV453253.1 | 1510364 | 24-scf00489    | 24 |
| AX-158304391 | 24 | 24.019 | KV453253.1 | 1512972 | 24-scf00489    | 24 |
| AX-157846572 | 24 | 24.019 | KV453253.1 | 1513952 | 24-scf00489    | 24 |
| AX-158304376 | 24 | 24.238 | KV453253.1 | 1497522 | 24-scf00489    | 24 |
| AX-157846571 | 24 | 24.238 | KV453253.1 | 1511525 | 24-scf00489    | 24 |
| AX-158304409 | 24 | 24.238 | KV453253.1 | 1541193 | 24-scf00489    | 24 |
| AX-158304414 | 24 | 24.238 | KV453253.1 | 1549047 | 24-scf00489    | 24 |



|              |    |        |            |         |             |    |
|--------------|----|--------|------------|---------|-------------|----|
| AX-158304433 | 24 | 24.238 | KV453253.1 | 1566571 | 24-scf00489 | 24 |
| AX-158304447 | 24 | 24.238 | KV453253.1 | 1583575 | 24-scf00489 | 24 |
| AX-158419746 | 24 | 24.238 | KV453253.1 | 1587790 | 24-scf00489 | 24 |
| AX-158304450 | 24 | 24.238 | KV453253.1 | 1589100 | 24-scf00489 | 24 |
| AX-158304456 | 24 | 24.238 | KV453253.1 | 1597780 | 24-scf00489 | 24 |
| AX-158304544 | 24 | 24.238 | KV453253.1 | 1704137 | 24-scf00489 | 24 |
| AX-158304552 | 24 | 24.238 | KV453253.1 | 1711332 | 24-scf00489 | 24 |
| AX-158304557 | 24 | 24.238 | KV453253.1 | 1719216 | 24-scf00489 | 24 |
| AX-158304411 | 24 | 24.259 | KV453253.1 | 1545753 | 24-scf00489 | 24 |
| AX-158304421 | 24 | 24.297 | KV453253.1 | 1553971 | 24-scf00489 | 24 |
| AX-157756252 | 24 | 24.297 | KV453253.1 | 1641706 | 24-scf00489 | 24 |
| AX-158304439 | 24 | 24.343 | KV453253.1 | 1572593 | 24-scf00489 | 24 |
| AX-158304440 | 24 | 24.397 | KV453253.1 | 1574748 | 24-scf00489 | 24 |
| AX-158304369 | 24 | 24.457 | KV453253.1 | 1492450 | 24-scf00489 | 24 |
| AX-158304426 | 24 | 24.457 | KV453253.1 | 1560972 | 24-scf00489 | 24 |
| AX-158304437 | 24 | 24.457 | KV453253.1 | 1568923 | 24-scf00489 | 24 |
| AX-158304446 | 24 | 24.457 | KV453253.1 | 1582632 | 24-scf00489 | 24 |
| AX-158304448 | 24 | 24.457 | KV453253.1 | 1585442 | 24-scf00489 | 24 |
| AX-158304451 | 24 | 24.457 | KV453253.1 | 1591768 | 24-scf00489 | 24 |
| AX-158304460 | 24 | 24.457 | KV453253.1 | 1600245 | 24-scf00489 | 24 |
| AX-158304517 | 24 | 24.457 | KV453253.1 | 1673658 | 24-scf00489 | 24 |
| AX-158304307 | 24 | 24.488 | KV453253.1 | 1421605 | 24-scf00489 | 24 |
| AX-157860886 | 24 | 24.488 | KV453253.1 | 1571812 | 24-scf00489 | 24 |
| AX-158304462 | 24 | 24.488 | KV453253.1 | 1602524 | 24-scf00489 | 24 |
| AX-158304473 | 24 | 24.511 | KV453253.1 | 1614233 | 24-scf00489 | 24 |
| AX-158304506 | 24 | 24.511 | KV453253.1 | 1659838 | 24-scf00489 | 24 |
| AX-158304475 | 24 | 24.524 | KV453253.1 | 1616247 | 24-scf00489 | 24 |
| AX-158304296 | 24 | 24.566 | KV453253.1 | 1407833 | 24-scf00489 | 24 |
| AX-157741334 | 24 | 24.566 | KV453253.1 | 1512582 | 24-scf00489 | 24 |
| AX-158304417 | 24 | 24.566 | KV453253.1 | 1551313 | 24-scf00489 | 24 |
| AX-158304419 | 24 | 24.566 | KV453253.1 | 1552330 | 24-scf00489 | 24 |
| AX-158304429 | 24 | 24.566 | KV453253.1 | 1563351 | 24-scf00489 | 24 |
| AX-158304449 | 24 | 24.566 | KV453253.1 | 1585930 | 24-scf00489 | 24 |
| AX-158419745 | 24 | 24.566 | KV453253.1 | 1586001 | 24-scf00489 | 24 |
| AX-158304455 | 24 | 24.566 | KV453253.1 | 1597316 | 24-scf00489 | 24 |
| AX-157888180 | 24 | 24.566 | KV453253.1 | 1617591 | 24-scf00489 | 24 |
| AX-158304478 | 24 | 24.566 | KV453253.1 | 1619534 | 24-scf00489 | 24 |
| AX-158304480 | 24 | 24.566 | KV453253.1 | 1621762 | 24-scf00489 | 24 |
| AX-158304481 | 24 | 24.566 | KV453253.1 | 1622541 | 24-scf00489 | 24 |
| AX-158304482 | 24 | 24.566 | KV453253.1 | 1623205 | 24-scf00489 | 24 |
| AX-158304484 | 24 | 24.566 | KV453253.1 | 1625506 | 24-scf00489 | 24 |
| AX-158304485 | 24 | 24.566 | KV453253.1 | 1626021 | 24-scf00489 | 24 |
| AX-158304497 | 24 | 24.566 | KV453253.1 | 1646972 | 24-scf00489 | 24 |
| AX-158304498 | 24 | 24.566 | KV453253.1 | 1647525 | 24-scf00489 | 24 |
| AX-158304531 | 24 | 24.566 | KV453253.1 | 1688340 | 24-scf00489 | 24 |
| AX-158304546 | 24 | 24.566 | KV453253.1 | 1707294 | 24-scf00489 | 24 |
| AX-158304577 | 24 | 24.566 | KV453253.1 | 1745973 | 24-scf00489 | 24 |
| AX-158304659 | 24 | 24.566 | KV453253.1 | 1845800 | 24-scf00489 | 24 |
| AX-158304509 | 24 | 24.568 | KV453253.1 | 1664043 | 24-scf00489 | 24 |
| AX-158304513 | 24 | 24.569 | KV453253.1 | 1668574 | 24-scf00489 | 24 |
| AX-158304519 | 24 | 24.989 | KV453253.1 | 1677961 | 24-scf00489 | 24 |

|              |    |        |            |         |             |    |
|--------------|----|--------|------------|---------|-------------|----|
| AX-158304529 | 24 | 25.029 | KV453253.1 | 1687084 | 24-scf00489 | 24 |
| AX-158304251 | 24 | 25.061 | KV453253.1 | 1336217 | 24-scf00489 | 24 |
| AX-158304261 | 24 | 25.061 | KV453253.1 | 1349784 | 24-scf00489 | 24 |
| AX-158304464 | 24 | 25.061 | KV453253.1 | 1604331 | 24-scf00489 | 24 |
| AX-158304504 | 24 | 25.061 | KV453253.1 | 1655886 | 24-scf00489 | 24 |
| AX-158304533 | 24 | 25.061 | KV453253.1 | 1689849 | 24-scf00489 | 24 |
| AX-158304695 | 24 | 25.061 | KV453253.1 | 1910237 | 24-scf00489 | 24 |
| AX-158304536 | 24 | 25.083 | KV453253.1 | 1694175 | 24-scf00489 | 24 |
| AX-158417719 | 24 | 25.13  | KV453253.1 | 1695559 | 24-scf00489 | 24 |
| AX-158417720 | 24 | 25.13  | KV453253.1 | 1695704 | 24-scf00489 | 24 |
| AX-158304538 | 24 | 25.13  | KV453253.1 | 1697081 | 24-scf00489 | 24 |
| AX-158304545 | 24 | 25.13  | KV453253.1 | 1705663 | 24-scf00489 | 24 |
| AX-158304501 | 24 | 25.14  | KV453253.1 | 1653631 | 24-scf00489 | 24 |
| AX-158304548 | 24 | 25.14  | KV453253.1 | 1709291 | 24-scf00489 | 24 |
| AX-158304355 | 24 | 25.151 | KV453253.1 | 1476696 | 24-scf00489 | 24 |
| AX-158304553 | 24 | 25.151 | KV453253.1 | 1711953 | 24-scf00489 | 24 |
| AX-157724085 | 24 | 25.41  | KV453253.1 | 1718029 | 24-scf00489 | 24 |
| AX-158304427 | 24 | 25.719 | KV453253.1 | 1561373 | 24-scf00489 | 24 |
| AX-158304562 | 24 | 25.719 | KV453253.1 | 1726106 | 24-scf00489 | 24 |
| AX-157753838 | 24 | 26.006 | KV453253.1 | 1732602 | 24-scf00489 | 24 |
| AX-157713228 | 24 | 26.006 | KV453253.1 | 1736160 | 24-scf00489 | 24 |
| AX-158304576 | 24 | 26.079 | KV453253.1 | 1744718 | 24-scf00489 | 24 |
| AX-158304578 | 24 | 26.248 | KV453253.1 | 1747973 | 24-scf00489 | 24 |
| AX-158304579 | 24 | 26.248 | KV453253.1 | 1749570 | 24-scf00489 | 24 |
| AX-158304646 | 24 | 26.248 | KV453253.1 | 1831900 | 24-scf00489 | 24 |
| AX-158304647 | 24 | 26.248 | KV453253.1 | 1832324 | 24-scf00489 | 24 |
| AX-158304602 | 24 | 26.335 | KV453253.1 | 1774760 | 24-scf00489 | 24 |
| AX-158304286 | 24 | 26.459 | KV453253.1 | 1392984 | 24-scf00489 | 24 |
| AX-158304292 | 24 | 26.459 | KV453253.1 | 1400538 | 24-scf00489 | 24 |
| AX-158304330 | 24 | 26.459 | KV453253.1 | 1447757 | 24-scf00489 | 24 |
| AX-158304337 | 24 | 26.459 | KV453253.1 | 1456437 | 24-scf00489 | 24 |
| AX-158304352 | 24 | 26.459 | KV453253.1 | 1472643 | 24-scf00489 | 24 |
| AX-157860884 | 24 | 26.459 | KV453253.1 | 1492505 | 24-scf00489 | 24 |
| AX-158304435 | 24 | 26.459 | KV453253.1 | 1567222 | 24-scf00489 | 24 |
| AX-157881043 | 24 | 26.459 | KV453253.1 | 1576775 | 24-scf00489 | 24 |
| AX-158304457 | 24 | 26.459 | KV453253.1 | 1597899 | 24-scf00489 | 24 |
| AX-158304569 | 24 | 26.459 | KV453253.1 | 1733918 | 24-scf00489 | 24 |
| AX-158304596 | 24 | 26.459 | KV453253.1 | 1769347 | 24-scf00489 | 24 |
| AX-158304604 | 24 | 26.459 | KV453253.1 | 1775737 | 24-scf00489 | 24 |
| AX-158304623 | 24 | 26.459 | KV453253.1 | 1800391 | 24-scf00489 | 24 |
| AX-158304606 | 24 | 26.462 | KV453253.1 | 1777894 | 24-scf00489 | 24 |
| AX-158304608 | 24 | 26.462 | KV453253.1 | 1779061 | 24-scf00489 | 24 |
| AX-158304600 | 24 | 26.508 | KV453253.1 | 1773247 | 24-scf00489 | 24 |
| AX-158304609 | 24 | 26.508 | KV453253.1 | 1779295 | 24-scf00489 | 24 |
| AX-158304620 | 24 | 26.508 | KV453253.1 | 1798334 | 24-scf00489 | 24 |
| AX-157846582 | 24 | 26.508 | KV453253.1 | 1829457 | 24-scf00489 | 24 |
| AX-158304713 | 24 | 26.508 | KV453253.1 | 1932847 | 24-scf00489 | 24 |
| AX-158304611 | 24 | 26.572 | KV453253.1 | 1785832 | 24-scf00489 | 24 |
| AX-158304616 | 24 | 26.572 | KV453253.1 | 1793880 | 24-scf00489 | 24 |
| AX-157846580 | 24 | 26.572 | KV453253.1 | 1795993 | 24-scf00489 | 24 |
| AX-158304618 | 24 | 26.572 | KV453253.1 | 1797100 | 24-scf00489 | 24 |

|              |    |        |            |         |             |    |
|--------------|----|--------|------------|---------|-------------|----|
| AX-158304628 | 24 | 26.572 | KV453253.1 | 1803985 | 24-scf00489 | 24 |
| AX-158304633 | 24 | 26.606 | KV453253.1 | 1815330 | 24-scf00489 | 24 |
| AX-158304634 | 24 | 26.681 | KV453253.1 | 1815835 | 24-scf00489 | 24 |
| AX-158304224 | 24 | 26.79  | KV453253.1 | 1289866 | 24-scf00489 | 24 |
| AX-158304494 | 24 | 26.79  | KV453253.1 | 1641039 | 24-scf00489 | 24 |
| AX-158304566 | 24 | 26.79  | KV453253.1 | 1730397 | 24-scf00489 | 24 |
| AX-157846577 | 24 | 26.79  | KV453253.1 | 1780102 | 24-scf00489 | 24 |
| AX-158304632 | 24 | 26.79  | KV453253.1 | 1813761 | 24-scf00489 | 24 |
| AX-158304639 | 24 | 26.79  | KV453253.1 | 1821673 | 24-scf00489 | 24 |
| AX-158304649 | 24 | 26.79  | KV453253.1 | 1835371 | 24-scf00489 | 24 |
| AX-158304652 | 24 | 26.79  | KV453253.1 | 1839757 | 24-scf00489 | 24 |
| AX-158304653 | 24 | 26.79  | KV453253.1 | 1840332 | 24-scf00489 | 24 |
| AX-158304657 | 24 | 26.79  | KV453253.1 | 1844653 | 24-scf00489 | 24 |
| AX-158304658 | 24 | 26.79  | KV453253.1 | 1845145 | 24-scf00489 | 24 |
| AX-157867692 | 24 | 26.79  | KV453253.1 | 1865201 | 24-scf00489 | 24 |
| AX-158304675 | 24 | 26.79  | KV453253.1 | 1867591 | 24-scf00489 | 24 |
| AX-158304680 | 24 | 26.79  | KV453253.1 | 1882301 | 24-scf00489 | 24 |
| AX-158304682 | 24 | 26.79  | KV453253.1 | 1884040 | 24-scf00489 | 24 |
| AX-157727231 | 24 | 26.79  | KV453253.1 | 1886122 | 24-scf00489 | 24 |
| AX-158304688 | 24 | 26.79  | KV453253.1 | 1899397 | 24-scf00489 | 24 |
| AX-157723706 | 24 | 26.79  | KV453253.1 | 1902336 | 24-scf00489 | 24 |
| AX-158304696 | 24 | 26.79  | KV453253.1 | 1912425 | 24-scf00489 | 24 |
| AX-158304697 | 24 | 26.79  | KV453253.1 | 1913010 | 24-scf00489 | 24 |
| AX-158417727 | 24 | 26.79  | KV453253.1 | 1914005 | 24-scf00489 | 24 |
| AX-158304698 | 24 | 26.79  | KV453253.1 | 1914503 | 24-scf00489 | 24 |
| AX-158304700 | 24 | 26.79  | KV453253.1 | 1916463 | 24-scf00489 | 24 |
| AX-158304701 | 24 | 26.79  | KV453253.1 | 1916804 | 24-scf00489 | 24 |
| AX-157738292 | 24 | 26.79  | KV453253.1 | 1918559 | 24-scf00489 | 24 |
| AX-158304702 | 24 | 26.79  | KV453253.1 | 1918828 | 24-scf00489 | 24 |
| AX-158304703 | 24 | 26.79  | KV453253.1 | 1919123 | 24-scf00489 | 24 |
| AX-157881048 | 24 | 26.79  | KV453253.1 | 1926674 | 24-scf00489 | 24 |
| AX-157748582 | 24 | 26.79  | KV453253.1 | 1928176 | 24-scf00489 | 24 |
| AX-158304709 | 24 | 26.79  | KV453253.1 | 1928430 | 24-scf00489 | 24 |
| AX-158304711 | 24 | 26.79  | KV453253.1 | 1929212 | 24-scf00489 | 24 |
| AX-157846584 | 24 | 26.79  | KV453253.1 | 1930221 | 24-scf00489 | 24 |
| AX-157715645 | 24 | 26.79  | KV453253.1 | 1935334 | 24-scf00489 | 24 |
| AX-157716419 | 24 | 26.79  | KV453253.1 | 1936494 | 24-scf00489 | 24 |
| AX-157846590 | 24 | 26.79  | KV453253.1 | 1969204 | 24-scf00489 | 24 |
| AX-158304737 | 24 | 26.79  | KV453253.1 | 1976006 | 24-scf00489 | 24 |
| AX-158304751 | 24 | 26.79  | KV453253.1 | 2001666 | 24-scf00489 | 24 |
| AX-157846593 | 24 | 26.79  | KV453253.1 | 2009206 | 24-scf00489 | 24 |
| AX-158381340 | 24 | 26.79  | KV453253.1 | 2018401 | 24-scf00489 | 24 |
| AX-157846586 | 24 | 26.954 | KV453253.1 | 1950798 | 24-scf00489 | 24 |
| AX-158304731 | 24 | 26.992 | KV453253.1 | 1961167 | 24-scf00489 | 24 |
| AX-157846591 | 24 | 26.992 | KV453253.1 | 1998357 | 24-scf00489 | 24 |
| AX-158304520 | 24 | 27.118 | KV453253.1 | 1678499 | 24-scf00489 | 24 |
| AX-158304622 | 24 | 27.118 | KV453253.1 | 1799867 | 24-scf00489 | 24 |
| AX-158304636 | 24 | 27.118 | KV453253.1 | 1818402 | 24-scf00489 | 24 |
| AX-158304642 | 24 | 27.118 | KV453253.1 | 1828065 | 24-scf00489 | 24 |
| AX-157713428 | 24 | 27.118 | KV453253.1 | 1931326 | 24-scf00489 | 24 |
| AX-158304728 | 24 | 27.118 | KV453253.1 | 1959219 | 24-scf00489 | 24 |

|              |    |        |            |         |             |    |
|--------------|----|--------|------------|---------|-------------|----|
| AX-158304741 | 24 | 27.118 | KV453253.1 | 1981806 | 24-scf00489 | 24 |
| AX-158304742 | 24 | 27.118 | KV453253.1 | 1982494 | 24-scf00489 | 24 |
| AX-157714005 | 24 | 27.118 | KV453253.1 | 1987230 | 24-scf00489 | 24 |
| AX-158304748 | 24 | 27.118 | KV453253.1 | 1989025 | 24-scf00489 | 24 |
| AX-158304749 | 24 | 27.118 | KV453253.1 | 1989399 | 24-scf00489 | 24 |
| AX-157774701 | 24 | 27.216 | KV453253.1 | 1997724 | 24-scf00489 | 24 |
| AX-157804323 | 24 | 27.271 | KV453253.1 | 2010070 | 24-scf00489 | 24 |
| AX-158304732 | 24 | 27.321 | KV453253.1 | 1962895 | 24-scf00489 | 24 |
| AX-158304754 | 24 | 27.321 | KV453253.1 | 2007096 | 24-scf00489 | 24 |
| AX-158304762 | 24 | 27.321 | KV453253.1 | 2024918 | 24-scf00489 | 24 |
| AX-158304764 | 24 | 27.321 | KV453253.1 | 2026827 | 24-scf00489 | 24 |
| AX-158304771 | 24 | 27.368 | KV453253.1 | 2043047 | 24-scf00489 | 24 |
| AX-158304716 | 24 | 27.447 | KV453253.1 | 1939877 | 24-scf00489 | 24 |
| AX-158304729 | 24 | 27.447 | KV453253.1 | 1959997 | 24-scf00489 | 24 |
| AX-158304733 | 24 | 27.447 | KV453253.1 | 1968268 | 24-scf00489 | 24 |
| AX-158304739 | 24 | 27.447 | KV453253.1 | 1977940 | 24-scf00489 | 24 |
| AX-157720332 | 24 | 27.447 | KV453253.1 | 1996286 | 24-scf00489 | 24 |
| AX-157722393 | 24 | 27.447 | KV453253.1 | 2008867 | 24-scf00489 | 24 |
| AX-158304765 | 24 | 27.447 | KV453253.1 | 2027878 | 24-scf00489 | 24 |
| AX-157846598 | 24 | 27.447 | KV453253.1 | 2042195 | 24-scf00489 | 24 |
| AX-157846599 | 24 | 27.447 | KV453253.1 | 2045007 | 24-scf00489 | 24 |
| AX-158304776 | 24 | 27.447 | KV453253.1 | 2046412 | 24-scf00489 | 24 |
| AX-158304779 | 24 | 27.447 | KV453253.1 | 2049286 | 24-scf00489 | 24 |
| AX-158304780 | 24 | 27.447 | KV453253.1 | 2053045 | 24-scf00489 | 24 |
| AX-157846603 | 24 | 27.447 | KV453253.1 | 2054303 | 24-scf00489 | 24 |
| AX-158304781 | 24 | 27.447 | KV453253.1 | 2055215 | 24-scf00489 | 24 |
| AX-158304789 | 24 | 27.447 | KV453253.1 | 2065763 | 24-scf00489 | 24 |
| AX-158304793 | 24 | 27.447 | KV453253.1 | 2072514 | 24-scf00489 | 24 |
| AX-157867696 | 24 | 27.447 | KV453253.1 | 2077558 | 24-scf00489 | 24 |
| AX-158304783 | 24 | 27.474 | KV453253.1 | 2056269 | 24-scf00489 | 24 |
| AX-157846604 | 24 | 27.556 | KV453253.1 | 2056636 | 24-scf00489 | 24 |
| AX-157846605 | 24 | 27.556 | KV453253.1 | 2058748 | 24-scf00489 | 24 |
| AX-157846606 | 24 | 27.556 | KV453253.1 | 2059335 | 24-scf00489 | 24 |
| AX-158304790 | 24 | 27.556 | KV453253.1 | 2068923 | 24-scf00489 | 24 |
| AX-158304791 | 24 | 27.556 | KV453253.1 | 2069904 | 24-scf00489 | 24 |
| AX-158304792 | 24 | 27.556 | KV453253.1 | 2070580 | 24-scf00489 | 24 |
| AX-158304794 | 24 | 27.556 | KV453253.1 | 2073418 | 24-scf00489 | 24 |
| AX-158304795 | 24 | 27.556 | KV453253.1 | 2075895 | 24-scf00489 | 24 |
| AX-158304796 | 24 | 27.556 | KV453253.1 | 2078606 | 24-scf00489 | 24 |
| AX-158304799 | 24 | 27.556 | KV453253.1 | 2082006 | 24-scf00489 | 24 |
| AX-157860889 | 24 | 27.633 | KV453253.1 | 2083535 | 24-scf00489 | 24 |
| AX-158304767 | 24 | 27.774 | KV453253.1 | 2029628 | 24-scf00489 | 24 |
| AX-158304800 | 24 | 27.774 | KV453253.1 | 2087013 | 24-scf00489 | 24 |
| AX-158304806 | 24 | 27.774 | KV453253.1 | 2096744 | 24-scf00489 | 24 |
| AX-158304810 | 24 | 27.774 | KV453253.1 | 2103205 | 24-scf00489 | 24 |
| AX-158304813 | 24 | 27.774 | KV453253.1 | 2104507 | 24-scf00489 | 24 |
| AX-158304814 | 24 | 27.774 | KV453253.1 | 2105224 | 24-scf00489 | 24 |
| AX-158304816 | 24 | 27.774 | KV453253.1 | 2107464 | 24-scf00489 | 24 |
| AX-158304817 | 24 | 27.774 | KV453253.1 | 2108077 | 24-scf00489 | 24 |
| AX-158304638 | 24 | 27.829 | KV453253.1 | 1820667 | 24-scf00489 | 24 |
| AX-158304719 | 24 | 27.829 | KV453253.1 | 1945867 | 24-scf00489 | 24 |

|              |    |        |            |         |             |    |
|--------------|----|--------|------------|---------|-------------|----|
| AX-157739461 | 24 | 27.829 | KV453253.1 | 2017886 | 24-scf00489 | 24 |
| AX-157846609 | 24 | 27.829 | KV453253.1 | 2087327 | 24-scf00489 | 24 |
| AX-158304801 | 24 | 27.829 | KV453253.1 | 2087769 | 24-scf00489 | 24 |
| AX-157846610 | 24 | 27.829 | KV453253.1 | 2090159 | 24-scf00489 | 24 |
| AX-158304818 | 24 | 27.829 | KV453253.1 | 2110509 | 24-scf00489 | 24 |
| AX-158417736 | 24 | 27.829 | KV453253.1 | 2219733 | 24-scf00489 | 24 |
| AX-158305135 | 24 | 27.829 | KV453253.1 | 2547782 | 24-scf00489 | 24 |
| AX-157740684 | 24 | 27.884 | KV453253.1 | 2040935 | 24-scf00489 | 24 |
| AX-158304770 | 24 | 27.884 | KV453253.1 | 2041142 | 24-scf00489 | 24 |
| AX-158304808 | 24 | 27.884 | KV453253.1 | 2100029 | 24-scf00489 | 24 |
| AX-158304824 | 24 | 27.884 | KV453253.1 | 2117838 | 24-scf00489 | 24 |
| AX-158304777 | 24 | 27.977 | KV453253.1 | 2046736 | 24-scf00489 | 24 |
| AX-158304826 | 24 | 27.977 | KV453253.1 | 2119849 | 24-scf00489 | 24 |
| AX-158304829 | 24 | 27.977 | KV453253.1 | 2124294 | 24-scf00489 | 24 |
| AX-158304845 | 24 | 27.977 | KV453253.1 | 2138622 | 24-scf00489 | 24 |
| AX-157881051 | 24 | 28.102 | KV453253.1 | 2093443 | 24-scf00489 | 24 |
| AX-158304827 | 24 | 28.102 | KV453253.1 | 2123071 | 24-scf00489 | 24 |
| AX-158304830 | 24 | 28.102 | KV453253.1 | 2125836 | 24-scf00489 | 24 |
| AX-158304832 | 24 | 28.102 | KV453253.1 | 2127301 | 24-scf00489 | 24 |
| AX-157846611 | 24 | 28.102 | KV453253.1 | 2127792 | 24-scf00489 | 24 |
| AX-158304833 | 24 | 28.102 | KV453253.1 | 2128000 | 24-scf00489 | 24 |
| AX-158304836 | 24 | 28.102 | KV453253.1 | 2129458 | 24-scf00489 | 24 |
| AX-158304838 | 24 | 28.102 | KV453253.1 | 2131370 | 24-scf00489 | 24 |
| AX-158304840 | 24 | 28.102 | KV453253.1 | 2132549 | 24-scf00489 | 24 |
| AX-158304841 | 24 | 28.102 | KV453253.1 | 2133160 | 24-scf00489 | 24 |
| AX-158304847 | 24 | 28.104 | KV453253.1 | 2141377 | 24-scf00489 | 24 |
| AX-157846613 | 24 | 28.106 | KV453253.1 | 2142054 | 24-scf00489 | 24 |
| AX-158304915 | 24 | 28.106 | KV453253.1 | 2237338 | 24-scf00489 | 24 |
| AX-158304849 | 24 | 28.331 | KV453253.1 | 2144700 | 24-scf00489 | 24 |
| AX-158304852 | 24 | 28.559 | KV453253.1 | 2153342 | 24-scf00489 | 24 |
| AX-158304839 | 24 | 28.562 | KV453253.1 | 2132134 | 24-scf00489 | 24 |
| AX-158304857 | 24 | 28.562 | KV453253.1 | 2157870 | 24-scf00489 | 24 |
| AX-158304859 | 24 | 28.562 | KV453253.1 | 2160033 | 24-scf00489 | 24 |
| AX-158304821 | 24 | 28.716 | KV453253.1 | 2115384 | 24-scf00489 | 24 |
| AX-158419749 | 24 | 28.716 | KV453253.1 | 2162056 | 24-scf00489 | 24 |
| AX-158304861 | 24 | 28.716 | KV453253.1 | 2162525 | 24-scf00489 | 24 |
| AX-157846614 | 24 | 28.798 | KV453253.1 | 2168765 | 24-scf00489 | 24 |
| AX-158304803 | 24 | 28.868 | KV453253.1 | 2091987 | 24-scf00489 | 24 |
| AX-158304860 | 24 | 28.868 | KV453253.1 | 2160826 | 24-scf00489 | 24 |
| AX-158304872 | 24 | 28.868 | KV453253.1 | 2177225 | 24-scf00489 | 24 |
| AX-158304877 | 24 | 28.868 | KV453253.1 | 2187348 | 24-scf00489 | 24 |
| AX-158304880 | 24 | 28.868 | KV453253.1 | 2189103 | 24-scf00489 | 24 |
| AX-158304882 | 24 | 28.868 | KV453253.1 | 2191144 | 24-scf00489 | 24 |
| AX-158304883 | 24 | 28.868 | KV453253.1 | 2191798 | 24-scf00489 | 24 |
| AX-158304885 | 24 | 28.868 | KV453253.1 | 2194929 | 24-scf00489 | 24 |
| AX-157724609 | 24 | 28.868 | KV453253.1 | 2198260 | 24-scf00489 | 24 |
| AX-158304887 | 24 | 28.868 | KV453253.1 | 2200210 | 24-scf00489 | 24 |
| AX-158304888 | 24 | 28.868 | KV453253.1 | 2200869 | 24-scf00489 | 24 |
| AX-157746259 | 24 | 28.868 | KV453253.1 | 2203751 | 24-scf00489 | 24 |
| AX-158304890 | 24 | 28.868 | KV453253.1 | 2204687 | 24-scf00489 | 24 |
| AX-158304892 | 24 | 28.868 | KV453253.1 | 2206512 | 24-scf00489 | 24 |

|              |    |        |            |         |             |    |
|--------------|----|--------|------------|---------|-------------|----|
| AX-158304894 | 24 | 28.868 | KV453253.1 | 2207981 | 24-scf00489 | 24 |
| AX-158304901 | 24 | 28.868 | KV453253.1 | 2211992 | 24-scf00489 | 24 |
| AX-157772595 | 24 | 28.868 | KV453253.1 | 2213083 | 24-scf00489 | 24 |
| AX-157713827 | 24 | 28.868 | KV453253.1 | 2224214 | 24-scf00489 | 24 |
| AX-158304907 | 24 | 28.868 | KV453253.1 | 2225041 | 24-scf00489 | 24 |
| AX-157846616 | 24 | 28.868 | KV453253.1 | 2227868 | 24-scf00489 | 24 |
| AX-158304908 | 24 | 28.868 | KV453253.1 | 2228851 | 24-scf00489 | 24 |
| AX-157718884 | 24 | 28.868 | KV453253.1 | 2232244 | 24-scf00489 | 24 |
| AX-158304913 | 24 | 28.868 | KV453253.1 | 2234762 | 24-scf00489 | 24 |
| AX-157774580 | 24 | 28.868 | KV453253.1 | 2238468 | 24-scf00489 | 24 |
| AX-158304918 | 24 | 28.868 | KV453253.1 | 2240907 | 24-scf00489 | 24 |
| AX-158417739 | 24 | 28.868 | KV453253.1 | 2243817 | 24-scf00489 | 24 |
| AX-158304922 | 24 | 28.868 | KV453253.1 | 2247018 | 24-scf00489 | 24 |
| AX-157714818 | 24 | 28.868 | KV453253.1 | 2249672 | 24-scf00489 | 24 |
| AX-158304924 | 24 | 28.868 | KV453253.1 | 2252306 | 24-scf00489 | 24 |
| AX-157846620 | 24 | 28.868 | KV453253.1 | 2252786 | 24-scf00489 | 24 |
| AX-158304933 | 24 | 28.868 | KV453253.1 | 2260494 | 24-scf00489 | 24 |
| AX-158304935 | 24 | 28.868 | KV453253.1 | 2262128 | 24-scf00489 | 24 |
| AX-158304988 | 24 | 28.868 | KV453253.1 | 2321183 | 24-scf00489 | 24 |
| AX-157846617 | 24 | 28.929 | KV453253.1 | 2246335 | 24-scf00489 | 24 |
| AX-157773519 | 24 | 28.929 | KV453253.1 | 2253740 | 24-scf00489 | 24 |
| AX-158304862 | 24 | 28.978 | KV453253.1 | 2163367 | 24-scf00489 | 24 |
| AX-158304864 | 24 | 28.978 | KV453253.1 | 2165203 | 24-scf00489 | 24 |
| AX-158304875 | 24 | 28.978 | KV453253.1 | 2180080 | 24-scf00489 | 24 |
| AX-158304893 | 24 | 28.978 | KV453253.1 | 2206965 | 24-scf00489 | 24 |
| AX-157888184 | 24 | 28.978 | KV453253.1 | 2209888 | 24-scf00489 | 24 |
| AX-158304900 | 24 | 28.978 | KV453253.1 | 2210812 | 24-scf00489 | 24 |
| AX-158304902 | 24 | 28.978 | KV453253.1 | 2213917 | 24-scf00489 | 24 |
| AX-157745849 | 24 | 28.978 | KV453253.1 | 2218974 | 24-scf00489 | 24 |
| AX-157740724 | 24 | 28.978 | KV453253.1 | 2257312 | 24-scf00489 | 24 |
| AX-158304929 | 24 | 28.978 | KV453253.1 | 2258669 | 24-scf00489 | 24 |
| AX-158304930 | 24 | 28.978 | KV453253.1 | 2259062 | 24-scf00489 | 24 |
| AX-158304931 | 24 | 28.978 | KV453253.1 | 2259363 | 24-scf00489 | 24 |
| AX-158304936 | 24 | 28.978 | KV453253.1 | 2263007 | 24-scf00489 | 24 |
| AX-157713150 | 24 | 29.305 | KV453253.1 | 2156639 | 24-scf00489 | 24 |
| AX-158304873 | 24 | 29.305 | KV453253.1 | 2178860 | 24-scf00489 | 24 |
| AX-158304879 | 24 | 29.305 | KV453253.1 | 2188534 | 24-scf00489 | 24 |
| AX-158304889 | 24 | 29.305 | KV453253.1 | 2204183 | 24-scf00489 | 24 |
| AX-158304910 | 24 | 29.305 | KV453253.1 | 2230968 | 24-scf00489 | 24 |
| AX-158304911 | 24 | 29.305 | KV453253.1 | 2231435 | 24-scf00489 | 24 |
| AX-158304928 | 24 | 29.305 | KV453253.1 | 2257120 | 24-scf00489 | 24 |
| AX-158304940 | 24 | 29.305 | KV453253.1 | 2269554 | 24-scf00489 | 24 |
| AX-158304946 | 24 | 29.305 | KV453253.1 | 2273562 | 24-scf00489 | 24 |
| AX-158304947 | 24 | 29.305 | KV453253.1 | 2274762 | 24-scf00489 | 24 |
| AX-157775418 | 24 | 29.305 | KV453253.1 | 2275888 | 24-scf00489 | 24 |
| AX-158304950 | 24 | 29.305 | KV453253.1 | 2276531 | 24-scf00489 | 24 |
| AX-158304951 | 24 | 29.305 | KV453253.1 | 2276831 | 24-scf00489 | 24 |
| AX-158304953 | 24 | 29.305 | KV453253.1 | 2279115 | 24-scf00489 | 24 |
| AX-158304956 | 24 | 29.305 | KV453253.1 | 2281704 | 24-scf00489 | 24 |
| AX-157754080 | 24 | 29.305 | KV453253.1 | 2284037 | 24-scf00489 | 24 |
| AX-158304962 | 24 | 29.305 | KV453253.1 | 2286838 | 24-scf00489 | 24 |

|              |    |        |            |         |             |    |
|--------------|----|--------|------------|---------|-------------|----|
| AX-158304965 | 24 | 29.305 | KV453253.1 | 2289960 | 24-scf00489 | 24 |
| AX-157888185 | 24 | 29.305 | KV453253.1 | 2293422 | 24-scf00489 | 24 |
| AX-158304969 | 24 | 29.305 | KV453253.1 | 2295535 | 24-scf00489 | 24 |
| AX-158304970 | 24 | 29.305 | KV453253.1 | 2295938 | 24-scf00489 | 24 |
| AX-158304976 | 24 | 29.305 | KV453253.1 | 2306707 | 24-scf00489 | 24 |
| AX-158304977 | 24 | 29.305 | KV453253.1 | 2307364 | 24-scf00489 | 24 |
| AX-157846621 | 24 | 29.305 | KV453253.1 | 2307971 | 24-scf00489 | 24 |
| AX-157846622 | 24 | 29.305 | KV453253.1 | 2311284 | 24-scf00489 | 24 |
| AX-157846623 | 24 | 29.305 | KV453253.1 | 2312618 | 24-scf00489 | 24 |
| AX-158304980 | 24 | 29.305 | KV453253.1 | 2313537 | 24-scf00489 | 24 |
| AX-158304981 | 24 | 29.305 | KV453253.1 | 2315007 | 24-scf00489 | 24 |
| AX-158417740 | 24 | 29.305 | KV453253.1 | 2316659 | 24-scf00489 | 24 |
| AX-158304983 | 24 | 29.305 | KV453253.1 | 2316972 | 24-scf00489 | 24 |
| AX-157846624 | 24 | 29.305 | KV453253.1 | 2319431 | 24-scf00489 | 24 |
| AX-158304986 | 24 | 29.305 | KV453253.1 | 2319867 | 24-scf00489 | 24 |
| AX-157742483 | 24 | 29.305 | KV453253.1 | 2321744 | 24-scf00489 | 24 |
| AX-158304989 | 24 | 29.305 | KV453253.1 | 2324556 | 24-scf00489 | 24 |
| AX-158304991 | 24 | 29.305 | KV453253.1 | 2329420 | 24-scf00489 | 24 |
| AX-157846628 | 24 | 29.305 | KV453253.1 | 2345308 | 24-scf00489 | 24 |
| AX-158305000 | 24 | 29.305 | KV453253.1 | 2348407 | 24-scf00489 | 24 |
| AX-157846651 | 24 | 29.305 | KV453253.1 | 2419336 | 24-scf00489 | 24 |
| AX-158305052 | 24 | 29.305 | KV453253.1 | 2421122 | 24-scf00489 | 24 |
| AX-158305102 | 24 | 29.305 | KV453253.1 | 2494935 | 24-scf00489 | 24 |
| AX-158305107 | 24 | 29.305 | KV453253.1 | 2506008 | 24-scf00489 | 24 |
| AX-158305109 | 24 | 29.305 | KV453253.1 | 2508748 | 24-scf00489 | 24 |
| AX-158305116 | 24 | 29.305 | KV453253.1 | 2517385 | 24-scf00489 | 24 |
| AX-158305128 | 24 | 29.305 | KV453253.1 | 2534734 | 24-scf00489 | 24 |
| AX-158305138 | 24 | 29.305 | KV453253.1 | 2553604 | 24-scf00489 | 24 |
| AX-157715116 | 24 | 29.305 | KV453253.1 | 2567824 | 24-scf00489 | 24 |
| AX-158305148 | 24 | 29.305 | KV453253.1 | 2582811 | 24-scf00489 | 24 |
| AX-158304995 | 24 | 29.314 | KV453253.1 | 2338690 | 24-scf00489 | 24 |
| AX-157846631 | 24 | 29.337 | KV453253.1 | 2353466 | 24-scf00489 | 24 |
| AX-158305007 | 24 | 29.361 | KV453253.1 | 2359043 | 24-scf00489 | 24 |
| AX-158304961 | 24 | 29.384 | KV453253.1 | 2286215 | 24-scf00489 | 24 |
| AX-158305009 | 24 | 29.384 | KV453253.1 | 2363573 | 24-scf00489 | 24 |
| AX-158305019 | 24 | 29.414 | KV453253.1 | 2374303 | 24-scf00489 | 24 |
| AX-157724099 | 24 | 29.414 | KV453253.1 | 2379316 | 24-scf00489 | 24 |
| AX-157760525 | 24 | 29.414 | KV453253.1 | 2381528 | 24-scf00489 | 24 |
| AX-158304941 | 24 | 29.524 | KV453253.1 | 2270973 | 24-scf00489 | 24 |
| AX-158304949 | 24 | 29.524 | KV453253.1 | 2276086 | 24-scf00489 | 24 |
| AX-158304954 | 24 | 29.524 | KV453253.1 | 2280449 | 24-scf00489 | 24 |
| AX-158304960 | 24 | 29.524 | KV453253.1 | 2284911 | 24-scf00489 | 24 |
| AX-158304966 | 24 | 29.524 | KV453253.1 | 2291791 | 24-scf00489 | 24 |
| AX-157741223 | 24 | 29.524 | KV453253.1 | 2311571 | 24-scf00489 | 24 |
| AX-157846625 | 24 | 29.524 | KV453253.1 | 2321535 | 24-scf00489 | 24 |
| AX-158304990 | 24 | 29.524 | KV453253.1 | 2328350 | 24-scf00489 | 24 |
| AX-158304999 | 24 | 29.524 | KV453253.1 | 2347907 | 24-scf00489 | 24 |
| AX-157743868 | 24 | 29.524 | KV453253.1 | 2353550 | 24-scf00489 | 24 |
| AX-158305004 | 24 | 29.524 | KV453253.1 | 2355920 | 24-scf00489 | 24 |
| AX-157846633 | 24 | 29.524 | KV453253.1 | 2358617 | 24-scf00489 | 24 |
| AX-157846635 | 24 | 29.524 | KV453253.1 | 2362381 | 24-scf00489 | 24 |

|              |    |        |            |         |             |    |
|--------------|----|--------|------------|---------|-------------|----|
| AX-158305011 | 24 | 29.524 | KV453253.1 | 2364685 | 24-scf00489 | 24 |
| AX-158305012 | 24 | 29.524 | KV453253.1 | 2365326 | 24-scf00489 | 24 |
| AX-158305013 | 24 | 29.524 | KV453253.1 | 2366306 | 24-scf00489 | 24 |
| AX-157804339 | 24 | 29.524 | KV453253.1 | 2371157 | 24-scf00489 | 24 |
| AX-158305014 | 24 | 29.524 | KV453253.1 | 2371375 | 24-scf00489 | 24 |
| AX-158305015 | 24 | 29.524 | KV453253.1 | 2372000 | 24-scf00489 | 24 |
| AX-158305016 | 24 | 29.524 | KV453253.1 | 2372873 | 24-scf00489 | 24 |
| AX-158305022 | 24 | 29.524 | KV453253.1 | 2377407 | 24-scf00489 | 24 |
| AX-158305024 | 24 | 29.524 | KV453253.1 | 2381469 | 24-scf00489 | 24 |
| AX-157846637 | 24 | 29.524 | KV453253.1 | 2389436 | 24-scf00489 | 24 |
| AX-158305030 | 24 | 29.524 | KV453253.1 | 2389526 | 24-scf00489 | 24 |
| AX-158305032 | 24 | 29.524 | KV453253.1 | 2392096 | 24-scf00489 | 24 |
| AX-157846638 | 24 | 29.524 | KV453253.1 | 2393055 | 24-scf00489 | 24 |
| AX-158305033 | 24 | 29.524 | KV453253.1 | 2395042 | 24-scf00489 | 24 |
| AX-158305035 | 24 | 29.524 | KV453253.1 | 2395882 | 24-scf00489 | 24 |
| AX-158305036 | 24 | 29.524 | KV453253.1 | 2397078 | 24-scf00489 | 24 |
| AX-158305037 | 24 | 29.524 | KV453253.1 | 2397633 | 24-scf00489 | 24 |
| AX-157723471 | 24 | 29.524 | KV453253.1 | 2397982 | 24-scf00489 | 24 |
| AX-158305038 | 24 | 29.524 | KV453253.1 | 2398667 | 24-scf00489 | 24 |
| AX-157846642 | 24 | 29.524 | KV453253.1 | 2401013 | 24-scf00489 | 24 |
| AX-158305044 | 24 | 29.524 | KV453253.1 | 2403582 | 24-scf00489 | 24 |
| AX-158305047 | 24 | 29.524 | KV453253.1 | 2406909 | 24-scf00489 | 24 |
| AX-158305048 | 24 | 29.524 | KV453253.1 | 2408014 | 24-scf00489 | 24 |
| AX-158305049 | 24 | 29.524 | KV453253.1 | 2412684 | 24-scf00489 | 24 |
| AX-158305050 | 24 | 29.524 | KV453253.1 | 2413204 | 24-scf00489 | 24 |
| AX-158305051 | 24 | 29.524 | KV453253.1 | 2417220 | 24-scf00489 | 24 |
| AX-157715024 | 24 | 29.524 | KV453253.1 | 2417487 | 24-scf00489 | 24 |
| AX-158305053 | 24 | 29.524 | KV453253.1 | 2421804 | 24-scf00489 | 24 |
| AX-158305054 | 24 | 29.524 | KV453253.1 | 2424028 | 24-scf00489 | 24 |
| AX-157846652 | 24 | 29.524 | KV453253.1 | 2425948 | 24-scf00489 | 24 |
| AX-158305055 | 24 | 29.524 | KV453253.1 | 2426274 | 24-scf00489 | 24 |
| AX-157846653 | 24 | 29.524 | KV453253.1 | 2432345 | 24-scf00489 | 24 |
| AX-157713390 | 24 | 29.524 | KV453253.1 | 2433001 | 24-scf00489 | 24 |
| AX-158305061 | 24 | 29.524 | KV453253.1 | 2444123 | 24-scf00489 | 24 |
| AX-157846654 | 24 | 29.524 | KV453253.1 | 2445767 | 24-scf00489 | 24 |
| AX-158305062 | 24 | 29.524 | KV453253.1 | 2445853 | 24-scf00489 | 24 |
| AX-157846655 | 24 | 29.524 | KV453253.1 | 2446118 | 24-scf00489 | 24 |
| AX-158305063 | 24 | 29.524 | KV453253.1 | 2447104 | 24-scf00489 | 24 |
| AX-158305064 | 24 | 29.524 | KV453253.1 | 2447484 | 24-scf00489 | 24 |
| AX-157774374 | 24 | 29.524 | KV453253.1 | 2454551 | 24-scf00489 | 24 |
| AX-158305072 | 24 | 29.524 | KV453253.1 | 2457713 | 24-scf00489 | 24 |
| AX-158305075 | 24 | 29.524 | KV453253.1 | 2460682 | 24-scf00489 | 24 |
| AX-158305077 | 24 | 29.524 | KV453253.1 | 2462636 | 24-scf00489 | 24 |
| AX-158305078 | 24 | 29.524 | KV453253.1 | 2462922 | 24-scf00489 | 24 |
| AX-158305080 | 24 | 29.524 | KV453253.1 | 2463343 | 24-scf00489 | 24 |
| AX-158305085 | 24 | 29.524 | KV453253.1 | 2468617 | 24-scf00489 | 24 |
| AX-158305086 | 24 | 29.524 | KV453253.1 | 2469100 | 24-scf00489 | 24 |
| AX-158305098 | 24 | 29.524 | KV453253.1 | 2491517 | 24-scf00489 | 24 |
| AX-158305100 | 24 | 29.524 | KV453253.1 | 2493799 | 24-scf00489 | 24 |
| AX-158305101 | 24 | 29.524 | KV453253.1 | 2494195 | 24-scf00489 | 24 |
| AX-157747773 | 24 | 29.524 | KV453253.1 | 2507838 | 24-scf00489 | 24 |



|              |    |        |             |         |             |    |
|--------------|----|--------|-------------|---------|-------------|----|
| AX-157755142 | 24 | 29.525 | KV453253.1  | 2463691 | 24-scf00489 | 24 |
| AX-158305088 | 24 | 29.525 | KV453253.1  | 2471832 | 24-scf00489 | 24 |
| AX-158305112 | 24 | 29.525 | KV453253.1  | 2514940 | 24-scf00489 | 24 |
| AX-158305105 | 24 | 29.7   | KV453253.1  | 2504656 | 24-scf00489 | 24 |
| AX-157846659 | 24 | 29.748 | KV453253.1  | 2511963 | 24-scf00489 | 24 |
| AX-157754348 | 24 | 29.777 | KV453253.1  | 2514802 | 24-scf00489 | 24 |
| AX-158305113 | 24 | 29.786 | KV453253.1  | 2515200 | 24-scf00489 | 24 |
| AX-158305041 | 24 | 29.8   | KV453253.1  | 2401489 | 24-scf00489 | 24 |
| AX-157846645 | 24 | 29.8   | KV453253.1  | 2408917 | 24-scf00489 | 24 |
| AX-157758187 | 24 | 29.8   | KV453253.1  | 2434722 | 24-scf00489 | 24 |
| AX-158305094 | 24 | 29.8   | KV453253.1  | 2481539 | 24-scf00489 | 24 |
| AX-158305117 | 24 | 29.8   | KV453253.1  | 2518439 | 24-scf00489 | 24 |
| AX-158305045 | 24 | 29.808 | KV453253.1  | 2404016 | 24-scf00489 | 24 |
| AX-157722177 | 24 | 29.808 | KV453253.1  | 2455331 | 24-scf00489 | 24 |
| AX-157757209 | 24 | 29.808 | KV453253.1  | 2475950 | 24-scf00489 | 24 |
| AX-158305118 | 24 | 29.808 | KV453253.1  | 2520598 | 24-scf00489 | 24 |
| AX-157720896 | 24 | 29.808 | KV453253.1  | 2523518 | 24-scf00489 | 24 |
| AX-158305120 | 24 | 29.808 | KV453253.1  | 2523903 | 24-scf00489 | 24 |
| AX-157846660 | 24 | 29.808 | KV453253.1  | 2524354 | 24-scf00489 | 24 |
| AX-157719257 | 24 | 29.808 | KV453253.1  | 2525479 | 24-scf00489 | 24 |
| AX-158305127 | 24 | 29.808 | KV453253.1  | 2533295 | 24-scf00489 | 24 |
| AX-157846661 | 24 | 29.882 | KV453253.1  | 2540127 | 24-scf00489 | 24 |
| AX-157846639 | 24 | 30.07  | KV453253.1  | 2393466 | 24-scf00489 | 24 |
| AX-157846662 | 24 | 30.07  | KV453253.1  | 2544426 | 24-scf00489 | 24 |
| AX-157774784 | 24 | 30.07  | KV453253.1  | 2545775 | 24-scf00489 | 24 |
| AX-158305134 | 24 | 30.07  | KV453253.1  | 2547517 | 24-scf00489 | 24 |
| AX-157715596 | 24 | 30.07  | KV453253.1  | 2552309 | 24-scf00489 | 24 |
| AX-158305137 | 24 | 30.071 | KV453253.1  | 2553358 | 24-scf00489 | 24 |
| AX-158305140 | 24 | 30.699 | KV453253.1  | 2564404 | 24-scf00489 | 24 |
| AX-157846663 | 24 | 30.725 | KV453253.1  | 2567450 | 24-scf00489 | 24 |
| AX-158305144 | 24 | 30.725 | KV453253.1  | 2571560 | 24-scf00489 | 24 |
| AX-158305149 | 24 | 30.725 | KV453253.1  | 2583477 | 24-scf00489 | 24 |
| AX-158305150 | 24 | 30.725 | KV453253.1  | 2585459 | 24-scf00489 | 24 |
| AX-158305153 | 24 | 30.725 | KV453253.1  | 2591237 | 24-scf00489 | 24 |
| AX-158305154 | 24 | 30.725 | KV453253.1  | 2591806 | 24-scf00489 | 24 |
| AX-158305178 | 24 | 30.725 | KV453253.1  | 2628049 | 24-scf00489 | 24 |
| AX-157682105 | 24 | 30.725 | 3ML01029288 | 1013    | scf04909_1  | UN |
| AX-158305160 | 24 | 30.726 | KV453253.1  | 2601106 | 24-scf00489 | 24 |
| AX-157747859 | 24 | 30.726 | KV453253.1  | 2607012 | 24-scf00489 | 24 |
| AX-158305087 | 24 | 30.926 | KV453253.1  | 2470087 | 24-scf00489 | 24 |
| AX-158305159 | 24 | 30.926 | KV453253.1  | 2599669 | 24-scf00489 | 24 |
| AX-157846665 | 24 | 30.926 | KV453253.1  | 2607844 | 24-scf00489 | 24 |
| AX-158305162 | 24 | 30.926 | KV453253.1  | 2607884 | 24-scf00489 | 24 |
| AX-158305163 | 24 | 30.926 | KV453253.1  | 2609153 | 24-scf00489 | 24 |
| AX-158305165 | 24 | 30.926 | KV453253.1  | 2610623 | 24-scf00489 | 24 |
| AX-158305166 | 24 | 30.926 | KV453253.1  | 2612347 | 24-scf00489 | 24 |
| AX-157860894 | 24 | 30.95  | KV453253.1  | 2614059 | 24-scf00489 | 24 |
| AX-158305171 | 24 | 30.95  | KV453253.1  | 2617518 | 24-scf00489 | 24 |
| AX-157846671 | 24 | 30.95  | KV453253.1  | 2653722 | 24-scf00489 | 24 |
| AX-158305157 | 24 | 30.961 | KV453253.1  | 2598291 | 24-scf00489 | 24 |
| AX-158305172 | 24 | 30.961 | KV453253.1  | 2618368 | 24-scf00489 | 24 |

|              |    |        |            |         |             |    |
|--------------|----|--------|------------|---------|-------------|----|
| AX-158305176 | 24 | 30.961 | KV453253.1 | 2624754 | 24-scf00489 | 24 |
| AX-157774676 | 24 | 31.162 | KV453253.1 | 2509031 | 24-scf00489 | 24 |
| AX-157746132 | 24 | 31.162 | KV453253.1 | 2516053 | 24-scf00489 | 24 |
| AX-158305173 | 24 | 31.162 | KV453253.1 | 2619739 | 24-scf00489 | 24 |
| AX-158305174 | 24 | 31.162 | KV453253.1 | 2620745 | 24-scf00489 | 24 |
| AX-158305185 | 24 | 31.162 | KV453253.1 | 2635008 | 24-scf00489 | 24 |
| AX-158305186 | 24 | 31.162 | KV453253.1 | 2635142 | 24-scf00489 | 24 |
| AX-158305188 | 24 | 31.162 | KV453253.1 | 2637987 | 24-scf00489 | 24 |
| AX-157774942 | 24 | 31.162 | KV453253.1 | 2661189 | 24-scf00489 | 24 |
| AX-157715592 | 24 | 31.206 | KV453253.1 | 2640262 | 24-scf00489 | 24 |
| AX-158417743 | 24 | 31.223 | KV453253.1 | 2604795 | 24-scf00489 | 24 |
| AX-157719507 | 24 | 31.223 | KV453253.1 | 2641623 | 24-scf00489 | 24 |
| AX-157721308 | 24 | 31.271 | KV453253.1 | 2633714 | 24-scf00489 | 24 |
| AX-158305190 | 24 | 31.271 | KV453253.1 | 2639814 | 24-scf00489 | 24 |
| AX-157846668 | 24 | 31.271 | KV453253.1 | 2642057 | 24-scf00489 | 24 |
| AX-158305195 | 24 | 31.271 | KV453253.1 | 2646253 | 24-scf00489 | 24 |
| AX-158305205 | 24 | 31.271 | KV453253.1 | 2668331 | 24-scf00489 | 24 |
| AX-158305250 | 24 | 31.271 | KV453253.1 | 2734790 | 24-scf00489 | 24 |
| AX-158305168 | 24 | 31.273 | KV453253.1 | 2614230 | 24-scf00489 | 24 |
| AX-158305170 | 24 | 31.273 | KV453253.1 | 2616824 | 24-scf00489 | 24 |
| AX-158305196 | 24 | 31.273 | KV453253.1 | 2648026 | 24-scf00489 | 24 |
| AX-158305198 | 24 | 31.273 | KV453253.1 | 2650100 | 24-scf00489 | 24 |
| AX-158305152 | 24 | 31.482 | KV453253.1 | 2586986 | 24-scf00489 | 24 |
| AX-157860895 | 24 | 31.482 | KV453253.1 | 2648227 | 24-scf00489 | 24 |
| AX-158305197 | 24 | 31.482 | KV453253.1 | 2649848 | 24-scf00489 | 24 |
| AX-157846669 | 24 | 31.482 | KV453253.1 | 2651561 | 24-scf00489 | 24 |
| AX-157846670 | 24 | 31.482 | KV453253.1 | 2652786 | 24-scf00489 | 24 |
| AX-157748531 | 24 | 31.482 | KV453253.1 | 2655950 | 24-scf00489 | 24 |
| AX-157846672 | 24 | 31.655 | KV453253.1 | 2659964 | 24-scf00489 | 24 |
| AX-158305200 | 24 | 31.827 | KV453253.1 | 2663703 | 24-scf00489 | 24 |
| AX-158305201 | 24 | 31.9   | KV453253.1 | 2664182 | 24-scf00489 | 24 |
| AX-158305211 | 24 | 31.993 | KV453253.1 | 2679063 | 24-scf00489 | 24 |
| AX-157888186 | 24 | 32.034 | KV453253.1 | 2679948 | 24-scf00489 | 24 |
| AX-158305203 | 24 | 32.037 | KV453253.1 | 2667168 | 24-scf00489 | 24 |
| AX-158305212 | 24 | 32.037 | KV453253.1 | 2683290 | 24-scf00489 | 24 |
| AX-158305214 | 24 | 32.037 | KV453253.1 | 2685821 | 24-scf00489 | 24 |
| AX-158305217 | 24 | 32.037 | KV453253.1 | 2688662 | 24-scf00489 | 24 |
| AX-157723853 | 24 | 32.037 | KV453253.1 | 2690038 | 24-scf00489 | 24 |
| AX-158305219 | 24 | 32.037 | KV453253.1 | 2691973 | 24-scf00489 | 24 |
| AX-158305220 | 24 | 32.037 | KV453253.1 | 2692712 | 24-scf00489 | 24 |
| AX-158305221 | 24 | 32.037 | KV453253.1 | 2693839 | 24-scf00489 | 24 |
| AX-158305222 | 24 | 32.037 | KV453253.1 | 2695414 | 24-scf00489 | 24 |
| AX-158305234 | 24 | 32.037 | KV453253.1 | 2709166 | 24-scf00489 | 24 |
| AX-158305226 | 24 | 32.413 | KV453253.1 | 2698423 | 24-scf00489 | 24 |
| AX-158305247 | 24 | 32.413 | KV453253.1 | 2730611 | 24-scf00489 | 24 |
| AX-158305227 | 24 | 32.415 | KV453253.1 | 2703838 | 24-scf00489 | 24 |
| AX-158305228 | 24 | 32.415 | KV453253.1 | 2704688 | 24-scf00489 | 24 |
| AX-158305230 | 24 | 32.416 | KV453253.1 | 2706358 | 24-scf00489 | 24 |
| AX-158305231 | 24 | 32.477 | KV453253.1 | 2707220 | 24-scf00489 | 24 |
| AX-158305241 | 24 | 32.477 | KV453253.1 | 2718200 | 24-scf00489 | 24 |
| AX-158305235 | 24 | 32.828 | KV453253.1 | 2710240 | 24-scf00489 | 24 |

|              |    |        |            |         |             |    |
|--------------|----|--------|------------|---------|-------------|----|
| AX-158305242 | 24 | 32.828 | KV453253.1 | 2719018 | 24-scf00489 | 24 |
| AX-158381346 | 24 | 32.914 | KV453253.1 | 2738922 | 24-scf00489 | 24 |
| AX-158305252 | 24 | 33.167 | KV453253.1 | 2739094 | 24-scf00489 | 24 |
| AX-158305124 | 24 | 33.397 | KV453253.1 | 2528033 | 24-scf00489 | 24 |
| AX-158305175 | 24 | 33.397 | KV453253.1 | 2621615 | 24-scf00489 | 24 |
| AX-158305254 | 24 | 33.397 | KV453253.1 | 2741642 | 24-scf00489 | 24 |
| AX-158305267 | 24 | 33.397 | KV453253.1 | 2766932 | 24-scf00489 | 24 |
| AX-157741630 | 24 | 33.645 | KV453253.1 | 2748291 | 24-scf00489 | 24 |
| AX-158305258 | 24 | 33.838 | KV453253.1 | 2757259 | 24-scf00489 | 24 |
| AX-158305240 | 24 | 33.908 | KV453253.1 | 2717422 | 24-scf00489 | 24 |
| AX-158305260 | 24 | 33.908 | KV453253.1 | 2759680 | 24-scf00489 | 24 |
| AX-158305262 | 24 | 33.908 | KV453253.1 | 2761834 | 24-scf00489 | 24 |
| AX-158305263 | 24 | 33.908 | KV453253.1 | 2762213 | 24-scf00489 | 24 |
| AX-158305266 | 24 | 33.908 | KV453253.1 | 2765897 | 24-scf00489 | 24 |
| AX-157722863 | 24 | 33.908 | KV453253.1 | 2766407 | 24-scf00489 | 24 |
| AX-158305268 | 24 | 33.908 | KV453253.1 | 2767189 | 24-scf00489 | 24 |
| AX-158305269 | 24 | 33.908 | KV453253.1 | 2767945 | 24-scf00489 | 24 |
| AX-158305273 | 24 | 33.908 | KV453253.1 | 2772297 | 24-scf00489 | 24 |
| AX-158305274 | 24 | 34.077 | KV453253.1 | 2772627 | 24-scf00489 | 24 |
| AX-158305264 | 24 | 34.232 | KV453253.1 | 2764736 | 24-scf00489 | 24 |
| AX-158305272 | 24 | 34.232 | KV453253.1 | 2771871 | 24-scf00489 | 24 |
| AX-158305275 | 24 | 34.232 | KV453253.1 | 2773694 | 24-scf00489 | 24 |
| AX-158305276 | 24 | 34.232 | KV453253.1 | 2774116 | 24-scf00489 | 24 |
| AX-158305278 | 24 | 34.232 | KV453253.1 | 2774822 | 24-scf00489 | 24 |
| AX-158305279 | 24 | 34.232 | KV453253.1 | 2774942 | 24-scf00489 | 24 |
| AX-158305280 | 24 | 34.232 | KV453253.1 | 2776293 | 24-scf00489 | 24 |
| AX-158305289 | 24 | 34.232 | KV453253.1 | 2783232 | 24-scf00489 | 24 |
| AX-157846676 | 24 | 34.232 | KV453253.1 | 2785370 | 24-scf00489 | 24 |
| AX-158305292 | 24 | 34.232 | KV453253.1 | 2789023 | 24-scf00489 | 24 |
| AX-157846677 | 24 | 34.232 | KV453253.1 | 2791160 | 24-scf00489 | 24 |
| AX-157723205 | 24 | 34.232 | KV453253.1 | 2799671 | 24-scf00489 | 24 |
| AX-158305296 | 24 | 34.232 | KV453253.1 | 2805769 | 24-scf00489 | 24 |
| AX-158305297 | 24 | 34.232 | KV453253.1 | 2809771 | 24-scf00489 | 24 |
| AX-157846679 | 24 | 34.232 | KV453253.1 | 2813637 | 24-scf00489 | 24 |
| AX-158305300 | 24 | 34.232 | KV453253.1 | 2814242 | 24-scf00489 | 24 |
| AX-157846680 | 24 | 34.232 | KV453253.1 | 2814831 | 24-scf00489 | 24 |
| AX-157758709 | 24 | 34.232 | KV453253.1 | 3030851 | 24-scf00489 | 24 |
| AX-158305727 | 24 | 34.232 | KV453253.1 | 3469320 | 24-scf00489 | 24 |
| AX-158306155 | 24 | 34.232 | KV453253.1 | 3960067 | 24-scf00489 | 24 |
| AX-158305301 | 24 | 34.287 | KV453253.1 | 2816475 | 24-scf00489 | 24 |
| AX-157846684 | 24 | 34.342 | KV453253.1 | 2820635 | 24-scf00489 | 24 |
| AX-158305304 | 24 | 34.342 | KV453253.1 | 2821515 | 24-scf00489 | 24 |
| AX-158305307 | 24 | 34.342 | KV453253.1 | 2824503 | 24-scf00489 | 24 |
| AX-158305308 | 24 | 34.396 | KV453253.1 | 2830312 | 24-scf00489 | 24 |
| AX-157846690 | 24 | 34.506 | KV453253.1 | 2842619 | 24-scf00489 | 24 |
| AX-158305313 | 24 | 34.543 | KV453253.1 | 2843441 | 24-scf00489 | 24 |
| AX-158305316 | 24 | 34.67  | KV453253.1 | 2859986 | 24-scf00489 | 24 |
| AX-158305317 | 24 | 34.67  | KV453253.1 | 2861273 | 24-scf00489 | 24 |
| AX-157846694 | 24 | 34.67  | KV453253.1 | 2861806 | 24-scf00489 | 24 |
| AX-158305322 | 24 | 34.834 | KV453253.1 | 2865578 | 24-scf00489 | 24 |
| AX-158305324 | 24 | 34.834 | KV453253.1 | 2868835 | 24-scf00489 | 24 |

|              |    |        |            |         |             |    |
|--------------|----|--------|------------|---------|-------------|----|
| AX-158305326 | 24 | 34.998 | KV453253.1 | 2872215 | 24-scf00489 | 24 |
| AX-158305327 | 24 | 34.998 | KV453253.1 | 2873585 | 24-scf00489 | 24 |
| AX-158305355 | 24 | 34.998 | KV453253.1 | 2921512 | 24-scf00489 | 24 |
| AX-158305368 | 24 | 34.998 | KV453253.1 | 2938550 | 24-scf00489 | 24 |
| AX-157846683 | 24 | 35.108 | KV453253.1 | 2818664 | 24-scf00489 | 24 |
| AX-157846685 | 24 | 35.108 | KV453253.1 | 2826030 | 24-scf00489 | 24 |
| AX-157873476 | 24 | 35.108 | KV453253.1 | 2866817 | 24-scf00489 | 24 |
| AX-158305329 | 24 | 35.108 | KV453253.1 | 2881707 | 24-scf00489 | 24 |
| AX-158305330 | 24 | 35.108 | KV453253.1 | 2885918 | 24-scf00489 | 24 |
| AX-157713013 | 24 | 35.108 | KV453253.1 | 2889206 | 24-scf00489 | 24 |
| AX-157846698 | 24 | 35.108 | KV453253.1 | 2890535 | 24-scf00489 | 24 |
| AX-158305333 | 24 | 35.108 | KV453253.1 | 2892025 | 24-scf00489 | 24 |
| AX-158305336 | 24 | 35.108 | KV453253.1 | 2895196 | 24-scf00489 | 24 |
| AX-158305338 | 24 | 35.108 | KV453253.1 | 2899426 | 24-scf00489 | 24 |
| AX-158305340 | 24 | 35.108 | KV453253.1 | 2903446 | 24-scf00489 | 24 |
| AX-158305341 | 24 | 35.108 | KV453253.1 | 2903829 | 24-scf00489 | 24 |
| AX-158305344 | 24 | 35.108 | KV453253.1 | 2906719 | 24-scf00489 | 24 |
| AX-158305345 | 24 | 35.108 | KV453253.1 | 2907765 | 24-scf00489 | 24 |
| AX-158305350 | 24 | 35.108 | KV453253.1 | 2911961 | 24-scf00489 | 24 |
| AX-158305358 | 24 | 35.108 | KV453253.1 | 2924454 | 24-scf00489 | 24 |
| AX-158305362 | 24 | 35.108 | KV453253.1 | 2927550 | 24-scf00489 | 24 |
| AX-158305364 | 24 | 35.108 | KV453253.1 | 2929818 | 24-scf00489 | 24 |
| AX-158419763 | 24 | 35.108 | KV453253.1 | 2931127 | 24-scf00489 | 24 |
| AX-158305385 | 24 | 35.108 | KV453253.1 | 2961297 | 24-scf00489 | 24 |
| AX-158305392 | 24 | 35.108 | KV453253.1 | 2973586 | 24-scf00489 | 24 |
| AX-158305401 | 24 | 35.108 | KV453253.1 | 2984526 | 24-scf00489 | 24 |
| AX-158305405 | 24 | 35.108 | KV453253.1 | 2988882 | 24-scf00489 | 24 |
| AX-157722349 | 24 | 35.108 | KV453253.1 | 3022720 | 24-scf00489 | 24 |
| AX-158305438 | 24 | 35.108 | KV453253.1 | 3037927 | 24-scf00489 | 24 |
| AX-158305439 | 24 | 35.108 | KV453253.1 | 3038920 | 24-scf00489 | 24 |
| AX-158306606 | 24 | 35.108 | KV453253.1 | 4613375 | 24-scf00489 | 24 |
| AX-157846702 | 24 | 35.193 | KV453253.1 | 2932031 | 24-scf00489 | 24 |
| AX-158305367 | 24 | 35.193 | KV453253.1 | 2938169 | 24-scf00489 | 24 |
| AX-157846692 | 24 | 35.289 | KV453253.1 | 2849425 | 24-scf00489 | 24 |
| AX-158305321 | 24 | 35.289 | KV453253.1 | 2865332 | 24-scf00489 | 24 |
| AX-158305339 | 24 | 35.289 | KV453253.1 | 2900057 | 24-scf00489 | 24 |
| AX-158305357 | 24 | 35.289 | KV453253.1 | 2923981 | 24-scf00489 | 24 |
| AX-158305371 | 24 | 35.289 | KV453253.1 | 2942002 | 24-scf00489 | 24 |
| AX-158305435 | 24 | 35.289 | KV453253.1 | 3029069 | 24-scf00489 | 24 |
| AX-158305334 | 24 | 35.326 | KV453253.1 | 2892665 | 24-scf00489 | 24 |
| AX-158305376 | 24 | 35.326 | KV453253.1 | 2947658 | 24-scf00489 | 24 |
| AX-158305378 | 24 | 35.326 | KV453253.1 | 2951180 | 24-scf00489 | 24 |
| AX-158305379 | 24 | 35.326 | KV453253.1 | 2952912 | 24-scf00489 | 24 |
| AX-158305380 | 24 | 35.326 | KV453253.1 | 2953288 | 24-scf00489 | 24 |
| AX-157846704 | 24 | 35.326 | KV453253.1 | 2953578 | 24-scf00489 | 24 |
| AX-158305383 | 24 | 35.326 | KV453253.1 | 2959298 | 24-scf00489 | 24 |
| AX-158305384 | 24 | 35.326 | KV453253.1 | 2960889 | 24-scf00489 | 24 |
| AX-157725943 | 24 | 35.326 | KV453253.1 | 2965362 | 24-scf00489 | 24 |
| AX-158305388 | 24 | 35.326 | KV453253.1 | 2967593 | 24-scf00489 | 24 |
| AX-158305389 | 24 | 35.326 | KV453253.1 | 2968529 | 24-scf00489 | 24 |
| AX-158305390 | 24 | 35.326 | KV453253.1 | 2969210 | 24-scf00489 | 24 |

|              |    |        |            |         |             |    |
|--------------|----|--------|------------|---------|-------------|----|
| AX-158305391 | 24 | 35.326 | KV453253.1 | 2970928 | 24-scf00489 | 24 |
| AX-158305394 | 24 | 35.326 | KV453253.1 | 2974638 | 24-scf00489 | 24 |
| AX-158305396 | 24 | 35.326 | KV453253.1 | 2976370 | 24-scf00489 | 24 |
| AX-158305398 | 24 | 35.326 | KV453253.1 | 2979628 | 24-scf00489 | 24 |
| AX-158305399 | 24 | 35.326 | KV453253.1 | 2980577 | 24-scf00489 | 24 |
| AX-158305402 | 24 | 35.326 | KV453253.1 | 2985447 | 24-scf00489 | 24 |
| AX-158305403 | 24 | 35.326 | KV453253.1 | 2986444 | 24-scf00489 | 24 |
| AX-158305407 | 24 | 35.326 | KV453253.1 | 2990380 | 24-scf00489 | 24 |
| AX-158305418 | 24 | 35.326 | KV453253.1 | 3008861 | 24-scf00489 | 24 |
| AX-158307655 | 24 | 35.326 | KV453253.1 | 5959534 | 24-scf00489 | 24 |
| AX-157752191 | 24 | 35.397 | KV453253.1 | 2976963 | 24-scf00489 | 24 |
| AX-158305408 | 24 | 35.397 | KV453253.1 | 2991686 | 24-scf00489 | 24 |
| AX-158305413 | 24 | 35.545 | KV453253.1 | 2997934 | 24-scf00489 | 24 |
| AX-158305415 | 24 | 35.545 | KV453253.1 | 3001667 | 24-scf00489 | 24 |
| AX-158305417 | 24 | 35.602 | KV453253.1 | 3006802 | 24-scf00489 | 24 |
| AX-158305425 | 24 | 35.654 | KV453253.1 | 3017275 | 24-scf00489 | 24 |
| AX-158305427 | 24 | 35.654 | KV453253.1 | 3019996 | 24-scf00489 | 24 |
| AX-158305428 | 24 | 35.654 | KV453253.1 | 3020731 | 24-scf00489 | 24 |
| AX-158305432 | 24 | 35.654 | KV453253.1 | 3025670 | 24-scf00489 | 24 |
| AX-158305404 | 24 | 35.763 | KV453253.1 | 2987222 | 24-scf00489 | 24 |
| AX-158305440 | 24 | 35.763 | KV453253.1 | 3042091 | 24-scf00489 | 24 |
| AX-158305441 | 24 | 35.763 | KV453253.1 | 3043135 | 24-scf00489 | 24 |
| AX-158305442 | 24 | 35.763 | KV453253.1 | 3043729 | 24-scf00489 | 24 |
| AX-158305453 | 24 | 35.763 | KV453253.1 | 3054378 | 24-scf00489 | 24 |
| AX-157846706 | 24 | 35.763 | KV453253.1 | 3059353 | 24-scf00489 | 24 |
| AX-158305455 | 24 | 35.763 | KV453253.1 | 3059942 | 24-scf00489 | 24 |
| AX-158305456 | 24 | 35.763 | KV453253.1 | 3060504 | 24-scf00489 | 24 |
| AX-158305457 | 24 | 35.763 | KV453253.1 | 3062072 | 24-scf00489 | 24 |
| AX-158305463 | 24 | 35.763 | KV453253.1 | 3075005 | 24-scf00489 | 24 |
| AX-158305465 | 24 | 35.763 | KV453253.1 | 3076095 | 24-scf00489 | 24 |
| AX-158305466 | 24 | 35.763 | KV453253.1 | 3076761 | 24-scf00489 | 24 |
| AX-158305467 | 24 | 35.763 | KV453253.1 | 3078589 | 24-scf00489 | 24 |
| AX-157751027 | 24 | 35.763 | KV453253.1 | 3082091 | 24-scf00489 | 24 |
| AX-158305433 | 24 | 35.981 | KV453253.1 | 3027376 | 24-scf00489 | 24 |
| AX-158305473 | 24 | 35.981 | KV453253.1 | 3096109 | 24-scf00489 | 24 |
| AX-158305477 | 24 | 35.981 | KV453253.1 | 3103026 | 24-scf00489 | 24 |
| AX-158305485 | 24 | 35.981 | KV453253.1 | 3124279 | 24-scf00489 | 24 |
| AX-158305486 | 24 | 35.981 | KV453253.1 | 3125452 | 24-scf00489 | 24 |
| AX-157846708 | 24 | 35.981 | KV453253.1 | 3128242 | 24-scf00489 | 24 |
| AX-158305489 | 24 | 35.981 | KV453253.1 | 3129498 | 24-scf00489 | 24 |
| AX-158305490 | 24 | 35.981 | KV453253.1 | 3130951 | 24-scf00489 | 24 |
| AX-158305496 | 24 | 35.981 | KV453253.1 | 3137424 | 24-scf00489 | 24 |
| AX-158305499 | 24 | 35.981 | KV453253.1 | 3139578 | 24-scf00489 | 24 |
| AX-158305500 | 24 | 35.981 | KV453253.1 | 3140268 | 24-scf00489 | 24 |
| AX-158305502 | 24 | 35.981 | KV453253.1 | 3143295 | 24-scf00489 | 24 |
| AX-158305508 | 24 | 35.981 | KV453253.1 | 3156508 | 24-scf00489 | 24 |
| AX-158305509 | 24 | 35.981 | KV453253.1 | 3158284 | 24-scf00489 | 24 |
| AX-158381349 | 24 | 35.981 | KV453253.1 | 3158445 | 24-scf00489 | 24 |
| AX-158305518 | 24 | 35.981 | KV453253.1 | 3178394 | 24-scf00489 | 24 |
| AX-157846711 | 24 | 35.981 | KV453253.1 | 3208607 | 24-scf00489 | 24 |
| AX-157846710 | 24 | 36.096 | KV453253.1 | 3171228 | 24-scf00489 | 24 |

|              |    |        |            |         |             |    |
|--------------|----|--------|------------|---------|-------------|----|
| AX-158305803 | 24 | 36.096 | KV453253.1 | 3565805 | 24-scf00489 | 24 |
| AX-158305517 | 24 | 36.2   | KV453253.1 | 3177619 | 24-scf00489 | 24 |
| AX-158305519 | 24 | 36.2   | KV453253.1 | 3179305 | 24-scf00489 | 24 |
| AX-158305520 | 24 | 36.2   | KV453253.1 | 3179930 | 24-scf00489 | 24 |
| AX-158305521 | 24 | 36.2   | KV453253.1 | 3183506 | 24-scf00489 | 24 |
| AX-158305524 | 24 | 36.2   | KV453253.1 | 3185605 | 24-scf00489 | 24 |
| AX-158305528 | 24 | 36.2   | KV453253.1 | 3193215 | 24-scf00489 | 24 |
| AX-158305530 | 24 | 36.2   | KV453253.1 | 3194944 | 24-scf00489 | 24 |
| AX-158305533 | 24 | 36.2   | KV453253.1 | 3197564 | 24-scf00489 | 24 |
| AX-158305535 | 24 | 36.2   | KV453253.1 | 3200515 | 24-scf00489 | 24 |
| AX-158305539 | 24 | 36.2   | KV453253.1 | 3210757 | 24-scf00489 | 24 |
| AX-157720053 | 24 | 36.2   | KV453253.1 | 3212065 | 24-scf00489 | 24 |
| AX-157846712 | 24 | 36.2   | KV453253.1 | 3213936 | 24-scf00489 | 24 |
| AX-158305540 | 24 | 36.2   | KV453253.1 | 3214517 | 24-scf00489 | 24 |
| AX-158305541 | 24 | 36.2   | KV453253.1 | 3215774 | 24-scf00489 | 24 |
| AX-158305548 | 24 | 36.2   | KV453253.1 | 3222172 | 24-scf00489 | 24 |
| AX-158305549 | 24 | 36.2   | KV453253.1 | 3226347 | 24-scf00489 | 24 |
| AX-158305550 | 24 | 36.2   | KV453253.1 | 3226981 | 24-scf00489 | 24 |
| AX-158305551 | 24 | 36.2   | KV453253.1 | 3227615 | 24-scf00489 | 24 |
| AX-158305552 | 24 | 36.2   | KV453253.1 | 3228075 | 24-scf00489 | 24 |
| AX-158305553 | 24 | 36.2   | KV453253.1 | 3228699 | 24-scf00489 | 24 |
| AX-158305556 | 24 | 36.2   | KV453253.1 | 3232519 | 24-scf00489 | 24 |
| AX-158305557 | 24 | 36.2   | KV453253.1 | 3233848 | 24-scf00489 | 24 |
| AX-158305559 | 24 | 36.473 | KV453253.1 | 3235380 | 24-scf00489 | 24 |
| AX-158305424 | 24 | 36.747 | KV453253.1 | 3013305 | 24-scf00489 | 24 |
| AX-158305494 | 24 | 36.747 | KV453253.1 | 3134951 | 24-scf00489 | 24 |
| AX-157751965 | 24 | 36.747 | KV453253.1 | 3171897 | 24-scf00489 | 24 |
| AX-158305516 | 24 | 36.747 | KV453253.1 | 3175805 | 24-scf00489 | 24 |
| AX-158305532 | 24 | 36.747 | KV453253.1 | 3197434 | 24-scf00489 | 24 |
| AX-158305545 | 24 | 36.747 | KV453253.1 | 3218628 | 24-scf00489 | 24 |
| AX-158305574 | 24 | 36.747 | KV453253.1 | 3261863 | 24-scf00489 | 24 |
| AX-158305585 | 24 | 36.747 | KV453253.1 | 3274235 | 24-scf00489 | 24 |
| AX-158305586 | 24 | 36.747 | KV453253.1 | 3276024 | 24-scf00489 | 24 |
| AX-157846718 | 24 | 36.747 | KV453253.1 | 3277298 | 24-scf00489 | 24 |
| AX-157846719 | 24 | 36.747 | KV453253.1 | 3277514 | 24-scf00489 | 24 |
| AX-158305588 | 24 | 36.747 | KV453253.1 | 3278554 | 24-scf00489 | 24 |
| AX-158305590 | 24 | 36.747 | KV453253.1 | 3281678 | 24-scf00489 | 24 |
| AX-158305591 | 24 | 36.747 | KV453253.1 | 3282667 | 24-scf00489 | 24 |
| AX-158305595 | 24 | 36.747 | KV453253.1 | 3287794 | 24-scf00489 | 24 |
| AX-158305596 | 24 | 36.747 | KV453253.1 | 3288339 | 24-scf00489 | 24 |
| AX-157846721 | 24 | 36.747 | KV453253.1 | 3290358 | 24-scf00489 | 24 |
| AX-158305601 | 24 | 36.747 | KV453253.1 | 3292519 | 24-scf00489 | 24 |
| AX-158305608 | 24 | 36.747 | KV453253.1 | 3301449 | 24-scf00489 | 24 |
| AX-158305610 | 24 | 36.747 | KV453253.1 | 3302900 | 24-scf00489 | 24 |
| AX-158305611 | 24 | 36.747 | KV453253.1 | 3305627 | 24-scf00489 | 24 |
| AX-158305612 | 24 | 36.747 | KV453253.1 | 3306964 | 24-scf00489 | 24 |
| AX-158305613 | 24 | 36.747 | KV453253.1 | 3307176 | 24-scf00489 | 24 |
| AX-157846724 | 24 | 36.747 | KV453253.1 | 3313956 | 24-scf00489 | 24 |
| AX-158305622 | 24 | 36.747 | KV453253.1 | 3318448 | 24-scf00489 | 24 |
| AX-158305626 | 24 | 36.747 | KV453253.1 | 3321785 | 24-scf00489 | 24 |
| AX-158305627 | 24 | 36.747 | KV453253.1 | 3322186 | 24-scf00489 | 24 |

|              |    |        |            |         |             |    |
|--------------|----|--------|------------|---------|-------------|----|
| AX-158412192 | 24 | 36.747 | KV453253.1 | 3331574 | 24-scf00489 | 24 |
| AX-158305632 | 24 | 36.747 | KV453253.1 | 3332998 | 24-scf00489 | 24 |
| AX-158305637 | 24 | 36.747 | KV453253.1 | 3342020 | 24-scf00489 | 24 |
| AX-158305638 | 24 | 36.747 | KV453253.1 | 3342950 | 24-scf00489 | 24 |
| AX-158305639 | 24 | 36.747 | KV453253.1 | 3343713 | 24-scf00489 | 24 |
| AX-158305642 | 24 | 36.747 | KV453253.1 | 3345545 | 24-scf00489 | 24 |
| AX-157723091 | 24 | 36.747 | KV453253.1 | 3354679 | 24-scf00489 | 24 |
| AX-158305649 | 24 | 36.747 | KV453253.1 | 3359373 | 24-scf00489 | 24 |
| AX-158305652 | 24 | 36.747 | KV453253.1 | 3363261 | 24-scf00489 | 24 |
| AX-158305654 | 24 | 36.747 | KV453253.1 | 3365099 | 24-scf00489 | 24 |
| AX-158305655 | 24 | 36.747 | KV453253.1 | 3365934 | 24-scf00489 | 24 |
| AX-158305656 | 24 | 36.747 | KV453253.1 | 3369112 | 24-scf00489 | 24 |
| AX-158305657 | 24 | 36.747 | KV453253.1 | 3369438 | 24-scf00489 | 24 |
| AX-158305662 | 24 | 36.747 | KV453253.1 | 3377926 | 24-scf00489 | 24 |
| AX-158305715 | 24 | 36.747 | KV453253.1 | 3449742 | 24-scf00489 | 24 |
| AX-158305293 | 24 | 36.856 | KV453253.1 | 2797605 | 24-scf00489 | 24 |
| AX-157846695 | 24 | 36.856 | KV453253.1 | 2874740 | 24-scf00489 | 24 |
| AX-157846699 | 24 | 36.856 | KV453253.1 | 2896318 | 24-scf00489 | 24 |
| AX-158305421 | 24 | 36.856 | KV453253.1 | 3011106 | 24-scf00489 | 24 |
| AX-158305437 | 24 | 36.856 | KV453253.1 | 3037004 | 24-scf00489 | 24 |
| AX-158305461 | 24 | 36.856 | KV453253.1 | 3071720 | 24-scf00489 | 24 |
| AX-158305462 | 24 | 36.856 | KV453253.1 | 3073827 | 24-scf00489 | 24 |
| AX-158305474 | 24 | 36.856 | KV453253.1 | 3098218 | 24-scf00489 | 24 |
| AX-158305481 | 24 | 36.856 | KV453253.1 | 3111792 | 24-scf00489 | 24 |
| AX-158305497 | 24 | 36.856 | KV453253.1 | 3137846 | 24-scf00489 | 24 |
| AX-158305503 | 24 | 36.856 | KV453253.1 | 3144991 | 24-scf00489 | 24 |
| AX-158305570 | 24 | 36.856 | KV453253.1 | 3256418 | 24-scf00489 | 24 |
| AX-158305576 | 24 | 36.856 | KV453253.1 | 3263652 | 24-scf00489 | 24 |
| AX-158305579 | 24 | 36.856 | KV453253.1 | 3267223 | 24-scf00489 | 24 |
| AX-158305581 | 24 | 36.856 | KV453253.1 | 3269925 | 24-scf00489 | 24 |
| AX-157846722 | 24 | 36.856 | KV453253.1 | 3291276 | 24-scf00489 | 24 |
| AX-158305600 | 24 | 36.856 | KV453253.1 | 3291987 | 24-scf00489 | 24 |
| AX-158305602 | 24 | 36.856 | KV453253.1 | 3293264 | 24-scf00489 | 24 |
| AX-158305616 | 24 | 36.856 | KV453253.1 | 3310785 | 24-scf00489 | 24 |
| AX-158305617 | 24 | 36.856 | KV453253.1 | 3310988 | 24-scf00489 | 24 |
| AX-158305618 | 24 | 36.856 | KV453253.1 | 3311352 | 24-scf00489 | 24 |
| AX-158305625 | 24 | 36.856 | KV453253.1 | 3321104 | 24-scf00489 | 24 |
| AX-157747730 | 24 | 36.856 | KV453253.1 | 3335478 | 24-scf00489 | 24 |
| AX-158305647 | 24 | 36.856 | KV453253.1 | 3352977 | 24-scf00489 | 24 |
| AX-158305665 | 24 | 36.856 | KV453253.1 | 3380637 | 24-scf00489 | 24 |
| AX-158305666 | 24 | 36.856 | KV453253.1 | 3383186 | 24-scf00489 | 24 |
| AX-158305667 | 24 | 36.856 | KV453253.1 | 3384377 | 24-scf00489 | 24 |
| AX-158305670 | 24 | 36.856 | KV453253.1 | 3387168 | 24-scf00489 | 24 |
| AX-158305671 | 24 | 36.856 | KV453253.1 | 3387500 | 24-scf00489 | 24 |
| AX-158305678 | 24 | 36.856 | KV453253.1 | 3393622 | 24-scf00489 | 24 |
| AX-157722745 | 24 | 36.856 | KV453253.1 | 3396591 | 24-scf00489 | 24 |
| AX-158305687 | 24 | 36.856 | KV453253.1 | 3408240 | 24-scf00489 | 24 |
| AX-158305693 | 24 | 36.856 | KV453253.1 | 3419904 | 24-scf00489 | 24 |
| AX-157747141 | 24 | 36.856 | KV453253.1 | 3427861 | 24-scf00489 | 24 |
| AX-158305700 | 24 | 36.856 | KV453253.1 | 3428747 | 24-scf00489 | 24 |
| AX-158305701 | 24 | 36.856 | KV453253.1 | 3429494 | 24-scf00489 | 24 |

|              |    |        |            |         |             |    |
|--------------|----|--------|------------|---------|-------------|----|
| AX-158305702 | 24 | 36.856 | KV453253.1 | 3430601 | 24-scf00489 | 24 |
| AX-157846729 | 24 | 36.856 | KV453253.1 | 3431170 | 24-scf00489 | 24 |
| AX-158305706 | 24 | 36.856 | KV453253.1 | 3438700 | 24-scf00489 | 24 |
| AX-157867707 | 24 | 36.856 | KV453253.1 | 3477179 | 24-scf00489 | 24 |
| AX-158305774 | 24 | 36.856 | KV453253.1 | 3532314 | 24-scf00489 | 24 |
| AX-158305832 | 24 | 36.856 | KV453253.1 | 3597793 | 24-scf00489 | 24 |
| AX-158306043 | 24 | 36.856 | KV453253.1 | 3842434 | 24-scf00489 | 24 |
| AX-157867708 | 24 | 36.856 | KV453253.1 | 3894781 | 24-scf00489 | 24 |
| AX-158306137 | 24 | 36.856 | KV453253.1 | 3942091 | 24-scf00489 | 24 |
| AX-158306296 | 24 | 36.856 | KV453253.1 | 4174788 | 24-scf00489 | 24 |
| AX-158387687 | 24 | 36.856 | KV453253.1 | 4822161 | 24-scf00489 | 24 |
| AX-158306819 | 24 | 36.856 | KV453253.1 | 4868908 | 24-scf00489 | 24 |
| AX-158306827 | 24 | 36.856 | KV453253.1 | 4878540 | 24-scf00489 | 24 |
| AX-158306840 | 24 | 36.856 | KV453253.1 | 4892899 | 24-scf00489 | 24 |
| AX-158306882 | 24 | 36.856 | KV453253.1 | 4938877 | 24-scf00489 | 24 |
| AX-158307026 | 24 | 36.856 | KV453253.1 | 5114980 | 24-scf00489 | 24 |
| AX-158307310 | 24 | 36.856 | KV453253.1 | 5450161 | 24-scf00489 | 24 |
| AX-158307336 | 24 | 36.856 | KV453253.1 | 5499077 | 24-scf00489 | 24 |
| AX-157846838 | 24 | 36.856 | KV453253.1 | 5539960 | 24-scf00489 | 24 |
| AX-157723184 | 24 | 36.856 | KV453253.1 | 5644182 | 24-scf00489 | 24 |
| AX-158307430 | 24 | 36.856 | KV453253.1 | 5645523 | 24-scf00489 | 24 |
| AX-157846867 | 24 | 36.856 | KV453253.1 | 5688818 | 24-scf00489 | 24 |
| AX-157718061 | 24 | 36.856 | KV453253.1 | 5821324 | 24-scf00489 | 24 |
| AX-158307648 | 24 | 36.856 | KV453253.1 | 5953098 | 24-scf00489 | 24 |
| AX-158307674 | 24 | 36.856 | KV453253.1 | 5981135 | 24-scf00489 | 24 |
| AX-158307764 | 24 | 36.856 | KV453253.1 | 6098762 | 24-scf00489 | 24 |
| AX-157846909 | 24 | 36.856 | KV453253.1 | 6107146 | 24-scf00489 | 24 |
| AX-157846933 | 24 | 36.856 | KV453253.1 | 6328276 | 24-scf00489 | 24 |
| AX-158307966 | 24 | 36.856 | KV453253.1 | 6353352 | 24-scf00489 | 24 |
| AX-157846934 | 24 | 36.856 | KV453253.1 | 6355913 | 24-scf00489 | 24 |
| AX-158307996 | 24 | 36.856 | KV453253.1 | 6386923 | 24-scf00489 | 24 |
| AX-158305708 | 24 | 36.888 | KV453253.1 | 3439829 | 24-scf00489 | 24 |
| AX-158305683 | 24 | 36.918 | KV453253.1 | 3401909 | 24-scf00489 | 24 |
| AX-157727143 | 24 | 36.918 | KV453253.1 | 3443785 | 24-scf00489 | 24 |
| AX-157732710 | 24 | 36.918 | KV453253.1 | 5775711 | 24-scf00489 | 24 |
| AX-157846709 | 24 | 36.965 | KV453253.1 | 3138208 | 24-scf00489 | 24 |
| AX-158305522 | 24 | 36.965 | KV453253.1 | 3184555 | 24-scf00489 | 24 |
| AX-158305624 | 24 | 36.965 | KV453253.1 | 3320738 | 24-scf00489 | 24 |
| AX-157846725 | 24 | 36.965 | KV453253.1 | 3327578 | 24-scf00489 | 24 |
| AX-158305631 | 24 | 36.965 | KV453253.1 | 3331086 | 24-scf00489 | 24 |
| AX-158305635 | 24 | 36.965 | KV453253.1 | 3340774 | 24-scf00489 | 24 |
| AX-158305646 | 24 | 36.965 | KV453253.1 | 3352168 | 24-scf00489 | 24 |
| AX-157846728 | 24 | 36.965 | KV453253.1 | 3353737 | 24-scf00489 | 24 |
| AX-158305674 | 24 | 36.965 | KV453253.1 | 3390264 | 24-scf00489 | 24 |
| AX-158305677 | 24 | 36.965 | KV453253.1 | 3392715 | 24-scf00489 | 24 |
| AX-158305716 | 24 | 36.965 | KV453253.1 | 3450462 | 24-scf00489 | 24 |
| AX-158305717 | 24 | 36.965 | KV453253.1 | 3451534 | 24-scf00489 | 24 |
| AX-158305718 | 24 | 36.965 | KV453253.1 | 3452007 | 24-scf00489 | 24 |
| AX-158305721 | 24 | 36.965 | KV453253.1 | 3458210 | 24-scf00489 | 24 |
| AX-158305722 | 24 | 37.02  | KV453253.1 | 3459940 | 24-scf00489 | 24 |
| AX-157775031 | 24 | 37.075 | KV453253.1 | 3460414 | 24-scf00489 | 24 |



|              |    |        |            |         |             |    |
|--------------|----|--------|------------|---------|-------------|----|
| AX-158305479 | 24 | 37.293 | KV453253.1 | 3104875 | 24-scf00489 | 24 |
| AX-158305724 | 24 | 37.293 | KV453253.1 | 3463455 | 24-scf00489 | 24 |
| AX-158305725 | 24 | 37.293 | KV453253.1 | 3467779 | 24-scf00489 | 24 |
| AX-157717238 | 24 | 37.293 | KV453253.1 | 3470612 | 24-scf00489 | 24 |
| AX-158305732 | 24 | 37.293 | KV453253.1 | 3476528 | 24-scf00489 | 24 |
| AX-157846731 | 24 | 37.293 | KV453253.1 | 3476776 | 24-scf00489 | 24 |
| AX-158305733 | 24 | 37.293 | KV453253.1 | 3477399 | 24-scf00489 | 24 |
| AX-157745594 | 24 | 37.293 | KV453253.1 | 3478491 | 24-scf00489 | 24 |
| AX-157846732 | 24 | 37.293 | KV453253.1 | 3478669 | 24-scf00489 | 24 |
| AX-158305736 | 24 | 37.293 | KV453253.1 | 3481944 | 24-scf00489 | 24 |
| AX-158305738 | 24 | 37.293 | KV453253.1 | 3483154 | 24-scf00489 | 24 |
| AX-158305739 | 24 | 37.293 | KV453253.1 | 3483372 | 24-scf00489 | 24 |
| AX-158305740 | 24 | 37.293 | KV453253.1 | 3483908 | 24-scf00489 | 24 |
| AX-158305741 | 24 | 37.293 | KV453253.1 | 3484441 | 24-scf00489 | 24 |
| AX-158305743 | 24 | 37.293 | KV453253.1 | 3487922 | 24-scf00489 | 24 |
| AX-157746465 | 24 | 37.293 | KV453253.1 | 3488078 | 24-scf00489 | 24 |
| AX-158305747 | 24 | 37.293 | KV453253.1 | 3489573 | 24-scf00489 | 24 |
| AX-158305750 | 24 | 37.293 | KV453253.1 | 3491138 | 24-scf00489 | 24 |
| AX-158305751 | 24 | 37.293 | KV453253.1 | 3492203 | 24-scf00489 | 24 |
| AX-158305752 | 24 | 37.293 | KV453253.1 | 3494055 | 24-scf00489 | 24 |
| AX-158305757 | 24 | 37.293 | KV453253.1 | 3500149 | 24-scf00489 | 24 |
| AX-157725284 | 24 | 37.293 | KV453253.1 | 3501820 | 24-scf00489 | 24 |
| AX-158305759 | 24 | 37.293 | KV453253.1 | 3502179 | 24-scf00489 | 24 |
| AX-158305760 | 24 | 37.293 | KV453253.1 | 3503431 | 24-scf00489 | 24 |
| AX-158305763 | 24 | 37.293 | KV453253.1 | 3506808 | 24-scf00489 | 24 |
| AX-157744574 | 24 | 37.293 | KV453253.1 | 3512130 | 24-scf00489 | 24 |
| AX-158305773 | 24 | 37.293 | KV453253.1 | 3531226 | 24-scf00489 | 24 |
| AX-157846739 | 24 | 37.293 | KV453253.1 | 3543683 | 24-scf00489 | 24 |
| AX-158305794 | 24 | 37.293 | KV453253.1 | 3554472 | 24-scf00489 | 24 |
| AX-158305819 | 24 | 37.293 | KV453253.1 | 3581906 | 24-scf00489 | 24 |
| AX-158305820 | 24 | 37.293 | KV453253.1 | 3581961 | 24-scf00489 | 24 |
| AX-158305827 | 24 | 37.293 | KV453253.1 | 3592477 | 24-scf00489 | 24 |
| AX-158305846 | 24 | 37.293 | KV453253.1 | 3611401 | 24-scf00489 | 24 |
| AX-158306282 | 24 | 37.293 | KV453253.1 | 4153053 | 24-scf00489 | 24 |
| AX-158306834 | 24 | 37.293 | KV453253.1 | 4886174 | 24-scf00489 | 24 |
| AX-157747304 | 24 | 37.293 | KV453253.1 | 5719465 | 24-scf00489 | 24 |
| AX-157846871 | 24 | 37.293 | KV453253.1 | 5720720 | 24-scf00489 | 24 |
| AX-157743781 | 24 | 37.356 | KV453253.1 | 3533734 | 24-scf00489 | 24 |
| AX-158305416 | 24 | 37.402 | KV453253.1 | 3003188 | 24-scf00489 | 24 |
| AX-157713120 | 24 | 37.402 | KV453253.1 | 3211541 | 24-scf00489 | 24 |
| AX-158305776 | 24 | 37.402 | KV453253.1 | 3537236 | 24-scf00489 | 24 |
| AX-158305797 | 24 | 37.402 | KV453253.1 | 3558693 | 24-scf00489 | 24 |
| AX-158305798 | 24 | 37.402 | KV453253.1 | 3559552 | 24-scf00489 | 24 |
| AX-158305815 | 24 | 37.402 | KV453253.1 | 3577016 | 24-scf00489 | 24 |
| AX-158305840 | 24 | 37.402 | KV453253.1 | 3605330 | 24-scf00489 | 24 |
| AX-158305919 | 24 | 37.402 | KV453253.1 | 3699494 | 24-scf00489 | 24 |
| AX-158306117 | 24 | 37.402 | KV453253.1 | 3916753 | 24-scf00489 | 24 |
| AX-157714906 | 24 | 37.402 | KV453253.1 | 3924683 | 24-scf00489 | 24 |
| AX-157846757 | 24 | 37.402 | KV453253.1 | 3929246 | 24-scf00489 | 24 |
| AX-158306131 | 24 | 37.621 | KV453253.1 | 3936231 | 24-scf00489 | 24 |
| AX-158306396 | 24 | 37.621 | KV453253.1 | 4294647 | 24-scf00489 | 24 |

|              |    |        |            |         |             |    |
|--------------|----|--------|------------|---------|-------------|----|
| AX-158306520 | 24 | 37.621 | KV453253.1 | 4470851 | 24-scf00489 | 24 |
| AX-158306696 | 24 | 37.621 | KV453253.1 | 4732905 | 24-scf00489 | 24 |
| AX-157846793 | 24 | 37.621 | KV453253.1 | 4766618 | 24-scf00489 | 24 |
| AX-158419787 | 24 | 37.621 | KV453253.1 | 4863899 | 24-scf00489 | 24 |
| AX-157846795 | 24 | 37.839 | KV453253.1 | 4939984 | 24-scf00489 | 24 |
| AX-158306889 | 24 | 37.839 | KV453253.1 | 4948079 | 24-scf00489 | 24 |
| AX-158306904 | 24 | 37.839 | KV453253.1 | 4968516 | 24-scf00489 | 24 |
| AX-157846798 | 24 | 37.839 | KV453253.1 | 4969552 | 24-scf00489 | 24 |
| AX-157846799 | 24 | 37.839 | KV453253.1 | 4971988 | 24-scf00489 | 24 |
| AX-158306906 | 24 | 37.839 | KV453253.1 | 4972403 | 24-scf00489 | 24 |
| AX-158306907 | 24 | 37.839 | KV453253.1 | 4977183 | 24-scf00489 | 24 |
| AX-157846800 | 24 | 37.839 | KV453253.1 | 4978586 | 24-scf00489 | 24 |
| AX-157873484 | 24 | 37.839 | KV453253.1 | 4980280 | 24-scf00489 | 24 |
| AX-158307057 | 24 | 37.839 | KV453253.1 | 5150893 | 24-scf00489 | 24 |
| AX-157717020 | 24 | 37.839 | KV453253.1 | 5197396 | 24-scf00489 | 24 |
| AX-157693842 | 24 | 37.839 | KV453253.1 | 5370832 | 24-scf00489 | 24 |
| AX-157773931 | 24 | 37.839 | KV453253.1 | 5437253 | 24-scf00489 | 24 |
| AX-157888195 | 24 | 37.839 | KV453253.1 | 5477876 | 24-scf00489 | 24 |
| AX-158305375 | 24 | 38.058 | KV453253.1 | 2945503 | 24-scf00489 | 24 |
| AX-157726072 | 24 | 38.058 | KV453253.1 | 4924138 | 24-scf00489 | 24 |
| AX-158307001 | 24 | 38.058 | KV453253.1 | 5087586 | 24-scf00489 | 24 |
| AX-158307247 | 24 | 38.058 | KV453253.1 | 5357138 | 24-scf00489 | 24 |
| AX-158307535 | 24 | 38.058 | KV453253.1 | 5820093 | 24-scf00489 | 24 |
| AX-158307680 | 24 | 38.058 | KV453253.1 | 5987986 | 24-scf00489 | 24 |
| AX-158307686 | 24 | 38.058 | KV453253.1 | 5992807 | 24-scf00489 | 24 |
| AX-157846900 | 24 | 38.058 | KV453253.1 | 6001807 | 24-scf00489 | 24 |
| AX-158417851 | 24 | 38.058 | KV453253.1 | 6003198 | 24-scf00489 | 24 |
| AX-158307701 | 24 | 38.058 | KV453253.1 | 6013665 | 24-scf00489 | 24 |
| AX-158307763 | 24 | 38.058 | KV453253.1 | 6097935 | 24-scf00489 | 24 |
| AX-158307786 | 24 | 38.058 | KV453253.1 | 6122739 | 24-scf00489 | 24 |
| AX-158307820 | 24 | 38.058 | KV453253.1 | 6169734 | 24-scf00489 | 24 |
| AX-158307940 | 24 | 38.058 | KV453253.1 | 6325103 | 24-scf00489 | 24 |
| AX-158307697 | 24 | 38.111 | KV453253.1 | 6011660 | 24-scf00489 | 24 |
| AX-158307805 | 24 | 38.111 | KV453253.1 | 6156868 | 24-scf00489 | 24 |
| AX-158307698 | 24 | 38.167 | KV453253.1 | 6012006 | 24-scf00489 | 24 |
| AX-158306413 | 24 | 38.276 | KV453253.1 | 4311475 | 24-scf00489 | 24 |
| AX-158307904 | 24 | 38.276 | KV453253.1 | 6272072 | 24-scf00489 | 24 |
| AX-158307911 | 24 | 38.276 | KV453253.1 | 6278245 | 24-scf00489 | 24 |
| AX-158307936 | 24 | 38.276 | KV453253.1 | 6321053 | 24-scf00489 | 24 |
| AX-158307790 | 24 | 38.305 | KV453253.1 | 6135142 | 24-scf00489 | 24 |
| AX-157846932 | 24 | 38.305 | KV453253.1 | 6327159 | 24-scf00489 | 24 |
| AX-158307980 | 24 | 38.305 | KV453253.1 | 6373126 | 24-scf00489 | 24 |
| AX-158307188 | 24 | 38.326 | KV453253.1 | 5285687 | 24-scf00489 | 24 |
| AX-158307943 | 24 | 38.326 | KV453253.1 | 6328049 | 24-scf00489 | 24 |
| AX-157846883 | 24 | 38.35  | KV453253.1 | 5916836 | 24-scf00489 | 24 |
| AX-158307747 | 24 | 38.35  | KV453253.1 | 6067183 | 24-scf00489 | 24 |
| AX-158307813 | 24 | 38.35  | KV453253.1 | 6164062 | 24-scf00489 | 24 |
| AX-157846924 | 24 | 38.35  | KV453253.1 | 6244458 | 24-scf00489 | 24 |
| AX-158307913 | 24 | 38.35  | KV453253.1 | 6282646 | 24-scf00489 | 24 |
| AX-158307916 | 24 | 38.35  | KV453253.1 | 6290854 | 24-scf00489 | 24 |
| AX-158307918 | 24 | 38.35  | KV453253.1 | 6293981 | 24-scf00489 | 24 |

|              |    |        |            |         |                |    |
|--------------|----|--------|------------|---------|----------------|----|
| AX-157888201 | 24 | 38.35  | KV453253.1 | 6330520 | 24-scf00489    | 24 |
| AX-158307945 | 24 | 38.35  | KV453253.1 | 6332511 | 24-scf00489    | 24 |
| AX-158308067 | 24 | 38.35  | KV453253.1 | 6480629 | 24-scf00489    | 24 |
| AX-158308088 | 24 | 38.35  | KV453253.1 | 6504260 | 24-scf00489    | 24 |
| AX-158306820 | 24 | 38.385 | KV453253.1 | 4872578 | 24-scf00489    | 24 |
| AX-158306899 | 24 | 38.385 | KV453253.1 | 4961788 | 24-scf00489    | 24 |
| AX-158307762 | 24 | 38.385 | KV453253.1 | 6096671 | 24-scf00489    | 24 |
| AX-157873503 | 24 | 38.385 | KV453253.1 | 6220219 | 24-scf00489    | 24 |
| AX-158307951 | 24 | 38.385 | KV453253.1 | 6338353 | 24-scf00489    | 24 |
| AX-158307957 | 24 | 38.385 | KV453253.1 | 6345785 | 24-scf00489    | 24 |
| AX-158307958 | 24 | 38.385 | KV453253.1 | 6346177 | 24-scf00489    | 24 |
| AX-158307959 | 24 | 38.385 | KV453253.1 | 6346966 | 24-scf00489    | 24 |
| AX-157846935 | 24 | 38.385 | KV453253.1 | 6356054 | 24-scf00489    | 24 |
| AX-157846936 | 24 | 38.385 | KV453253.1 | 6356298 | 24-scf00489    | 24 |
| AX-158307970 | 24 | 38.385 | KV453253.1 | 6360593 | 24-scf00489    | 24 |
| AX-157702751 | 24 | 38.385 | DX094070.1 | 97      | IORI212 lctalu | UN |
| AX-158307979 | 24 | 38.441 | KV453253.1 | 6372299 | 24-scf00489    | 24 |
| AX-158307646 | 24 | 38.495 | KV453253.1 | 5952556 | 24-scf00489    | 24 |
| AX-158307988 | 24 | 38.495 | KV453253.1 | 6380239 | 24-scf00489    | 24 |
| AX-158307991 | 24 | 38.495 | KV453253.1 | 6381895 | 24-scf00489    | 24 |
| AX-158307992 | 24 | 38.495 | KV453253.1 | 6382179 | 24-scf00489    | 24 |
| AX-158307994 | 24 | 38.495 | KV453253.1 | 6385205 | 24-scf00489    | 24 |
| AX-158307997 | 24 | 38.495 | KV453253.1 | 6387614 | 24-scf00489    | 24 |
| AX-158307998 | 24 | 38.495 | KV453253.1 | 6388264 | 24-scf00489    | 24 |
| AX-157860907 | 24 | 38.495 | KV453253.1 | 6388590 | 24-scf00489    | 24 |
| AX-158306831 | 24 | 38.713 | KV453253.1 | 4882211 | 24-scf00489    | 24 |
| AX-158306895 | 24 | 38.713 | KV453253.1 | 4956195 | 24-scf00489    | 24 |
| AX-158307611 | 24 | 38.713 | KV453253.1 | 5909048 | 24-scf00489    | 24 |
| AX-158307742 | 24 | 38.713 | KV453253.1 | 6057659 | 24-scf00489    | 24 |
| AX-158307777 | 24 | 38.713 | KV453253.1 | 6111247 | 24-scf00489    | 24 |
| AX-158307808 | 24 | 38.713 | KV453253.1 | 6161738 | 24-scf00489    | 24 |
| AX-157846927 | 24 | 38.713 | KV453253.1 | 6264057 | 24-scf00489    | 24 |
| AX-158308007 | 24 | 38.713 | KV453253.1 | 6400596 | 24-scf00489    | 24 |
| AX-158308013 | 24 | 38.713 | KV453253.1 | 6407559 | 24-scf00489    | 24 |
| AX-158308017 | 24 | 38.713 | KV453253.1 | 6410789 | 24-scf00489    | 24 |
| AX-158308021 | 24 | 38.713 | KV453253.1 | 6416073 | 24-scf00489    | 24 |
| AX-158308022 | 24 | 38.713 | KV453253.1 | 6416688 | 24-scf00489    | 24 |
| AX-157746136 | 24 | 38.713 | KV453253.1 | 6427511 | 24-scf00489    | 24 |
| AX-158308032 | 24 | 38.713 | KV453253.1 | 6433197 | 24-scf00489    | 24 |
| AX-157846941 | 24 | 38.713 | KV453253.1 | 6435952 | 24-scf00489    | 24 |
| AX-158308036 | 24 | 38.713 | KV453253.1 | 6437795 | 24-scf00489    | 24 |
| AX-157727923 | 24 | 38.713 | KV453253.1 | 6440420 | 24-scf00489    | 24 |
| AX-157846942 | 24 | 38.713 | KV453253.1 | 6440712 | 24-scf00489    | 24 |
| AX-158308042 | 24 | 38.713 | KV453253.1 | 6444769 | 24-scf00489    | 24 |
| AX-158308044 | 24 | 38.713 | KV453253.1 | 6447707 | 24-scf00489    | 24 |
| AX-158308045 | 24 | 38.713 | KV453253.1 | 6448822 | 24-scf00489    | 24 |
| AX-158308046 | 24 | 38.713 | KV453253.1 | 6449839 | 24-scf00489    | 24 |
| AX-158308047 | 24 | 38.713 | KV453253.1 | 6451346 | 24-scf00489    | 24 |
| AX-158308051 | 24 | 38.713 | KV453253.1 | 6454390 | 24-scf00489    | 24 |
| AX-158308052 | 24 | 38.713 | KV453253.1 | 6455138 | 24-scf00489    | 24 |
| AX-158308057 | 24 | 38.713 | KV453253.1 | 6463063 | 24-scf00489    | 24 |

|              |    |        |            |         |             |    |
|--------------|----|--------|------------|---------|-------------|----|
| AX-157773447 | 24 | 38.713 | KV453253.1 | 6465673 | 24-scf00489 | 24 |
| AX-158308059 | 24 | 38.713 | KV453253.1 | 6468560 | 24-scf00489 | 24 |
| AX-158308060 | 24 | 38.713 | KV453253.1 | 6469575 | 24-scf00489 | 24 |
| AX-158308062 | 24 | 38.713 | KV453253.1 | 6472087 | 24-scf00489 | 24 |
| AX-157771195 | 24 | 38.713 | KV453253.1 | 6482064 | 24-scf00489 | 24 |
| AX-157744750 | 24 | 38.713 | KV453253.1 | 6486280 | 24-scf00489 | 24 |
| AX-158308072 | 24 | 38.713 | KV453253.1 | 6487570 | 24-scf00489 | 24 |
| AX-158308073 | 24 | 38.713 | KV453253.1 | 6488234 | 24-scf00489 | 24 |
| AX-158308076 | 24 | 38.713 | KV453253.1 | 6491416 | 24-scf00489 | 24 |
| AX-158308080 | 24 | 38.713 | KV453253.1 | 6495554 | 24-scf00489 | 24 |
| AX-158308082 | 24 | 38.713 | KV453253.1 | 6496760 | 24-scf00489 | 24 |
| AX-158308083 | 24 | 38.713 | KV453253.1 | 6498018 | 24-scf00489 | 24 |
| AX-158308086 | 24 | 38.713 | KV453253.1 | 6501639 | 24-scf00489 | 24 |
| AX-158308087 | 24 | 38.713 | KV453253.1 | 6502354 | 24-scf00489 | 24 |
| AX-157846949 | 24 | 38.713 | KV453253.1 | 6503320 | 24-scf00489 | 24 |
| AX-157722261 | 24 | 38.932 | KV453253.1 | 6516194 | 24-scf00489 | 24 |
| AX-158308100 | 24 | 38.932 | KV453253.1 | 6519210 | 24-scf00489 | 24 |
| AX-158308105 | 24 | 39.15  | KV453253.1 | 6524744 | 24-scf00489 | 24 |
| AX-158308107 | 24 | 39.15  | KV453253.1 | 6526309 | 24-scf00489 | 24 |
| AX-158308118 | 24 | 39.15  | KV453253.1 | 6541512 | 24-scf00489 | 24 |
| AX-157743968 | 24 | 39.15  | KV453253.1 | 6543311 | 24-scf00489 | 24 |
| AX-158308121 | 24 | 39.15  | KV453253.1 | 6545006 | 24-scf00489 | 24 |
| AX-158308123 | 24 | 39.15  | KV453253.1 | 6545673 | 24-scf00489 | 24 |
| AX-158308127 | 24 | 39.15  | KV453253.1 | 6553843 | 24-scf00489 | 24 |
| AX-158308130 | 24 | 39.15  | KV453253.1 | 6556846 | 24-scf00489 | 24 |
| AX-158308133 | 24 | 39.15  | KV453253.1 | 6560854 | 24-scf00489 | 24 |
| AX-158308135 | 24 | 39.15  | KV453253.1 | 6562578 | 24-scf00489 | 24 |
| AX-158308140 | 24 | 39.15  | KV453253.1 | 6566699 | 24-scf00489 | 24 |
| AX-157757405 | 24 | 39.15  | KV453253.1 | 6568048 | 24-scf00489 | 24 |
| AX-158308389 | 24 | 39.15  | KV453253.1 | 6927125 | 24-scf00489 | 24 |
| AX-158308143 | 24 | 39.203 | KV453253.1 | 6571338 | 24-scf00489 | 24 |
| AX-158308145 | 24 | 39.259 | KV453253.1 | 6581408 | 24-scf00489 | 24 |
| AX-158308146 | 24 | 39.32  | KV453253.1 | 6581610 | 24-scf00489 | 24 |
| AX-158308289 | 24 | 39.32  | KV453253.1 | 6751747 | 24-scf00489 | 24 |
| AX-158308540 | 24 | 39.32  | KV453253.1 | 7309040 | 24-scf00489 | 24 |
| AX-158307556 | 24 | 39.369 | KV453253.1 | 5853315 | 24-scf00489 | 24 |
| AX-158308129 | 24 | 39.369 | KV453253.1 | 6555506 | 24-scf00489 | 24 |
| AX-157745730 | 24 | 39.369 | KV453253.1 | 6596250 | 24-scf00489 | 24 |
| AX-157860909 | 24 | 39.369 | KV453253.1 | 6597671 | 24-scf00489 | 24 |
| AX-157846940 | 24 | 39.37  | KV453253.1 | 6432458 | 24-scf00489 | 24 |
| AX-158308089 | 24 | 39.37  | KV453253.1 | 6505395 | 24-scf00489 | 24 |
| AX-158308137 | 24 | 39.37  | KV453253.1 | 6564295 | 24-scf00489 | 24 |
| AX-158308162 | 24 | 39.37  | KV453253.1 | 6603089 | 24-scf00489 | 24 |
| AX-158308165 | 24 | 39.37  | KV453253.1 | 6606419 | 24-scf00489 | 24 |
| AX-158308192 | 24 | 39.37  | KV453253.1 | 6648787 | 24-scf00489 | 24 |
| AX-158309035 | 24 | 39.37  | KV453253.1 | 8540409 | 24-scf00489 | 24 |
| AX-157725137 | 24 | 39.372 | KV453253.1 | 6653225 | 24-scf00489 | 24 |
| AX-158308212 | 24 | 39.372 | KV453253.1 | 6674373 | 24-scf00489 | 24 |
| AX-157846975 | 24 | 39.372 | KV453253.1 | 6780688 | 24-scf00489 | 24 |
| AX-158308428 | 24 | 39.372 | KV453253.1 | 7005057 | 24-scf00489 | 24 |
| AX-158308990 | 24 | 39.372 | KV453253.1 | 8492456 | 24-scf00489 | 24 |

|              |    |        |            |          |             |    |
|--------------|----|--------|------------|----------|-------------|----|
| AX-158309018 | 24 | 39.372 | KV453253.1 | 8525950  | 24-scf00489 | 24 |
| AX-157718038 | 24 | 39.372 | KV453253.1 | 9152870  | 24-scf00489 | 24 |
| AX-158309572 | 24 | 39.372 | KV453253.1 | 9334511  | 24-scf00489 | 24 |
| AX-158309703 | 24 | 39.372 | KV453253.1 | 9567496  | 24-scf00489 | 24 |
| AX-158309864 | 24 | 39.372 | KV453253.1 | 9876331  | 24-scf00489 | 24 |
| AX-158309865 | 24 | 39.372 | KV453253.1 | 9876717  | 24-scf00489 | 24 |
| AX-158308064 | 24 | 39.375 | KV453253.1 | 6476633  | 24-scf00489 | 24 |
| AX-158308229 | 24 | 39.375 | KV453253.1 | 6699586  | 24-scf00489 | 24 |
| AX-158308238 | 24 | 39.391 | KV453253.1 | 6705480  | 24-scf00489 | 24 |
| AX-158308249 | 24 | 39.394 | KV453253.1 | 6718352  | 24-scf00489 | 24 |
| AX-158308253 | 24 | 39.409 | KV453253.1 | 6722156  | 24-scf00489 | 24 |
| AX-158308270 | 24 | 39.42  | KV453253.1 | 6736127  | 24-scf00489 | 24 |
| AX-157847002 | 24 | 39.42  | KV453253.1 | 7157479  | 24-scf00489 | 24 |
| AX-157860967 | 24 | 39.42  | KV453253.1 | 9085803  | 24-scf00489 | 24 |
| AX-158308286 | 24 | 39.431 | KV453253.1 | 6747849  | 24-scf00489 | 24 |
| AX-158308287 | 24 | 39.44  | KV453253.1 | 6750064  | 24-scf00489 | 24 |
| AX-158308288 | 24 | 39.45  | KV453253.1 | 6751362  | 24-scf00489 | 24 |
| AX-158423616 | 24 | 39.46  | KV453253.1 | 6780170  | 24-scf00489 | 24 |
| AX-157846976 | 24 | 39.468 | KV453253.1 | 6786135  | 24-scf00489 | 24 |
| AX-158308319 | 24 | 39.472 | KV453253.1 | 6790509  | 24-scf00489 | 24 |
| AX-158381358 | 24 | 39.475 | KV453253.1 | 6118627  | 24-scf00489 | 24 |
| AX-158308058 | 24 | 39.475 | KV453253.1 | 6467695  | 24-scf00489 | 24 |
| AX-157700523 | 24 | 39.475 | KV453253.1 | 6619354  | 24-scf00489 | 24 |
| AX-158308331 | 24 | 39.475 | KV453253.1 | 6807335  | 24-scf00489 | 24 |
| AX-158308351 | 24 | 39.475 | KV453253.1 | 6847272  | 24-scf00489 | 24 |
| AX-158308160 | 24 | 39.477 | KV453253.1 | 6599162  | 24-scf00489 | 24 |
| AX-158308170 | 24 | 39.477 | KV453253.1 | 6609461  | 24-scf00489 | 24 |
| AX-158308183 | 24 | 39.477 | KV453253.1 | 6629051  | 24-scf00489 | 24 |
| AX-158308235 | 24 | 39.477 | KV453253.1 | 6704288  | 24-scf00489 | 24 |
| AX-158308341 | 24 | 39.477 | KV453253.1 | 6826440  | 24-scf00489 | 24 |
| AX-158308344 | 24 | 39.477 | KV453253.1 | 6831740  | 24-scf00489 | 24 |
| AX-157740923 | 24 | 39.477 | KV453253.1 | 11712612 | 24-scf00489 | 24 |
| AX-158308065 | 24 | 39.478 | KV453253.1 | 6478091  | 24-scf00489 | 24 |
| AX-158308104 | 24 | 39.478 | KV453253.1 | 6524391  | 24-scf00489 | 24 |
| AX-157752333 | 24 | 39.478 | KV453253.1 | 6528269  | 24-scf00489 | 24 |
| AX-157772635 | 24 | 39.478 | KV453253.1 | 6528605  | 24-scf00489 | 24 |
| AX-157846952 | 24 | 39.478 | KV453253.1 | 6562942  | 24-scf00489 | 24 |
| AX-157846960 | 24 | 39.478 | KV453253.1 | 6608612  | 24-scf00489 | 24 |
| AX-158308334 | 24 | 39.478 | KV453253.1 | 6811966  | 24-scf00489 | 24 |
| AX-158308335 | 24 | 39.478 | KV453253.1 | 6812374  | 24-scf00489 | 24 |
| AX-157774958 | 24 | 39.478 | KV453253.1 | 6814718  | 24-scf00489 | 24 |
| AX-158308342 | 24 | 39.478 | KV453253.1 | 6829820  | 24-scf00489 | 24 |
| AX-158308358 | 24 | 39.478 | KV453253.1 | 6880884  | 24-scf00489 | 24 |
| AX-158308359 | 24 | 39.478 | KV453253.1 | 6883481  | 24-scf00489 | 24 |
| AX-158308377 | 24 | 39.478 | KV453253.1 | 6913598  | 24-scf00489 | 24 |
| AX-158308378 | 24 | 39.478 | KV453253.1 | 6915544  | 24-scf00489 | 24 |
| AX-158308380 | 24 | 39.478 | KV453253.1 | 6916656  | 24-scf00489 | 24 |
| AX-157846980 | 24 | 39.478 | KV453253.1 | 6917842  | 24-scf00489 | 24 |
| AX-157710711 | 24 | 39.478 | KV453253.1 | 6933120  | 24-scf00489 | 24 |
| AX-158417871 | 24 | 39.478 | KV453253.1 | 6938633  | 24-scf00489 | 24 |
| AX-158308399 | 24 | 39.478 | KV453253.1 | 6944470  | 24-scf00489 | 24 |

|              |    |        |             |          |             |    |
|--------------|----|--------|-------------|----------|-------------|----|
| AX-158308403 | 24 | 39.478 | KV453253.1  | 6954552  | 24-scf00489 | 24 |
| AX-158308405 | 24 | 39.478 | KV453253.1  | 6956509  | 24-scf00489 | 24 |
| AX-158308408 | 24 | 39.478 | KV453253.1  | 6961051  | 24-scf00489 | 24 |
| AX-158308409 | 24 | 39.478 | KV453253.1  | 6962072  | 24-scf00489 | 24 |
| AX-158308416 | 24 | 39.478 | KV453253.1  | 6975456  | 24-scf00489 | 24 |
| AX-158308417 | 24 | 39.478 | KV453253.1  | 6976958  | 24-scf00489 | 24 |
| AX-158308612 | 24 | 39.478 | KV453253.1  | 7807803  | 24-scf00489 | 24 |
| AX-158308620 | 24 | 39.478 | KV453253.1  | 7844996  | 24-scf00489 | 24 |
| AX-157719005 | 24 | 39.478 | KV453253.1  | 8462618  | 24-scf00489 | 24 |
| AX-158308992 | 24 | 39.478 | KV453253.1  | 8493789  | 24-scf00489 | 24 |
| AX-158309065 | 24 | 39.478 | KV453253.1  | 8573429  | 24-scf00489 | 24 |
| AX-158309220 | 24 | 39.478 | KV453253.1  | 8811821  | 24-scf00489 | 24 |
| AX-158309293 | 24 | 39.478 | KV453253.1  | 8891694  | 24-scf00489 | 24 |
| AX-158309447 | 24 | 39.478 | KV453253.1  | 9126719  | 24-scf00489 | 24 |
| AX-157742235 | 24 | 39.478 | KV453253.1  | 9195767  | 24-scf00489 | 24 |
| AX-158309762 | 24 | 39.478 | KV453253.1  | 9657129  | 24-scf00489 | 24 |
| AX-157754289 | 24 | 39.478 | KV453253.1  | 10956959 | 24-scf00489 | 24 |
| AX-158310348 | 24 | 39.478 | KV453253.1  | 10963947 | 24-scf00489 | 24 |
| AX-158310349 | 24 | 39.478 | KV453253.1  | 10964254 | 24-scf00489 | 24 |
| AX-158310353 | 24 | 39.478 | KV453253.1  | 10966569 | 24-scf00489 | 24 |
| AX-158310567 | 24 | 39.478 | KV453253.1  | 11393154 | 24-scf00489 | 24 |
| AX-158310742 | 24 | 39.478 | KV453253.1  | 11639433 | 24-scf00489 | 24 |
| AX-158310834 | 24 | 39.478 | KV453253.1  | 11789626 | 24-scf00489 | 24 |
| AX-158310973 | 24 | 39.478 | KV453253.1  | 12020312 | 24-scf00489 | 24 |
| AX-158310985 | 24 | 39.478 | KV453253.1  | 12034334 | 24-scf00489 | 24 |
| AX-158310987 | 24 | 39.478 | KV453253.1  | 12035211 | 24-scf00489 | 24 |
| AX-157750489 | 24 | 39.478 | KV453253.1  | 12101457 | 24-scf00489 | 24 |
| AX-157712036 | 24 | 39.478 | 3ML01032328 | 364      | scf07943_1  | UN |
| AX-158308419 | 24 | 39.519 | KV453253.1  | 6981133  | 24-scf00489 | 24 |
| AX-157846764 | 24 | 39.587 | KV453253.1  | 4119053  | 24-scf00489 | 24 |
| AX-158306670 | 24 | 39.587 | KV453253.1  | 4702770  | 24-scf00489 | 24 |
| AX-158306851 | 24 | 39.587 | KV453253.1  | 4910005  | 24-scf00489 | 24 |
| AX-158306929 | 24 | 39.587 | KV453253.1  | 5015876  | 24-scf00489 | 24 |
| AX-157867710 | 24 | 39.587 | KV453253.1  | 5053375  | 24-scf00489 | 24 |
| AX-158306968 | 24 | 39.587 | KV453253.1  | 5063503  | 24-scf00489 | 24 |
| AX-158307654 | 24 | 39.587 | KV453253.1  | 5958433  | 24-scf00489 | 24 |
| AX-158307672 | 24 | 39.587 | KV453253.1  | 5979939  | 24-scf00489 | 24 |
| AX-158307723 | 24 | 39.587 | KV453253.1  | 6035248  | 24-scf00489 | 24 |
| AX-158307792 | 24 | 39.587 | KV453253.1  | 6139803  | 24-scf00489 | 24 |
| AX-158307824 | 24 | 39.587 | KV453253.1  | 6174898  | 24-scf00489 | 24 |
| AX-158307999 | 24 | 39.587 | KV453253.1  | 6389318  | 24-scf00489 | 24 |
| AX-158308024 | 24 | 39.587 | KV453253.1  | 6418404  | 24-scf00489 | 24 |
| AX-158308097 | 24 | 39.587 | KV453253.1  | 6514103  | 24-scf00489 | 24 |
| AX-158308111 | 24 | 39.587 | KV453253.1  | 6528558  | 24-scf00489 | 24 |
| AX-158308163 | 24 | 39.587 | KV453253.1  | 6603915  | 24-scf00489 | 24 |
| AX-158308172 | 24 | 39.587 | KV453253.1  | 6612856  | 24-scf00489 | 24 |
| AX-157721748 | 24 | 39.587 | KV453253.1  | 6613854  | 24-scf00489 | 24 |
| AX-158308189 | 24 | 39.587 | KV453253.1  | 6645937  | 24-scf00489 | 24 |
| AX-158308195 | 24 | 39.587 | KV453253.1  | 6651206  | 24-scf00489 | 24 |
| AX-158308198 | 24 | 39.587 | KV453253.1  | 6656927  | 24-scf00489 | 24 |
| AX-158419800 | 24 | 39.587 | KV453253.1  | 6657493  | 24-scf00489 | 24 |

|              |    |        |            |         |             |    |
|--------------|----|--------|------------|---------|-------------|----|
| AX-157860911 | 24 | 39.587 | KV453253.1 | 6665195 | 24-scf00489 | 24 |
| AX-158308225 | 24 | 39.587 | KV453253.1 | 6692928 | 24-scf00489 | 24 |
| AX-158417866 | 24 | 39.587 | KV453253.1 | 6699318 | 24-scf00489 | 24 |
| AX-157846966 | 24 | 39.587 | KV453253.1 | 6716632 | 24-scf00489 | 24 |
| AX-158308251 | 24 | 39.587 | KV453253.1 | 6720579 | 24-scf00489 | 24 |
| AX-158308254 | 24 | 39.587 | KV453253.1 | 6723361 | 24-scf00489 | 24 |
| AX-157709102 | 24 | 39.587 | KV453253.1 | 6740174 | 24-scf00489 | 24 |
| AX-158308278 | 24 | 39.587 | KV453253.1 | 6742022 | 24-scf00489 | 24 |
| AX-158308279 | 24 | 39.587 | KV453253.1 | 6742557 | 24-scf00489 | 24 |
| AX-158308280 | 24 | 39.587 | KV453253.1 | 6743110 | 24-scf00489 | 24 |
| AX-158308282 | 24 | 39.587 | KV453253.1 | 6744513 | 24-scf00489 | 24 |
| AX-158308298 | 24 | 39.587 | KV453253.1 | 6763291 | 24-scf00489 | 24 |
| AX-157846970 | 24 | 39.587 | KV453253.1 | 6768305 | 24-scf00489 | 24 |
| AX-157846971 | 24 | 39.587 | KV453253.1 | 6768934 | 24-scf00489 | 24 |
| AX-157846972 | 24 | 39.587 | KV453253.1 | 6772453 | 24-scf00489 | 24 |
| AX-157846973 | 24 | 39.587 | KV453253.1 | 6773826 | 24-scf00489 | 24 |
| AX-158308307 | 24 | 39.587 | KV453253.1 | 6774230 | 24-scf00489 | 24 |
| AX-157713947 | 24 | 39.587 | KV453253.1 | 6774621 | 24-scf00489 | 24 |
| AX-158308311 | 24 | 39.587 | KV453253.1 | 6779337 | 24-scf00489 | 24 |
| AX-158308313 | 24 | 39.587 | KV453253.1 | 6782206 | 24-scf00489 | 24 |
| AX-158308314 | 24 | 39.587 | KV453253.1 | 6782668 | 24-scf00489 | 24 |
| AX-158308316 | 24 | 39.587 | KV453253.1 | 6785227 | 24-scf00489 | 24 |
| AX-158308318 | 24 | 39.587 | KV453253.1 | 6787234 | 24-scf00489 | 24 |
| AX-158308322 | 24 | 39.587 | KV453253.1 | 6793538 | 24-scf00489 | 24 |
| AX-158308323 | 24 | 39.587 | KV453253.1 | 6794036 | 24-scf00489 | 24 |
| AX-157846977 | 24 | 39.587 | KV453253.1 | 6796554 | 24-scf00489 | 24 |
| AX-157710559 | 24 | 39.587 | KV453253.1 | 6815941 | 24-scf00489 | 24 |
| AX-158308352 | 24 | 39.587 | KV453253.1 | 6847692 | 24-scf00489 | 24 |
| AX-158308360 | 24 | 39.587 | KV453253.1 | 6885076 | 24-scf00489 | 24 |
| AX-158308363 | 24 | 39.587 | KV453253.1 | 6890037 | 24-scf00489 | 24 |
| AX-158308364 | 24 | 39.587 | KV453253.1 | 6891347 | 24-scf00489 | 24 |
| AX-158308366 | 24 | 39.587 | KV453253.1 | 6893218 | 24-scf00489 | 24 |
| AX-157846981 | 24 | 39.587 | KV453253.1 | 6918960 | 24-scf00489 | 24 |
| AX-158308398 | 24 | 39.587 | KV453253.1 | 6940760 | 24-scf00489 | 24 |
| AX-157725017 | 24 | 39.587 | KV453253.1 | 6979911 | 24-scf00489 | 24 |
| AX-158308420 | 24 | 39.587 | KV453253.1 | 6983224 | 24-scf00489 | 24 |
| AX-157846988 | 24 | 39.587 | KV453253.1 | 6989283 | 24-scf00489 | 24 |
| AX-158308423 | 24 | 39.587 | KV453253.1 | 6990349 | 24-scf00489 | 24 |
| AX-158308424 | 24 | 39.587 | KV453253.1 | 6992311 | 24-scf00489 | 24 |
| AX-158308425 | 24 | 39.587 | KV453253.1 | 6993097 | 24-scf00489 | 24 |
| AX-158308427 | 24 | 39.587 | KV453253.1 | 7004307 | 24-scf00489 | 24 |
| AX-158308429 | 24 | 39.587 | KV453253.1 | 7010243 | 24-scf00489 | 24 |
| AX-158308430 | 24 | 39.587 | KV453253.1 | 7011082 | 24-scf00489 | 24 |
| AX-157846989 | 24 | 39.587 | KV453253.1 | 7011322 | 24-scf00489 | 24 |
| AX-158308439 | 24 | 39.587 | KV453253.1 | 7022832 | 24-scf00489 | 24 |
| AX-158308442 | 24 | 39.587 | KV453253.1 | 7027548 | 24-scf00489 | 24 |
| AX-158308445 | 24 | 39.587 | KV453253.1 | 7031957 | 24-scf00489 | 24 |
| AX-158308450 | 24 | 39.587 | KV453253.1 | 7039144 | 24-scf00489 | 24 |
| AX-158308460 | 24 | 39.587 | KV453253.1 | 7050484 | 24-scf00489 | 24 |
| AX-158308461 | 24 | 39.587 | KV453253.1 | 7050741 | 24-scf00489 | 24 |
| AX-158308462 | 24 | 39.587 | KV453253.1 | 7051703 | 24-scf00489 | 24 |

|              |    |        |            |         |             |    |
|--------------|----|--------|------------|---------|-------------|----|
| AX-158308463 | 24 | 39.587 | KV453253.1 | 7055020 | 24-scf00489 | 24 |
| AX-158308464 | 24 | 39.587 | KV453253.1 | 7056459 | 24-scf00489 | 24 |
| AX-158308465 | 24 | 39.587 | KV453253.1 | 7056832 | 24-scf00489 | 24 |
| AX-158308471 | 24 | 39.587 | KV453253.1 | 7063470 | 24-scf00489 | 24 |
| AX-158308474 | 24 | 39.587 | KV453253.1 | 7065146 | 24-scf00489 | 24 |
| AX-158308476 | 24 | 39.587 | KV453253.1 | 7066399 | 24-scf00489 | 24 |
| AX-157758640 | 24 | 39.587 | KV453253.1 | 7067825 | 24-scf00489 | 24 |
| AX-157846991 | 24 | 39.587 | KV453253.1 | 7078005 | 24-scf00489 | 24 |
| AX-157860924 | 24 | 39.587 | KV453253.1 | 7083514 | 24-scf00489 | 24 |
| AX-157846992 | 24 | 39.587 | KV453253.1 | 7085093 | 24-scf00489 | 24 |
| AX-158308492 | 24 | 39.587 | KV453253.1 | 7094828 | 24-scf00489 | 24 |
| AX-158308498 | 24 | 39.587 | KV453253.1 | 7105536 | 24-scf00489 | 24 |
| AX-157860930 | 24 | 39.587 | KV453253.1 | 7106627 | 24-scf00489 | 24 |
| AX-158308500 | 24 | 39.587 | KV453253.1 | 7108834 | 24-scf00489 | 24 |
| AX-157860934 | 24 | 39.587 | KV453253.1 | 7116434 | 24-scf00489 | 24 |
| AX-157860935 | 24 | 39.587 | KV453253.1 | 7133024 | 24-scf00489 | 24 |
| AX-158308509 | 24 | 39.587 | KV453253.1 | 7139383 | 24-scf00489 | 24 |
| AX-157847000 | 24 | 39.587 | KV453253.1 | 7141684 | 24-scf00489 | 24 |
| AX-158308510 | 24 | 39.587 | KV453253.1 | 7144782 | 24-scf00489 | 24 |
| AX-157847001 | 24 | 39.587 | KV453253.1 | 7147870 | 24-scf00489 | 24 |
| AX-158308516 | 24 | 39.587 | KV453253.1 | 7165036 | 24-scf00489 | 24 |
| AX-157860939 | 24 | 39.587 | KV453253.1 | 7165902 | 24-scf00489 | 24 |
| AX-158308526 | 24 | 39.587 | KV453253.1 | 7195985 | 24-scf00489 | 24 |
| AX-158308527 | 24 | 39.587 | KV453253.1 | 7198650 | 24-scf00489 | 24 |
| AX-158308528 | 24 | 39.587 | KV453253.1 | 7199445 | 24-scf00489 | 24 |
| AX-158308532 | 24 | 39.587 | KV453253.1 | 7220695 | 24-scf00489 | 24 |
| AX-158308544 | 24 | 39.587 | KV453253.1 | 7345284 | 24-scf00489 | 24 |
| AX-158308545 | 24 | 39.587 | KV453253.1 | 7358304 | 24-scf00489 | 24 |
| AX-158308548 | 24 | 39.587 | KV453253.1 | 7411825 | 24-scf00489 | 24 |
| AX-158308549 | 24 | 39.587 | KV453253.1 | 7414197 | 24-scf00489 | 24 |
| AX-158381364 | 24 | 39.587 | KV453253.1 | 7420058 | 24-scf00489 | 24 |
| AX-158417882 | 24 | 39.587 | KV453253.1 | 7455678 | 24-scf00489 | 24 |
| AX-158308556 | 24 | 39.587 | KV453253.1 | 7460028 | 24-scf00489 | 24 |
| AX-158308565 | 24 | 39.587 | KV453253.1 | 7496154 | 24-scf00489 | 24 |
| AX-158308567 | 24 | 39.587 | KV453253.1 | 7527398 | 24-scf00489 | 24 |
| AX-158308570 | 24 | 39.587 | KV453253.1 | 7541746 | 24-scf00489 | 24 |
| AX-158308575 | 24 | 39.587 | KV453253.1 | 7581548 | 24-scf00489 | 24 |
| AX-158308577 | 24 | 39.587 | KV453253.1 | 7592616 | 24-scf00489 | 24 |
| AX-158308581 | 24 | 39.587 | KV453253.1 | 7618961 | 24-scf00489 | 24 |
| AX-158308589 | 24 | 39.587 | KV453253.1 | 7673419 | 24-scf00489 | 24 |
| AX-158308590 | 24 | 39.587 | KV453253.1 | 7674560 | 24-scf00489 | 24 |
| AX-158308599 | 24 | 39.587 | KV453253.1 | 7731314 | 24-scf00489 | 24 |
| AX-158308601 | 24 | 39.587 | KV453253.1 | 7748776 | 24-scf00489 | 24 |
| AX-158308604 | 24 | 39.587 | KV453253.1 | 7772759 | 24-scf00489 | 24 |
| AX-158308607 | 24 | 39.587 | KV453253.1 | 7779389 | 24-scf00489 | 24 |
| AX-158308609 | 24 | 39.587 | KV453253.1 | 7787552 | 24-scf00489 | 24 |
| AX-158308610 | 24 | 39.587 | KV453253.1 | 7788466 | 24-scf00489 | 24 |
| AX-158308611 | 24 | 39.587 | KV453253.1 | 7794565 | 24-scf00489 | 24 |
| AX-158308614 | 24 | 39.587 | KV453253.1 | 7810825 | 24-scf00489 | 24 |
| AX-157748829 | 24 | 39.587 | KV453253.1 | 7814825 | 24-scf00489 | 24 |
| AX-158308617 | 24 | 39.587 | KV453253.1 | 7824342 | 24-scf00489 | 24 |



|              |    |        |            |         |             |    |
|--------------|----|--------|------------|---------|-------------|----|
| AX-158417891 | 24 | 39.587 | KV453253.1 | 7846431 | 24-scf00489 | 24 |
| AX-158308622 | 24 | 39.587 | KV453253.1 | 7851590 | 24-scf00489 | 24 |
| AX-158308624 | 24 | 39.587 | KV453253.1 | 7863352 | 24-scf00489 | 24 |
| AX-158308626 | 24 | 39.587 | KV453253.1 | 7868712 | 24-scf00489 | 24 |
| AX-158308628 | 24 | 39.587 | KV453253.1 | 7877691 | 24-scf00489 | 24 |
| AX-157753696 | 24 | 39.587 | KV453253.1 | 7882075 | 24-scf00489 | 24 |
| AX-158308630 | 24 | 39.587 | KV453253.1 | 7887056 | 24-scf00489 | 24 |
| AX-158308632 | 24 | 39.587 | KV453253.1 | 7891808 | 24-scf00489 | 24 |
| AX-158308639 | 24 | 39.587 | KV453253.1 | 7920552 | 24-scf00489 | 24 |
| AX-158308640 | 24 | 39.587 | KV453253.1 | 7921302 | 24-scf00489 | 24 |
| AX-158308642 | 24 | 39.587 | KV453253.1 | 7923257 | 24-scf00489 | 24 |
| AX-158308643 | 24 | 39.587 | KV453253.1 | 7923527 | 24-scf00489 | 24 |
| AX-158308645 | 24 | 39.587 | KV453253.1 | 7924718 | 24-scf00489 | 24 |
| AX-158308646 | 24 | 39.587 | KV453253.1 | 7925311 | 24-scf00489 | 24 |
| AX-158308649 | 24 | 39.587 | KV453253.1 | 7930644 | 24-scf00489 | 24 |
| AX-158308650 | 24 | 39.587 | KV453253.1 | 7931032 | 24-scf00489 | 24 |
| AX-158308651 | 24 | 39.587 | KV453253.1 | 7931495 | 24-scf00489 | 24 |
| AX-158308652 | 24 | 39.587 | KV453253.1 | 7936972 | 24-scf00489 | 24 |
| AX-158308654 | 24 | 39.587 | KV453253.1 | 7937964 | 24-scf00489 | 24 |
| AX-158308655 | 24 | 39.587 | KV453253.1 | 7938502 | 24-scf00489 | 24 |
| AX-158308656 | 24 | 39.587 | KV453253.1 | 7939488 | 24-scf00489 | 24 |
| AX-158308657 | 24 | 39.587 | KV453253.1 | 7940218 | 24-scf00489 | 24 |
| AX-158308659 | 24 | 39.587 | KV453253.1 | 7943307 | 24-scf00489 | 24 |
| AX-158308661 | 24 | 39.587 | KV453253.1 | 7949289 | 24-scf00489 | 24 |
| AX-158308662 | 24 | 39.587 | KV453253.1 | 7951210 | 24-scf00489 | 24 |
| AX-158308663 | 24 | 39.587 | KV453253.1 | 7952286 | 24-scf00489 | 24 |
| AX-158308664 | 24 | 39.587 | KV453253.1 | 7953514 | 24-scf00489 | 24 |
| AX-158308665 | 24 | 39.587 | KV453253.1 | 7954675 | 24-scf00489 | 24 |
| AX-158308666 | 24 | 39.587 | KV453253.1 | 7956381 | 24-scf00489 | 24 |
| AX-158308667 | 24 | 39.587 | KV453253.1 | 7956744 | 24-scf00489 | 24 |
| AX-158308668 | 24 | 39.587 | KV453253.1 | 7958937 | 24-scf00489 | 24 |
| AX-158308670 | 24 | 39.587 | KV453253.1 | 7962076 | 24-scf00489 | 24 |
| AX-158308671 | 24 | 39.587 | KV453253.1 | 7963356 | 24-scf00489 | 24 |
| AX-158308672 | 24 | 39.587 | KV453253.1 | 7965221 | 24-scf00489 | 24 |
| AX-157847009 | 24 | 39.587 | KV453253.1 | 7968007 | 24-scf00489 | 24 |
| AX-158308673 | 24 | 39.587 | KV453253.1 | 7968157 | 24-scf00489 | 24 |
| AX-158308674 | 24 | 39.587 | KV453253.1 | 7969602 | 24-scf00489 | 24 |
| AX-157847010 | 24 | 39.587 | KV453253.1 | 7969779 | 24-scf00489 | 24 |
| AX-158308676 | 24 | 39.587 | KV453253.1 | 7974098 | 24-scf00489 | 24 |
| AX-158308677 | 24 | 39.587 | KV453253.1 | 7974567 | 24-scf00489 | 24 |
| AX-158308683 | 24 | 39.587 | KV453253.1 | 7983943 | 24-scf00489 | 24 |
| AX-158308685 | 24 | 39.587 | KV453253.1 | 7989900 | 24-scf00489 | 24 |
| AX-158308686 | 24 | 39.587 | KV453253.1 | 7993631 | 24-scf00489 | 24 |
| AX-158308688 | 24 | 39.587 | KV453253.1 | 7994795 | 24-scf00489 | 24 |
| AX-157847011 | 24 | 39.587 | KV453253.1 | 8001282 | 24-scf00489 | 24 |
| AX-158308692 | 24 | 39.587 | KV453253.1 | 8002631 | 24-scf00489 | 24 |
| AX-158308694 | 24 | 39.587 | KV453253.1 | 8007314 | 24-scf00489 | 24 |
| AX-158308695 | 24 | 39.587 | KV453253.1 | 8009125 | 24-scf00489 | 24 |
| AX-158308696 | 24 | 39.587 | KV453253.1 | 8009271 | 24-scf00489 | 24 |
| AX-158308697 | 24 | 39.587 | KV453253.1 | 8011254 | 24-scf00489 | 24 |
| AX-158308698 | 24 | 39.587 | KV453253.1 | 8014127 | 24-scf00489 | 24 |

|              |    |        |            |         |             |    |
|--------------|----|--------|------------|---------|-------------|----|
| AX-158308699 | 24 | 39.587 | KV453253.1 | 8015318 | 24-scf00489 | 24 |
| AX-158308701 | 24 | 39.587 | KV453253.1 | 8018024 | 24-scf00489 | 24 |
| AX-158308702 | 24 | 39.587 | KV453253.1 | 8019191 | 24-scf00489 | 24 |
| AX-158308704 | 24 | 39.587 | KV453253.1 | 8021868 | 24-scf00489 | 24 |
| AX-157847012 | 24 | 39.587 | KV453253.1 | 8022949 | 24-scf00489 | 24 |
| AX-158308705 | 24 | 39.587 | KV453253.1 | 8025530 | 24-scf00489 | 24 |
| AX-158308706 | 24 | 39.587 | KV453253.1 | 8030413 | 24-scf00489 | 24 |
| AX-158308707 | 24 | 39.587 | KV453253.1 | 8038232 | 24-scf00489 | 24 |
| AX-158308709 | 24 | 39.587 | KV453253.1 | 8040070 | 24-scf00489 | 24 |
| AX-158308710 | 24 | 39.587 | KV453253.1 | 8042129 | 24-scf00489 | 24 |
| AX-158308711 | 24 | 39.587 | KV453253.1 | 8042722 | 24-scf00489 | 24 |
| AX-158308713 | 24 | 39.587 | KV453253.1 | 8047349 | 24-scf00489 | 24 |
| AX-158308714 | 24 | 39.587 | KV453253.1 | 8053798 | 24-scf00489 | 24 |
| AX-158308715 | 24 | 39.587 | KV453253.1 | 8061121 | 24-scf00489 | 24 |
| AX-157847013 | 24 | 39.587 | KV453253.1 | 8063793 | 24-scf00489 | 24 |
| AX-158308716 | 24 | 39.587 | KV453253.1 | 8064483 | 24-scf00489 | 24 |
| AX-158308717 | 24 | 39.587 | KV453253.1 | 8065413 | 24-scf00489 | 24 |
| AX-158308719 | 24 | 39.587 | KV453253.1 | 8066535 | 24-scf00489 | 24 |
| AX-158308722 | 24 | 39.587 | KV453253.1 | 8069297 | 24-scf00489 | 24 |
| AX-158308726 | 24 | 39.587 | KV453253.1 | 8077786 | 24-scf00489 | 24 |
| AX-158308735 | 24 | 39.587 | KV453253.1 | 8102007 | 24-scf00489 | 24 |
| AX-158308737 | 24 | 39.587 | KV453253.1 | 8107157 | 24-scf00489 | 24 |
| AX-158308738 | 24 | 39.587 | KV453253.1 | 8110685 | 24-scf00489 | 24 |
| AX-158308739 | 24 | 39.587 | KV453253.1 | 8113437 | 24-scf00489 | 24 |
| AX-158308740 | 24 | 39.587 | KV453253.1 | 8120098 | 24-scf00489 | 24 |
| AX-158308741 | 24 | 39.587 | KV453253.1 | 8120585 | 24-scf00489 | 24 |
| AX-158308742 | 24 | 39.587 | KV453253.1 | 8123024 | 24-scf00489 | 24 |
| AX-158308743 | 24 | 39.587 | KV453253.1 | 8124597 | 24-scf00489 | 24 |
| AX-158308744 | 24 | 39.587 | KV453253.1 | 8127174 | 24-scf00489 | 24 |
| AX-158308747 | 24 | 39.587 | KV453253.1 | 8137529 | 24-scf00489 | 24 |
| AX-158308750 | 24 | 39.587 | KV453253.1 | 8141197 | 24-scf00489 | 24 |
| AX-158308751 | 24 | 39.587 | KV453253.1 | 8149949 | 24-scf00489 | 24 |
| AX-158308757 | 24 | 39.587 | KV453253.1 | 8164867 | 24-scf00489 | 24 |
| AX-158308758 | 24 | 39.587 | KV453253.1 | 8165705 | 24-scf00489 | 24 |
| AX-158308763 | 24 | 39.587 | KV453253.1 | 8173710 | 24-scf00489 | 24 |
| AX-158308764 | 24 | 39.587 | KV453253.1 | 8174083 | 24-scf00489 | 24 |
| AX-158308766 | 24 | 39.587 | KV453253.1 | 8176434 | 24-scf00489 | 24 |
| AX-158308776 | 24 | 39.587 | KV453253.1 | 8191514 | 24-scf00489 | 24 |
| AX-158308778 | 24 | 39.587 | KV453253.1 | 8201286 | 24-scf00489 | 24 |
| AX-158308781 | 24 | 39.587 | KV453253.1 | 8204507 | 24-scf00489 | 24 |
| AX-158308787 | 24 | 39.587 | KV453253.1 | 8209601 | 24-scf00489 | 24 |
| AX-158308788 | 24 | 39.587 | KV453253.1 | 8210264 | 24-scf00489 | 24 |
| AX-158308791 | 24 | 39.587 | KV453253.1 | 8213957 | 24-scf00489 | 24 |
| AX-158308792 | 24 | 39.587 | KV453253.1 | 8214511 | 24-scf00489 | 24 |
| AX-158308793 | 24 | 39.587 | KV453253.1 | 8216875 | 24-scf00489 | 24 |
| AX-157754433 | 24 | 39.587 | KV453253.1 | 8221603 | 24-scf00489 | 24 |
| AX-158308803 | 24 | 39.587 | KV453253.1 | 8230680 | 24-scf00489 | 24 |
| AX-158308806 | 24 | 39.587 | KV453253.1 | 8233249 | 24-scf00489 | 24 |
| AX-158308826 | 24 | 39.587 | KV453253.1 | 8256397 | 24-scf00489 | 24 |
| AX-158308839 | 24 | 39.587 | KV453253.1 | 8271085 | 24-scf00489 | 24 |
| AX-158308848 | 24 | 39.587 | KV453253.1 | 8282538 | 24-scf00489 | 24 |

|              |    |        |            |         |             |    |
|--------------|----|--------|------------|---------|-------------|----|
| AX-157847014 | 24 | 39.587 | KV453253.1 | 8293947 | 24-scf00489 | 24 |
| AX-158308856 | 24 | 39.587 | KV453253.1 | 8295867 | 24-scf00489 | 24 |
| AX-158308860 | 24 | 39.587 | KV453253.1 | 8307219 | 24-scf00489 | 24 |
| AX-157752247 | 24 | 39.587 | KV453253.1 | 8314946 | 24-scf00489 | 24 |
| AX-158308876 | 24 | 39.587 | KV453253.1 | 8322216 | 24-scf00489 | 24 |
| AX-158308903 | 24 | 39.587 | KV453253.1 | 8369847 | 24-scf00489 | 24 |
| AX-158308905 | 24 | 39.587 | KV453253.1 | 8371836 | 24-scf00489 | 24 |
| AX-158308914 | 24 | 39.587 | KV453253.1 | 8385287 | 24-scf00489 | 24 |
| AX-157847023 | 24 | 39.587 | KV453253.1 | 8409330 | 24-scf00489 | 24 |
| AX-158308938 | 24 | 39.587 | KV453253.1 | 8423332 | 24-scf00489 | 24 |
| AX-157847041 | 24 | 39.587 | KV453253.1 | 8468530 | 24-scf00489 | 24 |
| AX-158308970 | 24 | 39.587 | KV453253.1 | 8470497 | 24-scf00489 | 24 |
| AX-158308971 | 24 | 39.587 | KV453253.1 | 8470880 | 24-scf00489 | 24 |
| AX-157847044 | 24 | 39.587 | KV453253.1 | 8501580 | 24-scf00489 | 24 |
| AX-158309000 | 24 | 39.587 | KV453253.1 | 8502594 | 24-scf00489 | 24 |
| AX-157847045 | 24 | 39.587 | KV453253.1 | 8504428 | 24-scf00489 | 24 |
| AX-158309001 | 24 | 39.587 | KV453253.1 | 8505455 | 24-scf00489 | 24 |
| AX-158309003 | 24 | 39.587 | KV453253.1 | 8506359 | 24-scf00489 | 24 |
| AX-157847046 | 24 | 39.587 | KV453253.1 | 8509693 | 24-scf00489 | 24 |
| AX-157847047 | 24 | 39.587 | KV453253.1 | 8538579 | 24-scf00489 | 24 |
| AX-158309033 | 24 | 39.587 | KV453253.1 | 8538636 | 24-scf00489 | 24 |
| AX-157847050 | 24 | 39.587 | KV453253.1 | 8561905 | 24-scf00489 | 24 |
| AX-158309052 | 24 | 39.587 | KV453253.1 | 8562700 | 24-scf00489 | 24 |
| AX-158309053 | 24 | 39.587 | KV453253.1 | 8563306 | 24-scf00489 | 24 |
| AX-158309058 | 24 | 39.587 | KV453253.1 | 8566829 | 24-scf00489 | 24 |
| AX-158309068 | 24 | 39.587 | KV453253.1 | 8576007 | 24-scf00489 | 24 |
| AX-157707639 | 24 | 39.587 | KV453253.1 | 8577583 | 24-scf00489 | 24 |
| AX-157707638 | 24 | 39.587 | KV453253.1 | 8577638 | 24-scf00489 | 24 |
| AX-158309078 | 24 | 39.587 | KV453253.1 | 8588085 | 24-scf00489 | 24 |
| AX-158309079 | 24 | 39.587 | KV453253.1 | 8589009 | 24-scf00489 | 24 |
| AX-158309081 | 24 | 39.587 | KV453253.1 | 8590034 | 24-scf00489 | 24 |
| AX-158309093 | 24 | 39.587 | KV453253.1 | 8608402 | 24-scf00489 | 24 |
| AX-158309094 | 24 | 39.587 | KV453253.1 | 8608898 | 24-scf00489 | 24 |
| AX-158309099 | 24 | 39.587 | KV453253.1 | 8622179 | 24-scf00489 | 24 |
| AX-158309111 | 24 | 39.587 | KV453253.1 | 8637381 | 24-scf00489 | 24 |
| AX-158309117 | 24 | 39.587 | KV453253.1 | 8653870 | 24-scf00489 | 24 |
| AX-158309124 | 24 | 39.587 | KV453253.1 | 8666544 | 24-scf00489 | 24 |
| AX-157847057 | 24 | 39.587 | KV453253.1 | 8673591 | 24-scf00489 | 24 |
| AX-158309133 | 24 | 39.587 | KV453253.1 | 8685062 | 24-scf00489 | 24 |
| AX-158309141 | 24 | 39.587 | KV453253.1 | 8698387 | 24-scf00489 | 24 |
| AX-158309196 | 24 | 39.587 | KV453253.1 | 8788983 | 24-scf00489 | 24 |
| AX-158309215 | 24 | 39.587 | KV453253.1 | 8806204 | 24-scf00489 | 24 |
| AX-157847071 | 24 | 39.587 | KV453253.1 | 8840544 | 24-scf00489 | 24 |
| AX-157758200 | 24 | 39.587 | KV453253.1 | 8869803 | 24-scf00489 | 24 |
| AX-157711430 | 24 | 39.587 | KV453253.1 | 8875474 | 24-scf00489 | 24 |
| AX-158309294 | 24 | 39.587 | KV453253.1 | 8894119 | 24-scf00489 | 24 |
| AX-158309296 | 24 | 39.587 | KV453253.1 | 8902728 | 24-scf00489 | 24 |
| AX-158309297 | 24 | 39.587 | KV453253.1 | 8903175 | 24-scf00489 | 24 |
| AX-158309304 | 24 | 39.587 | KV453253.1 | 8907639 | 24-scf00489 | 24 |
| AX-158309333 | 24 | 39.587 | KV453253.1 | 8941899 | 24-scf00489 | 24 |
| AX-158309342 | 24 | 39.587 | KV453253.1 | 8955564 | 24-scf00489 | 24 |

|              |    |        |            |          |             |    |
|--------------|----|--------|------------|----------|-------------|----|
| AX-158309345 | 24 | 39.587 | KV453253.1 | 8960572  | 24-scf00489 | 24 |
| AX-158309355 | 24 | 39.587 | KV453253.1 | 8983438  | 24-scf00489 | 24 |
| AX-158309356 | 24 | 39.587 | KV453253.1 | 8985891  | 24-scf00489 | 24 |
| AX-158309379 | 24 | 39.587 | KV453253.1 | 9019095  | 24-scf00489 | 24 |
| AX-158309380 | 24 | 39.587 | KV453253.1 | 9019541  | 24-scf00489 | 24 |
| AX-158309382 | 24 | 39.587 | KV453253.1 | 9020849  | 24-scf00489 | 24 |
| AX-158309385 | 24 | 39.587 | KV453253.1 | 9024089  | 24-scf00489 | 24 |
| AX-158309386 | 24 | 39.587 | KV453253.1 | 9024728  | 24-scf00489 | 24 |
| AX-158309392 | 24 | 39.587 | KV453253.1 | 9030957  | 24-scf00489 | 24 |
| AX-157754917 | 24 | 39.587 | KV453253.1 | 9065141  | 24-scf00489 | 24 |
| AX-158309413 | 24 | 39.587 | KV453253.1 | 9074050  | 24-scf00489 | 24 |
| AX-158309420 | 24 | 39.587 | KV453253.1 | 9084773  | 24-scf00489 | 24 |
| AX-158309421 | 24 | 39.587 | KV453253.1 | 9087708  | 24-scf00489 | 24 |
| AX-158309430 | 24 | 39.587 | KV453253.1 | 9099925  | 24-scf00489 | 24 |
| AX-158309432 | 24 | 39.587 | KV453253.1 | 9104285  | 24-scf00489 | 24 |
| AX-158309433 | 24 | 39.587 | KV453253.1 | 9104832  | 24-scf00489 | 24 |
| AX-157847083 | 24 | 39.587 | KV453253.1 | 9107961  | 24-scf00489 | 24 |
| AX-158309444 | 24 | 39.587 | KV453253.1 | 9120684  | 24-scf00489 | 24 |
| AX-158309449 | 24 | 39.587 | KV453253.1 | 9131411  | 24-scf00489 | 24 |
| AX-158309450 | 24 | 39.587 | KV453253.1 | 9131949  | 24-scf00489 | 24 |
| AX-157847086 | 24 | 39.587 | KV453253.1 | 9137091  | 24-scf00489 | 24 |
| AX-157847088 | 24 | 39.587 | KV453253.1 | 9155157  | 24-scf00489 | 24 |
| AX-157847089 | 24 | 39.587 | KV453253.1 | 9156633  | 24-scf00489 | 24 |
| AX-158309480 | 24 | 39.587 | KV453253.1 | 9177967  | 24-scf00489 | 24 |
| AX-158309483 | 24 | 39.587 | KV453253.1 | 9185554  | 24-scf00489 | 24 |
| AX-158309492 | 24 | 39.587 | KV453253.1 | 9203949  | 24-scf00489 | 24 |
| AX-158309508 | 24 | 39.587 | KV453253.1 | 9230914  | 24-scf00489 | 24 |
| AX-157847099 | 24 | 39.587 | KV453253.1 | 9238032  | 24-scf00489 | 24 |
| AX-157860970 | 24 | 39.587 | KV453253.1 | 9249914  | 24-scf00489 | 24 |
| AX-158309522 | 24 | 39.587 | KV453253.1 | 9253349  | 24-scf00489 | 24 |
| AX-157847103 | 24 | 39.587 | KV453253.1 | 9256581  | 24-scf00489 | 24 |
| AX-158309527 | 24 | 39.587 | KV453253.1 | 9262109  | 24-scf00489 | 24 |
| AX-158309571 | 24 | 39.587 | KV453253.1 | 9326587  | 24-scf00489 | 24 |
| AX-158309602 | 24 | 39.587 | KV453253.1 | 9385043  | 24-scf00489 | 24 |
| AX-157847114 | 24 | 39.587 | KV453253.1 | 9421428  | 24-scf00489 | 24 |
| AX-158309629 | 24 | 39.587 | KV453253.1 | 9466067  | 24-scf00489 | 24 |
| AX-158309654 | 24 | 39.587 | KV453253.1 | 9516989  | 24-scf00489 | 24 |
| AX-158309702 | 24 | 39.587 | KV453253.1 | 9567080  | 24-scf00489 | 24 |
| AX-158309720 | 24 | 39.587 | KV453253.1 | 9589801  | 24-scf00489 | 24 |
| AX-158309734 | 24 | 39.587 | KV453253.1 | 9606342  | 24-scf00489 | 24 |
| AX-158309841 | 24 | 39.587 | KV453253.1 | 9836098  | 24-scf00489 | 24 |
| AX-158309856 | 24 | 39.587 | KV453253.1 | 9864735  | 24-scf00489 | 24 |
| AX-158309928 | 24 | 39.587 | KV453253.1 | 10007818 | 24-scf00489 | 24 |
| AX-158309982 | 24 | 39.587 | KV453253.1 | 10141905 | 24-scf00489 | 24 |
| AX-158310015 | 24 | 39.587 | KV453253.1 | 10216861 | 24-scf00489 | 24 |
| AX-158310037 | 24 | 39.587 | KV453253.1 | 10257078 | 24-scf00489 | 24 |
| AX-158310090 | 24 | 39.587 | KV453253.1 | 10347048 | 24-scf00489 | 24 |
| AX-157847168 | 24 | 39.587 | KV453253.1 | 10362951 | 24-scf00489 | 24 |
| AX-157721659 | 24 | 39.587 | KV453253.1 | 11021371 | 24-scf00489 | 24 |
| AX-158310538 | 24 | 39.587 | KV453253.1 | 11320087 | 24-scf00489 | 24 |
| AX-158310566 | 24 | 39.587 | KV453253.1 | 11392036 | 24-scf00489 | 24 |

|              |    |        |            |          |                |    |
|--------------|----|--------|------------|----------|----------------|----|
| AX-157716722 | 24 | 39.587 | KV453253.1 | 11596033 | 24-scf00489    | 24 |
| AX-158310727 | 24 | 39.587 | KV453253.1 | 11617480 | 24-scf00489    | 24 |
| AX-158311213 | 24 | 39.587 | KV453253.1 | 12321633 | 24-scf00489    | 24 |
| AX-158311214 | 24 | 39.587 | KV453253.1 | 12322334 | 24-scf00489    | 24 |
| AX-157696689 | 24 | 39.587 | FI874368.1 | 220      | IORI212 Ictalu | UN |
| AX-158309080 | 24 | 39.628 | KV453253.1 | 8589654  | 24-scf00489    | 24 |
| AX-158308486 | 24 | 39.696 | KV453253.1 | 7083291  | 24-scf00489    | 24 |
| AX-158308497 | 24 | 39.696 | KV453253.1 | 7104999  | 24-scf00489    | 24 |
| AX-157846998 | 24 | 39.696 | KV453253.1 | 7117918  | 24-scf00489    | 24 |
| AX-158308508 | 24 | 39.696 | KV453253.1 | 7132293  | 24-scf00489    | 24 |
| AX-157710527 | 24 | 39.696 | KV453253.1 | 7944308  | 24-scf00489    | 24 |
| AX-158308851 | 24 | 39.696 | KV453253.1 | 8287300  | 24-scf00489    | 24 |
| AX-158309016 | 24 | 39.696 | KV453253.1 | 8522521  | 24-scf00489    | 24 |
| AX-158309026 | 24 | 39.696 | KV453253.1 | 8531617  | 24-scf00489    | 24 |
| AX-158309045 | 24 | 39.696 | KV453253.1 | 8556822  | 24-scf00489    | 24 |
| AX-158309102 | 24 | 39.696 | KV453253.1 | 8628486  | 24-scf00489    | 24 |
| AX-158309104 | 24 | 39.696 | KV453253.1 | 8629722  | 24-scf00489    | 24 |
| AX-158309109 | 24 | 39.696 | KV453253.1 | 8632839  | 24-scf00489    | 24 |
| AX-158309198 | 24 | 39.696 | KV453253.1 | 8792732  | 24-scf00489    | 24 |
| AX-157748918 | 24 | 39.696 | KV453253.1 | 8838715  | 24-scf00489    | 24 |
| AX-158309292 | 24 | 39.696 | KV453253.1 | 8891212  | 24-scf00489    | 24 |
| AX-158309300 | 24 | 39.696 | KV453253.1 | 8904529  | 24-scf00489    | 24 |
| AX-158309414 | 24 | 39.696 | KV453253.1 | 9075269  | 24-scf00489    | 24 |
| AX-157709099 | 24 | 39.696 | KV453253.1 | 9114834  | 24-scf00489    | 24 |
| AX-158308432 | 24 | 39.806 | KV453253.1 | 7014722  | 24-scf00489    | 24 |
| AX-158308489 | 24 | 39.806 | KV453253.1 | 7090996  | 24-scf00489    | 24 |
| AX-158308562 | 24 | 39.806 | KV453253.1 | 7493360  | 24-scf00489    | 24 |
| AX-158308682 | 24 | 39.806 | KV453253.1 | 7982442  | 24-scf00489    | 24 |
| AX-158308900 | 24 | 39.806 | KV453253.1 | 8366551  | 24-scf00489    | 24 |
| AX-158309010 | 24 | 39.806 | KV453253.1 | 8515689  | 24-scf00489    | 24 |
| AX-158309036 | 24 | 39.806 | KV453253.1 | 8542031  | 24-scf00489    | 24 |
| AX-157847051 | 24 | 39.806 | KV453253.1 | 8566207  | 24-scf00489    | 24 |
| AX-157847056 | 24 | 39.806 | KV453253.1 | 8639569  | 24-scf00489    | 24 |
| AX-157716755 | 24 | 39.806 | KV453253.1 | 8648005  | 24-scf00489    | 24 |
| AX-157747026 | 24 | 39.806 | KV453253.1 | 8652165  | 24-scf00489    | 24 |
| AX-158309121 | 24 | 39.806 | KV453253.1 | 8661413  | 24-scf00489    | 24 |
| AX-158309126 | 24 | 39.806 | KV453253.1 | 8668991  | 24-scf00489    | 24 |
| AX-158309142 | 24 | 39.806 | KV453253.1 | 8699033  | 24-scf00489    | 24 |
| AX-157714970 | 24 | 39.806 | KV453253.1 | 8701718  | 24-scf00489    | 24 |
| AX-158309145 | 24 | 39.806 | KV453253.1 | 8702095  | 24-scf00489    | 24 |
| AX-158309148 | 24 | 39.806 | KV453253.1 | 8707193  | 24-scf00489    | 24 |
| AX-158309151 | 24 | 39.806 | KV453253.1 | 8711094  | 24-scf00489    | 24 |
| AX-158417900 | 24 | 39.806 | KV453253.1 | 8711617  | 24-scf00489    | 24 |
| AX-157847063 | 24 | 39.806 | KV453253.1 | 8727496  | 24-scf00489    | 24 |
| AX-157847064 | 24 | 39.806 | KV453253.1 | 8727772  | 24-scf00489    | 24 |
| AX-158381367 | 24 | 39.806 | KV453253.1 | 8728590  | 24-scf00489    | 24 |
| AX-157746334 | 24 | 39.806 | KV453253.1 | 8729693  | 24-scf00489    | 24 |
| AX-157860963 | 24 | 39.806 | KV453253.1 | 8732395  | 24-scf00489    | 24 |
| AX-157847067 | 24 | 39.806 | KV453253.1 | 8739085  | 24-scf00489    | 24 |
| AX-158309163 | 24 | 39.806 | KV453253.1 | 8740105  | 24-scf00489    | 24 |
| AX-158309167 | 24 | 39.806 | KV453253.1 | 8743808  | 24-scf00489    | 24 |

|              |    |        |            |          |             |    |
|--------------|----|--------|------------|----------|-------------|----|
| AX-158309168 | 24 | 39.806 | KV453253.1 | 8744779  | 24-scf00489 | 24 |
| AX-158309170 | 24 | 39.806 | KV453253.1 | 8745755  | 24-scf00489 | 24 |
| AX-158309174 | 24 | 39.806 | KV453253.1 | 8748570  | 24-scf00489 | 24 |
| AX-158309176 | 24 | 39.806 | KV453253.1 | 8751750  | 24-scf00489 | 24 |
| AX-157757735 | 24 | 39.806 | KV453253.1 | 8756940  | 24-scf00489 | 24 |
| AX-158309181 | 24 | 39.806 | KV453253.1 | 8762184  | 24-scf00489 | 24 |
| AX-158309184 | 24 | 39.806 | KV453253.1 | 8768193  | 24-scf00489 | 24 |
| AX-158309189 | 24 | 39.806 | KV453253.1 | 8781729  | 24-scf00489 | 24 |
| AX-158309228 | 24 | 39.806 | KV453253.1 | 8819229  | 24-scf00489 | 24 |
| AX-158309229 | 24 | 39.806 | KV453253.1 | 8823886  | 24-scf00489 | 24 |
| AX-158309244 | 24 | 39.806 | KV453253.1 | 8836490  | 24-scf00489 | 24 |
| AX-158309247 | 24 | 39.806 | KV453253.1 | 8841565  | 24-scf00489 | 24 |
| AX-158309250 | 24 | 39.806 | KV453253.1 | 8844006  | 24-scf00489 | 24 |
| AX-158309253 | 24 | 39.806 | KV453253.1 | 8845288  | 24-scf00489 | 24 |
| AX-157847072 | 24 | 39.806 | KV453253.1 | 8850649  | 24-scf00489 | 24 |
| AX-158309272 | 24 | 39.806 | KV453253.1 | 8874460  | 24-scf00489 | 24 |
| AX-158309280 | 24 | 39.806 | KV453253.1 | 8880658  | 24-scf00489 | 24 |
| AX-158309283 | 24 | 39.806 | KV453253.1 | 8882347  | 24-scf00489 | 24 |
| AX-157757211 | 24 | 39.806 | KV453253.1 | 8885941  | 24-scf00489 | 24 |
| AX-158309289 | 24 | 39.806 | KV453253.1 | 8888605  | 24-scf00489 | 24 |
| AX-158309329 | 24 | 39.806 | KV453253.1 | 8938947  | 24-scf00489 | 24 |
| AX-158309339 | 24 | 39.806 | KV453253.1 | 8950639  | 24-scf00489 | 24 |
| AX-158309377 | 24 | 39.806 | KV453253.1 | 9017983  | 24-scf00489 | 24 |
| AX-157773505 | 24 | 39.806 | KV453253.1 | 9140303  | 24-scf00489 | 24 |
| AX-158309960 | 24 | 39.806 | KV453253.1 | 10095420 | 24-scf00489 | 24 |
| AX-158310036 | 24 | 39.806 | KV453253.1 | 10256408 | 24-scf00489 | 24 |
| AX-158310067 | 24 | 39.806 | KV453253.1 | 10295266 | 24-scf00489 | 24 |
| AX-157709098 | 24 | 40.133 | KV453253.1 | 9115010  | 24-scf00489 | 24 |
| AX-158309607 | 24 | 40.133 | KV453253.1 | 9412370  | 24-scf00489 | 24 |
| AX-158309643 | 24 | 40.133 | KV453253.1 | 9496636  | 24-scf00489 | 24 |
| AX-158309652 | 24 | 40.133 | KV453253.1 | 9512146  | 24-scf00489 | 24 |
| AX-158309666 | 24 | 40.133 | KV453253.1 | 9532655  | 24-scf00489 | 24 |
| AX-158309669 | 24 | 40.133 | KV453253.1 | 9534307  | 24-scf00489 | 24 |
| AX-158309670 | 24 | 40.133 | KV453253.1 | 9534756  | 24-scf00489 | 24 |
| AX-158309673 | 24 | 40.133 | KV453253.1 | 9537581  | 24-scf00489 | 24 |
| AX-158309697 | 24 | 40.133 | KV453253.1 | 9563445  | 24-scf00489 | 24 |
| AX-158309698 | 24 | 40.133 | KV453253.1 | 9563913  | 24-scf00489 | 24 |
| AX-158309700 | 24 | 40.133 | KV453253.1 | 9565136  | 24-scf00489 | 24 |
| AX-158309709 | 24 | 40.133 | KV453253.1 | 9576532  | 24-scf00489 | 24 |
| AX-158309711 | 24 | 40.133 | KV453253.1 | 9577453  | 24-scf00489 | 24 |
| AX-158309713 | 24 | 40.133 | KV453253.1 | 9578363  | 24-scf00489 | 24 |
| AX-157847121 | 24 | 40.133 | KV453253.1 | 9579901  | 24-scf00489 | 24 |
| AX-158309722 | 24 | 40.133 | KV453253.1 | 9592495  | 24-scf00489 | 24 |
| AX-157847123 | 24 | 40.133 | KV453253.1 | 9593952  | 24-scf00489 | 24 |
| AX-158309727 | 24 | 40.133 | KV453253.1 | 9597117  | 24-scf00489 | 24 |
| AX-158309728 | 24 | 40.133 | KV453253.1 | 9597814  | 24-scf00489 | 24 |
| AX-157860995 | 24 | 40.133 | KV453253.1 | 9598418  | 24-scf00489 | 24 |
| AX-157748878 | 24 | 40.133 | KV453253.1 | 9602631  | 24-scf00489 | 24 |
| AX-158387722 | 24 | 40.133 | KV453253.1 | 9607203  | 24-scf00489 | 24 |
| AX-158309735 | 24 | 40.133 | KV453253.1 | 9608274  | 24-scf00489 | 24 |
| AX-158309736 | 24 | 40.133 | KV453253.1 | 9608616  | 24-scf00489 | 24 |

|              |    |        |            |          |             |    |
|--------------|----|--------|------------|----------|-------------|----|
| AX-157847140 | 24 | 40.133 | KV453253.1 | 9919262  | 24-scf00489 | 24 |
| AX-158309900 | 24 | 40.133 | KV453253.1 | 9946250  | 24-scf00489 | 24 |
| AX-158309933 | 24 | 40.133 | KV453253.1 | 10023578 | 24-scf00489 | 24 |
| AX-158309958 | 24 | 40.133 | KV453253.1 | 10086105 | 24-scf00489 | 24 |
| AX-157861041 | 24 | 40.133 | KV453253.1 | 10105477 | 24-scf00489 | 24 |
| AX-158309965 | 24 | 40.133 | KV453253.1 | 10105841 | 24-scf00489 | 24 |
| AX-157861042 | 24 | 40.133 | KV453253.1 | 10107571 | 24-scf00489 | 24 |
| AX-157861043 | 24 | 40.133 | KV453253.1 | 10109092 | 24-scf00489 | 24 |
| AX-158309970 | 24 | 40.133 | KV453253.1 | 10113543 | 24-scf00489 | 24 |
| AX-157847146 | 24 | 40.133 | KV453253.1 | 10121437 | 24-scf00489 | 24 |
| AX-157847147 | 24 | 40.133 | KV453253.1 | 10122740 | 24-scf00489 | 24 |
| AX-157861046 | 24 | 40.133 | KV453253.1 | 10124037 | 24-scf00489 | 24 |
| AX-158412285 | 24 | 40.133 | KV453253.1 | 10129016 | 24-scf00489 | 24 |
| AX-157847148 | 24 | 40.133 | KV453253.1 | 10129472 | 24-scf00489 | 24 |
| AX-158309976 | 24 | 40.133 | KV453253.1 | 10129508 | 24-scf00489 | 24 |
| AX-158310075 | 24 | 40.133 | KV453253.1 | 10324343 | 24-scf00489 | 24 |
| AX-158309738 | 24 | 40.203 | KV453253.1 | 9610445  | 24-scf00489 | 24 |
| AX-158309028 | 24 | 40.273 | KV453253.1 | 8533885  | 24-scf00489 | 24 |
| AX-158309739 | 24 | 40.273 | KV453253.1 | 9610889  | 24-scf00489 | 24 |
| AX-158306991 | 24 | 40.352 | KV453253.1 | 5078208  | 24-scf00489 | 24 |
| AX-158307424 | 24 | 40.352 | KV453253.1 | 5623668  | 24-scf00489 | 24 |
| AX-158308014 | 24 | 40.352 | KV453253.1 | 6407994  | 24-scf00489 | 24 |
| AX-158308018 | 24 | 40.352 | KV453253.1 | 6411547  | 24-scf00489 | 24 |
| AX-158308037 | 24 | 40.352 | KV453253.1 | 6438156  | 24-scf00489 | 24 |
| AX-158308041 | 24 | 40.352 | KV453253.1 | 6444268  | 24-scf00489 | 24 |
| AX-158308043 | 24 | 40.352 | KV453253.1 | 6445253  | 24-scf00489 | 24 |
| AX-157846944 | 24 | 40.352 | KV453253.1 | 6459107  | 24-scf00489 | 24 |
| AX-158308147 | 24 | 40.352 | KV453253.1 | 6583700  | 24-scf00489 | 24 |
| AX-158308159 | 24 | 40.352 | KV453253.1 | 6598837  | 24-scf00489 | 24 |
| AX-158308161 | 24 | 40.352 | KV453253.1 | 6602110  | 24-scf00489 | 24 |
| AX-158308169 | 24 | 40.352 | KV453253.1 | 6609265  | 24-scf00489 | 24 |
| AX-157771914 | 24 | 40.352 | KV453253.1 | 6625156  | 24-scf00489 | 24 |
| AX-158308187 | 24 | 40.352 | KV453253.1 | 6638565  | 24-scf00489 | 24 |
| AX-158308194 | 24 | 40.352 | KV453253.1 | 6650274  | 24-scf00489 | 24 |
| AX-157846964 | 24 | 40.352 | KV453253.1 | 6691581  | 24-scf00489 | 24 |
| AX-158308233 | 24 | 40.352 | KV453253.1 | 6703542  | 24-scf00489 | 24 |
| AX-158308234 | 24 | 40.352 | KV453253.1 | 6704116  | 24-scf00489 | 24 |
| AX-158308317 | 24 | 40.352 | KV453253.1 | 6786068  | 24-scf00489 | 24 |
| AX-158308382 | 24 | 40.352 | KV453253.1 | 6920642  | 24-scf00489 | 24 |
| AX-157757934 | 24 | 40.352 | KV453253.1 | 6932173  | 24-scf00489 | 24 |
| AX-158308410 | 24 | 40.352 | KV453253.1 | 6964746  | 24-scf00489 | 24 |
| AX-158308411 | 24 | 40.352 | KV453253.1 | 6967636  | 24-scf00489 | 24 |
| AX-158308431 | 24 | 40.352 | KV453253.1 | 7013834  | 24-scf00489 | 24 |
| AX-158308505 | 24 | 40.352 | KV453253.1 | 7118151  | 24-scf00489 | 24 |
| AX-158308511 | 24 | 40.352 | KV453253.1 | 7150891  | 24-scf00489 | 24 |
| AX-158308517 | 24 | 40.352 | KV453253.1 | 7166126  | 24-scf00489 | 24 |
| AX-158308529 | 24 | 40.352 | KV453253.1 | 7200846  | 24-scf00489 | 24 |
| AX-158308538 | 24 | 40.352 | KV453253.1 | 7299257  | 24-scf00489 | 24 |
| AX-158308675 | 24 | 40.352 | KV453253.1 | 7970790  | 24-scf00489 | 24 |
| AX-158308731 | 24 | 40.352 | KV453253.1 | 8086805  | 24-scf00489 | 24 |
| AX-158308752 | 24 | 40.352 | KV453253.1 | 8151723  | 24-scf00489 | 24 |

|              |    |        |            |         |             |    |
|--------------|----|--------|------------|---------|-------------|----|
| AX-157770800 | 24 | 40.352 | KV453253.1 | 8157935 | 24-scf00489 | 24 |
| AX-158308768 | 24 | 40.352 | KV453253.1 | 8178024 | 24-scf00489 | 24 |
| AX-158308769 | 24 | 40.352 | KV453253.1 | 8178724 | 24-scf00489 | 24 |
| AX-157757540 | 24 | 40.352 | KV453253.1 | 8183320 | 24-scf00489 | 24 |
| AX-158308808 | 24 | 40.352 | KV453253.1 | 8234547 | 24-scf00489 | 24 |
| AX-158308821 | 24 | 40.352 | KV453253.1 | 8245573 | 24-scf00489 | 24 |
| AX-158308824 | 24 | 40.352 | KV453253.1 | 8250531 | 24-scf00489 | 24 |
| AX-157744952 | 24 | 40.352 | KV453253.1 | 8270357 | 24-scf00489 | 24 |
| AX-158308850 | 24 | 40.352 | KV453253.1 | 8286178 | 24-scf00489 | 24 |
| AX-158308910 | 24 | 40.352 | KV453253.1 | 8377826 | 24-scf00489 | 24 |
| AX-158308917 | 24 | 40.352 | KV453253.1 | 8390879 | 24-scf00489 | 24 |
| AX-158308919 | 24 | 40.352 | KV453253.1 | 8396603 | 24-scf00489 | 24 |
| AX-158308981 | 24 | 40.352 | KV453253.1 | 8485399 | 24-scf00489 | 24 |
| AX-158308986 | 24 | 40.352 | KV453253.1 | 8489733 | 24-scf00489 | 24 |
| AX-158309004 | 24 | 40.352 | KV453253.1 | 8506973 | 24-scf00489 | 24 |
| AX-158309006 | 24 | 40.352 | KV453253.1 | 8509371 | 24-scf00489 | 24 |
| AX-158309014 | 24 | 40.352 | KV453253.1 | 8520583 | 24-scf00489 | 24 |
| AX-158309027 | 24 | 40.352 | KV453253.1 | 8532192 | 24-scf00489 | 24 |
| AX-158309037 | 24 | 40.352 | KV453253.1 | 8544334 | 24-scf00489 | 24 |
| AX-157847048 | 24 | 40.352 | KV453253.1 | 8546820 | 24-scf00489 | 24 |
| AX-158309050 | 24 | 40.352 | KV453253.1 | 8561830 | 24-scf00489 | 24 |
| AX-158309055 | 24 | 40.352 | KV453253.1 | 8564218 | 24-scf00489 | 24 |
| AX-158309061 | 24 | 40.352 | KV453253.1 | 8568337 | 24-scf00489 | 24 |
| AX-157847052 | 24 | 40.352 | KV453253.1 | 8571352 | 24-scf00489 | 24 |
| AX-158309066 | 24 | 40.352 | KV453253.1 | 8574346 | 24-scf00489 | 24 |
| AX-158309069 | 24 | 40.352 | KV453253.1 | 8577053 | 24-scf00489 | 24 |
| AX-158309070 | 24 | 40.352 | KV453253.1 | 8578485 | 24-scf00489 | 24 |
| AX-158309071 | 24 | 40.352 | KV453253.1 | 8580469 | 24-scf00489 | 24 |
| AX-158309076 | 24 | 40.352 | KV453253.1 | 8584803 | 24-scf00489 | 24 |
| AX-158309090 | 24 | 40.352 | KV453253.1 | 8605887 | 24-scf00489 | 24 |
| AX-158309105 | 24 | 40.352 | KV453253.1 | 8631029 | 24-scf00489 | 24 |
| AX-158309106 | 24 | 40.352 | KV453253.1 | 8631470 | 24-scf00489 | 24 |
| AX-158309114 | 24 | 40.352 | KV453253.1 | 8642806 | 24-scf00489 | 24 |
| AX-157881117 | 24 | 40.352 | KV453253.1 | 8657079 | 24-scf00489 | 24 |
| AX-158309120 | 24 | 40.352 | KV453253.1 | 8659689 | 24-scf00489 | 24 |
| AX-157860962 | 24 | 40.352 | KV453253.1 | 8667078 | 24-scf00489 | 24 |
| AX-158309139 | 24 | 40.352 | KV453253.1 | 8696203 | 24-scf00489 | 24 |
| AX-158309146 | 24 | 40.352 | KV453253.1 | 8702920 | 24-scf00489 | 24 |
| AX-158309150 | 24 | 40.352 | KV453253.1 | 8709218 | 24-scf00489 | 24 |
| AX-158309156 | 24 | 40.352 | KV453253.1 | 8722954 | 24-scf00489 | 24 |
| AX-157847065 | 24 | 40.352 | KV453253.1 | 8728499 | 24-scf00489 | 24 |
| AX-158309158 | 24 | 40.352 | KV453253.1 | 8730309 | 24-scf00489 | 24 |
| AX-158309165 | 24 | 40.352 | KV453253.1 | 8742392 | 24-scf00489 | 24 |
| AX-158309172 | 24 | 40.352 | KV453253.1 | 8746673 | 24-scf00489 | 24 |
| AX-158417901 | 24 | 40.352 | KV453253.1 | 8752994 | 24-scf00489 | 24 |
| AX-158309187 | 24 | 40.352 | KV453253.1 | 8777400 | 24-scf00489 | 24 |
| AX-158309188 | 24 | 40.352 | KV453253.1 | 8779661 | 24-scf00489 | 24 |
| AX-158309190 | 24 | 40.352 | KV453253.1 | 8782359 | 24-scf00489 | 24 |
| AX-157847069 | 24 | 40.352 | KV453253.1 | 8784165 | 24-scf00489 | 24 |
| AX-158309194 | 24 | 40.352 | KV453253.1 | 8786602 | 24-scf00489 | 24 |
| AX-158309195 | 24 | 40.352 | KV453253.1 | 8787481 | 24-scf00489 | 24 |



|              |    |        |            |         |             |    |
|--------------|----|--------|------------|---------|-------------|----|
| AX-158309216 | 24 | 40.352 | KV453253.1 | 8809338 | 24-scf00489 | 24 |
| AX-158309218 | 24 | 40.352 | KV453253.1 | 8810551 | 24-scf00489 | 24 |
| AX-158309226 | 24 | 40.352 | KV453253.1 | 8817308 | 24-scf00489 | 24 |
| AX-158309232 | 24 | 40.352 | KV453253.1 | 8825748 | 24-scf00489 | 24 |
| AX-158309237 | 24 | 40.352 | KV453253.1 | 8829231 | 24-scf00489 | 24 |
| AX-158309251 | 24 | 40.352 | KV453253.1 | 8844536 | 24-scf00489 | 24 |
| AX-158309259 | 24 | 40.352 | KV453253.1 | 8857196 | 24-scf00489 | 24 |
| AX-157847074 | 24 | 40.352 | KV453253.1 | 8857397 | 24-scf00489 | 24 |
| AX-158309260 | 24 | 40.352 | KV453253.1 | 8858031 | 24-scf00489 | 24 |
| AX-157847078 | 24 | 40.352 | KV453253.1 | 8887733 | 24-scf00489 | 24 |
| AX-158381368 | 24 | 40.352 | KV453253.1 | 8894678 | 24-scf00489 | 24 |
| AX-158309310 | 24 | 40.352 | KV453253.1 | 8916024 | 24-scf00489 | 24 |
| AX-158309313 | 24 | 40.352 | KV453253.1 | 8920954 | 24-scf00489 | 24 |
| AX-158309314 | 24 | 40.352 | KV453253.1 | 8921621 | 24-scf00489 | 24 |
| AX-158309315 | 24 | 40.352 | KV453253.1 | 8922907 | 24-scf00489 | 24 |
| AX-158309316 | 24 | 40.352 | KV453253.1 | 8923891 | 24-scf00489 | 24 |
| AX-157847080 | 24 | 40.352 | KV453253.1 | 8929492 | 24-scf00489 | 24 |
| AX-158309324 | 24 | 40.352 | KV453253.1 | 8933949 | 24-scf00489 | 24 |
| AX-158309328 | 24 | 40.352 | KV453253.1 | 8938574 | 24-scf00489 | 24 |
| AX-158309331 | 24 | 40.352 | KV453253.1 | 8940716 | 24-scf00489 | 24 |
| AX-158309334 | 24 | 40.352 | KV453253.1 | 8943189 | 24-scf00489 | 24 |
| AX-158309335 | 24 | 40.352 | KV453253.1 | 8943497 | 24-scf00489 | 24 |
| AX-158309336 | 24 | 40.352 | KV453253.1 | 8944142 | 24-scf00489 | 24 |
| AX-158309340 | 24 | 40.352 | KV453253.1 | 8951843 | 24-scf00489 | 24 |
| AX-158309344 | 24 | 40.352 | KV453253.1 | 8958873 | 24-scf00489 | 24 |
| AX-158309358 | 24 | 40.352 | KV453253.1 | 8988309 | 24-scf00489 | 24 |
| AX-158309359 | 24 | 40.352 | KV453253.1 | 8989253 | 24-scf00489 | 24 |
| AX-158309371 | 24 | 40.352 | KV453253.1 | 9012113 | 24-scf00489 | 24 |
| AX-158309376 | 24 | 40.352 | KV453253.1 | 9017409 | 24-scf00489 | 24 |
| AX-158309378 | 24 | 40.352 | KV453253.1 | 9018435 | 24-scf00489 | 24 |
| AX-158309383 | 24 | 40.352 | KV453253.1 | 9022206 | 24-scf00489 | 24 |
| AX-158309389 | 24 | 40.352 | KV453253.1 | 9027935 | 24-scf00489 | 24 |
| AX-158309407 | 24 | 40.352 | KV453253.1 | 9062164 | 24-scf00489 | 24 |
| AX-158309426 | 24 | 40.352 | KV453253.1 | 9094360 | 24-scf00489 | 24 |
| AX-158309428 | 24 | 40.352 | KV453253.1 | 9095682 | 24-scf00489 | 24 |
| AX-157723716 | 24 | 40.352 | KV453253.1 | 9117858 | 24-scf00489 | 24 |
| AX-158309443 | 24 | 40.352 | KV453253.1 | 9119970 | 24-scf00489 | 24 |
| AX-158309448 | 24 | 40.352 | KV453253.1 | 9127687 | 24-scf00489 | 24 |
| AX-158309451 | 24 | 40.352 | KV453253.1 | 9132301 | 24-scf00489 | 24 |
| AX-158309454 | 24 | 40.352 | KV453253.1 | 9136877 | 24-scf00489 | 24 |
| AX-158309456 | 24 | 40.352 | KV453253.1 | 9141449 | 24-scf00489 | 24 |
| AX-158309458 | 24 | 40.352 | KV453253.1 | 9143766 | 24-scf00489 | 24 |
| AX-158309460 | 24 | 40.352 | KV453253.1 | 9144663 | 24-scf00489 | 24 |
| AX-158309463 | 24 | 40.352 | KV453253.1 | 9149825 | 24-scf00489 | 24 |
| AX-158309470 | 24 | 40.352 | KV453253.1 | 9163233 | 24-scf00489 | 24 |
| AX-158309471 | 24 | 40.352 | KV453253.1 | 9165219 | 24-scf00489 | 24 |
| AX-157847091 | 24 | 40.352 | KV453253.1 | 9175272 | 24-scf00489 | 24 |
| AX-158309478 | 24 | 40.352 | KV453253.1 | 9176312 | 24-scf00489 | 24 |
| AX-158309481 | 24 | 40.352 | KV453253.1 | 9179272 | 24-scf00489 | 24 |
| AX-158381369 | 24 | 40.352 | KV453253.1 | 9186990 | 24-scf00489 | 24 |
| AX-158309486 | 24 | 40.352 | KV453253.1 | 9192384 | 24-scf00489 | 24 |

|              |    |        |            |         |             |    |
|--------------|----|--------|------------|---------|-------------|----|
| AX-158309487 | 24 | 40.352 | KV453253.1 | 9194475 | 24-scf00489 | 24 |
| AX-158309489 | 24 | 40.352 | KV453253.1 | 9197891 | 24-scf00489 | 24 |
| AX-158309490 | 24 | 40.352 | KV453253.1 | 9198695 | 24-scf00489 | 24 |
| AX-157860968 | 24 | 40.352 | KV453253.1 | 9202386 | 24-scf00489 | 24 |
| AX-157847095 | 24 | 40.352 | KV453253.1 | 9205967 | 24-scf00489 | 24 |
| AX-157743478 | 24 | 40.352 | KV453253.1 | 9209287 | 24-scf00489 | 24 |
| AX-158309494 | 24 | 40.352 | KV453253.1 | 9209803 | 24-scf00489 | 24 |
| AX-157847096 | 24 | 40.352 | KV453253.1 | 9214379 | 24-scf00489 | 24 |
| AX-158309496 | 24 | 40.352 | KV453253.1 | 9214727 | 24-scf00489 | 24 |
| AX-158309498 | 24 | 40.352 | KV453253.1 | 9215723 | 24-scf00489 | 24 |
| AX-158309499 | 24 | 40.352 | KV453253.1 | 9217743 | 24-scf00489 | 24 |
| AX-158309500 | 24 | 40.352 | KV453253.1 | 9220925 | 24-scf00489 | 24 |
| AX-158309502 | 24 | 40.352 | KV453253.1 | 9222229 | 24-scf00489 | 24 |
| AX-158309503 | 24 | 40.352 | KV453253.1 | 9223120 | 24-scf00489 | 24 |
| AX-158309505 | 24 | 40.352 | KV453253.1 | 9225130 | 24-scf00489 | 24 |
| AX-158309506 | 24 | 40.352 | KV453253.1 | 9226158 | 24-scf00489 | 24 |
| AX-157755400 | 24 | 40.352 | KV453253.1 | 9229025 | 24-scf00489 | 24 |
| AX-158309510 | 24 | 40.352 | KV453253.1 | 9233265 | 24-scf00489 | 24 |
| AX-158309511 | 24 | 40.352 | KV453253.1 | 9234228 | 24-scf00489 | 24 |
| AX-157860969 | 24 | 40.352 | KV453253.1 | 9234387 | 24-scf00489 | 24 |
| AX-157847097 | 24 | 40.352 | KV453253.1 | 9235475 | 24-scf00489 | 24 |
| AX-158309512 | 24 | 40.352 | KV453253.1 | 9235519 | 24-scf00489 | 24 |
| AX-158309514 | 24 | 40.352 | KV453253.1 | 9236912 | 24-scf00489 | 24 |
| AX-157847100 | 24 | 40.352 | KV453253.1 | 9238133 | 24-scf00489 | 24 |
| AX-158309515 | 24 | 40.352 | KV453253.1 | 9238178 | 24-scf00489 | 24 |
| AX-158309517 | 24 | 40.352 | KV453253.1 | 9239320 | 24-scf00489 | 24 |
| AX-158309531 | 24 | 40.352 | KV453253.1 | 9266708 | 24-scf00489 | 24 |
| AX-158309533 | 24 | 40.352 | KV453253.1 | 9271183 | 24-scf00489 | 24 |
| AX-158309534 | 24 | 40.352 | KV453253.1 | 9273542 | 24-scf00489 | 24 |
| AX-158309535 | 24 | 40.352 | KV453253.1 | 9274190 | 24-scf00489 | 24 |
| AX-158309542 | 24 | 40.352 | KV453253.1 | 9283042 | 24-scf00489 | 24 |
| AX-157860971 | 24 | 40.352 | KV453253.1 | 9283765 | 24-scf00489 | 24 |
| AX-158309546 | 24 | 40.352 | KV453253.1 | 9287143 | 24-scf00489 | 24 |
| AX-157860972 | 24 | 40.352 | KV453253.1 | 9288758 | 24-scf00489 | 24 |
| AX-158309549 | 24 | 40.352 | KV453253.1 | 9290520 | 24-scf00489 | 24 |
| AX-158309550 | 24 | 40.352 | KV453253.1 | 9292293 | 24-scf00489 | 24 |
| AX-158309551 | 24 | 40.352 | KV453253.1 | 9293011 | 24-scf00489 | 24 |
| AX-158309552 | 24 | 40.352 | KV453253.1 | 9297159 | 24-scf00489 | 24 |
| AX-158309553 | 24 | 40.352 | KV453253.1 | 9297822 | 24-scf00489 | 24 |
| AX-158309555 | 24 | 40.352 | KV453253.1 | 9299064 | 24-scf00489 | 24 |
| AX-158309556 | 24 | 40.352 | KV453253.1 | 9300851 | 24-scf00489 | 24 |
| AX-157860973 | 24 | 40.352 | KV453253.1 | 9302618 | 24-scf00489 | 24 |
| AX-157847109 | 24 | 40.352 | KV453253.1 | 9302952 | 24-scf00489 | 24 |
| AX-158309557 | 24 | 40.352 | KV453253.1 | 9303456 | 24-scf00489 | 24 |
| AX-158309558 | 24 | 40.352 | KV453253.1 | 9303926 | 24-scf00489 | 24 |
| AX-158309559 | 24 | 40.352 | KV453253.1 | 9304719 | 24-scf00489 | 24 |
| AX-158309560 | 24 | 40.352 | KV453253.1 | 9305703 | 24-scf00489 | 24 |
| AX-158309561 | 24 | 40.352 | KV453253.1 | 9306097 | 24-scf00489 | 24 |
| AX-158309562 | 24 | 40.352 | KV453253.1 | 9309704 | 24-scf00489 | 24 |
| AX-158309563 | 24 | 40.352 | KV453253.1 | 9313191 | 24-scf00489 | 24 |
| AX-158309564 | 24 | 40.352 | KV453253.1 | 9314215 | 24-scf00489 | 24 |

|              |    |        |            |         |             |    |
|--------------|----|--------|------------|---------|-------------|----|
| AX-158309565 | 24 | 40.352 | KV453253.1 | 9315865 | 24-scf00489 | 24 |
| AX-158309567 | 24 | 40.352 | KV453253.1 | 9317341 | 24-scf00489 | 24 |
| AX-158309568 | 24 | 40.352 | KV453253.1 | 9318423 | 24-scf00489 | 24 |
| AX-158309570 | 24 | 40.352 | KV453253.1 | 9320930 | 24-scf00489 | 24 |
| AX-158309573 | 24 | 40.352 | KV453253.1 | 9336309 | 24-scf00489 | 24 |
| AX-158309586 | 24 | 40.352 | KV453253.1 | 9355822 | 24-scf00489 | 24 |
| AX-158417909 | 24 | 40.352 | KV453253.1 | 9356803 | 24-scf00489 | 24 |
| AX-158309587 | 24 | 40.352 | KV453253.1 | 9358308 | 24-scf00489 | 24 |
| AX-158309588 | 24 | 40.352 | KV453253.1 | 9359262 | 24-scf00489 | 24 |
| AX-157860974 | 24 | 40.352 | KV453253.1 | 9360765 | 24-scf00489 | 24 |
| AX-158309589 | 24 | 40.352 | KV453253.1 | 9361335 | 24-scf00489 | 24 |
| AX-158309590 | 24 | 40.352 | KV453253.1 | 9362230 | 24-scf00489 | 24 |
| AX-158309593 | 24 | 40.352 | KV453253.1 | 9366379 | 24-scf00489 | 24 |
| AX-157860976 | 24 | 40.352 | KV453253.1 | 9392932 | 24-scf00489 | 24 |
| AX-157860977 | 24 | 40.352 | KV453253.1 | 9393511 | 24-scf00489 | 24 |
| AX-157860978 | 24 | 40.352 | KV453253.1 | 9393693 | 24-scf00489 | 24 |
| AX-157860979 | 24 | 40.352 | KV453253.1 | 9398026 | 24-scf00489 | 24 |
| AX-157860980 | 24 | 40.352 | KV453253.1 | 9401549 | 24-scf00489 | 24 |
| AX-157860981 | 24 | 40.352 | KV453253.1 | 9405663 | 24-scf00489 | 24 |
| AX-157847112 | 24 | 40.352 | KV453253.1 | 9407056 | 24-scf00489 | 24 |
| AX-157847113 | 24 | 40.352 | KV453253.1 | 9408625 | 24-scf00489 | 24 |
| AX-157860983 | 24 | 40.352 | KV453253.1 | 9453182 | 24-scf00489 | 24 |
| AX-157860989 | 24 | 40.352 | KV453253.1 | 9482613 | 24-scf00489 | 24 |
| AX-158309634 | 24 | 40.352 | KV453253.1 | 9484181 | 24-scf00489 | 24 |
| AX-157860990 | 24 | 40.352 | KV453253.1 | 9486918 | 24-scf00489 | 24 |
| AX-158309639 | 24 | 40.352 | KV453253.1 | 9493086 | 24-scf00489 | 24 |
| AX-158309640 | 24 | 40.352 | KV453253.1 | 9494204 | 24-scf00489 | 24 |
| AX-158309642 | 24 | 40.352 | KV453253.1 | 9496178 | 24-scf00489 | 24 |
| AX-157860991 | 24 | 40.352 | KV453253.1 | 9499571 | 24-scf00489 | 24 |
| AX-157860992 | 24 | 40.352 | KV453253.1 | 9505498 | 24-scf00489 | 24 |
| AX-157860993 | 24 | 40.352 | KV453253.1 | 9510686 | 24-scf00489 | 24 |
| AX-158309653 | 24 | 40.352 | KV453253.1 | 9513801 | 24-scf00489 | 24 |
| AX-158309657 | 24 | 40.352 | KV453253.1 | 9520373 | 24-scf00489 | 24 |
| AX-158309659 | 24 | 40.352 | KV453253.1 | 9522216 | 24-scf00489 | 24 |
| AX-158309660 | 24 | 40.352 | KV453253.1 | 9522669 | 24-scf00489 | 24 |
| AX-158309671 | 24 | 40.352 | KV453253.1 | 9535898 | 24-scf00489 | 24 |
| AX-158309672 | 24 | 40.352 | KV453253.1 | 9537078 | 24-scf00489 | 24 |
| AX-158309680 | 24 | 40.352 | KV453253.1 | 9548275 | 24-scf00489 | 24 |
| AX-158309688 | 24 | 40.352 | KV453253.1 | 9558125 | 24-scf00489 | 24 |
| AX-158309716 | 24 | 40.352 | KV453253.1 | 9579622 | 24-scf00489 | 24 |
| AX-158309717 | 24 | 40.352 | KV453253.1 | 9581808 | 24-scf00489 | 24 |
| AX-158309719 | 24 | 40.352 | KV453253.1 | 9585544 | 24-scf00489 | 24 |
| AX-158309732 | 24 | 40.352 | KV453253.1 | 9600760 | 24-scf00489 | 24 |
| AX-158309737 | 24 | 40.352 | KV453253.1 | 9609512 | 24-scf00489 | 24 |
| AX-158309748 | 24 | 40.352 | KV453253.1 | 9630638 | 24-scf00489 | 24 |
| AX-158309754 | 24 | 40.352 | KV453253.1 | 9637038 | 24-scf00489 | 24 |
| AX-158309755 | 24 | 40.352 | KV453253.1 | 9643140 | 24-scf00489 | 24 |
| AX-158309756 | 24 | 40.352 | KV453253.1 | 9644990 | 24-scf00489 | 24 |
| AX-158309758 | 24 | 40.352 | KV453253.1 | 9645870 | 24-scf00489 | 24 |
| AX-158309761 | 24 | 40.352 | KV453253.1 | 9648971 | 24-scf00489 | 24 |
| AX-158309765 | 24 | 40.352 | KV453253.1 | 9663980 | 24-scf00489 | 24 |

|              |    |        |            |          |             |    |
|--------------|----|--------|------------|----------|-------------|----|
| AX-157861007 | 24 | 40.352 | KV453253.1 | 9667390  | 24-scf00489 | 24 |
| AX-157861009 | 24 | 40.352 | KV453253.1 | 9670190  | 24-scf00489 | 24 |
| AX-158309768 | 24 | 40.352 | KV453253.1 | 9670655  | 24-scf00489 | 24 |
| AX-157861010 | 24 | 40.352 | KV453253.1 | 9679699  | 24-scf00489 | 24 |
| AX-158309774 | 24 | 40.352 | KV453253.1 | 9682155  | 24-scf00489 | 24 |
| AX-158309777 | 24 | 40.352 | KV453253.1 | 9684611  | 24-scf00489 | 24 |
| AX-158309778 | 24 | 40.352 | KV453253.1 | 9685604  | 24-scf00489 | 24 |
| AX-157861011 | 24 | 40.352 | KV453253.1 | 9688691  | 24-scf00489 | 24 |
| AX-158309784 | 24 | 40.352 | KV453253.1 | 9699420  | 24-scf00489 | 24 |
| AX-157861012 | 24 | 40.352 | KV453253.1 | 9708243  | 24-scf00489 | 24 |
| AX-158309789 | 24 | 40.352 | KV453253.1 | 9708896  | 24-scf00489 | 24 |
| AX-158417921 | 24 | 40.352 | KV453253.1 | 9714491  | 24-scf00489 | 24 |
| AX-157847127 | 24 | 40.352 | KV453253.1 | 9718763  | 24-scf00489 | 24 |
| AX-158309798 | 24 | 40.352 | KV453253.1 | 9728928  | 24-scf00489 | 24 |
| AX-157724139 | 24 | 40.352 | KV453253.1 | 9737545  | 24-scf00489 | 24 |
| AX-158309808 | 24 | 40.352 | KV453253.1 | 9742026  | 24-scf00489 | 24 |
| AX-158309810 | 24 | 40.352 | KV453253.1 | 9744681  | 24-scf00489 | 24 |
| AX-158309811 | 24 | 40.352 | KV453253.1 | 9745761  | 24-scf00489 | 24 |
| AX-158309814 | 24 | 40.352 | KV453253.1 | 9757383  | 24-scf00489 | 24 |
| AX-158309818 | 24 | 40.352 | KV453253.1 | 9773614  | 24-scf00489 | 24 |
| AX-158309820 | 24 | 40.352 | KV453253.1 | 9778803  | 24-scf00489 | 24 |
| AX-157700377 | 24 | 40.352 | KV453253.1 | 9783263  | 24-scf00489 | 24 |
| AX-158309824 | 24 | 40.352 | KV453253.1 | 9809170  | 24-scf00489 | 24 |
| AX-158309825 | 24 | 40.352 | KV453253.1 | 9809776  | 24-scf00489 | 24 |
| AX-157861019 | 24 | 40.352 | KV453253.1 | 9810003  | 24-scf00489 | 24 |
| AX-158309830 | 24 | 40.352 | KV453253.1 | 9817100  | 24-scf00489 | 24 |
| AX-158309843 | 24 | 40.352 | KV453253.1 | 9837377  | 24-scf00489 | 24 |
| AX-157861021 | 24 | 40.352 | KV453253.1 | 9840764  | 24-scf00489 | 24 |
| AX-158309847 | 24 | 40.352 | KV453253.1 | 9844923  | 24-scf00489 | 24 |
| AX-157861023 | 24 | 40.352 | KV453253.1 | 9845202  | 24-scf00489 | 24 |
| AX-157847132 | 24 | 40.352 | KV453253.1 | 9846108  | 24-scf00489 | 24 |
| AX-157861024 | 24 | 40.352 | KV453253.1 | 9854705  | 24-scf00489 | 24 |
| AX-158309851 | 24 | 40.352 | KV453253.1 | 9858461  | 24-scf00489 | 24 |
| AX-158309855 | 24 | 40.352 | KV453253.1 | 9861173  | 24-scf00489 | 24 |
| AX-157713911 | 24 | 40.352 | KV453253.1 | 9868312  | 24-scf00489 | 24 |
| AX-158309860 | 24 | 40.352 | KV453253.1 | 9869560  | 24-scf00489 | 24 |
| AX-157861025 | 24 | 40.352 | KV453253.1 | 9874829  | 24-scf00489 | 24 |
| AX-157861027 | 24 | 40.352 | KV453253.1 | 9882980  | 24-scf00489 | 24 |
| AX-158309868 | 24 | 40.352 | KV453253.1 | 9887458  | 24-scf00489 | 24 |
| AX-158309871 | 24 | 40.352 | KV453253.1 | 9890554  | 24-scf00489 | 24 |
| AX-157861028 | 24 | 40.352 | KV453253.1 | 9893838  | 24-scf00489 | 24 |
| AX-158309874 | 24 | 40.352 | KV453253.1 | 9895689  | 24-scf00489 | 24 |
| AX-157847137 | 24 | 40.352 | KV453253.1 | 9897698  | 24-scf00489 | 24 |
| AX-157847138 | 24 | 40.352 | KV453253.1 | 9898343  | 24-scf00489 | 24 |
| AX-157867736 | 24 | 40.352 | KV453253.1 | 9901715  | 24-scf00489 | 24 |
| AX-158309896 | 24 | 40.352 | KV453253.1 | 9939365  | 24-scf00489 | 24 |
| AX-158309920 | 24 | 40.352 | KV453253.1 | 9990856  | 24-scf00489 | 24 |
| AX-158309946 | 24 | 40.352 | KV453253.1 | 10059755 | 24-scf00489 | 24 |
| AX-158309957 | 24 | 40.352 | KV453253.1 | 10080199 | 24-scf00489 | 24 |
| AX-157847154 | 24 | 40.352 | KV453253.1 | 10187187 | 24-scf00489 | 24 |
| AX-158310096 | 24 | 40.352 | KV453253.1 | 10352267 | 24-scf00489 | 24 |

|              |    |        |            |          |                |    |
|--------------|----|--------|------------|----------|----------------|----|
| AX-158310100 | 24 | 40.352 | KV453253.1 | 10382809 | 24-scf00489    | 24 |
| AX-158310149 | 24 | 40.352 | KV453253.1 | 10505944 | 24-scf00489    | 24 |
| AX-158310181 | 24 | 40.352 | KV453253.1 | 10567169 | 24-scf00489    | 24 |
| AX-158310215 | 24 | 40.352 | KV453253.1 | 10641909 | 24-scf00489    | 24 |
| AX-158310470 | 24 | 40.352 | KV453253.1 | 11133222 | 24-scf00489    | 24 |
| AX-158310486 | 24 | 40.352 | KV453253.1 | 11169289 | 24-scf00489    | 24 |
| AX-158310535 | 24 | 40.352 | KV453253.1 | 11291772 | 24-scf00489    | 24 |
| AX-158310549 | 24 | 40.352 | KV453253.1 | 11352459 | 24-scf00489    | 24 |
| AX-157726144 | 24 | 40.352 | KV453253.1 | 11443906 | 24-scf00489    | 24 |
| AX-158310715 | 24 | 40.352 | KV453253.1 | 11600233 | 24-scf00489    | 24 |
| AX-158310758 | 24 | 40.352 | KV453253.1 | 11661717 | 24-scf00489    | 24 |
| AX-158311086 | 24 | 40.352 | KV453253.1 | 12166933 | 24-scf00489    | 24 |
| AX-158311243 | 24 | 40.352 | KV453253.1 | 12361869 | 24-scf00489    | 24 |
| AX-158311323 | 24 | 40.352 | KV453253.1 | 12466598 | 24-scf00489    | 24 |
| AX-158311334 | 24 | 40.352 | KV453253.1 | 12480257 | 24-scf00489    | 24 |
| AX-158311342 | 24 | 40.352 | KV453253.1 | 12488286 | 24-scf00489    | 24 |
| AX-158311411 | 24 | 40.352 | KV453253.1 | 12586970 | 24-scf00489    | 24 |
| AX-158311515 | 24 | 40.352 | KV453253.1 | 12718942 | 24-scf00489    | 24 |
| AX-158311532 | 24 | 40.352 | KV453253.1 | 12739965 | 24-scf00489    | 24 |
| AX-158311606 | 24 | 40.352 | KV453253.1 | 12852923 | 24-scf00489    | 24 |
| AX-157703595 | 24 | 40.352 | DX099320.1 | 340      | IORI212 lctalu | UN |
| AX-157711010 | 24 | 40.352 |            | 839      | :220097_g4_i:  | UN |
| AX-157693019 | 24 | 40.352 |            | 1463     | :220773_g2_i:  | UN |
| AX-158417923 | 24 | 40.437 | KV453253.1 | 9756040  | 24-scf00489    | 24 |
| AX-157860908 | 24 | 40.52  | KV453253.1 | 6403880  | 24-scf00489    | 24 |
| AX-158308103 | 24 | 40.52  | KV453253.1 | 6522670  | 24-scf00489    | 24 |
| AX-158309230 | 24 | 40.52  | KV453253.1 | 8824263  | 24-scf00489    | 24 |
| AX-158309766 | 24 | 40.52  | KV453253.1 | 9667775  | 24-scf00489    | 24 |
| AX-157847125 | 24 | 40.52  | KV453253.1 | 9712340  | 24-scf00489    | 24 |
| AX-158412275 | 24 | 40.52  | KV453253.1 | 9756697  | 24-scf00489    | 24 |
| AX-158309813 | 24 | 40.52  | KV453253.1 | 9756801  | 24-scf00489    | 24 |
| AX-157703559 | 24 | 40.52  | KV453253.1 | 9880325  | 24-scf00489    | 24 |
| AX-158309075 | 24 | 40.571 | KV453253.1 | 8584009  | 24-scf00489    | 24 |
| AX-157847061 | 24 | 40.571 | KV453253.1 | 8702699  | 24-scf00489    | 24 |
| AX-158309160 | 24 | 40.571 | KV453253.1 | 8733612  | 24-scf00489    | 24 |
| AX-158309417 | 24 | 40.571 | KV453253.1 | 9082338  | 24-scf00489    | 24 |
| AX-158309591 | 24 | 40.571 | KV453253.1 | 9364856  | 24-scf00489    | 24 |
| AX-158309592 | 24 | 40.571 | KV453253.1 | 9365662  | 24-scf00489    | 24 |
| AX-157847111 | 24 | 40.571 | KV453253.1 | 9405769  | 24-scf00489    | 24 |
| AX-158309621 | 24 | 40.571 | KV453253.1 | 9444883  | 24-scf00489    | 24 |
| AX-157724420 | 24 | 40.571 | KV453253.1 | 9462382  | 24-scf00489    | 24 |
| AX-158309631 | 24 | 40.571 | KV453253.1 | 9474253  | 24-scf00489    | 24 |
| AX-158309658 | 24 | 40.571 | KV453253.1 | 9520973  | 24-scf00489    | 24 |
| AX-157752274 | 24 | 40.571 | KV453253.1 | 9521392  | 24-scf00489    | 24 |
| AX-158309690 | 24 | 40.571 | KV453253.1 | 9558736  | 24-scf00489    | 24 |
| AX-158309746 | 24 | 40.571 | KV453253.1 | 9628922  | 24-scf00489    | 24 |
| AX-158309747 | 24 | 40.571 | KV453253.1 | 9629627  | 24-scf00489    | 24 |
| AX-158309751 | 24 | 40.571 | KV453253.1 | 9634357  | 24-scf00489    | 24 |
| AX-157861014 | 24 | 40.571 | KV453253.1 | 9718353  | 24-scf00489    | 24 |
| AX-157861015 | 24 | 40.571 | KV453253.1 | 9719033  | 24-scf00489    | 24 |
| AX-158309815 | 24 | 40.571 | KV453253.1 | 9759349  | 24-scf00489    | 24 |

|              |    |        |            |          |             |    |
|--------------|----|--------|------------|----------|-------------|----|
| AX-158309816 | 24 | 40.571 | KV453253.1 | 9759945  | 24-scf00489 | 24 |
| AX-157847134 | 24 | 40.571 | KV453253.1 | 9864316  | 24-scf00489 | 24 |
| AX-157746003 | 24 | 40.571 | KV453253.1 | 9899462  | 24-scf00489 | 24 |
| AX-157744871 | 24 | 40.571 | KV453253.1 | 9928642  | 24-scf00489 | 24 |
| AX-157745703 | 24 | 40.571 | KV453253.1 | 10180627 | 24-scf00489 | 24 |
| AX-158310024 | 24 | 40.571 | KV453253.1 | 10230456 | 24-scf00489 | 24 |
| AX-158310053 | 24 | 40.571 | KV453253.1 | 10279865 | 24-scf00489 | 24 |
| AX-158309787 | 24 | 40.574 | KV453253.1 | 9706774  | 24-scf00489 | 24 |
| AX-158309828 | 24 | 40.574 | KV453253.1 | 9814627  | 24-scf00489 | 24 |
| AX-157861018 | 24 | 40.577 | KV453253.1 | 9771306  | 24-scf00489 | 24 |
| AX-158309829 | 24 | 40.577 | KV453253.1 | 9815232  | 24-scf00489 | 24 |
| AX-158309953 | 24 | 40.577 | KV453253.1 | 10073756 | 24-scf00489 | 24 |
| AX-158309788 | 24 | 40.583 | KV453253.1 | 9707886  | 24-scf00489 | 24 |
| AX-158309831 | 24 | 40.583 | KV453253.1 | 9818185  | 24-scf00489 | 24 |
| AX-157861020 | 24 | 40.616 | KV453253.1 | 9821315  | 24-scf00489 | 24 |
| AX-158309834 | 24 | 40.646 | KV453253.1 | 9825801  | 24-scf00489 | 24 |
| AX-158308381 | 24 | 40.68  | KV453253.1 | 6920300  | 24-scf00489 | 24 |
| AX-158309391 | 24 | 40.68  | KV453253.1 | 9029104  | 24-scf00489 | 24 |
| AX-158309427 | 24 | 40.68  | KV453253.1 | 9095091  | 24-scf00489 | 24 |
| AX-157847090 | 24 | 40.68  | KV453253.1 | 9167710  | 24-scf00489 | 24 |
| AX-158309474 | 24 | 40.68  | KV453253.1 | 9168186  | 24-scf00489 | 24 |
| AX-157847094 | 24 | 40.68  | KV453253.1 | 9198171  | 24-scf00489 | 24 |
| AX-158309578 | 24 | 40.68  | KV453253.1 | 9348812  | 24-scf00489 | 24 |
| AX-158309616 | 24 | 40.68  | KV453253.1 | 9431564  | 24-scf00489 | 24 |
| AX-158309625 | 24 | 40.68  | KV453253.1 | 9455039  | 24-scf00489 | 24 |
| AX-158309674 | 24 | 40.68  | KV453253.1 | 9539807  | 24-scf00489 | 24 |
| AX-157847122 | 24 | 40.68  | KV453253.1 | 9588143  | 24-scf00489 | 24 |
| AX-158309725 | 24 | 40.68  | KV453253.1 | 9594413  | 24-scf00489 | 24 |
| AX-158309726 | 24 | 40.68  | KV453253.1 | 9596208  | 24-scf00489 | 24 |
| AX-158309730 | 24 | 40.68  | KV453253.1 | 9599533  | 24-scf00489 | 24 |
| AX-158309752 | 24 | 40.68  | KV453253.1 | 9635171  | 24-scf00489 | 24 |
| AX-158309753 | 24 | 40.68  | KV453253.1 | 9635750  | 24-scf00489 | 24 |
| AX-157847124 | 24 | 40.68  | KV453253.1 | 9693170  | 24-scf00489 | 24 |
| AX-158309793 | 24 | 40.68  | KV453253.1 | 9719873  | 24-scf00489 | 24 |
| AX-157718316 | 24 | 40.68  | KV453253.1 | 9755322  | 24-scf00489 | 24 |
| AX-157710579 | 24 | 40.68  | KV453253.1 | 9814677  | 24-scf00489 | 24 |
| AX-158309836 | 24 | 40.68  | KV453253.1 | 9827629  | 24-scf00489 | 24 |
| AX-158309845 | 24 | 40.68  | KV453253.1 | 9840559  | 24-scf00489 | 24 |
| AX-157861022 | 24 | 40.68  | KV453253.1 | 9842505  | 24-scf00489 | 24 |
| AX-158309849 | 24 | 40.68  | KV453253.1 | 9852097  | 24-scf00489 | 24 |
| AX-157847133 | 24 | 40.68  | KV453253.1 | 9854099  | 24-scf00489 | 24 |
| AX-158309853 | 24 | 40.68  | KV453253.1 | 9859235  | 24-scf00489 | 24 |
| AX-158309854 | 24 | 40.68  | KV453253.1 | 9860556  | 24-scf00489 | 24 |
| AX-157861026 | 24 | 40.68  | KV453253.1 | 9877427  | 24-scf00489 | 24 |
| AX-158309870 | 24 | 40.68  | KV453253.1 | 9888946  | 24-scf00489 | 24 |
| AX-157847139 | 24 | 40.68  | KV453253.1 | 9901107  | 24-scf00489 | 24 |
| AX-157861029 | 24 | 40.68  | KV453253.1 | 9906404  | 24-scf00489 | 24 |
| AX-158309879 | 24 | 40.68  | KV453253.1 | 9907170  | 24-scf00489 | 24 |
| AX-158309888 | 24 | 40.68  | KV453253.1 | 9926488  | 24-scf00489 | 24 |
| AX-158309889 | 24 | 40.68  | KV453253.1 | 9929618  | 24-scf00489 | 24 |
| AX-158309890 | 24 | 40.68  | KV453253.1 | 9930751  | 24-scf00489 | 24 |

|              |    |       |            |          |             |    |
|--------------|----|-------|------------|----------|-------------|----|
| AX-157847142 | 24 | 40.68 | KV453253.1 | 9931333  | 24-scf00489 | 24 |
| AX-157740563 | 24 | 40.68 | KV453253.1 | 9931561  | 24-scf00489 | 24 |
| AX-158309891 | 24 | 40.68 | KV453253.1 | 9933530  | 24-scf00489 | 24 |
| AX-158309893 | 24 | 40.68 | KV453253.1 | 9934034  | 24-scf00489 | 24 |
| AX-158309894 | 24 | 40.68 | KV453253.1 | 9934760  | 24-scf00489 | 24 |
| AX-158309895 | 24 | 40.68 | KV453253.1 | 9935309  | 24-scf00489 | 24 |
| AX-157861031 | 24 | 40.68 | KV453253.1 | 9937063  | 24-scf00489 | 24 |
| AX-158309904 | 24 | 40.68 | KV453253.1 | 9949499  | 24-scf00489 | 24 |
| AX-157861032 | 24 | 40.68 | KV453253.1 | 9961691  | 24-scf00489 | 24 |
| AX-158309915 | 24 | 40.68 | KV453253.1 | 9976061  | 24-scf00489 | 24 |
| AX-157861033 | 24 | 40.68 | KV453253.1 | 9977869  | 24-scf00489 | 24 |
| AX-157861034 | 24 | 40.68 | KV453253.1 | 9986865  | 24-scf00489 | 24 |
| AX-157861035 | 24 | 40.68 | KV453253.1 | 9999419  | 24-scf00489 | 24 |
| AX-158309927 | 24 | 40.68 | KV453253.1 | 10005323 | 24-scf00489 | 24 |
| AX-158309932 | 24 | 40.68 | KV453253.1 | 10022829 | 24-scf00489 | 24 |
| AX-157755338 | 24 | 40.68 | KV453253.1 | 10025233 | 24-scf00489 | 24 |
| AX-157861036 | 24 | 40.68 | KV453253.1 | 10029729 | 24-scf00489 | 24 |
| AX-158309936 | 24 | 40.68 | KV453253.1 | 10032828 | 24-scf00489 | 24 |
| AX-158309938 | 24 | 40.68 | KV453253.1 | 10037511 | 24-scf00489 | 24 |
| AX-158309939 | 24 | 40.68 | KV453253.1 | 10038163 | 24-scf00489 | 24 |
| AX-158309940 | 24 | 40.68 | KV453253.1 | 10038604 | 24-scf00489 | 24 |
| AX-158309941 | 24 | 40.68 | KV453253.1 | 10039249 | 24-scf00489 | 24 |
| AX-158309942 | 24 | 40.68 | KV453253.1 | 10039964 | 24-scf00489 | 24 |
| AX-158417926 | 24 | 40.68 | KV453253.1 | 10042333 | 24-scf00489 | 24 |
| AX-158417927 | 24 | 40.68 | KV453253.1 | 10043132 | 24-scf00489 | 24 |
| AX-157861037 | 24 | 40.68 | KV453253.1 | 10043680 | 24-scf00489 | 24 |
| AX-158309944 | 24 | 40.68 | KV453253.1 | 10045091 | 24-scf00489 | 24 |
| AX-157847143 | 24 | 40.68 | KV453253.1 | 10055131 | 24-scf00489 | 24 |
| AX-157847144 | 24 | 40.68 | KV453253.1 | 10057101 | 24-scf00489 | 24 |
| AX-158309947 | 24 | 40.68 | KV453253.1 | 10061881 | 24-scf00489 | 24 |
| AX-158309950 | 24 | 40.68 | KV453253.1 | 10070050 | 24-scf00489 | 24 |
| AX-157861038 | 24 | 40.68 | KV453253.1 | 10070506 | 24-scf00489 | 24 |
| AX-158309952 | 24 | 40.68 | KV453253.1 | 10072627 | 24-scf00489 | 24 |
| AX-158309955 | 24 | 40.68 | KV453253.1 | 10077677 | 24-scf00489 | 24 |
| AX-158309956 | 24 | 40.68 | KV453253.1 | 10078032 | 24-scf00489 | 24 |
| AX-158309959 | 24 | 40.68 | KV453253.1 | 10095035 | 24-scf00489 | 24 |
| AX-157861044 | 24 | 40.68 | KV453253.1 | 10109151 | 24-scf00489 | 24 |
| AX-158309975 | 24 | 40.68 | KV453253.1 | 10126714 | 24-scf00489 | 24 |
| AX-158381373 | 24 | 40.68 | KV453253.1 | 10168339 | 24-scf00489 | 24 |
| AX-157751186 | 24 | 40.68 | KV453253.1 | 10325220 | 24-scf00489 | 24 |
| AX-158310078 | 24 | 40.68 | KV453253.1 | 10329817 | 24-scf00489 | 24 |
| AX-158310087 | 24 | 40.68 | KV453253.1 | 10342516 | 24-scf00489 | 24 |
| AX-158310088 | 24 | 40.68 | KV453253.1 | 10344427 | 24-scf00489 | 24 |
| AX-158310089 | 24 | 40.68 | KV453253.1 | 10345566 | 24-scf00489 | 24 |
| AX-158310092 | 24 | 40.68 | KV453253.1 | 10350047 | 24-scf00489 | 24 |
| AX-158310112 | 24 | 40.68 | KV453253.1 | 10419485 | 24-scf00489 | 24 |
| AX-158310136 | 24 | 40.68 | KV453253.1 | 10475989 | 24-scf00489 | 24 |
| AX-158310170 | 24 | 40.68 | KV453253.1 | 10543045 | 24-scf00489 | 24 |
| AX-158310299 | 24 | 40.68 | KV453253.1 | 10868246 | 24-scf00489 | 24 |
| AX-157847272 | 24 | 40.68 | KV453253.1 | 11578397 | 24-scf00489 | 24 |
| AX-158310712 | 24 | 40.68 | KV453253.1 | 11595792 | 24-scf00489 | 24 |

|              |    |        |            |          |             |    |
|--------------|----|--------|------------|----------|-------------|----|
| AX-158310723 | 24 | 40.68  | KV453253.1 | 11615075 | 24-scf00489 | 24 |
| AX-157747497 | 24 | 40.68  | KV453253.1 | 12450043 | 24-scf00489 | 24 |
| AX-158310002 | 24 | 40.741 | KV453253.1 | 10183306 | 24-scf00489 | 24 |
| AX-157847040 | 24 | 40.789 | KV453253.1 | 8464520  | 24-scf00489 | 24 |
| AX-158309291 | 24 | 40.789 | KV453253.1 | 8890536  | 24-scf00489 | 24 |
| AX-158309308 | 24 | 40.789 | KV453253.1 | 8914586  | 24-scf00489 | 24 |
| AX-158309491 | 24 | 40.789 | KV453253.1 | 9200385  | 24-scf00489 | 24 |
| AX-158309579 | 24 | 40.789 | KV453253.1 | 9348952  | 24-scf00489 | 24 |
| AX-158309595 | 24 | 40.789 | KV453253.1 | 9374665  | 24-scf00489 | 24 |
| AX-158309603 | 24 | 40.789 | KV453253.1 | 9390115  | 24-scf00489 | 24 |
| AX-158309604 | 24 | 40.789 | KV453253.1 | 9390594  | 24-scf00489 | 24 |
| AX-158309609 | 24 | 40.789 | KV453253.1 | 9417238  | 24-scf00489 | 24 |
| AX-158309613 | 24 | 40.789 | KV453253.1 | 9425425  | 24-scf00489 | 24 |
| AX-158309615 | 24 | 40.789 | KV453253.1 | 9430122  | 24-scf00489 | 24 |
| AX-158309633 | 24 | 40.789 | KV453253.1 | 9482414  | 24-scf00489 | 24 |
| AX-158309678 | 24 | 40.789 | KV453253.1 | 9545207  | 24-scf00489 | 24 |
| AX-158309696 | 24 | 40.789 | KV453253.1 | 9562628  | 24-scf00489 | 24 |
| AX-158309832 | 24 | 40.789 | KV453253.1 | 9824788  | 24-scf00489 | 24 |
| AX-158309833 | 24 | 40.789 | KV453253.1 | 9825217  | 24-scf00489 | 24 |
| AX-158309850 | 24 | 40.789 | KV453253.1 | 9856775  | 24-scf00489 | 24 |
| AX-158309876 | 24 | 40.789 | KV453253.1 | 9897119  | 24-scf00489 | 24 |
| AX-158309885 | 24 | 40.789 | KV453253.1 | 9920419  | 24-scf00489 | 24 |
| AX-157716665 | 24 | 40.789 | KV453253.1 | 9924274  | 24-scf00489 | 24 |
| AX-157738895 | 24 | 40.789 | KV453253.1 | 9927658  | 24-scf00489 | 24 |
| AX-158309912 | 24 | 40.789 | KV453253.1 | 9969932  | 24-scf00489 | 24 |
| AX-158309943 | 24 | 40.789 | KV453253.1 | 10041286 | 24-scf00489 | 24 |
| AX-158417929 | 24 | 40.789 | KV453253.1 | 10091372 | 24-scf00489 | 24 |
| AX-158417930 | 24 | 40.789 | KV453253.1 | 10091809 | 24-scf00489 | 24 |
| AX-158417931 | 24 | 40.789 | KV453253.1 | 10091853 | 24-scf00489 | 24 |
| AX-157861040 | 24 | 40.789 | KV453253.1 | 10094121 | 24-scf00489 | 24 |
| AX-158310012 | 24 | 40.789 | KV453253.1 | 10205544 | 24-scf00489 | 24 |
| AX-158310018 | 24 | 40.789 | KV453253.1 | 10221558 | 24-scf00489 | 24 |
| AX-158310022 | 24 | 40.789 | KV453253.1 | 10226438 | 24-scf00489 | 24 |
| AX-158310026 | 24 | 40.789 | KV453253.1 | 10236933 | 24-scf00489 | 24 |
| AX-158310033 | 24 | 40.789 | KV453253.1 | 10253954 | 24-scf00489 | 24 |
| AX-158310034 | 24 | 40.789 | KV453253.1 | 10254308 | 24-scf00489 | 24 |
| AX-158310041 | 24 | 40.789 | KV453253.1 | 10264760 | 24-scf00489 | 24 |
| AX-158310042 | 24 | 40.789 | KV453253.1 | 10265313 | 24-scf00489 | 24 |
| AX-158310051 | 24 | 40.789 | KV453253.1 | 10278984 | 24-scf00489 | 24 |
| AX-158310052 | 24 | 40.789 | KV453253.1 | 10279398 | 24-scf00489 | 24 |
| AX-158310064 | 24 | 40.789 | KV453253.1 | 10293573 | 24-scf00489 | 24 |
| AX-158310073 | 24 | 40.789 | KV453253.1 | 10321288 | 24-scf00489 | 24 |
| AX-158310080 | 24 | 40.789 | KV453253.1 | 10333515 | 24-scf00489 | 24 |
| AX-158310085 | 24 | 40.789 | KV453253.1 | 10340444 | 24-scf00489 | 24 |
| AX-158310086 | 24 | 40.789 | KV453253.1 | 10341820 | 24-scf00489 | 24 |
| AX-158381374 | 24 | 40.789 | KV453253.1 | 10357673 | 24-scf00489 | 24 |
| AX-157847166 | 24 | 40.789 | KV453253.1 | 10358478 | 24-scf00489 | 24 |
| AX-157847172 | 24 | 40.789 | KV453253.1 | 10367488 | 24-scf00489 | 24 |
| AX-158417935 | 24 | 40.789 | KV453253.1 | 10381003 | 24-scf00489 | 24 |
| AX-158310104 | 24 | 40.789 | KV453253.1 | 10394450 | 24-scf00489 | 24 |
| AX-158310108 | 24 | 40.789 | KV453253.1 | 10401172 | 24-scf00489 | 24 |



|              |    |        |             |          |             |    |
|--------------|----|--------|-------------|----------|-------------|----|
| AX-158310110 | 24 | 40.789 | KV453253.1  | 10414833 | 24-scf00489 | 24 |
| AX-158310111 | 24 | 40.789 | KV453253.1  | 10418627 | 24-scf00489 | 24 |
| AX-158310119 | 24 | 40.789 | KV453253.1  | 10441860 | 24-scf00489 | 24 |
| AX-158310186 | 24 | 40.789 | KV453253.1  | 10578062 | 24-scf00489 | 24 |
| AX-157705881 | 24 | 40.789 | 3ML01031149 | 71       | scf06755_1  | UN |
| AX-158309178 | 24 | 41.007 | KV453253.1  | 8754389  | 24-scf00489 | 24 |
| AX-158309858 | 24 | 41.007 | KV453253.1  | 9865708  | 24-scf00489 | 24 |
| AX-158310021 | 24 | 41.007 | KV453253.1  | 10224868 | 24-scf00489 | 24 |
| AX-157716589 | 24 | 41.007 | KV453253.1  | 10233064 | 24-scf00489 | 24 |
| AX-158310046 | 24 | 41.007 | KV453253.1  | 10270539 | 24-scf00489 | 24 |
| AX-158310066 | 24 | 41.007 | KV453253.1  | 10294874 | 24-scf00489 | 24 |
| AX-158310122 | 24 | 41.007 | KV453253.1  | 10447218 | 24-scf00489 | 24 |
| AX-158310125 | 24 | 41.007 | KV453253.1  | 10451106 | 24-scf00489 | 24 |
| AX-158310134 | 24 | 41.007 | KV453253.1  | 10467516 | 24-scf00489 | 24 |
| AX-157718718 | 24 | 41.007 | KV453253.1  | 10470666 | 24-scf00489 | 24 |
| AX-158310138 | 24 | 41.007 | KV453253.1  | 10484384 | 24-scf00489 | 24 |
| AX-158310142 | 24 | 41.007 | KV453253.1  | 10495295 | 24-scf00489 | 24 |
| AX-158310143 | 24 | 41.007 | KV453253.1  | 10495826 | 24-scf00489 | 24 |
| AX-157747446 | 24 | 41.007 | KV453253.1  | 10511511 | 24-scf00489 | 24 |
| AX-158310156 | 24 | 41.007 | KV453253.1  | 10522400 | 24-scf00489 | 24 |
| AX-158310158 | 24 | 41.007 | KV453253.1  | 10526302 | 24-scf00489 | 24 |
| AX-158310160 | 24 | 41.007 | KV453253.1  | 10532051 | 24-scf00489 | 24 |
| AX-158310161 | 24 | 41.007 | KV453253.1  | 10533091 | 24-scf00489 | 24 |
| AX-158310163 | 24 | 41.007 | KV453253.1  | 10534728 | 24-scf00489 | 24 |
| AX-158310164 | 24 | 41.007 | KV453253.1  | 10536412 | 24-scf00489 | 24 |
| AX-158310190 | 24 | 41.007 | KV453253.1  | 10587610 | 24-scf00489 | 24 |
| AX-158310191 | 24 | 41.007 | KV453253.1  | 10588154 | 24-scf00489 | 24 |
| AX-158310192 | 24 | 41.007 | KV453253.1  | 10589954 | 24-scf00489 | 24 |
| AX-157847194 | 24 | 41.007 | KV453253.1  | 10604758 | 24-scf00489 | 24 |
| AX-158310208 | 24 | 41.007 | KV453253.1  | 10625115 | 24-scf00489 | 24 |
| AX-158310246 | 24 | 41.007 | KV453253.1  | 10724888 | 24-scf00489 | 24 |
| AX-157847205 | 24 | 41.007 | KV453253.1  | 10725508 | 24-scf00489 | 24 |
| AX-157847207 | 24 | 41.007 | KV453253.1  | 10736955 | 24-scf00489 | 24 |
| AX-157847223 | 24 | 41.007 | KV453253.1  | 10983869 | 24-scf00489 | 24 |
| AX-158310365 | 24 | 41.007 | KV453253.1  | 10986669 | 24-scf00489 | 24 |
| AX-158310366 | 24 | 41.007 | KV453253.1  | 10986973 | 24-scf00489 | 24 |
| AX-158310367 | 24 | 41.007 | KV453253.1  | 10987509 | 24-scf00489 | 24 |
| AX-158412297 | 24 | 41.007 | KV453253.1  | 10988626 | 24-scf00489 | 24 |
| AX-158381376 | 24 | 41.007 | KV453253.1  | 10989443 | 24-scf00489 | 24 |
| AX-158310371 | 24 | 41.007 | KV453253.1  | 10990436 | 24-scf00489 | 24 |
| AX-158310372 | 24 | 41.007 | KV453253.1  | 10991095 | 24-scf00489 | 24 |
| AX-158310374 | 24 | 41.007 | KV453253.1  | 10991789 | 24-scf00489 | 24 |
| AX-158310376 | 24 | 41.007 | KV453253.1  | 10993499 | 24-scf00489 | 24 |
| AX-158310378 | 24 | 41.007 | KV453253.1  | 10994715 | 24-scf00489 | 24 |
| AX-157847225 | 24 | 41.007 | KV453253.1  | 10995133 | 24-scf00489 | 24 |
| AX-158310384 | 24 | 41.007 | KV453253.1  | 11008282 | 24-scf00489 | 24 |
| AX-158417951 | 24 | 41.007 | KV453253.1  | 11019847 | 24-scf00489 | 24 |
| AX-158310404 | 24 | 41.007 | KV453253.1  | 11041088 | 24-scf00489 | 24 |
| AX-158310414 | 24 | 41.007 | KV453253.1  | 11054251 | 24-scf00489 | 24 |
| AX-158310427 | 24 | 41.007 | KV453253.1  | 11066201 | 24-scf00489 | 24 |
| AX-158310432 | 24 | 41.007 | KV453253.1  | 11073490 | 24-scf00489 | 24 |

|              |    |        |            |          |             |    |
|--------------|----|--------|------------|----------|-------------|----|
| AX-158310511 | 24 | 41.007 | KV453253.1 | 11232282 | 24-scf00489 | 24 |
| AX-158310903 | 24 | 41.007 | KV453253.1 | 11889566 | 24-scf00489 | 24 |
| AX-158311024 | 24 | 41.007 | KV453253.1 | 12098114 | 24-scf00489 | 24 |
| AX-158311584 | 24 | 41.007 | KV453253.1 | 12819108 | 24-scf00489 | 24 |
| AX-158310169 | 24 | 41.024 | KV453253.1 | 10541885 | 24-scf00489 | 24 |
| AX-157847185 | 24 | 41.068 | KV453253.1 | 10544585 | 24-scf00489 | 24 |
| AX-158306751 | 24 | 41.117 | KV453253.1 | 4797856  | 24-scf00489 | 24 |
| AX-158308372 | 24 | 41.117 | KV453253.1 | 6908669  | 24-scf00489 | 24 |
| AX-158381363 | 24 | 41.117 | KV453253.1 | 6909105  | 24-scf00489 | 24 |
| AX-158308563 | 24 | 41.117 | KV453253.1 | 7495063  | 24-scf00489 | 24 |
| AX-158308625 | 24 | 41.117 | KV453253.1 | 7866296  | 24-scf00489 | 24 |
| AX-158308889 | 24 | 41.117 | KV453253.1 | 8340714  | 24-scf00489 | 24 |
| AX-158308979 | 24 | 41.117 | KV453253.1 | 8483802  | 24-scf00489 | 24 |
| AX-158309007 | 24 | 41.117 | KV453253.1 | 8510136  | 24-scf00489 | 24 |
| AX-158309020 | 24 | 41.117 | KV453253.1 | 8527015  | 24-scf00489 | 24 |
| AX-158309041 | 24 | 41.117 | KV453253.1 | 8549080  | 24-scf00489 | 24 |
| AX-157741603 | 24 | 41.117 | KV453253.1 | 8694656  | 24-scf00489 | 24 |
| AX-158309261 | 24 | 41.117 | KV453253.1 | 8858642  | 24-scf00489 | 24 |
| AX-158309306 | 24 | 41.117 | KV453253.1 | 8913243  | 24-scf00489 | 24 |
| AX-158309352 | 24 | 41.117 | KV453253.1 | 8975442  | 24-scf00489 | 24 |
| AX-158309375 | 24 | 41.117 | KV453253.1 | 9016201  | 24-scf00489 | 24 |
| AX-158309390 | 24 | 41.117 | KV453253.1 | 9028270  | 24-scf00489 | 24 |
| AX-158309410 | 24 | 41.117 | KV453253.1 | 9071856  | 24-scf00489 | 24 |
| AX-158309411 | 24 | 41.117 | KV453253.1 | 9073175  | 24-scf00489 | 24 |
| AX-158309412 | 24 | 41.117 | KV453253.1 | 9073275  | 24-scf00489 | 24 |
| AX-157881119 | 24 | 41.117 | KV453253.1 | 9221024  | 24-scf00489 | 24 |
| AX-158309541 | 24 | 41.117 | KV453253.1 | 9281719  | 24-scf00489 | 24 |
| AX-158309543 | 24 | 41.117 | KV453253.1 | 9284365  | 24-scf00489 | 24 |
| AX-158309581 | 24 | 41.117 | KV453253.1 | 9350512  | 24-scf00489 | 24 |
| AX-158309594 | 24 | 41.117 | KV453253.1 | 9367079  | 24-scf00489 | 24 |
| AX-157860975 | 24 | 41.117 | KV453253.1 | 9385407  | 24-scf00489 | 24 |
| AX-158309614 | 24 | 41.117 | KV453253.1 | 9428300  | 24-scf00489 | 24 |
| AX-158309646 | 24 | 41.117 | KV453253.1 | 9502017  | 24-scf00489 | 24 |
| AX-158309650 | 24 | 41.117 | KV453253.1 | 9508892  | 24-scf00489 | 24 |
| AX-158309683 | 24 | 41.117 | KV453253.1 | 9551611  | 24-scf00489 | 24 |
| AX-158309769 | 24 | 41.117 | KV453253.1 | 9673311  | 24-scf00489 | 24 |
| AX-158309780 | 24 | 41.117 | KV453253.1 | 9688105  | 24-scf00489 | 24 |
| AX-158309807 | 24 | 41.117 | KV453253.1 | 9737945  | 24-scf00489 | 24 |
| AX-158309899 | 24 | 41.117 | KV453253.1 | 9944337  | 24-scf00489 | 24 |
| AX-158309902 | 24 | 41.117 | KV453253.1 | 9947468  | 24-scf00489 | 24 |
| AX-158309906 | 24 | 41.117 | KV453253.1 | 9952141  | 24-scf00489 | 24 |
| AX-158309926 | 24 | 41.117 | KV453253.1 | 10003365 | 24-scf00489 | 24 |
| AX-158309948 | 24 | 41.117 | KV453253.1 | 10068084 | 24-scf00489 | 24 |
| AX-158309949 | 24 | 41.117 | KV453253.1 | 10069594 | 24-scf00489 | 24 |
| AX-158309968 | 24 | 41.117 | KV453253.1 | 10111034 | 24-scf00489 | 24 |
| AX-158309985 | 24 | 41.117 | KV453253.1 | 10146485 | 24-scf00489 | 24 |
| AX-158309986 | 24 | 41.117 | KV453253.1 | 10149461 | 24-scf00489 | 24 |
| AX-158310010 | 24 | 41.117 | KV453253.1 | 10202779 | 24-scf00489 | 24 |
| AX-158310048 | 24 | 41.117 | KV453253.1 | 10276281 | 24-scf00489 | 24 |
| AX-158310098 | 24 | 41.117 | KV453253.1 | 10360242 | 24-scf00489 | 24 |
| AX-157847170 | 24 | 41.117 | KV453253.1 | 10365904 | 24-scf00489 | 24 |

|              |    |        |            |          |             |    |
|--------------|----|--------|------------|----------|-------------|----|
| AX-157847171 | 24 | 41.117 | KV453253.1 | 10367267 | 24-scf00489 | 24 |
| AX-158310121 | 24 | 41.117 | KV453253.1 | 10445934 | 24-scf00489 | 24 |
| AX-158310128 | 24 | 41.117 | KV453253.1 | 10453711 | 24-scf00489 | 24 |
| AX-157744300 | 24 | 41.117 | KV453253.1 | 10512928 | 24-scf00489 | 24 |
| AX-158310167 | 24 | 41.117 | KV453253.1 | 10539671 | 24-scf00489 | 24 |
| AX-158310168 | 24 | 41.117 | KV453253.1 | 10540994 | 24-scf00489 | 24 |
| AX-158310171 | 24 | 41.117 | KV453253.1 | 10545962 | 24-scf00489 | 24 |
| AX-158310173 | 24 | 41.117 | KV453253.1 | 10548608 | 24-scf00489 | 24 |
| AX-158310175 | 24 | 41.117 | KV453253.1 | 10550222 | 24-scf00489 | 24 |
| AX-157773717 | 24 | 41.117 | KV453253.1 | 10551527 | 24-scf00489 | 24 |
| AX-158310179 | 24 | 41.117 | KV453253.1 | 10564605 | 24-scf00489 | 24 |
| AX-158310180 | 24 | 41.117 | KV453253.1 | 10565795 | 24-scf00489 | 24 |
| AX-157847192 | 24 | 41.117 | KV453253.1 | 10601813 | 24-scf00489 | 24 |
| AX-158310197 | 24 | 41.117 | KV453253.1 | 10602225 | 24-scf00489 | 24 |
| AX-157708100 | 24 | 41.117 | KV453253.1 | 10602874 | 24-scf00489 | 24 |
| AX-158310199 | 24 | 41.117 | KV453253.1 | 10604275 | 24-scf00489 | 24 |
| AX-158310202 | 24 | 41.117 | KV453253.1 | 10612343 | 24-scf00489 | 24 |
| AX-158310209 | 24 | 41.117 | KV453253.1 | 10625869 | 24-scf00489 | 24 |
| AX-157847199 | 24 | 41.117 | KV453253.1 | 10628619 | 24-scf00489 | 24 |
| AX-158310212 | 24 | 41.117 | KV453253.1 | 10631968 | 24-scf00489 | 24 |
| AX-158310213 | 24 | 41.117 | KV453253.1 | 10635494 | 24-scf00489 | 24 |
| AX-157725702 | 24 | 41.117 | KV453253.1 | 10636812 | 24-scf00489 | 24 |
| AX-158310217 | 24 | 41.117 | KV453253.1 | 10646800 | 24-scf00489 | 24 |
| AX-157847200 | 24 | 41.117 | KV453253.1 | 10655663 | 24-scf00489 | 24 |
| AX-157847201 | 24 | 41.117 | KV453253.1 | 10664676 | 24-scf00489 | 24 |
| AX-158310219 | 24 | 41.117 | KV453253.1 | 10667470 | 24-scf00489 | 24 |
| AX-158310223 | 24 | 41.117 | KV453253.1 | 10675469 | 24-scf00489 | 24 |
| AX-157847202 | 24 | 41.117 | KV453253.1 | 10675863 | 24-scf00489 | 24 |
| AX-158310228 | 24 | 41.117 | KV453253.1 | 10687203 | 24-scf00489 | 24 |
| AX-157861132 | 24 | 41.117 | KV453253.1 | 10696734 | 24-scf00489 | 24 |
| AX-158310231 | 24 | 41.117 | KV453253.1 | 10696965 | 24-scf00489 | 24 |
| AX-158310238 | 24 | 41.117 | KV453253.1 | 10715030 | 24-scf00489 | 24 |
| AX-158310245 | 24 | 41.117 | KV453253.1 | 10724113 | 24-scf00489 | 24 |
| AX-157873516 | 24 | 41.117 | KV453253.1 | 10727071 | 24-scf00489 | 24 |
| AX-157718376 | 24 | 41.117 | KV453253.1 | 10727909 | 24-scf00489 | 24 |
| AX-158310247 | 24 | 41.117 | KV453253.1 | 10729258 | 24-scf00489 | 24 |
| AX-158417945 | 24 | 41.117 | KV453253.1 | 10729836 | 24-scf00489 | 24 |
| AX-157714390 | 24 | 41.117 | KV453253.1 | 10731172 | 24-scf00489 | 24 |
| AX-157847206 | 24 | 41.117 | KV453253.1 | 10731222 | 24-scf00489 | 24 |
| AX-158310248 | 24 | 41.117 | KV453253.1 | 10731840 | 24-scf00489 | 24 |
| AX-158310249 | 24 | 41.117 | KV453253.1 | 10732816 | 24-scf00489 | 24 |
| AX-158310250 | 24 | 41.117 | KV453253.1 | 10734125 | 24-scf00489 | 24 |
| AX-158310252 | 24 | 41.117 | KV453253.1 | 10735530 | 24-scf00489 | 24 |
| AX-158310270 | 24 | 41.117 | KV453253.1 | 10803055 | 24-scf00489 | 24 |
| AX-158310272 | 24 | 41.117 | KV453253.1 | 10809973 | 24-scf00489 | 24 |
| AX-158310273 | 24 | 41.117 | KV453253.1 | 10810712 | 24-scf00489 | 24 |
| AX-158310274 | 24 | 41.117 | KV453253.1 | 10812031 | 24-scf00489 | 24 |
| AX-158310284 | 24 | 41.117 | KV453253.1 | 10832866 | 24-scf00489 | 24 |
| AX-158310287 | 24 | 41.117 | KV453253.1 | 10849578 | 24-scf00489 | 24 |
| AX-158310288 | 24 | 41.117 | KV453253.1 | 10850105 | 24-scf00489 | 24 |
| AX-157847213 | 24 | 41.117 | KV453253.1 | 10851834 | 24-scf00489 | 24 |

|              |    |        |            |          |             |    |
|--------------|----|--------|------------|----------|-------------|----|
| AX-158310289 | 24 | 41.117 | KV453253.1 | 10854008 | 24-scf00489 | 24 |
| AX-158310305 | 24 | 41.117 | KV453253.1 | 10887270 | 24-scf00489 | 24 |
| AX-158310308 | 24 | 41.117 | KV453253.1 | 10889808 | 24-scf00489 | 24 |
| AX-157751955 | 24 | 41.117 | KV453253.1 | 10901295 | 24-scf00489 | 24 |
| AX-158310331 | 24 | 41.117 | KV453253.1 | 10944629 | 24-scf00489 | 24 |
| AX-158310334 | 24 | 41.117 | KV453253.1 | 10945931 | 24-scf00489 | 24 |
| AX-158310335 | 24 | 41.117 | KV453253.1 | 10946439 | 24-scf00489 | 24 |
| AX-158310338 | 24 | 41.117 | KV453253.1 | 10948862 | 24-scf00489 | 24 |
| AX-158310340 | 24 | 41.117 | KV453253.1 | 10952824 | 24-scf00489 | 24 |
| AX-158310342 | 24 | 41.117 | KV453253.1 | 10954695 | 24-scf00489 | 24 |
| AX-158310345 | 24 | 41.117 | KV453253.1 | 10957206 | 24-scf00489 | 24 |
| AX-158310346 | 24 | 41.117 | KV453253.1 | 10958727 | 24-scf00489 | 24 |
| AX-158310347 | 24 | 41.117 | KV453253.1 | 10960257 | 24-scf00489 | 24 |
| AX-158310350 | 24 | 41.117 | KV453253.1 | 10964735 | 24-scf00489 | 24 |
| AX-158310363 | 24 | 41.117 | KV453253.1 | 10985721 | 24-scf00489 | 24 |
| AX-157847227 | 24 | 41.117 | KV453253.1 | 10996161 | 24-scf00489 | 24 |
| AX-157847229 | 24 | 41.117 | KV453253.1 | 10997917 | 24-scf00489 | 24 |
| AX-158310380 | 24 | 41.117 | KV453253.1 | 11003531 | 24-scf00489 | 24 |
| AX-158310381 | 24 | 41.117 | KV453253.1 | 11005429 | 24-scf00489 | 24 |
| AX-158310382 | 24 | 41.117 | KV453253.1 | 11006393 | 24-scf00489 | 24 |
| AX-158310386 | 24 | 41.117 | KV453253.1 | 11012047 | 24-scf00489 | 24 |
| AX-158310387 | 24 | 41.117 | KV453253.1 | 11020816 | 24-scf00489 | 24 |
| AX-158310388 | 24 | 41.117 | KV453253.1 | 11024080 | 24-scf00489 | 24 |
| AX-158310390 | 24 | 41.117 | KV453253.1 | 11025100 | 24-scf00489 | 24 |
| AX-158310401 | 24 | 41.117 | KV453253.1 | 11039061 | 24-scf00489 | 24 |
| AX-158310403 | 24 | 41.117 | KV453253.1 | 11040760 | 24-scf00489 | 24 |
| AX-157847231 | 24 | 41.117 | KV453253.1 | 11043846 | 24-scf00489 | 24 |
| AX-158310410 | 24 | 41.117 | KV453253.1 | 11047539 | 24-scf00489 | 24 |
| AX-157847232 | 24 | 41.117 | KV453253.1 | 11049676 | 24-scf00489 | 24 |
| AX-158310412 | 24 | 41.117 | KV453253.1 | 11050319 | 24-scf00489 | 24 |
| AX-158310415 | 24 | 41.117 | KV453253.1 | 11056072 | 24-scf00489 | 24 |
| AX-158310416 | 24 | 41.117 | KV453253.1 | 11056380 | 24-scf00489 | 24 |
| AX-158310418 | 24 | 41.117 | KV453253.1 | 11057346 | 24-scf00489 | 24 |
| AX-158310419 | 24 | 41.117 | KV453253.1 | 11057665 | 24-scf00489 | 24 |
| AX-157775752 | 24 | 41.117 | KV453253.1 | 11061666 | 24-scf00489 | 24 |
| AX-158310423 | 24 | 41.117 | KV453253.1 | 11061893 | 24-scf00489 | 24 |
| AX-158310428 | 24 | 41.117 | KV453253.1 | 11067859 | 24-scf00489 | 24 |
| AX-158310431 | 24 | 41.117 | KV453253.1 | 11072959 | 24-scf00489 | 24 |
| AX-157881130 | 24 | 41.117 | KV453253.1 | 11075053 | 24-scf00489 | 24 |
| AX-158310440 | 24 | 41.117 | KV453253.1 | 11088590 | 24-scf00489 | 24 |
| AX-158310443 | 24 | 41.117 | KV453253.1 | 11090486 | 24-scf00489 | 24 |
| AX-158310445 | 24 | 41.117 | KV453253.1 | 11092384 | 24-scf00489 | 24 |
| AX-157746390 | 24 | 41.117 | KV453253.1 | 11098492 | 24-scf00489 | 24 |
| AX-158310501 | 24 | 41.117 | KV453253.1 | 11213237 | 24-scf00489 | 24 |
| AX-158310504 | 24 | 41.117 | KV453253.1 | 11225974 | 24-scf00489 | 24 |
| AX-158310514 | 24 | 41.117 | KV453253.1 | 11236758 | 24-scf00489 | 24 |
| AX-158310521 | 24 | 41.117 | KV453253.1 | 11249183 | 24-scf00489 | 24 |
| AX-158310522 | 24 | 41.117 | KV453253.1 | 11249635 | 24-scf00489 | 24 |
| AX-158310558 | 24 | 41.117 | KV453253.1 | 11372096 | 24-scf00489 | 24 |
| AX-158310571 | 24 | 41.117 | KV453253.1 | 11401272 | 24-scf00489 | 24 |
| AX-158310735 | 24 | 41.117 | KV453253.1 | 11629420 | 24-scf00489 | 24 |

|              |    |        |            |          |                |    |
|--------------|----|--------|------------|----------|----------------|----|
| AX-158310776 | 24 | 41.117 | KV453253.1 | 11680275 | 24-scf00489    | 24 |
| AX-158310823 | 24 | 41.117 | KV453253.1 | 11762687 | 24-scf00489    | 24 |
| AX-158310827 | 24 | 41.117 | KV453253.1 | 11768457 | 24-scf00489    | 24 |
| AX-158310866 | 24 | 41.117 | KV453253.1 | 11847274 | 24-scf00489    | 24 |
| AX-158310904 | 24 | 41.117 | KV453253.1 | 11893225 | 24-scf00489    | 24 |
| AX-158310926 | 24 | 41.117 | KV453253.1 | 11933174 | 24-scf00489    | 24 |
| AX-158310935 | 24 | 41.117 | KV453253.1 | 11953282 | 24-scf00489    | 24 |
| AX-158310937 | 24 | 41.117 | KV453253.1 | 11955318 | 24-scf00489    | 24 |
| AX-158311020 | 24 | 41.117 | KV453253.1 | 12095699 | 24-scf00489    | 24 |
| AX-158311022 | 24 | 41.117 | KV453253.1 | 12096833 | 24-scf00489    | 24 |
| AX-158311113 | 24 | 41.117 | KV453253.1 | 12197801 | 24-scf00489    | 24 |
| AX-157702660 | 24 | 41.117 | DX093520.1 | 429      | IORI212 lctalu | UN |
| AX-158310425 | 24 | 41.144 | KV453253.1 | 11062635 | 24-scf00489    | 24 |
| AX-158310174 | 24 | 41.16  | KV453253.1 | 10549052 | 24-scf00489    | 24 |
| AX-158310210 | 24 | 41.16  | KV453253.1 | 10629516 | 24-scf00489    | 24 |
| AX-158310375 | 24 | 41.16  | KV453253.1 | 10993165 | 24-scf00489    | 24 |
| AX-158310417 | 24 | 41.16  | KV453253.1 | 11056954 | 24-scf00489    | 24 |
| AX-157714169 | 24 | 41.16  | KV453253.1 | 11076637 | 24-scf00489    | 24 |
| AX-158308669 | 24 | 41.226 | KV453253.1 | 7960833  | 24-scf00489    | 24 |
| AX-158310409 | 24 | 41.226 | KV453253.1 | 11047063 | 24-scf00489    | 24 |
| AX-158310434 | 24 | 41.226 | KV453253.1 | 11079857 | 24-scf00489    | 24 |
| AX-158310437 | 24 | 41.226 | KV453253.1 | 11084727 | 24-scf00489    | 24 |
| AX-158310448 | 24 | 41.226 | KV453253.1 | 11095654 | 24-scf00489    | 24 |
| AX-158310493 | 24 | 41.226 | KV453253.1 | 11199037 | 24-scf00489    | 24 |
| AX-158310497 | 24 | 41.226 | KV453253.1 | 11206379 | 24-scf00489    | 24 |
| AX-158310499 | 24 | 41.226 | KV453253.1 | 11207408 | 24-scf00489    | 24 |
| AX-158310500 | 24 | 41.226 | KV453253.1 | 11208616 | 24-scf00489    | 24 |
| AX-157861241 | 24 | 41.226 | KV453253.1 | 11212603 | 24-scf00489    | 24 |
| AX-157864012 | 24 | 41.226 | KV453253.1 | 11221983 | 24-scf00489    | 24 |
| AX-158310543 | 24 | 41.226 | KV453253.1 | 11337611 | 24-scf00489    | 24 |
| AX-158310544 | 24 | 41.226 | KV453253.1 | 11339461 | 24-scf00489    | 24 |
| AX-158310891 | 24 | 41.226 | KV453253.1 | 11876095 | 24-scf00489    | 24 |
| AX-158310554 | 24 | 41.263 | KV453253.1 | 11360015 | 24-scf00489    | 24 |
| AX-158310570 | 24 | 41.305 | KV453253.1 | 11400148 | 24-scf00489    | 24 |
| AX-157888193 | 24 | 41.335 | KV453253.1 | 4190141  | 24-scf00489    | 24 |
| AX-158381370 | 24 | 41.335 | KV453253.1 | 9271139  | 24-scf00489    | 24 |
| AX-157847110 | 24 | 41.335 | KV453253.1 | 9345105  | 24-scf00489    | 24 |
| AX-157758594 | 24 | 41.335 | KV453253.1 | 9477620  | 24-scf00489    | 24 |
| AX-158310496 | 24 | 41.335 | KV453253.1 | 11202202 | 24-scf00489    | 24 |
| AX-158310557 | 24 | 41.335 | KV453253.1 | 11369801 | 24-scf00489    | 24 |
| AX-157861293 | 24 | 41.335 | KV453253.1 | 11412682 | 24-scf00489    | 24 |
| AX-158310576 | 24 | 41.335 | KV453253.1 | 11416156 | 24-scf00489    | 24 |
| AX-157861294 | 24 | 41.335 | KV453253.1 | 11419864 | 24-scf00489    | 24 |
| AX-157861295 | 24 | 41.335 | KV453253.1 | 11420635 | 24-scf00489    | 24 |
| AX-158310580 | 24 | 41.335 | KV453253.1 | 11423202 | 24-scf00489    | 24 |
| AX-157861298 | 24 | 41.335 | KV453253.1 | 11426604 | 24-scf00489    | 24 |
| AX-157861299 | 24 | 41.335 | KV453253.1 | 11427956 | 24-scf00489    | 24 |
| AX-158310587 | 24 | 41.335 | KV453253.1 | 11434542 | 24-scf00489    | 24 |
| AX-158310588 | 24 | 41.335 | KV453253.1 | 11435358 | 24-scf00489    | 24 |
| AX-157725649 | 24 | 41.335 | KV453253.1 | 11435808 | 24-scf00489    | 24 |
| AX-158310590 | 24 | 41.335 | KV453253.1 | 11436938 | 24-scf00489    | 24 |

|              |    |        |            |          |             |    |
|--------------|----|--------|------------|----------|-------------|----|
| AX-158310592 | 24 | 41.335 | KV453253.1 | 11438875 | 24-scf00489 | 24 |
| AX-158310600 | 24 | 41.335 | KV453253.1 | 11450943 | 24-scf00489 | 24 |
| AX-158310601 | 24 | 41.335 | KV453253.1 | 11452595 | 24-scf00489 | 24 |
| AX-158310602 | 24 | 41.335 | KV453253.1 | 11452970 | 24-scf00489 | 24 |
| AX-158310603 | 24 | 41.335 | KV453253.1 | 11455818 | 24-scf00489 | 24 |
| AX-157861302 | 24 | 41.335 | KV453253.1 | 11456004 | 24-scf00489 | 24 |
| AX-158310604 | 24 | 41.335 | KV453253.1 | 11456982 | 24-scf00489 | 24 |
| AX-158310605 | 24 | 41.335 | KV453253.1 | 11459934 | 24-scf00489 | 24 |
| AX-158310606 | 24 | 41.335 | KV453253.1 | 11462775 | 24-scf00489 | 24 |
| AX-157847261 | 24 | 41.335 | KV453253.1 | 11463951 | 24-scf00489 | 24 |
| AX-158310608 | 24 | 41.335 | KV453253.1 | 11464839 | 24-scf00489 | 24 |
| AX-158310610 | 24 | 41.335 | KV453253.1 | 11471948 | 24-scf00489 | 24 |
| AX-158310612 | 24 | 41.335 | KV453253.1 | 11473491 | 24-scf00489 | 24 |
| AX-158310613 | 24 | 41.335 | KV453253.1 | 11474137 | 24-scf00489 | 24 |
| AX-158310615 | 24 | 41.335 | KV453253.1 | 11475160 | 24-scf00489 | 24 |
| AX-158310617 | 24 | 41.335 | KV453253.1 | 11477581 | 24-scf00489 | 24 |
| AX-157772307 | 24 | 41.335 | KV453253.1 | 11478362 | 24-scf00489 | 24 |
| AX-158310619 | 24 | 41.335 | KV453253.1 | 11479636 | 24-scf00489 | 24 |
| AX-158310620 | 24 | 41.335 | KV453253.1 | 11480334 | 24-scf00489 | 24 |
| AX-158310621 | 24 | 41.335 | KV453253.1 | 11480505 | 24-scf00489 | 24 |
| AX-158310622 | 24 | 41.335 | KV453253.1 | 11484678 | 24-scf00489 | 24 |
| AX-158310628 | 24 | 41.335 | KV453253.1 | 11489282 | 24-scf00489 | 24 |
| AX-157754234 | 24 | 41.335 | KV453253.1 | 11491264 | 24-scf00489 | 24 |
| AX-158310632 | 24 | 41.335 | KV453253.1 | 11494483 | 24-scf00489 | 24 |
| AX-158310633 | 24 | 41.335 | KV453253.1 | 11494841 | 24-scf00489 | 24 |
| AX-158310634 | 24 | 41.335 | KV453253.1 | 11495597 | 24-scf00489 | 24 |
| AX-158310636 | 24 | 41.335 | KV453253.1 | 11497415 | 24-scf00489 | 24 |
| AX-158310638 | 24 | 41.335 | KV453253.1 | 11499520 | 24-scf00489 | 24 |
| AX-158310642 | 24 | 41.335 | KV453253.1 | 11504538 | 24-scf00489 | 24 |
| AX-158310649 | 24 | 41.335 | KV453253.1 | 11509159 | 24-scf00489 | 24 |
| AX-157739615 | 24 | 41.335 | KV453253.1 | 11509977 | 24-scf00489 | 24 |
| AX-158310650 | 24 | 41.335 | KV453253.1 | 11510487 | 24-scf00489 | 24 |
| AX-158310651 | 24 | 41.335 | KV453253.1 | 11510944 | 24-scf00489 | 24 |
| AX-158310652 | 24 | 41.335 | KV453253.1 | 11511925 | 24-scf00489 | 24 |
| AX-158310653 | 24 | 41.335 | KV453253.1 | 11512501 | 24-scf00489 | 24 |
| AX-158310654 | 24 | 41.335 | KV453253.1 | 11513215 | 24-scf00489 | 24 |
| AX-158310656 | 24 | 41.335 | KV453253.1 | 11515102 | 24-scf00489 | 24 |
| AX-158310989 | 24 | 41.335 | KV453253.1 | 12042483 | 24-scf00489 | 24 |
| AX-158310657 | 24 | 41.444 | KV453253.1 | 11519213 | 24-scf00489 | 24 |
| AX-158310658 | 24 | 41.444 | KV453253.1 | 11520311 | 24-scf00489 | 24 |
| AX-158310659 | 24 | 41.444 | KV453253.1 | 11522172 | 24-scf00489 | 24 |
| AX-158310660 | 24 | 41.444 | KV453253.1 | 11522810 | 24-scf00489 | 24 |
| AX-157847263 | 24 | 41.444 | KV453253.1 | 11523090 | 24-scf00489 | 24 |
| AX-158310662 | 24 | 41.444 | KV453253.1 | 11524213 | 24-scf00489 | 24 |
| AX-158310663 | 24 | 41.444 | KV453253.1 | 11525247 | 24-scf00489 | 24 |
| AX-158310664 | 24 | 41.444 | KV453253.1 | 11527825 | 24-scf00489 | 24 |
| AX-158310667 | 24 | 41.444 | KV453253.1 | 11529968 | 24-scf00489 | 24 |
| AX-157861304 | 24 | 41.444 | KV453253.1 | 11531907 | 24-scf00489 | 24 |
| AX-158310670 | 24 | 41.444 | KV453253.1 | 11533250 | 24-scf00489 | 24 |
| AX-157861305 | 24 | 41.444 | KV453253.1 | 11535056 | 24-scf00489 | 24 |
| AX-157847264 | 24 | 41.444 | KV453253.1 | 11536037 | 24-scf00489 | 24 |

|              |    |        |             |          |             |    |
|--------------|----|--------|-------------|----------|-------------|----|
| AX-157847267 | 24 | 41.444 | KV453253.1  | 11540408 | 24-scf00489 | 24 |
| AX-158310697 | 24 | 41.444 | KV453253.1  | 11573435 | 24-scf00489 | 24 |
| AX-158310717 | 24 | 41.444 | KV453253.1  | 11604846 | 24-scf00489 | 24 |
| AX-158310732 | 24 | 41.515 | KV453253.1  | 11624020 | 24-scf00489 | 24 |
| AX-158308092 | 24 | 41.554 | KV453253.1  | 6508143  | 24-scf00489 | 24 |
| AX-158310385 | 24 | 41.554 | KV453253.1  | 11008951 | 24-scf00489 | 24 |
| AX-158310629 | 24 | 41.554 | KV453253.1  | 11492742 | 24-scf00489 | 24 |
| AX-157847262 | 24 | 41.554 | KV453253.1  | 11496890 | 24-scf00489 | 24 |
| AX-158310704 | 24 | 41.554 | KV453253.1  | 11588779 | 24-scf00489 | 24 |
| AX-158310772 | 24 | 41.554 | KV453253.1  | 11675685 | 24-scf00489 | 24 |
| AX-158310773 | 24 | 41.554 | KV453253.1  | 11676329 | 24-scf00489 | 24 |
| AX-158310775 | 24 | 41.554 | KV453253.1  | 11679624 | 24-scf00489 | 24 |
| AX-158310777 | 24 | 41.554 | KV453253.1  | 11682250 | 24-scf00489 | 24 |
| AX-158310778 | 24 | 41.554 | KV453253.1  | 11684175 | 24-scf00489 | 24 |
| AX-158310780 | 24 | 41.554 | KV453253.1  | 11687719 | 24-scf00489 | 24 |
| AX-158310781 | 24 | 41.554 | KV453253.1  | 11688240 | 24-scf00489 | 24 |
| AX-158310784 | 24 | 41.554 | KV453253.1  | 11689920 | 24-scf00489 | 24 |
| AX-158310786 | 24 | 41.554 | KV453253.1  | 11693943 | 24-scf00489 | 24 |
| AX-158310800 | 24 | 41.554 | KV453253.1  | 11726101 | 24-scf00489 | 24 |
| AX-158310805 | 24 | 41.554 | KV453253.1  | 11732844 | 24-scf00489 | 24 |
| AX-158310806 | 24 | 41.554 | KV453253.1  | 11734314 | 24-scf00489 | 24 |
| AX-158310811 | 24 | 41.554 | KV453253.1  | 11743182 | 24-scf00489 | 24 |
| AX-157847280 | 24 | 41.554 | KV453253.1  | 11761285 | 24-scf00489 | 24 |
| AX-157740713 | 24 | 41.554 | KV453253.1  | 11766960 | 24-scf00489 | 24 |
| AX-158310828 | 24 | 41.554 | KV453253.1  | 11769063 | 24-scf00489 | 24 |
| AX-158310851 | 24 | 41.554 | KV453253.1  | 11824941 | 24-scf00489 | 24 |
| AX-158310852 | 24 | 41.554 | KV453253.1  | 11825786 | 24-scf00489 | 24 |
| AX-158310916 | 24 | 41.554 | KV453253.1  | 11912746 | 24-scf00489 | 24 |
| AX-158310986 | 24 | 41.554 | KV453253.1  | 12034879 | 24-scf00489 | 24 |
| AX-158311146 | 24 | 41.554 | KV453253.1  | 12251003 | 24-scf00489 | 24 |
| AX-158311206 | 24 | 41.554 | KV453253.1  | 12316306 | 24-scf00489 | 24 |
| AX-158311208 | 24 | 41.554 | KV453253.1  | 12317843 | 24-scf00489 | 24 |
| AX-158311216 | 24 | 41.554 | KV453253.1  | 12323589 | 24-scf00489 | 24 |
| AX-158311217 | 24 | 41.554 | KV453253.1  | 12324360 | 24-scf00489 | 24 |
| AX-158311218 | 24 | 41.554 | KV453253.1  | 12324963 | 24-scf00489 | 24 |
| AX-158311225 | 24 | 41.554 | KV453253.1  | 12331315 | 24-scf00489 | 24 |
| AX-158311226 | 24 | 41.554 | KV453253.1  | 12332186 | 24-scf00489 | 24 |
| AX-157873524 | 24 | 41.554 | KV453253.1  | 12349117 | 24-scf00489 | 24 |
| AX-157681807 | 24 | 41.554 | 3ML01026700 | 880      | scf02300_1  | UN |
| AX-158310314 | 24 | 41.772 | KV453253.1  | 10897966 | 24-scf00489 | 24 |
| AX-158310370 | 24 | 41.772 | KV453253.1  | 10989990 | 24-scf00489 | 24 |
| AX-158419830 | 24 | 41.772 | KV453253.1  | 11676400 | 24-scf00489 | 24 |
| AX-158310774 | 24 | 41.772 | KV453253.1  | 11677793 | 24-scf00489 | 24 |
| AX-157756289 | 24 | 41.772 | KV453253.1  | 11678820 | 24-scf00489 | 24 |
| AX-157753478 | 24 | 41.772 | KV453253.1  | 11783718 | 24-scf00489 | 24 |
| AX-157847283 | 24 | 41.772 | KV453253.1  | 11784866 | 24-scf00489 | 24 |
| AX-157847284 | 24 | 41.772 | KV453253.1  | 11785498 | 24-scf00489 | 24 |
| AX-158310841 | 24 | 41.772 | KV453253.1  | 11802398 | 24-scf00489 | 24 |
| AX-158310848 | 24 | 41.772 | KV453253.1  | 11816670 | 24-scf00489 | 24 |
| AX-158310853 | 24 | 41.772 | KV453253.1  | 11826295 | 24-scf00489 | 24 |
| AX-158310854 | 24 | 41.772 | KV453253.1  | 11827137 | 24-scf00489 | 24 |

|              |    |        |            |          |             |    |
|--------------|----|--------|------------|----------|-------------|----|
| AX-158310859 | 24 | 41.772 | KV453253.1 | 11833788 | 24-scf00489 | 24 |
| AX-158310861 | 24 | 41.772 | KV453253.1 | 11834893 | 24-scf00489 | 24 |
| AX-158310863 | 24 | 41.772 | KV453253.1 | 11837095 | 24-scf00489 | 24 |
| AX-158310880 | 24 | 41.772 | KV453253.1 | 11865648 | 24-scf00489 | 24 |
| AX-158412307 | 24 | 41.772 | KV453253.1 | 11868396 | 24-scf00489 | 24 |
| AX-158310890 | 24 | 41.772 | KV453253.1 | 11875278 | 24-scf00489 | 24 |
| AX-157693200 | 24 | 41.772 | KV453253.1 | 11885756 | 24-scf00489 | 24 |
| AX-158310913 | 24 | 41.772 | KV453253.1 | 11906585 | 24-scf00489 | 24 |
| AX-158310957 | 24 | 41.772 | KV453253.1 | 11992921 | 24-scf00489 | 24 |
| AX-158311014 | 24 | 41.772 | KV453253.1 | 12084254 | 24-scf00489 | 24 |
| AX-158311028 | 24 | 41.772 | KV453253.1 | 12100235 | 24-scf00489 | 24 |
| AX-157847302 | 24 | 41.772 | KV453253.1 | 12358548 | 24-scf00489 | 24 |
| AX-158310905 | 24 | 41.833 | KV453253.1 | 11894539 | 24-scf00489 | 24 |
| AX-158310406 | 24 | 41.881 | KV453253.1 | 11043252 | 24-scf00489 | 24 |
| AX-157847242 | 24 | 41.881 | KV453253.1 | 11258100 | 24-scf00489 | 24 |
| AX-157847245 | 24 | 41.881 | KV453253.1 | 11271961 | 24-scf00489 | 24 |
| AX-158310788 | 24 | 41.881 | KV453253.1 | 11699448 | 24-scf00489 | 24 |
| AX-158310804 | 24 | 41.881 | KV453253.1 | 11731807 | 24-scf00489 | 24 |
| AX-158310899 | 24 | 41.881 | KV453253.1 | 11883636 | 24-scf00489 | 24 |
| AX-157758036 | 24 | 41.881 | KV453253.1 | 11905841 | 24-scf00489 | 24 |
| AX-158310919 | 24 | 41.881 | KV453253.1 | 11918034 | 24-scf00489 | 24 |
| AX-158310921 | 24 | 41.881 | KV453253.1 | 11921524 | 24-scf00489 | 24 |
| AX-157847286 | 24 | 41.881 | KV453253.1 | 11926100 | 24-scf00489 | 24 |
| AX-158310924 | 24 | 41.881 | KV453253.1 | 11927183 | 24-scf00489 | 24 |
| AX-158310925 | 24 | 41.881 | KV453253.1 | 11932164 | 24-scf00489 | 24 |
| AX-158310929 | 24 | 41.881 | KV453253.1 | 11941379 | 24-scf00489 | 24 |
| AX-158310939 | 24 | 41.881 | KV453253.1 | 11962350 | 24-scf00489 | 24 |
| AX-157758005 | 24 | 41.881 | KV453253.1 | 12244577 | 24-scf00489 | 24 |
| AX-158311590 | 24 | 41.881 | KV453253.1 | 12825781 | 24-scf00489 | 24 |
| AX-158310933 | 24 | 41.906 | KV453253.1 | 11950415 | 24-scf00489 | 24 |
| AX-158310943 | 24 | 41.906 | KV453253.1 | 11967657 | 24-scf00489 | 24 |
| AX-158310946 | 24 | 41.906 | KV453253.1 | 11973136 | 24-scf00489 | 24 |
| AX-158310948 | 24 | 41.921 | KV453253.1 | 11975661 | 24-scf00489 | 24 |
| AX-158310949 | 24 | 41.956 | KV453253.1 | 11977392 | 24-scf00489 | 24 |
| AX-158307972 | 24 | 41.99  | KV453253.1 | 6362872  | 24-scf00489 | 24 |
| AX-157846957 | 24 | 41.99  | KV453253.1 | 6596614  | 24-scf00489 | 24 |
| AX-158308326 | 24 | 41.99  | KV453253.1 | 6798952  | 24-scf00489 | 24 |
| AX-158308690 | 24 | 41.99  | KV453253.1 | 7997990  | 24-scf00489 | 24 |
| AX-157847049 | 24 | 41.99  | KV453253.1 | 8548103  | 24-scf00489 | 24 |
| AX-158309362 | 24 | 41.99  | KV453253.1 | 8991768  | 24-scf00489 | 24 |
| AX-158309945 | 24 | 41.99  | KV453253.1 | 10047289 | 24-scf00489 | 24 |
| AX-158310094 | 24 | 41.99  | KV453253.1 | 10351154 | 24-scf00489 | 24 |
| AX-158310251 | 24 | 41.99  | KV453253.1 | 10735050 | 24-scf00489 | 24 |
| AX-158310290 | 24 | 41.99  | KV453253.1 | 10856030 | 24-scf00489 | 24 |
| AX-158310582 | 24 | 41.99  | KV453253.1 | 11426951 | 24-scf00489 | 24 |
| AX-158310675 | 24 | 41.99  | KV453253.1 | 11538637 | 24-scf00489 | 24 |
| AX-158310733 | 24 | 41.99  | KV453253.1 | 11624268 | 24-scf00489 | 24 |
| AX-158310795 | 24 | 41.99  | KV453253.1 | 11716300 | 24-scf00489 | 24 |
| AX-158310845 | 24 | 41.99  | KV453253.1 | 11811470 | 24-scf00489 | 24 |
| AX-158310850 | 24 | 41.99  | KV453253.1 | 11819126 | 24-scf00489 | 24 |
| AX-158310869 | 24 | 41.99  | KV453253.1 | 11849069 | 24-scf00489 | 24 |



|              |    |        |            |          |             |    |
|--------------|----|--------|------------|----------|-------------|----|
| AX-158310883 | 24 | 41.99  | KV453253.1 | 11868640 | 24-scf00489 | 24 |
| AX-158310886 | 24 | 41.99  | KV453253.1 | 11871186 | 24-scf00489 | 24 |
| AX-158310914 | 24 | 41.99  | KV453253.1 | 11911068 | 24-scf00489 | 24 |
| AX-157726578 | 24 | 41.99  | KV453253.1 | 11949933 | 24-scf00489 | 24 |
| AX-158310958 | 24 | 41.99  | KV453253.1 | 11994068 | 24-scf00489 | 24 |
| AX-158310960 | 24 | 41.99  | KV453253.1 | 11996814 | 24-scf00489 | 24 |
| AX-158310961 | 24 | 41.99  | KV453253.1 | 11997417 | 24-scf00489 | 24 |
| AX-157773026 | 24 | 41.99  | KV453253.1 | 12010972 | 24-scf00489 | 24 |
| AX-158310968 | 24 | 41.99  | KV453253.1 | 12015067 | 24-scf00489 | 24 |
| AX-158310972 | 24 | 41.99  | KV453253.1 | 12019578 | 24-scf00489 | 24 |
| AX-158381379 | 24 | 41.99  | KV453253.1 | 12020184 | 24-scf00489 | 24 |
| AX-158310978 | 24 | 41.99  | KV453253.1 | 12027233 | 24-scf00489 | 24 |
| AX-157847287 | 24 | 41.99  | KV453253.1 | 12030230 | 24-scf00489 | 24 |
| AX-158310983 | 24 | 41.99  | KV453253.1 | 12030661 | 24-scf00489 | 24 |
| AX-157888230 | 24 | 41.99  | KV453253.1 | 12032703 | 24-scf00489 | 24 |
| AX-158310990 | 24 | 41.99  | KV453253.1 | 12046791 | 24-scf00489 | 24 |
| AX-158310991 | 24 | 41.99  | KV453253.1 | 12047205 | 24-scf00489 | 24 |
| AX-158310996 | 24 | 41.99  | KV453253.1 | 12054643 | 24-scf00489 | 24 |
| AX-157847289 | 24 | 41.99  | KV453253.1 | 12056339 | 24-scf00489 | 24 |
| AX-158310999 | 24 | 41.99  | KV453253.1 | 12060659 | 24-scf00489 | 24 |
| AX-158311000 | 24 | 41.99  | KV453253.1 | 12061176 | 24-scf00489 | 24 |
| AX-158417966 | 24 | 41.99  | KV453253.1 | 12063537 | 24-scf00489 | 24 |
| AX-158311005 | 24 | 41.99  | KV453253.1 | 12071289 | 24-scf00489 | 24 |
| AX-158311007 | 24 | 41.99  | KV453253.1 | 12073089 | 24-scf00489 | 24 |
| AX-157847292 | 24 | 41.99  | KV453253.1 | 12076461 | 24-scf00489 | 24 |
| AX-157847293 | 24 | 41.99  | KV453253.1 | 12076843 | 24-scf00489 | 24 |
| AX-158311010 | 24 | 41.99  | KV453253.1 | 12078179 | 24-scf00489 | 24 |
| AX-158311023 | 24 | 41.99  | KV453253.1 | 12097077 | 24-scf00489 | 24 |
| AX-158311032 | 24 | 41.99  | KV453253.1 | 12104667 | 24-scf00489 | 24 |
| AX-158311033 | 24 | 41.99  | KV453253.1 | 12106207 | 24-scf00489 | 24 |
| AX-158311035 | 24 | 41.99  | KV453253.1 | 12109936 | 24-scf00489 | 24 |
| AX-157888232 | 24 | 41.99  | KV453253.1 | 12110550 | 24-scf00489 | 24 |
| AX-158311037 | 24 | 41.99  | KV453253.1 | 12115376 | 24-scf00489 | 24 |
| AX-158311038 | 24 | 41.99  | KV453253.1 | 12116044 | 24-scf00489 | 24 |
| AX-158311039 | 24 | 41.99  | KV453253.1 | 12116968 | 24-scf00489 | 24 |
| AX-158311047 | 24 | 41.99  | KV453253.1 | 12124702 | 24-scf00489 | 24 |
| AX-158311111 | 24 | 41.99  | KV453253.1 | 12194895 | 24-scf00489 | 24 |
| AX-157713885 | 24 | 41.99  | KV453253.1 | 12221083 | 24-scf00489 | 24 |
| AX-158311138 | 24 | 41.99  | KV453253.1 | 12243242 | 24-scf00489 | 24 |
| AX-157847303 | 24 | 41.99  | KV453253.1 | 12360458 | 24-scf00489 | 24 |
| AX-157847314 | 24 | 41.99  | KV453253.1 | 12446066 | 24-scf00489 | 24 |
| AX-158311058 | 24 | 42.154 | KV453253.1 | 12136963 | 24-scf00489 | 24 |
| AX-158311059 | 24 | 42.154 | KV453253.1 | 12138199 | 24-scf00489 | 24 |
| AX-158310505 | 24 | 42.318 | KV453253.1 | 11226545 | 24-scf00489 | 24 |
| AX-158310507 | 24 | 42.318 | KV453253.1 | 11227811 | 24-scf00489 | 24 |
| AX-158310537 | 24 | 42.318 | KV453253.1 | 11314543 | 24-scf00489 | 24 |
| AX-157847259 | 24 | 42.318 | KV453253.1 | 11422236 | 24-scf00489 | 24 |
| AX-157847277 | 24 | 42.318 | KV453253.1 | 11592668 | 24-scf00489 | 24 |
| AX-158310870 | 24 | 42.318 | KV453253.1 | 11850948 | 24-scf00489 | 24 |
| AX-158310930 | 24 | 42.318 | KV453253.1 | 11943748 | 24-scf00489 | 24 |
| AX-158419834 | 24 | 42.318 | KV453253.1 | 12087669 | 24-scf00489 | 24 |

|              |    |        |            |          |             |    |
|--------------|----|--------|------------|----------|-------------|----|
| AX-158311019 | 24 | 42.318 | KV453253.1 | 12092930 | 24-scf00489 | 24 |
| AX-158311063 | 24 | 42.318 | KV453253.1 | 12142961 | 24-scf00489 | 24 |
| AX-158311064 | 24 | 42.318 | KV453253.1 | 12143784 | 24-scf00489 | 24 |
| AX-158311066 | 24 | 42.318 | KV453253.1 | 12145605 | 24-scf00489 | 24 |
| AX-158311067 | 24 | 42.318 | KV453253.1 | 12146451 | 24-scf00489 | 24 |
| AX-158311070 | 24 | 42.318 | KV453253.1 | 12151807 | 24-scf00489 | 24 |
| AX-158311079 | 24 | 42.318 | KV453253.1 | 12161055 | 24-scf00489 | 24 |
| AX-157873523 | 24 | 42.318 | KV453253.1 | 12171977 | 24-scf00489 | 24 |
| AX-158311097 | 24 | 42.318 | KV453253.1 | 12177549 | 24-scf00489 | 24 |
| AX-157688118 | 24 | 42.318 | KV453254.1 | 2449     | 24-scf01253 | 24 |
| AX-158311025 | 24 | 42.362 | KV453253.1 | 12099130 | 24-scf00489 | 24 |
| AX-157847296 | 24 | 42.362 | KV453253.1 | 12175638 | 24-scf00489 | 24 |
| AX-158311301 | 24 | 42.362 | KV453253.1 | 12438433 | 24-scf00489 | 24 |
| AX-158311102 | 24 | 42.393 | KV453253.1 | 12182751 | 24-scf00489 | 24 |
| AX-157713049 | 24 | 42.427 | KV453253.1 | 6492423  | 24-scf00489 | 24 |
| AX-157846959 | 24 | 42.427 | KV453253.1 | 6607283  | 24-scf00489 | 24 |
| AX-158308193 | 24 | 42.427 | KV453253.1 | 6649520  | 24-scf00489 | 24 |
| AX-158308753 | 24 | 42.427 | KV453253.1 | 8152555  | 24-scf00489 | 24 |
| AX-157847073 | 24 | 42.427 | KV453253.1 | 8855657  | 24-scf00489 | 24 |
| AX-157847081 | 24 | 42.427 | KV453253.1 | 8968509  | 24-scf00489 | 24 |
| AX-158417936 | 24 | 42.427 | KV453253.1 | 10462846 | 24-scf00489 | 24 |
| AX-157748693 | 24 | 42.427 | KV453253.1 | 10514034 | 24-scf00489 | 24 |
| AX-158310232 | 24 | 42.427 | KV453253.1 | 10698610 | 24-scf00489 | 24 |
| AX-158310234 | 24 | 42.427 | KV453253.1 | 10709062 | 24-scf00489 | 24 |
| AX-158310239 | 24 | 42.427 | KV453253.1 | 10715727 | 24-scf00489 | 24 |
| AX-157847215 | 24 | 42.427 | KV453253.1 | 10885063 | 24-scf00489 | 24 |
| AX-158310436 | 24 | 42.427 | KV453253.1 | 11083351 | 24-scf00489 | 24 |
| AX-158310468 | 24 | 42.427 | KV453253.1 | 11129014 | 24-scf00489 | 24 |
| AX-158310475 | 24 | 42.427 | KV453253.1 | 11140063 | 24-scf00489 | 24 |
| AX-158310478 | 24 | 42.427 | KV453253.1 | 11142712 | 24-scf00489 | 24 |
| AX-158310491 | 24 | 42.427 | KV453253.1 | 11197423 | 24-scf00489 | 24 |
| AX-158310598 | 24 | 42.427 | KV453253.1 | 11447373 | 24-scf00489 | 24 |
| AX-158381378 | 24 | 42.427 | KV453253.1 | 11674287 | 24-scf00489 | 24 |
| AX-158310817 | 24 | 42.427 | KV453253.1 | 11754039 | 24-scf00489 | 24 |
| AX-158310849 | 24 | 42.427 | KV453253.1 | 11817828 | 24-scf00489 | 24 |
| AX-158310865 | 24 | 42.427 | KV453253.1 | 11839752 | 24-scf00489 | 24 |
| AX-158310900 | 24 | 42.427 | KV453253.1 | 11885697 | 24-scf00489 | 24 |
| AX-158310954 | 24 | 42.427 | KV453253.1 | 11984629 | 24-scf00489 | 24 |
| AX-158310970 | 24 | 42.427 | KV453253.1 | 12017059 | 24-scf00489 | 24 |
| AX-158310977 | 24 | 42.427 | KV453253.1 | 12024347 | 24-scf00489 | 24 |
| AX-157711588 | 24 | 42.427 | KV453253.1 | 12039379 | 24-scf00489 | 24 |
| AX-157722275 | 24 | 42.427 | KV453253.1 | 12106855 | 24-scf00489 | 24 |
| AX-158311050 | 24 | 42.427 | KV453253.1 | 12128318 | 24-scf00489 | 24 |
| AX-158311051 | 24 | 42.427 | KV453253.1 | 12129688 | 24-scf00489 | 24 |
| AX-158311053 | 24 | 42.427 | KV453253.1 | 12131594 | 24-scf00489 | 24 |
| AX-158311056 | 24 | 42.427 | KV453253.1 | 12133873 | 24-scf00489 | 24 |
| AX-158311060 | 24 | 42.427 | KV453253.1 | 12138895 | 24-scf00489 | 24 |
| AX-158311061 | 24 | 42.427 | KV453253.1 | 12140451 | 24-scf00489 | 24 |
| AX-158311082 | 24 | 42.427 | KV453253.1 | 12162455 | 24-scf00489 | 24 |
| AX-158311083 | 24 | 42.427 | KV453253.1 | 12163804 | 24-scf00489 | 24 |
| AX-157873522 | 24 | 42.427 | KV453253.1 | 12164093 | 24-scf00489 | 24 |

|              |    |        |            |          |             |    |
|--------------|----|--------|------------|----------|-------------|----|
| AX-158311098 | 24 | 42.427 | KV453253.1 | 12178863 | 24-scf00489 | 24 |
| AX-158311101 | 24 | 42.427 | KV453253.1 | 12181730 | 24-scf00489 | 24 |
| AX-157847297 | 24 | 42.427 | KV453253.1 | 12181863 | 24-scf00489 | 24 |
| AX-158311103 | 24 | 42.427 | KV453253.1 | 12184269 | 24-scf00489 | 24 |
| AX-158311104 | 24 | 42.427 | KV453253.1 | 12184992 | 24-scf00489 | 24 |
| AX-157753784 | 24 | 42.427 | KV453253.1 | 12210020 | 24-scf00489 | 24 |
| AX-158311123 | 24 | 42.427 | KV453253.1 | 12215641 | 24-scf00489 | 24 |
| AX-158311124 | 24 | 42.427 | KV453253.1 | 12216132 | 24-scf00489 | 24 |
| AX-158311125 | 24 | 42.427 | KV453253.1 | 12216580 | 24-scf00489 | 24 |
| AX-158311135 | 24 | 42.427 | KV453253.1 | 12224914 | 24-scf00489 | 24 |
| AX-158311136 | 24 | 42.427 | KV453253.1 | 12229723 | 24-scf00489 | 24 |
| AX-158311139 | 24 | 42.427 | KV453253.1 | 12243694 | 24-scf00489 | 24 |
| AX-158311140 | 24 | 42.427 | KV453253.1 | 12243996 | 24-scf00489 | 24 |
| AX-158311141 | 24 | 42.427 | KV453253.1 | 12245150 | 24-scf00489 | 24 |
| AX-158311147 | 24 | 42.427 | KV453253.1 | 12256888 | 24-scf00489 | 24 |
| AX-158311148 | 24 | 42.427 | KV453253.1 | 12258007 | 24-scf00489 | 24 |
| AX-158311150 | 24 | 42.427 | KV453253.1 | 12259509 | 24-scf00489 | 24 |
| AX-158311158 | 24 | 42.427 | KV453253.1 | 12265591 | 24-scf00489 | 24 |
| AX-158311159 | 24 | 42.427 | KV453253.1 | 12266438 | 24-scf00489 | 24 |
| AX-158311160 | 24 | 42.427 | KV453253.1 | 12266863 | 24-scf00489 | 24 |
| AX-158311162 | 24 | 42.427 | KV453253.1 | 12267458 | 24-scf00489 | 24 |
| AX-158311163 | 24 | 42.427 | KV453253.1 | 12268652 | 24-scf00489 | 24 |
| AX-157720939 | 24 | 42.427 | KV453253.1 | 12270810 | 24-scf00489 | 24 |
| AX-158311166 | 24 | 42.427 | KV453253.1 | 12271925 | 24-scf00489 | 24 |
| AX-158311167 | 24 | 42.427 | KV453253.1 | 12272546 | 24-scf00489 | 24 |
| AX-158311172 | 24 | 42.427 | KV453253.1 | 12280519 | 24-scf00489 | 24 |
| AX-158311173 | 24 | 42.427 | KV453253.1 | 12281328 | 24-scf00489 | 24 |
| AX-158311176 | 24 | 42.427 | KV453253.1 | 12285047 | 24-scf00489 | 24 |
| AX-158311179 | 24 | 42.427 | KV453253.1 | 12286995 | 24-scf00489 | 24 |
| AX-158311181 | 24 | 42.427 | KV453253.1 | 12289920 | 24-scf00489 | 24 |
| AX-158311185 | 24 | 42.427 | KV453253.1 | 12293059 | 24-scf00489 | 24 |
| AX-158311187 | 24 | 42.427 | KV453253.1 | 12295214 | 24-scf00489 | 24 |
| AX-158311190 | 24 | 42.427 | KV453253.1 | 12297257 | 24-scf00489 | 24 |
| AX-158311200 | 24 | 42.427 | KV453253.1 | 12310235 | 24-scf00489 | 24 |
| AX-158311202 | 24 | 42.427 | KV453253.1 | 12311898 | 24-scf00489 | 24 |
| AX-158311209 | 24 | 42.427 | KV453253.1 | 12318542 | 24-scf00489 | 24 |
| AX-158311212 | 24 | 42.427 | KV453253.1 | 12321076 | 24-scf00489 | 24 |
| AX-158311221 | 24 | 42.427 | KV453253.1 | 12327790 | 24-scf00489 | 24 |
| AX-158311228 | 24 | 42.427 | KV453253.1 | 12334066 | 24-scf00489 | 24 |
| AX-158311234 | 24 | 42.427 | KV453253.1 | 12347012 | 24-scf00489 | 24 |
| AX-158311235 | 24 | 42.427 | KV453253.1 | 12347791 | 24-scf00489 | 24 |
| AX-157847305 | 24 | 42.427 | KV453253.1 | 12366189 | 24-scf00489 | 24 |
| AX-158311245 | 24 | 42.427 | KV453253.1 | 12366776 | 24-scf00489 | 24 |
| AX-158311246 | 24 | 42.427 | KV453253.1 | 12367217 | 24-scf00489 | 24 |
| AX-158311247 | 24 | 42.427 | KV453253.1 | 12368429 | 24-scf00489 | 24 |
| AX-158311249 | 24 | 42.427 | KV453253.1 | 12369552 | 24-scf00489 | 24 |
| AX-158311250 | 24 | 42.427 | KV453253.1 | 12370124 | 24-scf00489 | 24 |
| AX-158311251 | 24 | 42.427 | KV453253.1 | 12372375 | 24-scf00489 | 24 |
| AX-158311252 | 24 | 42.427 | KV453253.1 | 12373989 | 24-scf00489 | 24 |
| AX-158311261 | 24 | 42.427 | KV453253.1 | 12380794 | 24-scf00489 | 24 |
| AX-157711780 | 24 | 42.427 | KV453253.1 | 12382108 | 24-scf00489 | 24 |

|              |    |        |            |          |                |    |
|--------------|----|--------|------------|----------|----------------|----|
| AX-158311265 | 24 | 42.427 | KV453253.1 | 12383002 | 24-scf00489    | 24 |
| AX-158311266 | 24 | 42.427 | KV453253.1 | 12387423 | 24-scf00489    | 24 |
| AX-158417971 | 24 | 42.427 | KV453253.1 | 12391449 | 24-scf00489    | 24 |
| AX-158311267 | 24 | 42.427 | KV453253.1 | 12391539 | 24-scf00489    | 24 |
| AX-158311268 | 24 | 42.427 | KV453253.1 | 12392375 | 24-scf00489    | 24 |
| AX-158311269 | 24 | 42.427 | KV453253.1 | 12392907 | 24-scf00489    | 24 |
| AX-157847307 | 24 | 42.427 | KV453253.1 | 12393838 | 24-scf00489    | 24 |
| AX-157847308 | 24 | 42.427 | KV453253.1 | 12397683 | 24-scf00489    | 24 |
| AX-157847309 | 24 | 42.427 | KV453253.1 | 12402583 | 24-scf00489    | 24 |
| AX-158311272 | 24 | 42.427 | KV453253.1 | 12402706 | 24-scf00489    | 24 |
| AX-158311274 | 24 | 42.427 | KV453253.1 | 12406039 | 24-scf00489    | 24 |
| AX-157717875 | 24 | 42.427 | KV453253.1 | 12406291 | 24-scf00489    | 24 |
| AX-158311275 | 24 | 42.427 | KV453253.1 | 12406499 | 24-scf00489    | 24 |
| AX-158311278 | 24 | 42.427 | KV453253.1 | 12409909 | 24-scf00489    | 24 |
| AX-158311279 | 24 | 42.427 | KV453253.1 | 12410781 | 24-scf00489    | 24 |
| AX-157774656 | 24 | 42.427 | KV453253.1 | 12412766 | 24-scf00489    | 24 |
| AX-158311290 | 24 | 42.427 | KV453253.1 | 12427963 | 24-scf00489    | 24 |
| AX-158311295 | 24 | 42.427 | KV453253.1 | 12431811 | 24-scf00489    | 24 |
| AX-158419838 | 24 | 42.427 | KV453253.1 | 12435244 | 24-scf00489    | 24 |
| AX-158311298 | 24 | 42.427 | KV453253.1 | 12436064 | 24-scf00489    | 24 |
| AX-158311309 | 24 | 42.427 | KV453253.1 | 12445445 | 24-scf00489    | 24 |
| AX-158311312 | 24 | 42.427 | KV453253.1 | 12447620 | 24-scf00489    | 24 |
| AX-158311314 | 24 | 42.427 | KV453253.1 | 12451452 | 24-scf00489    | 24 |
| AX-158311316 | 24 | 42.427 | KV453253.1 | 12453618 | 24-scf00489    | 24 |
| AX-158311347 | 24 | 42.427 | KV453253.1 | 12499525 | 24-scf00489    | 24 |
| AX-158311351 | 24 | 42.427 | KV453253.1 | 12503948 | 24-scf00489    | 24 |
| AX-157746796 | 24 | 42.427 | KV453253.1 | 12548001 | 24-scf00489    | 24 |
| AX-158311397 | 24 | 42.427 | KV453253.1 | 12566367 | 24-scf00489    | 24 |
| AX-158311418 | 24 | 42.427 | KV453253.1 | 12592615 | 24-scf00489    | 24 |
| AX-158311448 | 24 | 42.427 | KV453253.1 | 12635361 | 24-scf00489    | 24 |
| AX-157888243 | 24 | 42.427 | KV453253.1 | 12766114 | 24-scf00489    | 24 |
| AX-158311562 | 24 | 42.427 | KV453253.1 | 12785518 | 24-scf00489    | 24 |
| AX-158311597 | 24 | 42.427 | KV453253.1 | 12836995 | 24-scf00489    | 24 |
| AX-158311668 | 24 | 42.427 | KV453253.1 | 12930747 | 24-scf00489    | 24 |
| AX-157847355 | 24 | 42.427 | KV453253.1 | 13079124 | 24-scf00489    | 24 |
| AX-158311828 | 24 | 42.427 | KV453253.1 | 13138876 | 24-scf00489    | 24 |
| AX-158311848 | 24 | 42.427 | KV453253.1 | 13172369 | 24-scf00489    | 24 |
| AX-157688117 | 24 | 42.427 | KV453254.1 | 2409     | 24-scf01253    | 24 |
| AX-157701822 | 24 | 42.427 | DX088017.1 | 596      | 4ORI212 lctalt | UN |
| AX-158308099 | 24 | 42.537 | KV453253.1 | 6516584  | 24-scf00489    | 24 |
| AX-158308125 | 24 | 42.537 | KV453253.1 | 6548872  | 24-scf00489    | 24 |
| AX-157881107 | 24 | 42.537 | KV453253.1 | 6555804  | 24-scf00489    | 24 |
| AX-158308236 | 24 | 42.537 | KV453253.1 | 6704732  | 24-scf00489    | 24 |
| AX-157708309 | 24 | 42.537 | KV453253.1 | 7877179  | 24-scf00489    | 24 |
| AX-158308658 | 24 | 42.537 | KV453253.1 | 7941295  | 24-scf00489    | 24 |
| AX-158419808 | 24 | 42.537 | KV453253.1 | 8070512  | 24-scf00489    | 24 |
| AX-158417893 | 24 | 42.537 | KV453253.1 | 8139071  | 24-scf00489    | 24 |
| AX-158308807 | 24 | 42.537 | KV453253.1 | 8233373  | 24-scf00489    | 24 |
| AX-158309123 | 24 | 42.537 | KV453253.1 | 8665826  | 24-scf00489    | 24 |
| AX-158309137 | 24 | 42.537 | KV453253.1 | 8689038  | 24-scf00489    | 24 |
| AX-158309175 | 24 | 42.537 | KV453253.1 | 8750109  | 24-scf00489    | 24 |

|              |    |        |            |          |             |    |
|--------------|----|--------|------------|----------|-------------|----|
| AX-158309281 | 24 | 42.537 | KV453253.1 | 8880938  | 24-scf00489 | 24 |
| AX-158309309 | 24 | 42.537 | KV453253.1 | 8915150  | 24-scf00489 | 24 |
| AX-158309311 | 24 | 42.537 | KV453253.1 | 8916998  | 24-scf00489 | 24 |
| AX-158309381 | 24 | 42.537 | KV453253.1 | 9020251  | 24-scf00489 | 24 |
| AX-158309408 | 24 | 42.537 | KV453253.1 | 9067560  | 24-scf00489 | 24 |
| AX-157847092 | 24 | 42.537 | KV453253.1 | 9178984  | 24-scf00489 | 24 |
| AX-158309484 | 24 | 42.537 | KV453253.1 | 9187227  | 24-scf00489 | 24 |
| AX-157881120 | 24 | 42.537 | KV453253.1 | 9265049  | 24-scf00489 | 24 |
| AX-158309538 | 24 | 42.537 | KV453253.1 | 9278435  | 24-scf00489 | 24 |
| AX-158309600 | 24 | 42.537 | KV453253.1 | 9381710  | 24-scf00489 | 24 |
| AX-157775804 | 24 | 42.537 | KV453253.1 | 9507451  | 24-scf00489 | 24 |
| AX-158309706 | 24 | 42.537 | KV453253.1 | 9573782  | 24-scf00489 | 24 |
| AX-158309760 | 24 | 42.537 | KV453253.1 | 9646755  | 24-scf00489 | 24 |
| AX-158309857 | 24 | 42.537 | KV453253.1 | 9864975  | 24-scf00489 | 24 |
| AX-157881125 | 24 | 42.537 | KV453253.1 | 10011430 | 24-scf00489 | 24 |
| AX-158309934 | 24 | 42.537 | KV453253.1 | 10029986 | 24-scf00489 | 24 |
| AX-158309935 | 24 | 42.537 | KV453253.1 | 10031907 | 24-scf00489 | 24 |
| AX-158309951 | 24 | 42.537 | KV453253.1 | 10071357 | 24-scf00489 | 24 |
| AX-157847152 | 24 | 42.537 | KV453253.1 | 10173813 | 24-scf00489 | 24 |
| AX-157881126 | 24 | 42.537 | KV453253.1 | 10220944 | 24-scf00489 | 24 |
| AX-158310017 | 24 | 42.537 | KV453253.1 | 10221320 | 24-scf00489 | 24 |
| AX-158310070 | 24 | 42.537 | KV453253.1 | 10307509 | 24-scf00489 | 24 |
| AX-158310071 | 24 | 42.537 | KV453253.1 | 10309312 | 24-scf00489 | 24 |
| AX-157715176 | 24 | 42.537 | KV453253.1 | 10435155 | 24-scf00489 | 24 |
| AX-157881128 | 24 | 42.537 | KV453253.1 | 10471556 | 24-scf00489 | 24 |
| AX-158310261 | 24 | 42.537 | KV453253.1 | 10770539 | 24-scf00489 | 24 |
| AX-157847211 | 24 | 42.537 | KV453253.1 | 10776269 | 24-scf00489 | 24 |
| AX-158310265 | 24 | 42.537 | KV453253.1 | 10787283 | 24-scf00489 | 24 |
| AX-158310281 | 24 | 42.537 | KV453253.1 | 10827063 | 24-scf00489 | 24 |
| AX-158310389 | 24 | 42.537 | KV453253.1 | 11024315 | 24-scf00489 | 24 |
| AX-157873518 | 24 | 42.537 | KV453253.1 | 11025552 | 24-scf00489 | 24 |
| AX-158310392 | 24 | 42.537 | KV453253.1 | 11028925 | 24-scf00489 | 24 |
| AX-158310396 | 24 | 42.537 | KV453253.1 | 11034476 | 24-scf00489 | 24 |
| AX-158310405 | 24 | 42.537 | KV453253.1 | 11041733 | 24-scf00489 | 24 |
| AX-158310413 | 24 | 42.537 | KV453253.1 | 11050749 | 24-scf00489 | 24 |
| AX-158310466 | 24 | 42.537 | KV453253.1 | 11126203 | 24-scf00489 | 24 |
| AX-158310471 | 24 | 42.537 | KV453253.1 | 11134321 | 24-scf00489 | 24 |
| AX-158310579 | 24 | 42.537 | KV453253.1 | 11420215 | 24-scf00489 | 24 |
| AX-158310581 | 24 | 42.537 | KV453253.1 | 11424831 | 24-scf00489 | 24 |
| AX-158310647 | 24 | 42.537 | KV453253.1 | 11507770 | 24-scf00489 | 24 |
| AX-157861303 | 24 | 42.537 | KV453253.1 | 11527736 | 24-scf00489 | 24 |
| AX-158310671 | 24 | 42.537 | KV453253.1 | 11534362 | 24-scf00489 | 24 |
| AX-158310672 | 24 | 42.537 | KV453253.1 | 11534988 | 24-scf00489 | 24 |
| AX-158310721 | 24 | 42.537 | KV453253.1 | 11613363 | 24-scf00489 | 24 |
| AX-157847279 | 24 | 42.537 | KV453253.1 | 11735381 | 24-scf00489 | 24 |
| AX-158310812 | 24 | 42.537 | KV453253.1 | 11746832 | 24-scf00489 | 24 |
| AX-158310824 | 24 | 42.537 | KV453253.1 | 11764355 | 24-scf00489 | 24 |
| AX-157694965 | 24 | 42.537 | KV453253.1 | 11765744 | 24-scf00489 | 24 |
| AX-158310826 | 24 | 42.537 | KV453253.1 | 11767300 | 24-scf00489 | 24 |
| AX-158310867 | 24 | 42.537 | KV453253.1 | 11847934 | 24-scf00489 | 24 |
| AX-158310895 | 24 | 42.537 | KV453253.1 | 11880197 | 24-scf00489 | 24 |

|              |    |        |            |          |             |    |
|--------------|----|--------|------------|----------|-------------|----|
| AX-158310940 | 24 | 42.537 | KV453253.1 | 11964175 | 24-scf00489 | 24 |
| AX-158310966 | 24 | 42.537 | KV453253.1 | 12012432 | 24-scf00489 | 24 |
| AX-158310967 | 24 | 42.537 | KV453253.1 | 12012853 | 24-scf00489 | 24 |
| AX-158310988 | 24 | 42.537 | KV453253.1 | 12036104 | 24-scf00489 | 24 |
| AX-158311003 | 24 | 42.537 | KV453253.1 | 12068160 | 24-scf00489 | 24 |
| AX-157847291 | 24 | 42.537 | KV453253.1 | 12073789 | 24-scf00489 | 24 |
| AX-158311030 | 24 | 42.537 | KV453253.1 | 12102022 | 24-scf00489 | 24 |
| AX-158311055 | 24 | 42.537 | KV453253.1 | 12133348 | 24-scf00489 | 24 |
| AX-158311096 | 24 | 42.537 | KV453253.1 | 12177375 | 24-scf00489 | 24 |
| AX-158311108 | 24 | 42.537 | KV453253.1 | 12191045 | 24-scf00489 | 24 |
| AX-157847299 | 24 | 42.537 | KV453253.1 | 12208679 | 24-scf00489 | 24 |
| AX-158311118 | 24 | 42.537 | KV453253.1 | 12208716 | 24-scf00489 | 24 |
| AX-158311120 | 24 | 42.537 | KV453253.1 | 12212517 | 24-scf00489 | 24 |
| AX-158311133 | 24 | 42.537 | KV453253.1 | 12222538 | 24-scf00489 | 24 |
| AX-157708759 | 24 | 42.537 | KV453253.1 | 12257815 | 24-scf00489 | 24 |
| AX-158311149 | 24 | 42.537 | KV453253.1 | 12258530 | 24-scf00489 | 24 |
| AX-158311161 | 24 | 42.537 | KV453253.1 | 12267271 | 24-scf00489 | 24 |
| AX-158311165 | 24 | 42.537 | KV453253.1 | 12270167 | 24-scf00489 | 24 |
| AX-158311184 | 24 | 42.537 | KV453253.1 | 12292531 | 24-scf00489 | 24 |
| AX-158311205 | 24 | 42.537 | KV453253.1 | 12313822 | 24-scf00489 | 24 |
| AX-158311222 | 24 | 42.537 | KV453253.1 | 12329046 | 24-scf00489 | 24 |
| AX-157847300 | 24 | 42.537 | KV453253.1 | 12342221 | 24-scf00489 | 24 |
| AX-158311233 | 24 | 42.537 | KV453253.1 | 12346208 | 24-scf00489 | 24 |
| AX-158311238 | 24 | 42.537 | KV453253.1 | 12352105 | 24-scf00489 | 24 |
| AX-158311280 | 24 | 42.537 | KV453253.1 | 12414335 | 24-scf00489 | 24 |
| AX-158311281 | 24 | 42.537 | KV453253.1 | 12417050 | 24-scf00489 | 24 |
| AX-158311283 | 24 | 42.537 | KV453253.1 | 12418115 | 24-scf00489 | 24 |
| AX-158311284 | 24 | 42.537 | KV453253.1 | 12419749 | 24-scf00489 | 24 |
| AX-158311285 | 24 | 42.537 | KV453253.1 | 12423232 | 24-scf00489 | 24 |
| AX-158311288 | 24 | 42.537 | KV453253.1 | 12427065 | 24-scf00489 | 24 |
| AX-158311292 | 24 | 42.537 | KV453253.1 | 12429465 | 24-scf00489 | 24 |
| AX-158311293 | 24 | 42.537 | KV453253.1 | 12429748 | 24-scf00489 | 24 |
| AX-158311297 | 24 | 42.537 | KV453253.1 | 12433198 | 24-scf00489 | 24 |
| AX-158311300 | 24 | 42.537 | KV453253.1 | 12437117 | 24-scf00489 | 24 |
| AX-158311307 | 24 | 42.537 | KV453253.1 | 12444011 | 24-scf00489 | 24 |
| AX-158311308 | 24 | 42.537 | KV453253.1 | 12444750 | 24-scf00489 | 24 |
| AX-157847315 | 24 | 42.537 | KV453253.1 | 12448645 | 24-scf00489 | 24 |
| AX-158311318 | 24 | 42.537 | KV453253.1 | 12454489 | 24-scf00489 | 24 |
| AX-158311345 | 24 | 42.537 | KV453253.1 | 12494407 | 24-scf00489 | 24 |
| AX-157745671 | 24 | 42.537 | KV453253.1 | 12510217 | 24-scf00489 | 24 |
| AX-158311387 | 24 | 42.537 | KV453253.1 | 12552849 | 24-scf00489 | 24 |
| AX-158311408 | 24 | 42.537 | KV453253.1 | 12584267 | 24-scf00489 | 24 |
| AX-158311529 | 24 | 42.537 | KV453253.1 | 12737923 | 24-scf00489 | 24 |
| AX-158412325 | 24 | 42.537 | KV453253.1 | 12770156 | 24-scf00489 | 24 |
| AX-158311565 | 24 | 42.537 | KV453253.1 | 12790586 | 24-scf00489 | 24 |
| AX-158311588 | 24 | 42.537 | KV453253.1 | 12823511 | 24-scf00489 | 24 |
| AX-157717117 | 24 | 42.537 | KV453253.1 | 12837713 | 24-scf00489 | 24 |
| AX-158417978 | 24 | 42.537 | KV453253.1 | 12894479 | 24-scf00489 | 24 |
| AX-157847340 | 24 | 42.537 | KV453253.1 | 12904868 | 24-scf00489 | 24 |
| AX-158311690 | 24 | 42.537 | KV453253.1 | 12955298 | 24-scf00489 | 24 |
| AX-158310829 | 24 | 42.755 | KV453253.1 | 11773456 | 24-scf00489 | 24 |

|              |    |        |            |          |                |    |
|--------------|----|--------|------------|----------|----------------|----|
| AX-158310896 | 24 | 42.755 | KV453253.1 | 11880838 | 24-scf00489    | 24 |
| AX-158311319 | 24 | 42.755 | KV453253.1 | 12459476 | 24-scf00489    | 24 |
| AX-158311320 | 24 | 42.755 | KV453253.1 | 12460523 | 24-scf00489    | 24 |
| AX-157771642 | 24 | 42.755 | KV453253.1 | 12461808 | 24-scf00489    | 24 |
| AX-158311330 | 24 | 42.755 | KV453253.1 | 12472589 | 24-scf00489    | 24 |
| AX-158311331 | 24 | 42.755 | KV453253.1 | 12472812 | 24-scf00489    | 24 |
| AX-158311332 | 24 | 42.755 | KV453253.1 | 12473797 | 24-scf00489    | 24 |
| AX-158311339 | 24 | 42.755 | KV453253.1 | 12486534 | 24-scf00489    | 24 |
| AX-158311341 | 24 | 42.755 | KV453253.1 | 12487623 | 24-scf00489    | 24 |
| AX-158311343 | 24 | 42.755 | KV453253.1 | 12488961 | 24-scf00489    | 24 |
| AX-158311355 | 24 | 42.755 | KV453253.1 | 12513058 | 24-scf00489    | 24 |
| AX-157721171 | 24 | 42.755 | KV453253.1 | 12521952 | 24-scf00489    | 24 |
| AX-158311802 | 24 | 42.755 | KV453253.1 | 13095104 | 24-scf00489    | 24 |
| AX-157695964 | 24 | 42.755 | FI860284.1 | 66       | IORI212 lctalu | UN |
| AX-158311317 | 24 | 42.864 | KV453253.1 | 12454057 | 24-scf00489    | 24 |
| AX-157751336 | 24 | 42.864 | KV453253.1 | 12508827 | 24-scf00489    | 24 |
| AX-158311356 | 24 | 42.864 | KV453253.1 | 12513928 | 24-scf00489    | 24 |
| AX-158311365 | 24 | 42.864 | KV453253.1 | 12528155 | 24-scf00489    | 24 |
| AX-158311366 | 24 | 42.864 | KV453253.1 | 12528516 | 24-scf00489    | 24 |
| AX-158310204 | 24 | 42.973 | KV453253.1 | 10617786 | 24-scf00489    | 24 |
| AX-158310256 | 24 | 42.973 | KV453253.1 | 10752278 | 24-scf00489    | 24 |
| AX-157847282 | 24 | 42.973 | KV453253.1 | 11778592 | 24-scf00489    | 24 |
| AX-158310915 | 24 | 42.973 | KV453253.1 | 11911753 | 24-scf00489    | 24 |
| AX-158311305 | 24 | 42.973 | KV453253.1 | 12441808 | 24-scf00489    | 24 |
| AX-158311353 | 24 | 42.973 | KV453253.1 | 12506387 | 24-scf00489    | 24 |
| AX-158311358 | 24 | 42.973 | KV453253.1 | 12516762 | 24-scf00489    | 24 |
| AX-158311360 | 24 | 42.973 | KV453253.1 | 12517501 | 24-scf00489    | 24 |
| AX-158311364 | 24 | 42.973 | KV453253.1 | 12527672 | 24-scf00489    | 24 |
| AX-158311369 | 24 | 42.973 | KV453253.1 | 12530948 | 24-scf00489    | 24 |
| AX-158311370 | 24 | 42.973 | KV453253.1 | 12531305 | 24-scf00489    | 24 |
| AX-157847323 | 24 | 42.973 | KV453253.1 | 12535106 | 24-scf00489    | 24 |
| AX-158311374 | 24 | 42.973 | KV453253.1 | 12536235 | 24-scf00489    | 24 |
| AX-157751858 | 24 | 42.973 | KV453253.1 | 12537249 | 24-scf00489    | 24 |
| AX-158311375 | 24 | 42.973 | KV453253.1 | 12538884 | 24-scf00489    | 24 |
| AX-158311376 | 24 | 42.973 | KV453253.1 | 12540399 | 24-scf00489    | 24 |
| AX-157749289 | 24 | 42.973 | KV453253.1 | 12543507 | 24-scf00489    | 24 |
| AX-158311380 | 24 | 42.973 | KV453253.1 | 12547615 | 24-scf00489    | 24 |
| AX-158311381 | 24 | 42.973 | KV453253.1 | 12548532 | 24-scf00489    | 24 |
| AX-158311382 | 24 | 42.973 | KV453253.1 | 12549974 | 24-scf00489    | 24 |
| AX-158311383 | 24 | 42.973 | KV453253.1 | 12550487 | 24-scf00489    | 24 |
| AX-158311384 | 24 | 42.973 | KV453253.1 | 12551106 | 24-scf00489    | 24 |
| AX-158311385 | 24 | 42.973 | KV453253.1 | 12551687 | 24-scf00489    | 24 |
| AX-157847326 | 24 | 42.973 | KV453253.1 | 12553547 | 24-scf00489    | 24 |
| AX-158311388 | 24 | 42.973 | KV453253.1 | 12555151 | 24-scf00489    | 24 |
| AX-157847327 | 24 | 42.973 | KV453253.1 | 12561486 | 24-scf00489    | 24 |
| AX-158311395 | 24 | 42.973 | KV453253.1 | 12564722 | 24-scf00489    | 24 |
| AX-158311406 | 24 | 42.973 | KV453253.1 | 12582289 | 24-scf00489    | 24 |
| AX-158311477 | 24 | 42.973 | KV453253.1 | 12673223 | 24-scf00489    | 24 |
| AX-158311637 | 24 | 42.973 | KV453253.1 | 12887536 | 24-scf00489    | 24 |
| AX-158311686 | 24 | 42.973 | KV453253.1 | 12952814 | 24-scf00489    | 24 |
| AX-158311392 | 24 | 43.081 | KV453253.1 | 12560476 | 24-scf00489    | 24 |

|              |    |        |            |          |             |    |
|--------------|----|--------|------------|----------|-------------|----|
| AX-158311398 | 24 | 43.081 | KV453253.1 | 12568081 | 24-scf00489 | 24 |
| AX-158311399 | 24 | 43.192 | KV453253.1 | 12569629 | 24-scf00489 | 24 |
| AX-158311400 | 24 | 43.192 | KV453253.1 | 12570224 | 24-scf00489 | 24 |
| AX-158311404 | 24 | 43.192 | KV453253.1 | 12580934 | 24-scf00489 | 24 |
| AX-158311425 | 24 | 43.32  | KV453253.1 | 12601987 | 24-scf00489 | 24 |
| AX-158311444 | 24 | 43.32  | KV453253.1 | 12633418 | 24-scf00489 | 24 |
| AX-158311452 | 24 | 43.32  | KV453253.1 | 12642175 | 24-scf00489 | 24 |
| AX-158311474 | 24 | 43.32  | KV453253.1 | 12670259 | 24-scf00489 | 24 |
| AX-158311508 | 24 | 43.32  | KV453253.1 | 12710540 | 24-scf00489 | 24 |
| AX-158311514 | 24 | 43.32  | KV453253.1 | 12717597 | 24-scf00489 | 24 |
| AX-158311526 | 24 | 43.32  | KV453253.1 | 12733164 | 24-scf00489 | 24 |
| AX-158310992 | 24 | 43.411 | KV453253.1 | 12047426 | 24-scf00489 | 24 |
| AX-158311017 | 24 | 43.411 | KV453253.1 | 12089759 | 24-scf00489 | 24 |
| AX-157749476 | 24 | 43.411 | KV453253.1 | 12411183 | 24-scf00489 | 24 |
| AX-157772044 | 24 | 43.411 | KV453253.1 | 12428447 | 24-scf00489 | 24 |
| AX-157847328 | 24 | 43.411 | KV453253.1 | 12598266 | 24-scf00489 | 24 |
| AX-158311426 | 24 | 43.411 | KV453253.1 | 12607260 | 24-scf00489 | 24 |
| AX-158311427 | 24 | 43.411 | KV453253.1 | 12608613 | 24-scf00489 | 24 |
| AX-158311428 | 24 | 43.411 | KV453253.1 | 12610729 | 24-scf00489 | 24 |
| AX-158311429 | 24 | 43.411 | KV453253.1 | 12612777 | 24-scf00489 | 24 |
| AX-158311430 | 24 | 43.411 | KV453253.1 | 12613718 | 24-scf00489 | 24 |
| AX-157707744 | 24 | 43.411 | KV453253.1 | 12615510 | 24-scf00489 | 24 |
| AX-158311431 | 24 | 43.411 | KV453253.1 | 12615859 | 24-scf00489 | 24 |
| AX-158311438 | 24 | 43.411 | KV453253.1 | 12626927 | 24-scf00489 | 24 |
| AX-158311440 | 24 | 43.411 | KV453253.1 | 12630968 | 24-scf00489 | 24 |
| AX-158311447 | 24 | 43.411 | KV453253.1 | 12634861 | 24-scf00489 | 24 |
| AX-158311450 | 24 | 43.411 | KV453253.1 | 12639847 | 24-scf00489 | 24 |
| AX-158311453 | 24 | 43.411 | KV453253.1 | 12644236 | 24-scf00489 | 24 |
| AX-157721292 | 24 | 43.411 | KV453253.1 | 12645586 | 24-scf00489 | 24 |
| AX-158311456 | 24 | 43.411 | KV453253.1 | 12647871 | 24-scf00489 | 24 |
| AX-158311457 | 24 | 43.411 | KV453253.1 | 12648261 | 24-scf00489 | 24 |
| AX-158311462 | 24 | 43.411 | KV453253.1 | 12651876 | 24-scf00489 | 24 |
| AX-158311463 | 24 | 43.411 | KV453253.1 | 12653493 | 24-scf00489 | 24 |
| AX-158311465 | 24 | 43.411 | KV453253.1 | 12656992 | 24-scf00489 | 24 |
| AX-158311472 | 24 | 43.411 | KV453253.1 | 12666769 | 24-scf00489 | 24 |
| AX-158311473 | 24 | 43.411 | KV453253.1 | 12668537 | 24-scf00489 | 24 |
| AX-158311509 | 24 | 43.411 | KV453253.1 | 12711566 | 24-scf00489 | 24 |
| AX-158311510 | 24 | 43.411 | KV453253.1 | 12712275 | 24-scf00489 | 24 |
| AX-158311512 | 24 | 43.411 | KV453253.1 | 12714595 | 24-scf00489 | 24 |
| AX-158311517 | 24 | 43.411 | KV453253.1 | 12720712 | 24-scf00489 | 24 |
| AX-158311523 | 24 | 43.411 | KV453253.1 | 12730196 | 24-scf00489 | 24 |
| AX-157755586 | 24 | 43.411 | KV453253.1 | 12746036 | 24-scf00489 | 24 |
| AX-158311545 | 24 | 43.411 | KV453253.1 | 12755862 | 24-scf00489 | 24 |
| AX-157774219 | 24 | 43.411 | KV453253.1 | 12756040 | 24-scf00489 | 24 |
| AX-158311547 | 24 | 43.411 | KV453253.1 | 12756458 | 24-scf00489 | 24 |
| AX-157888242 | 24 | 43.411 | KV453253.1 | 12766032 | 24-scf00489 | 24 |
| AX-158311552 | 24 | 43.411 | KV453253.1 | 12773029 | 24-scf00489 | 24 |
| AX-157710976 | 24 | 43.411 | KV453253.1 | 12773756 | 24-scf00489 | 24 |
| AX-158311556 | 24 | 43.411 | KV453253.1 | 12777562 | 24-scf00489 | 24 |
| AX-157727518 | 24 | 43.411 | KV453253.1 | 12799494 | 24-scf00489 | 24 |
| AX-158311633 | 24 | 43.411 | KV453253.1 | 12879234 | 24-scf00489 | 24 |



|              |    |        |            |          |             |    |
|--------------|----|--------|------------|----------|-------------|----|
| AX-157847339 | 24 | 43.411 | KV453253.1 | 12898972 | 24-scf00489 | 24 |
| AX-158311505 | 24 | 43.629 | KV453253.1 | 12707374 | 24-scf00489 | 24 |
| AX-158311507 | 24 | 43.629 | KV453253.1 | 12709958 | 24-scf00489 | 24 |
| AX-158311539 | 24 | 43.629 | KV453253.1 | 12748065 | 24-scf00489 | 24 |
| AX-158311548 | 24 | 43.629 | KV453253.1 | 12756843 | 24-scf00489 | 24 |
| AX-158311554 | 24 | 43.629 | KV453253.1 | 12776219 | 24-scf00489 | 24 |
| AX-158311566 | 24 | 43.629 | KV453253.1 | 12791339 | 24-scf00489 | 24 |
| AX-158311567 | 24 | 43.629 | KV453253.1 | 12791620 | 24-scf00489 | 24 |
| AX-158311568 | 24 | 43.629 | KV453253.1 | 12792623 | 24-scf00489 | 24 |
| AX-158311570 | 24 | 43.629 | KV453253.1 | 12793654 | 24-scf00489 | 24 |
| AX-158311572 | 24 | 43.759 | KV453253.1 | 12797655 | 24-scf00489 | 24 |
| AX-158311586 | 24 | 43.759 | KV453253.1 | 12821896 | 24-scf00489 | 24 |
| AX-158311587 | 24 | 43.759 | KV453253.1 | 12822465 | 24-scf00489 | 24 |
| AX-158308157 | 24 | 43.848 | KV453253.1 | 6594959  | 24-scf00489 | 24 |
| AX-158310072 | 24 | 43.848 | KV453253.1 | 10314781 | 24-scf00489 | 24 |
| AX-158310889 | 24 | 43.848 | KV453253.1 | 11874678 | 24-scf00489 | 24 |
| AX-158311304 | 24 | 43.848 | KV453253.1 | 12440526 | 24-scf00489 | 24 |
| AX-158311372 | 24 | 43.848 | KV453253.1 | 12534750 | 24-scf00489 | 24 |
| AX-158311435 | 24 | 43.848 | KV453253.1 | 12620027 | 24-scf00489 | 24 |
| AX-158311542 | 24 | 43.848 | KV453253.1 | 12752307 | 24-scf00489 | 24 |
| AX-158311571 | 24 | 43.848 | KV453253.1 | 12796612 | 24-scf00489 | 24 |
| AX-158311574 | 24 | 43.848 | KV453253.1 | 12800088 | 24-scf00489 | 24 |
| AX-158311583 | 24 | 43.848 | KV453253.1 | 12818346 | 24-scf00489 | 24 |
| AX-158311594 | 24 | 43.848 | KV453253.1 | 12833288 | 24-scf00489 | 24 |
| AX-158311596 | 24 | 43.848 | KV453253.1 | 12836752 | 24-scf00489 | 24 |
| AX-157721518 | 24 | 43.848 | KV453253.1 | 12839762 | 24-scf00489 | 24 |
| AX-157746090 | 24 | 43.848 | KV453253.1 | 12840890 | 24-scf00489 | 24 |
| AX-158311600 | 24 | 43.848 | KV453253.1 | 12844042 | 24-scf00489 | 24 |
| AX-158311601 | 24 | 43.848 | KV453253.1 | 12846301 | 24-scf00489 | 24 |
| AX-158311602 | 24 | 43.848 | KV453253.1 | 12847320 | 24-scf00489 | 24 |
| AX-157847334 | 24 | 43.848 | KV453253.1 | 12854550 | 24-scf00489 | 24 |
| AX-158311615 | 24 | 43.848 | KV453253.1 | 12860666 | 24-scf00489 | 24 |
| AX-158311616 | 24 | 43.848 | KV453253.1 | 12861102 | 24-scf00489 | 24 |
| AX-158311617 | 24 | 43.848 | KV453253.1 | 12861955 | 24-scf00489 | 24 |
| AX-158311619 | 24 | 43.848 | KV453253.1 | 12867192 | 24-scf00489 | 24 |
| AX-158311620 | 24 | 43.848 | KV453253.1 | 12867637 | 24-scf00489 | 24 |
| AX-158311622 | 24 | 43.848 | KV453253.1 | 12871131 | 24-scf00489 | 24 |
| AX-158311628 | 24 | 43.848 | KV453253.1 | 12874749 | 24-scf00489 | 24 |
| AX-158311629 | 24 | 43.848 | KV453253.1 | 12875161 | 24-scf00489 | 24 |
| AX-157707734 | 24 | 43.848 | KV453253.1 | 12876599 | 24-scf00489 | 24 |
| AX-158311632 | 24 | 43.848 | KV453253.1 | 12878718 | 24-scf00489 | 24 |
| AX-158311635 | 24 | 43.848 | KV453253.1 | 12883618 | 24-scf00489 | 24 |
| AX-158311636 | 24 | 43.848 | KV453253.1 | 12886924 | 24-scf00489 | 24 |
| AX-158311639 | 24 | 43.848 | KV453253.1 | 12889511 | 24-scf00489 | 24 |
| AX-157847336 | 24 | 43.848 | KV453253.1 | 12890511 | 24-scf00489 | 24 |
| AX-158417979 | 24 | 43.848 | KV453253.1 | 12894879 | 24-scf00489 | 24 |
| AX-158311646 | 24 | 44.059 | KV453253.1 | 12903826 | 24-scf00489 | 24 |
| AX-157847059 | 24 | 44.176 | KV453253.1 | 8696514  | 24-scf00489 | 24 |
| AX-158311530 | 24 | 44.176 | KV453253.1 | 12738696 | 24-scf00489 | 24 |
| AX-158311653 | 24 | 44.176 | KV453253.1 | 12916901 | 24-scf00489 | 24 |
| AX-158311654 | 24 | 44.176 | KV453253.1 | 12917447 | 24-scf00489 | 24 |

|              |    |        |            |          |             |    |
|--------------|----|--------|------------|----------|-------------|----|
| AX-158311662 | 24 | 44.176 | KV453253.1 | 12925549 | 24-scf00489 | 24 |
| AX-158311663 | 24 | 44.176 | KV453253.1 | 12926276 | 24-scf00489 | 24 |
| AX-158311665 | 24 | 44.176 | KV453253.1 | 12928905 | 24-scf00489 | 24 |
| AX-158308095 | 24 | 44.503 | KV453253.1 | 6511396  | 24-scf00489 | 24 |
| AX-157846958 | 24 | 44.503 | KV453253.1 | 6596803  | 24-scf00489 | 24 |
| AX-158308173 | 24 | 44.503 | KV453253.1 | 6613466  | 24-scf00489 | 24 |
| AX-158308211 | 24 | 44.503 | KV453253.1 | 6674040  | 24-scf00489 | 24 |
| AX-158308224 | 24 | 44.503 | KV453253.1 | 6691456  | 24-scf00489 | 24 |
| AX-158308950 | 24 | 44.503 | KV453253.1 | 8446610  | 24-scf00489 | 24 |
| AX-158308969 | 24 | 44.503 | KV453253.1 | 8470135  | 24-scf00489 | 24 |
| AX-158309077 | 24 | 44.503 | KV453253.1 | 8586203  | 24-scf00489 | 24 |
| AX-158309118 | 24 | 44.503 | KV453253.1 | 8654878  | 24-scf00489 | 24 |
| AX-158309298 | 24 | 44.503 | KV453253.1 | 8903564  | 24-scf00489 | 24 |
| AX-158309435 | 24 | 44.503 | KV453253.1 | 9107314  | 24-scf00489 | 24 |
| AX-158309584 | 24 | 44.503 | KV453253.1 | 9353684  | 24-scf00489 | 24 |
| AX-158309651 | 24 | 44.503 | KV453253.1 | 9510216  | 24-scf00489 | 24 |
| AX-158309779 | 24 | 44.503 | KV453253.1 | 9686303  | 24-scf00489 | 24 |
| AX-158309781 | 24 | 44.503 | KV453253.1 | 9688591  | 24-scf00489 | 24 |
| AX-158309835 | 24 | 44.503 | KV453253.1 | 9827224  | 24-scf00489 | 24 |
| AX-158309869 | 24 | 44.503 | KV453253.1 | 9888649  | 24-scf00489 | 24 |
| AX-157719474 | 24 | 44.503 | KV453253.1 | 9891935  | 24-scf00489 | 24 |
| AX-157775634 | 24 | 44.503 | KV453253.1 | 9899916  | 24-scf00489 | 24 |
| AX-157724843 | 24 | 44.503 | KV453253.1 | 10135951 | 24-scf00489 | 24 |
| AX-158309994 | 24 | 44.503 | KV453253.1 | 10169614 | 24-scf00489 | 24 |
| AX-158310006 | 24 | 44.503 | KV453253.1 | 10198547 | 24-scf00489 | 24 |
| AX-157715807 | 24 | 44.503 | KV453253.1 | 10211281 | 24-scf00489 | 24 |
| AX-157718138 | 24 | 44.503 | KV453253.1 | 10616327 | 24-scf00489 | 24 |
| AX-158310438 | 24 | 44.503 | KV453253.1 | 11088030 | 24-scf00489 | 24 |
| AX-158412303 | 24 | 44.503 | KV453253.1 | 11135931 | 24-scf00489 | 24 |
| AX-158310495 | 24 | 44.503 | KV453253.1 | 11201359 | 24-scf00489 | 24 |
| AX-158310502 | 24 | 44.503 | KV453253.1 | 11213837 | 24-scf00489 | 24 |
| AX-158310503 | 24 | 44.503 | KV453253.1 | 11221919 | 24-scf00489 | 24 |
| AX-157867745 | 24 | 44.503 | KV453253.1 | 11341850 | 24-scf00489 | 24 |
| AX-158310556 | 24 | 44.503 | KV453253.1 | 11366627 | 24-scf00489 | 24 |
| AX-158310584 | 24 | 44.503 | KV453253.1 | 11429912 | 24-scf00489 | 24 |
| AX-158310596 | 24 | 44.503 | KV453253.1 | 11443158 | 24-scf00489 | 24 |
| AX-158310744 | 24 | 44.503 | KV453253.1 | 11644411 | 24-scf00489 | 24 |
| AX-157710531 | 24 | 44.503 | KV453253.1 | 11790000 | 24-scf00489 | 24 |
| AX-157701849 | 24 | 44.503 | KV453253.1 | 11808753 | 24-scf00489 | 24 |
| AX-158310956 | 24 | 44.503 | KV453253.1 | 11991866 | 24-scf00489 | 24 |
| AX-158311085 | 24 | 44.503 | KV453253.1 | 12165787 | 24-scf00489 | 24 |
| AX-158311087 | 24 | 44.503 | KV453253.1 | 12168350 | 24-scf00489 | 24 |
| AX-158311092 | 24 | 44.503 | KV453253.1 | 12174218 | 24-scf00489 | 24 |
| AX-158311095 | 24 | 44.503 | KV453253.1 | 12176093 | 24-scf00489 | 24 |
| AX-158311204 | 24 | 44.503 | KV453253.1 | 12313163 | 24-scf00489 | 24 |
| AX-158311306 | 24 | 44.503 | KV453253.1 | 12442918 | 24-scf00489 | 24 |
| AX-157735981 | 24 | 44.503 | KV453253.1 | 12466353 | 24-scf00489 | 24 |
| AX-158311368 | 24 | 44.503 | KV453253.1 | 12529844 | 24-scf00489 | 24 |
| AX-158311393 | 24 | 44.503 | KV453253.1 | 12561251 | 24-scf00489 | 24 |
| AX-158311432 | 24 | 44.503 | KV453253.1 | 12617004 | 24-scf00489 | 24 |
| AX-158311433 | 24 | 44.503 | KV453253.1 | 12618282 | 24-scf00489 | 24 |

|              |    |        |            |          |             |    |
|--------------|----|--------|------------|----------|-------------|----|
| AX-158311461 | 24 | 44.503 | KV453253.1 | 12650596 | 24-scf00489 | 24 |
| AX-158311475 | 24 | 44.503 | KV453253.1 | 12671544 | 24-scf00489 | 24 |
| AX-158311605 | 24 | 44.503 | KV453253.1 | 12850646 | 24-scf00489 | 24 |
| AX-158311648 | 24 | 44.503 | KV453253.1 | 12907230 | 24-scf00489 | 24 |
| AX-158311682 | 24 | 44.503 | KV453253.1 | 12948976 | 24-scf00489 | 24 |
| AX-158311708 | 24 | 44.503 | KV453253.1 | 12978791 | 24-scf00489 | 24 |
| AX-158311714 | 24 | 44.503 | KV453253.1 | 12984935 | 24-scf00489 | 24 |
| AX-157723542 | 24 | 44.503 | KV453253.1 | 12986598 | 24-scf00489 | 24 |
| AX-158311721 | 24 | 44.607 | KV453253.1 | 12993876 | 24-scf00489 | 24 |
| AX-158311657 | 24 | 44.647 | KV453253.1 | 12921153 | 24-scf00489 | 24 |
| AX-157847343 | 24 | 44.647 | KV453253.1 | 12994470 | 24-scf00489 | 24 |
| AX-157740521 | 24 | 44.647 | KV453253.1 | 13036236 | 24-scf00489 | 24 |
| AX-158311751 | 24 | 44.647 | KV453253.1 | 13040614 | 24-scf00489 | 24 |
| AX-158311753 | 24 | 44.647 | KV453253.1 | 13042070 | 24-scf00489 | 24 |
| AX-158311756 | 24 | 44.647 | KV453253.1 | 13045439 | 24-scf00489 | 24 |
| AX-157847354 | 24 | 44.647 | KV453253.1 | 13074239 | 24-scf00489 | 24 |
| AX-158311723 | 24 | 44.722 | KV453253.1 | 12995571 | 24-scf00489 | 24 |
| AX-158311725 | 24 | 44.722 | KV453253.1 | 12997404 | 24-scf00489 | 24 |
| AX-158311727 | 24 | 44.722 | KV453253.1 | 12998873 | 24-scf00489 | 24 |
| AX-158311728 | 24 | 44.722 | KV453253.1 | 12999506 | 24-scf00489 | 24 |
| AX-158311731 | 24 | 44.722 | KV453253.1 | 13006277 | 24-scf00489 | 24 |
| AX-157847347 | 24 | 44.722 | KV453253.1 | 13012707 | 24-scf00489 | 24 |
| AX-158311738 | 24 | 44.722 | KV453253.1 | 13019919 | 24-scf00489 | 24 |
| AX-158311741 | 24 | 44.722 | KV453253.1 | 13025305 | 24-scf00489 | 24 |
| AX-158311743 | 24 | 44.722 | KV453253.1 | 13027462 | 24-scf00489 | 24 |
| AX-157759004 | 24 | 44.722 | KV453253.1 | 13030802 | 24-scf00489 | 24 |
| AX-158311746 | 24 | 44.722 | KV453253.1 | 13031491 | 24-scf00489 | 24 |
| AX-157881155 | 24 | 44.722 | KV453253.1 | 13129611 | 24-scf00489 | 24 |
| AX-158311747 | 24 | 44.745 | KV453253.1 | 13031921 | 24-scf00489 | 24 |
| AX-158311754 | 24 | 44.745 | KV453253.1 | 13042763 | 24-scf00489 | 24 |
| AX-158311755 | 24 | 44.769 | KV453253.1 | 13042953 | 24-scf00489 | 24 |
| AX-157847351 | 24 | 44.798 | KV453253.1 | 13046281 | 24-scf00489 | 24 |
| AX-158311785 | 24 | 44.831 | KV453253.1 | 13072387 | 24-scf00489 | 24 |
| AX-158311791 | 24 | 44.831 | KV453253.1 | 13084824 | 24-scf00489 | 24 |
| AX-158311794 | 24 | 44.831 | KV453253.1 | 13088170 | 24-scf00489 | 24 |
| AX-158311796 | 24 | 44.831 | KV453253.1 | 13090334 | 24-scf00489 | 24 |
| AX-158311797 | 24 | 44.871 | KV453253.1 | 13090749 | 24-scf00489 | 24 |
| AX-158311801 | 24 | 44.911 | KV453253.1 | 13093011 | 24-scf00489 | 24 |
| AX-158311808 | 24 | 44.94  | KV453253.1 | 13111913 | 24-scf00489 | 24 |
| AX-158311812 | 24 | 44.94  | KV453253.1 | 13115675 | 24-scf00489 | 24 |
| AX-158311813 | 24 | 44.94  | KV453253.1 | 13116085 | 24-scf00489 | 24 |
| AX-158311815 | 24 | 44.94  | KV453253.1 | 13119951 | 24-scf00489 | 24 |
| AX-158311816 | 24 | 44.94  | KV453253.1 | 13123522 | 24-scf00489 | 24 |
| AX-158311819 | 24 | 44.94  | KV453253.1 | 13128750 | 24-scf00489 | 24 |
| AX-158311820 | 24 | 44.94  | KV453253.1 | 13129254 | 24-scf00489 | 24 |
| AX-158311823 | 24 | 44.94  | KV453253.1 | 13130599 | 24-scf00489 | 24 |
| AX-158311825 | 24 | 44.94  | KV453253.1 | 13132352 | 24-scf00489 | 24 |
| AX-158311831 | 24 | 44.94  | KV453253.1 | 13143549 | 24-scf00489 | 24 |
| AX-158311833 | 24 | 44.94  | KV453253.1 | 13144404 | 24-scf00489 | 24 |
| AX-158311834 | 24 | 44.94  | KV453253.1 | 13144883 | 24-scf00489 | 24 |
| AX-158311835 | 24 | 44.94  | KV453253.1 | 13148193 | 24-scf00489 | 24 |

|              |    |        |            |          |             |    |
|--------------|----|--------|------------|----------|-------------|----|
| AX-158311836 | 24 | 44.94  | KV453253.1 | 13148639 | 24-scf00489 | 24 |
| AX-158311855 | 24 | 44.94  | KV453253.1 | 13179144 | 24-scf00489 | 24 |
| AX-158311861 | 24 | 44.94  | KV453253.1 | 13184199 | 24-scf00489 | 24 |
| AX-158311752 | 24 | 45.159 | KV453253.1 | 13040872 | 24-scf00489 | 24 |
| AX-158311837 | 24 | 45.159 | KV453253.1 | 13149507 | 24-scf00489 | 24 |
| AX-158311840 | 24 | 45.159 | KV453253.1 | 13156342 | 24-scf00489 | 24 |
| AX-158311845 | 24 | 45.159 | KV453253.1 | 13167017 | 24-scf00489 | 24 |
| AX-158311854 | 24 | 45.159 | KV453253.1 | 13178317 | 24-scf00489 | 24 |
| AX-158311880 | 24 | 45.159 | KV453253.1 | 13213633 | 24-scf00489 | 24 |
| AX-158311852 | 24 | 45.214 | KV453253.1 | 13176397 | 24-scf00489 | 24 |
| AX-158311853 | 24 | 45.268 | KV453253.1 | 13177489 | 24-scf00489 | 24 |
| AX-158311856 | 24 | 45.268 | KV453253.1 | 13179467 | 24-scf00489 | 24 |
| AX-158311858 | 24 | 45.268 | KV453253.1 | 13180617 | 24-scf00489 | 24 |
| AX-158311860 | 24 | 45.268 | KV453253.1 | 13183388 | 24-scf00489 | 24 |
| AX-158311864 | 24 | 45.268 | KV453253.1 | 13190773 | 24-scf00489 | 24 |
| AX-157752142 | 24 | 45.269 | KV453253.1 | 13200299 | 24-scf00489 | 24 |
| AX-158311869 | 24 | 45.281 | KV453253.1 | 13201212 | 24-scf00489 | 24 |
| AX-158417985 | 24 | 45.281 | KV453253.1 | 13206867 | 24-scf00489 | 24 |
| AX-158417986 | 24 | 45.281 | KV453253.1 | 13207203 | 24-scf00489 | 24 |
| AX-158311207 | 24 | 45.436 | KV453253.1 | 12317384 | 24-scf00489 | 24 |
| AX-158311874 | 24 | 45.436 | KV453253.1 | 13209215 | 24-scf00489 | 24 |
| AX-158311877 | 24 | 45.437 | KV453253.1 | 13210268 | 24-scf00489 | 24 |
| AX-158311882 | 24 | 45.78  | KV453253.1 | 13216616 | 24-scf00489 | 24 |
| AX-158311883 | 24 | 45.78  | KV453253.1 | 13218571 | 24-scf00489 | 24 |
| AX-158311884 | 24 | 45.78  | KV453253.1 | 13219467 | 24-scf00489 | 24 |
| AX-158311888 | 24 | 45.78  | KV453253.1 | 13224394 | 24-scf00489 | 24 |
| AX-158311889 | 24 | 45.78  | KV453253.1 | 13224774 | 24-scf00489 | 24 |
| AX-158311890 | 24 | 45.78  | KV453253.1 | 13225532 | 24-scf00489 | 24 |
| AX-158311893 | 24 | 45.78  | KV453253.1 | 13228526 | 24-scf00489 | 24 |
| AX-158311897 | 24 | 45.78  | KV453253.1 | 13233471 | 24-scf00489 | 24 |
| AX-158311900 | 24 | 45.78  | KV453253.1 | 13235772 | 24-scf00489 | 24 |
| AX-158311906 | 24 | 45.78  | KV453253.1 | 13242763 | 24-scf00489 | 24 |
| AX-158311907 | 24 | 45.78  | KV453253.1 | 13247462 | 24-scf00489 | 24 |
| AX-158311909 | 24 | 45.78  | KV453253.1 | 13250130 | 24-scf00489 | 24 |
| AX-158311911 | 24 | 45.78  | KV453253.1 | 13252167 | 24-scf00489 | 24 |
| AX-158311918 | 24 | 45.78  | KV453253.1 | 13261256 | 24-scf00489 | 24 |
| AX-158311916 | 24 | 46.015 | KV453253.1 | 13259206 | 24-scf00489 | 24 |
| AX-158311921 | 24 | 46.343 | KV453253.1 | 13266993 | 24-scf00489 | 24 |
| AX-158311733 | 24 | 46.354 | KV453253.1 | 13016452 | 24-scf00489 | 24 |
| AX-157757980 | 24 | 46.354 | KV453253.1 | 13028850 | 24-scf00489 | 24 |
| AX-158311749 | 24 | 46.354 | KV453253.1 | 13037246 | 24-scf00489 | 24 |
| AX-158311774 | 24 | 46.354 | KV453253.1 | 13063292 | 24-scf00489 | 24 |
| AX-158311783 | 24 | 46.354 | KV453253.1 | 13070413 | 24-scf00489 | 24 |
| AX-158311786 | 24 | 46.354 | KV453253.1 | 13076166 | 24-scf00489 | 24 |
| AX-158311806 | 24 | 46.354 | KV453253.1 | 13108510 | 24-scf00489 | 24 |
| AX-158311811 | 24 | 46.354 | KV453253.1 | 13115280 | 24-scf00489 | 24 |
| AX-158311839 | 24 | 46.354 | KV453253.1 | 13153209 | 24-scf00489 | 24 |
| AX-158311846 | 24 | 46.354 | KV453253.1 | 13168873 | 24-scf00489 | 24 |
| AX-158311870 | 24 | 46.354 | KV453253.1 | 13202016 | 24-scf00489 | 24 |
| AX-158311891 | 24 | 46.354 | KV453253.1 | 13226089 | 24-scf00489 | 24 |
| AX-158311894 | 24 | 46.354 | KV453253.1 | 13229368 | 24-scf00489 | 24 |

|              |    |        |            |          |             |    |
|--------------|----|--------|------------|----------|-------------|----|
| AX-158311914 | 24 | 46.354 | KV453253.1 | 13256972 | 24-scf00489 | 24 |
| AX-158311919 | 24 | 46.354 | KV453253.1 | 13261614 | 24-scf00489 | 24 |
| AX-158311924 | 24 | 46.354 | KV453253.1 | 13272187 | 24-scf00489 | 24 |
| AX-158311926 | 24 | 46.354 | KV453253.1 | 13275782 | 24-scf00489 | 24 |
| AX-158311938 | 24 | 46.354 | KV453253.1 | 13291580 | 24-scf00489 | 24 |
| AX-158311940 | 24 | 46.354 | KV453253.1 | 13292726 | 24-scf00489 | 24 |
| AX-158311949 | 24 | 46.354 | KV453253.1 | 13301192 | 24-scf00489 | 24 |
| AX-158311922 | 24 | 46.362 | KV453253.1 | 13269269 | 24-scf00489 | 24 |
| AX-158311927 | 24 | 46.362 | KV453253.1 | 13276319 | 24-scf00489 | 24 |
| AX-157749822 | 24 | 46.362 | KV453253.1 | 13277584 | 24-scf00489 | 24 |
| AX-158417989 | 24 | 46.362 | KV453253.1 | 13280717 | 24-scf00489 | 24 |
| AX-158311929 | 24 | 46.471 | KV453253.1 | 13281941 | 24-scf00489 | 24 |
| AX-158311930 | 24 | 46.472 | KV453253.1 | 13282874 | 24-scf00489 | 24 |
| AX-158311931 | 24 | 46.472 | KV453253.1 | 13284906 | 24-scf00489 | 24 |
| AX-157758993 | 24 | 46.64  | KV453253.1 | 13283375 | 24-scf00489 | 24 |
| AX-157847350 | 24 | 46.799 | KV453253.1 | 13034575 | 24-scf00489 | 24 |
| AX-158311935 | 24 | 46.799 | KV453253.1 | 13289316 | 24-scf00489 | 24 |
| AX-158311936 | 24 | 46.799 | KV453253.1 | 13289742 | 24-scf00489 | 24 |
| AX-158311937 | 24 | 46.799 | KV453253.1 | 13290376 | 24-scf00489 | 24 |
| AX-158311942 | 24 | 46.799 | KV453253.1 | 13293569 | 24-scf00489 | 24 |
| AX-158311943 | 24 | 46.799 | KV453253.1 | 13294336 | 24-scf00489 | 24 |
| AX-158311945 | 24 | 46.799 | KV453253.1 | 13296349 | 24-scf00489 | 24 |
| AX-157774420 | 24 | 46.799 | KV453253.1 | 13296996 | 24-scf00489 | 24 |
| AX-158311946 | 24 | 46.799 | KV453253.1 | 13297552 | 24-scf00489 | 24 |
| AX-158311950 | 24 | 46.799 | KV453253.1 | 13303266 | 24-scf00489 | 24 |
| AX-158311951 | 24 | 46.8   | KV453253.1 | 13303704 | 24-scf00489 | 24 |
| AX-158311953 | 24 | 46.8   | KV453253.1 | 13305385 | 24-scf00489 | 24 |
| AX-157741518 | 24 | 47.01  | KV453253.1 | 13307285 | 24-scf00489 | 24 |
| AX-157847358 | 24 | 47.01  | KV453253.1 | 13307357 | 24-scf00489 | 24 |
| AX-158311958 | 24 | 47.017 | KV453253.1 | 13313656 | 24-scf00489 | 24 |
| AX-157751609 | 24 | 47.023 | KV453253.1 | 13315482 | 24-scf00489 | 24 |
| AX-158311960 | 24 | 47.023 | KV453253.1 | 13318921 | 24-scf00489 | 24 |
| AX-158311961 | 24 | 47.023 | KV453253.1 | 13323096 | 24-scf00489 | 24 |
| AX-157847360 | 24 | 47.024 | KV453253.1 | 13324739 | 24-scf00489 | 24 |
| AX-158311963 | 24 | 47.031 | KV453253.1 | 13325895 | 24-scf00489 | 24 |
| AX-158311964 | 24 | 47.038 | KV453253.1 | 13326699 | 24-scf00489 | 24 |
| AX-157873531 | 24 | 47.038 | KV453253.1 | 13327098 | 24-scf00489 | 24 |
| AX-158311969 | 24 | 47.038 | KV453253.1 | 13333515 | 24-scf00489 | 24 |
| AX-158311974 | 24 | 47.038 | KV453253.1 | 13339062 | 24-scf00489 | 24 |
| AX-158311956 | 24 | 47.042 | KV453253.1 | 13311783 | 24-scf00489 | 24 |
| AX-157873532 | 24 | 47.042 | KV453253.1 | 13328643 | 24-scf00489 | 24 |
| AX-158311982 | 24 | 47.042 | KV453253.1 | 13347861 | 24-scf00489 | 24 |
| AX-158311966 | 24 | 47.047 | KV453253.1 | 13329446 | 24-scf00489 | 24 |
| AX-158311976 | 24 | 47.225 | KV453253.1 | 13342513 | 24-scf00489 | 24 |
| AX-158311977 | 24 | 47.225 | KV453253.1 | 13343283 | 24-scf00489 | 24 |
| AX-158311984 | 24 | 47.698 | KV453253.1 | 13349432 | 24-scf00489 | 24 |
| AX-158311985 | 24 | 47.698 | KV453253.1 | 13349697 | 24-scf00489 | 24 |
| AX-158311996 | 24 | 47.698 | KV453253.1 | 13364124 | 24-scf00489 | 24 |
| AX-158312000 | 24 | 48.002 | KV453253.1 | 13368331 | 24-scf00489 | 24 |
| AX-158417992 | 24 | 48.002 | KV453253.1 | 13369796 | 24-scf00489 | 24 |
| AX-158417996 | 24 | 48.002 | KV453253.1 | 13370864 | 24-scf00489 | 24 |

|              |    |        |            |          |             |    |
|--------------|----|--------|------------|----------|-------------|----|
| AX-158312002 | 24 | 48.002 | KV453253.1 | 13372465 | 24-scf00489 | 24 |
| AX-158312009 | 24 | 48.002 | KV453253.1 | 13382602 | 24-scf00489 | 24 |
| AX-158312017 | 24 | 48.002 | KV453253.1 | 13390829 | 24-scf00489 | 24 |
| AX-158312066 | 24 | 48.002 | KV453253.1 | 13435950 | 24-scf00489 | 24 |
| AX-158312106 | 24 | 48.002 | KV453253.1 | 13521426 | 24-scf00489 | 24 |
| AX-158312193 | 24 | 48.002 | KV453253.1 | 13723757 | 24-scf00489 | 24 |
| AX-158312034 | 24 | 48.04  | KV453253.1 | 13407560 | 24-scf00489 | 24 |
| AX-158312047 | 24 | 48.04  | KV453253.1 | 13418725 | 24-scf00489 | 24 |
| AX-157847369 | 24 | 48.04  | KV453253.1 | 13447411 | 24-scf00489 | 24 |
| AX-158312074 | 24 | 48.04  | KV453253.1 | 13450007 | 24-scf00489 | 24 |
| AX-157847371 | 24 | 48.04  | KV453253.1 | 13461302 | 24-scf00489 | 24 |
| AX-158312178 | 24 | 48.04  | KV453253.1 | 13690464 | 24-scf00489 | 24 |
| AX-157861322 | 24 | 48.04  | KV453253.1 | 13707488 | 24-scf00489 | 24 |
| AX-158312036 | 24 | 48.077 | KV453253.1 | 13408520 | 24-scf00489 | 24 |
| AX-158312059 | 24 | 48.111 | KV453253.1 | 13428744 | 24-scf00489 | 24 |
| AX-157847362 | 24 | 48.147 | KV453253.1 | 13368091 | 24-scf00489 | 24 |
| AX-158312143 | 24 | 48.147 | KV453253.1 | 13646466 | 24-scf00489 | 24 |
| AX-158312144 | 24 | 48.147 | KV453253.1 | 13647793 | 24-scf00489 | 24 |
| AX-158312172 | 24 | 48.147 | KV453253.1 | 13686591 | 24-scf00489 | 24 |
| AX-157752960 | 24 | 48.186 | KV453253.1 | 13410529 | 24-scf00489 | 24 |
| AX-158312145 | 24 | 48.186 | KV453253.1 | 13648634 | 24-scf00489 | 24 |
| AX-158312165 | 24 | 48.186 | KV453253.1 | 13671113 | 24-scf00489 | 24 |
| AX-157720508 | 24 | 48.186 | KV453253.1 | 13726908 | 24-scf00489 | 24 |
| AX-158312147 | 24 | 48.22  | KV453253.1 | 13650962 | 24-scf00489 | 24 |
| AX-158312189 | 24 | 48.316 | KV453253.1 | 13714391 | 24-scf00489 | 24 |
| AX-158312155 | 24 | 48.459 | KV453253.1 | 13659323 | 24-scf00489 | 24 |
| AX-157710761 | 24 | 48.459 | KV453253.1 | 13698291 | 24-scf00489 | 24 |
| AX-157748039 | 24 | 48.459 | KV453253.1 | 13727626 | 24-scf00489 | 24 |
| AX-158417993 | 24 | 48.655 | KV453253.1 | 13370031 | 24-scf00489 | 24 |
| AX-158312030 | 24 | 48.655 | KV453253.1 | 13404178 | 24-scf00489 | 24 |
| AX-158312031 | 24 | 48.655 | KV453253.1 | 13405282 | 24-scf00489 | 24 |
| AX-158312049 | 24 | 48.655 | KV453253.1 | 13421287 | 24-scf00489 | 24 |
| AX-158312053 | 24 | 48.655 | KV453253.1 | 13423370 | 24-scf00489 | 24 |
| AX-157775905 | 24 | 48.655 | KV453253.1 | 13469244 | 24-scf00489 | 24 |
| AX-158312122 | 24 | 48.655 | KV453253.1 | 13544131 | 24-scf00489 | 24 |
| AX-158312133 | 24 | 48.655 | KV453253.1 | 13565549 | 24-scf00489 | 24 |
| AX-158312151 | 24 | 48.655 | KV453253.1 | 13656090 | 24-scf00489 | 24 |
| AX-158312152 | 24 | 48.655 | KV453253.1 | 13657041 | 24-scf00489 | 24 |
| AX-157713766 | 24 | 48.655 | KV453253.1 | 13658374 | 24-scf00489 | 24 |
| AX-157847387 | 24 | 48.655 | KV453253.1 | 13722605 | 24-scf00489 | 24 |
| AX-157727101 | 24 | 48.655 | KV453253.1 | 13736747 | 24-scf00489 | 24 |
| AX-158312200 | 24 | 48.655 | KV453253.1 | 13740359 | 24-scf00489 | 24 |
| AX-158312203 | 24 | 48.655 | KV453253.1 | 13745978 | 24-scf00489 | 24 |
| AX-158312204 | 24 | 48.655 | KV453253.1 | 13747170 | 24-scf00489 | 24 |
| AX-158312240 | 24 | 48.655 | KV453253.1 | 13790569 | 24-scf00489 | 24 |
| AX-158312214 | 24 | 48.659 | KV453253.1 | 13758442 | 24-scf00489 | 24 |
| AX-158312215 | 24 | 48.659 | KV453253.1 | 13761833 | 24-scf00489 | 24 |
| AX-158312216 | 24 | 49.059 | KV453253.1 | 13762455 | 24-scf00489 | 24 |
| AX-158312095 | 24 | 49.062 | KV453253.1 | 13496703 | 24-scf00489 | 24 |
| AX-158312107 | 24 | 49.062 | KV453253.1 | 13522014 | 24-scf00489 | 24 |
| AX-157847384 | 24 | 49.062 | KV453253.1 | 13697848 | 24-scf00489 | 24 |

|              |    |        |             |          |             |    |
|--------------|----|--------|-------------|----------|-------------|----|
| AX-158312206 | 24 | 49.062 | KV453253.1  | 13750689 | 24-scf00489 | 24 |
| AX-158312225 | 24 | 49.062 | KV453253.1  | 13775889 | 24-scf00489 | 24 |
| AX-158312239 | 24 | 49.062 | KV453253.1  | 13788996 | 24-scf00489 | 24 |
| AX-158312246 | 24 | 49.062 | KV453253.1  | 13794365 | 24-scf00489 | 24 |
| AX-158418000 | 24 | 49.13  | KV453253.1  | 13790696 | 24-scf00489 | 24 |
| AX-158312245 | 24 | 49.13  | KV453253.1  | 13793670 | 24-scf00489 | 24 |
| AX-158381388 | 24 | 49.243 | KV453253.1  | 13794499 | 24-scf00489 | 24 |
| AX-158312247 | 24 | 49.406 | KV453253.1  | 13794764 | 24-scf00489 | 24 |
| AX-158312249 | 24 | 49.5   | KV453253.1  | 13796608 | 24-scf00489 | 24 |
| AX-158312250 | 24 | 49.502 | KV453253.1  | 13797194 | 24-scf00489 | 24 |
| AX-158312253 | 24 | 49.502 | KV453253.1  | 13802235 | 24-scf00489 | 24 |
| AX-158312259 | 24 | 49.502 | KV453253.1  | 13815457 | 24-scf00489 | 24 |
| AX-158312319 | 24 | 49.502 | KV453253.1  | 13891161 | 24-scf00489 | 24 |
| AX-158312252 | 24 | 49.56  | KV453253.1  | 13800833 | 24-scf00489 | 24 |
| AX-158312255 | 24 | 50.258 | KV453253.1  | 13808045 | 24-scf00489 | 24 |
| AX-158312256 | 24 | 50.258 | KV453253.1  | 13810312 | 24-scf00489 | 24 |
| AX-158312261 | 24 | 50.268 | KV453253.1  | 13821366 | 24-scf00489 | 24 |
| AX-158312266 | 24 | 50.734 | KV453253.1  | 13834203 | 24-scf00489 | 24 |
| AX-158312270 | 24 | 50.741 | KV453253.1  | 13839076 | 24-scf00489 | 24 |
| AX-158312291 | 24 | 50.741 | KV453253.1  | 13861318 | 24-scf00489 | 24 |
| AX-158312292 | 24 | 50.741 | KV453253.1  | 13861982 | 24-scf00489 | 24 |
| AX-158312295 | 24 | 50.741 | KV453253.1  | 13864773 | 24-scf00489 | 24 |
| AX-158312303 | 24 | 50.741 | KV453253.1  | 13873675 | 24-scf00489 | 24 |
| AX-158312311 | 24 | 50.741 | KV453253.1  | 13884489 | 24-scf00489 | 24 |
| AX-158312312 | 24 | 50.741 | KV453253.1  | 13884903 | 24-scf00489 | 24 |
| AX-158312313 | 24 | 50.741 | KV453253.1  | 13885766 | 24-scf00489 | 24 |
| AX-158312314 | 24 | 50.741 | KV453253.1  | 13886422 | 24-scf00489 | 24 |
| AX-158312324 | 24 | 50.741 | KV453253.1  | 13904700 | 24-scf00489 | 24 |
| AX-158418006 | 24 | 50.741 | KV453253.1  | 13906805 | 24-scf00489 | 24 |
| AX-157750167 | 24 | 50.942 | KV453253.1  | 13903302 | 24-scf00489 | 24 |
| AX-158312327 | 24 | 50.942 | KV453253.1  | 13909407 | 24-scf00489 | 24 |
| AX-158312330 | 24 | 50.974 | KV453253.1  | 13915076 | 24-scf00489 | 24 |
| AX-158312329 | 24 | 51.179 | KV453253.1  | 13914048 | 24-scf00489 | 24 |
| AX-158312331 | 24 | 51.179 | KV453253.1  | 13916073 | 24-scf00489 | 24 |
| AX-158312332 | 24 | 51.179 | KV453253.1  | 13917302 | 24-scf00489 | 24 |
| AX-158312334 | 24 | 51.179 | KV453253.1  | 13918537 | 24-scf00489 | 24 |
| AX-157706262 | 24 | 51.179 | 3ML01031934 | 475      | scf07557_1  | UN |
| AX-158312340 | 24 | 51.612 | KV453253.1  | 13930190 | 24-scf00489 | 24 |
| AX-158312335 | 24 | 51.615 | KV453253.1  | 13920626 | 24-scf00489 | 24 |
| AX-158312343 | 24 | 51.615 | KV453253.1  | 13934360 | 24-scf00489 | 24 |
| AX-158312344 | 24 | 51.615 | KV453253.1  | 13935091 | 24-scf00489 | 24 |
| AX-158418008 | 24 | 51.615 | KV453253.1  | 13953865 | 24-scf00489 | 24 |
| AX-158312367 | 24 | 51.615 | KV453253.1  | 13967175 | 24-scf00489 | 24 |
| AX-158312346 | 24 | 51.834 | KV453253.1  | 13936500 | 24-scf00489 | 24 |
| AX-158312347 | 24 | 51.834 | KV453253.1  | 13937871 | 24-scf00489 | 24 |
| AX-158312348 | 24 | 51.834 | KV453253.1  | 13938078 | 24-scf00489 | 24 |
| AX-158312350 | 24 | 51.834 | KV453253.1  | 13940781 | 24-scf00489 | 24 |
| AX-158312352 | 24 | 52.052 | KV453253.1  | 13949537 | 24-scf00489 | 24 |
| AX-158312354 | 24 | 52.052 | KV453253.1  | 13951857 | 24-scf00489 | 24 |
| AX-158312355 | 24 | 52.052 | KV453253.1  | 13954103 | 24-scf00489 | 24 |
| AX-158312358 | 24 | 52.052 | KV453253.1  | 13956695 | 24-scf00489 | 24 |

|              |    |        |            |          |                |    |
|--------------|----|--------|------------|----------|----------------|----|
| AX-158312359 | 24 | 52.052 | KV453253.1 | 13958238 | 24-scf00489    | 24 |
| AX-158312360 | 24 | 52.052 | KV453253.1 | 13959117 | 24-scf00489    | 24 |
| AX-158312361 | 24 | 52.052 | KV453253.1 | 13961782 | 24-scf00489    | 24 |
| AX-158312363 | 24 | 52.052 | KV453253.1 | 13962306 | 24-scf00489    | 24 |
| AX-158312364 | 24 | 52.052 | KV453253.1 | 13962890 | 24-scf00489    | 24 |
| AX-158312366 | 24 | 52.052 | KV453253.1 | 13966210 | 24-scf00489    | 24 |
| AX-158312370 | 24 | 52.052 | KV453253.1 | 13970536 | 24-scf00489    | 24 |
| AX-158312372 | 24 | 52.052 | KV453253.1 | 13972339 | 24-scf00489    | 24 |
| AX-157699979 | 24 | 52.052 | FI871525.1 | 717      | IORI212 lctalu | UN |
| AX-158312371 | 24 | 52.054 | KV453253.1 | 13971541 | 24-scf00489    | 24 |
| AX-158381389 | 24 | 52.056 | KV453253.1 | 13971782 | 24-scf00489    | 24 |
| AX-158312369 | 24 | 52.244 | KV453253.1 | 13969530 | 24-scf00489    | 24 |
| AX-158312374 | 24 | 52.244 | KV453253.1 | 13974084 | 24-scf00489    | 24 |
| AX-158312377 | 24 | 52.44  | KV453253.1 | 13977021 | 24-scf00489    | 24 |
| AX-158312389 | 24 | 52.44  | KV453253.1 | 13986454 | 24-scf00489    | 24 |
| AX-158312378 | 24 | 52.446 | KV453253.1 | 13977525 | 24-scf00489    | 24 |
| AX-158312385 | 24 | 52.449 | KV453253.1 | 13983671 | 24-scf00489    | 24 |
| AX-158312386 | 24 | 52.455 | KV453253.1 | 13984573 | 24-scf00489    | 24 |
| AX-158312392 | 24 | 52.708 | KV453253.1 | 13992060 | 24-scf00489    | 24 |
| AX-157747454 | 24 | 52.708 | KV453253.1 | 13992830 | 24-scf00489    | 24 |
| AX-157774214 | 24 | 52.709 | KV453253.1 | 13999238 | 24-scf00489    | 24 |
| AX-158312396 | 24 | 52.71  | KV453253.1 | 13999330 | 24-scf00489    | 24 |
| AX-158312397 | 24 | 53.136 | KV453253.1 | 13999950 | 24-scf00489    | 24 |
| AX-158312399 | 24 | 53.145 | KV453253.1 | 14003763 | 24-scf00489    | 24 |
| AX-157726973 | 24 | 53.145 | KV453253.1 | 14005061 | 24-scf00489    | 24 |
| AX-158312403 | 24 | 53.145 | KV453253.1 | 14005339 | 24-scf00489    | 24 |
| AX-158312405 | 24 | 53.145 | KV453253.1 | 14006088 | 24-scf00489    | 24 |
| AX-157847392 | 24 | 53.145 | KV453253.1 | 14008410 | 24-scf00489    | 24 |
| AX-158312406 | 24 | 53.145 | KV453253.1 | 14010206 | 24-scf00489    | 24 |
| AX-158312382 | 24 | 53.364 | KV453253.1 | 13980598 | 24-scf00489    | 24 |
| AX-157724644 | 24 | 53.364 | KV453253.1 | 14014311 | 24-scf00489    | 24 |
| AX-158312412 | 24 | 53.364 | KV453253.1 | 14015726 | 24-scf00489    | 24 |
| AX-158312413 | 24 | 53.364 | KV453253.1 | 14018321 | 24-scf00489    | 24 |
| AX-158312415 | 24 | 53.364 | KV453253.1 | 14021535 | 24-scf00489    | 24 |
| AX-158312418 | 24 | 53.364 | KV453253.1 | 14028887 | 24-scf00489    | 24 |
| AX-158312419 | 24 | 53.562 | KV453253.1 | 14029497 | 24-scf00489    | 24 |
| AX-158312420 | 24 | 53.691 | KV453253.1 | 14033251 | 24-scf00489    | 24 |
| AX-158312421 | 24 | 53.691 | KV453253.1 | 14033972 | 24-scf00489    | 24 |
| AX-158312423 | 24 | 53.691 | KV453253.1 | 14036560 | 24-scf00489    | 24 |
| AX-158312424 | 24 | 53.691 | KV453253.1 | 14036997 | 24-scf00489    | 24 |
| AX-158312426 | 24 | 53.691 | KV453253.1 | 14039766 | 24-scf00489    | 24 |
| AX-158312435 | 24 | 53.691 | KV453253.1 | 14049925 | 24-scf00489    | 24 |
| AX-158312439 | 24 | 53.691 | KV453253.1 | 14058116 | 24-scf00489    | 24 |
| AX-157716753 | 24 | 53.691 | KV453253.1 | 14076176 | 24-scf00489    | 24 |
| AX-157714876 | 24 | 53.724 | KV453253.1 | 14041542 | 24-scf00489    | 24 |
| AX-158312451 | 24 | 53.724 | KV453253.1 | 14068497 | 24-scf00489    | 24 |
| AX-158312431 | 24 | 53.753 | KV453253.1 | 14048031 | 24-scf00489    | 24 |
| AX-158312432 | 24 | 53.774 | KV453253.1 | 14048301 | 24-scf00489    | 24 |
| AX-158312427 | 24 | 53.801 | KV453253.1 | 14040956 | 24-scf00489    | 24 |
| AX-158312433 | 24 | 53.801 | KV453253.1 | 14048516 | 24-scf00489    | 24 |
| AX-158312434 | 24 | 53.801 | KV453253.1 | 14049577 | 24-scf00489    | 24 |



|              |    |        |            |          |             |    |
|--------------|----|--------|------------|----------|-------------|----|
| AX-157751843 | 24 | 53.801 | KV453253.1 | 14051377 | 24-scf00489 | 24 |
| AX-158312436 | 24 | 53.802 | KV453253.1 | 14052024 | 24-scf00489 | 24 |
| AX-158312450 | 24 | 53.802 | KV453253.1 | 14067623 | 24-scf00489 | 24 |
| AX-158312438 | 24 | 53.805 | KV453253.1 | 14056677 | 24-scf00489 | 24 |
| AX-158312440 | 24 | 54.091 | KV453253.1 | 14061013 | 24-scf00489 | 24 |
| AX-158312442 | 24 | 54.091 | KV453253.1 | 14061933 | 24-scf00489 | 24 |
| AX-158312448 | 24 | 54.165 | KV453253.1 | 14065905 | 24-scf00489 | 24 |
| AX-158312462 | 24 | 54.237 | KV453253.1 | 14085424 | 24-scf00489 | 24 |
| AX-158312490 | 24 | 54.237 | KV453253.1 | 14118263 | 24-scf00489 | 24 |
| AX-158312523 | 24 | 54.237 | KV453253.1 | 14157596 | 24-scf00489 | 24 |
| AX-157743064 | 24 | 54.237 | KV453253.1 | 14202456 | 24-scf00489 | 24 |
| AX-158312463 | 24 | 54.238 | KV453253.1 | 14086255 | 24-scf00489 | 24 |
| AX-158312467 | 24 | 54.238 | KV453253.1 | 14089035 | 24-scf00489 | 24 |
| AX-158312468 | 24 | 54.238 | KV453253.1 | 14090038 | 24-scf00489 | 24 |
| AX-158312469 | 24 | 54.238 | KV453253.1 | 14090432 | 24-scf00489 | 24 |
| AX-158312470 | 24 | 54.238 | KV453253.1 | 14090846 | 24-scf00489 | 24 |
| AX-158312471 | 24 | 54.238 | KV453253.1 | 14092503 | 24-scf00489 | 24 |
| AX-157723841 | 24 | 54.238 | KV453253.1 | 14093606 | 24-scf00489 | 24 |
| AX-158312473 | 24 | 54.238 | KV453253.1 | 14096008 | 24-scf00489 | 24 |
| AX-158312475 | 24 | 54.238 | KV453253.1 | 14098319 | 24-scf00489 | 24 |
| AX-158312476 | 24 | 54.238 | KV453253.1 | 14098616 | 24-scf00489 | 24 |
| AX-157738812 | 24 | 54.238 | KV453253.1 | 14101090 | 24-scf00489 | 24 |
| AX-157740048 | 24 | 54.238 | KV453253.1 | 14101944 | 24-scf00489 | 24 |
| AX-158312483 | 24 | 54.238 | KV453253.1 | 14105891 | 24-scf00489 | 24 |
| AX-158312493 | 24 | 54.238 | KV453253.1 | 14120373 | 24-scf00489 | 24 |
| AX-158312496 | 24 | 54.238 | KV453253.1 | 14123115 | 24-scf00489 | 24 |
| AX-158312497 | 24 | 54.238 | KV453253.1 | 14125752 | 24-scf00489 | 24 |
| AX-158312498 | 24 | 54.238 | KV453253.1 | 14128799 | 24-scf00489 | 24 |
| AX-158312499 | 24 | 54.238 | KV453253.1 | 14130415 | 24-scf00489 | 24 |
| AX-158312500 | 24 | 54.238 | KV453253.1 | 14130964 | 24-scf00489 | 24 |
| AX-158312504 | 24 | 54.238 | KV453253.1 | 14135325 | 24-scf00489 | 24 |
| AX-158312506 | 24 | 54.238 | KV453253.1 | 14136879 | 24-scf00489 | 24 |
| AX-158312510 | 24 | 54.238 | KV453253.1 | 14139503 | 24-scf00489 | 24 |
| AX-157775107 | 24 | 54.238 | KV453253.1 | 14147452 | 24-scf00489 | 24 |
| AX-158312522 | 24 | 54.238 | KV453253.1 | 14156009 | 24-scf00489 | 24 |
| AX-157847411 | 24 | 54.238 | KV453253.1 | 14283866 | 24-scf00489 | 24 |
| AX-158312512 | 24 | 54.284 | KV453253.1 | 14142003 | 24-scf00489 | 24 |
| AX-158312459 | 24 | 54.302 | KV453253.1 | 14083695 | 24-scf00489 | 24 |
| AX-157713427 | 24 | 54.302 | KV453253.1 | 14108279 | 24-scf00489 | 24 |
| AX-158312485 | 24 | 54.302 | KV453253.1 | 14112938 | 24-scf00489 | 24 |
| AX-158312489 | 24 | 54.302 | KV453253.1 | 14116512 | 24-scf00489 | 24 |
| AX-158312502 | 24 | 54.302 | KV453253.1 | 14131847 | 24-scf00489 | 24 |
| AX-158312515 | 24 | 54.302 | KV453253.1 | 14146186 | 24-scf00489 | 24 |
| AX-158312534 | 24 | 54.302 | KV453253.1 | 14170685 | 24-scf00489 | 24 |
| AX-158312456 | 24 | 54.347 | KV453253.1 | 14077701 | 24-scf00489 | 24 |
| AX-158312464 | 24 | 54.347 | KV453253.1 | 14086721 | 24-scf00489 | 24 |
| AX-158312513 | 24 | 54.347 | KV453253.1 | 14143848 | 24-scf00489 | 24 |
| AX-158312521 | 24 | 54.347 | KV453253.1 | 14155379 | 24-scf00489 | 24 |
| AX-157774658 | 24 | 54.347 | KV453253.1 | 14159576 | 24-scf00489 | 24 |
| AX-158312528 | 24 | 54.347 | KV453253.1 | 14162985 | 24-scf00489 | 24 |
| AX-158312529 | 24 | 54.347 | KV453253.1 | 14163758 | 24-scf00489 | 24 |

|              |    |        |            |          |             |    |
|--------------|----|--------|------------|----------|-------------|----|
| AX-158312530 | 24 | 54.347 | KV453253.1 | 14164613 | 24-scf00489 | 24 |
| AX-158312533 | 24 | 54.347 | KV453253.1 | 14170298 | 24-scf00489 | 24 |
| AX-158312535 | 24 | 54.347 | KV453253.1 | 14171356 | 24-scf00489 | 24 |
| AX-158312536 | 24 | 54.347 | KV453253.1 | 14175608 | 24-scf00489 | 24 |
| AX-158312539 | 24 | 54.42  | KV453253.1 | 14178337 | 24-scf00489 | 24 |
| AX-157847402 | 24 | 54.42  | KV453253.1 | 14226261 | 24-scf00489 | 24 |
| AX-158312649 | 24 | 54.42  | KV453253.1 | 14336773 | 24-scf00489 | 24 |
| AX-157714353 | 24 | 54.488 | KV453253.1 | 14182869 | 24-scf00489 | 24 |
| AX-158312444 | 24 | 54.566 | KV453253.1 | 14062538 | 24-scf00489 | 24 |
| AX-158418012 | 24 | 54.566 | KV453253.1 | 14071672 | 24-scf00489 | 24 |
| AX-158312455 | 24 | 54.566 | KV453253.1 | 14076531 | 24-scf00489 | 24 |
| AX-158312466 | 24 | 54.566 | KV453253.1 | 14088318 | 24-scf00489 | 24 |
| AX-158312479 | 24 | 54.566 | KV453253.1 | 14101181 | 24-scf00489 | 24 |
| AX-158312540 | 24 | 54.566 | KV453253.1 | 14183004 | 24-scf00489 | 24 |
| AX-157847396 | 24 | 54.566 | KV453253.1 | 14189814 | 24-scf00489 | 24 |
| AX-158312547 | 24 | 54.566 | KV453253.1 | 14191022 | 24-scf00489 | 24 |
| AX-157730038 | 24 | 54.566 | KV453253.1 | 14191769 | 24-scf00489 | 24 |
| AX-157847397 | 24 | 54.566 | KV453253.1 | 14193094 | 24-scf00489 | 24 |
| AX-157847398 | 24 | 54.566 | KV453253.1 | 14195155 | 24-scf00489 | 24 |
| AX-158312548 | 24 | 54.566 | KV453253.1 | 14195736 | 24-scf00489 | 24 |
| AX-158312555 | 24 | 54.566 | KV453253.1 | 14202303 | 24-scf00489 | 24 |
| AX-158312556 | 24 | 54.566 | KV453253.1 | 14203119 | 24-scf00489 | 24 |
| AX-158312557 | 24 | 54.566 | KV453253.1 | 14203613 | 24-scf00489 | 24 |
| AX-158312559 | 24 | 54.566 | KV453253.1 | 14204375 | 24-scf00489 | 24 |
| AX-158312561 | 24 | 54.566 | KV453253.1 | 14205709 | 24-scf00489 | 24 |
| AX-157771512 | 24 | 54.566 | KV453253.1 | 14206539 | 24-scf00489 | 24 |
| AX-158312562 | 24 | 54.566 | KV453253.1 | 14206690 | 24-scf00489 | 24 |
| AX-158312566 | 24 | 54.566 | KV453253.1 | 14219675 | 24-scf00489 | 24 |
| AX-158312567 | 24 | 54.566 | KV453253.1 | 14222600 | 24-scf00489 | 24 |
| AX-158312564 | 24 | 54.567 | KV453253.1 | 14210471 | 24-scf00489 | 24 |
| AX-158312568 | 24 | 54.568 | KV453253.1 | 14223343 | 24-scf00489 | 24 |
| AX-158312558 | 24 | 54.791 | KV453253.1 | 14204099 | 24-scf00489 | 24 |
| AX-158312569 | 24 | 54.791 | KV453253.1 | 14223678 | 24-scf00489 | 24 |
| AX-157847403 | 24 | 54.998 | KV453253.1 | 14228660 | 24-scf00489 | 24 |
| AX-157715586 | 24 | 54.999 | KV453253.1 | 14232674 | 24-scf00489 | 24 |
| AX-157712968 | 24 | 54.999 | KV453253.1 | 14233182 | 24-scf00489 | 24 |
| AX-158312593 | 24 | 54.999 | KV453253.1 | 14261600 | 24-scf00489 | 24 |
| AX-158312601 | 24 | 54.999 | KV453253.1 | 14268683 | 24-scf00489 | 24 |
| AX-157745589 | 24 | 55     | KV453253.1 | 14234390 | 24-scf00489 | 24 |
| AX-158312575 | 24 | 55     | KV453253.1 | 14237108 | 24-scf00489 | 24 |
| AX-158312577 | 24 | 55.002 | KV453253.1 | 14243387 | 24-scf00489 | 24 |
| AX-157867761 | 24 | 55.003 | KV453253.1 | 14016639 | 24-scf00489 | 24 |
| AX-158312447 | 24 | 55.003 | KV453253.1 | 14065414 | 24-scf00489 | 24 |
| AX-158312486 | 24 | 55.003 | KV453253.1 | 14113384 | 24-scf00489 | 24 |
| AX-158381390 | 24 | 55.003 | KV453253.1 | 14121996 | 24-scf00489 | 24 |
| AX-158312503 | 24 | 55.003 | KV453253.1 | 14133053 | 24-scf00489 | 24 |
| AX-158312541 | 24 | 55.003 | KV453253.1 | 14184539 | 24-scf00489 | 24 |
| AX-158312553 | 24 | 55.003 | KV453253.1 | 14201232 | 24-scf00489 | 24 |
| AX-158312560 | 24 | 55.003 | KV453253.1 | 14204579 | 24-scf00489 | 24 |
| AX-157847400 | 24 | 55.003 | KV453253.1 | 14216888 | 24-scf00489 | 24 |
| AX-157847401 | 24 | 55.003 | KV453253.1 | 14225310 | 24-scf00489 | 24 |

|              |    |        |            |          |             |    |
|--------------|----|--------|------------|----------|-------------|----|
| AX-158312573 | 24 | 55.003 | KV453253.1 | 14236075 | 24-scf00489 | 24 |
| AX-158312579 | 24 | 55.003 | KV453253.1 | 14246979 | 24-scf00489 | 24 |
| AX-158312580 | 24 | 55.003 | KV453253.1 | 14247368 | 24-scf00489 | 24 |
| AX-157847405 | 24 | 55.003 | KV453253.1 | 14248340 | 24-scf00489 | 24 |
| AX-158312582 | 24 | 55.003 | KV453253.1 | 14248756 | 24-scf00489 | 24 |
| AX-158312584 | 24 | 55.003 | KV453253.1 | 14250926 | 24-scf00489 | 24 |
| AX-158312587 | 24 | 55.003 | KV453253.1 | 14252992 | 24-scf00489 | 24 |
| AX-158312588 | 24 | 55.003 | KV453253.1 | 14254499 | 24-scf00489 | 24 |
| AX-158312589 | 24 | 55.003 | KV453253.1 | 14257384 | 24-scf00489 | 24 |
| AX-158312591 | 24 | 55.003 | KV453253.1 | 14259076 | 24-scf00489 | 24 |
| AX-158312594 | 24 | 55.003 | KV453253.1 | 14262069 | 24-scf00489 | 24 |
| AX-158312595 | 24 | 55.003 | KV453253.1 | 14262528 | 24-scf00489 | 24 |
| AX-157847407 | 24 | 55.003 | KV453253.1 | 14262629 | 24-scf00489 | 24 |
| AX-158312596 | 24 | 55.003 | KV453253.1 | 14265070 | 24-scf00489 | 24 |
| AX-158312599 | 24 | 55.003 | KV453253.1 | 14267212 | 24-scf00489 | 24 |
| AX-158312613 | 24 | 55.003 | KV453253.1 | 14283433 | 24-scf00489 | 24 |
| AX-158312614 | 24 | 55.003 | KV453253.1 | 14285088 | 24-scf00489 | 24 |
| AX-158312622 | 24 | 55.003 | KV453253.1 | 14294829 | 24-scf00489 | 24 |
| AX-158312645 | 24 | 55.003 | KV453253.1 | 14328660 | 24-scf00489 | 24 |
| AX-158312669 | 24 | 55.003 | KV453253.1 | 14372521 | 24-scf00489 | 24 |
| AX-158312600 | 24 | 55.061 | KV453253.1 | 14267505 | 24-scf00489 | 24 |
| AX-158312604 | 24 | 55.112 | KV453253.1 | 14272560 | 24-scf00489 | 24 |
| AX-157714298 | 24 | 55.112 | KV453253.1 | 14273877 | 24-scf00489 | 24 |
| AX-157847409 | 24 | 55.112 | KV453253.1 | 14274362 | 24-scf00489 | 24 |
| AX-158312606 | 24 | 55.112 | KV453253.1 | 14275410 | 24-scf00489 | 24 |
| AX-158312607 | 24 | 55.112 | KV453253.1 | 14275798 | 24-scf00489 | 24 |
| AX-158312609 | 24 | 55.221 | KV453253.1 | 14277579 | 24-scf00489 | 24 |
| AX-158312611 | 24 | 55.289 | KV453253.1 | 14281208 | 24-scf00489 | 24 |
| AX-157847410 | 24 | 55.289 | KV453253.1 | 14282951 | 24-scf00489 | 24 |
| AX-158312615 | 24 | 55.331 | KV453253.1 | 14285754 | 24-scf00489 | 24 |
| AX-157726426 | 24 | 55.331 | KV453253.1 | 14285902 | 24-scf00489 | 24 |
| AX-158312616 | 24 | 55.331 | KV453253.1 | 14287310 | 24-scf00489 | 24 |
| AX-158312617 | 24 | 55.331 | KV453253.1 | 14288097 | 24-scf00489 | 24 |
| AX-157747662 | 24 | 55.331 | KV453253.1 | 14289163 | 24-scf00489 | 24 |
| AX-158312618 | 24 | 55.331 | KV453253.1 | 14290483 | 24-scf00489 | 24 |
| AX-158312619 | 24 | 55.331 | KV453253.1 | 14291073 | 24-scf00489 | 24 |
| AX-158418018 | 24 | 55.359 | KV453253.1 | 14294781 | 24-scf00489 | 24 |
| AX-158419862 | 24 | 55.373 | KV453253.1 | 14295241 | 24-scf00489 | 24 |
| AX-158312631 | 24 | 55.399 | KV453253.1 | 14311807 | 24-scf00489 | 24 |
| AX-158312664 | 24 | 55.399 | KV453253.1 | 14362602 | 24-scf00489 | 24 |
| AX-158312632 | 24 | 55.419 | KV453253.1 | 14312350 | 24-scf00489 | 24 |
| AX-158312458 | 24 | 55.44  | KV453253.1 | 14082143 | 24-scf00489 | 24 |
| AX-157727030 | 24 | 55.44  | KV453253.1 | 14111391 | 24-scf00489 | 24 |
| AX-158312488 | 24 | 55.44  | KV453253.1 | 14114474 | 24-scf00489 | 24 |
| AX-158312537 | 24 | 55.44  | KV453253.1 | 14177382 | 24-scf00489 | 24 |
| AX-157847394 | 24 | 55.44  | KV453253.1 | 14187027 | 24-scf00489 | 24 |
| AX-158312625 | 24 | 55.44  | KV453253.1 | 14304116 | 24-scf00489 | 24 |
| AX-157847413 | 24 | 55.44  | KV453253.1 | 14312869 | 24-scf00489 | 24 |
| AX-158312633 | 24 | 55.44  | KV453253.1 | 14313106 | 24-scf00489 | 24 |
| AX-158312638 | 24 | 55.44  | KV453253.1 | 14317354 | 24-scf00489 | 24 |
| AX-157847415 | 24 | 55.44  | KV453253.1 | 14320633 | 24-scf00489 | 24 |

|              |    |        |            |          |             |    |
|--------------|----|--------|------------|----------|-------------|----|
| AX-157743846 | 24 | 55.44  | KV453253.1 | 14320691 | 24-scf00489 | 24 |
| AX-157747022 | 24 | 55.44  | KV453253.1 | 14324069 | 24-scf00489 | 24 |
| AX-158312643 | 24 | 55.44  | KV453253.1 | 14327476 | 24-scf00489 | 24 |
| AX-158312646 | 24 | 55.44  | KV453253.1 | 14329660 | 24-scf00489 | 24 |
| AX-158312647 | 24 | 55.44  | KV453253.1 | 14330791 | 24-scf00489 | 24 |
| AX-157847416 | 24 | 55.44  | KV453253.1 | 14333215 | 24-scf00489 | 24 |
| AX-158312650 | 24 | 55.44  | KV453253.1 | 14341572 | 24-scf00489 | 24 |
| AX-158312652 | 24 | 55.44  | KV453253.1 | 14343247 | 24-scf00489 | 24 |
| AX-158312655 | 24 | 55.44  | KV453253.1 | 14346268 | 24-scf00489 | 24 |
| AX-158312656 | 24 | 55.44  | KV453253.1 | 14347585 | 24-scf00489 | 24 |
| AX-158312661 | 24 | 55.44  | KV453253.1 | 14354503 | 24-scf00489 | 24 |
| AX-158312657 | 24 | 55.556 | KV453253.1 | 14348537 | 24-scf00489 | 24 |
| AX-157751562 | 24 | 55.556 | KV453253.1 | 14348950 | 24-scf00489 | 24 |
| AX-158312658 | 24 | 55.556 | KV453253.1 | 14350781 | 24-scf00489 | 24 |
| AX-158312660 | 24 | 55.614 | KV453253.1 | 14352602 | 24-scf00489 | 24 |
| AX-157847421 | 24 | 55.614 | KV453253.1 | 14387444 | 24-scf00489 | 24 |
| AX-158312651 | 24 | 55.672 | KV453253.1 | 14342137 | 24-scf00489 | 24 |
| AX-158312662 | 24 | 55.672 | KV453253.1 | 14357636 | 24-scf00489 | 24 |
| AX-158312663 | 24 | 55.672 | KV453253.1 | 14358254 | 24-scf00489 | 24 |
| AX-157739592 | 24 | 55.672 | KV453253.1 | 14358963 | 24-scf00489 | 24 |
| AX-157861324 | 24 | 55.672 | KV453253.1 | 14360089 | 24-scf00489 | 24 |
| AX-158312666 | 24 | 55.672 | KV453253.1 | 14364801 | 24-scf00489 | 24 |
| AX-158312640 | 24 | 55.789 | KV453253.1 | 14324850 | 24-scf00489 | 24 |
| AX-158312641 | 24 | 55.789 | KV453253.1 | 14325095 | 24-scf00489 | 24 |
| AX-158312642 | 24 | 55.789 | KV453253.1 | 14326608 | 24-scf00489 | 24 |
| AX-157715167 | 24 | 55.789 | KV453253.1 | 14370105 | 24-scf00489 | 24 |
| AX-157847419 | 24 | 55.789 | KV453253.1 | 14371721 | 24-scf00489 | 24 |
| AX-157743639 | 24 | 55.789 | KV453253.1 | 14371787 | 24-scf00489 | 24 |
| AX-158312672 | 24 | 55.789 | KV453253.1 | 14380657 | 24-scf00489 | 24 |
| AX-158312697 | 24 | 55.789 | KV453253.1 | 14417848 | 24-scf00489 | 24 |
| AX-157754701 | 24 | 55.905 | KV453253.1 | 14375365 | 24-scf00489 | 24 |
| AX-158312671 | 24 | 55.96  | KV453253.1 | 14378247 | 24-scf00489 | 24 |
| AX-158381392 | 24 | 56.022 | KV453253.1 | 14381895 | 24-scf00489 | 24 |
| AX-157770614 | 24 | 56.022 | KV453253.1 | 14382957 | 24-scf00489 | 24 |
| AX-158312673 | 24 | 56.022 | KV453253.1 | 14384215 | 24-scf00489 | 24 |
| AX-158312675 | 24 | 56.022 | KV453253.1 | 14389163 | 24-scf00489 | 24 |
| AX-158312676 | 24 | 56.022 | KV453253.1 | 14389752 | 24-scf00489 | 24 |
| AX-158312678 | 24 | 56.022 | KV453253.1 | 14391474 | 24-scf00489 | 24 |
| AX-158312679 | 24 | 56.022 | KV453253.1 | 14392475 | 24-scf00489 | 24 |
| AX-158312681 | 24 | 56.022 | KV453253.1 | 14393787 | 24-scf00489 | 24 |
| AX-158312682 | 24 | 56.022 | KV453253.1 | 14395426 | 24-scf00489 | 24 |
| AX-158312683 | 24 | 56.022 | KV453253.1 | 14396009 | 24-scf00489 | 24 |
| AX-158312685 | 24 | 56.022 | KV453253.1 | 14399932 | 24-scf00489 | 24 |
| AX-158312686 | 24 | 56.022 | KV453253.1 | 14402285 | 24-scf00489 | 24 |
| AX-157757800 | 24 | 56.022 | KV453253.1 | 14403006 | 24-scf00489 | 24 |
| AX-158312687 | 24 | 56.022 | KV453253.1 | 14404475 | 24-scf00489 | 24 |
| AX-158312689 | 24 | 56.022 | KV453253.1 | 14406722 | 24-scf00489 | 24 |
| AX-158312690 | 24 | 56.022 | KV453253.1 | 14408239 | 24-scf00489 | 24 |
| AX-158312691 | 24 | 56.022 | KV453253.1 | 14411516 | 24-scf00489 | 24 |
| AX-158312692 | 24 | 56.022 | KV453253.1 | 14412077 | 24-scf00489 | 24 |
| AX-158312695 | 24 | 56.022 | KV453253.1 | 14414555 | 24-scf00489 | 24 |

|              |    |        |            |          |             |    |
|--------------|----|--------|------------|----------|-------------|----|
| AX-158312696 | 24 | 56.603 | KV453253.1 | 14417668 | 24-scf00489 | 24 |
| AX-158312700 | 24 | 56.603 | KV453253.1 | 14426800 | 24-scf00489 | 24 |
| AX-158312701 | 24 | 56.603 | KV453253.1 | 14432446 | 24-scf00489 | 24 |
| AX-157847422 | 24 | 56.608 | KV453253.1 | 14432895 | 24-scf00489 | 24 |
| AX-157867765 | 24 | 56.612 | KV453253.1 | 14435049 | 24-scf00489 | 24 |
| AX-158312699 | 24 | 56.752 | KV453253.1 | 14425395 | 24-scf00489 | 24 |
| AX-158312702 | 24 | 56.752 | KV453253.1 | 14435290 | 24-scf00489 | 24 |
| AX-158312703 | 24 | 56.752 | KV453253.1 | 14437239 | 24-scf00489 | 24 |
| AX-158312704 | 24 | 57.008 | KV453253.1 | 14444048 | 24-scf00489 | 24 |
| AX-157719073 | 24 | 57.119 | KV453253.1 | 14445532 | 24-scf00489 | 24 |
| AX-158312708 | 24 | 57.12  | KV453253.1 | 14448538 | 24-scf00489 | 24 |
| AX-158312709 | 24 | 57.12  | KV453253.1 | 14450724 | 24-scf00489 | 24 |
| AX-157747747 | 24 | 57.12  | KV453253.1 | 14453725 | 24-scf00489 | 24 |
| AX-158312710 | 24 | 57.122 | KV453253.1 | 14455180 | 24-scf00489 | 24 |
| AX-158312711 | 24 | 57.537 | KV453253.1 | 14457762 | 24-scf00489 | 24 |
| AX-157847424 | 24 | 57.537 | KV453253.1 | 14458419 | 24-scf00489 | 24 |
| AX-158312712 | 24 | 57.537 | KV453253.1 | 14460723 | 24-scf00489 | 24 |
| AX-158312713 | 24 | 57.601 | KV453253.1 | 14463568 | 24-scf00489 | 24 |
| AX-158312731 | 24 | 57.601 | KV453253.1 | 14499740 | 24-scf00489 | 24 |
| AX-158312715 | 24 | 57.652 | KV453253.1 | 14470265 | 24-scf00489 | 24 |
| AX-158312716 | 24 | 57.652 | KV453253.1 | 14471596 | 24-scf00489 | 24 |
| AX-158312717 | 24 | 57.652 | KV453253.1 | 14473863 | 24-scf00489 | 24 |
| AX-157721523 | 24 | 57.868 | KV453253.1 | 14477028 | 24-scf00489 | 24 |
| AX-157752227 | 24 | 57.902 | KV453253.1 | 14457122 | 24-scf00489 | 24 |
| AX-157748956 | 24 | 57.902 | KV453253.1 | 14478424 | 24-scf00489 | 24 |
| AX-158312721 | 24 | 57.902 | KV453253.1 | 14484134 | 24-scf00489 | 24 |
| AX-157881169 | 24 | 58.117 | KV453253.1 | 14486290 | 24-scf00489 | 24 |
| AX-157746944 | 24 | 58.117 | KV453253.1 | 14490505 | 24-scf00489 | 24 |
| AX-158312724 | 24 | 58.117 | KV453253.1 | 14491590 | 24-scf00489 | 24 |
| AX-158312725 | 24 | 58.117 | KV453253.1 | 14493722 | 24-scf00489 | 24 |
| AX-157773411 | 24 | 58.117 | KV453253.1 | 14493895 | 24-scf00489 | 24 |
| AX-158312728 | 24 | 58.117 | KV453253.1 | 14496758 | 24-scf00489 | 24 |
| AX-158312730 | 24 | 58.117 | KV453253.1 | 14498034 | 24-scf00489 | 24 |
| AX-158312732 | 24 | 58.117 | KV453253.1 | 14502613 | 24-scf00489 | 24 |
| AX-158312733 | 24 | 58.117 | KV453253.1 | 14503302 | 24-scf00489 | 24 |
| AX-157772656 | 24 | 58.117 | KV453253.1 | 14503541 | 24-scf00489 | 24 |
| AX-158312734 | 24 | 58.117 | KV453253.1 | 14504784 | 24-scf00489 | 24 |
| AX-158312737 | 24 | 58.117 | KV453253.1 | 14510206 | 24-scf00489 | 24 |
| AX-158312740 | 24 | 58.117 | KV453253.1 | 14513416 | 24-scf00489 | 24 |
| AX-158312742 | 24 | 58.117 | KV453253.1 | 14515210 | 24-scf00489 | 24 |
| AX-157735993 | 24 | 58.117 | KV453253.1 | 14523808 | 24-scf00489 | 24 |
| AX-158312746 | 24 | 58.117 | KV453253.1 | 14525509 | 24-scf00489 | 24 |
| AX-158312750 | 24 | 58.117 | KV453253.1 | 14528813 | 24-scf00489 | 24 |
| AX-158418024 | 24 | 58.117 | KV453253.1 | 14530856 | 24-scf00489 | 24 |
| AX-158312751 | 24 | 58.117 | KV453253.1 | 14530963 | 24-scf00489 | 24 |
| AX-158312753 | 24 | 58.117 | KV453253.1 | 14531840 | 24-scf00489 | 24 |
| AX-158312754 | 24 | 58.117 | KV453253.1 | 14532259 | 24-scf00489 | 24 |
| AX-158312755 | 24 | 58.117 | KV453253.1 | 14532672 | 24-scf00489 | 24 |
| AX-158312758 | 24 | 58.117 | KV453253.1 | 14534597 | 24-scf00489 | 24 |
| AX-157881171 | 24 | 58.117 | KV453253.1 | 14536259 | 24-scf00489 | 24 |
| AX-158312760 | 24 | 58.117 | KV453253.1 | 14537239 | 24-scf00489 | 24 |

|              |    |        |             |          |             |    |
|--------------|----|--------|-------------|----------|-------------|----|
| AX-158312761 | 24 | 58.117 | KV453253.1  | 14539050 | 24-scf00489 | 24 |
| AX-157739815 | 24 | 58.117 | KV453253.1  | 14539592 | 24-scf00489 | 24 |
| AX-158312762 | 24 | 58.117 | KV453253.1  | 14541171 | 24-scf00489 | 24 |
| AX-157881172 | 24 | 58.117 | KV453253.1  | 14546520 | 24-scf00489 | 24 |
| AX-158312767 | 24 | 58.117 | KV453253.1  | 14558257 | 24-scf00489 | 24 |
| AX-157873533 | 24 | 58.118 | KV453253.1  | 14557115 | 24-scf00489 | 24 |
| AX-157707403 | 24 | 58.118 | 3ML01034209 | 353      | scf09879_1  | UN |
| AX-157727418 | 24 | 58.119 | KV453253.1  | 14558982 | 24-scf00489 | 24 |
| AX-158312772 | 24 | 58.119 | KV453253.1  | 14562287 | 24-scf00489 | 24 |
| AX-158312776 | 24 | 58.291 | KV453253.1  | 14567629 | 24-scf00489 | 24 |
| AX-157704107 | 24 | 58.377 | KV453253.1  | 14569363 | 24-scf00489 | 24 |
| AX-158312780 | 24 | 58.467 | KV453253.1  | 14575305 | 24-scf00489 | 24 |
| AX-157718216 | 24 | 58.467 | KV453253.1  | 14580771 | 24-scf00489 | 24 |
| AX-158312781 | 24 | 58.491 | KV453253.1  | 14581772 | 24-scf00489 | 24 |
| AX-158312782 | 24 | 58.503 | KV453253.1  | 14584561 | 24-scf00489 | 24 |
| AX-158312785 | 24 | 58.527 | KV453253.1  | 14589188 | 24-scf00489 | 24 |
| AX-158312786 | 24 | 58.556 | KV453253.1  | 14590368 | 24-scf00489 | 24 |
| AX-157847428 | 24 | 58.583 | KV453253.1  | 14593346 | 24-scf00489 | 24 |
| AX-157847430 | 24 | 58.583 | KV453253.1  | 14599869 | 24-scf00489 | 24 |
| AX-158312793 | 24 | 58.583 | KV453253.1  | 14601013 | 24-scf00489 | 24 |
| AX-158312775 | 24 | 58.816 | KV453253.1  | 14565968 | 24-scf00489 | 24 |
| AX-158312794 | 24 | 58.816 | KV453253.1  | 14602457 | 24-scf00489 | 24 |
| AX-157750089 | 24 | 58.816 | KV453253.1  | 14603593 | 24-scf00489 | 24 |
| AX-158381394 | 24 | 58.816 | KV453253.1  | 14603786 | 24-scf00489 | 24 |
| AX-158312795 | 24 | 58.816 | KV453253.1  | 14604783 | 24-scf00489 | 24 |
| AX-158312796 | 24 | 58.816 | KV453253.1  | 14605356 | 24-scf00489 | 24 |
| AX-158312797 | 24 | 58.816 | KV453253.1  | 14606422 | 24-scf00489 | 24 |
| AX-158312798 | 24 | 58.816 | KV453253.1  | 14608125 | 24-scf00489 | 24 |
| AX-157861326 | 24 | 58.816 | KV453253.1  | 14613214 | 24-scf00489 | 24 |
| AX-158312804 | 24 | 58.816 | KV453253.1  | 14616437 | 24-scf00489 | 24 |
| AX-158312805 | 24 | 58.816 | KV453253.1  | 14616703 | 24-scf00489 | 24 |
| AX-158312806 | 24 | 58.816 | KV453253.1  | 14617144 | 24-scf00489 | 24 |
| AX-158312808 | 24 | 58.816 | KV453253.1  | 14618917 | 24-scf00489 | 24 |
| AX-158312810 | 24 | 58.816 | KV453253.1  | 14619998 | 24-scf00489 | 24 |
| AX-158312814 | 24 | 58.816 | KV453253.1  | 14625233 | 24-scf00489 | 24 |
| AX-157847432 | 24 | 58.816 | KV453253.1  | 14626191 | 24-scf00489 | 24 |
| AX-157748803 | 24 | 58.816 | KV453253.1  | 14801965 | 24-scf00489 | 24 |
| AX-158312815 | 24 | 58.887 | KV453253.1  | 14626649 | 24-scf00489 | 24 |
| AX-158312819 | 24 | 58.887 | KV453253.1  | 14632488 | 24-scf00489 | 24 |
| AX-158312818 | 24 | 58.909 | KV453253.1  | 14629406 | 24-scf00489 | 24 |
| AX-158312800 | 24 | 58.932 | KV453253.1  | 14609527 | 24-scf00489 | 24 |
| AX-158381395 | 24 | 58.932 | KV453253.1  | 14634558 | 24-scf00489 | 24 |
| AX-158312822 | 24 | 58.969 | KV453253.1  | 14642169 | 24-scf00489 | 24 |
| AX-158312823 | 24 | 59.005 | KV453253.1  | 14643125 | 24-scf00489 | 24 |
| AX-158312827 | 24 | 59.016 | KV453253.1  | 14646108 | 24-scf00489 | 24 |
| AX-158312828 | 24 | 59.022 | KV453253.1  | 14647032 | 24-scf00489 | 24 |
| AX-158312829 | 24 | 59.049 | KV453253.1  | 14647429 | 24-scf00489 | 24 |
| AX-158312831 | 24 | 59.049 | KV453253.1  | 14649294 | 24-scf00489 | 24 |
| AX-158312836 | 24 | 59.165 | KV453253.1  | 14655851 | 24-scf00489 | 24 |
| AX-157867767 | 24 | 59.196 | KV453253.1  | 14656570 | 24-scf00489 | 24 |
| AX-158312837 | 24 | 59.233 | KV453253.1  | 14657927 | 24-scf00489 | 24 |

|              |    |        |            |          |             |    |
|--------------|----|--------|------------|----------|-------------|----|
| AX-158312840 | 24 | 59.246 | KV453253.1 | 14661132 | 24-scf00489 | 24 |
| AX-158312842 | 24 | 59.282 | KV453253.1 | 14663530 | 24-scf00489 | 24 |
| AX-158312844 | 24 | 59.282 | KV453253.1 | 14672895 | 24-scf00489 | 24 |
| AX-158312846 | 24 | 59.323 | KV453253.1 | 14675372 | 24-scf00489 | 24 |
| AX-158312850 | 24 | 59.35  | KV453253.1 | 14688146 | 24-scf00489 | 24 |
| AX-157722596 | 24 | 59.398 | KV453253.1 | 14656104 | 24-scf00489 | 24 |
| AX-157847439 | 24 | 59.398 | KV453253.1 | 14689016 | 24-scf00489 | 24 |
| AX-158312852 | 24 | 59.398 | KV453253.1 | 14689926 | 24-scf00489 | 24 |
| AX-158312854 | 24 | 59.398 | KV453253.1 | 14693080 | 24-scf00489 | 24 |
| AX-158312855 | 24 | 59.398 | KV453253.1 | 14693439 | 24-scf00489 | 24 |
| AX-158312856 | 24 | 59.398 | KV453253.1 | 14697018 | 24-scf00489 | 24 |
| AX-158312857 | 24 | 59.398 | KV453253.1 | 14697646 | 24-scf00489 | 24 |
| AX-157847441 | 24 | 59.398 | KV453253.1 | 14697982 | 24-scf00489 | 24 |
| AX-157738734 | 24 | 59.398 | KV453253.1 | 14748855 | 24-scf00489 | 24 |
| AX-158312894 | 24 | 59.398 | KV453253.1 | 14775843 | 24-scf00489 | 24 |
| AX-158312860 | 24 | 59.514 | KV453253.1 | 14702346 | 24-scf00489 | 24 |
| AX-158312862 | 24 | 59.514 | KV453253.1 | 14703902 | 24-scf00489 | 24 |
| AX-157751980 | 24 | 59.514 | KV453253.1 | 14709223 | 24-scf00489 | 24 |
| AX-158312866 | 24 | 59.514 | KV453253.1 | 14709816 | 24-scf00489 | 24 |
| AX-158312873 | 24 | 59.514 | KV453253.1 | 14735631 | 24-scf00489 | 24 |
| AX-157847449 | 24 | 59.514 | KV453253.1 | 14773735 | 24-scf00489 | 24 |
| AX-158312933 | 24 | 59.514 | KV453253.1 | 14850312 | 24-scf00489 | 24 |
| AX-158312868 | 24 | 59.515 | KV453253.1 | 14712327 | 24-scf00489 | 24 |
| AX-157847444 | 24 | 59.515 | KV453253.1 | 14746371 | 24-scf00489 | 24 |
| AX-157728315 | 24 | 59.515 | KV453253.1 | 14746806 | 24-scf00489 | 24 |
| AX-157847447 | 24 | 59.515 | KV453253.1 | 14757273 | 24-scf00489 | 24 |
| AX-158423632 | 24 | 59.515 | KV453253.1 | 14814221 | 24-scf00489 | 24 |
| AX-158312790 | 24 | 59.748 | KV453253.1 | 14595288 | 24-scf00489 | 24 |
| AX-158312807 | 24 | 59.748 | KV453253.1 | 14618299 | 24-scf00489 | 24 |
| AX-158312812 | 24 | 59.748 | KV453253.1 | 14622406 | 24-scf00489 | 24 |
| AX-158312880 | 24 | 59.748 | KV453253.1 | 14760809 | 24-scf00489 | 24 |
| AX-158312882 | 24 | 59.748 | KV453253.1 | 14761454 | 24-scf00489 | 24 |
| AX-158312884 | 24 | 59.748 | KV453253.1 | 14762111 | 24-scf00489 | 24 |
| AX-157847448 | 24 | 59.748 | KV453253.1 | 14762332 | 24-scf00489 | 24 |
| AX-158312885 | 24 | 59.748 | KV453253.1 | 14765413 | 24-scf00489 | 24 |
| AX-158312889 | 24 | 59.748 | KV453253.1 | 14773148 | 24-scf00489 | 24 |
| AX-158312890 | 24 | 59.748 | KV453253.1 | 14773487 | 24-scf00489 | 24 |
| AX-158312891 | 24 | 59.748 | KV453253.1 | 14774341 | 24-scf00489 | 24 |
| AX-158412384 | 24 | 59.748 | KV453253.1 | 14776210 | 24-scf00489 | 24 |
| AX-158418027 | 24 | 59.748 | KV453253.1 | 14777449 | 24-scf00489 | 24 |
| AX-157847450 | 24 | 59.748 | KV453253.1 | 14789506 | 24-scf00489 | 24 |
| AX-158312901 | 24 | 59.748 | KV453253.1 | 14797548 | 24-scf00489 | 24 |
| AX-158312906 | 24 | 59.748 | KV453253.1 | 14802013 | 24-scf00489 | 24 |
| AX-158312908 | 24 | 59.748 | KV453253.1 | 14807725 | 24-scf00489 | 24 |
| AX-158312910 | 24 | 59.748 | KV453253.1 | 14809498 | 24-scf00489 | 24 |
| AX-158312917 | 24 | 59.748 | KV453253.1 | 14825712 | 24-scf00489 | 24 |
| AX-158312928 | 24 | 59.748 | KV453253.1 | 14841123 | 24-scf00489 | 24 |
| AX-157758768 | 24 | 59.804 | KV453253.1 | 14798992 | 24-scf00489 | 24 |
| AX-158312909 | 24 | 59.851 | KV453253.1 | 14808233 | 24-scf00489 | 24 |
| AX-158381396 | 24 | 59.864 | KV453253.1 | 14809821 | 24-scf00489 | 24 |
| AX-158312913 | 24 | 59.864 | KV453253.1 | 14813331 | 24-scf00489 | 24 |

|              |    |        |            |          |             |    |
|--------------|----|--------|------------|----------|-------------|----|
| AX-157847453 | 24 | 59.864 | KV453253.1 | 14819728 | 24-scf00489 | 24 |
| AX-158312919 | 24 | 59.864 | KV453253.1 | 14826223 | 24-scf00489 | 24 |
| AX-158312920 | 24 | 59.864 | KV453253.1 | 14826710 | 24-scf00489 | 24 |
| AX-158312923 | 24 | 59.9   | KV453253.1 | 14829966 | 24-scf00489 | 24 |
| AX-158312924 | 24 | 59.909 | KV453253.1 | 14833737 | 24-scf00489 | 24 |
| AX-158312925 | 24 | 59.909 | KV453253.1 | 14833975 | 24-scf00489 | 24 |
| AX-157847455 | 24 | 59.948 | KV453253.1 | 14836812 | 24-scf00489 | 24 |
| AX-158312921 | 24 | 59.981 | KV453253.1 | 14827060 | 24-scf00489 | 24 |
| AX-158312932 | 24 | 59.981 | KV453253.1 | 14847452 | 24-scf00489 | 24 |
| AX-158312935 | 24 | 59.981 | KV453253.1 | 14851367 | 24-scf00489 | 24 |
| AX-158312937 | 24 | 59.981 | KV453253.1 | 14854014 | 24-scf00489 | 24 |
| AX-158312927 | 24 | 60.214 | KV453253.1 | 14839539 | 24-scf00489 | 24 |
| AX-158312938 | 24 | 60.214 | KV453253.1 | 14855300 | 24-scf00489 | 24 |
| AX-158312939 | 24 | 60.214 | KV453253.1 | 14855912 | 24-scf00489 | 24 |
| AX-158312942 | 24 | 60.214 | KV453253.1 | 14858130 | 24-scf00489 | 24 |
| AX-158312943 | 24 | 60.214 | KV453253.1 | 14858541 | 24-scf00489 | 24 |
| AX-158312944 | 24 | 60.214 | KV453253.1 | 14859679 | 24-scf00489 | 24 |
| AX-158312945 | 24 | 60.214 | KV453253.1 | 14860853 | 24-scf00489 | 24 |
| AX-158312896 | 24 | 60.447 | KV453253.1 | 14776972 | 24-scf00489 | 24 |
| AX-158418032 | 24 | 60.447 | KV453253.1 | 14863203 | 24-scf00489 | 24 |
| AX-158312947 | 24 | 60.447 | KV453253.1 | 14865380 | 24-scf00489 | 24 |
| AX-158312951 | 24 | 60.447 | KV453253.1 | 14870246 | 24-scf00489 | 24 |
| AX-158312954 | 24 | 60.447 | KV453253.1 | 14871763 | 24-scf00489 | 24 |
| AX-158312955 | 24 | 60.447 | KV453253.1 | 14873844 | 24-scf00489 | 24 |
| AX-158312956 | 24 | 60.447 | KV453253.1 | 14874438 | 24-scf00489 | 24 |
| AX-158312915 | 24 | 60.834 | KV453253.1 | 14823457 | 24-scf00489 | 24 |
| AX-158312952 | 24 | 60.834 | KV453253.1 | 14870811 | 24-scf00489 | 24 |
| AX-158312958 | 24 | 60.834 | KV453253.1 | 14878400 | 24-scf00489 | 24 |
| AX-158312972 | 24 | 60.834 | KV453253.1 | 14896971 | 24-scf00489 | 24 |
| AX-158312959 | 24 | 60.836 | KV453253.1 | 14879264 | 24-scf00489 | 24 |
| AX-157888254 | 24 | 60.836 | KV453253.1 | 14879327 | 24-scf00489 | 24 |
| AX-158312888 | 24 | 60.925 | KV453253.1 | 14768540 | 24-scf00489 | 24 |
| AX-158312903 | 24 | 60.925 | KV453253.1 | 14798922 | 24-scf00489 | 24 |
| AX-158312962 | 24 | 60.925 | KV453253.1 | 14882871 | 24-scf00489 | 24 |
| AX-158312861 | 24 | 61.03  | KV453253.1 | 14703266 | 24-scf00489 | 24 |
| AX-157847457 | 24 | 61.03  | KV453253.1 | 14887428 | 24-scf00489 | 24 |
| AX-158312963 | 24 | 61.03  | KV453253.1 | 14888765 | 24-scf00489 | 24 |
| AX-158381397 | 24 | 61.03  | KV453253.1 | 14890296 | 24-scf00489 | 24 |
| AX-158312965 | 24 | 61.03  | KV453253.1 | 14890466 | 24-scf00489 | 24 |
| AX-158312969 | 24 | 61.03  | KV453253.1 | 14893436 | 24-scf00489 | 24 |
| AX-158312973 | 24 | 61.263 | KV453253.1 | 14897329 | 24-scf00489 | 24 |
| AX-158312975 | 24 | 61.263 | KV453253.1 | 14898553 | 24-scf00489 | 24 |
| AX-158312976 | 24 | 61.38  | KV453253.1 | 14901264 | 24-scf00489 | 24 |
| AX-158312978 | 24 | 61.38  | KV453253.1 | 14902512 | 24-scf00489 | 24 |
| AX-158312979 | 24 | 61.38  | KV453253.1 | 14904123 | 24-scf00489 | 24 |
| AX-158312980 | 24 | 61.38  | KV453253.1 | 14906375 | 24-scf00489 | 24 |
| AX-158312981 | 24 | 61.38  | KV453253.1 | 14906947 | 24-scf00489 | 24 |
| AX-158312984 | 24 | 61.38  | KV453253.1 | 14909421 | 24-scf00489 | 24 |
| AX-157724567 | 24 | 61.38  | KV453253.1 | 14910997 | 24-scf00489 | 24 |
| AX-158312985 | 24 | 61.38  | KV453253.1 | 14911841 | 24-scf00489 | 24 |
| AX-158312986 | 24 | 61.38  | KV453253.1 | 14912232 | 24-scf00489 | 24 |



|              |    |        |            |          |             |    |
|--------------|----|--------|------------|----------|-------------|----|
| AX-158312989 | 24 | 61.816 | KV453253.1 | 14916158 | 24-scf00489 | 24 |
| AX-158312990 | 24 | 61.816 | KV453253.1 | 14916532 | 24-scf00489 | 24 |
| AX-158312991 | 24 | 61.816 | KV453253.1 | 14917255 | 24-scf00489 | 24 |
| AX-158312992 | 24 | 61.816 | KV453253.1 | 14919075 | 24-scf00489 | 24 |
| AX-158312993 | 24 | 61.816 | KV453253.1 | 14919600 | 24-scf00489 | 24 |
| AX-157744877 | 24 | 61.816 | KV453253.1 | 14921774 | 24-scf00489 | 24 |
| AX-157847458 | 24 | 61.816 | KV453253.1 | 14923705 | 24-scf00489 | 24 |
| AX-158312995 | 24 | 61.816 | KV453253.1 | 14923857 | 24-scf00489 | 24 |
| AX-158312996 | 24 | 61.816 | KV453253.1 | 14924523 | 24-scf00489 | 24 |
| AX-158312997 | 24 | 61.816 | KV453253.1 | 14926159 | 24-scf00489 | 24 |
| AX-158312998 | 24 | 61.816 | KV453253.1 | 14926513 | 24-scf00489 | 24 |
| AX-158313001 | 24 | 61.926 | KV453253.1 | 14928889 | 24-scf00489 | 24 |
| AX-158313004 | 24 | 61.926 | KV453253.1 | 14930978 | 24-scf00489 | 24 |
| AX-158313005 | 24 | 61.926 | KV453253.1 | 14931642 | 24-scf00489 | 24 |
| AX-158418035 | 24 | 61.926 | KV453253.1 | 14934301 | 24-scf00489 | 24 |
| AX-158418034 | 24 | 62.065 | KV453253.1 | 14934082 | 24-scf00489 | 24 |
| AX-158313009 | 24 | 62.172 | KV453253.1 | 14936933 | 24-scf00489 | 24 |
| AX-158313012 | 24 | 62.418 | KV453253.1 | 14941205 | 24-scf00489 | 24 |
| AX-158313015 | 24 | 62.581 | KV453253.1 | 14944049 | 24-scf00489 | 24 |
| AX-158313018 | 24 | 62.581 | KV453253.1 | 14945451 | 24-scf00489 | 24 |
| AX-158313019 | 24 | 62.582 | KV453253.1 | 14945828 | 24-scf00489 | 24 |
| AX-158313020 | 24 | 62.582 | KV453253.1 | 14947591 | 24-scf00489 | 24 |
| AX-158313022 | 24 | 62.582 | KV453253.1 | 14950906 | 24-scf00489 | 24 |
| AX-158313023 | 24 | 62.582 | KV453253.1 | 14951189 | 24-scf00489 | 24 |
| AX-158313024 | 24 | 62.582 | KV453253.1 | 14952617 | 24-scf00489 | 24 |
| AX-157712999 | 24 | 62.582 | KV453253.1 | 15071820 | 24-scf00489 | 24 |
| AX-158313027 | 24 | 62.685 | KV453253.1 | 14956404 | 24-scf00489 | 24 |
| AX-158313021 | 24 | 62.8   | KV453253.1 | 14948798 | 24-scf00489 | 24 |
| AX-158381398 | 24 | 62.8   | KV453253.1 | 14954226 | 24-scf00489 | 24 |
| AX-158313032 | 24 | 62.8   | KV453253.1 | 14966337 | 24-scf00489 | 24 |
| AX-158313033 | 24 | 62.8   | KV453253.1 | 14967371 | 24-scf00489 | 24 |
| AX-158313035 | 24 | 62.8   | KV453253.1 | 14968799 | 24-scf00489 | 24 |
| AX-158313038 | 24 | 62.8   | KV453253.1 | 14973410 | 24-scf00489 | 24 |
| AX-157847459 | 24 | 62.8   | KV453253.1 | 14973800 | 24-scf00489 | 24 |
| AX-158313040 | 24 | 62.8   | KV453253.1 | 14976981 | 24-scf00489 | 24 |
| AX-158313053 | 24 | 62.8   | KV453253.1 | 14993109 | 24-scf00489 | 24 |
| AX-158313067 | 24 | 62.8   | KV453253.1 | 15016177 | 24-scf00489 | 24 |
| AX-157746111 | 24 | 62.823 | KV453253.1 | 14982541 | 24-scf00489 | 24 |
| AX-158313041 | 24 | 62.864 | KV453253.1 | 14978577 | 24-scf00489 | 24 |
| AX-157754173 | 24 | 62.864 | KV453253.1 | 14982919 | 24-scf00489 | 24 |
| AX-158313043 | 24 | 62.909 | KV453253.1 | 14983225 | 24-scf00489 | 24 |
| AX-158313047 | 24 | 62.909 | KV453253.1 | 14986504 | 24-scf00489 | 24 |
| AX-158313049 | 24 | 62.909 | KV453253.1 | 14988882 | 24-scf00489 | 24 |
| AX-158313051 | 24 | 62.909 | KV453253.1 | 14990540 | 24-scf00489 | 24 |
| AX-158313026 | 24 | 63.019 | KV453253.1 | 14954872 | 24-scf00489 | 24 |
| AX-158313052 | 24 | 63.019 | KV453253.1 | 14991589 | 24-scf00489 | 24 |
| AX-157722751 | 24 | 63.019 | KV453253.1 | 14992726 | 24-scf00489 | 24 |
| AX-158313054 | 24 | 63.019 | KV453253.1 | 14993462 | 24-scf00489 | 24 |
| AX-158313055 | 24 | 63.019 | KV453253.1 | 14993828 | 24-scf00489 | 24 |
| AX-158313056 | 24 | 63.019 | KV453253.1 | 14996895 | 24-scf00489 | 24 |
| AX-158313057 | 24 | 63.019 | KV453253.1 | 14998221 | 24-scf00489 | 24 |

|              |    |        |            |          |             |    |
|--------------|----|--------|------------|----------|-------------|----|
| AX-158313058 | 24 | 63.019 | KV453253.1 | 14999076 | 24-scf00489 | 24 |
| AX-158313060 | 24 | 63.019 | KV453253.1 | 15001034 | 24-scf00489 | 24 |
| AX-158313061 | 24 | 63.019 | KV453253.1 | 15001261 | 24-scf00489 | 24 |
| AX-158313062 | 24 | 63.019 | KV453253.1 | 15004784 | 24-scf00489 | 24 |
| AX-158313069 | 24 | 63.019 | KV453253.1 | 15019147 | 24-scf00489 | 24 |
| AX-158313073 | 24 | 63.019 | KV453253.1 | 15032110 | 24-scf00489 | 24 |
| AX-158313104 | 24 | 63.019 | KV453253.1 | 15085895 | 24-scf00489 | 24 |
| AX-158313036 | 24 | 63.346 | KV453253.1 | 14969254 | 24-scf00489 | 24 |
| AX-158313042 | 24 | 63.346 | KV453253.1 | 14981750 | 24-scf00489 | 24 |
| AX-158313070 | 24 | 63.346 | KV453253.1 | 15020041 | 24-scf00489 | 24 |
| AX-158313072 | 24 | 63.346 | KV453253.1 | 15028288 | 24-scf00489 | 24 |
| AX-158313074 | 24 | 63.346 | KV453253.1 | 15033827 | 24-scf00489 | 24 |
| AX-157751253 | 24 | 63.346 | KV453253.1 | 15041549 | 24-scf00489 | 24 |
| AX-158313083 | 24 | 63.346 | KV453253.1 | 15045960 | 24-scf00489 | 24 |
| AX-158418039 | 24 | 63.346 | KV453253.1 | 15046521 | 24-scf00489 | 24 |
| AX-157847462 | 24 | 63.346 | KV453253.1 | 15050069 | 24-scf00489 | 24 |
| AX-157745544 | 24 | 63.346 | KV453253.1 | 15051302 | 24-scf00489 | 24 |
| AX-158313091 | 24 | 63.346 | KV453253.1 | 15057330 | 24-scf00489 | 24 |
| AX-158313092 | 24 | 63.346 | KV453253.1 | 15058677 | 24-scf00489 | 24 |
| AX-158313093 | 24 | 63.346 | KV453253.1 | 15059749 | 24-scf00489 | 24 |
| AX-157721173 | 24 | 63.346 | KV453253.1 | 15067740 | 24-scf00489 | 24 |
| AX-158313100 | 24 | 63.346 | KV453253.1 | 15077736 | 24-scf00489 | 24 |
| AX-158313101 | 24 | 63.483 | KV453253.1 | 15078205 | 24-scf00489 | 24 |
| AX-157756395 | 24 | 63.632 | KV453253.1 | 15081877 | 24-scf00489 | 24 |
| AX-158313081 | 24 | 63.872 | KV453253.1 | 15044480 | 24-scf00489 | 24 |
| AX-158313105 | 24 | 63.872 | KV453253.1 | 15087285 | 24-scf00489 | 24 |
| AX-158313106 | 24 | 63.892 | KV453253.1 | 15089680 | 24-scf00489 | 24 |
| AX-158313108 | 24 | 63.893 | KV453253.1 | 15091637 | 24-scf00489 | 24 |
| AX-158313110 | 24 | 63.894 | KV453253.1 | 15094119 | 24-scf00489 | 24 |
| AX-158313111 | 24 | 63.895 | KV453253.1 | 15096387 | 24-scf00489 | 24 |
| AX-158313112 | 24 | 64.046 | KV453253.1 | 15096626 | 24-scf00489 | 24 |
| AX-158313113 | 24 | 64.046 | KV453253.1 | 15097460 | 24-scf00489 | 24 |
| AX-158313116 | 24 | 64.046 | KV453253.1 | 15098996 | 24-scf00489 | 24 |
| AX-158313119 | 24 | 64.046 | KV453253.1 | 15100599 | 24-scf00489 | 24 |
| AX-158313126 | 24 | 64.046 | KV453253.1 | 15114619 | 24-scf00489 | 24 |
| AX-158313127 | 24 | 64.046 | KV453253.1 | 15116361 | 24-scf00489 | 24 |
| AX-157710421 | 24 | 64.159 | KV453253.1 | 15101756 | 24-scf00489 | 24 |
| AX-158313121 | 24 | 64.27  | KV453253.1 | 15107230 | 24-scf00489 | 24 |
| AX-158313122 | 24 | 64.27  | KV453253.1 | 15109349 | 24-scf00489 | 24 |
| AX-158313125 | 24 | 64.27  | KV453253.1 | 15113682 | 24-scf00489 | 24 |
| AX-158313128 | 24 | 64.27  | KV453253.1 | 15116749 | 24-scf00489 | 24 |
| AX-158313135 | 24 | 64.27  | KV453253.1 | 15123808 | 24-scf00489 | 24 |
| AX-158313124 | 24 | 64.549 | KV453253.1 | 15111156 | 24-scf00489 | 24 |
| AX-158313137 | 24 | 64.549 | KV453253.1 | 15124750 | 24-scf00489 | 24 |
| AX-158313140 | 24 | 64.549 | KV453253.1 | 15127673 | 24-scf00489 | 24 |
| AX-158313141 | 24 | 64.549 | KV453253.1 | 15127913 | 24-scf00489 | 24 |
| AX-158313142 | 24 | 64.549 | KV453253.1 | 15128269 | 24-scf00489 | 24 |
| AX-158313145 | 24 | 64.549 | KV453253.1 | 15134542 | 24-scf00489 | 24 |
| AX-157693407 | 24 | 64.549 | KV453253.1 | 15135327 | 24-scf00489 | 24 |
| AX-157744028 | 24 | 64.549 | KV453253.1 | 15136201 | 24-scf00489 | 24 |
| AX-158313146 | 24 | 64.549 | KV453253.1 | 15136536 | 24-scf00489 | 24 |

|              |    |        |             |          |             |    |
|--------------|----|--------|-------------|----------|-------------|----|
| AX-158313148 | 24 | 64.549 | KV453253.1  | 15138542 | 24-scf00489 | 24 |
| AX-157750331 | 24 | 64.549 | KV453253.1  | 15139433 | 24-scf00489 | 24 |
| AX-158313151 | 24 | 64.549 | KV453253.1  | 15142993 | 24-scf00489 | 24 |
| AX-158313152 | 24 | 64.549 | KV453253.1  | 15143266 | 24-scf00489 | 24 |
| AX-158313159 | 24 | 64.549 | KV453253.1  | 15149267 | 24-scf00489 | 24 |
| AX-158313153 | 24 | 64.655 | KV453253.1  | 15145368 | 24-scf00489 | 24 |
| AX-158313136 | 24 | 64.767 | KV453253.1  | 15124517 | 24-scf00489 | 24 |
| AX-158313139 | 24 | 64.767 | KV453253.1  | 15126281 | 24-scf00489 | 24 |
| AX-158313154 | 24 | 64.767 | KV453253.1  | 15145767 | 24-scf00489 | 24 |
| AX-157881185 | 24 | 64.767 | KV453253.1  | 15146100 | 24-scf00489 | 24 |
| AX-158313155 | 24 | 64.767 | KV453253.1  | 15146278 | 24-scf00489 | 24 |
| AX-158381400 | 24 | 64.767 | KV453253.1  | 15148987 | 24-scf00489 | 24 |
| AX-158313166 | 24 | 65.204 | KV453253.1  | 15157835 | 24-scf00489 | 24 |
| AX-158313167 | 24 | 65.204 | KV453253.1  | 15158171 | 24-scf00489 | 24 |
| AX-158313168 | 24 | 65.204 | KV453253.1  | 15159107 | 24-scf00489 | 24 |
| AX-158313169 | 24 | 65.204 | KV453253.1  | 15160335 | 24-scf00489 | 24 |
| AX-157881186 | 24 | 65.204 | KV453253.1  | 15161076 | 24-scf00489 | 24 |
| AX-157751230 | 24 | 65.204 | KV453253.1  | 15164221 | 24-scf00489 | 24 |
| AX-157720881 | 24 | 65.204 | KV453253.1  | 15164505 | 24-scf00489 | 24 |
| AX-158313171 | 24 | 65.531 | KV453253.1  | 15166296 | 24-scf00489 | 24 |
| AX-157745483 | 24 | 65.531 | KV453253.1  | 15172865 | 24-scf00489 | 24 |
| AX-158313174 | 24 | 65.531 | KV453253.1  | 15173057 | 24-scf00489 | 24 |
| AX-157847467 | 24 | 65.531 | KV453253.1  | 15193616 | 24-scf00489 | 24 |
| AX-157847469 | 24 | 65.531 | KV453253.1  | 15202531 | 24-scf00489 | 24 |
| AX-158313177 | 24 | 65.578 | KV453253.1  | 15177685 | 24-scf00489 | 24 |
| AX-158313163 | 24 | 65.641 | KV453253.1  | 15155410 | 24-scf00489 | 24 |
| AX-157748016 | 24 | 65.641 | KV453253.1  | 15176262 | 24-scf00489 | 24 |
| AX-157847465 | 24 | 65.641 | KV453253.1  | 15180745 | 24-scf00489 | 24 |
| AX-158313179 | 24 | 65.641 | KV453253.1  | 15180847 | 24-scf00489 | 24 |
| AX-158313181 | 24 | 65.641 | KV453253.1  | 15182772 | 24-scf00489 | 24 |
| AX-157719597 | 24 | 65.641 | KV453253.1  | 15184308 | 24-scf00489 | 24 |
| AX-157847466 | 24 | 65.641 | KV453253.1  | 15189925 | 24-scf00489 | 24 |
| AX-158313185 | 24 | 65.641 | KV453253.1  | 15192121 | 24-scf00489 | 24 |
| AX-158313187 | 24 | 65.641 | KV453253.1  | 15199114 | 24-scf00489 | 24 |
| AX-157757505 | 24 | 65.641 | KV453253.1  | 15202637 | 24-scf00489 | 24 |
| AX-157847471 | 24 | 65.641 | KV453253.1  | 15208143 | 24-scf00489 | 24 |
| AX-157751701 | 24 | 65.641 | KV453253.1  | 15209331 | 24-scf00489 | 24 |
| AX-157847463 | 24 | 65.859 | KV453253.1  | 15174281 | 24-scf00489 | 24 |
| AX-157847475 | 24 | 65.859 | KV453253.1  | 15211178 | 24-scf00489 | 24 |
| AX-158418042 | 24 | 65.859 | KV453253.1  | 15212281 | 24-scf00489 | 24 |
| AX-157847476 | 24 | 65.859 | KV453253.1  | 15216685 | 24-scf00489 | 24 |
| AX-157867769 | 24 | 65.859 | KV453253.1  | 15222950 | 24-scf00489 | 24 |
| AX-158313196 | 24 | 65.859 | KV453253.1  | 15223670 | 24-scf00489 | 24 |
| AX-157847478 | 24 | 65.859 | KV453253.1  | 15229322 | 24-scf00489 | 24 |
| AX-157705092 | 24 | 65.859 | 3ML01028676 | 469      | scf04287_1  | UN |
| AX-157847477 | 24 | 65.91  | KV453253.1  | 15223310 | 24-scf00489 | 24 |
| AX-158313197 | 24 | 65.965 | KV453253.1  | 15227789 | 24-scf00489 | 24 |
| AX-158313198 | 24 | 66.031 | KV453253.1  | 15228161 | 24-scf00489 | 24 |
| AX-158313200 | 24 | 66.058 | KV453253.1  | 15230379 | 24-scf00489 | 24 |
| AX-158313188 | 24 | 66.116 | KV453253.1  | 15210420 | 24-scf00489 | 24 |
| AX-157710017 | 24 | 66.116 | KV453253.1  | 15211034 | 24-scf00489 | 24 |

|              |    |        |            |          |             |    |
|--------------|----|--------|------------|----------|-------------|----|
| AX-158313192 | 24 | 66.116 | KV453253.1 | 15216902 | 24-scf00489 | 24 |
| AX-158313194 | 24 | 66.116 | KV453253.1 | 15221665 | 24-scf00489 | 24 |
| AX-158313201 | 24 | 66.116 | KV453253.1 | 15232135 | 24-scf00489 | 24 |
| AX-158313203 | 24 | 66.116 | KV453253.1 | 15233445 | 24-scf00489 | 24 |
| AX-158313207 | 24 | 66.116 | KV453253.1 | 15239107 | 24-scf00489 | 24 |
| AX-157746079 | 24 | 66.116 | KV453253.1 | 15241100 | 24-scf00489 | 24 |
| AX-158381401 | 24 | 66.372 | KV453253.1 | 15242509 | 24-scf00489 | 24 |
| AX-157710824 | 24 | 66.372 | KV453253.1 | 15247046 | 24-scf00489 | 24 |
| AX-157741337 | 24 | 66.606 | KV453253.1 | 15247636 | 24-scf00489 | 24 |
| AX-158313220 | 24 | 66.606 | KV453253.1 | 15265630 | 24-scf00489 | 24 |
| AX-158313210 | 24 | 66.614 | KV453253.1 | 15249597 | 24-scf00489 | 24 |
| AX-158313214 | 24 | 66.614 | KV453253.1 | 15254189 | 24-scf00489 | 24 |
| AX-158313120 | 24 | 66.624 | KV453253.1 | 15102281 | 24-scf00489 | 24 |
| AX-158313212 | 24 | 66.624 | KV453253.1 | 15251979 | 24-scf00489 | 24 |
| AX-158313213 | 24 | 66.624 | KV453253.1 | 15252768 | 24-scf00489 | 24 |
| AX-158313216 | 24 | 66.624 | KV453253.1 | 15257278 | 24-scf00489 | 24 |
| AX-157757823 | 24 | 66.624 | KV453253.1 | 15258072 | 24-scf00489 | 24 |
| AX-158313217 | 24 | 66.624 | KV453253.1 | 15258558 | 24-scf00489 | 24 |
| AX-158313221 | 24 | 66.805 | KV453253.1 | 15266228 | 24-scf00489 | 24 |
| AX-158313222 | 24 | 66.805 | KV453253.1 | 15266613 | 24-scf00489 | 24 |
| AX-158313224 | 24 | 66.805 | KV453253.1 | 15268212 | 24-scf00489 | 24 |
| AX-158313226 | 24 | 66.986 | KV453253.1 | 15271802 | 24-scf00489 | 24 |
| AX-158313227 | 24 | 66.986 | KV453253.1 | 15272215 | 24-scf00489 | 24 |
| AX-157847484 | 24 | 66.986 | KV453253.1 | 15275377 | 24-scf00489 | 24 |
| AX-157847486 | 24 | 66.986 | KV453253.1 | 15286889 | 24-scf00489 | 24 |
| AX-158313230 | 24 | 67.127 | KV453253.1 | 15290450 | 24-scf00489 | 24 |
| AX-158313232 | 24 | 67.127 | KV453253.1 | 15293600 | 24-scf00489 | 24 |
| AX-158313233 | 24 | 67.134 | KV453253.1 | 15294480 | 24-scf00489 | 24 |
| AX-157709405 | 24 | 67.159 | KV453253.1 | 15280257 | 24-scf00489 | 24 |
| AX-157747466 | 24 | 67.349 | KV453253.1 | 15298702 | 24-scf00489 | 24 |
| AX-158313238 | 24 | 67.81  | KV453253.1 | 15301531 | 24-scf00489 | 24 |
| AX-158313239 | 24 | 67.814 | KV453253.1 | 15302530 | 24-scf00489 | 24 |
| AX-158313243 | 24 | 67.814 | KV453253.1 | 15308331 | 24-scf00489 | 24 |
| AX-158313267 | 24 | 67.814 | KV453253.1 | 15357469 | 24-scf00489 | 24 |
| AX-158313244 | 24 | 67.92  | KV453253.1 | 15312443 | 24-scf00489 | 24 |
| AX-158313246 | 24 | 67.931 | KV453253.1 | 15320441 | 24-scf00489 | 24 |
| AX-158313248 | 24 | 67.934 | KV453253.1 | 15321682 | 24-scf00489 | 24 |
| AX-157847487 | 24 | 67.938 | KV453253.1 | 15289279 | 24-scf00489 | 24 |
| AX-158313231 | 24 | 67.938 | KV453253.1 | 15291593 | 24-scf00489 | 24 |
| AX-157726373 | 24 | 67.938 | KV453253.1 | 15297755 | 24-scf00489 | 24 |
| AX-158313247 | 24 | 67.938 | KV453253.1 | 15321274 | 24-scf00489 | 24 |
| AX-157754102 | 24 | 67.938 | KV453253.1 | 15323200 | 24-scf00489 | 24 |
| AX-158313249 | 24 | 67.938 | KV453253.1 | 15324136 | 24-scf00489 | 24 |
| AX-158313250 | 24 | 67.938 | KV453253.1 | 15325284 | 24-scf00489 | 24 |
| AX-158313251 | 24 | 67.938 | KV453253.1 | 15326207 | 24-scf00489 | 24 |
| AX-158313253 | 24 | 67.938 | KV453253.1 | 15327570 | 24-scf00489 | 24 |
| AX-158313256 | 24 | 67.938 | KV453253.1 | 15333893 | 24-scf00489 | 24 |
| AX-157861330 | 24 | 67.938 | KV453253.1 | 15335839 | 24-scf00489 | 24 |
| AX-158313257 | 24 | 67.938 | KV453253.1 | 15337383 | 24-scf00489 | 24 |
| AX-158313258 | 24 | 67.938 | KV453253.1 | 15340081 | 24-scf00489 | 24 |
| AX-157699987 | 24 | 67.938 | KV453253.1 | 15347358 | 24-scf00489 | 24 |

|              |    |        |             |          |             |    |
|--------------|----|--------|-------------|----------|-------------|----|
| AX-158313261 | 24 | 67.938 | KV453253.1  | 15350250 | 24-scf00489 | 24 |
| AX-158313264 | 24 | 67.938 | KV453253.1  | 15353003 | 24-scf00489 | 24 |
| AX-157715903 | 24 | 67.938 | KV453253.1  | 15355323 | 24-scf00489 | 24 |
| AX-158313268 | 24 | 67.938 | KV453253.1  | 15358210 | 24-scf00489 | 24 |
| AX-158313269 | 24 | 67.938 | KV453253.1  | 15358962 | 24-scf00489 | 24 |
| AX-158313271 | 24 | 67.938 | KV453253.1  | 15359862 | 24-scf00489 | 24 |
| AX-157888258 | 24 | 67.938 | KV453253.1  | 15362512 | 24-scf00489 | 24 |
| AX-158313273 | 24 | 67.938 | KV453253.1  | 15364289 | 24-scf00489 | 24 |
| AX-158313274 | 24 | 68.048 | KV453253.1  | 15368335 | 24-scf00489 | 24 |
| AX-158313275 | 24 | 68.048 | KV453253.1  | 15369996 | 24-scf00489 | 24 |
| AX-158313276 | 24 | 68.171 | KV453253.1  | 15372963 | 24-scf00489 | 24 |
| AX-157743218 | 24 | 68.171 | KV453253.1  | 15374405 | 24-scf00489 | 24 |
| AX-158313278 | 24 | 68.356 | KV453253.1  | 15374717 | 24-scf00489 | 24 |
| AX-157739593 | 24 | 68.54  | KV453253.1  | 15348355 | 24-scf00489 | 24 |
| AX-158313283 | 24 | 68.54  | KV453253.1  | 15389450 | 24-scf00489 | 24 |
| AX-158313284 | 24 | 68.54  | KV453253.1  | 15389813 | 24-scf00489 | 24 |
| AX-158313286 | 24 | 68.54  | KV453253.1  | 15392213 | 24-scf00489 | 24 |
| AX-158313287 | 24 | 68.54  | KV453253.1  | 15392578 | 24-scf00489 | 24 |
| AX-158313288 | 24 | 68.54  | KV453253.1  | 15393370 | 24-scf00489 | 24 |
| AX-158313290 | 24 | 69.032 | KV453253.1  | 15396390 | 24-scf00489 | 24 |
| AX-158313291 | 24 | 69.032 | KV453253.1  | 15396898 | 24-scf00489 | 24 |
| AX-158313292 | 24 | 69.032 | KV453253.1  | 15397503 | 24-scf00489 | 24 |
| AX-158313293 | 24 | 69.032 | KV453253.1  | 15397838 | 24-scf00489 | 24 |
| AX-158313296 | 24 | 69.032 | KV453253.1  | 15408200 | 24-scf00489 | 24 |
| AX-158313297 | 24 | 69.032 | KV453253.1  | 15408789 | 24-scf00489 | 24 |
| AX-157847492 | 24 | 69.032 | KV453253.1  | 15410164 | 24-scf00489 | 24 |
| AX-157743436 | 24 | 69.032 | KV453253.1  | 15410507 | 24-scf00489 | 24 |
| AX-157847493 | 24 | 69.032 | KV453253.1  | 15412119 | 24-scf00489 | 24 |
| AX-158313300 | 24 | 69.032 | KV453253.1  | 15412193 | 24-scf00489 | 24 |
| AX-158313306 | 24 | 69.032 | KV453253.1  | 15421855 | 24-scf00489 | 24 |
| AX-158313308 | 24 | 69.14  | KV453253.1  | 15426160 | 24-scf00489 | 24 |
| AX-158313309 | 24 | 69.14  | KV453253.1  | 15430221 | 24-scf00489 | 24 |
| AX-158313310 | 24 | 69.14  | KV453253.1  | 15430575 | 24-scf00489 | 24 |
| AX-158313311 | 24 | 69.305 | KV453253.1  | 15432982 | 24-scf00489 | 24 |
| AX-158313314 | 24 | 69.35  | KV453253.1  | 15440719 | 24-scf00489 | 24 |
| AX-157726807 | 24 | 69.387 | KV453253.1  | 15441808 | 24-scf00489 | 24 |
| AX-158313315 | 24 | 69.44  | KV453253.1  | 15442824 | 24-scf00489 | 24 |
| AX-158313331 | 24 | 69.44  | KV453253.1  | 15462053 | 24-scf00489 | 24 |
| AX-158313307 | 24 | 69.469 | KV453253.1  | 15425050 | 24-scf00489 | 24 |
| AX-158313312 | 24 | 69.469 | KV453253.1  | 15436012 | 24-scf00489 | 24 |
| AX-158313317 | 24 | 69.469 | KV453253.1  | 15445726 | 24-scf00489 | 24 |
| AX-158313318 | 24 | 69.469 | KV453253.1  | 15446052 | 24-scf00489 | 24 |
| AX-158313327 | 24 | 69.469 | KV453253.1  | 15456812 | 24-scf00489 | 24 |
| AX-158313329 | 24 | 69.469 | KV453253.1  | 15458423 | 24-scf00489 | 24 |
| AX-158418045 | 24 | 69.469 | KV453253.1  | 15459552 | 24-scf00489 | 24 |
| AX-158313332 | 24 | 69.469 | KV453253.1  | 15463273 | 24-scf00489 | 24 |
| AX-157705204 | 24 | 69.469 | 3ML01029002 | 1042     | scf04619_1  | UN |
| AX-158313335 | 24 | 69.816 | KV453253.1  | 15471761 | 24-scf00489 | 24 |
| AX-157847494 | 24 | 70.125 | KV453253.1  | 15482423 | 24-scf00489 | 24 |
| AX-158313337 | 24 | 70.126 | KV453253.1  | 15484148 | 24-scf00489 | 24 |
| AX-158313339 | 24 | 70.126 | KV453253.1  | 15494108 | 24-scf00489 | 24 |

|              |    |        |            |          |             |    |
|--------------|----|--------|------------|----------|-------------|----|
| AX-158313343 | 24 | 70.126 | KV453253.1 | 15502528 | 24-scf00489 | 24 |
| AX-158313344 | 24 | 70.126 | KV453253.1 | 15503537 | 24-scf00489 | 24 |
| AX-158313345 | 24 | 70.126 | KV453253.1 | 15503949 | 24-scf00489 | 24 |
| AX-158313346 | 24 | 70.126 | KV453253.1 | 15506384 | 24-scf00489 | 24 |
| AX-158313349 | 24 | 70.126 | KV453253.1 | 15517173 | 24-scf00489 | 24 |
| AX-157773212 | 24 | 70.126 | KV453253.1 | 15524287 | 24-scf00489 | 24 |
| AX-157771617 | 24 | 70.344 | KV453253.1 | 15512867 | 24-scf00489 | 24 |
| AX-158313348 | 24 | 70.344 | KV453253.1 | 15516926 | 24-scf00489 | 24 |
| AX-158313353 | 24 | 70.344 | KV453253.1 | 15524949 | 24-scf00489 | 24 |
| AX-158313354 | 24 | 70.527 | KV453253.1 | 15526193 | 24-scf00489 | 24 |
| AX-158313355 | 24 | 70.636 | KV453253.1 | 15528463 | 24-scf00489 | 24 |
| AX-158313319 | 24 | 70.661 | KV453253.1 | 15446712 | 24-scf00489 | 24 |
| AX-158313324 | 24 | 70.661 | KV453253.1 | 15453621 | 24-scf00489 | 24 |
| AX-157750685 | 24 | 70.661 | KV453253.1 | 15480010 | 24-scf00489 | 24 |
| AX-157771793 | 24 | 70.661 | KV453253.1 | 15480981 | 24-scf00489 | 24 |
| AX-158313350 | 24 | 70.661 | KV453253.1 | 15519231 | 24-scf00489 | 24 |
| AX-158313356 | 24 | 70.661 | KV453253.1 | 15529623 | 24-scf00489 | 24 |
| AX-157738795 | 24 | 70.773 | KV453253.1 | 15533590 | 24-scf00489 | 24 |
| AX-158313359 | 24 | 70.891 | KV453253.1 | 15536632 | 24-scf00489 | 24 |
| AX-158313360 | 24 | 70.891 | KV453253.1 | 15538756 | 24-scf00489 | 24 |
| AX-157722089 | 24 | 71.001 | KV453253.1 | 15539621 | 24-scf00489 | 24 |
| AX-158313362 | 24 | 71.001 | KV453253.1 | 15542136 | 24-scf00489 | 24 |
| AX-158313365 | 24 | 71.016 | KV453253.1 | 15555933 | 24-scf00489 | 24 |
| AX-157720071 | 24 | 71.633 | KV453253.1 | 15556689 | 24-scf00489 | 24 |
| AX-158387788 | 24 | 71.663 | KV453253.1 | 15558893 | 24-scf00489 | 24 |
| AX-158313367 | 24 | 71.7   | KV453253.1 | 15561945 | 24-scf00489 | 24 |
| AX-157709847 | 24 | 71.72  | KV453253.1 | 15558062 | 24-scf00489 | 24 |
| AX-157748306 | 24 | 71.72  | KV453253.1 | 15562934 | 24-scf00489 | 24 |
| AX-158313368 | 24 | 71.762 | KV453253.1 | 15565280 | 24-scf00489 | 24 |
| AX-158313374 | 24 | 71.762 | KV453253.1 | 15570178 | 24-scf00489 | 24 |
| AX-158313391 | 24 | 71.762 | KV453253.1 | 15606753 | 24-scf00489 | 24 |
| AX-158313376 | 24 | 71.805 | KV453253.1 | 15572531 | 24-scf00489 | 24 |
| AX-158313381 | 24 | 71.894 | KV453253.1 | 15581182 | 24-scf00489 | 24 |
| AX-158313370 | 24 | 72.095 | KV453253.1 | 15566141 | 24-scf00489 | 24 |
| AX-158313371 | 24 | 72.095 | KV453253.1 | 15567298 | 24-scf00489 | 24 |
| AX-157708255 | 24 | 72.095 | KV453253.1 | 15573313 | 24-scf00489 | 24 |
| AX-157745558 | 24 | 72.095 | KV453253.1 | 15587232 | 24-scf00489 | 24 |
| AX-158313385 | 24 | 72.095 | KV453253.1 | 15593276 | 24-scf00489 | 24 |
| AX-158313387 | 24 | 72.095 | KV453253.1 | 15598088 | 24-scf00489 | 24 |
| AX-157861335 | 24 | 72.096 | KV453253.1 | 15600161 | 24-scf00489 | 24 |
| AX-157721645 | 24 | 72.428 | KV453253.1 | 15608144 | 24-scf00489 | 24 |
| AX-157750212 | 24 | 72.749 | KV453253.1 | 15611050 | 24-scf00489 | 24 |
| AX-158313393 | 24 | 72.754 | KV453253.1 | 15611970 | 24-scf00489 | 24 |
| AX-158313394 | 24 | 72.754 | KV453253.1 | 15613546 | 24-scf00489 | 24 |
| AX-157742403 | 24 | 72.754 | KV453253.1 | 15615723 | 24-scf00489 | 24 |
| AX-158313395 | 24 | 72.754 | KV453253.1 | 15616364 | 24-scf00489 | 24 |
| AX-158313397 | 24 | 72.861 | KV453253.1 | 15617897 | 24-scf00489 | 24 |
| AX-158313398 | 24 | 72.972 | KV453253.1 | 15619527 | 24-scf00489 | 24 |
| AX-158313400 | 24 | 73.406 | KV453253.1 | 15627927 | 24-scf00489 | 24 |
| AX-158313402 | 24 | 73.408 | KV453253.1 | 15629243 | 24-scf00489 | 24 |
| AX-158313406 | 24 | 73.408 | KV453253.1 | 15632652 | 24-scf00489 | 24 |

|              |    |        |            |          |             |    |
|--------------|----|--------|------------|----------|-------------|----|
| AX-158313407 | 24 | 73.408 | KV453253.1 | 15633292 | 24-scf00489 | 24 |
| AX-157847496 | 24 | 73.408 | KV453253.1 | 15643410 | 24-scf00489 | 24 |
| AX-158313411 | 24 | 73.408 | KV453253.1 | 15644271 | 24-scf00489 | 24 |
| AX-158313416 | 24 | 73.408 | KV453253.1 | 15649935 | 24-scf00489 | 24 |
| AX-158313417 | 24 | 73.408 | KV453253.1 | 15651268 | 24-scf00489 | 24 |
| AX-158313413 | 24 | 73.409 | KV453253.1 | 15645690 | 24-scf00489 | 24 |
| AX-158313415 | 24 | 73.409 | KV453253.1 | 15648440 | 24-scf00489 | 24 |
| AX-158313412 | 24 | 73.56  | KV453253.1 | 15644627 | 24-scf00489 | 24 |
| AX-158313418 | 24 | 73.56  | KV453253.1 | 15652123 | 24-scf00489 | 24 |
| AX-158313419 | 24 | 73.56  | KV453253.1 | 15652660 | 24-scf00489 | 24 |
| AX-158313421 | 24 | 73.56  | KV453253.1 | 15656043 | 24-scf00489 | 24 |
| AX-158313422 | 24 | 73.635 | KV453253.1 | 15656424 | 24-scf00489 | 24 |
| AX-158313430 | 24 | 73.635 | KV453253.1 | 15673884 | 24-scf00489 | 24 |
| AX-158313423 | 24 | 73.714 | KV453253.1 | 15660170 | 24-scf00489 | 24 |
| AX-158313424 | 24 | 73.714 | KV453253.1 | 15660824 | 24-scf00489 | 24 |
| AX-158313425 | 24 | 74.022 | KV453253.1 | 15663386 | 24-scf00489 | 24 |
| AX-158313426 | 24 | 74.022 | KV453253.1 | 15664292 | 24-scf00489 | 24 |
| AX-158313428 | 24 | 74.022 | KV453253.1 | 15672294 | 24-scf00489 | 24 |
| AX-158313431 | 24 | 74.022 | KV453253.1 | 15674627 | 24-scf00489 | 24 |
| AX-158313434 | 24 | 74.022 | KV453253.1 | 15680249 | 24-scf00489 | 24 |
| AX-158313436 | 24 | 74.022 | KV453253.1 | 15684094 | 24-scf00489 | 24 |
| AX-158313438 | 24 | 74.022 | KV453253.1 | 15685680 | 24-scf00489 | 24 |
| AX-157720768 | 24 | 74.022 | KV453253.1 | 15686763 | 24-scf00489 | 24 |
| AX-158313440 | 24 | 74.022 | KV453253.1 | 15689072 | 24-scf00489 | 24 |
| AX-158313441 | 24 | 74.022 | KV453253.1 | 15691471 | 24-scf00489 | 24 |
| AX-157881197 | 24 | 74.022 | KV453253.1 | 15783250 | 24-scf00489 | 24 |
| AX-158313443 | 24 | 74.33  | KV453253.1 | 15692828 | 24-scf00489 | 24 |
| AX-158313446 | 24 | 74.33  | KV453253.1 | 15697060 | 24-scf00489 | 24 |
| AX-158313449 | 24 | 74.376 | KV453253.1 | 15701557 | 24-scf00489 | 24 |
| AX-158313444 | 24 | 74.431 | KV453253.1 | 15694928 | 24-scf00489 | 24 |
| AX-157742362 | 24 | 74.431 | KV453253.1 | 15702897 | 24-scf00489 | 24 |
| AX-158313450 | 24 | 74.483 | KV453253.1 | 15705726 | 24-scf00489 | 24 |
| AX-158313452 | 24 | 74.483 | KV453253.1 | 15709474 | 24-scf00489 | 24 |
| AX-157774614 | 24 | 74.496 | KV453253.1 | 15698880 | 24-scf00489 | 24 |
| AX-158313457 | 24 | 74.496 | KV453253.1 | 15720202 | 24-scf00489 | 24 |
| AX-157847498 | 24 | 74.636 | KV453253.1 | 15703803 | 24-scf00489 | 24 |
| AX-158313460 | 24 | 74.636 | KV453253.1 | 15722492 | 24-scf00489 | 24 |
| AX-157772767 | 24 | 74.636 | KV453253.1 | 15722620 | 24-scf00489 | 24 |
| AX-158313462 | 24 | 74.79  | KV453253.1 | 15724814 | 24-scf00489 | 24 |
| AX-158313478 | 24 | 74.79  | KV453253.1 | 15760199 | 24-scf00489 | 24 |
| AX-158313463 | 24 | 74.943 | KV453253.1 | 15732031 | 24-scf00489 | 24 |
| AX-158313464 | 24 | 74.943 | KV453253.1 | 15733699 | 24-scf00489 | 24 |
| AX-158313466 | 24 | 74.943 | KV453253.1 | 15735656 | 24-scf00489 | 24 |
| AX-158313467 | 24 | 74.943 | KV453253.1 | 15740036 | 24-scf00489 | 24 |
| AX-157847500 | 24 | 74.943 | KV453253.1 | 15741757 | 24-scf00489 | 24 |
| AX-158313470 | 24 | 74.943 | KV453253.1 | 15743807 | 24-scf00489 | 24 |
| AX-158313482 | 24 | 75.637 | KV453253.1 | 15765861 | 24-scf00489 | 24 |
| AX-158313481 | 24 | 75.863 | KV453253.1 | 15764291 | 24-scf00489 | 24 |
| AX-158313483 | 24 | 75.863 | KV453253.1 | 15766540 | 24-scf00489 | 24 |
| AX-158313488 | 24 | 75.866 | KV453253.1 | 15773806 | 24-scf00489 | 24 |
| AX-158313493 | 24 | 76.019 | KV453253.1 | 15780244 | 24-scf00489 | 24 |

|              |    |        |            |          |             |    |
|--------------|----|--------|------------|----------|-------------|----|
| AX-158313494 | 24 | 76.019 | KV453253.1 | 15781740 | 24-scf00489 | 24 |
| AX-158313495 | 24 | 76.02  | KV453253.1 | 15782247 | 24-scf00489 | 24 |
| AX-157888261 | 24 | 76.021 | KV453253.1 | 15782329 | 24-scf00489 | 24 |
| AX-157847501 | 24 | 76.033 | KV453253.1 | 15788783 | 24-scf00489 | 24 |
| AX-157758271 | 24 | 76.156 | KV453253.1 | 15798546 | 24-scf00489 | 24 |
| AX-158313506 | 24 | 76.598 | KV453253.1 | 15799208 | 24-scf00489 | 24 |
| AX-158313512 | 24 | 76.79  | KV453253.1 | 15807225 | 24-scf00489 | 24 |
| AX-158313514 | 24 | 76.79  | KV453253.1 | 15808622 | 24-scf00489 | 24 |
| AX-158313523 | 24 | 76.79  | KV453253.1 | 15820995 | 24-scf00489 | 24 |
| AX-157873538 | 24 | 76.79  | KV453253.1 | 15822950 | 24-scf00489 | 24 |
| AX-158313524 | 24 | 76.79  | KV453253.1 | 15826158 | 24-scf00489 | 24 |
| AX-158313525 | 24 | 76.79  | KV453253.1 | 15827091 | 24-scf00489 | 24 |
| AX-158313529 | 24 | 76.79  | KV453253.1 | 15836837 | 24-scf00489 | 24 |
| AX-157873540 | 24 | 76.79  | KV453253.1 | 15840918 | 24-scf00489 | 24 |
| AX-158313532 | 24 | 76.793 | KV453253.1 | 15842144 | 24-scf00489 | 24 |
| AX-158313533 | 24 | 76.806 | KV453253.1 | 15842392 | 24-scf00489 | 24 |
| AX-157881201 | 24 | 77.391 | KV453253.1 | 15852562 | 24-scf00489 | 24 |
| AX-157716320 | 24 | 77.404 | KV453253.1 | 15837104 | 24-scf00489 | 24 |
| AX-157718953 | 24 | 77.404 | KV453253.1 | 15854007 | 24-scf00489 | 24 |
| AX-158313535 | 24 | 77.404 | KV453253.1 | 15854456 | 24-scf00489 | 24 |
| AX-158313536 | 24 | 77.71  | KV453253.1 | 15855522 | 24-scf00489 | 24 |
| AX-157750494 | 24 | 77.71  | KV453253.1 | 15859287 | 24-scf00489 | 24 |
| AX-158313541 | 24 | 77.712 | KV453253.1 | 15863158 | 24-scf00489 | 24 |
| AX-157709408 | 24 | 77.713 | KV453253.1 | 15867354 | 24-scf00489 | 24 |
| AX-158313543 | 24 | 77.715 | KV453253.1 | 15868770 | 24-scf00489 | 24 |
| AX-158313528 | 24 | 77.93  | KV453253.1 | 15830931 | 24-scf00489 | 24 |
| AX-157751274 | 24 | 77.93  | KV453253.1 | 15869404 | 24-scf00489 | 24 |
| AX-158381406 | 24 | 77.93  | KV453253.1 | 15870316 | 24-scf00489 | 24 |
| AX-158313546 | 24 | 77.93  | KV453253.1 | 15872564 | 24-scf00489 | 24 |
| AX-158313548 | 24 | 77.93  | KV453253.1 | 15876230 | 24-scf00489 | 24 |
| AX-158313549 | 24 | 77.93  | KV453253.1 | 15876669 | 24-scf00489 | 24 |
| AX-158313551 | 24 | 77.93  | KV453253.1 | 15878463 | 24-scf00489 | 24 |
| AX-158313552 | 24 | 77.93  | KV453253.1 | 15878978 | 24-scf00489 | 24 |
| AX-158313554 | 24 | 77.93  | KV453253.1 | 15883298 | 24-scf00489 | 24 |
| AX-158313557 | 24 | 77.93  | KV453253.1 | 15886507 | 24-scf00489 | 24 |
| AX-158313558 | 24 | 77.93  | KV453253.1 | 15886832 | 24-scf00489 | 24 |
| AX-158313559 | 24 | 77.93  | KV453253.1 | 15889297 | 24-scf00489 | 24 |
| AX-157873542 | 24 | 77.93  | KV453253.1 | 15889816 | 24-scf00489 | 24 |
| AX-158313560 | 24 | 77.93  | KV453253.1 | 15890113 | 24-scf00489 | 24 |
| AX-158313566 | 24 | 77.93  | KV453253.1 | 15896731 | 24-scf00489 | 24 |
| AX-157847507 | 24 | 77.93  | KV453253.1 | 15902381 | 24-scf00489 | 24 |
| AX-158313563 | 24 | 78.072 | KV453253.1 | 15895537 | 24-scf00489 | 24 |
| AX-158313565 | 24 | 78.072 | KV453253.1 | 15896392 | 24-scf00489 | 24 |
| AX-157724818 | 24 | 78.173 | KV453253.1 | 15916027 | 24-scf00489 | 24 |
| AX-158313572 | 24 | 78.409 | KV453253.1 | 15917750 | 24-scf00489 | 24 |
| AX-158313573 | 24 | 78.409 | KV453253.1 | 15921989 | 24-scf00489 | 24 |
| AX-158313574 | 24 | 78.409 | KV453253.1 | 15922714 | 24-scf00489 | 24 |
| AX-158313575 | 24 | 78.597 | KV453253.1 | 15923481 | 24-scf00489 | 24 |
| AX-158313578 | 24 | 78.597 | KV453253.1 | 15926356 | 24-scf00489 | 24 |
| AX-158313579 | 24 | 78.778 | KV453253.1 | 15929619 | 24-scf00489 | 24 |
| AX-157750011 | 24 | 78.781 | KV453253.1 | 15934670 | 24-scf00489 | 24 |



|              |    |        |            |          |             |    |
|--------------|----|--------|------------|----------|-------------|----|
| AX-158313586 | 24 | 78.905 | KV453253.1 | 15938180 | 24-scf00489 | 24 |
| AX-158313587 | 24 | 78.905 | KV453253.1 | 15938585 | 24-scf00489 | 24 |
| AX-157717263 | 24 | 78.905 | KV453253.1 | 15940933 | 24-scf00489 | 24 |
| AX-158313589 | 24 | 78.905 | KV453253.1 | 15943126 | 24-scf00489 | 24 |
| AX-158313590 | 24 | 78.905 | KV453253.1 | 15943533 | 24-scf00489 | 24 |
| AX-158313592 | 24 | 79.028 | KV453253.1 | 15945421 | 24-scf00489 | 24 |
| AX-158313593 | 24 | 79.189 | KV453253.1 | 15946554 | 24-scf00489 | 24 |
| AX-158313594 | 24 | 79.189 | KV453253.1 | 15946953 | 24-scf00489 | 24 |
| AX-158313595 | 24 | 79.345 | KV453253.1 | 15947624 | 24-scf00489 | 24 |
| AX-158313597 | 24 | 79.519 | KV453253.1 | 15955965 | 24-scf00489 | 24 |
| AX-158313598 | 24 | 79.519 | KV453253.1 | 15956983 | 24-scf00489 | 24 |
| AX-157881202 | 24 | 79.52  | KV453253.1 | 15959444 | 24-scf00489 | 24 |
| AX-157719949 | 24 | 79.771 | KV453253.1 | 15961029 | 24-scf00489 | 24 |
| AX-158313601 | 24 | 80.012 | KV453253.1 | 15962695 | 24-scf00489 | 24 |
| AX-157751732 | 24 | 80.012 | KV453253.1 | 15963698 | 24-scf00489 | 24 |
| AX-158381407 | 24 | 80.012 | KV453253.1 | 15974329 | 24-scf00489 | 24 |
| AX-158313603 | 24 | 80.012 | KV453253.1 | 15974457 | 24-scf00489 | 24 |
| AX-158313604 | 24 | 80.012 | KV453253.1 | 15975530 | 24-scf00489 | 24 |
| AX-158313606 | 24 | 80.012 | KV453253.1 | 15978974 | 24-scf00489 | 24 |
| AX-158313607 | 24 | 80.012 | KV453253.1 | 15983037 | 24-scf00489 | 24 |
| AX-158313596 | 24 | 80.231 | KV453253.1 | 15948571 | 24-scf00489 | 24 |
| AX-158313602 | 24 | 80.231 | KV453253.1 | 15964441 | 24-scf00489 | 24 |
| AX-157718964 | 24 | 80.231 | KV453253.1 | 15988108 | 24-scf00489 | 24 |
| AX-158313611 | 24 | 80.231 | KV453253.1 | 15992966 | 24-scf00489 | 24 |
| AX-157847514 | 24 | 80.231 | KV453253.1 | 15994415 | 24-scf00489 | 24 |
| AX-158313612 | 24 | 80.231 | KV453253.1 | 15994511 | 24-scf00489 | 24 |
| AX-158313614 | 24 | 80.231 | KV453253.1 | 15997195 | 24-scf00489 | 24 |
| AX-157739173 | 24 | 80.231 | KV453253.1 | 15998527 | 24-scf00489 | 24 |
| AX-158313615 | 24 | 80.231 | KV453253.1 | 16001148 | 24-scf00489 | 24 |
| AX-158313616 | 24 | 80.231 | KV453253.1 | 16002242 | 24-scf00489 | 24 |
| AX-158313617 | 24 | 80.231 | KV453253.1 | 16002813 | 24-scf00489 | 24 |
| AX-158313618 | 24 | 80.231 | KV453253.1 | 16003211 | 24-scf00489 | 24 |
| AX-158313619 | 24 | 80.231 | KV453253.1 | 16006252 | 24-scf00489 | 24 |
| AX-158313620 | 24 | 80.231 | KV453253.1 | 16007544 | 24-scf00489 | 24 |
| AX-157847515 | 24 | 80.231 | KV453253.1 | 16011831 | 24-scf00489 | 24 |
| AX-158313622 | 24 | 80.231 | KV453253.1 | 16012777 | 24-scf00489 | 24 |
| AX-158313640 | 24 | 80.231 | KV453253.1 | 16048680 | 24-scf00489 | 24 |
| AX-158313623 | 24 | 80.397 | KV453253.1 | 16013551 | 24-scf00489 | 24 |
| AX-158313625 | 24 | 80.397 | KV453253.1 | 16022829 | 24-scf00489 | 24 |
| AX-158313624 | 24 | 80.555 | KV453253.1 | 16020171 | 24-scf00489 | 24 |
| AX-157888265 | 24 | 80.671 | KV453253.1 | 16023154 | 24-scf00489 | 24 |
| AX-157745949 | 24 | 80.887 | KV453253.1 | 16024646 | 24-scf00489 | 24 |
| AX-157717581 | 24 | 80.887 | KV453253.1 | 16027837 | 24-scf00489 | 24 |
| AX-157717443 | 24 | 80.887 | KV453253.1 | 16029885 | 24-scf00489 | 24 |
| AX-158313627 | 24 | 80.887 | KV453253.1 | 16034288 | 24-scf00489 | 24 |
| AX-158313630 | 24 | 80.887 | KV453253.1 | 16036584 | 24-scf00489 | 24 |
| AX-158313631 | 24 | 80.887 | KV453253.1 | 16038757 | 24-scf00489 | 24 |
| AX-158313632 | 24 | 80.887 | KV453253.1 | 16038971 | 24-scf00489 | 24 |
| AX-158313635 | 24 | 80.887 | KV453253.1 | 16044679 | 24-scf00489 | 24 |
| AX-158313638 | 24 | 80.887 | KV453253.1 | 16045936 | 24-scf00489 | 24 |
| AX-158313639 | 24 | 80.887 | KV453253.1 | 16046410 | 24-scf00489 | 24 |

|              |    |        |             |          |             |    |
|--------------|----|--------|-------------|----------|-------------|----|
| AX-157754361 | 24 | 80.887 | KV453253.1  | 16046681 | 24-scf00489 | 24 |
| AX-158313641 | 24 | 80.887 | KV453253.1  | 16050814 | 24-scf00489 | 24 |
| AX-158313645 | 24 | 80.887 | KV453253.1  | 16055930 | 24-scf00489 | 24 |
| AX-158313646 | 24 | 80.887 | KV453253.1  | 16057588 | 24-scf00489 | 24 |
| AX-158313650 | 24 | 80.887 | KV453253.1  | 16065022 | 24-scf00489 | 24 |
| AX-158313664 | 24 | 80.887 | KV453253.1  | 16091293 | 24-scf00489 | 24 |
| AX-157772596 | 24 | 80.887 | KV453253.1  | 16098942 | 24-scf00489 | 24 |
| AX-157706680 | 24 | 80.887 | 3ML01032729 | 510      | scf08356_1  | UN |
| AX-158313628 | 24 | 80.903 | KV453253.1  | 16035203 | 24-scf00489 | 24 |
| AX-157714271 | 24 | 80.903 | KV453253.1  | 16058903 | 24-scf00489 | 24 |
| AX-158313648 | 24 | 80.903 | KV453253.1  | 16060555 | 24-scf00489 | 24 |
| AX-158313647 | 24 | 80.924 | KV453253.1  | 16059640 | 24-scf00489 | 24 |
| AX-158313636 | 24 | 80.933 | KV453253.1  | 16045258 | 24-scf00489 | 24 |
| AX-158313637 | 24 | 80.933 | KV453253.1  | 16045315 | 24-scf00489 | 24 |
| AX-158313651 | 24 | 80.933 | KV453253.1  | 16067367 | 24-scf00489 | 24 |
| AX-158313652 | 24 | 80.949 | KV453253.1  | 16068226 | 24-scf00489 | 24 |
| AX-158313653 | 24 | 80.966 | KV453253.1  | 16068580 | 24-scf00489 | 24 |
| AX-158313654 | 24 | 80.982 | KV453253.1  | 16069284 | 24-scf00489 | 24 |
| AX-158313656 | 24 | 80.997 | KV453253.1  | 16072529 | 24-scf00489 | 24 |
| AX-158313659 | 24 | 80.997 | KV453253.1  | 16075334 | 24-scf00489 | 24 |
| AX-157717119 | 24 | 80.997 | KV453253.1  | 16078506 | 24-scf00489 | 24 |
| AX-158313661 | 24 | 80.997 | KV453253.1  | 16083454 | 24-scf00489 | 24 |
| AX-157751715 | 24 | 81.246 | KV453253.1  | 16089504 | 24-scf00489 | 24 |
| AX-158313662 | 24 | 81.246 | KV453253.1  | 16090148 | 24-scf00489 | 24 |
| AX-158313665 | 24 | 81.246 | KV453253.1  | 16093834 | 24-scf00489 | 24 |
| AX-158313666 | 24 | 81.246 | KV453253.1  | 16096699 | 24-scf00489 | 24 |
| AX-157748615 | 24 | 81.455 | KV453253.1  | 16039545 | 24-scf00489 | 24 |
| AX-158313669 | 24 | 81.455 | KV453253.1  | 16101338 | 24-scf00489 | 24 |
| AX-158313671 | 24 | 81.871 | KV453253.1  | 16104935 | 24-scf00489 | 24 |
| AX-158313674 | 24 | 81.871 | KV453253.1  | 16106886 | 24-scf00489 | 24 |
| AX-157847518 | 24 | 81.871 | KV453253.1  | 16108084 | 24-scf00489 | 24 |
| AX-157775010 | 24 | 81.871 | KV453253.1  | 16108260 | 24-scf00489 | 24 |
| AX-158313678 | 24 | 81.871 | KV453253.1  | 16113919 | 24-scf00489 | 24 |
| AX-158313679 | 24 | 81.871 | KV453253.1  | 16114540 | 24-scf00489 | 24 |
| AX-158313682 | 24 | 81.981 | KV453253.1  | 16118484 | 24-scf00489 | 24 |
| AX-158313683 | 24 | 81.981 | KV453253.1  | 16120513 | 24-scf00489 | 24 |
| AX-158313685 | 24 | 82.145 | KV453253.1  | 16123586 | 24-scf00489 | 24 |
| AX-158313681 | 24 | 82.308 | KV453253.1  | 16117438 | 24-scf00489 | 24 |
| AX-157717913 | 24 | 82.308 | KV453253.1  | 16125410 | 24-scf00489 | 24 |
| AX-158313686 | 24 | 82.308 | KV453253.1  | 16126963 | 24-scf00489 | 24 |
| AX-158313687 | 24 | 82.308 | KV453253.1  | 16128338 | 24-scf00489 | 24 |
| AX-158313689 | 24 | 82.308 | KV453253.1  | 16130530 | 24-scf00489 | 24 |
| AX-158313692 | 24 | 82.308 | KV453253.1  | 16135178 | 24-scf00489 | 24 |
| AX-158313694 | 24 | 82.308 | KV453253.1  | 16142271 | 24-scf00489 | 24 |
| AX-158381409 | 24 | 82.308 | KV453253.1  | 16152452 | 24-scf00489 | 24 |
| AX-158313699 | 24 | 82.308 | KV453253.1  | 16154604 | 24-scf00489 | 24 |
| AX-158313700 | 24 | 82.308 | KV453253.1  | 16156462 | 24-scf00489 | 24 |
| AX-158313701 | 24 | 82.308 | KV453253.1  | 16156676 | 24-scf00489 | 24 |
| AX-157847520 | 24 | 82.308 | KV453253.1  | 16163496 | 24-scf00489 | 24 |
| AX-157867778 | 24 | 82.318 | KV453253.1  | 16164561 | 24-scf00489 | 24 |
| AX-158313705 | 24 | 82.348 | KV453253.1  | 16165877 | 24-scf00489 | 24 |

|              |    |        |            |          |             |    |
|--------------|----|--------|------------|----------|-------------|----|
| AX-158313709 | 24 | 82.348 | KV453253.1 | 16172207 | 24-scf00489 | 24 |
| AX-157738518 | 24 | 82.383 | KV453253.1 | 16173028 | 24-scf00489 | 24 |
| AX-158313690 | 24 | 82.418 | KV453253.1 | 16131216 | 24-scf00489 | 24 |
| AX-157847521 | 24 | 82.418 | KV453253.1 | 16167675 | 24-scf00489 | 24 |
| AX-158313707 | 24 | 82.418 | KV453253.1 | 16170195 | 24-scf00489 | 24 |
| AX-158313710 | 24 | 82.418 | KV453253.1 | 16174074 | 24-scf00489 | 24 |
| AX-158313713 | 24 | 82.472 | KV453253.1 | 16180583 | 24-scf00489 | 24 |
| AX-158313712 | 24 | 82.527 | KV453253.1 | 16179882 | 24-scf00489 | 24 |
| AX-158313716 | 24 | 82.527 | KV453253.1 | 16185726 | 24-scf00489 | 24 |
| AX-158313719 | 24 | 82.527 | KV453253.1 | 16189689 | 24-scf00489 | 24 |
| AX-158313720 | 24 | 82.527 | KV453253.1 | 16190201 | 24-scf00489 | 24 |
| AX-158313721 | 24 | 82.527 | KV453253.1 | 16191194 | 24-scf00489 | 24 |
| AX-157847522 | 24 | 82.527 | KV453253.1 | 16193889 | 24-scf00489 | 24 |
| AX-158313723 | 24 | 82.527 | KV453253.1 | 16195334 | 24-scf00489 | 24 |
| AX-157744125 | 24 | 82.527 | KV453253.1 | 16199193 | 24-scf00489 | 24 |
| AX-157680325 | 24 | 82.527 | KV453256.1 | 101618   | 24-scf00493 | 24 |
| AX-158313717 | 24 | 82.529 | KV453253.1 | 16188549 | 24-scf00489 | 24 |
| AX-158313724 | 24 | 82.529 | KV453253.1 | 16196873 | 24-scf00489 | 24 |
| AX-157684559 | 24 | 83.18  | KV453256.1 | 17633    | 24-scf00493 | 24 |
| AX-157684543 | 24 | 83.18  | KV453256.1 | 48446    | 24-scf00493 | 24 |
| AX-157684564 | 24 | 83.182 | KV453256.1 | 6379     | 24-scf00493 | 24 |
| AX-157684552 | 24 | 83.182 | KV453256.1 | 35406    | 24-scf00493 | 24 |
| AX-157684547 | 24 | 83.182 | KV453256.1 | 40769    | 24-scf00493 | 24 |
| AX-157680234 | 24 | 83.182 | KV453256.1 | 43077    | 24-scf00493 | 24 |
| AX-157681636 | 24 | 83.182 | KV453256.1 | 44889    | 24-scf00493 | 24 |
| AX-157680765 | 24 | 83.182 | KV453256.1 | 46159    | 24-scf00493 | 24 |
| AX-157684542 | 24 | 83.182 | KV453256.1 | 49163    | 24-scf00493 | 24 |
| AX-157684527 | 24 | 83.182 | KV453256.1 | 95825    | 24-scf00493 | 24 |
| AX-157684551 | 24 | 83.252 | KV453256.1 | 35821    | 24-scf00493 | 24 |
| AX-157680279 | 24 | 83.291 | KV453256.1 | 10073    | 24-scf00493 | 24 |
| AX-157684556 | 24 | 83.291 | KV453256.1 | 22946    | 24-scf00493 | 24 |
| AX-157684554 | 24 | 83.291 | KV453256.1 | 24836    | 24-scf00493 | 24 |
| AX-157681385 | 24 | 83.291 | KV453256.1 | 34791    | 24-scf00493 | 24 |
| AX-157680251 | 24 | 83.32  | KV453256.1 | 22516    | 24-scf00493 | 24 |
| AX-157681638 | 24 | 83.364 | KV453256.1 | 18464    | 24-scf00493 | 24 |
| AX-157680252 | 24 | 83.401 | KV453256.1 | 5683     | 24-scf00493 | 24 |
| AX-157680275 | 24 | 83.401 | KV453256.1 | 7756     | 24-scf00493 | 24 |
| AX-157684563 | 24 | 83.401 | KV453256.1 | 13604    | 24-scf00493 | 24 |
| AX-157684562 | 24 | 83.401 | KV453256.1 | 14143    | 24-scf00493 | 24 |
| AX-157684560 | 24 | 83.401 | KV453256.1 | 16608    | 24-scf00493 | 24 |
| AX-158314272 | 24 | 83.922 | KV453258.1 | 1201982  | 24-scf00494 | 24 |
| AX-158314418 | 24 | 83.922 | KV453257.1 | 161553   | 24-scf00495 | 24 |
| AX-157867789 | 24 | 83.924 | KV453257.1 | 195118   | 24-scf00495 | 24 |
| AX-158314422 | 24 | 83.927 | KV453257.1 | 196368   | 24-scf00495 | 24 |
| AX-158418113 | 24 | 83.934 | KV453257.1 | 197265   | 24-scf00495 | 24 |
| AX-157743883 | 24 | 83.942 | KV453257.1 | 198412   | 24-scf00495 | 24 |
| AX-158313818 | 24 | 83.944 | KV453258.1 | 115767   | 24-scf00494 | 24 |
| AX-157772775 | 24 | 83.944 | KV453257.1 | 199699   | 24-scf00495 | 24 |
| AX-157680113 | 24 | 83.947 | KV453256.1 | 49609    | 24-scf00493 | 24 |
| AX-157684499 | 24 | 83.947 | KV453256.1 | 50380    | 24-scf00493 | 24 |
| AX-157680267 | 24 | 83.947 | KV453256.1 | 51544    | 24-scf00493 | 24 |

|              |    |        |            |        |             |    |
|--------------|----|--------|------------|--------|-------------|----|
| AX-157681172 | 24 | 83.947 | KV453256.1 | 60580  | 24-scf00493 | 24 |
| AX-157684503 | 24 | 83.947 | KV453256.1 | 62565  | 24-scf00493 | 24 |
| AX-157684505 | 24 | 83.947 | KV453256.1 | 64890  | 24-scf00493 | 24 |
| AX-157684519 | 24 | 83.947 | KV453256.1 | 78832  | 24-scf00493 | 24 |
| AX-157684538 | 24 | 83.947 | KV453256.1 | 114490 | 24-scf00493 | 24 |
| AX-158313749 | 24 | 83.947 | KV453258.1 | 41125  | 24-scf00494 | 24 |
| AX-158314392 | 24 | 83.947 | KV453257.1 | 62592  | 24-scf00495 | 24 |
| AX-158314417 | 24 | 83.947 | KV453257.1 | 161164 | 24-scf00495 | 24 |
| AX-158314425 | 24 | 83.947 | KV453257.1 | 204150 | 24-scf00495 | 24 |
| AX-158314429 | 24 | 83.947 | KV453257.1 | 211248 | 24-scf00495 | 24 |
| AX-158314430 | 24 | 83.947 | KV453257.1 | 213584 | 24-scf00495 | 24 |
| AX-158314431 | 24 | 83.947 | KV453257.1 | 214769 | 24-scf00495 | 24 |
| AX-158314432 | 24 | 83.947 | KV453257.1 | 215213 | 24-scf00495 | 24 |
| AX-158314433 | 24 | 83.947 | KV453257.1 | 215501 | 24-scf00495 | 24 |
| AX-158314434 | 24 | 83.947 | KV453257.1 | 216363 | 24-scf00495 | 24 |
| AX-158314435 | 24 | 83.947 | KV453257.1 | 216565 | 24-scf00495 | 24 |
| AX-158314436 | 24 | 83.947 | KV453257.1 | 218056 | 24-scf00495 | 24 |
| AX-157684501 | 24 | 83.948 | KV453256.1 | 55165  | 24-scf00493 | 24 |
| AX-157684502 | 24 | 84.274 | KV453256.1 | 55809  | 24-scf00493 | 24 |
| AX-157709954 | 24 | 84.274 | KV453256.1 | 63412  | 24-scf00493 | 24 |
| AX-157684504 | 24 | 84.274 | KV453256.1 | 64422  | 24-scf00493 | 24 |
| AX-157684507 | 24 | 84.274 | KV453256.1 | 65741  | 24-scf00493 | 24 |
| AX-157684512 | 24 | 84.274 | KV453256.1 | 67356  | 24-scf00493 | 24 |
| AX-157684515 | 24 | 84.274 | KV453256.1 | 72047  | 24-scf00493 | 24 |
| AX-157684518 | 24 | 84.378 | KV453256.1 | 77590  | 24-scf00493 | 24 |
| AX-157684520 | 24 | 84.493 | KV453256.1 | 80114  | 24-scf00493 | 24 |
| AX-157684521 | 24 | 84.493 | KV453256.1 | 82338  | 24-scf00493 | 24 |
| AX-157684522 | 24 | 84.493 | KV453256.1 | 85706  | 24-scf00493 | 24 |
| AX-157684523 | 24 | 84.493 | KV453256.1 | 87503  | 24-scf00493 | 24 |
| AX-157684533 | 24 | 84.493 | KV453256.1 | 105928 | 24-scf00493 | 24 |
| AX-157684534 | 24 | 84.493 | KV453256.1 | 108662 | 24-scf00493 | 24 |
| AX-157684536 | 24 | 84.533 | KV453256.1 | 112007 | 24-scf00493 | 24 |
| AX-157684524 | 24 | 84.602 | KV453256.1 | 89323  | 24-scf00493 | 24 |
| AX-157847523 | 24 | 84.602 | KV453258.1 | 13708  | 24-scf00494 | 24 |
| AX-158313732 | 24 | 84.602 | KV453258.1 | 18642  | 24-scf00494 | 24 |
| AX-158313733 | 24 | 84.602 | KV453258.1 | 21496  | 24-scf00494 | 24 |
| AX-158313734 | 24 | 84.602 | KV453258.1 | 23473  | 24-scf00494 | 24 |
| AX-158313735 | 24 | 84.602 | KV453258.1 | 24358  | 24-scf00494 | 24 |
| AX-158313736 | 24 | 84.602 | KV453258.1 | 25301  | 24-scf00494 | 24 |
| AX-158313737 | 24 | 84.602 | KV453258.1 | 25798  | 24-scf00494 | 24 |
| AX-158313738 | 24 | 84.602 | KV453258.1 | 27133  | 24-scf00494 | 24 |
| AX-157847526 | 24 | 84.602 | KV453258.1 | 27869  | 24-scf00494 | 24 |
| AX-158313740 | 24 | 84.602 | KV453258.1 | 27946  | 24-scf00494 | 24 |
| AX-158313742 | 24 | 84.602 | KV453258.1 | 32904  | 24-scf00494 | 24 |
| AX-158313744 | 24 | 84.602 | KV453258.1 | 35226  | 24-scf00494 | 24 |
| AX-157752363 | 24 | 84.602 | KV453257.1 | 168652 | 24-scf00495 | 24 |
| AX-158314428 | 24 | 84.602 | KV453257.1 | 208884 | 24-scf00495 | 24 |
| AX-157770136 | 24 | 84.645 | KV453258.1 | 35631  | 24-scf00494 | 24 |
| AX-158313745 | 24 | 84.675 | KV453258.1 | 35691  | 24-scf00494 | 24 |
| AX-157867779 | 24 | 84.694 | KV453258.1 | 37694  | 24-scf00494 | 24 |
| AX-158313748 | 24 | 84.711 | KV453258.1 | 40459  | 24-scf00494 | 24 |

|              |    |        |            |        |             |    |
|--------------|----|--------|------------|--------|-------------|----|
| AX-158313750 | 24 | 84.711 | KV453258.1 | 41498  | 24-scf00494 | 24 |
| AX-158313751 | 24 | 84.711 | KV453258.1 | 41987  | 24-scf00494 | 24 |
| AX-157701115 | 24 | 84.711 | KV453257.1 | 223186 | 24-scf00495 | 24 |
| AX-158313752 | 24 | 84.766 | KV453258.1 | 43839  | 24-scf00494 | 24 |
| AX-158313753 | 24 | 84.821 | KV453258.1 | 44595  | 24-scf00494 | 24 |
| AX-158313754 | 24 | 84.93  | KV453258.1 | 45918  | 24-scf00494 | 24 |
| AX-157861338 | 24 | 84.983 | KV453258.1 | 46713  | 24-scf00494 | 24 |
| AX-157847528 | 24 | 85.039 | KV453258.1 | 48296  | 24-scf00494 | 24 |
| AX-158313758 | 24 | 85.039 | KV453258.1 | 49453  | 24-scf00494 | 24 |
| AX-158313759 | 24 | 85.039 | KV453258.1 | 50220  | 24-scf00494 | 24 |
| AX-158313761 | 24 | 85.039 | KV453258.1 | 50871  | 24-scf00494 | 24 |
| AX-158313764 | 24 | 85.039 | KV453258.1 | 52865  | 24-scf00494 | 24 |
| AX-158313805 | 24 | 85.039 | KV453258.1 | 102787 | 24-scf00494 | 24 |
| AX-158313767 | 24 | 85.161 | KV453258.1 | 54834  | 24-scf00494 | 24 |
| AX-158313770 | 24 | 85.258 | KV453258.1 | 57477  | 24-scf00494 | 24 |
| AX-158313771 | 24 | 85.258 | KV453258.1 | 58540  | 24-scf00494 | 24 |
| AX-158313772 | 24 | 85.258 | KV453258.1 | 58997  | 24-scf00494 | 24 |
| AX-158313779 | 24 | 85.258 | KV453258.1 | 65135  | 24-scf00494 | 24 |
| AX-158313782 | 24 | 85.258 | KV453258.1 | 69652  | 24-scf00494 | 24 |
| AX-158313786 | 24 | 85.258 | KV453258.1 | 77704  | 24-scf00494 | 24 |
| AX-158313787 | 24 | 85.258 | KV453258.1 | 79875  | 24-scf00494 | 24 |
| AX-158313789 | 24 | 85.258 | KV453258.1 | 81619  | 24-scf00494 | 24 |
| AX-158313790 | 24 | 85.258 | KV453258.1 | 82299  | 24-scf00494 | 24 |
| AX-158313791 | 24 | 85.258 | KV453258.1 | 83297  | 24-scf00494 | 24 |
| AX-158313924 | 24 | 85.258 | KV453258.1 | 329737 | 24-scf00494 | 24 |
| AX-158313798 | 24 | 85.367 | KV453258.1 | 94233  | 24-scf00494 | 24 |
| AX-157847529 | 24 | 85.367 | KV453258.1 | 96279  | 24-scf00494 | 24 |
| AX-158313830 | 24 | 85.367 | KV453258.1 | 136241 | 24-scf00494 | 24 |
| AX-158313765 | 24 | 85.476 | KV453258.1 | 53108  | 24-scf00494 | 24 |
| AX-158313785 | 24 | 85.476 | KV453258.1 | 75738  | 24-scf00494 | 24 |
| AX-158313797 | 24 | 85.476 | KV453258.1 | 93643  | 24-scf00494 | 24 |
| AX-158313803 | 24 | 85.476 | KV453258.1 | 100220 | 24-scf00494 | 24 |
| AX-158313804 | 24 | 85.476 | KV453258.1 | 101014 | 24-scf00494 | 24 |
| AX-158313807 | 24 | 85.476 | KV453258.1 | 103973 | 24-scf00494 | 24 |
| AX-158313808 | 24 | 85.476 | KV453258.1 | 104738 | 24-scf00494 | 24 |
| AX-158313809 | 24 | 85.476 | KV453258.1 | 106793 | 24-scf00494 | 24 |
| AX-158313811 | 24 | 85.476 | KV453258.1 | 109654 | 24-scf00494 | 24 |
| AX-158313812 | 24 | 85.476 | KV453258.1 | 109807 | 24-scf00494 | 24 |
| AX-157847530 | 24 | 85.476 | KV453258.1 | 112495 | 24-scf00494 | 24 |
| AX-158313814 | 24 | 85.476 | KV453258.1 | 113059 | 24-scf00494 | 24 |
| AX-158313816 | 24 | 85.476 | KV453258.1 | 114637 | 24-scf00494 | 24 |
| AX-158313817 | 24 | 85.476 | KV453258.1 | 115455 | 24-scf00494 | 24 |
| AX-157881205 | 24 | 85.476 | KV453258.1 | 125785 | 24-scf00494 | 24 |
| AX-158313824 | 24 | 85.476 | KV453258.1 | 126239 | 24-scf00494 | 24 |
| AX-158313826 | 24 | 85.476 | KV453258.1 | 130122 | 24-scf00494 | 24 |
| AX-158313827 | 24 | 85.478 | KV453258.1 | 133244 | 24-scf00494 | 24 |
| AX-158313828 | 24 | 85.657 | KV453258.1 | 134337 | 24-scf00494 | 24 |
| AX-158313762 | 24 | 85.658 | KV453258.1 | 51324  | 24-scf00494 | 24 |
| AX-158313792 | 24 | 85.658 | KV453258.1 | 84994  | 24-scf00494 | 24 |
| AX-158313774 | 24 | 86.022 | KV453258.1 | 59561  | 24-scf00494 | 24 |
| AX-157746854 | 24 | 86.022 | KV453258.1 | 71734  | 24-scf00494 | 24 |

|              |    |        |            |        |             |    |
|--------------|----|--------|------------|--------|-------------|----|
| AX-158313833 | 24 | 86.022 | KV453258.1 | 144422 | 24-scf00494 | 24 |
| AX-158313834 | 24 | 86.022 | KV453258.1 | 144759 | 24-scf00494 | 24 |
| AX-158313836 | 24 | 86.022 | KV453258.1 | 154695 | 24-scf00494 | 24 |
| AX-157847532 | 24 | 86.022 | KV453258.1 | 156788 | 24-scf00494 | 24 |
| AX-158313838 | 24 | 86.022 | KV453258.1 | 160026 | 24-scf00494 | 24 |
| AX-158313841 | 24 | 86.022 | KV453258.1 | 164750 | 24-scf00494 | 24 |
| AX-158313842 | 24 | 86.022 | KV453258.1 | 171705 | 24-scf00494 | 24 |
| AX-157742785 | 24 | 86.022 | KV453258.1 | 175178 | 24-scf00494 | 24 |
| AX-158313846 | 24 | 86.022 | KV453258.1 | 176547 | 24-scf00494 | 24 |
| AX-158313849 | 24 | 86.022 | KV453258.1 | 185028 | 24-scf00494 | 24 |
| AX-157867783 | 24 | 86.022 | KV453258.1 | 206357 | 24-scf00494 | 24 |
| AX-158313861 | 24 | 86.022 | KV453258.1 | 208266 | 24-scf00494 | 24 |
| AX-157775153 | 24 | 86.241 | KV453258.1 | 187218 | 24-scf00494 | 24 |
| AX-158313850 | 24 | 86.241 | KV453258.1 | 187549 | 24-scf00494 | 24 |
| AX-158313851 | 24 | 86.241 | KV453258.1 | 188014 | 24-scf00494 | 24 |
| AX-158313855 | 24 | 86.241 | KV453258.1 | 202041 | 24-scf00494 | 24 |
| AX-158313857 | 24 | 86.241 | KV453258.1 | 204917 | 24-scf00494 | 24 |
| AX-158313860 | 24 | 86.241 | KV453258.1 | 206745 | 24-scf00494 | 24 |
| AX-157861342 | 24 | 86.241 | KV453258.1 | 213586 | 24-scf00494 | 24 |
| AX-157847536 | 24 | 86.241 | KV453258.1 | 214765 | 24-scf00494 | 24 |
| AX-157861343 | 24 | 86.256 | KV453258.1 | 219611 | 24-scf00494 | 24 |
| AX-157861344 | 24 | 86.256 | KV453258.1 | 222357 | 24-scf00494 | 24 |
| AX-157721158 | 24 | 86.318 | KV453258.1 | 219701 | 24-scf00494 | 24 |
| AX-157847537 | 24 | 86.35  | KV453258.1 | 224086 | 24-scf00494 | 24 |
| AX-158313870 | 24 | 86.35  | KV453258.1 | 224641 | 24-scf00494 | 24 |
| AX-157873548 | 24 | 86.408 | KV453258.1 | 234317 | 24-scf00494 | 24 |
| AX-158313873 | 24 | 86.459 | KV453258.1 | 240574 | 24-scf00494 | 24 |
| AX-158313872 | 24 | 86.568 | KV453258.1 | 227540 | 24-scf00494 | 24 |
| AX-158313876 | 24 | 86.568 | KV453258.1 | 244334 | 24-scf00494 | 24 |
| AX-158313878 | 24 | 86.568 | KV453258.1 | 246324 | 24-scf00494 | 24 |
| AX-157752138 | 24 | 86.568 | KV453258.1 | 249391 | 24-scf00494 | 24 |
| AX-158313881 | 24 | 86.568 | KV453258.1 | 253759 | 24-scf00494 | 24 |
| AX-158313882 | 24 | 86.568 | KV453258.1 | 254195 | 24-scf00494 | 24 |
| AX-158313884 | 24 | 86.568 | KV453258.1 | 259642 | 24-scf00494 | 24 |
| AX-158313887 | 24 | 86.568 | KV453258.1 | 262265 | 24-scf00494 | 24 |
| AX-157873549 | 24 | 86.568 | KV453258.1 | 265341 | 24-scf00494 | 24 |
| AX-158313888 | 24 | 86.568 | KV453258.1 | 266238 | 24-scf00494 | 24 |
| AX-157743289 | 24 | 86.568 | KV453258.1 | 268778 | 24-scf00494 | 24 |
| AX-157750667 | 24 | 86.568 | KV453258.1 | 270778 | 24-scf00494 | 24 |
| AX-158313891 | 24 | 86.568 | KV453258.1 | 273616 | 24-scf00494 | 24 |
| AX-158313893 | 24 | 86.568 | KV453258.1 | 276133 | 24-scf00494 | 24 |
| AX-158313894 | 24 | 86.568 | KV453258.1 | 277726 | 24-scf00494 | 24 |
| AX-157720461 | 24 | 86.568 | KV453258.1 | 278815 | 24-scf00494 | 24 |
| AX-158313898 | 24 | 86.568 | KV453258.1 | 288399 | 24-scf00494 | 24 |
| AX-158313900 | 24 | 86.568 | KV453258.1 | 289611 | 24-scf00494 | 24 |
| AX-158313901 | 24 | 86.568 | KV453258.1 | 291005 | 24-scf00494 | 24 |
| AX-158403996 | 24 | 86.568 | KV453258.1 | 292058 | 24-scf00494 | 24 |
| AX-158313902 | 24 | 86.568 | KV453258.1 | 299232 | 24-scf00494 | 24 |
| AX-157873551 | 24 | 86.568 | KV453258.1 | 299476 | 24-scf00494 | 24 |
| AX-158313903 | 24 | 86.568 | KV453258.1 | 299864 | 24-scf00494 | 24 |
| AX-158313904 | 24 | 86.568 | KV453258.1 | 300187 | 24-scf00494 | 24 |

|              |    |        |            |        |             |    |
|--------------|----|--------|------------|--------|-------------|----|
| AX-158313906 | 24 | 86.568 | KV453258.1 | 303950 | 24-scf00494 | 24 |
| AX-157727417 | 24 | 86.568 | KV453258.1 | 306168 | 24-scf00494 | 24 |
| AX-157847546 | 24 | 86.568 | KV453258.1 | 306637 | 24-scf00494 | 24 |
| AX-158313909 | 24 | 86.568 | KV453258.1 | 309124 | 24-scf00494 | 24 |
| AX-158313910 | 24 | 86.568 | KV453258.1 | 314806 | 24-scf00494 | 24 |
| AX-158313911 | 24 | 86.568 | KV453258.1 | 315747 | 24-scf00494 | 24 |
| AX-157757949 | 24 | 86.568 | KV453258.1 | 319585 | 24-scf00494 | 24 |
| AX-157774505 | 24 | 86.568 | KV453258.1 | 320601 | 24-scf00494 | 24 |
| AX-157716391 | 24 | 86.568 | KV453258.1 | 396096 | 24-scf00494 | 24 |
| AX-158313915 | 24 | 86.677 | KV453258.1 | 320431 | 24-scf00494 | 24 |
| AX-158313916 | 24 | 86.677 | KV453258.1 | 321819 | 24-scf00494 | 24 |
| AX-158313917 | 24 | 86.677 | KV453258.1 | 322364 | 24-scf00494 | 24 |
| AX-158313918 | 24 | 86.677 | KV453258.1 | 323150 | 24-scf00494 | 24 |
| AX-158313919 | 24 | 86.677 | KV453258.1 | 324090 | 24-scf00494 | 24 |
| AX-158313920 | 24 | 86.677 | KV453258.1 | 324959 | 24-scf00494 | 24 |
| AX-158313921 | 24 | 86.677 | KV453258.1 | 325617 | 24-scf00494 | 24 |
| AX-158313922 | 24 | 86.677 | KV453258.1 | 327194 | 24-scf00494 | 24 |
| AX-157847547 | 24 | 86.677 | KV453258.1 | 334829 | 24-scf00494 | 24 |
| AX-158313931 | 24 | 86.677 | KV453258.1 | 348900 | 24-scf00494 | 24 |
| AX-158313932 | 24 | 86.677 | KV453258.1 | 351464 | 24-scf00494 | 24 |
| AX-158313934 | 24 | 86.677 | KV453258.1 | 355965 | 24-scf00494 | 24 |
| AX-158313936 | 24 | 86.692 | KV453258.1 | 357952 | 24-scf00494 | 24 |
| AX-158313941 | 24 | 86.721 | KV453258.1 | 377182 | 24-scf00494 | 24 |
| AX-157847543 | 24 | 86.752 | KV453258.1 | 255469 | 24-scf00494 | 24 |
| AX-158313886 | 24 | 86.752 | KV453258.1 | 261463 | 24-scf00494 | 24 |
| AX-158313926 | 24 | 86.752 | KV453258.1 | 336481 | 24-scf00494 | 24 |
| AX-157847550 | 24 | 86.752 | KV453258.1 | 380104 | 24-scf00494 | 24 |
| AX-158313970 | 24 | 86.752 | KV453258.1 | 432780 | 24-scf00494 | 24 |
| AX-157748743 | 24 | 86.752 | KV453258.1 | 446621 | 24-scf00494 | 24 |
| AX-158314119 | 24 | 86.752 | KV453258.1 | 765959 | 24-scf00494 | 24 |
| AX-158314146 | 24 | 86.752 | KV453258.1 | 882543 | 24-scf00494 | 24 |
| AX-158313892 | 24 | 86.787 | KV453258.1 | 275046 | 24-scf00494 | 24 |
| AX-158313944 | 24 | 86.787 | KV453258.1 | 384202 | 24-scf00494 | 24 |
| AX-158313946 | 24 | 86.787 | KV453258.1 | 388585 | 24-scf00494 | 24 |
| AX-158313949 | 24 | 86.787 | KV453258.1 | 392757 | 24-scf00494 | 24 |
| AX-157847551 | 24 | 86.787 | KV453258.1 | 399662 | 24-scf00494 | 24 |
| AX-157867786 | 24 | 86.787 | KV453258.1 | 400819 | 24-scf00494 | 24 |
| AX-158313950 | 24 | 86.787 | KV453258.1 | 401207 | 24-scf00494 | 24 |
| AX-158313952 | 24 | 86.787 | KV453258.1 | 402809 | 24-scf00494 | 24 |
| AX-157861346 | 24 | 86.787 | KV453258.1 | 404590 | 24-scf00494 | 24 |
| AX-158313957 | 24 | 86.787 | KV453258.1 | 407283 | 24-scf00494 | 24 |
| AX-158313960 | 24 | 86.787 | KV453258.1 | 409582 | 24-scf00494 | 24 |
| AX-158313961 | 24 | 86.787 | KV453258.1 | 411824 | 24-scf00494 | 24 |
| AX-158313963 | 24 | 86.787 | KV453258.1 | 414195 | 24-scf00494 | 24 |
| AX-158313964 | 24 | 86.787 | KV453258.1 | 419151 | 24-scf00494 | 24 |
| AX-158313965 | 24 | 86.787 | KV453258.1 | 419361 | 24-scf00494 | 24 |
| AX-157847553 | 24 | 86.787 | KV453258.1 | 425782 | 24-scf00494 | 24 |
| AX-158313968 | 24 | 86.787 | KV453258.1 | 429404 | 24-scf00494 | 24 |
| AX-158313976 | 24 | 86.787 | KV453258.1 | 444389 | 24-scf00494 | 24 |
| AX-158313988 | 24 | 86.787 | KV453258.1 | 475044 | 24-scf00494 | 24 |
| AX-158313991 | 24 | 86.787 | KV453258.1 | 481470 | 24-scf00494 | 24 |

|              |    |        |            |        |             |    |
|--------------|----|--------|------------|--------|-------------|----|
| AX-158313969 | 24 | 86.841 | KV453258.1 | 432123 | 24-scf00494 | 24 |
| AX-157750350 | 24 | 86.896 | KV453258.1 | 385231 | 24-scf00494 | 24 |
| AX-157847555 | 24 | 86.896 | KV453258.1 | 435002 | 24-scf00494 | 24 |
| AX-158313972 | 24 | 86.896 | KV453258.1 | 436387 | 24-scf00494 | 24 |
| AX-157758989 | 24 | 86.896 | KV453258.1 | 443825 | 24-scf00494 | 24 |
| AX-158313977 | 24 | 86.896 | KV453258.1 | 445596 | 24-scf00494 | 24 |
| AX-158313986 | 24 | 86.896 | KV453258.1 | 472090 | 24-scf00494 | 24 |
| AX-158314114 | 24 | 86.896 | KV453258.1 | 743974 | 24-scf00494 | 24 |
| AX-158412439 | 24 | 86.896 | KV453258.1 | 888870 | 24-scf00494 | 24 |
| AX-157746414 | 24 | 86.896 | KV453258.1 | 916712 | 24-scf00494 | 24 |
| AX-157756756 | 24 | 87.114 | KV453258.1 | 456792 | 24-scf00494 | 24 |
| AX-157847560 | 24 | 87.114 | KV453258.1 | 460317 | 24-scf00494 | 24 |
| AX-157847561 | 24 | 87.114 | KV453258.1 | 460459 | 24-scf00494 | 24 |
| AX-157741104 | 24 | 87.114 | KV453258.1 | 461608 | 24-scf00494 | 24 |
| AX-157881209 | 24 | 87.114 | KV453258.1 | 461684 | 24-scf00494 | 24 |
| AX-157847562 | 24 | 87.114 | KV453258.1 | 465253 | 24-scf00494 | 24 |
| AX-158313984 | 24 | 87.114 | KV453258.1 | 465788 | 24-scf00494 | 24 |
| AX-158313989 | 24 | 87.114 | KV453258.1 | 477447 | 24-scf00494 | 24 |
| AX-157765507 | 24 | 87.114 | KV453258.1 | 478445 | 24-scf00494 | 24 |
| AX-158313990 | 24 | 87.114 | KV453258.1 | 478787 | 24-scf00494 | 24 |
| AX-158313993 | 24 | 87.114 | KV453258.1 | 481982 | 24-scf00494 | 24 |
| AX-158313995 | 24 | 87.114 | KV453258.1 | 484737 | 24-scf00494 | 24 |
| AX-158314005 | 24 | 87.442 | KV453258.1 | 529171 | 24-scf00494 | 24 |
| AX-158314007 | 24 | 87.442 | KV453258.1 | 531049 | 24-scf00494 | 24 |
| AX-158314009 | 24 | 87.442 | KV453258.1 | 533548 | 24-scf00494 | 24 |
| AX-158314011 | 24 | 87.442 | KV453258.1 | 536494 | 24-scf00494 | 24 |
| AX-158314012 | 24 | 87.442 | KV453258.1 | 538947 | 24-scf00494 | 24 |
| AX-157717472 | 24 | 87.442 | KV453258.1 | 543833 | 24-scf00494 | 24 |
| AX-158314016 | 24 | 87.442 | KV453258.1 | 546804 | 24-scf00494 | 24 |
| AX-158314019 | 24 | 87.442 | KV453258.1 | 554307 | 24-scf00494 | 24 |
| AX-157715080 | 24 | 87.442 | KV453258.1 | 568485 | 24-scf00494 | 24 |
| AX-158314025 | 24 | 87.442 | KV453258.1 | 568582 | 24-scf00494 | 24 |
| AX-158314028 | 24 | 87.442 | KV453258.1 | 573682 | 24-scf00494 | 24 |
| AX-158314032 | 24 | 87.442 | KV453258.1 | 576656 | 24-scf00494 | 24 |
| AX-158314037 | 24 | 87.442 | KV453258.1 | 585143 | 24-scf00494 | 24 |
| AX-158314020 | 24 | 87.77  | KV453258.1 | 558473 | 24-scf00494 | 24 |
| AX-158314035 | 24 | 87.77  | KV453258.1 | 581691 | 24-scf00494 | 24 |
| AX-158314036 | 24 | 87.77  | KV453258.1 | 582316 | 24-scf00494 | 24 |
| AX-158314040 | 24 | 87.77  | KV453258.1 | 593295 | 24-scf00494 | 24 |
| AX-158314048 | 24 | 87.879 | KV453258.1 | 608339 | 24-scf00494 | 24 |
| AX-158314049 | 24 | 87.879 | KV453258.1 | 609938 | 24-scf00494 | 24 |
| AX-158314054 | 24 | 87.988 | KV453258.1 | 617044 | 24-scf00494 | 24 |
| AX-158314064 | 24 | 87.988 | KV453258.1 | 651931 | 24-scf00494 | 24 |
| AX-158314065 | 24 | 87.988 | KV453258.1 | 653248 | 24-scf00494 | 24 |
| AX-158314066 | 24 | 87.988 | KV453258.1 | 661080 | 24-scf00494 | 24 |
| AX-158314069 | 24 | 87.988 | KV453258.1 | 665920 | 24-scf00494 | 24 |
| AX-158313835 | 24 | 88.097 | KV453258.1 | 145890 | 24-scf00494 | 24 |
| AX-157867780 | 24 | 88.097 | KV453258.1 | 178236 | 24-scf00494 | 24 |
| AX-158313852 | 24 | 88.097 | KV453258.1 | 189959 | 24-scf00494 | 24 |
| AX-157847539 | 24 | 88.097 | KV453258.1 | 229867 | 24-scf00494 | 24 |
| AX-158313877 | 24 | 88.097 | KV453258.1 | 245387 | 24-scf00494 | 24 |



|              |    |        |            |        |             |    |
|--------------|----|--------|------------|--------|-------------|----|
| AX-158313879 | 24 | 88.097 | KV453258.1 | 248651 | 24-scf00494 | 24 |
| AX-158313954 | 24 | 88.097 | KV453258.1 | 404716 | 24-scf00494 | 24 |
| AX-158313962 | 24 | 88.097 | KV453258.1 | 412711 | 24-scf00494 | 24 |
| AX-158419886 | 24 | 88.097 | KV453258.1 | 452636 | 24-scf00494 | 24 |
| AX-158314010 | 24 | 88.097 | KV453258.1 | 536260 | 24-scf00494 | 24 |
| AX-158314018 | 24 | 88.097 | KV453258.1 | 553960 | 24-scf00494 | 24 |
| AX-157758520 | 24 | 88.097 | KV453258.1 | 564155 | 24-scf00494 | 24 |
| AX-158314030 | 24 | 88.097 | KV453258.1 | 575092 | 24-scf00494 | 24 |
| AX-158314044 | 24 | 88.097 | KV453258.1 | 599527 | 24-scf00494 | 24 |
| AX-158314045 | 24 | 88.097 | KV453258.1 | 600124 | 24-scf00494 | 24 |
| AX-158314046 | 24 | 88.097 | KV453258.1 | 601049 | 24-scf00494 | 24 |
| AX-157744146 | 24 | 88.097 | KV453258.1 | 602489 | 24-scf00494 | 24 |
| AX-158314051 | 24 | 88.097 | KV453258.1 | 611733 | 24-scf00494 | 24 |
| AX-158314053 | 24 | 88.097 | KV453258.1 | 616281 | 24-scf00494 | 24 |
| AX-158314070 | 24 | 88.097 | KV453258.1 | 668004 | 24-scf00494 | 24 |
| AX-158314071 | 24 | 88.097 | KV453258.1 | 674455 | 24-scf00494 | 24 |
| AX-157847572 | 24 | 88.097 | KV453258.1 | 681880 | 24-scf00494 | 24 |
| AX-157847573 | 24 | 88.097 | KV453258.1 | 682004 | 24-scf00494 | 24 |
| AX-158314077 | 24 | 88.097 | KV453258.1 | 683556 | 24-scf00494 | 24 |
| AX-158314078 | 24 | 88.097 | KV453258.1 | 683900 | 24-scf00494 | 24 |
| AX-157721951 | 24 | 88.097 | KV453258.1 | 689345 | 24-scf00494 | 24 |
| AX-158314079 | 24 | 88.097 | KV453258.1 | 690736 | 24-scf00494 | 24 |
| AX-158314081 | 24 | 88.097 | KV453258.1 | 693020 | 24-scf00494 | 24 |
| AX-158314083 | 24 | 88.097 | KV453258.1 | 693836 | 24-scf00494 | 24 |
| AX-158314084 | 24 | 88.097 | KV453258.1 | 694822 | 24-scf00494 | 24 |
| AX-157743613 | 24 | 88.097 | KV453258.1 | 695388 | 24-scf00494 | 24 |
| AX-157847575 | 24 | 88.097 | KV453258.1 | 695839 | 24-scf00494 | 24 |
| AX-157847576 | 24 | 88.097 | KV453258.1 | 696829 | 24-scf00494 | 24 |
| AX-158314086 | 24 | 88.097 | KV453258.1 | 697389 | 24-scf00494 | 24 |
| AX-158314089 | 24 | 88.097 | KV453258.1 | 701643 | 24-scf00494 | 24 |
| AX-158314090 | 24 | 88.097 | KV453258.1 | 704579 | 24-scf00494 | 24 |
| AX-158314091 | 24 | 88.097 | KV453258.1 | 705997 | 24-scf00494 | 24 |
| AX-158314093 | 24 | 88.097 | KV453258.1 | 711512 | 24-scf00494 | 24 |
| AX-158314094 | 24 | 88.097 | KV453258.1 | 712541 | 24-scf00494 | 24 |
| AX-158314095 | 24 | 88.097 | KV453258.1 | 713573 | 24-scf00494 | 24 |
| AX-158314096 | 24 | 88.097 | KV453258.1 | 714529 | 24-scf00494 | 24 |
| AX-158314098 | 24 | 88.097 | KV453258.1 | 716472 | 24-scf00494 | 24 |
| AX-158314102 | 24 | 88.097 | KV453258.1 | 725811 | 24-scf00494 | 24 |
| AX-158314105 | 24 | 88.097 | KV453258.1 | 730901 | 24-scf00494 | 24 |
| AX-158314106 | 24 | 88.097 | KV453258.1 | 733726 | 24-scf00494 | 24 |
| AX-158314108 | 24 | 88.097 | KV453258.1 | 734963 | 24-scf00494 | 24 |
| AX-158314110 | 24 | 88.097 | KV453258.1 | 737319 | 24-scf00494 | 24 |
| AX-158314111 | 24 | 88.097 | KV453258.1 | 739268 | 24-scf00494 | 24 |
| AX-158314112 | 24 | 88.097 | KV453258.1 | 740264 | 24-scf00494 | 24 |
| AX-158314113 | 24 | 88.097 | KV453258.1 | 741430 | 24-scf00494 | 24 |
| AX-158314115 | 24 | 88.097 | KV453258.1 | 747016 | 24-scf00494 | 24 |
| AX-158314116 | 24 | 88.097 | KV453258.1 | 750713 | 24-scf00494 | 24 |
| AX-158314117 | 24 | 88.097 | KV453258.1 | 752301 | 24-scf00494 | 24 |
| AX-158314121 | 24 | 88.097 | KV453258.1 | 772412 | 24-scf00494 | 24 |
| AX-158314122 | 24 | 88.097 | KV453258.1 | 773416 | 24-scf00494 | 24 |
| AX-157714118 | 24 | 88.097 | KV453258.1 | 773529 | 24-scf00494 | 24 |

|              |    |        |            |         |             |    |
|--------------|----|--------|------------|---------|-------------|----|
| AX-158314123 | 24 | 88.097 | KV453258.1 | 777167  | 24-scf00494 | 24 |
| AX-158314125 | 24 | 88.097 | KV453258.1 | 777987  | 24-scf00494 | 24 |
| AX-158314126 | 24 | 88.097 | KV453258.1 | 778276  | 24-scf00494 | 24 |
| AX-158314127 | 24 | 88.097 | KV453258.1 | 779976  | 24-scf00494 | 24 |
| AX-158314128 | 24 | 88.097 | KV453258.1 | 784709  | 24-scf00494 | 24 |
| AX-157847581 | 24 | 88.097 | KV453258.1 | 821061  | 24-scf00494 | 24 |
| AX-157847582 | 24 | 88.097 | KV453258.1 | 838503  | 24-scf00494 | 24 |
| AX-158314132 | 24 | 88.097 | KV453258.1 | 843119  | 24-scf00494 | 24 |
| AX-157847584 | 24 | 88.097 | KV453258.1 | 849827  | 24-scf00494 | 24 |
| AX-158314136 | 24 | 88.097 | KV453258.1 | 853344  | 24-scf00494 | 24 |
| AX-158314138 | 24 | 88.097 | KV453258.1 | 856325  | 24-scf00494 | 24 |
| AX-157719967 | 24 | 88.097 | KV453258.1 | 872252  | 24-scf00494 | 24 |
| AX-158314150 | 24 | 88.097 | KV453258.1 | 907808  | 24-scf00494 | 24 |
| AX-158314152 | 24 | 88.097 | KV453258.1 | 914529  | 24-scf00494 | 24 |
| AX-158314154 | 24 | 88.097 | KV453258.1 | 916576  | 24-scf00494 | 24 |
| AX-157847585 | 24 | 88.097 | KV453258.1 | 917232  | 24-scf00494 | 24 |
| AX-157847586 | 24 | 88.097 | KV453258.1 | 920568  | 24-scf00494 | 24 |
| AX-158314155 | 24 | 88.097 | KV453258.1 | 923143  | 24-scf00494 | 24 |
| AX-158314156 | 24 | 88.097 | KV453258.1 | 923210  | 24-scf00494 | 24 |
| AX-157847587 | 24 | 88.097 | KV453258.1 | 925342  | 24-scf00494 | 24 |
| AX-157758549 | 24 | 88.097 | KV453258.1 | 937056  | 24-scf00494 | 24 |
| AX-158314162 | 24 | 88.097 | KV453258.1 | 941321  | 24-scf00494 | 24 |
| AX-158418080 | 24 | 88.097 | KV453258.1 | 943363  | 24-scf00494 | 24 |
| AX-158314164 | 24 | 88.097 | KV453258.1 | 949336  | 24-scf00494 | 24 |
| AX-158314166 | 24 | 88.097 | KV453258.1 | 972384  | 24-scf00494 | 24 |
| AX-158314167 | 24 | 88.097 | KV453258.1 | 974439  | 24-scf00494 | 24 |
| AX-158314168 | 24 | 88.097 | KV453258.1 | 975801  | 24-scf00494 | 24 |
| AX-157847588 | 24 | 88.097 | KV453258.1 | 976040  | 24-scf00494 | 24 |
| AX-157847589 | 24 | 88.097 | KV453258.1 | 979827  | 24-scf00494 | 24 |
| AX-158314169 | 24 | 88.097 | KV453258.1 | 980010  | 24-scf00494 | 24 |
| AX-157847590 | 24 | 88.097 | KV453258.1 | 980213  | 24-scf00494 | 24 |
| AX-158314170 | 24 | 88.097 | KV453258.1 | 981818  | 24-scf00494 | 24 |
| AX-158314171 | 24 | 88.097 | KV453258.1 | 982922  | 24-scf00494 | 24 |
| AX-158314172 | 24 | 88.097 | KV453258.1 | 984154  | 24-scf00494 | 24 |
| AX-157720373 | 24 | 88.097 | KV453258.1 | 986397  | 24-scf00494 | 24 |
| AX-158314174 | 24 | 88.097 | KV453258.1 | 986554  | 24-scf00494 | 24 |
| AX-158418084 | 24 | 88.097 | KV453258.1 | 988190  | 24-scf00494 | 24 |
| AX-158314175 | 24 | 88.097 | KV453258.1 | 989194  | 24-scf00494 | 24 |
| AX-158314176 | 24 | 88.097 | KV453258.1 | 989816  | 24-scf00494 | 24 |
| AX-158314177 | 24 | 88.097 | KV453258.1 | 990311  | 24-scf00494 | 24 |
| AX-158314178 | 24 | 88.097 | KV453258.1 | 990753  | 24-scf00494 | 24 |
| AX-158314179 | 24 | 88.097 | KV453258.1 | 992158  | 24-scf00494 | 24 |
| AX-158314180 | 24 | 88.097 | KV453258.1 | 992969  | 24-scf00494 | 24 |
| AX-158314181 | 24 | 88.097 | KV453258.1 | 994067  | 24-scf00494 | 24 |
| AX-157741993 | 24 | 88.097 | KV453258.1 | 995112  | 24-scf00494 | 24 |
| AX-158314183 | 24 | 88.097 | KV453258.1 | 998713  | 24-scf00494 | 24 |
| AX-157847591 | 24 | 88.097 | KV453258.1 | 1000116 | 24-scf00494 | 24 |
| AX-158314184 | 24 | 88.097 | KV453258.1 | 1002162 | 24-scf00494 | 24 |
| AX-157738850 | 24 | 88.097 | KV453258.1 | 1003127 | 24-scf00494 | 24 |
| AX-158314187 | 24 | 88.097 | KV453258.1 | 1006231 | 24-scf00494 | 24 |
| AX-157847592 | 24 | 88.097 | KV453258.1 | 1012075 | 24-scf00494 | 24 |

|              |    |        |            |         |             |    |
|--------------|----|--------|------------|---------|-------------|----|
| AX-158314188 | 24 | 88.097 | KV453258.1 | 1012731 | 24-scf00494 | 24 |
| AX-158314189 | 24 | 88.097 | KV453258.1 | 1013820 | 24-scf00494 | 24 |
| AX-158314190 | 24 | 88.097 | KV453258.1 | 1017536 | 24-scf00494 | 24 |
| AX-158314191 | 24 | 88.097 | KV453258.1 | 1019128 | 24-scf00494 | 24 |
| AX-158314194 | 24 | 88.097 | KV453258.1 | 1021597 | 24-scf00494 | 24 |
| AX-158418086 | 24 | 88.097 | KV453258.1 | 1024324 | 24-scf00494 | 24 |
| AX-158418089 | 24 | 88.097 | KV453258.1 | 1025074 | 24-scf00494 | 24 |
| AX-158418092 | 24 | 88.097 | KV453258.1 | 1025504 | 24-scf00494 | 24 |
| AX-158314196 | 24 | 88.097 | KV453258.1 | 1025574 | 24-scf00494 | 24 |
| AX-158314197 | 24 | 88.097 | KV453258.1 | 1034810 | 24-scf00494 | 24 |
| AX-158314198 | 24 | 88.097 | KV453258.1 | 1035983 | 24-scf00494 | 24 |
| AX-158314200 | 24 | 88.097 | KV453258.1 | 1037773 | 24-scf00494 | 24 |
| AX-158314203 | 24 | 88.097 | KV453258.1 | 1042308 | 24-scf00494 | 24 |
| AX-158314204 | 24 | 88.097 | KV453258.1 | 1044905 | 24-scf00494 | 24 |
| AX-158314208 | 24 | 88.097 | KV453258.1 | 1051420 | 24-scf00494 | 24 |
| AX-158314209 | 24 | 88.097 | KV453258.1 | 1053726 | 24-scf00494 | 24 |
| AX-158314210 | 24 | 88.097 | KV453258.1 | 1056643 | 24-scf00494 | 24 |
| AX-158314211 | 24 | 88.097 | KV453258.1 | 1061023 | 24-scf00494 | 24 |
| AX-158314214 | 24 | 88.097 | KV453258.1 | 1070728 | 24-scf00494 | 24 |
| AX-158314217 | 24 | 88.097 | KV453258.1 | 1075948 | 24-scf00494 | 24 |
| AX-158314218 | 24 | 88.097 | KV453258.1 | 1076193 | 24-scf00494 | 24 |
| AX-158314219 | 24 | 88.097 | KV453258.1 | 1080720 | 24-scf00494 | 24 |
| AX-158314220 | 24 | 88.097 | KV453258.1 | 1082077 | 24-scf00494 | 24 |
| AX-158314222 | 24 | 88.097 | KV453258.1 | 1086597 | 24-scf00494 | 24 |
| AX-158314225 | 24 | 88.097 | KV453258.1 | 1093698 | 24-scf00494 | 24 |
| AX-158314226 | 24 | 88.097 | KV453258.1 | 1099317 | 24-scf00494 | 24 |
| AX-158418095 | 24 | 88.097 | KV453258.1 | 1100396 | 24-scf00494 | 24 |
| AX-158314227 | 24 | 88.097 | KV453258.1 | 1102767 | 24-scf00494 | 24 |
| AX-158314229 | 24 | 88.097 | KV453258.1 | 1106901 | 24-scf00494 | 24 |
| AX-158314230 | 24 | 88.097 | KV453258.1 | 1109668 | 24-scf00494 | 24 |
| AX-158314231 | 24 | 88.097 | KV453258.1 | 1110353 | 24-scf00494 | 24 |
| AX-158314232 | 24 | 88.097 | KV453258.1 | 1112404 | 24-scf00494 | 24 |
| AX-157864028 | 24 | 88.097 | KV453258.1 | 1114433 | 24-scf00494 | 24 |
| AX-157745394 | 24 | 88.097 | KV453258.1 | 1116070 | 24-scf00494 | 24 |
| AX-157847594 | 24 | 88.097 | KV453258.1 | 1119726 | 24-scf00494 | 24 |
| AX-158314233 | 24 | 88.097 | KV453258.1 | 1126477 | 24-scf00494 | 24 |
| AX-158314234 | 24 | 88.097 | KV453258.1 | 1127513 | 24-scf00494 | 24 |
| AX-158314235 | 24 | 88.097 | KV453258.1 | 1129313 | 24-scf00494 | 24 |
| AX-158314237 | 24 | 88.097 | KV453258.1 | 1129759 | 24-scf00494 | 24 |
| AX-158314239 | 24 | 88.097 | KV453258.1 | 1131701 | 24-scf00494 | 24 |
| AX-157716773 | 24 | 88.097 | KV453258.1 | 1140971 | 24-scf00494 | 24 |
| AX-157805031 | 24 | 88.097 | KV453258.1 | 1142846 | 24-scf00494 | 24 |
| AX-158314243 | 24 | 88.097 | KV453258.1 | 1146005 | 24-scf00494 | 24 |
| AX-158314244 | 24 | 88.097 | KV453258.1 | 1148475 | 24-scf00494 | 24 |
| AX-157861349 | 24 | 88.097 | KV453258.1 | 1148765 | 24-scf00494 | 24 |
| AX-158314246 | 24 | 88.097 | KV453258.1 | 1151652 | 24-scf00494 | 24 |
| AX-158314248 | 24 | 88.097 | KV453258.1 | 1155767 | 24-scf00494 | 24 |
| AX-158418099 | 24 | 88.097 | KV453258.1 | 1169693 | 24-scf00494 | 24 |
| AX-158314254 | 24 | 88.097 | KV453258.1 | 1172944 | 24-scf00494 | 24 |
| AX-158314255 | 24 | 88.097 | KV453258.1 | 1175277 | 24-scf00494 | 24 |
| AX-158314256 | 24 | 88.097 | KV453258.1 | 1178244 | 24-scf00494 | 24 |

|              |    |        |             |         |             |    |
|--------------|----|--------|-------------|---------|-------------|----|
| AX-158314259 | 24 | 88.097 | KV453258.1  | 1181661 | 24-scf00494 | 24 |
| AX-158314266 | 24 | 88.097 | KV453258.1  | 1191387 | 24-scf00494 | 24 |
| AX-158314269 | 24 | 88.097 | KV453258.1  | 1198979 | 24-scf00494 | 24 |
| AX-158314277 | 24 | 88.097 | KV453258.1  | 1211996 | 24-scf00494 | 24 |
| AX-158314283 | 24 | 88.097 | KV453258.1  | 1229979 | 24-scf00494 | 24 |
| AX-158314284 | 24 | 88.097 | KV453258.1  | 1231386 | 24-scf00494 | 24 |
| AX-158314292 | 24 | 88.097 | KV453258.1  | 1251573 | 24-scf00494 | 24 |
| AX-158314293 | 24 | 88.097 | KV453258.1  | 1252164 | 24-scf00494 | 24 |
| AX-158314301 | 24 | 88.097 | KV453258.1  | 1264584 | 24-scf00494 | 24 |
| AX-158314302 | 24 | 88.097 | KV453258.1  | 1272253 | 24-scf00494 | 24 |
| AX-158314308 | 24 | 88.097 | KV453258.1  | 1294858 | 24-scf00494 | 24 |
| AX-158314316 | 24 | 88.097 | KV453258.1  | 1308575 | 24-scf00494 | 24 |
| AX-157888275 | 24 | 88.097 | KV453258.1  | 1335334 | 24-scf00494 | 24 |
| AX-158314329 | 24 | 88.097 | KV453258.1  | 1336473 | 24-scf00494 | 24 |
| AX-158314331 | 24 | 88.097 | KV453258.1  | 1338617 | 24-scf00494 | 24 |
| AX-158314332 | 24 | 88.097 | KV453258.1  | 1340306 | 24-scf00494 | 24 |
| AX-158314343 | 24 | 88.097 | KV453258.1  | 1356062 | 24-scf00494 | 24 |
| AX-158314346 | 24 | 88.097 | KV453258.1  | 1361275 | 24-scf00494 | 24 |
| AX-158314347 | 24 | 88.097 | KV453258.1  | 1361567 | 24-scf00494 | 24 |
| AX-158314352 | 24 | 88.097 | KV453258.1  | 1370081 | 24-scf00494 | 24 |
| AX-158314357 | 24 | 88.097 | KV453258.1  | 1374783 | 24-scf00494 | 24 |
| AX-158314370 | 24 | 88.097 | KV453258.1  | 1389640 | 24-scf00494 | 24 |
| AX-157688148 | 24 | 88.097 | 3ML01025628 | 3204    | scf01286_1  | UN |
| AX-157689430 | 24 | 88.097 | 3ML01029700 | 245     | scf05322_1  | UN |
| AX-158314278 | 24 | 88.098 | KV453258.1  | 1212867 | 24-scf00494 | 24 |
| AX-158314312 | 24 | 88.577 | KV453258.1  | 1305865 | 24-scf00494 | 24 |
| AX-158314445 | 25 | 0      | KV453089.1  | 25315   | 16-scf00496 | 16 |
| AX-158314456 | 25 | 0.978  | KV453089.1  | 62665   | 16-scf00496 | 16 |
| AX-158314446 | 25 | 1.006  | KV453089.1  | 29057   | 16-scf00496 | 16 |
| AX-158419894 | 25 | 1.006  | KV453089.1  | 34356   | 16-scf00496 | 16 |
| AX-158314449 | 25 | 1.006  | KV453089.1  | 39479   | 16-scf00496 | 16 |
| AX-158314450 | 25 | 1.006  | KV453089.1  | 40845   | 16-scf00496 | 16 |
| AX-158314452 | 25 | 1.006  | KV453089.1  | 44329   | 16-scf00496 | 16 |
| AX-157756485 | 25 | 1.006  | KV453089.1  | 63419   | 16-scf00496 | 16 |
| AX-158314458 | 25 | 1.006  | KV453089.1  | 66410   | 16-scf00496 | 16 |
| AX-158314460 | 25 | 1.006  | KV453089.1  | 72970   | 16-scf00496 | 16 |
| AX-157847604 | 25 | 1.006  | KV453089.1  | 79875   | 16-scf00496 | 16 |
| AX-158314463 | 25 | 1.006  | KV453089.1  | 82495   | 16-scf00496 | 16 |
| AX-158314465 | 25 | 1.006  | KV453089.1  | 83699   | 16-scf00496 | 16 |
| AX-157861358 | 25 | 1.006  | KV453089.1  | 89054   | 16-scf00496 | 16 |
| AX-157861359 | 25 | 1.006  | KV453089.1  | 93118   | 16-scf00496 | 16 |
| AX-158314470 | 25 | 1.006  | KV453089.1  | 96898   | 16-scf00496 | 16 |
| AX-158314476 | 25 | 1.006  | KV453089.1  | 130108  | 16-scf00496 | 16 |
| AX-158314477 | 25 | 1.006  | KV453089.1  | 130636  | 16-scf00496 | 16 |
| AX-158314479 | 25 | 1.006  | KV453089.1  | 136029  | 16-scf00496 | 16 |
| AX-158314483 | 25 | 1.006  | KV453089.1  | 140470  | 16-scf00496 | 16 |
| AX-158314485 | 25 | 1.006  | KV453089.1  | 146065  | 16-scf00496 | 16 |
| AX-158314489 | 25 | 1.006  | KV453089.1  | 151487  | 16-scf00496 | 16 |
| AX-158314491 | 25 | 1.006  | KV453089.1  | 155104  | 16-scf00496 | 16 |
| AX-158314496 | 25 | 1.006  | KV453089.1  | 170213  | 16-scf00496 | 16 |
| AX-157861360 | 25 | 1.006  | KV453089.1  | 172500  | 16-scf00496 | 16 |

|              |    |       |            |        |             |    |
|--------------|----|-------|------------|--------|-------------|----|
| AX-158314500 | 25 | 1.006 | KV453089.1 | 178773 | 16-scf00496 | 16 |
| AX-157745005 | 25 | 1.006 | KV453089.1 | 179201 | 16-scf00496 | 16 |
| AX-157847610 | 25 | 1.006 | KV453089.1 | 181073 | 16-scf00496 | 16 |
| AX-157847613 | 25 | 1.006 | KV453089.1 | 215700 | 16-scf00496 | 16 |
| AX-158314508 | 25 | 1.006 | KV453089.1 | 218762 | 16-scf00496 | 16 |
| AX-158314517 | 25 | 1.006 | KV453089.1 | 235364 | 16-scf00496 | 16 |
| AX-158314550 | 25 | 1.006 | KV453089.1 | 303301 | 16-scf00496 | 16 |
| AX-157847624 | 25 | 1.006 | KV453089.1 | 305716 | 16-scf00496 | 16 |
| AX-158314561 | 25 | 1.006 | KV453089.1 | 324697 | 16-scf00496 | 16 |
| AX-158314571 | 25 | 1.006 | KV453089.1 | 344857 | 16-scf00496 | 16 |
| AX-158314688 | 25 | 1.006 | KV453089.1 | 603782 | 16-scf00496 | 16 |
| AX-158314728 | 25 | 1.006 | KV453089.1 | 691133 | 16-scf00496 | 16 |
| AX-158314532 | 25 | 1.115 | KV453089.1 | 278505 | 16-scf00496 | 16 |
| AX-157775452 | 25 | 1.115 | KV453089.1 | 283202 | 16-scf00496 | 16 |
| AX-158314536 | 25 | 1.115 | KV453089.1 | 285136 | 16-scf00496 | 16 |
| AX-158314537 | 25 | 1.115 | KV453089.1 | 286171 | 16-scf00496 | 16 |
| AX-158314575 | 25 | 1.115 | KV453089.1 | 348569 | 16-scf00496 | 16 |
| AX-158314544 | 25 | 1.224 | KV453089.1 | 294555 | 16-scf00496 | 16 |
| AX-158314545 | 25 | 1.224 | KV453089.1 | 294943 | 16-scf00496 | 16 |
| AX-157847623 | 25 | 1.224 | KV453089.1 | 297421 | 16-scf00496 | 16 |
| AX-158314555 | 25 | 1.333 | KV453089.1 | 310214 | 16-scf00496 | 16 |
| AX-158314559 | 25 | 1.333 | KV453089.1 | 317577 | 16-scf00496 | 16 |
| AX-158314482 | 25 | 1.353 | KV453089.1 | 139597 | 16-scf00496 | 16 |
| AX-158314528 | 25 | 1.353 | KV453089.1 | 264103 | 16-scf00496 | 16 |
| AX-158314538 | 25 | 1.353 | KV453089.1 | 286445 | 16-scf00496 | 16 |
| AX-157861361 | 25 | 1.353 | KV453089.1 | 298307 | 16-scf00496 | 16 |
| AX-157847626 | 25 | 1.353 | KV453089.1 | 319838 | 16-scf00496 | 16 |
| AX-158314569 | 25 | 1.353 | KV453089.1 | 340426 | 16-scf00496 | 16 |
| AX-158314619 | 25 | 1.353 | KV453089.1 | 460180 | 16-scf00496 | 16 |
| AX-158314621 | 25 | 1.353 | KV453089.1 | 464531 | 16-scf00496 | 16 |
| AX-157847641 | 25 | 1.353 | KV453089.1 | 523444 | 16-scf00496 | 16 |
| AX-158314670 | 25 | 1.353 | KV453089.1 | 559408 | 16-scf00496 | 16 |
| AX-158314673 | 25 | 1.353 | KV453089.1 | 567450 | 16-scf00496 | 16 |
| AX-157847663 | 25 | 1.353 | KV453089.1 | 741981 | 16-scf00496 | 16 |
| AX-158314563 | 25 | 1.443 | KV453089.1 | 326227 | 16-scf00496 | 16 |
| AX-158314564 | 25 | 1.443 | KV453089.1 | 329077 | 16-scf00496 | 16 |
| AX-158314566 | 25 | 1.443 | KV453089.1 | 333471 | 16-scf00496 | 16 |
| AX-158314573 | 25 | 1.443 | KV453089.1 | 347547 | 16-scf00496 | 16 |
| AX-158314576 | 25 | 1.443 | KV453089.1 | 349307 | 16-scf00496 | 16 |
| AX-157680769 | 25 | 1.443 | KV453089.1 | 409132 | 16-scf00496 | 16 |
| AX-157684585 | 25 | 1.661 | KV453089.1 | 394329 | 16-scf00496 | 16 |
| AX-157684583 | 25 | 1.661 | KV453089.1 | 395271 | 16-scf00496 | 16 |
| AX-157684580 | 25 | 1.661 | KV453089.1 | 400274 | 16-scf00496 | 16 |
| AX-157681173 | 25 | 1.661 | KV453089.1 | 411469 | 16-scf00496 | 16 |
| AX-157684574 | 25 | 1.661 | KV453089.1 | 419579 | 16-scf00496 | 16 |
| AX-157681386 | 25 | 1.661 | KV453089.1 | 421477 | 16-scf00496 | 16 |
| AX-157684573 | 25 | 1.661 | KV453089.1 | 423496 | 16-scf00496 | 16 |
| AX-157684571 | 25 | 1.661 | KV453089.1 | 427450 | 16-scf00496 | 16 |
| AX-157684570 | 25 | 1.661 | KV453089.1 | 428509 | 16-scf00496 | 16 |
| AX-158314602 | 25 | 1.661 | KV453089.1 | 433279 | 16-scf00496 | 16 |
| AX-158314603 | 25 | 1.661 | KV453089.1 | 434316 | 16-scf00496 | 16 |

|              |    |       |             |        |             |    |
|--------------|----|-------|-------------|--------|-------------|----|
| AX-157847628 | 25 | 1.661 | KV453089.1  | 434994 | 16-scf00496 | 16 |
| AX-158314604 | 25 | 1.661 | KV453089.1  | 438969 | 16-scf00496 | 16 |
| AX-158314605 | 25 | 1.661 | KV453089.1  | 440351 | 16-scf00496 | 16 |
| AX-158314607 | 25 | 1.661 | KV453089.1  | 444331 | 16-scf00496 | 16 |
| AX-158314609 | 25 | 1.661 | KV453089.1  | 444867 | 16-scf00496 | 16 |
| AX-158314611 | 25 | 1.661 | KV453089.1  | 450010 | 16-scf00496 | 16 |
| AX-158314613 | 25 | 1.661 | KV453089.1  | 452524 | 16-scf00496 | 16 |
| AX-157751262 | 25 | 1.661 | KV453089.1  | 456733 | 16-scf00496 | 16 |
| AX-158314617 | 25 | 1.661 | KV453089.1  | 457439 | 16-scf00496 | 16 |
| AX-158314678 | 25 | 1.661 | KV453089.1  | 579767 | 16-scf00496 | 16 |
| AX-158314696 | 25 | 1.661 | KV453089.1  | 620726 | 16-scf00496 | 16 |
| AX-157847653 | 25 | 1.661 | KV453089.1  | 637355 | 16-scf00496 | 16 |
| AX-158418125 | 25 | 1.661 | KV453089.1  | 844249 | 16-scf00496 | 16 |
| AX-158314829 | 25 | 1.661 | KV453089.1  | 850705 | 16-scf00496 | 16 |
| AX-157742367 | 25 | 1.77  | KV453089.1  | 462500 | 16-scf00496 | 16 |
| AX-157847632 | 25 | 1.77  | KV453089.1  | 474110 | 16-scf00496 | 16 |
| AX-157745364 | 25 | 1.77  | KV453089.1  | 481195 | 16-scf00496 | 16 |
| AX-157847634 | 25 | 1.77  | KV453089.1  | 481707 | 16-scf00496 | 16 |
| AX-157847635 | 25 | 1.77  | KV453089.1  | 486010 | 16-scf00496 | 16 |
| AX-158314631 | 25 | 1.77  | KV453089.1  | 487032 | 16-scf00496 | 16 |
| AX-157847637 | 25 | 1.77  | KV453089.1  | 491406 | 16-scf00496 | 16 |
| AX-158314634 | 25 | 1.77  | KV453089.1  | 492063 | 16-scf00496 | 16 |
| AX-158314635 | 25 | 1.77  | KV453089.1  | 492733 | 16-scf00496 | 16 |
| AX-158314640 | 25 | 1.77  | KV453089.1  | 499495 | 16-scf00496 | 16 |
| AX-157888282 | 25 | 1.77  | KV453089.1  | 533177 | 16-scf00496 | 16 |
| AX-157689761 | 25 | 1.77  | 3ML01032011 | 627    | scf07628_1  | UN |
| AX-158314646 | 25 | 1.989 | KV453089.1  | 516734 | 16-scf00496 | 16 |
| AX-157754015 | 25 | 1.989 | KV453089.1  | 517702 | 16-scf00496 | 16 |
| AX-158314648 | 25 | 1.989 | KV453089.1  | 518515 | 16-scf00496 | 16 |
| AX-157847640 | 25 | 1.989 | KV453089.1  | 521084 | 16-scf00496 | 16 |
| AX-158314651 | 25 | 1.989 | KV453089.1  | 522405 | 16-scf00496 | 16 |
| AX-158314658 | 25 | 1.989 | KV453089.1  | 535659 | 16-scf00496 | 16 |
| AX-157847642 | 25 | 1.989 | KV453089.1  | 535931 | 16-scf00496 | 16 |
| AX-157712081 | 25 | 1.989 | 3ML01033733 | 227    | scf09396_1  | UN |
| AX-158314516 | 25 | 2.039 | KV453089.1  | 227758 | 16-scf00496 | 16 |
| AX-158314520 | 25 | 2.039 | KV453089.1  | 245366 | 16-scf00496 | 16 |
| AX-158314524 | 25 | 2.039 | KV453089.1  | 258922 | 16-scf00496 | 16 |
| AX-158314525 | 25 | 2.039 | KV453089.1  | 260258 | 16-scf00496 | 16 |
| AX-158314660 | 25 | 2.039 | KV453089.1  | 538024 | 16-scf00496 | 16 |
| AX-158314677 | 25 | 2.039 | KV453089.1  | 578717 | 16-scf00496 | 16 |
| AX-157847657 | 25 | 2.039 | KV453089.1  | 651487 | 16-scf00496 | 16 |
| AX-158314754 | 25 | 2.039 | KV453089.1  | 739377 | 16-scf00496 | 16 |
| AX-158314441 | 25 | 2.098 | KV453089.1  | 7827   | 16-scf00496 | 16 |
| AX-158314663 | 25 | 2.098 | KV453089.1  | 546173 | 16-scf00496 | 16 |
| AX-158314665 | 25 | 2.098 | KV453089.1  | 548591 | 16-scf00496 | 16 |
| AX-158314666 | 25 | 2.098 | KV453089.1  | 549146 | 16-scf00496 | 16 |
| AX-158314667 | 25 | 2.098 | KV453089.1  | 556609 | 16-scf00496 | 16 |
| AX-157847644 | 25 | 2.098 | KV453089.1  | 562610 | 16-scf00496 | 16 |
| AX-157847646 | 25 | 2.098 | KV453089.1  | 564862 | 16-scf00496 | 16 |
| AX-157716680 | 25 | 2.098 | KV453089.1  | 572324 | 16-scf00496 | 16 |
| AX-157847648 | 25 | 2.098 | KV453089.1  | 572920 | 16-scf00496 | 16 |

|              |    |       |            |        |             |    |
|--------------|----|-------|------------|--------|-------------|----|
| AX-158314675 | 25 | 2.098 | KV453089.1 | 574608 | 16-scf00496 | 16 |
| AX-158314676 | 25 | 2.098 | KV453089.1 | 577702 | 16-scf00496 | 16 |
| AX-158314684 | 25 | 2.098 | KV453089.1 | 596618 | 16-scf00496 | 16 |
| AX-157712144 | 25 | 2.098 | KV453089.1 | 602681 | 16-scf00496 | 16 |
| AX-157847649 | 25 | 2.098 | KV453089.1 | 603856 | 16-scf00496 | 16 |
| AX-157719863 | 25 | 2.098 | KV453089.1 | 633113 | 16-scf00496 | 16 |
| AX-158314701 | 25 | 2.098 | KV453089.1 | 634877 | 16-scf00496 | 16 |
| AX-157714664 | 25 | 2.098 | KV453089.1 | 741831 | 16-scf00496 | 16 |
| AX-158314778 | 25 | 2.098 | KV453089.1 | 778442 | 16-scf00496 | 16 |
| AX-157710788 | 25 | 2.15  | KV453089.1 | 607687 | 16-scf00496 | 16 |
| AX-157847614 | 25 | 2.207 | KV453089.1 | 235994 | 16-scf00496 | 16 |
| AX-158314519 | 25 | 2.207 | KV453089.1 | 240717 | 16-scf00496 | 16 |
| AX-157716382 | 25 | 2.207 | KV453089.1 | 244662 | 16-scf00496 | 16 |
| AX-158314526 | 25 | 2.207 | KV453089.1 | 262253 | 16-scf00496 | 16 |
| AX-158314527 | 25 | 2.207 | KV453089.1 | 263418 | 16-scf00496 | 16 |
| AX-158314535 | 25 | 2.207 | KV453089.1 | 284693 | 16-scf00496 | 16 |
| AX-158314540 | 25 | 2.207 | KV453089.1 | 290524 | 16-scf00496 | 16 |
| AX-158314548 | 25 | 2.207 | KV453089.1 | 300340 | 16-scf00496 | 16 |
| AX-158314549 | 25 | 2.207 | KV453089.1 | 301126 | 16-scf00496 | 16 |
| AX-158314554 | 25 | 2.207 | KV453089.1 | 309455 | 16-scf00496 | 16 |
| AX-158314560 | 25 | 2.207 | KV453089.1 | 319268 | 16-scf00496 | 16 |
| AX-158314572 | 25 | 2.207 | KV453089.1 | 346664 | 16-scf00496 | 16 |
| AX-158314583 | 25 | 2.207 | KV453089.1 | 361855 | 16-scf00496 | 16 |
| AX-158314595 | 25 | 2.207 | KV453089.1 | 384752 | 16-scf00496 | 16 |
| AX-158314597 | 25 | 2.207 | KV453089.1 | 387247 | 16-scf00496 | 16 |
| AX-157684572 | 25 | 2.207 | KV453089.1 | 426079 | 16-scf00496 | 16 |
| AX-158314612 | 25 | 2.207 | KV453089.1 | 451027 | 16-scf00496 | 16 |
| AX-158314626 | 25 | 2.207 | KV453089.1 | 476019 | 16-scf00496 | 16 |
| AX-157847636 | 25 | 2.207 | KV453089.1 | 487432 | 16-scf00496 | 16 |
| AX-158314639 | 25 | 2.207 | KV453089.1 | 495943 | 16-scf00496 | 16 |
| AX-157746740 | 25 | 2.207 | KV453089.1 | 508564 | 16-scf00496 | 16 |
| AX-158314644 | 25 | 2.207 | KV453089.1 | 515712 | 16-scf00496 | 16 |
| AX-158314656 | 25 | 2.207 | KV453089.1 | 534092 | 16-scf00496 | 16 |
| AX-158314659 | 25 | 2.207 | KV453089.1 | 536516 | 16-scf00496 | 16 |
| AX-157775613 | 25 | 2.207 | KV453089.1 | 563218 | 16-scf00496 | 16 |
| AX-157861364 | 25 | 2.207 | KV453089.1 | 594172 | 16-scf00496 | 16 |
| AX-158314687 | 25 | 2.207 | KV453089.1 | 603222 | 16-scf00496 | 16 |
| AX-158314692 | 25 | 2.207 | KV453089.1 | 615473 | 16-scf00496 | 16 |
| AX-157770694 | 25 | 2.207 | KV453089.1 | 618153 | 16-scf00496 | 16 |
| AX-157708698 | 25 | 2.207 | KV453089.1 | 618571 | 16-scf00496 | 16 |
| AX-158314700 | 25 | 2.207 | KV453089.1 | 632022 | 16-scf00496 | 16 |
| AX-157718166 | 25 | 2.207 | KV453089.1 | 633879 | 16-scf00496 | 16 |
| AX-157847652 | 25 | 2.207 | KV453089.1 | 636964 | 16-scf00496 | 16 |
| AX-158314704 | 25 | 2.207 | KV453089.1 | 644932 | 16-scf00496 | 16 |
| AX-157847655 | 25 | 2.207 | KV453089.1 | 650237 | 16-scf00496 | 16 |
| AX-158314705 | 25 | 2.207 | KV453089.1 | 650503 | 16-scf00496 | 16 |
| AX-158314706 | 25 | 2.207 | KV453089.1 | 652761 | 16-scf00496 | 16 |
| AX-158314708 | 25 | 2.207 | KV453089.1 | 657026 | 16-scf00496 | 16 |
| AX-158314710 | 25 | 2.207 | KV453089.1 | 660046 | 16-scf00496 | 16 |
| AX-157847659 | 25 | 2.207 | KV453089.1 | 660465 | 16-scf00496 | 16 |
| AX-158314711 | 25 | 2.207 | KV453089.1 | 661011 | 16-scf00496 | 16 |

|              |    |       |             |        |                |    |
|--------------|----|-------|-------------|--------|----------------|----|
| AX-158314712 | 25 | 2.207 | KV453089.1  | 661489 | 16-scf00496    | 16 |
| AX-158314714 | 25 | 2.207 | KV453089.1  | 665389 | 16-scf00496    | 16 |
| AX-158314715 | 25 | 2.207 | KV453089.1  | 666820 | 16-scf00496    | 16 |
| AX-158314718 | 25 | 2.207 | KV453089.1  | 673051 | 16-scf00496    | 16 |
| AX-158314721 | 25 | 2.207 | KV453089.1  | 677958 | 16-scf00496    | 16 |
| AX-158314722 | 25 | 2.207 | KV453089.1  | 681379 | 16-scf00496    | 16 |
| AX-158314723 | 25 | 2.207 | KV453089.1  | 683463 | 16-scf00496    | 16 |
| AX-157709630 | 25 | 2.207 | KV453089.1  | 689674 | 16-scf00496    | 16 |
| AX-158314727 | 25 | 2.207 | KV453089.1  | 690549 | 16-scf00496    | 16 |
| AX-157847664 | 25 | 2.207 | KV453089.1  | 745203 | 16-scf00496    | 16 |
| AX-158314785 | 25 | 2.207 | KV453089.1  | 788889 | 16-scf00496    | 16 |
| AX-157847671 | 25 | 2.207 | KV453089.1  | 815074 | 16-scf00496    | 16 |
| AX-158314822 | 25 | 2.207 | KV453089.1  | 840382 | 16-scf00496    | 16 |
| AX-158314824 | 25 | 2.207 | KV453089.1  | 843128 | 16-scf00496    | 16 |
| AX-157706229 | 25 | 2.207 | 3ML01031862 | 672    | scf07483_1     | UN |
| AX-157707205 | 25 | 2.207 | 3ML01033733 | 276    | scf09396_1     | UN |
| AX-158314729 | 25 | 2.26  | KV453089.1  | 692595 | 16-scf00496    | 16 |
| AX-157716038 | 25 | 2.316 | KV453089.1  | 704286 | 16-scf00496    | 16 |
| AX-157758330 | 25 | 2.316 | KV453089.1  | 706424 | 16-scf00496    | 16 |
| AX-158314735 | 25 | 2.316 | KV453089.1  | 707481 | 16-scf00496    | 16 |
| AX-158314736 | 25 | 2.316 | KV453089.1  | 707655 | 16-scf00496    | 16 |
| AX-158314740 | 25 | 2.316 | KV453089.1  | 716951 | 16-scf00496    | 16 |
| AX-157847661 | 25 | 2.316 | KV453089.1  | 723257 | 16-scf00496    | 16 |
| AX-158314742 | 25 | 2.316 | KV453089.1  | 724656 | 16-scf00496    | 16 |
| AX-158314743 | 25 | 2.316 | KV453089.1  | 725250 | 16-scf00496    | 16 |
| AX-158314744 | 25 | 2.316 | KV453089.1  | 726052 | 16-scf00496    | 16 |
| AX-158314751 | 25 | 2.316 | KV453089.1  | 737504 | 16-scf00496    | 16 |
| AX-158314752 | 25 | 2.316 | KV453089.1  | 737823 | 16-scf00496    | 16 |
| AX-158314753 | 25 | 2.316 | KV453089.1  | 738090 | 16-scf00496    | 16 |
| AX-158314755 | 25 | 2.316 | KV453089.1  | 739733 | 16-scf00496    | 16 |
| AX-158314763 | 25 | 2.316 | KV453089.1  | 758340 | 16-scf00496    | 16 |
| AX-158314772 | 25 | 2.316 | KV453089.1  | 772773 | 16-scf00496    | 16 |
| AX-158314777 | 25 | 2.316 | KV453089.1  | 777745 | 16-scf00496    | 16 |
| AX-158314833 | 25 | 2.316 | KV453089.1  | 856236 | 16-scf00496    | 16 |
| AX-157881233 | 25 | 2.316 | KV453089.1  | 861760 | 16-scf00496    | 16 |
| AX-157698712 | 25 | 2.316 | FI859812.1  | 440    | IORI212 Ictalu | UN |
| AX-158314780 | 25 | 2.35  | KV453089.1  | 780519 | 16-scf00496    | 16 |
| AX-157873555 | 25 | 2.426 | KV453089.1  | 138051 | 16-scf00496    | 16 |
| AX-158314518 | 25 | 2.426 | KV453089.1  | 239453 | 16-scf00496    | 16 |
| AX-157867791 | 25 | 2.426 | KV453089.1  | 296519 | 16-scf00496    | 16 |
| AX-158314546 | 25 | 2.426 | KV453089.1  | 296984 | 16-scf00496    | 16 |
| AX-158314598 | 25 | 2.426 | KV453089.1  | 388559 | 16-scf00496    | 16 |
| AX-158314724 | 25 | 2.426 | KV453089.1  | 686257 | 16-scf00496    | 16 |
| AX-158314734 | 25 | 2.426 | KV453089.1  | 700545 | 16-scf00496    | 16 |
| AX-158314782 | 25 | 2.426 | KV453089.1  | 783782 | 16-scf00496    | 16 |
| AX-158314784 | 25 | 2.426 | KV453089.1  | 786375 | 16-scf00496    | 16 |
| AX-157749668 | 25 | 2.426 | KV453089.1  | 792489 | 16-scf00496    | 16 |
| AX-158314788 | 25 | 2.426 | KV453089.1  | 795609 | 16-scf00496    | 16 |
| AX-158314789 | 25 | 2.426 | KV453089.1  | 796493 | 16-scf00496    | 16 |
| AX-158314790 | 25 | 2.426 | KV453089.1  | 796918 | 16-scf00496    | 16 |
| AX-158314791 | 25 | 2.426 | KV453089.1  | 798746 | 16-scf00496    | 16 |



|              |    |       |             |        |             |    |
|--------------|----|-------|-------------|--------|-------------|----|
| AX-158418124 | 25 | 2.426 | KV453089.1  | 804103 | 16-scf00496 | 16 |
| AX-158314793 | 25 | 2.426 | KV453089.1  | 807449 | 16-scf00496 | 16 |
| AX-158314794 | 25 | 2.426 | KV453089.1  | 807951 | 16-scf00496 | 16 |
| AX-158387806 | 25 | 2.426 | KV453089.1  | 810031 | 16-scf00496 | 16 |
| AX-157861369 | 25 | 2.426 | KV453089.1  | 810860 | 16-scf00496 | 16 |
| AX-157696160 | 25 | 2.426 | KV453089.1  | 812089 | 16-scf00496 | 16 |
| AX-158314802 | 25 | 2.426 | KV453089.1  | 813555 | 16-scf00496 | 16 |
| AX-157847670 | 25 | 2.426 | KV453089.1  | 814845 | 16-scf00496 | 16 |
| AX-158314804 | 25 | 2.426 | KV453089.1  | 818227 | 16-scf00496 | 16 |
| AX-158314807 | 25 | 2.426 | KV453089.1  | 821118 | 16-scf00496 | 16 |
| AX-158314808 | 25 | 2.426 | KV453089.1  | 823543 | 16-scf00496 | 16 |
| AX-158314809 | 25 | 2.426 | KV453089.1  | 824401 | 16-scf00496 | 16 |
| AX-157847672 | 25 | 2.426 | KV453089.1  | 825364 | 16-scf00496 | 16 |
| AX-158314810 | 25 | 2.426 | KV453089.1  | 826162 | 16-scf00496 | 16 |
| AX-157873558 | 25 | 2.426 | KV453089.1  | 827194 | 16-scf00496 | 16 |
| AX-157739463 | 25 | 2.426 | KV453089.1  | 828968 | 16-scf00496 | 16 |
| AX-158314815 | 25 | 2.426 | KV453089.1  | 829485 | 16-scf00496 | 16 |
| AX-157861370 | 25 | 2.426 | KV453089.1  | 831060 | 16-scf00496 | 16 |
| AX-158314821 | 25 | 2.426 | KV453089.1  | 836338 | 16-scf00496 | 16 |
| AX-158314823 | 25 | 2.426 | KV453089.1  | 840855 | 16-scf00496 | 16 |
| AX-157707136 | 25 | 2.426 | 3ML01033575 | 431    | scf09231_1  | UN |
| AX-158314832 | 25 | 2.753 | KV453089.1  | 855692 | 16-scf00496 | 16 |
| AX-158314837 | 25 | 2.753 | KV453089.1  | 860989 | 16-scf00496 | 16 |
| AX-158314844 | 25 | 3.082 | KV453089.1  | 873991 | 16-scf00496 | 16 |
| AX-158314846 | 25 | 3.082 | KV453089.1  | 876506 | 16-scf00496 | 16 |
| AX-157847674 | 25 | 3.117 | KV453089.1  | 880209 | 16-scf00496 | 16 |
| AX-157888287 | 25 | 3.153 | KV453089.1  | 884948 | 16-scf00496 | 16 |
| AX-158314856 | 25 | 3.192 | KV453089.1  | 888798 | 16-scf00496 | 16 |
| AX-158314859 | 25 | 3.206 | KV453089.1  | 893669 | 16-scf00496 | 16 |
| AX-158314828 | 25 | 3.318 | KV453089.1  | 850312 | 16-scf00496 | 16 |
| AX-158314830 | 25 | 3.318 | KV453089.1  | 851125 | 16-scf00496 | 16 |
| AX-158314838 | 25 | 3.318 | KV453089.1  | 862264 | 16-scf00496 | 16 |
| AX-158314840 | 25 | 3.318 | KV453089.1  | 863857 | 16-scf00496 | 16 |
| AX-158314850 | 25 | 3.318 | KV453089.1  | 882635 | 16-scf00496 | 16 |
| AX-158314860 | 25 | 3.318 | KV453089.1  | 894376 | 16-scf00496 | 16 |
| AX-157715075 | 25 | 3.318 | KV453089.1  | 900955 | 16-scf00496 | 16 |
| AX-158314864 | 25 | 3.318 | KV453089.1  | 902183 | 16-scf00496 | 16 |
| AX-158314865 | 25 | 3.318 | KV453089.1  | 904593 | 16-scf00496 | 16 |
| AX-158314871 | 25 | 3.318 | KV453089.1  | 916362 | 16-scf00496 | 16 |
| AX-157684578 | 25 | 3.574 | KV453089.1  | 405602 | 16-scf00496 | 16 |
| AX-158314664 | 25 | 3.574 | KV453089.1  | 547330 | 16-scf00496 | 16 |
| AX-158314726 | 25 | 3.574 | KV453089.1  | 689372 | 16-scf00496 | 16 |
| AX-158314749 | 25 | 3.574 | KV453089.1  | 730089 | 16-scf00496 | 16 |
| AX-158314841 | 25 | 3.574 | KV453089.1  | 864499 | 16-scf00496 | 16 |
| AX-158314853 | 25 | 3.574 | KV453089.1  | 885018 | 16-scf00496 | 16 |
| AX-157888288 | 25 | 3.574 | KV453089.1  | 908377 | 16-scf00496 | 16 |
| AX-157847681 | 25 | 3.64  | KV453089.1  | 917633 | 16-scf00496 | 16 |
| AX-158314872 | 25 | 3.641 | KV453089.1  | 918236 | 16-scf00496 | 16 |
| AX-157748530 | 25 | 3.746 | KV453089.1  | 911462 | 16-scf00496 | 16 |
| AX-157713896 | 25 | 3.746 | KV453089.1  | 920972 | 16-scf00496 | 16 |
| AX-158314875 | 25 | 3.961 | KV453089.1  | 928414 | 16-scf00496 | 16 |

|              |    |       |            |         |             |    |
|--------------|----|-------|------------|---------|-------------|----|
| AX-158314876 | 25 | 3.961 | KV453089.1 | 929050  | 16-scf00496 | 16 |
| AX-158381414 | 25 | 3.961 | KV453089.1 | 929181  | 16-scf00496 | 16 |
| AX-157715340 | 25 | 3.961 | KV453089.1 | 929944  | 16-scf00496 | 16 |
| AX-158314877 | 25 | 3.961 | KV453089.1 | 930504  | 16-scf00496 | 16 |
| AX-158314879 | 25 | 4.222 | KV453089.1 | 935260  | 16-scf00496 | 16 |
| AX-158314885 | 25 | 4.222 | KV453089.1 | 948772  | 16-scf00496 | 16 |
| AX-158314881 | 25 | 4.223 | KV453089.1 | 937317  | 16-scf00496 | 16 |
| AX-158314882 | 25 | 4.223 | KV453089.1 | 937775  | 16-scf00496 | 16 |
| AX-157716710 | 25 | 4.223 | KV453089.1 | 940578  | 16-scf00496 | 16 |
| AX-158314884 | 25 | 4.223 | KV453089.1 | 942172  | 16-scf00496 | 16 |
| AX-157710411 | 25 | 4.223 | KV453089.1 | 942456  | 16-scf00496 | 16 |
| AX-157881234 | 25 | 4.223 | KV453089.1 | 948717  | 16-scf00496 | 16 |
| AX-158314891 | 25 | 4.615 | KV453089.1 | 958934  | 16-scf00496 | 16 |
| AX-158314892 | 25 | 4.615 | KV453089.1 | 959994  | 16-scf00496 | 16 |
| AX-158314893 | 25 | 4.615 | KV453089.1 | 961780  | 16-scf00496 | 16 |
| AX-158314895 | 25 | 4.615 | KV453089.1 | 963636  | 16-scf00496 | 16 |
| AX-158314896 | 25 | 4.615 | KV453089.1 | 968072  | 16-scf00496 | 16 |
| AX-158314897 | 25 | 4.616 | KV453089.1 | 971790  | 16-scf00496 | 16 |
| AX-158314898 | 25 | 4.942 | KV453089.1 | 974678  | 16-scf00496 | 16 |
| AX-158314907 | 25 | 4.942 | KV453089.1 | 992014  | 16-scf00496 | 16 |
| AX-158314900 | 25 | 4.943 | KV453089.1 | 980575  | 16-scf00496 | 16 |
| AX-158314901 | 25 | 4.944 | KV453089.1 | 981285  | 16-scf00496 | 16 |
| AX-158314903 | 25 | 4.944 | KV453089.1 | 984513  | 16-scf00496 | 16 |
| AX-158314904 | 25 | 5.123 | KV453089.1 | 985538  | 16-scf00496 | 16 |
| AX-158314905 | 25 | 5.271 | KV453089.1 | 986389  | 16-scf00496 | 16 |
| AX-157751458 | 25 | 5.271 | KV453089.1 | 987115  | 16-scf00496 | 16 |
| AX-157746080 | 25 | 5.271 | KV453089.1 | 990162  | 16-scf00496 | 16 |
| AX-158314906 | 25 | 5.271 | KV453089.1 | 991382  | 16-scf00496 | 16 |
| AX-157716526 | 25 | 5.271 | KV453089.1 | 993361  | 16-scf00496 | 16 |
| AX-158314909 | 25 | 5.271 | KV453089.1 | 994180  | 16-scf00496 | 16 |
| AX-158314910 | 25 | 5.271 | KV453089.1 | 995002  | 16-scf00496 | 16 |
| AX-158314912 | 25 | 5.271 | KV453089.1 | 996101  | 16-scf00496 | 16 |
| AX-158314914 | 25 | 5.271 | KV453089.1 | 998602  | 16-scf00496 | 16 |
| AX-158314916 | 25 | 5.271 | KV453089.1 | 1001226 | 16-scf00496 | 16 |
| AX-157861372 | 25 | 5.271 | KV453089.1 | 1004599 | 16-scf00496 | 16 |
| AX-157861373 | 25 | 5.271 | KV453089.1 | 1004779 | 16-scf00496 | 16 |
| AX-157699299 | 25 | 5.271 | KV453089.1 | 1005779 | 16-scf00496 | 16 |
| AX-158314918 | 25 | 5.271 | KV453089.1 | 1007654 | 16-scf00496 | 16 |
| AX-157847685 | 25 | 5.271 | KV453089.1 | 1008702 | 16-scf00496 | 16 |
| AX-158314920 | 25 | 5.271 | KV453089.1 | 1012742 | 16-scf00496 | 16 |
| AX-157743743 | 25 | 5.271 | KV453089.1 | 1017609 | 16-scf00496 | 16 |
| AX-158314921 | 25 | 5.271 | KV453089.1 | 1020739 | 16-scf00496 | 16 |
| AX-157861374 | 25 | 5.271 | KV453089.1 | 1020859 | 16-scf00496 | 16 |
| AX-158314925 | 25 | 5.271 | KV453089.1 | 1024739 | 16-scf00496 | 16 |
| AX-158314926 | 25 | 5.271 | KV453089.1 | 1026159 | 16-scf00496 | 16 |
| AX-158314927 | 25 | 5.271 | KV453089.1 | 1026803 | 16-scf00496 | 16 |
| AX-157748241 | 25 | 5.271 | KV453089.1 | 1031375 | 16-scf00496 | 16 |
| AX-157847686 | 25 | 5.271 | KV453089.1 | 1032115 | 16-scf00496 | 16 |
| AX-158314934 | 25 | 5.271 | KV453089.1 | 1033451 | 16-scf00496 | 16 |
| AX-158314935 | 25 | 5.271 | KV453089.1 | 1037550 | 16-scf00496 | 16 |
| AX-158314936 | 25 | 5.271 | KV453089.1 | 1037864 | 16-scf00496 | 16 |

|              |    |       |            |         |             |    |
|--------------|----|-------|------------|---------|-------------|----|
| AX-158314929 | 25 | 5.491 | KV453089.1 | 1029832 | 16-scf00496 | 16 |
| AX-157888290 | 25 | 5.706 | KV453089.1 | 1045888 | 16-scf00496 | 16 |
| AX-158314939 | 25 | 5.707 | KV453089.1 | 1048095 | 16-scf00496 | 16 |
| AX-158314938 | 25 | 5.709 | KV453089.1 | 1045374 | 16-scf00496 | 16 |
| AX-158314940 | 25 | 5.709 | KV453089.1 | 1048959 | 16-scf00496 | 16 |
| AX-157714893 | 25 | 5.709 | KV453089.1 | 1049327 | 16-scf00496 | 16 |
| AX-158314942 | 25 | 5.709 | KV453089.1 | 1053102 | 16-scf00496 | 16 |
| AX-158314943 | 25 | 5.709 | KV453089.1 | 1053473 | 16-scf00496 | 16 |
| AX-158314944 | 25 | 5.709 | KV453089.1 | 1053829 | 16-scf00496 | 16 |
| AX-158314945 | 25 | 5.709 | KV453089.1 | 1055027 | 16-scf00496 | 16 |
| AX-157888292 | 25 | 5.709 | KV453089.1 | 1057844 | 16-scf00496 | 16 |
| AX-157847688 | 25 | 5.709 | KV453089.1 | 1058450 | 16-scf00496 | 16 |
| AX-157713680 | 25 | 5.709 | KV453089.1 | 1062135 | 16-scf00496 | 16 |
| AX-158314947 | 25 | 5.709 | KV453089.1 | 1067779 | 16-scf00496 | 16 |
| AX-157742261 | 25 | 5.709 | KV453089.1 | 1068800 | 16-scf00496 | 16 |
| AX-158314951 | 25 | 5.927 | KV453089.1 | 1074883 | 16-scf00496 | 16 |
| AX-158381416 | 25 | 6.146 | KV453089.1 | 1075651 | 16-scf00496 | 16 |
| AX-157721562 | 25 | 6.146 | KV453089.1 | 1078008 | 16-scf00496 | 16 |
| AX-158314955 | 25 | 6.146 | KV453089.1 | 1079559 | 16-scf00496 | 16 |
| AX-158314956 | 25 | 6.146 | KV453089.1 | 1080067 | 16-scf00496 | 16 |
| AX-157847692 | 25 | 6.146 | KV453089.1 | 1081535 | 16-scf00496 | 16 |
| AX-158314957 | 25 | 6.146 | KV453089.1 | 1082100 | 16-scf00496 | 16 |
| AX-157847694 | 25 | 6.529 | KV453089.1 | 1098463 | 16-scf00496 | 16 |
| AX-157743294 | 25 | 6.529 | KV453089.1 | 1099391 | 16-scf00496 | 16 |
| AX-158314963 | 25 | 6.657 | KV453089.1 | 1100826 | 16-scf00496 | 16 |
| AX-158314964 | 25 | 6.657 | KV453089.1 | 1101923 | 16-scf00496 | 16 |
| AX-157758926 | 25 | 6.912 | KV453089.1 | 1106482 | 16-scf00496 | 16 |
| AX-158418133 | 25 | 6.912 | KV453089.1 | 1107978 | 16-scf00496 | 16 |
| AX-158314967 | 25 | 6.912 | KV453089.1 | 1109451 | 16-scf00496 | 16 |
| AX-158314949 | 25 | 7.022 | KV453089.1 | 1071539 | 16-scf00496 | 16 |
| AX-158314965 | 25 | 7.022 | KV453089.1 | 1103014 | 16-scf00496 | 16 |
| AX-158314968 | 25 | 7.022 | KV453089.1 | 1110768 | 16-scf00496 | 16 |
| AX-157727023 | 25 | 7.022 | KV453089.1 | 1115008 | 16-scf00496 | 16 |
| AX-158314972 | 25 | 7.022 | KV453089.1 | 1122657 | 16-scf00496 | 16 |
| AX-158314974 | 25 | 7.022 | KV453089.1 | 1125753 | 16-scf00496 | 16 |
| AX-158314976 | 25 | 7.022 | KV453089.1 | 1126947 | 16-scf00496 | 16 |
| AX-157749837 | 25 | 7.022 | KV453089.1 | 1129360 | 16-scf00496 | 16 |
| AX-158314977 | 25 | 7.022 | KV453089.1 | 1132076 | 16-scf00496 | 16 |
| AX-158314978 | 25 | 7.022 | KV453089.1 | 1133041 | 16-scf00496 | 16 |
| AX-158314984 | 25 | 7.022 | KV453089.1 | 1139211 | 16-scf00496 | 16 |
| AX-157847698 | 25 | 7.022 | KV453089.1 | 1142660 | 16-scf00496 | 16 |
| AX-158314986 | 25 | 7.022 | KV453089.1 | 1143112 | 16-scf00496 | 16 |
| AX-158314987 | 25 | 7.022 | KV453089.1 | 1144321 | 16-scf00496 | 16 |
| AX-158314988 | 25 | 7.022 | KV453089.1 | 1146623 | 16-scf00496 | 16 |
| AX-157847699 | 25 | 7.022 | KV453089.1 | 1146903 | 16-scf00496 | 16 |
| AX-158314989 | 25 | 7.022 | KV453089.1 | 1147023 | 16-scf00496 | 16 |
| AX-157738647 | 25 | 7.022 | KV453089.1 | 1148117 | 16-scf00496 | 16 |
| AX-157864034 | 25 | 7.022 | KV453089.1 | 1151913 | 16-scf00496 | 16 |
| AX-158314994 | 25 | 7.022 | KV453089.1 | 1152029 | 16-scf00496 | 16 |
| AX-157847703 | 25 | 7.022 | KV453089.1 | 1156245 | 16-scf00496 | 16 |
| AX-157737955 | 25 | 7.022 | KV453089.1 | 1157084 | 16-scf00496 | 16 |

|              |    |       |            |         |             |    |
|--------------|----|-------|------------|---------|-------------|----|
| AX-158314997 | 25 | 7.022 | KV453089.1 | 1158419 | 16-scf00496 | 16 |
| AX-158314998 | 25 | 7.022 | KV453089.1 | 1158827 | 16-scf00496 | 16 |
| AX-157847704 | 25 | 7.022 | KV453089.1 | 1160139 | 16-scf00496 | 16 |
| AX-157847705 | 25 | 7.022 | KV453089.1 | 1162473 | 16-scf00496 | 16 |
| AX-157721139 | 25 | 7.022 | KV453089.1 | 1163508 | 16-scf00496 | 16 |
| AX-157847706 | 25 | 7.022 | KV453089.1 | 1163867 | 16-scf00496 | 16 |
| AX-158315001 | 25 | 7.022 | KV453089.1 | 1165509 | 16-scf00496 | 16 |
| AX-157747888 | 25 | 7.022 | KV453089.1 | 1167869 | 16-scf00496 | 16 |
| AX-158315002 | 25 | 7.022 | KV453089.1 | 1169864 | 16-scf00496 | 16 |
| AX-158315003 | 25 | 7.022 | KV453089.1 | 1170464 | 16-scf00496 | 16 |
| AX-157888296 | 25 | 7.022 | KV453089.1 | 1172513 | 16-scf00496 | 16 |
| AX-158315010 | 25 | 7.022 | KV453089.1 | 1179297 | 16-scf00496 | 16 |
| AX-157710371 | 25 | 7.022 | KV453089.1 | 1182621 | 16-scf00496 | 16 |
| AX-158315013 | 25 | 7.022 | KV453089.1 | 1183800 | 16-scf00496 | 16 |
| AX-158315019 | 25 | 7.022 | KV453089.1 | 1192014 | 16-scf00496 | 16 |
| AX-158315022 | 25 | 7.022 | KV453089.1 | 1196876 | 16-scf00496 | 16 |
| AX-158315048 | 25 | 7.022 | KV453089.1 | 1236587 | 16-scf00496 | 16 |
| AX-157750385 | 25 | 7.022 | KV453089.1 | 1262465 | 16-scf00496 | 16 |
| AX-158315012 | 25 | 7.064 | KV453089.1 | 1183229 | 16-scf00496 | 16 |
| AX-157847707 | 25 | 7.107 | KV453089.1 | 1185150 | 16-scf00496 | 16 |
| AX-158315021 | 25 | 7.147 | KV453089.1 | 1193427 | 16-scf00496 | 16 |
| AX-157753070 | 25 | 7.398 | KV453089.1 | 1223272 | 16-scf00496 | 16 |
| AX-158315038 | 25 | 7.398 | KV453089.1 | 1224544 | 16-scf00496 | 16 |
| AX-158315039 | 25 | 7.398 | KV453089.1 | 1225029 | 16-scf00496 | 16 |
| AX-158315044 | 25 | 7.398 | KV453089.1 | 1233361 | 16-scf00496 | 16 |
| AX-158315041 | 25 | 7.566 | KV453089.1 | 1227313 | 16-scf00496 | 16 |
| AX-158315042 | 25 | 7.621 | KV453089.1 | 1228887 | 16-scf00496 | 16 |
| AX-158315065 | 25 | 7.621 | KV453089.1 | 1256841 | 16-scf00496 | 16 |
| AX-158315080 | 25 | 7.621 | KV453089.1 | 1282163 | 16-scf00496 | 16 |
| AX-158315043 | 25 | 7.734 | KV453089.1 | 1232404 | 16-scf00496 | 16 |
| AX-158315046 | 25 | 7.734 | KV453089.1 | 1234805 | 16-scf00496 | 16 |
| AX-158315047 | 25 | 7.734 | KV453089.1 | 1236073 | 16-scf00496 | 16 |
| AX-158315050 | 25 | 7.734 | KV453089.1 | 1237500 | 16-scf00496 | 16 |
| AX-158315051 | 25 | 7.892 | KV453089.1 | 1239609 | 16-scf00496 | 16 |
| AX-158315052 | 25 | 7.894 | KV453089.1 | 1240242 | 16-scf00496 | 16 |
| AX-158315055 | 25 | 7.898 | KV453089.1 | 1243800 | 16-scf00496 | 16 |
| AX-158315056 | 25 | 7.898 | KV453089.1 | 1244330 | 16-scf00496 | 16 |
| AX-158315060 | 25 | 7.898 | KV453089.1 | 1252945 | 16-scf00496 | 16 |
| AX-158315061 | 25 | 7.898 | KV453089.1 | 1254342 | 16-scf00496 | 16 |
| AX-158315062 | 25 | 7.898 | KV453089.1 | 1254628 | 16-scf00496 | 16 |
| AX-158315064 | 25 | 7.913 | KV453089.1 | 1256064 | 16-scf00496 | 16 |
| AX-158315073 | 25 | 8.169 | KV453089.1 | 1270173 | 16-scf00496 | 16 |
| AX-158423656 | 25 | 8.169 | KV453089.1 | 1273814 | 16-scf00496 | 16 |
| AX-158423657 | 25 | 8.169 | KV453089.1 | 1274226 | 16-scf00496 | 16 |
| AX-158315077 | 25 | 8.169 | KV453089.1 | 1277860 | 16-scf00496 | 16 |
| AX-158418139 | 25 | 8.246 | KV453089.1 | 1272728 | 16-scf00496 | 16 |
| AX-158315078 | 25 | 8.246 | KV453089.1 | 1281072 | 16-scf00496 | 16 |
| AX-158315086 | 25 | 8.301 | KV453089.1 | 1289902 | 16-scf00496 | 16 |
| AX-158315087 | 25 | 8.445 | KV453089.1 | 1290534 | 16-scf00496 | 16 |
| AX-158315088 | 25 | 8.445 | KV453089.1 | 1292388 | 16-scf00496 | 16 |
| AX-158315089 | 25 | 8.445 | KV453089.1 | 1293787 | 16-scf00496 | 16 |

|              |    |       |            |         |             |    |
|--------------|----|-------|------------|---------|-------------|----|
| AX-157847710 | 25 | 8.445 | KV453089.1 | 1294260 | 16-scf00496 | 16 |
| AX-158315094 | 25 | 8.445 | KV453089.1 | 1303574 | 16-scf00496 | 16 |
| AX-158315090 | 25 | 8.446 | KV453089.1 | 1294648 | 16-scf00496 | 16 |
| AX-158315096 | 25 | 8.573 | KV453089.1 | 1305027 | 16-scf00496 | 16 |
| AX-158315099 | 25 | 8.573 | KV453089.1 | 1308188 | 16-scf00496 | 16 |
| AX-158315098 | 25 | 8.772 | KV453089.1 | 1306201 | 16-scf00496 | 16 |
| AX-158315100 | 25 | 8.772 | KV453089.1 | 1310410 | 16-scf00496 | 16 |
| AX-158315054 | 25 | 8.773 | KV453089.1 | 1243081 | 16-scf00496 | 16 |
| AX-158315101 | 25 | 8.773 | KV453089.1 | 1311164 | 16-scf00496 | 16 |
| AX-158315102 | 25 | 8.773 | KV453089.1 | 1315277 | 16-scf00496 | 16 |
| AX-158315104 | 25 | 8.773 | KV453089.1 | 1316319 | 16-scf00496 | 16 |
| AX-158315107 | 25 | 8.773 | KV453089.1 | 1318072 | 16-scf00496 | 16 |
| AX-158315109 | 25 | 8.773 | KV453089.1 | 1321222 | 16-scf00496 | 16 |
| AX-157739510 | 25 | 8.959 | KV453089.1 | 1325999 | 16-scf00496 | 16 |
| AX-158315111 | 25 | 8.959 | KV453089.1 | 1327250 | 16-scf00496 | 16 |
| AX-158315112 | 25 | 8.959 | KV453089.1 | 1330580 | 16-scf00496 | 16 |
| AX-158315113 | 25 | 9.144 | KV453089.1 | 1331510 | 16-scf00496 | 16 |
| AX-158315117 | 25 | 9.145 | KV453089.1 | 1335260 | 16-scf00496 | 16 |
| AX-157774558 | 25 | 9.153 | KV453089.1 | 1338788 | 16-scf00496 | 16 |
| AX-158315120 | 25 | 9.153 | KV453089.1 | 1340986 | 16-scf00496 | 16 |
| AX-157881238 | 25 | 9.31  | KV453089.1 | 1344387 | 16-scf00496 | 16 |
| AX-158315145 | 25 | 9.31  | KV453089.1 | 1378320 | 16-scf00496 | 16 |
| AX-157847714 | 25 | 9.648 | KV453089.1 | 1349039 | 16-scf00496 | 16 |
| AX-157847715 | 25 | 9.648 | KV453089.1 | 1350402 | 16-scf00496 | 16 |
| AX-158315124 | 25 | 9.648 | KV453089.1 | 1351544 | 16-scf00496 | 16 |
| AX-158315126 | 25 | 9.648 | KV453089.1 | 1353238 | 16-scf00496 | 16 |
| AX-158315127 | 25 | 9.648 | KV453089.1 | 1356778 | 16-scf00496 | 16 |
| AX-157721064 | 25 | 9.648 | KV453089.1 | 1358737 | 16-scf00496 | 16 |
| AX-157847716 | 25 | 9.648 | KV453089.1 | 1360523 | 16-scf00496 | 16 |
| AX-158315130 | 25 | 9.648 | KV453089.1 | 1360876 | 16-scf00496 | 16 |
| AX-158315131 | 25 | 9.648 | KV453089.1 | 1362438 | 16-scf00496 | 16 |
| AX-157881239 | 25 | 9.648 | KV453089.1 | 1364608 | 16-scf00496 | 16 |
| AX-158315133 | 25 | 9.648 | KV453089.1 | 1365995 | 16-scf00496 | 16 |
| AX-158315135 | 25 | 9.648 | KV453089.1 | 1366904 | 16-scf00496 | 16 |
| AX-157847719 | 25 | 9.648 | KV453089.1 | 1367151 | 16-scf00496 | 16 |
| AX-158315136 | 25 | 9.648 | KV453089.1 | 1367880 | 16-scf00496 | 16 |
| AX-158315140 | 25 | 9.648 | KV453089.1 | 1371415 | 16-scf00496 | 16 |
| AX-158315142 | 25 | 9.648 | KV453089.1 | 1374062 | 16-scf00496 | 16 |
| AX-158315174 | 25 | 9.648 | KV453089.1 | 1416427 | 16-scf00496 | 16 |
| AX-158315175 | 25 | 9.648 | KV453089.1 | 1417550 | 16-scf00496 | 16 |
| AX-158315179 | 25 | 9.648 | KV453089.1 | 1426530 | 16-scf00496 | 16 |
| AX-158315184 | 25 | 9.648 | KV453089.1 | 1430493 | 16-scf00496 | 16 |
| AX-157847720 | 25 | 9.714 | KV453089.1 | 1369127 | 16-scf00496 | 16 |
| AX-158315144 | 25 | 9.736 | KV453089.1 | 1377747 | 16-scf00496 | 16 |
| AX-158315146 | 25 | 9.778 | KV453089.1 | 1378550 | 16-scf00496 | 16 |
| AX-158315148 | 25 | 9.838 | KV453089.1 | 1379243 | 16-scf00496 | 16 |
| AX-158315149 | 25 | 9.864 | KV453089.1 | 1380060 | 16-scf00496 | 16 |
| AX-158315152 | 25 | 9.864 | KV453089.1 | 1384027 | 16-scf00496 | 16 |
| AX-157847723 | 25 | 9.864 | KV453089.1 | 1384448 | 16-scf00496 | 16 |
| AX-158315153 | 25 | 9.866 | KV453089.1 | 1387871 | 16-scf00496 | 16 |
| AX-158315156 | 25 | 9.868 | KV453089.1 | 1391598 | 16-scf00496 | 16 |

|              |    |        |            |         |             |    |
|--------------|----|--------|------------|---------|-------------|----|
| AX-158315159 | 25 | 9.868  | KV453089.1 | 1396229 | 16-scf00496 | 16 |
| AX-158315160 | 25 | 9.868  | KV453089.1 | 1396746 | 16-scf00496 | 16 |
| AX-158315161 | 25 | 9.868  | KV453089.1 | 1397120 | 16-scf00496 | 16 |
| AX-158315169 | 25 | 10.194 | KV453089.1 | 1408380 | 16-scf00496 | 16 |
| AX-158315170 | 25 | 10.194 | KV453089.1 | 1410022 | 16-scf00496 | 16 |
| AX-158315171 | 25 | 10.194 | KV453089.1 | 1412456 | 16-scf00496 | 16 |
| AX-158315172 | 25 | 10.194 | KV453089.1 | 1413355 | 16-scf00496 | 16 |
| AX-157727010 | 25 | 10.194 | KV453089.1 | 1418406 | 16-scf00496 | 16 |
| AX-158315176 | 25 | 10.194 | KV453089.1 | 1418712 | 16-scf00496 | 16 |
| AX-158315177 | 25 | 10.194 | KV453089.1 | 1422366 | 16-scf00496 | 16 |
| AX-158315178 | 25 | 10.194 | KV453089.1 | 1422570 | 16-scf00496 | 16 |
| AX-157720952 | 25 | 10.194 | KV453089.1 | 1423105 | 16-scf00496 | 16 |
| AX-158315180 | 25 | 10.194 | KV453089.1 | 1427301 | 16-scf00496 | 16 |
| AX-157724029 | 25 | 10.275 | KV453089.1 | 1427005 | 16-scf00496 | 16 |
| AX-158315162 | 25 | 10.303 | KV453089.1 | 1397533 | 16-scf00496 | 16 |
| AX-158315183 | 25 | 10.303 | KV453089.1 | 1429252 | 16-scf00496 | 16 |
| AX-158315186 | 25 | 10.303 | KV453089.1 | 1431197 | 16-scf00496 | 16 |
| AX-158315188 | 25 | 10.303 | KV453089.1 | 1434709 | 16-scf00496 | 16 |
| AX-158315189 | 25 | 10.303 | KV453089.1 | 1436030 | 16-scf00496 | 16 |
| AX-158315190 | 25 | 10.303 | KV453089.1 | 1437797 | 16-scf00496 | 16 |
| AX-158315204 | 25 | 10.303 | KV453089.1 | 1462752 | 16-scf00496 | 16 |
| AX-158315271 | 25 | 10.303 | KV453089.1 | 1581672 | 16-scf00496 | 16 |
| AX-157710271 | 25 | 10.577 | KV453089.1 | 1441699 | 16-scf00496 | 16 |
| AX-157867806 | 25 | 10.577 | KV453089.1 | 1444526 | 16-scf00496 | 16 |
| AX-158315193 | 25 | 10.577 | KV453089.1 | 1446842 | 16-scf00496 | 16 |
| AX-158315195 | 25 | 10.577 | KV453089.1 | 1448819 | 16-scf00496 | 16 |
| AX-158315197 | 25 | 10.577 | KV453089.1 | 1450202 | 16-scf00496 | 16 |
| AX-158315198 | 25 | 10.577 | KV453089.1 | 1450670 | 16-scf00496 | 16 |
| AX-158418146 | 25 | 10.706 | KV453089.1 | 1456833 | 16-scf00496 | 16 |
| AX-158315202 | 25 | 10.847 | KV453089.1 | 1460130 | 16-scf00496 | 16 |
| AX-158315206 | 25 | 10.85  | KV453089.1 | 1467919 | 16-scf00496 | 16 |
| AX-158315207 | 25 | 10.85  | KV453089.1 | 1469749 | 16-scf00496 | 16 |
| AX-158315208 | 25 | 10.85  | KV453089.1 | 1470152 | 16-scf00496 | 16 |
| AX-158315209 | 25 | 10.85  | KV453089.1 | 1472846 | 16-scf00496 | 16 |
| AX-158315218 | 25 | 10.85  | KV453089.1 | 1489683 | 16-scf00496 | 16 |
| AX-158315210 | 25 | 10.868 | KV453089.1 | 1476253 | 16-scf00496 | 16 |
| AX-158315211 | 25 | 10.879 | KV453089.1 | 1478076 | 16-scf00496 | 16 |
| AX-157751101 | 25 | 10.879 | KV453089.1 | 1531445 | 16-scf00496 | 16 |
| AX-158381420 | 25 | 10.916 | KV453089.1 | 1484368 | 16-scf00496 | 16 |
| AX-157754896 | 25 | 10.959 | KV453089.1 | 1484599 | 16-scf00496 | 16 |
| AX-158315217 | 25 | 10.959 | KV453089.1 | 1489285 | 16-scf00496 | 16 |
| AX-158315219 | 25 | 10.959 | KV453089.1 | 1490946 | 16-scf00496 | 16 |
| AX-158412466 | 25 | 10.959 | KV453089.1 | 1491161 | 16-scf00496 | 16 |
| AX-157847727 | 25 | 10.959 | KV453089.1 | 1497790 | 16-scf00496 | 16 |
| AX-158315229 | 25 | 10.959 | KV453089.1 | 1511267 | 16-scf00496 | 16 |
| AX-158315222 | 25 | 10.996 | KV453089.1 | 1498253 | 16-scf00496 | 16 |
| AX-158315225 | 25 | 11.068 | KV453089.1 | 1503620 | 16-scf00496 | 16 |
| AX-157805136 | 25 | 11.068 | KV453089.1 | 1507256 | 16-scf00496 | 16 |
| AX-158315228 | 25 | 11.068 | KV453089.1 | 1510327 | 16-scf00496 | 16 |
| AX-158315230 | 25 | 11.068 | KV453089.1 | 1513716 | 16-scf00496 | 16 |
| AX-158315231 | 25 | 11.287 | KV453089.1 | 1517909 | 16-scf00496 | 16 |

|              |    |        |            |         |             |    |
|--------------|----|--------|------------|---------|-------------|----|
| AX-157749710 | 25 | 11.287 | KV453089.1 | 1522330 | 16-scf00496 | 16 |
| AX-157847728 | 25 | 11.287 | KV453089.1 | 1524338 | 16-scf00496 | 16 |
| AX-157847730 | 25 | 11.287 | KV453089.1 | 1525523 | 16-scf00496 | 16 |
| AX-158315233 | 25 | 11.287 | KV453089.1 | 1530661 | 16-scf00496 | 16 |
| AX-157847731 | 25 | 11.287 | KV453089.1 | 1532774 | 16-scf00496 | 16 |
| AX-158315235 | 25 | 11.287 | KV453089.1 | 1534591 | 16-scf00496 | 16 |
| AX-158315238 | 25 | 11.287 | KV453089.1 | 1537183 | 16-scf00496 | 16 |
| AX-158315240 | 25 | 11.287 | KV453089.1 | 1539718 | 16-scf00496 | 16 |
| AX-158315243 | 25 | 11.287 | KV453089.1 | 1543110 | 16-scf00496 | 16 |
| AX-158315232 | 25 | 11.426 | KV453089.1 | 1528426 | 16-scf00496 | 16 |
| AX-158315244 | 25 | 11.426 | KV453089.1 | 1544998 | 16-scf00496 | 16 |
| AX-157847735 | 25 | 11.529 | KV453089.1 | 1546616 | 16-scf00496 | 16 |
| AX-158315245 | 25 | 11.529 | KV453089.1 | 1547233 | 16-scf00496 | 16 |
| AX-157747947 | 25 | 11.529 | KV453089.1 | 1550088 | 16-scf00496 | 16 |
| AX-157774467 | 25 | 11.529 | KV453089.1 | 1550534 | 16-scf00496 | 16 |
| AX-158315251 | 25 | 11.529 | KV453089.1 | 1555339 | 16-scf00496 | 16 |
| AX-158315252 | 25 | 11.529 | KV453089.1 | 1556839 | 16-scf00496 | 16 |
| AX-158315257 | 25 | 11.529 | KV453089.1 | 1559253 | 16-scf00496 | 16 |
| AX-158315269 | 25 | 12.006 | KV453089.1 | 1576720 | 16-scf00496 | 16 |
| AX-158315270 | 25 | 12.094 | KV453089.1 | 1580112 | 16-scf00496 | 16 |
| AX-158315273 | 25 | 12.252 | KV453089.1 | 1586734 | 16-scf00496 | 16 |
| AX-158315279 | 25 | 12.41  | KV453089.1 | 1593634 | 16-scf00496 | 16 |
| AX-157717829 | 25 | 12.41  | KV453089.1 | 1595170 | 16-scf00496 | 16 |
| AX-158315284 | 25 | 12.41  | KV453089.1 | 1603683 | 16-scf00496 | 16 |
| AX-157847742 | 25 | 12.41  | KV453089.1 | 1604124 | 16-scf00496 | 16 |
| AX-157719452 | 25 | 12.535 | KV453089.1 | 1597576 | 16-scf00496 | 16 |
| AX-157771440 | 25 | 12.547 | KV453089.1 | 1596967 | 16-scf00496 | 16 |
| AX-158315281 | 25 | 12.547 | KV453089.1 | 1600550 | 16-scf00496 | 16 |
| AX-157757312 | 25 | 12.547 | KV453089.1 | 1603502 | 16-scf00496 | 16 |
| AX-157726685 | 25 | 12.547 | KV453089.1 | 1604504 | 16-scf00496 | 16 |
| AX-158315285 | 25 | 12.614 | KV453089.1 | 1606842 | 16-scf00496 | 16 |
| AX-158315286 | 25 | 12.791 | KV453089.1 | 1611258 | 16-scf00496 | 16 |
| AX-158315287 | 25 | 12.817 | KV453089.1 | 1611760 | 16-scf00496 | 16 |
| AX-158315290 | 25 | 12.817 | KV453089.1 | 1619267 | 16-scf00496 | 16 |
| AX-158315291 | 25 | 12.912 | KV453089.1 | 1623784 | 16-scf00496 | 16 |
| AX-158315292 | 25 | 12.912 | KV453089.1 | 1624695 | 16-scf00496 | 16 |
| AX-158315295 | 25 | 12.912 | KV453089.1 | 1626820 | 16-scf00496 | 16 |
| AX-158315297 | 25 | 13.082 | KV453089.1 | 1632794 | 16-scf00496 | 16 |
| AX-157772129 | 25 | 13.082 | KV453089.1 | 1634812 | 16-scf00496 | 16 |
| AX-157751095 | 25 | 13.342 | KV453089.1 | 1638081 | 16-scf00496 | 16 |
| AX-158315298 | 25 | 13.346 | KV453089.1 | 1637333 | 16-scf00496 | 16 |
| AX-158315299 | 25 | 13.346 | KV453089.1 | 1638916 | 16-scf00496 | 16 |
| AX-158315300 | 25 | 13.346 | KV453089.1 | 1639306 | 16-scf00496 | 16 |
| AX-158315301 | 25 | 13.346 | KV453089.1 | 1639907 | 16-scf00496 | 16 |
| AX-158315303 | 25 | 13.346 | KV453089.1 | 1642286 | 16-scf00496 | 16 |
| AX-158315304 | 25 | 13.346 | KV453089.1 | 1642372 | 16-scf00496 | 16 |
| AX-158315308 | 25 | 13.346 | KV453089.1 | 1647888 | 16-scf00496 | 16 |
| AX-158315309 | 25 | 13.347 | KV453089.1 | 1648540 | 16-scf00496 | 16 |
| AX-158315310 | 25 | 13.348 | KV453089.1 | 1651303 | 16-scf00496 | 16 |
| AX-158315311 | 25 | 13.407 | KV453089.1 | 1652333 | 16-scf00496 | 16 |
| AX-158315313 | 25 | 13.599 | KV453089.1 | 1653652 | 16-scf00496 | 16 |

|              |    |        |            |         |             |    |
|--------------|----|--------|------------|---------|-------------|----|
| AX-158315314 | 25 | 13.599 | KV453089.1 | 1654104 | 16-scf00496 | 16 |
| AX-158315315 | 25 | 13.599 | KV453089.1 | 1654792 | 16-scf00496 | 16 |
| AX-157751845 | 25 | 13.84  | KV453089.1 | 1655717 | 16-scf00496 | 16 |
| AX-158315316 | 25 | 13.844 | KV453089.1 | 1655165 | 16-scf00496 | 16 |
| AX-157773515 | 25 | 13.844 | KV453089.1 | 1656525 | 16-scf00496 | 16 |
| AX-158315320 | 25 | 13.844 | KV453089.1 | 1660040 | 16-scf00496 | 16 |
| AX-158315318 | 25 | 13.848 | KV453089.1 | 1658048 | 16-scf00496 | 16 |
| AX-158315321 | 25 | 14.035 | KV453089.1 | 1660810 | 16-scf00496 | 16 |
| AX-158315325 | 25 | 14.035 | KV453089.1 | 1669530 | 16-scf00496 | 16 |
| AX-158315327 | 25 | 14.047 | KV453089.1 | 1673523 | 16-scf00496 | 16 |
| AX-157847743 | 25 | 14.602 | KV453089.1 | 1678583 | 16-scf00496 | 16 |
| AX-158315332 | 25 | 14.62  | KV453089.1 | 1680157 | 16-scf00496 | 16 |
| AX-157752058 | 25 | 14.62  | KV453089.1 | 1682110 | 16-scf00496 | 16 |
| AX-157702421 | 25 | 14.737 | KV453089.1 | 1683133 | 16-scf00496 | 16 |
| AX-158315334 | 25 | 14.781 | KV453089.1 | 1683215 | 16-scf00496 | 16 |
| AX-158419903 | 25 | 14.824 | KV453089.1 | 1684329 | 16-scf00496 | 16 |
| AX-157721511 | 25 | 14.933 | KV453089.1 | 1691851 | 16-scf00496 | 16 |
| AX-158315338 | 25 | 15.128 | KV453089.1 | 1692484 | 16-scf00496 | 16 |
| AX-158315341 | 25 | 15.521 | KV453089.1 | 1698649 | 16-scf00496 | 16 |
| AX-158315343 | 25 | 15.523 | KV453089.1 | 1701020 | 16-scf00496 | 16 |
| AX-157740800 | 25 | 15.523 | KV453089.1 | 1702567 | 16-scf00496 | 16 |
| AX-158315345 | 25 | 15.523 | KV453089.1 | 1705173 | 16-scf00496 | 16 |
| AX-158315346 | 25 | 15.523 | KV453089.1 | 1706084 | 16-scf00496 | 16 |
| AX-158315348 | 25 | 15.599 | KV453089.1 | 1709290 | 16-scf00496 | 16 |
| AX-158315350 | 25 | 15.886 | KV453089.1 | 1712294 | 16-scf00496 | 16 |
| AX-158315351 | 25 | 15.886 | KV453089.1 | 1712699 | 16-scf00496 | 16 |
| AX-158315352 | 25 | 15.886 | KV453089.1 | 1713231 | 16-scf00496 | 16 |
| AX-157710118 | 25 | 15.886 | KV453089.1 | 1717015 | 16-scf00496 | 16 |
| AX-158315359 | 25 | 15.886 | KV453089.1 | 1721011 | 16-scf00496 | 16 |
| AX-158315360 | 25 | 15.886 | KV453089.1 | 1722118 | 16-scf00496 | 16 |
| AX-157771819 | 25 | 15.886 | KV453089.1 | 1723855 | 16-scf00496 | 16 |
| AX-158315361 | 25 | 15.886 | KV453089.1 | 1724885 | 16-scf00496 | 16 |
| AX-158315366 | 25 | 16.015 | KV453089.1 | 1729559 | 16-scf00496 | 16 |
| AX-158315368 | 25 | 16.141 | KV453089.1 | 1731244 | 16-scf00496 | 16 |
| AX-158315367 | 25 | 16.269 | KV453089.1 | 1730452 | 16-scf00496 | 16 |
| AX-158315369 | 25 | 16.269 | KV453089.1 | 1732316 | 16-scf00496 | 16 |
| AX-158315370 | 25 | 16.269 | KV453089.1 | 1732969 | 16-scf00496 | 16 |
| AX-158315371 | 25 | 16.269 | KV453089.1 | 1733358 | 16-scf00496 | 16 |
| AX-158315373 | 25 | 16.524 | KV453089.1 | 1737746 | 16-scf00496 | 16 |
| AX-158315374 | 25 | 16.524 | KV453089.1 | 1738894 | 16-scf00496 | 16 |
| AX-158315376 | 25 | 16.524 | KV453089.1 | 1739812 | 16-scf00496 | 16 |
| AX-158315377 | 25 | 16.588 | KV453089.1 | 1740551 | 16-scf00496 | 16 |
| AX-158315372 | 25 | 16.651 | KV453089.1 | 1736603 | 16-scf00496 | 16 |
| AX-158315378 | 25 | 16.651 | KV453089.1 | 1745223 | 16-scf00496 | 16 |
| AX-158315379 | 25 | 16.651 | KV453089.1 | 1745647 | 16-scf00496 | 16 |
| AX-158315380 | 25 | 16.651 | KV453089.1 | 1746334 | 16-scf00496 | 16 |
| AX-158315381 | 25 | 16.651 | KV453089.1 | 1747919 | 16-scf00496 | 16 |
| AX-158315385 | 25 | 16.688 | KV453089.1 | 1751584 | 16-scf00496 | 16 |
| AX-158315375 | 25 | 16.71  | KV453089.1 | 1739370 | 16-scf00496 | 16 |
| AX-157847745 | 25 | 16.71  | KV453089.1 | 1754994 | 16-scf00496 | 16 |
| AX-158419905 | 25 | 16.71  | KV453089.1 | 1758719 | 16-scf00496 | 16 |



|              |    |        |             |         |             |    |
|--------------|----|--------|-------------|---------|-------------|----|
| AX-158315388 | 25 | 16.761 | KV453089.1  | 1755181 | 16-scf00496 | 16 |
| AX-158315390 | 25 | 16.761 | KV453089.1  | 1761390 | 16-scf00496 | 16 |
| AX-158315391 | 25 | 16.978 | KV453089.1  | 1763416 | 16-scf00496 | 16 |
| AX-157706016 | 25 | 16.978 | 3ML01031433 | 101     | scf07046_1  | UN |
| AX-158315393 | 25 | 16.98  | KV453089.1  | 1765695 | 16-scf00496 | 16 |
| AX-158315394 | 25 | 17.143 | KV453089.1  | 1766073 | 16-scf00496 | 16 |
| AX-158315396 | 25 | 17.307 | KV453089.1  | 1769397 | 16-scf00496 | 16 |
| AX-158315399 | 25 | 17.307 | KV453089.1  | 1771831 | 16-scf00496 | 16 |
| AX-158315403 | 25 | 17.307 | KV453089.1  | 1775291 | 16-scf00496 | 16 |
| AX-158315405 | 25 | 17.307 | KV453089.1  | 1777326 | 16-scf00496 | 16 |
| AX-158315411 | 25 | 17.603 | KV453089.1  | 1786061 | 16-scf00496 | 16 |
| AX-158315412 | 25 | 17.603 | KV453089.1  | 1789188 | 16-scf00496 | 16 |
| AX-158315415 | 25 | 17.603 | KV453089.1  | 1792611 | 16-scf00496 | 16 |
| AX-158315422 | 25 | 17.897 | KV453089.1  | 1801857 | 16-scf00496 | 16 |
| AX-158315424 | 25 | 17.898 | KV453089.1  | 1804867 | 16-scf00496 | 16 |
| AX-157751052 | 25 | 17.898 | KV453089.1  | 1806636 | 16-scf00496 | 16 |
| AX-158315425 | 25 | 17.898 | KV453089.1  | 1808764 | 16-scf00496 | 16 |
| AX-158315428 | 25 | 17.898 | KV453089.1  | 1812371 | 16-scf00496 | 16 |
| AX-158315434 | 25 | 17.898 | KV453089.1  | 1819321 | 16-scf00496 | 16 |
| AX-158315430 | 25 | 17.964 | KV453089.1  | 1815536 | 16-scf00496 | 16 |
| AX-158315431 | 25 | 18.044 | KV453089.1  | 1816250 | 16-scf00496 | 16 |
| AX-158315432 | 25 | 18.134 | KV453089.1  | 1817466 | 16-scf00496 | 16 |
| AX-158315433 | 25 | 18.134 | KV453089.1  | 1819283 | 16-scf00496 | 16 |
| AX-158315436 | 25 | 18.134 | KV453089.1  | 1823107 | 16-scf00496 | 16 |
| AX-157707295 | 25 | 18.134 | 3ML01033941 | 406     | scf09610_1  | UN |
| AX-158315437 | 25 | 18.198 | KV453089.1  | 1824666 | 16-scf00496 | 16 |
| AX-158315439 | 25 | 18.253 | KV453089.1  | 1827422 | 16-scf00496 | 16 |
| AX-158381422 | 25 | 18.469 | KV453089.1  | 1829422 | 16-scf00496 | 16 |
| AX-158315445 | 25 | 18.777 | KV453089.1  | 1834206 | 16-scf00496 | 16 |
| AX-157757233 | 25 | 18.795 | KV453089.1  | 1835166 | 16-scf00496 | 16 |
| AX-158315449 | 25 | 18.795 | KV453089.1  | 1843703 | 16-scf00496 | 16 |
| AX-158315475 | 25 | 18.795 | KV453089.1  | 1870568 | 16-scf00496 | 16 |
| AX-158315452 | 25 | 19.149 | KV453089.1  | 1848030 | 16-scf00496 | 16 |
| AX-158315454 | 25 | 19.192 | KV453089.1  | 1850023 | 16-scf00496 | 16 |
| AX-158315455 | 25 | 19.373 | KV453089.1  | 1851073 | 16-scf00496 | 16 |
| AX-158315458 | 25 | 19.373 | KV453089.1  | 1852968 | 16-scf00496 | 16 |
| AX-158315459 | 25 | 19.605 | KV453089.1  | 1854256 | 16-scf00496 | 16 |
| AX-158315460 | 25 | 19.606 | KV453089.1  | 1855062 | 16-scf00496 | 16 |
| AX-157743324 | 25 | 19.606 | KV453089.1  | 1856576 | 16-scf00496 | 16 |
| AX-158315462 | 25 | 19.607 | KV453089.1  | 1858746 | 16-scf00496 | 16 |
| AX-158315463 | 25 | 19.607 | KV453089.1  | 1859233 | 16-scf00496 | 16 |
| AX-158315468 | 25 | 19.607 | KV453089.1  | 1865605 | 16-scf00496 | 16 |
| AX-158315470 | 25 | 19.607 | KV453089.1  | 1867101 | 16-scf00496 | 16 |
| AX-158315471 | 25 | 19.607 | KV453089.1  | 1868464 | 16-scf00496 | 16 |
| AX-158315473 | 25 | 19.607 | KV453089.1  | 1869429 | 16-scf00496 | 16 |
| AX-158315476 | 25 | 19.607 | KV453089.1  | 1871243 | 16-scf00496 | 16 |
| AX-158315477 | 25 | 19.607 | KV453089.1  | 1873211 | 16-scf00496 | 16 |
| AX-158315479 | 25 | 20.102 | KV453089.1  | 1875097 | 16-scf00496 | 16 |
| AX-158315481 | 25 | 20.268 | KV453089.1  | 1877507 | 16-scf00496 | 16 |
| AX-158315482 | 25 | 20.268 | KV453089.1  | 1878227 | 16-scf00496 | 16 |
| AX-158315484 | 25 | 20.433 | KV453089.1  | 1883056 | 16-scf00496 | 16 |

|              |    |        |            |         |               |    |
|--------------|----|--------|------------|---------|---------------|----|
| AX-158315487 | 25 | 20.433 | KV453089.1 | 1884826 | 16-scf00496   | 16 |
| AX-158315488 | 25 | 20.433 | KV453089.1 | 1885399 | 16-scf00496   | 16 |
| AX-158315491 | 25 | 20.433 | KV453089.1 | 1887926 | 16-scf00496   | 16 |
| AX-158315494 | 25 | 20.433 | KV453089.1 | 1891488 | 16-scf00496   | 16 |
| AX-157726402 | 25 | 20.751 | KV453089.1 | 1904685 | 16-scf00496   | 16 |
| AX-157740337 | 25 | 20.773 | KV453089.1 | 1905305 | 16-scf00496   | 16 |
| AX-158315505 | 25 | 21.26  | KV453089.1 | 1905609 | 16-scf00496   | 16 |
| AX-158315509 | 25 | 21.26  | KV453089.1 | 1916263 | 16-scf00496   | 16 |
| AX-158315510 | 25 | 21.26  | KV453089.1 | 1916480 | 16-scf00496   | 16 |
| AX-158315513 | 25 | 21.26  | KV453089.1 | 1922329 | 16-scf00496   | 16 |
| AX-158315511 | 25 | 21.261 | KV453089.1 | 1917200 | 16-scf00496   | 16 |
| AX-158315514 | 25 | 21.261 | KV453089.1 | 1925600 | 16-scf00496   | 16 |
| AX-157847747 | 25 | 21.478 | KV453089.1 | 1918352 | 16-scf00496   | 16 |
| AX-158315512 | 25 | 21.493 | KV453089.1 | 1921438 | 16-scf00496   | 16 |
| AX-157867809 | 25 | 21.507 | KV453089.1 | 1923510 | 16-scf00496   | 16 |
| AX-158315515 | 25 | 21.54  | KV453089.1 | 1926102 | 16-scf00496   | 16 |
| AX-158315516 | 25 | 22.008 | KV453089.1 | 1927282 | 16-scf00496   | 16 |
| AX-158315518 | 25 | 22.008 | KV453089.1 | 1929077 | 16-scf00496   | 16 |
| AX-158315507 | 25 | 22.009 | KV453089.1 | 1909599 | 16-scf00496   | 16 |
| AX-158315519 | 25 | 22.009 | KV453089.1 | 1929939 | 16-scf00496   | 16 |
| AX-158403776 | 25 | 22.359 | FI870073.1 | 586     | ORI212 lctalu | UN |
| AX-158403775 | 25 | 22.465 | KV453089.1 | 1943293 | 16-scf00496   | 16 |
| AX-158315525 | 25 | 22.465 | KV453089.1 | 1949494 | 16-scf00496   | 16 |
| AX-157847748 | 25 | 22.465 | KV453089.1 | 1957338 | 16-scf00496   | 16 |
| AX-157888303 | 25 | 22.706 | KV453089.1 | 1948802 | 16-scf00496   | 16 |
| AX-158315526 | 25 | 22.707 | KV453089.1 | 1950057 | 16-scf00496   | 16 |
| AX-158315528 | 25 | 22.709 | KV453089.1 | 1953193 | 16-scf00496   | 16 |
| AX-158315530 | 25 | 22.736 | KV453089.1 | 1956378 | 16-scf00496   | 16 |
| AX-157847749 | 25 | 22.738 | KV453089.1 | 1960918 | 16-scf00496   | 16 |
| AX-158315529 | 25 | 22.871 | KV453089.1 | 1955338 | 16-scf00496   | 16 |
| AX-157725871 | 25 | 22.871 | KV453089.1 | 1964676 | 16-scf00496   | 16 |
| AX-158315534 | 25 | 22.994 | KV453089.1 | 1965213 | 16-scf00496   | 16 |
| AX-158315567 | 25 | 22.994 | KV453089.1 | 2005067 | 16-scf00496   | 16 |
| AX-158315537 | 25 | 23.119 | KV453089.1 | 1966763 | 16-scf00496   | 16 |
| AX-157881254 | 25 | 23.121 | KV453089.1 | 1970587 | 16-scf00496   | 16 |
| AX-157719592 | 25 | 23.121 | KV453089.1 | 1980263 | 16-scf00496   | 16 |
| AX-158315547 | 25 | 23.124 | KV453089.1 | 1983913 | 16-scf00496   | 16 |
| AX-158315560 | 25 | 23.124 | KV453089.1 | 1997918 | 16-scf00496   | 16 |
| AX-158315541 | 25 | 23.126 | KV453089.1 | 1971022 | 16-scf00496   | 16 |
| AX-157756524 | 25 | 23.126 | KV453089.1 | 1971645 | 16-scf00496   | 16 |
| AX-158315548 | 25 | 23.126 | KV453089.1 | 1984739 | 16-scf00496   | 16 |
| AX-158315549 | 25 | 23.126 | KV453089.1 | 1984951 | 16-scf00496   | 16 |
| AX-158315551 | 25 | 23.126 | KV453089.1 | 1986725 | 16-scf00496   | 16 |
| AX-158315552 | 25 | 23.126 | KV453089.1 | 1987725 | 16-scf00496   | 16 |
| AX-158315553 | 25 | 23.126 | KV453089.1 | 1988115 | 16-scf00496   | 16 |
| AX-158315555 | 25 | 23.126 | KV453089.1 | 1991320 | 16-scf00496   | 16 |
| AX-158315557 | 25 | 23.126 | KV453089.1 | 1993003 | 16-scf00496   | 16 |
| AX-158315558 | 25 | 23.126 | KV453089.1 | 1994104 | 16-scf00496   | 16 |
| AX-157725758 | 25 | 23.126 | KV453089.1 | 1994703 | 16-scf00496   | 16 |
| AX-158315559 | 25 | 23.126 | KV453089.1 | 1995162 | 16-scf00496   | 16 |
| AX-158315562 | 25 | 23.126 | KV453089.1 | 1999451 | 16-scf00496   | 16 |

|              |    |        |            |         |             |    |
|--------------|----|--------|------------|---------|-------------|----|
| AX-158315563 | 25 | 23.126 | KV453089.1 | 1999913 | 16-scf00496 | 16 |
| AX-158315565 | 25 | 23.126 | KV453089.1 | 2001793 | 16-scf00496 | 16 |
| AX-158315566 | 25 | 23.126 | KV453089.1 | 2003981 | 16-scf00496 | 16 |
| AX-158315569 | 25 | 23.126 | KV453089.1 | 2007631 | 16-scf00496 | 16 |
| AX-158315571 | 25 | 23.126 | KV453089.1 | 2011355 | 16-scf00496 | 16 |
| AX-158381424 | 25 | 23.399 | KV453089.1 | 2020829 | 16-scf00496 | 16 |
| AX-158315575 | 25 | 23.4   | KV453089.1 | 2019751 | 16-scf00496 | 16 |
| AX-157721378 | 25 | 23.4   | KV453089.1 | 2023145 | 16-scf00496 | 16 |
| AX-157720427 | 25 | 23.4   | KV453089.1 | 2023527 | 16-scf00496 | 16 |
| AX-158315582 | 25 | 23.4   | KV453089.1 | 2032188 | 16-scf00496 | 16 |
| AX-158315584 | 25 | 23.4   | KV453089.1 | 2036431 | 16-scf00496 | 16 |
| AX-158315585 | 25 | 23.4   | KV453089.1 | 2038743 | 16-scf00496 | 16 |
| AX-158315586 | 25 | 23.4   | KV453089.1 | 2040218 | 16-scf00496 | 16 |
| AX-158315587 | 25 | 23.4   | KV453089.1 | 2043205 | 16-scf00496 | 16 |
| AX-157847754 | 25 | 23.4   | KV453089.1 | 2043567 | 16-scf00496 | 16 |
| AX-157847755 | 25 | 23.4   | KV453089.1 | 2043904 | 16-scf00496 | 16 |
| AX-158315594 | 25 | 23.4   | KV453089.1 | 2052881 | 16-scf00496 | 16 |
| AX-158315608 | 25 | 23.4   | KV453089.1 | 2070555 | 16-scf00496 | 16 |
| AX-157741068 | 25 | 23.4   | KV453089.1 | 2091260 | 16-scf00496 | 16 |
| AX-157697851 | 25 | 23.4   | KV453089.1 | 2521653 | 16-scf00496 | 16 |
| AX-157847751 | 25 | 23.463 | KV453089.1 | 2017840 | 16-scf00496 | 16 |
| AX-157847753 | 25 | 23.463 | KV453089.1 | 2041958 | 16-scf00496 | 16 |
| AX-158315589 | 25 | 23.463 | KV453089.1 | 2048954 | 16-scf00496 | 16 |
| AX-158315609 | 25 | 23.463 | KV453089.1 | 2072463 | 16-scf00496 | 16 |
| AX-158315590 | 25 | 23.537 | KV453089.1 | 2050172 | 16-scf00496 | 16 |
| AX-158315591 | 25 | 23.537 | KV453089.1 | 2050402 | 16-scf00496 | 16 |
| AX-158315592 | 25 | 23.537 | KV453089.1 | 2051359 | 16-scf00496 | 16 |
| AX-158315593 | 25 | 23.67  | KV453089.1 | 2052211 | 16-scf00496 | 16 |
| AX-158315598 | 25 | 23.672 | KV453089.1 | 2061137 | 16-scf00496 | 16 |
| AX-158315602 | 25 | 23.672 | KV453089.1 | 2063681 | 16-scf00496 | 16 |
| AX-158315604 | 25 | 23.869 | KV453089.1 | 2065233 | 16-scf00496 | 16 |
| AX-158315605 | 25 | 24     | KV453089.1 | 2065566 | 16-scf00496 | 16 |
| AX-157756745 | 25 | 24.001 | KV453089.1 | 2080447 | 16-scf00496 | 16 |
| AX-158315615 | 25 | 24.001 | KV453089.1 | 2081011 | 16-scf00496 | 16 |
| AX-158315616 | 25 | 24.001 | KV453089.1 | 2082072 | 16-scf00496 | 16 |
| AX-157724766 | 25 | 24.001 | KV453089.1 | 2082952 | 16-scf00496 | 16 |
| AX-158315617 | 25 | 24.001 | KV453089.1 | 2083991 | 16-scf00496 | 16 |
| AX-158315624 | 25 | 24.001 | KV453089.1 | 2093452 | 16-scf00496 | 16 |
| AX-158315630 | 25 | 24.001 | KV453089.1 | 2104286 | 16-scf00496 | 16 |
| AX-158315632 | 25 | 24.001 | KV453089.1 | 2106288 | 16-scf00496 | 16 |
| AX-158315633 | 25 | 24.001 | KV453089.1 | 2106816 | 16-scf00496 | 16 |
| AX-157718645 | 25 | 24.129 | KV453089.1 | 2107526 | 16-scf00496 | 16 |
| AX-158315642 | 25 | 24.129 | KV453089.1 | 2117621 | 16-scf00496 | 16 |
| AX-158315634 | 25 | 24.282 | KV453089.1 | 2109153 | 16-scf00496 | 16 |
| AX-158315635 | 25 | 24.282 | KV453089.1 | 2109648 | 16-scf00496 | 16 |
| AX-158315636 | 25 | 24.282 | KV453089.1 | 2110675 | 16-scf00496 | 16 |
| AX-158315637 | 25 | 24.282 | KV453089.1 | 2111666 | 16-scf00496 | 16 |
| AX-158315638 | 25 | 24.282 | KV453089.1 | 2112456 | 16-scf00496 | 16 |
| AX-158315652 | 25 | 24.282 | KV453089.1 | 2127014 | 16-scf00496 | 16 |
| AX-158315665 | 25 | 24.282 | KV453089.1 | 2143878 | 16-scf00496 | 16 |
| AX-158315610 | 25 | 24.283 | KV453089.1 | 2073067 | 16-scf00496 | 16 |

|              |    |        |            |         |             |    |
|--------------|----|--------|------------|---------|-------------|----|
| AX-158315620 | 25 | 24.283 | KV453089.1 | 2087404 | 16-scf00496 | 16 |
| AX-158315631 | 25 | 24.283 | KV453089.1 | 2104979 | 16-scf00496 | 16 |
| AX-158315640 | 25 | 24.283 | KV453089.1 | 2113758 | 16-scf00496 | 16 |
| AX-158315643 | 25 | 24.283 | KV453089.1 | 2119712 | 16-scf00496 | 16 |
| AX-158315644 | 25 | 24.283 | KV453089.1 | 2120442 | 16-scf00496 | 16 |
| AX-158315649 | 25 | 24.283 | KV453089.1 | 2124722 | 16-scf00496 | 16 |
| AX-158315650 | 25 | 24.283 | KV453089.1 | 2125646 | 16-scf00496 | 16 |
| AX-158315653 | 25 | 24.283 | KV453089.1 | 2130056 | 16-scf00496 | 16 |
| AX-157888307 | 25 | 24.283 | KV453089.1 | 2130368 | 16-scf00496 | 16 |
| AX-158315667 | 25 | 24.601 | KV453089.1 | 2147576 | 16-scf00496 | 16 |
| AX-158315671 | 25 | 24.772 | KV453089.1 | 2153908 | 16-scf00496 | 16 |
| AX-158315674 | 25 | 24.978 | KV453089.1 | 2157939 | 16-scf00496 | 16 |
| AX-158315675 | 25 | 24.982 | KV453089.1 | 2158987 | 16-scf00496 | 16 |
| AX-157720436 | 25 | 24.986 | KV453089.1 | 2159414 | 16-scf00496 | 16 |
| AX-158315679 | 25 | 24.986 | KV453089.1 | 2162435 | 16-scf00496 | 16 |
| AX-158315680 | 25 | 24.986 | KV453089.1 | 2163935 | 16-scf00496 | 16 |
| AX-157861382 | 25 | 25.041 | KV453089.1 | 2165827 | 16-scf00496 | 16 |
| AX-158315684 | 25 | 25.095 | KV453089.1 | 2168784 | 16-scf00496 | 16 |
| AX-157722400 | 25 | 25.095 | KV453089.1 | 2169588 | 16-scf00496 | 16 |
| AX-158315685 | 25 | 25.095 | KV453089.1 | 2170352 | 16-scf00496 | 16 |
| AX-158315688 | 25 | 25.095 | KV453089.1 | 2173466 | 16-scf00496 | 16 |
| AX-158315694 | 25 | 25.095 | KV453089.1 | 2184063 | 16-scf00496 | 16 |
| AX-158315730 | 25 | 25.095 | KV453089.1 | 2230521 | 16-scf00496 | 16 |
| AX-157773214 | 25 | 25.259 | KV453089.1 | 2189594 | 16-scf00496 | 16 |
| AX-158315702 | 25 | 25.259 | KV453089.1 | 2193887 | 16-scf00496 | 16 |
| AX-157710046 | 25 | 25.259 | KV453089.1 | 2196565 | 16-scf00496 | 16 |
| AX-158315713 | 25 | 25.328 | KV453089.1 | 2207491 | 16-scf00496 | 16 |
| AX-158315715 | 25 | 25.423 | KV453089.1 | 2209835 | 16-scf00496 | 16 |
| AX-158315716 | 25 | 25.438 | KV453089.1 | 2214434 | 16-scf00496 | 16 |
| AX-158315729 | 25 | 25.438 | KV453089.1 | 2229752 | 16-scf00496 | 16 |
| AX-158315755 | 25 | 25.438 | KV453089.1 | 2264106 | 16-scf00496 | 16 |
| AX-158315719 | 25 | 25.453 | KV453089.1 | 2218743 | 16-scf00496 | 16 |
| AX-158315720 | 25 | 25.467 | KV453089.1 | 2221047 | 16-scf00496 | 16 |
| AX-158315724 | 25 | 25.481 | KV453089.1 | 2224100 | 16-scf00496 | 16 |
| AX-157725616 | 25 | 25.489 | KV453089.1 | 2215053 | 16-scf00496 | 16 |
| AX-158315727 | 25 | 25.489 | KV453089.1 | 2227580 | 16-scf00496 | 16 |
| AX-158315738 | 25 | 25.489 | KV453089.1 | 2240485 | 16-scf00496 | 16 |
| AX-158315676 | 25 | 25.496 | KV453089.1 | 2160079 | 16-scf00496 | 16 |
| AX-158315770 | 25 | 25.496 | KV453089.1 | 2284090 | 16-scf00496 | 16 |
| AX-158315732 | 25 | 25.511 | KV453089.1 | 2235338 | 16-scf00496 | 16 |
| AX-158315740 | 25 | 25.511 | KV453089.1 | 2241861 | 16-scf00496 | 16 |
| AX-157718500 | 25 | 25.532 | KV453089.1 | 2094807 | 16-scf00496 | 16 |
| AX-158315690 | 25 | 25.532 | KV453089.1 | 2176103 | 16-scf00496 | 16 |
| AX-158315698 | 25 | 25.532 | KV453089.1 | 2187262 | 16-scf00496 | 16 |
| AX-158315734 | 25 | 25.532 | KV453089.1 | 2236491 | 16-scf00496 | 16 |
| AX-158315735 | 25 | 25.532 | KV453089.1 | 2237792 | 16-scf00496 | 16 |
| AX-158315736 | 25 | 25.532 | KV453089.1 | 2238621 | 16-scf00496 | 16 |
| AX-158315739 | 25 | 25.532 | KV453089.1 | 2241175 | 16-scf00496 | 16 |
| AX-158315743 | 25 | 25.532 | KV453089.1 | 2248403 | 16-scf00496 | 16 |
| AX-158315744 | 25 | 25.532 | KV453089.1 | 2250926 | 16-scf00496 | 16 |
| AX-158315746 | 25 | 25.532 | KV453089.1 | 2254260 | 16-scf00496 | 16 |

|              |    |        |            |         |             |    |
|--------------|----|--------|------------|---------|-------------|----|
| AX-158315747 | 25 | 25.532 | KV453089.1 | 2255270 | 16-scf00496 | 16 |
| AX-158315753 | 25 | 25.532 | KV453089.1 | 2261087 | 16-scf00496 | 16 |
| AX-158315754 | 25 | 25.532 | KV453089.1 | 2263123 | 16-scf00496 | 16 |
| AX-158315756 | 25 | 25.532 | KV453089.1 | 2266801 | 16-scf00496 | 16 |
| AX-158315579 | 25 | 25.751 | KV453089.1 | 2030001 | 16-scf00496 | 16 |
| AX-158315714 | 25 | 25.751 | KV453089.1 | 2208910 | 16-scf00496 | 16 |
| AX-158315758 | 25 | 25.751 | KV453089.1 | 2269073 | 16-scf00496 | 16 |
| AX-158315759 | 25 | 25.751 | KV453089.1 | 2269451 | 16-scf00496 | 16 |
| AX-158315760 | 25 | 25.751 | KV453089.1 | 2270895 | 16-scf00496 | 16 |
| AX-158315761 | 25 | 25.751 | KV453089.1 | 2272046 | 16-scf00496 | 16 |
| AX-158315762 | 25 | 25.751 | KV453089.1 | 2273164 | 16-scf00496 | 16 |
| AX-158315763 | 25 | 25.751 | KV453089.1 | 2273815 | 16-scf00496 | 16 |
| AX-158315764 | 25 | 25.751 | KV453089.1 | 2274507 | 16-scf00496 | 16 |
| AX-157724915 | 25 | 25.751 | KV453089.1 | 2275098 | 16-scf00496 | 16 |
| AX-158315765 | 25 | 25.751 | KV453089.1 | 2275479 | 16-scf00496 | 16 |
| AX-158315767 | 25 | 25.91  | KV453089.1 | 2277380 | 16-scf00496 | 16 |
| AX-157756190 | 25 | 26.101 | KV453089.1 | 2282247 | 16-scf00496 | 16 |
| AX-158315769 | 25 | 26.117 | KV453089.1 | 2283567 | 16-scf00496 | 16 |
| AX-158315776 | 25 | 26.243 | KV453089.1 | 2290483 | 16-scf00496 | 16 |
| AX-157771105 | 25 | 26.674 | KV453089.1 | 2295058 | 16-scf00496 | 16 |
| AX-158315781 | 25 | 26.677 | KV453089.1 | 2296712 | 16-scf00496 | 16 |
| AX-158315782 | 25 | 26.679 | KV453089.1 | 2297523 | 16-scf00496 | 16 |
| AX-158315785 | 25 | 26.679 | KV453089.1 | 2303415 | 16-scf00496 | 16 |
| AX-158315788 | 25 | 26.912 | KV453089.1 | 2308377 | 16-scf00496 | 16 |
| AX-158315789 | 25 | 26.912 | KV453089.1 | 2309525 | 16-scf00496 | 16 |
| AX-158315795 | 25 | 26.912 | KV453089.1 | 2315045 | 16-scf00496 | 16 |
| AX-157754848 | 25 | 26.912 | KV453089.1 | 2317930 | 16-scf00496 | 16 |
| AX-157847757 | 25 | 26.912 | KV453089.1 | 2318838 | 16-scf00496 | 16 |
| AX-158315797 | 25 | 27.065 | KV453089.1 | 2318917 | 16-scf00496 | 16 |
| AX-158315798 | 25 | 27.065 | KV453089.1 | 2320341 | 16-scf00496 | 16 |
| AX-158315800 | 25 | 27.065 | KV453089.1 | 2323776 | 16-scf00496 | 16 |
| AX-158315801 | 25 | 27.065 | KV453089.1 | 2324700 | 16-scf00496 | 16 |
| AX-158315804 | 25 | 27.065 | KV453089.1 | 2326687 | 16-scf00496 | 16 |
| AX-158315806 | 25 | 27.226 | KV453089.1 | 2327963 | 16-scf00496 | 16 |
| AX-158315808 | 25 | 27.393 | KV453089.1 | 2331047 | 16-scf00496 | 16 |
| AX-158315809 | 25 | 27.393 | KV453089.1 | 2332270 | 16-scf00496 | 16 |
| AX-158315810 | 25 | 27.393 | KV453089.1 | 2333687 | 16-scf00496 | 16 |
| AX-158315811 | 25 | 27.393 | KV453089.1 | 2334987 | 16-scf00496 | 16 |
| AX-158315814 | 25 | 27.393 | KV453089.1 | 2338507 | 16-scf00496 | 16 |
| AX-158315822 | 25 | 27.434 | KV453089.1 | 2353153 | 16-scf00496 | 16 |
| AX-158315826 | 25 | 27.539 | KV453089.1 | 2355909 | 16-scf00496 | 16 |
| AX-158315828 | 25 | 27.539 | KV453089.1 | 2357620 | 16-scf00496 | 16 |
| AX-158315824 | 25 | 27.635 | KV453089.1 | 2354311 | 16-scf00496 | 16 |
| AX-158315829 | 25 | 27.635 | KV453089.1 | 2358322 | 16-scf00496 | 16 |
| AX-158315830 | 25 | 27.635 | KV453089.1 | 2360820 | 16-scf00496 | 16 |
| AX-158315831 | 25 | 27.678 | KV453089.1 | 2362917 | 16-scf00496 | 16 |
| AX-158315844 | 25 | 27.678 | KV453089.1 | 2374836 | 16-scf00496 | 16 |
| AX-158315833 | 25 | 27.728 | KV453089.1 | 2366328 | 16-scf00496 | 16 |
| AX-157847758 | 25 | 27.776 | KV453089.1 | 2364937 | 16-scf00496 | 16 |
| AX-158315837 | 25 | 27.776 | KV453089.1 | 2369428 | 16-scf00496 | 16 |
| AX-158315845 | 25 | 27.811 | KV453089.1 | 2375449 | 16-scf00496 | 16 |

|              |    |        |            |         |             |    |
|--------------|----|--------|------------|---------|-------------|----|
| AX-158315849 | 25 | 27.872 | KV453089.1 | 2382117 | 16-scf00496 | 16 |
| AX-158315813 | 25 | 27.874 | KV453089.1 | 2337006 | 16-scf00496 | 16 |
| AX-158315854 | 25 | 27.874 | KV453089.1 | 2385956 | 16-scf00496 | 16 |
| AX-158315856 | 25 | 27.874 | KV453089.1 | 2388292 | 16-scf00496 | 16 |
| AX-158315889 | 25 | 27.874 | KV453089.1 | 2423940 | 16-scf00496 | 16 |
| AX-158315861 | 25 | 27.901 | KV453089.1 | 2395902 | 16-scf00496 | 16 |
| AX-158315847 | 25 | 28.032 | KV453089.1 | 2377949 | 16-scf00496 | 16 |
| AX-158315855 | 25 | 28.032 | KV453089.1 | 2388027 | 16-scf00496 | 16 |
| AX-158315859 | 25 | 28.032 | KV453089.1 | 2394360 | 16-scf00496 | 16 |
| AX-158315864 | 25 | 28.032 | KV453089.1 | 2398092 | 16-scf00496 | 16 |
| AX-158315865 | 25 | 28.032 | KV453089.1 | 2398942 | 16-scf00496 | 16 |
| AX-158315868 | 25 | 28.032 | KV453089.1 | 2401191 | 16-scf00496 | 16 |
| AX-158315818 | 25 | 28.19  | KV453089.1 | 2349502 | 16-scf00496 | 16 |
| AX-158315870 | 25 | 28.19  | KV453089.1 | 2402891 | 16-scf00496 | 16 |
| AX-158315871 | 25 | 28.19  | KV453089.1 | 2403809 | 16-scf00496 | 16 |
| AX-158315882 | 25 | 28.19  | KV453089.1 | 2414967 | 16-scf00496 | 16 |
| AX-158315885 | 25 | 28.19  | KV453089.1 | 2418603 | 16-scf00496 | 16 |
| AX-158315886 | 25 | 28.19  | KV453089.1 | 2420120 | 16-scf00496 | 16 |
| AX-158315887 | 25 | 28.19  | KV453089.1 | 2421255 | 16-scf00496 | 16 |
| AX-158315888 | 25 | 28.19  | KV453089.1 | 2422317 | 16-scf00496 | 16 |
| AX-158315892 | 25 | 28.19  | KV453089.1 | 2428477 | 16-scf00496 | 16 |
| AX-158315893 | 25 | 28.19  | KV453089.1 | 2430796 | 16-scf00496 | 16 |
| AX-158315895 | 25 | 28.19  | KV453089.1 | 2432389 | 16-scf00496 | 16 |
| AX-158315896 | 25 | 28.347 | KV453089.1 | 2433157 | 16-scf00496 | 16 |
| AX-157725363 | 25 | 28.347 | KV453089.1 | 2433833 | 16-scf00496 | 16 |
| AX-158315900 | 25 | 28.363 | KV453089.1 | 2438527 | 16-scf00496 | 16 |
| AX-158315903 | 25 | 28.585 | KV453089.1 | 2442777 | 16-scf00496 | 16 |
| AX-158315905 | 25 | 28.805 | KV453089.1 | 2445982 | 16-scf00496 | 16 |
| AX-158315906 | 25 | 28.821 | KV453089.1 | 2446222 | 16-scf00496 | 16 |
| AX-158315907 | 25 | 28.821 | KV453089.1 | 2448454 | 16-scf00496 | 16 |
| AX-158315908 | 25 | 28.821 | KV453089.1 | 2449103 | 16-scf00496 | 16 |
| AX-157774132 | 25 | 28.821 | KV453089.1 | 2449611 | 16-scf00496 | 16 |
| AX-158315909 | 25 | 28.821 | KV453089.1 | 2450110 | 16-scf00496 | 16 |
| AX-158315915 | 25 | 28.821 | KV453089.1 | 2458052 | 16-scf00496 | 16 |
| AX-158315918 | 25 | 28.821 | KV453089.1 | 2460042 | 16-scf00496 | 16 |
| AX-158315919 | 25 | 28.821 | KV453089.1 | 2461005 | 16-scf00496 | 16 |
| AX-157754380 | 25 | 28.821 | KV453089.1 | 2461500 | 16-scf00496 | 16 |
| AX-158315922 | 25 | 28.821 | KV453089.1 | 2463631 | 16-scf00496 | 16 |
| AX-158315925 | 25 | 28.821 | KV453089.1 | 2466269 | 16-scf00496 | 16 |
| AX-158315926 | 25 | 29.135 | KV453089.1 | 2468279 | 16-scf00496 | 16 |
| AX-157724457 | 25 | 29.136 | KV453089.1 | 2468881 | 16-scf00496 | 16 |
| AX-158315927 | 25 | 29.149 | KV453089.1 | 2469290 | 16-scf00496 | 16 |
| AX-158315933 | 25 | 29.149 | KV453089.1 | 2474684 | 16-scf00496 | 16 |
| AX-158315862 | 25 | 29.158 | KV453089.1 | 2396491 | 16-scf00496 | 16 |
| AX-158315877 | 25 | 29.158 | KV453089.1 | 2409200 | 16-scf00496 | 16 |
| AX-158315914 | 25 | 29.158 | KV453089.1 | 2457689 | 16-scf00496 | 16 |
| AX-158315928 | 25 | 29.158 | KV453089.1 | 2469693 | 16-scf00496 | 16 |
| AX-158315929 | 25 | 29.158 | KV453089.1 | 2470226 | 16-scf00496 | 16 |
| AX-157739765 | 25 | 29.158 | KV453089.1 | 2480926 | 16-scf00496 | 16 |
| AX-158315942 | 25 | 29.158 | KV453089.1 | 2486196 | 16-scf00496 | 16 |
| AX-158315953 | 25 | 29.158 | KV453089.1 | 2501884 | 16-scf00496 | 16 |

|              |    |        |             |         |             |    |
|--------------|----|--------|-------------|---------|-------------|----|
| AX-158315930 | 25 | 29.171 | KV453089.1  | 2470583 | 16-scf00496 | 16 |
| AX-158315934 | 25 | 29.183 | KV453089.1  | 2476360 | 16-scf00496 | 16 |
| AX-158315938 | 25 | 29.197 | KV453089.1  | 2482453 | 16-scf00496 | 16 |
| AX-158315940 | 25 | 29.313 | KV453089.1  | 2484025 | 16-scf00496 | 16 |
| AX-158315860 | 25 | 29.358 | KV453089.1  | 2395138 | 16-scf00496 | 16 |
| AX-158315863 | 25 | 29.358 | KV453089.1  | 2396937 | 16-scf00496 | 16 |
| AX-158315866 | 25 | 29.358 | KV453089.1  | 2399571 | 16-scf00496 | 16 |
| AX-158315884 | 25 | 29.358 | KV453089.1  | 2417995 | 16-scf00496 | 16 |
| AX-158315890 | 25 | 29.358 | KV453089.1  | 2425715 | 16-scf00496 | 16 |
| AX-158315904 | 25 | 29.358 | KV453089.1  | 2444550 | 16-scf00496 | 16 |
| AX-158315910 | 25 | 29.358 | KV453089.1  | 2451365 | 16-scf00496 | 16 |
| AX-158315923 | 25 | 29.358 | KV453089.1  | 2464302 | 16-scf00496 | 16 |
| AX-158315935 | 25 | 29.358 | KV453089.1  | 2477459 | 16-scf00496 | 16 |
| AX-158315936 | 25 | 29.358 | KV453089.1  | 2478074 | 16-scf00496 | 16 |
| AX-158315951 | 25 | 29.358 | KV453089.1  | 2500502 | 16-scf00496 | 16 |
| AX-158315956 | 25 | 29.358 | KV453089.1  | 2503498 | 16-scf00496 | 16 |
| AX-158315961 | 25 | 29.358 | KV453089.1  | 2517476 | 16-scf00496 | 16 |
| AX-158315989 | 25 | 29.358 | KV453089.1  | 2548389 | 16-scf00496 | 16 |
| AX-158316004 | 25 | 29.358 | KV453089.1  | 2563625 | 16-scf00496 | 16 |
| AX-157757408 | 25 | 30.038 | KV453089.1  | 2508810 | 16-scf00496 | 16 |
| AX-158315958 | 25 | 30.083 | KV453089.1  | 2510635 | 16-scf00496 | 16 |
| AX-157758820 | 25 | 30.083 | KV453089.1  | 2513356 | 16-scf00496 | 16 |
| AX-158315965 | 25 | 30.083 | KV453089.1  | 2523482 | 16-scf00496 | 16 |
| AX-157749671 | 25 | 30.083 | KV453089.1  | 2523950 | 16-scf00496 | 16 |
| AX-158315971 | 25 | 30.083 | KV453089.1  | 2526110 | 16-scf00496 | 16 |
| AX-158315972 | 25 | 30.083 | KV453089.1  | 2529704 | 16-scf00496 | 16 |
| AX-158316007 | 25 | 30.083 | KV453089.1  | 2567258 | 16-scf00496 | 16 |
| AX-158315974 | 25 | 30.104 | KV453089.1  | 2532125 | 16-scf00496 | 16 |
| AX-158315977 | 25 | 30.123 | KV453089.1  | 2534563 | 16-scf00496 | 16 |
| AX-158315983 | 25 | 30.123 | KV453089.1  | 2541966 | 16-scf00496 | 16 |
| AX-158418170 | 25 | 30.305 | KV453089.1  | 2544505 | 16-scf00496 | 16 |
| AX-157706345 | 25 | 30.479 | 3ML01032098 | 187     | scf07711_1  | UN |
| AX-158315990 | 25 | 30.703 | KV453089.1  | 2550836 | 16-scf00496 | 16 |
| AX-158315992 | 25 | 30.958 | KV453089.1  | 2551941 | 16-scf00496 | 16 |
| AX-158315995 | 25 | 30.958 | KV453089.1  | 2556798 | 16-scf00496 | 16 |
| AX-158315998 | 25 | 31.19  | KV453089.1  | 2558717 | 16-scf00496 | 16 |
| AX-158316002 | 25 | 31.191 | KV453089.1  | 2562518 | 16-scf00496 | 16 |
| AX-158316005 | 25 | 31.191 | KV453089.1  | 2565172 | 16-scf00496 | 16 |
| AX-158316010 | 25 | 31.191 | KV453089.1  | 2570365 | 16-scf00496 | 16 |
| AX-158315969 | 25 | 31.348 | KV453089.1  | 2525201 | 16-scf00496 | 16 |
| AX-157724147 | 25 | 31.348 | KV453089.1  | 2534058 | 16-scf00496 | 16 |
| AX-158315987 | 25 | 31.348 | KV453089.1  | 2546459 | 16-scf00496 | 16 |
| AX-158316006 | 25 | 31.348 | KV453089.1  | 2565972 | 16-scf00496 | 16 |
| AX-158316011 | 25 | 31.348 | KV453089.1  | 2573595 | 16-scf00496 | 16 |
| AX-157726502 | 25 | 31.348 | KV453089.1  | 2577166 | 16-scf00496 | 16 |
| AX-158316014 | 25 | 31.348 | KV453089.1  | 2579129 | 16-scf00496 | 16 |
| AX-158316015 | 25 | 31.348 | KV453089.1  | 2580387 | 16-scf00496 | 16 |
| AX-158316016 | 25 | 31.348 | KV453089.1  | 2581793 | 16-scf00496 | 16 |
| AX-158316017 | 25 | 31.348 | KV453089.1  | 2585637 | 16-scf00496 | 16 |
| AX-158316018 | 25 | 31.348 | KV453089.1  | 2586981 | 16-scf00496 | 16 |
| AX-157723206 | 25 | 31.348 | KV453089.1  | 2588929 | 16-scf00496 | 16 |

|              |    |        |            |         |             |    |
|--------------|----|--------|------------|---------|-------------|----|
| AX-158316021 | 25 | 31.623 | KV453089.1 | 2590562 | 16-scf00496 | 16 |
| AX-158316023 | 25 | 31.623 | KV453089.1 | 2592050 | 16-scf00496 | 16 |
| AX-158316024 | 25 | 31.711 | KV453089.1 | 2592791 | 16-scf00496 | 16 |
| AX-158316026 | 25 | 31.711 | KV453089.1 | 2593879 | 16-scf00496 | 16 |
| AX-157709057 | 25 | 31.711 | KV453089.1 | 2596247 | 16-scf00496 | 16 |
| AX-158418171 | 25 | 31.711 | KV453089.1 | 2597476 | 16-scf00496 | 16 |
| AX-157773926 | 25 | 31.711 | KV453089.1 | 2604722 | 16-scf00496 | 16 |
| AX-158316034 | 25 | 31.788 | KV453089.1 | 2602910 | 16-scf00496 | 16 |
| AX-158316035 | 25 | 31.894 | KV453089.1 | 2603689 | 16-scf00496 | 16 |
| AX-158316036 | 25 | 31.894 | KV453089.1 | 2607069 | 16-scf00496 | 16 |
| AX-158316037 | 25 | 31.894 | KV453089.1 | 2608697 | 16-scf00496 | 16 |
| AX-158316038 | 25 | 31.894 | KV453089.1 | 2609401 | 16-scf00496 | 16 |
| AX-158316042 | 25 | 31.894 | KV453089.1 | 2612954 | 16-scf00496 | 16 |
| AX-158316044 | 25 | 31.894 | KV453089.1 | 2618024 | 16-scf00496 | 16 |
| AX-157755046 | 25 | 31.894 | KV453089.1 | 2622377 | 16-scf00496 | 16 |
| AX-158316066 | 25 | 31.894 | KV453089.1 | 2648087 | 16-scf00496 | 16 |
| AX-158316093 | 25 | 31.894 | KV453089.1 | 2683323 | 16-scf00496 | 16 |
| AX-158316131 | 25 | 31.894 | KV453089.1 | 2738463 | 16-scf00496 | 16 |
| AX-158316141 | 25 | 31.894 | KV453089.1 | 2753456 | 16-scf00496 | 16 |
| AX-158316183 | 25 | 31.894 | KV453089.1 | 2835851 | 16-scf00496 | 16 |
| AX-158316197 | 25 | 31.894 | KV453089.1 | 2849603 | 16-scf00496 | 16 |
| AX-158316212 | 25 | 31.894 | KV453089.1 | 2864900 | 16-scf00496 | 16 |
| AX-158316277 | 25 | 31.894 | KV453089.1 | 2948246 | 16-scf00496 | 16 |
| AX-158316297 | 25 | 31.894 | KV453089.1 | 2968041 | 16-scf00496 | 16 |
| AX-158316305 | 25 | 31.894 | KV453089.1 | 2977804 | 16-scf00496 | 16 |
| AX-158316317 | 25 | 31.894 | KV453089.1 | 2984927 | 16-scf00496 | 16 |
| AX-158316045 | 25 | 32.169 | KV453089.1 | 2625533 | 16-scf00496 | 16 |
| AX-157752639 | 25 | 32.169 | KV453089.1 | 2626729 | 16-scf00496 | 16 |
| AX-158316052 | 25 | 32.169 | KV453089.1 | 2633973 | 16-scf00496 | 16 |
| AX-158316056 | 25 | 32.169 | KV453089.1 | 2639001 | 16-scf00496 | 16 |
| AX-158316057 | 25 | 32.306 | KV453089.1 | 2639821 | 16-scf00496 | 16 |
| AX-158316059 | 25 | 32.306 | KV453089.1 | 2641073 | 16-scf00496 | 16 |
| AX-158316061 | 25 | 32.306 | KV453089.1 | 2642275 | 16-scf00496 | 16 |
| AX-158316070 | 25 | 32.306 | KV453089.1 | 2652381 | 16-scf00496 | 16 |
| AX-158412482 | 25 | 32.433 | KV453089.1 | 2644630 | 16-scf00496 | 16 |
| AX-158316064 | 25 | 32.44  | KV453089.1 | 2646064 | 16-scf00496 | 16 |
| AX-158316067 | 25 | 32.44  | KV453089.1 | 2648925 | 16-scf00496 | 16 |
| AX-157755363 | 25 | 32.44  | KV453089.1 | 2650668 | 16-scf00496 | 16 |
| AX-158316095 | 25 | 32.44  | KV453089.1 | 2686195 | 16-scf00496 | 16 |
| AX-158316076 | 25 | 32.516 | KV453089.1 | 2662308 | 16-scf00496 | 16 |
| AX-158316208 | 25 | 32.516 | KV453089.1 | 2863325 | 16-scf00496 | 16 |
| AX-158316301 | 25 | 32.516 | KV453089.1 | 2971723 | 16-scf00496 | 16 |
| AX-158316077 | 25 | 32.55  | KV453089.1 | 2664119 | 16-scf00496 | 16 |
| AX-158316078 | 25 | 32.55  | KV453089.1 | 2665078 | 16-scf00496 | 16 |
| AX-158316080 | 25 | 32.55  | KV453089.1 | 2666796 | 16-scf00496 | 16 |
| AX-158316082 | 25 | 32.55  | KV453089.1 | 2670745 | 16-scf00496 | 16 |
| AX-158316083 | 25 | 32.55  | KV453089.1 | 2672228 | 16-scf00496 | 16 |
| AX-158316087 | 25 | 32.55  | KV453089.1 | 2677067 | 16-scf00496 | 16 |
| AX-158316088 | 25 | 32.55  | KV453089.1 | 2678002 | 16-scf00496 | 16 |
| AX-158316089 | 25 | 32.816 | KV453089.1 | 2678972 | 16-scf00496 | 16 |
| AX-158316090 | 25 | 32.816 | KV453089.1 | 2679884 | 16-scf00496 | 16 |



|              |    |        |            |         |             |    |
|--------------|----|--------|------------|---------|-------------|----|
| AX-158316091 | 25 | 32.816 | KV453089.1 | 2682057 | 16-scf00496 | 16 |
| AX-158316092 | 25 | 32.816 | KV453089.1 | 2682546 | 16-scf00496 | 16 |
| AX-158316097 | 25 | 33.165 | KV453089.1 | 2692094 | 16-scf00496 | 16 |
| AX-158316101 | 25 | 33.206 | KV453089.1 | 2695743 | 16-scf00496 | 16 |
| AX-158316104 | 25 | 33.206 | KV453089.1 | 2698804 | 16-scf00496 | 16 |
| AX-158316106 | 25 | 33.206 | KV453089.1 | 2701334 | 16-scf00496 | 16 |
| AX-158418172 | 25 | 33.206 | KV453089.1 | 2709033 | 16-scf00496 | 16 |
| AX-158316110 | 25 | 33.206 | KV453089.1 | 2715686 | 16-scf00496 | 16 |
| AX-158316111 | 25 | 33.222 | KV453089.1 | 2716139 | 16-scf00496 | 16 |
| AX-158316147 | 25 | 33.222 | KV453089.1 | 2760724 | 16-scf00496 | 16 |
| AX-158316148 | 25 | 33.222 | KV453089.1 | 2761509 | 16-scf00496 | 16 |
| AX-158316193 | 25 | 33.222 | KV453089.1 | 2846307 | 16-scf00496 | 16 |
| AX-158316112 | 25 | 33.271 | KV453089.1 | 2716736 | 16-scf00496 | 16 |
| AX-158316135 | 25 | 33.271 | KV453089.1 | 2743783 | 16-scf00496 | 16 |
| AX-158316198 | 25 | 33.271 | KV453089.1 | 2850290 | 16-scf00496 | 16 |
| AX-158316107 | 25 | 33.315 | KV453089.1 | 2705906 | 16-scf00496 | 16 |
| AX-158316118 | 25 | 33.315 | KV453089.1 | 2724265 | 16-scf00496 | 16 |
| AX-158316121 | 25 | 33.315 | KV453089.1 | 2727053 | 16-scf00496 | 16 |
| AX-158316122 | 25 | 33.315 | KV453089.1 | 2727685 | 16-scf00496 | 16 |
| AX-158316129 | 25 | 33.315 | KV453089.1 | 2735660 | 16-scf00496 | 16 |
| AX-158316179 | 25 | 33.315 | KV453089.1 | 2832346 | 16-scf00496 | 16 |
| AX-158316144 | 25 | 33.329 | KV453089.1 | 2756257 | 16-scf00496 | 16 |
| AX-158316149 | 25 | 33.357 | KV453089.1 | 2761976 | 16-scf00496 | 16 |
| AX-158316151 | 25 | 33.369 | KV453089.1 | 2764342 | 16-scf00496 | 16 |
| AX-158316152 | 25 | 33.397 | KV453089.1 | 2765537 | 16-scf00496 | 16 |
| AX-158316153 | 25 | 33.424 | KV453089.1 | 2766637 | 16-scf00496 | 16 |
| AX-158316142 | 25 | 33.533 | KV453089.1 | 2754107 | 16-scf00496 | 16 |
| AX-158316158 | 25 | 33.533 | KV453089.1 | 2778828 | 16-scf00496 | 16 |
| AX-158316159 | 25 | 33.533 | KV453089.1 | 2784148 | 16-scf00496 | 16 |
| AX-158316160 | 25 | 33.533 | KV453089.1 | 2786112 | 16-scf00496 | 16 |
| AX-158316161 | 25 | 33.533 | KV453089.1 | 2786645 | 16-scf00496 | 16 |
| AX-158316163 | 25 | 33.533 | KV453089.1 | 2789125 | 16-scf00496 | 16 |
| AX-158316167 | 25 | 33.533 | KV453089.1 | 2807545 | 16-scf00496 | 16 |
| AX-158316169 | 25 | 33.533 | KV453089.1 | 2810396 | 16-scf00496 | 16 |
| AX-158316172 | 25 | 33.533 | KV453089.1 | 2823465 | 16-scf00496 | 16 |
| AX-158316173 | 25 | 33.533 | KV453089.1 | 2825562 | 16-scf00496 | 16 |
| AX-158316174 | 25 | 33.533 | KV453089.1 | 2825968 | 16-scf00496 | 16 |
| AX-158316175 | 25 | 33.533 | KV453089.1 | 2827867 | 16-scf00496 | 16 |
| AX-158316177 | 25 | 33.533 | KV453089.1 | 2829341 | 16-scf00496 | 16 |
| AX-158316178 | 25 | 33.533 | KV453089.1 | 2831549 | 16-scf00496 | 16 |
| AX-158316181 | 25 | 33.533 | KV453089.1 | 2833888 | 16-scf00496 | 16 |
| AX-158316182 | 25 | 33.533 | KV453089.1 | 2835239 | 16-scf00496 | 16 |
| AX-158316184 | 25 | 33.533 | KV453089.1 | 2837746 | 16-scf00496 | 16 |
| AX-158316180 | 25 | 33.6   | KV453089.1 | 2833219 | 16-scf00496 | 16 |
| AX-158316199 | 25 | 33.6   | KV453089.1 | 2852232 | 16-scf00496 | 16 |
| AX-158316188 | 25 | 33.667 | KV453089.1 | 2840227 | 16-scf00496 | 16 |
| AX-157754790 | 25 | 33.752 | KV453089.1 | 2740062 | 16-scf00496 | 16 |
| AX-158316162 | 25 | 33.752 | KV453089.1 | 2787375 | 16-scf00496 | 16 |
| AX-158316189 | 25 | 33.752 | KV453089.1 | 2842541 | 16-scf00496 | 16 |
| AX-158316190 | 25 | 33.752 | KV453089.1 | 2843185 | 16-scf00496 | 16 |
| AX-158316195 | 25 | 33.752 | KV453089.1 | 2847694 | 16-scf00496 | 16 |

|              |    |        |            |         |             |    |
|--------------|----|--------|------------|---------|-------------|----|
| AX-157888311 | 25 | 33.752 | KV453089.1 | 2850149 | 16-scf00496 | 16 |
| AX-158316200 | 25 | 33.752 | KV453089.1 | 2854121 | 16-scf00496 | 16 |
| AX-158316203 | 25 | 33.752 | KV453089.1 | 2856779 | 16-scf00496 | 16 |
| AX-158316205 | 25 | 33.752 | KV453089.1 | 2857472 | 16-scf00496 | 16 |
| AX-158316211 | 25 | 33.752 | KV453089.1 | 2864295 | 16-scf00496 | 16 |
| AX-158316176 | 25 | 33.861 | KV453089.1 | 2828271 | 16-scf00496 | 16 |
| AX-158316219 | 25 | 33.861 | KV453089.1 | 2871428 | 16-scf00496 | 16 |
| AX-158316220 | 25 | 33.861 | KV453089.1 | 2873323 | 16-scf00496 | 16 |
| AX-158316224 | 25 | 33.861 | KV453089.1 | 2877832 | 16-scf00496 | 16 |
| AX-158316227 | 25 | 33.863 | KV453089.1 | 2880255 | 16-scf00496 | 16 |
| AX-158316241 | 25 | 33.865 | KV453089.1 | 2899891 | 16-scf00496 | 16 |
| AX-158316244 | 25 | 33.867 | KV453089.1 | 2903884 | 16-scf00496 | 16 |
| AX-158316109 | 25 | 34.298 | KV453089.1 | 2711409 | 16-scf00496 | 16 |
| AX-158316166 | 25 | 34.298 | KV453089.1 | 2806455 | 16-scf00496 | 16 |
| AX-158387840 | 25 | 34.298 | KV453089.1 | 2899021 | 16-scf00496 | 16 |
| AX-158412484 | 25 | 34.298 | KV453089.1 | 2909071 | 16-scf00496 | 16 |
| AX-157752260 | 25 | 34.298 | KV453089.1 | 2909544 | 16-scf00496 | 16 |
| AX-158316250 | 25 | 34.298 | KV453089.1 | 2915966 | 16-scf00496 | 16 |
| AX-158316251 | 25 | 34.298 | KV453089.1 | 2917346 | 16-scf00496 | 16 |
| AX-158316252 | 25 | 34.298 | KV453089.1 | 2918118 | 16-scf00496 | 16 |
| AX-158316253 | 25 | 34.298 | KV453089.1 | 2918722 | 16-scf00496 | 16 |
| AX-158316259 | 25 | 34.908 | KV453089.1 | 2929304 | 16-scf00496 | 16 |
| AX-158316261 | 25 | 34.909 | KV453089.1 | 2930252 | 16-scf00496 | 16 |
| AX-158316264 | 25 | 34.909 | KV453089.1 | 2933498 | 16-scf00496 | 16 |
| AX-158316265 | 25 | 34.909 | KV453089.1 | 2934409 | 16-scf00496 | 16 |
| AX-158316267 | 25 | 34.909 | KV453089.1 | 2935932 | 16-scf00496 | 16 |
| AX-158316270 | 25 | 34.909 | KV453089.1 | 2937650 | 16-scf00496 | 16 |
| AX-157847763 | 25 | 34.909 | KV453089.1 | 2944049 | 16-scf00496 | 16 |
| AX-158316315 | 25 | 34.909 | KV453089.1 | 2983402 | 16-scf00496 | 16 |
| AX-158316276 | 25 | 35.061 | KV453089.1 | 2945430 | 16-scf00496 | 16 |
| AX-158316279 | 25 | 35.061 | KV453089.1 | 2950079 | 16-scf00496 | 16 |
| AX-158316283 | 25 | 35.061 | KV453089.1 | 2952592 | 16-scf00496 | 16 |
| AX-157771123 | 25 | 35.061 | KV453089.1 | 2954138 | 16-scf00496 | 16 |
| AX-158316285 | 25 | 35.061 | KV453089.1 | 2954266 | 16-scf00496 | 16 |
| AX-158316288 | 25 | 35.061 | KV453089.1 | 2957211 | 16-scf00496 | 16 |
| AX-158316263 | 25 | 35.064 | KV453089.1 | 2931775 | 16-scf00496 | 16 |
| AX-158316290 | 25 | 35.064 | KV453089.1 | 2958085 | 16-scf00496 | 16 |
| AX-158316291 | 25 | 35.173 | KV453089.1 | 2958708 | 16-scf00496 | 16 |
| AX-158316294 | 25 | 35.281 | KV453089.1 | 2962253 | 16-scf00496 | 16 |
| AX-158316300 | 25 | 35.281 | KV453089.1 | 2971605 | 16-scf00496 | 16 |
| AX-157847764 | 25 | 35.281 | KV453089.1 | 2972724 | 16-scf00496 | 16 |
| AX-157772952 | 25 | 35.281 | KV453089.1 | 2975945 | 16-scf00496 | 16 |
| AX-158316304 | 25 | 35.281 | KV453089.1 | 2977576 | 16-scf00496 | 16 |
| AX-158316306 | 25 | 35.281 | KV453089.1 | 2978158 | 16-scf00496 | 16 |
| AX-158316310 | 25 | 35.281 | KV453089.1 | 2981980 | 16-scf00496 | 16 |
| AX-158316321 | 25 | 35.281 | KV453089.1 | 2988237 | 16-scf00496 | 16 |
| AX-158316328 | 25 | 35.281 | KV453089.1 | 2995258 | 16-scf00496 | 16 |
| AX-158316314 | 25 | 35.309 | KV453089.1 | 2983063 | 16-scf00496 | 16 |
| AX-158316319 | 25 | 35.34  | KV453089.1 | 2986054 | 16-scf00496 | 16 |
| AX-158316322 | 25 | 35.368 | KV453089.1 | 2988797 | 16-scf00496 | 16 |
| AX-158316330 | 25 | 35.368 | KV453089.1 | 2995981 | 16-scf00496 | 16 |

|              |    |        |            |         |             |    |
|--------------|----|--------|------------|---------|-------------|----|
| AX-158316325 | 25 | 35.39  | KV453089.1 | 2991334 | 16-scf00496 | 16 |
| AX-158316326 | 25 | 35.39  | KV453089.1 | 2993145 | 16-scf00496 | 16 |
| AX-158316327 | 25 | 35.39  | KV453089.1 | 2994372 | 16-scf00496 | 16 |
| AX-158387842 | 25 | 35.39  | KV453089.1 | 2995522 | 16-scf00496 | 16 |
| AX-158316331 | 25 | 35.39  | KV453089.1 | 2996392 | 16-scf00496 | 16 |
| AX-158316334 | 25 | 35.39  | KV453089.1 | 2999574 | 16-scf00496 | 16 |
| AX-158316335 | 25 | 35.39  | KV453089.1 | 3001587 | 16-scf00496 | 16 |
| AX-158381429 | 25 | 35.39  | KV453089.1 | 3005226 | 16-scf00496 | 16 |
| AX-158316345 | 25 | 35.39  | KV453089.1 | 3014352 | 16-scf00496 | 16 |
| AX-158316358 | 25 | 35.39  | KV453089.1 | 3031273 | 16-scf00496 | 16 |
| AX-158423661 | 25 | 35.39  | KV453089.1 | 3054609 | 16-scf00496 | 16 |
| AX-158316346 | 25 | 35.717 | KV453089.1 | 3016968 | 16-scf00496 | 16 |
| AX-158316349 | 25 | 35.717 | KV453089.1 | 3019983 | 16-scf00496 | 16 |
| AX-158316351 | 25 | 35.786 | KV453089.1 | 3022656 | 16-scf00496 | 16 |
| AX-157726130 | 25 | 35.827 | KV453089.1 | 3025057 | 16-scf00496 | 16 |
| AX-158316354 | 25 | 35.827 | KV453089.1 | 3025212 | 16-scf00496 | 16 |
| AX-158316357 | 25 | 35.827 | KV453089.1 | 3030631 | 16-scf00496 | 16 |
| AX-157750594 | 25 | 35.991 | KV453089.1 | 3033826 | 16-scf00496 | 16 |
| AX-157718114 | 25 | 36.154 | KV453089.1 | 3033321 | 16-scf00496 | 16 |
| AX-157717774 | 25 | 36.154 | KV453089.1 | 3034696 | 16-scf00496 | 16 |
| AX-157765233 | 25 | 36.154 | KV453089.1 | 3039774 | 16-scf00496 | 16 |
| AX-157770761 | 25 | 36.154 | KV453089.1 | 3044797 | 16-scf00496 | 16 |
| AX-158316370 | 25 | 36.154 | KV453089.1 | 3045582 | 16-scf00496 | 16 |
| AX-158316371 | 25 | 36.154 | KV453089.1 | 3048078 | 16-scf00496 | 16 |
| AX-158316073 | 25 | 36.155 | KV453089.1 | 2657778 | 16-scf00496 | 16 |
| AX-157847759 | 25 | 36.155 | KV453089.1 | 2791081 | 16-scf00496 | 16 |
| AX-158316298 | 25 | 36.155 | KV453089.1 | 2969441 | 16-scf00496 | 16 |
| AX-158316336 | 25 | 36.155 | KV453089.1 | 3004495 | 16-scf00496 | 16 |
| AX-157847768 | 25 | 36.155 | KV453089.1 | 3051984 | 16-scf00496 | 16 |
| AX-158418179 | 25 | 36.155 | KV453089.1 | 3054715 | 16-scf00496 | 16 |
| AX-158412486 | 25 | 36.155 | KV453089.1 | 3054968 | 16-scf00496 | 16 |
| AX-158418181 | 25 | 36.155 | KV453089.1 | 3055098 | 16-scf00496 | 16 |
| AX-158316378 | 25 | 36.155 | KV453089.1 | 3060931 | 16-scf00496 | 16 |
| AX-158316382 | 25 | 36.155 | KV453089.1 | 3065165 | 16-scf00496 | 16 |
| AX-158316386 | 25 | 36.155 | KV453089.1 | 3067633 | 16-scf00496 | 16 |
| AX-158316392 | 25 | 36.155 | KV453089.1 | 3075795 | 16-scf00496 | 16 |
| AX-158316395 | 25 | 36.155 | KV453089.1 | 3080211 | 16-scf00496 | 16 |
| AX-158316380 | 25 | 36.208 | KV453089.1 | 3062868 | 16-scf00496 | 16 |
| AX-158316381 | 25 | 36.264 | KV453089.1 | 3063895 | 16-scf00496 | 16 |
| AX-157847771 | 25 | 36.264 | KV453089.1 | 3065459 | 16-scf00496 | 16 |
| AX-158316383 | 25 | 36.264 | KV453089.1 | 3065528 | 16-scf00496 | 16 |
| AX-158316385 | 25 | 36.264 | KV453089.1 | 3066818 | 16-scf00496 | 16 |
| AX-158316394 | 25 | 36.592 | KV453089.1 | 3079321 | 16-scf00496 | 16 |
| AX-158316400 | 25 | 36.592 | KV453089.1 | 3087935 | 16-scf00496 | 16 |
| AX-158316401 | 25 | 36.592 | KV453089.1 | 3088690 | 16-scf00496 | 16 |
| AX-157847772 | 25 | 36.592 | KV453089.1 | 3091582 | 16-scf00496 | 16 |
| AX-158316405 | 25 | 36.592 | KV453089.1 | 3092229 | 16-scf00496 | 16 |
| AX-158316406 | 25 | 36.597 | KV453089.1 | 3094719 | 16-scf00496 | 16 |
| AX-158316422 | 25 | 36.597 | KV453089.1 | 3119545 | 16-scf00496 | 16 |
| AX-158316407 | 25 | 36.603 | KV453089.1 | 3096659 | 16-scf00496 | 16 |
| AX-158316366 | 25 | 36.781 | KV453089.1 | 3040294 | 16-scf00496 | 16 |

|              |    |        |            |         |             |    |
|--------------|----|--------|------------|---------|-------------|----|
| AX-158316408 | 25 | 36.781 | KV453089.1 | 3098991 | 16-scf00496 | 16 |
| AX-158316409 | 25 | 36.781 | KV453089.1 | 3099349 | 16-scf00496 | 16 |
| AX-157722299 | 25 | 36.861 | KV453089.1 | 3106634 | 16-scf00496 | 16 |
| AX-157748058 | 25 | 36.861 | KV453089.1 | 3109041 | 16-scf00496 | 16 |
| AX-158316415 | 25 | 37.138 | KV453089.1 | 3111582 | 16-scf00496 | 16 |
| AX-158316416 | 25 | 37.138 | KV453089.1 | 3112211 | 16-scf00496 | 16 |
| AX-158316424 | 25 | 37.138 | KV453089.1 | 3120803 | 16-scf00496 | 16 |
| AX-157847774 | 25 | 37.139 | KV453089.1 | 3114735 | 16-scf00496 | 16 |
| AX-158316419 | 25 | 37.139 | KV453089.1 | 3117081 | 16-scf00496 | 16 |
| AX-158316425 | 25 | 37.139 | KV453089.1 | 3121028 | 16-scf00496 | 16 |
| AX-158316426 | 25 | 37.139 | KV453089.1 | 3122465 | 16-scf00496 | 16 |
| AX-158316428 | 25 | 37.139 | KV453089.1 | 3125890 | 16-scf00496 | 16 |
| AX-157722310 | 25 | 37.139 | KV453089.1 | 3126785 | 16-scf00496 | 16 |
| AX-158316429 | 25 | 37.139 | KV453089.1 | 3127146 | 16-scf00496 | 16 |
| AX-158316430 | 25 | 37.139 | KV453089.1 | 3127568 | 16-scf00496 | 16 |
| AX-157752369 | 25 | 37.139 | KV453089.1 | 3127801 | 16-scf00496 | 16 |
| AX-158316442 | 25 | 37.139 | KV453089.1 | 3141985 | 16-scf00496 | 16 |
| AX-158316432 | 25 | 37.19  | KV453089.1 | 3132609 | 16-scf00496 | 16 |
| AX-158316436 | 25 | 37.248 | KV453089.1 | 3136216 | 16-scf00496 | 16 |
| AX-157847776 | 25 | 37.248 | KV453089.1 | 3136856 | 16-scf00496 | 16 |
| AX-158316437 | 25 | 37.248 | KV453089.1 | 3137168 | 16-scf00496 | 16 |
| AX-157847777 | 25 | 37.248 | KV453089.1 | 3138547 | 16-scf00496 | 16 |
| AX-158316439 | 25 | 37.248 | KV453089.1 | 3139902 | 16-scf00496 | 16 |
| AX-158316443 | 25 | 37.248 | KV453089.1 | 3142636 | 16-scf00496 | 16 |
| AX-158316444 | 25 | 37.248 | KV453089.1 | 3143529 | 16-scf00496 | 16 |
| AX-158316448 | 25 | 37.575 | KV453089.1 | 3151482 | 16-scf00496 | 16 |
| AX-158316449 | 25 | 37.575 | KV453089.1 | 3152859 | 16-scf00496 | 16 |
| AX-158316451 | 25 | 37.575 | KV453089.1 | 3154614 | 16-scf00496 | 16 |
| AX-157847779 | 25 | 37.575 | KV453089.1 | 3156027 | 16-scf00496 | 16 |
| AX-158316452 | 25 | 37.575 | KV453089.1 | 3157258 | 16-scf00496 | 16 |
| AX-157847781 | 25 | 37.575 | KV453089.1 | 3163462 | 16-scf00496 | 16 |
| AX-158316460 | 25 | 37.575 | KV453089.1 | 3165914 | 16-scf00496 | 16 |
| AX-158316461 | 25 | 37.575 | KV453089.1 | 3167434 | 16-scf00496 | 16 |
| AX-157724927 | 25 | 37.575 | KV453089.1 | 3170072 | 16-scf00496 | 16 |
| AX-158316463 | 25 | 37.575 | KV453089.1 | 3170485 | 16-scf00496 | 16 |
| AX-158316465 | 25 | 37.575 | KV453089.1 | 3173791 | 16-scf00496 | 16 |
| AX-158316467 | 25 | 37.575 | KV453089.1 | 3175619 | 16-scf00496 | 16 |
| AX-158316468 | 25 | 37.575 | KV453089.1 | 3175983 | 16-scf00496 | 16 |
| AX-158316469 | 25 | 37.575 | KV453089.1 | 3177223 | 16-scf00496 | 16 |
| AX-158316470 | 25 | 37.575 | KV453089.1 | 3177767 | 16-scf00496 | 16 |
| AX-158316471 | 25 | 37.575 | KV453089.1 | 3178326 | 16-scf00496 | 16 |
| AX-158316474 | 25 | 37.575 | KV453089.1 | 3182249 | 16-scf00496 | 16 |
| AX-157847783 | 25 | 37.575 | KV453089.1 | 3185537 | 16-scf00496 | 16 |
| AX-157847784 | 25 | 37.575 | KV453089.1 | 3186651 | 16-scf00496 | 16 |
| AX-158381430 | 25 | 37.575 | KV453089.1 | 3187453 | 16-scf00496 | 16 |
| AX-157739945 | 25 | 37.575 | KV453089.1 | 3187502 | 16-scf00496 | 16 |
| AX-158316478 | 25 | 37.575 | KV453089.1 | 3189022 | 16-scf00496 | 16 |
| AX-157744948 | 25 | 37.575 | KV453089.1 | 3190203 | 16-scf00496 | 16 |
| AX-158316480 | 25 | 37.575 | KV453089.1 | 3190927 | 16-scf00496 | 16 |
| AX-158316481 | 25 | 37.575 | KV453089.1 | 3191153 | 16-scf00496 | 16 |
| AX-158316484 | 25 | 37.575 | KV453089.1 | 3195628 | 16-scf00496 | 16 |

|              |    |        |            |         |             |    |
|--------------|----|--------|------------|---------|-------------|----|
| AX-157847786 | 25 | 37.575 | KV453089.1 | 3229090 | 16-scf00496 | 16 |
| AX-157847780 | 25 | 37.794 | KV453089.1 | 3156557 | 16-scf00496 | 16 |
| AX-158316453 | 25 | 37.794 | KV453089.1 | 3158549 | 16-scf00496 | 16 |
| AX-158316454 | 25 | 37.794 | KV453089.1 | 3159304 | 16-scf00496 | 16 |
| AX-157713130 | 25 | 37.794 | KV453089.1 | 3195835 | 16-scf00496 | 16 |
| AX-158316486 | 25 | 37.794 | KV453089.1 | 3196565 | 16-scf00496 | 16 |
| AX-158316488 | 25 | 37.794 | KV453089.1 | 3201951 | 16-scf00496 | 16 |
| AX-157753713 | 25 | 37.794 | KV453089.1 | 3202388 | 16-scf00496 | 16 |
| AX-158316489 | 25 | 37.794 | KV453089.1 | 3202486 | 16-scf00496 | 16 |
| AX-158316490 | 25 | 37.794 | KV453089.1 | 3202843 | 16-scf00496 | 16 |
| AX-158316492 | 25 | 37.794 | KV453089.1 | 3205763 | 16-scf00496 | 16 |
| AX-158316493 | 25 | 37.794 | KV453089.1 | 3206237 | 16-scf00496 | 16 |
| AX-158316495 | 25 | 37.794 | KV453089.1 | 3208639 | 16-scf00496 | 16 |
| AX-157717310 | 25 | 37.794 | KV453089.1 | 3210670 | 16-scf00496 | 16 |
| AX-158316499 | 25 | 37.794 | KV453089.1 | 3216051 | 16-scf00496 | 16 |
| AX-158316500 | 25 | 37.794 | KV453089.1 | 3216759 | 16-scf00496 | 16 |
| AX-158316502 | 25 | 37.794 | KV453089.1 | 3219041 | 16-scf00496 | 16 |
| AX-157746577 | 25 | 37.794 | KV453089.1 | 3219531 | 16-scf00496 | 16 |
| AX-158316504 | 25 | 37.903 | KV453089.1 | 3221137 | 16-scf00496 | 16 |
| AX-158316505 | 25 | 37.903 | KV453089.1 | 3221603 | 16-scf00496 | 16 |
| AX-158316506 | 25 | 37.903 | KV453089.1 | 3222021 | 16-scf00496 | 16 |
| AX-158316507 | 25 | 37.903 | KV453089.1 | 3222864 | 16-scf00496 | 16 |
| AX-158316514 | 25 | 37.903 | KV453089.1 | 3231146 | 16-scf00496 | 16 |
| AX-158316511 | 25 | 37.952 | KV453089.1 | 3229250 | 16-scf00496 | 16 |
| AX-158316512 | 25 | 38.012 | KV453089.1 | 3230151 | 16-scf00496 | 16 |
| AX-158316513 | 25 | 38.012 | KV453089.1 | 3230655 | 16-scf00496 | 16 |
| AX-158316516 | 25 | 38.012 | KV453089.1 | 3233815 | 16-scf00496 | 16 |
| AX-158316517 | 25 | 38.012 | KV453089.1 | 3234880 | 16-scf00496 | 16 |
| AX-157716336 | 25 | 38.012 | KV453089.1 | 3238314 | 16-scf00496 | 16 |
| AX-158316554 | 25 | 38.012 | KV453089.1 | 3287069 | 16-scf00496 | 16 |
| AX-158316560 | 25 | 38.012 | KV453089.1 | 3293549 | 16-scf00496 | 16 |
| AX-157847787 | 25 | 38.047 | KV453089.1 | 3238399 | 16-scf00496 | 16 |
| AX-158316520 | 25 | 38.088 | KV453089.1 | 3241297 | 16-scf00496 | 16 |
| AX-158316522 | 25 | 38.105 | KV453089.1 | 3245118 | 16-scf00496 | 16 |
| AX-158316524 | 25 | 38.121 | KV453089.1 | 3249855 | 16-scf00496 | 16 |
| AX-158316526 | 25 | 38.121 | KV453089.1 | 3251872 | 16-scf00496 | 16 |
| AX-157743062 | 25 | 38.121 | KV453089.1 | 3252632 | 16-scf00496 | 16 |
| AX-157774587 | 25 | 38.121 | KV453089.1 | 3257011 | 16-scf00496 | 16 |
| AX-158316532 | 25 | 38.121 | KV453089.1 | 3258866 | 16-scf00496 | 16 |
| AX-158316533 | 25 | 38.121 | KV453089.1 | 3259219 | 16-scf00496 | 16 |
| AX-158316534 | 25 | 38.121 | KV453089.1 | 3262183 | 16-scf00496 | 16 |
| AX-158316537 | 25 | 38.34  | KV453089.1 | 3269010 | 16-scf00496 | 16 |
| AX-157742418 | 25 | 38.34  | KV453089.1 | 3270774 | 16-scf00496 | 16 |
| AX-158316540 | 25 | 38.34  | KV453089.1 | 3272731 | 16-scf00496 | 16 |
| AX-158316541 | 25 | 38.34  | KV453089.1 | 3273551 | 16-scf00496 | 16 |
| AX-158316544 | 25 | 38.34  | KV453089.1 | 3275166 | 16-scf00496 | 16 |
| AX-158316545 | 25 | 38.34  | KV453089.1 | 3277426 | 16-scf00496 | 16 |
| AX-157847788 | 25 | 38.34  | KV453089.1 | 3277680 | 16-scf00496 | 16 |
| AX-158316547 | 25 | 38.34  | KV453089.1 | 3280200 | 16-scf00496 | 16 |
| AX-158316548 | 25 | 38.34  | KV453089.1 | 3281632 | 16-scf00496 | 16 |
| AX-158316549 | 25 | 38.34  | KV453089.1 | 3282154 | 16-scf00496 | 16 |

|              |    |        |            |         |             |    |
|--------------|----|--------|------------|---------|-------------|----|
| AX-158316550 | 25 | 38.34  | KV453089.1 | 3282971 | 16-scf00496 | 16 |
| AX-158316551 | 25 | 38.34  | KV453089.1 | 3283871 | 16-scf00496 | 16 |
| AX-158316553 | 25 | 38.34  | KV453089.1 | 3286319 | 16-scf00496 | 16 |
| AX-157750399 | 25 | 38.34  | KV453089.1 | 3286834 | 16-scf00496 | 16 |
| AX-157748726 | 25 | 38.34  | KV453089.1 | 3287421 | 16-scf00496 | 16 |
| AX-158316555 | 25 | 38.34  | KV453089.1 | 3287587 | 16-scf00496 | 16 |
| AX-158316556 | 25 | 38.34  | KV453089.1 | 3287942 | 16-scf00496 | 16 |
| AX-158316561 | 25 | 38.34  | KV453089.1 | 3302653 | 16-scf00496 | 16 |
| AX-157847794 | 25 | 38.34  | KV453089.1 | 3330767 | 16-scf00496 | 16 |
| AX-157741943 | 25 | 38.34  | KV453089.1 | 3332956 | 16-scf00496 | 16 |
| AX-158316584 | 25 | 38.34  | KV453089.1 | 3337635 | 16-scf00496 | 16 |
| AX-158316593 | 25 | 38.34  | KV453089.1 | 3347551 | 16-scf00496 | 16 |
| AX-158316600 | 25 | 38.34  | KV453089.1 | 3354289 | 16-scf00496 | 16 |
| AX-158316601 | 25 | 38.34  | KV453089.1 | 3354817 | 16-scf00496 | 16 |
| AX-157746505 | 25 | 38.34  | KV453089.1 | 3364906 | 16-scf00496 | 16 |
| AX-157847796 | 25 | 38.34  | KV453089.1 | 3366477 | 16-scf00496 | 16 |
| AX-158316839 | 25 | 38.34  | KV453089.1 | 3711621 | 16-scf00496 | 16 |
| AX-157847790 | 25 | 38.446 | KV453089.1 | 3290259 | 16-scf00496 | 16 |
| AX-157723944 | 25 | 38.558 | KV453089.1 | 3282276 | 16-scf00496 | 16 |
| AX-158316559 | 25 | 38.558 | KV453089.1 | 3293078 | 16-scf00496 | 16 |
| AX-158418184 | 25 | 38.558 | KV453089.1 | 3298419 | 16-scf00496 | 16 |
| AX-157711244 | 25 | 38.558 | KV453089.1 | 3298565 | 16-scf00496 | 16 |
| AX-158316564 | 25 | 38.558 | KV453089.1 | 3308665 | 16-scf00496 | 16 |
| AX-158316565 | 25 | 38.558 | KV453089.1 | 3309495 | 16-scf00496 | 16 |
| AX-158316566 | 25 | 38.558 | KV453089.1 | 3309912 | 16-scf00496 | 16 |
| AX-158316571 | 25 | 38.558 | KV453089.1 | 3315565 | 16-scf00496 | 16 |
| AX-158316577 | 25 | 38.558 | KV453089.1 | 3326503 | 16-scf00496 | 16 |
| AX-157744015 | 25 | 38.558 | KV453089.1 | 3340150 | 16-scf00496 | 16 |
| AX-158316592 | 25 | 38.558 | KV453089.1 | 3346806 | 16-scf00496 | 16 |
| AX-158316609 | 25 | 38.558 | KV453089.1 | 3366342 | 16-scf00496 | 16 |
| AX-158316612 | 25 | 38.558 | KV453089.1 | 3370275 | 16-scf00496 | 16 |
| AX-158316620 | 25 | 38.558 | KV453089.1 | 3383335 | 16-scf00496 | 16 |
| AX-158316633 | 25 | 38.558 | KV453089.1 | 3400992 | 16-scf00496 | 16 |
| AX-158316574 | 25 | 38.626 | KV453089.1 | 3323457 | 16-scf00496 | 16 |
| AX-157847792 | 25 | 38.767 | KV453089.1 | 3324337 | 16-scf00496 | 16 |
| AX-157888319 | 25 | 38.886 | KV453089.1 | 3313249 | 16-scf00496 | 16 |
| AX-157743555 | 25 | 38.886 | KV453089.1 | 3326010 | 16-scf00496 | 16 |
| AX-158316578 | 25 | 38.886 | KV453089.1 | 3327154 | 16-scf00496 | 16 |
| AX-158316579 | 25 | 38.886 | KV453089.1 | 3328130 | 16-scf00496 | 16 |
| AX-158316582 | 25 | 38.886 | KV453089.1 | 3336690 | 16-scf00496 | 16 |
| AX-158316583 | 25 | 38.886 | KV453089.1 | 3337409 | 16-scf00496 | 16 |
| AX-158316585 | 25 | 38.886 | KV453089.1 | 3338331 | 16-scf00496 | 16 |
| AX-158316586 | 25 | 38.886 | KV453089.1 | 3340416 | 16-scf00496 | 16 |
| AX-158316587 | 25 | 38.886 | KV453089.1 | 3341370 | 16-scf00496 | 16 |
| AX-157719122 | 25 | 38.886 | KV453089.1 | 3343078 | 16-scf00496 | 16 |
| AX-158316588 | 25 | 38.886 | KV453089.1 | 3344598 | 16-scf00496 | 16 |
| AX-158316589 | 25 | 38.886 | KV453089.1 | 3345550 | 16-scf00496 | 16 |
| AX-157743071 | 25 | 38.886 | KV453089.1 | 3346858 | 16-scf00496 | 16 |
| AX-158316594 | 25 | 38.886 | KV453089.1 | 3348315 | 16-scf00496 | 16 |
| AX-158316596 | 25 | 38.886 | KV453089.1 | 3350203 | 16-scf00496 | 16 |
| AX-158316597 | 25 | 38.928 | KV453089.1 | 3351493 | 16-scf00496 | 16 |

|              |    |        |            |         |             |    |
|--------------|----|--------|------------|---------|-------------|----|
| AX-158316573 | 25 | 38.996 | KV453089.1 | 3317900 | 16-scf00496 | 16 |
| AX-158316598 | 25 | 38.996 | KV453089.1 | 3353456 | 16-scf00496 | 16 |
| AX-158316602 | 25 | 38.996 | KV453089.1 | 3356033 | 16-scf00496 | 16 |
| AX-158316603 | 25 | 38.996 | KV453089.1 | 3357377 | 16-scf00496 | 16 |
| AX-158316608 | 25 | 38.996 | KV453089.1 | 3365612 | 16-scf00496 | 16 |
| AX-157750120 | 25 | 38.996 | KV453089.1 | 3366852 | 16-scf00496 | 16 |
| AX-158316610 | 25 | 38.996 | KV453089.1 | 3367198 | 16-scf00496 | 16 |
| AX-158316611 | 25 | 38.996 | KV453089.1 | 3369915 | 16-scf00496 | 16 |
| AX-158316614 | 25 | 38.996 | KV453089.1 | 3373650 | 16-scf00496 | 16 |
| AX-158316617 | 25 | 39.056 | KV453089.1 | 3380403 | 16-scf00496 | 16 |
| AX-158316628 | 25 | 39.105 | KV453089.1 | 3395609 | 16-scf00496 | 16 |
| AX-158316629 | 25 | 39.214 | KV453089.1 | 3398461 | 16-scf00496 | 16 |
| AX-158316638 | 25 | 39.433 | KV453089.1 | 3405331 | 16-scf00496 | 16 |
| AX-158316641 | 25 | 39.433 | KV453089.1 | 3407949 | 16-scf00496 | 16 |
| AX-158316646 | 25 | 39.433 | KV453089.1 | 3412054 | 16-scf00496 | 16 |
| AX-158316651 | 25 | 39.433 | KV453089.1 | 3416684 | 16-scf00496 | 16 |
| AX-158316655 | 25 | 39.433 | KV453089.1 | 3419455 | 16-scf00496 | 16 |
| AX-158316657 | 25 | 39.433 | KV453089.1 | 3420406 | 16-scf00496 | 16 |
| AX-158316659 | 25 | 39.433 | KV453089.1 | 3421277 | 16-scf00496 | 16 |
| AX-158316660 | 25 | 39.433 | KV453089.1 | 3422431 | 16-scf00496 | 16 |
| AX-158316664 | 25 | 39.433 | KV453089.1 | 3426940 | 16-scf00496 | 16 |
| AX-158316668 | 25 | 39.433 | KV453089.1 | 3432795 | 16-scf00496 | 16 |
| AX-157743151 | 25 | 39.433 | KV453089.1 | 3433524 | 16-scf00496 | 16 |
| AX-158316671 | 25 | 39.433 | KV453089.1 | 3440738 | 16-scf00496 | 16 |
| AX-158316673 | 25 | 39.433 | KV453089.1 | 3441942 | 16-scf00496 | 16 |
| AX-158418187 | 25 | 39.433 | KV453089.1 | 3447147 | 16-scf00496 | 16 |
| AX-158316674 | 25 | 39.433 | KV453089.1 | 3449819 | 16-scf00496 | 16 |
| AX-158316675 | 25 | 39.433 | KV453089.1 | 3450415 | 16-scf00496 | 16 |
| AX-157847800 | 25 | 39.433 | KV453089.1 | 3453307 | 16-scf00496 | 16 |
| AX-158316678 | 25 | 39.433 | KV453089.1 | 3457525 | 16-scf00496 | 16 |
| AX-158316679 | 25 | 39.433 | KV453089.1 | 3458652 | 16-scf00496 | 16 |
| AX-158381432 | 25 | 39.433 | KV453089.1 | 3466082 | 16-scf00496 | 16 |
| AX-158316699 | 25 | 39.433 | KV453089.1 | 3515264 | 16-scf00496 | 16 |
| AX-158316718 | 25 | 39.433 | KV453089.1 | 3544447 | 16-scf00496 | 16 |
| AX-158316720 | 25 | 39.433 | KV453089.1 | 3546131 | 16-scf00496 | 16 |
| AX-158316732 | 25 | 39.433 | KV453089.1 | 3560531 | 16-scf00496 | 16 |
| AX-158316772 | 25 | 39.433 | KV453089.1 | 3626350 | 16-scf00496 | 16 |
| AX-157888320 | 25 | 39.433 | KV453089.1 | 3655440 | 16-scf00496 | 16 |
| AX-158316796 | 25 | 39.433 | KV453089.1 | 3656564 | 16-scf00496 | 16 |
| AX-158316799 | 25 | 39.433 | KV453089.1 | 3659267 | 16-scf00496 | 16 |
| AX-158317277 | 25 | 39.433 | KV453089.1 | 4328470 | 16-scf00496 | 16 |
| AX-157847802 | 25 | 39.542 | KV453089.1 | 3472292 | 16-scf00496 | 16 |
| AX-157772570 | 25 | 39.651 | KV453089.1 | 3424035 | 16-scf00496 | 16 |
| AX-158316676 | 25 | 39.651 | KV453089.1 | 3454253 | 16-scf00496 | 16 |
| AX-157747788 | 25 | 39.651 | KV453089.1 | 3472984 | 16-scf00496 | 16 |
| AX-157847803 | 25 | 39.651 | KV453089.1 | 3476427 | 16-scf00496 | 16 |
| AX-157752267 | 25 | 39.651 | KV453089.1 | 3480286 | 16-scf00496 | 16 |
| AX-158316687 | 25 | 39.651 | KV453089.1 | 3482000 | 16-scf00496 | 16 |
| AX-158316689 | 25 | 39.651 | KV453089.1 | 3484570 | 16-scf00496 | 16 |
| AX-158316690 | 25 | 39.651 | KV453089.1 | 3485209 | 16-scf00496 | 16 |
| AX-158316691 | 25 | 39.651 | KV453089.1 | 3489182 | 16-scf00496 | 16 |

|              |    |        |            |         |             |    |
|--------------|----|--------|------------|---------|-------------|----|
| AX-157847805 | 25 | 39.651 | KV453089.1 | 3489460 | 16-scf00496 | 16 |
| AX-158316688 | 25 | 39.699 | KV453089.1 | 3483231 | 16-scf00496 | 16 |
| AX-158316692 | 25 | 39.699 | KV453089.1 | 3489533 | 16-scf00496 | 16 |
| AX-158316728 | 25 | 39.699 | KV453089.1 | 3554088 | 16-scf00496 | 16 |
| AX-157714936 | 25 | 39.761 | KV453089.1 | 3498072 | 16-scf00496 | 16 |
| AX-157748577 | 25 | 39.761 | KV453089.1 | 3498446 | 16-scf00496 | 16 |
| AX-157847809 | 25 | 39.761 | KV453089.1 | 3499533 | 16-scf00496 | 16 |
| AX-158316695 | 25 | 39.761 | KV453089.1 | 3506030 | 16-scf00496 | 16 |
| AX-158316696 | 25 | 39.761 | KV453089.1 | 3506652 | 16-scf00496 | 16 |
| AX-158316697 | 25 | 39.761 | KV453089.1 | 3509578 | 16-scf00496 | 16 |
| AX-157740323 | 25 | 39.761 | KV453089.1 | 3511900 | 16-scf00496 | 16 |
| AX-157744850 | 25 | 39.761 | KV453089.1 | 3518378 | 16-scf00496 | 16 |
| AX-157847811 | 25 | 39.761 | KV453089.1 | 3518589 | 16-scf00496 | 16 |
| AX-158316700 | 25 | 39.761 | KV453089.1 | 3519266 | 16-scf00496 | 16 |
| AX-157742076 | 25 | 39.761 | KV453089.1 | 3520685 | 16-scf00496 | 16 |
| AX-157847812 | 25 | 39.761 | KV453089.1 | 3523719 | 16-scf00496 | 16 |
| AX-157847813 | 25 | 39.761 | KV453089.1 | 3523884 | 16-scf00496 | 16 |
| AX-157847814 | 25 | 39.761 | KV453089.1 | 3524458 | 16-scf00496 | 16 |
| AX-157847815 | 25 | 39.761 | KV453089.1 | 3525253 | 16-scf00496 | 16 |
| AX-157721255 | 25 | 39.761 | KV453089.1 | 3526227 | 16-scf00496 | 16 |
| AX-158316706 | 25 | 39.761 | KV453089.1 | 3530026 | 16-scf00496 | 16 |
| AX-158316707 | 25 | 39.761 | KV453089.1 | 3530451 | 16-scf00496 | 16 |
| AX-158316710 | 25 | 39.761 | KV453089.1 | 3534757 | 16-scf00496 | 16 |
| AX-158316713 | 25 | 39.761 | KV453089.1 | 3538227 | 16-scf00496 | 16 |
| AX-158316716 | 25 | 39.761 | KV453089.1 | 3539887 | 16-scf00496 | 16 |
| AX-158316717 | 25 | 39.761 | KV453089.1 | 3542343 | 16-scf00496 | 16 |
| AX-157847819 | 25 | 39.761 | KV453089.1 | 3543313 | 16-scf00496 | 16 |
| AX-158316719 | 25 | 39.761 | KV453089.1 | 3545297 | 16-scf00496 | 16 |
| AX-158316722 | 25 | 39.761 | KV453089.1 | 3547427 | 16-scf00496 | 16 |
| AX-158316723 | 25 | 39.761 | KV453089.1 | 3547810 | 16-scf00496 | 16 |
| AX-158316725 | 25 | 39.761 | KV453089.1 | 3548974 | 16-scf00496 | 16 |
| AX-157864038 | 25 | 39.761 | KV453089.1 | 3555887 | 16-scf00496 | 16 |
| AX-158316729 | 25 | 39.761 | KV453089.1 | 3558574 | 16-scf00496 | 16 |
| AX-158316730 | 25 | 39.761 | KV453089.1 | 3560147 | 16-scf00496 | 16 |
| AX-158316731 | 25 | 39.761 | KV453089.1 | 3560244 | 16-scf00496 | 16 |
| AX-158316733 | 25 | 39.761 | KV453089.1 | 3562371 | 16-scf00496 | 16 |
| AX-158316734 | 25 | 39.761 | KV453089.1 | 3563566 | 16-scf00496 | 16 |
| AX-158316748 | 25 | 39.761 | KV453089.1 | 3588706 | 16-scf00496 | 16 |
| AX-158316791 | 25 | 39.761 | KV453089.1 | 3647052 | 16-scf00496 | 16 |
| AX-158316661 | 25 | 39.767 | KV453089.1 | 3423091 | 16-scf00496 | 16 |
| AX-158316662 | 25 | 39.767 | KV453089.1 | 3424561 | 16-scf00496 | 16 |
| AX-157717716 | 25 | 39.767 | KV453089.1 | 3453253 | 16-scf00496 | 16 |
| AX-158412491 | 25 | 39.767 | KV453089.1 | 3512572 | 16-scf00496 | 16 |
| AX-157726639 | 25 | 39.767 | KV453089.1 | 3515752 | 16-scf00496 | 16 |
| AX-158316702 | 25 | 39.767 | KV453089.1 | 3523193 | 16-scf00496 | 16 |
| AX-157743612 | 25 | 39.767 | KV453089.1 | 3557471 | 16-scf00496 | 16 |
| AX-158316737 | 25 | 39.767 | KV453089.1 | 3568999 | 16-scf00496 | 16 |
| AX-157718129 | 25 | 40.19  | KV453089.1 | 3493235 | 16-scf00496 | 16 |
| AX-157847808 | 25 | 40.19  | KV453089.1 | 3498009 | 16-scf00496 | 16 |
| AX-158316694 | 25 | 40.19  | KV453089.1 | 3503147 | 16-scf00496 | 16 |
| AX-158316738 | 25 | 40.19  | KV453089.1 | 3570509 | 16-scf00496 | 16 |



|              |    |        |            |         |             |    |
|--------------|----|--------|------------|---------|-------------|----|
| AX-158316802 | 25 | 40.19  | KV453089.1 | 3661944 | 16-scf00496 | 16 |
| AX-157847821 | 25 | 40.197 | KV453089.1 | 3579356 | 16-scf00496 | 16 |
| AX-158316743 | 25 | 40.197 | KV453089.1 | 3585966 | 16-scf00496 | 16 |
| AX-158316744 | 25 | 40.197 | KV453089.1 | 3586038 | 16-scf00496 | 16 |
| AX-158316746 | 25 | 40.197 | KV453089.1 | 3587396 | 16-scf00496 | 16 |
| AX-158316754 | 25 | 40.197 | KV453089.1 | 3594630 | 16-scf00496 | 16 |
| AX-157847823 | 25 | 40.197 | KV453089.1 | 3597448 | 16-scf00496 | 16 |
| AX-157847824 | 25 | 40.197 | KV453089.1 | 3600253 | 16-scf00496 | 16 |
| AX-157847825 | 25 | 40.197 | KV453089.1 | 3603185 | 16-scf00496 | 16 |
| AX-158316758 | 25 | 40.197 | KV453089.1 | 3603760 | 16-scf00496 | 16 |
| AX-158316759 | 25 | 40.197 | KV453089.1 | 3606670 | 16-scf00496 | 16 |
| AX-157847826 | 25 | 40.197 | KV453089.1 | 3608140 | 16-scf00496 | 16 |
| AX-157713359 | 25 | 40.197 | KV453089.1 | 3608269 | 16-scf00496 | 16 |
| AX-157744236 | 25 | 40.197 | KV453089.1 | 3608714 | 16-scf00496 | 16 |
| AX-157744346 | 25 | 40.197 | KV453089.1 | 3610977 | 16-scf00496 | 16 |
| AX-158316762 | 25 | 40.197 | KV453089.1 | 3612505 | 16-scf00496 | 16 |
| AX-158316763 | 25 | 40.197 | KV453089.1 | 3616092 | 16-scf00496 | 16 |
| AX-158316773 | 25 | 40.197 | KV453089.1 | 3626898 | 16-scf00496 | 16 |
| AX-158316776 | 25 | 40.197 | KV453089.1 | 3629508 | 16-scf00496 | 16 |
| AX-158316781 | 25 | 40.197 | KV453089.1 | 3633939 | 16-scf00496 | 16 |
| AX-157847829 | 25 | 40.197 | KV453089.1 | 3676142 | 16-scf00496 | 16 |
| AX-158316873 | 25 | 40.197 | KV453089.1 | 3758825 | 16-scf00496 | 16 |
| AX-158316765 | 25 | 40.222 | KV453089.1 | 3618652 | 16-scf00496 | 16 |
| AX-158316768 | 25 | 40.307 | KV453089.1 | 3622324 | 16-scf00496 | 16 |
| AX-157847828 | 25 | 40.307 | KV453089.1 | 3624899 | 16-scf00496 | 16 |
| AX-158316774 | 25 | 40.307 | KV453089.1 | 3627768 | 16-scf00496 | 16 |
| AX-158316777 | 25 | 40.307 | KV453089.1 | 3630565 | 16-scf00496 | 16 |
| AX-158316784 | 25 | 40.307 | KV453089.1 | 3639356 | 16-scf00496 | 16 |
| AX-158418191 | 25 | 40.307 | KV453089.1 | 3640611 | 16-scf00496 | 16 |
| AX-158316786 | 25 | 40.307 | KV453089.1 | 3641736 | 16-scf00496 | 16 |
| AX-158316788 | 25 | 40.307 | KV453089.1 | 3643415 | 16-scf00496 | 16 |
| AX-158381434 | 25 | 40.307 | KV453089.1 | 3656495 | 16-scf00496 | 16 |
| AX-158316797 | 25 | 40.307 | KV453089.1 | 3657760 | 16-scf00496 | 16 |
| AX-157867816 | 25 | 40.307 | KV453089.1 | 3659967 | 16-scf00496 | 16 |
| AX-158316800 | 25 | 40.307 | KV453089.1 | 3660190 | 16-scf00496 | 16 |
| AX-157867817 | 25 | 40.307 | KV453089.1 | 3660753 | 16-scf00496 | 16 |
| AX-157710984 | 25 | 40.307 | KV453089.1 | 3661566 | 16-scf00496 | 16 |
| AX-158316806 | 25 | 40.352 | KV453089.1 | 3664957 | 16-scf00496 | 16 |
| AX-158316741 | 25 | 40.416 | KV453089.1 | 3584800 | 16-scf00496 | 16 |
| AX-157716989 | 25 | 40.416 | KV453089.1 | 3673549 | 16-scf00496 | 16 |
| AX-157888322 | 25 | 40.416 | KV453089.1 | 3675353 | 16-scf00496 | 16 |
| AX-158316816 | 25 | 40.416 | KV453089.1 | 3675957 | 16-scf00496 | 16 |
| AX-158316819 | 25 | 40.525 | KV453089.1 | 3682383 | 16-scf00496 | 16 |
| AX-158316828 | 25 | 40.525 | KV453089.1 | 3696222 | 16-scf00496 | 16 |
| AX-158418192 | 25 | 40.525 | KV453089.1 | 3697148 | 16-scf00496 | 16 |
| AX-158316829 | 25 | 40.525 | KV453089.1 | 3699879 | 16-scf00496 | 16 |
| AX-158316830 | 25 | 40.525 | KV453089.1 | 3701684 | 16-scf00496 | 16 |
| AX-158316831 | 25 | 40.525 | KV453089.1 | 3702398 | 16-scf00496 | 16 |
| AX-158316832 | 25 | 40.525 | KV453089.1 | 3703386 | 16-scf00496 | 16 |
| AX-158316834 | 25 | 40.689 | KV453089.1 | 3706324 | 16-scf00496 | 16 |
| AX-157742713 | 25 | 40.689 | KV453089.1 | 3707416 | 16-scf00496 | 16 |

|              |    |        |            |         |             |    |
|--------------|----|--------|------------|---------|-------------|----|
| AX-158316836 | 25 | 40.689 | KV453089.1 | 3708276 | 16-scf00496 | 16 |
| AX-158316845 | 25 | 40.853 | KV453089.1 | 3718686 | 16-scf00496 | 16 |
| AX-158316847 | 25 | 40.853 | KV453089.1 | 3720449 | 16-scf00496 | 16 |
| AX-157861395 | 25 | 40.853 | KV453089.1 | 3721762 | 16-scf00496 | 16 |
| AX-157847832 | 25 | 40.853 | KV453089.1 | 3723636 | 16-scf00496 | 16 |
| AX-158316852 | 25 | 40.853 | KV453089.1 | 3729230 | 16-scf00496 | 16 |
| AX-157861396 | 25 | 40.853 | KV453089.1 | 3729286 | 16-scf00496 | 16 |
| AX-158316855 | 25 | 40.853 | KV453089.1 | 3735870 | 16-scf00496 | 16 |
| AX-158316857 | 25 | 40.89  | KV453089.1 | 3737418 | 16-scf00496 | 16 |
| AX-158316859 | 25 | 40.928 | KV453089.1 | 3740733 | 16-scf00496 | 16 |
| AX-158316862 | 25 | 40.962 | KV453089.1 | 3743521 | 16-scf00496 | 16 |
| AX-158316866 | 25 | 40.962 | KV453089.1 | 3748354 | 16-scf00496 | 16 |
| AX-158316868 | 25 | 40.962 | KV453089.1 | 3750664 | 16-scf00496 | 16 |
| AX-158316869 | 25 | 40.962 | KV453089.1 | 3751671 | 16-scf00496 | 16 |
| AX-158316870 | 25 | 40.962 | KV453089.1 | 3752420 | 16-scf00496 | 16 |
| AX-157847835 | 25 | 40.962 | KV453089.1 | 3762040 | 16-scf00496 | 16 |
| AX-158316876 | 25 | 40.962 | KV453089.1 | 3762210 | 16-scf00496 | 16 |
| AX-158316877 | 25 | 40.962 | KV453089.1 | 3762480 | 16-scf00496 | 16 |
| AX-158316878 | 25 | 40.962 | KV453089.1 | 3763729 | 16-scf00496 | 16 |
| AX-157847836 | 25 | 40.962 | KV453089.1 | 3763994 | 16-scf00496 | 16 |
| AX-157756420 | 25 | 40.962 | KV453089.1 | 3764212 | 16-scf00496 | 16 |
| AX-158316889 | 25 | 40.962 | KV453089.1 | 3787078 | 16-scf00496 | 16 |
| AX-157847838 | 25 | 40.979 | KV453089.1 | 3775995 | 16-scf00496 | 16 |
| AX-157847839 | 25 | 41.002 | KV453089.1 | 3776233 | 16-scf00496 | 16 |
| AX-158316854 | 25 | 41.011 | KV453089.1 | 3735047 | 16-scf00496 | 16 |
| AX-157756077 | 25 | 41.011 | KV453089.1 | 3773194 | 16-scf00496 | 16 |
| AX-157847840 | 25 | 41.011 | KV453089.1 | 3776275 | 16-scf00496 | 16 |
| AX-157873572 | 25 | 41.011 | KV453089.1 | 3784159 | 16-scf00496 | 16 |
| AX-157713027 | 25 | 41.027 | KV453089.1 | 3776550 | 16-scf00496 | 16 |
| AX-158316883 | 25 | 41.046 | KV453089.1 | 3777517 | 16-scf00496 | 16 |
| AX-158316810 | 25 | 41.071 | KV453089.1 | 3668171 | 16-scf00496 | 16 |
| AX-158316827 | 25 | 41.071 | KV453089.1 | 3694626 | 16-scf00496 | 16 |
| AX-157757265 | 25 | 41.071 | KV453089.1 | 3723717 | 16-scf00496 | 16 |
| AX-157719313 | 25 | 41.071 | KV453089.1 | 3779692 | 16-scf00496 | 16 |
| AX-157847843 | 25 | 41.071 | KV453089.1 | 3786672 | 16-scf00496 | 16 |
| AX-157746398 | 25 | 41.071 | KV453089.1 | 3787722 | 16-scf00496 | 16 |
| AX-158316983 | 25 | 41.071 | KV453089.1 | 3921187 | 16-scf00496 | 16 |
| AX-157746189 | 25 | 41.18  | KV453089.1 | 3427554 | 16-scf00496 | 16 |
| AX-158316894 | 25 | 41.18  | KV453089.1 | 3794397 | 16-scf00496 | 16 |
| AX-158316896 | 25 | 41.18  | KV453089.1 | 3795682 | 16-scf00496 | 16 |
| AX-158316904 | 25 | 41.18  | KV453089.1 | 3801756 | 16-scf00496 | 16 |
| AX-158316906 | 25 | 41.18  | KV453089.1 | 3804140 | 16-scf00496 | 16 |
| AX-158316907 | 25 | 41.18  | KV453089.1 | 3806049 | 16-scf00496 | 16 |
| AX-157755431 | 25 | 41.18  | KV453089.1 | 3809852 | 16-scf00496 | 16 |
| AX-157773616 | 25 | 41.18  | KV453089.1 | 3815123 | 16-scf00496 | 16 |
| AX-158316913 | 25 | 41.18  | KV453089.1 | 3816628 | 16-scf00496 | 16 |
| AX-158316914 | 25 | 41.18  | KV453089.1 | 3817554 | 16-scf00496 | 16 |
| AX-158316915 | 25 | 41.18  | KV453089.1 | 3817986 | 16-scf00496 | 16 |
| AX-158316917 | 25 | 41.18  | KV453089.1 | 3818785 | 16-scf00496 | 16 |
| AX-158316923 | 25 | 41.18  | KV453089.1 | 3828432 | 16-scf00496 | 16 |
| AX-158316924 | 25 | 41.18  | KV453089.1 | 3830182 | 16-scf00496 | 16 |

|              |    |        |            |         |             |    |
|--------------|----|--------|------------|---------|-------------|----|
| AX-158316925 | 25 | 41.18  | KV453089.1 | 3830403 | 16-scf00496 | 16 |
| AX-158316927 | 25 | 41.18  | KV453089.1 | 3830976 | 16-scf00496 | 16 |
| AX-158316928 | 25 | 41.18  | KV453089.1 | 3831826 | 16-scf00496 | 16 |
| AX-158316931 | 25 | 41.18  | KV453089.1 | 3833982 | 16-scf00496 | 16 |
| AX-158316933 | 25 | 41.18  | KV453089.1 | 3835976 | 16-scf00496 | 16 |
| AX-158316934 | 25 | 41.18  | KV453089.1 | 3836689 | 16-scf00496 | 16 |
| AX-157715225 | 25 | 41.18  | KV453089.1 | 3859195 | 16-scf00496 | 16 |
| AX-157847846 | 25 | 41.18  | KV453089.1 | 3861134 | 16-scf00496 | 16 |
| AX-157847847 | 25 | 41.18  | KV453089.1 | 3861730 | 16-scf00496 | 16 |
| AX-158316949 | 25 | 41.18  | KV453089.1 | 3862817 | 16-scf00496 | 16 |
| AX-158316950 | 25 | 41.18  | KV453089.1 | 3863554 | 16-scf00496 | 16 |
| AX-158316951 | 25 | 41.18  | KV453089.1 | 3865032 | 16-scf00496 | 16 |
| AX-158316952 | 25 | 41.18  | KV453089.1 | 3868246 | 16-scf00496 | 16 |
| AX-157726205 | 25 | 41.18  | KV453089.1 | 3891948 | 16-scf00496 | 16 |
| AX-158316971 | 25 | 41.18  | KV453089.1 | 3893415 | 16-scf00496 | 16 |
| AX-158317057 | 25 | 41.18  | KV453089.1 | 4041043 | 16-scf00496 | 16 |
| AX-157847885 | 25 | 41.18  | KV453089.1 | 4149499 | 16-scf00496 | 16 |
| AX-157847833 | 25 | 41.289 | KV453089.1 | 3749826 | 16-scf00496 | 16 |
| AX-158316910 | 25 | 41.289 | KV453089.1 | 3811129 | 16-scf00496 | 16 |
| AX-158316916 | 25 | 41.289 | KV453089.1 | 3818425 | 16-scf00496 | 16 |
| AX-158316953 | 25 | 41.289 | KV453089.1 | 3871109 | 16-scf00496 | 16 |
| AX-157727921 | 25 | 41.289 | KV453089.1 | 3872841 | 16-scf00496 | 16 |
| AX-158316954 | 25 | 41.289 | KV453089.1 | 3872918 | 16-scf00496 | 16 |
| AX-157708768 | 25 | 41.289 | KV453089.1 | 3874874 | 16-scf00496 | 16 |
| AX-158316955 | 25 | 41.289 | KV453089.1 | 3875021 | 16-scf00496 | 16 |
| AX-157847849 | 25 | 41.289 | KV453089.1 | 3877569 | 16-scf00496 | 16 |
| AX-158316961 | 25 | 41.289 | KV453089.1 | 3881326 | 16-scf00496 | 16 |
| AX-158316962 | 25 | 41.289 | KV453089.1 | 3882332 | 16-scf00496 | 16 |
| AX-158316965 | 25 | 41.289 | KV453089.1 | 3883863 | 16-scf00496 | 16 |
| AX-158316966 | 25 | 41.289 | KV453089.1 | 3885031 | 16-scf00496 | 16 |
| AX-158316967 | 25 | 41.289 | KV453089.1 | 3886003 | 16-scf00496 | 16 |
| AX-158316968 | 25 | 41.289 | KV453089.1 | 3888520 | 16-scf00496 | 16 |
| AX-158316970 | 25 | 41.289 | KV453089.1 | 3892408 | 16-scf00496 | 16 |
| AX-158316972 | 25 | 41.289 | KV453089.1 | 3895594 | 16-scf00496 | 16 |
| AX-157847852 | 25 | 41.289 | KV453089.1 | 3896394 | 16-scf00496 | 16 |
| AX-158316973 | 25 | 41.289 | KV453089.1 | 3897171 | 16-scf00496 | 16 |
| AX-158316974 | 25 | 41.289 | KV453089.1 | 3899119 | 16-scf00496 | 16 |
| AX-158316975 | 25 | 41.289 | KV453089.1 | 3902656 | 16-scf00496 | 16 |
| AX-158316982 | 25 | 41.289 | KV453089.1 | 3920022 | 16-scf00496 | 16 |
| AX-157847864 | 25 | 41.289 | KV453089.1 | 3987533 | 16-scf00496 | 16 |
| AX-158316856 | 25 | 41.399 | KV453089.1 | 3736816 | 16-scf00496 | 16 |
| AX-158316858 | 25 | 41.399 | KV453089.1 | 3740430 | 16-scf00496 | 16 |
| AX-157847842 | 25 | 41.399 | KV453089.1 | 3785318 | 16-scf00496 | 16 |
| AX-158316932 | 25 | 41.399 | KV453089.1 | 3835479 | 16-scf00496 | 16 |
| AX-158316938 | 25 | 41.399 | KV453089.1 | 3849674 | 16-scf00496 | 16 |
| AX-158316939 | 25 | 41.399 | KV453089.1 | 3850063 | 16-scf00496 | 16 |
| AX-158316941 | 25 | 41.399 | KV453089.1 | 3851087 | 16-scf00496 | 16 |
| AX-158316956 | 25 | 41.399 | KV453089.1 | 3877055 | 16-scf00496 | 16 |
| AX-158316957 | 25 | 41.399 | KV453089.1 | 3877293 | 16-scf00496 | 16 |
| AX-158316958 | 25 | 41.399 | KV453089.1 | 3877944 | 16-scf00496 | 16 |
| AX-157746785 | 25 | 41.399 | KV453089.1 | 3901986 | 16-scf00496 | 16 |

|              |    |        |            |         |             |    |
|--------------|----|--------|------------|---------|-------------|----|
| AX-157738290 | 25 | 41.399 | KV453089.1 | 3908364 | 16-scf00496 | 16 |
| AX-158316976 | 25 | 41.399 | KV453089.1 | 3909601 | 16-scf00496 | 16 |
| AX-157747849 | 25 | 41.399 | KV453089.1 | 3913324 | 16-scf00496 | 16 |
| AX-158316978 | 25 | 41.399 | KV453089.1 | 3914314 | 16-scf00496 | 16 |
| AX-158316980 | 25 | 41.399 | KV453089.1 | 3918263 | 16-scf00496 | 16 |
| AX-158381436 | 25 | 41.399 | KV453089.1 | 3927545 | 16-scf00496 | 16 |
| AX-158316987 | 25 | 41.617 | KV453089.1 | 3929000 | 16-scf00496 | 16 |
| AX-157847854 | 25 | 41.617 | KV453089.1 | 3929056 | 16-scf00496 | 16 |
| AX-158316991 | 25 | 41.668 | KV453089.1 | 3936163 | 16-scf00496 | 16 |
| AX-158316999 | 25 | 41.668 | KV453089.1 | 3953294 | 16-scf00496 | 16 |
| AX-158317597 | 25 | 41.668 | KV453089.1 | 4730614 | 16-scf00496 | 16 |
| AX-158316995 | 25 | 41.726 | KV453089.1 | 3944092 | 16-scf00496 | 16 |
| AX-157745685 | 25 | 41.726 | KV453089.1 | 3944662 | 16-scf00496 | 16 |
| AX-157744195 | 25 | 41.726 | KV453089.1 | 3949529 | 16-scf00496 | 16 |
| AX-157775780 | 25 | 41.726 | KV453089.1 | 3959120 | 16-scf00496 | 16 |
| AX-158317004 | 25 | 41.726 | KV453089.1 | 3962502 | 16-scf00496 | 16 |
| AX-158317005 | 25 | 41.726 | KV453089.1 | 3963220 | 16-scf00496 | 16 |
| AX-158317008 | 25 | 41.726 | KV453089.1 | 3965500 | 16-scf00496 | 16 |
| AX-158317009 | 25 | 41.726 | KV453089.1 | 3966548 | 16-scf00496 | 16 |
| AX-158317011 | 25 | 41.726 | KV453089.1 | 3971562 | 16-scf00496 | 16 |
| AX-157745976 | 25 | 41.726 | KV453089.1 | 3974105 | 16-scf00496 | 16 |
| AX-157715316 | 25 | 41.726 | KV453089.1 | 3977202 | 16-scf00496 | 16 |
| AX-157873573 | 25 | 41.835 | KV453089.1 | 3969359 | 16-scf00496 | 16 |
| AX-158317015 | 25 | 41.835 | KV453089.1 | 3982001 | 16-scf00496 | 16 |
| AX-158317016 | 25 | 41.835 | KV453089.1 | 3984364 | 16-scf00496 | 16 |
| AX-157847863 | 25 | 41.835 | KV453089.1 | 3987212 | 16-scf00496 | 16 |
| AX-158317017 | 25 | 41.835 | KV453089.1 | 3988113 | 16-scf00496 | 16 |
| AX-158317018 | 25 | 41.835 | KV453089.1 | 3991904 | 16-scf00496 | 16 |
| AX-158317422 | 25 | 41.835 | KV453089.1 | 4484975 | 16-scf00496 | 16 |
| AX-158317582 | 25 | 41.835 | KV453089.1 | 4703173 | 16-scf00496 | 16 |
| AX-158317019 | 25 | 41.891 | KV453089.1 | 3995413 | 16-scf00496 | 16 |
| AX-158317048 | 25 | 41.891 | KV453089.1 | 4032020 | 16-scf00496 | 16 |
| AX-158317584 | 25 | 41.891 | KV453089.1 | 4705916 | 16-scf00496 | 16 |
| AX-158317585 | 25 | 41.891 | KV453089.1 | 4708338 | 16-scf00496 | 16 |
| AX-157847848 | 25 | 41.945 | KV453089.1 | 3873151 | 16-scf00496 | 16 |
| AX-158316996 | 25 | 41.945 | KV453089.1 | 3946898 | 16-scf00496 | 16 |
| AX-157847862 | 25 | 41.945 | KV453089.1 | 3985696 | 16-scf00496 | 16 |
| AX-157847867 | 25 | 41.945 | KV453089.1 | 3993730 | 16-scf00496 | 16 |
| AX-157743750 | 25 | 41.945 | KV453089.1 | 3994251 | 16-scf00496 | 16 |
| AX-158317021 | 25 | 41.945 | KV453089.1 | 4001700 | 16-scf00496 | 16 |
| AX-158317022 | 25 | 41.945 | KV453089.1 | 4001822 | 16-scf00496 | 16 |
| AX-158317023 | 25 | 41.945 | KV453089.1 | 4009323 | 16-scf00496 | 16 |
| AX-158317025 | 25 | 41.945 | KV453089.1 | 4011275 | 16-scf00496 | 16 |
| AX-158317026 | 25 | 41.945 | KV453089.1 | 4011882 | 16-scf00496 | 16 |
| AX-158317027 | 25 | 41.945 | KV453089.1 | 4013079 | 16-scf00496 | 16 |
| AX-158317028 | 25 | 41.945 | KV453089.1 | 4014361 | 16-scf00496 | 16 |
| AX-158317030 | 25 | 41.945 | KV453089.1 | 4015878 | 16-scf00496 | 16 |
| AX-158317032 | 25 | 41.945 | KV453089.1 | 4017973 | 16-scf00496 | 16 |
| AX-158317033 | 25 | 41.945 | KV453089.1 | 4018320 | 16-scf00496 | 16 |
| AX-158317034 | 25 | 41.945 | KV453089.1 | 4018802 | 16-scf00496 | 16 |
| AX-158317036 | 25 | 41.945 | KV453089.1 | 4022763 | 16-scf00496 | 16 |

|              |    |        |             |         |             |    |
|--------------|----|--------|-------------|---------|-------------|----|
| AX-158317038 | 25 | 41.945 | KV453089.1  | 4023886 | 16-scf00496 | 16 |
| AX-157743943 | 25 | 41.945 | KV453089.1  | 4025163 | 16-scf00496 | 16 |
| AX-158317040 | 25 | 41.945 | KV453089.1  | 4025540 | 16-scf00496 | 16 |
| AX-158317042 | 25 | 41.945 | KV453089.1  | 4026293 | 16-scf00496 | 16 |
| AX-158317043 | 25 | 41.945 | KV453089.1  | 4026820 | 16-scf00496 | 16 |
| AX-158317044 | 25 | 41.945 | KV453089.1  | 4027414 | 16-scf00496 | 16 |
| AX-158317046 | 25 | 41.945 | KV453089.1  | 4029663 | 16-scf00496 | 16 |
| AX-158317047 | 25 | 41.945 | KV453089.1  | 4030068 | 16-scf00496 | 16 |
| AX-158317050 | 25 | 41.945 | KV453089.1  | 4033028 | 16-scf00496 | 16 |
| AX-158317051 | 25 | 41.945 | KV453089.1  | 4035750 | 16-scf00496 | 16 |
| AX-157847871 | 25 | 41.945 | KV453089.1  | 4036125 | 16-scf00496 | 16 |
| AX-157751470 | 25 | 41.945 | KV453089.1  | 4037263 | 16-scf00496 | 16 |
| AX-158317056 | 25 | 41.945 | KV453089.1  | 4040413 | 16-scf00496 | 16 |
| AX-157847872 | 25 | 41.945 | KV453089.1  | 4043830 | 16-scf00496 | 16 |
| AX-157744290 | 25 | 41.945 | KV453089.1  | 4052648 | 16-scf00496 | 16 |
| AX-157847874 | 25 | 41.945 | KV453089.1  | 4055631 | 16-scf00496 | 16 |
| AX-157749483 | 25 | 41.945 | KV453089.1  | 4056738 | 16-scf00496 | 16 |
| AX-158317071 | 25 | 41.945 | KV453089.1  | 4061536 | 16-scf00496 | 16 |
| AX-157847877 | 25 | 41.945 | KV453089.1  | 4075082 | 16-scf00496 | 16 |
| AX-158317290 | 25 | 41.945 | KV453089.1  | 4346664 | 16-scf00496 | 16 |
| AX-158317292 | 25 | 41.945 | KV453089.1  | 4348506 | 16-scf00496 | 16 |
| AX-158317294 | 25 | 41.945 | KV453089.1  | 4351760 | 16-scf00496 | 16 |
| AX-158317295 | 25 | 41.945 | KV453089.1  | 4352224 | 16-scf00496 | 16 |
| AX-158317297 | 25 | 41.945 | KV453089.1  | 4353237 | 16-scf00496 | 16 |
| AX-157847897 | 25 | 41.945 | KV453089.1  | 4354039 | 16-scf00496 | 16 |
| AX-158317385 | 25 | 41.945 | KV453089.1  | 4453049 | 16-scf00496 | 16 |
| AX-158317386 | 25 | 41.945 | KV453089.1  | 4453936 | 16-scf00496 | 16 |
| AX-158317389 | 25 | 41.945 | KV453089.1  | 4456571 | 16-scf00496 | 16 |
| AX-158317393 | 25 | 41.945 | KV453089.1  | 4459160 | 16-scf00496 | 16 |
| AX-158317405 | 25 | 41.945 | KV453089.1  | 4469727 | 16-scf00496 | 16 |
| AX-158317406 | 25 | 41.945 | KV453089.1  | 4472384 | 16-scf00496 | 16 |
| AX-158317424 | 25 | 41.945 | KV453089.1  | 4485951 | 16-scf00496 | 16 |
| AX-158317490 | 25 | 41.945 | KV453089.1  | 4560093 | 16-scf00496 | 16 |
| AX-158418207 | 25 | 41.945 | KV453089.1  | 4569458 | 16-scf00496 | 16 |
| AX-157722069 | 25 | 41.945 | KV453089.1  | 4675609 | 16-scf00496 | 16 |
| AX-158317561 | 25 | 41.945 | KV453089.1  | 4677001 | 16-scf00496 | 16 |
| AX-158317575 | 25 | 41.945 | KV453089.1  | 4692921 | 16-scf00496 | 16 |
| AX-158317632 | 25 | 41.945 | KV453089.1  | 4799518 | 16-scf00496 | 16 |
| AX-157847924 | 25 | 41.945 | KV453089.1  | 4822316 | 16-scf00496 | 16 |
| AX-158317645 | 25 | 41.945 | KV453089.1  | 4828351 | 16-scf00496 | 16 |
| AX-157706968 | 25 | 41.945 | 3ML01033255 | 148     | scf08896_1  | UN |
| AX-157888326 | 25 | 42.163 | KV453089.1  | 4065504 | 16-scf00496 | 16 |
| AX-157752197 | 25 | 42.163 | KV453089.1  | 4067513 | 16-scf00496 | 16 |
| AX-158317075 | 25 | 42.163 | KV453089.1  | 4068702 | 16-scf00496 | 16 |
| AX-158317077 | 25 | 42.163 | KV453089.1  | 4070572 | 16-scf00496 | 16 |
| AX-158317079 | 25 | 42.163 | KV453089.1  | 4072554 | 16-scf00496 | 16 |
| AX-157847879 | 25 | 42.163 | KV453089.1  | 4100285 | 16-scf00496 | 16 |
| AX-158317088 | 25 | 42.189 | KV453089.1  | 4085038 | 16-scf00496 | 16 |
| AX-158317091 | 25 | 42.216 | KV453089.1  | 4091482 | 16-scf00496 | 16 |
| AX-157847881 | 25 | 42.241 | KV453089.1  | 4104026 | 16-scf00496 | 16 |
| AX-158317103 | 25 | 42.241 | KV453089.1  | 4109012 | 16-scf00496 | 16 |

|              |    |        |            |         |             |    |
|--------------|----|--------|------------|---------|-------------|----|
| AX-158316988 | 25 | 42.272 | KV453089.1 | 3930163 | 16-scf00496 | 16 |
| AX-158317003 | 25 | 42.272 | KV453089.1 | 3960190 | 16-scf00496 | 16 |
| AX-157747855 | 25 | 42.272 | KV453089.1 | 3992486 | 16-scf00496 | 16 |
| AX-158317087 | 25 | 42.272 | KV453089.1 | 4084080 | 16-scf00496 | 16 |
| AX-158317089 | 25 | 42.272 | KV453089.1 | 4087211 | 16-scf00496 | 16 |
| AX-157743277 | 25 | 42.272 | KV453089.1 | 4092226 | 16-scf00496 | 16 |
| AX-157847880 | 25 | 42.272 | KV453089.1 | 4100560 | 16-scf00496 | 16 |
| AX-158317097 | 25 | 42.272 | KV453089.1 | 4101286 | 16-scf00496 | 16 |
| AX-157847882 | 25 | 42.272 | KV453089.1 | 4104932 | 16-scf00496 | 16 |
| AX-158317099 | 25 | 42.272 | KV453089.1 | 4105901 | 16-scf00496 | 16 |
| AX-158317101 | 25 | 42.272 | KV453089.1 | 4106859 | 16-scf00496 | 16 |
| AX-158317102 | 25 | 42.272 | KV453089.1 | 4108746 | 16-scf00496 | 16 |
| AX-158317104 | 25 | 42.272 | KV453089.1 | 4111331 | 16-scf00496 | 16 |
| AX-158317111 | 25 | 42.272 | KV453089.1 | 4119695 | 16-scf00496 | 16 |
| AX-158317113 | 25 | 42.272 | KV453089.1 | 4120984 | 16-scf00496 | 16 |
| AX-157717534 | 25 | 42.272 | KV453089.1 | 4121482 | 16-scf00496 | 16 |
| AX-158317115 | 25 | 42.272 | KV453089.1 | 4121953 | 16-scf00496 | 16 |
| AX-157739603 | 25 | 42.272 | KV453089.1 | 4124090 | 16-scf00496 | 16 |
| AX-157847884 | 25 | 42.272 | KV453089.1 | 4124454 | 16-scf00496 | 16 |
| AX-157743186 | 25 | 42.272 | KV453089.1 | 4125533 | 16-scf00496 | 16 |
| AX-158317121 | 25 | 42.272 | KV453089.1 | 4132087 | 16-scf00496 | 16 |
| AX-158317122 | 25 | 42.272 | KV453089.1 | 4134560 | 16-scf00496 | 16 |
| AX-158317126 | 25 | 42.272 | KV453089.1 | 4136396 | 16-scf00496 | 16 |
| AX-158317127 | 25 | 42.272 | KV453089.1 | 4136574 | 16-scf00496 | 16 |
| AX-158317128 | 25 | 42.272 | KV453089.1 | 4136891 | 16-scf00496 | 16 |
| AX-158317129 | 25 | 42.272 | KV453089.1 | 4137106 | 16-scf00496 | 16 |
| AX-158317131 | 25 | 42.272 | KV453089.1 | 4139361 | 16-scf00496 | 16 |
| AX-158317132 | 25 | 42.272 | KV453089.1 | 4139708 | 16-scf00496 | 16 |
| AX-158317134 | 25 | 42.272 | KV453089.1 | 4141549 | 16-scf00496 | 16 |
| AX-158317135 | 25 | 42.272 | KV453089.1 | 4141719 | 16-scf00496 | 16 |
| AX-158317138 | 25 | 42.272 | KV453089.1 | 4146355 | 16-scf00496 | 16 |
| AX-158317142 | 25 | 42.272 | KV453089.1 | 4153125 | 16-scf00496 | 16 |
| AX-157719744 | 25 | 42.272 | KV453089.1 | 4153763 | 16-scf00496 | 16 |
| AX-157714536 | 25 | 42.272 | KV453089.1 | 4157422 | 16-scf00496 | 16 |
| AX-158317146 | 25 | 42.272 | KV453089.1 | 4159205 | 16-scf00496 | 16 |
| AX-157847887 | 25 | 42.272 | KV453089.1 | 4165072 | 16-scf00496 | 16 |
| AX-158317153 | 25 | 42.272 | KV453089.1 | 4167616 | 16-scf00496 | 16 |
| AX-157847888 | 25 | 42.272 | KV453089.1 | 4168128 | 16-scf00496 | 16 |
| AX-158317157 | 25 | 42.272 | KV453089.1 | 4173194 | 16-scf00496 | 16 |
| AX-158317158 | 25 | 42.272 | KV453089.1 | 4174215 | 16-scf00496 | 16 |
| AX-158317159 | 25 | 42.272 | KV453089.1 | 4175635 | 16-scf00496 | 16 |
| AX-157753542 | 25 | 42.272 | KV453089.1 | 4179255 | 16-scf00496 | 16 |
| AX-158317164 | 25 | 42.272 | KV453089.1 | 4183013 | 16-scf00496 | 16 |
| AX-158317166 | 25 | 42.272 | KV453089.1 | 4184871 | 16-scf00496 | 16 |
| AX-157888328 | 25 | 42.272 | KV453089.1 | 4191790 | 16-scf00496 | 16 |
| AX-158317177 | 25 | 42.272 | KV453089.1 | 4201209 | 16-scf00496 | 16 |
| AX-158317178 | 25 | 42.272 | KV453089.1 | 4202877 | 16-scf00496 | 16 |
| AX-158317179 | 25 | 42.272 | KV453089.1 | 4203170 | 16-scf00496 | 16 |
| AX-158317182 | 25 | 42.272 | KV453089.1 | 4205799 | 16-scf00496 | 16 |
| AX-157867821 | 25 | 42.272 | KV453089.1 | 4206302 | 16-scf00496 | 16 |
| AX-157847892 | 25 | 42.272 | KV453089.1 | 4214763 | 16-scf00496 | 16 |

|              |    |        |            |         |             |    |
|--------------|----|--------|------------|---------|-------------|----|
| AX-158317186 | 25 | 42.272 | KV453089.1 | 4216355 | 16-scf00496 | 16 |
| AX-158317188 | 25 | 42.272 | KV453089.1 | 4220528 | 16-scf00496 | 16 |
| AX-158317189 | 25 | 42.272 | KV453089.1 | 4221419 | 16-scf00496 | 16 |
| AX-158317194 | 25 | 42.272 | KV453089.1 | 4227831 | 16-scf00496 | 16 |
| AX-158317195 | 25 | 42.272 | KV453089.1 | 4228216 | 16-scf00496 | 16 |
| AX-158317200 | 25 | 42.272 | KV453089.1 | 4234778 | 16-scf00496 | 16 |
| AX-158317202 | 25 | 42.272 | KV453089.1 | 4236649 | 16-scf00496 | 16 |
| AX-158317203 | 25 | 42.272 | KV453089.1 | 4238334 | 16-scf00496 | 16 |
| AX-158317206 | 25 | 42.272 | KV453089.1 | 4240224 | 16-scf00496 | 16 |
| AX-158317207 | 25 | 42.272 | KV453089.1 | 4242051 | 16-scf00496 | 16 |
| AX-158317208 | 25 | 42.272 | KV453089.1 | 4242777 | 16-scf00496 | 16 |
| AX-157722368 | 25 | 42.272 | KV453089.1 | 4245913 | 16-scf00496 | 16 |
| AX-158317217 | 25 | 42.272 | KV453089.1 | 4253272 | 16-scf00496 | 16 |
| AX-158317229 | 25 | 42.272 | KV453089.1 | 4267565 | 16-scf00496 | 16 |
| AX-158317230 | 25 | 42.272 | KV453089.1 | 4267940 | 16-scf00496 | 16 |
| AX-158317233 | 25 | 42.272 | KV453089.1 | 4273772 | 16-scf00496 | 16 |
| AX-158317234 | 25 | 42.272 | KV453089.1 | 4274537 | 16-scf00496 | 16 |
| AX-158317235 | 25 | 42.272 | KV453089.1 | 4275445 | 16-scf00496 | 16 |
| AX-158317236 | 25 | 42.272 | KV453089.1 | 4277086 | 16-scf00496 | 16 |
| AX-158317239 | 25 | 42.272 | KV453089.1 | 4279006 | 16-scf00496 | 16 |
| AX-158317240 | 25 | 42.272 | KV453089.1 | 4280158 | 16-scf00496 | 16 |
| AX-158317241 | 25 | 42.272 | KV453089.1 | 4281178 | 16-scf00496 | 16 |
| AX-158317242 | 25 | 42.272 | KV453089.1 | 4281715 | 16-scf00496 | 16 |
| AX-158317243 | 25 | 42.272 | KV453089.1 | 4285279 | 16-scf00496 | 16 |
| AX-158317245 | 25 | 42.272 | KV453089.1 | 4290034 | 16-scf00496 | 16 |
| AX-158317246 | 25 | 42.272 | KV453089.1 | 4290737 | 16-scf00496 | 16 |
| AX-157864042 | 25 | 42.272 | KV453089.1 | 4291230 | 16-scf00496 | 16 |
| AX-158317251 | 25 | 42.272 | KV453089.1 | 4295706 | 16-scf00496 | 16 |
| AX-158317252 | 25 | 42.272 | KV453089.1 | 4297621 | 16-scf00496 | 16 |
| AX-158317254 | 25 | 42.272 | KV453089.1 | 4300559 | 16-scf00496 | 16 |
| AX-158317256 | 25 | 42.272 | KV453089.1 | 4301556 | 16-scf00496 | 16 |
| AX-158317259 | 25 | 42.272 | KV453089.1 | 4303884 | 16-scf00496 | 16 |
| AX-158317261 | 25 | 42.272 | KV453089.1 | 4305362 | 16-scf00496 | 16 |
| AX-158317264 | 25 | 42.272 | KV453089.1 | 4310876 | 16-scf00496 | 16 |
| AX-158317265 | 25 | 42.272 | KV453089.1 | 4311955 | 16-scf00496 | 16 |
| AX-158317266 | 25 | 42.272 | KV453089.1 | 4313293 | 16-scf00496 | 16 |
| AX-158317267 | 25 | 42.272 | KV453089.1 | 4314505 | 16-scf00496 | 16 |
| AX-158317269 | 25 | 42.272 | KV453089.1 | 4315702 | 16-scf00496 | 16 |
| AX-158317271 | 25 | 42.272 | KV453089.1 | 4316761 | 16-scf00496 | 16 |
| AX-158317272 | 25 | 42.272 | KV453089.1 | 4317172 | 16-scf00496 | 16 |
| AX-158317274 | 25 | 42.272 | KV453089.1 | 4324421 | 16-scf00496 | 16 |
| AX-158317278 | 25 | 42.272 | KV453089.1 | 4331450 | 16-scf00496 | 16 |
| AX-158317279 | 25 | 42.272 | KV453089.1 | 4332955 | 16-scf00496 | 16 |
| AX-158317280 | 25 | 42.272 | KV453089.1 | 4334441 | 16-scf00496 | 16 |
| AX-158317281 | 25 | 42.272 | KV453089.1 | 4335777 | 16-scf00496 | 16 |
| AX-158317283 | 25 | 42.272 | KV453089.1 | 4337721 | 16-scf00496 | 16 |
| AX-158317285 | 25 | 42.272 | KV453089.1 | 4339396 | 16-scf00496 | 16 |
| AX-158317288 | 25 | 42.272 | KV453089.1 | 4342422 | 16-scf00496 | 16 |
| AX-158317289 | 25 | 42.272 | KV453089.1 | 4346253 | 16-scf00496 | 16 |
| AX-158317291 | 25 | 42.272 | KV453089.1 | 4346908 | 16-scf00496 | 16 |
| AX-158317293 | 25 | 42.272 | KV453089.1 | 4349913 | 16-scf00496 | 16 |

|              |    |        |            |         |             |    |
|--------------|----|--------|------------|---------|-------------|----|
| AX-158317296 | 25 | 42.272 | KV453089.1 | 4352610 | 16-scf00496 | 16 |
| AX-158317298 | 25 | 42.272 | KV453089.1 | 4354143 | 16-scf00496 | 16 |
| AX-158317300 | 25 | 42.272 | KV453089.1 | 4355816 | 16-scf00496 | 16 |
| AX-158317301 | 25 | 42.272 | KV453089.1 | 4356387 | 16-scf00496 | 16 |
| AX-158317303 | 25 | 42.272 | KV453089.1 | 4358737 | 16-scf00496 | 16 |
| AX-158317304 | 25 | 42.272 | KV453089.1 | 4359321 | 16-scf00496 | 16 |
| AX-158317305 | 25 | 42.272 | KV453089.1 | 4360053 | 16-scf00496 | 16 |
| AX-158317306 | 25 | 42.272 | KV453089.1 | 4361653 | 16-scf00496 | 16 |
| AX-158317307 | 25 | 42.272 | KV453089.1 | 4363624 | 16-scf00496 | 16 |
| AX-158317309 | 25 | 42.272 | KV453089.1 | 4365333 | 16-scf00496 | 16 |
| AX-158317310 | 25 | 42.272 | KV453089.1 | 4365927 | 16-scf00496 | 16 |
| AX-157771402 | 25 | 42.272 | KV453089.1 | 4368695 | 16-scf00496 | 16 |
| AX-158317312 | 25 | 42.272 | KV453089.1 | 4374786 | 16-scf00496 | 16 |
| AX-158317313 | 25 | 42.272 | KV453089.1 | 4376085 | 16-scf00496 | 16 |
| AX-157847898 | 25 | 42.272 | KV453089.1 | 4376559 | 16-scf00496 | 16 |
| AX-158317318 | 25 | 42.272 | KV453089.1 | 4379850 | 16-scf00496 | 16 |
| AX-158317319 | 25 | 42.272 | KV453089.1 | 4380702 | 16-scf00496 | 16 |
| AX-157772967 | 25 | 42.272 | KV453089.1 | 4381616 | 16-scf00496 | 16 |
| AX-158317320 | 25 | 42.272 | KV453089.1 | 4382063 | 16-scf00496 | 16 |
| AX-158317321 | 25 | 42.272 | KV453089.1 | 4382887 | 16-scf00496 | 16 |
| AX-158317322 | 25 | 42.272 | KV453089.1 | 4386211 | 16-scf00496 | 16 |
| AX-158317326 | 25 | 42.272 | KV453089.1 | 4392982 | 16-scf00496 | 16 |
| AX-158317327 | 25 | 42.272 | KV453089.1 | 4394055 | 16-scf00496 | 16 |
| AX-158317331 | 25 | 42.272 | KV453089.1 | 4396604 | 16-scf00496 | 16 |
| AX-158317332 | 25 | 42.272 | KV453089.1 | 4397238 | 16-scf00496 | 16 |
| AX-158317333 | 25 | 42.272 | KV453089.1 | 4398216 | 16-scf00496 | 16 |
| AX-158317337 | 25 | 42.272 | KV453089.1 | 4410000 | 16-scf00496 | 16 |
| AX-158317340 | 25 | 42.272 | KV453089.1 | 4413556 | 16-scf00496 | 16 |
| AX-158317344 | 25 | 42.272 | KV453089.1 | 4416558 | 16-scf00496 | 16 |
| AX-158317349 | 25 | 42.272 | KV453089.1 | 4422106 | 16-scf00496 | 16 |
| AX-158317353 | 25 | 42.272 | KV453089.1 | 4424311 | 16-scf00496 | 16 |
| AX-158317373 | 25 | 42.272 | KV453089.1 | 4438482 | 16-scf00496 | 16 |
| AX-158317375 | 25 | 42.272 | KV453089.1 | 4440412 | 16-scf00496 | 16 |
| AX-158317390 | 25 | 42.272 | KV453089.1 | 4457019 | 16-scf00496 | 16 |
| AX-158317397 | 25 | 42.272 | KV453089.1 | 4460908 | 16-scf00496 | 16 |
| AX-158317399 | 25 | 42.272 | KV453089.1 | 4462442 | 16-scf00496 | 16 |
| AX-158317407 | 25 | 42.272 | KV453089.1 | 4473215 | 16-scf00496 | 16 |
| AX-158317409 | 25 | 42.272 | KV453089.1 | 4474574 | 16-scf00496 | 16 |
| AX-158317413 | 25 | 42.272 | KV453089.1 | 4477597 | 16-scf00496 | 16 |
| AX-158317418 | 25 | 42.272 | KV453089.1 | 4481801 | 16-scf00496 | 16 |
| AX-158418206 | 25 | 42.272 | KV453089.1 | 4492953 | 16-scf00496 | 16 |
| AX-157774177 | 25 | 42.272 | KV453089.1 | 4499618 | 16-scf00496 | 16 |
| AX-158317454 | 25 | 42.272 | KV453089.1 | 4514308 | 16-scf00496 | 16 |
| AX-158317461 | 25 | 42.272 | KV453089.1 | 4521629 | 16-scf00496 | 16 |
| AX-158317487 | 25 | 42.272 | KV453089.1 | 4554656 | 16-scf00496 | 16 |
| AX-157847905 | 25 | 42.272 | KV453089.1 | 4567873 | 16-scf00496 | 16 |
| AX-158317502 | 25 | 42.272 | KV453089.1 | 4583003 | 16-scf00496 | 16 |
| AX-158317510 | 25 | 42.272 | KV453089.1 | 4590805 | 16-scf00496 | 16 |
| AX-157847906 | 25 | 42.272 | KV453089.1 | 4594556 | 16-scf00496 | 16 |
| AX-158317513 | 25 | 42.272 | KV453089.1 | 4595957 | 16-scf00496 | 16 |
| AX-158317521 | 25 | 42.272 | KV453089.1 | 4602397 | 16-scf00496 | 16 |



|              |    |        |             |         |               |    |
|--------------|----|--------|-------------|---------|---------------|----|
| AX-158317532 | 25 | 42.272 | KV453089.1  | 4611745 | 16-scf00496   | 16 |
| AX-157847909 | 25 | 42.272 | KV453089.1  | 4633126 | 16-scf00496   | 16 |
| AX-158317552 | 25 | 42.272 | KV453089.1  | 4650386 | 16-scf00496   | 16 |
| AX-158317556 | 25 | 42.272 | KV453089.1  | 4660374 | 16-scf00496   | 16 |
| AX-158317567 | 25 | 42.272 | KV453089.1  | 4681599 | 16-scf00496   | 16 |
| AX-158317578 | 25 | 42.272 | KV453089.1  | 4696855 | 16-scf00496   | 16 |
| AX-158317580 | 25 | 42.272 | KV453089.1  | 4698916 | 16-scf00496   | 16 |
| AX-158317596 | 25 | 42.272 | KV453089.1  | 4729674 | 16-scf00496   | 16 |
| AX-158317610 | 25 | 42.272 | KV453089.1  | 4768761 | 16-scf00496   | 16 |
| AX-157695080 | 25 | 42.272 | FI865900.1  | 621     | ORI212 Ictalu | UN |
| AX-157687801 | 25 | 42.272 | 3ML01025228 | 2135    | scf01032_1    | UN |
| AX-158317094 | 25 | 42.381 | KV453089.1  | 4096337 | 16-scf00496   | 16 |
| AX-158317107 | 25 | 42.381 | KV453089.1  | 4114297 | 16-scf00496   | 16 |
| AX-158317125 | 25 | 42.381 | KV453089.1  | 4136126 | 16-scf00496   | 16 |
| AX-157881276 | 25 | 42.381 | KV453089.1  | 4176907 | 16-scf00496   | 16 |
| AX-158317163 | 25 | 42.381 | KV453089.1  | 4181536 | 16-scf00496   | 16 |
| AX-158317181 | 25 | 42.381 | KV453089.1  | 4205513 | 16-scf00496   | 16 |
| AX-157847891 | 25 | 42.381 | KV453089.1  | 4208821 | 16-scf00496   | 16 |
| AX-158317187 | 25 | 42.381 | KV453089.1  | 4216737 | 16-scf00496   | 16 |
| AX-157847893 | 25 | 42.381 | KV453089.1  | 4218030 | 16-scf00496   | 16 |
| AX-158317276 | 25 | 42.381 | KV453089.1  | 4327237 | 16-scf00496   | 16 |
| AX-158317311 | 25 | 42.381 | KV453089.1  | 4371813 | 16-scf00496   | 16 |
| AX-158317335 | 25 | 42.381 | KV453089.1  | 4408253 | 16-scf00496   | 16 |
| AX-158317336 | 25 | 42.381 | KV453089.1  | 4409063 | 16-scf00496   | 16 |
| AX-158317338 | 25 | 42.381 | KV453089.1  | 4411604 | 16-scf00496   | 16 |
| AX-157746320 | 25 | 42.381 | KV453089.1  | 4416183 | 16-scf00496   | 16 |
| AX-157847901 | 25 | 42.381 | KV453089.1  | 4417423 | 16-scf00496   | 16 |
| AX-158317345 | 25 | 42.381 | KV453089.1  | 4417753 | 16-scf00496   | 16 |
| AX-157847902 | 25 | 42.381 | KV453089.1  | 4421356 | 16-scf00496   | 16 |
| AX-158317348 | 25 | 42.381 | KV453089.1  | 4421491 | 16-scf00496   | 16 |
| AX-158317350 | 25 | 42.381 | KV453089.1  | 4422872 | 16-scf00496   | 16 |
| AX-158317352 | 25 | 42.381 | KV453089.1  | 4424070 | 16-scf00496   | 16 |
| AX-158317357 | 25 | 42.381 | KV453089.1  | 4427899 | 16-scf00496   | 16 |
| AX-158317358 | 25 | 42.381 | KV453089.1  | 4428757 | 16-scf00496   | 16 |
| AX-158317360 | 25 | 42.381 | KV453089.1  | 4430143 | 16-scf00496   | 16 |
| AX-158317362 | 25 | 42.381 | KV453089.1  | 4430911 | 16-scf00496   | 16 |
| AX-158317364 | 25 | 42.381 | KV453089.1  | 4431616 | 16-scf00496   | 16 |
| AX-158317365 | 25 | 42.381 | KV453089.1  | 4432441 | 16-scf00496   | 16 |
| AX-158381439 | 25 | 42.381 | KV453089.1  | 4433868 | 16-scf00496   | 16 |
| AX-158317367 | 25 | 42.381 | KV453089.1  | 4433957 | 16-scf00496   | 16 |
| AX-158317368 | 25 | 42.381 | KV453089.1  | 4435068 | 16-scf00496   | 16 |
| AX-158317370 | 25 | 42.381 | KV453089.1  | 4436564 | 16-scf00496   | 16 |
| AX-158317371 | 25 | 42.381 | KV453089.1  | 4437289 | 16-scf00496   | 16 |
| AX-158317376 | 25 | 42.381 | KV453089.1  | 4443247 | 16-scf00496   | 16 |
| AX-158317381 | 25 | 42.381 | KV453089.1  | 4450349 | 16-scf00496   | 16 |
| AX-158317384 | 25 | 42.381 | KV453089.1  | 4452521 | 16-scf00496   | 16 |
| AX-158317426 | 25 | 42.381 | KV453089.1  | 4489765 | 16-scf00496   | 16 |
| AX-158317431 | 25 | 42.381 | KV453089.1  | 4493461 | 16-scf00496   | 16 |
| AX-158317432 | 25 | 42.381 | KV453089.1  | 4494034 | 16-scf00496   | 16 |
| AX-158317434 | 25 | 42.381 | KV453089.1  | 4495642 | 16-scf00496   | 16 |
| AX-158317437 | 25 | 42.381 | KV453089.1  | 4497775 | 16-scf00496   | 16 |

|              |    |        |            |         |             |    |
|--------------|----|--------|------------|---------|-------------|----|
| AX-158317438 | 25 | 42.381 | KV453089.1 | 4499966 | 16-scf00496 | 16 |
| AX-158317439 | 25 | 42.381 | KV453089.1 | 4501190 | 16-scf00496 | 16 |
| AX-158317442 | 25 | 42.381 | KV453089.1 | 4503523 | 16-scf00496 | 16 |
| AX-158317443 | 25 | 42.381 | KV453089.1 | 4504851 | 16-scf00496 | 16 |
| AX-158317446 | 25 | 42.381 | KV453089.1 | 4508097 | 16-scf00496 | 16 |
| AX-158317548 | 25 | 42.381 | KV453089.1 | 4643887 | 16-scf00496 | 16 |
| AX-158317602 | 25 | 42.381 | KV453089.1 | 4745519 | 16-scf00496 | 16 |
| AX-158317404 | 25 | 42.448 | KV453089.1 | 4468094 | 16-scf00496 | 16 |
| AX-158317145 | 25 | 42.491 | KV453089.1 | 4158462 | 16-scf00496 | 16 |
| AX-157717588 | 25 | 42.491 | KV453089.1 | 4177660 | 16-scf00496 | 16 |
| AX-158317168 | 25 | 42.491 | KV453089.1 | 4187922 | 16-scf00496 | 16 |
| AX-158317282 | 25 | 42.491 | KV453089.1 | 4337036 | 16-scf00496 | 16 |
| AX-158317317 | 25 | 42.491 | KV453089.1 | 4379405 | 16-scf00496 | 16 |
| AX-158317342 | 25 | 42.491 | KV453089.1 | 4415794 | 16-scf00496 | 16 |
| AX-158317363 | 25 | 42.491 | KV453089.1 | 4431309 | 16-scf00496 | 16 |
| AX-158317414 | 25 | 42.491 | KV453089.1 | 4478599 | 16-scf00496 | 16 |
| AX-157773051 | 25 | 42.491 | KV453089.1 | 4480662 | 16-scf00496 | 16 |
| AX-158317417 | 25 | 42.491 | KV453089.1 | 4481433 | 16-scf00496 | 16 |
| AX-158317419 | 25 | 42.491 | KV453089.1 | 4482387 | 16-scf00496 | 16 |
| AX-158317421 | 25 | 42.491 | KV453089.1 | 4483163 | 16-scf00496 | 16 |
| AX-158317423 | 25 | 42.491 | KV453089.1 | 4485551 | 16-scf00496 | 16 |
| AX-158317428 | 25 | 42.491 | KV453089.1 | 4490734 | 16-scf00496 | 16 |
| AX-158317429 | 25 | 42.491 | KV453089.1 | 4491669 | 16-scf00496 | 16 |
| AX-157847903 | 25 | 42.491 | KV453089.1 | 4491823 | 16-scf00496 | 16 |
| AX-158317440 | 25 | 42.491 | KV453089.1 | 4501988 | 16-scf00496 | 16 |
| AX-158317450 | 25 | 42.491 | KV453089.1 | 4511353 | 16-scf00496 | 16 |
| AX-158317464 | 25 | 42.491 | KV453089.1 | 4524637 | 16-scf00496 | 16 |
| AX-158317465 | 25 | 42.491 | KV453089.1 | 4526146 | 16-scf00496 | 16 |
| AX-158317481 | 25 | 42.491 | KV453089.1 | 4545927 | 16-scf00496 | 16 |
| AX-158317486 | 25 | 42.491 | KV453089.1 | 4552944 | 16-scf00496 | 16 |
| AX-157744310 | 25 | 42.491 | KV453089.1 | 4563304 | 16-scf00496 | 16 |
| AX-158317493 | 25 | 42.491 | KV453089.1 | 4565364 | 16-scf00496 | 16 |
| AX-158317494 | 25 | 42.491 | KV453089.1 | 4566235 | 16-scf00496 | 16 |
| AX-158317508 | 25 | 42.491 | KV453089.1 | 4589607 | 16-scf00496 | 16 |
| AX-157713915 | 25 | 42.491 | KV453089.1 | 4598478 | 16-scf00496 | 16 |
| AX-158317517 | 25 | 42.491 | KV453089.1 | 4599352 | 16-scf00496 | 16 |
| AX-158317518 | 25 | 42.491 | KV453089.1 | 4599689 | 16-scf00496 | 16 |
| AX-158317760 | 25 | 42.491 | KV453089.1 | 4987607 | 16-scf00496 | 16 |
| AX-158318055 | 25 | 42.491 | KV453089.1 | 5403977 | 16-scf00496 | 16 |
| AX-158317218 | 25 | 42.6   | KV453089.1 | 4253791 | 16-scf00496 | 16 |
| AX-158317529 | 25 | 42.6   | KV453089.1 | 4607569 | 16-scf00496 | 16 |
| AX-158317547 | 25 | 42.6   | KV453089.1 | 4639799 | 16-scf00496 | 16 |
| AX-158317559 | 25 | 42.6   | KV453089.1 | 4670151 | 16-scf00496 | 16 |
| AX-158317577 | 25 | 42.6   | KV453089.1 | 4696501 | 16-scf00496 | 16 |
| AX-158317581 | 25 | 42.6   | KV453089.1 | 4700347 | 16-scf00496 | 16 |
| AX-158317587 | 25 | 42.6   | KV453089.1 | 4713263 | 16-scf00496 | 16 |
| AX-158317588 | 25 | 42.6   | KV453089.1 | 4715089 | 16-scf00496 | 16 |
| AX-158317591 | 25 | 42.6   | KV453089.1 | 4720140 | 16-scf00496 | 16 |
| AX-158317592 | 25 | 42.6   | KV453089.1 | 4723944 | 16-scf00496 | 16 |
| AX-158317603 | 25 | 42.6   | KV453089.1 | 4758579 | 16-scf00496 | 16 |
| AX-158317611 | 25 | 42.6   | KV453089.1 | 4769351 | 16-scf00496 | 16 |

|              |    |        |            |         |             |    |
|--------------|----|--------|------------|---------|-------------|----|
| AX-158317626 | 25 | 42.6   | KV453089.1 | 4789082 | 16-scf00496 | 16 |
| AX-157847918 | 25 | 42.709 | KV453089.1 | 4783028 | 16-scf00496 | 16 |
| AX-158317624 | 25 | 42.709 | KV453089.1 | 4787010 | 16-scf00496 | 16 |
| AX-158381441 | 25 | 42.709 | KV453089.1 | 4787862 | 16-scf00496 | 16 |
| AX-157847919 | 25 | 42.709 | KV453089.1 | 4790352 | 16-scf00496 | 16 |
| AX-157847921 | 25 | 42.709 | KV453089.1 | 4791306 | 16-scf00496 | 16 |
| AX-158317630 | 25 | 42.709 | KV453089.1 | 4794011 | 16-scf00496 | 16 |
| AX-158317635 | 25 | 42.709 | KV453089.1 | 4806580 | 16-scf00496 | 16 |
| AX-157847923 | 25 | 42.709 | KV453089.1 | 4819925 | 16-scf00496 | 16 |
| AX-157747441 | 25 | 42.927 | KV453089.1 | 4813633 | 16-scf00496 | 16 |
| AX-157725173 | 25 | 42.927 | KV453089.1 | 4818916 | 16-scf00496 | 16 |
| AX-157847925 | 25 | 42.927 | KV453089.1 | 4823281 | 16-scf00496 | 16 |
| AX-158317642 | 25 | 42.927 | KV453089.1 | 4824502 | 16-scf00496 | 16 |
| AX-158317643 | 25 | 42.927 | KV453089.1 | 4824821 | 16-scf00496 | 16 |
| AX-158317644 | 25 | 43.219 | KV453089.1 | 4827488 | 16-scf00496 | 16 |
| AX-157847926 | 25 | 43.219 | KV453089.1 | 4831570 | 16-scf00496 | 16 |
| AX-158317648 | 25 | 43.291 | KV453089.1 | 4832717 | 16-scf00496 | 16 |
| AX-158317649 | 25 | 43.364 | KV453089.1 | 4835093 | 16-scf00496 | 16 |
| AX-157847927 | 25 | 43.365 | KV453089.1 | 4839461 | 16-scf00496 | 16 |
| AX-157847928 | 25 | 43.365 | KV453089.1 | 4841906 | 16-scf00496 | 16 |
| AX-158317653 | 25 | 43.545 | KV453089.1 | 4844152 | 16-scf00496 | 16 |
| AX-158317655 | 25 | 43.686 | KV453089.1 | 4847369 | 16-scf00496 | 16 |
| AX-158317660 | 25 | 43.695 | KV453089.1 | 4858010 | 16-scf00496 | 16 |
| AX-158317663 | 25 | 44.029 | KV453089.1 | 4862077 | 16-scf00496 | 16 |
| AX-158317664 | 25 | 44.334 | KV453089.1 | 4865894 | 16-scf00496 | 16 |
| AX-157847930 | 25 | 44.349 | KV453089.1 | 4872949 | 16-scf00496 | 16 |
| AX-157751120 | 25 | 44.349 | KV453089.1 | 4876351 | 16-scf00496 | 16 |
| AX-158317728 | 25 | 44.349 | KV453089.1 | 4950132 | 16-scf00496 | 16 |
| AX-158317668 | 25 | 44.369 | KV453089.1 | 4876956 | 16-scf00496 | 16 |
| AX-158317669 | 25 | 44.398 | KV453089.1 | 4878125 | 16-scf00496 | 16 |
| AX-157847932 | 25 | 44.459 | KV453089.1 | 4880437 | 16-scf00496 | 16 |
| AX-158317671 | 25 | 44.459 | KV453089.1 | 4884180 | 16-scf00496 | 16 |
| AX-158317674 | 25 | 44.459 | KV453089.1 | 4885936 | 16-scf00496 | 16 |
| AX-158317676 | 25 | 44.459 | KV453089.1 | 4888929 | 16-scf00496 | 16 |
| AX-158317679 | 25 | 44.459 | KV453089.1 | 4891337 | 16-scf00496 | 16 |
| AX-157867824 | 25 | 44.459 | KV453089.1 | 4892734 | 16-scf00496 | 16 |
| AX-157710609 | 25 | 44.459 | KV453089.1 | 4895305 | 16-scf00496 | 16 |
| AX-158317686 | 25 | 44.459 | KV453089.1 | 4901733 | 16-scf00496 | 16 |
| AX-158317688 | 25 | 44.459 | KV453089.1 | 4904842 | 16-scf00496 | 16 |
| AX-158317690 | 25 | 44.459 | KV453089.1 | 4906874 | 16-scf00496 | 16 |
| AX-158317692 | 25 | 44.459 | KV453089.1 | 4907643 | 16-scf00496 | 16 |
| AX-158317693 | 25 | 44.459 | KV453089.1 | 4908259 | 16-scf00496 | 16 |
| AX-158317694 | 25 | 44.459 | KV453089.1 | 4909514 | 16-scf00496 | 16 |
| AX-158317695 | 25 | 44.459 | KV453089.1 | 4909692 | 16-scf00496 | 16 |
| AX-158317703 | 25 | 44.459 | KV453089.1 | 4927831 | 16-scf00496 | 16 |
| AX-158317704 | 25 | 44.459 | KV453089.1 | 4928938 | 16-scf00496 | 16 |
| AX-158317706 | 25 | 44.459 | KV453089.1 | 4930931 | 16-scf00496 | 16 |
| AX-158317707 | 25 | 44.459 | KV453089.1 | 4931567 | 16-scf00496 | 16 |
| AX-158317708 | 25 | 44.459 | KV453089.1 | 4932983 | 16-scf00496 | 16 |
| AX-157750748 | 25 | 44.459 | KV453089.1 | 4935017 | 16-scf00496 | 16 |
| AX-157709635 | 25 | 44.459 | KV453089.1 | 4936960 | 16-scf00496 | 16 |

|              |    |        |             |         |             |    |
|--------------|----|--------|-------------|---------|-------------|----|
| AX-157750076 | 25 | 44.459 | KV453089.1  | 4939231 | 16-scf00496 | 16 |
| AX-158317711 | 25 | 44.459 | KV453089.1  | 4939516 | 16-scf00496 | 16 |
| AX-158317712 | 25 | 44.459 | KV453089.1  | 4940193 | 16-scf00496 | 16 |
| AX-158317716 | 25 | 44.459 | KV453089.1  | 4942648 | 16-scf00496 | 16 |
| AX-157774474 | 25 | 44.459 | KV453089.1  | 4944627 | 16-scf00496 | 16 |
| AX-158317721 | 25 | 44.459 | KV453089.1  | 4946459 | 16-scf00496 | 16 |
| AX-158317722 | 25 | 44.459 | KV453089.1  | 4948066 | 16-scf00496 | 16 |
| AX-158317723 | 25 | 44.459 | KV453089.1  | 4948670 | 16-scf00496 | 16 |
| AX-158317725 | 25 | 44.459 | KV453089.1  | 4949199 | 16-scf00496 | 16 |
| AX-158317726 | 25 | 44.459 | KV453089.1  | 4949527 | 16-scf00496 | 16 |
| AX-157867827 | 25 | 44.459 | KV453089.1  | 4951328 | 16-scf00496 | 16 |
| AX-158317731 | 25 | 44.459 | KV453089.1  | 4953901 | 16-scf00496 | 16 |
| AX-157772231 | 25 | 44.459 | KV453089.1  | 4953947 | 16-scf00496 | 16 |
| AX-158317732 | 25 | 44.459 | KV453089.1  | 4954865 | 16-scf00496 | 16 |
| AX-158317733 | 25 | 44.459 | KV453089.1  | 4955395 | 16-scf00496 | 16 |
| AX-158317735 | 25 | 44.459 | KV453089.1  | 4958051 | 16-scf00496 | 16 |
| AX-158317738 | 25 | 44.459 | KV453089.1  | 4965307 | 16-scf00496 | 16 |
| AX-158317741 | 25 | 44.459 | KV453089.1  | 4968064 | 16-scf00496 | 16 |
| AX-158317746 | 25 | 44.459 | KV453089.1  | 4972570 | 16-scf00496 | 16 |
| AX-158317754 | 25 | 44.459 | KV453089.1  | 4980336 | 16-scf00496 | 16 |
| AX-157741884 | 25 | 44.459 | KV453089.1  | 4991716 | 16-scf00496 | 16 |
| AX-157717245 | 25 | 44.459 | KV453089.1  | 4992712 | 16-scf00496 | 16 |
| AX-157888333 | 25 | 44.459 | KV453089.1  | 4996128 | 16-scf00496 | 16 |
| AX-157847941 | 25 | 44.459 | KV453089.1  | 5017040 | 16-scf00496 | 16 |
| AX-157847942 | 25 | 44.459 | KV453089.1  | 5023552 | 16-scf00496 | 16 |
| AX-157847945 | 25 | 44.459 | KV453089.1  | 5025538 | 16-scf00496 | 16 |
| AX-157847949 | 25 | 44.459 | KV453089.1  | 5078249 | 16-scf00496 | 16 |
| AX-158317872 | 25 | 44.459 | KV453089.1  | 5149938 | 16-scf00496 | 16 |
| AX-158317878 | 25 | 44.459 | KV453089.1  | 5159228 | 16-scf00496 | 16 |
| AX-158317933 | 25 | 44.459 | KV453089.1  | 5260231 | 16-scf00496 | 16 |
| AX-158317983 | 25 | 44.459 | KV453089.1  | 5327763 | 16-scf00496 | 16 |
| AX-158318117 | 25 | 44.459 | KV453089.1  | 5487268 | 16-scf00496 | 16 |
| AX-157848025 | 25 | 44.459 | KV453089.1  | 5744325 | 16-scf00496 | 16 |
| AX-157705661 | 25 | 44.459 | 3ML01030555 | 163     | scf06155_1  | UN |
| AX-157705662 | 25 | 44.459 | 3ML01030555 | 469     | scf06155_1  | UN |
| AX-158317744 | 25 | 44.786 | KV453089.1  | 4971594 | 16-scf00496 | 16 |
| AX-158317749 | 25 | 44.786 | KV453089.1  | 4975328 | 16-scf00496 | 16 |
| AX-158317751 | 25 | 44.786 | KV453089.1  | 4976954 | 16-scf00496 | 16 |
| AX-158317757 | 25 | 44.787 | KV453089.1  | 4984171 | 16-scf00496 | 16 |
| AX-157873583 | 25 | 44.787 | KV453089.1  | 4994920 | 16-scf00496 | 16 |
| AX-157847929 | 25 | 44.788 | KV453089.1  | 4848006 | 16-scf00496 | 16 |
| AX-158317764 | 25 | 44.788 | KV453089.1  | 4996341 | 16-scf00496 | 16 |
| AX-158317650 | 25 | 45.114 | KV453089.1  | 4836787 | 16-scf00496 | 16 |
| AX-158381442 | 25 | 45.114 | KV453089.1  | 4896050 | 16-scf00496 | 16 |
| AX-157771515 | 25 | 45.114 | KV453089.1  | 4962651 | 16-scf00496 | 16 |
| AX-158317748 | 25 | 45.114 | KV453089.1  | 4974184 | 16-scf00496 | 16 |
| AX-158317755 | 25 | 45.114 | KV453089.1  | 4980575 | 16-scf00496 | 16 |
| AX-158317758 | 25 | 45.114 | KV453089.1  | 4985254 | 16-scf00496 | 16 |
| AX-158317767 | 25 | 45.114 | KV453089.1  | 4998852 | 16-scf00496 | 16 |
| AX-157747678 | 25 | 45.114 | KV453089.1  | 5000228 | 16-scf00496 | 16 |
| AX-158317769 | 25 | 45.114 | KV453089.1  | 5005256 | 16-scf00496 | 16 |

|              |    |        |            |         |             |    |
|--------------|----|--------|------------|---------|-------------|----|
| AX-157847940 | 25 | 45.114 | KV453089.1 | 5009191 | 16-scf00496 | 16 |
| AX-157739556 | 25 | 45.114 | KV453089.1 | 5013090 | 16-scf00496 | 16 |
| AX-158317778 | 25 | 45.114 | KV453089.1 | 5022212 | 16-scf00496 | 16 |
| AX-158317779 | 25 | 45.114 | KV453089.1 | 5022629 | 16-scf00496 | 16 |
| AX-157717208 | 25 | 45.114 | KV453089.1 | 5025594 | 16-scf00496 | 16 |
| AX-158317782 | 25 | 45.114 | KV453089.1 | 5028072 | 16-scf00496 | 16 |
| AX-158317788 | 25 | 45.114 | KV453089.1 | 5035310 | 16-scf00496 | 16 |
| AX-158317793 | 25 | 45.114 | KV453089.1 | 5046018 | 16-scf00496 | 16 |
| AX-158317794 | 25 | 45.114 | KV453089.1 | 5046413 | 16-scf00496 | 16 |
| AX-158317796 | 25 | 45.114 | KV453089.1 | 5050405 | 16-scf00496 | 16 |
| AX-158317797 | 25 | 45.114 | KV453089.1 | 5051571 | 16-scf00496 | 16 |
| AX-158317798 | 25 | 45.114 | KV453089.1 | 5051894 | 16-scf00496 | 16 |
| AX-158317800 | 25 | 45.114 | KV453089.1 | 5053833 | 16-scf00496 | 16 |
| AX-158317801 | 25 | 45.114 | KV453089.1 | 5054799 | 16-scf00496 | 16 |
| AX-158317802 | 25 | 45.114 | KV453089.1 | 5055957 | 16-scf00496 | 16 |
| AX-158317807 | 25 | 45.114 | KV453089.1 | 5058900 | 16-scf00496 | 16 |
| AX-157881288 | 25 | 45.114 | KV453089.1 | 5060681 | 16-scf00496 | 16 |
| AX-157729971 | 25 | 45.114 | KV453089.1 | 5069563 | 16-scf00496 | 16 |
| AX-157764999 | 25 | 45.114 | KV453089.1 | 5071518 | 16-scf00496 | 16 |
| AX-158317811 | 25 | 45.114 | KV453089.1 | 5071792 | 16-scf00496 | 16 |
| AX-157888335 | 25 | 45.114 | KV453089.1 | 5074690 | 16-scf00496 | 16 |
| AX-158317814 | 25 | 45.114 | KV453089.1 | 5076185 | 16-scf00496 | 16 |
| AX-158317815 | 25 | 45.114 | KV453089.1 | 5076879 | 16-scf00496 | 16 |
| AX-158317816 | 25 | 45.114 | KV453089.1 | 5077221 | 16-scf00496 | 16 |
| AX-158317821 | 25 | 45.114 | KV453089.1 | 5090959 | 16-scf00496 | 16 |
| AX-158317822 | 25 | 45.114 | KV453089.1 | 5091240 | 16-scf00496 | 16 |
| AX-158317824 | 25 | 45.114 | KV453089.1 | 5095631 | 16-scf00496 | 16 |
| AX-158317770 | 25 | 45.146 | KV453089.1 | 5006592 | 16-scf00496 | 16 |
| AX-158317817 | 25 | 45.146 | KV453089.1 | 5077923 | 16-scf00496 | 16 |
| AX-158317820 | 25 | 45.174 | KV453089.1 | 5089670 | 16-scf00496 | 16 |
| AX-157748084 | 25 | 45.22  | KV453089.1 | 5099024 | 16-scf00496 | 16 |
| AX-158317826 | 25 | 45.253 | KV453089.1 | 5099870 | 16-scf00496 | 16 |
| AX-158317827 | 25 | 45.296 | KV453089.1 | 5100520 | 16-scf00496 | 16 |
| AX-158317831 | 25 | 45.66  | KV453089.1 | 5103735 | 16-scf00496 | 16 |
| AX-158317833 | 25 | 45.66  | KV453089.1 | 5106965 | 16-scf00496 | 16 |
| AX-158317834 | 25 | 45.66  | KV453089.1 | 5109636 | 16-scf00496 | 16 |
| AX-158317837 | 25 | 45.66  | KV453089.1 | 5110417 | 16-scf00496 | 16 |
| AX-158317839 | 25 | 45.66  | KV453089.1 | 5111555 | 16-scf00496 | 16 |
| AX-158317841 | 25 | 45.66  | KV453089.1 | 5113189 | 16-scf00496 | 16 |
| AX-158317842 | 25 | 45.66  | KV453089.1 | 5114851 | 16-scf00496 | 16 |
| AX-157757639 | 25 | 45.66  | KV453089.1 | 5116535 | 16-scf00496 | 16 |
| AX-157756978 | 25 | 45.66  | KV453089.1 | 5119759 | 16-scf00496 | 16 |
| AX-158317844 | 25 | 45.66  | KV453089.1 | 5120581 | 16-scf00496 | 16 |
| AX-158317847 | 25 | 45.66  | KV453089.1 | 5123404 | 16-scf00496 | 16 |
| AX-158317848 | 25 | 45.66  | KV453089.1 | 5123881 | 16-scf00496 | 16 |
| AX-158317849 | 25 | 45.66  | KV453089.1 | 5124560 | 16-scf00496 | 16 |
| AX-158317858 | 25 | 45.66  | KV453089.1 | 5129963 | 16-scf00496 | 16 |
| AX-158317861 | 25 | 45.77  | KV453089.1 | 5131908 | 16-scf00496 | 16 |
| AX-157847951 | 25 | 45.783 | KV453089.1 | 5132987 | 16-scf00496 | 16 |
| AX-158317915 | 25 | 45.783 | KV453089.1 | 5216908 | 16-scf00496 | 16 |
| AX-158317980 | 25 | 45.783 | KV453089.1 | 5324926 | 16-scf00496 | 16 |

|              |    |        |            |         |             |    |
|--------------|----|--------|------------|---------|-------------|----|
| AX-157727256 | 25 | 45.842 | KV453089.1 | 5133315 | 16-scf00496 | 16 |
| AX-158317859 | 25 | 45.879 | KV453089.1 | 5130298 | 16-scf00496 | 16 |
| AX-158317865 | 25 | 45.879 | KV453089.1 | 5137828 | 16-scf00496 | 16 |
| AX-157847952 | 25 | 45.879 | KV453089.1 | 5140833 | 16-scf00496 | 16 |
| AX-158317869 | 25 | 45.879 | KV453089.1 | 5146207 | 16-scf00496 | 16 |
| AX-158317870 | 25 | 45.879 | KV453089.1 | 5146839 | 16-scf00496 | 16 |
| AX-157847953 | 25 | 45.879 | KV453089.1 | 5148287 | 16-scf00496 | 16 |
| AX-158317871 | 25 | 45.879 | KV453089.1 | 5149183 | 16-scf00496 | 16 |
| AX-157748012 | 25 | 45.879 | KV453089.1 | 5152943 | 16-scf00496 | 16 |
| AX-158317879 | 25 | 45.879 | KV453089.1 | 5160476 | 16-scf00496 | 16 |
| AX-157755515 | 25 | 45.879 | KV453089.1 | 5221966 | 16-scf00496 | 16 |
| AX-157847965 | 25 | 45.879 | KV453089.1 | 5229158 | 16-scf00496 | 16 |
| AX-158317925 | 25 | 45.879 | KV453089.1 | 5244992 | 16-scf00496 | 16 |
| AX-158381444 | 25 | 45.908 | KV453089.1 | 5152852 | 16-scf00496 | 16 |
| AX-157873587 | 25 | 45.908 | KV453089.1 | 5178193 | 16-scf00496 | 16 |
| AX-158317905 | 25 | 45.908 | KV453089.1 | 5204595 | 16-scf00496 | 16 |
| AX-157888336 | 25 | 45.908 | KV453089.1 | 5205291 | 16-scf00496 | 16 |
| AX-158317907 | 25 | 45.908 | KV453089.1 | 5206616 | 16-scf00496 | 16 |
| AX-157847968 | 25 | 45.908 | KV453089.1 | 5253126 | 16-scf00496 | 16 |
| AX-158317935 | 25 | 45.908 | KV453089.1 | 5262038 | 16-scf00496 | 16 |
| AX-157847970 | 25 | 45.908 | KV453089.1 | 5281408 | 16-scf00496 | 16 |
| AX-158317951 | 25 | 45.908 | KV453089.1 | 5288897 | 16-scf00496 | 16 |
| AX-158317959 | 25 | 45.908 | KV453089.1 | 5298001 | 16-scf00496 | 16 |
| AX-158317972 | 25 | 45.908 | KV453089.1 | 5316989 | 16-scf00496 | 16 |
| AX-158317874 | 25 | 45.93  | KV453089.1 | 5154283 | 16-scf00496 | 16 |
| AX-158317875 | 25 | 45.941 | KV453089.1 | 5156474 | 16-scf00496 | 16 |
| AX-158317877 | 25 | 45.957 | KV453089.1 | 5158810 | 16-scf00496 | 16 |
| AX-158317867 | 25 | 45.988 | KV453089.1 | 5139326 | 16-scf00496 | 16 |
| AX-158317880 | 25 | 45.988 | KV453089.1 | 5163476 | 16-scf00496 | 16 |
| AX-158317882 | 25 | 45.988 | KV453089.1 | 5168386 | 16-scf00496 | 16 |
| AX-158317884 | 25 | 45.988 | KV453089.1 | 5171236 | 16-scf00496 | 16 |
| AX-157847955 | 25 | 46.04  | KV453089.1 | 5170219 | 16-scf00496 | 16 |
| AX-157847956 | 25 | 46.097 | KV453089.1 | 5173529 | 16-scf00496 | 16 |
| AX-157847958 | 25 | 46.097 | KV453089.1 | 5181740 | 16-scf00496 | 16 |
| AX-158317893 | 25 | 46.097 | KV453089.1 | 5187384 | 16-scf00496 | 16 |
| AX-157847961 | 25 | 46.097 | KV453089.1 | 5189626 | 16-scf00496 | 16 |
| AX-158317895 | 25 | 46.097 | KV453089.1 | 5189936 | 16-scf00496 | 16 |
| AX-158317902 | 25 | 46.097 | KV453089.1 | 5201247 | 16-scf00496 | 16 |
| AX-158317909 | 25 | 46.097 | KV453089.1 | 5210145 | 16-scf00496 | 16 |
| AX-158317913 | 25 | 46.097 | KV453089.1 | 5213629 | 16-scf00496 | 16 |
| AX-158317916 | 25 | 46.097 | KV453089.1 | 5218410 | 16-scf00496 | 16 |
| AX-158317918 | 25 | 46.097 | KV453089.1 | 5221805 | 16-scf00496 | 16 |
| AX-157847962 | 25 | 46.097 | KV453089.1 | 5225543 | 16-scf00496 | 16 |
| AX-157847963 | 25 | 46.097 | KV453089.1 | 5227863 | 16-scf00496 | 16 |
| AX-157847964 | 25 | 46.097 | KV453089.1 | 5229069 | 16-scf00496 | 16 |
| AX-158317922 | 25 | 46.097 | KV453089.1 | 5232177 | 16-scf00496 | 16 |
| AX-158317924 | 25 | 46.097 | KV453089.1 | 5243267 | 16-scf00496 | 16 |
| AX-157755432 | 25 | 46.097 | KV453089.1 | 5246625 | 16-scf00496 | 16 |
| AX-158317927 | 25 | 46.097 | KV453089.1 | 5247098 | 16-scf00496 | 16 |
| AX-157847967 | 25 | 46.097 | KV453089.1 | 5251517 | 16-scf00496 | 16 |
| AX-157715127 | 25 | 46.097 | KV453089.1 | 5251996 | 16-scf00496 | 16 |

|              |    |        |            |         |             |    |
|--------------|----|--------|------------|---------|-------------|----|
| AX-158317930 | 25 | 46.097 | KV453089.1 | 5252682 | 16-scf00496 | 16 |
| AX-158317932 | 25 | 46.097 | KV453089.1 | 5260056 | 16-scf00496 | 16 |
| AX-158317936 | 25 | 46.097 | KV453089.1 | 5266396 | 16-scf00496 | 16 |
| AX-157745246 | 25 | 46.097 | KV453089.1 | 5269472 | 16-scf00496 | 16 |
| AX-158317939 | 25 | 46.097 | KV453089.1 | 5272801 | 16-scf00496 | 16 |
| AX-157712241 | 25 | 46.097 | KV453089.1 | 5273619 | 16-scf00496 | 16 |
| AX-158317942 | 25 | 46.097 | KV453089.1 | 5275110 | 16-scf00496 | 16 |
| AX-158317945 | 25 | 46.097 | KV453089.1 | 5280990 | 16-scf00496 | 16 |
| AX-158317946 | 25 | 46.097 | KV453089.1 | 5281759 | 16-scf00496 | 16 |
| AX-158317948 | 25 | 46.097 | KV453089.1 | 5284654 | 16-scf00496 | 16 |
| AX-157748446 | 25 | 46.097 | KV453089.1 | 5293090 | 16-scf00496 | 16 |
| AX-158317956 | 25 | 46.097 | KV453089.1 | 5294486 | 16-scf00496 | 16 |
| AX-158317957 | 25 | 46.097 | KV453089.1 | 5294844 | 16-scf00496 | 16 |
| AX-158317962 | 25 | 46.097 | KV453089.1 | 5300325 | 16-scf00496 | 16 |
| AX-157771134 | 25 | 46.097 | KV453089.1 | 5302053 | 16-scf00496 | 16 |
| AX-158317967 | 25 | 46.097 | KV453089.1 | 5308487 | 16-scf00496 | 16 |
| AX-158317968 | 25 | 46.097 | KV453089.1 | 5310072 | 16-scf00496 | 16 |
| AX-158317970 | 25 | 46.097 | KV453089.1 | 5312957 | 16-scf00496 | 16 |
| AX-157713270 | 25 | 46.097 | KV453089.1 | 5448089 | 16-scf00496 | 16 |
| AX-157848023 | 25 | 46.097 | KV453089.1 | 5725960 | 16-scf00496 | 16 |
| AX-158318291 | 25 | 46.097 | KV453089.1 | 5726158 | 16-scf00496 | 16 |
| AX-157848024 | 25 | 46.097 | KV453089.1 | 5744022 | 16-scf00496 | 16 |
| AX-158418228 | 25 | 46.097 | KV453089.1 | 5831143 | 16-scf00496 | 16 |
| AX-158318565 | 25 | 46.097 | KV453089.1 | 6075539 | 16-scf00496 | 16 |
| AX-158318873 | 25 | 46.097 | KV453089.1 | 6446820 | 16-scf00496 | 16 |
| AX-158317864 | 25 | 46.206 | KV453089.1 | 5136944 | 16-scf00496 | 16 |
| AX-158317911 | 25 | 46.206 | KV453089.1 | 5212452 | 16-scf00496 | 16 |
| AX-158317914 | 25 | 46.206 | KV453089.1 | 5215985 | 16-scf00496 | 16 |
| AX-158317961 | 25 | 46.206 | KV453089.1 | 5299864 | 16-scf00496 | 16 |
| AX-158317971 | 25 | 46.206 | KV453089.1 | 5314203 | 16-scf00496 | 16 |
| AX-158317974 | 25 | 46.206 | KV453089.1 | 5317866 | 16-scf00496 | 16 |
| AX-158317977 | 25 | 46.238 | KV453089.1 | 5322235 | 16-scf00496 | 16 |
| AX-157755748 | 25 | 46.238 | KV453089.1 | 5333526 | 16-scf00496 | 16 |
| AX-158317978 | 25 | 46.273 | KV453089.1 | 5323442 | 16-scf00496 | 16 |
| AX-158317988 | 25 | 46.288 | KV453089.1 | 5333461 | 16-scf00496 | 16 |
| AX-158317991 | 25 | 46.288 | KV453089.1 | 5334555 | 16-scf00496 | 16 |
| AX-158318056 | 25 | 46.288 | KV453089.1 | 5404967 | 16-scf00496 | 16 |
| AX-158318083 | 25 | 46.288 | KV453089.1 | 5446984 | 16-scf00496 | 16 |
| AX-158318125 | 25 | 46.288 | KV453089.1 | 5506969 | 16-scf00496 | 16 |
| AX-158317979 | 25 | 46.316 | KV453089.1 | 5324118 | 16-scf00496 | 16 |
| AX-157755522 | 25 | 46.316 | KV453089.1 | 5330466 | 16-scf00496 | 16 |
| AX-158317986 | 25 | 46.316 | KV453089.1 | 5331009 | 16-scf00496 | 16 |
| AX-158317987 | 25 | 46.316 | KV453089.1 | 5331615 | 16-scf00496 | 16 |
| AX-158317993 | 25 | 46.316 | KV453089.1 | 5336712 | 16-scf00496 | 16 |
| AX-158317994 | 25 | 46.316 | KV453089.1 | 5338062 | 16-scf00496 | 16 |
| AX-158317997 | 25 | 46.316 | KV453089.1 | 5340856 | 16-scf00496 | 16 |
| AX-158318003 | 25 | 46.316 | KV453089.1 | 5343962 | 16-scf00496 | 16 |
| AX-158318004 | 25 | 46.316 | KV453089.1 | 5344478 | 16-scf00496 | 16 |
| AX-158318005 | 25 | 46.316 | KV453089.1 | 5345213 | 16-scf00496 | 16 |
| AX-158318007 | 25 | 46.316 | KV453089.1 | 5351053 | 16-scf00496 | 16 |
| AX-158318011 | 25 | 46.316 | KV453089.1 | 5353238 | 16-scf00496 | 16 |

|              |    |        |            |         |             |    |
|--------------|----|--------|------------|---------|-------------|----|
| AX-157847974 | 25 | 46.316 | KV453089.1 | 5354193 | 16-scf00496 | 16 |
| AX-157716375 | 25 | 46.316 | KV453089.1 | 5356341 | 16-scf00496 | 16 |
| AX-157847976 | 25 | 46.316 | KV453089.1 | 5357514 | 16-scf00496 | 16 |
| AX-158318015 | 25 | 46.316 | KV453089.1 | 5365940 | 16-scf00496 | 16 |
| AX-158318016 | 25 | 46.316 | KV453089.1 | 5366314 | 16-scf00496 | 16 |
| AX-158318017 | 25 | 46.316 | KV453089.1 | 5366967 | 16-scf00496 | 16 |
| AX-158318018 | 25 | 46.316 | KV453089.1 | 5368134 | 16-scf00496 | 16 |
| AX-157710498 | 25 | 46.316 | KV453089.1 | 5368503 | 16-scf00496 | 16 |
| AX-157847978 | 25 | 46.316 | KV453089.1 | 5368856 | 16-scf00496 | 16 |
| AX-158318021 | 25 | 46.316 | KV453089.1 | 5369866 | 16-scf00496 | 16 |
| AX-158318022 | 25 | 46.316 | KV453089.1 | 5370680 | 16-scf00496 | 16 |
| AX-158318024 | 25 | 46.316 | KV453089.1 | 5371806 | 16-scf00496 | 16 |
| AX-158318028 | 25 | 46.316 | KV453089.1 | 5375896 | 16-scf00496 | 16 |
| AX-157873589 | 25 | 46.316 | KV453089.1 | 5379483 | 16-scf00496 | 16 |
| AX-158318040 | 25 | 46.316 | KV453089.1 | 5386710 | 16-scf00496 | 16 |
| AX-158318041 | 25 | 46.316 | KV453089.1 | 5388861 | 16-scf00496 | 16 |
| AX-158318042 | 25 | 46.316 | KV453089.1 | 5390111 | 16-scf00496 | 16 |
| AX-158318044 | 25 | 46.316 | KV453089.1 | 5391668 | 16-scf00496 | 16 |
| AX-158318046 | 25 | 46.316 | KV453089.1 | 5394346 | 16-scf00496 | 16 |
| AX-158318047 | 25 | 46.316 | KV453089.1 | 5395114 | 16-scf00496 | 16 |
| AX-158318048 | 25 | 46.316 | KV453089.1 | 5396359 | 16-scf00496 | 16 |
| AX-158318050 | 25 | 46.316 | KV453089.1 | 5400290 | 16-scf00496 | 16 |
| AX-158318064 | 25 | 46.316 | KV453089.1 | 5420224 | 16-scf00496 | 16 |
| AX-158318065 | 25 | 46.316 | KV453089.1 | 5421681 | 16-scf00496 | 16 |
| AX-158318066 | 25 | 46.316 | KV453089.1 | 5422182 | 16-scf00496 | 16 |
| AX-158318067 | 25 | 46.316 | KV453089.1 | 5422632 | 16-scf00496 | 16 |
| AX-158318071 | 25 | 46.316 | KV453089.1 | 5425839 | 16-scf00496 | 16 |
| AX-158318072 | 25 | 46.316 | KV453089.1 | 5426201 | 16-scf00496 | 16 |
| AX-158318073 | 25 | 46.316 | KV453089.1 | 5427324 | 16-scf00496 | 16 |
| AX-158318074 | 25 | 46.316 | KV453089.1 | 5429193 | 16-scf00496 | 16 |
| AX-158318076 | 25 | 46.316 | KV453089.1 | 5432347 | 16-scf00496 | 16 |
| AX-157847982 | 25 | 46.316 | KV453089.1 | 5433024 | 16-scf00496 | 16 |
| AX-158318078 | 25 | 46.316 | KV453089.1 | 5436415 | 16-scf00496 | 16 |
| AX-158318079 | 25 | 46.316 | KV453089.1 | 5436804 | 16-scf00496 | 16 |
| AX-157744991 | 25 | 46.316 | KV453089.1 | 5437428 | 16-scf00496 | 16 |
| AX-157847983 | 25 | 46.316 | KV453089.1 | 5440531 | 16-scf00496 | 16 |
| AX-158318082 | 25 | 46.316 | KV453089.1 | 5443494 | 16-scf00496 | 16 |
| AX-158318084 | 25 | 46.316 | KV453089.1 | 5449029 | 16-scf00496 | 16 |
| AX-158418222 | 25 | 46.316 | KV453089.1 | 5452151 | 16-scf00496 | 16 |
| AX-157735507 | 25 | 46.316 | KV453089.1 | 5452742 | 16-scf00496 | 16 |
| AX-158318088 | 25 | 46.316 | KV453089.1 | 5457216 | 16-scf00496 | 16 |
| AX-158318093 | 25 | 46.316 | KV453089.1 | 5460083 | 16-scf00496 | 16 |
| AX-158318094 | 25 | 46.316 | KV453089.1 | 5461733 | 16-scf00496 | 16 |
| AX-158318098 | 25 | 46.316 | KV453089.1 | 5464918 | 16-scf00496 | 16 |
| AX-158318101 | 25 | 46.316 | KV453089.1 | 5468091 | 16-scf00496 | 16 |
| AX-158318102 | 25 | 46.316 | KV453089.1 | 5468555 | 16-scf00496 | 16 |
| AX-158318109 | 25 | 46.316 | KV453089.1 | 5477928 | 16-scf00496 | 16 |
| AX-158318110 | 25 | 46.316 | KV453089.1 | 5478351 | 16-scf00496 | 16 |
| AX-158318112 | 25 | 46.316 | KV453089.1 | 5480608 | 16-scf00496 | 16 |
| AX-157847988 | 25 | 46.316 | KV453089.1 | 5480675 | 16-scf00496 | 16 |
| AX-157752888 | 25 | 46.316 | KV453089.1 | 5485097 | 16-scf00496 | 16 |



|              |    |        |            |         |             |    |
|--------------|----|--------|------------|---------|-------------|----|
| AX-158318122 | 25 | 46.316 | KV453089.1 | 5496344 | 16-scf00496 | 16 |
| AX-158318123 | 25 | 46.316 | KV453089.1 | 5502623 | 16-scf00496 | 16 |
| AX-157847992 | 25 | 46.316 | KV453089.1 | 5503086 | 16-scf00496 | 16 |
| AX-157873591 | 25 | 46.316 | KV453089.1 | 5503531 | 16-scf00496 | 16 |
| AX-157873592 | 25 | 46.316 | KV453089.1 | 5504643 | 16-scf00496 | 16 |
| AX-158318131 | 25 | 46.316 | KV453089.1 | 5517011 | 16-scf00496 | 16 |
| AX-158318133 | 25 | 46.316 | KV453089.1 | 5518936 | 16-scf00496 | 16 |
| AX-158318137 | 25 | 46.316 | KV453089.1 | 5522347 | 16-scf00496 | 16 |
| AX-157847995 | 25 | 46.316 | KV453089.1 | 5534013 | 16-scf00496 | 16 |
| AX-158318141 | 25 | 46.316 | KV453089.1 | 5534974 | 16-scf00496 | 16 |
| AX-157847996 | 25 | 46.316 | KV453089.1 | 5535755 | 16-scf00496 | 16 |
| AX-157746620 | 25 | 46.316 | KV453089.1 | 5539751 | 16-scf00496 | 16 |
| AX-157716752 | 25 | 46.316 | KV453089.1 | 5542398 | 16-scf00496 | 16 |
| AX-158318151 | 25 | 46.316 | KV453089.1 | 5550567 | 16-scf00496 | 16 |
| AX-157717171 | 25 | 46.316 | KV453089.1 | 5567412 | 16-scf00496 | 16 |
| AX-158318165 | 25 | 46.316 | KV453089.1 | 5575548 | 16-scf00496 | 16 |
| AX-158318166 | 25 | 46.316 | KV453089.1 | 5575854 | 16-scf00496 | 16 |
| AX-158318167 | 25 | 46.316 | KV453089.1 | 5576640 | 16-scf00496 | 16 |
| AX-158318175 | 25 | 46.316 | KV453089.1 | 5582520 | 16-scf00496 | 16 |
| AX-157741125 | 25 | 46.316 | KV453089.1 | 5605518 | 16-scf00496 | 16 |
| AX-157718179 | 25 | 46.316 | KV453089.1 | 5605683 | 16-scf00496 | 16 |
| AX-158318194 | 25 | 46.316 | KV453089.1 | 5615185 | 16-scf00496 | 16 |
| AX-158318210 | 25 | 46.316 | KV453089.1 | 5633472 | 16-scf00496 | 16 |
| AX-158318225 | 25 | 46.316 | KV453089.1 | 5647009 | 16-scf00496 | 16 |
| AX-158318239 | 25 | 46.316 | KV453089.1 | 5667981 | 16-scf00496 | 16 |
| AX-158318245 | 25 | 46.316 | KV453089.1 | 5673914 | 16-scf00496 | 16 |
| AX-157720020 | 25 | 46.316 | KV453089.1 | 5686481 | 16-scf00496 | 16 |
| AX-157848021 | 25 | 46.316 | KV453089.1 | 5690394 | 16-scf00496 | 16 |
| AX-158318262 | 25 | 46.316 | KV453089.1 | 5694121 | 16-scf00496 | 16 |
| AX-158318265 | 25 | 46.316 | KV453089.1 | 5698093 | 16-scf00496 | 16 |
| AX-158318281 | 25 | 46.316 | KV453089.1 | 5715238 | 16-scf00496 | 16 |
| AX-158318290 | 25 | 46.316 | KV453089.1 | 5725455 | 16-scf00496 | 16 |
| AX-158318322 | 25 | 46.316 | KV453089.1 | 5772361 | 16-scf00496 | 16 |
| AX-158318323 | 25 | 46.316 | KV453089.1 | 5772546 | 16-scf00496 | 16 |
| AX-158318358 | 25 | 46.316 | KV453089.1 | 5798350 | 16-scf00496 | 16 |
| AX-158318361 | 25 | 46.316 | KV453089.1 | 5801299 | 16-scf00496 | 16 |
| AX-158318374 | 25 | 46.316 | KV453089.1 | 5832240 | 16-scf00496 | 16 |
| AX-158318383 | 25 | 46.316 | KV453089.1 | 5844278 | 16-scf00496 | 16 |
| AX-158387875 | 25 | 46.316 | KV453089.1 | 5849006 | 16-scf00496 | 16 |
| AX-158318396 | 25 | 46.316 | KV453089.1 | 5864440 | 16-scf00496 | 16 |
| AX-158318403 | 25 | 46.316 | KV453089.1 | 5870462 | 16-scf00496 | 16 |
| AX-158318411 | 25 | 46.316 | KV453089.1 | 5882562 | 16-scf00496 | 16 |
| AX-157881303 | 25 | 46.316 | KV453089.1 | 5889634 | 16-scf00496 | 16 |
| AX-158318422 | 25 | 46.316 | KV453089.1 | 5899190 | 16-scf00496 | 16 |
| AX-158318429 | 25 | 46.316 | KV453089.1 | 5903885 | 16-scf00496 | 16 |
| AX-158318431 | 25 | 46.316 | KV453089.1 | 5905035 | 16-scf00496 | 16 |
| AX-158318476 | 25 | 46.316 | KV453089.1 | 5976812 | 16-scf00496 | 16 |
| AX-158318515 | 25 | 46.316 | KV453089.1 | 6024792 | 16-scf00496 | 16 |
| AX-158318567 | 25 | 46.316 | KV453089.1 | 6079265 | 16-scf00496 | 16 |
| AX-158318574 | 25 | 46.316 | KV453089.1 | 6091220 | 16-scf00496 | 16 |
| AX-158318618 | 25 | 46.316 | KV453089.1 | 6141989 | 16-scf00496 | 16 |

|              |    |        |            |         |             |    |
|--------------|----|--------|------------|---------|-------------|----|
| AX-158318690 | 25 | 46.316 | KV453089.1 | 6223212 | 16-scf00496 | 16 |
| AX-158318697 | 25 | 46.316 | KV453089.1 | 6229858 | 16-scf00496 | 16 |
| AX-158318699 | 25 | 46.316 | KV453089.1 | 6231910 | 16-scf00496 | 16 |
| AX-158318700 | 25 | 46.316 | KV453089.1 | 6236449 | 16-scf00496 | 16 |
| AX-158318751 | 25 | 46.316 | KV453089.1 | 6294521 | 16-scf00496 | 16 |
| AX-157881310 | 25 | 46.316 | KV453089.1 | 6321821 | 16-scf00496 | 16 |
| AX-158318775 | 25 | 46.316 | KV453089.1 | 6327181 | 16-scf00496 | 16 |
| AX-158318797 | 25 | 46.316 | KV453089.1 | 6359122 | 16-scf00496 | 16 |
| AX-158318827 | 25 | 46.316 | KV453089.1 | 6393384 | 16-scf00496 | 16 |
| AX-158318851 | 25 | 46.316 | KV453089.1 | 6421128 | 16-scf00496 | 16 |
| AX-158318852 | 25 | 46.316 | KV453089.1 | 6421763 | 16-scf00496 | 16 |
| AX-158318853 | 25 | 46.316 | KV453089.1 | 6422130 | 16-scf00496 | 16 |
| AX-158318868 | 25 | 46.316 | KV453089.1 | 6437943 | 16-scf00496 | 16 |
| AX-157739753 | 25 | 46.316 | KV453089.1 | 6445949 | 16-scf00496 | 16 |
| AX-158318881 | 25 | 46.316 | KV453089.1 | 6450294 | 16-scf00496 | 16 |
| AX-158318887 | 25 | 46.316 | KV453089.1 | 6455726 | 16-scf00496 | 16 |
| AX-158318893 | 25 | 46.316 | KV453089.1 | 6470651 | 16-scf00496 | 16 |
| AX-157848046 | 25 | 46.316 | KV453089.1 | 6470970 | 16-scf00496 | 16 |
| AX-158318929 | 25 | 46.316 | KV453089.1 | 6526743 | 16-scf00496 | 16 |
| AX-157848062 | 25 | 46.316 | KV453089.1 | 6527369 | 16-scf00496 | 16 |
| AX-158318931 | 25 | 46.316 | KV453089.1 | 6534833 | 16-scf00496 | 16 |
| AX-158319015 | 25 | 46.316 | KV453089.1 | 6633742 | 16-scf00496 | 16 |
| AX-158319025 | 25 | 46.316 | KV453089.1 | 6644515 | 16-scf00496 | 16 |
| AX-158319064 | 25 | 46.316 | KV453089.1 | 6687367 | 16-scf00496 | 16 |
| AX-158319074 | 25 | 46.316 | KV453089.1 | 6694222 | 16-scf00496 | 16 |
| AX-158319091 | 25 | 46.316 | KV453089.1 | 6712902 | 16-scf00496 | 16 |
| AX-157848072 | 25 | 46.316 | KV453089.1 | 6719420 | 16-scf00496 | 16 |
| AX-158319128 | 25 | 46.316 | KV453089.1 | 6759735 | 16-scf00496 | 16 |
| AX-158319137 | 25 | 46.316 | KV453089.1 | 6772041 | 16-scf00496 | 16 |
| AX-158319154 | 25 | 46.316 | KV453089.1 | 6790503 | 16-scf00496 | 16 |
| AX-158319156 | 25 | 46.316 | KV453089.1 | 6791730 | 16-scf00496 | 16 |
| AX-157881325 | 25 | 46.316 | KV453089.1 | 6843853 | 16-scf00496 | 16 |
| AX-158319285 | 25 | 46.316 | KV453089.1 | 6963428 | 16-scf00496 | 16 |
| AX-158319310 | 25 | 46.316 | KV453089.1 | 6994175 | 16-scf00496 | 16 |
| AX-158319315 | 25 | 46.316 | KV453089.1 | 6998216 | 16-scf00496 | 16 |
| AX-158319316 | 25 | 46.316 | KV453089.1 | 6998783 | 16-scf00496 | 16 |
| AX-158319324 | 25 | 46.316 | KV453089.1 | 7005052 | 16-scf00496 | 16 |
| AX-158319379 | 25 | 46.316 | KV453089.1 | 7069572 | 16-scf00496 | 16 |
| AX-158319380 | 25 | 46.316 | KV453089.1 | 7072421 | 16-scf00496 | 16 |
| AX-157881331 | 25 | 46.316 | KV453089.1 | 7126127 | 16-scf00496 | 16 |
| AX-158319411 | 25 | 46.316 | KV453089.1 | 7127402 | 16-scf00496 | 16 |
| AX-158319419 | 25 | 46.316 | KV453089.1 | 7140556 | 16-scf00496 | 16 |
| AX-158319426 | 25 | 46.316 | KV453089.1 | 7156806 | 16-scf00496 | 16 |
| AX-157861431 | 25 | 46.316 | KV453089.1 | 7181734 | 16-scf00496 | 16 |
| AX-158319441 | 25 | 46.316 | KV453089.1 | 7186360 | 16-scf00496 | 16 |
| AX-158319443 | 25 | 46.316 | KV453089.1 | 7190618 | 16-scf00496 | 16 |
| AX-158319448 | 25 | 46.316 | KV453089.1 | 7215115 | 16-scf00496 | 16 |
| AX-158319471 | 25 | 46.316 | KV453089.1 | 7285985 | 16-scf00496 | 16 |
| AX-158319490 | 25 | 46.316 | KV453089.1 | 7333125 | 16-scf00496 | 16 |
| AX-158319493 | 25 | 46.316 | KV453089.1 | 7337194 | 16-scf00496 | 16 |
| AX-158319544 | 25 | 46.316 | KV453089.1 | 7438203 | 16-scf00496 | 16 |

|              |    |        |             |         |             |    |
|--------------|----|--------|-------------|---------|-------------|----|
| AX-158319564 | 25 | 46.316 | KV453089.1  | 7469565 | 16-scf00496 | 16 |
| AX-158319602 | 25 | 46.316 | KV453089.1  | 7519828 | 16-scf00496 | 16 |
| AX-158319611 | 25 | 46.316 | KV453089.1  | 7532202 | 16-scf00496 | 16 |
| AX-158319634 | 25 | 46.316 | KV453089.1  | 7564327 | 16-scf00496 | 16 |
| AX-157754103 | 25 | 46.316 | KV453089.1  | 7623128 | 16-scf00496 | 16 |
| AX-158319711 | 25 | 46.316 | KV453089.1  | 7655572 | 16-scf00496 | 16 |
| AX-158319795 | 25 | 46.316 | KV453089.1  | 7771255 | 16-scf00496 | 16 |
| AX-158319876 | 25 | 46.316 | KV453089.1  | 7871840 | 16-scf00496 | 16 |
| AX-157848160 | 25 | 46.316 | KV453089.1  | 7880546 | 16-scf00496 | 16 |
| AX-157848164 | 25 | 46.316 | KV453089.1  | 7892595 | 16-scf00496 | 16 |
| AX-157848180 | 25 | 46.316 | KV453089.1  | 7973273 | 16-scf00496 | 16 |
| AX-158319964 | 25 | 46.316 | KV453089.1  | 7983592 | 16-scf00496 | 16 |
| AX-158319976 | 25 | 46.316 | KV453089.1  | 8000718 | 16-scf00496 | 16 |
| AX-157695999 | 25 | 46.316 | FI885477.1  | 245     | 16-scf00496 | UN |
| AX-157704987 | 25 | 46.316 | 3ML01028193 | 840     | scf03798_1  | UN |
| AX-157707091 | 25 | 46.316 | 3ML01033488 | 222     | scf09140_1  | UN |
| AX-158318085 | 25 | 46.364 | KV453089.1  | 5454189 | 16-scf00496 | 16 |
| AX-158318086 | 25 | 46.425 | KV453089.1  | 5456449 | 16-scf00496 | 16 |
| AX-158318087 | 25 | 46.425 | KV453089.1  | 5456841 | 16-scf00496 | 16 |
| AX-158418218 | 25 | 46.534 | KV453089.1  | 5332357 | 16-scf00496 | 16 |
| AX-158317995 | 25 | 46.534 | KV453089.1  | 5339125 | 16-scf00496 | 16 |
| AX-158318090 | 25 | 46.534 | KV453089.1  | 5458447 | 16-scf00496 | 16 |
| AX-158318091 | 25 | 46.534 | KV453089.1  | 5459284 | 16-scf00496 | 16 |
| AX-158318096 | 25 | 46.534 | KV453089.1  | 5462764 | 16-scf00496 | 16 |
| AX-158318103 | 25 | 46.534 | KV453089.1  | 5471163 | 16-scf00496 | 16 |
| AX-158318105 | 25 | 46.534 | KV453089.1  | 5473521 | 16-scf00496 | 16 |
| AX-157714219 | 25 | 46.534 | KV453089.1  | 5474196 | 16-scf00496 | 16 |
| AX-157847986 | 25 | 46.534 | KV453089.1  | 5478131 | 16-scf00496 | 16 |
| AX-158318113 | 25 | 46.534 | KV453089.1  | 5481491 | 16-scf00496 | 16 |
| AX-158318121 | 25 | 46.643 | KV453089.1  | 5493987 | 16-scf00496 | 16 |
| AX-157748337 | 25 | 46.643 | KV453089.1  | 5494921 | 16-scf00496 | 16 |
| AX-157847989 | 25 | 46.643 | KV453089.1  | 5495350 | 16-scf00496 | 16 |
| AX-157847990 | 25 | 46.643 | KV453089.1  | 5498351 | 16-scf00496 | 16 |
| AX-158318517 | 25 | 46.643 | KV453089.1  | 6027401 | 16-scf00496 | 16 |
| AX-157756982 | 25 | 46.753 | KV453089.1  | 5443816 | 16-scf00496 | 16 |
| AX-158318126 | 25 | 46.753 | KV453089.1  | 5510497 | 16-scf00496 | 16 |
| AX-158318134 | 25 | 46.753 | KV453089.1  | 5520137 | 16-scf00496 | 16 |
| AX-157847993 | 25 | 46.753 | KV453089.1  | 5523928 | 16-scf00496 | 16 |
| AX-157748515 | 25 | 46.753 | KV453089.1  | 5532860 | 16-scf00496 | 16 |
| AX-158318140 | 25 | 46.753 | KV453089.1  | 5534545 | 16-scf00496 | 16 |
| AX-158318147 | 25 | 46.764 | KV453089.1  | 5546017 | 16-scf00496 | 16 |
| AX-157847999 | 25 | 46.789 | KV453089.1  | 5546848 | 16-scf00496 | 16 |
| AX-158318156 | 25 | 46.789 | KV453089.1  | 5556423 | 16-scf00496 | 16 |
| AX-158319455 | 25 | 46.789 | KV453089.1  | 7251845 | 16-scf00496 | 16 |
| AX-158318152 | 25 | 46.801 | KV453089.1  | 5553698 | 16-scf00496 | 16 |
| AX-158318169 | 25 | 46.801 | KV453089.1  | 5577091 | 16-scf00496 | 16 |
| AX-158318159 | 25 | 46.828 | KV453089.1  | 5562603 | 16-scf00496 | 16 |
| AX-158318858 | 25 | 46.828 | KV453089.1  | 6428258 | 16-scf00496 | 16 |
| AX-158318859 | 25 | 46.828 | KV453089.1  | 6428785 | 16-scf00496 | 16 |
| AX-158318861 | 25 | 46.828 | KV453089.1  | 6429681 | 16-scf00496 | 16 |
| AX-157881313 | 25 | 46.828 | KV453089.1  | 6459672 | 16-scf00496 | 16 |

|              |    |        |            |         |             |    |
|--------------|----|--------|------------|---------|-------------|----|
| AX-158318163 | 25 | 46.862 | KV453089.1 | 5570607 | 16-scf00496 | 16 |
| AX-157873593 | 25 | 46.862 | KV453089.1 | 5574564 | 16-scf00496 | 16 |
| AX-158318170 | 25 | 46.862 | KV453089.1 | 5577617 | 16-scf00496 | 16 |
| AX-157848001 | 25 | 46.862 | KV453089.1 | 5584492 | 16-scf00496 | 16 |
| AX-157848003 | 25 | 46.862 | KV453089.1 | 5586109 | 16-scf00496 | 16 |
| AX-157848006 | 25 | 46.862 | KV453089.1 | 5596034 | 16-scf00496 | 16 |
| AX-158318182 | 25 | 46.862 | KV453089.1 | 5601784 | 16-scf00496 | 16 |
| AX-157848008 | 25 | 46.862 | KV453089.1 | 5603892 | 16-scf00496 | 16 |
| AX-158318183 | 25 | 46.862 | KV453089.1 | 5606389 | 16-scf00496 | 16 |
| AX-158318189 | 25 | 46.862 | KV453089.1 | 5610631 | 16-scf00496 | 16 |
| AX-158318191 | 25 | 46.862 | KV453089.1 | 5613199 | 16-scf00496 | 16 |
| AX-158318192 | 25 | 46.862 | KV453089.1 | 5613617 | 16-scf00496 | 16 |
| AX-157719973 | 25 | 46.862 | KV453089.1 | 5614921 | 16-scf00496 | 16 |
| AX-158318199 | 25 | 46.862 | KV453089.1 | 5620113 | 16-scf00496 | 16 |
| AX-158318255 | 25 | 46.862 | KV453089.1 | 5685534 | 16-scf00496 | 16 |
| AX-158318256 | 25 | 46.862 | KV453089.1 | 5686445 | 16-scf00496 | 16 |
| AX-158318295 | 25 | 46.862 | KV453089.1 | 5732479 | 16-scf00496 | 16 |
| AX-157848068 | 25 | 46.862 | KV453089.1 | 6672959 | 16-scf00496 | 16 |
| AX-158319083 | 25 | 46.862 | KV453089.1 | 6703025 | 16-scf00496 | 16 |
| AX-158319115 | 25 | 46.862 | KV453089.1 | 6744388 | 16-scf00496 | 16 |
| AX-158423672 | 25 | 46.862 | KV453089.1 | 7755234 | 16-scf00496 | 16 |
| AX-158319855 | 25 | 46.862 | KV453089.1 | 7856914 | 16-scf00496 | 16 |
| AX-158319909 | 25 | 46.862 | KV453089.1 | 7908843 | 16-scf00496 | 16 |
| AX-158319913 | 25 | 46.862 | KV453089.1 | 7916799 | 16-scf00496 | 16 |
| AX-158318201 | 25 | 46.903 | KV453089.1 | 5623130 | 16-scf00496 | 16 |
| AX-158318203 | 25 | 46.93  | KV453089.1 | 5626565 | 16-scf00496 | 16 |
| AX-158318035 | 25 | 46.971 | KV453089.1 | 5382039 | 16-scf00496 | 16 |
| AX-158318176 | 25 | 46.971 | KV453089.1 | 5583083 | 16-scf00496 | 16 |
| AX-158318180 | 25 | 46.971 | KV453089.1 | 5598015 | 16-scf00496 | 16 |
| AX-157848012 | 25 | 46.971 | KV453089.1 | 5623263 | 16-scf00496 | 16 |
| AX-157848017 | 25 | 46.971 | KV453089.1 | 5651107 | 16-scf00496 | 16 |
| AX-157848018 | 25 | 46.971 | KV453089.1 | 5651709 | 16-scf00496 | 16 |
| AX-158318230 | 25 | 46.971 | KV453089.1 | 5653473 | 16-scf00496 | 16 |
| AX-158318231 | 25 | 46.971 | KV453089.1 | 5653843 | 16-scf00496 | 16 |
| AX-158318232 | 25 | 46.971 | KV453089.1 | 5654970 | 16-scf00496 | 16 |
| AX-158318233 | 25 | 46.971 | KV453089.1 | 5656560 | 16-scf00496 | 16 |
| AX-158318236 | 25 | 46.971 | KV453089.1 | 5663573 | 16-scf00496 | 16 |
| AX-158318237 | 25 | 46.971 | KV453089.1 | 5665264 | 16-scf00496 | 16 |
| AX-158318238 | 25 | 46.971 | KV453089.1 | 5666636 | 16-scf00496 | 16 |
| AX-158318240 | 25 | 46.971 | KV453089.1 | 5668171 | 16-scf00496 | 16 |
| AX-157848020 | 25 | 46.971 | KV453089.1 | 5669049 | 16-scf00496 | 16 |
| AX-158318242 | 25 | 46.971 | KV453089.1 | 5671562 | 16-scf00496 | 16 |
| AX-158318243 | 25 | 46.971 | KV453089.1 | 5672087 | 16-scf00496 | 16 |
| AX-158318244 | 25 | 46.971 | KV453089.1 | 5672621 | 16-scf00496 | 16 |
| AX-158318248 | 25 | 46.971 | KV453089.1 | 5680396 | 16-scf00496 | 16 |
| AX-158318249 | 25 | 46.971 | KV453089.1 | 5680931 | 16-scf00496 | 16 |
| AX-158318254 | 25 | 46.971 | KV453089.1 | 5684679 | 16-scf00496 | 16 |
| AX-158318257 | 25 | 46.971 | KV453089.1 | 5688623 | 16-scf00496 | 16 |
| AX-158318259 | 25 | 46.971 | KV453089.1 | 5690432 | 16-scf00496 | 16 |
| AX-158318260 | 25 | 46.971 | KV453089.1 | 5691179 | 16-scf00496 | 16 |
| AX-158318261 | 25 | 46.971 | KV453089.1 | 5693296 | 16-scf00496 | 16 |

|              |    |        |            |         |             |    |
|--------------|----|--------|------------|---------|-------------|----|
| AX-158318264 | 25 | 46.971 | KV453089.1 | 5696986 | 16-scf00496 | 16 |
| AX-158318267 | 25 | 46.971 | KV453089.1 | 5700272 | 16-scf00496 | 16 |
| AX-158318268 | 25 | 46.971 | KV453089.1 | 5701058 | 16-scf00496 | 16 |
| AX-158318276 | 25 | 46.971 | KV453089.1 | 5710211 | 16-scf00496 | 16 |
| AX-158418224 | 25 | 46.971 | KV453089.1 | 5710286 | 16-scf00496 | 16 |
| AX-158318278 | 25 | 46.971 | KV453089.1 | 5713798 | 16-scf00496 | 16 |
| AX-157848022 | 25 | 46.971 | KV453089.1 | 5720081 | 16-scf00496 | 16 |
| AX-158318284 | 25 | 46.971 | KV453089.1 | 5720156 | 16-scf00496 | 16 |
| AX-158318286 | 25 | 46.971 | KV453089.1 | 5721110 | 16-scf00496 | 16 |
| AX-158318287 | 25 | 46.971 | KV453089.1 | 5721681 | 16-scf00496 | 16 |
| AX-158318294 | 25 | 46.971 | KV453089.1 | 5730265 | 16-scf00496 | 16 |
| AX-158318309 | 25 | 46.971 | KV453089.1 | 5753417 | 16-scf00496 | 16 |
| AX-158318310 | 25 | 46.971 | KV453089.1 | 5754148 | 16-scf00496 | 16 |
| AX-157698775 | 25 | 46.971 | KV453089.1 | 5780627 | 16-scf00496 | 16 |
| AX-158318345 | 25 | 46.971 | KV453089.1 | 5790699 | 16-scf00496 | 16 |
| AX-158318362 | 25 | 46.971 | KV453089.1 | 5802701 | 16-scf00496 | 16 |
| AX-158318373 | 25 | 46.971 | KV453089.1 | 5831731 | 16-scf00496 | 16 |
| AX-158318889 | 25 | 46.971 | KV453089.1 | 6461872 | 16-scf00496 | 16 |
| AX-158319135 | 25 | 46.971 | KV453089.1 | 6770497 | 16-scf00496 | 16 |
| AX-158319138 | 25 | 46.971 | KV453089.1 | 6772745 | 16-scf00496 | 16 |
| AX-158319143 | 25 | 46.971 | KV453089.1 | 6776789 | 16-scf00496 | 16 |
| AX-158319201 | 25 | 46.971 | KV453089.1 | 6850189 | 16-scf00496 | 16 |
| AX-158319327 | 25 | 46.971 | KV453089.1 | 7007172 | 16-scf00496 | 16 |
| AX-158319362 | 25 | 46.971 | KV453089.1 | 7050731 | 16-scf00496 | 16 |
| AX-158319551 | 25 | 46.971 | KV453089.1 | 7449898 | 16-scf00496 | 16 |
| AX-158319555 | 25 | 46.971 | KV453089.1 | 7454244 | 16-scf00496 | 16 |
| AX-158319755 | 25 | 46.971 | KV453089.1 | 7709726 | 16-scf00496 | 16 |
| AX-158319776 | 25 | 46.971 | KV453089.1 | 7738443 | 16-scf00496 | 16 |
| AX-157721391 | 25 | 46.971 | KV453089.1 | 7758390 | 16-scf00496 | 16 |
| AX-158319790 | 25 | 46.971 | KV453089.1 | 7761999 | 16-scf00496 | 16 |
| AX-158319791 | 25 | 46.971 | KV453089.1 | 7763342 | 16-scf00496 | 16 |
| AX-158319802 | 25 | 46.971 | KV453089.1 | 7782454 | 16-scf00496 | 16 |
| AX-158319805 | 25 | 46.971 | KV453089.1 | 7786738 | 16-scf00496 | 16 |
| AX-158319864 | 25 | 46.971 | KV453089.1 | 7863865 | 16-scf00496 | 16 |
| AX-158318300 | 25 | 47.004 | KV453089.1 | 5738333 | 16-scf00496 | 16 |
| AX-158418275 | 25 | 47.004 | KV453089.1 | 7605120 | 16-scf00496 | 16 |
| AX-158318305 | 25 | 47.044 | KV453089.1 | 5750510 | 16-scf00496 | 16 |
| AX-158317985 | 25 | 47.08  | KV453089.1 | 5330115 | 16-scf00496 | 16 |
| AX-158318118 | 25 | 47.08  | KV453089.1 | 5491805 | 16-scf00496 | 16 |
| AX-157738463 | 25 | 47.08  | KV453089.1 | 5541191 | 16-scf00496 | 16 |
| AX-157718122 | 25 | 47.08  | KV453089.1 | 5541855 | 16-scf00496 | 16 |
| AX-158318160 | 25 | 47.08  | KV453089.1 | 5568892 | 16-scf00496 | 16 |
| AX-157773676 | 25 | 47.08  | KV453089.1 | 5569665 | 16-scf00496 | 16 |
| AX-158318184 | 25 | 47.08  | KV453089.1 | 5607056 | 16-scf00496 | 16 |
| AX-158318188 | 25 | 47.08  | KV453089.1 | 5610265 | 16-scf00496 | 16 |
| AX-158318246 | 25 | 47.08  | KV453089.1 | 5678926 | 16-scf00496 | 16 |
| AX-158318253 | 25 | 47.08  | KV453089.1 | 5684080 | 16-scf00496 | 16 |
| AX-158418223 | 25 | 47.08  | KV453089.1 | 5695850 | 16-scf00496 | 16 |
| AX-158318272 | 25 | 47.08  | KV453089.1 | 5706262 | 16-scf00496 | 16 |
| AX-158318273 | 25 | 47.08  | KV453089.1 | 5707081 | 16-scf00496 | 16 |
| AX-158318283 | 25 | 47.08  | KV453089.1 | 5717413 | 16-scf00496 | 16 |

|              |    |        |             |         |             |    |
|--------------|----|--------|-------------|---------|-------------|----|
| AX-158318303 | 25 | 47.08  | KV453089.1  | 5743161 | 16-scf00496 | 16 |
| AX-157717535 | 25 | 47.08  | KV453089.1  | 5748734 | 16-scf00496 | 16 |
| AX-158318308 | 25 | 47.08  | KV453089.1  | 5752477 | 16-scf00496 | 16 |
| AX-158318311 | 25 | 47.08  | KV453089.1  | 5756374 | 16-scf00496 | 16 |
| AX-157848027 | 25 | 47.08  | KV453089.1  | 5757898 | 16-scf00496 | 16 |
| AX-158318312 | 25 | 47.08  | KV453089.1  | 5759287 | 16-scf00496 | 16 |
| AX-157848029 | 25 | 47.08  | KV453089.1  | 5762545 | 16-scf00496 | 16 |
| AX-157848030 | 25 | 47.08  | KV453089.1  | 5762784 | 16-scf00496 | 16 |
| AX-158318325 | 25 | 47.08  | KV453089.1  | 5773726 | 16-scf00496 | 16 |
| AX-157867838 | 25 | 47.08  | KV453089.1  | 5774752 | 16-scf00496 | 16 |
| AX-158318329 | 25 | 47.08  | KV453089.1  | 5776467 | 16-scf00496 | 16 |
| AX-157725007 | 25 | 47.08  | KV453089.1  | 5777429 | 16-scf00496 | 16 |
| AX-157848031 | 25 | 47.08  | KV453089.1  | 5777977 | 16-scf00496 | 16 |
| AX-158318332 | 25 | 47.08  | KV453089.1  | 5779159 | 16-scf00496 | 16 |
| AX-158318335 | 25 | 47.08  | KV453089.1  | 5781876 | 16-scf00496 | 16 |
| AX-157888341 | 25 | 47.08  | KV453089.1  | 5782115 | 16-scf00496 | 16 |
| AX-158318336 | 25 | 47.08  | KV453089.1  | 5782679 | 16-scf00496 | 16 |
| AX-158318337 | 25 | 47.08  | KV453089.1  | 5784404 | 16-scf00496 | 16 |
| AX-158318340 | 25 | 47.08  | KV453089.1  | 5786917 | 16-scf00496 | 16 |
| AX-158318346 | 25 | 47.08  | KV453089.1  | 5790918 | 16-scf00496 | 16 |
| AX-158318347 | 25 | 47.08  | KV453089.1  | 5791148 | 16-scf00496 | 16 |
| AX-158318348 | 25 | 47.08  | KV453089.1  | 5791642 | 16-scf00496 | 16 |
| AX-158318356 | 25 | 47.08  | KV453089.1  | 5797469 | 16-scf00496 | 16 |
| AX-158318366 | 25 | 47.08  | KV453089.1  | 5819735 | 16-scf00496 | 16 |
| AX-158318367 | 25 | 47.08  | KV453089.1  | 5820086 | 16-scf00496 | 16 |
| AX-158318368 | 25 | 47.08  | KV453089.1  | 5821380 | 16-scf00496 | 16 |
| AX-158318369 | 25 | 47.08  | KV453089.1  | 5821562 | 16-scf00496 | 16 |
| AX-158318370 | 25 | 47.08  | KV453089.1  | 5822216 | 16-scf00496 | 16 |
| AX-157743805 | 25 | 47.08  | KV453089.1  | 5827195 | 16-scf00496 | 16 |
| AX-158318382 | 25 | 47.08  | KV453089.1  | 5843074 | 16-scf00496 | 16 |
| AX-158318533 | 25 | 47.08  | KV453089.1  | 6046612 | 16-scf00496 | 16 |
| AX-157742798 | 25 | 47.08  | KV453089.1  | 6303928 | 16-scf00496 | 16 |
| AX-158319012 | 25 | 47.08  | KV453089.1  | 6631670 | 16-scf00496 | 16 |
| AX-158319032 | 25 | 47.08  | KV453089.1  | 6654289 | 16-scf00496 | 16 |
| AX-158319090 | 25 | 47.08  | KV453089.1  | 6711920 | 16-scf00496 | 16 |
| AX-157705161 | 25 | 47.08  | 3ML01028820 | 87      | scf04434_1  | UN |
| AX-157705159 | 25 | 47.08  | 3ML01028820 | 503     | scf04434_1  | UN |
| AX-158318390 | 25 | 47.088 | KV453089.1  | 5853753 | 16-scf00496 | 16 |
| AX-158318906 | 25 | 47.088 | KV453089.1  | 6487236 | 16-scf00496 | 16 |
| AX-158319150 | 25 | 47.088 | KV453089.1  | 6786047 | 16-scf00496 | 16 |
| AX-158318392 | 25 | 47.43  | KV453089.1  | 5858199 | 16-scf00496 | 16 |
| AX-158319093 | 25 | 47.43  | KV453089.1  | 6714441 | 16-scf00496 | 16 |
| AX-158318397 | 25 | 47.489 | KV453089.1  | 5865120 | 16-scf00496 | 16 |
| AX-158318416 | 25 | 47.55  | KV453089.1  | 5893917 | 16-scf00496 | 16 |
| AX-158318771 | 25 | 47.55  | KV453089.1  | 6322287 | 16-scf00496 | 16 |
| AX-158318793 | 25 | 47.55  | KV453089.1  | 6355139 | 16-scf00496 | 16 |
| AX-158318999 | 25 | 47.55  | KV453089.1  | 6614254 | 16-scf00496 | 16 |
| AX-158319107 | 25 | 47.55  | KV453089.1  | 6735667 | 16-scf00496 | 16 |
| AX-158381448 | 25 | 47.604 | KV453089.1  | 5894200 | 16-scf00496 | 16 |
| AX-158318204 | 25 | 47.605 | KV453089.1  | 5628898 | 16-scf00496 | 16 |
| AX-158318393 | 25 | 47.605 | KV453089.1  | 5858707 | 16-scf00496 | 16 |

|              |    |        |            |         |             |    |
|--------------|----|--------|------------|---------|-------------|----|
| AX-158318417 | 25 | 47.605 | KV453089.1 | 5894254 | 16-scf00496 | 16 |
| AX-158318840 | 25 | 47.605 | KV453089.1 | 6408393 | 16-scf00496 | 16 |
| AX-158318841 | 25 | 47.605 | KV453089.1 | 6408961 | 16-scf00496 | 16 |
| AX-158318896 | 25 | 47.605 | KV453089.1 | 6479036 | 16-scf00496 | 16 |
| AX-158319039 | 25 | 47.605 | KV453089.1 | 6660882 | 16-scf00496 | 16 |
| AX-158319258 | 25 | 47.605 | KV453089.1 | 6927825 | 16-scf00496 | 16 |
| AX-158319464 | 25 | 47.605 | KV453089.1 | 7269984 | 16-scf00496 | 16 |
| AX-158319476 | 25 | 47.605 | KV453089.1 | 7294218 | 16-scf00496 | 16 |
| AX-157720863 | 25 | 47.605 | KV453089.1 | 7305633 | 16-scf00496 | 16 |
| AX-158319563 | 25 | 47.605 | KV453089.1 | 7467387 | 16-scf00496 | 16 |
| AX-158319565 | 25 | 47.605 | KV453089.1 | 7476208 | 16-scf00496 | 16 |
| AX-158319567 | 25 | 47.605 | KV453089.1 | 7480570 | 16-scf00496 | 16 |
| AX-157773766 | 25 | 47.605 | KV453089.1 | 7481475 | 16-scf00496 | 16 |
| AX-158319571 | 25 | 47.605 | KV453089.1 | 7487008 | 16-scf00496 | 16 |
| AX-158319575 | 25 | 47.605 | KV453089.1 | 7492748 | 16-scf00496 | 16 |
| AX-158319577 | 25 | 47.605 | KV453089.1 | 7494755 | 16-scf00496 | 16 |
| AX-157848121 | 25 | 47.605 | KV453089.1 | 7547866 | 16-scf00496 | 16 |
| AX-158318211 | 25 | 47.606 | KV453089.1 | 5634415 | 16-scf00496 | 16 |
| AX-158318418 | 25 | 47.606 | KV453089.1 | 5896481 | 16-scf00496 | 16 |
| AX-158318419 | 25 | 47.606 | KV453089.1 | 5897271 | 16-scf00496 | 16 |
| AX-158318420 | 25 | 47.606 | KV453089.1 | 5897669 | 16-scf00496 | 16 |
| AX-157709508 | 25 | 47.606 | KV453089.1 | 6072934 | 16-scf00496 | 16 |
| AX-158318737 | 25 | 47.606 | KV453089.1 | 6279336 | 16-scf00496 | 16 |
| AX-158319326 | 25 | 47.606 | KV453089.1 | 7006588 | 16-scf00496 | 16 |
| AX-158318426 | 25 | 47.669 | KV453089.1 | 5902666 | 16-scf00496 | 16 |
| AX-158318721 | 25 | 47.669 | KV453089.1 | 6266602 | 16-scf00496 | 16 |
| AX-158318448 | 25 | 47.732 | KV453089.1 | 5933717 | 16-scf00496 | 16 |
| AX-158318212 | 25 | 47.736 | KV453089.1 | 5635057 | 16-scf00496 | 16 |
| AX-158318439 | 25 | 47.736 | KV453089.1 | 5919651 | 16-scf00496 | 16 |
| AX-158318443 | 25 | 47.736 | KV453089.1 | 5925553 | 16-scf00496 | 16 |
| AX-158318449 | 25 | 47.736 | KV453089.1 | 5934474 | 16-scf00496 | 16 |
| AX-158318453 | 25 | 47.736 | KV453089.1 | 5941128 | 16-scf00496 | 16 |
| AX-158318455 | 25 | 47.736 | KV453089.1 | 5942540 | 16-scf00496 | 16 |
| AX-158318459 | 25 | 47.736 | KV453089.1 | 5954207 | 16-scf00496 | 16 |
| AX-158318463 | 25 | 47.736 | KV453089.1 | 5958386 | 16-scf00496 | 16 |
| AX-158318464 | 25 | 47.736 | KV453089.1 | 5959649 | 16-scf00496 | 16 |
| AX-158318466 | 25 | 47.736 | KV453089.1 | 5960984 | 16-scf00496 | 16 |
| AX-158318467 | 25 | 47.736 | KV453089.1 | 5962276 | 16-scf00496 | 16 |
| AX-158318470 | 25 | 47.736 | KV453089.1 | 5966669 | 16-scf00496 | 16 |
| AX-158318474 | 25 | 47.736 | KV453089.1 | 5975396 | 16-scf00496 | 16 |
| AX-158318475 | 25 | 47.736 | KV453089.1 | 5976394 | 16-scf00496 | 16 |
| AX-158318485 | 25 | 47.736 | KV453089.1 | 5988483 | 16-scf00496 | 16 |
| AX-158318486 | 25 | 47.736 | KV453089.1 | 5989465 | 16-scf00496 | 16 |
| AX-158318487 | 25 | 47.736 | KV453089.1 | 5990232 | 16-scf00496 | 16 |
| AX-158318500 | 25 | 47.736 | KV453089.1 | 6010264 | 16-scf00496 | 16 |
| AX-158318503 | 25 | 47.736 | KV453089.1 | 6012918 | 16-scf00496 | 16 |
| AX-158318508 | 25 | 47.736 | KV453089.1 | 6016866 | 16-scf00496 | 16 |
| AX-158318509 | 25 | 47.736 | KV453089.1 | 6017152 | 16-scf00496 | 16 |
| AX-158318514 | 25 | 47.736 | KV453089.1 | 6022929 | 16-scf00496 | 16 |
| AX-158318518 | 25 | 47.736 | KV453089.1 | 6028066 | 16-scf00496 | 16 |
| AX-158318520 | 25 | 47.736 | KV453089.1 | 6030131 | 16-scf00496 | 16 |

|              |    |        |            |         |             |    |
|--------------|----|--------|------------|---------|-------------|----|
| AX-158318526 | 25 | 47.736 | KV453089.1 | 6035617 | 16-scf00496 | 16 |
| AX-158318535 | 25 | 47.736 | KV453089.1 | 6048696 | 16-scf00496 | 16 |
| AX-158318536 | 25 | 47.736 | KV453089.1 | 6049199 | 16-scf00496 | 16 |
| AX-157726452 | 25 | 47.736 | KV453089.1 | 6049869 | 16-scf00496 | 16 |
| AX-158318537 | 25 | 47.736 | KV453089.1 | 6050839 | 16-scf00496 | 16 |
| AX-158318538 | 25 | 47.736 | KV453089.1 | 6054121 | 16-scf00496 | 16 |
| AX-157744167 | 25 | 47.736 | KV453089.1 | 6064034 | 16-scf00496 | 16 |
| AX-158318552 | 25 | 47.736 | KV453089.1 | 6064676 | 16-scf00496 | 16 |
| AX-158318602 | 25 | 47.736 | KV453089.1 | 6125408 | 16-scf00496 | 16 |
| AX-157696345 | 25 | 47.736 | KV453089.1 | 6171126 | 16-scf00496 | 16 |
| AX-158318757 | 25 | 47.736 | KV453089.1 | 6301719 | 16-scf00496 | 16 |
| AX-157726347 | 25 | 47.736 | KV453089.1 | 6305668 | 16-scf00496 | 16 |
| AX-157848044 | 25 | 47.736 | KV453089.1 | 6466014 | 16-scf00496 | 16 |
| AX-158318898 | 25 | 47.736 | KV453089.1 | 6481793 | 16-scf00496 | 16 |
| AX-158318925 | 25 | 47.736 | KV453089.1 | 6520140 | 16-scf00496 | 16 |
| AX-158318928 | 25 | 47.736 | KV453089.1 | 6523659 | 16-scf00496 | 16 |
| AX-157848060 | 25 | 47.736 | KV453089.1 | 6525051 | 16-scf00496 | 16 |
| AX-158319068 | 25 | 47.736 | KV453089.1 | 6691069 | 16-scf00496 | 16 |
| AX-158319094 | 25 | 47.736 | KV453089.1 | 6715605 | 16-scf00496 | 16 |
| AX-158319105 | 25 | 47.736 | KV453089.1 | 6731265 | 16-scf00496 | 16 |
| AX-158418251 | 25 | 47.736 | KV453089.1 | 6799162 | 16-scf00496 | 16 |
| AX-157718380 | 25 | 47.736 | KV453089.1 | 6973093 | 16-scf00496 | 16 |
| AX-158319291 | 25 | 47.736 | KV453089.1 | 6973702 | 16-scf00496 | 16 |
| AX-158319430 | 25 | 47.736 | KV453089.1 | 7158808 | 16-scf00496 | 16 |
| AX-158319572 | 25 | 47.736 | KV453089.1 | 7487616 | 16-scf00496 | 16 |
| AX-158319784 | 25 | 47.736 | KV453089.1 | 7758338 | 16-scf00496 | 16 |
| AX-158318296 | 25 | 47.796 | KV453089.1 | 5733020 | 16-scf00496 | 16 |
| AX-158318548 | 25 | 47.796 | KV453089.1 | 6061937 | 16-scf00496 | 16 |
| AX-158318558 | 25 | 47.796 | KV453089.1 | 6069330 | 16-scf00496 | 16 |
| AX-158318562 | 25 | 47.796 | KV453089.1 | 6073307 | 16-scf00496 | 16 |
| AX-158318406 | 25 | 47.845 | KV453089.1 | 5874799 | 16-scf00496 | 16 |
| AX-158318490 | 25 | 47.845 | KV453089.1 | 5991180 | 16-scf00496 | 16 |
| AX-158318546 | 25 | 47.845 | KV453089.1 | 6060098 | 16-scf00496 | 16 |
| AX-158318547 | 25 | 47.845 | KV453089.1 | 6061297 | 16-scf00496 | 16 |
| AX-158318556 | 25 | 47.845 | KV453089.1 | 6067915 | 16-scf00496 | 16 |
| AX-158318560 | 25 | 47.845 | KV453089.1 | 6071255 | 16-scf00496 | 16 |
| AX-158318594 | 25 | 47.845 | KV453089.1 | 6118798 | 16-scf00496 | 16 |
| AX-158318596 | 25 | 47.845 | KV453089.1 | 6121461 | 16-scf00496 | 16 |
| AX-158318597 | 25 | 47.845 | KV453089.1 | 6122187 | 16-scf00496 | 16 |
| AX-158318599 | 25 | 47.845 | KV453089.1 | 6123191 | 16-scf00496 | 16 |
| AX-158318615 | 25 | 47.845 | KV453089.1 | 6140007 | 16-scf00496 | 16 |
| AX-158318616 | 25 | 47.845 | KV453089.1 | 6140516 | 16-scf00496 | 16 |
| AX-158318617 | 25 | 47.845 | KV453089.1 | 6141282 | 16-scf00496 | 16 |
| AX-158318619 | 25 | 47.845 | KV453089.1 | 6142158 | 16-scf00496 | 16 |
| AX-157695138 | 25 | 47.845 | KV453089.1 | 6143196 | 16-scf00496 | 16 |
| AX-158318621 | 25 | 47.845 | KV453089.1 | 6145298 | 16-scf00496 | 16 |
| AX-158318622 | 25 | 47.845 | KV453089.1 | 6145958 | 16-scf00496 | 16 |
| AX-158318623 | 25 | 47.845 | KV453089.1 | 6146856 | 16-scf00496 | 16 |
| AX-158318624 | 25 | 47.845 | KV453089.1 | 6147841 | 16-scf00496 | 16 |
| AX-158318625 | 25 | 47.845 | KV453089.1 | 6150163 | 16-scf00496 | 16 |
| AX-158318626 | 25 | 47.845 | KV453089.1 | 6151166 | 16-scf00496 | 16 |



|              |    |        |            |         |             |    |
|--------------|----|--------|------------|---------|-------------|----|
| AX-158318629 | 25 | 47.845 | KV453089.1 | 6153832 | 16-scf00496 | 16 |
| AX-158318633 | 25 | 47.845 | KV453089.1 | 6160186 | 16-scf00496 | 16 |
| AX-157718709 | 25 | 47.845 | KV453089.1 | 6160817 | 16-scf00496 | 16 |
| AX-157754355 | 25 | 47.845 | KV453089.1 | 6163345 | 16-scf00496 | 16 |
| AX-158318640 | 25 | 47.845 | KV453089.1 | 6167791 | 16-scf00496 | 16 |
| AX-158318643 | 25 | 47.845 | KV453089.1 | 6172153 | 16-scf00496 | 16 |
| AX-158318649 | 25 | 47.845 | KV453089.1 | 6182106 | 16-scf00496 | 16 |
| AX-158318654 | 25 | 47.845 | KV453089.1 | 6186105 | 16-scf00496 | 16 |
| AX-157726751 | 25 | 47.845 | KV453089.1 | 6188758 | 16-scf00496 | 16 |
| AX-158318657 | 25 | 47.845 | KV453089.1 | 6189505 | 16-scf00496 | 16 |
| AX-158318658 | 25 | 47.845 | KV453089.1 | 6190195 | 16-scf00496 | 16 |
| AX-158318665 | 25 | 47.845 | KV453089.1 | 6199061 | 16-scf00496 | 16 |
| AX-158318667 | 25 | 47.845 | KV453089.1 | 6201606 | 16-scf00496 | 16 |
| AX-157861418 | 25 | 47.845 | KV453089.1 | 6211854 | 16-scf00496 | 16 |
| AX-158318683 | 25 | 47.845 | KV453089.1 | 6216705 | 16-scf00496 | 16 |
| AX-158318687 | 25 | 47.845 | KV453089.1 | 6220264 | 16-scf00496 | 16 |
| AX-158318693 | 25 | 47.845 | KV453089.1 | 6226931 | 16-scf00496 | 16 |
| AX-158318694 | 25 | 47.845 | KV453089.1 | 6227368 | 16-scf00496 | 16 |
| AX-158318702 | 25 | 47.845 | KV453089.1 | 6244823 | 16-scf00496 | 16 |
| AX-157723847 | 25 | 47.845 | KV453089.1 | 6250982 | 16-scf00496 | 16 |
| AX-158318706 | 25 | 47.845 | KV453089.1 | 6253666 | 16-scf00496 | 16 |
| AX-158318710 | 25 | 47.845 | KV453089.1 | 6257235 | 16-scf00496 | 16 |
| AX-158318723 | 25 | 47.845 | KV453089.1 | 6267658 | 16-scf00496 | 16 |
| AX-158318726 | 25 | 47.845 | KV453089.1 | 6269905 | 16-scf00496 | 16 |
| AX-158318738 | 25 | 47.845 | KV453089.1 | 6279690 | 16-scf00496 | 16 |
| AX-158318739 | 25 | 47.845 | KV453089.1 | 6280200 | 16-scf00496 | 16 |
| AX-158318747 | 25 | 47.845 | KV453089.1 | 6288807 | 16-scf00496 | 16 |
| AX-157848041 | 25 | 47.845 | KV453089.1 | 6289465 | 16-scf00496 | 16 |
| AX-158318750 | 25 | 47.845 | KV453089.1 | 6291981 | 16-scf00496 | 16 |
| AX-158318752 | 25 | 47.845 | KV453089.1 | 6295337 | 16-scf00496 | 16 |
| AX-158318753 | 25 | 47.845 | KV453089.1 | 6297288 | 16-scf00496 | 16 |
| AX-158318754 | 25 | 47.845 | KV453089.1 | 6297982 | 16-scf00496 | 16 |
| AX-158318763 | 25 | 47.845 | KV453089.1 | 6315315 | 16-scf00496 | 16 |
| AX-158318773 | 25 | 47.845 | KV453089.1 | 6325003 | 16-scf00496 | 16 |
| AX-158318784 | 25 | 47.845 | KV453089.1 | 6342568 | 16-scf00496 | 16 |
| AX-158318794 | 25 | 47.845 | KV453089.1 | 6355956 | 16-scf00496 | 16 |
| AX-158318795 | 25 | 47.845 | KV453089.1 | 6357901 | 16-scf00496 | 16 |
| AX-158318812 | 25 | 47.845 | KV453089.1 | 6371072 | 16-scf00496 | 16 |
| AX-158318833 | 25 | 47.845 | KV453089.1 | 6400460 | 16-scf00496 | 16 |
| AX-158318839 | 25 | 47.845 | KV453089.1 | 6407745 | 16-scf00496 | 16 |
| AX-158318842 | 25 | 47.845 | KV453089.1 | 6409764 | 16-scf00496 | 16 |
| AX-158318844 | 25 | 47.845 | KV453089.1 | 6411590 | 16-scf00496 | 16 |
| AX-158318846 | 25 | 47.845 | KV453089.1 | 6413556 | 16-scf00496 | 16 |
| AX-157725208 | 25 | 47.845 | KV453089.1 | 6414674 | 16-scf00496 | 16 |
| AX-157708307 | 25 | 47.845 | KV453089.1 | 6416809 | 16-scf00496 | 16 |
| AX-158318857 | 25 | 47.845 | KV453089.1 | 6425291 | 16-scf00496 | 16 |
| AX-158318891 | 25 | 47.845 | KV453089.1 | 6468588 | 16-scf00496 | 16 |
| AX-157848058 | 25 | 47.845 | KV453089.1 | 6522722 | 16-scf00496 | 16 |
| AX-158318944 | 25 | 47.845 | KV453089.1 | 6546627 | 16-scf00496 | 16 |
| AX-158318984 | 25 | 47.845 | KV453089.1 | 6593614 | 16-scf00496 | 16 |
| AX-158319026 | 25 | 47.845 | KV453089.1 | 6645229 | 16-scf00496 | 16 |

|              |    |        |            |         |             |    |
|--------------|----|--------|------------|---------|-------------|----|
| AX-158319035 | 25 | 47.845 | KV453089.1 | 6657527 | 16-scf00496 | 16 |
| AX-158319037 | 25 | 47.845 | KV453089.1 | 6659807 | 16-scf00496 | 16 |
| AX-158319038 | 25 | 47.845 | KV453089.1 | 6660329 | 16-scf00496 | 16 |
| AX-158319044 | 25 | 47.845 | KV453089.1 | 6664400 | 16-scf00496 | 16 |
| AX-157848069 | 25 | 47.845 | KV453089.1 | 6673989 | 16-scf00496 | 16 |
| AX-157848071 | 25 | 47.845 | KV453089.1 | 6674446 | 16-scf00496 | 16 |
| AX-158319054 | 25 | 47.845 | KV453089.1 | 6675429 | 16-scf00496 | 16 |
| AX-158319080 | 25 | 47.845 | KV453089.1 | 6698836 | 16-scf00496 | 16 |
| AX-158319100 | 25 | 47.845 | KV453089.1 | 6724029 | 16-scf00496 | 16 |
| AX-158319111 | 25 | 47.845 | KV453089.1 | 6740291 | 16-scf00496 | 16 |
| AX-158319113 | 25 | 47.845 | KV453089.1 | 6742576 | 16-scf00496 | 16 |
| AX-158319114 | 25 | 47.845 | KV453089.1 | 6742779 | 16-scf00496 | 16 |
| AX-158319116 | 25 | 47.845 | KV453089.1 | 6745404 | 16-scf00496 | 16 |
| AX-158319117 | 25 | 47.845 | KV453089.1 | 6746675 | 16-scf00496 | 16 |
| AX-158319245 | 25 | 47.845 | KV453089.1 | 6916411 | 16-scf00496 | 16 |
| AX-158319272 | 25 | 47.845 | KV453089.1 | 6949109 | 16-scf00496 | 16 |
| AX-158319399 | 25 | 47.845 | KV453089.1 | 7088983 | 16-scf00496 | 16 |
| AX-158319477 | 25 | 47.845 | KV453089.1 | 7294908 | 16-scf00496 | 16 |
| AX-157739722 | 25 | 47.845 | KV453089.1 | 7469024 | 16-scf00496 | 16 |
| AX-158319601 | 25 | 47.845 | KV453089.1 | 7518303 | 16-scf00496 | 16 |
| AX-157848123 | 25 | 47.845 | KV453089.1 | 7549543 | 16-scf00496 | 16 |
| AX-158319625 | 25 | 47.845 | KV453089.1 | 7549686 | 16-scf00496 | 16 |
| AX-158319714 | 25 | 47.845 | KV453089.1 | 7660926 | 16-scf00496 | 16 |
| AX-157867843 | 25 | 47.845 | KV453089.1 | 7773795 | 16-scf00496 | 16 |
| AX-158319899 | 25 | 47.845 | KV453089.1 | 7899841 | 16-scf00496 | 16 |
| AX-157848011 | 25 | 47.954 | KV453089.1 | 5618091 | 16-scf00496 | 16 |
| AX-158318200 | 25 | 47.954 | KV453089.1 | 5621792 | 16-scf00496 | 16 |
| AX-158318505 | 25 | 47.954 | KV453089.1 | 6014484 | 16-scf00496 | 16 |
| AX-158318559 | 25 | 47.954 | KV453089.1 | 6070308 | 16-scf00496 | 16 |
| AX-158318561 | 25 | 47.954 | KV453089.1 | 6071767 | 16-scf00496 | 16 |
| AX-157743052 | 25 | 47.954 | KV453089.1 | 6156559 | 16-scf00496 | 16 |
| AX-158318638 | 25 | 47.954 | KV453089.1 | 6166238 | 16-scf00496 | 16 |
| AX-158318669 | 25 | 47.954 | KV453089.1 | 6203504 | 16-scf00496 | 16 |
| AX-157848038 | 25 | 47.954 | KV453089.1 | 6235291 | 16-scf00496 | 16 |
| AX-158318759 | 25 | 47.954 | KV453089.1 | 6307417 | 16-scf00496 | 16 |
| AX-158318781 | 25 | 47.954 | KV453089.1 | 6333319 | 16-scf00496 | 16 |
| AX-158318804 | 25 | 47.954 | KV453089.1 | 6365506 | 16-scf00496 | 16 |
| AX-158318822 | 25 | 47.954 | KV453089.1 | 6384374 | 16-scf00496 | 16 |
| AX-158318837 | 25 | 47.954 | KV453089.1 | 6406425 | 16-scf00496 | 16 |
| AX-158318865 | 25 | 47.954 | KV453089.1 | 6434511 | 16-scf00496 | 16 |
| AX-158318871 | 25 | 47.954 | KV453089.1 | 6440317 | 16-scf00496 | 16 |
| AX-158318874 | 25 | 47.954 | KV453089.1 | 6447316 | 16-scf00496 | 16 |
| AX-158318876 | 25 | 47.954 | KV453089.1 | 6448259 | 16-scf00496 | 16 |
| AX-158318886 | 25 | 47.954 | KV453089.1 | 6454295 | 16-scf00496 | 16 |
| AX-158318888 | 25 | 47.954 | KV453089.1 | 6456323 | 16-scf00496 | 16 |
| AX-157726509 | 25 | 47.954 | KV453089.1 | 6476829 | 16-scf00496 | 16 |
| AX-158318899 | 25 | 47.954 | KV453089.1 | 6482048 | 16-scf00496 | 16 |
| AX-158318901 | 25 | 47.954 | KV453089.1 | 6483886 | 16-scf00496 | 16 |
| AX-157848051 | 25 | 47.954 | KV453089.1 | 6487886 | 16-scf00496 | 16 |
| AX-157744825 | 25 | 47.954 | KV453089.1 | 6493940 | 16-scf00496 | 16 |
| AX-158318915 | 25 | 47.954 | KV453089.1 | 6509027 | 16-scf00496 | 16 |

|              |    |        |            |         |             |    |
|--------------|----|--------|------------|---------|-------------|----|
| AX-158318935 | 25 | 47.954 | KV453089.1 | 6539637 | 16-scf00496 | 16 |
| AX-158318936 | 25 | 47.954 | KV453089.1 | 6540018 | 16-scf00496 | 16 |
| AX-158318938 | 25 | 47.954 | KV453089.1 | 6542104 | 16-scf00496 | 16 |
| AX-158318940 | 25 | 47.954 | KV453089.1 | 6543978 | 16-scf00496 | 16 |
| AX-158318941 | 25 | 47.954 | KV453089.1 | 6544214 | 16-scf00496 | 16 |
| AX-158318947 | 25 | 47.954 | KV453089.1 | 6549381 | 16-scf00496 | 16 |
| AX-158318950 | 25 | 47.954 | KV453089.1 | 6555100 | 16-scf00496 | 16 |
| AX-157726593 | 25 | 47.954 | KV453089.1 | 6555579 | 16-scf00496 | 16 |
| AX-158318957 | 25 | 47.954 | KV453089.1 | 6561294 | 16-scf00496 | 16 |
| AX-157848065 | 25 | 47.954 | KV453089.1 | 6569835 | 16-scf00496 | 16 |
| AX-158318977 | 25 | 47.954 | KV453089.1 | 6587190 | 16-scf00496 | 16 |
| AX-158318981 | 25 | 47.954 | KV453089.1 | 6591072 | 16-scf00496 | 16 |
| AX-158318986 | 25 | 47.954 | KV453089.1 | 6594762 | 16-scf00496 | 16 |
| AX-158318990 | 25 | 47.954 | KV453089.1 | 6600833 | 16-scf00496 | 16 |
| AX-158318991 | 25 | 47.954 | KV453089.1 | 6601691 | 16-scf00496 | 16 |
| AX-157848067 | 25 | 47.954 | KV453089.1 | 6602222 | 16-scf00496 | 16 |
| AX-158318998 | 25 | 47.954 | KV453089.1 | 6611141 | 16-scf00496 | 16 |
| AX-158319002 | 25 | 47.954 | KV453089.1 | 6616755 | 16-scf00496 | 16 |
| AX-158319003 | 25 | 47.954 | KV453089.1 | 6617391 | 16-scf00496 | 16 |
| AX-158319007 | 25 | 47.954 | KV453089.1 | 6627928 | 16-scf00496 | 16 |
| AX-158319018 | 25 | 47.954 | KV453089.1 | 6639015 | 16-scf00496 | 16 |
| AX-158319022 | 25 | 47.954 | KV453089.1 | 6642181 | 16-scf00496 | 16 |
| AX-158319024 | 25 | 47.954 | KV453089.1 | 6643399 | 16-scf00496 | 16 |
| AX-158319028 | 25 | 47.954 | KV453089.1 | 6650213 | 16-scf00496 | 16 |
| AX-158319029 | 25 | 47.954 | KV453089.1 | 6651376 | 16-scf00496 | 16 |
| AX-158319042 | 25 | 47.954 | KV453089.1 | 6663092 | 16-scf00496 | 16 |
| AX-158319043 | 25 | 47.954 | KV453089.1 | 6664008 | 16-scf00496 | 16 |
| AX-158319045 | 25 | 47.954 | KV453089.1 | 6665564 | 16-scf00496 | 16 |
| AX-157709644 | 25 | 47.954 | KV453089.1 | 6676260 | 16-scf00496 | 16 |
| AX-158319059 | 25 | 47.954 | KV453089.1 | 6683523 | 16-scf00496 | 16 |
| AX-158319067 | 25 | 47.954 | KV453089.1 | 6689163 | 16-scf00496 | 16 |
| AX-158319072 | 25 | 47.954 | KV453089.1 | 6693034 | 16-scf00496 | 16 |
| AX-158319076 | 25 | 47.954 | KV453089.1 | 6695896 | 16-scf00496 | 16 |
| AX-158319078 | 25 | 47.954 | KV453089.1 | 6697412 | 16-scf00496 | 16 |
| AX-158319119 | 25 | 47.954 | KV453089.1 | 6750585 | 16-scf00496 | 16 |
| AX-158319121 | 25 | 47.954 | KV453089.1 | 6754580 | 16-scf00496 | 16 |
| AX-158319129 | 25 | 47.954 | KV453089.1 | 6760378 | 16-scf00496 | 16 |
| AX-157772928 | 25 | 47.954 | KV453089.1 | 6763427 | 16-scf00496 | 16 |
| AX-158319132 | 25 | 47.954 | KV453089.1 | 6766681 | 16-scf00496 | 16 |
| AX-157726660 | 25 | 47.954 | KV453089.1 | 6787864 | 16-scf00496 | 16 |
| AX-158319193 | 25 | 47.954 | KV453089.1 | 6841669 | 16-scf00496 | 16 |
| AX-158319227 | 25 | 47.954 | KV453089.1 | 6893432 | 16-scf00496 | 16 |
| AX-158319259 | 25 | 47.954 | KV453089.1 | 6928936 | 16-scf00496 | 16 |
| AX-158319319 | 25 | 47.954 | KV453089.1 | 7000702 | 16-scf00496 | 16 |
| AX-158319323 | 25 | 47.954 | KV453089.1 | 7003159 | 16-scf00496 | 16 |
| AX-158319409 | 25 | 47.954 | KV453089.1 | 7125903 | 16-scf00496 | 16 |
| AX-158319673 | 25 | 47.954 | KV453089.1 | 7609658 | 16-scf00496 | 16 |
| AX-158319687 | 25 | 47.954 | KV453089.1 | 7629847 | 16-scf00496 | 16 |
| AX-158319906 | 25 | 47.954 | KV453089.1 | 7905089 | 16-scf00496 | 16 |
| AX-157861439 | 25 | 47.954 | KV453089.1 | 8023027 | 16-scf00496 | 16 |
| AX-158320058 | 25 | 47.954 | KV453089.1 | 8125475 | 16-scf00496 | 16 |

|              |    |        |            |         |             |    |
|--------------|----|--------|------------|---------|-------------|----|
| AX-158418250 | 25 | 47.956 | KV453089.1 | 6702321 | 16-scf00496 | 16 |
| AX-158318988 | 25 | 48.051 | KV453089.1 | 6598361 | 16-scf00496 | 16 |
| AX-158319023 | 25 | 48.051 | KV453089.1 | 6642941 | 16-scf00496 | 16 |
| AX-158319084 | 25 | 48.051 | KV453089.1 | 6705255 | 16-scf00496 | 16 |
| AX-158319088 | 25 | 48.051 | KV453089.1 | 6709293 | 16-scf00496 | 16 |
| AX-158319279 | 25 | 48.051 | KV453089.1 | 6953051 | 16-scf00496 | 16 |
| AX-158318735 | 25 | 48.1   | KV453089.1 | 6277867 | 16-scf00496 | 16 |
| AX-157719758 | 25 | 48.1   | KV453089.1 | 6506935 | 16-scf00496 | 16 |
| AX-158319062 | 25 | 48.1   | KV453089.1 | 6685581 | 16-scf00496 | 16 |
| AX-158319086 | 25 | 48.1   | KV453089.1 | 6706495 | 16-scf00496 | 16 |
| AX-158319089 | 25 | 48.1   | KV453089.1 | 6711293 | 16-scf00496 | 16 |
| AX-158319092 | 25 | 48.1   | KV453089.1 | 6713579 | 16-scf00496 | 16 |
| AX-158319095 | 25 | 48.1   | KV453089.1 | 6716328 | 16-scf00496 | 16 |
| AX-158319097 | 25 | 48.1   | KV453089.1 | 6717754 | 16-scf00496 | 16 |
| AX-158319099 | 25 | 48.1   | KV453089.1 | 6719503 | 16-scf00496 | 16 |
| AX-158319199 | 25 | 48.1   | KV453089.1 | 6849350 | 16-scf00496 | 16 |
| AX-158319329 | 25 | 48.1   | KV453089.1 | 7008049 | 16-scf00496 | 16 |
| AX-158319393 | 25 | 48.1   | KV453089.1 | 7083289 | 16-scf00496 | 16 |
| AX-158319408 | 25 | 48.1   | KV453089.1 | 7123044 | 16-scf00496 | 16 |
| AX-158319848 | 25 | 48.1   | KV453089.1 | 7847732 | 16-scf00496 | 16 |
| AX-157848171 | 25 | 48.1   | KV453089.1 | 7945438 | 16-scf00496 | 16 |
| AX-158319109 | 25 | 48.246 | KV453089.1 | 6738287 | 16-scf00496 | 16 |
| AX-158317792 | 25 | 48.392 | KV453089.1 | 5041201 | 16-scf00496 | 16 |
| AX-157861414 | 25 | 48.392 | KV453089.1 | 5062457 | 16-scf00496 | 16 |
| AX-158318297 | 25 | 48.392 | KV453089.1 | 5733464 | 16-scf00496 | 16 |
| AX-158318359 | 25 | 48.392 | KV453089.1 | 5798764 | 16-scf00496 | 16 |
| AX-158318387 | 25 | 48.392 | KV453089.1 | 5847230 | 16-scf00496 | 16 |
| AX-158318395 | 25 | 48.392 | KV453089.1 | 5863771 | 16-scf00496 | 16 |
| AX-158318456 | 25 | 48.392 | KV453089.1 | 5944877 | 16-scf00496 | 16 |
| AX-158318492 | 25 | 48.392 | KV453089.1 | 5993392 | 16-scf00496 | 16 |
| AX-158318607 | 25 | 48.392 | KV453089.1 | 6129733 | 16-scf00496 | 16 |
| AX-158318628 | 25 | 48.392 | KV453089.1 | 6152462 | 16-scf00496 | 16 |
| AX-158318642 | 25 | 48.392 | KV453089.1 | 6170382 | 16-scf00496 | 16 |
| AX-158318646 | 25 | 48.392 | KV453089.1 | 6180294 | 16-scf00496 | 16 |
| AX-158318703 | 25 | 48.392 | KV453089.1 | 6245316 | 16-scf00496 | 16 |
| AX-158318713 | 25 | 48.392 | KV453089.1 | 6260048 | 16-scf00496 | 16 |
| AX-158319069 | 25 | 48.392 | KV453089.1 | 6691320 | 16-scf00496 | 16 |
| AX-157741820 | 25 | 48.392 | KV453089.1 | 6719952 | 16-scf00496 | 16 |
| AX-158319106 | 25 | 48.392 | KV453089.1 | 6732449 | 16-scf00496 | 16 |
| AX-158319136 | 25 | 48.392 | KV453089.1 | 6771386 | 16-scf00496 | 16 |
| AX-158319151 | 25 | 48.392 | KV453089.1 | 6786572 | 16-scf00496 | 16 |
| AX-157700650 | 25 | 48.392 | KV453089.1 | 6792363 | 16-scf00496 | 16 |
| AX-158319166 | 25 | 48.392 | KV453089.1 | 6809671 | 16-scf00496 | 16 |
| AX-158319171 | 25 | 48.392 | KV453089.1 | 6814414 | 16-scf00496 | 16 |
| AX-158319198 | 25 | 48.392 | KV453089.1 | 6846640 | 16-scf00496 | 16 |
| AX-158319200 | 25 | 48.392 | KV453089.1 | 6849820 | 16-scf00496 | 16 |
| AX-158319202 | 25 | 48.392 | KV453089.1 | 6851359 | 16-scf00496 | 16 |
| AX-158319204 | 25 | 48.392 | KV453089.1 | 6855443 | 16-scf00496 | 16 |
| AX-158319209 | 25 | 48.392 | KV453089.1 | 6864273 | 16-scf00496 | 16 |
| AX-158319214 | 25 | 48.392 | KV453089.1 | 6870111 | 16-scf00496 | 16 |
| AX-158319252 | 25 | 48.392 | KV453089.1 | 6922804 | 16-scf00496 | 16 |

|              |    |        |            |         |             |    |
|--------------|----|--------|------------|---------|-------------|----|
| AX-157848078 | 25 | 48.392 | KV453089.1 | 6923688 | 16-scf00496 | 16 |
| AX-158319292 | 25 | 48.392 | KV453089.1 | 6974933 | 16-scf00496 | 16 |
| AX-158319350 | 25 | 48.392 | KV453089.1 | 7034618 | 16-scf00496 | 16 |
| AX-158319351 | 25 | 48.392 | KV453089.1 | 7035170 | 16-scf00496 | 16 |
| AX-158319352 | 25 | 48.392 | KV453089.1 | 7035570 | 16-scf00496 | 16 |
| AX-158319354 | 25 | 48.392 | KV453089.1 | 7036445 | 16-scf00496 | 16 |
| AX-158319416 | 25 | 48.392 | KV453089.1 | 7135757 | 16-scf00496 | 16 |
| AX-158319439 | 25 | 48.392 | KV453089.1 | 7175715 | 16-scf00496 | 16 |
| AX-158319474 | 25 | 48.392 | KV453089.1 | 7291169 | 16-scf00496 | 16 |
| AX-158319489 | 25 | 48.392 | KV453089.1 | 7332757 | 16-scf00496 | 16 |
| AX-158319495 | 25 | 48.392 | KV453089.1 | 7345367 | 16-scf00496 | 16 |
| AX-158319503 | 25 | 48.392 | KV453089.1 | 7352567 | 16-scf00496 | 16 |
| AX-158319510 | 25 | 48.392 | KV453089.1 | 7361021 | 16-scf00496 | 16 |
| AX-158319524 | 25 | 48.392 | KV453089.1 | 7386132 | 16-scf00496 | 16 |
| AX-158319525 | 25 | 48.392 | KV453089.1 | 7389087 | 16-scf00496 | 16 |
| AX-158319527 | 25 | 48.392 | KV453089.1 | 7391564 | 16-scf00496 | 16 |
| AX-158319558 | 25 | 48.392 | KV453089.1 | 7463787 | 16-scf00496 | 16 |
| AX-158319574 | 25 | 48.392 | KV453089.1 | 7491600 | 16-scf00496 | 16 |
| AX-158319584 | 25 | 48.392 | KV453089.1 | 7499898 | 16-scf00496 | 16 |
| AX-158319624 | 25 | 48.392 | KV453089.1 | 7548678 | 16-scf00496 | 16 |
| AX-158319679 | 25 | 48.392 | KV453089.1 | 7622263 | 16-scf00496 | 16 |
| AX-158320143 | 25 | 48.392 | KV453089.1 | 8264305 | 16-scf00496 | 16 |
| AX-158319219 | 25 | 48.501 | KV453089.1 | 6876497 | 16-scf00496 | 16 |
| AX-158319223 | 25 | 48.501 | KV453089.1 | 6885739 | 16-scf00496 | 16 |
| AX-157718753 | 25 | 48.501 | KV453089.1 | 6888479 | 16-scf00496 | 16 |
| AX-158318128 | 25 | 48.61  | KV453089.1 | 5512141 | 16-scf00496 | 16 |
| AX-157848004 | 25 | 48.61  | KV453089.1 | 5586153 | 16-scf00496 | 16 |
| AX-157848013 | 25 | 48.61  | KV453089.1 | 5627081 | 16-scf00496 | 16 |
| AX-158318409 | 25 | 48.61  | KV453089.1 | 5877601 | 16-scf00496 | 16 |
| AX-158318434 | 25 | 48.61  | KV453089.1 | 5911368 | 16-scf00496 | 16 |
| AX-157848034 | 25 | 48.61  | KV453089.1 | 5978878 | 16-scf00496 | 16 |
| AX-158318480 | 25 | 48.61  | KV453089.1 | 5982152 | 16-scf00496 | 16 |
| AX-158318527 | 25 | 48.61  | KV453089.1 | 6037093 | 16-scf00496 | 16 |
| AX-158318551 | 25 | 48.61  | KV453089.1 | 6063614 | 16-scf00496 | 16 |
| AX-158318591 | 25 | 48.61  | KV453089.1 | 6114752 | 16-scf00496 | 16 |
| AX-157756688 | 25 | 48.61  | KV453089.1 | 6142901 | 16-scf00496 | 16 |
| AX-157848039 | 25 | 48.61  | KV453089.1 | 6250198 | 16-scf00496 | 16 |
| AX-157881314 | 25 | 48.61  | KV453089.1 | 6500846 | 16-scf00496 | 16 |
| AX-158318918 | 25 | 48.61  | KV453089.1 | 6516057 | 16-scf00496 | 16 |
| AX-158318921 | 25 | 48.61  | KV453089.1 | 6517221 | 16-scf00496 | 16 |
| AX-158318932 | 25 | 48.61  | KV453089.1 | 6535284 | 16-scf00496 | 16 |
| AX-158318980 | 25 | 48.61  | KV453089.1 | 6590120 | 16-scf00496 | 16 |
| AX-157848066 | 25 | 48.61  | KV453089.1 | 6590446 | 16-scf00496 | 16 |
| AX-158319008 | 25 | 48.61  | KV453089.1 | 6628593 | 16-scf00496 | 16 |
| AX-157881321 | 25 | 48.61  | KV453089.1 | 6649426 | 16-scf00496 | 16 |
| AX-158319046 | 25 | 48.61  | KV453089.1 | 6667626 | 16-scf00496 | 16 |
| AX-158319060 | 25 | 48.61  | KV453089.1 | 6683850 | 16-scf00496 | 16 |
| AX-158319122 | 25 | 48.61  | KV453089.1 | 6755134 | 16-scf00496 | 16 |
| AX-158319127 | 25 | 48.61  | KV453089.1 | 6759375 | 16-scf00496 | 16 |
| AX-158319144 | 25 | 48.61  | KV453089.1 | 6783226 | 16-scf00496 | 16 |
| AX-158319153 | 25 | 48.61  | KV453089.1 | 6787272 | 16-scf00496 | 16 |

|              |    |       |            |         |             |    |
|--------------|----|-------|------------|---------|-------------|----|
| AX-158319159 | 25 | 48.61 | KV453089.1 | 6800121 | 16-scf00496 | 16 |
| AX-158319162 | 25 | 48.61 | KV453089.1 | 6803050 | 16-scf00496 | 16 |
| AX-157756961 | 25 | 48.61 | KV453089.1 | 6815378 | 16-scf00496 | 16 |
| AX-158319176 | 25 | 48.61 | KV453089.1 | 6818646 | 16-scf00496 | 16 |
| AX-158319177 | 25 | 48.61 | KV453089.1 | 6819308 | 16-scf00496 | 16 |
| AX-158319179 | 25 | 48.61 | KV453089.1 | 6819895 | 16-scf00496 | 16 |
| AX-158319181 | 25 | 48.61 | KV453089.1 | 6820815 | 16-scf00496 | 16 |
| AX-158319186 | 25 | 48.61 | KV453089.1 | 6825383 | 16-scf00496 | 16 |
| AX-158319211 | 25 | 48.61 | KV453089.1 | 6868151 | 16-scf00496 | 16 |
| AX-158319220 | 25 | 48.61 | KV453089.1 | 6878863 | 16-scf00496 | 16 |
| AX-158319233 | 25 | 48.61 | KV453089.1 | 6901872 | 16-scf00496 | 16 |
| AX-158319234 | 25 | 48.61 | KV453089.1 | 6902413 | 16-scf00496 | 16 |
| AX-158319237 | 25 | 48.61 | KV453089.1 | 6903647 | 16-scf00496 | 16 |
| AX-158319239 | 25 | 48.61 | KV453089.1 | 6906735 | 16-scf00496 | 16 |
| AX-158319241 | 25 | 48.61 | KV453089.1 | 6912308 | 16-scf00496 | 16 |
| AX-158319244 | 25 | 48.61 | KV453089.1 | 6915891 | 16-scf00496 | 16 |
| AX-158319248 | 25 | 48.61 | KV453089.1 | 6919992 | 16-scf00496 | 16 |
| AX-157848076 | 25 | 48.61 | KV453089.1 | 6920802 | 16-scf00496 | 16 |
| AX-158319250 | 25 | 48.61 | KV453089.1 | 6921305 | 16-scf00496 | 16 |
| AX-158319254 | 25 | 48.61 | KV453089.1 | 6924013 | 16-scf00496 | 16 |
| AX-158319255 | 25 | 48.61 | KV453089.1 | 6925754 | 16-scf00496 | 16 |
| AX-158319256 | 25 | 48.61 | KV453089.1 | 6926157 | 16-scf00496 | 16 |
| AX-158319257 | 25 | 48.61 | KV453089.1 | 6927123 | 16-scf00496 | 16 |
| AX-158319261 | 25 | 48.61 | KV453089.1 | 6931996 | 16-scf00496 | 16 |
| AX-158319262 | 25 | 48.61 | KV453089.1 | 6933101 | 16-scf00496 | 16 |
| AX-158319263 | 25 | 48.61 | KV453089.1 | 6933949 | 16-scf00496 | 16 |
| AX-157848080 | 25 | 48.61 | KV453089.1 | 6937510 | 16-scf00496 | 16 |
| AX-158319267 | 25 | 48.61 | KV453089.1 | 6940953 | 16-scf00496 | 16 |
| AX-158319274 | 25 | 48.61 | KV453089.1 | 6950414 | 16-scf00496 | 16 |
| AX-158319276 | 25 | 48.61 | KV453089.1 | 6951154 | 16-scf00496 | 16 |
| AX-158319277 | 25 | 48.61 | KV453089.1 | 6952094 | 16-scf00496 | 16 |
| AX-157754963 | 25 | 48.61 | KV453089.1 | 6958234 | 16-scf00496 | 16 |
| AX-158319281 | 25 | 48.61 | KV453089.1 | 6959877 | 16-scf00496 | 16 |
| AX-158319287 | 25 | 48.61 | KV453089.1 | 6966661 | 16-scf00496 | 16 |
| AX-158319294 | 25 | 48.61 | KV453089.1 | 6975925 | 16-scf00496 | 16 |
| AX-158319295 | 25 | 48.61 | KV453089.1 | 6977144 | 16-scf00496 | 16 |
| AX-157700282 | 25 | 48.61 | KV453089.1 | 6977953 | 16-scf00496 | 16 |
| AX-158319297 | 25 | 48.61 | KV453089.1 | 6978196 | 16-scf00496 | 16 |
| AX-158319298 | 25 | 48.61 | KV453089.1 | 6979098 | 16-scf00496 | 16 |
| AX-158319299 | 25 | 48.61 | KV453089.1 | 6980918 | 16-scf00496 | 16 |
| AX-158319300 | 25 | 48.61 | KV453089.1 | 6983154 | 16-scf00496 | 16 |
| AX-158319303 | 25 | 48.61 | KV453089.1 | 6986198 | 16-scf00496 | 16 |
| AX-158319304 | 25 | 48.61 | KV453089.1 | 6986686 | 16-scf00496 | 16 |
| AX-158319306 | 25 | 48.61 | KV453089.1 | 6988396 | 16-scf00496 | 16 |
| AX-158319320 | 25 | 48.61 | KV453089.1 | 7001085 | 16-scf00496 | 16 |
| AX-158319321 | 25 | 48.61 | KV453089.1 | 7002218 | 16-scf00496 | 16 |
| AX-158319325 | 25 | 48.61 | KV453089.1 | 7005665 | 16-scf00496 | 16 |
| AX-158319331 | 25 | 48.61 | KV453089.1 | 7011757 | 16-scf00496 | 16 |
| AX-157848082 | 25 | 48.61 | KV453089.1 | 7013677 | 16-scf00496 | 16 |
| AX-158319342 | 25 | 48.61 | KV453089.1 | 7025840 | 16-scf00496 | 16 |
| AX-158319343 | 25 | 48.61 | KV453089.1 | 7026972 | 16-scf00496 | 16 |

|              |    |       |            |         |             |    |
|--------------|----|-------|------------|---------|-------------|----|
| AX-158319346 | 25 | 48.61 | KV453089.1 | 7028084 | 16-scf00496 | 16 |
| AX-158319348 | 25 | 48.61 | KV453089.1 | 7031241 | 16-scf00496 | 16 |
| AX-157881328 | 25 | 48.61 | KV453089.1 | 7032456 | 16-scf00496 | 16 |
| AX-158319349 | 25 | 48.61 | KV453089.1 | 7034287 | 16-scf00496 | 16 |
| AX-158319353 | 25 | 48.61 | KV453089.1 | 7036214 | 16-scf00496 | 16 |
| AX-157755443 | 25 | 48.61 | KV453089.1 | 7036313 | 16-scf00496 | 16 |
| AX-158319355 | 25 | 48.61 | KV453089.1 | 7037666 | 16-scf00496 | 16 |
| AX-157774825 | 25 | 48.61 | KV453089.1 | 7041304 | 16-scf00496 | 16 |
| AX-157718409 | 25 | 48.61 | KV453089.1 | 7053606 | 16-scf00496 | 16 |
| AX-158319363 | 25 | 48.61 | KV453089.1 | 7055704 | 16-scf00496 | 16 |
| AX-158319364 | 25 | 48.61 | KV453089.1 | 7055952 | 16-scf00496 | 16 |
| AX-158319365 | 25 | 48.61 | KV453089.1 | 7056787 | 16-scf00496 | 16 |
| AX-158319366 | 25 | 48.61 | KV453089.1 | 7057212 | 16-scf00496 | 16 |
| AX-158319370 | 25 | 48.61 | KV453089.1 | 7061997 | 16-scf00496 | 16 |
| AX-158319377 | 25 | 48.61 | KV453089.1 | 7068409 | 16-scf00496 | 16 |
| AX-158319386 | 25 | 48.61 | KV453089.1 | 7076617 | 16-scf00496 | 16 |
| AX-158319387 | 25 | 48.61 | KV453089.1 | 7077658 | 16-scf00496 | 16 |
| AX-158319388 | 25 | 48.61 | KV453089.1 | 7078428 | 16-scf00496 | 16 |
| AX-157848086 | 25 | 48.61 | KV453089.1 | 7081022 | 16-scf00496 | 16 |
| AX-158319394 | 25 | 48.61 | KV453089.1 | 7083861 | 16-scf00496 | 16 |
| AX-158319395 | 25 | 48.61 | KV453089.1 | 7084312 | 16-scf00496 | 16 |
| AX-158319398 | 25 | 48.61 | KV453089.1 | 7088587 | 16-scf00496 | 16 |
| AX-158319400 | 25 | 48.61 | KV453089.1 | 7089483 | 16-scf00496 | 16 |
| AX-157848087 | 25 | 48.61 | KV453089.1 | 7089733 | 16-scf00496 | 16 |
| AX-158319401 | 25 | 48.61 | KV453089.1 | 7090866 | 16-scf00496 | 16 |
| AX-157848089 | 25 | 48.61 | KV453089.1 | 7095490 | 16-scf00496 | 16 |
| AX-157848090 | 25 | 48.61 | KV453089.1 | 7095902 | 16-scf00496 | 16 |
| AX-157861428 | 25 | 48.61 | KV453089.1 | 7122170 | 16-scf00496 | 16 |
| AX-157848098 | 25 | 48.61 | KV453089.1 | 7129729 | 16-scf00496 | 16 |
| AX-158319415 | 25 | 48.61 | KV453089.1 | 7133582 | 16-scf00496 | 16 |
| AX-158319421 | 25 | 48.61 | KV453089.1 | 7146231 | 16-scf00496 | 16 |
| AX-157881332 | 25 | 48.61 | KV453089.1 | 7150851 | 16-scf00496 | 16 |
| AX-158319438 | 25 | 48.61 | KV453089.1 | 7171295 | 16-scf00496 | 16 |
| AX-158319442 | 25 | 48.61 | KV453089.1 | 7188618 | 16-scf00496 | 16 |
| AX-158319444 | 25 | 48.61 | KV453089.1 | 7192006 | 16-scf00496 | 16 |
| AX-158319446 | 25 | 48.61 | KV453089.1 | 7207467 | 16-scf00496 | 16 |
| AX-158319447 | 25 | 48.61 | KV453089.1 | 7213614 | 16-scf00496 | 16 |
| AX-158319449 | 25 | 48.61 | KV453089.1 | 7221679 | 16-scf00496 | 16 |
| AX-158319453 | 25 | 48.61 | KV453089.1 | 7245394 | 16-scf00496 | 16 |
| AX-158319458 | 25 | 48.61 | KV453089.1 | 7256914 | 16-scf00496 | 16 |
| AX-158319462 | 25 | 48.61 | KV453089.1 | 7264988 | 16-scf00496 | 16 |
| AX-157743586 | 25 | 48.61 | KV453089.1 | 7279575 | 16-scf00496 | 16 |
| AX-158319470 | 25 | 48.61 | KV453089.1 | 7281685 | 16-scf00496 | 16 |
| AX-157848110 | 25 | 48.61 | KV453089.1 | 7284852 | 16-scf00496 | 16 |
| AX-158319482 | 25 | 48.61 | KV453089.1 | 7304767 | 16-scf00496 | 16 |
| AX-158319483 | 25 | 48.61 | KV453089.1 | 7305233 | 16-scf00496 | 16 |
| AX-158319497 | 25 | 48.61 | KV453089.1 | 7347194 | 16-scf00496 | 16 |
| AX-158319498 | 25 | 48.61 | KV453089.1 | 7348015 | 16-scf00496 | 16 |
| AX-158319501 | 25 | 48.61 | KV453089.1 | 7350965 | 16-scf00496 | 16 |
| AX-158319508 | 25 | 48.61 | KV453089.1 | 7358463 | 16-scf00496 | 16 |
| AX-158319513 | 25 | 48.61 | KV453089.1 | 7363593 | 16-scf00496 | 16 |

|              |    |       |            |         |             |    |
|--------------|----|-------|------------|---------|-------------|----|
| AX-158319522 | 25 | 48.61 | KV453089.1 | 7381515 | 16-scf00496 | 16 |
| AX-158418264 | 25 | 48.61 | KV453089.1 | 7384553 | 16-scf00496 | 16 |
| AX-157713323 | 25 | 48.61 | KV453089.1 | 7401731 | 16-scf00496 | 16 |
| AX-158319534 | 25 | 48.61 | KV453089.1 | 7411300 | 16-scf00496 | 16 |
| AX-157848114 | 25 | 48.61 | KV453089.1 | 7412435 | 16-scf00496 | 16 |
| AX-158319536 | 25 | 48.61 | KV453089.1 | 7414622 | 16-scf00496 | 16 |
| AX-158319537 | 25 | 48.61 | KV453089.1 | 7415873 | 16-scf00496 | 16 |
| AX-158319539 | 25 | 48.61 | KV453089.1 | 7419557 | 16-scf00496 | 16 |
| AX-158319540 | 25 | 48.61 | KV453089.1 | 7427215 | 16-scf00496 | 16 |
| AX-158319541 | 25 | 48.61 | KV453089.1 | 7428238 | 16-scf00496 | 16 |
| AX-158418271 | 25 | 48.61 | KV453089.1 | 7429430 | 16-scf00496 | 16 |
| AX-158319542 | 25 | 48.61 | KV453089.1 | 7433191 | 16-scf00496 | 16 |
| AX-157718654 | 25 | 48.61 | KV453089.1 | 7435940 | 16-scf00496 | 16 |
| AX-157718724 | 25 | 48.61 | KV453089.1 | 7436462 | 16-scf00496 | 16 |
| AX-158319545 | 25 | 48.61 | KV453089.1 | 7438678 | 16-scf00496 | 16 |
| AX-158319546 | 25 | 48.61 | KV453089.1 | 7440767 | 16-scf00496 | 16 |
| AX-158319547 | 25 | 48.61 | KV453089.1 | 7442977 | 16-scf00496 | 16 |
| AX-158319548 | 25 | 48.61 | KV453089.1 | 7443983 | 16-scf00496 | 16 |
| AX-158319549 | 25 | 48.61 | KV453089.1 | 7444592 | 16-scf00496 | 16 |
| AX-157699958 | 25 | 48.61 | KV453089.1 | 7448665 | 16-scf00496 | 16 |
| AX-158319552 | 25 | 48.61 | KV453089.1 | 7452130 | 16-scf00496 | 16 |
| AX-158319554 | 25 | 48.61 | KV453089.1 | 7453847 | 16-scf00496 | 16 |
| AX-158319556 | 25 | 48.61 | KV453089.1 | 7455051 | 16-scf00496 | 16 |
| AX-158319562 | 25 | 48.61 | KV453089.1 | 7466630 | 16-scf00496 | 16 |
| AX-158319566 | 25 | 48.61 | KV453089.1 | 7478741 | 16-scf00496 | 16 |
| AX-158319568 | 25 | 48.61 | KV453089.1 | 7482728 | 16-scf00496 | 16 |
| AX-158319570 | 25 | 48.61 | KV453089.1 | 7486600 | 16-scf00496 | 16 |
| AX-158418273 | 25 | 48.61 | KV453089.1 | 7488876 | 16-scf00496 | 16 |
| AX-157743829 | 25 | 48.61 | KV453089.1 | 7489643 | 16-scf00496 | 16 |
| AX-158319578 | 25 | 48.61 | KV453089.1 | 7495119 | 16-scf00496 | 16 |
| AX-158319579 | 25 | 48.61 | KV453089.1 | 7496982 | 16-scf00496 | 16 |
| AX-158319590 | 25 | 48.61 | KV453089.1 | 7507447 | 16-scf00496 | 16 |
| AX-158319591 | 25 | 48.61 | KV453089.1 | 7507842 | 16-scf00496 | 16 |
| AX-158319592 | 25 | 48.61 | KV453089.1 | 7508301 | 16-scf00496 | 16 |
| AX-158319593 | 25 | 48.61 | KV453089.1 | 7508826 | 16-scf00496 | 16 |
| AX-157706612 | 25 | 48.61 | KV453089.1 | 7510532 | 16-scf00496 | 16 |
| AX-157706613 | 25 | 48.61 | KV453089.1 | 7510785 | 16-scf00496 | 16 |
| AX-158319594 | 25 | 48.61 | KV453089.1 | 7510947 | 16-scf00496 | 16 |
| AX-158319595 | 25 | 48.61 | KV453089.1 | 7511516 | 16-scf00496 | 16 |
| AX-158319596 | 25 | 48.61 | KV453089.1 | 7511979 | 16-scf00496 | 16 |
| AX-158319599 | 25 | 48.61 | KV453089.1 | 7515869 | 16-scf00496 | 16 |
| AX-158319604 | 25 | 48.61 | KV453089.1 | 7521880 | 16-scf00496 | 16 |
| AX-158319605 | 25 | 48.61 | KV453089.1 | 7525445 | 16-scf00496 | 16 |
| AX-158319606 | 25 | 48.61 | KV453089.1 | 7526695 | 16-scf00496 | 16 |
| AX-158319607 | 25 | 48.61 | KV453089.1 | 7527293 | 16-scf00496 | 16 |
| AX-158319609 | 25 | 48.61 | KV453089.1 | 7528690 | 16-scf00496 | 16 |
| AX-158319616 | 25 | 48.61 | KV453089.1 | 7537643 | 16-scf00496 | 16 |
| AX-157881346 | 25 | 48.61 | KV453089.1 | 7541165 | 16-scf00496 | 16 |
| AX-158319626 | 25 | 48.61 | KV453089.1 | 7552018 | 16-scf00496 | 16 |
| AX-158319627 | 25 | 48.61 | KV453089.1 | 7553066 | 16-scf00496 | 16 |
| AX-157744222 | 25 | 48.61 | KV453089.1 | 7556299 | 16-scf00496 | 16 |



|              |    |        |             |         |             |    |
|--------------|----|--------|-------------|---------|-------------|----|
| AX-158319629 | 25 | 48.61  | KV453089.1  | 7557646 | 16-scf00496 | 16 |
| AX-158419972 | 25 | 48.61  | KV453089.1  | 7563589 | 16-scf00496 | 16 |
| AX-158319636 | 25 | 48.61  | KV453089.1  | 7566147 | 16-scf00496 | 16 |
| AX-158319637 | 25 | 48.61  | KV453089.1  | 7566521 | 16-scf00496 | 16 |
| AX-158319638 | 25 | 48.61  | KV453089.1  | 7566942 | 16-scf00496 | 16 |
| AX-157848124 | 25 | 48.61  | KV453089.1  | 7567564 | 16-scf00496 | 16 |
| AX-158319639 | 25 | 48.61  | KV453089.1  | 7571829 | 16-scf00496 | 16 |
| AX-158319640 | 25 | 48.61  | KV453089.1  | 7574397 | 16-scf00496 | 16 |
| AX-158319641 | 25 | 48.61  | KV453089.1  | 7575051 | 16-scf00496 | 16 |
| AX-158319642 | 25 | 48.61  | KV453089.1  | 7575571 | 16-scf00496 | 16 |
| AX-158319657 | 25 | 48.61  | KV453089.1  | 7592644 | 16-scf00496 | 16 |
| AX-158319664 | 25 | 48.61  | KV453089.1  | 7597317 | 16-scf00496 | 16 |
| AX-158319669 | 25 | 48.61  | KV453089.1  | 7603650 | 16-scf00496 | 16 |
| AX-158418277 | 25 | 48.61  | KV453089.1  | 7606400 | 16-scf00496 | 16 |
| AX-158319672 | 25 | 48.61  | KV453089.1  | 7608452 | 16-scf00496 | 16 |
| AX-157848126 | 25 | 48.61  | KV453089.1  | 7614445 | 16-scf00496 | 16 |
| AX-158319678 | 25 | 48.61  | KV453089.1  | 7619869 | 16-scf00496 | 16 |
| AX-158319681 | 25 | 48.61  | KV453089.1  | 7625129 | 16-scf00496 | 16 |
| AX-158319683 | 25 | 48.61  | KV453089.1  | 7627329 | 16-scf00496 | 16 |
| AX-158319685 | 25 | 48.61  | KV453089.1  | 7628546 | 16-scf00496 | 16 |
| AX-158319686 | 25 | 48.61  | KV453089.1  | 7629667 | 16-scf00496 | 16 |
| AX-158319688 | 25 | 48.61  | KV453089.1  | 7630658 | 16-scf00496 | 16 |
| AX-158319690 | 25 | 48.61  | KV453089.1  | 7633030 | 16-scf00496 | 16 |
| AX-158319693 | 25 | 48.61  | KV453089.1  | 7635493 | 16-scf00496 | 16 |
| AX-158319700 | 25 | 48.61  | KV453089.1  | 7645935 | 16-scf00496 | 16 |
| AX-158319706 | 25 | 48.61  | KV453089.1  | 7649322 | 16-scf00496 | 16 |
| AX-158319708 | 25 | 48.61  | KV453089.1  | 7651572 | 16-scf00496 | 16 |
| AX-158319716 | 25 | 48.61  | KV453089.1  | 7663409 | 16-scf00496 | 16 |
| AX-157848129 | 25 | 48.61  | KV453089.1  | 7666828 | 16-scf00496 | 16 |
| AX-158319740 | 25 | 48.61  | KV453089.1  | 7691877 | 16-scf00496 | 16 |
| AX-158319773 | 25 | 48.61  | KV453089.1  | 7733404 | 16-scf00496 | 16 |
| AX-158319832 | 25 | 48.61  | KV453089.1  | 7829030 | 16-scf00496 | 16 |
| AX-157706038 | 25 | 48.61  | 3ML01031484 | 239     | scf07098_1  | UN |
| AX-158319674 | 25 | 48.665 | KV453089.1  | 7611087 | 16-scf00496 | 16 |
| AX-158318976 | 25 | 48.719 | KV453089.1  | 6585766 | 16-scf00496 | 16 |
| AX-157717177 | 25 | 48.719 | KV453089.1  | 7465679 | 16-scf00496 | 16 |
| AX-158319680 | 25 | 48.719 | KV453089.1  | 7623805 | 16-scf00496 | 16 |
| AX-158319682 | 25 | 48.719 | KV453089.1  | 7625350 | 16-scf00496 | 16 |
| AX-158319689 | 25 | 48.719 | KV453089.1  | 7631777 | 16-scf00496 | 16 |
| AX-157752580 | 25 | 48.719 | KV453089.1  | 7633440 | 16-scf00496 | 16 |
| AX-158319692 | 25 | 48.719 | KV453089.1  | 7634934 | 16-scf00496 | 16 |
| AX-158319696 | 25 | 48.719 | KV453089.1  | 7638095 | 16-scf00496 | 16 |
| AX-158319704 | 25 | 48.719 | KV453089.1  | 7647110 | 16-scf00496 | 16 |
| AX-158319709 | 25 | 48.719 | KV453089.1  | 7652471 | 16-scf00496 | 16 |
| AX-158319710 | 25 | 48.719 | KV453089.1  | 7652797 | 16-scf00496 | 16 |
| AX-158418279 | 25 | 48.719 | KV453089.1  | 7655255 | 16-scf00496 | 16 |
| AX-158319712 | 25 | 48.719 | KV453089.1  | 7658833 | 16-scf00496 | 16 |
| AX-158319713 | 25 | 48.719 | KV453089.1  | 7659262 | 16-scf00496 | 16 |
| AX-158319715 | 25 | 48.719 | KV453089.1  | 7661147 | 16-scf00496 | 16 |
| AX-158319717 | 25 | 48.719 | KV453089.1  | 7663783 | 16-scf00496 | 16 |
| AX-158319718 | 25 | 48.719 | KV453089.1  | 7665053 | 16-scf00496 | 16 |

|              |    |        |            |         |             |    |
|--------------|----|--------|------------|---------|-------------|----|
| AX-158319720 | 25 | 48.719 | KV453089.1 | 7665534 | 16-scf00496 | 16 |
| AX-158319721 | 25 | 48.719 | KV453089.1 | 7665781 | 16-scf00496 | 16 |
| AX-158319724 | 25 | 48.719 | KV453089.1 | 7669498 | 16-scf00496 | 16 |
| AX-158319754 | 25 | 48.719 | KV453089.1 | 7709048 | 16-scf00496 | 16 |
| AX-157848149 | 25 | 48.719 | KV453089.1 | 7817374 | 16-scf00496 | 16 |
| AX-157848127 | 25 | 49.147 | KV453089.1 | 7620758 | 16-scf00496 | 16 |
| AX-158419974 | 25 | 49.147 | KV453089.1 | 7714644 | 16-scf00496 | 16 |
| AX-157848134 | 25 | 49.147 | KV453089.1 | 7732973 | 16-scf00496 | 16 |
| AX-158319943 | 25 | 49.147 | KV453089.1 | 7953484 | 16-scf00496 | 16 |
| AX-157695139 | 25 | 49.156 | KV453089.1 | 6143249 | 16-scf00496 | 16 |
| AX-157848136 | 25 | 49.156 | KV453089.1 | 7737677 | 16-scf00496 | 16 |
| AX-158319778 | 25 | 49.156 | KV453089.1 | 7742615 | 16-scf00496 | 16 |
| AX-158319781 | 25 | 49.156 | KV453089.1 | 7753763 | 16-scf00496 | 16 |
| AX-158418283 | 25 | 49.156 | KV453089.1 | 7755611 | 16-scf00496 | 16 |
| AX-158319783 | 25 | 49.156 | KV453089.1 | 7757410 | 16-scf00496 | 16 |
| AX-158319785 | 25 | 49.156 | KV453089.1 | 7760414 | 16-scf00496 | 16 |
| AX-158319786 | 25 | 49.156 | KV453089.1 | 7760671 | 16-scf00496 | 16 |
| AX-158319793 | 25 | 49.156 | KV453089.1 | 7767892 | 16-scf00496 | 16 |
| AX-157848139 | 25 | 49.156 | KV453089.1 | 7768188 | 16-scf00496 | 16 |
| AX-158319794 | 25 | 49.156 | KV453089.1 | 7769531 | 16-scf00496 | 16 |
| AX-157848140 | 25 | 49.156 | KV453089.1 | 7770280 | 16-scf00496 | 16 |
| AX-158319796 | 25 | 49.156 | KV453089.1 | 7771708 | 16-scf00496 | 16 |
| AX-158319797 | 25 | 49.156 | KV453089.1 | 7772631 | 16-scf00496 | 16 |
| AX-158319798 | 25 | 49.156 | KV453089.1 | 7773412 | 16-scf00496 | 16 |
| AX-157848142 | 25 | 49.156 | KV453089.1 | 7777182 | 16-scf00496 | 16 |
| AX-158319800 | 25 | 49.156 | KV453089.1 | 7780897 | 16-scf00496 | 16 |
| AX-158319804 | 25 | 49.156 | KV453089.1 | 7784060 | 16-scf00496 | 16 |
| AX-157715983 | 25 | 49.156 | KV453089.1 | 7785186 | 16-scf00496 | 16 |
| AX-158319806 | 25 | 49.156 | KV453089.1 | 7787409 | 16-scf00496 | 16 |
| AX-158319810 | 25 | 49.156 | KV453089.1 | 7794050 | 16-scf00496 | 16 |
| AX-158319816 | 25 | 49.156 | KV453089.1 | 7798368 | 16-scf00496 | 16 |
| AX-158319817 | 25 | 49.156 | KV453089.1 | 7799293 | 16-scf00496 | 16 |
| AX-158319821 | 25 | 49.156 | KV453089.1 | 7804432 | 16-scf00496 | 16 |
| AX-158319826 | 25 | 49.156 | KV453089.1 | 7820186 | 16-scf00496 | 16 |
| AX-157848150 | 25 | 49.156 | KV453089.1 | 7822526 | 16-scf00496 | 16 |
| AX-158319828 | 25 | 49.156 | KV453089.1 | 7822771 | 16-scf00496 | 16 |
| AX-157848154 | 25 | 49.156 | KV453089.1 | 7833855 | 16-scf00496 | 16 |
| AX-157752432 | 25 | 49.156 | KV453089.1 | 7836020 | 16-scf00496 | 16 |
| AX-158319837 | 25 | 49.156 | KV453089.1 | 7836110 | 16-scf00496 | 16 |
| AX-158319840 | 25 | 49.156 | KV453089.1 | 7838779 | 16-scf00496 | 16 |
| AX-158319846 | 25 | 49.156 | KV453089.1 | 7845209 | 16-scf00496 | 16 |
| AX-157848158 | 25 | 49.156 | KV453089.1 | 7848181 | 16-scf00496 | 16 |
| AX-158319850 | 25 | 49.156 | KV453089.1 | 7852297 | 16-scf00496 | 16 |
| AX-158319960 | 25 | 49.156 | KV453089.1 | 7980806 | 16-scf00496 | 16 |
| AX-157694985 | 25 | 49.156 | KV453089.1 | 8501817 | 16-scf00496 | 16 |
| AX-157716552 | 25 | 49.156 | KV453089.1 | 8548502 | 16-scf00496 | 16 |
| AX-158320413 | 25 | 49.156 | KV453089.1 | 8649534 | 16-scf00496 | 16 |
| AX-158318313 | 25 | 49.265 | KV453089.1 | 5760251 | 16-scf00496 | 16 |
| AX-157848033 | 25 | 49.265 | KV453089.1 | 5834148 | 16-scf00496 | 16 |
| AX-157756960 | 25 | 49.265 | KV453089.1 | 5910429 | 16-scf00496 | 16 |
| AX-158318438 | 25 | 49.265 | KV453089.1 | 5916680 | 16-scf00496 | 16 |

|              |    |        |            |         |             |    |
|--------------|----|--------|------------|---------|-------------|----|
| AX-158318498 | 25 | 49.265 | KV453089.1 | 6006640 | 16-scf00496 | 16 |
| AX-158318610 | 25 | 49.265 | KV453089.1 | 6133854 | 16-scf00496 | 16 |
| AX-158318867 | 25 | 49.265 | KV453089.1 | 6437355 | 16-scf00496 | 16 |
| AX-158318882 | 25 | 49.265 | KV453089.1 | 6451385 | 16-scf00496 | 16 |
| AX-157861425 | 25 | 49.265 | KV453089.1 | 6631961 | 16-scf00496 | 16 |
| AX-158319016 | 25 | 49.265 | KV453089.1 | 6635083 | 16-scf00496 | 16 |
| AX-158319053 | 25 | 49.265 | KV453089.1 | 6674411 | 16-scf00496 | 16 |
| AX-158319065 | 25 | 49.265 | KV453089.1 | 6688658 | 16-scf00496 | 16 |
| AX-158319102 | 25 | 49.265 | KV453089.1 | 6727774 | 16-scf00496 | 16 |
| AX-158319243 | 25 | 49.265 | KV453089.1 | 6914875 | 16-scf00496 | 16 |
| AX-158319247 | 25 | 49.265 | KV453089.1 | 6918098 | 16-scf00496 | 16 |
| AX-158319280 | 25 | 49.265 | KV453089.1 | 6956082 | 16-scf00496 | 16 |
| AX-158319397 | 25 | 49.265 | KV453089.1 | 7085384 | 16-scf00496 | 16 |
| AX-158319561 | 25 | 49.265 | KV453089.1 | 7465539 | 16-scf00496 | 16 |
| AX-158319581 | 25 | 49.265 | KV453089.1 | 7498583 | 16-scf00496 | 16 |
| AX-158319583 | 25 | 49.265 | KV453089.1 | 7499219 | 16-scf00496 | 16 |
| AX-158319588 | 25 | 49.265 | KV453089.1 | 7502242 | 16-scf00496 | 16 |
| AX-157881345 | 25 | 49.265 | KV453089.1 | 7507489 | 16-scf00496 | 16 |
| AX-158319772 | 25 | 49.265 | KV453089.1 | 7730191 | 16-scf00496 | 16 |
| AX-157848153 | 25 | 49.265 | KV453089.1 | 7832128 | 16-scf00496 | 16 |
| AX-158319841 | 25 | 49.265 | KV453089.1 | 7840327 | 16-scf00496 | 16 |
| AX-158319851 | 25 | 49.265 | KV453089.1 | 7854384 | 16-scf00496 | 16 |
| AX-158319852 | 25 | 49.265 | KV453089.1 | 7855063 | 16-scf00496 | 16 |
| AX-158319854 | 25 | 49.265 | KV453089.1 | 7856742 | 16-scf00496 | 16 |
| AX-158319857 | 25 | 49.265 | KV453089.1 | 7857582 | 16-scf00496 | 16 |
| AX-158319861 | 25 | 49.265 | KV453089.1 | 7862462 | 16-scf00496 | 16 |
| AX-158319862 | 25 | 49.265 | KV453089.1 | 7863035 | 16-scf00496 | 16 |
| AX-158319866 | 25 | 49.265 | KV453089.1 | 7865563 | 16-scf00496 | 16 |
| AX-158319868 | 25 | 49.265 | KV453089.1 | 7866675 | 16-scf00496 | 16 |
| AX-158319872 | 25 | 49.265 | KV453089.1 | 7869027 | 16-scf00496 | 16 |
| AX-158319873 | 25 | 49.265 | KV453089.1 | 7869977 | 16-scf00496 | 16 |
| AX-157743521 | 25 | 49.265 | KV453089.1 | 7901544 | 16-scf00496 | 16 |
| AX-158318207 | 25 | 49.374 | KV453089.1 | 5631016 | 16-scf00496 | 16 |
| AX-158318228 | 25 | 49.374 | KV453089.1 | 5649860 | 16-scf00496 | 16 |
| AX-158318496 | 25 | 49.374 | KV453089.1 | 6003367 | 16-scf00496 | 16 |
| AX-158319051 | 25 | 49.374 | KV453089.1 | 6672378 | 16-scf00496 | 16 |
| AX-158319077 | 25 | 49.374 | KV453089.1 | 6697070 | 16-scf00496 | 16 |
| AX-158319232 | 25 | 49.374 | KV453089.1 | 6899719 | 16-scf00496 | 16 |
| AX-158319284 | 25 | 49.374 | KV453089.1 | 6962669 | 16-scf00496 | 16 |
| AX-158319654 | 25 | 49.374 | KV453089.1 | 7589994 | 16-scf00496 | 16 |
| AX-158319658 | 25 | 49.374 | KV453089.1 | 7593700 | 16-scf00496 | 16 |
| AX-158319878 | 25 | 49.374 | KV453089.1 | 7872539 | 16-scf00496 | 16 |
| AX-158319879 | 25 | 49.374 | KV453089.1 | 7873080 | 16-scf00496 | 16 |
| AX-158319881 | 25 | 49.374 | KV453089.1 | 7875572 | 16-scf00496 | 16 |
| AX-158319883 | 25 | 49.374 | KV453089.1 | 7877287 | 16-scf00496 | 16 |
| AX-158319884 | 25 | 49.374 | KV453089.1 | 7877551 | 16-scf00496 | 16 |
| AX-157749819 | 25 | 49.374 | KV453089.1 | 7881230 | 16-scf00496 | 16 |
| AX-158319887 | 25 | 49.374 | KV453089.1 | 7884193 | 16-scf00496 | 16 |
| AX-158319888 | 25 | 49.374 | KV453089.1 | 7884613 | 16-scf00496 | 16 |
| AX-158319889 | 25 | 49.374 | KV453089.1 | 7885448 | 16-scf00496 | 16 |
| AX-157848162 | 25 | 49.374 | KV453089.1 | 7889089 | 16-scf00496 | 16 |

|              |    |        |            |         |             |    |
|--------------|----|--------|------------|---------|-------------|----|
| AX-157848163 | 25 | 49.374 | KV453089.1 | 7889631 | 16-scf00496 | 16 |
| AX-157773024 | 25 | 49.374 | KV453089.1 | 7892720 | 16-scf00496 | 16 |
| AX-158319894 | 25 | 49.374 | KV453089.1 | 7894438 | 16-scf00496 | 16 |
| AX-158319895 | 25 | 49.374 | KV453089.1 | 7895554 | 16-scf00496 | 16 |
| AX-157848165 | 25 | 49.374 | KV453089.1 | 7895768 | 16-scf00496 | 16 |
| AX-158319898 | 25 | 49.374 | KV453089.1 | 7897926 | 16-scf00496 | 16 |
| AX-158319903 | 25 | 49.374 | KV453089.1 | 7903403 | 16-scf00496 | 16 |
| AX-157848166 | 25 | 49.374 | KV453089.1 | 7909490 | 16-scf00496 | 16 |
| AX-158319910 | 25 | 49.374 | KV453089.1 | 7910883 | 16-scf00496 | 16 |
| AX-158319912 | 25 | 49.374 | KV453089.1 | 7915216 | 16-scf00496 | 16 |
| AX-157848167 | 25 | 49.374 | KV453089.1 | 7915820 | 16-scf00496 | 16 |
| AX-157701847 | 25 | 49.374 | KV453089.1 | 7916032 | 16-scf00496 | 16 |
| AX-158319914 | 25 | 49.374 | KV453089.1 | 7918061 | 16-scf00496 | 16 |
| AX-158319916 | 25 | 49.374 | KV453089.1 | 7920690 | 16-scf00496 | 16 |
| AX-158319917 | 25 | 49.374 | KV453089.1 | 7921213 | 16-scf00496 | 16 |
| AX-158319918 | 25 | 49.374 | KV453089.1 | 7922254 | 16-scf00496 | 16 |
| AX-157717187 | 25 | 49.374 | KV453089.1 | 7922994 | 16-scf00496 | 16 |
| AX-158319920 | 25 | 49.374 | KV453089.1 | 7925527 | 16-scf00496 | 16 |
| AX-157716143 | 25 | 49.374 | KV453089.1 | 7926674 | 16-scf00496 | 16 |
| AX-158319925 | 25 | 49.374 | KV453089.1 | 7936805 | 16-scf00496 | 16 |
| AX-157848169 | 25 | 49.374 | KV453089.1 | 7937442 | 16-scf00496 | 16 |
| AX-158319927 | 25 | 49.374 | KV453089.1 | 7938514 | 16-scf00496 | 16 |
| AX-158319930 | 25 | 49.374 | KV453089.1 | 7940023 | 16-scf00496 | 16 |
| AX-158319932 | 25 | 49.374 | KV453089.1 | 7941202 | 16-scf00496 | 16 |
| AX-157848174 | 25 | 49.374 | KV453089.1 | 7955060 | 16-scf00496 | 16 |
| AX-157848176 | 25 | 49.374 | KV453089.1 | 7956811 | 16-scf00496 | 16 |
| AX-158319948 | 25 | 49.374 | KV453089.1 | 7959546 | 16-scf00496 | 16 |
| AX-158319951 | 25 | 49.374 | KV453089.1 | 7963381 | 16-scf00496 | 16 |
| AX-158319959 | 25 | 49.374 | KV453089.1 | 7978171 | 16-scf00496 | 16 |
| AX-157716405 | 25 | 49.374 | KV453089.1 | 7978438 | 16-scf00496 | 16 |
| AX-158319992 | 25 | 49.374 | KV453089.1 | 8015934 | 16-scf00496 | 16 |
| AX-158319996 | 25 | 49.374 | KV453089.1 | 8027118 | 16-scf00496 | 16 |
| AX-158319999 | 25 | 49.374 | KV453089.1 | 8029894 | 16-scf00496 | 16 |
| AX-158320008 | 25 | 49.374 | KV453089.1 | 8042538 | 16-scf00496 | 16 |
| AX-158320019 | 25 | 49.374 | KV453089.1 | 8051428 | 16-scf00496 | 16 |
| AX-157747601 | 25 | 49.374 | KV453089.1 | 8065766 | 16-scf00496 | 16 |
| AX-158320136 | 25 | 49.374 | KV453089.1 | 8256925 | 16-scf00496 | 16 |
| AX-158418287 | 25 | 49.396 | KV453089.1 | 7873569 | 16-scf00496 | 16 |
| AX-158319885 | 25 | 49.396 | KV453089.1 | 7879295 | 16-scf00496 | 16 |
| AX-158319891 | 25 | 49.396 | KV453089.1 | 7888535 | 16-scf00496 | 16 |
| AX-158319922 | 25 | 49.396 | KV453089.1 | 7929008 | 16-scf00496 | 16 |
| AX-158319929 | 25 | 49.396 | KV453089.1 | 7939346 | 16-scf00496 | 16 |
| AX-158319934 | 25 | 49.396 | KV453089.1 | 7944352 | 16-scf00496 | 16 |
| AX-157752188 | 25 | 49.396 | KV453089.1 | 7947489 | 16-scf00496 | 16 |
| AX-158319952 | 25 | 49.396 | KV453089.1 | 7964734 | 16-scf00496 | 16 |
| AX-158319979 | 25 | 49.396 | KV453089.1 | 8003016 | 16-scf00496 | 16 |
| AX-158319980 | 25 | 49.396 | KV453089.1 | 8003457 | 16-scf00496 | 16 |
| AX-158319986 | 25 | 49.396 | KV453089.1 | 8010695 | 16-scf00496 | 16 |
| AX-158319993 | 25 | 49.396 | KV453089.1 | 8019458 | 16-scf00496 | 16 |
| AX-158320509 | 25 | 49.396 | KV453089.1 | 8770624 | 16-scf00496 | 16 |
| AX-158320729 | 25 | 49.396 | KV453089.1 | 9075334 | 16-scf00496 | 16 |

|              |    |        |            |          |             |    |
|--------------|----|--------|------------|----------|-------------|----|
| AX-157848235 | 25 | 49.396 | KV453089.1 | 9086463  | 16-scf00496 | 16 |
| AX-158321543 | 25 | 49.396 | KV453089.1 | 11299774 | 16-scf00496 | 16 |
| AX-158322110 | 25 | 49.396 | KV453089.1 | 12857945 | 16-scf00496 | 16 |
| AX-158322112 | 25 | 49.396 | KV453089.1 | 12858636 | 16-scf00496 | 16 |
| AX-158322121 | 25 | 49.396 | KV453089.1 | 12871281 | 16-scf00496 | 16 |
| AX-157739015 | 25 | 49.396 | KV453089.1 | 12941802 | 16-scf00496 | 16 |
| AX-158322158 | 25 | 49.396 | KV453089.1 | 12948798 | 16-scf00496 | 16 |
| AX-158381468 | 25 | 49.396 | KV453089.1 | 12959173 | 16-scf00496 | 16 |
| AX-157722516 | 25 | 49.396 | KV453090.1 | 1290376  | 16-scf00499 | 16 |
| AX-157699765 | 25 | 49.396 | FI899379.1 | 570      | 16-scf00496 | UN |
| AX-158319957 | 25 | 49.416 | KV453089.1 | 7976492  | 16-scf00496 | 16 |
| AX-158319958 | 25 | 49.416 | KV453089.1 | 7977703  | 16-scf00496 | 16 |
| AX-158319965 | 25 | 49.451 | KV453089.1 | 7984392  | 16-scf00496 | 16 |
| AX-158319838 | 25 | 49.484 | KV453089.1 | 7837009  | 16-scf00496 | 16 |
| AX-158319880 | 25 | 49.484 | KV453089.1 | 7874700  | 16-scf00496 | 16 |
| AX-157716243 | 25 | 49.484 | KV453089.1 | 7906984  | 16-scf00496 | 16 |
| AX-158319961 | 25 | 49.484 | KV453089.1 | 7981457  | 16-scf00496 | 16 |
| AX-158319963 | 25 | 49.484 | KV453089.1 | 7982869  | 16-scf00496 | 16 |
| AX-158319968 | 25 | 49.484 | KV453089.1 | 7989379  | 16-scf00496 | 16 |
| AX-158319974 | 25 | 49.484 | KV453089.1 | 7996694  | 16-scf00496 | 16 |
| AX-158319982 | 25 | 49.484 | KV453089.1 | 8007305  | 16-scf00496 | 16 |
| AX-158319987 | 25 | 49.484 | KV453089.1 | 8012383  | 16-scf00496 | 16 |
| AX-158319988 | 25 | 49.484 | KV453089.1 | 8013027  | 16-scf00496 | 16 |
| AX-158319990 | 25 | 49.484 | KV453089.1 | 8014613  | 16-scf00496 | 16 |
| AX-158319995 | 25 | 49.484 | KV453089.1 | 8021860  | 16-scf00496 | 16 |
| AX-157848186 | 25 | 49.484 | KV453089.1 | 8022762  | 16-scf00496 | 16 |
| AX-158320007 | 25 | 49.484 | KV453089.1 | 8039240  | 16-scf00496 | 16 |
| AX-157716917 | 25 | 49.484 | KV453089.1 | 8109769  | 16-scf00496 | 16 |
| AX-158320075 | 25 | 49.484 | KV453089.1 | 8157862  | 16-scf00496 | 16 |
| AX-158319998 | 25 | 49.593 | KV453089.1 | 8029479  | 16-scf00496 | 16 |
| AX-158320000 | 25 | 49.593 | KV453089.1 | 8030561  | 16-scf00496 | 16 |
| AX-158320001 | 25 | 49.593 | KV453089.1 | 8032051  | 16-scf00496 | 16 |
| AX-158320004 | 25 | 49.593 | KV453089.1 | 8033970  | 16-scf00496 | 16 |
| AX-158320009 | 25 | 49.617 | KV453089.1 | 8043554  | 16-scf00496 | 16 |
| AX-158320010 | 25 | 49.617 | KV453089.1 | 8043990  | 16-scf00496 | 16 |
| AX-158320017 | 25 | 49.656 | KV453089.1 | 8050619  | 16-scf00496 | 16 |
| AX-157713738 | 25 | 49.702 | KV453089.1 | 7935322  | 16-scf00496 | 16 |
| AX-158320022 | 25 | 49.702 | KV453089.1 | 8058777  | 16-scf00496 | 16 |
| AX-158320023 | 25 | 49.702 | KV453089.1 | 8059778  | 16-scf00496 | 16 |
| AX-158320024 | 25 | 49.702 | KV453089.1 | 8060668  | 16-scf00496 | 16 |
| AX-158320025 | 25 | 49.702 | KV453089.1 | 8061460  | 16-scf00496 | 16 |
| AX-158320028 | 25 | 49.702 | KV453089.1 | 8065808  | 16-scf00496 | 16 |
| AX-157756755 | 25 | 49.702 | KV453089.1 | 8073737  | 16-scf00496 | 16 |
| AX-158320035 | 25 | 49.702 | KV453089.1 | 8082396  | 16-scf00496 | 16 |
| AX-157746317 | 25 | 49.702 | KV453089.1 | 8089334  | 16-scf00496 | 16 |
| AX-158319406 | 25 | 49.742 | KV453089.1 | 7110998  | 16-scf00496 | 16 |
| AX-157861436 | 25 | 49.742 | KV453089.1 | 7353342  | 16-scf00496 | 16 |
| AX-158319529 | 25 | 49.742 | KV453089.1 | 7393298  | 16-scf00496 | 16 |
| AX-157873598 | 25 | 49.742 | KV453089.1 | 7396803  | 16-scf00496 | 16 |
| AX-158319619 | 25 | 49.742 | KV453089.1 | 7540594  | 16-scf00496 | 16 |
| AX-158320027 | 25 | 49.742 | KV453089.1 | 8064452  | 16-scf00496 | 16 |

|              |    |        |            |          |             |    |
|--------------|----|--------|------------|----------|-------------|----|
| AX-158320033 | 25 | 49.742 | KV453089.1 | 8073534  | 16-scf00496 | 16 |
| AX-158320039 | 25 | 49.742 | KV453089.1 | 8086810  | 16-scf00496 | 16 |
| AX-158320041 | 25 | 49.742 | KV453089.1 | 8088334  | 16-scf00496 | 16 |
| AX-158320043 | 25 | 49.742 | KV453089.1 | 8098356  | 16-scf00496 | 16 |
| AX-158320071 | 25 | 49.742 | KV453089.1 | 8147605  | 16-scf00496 | 16 |
| AX-158320077 | 25 | 49.742 | KV453089.1 | 8159355  | 16-scf00496 | 16 |
| AX-157848197 | 25 | 49.742 | KV453089.1 | 8168670  | 16-scf00496 | 16 |
| AX-158320127 | 25 | 49.742 | KV453089.1 | 8242917  | 16-scf00496 | 16 |
| AX-158320157 | 25 | 49.742 | KV453089.1 | 8291668  | 16-scf00496 | 16 |
| AX-158320171 | 25 | 49.742 | KV453089.1 | 8306867  | 16-scf00496 | 16 |
| AX-158320176 | 25 | 49.742 | KV453089.1 | 8311600  | 16-scf00496 | 16 |
| AX-158320186 | 25 | 49.742 | KV453089.1 | 8324844  | 16-scf00496 | 16 |
| AX-158320210 | 25 | 49.742 | KV453089.1 | 8364209  | 16-scf00496 | 16 |
| AX-157848212 | 25 | 49.742 | KV453089.1 | 8412049  | 16-scf00496 | 16 |
| AX-158320330 | 25 | 49.742 | KV453089.1 | 8517725  | 16-scf00496 | 16 |
| AX-158320403 | 25 | 49.742 | KV453089.1 | 8639411  | 16-scf00496 | 16 |
| AX-158320448 | 25 | 49.742 | KV453089.1 | 8692847  | 16-scf00496 | 16 |
| AX-158320453 | 25 | 49.742 | KV453089.1 | 8703607  | 16-scf00496 | 16 |
| AX-158320465 | 25 | 49.742 | KV453089.1 | 8713175  | 16-scf00496 | 16 |
| AX-158320479 | 25 | 49.742 | KV453089.1 | 8725806  | 16-scf00496 | 16 |
| AX-158320512 | 25 | 49.742 | KV453089.1 | 8776738  | 16-scf00496 | 16 |
| AX-158320526 | 25 | 49.742 | KV453089.1 | 8791622  | 16-scf00496 | 16 |
| AX-158320573 | 25 | 49.742 | KV453089.1 | 8850115  | 16-scf00496 | 16 |
| AX-158320587 | 25 | 49.742 | KV453089.1 | 8869374  | 16-scf00496 | 16 |
| AX-158320617 | 25 | 49.742 | KV453089.1 | 8905538  | 16-scf00496 | 16 |
| AX-158320619 | 25 | 49.742 | KV453089.1 | 8909857  | 16-scf00496 | 16 |
| AX-158320636 | 25 | 49.742 | KV453089.1 | 8932478  | 16-scf00496 | 16 |
| AX-158320683 | 25 | 49.742 | KV453089.1 | 9004244  | 16-scf00496 | 16 |
| AX-158320698 | 25 | 49.742 | KV453089.1 | 9035140  | 16-scf00496 | 16 |
| AX-158320819 | 25 | 49.742 | KV453089.1 | 9273698  | 16-scf00496 | 16 |
| AX-158320825 | 25 | 49.742 | KV453089.1 | 9282262  | 16-scf00496 | 16 |
| AX-158320854 | 25 | 49.742 | KV453089.1 | 9316886  | 16-scf00496 | 16 |
| AX-158320949 | 25 | 49.742 | KV453089.1 | 9477209  | 16-scf00496 | 16 |
| AX-158320973 | 25 | 49.742 | KV453089.1 | 9509932  | 16-scf00496 | 16 |
| AX-158320975 | 25 | 49.742 | KV453089.1 | 9512968  | 16-scf00496 | 16 |
| AX-158320996 | 25 | 49.742 | KV453089.1 | 9542648  | 16-scf00496 | 16 |
| AX-158321064 | 25 | 49.742 | KV453089.1 | 9642879  | 16-scf00496 | 16 |
| AX-157848288 | 25 | 49.742 | KV453089.1 | 10181123 | 16-scf00496 | 16 |
| AX-158321284 | 25 | 49.742 | KV453089.1 | 10211031 | 16-scf00496 | 16 |
| AX-158419984 | 25 | 49.742 | KV453089.1 | 10489488 | 16-scf00496 | 16 |
| AX-158321492 | 25 | 49.742 | KV453089.1 | 11165476 | 16-scf00496 | 16 |
| AX-158321493 | 25 | 49.742 | KV453089.1 | 11175193 | 16-scf00496 | 16 |
| AX-158419998 | 25 | 49.742 | KV453089.1 | 11433530 | 16-scf00496 | 16 |
| AX-158321731 | 25 | 49.742 | KV453089.1 | 11601141 | 16-scf00496 | 16 |
| AX-158321743 | 25 | 49.742 | KV453089.1 | 11626016 | 16-scf00496 | 16 |
| AX-158321858 | 25 | 49.742 | KV453089.1 | 11975727 | 16-scf00496 | 16 |
| AX-158321926 | 25 | 49.742 | KV453089.1 | 12162067 | 16-scf00496 | 16 |
| AX-158321928 | 25 | 49.742 | KV453089.1 | 12167662 | 16-scf00496 | 16 |
| AX-158321929 | 25 | 49.742 | KV453089.1 | 12169814 | 16-scf00496 | 16 |
| AX-158418386 | 25 | 49.742 | KV453089.1 | 12211721 | 16-scf00496 | 16 |
| AX-158322005 | 25 | 49.742 | KV453089.1 | 12476399 | 16-scf00496 | 16 |

|              |    |        |            |         |             |    |
|--------------|----|--------|------------|---------|-------------|----|
| AX-158322378 | 25 | 49.742 | KV453090.1 | 283914  | 16-scf00499 | 16 |
| AX-158322396 | 25 | 49.742 | KV453090.1 | 318818  | 16-scf00499 | 16 |
| AX-158418408 | 25 | 49.742 | KV453090.1 | 323014  | 16-scf00499 | 16 |
| AX-158322401 | 25 | 49.742 | KV453090.1 | 326692  | 16-scf00499 | 16 |
| AX-158322402 | 25 | 49.742 | KV453090.1 | 327709  | 16-scf00499 | 16 |
| AX-158322463 | 25 | 49.742 | KV453090.1 | 453049  | 16-scf00499 | 16 |
| AX-158322464 | 25 | 49.742 | KV453090.1 | 454507  | 16-scf00499 | 16 |
| AX-157848352 | 25 | 49.742 | KV453090.1 | 490829  | 16-scf00499 | 16 |
| AX-158322500 | 25 | 49.742 | KV453090.1 | 521346  | 16-scf00499 | 16 |
| AX-158322517 | 25 | 49.742 | KV453090.1 | 560510  | 16-scf00499 | 16 |
| AX-158322542 | 25 | 49.742 | KV453090.1 | 603915  | 16-scf00499 | 16 |
| AX-158322561 | 25 | 49.742 | KV453090.1 | 632385  | 16-scf00499 | 16 |
| AX-158322562 | 25 | 49.742 | KV453090.1 | 633203  | 16-scf00499 | 16 |
| AX-158322563 | 25 | 49.742 | KV453090.1 | 635106  | 16-scf00499 | 16 |
| AX-158322626 | 25 | 49.742 | KV453090.1 | 781613  | 16-scf00499 | 16 |
| AX-157750456 | 25 | 49.742 | KV453090.1 | 788322  | 16-scf00499 | 16 |
| AX-158322733 | 25 | 49.742 | KV453090.1 | 1327311 | 16-scf00499 | 16 |
| AX-158323978 | 25 | 49.742 | KV453093.1 | 63656   | 16-scf00501 | 16 |
| AX-158323993 | 25 | 49.742 | KV453093.1 | 228194  | 16-scf00501 | 16 |
| AX-158324074 | 25 | 49.742 | KV453093.1 | 561526  | 16-scf00501 | 16 |
| AX-158324076 | 25 | 49.742 | KV453093.1 | 565226  | 16-scf00501 | 16 |
| AX-158324087 | 25 | 49.742 | KV453093.1 | 595651  | 16-scf00501 | 16 |
| AX-158324233 | 25 | 49.742 | KV453093.1 | 1323560 | 16-scf00501 | 16 |
| AX-158324250 | 25 | 49.742 | KV453093.1 | 1398253 | 16-scf00501 | 16 |
| AX-158324251 | 25 | 49.742 | KV453093.1 | 1402785 | 16-scf00501 | 16 |
| AX-158324254 | 25 | 49.742 | KV453093.1 | 1413311 | 16-scf00501 | 16 |
| AX-158324262 | 25 | 49.742 | KV453093.1 | 1431435 | 16-scf00501 | 16 |
| AX-158324272 | 25 | 49.742 | KV453093.1 | 1472071 | 16-scf00501 | 16 |
| AX-157848537 | 25 | 49.742 | KV453093.1 | 1495566 | 16-scf00501 | 16 |
| AX-158324281 | 25 | 49.742 | KV453093.1 | 1495832 | 16-scf00501 | 16 |
| AX-158324436 | 25 | 49.742 | KV453094.1 | 22142   | 16-scf00503 | 16 |
| AX-158324511 | 25 | 49.742 | KV453094.1 | 694048  | 16-scf00503 | 16 |
| AX-158324514 | 25 | 49.742 | KV453094.1 | 702229  | 16-scf00503 | 16 |
| AX-158324518 | 25 | 49.742 | KV453094.1 | 721583  | 16-scf00503 | 16 |
| AX-158324523 | 25 | 49.742 | KV453094.1 | 741458  | 16-scf00503 | 16 |
| AX-157861491 | 25 | 49.742 | KV453094.1 | 810226  | 16-scf00503 | 16 |
| AX-158324637 | 25 | 49.742 | KV453094.1 | 1031907 | 16-scf00503 | 16 |
| AX-157848556 | 25 | 49.742 | KV453094.1 | 1058958 | 16-scf00503 | 16 |
| AX-158324675 | 25 | 49.742 | KV453097.1 | 33328   | 16-scf00504 | 16 |
| AX-158324772 | 25 | 49.742 | KV453097.1 | 225579  | 16-scf00504 | 16 |
| AX-158324779 | 25 | 49.742 | KV453097.1 | 238773  | 16-scf00504 | 16 |
| AX-158324897 | 25 | 49.742 | KV453097.1 | 430441  | 16-scf00504 | 16 |
| AX-158324904 | 25 | 49.742 | KV453097.1 | 437586  | 16-scf00504 | 16 |
| AX-158423713 | 25 | 49.742 | KV453097.1 | 475807  | 16-scf00504 | 16 |
| AX-158324958 | 25 | 49.742 | KV453097.1 | 513050  | 16-scf00504 | 16 |
| AX-158324974 | 25 | 49.742 | KV453097.1 | 532460  | 16-scf00504 | 16 |
| AX-158325038 | 25 | 49.742 | KV453097.1 | 682731  | 16-scf00504 | 16 |
| AX-158325071 | 25 | 49.742 | KV453097.1 | 730681  | 16-scf00504 | 16 |
| AX-158325084 | 25 | 49.742 | KV453097.1 | 741591  | 16-scf00504 | 16 |
| AX-157848609 | 25 | 49.742 | KV453097.1 | 821703  | 16-scf00504 | 16 |
| AX-158376040 | 25 | 49.742 | KV453095.1 | 479023  | 16-scf00570 | 16 |

|              |    |        |             |         |             |    |
|--------------|----|--------|-------------|---------|-------------|----|
| AX-158324422 | 25 | 49.742 | KV453095.1  | 681020  | 16-scf00570 | 16 |
| AX-158324356 | 25 | 49.742 | KV453095.1  | 1274239 | 16-scf00570 | 16 |
| AX-158324343 | 25 | 49.742 | KV453095.1  | 1363853 | 16-scf00570 | 16 |
| AX-158324338 | 25 | 49.742 | KV453095.1  | 1389465 | 16-scf00570 | 16 |
| AX-158324330 | 25 | 49.742 | KV453095.1  | 1458089 | 16-scf00570 | 16 |
| AX-157748636 | 25 | 49.742 | KV453095.1  | 1473098 | 16-scf00570 | 16 |
| AX-158324325 | 25 | 49.742 | KV453095.1  | 1494598 | 16-scf00570 | 16 |
| AX-158324324 | 25 | 49.742 | KV453095.1  | 1513663 | 16-scf00570 | 16 |
| AX-158324321 | 25 | 49.742 | KV453095.1  | 1543179 | 16-scf00570 | 16 |
| AX-158324317 | 25 | 49.742 | KV453095.1  | 1555305 | 16-scf00570 | 16 |
| AX-158324312 | 25 | 49.742 | KV453095.1  | 1567530 | 16-scf00570 | 16 |
| AX-158322796 | 25 | 49.742 | KV453095.1  | 1816391 | 16-scf00570 | 16 |
| AX-158322810 | 25 | 49.742 | KV453095.1  | 1843312 | 16-scf00570 | 16 |
| AX-157861469 | 25 | 49.742 | KV453095.1  | 1859335 | 16-scf00570 | 16 |
| AX-158322854 | 25 | 49.742 | KV453095.1  | 1902979 | 16-scf00570 | 16 |
| AX-157715826 | 25 | 49.742 | KV453095.1  | 2076572 | 16-scf00570 | 16 |
| AX-158322999 | 25 | 49.742 | KV453095.1  | 2125112 | 16-scf00570 | 16 |
| AX-158323018 | 25 | 49.742 | KV453095.1  | 2151748 | 16-scf00570 | 16 |
| AX-158323019 | 25 | 49.742 | KV453095.1  | 2152330 | 16-scf00570 | 16 |
| AX-158323024 | 25 | 49.742 | KV453095.1  | 2158818 | 16-scf00570 | 16 |
| AX-158420023 | 25 | 49.742 | KV453095.1  | 2172511 | 16-scf00570 | 16 |
| AX-158323044 | 25 | 49.742 | KV453095.1  | 2180801 | 16-scf00570 | 16 |
| AX-158323056 | 25 | 49.742 | KV453095.1  | 2192018 | 16-scf00570 | 16 |
| AX-158323076 | 25 | 49.742 | KV453095.1  | 2220512 | 16-scf00570 | 16 |
| AX-158323098 | 25 | 49.742 | KV453095.1  | 2247833 | 16-scf00570 | 16 |
| AX-158323117 | 25 | 49.742 | KV453095.1  | 2270963 | 16-scf00570 | 16 |
| AX-158323128 | 25 | 49.742 | KV453095.1  | 2293188 | 16-scf00570 | 16 |
| AX-158418441 | 25 | 49.742 | KV453095.1  | 2492792 | 16-scf00570 | 16 |
| AX-158323287 | 25 | 49.742 | KV453095.1  | 2513232 | 16-scf00570 | 16 |
| AX-158323291 | 25 | 49.742 | KV453095.1  | 2519939 | 16-scf00570 | 16 |
| AX-158323341 | 25 | 49.742 | KV453095.1  | 2622224 | 16-scf00570 | 16 |
| AX-157723581 | 25 | 49.742 | KV453095.1  | 2800831 | 16-scf00570 | 16 |
| AX-158323439 | 25 | 49.742 | KV453095.1  | 2801856 | 16-scf00570 | 16 |
| AX-158323443 | 25 | 49.742 | KV453095.1  | 2828114 | 16-scf00570 | 16 |
| AX-157743111 | 25 | 49.742 | KV453095.1  | 2923362 | 16-scf00570 | 16 |
| AX-158323524 | 25 | 49.742 | KV453095.1  | 2965637 | 16-scf00570 | 16 |
| AX-157758182 | 25 | 49.742 | KV453095.1  | 3023210 | 16-scf00570 | 16 |
| AX-158323588 | 25 | 49.742 | KV453095.1  | 3053674 | 16-scf00570 | 16 |
| AX-157722106 | 25 | 49.742 | KV453095.1  | 3329744 | 16-scf00570 | 16 |
| AX-157861485 | 25 | 49.742 | KV453095.1  | 3674079 | 16-scf00570 | 16 |
| AX-158323952 | 25 | 49.742 | KV453095.1  | 3778888 | 16-scf00570 | 16 |
| AX-157685656 | 25 | 49.742 | KV453091.1  | 63958   | 16-scf00630 | 16 |
| AX-157705416 | 25 | 49.742 | 3ML01029718 | 185     | scf05340_1  | UN |
| AX-157881356 | 25 | 49.774 | KV453089.1  | 8116203 | 16-scf00496 | 16 |
| AX-157888352 | 25 | 49.811 | KV453089.1  | 8072827 | 16-scf00496 | 16 |
| AX-158320051 | 25 | 49.811 | KV453089.1  | 8121838 | 16-scf00496 | 16 |
| AX-158320053 | 25 | 49.811 | KV453089.1  | 8122740 | 16-scf00496 | 16 |
| AX-158320056 | 25 | 49.811 | KV453089.1  | 8124341 | 16-scf00496 | 16 |
| AX-158320057 | 25 | 49.811 | KV453089.1  | 8124738 | 16-scf00496 | 16 |
| AX-158320060 | 25 | 49.811 | KV453089.1  | 8129718 | 16-scf00496 | 16 |
| AX-158320061 | 25 | 49.811 | KV453089.1  | 8130041 | 16-scf00496 | 16 |



|              |    |        |            |         |             |    |
|--------------|----|--------|------------|---------|-------------|----|
| AX-158320062 | 25 | 49.811 | KV453089.1 | 8131434 | 16-scf00496 | 16 |
| AX-158320065 | 25 | 49.811 | KV453089.1 | 8141527 | 16-scf00496 | 16 |
| AX-158320070 | 25 | 49.811 | KV453089.1 | 8146979 | 16-scf00496 | 16 |
| AX-157848195 | 25 | 49.811 | KV453089.1 | 8147225 | 16-scf00496 | 16 |
| AX-158320073 | 25 | 49.811 | KV453089.1 | 8148895 | 16-scf00496 | 16 |
| AX-157775469 | 25 | 49.811 | KV453089.1 | 8149544 | 16-scf00496 | 16 |
| AX-158320078 | 25 | 49.811 | KV453089.1 | 8161617 | 16-scf00496 | 16 |
| AX-158320079 | 25 | 49.811 | KV453089.1 | 8162513 | 16-scf00496 | 16 |
| AX-158320080 | 25 | 49.811 | KV453089.1 | 8166899 | 16-scf00496 | 16 |
| AX-157774456 | 25 | 49.811 | KV453089.1 | 8167262 | 16-scf00496 | 16 |
| AX-158320081 | 25 | 49.811 | KV453089.1 | 8169917 | 16-scf00496 | 16 |
| AX-158320088 | 25 | 49.811 | KV453089.1 | 8176919 | 16-scf00496 | 16 |
| AX-158320089 | 25 | 49.811 | KV453089.1 | 8177402 | 16-scf00496 | 16 |
| AX-157848199 | 25 | 49.811 | KV453089.1 | 8178469 | 16-scf00496 | 16 |
| AX-158320556 | 25 | 49.811 | KV453089.1 | 8827473 | 16-scf00496 | 16 |
| AX-158322861 | 25 | 49.811 | KV453095.1 | 1915662 | 16-scf00570 | 16 |
| AX-158323185 | 25 | 49.811 | KV453095.1 | 2382899 | 16-scf00570 | 16 |
| AX-158317898 | 25 | 49.876 | KV453089.1 | 5193542 | 16-scf00496 | 16 |
| AX-158317954 | 25 | 49.876 | KV453089.1 | 5292684 | 16-scf00496 | 16 |
| AX-157848194 | 25 | 49.876 | KV453089.1 | 8116486 | 16-scf00496 | 16 |
| AX-158320091 | 25 | 49.876 | KV453089.1 | 8182246 | 16-scf00496 | 16 |
| AX-158319933 | 25 | 49.92  | KV453089.1 | 7942463 | 16-scf00496 | 16 |
| AX-158319937 | 25 | 49.92  | KV453089.1 | 7948093 | 16-scf00496 | 16 |
| AX-158319955 | 25 | 49.92  | KV453089.1 | 7975605 | 16-scf00496 | 16 |
| AX-157848192 | 25 | 49.92  | KV453089.1 | 8102360 | 16-scf00496 | 16 |
| AX-158320064 | 25 | 49.92  | KV453089.1 | 8138896 | 16-scf00496 | 16 |
| AX-158320082 | 25 | 49.92  | KV453089.1 | 8170704 | 16-scf00496 | 16 |
| AX-158320095 | 25 | 49.92  | KV453089.1 | 8189133 | 16-scf00496 | 16 |
| AX-158320100 | 25 | 49.92  | KV453089.1 | 8193899 | 16-scf00496 | 16 |
| AX-157754406 | 25 | 49.92  | KV453089.1 | 8198746 | 16-scf00496 | 16 |
| AX-158320104 | 25 | 49.92  | KV453089.1 | 8199498 | 16-scf00496 | 16 |
| AX-157723842 | 25 | 49.92  | KV453089.1 | 8200382 | 16-scf00496 | 16 |
| AX-158320105 | 25 | 49.925 | KV453089.1 | 8202963 | 16-scf00496 | 16 |
| AX-158320116 | 25 | 50.357 | KV453089.1 | 8222799 | 16-scf00496 | 16 |
| AX-158320117 | 25 | 50.357 | KV453089.1 | 8224698 | 16-scf00496 | 16 |
| AX-158320121 | 25 | 50.357 | KV453089.1 | 8231101 | 16-scf00496 | 16 |
| AX-158320122 | 25 | 50.508 | KV453089.1 | 8234470 | 16-scf00496 | 16 |
| AX-158320125 | 25 | 50.685 | KV453089.1 | 8238707 | 16-scf00496 | 16 |
| AX-158320126 | 25 | 50.685 | KV453089.1 | 8239692 | 16-scf00496 | 16 |
| AX-158320128 | 25 | 50.685 | KV453089.1 | 8243660 | 16-scf00496 | 16 |
| AX-158320129 | 25 | 50.685 | KV453089.1 | 8245269 | 16-scf00496 | 16 |
| AX-158320130 | 25 | 50.685 | KV453089.1 | 8246801 | 16-scf00496 | 16 |
| AX-158418293 | 25 | 50.685 | KV453089.1 | 8254120 | 16-scf00496 | 16 |
| AX-158320134 | 25 | 50.685 | KV453089.1 | 8254330 | 16-scf00496 | 16 |
| AX-158320148 | 25 | 50.685 | KV453089.1 | 8276403 | 16-scf00496 | 16 |
| AX-158320137 | 25 | 50.904 | KV453089.1 | 8258363 | 16-scf00496 | 16 |
| AX-158320140 | 25 | 50.904 | KV453089.1 | 8261769 | 16-scf00496 | 16 |
| AX-158320145 | 25 | 50.904 | KV453089.1 | 8270479 | 16-scf00496 | 16 |
| AX-157746252 | 25 | 50.904 | KV453089.1 | 8272659 | 16-scf00496 | 16 |
| AX-158381460 | 25 | 50.904 | KV453089.1 | 8272756 | 16-scf00496 | 16 |
| AX-158320147 | 25 | 50.904 | KV453089.1 | 8275764 | 16-scf00496 | 16 |

|              |    |        |            |         |             |    |
|--------------|----|--------|------------|---------|-------------|----|
| AX-158320149 | 25 | 51.171 | KV453089.1 | 8279785 | 16-scf00496 | 16 |
| AX-158320151 | 25 | 51.198 | KV453089.1 | 8284567 | 16-scf00496 | 16 |
| AX-157848203 | 25 | 51.222 | KV453089.1 | 8292722 | 16-scf00496 | 16 |
| AX-158320668 | 25 | 51.222 | KV453089.1 | 8983599 | 16-scf00496 | 16 |
| AX-158320158 | 25 | 51.248 | KV453089.1 | 8292910 | 16-scf00496 | 16 |
| AX-158320159 | 25 | 51.271 | KV453089.1 | 8293543 | 16-scf00496 | 16 |
| AX-157771959 | 25 | 51.271 | KV453089.1 | 8293916 | 16-scf00496 | 16 |
| AX-158320165 | 25 | 51.45  | KV453089.1 | 8298143 | 16-scf00496 | 16 |
| AX-158320166 | 25 | 51.45  | KV453089.1 | 8298843 | 16-scf00496 | 16 |
| AX-158320167 | 25 | 51.45  | KV453089.1 | 8299543 | 16-scf00496 | 16 |
| AX-158320168 | 25 | 51.45  | KV453089.1 | 8302634 | 16-scf00496 | 16 |
| AX-158320169 | 25 | 51.45  | KV453089.1 | 8304236 | 16-scf00496 | 16 |
| AX-157861441 | 25 | 51.451 | KV453089.1 | 8278169 | 16-scf00496 | 16 |
| AX-158320154 | 25 | 51.451 | KV453089.1 | 8287155 | 16-scf00496 | 16 |
| AX-158320172 | 25 | 51.451 | KV453089.1 | 8307494 | 16-scf00496 | 16 |
| AX-158320175 | 25 | 51.451 | KV453089.1 | 8310771 | 16-scf00496 | 16 |
| AX-157771500 | 25 | 51.451 | KV453089.1 | 8314599 | 16-scf00496 | 16 |
| AX-158320178 | 25 | 51.777 | KV453089.1 | 8318897 | 16-scf00496 | 16 |
| AX-158320181 | 25 | 51.777 | KV453089.1 | 8320016 | 16-scf00496 | 16 |
| AX-158320182 | 25 | 51.803 | KV453089.1 | 8321222 | 16-scf00496 | 16 |
| AX-157848208 | 25 | 52.21  | KV453089.1 | 8330013 | 16-scf00496 | 16 |
| AX-158320189 | 25 | 52.21  | KV453089.1 | 8330823 | 16-scf00496 | 16 |
| AX-157873603 | 25 | 52.21  | KV453089.1 | 8331389 | 16-scf00496 | 16 |
| AX-158320191 | 25 | 52.21  | KV453089.1 | 8334020 | 16-scf00496 | 16 |
| AX-158320193 | 25 | 52.21  | KV453089.1 | 8336592 | 16-scf00496 | 16 |
| AX-158320194 | 25 | 52.21  | KV453089.1 | 8337919 | 16-scf00496 | 16 |
| AX-158320197 | 25 | 52.433 | KV453089.1 | 8345435 | 16-scf00496 | 16 |
| AX-157754165 | 25 | 52.434 | KV453089.1 | 8342546 | 16-scf00496 | 16 |
| AX-158320202 | 25 | 52.434 | KV453089.1 | 8353452 | 16-scf00496 | 16 |
| AX-158320206 | 25 | 52.434 | KV453089.1 | 8358067 | 16-scf00496 | 16 |
| AX-158320208 | 25 | 52.434 | KV453089.1 | 8360982 | 16-scf00496 | 16 |
| AX-158320211 | 25 | 52.434 | KV453089.1 | 8366997 | 16-scf00496 | 16 |
| AX-157715628 | 25 | 52.651 | KV453089.1 | 8323525 | 16-scf00496 | 16 |
| AX-157699941 | 25 | 52.651 | KV453089.1 | 8341477 | 16-scf00496 | 16 |
| AX-157717116 | 25 | 52.651 | KV453089.1 | 8370326 | 16-scf00496 | 16 |
| AX-158320216 | 25 | 52.651 | KV453089.1 | 8371091 | 16-scf00496 | 16 |
| AX-158320220 | 25 | 52.651 | KV453089.1 | 8375135 | 16-scf00496 | 16 |
| AX-158320232 | 25 | 52.651 | KV453089.1 | 8397127 | 16-scf00496 | 16 |
| AX-158320236 | 25 | 52.651 | KV453089.1 | 8402844 | 16-scf00496 | 16 |
| AX-158320237 | 25 | 52.651 | KV453089.1 | 8403993 | 16-scf00496 | 16 |
| AX-158320240 | 25 | 52.651 | KV453089.1 | 8407739 | 16-scf00496 | 16 |
| AX-158320241 | 25 | 52.651 | KV453089.1 | 8408540 | 16-scf00496 | 16 |
| AX-158320242 | 25 | 52.651 | KV453089.1 | 8408866 | 16-scf00496 | 16 |
| AX-158320244 | 25 | 52.651 | KV453089.1 | 8410136 | 16-scf00496 | 16 |
| AX-158320245 | 25 | 52.651 | KV453089.1 | 8414037 | 16-scf00496 | 16 |
| AX-157723049 | 25 | 52.651 | KV453089.1 | 8416636 | 16-scf00496 | 16 |
| AX-158320249 | 25 | 52.651 | KV453089.1 | 8420884 | 16-scf00496 | 16 |
| AX-158320260 | 25 | 52.651 | KV453089.1 | 8430826 | 16-scf00496 | 16 |
| AX-158320274 | 25 | 52.651 | KV453089.1 | 8448356 | 16-scf00496 | 16 |
| AX-158320334 | 25 | 52.651 | KV453089.1 | 8521126 | 16-scf00496 | 16 |
| AX-158320758 | 25 | 52.651 | KV453089.1 | 9123924 | 16-scf00496 | 16 |

|              |    |        |            |          |             |    |
|--------------|----|--------|------------|----------|-------------|----|
| AX-158320929 | 25 | 52.651 | KV453089.1 | 9450462  | 16-scf00496 | 16 |
| AX-158321063 | 25 | 52.651 | KV453089.1 | 9641339  | 16-scf00496 | 16 |
| AX-158321709 | 25 | 52.651 | KV453089.1 | 11563584 | 16-scf00496 | 16 |
| AX-158321802 | 25 | 52.651 | KV453089.1 | 11798151 | 16-scf00496 | 16 |
| AX-158322579 | 25 | 52.651 | KV453090.1 | 674019   | 16-scf00499 | 16 |
| AX-158322686 | 25 | 52.651 | KV453090.1 | 1088380  | 16-scf00499 | 16 |
| AX-158376083 | 25 | 52.651 | KV453095.1 | 11580    | 16-scf00570 | 16 |
| AX-157853293 | 25 | 52.651 | KV453095.1 | 32569    | 16-scf00570 | 16 |
| AX-158376082 | 25 | 52.651 | KV453095.1 | 55568    | 16-scf00570 | 16 |
| AX-158376081 | 25 | 52.651 | KV453095.1 | 71867    | 16-scf00570 | 16 |
| AX-158376079 | 25 | 52.651 | KV453095.1 | 86492    | 16-scf00570 | 16 |
| AX-158376077 | 25 | 52.651 | KV453095.1 | 98780    | 16-scf00570 | 16 |
| AX-158376069 | 25 | 52.651 | KV453095.1 | 171799   | 16-scf00570 | 16 |
| AX-158376067 | 25 | 52.651 | KV453095.1 | 175592   | 16-scf00570 | 16 |
| AX-158376066 | 25 | 52.651 | KV453095.1 | 176162   | 16-scf00570 | 16 |
| AX-158376065 | 25 | 52.651 | KV453095.1 | 177484   | 16-scf00570 | 16 |
| AX-158376063 | 25 | 52.651 | KV453095.1 | 200536   | 16-scf00570 | 16 |
| AX-158376053 | 25 | 52.651 | KV453095.1 | 290039   | 16-scf00570 | 16 |
| AX-157853288 | 25 | 52.651 | KV453095.1 | 330941   | 16-scf00570 | 16 |
| AX-158376049 | 25 | 52.651 | KV453095.1 | 353998   | 16-scf00570 | 16 |
| AX-158376048 | 25 | 52.651 | KV453095.1 | 366663   | 16-scf00570 | 16 |
| AX-158376043 | 25 | 52.651 | KV453095.1 | 454064   | 16-scf00570 | 16 |
| AX-158376038 | 25 | 52.651 | KV453095.1 | 505889   | 16-scf00570 | 16 |
| AX-158376037 | 25 | 52.651 | KV453095.1 | 509297   | 16-scf00570 | 16 |
| AX-157853284 | 25 | 52.651 | KV453095.1 | 592690   | 16-scf00570 | 16 |
| AX-157758410 | 25 | 52.651 | KV453095.1 | 634325   | 16-scf00570 | 16 |
| AX-158324426 | 25 | 52.651 | KV453095.1 | 662079   | 16-scf00570 | 16 |
| AX-158324425 | 25 | 52.651 | KV453095.1 | 666351   | 16-scf00570 | 16 |
| AX-158324423 | 25 | 52.651 | KV453095.1 | 679416   | 16-scf00570 | 16 |
| AX-158324413 | 25 | 52.651 | KV453095.1 | 759503   | 16-scf00570 | 16 |
| AX-158324411 | 25 | 52.651 | KV453095.1 | 761060   | 16-scf00570 | 16 |
| AX-158324410 | 25 | 52.651 | KV453095.1 | 762443   | 16-scf00570 | 16 |
| AX-158324408 | 25 | 52.651 | KV453095.1 | 771149   | 16-scf00570 | 16 |
| AX-158324404 | 25 | 52.651 | KV453095.1 | 824391   | 16-scf00570 | 16 |
| AX-158324401 | 25 | 52.651 | KV453095.1 | 850601   | 16-scf00570 | 16 |
| AX-158324397 | 25 | 52.651 | KV453095.1 | 910266   | 16-scf00570 | 16 |
| AX-158324390 | 25 | 52.651 | KV453095.1 | 956519   | 16-scf00570 | 16 |
| AX-158324389 | 25 | 52.651 | KV453095.1 | 958408   | 16-scf00570 | 16 |
| AX-158324387 | 25 | 52.651 | KV453095.1 | 988967   | 16-scf00570 | 16 |
| AX-158324383 | 25 | 52.651 | KV453095.1 | 1011784  | 16-scf00570 | 16 |
| AX-158418509 | 25 | 52.651 | KV453095.1 | 1075575  | 16-scf00570 | 16 |
| AX-158324377 | 25 | 52.651 | KV453095.1 | 1076665  | 16-scf00570 | 16 |
| AX-158324362 | 25 | 52.651 | KV453095.1 | 1192324  | 16-scf00570 | 16 |
| AX-158418505 | 25 | 52.651 | KV453095.1 | 1217743  | 16-scf00570 | 16 |
| AX-158324359 | 25 | 52.651 | KV453095.1 | 1262853  | 16-scf00570 | 16 |
| AX-158324358 | 25 | 52.651 | KV453095.1 | 1270325  | 16-scf00570 | 16 |
| AX-158324353 | 25 | 52.651 | KV453095.1 | 1291030  | 16-scf00570 | 16 |
| AX-158324351 | 25 | 52.651 | KV453095.1 | 1302562  | 16-scf00570 | 16 |
| AX-158322851 | 25 | 52.651 | KV453095.1 | 1898873  | 16-scf00570 | 16 |
| AX-158323474 | 25 | 52.651 | KV453095.1 | 2880159  | 16-scf00570 | 16 |
| AX-158323545 | 25 | 52.651 | KV453095.1 | 2987390  | 16-scf00570 | 16 |

|              |    |        |            |          |             |    |
|--------------|----|--------|------------|----------|-------------|----|
| AX-157685554 | 25 | 52.651 | KV453096.1 | 21673    | 16-scf00625 | 16 |
| AX-157685558 | 25 | 52.651 | KV453096.1 | 41259    | 16-scf00625 | 16 |
| AX-157685658 | 25 | 52.651 | KV453091.1 | 16348    | 16-scf00630 | 16 |
| AX-157687026 | 25 | 52.651 | KV453091.1 | 119707   | 16-scf00630 | 16 |
| AX-157685874 | 25 | 52.651 | KV453092.1 | 59199    | 16-scf00649 | 16 |
| AX-157680239 | 25 | 52.651 | KV453092.1 | 62745    | 16-scf00649 | 16 |
| AX-157685875 | 25 | 52.651 | KV453092.1 | 71654    | 16-scf00649 | 16 |
| AX-158320250 | 25 | 52.761 | KV453089.1 | 8422236  | 16-scf00496 | 16 |
| AX-158320253 | 25 | 52.761 | KV453089.1 | 8425208  | 16-scf00496 | 16 |
| AX-158320254 | 25 | 52.761 | KV453089.1 | 8425739  | 16-scf00496 | 16 |
| AX-158320255 | 25 | 52.761 | KV453089.1 | 8426537  | 16-scf00496 | 16 |
| AX-158320256 | 25 | 52.761 | KV453089.1 | 8427171  | 16-scf00496 | 16 |
| AX-158320238 | 25 | 52.87  | KV453089.1 | 8405954  | 16-scf00496 | 16 |
| AX-158320265 | 25 | 52.87  | KV453089.1 | 8437476  | 16-scf00496 | 16 |
| AX-158320268 | 25 | 52.87  | KV453089.1 | 8440172  | 16-scf00496 | 16 |
| AX-157751894 | 25 | 52.87  | KV453089.1 | 8448642  | 16-scf00496 | 16 |
| AX-158320275 | 25 | 52.87  | KV453089.1 | 8449770  | 16-scf00496 | 16 |
| AX-158320279 | 25 | 52.87  | KV453089.1 | 8452515  | 16-scf00496 | 16 |
| AX-158320284 | 25 | 52.87  | KV453089.1 | 8458298  | 16-scf00496 | 16 |
| AX-158320285 | 25 | 52.87  | KV453089.1 | 8459046  | 16-scf00496 | 16 |
| AX-158320287 | 25 | 52.87  | KV453089.1 | 8460113  | 16-scf00496 | 16 |
| AX-158320305 | 25 | 52.87  | KV453089.1 | 8481431  | 16-scf00496 | 16 |
| AX-158320351 | 25 | 52.87  | KV453089.1 | 8552914  | 16-scf00496 | 16 |
| AX-157888385 | 25 | 52.87  | KV453089.1 | 12537685 | 16-scf00496 | 16 |
| AX-158323311 | 25 | 52.87  | KV453095.1 | 2557355  | 16-scf00570 | 16 |
| AX-158320277 | 25 | 52.979 | KV453089.1 | 8450795  | 16-scf00496 | 16 |
| AX-158320293 | 25 | 52.979 | KV453089.1 | 8464213  | 16-scf00496 | 16 |
| AX-158320295 | 25 | 52.979 | KV453089.1 | 8467045  | 16-scf00496 | 16 |
| AX-158418299 | 25 | 52.979 | KV453089.1 | 8471329  | 16-scf00496 | 16 |
| AX-158320298 | 25 | 52.979 | KV453089.1 | 8472669  | 16-scf00496 | 16 |
| AX-158320300 | 25 | 52.979 | KV453089.1 | 8474982  | 16-scf00496 | 16 |
| AX-158320308 | 25 | 52.979 | KV453089.1 | 8487699  | 16-scf00496 | 16 |
| AX-157848224 | 25 | 52.979 | KV453089.1 | 8532111  | 16-scf00496 | 16 |
| AX-157748247 | 25 | 52.979 | KV453089.1 | 8538089  | 16-scf00496 | 16 |
| AX-158320299 | 25 | 53.008 | KV453089.1 | 8473765  | 16-scf00496 | 16 |
| AX-158320385 | 25 | 53.008 | KV453089.1 | 8613403  | 16-scf00496 | 16 |
| AX-158320417 | 25 | 53.008 | KV453089.1 | 8652551  | 16-scf00496 | 16 |
| AX-158320468 | 25 | 53.008 | KV453089.1 | 8715250  | 16-scf00496 | 16 |
| AX-158381461 | 25 | 53.046 | KV453089.1 | 8478128  | 16-scf00496 | 16 |
| AX-158320217 | 25 | 53.088 | KV453089.1 | 8371530  | 16-scf00496 | 16 |
| AX-157848216 | 25 | 53.088 | KV453089.1 | 8478173  | 16-scf00496 | 16 |
| AX-157848217 | 25 | 53.088 | KV453089.1 | 8478597  | 16-scf00496 | 16 |
| AX-158320302 | 25 | 53.088 | KV453089.1 | 8479982  | 16-scf00496 | 16 |
| AX-158320304 | 25 | 53.088 | KV453089.1 | 8480702  | 16-scf00496 | 16 |
| AX-158320307 | 25 | 53.088 | KV453089.1 | 8485649  | 16-scf00496 | 16 |
| AX-158320321 | 25 | 53.088 | KV453089.1 | 8508147  | 16-scf00496 | 16 |
| AX-157773981 | 25 | 53.088 | KV453089.1 | 8509456  | 16-scf00496 | 16 |
| AX-158320358 | 25 | 53.088 | KV453089.1 | 8569738  | 16-scf00496 | 16 |
| AX-158320391 | 25 | 53.088 | KV453089.1 | 8619598  | 16-scf00496 | 16 |
| AX-158320310 | 25 | 53.093 | KV453089.1 | 8489480  | 16-scf00496 | 16 |
| AX-157848218 | 25 | 53.093 | KV453089.1 | 8489751  | 16-scf00496 | 16 |

|              |    |        |            |         |             |    |
|--------------|----|--------|------------|---------|-------------|----|
| AX-158320390 | 25 | 53.093 | KV453089.1 | 8618432 | 16-scf00496 | 16 |
| AX-158320476 | 25 | 53.093 | KV453089.1 | 8722649 | 16-scf00496 | 16 |
| AX-157867848 | 25 | 53.101 | KV453089.1 | 8490646 | 16-scf00496 | 16 |
| AX-157724429 | 25 | 53.135 | KV453089.1 | 8496615 | 16-scf00496 | 16 |
| AX-158320313 | 25 | 53.159 | KV453089.1 | 8496894 | 16-scf00496 | 16 |
| AX-158320316 | 25 | 53.182 | KV453089.1 | 8498549 | 16-scf00496 | 16 |
| AX-158320853 | 25 | 53.182 | KV453089.1 | 9316112 | 16-scf00496 | 16 |
| AX-158320925 | 25 | 53.182 | KV453089.1 | 9442225 | 16-scf00496 | 16 |
| AX-158320320 | 25 | 53.19  | KV453089.1 | 8507537 | 16-scf00496 | 16 |
| AX-158418305 | 25 | 53.19  | KV453089.1 | 8524364 | 16-scf00496 | 16 |
| AX-158320318 | 25 | 53.197 | KV453089.1 | 8503367 | 16-scf00496 | 16 |
| AX-158320319 | 25 | 53.197 | KV453089.1 | 8506835 | 16-scf00496 | 16 |
| AX-157848220 | 25 | 53.197 | KV453089.1 | 8509262 | 16-scf00496 | 16 |
| AX-158320324 | 25 | 53.197 | KV453089.1 | 8511044 | 16-scf00496 | 16 |
| AX-158320325 | 25 | 53.197 | KV453089.1 | 8512343 | 16-scf00496 | 16 |
| AX-158320328 | 25 | 53.197 | KV453089.1 | 8516793 | 16-scf00496 | 16 |
| AX-158423676 | 25 | 53.197 | KV453089.1 | 8523542 | 16-scf00496 | 16 |
| AX-158320338 | 25 | 53.197 | KV453089.1 | 8532284 | 16-scf00496 | 16 |
| AX-158320339 | 25 | 53.197 | KV453089.1 | 8534215 | 16-scf00496 | 16 |
| AX-158320340 | 25 | 53.197 | KV453089.1 | 8534419 | 16-scf00496 | 16 |
| AX-158320341 | 25 | 53.197 | KV453089.1 | 8534695 | 16-scf00496 | 16 |
| AX-158320342 | 25 | 53.197 | KV453089.1 | 8535791 | 16-scf00496 | 16 |
| AX-158320343 | 25 | 53.197 | KV453089.1 | 8537317 | 16-scf00496 | 16 |
| AX-157754440 | 25 | 53.197 | KV453089.1 | 8550893 | 16-scf00496 | 16 |
| AX-158320348 | 25 | 53.197 | KV453089.1 | 8552017 | 16-scf00496 | 16 |
| AX-158320349 | 25 | 53.197 | KV453089.1 | 8552074 | 16-scf00496 | 16 |
| AX-158320350 | 25 | 53.197 | KV453089.1 | 8552387 | 16-scf00496 | 16 |
| AX-157848226 | 25 | 53.197 | KV453089.1 | 8552674 | 16-scf00496 | 16 |
| AX-157848227 | 25 | 53.197 | KV453089.1 | 8553550 | 16-scf00496 | 16 |
| AX-157848228 | 25 | 53.197 | KV453089.1 | 8555213 | 16-scf00496 | 16 |
| AX-158320354 | 25 | 53.197 | KV453089.1 | 8557053 | 16-scf00496 | 16 |
| AX-158320359 | 25 | 53.197 | KV453089.1 | 8571199 | 16-scf00496 | 16 |
| AX-158320478 | 25 | 53.197 | KV453089.1 | 8725134 | 16-scf00496 | 16 |
| AX-158321019 | 25 | 53.197 | KV453089.1 | 9575154 | 16-scf00496 | 16 |
| AX-158324644 | 25 | 53.197 | KV453094.1 | 1047746 | 16-scf00503 | 16 |
| AX-158323066 | 25 | 53.197 | KV453095.1 | 2208006 | 16-scf00570 | 16 |
| AX-157848462 | 25 | 53.197 | KV453095.1 | 2944917 | 16-scf00570 | 16 |
| AX-158320357 | 25 | 53.26  | KV453089.1 | 8567540 | 16-scf00496 | 16 |
| AX-157848219 | 25 | 53.416 | KV453089.1 | 8491920 | 16-scf00496 | 16 |
| AX-158320356 | 25 | 53.416 | KV453089.1 | 8562294 | 16-scf00496 | 16 |
| AX-158320360 | 25 | 53.416 | KV453089.1 | 8571994 | 16-scf00496 | 16 |
| AX-158320380 | 25 | 53.416 | KV453089.1 | 8605532 | 16-scf00496 | 16 |
| AX-158320384 | 25 | 53.416 | KV453089.1 | 8611550 | 16-scf00496 | 16 |
| AX-158320387 | 25 | 53.416 | KV453089.1 | 8617041 | 16-scf00496 | 16 |
| AX-158320388 | 25 | 53.416 | KV453089.1 | 8617647 | 16-scf00496 | 16 |
| AX-158320393 | 25 | 53.416 | KV453089.1 | 8622376 | 16-scf00496 | 16 |
| AX-158320394 | 25 | 53.416 | KV453089.1 | 8624697 | 16-scf00496 | 16 |
| AX-158320396 | 25 | 53.416 | KV453089.1 | 8626818 | 16-scf00496 | 16 |
| AX-158320397 | 25 | 53.416 | KV453089.1 | 8628932 | 16-scf00496 | 16 |
| AX-158320409 | 25 | 53.416 | KV453089.1 | 8645522 | 16-scf00496 | 16 |
| AX-158421718 | 25 | 53.416 | KV453089.1 | 8648631 | 16-scf00496 | 16 |

|              |    |        |            |          |             |    |
|--------------|----|--------|------------|----------|-------------|----|
| AX-158320414 | 25 | 53.416 | KV453089.1 | 8650652  | 16-scf00496 | 16 |
| AX-158320416 | 25 | 53.416 | KV453089.1 | 8651763  | 16-scf00496 | 16 |
| AX-158320418 | 25 | 53.416 | KV453089.1 | 8653836  | 16-scf00496 | 16 |
| AX-158320426 | 25 | 53.416 | KV453089.1 | 8664815  | 16-scf00496 | 16 |
| AX-158320442 | 25 | 53.416 | KV453089.1 | 8688194  | 16-scf00496 | 16 |
| AX-158320454 | 25 | 53.416 | KV453089.1 | 8704529  | 16-scf00496 | 16 |
| AX-158320485 | 25 | 53.416 | KV453089.1 | 8730590  | 16-scf00496 | 16 |
| AX-157881384 | 25 | 53.416 | KV453089.1 | 9730051  | 16-scf00496 | 16 |
| AX-158320436 | 25 | 53.438 | KV453089.1 | 8679193  | 16-scf00496 | 16 |
| AX-158320415 | 25 | 53.525 | KV453089.1 | 8651370  | 16-scf00496 | 16 |
| AX-158320438 | 25 | 53.525 | KV453089.1 | 8682297  | 16-scf00496 | 16 |
| AX-158320439 | 25 | 53.525 | KV453089.1 | 8683137  | 16-scf00496 | 16 |
| AX-158320441 | 25 | 53.525 | KV453089.1 | 8685501  | 16-scf00496 | 16 |
| AX-157773944 | 25 | 53.525 | KV453089.1 | 8687829  | 16-scf00496 | 16 |
| AX-158320447 | 25 | 53.525 | KV453089.1 | 8692541  | 16-scf00496 | 16 |
| AX-158320449 | 25 | 53.525 | KV453089.1 | 8697203  | 16-scf00496 | 16 |
| AX-157881360 | 25 | 53.525 | KV453089.1 | 8699769  | 16-scf00496 | 16 |
| AX-158320452 | 25 | 53.525 | KV453089.1 | 8702883  | 16-scf00496 | 16 |
| AX-158320456 | 25 | 53.525 | KV453089.1 | 8707144  | 16-scf00496 | 16 |
| AX-158320458 | 25 | 53.525 | KV453089.1 | 8708608  | 16-scf00496 | 16 |
| AX-158320464 | 25 | 53.525 | KV453089.1 | 8712857  | 16-scf00496 | 16 |
| AX-158320473 | 25 | 53.525 | KV453089.1 | 8719770  | 16-scf00496 | 16 |
| AX-158320474 | 25 | 53.525 | KV453089.1 | 8720534  | 16-scf00496 | 16 |
| AX-158320475 | 25 | 53.525 | KV453089.1 | 8720985  | 16-scf00496 | 16 |
| AX-158320480 | 25 | 53.525 | KV453089.1 | 8727207  | 16-scf00496 | 16 |
| AX-157752533 | 25 | 53.525 | KV453089.1 | 8727638  | 16-scf00496 | 16 |
| AX-158320484 | 25 | 53.525 | KV453089.1 | 8730155  | 16-scf00496 | 16 |
| AX-158320515 | 25 | 53.525 | KV453089.1 | 8778196  | 16-scf00496 | 16 |
| AX-158320808 | 25 | 53.525 | KV453089.1 | 9254588  | 16-scf00496 | 16 |
| AX-158320861 | 25 | 53.525 | KV453089.1 | 9329906  | 16-scf00496 | 16 |
| AX-158320978 | 25 | 53.525 | KV453089.1 | 9518501  | 16-scf00496 | 16 |
| AX-158321169 | 25 | 53.525 | KV453089.1 | 9801580  | 16-scf00496 | 16 |
| AX-158321969 | 25 | 53.525 | KV453089.1 | 12328297 | 16-scf00496 | 16 |
| AX-158324460 | 25 | 53.525 | KV453094.1 | 267321   | 16-scf00503 | 16 |
| AX-158324487 | 25 | 53.525 | KV453094.1 | 445492   | 16-scf00503 | 16 |
| AX-158324634 | 25 | 53.525 | KV453094.1 | 1016036  | 16-scf00503 | 16 |
| AX-158320488 | 25 | 53.564 | KV453089.1 | 8736207  | 16-scf00496 | 16 |
| AX-158320491 | 25 | 53.603 | KV453089.1 | 8739450  | 16-scf00496 | 16 |
| AX-158320212 | 25 | 53.634 | KV453089.1 | 8368084  | 16-scf00496 | 16 |
| AX-158320234 | 25 | 53.634 | KV453089.1 | 8400319  | 16-scf00496 | 16 |
| AX-158320248 | 25 | 53.634 | KV453089.1 | 8420394  | 16-scf00496 | 16 |
| AX-158320331 | 25 | 53.634 | KV453089.1 | 8519474  | 16-scf00496 | 16 |
| AX-158320333 | 25 | 53.634 | KV453089.1 | 8520325  | 16-scf00496 | 16 |
| AX-158320344 | 25 | 53.634 | KV453089.1 | 8540507  | 16-scf00496 | 16 |
| AX-158320407 | 25 | 53.634 | KV453089.1 | 8643689  | 16-scf00496 | 16 |
| AX-158320493 | 25 | 53.634 | KV453089.1 | 8743400  | 16-scf00496 | 16 |
| AX-158320497 | 25 | 53.634 | KV453089.1 | 8747058  | 16-scf00496 | 16 |
| AX-158320501 | 25 | 53.634 | KV453089.1 | 8755057  | 16-scf00496 | 16 |
| AX-158320516 | 25 | 53.634 | KV453089.1 | 8780532  | 16-scf00496 | 16 |
| AX-158320520 | 25 | 53.634 | KV453089.1 | 8782952  | 16-scf00496 | 16 |
| AX-158320523 | 25 | 53.634 | KV453089.1 | 8786643  | 16-scf00496 | 16 |

|              |    |        |            |          |             |    |
|--------------|----|--------|------------|----------|-------------|----|
| AX-158320525 | 25 | 53.634 | KV453089.1 | 8789527  | 16-scf00496 | 16 |
| AX-158320535 | 25 | 53.634 | KV453089.1 | 8798770  | 16-scf00496 | 16 |
| AX-158320541 | 25 | 53.634 | KV453089.1 | 8805053  | 16-scf00496 | 16 |
| AX-158320544 | 25 | 53.634 | KV453089.1 | 8807284  | 16-scf00496 | 16 |
| AX-158320547 | 25 | 53.634 | KV453089.1 | 8812685  | 16-scf00496 | 16 |
| AX-157710607 | 25 | 53.634 | KV453089.1 | 8813810  | 16-scf00496 | 16 |
| AX-158320597 | 25 | 53.634 | KV453089.1 | 8879618  | 16-scf00496 | 16 |
| AX-158320809 | 25 | 53.634 | KV453089.1 | 9258084  | 16-scf00496 | 16 |
| AX-158321075 | 25 | 53.634 | KV453089.1 | 9658568  | 16-scf00496 | 16 |
| AX-158321153 | 25 | 53.634 | KV453089.1 | 9777718  | 16-scf00496 | 16 |
| AX-158412596 | 25 | 53.634 | KV453089.1 | 9995880  | 16-scf00496 | 16 |
| AX-158321663 | 25 | 53.634 | KV453089.1 | 11480064 | 16-scf00496 | 16 |
| AX-158324258 | 25 | 53.634 | KV453093.1 | 1427408  | 16-scf00501 | 16 |
| AX-158320489 | 25 | 53.853 | KV453089.1 | 8738529  | 16-scf00496 | 16 |
| AX-158320492 | 25 | 53.853 | KV453089.1 | 8740719  | 16-scf00496 | 16 |
| AX-158320537 | 25 | 53.853 | KV453089.1 | 8800419  | 16-scf00496 | 16 |
| AX-158320543 | 25 | 53.853 | KV453089.1 | 8806127  | 16-scf00496 | 16 |
| AX-158320552 | 25 | 53.853 | KV453089.1 | 8822534  | 16-scf00496 | 16 |
| AX-158320553 | 25 | 53.853 | KV453089.1 | 8823956  | 16-scf00496 | 16 |
| AX-158320555 | 25 | 53.853 | KV453089.1 | 8826084  | 16-scf00496 | 16 |
| AX-158320557 | 25 | 53.853 | KV453089.1 | 8828866  | 16-scf00496 | 16 |
| AX-158320566 | 25 | 53.853 | KV453089.1 | 8840784  | 16-scf00496 | 16 |
| AX-158320568 | 25 | 53.853 | KV453089.1 | 8844368  | 16-scf00496 | 16 |
| AX-158320572 | 25 | 53.853 | KV453089.1 | 8849657  | 16-scf00496 | 16 |
| AX-158320574 | 25 | 53.853 | KV453089.1 | 8852724  | 16-scf00496 | 16 |
| AX-158320575 | 25 | 53.853 | KV453089.1 | 8854203  | 16-scf00496 | 16 |
| AX-158320578 | 25 | 53.853 | KV453089.1 | 8857984  | 16-scf00496 | 16 |
| AX-158320591 | 25 | 53.853 | KV453089.1 | 8875557  | 16-scf00496 | 16 |
| AX-158320592 | 25 | 53.853 | KV453089.1 | 8876279  | 16-scf00496 | 16 |
| AX-158320594 | 25 | 53.853 | KV453089.1 | 8877046  | 16-scf00496 | 16 |
| AX-158320595 | 25 | 53.853 | KV453089.1 | 8877978  | 16-scf00496 | 16 |
| AX-158320598 | 25 | 53.853 | KV453089.1 | 8880115  | 16-scf00496 | 16 |
| AX-158320602 | 25 | 53.853 | KV453089.1 | 8883554  | 16-scf00496 | 16 |
| AX-158320603 | 25 | 53.853 | KV453089.1 | 8884474  | 16-scf00496 | 16 |
| AX-158320606 | 25 | 53.853 | KV453089.1 | 8888456  | 16-scf00496 | 16 |
| AX-158320607 | 25 | 53.853 | KV453089.1 | 8889561  | 16-scf00496 | 16 |
| AX-158320611 | 25 | 53.853 | KV453089.1 | 8897237  | 16-scf00496 | 16 |
| AX-158320616 | 25 | 53.853 | KV453089.1 | 8904459  | 16-scf00496 | 16 |
| AX-158320618 | 25 | 53.853 | KV453089.1 | 8909306  | 16-scf00496 | 16 |
| AX-158320624 | 25 | 53.853 | KV453089.1 | 8917582  | 16-scf00496 | 16 |
| AX-158320626 | 25 | 53.853 | KV453089.1 | 8920241  | 16-scf00496 | 16 |
| AX-158320627 | 25 | 53.853 | KV453089.1 | 8921477  | 16-scf00496 | 16 |
| AX-158320629 | 25 | 53.853 | KV453089.1 | 8922639  | 16-scf00496 | 16 |
| AX-158320632 | 25 | 53.853 | KV453089.1 | 8925291  | 16-scf00496 | 16 |
| AX-158320638 | 25 | 53.853 | KV453089.1 | 8936470  | 16-scf00496 | 16 |
| AX-158320643 | 25 | 53.853 | KV453089.1 | 8946678  | 16-scf00496 | 16 |
| AX-158320644 | 25 | 53.853 | KV453089.1 | 8948084  | 16-scf00496 | 16 |
| AX-157757296 | 25 | 53.853 | KV453089.1 | 8949115  | 16-scf00496 | 16 |
| AX-158320646 | 25 | 53.853 | KV453089.1 | 8951742  | 16-scf00496 | 16 |
| AX-158320647 | 25 | 53.853 | KV453089.1 | 8952317  | 16-scf00496 | 16 |
| AX-157753830 | 25 | 53.853 | KV453089.1 | 8956362  | 16-scf00496 | 16 |

|              |    |        |            |          |             |    |
|--------------|----|--------|------------|----------|-------------|----|
| AX-158320650 | 25 | 53.853 | KV453089.1 | 8956845  | 16-scf00496 | 16 |
| AX-158320651 | 25 | 53.853 | KV453089.1 | 8958630  | 16-scf00496 | 16 |
| AX-158320652 | 25 | 53.853 | KV453089.1 | 8959888  | 16-scf00496 | 16 |
| AX-157861446 | 25 | 53.853 | KV453089.1 | 8960545  | 16-scf00496 | 16 |
| AX-158320655 | 25 | 53.853 | KV453089.1 | 8968036  | 16-scf00496 | 16 |
| AX-158320658 | 25 | 53.853 | KV453089.1 | 8973974  | 16-scf00496 | 16 |
| AX-158320659 | 25 | 53.853 | KV453089.1 | 8974270  | 16-scf00496 | 16 |
| AX-158320662 | 25 | 53.853 | KV453089.1 | 8976337  | 16-scf00496 | 16 |
| AX-158320663 | 25 | 53.853 | KV453089.1 | 8977273  | 16-scf00496 | 16 |
| AX-158320664 | 25 | 53.853 | KV453089.1 | 8980402  | 16-scf00496 | 16 |
| AX-157881364 | 25 | 53.853 | KV453089.1 | 8980809  | 16-scf00496 | 16 |
| AX-158320665 | 25 | 53.853 | KV453089.1 | 8980886  | 16-scf00496 | 16 |
| AX-158320666 | 25 | 53.853 | KV453089.1 | 8981261  | 16-scf00496 | 16 |
| AX-158320667 | 25 | 53.853 | KV453089.1 | 8982219  | 16-scf00496 | 16 |
| AX-157753338 | 25 | 53.853 | KV453089.1 | 8984149  | 16-scf00496 | 16 |
| AX-158320669 | 25 | 53.853 | KV453089.1 | 8984573  | 16-scf00496 | 16 |
| AX-158412589 | 25 | 53.853 | KV453089.1 | 8999165  | 16-scf00496 | 16 |
| AX-158320681 | 25 | 53.853 | KV453089.1 | 9002002  | 16-scf00496 | 16 |
| AX-158320684 | 25 | 53.853 | KV453089.1 | 9005241  | 16-scf00496 | 16 |
| AX-158320687 | 25 | 53.853 | KV453089.1 | 9011495  | 16-scf00496 | 16 |
| AX-158320690 | 25 | 53.853 | KV453089.1 | 9022290  | 16-scf00496 | 16 |
| AX-157861448 | 25 | 53.853 | KV453089.1 | 9030091  | 16-scf00496 | 16 |
| AX-158320695 | 25 | 53.853 | KV453089.1 | 9032142  | 16-scf00496 | 16 |
| AX-158320702 | 25 | 53.853 | KV453089.1 | 9043487  | 16-scf00496 | 16 |
| AX-158320703 | 25 | 53.853 | KV453089.1 | 9044494  | 16-scf00496 | 16 |
| AX-158320704 | 25 | 53.853 | KV453089.1 | 9044711  | 16-scf00496 | 16 |
| AX-157881369 | 25 | 53.853 | KV453089.1 | 9050714  | 16-scf00496 | 16 |
| AX-158320709 | 25 | 53.853 | KV453089.1 | 9055535  | 16-scf00496 | 16 |
| AX-158320715 | 25 | 53.853 | KV453089.1 | 9061977  | 16-scf00496 | 16 |
| AX-158320728 | 25 | 53.853 | KV453089.1 | 9074895  | 16-scf00496 | 16 |
| AX-158320733 | 25 | 53.853 | KV453089.1 | 9083541  | 16-scf00496 | 16 |
| AX-157848237 | 25 | 53.853 | KV453089.1 | 9105730  | 16-scf00496 | 16 |
| AX-158320842 | 25 | 53.853 | KV453089.1 | 9300848  | 16-scf00496 | 16 |
| AX-157724587 | 25 | 53.853 | KV453089.1 | 9323218  | 16-scf00496 | 16 |
| AX-158320862 | 25 | 53.853 | KV453089.1 | 9330665  | 16-scf00496 | 16 |
| AX-158320880 | 25 | 53.853 | KV453089.1 | 9381575  | 16-scf00496 | 16 |
| AX-158320884 | 25 | 53.853 | KV453089.1 | 9384069  | 16-scf00496 | 16 |
| AX-158320891 | 25 | 53.853 | KV453089.1 | 9394583  | 16-scf00496 | 16 |
| AX-158320892 | 25 | 53.853 | KV453089.1 | 9395483  | 16-scf00496 | 16 |
| AX-158320894 | 25 | 53.853 | KV453089.1 | 9397215  | 16-scf00496 | 16 |
| AX-158320895 | 25 | 53.853 | KV453089.1 | 9398001  | 16-scf00496 | 16 |
| AX-158320902 | 25 | 53.853 | KV453089.1 | 9409199  | 16-scf00496 | 16 |
| AX-158320903 | 25 | 53.853 | KV453089.1 | 9409265  | 16-scf00496 | 16 |
| AX-158320930 | 25 | 53.853 | KV453089.1 | 9451791  | 16-scf00496 | 16 |
| AX-158321020 | 25 | 53.853 | KV453089.1 | 9577265  | 16-scf00496 | 16 |
| AX-158321034 | 25 | 53.853 | KV453089.1 | 9607774  | 16-scf00496 | 16 |
| AX-158321093 | 25 | 53.853 | KV453089.1 | 9692116  | 16-scf00496 | 16 |
| AX-158321094 | 25 | 53.853 | KV453089.1 | 9692570  | 16-scf00496 | 16 |
| AX-158321113 | 25 | 53.853 | KV453089.1 | 9713960  | 16-scf00496 | 16 |
| AX-158321114 | 25 | 53.853 | KV453089.1 | 9714629  | 16-scf00496 | 16 |
| AX-158321524 | 25 | 53.853 | KV453089.1 | 11246644 | 16-scf00496 | 16 |



|              |    |        |            |          |             |    |
|--------------|----|--------|------------|----------|-------------|----|
| AX-158321526 | 25 | 53.853 | KV453089.1 | 11253154 | 16-scf00496 | 16 |
| AX-158321640 | 25 | 53.853 | KV453089.1 | 11457509 | 16-scf00496 | 16 |
| AX-158321644 | 25 | 53.853 | KV453089.1 | 11461508 | 16-scf00496 | 16 |
| AX-158321645 | 25 | 53.853 | KV453089.1 | 11462096 | 16-scf00496 | 16 |
| AX-158321665 | 25 | 53.853 | KV453089.1 | 11483463 | 16-scf00496 | 16 |
| AX-158321699 | 25 | 53.853 | KV453089.1 | 11548220 | 16-scf00496 | 16 |
| AX-158321729 | 25 | 53.853 | KV453089.1 | 11598770 | 16-scf00496 | 16 |
| AX-158321832 | 25 | 53.853 | KV453089.1 | 11931469 | 16-scf00496 | 16 |
| AX-158321869 | 25 | 53.853 | KV453089.1 | 11996522 | 16-scf00496 | 16 |
| AX-158322096 | 25 | 53.853 | KV453089.1 | 12827485 | 16-scf00496 | 16 |
| AX-157716585 | 25 | 53.853 | KV453090.1 | 526252   | 16-scf00499 | 16 |
| AX-157714909 | 25 | 53.853 | KV453090.1 | 1227115  | 16-scf00499 | 16 |
| AX-157848521 | 25 | 53.853 | KV453093.1 | 293808   | 16-scf00501 | 16 |
| AX-158324010 | 25 | 53.853 | KV453093.1 | 372794   | 16-scf00501 | 16 |
| AX-158324012 | 25 | 53.853 | KV453093.1 | 379622   | 16-scf00501 | 16 |
| AX-158324073 | 25 | 53.853 | KV453093.1 | 561075   | 16-scf00501 | 16 |
| AX-158324075 | 25 | 53.853 | KV453093.1 | 564616   | 16-scf00501 | 16 |
| AX-158324091 | 25 | 53.853 | KV453093.1 | 621133   | 16-scf00501 | 16 |
| AX-158324103 | 25 | 53.853 | KV453093.1 | 646052   | 16-scf00501 | 16 |
| AX-157888425 | 25 | 53.853 | KV453093.1 | 662199   | 16-scf00501 | 16 |
| AX-158324135 | 25 | 53.853 | KV453093.1 | 725974   | 16-scf00501 | 16 |
| AX-158324145 | 25 | 53.853 | KV453093.1 | 774886   | 16-scf00501 | 16 |
| AX-158324150 | 25 | 53.853 | KV453093.1 | 807212   | 16-scf00501 | 16 |
| AX-158324155 | 25 | 53.853 | KV453093.1 | 861175   | 16-scf00501 | 16 |
| AX-157707836 | 25 | 53.853 | KV453097.1 | 232402   | 16-scf00504 | 16 |
| AX-158322750 | 25 | 53.853 | KV453095.1 | 1710395  | 16-scf00570 | 16 |
| AX-157695079 | 25 | 53.853 | KV453095.1 | 1711469  | 16-scf00570 | 16 |
| AX-157848396 | 25 | 53.853 | KV453095.1 | 1754620  | 16-scf00570 | 16 |
| AX-158322895 | 25 | 53.853 | KV453095.1 | 1965012  | 16-scf00570 | 16 |
| AX-158323865 | 25 | 53.853 | KV453095.1 | 3594412  | 16-scf00570 | 16 |
| AX-157848147 | 25 | 53.872 | KV453089.1 | 7805461  | 16-scf00496 | 16 |
| AX-158320688 | 25 | 53.911 | KV453089.1 | 9020420  | 16-scf00496 | 16 |
| AX-158418316 | 25 | 53.939 | KV453089.1 | 9032547  | 16-scf00496 | 16 |
| AX-158320517 | 25 | 53.962 | KV453089.1 | 8781361  | 16-scf00496 | 16 |
| AX-158320625 | 25 | 53.962 | KV453089.1 | 8918338  | 16-scf00496 | 16 |
| AX-157861445 | 25 | 53.962 | KV453089.1 | 8936312  | 16-scf00496 | 16 |
| AX-158320693 | 25 | 53.962 | KV453089.1 | 9029425  | 16-scf00496 | 16 |
| AX-158381462 | 25 | 53.962 | KV453089.1 | 9029573  | 16-scf00496 | 16 |
| AX-158320694 | 25 | 53.962 | KV453089.1 | 9030882  | 16-scf00496 | 16 |
| AX-158320700 | 25 | 53.962 | KV453089.1 | 9037051  | 16-scf00496 | 16 |
| AX-158320708 | 25 | 53.962 | KV453089.1 | 9052124  | 16-scf00496 | 16 |
| AX-158320710 | 25 | 53.962 | KV453089.1 | 9057406  | 16-scf00496 | 16 |
| AX-158320712 | 25 | 53.962 | KV453089.1 | 9058895  | 16-scf00496 | 16 |
| AX-157888357 | 25 | 53.962 | KV453089.1 | 9062751  | 16-scf00496 | 16 |
| AX-158320717 | 25 | 53.962 | KV453089.1 | 9063796  | 16-scf00496 | 16 |
| AX-158320718 | 25 | 53.962 | KV453089.1 | 9064519  | 16-scf00496 | 16 |
| AX-158320721 | 25 | 53.962 | KV453089.1 | 9068250  | 16-scf00496 | 16 |
| AX-158320722 | 25 | 53.962 | KV453089.1 | 9070303  | 16-scf00496 | 16 |
| AX-158320724 | 25 | 53.962 | KV453089.1 | 9071181  | 16-scf00496 | 16 |
| AX-158320725 | 25 | 53.962 | KV453089.1 | 9072867  | 16-scf00496 | 16 |
| AX-158320726 | 25 | 53.962 | KV453089.1 | 9073101  | 16-scf00496 | 16 |

|              |    |        |            |         |             |    |
|--------------|----|--------|------------|---------|-------------|----|
| AX-158320730 | 25 | 53.962 | KV453089.1 | 9075632 | 16-scf00496 | 16 |
| AX-158320731 | 25 | 53.962 | KV453089.1 | 9075871 | 16-scf00496 | 16 |
| AX-157745789 | 25 | 53.962 | KV453089.1 | 9084262 | 16-scf00496 | 16 |
| AX-158320737 | 25 | 53.962 | KV453089.1 | 9092624 | 16-scf00496 | 16 |
| AX-158320743 | 25 | 53.962 | KV453089.1 | 9100516 | 16-scf00496 | 16 |
| AX-157695592 | 25 | 53.962 | KV453089.1 | 9104586 | 16-scf00496 | 16 |
| AX-158320752 | 25 | 53.962 | KV453089.1 | 9115179 | 16-scf00496 | 16 |
| AX-158320753 | 25 | 53.962 | KV453089.1 | 9119126 | 16-scf00496 | 16 |
| AX-158320762 | 25 | 53.962 | KV453089.1 | 9129370 | 16-scf00496 | 16 |
| AX-158320763 | 25 | 53.962 | KV453089.1 | 9130356 | 16-scf00496 | 16 |
| AX-158320765 | 25 | 53.962 | KV453089.1 | 9131351 | 16-scf00496 | 16 |
| AX-158320766 | 25 | 53.962 | KV453089.1 | 9132578 | 16-scf00496 | 16 |
| AX-158320774 | 25 | 53.962 | KV453089.1 | 9147226 | 16-scf00496 | 16 |
| AX-158320794 | 25 | 53.962 | KV453089.1 | 9234014 | 16-scf00496 | 16 |
| AX-158320807 | 25 | 53.962 | KV453089.1 | 9254294 | 16-scf00496 | 16 |
| AX-158320908 | 25 | 53.962 | KV453089.1 | 9414987 | 16-scf00496 | 16 |
| AX-158320923 | 25 | 53.962 | KV453089.1 | 9437701 | 16-scf00496 | 16 |
| AX-158320971 | 25 | 53.962 | KV453089.1 | 9506811 | 16-scf00496 | 16 |
| AX-158320518 | 25 | 53.976 | KV453089.1 | 8782068 | 16-scf00496 | 16 |
| AX-157718402 | 25 | 53.976 | KV453089.1 | 8801319 | 16-scf00496 | 16 |
| AX-158320565 | 25 | 53.976 | KV453089.1 | 8840135 | 16-scf00496 | 16 |
| AX-158320583 | 25 | 53.976 | KV453089.1 | 8863034 | 16-scf00496 | 16 |
| AX-158412588 | 25 | 53.976 | KV453089.1 | 8955664 | 16-scf00496 | 16 |
| AX-158320649 | 25 | 53.976 | KV453089.1 | 8955991 | 16-scf00496 | 16 |
| AX-158320783 | 25 | 53.976 | KV453089.1 | 9175188 | 16-scf00496 | 16 |
| AX-158320785 | 25 | 53.976 | KV453089.1 | 9180392 | 16-scf00496 | 16 |
| AX-158320787 | 25 | 53.976 | KV453089.1 | 9188445 | 16-scf00496 | 16 |
| AX-158320788 | 25 | 53.976 | KV453089.1 | 9191069 | 16-scf00496 | 16 |
| AX-158320790 | 25 | 53.976 | KV453089.1 | 9212975 | 16-scf00496 | 16 |
| AX-158320818 | 25 | 53.976 | KV453089.1 | 9271498 | 16-scf00496 | 16 |
| AX-157775728 | 25 | 53.976 | KV453089.1 | 9310200 | 16-scf00496 | 16 |
| AX-157861451 | 25 | 53.976 | KV453089.1 | 9385402 | 16-scf00496 | 16 |
| AX-158320982 | 25 | 53.976 | KV453089.1 | 9526485 | 16-scf00496 | 16 |
| AX-158320795 | 25 | 54.003 | KV453089.1 | 9235594 | 16-scf00496 | 16 |
| AX-158320796 | 25 | 54.003 | KV453089.1 | 9240853 | 16-scf00496 | 16 |
| AX-158320800 | 25 | 54.025 | KV453089.1 | 9246103 | 16-scf00496 | 16 |
| AX-158320199 | 25 | 54.071 | KV453089.1 | 8346811 | 16-scf00496 | 16 |
| AX-157848209 | 25 | 54.071 | KV453089.1 | 8362759 | 16-scf00496 | 16 |
| AX-158320213 | 25 | 54.071 | KV453089.1 | 8368591 | 16-scf00496 | 16 |
| AX-158320259 | 25 | 54.071 | KV453089.1 | 8429373 | 16-scf00496 | 16 |
| AX-157744941 | 25 | 54.071 | KV453089.1 | 8562198 | 16-scf00496 | 16 |
| AX-158320373 | 25 | 54.071 | KV453089.1 | 8595052 | 16-scf00496 | 16 |
| AX-158320381 | 25 | 54.071 | KV453089.1 | 8606828 | 16-scf00496 | 16 |
| AX-157743885 | 25 | 54.071 | KV453089.1 | 8612473 | 16-scf00496 | 16 |
| AX-158320420 | 25 | 54.071 | KV453089.1 | 8654799 | 16-scf00496 | 16 |
| AX-158320424 | 25 | 54.071 | KV453089.1 | 8659128 | 16-scf00496 | 16 |
| AX-158320435 | 25 | 54.071 | KV453089.1 | 8678782 | 16-scf00496 | 16 |
| AX-158320450 | 25 | 54.071 | KV453089.1 | 8697629 | 16-scf00496 | 16 |
| AX-158320459 | 25 | 54.071 | KV453089.1 | 8709960 | 16-scf00496 | 16 |
| AX-158320463 | 25 | 54.071 | KV453089.1 | 8711884 | 16-scf00496 | 16 |
| AX-157723779 | 25 | 54.071 | KV453089.1 | 8725866 | 16-scf00496 | 16 |

|              |    |        |            |         |             |    |
|--------------|----|--------|------------|---------|-------------|----|
| AX-158320486 | 25 | 54.071 | KV453089.1 | 8732474 | 16-scf00496 | 16 |
| AX-158418309 | 25 | 54.071 | KV453089.1 | 8785052 | 16-scf00496 | 16 |
| AX-158320522 | 25 | 54.071 | KV453089.1 | 8786156 | 16-scf00496 | 16 |
| AX-158320551 | 25 | 54.071 | KV453089.1 | 8822158 | 16-scf00496 | 16 |
| AX-157721581 | 25 | 54.071 | KV453089.1 | 8853249 | 16-scf00496 | 16 |
| AX-158320605 | 25 | 54.071 | KV453089.1 | 8887320 | 16-scf00496 | 16 |
| AX-158320609 | 25 | 54.071 | KV453089.1 | 8893214 | 16-scf00496 | 16 |
| AX-158320639 | 25 | 54.071 | KV453089.1 | 8937030 | 16-scf00496 | 16 |
| AX-158320654 | 25 | 54.071 | KV453089.1 | 8962593 | 16-scf00496 | 16 |
| AX-158320755 | 25 | 54.071 | KV453089.1 | 9119830 | 16-scf00496 | 16 |
| AX-158320756 | 25 | 54.071 | KV453089.1 | 9122953 | 16-scf00496 | 16 |
| AX-158320801 | 25 | 54.071 | KV453089.1 | 9247153 | 16-scf00496 | 16 |
| AX-158320802 | 25 | 54.071 | KV453089.1 | 9250479 | 16-scf00496 | 16 |
| AX-157848241 | 25 | 54.071 | KV453089.1 | 9250795 | 16-scf00496 | 16 |
| AX-157720545 | 25 | 54.071 | KV453089.1 | 9250886 | 16-scf00496 | 16 |
| AX-157848243 | 25 | 54.071 | KV453089.1 | 9262868 | 16-scf00496 | 16 |
| AX-158320820 | 25 | 54.071 | KV453089.1 | 9278689 | 16-scf00496 | 16 |
| AX-158320823 | 25 | 54.071 | KV453089.1 | 9280983 | 16-scf00496 | 16 |
| AX-158320824 | 25 | 54.071 | KV453089.1 | 9281761 | 16-scf00496 | 16 |
| AX-158320828 | 25 | 54.071 | KV453089.1 | 9285265 | 16-scf00496 | 16 |
| AX-158320829 | 25 | 54.071 | KV453089.1 | 9286292 | 16-scf00496 | 16 |
| AX-158320830 | 25 | 54.071 | KV453089.1 | 9286528 | 16-scf00496 | 16 |
| AX-158320836 | 25 | 54.071 | KV453089.1 | 9293410 | 16-scf00496 | 16 |
| AX-157848245 | 25 | 54.071 | KV453089.1 | 9296214 | 16-scf00496 | 16 |
| AX-158320839 | 25 | 54.071 | KV453089.1 | 9296432 | 16-scf00496 | 16 |
| AX-157848246 | 25 | 54.071 | KV453089.1 | 9297592 | 16-scf00496 | 16 |
| AX-158320840 | 25 | 54.071 | KV453089.1 | 9297962 | 16-scf00496 | 16 |
| AX-158418327 | 25 | 54.071 | KV453089.1 | 9304821 | 16-scf00496 | 16 |
| AX-158320845 | 25 | 54.071 | KV453089.1 | 9308275 | 16-scf00496 | 16 |
| AX-158320847 | 25 | 54.071 | KV453089.1 | 9311321 | 16-scf00496 | 16 |
| AX-158320849 | 25 | 54.071 | KV453089.1 | 9313372 | 16-scf00496 | 16 |
| AX-158320850 | 25 | 54.071 | KV453089.1 | 9314566 | 16-scf00496 | 16 |
| AX-158320851 | 25 | 54.071 | KV453089.1 | 9315260 | 16-scf00496 | 16 |
| AX-158320852 | 25 | 54.071 | KV453089.1 | 9315540 | 16-scf00496 | 16 |
| AX-158320859 | 25 | 54.071 | KV453089.1 | 9328093 | 16-scf00496 | 16 |
| AX-158320860 | 25 | 54.071 | KV453089.1 | 9329555 | 16-scf00496 | 16 |
| AX-158320863 | 25 | 54.071 | KV453089.1 | 9341119 | 16-scf00496 | 16 |
| AX-158320873 | 25 | 54.071 | KV453089.1 | 9372806 | 16-scf00496 | 16 |
| AX-157699074 | 25 | 54.071 | KV453089.1 | 9374862 | 16-scf00496 | 16 |
| AX-158320874 | 25 | 54.071 | KV453089.1 | 9374998 | 16-scf00496 | 16 |
| AX-158320876 | 25 | 54.071 | KV453089.1 | 9377495 | 16-scf00496 | 16 |
| AX-158320877 | 25 | 54.071 | KV453089.1 | 9378248 | 16-scf00496 | 16 |
| AX-158320879 | 25 | 54.071 | KV453089.1 | 9380522 | 16-scf00496 | 16 |
| AX-158320883 | 25 | 54.071 | KV453089.1 | 9383564 | 16-scf00496 | 16 |
| AX-158320886 | 25 | 54.071 | KV453089.1 | 9386761 | 16-scf00496 | 16 |
| AX-158320887 | 25 | 54.071 | KV453089.1 | 9387341 | 16-scf00496 | 16 |
| AX-158320888 | 25 | 54.071 | KV453089.1 | 9389360 | 16-scf00496 | 16 |
| AX-158418335 | 25 | 54.071 | KV453089.1 | 9391518 | 16-scf00496 | 16 |
| AX-158320890 | 25 | 54.071 | KV453089.1 | 9392593 | 16-scf00496 | 16 |
| AX-158320896 | 25 | 54.071 | KV453089.1 | 9399142 | 16-scf00496 | 16 |
| AX-158320899 | 25 | 54.071 | KV453089.1 | 9401270 | 16-scf00496 | 16 |

|              |    |        |             |          |             |    |
|--------------|----|--------|-------------|----------|-------------|----|
| AX-158320900 | 25 | 54.071 | KV453089.1  | 9403303  | 16-scf00496 | 16 |
| AX-158320901 | 25 | 54.071 | KV453089.1  | 9406493  | 16-scf00496 | 16 |
| AX-158320904 | 25 | 54.071 | KV453089.1  | 9411298  | 16-scf00496 | 16 |
| AX-157713241 | 25 | 54.071 | KV453089.1  | 9412360  | 16-scf00496 | 16 |
| AX-158320907 | 25 | 54.071 | KV453089.1  | 9413903  | 16-scf00496 | 16 |
| AX-158320913 | 25 | 54.071 | KV453089.1  | 9418515  | 16-scf00496 | 16 |
| AX-157750498 | 25 | 54.071 | KV453089.1  | 9418624  | 16-scf00496 | 16 |
| AX-157720471 | 25 | 54.071 | KV453089.1  | 9419158  | 16-scf00496 | 16 |
| AX-158320915 | 25 | 54.071 | KV453089.1  | 9427474  | 16-scf00496 | 16 |
| AX-157744561 | 25 | 54.071 | KV453089.1  | 9441467  | 16-scf00496 | 16 |
| AX-158320927 | 25 | 54.071 | KV453089.1  | 9445489  | 16-scf00496 | 16 |
| AX-158320928 | 25 | 54.071 | KV453089.1  | 9449219  | 16-scf00496 | 16 |
| AX-158320957 | 25 | 54.071 | KV453089.1  | 9487276  | 16-scf00496 | 16 |
| AX-158320963 | 25 | 54.071 | KV453089.1  | 9495805  | 16-scf00496 | 16 |
| AX-158320964 | 25 | 54.071 | KV453089.1  | 9496948  | 16-scf00496 | 16 |
| AX-158320966 | 25 | 54.071 | KV453089.1  | 9499431  | 16-scf00496 | 16 |
| AX-158320972 | 25 | 54.071 | KV453089.1  | 9508036  | 16-scf00496 | 16 |
| AX-158320977 | 25 | 54.071 | KV453089.1  | 9516033  | 16-scf00496 | 16 |
| AX-158320979 | 25 | 54.071 | KV453089.1  | 9519845  | 16-scf00496 | 16 |
| AX-157848257 | 25 | 54.071 | KV453089.1  | 9526169  | 16-scf00496 | 16 |
| AX-158320984 | 25 | 54.071 | KV453089.1  | 9530618  | 16-scf00496 | 16 |
| AX-158320988 | 25 | 54.071 | KV453089.1  | 9533844  | 16-scf00496 | 16 |
| AX-158320998 | 25 | 54.071 | KV453089.1  | 9545621  | 16-scf00496 | 16 |
| AX-158321010 | 25 | 54.071 | KV453089.1  | 9560275  | 16-scf00496 | 16 |
| AX-158321021 | 25 | 54.071 | KV453089.1  | 9580887  | 16-scf00496 | 16 |
| AX-158321022 | 25 | 54.071 | KV453089.1  | 9581294  | 16-scf00496 | 16 |
| AX-157848265 | 25 | 54.071 | KV453089.1  | 9597435  | 16-scf00496 | 16 |
| AX-158321154 | 25 | 54.071 | KV453089.1  | 9778160  | 16-scf00496 | 16 |
| AX-158321202 | 25 | 54.071 | KV453089.1  | 9926015  | 16-scf00496 | 16 |
| AX-158321222 | 25 | 54.071 | KV453089.1  | 10003372 | 16-scf00496 | 16 |
| AX-158321270 | 25 | 54.071 | KV453089.1  | 10182915 | 16-scf00496 | 16 |
| AX-158321286 | 25 | 54.071 | KV453089.1  | 10231669 | 16-scf00496 | 16 |
| AX-157724043 | 25 | 54.071 | KV453089.1  | 11084744 | 16-scf00496 | 16 |
| AX-157754976 | 25 | 54.071 | KV453089.1  | 11178475 | 16-scf00496 | 16 |
| AX-158322237 | 25 | 54.071 | KV453089.1  | 13121714 | 16-scf00496 | 16 |
| AX-158322239 | 25 | 54.071 | KV453089.1  | 13127432 | 16-scf00496 | 16 |
| AX-158322260 | 25 | 54.071 | KV453089.1  | 13190787 | 16-scf00496 | 16 |
| AX-158322273 | 25 | 54.071 | KV453090.1  | 19021    | 16-scf00499 | 16 |
| AX-158322763 | 25 | 54.071 | KV453095.1  | 1736549  | 16-scf00570 | 16 |
| AX-157707483 | 25 | 54.071 | 3ML01034379 | 203      | scf10053_1  | UN |
| AX-158320508 | 25 | 54.235 | KV453089.1  | 8762705  | 16-scf00496 | 16 |
| AX-158320545 | 25 | 54.235 | KV453089.1  | 8807874  | 16-scf00496 | 16 |
| AX-158320674 | 25 | 54.235 | KV453089.1  | 8994842  | 16-scf00496 | 16 |
| AX-158320989 | 25 | 54.235 | KV453089.1  | 9535871  | 16-scf00496 | 16 |
| AX-158320994 | 25 | 54.235 | KV453089.1  | 9540751  | 16-scf00496 | 16 |
| AX-158321005 | 25 | 54.235 | KV453089.1  | 9553523  | 16-scf00496 | 16 |
| AX-157725464 | 25 | 54.235 | KV453089.1  | 9561116  | 16-scf00496 | 16 |
| AX-158321089 | 25 | 54.235 | KV453089.1  | 9688250  | 16-scf00496 | 16 |
| AX-158321090 | 25 | 54.235 | KV453089.1  | 9688662  | 16-scf00496 | 16 |
| AX-158321097 | 25 | 54.235 | KV453089.1  | 9694820  | 16-scf00496 | 16 |
| AX-158321135 | 25 | 54.235 | KV453089.1  | 9749411  | 16-scf00496 | 16 |

|              |    |        |            |          |             |    |
|--------------|----|--------|------------|----------|-------------|----|
| AX-157756667 | 25 | 54.235 | KV453089.1 | 11311089 | 16-scf00496 | 16 |
| AX-158321622 | 25 | 54.235 | KV453089.1 | 11428920 | 16-scf00496 | 16 |
| AX-158322074 | 25 | 54.235 | KV453089.1 | 12733333 | 16-scf00496 | 16 |
| AX-158322084 | 25 | 54.235 | KV453089.1 | 12771198 | 16-scf00496 | 16 |
| AX-158322088 | 25 | 54.235 | KV453089.1 | 12800861 | 16-scf00496 | 16 |
| AX-158322154 | 25 | 54.235 | KV453089.1 | 12944081 | 16-scf00496 | 16 |
| AX-158322230 | 25 | 54.235 | KV453089.1 | 13092537 | 16-scf00496 | 16 |
| AX-158322233 | 25 | 54.235 | KV453089.1 | 13101358 | 16-scf00496 | 16 |
| AX-158322262 | 25 | 54.235 | KV453089.1 | 13192929 | 16-scf00496 | 16 |
| AX-158322267 | 25 | 54.235 | KV453090.1 | 919      | 16-scf00499 | 16 |
| AX-158322268 | 25 | 54.235 | KV453090.1 | 1177     | 16-scf00499 | 16 |
| AX-158322484 | 25 | 54.235 | KV453090.1 | 489307   | 16-scf00499 | 16 |
| AX-158322531 | 25 | 54.235 | KV453090.1 | 583471   | 16-scf00499 | 16 |
| AX-158322720 | 25 | 54.235 | KV453090.1 | 1229123  | 16-scf00499 | 16 |
| AX-158420048 | 25 | 54.235 | KV453093.1 | 493996   | 16-scf00501 | 16 |
| AX-158324063 | 25 | 54.235 | KV453093.1 | 541788   | 16-scf00501 | 16 |
| AX-158324069 | 25 | 54.235 | KV453093.1 | 557415   | 16-scf00501 | 16 |
| AX-158321015 | 25 | 54.275 | KV453089.1 | 9567980  | 16-scf00496 | 16 |
| AX-158321026 | 25 | 54.275 | KV453089.1 | 9588878  | 16-scf00496 | 16 |
| AX-158321459 | 25 | 54.275 | KV453089.1 | 11095027 | 16-scf00496 | 16 |
| AX-158321461 | 25 | 54.275 | KV453089.1 | 11098799 | 16-scf00496 | 16 |
| AX-158321464 | 25 | 54.275 | KV453089.1 | 11105256 | 16-scf00496 | 16 |
| AX-157848296 | 25 | 54.275 | KV453089.1 | 11111759 | 16-scf00496 | 16 |
| AX-158321473 | 25 | 54.275 | KV453089.1 | 11116298 | 16-scf00496 | 16 |
| AX-158321016 | 25 | 54.32  | KV453089.1 | 9573433  | 16-scf00496 | 16 |
| AX-158321018 | 25 | 54.359 | KV453089.1 | 9573954  | 16-scf00496 | 16 |
| AX-157848190 | 25 | 54.399 | KV453089.1 | 8098167  | 16-scf00496 | 16 |
| AX-158320119 | 25 | 54.399 | KV453089.1 | 8225748  | 16-scf00496 | 16 |
| AX-158418292 | 25 | 54.399 | KV453089.1 | 8249575  | 16-scf00496 | 16 |
| AX-158320146 | 25 | 54.399 | KV453089.1 | 8273525  | 16-scf00496 | 16 |
| AX-158320560 | 25 | 54.399 | KV453089.1 | 8832790  | 16-scf00496 | 16 |
| AX-158320620 | 25 | 54.399 | KV453089.1 | 8910923  | 16-scf00496 | 16 |
| AX-158320621 | 25 | 54.399 | KV453089.1 | 8913201  | 16-scf00496 | 16 |
| AX-158320633 | 25 | 54.399 | KV453089.1 | 8926733  | 16-scf00496 | 16 |
| AX-158320645 | 25 | 54.399 | KV453089.1 | 8949939  | 16-scf00496 | 16 |
| AX-158320653 | 25 | 54.399 | KV453089.1 | 8960762  | 16-scf00496 | 16 |
| AX-158320705 | 25 | 54.399 | KV453089.1 | 9045819  | 16-scf00496 | 16 |
| AX-158320714 | 25 | 54.399 | KV453089.1 | 9060582  | 16-scf00496 | 16 |
| AX-157848233 | 25 | 54.399 | KV453089.1 | 9077918  | 16-scf00496 | 16 |
| AX-158320754 | 25 | 54.399 | KV453089.1 | 9119529  | 16-scf00496 | 16 |
| AX-157848239 | 25 | 54.399 | KV453089.1 | 9244903  | 16-scf00496 | 16 |
| AX-157861449 | 25 | 54.399 | KV453089.1 | 9265502  | 16-scf00496 | 16 |
| AX-157848252 | 25 | 54.399 | KV453089.1 | 9404924  | 16-scf00496 | 16 |
| AX-158320911 | 25 | 54.399 | KV453089.1 | 9416264  | 16-scf00496 | 16 |
| AX-158320919 | 25 | 54.399 | KV453089.1 | 9429601  | 16-scf00496 | 16 |
| AX-157873605 | 25 | 54.399 | KV453089.1 | 9430649  | 16-scf00496 | 16 |
| AX-158381464 | 25 | 54.399 | KV453089.1 | 9484496  | 16-scf00496 | 16 |
| AX-158320958 | 25 | 54.399 | KV453089.1 | 9488311  | 16-scf00496 | 16 |
| AX-158320974 | 25 | 54.399 | KV453089.1 | 9511562  | 16-scf00496 | 16 |
| AX-157745999 | 25 | 54.399 | KV453089.1 | 9525987  | 16-scf00496 | 16 |
| AX-158320993 | 25 | 54.399 | KV453089.1 | 9540301  | 16-scf00496 | 16 |

|              |    |        |            |         |             |    |
|--------------|----|--------|------------|---------|-------------|----|
| AX-157848259 | 25 | 54.399 | KV453089.1 | 9564429 | 16-scf00496 | 16 |
| AX-157748396 | 25 | 54.399 | KV453089.1 | 9567046 | 16-scf00496 | 16 |
| AX-157848260 | 25 | 54.399 | KV453089.1 | 9568408 | 16-scf00496 | 16 |
| AX-157848262 | 25 | 54.399 | KV453089.1 | 9579549 | 16-scf00496 | 16 |
| AX-157848263 | 25 | 54.399 | KV453089.1 | 9585577 | 16-scf00496 | 16 |
| AX-157848266 | 25 | 54.399 | KV453089.1 | 9605723 | 16-scf00496 | 16 |
| AX-158321035 | 25 | 54.399 | KV453089.1 | 9609306 | 16-scf00496 | 16 |
| AX-158321037 | 25 | 54.399 | KV453089.1 | 9610146 | 16-scf00496 | 16 |
| AX-158321038 | 25 | 54.399 | KV453089.1 | 9610501 | 16-scf00496 | 16 |
| AX-158321039 | 25 | 54.399 | KV453089.1 | 9610888 | 16-scf00496 | 16 |
| AX-158321040 | 25 | 54.399 | KV453089.1 | 9611649 | 16-scf00496 | 16 |
| AX-157848267 | 25 | 54.399 | KV453089.1 | 9612369 | 16-scf00496 | 16 |
| AX-157755092 | 25 | 54.399 | KV453089.1 | 9617619 | 16-scf00496 | 16 |
| AX-158321043 | 25 | 54.399 | KV453089.1 | 9619549 | 16-scf00496 | 16 |
| AX-158321049 | 25 | 54.399 | KV453089.1 | 9624755 | 16-scf00496 | 16 |
| AX-158321056 | 25 | 54.399 | KV453089.1 | 9633832 | 16-scf00496 | 16 |
| AX-158321061 | 25 | 54.399 | KV453089.1 | 9640500 | 16-scf00496 | 16 |
| AX-158321066 | 25 | 54.399 | KV453089.1 | 9644304 | 16-scf00496 | 16 |
| AX-158321069 | 25 | 54.399 | KV453089.1 | 9646031 | 16-scf00496 | 16 |
| AX-158321077 | 25 | 54.399 | KV453089.1 | 9662808 | 16-scf00496 | 16 |
| AX-158321079 | 25 | 54.399 | KV453089.1 | 9663885 | 16-scf00496 | 16 |
| AX-158321080 | 25 | 54.399 | KV453089.1 | 9666604 | 16-scf00496 | 16 |
| AX-158321083 | 25 | 54.399 | KV453089.1 | 9673671 | 16-scf00496 | 16 |
| AX-158321084 | 25 | 54.399 | KV453089.1 | 9680736 | 16-scf00496 | 16 |
| AX-158321085 | 25 | 54.399 | KV453089.1 | 9681522 | 16-scf00496 | 16 |
| AX-158321091 | 25 | 54.399 | KV453089.1 | 9689466 | 16-scf00496 | 16 |
| AX-158321092 | 25 | 54.399 | KV453089.1 | 9691371 | 16-scf00496 | 16 |
| AX-158321096 | 25 | 54.399 | KV453089.1 | 9694188 | 16-scf00496 | 16 |
| AX-158321099 | 25 | 54.399 | KV453089.1 | 9696493 | 16-scf00496 | 16 |
| AX-158321100 | 25 | 54.399 | KV453089.1 | 9697117 | 16-scf00496 | 16 |
| AX-158321103 | 25 | 54.399 | KV453089.1 | 9700028 | 16-scf00496 | 16 |
| AX-158321109 | 25 | 54.399 | KV453089.1 | 9711043 | 16-scf00496 | 16 |
| AX-158321112 | 25 | 54.399 | KV453089.1 | 9712589 | 16-scf00496 | 16 |
| AX-158321115 | 25 | 54.399 | KV453089.1 | 9715859 | 16-scf00496 | 16 |
| AX-158321116 | 25 | 54.399 | KV453089.1 | 9716866 | 16-scf00496 | 16 |
| AX-158321122 | 25 | 54.399 | KV453089.1 | 9729899 | 16-scf00496 | 16 |
| AX-158321124 | 25 | 54.399 | KV453089.1 | 9735326 | 16-scf00496 | 16 |
| AX-158321132 | 25 | 54.399 | KV453089.1 | 9742548 | 16-scf00496 | 16 |
| AX-158321141 | 25 | 54.399 | KV453089.1 | 9763132 | 16-scf00496 | 16 |
| AX-158321142 | 25 | 54.399 | KV453089.1 | 9764404 | 16-scf00496 | 16 |
| AX-158321146 | 25 | 54.399 | KV453089.1 | 9768557 | 16-scf00496 | 16 |
| AX-158321147 | 25 | 54.399 | KV453089.1 | 9769871 | 16-scf00496 | 16 |
| AX-158321161 | 25 | 54.399 | KV453089.1 | 9793418 | 16-scf00496 | 16 |
| AX-158321186 | 25 | 54.399 | KV453089.1 | 9853998 | 16-scf00496 | 16 |
| AX-158321204 | 25 | 54.399 | KV453089.1 | 9931540 | 16-scf00496 | 16 |
| AX-158321205 | 25 | 54.399 | KV453089.1 | 9950780 | 16-scf00496 | 16 |
| AX-158321207 | 25 | 54.399 | KV453089.1 | 9953810 | 16-scf00496 | 16 |
| AX-158321210 | 25 | 54.399 | KV453089.1 | 9959264 | 16-scf00496 | 16 |
| AX-158321212 | 25 | 54.399 | KV453089.1 | 9961378 | 16-scf00496 | 16 |
| AX-158321213 | 25 | 54.399 | KV453089.1 | 9961965 | 16-scf00496 | 16 |
| AX-158321215 | 25 | 54.399 | KV453089.1 | 9983802 | 16-scf00496 | 16 |

|              |    |        |            |          |             |    |
|--------------|----|--------|------------|----------|-------------|----|
| AX-158321223 | 25 | 54.399 | KV453089.1 | 10004567 | 16-scf00496 | 16 |
| AX-158321228 | 25 | 54.399 | KV453089.1 | 10019604 | 16-scf00496 | 16 |
| AX-158321251 | 25 | 54.399 | KV453089.1 | 10116811 | 16-scf00496 | 16 |
| AX-158321253 | 25 | 54.399 | KV453089.1 | 10120708 | 16-scf00496 | 16 |
| AX-158321259 | 25 | 54.399 | KV453089.1 | 10152895 | 16-scf00496 | 16 |
| AX-158321264 | 25 | 54.399 | KV453089.1 | 10171408 | 16-scf00496 | 16 |
| AX-158321266 | 25 | 54.399 | KV453089.1 | 10174523 | 16-scf00496 | 16 |
| AX-158321267 | 25 | 54.399 | KV453089.1 | 10176524 | 16-scf00496 | 16 |
| AX-158321273 | 25 | 54.399 | KV453089.1 | 10185846 | 16-scf00496 | 16 |
| AX-158321312 | 25 | 54.399 | KV453089.1 | 10366901 | 16-scf00496 | 16 |
| AX-158321334 | 25 | 54.399 | KV453089.1 | 10504515 | 16-scf00496 | 16 |
| AX-158321353 | 25 | 54.399 | KV453089.1 | 10592195 | 16-scf00496 | 16 |
| AX-158321368 | 25 | 54.399 | KV453089.1 | 10711383 | 16-scf00496 | 16 |
| AX-157848292 | 25 | 54.399 | KV453089.1 | 10783152 | 16-scf00496 | 16 |
| AX-158321420 | 25 | 54.399 | KV453089.1 | 10903242 | 16-scf00496 | 16 |
| AX-158321468 | 25 | 54.399 | KV453089.1 | 11109016 | 16-scf00496 | 16 |
| AX-157848300 | 25 | 54.399 | KV453089.1 | 11197947 | 16-scf00496 | 16 |
| AX-157707817 | 25 | 54.399 | KV453089.1 | 11249866 | 16-scf00496 | 16 |
| AX-158321710 | 25 | 54.399 | KV453089.1 | 11564410 | 16-scf00496 | 16 |
| AX-158321810 | 25 | 54.399 | KV453089.1 | 11810210 | 16-scf00496 | 16 |
| AX-158321975 | 25 | 54.399 | KV453089.1 | 12386733 | 16-scf00496 | 16 |
| AX-158322435 | 25 | 54.399 | KV453090.1 | 384790   | 16-scf00499 | 16 |
| AX-158322490 | 25 | 54.399 | KV453090.1 | 500894   | 16-scf00499 | 16 |
| AX-158322543 | 25 | 54.399 | KV453090.1 | 604619   | 16-scf00499 | 16 |
| AX-158322576 | 25 | 54.399 | KV453090.1 | 668500   | 16-scf00499 | 16 |
| AX-157848386 | 25 | 54.399 | KV453090.1 | 1060241  | 16-scf00499 | 16 |
| AX-157754891 | 25 | 54.399 | KV453090.1 | 1082070  | 16-scf00499 | 16 |
| AX-158322687 | 25 | 54.399 | KV453090.1 | 1090488  | 16-scf00499 | 16 |
| AX-158322714 | 25 | 54.399 | KV453090.1 | 1202770  | 16-scf00499 | 16 |
| AX-158322723 | 25 | 54.399 | KV453090.1 | 1237547  | 16-scf00499 | 16 |
| AX-158418426 | 25 | 54.399 | KV453090.1 | 1308794  | 16-scf00499 | 16 |
| AX-158324089 | 25 | 54.399 | KV453093.1 | 613554   | 16-scf00501 | 16 |
| AX-157881456 | 25 | 54.399 | KV453093.1 | 858765   | 16-scf00501 | 16 |
| AX-158324290 | 25 | 54.399 | KV453093.1 | 1524634  | 16-scf00501 | 16 |
| AX-158324486 | 25 | 54.399 | KV453094.1 | 425213   | 16-scf00503 | 16 |
| AX-157853295 | 25 | 54.399 | KV453095.1 | 18390    | 16-scf00570 | 16 |
| AX-158376070 | 25 | 54.399 | KV453095.1 | 167147   | 16-scf00570 | 16 |
| AX-158376054 | 25 | 54.399 | KV453095.1 | 272666   | 16-scf00570 | 16 |
| AX-158324379 | 25 | 54.399 | KV453095.1 | 1064527  | 16-scf00570 | 16 |
| AX-158418508 | 25 | 54.399 | KV453095.1 | 1194023  | 16-scf00570 | 16 |
| AX-158324357 | 25 | 54.399 | KV453095.1 | 1273662  | 16-scf00570 | 16 |
| AX-157714676 | 25 | 54.399 | KV453095.1 | 1316543  | 16-scf00570 | 16 |
| AX-158322979 | 25 | 54.399 | KV453095.1 | 2066519  | 16-scf00570 | 16 |
| AX-157888407 | 25 | 54.399 | KV453095.1 | 2263385  | 16-scf00570 | 16 |
| AX-157888409 | 25 | 54.399 | KV453095.1 | 2266304  | 16-scf00570 | 16 |
| AX-158323205 | 25 | 54.399 | KV453095.1 | 2402176  | 16-scf00570 | 16 |
| AX-157848452 | 25 | 54.399 | KV453095.1 | 2858023  | 16-scf00570 | 16 |
| AX-158323699 | 25 | 54.399 | KV453095.1 | 3295819  | 16-scf00570 | 16 |
| AX-157848490 | 25 | 54.399 | KV453095.1 | 3322283  | 16-scf00570 | 16 |
| AX-157888418 | 25 | 54.399 | KV453095.1 | 3435308  | 16-scf00570 | 16 |
| AX-158323867 | 25 | 54.399 | KV453095.1 | 3598901  | 16-scf00570 | 16 |

|              |    |        |            |          |             |    |
|--------------|----|--------|------------|----------|-------------|----|
| AX-157685657 | 25 | 54.399 | KV453091.1 | 18106    | 16-scf00630 | 16 |
| AX-158321123 | 25 | 54.505 | KV453089.1 | 9734965  | 16-scf00496 | 16 |
| AX-158321683 | 25 | 54.505 | KV453089.1 | 11523390 | 16-scf00496 | 16 |
| AX-157881366 | 25 | 54.617 | KV453089.1 | 8988593  | 16-scf00496 | 16 |
| AX-158320682 | 25 | 54.617 | KV453089.1 | 9002455  | 16-scf00496 | 16 |
| AX-157740204 | 25 | 54.617 | KV453089.1 | 9268843  | 16-scf00496 | 16 |
| AX-158320858 | 25 | 54.617 | KV453089.1 | 9323384  | 16-scf00496 | 16 |
| AX-157848251 | 25 | 54.617 | KV453089.1 | 9343471  | 16-scf00496 | 16 |
| AX-158320916 | 25 | 54.617 | KV453089.1 | 9428030  | 16-scf00496 | 16 |
| AX-158321051 | 25 | 54.617 | KV453089.1 | 9628764  | 16-scf00496 | 16 |
| AX-158321052 | 25 | 54.617 | KV453089.1 | 9629253  | 16-scf00496 | 16 |
| AX-158321054 | 25 | 54.617 | KV453089.1 | 9630835  | 16-scf00496 | 16 |
| AX-158321060 | 25 | 54.617 | KV453089.1 | 9640225  | 16-scf00496 | 16 |
| AX-158321065 | 25 | 54.617 | KV453089.1 | 9643486  | 16-scf00496 | 16 |
| AX-158321095 | 25 | 54.617 | KV453089.1 | 9693290  | 16-scf00496 | 16 |
| AX-158321098 | 25 | 54.617 | KV453089.1 | 9695452  | 16-scf00496 | 16 |
| AX-158321108 | 25 | 54.617 | KV453089.1 | 9709637  | 16-scf00496 | 16 |
| AX-158321143 | 25 | 54.617 | KV453089.1 | 9765184  | 16-scf00496 | 16 |
| AX-158321144 | 25 | 54.617 | KV453089.1 | 9765648  | 16-scf00496 | 16 |
| AX-158321145 | 25 | 54.617 | KV453089.1 | 9766454  | 16-scf00496 | 16 |
| AX-158321148 | 25 | 54.617 | KV453089.1 | 9771164  | 16-scf00496 | 16 |
| AX-158321149 | 25 | 54.617 | KV453089.1 | 9774103  | 16-scf00496 | 16 |
| AX-158321150 | 25 | 54.617 | KV453089.1 | 9774510  | 16-scf00496 | 16 |
| AX-158321151 | 25 | 54.617 | KV453089.1 | 9774899  | 16-scf00496 | 16 |
| AX-158321157 | 25 | 54.617 | KV453089.1 | 9783598  | 16-scf00496 | 16 |
| AX-158321160 | 25 | 54.617 | KV453089.1 | 9786829  | 16-scf00496 | 16 |
| AX-158321163 | 25 | 54.617 | KV453089.1 | 9795785  | 16-scf00496 | 16 |
| AX-158321168 | 25 | 54.617 | KV453089.1 | 9800675  | 16-scf00496 | 16 |
| AX-158321172 | 25 | 54.617 | KV453089.1 | 9809528  | 16-scf00496 | 16 |
| AX-158321173 | 25 | 54.617 | KV453089.1 | 9811481  | 16-scf00496 | 16 |
| AX-158321175 | 25 | 54.617 | KV453089.1 | 9813732  | 16-scf00496 | 16 |
| AX-158321183 | 25 | 54.617 | KV453089.1 | 9848355  | 16-scf00496 | 16 |
| AX-158321184 | 25 | 54.617 | KV453089.1 | 9849400  | 16-scf00496 | 16 |
| AX-158321193 | 25 | 54.617 | KV453089.1 | 9878652  | 16-scf00496 | 16 |
| AX-158321195 | 25 | 54.617 | KV453089.1 | 9883448  | 16-scf00496 | 16 |
| AX-157888366 | 25 | 54.617 | KV453089.1 | 9900729  | 16-scf00496 | 16 |
| AX-157805543 | 25 | 54.617 | KV453089.1 | 9909853  | 16-scf00496 | 16 |
| AX-157848277 | 25 | 54.617 | KV453089.1 | 9949096  | 16-scf00496 | 16 |
| AX-157888367 | 25 | 54.617 | KV453089.1 | 9950026  | 16-scf00496 | 16 |
| AX-158321208 | 25 | 54.617 | KV453089.1 | 9955133  | 16-scf00496 | 16 |
| AX-158321230 | 25 | 54.617 | KV453089.1 | 10029589 | 16-scf00496 | 16 |
| AX-158321231 | 25 | 54.617 | KV453089.1 | 10032858 | 16-scf00496 | 16 |
| AX-158321233 | 25 | 54.617 | KV453089.1 | 10035114 | 16-scf00496 | 16 |
| AX-158321234 | 25 | 54.617 | KV453089.1 | 10035617 | 16-scf00496 | 16 |
| AX-158321239 | 25 | 54.617 | KV453089.1 | 10057359 | 16-scf00496 | 16 |
| AX-158321248 | 25 | 54.617 | KV453089.1 | 10095299 | 16-scf00496 | 16 |
| AX-158321249 | 25 | 54.617 | KV453089.1 | 10097948 | 16-scf00496 | 16 |
| AX-157848282 | 25 | 54.617 | KV453089.1 | 10123957 | 16-scf00496 | 16 |
| AX-158321254 | 25 | 54.617 | KV453089.1 | 10131701 | 16-scf00496 | 16 |
| AX-157848283 | 25 | 54.617 | KV453089.1 | 10138679 | 16-scf00496 | 16 |
| AX-158321258 | 25 | 54.617 | KV453089.1 | 10147483 | 16-scf00496 | 16 |



|              |    |        |            |          |             |    |
|--------------|----|--------|------------|----------|-------------|----|
| AX-158321261 | 25 | 54.617 | KV453089.1 | 10156312 | 16-scf00496 | 16 |
| AX-158321263 | 25 | 54.617 | KV453089.1 | 10170312 | 16-scf00496 | 16 |
| AX-158321265 | 25 | 54.617 | KV453089.1 | 10172528 | 16-scf00496 | 16 |
| AX-157848285 | 25 | 54.617 | KV453089.1 | 10173714 | 16-scf00496 | 16 |
| AX-157848286 | 25 | 54.617 | KV453089.1 | 10175733 | 16-scf00496 | 16 |
| AX-157888369 | 25 | 54.617 | KV453089.1 | 10264775 | 16-scf00496 | 16 |
| AX-158321293 | 25 | 54.617 | KV453089.1 | 10265929 | 16-scf00496 | 16 |
| AX-157888370 | 25 | 54.617 | KV453089.1 | 10269588 | 16-scf00496 | 16 |
| AX-158321296 | 25 | 54.617 | KV453089.1 | 10276027 | 16-scf00496 | 16 |
| AX-158321297 | 25 | 54.617 | KV453089.1 | 10284345 | 16-scf00496 | 16 |
| AX-157861452 | 25 | 54.617 | KV453089.1 | 10284547 | 16-scf00496 | 16 |
| AX-158321302 | 25 | 54.617 | KV453089.1 | 10317291 | 16-scf00496 | 16 |
| AX-158321304 | 25 | 54.617 | KV453089.1 | 10326850 | 16-scf00496 | 16 |
| AX-158321305 | 25 | 54.617 | KV453089.1 | 10329828 | 16-scf00496 | 16 |
| AX-158321307 | 25 | 54.617 | KV453089.1 | 10337364 | 16-scf00496 | 16 |
| AX-158321315 | 25 | 54.617 | KV453089.1 | 10377230 | 16-scf00496 | 16 |
| AX-158321316 | 25 | 54.617 | KV453089.1 | 10381349 | 16-scf00496 | 16 |
| AX-158321318 | 25 | 54.617 | KV453089.1 | 10385614 | 16-scf00496 | 16 |
| AX-157710203 | 25 | 54.617 | KV453089.1 | 10427058 | 16-scf00496 | 16 |
| AX-158321327 | 25 | 54.617 | KV453089.1 | 10445604 | 16-scf00496 | 16 |
| AX-158321329 | 25 | 54.617 | KV453089.1 | 10446785 | 16-scf00496 | 16 |
| AX-158321331 | 25 | 54.617 | KV453089.1 | 10456609 | 16-scf00496 | 16 |
| AX-158321332 | 25 | 54.617 | KV453089.1 | 10488226 | 16-scf00496 | 16 |
| AX-158321333 | 25 | 54.617 | KV453089.1 | 10504210 | 16-scf00496 | 16 |
| AX-158321341 | 25 | 54.617 | KV453089.1 | 10537904 | 16-scf00496 | 16 |
| AX-157888371 | 25 | 54.617 | KV453089.1 | 10552615 | 16-scf00496 | 16 |
| AX-158321344 | 25 | 54.617 | KV453089.1 | 10558599 | 16-scf00496 | 16 |
| AX-158321345 | 25 | 54.617 | KV453089.1 | 10561513 | 16-scf00496 | 16 |
| AX-158321346 | 25 | 54.617 | KV453089.1 | 10562269 | 16-scf00496 | 16 |
| AX-158321347 | 25 | 54.617 | KV453089.1 | 10563675 | 16-scf00496 | 16 |
| AX-157888373 | 25 | 54.617 | KV453089.1 | 10587823 | 16-scf00496 | 16 |
| AX-158321354 | 25 | 54.617 | KV453089.1 | 10601824 | 16-scf00496 | 16 |
| AX-158321355 | 25 | 54.617 | KV453089.1 | 10602684 | 16-scf00496 | 16 |
| AX-158321358 | 25 | 54.617 | KV453089.1 | 10615249 | 16-scf00496 | 16 |
| AX-158321364 | 25 | 54.617 | KV453089.1 | 10647375 | 16-scf00496 | 16 |
| AX-158321371 | 25 | 54.617 | KV453089.1 | 10722398 | 16-scf00496 | 16 |
| AX-157708203 | 25 | 54.617 | KV453089.1 | 10723727 | 16-scf00496 | 16 |
| AX-157848291 | 25 | 54.617 | KV453089.1 | 10737771 | 16-scf00496 | 16 |
| AX-158321376 | 25 | 54.617 | KV453089.1 | 10739862 | 16-scf00496 | 16 |
| AX-158321384 | 25 | 54.617 | KV453089.1 | 10784404 | 16-scf00496 | 16 |
| AX-158321385 | 25 | 54.617 | KV453089.1 | 10787869 | 16-scf00496 | 16 |
| AX-158321386 | 25 | 54.617 | KV453089.1 | 10788455 | 16-scf00496 | 16 |
| AX-157752815 | 25 | 54.617 | KV453089.1 | 10808031 | 16-scf00496 | 16 |
| AX-158321392 | 25 | 54.617 | KV453089.1 | 10810625 | 16-scf00496 | 16 |
| AX-157888374 | 25 | 54.617 | KV453089.1 | 10816432 | 16-scf00496 | 16 |
| AX-158321393 | 25 | 54.617 | KV453089.1 | 10817298 | 16-scf00496 | 16 |
| AX-157848293 | 25 | 54.617 | KV453089.1 | 10821358 | 16-scf00496 | 16 |
| AX-158321396 | 25 | 54.617 | KV453089.1 | 10824239 | 16-scf00496 | 16 |
| AX-158321398 | 25 | 54.617 | KV453089.1 | 10829164 | 16-scf00496 | 16 |
| AX-158418355 | 25 | 54.617 | KV453089.1 | 10834317 | 16-scf00496 | 16 |
| AX-157848294 | 25 | 54.617 | KV453089.1 | 10837366 | 16-scf00496 | 16 |

|              |    |        |            |          |             |    |
|--------------|----|--------|------------|----------|-------------|----|
| AX-158412598 | 25 | 54.617 | KV453089.1 | 10837656 | 16-scf00496 | 16 |
| AX-158421609 | 25 | 54.617 | KV453089.1 | 10837718 | 16-scf00496 | 16 |
| AX-158321401 | 25 | 54.617 | KV453089.1 | 10846929 | 16-scf00496 | 16 |
| AX-158321402 | 25 | 54.617 | KV453089.1 | 10847675 | 16-scf00496 | 16 |
| AX-158418356 | 25 | 54.617 | KV453089.1 | 10850773 | 16-scf00496 | 16 |
| AX-158321405 | 25 | 54.617 | KV453089.1 | 10858166 | 16-scf00496 | 16 |
| AX-158321408 | 25 | 54.617 | KV453089.1 | 10861847 | 16-scf00496 | 16 |
| AX-158321410 | 25 | 54.617 | KV453089.1 | 10873066 | 16-scf00496 | 16 |
| AX-158321411 | 25 | 54.617 | KV453089.1 | 10873467 | 16-scf00496 | 16 |
| AX-157861456 | 25 | 54.617 | KV453089.1 | 10876864 | 16-scf00496 | 16 |
| AX-158321416 | 25 | 54.617 | KV453089.1 | 10896679 | 16-scf00496 | 16 |
| AX-158321418 | 25 | 54.617 | KV453089.1 | 10898133 | 16-scf00496 | 16 |
| AX-158321422 | 25 | 54.617 | KV453089.1 | 10924129 | 16-scf00496 | 16 |
| AX-158321428 | 25 | 54.617 | KV453089.1 | 10973650 | 16-scf00496 | 16 |
| AX-158321433 | 25 | 54.617 | KV453089.1 | 10992404 | 16-scf00496 | 16 |
| AX-158418358 | 25 | 54.617 | KV453089.1 | 11000107 | 16-scf00496 | 16 |
| AX-158321436 | 25 | 54.617 | KV453089.1 | 11009820 | 16-scf00496 | 16 |
| AX-158321442 | 25 | 54.617 | KV453089.1 | 11035746 | 16-scf00496 | 16 |
| AX-158321443 | 25 | 54.617 | KV453089.1 | 11038352 | 16-scf00496 | 16 |
| AX-158321449 | 25 | 54.617 | KV453089.1 | 11076225 | 16-scf00496 | 16 |
| AX-158321450 | 25 | 54.617 | KV453089.1 | 11076974 | 16-scf00496 | 16 |
| AX-158321456 | 25 | 54.617 | KV453089.1 | 11091427 | 16-scf00496 | 16 |
| AX-157861459 | 25 | 54.617 | KV453089.1 | 11101725 | 16-scf00496 | 16 |
| AX-158321463 | 25 | 54.617 | KV453089.1 | 11102941 | 16-scf00496 | 16 |
| AX-158321466 | 25 | 54.617 | KV453089.1 | 11107155 | 16-scf00496 | 16 |
| AX-157861460 | 25 | 54.617 | KV453089.1 | 11109895 | 16-scf00496 | 16 |
| AX-158321477 | 25 | 54.617 | KV453089.1 | 11130996 | 16-scf00496 | 16 |
| AX-158321480 | 25 | 54.617 | KV453089.1 | 11143787 | 16-scf00496 | 16 |
| AX-158321483 | 25 | 54.617 | KV453089.1 | 11145745 | 16-scf00496 | 16 |
| AX-157848297 | 25 | 54.617 | KV453089.1 | 11156044 | 16-scf00496 | 16 |
| AX-158321490 | 25 | 54.617 | KV453089.1 | 11161002 | 16-scf00496 | 16 |
| AX-157848299 | 25 | 54.617 | KV453089.1 | 11188471 | 16-scf00496 | 16 |
| AX-158321500 | 25 | 54.617 | KV453089.1 | 11191222 | 16-scf00496 | 16 |
| AX-158321508 | 25 | 54.617 | KV453089.1 | 11208176 | 16-scf00496 | 16 |
| AX-157848302 | 25 | 54.617 | KV453089.1 | 11211889 | 16-scf00496 | 16 |
| AX-158321515 | 25 | 54.617 | KV453089.1 | 11224459 | 16-scf00496 | 16 |
| AX-157848304 | 25 | 54.617 | KV453089.1 | 11232140 | 16-scf00496 | 16 |
| AX-158321522 | 25 | 54.617 | KV453089.1 | 11242691 | 16-scf00496 | 16 |
| AX-158321656 | 25 | 54.617 | KV453089.1 | 11473593 | 16-scf00496 | 16 |
| AX-158321680 | 25 | 54.617 | KV453089.1 | 11515719 | 16-scf00496 | 16 |
| AX-158321686 | 25 | 54.617 | KV453089.1 | 11529166 | 16-scf00496 | 16 |
| AX-158321690 | 25 | 54.617 | KV453089.1 | 11536681 | 16-scf00496 | 16 |
| AX-158321691 | 25 | 54.617 | KV453089.1 | 11537497 | 16-scf00496 | 16 |
| AX-157745487 | 25 | 54.617 | KV453089.1 | 11708092 | 16-scf00496 | 16 |
| AX-158321889 | 25 | 54.617 | KV453089.1 | 12016220 | 16-scf00496 | 16 |
| AX-158321890 | 25 | 54.617 | KV453089.1 | 12016980 | 16-scf00496 | 16 |
| AX-158412613 | 25 | 54.617 | KV453089.1 | 12043186 | 16-scf00496 | 16 |
| AX-158322236 | 25 | 54.617 | KV453089.1 | 13120567 | 16-scf00496 | 16 |
| AX-157848345 | 25 | 54.617 | KV453090.1 | 423031   | 16-scf00499 | 16 |
| AX-158322450 | 25 | 54.617 | KV453090.1 | 423111   | 16-scf00499 | 16 |
| AX-157750809 | 25 | 54.617 | KV453090.1 | 516240   | 16-scf00499 | 16 |

|              |    |        |            |          |             |    |
|--------------|----|--------|------------|----------|-------------|----|
| AX-158322580 | 25 | 54.617 | KV453090.1 | 675389   | 16-scf00499 | 16 |
| AX-158322681 | 25 | 54.617 | KV453090.1 | 1058761  | 16-scf00499 | 16 |
| AX-158322738 | 25 | 54.617 | KV453090.1 | 1362827  | 16-scf00499 | 16 |
| AX-157711028 | 25 | 54.617 | KV453090.1 | 1367575  | 16-scf00499 | 16 |
| AX-158324009 | 25 | 54.617 | KV453093.1 | 360860   | 16-scf00501 | 16 |
| AX-158324070 | 25 | 54.617 | KV453093.1 | 558432   | 16-scf00501 | 16 |
| AX-158324071 | 25 | 54.617 | KV453093.1 | 558806   | 16-scf00501 | 16 |
| AX-158324090 | 25 | 54.617 | KV453093.1 | 619549   | 16-scf00501 | 16 |
| AX-158324130 | 25 | 54.617 | KV453093.1 | 706088   | 16-scf00501 | 16 |
| AX-158324723 | 25 | 54.617 | KV453097.1 | 144663   | 16-scf00504 | 16 |
| AX-158324746 | 25 | 54.617 | KV453097.1 | 180205   | 16-scf00504 | 16 |
| AX-157848390 | 25 | 54.617 | KV453095.1 | 1690705  | 16-scf00570 | 16 |
| AX-158322746 | 25 | 54.617 | KV453095.1 | 1690890  | 16-scf00570 | 16 |
| AX-157848393 | 25 | 54.617 | KV453095.1 | 1718192  | 16-scf00570 | 16 |
| AX-158322770 | 25 | 54.617 | KV453095.1 | 1765521  | 16-scf00570 | 16 |
| AX-158322778 | 25 | 54.617 | KV453095.1 | 1788088  | 16-scf00570 | 16 |
| AX-158322812 | 25 | 54.617 | KV453095.1 | 1851081  | 16-scf00570 | 16 |
| AX-157726980 | 25 | 54.617 | KV453095.1 | 1851774  | 16-scf00570 | 16 |
| AX-158322916 | 25 | 54.617 | KV453095.1 | 1991228  | 16-scf00570 | 16 |
| AX-158320498 | 25 | 54.727 | KV453089.1 | 8750589  | 16-scf00496 | 16 |
| AX-158320832 | 25 | 54.727 | KV453089.1 | 9287596  | 16-scf00496 | 16 |
| AX-158320990 | 25 | 54.727 | KV453089.1 | 9536821  | 16-scf00496 | 16 |
| AX-158321206 | 25 | 54.727 | KV453089.1 | 9952969  | 16-scf00496 | 16 |
| AX-158321257 | 25 | 54.727 | KV453089.1 | 10144099 | 16-scf00496 | 16 |
| AX-158321413 | 25 | 54.727 | KV453089.1 | 10878789 | 16-scf00496 | 16 |
| AX-158321415 | 25 | 54.727 | KV453089.1 | 10883701 | 16-scf00496 | 16 |
| AX-158321419 | 25 | 54.727 | KV453089.1 | 10899187 | 16-scf00496 | 16 |
| AX-157861457 | 25 | 54.727 | KV453089.1 | 10915447 | 16-scf00496 | 16 |
| AX-158321429 | 25 | 54.727 | KV453089.1 | 10977990 | 16-scf00496 | 16 |
| AX-158321431 | 25 | 54.727 | KV453089.1 | 10988996 | 16-scf00496 | 16 |
| AX-158412599 | 25 | 54.727 | KV453089.1 | 11005584 | 16-scf00496 | 16 |
| AX-158321437 | 25 | 54.727 | KV453089.1 | 11012932 | 16-scf00496 | 16 |
| AX-158321441 | 25 | 54.727 | KV453089.1 | 11034827 | 16-scf00496 | 16 |
| AX-157726998 | 25 | 54.727 | KV453089.1 | 11045905 | 16-scf00496 | 16 |
| AX-158412600 | 25 | 54.727 | KV453089.1 | 11071476 | 16-scf00496 | 16 |
| AX-158321452 | 25 | 54.727 | KV453089.1 | 11079053 | 16-scf00496 | 16 |
| AX-157738678 | 25 | 54.727 | KV453089.1 | 11086700 | 16-scf00496 | 16 |
| AX-158321455 | 25 | 54.727 | KV453089.1 | 11090102 | 16-scf00496 | 16 |
| AX-158321458 | 25 | 54.727 | KV453089.1 | 11093381 | 16-scf00496 | 16 |
| AX-158321460 | 25 | 54.727 | KV453089.1 | 11095977 | 16-scf00496 | 16 |
| AX-158321462 | 25 | 54.727 | KV453089.1 | 11100898 | 16-scf00496 | 16 |
| AX-158321465 | 25 | 54.727 | KV453089.1 | 11106510 | 16-scf00496 | 16 |
| AX-158321467 | 25 | 54.727 | KV453089.1 | 11107606 | 16-scf00496 | 16 |
| AX-158321472 | 25 | 54.727 | KV453089.1 | 11113939 | 16-scf00496 | 16 |
| AX-158321533 | 25 | 54.727 | KV453089.1 | 11279209 | 16-scf00496 | 16 |
| AX-158321534 | 25 | 54.727 | KV453089.1 | 11279690 | 16-scf00496 | 16 |
| AX-157716818 | 25 | 54.727 | KV453089.1 | 11293322 | 16-scf00496 | 16 |
| AX-158321540 | 25 | 54.727 | KV453089.1 | 11293725 | 16-scf00496 | 16 |
| AX-158321553 | 25 | 54.727 | KV453089.1 | 11340866 | 16-scf00496 | 16 |
| AX-158321557 | 25 | 54.727 | KV453089.1 | 11343740 | 16-scf00496 | 16 |
| AX-158321570 | 25 | 54.727 | KV453089.1 | 11366602 | 16-scf00496 | 16 |

|              |    |        |            |          |             |    |
|--------------|----|--------|------------|----------|-------------|----|
| AX-158321572 | 25 | 54.727 | KV453089.1 | 11373172 | 16-scf00496 | 16 |
| AX-158321574 | 25 | 54.727 | KV453089.1 | 11379175 | 16-scf00496 | 16 |
| AX-158321580 | 25 | 54.727 | KV453089.1 | 11384920 | 16-scf00496 | 16 |
| AX-158321583 | 25 | 54.727 | KV453089.1 | 11387196 | 16-scf00496 | 16 |
| AX-157848317 | 25 | 54.727 | KV453089.1 | 11390546 | 16-scf00496 | 16 |
| AX-158321602 | 25 | 54.727 | KV453089.1 | 11406304 | 16-scf00496 | 16 |
| AX-158321618 | 25 | 54.727 | KV453089.1 | 11425952 | 16-scf00496 | 16 |
| AX-158322094 | 25 | 54.727 | KV453089.1 | 12818862 | 16-scf00496 | 16 |
| AX-157771482 | 25 | 54.727 | KV453089.1 | 13182194 | 16-scf00496 | 16 |
| AX-158322375 | 25 | 54.727 | KV453090.1 | 273238   | 16-scf00499 | 16 |
| AX-158322476 | 25 | 54.727 | KV453090.1 | 479130   | 16-scf00499 | 16 |
| AX-158322494 | 25 | 54.727 | KV453090.1 | 504743   | 16-scf00499 | 16 |
| AX-158322545 | 25 | 54.727 | KV453090.1 | 609293   | 16-scf00499 | 16 |
| AX-158322621 | 25 | 54.727 | KV453090.1 | 752956   | 16-scf00499 | 16 |
| AX-158322646 | 25 | 54.727 | KV453090.1 | 851666   | 16-scf00499 | 16 |
| AX-158324052 | 25 | 54.727 | KV453093.1 | 488293   | 16-scf00501 | 16 |
| AX-158324097 | 25 | 54.727 | KV453093.1 | 631594   | 16-scf00501 | 16 |
| AX-158324099 | 25 | 54.727 | KV453093.1 | 635485   | 16-scf00501 | 16 |
| AX-158324100 | 25 | 54.727 | KV453093.1 | 637617   | 16-scf00501 | 16 |
| AX-158420049 | 25 | 54.727 | KV453093.1 | 671497   | 16-scf00501 | 16 |
| AX-158324156 | 25 | 54.727 | KV453093.1 | 861568   | 16-scf00501 | 16 |
| AX-158376056 | 25 | 54.727 | KV453095.1 | 261964   | 16-scf00570 | 16 |
| AX-158376044 | 25 | 54.727 | KV453095.1 | 447412   | 16-scf00570 | 16 |
| AX-158324414 | 25 | 54.727 | KV453095.1 | 745108   | 16-scf00570 | 16 |
| AX-158324399 | 25 | 54.727 | KV453095.1 | 874048   | 16-scf00570 | 16 |
| AX-158324395 | 25 | 54.727 | KV453095.1 | 917424   | 16-scf00570 | 16 |
| AX-158324364 | 25 | 54.727 | KV453095.1 | 1186754  | 16-scf00570 | 16 |
| AX-158322938 | 25 | 54.727 | KV453095.1 | 2023149  | 16-scf00570 | 16 |
| AX-157685653 | 25 | 54.727 | KV453091.1 | 89454    | 16-scf00630 | 16 |
| AX-157685651 | 25 | 54.727 | KV453091.1 | 96035    | 16-scf00630 | 16 |
| AX-157685869 | 25 | 54.727 | KV453092.1 | 19917    | 16-scf00649 | 16 |
| AX-157685870 | 25 | 54.727 | KV453092.1 | 22792    | 16-scf00649 | 16 |
| AX-157685872 | 25 | 54.727 | KV453092.1 | 49909    | 16-scf00649 | 16 |
| AX-157685873 | 25 | 54.727 | KV453092.1 | 54760    | 16-scf00649 | 16 |
| AX-158321623 | 25 | 54.782 | KV453089.1 | 11429637 | 16-scf00496 | 16 |
| AX-157752719 | 25 | 54.836 | KV453089.1 | 9006373  | 16-scf00496 | 16 |
| AX-158320757 | 25 | 54.836 | KV453089.1 | 9123260  | 16-scf00496 | 16 |
| AX-158320767 | 25 | 54.836 | KV453089.1 | 9133585  | 16-scf00496 | 16 |
| AX-158320776 | 25 | 54.836 | KV453089.1 | 9148509  | 16-scf00496 | 16 |
| AX-158320965 | 25 | 54.836 | KV453089.1 | 9498246  | 16-scf00496 | 16 |
| AX-158320983 | 25 | 54.836 | KV453089.1 | 9527746  | 16-scf00496 | 16 |
| AX-158321055 | 25 | 54.836 | KV453089.1 | 9632468  | 16-scf00496 | 16 |
| AX-158321057 | 25 | 54.836 | KV453089.1 | 9634361  | 16-scf00496 | 16 |
| AX-158321068 | 25 | 54.836 | KV453089.1 | 9645572  | 16-scf00496 | 16 |
| AX-157755031 | 25 | 54.836 | KV453089.1 | 9735606  | 16-scf00496 | 16 |
| AX-158321194 | 25 | 54.836 | KV453089.1 | 9880730  | 16-scf00496 | 16 |
| AX-158321229 | 25 | 54.836 | KV453089.1 | 10026566 | 16-scf00496 | 16 |
| AX-158321446 | 25 | 54.836 | KV453089.1 | 11057644 | 16-scf00496 | 16 |
| AX-158321470 | 25 | 54.836 | KV453089.1 | 11113031 | 16-scf00496 | 16 |
| AX-158321499 | 25 | 54.836 | KV453089.1 | 11186662 | 16-scf00496 | 16 |
| AX-158321519 | 25 | 54.836 | KV453089.1 | 11236918 | 16-scf00496 | 16 |

|              |    |        |            |          |             |    |
|--------------|----|--------|------------|----------|-------------|----|
| AX-158321536 | 25 | 54.836 | KV453089.1 | 11283215 | 16-scf00496 | 16 |
| AX-158321550 | 25 | 54.836 | KV453089.1 | 11323146 | 16-scf00496 | 16 |
| AX-158321551 | 25 | 54.836 | KV453089.1 | 11330987 | 16-scf00496 | 16 |
| AX-158321558 | 25 | 54.836 | KV453089.1 | 11344091 | 16-scf00496 | 16 |
| AX-158321559 | 25 | 54.836 | KV453089.1 | 11344942 | 16-scf00496 | 16 |
| AX-157848312 | 25 | 54.836 | KV453089.1 | 11353989 | 16-scf00496 | 16 |
| AX-157738556 | 25 | 54.836 | KV453089.1 | 11354351 | 16-scf00496 | 16 |
| AX-158321587 | 25 | 54.836 | KV453089.1 | 11392601 | 16-scf00496 | 16 |
| AX-158321591 | 25 | 54.836 | KV453089.1 | 11395586 | 16-scf00496 | 16 |
| AX-158321631 | 25 | 54.836 | KV453089.1 | 11448445 | 16-scf00496 | 16 |
| AX-158321646 | 25 | 54.836 | KV453089.1 | 11463049 | 16-scf00496 | 16 |
| AX-158321647 | 25 | 54.836 | KV453089.1 | 11464032 | 16-scf00496 | 16 |
| AX-158321648 | 25 | 54.836 | KV453089.1 | 11465273 | 16-scf00496 | 16 |
| AX-158321652 | 25 | 54.836 | KV453089.1 | 11468101 | 16-scf00496 | 16 |
| AX-158321653 | 25 | 54.836 | KV453089.1 | 11468679 | 16-scf00496 | 16 |
| AX-158321654 | 25 | 54.836 | KV453089.1 | 11470918 | 16-scf00496 | 16 |
| AX-158321655 | 25 | 54.836 | KV453089.1 | 11472862 | 16-scf00496 | 16 |
| AX-158321657 | 25 | 54.836 | KV453089.1 | 11474074 | 16-scf00496 | 16 |
| AX-158321658 | 25 | 54.836 | KV453089.1 | 11474925 | 16-scf00496 | 16 |
| AX-158321660 | 25 | 54.836 | KV453089.1 | 11476204 | 16-scf00496 | 16 |
| AX-158321664 | 25 | 54.836 | KV453089.1 | 11482373 | 16-scf00496 | 16 |
| AX-158321666 | 25 | 54.836 | KV453089.1 | 11488795 | 16-scf00496 | 16 |
| AX-158321676 | 25 | 54.836 | KV453089.1 | 11506594 | 16-scf00496 | 16 |
| AX-158321677 | 25 | 54.836 | KV453089.1 | 11507329 | 16-scf00496 | 16 |
| AX-158321678 | 25 | 54.836 | KV453089.1 | 11513794 | 16-scf00496 | 16 |
| AX-158381467 | 25 | 54.836 | KV453089.1 | 11513854 | 16-scf00496 | 16 |
| AX-157864069 | 25 | 54.836 | KV453089.1 | 11513936 | 16-scf00496 | 16 |
| AX-158321681 | 25 | 54.836 | KV453089.1 | 11517499 | 16-scf00496 | 16 |
| AX-157805600 | 25 | 54.836 | KV453089.1 | 11519573 | 16-scf00496 | 16 |
| AX-158321685 | 25 | 54.836 | KV453089.1 | 11527305 | 16-scf00496 | 16 |
| AX-158321696 | 25 | 54.836 | KV453089.1 | 11545057 | 16-scf00496 | 16 |
| AX-158321700 | 25 | 54.836 | KV453089.1 | 11549911 | 16-scf00496 | 16 |
| AX-157754101 | 25 | 54.836 | KV453089.1 | 11550803 | 16-scf00496 | 16 |
| AX-158321708 | 25 | 54.836 | KV453089.1 | 11560416 | 16-scf00496 | 16 |
| AX-158321715 | 25 | 54.836 | KV453089.1 | 11574967 | 16-scf00496 | 16 |
| AX-158321716 | 25 | 54.836 | KV453089.1 | 11575368 | 16-scf00496 | 16 |
| AX-157861466 | 25 | 54.836 | KV453089.1 | 11617537 | 16-scf00496 | 16 |
| AX-158321742 | 25 | 54.836 | KV453089.1 | 11621211 | 16-scf00496 | 16 |
| AX-158321744 | 25 | 54.836 | KV453089.1 | 11626459 | 16-scf00496 | 16 |
| AX-158321745 | 25 | 54.836 | KV453089.1 | 11627870 | 16-scf00496 | 16 |
| AX-158321747 | 25 | 54.836 | KV453089.1 | 11632382 | 16-scf00496 | 16 |
| AX-157864071 | 25 | 54.836 | KV453089.1 | 11635949 | 16-scf00496 | 16 |
| AX-158321748 | 25 | 54.836 | KV453089.1 | 11636578 | 16-scf00496 | 16 |
| AX-158321752 | 25 | 54.836 | KV453089.1 | 11649066 | 16-scf00496 | 16 |
| AX-158321753 | 25 | 54.836 | KV453089.1 | 11649690 | 16-scf00496 | 16 |
| AX-157848323 | 25 | 54.836 | KV453089.1 | 11663987 | 16-scf00496 | 16 |
| AX-158321757 | 25 | 54.836 | KV453089.1 | 11664622 | 16-scf00496 | 16 |
| AX-158321768 | 25 | 54.836 | KV453089.1 | 11686315 | 16-scf00496 | 16 |
| AX-157848326 | 25 | 54.836 | KV453089.1 | 11686406 | 16-scf00496 | 16 |
| AX-158321769 | 25 | 54.836 | KV453089.1 | 11693127 | 16-scf00496 | 16 |
| AX-158321770 | 25 | 54.836 | KV453089.1 | 11693551 | 16-scf00496 | 16 |

|              |    |        |            |          |             |    |
|--------------|----|--------|------------|----------|-------------|----|
| AX-158321771 | 25 | 54.836 | KV453089.1 | 11694418 | 16-scf00496 | 16 |
| AX-157848327 | 25 | 54.836 | KV453089.1 | 11699681 | 16-scf00496 | 16 |
| AX-158321777 | 25 | 54.836 | KV453089.1 | 11702130 | 16-scf00496 | 16 |
| AX-158321778 | 25 | 54.836 | KV453089.1 | 11702548 | 16-scf00496 | 16 |
| AX-158321779 | 25 | 54.836 | KV453089.1 | 11703385 | 16-scf00496 | 16 |
| AX-158321780 | 25 | 54.836 | KV453089.1 | 11704913 | 16-scf00496 | 16 |
| AX-158321782 | 25 | 54.836 | KV453089.1 | 11706741 | 16-scf00496 | 16 |
| AX-158321783 | 25 | 54.836 | KV453089.1 | 11707544 | 16-scf00496 | 16 |
| AX-158321784 | 25 | 54.836 | KV453089.1 | 11708351 | 16-scf00496 | 16 |
| AX-157722379 | 25 | 54.836 | KV453089.1 | 11725235 | 16-scf00496 | 16 |
| AX-157771601 | 25 | 54.836 | KV453089.1 | 11742337 | 16-scf00496 | 16 |
| AX-158321796 | 25 | 54.836 | KV453089.1 | 11775863 | 16-scf00496 | 16 |
| AX-158321797 | 25 | 54.836 | KV453089.1 | 11785621 | 16-scf00496 | 16 |
| AX-158321798 | 25 | 54.836 | KV453089.1 | 11787283 | 16-scf00496 | 16 |
| AX-157758462 | 25 | 54.836 | KV453089.1 | 11791380 | 16-scf00496 | 16 |
| AX-158321801 | 25 | 54.836 | KV453089.1 | 11793629 | 16-scf00496 | 16 |
| AX-158321805 | 25 | 54.836 | KV453089.1 | 11799800 | 16-scf00496 | 16 |
| AX-158321817 | 25 | 54.836 | KV453089.1 | 11878390 | 16-scf00496 | 16 |
| AX-158321819 | 25 | 54.836 | KV453089.1 | 11880777 | 16-scf00496 | 16 |
| AX-158321820 | 25 | 54.836 | KV453089.1 | 11881374 | 16-scf00496 | 16 |
| AX-158321826 | 25 | 54.836 | KV453089.1 | 11915454 | 16-scf00496 | 16 |
| AX-158321827 | 25 | 54.836 | KV453089.1 | 11916103 | 16-scf00496 | 16 |
| AX-158420004 | 25 | 54.836 | KV453089.1 | 11919331 | 16-scf00496 | 16 |
| AX-158321828 | 25 | 54.836 | KV453089.1 | 11920420 | 16-scf00496 | 16 |
| AX-158321829 | 25 | 54.836 | KV453089.1 | 11927913 | 16-scf00496 | 16 |
| AX-158321833 | 25 | 54.836 | KV453089.1 | 11932541 | 16-scf00496 | 16 |
| AX-158321834 | 25 | 54.836 | KV453089.1 | 11933228 | 16-scf00496 | 16 |
| AX-158321835 | 25 | 54.836 | KV453089.1 | 11934380 | 16-scf00496 | 16 |
| AX-157888381 | 25 | 54.836 | KV453089.1 | 11936148 | 16-scf00496 | 16 |
| AX-158321838 | 25 | 54.836 | KV453089.1 | 11943142 | 16-scf00496 | 16 |
| AX-158321840 | 25 | 54.836 | KV453089.1 | 11945659 | 16-scf00496 | 16 |
| AX-158321843 | 25 | 54.836 | KV453089.1 | 11950907 | 16-scf00496 | 16 |
| AX-158321844 | 25 | 54.836 | KV453089.1 | 11953711 | 16-scf00496 | 16 |
| AX-158321848 | 25 | 54.836 | KV453089.1 | 11960529 | 16-scf00496 | 16 |
| AX-158321853 | 25 | 54.836 | KV453089.1 | 11968636 | 16-scf00496 | 16 |
| AX-158321854 | 25 | 54.836 | KV453089.1 | 11969002 | 16-scf00496 | 16 |
| AX-158321855 | 25 | 54.836 | KV453089.1 | 11969970 | 16-scf00496 | 16 |
| AX-158321856 | 25 | 54.836 | KV453089.1 | 11971205 | 16-scf00496 | 16 |
| AX-158321864 | 25 | 54.836 | KV453089.1 | 11991488 | 16-scf00496 | 16 |
| AX-158321871 | 25 | 54.836 | KV453089.1 | 11997606 | 16-scf00496 | 16 |
| AX-158321882 | 25 | 54.836 | KV453089.1 | 12004319 | 16-scf00496 | 16 |
| AX-158321883 | 25 | 54.836 | KV453089.1 | 12004827 | 16-scf00496 | 16 |
| AX-158321885 | 25 | 54.836 | KV453089.1 | 12006202 | 16-scf00496 | 16 |
| AX-158321886 | 25 | 54.836 | KV453089.1 | 12007501 | 16-scf00496 | 16 |
| AX-158321893 | 25 | 54.836 | KV453089.1 | 12038639 | 16-scf00496 | 16 |
| AX-158321895 | 25 | 54.836 | KV453089.1 | 12042601 | 16-scf00496 | 16 |
| AX-157848330 | 25 | 54.836 | KV453089.1 | 12045717 | 16-scf00496 | 16 |
| AX-158321897 | 25 | 54.836 | KV453089.1 | 12055378 | 16-scf00496 | 16 |
| AX-158321898 | 25 | 54.836 | KV453089.1 | 12058025 | 16-scf00496 | 16 |
| AX-158321899 | 25 | 54.836 | KV453089.1 | 12058771 | 16-scf00496 | 16 |
| AX-158321903 | 25 | 54.836 | KV453089.1 | 12068645 | 16-scf00496 | 16 |

|              |    |        |            |          |             |    |
|--------------|----|--------|------------|----------|-------------|----|
| AX-158321906 | 25 | 54.836 | KV453089.1 | 12095153 | 16-scf00496 | 16 |
| AX-158321909 | 25 | 54.836 | KV453089.1 | 12103923 | 16-scf00496 | 16 |
| AX-157708835 | 25 | 54.836 | KV453089.1 | 12110656 | 16-scf00496 | 16 |
| AX-158321910 | 25 | 54.836 | KV453089.1 | 12113436 | 16-scf00496 | 16 |
| AX-157848331 | 25 | 54.836 | KV453089.1 | 12114602 | 16-scf00496 | 16 |
| AX-158321911 | 25 | 54.836 | KV453089.1 | 12114849 | 16-scf00496 | 16 |
| AX-158321912 | 25 | 54.836 | KV453089.1 | 12119157 | 16-scf00496 | 16 |
| AX-158321915 | 25 | 54.836 | KV453089.1 | 12123723 | 16-scf00496 | 16 |
| AX-158321922 | 25 | 54.836 | KV453089.1 | 12139907 | 16-scf00496 | 16 |
| AX-158321923 | 25 | 54.836 | KV453089.1 | 12144887 | 16-scf00496 | 16 |
| AX-158321927 | 25 | 54.836 | KV453089.1 | 12166720 | 16-scf00496 | 16 |
| AX-157848332 | 25 | 54.836 | KV453089.1 | 12176080 | 16-scf00496 | 16 |
| AX-158321933 | 25 | 54.836 | KV453089.1 | 12185634 | 16-scf00496 | 16 |
| AX-158321934 | 25 | 54.836 | KV453089.1 | 12186895 | 16-scf00496 | 16 |
| AX-158321936 | 25 | 54.836 | KV453089.1 | 12188957 | 16-scf00496 | 16 |
| AX-158321937 | 25 | 54.836 | KV453089.1 | 12190329 | 16-scf00496 | 16 |
| AX-158321942 | 25 | 54.836 | KV453089.1 | 12216598 | 16-scf00496 | 16 |
| AX-158321999 | 25 | 54.836 | KV453089.1 | 12463221 | 16-scf00496 | 16 |
| AX-158322058 | 25 | 54.836 | KV453089.1 | 12679411 | 16-scf00496 | 16 |
| AX-158322066 | 25 | 54.836 | KV453089.1 | 12707360 | 16-scf00496 | 16 |
| AX-158322097 | 25 | 54.836 | KV453089.1 | 12828505 | 16-scf00496 | 16 |
| AX-158322100 | 25 | 54.836 | KV453089.1 | 12836650 | 16-scf00496 | 16 |
| AX-158322101 | 25 | 54.836 | KV453089.1 | 12836912 | 16-scf00496 | 16 |
| AX-158322118 | 25 | 54.836 | KV453089.1 | 12868033 | 16-scf00496 | 16 |
| AX-158322129 | 25 | 54.836 | KV453089.1 | 12888716 | 16-scf00496 | 16 |
| AX-158322157 | 25 | 54.836 | KV453089.1 | 12947372 | 16-scf00496 | 16 |
| AX-158322160 | 25 | 54.836 | KV453089.1 | 12950235 | 16-scf00496 | 16 |
| AX-158322162 | 25 | 54.836 | KV453089.1 | 12958978 | 16-scf00496 | 16 |
| AX-158322186 | 25 | 54.836 | KV453089.1 | 13009365 | 16-scf00496 | 16 |
| AX-158322223 | 25 | 54.836 | KV453089.1 | 13056966 | 16-scf00496 | 16 |
| AX-158322261 | 25 | 54.836 | KV453089.1 | 13191175 | 16-scf00496 | 16 |
| AX-158322271 | 25 | 54.836 | KV453090.1 | 4206     | 16-scf00499 | 16 |
| AX-158322279 | 25 | 54.836 | KV453090.1 | 39688    | 16-scf00499 | 16 |
| AX-158322280 | 25 | 54.836 | KV453090.1 | 55340    | 16-scf00499 | 16 |
| AX-158322284 | 25 | 54.836 | KV453090.1 | 62660    | 16-scf00499 | 16 |
| AX-157848338 | 25 | 54.836 | KV453090.1 | 83058    | 16-scf00499 | 16 |
| AX-158322299 | 25 | 54.836 | KV453090.1 | 107250   | 16-scf00499 | 16 |
| AX-158322302 | 25 | 54.836 | KV453090.1 | 120802   | 16-scf00499 | 16 |
| AX-158322304 | 25 | 54.836 | KV453090.1 | 125112   | 16-scf00499 | 16 |
| AX-158322312 | 25 | 54.836 | KV453090.1 | 149879   | 16-scf00499 | 16 |
| AX-158322315 | 25 | 54.836 | KV453090.1 | 155227   | 16-scf00499 | 16 |
| AX-158322319 | 25 | 54.836 | KV453090.1 | 166237   | 16-scf00499 | 16 |
| AX-158322320 | 25 | 54.836 | KV453090.1 | 170754   | 16-scf00499 | 16 |
| AX-158322340 | 25 | 54.836 | KV453090.1 | 212157   | 16-scf00499 | 16 |
| AX-158322345 | 25 | 54.836 | KV453090.1 | 222026   | 16-scf00499 | 16 |
| AX-158322355 | 25 | 54.836 | KV453090.1 | 238030   | 16-scf00499 | 16 |
| AX-158322357 | 25 | 54.836 | KV453090.1 | 240077   | 16-scf00499 | 16 |
| AX-158322358 | 25 | 54.836 | KV453090.1 | 242890   | 16-scf00499 | 16 |
| AX-158322360 | 25 | 54.836 | KV453090.1 | 245816   | 16-scf00499 | 16 |
| AX-158322364 | 25 | 54.836 | KV453090.1 | 249511   | 16-scf00499 | 16 |
| AX-158322368 | 25 | 54.836 | KV453090.1 | 261375   | 16-scf00499 | 16 |

|              |    |        |            |         |             |    |
|--------------|----|--------|------------|---------|-------------|----|
| AX-158322369 | 25 | 54.836 | KV453090.1 | 262050  | 16-scf00499 | 16 |
| AX-158322380 | 25 | 54.836 | KV453090.1 | 290848  | 16-scf00499 | 16 |
| AX-158322388 | 25 | 54.836 | KV453090.1 | 304203  | 16-scf00499 | 16 |
| AX-158322398 | 25 | 54.836 | KV453090.1 | 323744  | 16-scf00499 | 16 |
| AX-158420011 | 25 | 54.836 | KV453090.1 | 329870  | 16-scf00499 | 16 |
| AX-157712944 | 25 | 54.836 | KV453090.1 | 386850  | 16-scf00499 | 16 |
| AX-157867867 | 25 | 54.836 | KV453090.1 | 438845  | 16-scf00499 | 16 |
| AX-157848347 | 25 | 54.836 | KV453090.1 | 455276  | 16-scf00499 | 16 |
| AX-157748123 | 25 | 54.836 | KV453090.1 | 470335  | 16-scf00499 | 16 |
| AX-158322477 | 25 | 54.836 | KV453090.1 | 480011  | 16-scf00499 | 16 |
| AX-158322479 | 25 | 54.836 | KV453090.1 | 482729  | 16-scf00499 | 16 |
| AX-158322481 | 25 | 54.836 | KV453090.1 | 484017  | 16-scf00499 | 16 |
| AX-157848351 | 25 | 54.836 | KV453090.1 | 489832  | 16-scf00499 | 16 |
| AX-157848353 | 25 | 54.836 | KV453090.1 | 506605  | 16-scf00499 | 16 |
| AX-158322526 | 25 | 54.836 | KV453090.1 | 577959  | 16-scf00499 | 16 |
| AX-158322541 | 25 | 54.836 | KV453090.1 | 599619  | 16-scf00499 | 16 |
| AX-158322554 | 25 | 54.836 | KV453090.1 | 623085  | 16-scf00499 | 16 |
| AX-158322556 | 25 | 54.836 | KV453090.1 | 624886  | 16-scf00499 | 16 |
| AX-158322560 | 25 | 54.836 | KV453090.1 | 631754  | 16-scf00499 | 16 |
| AX-158322564 | 25 | 54.836 | KV453090.1 | 635797  | 16-scf00499 | 16 |
| AX-158322566 | 25 | 54.836 | KV453090.1 | 640905  | 16-scf00499 | 16 |
| AX-158322567 | 25 | 54.836 | KV453090.1 | 641510  | 16-scf00499 | 16 |
| AX-158322570 | 25 | 54.836 | KV453090.1 | 653994  | 16-scf00499 | 16 |
| AX-157741329 | 25 | 54.836 | KV453090.1 | 676293  | 16-scf00499 | 16 |
| AX-158322609 | 25 | 54.836 | KV453090.1 | 738048  | 16-scf00499 | 16 |
| AX-158322610 | 25 | 54.836 | KV453090.1 | 738769  | 16-scf00499 | 16 |
| AX-157720104 | 25 | 54.836 | KV453090.1 | 742194  | 16-scf00499 | 16 |
| AX-157747824 | 25 | 54.836 | KV453090.1 | 797301  | 16-scf00499 | 16 |
| AX-157848379 | 25 | 54.836 | KV453090.1 | 916967  | 16-scf00499 | 16 |
| AX-158322658 | 25 | 54.836 | KV453090.1 | 926007  | 16-scf00499 | 16 |
| AX-158322669 | 25 | 54.836 | KV453090.1 | 1000152 | 16-scf00499 | 16 |
| AX-158322674 | 25 | 54.836 | KV453090.1 | 1015623 | 16-scf00499 | 16 |
| AX-158322678 | 25 | 54.836 | KV453090.1 | 1052326 | 16-scf00499 | 16 |
| AX-158322704 | 25 | 54.836 | KV453090.1 | 1170856 | 16-scf00499 | 16 |
| AX-158322705 | 25 | 54.836 | KV453090.1 | 1172161 | 16-scf00499 | 16 |
| AX-158322706 | 25 | 54.836 | KV453090.1 | 1175054 | 16-scf00499 | 16 |
| AX-158322707 | 25 | 54.836 | KV453090.1 | 1175482 | 16-scf00499 | 16 |
| AX-158322708 | 25 | 54.836 | KV453090.1 | 1175884 | 16-scf00499 | 16 |
| AX-158322709 | 25 | 54.836 | KV453090.1 | 1176881 | 16-scf00499 | 16 |
| AX-158322717 | 25 | 54.836 | KV453090.1 | 1216494 | 16-scf00499 | 16 |
| AX-158322724 | 25 | 54.836 | KV453090.1 | 1238456 | 16-scf00499 | 16 |
| AX-158322726 | 25 | 54.836 | KV453090.1 | 1256522 | 16-scf00499 | 16 |
| AX-158322735 | 25 | 54.836 | KV453090.1 | 1341722 | 16-scf00499 | 16 |
| AX-158322741 | 25 | 54.836 | KV453090.1 | 1376120 | 16-scf00499 | 16 |
| AX-158323981 | 25 | 54.836 | KV453093.1 | 79587   | 16-scf00501 | 16 |
| AX-158324011 | 25 | 54.836 | KV453093.1 | 374533  | 16-scf00501 | 16 |
| AX-158324026 | 25 | 54.836 | KV453093.1 | 425727  | 16-scf00501 | 16 |
| AX-158324043 | 25 | 54.836 | KV453093.1 | 452806  | 16-scf00501 | 16 |
| AX-157848525 | 25 | 54.836 | KV453093.1 | 532674  | 16-scf00501 | 16 |
| AX-158324105 | 25 | 54.836 | KV453093.1 | 647731  | 16-scf00501 | 16 |
| AX-158324106 | 25 | 54.836 | KV453093.1 | 652716  | 16-scf00501 | 16 |



|              |    |        |            |         |             |    |
|--------------|----|--------|------------|---------|-------------|----|
| AX-158324109 | 25 | 54.836 | KV453093.1 | 660136  | 16-scf00501 | 16 |
| AX-158324110 | 25 | 54.836 | KV453093.1 | 661063  | 16-scf00501 | 16 |
| AX-158324111 | 25 | 54.836 | KV453093.1 | 663320  | 16-scf00501 | 16 |
| AX-158324112 | 25 | 54.836 | KV453093.1 | 666558  | 16-scf00501 | 16 |
| AX-158324172 | 25 | 54.836 | KV453093.1 | 964586  | 16-scf00501 | 16 |
| AX-158324173 | 25 | 54.836 | KV453093.1 | 965060  | 16-scf00501 | 16 |
| AX-158324176 | 25 | 54.836 | KV453093.1 | 978544  | 16-scf00501 | 16 |
| AX-158324180 | 25 | 54.836 | KV453093.1 | 995851  | 16-scf00501 | 16 |
| AX-158324181 | 25 | 54.836 | KV453093.1 | 1003022 | 16-scf00501 | 16 |
| AX-158324185 | 25 | 54.836 | KV453093.1 | 1025479 | 16-scf00501 | 16 |
| AX-158324186 | 25 | 54.836 | KV453093.1 | 1035891 | 16-scf00501 | 16 |
| AX-158324187 | 25 | 54.836 | KV453093.1 | 1058925 | 16-scf00501 | 16 |
| AX-158324188 | 25 | 54.836 | KV453093.1 | 1069383 | 16-scf00501 | 16 |
| AX-158324193 | 25 | 54.836 | KV453093.1 | 1119408 | 16-scf00501 | 16 |
| AX-157703292 | 25 | 54.836 | KV453093.1 | 1135492 | 16-scf00501 | 16 |
| AX-158324199 | 25 | 54.836 | KV453093.1 | 1180641 | 16-scf00501 | 16 |
| AX-158324201 | 25 | 54.836 | KV453093.1 | 1194948 | 16-scf00501 | 16 |
| AX-158324206 | 25 | 54.836 | KV453093.1 | 1220742 | 16-scf00501 | 16 |
| AX-158324212 | 25 | 54.836 | KV453093.1 | 1233361 | 16-scf00501 | 16 |
| AX-158418493 | 25 | 54.836 | KV453093.1 | 1238390 | 16-scf00501 | 16 |
| AX-158324220 | 25 | 54.836 | KV453093.1 | 1262388 | 16-scf00501 | 16 |
| AX-158324221 | 25 | 54.836 | KV453093.1 | 1267146 | 16-scf00501 | 16 |
| AX-158324224 | 25 | 54.836 | KV453093.1 | 1288475 | 16-scf00501 | 16 |
| AX-158324228 | 25 | 54.836 | KV453093.1 | 1308890 | 16-scf00501 | 16 |
| AX-158324231 | 25 | 54.836 | KV453093.1 | 1313251 | 16-scf00501 | 16 |
| AX-158324232 | 25 | 54.836 | KV453093.1 | 1314981 | 16-scf00501 | 16 |
| AX-157848535 | 25 | 54.836 | KV453093.1 | 1318821 | 16-scf00501 | 16 |
| AX-158324239 | 25 | 54.836 | KV453093.1 | 1351615 | 16-scf00501 | 16 |
| AX-158324257 | 25 | 54.836 | KV453093.1 | 1423363 | 16-scf00501 | 16 |
| AX-157772531 | 25 | 54.836 | KV453093.1 | 1437089 | 16-scf00501 | 16 |
| AX-158324268 | 25 | 54.836 | KV453093.1 | 1457243 | 16-scf00501 | 16 |
| AX-158324270 | 25 | 54.836 | KV453093.1 | 1466749 | 16-scf00501 | 16 |
| AX-158324297 | 25 | 54.836 | KV453093.1 | 1548440 | 16-scf00501 | 16 |
| AX-157717755 | 25 | 54.836 | KV453094.1 | 10367   | 16-scf00503 | 16 |
| AX-158324435 | 25 | 54.836 | KV453094.1 | 14149   | 16-scf00503 | 16 |
| AX-158324438 | 25 | 54.836 | KV453094.1 | 59344   | 16-scf00503 | 16 |
| AX-158324439 | 25 | 54.836 | KV453094.1 | 70545   | 16-scf00503 | 16 |
| AX-158324443 | 25 | 54.836 | KV453094.1 | 122227  | 16-scf00503 | 16 |
| AX-158324449 | 25 | 54.836 | KV453094.1 | 163343  | 16-scf00503 | 16 |
| AX-158324451 | 25 | 54.836 | KV453094.1 | 174749  | 16-scf00503 | 16 |
| AX-158324454 | 25 | 54.836 | KV453094.1 | 188891  | 16-scf00503 | 16 |
| AX-158324461 | 25 | 54.836 | KV453094.1 | 298003  | 16-scf00503 | 16 |
| AX-158324474 | 25 | 54.836 | KV453094.1 | 346540  | 16-scf00503 | 16 |
| AX-158324488 | 25 | 54.836 | KV453094.1 | 448709  | 16-scf00503 | 16 |
| AX-158324493 | 25 | 54.836 | KV453094.1 | 528699  | 16-scf00503 | 16 |
| AX-158324569 | 25 | 54.836 | KV453094.1 | 875989  | 16-scf00503 | 16 |
| AX-158324577 | 25 | 54.836 | KV453094.1 | 884007  | 16-scf00503 | 16 |
| AX-158324597 | 25 | 54.836 | KV453094.1 | 912844  | 16-scf00503 | 16 |
| AX-157725798 | 25 | 54.836 | KV453094.1 | 918125  | 16-scf00503 | 16 |
| AX-158324617 | 25 | 54.836 | KV453094.1 | 948244  | 16-scf00503 | 16 |
| AX-158324628 | 25 | 54.836 | KV453094.1 | 978918  | 16-scf00503 | 16 |

|              |    |        |             |         |             |    |
|--------------|----|--------|-------------|---------|-------------|----|
| AX-158376084 | 25 | 54.836 | KV453095.1  | 8111    | 16-scf00570 | 16 |
| AX-158376061 | 25 | 54.836 | KV453095.1  | 221597  | 16-scf00570 | 16 |
| AX-158376050 | 25 | 54.836 | KV453095.1  | 352553  | 16-scf00570 | 16 |
| AX-158376033 | 25 | 54.836 | KV453095.1  | 562737  | 16-scf00570 | 16 |
| AX-157700272 | 25 | 54.836 | KV453095.1  | 765256  | 16-scf00570 | 16 |
| AX-158324374 | 25 | 54.836 | KV453095.1  | 1099535 | 16-scf00570 | 16 |
| AX-158324369 | 25 | 54.836 | KV453095.1  | 1158854 | 16-scf00570 | 16 |
| AX-158324352 | 25 | 54.836 | KV453095.1  | 1291551 | 16-scf00570 | 16 |
| AX-158324309 | 25 | 54.836 | KV453095.1  | 1599727 | 16-scf00570 | 16 |
| AX-157743533 | 25 | 54.836 | KV453095.1  | 1669768 | 16-scf00570 | 16 |
| AX-158418499 | 25 | 54.836 | KV453095.1  | 1673394 | 16-scf00570 | 16 |
| AX-158322752 | 25 | 54.836 | KV453095.1  | 1713895 | 16-scf00570 | 16 |
| AX-158322792 | 25 | 54.836 | KV453095.1  | 1811622 | 16-scf00570 | 16 |
| AX-158322797 | 25 | 54.836 | KV453095.1  | 1818533 | 16-scf00570 | 16 |
| AX-158322798 | 25 | 54.836 | KV453095.1  | 1819006 | 16-scf00570 | 16 |
| AX-158322822 | 25 | 54.836 | KV453095.1  | 1862946 | 16-scf00570 | 16 |
| AX-158322840 | 25 | 54.836 | KV453095.1  | 1888310 | 16-scf00570 | 16 |
| AX-158322922 | 25 | 54.836 | KV453095.1  | 2001905 | 16-scf00570 | 16 |
| AX-157772228 | 25 | 54.836 | KV453095.1  | 2055770 | 16-scf00570 | 16 |
| AX-158322976 | 25 | 54.836 | KV453095.1  | 2065470 | 16-scf00570 | 16 |
| AX-158323043 | 25 | 54.836 | KV453095.1  | 2179230 | 16-scf00570 | 16 |
| AX-157848425 | 25 | 54.836 | KV453095.1  | 2287723 | 16-scf00570 | 16 |
| AX-158323126 | 25 | 54.836 | KV453095.1  | 2291453 | 16-scf00570 | 16 |
| AX-158323244 | 25 | 54.836 | KV453095.1  | 2461249 | 16-scf00570 | 16 |
| AX-157848444 | 25 | 54.836 | KV453095.1  | 2712203 | 16-scf00570 | 16 |
| AX-158323393 | 25 | 54.836 | KV453095.1  | 2712919 | 16-scf00570 | 16 |
| AX-158323403 | 25 | 54.836 | KV453095.1  | 2724937 | 16-scf00570 | 16 |
| AX-158323422 | 25 | 54.836 | KV453095.1  | 2749790 | 16-scf00570 | 16 |
| AX-157867873 | 25 | 54.836 | KV453095.1  | 2846352 | 16-scf00570 | 16 |
| AX-157848456 | 25 | 54.836 | KV453095.1  | 2888569 | 16-scf00570 | 16 |
| AX-158323565 | 25 | 54.836 | KV453095.1  | 3021183 | 16-scf00570 | 16 |
| AX-157709738 | 25 | 54.836 | KV453095.1  | 3033128 | 16-scf00570 | 16 |
| AX-158323652 | 25 | 54.836 | KV453095.1  | 3206476 | 16-scf00570 | 16 |
| AX-158323653 | 25 | 54.836 | KV453095.1  | 3206960 | 16-scf00570 | 16 |
| AX-157848484 | 25 | 54.836 | KV453095.1  | 3215078 | 16-scf00570 | 16 |
| AX-157714551 | 25 | 54.836 | KV453095.1  | 3215836 | 16-scf00570 | 16 |
| AX-158323700 | 25 | 54.836 | KV453095.1  | 3299963 | 16-scf00570 | 16 |
| AX-158323714 | 25 | 54.836 | KV453095.1  | 3325826 | 16-scf00570 | 16 |
| AX-158323728 | 25 | 54.836 | KV453095.1  | 3344624 | 16-scf00570 | 16 |
| AX-158323736 | 25 | 54.836 | KV453095.1  | 3351601 | 16-scf00570 | 16 |
| AX-157755648 | 25 | 54.836 | KV453095.1  | 3547973 | 16-scf00570 | 16 |
| AX-158323938 | 25 | 54.836 | KV453095.1  | 3746625 | 16-scf00570 | 16 |
| AX-158323941 | 25 | 54.836 | KV453095.1  | 3755024 | 16-scf00570 | 16 |
| AX-157685560 | 25 | 54.836 | KV453096.1  | 96548   | 16-scf00625 | 16 |
| AX-157685871 | 25 | 54.836 | KV453092.1  | 40161   | 16-scf00649 | 16 |
| AX-157687511 | 25 | 54.836 | 3ML01024984 | 5302    | scf00910_1  | UN |
| AX-157687512 | 25 | 54.836 | 3ML01024984 | 7341    | scf00910_1  | UN |
| AX-157687921 | 25 | 54.836 | 3ML01025335 | 3760    | scf01097_1  | UN |
| AX-157707469 | 25 | 54.836 | 3ML01034340 | 256     | scf10013_1  | UN |
| AX-158320270 | 25 | 54.945 | KV453089.1  | 8442078 | 16-scf00496 | 16 |
| AX-158322356 | 25 | 54.945 | KV453090.1  | 239106  | 16-scf00499 | 16 |

|              |    |        |            |          |             |    |
|--------------|----|--------|------------|----------|-------------|----|
| AX-158322382 | 25 | 54.945 | KV453090.1 | 295616   | 16-scf00499 | 16 |
| AX-157848546 | 25 | 54.945 | KV453095.1 | 819891   | 16-scf00570 | 16 |
| AX-158322905 | 25 | 54.945 | KV453095.1 | 1972998  | 16-scf00570 | 16 |
| AX-157848426 | 25 | 54.945 | KV453095.1 | 2302980  | 16-scf00570 | 16 |
| AX-158323209 | 25 | 54.945 | KV453095.1 | 2418044  | 16-scf00570 | 16 |
| AX-157848222 | 25 | 55.054 | KV453089.1 | 8527024  | 16-scf00496 | 16 |
| AX-158321086 | 25 | 55.054 | KV453089.1 | 9683287  | 16-scf00496 | 16 |
| AX-158321137 | 25 | 55.054 | KV453089.1 | 9750507  | 16-scf00496 | 16 |
| AX-158321164 | 25 | 55.054 | KV453089.1 | 9796565  | 16-scf00496 | 16 |
| AX-157725425 | 25 | 55.054 | KV453089.1 | 11485353 | 16-scf00496 | 16 |
| AX-158321695 | 25 | 55.054 | KV453089.1 | 11544385 | 16-scf00496 | 16 |
| AX-158321726 | 25 | 55.054 | KV453089.1 | 11596550 | 16-scf00496 | 16 |
| AX-158321821 | 25 | 55.054 | KV453089.1 | 11893116 | 16-scf00496 | 16 |
| AX-158322383 | 25 | 55.054 | KV453090.1 | 297485   | 16-scf00499 | 16 |
| AX-158322384 | 25 | 55.054 | KV453090.1 | 299824   | 16-scf00499 | 16 |
| AX-158322387 | 25 | 55.054 | KV453090.1 | 304112   | 16-scf00499 | 16 |
| AX-158322400 | 25 | 55.054 | KV453090.1 | 326013   | 16-scf00499 | 16 |
| AX-158322403 | 25 | 55.054 | KV453090.1 | 330654   | 16-scf00499 | 16 |
| AX-158322405 | 25 | 55.054 | KV453090.1 | 333008   | 16-scf00499 | 16 |
| AX-158420012 | 25 | 55.054 | KV453090.1 | 334594   | 16-scf00499 | 16 |
| AX-158322409 | 25 | 55.054 | KV453090.1 | 338059   | 16-scf00499 | 16 |
| AX-158322452 | 25 | 55.054 | KV453090.1 | 426711   | 16-scf00499 | 16 |
| AX-158322525 | 25 | 55.054 | KV453090.1 | 571670   | 16-scf00499 | 16 |
| AX-158323991 | 25 | 55.054 | KV453093.1 | 209674   | 16-scf00501 | 16 |
| AX-158322830 | 25 | 55.054 | KV453095.1 | 1877915  | 16-scf00570 | 16 |
| AX-158322859 | 25 | 55.054 | KV453095.1 | 1911281  | 16-scf00570 | 16 |
| AX-158322885 | 25 | 55.054 | KV453095.1 | 1953227  | 16-scf00570 | 16 |
| AX-158323661 | 25 | 55.054 | KV453095.1 | 3221029  | 16-scf00570 | 16 |
| AX-158321571 | 25 | 55.084 | KV453089.1 | 11367623 | 16-scf00496 | 16 |
| AX-158321630 | 25 | 55.084 | KV453089.1 | 11447715 | 16-scf00496 | 16 |
| AX-158321697 | 25 | 55.084 | KV453089.1 | 11546228 | 16-scf00496 | 16 |
| AX-158321760 | 25 | 55.084 | KV453089.1 | 11672958 | 16-scf00496 | 16 |
| AX-158321804 | 25 | 55.084 | KV453089.1 | 11799472 | 16-scf00496 | 16 |
| AX-158321811 | 25 | 55.084 | KV453089.1 | 11815311 | 16-scf00496 | 16 |
| AX-157717776 | 25 | 55.084 | KV453090.1 | 101078   | 16-scf00499 | 16 |
| AX-158322300 | 25 | 55.084 | KV453090.1 | 110728   | 16-scf00499 | 16 |
| AX-158322449 | 25 | 55.084 | KV453090.1 | 420659   | 16-scf00499 | 16 |
| AX-158322454 | 25 | 55.084 | KV453090.1 | 431290   | 16-scf00499 | 16 |
| AX-158322491 | 25 | 55.084 | KV453090.1 | 502392   | 16-scf00499 | 16 |
| AX-158323996 | 25 | 55.084 | KV453093.1 | 233163   | 16-scf00501 | 16 |
| AX-158324200 | 25 | 55.084 | KV453093.1 | 1191980  | 16-scf00501 | 16 |
| AX-158324246 | 25 | 55.084 | KV453093.1 | 1382764  | 16-scf00501 | 16 |
| AX-158324248 | 25 | 55.084 | KV453093.1 | 1393912  | 16-scf00501 | 16 |
| AX-158324249 | 25 | 55.084 | KV453093.1 | 1397523  | 16-scf00501 | 16 |
| AX-158324259 | 25 | 55.084 | KV453093.1 | 1428732  | 16-scf00501 | 16 |
| AX-158324261 | 25 | 55.084 | KV453093.1 | 1430609  | 16-scf00501 | 16 |
| AX-158324273 | 25 | 55.084 | KV453093.1 | 1480704  | 16-scf00501 | 16 |
| AX-158324292 | 25 | 55.084 | KV453093.1 | 1530343  | 16-scf00501 | 16 |
| AX-158324440 | 25 | 55.084 | KV453094.1 | 71900    | 16-scf00503 | 16 |
| AX-158324453 | 25 | 55.084 | KV453094.1 | 182799   | 16-scf00503 | 16 |
| AX-158324458 | 25 | 55.084 | KV453094.1 | 226295   | 16-scf00503 | 16 |

|              |    |        |            |          |             |    |
|--------------|----|--------|------------|----------|-------------|----|
| AX-158324462 | 25 | 55.084 | KV453094.1 | 301333   | 16-scf00503 | 16 |
| AX-158324468 | 25 | 55.084 | KV453094.1 | 315595   | 16-scf00503 | 16 |
| AX-158324473 | 25 | 55.084 | KV453094.1 | 342695   | 16-scf00503 | 16 |
| AX-158324480 | 25 | 55.084 | KV453094.1 | 395451   | 16-scf00503 | 16 |
| AX-158324481 | 25 | 55.084 | KV453094.1 | 398746   | 16-scf00503 | 16 |
| AX-158321636 | 25 | 55.109 | KV453089.1 | 11453530 | 16-scf00496 | 16 |
| AX-158321917 | 25 | 55.109 | KV453089.1 | 12131914 | 16-scf00496 | 16 |
| AX-158321930 | 25 | 55.109 | KV453089.1 | 12177724 | 16-scf00496 | 16 |
| AX-158322412 | 25 | 55.109 | KV453090.1 | 340800   | 16-scf00499 | 16 |
| AX-158322414 | 25 | 55.109 | KV453090.1 | 344633   | 16-scf00499 | 16 |
| AX-158322415 | 25 | 55.109 | KV453090.1 | 346441   | 16-scf00499 | 16 |
| AX-158322417 | 25 | 55.109 | KV453090.1 | 348167   | 16-scf00499 | 16 |
| AX-158322419 | 25 | 55.109 | KV453090.1 | 350954   | 16-scf00499 | 16 |
| AX-158322422 | 25 | 55.109 | KV453090.1 | 360723   | 16-scf00499 | 16 |
| AX-158322423 | 25 | 55.109 | KV453090.1 | 364036   | 16-scf00499 | 16 |
| AX-158322465 | 25 | 55.109 | KV453090.1 | 455568   | 16-scf00499 | 16 |
| AX-157848357 | 25 | 55.109 | KV453090.1 | 645568   | 16-scf00499 | 16 |
| AX-158324467 | 25 | 55.109 | KV453094.1 | 314148   | 16-scf00503 | 16 |
| AX-158324482 | 25 | 55.109 | KV453094.1 | 405827   | 16-scf00503 | 16 |
| AX-158322489 | 25 | 55.14  | KV453090.1 | 497385   | 16-scf00499 | 16 |
| AX-158321633 | 25 | 55.163 | KV453089.1 | 11449574 | 16-scf00496 | 16 |
| AX-158321651 | 25 | 55.163 | KV453089.1 | 11467920 | 16-scf00496 | 16 |
| AX-158321674 | 25 | 55.163 | KV453089.1 | 11504611 | 16-scf00496 | 16 |
| AX-158322156 | 25 | 55.163 | KV453089.1 | 12946284 | 16-scf00496 | 16 |
| AX-158322206 | 25 | 55.163 | KV453089.1 | 13035428 | 16-scf00496 | 16 |
| AX-157888397 | 25 | 55.163 | KV453089.1 | 13051659 | 16-scf00496 | 16 |
| AX-157888398 | 25 | 55.163 | KV453089.1 | 13054752 | 16-scf00496 | 16 |
| AX-158322222 | 25 | 55.163 | KV453089.1 | 13056674 | 16-scf00496 | 16 |
| AX-158322498 | 25 | 55.163 | KV453090.1 | 518075   | 16-scf00499 | 16 |
| AX-158322499 | 25 | 55.163 | KV453090.1 | 519995   | 16-scf00499 | 16 |
| AX-157694387 | 25 | 55.163 | KV453090.1 | 520191   | 16-scf00499 | 16 |
| AX-158322501 | 25 | 55.163 | KV453090.1 | 522307   | 16-scf00499 | 16 |
| AX-158322512 | 25 | 55.163 | KV453090.1 | 550705   | 16-scf00499 | 16 |
| AX-157725190 | 25 | 55.163 | KV453090.1 | 554682   | 16-scf00499 | 16 |
| AX-158322521 | 25 | 55.163 | KV453090.1 | 566283   | 16-scf00499 | 16 |
| AX-158322522 | 25 | 55.163 | KV453090.1 | 568059   | 16-scf00499 | 16 |
| AX-158321012 | 25 | 55.222 | KV453089.1 | 9562559  | 16-scf00496 | 16 |
| AX-158321474 | 25 | 55.222 | KV453089.1 | 11117433 | 16-scf00496 | 16 |
| AX-158322565 | 25 | 55.222 | KV453090.1 | 636214   | 16-scf00499 | 16 |
| AX-157773576 | 25 | 55.273 | KV453090.1 | 642993   | 16-scf00499 | 16 |
| AX-157848356 | 25 | 55.288 | KV453090.1 | 643616   | 16-scf00499 | 16 |
| AX-158322571 | 25 | 55.307 | KV453090.1 | 657895   | 16-scf00499 | 16 |
| AX-157848358 | 25 | 55.323 | KV453090.1 | 661128   | 16-scf00499 | 16 |
| AX-157848359 | 25 | 55.344 | KV453090.1 | 663720   | 16-scf00499 | 16 |
| AX-158321606 | 25 | 55.367 | KV453089.1 | 11413395 | 16-scf00496 | 16 |
| AX-158321628 | 25 | 55.367 | KV453089.1 | 11442474 | 16-scf00496 | 16 |
| AX-158321687 | 25 | 55.367 | KV453089.1 | 11529708 | 16-scf00496 | 16 |
| AX-158321717 | 25 | 55.367 | KV453089.1 | 11578441 | 16-scf00496 | 16 |
| AX-158321718 | 25 | 55.367 | KV453089.1 | 11578937 | 16-scf00496 | 16 |
| AX-158321719 | 25 | 55.367 | KV453089.1 | 11582539 | 16-scf00496 | 16 |
| AX-158322000 | 25 | 55.367 | KV453089.1 | 12464335 | 16-scf00496 | 16 |

|              |    |        |            |          |             |    |
|--------------|----|--------|------------|----------|-------------|----|
| AX-158322152 | 25 | 55.367 | KV453089.1 | 12934966 | 16-scf00496 | 16 |
| AX-158322192 | 25 | 55.367 | KV453089.1 | 13019341 | 16-scf00496 | 16 |
| AX-158322208 | 25 | 55.367 | KV453089.1 | 13037027 | 16-scf00496 | 16 |
| AX-158322210 | 25 | 55.367 | KV453089.1 | 13044280 | 16-scf00496 | 16 |
| AX-158322211 | 25 | 55.367 | KV453089.1 | 13045955 | 16-scf00496 | 16 |
| AX-158322213 | 25 | 55.367 | KV453089.1 | 13047693 | 16-scf00496 | 16 |
| AX-158322221 | 25 | 55.367 | KV453089.1 | 13056133 | 16-scf00496 | 16 |
| AX-158322225 | 25 | 55.367 | KV453089.1 | 13061366 | 16-scf00496 | 16 |
| AX-157848360 | 25 | 55.367 | KV453090.1 | 664481   | 16-scf00499 | 16 |
| AX-158322641 | 25 | 55.367 | KV453090.1 | 835823   | 16-scf00499 | 16 |
| AX-158322661 | 25 | 55.367 | KV453090.1 | 942099   | 16-scf00499 | 16 |
| AX-158324004 | 25 | 55.367 | KV453093.1 | 310659   | 16-scf00501 | 16 |
| AX-158324005 | 25 | 55.367 | KV453093.1 | 326019   | 16-scf00501 | 16 |
| AX-158324058 | 25 | 55.367 | KV453093.1 | 511184   | 16-scf00501 | 16 |
| AX-157867875 | 25 | 55.367 | KV453093.1 | 518972   | 16-scf00501 | 16 |
| AX-157867876 | 25 | 55.367 | KV453093.1 | 526550   | 16-scf00501 | 16 |
| AX-158324062 | 25 | 55.367 | KV453093.1 | 534267   | 16-scf00501 | 16 |
| AX-158324094 | 25 | 55.367 | KV453093.1 | 625014   | 16-scf00501 | 16 |
| AX-158324429 | 25 | 55.367 | KV453095.1 | 629483   | 16-scf00570 | 16 |
| AX-158322756 | 25 | 55.367 | KV453095.1 | 1723899  | 16-scf00570 | 16 |
| AX-158322759 | 25 | 55.367 | KV453095.1 | 1731141  | 16-scf00570 | 16 |
| AX-158322765 | 25 | 55.367 | KV453095.1 | 1752774  | 16-scf00570 | 16 |
| AX-158322768 | 25 | 55.367 | KV453095.1 | 1763487  | 16-scf00570 | 16 |
| AX-158320185 | 25 | 55.382 | KV453089.1 | 8323770  | 16-scf00496 | 16 |
| AX-158320642 | 25 | 55.382 | KV453089.1 | 8940194  | 16-scf00496 | 16 |
| AX-157700390 | 25 | 55.382 | KV453089.1 | 9124467  | 16-scf00496 | 16 |
| AX-158320810 | 25 | 55.382 | KV453089.1 | 9258655  | 16-scf00496 | 16 |
| AX-158321029 | 25 | 55.382 | KV453089.1 | 9592557  | 16-scf00496 | 16 |
| AX-158418342 | 25 | 55.382 | KV453089.1 | 9670961  | 16-scf00496 | 16 |
| AX-158321102 | 25 | 55.382 | KV453089.1 | 9698969  | 16-scf00496 | 16 |
| AX-158321178 | 25 | 55.382 | KV453089.1 | 9820095  | 16-scf00496 | 16 |
| AX-158321179 | 25 | 55.382 | KV453089.1 | 9820682  | 16-scf00496 | 16 |
| AX-158321200 | 25 | 55.382 | KV453089.1 | 9911856  | 16-scf00496 | 16 |
| AX-157848301 | 25 | 55.382 | KV453089.1 | 11209092 | 16-scf00496 | 16 |
| AX-158321511 | 25 | 55.382 | KV453089.1 | 11211117 | 16-scf00496 | 16 |
| AX-158321517 | 25 | 55.382 | KV453089.1 | 11233315 | 16-scf00496 | 16 |
| AX-158321525 | 25 | 55.382 | KV453089.1 | 11246702 | 16-scf00496 | 16 |
| AX-158321528 | 25 | 55.382 | KV453089.1 | 11258327 | 16-scf00496 | 16 |
| AX-157848311 | 25 | 55.382 | KV453089.1 | 11352376 | 16-scf00496 | 16 |
| AX-158321578 | 25 | 55.382 | KV453089.1 | 11383193 | 16-scf00496 | 16 |
| AX-158321581 | 25 | 55.382 | KV453089.1 | 11385438 | 16-scf00496 | 16 |
| AX-158321589 | 25 | 55.382 | KV453089.1 | 11394371 | 16-scf00496 | 16 |
| AX-157881393 | 25 | 55.382 | KV453089.1 | 11417250 | 16-scf00496 | 16 |
| AX-158321619 | 25 | 55.382 | KV453089.1 | 11426680 | 16-scf00496 | 16 |
| AX-158321635 | 25 | 55.382 | KV453089.1 | 11452538 | 16-scf00496 | 16 |
| AX-158321638 | 25 | 55.382 | KV453089.1 | 11454965 | 16-scf00496 | 16 |
| AX-158321639 | 25 | 55.382 | KV453089.1 | 11456661 | 16-scf00496 | 16 |
| AX-158321642 | 25 | 55.382 | KV453089.1 | 11458903 | 16-scf00496 | 16 |
| AX-158321643 | 25 | 55.382 | KV453089.1 | 11459686 | 16-scf00496 | 16 |
| AX-158321693 | 25 | 55.382 | KV453089.1 | 11542147 | 16-scf00496 | 16 |
| AX-158321707 | 25 | 55.382 | KV453089.1 | 11559836 | 16-scf00496 | 16 |

|              |    |        |            |          |             |    |
|--------------|----|--------|------------|----------|-------------|----|
| AX-157861465 | 25 | 55.382 | KV453089.1 | 11599773 | 16-scf00496 | 16 |
| AX-157739227 | 25 | 55.382 | KV453089.1 | 11636726 | 16-scf00496 | 16 |
| AX-158321749 | 25 | 55.382 | KV453089.1 | 11637427 | 16-scf00496 | 16 |
| AX-158321751 | 25 | 55.382 | KV453089.1 | 11643597 | 16-scf00496 | 16 |
| AX-158321765 | 25 | 55.382 | KV453089.1 | 11678570 | 16-scf00496 | 16 |
| AX-158321772 | 25 | 55.382 | KV453089.1 | 11694886 | 16-scf00496 | 16 |
| AX-158321773 | 25 | 55.382 | KV453089.1 | 11695530 | 16-scf00496 | 16 |
| AX-158321791 | 25 | 55.382 | KV453089.1 | 11745724 | 16-scf00496 | 16 |
| AX-158418383 | 25 | 55.382 | KV453089.1 | 11917003 | 16-scf00496 | 16 |
| AX-158420003 | 25 | 55.382 | KV453089.1 | 11919279 | 16-scf00496 | 16 |
| AX-158321830 | 25 | 55.382 | KV453089.1 | 11928570 | 16-scf00496 | 16 |
| AX-158321836 | 25 | 55.382 | KV453089.1 | 11934816 | 16-scf00496 | 16 |
| AX-158321837 | 25 | 55.382 | KV453089.1 | 11942166 | 16-scf00496 | 16 |
| AX-158321839 | 25 | 55.382 | KV453089.1 | 11943881 | 16-scf00496 | 16 |
| AX-158321841 | 25 | 55.382 | KV453089.1 | 11947717 | 16-scf00496 | 16 |
| AX-158321842 | 25 | 55.382 | KV453089.1 | 11948096 | 16-scf00496 | 16 |
| AX-158321845 | 25 | 55.382 | KV453089.1 | 11955957 | 16-scf00496 | 16 |
| AX-158321850 | 25 | 55.382 | KV453089.1 | 11963762 | 16-scf00496 | 16 |
| AX-158321851 | 25 | 55.382 | KV453089.1 | 11966009 | 16-scf00496 | 16 |
| AX-158321852 | 25 | 55.382 | KV453089.1 | 11966594 | 16-scf00496 | 16 |
| AX-158321859 | 25 | 55.382 | KV453089.1 | 11977817 | 16-scf00496 | 16 |
| AX-158321862 | 25 | 55.382 | KV453089.1 | 11989233 | 16-scf00496 | 16 |
| AX-158321865 | 25 | 55.382 | KV453089.1 | 11992816 | 16-scf00496 | 16 |
| AX-158321866 | 25 | 55.382 | KV453089.1 | 11993754 | 16-scf00496 | 16 |
| AX-158321867 | 25 | 55.382 | KV453089.1 | 11994719 | 16-scf00496 | 16 |
| AX-158321872 | 25 | 55.382 | KV453089.1 | 11998044 | 16-scf00496 | 16 |
| AX-158321873 | 25 | 55.382 | KV453089.1 | 11998544 | 16-scf00496 | 16 |
| AX-158321874 | 25 | 55.382 | KV453089.1 | 11998980 | 16-scf00496 | 16 |
| AX-158321875 | 25 | 55.382 | KV453089.1 | 11999563 | 16-scf00496 | 16 |
| AX-158321876 | 25 | 55.382 | KV453089.1 | 12000749 | 16-scf00496 | 16 |
| AX-158321878 | 25 | 55.382 | KV453089.1 | 12001937 | 16-scf00496 | 16 |
| AX-158321879 | 25 | 55.382 | KV453089.1 | 12002291 | 16-scf00496 | 16 |
| AX-158321891 | 25 | 55.382 | KV453089.1 | 12020561 | 16-scf00496 | 16 |
| AX-158321894 | 25 | 55.382 | KV453089.1 | 12039452 | 16-scf00496 | 16 |
| AX-158321896 | 25 | 55.382 | KV453089.1 | 12047132 | 16-scf00496 | 16 |
| AX-158322099 | 25 | 55.382 | KV453089.1 | 12830606 | 16-scf00496 | 16 |
| AX-158322120 | 25 | 55.382 | KV453089.1 | 12869464 | 16-scf00496 | 16 |
| AX-158322163 | 25 | 55.382 | KV453089.1 | 12961405 | 16-scf00496 | 16 |
| AX-158322266 | 25 | 55.382 | KV453089.1 | 13203608 | 16-scf00496 | 16 |
| AX-158322292 | 25 | 55.382 | KV453090.1 | 83123    | 16-scf00499 | 16 |
| AX-158322327 | 25 | 55.382 | KV453090.1 | 179773   | 16-scf00499 | 16 |
| AX-158322331 | 25 | 55.382 | KV453090.1 | 193096   | 16-scf00499 | 16 |
| AX-158322413 | 25 | 55.382 | KV453090.1 | 341793   | 16-scf00499 | 16 |
| AX-158322428 | 25 | 55.382 | KV453090.1 | 370214   | 16-scf00499 | 16 |
| AX-158322430 | 25 | 55.382 | KV453090.1 | 372455   | 16-scf00499 | 16 |
| AX-158322503 | 25 | 55.382 | KV453090.1 | 523511   | 16-scf00499 | 16 |
| AX-158322510 | 25 | 55.382 | KV453090.1 | 546198   | 16-scf00499 | 16 |
| AX-157881414 | 25 | 55.382 | KV453090.1 | 555984   | 16-scf00499 | 16 |
| AX-158322518 | 25 | 55.382 | KV453090.1 | 561968   | 16-scf00499 | 16 |
| AX-158322524 | 25 | 55.382 | KV453090.1 | 571271   | 16-scf00499 | 16 |
| AX-158322582 | 25 | 55.382 | KV453090.1 | 678182   | 16-scf00499 | 16 |

|              |    |        |            |         |             |    |
|--------------|----|--------|------------|---------|-------------|----|
| AX-158322583 | 25 | 55.382 | KV453090.1 | 679978  | 16-scf00499 | 16 |
| AX-158322587 | 25 | 55.382 | KV453090.1 | 683056  | 16-scf00499 | 16 |
| AX-158322588 | 25 | 55.382 | KV453090.1 | 684664  | 16-scf00499 | 16 |
| AX-158322590 | 25 | 55.382 | KV453090.1 | 685599  | 16-scf00499 | 16 |
| AX-158322591 | 25 | 55.382 | KV453090.1 | 686943  | 16-scf00499 | 16 |
| AX-158322593 | 25 | 55.382 | KV453090.1 | 688350  | 16-scf00499 | 16 |
| AX-158322594 | 25 | 55.382 | KV453090.1 | 689287  | 16-scf00499 | 16 |
| AX-158322597 | 25 | 55.382 | KV453090.1 | 698443  | 16-scf00499 | 16 |
| AX-158322604 | 25 | 55.382 | KV453090.1 | 718841  | 16-scf00499 | 16 |
| AX-158322608 | 25 | 55.382 | KV453090.1 | 736310  | 16-scf00499 | 16 |
| AX-158322611 | 25 | 55.382 | KV453090.1 | 739306  | 16-scf00499 | 16 |
| AX-158322613 | 25 | 55.382 | KV453090.1 | 741110  | 16-scf00499 | 16 |
| AX-158322615 | 25 | 55.382 | KV453090.1 | 742371  | 16-scf00499 | 16 |
| AX-158322620 | 25 | 55.382 | KV453090.1 | 752032  | 16-scf00499 | 16 |
| AX-157848367 | 25 | 55.382 | KV453090.1 | 780564  | 16-scf00499 | 16 |
| AX-157743410 | 25 | 55.382 | KV453090.1 | 794989  | 16-scf00499 | 16 |
| AX-158322633 | 25 | 55.382 | KV453090.1 | 796428  | 16-scf00499 | 16 |
| AX-158322634 | 25 | 55.382 | KV453090.1 | 802101  | 16-scf00499 | 16 |
| AX-158420015 | 25 | 55.382 | KV453090.1 | 805859  | 16-scf00499 | 16 |
| AX-157861467 | 25 | 55.382 | KV453090.1 | 808130  | 16-scf00499 | 16 |
| AX-157848373 | 25 | 55.382 | KV453090.1 | 812249  | 16-scf00499 | 16 |
| AX-158322636 | 25 | 55.382 | KV453090.1 | 817056  | 16-scf00499 | 16 |
| AX-158322637 | 25 | 55.382 | KV453090.1 | 818475  | 16-scf00499 | 16 |
| AX-158322638 | 25 | 55.382 | KV453090.1 | 826859  | 16-scf00499 | 16 |
| AX-158322639 | 25 | 55.382 | KV453090.1 | 827612  | 16-scf00499 | 16 |
| AX-158322642 | 25 | 55.382 | KV453090.1 | 838136  | 16-scf00499 | 16 |
| AX-157861468 | 25 | 55.382 | KV453090.1 | 839132  | 16-scf00499 | 16 |
| AX-158322643 | 25 | 55.382 | KV453090.1 | 840447  | 16-scf00499 | 16 |
| AX-157848374 | 25 | 55.382 | KV453090.1 | 847351  | 16-scf00499 | 16 |
| AX-158322645 | 25 | 55.382 | KV453090.1 | 848201  | 16-scf00499 | 16 |
| AX-157848375 | 25 | 55.382 | KV453090.1 | 849763  | 16-scf00499 | 16 |
| AX-158322647 | 25 | 55.382 | KV453090.1 | 856946  | 16-scf00499 | 16 |
| AX-158322651 | 25 | 55.382 | KV453090.1 | 879721  | 16-scf00499 | 16 |
| AX-157848376 | 25 | 55.382 | KV453090.1 | 887651  | 16-scf00499 | 16 |
| AX-158322652 | 25 | 55.382 | KV453090.1 | 890764  | 16-scf00499 | 16 |
| AX-157848377 | 25 | 55.382 | KV453090.1 | 902429  | 16-scf00499 | 16 |
| AX-158322654 | 25 | 55.382 | KV453090.1 | 903468  | 16-scf00499 | 16 |
| AX-157848378 | 25 | 55.382 | KV453090.1 | 915042  | 16-scf00499 | 16 |
| AX-157848380 | 25 | 55.382 | KV453090.1 | 917410  | 16-scf00499 | 16 |
| AX-157873613 | 25 | 55.382 | KV453090.1 | 936433  | 16-scf00499 | 16 |
| AX-157717215 | 25 | 55.382 | KV453090.1 | 951630  | 16-scf00499 | 16 |
| AX-157848383 | 25 | 55.382 | KV453090.1 | 952203  | 16-scf00499 | 16 |
| AX-157848384 | 25 | 55.382 | KV453090.1 | 973413  | 16-scf00499 | 16 |
| AX-157691594 | 25 | 55.382 | KV453090.1 | 978977  | 16-scf00499 | 16 |
| AX-158418419 | 25 | 55.382 | KV453090.1 | 997954  | 16-scf00499 | 16 |
| AX-157848385 | 25 | 55.382 | KV453090.1 | 1048955 | 16-scf00499 | 16 |
| AX-157848387 | 25 | 55.382 | KV453090.1 | 1066662 | 16-scf00499 | 16 |
| AX-158322689 | 25 | 55.382 | KV453090.1 | 1114899 | 16-scf00499 | 16 |
| AX-158322693 | 25 | 55.382 | KV453090.1 | 1123409 | 16-scf00499 | 16 |
| AX-158322694 | 25 | 55.382 | KV453090.1 | 1125696 | 16-scf00499 | 16 |
| AX-157881416 | 25 | 55.382 | KV453090.1 | 1152467 | 16-scf00499 | 16 |

|              |    |        |            |         |             |    |
|--------------|----|--------|------------|---------|-------------|----|
| AX-158322697 | 25 | 55.382 | KV453090.1 | 1153948 | 16-scf00499 | 16 |
| AX-158322698 | 25 | 55.382 | KV453090.1 | 1158121 | 16-scf00499 | 16 |
| AX-158322700 | 25 | 55.382 | KV453090.1 | 1159303 | 16-scf00499 | 16 |
| AX-158322711 | 25 | 55.382 | KV453090.1 | 1182465 | 16-scf00499 | 16 |
| AX-158322721 | 25 | 55.382 | KV453090.1 | 1230680 | 16-scf00499 | 16 |
| AX-158322739 | 25 | 55.382 | KV453090.1 | 1372604 | 16-scf00499 | 16 |
| AX-158323973 | 25 | 55.382 | KV453093.1 | 26106   | 16-scf00501 | 16 |
| AX-158323974 | 25 | 55.382 | KV453093.1 | 36740   | 16-scf00501 | 16 |
| AX-158323976 | 25 | 55.382 | KV453093.1 | 59269   | 16-scf00501 | 16 |
| AX-157757903 | 25 | 55.382 | KV453093.1 | 61838   | 16-scf00501 | 16 |
| AX-158323977 | 25 | 55.382 | KV453093.1 | 62451   | 16-scf00501 | 16 |
| AX-157848518 | 25 | 55.382 | KV453093.1 | 64341   | 16-scf00501 | 16 |
| AX-158323983 | 25 | 55.382 | KV453093.1 | 98383   | 16-scf00501 | 16 |
| AX-157848519 | 25 | 55.382 | KV453093.1 | 172613  | 16-scf00501 | 16 |
| AX-157848520 | 25 | 55.382 | KV453093.1 | 207566  | 16-scf00501 | 16 |
| AX-158323990 | 25 | 55.382 | KV453093.1 | 208478  | 16-scf00501 | 16 |
| AX-158323994 | 25 | 55.382 | KV453093.1 | 230317  | 16-scf00501 | 16 |
| AX-158323997 | 25 | 55.382 | KV453093.1 | 234496  | 16-scf00501 | 16 |
| AX-158324001 | 25 | 55.382 | KV453093.1 | 262996  | 16-scf00501 | 16 |
| AX-158324002 | 25 | 55.382 | KV453093.1 | 274518  | 16-scf00501 | 16 |
| AX-158324006 | 25 | 55.382 | KV453093.1 | 336534  | 16-scf00501 | 16 |
| AX-157848522 | 25 | 55.382 | KV453093.1 | 346424  | 16-scf00501 | 16 |
| AX-158324008 | 25 | 55.382 | KV453093.1 | 352770  | 16-scf00501 | 16 |
| AX-158324016 | 25 | 55.382 | KV453093.1 | 397861  | 16-scf00501 | 16 |
| AX-158324017 | 25 | 55.382 | KV453093.1 | 417030  | 16-scf00501 | 16 |
| AX-158324020 | 25 | 55.382 | KV453093.1 | 419316  | 16-scf00501 | 16 |
| AX-158324022 | 25 | 55.382 | KV453093.1 | 424040  | 16-scf00501 | 16 |
| AX-158324023 | 25 | 55.382 | KV453093.1 | 424301  | 16-scf00501 | 16 |
| AX-158324024 | 25 | 55.382 | KV453093.1 | 424810  | 16-scf00501 | 16 |
| AX-158324025 | 25 | 55.382 | KV453093.1 | 425497  | 16-scf00501 | 16 |
| AX-158324027 | 25 | 55.382 | KV453093.1 | 426577  | 16-scf00501 | 16 |
| AX-158324028 | 25 | 55.382 | KV453093.1 | 427476  | 16-scf00501 | 16 |
| AX-158324031 | 25 | 55.382 | KV453093.1 | 433752  | 16-scf00501 | 16 |
| AX-158324032 | 25 | 55.382 | KV453093.1 | 433920  | 16-scf00501 | 16 |
| AX-158324033 | 25 | 55.382 | KV453093.1 | 434697  | 16-scf00501 | 16 |
| AX-158324034 | 25 | 55.382 | KV453093.1 | 435564  | 16-scf00501 | 16 |
| AX-157848523 | 25 | 55.382 | KV453093.1 | 436862  | 16-scf00501 | 16 |
| AX-158324035 | 25 | 55.382 | KV453093.1 | 438839  | 16-scf00501 | 16 |
| AX-158324036 | 25 | 55.382 | KV453093.1 | 443205  | 16-scf00501 | 16 |
| AX-158324037 | 25 | 55.382 | KV453093.1 | 443744  | 16-scf00501 | 16 |
| AX-158324038 | 25 | 55.382 | KV453093.1 | 444719  | 16-scf00501 | 16 |
| AX-158324039 | 25 | 55.382 | KV453093.1 | 445105  | 16-scf00501 | 16 |
| AX-158324040 | 25 | 55.382 | KV453093.1 | 445736  | 16-scf00501 | 16 |
| AX-158324041 | 25 | 55.382 | KV453093.1 | 448392  | 16-scf00501 | 16 |
| AX-158324042 | 25 | 55.382 | KV453093.1 | 449808  | 16-scf00501 | 16 |
| AX-157747667 | 25 | 55.382 | KV453093.1 | 451696  | 16-scf00501 | 16 |
| AX-158324045 | 25 | 55.382 | KV453093.1 | 454276  | 16-scf00501 | 16 |
| AX-158324047 | 25 | 55.382 | KV453093.1 | 458569  | 16-scf00501 | 16 |
| AX-158324049 | 25 | 55.382 | KV453093.1 | 472422  | 16-scf00501 | 16 |
| AX-158324051 | 25 | 55.382 | KV453093.1 | 487882  | 16-scf00501 | 16 |
| AX-158324057 | 25 | 55.382 | KV453093.1 | 510338  | 16-scf00501 | 16 |



|              |    |        |            |         |             |    |
|--------------|----|--------|------------|---------|-------------|----|
| AX-158324059 | 25 | 55.382 | KV453093.1 | 524595  | 16-scf00501 | 16 |
| AX-158324077 | 25 | 55.382 | KV453093.1 | 565958  | 16-scf00501 | 16 |
| AX-158324078 | 25 | 55.382 | KV453093.1 | 566562  | 16-scf00501 | 16 |
| AX-158324079 | 25 | 55.382 | KV453093.1 | 569133  | 16-scf00501 | 16 |
| AX-158324083 | 25 | 55.382 | KV453093.1 | 581669  | 16-scf00501 | 16 |
| AX-158324085 | 25 | 55.382 | KV453093.1 | 588848  | 16-scf00501 | 16 |
| AX-158324093 | 25 | 55.382 | KV453093.1 | 624661  | 16-scf00501 | 16 |
| AX-158324096 | 25 | 55.382 | KV453093.1 | 627924  | 16-scf00501 | 16 |
| AX-158324098 | 25 | 55.382 | KV453093.1 | 634663  | 16-scf00501 | 16 |
| AX-158324102 | 25 | 55.382 | KV453093.1 | 643841  | 16-scf00501 | 16 |
| AX-158324104 | 25 | 55.382 | KV453093.1 | 646462  | 16-scf00501 | 16 |
| AX-158324114 | 25 | 55.382 | KV453093.1 | 671309  | 16-scf00501 | 16 |
| AX-158324117 | 25 | 55.382 | KV453093.1 | 679773  | 16-scf00501 | 16 |
| AX-158324119 | 25 | 55.382 | KV453093.1 | 681550  | 16-scf00501 | 16 |
| AX-158324120 | 25 | 55.382 | KV453093.1 | 684838  | 16-scf00501 | 16 |
| AX-157848526 | 25 | 55.382 | KV453093.1 | 687267  | 16-scf00501 | 16 |
| AX-158324122 | 25 | 55.382 | KV453093.1 | 689501  | 16-scf00501 | 16 |
| AX-158324123 | 25 | 55.382 | KV453093.1 | 691725  | 16-scf00501 | 16 |
| AX-158324124 | 25 | 55.382 | KV453093.1 | 692555  | 16-scf00501 | 16 |
| AX-158324126 | 25 | 55.382 | KV453093.1 | 698514  | 16-scf00501 | 16 |
| AX-158324131 | 25 | 55.382 | KV453093.1 | 714721  | 16-scf00501 | 16 |
| AX-158324132 | 25 | 55.382 | KV453093.1 | 715433  | 16-scf00501 | 16 |
| AX-158324136 | 25 | 55.382 | KV453093.1 | 729520  | 16-scf00501 | 16 |
| AX-158324137 | 25 | 55.382 | KV453093.1 | 735883  | 16-scf00501 | 16 |
| AX-158324138 | 25 | 55.382 | KV453093.1 | 738272  | 16-scf00501 | 16 |
| AX-158324139 | 25 | 55.382 | KV453093.1 | 746696  | 16-scf00501 | 16 |
| AX-158324140 | 25 | 55.382 | KV453093.1 | 754649  | 16-scf00501 | 16 |
| AX-158324142 | 25 | 55.382 | KV453093.1 | 757869  | 16-scf00501 | 16 |
| AX-158324143 | 25 | 55.382 | KV453093.1 | 759783  | 16-scf00501 | 16 |
| AX-158324144 | 25 | 55.382 | KV453093.1 | 764200  | 16-scf00501 | 16 |
| AX-158324146 | 25 | 55.382 | KV453093.1 | 794998  | 16-scf00501 | 16 |
| AX-158418491 | 25 | 55.382 | KV453093.1 | 795972  | 16-scf00501 | 16 |
| AX-157848529 | 25 | 55.382 | KV453093.1 | 798521  | 16-scf00501 | 16 |
| AX-158324147 | 25 | 55.382 | KV453093.1 | 800946  | 16-scf00501 | 16 |
| AX-158324148 | 25 | 55.382 | KV453093.1 | 804065  | 16-scf00501 | 16 |
| AX-158324149 | 25 | 55.382 | KV453093.1 | 806550  | 16-scf00501 | 16 |
| AX-157848530 | 25 | 55.382 | KV453093.1 | 814409  | 16-scf00501 | 16 |
| AX-158324151 | 25 | 55.382 | KV453093.1 | 836723  | 16-scf00501 | 16 |
| AX-158324152 | 25 | 55.382 | KV453093.1 | 837754  | 16-scf00501 | 16 |
| AX-158324153 | 25 | 55.382 | KV453093.1 | 844808  | 16-scf00501 | 16 |
| AX-158324167 | 25 | 55.382 | KV453093.1 | 930442  | 16-scf00501 | 16 |
| AX-158324171 | 25 | 55.382 | KV453093.1 | 954606  | 16-scf00501 | 16 |
| AX-158324178 | 25 | 55.382 | KV453093.1 | 989684  | 16-scf00501 | 16 |
| AX-158387970 | 25 | 55.382 | KV453093.1 | 1055864 | 16-scf00501 | 16 |
| AX-158324190 | 25 | 55.382 | KV453093.1 | 1101601 | 16-scf00501 | 16 |
| AX-158324191 | 25 | 55.382 | KV453093.1 | 1101803 | 16-scf00501 | 16 |
| AX-158324192 | 25 | 55.382 | KV453093.1 | 1118076 | 16-scf00501 | 16 |
| AX-158324195 | 25 | 55.382 | KV453093.1 | 1130531 | 16-scf00501 | 16 |
| AX-158324202 | 25 | 55.382 | KV453093.1 | 1195217 | 16-scf00501 | 16 |
| AX-158324209 | 25 | 55.382 | KV453093.1 | 1231095 | 16-scf00501 | 16 |
| AX-158324210 | 25 | 55.382 | KV453093.1 | 1231528 | 16-scf00501 | 16 |

|              |    |        |            |         |             |    |
|--------------|----|--------|------------|---------|-------------|----|
| AX-158324215 | 25 | 55.382 | KV453093.1 | 1242109 | 16-scf00501 | 16 |
| AX-158324217 | 25 | 55.382 | KV453093.1 | 1252880 | 16-scf00501 | 16 |
| AX-157699314 | 25 | 55.382 | KV453093.1 | 1275732 | 16-scf00501 | 16 |
| AX-157848533 | 25 | 55.382 | KV453093.1 | 1287833 | 16-scf00501 | 16 |
| AX-158324229 | 25 | 55.382 | KV453093.1 | 1311002 | 16-scf00501 | 16 |
| AX-157848534 | 25 | 55.382 | KV453093.1 | 1317844 | 16-scf00501 | 16 |
| AX-157888426 | 25 | 55.382 | KV453093.1 | 1333225 | 16-scf00501 | 16 |
| AX-157715354 | 25 | 55.382 | KV453093.1 | 1334963 | 16-scf00501 | 16 |
| AX-158324237 | 25 | 55.382 | KV453093.1 | 1349072 | 16-scf00501 | 16 |
| AX-158324240 | 25 | 55.382 | KV453093.1 | 1357116 | 16-scf00501 | 16 |
| AX-158324242 | 25 | 55.382 | KV453093.1 | 1364671 | 16-scf00501 | 16 |
| AX-158418497 | 25 | 55.382 | KV453093.1 | 1365229 | 16-scf00501 | 16 |
| AX-158324244 | 25 | 55.382 | KV453093.1 | 1370566 | 16-scf00501 | 16 |
| AX-158324252 | 25 | 55.382 | KV453093.1 | 1410329 | 16-scf00501 | 16 |
| AX-158324255 | 25 | 55.382 | KV453093.1 | 1415802 | 16-scf00501 | 16 |
| AX-158324266 | 25 | 55.382 | KV453093.1 | 1448432 | 16-scf00501 | 16 |
| AX-158324276 | 25 | 55.382 | KV453093.1 | 1482761 | 16-scf00501 | 16 |
| AX-158324287 | 25 | 55.382 | KV453093.1 | 1516050 | 16-scf00501 | 16 |
| AX-158324296 | 25 | 55.382 | KV453093.1 | 1544564 | 16-scf00501 | 16 |
| AX-157848549 | 25 | 55.382 | KV453094.1 | 18079   | 16-scf00503 | 16 |
| AX-158324441 | 25 | 55.382 | KV453094.1 | 74154   | 16-scf00503 | 16 |
| AX-158324442 | 25 | 55.382 | KV453094.1 | 97360   | 16-scf00503 | 16 |
| AX-158324452 | 25 | 55.382 | KV453094.1 | 179523  | 16-scf00503 | 16 |
| AX-158324457 | 25 | 55.382 | KV453094.1 | 201102  | 16-scf00503 | 16 |
| AX-158324466 | 25 | 55.382 | KV453094.1 | 313356  | 16-scf00503 | 16 |
| AX-158324469 | 25 | 55.382 | KV453094.1 | 328380  | 16-scf00503 | 16 |
| AX-158324475 | 25 | 55.382 | KV453094.1 | 348853  | 16-scf00503 | 16 |
| AX-158324478 | 25 | 55.382 | KV453094.1 | 373939  | 16-scf00503 | 16 |
| AX-158324484 | 25 | 55.382 | KV453094.1 | 420515  | 16-scf00503 | 16 |
| AX-158324485 | 25 | 55.382 | KV453094.1 | 423442  | 16-scf00503 | 16 |
| AX-157848551 | 25 | 55.382 | KV453094.1 | 479067  | 16-scf00503 | 16 |
| AX-158324491 | 25 | 55.382 | KV453094.1 | 502026  | 16-scf00503 | 16 |
| AX-158324494 | 25 | 55.382 | KV453094.1 | 531556  | 16-scf00503 | 16 |
| AX-158324497 | 25 | 55.382 | KV453094.1 | 549359  | 16-scf00503 | 16 |
| AX-158324498 | 25 | 55.382 | KV453094.1 | 568964  | 16-scf00503 | 16 |
| AX-158324500 | 25 | 55.382 | KV453094.1 | 594935  | 16-scf00503 | 16 |
| AX-158324502 | 25 | 55.382 | KV453094.1 | 613982  | 16-scf00503 | 16 |
| AX-158324506 | 25 | 55.382 | KV453094.1 | 649309  | 16-scf00503 | 16 |
| AX-158324509 | 25 | 55.382 | KV453094.1 | 665307  | 16-scf00503 | 16 |
| AX-157719621 | 25 | 55.382 | KV453094.1 | 671317  | 16-scf00503 | 16 |
| AX-158324515 | 25 | 55.382 | KV453094.1 | 714105  | 16-scf00503 | 16 |
| AX-158324516 | 25 | 55.382 | KV453094.1 | 714329  | 16-scf00503 | 16 |
| AX-157763880 | 25 | 55.382 | KV453094.1 | 746387  | 16-scf00503 | 16 |
| AX-158324524 | 25 | 55.382 | KV453094.1 | 749796  | 16-scf00503 | 16 |
| AX-157720030 | 25 | 55.382 | KV453094.1 | 753308  | 16-scf00503 | 16 |
| AX-158324525 | 25 | 55.382 | KV453094.1 | 758173  | 16-scf00503 | 16 |
| AX-158324526 | 25 | 55.382 | KV453094.1 | 758703  | 16-scf00503 | 16 |
| AX-158324527 | 25 | 55.382 | KV453094.1 | 759239  | 16-scf00503 | 16 |
| AX-158324531 | 25 | 55.382 | KV453094.1 | 765984  | 16-scf00503 | 16 |
| AX-158324533 | 25 | 55.382 | KV453094.1 | 771928  | 16-scf00503 | 16 |
| AX-158324535 | 25 | 55.382 | KV453094.1 | 774520  | 16-scf00503 | 16 |

|              |    |        |            |         |             |    |
|--------------|----|--------|------------|---------|-------------|----|
| AX-158324536 | 25 | 55.382 | KV453094.1 | 778906  | 16-scf00503 | 16 |
| AX-158324538 | 25 | 55.382 | KV453094.1 | 787898  | 16-scf00503 | 16 |
| AX-158423709 | 25 | 55.382 | KV453094.1 | 792615  | 16-scf00503 | 16 |
| AX-158324540 | 25 | 55.382 | KV453094.1 | 796586  | 16-scf00503 | 16 |
| AX-158324638 | 25 | 55.382 | KV453094.1 | 1034624 | 16-scf00503 | 16 |
| AX-158324643 | 25 | 55.382 | KV453094.1 | 1047479 | 16-scf00503 | 16 |
| AX-158324799 | 25 | 55.382 | KV453097.1 | 272006  | 16-scf00504 | 16 |
| AX-157709088 | 25 | 55.382 | KV453097.1 | 778215  | 16-scf00504 | 16 |
| AX-158325280 | 25 | 55.382 | KV453097.1 | 1047861 | 16-scf00504 | 16 |
| AX-157853296 | 25 | 55.382 | KV453095.1 | 12353   | 16-scf00570 | 16 |
| AX-157853294 | 25 | 55.382 | KV453095.1 | 30639   | 16-scf00570 | 16 |
| AX-157853292 | 25 | 55.382 | KV453095.1 | 68422   | 16-scf00570 | 16 |
| AX-158376072 | 25 | 55.382 | KV453095.1 | 141934  | 16-scf00570 | 16 |
| AX-157853291 | 25 | 55.382 | KV453095.1 | 166910  | 16-scf00570 | 16 |
| AX-158376059 | 25 | 55.382 | KV453095.1 | 228135  | 16-scf00570 | 16 |
| AX-157853290 | 25 | 55.382 | KV453095.1 | 285807  | 16-scf00570 | 16 |
| AX-157853289 | 25 | 55.382 | KV453095.1 | 285920  | 16-scf00570 | 16 |
| AX-158376052 | 25 | 55.382 | KV453095.1 | 306514  | 16-scf00570 | 16 |
| AX-158376051 | 25 | 55.382 | KV453095.1 | 310365  | 16-scf00570 | 16 |
| AX-158376039 | 25 | 55.382 | KV453095.1 | 498952  | 16-scf00570 | 16 |
| AX-158376036 | 25 | 55.382 | KV453095.1 | 523045  | 16-scf00570 | 16 |
| AX-157853287 | 25 | 55.382 | KV453095.1 | 538020  | 16-scf00570 | 16 |
| AX-158376035 | 25 | 55.382 | KV453095.1 | 553361  | 16-scf00570 | 16 |
| AX-157853286 | 25 | 55.382 | KV453095.1 | 557659  | 16-scf00570 | 16 |
| AX-158376031 | 25 | 55.382 | KV453095.1 | 591369  | 16-scf00570 | 16 |
| AX-158324431 | 25 | 55.382 | KV453095.1 | 600952  | 16-scf00570 | 16 |
| AX-158324428 | 25 | 55.382 | KV453095.1 | 647963  | 16-scf00570 | 16 |
| AX-157848547 | 25 | 55.382 | KV453095.1 | 752123  | 16-scf00570 | 16 |
| AX-158324403 | 25 | 55.382 | KV453095.1 | 829389  | 16-scf00570 | 16 |
| AX-158324400 | 25 | 55.382 | KV453095.1 | 861146  | 16-scf00570 | 16 |
| AX-158324398 | 25 | 55.382 | KV453095.1 | 895171  | 16-scf00570 | 16 |
| AX-158324396 | 25 | 55.382 | KV453095.1 | 914415  | 16-scf00570 | 16 |
| AX-158324394 | 25 | 55.382 | KV453095.1 | 920752  | 16-scf00570 | 16 |
| AX-158324392 | 25 | 55.382 | KV453095.1 | 936040  | 16-scf00570 | 16 |
| AX-158324391 | 25 | 55.382 | KV453095.1 | 939182  | 16-scf00570 | 16 |
| AX-158324382 | 25 | 55.382 | KV453095.1 | 1023761 | 16-scf00570 | 16 |
| AX-158324378 | 25 | 55.382 | KV453095.1 | 1075433 | 16-scf00570 | 16 |
| AX-158324376 | 25 | 55.382 | KV453095.1 | 1086205 | 16-scf00570 | 16 |
| AX-158324375 | 25 | 55.382 | KV453095.1 | 1089421 | 16-scf00570 | 16 |
| AX-158324368 | 25 | 55.382 | KV453095.1 | 1164975 | 16-scf00570 | 16 |
| AX-158324367 | 25 | 55.382 | KV453095.1 | 1165455 | 16-scf00570 | 16 |
| AX-158324363 | 25 | 55.382 | KV453095.1 | 1189555 | 16-scf00570 | 16 |
| AX-158418506 | 25 | 55.382 | KV453095.1 | 1197485 | 16-scf00570 | 16 |
| AX-158324360 | 25 | 55.382 | KV453095.1 | 1205344 | 16-scf00570 | 16 |
| AX-158324355 | 25 | 55.382 | KV453095.1 | 1276826 | 16-scf00570 | 16 |
| AX-158324354 | 25 | 55.382 | KV453095.1 | 1288692 | 16-scf00570 | 16 |
| AX-158324349 | 25 | 55.382 | KV453095.1 | 1326947 | 16-scf00570 | 16 |
| AX-158324345 | 25 | 55.382 | KV453095.1 | 1348060 | 16-scf00570 | 16 |
| AX-157848543 | 25 | 55.382 | KV453095.1 | 1348672 | 16-scf00570 | 16 |
| AX-158324341 | 25 | 55.382 | KV453095.1 | 1370524 | 16-scf00570 | 16 |
| AX-158324340 | 25 | 55.382 | KV453095.1 | 1375987 | 16-scf00570 | 16 |

|              |    |        |            |         |             |    |
|--------------|----|--------|------------|---------|-------------|----|
| AX-158324339 | 25 | 55.382 | KV453095.1 | 1387088 | 16-scf00570 | 16 |
| AX-158324337 | 25 | 55.382 | KV453095.1 | 1399022 | 16-scf00570 | 16 |
| AX-158324335 | 25 | 55.382 | KV453095.1 | 1404019 | 16-scf00570 | 16 |
| AX-158324334 | 25 | 55.382 | KV453095.1 | 1411503 | 16-scf00570 | 16 |
| AX-158324333 | 25 | 55.382 | KV453095.1 | 1413269 | 16-scf00570 | 16 |
| AX-158324332 | 25 | 55.382 | KV453095.1 | 1413801 | 16-scf00570 | 16 |
| AX-157848542 | 25 | 55.382 | KV453095.1 | 1418824 | 16-scf00570 | 16 |
| AX-158324329 | 25 | 55.382 | KV453095.1 | 1470136 | 16-scf00570 | 16 |
| AX-158324328 | 25 | 55.382 | KV453095.1 | 1485460 | 16-scf00570 | 16 |
| AX-158324327 | 25 | 55.382 | KV453095.1 | 1491622 | 16-scf00570 | 16 |
| AX-158324322 | 25 | 55.382 | KV453095.1 | 1541430 | 16-scf00570 | 16 |
| AX-158324320 | 25 | 55.382 | KV453095.1 | 1550009 | 16-scf00570 | 16 |
| AX-158324318 | 25 | 55.382 | KV453095.1 | 1553117 | 16-scf00570 | 16 |
| AX-158324311 | 25 | 55.382 | KV453095.1 | 1584839 | 16-scf00570 | 16 |
| AX-157848391 | 25 | 55.382 | KV453095.1 | 1691843 | 16-scf00570 | 16 |
| AX-158322748 | 25 | 55.382 | KV453095.1 | 1693919 | 16-scf00570 | 16 |
| AX-158322749 | 25 | 55.382 | KV453095.1 | 1702859 | 16-scf00570 | 16 |
| AX-158322758 | 25 | 55.382 | KV453095.1 | 1729370 | 16-scf00570 | 16 |
| AX-158322764 | 25 | 55.382 | KV453095.1 | 1745840 | 16-scf00570 | 16 |
| AX-158322769 | 25 | 55.382 | KV453095.1 | 1765204 | 16-scf00570 | 16 |
| AX-158322773 | 25 | 55.382 | KV453095.1 | 1769533 | 16-scf00570 | 16 |
| AX-157716390 | 25 | 55.382 | KV453095.1 | 1769790 | 16-scf00570 | 16 |
| AX-158322777 | 25 | 55.382 | KV453095.1 | 1783424 | 16-scf00570 | 16 |
| AX-158322795 | 25 | 55.382 | KV453095.1 | 1815330 | 16-scf00570 | 16 |
| AX-158322804 | 25 | 55.382 | KV453095.1 | 1834155 | 16-scf00570 | 16 |
| AX-157772834 | 25 | 55.382 | KV453095.1 | 1859666 | 16-scf00570 | 16 |
| AX-158322820 | 25 | 55.382 | KV453095.1 | 1859904 | 16-scf00570 | 16 |
| AX-158322863 | 25 | 55.382 | KV453095.1 | 1919172 | 16-scf00570 | 16 |
| AX-158322870 | 25 | 55.382 | KV453095.1 | 1935114 | 16-scf00570 | 16 |
| AX-158322876 | 25 | 55.382 | KV453095.1 | 1940964 | 16-scf00570 | 16 |
| AX-157848411 | 25 | 55.382 | KV453095.1 | 1968560 | 16-scf00570 | 16 |
| AX-158322931 | 25 | 55.382 | KV453095.1 | 2015060 | 16-scf00570 | 16 |
| AX-158323030 | 25 | 55.382 | KV453095.1 | 2165440 | 16-scf00570 | 16 |
| AX-157769030 | 25 | 55.382 | KV453095.1 | 2221789 | 16-scf00570 | 16 |
| AX-158323148 | 25 | 55.382 | KV453095.1 | 2329262 | 16-scf00570 | 16 |
| AX-158323166 | 25 | 55.382 | KV453095.1 | 2356769 | 16-scf00570 | 16 |
| AX-158323195 | 25 | 55.382 | KV453095.1 | 2391492 | 16-scf00570 | 16 |
| AX-158323204 | 25 | 55.382 | KV453095.1 | 2401712 | 16-scf00570 | 16 |
| AX-158323481 | 25 | 55.382 | KV453095.1 | 2896530 | 16-scf00570 | 16 |
| AX-158323578 | 25 | 55.382 | KV453095.1 | 3038708 | 16-scf00570 | 16 |
| AX-158323659 | 25 | 55.382 | KV453095.1 | 3217811 | 16-scf00570 | 16 |
| AX-158323824 | 25 | 55.382 | KV453095.1 | 3499198 | 16-scf00570 | 16 |
| AX-157848516 | 25 | 55.382 | KV453095.1 | 3803994 | 16-scf00570 | 16 |
| AX-157685559 | 25 | 55.382 | KV453096.1 | 81506   | 16-scf00625 | 16 |
| AX-157685562 | 25 | 55.382 | KV453096.1 | 99147   | 16-scf00625 | 16 |
| AX-157685654 | 25 | 55.382 | KV453091.1 | 85146   | 16-scf00630 | 16 |
| AX-157702366 | 25 | 55.382 | DX091495.1 | 121     | 16-scf00630 | UN |
| AX-158320184 | 25 | 55.491 | KV453089.1 | 8321695 | 16-scf00496 | 16 |
| AX-158320434 | 25 | 55.491 | KV453089.1 | 8676950 | 16-scf00496 | 16 |
| AX-158320567 | 25 | 55.491 | KV453089.1 | 8842264 | 16-scf00496 | 16 |
| AX-158321003 | 25 | 55.491 | KV453089.1 | 9548948 | 16-scf00496 | 16 |

|              |    |        |            |          |             |    |
|--------------|----|--------|------------|----------|-------------|----|
| AX-157848295 | 25 | 55.491 | KV453089.1 | 11056722 | 16-scf00496 | 16 |
| AX-158321448 | 25 | 55.491 | KV453089.1 | 11073958 | 16-scf00496 | 16 |
| AX-158321494 | 25 | 55.491 | KV453089.1 | 11179207 | 16-scf00496 | 16 |
| AX-158321713 | 25 | 55.491 | KV453089.1 | 11572404 | 16-scf00496 | 16 |
| AX-158322474 | 25 | 55.491 | KV453090.1 | 475733   | 16-scf00499 | 16 |
| AX-157848355 | 25 | 55.491 | KV453090.1 | 555733   | 16-scf00499 | 16 |
| AX-158322528 | 25 | 55.491 | KV453090.1 | 580006   | 16-scf00499 | 16 |
| AX-158322534 | 25 | 55.491 | KV453090.1 | 586248   | 16-scf00499 | 16 |
| AX-158322679 | 25 | 55.491 | KV453090.1 | 1054143  | 16-scf00499 | 16 |
| AX-158322690 | 25 | 55.491 | KV453090.1 | 1118905  | 16-scf00499 | 16 |
| AX-158322691 | 25 | 55.491 | KV453090.1 | 1121772  | 16-scf00499 | 16 |
| AX-158322695 | 25 | 55.491 | KV453090.1 | 1128993  | 16-scf00499 | 16 |
| AX-157722850 | 25 | 55.491 | KV453093.1 | 712174   | 16-scf00501 | 16 |
| AX-158325067 | 25 | 55.491 | KV453097.1 | 725969   | 16-scf00504 | 16 |
| AX-158325100 | 25 | 55.491 | KV453097.1 | 756336   | 16-scf00504 | 16 |
| AX-158324385 | 25 | 55.491 | KV453095.1 | 1010493  | 16-scf00570 | 16 |
| AX-158322780 | 25 | 55.491 | KV453095.1 | 1795000  | 16-scf00570 | 16 |
| AX-158322781 | 25 | 55.491 | KV453095.1 | 1796665  | 16-scf00570 | 16 |
| AX-158322783 | 25 | 55.491 | KV453095.1 | 1800018  | 16-scf00570 | 16 |
| AX-158322784 | 25 | 55.491 | KV453095.1 | 1800401  | 16-scf00570 | 16 |
| AX-158322785 | 25 | 55.491 | KV453095.1 | 1801715  | 16-scf00570 | 16 |
| AX-158322786 | 25 | 55.491 | KV453095.1 | 1802917  | 16-scf00570 | 16 |
| AX-158322791 | 25 | 55.491 | KV453095.1 | 1811185  | 16-scf00570 | 16 |
| AX-158322793 | 25 | 55.491 | KV453095.1 | 1812077  | 16-scf00570 | 16 |
| AX-158322794 | 25 | 55.491 | KV453095.1 | 1814531  | 16-scf00570 | 16 |
| AX-158322801 | 25 | 55.491 | KV453095.1 | 1823623  | 16-scf00570 | 16 |
| AX-157743031 | 25 | 55.491 | KV453095.1 | 1825252  | 16-scf00570 | 16 |
| AX-158322807 | 25 | 55.491 | KV453095.1 | 1837031  | 16-scf00570 | 16 |
| AX-158322811 | 25 | 55.491 | KV453095.1 | 1849499  | 16-scf00570 | 16 |
| AX-157848401 | 25 | 55.491 | KV453095.1 | 1850062  | 16-scf00570 | 16 |
| AX-158322816 | 25 | 55.491 | KV453095.1 | 1855992  | 16-scf00570 | 16 |
| AX-158322817 | 25 | 55.491 | KV453095.1 | 1858032  | 16-scf00570 | 16 |
| AX-158418429 | 25 | 55.491 | KV453095.1 | 1861343  | 16-scf00570 | 16 |
| AX-157741554 | 25 | 55.491 | KV453095.1 | 1887680  | 16-scf00570 | 16 |
| AX-158423690 | 25 | 55.491 | KV453095.1 | 2009604  | 16-scf00570 | 16 |
| AX-157848412 | 25 | 55.491 | KV453095.1 | 2015455  | 16-scf00570 | 16 |
| AX-158322952 | 25 | 55.491 | KV453095.1 | 2044853  | 16-scf00570 | 16 |
| AX-158323322 | 25 | 55.491 | KV453095.1 | 2577079  | 16-scf00570 | 16 |
| AX-158323472 | 25 | 55.491 | KV453095.1 | 2878165  | 16-scf00570 | 16 |
| AX-158323877 | 25 | 55.491 | KV453095.1 | 3612722  | 16-scf00570 | 16 |
| AX-157680840 | 25 | 55.491 | KV453096.1 | 111506   | 16-scf00625 | 16 |
| AX-158324631 | 25 | 55.6   | KV453094.1 | 1008949  | 16-scf00503 | 16 |
| AX-157848554 | 25 | 55.6   | KV453094.1 | 1009325  | 16-scf00503 | 16 |
| AX-157754872 | 25 | 55.6   | KV453095.1 | 1794224  | 16-scf00570 | 16 |
| AX-158322823 | 25 | 55.6   | KV453095.1 | 1869150  | 16-scf00570 | 16 |
| AX-158322826 | 25 | 55.6   | KV453095.1 | 1872125  | 16-scf00570 | 16 |
| AX-158322828 | 25 | 55.6   | KV453095.1 | 1875058  | 16-scf00570 | 16 |
| AX-157744319 | 25 | 55.6   | KV453095.1 | 1876171  | 16-scf00570 | 16 |
| AX-157758144 | 25 | 55.6   | KV453095.1 | 1876842  | 16-scf00570 | 16 |
| AX-158322834 | 25 | 55.6   | KV453095.1 | 1881976  | 16-scf00570 | 16 |
| AX-157756880 | 25 | 55.6   | KV453095.1 | 1883017  | 16-scf00570 | 16 |

|              |    |        |            |          |             |    |
|--------------|----|--------|------------|----------|-------------|----|
| AX-158322836 | 25 | 55.6   | KV453095.1 | 1883709  | 16-scf00570 | 16 |
| AX-158322838 | 25 | 55.6   | KV453095.1 | 1887305  | 16-scf00570 | 16 |
| AX-158322841 | 25 | 55.6   | KV453095.1 | 1888752  | 16-scf00570 | 16 |
| AX-158322842 | 25 | 55.6   | KV453095.1 | 1889600  | 16-scf00570 | 16 |
| AX-158322850 | 25 | 55.6   | KV453095.1 | 1898027  | 16-scf00570 | 16 |
| AX-157775675 | 25 | 55.6   | KV453095.1 | 1903603  | 16-scf00570 | 16 |
| AX-158322855 | 25 | 55.6   | KV453095.1 | 1904053  | 16-scf00570 | 16 |
| AX-158418431 | 25 | 55.6   | KV453095.1 | 1913934  | 16-scf00570 | 16 |
| AX-158322866 | 25 | 55.6   | KV453095.1 | 1924473  | 16-scf00570 | 16 |
| AX-158322867 | 25 | 55.6   | KV453095.1 | 1928697  | 16-scf00570 | 16 |
| AX-158322868 | 25 | 55.6   | KV453095.1 | 1930934  | 16-scf00570 | 16 |
| AX-157848405 | 25 | 55.6   | KV453095.1 | 1933157  | 16-scf00570 | 16 |
| AX-158322883 | 25 | 55.6   | KV453095.1 | 1950827  | 16-scf00570 | 16 |
| AX-158322884 | 25 | 55.6   | KV453095.1 | 1952990  | 16-scf00570 | 16 |
| AX-158322887 | 25 | 55.6   | KV453095.1 | 1955905  | 16-scf00570 | 16 |
| AX-158322889 | 25 | 55.6   | KV453095.1 | 1959682  | 16-scf00570 | 16 |
| AX-158322896 | 25 | 55.6   | KV453095.1 | 1966756  | 16-scf00570 | 16 |
| AX-158322897 | 25 | 55.6   | KV453095.1 | 1968034  | 16-scf00570 | 16 |
| AX-158322907 | 25 | 55.6   | KV453095.1 | 1978918  | 16-scf00570 | 16 |
| AX-158322908 | 25 | 55.6   | KV453095.1 | 1979372  | 16-scf00570 | 16 |
| AX-158418433 | 25 | 55.6   | KV453095.1 | 1989106  | 16-scf00570 | 16 |
| AX-158322915 | 25 | 55.6   | KV453095.1 | 1990800  | 16-scf00570 | 16 |
| AX-158322924 | 25 | 55.6   | KV453095.1 | 2003336  | 16-scf00570 | 16 |
| AX-158322926 | 25 | 55.6   | KV453095.1 | 2005950  | 16-scf00570 | 16 |
| AX-157881418 | 25 | 55.6   | KV453095.1 | 2006745  | 16-scf00570 | 16 |
| AX-158322930 | 25 | 55.6   | KV453095.1 | 2014645  | 16-scf00570 | 16 |
| AX-158322945 | 25 | 55.6   | KV453095.1 | 2031842  | 16-scf00570 | 16 |
| AX-158322949 | 25 | 55.6   | KV453095.1 | 2039686  | 16-scf00570 | 16 |
| AX-158322909 | 25 | 55.702 | KV453095.1 | 1981095  | 16-scf00570 | 16 |
| AX-158322927 | 25 | 55.702 | KV453095.1 | 2007214  | 16-scf00570 | 16 |
| AX-158322589 | 25 | 55.756 | KV453090.1 | 685225   | 16-scf00499 | 16 |
| AX-158322932 | 25 | 55.756 | KV453095.1 | 2015588  | 16-scf00570 | 16 |
| AX-158322935 | 25 | 55.756 | KV453095.1 | 2018122  | 16-scf00570 | 16 |
| AX-158323350 | 25 | 55.756 | KV453095.1 | 2643578  | 16-scf00570 | 16 |
| AX-158322933 | 25 | 55.819 | KV453095.1 | 2015790  | 16-scf00570 | 16 |
| AX-157724387 | 25 | 55.819 | KV453095.1 | 2018993  | 16-scf00570 | 16 |
| AX-158322951 | 25 | 55.819 | KV453095.1 | 2043320  | 16-scf00570 | 16 |
| AX-158322937 | 25 | 55.837 | KV453095.1 | 2021371  | 16-scf00570 | 16 |
| AX-158323139 | 25 | 55.837 | KV453095.1 | 2310384  | 16-scf00570 | 16 |
| AX-157757279 | 25 | 55.837 | KV453095.1 | 2312686  | 16-scf00570 | 16 |
| AX-158322940 | 25 | 55.863 | KV453095.1 | 2026144  | 16-scf00570 | 16 |
| AX-158322941 | 25 | 55.887 | KV453095.1 | 2028122  | 16-scf00570 | 16 |
| AX-158323001 | 25 | 55.887 | KV453095.1 | 2129355  | 16-scf00570 | 16 |
| AX-158322942 | 25 | 55.905 | KV453095.1 | 2028991  | 16-scf00570 | 16 |
| AX-158322929 | 25 | 55.928 | KV453095.1 | 2012722  | 16-scf00570 | 16 |
| AX-158322943 | 25 | 55.928 | KV453095.1 | 2029638  | 16-scf00570 | 16 |
| AX-158322944 | 25 | 55.928 | KV453095.1 | 2030145  | 16-scf00570 | 16 |
| AX-157848413 | 25 | 55.928 | KV453095.1 | 2034814  | 16-scf00570 | 16 |
| AX-158322948 | 25 | 55.928 | KV453095.1 | 2038976  | 16-scf00570 | 16 |
| AX-158323227 | 25 | 55.928 | KV453095.1 | 2437126  | 16-scf00570 | 16 |
| AX-158321585 | 25 | 56.037 | KV453089.1 | 11390099 | 16-scf00496 | 16 |

|              |    |        |            |          |             |    |
|--------------|----|--------|------------|----------|-------------|----|
| AX-158321637 | 25 | 56.037 | KV453089.1 | 11454463 | 16-scf00496 | 16 |
| AX-158321702 | 25 | 56.037 | KV453089.1 | 11554272 | 16-scf00496 | 16 |
| AX-158321720 | 25 | 56.037 | KV453089.1 | 11582892 | 16-scf00496 | 16 |
| AX-158321831 | 25 | 56.037 | KV453089.1 | 11929956 | 16-scf00496 | 16 |
| AX-158418385 | 25 | 56.037 | KV453089.1 | 12210726 | 16-scf00496 | 16 |
| AX-158322624 | 25 | 56.037 | KV453090.1 | 771541   | 16-scf00499 | 16 |
| AX-158324095 | 25 | 56.037 | KV453093.1 | 627537   | 16-scf00501 | 16 |
| AX-158324490 | 25 | 56.037 | KV453094.1 | 487642   | 16-scf00503 | 16 |
| AX-158324492 | 25 | 56.037 | KV453094.1 | 510686   | 16-scf00503 | 16 |
| AX-158324646 | 25 | 56.037 | KV453094.1 | 1049184  | 16-scf00503 | 16 |
| AX-158324880 | 25 | 56.037 | KV453097.1 | 404393   | 16-scf00504 | 16 |
| AX-158324881 | 25 | 56.037 | KV453097.1 | 405868   | 16-scf00504 | 16 |
| AX-158325074 | 25 | 56.037 | KV453097.1 | 732291   | 16-scf00504 | 16 |
| AX-157848404 | 25 | 56.037 | KV453095.1 | 1913329  | 16-scf00570 | 16 |
| AX-157741078 | 25 | 56.037 | KV453095.1 | 2046625  | 16-scf00570 | 16 |
| AX-158322956 | 25 | 56.037 | KV453095.1 | 2047405  | 16-scf00570 | 16 |
| AX-158322957 | 25 | 56.037 | KV453095.1 | 2049145  | 16-scf00570 | 16 |
| AX-158322958 | 25 | 56.037 | KV453095.1 | 2050050  | 16-scf00570 | 16 |
| AX-158322959 | 25 | 56.037 | KV453095.1 | 2050928  | 16-scf00570 | 16 |
| AX-158322968 | 25 | 56.037 | KV453095.1 | 2058168  | 16-scf00570 | 16 |
| AX-157848415 | 25 | 56.037 | KV453095.1 | 2058477  | 16-scf00570 | 16 |
| AX-158322969 | 25 | 56.037 | KV453095.1 | 2059160  | 16-scf00570 | 16 |
| AX-158322972 | 25 | 56.037 | KV453095.1 | 2060024  | 16-scf00570 | 16 |
| AX-157848416 | 25 | 56.037 | KV453095.1 | 2060493  | 16-scf00570 | 16 |
| AX-158322986 | 25 | 56.037 | KV453095.1 | 2081766  | 16-scf00570 | 16 |
| AX-158322988 | 25 | 56.037 | KV453095.1 | 2097851  | 16-scf00570 | 16 |
| AX-158322989 | 25 | 56.037 | KV453095.1 | 2099320  | 16-scf00570 | 16 |
| AX-158322990 | 25 | 56.037 | KV453095.1 | 2099820  | 16-scf00570 | 16 |
| AX-158322992 | 25 | 56.037 | KV453095.1 | 2105663  | 16-scf00570 | 16 |
| AX-158322994 | 25 | 56.037 | KV453095.1 | 2115783  | 16-scf00570 | 16 |
| AX-158323000 | 25 | 56.037 | KV453095.1 | 2128914  | 16-scf00570 | 16 |
| AX-158323002 | 25 | 56.037 | KV453095.1 | 2130399  | 16-scf00570 | 16 |
| AX-158323006 | 25 | 56.037 | KV453095.1 | 2135071  | 16-scf00570 | 16 |
| AX-157739820 | 25 | 56.037 | KV453095.1 | 2139140  | 16-scf00570 | 16 |
| AX-158323028 | 25 | 56.037 | KV453095.1 | 2163008  | 16-scf00570 | 16 |
| AX-158323035 | 25 | 56.037 | KV453095.1 | 2171246  | 16-scf00570 | 16 |
| AX-158323037 | 25 | 56.037 | KV453095.1 | 2175059  | 16-scf00570 | 16 |
| AX-158323038 | 25 | 56.037 | KV453095.1 | 2175426  | 16-scf00570 | 16 |
| AX-158323040 | 25 | 56.037 | KV453095.1 | 2176467  | 16-scf00570 | 16 |
| AX-158323046 | 25 | 56.037 | KV453095.1 | 2182265  | 16-scf00570 | 16 |
| AX-158323050 | 25 | 56.037 | KV453095.1 | 2186252  | 16-scf00570 | 16 |
| AX-158323057 | 25 | 56.037 | KV453095.1 | 2192390  | 16-scf00570 | 16 |
| AX-158323062 | 25 | 56.037 | KV453095.1 | 2196194  | 16-scf00570 | 16 |
| AX-158323065 | 25 | 56.037 | KV453095.1 | 2207334  | 16-scf00570 | 16 |
| AX-157774643 | 25 | 56.037 | KV453095.1 | 2219081  | 16-scf00570 | 16 |
| AX-157714069 | 25 | 56.037 | KV453095.1 | 2220225  | 16-scf00570 | 16 |
| AX-158323077 | 25 | 56.037 | KV453095.1 | 2220873  | 16-scf00570 | 16 |
| AX-158323078 | 25 | 56.037 | KV453095.1 | 2221344  | 16-scf00570 | 16 |
| AX-158323081 | 25 | 56.037 | KV453095.1 | 2223195  | 16-scf00570 | 16 |
| AX-158323083 | 25 | 56.037 | KV453095.1 | 2227064  | 16-scf00570 | 16 |
| AX-158323084 | 25 | 56.037 | KV453095.1 | 2229034  | 16-scf00570 | 16 |

|              |    |        |            |         |             |    |
|--------------|----|--------|------------|---------|-------------|----|
| AX-158323089 | 25 | 56.037 | KV453095.1 | 2235067 | 16-scf00570 | 16 |
| AX-158323092 | 25 | 56.037 | KV453095.1 | 2241681 | 16-scf00570 | 16 |
| AX-158323093 | 25 | 56.037 | KV453095.1 | 2243400 | 16-scf00570 | 16 |
| AX-158323099 | 25 | 56.037 | KV453095.1 | 2248641 | 16-scf00570 | 16 |
| AX-157714987 | 25 | 56.037 | KV453095.1 | 2255860 | 16-scf00570 | 16 |
| AX-158323113 | 25 | 56.037 | KV453095.1 | 2266384 | 16-scf00570 | 16 |
| AX-158323115 | 25 | 56.037 | KV453095.1 | 2267633 | 16-scf00570 | 16 |
| AX-157848424 | 25 | 56.037 | KV453095.1 | 2269778 | 16-scf00570 | 16 |
| AX-158323118 | 25 | 56.037 | KV453095.1 | 2271368 | 16-scf00570 | 16 |
| AX-157720430 | 25 | 56.037 | KV453095.1 | 2271635 | 16-scf00570 | 16 |
| AX-158323119 | 25 | 56.037 | KV453095.1 | 2274001 | 16-scf00570 | 16 |
| AX-158323122 | 25 | 56.037 | KV453095.1 | 2282310 | 16-scf00570 | 16 |
| AX-158323124 | 25 | 56.037 | KV453095.1 | 2288405 | 16-scf00570 | 16 |
| AX-158323127 | 25 | 56.037 | KV453095.1 | 2292498 | 16-scf00570 | 16 |
| AX-158418437 | 25 | 56.037 | KV453095.1 | 2321167 | 16-scf00570 | 16 |
| AX-158323143 | 25 | 56.037 | KV453095.1 | 2322429 | 16-scf00570 | 16 |
| AX-158323144 | 25 | 56.037 | KV453095.1 | 2323428 | 16-scf00570 | 16 |
| AX-158323146 | 25 | 56.037 | KV453095.1 | 2325027 | 16-scf00570 | 16 |
| AX-158323165 | 25 | 56.037 | KV453095.1 | 2356509 | 16-scf00570 | 16 |
| AX-158323170 | 25 | 56.037 | KV453095.1 | 2365461 | 16-scf00570 | 16 |
| AX-158323171 | 25 | 56.037 | KV453095.1 | 2367547 | 16-scf00570 | 16 |
| AX-158323172 | 25 | 56.037 | KV453095.1 | 2368054 | 16-scf00570 | 16 |
| AX-158323173 | 25 | 56.037 | KV453095.1 | 2368529 | 16-scf00570 | 16 |
| AX-158323176 | 25 | 56.037 | KV453095.1 | 2370109 | 16-scf00570 | 16 |
| AX-158323177 | 25 | 56.037 | KV453095.1 | 2370278 | 16-scf00570 | 16 |
| AX-158323178 | 25 | 56.037 | KV453095.1 | 2371724 | 16-scf00570 | 16 |
| AX-158323179 | 25 | 56.037 | KV453095.1 | 2372479 | 16-scf00570 | 16 |
| AX-157848432 | 25 | 56.037 | KV453095.1 | 2372924 | 16-scf00570 | 16 |
| AX-158323180 | 25 | 56.037 | KV453095.1 | 2373262 | 16-scf00570 | 16 |
| AX-158323187 | 25 | 56.037 | KV453095.1 | 2384144 | 16-scf00570 | 16 |
| AX-158323190 | 25 | 56.037 | KV453095.1 | 2387989 | 16-scf00570 | 16 |
| AX-158323194 | 25 | 56.037 | KV453095.1 | 2390898 | 16-scf00570 | 16 |
| AX-158323196 | 25 | 56.037 | KV453095.1 | 2391940 | 16-scf00570 | 16 |
| AX-158323197 | 25 | 56.037 | KV453095.1 | 2393545 | 16-scf00570 | 16 |
| AX-158323208 | 25 | 56.037 | KV453095.1 | 2406223 | 16-scf00570 | 16 |
| AX-158323213 | 25 | 56.037 | KV453095.1 | 2424130 | 16-scf00570 | 16 |
| AX-158323214 | 25 | 56.037 | KV453095.1 | 2425504 | 16-scf00570 | 16 |
| AX-158323217 | 25 | 56.037 | KV453095.1 | 2427364 | 16-scf00570 | 16 |
| AX-158323218 | 25 | 56.037 | KV453095.1 | 2427775 | 16-scf00570 | 16 |
| AX-157848434 | 25 | 56.037 | KV453095.1 | 2427902 | 16-scf00570 | 16 |
| AX-158323219 | 25 | 56.037 | KV453095.1 | 2428268 | 16-scf00570 | 16 |
| AX-158323220 | 25 | 56.037 | KV453095.1 | 2431331 | 16-scf00570 | 16 |
| AX-158323221 | 25 | 56.037 | KV453095.1 | 2432016 | 16-scf00570 | 16 |
| AX-158323222 | 25 | 56.037 | KV453095.1 | 2433328 | 16-scf00570 | 16 |
| AX-158323226 | 25 | 56.037 | KV453095.1 | 2436711 | 16-scf00570 | 16 |
| AX-158323229 | 25 | 56.037 | KV453095.1 | 2444951 | 16-scf00570 | 16 |
| AX-158323230 | 25 | 56.037 | KV453095.1 | 2445423 | 16-scf00570 | 16 |
| AX-158323242 | 25 | 56.037 | KV453095.1 | 2460302 | 16-scf00570 | 16 |
| AX-157848435 | 25 | 56.037 | KV453095.1 | 2468429 | 16-scf00570 | 16 |
| AX-158323259 | 25 | 56.037 | KV453095.1 | 2476362 | 16-scf00570 | 16 |
| AX-158323347 | 25 | 56.037 | KV453095.1 | 2640018 | 16-scf00570 | 16 |



|              |    |        |            |          |             |    |
|--------------|----|--------|------------|----------|-------------|----|
| AX-158323373 | 25 | 56.037 | KV453095.1 | 2677715  | 16-scf00570 | 16 |
| AX-158323409 | 25 | 56.037 | KV453095.1 | 2734390  | 16-scf00570 | 16 |
| AX-157722843 | 25 | 56.037 | KV453095.1 | 3051194  | 16-scf00570 | 16 |
| AX-158323691 | 25 | 56.037 | KV453095.1 | 3271408  | 16-scf00570 | 16 |
| AX-157713736 | 25 | 56.037 | KV453095.1 | 3530348  | 16-scf00570 | 16 |
| AX-158323241 | 25 | 56.072 | KV453095.1 | 2458881  | 16-scf00570 | 16 |
| AX-158323245 | 25 | 56.102 | KV453095.1 | 2462060  | 16-scf00570 | 16 |
| AX-158322844 | 25 | 56.146 | KV453095.1 | 1891389  | 16-scf00570 | 16 |
| AX-158322846 | 25 | 56.146 | KV453095.1 | 1893691  | 16-scf00570 | 16 |
| AX-158322847 | 25 | 56.146 | KV453095.1 | 1895304  | 16-scf00570 | 16 |
| AX-158322890 | 25 | 56.146 | KV453095.1 | 1960115  | 16-scf00570 | 16 |
| AX-158322919 | 25 | 56.146 | KV453095.1 | 1996224  | 16-scf00570 | 16 |
| AX-158322993 | 25 | 56.146 | KV453095.1 | 2114880  | 16-scf00570 | 16 |
| AX-158323007 | 25 | 56.146 | KV453095.1 | 2135480  | 16-scf00570 | 16 |
| AX-158323125 | 25 | 56.146 | KV453095.1 | 2290293  | 16-scf00570 | 16 |
| AX-158323251 | 25 | 56.146 | KV453095.1 | 2469424  | 16-scf00570 | 16 |
| AX-158323252 | 25 | 56.146 | KV453095.1 | 2470147  | 16-scf00570 | 16 |
| AX-158323253 | 25 | 56.146 | KV453095.1 | 2471461  | 16-scf00570 | 16 |
| AX-158323260 | 25 | 56.146 | KV453095.1 | 2478287  | 16-scf00570 | 16 |
| AX-157724113 | 25 | 56.146 | KV453095.1 | 2480570  | 16-scf00570 | 16 |
| AX-158323263 | 25 | 56.146 | KV453095.1 | 2481175  | 16-scf00570 | 16 |
| AX-158323264 | 25 | 56.146 | KV453095.1 | 2481458  | 16-scf00570 | 16 |
| AX-158323265 | 25 | 56.146 | KV453095.1 | 2481890  | 16-scf00570 | 16 |
| AX-157848436 | 25 | 56.146 | KV453095.1 | 2486088  | 16-scf00570 | 16 |
| AX-158323272 | 25 | 56.146 | KV453095.1 | 2495902  | 16-scf00570 | 16 |
| AX-157753517 | 25 | 56.146 | KV453095.1 | 2497824  | 16-scf00570 | 16 |
| AX-158323273 | 25 | 56.146 | KV453095.1 | 2498437  | 16-scf00570 | 16 |
| AX-158323279 | 25 | 56.146 | KV453095.1 | 2504459  | 16-scf00570 | 16 |
| AX-158323280 | 25 | 56.146 | KV453095.1 | 2504945  | 16-scf00570 | 16 |
| AX-158323675 | 25 | 56.146 | KV453095.1 | 3244405  | 16-scf00570 | 16 |
| AX-158323829 | 25 | 56.146 | KV453095.1 | 3507513  | 16-scf00570 | 16 |
| AX-158418439 | 25 | 56.153 | KV453095.1 | 2401096  | 16-scf00570 | 16 |
| AX-158323267 | 25 | 56.153 | KV453095.1 | 2485598  | 16-scf00570 | 16 |
| AX-158420025 | 25 | 56.153 | KV453095.1 | 2524644  | 16-scf00570 | 16 |
| AX-158323417 | 25 | 56.153 | KV453095.1 | 2745862  | 16-scf00570 | 16 |
| AX-158323296 | 25 | 56.203 | KV453095.1 | 2525183  | 16-scf00570 | 16 |
| AX-158321626 | 25 | 56.256 | KV453089.1 | 11437064 | 16-scf00496 | 16 |
| AX-158322161 | 25 | 56.256 | KV453089.1 | 12952794 | 16-scf00496 | 16 |
| AX-158324107 | 25 | 56.256 | KV453093.1 | 655061   | 16-scf00501 | 16 |
| AX-158324163 | 25 | 56.256 | KV453093.1 | 910664   | 16-scf00501 | 16 |
| AX-158324271 | 25 | 56.256 | KV453093.1 | 1467763  | 16-scf00501 | 16 |
| AX-158412631 | 25 | 56.256 | KV453095.1 | 1914076  | 16-scf00570 | 16 |
| AX-158322920 | 25 | 56.256 | KV453095.1 | 1998523  | 16-scf00570 | 16 |
| AX-158323047 | 25 | 56.256 | KV453095.1 | 2182874  | 16-scf00570 | 16 |
| AX-157773856 | 25 | 56.256 | KV453095.1 | 2478716  | 16-scf00570 | 16 |
| AX-158323261 | 25 | 56.256 | KV453095.1 | 2479511  | 16-scf00570 | 16 |
| AX-158323286 | 25 | 56.256 | KV453095.1 | 2511152  | 16-scf00570 | 16 |
| AX-158323299 | 25 | 56.256 | KV453095.1 | 2529317  | 16-scf00570 | 16 |
| AX-158323300 | 25 | 56.256 | KV453095.1 | 2530164  | 16-scf00570 | 16 |
| AX-158323312 | 25 | 56.256 | KV453095.1 | 2558634  | 16-scf00570 | 16 |
| AX-158323313 | 25 | 56.256 | KV453095.1 | 2559037  | 16-scf00570 | 16 |

|              |    |        |            |          |             |    |
|--------------|----|--------|------------|----------|-------------|----|
| AX-158323314 | 25 | 56.256 | KV453095.1 | 2561863  | 16-scf00570 | 16 |
| AX-158323315 | 25 | 56.256 | KV453095.1 | 2562331  | 16-scf00570 | 16 |
| AX-157848437 | 25 | 56.256 | KV453095.1 | 2571274  | 16-scf00570 | 16 |
| AX-158323376 | 25 | 56.256 | KV453095.1 | 2683599  | 16-scf00570 | 16 |
| AX-157707647 | 25 | 56.256 | KV453095.1 | 2684772  | 16-scf00570 | 16 |
| AX-158323379 | 25 | 56.256 | KV453095.1 | 2688263  | 16-scf00570 | 16 |
| AX-157708376 | 25 | 56.256 | KV453095.1 | 3525661  | 16-scf00570 | 16 |
| AX-157713118 | 25 | 56.256 | KV453095.1 | 3582917  | 16-scf00570 | 16 |
| AX-158323325 | 25 | 56.304 | KV453095.1 | 2582432  | 16-scf00570 | 16 |
| AX-158322911 | 25 | 56.365 | KV453095.1 | 1984424  | 16-scf00570 | 16 |
| AX-158323316 | 25 | 56.365 | KV453095.1 | 2562889  | 16-scf00570 | 16 |
| AX-158323319 | 25 | 56.365 | KV453095.1 | 2571762  | 16-scf00570 | 16 |
| AX-158323329 | 25 | 56.365 | KV453095.1 | 2585658  | 16-scf00570 | 16 |
| AX-158323330 | 25 | 56.365 | KV453095.1 | 2585919  | 16-scf00570 | 16 |
| AX-157771984 | 25 | 56.365 | KV453095.1 | 2595743  | 16-scf00570 | 16 |
| AX-158323334 | 25 | 56.365 | KV453095.1 | 2603056  | 16-scf00570 | 16 |
| AX-157720945 | 25 | 56.365 | KV453095.1 | 2603391  | 16-scf00570 | 16 |
| AX-158323337 | 25 | 56.365 | KV453095.1 | 2610679  | 16-scf00570 | 16 |
| AX-158323338 | 25 | 56.365 | KV453095.1 | 2614159  | 16-scf00570 | 16 |
| AX-158323340 | 25 | 56.365 | KV453095.1 | 2619615  | 16-scf00570 | 16 |
| AX-158323342 | 25 | 56.365 | KV453095.1 | 2623593  | 16-scf00570 | 16 |
| AX-158323344 | 25 | 56.365 | KV453095.1 | 2627209  | 16-scf00570 | 16 |
| AX-158323345 | 25 | 56.365 | KV453095.1 | 2628071  | 16-scf00570 | 16 |
| AX-158323348 | 25 | 56.365 | KV453095.1 | 2640674  | 16-scf00570 | 16 |
| AX-158323352 | 25 | 56.365 | KV453095.1 | 2647212  | 16-scf00570 | 16 |
| AX-158323356 | 25 | 56.365 | KV453095.1 | 2652976  | 16-scf00570 | 16 |
| AX-158323358 | 25 | 56.365 | KV453095.1 | 2658447  | 16-scf00570 | 16 |
| AX-158323359 | 25 | 56.365 | KV453095.1 | 2658835  | 16-scf00570 | 16 |
| AX-158418444 | 25 | 56.365 | KV453095.1 | 2659213  | 16-scf00570 | 16 |
| AX-158323361 | 25 | 56.365 | KV453095.1 | 2661955  | 16-scf00570 | 16 |
| AX-158323362 | 25 | 56.365 | KV453095.1 | 2663113  | 16-scf00570 | 16 |
| AX-158323372 | 25 | 56.365 | KV453095.1 | 2677223  | 16-scf00570 | 16 |
| AX-158323375 | 25 | 56.365 | KV453095.1 | 2680858  | 16-scf00570 | 16 |
| AX-158323378 | 25 | 56.365 | KV453095.1 | 2686678  | 16-scf00570 | 16 |
| AX-157714124 | 25 | 56.365 | KV453095.1 | 2706265  | 16-scf00570 | 16 |
| AX-157723646 | 25 | 56.365 | KV453095.1 | 2935241  | 16-scf00570 | 16 |
| AX-158323504 | 25 | 56.365 | KV453095.1 | 2938715  | 16-scf00570 | 16 |
| AX-158323657 | 25 | 56.365 | KV453095.1 | 3216086  | 16-scf00570 | 16 |
| AX-158323660 | 25 | 56.365 | KV453095.1 | 3219211  | 16-scf00570 | 16 |
| AX-158323662 | 25 | 56.365 | KV453095.1 | 3224703  | 16-scf00570 | 16 |
| AX-158323664 | 25 | 56.365 | KV453095.1 | 3227067  | 16-scf00570 | 16 |
| AX-158323665 | 25 | 56.365 | KV453095.1 | 3227447  | 16-scf00570 | 16 |
| AX-158323666 | 25 | 56.365 | KV453095.1 | 3227851  | 16-scf00570 | 16 |
| AX-158323683 | 25 | 56.365 | KV453095.1 | 3260857  | 16-scf00570 | 16 |
| AX-158320419 | 25 | 56.583 | KV453089.1 | 8654422  | 16-scf00496 | 16 |
| AX-158320997 | 25 | 56.583 | KV453089.1 | 9543579  | 16-scf00496 | 16 |
| AX-158321563 | 25 | 56.583 | KV453089.1 | 11353336 | 16-scf00496 | 16 |
| AX-158321595 | 25 | 56.583 | KV453089.1 | 11397839 | 16-scf00496 | 16 |
| AX-158321621 | 25 | 56.583 | KV453089.1 | 11428416 | 16-scf00496 | 16 |
| AX-158321706 | 25 | 56.583 | KV453089.1 | 11556778 | 16-scf00496 | 16 |
| AX-158321750 | 25 | 56.583 | KV453089.1 | 11641696 | 16-scf00496 | 16 |

|              |    |        |            |          |             |    |
|--------------|----|--------|------------|----------|-------------|----|
| AX-157711177 | 25 | 56.583 | KV453089.1 | 11667746 | 16-scf00496 | 16 |
| AX-158321944 | 25 | 56.583 | KV453089.1 | 12224408 | 16-scf00496 | 16 |
| AX-158321953 | 25 | 56.583 | KV453089.1 | 12258434 | 16-scf00496 | 16 |
| AX-158321958 | 25 | 56.583 | KV453089.1 | 12276320 | 16-scf00496 | 16 |
| AX-158321964 | 25 | 56.583 | KV453089.1 | 12302846 | 16-scf00496 | 16 |
| AX-158321972 | 25 | 56.583 | KV453089.1 | 12357007 | 16-scf00496 | 16 |
| AX-158321973 | 25 | 56.583 | KV453089.1 | 12378508 | 16-scf00496 | 16 |
| AX-158321979 | 25 | 56.583 | KV453089.1 | 12405412 | 16-scf00496 | 16 |
| AX-158321980 | 25 | 56.583 | KV453089.1 | 12408778 | 16-scf00496 | 16 |
| AX-158321981 | 25 | 56.583 | KV453089.1 | 12409811 | 16-scf00496 | 16 |
| AX-158321983 | 25 | 56.583 | KV453089.1 | 12416758 | 16-scf00496 | 16 |
| AX-158321995 | 25 | 56.583 | KV453089.1 | 12450709 | 16-scf00496 | 16 |
| AX-158322002 | 25 | 56.583 | KV453089.1 | 12469021 | 16-scf00496 | 16 |
| AX-158322003 | 25 | 56.583 | KV453089.1 | 12470039 | 16-scf00496 | 16 |
| AX-158322004 | 25 | 56.583 | KV453089.1 | 12473652 | 16-scf00496 | 16 |
| AX-158322006 | 25 | 56.583 | KV453089.1 | 12479671 | 16-scf00496 | 16 |
| AX-158322016 | 25 | 56.583 | KV453089.1 | 12501640 | 16-scf00496 | 16 |
| AX-158322017 | 25 | 56.583 | KV453089.1 | 12504333 | 16-scf00496 | 16 |
| AX-158322018 | 25 | 56.583 | KV453089.1 | 12505036 | 16-scf00496 | 16 |
| AX-158322022 | 25 | 56.583 | KV453089.1 | 12519429 | 16-scf00496 | 16 |
| AX-158322024 | 25 | 56.583 | KV453089.1 | 12527398 | 16-scf00496 | 16 |
| AX-158322027 | 25 | 56.583 | KV453089.1 | 12539387 | 16-scf00496 | 16 |
| AX-158322038 | 25 | 56.583 | KV453089.1 | 12597699 | 16-scf00496 | 16 |
| AX-158322042 | 25 | 56.583 | KV453089.1 | 12603106 | 16-scf00496 | 16 |
| AX-158322046 | 25 | 56.583 | KV453089.1 | 12619645 | 16-scf00496 | 16 |
| AX-158322050 | 25 | 56.583 | KV453089.1 | 12628134 | 16-scf00496 | 16 |
| AX-158322054 | 25 | 56.583 | KV453089.1 | 12651201 | 16-scf00496 | 16 |
| AX-158322056 | 25 | 56.583 | KV453089.1 | 12655427 | 16-scf00496 | 16 |
| AX-158322062 | 25 | 56.583 | KV453089.1 | 12696224 | 16-scf00496 | 16 |
| AX-158322065 | 25 | 56.583 | KV453089.1 | 12700923 | 16-scf00496 | 16 |
| AX-158322067 | 25 | 56.583 | KV453089.1 | 12709963 | 16-scf00496 | 16 |
| AX-158322073 | 25 | 56.583 | KV453089.1 | 12726445 | 16-scf00496 | 16 |
| AX-158322078 | 25 | 56.583 | KV453089.1 | 12742992 | 16-scf00496 | 16 |
| AX-158322079 | 25 | 56.583 | KV453089.1 | 12748573 | 16-scf00496 | 16 |
| AX-158322086 | 25 | 56.583 | KV453089.1 | 12796362 | 16-scf00496 | 16 |
| AX-158322098 | 25 | 56.583 | KV453089.1 | 12828984 | 16-scf00496 | 16 |
| AX-158322102 | 25 | 56.583 | KV453089.1 | 12838306 | 16-scf00496 | 16 |
| AX-158322103 | 25 | 56.583 | KV453089.1 | 12838775 | 16-scf00496 | 16 |
| AX-158322104 | 25 | 56.583 | KV453089.1 | 12845659 | 16-scf00496 | 16 |
| AX-158322106 | 25 | 56.583 | KV453089.1 | 12852779 | 16-scf00496 | 16 |
| AX-158322108 | 25 | 56.583 | KV453089.1 | 12855300 | 16-scf00496 | 16 |
| AX-158322117 | 25 | 56.583 | KV453089.1 | 12866164 | 16-scf00496 | 16 |
| AX-158322122 | 25 | 56.583 | KV453089.1 | 12874109 | 16-scf00496 | 16 |
| AX-158322124 | 25 | 56.583 | KV453089.1 | 12877562 | 16-scf00496 | 16 |
| AX-158322126 | 25 | 56.583 | KV453089.1 | 12881783 | 16-scf00496 | 16 |
| AX-158322130 | 25 | 56.583 | KV453089.1 | 12890232 | 16-scf00496 | 16 |
| AX-158322131 | 25 | 56.583 | KV453089.1 | 12891531 | 16-scf00496 | 16 |
| AX-158322142 | 25 | 56.583 | KV453089.1 | 12913634 | 16-scf00496 | 16 |
| AX-158322146 | 25 | 56.583 | KV453089.1 | 12925675 | 16-scf00496 | 16 |
| AX-158322150 | 25 | 56.583 | KV453089.1 | 12931713 | 16-scf00496 | 16 |
| AX-158322151 | 25 | 56.583 | KV453089.1 | 12934136 | 16-scf00496 | 16 |

|              |    |        |            |          |             |    |
|--------------|----|--------|------------|----------|-------------|----|
| AX-158322228 | 25 | 56.583 | KV453089.1 | 13082581 | 16-scf00496 | 16 |
| AX-158322244 | 25 | 56.583 | KV453089.1 | 13140903 | 16-scf00496 | 16 |
| AX-158322247 | 25 | 56.583 | KV453089.1 | 13145788 | 16-scf00496 | 16 |
| AX-158322325 | 25 | 56.583 | KV453090.1 | 176284   | 16-scf00499 | 16 |
| AX-158322359 | 25 | 56.583 | KV453090.1 | 245295   | 16-scf00499 | 16 |
| AX-158322379 | 25 | 56.583 | KV453090.1 | 284708   | 16-scf00499 | 16 |
| AX-158322460 | 25 | 56.583 | KV453090.1 | 441371   | 16-scf00499 | 16 |
| AX-157713946 | 25 | 56.583 | KV453090.1 | 474383   | 16-scf00499 | 16 |
| AX-158322680 | 25 | 56.583 | KV453090.1 | 1055357  | 16-scf00499 | 16 |
| AX-158324066 | 25 | 56.583 | KV453093.1 | 552247   | 16-scf00501 | 16 |
| AX-157758070 | 25 | 56.583 | KV453093.1 | 647265   | 16-scf00501 | 16 |
| AX-158324113 | 25 | 56.583 | KV453093.1 | 666931   | 16-scf00501 | 16 |
| AX-158324116 | 25 | 56.583 | KV453093.1 | 673937   | 16-scf00501 | 16 |
| AX-158324470 | 25 | 56.583 | KV453094.1 | 329997   | 16-scf00503 | 16 |
| AX-158324641 | 25 | 56.583 | KV453094.1 | 1039242  | 16-scf00503 | 16 |
| AX-158324737 | 25 | 56.583 | KV453097.1 | 169885   | 16-scf00504 | 16 |
| AX-158324971 | 25 | 56.583 | KV453097.1 | 530052   | 16-scf00504 | 16 |
| AX-157848610 | 25 | 56.583 | KV453097.1 | 822671   | 16-scf00504 | 16 |
| AX-158376073 | 25 | 56.583 | KV453095.1 | 123061   | 16-scf00570 | 16 |
| AX-158324421 | 25 | 56.583 | KV453095.1 | 689379   | 16-scf00570 | 16 |
| AX-158322774 | 25 | 56.583 | KV453095.1 | 1770786  | 16-scf00570 | 16 |
| AX-158322982 | 25 | 56.583 | KV453095.1 | 2071494  | 16-scf00570 | 16 |
| AX-158322987 | 25 | 56.583 | KV453095.1 | 2084836  | 16-scf00570 | 16 |
| AX-158323053 | 25 | 56.583 | KV453095.1 | 2189720  | 16-scf00570 | 16 |
| AX-158323096 | 25 | 56.583 | KV453095.1 | 2247411  | 16-scf00570 | 16 |
| AX-158323141 | 25 | 56.583 | KV453095.1 | 2316164  | 16-scf00570 | 16 |
| AX-157708638 | 25 | 56.583 | KV453095.1 | 2512645  | 16-scf00570 | 16 |
| AX-158323332 | 25 | 56.583 | KV453095.1 | 2587759  | 16-scf00570 | 16 |
| AX-157771072 | 25 | 56.583 | KV453095.1 | 2622682  | 16-scf00570 | 16 |
| AX-158323351 | 25 | 56.583 | KV453095.1 | 2644428  | 16-scf00570 | 16 |
| AX-158323355 | 25 | 56.583 | KV453095.1 | 2651574  | 16-scf00570 | 16 |
| AX-158323386 | 25 | 56.583 | KV453095.1 | 2695932  | 16-scf00570 | 16 |
| AX-158323389 | 25 | 56.583 | KV453095.1 | 2708552  | 16-scf00570 | 16 |
| AX-158323390 | 25 | 56.583 | KV453095.1 | 2709049  | 16-scf00570 | 16 |
| AX-158323396 | 25 | 56.583 | KV453095.1 | 2714956  | 16-scf00570 | 16 |
| AX-158323398 | 25 | 56.583 | KV453095.1 | 2719247  | 16-scf00570 | 16 |
| AX-158323399 | 25 | 56.583 | KV453095.1 | 2721181  | 16-scf00570 | 16 |
| AX-158323400 | 25 | 56.583 | KV453095.1 | 2722595  | 16-scf00570 | 16 |
| AX-158323401 | 25 | 56.583 | KV453095.1 | 2722901  | 16-scf00570 | 16 |
| AX-158323404 | 25 | 56.583 | KV453095.1 | 2725977  | 16-scf00570 | 16 |
| AX-158323407 | 25 | 56.583 | KV453095.1 | 2730656  | 16-scf00570 | 16 |
| AX-158323408 | 25 | 56.583 | KV453095.1 | 2731025  | 16-scf00570 | 16 |
| AX-158323421 | 25 | 56.583 | KV453095.1 | 2749227  | 16-scf00570 | 16 |
| AX-158323424 | 25 | 56.583 | KV453095.1 | 2752781  | 16-scf00570 | 16 |
| AX-158323426 | 25 | 56.583 | KV453095.1 | 2757197  | 16-scf00570 | 16 |
| AX-157717035 | 25 | 56.583 | KV453095.1 | 2782726  | 16-scf00570 | 16 |
| AX-158323435 | 25 | 56.583 | KV453095.1 | 2785534  | 16-scf00570 | 16 |
| AX-158323436 | 25 | 56.583 | KV453095.1 | 2786117  | 16-scf00570 | 16 |
| AX-158323438 | 25 | 56.583 | KV453095.1 | 2797542  | 16-scf00570 | 16 |
| AX-158323440 | 25 | 56.583 | KV453095.1 | 2808485  | 16-scf00570 | 16 |
| AX-158418450 | 25 | 56.583 | KV453095.1 | 2825650  | 16-scf00570 | 16 |

|              |    |        |            |         |             |    |
|--------------|----|--------|------------|---------|-------------|----|
| AX-158323445 | 25 | 56.583 | KV453095.1 | 2837695 | 16-scf00570 | 16 |
| AX-157750559 | 25 | 56.583 | KV453095.1 | 2838774 | 16-scf00570 | 16 |
| AX-158323448 | 25 | 56.583 | KV453095.1 | 2845576 | 16-scf00570 | 16 |
| AX-158323449 | 25 | 56.583 | KV453095.1 | 2846677 | 16-scf00570 | 16 |
| AX-157693563 | 25 | 56.583 | KV453095.1 | 2848755 | 16-scf00570 | 16 |
| AX-157848451 | 25 | 56.583 | KV453095.1 | 2849558 | 16-scf00570 | 16 |
| AX-158323451 | 25 | 56.583 | KV453095.1 | 2849875 | 16-scf00570 | 16 |
| AX-158323452 | 25 | 56.583 | KV453095.1 | 2850191 | 16-scf00570 | 16 |
| AX-158323453 | 25 | 56.583 | KV453095.1 | 2852704 | 16-scf00570 | 16 |
| AX-158323454 | 25 | 56.583 | KV453095.1 | 2852996 | 16-scf00570 | 16 |
| AX-158323456 | 25 | 56.583 | KV453095.1 | 2858308 | 16-scf00570 | 16 |
| AX-158323460 | 25 | 56.583 | KV453095.1 | 2862130 | 16-scf00570 | 16 |
| AX-158323463 | 25 | 56.583 | KV453095.1 | 2863710 | 16-scf00570 | 16 |
| AX-157848453 | 25 | 56.583 | KV453095.1 | 2873776 | 16-scf00570 | 16 |
| AX-158323467 | 25 | 56.583 | KV453095.1 | 2874769 | 16-scf00570 | 16 |
| AX-157743953 | 25 | 56.583 | KV453095.1 | 2876101 | 16-scf00570 | 16 |
| AX-158323470 | 25 | 56.583 | KV453095.1 | 2876788 | 16-scf00570 | 16 |
| AX-158323471 | 25 | 56.583 | KV453095.1 | 2877012 | 16-scf00570 | 16 |
| AX-157848455 | 25 | 56.583 | KV453095.1 | 2880805 | 16-scf00570 | 16 |
| AX-158323478 | 25 | 56.583 | KV453095.1 | 2894024 | 16-scf00570 | 16 |
| AX-157848458 | 25 | 56.583 | KV453095.1 | 2924687 | 16-scf00570 | 16 |
| AX-158323499 | 25 | 56.583 | KV453095.1 | 2929875 | 16-scf00570 | 16 |
| AX-157848459 | 25 | 56.583 | KV453095.1 | 2936087 | 16-scf00570 | 16 |
| AX-157848461 | 25 | 56.583 | KV453095.1 | 2937476 | 16-scf00570 | 16 |
| AX-158323505 | 25 | 56.583 | KV453095.1 | 2940923 | 16-scf00570 | 16 |
| AX-158323506 | 25 | 56.583 | KV453095.1 | 2941457 | 16-scf00570 | 16 |
| AX-158323513 | 25 | 56.583 | KV453095.1 | 2952841 | 16-scf00570 | 16 |
| AX-157848463 | 25 | 56.583 | KV453095.1 | 2955501 | 16-scf00570 | 16 |
| AX-158323519 | 25 | 56.583 | KV453095.1 | 2957786 | 16-scf00570 | 16 |
| AX-157721056 | 25 | 56.583 | KV453095.1 | 2958722 | 16-scf00570 | 16 |
| AX-158323521 | 25 | 56.583 | KV453095.1 | 2960841 | 16-scf00570 | 16 |
| AX-158323522 | 25 | 56.583 | KV453095.1 | 2961103 | 16-scf00570 | 16 |
| AX-158323546 | 25 | 56.583 | KV453095.1 | 2990758 | 16-scf00570 | 16 |
| AX-158323549 | 25 | 56.583 | KV453095.1 | 2992188 | 16-scf00570 | 16 |
| AX-157848465 | 25 | 56.583 | KV453095.1 | 2992952 | 16-scf00570 | 16 |
| AX-157848466 | 25 | 56.583 | KV453095.1 | 2993262 | 16-scf00570 | 16 |
| AX-158323550 | 25 | 56.583 | KV453095.1 | 2996234 | 16-scf00570 | 16 |
| AX-158323551 | 25 | 56.583 | KV453095.1 | 3003224 | 16-scf00570 | 16 |
| AX-158323554 | 25 | 56.583 | KV453095.1 | 3009909 | 16-scf00570 | 16 |
| AX-157848469 | 25 | 56.583 | KV453095.1 | 3011002 | 16-scf00570 | 16 |
| AX-158323557 | 25 | 56.583 | KV453095.1 | 3012079 | 16-scf00570 | 16 |
| AX-158323558 | 25 | 56.583 | KV453095.1 | 3013881 | 16-scf00570 | 16 |
| AX-158323559 | 25 | 56.583 | KV453095.1 | 3014792 | 16-scf00570 | 16 |
| AX-158323564 | 25 | 56.583 | KV453095.1 | 3018472 | 16-scf00570 | 16 |
| AX-158323568 | 25 | 56.583 | KV453095.1 | 3024483 | 16-scf00570 | 16 |
| AX-158323570 | 25 | 56.583 | KV453095.1 | 3027570 | 16-scf00570 | 16 |
| AX-158323572 | 25 | 56.583 | KV453095.1 | 3030135 | 16-scf00570 | 16 |
| AX-158323579 | 25 | 56.583 | KV453095.1 | 3040308 | 16-scf00570 | 16 |
| AX-157714006 | 25 | 56.583 | KV453095.1 | 3044210 | 16-scf00570 | 16 |
| AX-157848471 | 25 | 56.583 | KV453095.1 | 3045380 | 16-scf00570 | 16 |
| AX-158323586 | 25 | 56.583 | KV453095.1 | 3051748 | 16-scf00570 | 16 |

|              |    |        |             |         |             |    |
|--------------|----|--------|-------------|---------|-------------|----|
| AX-158323590 | 25 | 56.583 | KV453095.1  | 3056684 | 16-scf00570 | 16 |
| AX-158323591 | 25 | 56.583 | KV453095.1  | 3058134 | 16-scf00570 | 16 |
| AX-157848473 | 25 | 56.583 | KV453095.1  | 3065621 | 16-scf00570 | 16 |
| AX-158323596 | 25 | 56.583 | KV453095.1  | 3068615 | 16-scf00570 | 16 |
| AX-158323597 | 25 | 56.583 | KV453095.1  | 3069115 | 16-scf00570 | 16 |
| AX-158323599 | 25 | 56.583 | KV453095.1  | 3069934 | 16-scf00570 | 16 |
| AX-158323602 | 25 | 56.583 | KV453095.1  | 3078618 | 16-scf00570 | 16 |
| AX-158323606 | 25 | 56.583 | KV453095.1  | 3083020 | 16-scf00570 | 16 |
| AX-158323608 | 25 | 56.583 | KV453095.1  | 3084089 | 16-scf00570 | 16 |
| AX-157714697 | 25 | 56.583 | KV453095.1  | 3095022 | 16-scf00570 | 16 |
| AX-158323628 | 25 | 56.583 | KV453095.1  | 3134918 | 16-scf00570 | 16 |
| AX-158323629 | 25 | 56.583 | KV453095.1  | 3135976 | 16-scf00570 | 16 |
| AX-157749725 | 25 | 56.583 | KV453095.1  | 3143692 | 16-scf00570 | 16 |
| AX-158323631 | 25 | 56.583 | KV453095.1  | 3145613 | 16-scf00570 | 16 |
| AX-158323638 | 25 | 56.583 | KV453095.1  | 3181562 | 16-scf00570 | 16 |
| AX-158323640 | 25 | 56.583 | KV453095.1  | 3185549 | 16-scf00570 | 16 |
| AX-158323643 | 25 | 56.583 | KV453095.1  | 3192069 | 16-scf00570 | 16 |
| AX-157848479 | 25 | 56.583 | KV453095.1  | 3192157 | 16-scf00570 | 16 |
| AX-158323651 | 25 | 56.583 | KV453095.1  | 3204992 | 16-scf00570 | 16 |
| AX-158323681 | 25 | 56.583 | KV453095.1  | 3254418 | 16-scf00570 | 16 |
| AX-157881434 | 25 | 56.583 | KV453095.1  | 3270615 | 16-scf00570 | 16 |
| AX-157746446 | 25 | 56.583 | KV453095.1  | 3303688 | 16-scf00570 | 16 |
| AX-157805807 | 25 | 56.583 | KV453095.1  | 3315382 | 16-scf00570 | 16 |
| AX-158323726 | 25 | 56.583 | KV453095.1  | 3338791 | 16-scf00570 | 16 |
| AX-157729633 | 25 | 56.583 | KV453095.1  | 3494765 | 16-scf00570 | 16 |
| AX-158323825 | 25 | 56.583 | KV453095.1  | 3501263 | 16-scf00570 | 16 |
| AX-158323908 | 25 | 56.583 | KV453095.1  | 3676752 | 16-scf00570 | 16 |
| AX-157705417 | 25 | 56.583 | 3ML01030806 | 278     | scf06410_1  | UN |
| AX-158323465 | 25 | 56.692 | KV453095.1  | 2871893 | 16-scf00570 | 16 |
| AX-158323512 | 25 | 56.692 | KV453095.1  | 2952367 | 16-scf00570 | 16 |
| AX-158323514 | 25 | 56.692 | KV453095.1  | 2953321 | 16-scf00570 | 16 |
| AX-158323517 | 25 | 56.692 | KV453095.1  | 2955217 | 16-scf00570 | 16 |
| AX-158323523 | 25 | 56.692 | KV453095.1  | 2962271 | 16-scf00570 | 16 |
| AX-158323689 | 25 | 56.692 | KV453095.1  | 3269933 | 16-scf00570 | 16 |
| AX-158323695 | 25 | 56.692 | KV453095.1  | 3286008 | 16-scf00570 | 16 |
| AX-157719823 | 25 | 56.692 | KV453095.1  | 3292470 | 16-scf00570 | 16 |
| AX-158323698 | 25 | 56.692 | KV453095.1  | 3292633 | 16-scf00570 | 16 |
| AX-158323709 | 25 | 56.692 | KV453095.1  | 3317984 | 16-scf00570 | 16 |
| AX-158323717 | 25 | 56.692 | KV453095.1  | 3329048 | 16-scf00570 | 16 |
| AX-158323740 | 25 | 56.692 | KV453095.1  | 3357696 | 16-scf00570 | 16 |
| AX-158323799 | 25 | 56.692 | KV453095.1  | 3446397 | 16-scf00570 | 16 |
| AX-158323815 | 25 | 56.692 | KV453095.1  | 3478524 | 16-scf00570 | 16 |
| AX-158323673 | 25 | 56.802 | KV453095.1  | 3239156 | 16-scf00570 | 16 |
| AX-158323706 | 25 | 56.802 | KV453095.1  | 3311156 | 16-scf00570 | 16 |
| AX-157749999 | 25 | 56.802 | KV453095.1  | 3311818 | 16-scf00570 | 16 |
| AX-157848489 | 25 | 56.802 | KV453095.1  | 3313240 | 16-scf00570 | 16 |
| AX-158323707 | 25 | 56.802 | KV453095.1  | 3314055 | 16-scf00570 | 16 |
| AX-158323708 | 25 | 56.802 | KV453095.1  | 3315733 | 16-scf00570 | 16 |
| AX-158323711 | 25 | 56.802 | KV453095.1  | 3319936 | 16-scf00570 | 16 |
| AX-157738342 | 25 | 56.802 | KV453095.1  | 3353722 | 16-scf00570 | 16 |
| AX-158323767 | 25 | 56.802 | KV453095.1  | 3384146 | 16-scf00570 | 16 |

|              |    |        |            |          |             |    |
|--------------|----|--------|------------|----------|-------------|----|
| AX-158323816 | 25 | 56.802 | KV453095.1 | 3481512  | 16-scf00570 | 16 |
| AX-157716674 | 25 | 56.837 | KV453095.1 | 3321233  | 16-scf00570 | 16 |
| AX-157740854 | 25 | 56.837 | KV453095.1 | 3322521  | 16-scf00570 | 16 |
| AX-158323754 | 25 | 56.837 | KV453095.1 | 3371508  | 16-scf00570 | 16 |
| AX-157848493 | 25 | 56.837 | KV453095.1 | 3378202  | 16-scf00570 | 16 |
| AX-158323820 | 25 | 56.837 | KV453095.1 | 3486075  | 16-scf00570 | 16 |
| AX-158323827 | 25 | 56.837 | KV453095.1 | 3502181  | 16-scf00570 | 16 |
| AX-158323716 | 25 | 56.847 | KV453095.1 | 3328193  | 16-scf00570 | 16 |
| AX-158323719 | 25 | 56.852 | KV453095.1 | 3329945  | 16-scf00570 | 16 |
| AX-158323897 | 25 | 56.852 | KV453095.1 | 3664400  | 16-scf00570 | 16 |
| AX-157861487 | 25 | 56.852 | KV453095.1 | 3685791  | 16-scf00570 | 16 |
| AX-158323722 | 25 | 56.878 | KV453095.1 | 3332655  | 16-scf00570 | 16 |
| AX-158322033 | 25 | 56.911 | KV453089.1 | 12585449 | 16-scf00496 | 16 |
| AX-158322035 | 25 | 56.911 | KV453089.1 | 12589461 | 16-scf00496 | 16 |
| AX-158322039 | 25 | 56.911 | KV453089.1 | 12598477 | 16-scf00496 | 16 |
| AX-158322041 | 25 | 56.911 | KV453089.1 | 12602201 | 16-scf00496 | 16 |
| AX-158322043 | 25 | 56.911 | KV453089.1 | 12612715 | 16-scf00496 | 16 |
| AX-158322044 | 25 | 56.911 | KV453089.1 | 12613310 | 16-scf00496 | 16 |
| AX-158323688 | 25 | 56.911 | KV453095.1 | 3265359  | 16-scf00570 | 16 |
| AX-158323696 | 25 | 56.911 | KV453095.1 | 3289497  | 16-scf00570 | 16 |
| AX-157848488 | 25 | 56.911 | KV453095.1 | 3304558  | 16-scf00570 | 16 |
| AX-158323723 | 25 | 56.911 | KV453095.1 | 3336445  | 16-scf00570 | 16 |
| AX-158323729 | 25 | 56.911 | KV453095.1 | 3345052  | 16-scf00570 | 16 |
| AX-158323742 | 25 | 56.911 | KV453095.1 | 3359337  | 16-scf00570 | 16 |
| AX-158323743 | 25 | 56.911 | KV453095.1 | 3360991  | 16-scf00570 | 16 |
| AX-158323744 | 25 | 56.911 | KV453095.1 | 3363366  | 16-scf00570 | 16 |
| AX-158323748 | 25 | 56.911 | KV453095.1 | 3365650  | 16-scf00570 | 16 |
| AX-158323749 | 25 | 56.911 | KV453095.1 | 3367807  | 16-scf00570 | 16 |
| AX-158323752 | 25 | 56.911 | KV453095.1 | 3369983  | 16-scf00570 | 16 |
| AX-158323753 | 25 | 56.911 | KV453095.1 | 3370876  | 16-scf00570 | 16 |
| AX-158323757 | 25 | 56.911 | KV453095.1 | 3376318  | 16-scf00570 | 16 |
| AX-158323758 | 25 | 56.911 | KV453095.1 | 3377292  | 16-scf00570 | 16 |
| AX-158323759 | 25 | 56.911 | KV453095.1 | 3378314  | 16-scf00570 | 16 |
| AX-158323760 | 25 | 56.911 | KV453095.1 | 3379548  | 16-scf00570 | 16 |
| AX-158323763 | 25 | 56.911 | KV453095.1 | 3381691  | 16-scf00570 | 16 |
| AX-158323766 | 25 | 56.911 | KV453095.1 | 3383815  | 16-scf00570 | 16 |
| AX-157881437 | 25 | 56.911 | KV453095.1 | 3384866  | 16-scf00570 | 16 |
| AX-158323768 | 25 | 56.911 | KV453095.1 | 3385294  | 16-scf00570 | 16 |
| AX-158323776 | 25 | 56.911 | KV453095.1 | 3393059  | 16-scf00570 | 16 |
| AX-158323777 | 25 | 56.911 | KV453095.1 | 3396597  | 16-scf00570 | 16 |
| AX-158323779 | 25 | 56.911 | KV453095.1 | 3399664  | 16-scf00570 | 16 |
| AX-157747100 | 25 | 56.911 | KV453095.1 | 3400399  | 16-scf00570 | 16 |
| AX-158323783 | 25 | 56.911 | KV453095.1 | 3410775  | 16-scf00570 | 16 |
| AX-158323784 | 25 | 56.911 | KV453095.1 | 3411100  | 16-scf00570 | 16 |
| AX-158323786 | 25 | 56.911 | KV453095.1 | 3413478  | 16-scf00570 | 16 |
| AX-157848495 | 25 | 56.911 | KV453095.1 | 3419406  | 16-scf00570 | 16 |
| AX-157714039 | 25 | 56.911 | KV453095.1 | 3421057  | 16-scf00570 | 16 |
| AX-158323796 | 25 | 56.911 | KV453095.1 | 3431551  | 16-scf00570 | 16 |
| AX-157848496 | 25 | 56.911 | KV453095.1 | 3431828  | 16-scf00570 | 16 |
| AX-157848499 | 25 | 56.911 | KV453095.1 | 3441940  | 16-scf00570 | 16 |
| AX-157881440 | 25 | 56.911 | KV453095.1 | 3444474  | 16-scf00570 | 16 |

|              |    |        |            |         |             |    |
|--------------|----|--------|------------|---------|-------------|----|
| AX-158323800 | 25 | 56.911 | KV453095.1 | 3449284 | 16-scf00570 | 16 |
| AX-158323801 | 25 | 56.911 | KV453095.1 | 3449895 | 16-scf00570 | 16 |
| AX-158323803 | 25 | 56.911 | KV453095.1 | 3453284 | 16-scf00570 | 16 |
| AX-157881441 | 25 | 56.911 | KV453095.1 | 3453961 | 16-scf00570 | 16 |
| AX-158323804 | 25 | 56.911 | KV453095.1 | 3459581 | 16-scf00570 | 16 |
| AX-157756270 | 25 | 56.911 | KV453095.1 | 3461264 | 16-scf00570 | 16 |
| AX-158323805 | 25 | 56.911 | KV453095.1 | 3462266 | 16-scf00570 | 16 |
| AX-158323807 | 25 | 56.911 | KV453095.1 | 3464156 | 16-scf00570 | 16 |
| AX-158323809 | 25 | 56.911 | KV453095.1 | 3466658 | 16-scf00570 | 16 |
| AX-158323810 | 25 | 56.911 | KV453095.1 | 3469213 | 16-scf00570 | 16 |
| AX-158323811 | 25 | 56.911 | KV453095.1 | 3470290 | 16-scf00570 | 16 |
| AX-158323812 | 25 | 56.911 | KV453095.1 | 3471870 | 16-scf00570 | 16 |
| AX-158323813 | 25 | 56.911 | KV453095.1 | 3477322 | 16-scf00570 | 16 |
| AX-158323817 | 25 | 56.911 | KV453095.1 | 3482439 | 16-scf00570 | 16 |
| AX-158323818 | 25 | 56.911 | KV453095.1 | 3483225 | 16-scf00570 | 16 |
| AX-157848502 | 25 | 56.911 | KV453095.1 | 3488961 | 16-scf00570 | 16 |
| AX-158323823 | 25 | 56.911 | KV453095.1 | 3493017 | 16-scf00570 | 16 |
| AX-157805821 | 25 | 56.911 | KV453095.1 | 3497079 | 16-scf00570 | 16 |
| AX-158323828 | 25 | 56.911 | KV453095.1 | 3504450 | 16-scf00570 | 16 |
| AX-157848503 | 25 | 56.911 | KV453095.1 | 3511985 | 16-scf00570 | 16 |
| AX-157748441 | 25 | 56.911 | KV453095.1 | 3514942 | 16-scf00570 | 16 |
| AX-158323834 | 25 | 56.911 | KV453095.1 | 3522637 | 16-scf00570 | 16 |
| AX-157848506 | 25 | 56.911 | KV453095.1 | 3523716 | 16-scf00570 | 16 |
| AX-158323837 | 25 | 56.911 | KV453095.1 | 3536611 | 16-scf00570 | 16 |
| AX-158323838 | 25 | 57.02  | KV453095.1 | 3537844 | 16-scf00570 | 16 |
| AX-157715630 | 25 | 57.02  | KV453095.1 | 3540023 | 16-scf00570 | 16 |
| AX-157751764 | 25 | 57.02  | KV453095.1 | 3544567 | 16-scf00570 | 16 |
| AX-157848507 | 25 | 57.02  | KV453095.1 | 3545681 | 16-scf00570 | 16 |
| AX-158323847 | 25 | 57.02  | KV453095.1 | 3555454 | 16-scf00570 | 16 |
| AX-158387964 | 25 | 57.02  | KV453095.1 | 3555536 | 16-scf00570 | 16 |
| AX-158323857 | 25 | 57.02  | KV453095.1 | 3570849 | 16-scf00570 | 16 |
| AX-158323870 | 25 | 57.02  | KV453095.1 | 3601858 | 16-scf00570 | 16 |
| AX-158323894 | 25 | 57.02  | KV453095.1 | 3652703 | 16-scf00570 | 16 |
| AX-158323868 | 25 | 57.123 | KV453095.1 | 3599993 | 16-scf00570 | 16 |
| AX-158323789 | 25 | 57.233 | KV453095.1 | 3421763 | 16-scf00570 | 16 |
| AX-158323866 | 25 | 57.233 | KV453095.1 | 3597824 | 16-scf00570 | 16 |
| AX-157724264 | 25 | 57.233 | KV453095.1 | 3598162 | 16-scf00570 | 16 |
| AX-158323872 | 25 | 57.233 | KV453095.1 | 3604593 | 16-scf00570 | 16 |
| AX-158323880 | 25 | 57.233 | KV453095.1 | 3618337 | 16-scf00570 | 16 |
| AX-158323882 | 25 | 57.233 | KV453095.1 | 3620041 | 16-scf00570 | 16 |
| AX-157765425 | 25 | 57.233 | KV453095.1 | 3629040 | 16-scf00570 | 16 |
| AX-158323886 | 25 | 57.233 | KV453095.1 | 3633487 | 16-scf00570 | 16 |
| AX-157848508 | 25 | 57.242 | KV453095.1 | 3577497 | 16-scf00570 | 16 |
| AX-157702071 | 25 | 57.242 | KV453095.1 | 3629163 | 16-scf00570 | 16 |
| AX-158323892 | 25 | 57.564 | KV453095.1 | 3644567 | 16-scf00570 | 16 |
| AX-158424152 | 25 | 57.564 | KV453095.1 | 3644852 | 16-scf00570 | 16 |
| AX-157861482 | 25 | 57.564 | KV453095.1 | 3645152 | 16-scf00570 | 16 |
| AX-158323893 | 25 | 57.565 | KV453095.1 | 3648064 | 16-scf00570 | 16 |
| AX-157888419 | 25 | 57.565 | KV453095.1 | 3655815 | 16-scf00570 | 16 |
| AX-157861483 | 25 | 57.565 | KV453095.1 | 3661878 | 16-scf00570 | 16 |
| AX-157848512 | 25 | 57.566 | KV453095.1 | 3662919 | 16-scf00570 | 16 |



|              |    |        |            |         |             |    |
|--------------|----|--------|------------|---------|-------------|----|
| AX-158323898 | 25 | 57.566 | KV453095.1 | 3664837 | 16-scf00570 | 16 |
| AX-158323901 | 25 | 57.566 | KV453095.1 | 3667947 | 16-scf00570 | 16 |
| AX-158323902 | 25 | 57.566 | KV453095.1 | 3670260 | 16-scf00570 | 16 |
| AX-158323905 | 25 | 57.566 | KV453095.1 | 3673414 | 16-scf00570 | 16 |
| AX-158325199 | 25 | 57.627 | KV453097.1 | 919599  | 16-scf00504 | 16 |
| AX-158323907 | 25 | 57.627 | KV453095.1 | 3676080 | 16-scf00570 | 16 |
| AX-158323912 | 25 | 57.658 | KV453095.1 | 3685470 | 16-scf00570 | 16 |
| AX-158323914 | 25 | 57.721 | KV453095.1 | 3688661 | 16-scf00570 | 16 |
| AX-157773840 | 25 | 57.785 | KV453097.1 | 308173  | 16-scf00504 | 16 |
| AX-158323724 | 25 | 57.785 | KV453095.1 | 3336900 | 16-scf00570 | 16 |
| AX-158323910 | 25 | 57.785 | KV453095.1 | 3682930 | 16-scf00570 | 16 |
| AX-157848513 | 25 | 57.785 | KV453095.1 | 3689151 | 16-scf00570 | 16 |
| AX-158323916 | 25 | 57.785 | KV453095.1 | 3696128 | 16-scf00570 | 16 |
| AX-158323918 | 25 | 57.785 | KV453095.1 | 3698632 | 16-scf00570 | 16 |
| AX-157805836 | 25 | 57.785 | KV453095.1 | 3698867 | 16-scf00570 | 16 |
| AX-157719941 | 25 | 57.785 | KV453095.1 | 3703360 | 16-scf00570 | 16 |
| AX-158323935 | 25 | 57.785 | KV453095.1 | 3739945 | 16-scf00570 | 16 |
| AX-158323955 | 25 | 57.785 | KV453095.1 | 3784153 | 16-scf00570 | 16 |
| AX-158323920 | 25 | 57.949 | KV453095.1 | 3705223 | 16-scf00570 | 16 |
| AX-158323922 | 25 | 58.113 | KV453095.1 | 3718671 | 16-scf00570 | 16 |
| AX-158323923 | 25 | 58.113 | KV453095.1 | 3720077 | 16-scf00570 | 16 |
| AX-158323930 | 25 | 58.113 | KV453095.1 | 3732967 | 16-scf00570 | 16 |
| AX-158323931 | 25 | 58.113 | KV453095.1 | 3734961 | 16-scf00570 | 16 |
| AX-157744382 | 25 | 58.113 | KV453095.1 | 3735376 | 16-scf00570 | 16 |
| AX-158323932 | 25 | 58.113 | KV453095.1 | 3736560 | 16-scf00570 | 16 |
| AX-157720200 | 25 | 58.125 | KV453095.1 | 3741262 | 16-scf00570 | 16 |
| AX-158323940 | 25 | 58.636 | KV453095.1 | 3751635 | 16-scf00570 | 16 |
| AX-158323942 | 25 | 58.636 | KV453095.1 | 3755372 | 16-scf00570 | 16 |
| AX-157861489 | 25 | 58.636 | KV453095.1 | 3756002 | 16-scf00570 | 16 |
| AX-157750942 | 25 | 58.636 | KV453095.1 | 3758322 | 16-scf00570 | 16 |
| AX-158324668 | 25 | 58.699 | KV453097.1 | 27083   | 16-scf00504 | 16 |
| AX-158323336 | 25 | 58.699 | KV453095.1 | 2605548 | 16-scf00570 | 16 |
| AX-158323410 | 25 | 58.699 | KV453095.1 | 2738553 | 16-scf00570 | 16 |
| AX-157861475 | 25 | 58.699 | KV453095.1 | 2957479 | 16-scf00570 | 16 |
| AX-158418461 | 25 | 58.699 | KV453095.1 | 3162386 | 16-scf00570 | 16 |
| AX-157713597 | 25 | 58.699 | KV453095.1 | 3187142 | 16-scf00570 | 16 |
| AX-158323937 | 25 | 58.699 | KV453095.1 | 3746161 | 16-scf00570 | 16 |
| AX-158323944 | 25 | 58.699 | KV453095.1 | 3759008 | 16-scf00570 | 16 |
| AX-157888423 | 25 | 58.699 | KV453095.1 | 3788972 | 16-scf00570 | 16 |
| AX-158323963 | 25 | 58.699 | KV453095.1 | 3792282 | 16-scf00570 | 16 |
| AX-158323945 | 25 | 58.768 | KV453095.1 | 3763741 | 16-scf00570 | 16 |
| AX-158323947 | 25 | 58.768 | KV453095.1 | 3767889 | 16-scf00570 | 16 |
| AX-158323950 | 25 | 58.768 | KV453095.1 | 3777846 | 16-scf00570 | 16 |
| AX-158323953 | 25 | 58.768 | KV453095.1 | 3779617 | 16-scf00570 | 16 |
| AX-158323957 | 25 | 58.768 | KV453095.1 | 3786023 | 16-scf00570 | 16 |
| AX-158323959 | 25 | 58.768 | KV453095.1 | 3787760 | 16-scf00570 | 16 |
| AX-158323968 | 25 | 58.768 | KV453095.1 | 3806511 | 16-scf00570 | 16 |
| AX-158324648 | 25 | 58.877 | KV453097.1 | 3051    | 16-scf00504 | 16 |
| AX-158324649 | 25 | 58.877 | KV453097.1 | 3626    | 16-scf00504 | 16 |
| AX-158324650 | 25 | 58.877 | KV453097.1 | 3928    | 16-scf00504 | 16 |
| AX-157848559 | 25 | 58.877 | KV453097.1 | 9413    | 16-scf00504 | 16 |

|              |    |        |            |         |             |    |
|--------------|----|--------|------------|---------|-------------|----|
| AX-158324654 | 25 | 58.877 | KV453097.1 | 12574   | 16-scf00504 | 16 |
| AX-158324656 | 25 | 58.877 | KV453097.1 | 14512   | 16-scf00504 | 16 |
| AX-158324657 | 25 | 58.877 | KV453097.1 | 15328   | 16-scf00504 | 16 |
| AX-158324666 | 25 | 58.877 | KV453097.1 | 25874   | 16-scf00504 | 16 |
| AX-158324667 | 25 | 58.877 | KV453097.1 | 26574   | 16-scf00504 | 16 |
| AX-158324669 | 25 | 58.877 | KV453097.1 | 27933   | 16-scf00504 | 16 |
| AX-158324671 | 25 | 58.877 | KV453097.1 | 29976   | 16-scf00504 | 16 |
| AX-158324672 | 25 | 58.877 | KV453097.1 | 30448   | 16-scf00504 | 16 |
| AX-158324674 | 25 | 58.877 | KV453097.1 | 32150   | 16-scf00504 | 16 |
| AX-157756157 | 25 | 58.877 | KV453097.1 | 35287   | 16-scf00504 | 16 |
| AX-158324680 | 25 | 58.877 | KV453097.1 | 45379   | 16-scf00504 | 16 |
| AX-158324683 | 25 | 58.877 | KV453097.1 | 48546   | 16-scf00504 | 16 |
| AX-158324684 | 25 | 58.877 | KV453097.1 | 49399   | 16-scf00504 | 16 |
| AX-157888431 | 25 | 58.877 | KV453097.1 | 49508   | 16-scf00504 | 16 |
| AX-158324685 | 25 | 58.877 | KV453097.1 | 54345   | 16-scf00504 | 16 |
| AX-158324686 | 25 | 58.877 | KV453097.1 | 54884   | 16-scf00504 | 16 |
| AX-158324687 | 25 | 58.877 | KV453097.1 | 55395   | 16-scf00504 | 16 |
| AX-158324688 | 25 | 58.877 | KV453097.1 | 56747   | 16-scf00504 | 16 |
| AX-158324718 | 25 | 58.877 | KV453097.1 | 104937  | 16-scf00504 | 16 |
| AX-158324722 | 25 | 58.877 | KV453097.1 | 135576  | 16-scf00504 | 16 |
| AX-157848600 | 25 | 58.877 | KV453097.1 | 621839  | 16-scf00504 | 16 |
| AX-158325054 | 25 | 58.877 | KV453097.1 | 710126  | 16-scf00504 | 16 |
| AX-158325061 | 25 | 58.877 | KV453097.1 | 720293  | 16-scf00504 | 16 |
| AX-158325129 | 25 | 58.877 | KV453097.1 | 811173  | 16-scf00504 | 16 |
| AX-157771401 | 25 | 58.877 | KV453095.1 | 2517931 | 16-scf00570 | 16 |
| AX-158323370 | 25 | 58.877 | KV453095.1 | 2671537 | 16-scf00570 | 16 |
| AX-158323929 | 25 | 58.877 | KV453095.1 | 3730864 | 16-scf00570 | 16 |
| AX-157758688 | 25 | 58.877 | KV453095.1 | 3757937 | 16-scf00570 | 16 |
| AX-157774375 | 25 | 58.877 | KV453095.1 | 3782287 | 16-scf00570 | 16 |
| AX-158323961 | 25 | 58.877 | KV453095.1 | 3790319 | 16-scf00570 | 16 |
| AX-158323970 | 25 | 58.877 | KV453095.1 | 3812086 | 16-scf00570 | 16 |
| AX-158324234 | 25 | 59.095 | KV453093.1 | 1339447 | 16-scf00501 | 16 |
| AX-158324499 | 25 | 59.095 | KV453094.1 | 578607  | 16-scf00503 | 16 |
| AX-158324689 | 25 | 59.095 | KV453097.1 | 57727   | 16-scf00504 | 16 |
| AX-158381470 | 25 | 59.095 | KV453097.1 | 62317   | 16-scf00504 | 16 |
| AX-158324698 | 25 | 59.095 | KV453097.1 | 68119   | 16-scf00504 | 16 |
| AX-158324699 | 25 | 59.095 | KV453097.1 | 68463   | 16-scf00504 | 16 |
| AX-157848563 | 25 | 59.095 | KV453097.1 | 69653   | 16-scf00504 | 16 |
| AX-158324701 | 25 | 59.095 | KV453097.1 | 74130   | 16-scf00504 | 16 |
| AX-158324703 | 25 | 59.095 | KV453097.1 | 76412   | 16-scf00504 | 16 |
| AX-158418531 | 25 | 59.095 | KV453097.1 | 76732   | 16-scf00504 | 16 |
| AX-158324704 | 25 | 59.095 | KV453097.1 | 78125   | 16-scf00504 | 16 |
| AX-158324705 | 25 | 59.095 | KV453097.1 | 78835   | 16-scf00504 | 16 |
| AX-158324707 | 25 | 59.095 | KV453097.1 | 84810   | 16-scf00504 | 16 |
| AX-158324708 | 25 | 59.095 | KV453097.1 | 85548   | 16-scf00504 | 16 |
| AX-158324712 | 25 | 59.095 | KV453097.1 | 97217   | 16-scf00504 | 16 |
| AX-158324715 | 25 | 59.095 | KV453097.1 | 99074   | 16-scf00504 | 16 |
| AX-158324716 | 25 | 59.095 | KV453097.1 | 100993  | 16-scf00504 | 16 |
| AX-158324717 | 25 | 59.095 | KV453097.1 | 103393  | 16-scf00504 | 16 |
| AX-158324720 | 25 | 59.095 | KV453097.1 | 120641  | 16-scf00504 | 16 |
| AX-158324725 | 25 | 59.095 | KV453097.1 | 147366  | 16-scf00504 | 16 |

|              |    |        |            |         |             |    |
|--------------|----|--------|------------|---------|-------------|----|
| AX-158324727 | 25 | 59.095 | KV453097.1 | 157591  | 16-scf00504 | 16 |
| AX-158324728 | 25 | 59.095 | KV453097.1 | 160452  | 16-scf00504 | 16 |
| AX-158324729 | 25 | 59.095 | KV453097.1 | 161439  | 16-scf00504 | 16 |
| AX-158324731 | 25 | 59.095 | KV453097.1 | 163379  | 16-scf00504 | 16 |
| AX-158324733 | 25 | 59.095 | KV453097.1 | 164720  | 16-scf00504 | 16 |
| AX-158324734 | 25 | 59.095 | KV453097.1 | 166254  | 16-scf00504 | 16 |
| AX-158324735 | 25 | 59.095 | KV453097.1 | 167112  | 16-scf00504 | 16 |
| AX-158324736 | 25 | 59.095 | KV453097.1 | 168162  | 16-scf00504 | 16 |
| AX-158324740 | 25 | 59.095 | KV453097.1 | 173987  | 16-scf00504 | 16 |
| AX-158324744 | 25 | 59.095 | KV453097.1 | 176746  | 16-scf00504 | 16 |
| AX-157716595 | 25 | 59.095 | KV453097.1 | 181021  | 16-scf00504 | 16 |
| AX-158324748 | 25 | 59.095 | KV453097.1 | 189916  | 16-scf00504 | 16 |
| AX-158324755 | 25 | 59.095 | KV453097.1 | 198095  | 16-scf00504 | 16 |
| AX-157744199 | 25 | 59.095 | KV453097.1 | 203006  | 16-scf00504 | 16 |
| AX-158324759 | 25 | 59.095 | KV453097.1 | 205334  | 16-scf00504 | 16 |
| AX-158324761 | 25 | 59.095 | KV453097.1 | 207767  | 16-scf00504 | 16 |
| AX-158324762 | 25 | 59.095 | KV453097.1 | 208625  | 16-scf00504 | 16 |
| AX-158324770 | 25 | 59.095 | KV453097.1 | 218144  | 16-scf00504 | 16 |
| AX-158324771 | 25 | 59.095 | KV453097.1 | 223537  | 16-scf00504 | 16 |
| AX-157773085 | 25 | 59.095 | KV453097.1 | 224081  | 16-scf00504 | 16 |
| AX-157867883 | 25 | 59.095 | KV453097.1 | 224404  | 16-scf00504 | 16 |
| AX-157867884 | 25 | 59.095 | KV453097.1 | 226371  | 16-scf00504 | 16 |
| AX-158324774 | 25 | 59.095 | KV453097.1 | 227713  | 16-scf00504 | 16 |
| AX-158324775 | 25 | 59.095 | KV453097.1 | 228414  | 16-scf00504 | 16 |
| AX-158324778 | 25 | 59.095 | KV453097.1 | 234984  | 16-scf00504 | 16 |
| AX-158324781 | 25 | 59.095 | KV453097.1 | 241214  | 16-scf00504 | 16 |
| AX-158324782 | 25 | 59.095 | KV453097.1 | 241424  | 16-scf00504 | 16 |
| AX-157881472 | 25 | 59.095 | KV453097.1 | 258557  | 16-scf00504 | 16 |
| AX-158324795 | 25 | 59.095 | KV453097.1 | 268586  | 16-scf00504 | 16 |
| AX-158324798 | 25 | 59.095 | KV453097.1 | 271447  | 16-scf00504 | 16 |
| AX-158324802 | 25 | 59.095 | KV453097.1 | 275878  | 16-scf00504 | 16 |
| AX-158324803 | 25 | 59.095 | KV453097.1 | 277283  | 16-scf00504 | 16 |
| AX-158324805 | 25 | 59.095 | KV453097.1 | 279228  | 16-scf00504 | 16 |
| AX-158324807 | 25 | 59.095 | KV453097.1 | 282023  | 16-scf00504 | 16 |
| AX-158324809 | 25 | 59.095 | KV453097.1 | 289190  | 16-scf00504 | 16 |
| AX-158324870 | 25 | 59.095 | KV453097.1 | 386015  | 16-scf00504 | 16 |
| AX-158324878 | 25 | 59.095 | KV453097.1 | 394531  | 16-scf00504 | 16 |
| AX-157848582 | 25 | 59.095 | KV453097.1 | 429129  | 16-scf00504 | 16 |
| AX-158325134 | 25 | 59.095 | KV453097.1 | 819674  | 16-scf00504 | 16 |
| AX-158325135 | 25 | 59.095 | KV453097.1 | 819912  | 16-scf00504 | 16 |
| AX-158323967 | 25 | 59.095 | KV453095.1 | 3802177 | 16-scf00570 | 16 |
| AX-158323969 | 25 | 59.095 | KV453095.1 | 3810356 | 16-scf00570 | 16 |
| AX-158324796 | 25 | 59.205 | KV453097.1 | 269995  | 16-scf00504 | 16 |
| AX-157848569 | 25 | 59.205 | KV453097.1 | 270806  | 16-scf00504 | 16 |
| AX-158324804 | 25 | 59.205 | KV453097.1 | 277824  | 16-scf00504 | 16 |
| AX-157739360 | 25 | 59.423 | KV453097.1 | 292201  | 16-scf00504 | 16 |
| AX-158324811 | 25 | 59.423 | KV453097.1 | 294602  | 16-scf00504 | 16 |
| AX-158324812 | 25 | 59.423 | KV453097.1 | 294962  | 16-scf00504 | 16 |
| AX-158324819 | 25 | 59.423 | KV453097.1 | 304192  | 16-scf00504 | 16 |
| AX-158324820 | 25 | 59.423 | KV453097.1 | 304458  | 16-scf00504 | 16 |
| AX-158324822 | 25 | 59.423 | KV453097.1 | 305930  | 16-scf00504 | 16 |

|              |    |        |            |        |             |    |
|--------------|----|--------|------------|--------|-------------|----|
| AX-158324826 | 25 | 59.423 | KV453097.1 | 311486 | 16-scf00504 | 16 |
| AX-158324828 | 25 | 59.423 | KV453097.1 | 318501 | 16-scf00504 | 16 |
| AX-158324829 | 25 | 59.423 | KV453097.1 | 319902 | 16-scf00504 | 16 |
| AX-157848572 | 25 | 59.423 | KV453097.1 | 323213 | 16-scf00504 | 16 |
| AX-157723863 | 25 | 59.423 | KV453097.1 | 325933 | 16-scf00504 | 16 |
| AX-158324835 | 25 | 59.423 | KV453097.1 | 327637 | 16-scf00504 | 16 |
| AX-158324837 | 25 | 59.423 | KV453097.1 | 331776 | 16-scf00504 | 16 |
| AX-158381471 | 25 | 59.423 | KV453097.1 | 333373 | 16-scf00504 | 16 |
| AX-158324840 | 25 | 59.423 | KV453097.1 | 333653 | 16-scf00504 | 16 |
| AX-158324841 | 25 | 59.423 | KV453097.1 | 335411 | 16-scf00504 | 16 |
| AX-157848574 | 25 | 59.423 | KV453097.1 | 337490 | 16-scf00504 | 16 |
| AX-157746037 | 25 | 59.423 | KV453097.1 | 340245 | 16-scf00504 | 16 |
| AX-157848576 | 25 | 59.423 | KV453097.1 | 341467 | 16-scf00504 | 16 |
| AX-158324844 | 25 | 59.423 | KV453097.1 | 341617 | 16-scf00504 | 16 |
| AX-158324845 | 25 | 59.423 | KV453097.1 | 346040 | 16-scf00504 | 16 |
| AX-158324846 | 25 | 59.423 | KV453097.1 | 350769 | 16-scf00504 | 16 |
| AX-158324850 | 25 | 59.423 | KV453097.1 | 356500 | 16-scf00504 | 16 |
| AX-157742447 | 25 | 59.423 | KV453097.1 | 358585 | 16-scf00504 | 16 |
| AX-158324858 | 25 | 59.423 | KV453097.1 | 367118 | 16-scf00504 | 16 |
| AX-158324859 | 25 | 59.423 | KV453097.1 | 368936 | 16-scf00504 | 16 |
| AX-158324860 | 25 | 59.423 | KV453097.1 | 369316 | 16-scf00504 | 16 |
| AX-158324861 | 25 | 59.423 | KV453097.1 | 370065 | 16-scf00504 | 16 |
| AX-158324862 | 25 | 59.423 | KV453097.1 | 370960 | 16-scf00504 | 16 |
| AX-158324869 | 25 | 59.423 | KV453097.1 | 385710 | 16-scf00504 | 16 |
| AX-158324871 | 25 | 59.423 | KV453097.1 | 387064 | 16-scf00504 | 16 |
| AX-158324872 | 25 | 59.423 | KV453097.1 | 388315 | 16-scf00504 | 16 |
| AX-158324874 | 25 | 59.423 | KV453097.1 | 389022 | 16-scf00504 | 16 |
| AX-158324875 | 25 | 59.423 | KV453097.1 | 389839 | 16-scf00504 | 16 |
| AX-157709192 | 25 | 59.423 | KV453097.1 | 391698 | 16-scf00504 | 16 |
| AX-158324876 | 25 | 59.423 | KV453097.1 | 393284 | 16-scf00504 | 16 |
| AX-158324877 | 25 | 59.423 | KV453097.1 | 393947 | 16-scf00504 | 16 |
| AX-157848579 | 25 | 59.423 | KV453097.1 | 400423 | 16-scf00504 | 16 |
| AX-158324891 | 25 | 59.423 | KV453097.1 | 418836 | 16-scf00504 | 16 |
| AX-158324912 | 25 | 59.423 | KV453097.1 | 454823 | 16-scf00504 | 16 |
| AX-157714573 | 25 | 59.423 | KV453097.1 | 456173 | 16-scf00504 | 16 |
| AX-157881479 | 25 | 59.423 | KV453097.1 | 457845 | 16-scf00504 | 16 |
| AX-158324968 | 25 | 59.423 | KV453097.1 | 527380 | 16-scf00504 | 16 |
| AX-158324992 | 25 | 59.423 | KV453097.1 | 586305 | 16-scf00504 | 16 |
| AX-158325005 | 25 | 59.423 | KV453097.1 | 618551 | 16-scf00504 | 16 |
| AX-158325007 | 25 | 59.423 | KV453097.1 | 621069 | 16-scf00504 | 16 |
| AX-158325021 | 25 | 59.423 | KV453097.1 | 656571 | 16-scf00504 | 16 |
| AX-158325022 | 25 | 59.423 | KV453097.1 | 659554 | 16-scf00504 | 16 |
| AX-158381474 | 25 | 59.423 | KV453097.1 | 684208 | 16-scf00504 | 16 |
| AX-158325055 | 25 | 59.423 | KV453097.1 | 712089 | 16-scf00504 | 16 |
| AX-158325158 | 25 | 59.423 | KV453097.1 | 859133 | 16-scf00504 | 16 |
| AX-158324885 | 25 | 59.424 | KV453097.1 | 410905 | 16-scf00504 | 16 |
| AX-158324896 | 25 | 59.587 | KV453097.1 | 428895 | 16-scf00504 | 16 |
| AX-157848568 | 25 | 59.751 | KV453097.1 | 259103 | 16-scf00504 | 16 |
| AX-158381472 | 25 | 59.751 | KV453097.1 | 432444 | 16-scf00504 | 16 |
| AX-158324903 | 25 | 59.751 | KV453097.1 | 436382 | 16-scf00504 | 16 |
| AX-158324905 | 25 | 59.751 | KV453097.1 | 439905 | 16-scf00504 | 16 |

|              |    |        |            |        |             |    |
|--------------|----|--------|------------|--------|-------------|----|
| AX-158324906 | 25 | 59.751 | KV453097.1 | 440900 | 16-scf00504 | 16 |
| AX-158324907 | 25 | 59.751 | KV453097.1 | 441251 | 16-scf00504 | 16 |
| AX-158324908 | 25 | 59.751 | KV453097.1 | 441703 | 16-scf00504 | 16 |
| AX-157725185 | 25 | 59.751 | KV453097.1 | 443134 | 16-scf00504 | 16 |
| AX-158324910 | 25 | 59.751 | KV453097.1 | 445941 | 16-scf00504 | 16 |
| AX-157715393 | 25 | 59.751 | KV453097.1 | 447723 | 16-scf00504 | 16 |
| AX-157848583 | 25 | 59.751 | KV453097.1 | 448695 | 16-scf00504 | 16 |
| AX-158324914 | 25 | 59.751 | KV453097.1 | 457438 | 16-scf00504 | 16 |
| AX-158324915 | 25 | 59.751 | KV453097.1 | 458401 | 16-scf00504 | 16 |
| AX-158324919 | 25 | 59.751 | KV453097.1 | 461744 | 16-scf00504 | 16 |
| AX-158324920 | 25 | 59.751 | KV453097.1 | 462100 | 16-scf00504 | 16 |
| AX-158324921 | 25 | 59.751 | KV453097.1 | 463241 | 16-scf00504 | 16 |
| AX-158324922 | 25 | 59.751 | KV453097.1 | 463928 | 16-scf00504 | 16 |
| AX-158324924 | 25 | 59.751 | KV453097.1 | 466561 | 16-scf00504 | 16 |
| AX-158324925 | 25 | 59.751 | KV453097.1 | 466684 | 16-scf00504 | 16 |
| AX-157848585 | 25 | 59.751 | KV453097.1 | 469482 | 16-scf00504 | 16 |
| AX-158324927 | 25 | 59.751 | KV453097.1 | 471099 | 16-scf00504 | 16 |
| AX-158324929 | 25 | 59.751 | KV453097.1 | 473311 | 16-scf00504 | 16 |
| AX-158418542 | 25 | 59.751 | KV453097.1 | 476788 | 16-scf00504 | 16 |
| AX-158324936 | 25 | 59.751 | KV453097.1 | 479052 | 16-scf00504 | 16 |
| AX-157848587 | 25 | 59.751 | KV453097.1 | 487472 | 16-scf00504 | 16 |
| AX-158324947 | 25 | 59.751 | KV453097.1 | 496681 | 16-scf00504 | 16 |
| AX-158324955 | 25 | 59.751 | KV453097.1 | 510386 | 16-scf00504 | 16 |
| AX-158324956 | 25 | 59.751 | KV453097.1 | 510860 | 16-scf00504 | 16 |
| AX-158324959 | 25 | 59.751 | KV453097.1 | 513666 | 16-scf00504 | 16 |
| AX-157861493 | 25 | 59.751 | KV453097.1 | 513849 | 16-scf00504 | 16 |
| AX-158324962 | 25 | 59.751 | KV453097.1 | 516710 | 16-scf00504 | 16 |
| AX-158324963 | 25 | 59.751 | KV453097.1 | 517288 | 16-scf00504 | 16 |
| AX-158324965 | 25 | 59.751 | KV453097.1 | 521127 | 16-scf00504 | 16 |
| AX-158324970 | 25 | 59.751 | KV453097.1 | 529253 | 16-scf00504 | 16 |
| AX-158324980 | 25 | 59.751 | KV453097.1 | 549970 | 16-scf00504 | 16 |
| AX-157848589 | 25 | 59.751 | KV453097.1 | 550811 | 16-scf00504 | 16 |
| AX-158324981 | 25 | 59.751 | KV453097.1 | 550929 | 16-scf00504 | 16 |
| AX-157848591 | 25 | 59.751 | KV453097.1 | 562139 | 16-scf00504 | 16 |
| AX-158324984 | 25 | 59.751 | KV453097.1 | 567707 | 16-scf00504 | 16 |
| AX-157848592 | 25 | 59.751 | KV453097.1 | 574228 | 16-scf00504 | 16 |
| AX-157848593 | 25 | 59.751 | KV453097.1 | 574423 | 16-scf00504 | 16 |
| AX-157848594 | 25 | 59.751 | KV453097.1 | 577519 | 16-scf00504 | 16 |
| AX-158324988 | 25 | 59.751 | KV453097.1 | 577863 | 16-scf00504 | 16 |
| AX-158324989 | 25 | 59.751 | KV453097.1 | 579243 | 16-scf00504 | 16 |
| AX-158324990 | 25 | 59.751 | KV453097.1 | 581136 | 16-scf00504 | 16 |
| AX-157713014 | 25 | 59.751 | KV453097.1 | 594330 | 16-scf00504 | 16 |
| AX-158324995 | 25 | 59.751 | KV453097.1 | 595745 | 16-scf00504 | 16 |
| AX-158324996 | 25 | 59.751 | KV453097.1 | 599200 | 16-scf00504 | 16 |
| AX-158324997 | 25 | 59.751 | KV453097.1 | 599935 | 16-scf00504 | 16 |
| AX-158325016 | 25 | 59.751 | KV453097.1 | 635527 | 16-scf00504 | 16 |
| AX-158325017 | 25 | 59.751 | KV453097.1 | 640573 | 16-scf00504 | 16 |
| AX-157848601 | 25 | 59.751 | KV453097.1 | 650422 | 16-scf00504 | 16 |
| AX-158325019 | 25 | 59.751 | KV453097.1 | 651567 | 16-scf00504 | 16 |
| AX-158325023 | 25 | 59.751 | KV453097.1 | 663247 | 16-scf00504 | 16 |
| AX-158325024 | 25 | 59.751 | KV453097.1 | 664405 | 16-scf00504 | 16 |

|              |    |        |             |        |               |    |
|--------------|----|--------|-------------|--------|---------------|----|
| AX-158325042 | 25 | 59.751 | KV453097.1  | 689070 | 16-scf00504   | 16 |
| AX-158325043 | 25 | 59.751 | KV453097.1  | 689352 | 16-scf00504   | 16 |
| AX-158325045 | 25 | 59.751 | KV453097.1  | 690775 | 16-scf00504   | 16 |
| AX-158325050 | 25 | 59.751 | KV453097.1  | 699490 | 16-scf00504   | 16 |
| AX-158325052 | 25 | 59.751 | KV453097.1  | 701499 | 16-scf00504   | 16 |
| AX-158325072 | 25 | 59.751 | KV453097.1  | 730982 | 16-scf00504   | 16 |
| AX-157848604 | 25 | 59.751 | KV453097.1  | 731486 | 16-scf00504   | 16 |
| AX-158325073 | 25 | 59.751 | KV453097.1  | 731741 | 16-scf00504   | 16 |
| AX-158325087 | 25 | 59.751 | KV453097.1  | 744341 | 16-scf00504   | 16 |
| AX-158325089 | 25 | 59.751 | KV453097.1  | 746924 | 16-scf00504   | 16 |
| AX-158325091 | 25 | 59.751 | KV453097.1  | 747968 | 16-scf00504   | 16 |
| AX-158325092 | 25 | 59.751 | KV453097.1  | 748190 | 16-scf00504   | 16 |
| AX-158325093 | 25 | 59.751 | KV453097.1  | 750259 | 16-scf00504   | 16 |
| AX-157848605 | 25 | 59.751 | KV453097.1  | 750714 | 16-scf00504   | 16 |
| AX-158325094 | 25 | 59.751 | KV453097.1  | 751797 | 16-scf00504   | 16 |
| AX-158325106 | 25 | 59.751 | KV453097.1  | 763532 | 16-scf00504   | 16 |
| AX-158325107 | 25 | 59.751 | KV453097.1  | 763926 | 16-scf00504   | 16 |
| AX-158325123 | 25 | 59.751 | KV453097.1  | 794264 | 16-scf00504   | 16 |
| AX-158325141 | 25 | 59.751 | KV453097.1  | 826697 | 16-scf00504   | 16 |
| AX-158325143 | 25 | 59.751 | KV453097.1  | 828351 | 16-scf00504   | 16 |
| AX-158325144 | 25 | 59.751 | KV453097.1  | 829512 | 16-scf00504   | 16 |
| AX-158325145 | 25 | 59.751 | KV453097.1  | 830432 | 16-scf00504   | 16 |
| AX-158325146 | 25 | 59.751 | KV453097.1  | 831277 | 16-scf00504   | 16 |
| AX-158325148 | 25 | 59.751 | KV453097.1  | 833803 | 16-scf00504   | 16 |
| AX-158325184 | 25 | 59.751 | KV453097.1  | 892622 | 16-scf00504   | 16 |
| AX-157693107 | 25 | 59.751 |             | 1147   | :233303_g4_i: | UN |
| AX-157693109 | 25 | 59.751 |             | 2104   | :233303_g4_i: | UN |
| AX-157693112 | 25 | 59.751 |             | 2826   | :233303_g4_i: | UN |
| AX-157706845 | 25 | 59.751 | 3ML01033027 | 551    | scf08664_1    | UN |
| AX-157706844 | 25 | 59.751 | 3ML01033041 | 110    | scf08678_1    | UN |
| AX-157693108 | 25 | 59.751 | 3ML01033054 | 562    | scf08691_1    | UN |
| AX-157848611 | 25 | 59.86  | KV453097.1  | 847084 | 16-scf00504   | 16 |
| AX-158325154 | 25 | 59.86  | KV453097.1  | 850902 | 16-scf00504   | 16 |
| AX-158325155 | 25 | 59.86  | KV453097.1  | 852389 | 16-scf00504   | 16 |
| AX-157719540 | 25 | 59.876 | KV453097.1  | 855274 | 16-scf00504   | 16 |
| AX-158325152 | 25 | 59.884 | KV453097.1  | 846230 | 16-scf00504   | 16 |
| AX-158325157 | 25 | 59.884 | KV453097.1  | 857843 | 16-scf00504   | 16 |
| AX-158325165 | 25 | 59.884 | KV453097.1  | 867315 | 16-scf00504   | 16 |
| AX-158325189 | 25 | 59.884 | KV453097.1  | 901174 | 16-scf00504   | 16 |
| AX-158325200 | 25 | 59.884 | KV453097.1  | 920794 | 16-scf00504   | 16 |
| AX-158325160 | 25 | 59.895 | KV453097.1  | 860735 | 16-scf00504   | 16 |
| AX-157881495 | 25 | 59.92  | KV453097.1  | 872795 | 16-scf00504   | 16 |
| AX-158325169 | 25 | 59.935 | KV453097.1  | 876211 | 16-scf00504   | 16 |
| AX-158325171 | 25 | 59.946 | KV453097.1  | 877611 | 16-scf00504   | 16 |
| AX-157848613 | 25 | 59.97  | KV453097.1  | 850568 | 16-scf00504   | 16 |
| AX-158325178 | 25 | 59.97  | KV453097.1  | 884723 | 16-scf00504   | 16 |
| AX-158325183 | 25 | 59.97  | KV453097.1  | 892230 | 16-scf00504   | 16 |
| AX-158325188 | 25 | 60.079 | KV453097.1  | 900057 | 16-scf00504   | 16 |
| AX-158325191 | 25 | 60.079 | KV453097.1  | 902815 | 16-scf00504   | 16 |
| AX-158325195 | 25 | 60.141 | KV453097.1  | 911015 | 16-scf00504   | 16 |
| AX-157861496 | 25 | 60.141 | KV453097.1  | 911173 | 16-scf00504   | 16 |

|              |    |        |            |         |             |    |
|--------------|----|--------|------------|---------|-------------|----|
| AX-158325201 | 25 | 60.188 | KV453097.1 | 921407  | 16-scf00504 | 16 |
| AX-158325204 | 25 | 60.188 | KV453097.1 | 925388  | 16-scf00504 | 16 |
| AX-158325205 | 25 | 60.188 | KV453097.1 | 925974  | 16-scf00504 | 16 |
| AX-158325206 | 25 | 60.19  | KV453097.1 | 928416  | 16-scf00504 | 16 |
| AX-157722312 | 25 | 60.625 | KV453097.1 | 930424  | 16-scf00504 | 16 |
| AX-158381475 | 25 | 60.625 | KV453097.1 | 930465  | 16-scf00504 | 16 |
| AX-157753236 | 25 | 60.625 | KV453097.1 | 931346  | 16-scf00504 | 16 |
| AX-158325209 | 25 | 60.625 | KV453097.1 | 932167  | 16-scf00504 | 16 |
| AX-158325214 | 25 | 60.625 | KV453097.1 | 941539  | 16-scf00504 | 16 |
| AX-158325218 | 25 | 60.625 | KV453097.1 | 948990  | 16-scf00504 | 16 |
| AX-158325220 | 25 | 60.666 | KV453097.1 | 950151  | 16-scf00504 | 16 |
| AX-158325223 | 25 | 60.765 | KV453097.1 | 954741  | 16-scf00504 | 16 |
| AX-158325228 | 25 | 60.765 | KV453097.1 | 959177  | 16-scf00504 | 16 |
| AX-158325231 | 25 | 60.765 | KV453097.1 | 962260  | 16-scf00504 | 16 |
| AX-158325232 | 25 | 60.765 | KV453097.1 | 962674  | 16-scf00504 | 16 |
| AX-158325234 | 25 | 60.765 | KV453097.1 | 965571  | 16-scf00504 | 16 |
| AX-158325236 | 25 | 60.904 | KV453097.1 | 971193  | 16-scf00504 | 16 |
| AX-157693480 | 25 | 60.904 | KV453097.1 | 972241  | 16-scf00504 | 16 |
| AX-158325238 | 25 | 60.904 | KV453097.1 | 976033  | 16-scf00504 | 16 |
| AX-157750860 | 25 | 60.904 | KV453097.1 | 977038  | 16-scf00504 | 16 |
| AX-158325237 | 25 | 61.127 | KV453097.1 | 972553  | 16-scf00504 | 16 |
| AX-158325239 | 25 | 61.127 | KV453097.1 | 978114  | 16-scf00504 | 16 |
| AX-158325240 | 25 | 61.127 | KV453097.1 | 979551  | 16-scf00504 | 16 |
| AX-158325241 | 25 | 61.127 | KV453097.1 | 981040  | 16-scf00504 | 16 |
| AX-158325247 | 25 | 61.127 | KV453097.1 | 987702  | 16-scf00504 | 16 |
| AX-158325311 | 25 | 61.127 | KV453097.1 | 1089071 | 16-scf00504 | 16 |
| AX-158325242 | 25 | 61.207 | KV453097.1 | 982224  | 16-scf00504 | 16 |
| AX-158325245 | 25 | 61.281 | KV453097.1 | 984447  | 16-scf00504 | 16 |
| AX-158325250 | 25 | 61.281 | KV453097.1 | 990164  | 16-scf00504 | 16 |
| AX-158325255 | 25 | 61.281 | KV453097.1 | 996904  | 16-scf00504 | 16 |
| AX-158325256 | 25 | 61.281 | KV453097.1 | 999294  | 16-scf00504 | 16 |
| AX-158325086 | 25 | 61.607 | KV453097.1 | 742337  | 16-scf00504 | 16 |
| AX-158325222 | 25 | 61.607 | KV453097.1 | 953595  | 16-scf00504 | 16 |
| AX-158325244 | 25 | 61.607 | KV453097.1 | 983609  | 16-scf00504 | 16 |
| AX-158325258 | 25 | 61.607 | KV453097.1 | 1001697 | 16-scf00504 | 16 |
| AX-158325264 | 25 | 61.607 | KV453097.1 | 1020497 | 16-scf00504 | 16 |
| AX-158325267 | 25 | 61.607 | KV453097.1 | 1023292 | 16-scf00504 | 16 |
| AX-157848615 | 25 | 61.607 | KV453097.1 | 1027966 | 16-scf00504 | 16 |
| AX-157848616 | 25 | 61.607 | KV453097.1 | 1037008 | 16-scf00504 | 16 |
| AX-158325272 | 25 | 61.607 | KV453097.1 | 1038766 | 16-scf00504 | 16 |
| AX-158325275 | 25 | 61.607 | KV453097.1 | 1043017 | 16-scf00504 | 16 |
| AX-158325276 | 25 | 61.607 | KV453097.1 | 1043919 | 16-scf00504 | 16 |
| AX-158325277 | 25 | 61.607 | KV453097.1 | 1044224 | 16-scf00504 | 16 |
| AX-158325284 | 25 | 61.607 | KV453097.1 | 1055323 | 16-scf00504 | 16 |
| AX-158325288 | 25 | 61.607 | KV453097.1 | 1060931 | 16-scf00504 | 16 |
| AX-158381476 | 25 | 61.607 | KV453097.1 | 1078321 | 16-scf00504 | 16 |
| AX-158325305 | 25 | 61.607 | KV453097.1 | 1082863 | 16-scf00504 | 16 |
| AX-158325334 | 25 | 61.607 | KV453097.1 | 1125324 | 16-scf00504 | 16 |
| AX-158325289 | 25 | 61.61  | KV453097.1 | 1061330 | 16-scf00504 | 16 |
| AX-158325290 | 25 | 61.677 | KV453097.1 | 1061566 | 16-scf00504 | 16 |
| AX-158325294 | 25 | 61.677 | KV453097.1 | 1066588 | 16-scf00504 | 16 |

|              |    |        |            |         |             |    |
|--------------|----|--------|------------|---------|-------------|----|
| AX-158325291 | 25 | 61.739 | KV453097.1 | 1061801 | 16-scf00504 | 16 |
| AX-158325261 | 25 | 61.827 | KV453097.1 | 1007293 | 16-scf00504 | 16 |
| AX-158325298 | 25 | 61.827 | KV453097.1 | 1070618 | 16-scf00504 | 16 |
| AX-158325300 | 25 | 61.827 | KV453097.1 | 1073997 | 16-scf00504 | 16 |
| AX-158325313 | 25 | 61.827 | KV453097.1 | 1090350 | 16-scf00504 | 16 |
| AX-158325316 | 25 | 61.827 | KV453097.1 | 1095205 | 16-scf00504 | 16 |
| AX-158325322 | 25 | 61.827 | KV453097.1 | 1107635 | 16-scf00504 | 16 |
| AX-158325323 | 25 | 61.827 | KV453097.1 | 1108181 | 16-scf00504 | 16 |
| AX-158325324 | 25 | 61.827 | KV453097.1 | 1111186 | 16-scf00504 | 16 |
| AX-158325326 | 25 | 61.827 | KV453097.1 | 1114422 | 16-scf00504 | 16 |
| AX-158325333 | 25 | 61.827 | KV453097.1 | 1124577 | 16-scf00504 | 16 |
| AX-158325347 | 25 | 61.827 | KV453097.1 | 1138324 | 16-scf00504 | 16 |
| AX-158325349 | 25 | 61.827 | KV453097.1 | 1141318 | 16-scf00504 | 16 |
| AX-158325353 | 25 | 61.827 | KV453097.1 | 1148955 | 16-scf00504 | 16 |
| AX-158325373 | 25 | 61.827 | KV453097.1 | 1180461 | 16-scf00504 | 16 |
| AX-158325376 | 25 | 61.827 | KV453097.1 | 1183675 | 16-scf00504 | 16 |
| AX-158325409 | 25 | 61.827 | KV453097.1 | 1229162 | 16-scf00504 | 16 |
| AX-157757597 | 25 | 61.936 | KV453097.1 | 1116468 | 16-scf00504 | 16 |
| AX-158325331 | 25 | 61.936 | KV453097.1 | 1122546 | 16-scf00504 | 16 |
| AX-158325342 | 25 | 61.936 | KV453097.1 | 1135129 | 16-scf00504 | 16 |
| AX-158325336 | 25 | 61.94  | KV453097.1 | 1126329 | 16-scf00504 | 16 |
| AX-158325345 | 25 | 62.072 | KV453097.1 | 1137681 | 16-scf00504 | 16 |
| AX-158325346 | 25 | 62.072 | KV453097.1 | 1138120 | 16-scf00504 | 16 |
| AX-158325350 | 25 | 62.209 | KV453097.1 | 1142502 | 16-scf00504 | 16 |
| AX-157881503 | 25 | 62.347 | KV453097.1 | 1127202 | 16-scf00504 | 16 |
| AX-158325348 | 25 | 62.347 | KV453097.1 | 1140261 | 16-scf00504 | 16 |
| AX-158325355 | 25 | 62.347 | KV453097.1 | 1151770 | 16-scf00504 | 16 |
| AX-158325370 | 25 | 62.347 | KV453097.1 | 1175904 | 16-scf00504 | 16 |
| AX-158325356 | 25 | 62.4   | KV453097.1 | 1152216 | 16-scf00504 | 16 |
| AX-158325337 | 25 | 62.48  | KV453097.1 | 1128032 | 16-scf00504 | 16 |
| AX-158325357 | 25 | 62.48  | KV453097.1 | 1152781 | 16-scf00504 | 16 |
| AX-157749152 | 25 | 62.483 | KV453097.1 | 1157757 | 16-scf00504 | 16 |
| AX-158325361 | 25 | 62.483 | KV453097.1 | 1160741 | 16-scf00504 | 16 |
| AX-158403330 | 25 | 62.483 | KV453097.1 | 1162851 | 16-scf00504 | 16 |
| AX-158325372 | 25 | 62.483 | KV453097.1 | 1180086 | 16-scf00504 | 16 |
| AX-157757425 | 25 | 62.492 | KV453097.1 | 1163053 | 16-scf00504 | 16 |
| AX-158325363 | 25 | 62.617 | KV453097.1 | 1164225 | 16-scf00504 | 16 |
| AX-158325321 | 25 | 62.751 | KV453097.1 | 1105740 | 16-scf00504 | 16 |
| AX-158325341 | 25 | 62.751 | KV453097.1 | 1133939 | 16-scf00504 | 16 |
| AX-158325367 | 25 | 62.751 | KV453097.1 | 1169623 | 16-scf00504 | 16 |
| AX-157771849 | 25 | 62.751 | KV453097.1 | 1174587 | 16-scf00504 | 16 |
| AX-158325371 | 25 | 62.751 | KV453097.1 | 1176876 | 16-scf00504 | 16 |
| AX-158325374 | 25 | 62.751 | KV453097.1 | 1181148 | 16-scf00504 | 16 |
| AX-158325384 | 25 | 62.751 | KV453097.1 | 1203781 | 16-scf00504 | 16 |
| AX-157775017 | 25 | 63.021 | KV453097.1 | 1190862 | 16-scf00504 | 16 |
| AX-158325380 | 25 | 63.021 | KV453097.1 | 1191493 | 16-scf00504 | 16 |
| AX-157731528 | 25 | 63.021 | KV453097.1 | 1193821 | 16-scf00504 | 16 |
| AX-158325382 | 25 | 63.021 | KV453097.1 | 1202391 | 16-scf00504 | 16 |
| AX-158325385 | 25 | 63.021 | KV453097.1 | 1204363 | 16-scf00504 | 16 |
| AX-158325386 | 25 | 63.021 | KV453097.1 | 1205237 | 16-scf00504 | 16 |
| AX-158325387 | 25 | 63.021 | KV453097.1 | 1205566 | 16-scf00504 | 16 |



|              |    |        |            |         |             |    |
|--------------|----|--------|------------|---------|-------------|----|
| AX-158325388 | 25 | 63.021 | KV453097.1 | 1206351 | 16-scf00504 | 16 |
| AX-158325389 | 25 | 63.021 | KV453097.1 | 1206971 | 16-scf00504 | 16 |
| AX-158325390 | 25 | 63.021 | KV453097.1 | 1207757 | 16-scf00504 | 16 |
| AX-158325394 | 25 | 63.021 | KV453097.1 | 1210091 | 16-scf00504 | 16 |
| AX-158325396 | 25 | 63.021 | KV453097.1 | 1212349 | 16-scf00504 | 16 |
| AX-158325398 | 25 | 63.021 | KV453097.1 | 1213869 | 16-scf00504 | 16 |
| AX-158325406 | 25 | 63.021 | KV453097.1 | 1224430 | 16-scf00504 | 16 |
| AX-158325407 | 25 | 63.021 | KV453097.1 | 1225103 | 16-scf00504 | 16 |
| AX-158325413 | 25 | 63.021 | KV453097.1 | 1234736 | 16-scf00504 | 16 |
| AX-158325397 | 25 | 63.034 | KV453097.1 | 1213380 | 16-scf00504 | 16 |
| AX-157848621 | 25 | 63.048 | KV453097.1 | 1215560 | 16-scf00504 | 16 |
| AX-158325400 | 25 | 63.059 | KV453097.1 | 1218039 | 16-scf00504 | 16 |
| AX-157848622 | 25 | 63.059 | KV453097.1 | 1218855 | 16-scf00504 | 16 |
| AX-157848623 | 25 | 63.182 | KV453097.1 | 1219061 | 16-scf00504 | 16 |
| AX-157848624 | 25 | 63.182 | KV453097.1 | 1221885 | 16-scf00504 | 16 |
| AX-158325405 | 25 | 63.182 | KV453097.1 | 1224249 | 16-scf00504 | 16 |
| AX-157774038 | 25 | 63.182 | KV453097.1 | 1226812 | 16-scf00504 | 16 |
| AX-158325412 | 25 | 63.182 | KV453097.1 | 1233801 | 16-scf00504 | 16 |
| AX-158325417 | 25 | 63.182 | KV453097.1 | 1241289 | 16-scf00504 | 16 |
| AX-157848626 | 25 | 63.182 | KV453097.1 | 1266113 | 16-scf00504 | 16 |
| AX-158325319 | 25 | 63.357 | KV453097.1 | 1100317 | 16-scf00504 | 16 |
| AX-158325414 | 25 | 63.357 | KV453097.1 | 1235830 | 16-scf00504 | 16 |
| AX-157722257 | 25 | 63.357 | KV453097.1 | 1236493 | 16-scf00504 | 16 |
| AX-158325416 | 25 | 63.357 | KV453097.1 | 1240572 | 16-scf00504 | 16 |
| AX-157740410 | 25 | 63.357 | KV453097.1 | 1244232 | 16-scf00504 | 16 |
| AX-158325419 | 25 | 63.357 | KV453097.1 | 1244389 | 16-scf00504 | 16 |
| AX-158325470 | 25 | 63.357 | KV453097.1 | 1312425 | 16-scf00504 | 16 |
| AX-158325423 | 25 | 63.388 | KV453097.1 | 1250584 | 16-scf00504 | 16 |
| AX-157848619 | 25 | 63.443 | KV453097.1 | 1192963 | 16-scf00504 | 16 |
| AX-158325424 | 25 | 63.443 | KV453097.1 | 1251196 | 16-scf00504 | 16 |
| AX-158325430 | 25 | 63.466 | KV453097.1 | 1259648 | 16-scf00504 | 16 |
| AX-157756620 | 25 | 63.466 | KV453097.1 | 1261989 | 16-scf00504 | 16 |
| AX-158325432 | 25 | 63.466 | KV453097.1 | 1262724 | 16-scf00504 | 16 |
| AX-157848625 | 25 | 63.466 | KV453097.1 | 1262790 | 16-scf00504 | 16 |
| AX-158325433 | 25 | 63.474 | KV453097.1 | 1263239 | 16-scf00504 | 16 |
| AX-157861497 | 25 | 63.806 | KV453097.1 | 1235782 | 16-scf00504 | 16 |
| AX-158325437 | 25 | 63.806 | KV453097.1 | 1269648 | 16-scf00504 | 16 |
| AX-158325440 | 25 | 63.806 | KV453097.1 | 1275345 | 16-scf00504 | 16 |
| AX-158325443 | 25 | 63.806 | KV453097.1 | 1276768 | 16-scf00504 | 16 |
| AX-158325446 | 25 | 63.806 | KV453097.1 | 1282017 | 16-scf00504 | 16 |
| AX-158325451 | 25 | 63.974 | KV453097.1 | 1292257 | 16-scf00504 | 16 |
| AX-158325452 | 25 | 63.977 | KV453097.1 | 1294201 | 16-scf00504 | 16 |
| AX-158325456 | 25 | 64.104 | KV453097.1 | 1299383 | 16-scf00504 | 16 |
| AX-158325458 | 25 | 64.104 | KV453097.1 | 1302047 | 16-scf00504 | 16 |
| AX-158325459 | 25 | 64.104 | KV453097.1 | 1302577 | 16-scf00504 | 16 |
| AX-158325467 | 25 | 64.232 | KV453097.1 | 1308910 | 16-scf00504 | 16 |
| AX-158325468 | 25 | 64.232 | KV453097.1 | 1311020 | 16-scf00504 | 16 |
| AX-158325469 | 25 | 64.232 | KV453097.1 | 1311528 | 16-scf00504 | 16 |
| AX-158325471 | 25 | 64.232 | KV453097.1 | 1313323 | 16-scf00504 | 16 |
| AX-158325473 | 25 | 64.232 | KV453097.1 | 1314715 | 16-scf00504 | 16 |
| AX-158325474 | 25 | 64.232 | KV453097.1 | 1315744 | 16-scf00504 | 16 |

|              |    |        |             |         |             |    |
|--------------|----|--------|-------------|---------|-------------|----|
| AX-158325475 | 25 | 64.232 | KV453097.1  | 1316403 | 16-scf00504 | 16 |
| AX-158325476 | 25 | 64.232 | KV453097.1  | 1316881 | 16-scf00504 | 16 |
| AX-157716823 | 25 | 64.524 | KV453097.1  | 1327385 | 16-scf00504 | 16 |
| AX-158325429 | 25 | 64.605 | KV453097.1  | 1258926 | 16-scf00504 | 16 |
| AX-157848628 | 25 | 64.605 | KV453097.1  | 1329121 | 16-scf00504 | 16 |
| AX-158387981 | 25 | 64.668 | KV453097.1  | 1330504 | 16-scf00504 | 16 |
| AX-158325482 | 25 | 64.669 | KV453097.1  | 1332245 | 16-scf00504 | 16 |
| AX-158325483 | 25 | 64.669 | KV453097.1  | 1333149 | 16-scf00504 | 16 |
| AX-158325484 | 25 | 64.669 | KV453097.1  | 1333814 | 16-scf00504 | 16 |
| AX-158325485 | 25 | 64.669 | KV453097.1  | 1334923 | 16-scf00504 | 16 |
| AX-158325381 | 25 | 64.806 | KV453097.1  | 1197174 | 16-scf00504 | 16 |
| AX-158325447 | 25 | 64.806 | KV453097.1  | 1282327 | 16-scf00504 | 16 |
| AX-157727827 | 25 | 64.806 | KV453097.1  | 1340493 | 16-scf00504 | 16 |
| AX-158418556 | 25 | 64.806 | KV453097.1  | 1340695 | 16-scf00504 | 16 |
| AX-158420059 | 25 | 64.806 | KV453097.1  | 1341220 | 16-scf00504 | 16 |
| AX-158325491 | 25 | 64.806 | KV453097.1  | 1341870 | 16-scf00504 | 16 |
| AX-158325495 | 25 | 64.806 | KV453097.1  | 1348902 | 16-scf00504 | 16 |
| AX-157706950 | 25 | 64.806 | 3ML01033208 | 176     | scf08848_1  | UN |
| AX-158325497 | 25 | 65.092 | KV453097.1  | 1363815 | 16-scf00504 | 16 |
| AX-158325498 | 25 | 65.765 | KV453097.1  | 1364194 | 16-scf00504 | 16 |
| AX-158325499 | 25 | 65.765 | KV453097.1  | 1364992 | 16-scf00504 | 16 |
| AX-157752408 | 25 | 65.765 | KV453097.1  | 1367740 | 16-scf00504 | 16 |
| AX-158325503 | 25 | 65.765 | KV453097.1  | 1371777 | 16-scf00504 | 16 |
| AX-158325504 | 25 | 65.765 | KV453097.1  | 1372865 | 16-scf00504 | 16 |
| AX-158325507 | 25 | 66.421 | KV453097.1  | 1383113 | 16-scf00504 | 16 |
| AX-158325531 | 25 | 66.421 | KV453097.1  | 1405752 | 16-scf00504 | 16 |
| AX-158325552 | 25 | 66.421 | KV453097.1  | 1436423 | 16-scf00504 | 16 |
| AX-157881517 | 25 | 66.421 | KV453097.1  | 1470898 | 16-scf00504 | 16 |
| AX-158325594 | 25 | 66.421 | KV453097.1  | 1494282 | 16-scf00504 | 16 |
| AX-158325616 | 25 | 66.421 | KV453097.1  | 1531537 | 16-scf00504 | 16 |
| AX-158325512 | 25 | 66.639 | KV453097.1  | 1386987 | 16-scf00504 | 16 |
| AX-158325513 | 25 | 66.639 | KV453097.1  | 1387371 | 16-scf00504 | 16 |
| AX-158325516 | 25 | 66.639 | KV453097.1  | 1389869 | 16-scf00504 | 16 |
| AX-158325519 | 25 | 66.639 | KV453097.1  | 1392120 | 16-scf00504 | 16 |
| AX-158325521 | 25 | 66.749 | KV453097.1  | 1393997 | 16-scf00504 | 16 |
| AX-158325508 | 25 | 66.797 | KV453097.1  | 1384072 | 16-scf00504 | 16 |
| AX-158325517 | 25 | 66.797 | KV453097.1  | 1391001 | 16-scf00504 | 16 |
| AX-158325523 | 25 | 66.797 | KV453097.1  | 1397363 | 16-scf00504 | 16 |
| AX-158325526 | 25 | 66.797 | KV453097.1  | 1400773 | 16-scf00504 | 16 |
| AX-158325557 | 25 | 66.797 | KV453097.1  | 1443077 | 16-scf00504 | 16 |
| AX-157881523 | 25 | 66.797 | KV453097.1  | 1555073 | 16-scf00504 | 16 |
| AX-158325524 | 25 | 66.858 | KV453097.1  | 1399074 | 16-scf00504 | 16 |
| AX-158325525 | 25 | 66.858 | KV453097.1  | 1399586 | 16-scf00504 | 16 |
| AX-158325530 | 25 | 66.858 | KV453097.1  | 1404961 | 16-scf00504 | 16 |
| AX-157888438 | 25 | 66.858 | KV453097.1  | 1405647 | 16-scf00504 | 16 |
| AX-158325533 | 25 | 66.992 | KV453097.1  | 1409226 | 16-scf00504 | 16 |
| AX-158325535 | 25 | 67.347 | KV453097.1  | 1413973 | 16-scf00504 | 16 |
| AX-158381478 | 25 | 67.536 | KV453097.1  | 1420697 | 16-scf00504 | 16 |
| AX-158325539 | 25 | 67.55  | KV453097.1  | 1421363 | 16-scf00504 | 16 |
| AX-158325541 | 25 | 67.674 | KV453097.1  | 1425743 | 16-scf00504 | 16 |
| AX-157706429 | 25 | 67.722 | 3ML01032224 | 210     | scf07840_1  | UN |

|              |    |        |            |         |             |    |
|--------------|----|--------|------------|---------|-------------|----|
| AX-158325546 | 25 | 68.061 | KV453097.1 | 1431615 | 16-scf00504 | 16 |
| AX-158325547 | 25 | 68.062 | KV453097.1 | 1432207 | 16-scf00504 | 16 |
| AX-158325548 | 25 | 68.062 | KV453097.1 | 1432932 | 16-scf00504 | 16 |
| AX-158325549 | 25 | 68.062 | KV453097.1 | 1433812 | 16-scf00504 | 16 |
| AX-158325550 | 25 | 68.062 | KV453097.1 | 1434945 | 16-scf00504 | 16 |
| AX-158325553 | 25 | 68.062 | KV453097.1 | 1437571 | 16-scf00504 | 16 |
| AX-158325555 | 25 | 68.38  | KV453097.1 | 1440534 | 16-scf00504 | 16 |
| AX-158325556 | 25 | 68.38  | KV453097.1 | 1442667 | 16-scf00504 | 16 |
| AX-158325562 | 25 | 68.38  | KV453097.1 | 1451121 | 16-scf00504 | 16 |
| AX-158325565 | 25 | 68.639 | KV453097.1 | 1453622 | 16-scf00504 | 16 |
| AX-158325566 | 25 | 68.639 | KV453097.1 | 1455821 | 16-scf00504 | 16 |
| AX-158325569 | 25 | 69.116 | KV453097.1 | 1459518 | 16-scf00504 | 16 |
| AX-158325570 | 25 | 69.195 | KV453097.1 | 1460742 | 16-scf00504 | 16 |
| AX-158325571 | 25 | 69.468 | KV453097.1 | 1461607 | 16-scf00504 | 16 |
| AX-158325574 | 25 | 69.814 | KV453097.1 | 1465244 | 16-scf00504 | 16 |
| AX-158325575 | 25 | 69.951 | KV453097.1 | 1467996 | 16-scf00504 | 16 |
| AX-158325578 | 25 | 70.361 | KV453097.1 | 1474154 | 16-scf00504 | 16 |
| AX-157719518 | 25 | 70.361 | KV453097.1 | 1477162 | 16-scf00504 | 16 |
| AX-158325580 | 25 | 70.404 | KV453097.1 | 1478783 | 16-scf00504 | 16 |
| AX-158325587 | 25 | 70.47  | KV453097.1 | 1485350 | 16-scf00504 | 16 |
| AX-158325589 | 25 | 70.47  | KV453097.1 | 1488717 | 16-scf00504 | 16 |
| AX-158325593 | 25 | 70.47  | KV453097.1 | 1491956 | 16-scf00504 | 16 |
| AX-158325595 | 25 | 70.787 | KV453097.1 | 1495946 | 16-scf00504 | 16 |
| AX-158325600 | 25 | 71.106 | KV453097.1 | 1505704 | 16-scf00504 | 16 |
| AX-158325601 | 25 | 71.424 | KV453097.1 | 1506895 | 16-scf00504 | 16 |
| AX-158325604 | 25 | 71.477 | KV453097.1 | 1512476 | 16-scf00504 | 16 |
| AX-157881519 | 25 | 71.484 | KV453097.1 | 1495065 | 16-scf00504 | 16 |
| AX-158325605 | 25 | 71.484 | KV453097.1 | 1513325 | 16-scf00504 | 16 |
| AX-158325606 | 25 | 71.674 | KV453097.1 | 1514931 | 16-scf00504 | 16 |
| AX-158325607 | 25 | 71.676 | KV453097.1 | 1515491 | 16-scf00504 | 16 |
| AX-158325602 | 25 | 71.677 | KV453097.1 | 1508029 | 16-scf00504 | 16 |
| AX-158325608 | 25 | 71.677 | KV453097.1 | 1515616 | 16-scf00504 | 16 |
| AX-158325609 | 25 | 71.677 | KV453097.1 | 1517935 | 16-scf00504 | 16 |
| AX-157881520 | 25 | 71.677 | KV453097.1 | 1520606 | 16-scf00504 | 16 |
| AX-157722406 | 25 | 71.677 | KV453097.1 | 1521598 | 16-scf00504 | 16 |
| AX-158325612 | 25 | 71.677 | KV453097.1 | 1522620 | 16-scf00504 | 16 |
| AX-158325613 | 25 | 72.069 | KV453097.1 | 1524918 | 16-scf00504 | 16 |
| AX-158325614 | 25 | 72.069 | KV453097.1 | 1525298 | 16-scf00504 | 16 |
| AX-158325615 | 25 | 72.069 | KV453097.1 | 1527692 | 16-scf00504 | 16 |
| AX-158325617 | 25 | 72.331 | KV453097.1 | 1531906 | 16-scf00504 | 16 |
| AX-158325621 | 25 | 72.331 | KV453097.1 | 1537419 | 16-scf00504 | 16 |
| AX-158381479 | 25 | 72.331 | KV453097.1 | 1537975 | 16-scf00504 | 16 |
| AX-158325622 | 25 | 72.331 | KV453097.1 | 1538132 | 16-scf00504 | 16 |
| AX-158325624 | 25 | 72.441 | KV453097.1 | 1540874 | 16-scf00504 | 16 |
| AX-158325625 | 25 | 72.441 | KV453097.1 | 1541853 | 16-scf00504 | 16 |
| AX-158325627 | 25 | 72.505 | KV453097.1 | 1546504 | 16-scf00504 | 16 |
| AX-158325628 | 25 | 72.55  | KV453097.1 | 1546941 | 16-scf00504 | 16 |
| AX-158325629 | 25 | 72.659 | KV453097.1 | 1547836 | 16-scf00504 | 16 |
| AX-158325630 | 25 | 72.659 | KV453097.1 | 1548701 | 16-scf00504 | 16 |
| AX-158325633 | 25 | 72.659 | KV453097.1 | 1550399 | 16-scf00504 | 16 |
| AX-158325636 | 25 | 72.796 | KV453097.1 | 1555356 | 16-scf00504 | 16 |

|              |    |        |            |         |             |    |
|--------------|----|--------|------------|---------|-------------|----|
| AX-158325638 | 25 | 72.797 | KV453097.1 | 1557134 | 16-scf00504 | 16 |
| AX-158325722 | 25 | 72.797 | KV453097.1 | 1665347 | 16-scf00504 | 16 |
| AX-157848639 | 25 | 72.797 | KV453097.1 | 1742434 | 16-scf00504 | 16 |
| AX-157747801 | 25 | 73.205 | KV453097.1 | 1568691 | 16-scf00504 | 16 |
| AX-158325649 | 25 | 73.205 | KV453097.1 | 1572075 | 16-scf00504 | 16 |
| AX-158325652 | 25 | 73.205 | KV453097.1 | 1575320 | 16-scf00504 | 16 |
| AX-158325653 | 25 | 73.205 | KV453097.1 | 1577195 | 16-scf00504 | 16 |
| AX-158325658 | 25 | 73.205 | KV453097.1 | 1587206 | 16-scf00504 | 16 |
| AX-158325677 | 25 | 73.205 | KV453097.1 | 1611033 | 16-scf00504 | 16 |
| AX-158418561 | 25 | 73.205 | KV453097.1 | 1616283 | 16-scf00504 | 16 |
| AX-158325733 | 25 | 73.205 | KV453097.1 | 1680771 | 16-scf00504 | 16 |
| AX-158325736 | 25 | 73.205 | KV453097.1 | 1686147 | 16-scf00504 | 16 |
| AX-158325755 | 25 | 73.205 | KV453097.1 | 1720296 | 16-scf00504 | 16 |
| AX-158325803 | 25 | 73.205 | KV453097.1 | 1781636 | 16-scf00504 | 16 |
| AX-158325660 | 25 | 73.315 | KV453097.1 | 1588829 | 16-scf00504 | 16 |
| AX-158325661 | 25 | 73.315 | KV453097.1 | 1589510 | 16-scf00504 | 16 |
| AX-158325662 | 25 | 73.315 | KV453097.1 | 1590001 | 16-scf00504 | 16 |
| AX-158325663 | 25 | 73.315 | KV453097.1 | 1591602 | 16-scf00504 | 16 |
| AX-158325664 | 25 | 73.315 | KV453097.1 | 1592204 | 16-scf00504 | 16 |
| AX-158325667 | 25 | 73.315 | KV453097.1 | 1598760 | 16-scf00504 | 16 |
| AX-158325666 | 25 | 73.585 | KV453097.1 | 1595513 | 16-scf00504 | 16 |
| AX-158325668 | 25 | 73.586 | KV453097.1 | 1600794 | 16-scf00504 | 16 |
| AX-158325670 | 25 | 73.586 | KV453097.1 | 1602394 | 16-scf00504 | 16 |
| AX-157753281 | 25 | 73.586 | KV453097.1 | 1605064 | 16-scf00504 | 16 |
| AX-157861499 | 25 | 73.592 | KV453097.1 | 1611534 | 16-scf00504 | 16 |
| AX-158325679 | 25 | 73.598 | KV453097.1 | 1612604 | 16-scf00504 | 16 |
| AX-158325683 | 25 | 73.88  | KV453097.1 | 1616999 | 16-scf00504 | 16 |
| AX-158325684 | 25 | 73.88  | KV453097.1 | 1618266 | 16-scf00504 | 16 |
| AX-158325686 | 25 | 73.924 | KV453097.1 | 1620298 | 16-scf00504 | 16 |
| AX-158325687 | 25 | 74.08  | KV453097.1 | 1621866 | 16-scf00504 | 16 |
| AX-158325688 | 25 | 74.08  | KV453097.1 | 1622588 | 16-scf00504 | 16 |
| AX-158325689 | 25 | 74.08  | KV453097.1 | 1623812 | 16-scf00504 | 16 |
| AX-158325692 | 25 | 74.08  | KV453097.1 | 1627164 | 16-scf00504 | 16 |
| AX-158325693 | 25 | 74.08  | KV453097.1 | 1627602 | 16-scf00504 | 16 |
| AX-158325699 | 25 | 74.08  | KV453097.1 | 1634365 | 16-scf00504 | 16 |
| AX-158325691 | 25 | 74.189 | KV453097.1 | 1625659 | 16-scf00504 | 16 |
| AX-158325697 | 25 | 74.189 | KV453097.1 | 1632733 | 16-scf00504 | 16 |
| AX-158325698 | 25 | 74.189 | KV453097.1 | 1633696 | 16-scf00504 | 16 |
| AX-158325700 | 25 | 74.189 | KV453097.1 | 1635450 | 16-scf00504 | 16 |
| AX-158325705 | 25 | 74.189 | KV453097.1 | 1639765 | 16-scf00504 | 16 |
| AX-158325706 | 25 | 74.189 | KV453097.1 | 1640271 | 16-scf00504 | 16 |
| AX-157881530 | 25 | 74.189 | KV453097.1 | 1641445 | 16-scf00504 | 16 |
| AX-158325707 | 25 | 74.189 | KV453097.1 | 1641756 | 16-scf00504 | 16 |
| AX-158325709 | 25 | 74.189 | KV453097.1 | 1642946 | 16-scf00504 | 16 |
| AX-158325710 | 25 | 74.189 | KV453097.1 | 1643228 | 16-scf00504 | 16 |
| AX-158325711 | 25 | 74.189 | KV453097.1 | 1643498 | 16-scf00504 | 16 |
| AX-157743377 | 25 | 74.189 | KV453097.1 | 1656329 | 16-scf00504 | 16 |
| AX-158325720 | 25 | 74.189 | KV453097.1 | 1660343 | 16-scf00504 | 16 |
| AX-157848632 | 25 | 74.189 | KV453097.1 | 1660736 | 16-scf00504 | 16 |
| AX-158325721 | 25 | 74.189 | KV453097.1 | 1662763 | 16-scf00504 | 16 |
| AX-158325727 | 25 | 74.189 | KV453097.1 | 1675656 | 16-scf00504 | 16 |

|              |    |        |            |         |             |    |
|--------------|----|--------|------------|---------|-------------|----|
| AX-157726583 | 25 | 74.189 | KV453097.1 | 1676031 | 16-scf00504 | 16 |
| AX-158325728 | 25 | 74.189 | KV453097.1 | 1676655 | 16-scf00504 | 16 |
| AX-158325729 | 25 | 74.189 | KV453097.1 | 1677649 | 16-scf00504 | 16 |
| AX-158325730 | 25 | 74.189 | KV453097.1 | 1677887 | 16-scf00504 | 16 |
| AX-158325731 | 25 | 74.189 | KV453097.1 | 1678205 | 16-scf00504 | 16 |
| AX-157848634 | 25 | 74.189 | KV453097.1 | 1681162 | 16-scf00504 | 16 |
| AX-158325734 | 25 | 74.189 | KV453097.1 | 1681826 | 16-scf00504 | 16 |
| AX-157727460 | 25 | 74.189 | KV453097.1 | 1684241 | 16-scf00504 | 16 |
| AX-158325740 | 25 | 74.189 | KV453097.1 | 1698265 | 16-scf00504 | 16 |
| AX-158325741 | 25 | 74.189 | KV453097.1 | 1699526 | 16-scf00504 | 16 |
| AX-158325742 | 25 | 74.189 | KV453097.1 | 1699815 | 16-scf00504 | 16 |
| AX-157848636 | 25 | 74.189 | KV453097.1 | 1700534 | 16-scf00504 | 16 |
| AX-158325743 | 25 | 74.189 | KV453097.1 | 1700767 | 16-scf00504 | 16 |
| AX-157725086 | 25 | 74.189 | KV453097.1 | 1703040 | 16-scf00504 | 16 |
| AX-157751806 | 25 | 74.189 | KV453097.1 | 1703697 | 16-scf00504 | 16 |
| AX-158325744 | 25 | 74.189 | KV453097.1 | 1704279 | 16-scf00504 | 16 |
| AX-158325745 | 25 | 74.189 | KV453097.1 | 1706052 | 16-scf00504 | 16 |
| AX-158325746 | 25 | 74.189 | KV453097.1 | 1706534 | 16-scf00504 | 16 |
| AX-158325747 | 25 | 74.189 | KV453097.1 | 1706967 | 16-scf00504 | 16 |
| AX-158325748 | 25 | 74.189 | KV453097.1 | 1711169 | 16-scf00504 | 16 |
| AX-158325749 | 25 | 74.189 | KV453097.1 | 1712008 | 16-scf00504 | 16 |
| AX-158325751 | 25 | 74.189 | KV453097.1 | 1713204 | 16-scf00504 | 16 |
| AX-157848637 | 25 | 74.189 | KV453097.1 | 1713494 | 16-scf00504 | 16 |
| AX-157861500 | 25 | 74.189 | KV453097.1 | 1714561 | 16-scf00504 | 16 |
| AX-157746621 | 25 | 74.189 | KV453097.1 | 1716168 | 16-scf00504 | 16 |
| AX-158325753 | 25 | 74.189 | KV453097.1 | 1716544 | 16-scf00504 | 16 |
| AX-158325754 | 25 | 74.189 | KV453097.1 | 1718389 | 16-scf00504 | 16 |
| AX-158418566 | 25 | 74.189 | KV453097.1 | 1725561 | 16-scf00504 | 16 |
| AX-158325758 | 25 | 74.189 | KV453097.1 | 1726906 | 16-scf00504 | 16 |
| AX-158325760 | 25 | 74.189 | KV453097.1 | 1729866 | 16-scf00504 | 16 |
| AX-157774506 | 25 | 74.189 | KV453097.1 | 1738268 | 16-scf00504 | 16 |
| AX-158325767 | 25 | 74.189 | KV453097.1 | 1738468 | 16-scf00504 | 16 |
| AX-158325768 | 25 | 74.189 | KV453097.1 | 1738771 | 16-scf00504 | 16 |
| AX-158325770 | 25 | 74.189 | KV453097.1 | 1739847 | 16-scf00504 | 16 |
| AX-158325771 | 25 | 74.189 | KV453097.1 | 1740132 | 16-scf00504 | 16 |
| AX-158325772 | 25 | 74.189 | KV453097.1 | 1741126 | 16-scf00504 | 16 |
| AX-158325774 | 25 | 74.189 | KV453097.1 | 1748159 | 16-scf00504 | 16 |
| AX-158325775 | 25 | 74.189 | KV453097.1 | 1748919 | 16-scf00504 | 16 |
| AX-158325776 | 25 | 74.189 | KV453097.1 | 1749451 | 16-scf00504 | 16 |
| AX-158325777 | 25 | 74.189 | KV453097.1 | 1750012 | 16-scf00504 | 16 |
| AX-158325778 | 25 | 74.189 | KV453097.1 | 1751048 | 16-scf00504 | 16 |
| AX-158325779 | 25 | 74.189 | KV453097.1 | 1752053 | 16-scf00504 | 16 |
| AX-158325782 | 25 | 74.189 | KV453097.1 | 1755203 | 16-scf00504 | 16 |
| AX-158325786 | 25 | 74.189 | KV453097.1 | 1758831 | 16-scf00504 | 16 |
| AX-157888444 | 25 | 74.189 | KV453097.1 | 1760522 | 16-scf00504 | 16 |
| AX-158325788 | 25 | 74.189 | KV453097.1 | 1763102 | 16-scf00504 | 16 |
| AX-158418570 | 25 | 74.189 | KV453097.1 | 1768301 | 16-scf00504 | 16 |
| AX-158325802 | 25 | 74.189 | KV453097.1 | 1778842 | 16-scf00504 | 16 |
| AX-158325818 | 25 | 74.189 | KV453097.1 | 1797925 | 16-scf00504 | 16 |
| AX-158423716 | 25 | 74.189 | KV453097.1 | 1806171 | 16-scf00504 | 16 |
| AX-158325841 | 25 | 74.189 | KV453097.1 | 1820975 | 16-scf00504 | 16 |

|              |    |        |            |         |             |    |
|--------------|----|--------|------------|---------|-------------|----|
| AX-157713123 | 25 | 74.189 | KV453097.1 | 1886403 | 16-scf00504 | 16 |
| AX-158325906 | 25 | 74.189 | KV453097.1 | 1902274 | 16-scf00504 | 16 |
| AX-158418578 | 25 | 74.189 | KV453097.1 | 1956175 | 16-scf00504 | 16 |
| AX-158325967 | 25 | 74.189 | KV453097.1 | 1991468 | 16-scf00504 | 16 |
| AX-158325789 | 25 | 74.408 | KV453097.1 | 1764231 | 16-scf00504 | 16 |
| AX-158325790 | 25 | 74.408 | KV453097.1 | 1764680 | 16-scf00504 | 16 |
| AX-158325792 | 25 | 74.408 | KV453097.1 | 1766077 | 16-scf00504 | 16 |
| AX-158325793 | 25 | 74.408 | KV453097.1 | 1767317 | 16-scf00504 | 16 |
| AX-157752725 | 25 | 74.491 | KV453097.1 | 1686960 | 16-scf00504 | 16 |
| AX-158325794 | 25 | 74.491 | KV453097.1 | 1768485 | 16-scf00504 | 16 |
| AX-157848633 | 25 | 74.626 | KV453097.1 | 1674712 | 16-scf00504 | 16 |
| AX-158325806 | 25 | 74.626 | KV453097.1 | 1786137 | 16-scf00504 | 16 |
| AX-157848641 | 25 | 74.626 | KV453097.1 | 1786216 | 16-scf00504 | 16 |
| AX-157867890 | 25 | 74.626 | KV453097.1 | 1788864 | 16-scf00504 | 16 |
| AX-158325809 | 25 | 74.626 | KV453097.1 | 1790550 | 16-scf00504 | 16 |
| AX-158325811 | 25 | 74.626 | KV453097.1 | 1791279 | 16-scf00504 | 16 |
| AX-158325812 | 25 | 74.626 | KV453097.1 | 1791630 | 16-scf00504 | 16 |
| AX-157724256 | 25 | 74.626 | KV453097.1 | 1794010 | 16-scf00504 | 16 |
| AX-158325817 | 25 | 74.626 | KV453097.1 | 1796266 | 16-scf00504 | 16 |
| AX-158325819 | 25 | 74.626 | KV453097.1 | 1798259 | 16-scf00504 | 16 |
| AX-158325823 | 25 | 74.626 | KV453097.1 | 1800969 | 16-scf00504 | 16 |
| AX-158325826 | 25 | 74.626 | KV453097.1 | 1803058 | 16-scf00504 | 16 |
| AX-158325829 | 25 | 74.626 | KV453097.1 | 1807638 | 16-scf00504 | 16 |
| AX-158325831 | 25 | 74.626 | KV453097.1 | 1808532 | 16-scf00504 | 16 |
| AX-158325835 | 25 | 74.626 | KV453097.1 | 1815469 | 16-scf00504 | 16 |
| AX-158325838 | 25 | 74.626 | KV453097.1 | 1817274 | 16-scf00504 | 16 |
| AX-158325839 | 25 | 74.626 | KV453097.1 | 1817669 | 16-scf00504 | 16 |
| AX-158325840 | 25 | 74.626 | KV453097.1 | 1818875 | 16-scf00504 | 16 |
| AX-158325842 | 25 | 74.626 | KV453097.1 | 1821508 | 16-scf00504 | 16 |
| AX-158325844 | 25 | 74.626 | KV453097.1 | 1822703 | 16-scf00504 | 16 |
| AX-158325845 | 25 | 74.626 | KV453097.1 | 1823547 | 16-scf00504 | 16 |
| AX-158325846 | 25 | 74.626 | KV453097.1 | 1824176 | 16-scf00504 | 16 |
| AX-158325847 | 25 | 74.626 | KV453097.1 | 1824661 | 16-scf00504 | 16 |
| AX-158325848 | 25 | 74.626 | KV453097.1 | 1825139 | 16-scf00504 | 16 |
| AX-158325849 | 25 | 74.626 | KV453097.1 | 1827308 | 16-scf00504 | 16 |
| AX-158325925 | 25 | 74.626 | KV453097.1 | 1930828 | 16-scf00504 | 16 |
| AX-158325952 | 25 | 74.626 | KV453097.1 | 1966295 | 16-scf00504 | 16 |
| AX-158325850 | 25 | 74.627 | KV453097.1 | 1827524 | 16-scf00504 | 16 |
| AX-158325857 | 25 | 74.79  | KV453097.1 | 1840382 | 16-scf00504 | 16 |
| AX-158325858 | 25 | 74.955 | KV453097.1 | 1841880 | 16-scf00504 | 16 |
| AX-158325861 | 25 | 74.955 | KV453097.1 | 1845741 | 16-scf00504 | 16 |
| AX-158325870 | 25 | 75.12  | KV453097.1 | 1858243 | 16-scf00504 | 16 |
| AX-158325872 | 25 | 75.282 | KV453097.1 | 1862211 | 16-scf00504 | 16 |
| AX-157720348 | 25 | 75.283 | KV453097.1 | 1863434 | 16-scf00504 | 16 |
| AX-158325875 | 25 | 75.283 | KV453097.1 | 1866383 | 16-scf00504 | 16 |
| AX-158325876 | 25 | 75.283 | KV453097.1 | 1867946 | 16-scf00504 | 16 |
| AX-157888446 | 25 | 75.283 | KV453097.1 | 1868113 | 16-scf00504 | 16 |
| AX-158325877 | 25 | 75.501 | KV453097.1 | 1869006 | 16-scf00504 | 16 |
| AX-157748922 | 25 | 75.501 | KV453097.1 | 1870013 | 16-scf00504 | 16 |
| AX-158325878 | 25 | 75.611 | KV453097.1 | 1872048 | 16-scf00504 | 16 |
| AX-158325880 | 25 | 75.611 | KV453097.1 | 1872856 | 16-scf00504 | 16 |

|              |    |        |            |         |             |    |
|--------------|----|--------|------------|---------|-------------|----|
| AX-158418574 | 25 | 76.043 | KV453097.1 | 1875253 | 16-scf00504 | 16 |
| AX-158325884 | 25 | 76.043 | KV453097.1 | 1882027 | 16-scf00504 | 16 |
| AX-158325881 | 25 | 76.045 | KV453097.1 | 1875509 | 16-scf00504 | 16 |
| AX-158325882 | 25 | 76.048 | KV453097.1 | 1876344 | 16-scf00504 | 16 |
| AX-158325889 | 25 | 76.048 | KV453097.1 | 1884232 | 16-scf00504 | 16 |
| AX-158325890 | 25 | 76.048 | KV453097.1 | 1885117 | 16-scf00504 | 16 |
| AX-157775367 | 25 | 76.048 | KV453097.1 | 1885882 | 16-scf00504 | 16 |
| AX-157848643 | 25 | 76.048 | KV453097.1 | 1886808 | 16-scf00504 | 16 |
| AX-158325893 | 25 | 76.048 | KV453097.1 | 1890872 | 16-scf00504 | 16 |
| AX-157848645 | 25 | 76.048 | KV453097.1 | 1892140 | 16-scf00504 | 16 |
| AX-158325897 | 25 | 76.048 | KV453097.1 | 1893508 | 16-scf00504 | 16 |
| AX-158325898 | 25 | 76.048 | KV453097.1 | 1894451 | 16-scf00504 | 16 |
| AX-158325902 | 25 | 76.095 | KV453097.1 | 1899402 | 16-scf00504 | 16 |
| AX-158325904 | 25 | 76.142 | KV453097.1 | 1900523 | 16-scf00504 | 16 |
| AX-158325905 | 25 | 76.187 | KV453097.1 | 1901435 | 16-scf00504 | 16 |
| AX-158325910 | 25 | 76.229 | KV453097.1 | 1905384 | 16-scf00504 | 16 |
| AX-158325911 | 25 | 76.275 | KV453097.1 | 1906409 | 16-scf00504 | 16 |
| AX-157772041 | 25 | 76.3   | KV453097.1 | 1912029 | 16-scf00504 | 16 |
| AX-158325914 | 25 | 76.3   | KV453097.1 | 1912140 | 16-scf00504 | 16 |
| AX-158325990 | 25 | 76.3   | KV453097.1 | 2025217 | 16-scf00504 | 16 |
| AX-158325916 | 25 | 76.319 | KV453097.1 | 1915082 | 16-scf00504 | 16 |
| AX-158325920 | 25 | 76.327 | KV453097.1 | 1925493 | 16-scf00504 | 16 |
| AX-158325923 | 25 | 76.342 | KV453097.1 | 1928573 | 16-scf00504 | 16 |
| AX-158325929 | 25 | 76.469 | KV453097.1 | 1934695 | 16-scf00504 | 16 |
| AX-157848647 | 25 | 76.594 | KV453097.1 | 1935309 | 16-scf00504 | 16 |
| AX-158325930 | 25 | 76.594 | KV453097.1 | 1935394 | 16-scf00504 | 16 |
| AX-158325931 | 25 | 76.594 | KV453097.1 | 1937126 | 16-scf00504 | 16 |
| AX-158325932 | 25 | 76.594 | KV453097.1 | 1938687 | 16-scf00504 | 16 |
| AX-157881541 | 25 | 76.594 | KV453097.1 | 1940269 | 16-scf00504 | 16 |
| AX-157848649 | 25 | 76.594 | KV453097.1 | 1942142 | 16-scf00504 | 16 |
| AX-157848650 | 25 | 76.594 | KV453097.1 | 1944397 | 16-scf00504 | 16 |
| AX-158325938 | 25 | 76.594 | KV453097.1 | 1945575 | 16-scf00504 | 16 |
| AX-158325943 | 25 | 76.594 | KV453097.1 | 1951059 | 16-scf00504 | 16 |
| AX-158325942 | 25 | 76.813 | KV453097.1 | 1949501 | 16-scf00504 | 16 |
| AX-158325949 | 25 | 76.813 | KV453097.1 | 1958511 | 16-scf00504 | 16 |
| AX-158325950 | 25 | 76.813 | KV453097.1 | 1959653 | 16-scf00504 | 16 |
| AX-157752194 | 25 | 76.813 | KV453097.1 | 1962987 | 16-scf00504 | 16 |
| AX-157747895 | 25 | 76.813 | KV453097.1 | 1963761 | 16-scf00504 | 16 |
| AX-158325955 | 25 | 76.813 | KV453097.1 | 1968256 | 16-scf00504 | 16 |
| AX-158325953 | 25 | 76.821 | KV453097.1 | 1966722 | 16-scf00504 | 16 |
| AX-158325954 | 25 | 76.821 | KV453097.1 | 1967848 | 16-scf00504 | 16 |
| AX-158325963 | 25 | 76.821 | KV453097.1 | 1981609 | 16-scf00504 | 16 |
| AX-158325968 | 25 | 76.821 | KV453097.1 | 1992020 | 16-scf00504 | 16 |
| AX-157848657 | 25 | 76.821 | KV453097.1 | 2000092 | 16-scf00504 | 16 |
| AX-158325956 | 25 | 76.922 | KV453097.1 | 1969455 | 16-scf00504 | 16 |
| AX-158325958 | 25 | 76.922 | KV453097.1 | 1973433 | 16-scf00504 | 16 |
| AX-158325961 | 25 | 76.922 | KV453097.1 | 1974629 | 16-scf00504 | 16 |
| AX-157848651 | 25 | 76.922 | KV453097.1 | 1975966 | 16-scf00504 | 16 |
| AX-157771039 | 25 | 76.922 | KV453097.1 | 1977609 | 16-scf00504 | 16 |
| AX-157751081 | 25 | 76.922 | KV453097.1 | 1977996 | 16-scf00504 | 16 |
| AX-157774609 | 25 | 76.922 | KV453097.1 | 1980170 | 16-scf00504 | 16 |

|              |    |        |             |         |             |    |
|--------------|----|--------|-------------|---------|-------------|----|
| AX-157752450 | 25 | 76.922 | KV453097.1  | 1981884 | 16-scf00504 | 16 |
| AX-158325964 | 25 | 76.922 | KV453097.1  | 1982874 | 16-scf00504 | 16 |
| AX-158325965 | 25 | 76.922 | KV453097.1  | 1985729 | 16-scf00504 | 16 |
| AX-157848653 | 25 | 76.922 | KV453097.1  | 1986861 | 16-scf00504 | 16 |
| AX-157714919 | 25 | 76.922 | KV453097.1  | 1988067 | 16-scf00504 | 16 |
| AX-158325966 | 25 | 76.922 | KV453097.1  | 1988447 | 16-scf00504 | 16 |
| AX-158325969 | 25 | 76.922 | KV453097.1  | 1993184 | 16-scf00504 | 16 |
| AX-157740122 | 25 | 77.068 | KV453097.1  | 1994862 | 16-scf00504 | 16 |
| AX-158325972 | 25 | 77.068 | KV453097.1  | 1997922 | 16-scf00504 | 16 |
| AX-157848656 | 25 | 77.068 | KV453097.1  | 1998298 | 16-scf00504 | 16 |
| AX-158325973 | 25 | 77.355 | KV453097.1  | 2000652 | 16-scf00504 | 16 |
| AX-158325976 | 25 | 77.359 | KV453097.1  | 2004308 | 16-scf00504 | 16 |
| AX-158325978 | 25 | 77.359 | KV453097.1  | 2006114 | 16-scf00504 | 16 |
| AX-158325979 | 25 | 77.359 | KV453097.1  | 2007856 | 16-scf00504 | 16 |
| AX-158325984 | 25 | 77.359 | KV453097.1  | 2015806 | 16-scf00504 | 16 |
| AX-158325997 | 25 | 77.359 | KV453097.1  | 2040050 | 16-scf00504 | 16 |
| AX-158325974 | 25 | 77.366 | KV453097.1  | 2002187 | 16-scf00504 | 16 |
| AX-158325980 | 25 | 77.366 | KV453097.1  | 2008744 | 16-scf00504 | 16 |
| AX-158326003 | 25 | 77.366 | KV453097.1  | 2046675 | 16-scf00504 | 16 |
| AX-157848658 | 25 | 77.395 | KV453097.1  | 2010309 | 16-scf00504 | 16 |
| AX-158325989 | 25 | 77.43  | KV453097.1  | 2024560 | 16-scf00504 | 16 |
| AX-158326015 | 25 | 77.43  | KV453097.1  | 2068272 | 16-scf00504 | 16 |
| AX-158325985 | 25 | 77.468 | KV453097.1  | 2018248 | 16-scf00504 | 16 |
| AX-158325991 | 25 | 77.468 | KV453097.1  | 2026124 | 16-scf00504 | 16 |
| AX-158325994 | 25 | 77.468 | KV453097.1  | 2030332 | 16-scf00504 | 16 |
| AX-158325995 | 25 | 77.468 | KV453097.1  | 2037060 | 16-scf00504 | 16 |
| AX-158325999 | 25 | 77.468 | KV453097.1  | 2041520 | 16-scf00504 | 16 |
| AX-158326001 | 25 | 77.686 | KV453097.1  | 2045475 | 16-scf00504 | 16 |
| AX-158418580 | 25 | 77.686 | KV453097.1  | 2046914 | 16-scf00504 | 16 |
| AX-157848659 | 25 | 77.686 | KV453097.1  | 2051282 | 16-scf00504 | 16 |
| AX-158381483 | 25 | 77.686 | KV453097.1  | 2052074 | 16-scf00504 | 16 |
| AX-158326023 | 25 | 77.686 | KV453097.1  | 2079685 | 16-scf00504 | 16 |
| AX-157848660 | 25 | 77.714 | KV453097.1  | 2053581 | 16-scf00504 | 16 |
| AX-158326007 | 25 | 77.781 | KV453097.1  | 2054094 | 16-scf00504 | 16 |
| AX-157705497 | 25 | 77.851 | 3ML01029952 | 704     | scf05574_1  | UN |
| AX-158326010 | 25 | 77.925 | KV453097.1  | 2058859 | 16-scf00504 | 16 |
| AX-158326011 | 25 | 77.979 | KV453097.1  | 2061543 | 16-scf00504 | 16 |
| AX-158326013 | 25 | 77.979 | KV453097.1  | 2065810 | 16-scf00504 | 16 |
| AX-157848661 | 25 | 77.979 | KV453097.1  | 2069695 | 16-scf00504 | 16 |
| AX-158326018 | 25 | 78     | KV453097.1  | 2071910 | 16-scf00504 | 16 |
| AX-158326022 | 25 | 78.058 | KV453097.1  | 2073861 | 16-scf00504 | 16 |
| AX-158326055 | 25 | 78.058 | KV453097.1  | 2125222 | 16-scf00504 | 16 |
| AX-157717989 | 25 | 78.12  | KV453097.1  | 2079241 | 16-scf00504 | 16 |
| AX-158326061 | 25 | 78.12  | KV453097.1  | 2132441 | 16-scf00504 | 16 |
| AX-157708173 | 25 | 78.121 | KV453097.1  | 2072209 | 16-scf00504 | 16 |
| AX-157848662 | 25 | 78.121 | KV453097.1  | 2080070 | 16-scf00504 | 16 |
| AX-157773820 | 25 | 78.121 | KV453097.1  | 2082395 | 16-scf00504 | 16 |
| AX-158326026 | 25 | 78.122 | KV453097.1  | 2083418 | 16-scf00504 | 16 |
| AX-158326008 | 25 | 78.124 | KV453097.1  | 2055327 | 16-scf00504 | 16 |
| AX-157774279 | 25 | 78.124 | KV453097.1  | 2058456 | 16-scf00504 | 16 |
| AX-158326028 | 25 | 78.124 | KV453097.1  | 2084828 | 16-scf00504 | 16 |



|              |    |        |            |         |             |    |
|--------------|----|--------|------------|---------|-------------|----|
| AX-158326032 | 25 | 78.124 | KV453097.1 | 2086734 | 16-scf00504 | 16 |
| AX-158326035 | 25 | 78.124 | KV453097.1 | 2089201 | 16-scf00504 | 16 |
| AX-158326036 | 25 | 78.124 | KV453097.1 | 2090836 | 16-scf00504 | 16 |
| AX-157748703 | 25 | 78.124 | KV453097.1 | 2094163 | 16-scf00504 | 16 |
| AX-158326039 | 25 | 78.124 | KV453097.1 | 2095636 | 16-scf00504 | 16 |
| AX-157848663 | 25 | 78.124 | KV453097.1 | 2095989 | 16-scf00504 | 16 |
| AX-158326042 | 25 | 78.124 | KV453097.1 | 2099360 | 16-scf00504 | 16 |
| AX-157848664 | 25 | 78.124 | KV453097.1 | 2101602 | 16-scf00504 | 16 |
| AX-157848665 | 25 | 78.124 | KV453097.1 | 2101758 | 16-scf00504 | 16 |
| AX-158326045 | 25 | 78.124 | KV453097.1 | 2103426 | 16-scf00504 | 16 |
| AX-157710884 | 25 | 78.124 | KV453097.1 | 2106552 | 16-scf00504 | 16 |
| AX-158326047 | 25 | 78.124 | KV453097.1 | 2106804 | 16-scf00504 | 16 |
| AX-158326048 | 25 | 78.124 | KV453097.1 | 2112209 | 16-scf00504 | 16 |
| AX-158326049 | 25 | 78.124 | KV453097.1 | 2114969 | 16-scf00504 | 16 |
| AX-158326050 | 25 | 78.124 | KV453097.1 | 2115419 | 16-scf00504 | 16 |
| AX-158381484 | 25 | 78.124 | KV453097.1 | 2115512 | 16-scf00504 | 16 |
| AX-158326051 | 25 | 78.124 | KV453097.1 | 2118087 | 16-scf00504 | 16 |
| AX-158326056 | 25 | 78.124 | KV453097.1 | 2127870 | 16-scf00504 | 16 |
| AX-158326058 | 25 | 78.124 | KV453097.1 | 2130891 | 16-scf00504 | 16 |
| AX-158326062 | 25 | 78.124 | KV453097.1 | 2132819 | 16-scf00504 | 16 |
| AX-158326064 | 25 | 78.174 | KV453097.1 | 2138684 | 16-scf00504 | 16 |
| AX-158326066 | 25 | 78.174 | KV453097.1 | 2141013 | 16-scf00504 | 16 |
| AX-158326065 | 25 | 78.233 | KV453097.1 | 2140515 | 16-scf00504 | 16 |
| AX-157888448 | 25 | 78.233 | KV453097.1 | 2141973 | 16-scf00504 | 16 |
| AX-158326070 | 25 | 78.233 | KV453097.1 | 2151421 | 16-scf00504 | 16 |
| AX-158326071 | 25 | 78.233 | KV453097.1 | 2152737 | 16-scf00504 | 16 |
| AX-157848666 | 25 | 78.233 | KV453097.1 | 2153047 | 16-scf00504 | 16 |
| AX-158326072 | 25 | 78.233 | KV453097.1 | 2156622 | 16-scf00504 | 16 |
| AX-158326074 | 25 | 78.236 | KV453097.1 | 2158821 | 16-scf00504 | 16 |
| AX-158326076 | 25 | 78.66  | KV453097.1 | 2160152 | 16-scf00504 | 16 |
| AX-158326079 | 25 | 78.66  | KV453097.1 | 2164723 | 16-scf00504 | 16 |
| AX-158326080 | 25 | 78.66  | KV453097.1 | 2168420 | 16-scf00504 | 16 |
| AX-157725651 | 25 | 78.66  | KV453097.1 | 2168815 | 16-scf00504 | 16 |
| AX-158326082 | 25 | 78.816 | KV453097.1 | 2170651 | 16-scf00504 | 16 |
| AX-158326083 | 25 | 78.816 | KV453097.1 | 2173645 | 16-scf00504 | 16 |
| AX-158326081 | 25 | 78.885 | KV453097.1 | 2169848 | 16-scf00504 | 16 |
| AX-158326084 | 25 | 78.885 | KV453097.1 | 2175933 | 16-scf00504 | 16 |
| AX-158326091 | 25 | 78.962 | KV453097.1 | 2187367 | 16-scf00504 | 16 |
| AX-158412723 | 25 | 78.962 | KV453097.1 | 2188430 | 16-scf00504 | 16 |
| AX-158326093 | 25 | 78.962 | KV453097.1 | 2193489 | 16-scf00504 | 16 |
| AX-158326096 | 25 | 79.108 | KV453097.1 | 2196649 | 16-scf00504 | 16 |
| AX-158326097 | 25 | 79.108 | KV453097.1 | 2199122 | 16-scf00504 | 16 |
| AX-158326098 | 25 | 79.108 | KV453097.1 | 2199976 | 16-scf00504 | 16 |
| AX-158326099 | 25 | 79.108 | KV453097.1 | 2202062 | 16-scf00504 | 16 |
| AX-158326100 | 25 | 79.108 | KV453097.1 | 2203034 | 16-scf00504 | 16 |
| AX-158326101 | 25 | 79.108 | KV453097.1 | 2204669 | 16-scf00504 | 16 |
| AX-158326102 | 25 | 79.108 | KV453097.1 | 2206817 | 16-scf00504 | 16 |
| AX-158326105 | 25 | 79.108 | KV453097.1 | 2210385 | 16-scf00504 | 16 |
| AX-158423718 | 25 | 79.108 | KV453097.1 | 2227170 | 16-scf00504 | 16 |
| AX-158326109 | 25 | 79.159 | KV453097.1 | 2213773 | 16-scf00504 | 16 |
| AX-157771904 | 25 | 79.217 | KV453097.1 | 2214210 | 16-scf00504 | 16 |

|              |    |        |            |         |                |    |
|--------------|----|--------|------------|---------|----------------|----|
| AX-157723304 | 25 | 79.217 | KV453097.1 | 2215665 | 16-scf00504    | 16 |
| AX-158326113 | 25 | 79.217 | KV453097.1 | 2219534 | 16-scf00504    | 16 |
| AX-158326114 | 25 | 79.217 | KV453097.1 | 2219975 | 16-scf00504    | 16 |
| AX-158326115 | 25 | 79.217 | KV453097.1 | 2220952 | 16-scf00504    | 16 |
| AX-158326117 | 25 | 79.217 | KV453097.1 | 2221917 | 16-scf00504    | 16 |
| AX-158326119 | 25 | 79.217 | KV453097.1 | 2223850 | 16-scf00504    | 16 |
| AX-158326120 | 25 | 79.217 | KV453097.1 | 2224495 | 16-scf00504    | 16 |
| AX-158326121 | 25 | 79.217 | KV453097.1 | 2226860 | 16-scf00504    | 16 |
| AX-158326124 | 25 | 79.27  | KV453097.1 | 2230145 | 16-scf00504    | 16 |
| AX-158326125 | 25 | 79.399 | KV453097.1 | 2231622 | 16-scf00504    | 16 |
| AX-158326126 | 25 | 79.4   | KV453097.1 | 2233261 | 16-scf00504    | 16 |
| AX-158326024 | 25 | 79.401 | KV453097.1 | 2081019 | 16-scf00504    | 16 |
| AX-158326108 | 25 | 79.401 | KV453097.1 | 2212520 | 16-scf00504    | 16 |
| AX-158418584 | 25 | 79.401 | KV453097.1 | 2227273 | 16-scf00504    | 16 |
| AX-158326127 | 25 | 79.401 | KV453097.1 | 2234304 | 16-scf00504    | 16 |
| AX-158326132 | 25 | 79.401 | KV453097.1 | 2246598 | 16-scf00504    | 16 |
| AX-158326134 | 25 | 79.401 | KV453097.1 | 2249584 | 16-scf00504    | 16 |
| AX-158326131 | 25 | 79.402 | KV453097.1 | 2242235 | 16-scf00504    | 16 |
| AX-157848669 | 25 | 79.761 | KV453097.1 | 2247258 | 16-scf00504    | 16 |
| AX-157748382 | 25 | 79.763 | KV453097.1 | 2248130 | 16-scf00504    | 16 |
| AX-157739162 | 25 | 79.763 | KV453097.1 | 2250792 | 16-scf00504    | 16 |
| AX-158326136 | 25 | 79.763 | KV453097.1 | 2252720 | 16-scf00504    | 16 |
| AX-158326137 | 25 | 79.819 | KV453097.1 | 2257161 | 16-scf00504    | 16 |
| AX-158326138 | 25 | 79.872 | KV453097.1 | 2257556 | 16-scf00504    | 16 |
| AX-157708591 | 25 | 79.872 | KV453097.1 | 2260632 | 16-scf00504    | 16 |
| AX-158326141 | 25 | 79.872 | KV453097.1 | 2266559 | 16-scf00504    | 16 |
| AX-157700077 | 25 | 79.872 | FI891665.1 | 358     | -ORI212 lctali | UN |
| AX-157848667 | 25 | 79.897 | KV453097.1 | 2242383 | 16-scf00504    | 16 |
| AX-157708617 | 25 | 79.897 | KV453097.1 | 2266962 | 16-scf00504    | 16 |
| AX-158326160 | 25 | 79.897 | KV453097.1 | 2296745 | 16-scf00504    | 16 |
| AX-158326142 | 25 | 79.905 | KV453097.1 | 2267590 | 16-scf00504    | 16 |
| AX-158326143 | 25 | 80.12  | KV453097.1 | 2270706 | 16-scf00504    | 16 |
| AX-158326144 | 25 | 80.12  | KV453097.1 | 2272661 | 16-scf00504    | 16 |
| AX-158326147 | 25 | 80.12  | KV453097.1 | 2275292 | 16-scf00504    | 16 |
| AX-158326148 | 25 | 80.126 | KV453097.1 | 2276502 | 16-scf00504    | 16 |
| AX-158326156 | 25 | 80.359 | KV453097.1 | 2290736 | 16-scf00504    | 16 |
| AX-158326157 | 25 | 80.706 | KV453097.1 | 2292236 | 16-scf00504    | 16 |
| AX-158326159 | 25 | 81.187 | KV453097.1 | 2295947 | 16-scf00504    | 16 |
| AX-158326162 | 25 | 81.187 | KV453097.1 | 2302537 | 16-scf00504    | 16 |
| AX-158326163 | 25 | 81.187 | KV453097.1 | 2303201 | 16-scf00504    | 16 |
| AX-157848672 | 25 | 81.514 | KV453097.1 | 2304657 | 16-scf00504    | 16 |
| AX-158326164 | 25 | 81.514 | KV453097.1 | 2305675 | 16-scf00504    | 16 |
| AX-157771582 | 25 | 81.514 | KV453097.1 | 2306868 | 16-scf00504    | 16 |
| AX-158326166 | 25 | 81.812 | KV453097.1 | 2309636 | 16-scf00504    | 16 |
| AX-158326165 | 25 | 81.813 | KV453097.1 | 2307325 | 16-scf00504    | 16 |
| AX-158326168 | 25 | 81.813 | KV453097.1 | 2311707 | 16-scf00504    | 16 |
| AX-158326169 | 25 | 81.856 | KV453097.1 | 2312064 | 16-scf00504    | 16 |
| AX-158326170 | 25 | 82.013 | KV453097.1 | 2312687 | 16-scf00504    | 16 |
| AX-158326171 | 25 | 82.168 | KV453097.1 | 2313456 | 16-scf00504    | 16 |
| AX-158326174 | 25 | 82.17  | KV453097.1 | 2315758 | 16-scf00504    | 16 |
| AX-158326175 | 25 | 82.17  | KV453097.1 | 2316953 | 16-scf00504    | 16 |

|              |    |        |            |         |             |    |
|--------------|----|--------|------------|---------|-------------|----|
| AX-158326167 | 25 | 82.279 | KV453097.1 | 2311311 | 16-scf00504 | 16 |
| AX-157848673 | 25 | 82.279 | KV453097.1 | 2321359 | 16-scf00504 | 16 |
| AX-158326180 | 25 | 82.279 | KV453097.1 | 2322375 | 16-scf00504 | 16 |
| AX-158326181 | 25 | 82.279 | KV453097.1 | 2322556 | 16-scf00504 | 16 |
| AX-157720374 | 25 | 82.283 | KV453097.1 | 2327315 | 16-scf00504 | 16 |
| AX-158326185 | 25 | 82.712 | KV453097.1 | 2329148 | 16-scf00504 | 16 |
| AX-158326186 | 25 | 82.716 | KV453097.1 | 2330252 | 16-scf00504 | 16 |
| AX-158326187 | 25 | 82.716 | KV453097.1 | 2333768 | 16-scf00504 | 16 |
| AX-158326188 | 25 | 82.716 | KV453097.1 | 2334717 | 16-scf00504 | 16 |
| AX-158326189 | 25 | 82.716 | KV453097.1 | 2335083 | 16-scf00504 | 16 |
| AX-158326190 | 25 | 82.716 | KV453097.1 | 2336324 | 16-scf00504 | 16 |
| AX-157771020 | 25 | 82.979 | KV453097.1 | 2338534 | 16-scf00504 | 16 |
| AX-158326192 | 25 | 82.979 | KV453097.1 | 2339720 | 16-scf00504 | 16 |
| AX-158326193 | 25 | 82.979 | KV453097.1 | 2344528 | 16-scf00504 | 16 |
| AX-157888450 | 25 | 83.185 | KV453097.1 | 2347233 | 16-scf00504 | 16 |
| AX-158381486 | 25 | 83.368 | KV453097.1 | 2348836 | 16-scf00504 | 16 |
| AX-158326196 | 25 | 83.379 | KV453097.1 | 2352414 | 16-scf00504 | 16 |
| AX-158326197 | 25 | 83.379 | KV453097.1 | 2356891 | 16-scf00504 | 16 |
| AX-158326158 | 25 | 83.876 | KV453097.1 | 2294643 | 16-scf00504 | 16 |
| AX-157752351 | 25 | 83.876 | KV453097.1 | 2326758 | 16-scf00504 | 16 |
| AX-158326191 | 25 | 83.876 | KV453097.1 | 2336804 | 16-scf00504 | 16 |
| AX-157881547 | 25 | 83.876 | KV453097.1 | 2357717 | 16-scf00504 | 16 |
| AX-158326198 | 25 | 83.876 | KV453097.1 | 2358856 | 16-scf00504 | 16 |
| AX-158326200 | 25 | 83.876 | KV453097.1 | 2364469 | 16-scf00504 | 16 |
| AX-158326201 | 25 | 83.876 | KV453097.1 | 2364873 | 16-scf00504 | 16 |
| AX-158326202 | 25 | 83.876 | KV453097.1 | 2366440 | 16-scf00504 | 16 |
| AX-158326205 | 25 | 83.98  | KV453097.1 | 2370652 | 16-scf00504 | 16 |
| AX-158326206 | 25 | 83.993 | KV453097.1 | 2371059 | 16-scf00504 | 16 |
| AX-158326207 | 25 | 84.007 | KV453097.1 | 2372454 | 16-scf00504 | 16 |
| AX-157758907 | 25 | 84.021 | KV453097.1 | 2375913 | 16-scf00504 | 16 |
| AX-158326210 | 25 | 84.029 | KV453097.1 | 2380476 | 16-scf00504 | 16 |
| AX-158326212 | 25 | 84.029 | KV453097.1 | 2382855 | 16-scf00504 | 16 |
| AX-158326214 | 25 | 84.356 | KV453097.1 | 2386067 | 16-scf00504 | 16 |
| AX-158326215 | 25 | 84.356 | KV453097.1 | 2388324 | 16-scf00504 | 16 |
| AX-158326227 | 25 | 84.356 | KV453097.1 | 2413610 | 16-scf00504 | 16 |
| AX-158326217 | 25 | 84.43  | KV453097.1 | 2391490 | 16-scf00504 | 16 |
| AX-158326229 | 25 | 84.43  | KV453097.1 | 2415337 | 16-scf00504 | 16 |
| AX-158326216 | 25 | 84.466 | KV453097.1 | 2389939 | 16-scf00504 | 16 |
| AX-158326219 | 25 | 84.466 | KV453097.1 | 2395863 | 16-scf00504 | 16 |
| AX-158326220 | 25 | 84.466 | KV453097.1 | 2396542 | 16-scf00504 | 16 |
| AX-158326221 | 25 | 84.466 | KV453097.1 | 2398050 | 16-scf00504 | 16 |
| AX-157848675 | 25 | 84.501 | KV453097.1 | 2403678 | 16-scf00504 | 16 |
| AX-158326224 | 25 | 84.602 | KV453097.1 | 2408925 | 16-scf00504 | 16 |
| AX-157881548 | 25 | 84.602 | KV453097.1 | 2413302 | 16-scf00504 | 16 |
| AX-157773012 | 25 | 84.807 | KV453097.1 | 2390410 | 16-scf00504 | 16 |
| AX-158326232 | 25 | 84.807 | KV453097.1 | 2418224 | 16-scf00504 | 16 |
| AX-157720325 | 25 | 84.913 | KV453097.1 | 2418683 | 16-scf00504 | 16 |
| AX-158326234 | 25 | 85.012 | KV453097.1 | 2421410 | 16-scf00504 | 16 |
| AX-158326241 | 25 | 85.012 | KV453097.1 | 2434667 | 16-scf00504 | 16 |
| AX-158326243 | 25 | 85.013 | KV453097.1 | 2440672 | 16-scf00504 | 16 |
| AX-158326244 | 25 | 85.013 | KV453097.1 | 2442077 | 16-scf00504 | 16 |

|              |    |        |            |         |             |    |
|--------------|----|--------|------------|---------|-------------|----|
| AX-158326246 | 25 | 85.22  | KV453097.1 | 2448536 | 16-scf00504 | 16 |
| AX-158326248 | 25 | 85.241 | KV453097.1 | 2450686 | 16-scf00504 | 16 |
| AX-158381487 | 25 | 85.449 | KV453097.1 | 2454948 | 16-scf00504 | 16 |
| AX-158326252 | 25 | 85.449 | KV453097.1 | 2459899 | 16-scf00504 | 16 |
| AX-158326254 | 25 | 85.449 | KV453097.1 | 2460868 | 16-scf00504 | 16 |
| AX-158326255 | 25 | 85.449 | KV453097.1 | 2461144 | 16-scf00504 | 16 |
| AX-158326258 | 25 | 85.449 | KV453097.1 | 2463242 | 16-scf00504 | 16 |
| AX-157881549 | 25 | 85.449 | KV453097.1 | 2466338 | 16-scf00504 | 16 |
| AX-158326262 | 25 | 85.449 | KV453097.1 | 2469857 | 16-scf00504 | 16 |
| AX-158326338 | 25 | 85.449 | KV453097.1 | 2561976 | 16-scf00504 | 16 |
| AX-157848684 | 25 | 85.449 | KV453097.1 | 2568704 | 16-scf00504 | 16 |
| AX-158326260 | 25 | 85.523 | KV453097.1 | 2468018 | 16-scf00504 | 16 |
| AX-158326267 | 25 | 85.575 | KV453097.1 | 2475206 | 16-scf00504 | 16 |
| AX-157848678 | 25 | 85.668 | KV453097.1 | 2476835 | 16-scf00504 | 16 |
| AX-158326271 | 25 | 85.668 | KV453097.1 | 2479494 | 16-scf00504 | 16 |
| AX-158326272 | 25 | 85.668 | KV453097.1 | 2481037 | 16-scf00504 | 16 |
| AX-157848680 | 25 | 85.668 | KV453097.1 | 2481330 | 16-scf00504 | 16 |
| AX-158326273 | 25 | 85.668 | KV453097.1 | 2483065 | 16-scf00504 | 16 |
| AX-158326274 | 25 | 85.708 | KV453097.1 | 2483697 | 16-scf00504 | 16 |
| AX-157848681 | 25 | 85.708 | KV453097.1 | 2526138 | 16-scf00504 | 16 |
| AX-158326275 | 25 | 85.745 | KV453097.1 | 2484487 | 16-scf00504 | 16 |
| AX-158326277 | 25 | 85.777 | KV453097.1 | 2486796 | 16-scf00504 | 16 |
| AX-158326279 | 25 | 85.777 | KV453097.1 | 2489237 | 16-scf00504 | 16 |
| AX-158326283 | 25 | 85.777 | KV453097.1 | 2493892 | 16-scf00504 | 16 |
| AX-157740875 | 25 | 85.777 | KV453097.1 | 2494539 | 16-scf00504 | 16 |
| AX-158326284 | 25 | 85.777 | KV453097.1 | 2495506 | 16-scf00504 | 16 |
| AX-158326289 | 25 | 85.777 | KV453097.1 | 2501362 | 16-scf00504 | 16 |
| AX-158326294 | 25 | 85.8   | KV453097.1 | 2511763 | 16-scf00504 | 16 |
| AX-158326296 | 25 | 85.823 | KV453097.1 | 2513341 | 16-scf00504 | 16 |
| AX-158326299 | 25 | 85.838 | KV453097.1 | 2516435 | 16-scf00504 | 16 |
| AX-158326250 | 25 | 85.854 | KV453097.1 | 2452021 | 16-scf00504 | 16 |
| AX-158326301 | 25 | 85.854 | KV453097.1 | 2518622 | 16-scf00504 | 16 |
| AX-158326306 | 25 | 85.86  | KV453097.1 | 2522897 | 16-scf00504 | 16 |
| AX-157848679 | 25 | 85.874 | KV453097.1 | 2477575 | 16-scf00504 | 16 |
| AX-157750223 | 25 | 85.874 | KV453097.1 | 2529578 | 16-scf00504 | 16 |
| AX-157752496 | 25 | 85.874 | KV453097.1 | 2562380 | 16-scf00504 | 16 |
| AX-158326251 | 25 | 85.886 | KV453097.1 | 2453695 | 16-scf00504 | 16 |
| AX-158326253 | 25 | 85.886 | KV453097.1 | 2460792 | 16-scf00504 | 16 |
| AX-157848677 | 25 | 85.886 | KV453097.1 | 2463934 | 16-scf00504 | 16 |
| AX-158326264 | 25 | 85.886 | KV453097.1 | 2470716 | 16-scf00504 | 16 |
| AX-157881551 | 25 | 85.886 | KV453097.1 | 2513652 | 16-scf00504 | 16 |
| AX-158326298 | 25 | 85.886 | KV453097.1 | 2515640 | 16-scf00504 | 16 |
| AX-158326300 | 25 | 85.886 | KV453097.1 | 2517172 | 16-scf00504 | 16 |
| AX-157757799 | 25 | 85.886 | KV453097.1 | 2530825 | 16-scf00504 | 16 |
| AX-157848682 | 25 | 85.886 | KV453097.1 | 2531044 | 16-scf00504 | 16 |
| AX-158326312 | 25 | 85.886 | KV453097.1 | 2531787 | 16-scf00504 | 16 |
| AX-158326313 | 25 | 85.886 | KV453097.1 | 2533336 | 16-scf00504 | 16 |
| AX-158326314 | 25 | 85.886 | KV453097.1 | 2534412 | 16-scf00504 | 16 |
| AX-158326316 | 25 | 85.886 | KV453097.1 | 2536438 | 16-scf00504 | 16 |
| AX-157888451 | 25 | 85.886 | KV453097.1 | 2537546 | 16-scf00504 | 16 |
| AX-158326317 | 25 | 85.886 | KV453097.1 | 2538685 | 16-scf00504 | 16 |

|              |    |        |            |         |             |    |
|--------------|----|--------|------------|---------|-------------|----|
| AX-157715869 | 25 | 85.886 | KV453097.1 | 2538892 | 16-scf00504 | 16 |
| AX-158326320 | 25 | 85.886 | KV453097.1 | 2542965 | 16-scf00504 | 16 |
| AX-158326321 | 25 | 85.886 | KV453097.1 | 2543707 | 16-scf00504 | 16 |
| AX-158326333 | 25 | 85.886 | KV453097.1 | 2558956 | 16-scf00504 | 16 |
| AX-158326334 | 25 | 85.886 | KV453097.1 | 2559335 | 16-scf00504 | 16 |
| AX-157771650 | 25 | 85.886 | KV453097.1 | 2575470 | 16-scf00504 | 16 |
| AX-158326360 | 25 | 85.886 | KV453097.1 | 2585704 | 16-scf00504 | 16 |
| AX-158326372 | 25 | 85.886 | KV453097.1 | 2603802 | 16-scf00504 | 16 |
| AX-158326381 | 25 | 85.886 | KV453097.1 | 2617368 | 16-scf00504 | 16 |
| AX-158326386 | 25 | 85.886 | KV453097.1 | 2623202 | 16-scf00504 | 16 |
| AX-158326389 | 25 | 85.886 | KV453097.1 | 2628312 | 16-scf00504 | 16 |
| AX-158326322 | 25 | 85.92  | KV453097.1 | 2544318 | 16-scf00504 | 16 |
| AX-157712169 | 25 | 85.92  | KV453097.1 | 2547605 | 16-scf00504 | 16 |
| AX-158326326 | 25 | 85.92  | KV453097.1 | 2551766 | 16-scf00504 | 16 |
| AX-158326327 | 25 | 85.995 | KV453097.1 | 2552722 | 16-scf00504 | 16 |
| AX-158326328 | 25 | 86.019 | KV453097.1 | 2553276 | 16-scf00504 | 16 |
| AX-158326355 | 25 | 86.019 | KV453097.1 | 2576303 | 16-scf00504 | 16 |
| AX-158326331 | 25 | 86.044 | KV453097.1 | 2557239 | 16-scf00504 | 16 |
| AX-157848683 | 25 | 86.073 | KV453097.1 | 2560604 | 16-scf00504 | 16 |
| AX-158326357 | 25 | 86.073 | KV453097.1 | 2577945 | 16-scf00504 | 16 |
| AX-158326367 | 25 | 86.073 | KV453097.1 | 2597587 | 16-scf00504 | 16 |
| AX-158418595 | 25 | 86.073 | KV453097.1 | 2602498 | 16-scf00504 | 16 |
| AX-158326383 | 25 | 86.073 | KV453097.1 | 2618352 | 16-scf00504 | 16 |
| AX-158326439 | 25 | 86.073 | KV453097.1 | 2708083 | 16-scf00504 | 16 |
| AX-158326291 | 25 | 86.105 | KV453097.1 | 2505541 | 16-scf00504 | 16 |
| AX-157742087 | 25 | 86.105 | KV453097.1 | 2561400 | 16-scf00504 | 16 |
| AX-157733453 | 25 | 86.105 | KV453097.1 | 2564129 | 16-scf00504 | 16 |
| AX-158326346 | 25 | 86.105 | KV453097.1 | 2569170 | 16-scf00504 | 16 |
| AX-158326351 | 25 | 86.105 | KV453097.1 | 2572123 | 16-scf00504 | 16 |
| AX-158326354 | 25 | 86.105 | KV453097.1 | 2575179 | 16-scf00504 | 16 |
| AX-158326356 | 25 | 86.105 | KV453097.1 | 2577569 | 16-scf00504 | 16 |
| AX-158326359 | 25 | 86.105 | KV453097.1 | 2582573 | 16-scf00504 | 16 |
| AX-157758482 | 25 | 86.105 | KV453097.1 | 2583302 | 16-scf00504 | 16 |
| AX-157867891 | 25 | 86.105 | KV453097.1 | 2586288 | 16-scf00504 | 16 |
| AX-158326363 | 25 | 86.105 | KV453097.1 | 2589549 | 16-scf00504 | 16 |
| AX-158326365 | 25 | 86.105 | KV453097.1 | 2593872 | 16-scf00504 | 16 |
| AX-158326366 | 25 | 86.105 | KV453097.1 | 2595939 | 16-scf00504 | 16 |
| AX-158420061 | 25 | 86.105 | KV453097.1 | 2602114 | 16-scf00504 | 16 |
| AX-158326373 | 25 | 86.105 | KV453097.1 | 2607654 | 16-scf00504 | 16 |
| AX-158326423 | 25 | 86.105 | KV453097.1 | 2684196 | 16-scf00504 | 16 |
| AX-158326369 | 25 | 86.321 | KV453097.1 | 2599866 | 16-scf00504 | 16 |
| AX-158326370 | 25 | 86.321 | KV453097.1 | 2600428 | 16-scf00504 | 16 |
| AX-158326371 | 25 | 86.321 | KV453097.1 | 2601164 | 16-scf00504 | 16 |
| AX-157848686 | 25 | 86.321 | KV453097.1 | 2607400 | 16-scf00504 | 16 |
| AX-157848687 | 25 | 86.321 | KV453097.1 | 2609447 | 16-scf00504 | 16 |
| AX-157724296 | 25 | 86.322 | KV453097.1 | 2615146 | 16-scf00504 | 16 |
| AX-158326292 | 25 | 86.324 | KV453097.1 | 2507205 | 16-scf00504 | 16 |
| AX-157848689 | 25 | 86.324 | KV453097.1 | 2618526 | 16-scf00504 | 16 |
| AX-158326384 | 25 | 86.324 | KV453097.1 | 2620056 | 16-scf00504 | 16 |
| AX-158326387 | 25 | 86.324 | KV453097.1 | 2624019 | 16-scf00504 | 16 |
| AX-157848690 | 25 | 86.324 | KV453097.1 | 2625560 | 16-scf00504 | 16 |

|              |    |        |            |         |             |    |
|--------------|----|--------|------------|---------|-------------|----|
| AX-157881556 | 25 | 86.324 | KV453097.1 | 2629989 | 16-scf00504 | 16 |
| AX-158326390 | 25 | 86.324 | KV453097.1 | 2631075 | 16-scf00504 | 16 |
| AX-157848691 | 25 | 86.324 | KV453097.1 | 2635084 | 16-scf00504 | 16 |
| AX-158326393 | 25 | 86.324 | KV453097.1 | 2636496 | 16-scf00504 | 16 |
| AX-158326396 | 25 | 86.324 | KV453097.1 | 2639660 | 16-scf00504 | 16 |
| AX-158326403 | 25 | 86.324 | KV453097.1 | 2656843 | 16-scf00504 | 16 |
| AX-158326410 | 25 | 86.324 | KV453097.1 | 2661215 | 16-scf00504 | 16 |
| AX-158326411 | 25 | 86.324 | KV453097.1 | 2662362 | 16-scf00504 | 16 |
| AX-158326412 | 25 | 86.324 | KV453097.1 | 2663991 | 16-scf00504 | 16 |
| AX-158326413 | 25 | 86.324 | KV453097.1 | 2665000 | 16-scf00504 | 16 |
| AX-158326414 | 25 | 86.324 | KV453097.1 | 2665851 | 16-scf00504 | 16 |
| AX-158326417 | 25 | 86.324 | KV453097.1 | 2673661 | 16-scf00504 | 16 |
| AX-157848692 | 25 | 86.324 | KV453097.1 | 2676008 | 16-scf00504 | 16 |
| AX-158326420 | 25 | 86.324 | KV453097.1 | 2679347 | 16-scf00504 | 16 |
| AX-157724384 | 25 | 86.324 | KV453097.1 | 2680855 | 16-scf00504 | 16 |
| AX-158326422 | 25 | 86.325 | KV453097.1 | 2681006 | 16-scf00504 | 16 |
| AX-158326424 | 25 | 86.382 | KV453097.1 | 2684741 | 16-scf00504 | 16 |
| AX-158326426 | 25 | 86.621 | KV453097.1 | 2688191 | 16-scf00504 | 16 |
| AX-158326428 | 25 | 86.621 | KV453097.1 | 2691616 | 16-scf00504 | 16 |
| AX-158326382 | 25 | 86.914 | KV453097.1 | 2617825 | 16-scf00504 | 16 |
| AX-158326429 | 25 | 86.914 | KV453097.1 | 2692385 | 16-scf00504 | 16 |
| AX-158326431 | 25 | 86.914 | KV453097.1 | 2693871 | 16-scf00504 | 16 |
| AX-158326433 | 25 | 86.914 | KV453097.1 | 2695895 | 16-scf00504 | 16 |
| AX-158326434 | 25 | 86.914 | KV453097.1 | 2700408 | 16-scf00504 | 16 |
| AX-158326437 | 25 | 86.914 | KV453097.1 | 2704933 | 16-scf00504 | 16 |
| AX-158326438 | 25 | 86.914 | KV453097.1 | 2707679 | 16-scf00504 | 16 |
| AX-158326441 | 25 | 86.914 | KV453097.1 | 2711909 | 16-scf00504 | 16 |
| AX-158326442 | 25 | 86.914 | KV453097.1 | 2714660 | 16-scf00504 | 16 |
| AX-158326443 | 25 | 86.914 | KV453097.1 | 2715099 | 16-scf00504 | 16 |
| AX-158326444 | 25 | 86.914 | KV453097.1 | 2716222 | 16-scf00504 | 16 |
| AX-158412727 | 25 | 86.914 | KV453097.1 | 2723273 | 16-scf00504 | 16 |
| AX-158326447 | 25 | 86.914 | KV453097.1 | 2724690 | 16-scf00504 | 16 |
| AX-157744992 | 25 | 86.914 | KV453097.1 | 2729081 | 16-scf00504 | 16 |
| AX-158381489 | 25 | 86.914 | KV453097.1 | 2736824 | 16-scf00504 | 16 |
| AX-157748943 | 25 | 86.914 | KV453097.1 | 2795335 | 16-scf00504 | 16 |
| AX-157747182 | 25 | 86.921 | KV453097.1 | 2729971 | 16-scf00504 | 16 |
| AX-158326451 | 25 | 87.348 | KV453097.1 | 2737988 | 16-scf00504 | 16 |
| AX-157848696 | 25 | 87.348 | KV453097.1 | 2738537 | 16-scf00504 | 16 |
| AX-157848697 | 25 | 87.348 | KV453097.1 | 2743759 | 16-scf00504 | 16 |
| AX-158326452 | 25 | 87.352 | KV453097.1 | 2738963 | 16-scf00504 | 16 |
| AX-157873631 | 25 | 87.357 | KV453097.1 | 2746560 | 16-scf00504 | 16 |
| AX-158326458 | 25 | 87.504 | KV453097.1 | 2748442 | 16-scf00504 | 16 |
| AX-158326460 | 25 | 87.504 | KV453097.1 | 2749606 | 16-scf00504 | 16 |
| AX-157848698 | 25 | 87.504 | KV453097.1 | 2765643 | 16-scf00504 | 16 |
| AX-158326469 | 25 | 87.583 | KV453097.1 | 2766495 | 16-scf00504 | 16 |
| AX-158326453 | 25 | 87.652 | KV453097.1 | 2739284 | 16-scf00504 | 16 |
| AX-158326463 | 25 | 87.652 | KV453097.1 | 2753970 | 16-scf00504 | 16 |
| AX-158326465 | 25 | 87.652 | KV453097.1 | 2757022 | 16-scf00504 | 16 |
| AX-157727606 | 25 | 87.652 | KV453097.1 | 2763948 | 16-scf00504 | 16 |
| AX-157848699 | 25 | 87.652 | KV453097.1 | 2767878 | 16-scf00504 | 16 |
| AX-158326473 | 25 | 87.652 | KV453097.1 | 2772151 | 16-scf00504 | 16 |

|              |    |        |            |         |             |    |
|--------------|----|--------|------------|---------|-------------|----|
| AX-158326474 | 25 | 87.652 | KV453097.1 | 2773424 | 16-scf00504 | 16 |
| AX-158326476 | 25 | 87.652 | KV453097.1 | 2777191 | 16-scf00504 | 16 |
| AX-158326477 | 25 | 87.652 | KV453097.1 | 2778027 | 16-scf00504 | 16 |
| AX-158326478 | 25 | 87.652 | KV453097.1 | 2778703 | 16-scf00504 | 16 |
| AX-158326481 | 25 | 87.652 | KV453097.1 | 2781467 | 16-scf00504 | 16 |
| AX-158326482 | 25 | 87.652 | KV453097.1 | 2781700 | 16-scf00504 | 16 |
| AX-158326483 | 25 | 87.652 | KV453097.1 | 2782361 | 16-scf00504 | 16 |
| AX-157739883 | 25 | 87.652 | KV453097.1 | 2785451 | 16-scf00504 | 16 |
| AX-158326484 | 25 | 87.652 | KV453097.1 | 2785847 | 16-scf00504 | 16 |
| AX-158326485 | 25 | 87.652 | KV453097.1 | 2788328 | 16-scf00504 | 16 |
| AX-158326486 | 25 | 87.652 | KV453097.1 | 2789075 | 16-scf00504 | 16 |
| AX-157848700 | 25 | 87.652 | KV453097.1 | 2789441 | 16-scf00504 | 16 |
| AX-158326487 | 25 | 87.652 | KV453097.1 | 2789719 | 16-scf00504 | 16 |
| AX-158326488 | 25 | 87.652 | KV453097.1 | 2790355 | 16-scf00504 | 16 |
| AX-158326489 | 25 | 87.652 | KV453097.1 | 2791785 | 16-scf00504 | 16 |
| AX-158326490 | 25 | 87.652 | KV453097.1 | 2793164 | 16-scf00504 | 16 |
| AX-158326491 | 25 | 87.863 | KV453097.1 | 2793747 | 16-scf00504 | 16 |
| AX-158326495 | 25 | 88.092 | KV453097.1 | 2805079 | 16-scf00504 | 16 |
| AX-157722290 | 25 | 88.095 | KV453097.1 | 2808186 | 16-scf00504 | 16 |
| AX-158326499 | 25 | 88.095 | KV453097.1 | 2809649 | 16-scf00504 | 16 |
| AX-157715290 | 25 | 88.095 | KV453097.1 | 2813227 | 16-scf00504 | 16 |
| AX-158326500 | 25 | 88.095 | KV453097.1 | 2813790 | 16-scf00504 | 16 |
| AX-158326504 | 25 | 88.095 | KV453097.1 | 2819834 | 16-scf00504 | 16 |
| AX-158326502 | 25 | 88.188 | KV453097.1 | 2815540 | 16-scf00504 | 16 |
| AX-158326503 | 25 | 88.26  | KV453097.1 | 2816757 | 16-scf00504 | 16 |
| AX-158326507 | 25 | 88.26  | KV453097.1 | 2830497 | 16-scf00504 | 16 |
| AX-158326508 | 25 | 88.426 | KV453097.1 | 2831983 | 16-scf00504 | 16 |
| AX-158326510 | 25 | 88.51  | KV453097.1 | 2835528 | 16-scf00504 | 16 |
| AX-158381491 | 25 | 88.51  | KV453097.1 | 2838711 | 16-scf00504 | 16 |
| AX-158326519 | 25 | 88.51  | KV453097.1 | 2845216 | 16-scf00504 | 16 |
| AX-158326512 | 25 | 88.591 | KV453097.1 | 2839573 | 16-scf00504 | 16 |
| AX-158326513 | 25 | 88.591 | KV453097.1 | 2839838 | 16-scf00504 | 16 |
| AX-158326514 | 25 | 88.591 | KV453097.1 | 2840547 | 16-scf00504 | 16 |
| AX-158326517 | 25 | 88.592 | KV453097.1 | 2843413 | 16-scf00504 | 16 |
| AX-158326518 | 25 | 88.592 | KV453097.1 | 2844703 | 16-scf00504 | 16 |
| AX-158326522 | 25 | 88.922 | KV453097.1 | 2852552 | 16-scf00504 | 16 |
| AX-158326523 | 25 | 89.089 | KV453097.1 | 2854941 | 16-scf00504 | 16 |
| AX-158326524 | 25 | 89.254 | KV453097.1 | 2855743 | 16-scf00504 | 16 |
| AX-158326528 | 25 | 89.474 | KV453097.1 | 2864058 | 16-scf00504 | 16 |
| AX-158326531 | 25 | 89.474 | KV453097.1 | 2869346 | 16-scf00504 | 16 |
| AX-157773302 | 25 | 89.474 | KV453097.1 | 2869751 | 16-scf00504 | 16 |
| AX-158326532 | 25 | 89.474 | KV453097.1 | 2870102 | 16-scf00504 | 16 |
| AX-158326537 | 25 | 89.72  | KV453097.1 | 2874307 | 16-scf00504 | 16 |
| AX-158326538 | 25 | 89.936 | KV453097.1 | 2875167 | 16-scf00504 | 16 |
| AX-158326539 | 25 | 89.954 | KV453097.1 | 2879181 | 16-scf00504 | 16 |
| AX-158326540 | 25 | 90.314 | KV453097.1 | 2881974 | 16-scf00504 | 16 |
| AX-158326541 | 25 | 90.314 | KV453097.1 | 2883838 | 16-scf00504 | 16 |
| AX-157741230 | 25 | 90.314 | KV453097.1 | 2884489 | 16-scf00504 | 16 |
| AX-158326543 | 25 | 90.314 | KV453097.1 | 2886220 | 16-scf00504 | 16 |
| AX-158326544 | 25 | 90.314 | KV453097.1 | 2887970 | 16-scf00504 | 16 |
| AX-158326545 | 25 | 90.314 | KV453097.1 | 2890569 | 16-scf00504 | 16 |

|              |    |        |            |         |             |    |
|--------------|----|--------|------------|---------|-------------|----|
| AX-157709494 | 25 | 90.314 | KV453097.1 | 2891374 | 16-scf00504 | 16 |
| AX-158326547 | 25 | 90.314 | KV453097.1 | 2892058 | 16-scf00504 | 16 |
| AX-157873632 | 25 | 90.314 | KV453097.1 | 2893097 | 16-scf00504 | 16 |
| AX-157714564 | 25 | 90.314 | KV453097.1 | 2919782 | 16-scf00504 | 16 |
| AX-158326568 | 25 | 90.314 | KV453097.1 | 2925101 | 16-scf00504 | 16 |
| AX-158326546 | 25 | 90.609 | KV453097.1 | 2890995 | 16-scf00504 | 16 |
| AX-157848702 | 25 | 90.609 | KV453097.1 | 2895124 | 16-scf00504 | 16 |
| AX-157848703 | 25 | 90.609 | KV453097.1 | 2896024 | 16-scf00504 | 16 |
| AX-157754693 | 25 | 90.609 | KV453097.1 | 2896160 | 16-scf00504 | 16 |
| AX-158326553 | 25 | 90.609 | KV453097.1 | 2901472 | 16-scf00504 | 16 |
| AX-158326555 | 25 | 90.609 | KV453097.1 | 2906030 | 16-scf00504 | 16 |
| AX-158326556 | 25 | 90.609 | KV453097.1 | 2906877 | 16-scf00504 | 16 |
| AX-158326557 | 25 | 90.609 | KV453097.1 | 2909199 | 16-scf00504 | 16 |
| AX-157718120 | 25 | 90.609 | KV453097.1 | 2909366 | 16-scf00504 | 16 |
| AX-158326558 | 25 | 90.609 | KV453097.1 | 2911539 | 16-scf00504 | 16 |
| AX-158326559 | 25 | 90.609 | KV453097.1 | 2913025 | 16-scf00504 | 16 |
| AX-158326561 | 25 | 90.609 | KV453097.1 | 2913769 | 16-scf00504 | 16 |
| AX-158326562 | 25 | 90.609 | KV453097.1 | 2914304 | 16-scf00504 | 16 |
| AX-157848706 | 25 | 90.609 | KV453097.1 | 2917282 | 16-scf00504 | 16 |
| AX-158326576 | 25 | 90.609 | KV453097.1 | 2934544 | 16-scf00504 | 16 |
| AX-158326565 | 25 | 90.658 | KV453097.1 | 2918887 | 16-scf00504 | 16 |
| AX-158326563 | 25 | 90.705 | KV453097.1 | 2915328 | 16-scf00504 | 16 |
| AX-158326566 | 25 | 90.705 | KV453097.1 | 2920527 | 16-scf00504 | 16 |
| AX-158326560 | 25 | 90.756 | KV453097.1 | 2913390 | 16-scf00504 | 16 |
| AX-157848705 | 25 | 90.756 | KV453097.1 | 2916422 | 16-scf00504 | 16 |
| AX-158326567 | 25 | 90.756 | KV453097.1 | 2921570 | 16-scf00504 | 16 |
| AX-157714700 | 25 | 90.756 | KV453097.1 | 2930113 | 16-scf00504 | 16 |
| AX-158326573 | 25 | 90.756 | KV453097.1 | 2931974 | 16-scf00504 | 16 |
| AX-158326574 | 25 | 90.756 | KV453097.1 | 2932374 | 16-scf00504 | 16 |
| AX-158326577 | 25 | 90.756 | KV453097.1 | 2934914 | 16-scf00504 | 16 |
| AX-158326578 | 25 | 90.756 | KV453097.1 | 2935934 | 16-scf00504 | 16 |
| AX-157848710 | 25 | 90.756 | KV453097.1 | 2938128 | 16-scf00504 | 16 |
| AX-157848711 | 25 | 91.051 | KV453097.1 | 2941592 | 16-scf00504 | 16 |
| AX-157716897 | 25 | 91.051 | KV453097.1 | 2943528 | 16-scf00504 | 16 |
| AX-157848712 | 25 | 91.051 | KV453097.1 | 2943898 | 16-scf00504 | 16 |
| AX-157743603 | 25 | 91.051 | KV453097.1 | 2944904 | 16-scf00504 | 16 |
| AX-158326585 | 25 | 91.051 | KV453097.1 | 2947347 | 16-scf00504 | 16 |
| AX-158381492 | 25 | 91.051 | KV453097.1 | 2949003 | 16-scf00504 | 16 |
| AX-158326586 | 25 | 91.051 | KV453097.1 | 2952073 | 16-scf00504 | 16 |
| AX-157848713 | 25 | 91.051 | KV453097.1 | 2952671 | 16-scf00504 | 16 |
| AX-158326587 | 25 | 91.051 | KV453097.1 | 2953182 | 16-scf00504 | 16 |
| AX-157756930 | 25 | 91.051 | KV453097.1 | 2953946 | 16-scf00504 | 16 |
| AX-158326589 | 25 | 91.051 | KV453097.1 | 2954590 | 16-scf00504 | 16 |
| AX-158326590 | 25 | 91.051 | KV453097.1 | 2956864 | 16-scf00504 | 16 |
| AX-158326591 | 25 | 91.051 | KV453097.1 | 2957720 | 16-scf00504 | 16 |
| AX-158326596 | 25 | 91.343 | KV453097.1 | 2965352 | 16-scf00504 | 16 |
| AX-157773664 | 25 | 91.343 | KV453097.1 | 2965746 | 16-scf00504 | 16 |
| AX-158326597 | 25 | 91.486 | KV453097.1 | 2967459 | 16-scf00504 | 16 |
| AX-157741779 | 25 | 91.488 | KV453097.1 | 2973015 | 16-scf00504 | 16 |
| AX-157848714 | 25 | 91.488 | KV453097.1 | 2973163 | 16-scf00504 | 16 |
| AX-157881564 | 25 | 91.488 | KV453097.1 | 2976557 | 16-scf00504 | 16 |



|              |    |        |            |         |             |    |
|--------------|----|--------|------------|---------|-------------|----|
| AX-157848715 | 25 | 91.488 | KV453097.1 | 2977240 | 16-scf00504 | 16 |
| AX-158326599 | 25 | 91.488 | KV453097.1 | 2978451 | 16-scf00504 | 16 |
| AX-158326600 | 25 | 91.488 | KV453097.1 | 2979286 | 16-scf00504 | 16 |
| AX-158326601 | 25 | 91.488 | KV453097.1 | 2981473 | 16-scf00504 | 16 |
| AX-157848716 | 25 | 91.488 | KV453097.1 | 2982043 | 16-scf00504 | 16 |
| AX-158326604 | 25 | 91.488 | KV453097.1 | 2984120 | 16-scf00504 | 16 |
| AX-158326605 | 25 | 91.488 | KV453097.1 | 2984542 | 16-scf00504 | 16 |
| AX-158326606 | 25 | 91.488 | KV453097.1 | 2987267 | 16-scf00504 | 16 |
| AX-158326608 | 25 | 91.488 | KV453097.1 | 2987891 | 16-scf00504 | 16 |
| AX-157747714 | 25 | 91.526 | KV453097.1 | 2988778 | 16-scf00504 | 16 |
| AX-158326613 | 25 | 91.598 | KV453097.1 | 3000765 | 16-scf00504 | 16 |
| AX-158326614 | 25 | 91.598 | KV453097.1 | 3002773 | 16-scf00504 | 16 |
| AX-158326612 | 25 | 91.816 | KV453097.1 | 2998654 | 16-scf00504 | 16 |
| AX-157744372 | 25 | 91.816 | KV453097.1 | 3006232 | 16-scf00504 | 16 |
| AX-158326616 | 25 | 91.816 | KV453097.1 | 3007735 | 16-scf00504 | 16 |
| AX-158326617 | 25 | 91.816 | KV453097.1 | 3008531 | 16-scf00504 | 16 |
| AX-157715224 | 25 | 91.816 | KV453097.1 | 3009931 | 16-scf00504 | 16 |
| AX-157716365 | 25 | 91.816 | KV453097.1 | 3012023 | 16-scf00504 | 16 |
| AX-158326716 | 25 | 91.816 | KV453097.1 | 3149775 | 16-scf00504 | 16 |
| AX-158326592 | 25 | 91.903 | KV453097.1 | 2961185 | 16-scf00504 | 16 |
| AX-157848721 | 25 | 91.903 | KV453097.1 | 3012502 | 16-scf00504 | 16 |
| AX-158326623 | 25 | 92.034 | KV453097.1 | 3021230 | 16-scf00504 | 16 |
| AX-158326624 | 25 | 92.034 | KV453097.1 | 3021703 | 16-scf00504 | 16 |
| AX-157747885 | 25 | 92.034 | KV453097.1 | 3026534 | 16-scf00504 | 16 |
| AX-158326627 | 25 | 92.034 | KV453097.1 | 3029864 | 16-scf00504 | 16 |
| AX-157715455 | 25 | 92.146 | KV453097.1 | 3033834 | 16-scf00504 | 16 |
| AX-157848724 | 25 | 92.253 | KV453097.1 | 3035506 | 16-scf00504 | 16 |
| AX-158418602 | 25 | 92.253 | KV453097.1 | 3036788 | 16-scf00504 | 16 |
| AX-158326631 | 25 | 92.253 | KV453097.1 | 3038261 | 16-scf00504 | 16 |
| AX-158326632 | 25 | 92.253 | KV453097.1 | 3038650 | 16-scf00504 | 16 |
| AX-158326633 | 25 | 92.254 | KV453097.1 | 3039245 | 16-scf00504 | 16 |
| AX-157752438 | 25 | 92.399 | KV453097.1 | 3044222 | 16-scf00504 | 16 |
| AX-157738974 | 25 | 92.581 | KV453097.1 | 3041146 | 16-scf00504 | 16 |
| AX-158326639 | 25 | 92.581 | KV453097.1 | 3047160 | 16-scf00504 | 16 |
| AX-157714303 | 25 | 92.581 | KV453097.1 | 3047707 | 16-scf00504 | 16 |
| AX-158326640 | 25 | 92.581 | KV453097.1 | 3048208 | 16-scf00504 | 16 |
| AX-158326642 | 25 | 92.581 | KV453097.1 | 3051840 | 16-scf00504 | 16 |
| AX-157745936 | 25 | 92.581 | KV453097.1 | 3057580 | 16-scf00504 | 16 |
| AX-158326646 | 25 | 92.69  | KV453097.1 | 3059251 | 16-scf00504 | 16 |
| AX-158326648 | 25 | 92.69  | KV453097.1 | 3060835 | 16-scf00504 | 16 |
| AX-158326649 | 25 | 92.69  | KV453097.1 | 3062115 | 16-scf00504 | 16 |
| AX-158326650 | 25 | 92.69  | KV453097.1 | 3063097 | 16-scf00504 | 16 |
| AX-157713477 | 25 | 92.69  | KV453097.1 | 3070215 | 16-scf00504 | 16 |
| AX-158326651 | 25 | 92.69  | KV453097.1 | 3071150 | 16-scf00504 | 16 |
| AX-158326652 | 25 | 92.69  | KV453097.1 | 3071637 | 16-scf00504 | 16 |
| AX-158326655 | 25 | 92.69  | KV453097.1 | 3074716 | 16-scf00504 | 16 |
| AX-157848728 | 25 | 92.69  | KV453097.1 | 3077976 | 16-scf00504 | 16 |
| AX-158326657 | 25 | 92.69  | KV453097.1 | 3082474 | 16-scf00504 | 16 |
| AX-158326658 | 25 | 92.69  | KV453097.1 | 3082767 | 16-scf00504 | 16 |
| AX-158326661 | 25 | 92.69  | KV453097.1 | 3084786 | 16-scf00504 | 16 |
| AX-157848729 | 25 | 92.69  | KV453097.1 | 3085135 | 16-scf00504 | 16 |

|              |    |        |            |         |             |    |
|--------------|----|--------|------------|---------|-------------|----|
| AX-157774449 | 25 | 92.69  | KV453097.1 | 3087026 | 16-scf00504 | 16 |
| AX-158326664 | 25 | 92.69  | KV453097.1 | 3089545 | 16-scf00504 | 16 |
| AX-158326667 | 25 | 92.69  | KV453097.1 | 3092745 | 16-scf00504 | 16 |
| AX-158326669 | 25 | 92.69  | KV453097.1 | 3094041 | 16-scf00504 | 16 |
| AX-157751654 | 25 | 92.69  | KV453097.1 | 3095425 | 16-scf00504 | 16 |
| AX-158326671 | 25 | 92.69  | KV453097.1 | 3097726 | 16-scf00504 | 16 |
| AX-158326673 | 25 | 92.69  | KV453097.1 | 3099291 | 16-scf00504 | 16 |
| AX-158326682 | 25 | 92.69  | KV453097.1 | 3107821 | 16-scf00504 | 16 |
| AX-158326645 | 25 | 92.708 | KV453097.1 | 3058680 | 16-scf00504 | 16 |
| AX-158326663 | 25 | 92.708 | KV453097.1 | 3087595 | 16-scf00504 | 16 |
| AX-158326672 | 25 | 92.708 | KV453097.1 | 3099004 | 16-scf00504 | 16 |
| AX-157848730 | 25 | 92.708 | KV453097.1 | 3104576 | 16-scf00504 | 16 |
| AX-158326681 | 25 | 92.708 | KV453097.1 | 3105964 | 16-scf00504 | 16 |
| AX-158326690 | 25 | 92.708 | KV453097.1 | 3114867 | 16-scf00504 | 16 |
| AX-158326660 | 25 | 92.8   | KV453097.1 | 3084059 | 16-scf00504 | 16 |
| AX-158326668 | 25 | 92.8   | KV453097.1 | 3093208 | 16-scf00504 | 16 |
| AX-158326675 | 25 | 92.8   | KV453097.1 | 3101729 | 16-scf00504 | 16 |
| AX-158326676 | 25 | 92.8   | KV453097.1 | 3102143 | 16-scf00504 | 16 |
| AX-158326683 | 25 | 92.8   | KV453097.1 | 3108278 | 16-scf00504 | 16 |
| AX-158326684 | 25 | 92.8   | KV453097.1 | 3108735 | 16-scf00504 | 16 |
| AX-158326686 | 25 | 92.8   | KV453097.1 | 3110127 | 16-scf00504 | 16 |
| AX-157719343 | 25 | 92.8   | KV453097.1 | 3111070 | 16-scf00504 | 16 |
| AX-158326687 | 25 | 92.8   | KV453097.1 | 3112177 | 16-scf00504 | 16 |
| AX-157848731 | 25 | 92.8   | KV453097.1 | 3112688 | 16-scf00504 | 16 |
| AX-157848732 | 25 | 92.8   | KV453097.1 | 3112880 | 16-scf00504 | 16 |
| AX-158326689 | 25 | 92.8   | KV453097.1 | 3114683 | 16-scf00504 | 16 |
| AX-158326692 | 25 | 92.8   | KV453097.1 | 3117624 | 16-scf00504 | 16 |
| AX-157848733 | 25 | 92.8   | KV453097.1 | 3123986 | 16-scf00504 | 16 |
| AX-158326670 | 25 | 92.909 | KV453097.1 | 3095292 | 16-scf00504 | 16 |
| AX-158326693 | 25 | 92.909 | KV453097.1 | 3118207 | 16-scf00504 | 16 |
| AX-158326704 | 25 | 92.909 | KV453097.1 | 3131989 | 16-scf00504 | 16 |
| AX-158326696 | 25 | 93.018 | KV453097.1 | 3122544 | 16-scf00504 | 16 |
| AX-158326700 | 25 | 93.018 | KV453097.1 | 3128367 | 16-scf00504 | 16 |
| AX-158326706 | 25 | 93.018 | KV453097.1 | 3134409 | 16-scf00504 | 16 |
| AX-158326707 | 25 | 93.018 | KV453097.1 | 3135006 | 16-scf00504 | 16 |
| AX-157755872 | 25 | 93.237 | KV453097.1 | 3136672 | 16-scf00504 | 16 |
| AX-158326710 | 25 | 93.456 | KV453097.1 | 3140275 | 16-scf00504 | 16 |
| AX-158326711 | 25 | 93.456 | KV453097.1 | 3142114 | 16-scf00504 | 16 |
| AX-157749180 | 25 | 93.456 | KV453097.1 | 3143113 | 16-scf00504 | 16 |
| AX-158326712 | 25 | 93.456 | KV453097.1 | 3143793 | 16-scf00504 | 16 |
| AX-158326713 | 25 | 93.456 | KV453097.1 | 3144778 | 16-scf00504 | 16 |
| AX-158326715 | 25 | 93.456 | KV453097.1 | 3149240 | 16-scf00504 | 16 |
| AX-157747515 | 25 | 93.456 | KV453097.1 | 3151359 | 16-scf00504 | 16 |
| AX-158326719 | 25 | 93.565 | KV453097.1 | 3154317 | 16-scf00504 | 16 |
| AX-158418605 | 25 | 93.565 | KV453097.1 | 3161198 | 16-scf00504 | 16 |
| AX-158326725 | 25 | 93.616 | KV453097.1 | 3163075 | 16-scf00504 | 16 |
| AX-158326634 | 25 | 93.735 | KV453097.1 | 3041250 | 16-scf00504 | 16 |
| AX-158326691 | 25 | 93.735 | KV453097.1 | 3116971 | 16-scf00504 | 16 |
| AX-158326703 | 25 | 93.735 | KV453097.1 | 3131174 | 16-scf00504 | 16 |
| AX-158326726 | 25 | 93.735 | KV453097.1 | 3163501 | 16-scf00504 | 16 |
| AX-158326728 | 25 | 93.735 | KV453097.1 | 3164782 | 16-scf00504 | 16 |

|              |    |        |            |         |             |    |
|--------------|----|--------|------------|---------|-------------|----|
| AX-157747464 | 25 | 93.735 | KV453097.1 | 3168146 | 16-scf00504 | 16 |
| AX-158326724 | 25 | 93.784 | KV453097.1 | 3162689 | 16-scf00504 | 16 |
| AX-157719816 | 25 | 93.784 | KV453097.1 | 3163673 | 16-scf00504 | 16 |
| AX-158326727 | 25 | 93.833 | KV453097.1 | 3163803 | 16-scf00504 | 16 |
| AX-157773504 | 25 | 93.857 | KV453097.1 | 3164379 | 16-scf00504 | 16 |
| AX-158326730 | 25 | 93.931 | KV453097.1 | 3168999 | 16-scf00504 | 16 |
| AX-157888456 | 25 | 93.931 | KV453097.1 | 3228704 | 16-scf00504 | 16 |
| AX-158326732 | 25 | 93.956 | KV453097.1 | 3172267 | 16-scf00504 | 16 |
| AX-158326733 | 25 | 93.961 | KV453097.1 | 3173440 | 16-scf00504 | 16 |
| AX-158326735 | 25 | 93.968 | KV453097.1 | 3174355 | 16-scf00504 | 16 |
| AX-157848736 | 25 | 93.987 | KV453097.1 | 3179350 | 16-scf00504 | 16 |
| AX-158326731 | 25 | 94.007 | KV453097.1 | 3169621 | 16-scf00504 | 16 |
| AX-158326737 | 25 | 94.007 | KV453097.1 | 3176593 | 16-scf00504 | 16 |
| AX-157848737 | 25 | 94.007 | KV453097.1 | 3180345 | 16-scf00504 | 16 |
| AX-158326742 | 25 | 94.078 | KV453097.1 | 3180755 | 16-scf00504 | 16 |
| AX-158326743 | 25 | 94.213 | KV453097.1 | 3181979 | 16-scf00504 | 16 |
| AX-158326747 | 25 | 94.215 | KV453097.1 | 3188030 | 16-scf00504 | 16 |
| AX-157709087 | 25 | 94.221 | KV453097.1 | 3190536 | 16-scf00504 | 16 |
| AX-157709086 | 25 | 94.221 | KV453097.1 | 3190578 | 16-scf00504 | 16 |
| AX-158326749 | 25 | 94.221 | KV453097.1 | 3191749 | 16-scf00504 | 16 |
| AX-157715324 | 25 | 94.221 | KV453097.1 | 3194204 | 16-scf00504 | 16 |
| AX-158326762 | 25 | 94.221 | KV453097.1 | 3207326 | 16-scf00504 | 16 |
| AX-157848747 | 25 | 94.221 | KV453097.1 | 3274976 | 16-scf00504 | 16 |
| AX-157848748 | 25 | 94.221 | KV453097.1 | 3275609 | 16-scf00504 | 16 |
| AX-158326752 | 25 | 94.224 | KV453097.1 | 3195508 | 16-scf00504 | 16 |
| AX-157745764 | 25 | 94.345 | KV453097.1 | 3199277 | 16-scf00504 | 16 |
| AX-158326755 | 25 | 94.497 | KV453097.1 | 3201154 | 16-scf00504 | 16 |
| AX-158326756 | 25 | 94.497 | KV453097.1 | 3202293 | 16-scf00504 | 16 |
| AX-158326757 | 25 | 94.497 | KV453097.1 | 3202402 | 16-scf00504 | 16 |
| AX-158326758 | 25 | 94.497 | KV453097.1 | 3202952 | 16-scf00504 | 16 |
| AX-157719924 | 25 | 94.497 | KV453097.1 | 3203585 | 16-scf00504 | 16 |
| AX-158326766 | 25 | 94.497 | KV453097.1 | 3211591 | 16-scf00504 | 16 |
| AX-158326767 | 25 | 94.497 | KV453097.1 | 3213247 | 16-scf00504 | 16 |
| AX-158326759 | 25 | 94.752 | KV453097.1 | 3203652 | 16-scf00504 | 16 |
| AX-158326763 | 25 | 94.752 | KV453097.1 | 3208947 | 16-scf00504 | 16 |
| AX-158326786 | 25 | 94.752 | KV453097.1 | 3227469 | 16-scf00504 | 16 |
| AX-158326788 | 25 | 94.752 | KV453097.1 | 3228566 | 16-scf00504 | 16 |
| AX-158326795 | 25 | 94.752 | KV453097.1 | 3236141 | 16-scf00504 | 16 |
| AX-157738888 | 25 | 94.76  | KV453097.1 | 3200644 | 16-scf00504 | 16 |
| AX-158326764 | 25 | 94.76  | KV453097.1 | 3209707 | 16-scf00504 | 16 |
| AX-158381495 | 25 | 94.76  | KV453097.1 | 3211234 | 16-scf00504 | 16 |
| AX-158326771 | 25 | 94.768 | KV453097.1 | 3214999 | 16-scf00504 | 16 |
| AX-158326772 | 25 | 94.768 | KV453097.1 | 3216680 | 16-scf00504 | 16 |
| AX-157773605 | 25 | 94.768 | KV453097.1 | 3218122 | 16-scf00504 | 16 |
| AX-158326774 | 25 | 94.768 | KV453097.1 | 3218628 | 16-scf00504 | 16 |
| AX-158326775 | 25 | 94.768 | KV453097.1 | 3218779 | 16-scf00504 | 16 |
| AX-158326777 | 25 | 94.768 | KV453097.1 | 3219813 | 16-scf00504 | 16 |
| AX-158326778 | 25 | 94.768 | KV453097.1 | 3219914 | 16-scf00504 | 16 |
| AX-158326780 | 25 | 94.831 | KV453097.1 | 3221064 | 16-scf00504 | 16 |
| AX-157848739 | 25 | 94.831 | KV453097.1 | 3233305 | 16-scf00504 | 16 |
| AX-158326783 | 25 | 94.986 | KV453097.1 | 3223608 | 16-scf00504 | 16 |

|              |    |        |            |         |             |    |
|--------------|----|--------|------------|---------|-------------|----|
| AX-157848738 | 25 | 94.986 | KV453097.1 | 3225636 | 16-scf00504 | 16 |
| AX-158326791 | 25 | 94.986 | KV453097.1 | 3230262 | 16-scf00504 | 16 |
| AX-158326793 | 25 | 94.986 | KV453097.1 | 3233830 | 16-scf00504 | 16 |
| AX-158326794 | 25 | 94.986 | KV453097.1 | 3235760 | 16-scf00504 | 16 |
| AX-157848741 | 25 | 94.986 | KV453097.1 | 3236918 | 16-scf00504 | 16 |
| AX-158418610 | 25 | 94.986 | KV453097.1 | 3238281 | 16-scf00504 | 16 |
| AX-158418611 | 25 | 94.986 | KV453097.1 | 3239059 | 16-scf00504 | 16 |
| AX-158326796 | 25 | 94.986 | KV453097.1 | 3240108 | 16-scf00504 | 16 |
| AX-158326801 | 25 | 94.986 | KV453097.1 | 3246447 | 16-scf00504 | 16 |
| AX-158326826 | 25 | 94.986 | KV453097.1 | 3290110 | 16-scf00504 | 16 |
| AX-158326804 | 25 | 95.019 | KV453097.1 | 3252000 | 16-scf00504 | 16 |
| AX-158326785 | 25 | 95.205 | KV453097.1 | 3225724 | 16-scf00504 | 16 |
| AX-158326790 | 25 | 95.205 | KV453097.1 | 3229828 | 16-scf00504 | 16 |
| AX-158326799 | 25 | 95.205 | KV453097.1 | 3242562 | 16-scf00504 | 16 |
| AX-158326805 | 25 | 95.205 | KV453097.1 | 3252948 | 16-scf00504 | 16 |
| AX-158326806 | 25 | 95.205 | KV453097.1 | 3253581 | 16-scf00504 | 16 |
| AX-157861509 | 25 | 95.205 | KV453097.1 | 3259122 | 16-scf00504 | 16 |
| AX-158326807 | 25 | 95.314 | KV453097.1 | 3255632 | 16-scf00504 | 16 |
| AX-158326808 | 25 | 95.314 | KV453097.1 | 3257776 | 16-scf00504 | 16 |
| AX-157746442 | 25 | 95.399 | KV453097.1 | 3249484 | 16-scf00504 | 16 |
| AX-157773729 | 25 | 95.399 | KV453097.1 | 3258778 | 16-scf00504 | 16 |
| AX-158326839 | 25 | 95.399 | KV453097.1 | 3313169 | 16-scf00504 | 16 |
| AX-158326810 | 25 | 95.45  | KV453097.1 | 3260721 | 16-scf00504 | 16 |
| AX-158326812 | 25 | 95.533 | KV453097.1 | 3263615 | 16-scf00504 | 16 |
| AX-158326813 | 25 | 95.533 | KV453097.1 | 3264858 | 16-scf00504 | 16 |
| AX-157716418 | 25 | 95.533 | KV453097.1 | 3267718 | 16-scf00504 | 16 |
| AX-157848745 | 25 | 95.533 | KV453097.1 | 3270030 | 16-scf00504 | 16 |
| AX-157848746 | 25 | 95.533 | KV453097.1 | 3273740 | 16-scf00504 | 16 |
| AX-158326819 | 25 | 95.533 | KV453097.1 | 3275825 | 16-scf00504 | 16 |
| AX-158326825 | 25 | 95.533 | KV453097.1 | 3285272 | 16-scf00504 | 16 |
| AX-158326828 | 25 | 95.59  | KV453097.1 | 3293256 | 16-scf00504 | 16 |
| AX-158326821 | 25 | 95.642 | KV453097.1 | 3278989 | 16-scf00504 | 16 |
| AX-158326829 | 25 | 95.642 | KV453097.1 | 3294110 | 16-scf00504 | 16 |
| AX-158326830 | 25 | 95.642 | KV453097.1 | 3295251 | 16-scf00504 | 16 |
| AX-158326831 | 25 | 95.642 | KV453097.1 | 3296863 | 16-scf00504 | 16 |
| AX-157741580 | 25 | 95.642 | KV453097.1 | 3297750 | 16-scf00504 | 16 |
| AX-158326832 | 25 | 95.642 | KV453097.1 | 3298262 | 16-scf00504 | 16 |
| AX-157861512 | 25 | 95.642 | KV453097.1 | 3299177 | 16-scf00504 | 16 |
| AX-157770982 | 25 | 95.642 | KV453097.1 | 3301527 | 16-scf00504 | 16 |
| AX-158326834 | 25 | 95.642 | KV453097.1 | 3305610 | 16-scf00504 | 16 |
| AX-158381496 | 25 | 95.642 | KV453097.1 | 3305788 | 16-scf00504 | 16 |
| AX-158326836 | 25 | 95.642 | KV453097.1 | 3308429 | 16-scf00504 | 16 |
| AX-157757495 | 25 | 95.642 | KV453097.1 | 3311094 | 16-scf00504 | 16 |
| AX-158326841 | 25 | 95.642 | KV453097.1 | 3316475 | 16-scf00504 | 16 |
| AX-158326845 | 25 | 95.642 | KV453097.1 | 3320415 | 16-scf00504 | 16 |
| AX-158326846 | 25 | 95.642 | KV453097.1 | 3320810 | 16-scf00504 | 16 |
| AX-158326856 | 25 | 95.642 | KV453097.1 | 3334472 | 16-scf00504 | 16 |
| AX-158326837 | 25 | 95.752 | KV453097.1 | 3312053 | 16-scf00504 | 16 |
| AX-158326842 | 25 | 95.752 | KV453097.1 | 3317292 | 16-scf00504 | 16 |
| AX-158326844 | 25 | 95.778 | KV453097.1 | 3319589 | 16-scf00504 | 16 |
| AX-158326849 | 25 | 95.803 | KV453097.1 | 3327543 | 16-scf00504 | 16 |

|              |    |        |            |         |             |    |
|--------------|----|--------|------------|---------|-------------|----|
| AX-158326853 | 25 | 95.814 | KV453097.1 | 3332351 | 16-scf00504 | 16 |
| AX-157751946 | 25 | 95.814 | KV453097.1 | 3351418 | 16-scf00504 | 16 |
| AX-158326871 | 25 | 95.814 | KV453097.1 | 3355946 | 16-scf00504 | 16 |
| AX-158326876 | 25 | 95.814 | KV453097.1 | 3366653 | 16-scf00504 | 16 |
| AX-158326858 | 25 | 95.834 | KV453097.1 | 3336720 | 16-scf00504 | 16 |
| AX-158326860 | 25 | 95.861 | KV453097.1 | 3341466 | 16-scf00504 | 16 |
| AX-158326862 | 25 | 95.861 | KV453097.1 | 3343185 | 16-scf00504 | 16 |
| AX-158326865 | 25 | 95.861 | KV453097.1 | 3346363 | 16-scf00504 | 16 |
| AX-157848753 | 25 | 96.04  | KV453097.1 | 3355181 | 16-scf00504 | 16 |
| AX-157848754 | 25 | 96.146 | KV453097.1 | 3359072 | 16-scf00504 | 16 |
| AX-157888459 | 25 | 96.146 | KV453097.1 | 3373062 | 16-scf00504 | 16 |
| AX-158326886 | 25 | 96.146 | KV453097.1 | 3386097 | 16-scf00504 | 16 |
| AX-158326893 | 25 | 96.146 | KV453097.1 | 3393622 | 16-scf00504 | 16 |
| AX-158326873 | 25 | 96.147 | KV453097.1 | 3362934 | 16-scf00504 | 16 |
| AX-158326874 | 25 | 96.174 | KV453097.1 | 3364637 | 16-scf00504 | 16 |
| AX-158326875 | 25 | 96.189 | KV453097.1 | 3365113 | 16-scf00504 | 16 |
| AX-158381497 | 25 | 96.209 | KV453097.1 | 3370684 | 16-scf00504 | 16 |
| AX-158326878 | 25 | 96.209 | KV453097.1 | 3370805 | 16-scf00504 | 16 |
| AX-158326879 | 25 | 96.209 | KV453097.1 | 3374409 | 16-scf00504 | 16 |
| AX-158326882 | 25 | 96.209 | KV453097.1 | 3378310 | 16-scf00504 | 16 |
| AX-158326883 | 25 | 96.209 | KV453097.1 | 3378754 | 16-scf00504 | 16 |
| AX-158326884 | 25 | 96.209 | KV453097.1 | 3380461 | 16-scf00504 | 16 |
| AX-158326885 | 25 | 96.209 | KV453097.1 | 3381356 | 16-scf00504 | 16 |
| AX-158326888 | 25 | 96.209 | KV453097.1 | 3390296 | 16-scf00504 | 16 |
| AX-158326895 | 25 | 96.209 | KV453097.1 | 3394462 | 16-scf00504 | 16 |
| AX-158326896 | 25 | 96.209 | KV453097.1 | 3396083 | 16-scf00504 | 16 |
| AX-158326898 | 25 | 96.209 | KV453097.1 | 3399831 | 16-scf00504 | 16 |
| AX-158326907 | 25 | 96.209 | KV453097.1 | 3414952 | 16-scf00504 | 16 |
| AX-158326904 | 25 | 96.621 | KV453097.1 | 3406521 | 16-scf00504 | 16 |
| AX-157741414 | 25 | 96.623 | KV453097.1 | 3409616 | 16-scf00504 | 16 |
| AX-158326905 | 25 | 96.625 | KV453097.1 | 3411254 | 16-scf00504 | 16 |
| AX-157848755 | 25 | 96.833 | KV453097.1 | 3422417 | 16-scf00504 | 16 |
| AX-158326912 | 25 | 96.833 | KV453097.1 | 3422882 | 16-scf00504 | 16 |
| AX-158326913 | 25 | 96.833 | KV453097.1 | 3423155 | 16-scf00504 | 16 |
| AX-158326914 | 25 | 96.833 | KV453097.1 | 3423631 | 16-scf00504 | 16 |
| AX-158326916 | 25 | 96.833 | KV453097.1 | 3425126 | 16-scf00504 | 16 |
| AX-158326918 | 25 | 96.833 | KV453097.1 | 3426656 | 16-scf00504 | 16 |
| AX-158326919 | 25 | 96.833 | KV453097.1 | 3429938 | 16-scf00504 | 16 |
| AX-158326938 | 25 | 96.833 | KV453097.1 | 3459237 | 16-scf00504 | 16 |
| AX-158326949 | 25 | 96.833 | KV453097.1 | 3477746 | 16-scf00504 | 16 |
| AX-158326923 | 25 | 97.246 | KV453097.1 | 3434261 | 16-scf00504 | 16 |
| AX-158326924 | 25 | 97.248 | KV453097.1 | 3434973 | 16-scf00504 | 16 |
| AX-158326926 | 25 | 97.248 | KV453097.1 | 3438936 | 16-scf00504 | 16 |
| AX-158326934 | 25 | 97.248 | KV453097.1 | 3449666 | 16-scf00504 | 16 |
| AX-158326935 | 25 | 97.248 | KV453097.1 | 3450526 | 16-scf00504 | 16 |
| AX-158326937 | 25 | 97.577 | KV453097.1 | 3458773 | 16-scf00504 | 16 |
| AX-158326954 | 25 | 97.772 | KV453097.1 | 3488019 | 16-scf00504 | 16 |
| AX-158326989 | 25 | 97.772 | KV453097.1 | 3541169 | 16-scf00504 | 16 |
| AX-158326955 | 25 | 97.82  | KV453097.1 | 3490579 | 16-scf00504 | 16 |
| AX-158326956 | 25 | 97.82  | KV453097.1 | 3491415 | 16-scf00504 | 16 |
| AX-158326957 | 25 | 97.82  | KV453097.1 | 3492573 | 16-scf00504 | 16 |

|              |    |        |            |         |             |    |
|--------------|----|--------|------------|---------|-------------|----|
| AX-158326959 | 25 | 97.82  | KV453097.1 | 3494683 | 16-scf00504 | 16 |
| AX-157748249 | 25 | 97.82  | KV453097.1 | 3495205 | 16-scf00504 | 16 |
| AX-158326961 | 25 | 97.82  | KV453097.1 | 3500340 | 16-scf00504 | 16 |
| AX-158326998 | 25 | 97.82  | KV453097.1 | 3552288 | 16-scf00504 | 16 |
| AX-158326943 | 25 | 98.051 | KV453097.1 | 3467300 | 16-scf00504 | 16 |
| AX-158326944 | 25 | 98.051 | KV453097.1 | 3468304 | 16-scf00504 | 16 |
| AX-158418617 | 25 | 98.051 | KV453097.1 | 3507753 | 16-scf00504 | 16 |
| AX-158326966 | 25 | 98.051 | KV453097.1 | 3510320 | 16-scf00504 | 16 |
| AX-158326967 | 25 | 98.051 | KV453097.1 | 3511611 | 16-scf00504 | 16 |
| AX-158326968 | 25 | 98.051 | KV453097.1 | 3511870 | 16-scf00504 | 16 |
| AX-158326969 | 25 | 98.051 | KV453097.1 | 3517016 | 16-scf00504 | 16 |
| AX-157708365 | 25 | 98.051 | KV453097.1 | 3519866 | 16-scf00504 | 16 |
| AX-158326973 | 25 | 98.051 | KV453097.1 | 3520779 | 16-scf00504 | 16 |
| AX-158326983 | 25 | 98.484 | KV453097.1 | 3532533 | 16-scf00504 | 16 |
| AX-158326985 | 25 | 98.484 | KV453097.1 | 3533247 | 16-scf00504 | 16 |
| AX-158326987 | 25 | 98.484 | KV453097.1 | 3536539 | 16-scf00504 | 16 |
| AX-157725732 | 25 | 98.484 | KV453097.1 | 3536961 | 16-scf00504 | 16 |
| AX-158326988 | 25 | 98.484 | KV453097.1 | 3540884 | 16-scf00504 | 16 |
| AX-157754152 | 25 | 98.484 | KV453097.1 | 3542694 | 16-scf00504 | 16 |
| AX-158326993 | 25 | 98.487 | KV453097.1 | 3545911 | 16-scf00504 | 16 |
| AX-157707936 | 25 | 98.487 | KV453097.1 | 3548097 | 16-scf00504 | 16 |
| AX-158326995 | 25 | 98.49  | KV453097.1 | 3550014 | 16-scf00504 | 16 |
| AX-158326997 | 25 | 98.85  | KV453097.1 | 3551354 | 16-scf00504 | 16 |
| AX-158327004 | 25 | 98.85  | KV453097.1 | 3562242 | 16-scf00504 | 16 |
| AX-158327014 | 25 | 98.85  | KV453097.1 | 3585394 | 16-scf00504 | 16 |
| AX-158327023 | 25 | 98.85  | KV453097.1 | 3595114 | 16-scf00504 | 16 |
| AX-158326986 | 25 | 98.851 | KV453097.1 | 3535384 | 16-scf00504 | 16 |
| AX-158327007 | 25 | 98.851 | KV453097.1 | 3569099 | 16-scf00504 | 16 |
| AX-158327008 | 25 | 98.851 | KV453097.1 | 3569497 | 16-scf00504 | 16 |
| AX-157754243 | 25 | 98.851 | KV453097.1 | 3578050 | 16-scf00504 | 16 |
| AX-158327010 | 25 | 98.851 | KV453097.1 | 3581039 | 16-scf00504 | 16 |
| AX-158327011 | 25 | 98.851 | KV453097.1 | 3581816 | 16-scf00504 | 16 |
| AX-158327018 | 25 | 98.851 | KV453097.1 | 3589167 | 16-scf00504 | 16 |
| AX-158327202 | 25 | 98.851 | KV453097.1 | 3848690 | 16-scf00504 | 16 |
| AX-158327028 | 25 | 99.034 | KV453097.1 | 3600517 | 16-scf00504 | 16 |
| AX-158327029 | 25 | 99.034 | KV453097.1 | 3601135 | 16-scf00504 | 16 |
| AX-158327030 | 25 | 99.143 | KV453097.1 | 3601759 | 16-scf00504 | 16 |
| AX-157861515 | 25 | 99.143 | KV453097.1 | 3608766 | 16-scf00504 | 16 |
| AX-158327038 | 25 | 99.143 | KV453097.1 | 3610945 | 16-scf00504 | 16 |
| AX-158327076 | 25 | 99.143 | KV453097.1 | 3655501 | 16-scf00504 | 16 |
| AX-158327094 | 25 | 99.143 | KV453097.1 | 3687856 | 16-scf00504 | 16 |
| AX-157873637 | 25 | 99.143 | KV453097.1 | 3697399 | 16-scf00504 | 16 |
| AX-158327204 | 25 | 99.143 | KV453097.1 | 3852435 | 16-scf00504 | 16 |
| AX-157751299 | 25 | 99.143 | KV453097.1 | 3868560 | 16-scf00504 | 16 |
| AX-158327225 | 25 | 99.143 | KV453097.1 | 3883868 | 16-scf00504 | 16 |
| AX-158327252 | 25 | 99.143 | KV453097.1 | 3912597 | 16-scf00504 | 16 |
| AX-158327265 | 25 | 99.143 | KV453097.1 | 3925765 | 16-scf00504 | 16 |
| AX-157748699 | 25 | 99.143 | KV453097.1 | 3935971 | 16-scf00504 | 16 |
| AX-158327277 | 25 | 99.143 | KV453097.1 | 3948264 | 16-scf00504 | 16 |
| AX-158327280 | 25 | 99.143 | KV453097.1 | 3958350 | 16-scf00504 | 16 |
| AX-158327289 | 25 | 99.143 | KV453097.1 | 3974645 | 16-scf00504 | 16 |

|              |    |        |            |         |             |    |
|--------------|----|--------|------------|---------|-------------|----|
| AX-158327294 | 25 | 99.143 | KV453097.1 | 3982541 | 16-scf00504 | 16 |
| AX-158327384 | 25 | 99.143 | KV453097.1 | 4086968 | 16-scf00504 | 16 |
| AX-157756927 | 25 | 99.143 | KV453097.1 | 4134434 | 16-scf00504 | 16 |
| AX-158327470 | 25 | 99.143 | KV453097.1 | 4182363 | 16-scf00504 | 16 |
| AX-157723106 | 25 | 99.143 | KV453097.1 | 4207555 | 16-scf00504 | 16 |
| AX-158327519 | 25 | 99.143 | KV453097.1 | 4243569 | 16-scf00504 | 16 |
| AX-158327520 | 25 | 99.143 | KV453097.1 | 4244074 | 16-scf00504 | 16 |
| AX-158327544 | 25 | 99.143 | KV453097.1 | 4271054 | 16-scf00504 | 16 |
| AX-158327546 | 25 | 99.143 | KV453097.1 | 4272581 | 16-scf00504 | 16 |
| AX-158327632 | 25 | 99.143 | KV453097.1 | 4400834 | 16-scf00504 | 16 |
| AX-158327634 | 25 | 99.143 | KV453097.1 | 4402493 | 16-scf00504 | 16 |
| AX-157848813 | 25 | 99.143 | KV453097.1 | 4456879 | 16-scf00504 | 16 |
| AX-158327039 | 25 | 99.146 | KV453097.1 | 3612776 | 16-scf00504 | 16 |
| AX-157888462 | 25 | 99.148 | KV453097.1 | 3615113 | 16-scf00504 | 16 |
| AX-158316715 | 25 | 99.153 | KV453089.1 | 3539330 | 16-scf00496 | 16 |
| AX-158327047 | 25 | 99.469 | KV453097.1 | 3623484 | 16-scf00504 | 16 |
| AX-158327127 | 25 | 99.469 | KV453097.1 | 3726301 | 16-scf00504 | 16 |
| AX-158327195 | 25 | 99.469 | KV453097.1 | 3835732 | 16-scf00504 | 16 |
| AX-158327258 | 25 | 99.469 | KV453097.1 | 3917312 | 16-scf00504 | 16 |
| AX-157720895 | 25 | 99.469 | KV453097.1 | 3980280 | 16-scf00504 | 16 |
| AX-158327050 | 25 | 99.471 | KV453097.1 | 3627720 | 16-scf00504 | 16 |
| AX-158327052 | 25 | 99.471 | KV453097.1 | 3628845 | 16-scf00504 | 16 |
| AX-158327053 | 25 | 99.471 | KV453097.1 | 3629155 | 16-scf00504 | 16 |
| AX-158327055 | 25 | 99.516 | KV453097.1 | 3629948 | 16-scf00504 | 16 |
| AX-158327057 | 25 | 99.534 | KV453097.1 | 3631618 | 16-scf00504 | 16 |
| AX-158327062 | 25 | 99.58  | KV453097.1 | 3636251 | 16-scf00504 | 16 |
| AX-158327068 | 25 | 99.58  | KV453097.1 | 3645495 | 16-scf00504 | 16 |
| AX-158327069 | 25 | 99.58  | KV453097.1 | 3650029 | 16-scf00504 | 16 |
| AX-158327071 | 25 | 99.58  | KV453097.1 | 3652636 | 16-scf00504 | 16 |
| AX-158327078 | 25 | 99.58  | KV453097.1 | 3656835 | 16-scf00504 | 16 |
| AX-157848760 | 25 | 99.58  | KV453097.1 | 3663953 | 16-scf00504 | 16 |
| AX-157848763 | 25 | 99.58  | KV453097.1 | 3667119 | 16-scf00504 | 16 |
| AX-157739038 | 25 | 99.58  | KV453097.1 | 3667294 | 16-scf00504 | 16 |
| AX-157715476 | 25 | 99.58  | KV453097.1 | 3669569 | 16-scf00504 | 16 |
| AX-158327087 | 25 | 99.58  | KV453097.1 | 3679232 | 16-scf00504 | 16 |
| AX-158327088 | 25 | 99.58  | KV453097.1 | 3679922 | 16-scf00504 | 16 |
| AX-157755428 | 25 | 99.58  | KV453097.1 | 3680643 | 16-scf00504 | 16 |
| AX-158327089 | 25 | 99.58  | KV453097.1 | 3682143 | 16-scf00504 | 16 |
| AX-158327090 | 25 | 99.58  | KV453097.1 | 3684323 | 16-scf00504 | 16 |
| AX-158327091 | 25 | 99.58  | KV453097.1 | 3685693 | 16-scf00504 | 16 |
| AX-158327092 | 25 | 99.58  | KV453097.1 | 3686159 | 16-scf00504 | 16 |
| AX-158327095 | 25 | 99.58  | KV453097.1 | 3688361 | 16-scf00504 | 16 |
| AX-158327096 | 25 | 99.58  | KV453097.1 | 3688859 | 16-scf00504 | 16 |
| AX-158327099 | 25 | 99.58  | KV453097.1 | 3691440 | 16-scf00504 | 16 |
| AX-158327101 | 25 | 99.58  | KV453097.1 | 3693007 | 16-scf00504 | 16 |
| AX-158327102 | 25 | 99.58  | KV453097.1 | 3694273 | 16-scf00504 | 16 |
| AX-158327103 | 25 | 99.58  | KV453097.1 | 3695353 | 16-scf00504 | 16 |
| AX-158327105 | 25 | 99.58  | KV453097.1 | 3696876 | 16-scf00504 | 16 |
| AX-158418622 | 25 | 99.58  | KV453097.1 | 3971332 | 16-scf00504 | 16 |
| AX-158327110 | 25 | 99.689 | KV453097.1 | 3703058 | 16-scf00504 | 16 |
| AX-158327111 | 25 | 99.689 | KV453097.1 | 3704647 | 16-scf00504 | 16 |

|              |    |         |            |         |             |    |
|--------------|----|---------|------------|---------|-------------|----|
| AX-158327206 | 25 | 99.689  | KV453097.1 | 3856424 | 16-scf00504 | 16 |
| AX-158327116 | 25 | 99.704  | KV453097.1 | 3710902 | 16-scf00504 | 16 |
| AX-157743843 | 25 | 99.704  | KV453097.1 | 3749538 | 16-scf00504 | 16 |
| AX-158327283 | 25 | 99.704  | KV453097.1 | 3965317 | 16-scf00504 | 16 |
| AX-158327334 | 25 | 99.704  | KV453097.1 | 4022325 | 16-scf00504 | 16 |
| AX-158327336 | 25 | 99.704  | KV453097.1 | 4025342 | 16-scf00504 | 16 |
| AX-158327496 | 25 | 99.704  | KV453097.1 | 4220103 | 16-scf00504 | 16 |
| AX-158327593 | 25 | 99.704  | KV453097.1 | 4353331 | 16-scf00504 | 16 |
| AX-158327122 | 25 | 99.725  | KV453097.1 | 3719348 | 16-scf00504 | 16 |
| AX-158327123 | 25 | 99.725  | KV453097.1 | 3719848 | 16-scf00504 | 16 |
| AX-157848768 | 25 | 99.741  | KV453097.1 | 3720224 | 16-scf00504 | 16 |
| AX-158327081 | 25 | 99.769  | KV453097.1 | 3672459 | 16-scf00504 | 16 |
| AX-158327124 | 25 | 99.769  | KV453097.1 | 3721509 | 16-scf00504 | 16 |
| AX-158327128 | 25 | 99.779  | KV453097.1 | 3727543 | 16-scf00504 | 16 |
| AX-158327130 | 25 | 99.779  | KV453097.1 | 3728797 | 16-scf00504 | 16 |
| AX-157775272 | 25 | 99.779  | KV453097.1 | 3741404 | 16-scf00504 | 16 |
| AX-158327134 | 25 | 99.798  | KV453097.1 | 3732416 | 16-scf00504 | 16 |
| AX-158327137 | 25 | 99.798  | KV453097.1 | 3735973 | 16-scf00504 | 16 |
| AX-158327140 | 25 | 99.798  | KV453097.1 | 3737614 | 16-scf00504 | 16 |
| AX-158327144 | 25 | 99.908  | KV453097.1 | 3744520 | 16-scf00504 | 16 |
| AX-158327145 | 25 | 100.017 | KV453097.1 | 3745292 | 16-scf00504 | 16 |
| AX-158327146 | 25 | 100.017 | KV453097.1 | 3746067 | 16-scf00504 | 16 |
| AX-157848770 | 25 | 100.017 | KV453097.1 | 3751365 | 16-scf00504 | 16 |
| AX-157756384 | 25 | 100.017 | KV453097.1 | 3758748 | 16-scf00504 | 16 |
| AX-158327156 | 25 | 100.017 | KV453097.1 | 3764995 | 16-scf00504 | 16 |
| AX-158327163 | 25 | 100.235 | KV453097.1 | 3782372 | 16-scf00504 | 16 |
| AX-157861517 | 25 | 100.235 | KV453097.1 | 3782928 | 16-scf00504 | 16 |
| AX-158327164 | 25 | 100.235 | KV453097.1 | 3783549 | 16-scf00504 | 16 |
| AX-158327167 | 25 | 100.235 | KV453097.1 | 3784793 | 16-scf00504 | 16 |
| AX-157848773 | 25 | 100.235 | KV453097.1 | 3794714 | 16-scf00504 | 16 |
| AX-157751268 | 25 | 100.235 | KV453097.1 | 3796126 | 16-scf00504 | 16 |
| AX-157848776 | 25 | 100.235 | KV453097.1 | 3796641 | 16-scf00504 | 16 |
| AX-158327171 | 25 | 100.235 | KV453097.1 | 3802395 | 16-scf00504 | 16 |
| AX-158327173 | 25 | 100.235 | KV453097.1 | 3805234 | 16-scf00504 | 16 |
| AX-158327176 | 25 | 100.235 | KV453097.1 | 3814972 | 16-scf00504 | 16 |
| AX-157717451 | 25 | 100.235 | KV453097.1 | 3815718 | 16-scf00504 | 16 |
| AX-158327181 | 25 | 100.235 | KV453097.1 | 3819937 | 16-scf00504 | 16 |
| AX-158327214 | 25 | 100.235 | KV453097.1 | 3867143 | 16-scf00504 | 16 |
| AX-158327215 | 25 | 100.235 | KV453097.1 | 3867894 | 16-scf00504 | 16 |
| AX-158327223 | 25 | 100.235 | KV453097.1 | 3882435 | 16-scf00504 | 16 |
| AX-158327239 | 25 | 100.235 | KV453097.1 | 3897852 | 16-scf00504 | 16 |
| AX-158327159 | 25 | 100.237 | KV453097.1 | 3774861 | 16-scf00504 | 16 |
| AX-157848780 | 25 | 100.237 | KV453097.1 | 3816248 | 16-scf00504 | 16 |
| AX-158327177 | 25 | 100.237 | KV453097.1 | 3817014 | 16-scf00504 | 16 |
| AX-158327207 | 25 | 100.237 | KV453097.1 | 3857395 | 16-scf00504 | 16 |
| AX-157695765 | 25 | 100.237 | KV453097.1 | 3894781 | 16-scf00504 | 16 |
| AX-158327243 | 25 | 100.237 | KV453097.1 | 3900960 | 16-scf00504 | 16 |
| AX-158327185 | 25 | 100.239 | KV453097.1 | 3827950 | 16-scf00504 | 16 |
| AX-157725927 | 25 | 100.239 | KV453097.1 | 3964063 | 16-scf00504 | 16 |
| AX-158327188 | 25 | 100.24  | KV453097.1 | 3829867 | 16-scf00504 | 16 |
| AX-158327192 | 25 | 100.241 | KV453097.1 | 3831279 | 16-scf00504 | 16 |



|              |    |         |            |         |             |    |
|--------------|----|---------|------------|---------|-------------|----|
| AX-158327193 | 25 | 100.244 | KV453097.1 | 3833680 | 16-scf00504 | 16 |
| AX-158327197 | 25 | 100.249 | KV453097.1 | 3837633 | 16-scf00504 | 16 |
| AX-158327321 | 25 | 100.249 | KV453097.1 | 4008498 | 16-scf00504 | 16 |
| AX-158327600 | 25 | 100.249 | KV453097.1 | 4359573 | 16-scf00504 | 16 |
| AX-158327605 | 25 | 100.249 | KV453097.1 | 4362091 | 16-scf00504 | 16 |
| AX-158327711 | 25 | 100.249 | KV453097.1 | 4510065 | 16-scf00504 | 16 |
| AX-157755557 | 25 | 100.251 | KV453097.1 | 3814714 | 16-scf00504 | 16 |
| AX-158327201 | 25 | 100.251 | KV453097.1 | 3846859 | 16-scf00504 | 16 |
| AX-158327210 | 25 | 100.253 | KV453097.1 | 3859390 | 16-scf00504 | 16 |
| AX-158327212 | 25 | 100.253 | KV453097.1 | 3861373 | 16-scf00504 | 16 |
| AX-158327222 | 25 | 100.253 | KV453097.1 | 3880594 | 16-scf00504 | 16 |
| AX-157861518 | 25 | 100.257 | KV453097.1 | 3868210 | 16-scf00504 | 16 |
| AX-158327218 | 25 | 100.26  | KV453097.1 | 3876005 | 16-scf00504 | 16 |
| AX-158327219 | 25 | 100.262 | KV453097.1 | 3876448 | 16-scf00504 | 16 |
| AX-157848787 | 25 | 100.264 | KV453097.1 | 3881147 | 16-scf00504 | 16 |
| AX-158327228 | 25 | 100.302 | KV453097.1 | 3886552 | 16-scf00504 | 16 |
| AX-158327231 | 25 | 100.304 | KV453097.1 | 3890096 | 16-scf00504 | 16 |
| AX-158327246 | 25 | 100.345 | KV453097.1 | 3904522 | 16-scf00504 | 16 |
| AX-158327198 | 25 | 100.454 | KV453097.1 | 3840178 | 16-scf00504 | 16 |
| AX-158327248 | 25 | 100.454 | KV453097.1 | 3907461 | 16-scf00504 | 16 |
| AX-158327250 | 25 | 100.454 | KV453097.1 | 3909320 | 16-scf00504 | 16 |
| AX-158327255 | 25 | 100.454 | KV453097.1 | 3915887 | 16-scf00504 | 16 |
| AX-158327257 | 25 | 100.454 | KV453097.1 | 3916842 | 16-scf00504 | 16 |
| AX-158327262 | 25 | 100.454 | KV453097.1 | 3921985 | 16-scf00504 | 16 |
| AX-157717328 | 25 | 100.454 | KV453097.1 | 3927083 | 16-scf00504 | 16 |
| AX-157756657 | 25 | 100.454 | KV453097.1 | 3931386 | 16-scf00504 | 16 |
| AX-157744248 | 25 | 100.454 | KV453097.1 | 3931920 | 16-scf00504 | 16 |
| AX-158327744 | 25 | 100.454 | KV453097.1 | 4609378 | 16-scf00504 | 16 |
| AX-158327268 | 25 | 100.564 | KV453097.1 | 3934969 | 16-scf00504 | 16 |
| AX-158327271 | 25 | 100.564 | KV453097.1 | 3939907 | 16-scf00504 | 16 |
| AX-158327272 | 25 | 100.673 | KV453097.1 | 3942213 | 16-scf00504 | 16 |
| AX-157848790 | 25 | 100.673 | KV453097.1 | 3944656 | 16-scf00504 | 16 |
| AX-158327274 | 25 | 100.673 | KV453097.1 | 3945072 | 16-scf00504 | 16 |
| AX-158327276 | 25 | 100.673 | KV453097.1 | 3947535 | 16-scf00504 | 16 |
| AX-158327278 | 25 | 100.673 | KV453097.1 | 3957135 | 16-scf00504 | 16 |
| AX-158327279 | 25 | 100.673 | KV453097.1 | 3957522 | 16-scf00504 | 16 |
| AX-157716121 | 25 | 100.673 | KV453097.1 | 3960627 | 16-scf00504 | 16 |
| AX-158327282 | 25 | 100.673 | KV453097.1 | 3964714 | 16-scf00504 | 16 |
| AX-158327284 | 25 | 100.673 | KV453097.1 | 3966220 | 16-scf00504 | 16 |
| AX-158327285 | 25 | 100.673 | KV453097.1 | 3966955 | 16-scf00504 | 16 |
| AX-158327287 | 25 | 100.673 | KV453097.1 | 3969267 | 16-scf00504 | 16 |
| AX-158327359 | 25 | 100.673 | KV453097.1 | 4059200 | 16-scf00504 | 16 |
| AX-158327063 | 25 | 100.782 | KV453097.1 | 3636472 | 16-scf00504 | 16 |
| AX-158327220 | 25 | 100.782 | KV453097.1 | 3876872 | 16-scf00504 | 16 |
| AX-158327290 | 25 | 100.782 | KV453097.1 | 3976186 | 16-scf00504 | 16 |
| AX-158327291 | 25 | 100.782 | KV453097.1 | 3977775 | 16-scf00504 | 16 |
| AX-158327292 | 25 | 100.782 | KV453097.1 | 3981236 | 16-scf00504 | 16 |
| AX-158327298 | 25 | 100.782 | KV453097.1 | 3984960 | 16-scf00504 | 16 |
| AX-158327299 | 25 | 100.782 | KV453097.1 | 3986889 | 16-scf00504 | 16 |
| AX-158327300 | 25 | 100.782 | KV453097.1 | 3990396 | 16-scf00504 | 16 |
| AX-158327301 | 25 | 100.782 | KV453097.1 | 3991154 | 16-scf00504 | 16 |

|              |    |         |            |         |             |    |
|--------------|----|---------|------------|---------|-------------|----|
| AX-158327302 | 25 | 100.782 | KV453097.1 | 3992948 | 16-scf00504 | 16 |
| AX-158327303 | 25 | 100.782 | KV453097.1 | 3993700 | 16-scf00504 | 16 |
| AX-158327304 | 25 | 100.782 | KV453097.1 | 3994338 | 16-scf00504 | 16 |
| AX-158327320 | 25 | 100.782 | KV453097.1 | 4008059 | 16-scf00504 | 16 |
| AX-157722996 | 25 | 100.782 | KV453097.1 | 4218353 | 16-scf00504 | 16 |
| AX-158327561 | 25 | 100.782 | KV453097.1 | 4297757 | 16-scf00504 | 16 |
| AX-158327624 | 25 | 100.782 | KV453097.1 | 4390314 | 16-scf00504 | 16 |
| AX-158327625 | 25 | 100.782 | KV453097.1 | 4391025 | 16-scf00504 | 16 |
| AX-157756832 | 25 | 100.782 | KV453097.1 | 4391565 | 16-scf00504 | 16 |
| AX-157848806 | 25 | 100.782 | KV453097.1 | 4401570 | 16-scf00504 | 16 |
| AX-157774995 | 25 | 100.782 | KV453097.1 | 4408105 | 16-scf00504 | 16 |
| AX-158327637 | 25 | 100.782 | KV453097.1 | 4410295 | 16-scf00504 | 16 |
| AX-158327305 | 25 | 100.891 | KV453097.1 | 3995089 | 16-scf00504 | 16 |
| AX-158327061 | 25 | 101.001 | KV453097.1 | 3636040 | 16-scf00504 | 16 |
| AX-158327066 | 25 | 101.001 | KV453097.1 | 3640069 | 16-scf00504 | 16 |
| AX-158327086 | 25 | 101.001 | KV453097.1 | 3678747 | 16-scf00504 | 16 |
| AX-158327147 | 25 | 101.001 | KV453097.1 | 3746754 | 16-scf00504 | 16 |
| AX-158327307 | 25 | 101.001 | KV453097.1 | 3996977 | 16-scf00504 | 16 |
| AX-158327310 | 25 | 101.001 | KV453097.1 | 3998364 | 16-scf00504 | 16 |
| AX-158327313 | 25 | 101.001 | KV453097.1 | 4002410 | 16-scf00504 | 16 |
| AX-158327317 | 25 | 101.001 | KV453097.1 | 4005042 | 16-scf00504 | 16 |
| AX-158327326 | 25 | 101.001 | KV453097.1 | 4014443 | 16-scf00504 | 16 |
| AX-158327331 | 25 | 101.001 | KV453097.1 | 4018163 | 16-scf00504 | 16 |
| AX-158327333 | 25 | 101.001 | KV453097.1 | 4021901 | 16-scf00504 | 16 |
| AX-158327341 | 25 | 101.001 | KV453097.1 | 4030569 | 16-scf00504 | 16 |
| AX-157718963 | 25 | 101.001 | KV453097.1 | 4031176 | 16-scf00504 | 16 |
| AX-158327342 | 25 | 101.001 | KV453097.1 | 4032222 | 16-scf00504 | 16 |
| AX-158327343 | 25 | 101.001 | KV453097.1 | 4033720 | 16-scf00504 | 16 |
| AX-158327346 | 25 | 101.001 | KV453097.1 | 4039974 | 16-scf00504 | 16 |
| AX-158327347 | 25 | 101.001 | KV453097.1 | 4040627 | 16-scf00504 | 16 |
| AX-158327348 | 25 | 101.001 | KV453097.1 | 4041246 | 16-scf00504 | 16 |
| AX-158327353 | 25 | 101.001 | KV453097.1 | 4048021 | 16-scf00504 | 16 |
| AX-158327356 | 25 | 101.001 | KV453097.1 | 4055294 | 16-scf00504 | 16 |
| AX-158327358 | 25 | 101.001 | KV453097.1 | 4057689 | 16-scf00504 | 16 |
| AX-158327362 | 25 | 101.001 | KV453097.1 | 4062663 | 16-scf00504 | 16 |
| AX-158327367 | 25 | 101.001 | KV453097.1 | 4066950 | 16-scf00504 | 16 |
| AX-158327371 | 25 | 101.001 | KV453097.1 | 4071608 | 16-scf00504 | 16 |
| AX-158327385 | 25 | 101.001 | KV453097.1 | 4087631 | 16-scf00504 | 16 |
| AX-158327387 | 25 | 101.001 | KV453097.1 | 4091186 | 16-scf00504 | 16 |
| AX-157741913 | 25 | 101.001 | KV453097.1 | 4094857 | 16-scf00504 | 16 |
| AX-158327392 | 25 | 101.001 | KV453097.1 | 4098772 | 16-scf00504 | 16 |
| AX-158327395 | 25 | 101.001 | KV453097.1 | 4101444 | 16-scf00504 | 16 |
| AX-158327396 | 25 | 101.001 | KV453097.1 | 4102076 | 16-scf00504 | 16 |
| AX-158327399 | 25 | 101.001 | KV453097.1 | 4104529 | 16-scf00504 | 16 |
| AX-158327406 | 25 | 101.001 | KV453097.1 | 4113048 | 16-scf00504 | 16 |
| AX-158327407 | 25 | 101.001 | KV453097.1 | 4114006 | 16-scf00504 | 16 |
| AX-157888466 | 25 | 101.001 | KV453097.1 | 4115155 | 16-scf00504 | 16 |
| AX-158327411 | 25 | 101.001 | KV453097.1 | 4119174 | 16-scf00504 | 16 |
| AX-158327418 | 25 | 101.001 | KV453097.1 | 4126161 | 16-scf00504 | 16 |
| AX-157772182 | 25 | 101.001 | KV453097.1 | 4129718 | 16-scf00504 | 16 |
| AX-158327421 | 25 | 101.001 | KV453097.1 | 4132067 | 16-scf00504 | 16 |

|              |    |         |            |         |             |    |
|--------------|----|---------|------------|---------|-------------|----|
| AX-158327422 | 25 | 101.001 | KV453097.1 | 4133383 | 16-scf00504 | 16 |
| AX-158327426 | 25 | 101.001 | KV453097.1 | 4136385 | 16-scf00504 | 16 |
| AX-158327429 | 25 | 101.001 | KV453097.1 | 4138110 | 16-scf00504 | 16 |
| AX-158327437 | 25 | 101.001 | KV453097.1 | 4150377 | 16-scf00504 | 16 |
| AX-158327443 | 25 | 101.001 | KV453097.1 | 4157226 | 16-scf00504 | 16 |
| AX-158327448 | 25 | 101.001 | KV453097.1 | 4161098 | 16-scf00504 | 16 |
| AX-157723158 | 25 | 101.001 | KV453097.1 | 4163404 | 16-scf00504 | 16 |
| AX-158327452 | 25 | 101.001 | KV453097.1 | 4165001 | 16-scf00504 | 16 |
| AX-158327455 | 25 | 101.001 | KV453097.1 | 4166987 | 16-scf00504 | 16 |
| AX-158327458 | 25 | 101.001 | KV453097.1 | 4169465 | 16-scf00504 | 16 |
| AX-157867903 | 25 | 101.001 | KV453097.1 | 4170162 | 16-scf00504 | 16 |
| AX-158327462 | 25 | 101.001 | KV453097.1 | 4173413 | 16-scf00504 | 16 |
| AX-158327463 | 25 | 101.001 | KV453097.1 | 4174194 | 16-scf00504 | 16 |
| AX-158327465 | 25 | 101.001 | KV453097.1 | 4177100 | 16-scf00504 | 16 |
| AX-158327468 | 25 | 101.001 | KV453097.1 | 4180382 | 16-scf00504 | 16 |
| AX-158327474 | 25 | 101.001 | KV453097.1 | 4187098 | 16-scf00504 | 16 |
| AX-158327476 | 25 | 101.001 | KV453097.1 | 4192603 | 16-scf00504 | 16 |
| AX-158327494 | 25 | 101.001 | KV453097.1 | 4218711 | 16-scf00504 | 16 |
| AX-158327504 | 25 | 101.001 | KV453097.1 | 4229152 | 16-scf00504 | 16 |
| AX-158327536 | 25 | 101.001 | KV453097.1 | 4261758 | 16-scf00504 | 16 |
| AX-158327542 | 25 | 101.001 | KV453097.1 | 4269296 | 16-scf00504 | 16 |
| AX-158327557 | 25 | 101.001 | KV453097.1 | 4293501 | 16-scf00504 | 16 |
| AX-158327633 | 25 | 101.001 | KV453097.1 | 4401331 | 16-scf00504 | 16 |
| AX-157848809 | 25 | 101.001 | KV453097.1 | 4420139 | 16-scf00504 | 16 |
| AX-158327643 | 25 | 101.001 | KV453097.1 | 4424285 | 16-scf00504 | 16 |
| AX-158327647 | 25 | 101.001 | KV453097.1 | 4426537 | 16-scf00504 | 16 |
| AX-158327652 | 25 | 101.001 | KV453097.1 | 4432730 | 16-scf00504 | 16 |
| AX-158327481 | 25 | 101.11  | KV453097.1 | 4200124 | 16-scf00504 | 16 |
| AX-158327484 | 25 | 101.11  | KV453097.1 | 4204316 | 16-scf00504 | 16 |
| AX-158327485 | 25 | 101.11  | KV453097.1 | 4206121 | 16-scf00504 | 16 |
| AX-158327488 | 25 | 101.11  | KV453097.1 | 4208937 | 16-scf00504 | 16 |
| AX-158327489 | 25 | 101.11  | KV453097.1 | 4210081 | 16-scf00504 | 16 |
| AX-157738539 | 25 | 101.219 | KV453097.1 | 3526729 | 16-scf00504 | 16 |
| AX-157775735 | 25 | 101.219 | KV453097.1 | 4213830 | 16-scf00504 | 16 |
| AX-158327492 | 25 | 101.219 | KV453097.1 | 4216175 | 16-scf00504 | 16 |
| AX-158327493 | 25 | 101.219 | KV453097.1 | 4217037 | 16-scf00504 | 16 |
| AX-158327495 | 25 | 101.219 | KV453097.1 | 4219456 | 16-scf00504 | 16 |
| AX-158327497 | 25 | 101.219 | KV453097.1 | 4220353 | 16-scf00504 | 16 |
| AX-158327499 | 25 | 101.219 | KV453097.1 | 4221724 | 16-scf00504 | 16 |
| AX-158327501 | 25 | 101.219 | KV453097.1 | 4222882 | 16-scf00504 | 16 |
| AX-158327502 | 25 | 101.219 | KV453097.1 | 4225872 | 16-scf00504 | 16 |
| AX-158327503 | 25 | 101.219 | KV453097.1 | 4226535 | 16-scf00504 | 16 |
| AX-158327507 | 25 | 101.219 | KV453097.1 | 4232806 | 16-scf00504 | 16 |
| AX-158327510 | 25 | 101.219 | KV453097.1 | 4236008 | 16-scf00504 | 16 |
| AX-158327516 | 25 | 101.219 | KV453097.1 | 4241246 | 16-scf00504 | 16 |
| AX-157745937 | 25 | 101.219 | KV453097.1 | 4246192 | 16-scf00504 | 16 |
| AX-158327525 | 25 | 101.219 | KV453097.1 | 4248491 | 16-scf00504 | 16 |
| AX-158327529 | 25 | 101.219 | KV453097.1 | 4252500 | 16-scf00504 | 16 |
| AX-158327530 | 25 | 101.219 | KV453097.1 | 4253218 | 16-scf00504 | 16 |
| AX-158327531 | 25 | 101.219 | KV453097.1 | 4253652 | 16-scf00504 | 16 |
| AX-157718894 | 25 | 101.219 | KV453097.1 | 4256044 | 16-scf00504 | 16 |

|              |    |         |            |         |             |    |
|--------------|----|---------|------------|---------|-------------|----|
| AX-158327537 | 25 | 101.328 | KV453097.1 | 4263130 | 16-scf00504 | 16 |
| AX-157700205 | 25 | 101.328 | KV453097.1 | 4266242 | 16-scf00504 | 16 |
| AX-157747808 | 25 | 101.438 | KV453097.1 | 3750909 | 16-scf00504 | 16 |
| AX-157848771 | 25 | 101.438 | KV453097.1 | 3767302 | 16-scf00504 | 16 |
| AX-158327168 | 25 | 101.438 | KV453097.1 | 3791630 | 16-scf00504 | 16 |
| AX-158327169 | 25 | 101.438 | KV453097.1 | 3799534 | 16-scf00504 | 16 |
| AX-158327170 | 25 | 101.438 | KV453097.1 | 3801323 | 16-scf00504 | 16 |
| AX-158327178 | 25 | 101.438 | KV453097.1 | 3817394 | 16-scf00504 | 16 |
| AX-158327180 | 25 | 101.438 | KV453097.1 | 3817835 | 16-scf00504 | 16 |
| AX-157848782 | 25 | 101.438 | KV453097.1 | 3837934 | 16-scf00504 | 16 |
| AX-158327199 | 25 | 101.438 | KV453097.1 | 3845826 | 16-scf00504 | 16 |
| AX-157719089 | 25 | 101.438 | KV453097.1 | 3893155 | 16-scf00504 | 16 |
| AX-158327264 | 25 | 101.438 | KV453097.1 | 3925456 | 16-scf00504 | 16 |
| AX-158327329 | 25 | 101.438 | KV453097.1 | 4016763 | 16-scf00504 | 16 |
| AX-157694682 | 25 | 101.438 | KV453097.1 | 4023956 | 16-scf00504 | 16 |
| AX-158327388 | 25 | 101.438 | KV453097.1 | 4092963 | 16-scf00504 | 16 |
| AX-158327415 | 25 | 101.438 | KV453097.1 | 4123823 | 16-scf00504 | 16 |
| AX-158327435 | 25 | 101.438 | KV453097.1 | 4145444 | 16-scf00504 | 16 |
| AX-158327475 | 25 | 101.438 | KV453097.1 | 4188486 | 16-scf00504 | 16 |
| AX-157861523 | 25 | 101.438 | KV453097.1 | 4192271 | 16-scf00504 | 16 |
| AX-158327478 | 25 | 101.438 | KV453097.1 | 4193585 | 16-scf00504 | 16 |
| AX-158327486 | 25 | 101.438 | KV453097.1 | 4206405 | 16-scf00504 | 16 |
| AX-157720596 | 25 | 101.438 | KV453097.1 | 4217768 | 16-scf00504 | 16 |
| AX-157722869 | 25 | 101.438 | KV453097.1 | 4224866 | 16-scf00504 | 16 |
| AX-158327543 | 25 | 101.438 | KV453097.1 | 4270373 | 16-scf00504 | 16 |
| AX-158327545 | 25 | 101.438 | KV453097.1 | 4271477 | 16-scf00504 | 16 |
| AX-158327547 | 25 | 101.438 | KV453097.1 | 4273024 | 16-scf00504 | 16 |
| AX-158327548 | 25 | 101.438 | KV453097.1 | 4273927 | 16-scf00504 | 16 |
| AX-157881584 | 25 | 101.438 | KV453097.1 | 4274135 | 16-scf00504 | 16 |
| AX-158327551 | 25 | 101.438 | KV453097.1 | 4277787 | 16-scf00504 | 16 |
| AX-157751634 | 25 | 101.438 | KV453097.1 | 4278651 | 16-scf00504 | 16 |
| AX-158327552 | 25 | 101.438 | KV453097.1 | 4279756 | 16-scf00504 | 16 |
| AX-158327554 | 25 | 101.438 | KV453097.1 | 4288525 | 16-scf00504 | 16 |
| AX-158327556 | 25 | 101.438 | KV453097.1 | 4291123 | 16-scf00504 | 16 |
| AX-158327558 | 25 | 101.438 | KV453097.1 | 4293909 | 16-scf00504 | 16 |
| AX-158327559 | 25 | 101.438 | KV453097.1 | 4295688 | 16-scf00504 | 16 |
| AX-158327560 | 25 | 101.438 | KV453097.1 | 4296101 | 16-scf00504 | 16 |
| AX-157848795 | 25 | 101.438 | KV453097.1 | 4300101 | 16-scf00504 | 16 |
| AX-157696040 | 25 | 101.438 | KV453097.1 | 4300984 | 16-scf00504 | 16 |
| AX-158327565 | 25 | 101.438 | KV453097.1 | 4302306 | 16-scf00504 | 16 |
| AX-157848796 | 25 | 101.438 | KV453097.1 | 4305587 | 16-scf00504 | 16 |
| AX-158381505 | 25 | 101.438 | KV453097.1 | 4306489 | 16-scf00504 | 16 |
| AX-158327566 | 25 | 101.438 | KV453097.1 | 4308506 | 16-scf00504 | 16 |
| AX-158327567 | 25 | 101.438 | KV453097.1 | 4311694 | 16-scf00504 | 16 |
| AX-158327568 | 25 | 101.438 | KV453097.1 | 4311912 | 16-scf00504 | 16 |
| AX-158327570 | 25 | 101.438 | KV453097.1 | 4318568 | 16-scf00504 | 16 |
| AX-158327571 | 25 | 101.438 | KV453097.1 | 4320107 | 16-scf00504 | 16 |
| AX-158327573 | 25 | 101.438 | KV453097.1 | 4322416 | 16-scf00504 | 16 |
| AX-158327574 | 25 | 101.438 | KV453097.1 | 4322567 | 16-scf00504 | 16 |
| AX-157873639 | 25 | 101.438 | KV453097.1 | 4323946 | 16-scf00504 | 16 |
| AX-158327575 | 25 | 101.438 | KV453097.1 | 4324919 | 16-scf00504 | 16 |

|              |    |         |            |         |             |    |
|--------------|----|---------|------------|---------|-------------|----|
| AX-158327576 | 25 | 101.438 | KV453097.1 | 4325400 | 16-scf00504 | 16 |
| AX-158327577 | 25 | 101.438 | KV453097.1 | 4326585 | 16-scf00504 | 16 |
| AX-158327579 | 25 | 101.438 | KV453097.1 | 4330458 | 16-scf00504 | 16 |
| AX-158327580 | 25 | 101.438 | KV453097.1 | 4330846 | 16-scf00504 | 16 |
| AX-158327581 | 25 | 101.438 | KV453097.1 | 4331070 | 16-scf00504 | 16 |
| AX-158327582 | 25 | 101.438 | KV453097.1 | 4332943 | 16-scf00504 | 16 |
| AX-158327583 | 25 | 101.438 | KV453097.1 | 4333533 | 16-scf00504 | 16 |
| AX-157867904 | 25 | 101.438 | KV453097.1 | 4333922 | 16-scf00504 | 16 |
| AX-158327584 | 25 | 101.438 | KV453097.1 | 4335510 | 16-scf00504 | 16 |
| AX-157713621 | 25 | 101.438 | KV453097.1 | 4348551 | 16-scf00504 | 16 |
| AX-157848798 | 25 | 101.438 | KV453097.1 | 4348660 | 16-scf00504 | 16 |
| AX-158327594 | 25 | 101.438 | KV453097.1 | 4354238 | 16-scf00504 | 16 |
| AX-157744456 | 25 | 101.438 | KV453097.1 | 4354684 | 16-scf00504 | 16 |
| AX-158327596 | 25 | 101.438 | KV453097.1 | 4356429 | 16-scf00504 | 16 |
| AX-158327598 | 25 | 101.438 | KV453097.1 | 4357827 | 16-scf00504 | 16 |
| AX-158327599 | 25 | 101.438 | KV453097.1 | 4359298 | 16-scf00504 | 16 |
| AX-158327602 | 25 | 101.438 | KV453097.1 | 4360506 | 16-scf00504 | 16 |
| AX-158327604 | 25 | 101.438 | KV453097.1 | 4361271 | 16-scf00504 | 16 |
| AX-158327606 | 25 | 101.438 | KV453097.1 | 4362448 | 16-scf00504 | 16 |
| AX-158327610 | 25 | 101.438 | KV453097.1 | 4368816 | 16-scf00504 | 16 |
| AX-157848800 | 25 | 101.438 | KV453097.1 | 4369153 | 16-scf00504 | 16 |
| AX-158327611 | 25 | 101.438 | KV453097.1 | 4370183 | 16-scf00504 | 16 |
| AX-157848801 | 25 | 101.438 | KV453097.1 | 4373732 | 16-scf00504 | 16 |
| AX-158327615 | 25 | 101.438 | KV453097.1 | 4375548 | 16-scf00504 | 16 |
| AX-158327616 | 25 | 101.438 | KV453097.1 | 4376410 | 16-scf00504 | 16 |
| AX-157713459 | 25 | 101.438 | KV453097.1 | 4376526 | 16-scf00504 | 16 |
| AX-158327617 | 25 | 101.438 | KV453097.1 | 4376630 | 16-scf00504 | 16 |
| AX-158327618 | 25 | 101.438 | KV453097.1 | 4376893 | 16-scf00504 | 16 |
| AX-158327619 | 25 | 101.438 | KV453097.1 | 4378499 | 16-scf00504 | 16 |
| AX-158327620 | 25 | 101.438 | KV453097.1 | 4383341 | 16-scf00504 | 16 |
| AX-158327626 | 25 | 101.438 | KV453097.1 | 4392725 | 16-scf00504 | 16 |
| AX-157715996 | 25 | 101.438 | KV453097.1 | 4406329 | 16-scf00504 | 16 |
| AX-158327635 | 25 | 101.438 | KV453097.1 | 4408927 | 16-scf00504 | 16 |
| AX-158327636 | 25 | 101.438 | KV453097.1 | 4410076 | 16-scf00504 | 16 |
| AX-158327638 | 25 | 101.438 | KV453097.1 | 4415253 | 16-scf00504 | 16 |
| AX-157717428 | 25 | 101.438 | KV453097.1 | 4416675 | 16-scf00504 | 16 |
| AX-158327639 | 25 | 101.438 | KV453097.1 | 4418374 | 16-scf00504 | 16 |
| AX-157848808 | 25 | 101.438 | KV453097.1 | 4419372 | 16-scf00504 | 16 |
| AX-158327640 | 25 | 101.438 | KV453097.1 | 4420008 | 16-scf00504 | 16 |
| AX-158327642 | 25 | 101.438 | KV453097.1 | 4422560 | 16-scf00504 | 16 |
| AX-158327644 | 25 | 101.438 | KV453097.1 | 4424732 | 16-scf00504 | 16 |
| AX-158327645 | 25 | 101.438 | KV453097.1 | 4425258 | 16-scf00504 | 16 |
| AX-158327646 | 25 | 101.438 | KV453097.1 | 4425600 | 16-scf00504 | 16 |
| AX-158327648 | 25 | 101.438 | KV453097.1 | 4427103 | 16-scf00504 | 16 |
| AX-157848810 | 25 | 101.438 | KV453097.1 | 4428092 | 16-scf00504 | 16 |
| AX-158327650 | 25 | 101.438 | KV453097.1 | 4430122 | 16-scf00504 | 16 |
| AX-158327651 | 25 | 101.438 | KV453097.1 | 4431109 | 16-scf00504 | 16 |
| AX-158327653 | 25 | 101.438 | KV453097.1 | 4433380 | 16-scf00504 | 16 |
| AX-158327654 | 25 | 101.438 | KV453097.1 | 4434084 | 16-scf00504 | 16 |
| AX-158327656 | 25 | 101.438 | KV453097.1 | 4434546 | 16-scf00504 | 16 |
| AX-158327657 | 25 | 101.438 | KV453097.1 | 4434930 | 16-scf00504 | 16 |

|              |    |         |             |         |             |    |
|--------------|----|---------|-------------|---------|-------------|----|
| AX-158327658 | 25 | 101.438 | KV453097.1  | 4436968 | 16-scf00504 | 16 |
| AX-157848811 | 25 | 101.438 | KV453097.1  | 4437836 | 16-scf00504 | 16 |
| AX-158327660 | 25 | 101.438 | KV453097.1  | 4438202 | 16-scf00504 | 16 |
| AX-158327664 | 25 | 101.438 | KV453097.1  | 4446343 | 16-scf00504 | 16 |
| AX-158327665 | 25 | 101.438 | KV453097.1  | 4446965 | 16-scf00504 | 16 |
| AX-157881585 | 25 | 101.438 | KV453097.1  | 4454738 | 16-scf00504 | 16 |
| AX-158327670 | 25 | 101.438 | KV453097.1  | 4455848 | 16-scf00504 | 16 |
| AX-158327671 | 25 | 101.438 | KV453097.1  | 4456445 | 16-scf00504 | 16 |
| AX-158327672 | 25 | 101.438 | KV453097.1  | 4458671 | 16-scf00504 | 16 |
| AX-158327673 | 25 | 101.438 | KV453097.1  | 4459521 | 16-scf00504 | 16 |
| AX-158327674 | 25 | 101.438 | KV453097.1  | 4462383 | 16-scf00504 | 16 |
| AX-158327675 | 25 | 101.438 | KV453097.1  | 4463500 | 16-scf00504 | 16 |
| AX-158327677 | 25 | 101.438 | KV453097.1  | 4466747 | 16-scf00504 | 16 |
| AX-158327680 | 25 | 101.438 | KV453097.1  | 4469986 | 16-scf00504 | 16 |
| AX-158327681 | 25 | 101.438 | KV453097.1  | 4470982 | 16-scf00504 | 16 |
| AX-158327682 | 25 | 101.438 | KV453097.1  | 4472063 | 16-scf00504 | 16 |
| AX-158327683 | 25 | 101.438 | KV453097.1  | 4473025 | 16-scf00504 | 16 |
| AX-158327685 | 25 | 101.438 | KV453097.1  | 4477243 | 16-scf00504 | 16 |
| AX-158327686 | 25 | 101.438 | KV453097.1  | 4477863 | 16-scf00504 | 16 |
| AX-158327687 | 25 | 101.438 | KV453097.1  | 4478148 | 16-scf00504 | 16 |
| AX-158327688 | 25 | 101.438 | KV453097.1  | 4478441 | 16-scf00504 | 16 |
| AX-157848814 | 25 | 101.438 | KV453097.1  | 4479370 | 16-scf00504 | 16 |
| AX-157713891 | 25 | 101.438 | KV453097.1  | 4489321 | 16-scf00504 | 16 |
| AX-158327693 | 25 | 101.438 | KV453097.1  | 4489590 | 16-scf00504 | 16 |
| AX-157773018 | 25 | 101.438 | KV453097.1  | 4496604 | 16-scf00504 | 16 |
| AX-157848818 | 25 | 101.438 | KV453097.1  | 4497951 | 16-scf00504 | 16 |
| AX-158327698 | 25 | 101.438 | KV453097.1  | 4499498 | 16-scf00504 | 16 |
| AX-158327699 | 25 | 101.438 | KV453097.1  | 4499866 | 16-scf00504 | 16 |
| AX-158327700 | 25 | 101.438 | KV453097.1  | 4501674 | 16-scf00504 | 16 |
| AX-158327702 | 25 | 101.438 | KV453097.1  | 4503244 | 16-scf00504 | 16 |
| AX-158327703 | 25 | 101.438 | KV453097.1  | 4503485 | 16-scf00504 | 16 |
| AX-158327706 | 25 | 101.438 | KV453097.1  | 4505464 | 16-scf00504 | 16 |
| AX-158327707 | 25 | 101.438 | KV453097.1  | 4506306 | 16-scf00504 | 16 |
| AX-157848820 | 25 | 101.438 | KV453097.1  | 4507925 | 16-scf00504 | 16 |
| AX-158327709 | 25 | 101.438 | KV453097.1  | 4508863 | 16-scf00504 | 16 |
| AX-157775605 | 25 | 101.438 | KV453097.1  | 4509261 | 16-scf00504 | 16 |
| AX-158327713 | 25 | 101.438 | KV453097.1  | 4518442 | 16-scf00504 | 16 |
| AX-158327715 | 25 | 101.438 | KV453097.1  | 4529826 | 16-scf00504 | 16 |
| AX-157848822 | 25 | 101.438 | KV453097.1  | 4532299 | 16-scf00504 | 16 |
| AX-158327719 | 25 | 101.438 | KV453097.1  | 4546800 | 16-scf00504 | 16 |
| AX-158327723 | 25 | 101.438 | KV453097.1  | 4562509 | 16-scf00504 | 16 |
| AX-158327730 | 25 | 101.438 | KV453097.1  | 4569696 | 16-scf00504 | 16 |
| AX-158327732 | 25 | 101.438 | KV453097.1  | 4573403 | 16-scf00504 | 16 |
| AX-158327733 | 25 | 101.438 | KV453097.1  | 4575559 | 16-scf00504 | 16 |
| AX-157706443 | 25 | 101.438 | 3ML01032402 | 440     | scf08021_1  | UN |
| AX-157684619 | 26 | 0       | KV453224.1  | 2599    | 22-scf00511 | 22 |
| AX-157684621 | 26 | 0       | KV453224.1  | 6899    | 22-scf00511 | 22 |
| AX-157681641 | 26 | 0       | KV453224.1  | 15430   | 22-scf00511 | 22 |
| AX-157684625 | 26 | 0       | KV453224.1  | 16022   | 22-scf00511 | 22 |
| AX-157684629 | 26 | 0       | KV453224.1  | 19865   | 22-scf00511 | 22 |
| AX-157684630 | 26 | 0       | KV453224.1  | 20946   | 22-scf00511 | 22 |

|              |    |       |             |        |             |    |
|--------------|----|-------|-------------|--------|-------------|----|
| AX-157684631 | 26 | 0     | KV453224.1  | 22971  | 22-scf00511 | 22 |
| AX-157684633 | 26 | 0     | KV453224.1  | 25553  | 22-scf00511 | 22 |
| AX-157682173 | 26 | 0     | KV453224.1  | 44127  | 22-scf00511 | 22 |
| AX-158327991 | 26 | 0     | KV453222.1  | 165648 | 22-scf00512 | 22 |
| AX-158328006 | 26 | 0     | KV453222.1  | 188501 | 22-scf00512 | 22 |
| AX-158327886 | 26 | 0.126 | KV453220.1  | 143508 | 22-scf00508 | 22 |
| AX-157684644 | 26 | 0.126 | KV453224.1  | 51944  | 22-scf00511 | 22 |
| AX-157684647 | 26 | 0.126 | KV453224.1  | 57779  | 22-scf00511 | 22 |
| AX-157684652 | 26 | 0.126 | KV453224.1  | 65970  | 22-scf00511 | 22 |
| AX-158327751 | 26 | 1.262 | KV453216.1  | 18821  | 22-scf00505 | 22 |
| AX-157848826 | 26 | 1.262 | KV453216.1  | 22259  | 22-scf00505 | 22 |
| AX-158327757 | 26 | 1.262 | KV453216.1  | 46972  | 22-scf00505 | 22 |
| AX-158327758 | 26 | 1.262 | KV453216.1  | 48646  | 22-scf00505 | 22 |
| AX-158327760 | 26 | 1.262 | KV453216.1  | 51522  | 22-scf00505 | 22 |
| AX-158327765 | 26 | 1.262 | KV453216.1  | 71456  | 22-scf00505 | 22 |
| AX-158327768 | 26 | 1.262 | KV453216.1  | 78320  | 22-scf00505 | 22 |
| AX-158327769 | 26 | 1.262 | KV453216.1  | 78829  | 22-scf00505 | 22 |
| AX-158327776 | 26 | 1.262 | KV453216.1  | 89667  | 22-scf00505 | 22 |
| AX-158327785 | 26 | 1.262 | KV453216.1  | 100367 | 22-scf00505 | 22 |
| AX-158327786 | 26 | 1.262 | KV453216.1  | 102112 | 22-scf00505 | 22 |
| AX-158327788 | 26 | 1.262 | KV453216.1  | 103652 | 22-scf00505 | 22 |
| AX-158327789 | 26 | 1.262 | KV453216.1  | 107205 | 22-scf00505 | 22 |
| AX-158327791 | 26 | 1.262 | KV453216.1  | 110553 | 22-scf00505 | 22 |
| AX-158327792 | 26 | 1.262 | KV453216.1  | 110985 | 22-scf00505 | 22 |
| AX-158327794 | 26 | 1.262 | KV453216.1  | 112428 | 22-scf00505 | 22 |
| AX-158327795 | 26 | 1.262 | KV453216.1  | 113588 | 22-scf00505 | 22 |
| AX-157752990 | 26 | 1.262 | KV453216.1  | 115472 | 22-scf00505 | 22 |
| AX-158327796 | 26 | 1.262 | KV453216.1  | 131136 | 22-scf00505 | 22 |
| AX-158327807 | 26 | 1.262 | KV453216.1  | 163668 | 22-scf00505 | 22 |
| AX-158327809 | 26 | 1.262 | KV453216.1  | 165134 | 22-scf00505 | 22 |
| AX-158327816 | 26 | 1.262 | KV453216.1  | 178615 | 22-scf00505 | 22 |
| AX-158327817 | 26 | 1.262 | KV453216.1  | 182696 | 22-scf00505 | 22 |
| AX-157684587 | 26 | 1.262 | KV453218.1  | 3821   | 22-scf00506 | 22 |
| AX-157684592 | 26 | 1.262 | KV453218.1  | 22104  | 22-scf00506 | 22 |
| AX-157684595 | 26 | 1.262 | KV453218.1  | 31703  | 22-scf00506 | 22 |
| AX-158327835 | 26 | 1.262 | KV453220.1  | 45140  | 22-scf00508 | 22 |
| AX-157748744 | 26 | 1.262 | KV453220.1  | 47885  | 22-scf00508 | 22 |
| AX-158327903 | 26 | 1.262 | KV453220.1  | 173272 | 22-scf00508 | 22 |
| AX-158327927 | 26 | 1.262 | KV453220.1  | 240989 | 22-scf00508 | 22 |
| AX-157684615 | 26 | 1.262 | KV453221.1  | 13264  | 22-scf00509 | 22 |
| AX-157684616 | 26 | 1.262 | KV453221.1  | 13887  | 22-scf00509 | 22 |
| AX-157680108 | 26 | 1.262 | KV453221.1  | 16861  | 22-scf00509 | 22 |
| AX-158328099 | 26 | 1.262 | KV453225.1  | 178655 | 22-scf00513 | 22 |
| AX-157680948 | 26 | 1.262 | KV453422.1  | 26786  | scf00728    | UN |
| AX-157686751 | 26 | 1.262 | KV453422.1  | 27208  | scf00728    | UN |
| AX-157687435 | 26 | 1.262 | 3ML01024904 | 13268  | scf00878_1  | UN |
| AX-157689699 | 26 | 1.262 | 3ML01031438 | 509    | scf07051_1  | UN |
| AX-157680394 | 26 | 1.345 | KV453422.1  | 29827  | scf00728    | UN |
| AX-158327982 | 26 | 1.38  | KV453222.1  | 147289 | 22-scf00512 | 22 |
| AX-157689783 | 26 | 1.38  | KV453217.1  | 468    | 22-scf07983 | 22 |
| AX-157684588 | 26 | 1.48  | KV453218.1  | 16063  | 22-scf00506 | 22 |

|              |    |       |             |        |             |    |
|--------------|----|-------|-------------|--------|-------------|----|
| AX-157684591 | 26 | 1.48  | KV453218.1  | 21879  | 22-scf00506 | 22 |
| AX-157684601 | 26 | 1.48  | KV453219.1  | 5721   | 22-scf00507 | 22 |
| AX-157680273 | 26 | 1.48  | KV453219.1  | 6336   | 22-scf00507 | 22 |
| AX-157684602 | 26 | 1.48  | KV453219.1  | 8577   | 22-scf00507 | 22 |
| AX-157684603 | 26 | 1.48  | KV453219.1  | 9391   | 22-scf00507 | 22 |
| AX-157684604 | 26 | 1.48  | KV453219.1  | 10357  | 22-scf00507 | 22 |
| AX-157684655 | 26 | 1.48  | KV453222.1  | 52583  | 22-scf00512 | 22 |
| AX-158327935 | 26 | 1.48  | KV453222.1  | 73171  | 22-scf00512 | 22 |
| AX-158327829 | 26 | 1.808 | KV453220.1  | 28368  | 22-scf00508 | 22 |
| AX-158327832 | 26 | 1.808 | KV453220.1  | 37075  | 22-scf00508 | 22 |
| AX-158327833 | 26 | 1.808 | KV453220.1  | 40803  | 22-scf00508 | 22 |
| AX-158327834 | 26 | 1.808 | KV453220.1  | 44412  | 22-scf00508 | 22 |
| AX-158327837 | 26 | 1.808 | KV453220.1  | 53208  | 22-scf00508 | 22 |
| AX-158327838 | 26 | 1.808 | KV453220.1  | 58926  | 22-scf00508 | 22 |
| AX-158327846 | 26 | 1.808 | KV453220.1  | 71263  | 22-scf00508 | 22 |
| AX-158327894 | 26 | 1.808 | KV453220.1  | 154683 | 22-scf00508 | 22 |
| AX-158327912 | 26 | 1.808 | KV453220.1  | 191061 | 22-scf00508 | 22 |
| AX-157687268 | 26 | 1.808 | KV453223.1  | 10501  | 22-scf00837 | 22 |
| AX-157689812 | 26 | 1.808 | 3ML01032820 | 106    | scf08450_1  | UN |
| AX-158327840 | 26 | 2.027 | KV453220.1  | 64291  | 22-scf00508 | 22 |
| AX-158327841 | 26 | 2.027 | KV453220.1  | 65354  | 22-scf00508 | 22 |
| AX-157861527 | 26 | 2.027 | KV453220.1  | 66763  | 22-scf00508 | 22 |
| AX-158327843 | 26 | 2.027 | KV453220.1  | 66954  | 22-scf00508 | 22 |
| AX-158327844 | 26 | 2.057 | KV453220.1  | 67337  | 22-scf00508 | 22 |
| AX-158327847 | 26 | 2.087 | KV453220.1  | 72661  | 22-scf00508 | 22 |
| AX-158327849 | 26 | 2.136 | KV453220.1  | 78084  | 22-scf00508 | 22 |
| AX-158327851 | 26 | 2.136 | KV453220.1  | 79595  | 22-scf00508 | 22 |
| AX-157746300 | 26 | 2.136 | KV453220.1  | 80329  | 22-scf00508 | 22 |
| AX-158327854 | 26 | 2.136 | KV453220.1  | 89479  | 22-scf00508 | 22 |
| AX-158327855 | 26 | 2.136 | KV453220.1  | 89996  | 22-scf00508 | 22 |
| AX-158327858 | 26 | 2.136 | KV453220.1  | 93856  | 22-scf00508 | 22 |
| AX-158327861 | 26 | 2.136 | KV453220.1  | 98721  | 22-scf00508 | 22 |
| AX-158327863 | 26 | 2.136 | KV453220.1  | 100284 | 22-scf00508 | 22 |
| AX-157848835 | 26 | 2.136 | KV453220.1  | 100489 | 22-scf00508 | 22 |
| AX-158327864 | 26 | 2.136 | KV453220.1  | 100718 | 22-scf00508 | 22 |
| AX-158327865 | 26 | 2.136 | KV453220.1  | 101161 | 22-scf00508 | 22 |
| AX-158327866 | 26 | 2.136 | KV453220.1  | 103161 | 22-scf00508 | 22 |
| AX-158327871 | 26 | 2.136 | KV453220.1  | 112516 | 22-scf00508 | 22 |
| AX-158327872 | 26 | 2.136 | KV453220.1  | 113009 | 22-scf00508 | 22 |
| AX-158327873 | 26 | 2.136 | KV453220.1  | 115363 | 22-scf00508 | 22 |
| AX-158327875 | 26 | 2.136 | KV453220.1  | 118565 | 22-scf00508 | 22 |
| AX-158327881 | 26 | 2.136 | KV453220.1  | 132696 | 22-scf00508 | 22 |
| AX-158327882 | 26 | 2.136 | KV453220.1  | 136393 | 22-scf00508 | 22 |
| AX-158327883 | 26 | 2.136 | KV453220.1  | 138438 | 22-scf00508 | 22 |
| AX-158327884 | 26 | 2.136 | KV453220.1  | 138771 | 22-scf00508 | 22 |
| AX-157709357 | 26 | 2.136 | KV453220.1  | 140165 | 22-scf00508 | 22 |
| AX-158327885 | 26 | 2.136 | KV453220.1  | 142497 | 22-scf00508 | 22 |
| AX-158327890 | 26 | 2.136 | KV453220.1  | 148740 | 22-scf00508 | 22 |
| AX-157888488 | 26 | 2.136 | KV453220.1  | 150839 | 22-scf00508 | 22 |
| AX-158327892 | 26 | 2.136 | KV453220.1  | 151891 | 22-scf00508 | 22 |
| AX-158327891 | 26 | 2.165 | KV453220.1  | 151363 | 22-scf00508 | 22 |



|              |    |       |             |        |             |    |
|--------------|----|-------|-------------|--------|-------------|----|
| AX-157684622 | 26 | 2.165 | KV453224.1  | 12028  | 22-scf00511 | 22 |
| AX-158327893 | 26 | 2.183 | KV453220.1  | 153379 | 22-scf00508 | 22 |
| AX-158327771 | 26 | 2.214 | KV453216.1  | 82046  | 22-scf00505 | 22 |
| AX-157686745 | 26 | 2.214 | KV453422.1  | 8956   | scf00728    | UN |
| AX-157848833 | 26 | 2.245 | KV453220.1  | 82541  | 22-scf00508 | 22 |
| AX-158327877 | 26 | 2.245 | KV453220.1  | 120310 | 22-scf00508 | 22 |
| AX-157756305 | 26 | 2.245 | KV453220.1  | 136950 | 22-scf00508 | 22 |
| AX-158327887 | 26 | 2.245 | KV453220.1  | 144765 | 22-scf00508 | 22 |
| AX-158327896 | 26 | 2.245 | KV453220.1  | 160324 | 22-scf00508 | 22 |
| AX-158327898 | 26 | 2.245 | KV453220.1  | 170420 | 22-scf00508 | 22 |
| AX-158327900 | 26 | 2.245 | KV453220.1  | 171995 | 22-scf00508 | 22 |
| AX-158327902 | 26 | 2.245 | KV453220.1  | 172698 | 22-scf00508 | 22 |
| AX-158327907 | 26 | 2.245 | KV453220.1  | 183219 | 22-scf00508 | 22 |
| AX-158327908 | 26 | 2.245 | KV453220.1  | 184433 | 22-scf00508 | 22 |
| AX-158327909 | 26 | 2.245 | KV453220.1  | 185091 | 22-scf00508 | 22 |
| AX-157684646 | 26 | 2.245 | KV453224.1  | 55351  | 22-scf00511 | 22 |
| AX-157684649 | 26 | 2.245 | KV453224.1  | 63804  | 22-scf00511 | 22 |
| AX-157687267 | 26 | 2.245 | KV453223.1  | 9663   | 22-scf00837 | 22 |
| AX-157888490 | 26 | 2.268 | KV453220.1  | 195717 | 22-scf00508 | 22 |
| AX-157709682 | 26 | 3.01  | KV453220.1  | 2615   | 22-scf00508 | 22 |
| AX-158327919 | 26 | 3.01  | KV453220.1  | 224177 | 22-scf00508 | 22 |
| AX-158327921 | 26 | 3.01  | KV453220.1  | 228831 | 22-scf00508 | 22 |
| AX-157720526 | 26 | 3.01  | KV453220.1  | 229678 | 22-scf00508 | 22 |
| AX-158327926 | 26 | 3.01  | KV453220.1  | 239595 | 22-scf00508 | 22 |
| AX-157861529 | 26 | 3.01  | KV453220.1  | 240467 | 22-scf00508 | 22 |
| AX-158327928 | 26 | 3.01  | KV453220.1  | 241119 | 22-scf00508 | 22 |
| AX-157684607 | 26 | 3.01  | KV453221.1  | 258    | 22-scf00509 | 22 |
| AX-157684612 | 26 | 3.01  | KV453221.1  | 5466   | 22-scf00509 | 22 |
| AX-157686753 | 26 | 3.01  | KV453422.1  | 32270  | scf00728    | UN |
| AX-157745329 | 26 | 3.119 | KV453220.1  | 240161 | 22-scf00508 | 22 |
| AX-157684614 | 26 | 3.119 | KV453221.1  | 11606  | 22-scf00509 | 22 |
| AX-157680123 | 26 | 3.119 | KV453221.1  | 14749  | 22-scf00509 | 22 |
| AX-157684617 | 26 | 3.119 | KV453221.1  | 15166  | 22-scf00509 | 22 |
| AX-157681202 | 26 | 3.119 | KV453422.1  | 25850  | scf00728    | UN |
| AX-158327804 | 26 | 3.145 | KV453216.1  | 160162 | 22-scf00505 | 22 |
| AX-158327810 | 26 | 3.145 | KV453216.1  | 165909 | 22-scf00505 | 22 |
| AX-157684618 | 26 | 3.145 | KV453221.1  | 16286  | 22-scf00509 | 22 |
| AX-157684672 | 26 | 3.145 | KV453222.1  | 19521  | 22-scf00512 | 22 |
| AX-157687433 | 26 | 3.145 | 3ML01024904 | 5764   | scf00878_1  | UN |
| AX-158327931 | 26 | 3.915 | KV453222.1  | 60352  | 22-scf00512 | 22 |
| AX-157684658 | 26 | 4.764 | KV453222.1  | 49437  | 22-scf00512 | 22 |
| AX-158327933 | 26 | 4.764 | KV453222.1  | 62998  | 22-scf00512 | 22 |
| AX-157848839 | 26 | 4.764 | KV453222.1  | 72863  | 22-scf00512 | 22 |
| AX-158327938 | 26 | 4.764 | KV453222.1  | 75507  | 22-scf00512 | 22 |
| AX-158327939 | 26 | 4.764 | KV453222.1  | 75937  | 22-scf00512 | 22 |
| AX-157753616 | 26 | 4.764 | KV453222.1  | 78697  | 22-scf00512 | 22 |
| AX-157848842 | 26 | 4.764 | KV453222.1  | 81640  | 22-scf00512 | 22 |
| AX-158327941 | 26 | 4.764 | KV453222.1  | 84571  | 22-scf00512 | 22 |
| AX-158327942 | 26 | 4.764 | KV453222.1  | 84865  | 22-scf00512 | 22 |
| AX-158327943 | 26 | 4.764 | KV453222.1  | 88675  | 22-scf00512 | 22 |
| AX-158327945 | 26 | 4.764 | KV453222.1  | 90391  | 22-scf00512 | 22 |

|              |    |       |             |        |             |    |
|--------------|----|-------|-------------|--------|-------------|----|
| AX-158327950 | 26 | 4.764 | KV453222.1  | 96785  | 22-scf00512 | 22 |
| AX-158327953 | 26 | 4.764 | KV453222.1  | 101349 | 22-scf00512 | 22 |
| AX-158327954 | 26 | 4.764 | KV453222.1  | 103513 | 22-scf00512 | 22 |
| AX-158327955 | 26 | 4.764 | KV453222.1  | 106653 | 22-scf00512 | 22 |
| AX-158327956 | 26 | 4.764 | KV453222.1  | 108255 | 22-scf00512 | 22 |
| AX-158327957 | 26 | 4.764 | KV453222.1  | 110634 | 22-scf00512 | 22 |
| AX-157722401 | 26 | 4.764 | KV453222.1  | 116676 | 22-scf00512 | 22 |
| AX-158327961 | 26 | 4.764 | KV453222.1  | 118382 | 22-scf00512 | 22 |
| AX-157861530 | 26 | 4.764 | KV453225.1  | 6433   | 22-scf00513 | 22 |
| AX-158327964 | 26 | 5.037 | KV453222.1  | 122914 | 22-scf00512 | 22 |
| AX-157724410 | 26 | 5.198 | KV453222.1  | 125150 | 22-scf00512 | 22 |
| AX-158327990 | 26 | 5.198 | KV453222.1  | 164628 | 22-scf00512 | 22 |
| AX-158327977 | 26 | 5.341 | KV453222.1  | 139227 | 22-scf00512 | 22 |
| AX-158327979 | 26 | 5.341 | KV453222.1  | 144350 | 22-scf00512 | 22 |
| AX-158327980 | 26 | 5.85  | KV453222.1  | 145395 | 22-scf00512 | 22 |
| AX-158327811 | 26 | 6.411 | KV453216.1  | 166887 | 22-scf00505 | 22 |
| AX-157686738 | 26 | 6.411 | KV453422.1  | 611    | scf00728    | UN |
| AX-157686739 | 26 | 6.411 | KV453422.1  | 1417   | scf00728    | UN |
| AX-157686743 | 26 | 6.411 | KV453422.1  | 7850   | scf00728    | UN |
| AX-157681459 | 26 | 6.411 | KV453422.1  | 9556   | scf00728    | UN |
| AX-157686746 | 26 | 6.411 | KV453422.1  | 16191  | scf00728    | UN |
| AX-157686754 | 26 | 6.411 | KV453422.1  | 33037  | scf00728    | UN |
| AX-157706559 | 26 | 6.411 | 3ML01032456 | 281    | scf08077_1  | UN |
| AX-158327880 | 26 | 7.503 | KV453220.1  | 123400 | 22-scf00508 | 22 |
| AX-157684620 | 26 | 7.503 | KV453224.1  | 3340   | 22-scf00511 | 22 |
| AX-157684670 | 26 | 7.503 | KV453222.1  | 22694  | 22-scf00512 | 22 |
| AX-157684669 | 26 | 7.503 | KV453222.1  | 23184  | 22-scf00512 | 22 |
| AX-157756130 | 26 | 7.503 | KV453222.1  | 55549  | 22-scf00512 | 22 |
| AX-158327929 | 26 | 7.503 | KV453222.1  | 56521  | 22-scf00512 | 22 |
| AX-158327930 | 26 | 7.503 | KV453222.1  | 57340  | 22-scf00512 | 22 |
| AX-158327936 | 26 | 7.503 | KV453222.1  | 73570  | 22-scf00512 | 22 |
| AX-157724890 | 26 | 7.503 | KV453222.1  | 93907  | 22-scf00512 | 22 |
| AX-158327959 | 26 | 7.503 | KV453222.1  | 112825 | 22-scf00512 | 22 |
| AX-158327960 | 26 | 7.503 | KV453222.1  | 113998 | 22-scf00512 | 22 |
| AX-158327969 | 26 | 7.503 | KV453222.1  | 129387 | 22-scf00512 | 22 |
| AX-158327973 | 26 | 7.503 | KV453222.1  | 134001 | 22-scf00512 | 22 |
| AX-158327975 | 26 | 7.503 | KV453222.1  | 135867 | 22-scf00512 | 22 |
| AX-157773862 | 26 | 7.503 | KV453222.1  | 141281 | 22-scf00512 | 22 |
| AX-158327987 | 26 | 7.503 | KV453222.1  | 158431 | 22-scf00512 | 22 |
| AX-158327988 | 26 | 7.503 | KV453222.1  | 159236 | 22-scf00512 | 22 |
| AX-158327989 | 26 | 7.503 | KV453222.1  | 163454 | 22-scf00512 | 22 |
| AX-158327992 | 26 | 7.503 | KV453222.1  | 167180 | 22-scf00512 | 22 |
| AX-158327994 | 26 | 7.503 | KV453222.1  | 168291 | 22-scf00512 | 22 |
| AX-158327996 | 26 | 7.503 | KV453222.1  | 173447 | 22-scf00512 | 22 |
| AX-158327997 | 26 | 7.503 | KV453222.1  | 175006 | 22-scf00512 | 22 |
| AX-158327998 | 26 | 7.503 | KV453222.1  | 176051 | 22-scf00512 | 22 |
| AX-158327999 | 26 | 7.503 | KV453222.1  | 176311 | 22-scf00512 | 22 |
| AX-158328002 | 26 | 7.503 | KV453222.1  | 178421 | 22-scf00512 | 22 |
| AX-158328004 | 26 | 7.503 | KV453222.1  | 182155 | 22-scf00512 | 22 |
| AX-158328007 | 26 | 7.503 | KV453222.1  | 188768 | 22-scf00512 | 22 |
| AX-158327848 | 26 | 7.511 | KV453220.1  | 75333  | 22-scf00508 | 22 |

|              |    |       |            |        |             |    |
|--------------|----|-------|------------|--------|-------------|----|
| AX-158327856 | 26 | 7.511 | KV453220.1 | 90453  | 22-scf00508 | 22 |
| AX-158327878 | 26 | 7.511 | KV453220.1 | 121199 | 22-scf00508 | 22 |
| AX-157684642 | 26 | 7.511 | KV453224.1 | 48602  | 22-scf00511 | 22 |
| AX-157687266 | 26 | 7.511 | KV453223.1 | 7689   | 22-scf00837 | 22 |
| AX-158327867 | 26 | 8.05  | KV453220.1 | 103929 | 22-scf00508 | 22 |
| AX-157684645 | 26 | 8.05  | KV453224.1 | 52810  | 22-scf00511 | 22 |
| AX-157684685 | 26 | 8.05  | KV453222.1 | 5046   | 22-scf00512 | 22 |
| AX-157684676 | 26 | 8.05  | KV453222.1 | 15120  | 22-scf00512 | 22 |
| AX-157684675 | 26 | 8.05  | KV453222.1 | 15257  | 22-scf00512 | 22 |
| AX-157684674 | 26 | 8.05  | KV453222.1 | 17435  | 22-scf00512 | 22 |
| AX-157684673 | 26 | 8.05  | KV453222.1 | 18201  | 22-scf00512 | 22 |
| AX-157684671 | 26 | 8.05  | KV453222.1 | 22145  | 22-scf00512 | 22 |
| AX-157684666 | 26 | 8.05  | KV453222.1 | 28362  | 22-scf00512 | 22 |
| AX-157684665 | 26 | 8.05  | KV453222.1 | 32359  | 22-scf00512 | 22 |
| AX-157684663 | 26 | 8.05  | KV453222.1 | 43836  | 22-scf00512 | 22 |
| AX-157684662 | 26 | 8.05  | KV453222.1 | 44569  | 22-scf00512 | 22 |
| AX-157684661 | 26 | 8.05  | KV453222.1 | 45851  | 22-scf00512 | 22 |
| AX-157684660 | 26 | 8.05  | KV453222.1 | 46425  | 22-scf00512 | 22 |
| AX-157848840 | 26 | 8.05  | KV453222.1 | 73757  | 22-scf00512 | 22 |
| AX-158327947 | 26 | 8.05  | KV453222.1 | 92141  | 22-scf00512 | 22 |
| AX-157684677 | 26 | 8.159 | KV453222.1 | 13439  | 22-scf00512 | 22 |
| AX-157684682 | 26 | 8.268 | KV453222.1 | 10095  | 22-scf00512 | 22 |
| AX-158328010 | 26 | 8.268 | KV453225.1 | 6028   | 22-scf00513 | 22 |
| AX-157848843 | 26 | 8.268 | KV453225.1 | 12013  | 22-scf00513 | 22 |
| AX-158328066 | 26 | 8.268 | KV453225.1 | 134844 | 22-scf00513 | 22 |
| AX-157684684 | 26 | 8.323 | KV453222.1 | 5714   | 22-scf00512 | 22 |
| AX-157684681 | 26 | 8.323 | KV453222.1 | 10774  | 22-scf00512 | 22 |
| AX-157684686 | 26 | 8.378 | KV453222.1 | 3365   | 22-scf00512 | 22 |
| AX-157717499 | 26 | 8.378 | KV453225.1 | 3428   | 22-scf00513 | 22 |
| AX-157775178 | 26 | 8.378 | KV453225.1 | 3818   | 22-scf00513 | 22 |
| AX-158328013 | 26 | 8.378 | KV453225.1 | 11532  | 22-scf00513 | 22 |
| AX-157848845 | 26 | 8.378 | KV453225.1 | 15903  | 22-scf00513 | 22 |
| AX-158328017 | 26 | 8.378 | KV453225.1 | 35015  | 22-scf00513 | 22 |
| AX-157741020 | 26 | 8.487 | KV453225.1 | 41637  | 22-scf00513 | 22 |
| AX-158328019 | 26 | 8.487 | KV453225.1 | 43859  | 22-scf00513 | 22 |
| AX-158328020 | 26 | 8.487 | KV453225.1 | 44444  | 22-scf00513 | 22 |
| AX-158328018 | 26 | 8.596 | KV453225.1 | 40931  | 22-scf00513 | 22 |
| AX-158328024 | 26 | 8.596 | KV453225.1 | 52438  | 22-scf00513 | 22 |
| AX-157848847 | 26 | 8.596 | KV453225.1 | 59547  | 22-scf00513 | 22 |
| AX-157746163 | 26 | 8.596 | KV453225.1 | 61144  | 22-scf00513 | 22 |
| AX-157738816 | 26 | 8.705 | KV453225.1 | 67011  | 22-scf00513 | 22 |
| AX-157881595 | 26 | 8.705 | KV453225.1 | 68764  | 22-scf00513 | 22 |
| AX-157740366 | 26 | 8.705 | KV453225.1 | 69281  | 22-scf00513 | 22 |
| AX-157848849 | 26 | 8.705 | KV453225.1 | 72990  | 22-scf00513 | 22 |
| AX-158328034 | 26 | 8.705 | KV453225.1 | 73708  | 22-scf00513 | 22 |
| AX-158328035 | 26 | 8.705 | KV453225.1 | 74239  | 22-scf00513 | 22 |
| AX-158328036 | 26 | 8.705 | KV453225.1 | 75375  | 22-scf00513 | 22 |
| AX-158328025 | 26 | 8.814 | KV453225.1 | 52961  | 22-scf00513 | 22 |
| AX-157848850 | 26 | 8.814 | KV453225.1 | 84320  | 22-scf00513 | 22 |
| AX-158328038 | 26 | 8.814 | KV453225.1 | 85719  | 22-scf00513 | 22 |
| AX-157714505 | 26 | 8.814 | KV453225.1 | 97019  | 22-scf00513 | 22 |

|              |    |       |            |        |             |    |
|--------------|----|-------|------------|--------|-------------|----|
| AX-157873641 | 26 | 8.814 | KV453225.1 | 102848 | 22-scf00513 | 22 |
| AX-158328079 | 26 | 8.814 | KV453225.1 | 148520 | 22-scf00513 | 22 |
| AX-157873643 | 26 | 8.814 | KV453225.1 | 159475 | 22-scf00513 | 22 |
| AX-157888491 | 26 | 8.839 | KV453222.1 | 71282  | 22-scf00512 | 22 |
| AX-158328040 | 26 | 8.839 | KV453225.1 | 99540  | 22-scf00513 | 22 |
| AX-158328041 | 26 | 8.924 | KV453225.1 | 100205 | 22-scf00513 | 22 |
| AX-158328043 | 26 | 8.941 | KV453225.1 | 102398 | 22-scf00513 | 22 |
| AX-158328074 | 26 | 8.941 | KV453225.1 | 142865 | 22-scf00513 | 22 |
| AX-157848852 | 26 | 8.969 | KV453225.1 | 110210 | 22-scf00513 | 22 |
| AX-158328054 | 26 | 8.997 | KV453225.1 | 116948 | 22-scf00513 | 22 |
| AX-158328055 | 26 | 9.026 | KV453225.1 | 117769 | 22-scf00513 | 22 |
| AX-158420073 | 26 | 9.07  | KV453225.1 | 123413 | 22-scf00513 | 22 |
| AX-158328057 | 26 | 9.101 | KV453225.1 | 124301 | 22-scf00513 | 22 |
| AX-157684683 | 26 | 9.142 | KV453222.1 | 8078   | 22-scf00512 | 22 |
| AX-157861531 | 26 | 9.142 | KV453225.1 | 120766 | 22-scf00513 | 22 |
| AX-158328059 | 26 | 9.142 | KV453225.1 | 128484 | 22-scf00513 | 22 |
| AX-158328060 | 26 | 9.142 | KV453225.1 | 129877 | 22-scf00513 | 22 |
| AX-157746794 | 26 | 9.142 | KV453225.1 | 130305 | 22-scf00513 | 22 |
| AX-158328061 | 26 | 9.142 | KV453225.1 | 130728 | 22-scf00513 | 22 |
| AX-158328062 | 26 | 9.142 | KV453225.1 | 131158 | 22-scf00513 | 22 |
| AX-158328063 | 26 | 9.142 | KV453225.1 | 132473 | 22-scf00513 | 22 |
| AX-158328065 | 26 | 9.142 | KV453225.1 | 133881 | 22-scf00513 | 22 |
| AX-158328069 | 26 | 9.142 | KV453225.1 | 139892 | 22-scf00513 | 22 |
| AX-158328070 | 26 | 9.142 | KV453225.1 | 140280 | 22-scf00513 | 22 |
| AX-158328072 | 26 | 9.142 | KV453225.1 | 142336 | 22-scf00513 | 22 |
| AX-158328073 | 26 | 9.142 | KV453225.1 | 142497 | 22-scf00513 | 22 |
| AX-158381509 | 26 | 9.142 | KV453225.1 | 143453 | 22-scf00513 | 22 |
| AX-158328075 | 26 | 9.142 | KV453225.1 | 144549 | 22-scf00513 | 22 |
| AX-157848854 | 26 | 9.142 | KV453225.1 | 144602 | 22-scf00513 | 22 |
| AX-158328076 | 26 | 9.142 | KV453225.1 | 146069 | 22-scf00513 | 22 |
| AX-157714922 | 26 | 9.142 | KV453225.1 | 154933 | 22-scf00513 | 22 |
| AX-158328081 | 26 | 9.142 | KV453225.1 | 156128 | 22-scf00513 | 22 |
| AX-158328082 | 26 | 9.142 | KV453225.1 | 157579 | 22-scf00513 | 22 |
| AX-158328083 | 26 | 9.361 | KV453225.1 | 159101 | 22-scf00513 | 22 |
| AX-158328049 | 26 | 9.58  | KV453225.1 | 106942 | 22-scf00513 | 22 |
| AX-157861533 | 26 | 9.58  | KV453225.1 | 162738 | 22-scf00513 | 22 |
| AX-158328084 | 26 | 9.58  | KV453225.1 | 163078 | 22-scf00513 | 22 |
| AX-158328085 | 26 | 9.58  | KV453225.1 | 163863 | 22-scf00513 | 22 |
| AX-158328086 | 26 | 9.58  | KV453225.1 | 165298 | 22-scf00513 | 22 |
| AX-158328090 | 26 | 9.58  | KV453225.1 | 168166 | 22-scf00513 | 22 |
| AX-158328091 | 26 | 9.58  | KV453225.1 | 169155 | 22-scf00513 | 22 |
| AX-158328093 | 26 | 9.58  | KV453225.1 | 170129 | 22-scf00513 | 22 |
| AX-158328094 | 26 | 9.58  | KV453225.1 | 172897 | 22-scf00513 | 22 |
| AX-158328095 | 26 | 9.58  | KV453225.1 | 173792 | 22-scf00513 | 22 |
| AX-158328097 | 26 | 9.58  | KV453225.1 | 176338 | 22-scf00513 | 22 |
| AX-158328101 | 26 | 9.58  | KV453225.1 | 185635 | 22-scf00513 | 22 |
| AX-158328102 | 26 | 9.58  | KV453225.1 | 186852 | 22-scf00513 | 22 |
| AX-157873644 | 26 | 9.58  | KV453225.1 | 187302 | 22-scf00513 | 22 |
| AX-158328103 | 26 | 9.58  | KV453225.1 | 187938 | 22-scf00513 | 22 |
| AX-158328104 | 26 | 9.58  | KV453225.1 | 188110 | 22-scf00513 | 22 |
| AX-157743245 | 26 | 9.58  | KV453225.1 | 189821 | 22-scf00513 | 22 |

|              |    |        |            |        |             |    |
|--------------|----|--------|------------|--------|-------------|----|
| AX-158328106 | 26 | 9.58   | KV453225.1 | 190512 | 22-scf00513 | 22 |
| AX-158328107 | 26 | 9.58   | KV453225.1 | 190831 | 22-scf00513 | 22 |
| AX-158328109 | 26 | 9.58   | KV453225.1 | 191887 | 22-scf00513 | 22 |
| AX-158328110 | 26 | 9.58   | KV453225.1 | 192170 | 22-scf00513 | 22 |
| AX-158328111 | 26 | 9.58   | KV453225.1 | 193910 | 22-scf00513 | 22 |
| AX-158328112 | 26 | 9.58   | KV453225.1 | 194370 | 22-scf00513 | 22 |
| AX-158328113 | 26 | 9.58   | KV453225.1 | 195449 | 22-scf00513 | 22 |
| AX-158328115 | 26 | 9.58   | KV453225.1 | 197815 | 22-scf00513 | 22 |
| AX-158328117 | 26 | 9.58   | KV453225.1 | 198923 | 22-scf00513 | 22 |
| AX-157755691 | 26 | 9.58   | KV453226.1 | 8890   | 22-scf00514 | 22 |
| AX-157848862 | 26 | 9.58   | KV453226.1 | 44138  | 22-scf00514 | 22 |
| AX-157750202 | 26 | 9.58   | KV453226.1 | 49344  | 22-scf00514 | 22 |
| AX-157873646 | 26 | 9.58   | KV453226.1 | 67872  | 22-scf00514 | 22 |
| AX-158328173 | 26 | 9.58   | KV453226.1 | 91930  | 22-scf00514 | 22 |
| AX-157725822 | 26 | 9.58   | KV453226.1 | 118934 | 22-scf00514 | 22 |
| AX-158328118 | 26 | 9.634  | KV453225.1 | 200247 | 22-scf00513 | 22 |
| AX-158328119 | 26 | 9.689  | KV453225.1 | 200843 | 22-scf00513 | 22 |
| AX-157773554 | 26 | 9.689  | KV453225.1 | 202986 | 22-scf00513 | 22 |
| AX-158328121 | 26 | 9.689  | KV453225.1 | 203038 | 22-scf00513 | 22 |
| AX-158328122 | 26 | 9.689  | KV453225.1 | 204725 | 22-scf00513 | 22 |
| AX-158328123 | 26 | 9.689  | KV453225.1 | 205031 | 22-scf00513 | 22 |
| AX-157720070 | 26 | 9.884  | KV453225.1 | 207670 | 22-scf00513 | 22 |
| AX-158328125 | 26 | 9.884  | KV453225.1 | 208229 | 22-scf00513 | 22 |
| AX-158328126 | 26 | 9.884  | KV453225.1 | 209058 | 22-scf00513 | 22 |
| AX-157710382 | 26 | 9.884  |            | 81     | scf18586    | UN |
| AX-157710339 | 26 | 10.078 | KV453226.1 | 3038   | 22-scf00514 | 22 |
| AX-158328130 | 26 | 10.078 | KV453226.1 | 4271   | 22-scf00514 | 22 |
| AX-158328132 | 26 | 10.078 | KV453226.1 | 5156   | 22-scf00514 | 22 |
| AX-158418646 | 26 | 10.078 | KV453226.1 | 7494   | 22-scf00514 | 22 |
| AX-158328135 | 26 | 10.078 | KV453226.1 | 9944   | 22-scf00514 | 22 |
| AX-158328137 | 26 | 10.078 | KV453226.1 | 15964  | 22-scf00514 | 22 |
| AX-157709999 | 26 | 10.078 | KV453226.1 | 20083  | 22-scf00514 | 22 |
| AX-158418647 | 26 | 10.078 | KV453226.1 | 22102  | 22-scf00514 | 22 |
| AX-158328142 | 26 | 10.078 | KV453226.1 | 27871  | 22-scf00514 | 22 |
| AX-157848858 | 26 | 10.078 | KV453226.1 | 33171  | 22-scf00514 | 22 |
| AX-157848860 | 26 | 10.078 | KV453226.1 | 34438  | 22-scf00514 | 22 |
| AX-158328145 | 26 | 10.078 | KV453226.1 | 37140  | 22-scf00514 | 22 |
| AX-157755914 | 26 | 10.078 | KV453226.1 | 44429  | 22-scf00514 | 22 |
| AX-157745092 | 26 | 10.078 | KV453226.1 | 50182  | 22-scf00514 | 22 |
| AX-157848865 | 26 | 10.078 | KV453226.1 | 53534  | 22-scf00514 | 22 |
| AX-158328153 | 26 | 10.078 | KV453226.1 | 54403  | 22-scf00514 | 22 |
| AX-158328155 | 26 | 10.078 | KV453226.1 | 58561  | 22-scf00514 | 22 |
| AX-157848867 | 26 | 10.467 | KV453226.1 | 64040  | 22-scf00514 | 22 |
| AX-158328156 | 26 | 10.559 | KV453226.1 | 65407  | 22-scf00514 | 22 |
| AX-157848868 | 26 | 10.662 | KV453226.1 | 69809  | 22-scf00514 | 22 |
| AX-157848869 | 26 | 10.966 | KV453226.1 | 70404  | 22-scf00514 | 22 |
| AX-157718016 | 26 | 10.966 | KV453226.1 | 72523  | 22-scf00514 | 22 |
| AX-158328158 | 26 | 10.966 | KV453226.1 | 73489  | 22-scf00514 | 22 |
| AX-157684664 | 26 | 11.135 | KV453222.1 | 42124  | 22-scf00512 | 22 |
| AX-158328147 | 26 | 11.135 | KV453226.1 | 40486  | 22-scf00514 | 22 |
| AX-157756786 | 26 | 11.135 | KV453226.1 | 46118  | 22-scf00514 | 22 |

|              |    |        |            |        |             |    |
|--------------|----|--------|------------|--------|-------------|----|
| AX-158328162 | 26 | 11.135 | KV453226.1 | 77255  | 22-scf00514 | 22 |
| AX-158328165 | 26 | 11.225 | KV453226.1 | 81957  | 22-scf00514 | 22 |
| AX-158328166 | 26 | 11.247 | KV453226.1 | 85490  | 22-scf00514 | 22 |
| AX-158328168 | 26 | 11.247 | KV453226.1 | 87119  | 22-scf00514 | 22 |
| AX-158328170 | 26 | 11.247 | KV453226.1 | 88680  | 22-scf00514 | 22 |
| AX-158328172 | 26 | 11.247 | KV453226.1 | 90669  | 22-scf00514 | 22 |
| AX-157741842 | 26 | 11.441 | KV453226.1 | 96697  | 22-scf00514 | 22 |
| AX-158328177 | 26 | 11.441 | KV453226.1 | 97246  | 22-scf00514 | 22 |
| AX-157757722 | 26 | 11.495 | KV453226.1 | 100251 | 22-scf00514 | 22 |
| AX-158328187 | 26 | 11.551 | KV453226.1 | 114408 | 22-scf00514 | 22 |
| AX-158328188 | 26 | 11.551 | KV453226.1 | 115696 | 22-scf00514 | 22 |
| AX-158328160 | 26 | 11.66  | KV453226.1 | 74934  | 22-scf00514 | 22 |
| AX-158328182 | 26 | 11.66  | KV453226.1 | 101063 | 22-scf00514 | 22 |
| AX-157717196 | 26 | 11.66  | KV453226.1 | 103061 | 22-scf00514 | 22 |
| AX-158328191 | 26 | 11.66  | KV453226.1 | 117817 | 22-scf00514 | 22 |
| AX-157742494 | 26 | 11.66  | KV453226.1 | 118548 | 22-scf00514 | 22 |
| AX-157848872 | 26 | 11.66  | KV453226.1 | 119276 | 22-scf00514 | 22 |
| AX-158328192 | 26 | 11.66  | KV453226.1 | 120760 | 22-scf00514 | 22 |
| AX-158328193 | 26 | 11.66  | KV453226.1 | 120990 | 22-scf00514 | 22 |
| AX-158328195 | 26 | 11.66  | KV453226.1 | 122812 | 22-scf00514 | 22 |
| AX-158328196 | 26 | 11.66  | KV453226.1 | 123153 | 22-scf00514 | 22 |
| AX-157848873 | 26 | 11.66  | KV453226.1 | 126423 | 22-scf00514 | 22 |
| AX-157848874 | 26 | 11.66  | KV453226.1 | 128172 | 22-scf00514 | 22 |
| AX-158328201 | 26 | 11.66  | KV453226.1 | 131755 | 22-scf00514 | 22 |
| AX-158328202 | 26 | 11.66  | KV453226.1 | 132026 | 22-scf00514 | 22 |
| AX-158328206 | 26 | 11.66  | KV453226.1 | 134798 | 22-scf00514 | 22 |
| AX-158328208 | 26 | 11.66  | KV453226.1 | 139127 | 22-scf00514 | 22 |
| AX-157723398 | 26 | 11.66  | KV453226.1 | 143240 | 22-scf00514 | 22 |
| AX-157881601 | 26 | 11.66  | KV453226.1 | 171367 | 22-scf00514 | 22 |
| AX-158328242 | 26 | 11.66  | KV453226.1 | 185411 | 22-scf00514 | 22 |
| AX-158328190 | 26 | 11.709 | KV453226.1 | 117063 | 22-scf00514 | 22 |
| AX-158328210 | 26 | 11.709 | KV453226.1 | 141768 | 22-scf00514 | 22 |
| AX-158328171 | 26 | 11.769 | KV453226.1 | 89633  | 22-scf00514 | 22 |
| AX-158328186 | 26 | 11.769 | KV453226.1 | 114019 | 22-scf00514 | 22 |
| AX-158328214 | 26 | 11.769 | KV453226.1 | 158104 | 22-scf00514 | 22 |
| AX-158328215 | 26 | 11.769 | KV453226.1 | 159268 | 22-scf00514 | 22 |
| AX-158328217 | 26 | 11.769 | KV453226.1 | 160709 | 22-scf00514 | 22 |
| AX-158328218 | 26 | 11.769 | KV453226.1 | 164320 | 22-scf00514 | 22 |
| AX-158328220 | 26 | 11.769 | KV453226.1 | 165658 | 22-scf00514 | 22 |
| AX-158328227 | 26 | 11.769 | KV453226.1 | 171187 | 22-scf00514 | 22 |
| AX-158328235 | 26 | 11.769 | KV453226.1 | 178246 | 22-scf00514 | 22 |
| AX-158328222 | 26 | 11.844 | KV453226.1 | 167056 | 22-scf00514 | 22 |
| AX-158328223 | 26 | 11.918 | KV453226.1 | 168358 | 22-scf00514 | 22 |
| AX-158328224 | 26 | 11.988 | KV453226.1 | 168810 | 22-scf00514 | 22 |
| AX-158328226 | 26 | 11.988 | KV453226.1 | 170037 | 22-scf00514 | 22 |
| AX-158328228 | 26 | 12.061 | KV453226.1 | 171797 | 22-scf00514 | 22 |
| AX-158328244 | 26 | 12.061 | KV453226.1 | 188475 | 22-scf00514 | 22 |
| AX-158328230 | 26 | 12.133 | KV453226.1 | 173531 | 22-scf00514 | 22 |
| AX-158328232 | 26 | 12.133 | KV453226.1 | 175759 | 22-scf00514 | 22 |
| AX-158328234 | 26 | 12.133 | KV453226.1 | 176831 | 22-scf00514 | 22 |
| AX-158328238 | 26 | 12.133 | KV453226.1 | 180681 | 22-scf00514 | 22 |

|              |    |        |            |        |             |    |
|--------------|----|--------|------------|--------|-------------|----|
| AX-158328240 | 26 | 12.133 | KV453226.1 | 183546 | 22-scf00514 | 22 |
| AX-158328245 | 26 | 12.263 | KV453226.1 | 195883 | 22-scf00514 | 22 |
| AX-157771376 | 26 | 12.425 | KV453226.1 | 191934 | 22-scf00514 | 22 |
| AX-158328246 | 26 | 12.425 | KV453226.1 | 196503 | 22-scf00514 | 22 |
| AX-158328247 | 26 | 12.425 | KV453226.1 | 197849 | 22-scf00514 | 22 |
| AX-158328250 | 26 | 12.425 | KV453226.1 | 203115 | 22-scf00514 | 22 |
| AX-158328253 | 26 | 12.425 | KV453226.1 | 208256 | 22-scf00514 | 22 |
| AX-158328254 | 26 | 12.425 | KV453226.1 | 208948 | 22-scf00514 | 22 |
| AX-158328259 | 26 | 12.425 | KV453226.1 | 212860 | 22-scf00514 | 22 |
| AX-158328260 | 26 | 12.425 | KV453226.1 | 213430 | 22-scf00514 | 22 |
| AX-158328262 | 26 | 12.425 | KV453226.1 | 215050 | 22-scf00514 | 22 |
| AX-158328263 | 26 | 12.425 | KV453226.1 | 216128 | 22-scf00514 | 22 |
| AX-157720934 | 26 | 12.425 | KV453226.1 | 221193 | 22-scf00514 | 22 |
| AX-158328275 | 26 | 12.425 | KV453226.1 | 234996 | 22-scf00514 | 22 |
| AX-157741608 | 26 | 12.495 | KV453226.1 | 222294 | 22-scf00514 | 22 |
| AX-157772667 | 26 | 12.495 | KV453226.1 | 228507 | 22-scf00514 | 22 |
| AX-158328273 | 26 | 12.495 | KV453226.1 | 230231 | 22-scf00514 | 22 |
| AX-158328270 | 26 | 12.534 | KV453226.1 | 224957 | 22-scf00514 | 22 |
| AX-157861536 | 26 | 12.534 | KV453226.1 | 228915 | 22-scf00514 | 22 |
| AX-158328271 | 26 | 12.534 | KV453226.1 | 229037 | 22-scf00514 | 22 |
| AX-157881603 | 26 | 12.534 | KV453226.1 | 233633 | 22-scf00514 | 22 |
| AX-158328279 | 26 | 12.534 | KV453226.1 | 253361 | 22-scf00514 | 22 |
| AX-158328280 | 26 | 12.542 | KV453226.1 | 255591 | 22-scf00514 | 22 |
| AX-158328281 | 26 | 12.549 | KV453226.1 | 258939 | 22-scf00514 | 22 |
| AX-158328283 | 26 | 12.555 | KV453226.1 | 261659 | 22-scf00514 | 22 |
| AX-158328183 | 26 | 13.058 | KV453226.1 | 101905 | 22-scf00514 | 22 |
| AX-158328286 | 26 | 13.058 | KV453226.1 | 264369 | 22-scf00514 | 22 |
| AX-158328287 | 26 | 13.058 | KV453226.1 | 265133 | 22-scf00514 | 22 |
| AX-158328289 | 26 | 13.058 | KV453226.1 | 267366 | 22-scf00514 | 22 |
| AX-158328291 | 26 | 13.058 | KV453226.1 | 272018 | 22-scf00514 | 22 |
| AX-158328293 | 26 | 13.058 | KV453226.1 | 274508 | 22-scf00514 | 22 |
| AX-158381511 | 26 | 13.058 | KV453226.1 | 297243 | 22-scf00514 | 22 |
| AX-157848880 | 26 | 13.058 | KV453226.1 | 335069 | 22-scf00514 | 22 |
| AX-157756223 | 26 | 13.121 | KV453226.1 | 278482 | 22-scf00514 | 22 |
| AX-158328296 | 26 | 13.189 | KV453226.1 | 284711 | 22-scf00514 | 22 |
| AX-158328297 | 26 | 13.189 | KV453226.1 | 288672 | 22-scf00514 | 22 |
| AX-157848875 | 26 | 13.189 | KV453226.1 | 290828 | 22-scf00514 | 22 |
| AX-157848876 | 26 | 13.189 | KV453226.1 | 294759 | 22-scf00514 | 22 |
| AX-158328301 | 26 | 13.189 | KV453226.1 | 295621 | 22-scf00514 | 22 |
| AX-158328302 | 26 | 13.189 | KV453226.1 | 296543 | 22-scf00514 | 22 |
| AX-158328306 | 26 | 13.189 | KV453226.1 | 300255 | 22-scf00514 | 22 |
| AX-157746523 | 26 | 13.189 | KV453226.1 | 343485 | 22-scf00514 | 22 |
| AX-157716316 | 26 | 13.299 | KV453226.1 | 301214 | 22-scf00514 | 22 |
| AX-158328310 | 26 | 13.299 | KV453226.1 | 306165 | 22-scf00514 | 22 |
| AX-158328406 | 26 | 13.299 | KV453226.1 | 440091 | 22-scf00514 | 22 |
| AX-158328307 | 26 | 13.393 | KV453226.1 | 302984 | 22-scf00514 | 22 |
| AX-158328319 | 26 | 13.393 | KV453226.1 | 322930 | 22-scf00514 | 22 |
| AX-158328382 | 26 | 13.393 | KV453226.1 | 390984 | 22-scf00514 | 22 |
| AX-158328316 | 26 | 13.405 | KV453226.1 | 317902 | 22-scf00514 | 22 |
| AX-158328318 | 26 | 13.41  | KV453226.1 | 320123 | 22-scf00514 | 22 |
| AX-157716392 | 26 | 13.422 | KV453226.1 | 324450 | 22-scf00514 | 22 |

|              |    |        |            |        |             |    |
|--------------|----|--------|------------|--------|-------------|----|
| AX-158328321 | 26 | 13.422 | KV453226.1 | 324582 | 22-scf00514 | 22 |
| AX-157708151 | 26 | 13.422 | KV453226.1 | 325399 | 22-scf00514 | 22 |
| AX-158328370 | 26 | 13.422 | KV453226.1 | 379594 | 22-scf00514 | 22 |
| AX-158328324 | 26 | 13.626 | KV453226.1 | 327920 | 22-scf00514 | 22 |
| AX-158328327 | 26 | 13.626 | KV453226.1 | 331156 | 22-scf00514 | 22 |
| AX-158328328 | 26 | 13.626 | KV453226.1 | 331935 | 22-scf00514 | 22 |
| AX-158328329 | 26 | 13.626 | KV453226.1 | 333576 | 22-scf00514 | 22 |
| AX-157716519 | 26 | 13.626 | KV453226.1 | 333662 | 22-scf00514 | 22 |
| AX-158328330 | 26 | 13.626 | KV453226.1 | 333890 | 22-scf00514 | 22 |
| AX-157848879 | 26 | 13.626 | KV453226.1 | 334230 | 22-scf00514 | 22 |
| AX-158328331 | 26 | 13.626 | KV453226.1 | 335849 | 22-scf00514 | 22 |
| AX-157848881 | 26 | 13.626 | KV453226.1 | 336111 | 22-scf00514 | 22 |
| AX-157742475 | 26 | 13.626 | KV453226.1 | 337852 | 22-scf00514 | 22 |
| AX-158328332 | 26 | 13.626 | KV453226.1 | 338553 | 22-scf00514 | 22 |
| AX-158328348 | 26 | 13.626 | KV453226.1 | 360344 | 22-scf00514 | 22 |
| AX-158328357 | 26 | 13.626 | KV453226.1 | 370964 | 22-scf00514 | 22 |
| AX-158418649 | 26 | 13.651 | KV453226.1 | 341905 | 22-scf00514 | 22 |
| AX-157848882 | 26 | 13.696 | KV453226.1 | 342449 | 22-scf00514 | 22 |
| AX-158328336 | 26 | 13.736 | KV453226.1 | 347710 | 22-scf00514 | 22 |
| AX-158328334 | 26 | 13.845 | KV453226.1 | 345079 | 22-scf00514 | 22 |
| AX-158328338 | 26 | 13.845 | KV453226.1 | 351596 | 22-scf00514 | 22 |
| AX-158328343 | 26 | 13.845 | KV453226.1 | 355471 | 22-scf00514 | 22 |
| AX-158328344 | 26 | 13.845 | KV453226.1 | 355841 | 22-scf00514 | 22 |
| AX-157726997 | 26 | 13.845 | KV453226.1 | 363354 | 22-scf00514 | 22 |
| AX-158328349 | 26 | 13.845 | KV453226.1 | 363494 | 22-scf00514 | 22 |
| AX-158328350 | 26 | 13.845 | KV453226.1 | 364192 | 22-scf00514 | 22 |
| AX-157723601 | 26 | 13.845 | KV453226.1 | 366233 | 22-scf00514 | 22 |
| AX-158328352 | 26 | 13.845 | KV453226.1 | 366671 | 22-scf00514 | 22 |
| AX-158328355 | 26 | 13.845 | KV453226.1 | 369501 | 22-scf00514 | 22 |
| AX-158328356 | 26 | 13.845 | KV453226.1 | 370679 | 22-scf00514 | 22 |
| AX-158328358 | 26 | 13.845 | KV453226.1 | 371319 | 22-scf00514 | 22 |
| AX-158328359 | 26 | 13.845 | KV453226.1 | 372563 | 22-scf00514 | 22 |
| AX-158328364 | 26 | 13.845 | KV453226.1 | 374183 | 22-scf00514 | 22 |
| AX-158328365 | 26 | 13.845 | KV453226.1 | 374871 | 22-scf00514 | 22 |
| AX-157726093 | 26 | 13.845 | KV453226.1 | 376123 | 22-scf00514 | 22 |
| AX-158328367 | 26 | 13.845 | KV453226.1 | 377276 | 22-scf00514 | 22 |
| AX-158328368 | 26 | 13.845 | KV453226.1 | 377984 | 22-scf00514 | 22 |
| AX-158328371 | 26 | 13.845 | KV453226.1 | 379973 | 22-scf00514 | 22 |
| AX-158328373 | 26 | 13.845 | KV453226.1 | 382302 | 22-scf00514 | 22 |
| AX-158328375 | 26 | 13.845 | KV453226.1 | 383090 | 22-scf00514 | 22 |
| AX-158328377 | 26 | 13.845 | KV453226.1 | 385121 | 22-scf00514 | 22 |
| AX-158328378 | 26 | 13.845 | KV453226.1 | 386107 | 22-scf00514 | 22 |
| AX-158328380 | 26 | 13.845 | KV453226.1 | 389814 | 22-scf00514 | 22 |
| AX-158328381 | 26 | 13.845 | KV453226.1 | 390556 | 22-scf00514 | 22 |
| AX-158328384 | 26 | 13.845 | KV453226.1 | 394903 | 22-scf00514 | 22 |
| AX-158328386 | 26 | 13.845 | KV453226.1 | 396763 | 22-scf00514 | 22 |
| AX-158328387 | 26 | 13.845 | KV453226.1 | 398471 | 22-scf00514 | 22 |
| AX-158328388 | 26 | 13.845 | KV453226.1 | 399746 | 22-scf00514 | 22 |
| AX-158328389 | 26 | 13.845 | KV453226.1 | 401040 | 22-scf00514 | 22 |
| AX-158328393 | 26 | 13.845 | KV453226.1 | 428917 | 22-scf00514 | 22 |
| AX-158328394 | 26 | 13.845 | KV453226.1 | 429946 | 22-scf00514 | 22 |



|              |    |        |            |        |             |    |
|--------------|----|--------|------------|--------|-------------|----|
| AX-158328395 | 26 | 13.845 | KV453226.1 | 430536 | 22-scf00514 | 22 |
| AX-158328396 | 26 | 13.845 | KV453226.1 | 430968 | 22-scf00514 | 22 |
| AX-157848885 | 26 | 13.845 | KV453226.1 | 432539 | 22-scf00514 | 22 |
| AX-157848886 | 26 | 13.845 | KV453226.1 | 432589 | 22-scf00514 | 22 |
| AX-158328398 | 26 | 13.845 | KV453226.1 | 432953 | 22-scf00514 | 22 |
| AX-158328405 | 26 | 13.845 | KV453226.1 | 438260 | 22-scf00514 | 22 |
| AX-158328424 | 26 | 13.845 | KV453226.1 | 476239 | 22-scf00514 | 22 |
| AX-158328425 | 26 | 13.845 | KV453226.1 | 476729 | 22-scf00514 | 22 |
| AX-158328407 | 26 | 14.063 | KV453226.1 | 445606 | 22-scf00514 | 22 |
| AX-158328409 | 26 | 14.063 | KV453226.1 | 448648 | 22-scf00514 | 22 |
| AX-158328412 | 26 | 14.063 | KV453226.1 | 451788 | 22-scf00514 | 22 |
| AX-158328413 | 26 | 14.063 | KV453226.1 | 452188 | 22-scf00514 | 22 |
| AX-158328414 | 26 | 14.063 | KV453226.1 | 452593 | 22-scf00514 | 22 |
| AX-157848888 | 26 | 14.063 | KV453226.1 | 454842 | 22-scf00514 | 22 |
| AX-157751464 | 26 | 14.063 | KV453226.1 | 455720 | 22-scf00514 | 22 |
| AX-157848891 | 26 | 14.063 | KV453226.1 | 466494 | 22-scf00514 | 22 |
| AX-158328422 | 26 | 14.063 | KV453226.1 | 472446 | 22-scf00514 | 22 |
| AX-157861538 | 26 | 14.063 | KV453226.1 | 476931 | 22-scf00514 | 22 |
| AX-157848901 | 26 | 14.063 | KV453226.1 | 571243 | 22-scf00514 | 22 |
| AX-158328400 | 26 | 14.172 | KV453226.1 | 435374 | 22-scf00514 | 22 |
| AX-157848890 | 26 | 14.172 | KV453226.1 | 457593 | 22-scf00514 | 22 |
| AX-158328419 | 26 | 14.172 | KV453226.1 | 465306 | 22-scf00514 | 22 |
| AX-158328420 | 26 | 14.172 | KV453226.1 | 468490 | 22-scf00514 | 22 |
| AX-158328423 | 26 | 14.172 | KV453226.1 | 475880 | 22-scf00514 | 22 |
| AX-158328426 | 26 | 14.172 | KV453226.1 | 477822 | 22-scf00514 | 22 |
| AX-158328427 | 26 | 14.172 | KV453226.1 | 478298 | 22-scf00514 | 22 |
| AX-158328430 | 26 | 14.172 | KV453226.1 | 481979 | 22-scf00514 | 22 |
| AX-158328431 | 26 | 14.172 | KV453226.1 | 482636 | 22-scf00514 | 22 |
| AX-157720161 | 26 | 14.172 | KV453226.1 | 483507 | 22-scf00514 | 22 |
| AX-157848893 | 26 | 14.173 | KV453226.1 | 494874 | 22-scf00514 | 22 |
| AX-158328438 | 26 | 14.717 | KV453226.1 | 509794 | 22-scf00514 | 22 |
| AX-158418652 | 26 | 14.717 | KV453226.1 | 511015 | 22-scf00514 | 22 |
| AX-158328442 | 26 | 14.717 | KV453226.1 | 514266 | 22-scf00514 | 22 |
| AX-158328443 | 26 | 14.717 | KV453226.1 | 515107 | 22-scf00514 | 22 |
| AX-158328444 | 26 | 14.717 | KV453226.1 | 515646 | 22-scf00514 | 22 |
| AX-158328445 | 26 | 14.717 | KV453226.1 | 516402 | 22-scf00514 | 22 |
| AX-158328446 | 26 | 14.717 | KV453226.1 | 516950 | 22-scf00514 | 22 |
| AX-157757805 | 26 | 14.717 | KV453226.1 | 519152 | 22-scf00514 | 22 |
| AX-158328449 | 26 | 14.717 | KV453226.1 | 519194 | 22-scf00514 | 22 |
| AX-157741787 | 26 | 14.717 | KV453226.1 | 521224 | 22-scf00514 | 22 |
| AX-157750027 | 26 | 14.717 | KV453226.1 | 522464 | 22-scf00514 | 22 |
| AX-158328453 | 26 | 14.717 | KV453226.1 | 525812 | 22-scf00514 | 22 |
| AX-158328457 | 26 | 14.717 | KV453226.1 | 532583 | 22-scf00514 | 22 |
| AX-158381513 | 26 | 14.717 | KV453226.1 | 534062 | 22-scf00514 | 22 |
| AX-158328463 | 26 | 14.883 | KV453226.1 | 547872 | 22-scf00514 | 22 |
| AX-158328437 | 26 | 15.046 | KV453226.1 | 503763 | 22-scf00514 | 22 |
| AX-158328451 | 26 | 15.046 | KV453226.1 | 523124 | 22-scf00514 | 22 |
| AX-158328455 | 26 | 15.046 | KV453226.1 | 527488 | 22-scf00514 | 22 |
| AX-157740920 | 26 | 15.046 | KV453226.1 | 552765 | 22-scf00514 | 22 |
| AX-157848900 | 26 | 15.046 | KV453226.1 | 559937 | 22-scf00514 | 22 |
| AX-158328465 | 26 | 15.046 | KV453226.1 | 561078 | 22-scf00514 | 22 |

|              |    |        |            |        |             |    |
|--------------|----|--------|------------|--------|-------------|----|
| AX-158328468 | 26 | 15.046 | KV453226.1 | 564163 | 22-scf00514 | 22 |
| AX-158328469 | 26 | 15.046 | KV453226.1 | 565974 | 22-scf00514 | 22 |
| AX-158328470 | 26 | 15.046 | KV453226.1 | 566641 | 22-scf00514 | 22 |
| AX-158328471 | 26 | 15.046 | KV453226.1 | 568143 | 22-scf00514 | 22 |
| AX-158328475 | 26 | 15.12  | KV453226.1 | 576958 | 22-scf00514 | 22 |
| AX-158328480 | 26 | 15.265 | KV453226.1 | 585063 | 22-scf00514 | 22 |
| AX-158328485 | 26 | 15.265 | KV453226.1 | 593013 | 22-scf00514 | 22 |
| AX-158328482 | 26 | 15.283 | KV453226.1 | 588710 | 22-scf00514 | 22 |
| AX-158328484 | 26 | 15.303 | KV453226.1 | 591961 | 22-scf00514 | 22 |
| AX-157751698 | 26 | 15.32  | KV453226.1 | 592427 | 22-scf00514 | 22 |
| AX-158328486 | 26 | 15.328 | KV453226.1 | 593451 | 22-scf00514 | 22 |
| AX-158328487 | 26 | 15.349 | KV453226.1 | 595221 | 22-scf00514 | 22 |
| AX-157881608 | 26 | 15.349 | KV453226.1 | 623549 | 22-scf00514 | 22 |
| AX-158328489 | 26 | 15.365 | KV453226.1 | 598147 | 22-scf00514 | 22 |
| AX-158328490 | 26 | 15.374 | KV453226.1 | 599014 | 22-scf00514 | 22 |
| AX-158328492 | 26 | 15.484 | KV453226.1 | 601135 | 22-scf00514 | 22 |
| AX-158328493 | 26 | 15.523 | KV453226.1 | 605637 | 22-scf00514 | 22 |
| AX-158328494 | 26 | 15.523 | KV453226.1 | 606055 | 22-scf00514 | 22 |
| AX-158328495 | 26 | 15.635 | KV453226.1 | 609673 | 22-scf00514 | 22 |
| AX-158328499 | 26 | 15.88  | KV453226.1 | 614974 | 22-scf00514 | 22 |
| AX-157713195 | 26 | 16.03  | KV453226.1 | 620387 | 22-scf00514 | 22 |
| AX-158328505 | 26 | 16.03  | KV453226.1 | 621651 | 22-scf00514 | 22 |
| AX-157727198 | 26 | 16.03  | KV453226.1 | 623147 | 22-scf00514 | 22 |
| AX-157719170 | 26 | 16.03  | KV453226.1 | 625087 | 22-scf00514 | 22 |
| AX-158328508 | 26 | 16.03  | KV453226.1 | 625789 | 22-scf00514 | 22 |
| AX-158328509 | 26 | 16.03  | KV453226.1 | 627813 | 22-scf00514 | 22 |
| AX-158328511 | 26 | 16.03  | KV453226.1 | 629014 | 22-scf00514 | 22 |
| AX-158328513 | 26 | 16.03  | KV453226.1 | 630697 | 22-scf00514 | 22 |
| AX-158328514 | 26 | 16.03  | KV453226.1 | 632650 | 22-scf00514 | 22 |
| AX-158328515 | 26 | 16.03  | KV453226.1 | 633644 | 22-scf00514 | 22 |
| AX-158328516 | 26 | 16.03  | KV453226.1 | 634063 | 22-scf00514 | 22 |
| AX-158328517 | 26 | 16.03  | KV453226.1 | 634586 | 22-scf00514 | 22 |
| AX-158328519 | 26 | 16.03  | KV453226.1 | 637225 | 22-scf00514 | 22 |
| AX-157861540 | 26 | 16.03  | KV453226.1 | 647679 | 22-scf00514 | 22 |
| AX-158328533 | 26 | 16.03  | KV453226.1 | 653663 | 22-scf00514 | 22 |
| AX-158328520 | 26 | 16.032 | KV453226.1 | 637925 | 22-scf00514 | 22 |
| AX-158328521 | 26 | 16.036 | KV453226.1 | 638610 | 22-scf00514 | 22 |
| AX-158328524 | 26 | 16.165 | KV453226.1 | 641766 | 22-scf00514 | 22 |
| AX-158328525 | 26 | 16.302 | KV453226.1 | 642706 | 22-scf00514 | 22 |
| AX-158328528 | 26 | 16.369 | KV453226.1 | 645678 | 22-scf00514 | 22 |
| AX-157723381 | 26 | 16.438 | KV453226.1 | 648895 | 22-scf00514 | 22 |
| AX-158328530 | 26 | 16.575 | KV453226.1 | 649431 | 22-scf00514 | 22 |
| AX-158328531 | 26 | 16.575 | KV453226.1 | 649910 | 22-scf00514 | 22 |
| AX-158418654 | 26 | 16.575 | KV453226.1 | 653105 | 22-scf00514 | 22 |
| AX-158328535 | 26 | 16.575 | KV453226.1 | 654463 | 22-scf00514 | 22 |
| AX-158328536 | 26 | 16.585 | KV453226.1 | 654909 | 22-scf00514 | 22 |
| AX-158328537 | 26 | 16.585 | KV453226.1 | 655385 | 22-scf00514 | 22 |
| AX-158328539 | 26 | 16.585 | KV453226.1 | 658282 | 22-scf00514 | 22 |
| AX-158328617 | 26 | 16.585 | KV453226.1 | 795043 | 22-scf00514 | 22 |
| AX-158328540 | 26 | 16.905 | KV453226.1 | 660776 | 22-scf00514 | 22 |
| AX-158328542 | 26 | 16.905 | KV453226.1 | 663519 | 22-scf00514 | 22 |

|              |    |        |             |        |             |    |
|--------------|----|--------|-------------|--------|-------------|----|
| AX-158328545 | 26 | 16.905 | KV453226.1  | 665894 | 22-scf00514 | 22 |
| AX-157770657 | 26 | 16.965 | KV453226.1  | 667538 | 22-scf00514 | 22 |
| AX-158328546 | 26 | 17.028 | KV453226.1  | 666562 | 22-scf00514 | 22 |
| AX-158328549 | 26 | 17.028 | KV453226.1  | 670612 | 22-scf00514 | 22 |
| AX-158328551 | 26 | 17.028 | KV453226.1  | 671620 | 22-scf00514 | 22 |
| AX-158328552 | 26 | 17.028 | KV453226.1  | 672600 | 22-scf00514 | 22 |
| AX-157705924 | 26 | 17.028 | 3ML01031242 | 247    | scf06849_1  | UN |
| AX-157881610 | 26 | 17.15  | KV453226.1  | 675745 | 22-scf00514 | 22 |
| AX-158328543 | 26 | 17.273 | KV453226.1  | 663994 | 22-scf00514 | 22 |
| AX-158328544 | 26 | 17.273 | KV453226.1  | 665276 | 22-scf00514 | 22 |
| AX-158328559 | 26 | 17.273 | KV453226.1  | 680473 | 22-scf00514 | 22 |
| AX-158328560 | 26 | 17.273 | KV453226.1  | 682929 | 22-scf00514 | 22 |
| AX-158328580 | 26 | 17.273 | KV453226.1  | 725944 | 22-scf00514 | 22 |
| AX-157742732 | 26 | 17.274 | KV453226.1  | 683558 | 22-scf00514 | 22 |
| AX-158328562 | 26 | 17.274 | KV453226.1  | 683938 | 22-scf00514 | 22 |
| AX-157848903 | 26 | 17.274 | KV453226.1  | 686604 | 22-scf00514 | 22 |
| AX-157848904 | 26 | 17.274 | KV453226.1  | 699845 | 22-scf00514 | 22 |
| AX-158328568 | 26 | 17.277 | KV453226.1  | 700182 | 22-scf00514 | 22 |
| AX-158328574 | 26 | 17.888 | KV453226.1  | 718237 | 22-scf00514 | 22 |
| AX-157743109 | 26 | 17.888 | KV453226.1  | 720360 | 22-scf00514 | 22 |
| AX-158328578 | 26 | 17.888 | KV453226.1  | 724872 | 22-scf00514 | 22 |
| AX-158328581 | 26 | 17.888 | KV453226.1  | 726740 | 22-scf00514 | 22 |
| AX-158328582 | 26 | 17.888 | KV453226.1  | 727571 | 22-scf00514 | 22 |
| AX-157709601 | 26 | 17.888 | KV453226.1  | 730733 | 22-scf00514 | 22 |
| AX-157748504 | 26 | 17.888 | KV453226.1  | 731762 | 22-scf00514 | 22 |
| AX-157774944 | 26 | 17.888 | KV453226.1  | 734251 | 22-scf00514 | 22 |
| AX-158328586 | 26 | 17.888 | KV453226.1  | 737774 | 22-scf00514 | 22 |
| AX-158328587 | 26 | 17.888 | KV453226.1  | 738739 | 22-scf00514 | 22 |
| AX-158328589 | 26 | 17.888 | KV453226.1  | 740231 | 22-scf00514 | 22 |
| AX-157848907 | 26 | 17.888 | KV453226.1  | 745939 | 22-scf00514 | 22 |
| AX-158328590 | 26 | 17.888 | KV453226.1  | 748027 | 22-scf00514 | 22 |
| AX-158328592 | 26 | 17.888 | KV453226.1  | 751988 | 22-scf00514 | 22 |
| AX-158328593 | 26 | 17.888 | KV453226.1  | 752791 | 22-scf00514 | 22 |
| AX-158328594 | 26 | 17.888 | KV453226.1  | 753185 | 22-scf00514 | 22 |
| AX-157694437 | 26 | 17.888 | KV453226.1  | 756764 | 22-scf00514 | 22 |
| AX-158328596 | 26 | 17.888 | KV453226.1  | 761431 | 22-scf00514 | 22 |
| AX-158328597 | 26 | 17.888 | KV453226.1  | 765647 | 22-scf00514 | 22 |
| AX-158381515 | 26 | 17.888 | KV453226.1  | 767636 | 22-scf00514 | 22 |
| AX-157848909 | 26 | 17.888 | KV453226.1  | 768641 | 22-scf00514 | 22 |
| AX-158328600 | 26 | 17.888 | KV453226.1  | 773345 | 22-scf00514 | 22 |
| AX-158328629 | 26 | 17.888 | KV453226.1  | 826476 | 22-scf00514 | 22 |
| AX-158328572 | 26 | 17.998 | KV453226.1  | 715998 | 22-scf00514 | 22 |
| AX-158328598 | 26 | 17.998 | KV453226.1  | 770320 | 22-scf00514 | 22 |
| AX-158418656 | 26 | 17.998 | KV453226.1  | 775700 | 22-scf00514 | 22 |
| AX-158328601 | 26 | 17.998 | KV453226.1  | 776064 | 22-scf00514 | 22 |
| AX-158328607 | 26 | 17.998 | KV453226.1  | 784384 | 22-scf00514 | 22 |
| AX-158328624 | 26 | 17.998 | KV453226.1  | 811138 | 22-scf00514 | 22 |
| AX-158328602 | 26 | 18.107 | KV453226.1  | 778015 | 22-scf00514 | 22 |
| AX-158328603 | 26 | 18.107 | KV453226.1  | 778827 | 22-scf00514 | 22 |
| AX-158328605 | 26 | 18.107 | KV453226.1  | 780759 | 22-scf00514 | 22 |
| AX-158328608 | 26 | 18.107 | KV453226.1  | 786279 | 22-scf00514 | 22 |

|              |    |        |            |        |             |    |
|--------------|----|--------|------------|--------|-------------|----|
| AX-158328609 | 26 | 18.107 | KV453226.1 | 787096 | 22-scf00514 | 22 |
| AX-158328611 | 26 | 18.107 | KV453226.1 | 787978 | 22-scf00514 | 22 |
| AX-158328612 | 26 | 18.107 | KV453226.1 | 788733 | 22-scf00514 | 22 |
| AX-158328614 | 26 | 18.107 | KV453226.1 | 790332 | 22-scf00514 | 22 |
| AX-158328615 | 26 | 18.107 | KV453226.1 | 790986 | 22-scf00514 | 22 |
| AX-158328616 | 26 | 18.107 | KV453226.1 | 792513 | 22-scf00514 | 22 |
| AX-158328618 | 26 | 18.107 | KV453226.1 | 798140 | 22-scf00514 | 22 |
| AX-158328620 | 26 | 18.107 | KV453226.1 | 800247 | 22-scf00514 | 22 |
| AX-158328622 | 26 | 18.107 | KV453226.1 | 804226 | 22-scf00514 | 22 |
| AX-157848912 | 26 | 18.107 | KV453226.1 | 817026 | 22-scf00514 | 22 |
| AX-157748626 | 26 | 18.325 | KV453226.1 | 813474 | 22-scf00514 | 22 |
| AX-157848911 | 26 | 18.325 | KV453226.1 | 816715 | 22-scf00514 | 22 |
| AX-158328626 | 26 | 18.543 | KV453226.1 | 820630 | 22-scf00514 | 22 |
| AX-157738933 | 26 | 18.544 | KV453226.1 | 821969 | 22-scf00514 | 22 |
| AX-157758441 | 26 | 18.544 | KV453226.1 | 828718 | 22-scf00514 | 22 |
| AX-158328631 | 26 | 18.544 | KV453226.1 | 832367 | 22-scf00514 | 22 |
| AX-158328634 | 26 | 18.544 | KV453226.1 | 841149 | 22-scf00514 | 22 |
| AX-158328636 | 26 | 18.544 | KV453226.1 | 843220 | 22-scf00514 | 22 |
| AX-158328637 | 26 | 18.544 | KV453226.1 | 845258 | 22-scf00514 | 22 |
| AX-158328638 | 26 | 18.762 | KV453226.1 | 846632 | 22-scf00514 | 22 |
| AX-157758742 | 26 | 18.762 | KV453226.1 | 847878 | 22-scf00514 | 22 |
| AX-158328639 | 26 | 18.762 | KV453226.1 | 852638 | 22-scf00514 | 22 |
| AX-158328640 | 26 | 18.762 | KV453226.1 | 853519 | 22-scf00514 | 22 |
| AX-158328642 | 26 | 18.762 | KV453226.1 | 854522 | 22-scf00514 | 22 |
| AX-158328644 | 26 | 18.762 | KV453226.1 | 857582 | 22-scf00514 | 22 |
| AX-158328647 | 26 | 18.926 | KV453226.1 | 861488 | 22-scf00514 | 22 |
| AX-158328650 | 26 | 19.089 | KV453226.1 | 865486 | 22-scf00514 | 22 |
| AX-158328654 | 26 | 19.09  | KV453226.1 | 869450 | 22-scf00514 | 22 |
| AX-157848916 | 26 | 19.144 | KV453226.1 | 869555 | 22-scf00514 | 22 |
| AX-158328656 | 26 | 19.199 | KV453226.1 | 871667 | 22-scf00514 | 22 |
| AX-158381516 | 26 | 19.199 | KV453226.1 | 872507 | 22-scf00514 | 22 |
| AX-158328658 | 26 | 19.199 | KV453226.1 | 873662 | 22-scf00514 | 22 |
| AX-158328660 | 26 | 19.199 | KV453226.1 | 876541 | 22-scf00514 | 22 |
| AX-158328643 | 26 | 19.238 | KV453226.1 | 856818 | 22-scf00514 | 22 |
| AX-158328663 | 26 | 19.238 | KV453226.1 | 881737 | 22-scf00514 | 22 |
| AX-157773740 | 26 | 19.263 | KV453226.1 | 883118 | 22-scf00514 | 22 |
| AX-157721000 | 26 | 19.263 | KV453226.1 | 922456 | 22-scf00514 | 22 |
| AX-158328689 | 26 | 19.263 | KV453226.1 | 922938 | 22-scf00514 | 22 |
| AX-158328703 | 26 | 19.263 | KV453226.1 | 944015 | 22-scf00514 | 22 |
| AX-158328657 | 26 | 19.285 | KV453226.1 | 872694 | 22-scf00514 | 22 |
| AX-158328665 | 26 | 19.285 | KV453226.1 | 884853 | 22-scf00514 | 22 |
| AX-158328645 | 26 | 19.308 | KV453226.1 | 860140 | 22-scf00514 | 22 |
| AX-158328651 | 26 | 19.308 | KV453226.1 | 865852 | 22-scf00514 | 22 |
| AX-157746680 | 26 | 19.308 | KV453226.1 | 885489 | 22-scf00514 | 22 |
| AX-158328666 | 26 | 19.308 | KV453226.1 | 885841 | 22-scf00514 | 22 |
| AX-158328667 | 26 | 19.308 | KV453226.1 | 886849 | 22-scf00514 | 22 |
| AX-158328668 | 26 | 19.308 | KV453226.1 | 887529 | 22-scf00514 | 22 |
| AX-157848917 | 26 | 19.308 | KV453226.1 | 887784 | 22-scf00514 | 22 |
| AX-158328669 | 26 | 19.308 | KV453226.1 | 888117 | 22-scf00514 | 22 |
| AX-158328678 | 26 | 19.308 | KV453226.1 | 906210 | 22-scf00514 | 22 |
| AX-158328674 | 26 | 19.527 | KV453226.1 | 900573 | 22-scf00514 | 22 |

|              |    |        |            |         |             |    |
|--------------|----|--------|------------|---------|-------------|----|
| AX-158328677 | 26 | 19.745 | KV453226.1 | 905279  | 22-scf00514 | 22 |
| AX-158328679 | 26 | 19.745 | KV453226.1 | 907583  | 22-scf00514 | 22 |
| AX-158328680 | 26 | 19.745 | KV453226.1 | 909043  | 22-scf00514 | 22 |
| AX-158328693 | 26 | 19.745 | KV453226.1 | 930015  | 22-scf00514 | 22 |
| AX-158328682 | 26 | 19.854 | KV453226.1 | 913913  | 22-scf00514 | 22 |
| AX-158328683 | 26 | 19.854 | KV453226.1 | 915053  | 22-scf00514 | 22 |
| AX-158328684 | 26 | 19.894 | KV453226.1 | 916016  | 22-scf00514 | 22 |
| AX-158328692 | 26 | 19.894 | KV453226.1 | 929286  | 22-scf00514 | 22 |
| AX-158328685 | 26 | 19.915 | KV453226.1 | 917243  | 22-scf00514 | 22 |
| AX-158328686 | 26 | 19.964 | KV453226.1 | 919413  | 22-scf00514 | 22 |
| AX-158328688 | 26 | 19.964 | KV453226.1 | 921518  | 22-scf00514 | 22 |
| AX-158328690 | 26 | 20.073 | KV453226.1 | 924071  | 22-scf00514 | 22 |
| AX-158328691 | 26 | 20.175 | KV453226.1 | 928159  | 22-scf00514 | 22 |
| AX-158328694 | 26 | 20.292 | KV453226.1 | 934753  | 22-scf00514 | 22 |
| AX-158328695 | 26 | 20.292 | KV453226.1 | 935930  | 22-scf00514 | 22 |
| AX-158328697 | 26 | 20.292 | KV453226.1 | 937992  | 22-scf00514 | 22 |
| AX-158328734 | 26 | 20.292 | KV453226.1 | 981607  | 22-scf00514 | 22 |
| AX-158328736 | 26 | 20.292 | KV453226.1 | 989112  | 22-scf00514 | 22 |
| AX-158328722 | 26 | 20.685 | KV453226.1 | 966838  | 22-scf00514 | 22 |
| AX-157750398 | 26 | 20.685 | KV453226.1 | 967885  | 22-scf00514 | 22 |
| AX-158328723 | 26 | 20.685 | KV453226.1 | 968594  | 22-scf00514 | 22 |
| AX-158328732 | 26 | 20.685 | KV453226.1 | 980205  | 22-scf00514 | 22 |
| AX-158328741 | 26 | 20.685 | KV453226.1 | 994815  | 22-scf00514 | 22 |
| AX-158328728 | 26 | 20.817 | KV453226.1 | 978563  | 22-scf00514 | 22 |
| AX-158328729 | 26 | 20.859 | KV453226.1 | 978778  | 22-scf00514 | 22 |
| AX-158328733 | 26 | 20.903 | KV453226.1 | 980960  | 22-scf00514 | 22 |
| AX-157709412 | 26 | 20.946 | KV453226.1 | 982002  | 22-scf00514 | 22 |
| AX-158328738 | 26 | 20.947 | KV453226.1 | 991016  | 22-scf00514 | 22 |
| AX-158328740 | 26 | 20.947 | KV453226.1 | 993669  | 22-scf00514 | 22 |
| AX-158328743 | 26 | 20.947 | KV453226.1 | 998567  | 22-scf00514 | 22 |
| AX-158328744 | 26 | 20.947 | KV453226.1 | 1000535 | 22-scf00514 | 22 |
| AX-158328745 | 26 | 20.947 | KV453226.1 | 1001987 | 22-scf00514 | 22 |
| AX-157715727 | 26 | 20.947 | KV453226.1 | 1003055 | 22-scf00514 | 22 |
| AX-158328748 | 26 | 20.947 | KV453226.1 | 1009239 | 22-scf00514 | 22 |
| AX-158328749 | 26 | 20.949 | KV453226.1 | 1009833 | 22-scf00514 | 22 |
| AX-158328753 | 26 | 20.951 | KV453226.1 | 1020900 | 22-scf00514 | 22 |
| AX-158328757 | 26 | 21.382 | KV453226.1 | 1027668 | 22-scf00514 | 22 |
| AX-158328758 | 26 | 21.384 | KV453226.1 | 1028039 | 22-scf00514 | 22 |
| AX-158328759 | 26 | 21.384 | KV453226.1 | 1028668 | 22-scf00514 | 22 |
| AX-158328761 | 26 | 21.385 | KV453226.1 | 1033781 | 22-scf00514 | 22 |
| AX-158328754 | 26 | 21.386 | KV453226.1 | 1022555 | 22-scf00514 | 22 |
| AX-158328762 | 26 | 21.386 | KV453226.1 | 1035098 | 22-scf00514 | 22 |
| AX-158328766 | 26 | 21.547 | KV453226.1 | 1041309 | 22-scf00514 | 22 |
| AX-157739582 | 26 | 21.547 | KV453227.1 | 7492    | 22-scf00515 | 22 |
| AX-158328764 | 26 | 21.712 | KV453226.1 | 1039870 | 22-scf00514 | 22 |
| AX-158328767 | 26 | 21.712 | KV453226.1 | 1042425 | 22-scf00514 | 22 |
| AX-158328768 | 26 | 21.712 | KV453226.1 | 1044293 | 22-scf00514 | 22 |
| AX-158328769 | 26 | 21.712 | KV453226.1 | 1045280 | 22-scf00514 | 22 |
| AX-158328770 | 26 | 21.712 | KV453226.1 | 1045970 | 22-scf00514 | 22 |
| AX-158328772 | 26 | 21.712 | KV453226.1 | 1048667 | 22-scf00514 | 22 |
| AX-158328777 | 26 | 21.977 | KV453227.1 | 10667   | 22-scf00515 | 22 |

|              |    |        |            |        |             |    |
|--------------|----|--------|------------|--------|-------------|----|
| AX-158328782 | 26 | 21.977 | KV453227.1 | 18754  | 22-scf00515 | 22 |
| AX-158328784 | 26 | 21.977 | KV453227.1 | 22136  | 22-scf00515 | 22 |
| AX-158328787 | 26 | 22.337 | KV453227.1 | 30276  | 22-scf00515 | 22 |
| AX-158328789 | 26 | 22.337 | KV453227.1 | 37106  | 22-scf00515 | 22 |
| AX-158328786 | 26 | 22.477 | KV453227.1 | 26635  | 22-scf00515 | 22 |
| AX-158328788 | 26 | 22.477 | KV453227.1 | 34436  | 22-scf00515 | 22 |
| AX-158328790 | 26 | 22.477 | KV453227.1 | 37590  | 22-scf00515 | 22 |
| AX-158381518 | 26 | 22.477 | KV453227.1 | 37936  | 22-scf00515 | 22 |
| AX-158328791 | 26 | 22.477 | KV453227.1 | 38128  | 22-scf00515 | 22 |
| AX-158328792 | 26 | 22.477 | KV453227.1 | 38704  | 22-scf00515 | 22 |
| AX-158328793 | 26 | 22.477 | KV453227.1 | 40662  | 22-scf00515 | 22 |
| AX-158328795 | 26 | 22.477 | KV453227.1 | 43527  | 22-scf00515 | 22 |
| AX-158328796 | 26 | 22.477 | KV453227.1 | 46537  | 22-scf00515 | 22 |
| AX-158328797 | 26 | 22.477 | KV453227.1 | 47389  | 22-scf00515 | 22 |
| AX-158328798 | 26 | 22.477 | KV453227.1 | 48408  | 22-scf00515 | 22 |
| AX-158328799 | 26 | 22.477 | KV453227.1 | 49539  | 22-scf00515 | 22 |
| AX-158328800 | 26 | 22.477 | KV453227.1 | 50514  | 22-scf00515 | 22 |
| AX-158328802 | 26 | 22.477 | KV453227.1 | 52037  | 22-scf00515 | 22 |
| AX-158328803 | 26 | 22.477 | KV453227.1 | 53821  | 22-scf00515 | 22 |
| AX-158328804 | 26 | 22.477 | KV453227.1 | 54616  | 22-scf00515 | 22 |
| AX-158328809 | 26 | 22.477 | KV453227.1 | 61181  | 22-scf00515 | 22 |
| AX-158328810 | 26 | 22.477 | KV453227.1 | 62482  | 22-scf00515 | 22 |
| AX-158328811 | 26 | 22.477 | KV453227.1 | 64347  | 22-scf00515 | 22 |
| AX-158328814 | 26 | 22.477 | KV453227.1 | 67422  | 22-scf00515 | 22 |
| AX-158328813 | 26 | 22.804 | KV453227.1 | 66747  | 22-scf00515 | 22 |
| AX-157771090 | 26 | 22.804 | KV453227.1 | 74742  | 22-scf00515 | 22 |
| AX-158328823 | 26 | 22.804 | KV453227.1 | 89478  | 22-scf00515 | 22 |
| AX-158328831 | 26 | 22.804 | KV453227.1 | 101649 | 22-scf00515 | 22 |
| AX-157760543 | 26 | 22.804 | KV453227.1 | 193811 | 22-scf00515 | 22 |
| AX-158328819 | 26 | 23.02  | KV453227.1 | 77401  | 22-scf00515 | 22 |
| AX-157740291 | 26 | 23.02  | KV453227.1 | 86171  | 22-scf00515 | 22 |
| AX-157709415 | 26 | 23.025 | KV453227.1 | 66101  | 22-scf00515 | 22 |
| AX-158328818 | 26 | 23.025 | KV453227.1 | 76559  | 22-scf00515 | 22 |
| AX-158328821 | 26 | 23.025 | KV453227.1 | 84637  | 22-scf00515 | 22 |
| AX-158328822 | 26 | 23.025 | KV453227.1 | 86871  | 22-scf00515 | 22 |
| AX-158328824 | 26 | 23.025 | KV453227.1 | 89878  | 22-scf00515 | 22 |
| AX-158328833 | 26 | 23.025 | KV453227.1 | 102698 | 22-scf00515 | 22 |
| AX-157741741 | 26 | 23.025 | KV453227.1 | 104239 | 22-scf00515 | 22 |
| AX-158328862 | 26 | 23.025 | KV453227.1 | 147911 | 22-scf00515 | 22 |
| AX-158328868 | 26 | 23.025 | KV453227.1 | 152659 | 22-scf00515 | 22 |
| AX-157745696 | 26 | 23.026 | KV453227.1 | 80558  | 22-scf00515 | 22 |
| AX-157724295 | 26 | 23.374 | KV453227.1 | 87920  | 22-scf00515 | 22 |
| AX-158328826 | 26 | 23.374 | KV453227.1 | 93936  | 22-scf00515 | 22 |
| AX-158328829 | 26 | 23.374 | KV453227.1 | 100400 | 22-scf00515 | 22 |
| AX-157741027 | 26 | 23.374 | KV453227.1 | 121660 | 22-scf00515 | 22 |
| AX-158328839 | 26 | 23.549 | KV453227.1 | 111131 | 22-scf00515 | 22 |
| AX-157740081 | 26 | 23.549 | KV453227.1 | 116007 | 22-scf00515 | 22 |
| AX-158328849 | 26 | 23.607 | KV453227.1 | 126203 | 22-scf00515 | 22 |
| AX-158328834 | 26 | 23.789 | KV453227.1 | 105003 | 22-scf00515 | 22 |
| AX-157771890 | 26 | 23.789 | KV453227.1 | 108233 | 22-scf00515 | 22 |
| AX-158328840 | 26 | 23.789 | KV453227.1 | 114469 | 22-scf00515 | 22 |

|              |    |        |            |        |             |    |
|--------------|----|--------|------------|--------|-------------|----|
| AX-158328841 | 26 | 23.789 | KV453227.1 | 115157 | 22-scf00515 | 22 |
| AX-158328844 | 26 | 23.789 | KV453227.1 | 117822 | 22-scf00515 | 22 |
| AX-158328846 | 26 | 23.789 | KV453227.1 | 119819 | 22-scf00515 | 22 |
| AX-158328847 | 26 | 23.789 | KV453227.1 | 120327 | 22-scf00515 | 22 |
| AX-157721572 | 26 | 23.789 | KV453227.1 | 128335 | 22-scf00515 | 22 |
| AX-158328851 | 26 | 23.789 | KV453227.1 | 129677 | 22-scf00515 | 22 |
| AX-158328852 | 26 | 23.789 | KV453227.1 | 131270 | 22-scf00515 | 22 |
| AX-158328854 | 26 | 23.789 | KV453227.1 | 135921 | 22-scf00515 | 22 |
| AX-157750835 | 26 | 23.922 | KV453227.1 | 141060 | 22-scf00515 | 22 |
| AX-158328863 | 26 | 24.173 | KV453227.1 | 148409 | 22-scf00515 | 22 |
| AX-158328857 | 26 | 24.423 | KV453227.1 | 139299 | 22-scf00515 | 22 |
| AX-158328861 | 26 | 24.423 | KV453227.1 | 145157 | 22-scf00515 | 22 |
| AX-158328864 | 26 | 24.423 | KV453227.1 | 150398 | 22-scf00515 | 22 |
| AX-158328865 | 26 | 24.423 | KV453227.1 | 151117 | 22-scf00515 | 22 |
| AX-158328866 | 26 | 24.423 | KV453227.1 | 151694 | 22-scf00515 | 22 |
| AX-158328883 | 26 | 24.423 | KV453227.1 | 177710 | 22-scf00515 | 22 |
| AX-158328890 | 26 | 24.423 | KV453227.1 | 183695 | 22-scf00515 | 22 |
| AX-158328894 | 26 | 24.423 | KV453227.1 | 193610 | 22-scf00515 | 22 |
| AX-158328913 | 26 | 24.423 | KV453227.1 | 223741 | 22-scf00515 | 22 |
| AX-158329001 | 26 | 24.423 | KV453227.1 | 359442 | 22-scf00515 | 22 |
| AX-158328874 | 26 | 24.555 | KV453227.1 | 161030 | 22-scf00515 | 22 |
| AX-158328875 | 26 | 24.555 | KV453227.1 | 163824 | 22-scf00515 | 22 |
| AX-158328876 | 26 | 24.555 | KV453227.1 | 164327 | 22-scf00515 | 22 |
| AX-157848923 | 26 | 24.555 | KV453227.1 | 166514 | 22-scf00515 | 22 |
| AX-157848924 | 26 | 24.555 | KV453227.1 | 168896 | 22-scf00515 | 22 |
| AX-158328880 | 26 | 24.555 | KV453227.1 | 169852 | 22-scf00515 | 22 |
| AX-158328882 | 26 | 24.555 | KV453227.1 | 175737 | 22-scf00515 | 22 |
| AX-158328886 | 26 | 24.555 | KV453227.1 | 181194 | 22-scf00515 | 22 |
| AX-158328942 | 26 | 24.555 | KV453227.1 | 273441 | 22-scf00515 | 22 |
| AX-158328869 | 26 | 24.665 | KV453227.1 | 153339 | 22-scf00515 | 22 |
| AX-157719916 | 26 | 24.665 | KV453227.1 | 155007 | 22-scf00515 | 22 |
| AX-158328873 | 26 | 24.665 | KV453227.1 | 160331 | 22-scf00515 | 22 |
| AX-158328879 | 26 | 24.665 | KV453227.1 | 169379 | 22-scf00515 | 22 |
| AX-158328885 | 26 | 24.665 | KV453227.1 | 180473 | 22-scf00515 | 22 |
| AX-158328887 | 26 | 24.665 | KV453227.1 | 181909 | 22-scf00515 | 22 |
| AX-158328888 | 26 | 24.665 | KV453227.1 | 182524 | 22-scf00515 | 22 |
| AX-158328891 | 26 | 24.665 | KV453227.1 | 184455 | 22-scf00515 | 22 |
| AX-158328892 | 26 | 24.665 | KV453227.1 | 185116 | 22-scf00515 | 22 |
| AX-158328895 | 26 | 24.665 | KV453227.1 | 194526 | 22-scf00515 | 22 |
| AX-157848925 | 26 | 24.665 | KV453227.1 | 194797 | 22-scf00515 | 22 |
| AX-158328897 | 26 | 24.665 | KV453227.1 | 198480 | 22-scf00515 | 22 |
| AX-158328898 | 26 | 24.665 | KV453227.1 | 199342 | 22-scf00515 | 22 |
| AX-158328899 | 26 | 24.665 | KV453227.1 | 200488 | 22-scf00515 | 22 |
| AX-158328901 | 26 | 24.665 | KV453227.1 | 201975 | 22-scf00515 | 22 |
| AX-158328904 | 26 | 24.665 | KV453227.1 | 207552 | 22-scf00515 | 22 |
| AX-158328905 | 26 | 24.665 | KV453227.1 | 208100 | 22-scf00515 | 22 |
| AX-158328906 | 26 | 24.665 | KV453227.1 | 208656 | 22-scf00515 | 22 |
| AX-158328907 | 26 | 24.665 | KV453227.1 | 209248 | 22-scf00515 | 22 |
| AX-158328909 | 26 | 24.665 | KV453227.1 | 214630 | 22-scf00515 | 22 |
| AX-157848927 | 26 | 24.665 | KV453227.1 | 217517 | 22-scf00515 | 22 |
| AX-158328911 | 26 | 24.665 | KV453227.1 | 222701 | 22-scf00515 | 22 |

|              |    |        |             |        |             |    |
|--------------|----|--------|-------------|--------|-------------|----|
| AX-157754142 | 26 | 24.665 | KV453227.1  | 230365 | 22-scf00515 | 22 |
| AX-158328917 | 26 | 24.665 | KV453227.1  | 231264 | 22-scf00515 | 22 |
| AX-158328918 | 26 | 24.665 | KV453227.1  | 232638 | 22-scf00515 | 22 |
| AX-158328935 | 26 | 24.665 | KV453227.1  | 264352 | 22-scf00515 | 22 |
| AX-157709875 | 26 | 24.81  | KV453227.1  | 234035 | 22-scf00515 | 22 |
| AX-158328921 | 26 | 24.81  | KV453227.1  | 237002 | 22-scf00515 | 22 |
| AX-158328929 | 26 | 24.956 | KV453227.1  | 257230 | 22-scf00515 | 22 |
| AX-158328924 | 26 | 25.102 | KV453227.1  | 244805 | 22-scf00515 | 22 |
| AX-158328925 | 26 | 25.102 | KV453227.1  | 246163 | 22-scf00515 | 22 |
| AX-158381521 | 26 | 25.102 | KV453227.1  | 253656 | 22-scf00515 | 22 |
| AX-158328930 | 26 | 25.102 | KV453227.1  | 258844 | 22-scf00515 | 22 |
| AX-158328932 | 26 | 25.102 | KV453227.1  | 260072 | 22-scf00515 | 22 |
| AX-158328940 | 26 | 25.102 | KV453227.1  | 270535 | 22-scf00515 | 22 |
| AX-158328941 | 26 | 25.102 | KV453227.1  | 271315 | 22-scf00515 | 22 |
| AX-158328943 | 26 | 25.102 | KV453227.1  | 274227 | 22-scf00515 | 22 |
| AX-157848930 | 26 | 25.102 | KV453227.1  | 276430 | 22-scf00515 | 22 |
| AX-158328947 | 26 | 25.102 | KV453227.1  | 282002 | 22-scf00515 | 22 |
| AX-157750885 | 26 | 25.102 | KV453227.1  | 284735 | 22-scf00515 | 22 |
| AX-158328950 | 26 | 25.102 | KV453227.1  | 289057 | 22-scf00515 | 22 |
| AX-157848931 | 26 | 25.255 | KV453227.1  | 281636 | 22-scf00515 | 22 |
| AX-158328915 | 26 | 25.867 | KV453227.1  | 226939 | 22-scf00515 | 22 |
| AX-157727715 | 26 | 25.867 | KV453227.1  | 248651 | 22-scf00515 | 22 |
| AX-158328938 | 26 | 25.867 | KV453227.1  | 266594 | 22-scf00515 | 22 |
| AX-158328939 | 26 | 25.867 | KV453227.1  | 267654 | 22-scf00515 | 22 |
| AX-158328946 | 26 | 25.867 | KV453227.1  | 281513 | 22-scf00515 | 22 |
| AX-158328949 | 26 | 25.867 | KV453227.1  | 286797 | 22-scf00515 | 22 |
| AX-158328954 | 26 | 25.867 | KV453227.1  | 295525 | 22-scf00515 | 22 |
| AX-158328956 | 26 | 25.867 | KV453227.1  | 296790 | 22-scf00515 | 22 |
| AX-158328957 | 26 | 25.867 | KV453227.1  | 298043 | 22-scf00515 | 22 |
| AX-158328958 | 26 | 25.867 | KV453227.1  | 299181 | 22-scf00515 | 22 |
| AX-158328959 | 26 | 25.867 | KV453227.1  | 300264 | 22-scf00515 | 22 |
| AX-158328964 | 26 | 25.867 | KV453227.1  | 304329 | 22-scf00515 | 22 |
| AX-158328967 | 26 | 25.867 | KV453227.1  | 309593 | 22-scf00515 | 22 |
| AX-158328971 | 26 | 25.867 | KV453227.1  | 316304 | 22-scf00515 | 22 |
| AX-157719415 | 26 | 25.867 | KV453227.1  | 345467 | 22-scf00515 | 22 |
| AX-157688717 | 26 | 25.867 | 3ML01026835 | 1388   | scf02438_1  | UN |
| AX-157725118 | 26 | 26.085 | KV453227.1  | 193116 | 22-scf00515 | 22 |
| AX-158328937 | 26 | 26.085 | KV453227.1  | 265958 | 22-scf00515 | 22 |
| AX-157861545 | 26 | 26.085 | KV453227.1  | 274808 | 22-scf00515 | 22 |
| AX-158328965 | 26 | 26.085 | KV453227.1  | 305129 | 22-scf00515 | 22 |
| AX-158328972 | 26 | 26.085 | KV453227.1  | 317057 | 22-scf00515 | 22 |
| AX-158328980 | 26 | 26.085 | KV453227.1  | 323530 | 22-scf00515 | 22 |
| AX-158328982 | 26 | 26.085 | KV453227.1  | 326968 | 22-scf00515 | 22 |
| AX-158328986 | 26 | 26.085 | KV453227.1  | 331399 | 22-scf00515 | 22 |
| AX-158328990 | 26 | 26.085 | KV453227.1  | 336784 | 22-scf00515 | 22 |
| AX-158328992 | 26 | 26.085 | KV453227.1  | 339522 | 22-scf00515 | 22 |
| AX-158328994 | 26 | 26.085 | KV453227.1  | 349113 | 22-scf00515 | 22 |
| AX-158328997 | 26 | 26.085 | KV453227.1  | 354034 | 22-scf00515 | 22 |
| AX-158329011 | 26 | 26.085 | KV453227.1  | 375083 | 22-scf00515 | 22 |
| AX-158329015 | 26 | 26.085 | KV453227.1  | 382534 | 22-scf00515 | 22 |
| AX-157848933 | 26 | 26.085 | KV453227.1  | 407982 | 22-scf00515 | 22 |



|              |    |        |            |        |             |    |
|--------------|----|--------|------------|--------|-------------|----|
| AX-158328955 | 26 | 26.241 | KV453227.1 | 295764 | 22-scf00515 | 22 |
| AX-158328981 | 26 | 26.303 | KV453227.1 | 326510 | 22-scf00515 | 22 |
| AX-158421561 | 26 | 26.303 | KV453227.1 | 364121 | 22-scf00515 | 22 |
| AX-157771021 | 26 | 26.303 | KV453227.1 | 364973 | 22-scf00515 | 22 |
| AX-158381522 | 26 | 26.303 | KV453227.1 | 365091 | 22-scf00515 | 22 |
| AX-158329004 | 26 | 26.303 | KV453227.1 | 365604 | 22-scf00515 | 22 |
| AX-158329005 | 26 | 26.303 | KV453227.1 | 366616 | 22-scf00515 | 22 |
| AX-157848932 | 26 | 26.303 | KV453227.1 | 367373 | 22-scf00515 | 22 |
| AX-158329006 | 26 | 26.303 | KV453227.1 | 367532 | 22-scf00515 | 22 |
| AX-157751784 | 26 | 26.303 | KV453227.1 | 369903 | 22-scf00515 | 22 |
| AX-158329009 | 26 | 26.303 | KV453227.1 | 370853 | 22-scf00515 | 22 |
| AX-158329010 | 26 | 26.303 | KV453227.1 | 372491 | 22-scf00515 | 22 |
| AX-158329012 | 26 | 26.303 | KV453227.1 | 376032 | 22-scf00515 | 22 |
| AX-158329014 | 26 | 26.303 | KV453227.1 | 381770 | 22-scf00515 | 22 |
| AX-157726338 | 26 | 26.303 | KV453227.1 | 387065 | 22-scf00515 | 22 |
| AX-158329020 | 26 | 26.303 | KV453227.1 | 392776 | 22-scf00515 | 22 |
| AX-158329022 | 26 | 26.303 | KV453227.1 | 399190 | 22-scf00515 | 22 |
| AX-158329033 | 26 | 26.303 | KV453227.1 | 417389 | 22-scf00515 | 22 |
| AX-158329028 | 26 | 26.877 | KV453227.1 | 409502 | 22-scf00515 | 22 |
| AX-158328998 | 26 | 27.069 | KV453227.1 | 355392 | 22-scf00515 | 22 |
| AX-158329000 | 26 | 27.069 | KV453227.1 | 357974 | 22-scf00515 | 22 |
| AX-158329019 | 26 | 27.069 | KV453227.1 | 390819 | 22-scf00515 | 22 |
| AX-157740792 | 26 | 27.069 | KV453227.1 | 407941 | 22-scf00515 | 22 |
| AX-158329029 | 26 | 27.069 | KV453227.1 | 410390 | 22-scf00515 | 22 |
| AX-158329031 | 26 | 27.069 | KV453227.1 | 413438 | 22-scf00515 | 22 |
| AX-158329032 | 26 | 27.069 | KV453227.1 | 415506 | 22-scf00515 | 22 |
| AX-157888498 | 26 | 27.069 | KV453227.1 | 418562 | 22-scf00515 | 22 |
| AX-157848934 | 26 | 27.069 | KV453227.1 | 424626 | 22-scf00515 | 22 |
| AX-158381523 | 26 | 27.069 | KV453227.1 | 426036 | 22-scf00515 | 22 |
| AX-158329037 | 26 | 27.069 | KV453227.1 | 426715 | 22-scf00515 | 22 |
| AX-158329039 | 26 | 27.069 | KV453227.1 | 429163 | 22-scf00515 | 22 |
| AX-158329040 | 26 | 27.069 | KV453227.1 | 429711 | 22-scf00515 | 22 |
| AX-158329042 | 26 | 27.069 | KV453227.1 | 431723 | 22-scf00515 | 22 |
| AX-158329044 | 26 | 27.069 | KV453227.1 | 432783 | 22-scf00515 | 22 |
| AX-158329057 | 26 | 27.069 | KV453227.1 | 453713 | 22-scf00515 | 22 |
| AX-158329060 | 26 | 27.069 | KV453227.1 | 456822 | 22-scf00515 | 22 |
| AX-158329016 | 26 | 27.397 | KV453227.1 | 383348 | 22-scf00515 | 22 |
| AX-157806323 | 26 | 27.397 | KV453227.1 | 410027 | 22-scf00515 | 22 |
| AX-158329038 | 26 | 27.397 | KV453227.1 | 428847 | 22-scf00515 | 22 |
| AX-158329043 | 26 | 27.397 | KV453227.1 | 432294 | 22-scf00515 | 22 |
| AX-158329047 | 26 | 27.397 | KV453227.1 | 438745 | 22-scf00515 | 22 |
| AX-158329049 | 26 | 27.397 | KV453227.1 | 441238 | 22-scf00515 | 22 |
| AX-158329050 | 26 | 27.397 | KV453227.1 | 442373 | 22-scf00515 | 22 |
| AX-157848936 | 26 | 27.397 | KV453227.1 | 444621 | 22-scf00515 | 22 |
| AX-157848937 | 26 | 27.397 | KV453227.1 | 445185 | 22-scf00515 | 22 |
| AX-158329051 | 26 | 27.397 | KV453227.1 | 446373 | 22-scf00515 | 22 |
| AX-157848938 | 26 | 27.397 | KV453227.1 | 450645 | 22-scf00515 | 22 |
| AX-158329054 | 26 | 27.397 | KV453227.1 | 450836 | 22-scf00515 | 22 |
| AX-158329056 | 26 | 27.397 | KV453227.1 | 452044 | 22-scf00515 | 22 |
| AX-157750900 | 26 | 27.397 | KV453227.1 | 454555 | 22-scf00515 | 22 |
| AX-158329013 | 26 | 27.615 | KV453227.1 | 381392 | 22-scf00515 | 22 |

|              |    |        |             |        |             |    |
|--------------|----|--------|-------------|--------|-------------|----|
| AX-157722586 | 26 | 27.615 | KV453227.1  | 391178 | 22-scf00515 | 22 |
| AX-158329030 | 26 | 27.615 | KV453227.1  | 412244 | 22-scf00515 | 22 |
| AX-158329034 | 26 | 27.615 | KV453227.1  | 422852 | 22-scf00515 | 22 |
| AX-158329045 | 26 | 27.615 | KV453227.1  | 434028 | 22-scf00515 | 22 |
| AX-157848935 | 26 | 27.615 | KV453227.1  | 442103 | 22-scf00515 | 22 |
| AX-158329058 | 26 | 27.615 | KV453227.1  | 455206 | 22-scf00515 | 22 |
| AX-157742492 | 26 | 27.615 | KV453227.1  | 601939 | 22-scf00515 | 22 |
| AX-158329062 | 26 | 28.198 | KV453227.1  | 463119 | 22-scf00515 | 22 |
| AX-158329063 | 26 | 28.198 | KV453227.1  | 466217 | 22-scf00515 | 22 |
| AX-157848943 | 26 | 28.198 | KV453227.1  | 472973 | 22-scf00515 | 22 |
| AX-158329065 | 26 | 28.49  | KV453227.1  | 467005 | 22-scf00515 | 22 |
| AX-158329066 | 26 | 28.49  | KV453227.1  | 467531 | 22-scf00515 | 22 |
| AX-158329067 | 26 | 28.49  | KV453227.1  | 467917 | 22-scf00515 | 22 |
| AX-157744472 | 26 | 28.49  | KV453227.1  | 472384 | 22-scf00515 | 22 |
| AX-157747478 | 26 | 28.49  | KV453227.1  | 473498 | 22-scf00515 | 22 |
| AX-158329068 | 26 | 28.49  | KV453227.1  | 474910 | 22-scf00515 | 22 |
| AX-158329069 | 26 | 28.49  | KV453227.1  | 476296 | 22-scf00515 | 22 |
| AX-158329071 | 26 | 28.49  | KV453227.1  | 478381 | 22-scf00515 | 22 |
| AX-158329072 | 26 | 28.49  | KV453227.1  | 478630 | 22-scf00515 | 22 |
| AX-158329075 | 26 | 28.49  | KV453227.1  | 482370 | 22-scf00515 | 22 |
| AX-158329079 | 26 | 28.49  | KV453227.1  | 487611 | 22-scf00515 | 22 |
| AX-158329082 | 26 | 28.49  | KV453227.1  | 493706 | 22-scf00515 | 22 |
| AX-158329084 | 26 | 28.49  | KV453227.1  | 494500 | 22-scf00515 | 22 |
| AX-158329085 | 26 | 28.49  | KV453227.1  | 495872 | 22-scf00515 | 22 |
| AX-158329088 | 26 | 28.49  | KV453227.1  | 498334 | 22-scf00515 | 22 |
| AX-158329091 | 26 | 28.49  | KV453227.1  | 505474 | 22-scf00515 | 22 |
| AX-157861546 | 26 | 28.49  | KV453227.1  | 560815 | 22-scf00515 | 22 |
| AX-157888500 | 26 | 28.49  | KV453227.1  | 603149 | 22-scf00515 | 22 |
| AX-158329162 | 26 | 28.49  | KV453227.1  | 632967 | 22-scf00515 | 22 |
| AX-158329165 | 26 | 28.49  | KV453227.1  | 637370 | 22-scf00515 | 22 |
| AX-158329171 | 26 | 28.49  | KV453227.1  | 647055 | 22-scf00515 | 22 |
| AX-158329083 | 26 | 28.612 | KV453227.1  | 494289 | 22-scf00515 | 22 |
| AX-158329092 | 26 | 28.708 | KV453227.1  | 506047 | 22-scf00515 | 22 |
| AX-158329089 | 26 | 28.71  | KV453227.1  | 501785 | 22-scf00515 | 22 |
| AX-158329097 | 26 | 29.146 | KV453227.1  | 513559 | 22-scf00515 | 22 |
| AX-157704762 | 26 | 29.146 | 3ML01027313 | 1062   | scf02919_1  | UN |
| AX-158329102 | 26 | 29.657 | KV453227.1  | 523132 | 22-scf00515 | 22 |
| AX-158329103 | 26 | 29.913 | KV453227.1  | 525843 | 22-scf00515 | 22 |
| AX-158329100 | 26 | 30.022 | KV453227.1  | 517094 | 22-scf00515 | 22 |
| AX-157751107 | 26 | 30.022 | KV453227.1  | 526225 | 22-scf00515 | 22 |
| AX-158329105 | 26 | 30.022 | KV453227.1  | 528920 | 22-scf00515 | 22 |
| AX-158329107 | 26 | 30.022 | KV453227.1  | 530313 | 22-scf00515 | 22 |
| AX-157712234 | 26 | 30.022 | KV453227.1  | 530884 | 22-scf00515 | 22 |
| AX-157773366 | 26 | 30.022 | KV453227.1  | 531574 | 22-scf00515 | 22 |
| AX-158329115 | 26 | 30.022 | KV453227.1  | 545298 | 22-scf00515 | 22 |
| AX-158329133 | 26 | 30.022 | KV453227.1  | 589382 | 22-scf00515 | 22 |
| AX-158329136 | 26 | 30.022 | KV453227.1  | 592825 | 22-scf00515 | 22 |
| AX-158329109 | 26 | 30.131 | KV453227.1  | 533368 | 22-scf00515 | 22 |
| AX-158329110 | 26 | 30.131 | KV453227.1  | 533750 | 22-scf00515 | 22 |
| AX-158329111 | 26 | 30.131 | KV453227.1  | 534280 | 22-scf00515 | 22 |
| AX-158329112 | 26 | 30.131 | KV453227.1  | 535065 | 22-scf00515 | 22 |

|              |    |        |            |        |             |    |
|--------------|----|--------|------------|--------|-------------|----|
| AX-157724417 | 26 | 30.131 | KV453227.1 | 536518 | 22-scf00515 | 22 |
| AX-157722507 | 26 | 30.131 | KV453227.1 | 539417 | 22-scf00515 | 22 |
| AX-158329119 | 26 | 30.131 | KV453227.1 | 560382 | 22-scf00515 | 22 |
| AX-158329121 | 26 | 30.35  | KV453227.1 | 569182 | 22-scf00515 | 22 |
| AX-158329124 | 26 | 30.35  | KV453227.1 | 573061 | 22-scf00515 | 22 |
| AX-158329131 | 26 | 30.35  | KV453227.1 | 588111 | 22-scf00515 | 22 |
| AX-158329132 | 26 | 30.35  | KV453227.1 | 588653 | 22-scf00515 | 22 |
| AX-158329134 | 26 | 30.35  | KV453227.1 | 590493 | 22-scf00515 | 22 |
| AX-158329135 | 26 | 30.35  | KV453227.1 | 591887 | 22-scf00515 | 22 |
| AX-158329137 | 26 | 30.35  | KV453227.1 | 593447 | 22-scf00515 | 22 |
| AX-158329138 | 26 | 30.35  | KV453227.1 | 594678 | 22-scf00515 | 22 |
| AX-158329140 | 26 | 30.35  | KV453227.1 | 596694 | 22-scf00515 | 22 |
| AX-158329141 | 26 | 30.35  | KV453227.1 | 600607 | 22-scf00515 | 22 |
| AX-158329144 | 26 | 30.35  | KV453227.1 | 608644 | 22-scf00515 | 22 |
| AX-158329146 | 26 | 30.35  | KV453227.1 | 609803 | 22-scf00515 | 22 |
| AX-158329104 | 26 | 30.379 | KV453227.1 | 527793 | 22-scf00515 | 22 |
| AX-158329114 | 26 | 30.46  | KV453227.1 | 544049 | 22-scf00515 | 22 |
| AX-158329126 | 26 | 30.46  | KV453227.1 | 578798 | 22-scf00515 | 22 |
| AX-157848947 | 26 | 30.46  | KV453227.1 | 600799 | 22-scf00515 | 22 |
| AX-157713434 | 26 | 30.46  | KV453227.1 | 697531 | 22-scf00515 | 22 |
| AX-158329143 | 26 | 30.68  | KV453227.1 | 606060 | 22-scf00515 | 22 |
| AX-157848949 | 26 | 30.787 | KV453227.1 | 617053 | 22-scf00515 | 22 |
| AX-158329152 | 26 | 30.787 | KV453227.1 | 618398 | 22-scf00515 | 22 |
| AX-158329155 | 26 | 30.787 | KV453227.1 | 624745 | 22-scf00515 | 22 |
| AX-158329157 | 26 | 30.787 | KV453227.1 | 627891 | 22-scf00515 | 22 |
| AX-158329160 | 26 | 30.787 | KV453227.1 | 630681 | 22-scf00515 | 22 |
| AX-158329185 | 26 | 30.787 | KV453227.1 | 660727 | 22-scf00515 | 22 |
| AX-158329156 | 26 | 30.806 | KV453227.1 | 626136 | 22-scf00515 | 22 |
| AX-157848952 | 26 | 30.806 | KV453227.1 | 651658 | 22-scf00515 | 22 |
| AX-158329177 | 26 | 30.806 | KV453227.1 | 652403 | 22-scf00515 | 22 |
| AX-158329186 | 26 | 30.806 | KV453227.1 | 661646 | 22-scf00515 | 22 |
| AX-158329190 | 26 | 30.806 | KV453227.1 | 665830 | 22-scf00515 | 22 |
| AX-158381525 | 26 | 30.852 | KV453227.1 | 620745 | 22-scf00515 | 22 |
| AX-158329145 | 26 | 30.896 | KV453227.1 | 609421 | 22-scf00515 | 22 |
| AX-158329154 | 26 | 30.896 | KV453227.1 | 624384 | 22-scf00515 | 22 |
| AX-158329161 | 26 | 30.896 | KV453227.1 | 631556 | 22-scf00515 | 22 |
| AX-158329164 | 26 | 30.896 | KV453227.1 | 636351 | 22-scf00515 | 22 |
| AX-158329166 | 26 | 30.896 | KV453227.1 | 637813 | 22-scf00515 | 22 |
| AX-158329168 | 26 | 30.896 | KV453227.1 | 640634 | 22-scf00515 | 22 |
| AX-158329176 | 26 | 30.896 | KV453227.1 | 651845 | 22-scf00515 | 22 |
| AX-158329173 | 26 | 31.115 | KV453227.1 | 648312 | 22-scf00515 | 22 |
| AX-158329178 | 26 | 31.115 | KV453227.1 | 652783 | 22-scf00515 | 22 |
| AX-158329179 | 26 | 31.115 | KV453227.1 | 654023 | 22-scf00515 | 22 |
| AX-158329180 | 26 | 31.115 | KV453227.1 | 655260 | 22-scf00515 | 22 |
| AX-158329181 | 26 | 31.115 | KV453227.1 | 656528 | 22-scf00515 | 22 |
| AX-158329182 | 26 | 31.115 | KV453227.1 | 657981 | 22-scf00515 | 22 |
| AX-157742891 | 26 | 31.115 | KV453227.1 | 661110 | 22-scf00515 | 22 |
| AX-158329187 | 26 | 31.115 | KV453227.1 | 662222 | 22-scf00515 | 22 |
| AX-158329188 | 26 | 31.115 | KV453227.1 | 664060 | 22-scf00515 | 22 |
| AX-158329189 | 26 | 31.115 | KV453227.1 | 665339 | 22-scf00515 | 22 |
| AX-158329192 | 26 | 31.115 | KV453227.1 | 667280 | 22-scf00515 | 22 |

|              |    |        |            |        |               |    |
|--------------|----|--------|------------|--------|---------------|----|
| AX-158329193 | 26 | 31.115 | KV453227.1 | 668409 | 22-scf00515   | 22 |
| AX-158329195 | 26 | 31.115 | KV453227.1 | 669631 | 22-scf00515   | 22 |
| AX-158329198 | 26 | 31.115 | KV453227.1 | 672593 | 22-scf00515   | 22 |
| AX-158329203 | 26 | 31.115 | KV453227.1 | 676434 | 22-scf00515   | 22 |
| AX-157848953 | 26 | 31.115 | KV453227.1 | 677811 | 22-scf00515   | 22 |
| AX-157881631 | 26 | 31.115 | KV453227.1 | 685601 | 22-scf00515   | 22 |
| AX-157848951 | 26 | 31.156 | KV453227.1 | 631747 | 22-scf00515   | 22 |
| AX-158329174 | 26 | 31.156 | KV453227.1 | 649118 | 22-scf00515   | 22 |
| AX-158329199 | 26 | 31.179 | KV453227.1 | 673419 | 22-scf00515   | 22 |
| AX-158329204 | 26 | 31.208 | KV453227.1 | 676803 | 22-scf00515   | 22 |
| AX-158329207 | 26 | 31.224 | KV453227.1 | 679063 | 22-scf00515   | 22 |
| AX-158329208 | 26 | 31.272 | KV453227.1 | 679973 | 22-scf00515   | 22 |
| AX-158329209 | 26 | 31.304 | KV453227.1 | 682717 | 22-scf00515   | 22 |
| AX-158329210 | 26 | 31.333 | KV453227.1 | 683954 | 22-scf00515   | 22 |
| AX-158329232 | 26 | 31.333 | KV453227.1 | 721323 | 22-scf00515   | 22 |
| AX-158329211 | 26 | 31.337 | KV453227.1 | 685186 | 22-scf00515   | 22 |
| AX-158329213 | 26 | 31.624 | KV453227.1 | 688744 | 22-scf00515   | 22 |
| AX-158329216 | 26 | 31.771 | KV453227.1 | 693787 | 22-scf00515   | 22 |
| AX-158329218 | 26 | 31.771 | KV453227.1 | 696778 | 22-scf00515   | 22 |
| AX-157888501 | 26 | 31.771 | KV453227.1 | 707138 | 22-scf00515   | 22 |
| AX-158418671 | 26 | 31.771 | KV453227.1 | 742908 | 22-scf00515   | 22 |
| AX-157722186 | 26 | 31.772 | KV453227.1 | 709271 | 22-scf00515   | 22 |
| AX-157848945 | 26 | 32.098 | KV453227.1 | 586845 | 22-scf00515   | 22 |
| AX-158329224 | 26 | 32.098 | KV453227.1 | 710493 | 22-scf00515   | 22 |
| AX-158329227 | 26 | 32.098 | KV453227.1 | 712683 | 22-scf00515   | 22 |
| AX-158329228 | 26 | 32.098 | KV453227.1 | 713119 | 22-scf00515   | 22 |
| AX-158329229 | 26 | 32.098 | KV453227.1 | 713530 | 22-scf00515   | 22 |
| AX-158329230 | 26 | 32.098 | KV453227.1 | 714616 | 22-scf00515   | 22 |
| AX-157742249 | 26 | 32.098 | KV453227.1 | 716502 | 22-scf00515   | 22 |
| AX-157746885 | 26 | 32.098 | KV453227.1 | 722276 | 22-scf00515   | 22 |
| AX-157848955 | 26 | 32.098 | KV453227.1 | 722852 | 22-scf00515   | 22 |
| AX-158329234 | 26 | 32.098 | KV453227.1 | 725545 | 22-scf00515   | 22 |
| AX-157700718 | 26 | 32.098 | FI879085.1 | 707    | ORI212 lctalu | UN |
| AX-158329238 | 26 | 32.101 | KV453227.1 | 729221 | 22-scf00515   | 22 |
| AX-158329244 | 26 | 32.315 | KV453227.1 | 740504 | 22-scf00515   | 22 |
| AX-158329247 | 26 | 32.315 | KV453227.1 | 744674 | 22-scf00515   | 22 |
| AX-158329248 | 26 | 32.481 | KV453227.1 | 745851 | 22-scf00515   | 22 |
| AX-158329245 | 26 | 32.536 | KV453227.1 | 743521 | 22-scf00515   | 22 |
| AX-158329249 | 26 | 32.536 | KV453227.1 | 751034 | 22-scf00515   | 22 |
| AX-158329250 | 26 | 32.536 | KV453227.1 | 752288 | 22-scf00515   | 22 |
| AX-158329252 | 26 | 32.536 | KV453227.1 | 754144 | 22-scf00515   | 22 |
| AX-158329253 | 26 | 32.536 | KV453227.1 | 755124 | 22-scf00515   | 22 |
| AX-158329254 | 26 | 32.536 | KV453227.1 | 756637 | 22-scf00515   | 22 |
| AX-158329255 | 26 | 32.536 | KV453227.1 | 758841 | 22-scf00515   | 22 |
| AX-157742171 | 26 | 32.536 | KV453227.1 | 764066 | 22-scf00515   | 22 |
| AX-157873654 | 26 | 32.536 | KV453227.1 | 764142 | 22-scf00515   | 22 |
| AX-157720340 | 26 | 32.536 | KV453227.1 | 765062 | 22-scf00515   | 22 |
| AX-158329257 | 26 | 32.536 | KV453227.1 | 765488 | 22-scf00515   | 22 |
| AX-157771663 | 26 | 32.536 | KV453227.1 | 766197 | 22-scf00515   | 22 |
| AX-158329258 | 26 | 32.536 | KV453227.1 | 768369 | 22-scf00515   | 22 |
| AX-157867924 | 26 | 32.536 | KV453227.1 | 768802 | 22-scf00515   | 22 |

|              |    |        |             |        |             |    |
|--------------|----|--------|-------------|--------|-------------|----|
| AX-158329259 | 26 | 32.536 | KV453227.1  | 769057 | 22-scf00515 | 22 |
| AX-158329260 | 26 | 32.536 | KV453227.1  | 769300 | 22-scf00515 | 22 |
| AX-158329261 | 26 | 32.536 | KV453227.1  | 770408 | 22-scf00515 | 22 |
| AX-158329262 | 26 | 32.536 | KV453227.1  | 771935 | 22-scf00515 | 22 |
| AX-157719659 | 26 | 32.536 | KV453227.1  | 774426 | 22-scf00515 | 22 |
| AX-158329263 | 26 | 32.536 | KV453227.1  | 774909 | 22-scf00515 | 22 |
| AX-158329264 | 26 | 32.536 | KV453227.1  | 775296 | 22-scf00515 | 22 |
| AX-158329265 | 26 | 32.536 | KV453227.1  | 777291 | 22-scf00515 | 22 |
| AX-157714180 | 26 | 32.536 | KV453227.1  | 782350 | 22-scf00515 | 22 |
| AX-157755712 | 26 | 32.536 | KV453227.1  | 784614 | 22-scf00515 | 22 |
| AX-158329267 | 26 | 32.536 | KV453227.1  | 785462 | 22-scf00515 | 22 |
| AX-158329270 | 26 | 32.536 | KV453227.1  | 795624 | 22-scf00515 | 22 |
| AX-157888503 | 26 | 32.536 | KV453227.1  | 796590 | 22-scf00515 | 22 |
| AX-158329271 | 26 | 32.536 | KV453227.1  | 799597 | 22-scf00515 | 22 |
| AX-158329272 | 26 | 32.536 | KV453227.1  | 800733 | 22-scf00515 | 22 |
| AX-158329274 | 26 | 32.536 | KV453227.1  | 802511 | 22-scf00515 | 22 |
| AX-158329275 | 26 | 32.536 | KV453227.1  | 803203 | 22-scf00515 | 22 |
| AX-158329281 | 26 | 32.536 | KV453227.1  | 809326 | 22-scf00515 | 22 |
| AX-158329290 | 26 | 32.536 | KV453227.1  | 820135 | 22-scf00515 | 22 |
| AX-158329302 | 26 | 32.536 | KV453227.1  | 834166 | 22-scf00515 | 22 |
| AX-158329269 | 26 | 32.754 | KV453227.1  | 791400 | 22-scf00515 | 22 |
| AX-157723097 | 26 | 32.754 | KV453227.1  | 806299 | 22-scf00515 | 22 |
| AX-158329279 | 26 | 32.754 | KV453227.1  | 807957 | 22-scf00515 | 22 |
| AX-158329280 | 26 | 32.754 | KV453227.1  | 808498 | 22-scf00515 | 22 |
| AX-158329282 | 26 | 32.754 | KV453227.1  | 810729 | 22-scf00515 | 22 |
| AX-157745190 | 26 | 32.754 | KV453227.1  | 811493 | 22-scf00515 | 22 |
| AX-158329284 | 26 | 32.754 | KV453227.1  | 813575 | 22-scf00515 | 22 |
| AX-158329286 | 26 | 32.754 | KV453227.1  | 814926 | 22-scf00515 | 22 |
| AX-158329287 | 26 | 32.754 | KV453227.1  | 815120 | 22-scf00515 | 22 |
| AX-158329292 | 26 | 32.754 | KV453227.1  | 820975 | 22-scf00515 | 22 |
| AX-158329294 | 26 | 32.754 | KV453227.1  | 824089 | 22-scf00515 | 22 |
| AX-158329296 | 26 | 32.754 | KV453227.1  | 827043 | 22-scf00515 | 22 |
| AX-157706112 | 26 | 32.754 | 3ML01031633 | 248    | scf07250_1  | UN |
| AX-158329276 | 26 | 32.755 | KV453227.1  | 803706 | 22-scf00515 | 22 |
| AX-158329297 | 26 | 32.755 | KV453227.1  | 828153 | 22-scf00515 | 22 |
| AX-158329298 | 26 | 33.081 | KV453227.1  | 829035 | 22-scf00515 | 22 |
| AX-158329299 | 26 | 33.081 | KV453227.1  | 830167 | 22-scf00515 | 22 |
| AX-157861550 | 26 | 33.081 | KV453227.1  | 830328 | 22-scf00515 | 22 |
| AX-158329300 | 26 | 33.081 | KV453227.1  | 832009 | 22-scf00515 | 22 |
| AX-158329301 | 26 | 33.3   | KV453227.1  | 833559 | 22-scf00515 | 22 |
| AX-158329293 | 26 | 33.409 | KV453227.1  | 823477 | 22-scf00515 | 22 |
| AX-158329303 | 26 | 33.409 | KV453227.1  | 838371 | 22-scf00515 | 22 |
| AX-158418674 | 26 | 33.409 | KV453227.1  | 839791 | 22-scf00515 | 22 |
| AX-158329304 | 26 | 33.409 | KV453227.1  | 841738 | 22-scf00515 | 22 |
| AX-158329305 | 26 | 33.409 | KV453227.1  | 842586 | 22-scf00515 | 22 |
| AX-158329307 | 26 | 33.409 | KV453227.1  | 845378 | 22-scf00515 | 22 |
| AX-158329309 | 26 | 33.409 | KV453227.1  | 846597 | 22-scf00515 | 22 |
| AX-158329310 | 26 | 33.409 | KV453227.1  | 846975 | 22-scf00515 | 22 |
| AX-158329311 | 26 | 33.409 | KV453227.1  | 847792 | 22-scf00515 | 22 |
| AX-157722916 | 26 | 33.409 | KV453227.1  | 848775 | 22-scf00515 | 22 |
| AX-158329312 | 26 | 33.409 | KV453227.1  | 849918 | 22-scf00515 | 22 |

|              |    |        |             |         |             |    |
|--------------|----|--------|-------------|---------|-------------|----|
| AX-158329314 | 26 | 33.409 | KV453227.1  | 852335  | 22-scf00515 | 22 |
| AX-158329315 | 26 | 33.409 | KV453227.1  | 852789  | 22-scf00515 | 22 |
| AX-157706113 | 26 | 33.409 | 3ML01031633 | 348     | scf07250_1  | UN |
| AX-158329316 | 26 | 33.555 | KV453227.1  | 855582  | 22-scf00515 | 22 |
| AX-158329317 | 26 | 33.846 | KV453227.1  | 859269  | 22-scf00515 | 22 |
| AX-158329318 | 26 | 33.846 | KV453227.1  | 861179  | 22-scf00515 | 22 |
| AX-158381526 | 26 | 33.846 | KV453227.1  | 861967  | 22-scf00515 | 22 |
| AX-158329319 | 26 | 33.846 | KV453227.1  | 862269  | 22-scf00515 | 22 |
| AX-157726123 | 26 | 33.846 | KV453227.1  | 864883  | 22-scf00515 | 22 |
| AX-158329321 | 26 | 33.846 | KV453227.1  | 866376  | 22-scf00515 | 22 |
| AX-158329327 | 26 | 33.846 | KV453227.1  | 875986  | 22-scf00515 | 22 |
| AX-158329330 | 26 | 33.846 | KV453227.1  | 878521  | 22-scf00515 | 22 |
| AX-158329331 | 26 | 33.846 | KV453227.1  | 879579  | 22-scf00515 | 22 |
| AX-157738874 | 26 | 33.846 | KV453227.1  | 932235  | 22-scf00515 | 22 |
| AX-158329334 | 26 | 33.847 | KV453227.1  | 884279  | 22-scf00515 | 22 |
| AX-158329401 | 26 | 33.847 | KV453227.1  | 972663  | 22-scf00515 | 22 |
| AX-158329337 | 26 | 34.174 | KV453227.1  | 888799  | 22-scf00515 | 22 |
| AX-158388062 | 26 | 34.174 | KV453227.1  | 890344  | 22-scf00515 | 22 |
| AX-157848958 | 26 | 34.174 | KV453227.1  | 892274  | 22-scf00515 | 22 |
| AX-158329341 | 26 | 34.174 | KV453227.1  | 893410  | 22-scf00515 | 22 |
| AX-157848959 | 26 | 34.174 | KV453227.1  | 893615  | 22-scf00515 | 22 |
| AX-158329343 | 26 | 34.174 | KV453227.1  | 897313  | 22-scf00515 | 22 |
| AX-157748141 | 26 | 34.174 | KV453227.1  | 898032  | 22-scf00515 | 22 |
| AX-157750100 | 26 | 34.174 | KV453227.1  | 899809  | 22-scf00515 | 22 |
| AX-158329344 | 26 | 34.174 | KV453227.1  | 901102  | 22-scf00515 | 22 |
| AX-158329347 | 26 | 34.174 | KV453227.1  | 903776  | 22-scf00515 | 22 |
| AX-157774885 | 26 | 34.174 | KV453227.1  | 904172  | 22-scf00515 | 22 |
| AX-158329349 | 26 | 34.174 | KV453227.1  | 909959  | 22-scf00515 | 22 |
| AX-157848964 | 26 | 34.174 | KV453227.1  | 932098  | 22-scf00515 | 22 |
| AX-157881637 | 26 | 34.174 | KV453227.1  | 954431  | 22-scf00515 | 22 |
| AX-157888507 | 26 | 34.174 | KV453227.1  | 992085  | 22-scf00515 | 22 |
| AX-158329416 | 26 | 34.174 | KV453227.1  | 1004916 | 22-scf00515 | 22 |
| AX-157848962 | 26 | 34.232 | KV453227.1  | 905141  | 22-scf00515 | 22 |
| AX-158329335 | 26 | 34.283 | KV453227.1  | 885607  | 22-scf00515 | 22 |
| AX-158329345 | 26 | 34.283 | KV453227.1  | 902488  | 22-scf00515 | 22 |
| AX-158329346 | 26 | 34.283 | KV453227.1  | 903193  | 22-scf00515 | 22 |
| AX-158329348 | 26 | 34.283 | KV453227.1  | 905784  | 22-scf00515 | 22 |
| AX-157867926 | 26 | 34.283 | KV453227.1  | 908763  | 22-scf00515 | 22 |
| AX-158329350 | 26 | 34.283 | KV453227.1  | 911079  | 22-scf00515 | 22 |
| AX-157888506 | 26 | 34.283 | KV453227.1  | 913350  | 22-scf00515 | 22 |
| AX-158329352 | 26 | 34.283 | KV453227.1  | 914214  | 22-scf00515 | 22 |
| AX-158329353 | 26 | 34.283 | KV453227.1  | 914604  | 22-scf00515 | 22 |
| AX-158329355 | 26 | 34.283 | KV453227.1  | 917495  | 22-scf00515 | 22 |
| AX-158329356 | 26 | 34.283 | KV453227.1  | 917832  | 22-scf00515 | 22 |
| AX-158329357 | 26 | 34.283 | KV453227.1  | 918115  | 22-scf00515 | 22 |
| AX-158329358 | 26 | 34.283 | KV453227.1  | 918774  | 22-scf00515 | 22 |
| AX-158418675 | 26 | 34.283 | KV453227.1  | 918905  | 22-scf00515 | 22 |
| AX-158329363 | 26 | 34.283 | KV453227.1  | 927739  | 22-scf00515 | 22 |
| AX-158329365 | 26 | 34.283 | KV453227.1  | 929428  | 22-scf00515 | 22 |
| AX-158329366 | 26 | 34.283 | KV453227.1  | 929865  | 22-scf00515 | 22 |
| AX-158329367 | 26 | 34.283 | KV453227.1  | 930446  | 22-scf00515 | 22 |

|              |    |        |            |         |             |    |
|--------------|----|--------|------------|---------|-------------|----|
| AX-157806339 | 26 | 34.283 | KV453227.1 | 936265  | 22-scf00515 | 22 |
| AX-158329371 | 26 | 34.283 | KV453227.1 | 939465  | 22-scf00515 | 22 |
| AX-158329372 | 26 | 34.283 | KV453227.1 | 941319  | 22-scf00515 | 22 |
| AX-158329374 | 26 | 34.283 | KV453227.1 | 943547  | 22-scf00515 | 22 |
| AX-157730422 | 26 | 34.283 | KV453227.1 | 947004  | 22-scf00515 | 22 |
| AX-158329375 | 26 | 34.283 | KV453227.1 | 947344  | 22-scf00515 | 22 |
| AX-158329381 | 26 | 34.283 | KV453227.1 | 953021  | 22-scf00515 | 22 |
| AX-158329382 | 26 | 34.283 | KV453227.1 | 954987  | 22-scf00515 | 22 |
| AX-158329383 | 26 | 34.283 | KV453227.1 | 955143  | 22-scf00515 | 22 |
| AX-157759023 | 26 | 34.283 | KV453227.1 | 956171  | 22-scf00515 | 22 |
| AX-158329384 | 26 | 34.283 | KV453227.1 | 956583  | 22-scf00515 | 22 |
| AX-158329385 | 26 | 34.283 | KV453227.1 | 957096  | 22-scf00515 | 22 |
| AX-158329386 | 26 | 34.283 | KV453227.1 | 957309  | 22-scf00515 | 22 |
| AX-158329388 | 26 | 34.283 | KV453227.1 | 960640  | 22-scf00515 | 22 |
| AX-157848966 | 26 | 34.283 | KV453227.1 | 963974  | 22-scf00515 | 22 |
| AX-158329397 | 26 | 34.283 | KV453227.1 | 970189  | 22-scf00515 | 22 |
| AX-157848960 | 26 | 34.319 | KV453227.1 | 902198  | 22-scf00515 | 22 |
| AX-158329387 | 26 | 34.319 | KV453227.1 | 960155  | 22-scf00515 | 22 |
| AX-158329390 | 26 | 34.352 | KV453227.1 | 961145  | 22-scf00515 | 22 |
| AX-158329393 | 26 | 34.392 | KV453227.1 | 964409  | 22-scf00515 | 22 |
| AX-158329394 | 26 | 34.655 | KV453227.1 | 966421  | 22-scf00515 | 22 |
| AX-158329395 | 26 | 34.655 | KV453227.1 | 968110  | 22-scf00515 | 22 |
| AX-158329396 | 26 | 34.655 | KV453227.1 | 969113  | 22-scf00515 | 22 |
| AX-158329398 | 26 | 34.786 | KV453227.1 | 971197  | 22-scf00515 | 22 |
| AX-157873658 | 26 | 35.049 | KV453227.1 | 976402  | 22-scf00515 | 22 |
| AX-157747572 | 26 | 35.049 | KV453227.1 | 977540  | 22-scf00515 | 22 |
| AX-157848969 | 26 | 35.049 | KV453227.1 | 978573  | 22-scf00515 | 22 |
| AX-157752330 | 26 | 35.049 | KV453227.1 | 984228  | 22-scf00515 | 22 |
| AX-157748538 | 26 | 35.049 | KV453227.1 | 987071  | 22-scf00515 | 22 |
| AX-158329406 | 26 | 35.049 | KV453227.1 | 988574  | 22-scf00515 | 22 |
| AX-157711180 | 26 | 35.049 | KV453227.1 | 989307  | 22-scf00515 | 22 |
| AX-158329411 | 26 | 35.049 | KV453227.1 | 995812  | 22-scf00515 | 22 |
| AX-158329414 | 26 | 35.049 | KV453227.1 | 1002576 | 22-scf00515 | 22 |
| AX-158329407 | 26 | 35.105 | KV453227.1 | 989895  | 22-scf00515 | 22 |
| AX-157848971 | 26 | 35.158 | KV453227.1 | 990060  | 22-scf00515 | 22 |
| AX-158329408 | 26 | 35.158 | KV453227.1 | 992857  | 22-scf00515 | 22 |
| AX-158329409 | 26 | 35.158 | KV453227.1 | 994038  | 22-scf00515 | 22 |
| AX-158329410 | 26 | 35.158 | KV453227.1 | 994327  | 22-scf00515 | 22 |
| AX-157718622 | 26 | 35.158 | KV453227.1 | 998173  | 22-scf00515 | 22 |
| AX-157848972 | 26 | 35.158 | KV453227.1 | 1001005 | 22-scf00515 | 22 |
| AX-158329418 | 26 | 35.158 | KV453227.1 | 1006176 | 22-scf00515 | 22 |
| AX-158329419 | 26 | 35.158 | KV453227.1 | 1007337 | 22-scf00515 | 22 |
| AX-157747611 | 26 | 35.267 | KV453227.1 | 980526  | 22-scf00515 | 22 |
| AX-157735919 | 26 | 35.267 | KV453227.1 | 993892  | 22-scf00515 | 22 |
| AX-158329413 | 26 | 35.267 | KV453227.1 | 1000641 | 22-scf00515 | 22 |
| AX-158329421 | 26 | 35.267 | KV453227.1 | 1008656 | 22-scf00515 | 22 |
| AX-158329426 | 26 | 35.267 | KV453227.1 | 1013298 | 22-scf00515 | 22 |
| AX-158329427 | 26 | 35.267 | KV453227.1 | 1013453 | 22-scf00515 | 22 |
| AX-158329428 | 26 | 35.267 | KV453227.1 | 1014321 | 22-scf00515 | 22 |
| AX-158329429 | 26 | 35.267 | KV453227.1 | 1015194 | 22-scf00515 | 22 |
| AX-158329433 | 26 | 35.267 | KV453227.1 | 1018946 | 22-scf00515 | 22 |

|              |    |        |             |         |             |    |
|--------------|----|--------|-------------|---------|-------------|----|
| AX-158329435 | 26 | 35.267 | KV453227.1  | 1020256 | 22-scf00515 | 22 |
| AX-157888510 | 26 | 35.267 | KV453227.1  | 1021474 | 22-scf00515 | 22 |
| AX-158418677 | 26 | 35.267 | KV453227.1  | 1023701 | 22-scf00515 | 22 |
| AX-158329441 | 26 | 35.267 | KV453227.1  | 1025837 | 22-scf00515 | 22 |
| AX-158329442 | 26 | 35.267 | KV453227.1  | 1026476 | 22-scf00515 | 22 |
| AX-158329443 | 26 | 35.267 | KV453227.1  | 1026669 | 22-scf00515 | 22 |
| AX-157774323 | 26 | 35.267 | KV453227.1  | 1082020 | 22-scf00515 | 22 |
| AX-158329405 | 26 | 35.337 | KV453227.1  | 987227  | 22-scf00515 | 22 |
| AX-158329444 | 26 | 35.337 | KV453227.1  | 1027302 | 22-scf00515 | 22 |
| AX-158329448 | 26 | 35.376 | KV453227.1  | 1032687 | 22-scf00515 | 22 |
| AX-158329450 | 26 | 35.376 | KV453227.1  | 1034084 | 22-scf00515 | 22 |
| AX-158329452 | 26 | 35.376 | KV453227.1  | 1035852 | 22-scf00515 | 22 |
| AX-158329454 | 26 | 35.376 | KV453227.1  | 1037203 | 22-scf00515 | 22 |
| AX-158329460 | 26 | 35.485 | KV453227.1  | 1043131 | 22-scf00515 | 22 |
| AX-158329466 | 26 | 35.595 | KV453227.1  | 1046366 | 22-scf00515 | 22 |
| AX-158329467 | 26 | 35.595 | KV453227.1  | 1047826 | 22-scf00515 | 22 |
| AX-158329470 | 26 | 35.704 | KV453227.1  | 1050908 | 22-scf00515 | 22 |
| AX-158329471 | 26 | 35.704 | KV453227.1  | 1053879 | 22-scf00515 | 22 |
| AX-158329474 | 26 | 35.704 | KV453227.1  | 1056023 | 22-scf00515 | 22 |
| AX-158329483 | 26 | 35.704 | KV453227.1  | 1067126 | 22-scf00515 | 22 |
| AX-158329528 | 26 | 35.704 | KV453227.1  | 1118272 | 22-scf00515 | 22 |
| AX-158329475 | 26 | 35.923 | KV453227.1  | 1058296 | 22-scf00515 | 22 |
| AX-157888513 | 26 | 36.142 | KV453227.1  | 1062013 | 22-scf00515 | 22 |
| AX-158329478 | 26 | 36.361 | KV453227.1  | 1062517 | 22-scf00515 | 22 |
| AX-158329479 | 26 | 36.361 | KV453227.1  | 1063277 | 22-scf00515 | 22 |
| AX-158329481 | 26 | 36.361 | KV453227.1  | 1065188 | 22-scf00515 | 22 |
| AX-157861553 | 26 | 36.361 | KV453227.1  | 1066025 | 22-scf00515 | 22 |
| AX-157848975 | 26 | 36.361 | KV453227.1  | 1067570 | 22-scf00515 | 22 |
| AX-158329484 | 26 | 36.361 | KV453227.1  | 1068358 | 22-scf00515 | 22 |
| AX-158329485 | 26 | 36.361 | KV453227.1  | 1068808 | 22-scf00515 | 22 |
| AX-158329487 | 26 | 36.361 | KV453227.1  | 1070019 | 22-scf00515 | 22 |
| AX-158329488 | 26 | 36.361 | KV453227.1  | 1070797 | 22-scf00515 | 22 |
| AX-158329489 | 26 | 36.361 | KV453227.1  | 1071418 | 22-scf00515 | 22 |
| AX-158329490 | 26 | 36.361 | KV453227.1  | 1072571 | 22-scf00515 | 22 |
| AX-158329493 | 26 | 36.361 | KV453227.1  | 1073827 | 22-scf00515 | 22 |
| AX-158329495 | 26 | 36.361 | KV453227.1  | 1074761 | 22-scf00515 | 22 |
| AX-157749166 | 26 | 36.361 | KV453227.1  | 1099063 | 22-scf00515 | 22 |
| AX-158329497 | 26 | 36.371 | KV453227.1  | 1077810 | 22-scf00515 | 22 |
| AX-157706818 | 26 | 36.77  | 3ML01033860 | 471     | scf09526_1  | UN |
| AX-158329500 | 26 | 36.908 | KV453227.1  | 1085692 | 22-scf00515 | 22 |
| AX-157706563 | 26 | 36.908 | 3ML01032465 | 96      | scf08086_1  | UN |
| AX-158329507 | 26 | 37.017 | KV453227.1  | 1092216 | 22-scf00515 | 22 |
| AX-158329508 | 26 | 37.017 | KV453227.1  | 1092674 | 22-scf00515 | 22 |
| AX-158329510 | 26 | 37.017 | KV453227.1  | 1096231 | 22-scf00515 | 22 |
| AX-158329512 | 26 | 37.017 | KV453227.1  | 1096919 | 22-scf00515 | 22 |
| AX-158329516 | 26 | 37.017 | KV453227.1  | 1102609 | 22-scf00515 | 22 |
| AX-158329517 | 26 | 37.017 | KV453227.1  | 1103864 | 22-scf00515 | 22 |
| AX-158329518 | 26 | 37.017 | KV453227.1  | 1104321 | 22-scf00515 | 22 |
| AX-158329519 | 26 | 37.017 | KV453227.1  | 1104871 | 22-scf00515 | 22 |
| AX-158329521 | 26 | 37.017 | KV453227.1  | 1108740 | 22-scf00515 | 22 |
| AX-158329522 | 26 | 37.017 | KV453227.1  | 1109194 | 22-scf00515 | 22 |



|              |    |        |            |         |             |    |
|--------------|----|--------|------------|---------|-------------|----|
| AX-158329523 | 26 | 37.017 | KV453227.1 | 1110188 | 22-scf00515 | 22 |
| AX-158329524 | 26 | 37.017 | KV453227.1 | 1113007 | 22-scf00515 | 22 |
| AX-158329525 | 26 | 37.017 | KV453227.1 | 1115112 | 22-scf00515 | 22 |
| AX-157754017 | 26 | 37.017 | KV453227.1 | 1115580 | 22-scf00515 | 22 |
| AX-158329547 | 26 | 37.017 | KV453227.1 | 1140065 | 22-scf00515 | 22 |
| AX-158329529 | 26 | 37.126 | KV453227.1 | 1119576 | 22-scf00515 | 22 |
| AX-157749014 | 26 | 37.126 | KV453227.1 | 1120476 | 22-scf00515 | 22 |
| AX-158329515 | 26 | 37.176 | KV453227.1 | 1099918 | 22-scf00515 | 22 |
| AX-157739866 | 26 | 37.176 | KV453227.1 | 1100369 | 22-scf00515 | 22 |
| AX-158329531 | 26 | 37.176 | KV453227.1 | 1123270 | 22-scf00515 | 22 |
| AX-158329533 | 26 | 37.21  | KV453227.1 | 1125259 | 22-scf00515 | 22 |
| AX-158329535 | 26 | 37.235 | KV453227.1 | 1126985 | 22-scf00515 | 22 |
| AX-158329536 | 26 | 37.235 | KV453227.1 | 1127514 | 22-scf00515 | 22 |
| AX-158329538 | 26 | 37.235 | KV453227.1 | 1130055 | 22-scf00515 | 22 |
| AX-157706990 | 26 | 37.235 | KV453227.1 | 1131362 | 22-scf00515 | 22 |
| AX-158329540 | 26 | 37.235 | KV453227.1 | 1132514 | 22-scf00515 | 22 |
| AX-158329541 | 26 | 37.235 | KV453227.1 | 1133025 | 22-scf00515 | 22 |
| AX-158329543 | 26 | 37.235 | KV453227.1 | 1136415 | 22-scf00515 | 22 |
| AX-158329545 | 26 | 37.235 | KV453227.1 | 1138257 | 22-scf00515 | 22 |
| AX-158329549 | 26 | 37.235 | KV453227.1 | 1141780 | 22-scf00515 | 22 |
| AX-158329550 | 26 | 37.235 | KV453227.1 | 1142633 | 22-scf00515 | 22 |
| AX-158329556 | 26 | 37.235 | KV453227.1 | 1148798 | 22-scf00515 | 22 |
| AX-158329562 | 26 | 37.235 | KV453227.1 | 1154696 | 22-scf00515 | 22 |
| AX-158329583 | 26 | 37.235 | KV453227.1 | 1176391 | 22-scf00515 | 22 |
| AX-158329586 | 26 | 37.235 | KV453227.1 | 1179269 | 22-scf00515 | 22 |
| AX-158329551 | 26 | 37.271 | KV453227.1 | 1143467 | 22-scf00515 | 22 |
| AX-158329552 | 26 | 37.305 | KV453227.1 | 1143837 | 22-scf00515 | 22 |
| AX-157848976 | 26 | 37.345 | KV453227.1 | 1144878 | 22-scf00515 | 22 |
| AX-158329554 | 26 | 37.345 | KV453227.1 | 1146816 | 22-scf00515 | 22 |
| AX-158329555 | 26 | 37.345 | KV453227.1 | 1147462 | 22-scf00515 | 22 |
| AX-158329557 | 26 | 37.345 | KV453227.1 | 1149298 | 22-scf00515 | 22 |
| AX-158329558 | 26 | 37.385 | KV453227.1 | 1151875 | 22-scf00515 | 22 |
| AX-158329560 | 26 | 37.417 | KV453227.1 | 1153514 | 22-scf00515 | 22 |
| AX-158329561 | 26 | 37.454 | KV453227.1 | 1154079 | 22-scf00515 | 22 |
| AX-158329565 | 26 | 37.454 | KV453227.1 | 1158846 | 22-scf00515 | 22 |
| AX-158329566 | 26 | 37.454 | KV453227.1 | 1159698 | 22-scf00515 | 22 |
| AX-158329567 | 26 | 37.454 | KV453227.1 | 1160287 | 22-scf00515 | 22 |
| AX-158329568 | 26 | 37.454 | KV453227.1 | 1161038 | 22-scf00515 | 22 |
| AX-158329574 | 26 | 37.454 | KV453227.1 | 1166970 | 22-scf00515 | 22 |
| AX-158329575 | 26 | 37.454 | KV453227.1 | 1167106 | 22-scf00515 | 22 |
| AX-158418682 | 26 | 37.454 | KV453227.1 | 1167537 | 22-scf00515 | 22 |
| AX-158329576 | 26 | 37.454 | KV453227.1 | 1168318 | 22-scf00515 | 22 |
| AX-158329577 | 26 | 37.454 | KV453227.1 | 1168871 | 22-scf00515 | 22 |
| AX-158329596 | 26 | 37.454 | KV453227.1 | 1197470 | 22-scf00515 | 22 |
| AX-158329580 | 26 | 37.563 | KV453227.1 | 1173029 | 22-scf00515 | 22 |
| AX-158329582 | 26 | 37.563 | KV453227.1 | 1174405 | 22-scf00515 | 22 |
| AX-157720352 | 26 | 37.563 | KV453227.1 | 1175021 | 22-scf00515 | 22 |
| AX-158329584 | 26 | 37.563 | KV453227.1 | 1177021 | 22-scf00515 | 22 |
| AX-158329587 | 26 | 37.672 | KV453227.1 | 1181634 | 22-scf00515 | 22 |
| AX-157757637 | 26 | 37.672 | KV453227.1 | 1184552 | 22-scf00515 | 22 |
| AX-158329589 | 26 | 37.672 | KV453227.1 | 1185393 | 22-scf00515 | 22 |

|              |    |        |            |         |                 |    |
|--------------|----|--------|------------|---------|-----------------|----|
| AX-158329590 | 26 | 37.672 | KV453227.1 | 1188190 | 22-scf00515     | 22 |
| AX-157774912 | 26 | 37.672 | KV453227.1 | 1188823 | 22-scf00515     | 22 |
| AX-157724416 | 26 | 37.672 | KV453227.1 | 1189934 | 22-scf00515     | 22 |
| AX-158329593 | 26 | 38     | KV453227.1 | 1193669 | 22-scf00515     | 22 |
| AX-158329594 | 26 | 38     | KV453227.1 | 1194519 | 22-scf00515     | 22 |
| AX-158329597 | 26 | 38     | KV453227.1 | 1198969 | 22-scf00515     | 22 |
| AX-158329599 | 26 | 38     | KV453227.1 | 1200736 | 22-scf00515     | 22 |
| AX-158329600 | 26 | 38     | KV453227.1 | 1201275 | 22-scf00515     | 22 |
| AX-158329602 | 26 | 38     | KV453227.1 | 1205653 | 22-scf00515     | 22 |
| AX-158418683 | 26 | 38     | KV453227.1 | 1208644 | 22-scf00515     | 22 |
| AX-158329604 | 26 | 38     | KV453227.1 | 1210521 | 22-scf00515     | 22 |
| AX-157774973 | 26 | 38     | KV453227.1 | 1210853 | 22-scf00515     | 22 |
| AX-158329615 | 26 | 38     | KV453227.1 | 1220968 | 22-scf00515     | 22 |
| AX-158329605 | 26 | 38.327 | KV453227.1 | 1211528 | 22-scf00515     | 22 |
| AX-158329607 | 26 | 38.327 | KV453227.1 | 1213255 | 22-scf00515     | 22 |
| AX-158329608 | 26 | 38.327 | KV453227.1 | 1213780 | 22-scf00515     | 22 |
| AX-158329609 | 26 | 38.327 | KV453227.1 | 1214201 | 22-scf00515     | 22 |
| AX-158329610 | 26 | 38.437 | KV453227.1 | 1215511 | 22-scf00515     | 22 |
| AX-158329612 | 26 | 38.437 | KV453227.1 | 1218308 | 22-scf00515     | 22 |
| AX-158329616 | 26 | 38.437 | KV453227.1 | 1222225 | 22-scf00515     | 22 |
| AX-158329617 | 26 | 38.437 | KV453227.1 | 1222686 | 22-scf00515     | 22 |
| AX-158329618 | 26 | 38.437 | KV453227.1 | 1223607 | 22-scf00515     | 22 |
| AX-158329619 | 26 | 38.437 | KV453227.1 | 1224019 | 22-scf00515     | 22 |
| AX-158329620 | 26 | 38.437 | KV453227.1 | 1224788 | 22-scf00515     | 22 |
| AX-158329621 | 26 | 38.437 | KV453227.1 | 1226260 | 22-scf00515     | 22 |
| AX-158329637 | 26 | 38.437 | KV453227.1 | 1247855 | 22-scf00515     | 22 |
| AX-158329623 | 26 | 38.762 | KV453227.1 | 1228385 | 22-scf00515     | 22 |
| AX-157710025 | 26 | 38.762 | KV453227.1 | 1230730 | 22-scf00515     | 22 |
| AX-157702526 | 26 | 38.762 | DX092590.1 | 282     | -IORI212 lctalt | UN |
| AX-158329624 | 26 | 38.763 | KV453227.1 | 1231179 | 22-scf00515     | 22 |
| AX-157723624 | 26 | 38.763 | KV453227.1 | 1235039 | 22-scf00515     | 22 |
| AX-158329628 | 26 | 38.764 | KV453227.1 | 1238635 | 22-scf00515     | 22 |
| AX-157861555 | 26 | 38.764 | KV453227.1 | 1239541 | 22-scf00515     | 22 |
| AX-158329629 | 26 | 38.764 | KV453227.1 | 1239838 | 22-scf00515     | 22 |
| AX-158329630 | 26 | 38.764 | KV453227.1 | 1241142 | 22-scf00515     | 22 |
| AX-158329631 | 26 | 38.764 | KV453227.1 | 1242283 | 22-scf00515     | 22 |
| AX-158329632 | 26 | 38.764 | KV453227.1 | 1242838 | 22-scf00515     | 22 |
| AX-158329633 | 26 | 38.764 | KV453227.1 | 1243761 | 22-scf00515     | 22 |
| AX-158329636 | 26 | 38.764 | KV453227.1 | 1247207 | 22-scf00515     | 22 |
| AX-158329639 | 26 | 38.764 | KV453227.1 | 1250138 | 22-scf00515     | 22 |
| AX-158329640 | 26 | 38.764 | KV453227.1 | 1251518 | 22-scf00515     | 22 |
| AX-158329645 | 26 | 38.764 | KV453227.1 | 1256952 | 22-scf00515     | 22 |
| AX-158329646 | 26 | 38.764 | KV453227.1 | 1258190 | 22-scf00515     | 22 |
| AX-158329647 | 26 | 38.764 | KV453227.1 | 1258840 | 22-scf00515     | 22 |
| AX-158329650 | 26 | 38.764 | KV453227.1 | 1261755 | 22-scf00515     | 22 |
| AX-158329652 | 26 | 38.764 | KV453227.1 | 1263281 | 22-scf00515     | 22 |
| AX-158329653 | 26 | 38.764 | KV453227.1 | 1263917 | 22-scf00515     | 22 |
| AX-158329654 | 26 | 38.764 | KV453227.1 | 1264704 | 22-scf00515     | 22 |
| AX-157888521 | 26 | 38.764 | KV453227.1 | 1269367 | 22-scf00515     | 22 |
| AX-158329657 | 26 | 38.764 | KV453227.1 | 1269578 | 22-scf00515     | 22 |
| AX-158329658 | 26 | 38.944 | KV453227.1 | 1270406 | 22-scf00515     | 22 |

|              |    |        |            |         |             |    |
|--------------|----|--------|------------|---------|-------------|----|
| AX-157720032 | 26 | 38.944 | KV453227.1 | 1270939 | 22-scf00515 | 22 |
| AX-158329660 | 26 | 38.944 | KV453227.1 | 1272012 | 22-scf00515 | 22 |
| AX-157774068 | 26 | 38.944 | KV453227.1 | 1317453 | 22-scf00515 | 22 |
| AX-158329666 | 26 | 39.04  | KV453227.1 | 1283225 | 22-scf00515 | 22 |
| AX-157708494 | 26 | 39.062 | KV453227.1 | 1290894 | 22-scf00515 | 22 |
| AX-158329693 | 26 | 39.062 | KV453227.1 | 1318735 | 22-scf00515 | 22 |
| AX-158418686 | 26 | 39.31  | KV453227.1 | 1291835 | 22-scf00515 | 22 |
| AX-158329672 | 26 | 39.31  | KV453227.1 | 1294478 | 22-scf00515 | 22 |
| AX-158329673 | 26 | 39.31  | KV453227.1 | 1297151 | 22-scf00515 | 22 |
| AX-158329674 | 26 | 39.31  | KV453227.1 | 1297570 | 22-scf00515 | 22 |
| AX-158329675 | 26 | 39.31  | KV453227.1 | 1298193 | 22-scf00515 | 22 |
| AX-157848977 | 26 | 39.31  | KV453227.1 | 1298937 | 22-scf00515 | 22 |
| AX-158329677 | 26 | 39.31  | KV453227.1 | 1299582 | 22-scf00515 | 22 |
| AX-158329678 | 26 | 39.31  | KV453227.1 | 1300056 | 22-scf00515 | 22 |
| AX-157848978 | 26 | 39.31  | KV453227.1 | 1300567 | 22-scf00515 | 22 |
| AX-158329680 | 26 | 39.31  | KV453227.1 | 1302589 | 22-scf00515 | 22 |
| AX-158329681 | 26 | 39.31  | KV453227.1 | 1303693 | 22-scf00515 | 22 |
| AX-158329682 | 26 | 39.31  | KV453227.1 | 1306130 | 22-scf00515 | 22 |
| AX-158329683 | 26 | 39.31  | KV453227.1 | 1306963 | 22-scf00515 | 22 |
| AX-158329685 | 26 | 39.342 | KV453227.1 | 1308976 | 22-scf00515 | 22 |
| AX-158329686 | 26 | 39.42  | KV453227.1 | 1309352 | 22-scf00515 | 22 |
| AX-157724171 | 26 | 39.42  | KV453227.1 | 1309894 | 22-scf00515 | 22 |
| AX-158329687 | 26 | 39.42  | KV453227.1 | 1310775 | 22-scf00515 | 22 |
| AX-158329690 | 26 | 39.42  | KV453227.1 | 1312581 | 22-scf00515 | 22 |
| AX-157718325 | 26 | 39.42  | KV453227.1 | 1313313 | 22-scf00515 | 22 |
| AX-157848979 | 26 | 39.42  | KV453227.1 | 1317708 | 22-scf00515 | 22 |
| AX-158418688 | 26 | 39.42  | KV453227.1 | 1324134 | 22-scf00515 | 22 |
| AX-157722113 | 26 | 39.42  | KV453227.1 | 1331139 | 22-scf00515 | 22 |
| AX-158329701 | 26 | 39.42  | KV453227.1 | 1336804 | 22-scf00515 | 22 |
| AX-158418689 | 26 | 39.42  | KV453227.1 | 1350043 | 22-scf00515 | 22 |
| AX-158329696 | 26 | 39.486 | KV453227.1 | 1328459 | 22-scf00515 | 22 |
| AX-158329697 | 26 | 39.638 | KV453227.1 | 1329057 | 22-scf00515 | 22 |
| AX-157716197 | 26 | 39.747 | KV453227.1 | 1329824 | 22-scf00515 | 22 |
| AX-158329698 | 26 | 39.792 | KV453227.1 | 1330368 | 22-scf00515 | 22 |
| AX-158329709 | 26 | 39.792 | KV453227.1 | 1345314 | 22-scf00515 | 22 |
| AX-158329667 | 26 | 39.857 | KV453227.1 | 1284179 | 22-scf00515 | 22 |
| AX-158329699 | 26 | 39.857 | KV453227.1 | 1334320 | 22-scf00515 | 22 |
| AX-158329700 | 26 | 39.857 | KV453227.1 | 1335766 | 22-scf00515 | 22 |
| AX-158329702 | 26 | 39.857 | KV453227.1 | 1337593 | 22-scf00515 | 22 |
| AX-158329703 | 26 | 39.857 | KV453227.1 | 1338262 | 22-scf00515 | 22 |
| AX-158329705 | 26 | 39.857 | KV453227.1 | 1339617 | 22-scf00515 | 22 |
| AX-158329706 | 26 | 39.857 | KV453227.1 | 1340228 | 22-scf00515 | 22 |
| AX-158329707 | 26 | 39.925 | KV453227.1 | 1342459 | 22-scf00515 | 22 |
| AX-158329708 | 26 | 39.982 | KV453227.1 | 1343986 | 22-scf00515 | 22 |
| AX-158329710 | 26 | 40.039 | KV453227.1 | 1345844 | 22-scf00515 | 22 |
| AX-158329715 | 26 | 40.129 | KV453227.1 | 1351474 | 22-scf00515 | 22 |
| AX-158329716 | 26 | 40.129 | KV453227.1 | 1352740 | 22-scf00515 | 22 |
| AX-158329720 | 26 | 40.221 | KV453227.1 | 1356642 | 22-scf00515 | 22 |
| AX-158329721 | 26 | 40.313 | KV453227.1 | 1358603 | 22-scf00515 | 22 |
| AX-158329722 | 26 | 40.403 | KV453227.1 | 1359926 | 22-scf00515 | 22 |
| AX-158329723 | 26 | 40.403 | KV453227.1 | 1361057 | 22-scf00515 | 22 |

|              |    |        |            |         |             |    |
|--------------|----|--------|------------|---------|-------------|----|
| AX-158329725 | 26 | 40.403 | KV453227.1 | 1364214 | 22-scf00515 | 22 |
| AX-158329726 | 26 | 40.403 | KV453227.1 | 1366036 | 22-scf00515 | 22 |
| AX-158329727 | 26 | 40.403 | KV453227.1 | 1367607 | 22-scf00515 | 22 |
| AX-158329728 | 26 | 40.403 | KV453227.1 | 1369625 | 22-scf00515 | 22 |
| AX-158329729 | 26 | 40.403 | KV453227.1 | 1370203 | 22-scf00515 | 22 |
| AX-158329730 | 26 | 40.487 | KV453227.1 | 1370825 | 22-scf00515 | 22 |
| AX-158329734 | 26 | 40.619 | KV453227.1 | 1377533 | 22-scf00515 | 22 |
| AX-158329733 | 26 | 40.623 | KV453227.1 | 1376616 | 22-scf00515 | 22 |
| AX-158329735 | 26 | 40.623 | KV453227.1 | 1377912 | 22-scf00515 | 22 |
| AX-158329746 | 26 | 40.623 | KV453227.1 | 1391327 | 22-scf00515 | 22 |
| AX-158329770 | 26 | 40.623 | KV453227.1 | 1418420 | 22-scf00515 | 22 |
| AX-158329739 | 26 | 40.624 | KV453227.1 | 1381884 | 22-scf00515 | 22 |
| AX-158418690 | 26 | 40.624 | KV453227.1 | 1382570 | 22-scf00515 | 22 |
| AX-158329741 | 26 | 40.624 | KV453227.1 | 1384551 | 22-scf00515 | 22 |
| AX-158329749 | 26 | 40.624 | KV453227.1 | 1395616 | 22-scf00515 | 22 |
| AX-158421667 | 26 | 40.624 | KV453227.1 | 1404710 | 22-scf00515 | 22 |
| AX-158329745 | 26 | 40.949 | KV453227.1 | 1390348 | 22-scf00515 | 22 |
| AX-158329748 | 26 | 40.949 | KV453227.1 | 1394275 | 22-scf00515 | 22 |
| AX-158329750 | 26 | 40.949 | KV453227.1 | 1396224 | 22-scf00515 | 22 |
| AX-158329751 | 26 | 40.949 | KV453227.1 | 1396927 | 22-scf00515 | 22 |
| AX-158329757 | 26 | 40.949 | KV453227.1 | 1403707 | 22-scf00515 | 22 |
| AX-158329752 | 26 | 40.967 | KV453227.1 | 1398064 | 22-scf00515 | 22 |
| AX-158329756 | 26 | 40.967 | KV453227.1 | 1402415 | 22-scf00515 | 22 |
| AX-158329758 | 26 | 41.058 | KV453227.1 | 1404306 | 22-scf00515 | 22 |
| AX-158329760 | 26 | 41.058 | KV453227.1 | 1407711 | 22-scf00515 | 22 |
| AX-158329761 | 26 | 41.058 | KV453227.1 | 1408362 | 22-scf00515 | 22 |
| AX-158329763 | 26 | 41.058 | KV453227.1 | 1410433 | 22-scf00515 | 22 |
| AX-158329764 | 26 | 41.098 | KV453227.1 | 1411312 | 22-scf00515 | 22 |
| AX-158329767 | 26 | 41.124 | KV453227.1 | 1415388 | 22-scf00515 | 22 |
| AX-158329768 | 26 | 41.147 | KV453227.1 | 1416453 | 22-scf00515 | 22 |
| AX-158329771 | 26 | 41.147 | KV453227.1 | 1419934 | 22-scf00515 | 22 |
| AX-158329772 | 26 | 41.168 | KV453227.1 | 1421781 | 22-scf00515 | 22 |
| AX-158329773 | 26 | 41.168 | KV453227.1 | 1423071 | 22-scf00515 | 22 |
| AX-157754342 | 26 | 41.168 | KV453227.1 | 1427069 | 22-scf00515 | 22 |
| AX-158329777 | 26 | 41.168 | KV453227.1 | 1427678 | 22-scf00515 | 22 |
| AX-158329779 | 26 | 41.168 | KV453227.1 | 1429571 | 22-scf00515 | 22 |
| AX-158329780 | 26 | 41.168 | KV453227.1 | 1432291 | 22-scf00515 | 22 |
| AX-158329835 | 26 | 41.168 | KV453227.1 | 1492671 | 22-scf00515 | 22 |
| AX-157726359 | 26 | 41.277 | KV453227.1 | 1416033 | 22-scf00515 | 22 |
| AX-158329781 | 26 | 41.277 | KV453227.1 | 1433506 | 22-scf00515 | 22 |
| AX-158329782 | 26 | 41.277 | KV453227.1 | 1434977 | 22-scf00515 | 22 |
| AX-158329784 | 26 | 41.277 | KV453227.1 | 1436891 | 22-scf00515 | 22 |
| AX-158329788 | 26 | 41.277 | KV453227.1 | 1439801 | 22-scf00515 | 22 |
| AX-158329794 | 26 | 41.335 | KV453227.1 | 1445331 | 22-scf00515 | 22 |
| AX-158329795 | 26 | 41.386 | KV453227.1 | 1446265 | 22-scf00515 | 22 |
| AX-158329796 | 26 | 41.386 | KV453227.1 | 1446644 | 22-scf00515 | 22 |
| AX-158329797 | 26 | 41.433 | KV453227.1 | 1448231 | 22-scf00515 | 22 |
| AX-158329798 | 26 | 41.467 | KV453227.1 | 1449136 | 22-scf00515 | 22 |
| AX-158329799 | 26 | 41.495 | KV453227.1 | 1449713 | 22-scf00515 | 22 |
| AX-158329802 | 26 | 41.514 | KV453227.1 | 1454216 | 22-scf00515 | 22 |
| AX-158329804 | 26 | 41.605 | KV453227.1 | 1456337 | 22-scf00515 | 22 |

|              |    |        |            |         |             |    |
|--------------|----|--------|------------|---------|-------------|----|
| AX-157739210 | 26 | 41.605 | KV453227.1 | 1460362 | 22-scf00515 | 22 |
| AX-158329807 | 26 | 41.605 | KV453227.1 | 1460745 | 22-scf00515 | 22 |
| AX-157714981 | 26 | 41.606 | KV453227.1 | 1462561 | 22-scf00515 | 22 |
| AX-157747327 | 26 | 41.606 | KV453227.1 | 1462992 | 22-scf00515 | 22 |
| AX-158329789 | 26 | 41.932 | KV453227.1 | 1440647 | 22-scf00515 | 22 |
| AX-158329810 | 26 | 41.932 | KV453227.1 | 1463945 | 22-scf00515 | 22 |
| AX-158329811 | 26 | 41.932 | KV453227.1 | 1466630 | 22-scf00515 | 22 |
| AX-158329814 | 26 | 41.932 | KV453227.1 | 1468237 | 22-scf00515 | 22 |
| AX-157717658 | 26 | 41.932 | KV453227.1 | 1470574 | 22-scf00515 | 22 |
| AX-158329815 | 26 | 41.932 | KV453227.1 | 1471121 | 22-scf00515 | 22 |
| AX-158329816 | 26 | 41.932 | KV453227.1 | 1471806 | 22-scf00515 | 22 |
| AX-158329821 | 26 | 41.932 | KV453227.1 | 1476665 | 22-scf00515 | 22 |
| AX-158329817 | 26 | 41.948 | KV453227.1 | 1472131 | 22-scf00515 | 22 |
| AX-158329791 | 26 | 41.982 | KV453227.1 | 1441582 | 22-scf00515 | 22 |
| AX-158329818 | 26 | 41.982 | KV453227.1 | 1474379 | 22-scf00515 | 22 |
| AX-158329827 | 26 | 41.982 | KV453227.1 | 1481810 | 22-scf00515 | 22 |
| AX-158329819 | 26 | 42.004 | KV453227.1 | 1475589 | 22-scf00515 | 22 |
| AX-158329820 | 26 | 42.004 | KV453227.1 | 1476113 | 22-scf00515 | 22 |
| AX-158329839 | 26 | 42.004 | KV453227.1 | 1497316 | 22-scf00515 | 22 |
| AX-158329826 | 26 | 42.041 | KV453227.1 | 1481563 | 22-scf00515 | 22 |
| AX-158329829 | 26 | 42.151 | KV453227.1 | 1485478 | 22-scf00515 | 22 |
| AX-158329830 | 26 | 42.151 | KV453227.1 | 1488330 | 22-scf00515 | 22 |
| AX-158329832 | 26 | 42.151 | KV453227.1 | 1489564 | 22-scf00515 | 22 |
| AX-158329837 | 26 | 42.151 | KV453227.1 | 1494933 | 22-scf00515 | 22 |
| AX-158329838 | 26 | 42.151 | KV453227.1 | 1495332 | 22-scf00515 | 22 |
| AX-158329840 | 26 | 42.151 | KV453227.1 | 1498886 | 22-scf00515 | 22 |
| AX-158329841 | 26 | 42.477 | KV453227.1 | 1501915 | 22-scf00515 | 22 |
| AX-158329842 | 26 | 42.477 | KV453227.1 | 1506702 | 22-scf00515 | 22 |
| AX-158329844 | 26 | 42.478 | KV453227.1 | 1509459 | 22-scf00515 | 22 |
| AX-158329845 | 26 | 42.478 | KV453227.1 | 1509857 | 22-scf00515 | 22 |
| AX-158329846 | 26 | 42.478 | KV453227.1 | 1510667 | 22-scf00515 | 22 |
| AX-158329848 | 26 | 42.478 | KV453227.1 | 1513396 | 22-scf00515 | 22 |
| AX-158329847 | 26 | 42.522 | KV453227.1 | 1512678 | 22-scf00515 | 22 |
| AX-158329849 | 26 | 42.587 | KV453227.1 | 1515260 | 22-scf00515 | 22 |
| AX-158329852 | 26 | 42.587 | KV453227.1 | 1521470 | 22-scf00515 | 22 |
| AX-157724511 | 26 | 42.587 | KV453227.1 | 1522357 | 22-scf00515 | 22 |
| AX-158329853 | 26 | 42.587 | KV453227.1 | 1522841 | 22-scf00515 | 22 |
| AX-158423731 | 26 | 42.587 | KV453227.1 | 1523458 | 22-scf00515 | 22 |
| AX-158329854 | 26 | 42.587 | KV453227.1 | 1525859 | 22-scf00515 | 22 |
| AX-158329855 | 26 | 42.587 | KV453227.1 | 1526596 | 22-scf00515 | 22 |
| AX-158329856 | 26 | 42.587 | KV453227.1 | 1529249 | 22-scf00515 | 22 |
| AX-158329857 | 26 | 42.587 | KV453227.1 | 1530921 | 22-scf00515 | 22 |
| AX-158329858 | 26 | 42.587 | KV453227.1 | 1531674 | 22-scf00515 | 22 |
| AX-158329859 | 26 | 42.587 | KV453227.1 | 1534688 | 22-scf00515 | 22 |
| AX-157746790 | 26 | 42.587 | KV453227.1 | 1535219 | 22-scf00515 | 22 |
| AX-157848984 | 26 | 42.587 | KV453227.1 | 1536905 | 22-scf00515 | 22 |
| AX-158329862 | 26 | 42.587 | KV453227.1 | 1537272 | 22-scf00515 | 22 |
| AX-158329864 | 26 | 42.587 | KV453227.1 | 1538494 | 22-scf00515 | 22 |
| AX-158329865 | 26 | 42.587 | KV453227.1 | 1539125 | 22-scf00515 | 22 |
| AX-158329867 | 26 | 42.587 | KV453227.1 | 1540739 | 22-scf00515 | 22 |
| AX-157867933 | 26 | 42.587 | KV453227.1 | 1542097 | 22-scf00515 | 22 |

|              |    |        |            |         |             |    |
|--------------|----|--------|------------|---------|-------------|----|
| AX-158329869 | 26 | 42.587 | KV453227.1 | 1542388 | 22-scf00515 | 22 |
| AX-158329870 | 26 | 42.587 | KV453227.1 | 1543105 | 22-scf00515 | 22 |
| AX-158329871 | 26 | 42.587 | KV453227.1 | 1543431 | 22-scf00515 | 22 |
| AX-158329872 | 26 | 42.587 | KV453227.1 | 1543842 | 22-scf00515 | 22 |
| AX-158329873 | 26 | 42.587 | KV453227.1 | 1544353 | 22-scf00515 | 22 |
| AX-158329875 | 26 | 42.587 | KV453227.1 | 1545707 | 22-scf00515 | 22 |
| AX-158329877 | 26 | 42.914 | KV453227.1 | 1547049 | 22-scf00515 | 22 |
| AX-158329882 | 26 | 42.914 | KV453227.1 | 1552115 | 22-scf00515 | 22 |
| AX-157755692 | 26 | 42.915 | KV453227.1 | 1530558 | 22-scf00515 | 22 |
| AX-158329861 | 26 | 42.915 | KV453227.1 | 1536943 | 22-scf00515 | 22 |
| AX-158329878 | 26 | 42.915 | KV453227.1 | 1548263 | 22-scf00515 | 22 |
| AX-158329879 | 26 | 42.915 | KV453227.1 | 1548808 | 22-scf00515 | 22 |
| AX-158329885 | 26 | 42.915 | KV453227.1 | 1554038 | 22-scf00515 | 22 |
| AX-158329886 | 26 | 42.915 | KV453227.1 | 1554629 | 22-scf00515 | 22 |
| AX-158329887 | 26 | 42.915 | KV453227.1 | 1556896 | 22-scf00515 | 22 |
| AX-158329889 | 26 | 42.915 | KV453227.1 | 1561179 | 22-scf00515 | 22 |
| AX-158329890 | 26 | 42.915 | KV453227.1 | 1561952 | 22-scf00515 | 22 |
| AX-158329892 | 26 | 42.915 | KV453227.1 | 1564716 | 22-scf00515 | 22 |
| AX-158329893 | 26 | 42.915 | KV453227.1 | 1566983 | 22-scf00515 | 22 |
| AX-158329894 | 26 | 42.915 | KV453227.1 | 1567672 | 22-scf00515 | 22 |
| AX-157714449 | 26 | 42.915 | KV453227.1 | 1568173 | 22-scf00515 | 22 |
| AX-158329898 | 26 | 42.915 | KV453227.1 | 1572584 | 22-scf00515 | 22 |
| AX-158329899 | 26 | 42.915 | KV453227.1 | 1573319 | 22-scf00515 | 22 |
| AX-158329900 | 26 | 42.915 | KV453227.1 | 1575075 | 22-scf00515 | 22 |
| AX-158329901 | 26 | 42.915 | KV453227.1 | 1577893 | 22-scf00515 | 22 |
| AX-158329905 | 26 | 42.915 | KV453227.1 | 1580704 | 22-scf00515 | 22 |
| AX-157888523 | 26 | 42.915 | KV453227.1 | 1582568 | 22-scf00515 | 22 |
| AX-158329906 | 26 | 42.915 | KV453227.1 | 1582722 | 22-scf00515 | 22 |
| AX-158329907 | 26 | 42.915 | KV453227.1 | 1583475 | 22-scf00515 | 22 |
| AX-157861559 | 26 | 42.915 | KV453227.1 | 1585281 | 22-scf00515 | 22 |
| AX-158329909 | 26 | 42.915 | KV453227.1 | 1586467 | 22-scf00515 | 22 |
| AX-158329910 | 26 | 42.915 | KV453227.1 | 1588232 | 22-scf00515 | 22 |
| AX-157881647 | 26 | 42.915 | KV453227.1 | 1589789 | 22-scf00515 | 22 |
| AX-158329913 | 26 | 42.915 | KV453227.1 | 1590588 | 22-scf00515 | 22 |
| AX-158329915 | 26 | 42.915 | KV453227.1 | 1593271 | 22-scf00515 | 22 |
| AX-158329930 | 26 | 42.915 | KV453227.1 | 1607326 | 22-scf00515 | 22 |
| AX-158329916 | 26 | 43.024 | KV453227.1 | 1595661 | 22-scf00515 | 22 |
| AX-158329919 | 26 | 43.025 | KV453227.1 | 1598301 | 22-scf00515 | 22 |
| AX-158329922 | 26 | 43.351 | KV453227.1 | 1600203 | 22-scf00515 | 22 |
| AX-158329924 | 26 | 43.352 | KV453227.1 | 1602324 | 22-scf00515 | 22 |
| AX-158329925 | 26 | 43.352 | KV453227.1 | 1603354 | 22-scf00515 | 22 |
| AX-158329927 | 26 | 43.352 | KV453227.1 | 1605109 | 22-scf00515 | 22 |
| AX-158329928 | 26 | 43.352 | KV453227.1 | 1605541 | 22-scf00515 | 22 |
| AX-158329929 | 26 | 43.352 | KV453227.1 | 1606500 | 22-scf00515 | 22 |
| AX-158329944 | 26 | 43.352 | KV453227.1 | 1625286 | 22-scf00515 | 22 |
| AX-158329932 | 26 | 43.392 | KV453227.1 | 1610551 | 22-scf00515 | 22 |
| AX-158329933 | 26 | 43.411 | KV453227.1 | 1611144 | 22-scf00515 | 22 |
| AX-158329891 | 26 | 43.461 | KV453227.1 | 1563639 | 22-scf00515 | 22 |
| AX-158329934 | 26 | 43.461 | KV453227.1 | 1611775 | 22-scf00515 | 22 |
| AX-158329935 | 26 | 43.461 | KV453227.1 | 1613718 | 22-scf00515 | 22 |
| AX-158329940 | 26 | 43.461 | KV453227.1 | 1621367 | 22-scf00515 | 22 |

|              |    |        |            |         |             |    |
|--------------|----|--------|------------|---------|-------------|----|
| AX-158329941 | 26 | 43.461 | KV453227.1 | 1622138 | 22-scf00515 | 22 |
| AX-158329943 | 26 | 43.516 | KV453227.1 | 1624204 | 22-scf00515 | 22 |
| AX-158329946 | 26 | 43.57  | KV453227.1 | 1628381 | 22-scf00515 | 22 |
| AX-158329947 | 26 | 43.57  | KV453227.1 | 1628824 | 22-scf00515 | 22 |
| AX-158329948 | 26 | 43.679 | KV453227.1 | 1632110 | 22-scf00515 | 22 |
| AX-158329949 | 26 | 43.679 | KV453227.1 | 1632838 | 22-scf00515 | 22 |
| AX-158329950 | 26 | 43.679 | KV453227.1 | 1633952 | 22-scf00515 | 22 |
| AX-158329951 | 26 | 43.679 | KV453227.1 | 1634468 | 22-scf00515 | 22 |
| AX-158329952 | 26 | 43.708 | KV453227.1 | 1635035 | 22-scf00515 | 22 |
| AX-158329955 | 26 | 43.789 | KV453227.1 | 1641583 | 22-scf00515 | 22 |
| AX-157758506 | 26 | 43.789 | KV453227.1 | 1643757 | 22-scf00515 | 22 |
| AX-158329956 | 26 | 43.897 | KV453227.1 | 1644492 | 22-scf00515 | 22 |
| AX-157726570 | 26 | 43.897 | KV453227.1 | 1645936 | 22-scf00515 | 22 |
| AX-158329957 | 26 | 43.897 | KV453227.1 | 1651430 | 22-scf00515 | 22 |
| AX-158329958 | 26 | 44.117 | KV453227.1 | 1651830 | 22-scf00515 | 22 |
| AX-158329961 | 26 | 44.263 | KV453227.1 | 1654602 | 22-scf00515 | 22 |
| AX-158329962 | 26 | 44.263 | KV453227.1 | 1658255 | 22-scf00515 | 22 |
| AX-158329963 | 26 | 44.408 | KV453227.1 | 1659826 | 22-scf00515 | 22 |
| AX-158329965 | 26 | 44.408 | KV453227.1 | 1662199 | 22-scf00515 | 22 |
| AX-158329964 | 26 | 44.554 | KV453227.1 | 1661615 | 22-scf00515 | 22 |
| AX-158329967 | 26 | 44.554 | KV453227.1 | 1664018 | 22-scf00515 | 22 |
| AX-158329969 | 26 | 44.554 | KV453227.1 | 1665091 | 22-scf00515 | 22 |
| AX-158329970 | 26 | 44.554 | KV453227.1 | 1665297 | 22-scf00515 | 22 |
| AX-158329972 | 26 | 44.554 | KV453227.1 | 1669236 | 22-scf00515 | 22 |
| AX-158418696 | 26 | 44.554 | KV453227.1 | 1672933 | 22-scf00515 | 22 |
| AX-157881648 | 26 | 44.881 | KV453227.1 | 1675916 | 22-scf00515 | 22 |
| AX-158329977 | 26 | 44.881 | KV453227.1 | 1679759 | 22-scf00515 | 22 |
| AX-157754311 | 26 | 44.881 | KV453227.1 | 1679853 | 22-scf00515 | 22 |
| AX-158329979 | 26 | 44.881 | KV453227.1 | 1681239 | 22-scf00515 | 22 |
| AX-158329980 | 26 | 44.881 | KV453227.1 | 1681781 | 22-scf00515 | 22 |
| AX-158329981 | 26 | 44.881 | KV453227.1 | 1682321 | 22-scf00515 | 22 |
| AX-158329982 | 26 | 44.881 | KV453227.1 | 1682807 | 22-scf00515 | 22 |
| AX-157848988 | 26 | 44.881 | KV453227.1 | 1684841 | 22-scf00515 | 22 |
| AX-158329986 | 26 | 44.881 | KV453227.1 | 1685158 | 22-scf00515 | 22 |
| AX-158329987 | 26 | 44.881 | KV453227.1 | 1685911 | 22-scf00515 | 22 |
| AX-157770857 | 26 | 44.909 | KV453227.1 | 1681199 | 22-scf00515 | 22 |
| AX-158329988 | 26 | 44.909 | KV453227.1 | 1687710 | 22-scf00515 | 22 |
| AX-158330003 | 26 | 44.909 | KV453227.1 | 1706251 | 22-scf00515 | 22 |
| AX-158329992 | 26 | 44.948 | KV453227.1 | 1689353 | 22-scf00515 | 22 |
| AX-158329993 | 26 | 44.991 | KV453227.1 | 1689840 | 22-scf00515 | 22 |
| AX-158329994 | 26 | 44.991 | KV453227.1 | 1690094 | 22-scf00515 | 22 |
| AX-158329996 | 26 | 44.991 | KV453227.1 | 1691593 | 22-scf00515 | 22 |
| AX-157848989 | 26 | 44.991 | KV453227.1 | 1692058 | 22-scf00515 | 22 |
| AX-158329997 | 26 | 44.991 | KV453227.1 | 1695048 | 22-scf00515 | 22 |
| AX-157751190 | 26 | 44.991 | KV453227.1 | 1695369 | 22-scf00515 | 22 |
| AX-158330001 | 26 | 45.155 | KV453227.1 | 1705133 | 22-scf00515 | 22 |
| AX-158330019 | 26 | 45.155 | KV453227.1 | 1736601 | 22-scf00515 | 22 |
| AX-158330002 | 26 | 45.25  | KV453227.1 | 1705513 | 22-scf00515 | 22 |
| AX-158329983 | 26 | 45.318 | KV453227.1 | 1683048 | 22-scf00515 | 22 |
| AX-158330004 | 26 | 45.318 | KV453227.1 | 1707823 | 22-scf00515 | 22 |
| AX-158330005 | 26 | 45.318 | KV453227.1 | 1708300 | 22-scf00515 | 22 |

|              |    |        |            |         |             |    |
|--------------|----|--------|------------|---------|-------------|----|
| AX-158330006 | 26 | 45.318 | KV453227.1 | 1710474 | 22-scf00515 | 22 |
| AX-157848991 | 26 | 45.318 | KV453227.1 | 1712058 | 22-scf00515 | 22 |
| AX-158381532 | 26 | 45.318 | KV453227.1 | 1714602 | 22-scf00515 | 22 |
| AX-157746695 | 26 | 45.318 | KV453227.1 | 1715920 | 22-scf00515 | 22 |
| AX-157848995 | 26 | 45.318 | KV453227.1 | 1731897 | 22-scf00515 | 22 |
| AX-157849001 | 26 | 45.318 | KV453227.1 | 1767737 | 22-scf00515 | 22 |
| AX-157774761 | 26 | 45.396 | KV453227.1 | 1723632 | 22-scf00515 | 22 |
| AX-157848994 | 26 | 45.537 | KV453227.1 | 1726057 | 22-scf00515 | 22 |
| AX-158330013 | 26 | 45.537 | KV453227.1 | 1728702 | 22-scf00515 | 22 |
| AX-158330015 | 26 | 45.537 | KV453227.1 | 1729624 | 22-scf00515 | 22 |
| AX-158330017 | 26 | 45.587 | KV453227.1 | 1732886 | 22-scf00515 | 22 |
| AX-157746039 | 26 | 45.662 | KV453227.1 | 1736165 | 22-scf00515 | 22 |
| AX-157848997 | 26 | 45.74  | KV453227.1 | 1740146 | 22-scf00515 | 22 |
| AX-158330021 | 26 | 45.74  | KV453227.1 | 1740267 | 22-scf00515 | 22 |
| AX-157848992 | 26 | 45.756 | KV453227.1 | 1712334 | 22-scf00515 | 22 |
| AX-158330007 | 26 | 45.756 | KV453227.1 | 1718549 | 22-scf00515 | 22 |
| AX-157775599 | 26 | 45.756 | KV453227.1 | 1742794 | 22-scf00515 | 22 |
| AX-157751650 | 26 | 45.771 | KV453227.1 | 1751848 | 22-scf00515 | 22 |
| AX-157848999 | 26 | 45.98  | KV453227.1 | 1752613 | 22-scf00515 | 22 |
| AX-157734071 | 26 | 45.981 | KV453227.1 | 1752780 | 22-scf00515 | 22 |
| AX-158330026 | 26 | 45.981 | KV453227.1 | 1757631 | 22-scf00515 | 22 |
| AX-158330028 | 26 | 45.981 | KV453227.1 | 1760353 | 22-scf00515 | 22 |
| AX-158330029 | 26 | 46.162 | KV453227.1 | 1761220 | 22-scf00515 | 22 |
| AX-158330034 | 26 | 46.162 | KV453227.1 | 1768919 | 22-scf00515 | 22 |
| AX-157720448 | 26 | 46.162 | KV453227.1 | 1782378 | 22-scf00515 | 22 |
| AX-158330025 | 26 | 46.236 | KV453227.1 | 1756603 | 22-scf00515 | 22 |
| AX-157756142 | 26 | 46.236 | KV453227.1 | 1770065 | 22-scf00515 | 22 |
| AX-158330036 | 26 | 46.276 | KV453227.1 | 1772236 | 22-scf00515 | 22 |
| AX-157750556 | 26 | 46.306 | KV453227.1 | 1772823 | 22-scf00515 | 22 |
| AX-158330043 | 26 | 46.344 | KV453227.1 | 1782447 | 22-scf00515 | 22 |
| AX-157849000 | 26 | 46.52  | KV453227.1 | 1766695 | 22-scf00515 | 22 |
| AX-158330040 | 26 | 46.52  | KV453227.1 | 1778587 | 22-scf00515 | 22 |
| AX-158330044 | 26 | 46.52  | KV453227.1 | 1782805 | 22-scf00515 | 22 |
| AX-158330046 | 26 | 46.52  | KV453227.1 | 1784660 | 22-scf00515 | 22 |
| AX-157717931 | 26 | 46.52  | KV453227.1 | 1786656 | 22-scf00515 | 22 |
| AX-158330052 | 26 | 46.52  | KV453227.1 | 1790876 | 22-scf00515 | 22 |
| AX-157849002 | 26 | 46.52  | KV453227.1 | 1794765 | 22-scf00515 | 22 |
| AX-157747489 | 26 | 46.52  | KV453227.1 | 1795970 | 22-scf00515 | 22 |
| AX-158330055 | 26 | 46.52  | KV453227.1 | 1797096 | 22-scf00515 | 22 |
| AX-158330056 | 26 | 46.52  | KV453227.1 | 1798160 | 22-scf00515 | 22 |
| AX-158330057 | 26 | 46.52  | KV453227.1 | 1800820 | 22-scf00515 | 22 |
| AX-158330061 | 26 | 46.521 | KV453227.1 | 1809919 | 22-scf00515 | 22 |
| AX-158330064 | 26 | 46.521 | KV453227.1 | 1814270 | 22-scf00515 | 22 |
| AX-157849004 | 26 | 46.848 | KV453227.1 | 1806282 | 22-scf00515 | 22 |
| AX-157754010 | 26 | 46.848 | KV453227.1 | 1811068 | 22-scf00515 | 22 |
| AX-158330069 | 26 | 46.848 | KV453227.1 | 1819118 | 22-scf00515 | 22 |
| AX-158330070 | 26 | 46.848 | KV453227.1 | 1820076 | 22-scf00515 | 22 |
| AX-158330075 | 26 | 46.848 | KV453227.1 | 1827106 | 22-scf00515 | 22 |
| AX-158330076 | 26 | 46.848 | KV453227.1 | 1828860 | 22-scf00515 | 22 |
| AX-157849005 | 26 | 46.848 | KV453227.1 | 1829006 | 22-scf00515 | 22 |
| AX-158381533 | 26 | 46.848 | KV453227.1 | 1830241 | 22-scf00515 | 22 |



|              |    |        |            |         |             |    |
|--------------|----|--------|------------|---------|-------------|----|
| AX-157849006 | 26 | 46.848 | KV453227.1 | 1833455 | 22-scf00515 | 22 |
| AX-157849007 | 26 | 46.848 | KV453227.1 | 1833843 | 22-scf00515 | 22 |
| AX-158330078 | 26 | 46.848 | KV453227.1 | 1836346 | 22-scf00515 | 22 |
| AX-158330079 | 26 | 46.848 | KV453227.1 | 1837413 | 22-scf00515 | 22 |
| AX-157849008 | 26 | 46.848 | KV453227.1 | 1838662 | 22-scf00515 | 22 |
| AX-157867937 | 26 | 46.848 | KV453227.1 | 1841622 | 22-scf00515 | 22 |
| AX-158330082 | 26 | 46.947 | KV453227.1 | 1842465 | 22-scf00515 | 22 |
| AX-157849003 | 26 | 47.066 | KV453227.1 | 1797749 | 22-scf00515 | 22 |
| AX-158330058 | 26 | 47.066 | KV453227.1 | 1802843 | 22-scf00515 | 22 |
| AX-158330084 | 26 | 47.066 | KV453227.1 | 1845282 | 22-scf00515 | 22 |
| AX-158330085 | 26 | 47.066 | KV453227.1 | 1845757 | 22-scf00515 | 22 |
| AX-158330086 | 26 | 47.066 | KV453227.1 | 1846029 | 22-scf00515 | 22 |
| AX-158330087 | 26 | 47.066 | KV453227.1 | 1846388 | 22-scf00515 | 22 |
| AX-158330088 | 26 | 47.066 | KV453227.1 | 1848745 | 22-scf00515 | 22 |
| AX-158330091 | 26 | 47.066 | KV453227.1 | 1850881 | 22-scf00515 | 22 |
| AX-158330092 | 26 | 47.066 | KV453227.1 | 1851409 | 22-scf00515 | 22 |
| AX-157757240 | 26 | 47.066 | KV453227.1 | 1852831 | 22-scf00515 | 22 |
| AX-157849009 | 26 | 47.133 | KV453227.1 | 1853382 | 22-scf00515 | 22 |
| AX-158330095 | 26 | 47.176 | KV453227.1 | 1854660 | 22-scf00515 | 22 |
| AX-158330096 | 26 | 47.176 | KV453227.1 | 1856066 | 22-scf00515 | 22 |
| AX-157873663 | 26 | 47.176 | KV453227.1 | 1858107 | 22-scf00515 | 22 |
| AX-158330099 | 26 | 47.176 | KV453227.1 | 1858936 | 22-scf00515 | 22 |
| AX-158330102 | 26 | 47.322 | KV453227.1 | 1860855 | 22-scf00515 | 22 |
| AX-158330108 | 26 | 47.441 | KV453227.1 | 1867861 | 22-scf00515 | 22 |
| AX-158330110 | 26 | 47.608 | KV453227.1 | 1869038 | 22-scf00515 | 22 |
| AX-158330112 | 26 | 47.61  | KV453227.1 | 1871354 | 22-scf00515 | 22 |
| AX-158330115 | 26 | 47.611 | KV453227.1 | 1874269 | 22-scf00515 | 22 |
| AX-158330104 | 26 | 47.613 | KV453227.1 | 1865231 | 22-scf00515 | 22 |
| AX-158330116 | 26 | 47.613 | KV453227.1 | 1875419 | 22-scf00515 | 22 |
| AX-158330117 | 26 | 47.613 | KV453227.1 | 1875726 | 22-scf00515 | 22 |
| AX-158330119 | 26 | 47.613 | KV453227.1 | 1877235 | 22-scf00515 | 22 |
| AX-158330120 | 26 | 47.613 | KV453227.1 | 1877829 | 22-scf00515 | 22 |
| AX-158330135 | 26 | 47.613 | KV453227.1 | 1894755 | 22-scf00515 | 22 |
| AX-158330124 | 26 | 47.722 | KV453227.1 | 1882641 | 22-scf00515 | 22 |
| AX-158330127 | 26 | 47.726 | KV453227.1 | 1886728 | 22-scf00515 | 22 |
| AX-158330129 | 26 | 48.013 | KV453227.1 | 1890335 | 22-scf00515 | 22 |
| AX-158330136 | 26 | 48.013 | KV453227.1 | 1895156 | 22-scf00515 | 22 |
| AX-158330138 | 26 | 48.013 | KV453227.1 | 1897957 | 22-scf00515 | 22 |
| AX-158330144 | 26 | 48.013 | KV453227.1 | 1903418 | 22-scf00515 | 22 |
| AX-158330141 | 26 | 48.08  | KV453227.1 | 1901322 | 22-scf00515 | 22 |
| AX-158330142 | 26 | 48.159 | KV453227.1 | 1901802 | 22-scf00515 | 22 |
| AX-157714038 | 26 | 48.159 | KV453227.1 | 1904450 | 22-scf00515 | 22 |
| AX-158330147 | 26 | 48.159 | KV453227.1 | 1908721 | 22-scf00515 | 22 |
| AX-158330149 | 26 | 48.159 | KV453227.1 | 1910342 | 22-scf00515 | 22 |
| AX-157881651 | 26 | 48.159 | KV453227.1 | 1914144 | 22-scf00515 | 22 |
| AX-157849013 | 26 | 48.16  | KV453227.1 | 1919609 | 22-scf00515 | 22 |
| AX-158330156 | 26 | 48.486 | KV453227.1 | 1924792 | 22-scf00515 | 22 |
| AX-158330154 | 26 | 48.487 | KV453227.1 | 1920850 | 22-scf00515 | 22 |
| AX-158330157 | 26 | 48.487 | KV453227.1 | 1926014 | 22-scf00515 | 22 |
| AX-157715872 | 26 | 48.487 | KV453227.1 | 1927956 | 22-scf00515 | 22 |
| AX-158330161 | 26 | 48.487 | KV453227.1 | 1930817 | 22-scf00515 | 22 |

|              |    |        |            |         |             |    |
|--------------|----|--------|------------|---------|-------------|----|
| AX-157749795 | 26 | 48.487 | KV453227.1 | 1931057 | 22-scf00515 | 22 |
| AX-158330166 | 26 | 48.487 | KV453227.1 | 1933772 | 22-scf00515 | 22 |
| AX-157739379 | 26 | 48.487 | KV453227.1 | 1938004 | 22-scf00515 | 22 |
| AX-158330171 | 26 | 48.487 | KV453227.1 | 1940270 | 22-scf00515 | 22 |
| AX-158330165 | 26 | 48.57  | KV453227.1 | 1933332 | 22-scf00515 | 22 |
| AX-158330150 | 26 | 48.596 | KV453227.1 | 1916138 | 22-scf00515 | 22 |
| AX-158330158 | 26 | 48.596 | KV453227.1 | 1927670 | 22-scf00515 | 22 |
| AX-158330162 | 26 | 48.596 | KV453227.1 | 1931912 | 22-scf00515 | 22 |
| AX-158330167 | 26 | 48.596 | KV453227.1 | 1934778 | 22-scf00515 | 22 |
| AX-158330168 | 26 | 48.596 | KV453227.1 | 1935628 | 22-scf00515 | 22 |
| AX-158330170 | 26 | 48.596 | KV453227.1 | 1938295 | 22-scf00515 | 22 |
| AX-158330164 | 26 | 48.604 | KV453227.1 | 1932663 | 22-scf00515 | 22 |
| AX-158330172 | 26 | 48.604 | KV453227.1 | 1940575 | 22-scf00515 | 22 |
| AX-158330173 | 26 | 48.827 | KV453227.1 | 1941948 | 22-scf00515 | 22 |
| AX-158330175 | 26 | 48.87  | KV453227.1 | 1943656 | 22-scf00515 | 22 |
| AX-158330176 | 26 | 49.005 | KV453227.1 | 1944343 | 22-scf00515 | 22 |
| AX-158330178 | 26 | 49.006 | KV453227.1 | 1948544 | 22-scf00515 | 22 |
| AX-158330179 | 26 | 49.068 | KV453227.1 | 1949014 | 22-scf00515 | 22 |
| AX-158330182 | 26 | 49.068 | KV453227.1 | 1953591 | 22-scf00515 | 22 |
| AX-158330130 | 26 | 49.267 | KV453227.1 | 1890976 | 22-scf00515 | 22 |
| AX-158330133 | 26 | 49.267 | KV453227.1 | 1893118 | 22-scf00515 | 22 |
| AX-158330152 | 26 | 49.267 | KV453227.1 | 1917913 | 22-scf00515 | 22 |
| AX-158330177 | 26 | 49.267 | KV453227.1 | 1947341 | 22-scf00515 | 22 |
| AX-158330184 | 26 | 49.267 | KV453227.1 | 1955820 | 22-scf00515 | 22 |
| AX-158330186 | 26 | 49.4   | KV453227.1 | 1956630 | 22-scf00515 | 22 |
| AX-158330188 | 26 | 49.464 | KV453227.1 | 1958779 | 22-scf00515 | 22 |
| AX-158330230 | 26 | 49.464 | KV453227.1 | 2011716 | 22-scf00515 | 22 |
| AX-158330263 | 26 | 49.464 | KV453227.1 | 2042710 | 22-scf00515 | 22 |
| AX-158330363 | 26 | 49.464 | KV453227.1 | 2167250 | 22-scf00515 | 22 |
| AX-158330189 | 26 | 49.537 | KV453227.1 | 1960112 | 22-scf00515 | 22 |
| AX-158330191 | 26 | 49.593 | KV453227.1 | 1962659 | 22-scf00515 | 22 |
| AX-158330183 | 26 | 49.595 | KV453227.1 | 1954975 | 22-scf00515 | 22 |
| AX-158330194 | 26 | 49.595 | KV453227.1 | 1965813 | 22-scf00515 | 22 |
| AX-157708220 | 26 | 49.595 | KV453227.1 | 1968561 | 22-scf00515 | 22 |
| AX-158330197 | 26 | 49.595 | KV453227.1 | 1969844 | 22-scf00515 | 22 |
| AX-158330256 | 26 | 49.595 | KV453227.1 | 2038561 | 22-scf00515 | 22 |
| AX-158330200 | 26 | 49.596 | KV453227.1 | 1974031 | 22-scf00515 | 22 |
| AX-158330201 | 26 | 50.014 | KV453227.1 | 1975455 | 22-scf00515 | 22 |
| AX-158330203 | 26 | 50.014 | KV453227.1 | 1979322 | 22-scf00515 | 22 |
| AX-158330249 | 26 | 50.014 | KV453227.1 | 2029476 | 22-scf00515 | 22 |
| AX-158330253 | 26 | 50.014 | KV453227.1 | 2034274 | 22-scf00515 | 22 |
| AX-158330277 | 26 | 50.014 | KV453227.1 | 2066529 | 22-scf00515 | 22 |
| AX-157739850 | 26 | 50.015 | KV453227.1 | 1986744 | 22-scf00515 | 22 |
| AX-157888528 | 26 | 50.015 | KV453227.1 | 2035589 | 22-scf00515 | 22 |
| AX-158330211 | 26 | 50.016 | KV453227.1 | 1989052 | 22-scf00515 | 22 |
| AX-158330216 | 26 | 50.017 | KV453227.1 | 1995298 | 22-scf00515 | 22 |
| AX-158330207 | 26 | 50.018 | KV453227.1 | 1984235 | 22-scf00515 | 22 |
| AX-158330220 | 26 | 50.018 | KV453227.1 | 1999839 | 22-scf00515 | 22 |
| AX-158330224 | 26 | 50.018 | KV453227.1 | 2005912 | 22-scf00515 | 22 |
| AX-157748517 | 26 | 50.018 | KV453227.1 | 2006325 | 22-scf00515 | 22 |
| AX-157849014 | 26 | 50.018 | KV453227.1 | 2006520 | 22-scf00515 | 22 |

|              |    |        |             |         |             |    |
|--------------|----|--------|-------------|---------|-------------|----|
| AX-158330225 | 26 | 50.018 | KV453227.1  | 2007686 | 22-scf00515 | 22 |
| AX-158330226 | 26 | 50.018 | KV453227.1  | 2008095 | 22-scf00515 | 22 |
| AX-158330229 | 26 | 50.018 | KV453227.1  | 2011005 | 22-scf00515 | 22 |
| AX-157740749 | 26 | 50.018 | KV453227.1  | 2012404 | 22-scf00515 | 22 |
| AX-158330232 | 26 | 50.018 | KV453227.1  | 2012749 | 22-scf00515 | 22 |
| AX-157751716 | 26 | 50.018 | KV453227.1  | 2015638 | 22-scf00515 | 22 |
| AX-157861562 | 26 | 50.018 | KV453227.1  | 2017321 | 22-scf00515 | 22 |
| AX-157772777 | 26 | 50.018 | KV453227.1  | 2018001 | 22-scf00515 | 22 |
| AX-158330240 | 26 | 50.018 | KV453227.1  | 2020150 | 22-scf00515 | 22 |
| AX-158330242 | 26 | 50.018 | KV453227.1  | 2021169 | 22-scf00515 | 22 |
| AX-158330244 | 26 | 50.018 | KV453227.1  | 2025124 | 22-scf00515 | 22 |
| AX-158330245 | 26 | 50.018 | KV453227.1  | 2025878 | 22-scf00515 | 22 |
| AX-158330246 | 26 | 50.018 | KV453227.1  | 2026619 | 22-scf00515 | 22 |
| AX-158330247 | 26 | 50.018 | KV453227.1  | 2027719 | 22-scf00515 | 22 |
| AX-158330248 | 26 | 50.018 | KV453227.1  | 2028980 | 22-scf00515 | 22 |
| AX-158330251 | 26 | 50.018 | KV453227.1  | 2030276 | 22-scf00515 | 22 |
| AX-158330252 | 26 | 50.018 | KV453227.1  | 2030616 | 22-scf00515 | 22 |
| AX-158330255 | 26 | 50.018 | KV453227.1  | 2037180 | 22-scf00515 | 22 |
| AX-158330258 | 26 | 50.018 | KV453227.1  | 2039221 | 22-scf00515 | 22 |
| AX-158330260 | 26 | 50.018 | KV453227.1  | 2040766 | 22-scf00515 | 22 |
| AX-157708534 | 26 | 50.018 | KV453227.1  | 2041704 | 22-scf00515 | 22 |
| AX-157849017 | 26 | 50.018 | KV453227.1  | 2041882 | 22-scf00515 | 22 |
| AX-158330264 | 26 | 50.018 | KV453227.1  | 2043644 | 22-scf00515 | 22 |
| AX-158330265 | 26 | 50.018 | KV453227.1  | 2044954 | 22-scf00515 | 22 |
| AX-157849018 | 26 | 50.018 | KV453227.1  | 2053556 | 22-scf00515 | 22 |
| AX-158418703 | 26 | 50.018 | KV453227.1  | 2054686 | 22-scf00515 | 22 |
| AX-157849019 | 26 | 50.018 | KV453227.1  | 2056087 | 22-scf00515 | 22 |
| AX-158330268 | 26 | 50.018 | KV453227.1  | 2056465 | 22-scf00515 | 22 |
| AX-158330274 | 26 | 50.018 | KV453227.1  | 2063438 | 22-scf00515 | 22 |
| AX-158330279 | 26 | 50.018 | KV453227.1  | 2067662 | 22-scf00515 | 22 |
| AX-158330295 | 26 | 50.018 | KV453227.1  | 2080529 | 22-scf00515 | 22 |
| AX-158330335 | 26 | 50.018 | KV453227.1  | 2129843 | 22-scf00515 | 22 |
| AX-157867944 | 26 | 50.018 | KV453227.1  | 2134964 | 22-scf00515 | 22 |
| AX-157806370 | 26 | 50.018 | KV453227.1  | 2161294 | 22-scf00515 | 22 |
| AX-157849026 | 26 | 50.018 | KV453227.1  | 2169469 | 22-scf00515 | 22 |
| AX-158330267 | 26 | 50.042 | KV453227.1  | 2055478 | 22-scf00515 | 22 |
| AX-158330272 | 26 | 50.042 | KV453227.1  | 2062266 | 22-scf00515 | 22 |
| AX-158330269 | 26 | 50.063 | KV453227.1  | 2056923 | 22-scf00515 | 22 |
| AX-158330316 | 26 | 50.063 | KV453227.1  | 2103460 | 22-scf00515 | 22 |
| AX-157705887 | 26 | 50.063 | 3ML01031171 | 362     | scf06778_1  | UN |
| AX-157861563 | 26 | 50.084 | KV453227.1  | 2058477 | 22-scf00515 | 22 |
| AX-158330271 | 26 | 50.108 | KV453227.1  | 2061683 | 22-scf00515 | 22 |
| AX-158330273 | 26 | 50.127 | KV453227.1  | 2063269 | 22-scf00515 | 22 |
| AX-158330275 | 26 | 50.127 | KV453227.1  | 2064760 | 22-scf00515 | 22 |
| AX-158330276 | 26 | 50.127 | KV453227.1  | 2065518 | 22-scf00515 | 22 |
| AX-158330284 | 26 | 50.127 | KV453227.1  | 2069718 | 22-scf00515 | 22 |
| AX-158330307 | 26 | 50.127 | KV453227.1  | 2092215 | 22-scf00515 | 22 |
| AX-157705889 | 26 | 50.127 | 3ML01031171 | 783     | scf06778_1  | UN |
| AX-158330282 | 26 | 50.174 | KV453227.1  | 2068807 | 22-scf00515 | 22 |
| AX-157849015 | 26 | 50.188 | KV453227.1  | 2008733 | 22-scf00515 | 22 |
| AX-158330243 | 26 | 50.188 | KV453227.1  | 2021627 | 22-scf00515 | 22 |

|              |    |        |            |         |             |    |
|--------------|----|--------|------------|---------|-------------|----|
| AX-158330291 | 26 | 50.188 | KV453227.1 | 2076375 | 22-scf00515 | 22 |
| AX-157861564 | 26 | 50.188 | KV453227.1 | 2108856 | 22-scf00515 | 22 |
| AX-158330292 | 26 | 50.193 | KV453227.1 | 2076838 | 22-scf00515 | 22 |
| AX-158330301 | 26 | 50.193 | KV453227.1 | 2085875 | 22-scf00515 | 22 |
| AX-158330293 | 26 | 50.237 | KV453227.1 | 2077338 | 22-scf00515 | 22 |
| AX-158412817 | 26 | 50.346 | KV453227.1 | 2054638 | 22-scf00515 | 22 |
| AX-158330294 | 26 | 50.346 | KV453227.1 | 2078796 | 22-scf00515 | 22 |
| AX-158330298 | 26 | 50.346 | KV453227.1 | 2084172 | 22-scf00515 | 22 |
| AX-158330300 | 26 | 50.346 | KV453227.1 | 2085158 | 22-scf00515 | 22 |
| AX-158330303 | 26 | 50.346 | KV453227.1 | 2087876 | 22-scf00515 | 22 |
| AX-158330304 | 26 | 50.346 | KV453227.1 | 2088662 | 22-scf00515 | 22 |
| AX-157752319 | 26 | 50.346 | KV453227.1 | 2090787 | 22-scf00515 | 22 |
| AX-158330309 | 26 | 50.346 | KV453227.1 | 2093648 | 22-scf00515 | 22 |
| AX-158330311 | 26 | 50.346 | KV453227.1 | 2096828 | 22-scf00515 | 22 |
| AX-158330313 | 26 | 50.346 | KV453227.1 | 2098725 | 22-scf00515 | 22 |
| AX-157716775 | 26 | 50.346 | KV453227.1 | 2102447 | 22-scf00515 | 22 |
| AX-157849021 | 26 | 50.346 | KV453227.1 | 2103110 | 22-scf00515 | 22 |
| AX-157849022 | 26 | 50.346 | KV453227.1 | 2104297 | 22-scf00515 | 22 |
| AX-158330318 | 26 | 50.346 | KV453227.1 | 2107953 | 22-scf00515 | 22 |
| AX-157771791 | 26 | 50.346 | KV453227.1 | 2109284 | 22-scf00515 | 22 |
| AX-158330320 | 26 | 50.346 | KV453227.1 | 2109799 | 22-scf00515 | 22 |
| AX-157745834 | 26 | 50.346 | KV453227.1 | 2112061 | 22-scf00515 | 22 |
| AX-158330323 | 26 | 50.346 | KV453227.1 | 2112247 | 22-scf00515 | 22 |
| AX-158330325 | 26 | 50.346 | KV453227.1 | 2113588 | 22-scf00515 | 22 |
| AX-157849023 | 26 | 50.346 | KV453227.1 | 2114288 | 22-scf00515 | 22 |
| AX-158330328 | 26 | 50.346 | KV453227.1 | 2117555 | 22-scf00515 | 22 |
| AX-158330329 | 26 | 50.346 | KV453227.1 | 2118213 | 22-scf00515 | 22 |
| AX-158330330 | 26 | 50.346 | KV453227.1 | 2119513 | 22-scf00515 | 22 |
| AX-158330348 | 26 | 50.346 | KV453227.1 | 2147612 | 22-scf00515 | 22 |
| AX-158381535 | 26 | 50.564 | KV453227.1 | 2131202 | 22-scf00515 | 22 |
| AX-157861565 | 26 | 50.564 | KV453227.1 | 2132448 | 22-scf00515 | 22 |
| AX-157715749 | 26 | 50.564 | KV453227.1 | 2133261 | 22-scf00515 | 22 |
| AX-158330339 | 26 | 50.564 | KV453227.1 | 2136979 | 22-scf00515 | 22 |
| AX-158330340 | 26 | 50.564 | KV453227.1 | 2138111 | 22-scf00515 | 22 |
| AX-158330341 | 26 | 50.564 | KV453227.1 | 2138884 | 22-scf00515 | 22 |
| AX-158330345 | 26 | 50.564 | KV453227.1 | 2142123 | 22-scf00515 | 22 |
| AX-158330349 | 26 | 50.564 | KV453227.1 | 2148768 | 22-scf00515 | 22 |
| AX-158330350 | 26 | 50.564 | KV453227.1 | 2149139 | 22-scf00515 | 22 |
| AX-158330346 | 26 | 50.673 | KV453227.1 | 2143264 | 22-scf00515 | 22 |
| AX-157751677 | 26 | 50.673 | KV453227.1 | 2143600 | 22-scf00515 | 22 |
| AX-157849025 | 26 | 50.686 | KV453227.1 | 2145491 | 22-scf00515 | 22 |
| AX-158330352 | 26 | 50.698 | KV453227.1 | 2150225 | 22-scf00515 | 22 |
| AX-158330355 | 26 | 50.794 | KV453227.1 | 2154247 | 22-scf00515 | 22 |
| AX-158330354 | 26 | 51.042 | KV453227.1 | 2152851 | 22-scf00515 | 22 |
| AX-158330360 | 26 | 51.042 | KV453227.1 | 2159515 | 22-scf00515 | 22 |
| AX-157758779 | 26 | 51.042 | KV453227.1 | 2161044 | 22-scf00515 | 22 |
| AX-158330361 | 26 | 51.042 | KV453227.1 | 2164936 | 22-scf00515 | 22 |
| AX-157714716 | 26 | 51.042 | KV453227.1 | 2165847 | 22-scf00515 | 22 |
| AX-157740157 | 26 | 51.042 | KV453227.1 | 2166286 | 22-scf00515 | 22 |
| AX-158330364 | 26 | 51.042 | KV453227.1 | 2169080 | 22-scf00515 | 22 |
| AX-158330365 | 26 | 51.042 | KV453227.1 | 2171278 | 22-scf00515 | 22 |

|              |    |        |            |         |             |    |
|--------------|----|--------|------------|---------|-------------|----|
| AX-158418707 | 26 | 51.042 | KV453227.1 | 2172232 | 22-scf00515 | 22 |
| AX-158330367 | 26 | 51.042 | KV453227.1 | 2176344 | 22-scf00515 | 22 |
| AX-158330369 | 26 | 51.042 | KV453227.1 | 2179996 | 22-scf00515 | 22 |
| AX-158330368 | 26 | 51.166 | KV453227.1 | 2177619 | 22-scf00515 | 22 |
| AX-158330370 | 26 | 51.166 | KV453227.1 | 2180530 | 22-scf00515 | 22 |
| AX-158412819 | 26 | 51.174 | KV453227.1 | 2172287 | 22-scf00515 | 22 |
| AX-158330372 | 26 | 51.174 | KV453227.1 | 2181213 | 22-scf00515 | 22 |
| AX-158330373 | 26 | 51.174 | KV453227.1 | 2182686 | 22-scf00515 | 22 |
| AX-157867946 | 26 | 51.174 | KV453227.1 | 2186007 | 22-scf00515 | 22 |
| AX-158330379 | 26 | 51.371 | KV453227.1 | 2189117 | 22-scf00515 | 22 |
| AX-157849030 | 26 | 51.371 | KV453227.1 | 2193239 | 22-scf00515 | 22 |
| AX-158330380 | 26 | 51.618 | KV453227.1 | 2189857 | 22-scf00515 | 22 |
| AX-157861566 | 26 | 51.618 | KV453227.1 | 2194315 | 22-scf00515 | 22 |
| AX-158330399 | 26 | 51.618 | KV453227.1 | 2212612 | 22-scf00515 | 22 |
| AX-158330384 | 26 | 51.748 | KV453227.1 | 2195351 | 22-scf00515 | 22 |
| AX-157725100 | 26 | 51.818 | KV453227.1 | 2195894 | 22-scf00515 | 22 |
| AX-157849037 | 26 | 51.818 | KV453227.1 | 2232676 | 22-scf00515 | 22 |
| AX-158330538 | 26 | 51.818 | KV453227.1 | 2480661 | 22-scf00515 | 22 |
| AX-158330930 | 26 | 51.818 | KV453228.1 | 365582  | 22-scf00516 | 22 |
| AX-158330386 | 26 | 51.872 | KV453227.1 | 2196468 | 22-scf00515 | 22 |
| AX-157743474 | 26 | 51.874 | KV453227.1 | 2197534 | 22-scf00515 | 22 |
| AX-158330389 | 26 | 51.874 | KV453227.1 | 2201107 | 22-scf00515 | 22 |
| AX-158330387 | 26 | 51.877 | KV453227.1 | 2199568 | 22-scf00515 | 22 |
| AX-157713788 | 26 | 51.877 | KV453227.1 | 2199672 | 22-scf00515 | 22 |
| AX-157849031 | 26 | 51.877 | KV453227.1 | 2200010 | 22-scf00515 | 22 |
| AX-158330391 | 26 | 51.923 | KV453227.1 | 2203509 | 22-scf00515 | 22 |
| AX-158330395 | 26 | 51.946 | KV453227.1 | 2208219 | 22-scf00515 | 22 |
| AX-158330396 | 26 | 51.986 | KV453227.1 | 2209420 | 22-scf00515 | 22 |
| AX-158330398 | 26 | 51.986 | KV453227.1 | 2211241 | 22-scf00515 | 22 |
| AX-158330400 | 26 | 52.095 | KV453227.1 | 2213784 | 22-scf00515 | 22 |
| AX-158330403 | 26 | 52.095 | KV453227.1 | 2217847 | 22-scf00515 | 22 |
| AX-157849035 | 26 | 52.423 | KV453227.1 | 2229168 | 22-scf00515 | 22 |
| AX-158330407 | 26 | 52.423 | KV453227.1 | 2230443 | 22-scf00515 | 22 |
| AX-157739813 | 26 | 52.423 | KV453227.1 | 2230820 | 22-scf00515 | 22 |
| AX-158330408 | 26 | 52.423 | KV453227.1 | 2236477 | 22-scf00515 | 22 |
| AX-158330409 | 26 | 52.423 | KV453227.1 | 2237459 | 22-scf00515 | 22 |
| AX-158330410 | 26 | 52.423 | KV453227.1 | 2238772 | 22-scf00515 | 22 |
| AX-157888531 | 26 | 52.423 | KV453227.1 | 2241185 | 22-scf00515 | 22 |
| AX-158330414 | 26 | 52.423 | KV453227.1 | 2247820 | 22-scf00515 | 22 |
| AX-158330424 | 26 | 52.423 | KV453227.1 | 2274875 | 22-scf00515 | 22 |
| AX-157849104 | 26 | 52.423 | KV453228.1 | 142697  | 22-scf00516 | 22 |
| AX-158330741 | 26 | 52.423 | KV453228.1 | 143004  | 22-scf00516 | 22 |
| AX-157849105 | 26 | 52.423 | KV453228.1 | 143234  | 22-scf00516 | 22 |
| AX-158330877 | 26 | 52.423 | KV453228.1 | 311176  | 22-scf00516 | 22 |
| AX-158418724 | 26 | 52.423 | KV453228.1 | 319817  | 22-scf00516 | 22 |
| AX-158330928 | 26 | 52.423 | KV453228.1 | 364003  | 22-scf00516 | 22 |
| AX-158330401 | 26 | 52.532 | KV453227.1 | 2214830 | 22-scf00515 | 22 |
| AX-158330417 | 26 | 52.532 | KV453227.1 | 2255633 | 22-scf00515 | 22 |
| AX-158330418 | 26 | 52.532 | KV453227.1 | 2256265 | 22-scf00515 | 22 |
| AX-158330420 | 26 | 52.532 | KV453227.1 | 2262320 | 22-scf00515 | 22 |
| AX-157849040 | 26 | 52.532 | KV453227.1 | 2267707 | 22-scf00515 | 22 |

|              |    |        |            |         |             |    |
|--------------|----|--------|------------|---------|-------------|----|
| AX-157849042 | 26 | 52.532 | KV453227.1 | 2269976 | 22-scf00515 | 22 |
| AX-158330432 | 26 | 52.532 | KV453227.1 | 2290777 | 22-scf00515 | 22 |
| AX-157849045 | 26 | 52.532 | KV453227.1 | 2308932 | 22-scf00515 | 22 |
| AX-158330446 | 26 | 52.532 | KV453227.1 | 2330462 | 22-scf00515 | 22 |
| AX-157873668 | 26 | 52.532 | KV453227.1 | 2345764 | 22-scf00515 | 22 |
| AX-158330465 | 26 | 52.532 | KV453227.1 | 2355896 | 22-scf00515 | 22 |
| AX-158330533 | 26 | 52.532 | KV453227.1 | 2476271 | 22-scf00515 | 22 |
| AX-158330647 | 26 | 52.532 | KV453227.1 | 2644524 | 22-scf00515 | 22 |
| AX-157773646 | 26 | 52.532 | KV453227.1 | 2689431 | 22-scf00515 | 22 |
| AX-158330913 | 26 | 52.532 | KV453228.1 | 349861  | 22-scf00516 | 22 |
| AX-158330983 | 26 | 52.532 | KV453228.1 | 437081  | 22-scf00516 | 22 |
| AX-158331168 | 26 | 52.532 | KV453228.1 | 686205  | 22-scf00516 | 22 |
| AX-158331179 | 26 | 52.532 | KV453228.1 | 699092  | 22-scf00516 | 22 |
| AX-158331233 | 26 | 52.532 | KV453228.1 | 772579  | 22-scf00516 | 22 |
| AX-158331235 | 26 | 52.532 | KV453228.1 | 773157  | 22-scf00516 | 22 |
| AX-158331304 | 26 | 52.532 | KV453228.1 | 864184  | 22-scf00516 | 22 |
| AX-157743282 | 26 | 52.557 | KV453227.1 | 2273865 | 22-scf00515 | 22 |
| AX-158330429 | 26 | 52.604 | KV453227.1 | 2283802 | 22-scf00515 | 22 |
| AX-158330431 | 26 | 52.642 | KV453227.1 | 2289118 | 22-scf00515 | 22 |
| AX-158330434 | 26 | 52.642 | KV453227.1 | 2295815 | 22-scf00515 | 22 |
| AX-157745243 | 26 | 52.642 | KV453227.1 | 2313161 | 22-scf00515 | 22 |
| AX-158330436 | 26 | 52.642 | KV453227.1 | 2316248 | 22-scf00515 | 22 |
| AX-157773027 | 26 | 52.721 | KV453227.1 | 2314964 | 22-scf00515 | 22 |
| AX-158330438 | 26 | 52.806 | KV453227.1 | 2319340 | 22-scf00515 | 22 |
| AX-158330406 | 26 | 52.969 | KV453227.1 | 2222669 | 22-scf00515 | 22 |
| AX-158330426 | 26 | 52.969 | KV453227.1 | 2278322 | 22-scf00515 | 22 |
| AX-158330442 | 26 | 52.969 | KV453227.1 | 2321433 | 22-scf00515 | 22 |
| AX-158330445 | 26 | 52.969 | KV453227.1 | 2329910 | 22-scf00515 | 22 |
| AX-158330447 | 26 | 52.969 | KV453227.1 | 2333324 | 22-scf00515 | 22 |
| AX-158330450 | 26 | 52.969 | KV453227.1 | 2335506 | 22-scf00515 | 22 |
| AX-158330451 | 26 | 52.969 | KV453227.1 | 2336158 | 22-scf00515 | 22 |
| AX-158330462 | 26 | 52.969 | KV453227.1 | 2348625 | 22-scf00515 | 22 |
| AX-157861568 | 26 | 52.969 | KV453227.1 | 2418629 | 22-scf00515 | 22 |
| AX-158330497 | 26 | 52.969 | KV453227.1 | 2431696 | 22-scf00515 | 22 |
| AX-158330500 | 26 | 52.969 | KV453227.1 | 2433489 | 22-scf00515 | 22 |
| AX-158330502 | 26 | 52.969 | KV453227.1 | 2434863 | 22-scf00515 | 22 |
| AX-157849064 | 26 | 52.969 | KV453227.1 | 2456718 | 22-scf00515 | 22 |
| AX-158330539 | 26 | 52.969 | KV453227.1 | 2482256 | 22-scf00515 | 22 |
| AX-158330851 | 26 | 52.969 | KV453228.1 | 277777  | 22-scf00516 | 22 |
| AX-158330415 | 26 | 52.97  | KV453227.1 | 2249944 | 22-scf00515 | 22 |
| AX-157849046 | 26 | 52.97  | KV453227.1 | 2311798 | 22-scf00515 | 22 |
| AX-158330440 | 26 | 52.97  | KV453227.1 | 2320822 | 22-scf00515 | 22 |
| AX-157774308 | 26 | 52.97  | KV453227.1 | 2333730 | 22-scf00515 | 22 |
| AX-158330454 | 26 | 52.97  | KV453227.1 | 2339351 | 22-scf00515 | 22 |
| AX-158330457 | 26 | 52.97  | KV453227.1 | 2343422 | 22-scf00515 | 22 |
| AX-158330458 | 26 | 52.97  | KV453227.1 | 2343877 | 22-scf00515 | 22 |
| AX-158330460 | 26 | 52.97  | KV453227.1 | 2344306 | 22-scf00515 | 22 |
| AX-158330464 | 26 | 52.97  | KV453227.1 | 2351236 | 22-scf00515 | 22 |
| AX-158330466 | 26 | 52.97  | KV453227.1 | 2357089 | 22-scf00515 | 22 |
| AX-158330467 | 26 | 52.97  | KV453227.1 | 2358356 | 22-scf00515 | 22 |
| AX-158330471 | 26 | 52.97  | KV453227.1 | 2364680 | 22-scf00515 | 22 |

|              |    |        |            |         |             |    |
|--------------|----|--------|------------|---------|-------------|----|
| AX-157757850 | 26 | 52.97  | KV453227.1 | 2369481 | 22-scf00515 | 22 |
| AX-158330479 | 26 | 52.97  | KV453227.1 | 2393116 | 22-scf00515 | 22 |
| AX-157849053 | 26 | 52.97  | KV453227.1 | 2396907 | 22-scf00515 | 22 |
| AX-157849054 | 26 | 52.97  | KV453227.1 | 2397411 | 22-scf00515 | 22 |
| AX-157716839 | 26 | 52.97  | KV453227.1 | 2439013 | 22-scf00515 | 22 |
| AX-158330519 | 26 | 52.97  | KV453227.1 | 2458889 | 22-scf00515 | 22 |
| AX-158330555 | 26 | 52.97  | KV453227.1 | 2511513 | 22-scf00515 | 22 |
| AX-158330701 | 26 | 52.97  | KV453228.1 | 34415   | 22-scf00516 | 22 |
| AX-158330702 | 26 | 52.97  | KV453228.1 | 34978   | 22-scf00516 | 22 |
| AX-158330482 | 26 | 52.998 | KV453227.1 | 2401580 | 22-scf00515 | 22 |
| AX-157744348 | 26 | 53.037 | KV453227.1 | 2401995 | 22-scf00515 | 22 |
| AX-158330463 | 26 | 53.079 | KV453227.1 | 2349550 | 22-scf00515 | 22 |
| AX-158330483 | 26 | 53.079 | KV453227.1 | 2403515 | 22-scf00515 | 22 |
| AX-157881660 | 26 | 53.079 | KV453227.1 | 2416788 | 22-scf00515 | 22 |
| AX-158330490 | 26 | 53.079 | KV453227.1 | 2417217 | 22-scf00515 | 22 |
| AX-158330491 | 26 | 53.079 | KV453227.1 | 2419358 | 22-scf00515 | 22 |
| AX-157849057 | 26 | 53.079 | KV453227.1 | 2419630 | 22-scf00515 | 22 |
| AX-158330492 | 26 | 53.079 | KV453227.1 | 2419880 | 22-scf00515 | 22 |
| AX-158330493 | 26 | 53.079 | KV453227.1 | 2423206 | 22-scf00515 | 22 |
| AX-157714974 | 26 | 53.079 | KV453227.1 | 2424798 | 22-scf00515 | 22 |
| AX-158330494 | 26 | 53.079 | KV453227.1 | 2427652 | 22-scf00515 | 22 |
| AX-157888534 | 26 | 53.079 | KV453227.1 | 2428467 | 22-scf00515 | 22 |
| AX-158330495 | 26 | 53.079 | KV453227.1 | 2430977 | 22-scf00515 | 22 |
| AX-158330496 | 26 | 53.079 | KV453227.1 | 2431277 | 22-scf00515 | 22 |
| AX-157861569 | 26 | 53.079 | KV453227.1 | 2432300 | 22-scf00515 | 22 |
| AX-157739421 | 26 | 53.079 | KV453227.1 | 2432465 | 22-scf00515 | 22 |
| AX-158330499 | 26 | 53.079 | KV453227.1 | 2433183 | 22-scf00515 | 22 |
| AX-157849058 | 26 | 53.079 | KV453227.1 | 2435243 | 22-scf00515 | 22 |
| AX-157758658 | 26 | 53.079 | KV453227.1 | 2435306 | 22-scf00515 | 22 |
| AX-157849059 | 26 | 53.079 | KV453227.1 | 2436376 | 22-scf00515 | 22 |
| AX-158330503 | 26 | 53.079 | KV453227.1 | 2436802 | 22-scf00515 | 22 |
| AX-158330508 | 26 | 53.079 | KV453227.1 | 2444207 | 22-scf00515 | 22 |
| AX-157849060 | 26 | 53.079 | KV453227.1 | 2445730 | 22-scf00515 | 22 |
| AX-158330511 | 26 | 53.079 | KV453227.1 | 2450078 | 22-scf00515 | 22 |
| AX-158330512 | 26 | 53.079 | KV453227.1 | 2450382 | 22-scf00515 | 22 |
| AX-158330513 | 26 | 53.079 | KV453227.1 | 2454087 | 22-scf00515 | 22 |
| AX-158330515 | 26 | 53.079 | KV453227.1 | 2454841 | 22-scf00515 | 22 |
| AX-158330516 | 26 | 53.079 | KV453227.1 | 2455267 | 22-scf00515 | 22 |
| AX-158330517 | 26 | 53.079 | KV453227.1 | 2455590 | 22-scf00515 | 22 |
| AX-157849063 | 26 | 53.079 | KV453227.1 | 2455812 | 22-scf00515 | 22 |
| AX-158330523 | 26 | 53.079 | KV453227.1 | 2461417 | 22-scf00515 | 22 |
| AX-158330524 | 26 | 53.079 | KV453227.1 | 2462485 | 22-scf00515 | 22 |
| AX-157849067 | 26 | 53.079 | KV453227.1 | 2466766 | 22-scf00515 | 22 |
| AX-158330526 | 26 | 53.079 | KV453227.1 | 2466831 | 22-scf00515 | 22 |
| AX-157849068 | 26 | 53.079 | KV453227.1 | 2467975 | 22-scf00515 | 22 |
| AX-158330532 | 26 | 53.079 | KV453227.1 | 2474652 | 22-scf00515 | 22 |
| AX-158330534 | 26 | 53.079 | KV453227.1 | 2477801 | 22-scf00515 | 22 |
| AX-158330535 | 26 | 53.079 | KV453227.1 | 2478528 | 22-scf00515 | 22 |
| AX-158330541 | 26 | 53.079 | KV453227.1 | 2483215 | 22-scf00515 | 22 |
| AX-157770882 | 26 | 53.079 | KV453227.1 | 2483578 | 22-scf00515 | 22 |
| AX-158330542 | 26 | 53.079 | KV453227.1 | 2486521 | 22-scf00515 | 22 |

|              |    |        |             |         |             |    |
|--------------|----|--------|-------------|---------|-------------|----|
| AX-158330543 | 26 | 53.079 | KV453227.1  | 2488318 | 22-scf00515 | 22 |
| AX-158330545 | 26 | 53.079 | KV453227.1  | 2489707 | 22-scf00515 | 22 |
| AX-158330546 | 26 | 53.079 | KV453227.1  | 2493703 | 22-scf00515 | 22 |
| AX-158330547 | 26 | 53.079 | KV453227.1  | 2495295 | 22-scf00515 | 22 |
| AX-158330550 | 26 | 53.079 | KV453227.1  | 2502254 | 22-scf00515 | 22 |
| AX-158330607 | 26 | 53.079 | KV453227.1  | 2593512 | 22-scf00515 | 22 |
| AX-158330628 | 26 | 53.079 | KV453227.1  | 2617505 | 22-scf00515 | 22 |
| AX-157849083 | 26 | 53.079 | KV453227.1  | 2628586 | 22-scf00515 | 22 |
| AX-158330657 | 26 | 53.079 | KV453227.1  | 2655949 | 22-scf00515 | 22 |
| AX-157849086 | 26 | 53.079 | KV453227.1  | 2679469 | 22-scf00515 | 22 |
| AX-158330675 | 26 | 53.079 | KV453227.1  | 2684742 | 22-scf00515 | 22 |
| AX-158330680 | 26 | 53.079 | KV453227.1  | 2689384 | 22-scf00515 | 22 |
| AX-158330696 | 26 | 53.079 | KV453228.1  | 26718   | 22-scf00516 | 22 |
| AX-158330700 | 26 | 53.079 | KV453228.1  | 33483   | 22-scf00516 | 22 |
| AX-158330703 | 26 | 53.079 | KV453228.1  | 38302   | 22-scf00516 | 22 |
| AX-158330724 | 26 | 53.079 | KV453228.1  | 74709   | 22-scf00516 | 22 |
| AX-158330728 | 26 | 53.079 | KV453228.1  | 84165   | 22-scf00516 | 22 |
| AX-158330730 | 26 | 53.079 | KV453228.1  | 90163   | 22-scf00516 | 22 |
| AX-158330746 | 26 | 53.079 | KV453228.1  | 151355  | 22-scf00516 | 22 |
| AX-158330798 | 26 | 53.079 | KV453228.1  | 213037  | 22-scf00516 | 22 |
| AX-158330876 | 26 | 53.079 | KV453228.1  | 310579  | 22-scf00516 | 22 |
| AX-158330940 | 26 | 53.079 | KV453228.1  | 382441  | 22-scf00516 | 22 |
| AX-157861574 | 26 | 53.079 | KV453228.1  | 488323  | 22-scf00516 | 22 |
| AX-158331053 | 26 | 53.079 | KV453228.1  | 528238  | 22-scf00516 | 22 |
| AX-158331059 | 26 | 53.079 | KV453228.1  | 534205  | 22-scf00516 | 22 |
| AX-157706824 | 26 | 53.079 | 3ML01032984 | 315     | scf08617_1  | UN |
| AX-158330441 | 26 | 53.188 | KV453227.1  | 2321196 | 22-scf00515 | 22 |
| AX-158330455 | 26 | 53.188 | KV453227.1  | 2340051 | 22-scf00515 | 22 |
| AX-158330469 | 26 | 53.188 | KV453227.1  | 2362165 | 22-scf00515 | 22 |
| AX-157758302 | 26 | 53.188 | KV453227.1  | 2393277 | 22-scf00515 | 22 |
| AX-158330480 | 26 | 53.188 | KV453227.1  | 2393698 | 22-scf00515 | 22 |
| AX-157849061 | 26 | 53.188 | KV453227.1  | 2446508 | 22-scf00515 | 22 |
| AX-158330510 | 26 | 53.188 | KV453227.1  | 2448563 | 22-scf00515 | 22 |
| AX-157754874 | 26 | 53.188 | KV453227.1  | 2493870 | 22-scf00515 | 22 |
| AX-158330548 | 26 | 53.188 | KV453227.1  | 2499671 | 22-scf00515 | 22 |
| AX-157849070 | 26 | 53.188 | KV453227.1  | 2500252 | 22-scf00515 | 22 |
| AX-158330549 | 26 | 53.188 | KV453227.1  | 2501780 | 22-scf00515 | 22 |
| AX-158330551 | 26 | 53.188 | KV453227.1  | 2503697 | 22-scf00515 | 22 |
| AX-158330552 | 26 | 53.188 | KV453227.1  | 2504533 | 22-scf00515 | 22 |
| AX-157730181 | 26 | 53.188 | KV453227.1  | 2507735 | 22-scf00515 | 22 |
| AX-158330554 | 26 | 53.188 | KV453227.1  | 2510251 | 22-scf00515 | 22 |
| AX-158330556 | 26 | 53.188 | KV453227.1  | 2512202 | 22-scf00515 | 22 |
| AX-158330557 | 26 | 53.188 | KV453227.1  | 2512422 | 22-scf00515 | 22 |
| AX-158330558 | 26 | 53.188 | KV453227.1  | 2513203 | 22-scf00515 | 22 |
| AX-158330559 | 26 | 53.188 | KV453227.1  | 2513505 | 22-scf00515 | 22 |
| AX-158330561 | 26 | 53.188 | KV453227.1  | 2514813 | 22-scf00515 | 22 |
| AX-157849071 | 26 | 53.188 | KV453227.1  | 2516238 | 22-scf00515 | 22 |
| AX-158330562 | 26 | 53.188 | KV453227.1  | 2516449 | 22-scf00515 | 22 |
| AX-158330564 | 26 | 53.188 | KV453227.1  | 2518854 | 22-scf00515 | 22 |
| AX-157849073 | 26 | 53.188 | KV453227.1  | 2520650 | 22-scf00515 | 22 |
| AX-158330566 | 26 | 53.188 | KV453227.1  | 2521272 | 22-scf00515 | 22 |



|              |    |        |            |         |             |    |
|--------------|----|--------|------------|---------|-------------|----|
| AX-158330571 | 26 | 53.188 | KV453227.1 | 2535021 | 22-scf00515 | 22 |
| AX-158330572 | 26 | 53.188 | KV453227.1 | 2536737 | 22-scf00515 | 22 |
| AX-158330574 | 26 | 53.188 | KV453227.1 | 2543584 | 22-scf00515 | 22 |
| AX-158330575 | 26 | 53.188 | KV453227.1 | 2543786 | 22-scf00515 | 22 |
| AX-158330576 | 26 | 53.188 | KV453227.1 | 2547223 | 22-scf00515 | 22 |
| AX-158330577 | 26 | 53.188 | KV453227.1 | 2547606 | 22-scf00515 | 22 |
| AX-158330578 | 26 | 53.188 | KV453227.1 | 2549830 | 22-scf00515 | 22 |
| AX-158330582 | 26 | 53.188 | KV453227.1 | 2557892 | 22-scf00515 | 22 |
| AX-158330583 | 26 | 53.188 | KV453227.1 | 2558466 | 22-scf00515 | 22 |
| AX-158330586 | 26 | 53.188 | KV453227.1 | 2563616 | 22-scf00515 | 22 |
| AX-158381537 | 26 | 53.188 | KV453227.1 | 2565015 | 22-scf00515 | 22 |
| AX-157849077 | 26 | 53.188 | KV453227.1 | 2565091 | 22-scf00515 | 22 |
| AX-157849078 | 26 | 53.188 | KV453227.1 | 2565194 | 22-scf00515 | 22 |
| AX-158330588 | 26 | 53.188 | KV453227.1 | 2565667 | 22-scf00515 | 22 |
| AX-158330592 | 26 | 53.188 | KV453227.1 | 2568877 | 22-scf00515 | 22 |
| AX-158330598 | 26 | 53.188 | KV453227.1 | 2581819 | 22-scf00515 | 22 |
| AX-158330601 | 26 | 53.188 | KV453227.1 | 2584956 | 22-scf00515 | 22 |
| AX-158330603 | 26 | 53.188 | KV453227.1 | 2586722 | 22-scf00515 | 22 |
| AX-158330604 | 26 | 53.188 | KV453227.1 | 2588347 | 22-scf00515 | 22 |
| AX-158330612 | 26 | 53.188 | KV453227.1 | 2597515 | 22-scf00515 | 22 |
| AX-158330613 | 26 | 53.188 | KV453227.1 | 2598000 | 22-scf00515 | 22 |
| AX-157861572 | 26 | 53.188 | KV453227.1 | 2599378 | 22-scf00515 | 22 |
| AX-158330614 | 26 | 53.188 | KV453227.1 | 2601202 | 22-scf00515 | 22 |
| AX-158330615 | 26 | 53.188 | KV453227.1 | 2601443 | 22-scf00515 | 22 |
| AX-158330619 | 26 | 53.188 | KV453227.1 | 2604541 | 22-scf00515 | 22 |
| AX-158330620 | 26 | 53.188 | KV453227.1 | 2607679 | 22-scf00515 | 22 |
| AX-158330623 | 26 | 53.188 | KV453227.1 | 2608955 | 22-scf00515 | 22 |
| AX-158330624 | 26 | 53.188 | KV453227.1 | 2609702 | 22-scf00515 | 22 |
| AX-158330626 | 26 | 53.188 | KV453227.1 | 2613874 | 22-scf00515 | 22 |
| AX-158330627 | 26 | 53.188 | KV453227.1 | 2614188 | 22-scf00515 | 22 |
| AX-158330629 | 26 | 53.188 | KV453227.1 | 2618405 | 22-scf00515 | 22 |
| AX-158330630 | 26 | 53.188 | KV453227.1 | 2619559 | 22-scf00515 | 22 |
| AX-158330632 | 26 | 53.188 | KV453227.1 | 2623246 | 22-scf00515 | 22 |
| AX-157744083 | 26 | 53.188 | KV453227.1 | 2624195 | 22-scf00515 | 22 |
| AX-158330634 | 26 | 53.188 | KV453227.1 | 2627286 | 22-scf00515 | 22 |
| AX-157849082 | 26 | 53.188 | KV453227.1 | 2627662 | 22-scf00515 | 22 |
| AX-158330635 | 26 | 53.188 | KV453227.1 | 2627812 | 22-scf00515 | 22 |
| AX-157849084 | 26 | 53.188 | KV453227.1 | 2629896 | 22-scf00515 | 22 |
| AX-158330636 | 26 | 53.188 | KV453227.1 | 2631608 | 22-scf00515 | 22 |
| AX-157723073 | 26 | 53.188 | KV453227.1 | 2631644 | 22-scf00515 | 22 |
| AX-158330638 | 26 | 53.188 | KV453227.1 | 2633641 | 22-scf00515 | 22 |
| AX-157849085 | 26 | 53.188 | KV453227.1 | 2634230 | 22-scf00515 | 22 |
| AX-158330639 | 26 | 53.188 | KV453227.1 | 2636121 | 22-scf00515 | 22 |
| AX-158330640 | 26 | 53.188 | KV453227.1 | 2636586 | 22-scf00515 | 22 |
| AX-158330641 | 26 | 53.188 | KV453227.1 | 2637178 | 22-scf00515 | 22 |
| AX-158330642 | 26 | 53.188 | KV453227.1 | 2638964 | 22-scf00515 | 22 |
| AX-158330643 | 26 | 53.188 | KV453227.1 | 2639519 | 22-scf00515 | 22 |
| AX-158418713 | 26 | 53.188 | KV453227.1 | 2640205 | 22-scf00515 | 22 |
| AX-158420102 | 26 | 53.188 | KV453227.1 | 2640451 | 22-scf00515 | 22 |
| AX-158330644 | 26 | 53.188 | KV453227.1 | 2641243 | 22-scf00515 | 22 |
| AX-158330645 | 26 | 53.188 | KV453227.1 | 2641841 | 22-scf00515 | 22 |

|              |    |        |            |         |             |    |
|--------------|----|--------|------------|---------|-------------|----|
| AX-158330646 | 26 | 53.188 | KV453227.1 | 2643228 | 22-scf00515 | 22 |
| AX-158330648 | 26 | 53.188 | KV453227.1 | 2645379 | 22-scf00515 | 22 |
| AX-157873674 | 26 | 53.188 | KV453227.1 | 2648321 | 22-scf00515 | 22 |
| AX-158330652 | 26 | 53.188 | KV453227.1 | 2650933 | 22-scf00515 | 22 |
| AX-158330653 | 26 | 53.188 | KV453227.1 | 2651676 | 22-scf00515 | 22 |
| AX-158330655 | 26 | 53.188 | KV453227.1 | 2653682 | 22-scf00515 | 22 |
| AX-158330656 | 26 | 53.188 | KV453227.1 | 2654645 | 22-scf00515 | 22 |
| AX-158418715 | 26 | 53.188 | KV453227.1 | 2660801 | 22-scf00515 | 22 |
| AX-158330664 | 26 | 53.188 | KV453227.1 | 2665035 | 22-scf00515 | 22 |
| AX-157757238 | 26 | 53.188 | KV453227.1 | 2678201 | 22-scf00515 | 22 |
| AX-157718070 | 26 | 53.188 | KV453227.1 | 2679073 | 22-scf00515 | 22 |
| AX-158330676 | 26 | 53.188 | KV453227.1 | 2685065 | 22-scf00515 | 22 |
| AX-157751160 | 26 | 53.188 | KV453227.1 | 2685803 | 22-scf00515 | 22 |
| AX-158330678 | 26 | 53.188 | KV453227.1 | 2686163 | 22-scf00515 | 22 |
| AX-157849088 | 26 | 53.188 | KV453227.1 | 2688275 | 22-scf00515 | 22 |
| AX-157888539 | 26 | 53.188 | KV453227.1 | 2690462 | 22-scf00515 | 22 |
| AX-157745591 | 26 | 53.188 | KV453227.1 | 2691540 | 22-scf00515 | 22 |
| AX-157849090 | 26 | 53.188 | KV453228.1 | 2604    | 22-scf00516 | 22 |
| AX-158330683 | 26 | 53.188 | KV453228.1 | 4435    | 22-scf00516 | 22 |
| AX-158330685 | 26 | 53.188 | KV453228.1 | 8806    | 22-scf00516 | 22 |
| AX-158330687 | 26 | 53.188 | KV453228.1 | 15425   | 22-scf00516 | 22 |
| AX-158330688 | 26 | 53.188 | KV453228.1 | 15989   | 22-scf00516 | 22 |
| AX-158330689 | 26 | 53.188 | KV453228.1 | 16812   | 22-scf00516 | 22 |
| AX-157757685 | 26 | 53.188 | KV453228.1 | 16878   | 22-scf00516 | 22 |
| AX-158330690 | 26 | 53.188 | KV453228.1 | 17141   | 22-scf00516 | 22 |
| AX-157742027 | 26 | 53.188 | KV453228.1 | 18043   | 22-scf00516 | 22 |
| AX-157753977 | 26 | 53.188 | KV453228.1 | 21531   | 22-scf00516 | 22 |
| AX-158330693 | 26 | 53.188 | KV453228.1 | 22172   | 22-scf00516 | 22 |
| AX-158330697 | 26 | 53.188 | KV453228.1 | 27515   | 22-scf00516 | 22 |
| AX-157888540 | 26 | 53.188 | KV453228.1 | 28386   | 22-scf00516 | 22 |
| AX-158330699 | 26 | 53.188 | KV453228.1 | 30749   | 22-scf00516 | 22 |
| AX-157849091 | 26 | 53.188 | KV453228.1 | 31534   | 22-scf00516 | 22 |
| AX-157723740 | 26 | 53.188 | KV453228.1 | 35713   | 22-scf00516 | 22 |
| AX-157881665 | 26 | 53.188 | KV453228.1 | 39236   | 22-scf00516 | 22 |
| AX-157849092 | 26 | 53.188 | KV453228.1 | 39659   | 22-scf00516 | 22 |
| AX-158330705 | 26 | 53.188 | KV453228.1 | 43268   | 22-scf00516 | 22 |
| AX-158330707 | 26 | 53.188 | KV453228.1 | 45777   | 22-scf00516 | 22 |
| AX-158330709 | 26 | 53.188 | KV453228.1 | 49267   | 22-scf00516 | 22 |
| AX-157849093 | 26 | 53.188 | KV453228.1 | 49625   | 22-scf00516 | 22 |
| AX-158330711 | 26 | 53.188 | KV453228.1 | 55383   | 22-scf00516 | 22 |
| AX-158330713 | 26 | 53.188 | KV453228.1 | 56630   | 22-scf00516 | 22 |
| AX-158330715 | 26 | 53.188 | KV453228.1 | 58499   | 22-scf00516 | 22 |
| AX-158330716 | 26 | 53.188 | KV453228.1 | 59152   | 22-scf00516 | 22 |
| AX-157849094 | 26 | 53.188 | KV453228.1 | 59974   | 22-scf00516 | 22 |
| AX-157849095 | 26 | 53.188 | KV453228.1 | 60033   | 22-scf00516 | 22 |
| AX-158330717 | 26 | 53.188 | KV453228.1 | 60173   | 22-scf00516 | 22 |
| AX-158330718 | 26 | 53.188 | KV453228.1 | 63391   | 22-scf00516 | 22 |
| AX-158330719 | 26 | 53.188 | KV453228.1 | 65103   | 22-scf00516 | 22 |
| AX-158418718 | 26 | 53.188 | KV453228.1 | 151489  | 22-scf00516 | 22 |
| AX-158330749 | 26 | 53.188 | KV453228.1 | 154539  | 22-scf00516 | 22 |
| AX-157849112 | 26 | 53.188 | KV453228.1 | 184439  | 22-scf00516 | 22 |

|              |    |        |             |         |             |    |
|--------------|----|--------|-------------|---------|-------------|----|
| AX-158330786 | 26 | 53.188 | KV453228.1  | 199338  | 22-scf00516 | 22 |
| AX-158330787 | 26 | 53.188 | KV453228.1  | 199709  | 22-scf00516 | 22 |
| AX-158330819 | 26 | 53.188 | KV453228.1  | 246036  | 22-scf00516 | 22 |
| AX-158330865 | 26 | 53.188 | KV453228.1  | 297916  | 22-scf00516 | 22 |
| AX-157757414 | 26 | 53.188 | KV453228.1  | 349238  | 22-scf00516 | 22 |
| AX-158330919 | 26 | 53.188 | KV453228.1  | 355057  | 22-scf00516 | 22 |
| AX-158330934 | 26 | 53.188 | KV453228.1  | 368962  | 22-scf00516 | 22 |
| AX-158330948 | 26 | 53.188 | KV453228.1  | 392539  | 22-scf00516 | 22 |
| AX-157725355 | 26 | 53.188 | KV453228.1  | 393894  | 22-scf00516 | 22 |
| AX-158330969 | 26 | 53.188 | KV453228.1  | 419270  | 22-scf00516 | 22 |
| AX-158331011 | 26 | 53.188 | KV453228.1  | 471237  | 22-scf00516 | 22 |
| AX-157861576 | 26 | 53.188 | KV453228.1  | 700088  | 22-scf00516 | 22 |
| AX-158331312 | 26 | 53.188 | KV453228.1  | 870830  | 22-scf00516 | 22 |
| AX-157706980 | 26 | 53.188 | 3ML01033278 | 335     | scf08919_1  | UN |
| AX-157867947 | 26 | 53.406 | KV453227.1  | 2301477 | 22-scf00515 | 22 |
| AX-158418708 | 26 | 53.406 | KV453227.1  | 2304858 | 22-scf00515 | 22 |
| AX-158330468 | 26 | 53.406 | KV453227.1  | 2359751 | 22-scf00515 | 22 |
| AX-157888536 | 26 | 53.406 | KV453227.1  | 2473335 | 22-scf00515 | 22 |
| AX-158330600 | 26 | 53.406 | KV453227.1  | 2584421 | 22-scf00515 | 22 |
| AX-158330667 | 26 | 53.406 | KV453227.1  | 2669408 | 22-scf00515 | 22 |
| AX-158330694 | 26 | 53.406 | KV453228.1  | 22527   | 22-scf00516 | 22 |
| AX-158330706 | 26 | 53.406 | KV453228.1  | 44531   | 22-scf00516 | 22 |
| AX-157806431 | 26 | 53.406 | KV453228.1  | 77861   | 22-scf00516 | 22 |
| AX-157849096 | 26 | 53.406 | KV453228.1  | 77981   | 22-scf00516 | 22 |
| AX-158330725 | 26 | 53.406 | KV453228.1  | 78350   | 22-scf00516 | 22 |
| AX-157849099 | 26 | 53.406 | KV453228.1  | 83749   | 22-scf00516 | 22 |
| AX-157849100 | 26 | 53.406 | KV453228.1  | 87791   | 22-scf00516 | 22 |
| AX-158330729 | 26 | 53.406 | KV453228.1  | 88156   | 22-scf00516 | 22 |
| AX-158330735 | 26 | 53.406 | KV453228.1  | 123351  | 22-scf00516 | 22 |
| AX-157849101 | 26 | 53.406 | KV453228.1  | 125499  | 22-scf00516 | 22 |
| AX-158330736 | 26 | 53.406 | KV453228.1  | 127005  | 22-scf00516 | 22 |
| AX-157713216 | 26 | 53.406 | KV453228.1  | 128711  | 22-scf00516 | 22 |
| AX-157849102 | 26 | 53.406 | KV453228.1  | 133807  | 22-scf00516 | 22 |
| AX-158330739 | 26 | 53.406 | KV453228.1  | 136061  | 22-scf00516 | 22 |
| AX-158330742 | 26 | 53.406 | KV453228.1  | 144845  | 22-scf00516 | 22 |
| AX-157849106 | 26 | 53.406 | KV453228.1  | 145387  | 22-scf00516 | 22 |
| AX-158330743 | 26 | 53.406 | KV453228.1  | 147098  | 22-scf00516 | 22 |
| AX-157849107 | 26 | 53.406 | KV453228.1  | 147866  | 22-scf00516 | 22 |
| AX-158330744 | 26 | 53.406 | KV453228.1  | 148177  | 22-scf00516 | 22 |
| AX-157849108 | 26 | 53.406 | KV453228.1  | 148823  | 22-scf00516 | 22 |
| AX-158418719 | 26 | 53.406 | KV453228.1  | 152056  | 22-scf00516 | 22 |
| AX-158330747 | 26 | 53.406 | KV453228.1  | 153008  | 22-scf00516 | 22 |
| AX-158330748 | 26 | 53.406 | KV453228.1  | 153537  | 22-scf00516 | 22 |
| AX-157849109 | 26 | 53.406 | KV453228.1  | 155859  | 22-scf00516 | 22 |
| AX-158418720 | 26 | 53.406 | KV453228.1  | 160568  | 22-scf00516 | 22 |
| AX-158418721 | 26 | 53.406 | KV453228.1  | 160633  | 22-scf00516 | 22 |
| AX-158418722 | 26 | 53.406 | KV453228.1  | 160911  | 22-scf00516 | 22 |
| AX-158330752 | 26 | 53.406 | KV453228.1  | 162417  | 22-scf00516 | 22 |
| AX-158330755 | 26 | 53.406 | KV453228.1  | 164407  | 22-scf00516 | 22 |
| AX-158330756 | 26 | 53.406 | KV453228.1  | 164766  | 22-scf00516 | 22 |
| AX-158330757 | 26 | 53.406 | KV453228.1  | 166328  | 22-scf00516 | 22 |

|              |    |        |            |        |             |    |
|--------------|----|--------|------------|--------|-------------|----|
| AX-157735527 | 26 | 53.406 | KV453228.1 | 167676 | 22-scf00516 | 22 |
| AX-158330760 | 26 | 53.406 | KV453228.1 | 167865 | 22-scf00516 | 22 |
| AX-157753315 | 26 | 53.406 | KV453228.1 | 173325 | 22-scf00516 | 22 |
| AX-158330763 | 26 | 53.406 | KV453228.1 | 176007 | 22-scf00516 | 22 |
| AX-158330764 | 26 | 53.406 | KV453228.1 | 176962 | 22-scf00516 | 22 |
| AX-158330766 | 26 | 53.406 | KV453228.1 | 177941 | 22-scf00516 | 22 |
| AX-158330767 | 26 | 53.406 | KV453228.1 | 179138 | 22-scf00516 | 22 |
| AX-158330768 | 26 | 53.406 | KV453228.1 | 181235 | 22-scf00516 | 22 |
| AX-158330772 | 26 | 53.406 | KV453228.1 | 188907 | 22-scf00516 | 22 |
| AX-158330775 | 26 | 53.406 | KV453228.1 | 190950 | 22-scf00516 | 22 |
| AX-158330777 | 26 | 53.406 | KV453228.1 | 193283 | 22-scf00516 | 22 |
| AX-158330780 | 26 | 53.406 | KV453228.1 | 196102 | 22-scf00516 | 22 |
| AX-158330781 | 26 | 53.406 | KV453228.1 | 196520 | 22-scf00516 | 22 |
| AX-158330782 | 26 | 53.406 | KV453228.1 | 196958 | 22-scf00516 | 22 |
| AX-158330783 | 26 | 53.406 | KV453228.1 | 198210 | 22-scf00516 | 22 |
| AX-158330784 | 26 | 53.406 | KV453228.1 | 198800 | 22-scf00516 | 22 |
| AX-157773189 | 26 | 53.406 | KV453228.1 | 205247 | 22-scf00516 | 22 |
| AX-158330793 | 26 | 53.406 | KV453228.1 | 205722 | 22-scf00516 | 22 |
| AX-158330794 | 26 | 53.406 | KV453228.1 | 207153 | 22-scf00516 | 22 |
| AX-158330795 | 26 | 53.406 | KV453228.1 | 208130 | 22-scf00516 | 22 |
| AX-158330797 | 26 | 53.406 | KV453228.1 | 210101 | 22-scf00516 | 22 |
| AX-158330800 | 26 | 53.406 | KV453228.1 | 214724 | 22-scf00516 | 22 |
| AX-158330801 | 26 | 53.406 | KV453228.1 | 214961 | 22-scf00516 | 22 |
| AX-158330804 | 26 | 53.406 | KV453228.1 | 218073 | 22-scf00516 | 22 |
| AX-158330808 | 26 | 53.406 | KV453228.1 | 229890 | 22-scf00516 | 22 |
| AX-158330809 | 26 | 53.406 | KV453228.1 | 230454 | 22-scf00516 | 22 |
| AX-158330812 | 26 | 53.406 | KV453228.1 | 233616 | 22-scf00516 | 22 |
| AX-158330813 | 26 | 53.406 | KV453228.1 | 235109 | 22-scf00516 | 22 |
| AX-158330814 | 26 | 53.406 | KV453228.1 | 235637 | 22-scf00516 | 22 |
| AX-158330815 | 26 | 53.406 | KV453228.1 | 236228 | 22-scf00516 | 22 |
| AX-158330817 | 26 | 53.406 | KV453228.1 | 237388 | 22-scf00516 | 22 |
| AX-158330820 | 26 | 53.406 | KV453228.1 | 248178 | 22-scf00516 | 22 |
| AX-158330822 | 26 | 53.406 | KV453228.1 | 250382 | 22-scf00516 | 22 |
| AX-158330823 | 26 | 53.406 | KV453228.1 | 251727 | 22-scf00516 | 22 |
| AX-158330824 | 26 | 53.406 | KV453228.1 | 252219 | 22-scf00516 | 22 |
| AX-158330825 | 26 | 53.406 | KV453228.1 | 252943 | 22-scf00516 | 22 |
| AX-158330826 | 26 | 53.406 | KV453228.1 | 253883 | 22-scf00516 | 22 |
| AX-158330828 | 26 | 53.406 | KV453228.1 | 254791 | 22-scf00516 | 22 |
| AX-158330829 | 26 | 53.406 | KV453228.1 | 255415 | 22-scf00516 | 22 |
| AX-157753458 | 26 | 53.406 | KV453228.1 | 258456 | 22-scf00516 | 22 |
| AX-157742153 | 26 | 53.406 | KV453228.1 | 260235 | 22-scf00516 | 22 |
| AX-158330834 | 26 | 53.406 | KV453228.1 | 262451 | 22-scf00516 | 22 |
| AX-158330835 | 26 | 53.406 | KV453228.1 | 262945 | 22-scf00516 | 22 |
| AX-158330838 | 26 | 53.406 | KV453228.1 | 265289 | 22-scf00516 | 22 |
| AX-158330840 | 26 | 53.406 | KV453228.1 | 266445 | 22-scf00516 | 22 |
| AX-157726323 | 26 | 53.406 | KV453228.1 | 266496 | 22-scf00516 | 22 |
| AX-158330842 | 26 | 53.406 | KV453228.1 | 269391 | 22-scf00516 | 22 |
| AX-158330843 | 26 | 53.406 | KV453228.1 | 269859 | 22-scf00516 | 22 |
| AX-158330844 | 26 | 53.406 | KV453228.1 | 270249 | 22-scf00516 | 22 |
| AX-158330845 | 26 | 53.406 | KV453228.1 | 270911 | 22-scf00516 | 22 |
| AX-158330846 | 26 | 53.406 | KV453228.1 | 271155 | 22-scf00516 | 22 |

|              |    |        |            |        |             |    |
|--------------|----|--------|------------|--------|-------------|----|
| AX-158330847 | 26 | 53.406 | KV453228.1 | 272454 | 22-scf00516 | 22 |
| AX-158330854 | 26 | 53.406 | KV453228.1 | 278900 | 22-scf00516 | 22 |
| AX-158330855 | 26 | 53.406 | KV453228.1 | 280148 | 22-scf00516 | 22 |
| AX-158330858 | 26 | 53.406 | KV453228.1 | 286849 | 22-scf00516 | 22 |
| AX-157700512 | 26 | 53.406 | KV453228.1 | 287496 | 22-scf00516 | 22 |
| AX-158330862 | 26 | 53.406 | KV453228.1 | 289427 | 22-scf00516 | 22 |
| AX-158330869 | 26 | 53.406 | KV453228.1 | 300670 | 22-scf00516 | 22 |
| AX-158330870 | 26 | 53.406 | KV453228.1 | 304516 | 22-scf00516 | 22 |
| AX-158330872 | 26 | 53.406 | KV453228.1 | 306578 | 22-scf00516 | 22 |
| AX-158330874 | 26 | 53.406 | KV453228.1 | 308140 | 22-scf00516 | 22 |
| AX-158330875 | 26 | 53.406 | KV453228.1 | 309539 | 22-scf00516 | 22 |
| AX-158330881 | 26 | 53.406 | KV453228.1 | 315434 | 22-scf00516 | 22 |
| AX-158330883 | 26 | 53.406 | KV453228.1 | 317402 | 22-scf00516 | 22 |
| AX-158330900 | 26 | 53.406 | KV453228.1 | 339885 | 22-scf00516 | 22 |
| AX-158330902 | 26 | 53.406 | KV453228.1 | 341148 | 22-scf00516 | 22 |
| AX-158330903 | 26 | 53.406 | KV453228.1 | 341618 | 22-scf00516 | 22 |
| AX-158330905 | 26 | 53.406 | KV453228.1 | 343099 | 22-scf00516 | 22 |
| AX-158330907 | 26 | 53.406 | KV453228.1 | 344501 | 22-scf00516 | 22 |
| AX-158330908 | 26 | 53.406 | KV453228.1 | 344718 | 22-scf00516 | 22 |
| AX-157751636 | 26 | 53.406 | KV453228.1 | 347385 | 22-scf00516 | 22 |
| AX-158330915 | 26 | 53.406 | KV453228.1 | 351745 | 22-scf00516 | 22 |
| AX-158330917 | 26 | 53.406 | KV453228.1 | 354541 | 22-scf00516 | 22 |
| AX-157867957 | 26 | 53.406 | KV453228.1 | 355826 | 22-scf00516 | 22 |
| AX-158330921 | 26 | 53.406 | KV453228.1 | 356581 | 22-scf00516 | 22 |
| AX-158330922 | 26 | 53.406 | KV453228.1 | 357346 | 22-scf00516 | 22 |
| AX-158330923 | 26 | 53.406 | KV453228.1 | 357803 | 22-scf00516 | 22 |
| AX-157881671 | 26 | 53.406 | KV453228.1 | 358101 | 22-scf00516 | 22 |
| AX-158330925 | 26 | 53.406 | KV453228.1 | 360545 | 22-scf00516 | 22 |
| AX-158330927 | 26 | 53.406 | KV453228.1 | 363263 | 22-scf00516 | 22 |
| AX-157748063 | 26 | 53.406 | KV453228.1 | 367667 | 22-scf00516 | 22 |
| AX-158330932 | 26 | 53.406 | KV453228.1 | 368191 | 22-scf00516 | 22 |
| AX-158330933 | 26 | 53.406 | KV453228.1 | 368792 | 22-scf00516 | 22 |
| AX-158330937 | 26 | 53.406 | KV453228.1 | 380796 | 22-scf00516 | 22 |
| AX-158330938 | 26 | 53.406 | KV453228.1 | 381050 | 22-scf00516 | 22 |
| AX-158330939 | 26 | 53.406 | KV453228.1 | 381345 | 22-scf00516 | 22 |
| AX-158330944 | 26 | 53.406 | KV453228.1 | 385653 | 22-scf00516 | 22 |
| AX-157849117 | 26 | 53.406 | KV453228.1 | 390978 | 22-scf00516 | 22 |
| AX-158330950 | 26 | 53.406 | KV453228.1 | 395454 | 22-scf00516 | 22 |
| AX-158330980 | 26 | 53.406 | KV453228.1 | 435334 | 22-scf00516 | 22 |
| AX-158330981 | 26 | 53.406 | KV453228.1 | 436094 | 22-scf00516 | 22 |
| AX-158330982 | 26 | 53.406 | KV453228.1 | 436646 | 22-scf00516 | 22 |
| AX-158331017 | 26 | 53.406 | KV453228.1 | 480722 | 22-scf00516 | 22 |
| AX-158331027 | 26 | 53.406 | KV453228.1 | 495261 | 22-scf00516 | 22 |
| AX-157849124 | 26 | 53.406 | KV453228.1 | 536841 | 22-scf00516 | 22 |
| AX-158331060 | 26 | 53.406 | KV453228.1 | 537603 | 22-scf00516 | 22 |
| AX-157873679 | 26 | 53.406 | KV453228.1 | 559882 | 22-scf00516 | 22 |
| AX-158331111 | 26 | 53.406 | KV453228.1 | 608164 | 22-scf00516 | 22 |
| AX-158331166 | 26 | 53.406 | KV453228.1 | 684564 | 22-scf00516 | 22 |
| AX-158331195 | 26 | 53.406 | KV453228.1 | 717494 | 22-scf00516 | 22 |
| AX-158331222 | 26 | 53.406 | KV453228.1 | 756712 | 22-scf00516 | 22 |
| AX-158331249 | 26 | 53.406 | KV453228.1 | 787707 | 22-scf00516 | 22 |

|              |    |        |             |         |             |    |
|--------------|----|--------|-------------|---------|-------------|----|
| AX-158331254 | 26 | 53.406 | KV453228.1  | 791979  | 22-scf00516 | 22 |
| AX-157849153 | 26 | 53.406 | KV453228.1  | 849709  | 22-scf00516 | 22 |
| AX-157849171 | 26 | 53.406 | KV453228.1  | 1103803 | 22-scf00516 | 22 |
| AX-157689838 | 26 | 53.406 | 3ML01033421 | 341     | scf09070_1  | UN |
| AX-158330951 | 26 | 53.515 | KV453228.1  | 395817  | 22-scf00516 | 22 |
| AX-158330955 | 26 | 53.515 | KV453228.1  | 399999  | 22-scf00516 | 22 |
| AX-158330957 | 26 | 53.515 | KV453228.1  | 400659  | 22-scf00516 | 22 |
| AX-157703940 | 26 | 53.515 | KV453228.1  | 407503  | 22-scf00516 | 22 |
| AX-158330962 | 26 | 53.515 | KV453228.1  | 407699  | 22-scf00516 | 22 |
| AX-158331004 | 26 | 53.515 | KV453228.1  | 462861  | 22-scf00516 | 22 |
| AX-158331005 | 26 | 53.515 | KV453228.1  | 463241  | 22-scf00516 | 22 |
| AX-158331023 | 26 | 53.515 | KV453228.1  | 486876  | 22-scf00516 | 22 |
| AX-158331077 | 26 | 53.515 | KV453228.1  | 557801  | 22-scf00516 | 22 |
| AX-157774551 | 26 | 53.515 | KV453228.1  | 562223  | 22-scf00516 | 22 |
| AX-158331093 | 26 | 53.515 | KV453228.1  | 580452  | 22-scf00516 | 22 |
| AX-158330964 | 26 | 53.535 | KV453228.1  | 412959  | 22-scf00516 | 22 |
| AX-157849118 | 26 | 53.535 | KV453228.1  | 421350  | 22-scf00516 | 22 |
| AX-158330966 | 26 | 53.553 | KV453228.1  | 415032  | 22-scf00516 | 22 |
| AX-158330774 | 26 | 53.574 | KV453228.1  | 190664  | 22-scf00516 | 22 |
| AX-158330778 | 26 | 53.574 | KV453228.1  | 193953  | 22-scf00516 | 22 |
| AX-158330970 | 26 | 53.574 | KV453228.1  | 419528  | 22-scf00516 | 22 |
| AX-158330971 | 26 | 53.574 | KV453228.1  | 419999  | 22-scf00516 | 22 |
| AX-158330972 | 26 | 53.574 | KV453228.1  | 420231  | 22-scf00516 | 22 |
| AX-158330991 | 26 | 53.574 | KV453228.1  | 449417  | 22-scf00516 | 22 |
| AX-158331063 | 26 | 53.574 | KV453228.1  | 541825  | 22-scf00516 | 22 |
| AX-158331074 | 26 | 53.574 | KV453228.1  | 555640  | 22-scf00516 | 22 |
| AX-158331075 | 26 | 53.574 | KV453228.1  | 556263  | 22-scf00516 | 22 |
| AX-158330605 | 26 | 53.589 | KV453227.1  | 2589329 | 22-scf00515 | 22 |
| AX-158330974 | 26 | 53.589 | KV453228.1  | 422092  | 22-scf00516 | 22 |
| AX-158330984 | 26 | 53.611 | KV453228.1  | 437994  | 22-scf00516 | 22 |
| AX-157849055 | 26 | 53.625 | KV453227.1  | 2405584 | 22-scf00515 | 22 |
| AX-157849056 | 26 | 53.625 | KV453227.1  | 2406194 | 22-scf00515 | 22 |
| AX-158330525 | 26 | 53.625 | KV453227.1  | 2463661 | 22-scf00515 | 22 |
| AX-157758221 | 26 | 53.625 | KV453228.1  | 11189   | 22-scf00516 | 22 |
| AX-158330721 | 26 | 53.625 | KV453228.1  | 68280   | 22-scf00516 | 22 |
| AX-158330722 | 26 | 53.625 | KV453228.1  | 68670   | 22-scf00516 | 22 |
| AX-158330723 | 26 | 53.625 | KV453228.1  | 69242   | 22-scf00516 | 22 |
| AX-157701902 | 26 | 53.625 | KV453228.1  | 96037   | 22-scf00516 | 22 |
| AX-158330751 | 26 | 53.625 | KV453228.1  | 158328  | 22-scf00516 | 22 |
| AX-158330761 | 26 | 53.625 | KV453228.1  | 169032  | 22-scf00516 | 22 |
| AX-158330796 | 26 | 53.625 | KV453228.1  | 209596  | 22-scf00516 | 22 |
| AX-158330811 | 26 | 53.625 | KV453228.1  | 232997  | 22-scf00516 | 22 |
| AX-158330987 | 26 | 53.625 | KV453228.1  | 441210  | 22-scf00516 | 22 |
| AX-158330995 | 26 | 53.625 | KV453228.1  | 452725  | 22-scf00516 | 22 |
| AX-158330998 | 26 | 53.625 | KV453228.1  | 455302  | 22-scf00516 | 22 |
| AX-158331002 | 26 | 53.625 | KV453228.1  | 461673  | 22-scf00516 | 22 |
| AX-158331003 | 26 | 53.625 | KV453228.1  | 462496  | 22-scf00516 | 22 |
| AX-158331006 | 26 | 53.625 | KV453228.1  | 464978  | 22-scf00516 | 22 |
| AX-158331008 | 26 | 53.625 | KV453228.1  | 468837  | 22-scf00516 | 22 |
| AX-158331009 | 26 | 53.625 | KV453228.1  | 469304  | 22-scf00516 | 22 |
| AX-158331014 | 26 | 53.625 | KV453228.1  | 475174  | 22-scf00516 | 22 |

|              |    |        |            |        |             |    |
|--------------|----|--------|------------|--------|-------------|----|
| AX-157754312 | 26 | 53.625 | KV453228.1 | 476838 | 22-scf00516 | 22 |
| AX-158331016 | 26 | 53.625 | KV453228.1 | 477444 | 22-scf00516 | 22 |
| AX-157752913 | 26 | 53.625 | KV453228.1 | 478976 | 22-scf00516 | 22 |
| AX-158331022 | 26 | 53.625 | KV453228.1 | 486210 | 22-scf00516 | 22 |
| AX-158331024 | 26 | 53.625 | KV453228.1 | 487864 | 22-scf00516 | 22 |
| AX-158331025 | 26 | 53.625 | KV453228.1 | 488953 | 22-scf00516 | 22 |
| AX-158331028 | 26 | 53.625 | KV453228.1 | 496028 | 22-scf00516 | 22 |
| AX-158331031 | 26 | 53.625 | KV453228.1 | 499424 | 22-scf00516 | 22 |
| AX-158331033 | 26 | 53.625 | KV453228.1 | 501857 | 22-scf00516 | 22 |
| AX-158331034 | 26 | 53.625 | KV453228.1 | 502501 | 22-scf00516 | 22 |
| AX-158331035 | 26 | 53.625 | KV453228.1 | 503977 | 22-scf00516 | 22 |
| AX-158331036 | 26 | 53.625 | KV453228.1 | 504668 | 22-scf00516 | 22 |
| AX-158418729 | 26 | 53.625 | KV453228.1 | 506695 | 22-scf00516 | 22 |
| AX-158331040 | 26 | 53.625 | KV453228.1 | 509205 | 22-scf00516 | 22 |
| AX-157728778 | 26 | 53.625 | KV453228.1 | 511378 | 22-scf00516 | 22 |
| AX-158331043 | 26 | 53.625 | KV453228.1 | 511650 | 22-scf00516 | 22 |
| AX-158331044 | 26 | 53.625 | KV453228.1 | 513176 | 22-scf00516 | 22 |
| AX-157881675 | 26 | 53.625 | KV453228.1 | 513546 | 22-scf00516 | 22 |
| AX-158331046 | 26 | 53.625 | KV453228.1 | 516521 | 22-scf00516 | 22 |
| AX-158331047 | 26 | 53.625 | KV453228.1 | 517340 | 22-scf00516 | 22 |
| AX-158331048 | 26 | 53.625 | KV453228.1 | 518554 | 22-scf00516 | 22 |
| AX-158331052 | 26 | 53.625 | KV453228.1 | 525889 | 22-scf00516 | 22 |
| AX-157873677 | 26 | 53.625 | KV453228.1 | 529535 | 22-scf00516 | 22 |
| AX-157743701 | 26 | 53.625 | KV453228.1 | 530087 | 22-scf00516 | 22 |
| AX-158331055 | 26 | 53.625 | KV453228.1 | 530407 | 22-scf00516 | 22 |
| AX-158331058 | 26 | 53.625 | KV453228.1 | 533119 | 22-scf00516 | 22 |
| AX-157849125 | 26 | 53.625 | KV453228.1 | 538406 | 22-scf00516 | 22 |
| AX-157713743 | 26 | 53.625 | KV453228.1 | 540165 | 22-scf00516 | 22 |
| AX-158331062 | 26 | 53.625 | KV453228.1 | 540754 | 22-scf00516 | 22 |
| AX-158331066 | 26 | 53.625 | KV453228.1 | 545823 | 22-scf00516 | 22 |
| AX-158331067 | 26 | 53.625 | KV453228.1 | 546785 | 22-scf00516 | 22 |
| AX-158331068 | 26 | 53.625 | KV453228.1 | 547686 | 22-scf00516 | 22 |
| AX-158331069 | 26 | 53.625 | KV453228.1 | 549466 | 22-scf00516 | 22 |
| AX-158331070 | 26 | 53.625 | KV453228.1 | 550429 | 22-scf00516 | 22 |
| AX-158331071 | 26 | 53.625 | KV453228.1 | 550792 | 22-scf00516 | 22 |
| AX-158331076 | 26 | 53.625 | KV453228.1 | 556793 | 22-scf00516 | 22 |
| AX-158331078 | 26 | 53.625 | KV453228.1 | 559142 | 22-scf00516 | 22 |
| AX-158331082 | 26 | 53.625 | KV453228.1 | 568866 | 22-scf00516 | 22 |
| AX-158331083 | 26 | 53.625 | KV453228.1 | 569311 | 22-scf00516 | 22 |
| AX-158331085 | 26 | 53.625 | KV453228.1 | 572673 | 22-scf00516 | 22 |
| AX-158331086 | 26 | 53.625 | KV453228.1 | 572918 | 22-scf00516 | 22 |
| AX-158418730 | 26 | 53.625 | KV453228.1 | 574691 | 22-scf00516 | 22 |
| AX-158331088 | 26 | 53.625 | KV453228.1 | 575534 | 22-scf00516 | 22 |
| AX-158331094 | 26 | 53.625 | KV453228.1 | 582674 | 22-scf00516 | 22 |
| AX-158331095 | 26 | 53.625 | KV453228.1 | 583052 | 22-scf00516 | 22 |
| AX-158331097 | 26 | 53.625 | KV453228.1 | 586428 | 22-scf00516 | 22 |
| AX-158381539 | 26 | 53.625 | KV453228.1 | 587040 | 22-scf00516 | 22 |
| AX-158331098 | 26 | 53.625 | KV453228.1 | 587196 | 22-scf00516 | 22 |
| AX-158331101 | 26 | 53.625 | KV453228.1 | 594211 | 22-scf00516 | 22 |
| AX-158331102 | 26 | 53.625 | KV453228.1 | 595103 | 22-scf00516 | 22 |
| AX-158331103 | 26 | 53.625 | KV453228.1 | 595979 | 22-scf00516 | 22 |

|              |    |        |            |        |             |    |
|--------------|----|--------|------------|--------|-------------|----|
| AX-157849130 | 26 | 53.625 | KV453228.1 | 596328 | 22-scf00516 | 22 |
| AX-158331104 | 26 | 53.625 | KV453228.1 | 598604 | 22-scf00516 | 22 |
| AX-158331108 | 26 | 53.625 | KV453228.1 | 602228 | 22-scf00516 | 22 |
| AX-157849131 | 26 | 53.625 | KV453228.1 | 604437 | 22-scf00516 | 22 |
| AX-158331110 | 26 | 53.625 | KV453228.1 | 604649 | 22-scf00516 | 22 |
| AX-157849134 | 26 | 53.625 | KV453228.1 | 608608 | 22-scf00516 | 22 |
| AX-158331112 | 26 | 53.625 | KV453228.1 | 610369 | 22-scf00516 | 22 |
| AX-157849136 | 26 | 53.625 | KV453228.1 | 616475 | 22-scf00516 | 22 |
| AX-158331117 | 26 | 53.625 | KV453228.1 | 619759 | 22-scf00516 | 22 |
| AX-158331118 | 26 | 53.625 | KV453228.1 | 620184 | 22-scf00516 | 22 |
| AX-157750833 | 26 | 53.625 | KV453228.1 | 628163 | 22-scf00516 | 22 |
| AX-157722779 | 26 | 53.625 | KV453228.1 | 630955 | 22-scf00516 | 22 |
| AX-158331121 | 26 | 53.625 | KV453228.1 | 631683 | 22-scf00516 | 22 |
| AX-158331127 | 26 | 53.625 | KV453228.1 | 650860 | 22-scf00516 | 22 |
| AX-158331131 | 26 | 53.625 | KV453228.1 | 654280 | 22-scf00516 | 22 |
| AX-158331134 | 26 | 53.625 | KV453228.1 | 656131 | 22-scf00516 | 22 |
| AX-158331142 | 26 | 53.625 | KV453228.1 | 663673 | 22-scf00516 | 22 |
| AX-158331146 | 26 | 53.625 | KV453228.1 | 667417 | 22-scf00516 | 22 |
| AX-158331148 | 26 | 53.625 | KV453228.1 | 669090 | 22-scf00516 | 22 |
| AX-158331149 | 26 | 53.625 | KV453228.1 | 669457 | 22-scf00516 | 22 |
| AX-158331150 | 26 | 53.625 | KV453228.1 | 670984 | 22-scf00516 | 22 |
| AX-158331151 | 26 | 53.625 | KV453228.1 | 671684 | 22-scf00516 | 22 |
| AX-158331153 | 26 | 53.625 | KV453228.1 | 673508 | 22-scf00516 | 22 |
| AX-158331187 | 26 | 53.625 | KV453228.1 | 709854 | 22-scf00516 | 22 |
| AX-158331253 | 26 | 53.625 | KV453228.1 | 791558 | 22-scf00516 | 22 |
| AX-158331282 | 26 | 53.625 | KV453228.1 | 835162 | 22-scf00516 | 22 |
| AX-157714157 | 26 | 53.625 | KV453228.1 | 852774 | 22-scf00516 | 22 |
| AX-157718251 | 26 | 53.625 | KV453228.1 | 895830 | 22-scf00516 | 22 |
| AX-158331380 | 26 | 53.625 | KV453228.1 | 973734 | 22-scf00516 | 22 |
| AX-158331402 | 26 | 53.625 | KV453228.1 | 990403 | 22-scf00516 | 22 |
| AX-158331029 | 26 | 53.665 | KV453228.1 | 496766 | 22-scf00516 | 22 |
| AX-158331154 | 26 | 53.665 | KV453228.1 | 674424 | 22-scf00516 | 22 |
| AX-158331155 | 26 | 53.665 | KV453228.1 | 675659 | 22-scf00516 | 22 |
| AX-158331156 | 26 | 53.734 | KV453228.1 | 676329 | 22-scf00516 | 22 |
| AX-158331157 | 26 | 53.734 | KV453228.1 | 676878 | 22-scf00516 | 22 |
| AX-158331160 | 26 | 53.734 | KV453228.1 | 681150 | 22-scf00516 | 22 |
| AX-158331161 | 26 | 53.734 | KV453228.1 | 682035 | 22-scf00516 | 22 |
| AX-158331162 | 26 | 53.734 | KV453228.1 | 682486 | 22-scf00516 | 22 |
| AX-158331165 | 26 | 53.734 | KV453228.1 | 683980 | 22-scf00516 | 22 |
| AX-158331176 | 26 | 53.734 | KV453228.1 | 697466 | 22-scf00516 | 22 |
| AX-158331180 | 26 | 53.734 | KV453228.1 | 699730 | 22-scf00516 | 22 |
| AX-158331181 | 26 | 53.734 | KV453228.1 | 700437 | 22-scf00516 | 22 |
| AX-157849138 | 26 | 53.734 | KV453228.1 | 700525 | 22-scf00516 | 22 |
| AX-158331185 | 26 | 53.734 | KV453228.1 | 705395 | 22-scf00516 | 22 |
| AX-158331186 | 26 | 53.734 | KV453228.1 | 706063 | 22-scf00516 | 22 |
| AX-158331192 | 26 | 53.734 | KV453228.1 | 714737 | 22-scf00516 | 22 |
| AX-158331193 | 26 | 53.734 | KV453228.1 | 716242 | 22-scf00516 | 22 |
| AX-158331194 | 26 | 53.734 | KV453228.1 | 716939 | 22-scf00516 | 22 |
| AX-158331196 | 26 | 53.734 | KV453228.1 | 721397 | 22-scf00516 | 22 |
| AX-158331198 | 26 | 53.734 | KV453228.1 | 726961 | 22-scf00516 | 22 |
| AX-158331202 | 26 | 53.734 | KV453228.1 | 732670 | 22-scf00516 | 22 |



|              |    |        |            |         |                |    |
|--------------|----|--------|------------|---------|----------------|----|
| AX-158331203 | 26 | 53.734 | KV453228.1 | 733028  | 22-scf00516    | 22 |
| AX-158331204 | 26 | 53.734 | KV453228.1 | 736778  | 22-scf00516    | 22 |
| AX-158331205 | 26 | 53.734 | KV453228.1 | 737685  | 22-scf00516    | 22 |
| AX-158331207 | 26 | 53.734 | KV453228.1 | 740284  | 22-scf00516    | 22 |
| AX-158331209 | 26 | 53.734 | KV453228.1 | 743603  | 22-scf00516    | 22 |
| AX-158331210 | 26 | 53.734 | KV453228.1 | 743742  | 22-scf00516    | 22 |
| AX-158331211 | 26 | 53.734 | KV453228.1 | 744360  | 22-scf00516    | 22 |
| AX-158331212 | 26 | 53.734 | KV453228.1 | 744776  | 22-scf00516    | 22 |
| AX-158331213 | 26 | 53.734 | KV453228.1 | 745641  | 22-scf00516    | 22 |
| AX-158331214 | 26 | 53.734 | KV453228.1 | 747146  | 22-scf00516    | 22 |
| AX-158331215 | 26 | 53.734 | KV453228.1 | 748412  | 22-scf00516    | 22 |
| AX-157849139 | 26 | 53.734 | KV453228.1 | 749540  | 22-scf00516    | 22 |
| AX-158418734 | 26 | 53.734 | KV453228.1 | 750605  | 22-scf00516    | 22 |
| AX-158331217 | 26 | 53.734 | KV453228.1 | 751600  | 22-scf00516    | 22 |
| AX-158331219 | 26 | 53.734 | KV453228.1 | 754489  | 22-scf00516    | 22 |
| AX-157849140 | 26 | 53.734 | KV453228.1 | 755287  | 22-scf00516    | 22 |
| AX-157721707 | 26 | 53.734 | KV453228.1 | 755801  | 22-scf00516    | 22 |
| AX-157849146 | 26 | 53.734 | KV453228.1 | 784375  | 22-scf00516    | 22 |
| AX-158331267 | 26 | 53.734 | KV453228.1 | 809910  | 22-scf00516    | 22 |
| AX-158331333 | 26 | 53.734 | KV453228.1 | 906471  | 22-scf00516    | 22 |
| AX-158331371 | 26 | 53.734 | KV453228.1 | 959074  | 22-scf00516    | 22 |
| AX-158331403 | 26 | 53.734 | KV453228.1 | 992949  | 22-scf00516    | 22 |
| AX-158331216 | 26 | 53.792 | KV453228.1 | 751309  | 22-scf00516    | 22 |
| AX-158331221 | 26 | 53.843 | KV453228.1 | 756290  | 22-scf00516    | 22 |
| AX-158331223 | 26 | 53.843 | KV453228.1 | 757557  | 22-scf00516    | 22 |
| AX-158331236 | 26 | 53.843 | KV453228.1 | 773605  | 22-scf00516    | 22 |
| AX-157849144 | 26 | 53.843 | KV453228.1 | 776011  | 22-scf00516    | 22 |
| AX-158331238 | 26 | 53.843 | KV453228.1 | 777305  | 22-scf00516    | 22 |
| AX-158331239 | 26 | 53.843 | KV453228.1 | 777512  | 22-scf00516    | 22 |
| AX-158331244 | 26 | 53.843 | KV453228.1 | 780468  | 22-scf00516    | 22 |
| AX-157742763 | 26 | 53.843 | KV453228.1 | 784489  | 22-scf00516    | 22 |
| AX-158330672 | 26 | 54.062 | KV453227.1 | 2680441 | 22-scf00515    | 22 |
| AX-157849087 | 26 | 54.062 | KV453227.1 | 2683528 | 22-scf00515    | 22 |
| AX-158330673 | 26 | 54.062 | KV453227.1 | 2683607 | 22-scf00515    | 22 |
| AX-158330674 | 26 | 54.062 | KV453227.1 | 2684012 | 22-scf00515    | 22 |
| AX-158330765 | 26 | 54.062 | KV453228.1 | 177458  | 22-scf00516    | 22 |
| AX-158330882 | 26 | 54.062 | KV453228.1 | 315876  | 22-scf00516    | 22 |
| AX-158330911 | 26 | 54.062 | KV453228.1 | 345954  | 22-scf00516    | 22 |
| AX-157710117 | 26 | 54.062 | KV453228.1 | 566614  | 22-scf00516    | 22 |
| AX-157694897 | 26 | 54.062 | FI869216.1 | 221     | IORI212 lctalu | UN |
| AX-158331247 | 26 | 54.28  | KV453228.1 | 784979  | 22-scf00516    | 22 |
| AX-157849147 | 26 | 54.28  | KV453228.1 | 786459  | 22-scf00516    | 22 |
| AX-158331250 | 26 | 54.28  | KV453228.1 | 788978  | 22-scf00516    | 22 |
| AX-158331258 | 26 | 54.28  | KV453228.1 | 801879  | 22-scf00516    | 22 |
| AX-158331261 | 26 | 54.293 | KV453228.1 | 804117  | 22-scf00516    | 22 |
| AX-158331317 | 26 | 54.293 | KV453228.1 | 874189  | 22-scf00516    | 22 |
| AX-158331364 | 26 | 54.293 | KV453228.1 | 950764  | 22-scf00516    | 22 |
| AX-158331021 | 26 | 54.305 | KV453228.1 | 485816  | 22-scf00516    | 22 |
| AX-158418728 | 26 | 54.305 | KV453228.1 | 502321  | 22-scf00516    | 22 |
| AX-157720324 | 26 | 54.305 | KV453228.1 | 540832  | 22-scf00516    | 22 |
| AX-158331163 | 26 | 54.305 | KV453228.1 | 682895  | 22-scf00516    | 22 |

|              |    |        |            |        |             |    |
|--------------|----|--------|------------|--------|-------------|----|
| AX-158331177 | 26 | 54.305 | KV453228.1 | 697840 | 22-scf00516 | 22 |
| AX-158331199 | 26 | 54.305 | KV453228.1 | 729118 | 22-scf00516 | 22 |
| AX-158331200 | 26 | 54.305 | KV453228.1 | 731033 | 22-scf00516 | 22 |
| AX-158331201 | 26 | 54.305 | KV453228.1 | 731804 | 22-scf00516 | 22 |
| AX-158331241 | 26 | 54.305 | KV453228.1 | 778567 | 22-scf00516 | 22 |
| AX-158331262 | 26 | 54.305 | KV453228.1 | 804542 | 22-scf00516 | 22 |
| AX-158331266 | 26 | 54.305 | KV453228.1 | 809417 | 22-scf00516 | 22 |
| AX-158331271 | 26 | 54.305 | KV453228.1 | 813651 | 22-scf00516 | 22 |
| AX-158331272 | 26 | 54.305 | KV453228.1 | 814153 | 22-scf00516 | 22 |
| AX-158331268 | 26 | 54.316 | KV453228.1 | 810487 | 22-scf00516 | 22 |
| AX-157773448 | 26 | 54.327 | KV453228.1 | 812593 | 22-scf00516 | 22 |
| AX-158331400 | 26 | 54.327 | KV453228.1 | 989627 | 22-scf00516 | 22 |
| AX-158331274 | 26 | 54.34  | KV453228.1 | 816478 | 22-scf00516 | 22 |
| AX-158330989 | 26 | 54.351 | KV453228.1 | 444697 | 22-scf00516 | 22 |
| AX-158331277 | 26 | 54.351 | KV453228.1 | 817593 | 22-scf00516 | 22 |
| AX-158331281 | 26 | 54.351 | KV453228.1 | 823375 | 22-scf00516 | 22 |
| AX-157849148 | 26 | 54.389 | KV453228.1 | 789102 | 22-scf00516 | 22 |
| AX-158331270 | 26 | 54.389 | KV453228.1 | 811832 | 22-scf00516 | 22 |
| AX-158331284 | 26 | 54.389 | KV453228.1 | 842110 | 22-scf00516 | 22 |
| AX-158331289 | 26 | 54.389 | KV453228.1 | 848491 | 22-scf00516 | 22 |
| AX-158331290 | 26 | 54.389 | KV453228.1 | 849002 | 22-scf00516 | 22 |
| AX-158331291 | 26 | 54.389 | KV453228.1 | 850458 | 22-scf00516 | 22 |
| AX-158331295 | 26 | 54.389 | KV453228.1 | 856738 | 22-scf00516 | 22 |
| AX-158331297 | 26 | 54.389 | KV453228.1 | 857659 | 22-scf00516 | 22 |
| AX-158331302 | 26 | 54.389 | KV453228.1 | 862591 | 22-scf00516 | 22 |
| AX-158331361 | 26 | 54.389 | KV453228.1 | 948231 | 22-scf00516 | 22 |
| AX-158331397 | 26 | 54.389 | KV453228.1 | 986568 | 22-scf00516 | 22 |
| AX-157849103 | 26 | 54.499 | KV453228.1 | 140386 | 22-scf00516 | 22 |
| AX-157758255 | 26 | 54.499 | KV453228.1 | 576956 | 22-scf00516 | 22 |
| AX-158331294 | 26 | 54.499 | KV453228.1 | 853129 | 22-scf00516 | 22 |
| AX-158331298 | 26 | 54.499 | KV453228.1 | 858201 | 22-scf00516 | 22 |
| AX-158331305 | 26 | 54.499 | KV453228.1 | 865555 | 22-scf00516 | 22 |
| AX-158331310 | 26 | 54.499 | KV453228.1 | 869565 | 22-scf00516 | 22 |
| AX-158331313 | 26 | 54.499 | KV453228.1 | 872149 | 22-scf00516 | 22 |
| AX-158331316 | 26 | 54.499 | KV453228.1 | 873902 | 22-scf00516 | 22 |
| AX-158331318 | 26 | 54.499 | KV453228.1 | 874456 | 22-scf00516 | 22 |
| AX-158331320 | 26 | 54.499 | KV453228.1 | 875441 | 22-scf00516 | 22 |
| AX-158331322 | 26 | 54.499 | KV453228.1 | 877614 | 22-scf00516 | 22 |
| AX-158331327 | 26 | 54.499 | KV453228.1 | 887188 | 22-scf00516 | 22 |
| AX-158381540 | 26 | 54.499 | KV453228.1 | 888838 | 22-scf00516 | 22 |
| AX-158331328 | 26 | 54.499 | KV453228.1 | 891385 | 22-scf00516 | 22 |
| AX-157739781 | 26 | 54.499 | KV453228.1 | 891970 | 22-scf00516 | 22 |
| AX-158331330 | 26 | 54.499 | KV453228.1 | 893411 | 22-scf00516 | 22 |
| AX-158331334 | 26 | 54.499 | KV453228.1 | 910632 | 22-scf00516 | 22 |
| AX-158331335 | 26 | 54.499 | KV453228.1 | 912289 | 22-scf00516 | 22 |
| AX-158331336 | 26 | 54.499 | KV453228.1 | 913190 | 22-scf00516 | 22 |
| AX-158331337 | 26 | 54.499 | KV453228.1 | 914028 | 22-scf00516 | 22 |
| AX-158331338 | 26 | 54.499 | KV453228.1 | 914901 | 22-scf00516 | 22 |
| AX-158331339 | 26 | 54.499 | KV453228.1 | 915918 | 22-scf00516 | 22 |
| AX-158331340 | 26 | 54.499 | KV453228.1 | 916299 | 22-scf00516 | 22 |
| AX-158331342 | 26 | 54.499 | KV453228.1 | 917244 | 22-scf00516 | 22 |

|              |    |        |            |         |             |    |
|--------------|----|--------|------------|---------|-------------|----|
| AX-158331343 | 26 | 54.499 | KV453228.1 | 918091  | 22-scf00516 | 22 |
| AX-158331344 | 26 | 54.499 | KV453228.1 | 918838  | 22-scf00516 | 22 |
| AX-158331345 | 26 | 54.499 | KV453228.1 | 919872  | 22-scf00516 | 22 |
| AX-158331349 | 26 | 54.499 | KV453228.1 | 924606  | 22-scf00516 | 22 |
| AX-158331351 | 26 | 54.499 | KV453228.1 | 928605  | 22-scf00516 | 22 |
| AX-158331352 | 26 | 54.499 | KV453228.1 | 930770  | 22-scf00516 | 22 |
| AX-158331353 | 26 | 54.499 | KV453228.1 | 931828  | 22-scf00516 | 22 |
| AX-158331356 | 26 | 54.499 | KV453228.1 | 940296  | 22-scf00516 | 22 |
| AX-158331358 | 26 | 54.499 | KV453228.1 | 944578  | 22-scf00516 | 22 |
| AX-157867964 | 26 | 54.499 | KV453228.1 | 948471  | 22-scf00516 | 22 |
| AX-158331362 | 26 | 54.499 | KV453228.1 | 949887  | 22-scf00516 | 22 |
| AX-158331363 | 26 | 54.499 | KV453228.1 | 950321  | 22-scf00516 | 22 |
| AX-158331365 | 26 | 54.499 | KV453228.1 | 951685  | 22-scf00516 | 22 |
| AX-158331366 | 26 | 54.499 | KV453228.1 | 951941  | 22-scf00516 | 22 |
| AX-158331367 | 26 | 54.499 | KV453228.1 | 952291  | 22-scf00516 | 22 |
| AX-158331370 | 26 | 54.499 | KV453228.1 | 956644  | 22-scf00516 | 22 |
| AX-158331375 | 26 | 54.499 | KV453228.1 | 963791  | 22-scf00516 | 22 |
| AX-158331377 | 26 | 54.499 | KV453228.1 | 969072  | 22-scf00516 | 22 |
| AX-157849160 | 26 | 54.499 | KV453228.1 | 969599  | 22-scf00516 | 22 |
| AX-158331381 | 26 | 54.499 | KV453228.1 | 974334  | 22-scf00516 | 22 |
| AX-158331384 | 26 | 54.499 | KV453228.1 | 976324  | 22-scf00516 | 22 |
| AX-157742600 | 26 | 54.499 | KV453228.1 | 977525  | 22-scf00516 | 22 |
| AX-158331385 | 26 | 54.499 | KV453228.1 | 977670  | 22-scf00516 | 22 |
| AX-158331386 | 26 | 54.499 | KV453228.1 | 979127  | 22-scf00516 | 22 |
| AX-158331387 | 26 | 54.499 | KV453228.1 | 979355  | 22-scf00516 | 22 |
| AX-158331388 | 26 | 54.499 | KV453228.1 | 979587  | 22-scf00516 | 22 |
| AX-158331392 | 26 | 54.499 | KV453228.1 | 981253  | 22-scf00516 | 22 |
| AX-158331394 | 26 | 54.499 | KV453228.1 | 982263  | 22-scf00516 | 22 |
| AX-158331395 | 26 | 54.499 | KV453228.1 | 982720  | 22-scf00516 | 22 |
| AX-158331396 | 26 | 54.499 | KV453228.1 | 984557  | 22-scf00516 | 22 |
| AX-158331398 | 26 | 54.499 | KV453228.1 | 987607  | 22-scf00516 | 22 |
| AX-158331401 | 26 | 54.499 | KV453228.1 | 990091  | 22-scf00516 | 22 |
| AX-158331411 | 26 | 54.499 | KV453228.1 | 1009432 | 22-scf00516 | 22 |
| AX-158418741 | 26 | 54.499 | KV453228.1 | 1013232 | 22-scf00516 | 22 |
| AX-158331428 | 26 | 54.499 | KV453228.1 | 1029745 | 22-scf00516 | 22 |
| AX-158331433 | 26 | 54.499 | KV453228.1 | 1042732 | 22-scf00516 | 22 |
| AX-158331569 | 26 | 54.499 | KV453228.1 | 1241608 | 22-scf00516 | 22 |
| AX-158331607 | 26 | 54.499 | KV453228.1 | 1300211 | 22-scf00516 | 22 |
| AX-158331654 | 26 | 54.499 | KV453228.1 | 1370043 | 22-scf00516 | 22 |
| AX-158418751 | 26 | 54.499 | KV453228.1 | 1514989 | 22-scf00516 | 22 |
| AX-158332160 | 26 | 54.499 | KV453228.1 | 2081146 | 22-scf00516 | 22 |
| AX-158331408 | 26 | 54.717 | KV453228.1 | 1003168 | 22-scf00516 | 22 |
| AX-158331409 | 26 | 54.717 | KV453228.1 | 1004415 | 22-scf00516 | 22 |
| AX-158331410 | 26 | 54.717 | KV453228.1 | 1008171 | 22-scf00516 | 22 |
| AX-158331412 | 26 | 54.717 | KV453228.1 | 1010625 | 22-scf00516 | 22 |
| AX-158331414 | 26 | 54.717 | KV453228.1 | 1011769 | 22-scf00516 | 22 |
| AX-157849163 | 26 | 54.717 | KV453228.1 | 1014895 | 22-scf00516 | 22 |
| AX-158331415 | 26 | 54.717 | KV453228.1 | 1015615 | 22-scf00516 | 22 |
| AX-158331420 | 26 | 54.717 | KV453228.1 | 1019242 | 22-scf00516 | 22 |
| AX-158331424 | 26 | 54.717 | KV453228.1 | 1022119 | 22-scf00516 | 22 |
| AX-158331486 | 26 | 54.717 | KV453228.1 | 1112219 | 22-scf00516 | 22 |

|              |    |        |            |         |             |    |
|--------------|----|--------|------------|---------|-------------|----|
| AX-157714473 | 26 | 54.717 | KV453228.1 | 2722408 | 22-scf00516 | 22 |
| AX-158331418 | 26 | 54.826 | KV453228.1 | 1017628 | 22-scf00516 | 22 |
| AX-158331423 | 26 | 54.826 | KV453228.1 | 1021527 | 22-scf00516 | 22 |
| AX-157849164 | 26 | 54.826 | KV453228.1 | 1023387 | 22-scf00516 | 22 |
| AX-158331426 | 26 | 54.826 | KV453228.1 | 1024359 | 22-scf00516 | 22 |
| AX-158331430 | 26 | 54.826 | KV453228.1 | 1033400 | 22-scf00516 | 22 |
| AX-157849165 | 26 | 54.826 | KV453228.1 | 1034345 | 22-scf00516 | 22 |
| AX-157751151 | 26 | 54.826 | KV453228.1 | 1036312 | 22-scf00516 | 22 |
| AX-157849166 | 26 | 54.826 | KV453228.1 | 1037324 | 22-scf00516 | 22 |
| AX-158331431 | 26 | 54.826 | KV453228.1 | 1040054 | 22-scf00516 | 22 |
| AX-158331432 | 26 | 54.826 | KV453228.1 | 1041852 | 22-scf00516 | 22 |
| AX-158331435 | 26 | 54.826 | KV453228.1 | 1045600 | 22-scf00516 | 22 |
| AX-158331447 | 26 | 54.826 | KV453228.1 | 1065681 | 22-scf00516 | 22 |
| AX-157748830 | 26 | 55.008 | KV453228.1 | 1037683 | 22-scf00516 | 22 |
| AX-158331437 | 26 | 55.008 | KV453228.1 | 1047549 | 22-scf00516 | 22 |
| AX-158331439 | 26 | 55.008 | KV453228.1 | 1049732 | 22-scf00516 | 22 |
| AX-158331441 | 26 | 55.008 | KV453228.1 | 1051662 | 22-scf00516 | 22 |
| AX-158331443 | 26 | 55.009 | KV453228.1 | 1052603 | 22-scf00516 | 22 |
| AX-158331451 | 26 | 55.373 | KV453228.1 | 1072063 | 22-scf00516 | 22 |
| AX-157727878 | 26 | 55.373 | KV453228.1 | 1073133 | 22-scf00516 | 22 |
| AX-158331452 | 26 | 55.373 | KV453228.1 | 1073988 | 22-scf00516 | 22 |
| AX-158331456 | 26 | 55.373 | KV453228.1 | 1076201 | 22-scf00516 | 22 |
| AX-158331457 | 26 | 55.373 | KV453228.1 | 1076449 | 22-scf00516 | 22 |
| AX-158331461 | 26 | 55.373 | KV453228.1 | 1078475 | 22-scf00516 | 22 |
| AX-158331463 | 26 | 55.373 | KV453228.1 | 1079180 | 22-scf00516 | 22 |
| AX-158331466 | 26 | 55.373 | KV453228.1 | 1085146 | 22-scf00516 | 22 |
| AX-158331468 | 26 | 55.373 | KV453228.1 | 1086439 | 22-scf00516 | 22 |
| AX-157772458 | 26 | 55.373 | KV453228.1 | 1088386 | 22-scf00516 | 22 |
| AX-157849167 | 26 | 55.373 | KV453228.1 | 1088769 | 22-scf00516 | 22 |
| AX-158331471 | 26 | 55.373 | KV453228.1 | 1091782 | 22-scf00516 | 22 |
| AX-158331472 | 26 | 55.373 | KV453228.1 | 1095469 | 22-scf00516 | 22 |
| AX-157715489 | 26 | 55.373 | KV453228.1 | 1096234 | 22-scf00516 | 22 |
| AX-158331473 | 26 | 55.373 | KV453228.1 | 1100371 | 22-scf00516 | 22 |
| AX-158331477 | 26 | 55.373 | KV453228.1 | 1103209 | 22-scf00516 | 22 |
| AX-158331487 | 26 | 55.373 | KV453228.1 | 1113212 | 22-scf00516 | 22 |
| AX-158331488 | 26 | 55.373 | KV453228.1 | 1116330 | 22-scf00516 | 22 |
| AX-158331491 | 26 | 55.373 | KV453228.1 | 1118046 | 22-scf00516 | 22 |
| AX-158331493 | 26 | 55.373 | KV453228.1 | 1120091 | 22-scf00516 | 22 |
| AX-158331494 | 26 | 55.373 | KV453228.1 | 1120525 | 22-scf00516 | 22 |
| AX-158331495 | 26 | 55.373 | KV453228.1 | 1121298 | 22-scf00516 | 22 |
| AX-157849173 | 26 | 55.373 | KV453228.1 | 1123244 | 22-scf00516 | 22 |
| AX-158331497 | 26 | 55.373 | KV453228.1 | 1123823 | 22-scf00516 | 22 |
| AX-157849174 | 26 | 55.373 | KV453228.1 | 1130720 | 22-scf00516 | 22 |
| AX-158331504 | 26 | 55.373 | KV453228.1 | 1131919 | 22-scf00516 | 22 |
| AX-158331508 | 26 | 55.373 | KV453228.1 | 1144336 | 22-scf00516 | 22 |
| AX-157849177 | 26 | 55.373 | KV453228.1 | 1155419 | 22-scf00516 | 22 |
| AX-157849184 | 26 | 55.373 | KV453228.1 | 1178429 | 22-scf00516 | 22 |
| AX-158331528 | 26 | 55.373 | KV453228.1 | 1184667 | 22-scf00516 | 22 |
| AX-157849192 | 26 | 55.373 | KV453228.1 | 1207275 | 22-scf00516 | 22 |
| AX-158331558 | 26 | 55.373 | KV453228.1 | 1234340 | 22-scf00516 | 22 |
| AX-158331560 | 26 | 55.373 | KV453228.1 | 1236754 | 22-scf00516 | 22 |

|              |    |        |            |         |             |    |
|--------------|----|--------|------------|---------|-------------|----|
| AX-158331561 | 26 | 55.373 | KV453228.1 | 1237386 | 22-scf00516 | 22 |
| AX-158331597 | 26 | 55.373 | KV453228.1 | 1276503 | 22-scf00516 | 22 |
| AX-158331603 | 26 | 55.373 | KV453228.1 | 1296784 | 22-scf00516 | 22 |
| AX-158331606 | 26 | 55.373 | KV453228.1 | 1299509 | 22-scf00516 | 22 |
| AX-157873689 | 26 | 55.373 | KV453228.1 | 1389825 | 22-scf00516 | 22 |
| AX-158331671 | 26 | 55.373 | KV453228.1 | 1394294 | 22-scf00516 | 22 |
| AX-158331675 | 26 | 55.373 | KV453228.1 | 1397215 | 22-scf00516 | 22 |
| AX-157861579 | 26 | 55.373 | KV453228.1 | 1442691 | 22-scf00516 | 22 |
| AX-158331724 | 26 | 55.373 | KV453228.1 | 1455023 | 22-scf00516 | 22 |
| AX-158331758 | 26 | 55.373 | KV453228.1 | 1499784 | 22-scf00516 | 22 |
| AX-158331774 | 26 | 55.373 | KV453228.1 | 1522614 | 22-scf00516 | 22 |
| AX-158331857 | 26 | 55.373 | KV453228.1 | 1655145 | 22-scf00516 | 22 |
| AX-158331931 | 26 | 55.373 | KV453228.1 | 1759160 | 22-scf00516 | 22 |
| AX-158332112 | 26 | 55.373 | KV453228.1 | 2020992 | 22-scf00516 | 22 |
| AX-158332141 | 26 | 55.373 | KV453228.1 | 2050162 | 22-scf00516 | 22 |
| AX-158331500 | 26 | 55.4   | KV453228.1 | 1127062 | 22-scf00516 | 22 |
| AX-157849189 | 26 | 55.4   | KV453228.1 | 1190289 | 22-scf00516 | 22 |
| AX-158331533 | 26 | 55.4   | KV453228.1 | 1194221 | 22-scf00516 | 22 |
| AX-158331663 | 26 | 55.4   | KV453228.1 | 1383034 | 22-scf00516 | 22 |
| AX-158331664 | 26 | 55.4   | KV453228.1 | 1384763 | 22-scf00516 | 22 |
| AX-158331799 | 26 | 55.4   | KV453228.1 | 1561792 | 22-scf00516 | 22 |
| AX-158332098 | 26 | 55.4   | KV453228.1 | 2002196 | 22-scf00516 | 22 |
| AX-157755573 | 26 | 55.435 | KV453228.1 | 1124157 | 22-scf00516 | 22 |
| AX-157713039 | 26 | 55.435 | KV453228.1 | 1133979 | 22-scf00516 | 22 |
| AX-158331506 | 26 | 55.452 | KV453228.1 | 1137667 | 22-scf00516 | 22 |
| AX-158331453 | 26 | 55.482 | KV453228.1 | 1074798 | 22-scf00516 | 22 |
| AX-158331455 | 26 | 55.482 | KV453228.1 | 1075601 | 22-scf00516 | 22 |
| AX-158331464 | 26 | 55.482 | KV453228.1 | 1082159 | 22-scf00516 | 22 |
| AX-158331467 | 26 | 55.482 | KV453228.1 | 1086116 | 22-scf00516 | 22 |
| AX-158331501 | 26 | 55.482 | KV453228.1 | 1128369 | 22-scf00516 | 22 |
| AX-158331503 | 26 | 55.482 | KV453228.1 | 1131343 | 22-scf00516 | 22 |
| AX-158423736 | 26 | 55.482 | KV453228.1 | 1142289 | 22-scf00516 | 22 |
| AX-157746751 | 26 | 55.482 | KV453228.1 | 1143942 | 22-scf00516 | 22 |
| AX-157740555 | 26 | 55.482 | KV453228.1 | 1144994 | 22-scf00516 | 22 |
| AX-158331513 | 26 | 55.482 | KV453228.1 | 1154502 | 22-scf00516 | 22 |
| AX-157772666 | 26 | 55.482 | KV453228.1 | 1154943 | 22-scf00516 | 22 |
| AX-158331515 | 26 | 55.482 | KV453228.1 | 1156481 | 22-scf00516 | 22 |
| AX-157849180 | 26 | 55.482 | KV453228.1 | 1159935 | 22-scf00516 | 22 |
| AX-157849181 | 26 | 55.482 | KV453228.1 | 1162460 | 22-scf00516 | 22 |
| AX-157849182 | 26 | 55.482 | KV453228.1 | 1162684 | 22-scf00516 | 22 |
| AX-158331516 | 26 | 55.482 | KV453228.1 | 1163785 | 22-scf00516 | 22 |
| AX-157888547 | 26 | 55.482 | KV453228.1 | 1164053 | 22-scf00516 | 22 |
| AX-158331517 | 26 | 55.482 | KV453228.1 | 1164565 | 22-scf00516 | 22 |
| AX-158331519 | 26 | 55.482 | KV453228.1 | 1166000 | 22-scf00516 | 22 |
| AX-158331520 | 26 | 55.482 | KV453228.1 | 1169148 | 22-scf00516 | 22 |
| AX-157849183 | 26 | 55.482 | KV453228.1 | 1171271 | 22-scf00516 | 22 |
| AX-157867969 | 26 | 55.482 | KV453228.1 | 1172778 | 22-scf00516 | 22 |
| AX-158331526 | 26 | 55.482 | KV453228.1 | 1176260 | 22-scf00516 | 22 |
| AX-158331527 | 26 | 55.482 | KV453228.1 | 1177274 | 22-scf00516 | 22 |
| AX-157849185 | 26 | 55.482 | KV453228.1 | 1180969 | 22-scf00516 | 22 |
| AX-157849187 | 26 | 55.482 | KV453228.1 | 1181926 | 22-scf00516 | 22 |

|              |    |        |            |         |             |    |
|--------------|----|--------|------------|---------|-------------|----|
| AX-158331535 | 26 | 55.482 | KV453228.1 | 1196965 | 22-scf00516 | 22 |
| AX-157849190 | 26 | 55.482 | KV453228.1 | 1197491 | 22-scf00516 | 22 |
| AX-158331537 | 26 | 55.482 | KV453228.1 | 1199703 | 22-scf00516 | 22 |
| AX-158331539 | 26 | 55.482 | KV453228.1 | 1203498 | 22-scf00516 | 22 |
| AX-157849191 | 26 | 55.482 | KV453228.1 | 1205555 | 22-scf00516 | 22 |
| AX-158331541 | 26 | 55.482 | KV453228.1 | 1205864 | 22-scf00516 | 22 |
| AX-158331542 | 26 | 55.482 | KV453228.1 | 1206964 | 22-scf00516 | 22 |
| AX-158331544 | 26 | 55.482 | KV453228.1 | 1209658 | 22-scf00516 | 22 |
| AX-158331545 | 26 | 55.482 | KV453228.1 | 1210088 | 22-scf00516 | 22 |
| AX-157754862 | 26 | 55.482 | KV453228.1 | 1219342 | 22-scf00516 | 22 |
| AX-158331551 | 26 | 55.482 | KV453228.1 | 1222244 | 22-scf00516 | 22 |
| AX-157757283 | 26 | 55.482 | KV453228.1 | 1225591 | 22-scf00516 | 22 |
| AX-158331553 | 26 | 55.482 | KV453228.1 | 1226362 | 22-scf00516 | 22 |
| AX-158418744 | 26 | 55.482 | KV453228.1 | 1230797 | 22-scf00516 | 22 |
| AX-157742128 | 26 | 55.482 | KV453228.1 | 1234775 | 22-scf00516 | 22 |
| AX-158331559 | 26 | 55.482 | KV453228.1 | 1234852 | 22-scf00516 | 22 |
| AX-158331562 | 26 | 55.482 | KV453228.1 | 1237697 | 22-scf00516 | 22 |
| AX-158331565 | 26 | 55.482 | KV453228.1 | 1239527 | 22-scf00516 | 22 |
| AX-157725263 | 26 | 55.482 | KV453228.1 | 1240104 | 22-scf00516 | 22 |
| AX-158331567 | 26 | 55.482 | KV453228.1 | 1240482 | 22-scf00516 | 22 |
| AX-158331573 | 26 | 55.482 | KV453228.1 | 1249181 | 22-scf00516 | 22 |
| AX-157717089 | 26 | 55.482 | KV453228.1 | 1249743 | 22-scf00516 | 22 |
| AX-157849196 | 26 | 55.482 | KV453228.1 | 1250283 | 22-scf00516 | 22 |
| AX-158331574 | 26 | 55.482 | KV453228.1 | 1253490 | 22-scf00516 | 22 |
| AX-158331575 | 26 | 55.482 | KV453228.1 | 1254655 | 22-scf00516 | 22 |
| AX-157849198 | 26 | 55.482 | KV453228.1 | 1255907 | 22-scf00516 | 22 |
| AX-158331577 | 26 | 55.482 | KV453228.1 | 1257172 | 22-scf00516 | 22 |
| AX-158331578 | 26 | 55.482 | KV453228.1 | 1257453 | 22-scf00516 | 22 |
| AX-157849199 | 26 | 55.482 | KV453228.1 | 1259722 | 22-scf00516 | 22 |
| AX-158331584 | 26 | 55.482 | KV453228.1 | 1266446 | 22-scf00516 | 22 |
| AX-158331586 | 26 | 55.482 | KV453228.1 | 1267040 | 22-scf00516 | 22 |
| AX-158331587 | 26 | 55.482 | KV453228.1 | 1267877 | 22-scf00516 | 22 |
| AX-157750046 | 26 | 55.482 | KV453228.1 | 1268881 | 22-scf00516 | 22 |
| AX-158331589 | 26 | 55.482 | KV453228.1 | 1268947 | 22-scf00516 | 22 |
| AX-158331591 | 26 | 55.482 | KV453228.1 | 1269845 | 22-scf00516 | 22 |
| AX-158331592 | 26 | 55.482 | KV453228.1 | 1270668 | 22-scf00516 | 22 |
| AX-158331596 | 26 | 55.482 | KV453228.1 | 1275506 | 22-scf00516 | 22 |
| AX-158331598 | 26 | 55.482 | KV453228.1 | 1279707 | 22-scf00516 | 22 |
| AX-158331599 | 26 | 55.482 | KV453228.1 | 1280417 | 22-scf00516 | 22 |
| AX-157849202 | 26 | 55.482 | KV453228.1 | 1283849 | 22-scf00516 | 22 |
| AX-157717166 | 26 | 55.482 | KV453228.1 | 1291660 | 22-scf00516 | 22 |
| AX-158331610 | 26 | 55.482 | KV453228.1 | 1305063 | 22-scf00516 | 22 |
| AX-157714184 | 26 | 55.482 | KV453228.1 | 1313314 | 22-scf00516 | 22 |
| AX-158331632 | 26 | 55.482 | KV453228.1 | 1336689 | 22-scf00516 | 22 |
| AX-158331636 | 26 | 55.482 | KV453228.1 | 1342684 | 22-scf00516 | 22 |
| AX-158331659 | 26 | 55.482 | KV453228.1 | 1378171 | 22-scf00516 | 22 |
| AX-157722840 | 26 | 55.482 | KV453228.1 | 1380003 | 22-scf00516 | 22 |
| AX-158331677 | 26 | 55.482 | KV453228.1 | 1399159 | 22-scf00516 | 22 |
| AX-158331678 | 26 | 55.482 | KV453228.1 | 1401332 | 22-scf00516 | 22 |
| AX-158331707 | 26 | 55.482 | KV453228.1 | 1435180 | 22-scf00516 | 22 |
| AX-158331732 | 26 | 55.482 | KV453228.1 | 1462860 | 22-scf00516 | 22 |

|              |    |        |             |         |             |    |
|--------------|----|--------|-------------|---------|-------------|----|
| AX-158331746 | 26 | 55.482 | KV453228.1  | 1485034 | 22-scf00516 | 22 |
| AX-158331757 | 26 | 55.482 | KV453228.1  | 1498939 | 22-scf00516 | 22 |
| AX-158331776 | 26 | 55.482 | KV453228.1  | 1524699 | 22-scf00516 | 22 |
| AX-158331777 | 26 | 55.482 | KV453228.1  | 1525352 | 22-scf00516 | 22 |
| AX-158331780 | 26 | 55.482 | KV453228.1  | 1528716 | 22-scf00516 | 22 |
| AX-158331788 | 26 | 55.482 | KV453228.1  | 1538711 | 22-scf00516 | 22 |
| AX-158331790 | 26 | 55.482 | KV453228.1  | 1542547 | 22-scf00516 | 22 |
| AX-157746152 | 26 | 55.482 | KV453228.1  | 1593387 | 22-scf00516 | 22 |
| AX-158331824 | 26 | 55.482 | KV453228.1  | 1613791 | 22-scf00516 | 22 |
| AX-158331828 | 26 | 55.482 | KV453228.1  | 1616818 | 22-scf00516 | 22 |
| AX-158331845 | 26 | 55.482 | KV453228.1  | 1640630 | 22-scf00516 | 22 |
| AX-158331863 | 26 | 55.482 | KV453228.1  | 1659120 | 22-scf00516 | 22 |
| AX-158331865 | 26 | 55.482 | KV453228.1  | 1659593 | 22-scf00516 | 22 |
| AX-158331904 | 26 | 55.482 | KV453228.1  | 1707920 | 22-scf00516 | 22 |
| AX-157849243 | 26 | 55.482 | KV453228.1  | 1747314 | 22-scf00516 | 22 |
| AX-158331951 | 26 | 55.482 | KV453228.1  | 1792113 | 22-scf00516 | 22 |
| AX-158331958 | 26 | 55.482 | KV453228.1  | 1802227 | 22-scf00516 | 22 |
| AX-158331971 | 26 | 55.482 | KV453228.1  | 1820287 | 22-scf00516 | 22 |
| AX-158332136 | 26 | 55.482 | KV453228.1  | 2045627 | 22-scf00516 | 22 |
| AX-158332175 | 26 | 55.482 | KV453228.1  | 2099738 | 22-scf00516 | 22 |
| AX-158333132 | 26 | 55.482 | KV453229.1  | 369897  | 22-scf00517 | 22 |
| AX-157705447 | 26 | 55.482 | 3ML01029830 | 98      | scf05452_1  | UN |
| AX-157707363 | 26 | 55.482 | 3ML01034101 | 233     | scf09771_1  | UN |
| AX-157849203 | 26 | 55.539 | KV453228.1  | 1288966 | 22-scf00516 | 22 |
| AX-158331171 | 26 | 55.591 | KV453228.1  | 692405  | 22-scf00516 | 22 |
| AX-157849206 | 26 | 55.591 | KV453228.1  | 1294374 | 22-scf00516 | 22 |
| AX-158331604 | 26 | 55.591 | KV453228.1  | 1297614 | 22-scf00516 | 22 |
| AX-158331609 | 26 | 55.591 | KV453228.1  | 1304762 | 22-scf00516 | 22 |
| AX-158331612 | 26 | 55.591 | KV453228.1  | 1306713 | 22-scf00516 | 22 |
| AX-158331616 | 26 | 55.591 | KV453228.1  | 1310864 | 22-scf00516 | 22 |
| AX-158331617 | 26 | 55.591 | KV453228.1  | 1312232 | 22-scf00516 | 22 |
| AX-158331622 | 26 | 55.591 | KV453228.1  | 1316021 | 22-scf00516 | 22 |
| AX-158331624 | 26 | 55.591 | KV453228.1  | 1317509 | 22-scf00516 | 22 |
| AX-158331634 | 26 | 55.591 | KV453228.1  | 1339040 | 22-scf00516 | 22 |
| AX-158331637 | 26 | 55.591 | KV453228.1  | 1343674 | 22-scf00516 | 22 |
| AX-157873687 | 26 | 55.591 | KV453228.1  | 1348158 | 22-scf00516 | 22 |
| AX-158331639 | 26 | 55.591 | KV453228.1  | 1349143 | 22-scf00516 | 22 |
| AX-158331744 | 26 | 55.591 | KV453228.1  | 1483946 | 22-scf00516 | 22 |
| AX-158331547 | 26 | 55.602 | KV453228.1  | 1213230 | 22-scf00516 | 22 |
| AX-158331647 | 26 | 55.602 | KV453228.1  | 1365405 | 22-scf00516 | 22 |
| AX-158331730 | 26 | 55.602 | KV453228.1  | 1460455 | 22-scf00516 | 22 |
| AX-158331778 | 26 | 55.602 | KV453228.1  | 1525910 | 22-scf00516 | 22 |
| AX-158331779 | 26 | 55.602 | KV453228.1  | 1527967 | 22-scf00516 | 22 |
| AX-158331781 | 26 | 55.602 | KV453228.1  | 1531904 | 22-scf00516 | 22 |
| AX-158331782 | 26 | 55.602 | KV453228.1  | 1532271 | 22-scf00516 | 22 |
| AX-158331793 | 26 | 55.602 | KV453228.1  | 1550565 | 22-scf00516 | 22 |
| AX-158331834 | 26 | 55.602 | KV453228.1  | 1624771 | 22-scf00516 | 22 |
| AX-157873692 | 26 | 55.602 | KV453228.1  | 1666702 | 22-scf00516 | 22 |
| AX-158331882 | 26 | 55.602 | KV453228.1  | 1673320 | 22-scf00516 | 22 |
| AX-158331595 | 26 | 55.615 | KV453228.1  | 1274511 | 22-scf00516 | 22 |
| AX-158331651 | 26 | 55.615 | KV453228.1  | 1368038 | 22-scf00516 | 22 |

|              |    |        |            |         |             |    |
|--------------|----|--------|------------|---------|-------------|----|
| AX-158331656 | 26 | 55.615 | KV453228.1 | 1373566 | 22-scf00516 | 22 |
| AX-158331682 | 26 | 55.615 | KV453228.1 | 1405104 | 22-scf00516 | 22 |
| AX-158331690 | 26 | 55.615 | KV453228.1 | 1412500 | 22-scf00516 | 22 |
| AX-158331701 | 26 | 55.615 | KV453228.1 | 1427465 | 22-scf00516 | 22 |
| AX-158331759 | 26 | 55.615 | KV453228.1 | 1500313 | 22-scf00516 | 22 |
| AX-157747261 | 26 | 55.615 | KV453228.1 | 1540030 | 22-scf00516 | 22 |
| AX-157873693 | 26 | 55.615 | KV453228.1 | 1742632 | 22-scf00516 | 22 |
| AX-157873694 | 26 | 55.615 | KV453228.1 | 1745839 | 22-scf00516 | 22 |
| AX-158331928 | 26 | 55.615 | KV453228.1 | 1754178 | 22-scf00516 | 22 |
| AX-158331976 | 26 | 55.615 | KV453228.1 | 1828228 | 22-scf00516 | 22 |
| AX-158331653 | 26 | 55.628 | KV453228.1 | 1369182 | 22-scf00516 | 22 |
| AX-158331243 | 26 | 55.7   | KV453228.1 | 779957  | 22-scf00516 | 22 |
| AX-157849175 | 26 | 55.7   | KV453228.1 | 1138422 | 22-scf00516 | 22 |
| AX-158331529 | 26 | 55.7   | KV453228.1 | 1185510 | 22-scf00516 | 22 |
| AX-157701860 | 26 | 55.7   | KV453228.1 | 1202572 | 22-scf00516 | 22 |
| AX-157873686 | 26 | 55.7   | KV453228.1 | 1329300 | 22-scf00516 | 22 |
| AX-158331631 | 26 | 55.7   | KV453228.1 | 1333726 | 22-scf00516 | 22 |
| AX-157873688 | 26 | 55.7   | KV453228.1 | 1388650 | 22-scf00516 | 22 |
| AX-158331669 | 26 | 55.7   | KV453228.1 | 1393748 | 22-scf00516 | 22 |
| AX-158331672 | 26 | 55.7   | KV453228.1 | 1395099 | 22-scf00516 | 22 |
| AX-157867972 | 26 | 55.7   | KV453228.1 | 1395531 | 22-scf00516 | 22 |
| AX-158331679 | 26 | 55.7   | KV453228.1 | 1403517 | 22-scf00516 | 22 |
| AX-158331684 | 26 | 55.7   | KV453228.1 | 1406562 | 22-scf00516 | 22 |
| AX-158331685 | 26 | 55.7   | KV453228.1 | 1407106 | 22-scf00516 | 22 |
| AX-158331686 | 26 | 55.7   | KV453228.1 | 1408100 | 22-scf00516 | 22 |
| AX-157849214 | 26 | 55.7   | KV453228.1 | 1421519 | 22-scf00516 | 22 |
| AX-158331699 | 26 | 55.7   | KV453228.1 | 1422818 | 22-scf00516 | 22 |
| AX-158331700 | 26 | 55.7   | KV453228.1 | 1423782 | 22-scf00516 | 22 |
| AX-158418749 | 26 | 55.7   | KV453228.1 | 1426191 | 22-scf00516 | 22 |
| AX-158331702 | 26 | 55.7   | KV453228.1 | 1428395 | 22-scf00516 | 22 |
| AX-158331703 | 26 | 55.7   | KV453228.1 | 1429580 | 22-scf00516 | 22 |
| AX-158331706 | 26 | 55.7   | KV453228.1 | 1434262 | 22-scf00516 | 22 |
| AX-158331708 | 26 | 55.7   | KV453228.1 | 1435427 | 22-scf00516 | 22 |
| AX-158331709 | 26 | 55.7   | KV453228.1 | 1439110 | 22-scf00516 | 22 |
| AX-158331710 | 26 | 55.7   | KV453228.1 | 1440190 | 22-scf00516 | 22 |
| AX-158331711 | 26 | 55.7   | KV453228.1 | 1440876 | 22-scf00516 | 22 |
| AX-158331713 | 26 | 55.7   | KV453228.1 | 1442417 | 22-scf00516 | 22 |
| AX-158331714 | 26 | 55.7   | KV453228.1 | 1443809 | 22-scf00516 | 22 |
| AX-158331715 | 26 | 55.7   | KV453228.1 | 1445463 | 22-scf00516 | 22 |
| AX-158331716 | 26 | 55.7   | KV453228.1 | 1448748 | 22-scf00516 | 22 |
| AX-158331717 | 26 | 55.7   | KV453228.1 | 1449477 | 22-scf00516 | 22 |
| AX-158331718 | 26 | 55.7   | KV453228.1 | 1450641 | 22-scf00516 | 22 |
| AX-158331719 | 26 | 55.7   | KV453228.1 | 1451300 | 22-scf00516 | 22 |
| AX-158331722 | 26 | 55.7   | KV453228.1 | 1453509 | 22-scf00516 | 22 |
| AX-158331723 | 26 | 55.7   | KV453228.1 | 1454211 | 22-scf00516 | 22 |
| AX-157775896 | 26 | 55.7   | KV453228.1 | 1460743 | 22-scf00516 | 22 |
| AX-158331733 | 26 | 55.7   | KV453228.1 | 1464333 | 22-scf00516 | 22 |
| AX-158331735 | 26 | 55.7   | KV453228.1 | 1465669 | 22-scf00516 | 22 |
| AX-158331737 | 26 | 55.7   | KV453228.1 | 1468448 | 22-scf00516 | 22 |
| AX-157849216 | 26 | 55.7   | KV453228.1 | 1470303 | 22-scf00516 | 22 |
| AX-158331739 | 26 | 55.7   | KV453228.1 | 1473659 | 22-scf00516 | 22 |



|              |    |      |            |         |             |    |
|--------------|----|------|------------|---------|-------------|----|
| AX-158331741 | 26 | 55.7 | KV453228.1 | 1474991 | 22-scf00516 | 22 |
| AX-158331749 | 26 | 55.7 | KV453228.1 | 1488919 | 22-scf00516 | 22 |
| AX-158331750 | 26 | 55.7 | KV453228.1 | 1489846 | 22-scf00516 | 22 |
| AX-157881708 | 26 | 55.7 | KV453228.1 | 1490361 | 22-scf00516 | 22 |
| AX-158331751 | 26 | 55.7 | KV453228.1 | 1491075 | 22-scf00516 | 22 |
| AX-158331753 | 26 | 55.7 | KV453228.1 | 1493350 | 22-scf00516 | 22 |
| AX-158331768 | 26 | 55.7 | KV453228.1 | 1516906 | 22-scf00516 | 22 |
| AX-158331769 | 26 | 55.7 | KV453228.1 | 1518003 | 22-scf00516 | 22 |
| AX-158331770 | 26 | 55.7 | KV453228.1 | 1519040 | 22-scf00516 | 22 |
| AX-157849219 | 26 | 55.7 | KV453228.1 | 1519167 | 22-scf00516 | 22 |
| AX-158331771 | 26 | 55.7 | KV453228.1 | 1520167 | 22-scf00516 | 22 |
| AX-158331785 | 26 | 55.7 | KV453228.1 | 1535743 | 22-scf00516 | 22 |
| AX-158331791 | 26 | 55.7 | KV453228.1 | 1547535 | 22-scf00516 | 22 |
| AX-157849220 | 26 | 55.7 | KV453228.1 | 1547959 | 22-scf00516 | 22 |
| AX-158331792 | 26 | 55.7 | KV453228.1 | 1548347 | 22-scf00516 | 22 |
| AX-158331794 | 26 | 55.7 | KV453228.1 | 1551257 | 22-scf00516 | 22 |
| AX-158331797 | 26 | 55.7 | KV453228.1 | 1557104 | 22-scf00516 | 22 |
| AX-158331798 | 26 | 55.7 | KV453228.1 | 1557673 | 22-scf00516 | 22 |
| AX-158331801 | 26 | 55.7 | KV453228.1 | 1565264 | 22-scf00516 | 22 |
| AX-157849221 | 26 | 55.7 | KV453228.1 | 1566734 | 22-scf00516 | 22 |
| AX-158331802 | 26 | 55.7 | KV453228.1 | 1567946 | 22-scf00516 | 22 |
| AX-158331803 | 26 | 55.7 | KV453228.1 | 1568660 | 22-scf00516 | 22 |
| AX-158331804 | 26 | 55.7 | KV453228.1 | 1569898 | 22-scf00516 | 22 |
| AX-158331805 | 26 | 55.7 | KV453228.1 | 1570122 | 22-scf00516 | 22 |
| AX-157738347 | 26 | 55.7 | KV453228.1 | 1570997 | 22-scf00516 | 22 |
| AX-158331807 | 26 | 55.7 | KV453228.1 | 1572106 | 22-scf00516 | 22 |
| AX-158331808 | 26 | 55.7 | KV453228.1 | 1572766 | 22-scf00516 | 22 |
| AX-157727897 | 26 | 55.7 | KV453228.1 | 1575020 | 22-scf00516 | 22 |
| AX-158331810 | 26 | 55.7 | KV453228.1 | 1575688 | 22-scf00516 | 22 |
| AX-157849222 | 26 | 55.7 | KV453228.1 | 1586222 | 22-scf00516 | 22 |
| AX-157849225 | 26 | 55.7 | KV453228.1 | 1591775 | 22-scf00516 | 22 |
| AX-158331815 | 26 | 55.7 | KV453228.1 | 1596553 | 22-scf00516 | 22 |
| AX-157695990 | 26 | 55.7 | KV453228.1 | 1600914 | 22-scf00516 | 22 |
| AX-158331819 | 26 | 55.7 | KV453228.1 | 1606774 | 22-scf00516 | 22 |
| AX-158331820 | 26 | 55.7 | KV453228.1 | 1607508 | 22-scf00516 | 22 |
| AX-158331822 | 26 | 55.7 | KV453228.1 | 1610038 | 22-scf00516 | 22 |
| AX-157738542 | 26 | 55.7 | KV453228.1 | 1614348 | 22-scf00516 | 22 |
| AX-157726856 | 26 | 55.7 | KV453228.1 | 1614818 | 22-scf00516 | 22 |
| AX-158331826 | 26 | 55.7 | KV453228.1 | 1615921 | 22-scf00516 | 22 |
| AX-158331827 | 26 | 55.7 | KV453228.1 | 1616466 | 22-scf00516 | 22 |
| AX-158331829 | 26 | 55.7 | KV453228.1 | 1617445 | 22-scf00516 | 22 |
| AX-158331831 | 26 | 55.7 | KV453228.1 | 1622786 | 22-scf00516 | 22 |
| AX-158331833 | 26 | 55.7 | KV453228.1 | 1624070 | 22-scf00516 | 22 |
| AX-158331835 | 26 | 55.7 | KV453228.1 | 1626550 | 22-scf00516 | 22 |
| AX-158331836 | 26 | 55.7 | KV453228.1 | 1626970 | 22-scf00516 | 22 |
| AX-158331837 | 26 | 55.7 | KV453228.1 | 1628197 | 22-scf00516 | 22 |
| AX-157750644 | 26 | 55.7 | KV453228.1 | 1637052 | 22-scf00516 | 22 |
| AX-158331848 | 26 | 55.7 | KV453228.1 | 1644388 | 22-scf00516 | 22 |
| AX-158331872 | 26 | 55.7 | KV453228.1 | 1666097 | 22-scf00516 | 22 |
| AX-158331887 | 26 | 55.7 | KV453228.1 | 1683259 | 22-scf00516 | 22 |
| AX-158331890 | 26 | 55.7 | KV453228.1 | 1686040 | 22-scf00516 | 22 |

|              |    |        |            |         |             |    |
|--------------|----|--------|------------|---------|-------------|----|
| AX-158331909 | 26 | 55.7   | KV453228.1 | 1716387 | 22-scf00516 | 22 |
| AX-158331911 | 26 | 55.7   | KV453228.1 | 1719906 | 22-scf00516 | 22 |
| AX-157849236 | 26 | 55.7   | KV453228.1 | 1726136 | 22-scf00516 | 22 |
| AX-158331940 | 26 | 55.7   | KV453228.1 | 1773320 | 22-scf00516 | 22 |
| AX-158331961 | 26 | 55.7   | KV453228.1 | 1803956 | 22-scf00516 | 22 |
| AX-158331977 | 26 | 55.7   | KV453228.1 | 1828793 | 22-scf00516 | 22 |
| AX-158331979 | 26 | 55.7   | KV453228.1 | 1832236 | 22-scf00516 | 22 |
| AX-158331985 | 26 | 55.7   | KV453228.1 | 1842691 | 22-scf00516 | 22 |
| AX-158331999 | 26 | 55.7   | KV453228.1 | 1862388 | 22-scf00516 | 22 |
| AX-158332001 | 26 | 55.7   | KV453228.1 | 1863489 | 22-scf00516 | 22 |
| AX-158332030 | 26 | 55.7   | KV453228.1 | 1897601 | 22-scf00516 | 22 |
| AX-158332115 | 26 | 55.7   | KV453228.1 | 2022376 | 22-scf00516 | 22 |
| AX-158332202 | 26 | 55.7   | KV453228.1 | 2132528 | 22-scf00516 | 22 |
| AX-158331522 | 26 | 55.809 | KV453228.1 | 1170100 | 22-scf00516 | 22 |
| AX-158331680 | 26 | 55.809 | KV453228.1 | 1404518 | 22-scf00516 | 22 |
| AX-158331681 | 26 | 55.809 | KV453228.1 | 1404823 | 22-scf00516 | 22 |
| AX-158331697 | 26 | 55.809 | KV453228.1 | 1419980 | 22-scf00516 | 22 |
| AX-157720459 | 26 | 55.809 | KV453228.1 | 1430273 | 22-scf00516 | 22 |
| AX-158331745 | 26 | 55.809 | KV453228.1 | 1484162 | 22-scf00516 | 22 |
| AX-158331765 | 26 | 55.809 | KV453228.1 | 1507818 | 22-scf00516 | 22 |
| AX-157745140 | 26 | 55.809 | KV453228.1 | 1578233 | 22-scf00516 | 22 |
| AX-157769829 | 26 | 55.809 | KV453228.1 | 1584704 | 22-scf00516 | 22 |
| AX-157747928 | 26 | 55.809 | KV453228.1 | 1592554 | 22-scf00516 | 22 |
| AX-157849226 | 26 | 55.809 | KV453228.1 | 1630602 | 22-scf00516 | 22 |
| AX-158331838 | 26 | 55.809 | KV453228.1 | 1631463 | 22-scf00516 | 22 |
| AX-158331839 | 26 | 55.809 | KV453228.1 | 1632597 | 22-scf00516 | 22 |
| AX-158331841 | 26 | 55.809 | KV453228.1 | 1635522 | 22-scf00516 | 22 |
| AX-158331844 | 26 | 55.809 | KV453228.1 | 1637830 | 22-scf00516 | 22 |
| AX-157849227 | 26 | 55.809 | KV453228.1 | 1643227 | 22-scf00516 | 22 |
| AX-157888550 | 26 | 55.809 | KV453228.1 | 1645965 | 22-scf00516 | 22 |
| AX-158331851 | 26 | 55.809 | KV453228.1 | 1647361 | 22-scf00516 | 22 |
| AX-158331854 | 26 | 55.809 | KV453228.1 | 1650078 | 22-scf00516 | 22 |
| AX-158331859 | 26 | 55.809 | KV453228.1 | 1656597 | 22-scf00516 | 22 |
| AX-158331860 | 26 | 55.809 | KV453228.1 | 1657905 | 22-scf00516 | 22 |
| AX-158331866 | 26 | 55.809 | KV453228.1 | 1660390 | 22-scf00516 | 22 |
| AX-157713734 | 26 | 55.809 | KV453228.1 | 1662121 | 22-scf00516 | 22 |
| AX-157754202 | 26 | 55.809 | KV453228.1 | 1662767 | 22-scf00516 | 22 |
| AX-158331869 | 26 | 55.809 | KV453228.1 | 1663193 | 22-scf00516 | 22 |
| AX-158331878 | 26 | 55.809 | KV453228.1 | 1670807 | 22-scf00516 | 22 |
| AX-158331880 | 26 | 55.809 | KV453228.1 | 1671513 | 22-scf00516 | 22 |
| AX-158331881 | 26 | 55.809 | KV453228.1 | 1672349 | 22-scf00516 | 22 |
| AX-158331883 | 26 | 55.809 | KV453228.1 | 1673802 | 22-scf00516 | 22 |
| AX-158331885 | 26 | 55.809 | KV453228.1 | 1682072 | 22-scf00516 | 22 |
| AX-158331888 | 26 | 55.809 | KV453228.1 | 1684083 | 22-scf00516 | 22 |
| AX-157849230 | 26 | 55.809 | KV453228.1 | 1690616 | 22-scf00516 | 22 |
| AX-158331893 | 26 | 55.809 | KV453228.1 | 1691436 | 22-scf00516 | 22 |
| AX-158331895 | 26 | 55.809 | KV453228.1 | 1693339 | 22-scf00516 | 22 |
| AX-158331896 | 26 | 55.809 | KV453228.1 | 1694197 | 22-scf00516 | 22 |
| AX-158331902 | 26 | 55.809 | KV453228.1 | 1706102 | 22-scf00516 | 22 |
| AX-158331903 | 26 | 55.809 | KV453228.1 | 1707072 | 22-scf00516 | 22 |
| AX-157849231 | 26 | 55.809 | KV453228.1 | 1708439 | 22-scf00516 | 22 |

|              |    |        |            |         |             |    |
|--------------|----|--------|------------|---------|-------------|----|
| AX-157849232 | 26 | 55.809 | KV453228.1 | 1710669 | 22-scf00516 | 22 |
| AX-158331905 | 26 | 55.809 | KV453228.1 | 1711000 | 22-scf00516 | 22 |
| AX-157861580 | 26 | 55.809 | KV453228.1 | 1711386 | 22-scf00516 | 22 |
| AX-158331906 | 26 | 55.809 | KV453228.1 | 1712337 | 22-scf00516 | 22 |
| AX-158331908 | 26 | 55.809 | KV453228.1 | 1713659 | 22-scf00516 | 22 |
| AX-158331910 | 26 | 55.809 | KV453228.1 | 1717648 | 22-scf00516 | 22 |
| AX-157849234 | 26 | 55.809 | KV453228.1 | 1718737 | 22-scf00516 | 22 |
| AX-158331923 | 26 | 55.809 | KV453228.1 | 1736090 | 22-scf00516 | 22 |
| AX-158331924 | 26 | 55.809 | KV453228.1 | 1736631 | 22-scf00516 | 22 |
| AX-158331926 | 26 | 55.809 | KV453228.1 | 1743073 | 22-scf00516 | 22 |
| AX-158331929 | 26 | 55.809 | KV453228.1 | 1755205 | 22-scf00516 | 22 |
| AX-158331932 | 26 | 55.809 | KV453228.1 | 1761540 | 22-scf00516 | 22 |
| AX-158331933 | 26 | 55.809 | KV453228.1 | 1762204 | 22-scf00516 | 22 |
| AX-158331936 | 26 | 55.809 | KV453228.1 | 1767860 | 22-scf00516 | 22 |
| AX-158331941 | 26 | 55.809 | KV453228.1 | 1774270 | 22-scf00516 | 22 |
| AX-158331944 | 26 | 55.809 | KV453228.1 | 1776814 | 22-scf00516 | 22 |
| AX-158331945 | 26 | 55.809 | KV453228.1 | 1778122 | 22-scf00516 | 22 |
| AX-158331953 | 26 | 55.809 | KV453228.1 | 1795965 | 22-scf00516 | 22 |
| AX-158331954 | 26 | 55.809 | KV453228.1 | 1796584 | 22-scf00516 | 22 |
| AX-158331955 | 26 | 55.809 | KV453228.1 | 1799182 | 22-scf00516 | 22 |
| AX-157757133 | 26 | 55.809 | KV453228.1 | 1805673 | 22-scf00516 | 22 |
| AX-158331963 | 26 | 55.809 | KV453228.1 | 1806406 | 22-scf00516 | 22 |
| AX-158331964 | 26 | 55.809 | KV453228.1 | 1806889 | 22-scf00516 | 22 |
| AX-158331965 | 26 | 55.809 | KV453228.1 | 1807259 | 22-scf00516 | 22 |
| AX-158331968 | 26 | 55.809 | KV453228.1 | 1812876 | 22-scf00516 | 22 |
| AX-157709350 | 26 | 55.809 | KV453228.1 | 1820931 | 22-scf00516 | 22 |
| AX-157709349 | 26 | 55.809 | KV453228.1 | 1820996 | 22-scf00516 | 22 |
| AX-158331973 | 26 | 55.809 | KV453228.1 | 1823588 | 22-scf00516 | 22 |
| AX-158331993 | 26 | 55.809 | KV453228.1 | 1851629 | 22-scf00516 | 22 |
| AX-158332009 | 26 | 55.809 | KV453228.1 | 1871439 | 22-scf00516 | 22 |
| AX-158332025 | 26 | 55.809 | KV453228.1 | 1892210 | 22-scf00516 | 22 |
| AX-158332087 | 26 | 55.809 | KV453228.1 | 1984471 | 22-scf00516 | 22 |
| AX-158333205 | 26 | 55.809 | KV453229.1 | 452735  | 22-scf00517 | 22 |
| AX-158331987 | 26 | 56.135 | KV453228.1 | 1844996 | 22-scf00516 | 22 |
| AX-158331868 | 26 | 56.137 | KV453228.1 | 1661903 | 22-scf00516 | 22 |
| AX-158381543 | 26 | 56.137 | KV453228.1 | 1708603 | 22-scf00516 | 22 |
| AX-158331918 | 26 | 56.137 | KV453228.1 | 1728235 | 22-scf00516 | 22 |
| AX-158331975 | 26 | 56.137 | KV453228.1 | 1827048 | 22-scf00516 | 22 |
| AX-158331988 | 26 | 56.137 | KV453228.1 | 1845463 | 22-scf00516 | 22 |
| AX-158331990 | 26 | 56.137 | KV453228.1 | 1847785 | 22-scf00516 | 22 |
| AX-158331992 | 26 | 56.137 | KV453228.1 | 1850353 | 22-scf00516 | 22 |
| AX-158331994 | 26 | 56.137 | KV453228.1 | 1853971 | 22-scf00516 | 22 |
| AX-158331996 | 26 | 56.137 | KV453228.1 | 1857359 | 22-scf00516 | 22 |
| AX-158332010 | 26 | 56.137 | KV453228.1 | 1873971 | 22-scf00516 | 22 |
| AX-157752521 | 26 | 56.137 | KV453228.1 | 1875690 | 22-scf00516 | 22 |
| AX-158332012 | 26 | 56.137 | KV453228.1 | 1878836 | 22-scf00516 | 22 |
| AX-158332013 | 26 | 56.137 | KV453228.1 | 1879279 | 22-scf00516 | 22 |
| AX-158332015 | 26 | 56.137 | KV453228.1 | 1882690 | 22-scf00516 | 22 |
| AX-158332017 | 26 | 56.137 | KV453228.1 | 1885249 | 22-scf00516 | 22 |
| AX-158332019 | 26 | 56.137 | KV453228.1 | 1887278 | 22-scf00516 | 22 |
| AX-158332020 | 26 | 56.137 | KV453228.1 | 1887804 | 22-scf00516 | 22 |

|              |    |        |            |         |             |    |
|--------------|----|--------|------------|---------|-------------|----|
| AX-158332024 | 26 | 56.137 | KV453228.1 | 1891832 | 22-scf00516 | 22 |
| AX-158332027 | 26 | 56.137 | KV453228.1 | 1894281 | 22-scf00516 | 22 |
| AX-158332033 | 26 | 56.137 | KV453228.1 | 1903242 | 22-scf00516 | 22 |
| AX-158332036 | 26 | 56.137 | KV453228.1 | 1906628 | 22-scf00516 | 22 |
| AX-157849246 | 26 | 56.137 | KV453228.1 | 1909193 | 22-scf00516 | 22 |
| AX-158332037 | 26 | 56.137 | KV453228.1 | 1911749 | 22-scf00516 | 22 |
| AX-158332038 | 26 | 56.137 | KV453228.1 | 1912420 | 22-scf00516 | 22 |
| AX-158332040 | 26 | 56.137 | KV453228.1 | 1913887 | 22-scf00516 | 22 |
| AX-158332041 | 26 | 56.137 | KV453228.1 | 1915966 | 22-scf00516 | 22 |
| AX-158332046 | 26 | 56.137 | KV453228.1 | 1921840 | 22-scf00516 | 22 |
| AX-158332047 | 26 | 56.137 | KV453228.1 | 1923855 | 22-scf00516 | 22 |
| AX-158332050 | 26 | 56.137 | KV453228.1 | 1927594 | 22-scf00516 | 22 |
| AX-158332052 | 26 | 56.137 | KV453228.1 | 1929901 | 22-scf00516 | 22 |
| AX-158332055 | 26 | 56.137 | KV453228.1 | 1932864 | 22-scf00516 | 22 |
| AX-158332056 | 26 | 56.137 | KV453228.1 | 1933869 | 22-scf00516 | 22 |
| AX-158332067 | 26 | 56.137 | KV453228.1 | 1955376 | 22-scf00516 | 22 |
| AX-158332070 | 26 | 56.137 | KV453228.1 | 1957440 | 22-scf00516 | 22 |
| AX-158332071 | 26 | 56.137 | KV453228.1 | 1957885 | 22-scf00516 | 22 |
| AX-158332073 | 26 | 56.137 | KV453228.1 | 1960479 | 22-scf00516 | 22 |
| AX-158332074 | 26 | 56.137 | KV453228.1 | 1961297 | 22-scf00516 | 22 |
| AX-158332075 | 26 | 56.137 | KV453228.1 | 1962119 | 22-scf00516 | 22 |
| AX-157770871 | 26 | 56.137 | KV453228.1 | 1963803 | 22-scf00516 | 22 |
| AX-158418764 | 26 | 56.137 | KV453228.1 | 1964057 | 22-scf00516 | 22 |
| AX-158332076 | 26 | 56.137 | KV453228.1 | 1965690 | 22-scf00516 | 22 |
| AX-158332081 | 26 | 56.137 | KV453228.1 | 1973361 | 22-scf00516 | 22 |
| AX-158332465 | 26 | 56.137 | KV453228.1 | 2554978 | 22-scf00516 | 22 |
| AX-158333839 | 26 | 56.137 | KV453229.1 | 1205147 | 22-scf00517 | 22 |
| AX-158332084 | 26 | 56.307 | KV453228.1 | 1982814 | 22-scf00516 | 22 |
| AX-158332103 | 26 | 56.307 | KV453228.1 | 2006147 | 22-scf00516 | 22 |
| AX-158332290 | 26 | 56.307 | KV453228.1 | 2245340 | 22-scf00516 | 22 |
| AX-158332086 | 26 | 56.465 | KV453228.1 | 1984128 | 22-scf00516 | 22 |
| AX-158332089 | 26 | 56.465 | KV453228.1 | 1987414 | 22-scf00516 | 22 |
| AX-158332091 | 26 | 56.465 | KV453228.1 | 1988496 | 22-scf00516 | 22 |
| AX-157748351 | 26 | 56.465 | KV453228.1 | 1990357 | 22-scf00516 | 22 |
| AX-158332092 | 26 | 56.465 | KV453228.1 | 1990573 | 22-scf00516 | 22 |
| AX-158332097 | 26 | 56.465 | KV453228.1 | 2001203 | 22-scf00516 | 22 |
| AX-158332102 | 26 | 56.465 | KV453228.1 | 2004163 | 22-scf00516 | 22 |
| AX-158332104 | 26 | 56.465 | KV453228.1 | 2006937 | 22-scf00516 | 22 |
| AX-158332120 | 26 | 56.465 | KV453228.1 | 2028205 | 22-scf00516 | 22 |
| AX-158332133 | 26 | 56.465 | KV453228.1 | 2043568 | 22-scf00516 | 22 |
| AX-158332108 | 26 | 56.508 | KV453228.1 | 2013751 | 22-scf00516 | 22 |
| AX-158332127 | 26 | 56.53  | KV453228.1 | 2036981 | 22-scf00516 | 22 |
| AX-158420141 | 26 | 56.574 | KV453228.1 | 2016901 | 22-scf00516 | 22 |
| AX-158332109 | 26 | 56.574 | KV453228.1 | 2018042 | 22-scf00516 | 22 |
| AX-158332110 | 26 | 56.574 | KV453228.1 | 2019735 | 22-scf00516 | 22 |
| AX-158332129 | 26 | 56.574 | KV453228.1 | 2039079 | 22-scf00516 | 22 |
| AX-158332131 | 26 | 56.574 | KV453228.1 | 2041872 | 22-scf00516 | 22 |
| AX-158332134 | 26 | 56.574 | KV453228.1 | 2043952 | 22-scf00516 | 22 |
| AX-158332140 | 26 | 56.574 | KV453228.1 | 2049294 | 22-scf00516 | 22 |
| AX-158332143 | 26 | 56.574 | KV453228.1 | 2051213 | 22-scf00516 | 22 |
| AX-158332144 | 26 | 56.574 | KV453228.1 | 2051698 | 22-scf00516 | 22 |

|              |    |        |            |         |             |    |
|--------------|----|--------|------------|---------|-------------|----|
| AX-158381544 | 26 | 56.574 | KV453228.1 | 2062336 | 22-scf00516 | 22 |
| AX-158332150 | 26 | 56.574 | KV453228.1 | 2065479 | 22-scf00516 | 22 |
| AX-158332154 | 26 | 56.574 | KV453228.1 | 2070214 | 22-scf00516 | 22 |
| AX-158332155 | 26 | 56.574 | KV453228.1 | 2070907 | 22-scf00516 | 22 |
| AX-158332156 | 26 | 56.574 | KV453228.1 | 2071241 | 22-scf00516 | 22 |
| AX-158332164 | 26 | 56.574 | KV453228.1 | 2087245 | 22-scf00516 | 22 |
| AX-158332167 | 26 | 56.574 | KV453228.1 | 2090245 | 22-scf00516 | 22 |
| AX-157888553 | 26 | 56.574 | KV453228.1 | 2090650 | 22-scf00516 | 22 |
| AX-158332169 | 26 | 56.574 | KV453228.1 | 2092457 | 22-scf00516 | 22 |
| AX-158332158 | 26 | 56.641 | KV453228.1 | 2077511 | 22-scf00516 | 22 |
| AX-158332180 | 26 | 56.641 | KV453228.1 | 2106178 | 22-scf00516 | 22 |
| AX-158332159 | 26 | 56.709 | KV453228.1 | 2080189 | 22-scf00516 | 22 |
| AX-158332114 | 26 | 56.793 | KV453228.1 | 2021928 | 22-scf00516 | 22 |
| AX-158332172 | 26 | 56.793 | KV453228.1 | 2097165 | 22-scf00516 | 22 |
| AX-157849252 | 26 | 56.793 | KV453228.1 | 2099862 | 22-scf00516 | 22 |
| AX-158332176 | 26 | 56.793 | KV453228.1 | 2101902 | 22-scf00516 | 22 |
| AX-158332181 | 26 | 56.793 | KV453228.1 | 2107056 | 22-scf00516 | 22 |
| AX-158332182 | 26 | 56.793 | KV453228.1 | 2107622 | 22-scf00516 | 22 |
| AX-157715185 | 26 | 56.793 | KV453228.1 | 2108438 | 22-scf00516 | 22 |
| AX-158332184 | 26 | 56.793 | KV453228.1 | 2109836 | 22-scf00516 | 22 |
| AX-158332361 | 26 | 56.793 | KV453228.1 | 2352626 | 22-scf00516 | 22 |
| AX-158332746 | 26 | 56.793 | KV453228.1 | 2905095 | 22-scf00516 | 22 |
| AX-158332872 | 26 | 56.793 | KV453229.1 | 105758  | 22-scf00517 | 22 |
| AX-158332983 | 26 | 56.793 | KV453229.1 | 229333  | 22-scf00517 | 22 |
| AX-158333044 | 26 | 56.793 | KV453229.1 | 279726  | 22-scf00517 | 22 |
| AX-158333296 | 26 | 56.793 | KV453229.1 | 539019  | 22-scf00517 | 22 |
| AX-158332190 | 26 | 56.994 | KV453228.1 | 2118509 | 22-scf00516 | 22 |
| AX-157849256 | 26 | 57.028 | KV453228.1 | 2119273 | 22-scf00516 | 22 |
| AX-158332191 | 26 | 57.028 | KV453228.1 | 2119806 | 22-scf00516 | 22 |
| AX-158333352 | 26 | 57.028 | KV453229.1 | 594304  | 22-scf00517 | 22 |
| AX-157770655 | 26 | 57.028 | KV453229.1 | 975521  | 22-scf00517 | 22 |
| AX-158418841 | 26 | 57.028 | KV453229.1 | 2345600 | 22-scf00517 | 22 |
| AX-158331991 | 26 | 57.229 | KV453228.1 | 1848513 | 22-scf00516 | 22 |
| AX-157742065 | 26 | 57.229 | KV453228.1 | 1849442 | 22-scf00516 | 22 |
| AX-158332028 | 26 | 57.229 | KV453228.1 | 1894962 | 22-scf00516 | 22 |
| AX-157849254 | 26 | 57.229 | KV453228.1 | 2102234 | 22-scf00516 | 22 |
| AX-157726573 | 26 | 57.229 | KV453228.1 | 2126725 | 22-scf00516 | 22 |
| AX-158332200 | 26 | 57.229 | KV453228.1 | 2130298 | 22-scf00516 | 22 |
| AX-158332201 | 26 | 57.229 | KV453228.1 | 2131003 | 22-scf00516 | 22 |
| AX-158332204 | 26 | 57.229 | KV453228.1 | 2135214 | 22-scf00516 | 22 |
| AX-157758250 | 26 | 57.229 | KV453228.1 | 2137508 | 22-scf00516 | 22 |
| AX-157849258 | 26 | 57.229 | KV453228.1 | 2137803 | 22-scf00516 | 22 |
| AX-157849259 | 26 | 57.229 | KV453228.1 | 2138394 | 22-scf00516 | 22 |
| AX-158332206 | 26 | 57.229 | KV453228.1 | 2139042 | 22-scf00516 | 22 |
| AX-158332214 | 26 | 57.229 | KV453228.1 | 2145585 | 22-scf00516 | 22 |
| AX-158332215 | 26 | 57.229 | KV453228.1 | 2148461 | 22-scf00516 | 22 |
| AX-158332217 | 26 | 57.229 | KV453228.1 | 2149591 | 22-scf00516 | 22 |
| AX-158332260 | 26 | 57.229 | KV453228.1 | 2207948 | 22-scf00516 | 22 |
| AX-158418772 | 26 | 57.229 | KV453228.1 | 2220280 | 22-scf00516 | 22 |
| AX-158332303 | 26 | 57.229 | KV453228.1 | 2259611 | 22-scf00516 | 22 |
| AX-157758325 | 26 | 57.229 | KV453228.1 | 2276004 | 22-scf00516 | 22 |

|              |    |        |             |         |             |    |
|--------------|----|--------|-------------|---------|-------------|----|
| AX-158332319 | 26 | 57.229 | KV453228.1  | 2286868 | 22-scf00516 | 22 |
| AX-158332337 | 26 | 57.229 | KV453228.1  | 2324383 | 22-scf00516 | 22 |
| AX-158332480 | 26 | 57.229 | KV453228.1  | 2583634 | 22-scf00516 | 22 |
| AX-158332629 | 26 | 57.229 | KV453228.1  | 2778514 | 22-scf00516 | 22 |
| AX-158332667 | 26 | 57.229 | KV453228.1  | 2810492 | 22-scf00516 | 22 |
| AX-157888560 | 26 | 57.229 | KV453228.1  | 2878119 | 22-scf00516 | 22 |
| AX-158332878 | 26 | 57.229 | KV453229.1  | 109891  | 22-scf00517 | 22 |
| AX-158332988 | 26 | 57.229 | KV453229.1  | 232930  | 22-scf00517 | 22 |
| AX-158333018 | 26 | 57.229 | KV453229.1  | 260411  | 22-scf00517 | 22 |
| AX-157747460 | 26 | 57.229 | KV453229.1  | 265474  | 22-scf00517 | 22 |
| AX-158333025 | 26 | 57.229 | KV453229.1  | 265799  | 22-scf00517 | 22 |
| AX-158333026 | 26 | 57.229 | KV453229.1  | 266377  | 22-scf00517 | 22 |
| AX-158333049 | 26 | 57.229 | KV453229.1  | 283202  | 22-scf00517 | 22 |
| AX-157861608 | 26 | 57.229 | KV453229.1  | 316343  | 22-scf00517 | 22 |
| AX-158418805 | 26 | 57.229 | KV453229.1  | 474296  | 22-scf00517 | 22 |
| AX-158333236 | 26 | 57.229 | KV453229.1  | 476374  | 22-scf00517 | 22 |
| AX-157881795 | 26 | 57.229 | KV453229.1  | 486234  | 22-scf00517 | 22 |
| AX-157717522 | 26 | 57.229 | KV453229.1  | 557582  | 22-scf00517 | 22 |
| AX-158333392 | 26 | 57.229 | KV453229.1  | 634905  | 22-scf00517 | 22 |
| AX-158333398 | 26 | 57.229 | KV453229.1  | 639696  | 22-scf00517 | 22 |
| AX-157726496 | 26 | 57.229 | KV453229.1  | 658684  | 22-scf00517 | 22 |
| AX-157752139 | 26 | 57.229 | KV453229.1  | 1884693 | 22-scf00517 | 22 |
| AX-158334580 | 26 | 57.229 | KV453229.1  | 1970489 | 22-scf00517 | 22 |
| AX-157706611 | 26 | 57.229 | 3ML01032582 | 581     | scf08205_1  | UN |
| AX-158332224 | 26 | 57.316 | KV453228.1  | 2157281 | 22-scf00516 | 22 |
| AX-158332230 | 26 | 57.444 | KV453228.1  | 2168926 | 22-scf00516 | 22 |
| AX-157849260 | 26 | 57.558 | KV453228.1  | 2168402 | 22-scf00516 | 22 |
| AX-158332232 | 26 | 57.558 | KV453228.1  | 2170977 | 22-scf00516 | 22 |
| AX-158332239 | 26 | 57.558 | KV453228.1  | 2184151 | 22-scf00516 | 22 |
| AX-158332262 | 26 | 57.558 | KV453228.1  | 2210471 | 22-scf00516 | 22 |
| AX-158332500 | 26 | 57.558 | KV453228.1  | 2611886 | 22-scf00516 | 22 |
| AX-158333047 | 26 | 57.558 | KV453229.1  | 281057  | 22-scf00517 | 22 |
| AX-158333054 | 26 | 57.558 | KV453229.1  | 286581  | 22-scf00517 | 22 |
| AX-158333056 | 26 | 57.558 | KV453229.1  | 288791  | 22-scf00517 | 22 |
| AX-158332241 | 26 | 57.573 | KV453228.1  | 2186110 | 22-scf00516 | 22 |
| AX-158332314 | 26 | 57.573 | KV453228.1  | 2280128 | 22-scf00516 | 22 |
| AX-158332244 | 26 | 57.584 | KV453228.1  | 2189908 | 22-scf00516 | 22 |
| AX-158332248 | 26 | 57.584 | KV453228.1  | 2192946 | 22-scf00516 | 22 |
| AX-158332284 | 26 | 57.584 | KV453228.1  | 2240565 | 22-scf00516 | 22 |
| AX-158332261 | 26 | 57.594 | KV453228.1  | 2210077 | 22-scf00516 | 22 |
| AX-158333402 | 26 | 57.594 | KV453229.1  | 642897  | 22-scf00517 | 22 |
| AX-158332264 | 26 | 57.61  | KV453228.1  | 2212788 | 22-scf00516 | 22 |
| AX-157775053 | 26 | 57.635 | KV453228.1  | 2221919 | 22-scf00516 | 22 |
| AX-158332254 | 26 | 57.645 | KV453228.1  | 2199413 | 22-scf00516 | 22 |
| AX-158332269 | 26 | 57.645 | KV453228.1  | 2218336 | 22-scf00516 | 22 |
| AX-158332271 | 26 | 57.645 | KV453228.1  | 2224178 | 22-scf00516 | 22 |
| AX-157849262 | 26 | 57.645 | KV453228.1  | 2225197 | 22-scf00516 | 22 |
| AX-158412845 | 26 | 57.645 | KV453228.1  | 2263958 | 22-scf00516 | 22 |
| AX-158332431 | 26 | 57.645 | KV453228.1  | 2491110 | 22-scf00516 | 22 |
| AX-158332528 | 26 | 57.645 | KV453228.1  | 2647043 | 22-scf00516 | 22 |
| AX-158332529 | 26 | 57.645 | KV453228.1  | 2648162 | 22-scf00516 | 22 |

|              |    |        |            |         |             |    |
|--------------|----|--------|------------|---------|-------------|----|
| AX-158333116 | 26 | 57.645 | KV453229.1 | 348923  | 22-scf00517 | 22 |
| AX-158333382 | 26 | 57.645 | KV453229.1 | 624826  | 22-scf00517 | 22 |
| AX-158332258 | 26 | 57.655 | KV453228.1 | 2204873 | 22-scf00516 | 22 |
| AX-158332275 | 26 | 57.655 | KV453228.1 | 2229864 | 22-scf00516 | 22 |
| AX-158332530 | 26 | 57.655 | KV453228.1 | 2648702 | 22-scf00516 | 22 |
| AX-158332192 | 26 | 57.667 | KV453228.1 | 2121992 | 22-scf00516 | 22 |
| AX-157861585 | 26 | 57.667 | KV453228.1 | 2135642 | 22-scf00516 | 22 |
| AX-158332235 | 26 | 57.667 | KV453228.1 | 2175978 | 22-scf00516 | 22 |
| AX-158332236 | 26 | 57.667 | KV453228.1 | 2177367 | 22-scf00516 | 22 |
| AX-157849263 | 26 | 57.667 | KV453228.1 | 2234203 | 22-scf00516 | 22 |
| AX-158332281 | 26 | 57.667 | KV453228.1 | 2237137 | 22-scf00516 | 22 |
| AX-158332285 | 26 | 57.667 | KV453228.1 | 2241044 | 22-scf00516 | 22 |
| AX-158332286 | 26 | 57.667 | KV453228.1 | 2241357 | 22-scf00516 | 22 |
| AX-157721277 | 26 | 57.667 | KV453228.1 | 2242271 | 22-scf00516 | 22 |
| AX-157774295 | 26 | 57.667 | KV453228.1 | 2242679 | 22-scf00516 | 22 |
| AX-158332291 | 26 | 57.667 | KV453228.1 | 2245778 | 22-scf00516 | 22 |
| AX-158332292 | 26 | 57.667 | KV453228.1 | 2247943 | 22-scf00516 | 22 |
| AX-158332295 | 26 | 57.667 | KV453228.1 | 2251911 | 22-scf00516 | 22 |
| AX-158332299 | 26 | 57.667 | KV453228.1 | 2255402 | 22-scf00516 | 22 |
| AX-158332304 | 26 | 57.667 | KV453228.1 | 2260472 | 22-scf00516 | 22 |
| AX-158332305 | 26 | 57.667 | KV453228.1 | 2262270 | 22-scf00516 | 22 |
| AX-158332308 | 26 | 57.667 | KV453228.1 | 2270694 | 22-scf00516 | 22 |
| AX-157849264 | 26 | 57.667 | KV453228.1 | 2272335 | 22-scf00516 | 22 |
| AX-158332315 | 26 | 57.667 | KV453228.1 | 2281044 | 22-scf00516 | 22 |
| AX-158332317 | 26 | 57.667 | KV453228.1 | 2283042 | 22-scf00516 | 22 |
| AX-158332318 | 26 | 57.667 | KV453228.1 | 2286419 | 22-scf00516 | 22 |
| AX-158332321 | 26 | 57.667 | KV453228.1 | 2287913 | 22-scf00516 | 22 |
| AX-158332338 | 26 | 57.667 | KV453228.1 | 2325357 | 22-scf00516 | 22 |
| AX-158332351 | 26 | 57.667 | KV453228.1 | 2338859 | 22-scf00516 | 22 |
| AX-158332354 | 26 | 57.667 | KV453228.1 | 2342935 | 22-scf00516 | 22 |
| AX-158332355 | 26 | 57.667 | KV453228.1 | 2343915 | 22-scf00516 | 22 |
| AX-158332357 | 26 | 57.667 | KV453228.1 | 2346402 | 22-scf00516 | 22 |
| AX-158332377 | 26 | 57.667 | KV453228.1 | 2377825 | 22-scf00516 | 22 |
| AX-158332385 | 26 | 57.667 | KV453228.1 | 2395267 | 22-scf00516 | 22 |
| AX-157861589 | 26 | 57.667 | KV453228.1 | 2397973 | 22-scf00516 | 22 |
| AX-158332395 | 26 | 57.667 | KV453228.1 | 2411169 | 22-scf00516 | 22 |
| AX-157861590 | 26 | 57.667 | KV453228.1 | 2452561 | 22-scf00516 | 22 |
| AX-158332501 | 26 | 57.667 | KV453228.1 | 2612494 | 22-scf00516 | 22 |
| AX-158332543 | 26 | 57.667 | KV453228.1 | 2663674 | 22-scf00516 | 22 |
| AX-158332545 | 26 | 57.667 | KV453228.1 | 2665694 | 22-scf00516 | 22 |
| AX-158332576 | 26 | 57.667 | KV453228.1 | 2695679 | 22-scf00516 | 22 |
| AX-158420153 | 26 | 57.667 | KV453228.1 | 2801051 | 22-scf00516 | 22 |
| AX-158332668 | 26 | 57.667 | KV453228.1 | 2810871 | 22-scf00516 | 22 |
| AX-158332730 | 26 | 57.667 | KV453228.1 | 2885135 | 22-scf00516 | 22 |
| AX-158333214 | 26 | 57.667 | KV453229.1 | 460775  | 22-scf00517 | 22 |
| AX-157849329 | 26 | 57.667 | KV453229.1 | 482960  | 22-scf00517 | 22 |
| AX-157849330 | 26 | 57.667 | KV453229.1 | 484055  | 22-scf00517 | 22 |
| AX-158333268 | 26 | 57.667 | KV453229.1 | 504881  | 22-scf00517 | 22 |
| AX-158333299 | 26 | 57.667 | KV453229.1 | 540807  | 22-scf00517 | 22 |
| AX-158333374 | 26 | 57.667 | KV453229.1 | 617419  | 22-scf00517 | 22 |
| AX-158333391 | 26 | 57.667 | KV453229.1 | 634338  | 22-scf00517 | 22 |

|              |    |        |            |         |             |    |
|--------------|----|--------|------------|---------|-------------|----|
| AX-158333393 | 26 | 57.667 | KV453229.1 | 635443  | 22-scf00517 | 22 |
| AX-158332322 | 26 | 57.718 | KV453228.1 | 2288873 | 22-scf00516 | 22 |
| AX-158331726 | 26 | 57.776 | KV453228.1 | 1456291 | 22-scf00516 | 22 |
| AX-158332265 | 26 | 57.776 | KV453228.1 | 2213558 | 22-scf00516 | 22 |
| AX-158332313 | 26 | 57.776 | KV453228.1 | 2279749 | 22-scf00516 | 22 |
| AX-158332330 | 26 | 57.776 | KV453228.1 | 2313206 | 22-scf00516 | 22 |
| AX-158332333 | 26 | 57.776 | KV453228.1 | 2316624 | 22-scf00516 | 22 |
| AX-158332334 | 26 | 57.776 | KV453228.1 | 2317855 | 22-scf00516 | 22 |
| AX-158332336 | 26 | 57.776 | KV453228.1 | 2324014 | 22-scf00516 | 22 |
| AX-158332339 | 26 | 57.776 | KV453228.1 | 2326013 | 22-scf00516 | 22 |
| AX-158332340 | 26 | 57.776 | KV453228.1 | 2326262 | 22-scf00516 | 22 |
| AX-158332346 | 26 | 57.776 | KV453228.1 | 2333045 | 22-scf00516 | 22 |
| AX-158332347 | 26 | 57.776 | KV453228.1 | 2333787 | 22-scf00516 | 22 |
| AX-158332348 | 26 | 57.776 | KV453228.1 | 2335342 | 22-scf00516 | 22 |
| AX-158332349 | 26 | 57.776 | KV453228.1 | 2335842 | 22-scf00516 | 22 |
| AX-158332358 | 26 | 57.776 | KV453228.1 | 2347537 | 22-scf00516 | 22 |
| AX-158332359 | 26 | 57.776 | KV453228.1 | 2349048 | 22-scf00516 | 22 |
| AX-158332360 | 26 | 57.776 | KV453228.1 | 2351061 | 22-scf00516 | 22 |
| AX-158332362 | 26 | 57.776 | KV453228.1 | 2352979 | 22-scf00516 | 22 |
| AX-158332364 | 26 | 57.776 | KV453228.1 | 2355502 | 22-scf00516 | 22 |
| AX-158332373 | 26 | 57.776 | KV453228.1 | 2367722 | 22-scf00516 | 22 |
| AX-157717630 | 26 | 57.776 | KV453228.1 | 2370033 | 22-scf00516 | 22 |
| AX-158332374 | 26 | 57.776 | KV453228.1 | 2373436 | 22-scf00516 | 22 |
| AX-158332375 | 26 | 57.776 | KV453228.1 | 2374283 | 22-scf00516 | 22 |
| AX-157849268 | 26 | 57.776 | KV453228.1 | 2376878 | 22-scf00516 | 22 |
| AX-158332376 | 26 | 57.776 | KV453228.1 | 2377564 | 22-scf00516 | 22 |
| AX-158332378 | 26 | 57.776 | KV453228.1 | 2379438 | 22-scf00516 | 22 |
| AX-158332379 | 26 | 57.776 | KV453228.1 | 2387763 | 22-scf00516 | 22 |
| AX-158332386 | 26 | 57.776 | KV453228.1 | 2395797 | 22-scf00516 | 22 |
| AX-158332389 | 26 | 57.776 | KV453228.1 | 2399455 | 22-scf00516 | 22 |
| AX-158332390 | 26 | 57.776 | KV453228.1 | 2402230 | 22-scf00516 | 22 |
| AX-157873697 | 26 | 57.776 | KV453228.1 | 2404914 | 22-scf00516 | 22 |
| AX-157849269 | 26 | 57.776 | KV453228.1 | 2408269 | 22-scf00516 | 22 |
| AX-158332394 | 26 | 57.776 | KV453228.1 | 2409498 | 22-scf00516 | 22 |
| AX-158332447 | 26 | 57.776 | KV453228.1 | 2508351 | 22-scf00516 | 22 |
| AX-158332466 | 26 | 57.776 | KV453228.1 | 2558853 | 22-scf00516 | 22 |
| AX-158332467 | 26 | 57.776 | KV453228.1 | 2562810 | 22-scf00516 | 22 |
| AX-158332488 | 26 | 57.776 | KV453228.1 | 2598704 | 22-scf00516 | 22 |
| AX-157888558 | 26 | 57.776 | KV453228.1 | 2650478 | 22-scf00516 | 22 |
| AX-158332554 | 26 | 57.776 | KV453228.1 | 2671149 | 22-scf00516 | 22 |
| AX-158332568 | 26 | 57.776 | KV453228.1 | 2690185 | 22-scf00516 | 22 |
| AX-158332586 | 26 | 57.776 | KV453228.1 | 2711138 | 22-scf00516 | 22 |
| AX-158418794 | 26 | 57.776 | KV453228.1 | 2884252 | 22-scf00516 | 22 |
| AX-158332762 | 26 | 57.776 | KV453228.1 | 2929051 | 22-scf00516 | 22 |
| AX-157861605 | 26 | 57.776 | KV453229.1 | 5813    | 22-scf00517 | 22 |
| AX-158332807 | 26 | 57.776 | KV453229.1 | 15153   | 22-scf00517 | 22 |
| AX-158332808 | 26 | 57.776 | KV453229.1 | 15811   | 22-scf00517 | 22 |
| AX-158332810 | 26 | 57.776 | KV453229.1 | 17890   | 22-scf00517 | 22 |
| AX-158332813 | 26 | 57.776 | KV453229.1 | 20370   | 22-scf00517 | 22 |
| AX-158332814 | 26 | 57.776 | KV453229.1 | 21755   | 22-scf00517 | 22 |
| AX-158332816 | 26 | 57.776 | KV453229.1 | 27770   | 22-scf00517 | 22 |



|              |    |        |            |         |             |    |
|--------------|----|--------|------------|---------|-------------|----|
| AX-158332823 | 26 | 57.776 | KV453229.1 | 37437   | 22-scf00517 | 22 |
| AX-158332825 | 26 | 57.776 | KV453229.1 | 40783   | 22-scf00517 | 22 |
| AX-158332828 | 26 | 57.776 | KV453229.1 | 43903   | 22-scf00517 | 22 |
| AX-158332831 | 26 | 57.776 | KV453229.1 | 50311   | 22-scf00517 | 22 |
| AX-158332837 | 26 | 57.776 | KV453229.1 | 56909   | 22-scf00517 | 22 |
| AX-158332900 | 26 | 57.776 | KV453229.1 | 129992  | 22-scf00517 | 22 |
| AX-158332911 | 26 | 57.776 | KV453229.1 | 137645  | 22-scf00517 | 22 |
| AX-158333103 | 26 | 57.776 | KV453229.1 | 337447  | 22-scf00517 | 22 |
| AX-158333146 | 26 | 57.776 | KV453229.1 | 385824  | 22-scf00517 | 22 |
| AX-158333239 | 26 | 57.776 | KV453229.1 | 478556  | 22-scf00517 | 22 |
| AX-158333257 | 26 | 57.776 | KV453229.1 | 498015  | 22-scf00517 | 22 |
| AX-158333259 | 26 | 57.776 | KV453229.1 | 500748  | 22-scf00517 | 22 |
| AX-158333261 | 26 | 57.776 | KV453229.1 | 501376  | 22-scf00517 | 22 |
| AX-158333367 | 26 | 57.776 | KV453229.1 | 610192  | 22-scf00517 | 22 |
| AX-158333491 | 26 | 57.776 | KV453229.1 | 739911  | 22-scf00517 | 22 |
| AX-158333518 | 26 | 57.776 | KV453229.1 | 774971  | 22-scf00517 | 22 |
| AX-158333519 | 26 | 57.776 | KV453229.1 | 777243  | 22-scf00517 | 22 |
| AX-158333520 | 26 | 57.776 | KV453229.1 | 779464  | 22-scf00517 | 22 |
| AX-158333521 | 26 | 57.776 | KV453229.1 | 780131  | 22-scf00517 | 22 |
| AX-158333535 | 26 | 57.776 | KV453229.1 | 804051  | 22-scf00517 | 22 |
| AX-158333732 | 26 | 57.776 | KV453229.1 | 1077533 | 22-scf00517 | 22 |
| AX-158333810 | 26 | 57.776 | KV453229.1 | 1174382 | 22-scf00517 | 22 |
| AX-158333893 | 26 | 57.776 | KV453229.1 | 1277312 | 22-scf00517 | 22 |
| AX-158381555 | 26 | 57.776 | KV453229.1 | 1277842 | 22-scf00517 | 22 |
| AX-157775806 | 26 | 57.776 | KV453229.1 | 1278870 | 22-scf00517 | 22 |
| AX-158333895 | 26 | 57.776 | KV453229.1 | 1279004 | 22-scf00517 | 22 |
| AX-158333899 | 26 | 57.776 | KV453229.1 | 1281291 | 22-scf00517 | 22 |
| AX-158333901 | 26 | 57.776 | KV453229.1 | 1282213 | 22-scf00517 | 22 |
| AX-158333902 | 26 | 57.776 | KV453229.1 | 1282845 | 22-scf00517 | 22 |
| AX-158333917 | 26 | 57.776 | KV453229.1 | 1299549 | 22-scf00517 | 22 |
| AX-158333925 | 26 | 57.776 | KV453229.1 | 1308601 | 22-scf00517 | 22 |
| AX-158333933 | 26 | 57.776 | KV453229.1 | 1313591 | 22-scf00517 | 22 |
| AX-158333934 | 26 | 57.776 | KV453229.1 | 1314377 | 22-scf00517 | 22 |
| AX-158333936 | 26 | 57.776 | KV453229.1 | 1316893 | 22-scf00517 | 22 |
| AX-158333938 | 26 | 57.776 | KV453229.1 | 1317512 | 22-scf00517 | 22 |
| AX-158333942 | 26 | 57.776 | KV453229.1 | 1319930 | 22-scf00517 | 22 |
| AX-158333943 | 26 | 57.776 | KV453229.1 | 1320609 | 22-scf00517 | 22 |
| AX-158333944 | 26 | 57.776 | KV453229.1 | 1320810 | 22-scf00517 | 22 |
| AX-158333949 | 26 | 57.776 | KV453229.1 | 1323935 | 22-scf00517 | 22 |
| AX-158333952 | 26 | 57.776 | KV453229.1 | 1326959 | 22-scf00517 | 22 |
| AX-158333953 | 26 | 57.776 | KV453229.1 | 1327362 | 22-scf00517 | 22 |
| AX-158333955 | 26 | 57.776 | KV453229.1 | 1328832 | 22-scf00517 | 22 |
| AX-157717600 | 26 | 57.776 | KV453229.1 | 1389935 | 22-scf00517 | 22 |
| AX-158334054 | 26 | 57.776 | KV453229.1 | 1426474 | 22-scf00517 | 22 |
| AX-157849402 | 26 | 57.776 | KV453229.1 | 1445904 | 22-scf00517 | 22 |
| AX-158334401 | 26 | 57.776 | KV453229.1 | 1757123 | 22-scf00517 | 22 |
| AX-158334404 | 26 | 57.776 | KV453229.1 | 1760153 | 22-scf00517 | 22 |
| AX-158334535 | 26 | 57.776 | KV453229.1 | 1910897 | 22-scf00517 | 22 |
| AX-158334552 | 26 | 57.776 | KV453229.1 | 1940266 | 22-scf00517 | 22 |
| AX-158334554 | 26 | 57.776 | KV453229.1 | 1942131 | 22-scf00517 | 22 |
| AX-158334602 | 26 | 57.776 | KV453229.1 | 1996347 | 22-scf00517 | 22 |

|              |    |        |             |         |             |    |
|--------------|----|--------|-------------|---------|-------------|----|
| AX-158334604 | 26 | 57.776 | KV453229.1  | 2003198 | 22-scf00517 | 22 |
| AX-158334720 | 26 | 57.776 | KV453229.1  | 2199887 | 22-scf00517 | 22 |
| AX-158334722 | 26 | 57.776 | KV453229.1  | 2203046 | 22-scf00517 | 22 |
| AX-157861692 | 26 | 57.776 | KV453229.1  | 2210494 | 22-scf00517 | 22 |
| AX-158334728 | 26 | 57.776 | KV453229.1  | 2212099 | 22-scf00517 | 22 |
| AX-158334729 | 26 | 57.776 | KV453229.1  | 2216423 | 22-scf00517 | 22 |
| AX-158335758 | 26 | 57.776 | KV453229.1  | 3449937 | 22-scf00517 | 22 |
| AX-158335841 | 26 | 57.776 | KV453229.1  | 3587981 | 22-scf00517 | 22 |
| AX-158336366 | 26 | 57.776 | KV453229.1  | 4406499 | 22-scf00517 | 22 |
| AX-157705233 | 26 | 57.776 | 3ML01029119 | 676     | scf04739_1  | UN |
| AX-157881722 | 26 | 57.885 | KV453228.1  | 2120295 | 22-scf00516 | 22 |
| AX-158332240 | 26 | 57.885 | KV453228.1  | 2185770 | 22-scf00516 | 22 |
| AX-158332245 | 26 | 57.885 | KV453228.1  | 2191010 | 22-scf00516 | 22 |
| AX-158332289 | 26 | 57.885 | KV453228.1  | 2244925 | 22-scf00516 | 22 |
| AX-158332297 | 26 | 57.885 | KV453228.1  | 2253094 | 22-scf00516 | 22 |
| AX-158332331 | 26 | 57.885 | KV453228.1  | 2314645 | 22-scf00516 | 22 |
| AX-158332332 | 26 | 57.885 | KV453228.1  | 2315723 | 22-scf00516 | 22 |
| AX-158332335 | 26 | 57.885 | KV453228.1  | 2319943 | 22-scf00516 | 22 |
| AX-157849265 | 26 | 57.885 | KV453228.1  | 2367388 | 22-scf00516 | 22 |
| AX-157849267 | 26 | 57.885 | KV453228.1  | 2373061 | 22-scf00516 | 22 |
| AX-158332387 | 26 | 57.885 | KV453228.1  | 2396273 | 22-scf00516 | 22 |
| AX-158332388 | 26 | 57.885 | KV453228.1  | 2397004 | 22-scf00516 | 22 |
| AX-158332393 | 26 | 57.885 | KV453228.1  | 2409393 | 22-scf00516 | 22 |
| AX-158332405 | 26 | 57.885 | KV453228.1  | 2433674 | 22-scf00516 | 22 |
| AX-158332406 | 26 | 57.885 | KV453228.1  | 2434872 | 22-scf00516 | 22 |
| AX-158332407 | 26 | 57.885 | KV453228.1  | 2437900 | 22-scf00516 | 22 |
| AX-158418785 | 26 | 57.885 | KV453228.1  | 2442848 | 22-scf00516 | 22 |
| AX-158332420 | 26 | 57.885 | KV453228.1  | 2471995 | 22-scf00516 | 22 |
| AX-158332423 | 26 | 57.885 | KV453228.1  | 2474325 | 22-scf00516 | 22 |
| AX-158332426 | 26 | 57.885 | KV453228.1  | 2478624 | 22-scf00516 | 22 |
| AX-158332427 | 26 | 57.885 | KV453228.1  | 2480494 | 22-scf00516 | 22 |
| AX-158332428 | 26 | 57.885 | KV453228.1  | 2487773 | 22-scf00516 | 22 |
| AX-158332429 | 26 | 57.885 | KV453228.1  | 2488668 | 22-scf00516 | 22 |
| AX-158332432 | 26 | 57.885 | KV453228.1  | 2491866 | 22-scf00516 | 22 |
| AX-158332433 | 26 | 57.885 | KV453228.1  | 2492217 | 22-scf00516 | 22 |
| AX-158332434 | 26 | 57.885 | KV453228.1  | 2492864 | 22-scf00516 | 22 |
| AX-158332436 | 26 | 57.885 | KV453228.1  | 2494946 | 22-scf00516 | 22 |
| AX-158332437 | 26 | 57.885 | KV453228.1  | 2495656 | 22-scf00516 | 22 |
| AX-158332438 | 26 | 57.885 | KV453228.1  | 2496153 | 22-scf00516 | 22 |
| AX-157725640 | 26 | 57.885 | KV453228.1  | 2505313 | 22-scf00516 | 22 |
| AX-158332448 | 26 | 57.885 | KV453228.1  | 2510638 | 22-scf00516 | 22 |
| AX-158332449 | 26 | 57.885 | KV453228.1  | 2511013 | 22-scf00516 | 22 |
| AX-158332450 | 26 | 57.885 | KV453228.1  | 2511864 | 22-scf00516 | 22 |
| AX-158332453 | 26 | 57.885 | KV453228.1  | 2520606 | 22-scf00516 | 22 |
| AX-157849271 | 26 | 57.885 | KV453228.1  | 2535372 | 22-scf00516 | 22 |
| AX-157849273 | 26 | 57.885 | KV453228.1  | 2539620 | 22-scf00516 | 22 |
| AX-157741392 | 26 | 57.885 | KV453228.1  | 2560842 | 22-scf00516 | 22 |
| AX-158332468 | 26 | 57.885 | KV453228.1  | 2563980 | 22-scf00516 | 22 |
| AX-158332469 | 26 | 57.885 | KV453228.1  | 2564697 | 22-scf00516 | 22 |
| AX-157849278 | 26 | 57.885 | KV453228.1  | 2570862 | 22-scf00516 | 22 |
| AX-157849279 | 26 | 57.885 | KV453228.1  | 2574169 | 22-scf00516 | 22 |

|              |    |        |            |         |                |    |
|--------------|----|--------|------------|---------|----------------|----|
| AX-158332475 | 26 | 57.885 | KV453228.1 | 2575937 | 22-scf00516    | 22 |
| AX-157849280 | 26 | 57.885 | KV453228.1 | 2576165 | 22-scf00516    | 22 |
| AX-158332476 | 26 | 57.885 | KV453228.1 | 2578659 | 22-scf00516    | 22 |
| AX-158332478 | 26 | 57.885 | KV453228.1 | 2580538 | 22-scf00516    | 22 |
| AX-158332479 | 26 | 57.885 | KV453228.1 | 2581677 | 22-scf00516    | 22 |
| AX-158332483 | 26 | 57.885 | KV453228.1 | 2588597 | 22-scf00516    | 22 |
| AX-158332490 | 26 | 57.885 | KV453228.1 | 2601944 | 22-scf00516    | 22 |
| AX-158332495 | 26 | 57.885 | KV453228.1 | 2608256 | 22-scf00516    | 22 |
| AX-158332496 | 26 | 57.885 | KV453228.1 | 2609296 | 22-scf00516    | 22 |
| AX-158381546 | 26 | 57.885 | KV453228.1 | 2609430 | 22-scf00516    | 22 |
| AX-158332497 | 26 | 57.885 | KV453228.1 | 2610016 | 22-scf00516    | 22 |
| AX-158332498 | 26 | 57.885 | KV453228.1 | 2610903 | 22-scf00516    | 22 |
| AX-158332499 | 26 | 57.885 | KV453228.1 | 2611347 | 22-scf00516    | 22 |
| AX-158332502 | 26 | 57.885 | KV453228.1 | 2613450 | 22-scf00516    | 22 |
| AX-158332503 | 26 | 57.885 | KV453228.1 | 2614556 | 22-scf00516    | 22 |
| AX-158332510 | 26 | 57.885 | KV453228.1 | 2622613 | 22-scf00516    | 22 |
| AX-158332511 | 26 | 57.885 | KV453228.1 | 2623127 | 22-scf00516    | 22 |
| AX-158332520 | 26 | 57.885 | KV453228.1 | 2631984 | 22-scf00516    | 22 |
| AX-158332523 | 26 | 57.885 | KV453228.1 | 2639939 | 22-scf00516    | 22 |
| AX-158418788 | 26 | 57.885 | KV453228.1 | 2663330 | 22-scf00516    | 22 |
| AX-157702373 | 26 | 57.885 | KV453228.1 | 2699008 | 22-scf00516    | 22 |
| AX-158418789 | 26 | 57.885 | KV453228.1 | 2704907 | 22-scf00516    | 22 |
| AX-158332579 | 26 | 57.885 | KV453228.1 | 2705690 | 22-scf00516    | 22 |
| AX-158332589 | 26 | 57.885 | KV453228.1 | 2714404 | 22-scf00516    | 22 |
| AX-158332609 | 26 | 57.885 | KV453228.1 | 2751029 | 22-scf00516    | 22 |
| AX-158332619 | 26 | 57.885 | KV453228.1 | 2766705 | 22-scf00516    | 22 |
| AX-158332624 | 26 | 57.885 | KV453228.1 | 2773498 | 22-scf00516    | 22 |
| AX-158332638 | 26 | 57.885 | KV453228.1 | 2782748 | 22-scf00516    | 22 |
| AX-158332700 | 26 | 57.885 | KV453228.1 | 2844258 | 22-scf00516    | 22 |
| AX-158332701 | 26 | 57.885 | KV453228.1 | 2847328 | 22-scf00516    | 22 |
| AX-158332731 | 26 | 57.885 | KV453228.1 | 2885595 | 22-scf00516    | 22 |
| AX-158332736 | 26 | 57.885 | KV453228.1 | 2893118 | 22-scf00516    | 22 |
| AX-158333064 | 26 | 57.885 | KV453229.1 | 294216  | 22-scf00517    | 22 |
| AX-158333068 | 26 | 57.885 | KV453229.1 | 299853  | 22-scf00517    | 22 |
| AX-158333115 | 26 | 57.885 | KV453229.1 | 348205  | 22-scf00517    | 22 |
| AX-158333175 | 26 | 57.885 | KV453229.1 | 414296  | 22-scf00517    | 22 |
| AX-158333218 | 26 | 57.885 | KV453229.1 | 463572  | 22-scf00517    | 22 |
| AX-158333340 | 26 | 57.885 | KV453229.1 | 583526  | 22-scf00517    | 22 |
| AX-157772096 | 26 | 57.885 | KV453229.1 | 596393  | 22-scf00517    | 22 |
| AX-157714149 | 26 | 57.885 | KV453229.1 | 781366  | 22-scf00517    | 22 |
| AX-158333523 | 26 | 57.885 | KV453229.1 | 781464  | 22-scf00517    | 22 |
| AX-158420180 | 26 | 57.885 | KV453229.1 | 927888  | 22-scf00517    | 22 |
| AX-158334556 | 26 | 57.885 | KV453229.1 | 1944397 | 22-scf00517    | 22 |
| AX-158335684 | 26 | 57.885 | KV453229.1 | 3314287 | 22-scf00517    | 22 |
| AX-158335855 | 26 | 57.885 | KV453229.1 | 3610322 | 22-scf00517    | 22 |
| AX-157697156 | 26 | 57.885 | FI864835.1 | 116     | IORI212 Ictalu | UN |
| AX-158332221 | 26 | 57.933 | KV453228.1 | 2153483 | 22-scf00516    | 22 |
| AX-158332506 | 26 | 57.933 | KV453228.1 | 2618049 | 22-scf00516    | 22 |
| AX-158332472 | 26 | 57.994 | KV453228.1 | 2570111 | 22-scf00516    | 22 |
| AX-157849277 | 26 | 57.994 | KV453228.1 | 2570400 | 22-scf00516    | 22 |
| AX-158332516 | 26 | 57.994 | KV453228.1 | 2627056 | 22-scf00516    | 22 |

|              |    |        |            |         |             |    |
|--------------|----|--------|------------|---------|-------------|----|
| AX-158332518 | 26 | 57.994 | KV453228.1 | 2629184 | 22-scf00516 | 22 |
| AX-158332519 | 26 | 57.994 | KV453228.1 | 2630050 | 22-scf00516 | 22 |
| AX-157881740 | 26 | 57.994 | KV453228.1 | 2633094 | 22-scf00516 | 22 |
| AX-157861591 | 26 | 57.994 | KV453228.1 | 2634856 | 22-scf00516 | 22 |
| AX-158332535 | 26 | 57.994 | KV453228.1 | 2651778 | 22-scf00516 | 22 |
| AX-158332539 | 26 | 57.994 | KV453228.1 | 2656820 | 22-scf00516 | 22 |
| AX-158332546 | 26 | 57.994 | KV453228.1 | 2666678 | 22-scf00516 | 22 |
| AX-158332557 | 26 | 57.994 | KV453228.1 | 2675833 | 22-scf00516 | 22 |
| AX-158332562 | 26 | 57.994 | KV453228.1 | 2682079 | 22-scf00516 | 22 |
| AX-158332572 | 26 | 57.994 | KV453228.1 | 2693428 | 22-scf00516 | 22 |
| AX-158332578 | 26 | 57.994 | KV453228.1 | 2699331 | 22-scf00516 | 22 |
| AX-158332585 | 26 | 57.994 | KV453228.1 | 2710694 | 22-scf00516 | 22 |
| AX-158332595 | 26 | 57.994 | KV453228.1 | 2726070 | 22-scf00516 | 22 |
| AX-158332596 | 26 | 57.994 | KV453228.1 | 2728201 | 22-scf00516 | 22 |
| AX-158332674 | 26 | 57.994 | KV453228.1 | 2813774 | 22-scf00516 | 22 |
| AX-158332809 | 26 | 57.994 | KV453229.1 | 16377   | 22-scf00517 | 22 |
| AX-158332833 | 26 | 57.994 | KV453229.1 | 53483   | 22-scf00517 | 22 |
| AX-157849318 | 26 | 57.994 | KV453229.1 | 335321  | 22-scf00517 | 22 |
| AX-157849319 | 26 | 57.994 | KV453229.1 | 336124  | 22-scf00517 | 22 |
| AX-157849321 | 26 | 57.994 | KV453229.1 | 340762  | 22-scf00517 | 22 |
| AX-158332371 | 26 | 58.103 | KV453228.1 | 2365908 | 22-scf00516 | 22 |
| AX-158332601 | 26 | 58.103 | KV453228.1 | 2739873 | 22-scf00516 | 22 |
| AX-158332602 | 26 | 58.103 | KV453228.1 | 2741810 | 22-scf00516 | 22 |
| AX-158388140 | 26 | 58.103 | KV453228.1 | 2754379 | 22-scf00516 | 22 |
| AX-158332604 | 26 | 58.16  | KV453228.1 | 2744435 | 22-scf00516 | 22 |
| AX-158332613 | 26 | 58.16  | KV453228.1 | 2758213 | 22-scf00516 | 22 |
| AX-158332914 | 26 | 58.16  | KV453229.1 | 141759  | 22-scf00517 | 22 |
| AX-158332325 | 26 | 58.213 | KV453228.1 | 2294435 | 22-scf00516 | 22 |
| AX-157770656 | 26 | 58.213 | KV453228.1 | 2357066 | 22-scf00516 | 22 |
| AX-158332402 | 26 | 58.213 | KV453228.1 | 2426933 | 22-scf00516 | 22 |
| AX-158332416 | 26 | 58.213 | KV453228.1 | 2467460 | 22-scf00516 | 22 |
| AX-158332444 | 26 | 58.213 | KV453228.1 | 2501092 | 22-scf00516 | 22 |
| AX-158332549 | 26 | 58.213 | KV453228.1 | 2668464 | 22-scf00516 | 22 |
| AX-158332567 | 26 | 58.213 | KV453228.1 | 2688250 | 22-scf00516 | 22 |
| AX-158418791 | 26 | 58.213 | KV453228.1 | 2734212 | 22-scf00516 | 22 |
| AX-158420152 | 26 | 58.213 | KV453228.1 | 2734259 | 22-scf00516 | 22 |
| AX-158332600 | 26 | 58.213 | KV453228.1 | 2738950 | 22-scf00516 | 22 |
| AX-158332611 | 26 | 58.213 | KV453228.1 | 2754632 | 22-scf00516 | 22 |
| AX-158332614 | 26 | 58.213 | KV453228.1 | 2760453 | 22-scf00516 | 22 |
| AX-158332618 | 26 | 58.213 | KV453228.1 | 2764400 | 22-scf00516 | 22 |
| AX-158332621 | 26 | 58.213 | KV453228.1 | 2772098 | 22-scf00516 | 22 |
| AX-158332623 | 26 | 58.213 | KV453228.1 | 2773143 | 22-scf00516 | 22 |
| AX-158332627 | 26 | 58.213 | KV453228.1 | 2776416 | 22-scf00516 | 22 |
| AX-157849291 | 26 | 58.213 | KV453228.1 | 2779649 | 22-scf00516 | 22 |
| AX-158332631 | 26 | 58.213 | KV453228.1 | 2780051 | 22-scf00516 | 22 |
| AX-158332632 | 26 | 58.213 | KV453228.1 | 2780428 | 22-scf00516 | 22 |
| AX-158332633 | 26 | 58.213 | KV453228.1 | 2780943 | 22-scf00516 | 22 |
| AX-158332637 | 26 | 58.213 | KV453228.1 | 2782354 | 22-scf00516 | 22 |
| AX-158332639 | 26 | 58.213 | KV453228.1 | 2783426 | 22-scf00516 | 22 |
| AX-158332640 | 26 | 58.213 | KV453228.1 | 2785389 | 22-scf00516 | 22 |
| AX-157849292 | 26 | 58.213 | KV453228.1 | 2790921 | 22-scf00516 | 22 |

|              |    |        |            |         |             |    |
|--------------|----|--------|------------|---------|-------------|----|
| AX-158332657 | 26 | 58.213 | KV453228.1 | 2799271 | 22-scf00516 | 22 |
| AX-158332660 | 26 | 58.213 | KV453228.1 | 2803173 | 22-scf00516 | 22 |
| AX-158332661 | 26 | 58.213 | KV453228.1 | 2803376 | 22-scf00516 | 22 |
| AX-158332663 | 26 | 58.213 | KV453228.1 | 2805532 | 22-scf00516 | 22 |
| AX-158332664 | 26 | 58.213 | KV453228.1 | 2806688 | 22-scf00516 | 22 |
| AX-158332675 | 26 | 58.213 | KV453228.1 | 2814188 | 22-scf00516 | 22 |
| AX-158332680 | 26 | 58.213 | KV453228.1 | 2818909 | 22-scf00516 | 22 |
| AX-158332684 | 26 | 58.213 | KV453228.1 | 2821860 | 22-scf00516 | 22 |
| AX-158332685 | 26 | 58.213 | KV453228.1 | 2822318 | 22-scf00516 | 22 |
| AX-158332686 | 26 | 58.213 | KV453228.1 | 2823027 | 22-scf00516 | 22 |
| AX-157725849 | 26 | 58.213 | KV453228.1 | 2823081 | 22-scf00516 | 22 |
| AX-158332687 | 26 | 58.213 | KV453228.1 | 2825171 | 22-scf00516 | 22 |
| AX-158332692 | 26 | 58.213 | KV453228.1 | 2830774 | 22-scf00516 | 22 |
| AX-158332693 | 26 | 58.213 | KV453228.1 | 2832204 | 22-scf00516 | 22 |
| AX-158332695 | 26 | 58.213 | KV453228.1 | 2834393 | 22-scf00516 | 22 |
| AX-158332696 | 26 | 58.213 | KV453228.1 | 2834914 | 22-scf00516 | 22 |
| AX-158332703 | 26 | 58.213 | KV453228.1 | 2848787 | 22-scf00516 | 22 |
| AX-158332704 | 26 | 58.213 | KV453228.1 | 2850733 | 22-scf00516 | 22 |
| AX-158332709 | 26 | 58.213 | KV453228.1 | 2859710 | 22-scf00516 | 22 |
| AX-158332710 | 26 | 58.213 | KV453228.1 | 2860147 | 22-scf00516 | 22 |
| AX-158332713 | 26 | 58.213 | KV453228.1 | 2867771 | 22-scf00516 | 22 |
| AX-158332714 | 26 | 58.213 | KV453228.1 | 2869262 | 22-scf00516 | 22 |
| AX-157849295 | 26 | 58.213 | KV453228.1 | 2869508 | 22-scf00516 | 22 |
| AX-158332715 | 26 | 58.213 | KV453228.1 | 2870510 | 22-scf00516 | 22 |
| AX-158332716 | 26 | 58.213 | KV453228.1 | 2870857 | 22-scf00516 | 22 |
| AX-158332718 | 26 | 58.213 | KV453228.1 | 2872577 | 22-scf00516 | 22 |
| AX-158332720 | 26 | 58.213 | KV453228.1 | 2874501 | 22-scf00516 | 22 |
| AX-158332721 | 26 | 58.213 | KV453228.1 | 2874986 | 22-scf00516 | 22 |
| AX-158332723 | 26 | 58.213 | KV453228.1 | 2875866 | 22-scf00516 | 22 |
| AX-158332724 | 26 | 58.213 | KV453228.1 | 2876260 | 22-scf00516 | 22 |
| AX-157742423 | 26 | 58.213 | KV453228.1 | 2877350 | 22-scf00516 | 22 |
| AX-158332725 | 26 | 58.213 | KV453228.1 | 2878013 | 22-scf00516 | 22 |
| AX-158332726 | 26 | 58.213 | KV453228.1 | 2879011 | 22-scf00516 | 22 |
| AX-158332729 | 26 | 58.213 | KV453228.1 | 2884680 | 22-scf00516 | 22 |
| AX-158332732 | 26 | 58.213 | KV453228.1 | 2885967 | 22-scf00516 | 22 |
| AX-158332733 | 26 | 58.213 | KV453228.1 | 2888238 | 22-scf00516 | 22 |
| AX-158332734 | 26 | 58.213 | KV453228.1 | 2889839 | 22-scf00516 | 22 |
| AX-158332735 | 26 | 58.213 | KV453228.1 | 2891397 | 22-scf00516 | 22 |
| AX-158332738 | 26 | 58.213 | KV453228.1 | 2894440 | 22-scf00516 | 22 |
| AX-158332739 | 26 | 58.213 | KV453228.1 | 2898368 | 22-scf00516 | 22 |
| AX-158332742 | 26 | 58.213 | KV453228.1 | 2903042 | 22-scf00516 | 22 |
| AX-158332743 | 26 | 58.213 | KV453228.1 | 2903309 | 22-scf00516 | 22 |
| AX-158332748 | 26 | 58.213 | KV453228.1 | 2906868 | 22-scf00516 | 22 |
| AX-158332749 | 26 | 58.213 | KV453228.1 | 2907428 | 22-scf00516 | 22 |
| AX-158332751 | 26 | 58.213 | KV453228.1 | 2910159 | 22-scf00516 | 22 |
| AX-158332752 | 26 | 58.213 | KV453228.1 | 2910764 | 22-scf00516 | 22 |
| AX-158332754 | 26 | 58.213 | KV453228.1 | 2918071 | 22-scf00516 | 22 |
| AX-157744147 | 26 | 58.213 | KV453228.1 | 2919041 | 22-scf00516 | 22 |
| AX-158332761 | 26 | 58.213 | KV453228.1 | 2928419 | 22-scf00516 | 22 |
| AX-158332775 | 26 | 58.213 | KV453228.1 | 2946364 | 22-scf00516 | 22 |
| AX-158332779 | 26 | 58.213 | KV453228.1 | 2954567 | 22-scf00516 | 22 |

|              |    |        |            |         |             |    |
|--------------|----|--------|------------|---------|-------------|----|
| AX-158332784 | 26 | 58.213 | KV453228.1 | 2961447 | 22-scf00516 | 22 |
| AX-158332790 | 26 | 58.213 | KV453228.1 | 2971085 | 22-scf00516 | 22 |
| AX-158332791 | 26 | 58.213 | KV453228.1 | 2972015 | 22-scf00516 | 22 |
| AX-158332793 | 26 | 58.213 | KV453228.1 | 2974580 | 22-scf00516 | 22 |
| AX-157757172 | 26 | 58.213 | KV453228.1 | 2975138 | 22-scf00516 | 22 |
| AX-158332794 | 26 | 58.213 | KV453228.1 | 2976271 | 22-scf00516 | 22 |
| AX-158332795 | 26 | 58.213 | KV453228.1 | 2976682 | 22-scf00516 | 22 |
| AX-158332796 | 26 | 58.213 | KV453228.1 | 2977254 | 22-scf00516 | 22 |
| AX-158332797 | 26 | 58.213 | KV453228.1 | 2978017 | 22-scf00516 | 22 |
| AX-158332799 | 26 | 58.213 | KV453228.1 | 2981691 | 22-scf00516 | 22 |
| AX-158332812 | 26 | 58.213 | KV453229.1 | 19789   | 22-scf00517 | 22 |
| AX-158332818 | 26 | 58.213 | KV453229.1 | 28314   | 22-scf00517 | 22 |
| AX-157849303 | 26 | 58.213 | KV453229.1 | 30221   | 22-scf00517 | 22 |
| AX-158332821 | 26 | 58.213 | KV453229.1 | 33734   | 22-scf00517 | 22 |
| AX-158332834 | 26 | 58.213 | KV453229.1 | 54545   | 22-scf00517 | 22 |
| AX-157849305 | 26 | 58.213 | KV453229.1 | 55518   | 22-scf00517 | 22 |
| AX-158332839 | 26 | 58.213 | KV453229.1 | 57943   | 22-scf00517 | 22 |
| AX-158332840 | 26 | 58.213 | KV453229.1 | 59316   | 22-scf00517 | 22 |
| AX-158332841 | 26 | 58.213 | KV453229.1 | 60390   | 22-scf00517 | 22 |
| AX-158332852 | 26 | 58.213 | KV453229.1 | 80669   | 22-scf00517 | 22 |
| AX-158332867 | 26 | 58.213 | KV453229.1 | 93590   | 22-scf00517 | 22 |
| AX-158332882 | 26 | 58.213 | KV453229.1 | 112477  | 22-scf00517 | 22 |
| AX-158332886 | 26 | 58.213 | KV453229.1 | 114930  | 22-scf00517 | 22 |
| AX-158332888 | 26 | 58.213 | KV453229.1 | 117560  | 22-scf00517 | 22 |
| AX-158332923 | 26 | 58.213 | KV453229.1 | 150838  | 22-scf00517 | 22 |
| AX-158332928 | 26 | 58.213 | KV453229.1 | 154999  | 22-scf00517 | 22 |
| AX-157771679 | 26 | 58.213 | KV453229.1 | 192101  | 22-scf00517 | 22 |
| AX-158381549 | 26 | 58.213 | KV453229.1 | 206466  | 22-scf00517 | 22 |
| AX-157849316 | 26 | 58.213 | KV453229.1 | 208944  | 22-scf00517 | 22 |
| AX-157723422 | 26 | 58.213 | KV453229.1 | 215505  | 22-scf00517 | 22 |
| AX-157749320 | 26 | 58.213 | KV453229.1 | 219732  | 22-scf00517 | 22 |
| AX-158332987 | 26 | 58.213 | KV453229.1 | 231662  | 22-scf00517 | 22 |
| AX-158332989 | 26 | 58.213 | KV453229.1 | 233996  | 22-scf00517 | 22 |
| AX-158332990 | 26 | 58.213 | KV453229.1 | 236449  | 22-scf00517 | 22 |
| AX-158333005 | 26 | 58.213 | KV453229.1 | 247193  | 22-scf00517 | 22 |
| AX-158333012 | 26 | 58.213 | KV453229.1 | 253423  | 22-scf00517 | 22 |
| AX-158333013 | 26 | 58.213 | KV453229.1 | 254889  | 22-scf00517 | 22 |
| AX-158333037 | 26 | 58.213 | KV453229.1 | 270904  | 22-scf00517 | 22 |
| AX-158333121 | 26 | 58.213 | KV453229.1 | 351722  | 22-scf00517 | 22 |
| AX-158333195 | 26 | 58.213 | KV453229.1 | 438658  | 22-scf00517 | 22 |
| AX-158418802 | 26 | 58.213 | KV453229.1 | 453537  | 22-scf00517 | 22 |
| AX-158333212 | 26 | 58.213 | KV453229.1 | 458375  | 22-scf00517 | 22 |
| AX-158333241 | 26 | 58.213 | KV453229.1 | 479493  | 22-scf00517 | 22 |
| AX-157881804 | 26 | 58.213 | KV453229.1 | 646239  | 22-scf00517 | 22 |
| AX-158333592 | 26 | 58.213 | KV453229.1 | 892478  | 22-scf00517 | 22 |
| AX-158381553 | 26 | 58.213 | KV453229.1 | 1086603 | 22-scf00517 | 22 |
| AX-158333786 | 26 | 58.213 | KV453229.1 | 1148890 | 22-scf00517 | 22 |
| AX-158333787 | 26 | 58.213 | KV453229.1 | 1151876 | 22-scf00517 | 22 |
| AX-158333788 | 26 | 58.213 | KV453229.1 | 1152288 | 22-scf00517 | 22 |
| AX-158333904 | 26 | 58.213 | KV453229.1 | 1284948 | 22-scf00517 | 22 |
| AX-158333950 | 26 | 58.213 | KV453229.1 | 1324382 | 22-scf00517 | 22 |

|              |    |        |             |         |             |    |
|--------------|----|--------|-------------|---------|-------------|----|
| AX-158334529 | 26 | 58.213 | KV453229.1  | 1899374 | 22-scf00517 | 22 |
| AX-158334569 | 26 | 58.213 | KV453229.1  | 1957786 | 22-scf00517 | 22 |
| AX-157723154 | 26 | 58.213 | KV453229.1  | 1975865 | 22-scf00517 | 22 |
| AX-157849417 | 26 | 58.213 | KV453229.1  | 1984981 | 22-scf00517 | 22 |
| AX-158335222 | 26 | 58.213 | KV453229.1  | 2753620 | 22-scf00517 | 22 |
| AX-158335229 | 26 | 58.213 | KV453229.1  | 2760272 | 22-scf00517 | 22 |
| AX-158335372 | 26 | 58.213 | KV453229.1  | 2908206 | 22-scf00517 | 22 |
| AX-158335409 | 26 | 58.213 | KV453229.1  | 2960784 | 22-scf00517 | 22 |
| AX-158335418 | 26 | 58.213 | KV453229.1  | 2971104 | 22-scf00517 | 22 |
| AX-158335477 | 26 | 58.213 | KV453229.1  | 3053110 | 22-scf00517 | 22 |
| AX-158335548 | 26 | 58.213 | KV453229.1  | 3130995 | 22-scf00517 | 22 |
| AX-158423754 | 26 | 58.213 | KV453229.1  | 3335875 | 22-scf00517 | 22 |
| AX-158335991 | 26 | 58.213 | KV453229.1  | 3812005 | 22-scf00517 | 22 |
| AX-157753885 | 26 | 58.213 | KV453229.1  | 3883081 | 22-scf00517 | 22 |
| AX-158336081 | 26 | 58.213 | KV453229.1  | 3946883 | 22-scf00517 | 22 |
| AX-158337002 | 26 | 58.213 | KV453229.1  | 5374446 | 22-scf00517 | 22 |
| AX-157680415 | 26 | 58.213 | 3ML01025927 | 754     | scf01536_1  | UN |
| AX-157705087 | 26 | 58.213 | 3ML01028559 | 421     | scf04169_1  | UN |
| AX-158332574 | 26 | 58.322 | KV453228.1  | 2694647 | 22-scf00516 | 22 |
| AX-158332597 | 26 | 58.322 | KV453228.1  | 2731246 | 22-scf00516 | 22 |
| AX-158332622 | 26 | 58.322 | KV453228.1  | 2772705 | 22-scf00516 | 22 |
| AX-158381547 | 26 | 58.322 | KV453228.1  | 2850665 | 22-scf00516 | 22 |
| AX-158332820 | 26 | 58.322 | KV453229.1  | 32763   | 22-scf00517 | 22 |
| AX-158332849 | 26 | 58.322 | KV453229.1  | 76755   | 22-scf00517 | 22 |
| AX-158332851 | 26 | 58.322 | KV453229.1  | 80047   | 22-scf00517 | 22 |
| AX-158332855 | 26 | 58.322 | KV453229.1  | 82100   | 22-scf00517 | 22 |
| AX-157849308 | 26 | 58.322 | KV453229.1  | 94999   | 22-scf00517 | 22 |
| AX-157849309 | 26 | 58.322 | KV453229.1  | 95482   | 22-scf00517 | 22 |
| AX-158332879 | 26 | 58.322 | KV453229.1  | 110463  | 22-scf00517 | 22 |
| AX-158332883 | 26 | 58.322 | KV453229.1  | 112606  | 22-scf00517 | 22 |
| AX-158332891 | 26 | 58.322 | KV453229.1  | 120737  | 22-scf00517 | 22 |
| AX-158332892 | 26 | 58.322 | KV453229.1  | 121205  | 22-scf00517 | 22 |
| AX-158332893 | 26 | 58.322 | KV453229.1  | 121672  | 22-scf00517 | 22 |
| AX-158332894 | 26 | 58.322 | KV453229.1  | 122567  | 22-scf00517 | 22 |
| AX-157849312 | 26 | 58.322 | KV453229.1  | 122978  | 22-scf00517 | 22 |
| AX-158332904 | 26 | 58.322 | KV453229.1  | 132702  | 22-scf00517 | 22 |
| AX-157771674 | 26 | 58.322 | KV453229.1  | 139374  | 22-scf00517 | 22 |
| AX-158332940 | 26 | 58.322 | KV453229.1  | 171210  | 22-scf00517 | 22 |
| AX-158332981 | 26 | 58.322 | KV453229.1  | 227348  | 22-scf00517 | 22 |
| AX-157881777 | 26 | 58.322 | KV453229.1  | 248580  | 22-scf00517 | 22 |
| AX-158333011 | 26 | 58.322 | KV453229.1  | 251777  | 22-scf00517 | 22 |
| AX-157710871 | 26 | 58.322 | KV453229.1  | 275431  | 22-scf00517 | 22 |
| AX-158333040 | 26 | 58.322 | KV453229.1  | 276618  | 22-scf00517 | 22 |
| AX-158333041 | 26 | 58.322 | KV453229.1  | 277142  | 22-scf00517 | 22 |
| AX-158333042 | 26 | 58.322 | KV453229.1  | 277799  | 22-scf00517 | 22 |
| AX-158333045 | 26 | 58.322 | KV453229.1  | 279968  | 22-scf00517 | 22 |
| AX-158333062 | 26 | 58.322 | KV453229.1  | 293169  | 22-scf00517 | 22 |
| AX-158333088 | 26 | 58.322 | KV453229.1  | 320318  | 22-scf00517 | 22 |
| AX-158412860 | 26 | 58.322 | KV453229.1  | 358941  | 22-scf00517 | 22 |
| AX-158333135 | 26 | 58.322 | KV453229.1  | 374658  | 22-scf00517 | 22 |
| AX-157738772 | 26 | 58.322 | KV453229.1  | 551882  | 22-scf00517 | 22 |

|              |    |        |            |         |             |    |
|--------------|----|--------|------------|---------|-------------|----|
| AX-158333403 | 26 | 58.322 | KV453229.1 | 645179  | 22-scf00517 | 22 |
| AX-158332948 | 26 | 58.333 | KV453229.1 | 177721  | 22-scf00517 | 22 |
| AX-158332999 | 26 | 58.355 | KV453229.1 | 243856  | 22-scf00517 | 22 |
| AX-157708874 | 26 | 58.355 | KV453229.1 | 1120043 | 22-scf00517 | 22 |
| AX-158333010 | 26 | 58.379 | KV453229.1 | 251389  | 22-scf00517 | 22 |
| AX-158333032 | 26 | 58.399 | KV453229.1 | 269400  | 22-scf00517 | 22 |
| AX-158332002 | 26 | 58.431 | KV453228.1 | 1864279 | 22-scf00516 | 22 |
| AX-158332227 | 26 | 58.431 | KV453228.1 | 2163617 | 22-scf00516 | 22 |
| AX-158332249 | 26 | 58.431 | KV453228.1 | 2193881 | 22-scf00516 | 22 |
| AX-157726993 | 26 | 58.431 | KV453228.1 | 2239280 | 22-scf00516 | 22 |
| AX-157740301 | 26 | 58.431 | KV453228.1 | 2258442 | 22-scf00516 | 22 |
| AX-158332442 | 26 | 58.431 | KV453228.1 | 2499596 | 22-scf00516 | 22 |
| AX-158332481 | 26 | 58.431 | KV453228.1 | 2585418 | 22-scf00516 | 22 |
| AX-158332485 | 26 | 58.431 | KV453228.1 | 2591498 | 22-scf00516 | 22 |
| AX-158332575 | 26 | 58.431 | KV453228.1 | 2695134 | 22-scf00516 | 22 |
| AX-158332590 | 26 | 58.431 | KV453228.1 | 2715160 | 22-scf00516 | 22 |
| AX-157724339 | 26 | 58.431 | KV453228.1 | 2807326 | 22-scf00516 | 22 |
| AX-158332676 | 26 | 58.431 | KV453228.1 | 2815327 | 22-scf00516 | 22 |
| AX-158332786 | 26 | 58.431 | KV453228.1 | 2962069 | 22-scf00516 | 22 |
| AX-157756482 | 26 | 58.431 | KV453229.1 | 20657   | 22-scf00517 | 22 |
| AX-158332847 | 26 | 58.431 | KV453229.1 | 69490   | 22-scf00517 | 22 |
| AX-158332877 | 26 | 58.431 | KV453229.1 | 109658  | 22-scf00517 | 22 |
| AX-158332887 | 26 | 58.431 | KV453229.1 | 117224  | 22-scf00517 | 22 |
| AX-158332909 | 26 | 58.431 | KV453229.1 | 136741  | 22-scf00517 | 22 |
| AX-158332982 | 26 | 58.431 | KV453229.1 | 228213  | 22-scf00517 | 22 |
| AX-157849317 | 26 | 58.431 | KV453229.1 | 235847  | 22-scf00517 | 22 |
| AX-158332997 | 26 | 58.431 | KV453229.1 | 242857  | 22-scf00517 | 22 |
| AX-158332998 | 26 | 58.431 | KV453229.1 | 243610  | 22-scf00517 | 22 |
| AX-158333002 | 26 | 58.431 | KV453229.1 | 244957  | 22-scf00517 | 22 |
| AX-158333003 | 26 | 58.431 | KV453229.1 | 245486  | 22-scf00517 | 22 |
| AX-158333006 | 26 | 58.431 | KV453229.1 | 247410  | 22-scf00517 | 22 |
| AX-158333017 | 26 | 58.431 | KV453229.1 | 259055  | 22-scf00517 | 22 |
| AX-158333019 | 26 | 58.431 | KV453229.1 | 261185  | 22-scf00517 | 22 |
| AX-158333028 | 26 | 58.431 | KV453229.1 | 267535  | 22-scf00517 | 22 |
| AX-158333033 | 26 | 58.431 | KV453229.1 | 269732  | 22-scf00517 | 22 |
| AX-158333035 | 26 | 58.431 | KV453229.1 | 270188  | 22-scf00517 | 22 |
| AX-158333036 | 26 | 58.431 | KV453229.1 | 270553  | 22-scf00517 | 22 |
| AX-158333039 | 26 | 58.431 | KV453229.1 | 276268  | 22-scf00517 | 22 |
| AX-158333043 | 26 | 58.431 | KV453229.1 | 279456  | 22-scf00517 | 22 |
| AX-158333046 | 26 | 58.431 | KV453229.1 | 280677  | 22-scf00517 | 22 |
| AX-158333048 | 26 | 58.431 | KV453229.1 | 281278  | 22-scf00517 | 22 |
| AX-158333050 | 26 | 58.431 | KV453229.1 | 284789  | 22-scf00517 | 22 |
| AX-158333052 | 26 | 58.431 | KV453229.1 | 285549  | 22-scf00517 | 22 |
| AX-158333055 | 26 | 58.431 | KV453229.1 | 287697  | 22-scf00517 | 22 |
| AX-158333057 | 26 | 58.431 | KV453229.1 | 289377  | 22-scf00517 | 22 |
| AX-158333059 | 26 | 58.431 | KV453229.1 | 290224  | 22-scf00517 | 22 |
| AX-158333060 | 26 | 58.431 | KV453229.1 | 291044  | 22-scf00517 | 22 |
| AX-157702334 | 26 | 58.431 | KV453229.1 | 292683  | 22-scf00517 | 22 |
| AX-158333063 | 26 | 58.431 | KV453229.1 | 293688  | 22-scf00517 | 22 |
| AX-158333065 | 26 | 58.431 | KV453229.1 | 296424  | 22-scf00517 | 22 |
| AX-158333066 | 26 | 58.431 | KV453229.1 | 296515  | 22-scf00517 | 22 |



|              |    |        |            |        |             |    |
|--------------|----|--------|------------|--------|-------------|----|
| AX-158333069 | 26 | 58.431 | KV453229.1 | 302118 | 22-scf00517 | 22 |
| AX-157751197 | 26 | 58.431 | KV453229.1 | 302482 | 22-scf00517 | 22 |
| AX-158333070 | 26 | 58.431 | KV453229.1 | 302721 | 22-scf00517 | 22 |
| AX-158333071 | 26 | 58.431 | KV453229.1 | 306560 | 22-scf00517 | 22 |
| AX-157748445 | 26 | 58.431 | KV453229.1 | 306642 | 22-scf00517 | 22 |
| AX-158333074 | 26 | 58.431 | KV453229.1 | 308798 | 22-scf00517 | 22 |
| AX-158333075 | 26 | 58.431 | KV453229.1 | 309304 | 22-scf00517 | 22 |
| AX-158333076 | 26 | 58.431 | KV453229.1 | 310565 | 22-scf00517 | 22 |
| AX-158333078 | 26 | 58.431 | KV453229.1 | 311814 | 22-scf00517 | 22 |
| AX-158333079 | 26 | 58.431 | KV453229.1 | 312352 | 22-scf00517 | 22 |
| AX-158333080 | 26 | 58.431 | KV453229.1 | 312738 | 22-scf00517 | 22 |
| AX-158333082 | 26 | 58.431 | KV453229.1 | 315271 | 22-scf00517 | 22 |
| AX-158333083 | 26 | 58.431 | KV453229.1 | 315850 | 22-scf00517 | 22 |
| AX-158333084 | 26 | 58.431 | KV453229.1 | 316293 | 22-scf00517 | 22 |
| AX-158333085 | 26 | 58.431 | KV453229.1 | 317556 | 22-scf00517 | 22 |
| AX-158333086 | 26 | 58.431 | KV453229.1 | 318674 | 22-scf00517 | 22 |
| AX-158333089 | 26 | 58.431 | KV453229.1 | 321293 | 22-scf00517 | 22 |
| AX-158333090 | 26 | 58.431 | KV453229.1 | 322558 | 22-scf00517 | 22 |
| AX-158333092 | 26 | 58.431 | KV453229.1 | 323478 | 22-scf00517 | 22 |
| AX-157861609 | 26 | 58.431 | KV453229.1 | 324802 | 22-scf00517 | 22 |
| AX-158333094 | 26 | 58.431 | KV453229.1 | 325088 | 22-scf00517 | 22 |
| AX-158381550 | 26 | 58.431 | KV453229.1 | 326550 | 22-scf00517 | 22 |
| AX-158333095 | 26 | 58.431 | KV453229.1 | 326886 | 22-scf00517 | 22 |
| AX-158333097 | 26 | 58.431 | KV453229.1 | 327739 | 22-scf00517 | 22 |
| AX-158333099 | 26 | 58.431 | KV453229.1 | 331430 | 22-scf00517 | 22 |
| AX-158333102 | 26 | 58.431 | KV453229.1 | 336563 | 22-scf00517 | 22 |
| AX-157849320 | 26 | 58.431 | KV453229.1 | 336810 | 22-scf00517 | 22 |
| AX-158333104 | 26 | 58.431 | KV453229.1 | 338373 | 22-scf00517 | 22 |
| AX-158333105 | 26 | 58.431 | KV453229.1 | 339233 | 22-scf00517 | 22 |
| AX-158333106 | 26 | 58.431 | KV453229.1 | 339569 | 22-scf00517 | 22 |
| AX-158333107 | 26 | 58.431 | KV453229.1 | 340127 | 22-scf00517 | 22 |
| AX-158333108 | 26 | 58.431 | KV453229.1 | 341005 | 22-scf00517 | 22 |
| AX-158333109 | 26 | 58.431 | KV453229.1 | 342234 | 22-scf00517 | 22 |
| AX-158333110 | 26 | 58.431 | KV453229.1 | 342730 | 22-scf00517 | 22 |
| AX-158333111 | 26 | 58.431 | KV453229.1 | 343515 | 22-scf00517 | 22 |
| AX-157849322 | 26 | 58.431 | KV453229.1 | 345344 | 22-scf00517 | 22 |
| AX-158333113 | 26 | 58.431 | KV453229.1 | 345537 | 22-scf00517 | 22 |
| AX-157849323 | 26 | 58.431 | KV453229.1 | 346051 | 22-scf00517 | 22 |
| AX-158333114 | 26 | 58.431 | KV453229.1 | 346381 | 22-scf00517 | 22 |
| AX-158333118 | 26 | 58.431 | KV453229.1 | 349765 | 22-scf00517 | 22 |
| AX-158333119 | 26 | 58.431 | KV453229.1 | 350149 | 22-scf00517 | 22 |
| AX-158333122 | 26 | 58.431 | KV453229.1 | 352344 | 22-scf00517 | 22 |
| AX-158333123 | 26 | 58.431 | KV453229.1 | 353220 | 22-scf00517 | 22 |
| AX-158333124 | 26 | 58.431 | KV453229.1 | 354934 | 22-scf00517 | 22 |
| AX-157849324 | 26 | 58.431 | KV453229.1 | 356396 | 22-scf00517 | 22 |
| AX-158333130 | 26 | 58.431 | KV453229.1 | 365692 | 22-scf00517 | 22 |
| AX-158333134 | 26 | 58.431 | KV453229.1 | 374195 | 22-scf00517 | 22 |
| AX-158333136 | 26 | 58.431 | KV453229.1 | 375550 | 22-scf00517 | 22 |
| AX-158333137 | 26 | 58.431 | KV453229.1 | 376174 | 22-scf00517 | 22 |
| AX-158333138 | 26 | 58.431 | KV453229.1 | 376564 | 22-scf00517 | 22 |
| AX-158333139 | 26 | 58.431 | KV453229.1 | 377393 | 22-scf00517 | 22 |

|              |    |        |            |        |             |    |
|--------------|----|--------|------------|--------|-------------|----|
| AX-158333143 | 26 | 58.431 | KV453229.1 | 384153 | 22-scf00517 | 22 |
| AX-158333144 | 26 | 58.431 | KV453229.1 | 384600 | 22-scf00517 | 22 |
| AX-157888565 | 26 | 58.431 | KV453229.1 | 389488 | 22-scf00517 | 22 |
| AX-158333151 | 26 | 58.431 | KV453229.1 | 390983 | 22-scf00517 | 22 |
| AX-158333153 | 26 | 58.431 | KV453229.1 | 392455 | 22-scf00517 | 22 |
| AX-158333156 | 26 | 58.431 | KV453229.1 | 395628 | 22-scf00517 | 22 |
| AX-158333178 | 26 | 58.431 | KV453229.1 | 418933 | 22-scf00517 | 22 |
| AX-157720983 | 26 | 58.431 | KV453229.1 | 429794 | 22-scf00517 | 22 |
| AX-158333189 | 26 | 58.431 | KV453229.1 | 431824 | 22-scf00517 | 22 |
| AX-158333191 | 26 | 58.431 | KV453229.1 | 432958 | 22-scf00517 | 22 |
| AX-158333192 | 26 | 58.431 | KV453229.1 | 433745 | 22-scf00517 | 22 |
| AX-158333193 | 26 | 58.431 | KV453229.1 | 434374 | 22-scf00517 | 22 |
| AX-158333199 | 26 | 58.431 | KV453229.1 | 441346 | 22-scf00517 | 22 |
| AX-158333221 | 26 | 58.431 | KV453229.1 | 465421 | 22-scf00517 | 22 |
| AX-158333234 | 26 | 58.431 | KV453229.1 | 475225 | 22-scf00517 | 22 |
| AX-158333249 | 26 | 58.431 | KV453229.1 | 490551 | 22-scf00517 | 22 |
| AX-158333277 | 26 | 58.431 | KV453229.1 | 517819 | 22-scf00517 | 22 |
| AX-158333278 | 26 | 58.431 | KV453229.1 | 518244 | 22-scf00517 | 22 |
| AX-157849334 | 26 | 58.431 | KV453229.1 | 527761 | 22-scf00517 | 22 |
| AX-158333290 | 26 | 58.431 | KV453229.1 | 530658 | 22-scf00517 | 22 |
| AX-158333300 | 26 | 58.431 | KV453229.1 | 541417 | 22-scf00517 | 22 |
| AX-157772180 | 26 | 58.431 | KV453229.1 | 548846 | 22-scf00517 | 22 |
| AX-158333307 | 26 | 58.431 | KV453229.1 | 549232 | 22-scf00517 | 22 |
| AX-158333309 | 26 | 58.431 | KV453229.1 | 549830 | 22-scf00517 | 22 |
| AX-157721607 | 26 | 58.431 | KV453229.1 | 550063 | 22-scf00517 | 22 |
| AX-158333310 | 26 | 58.431 | KV453229.1 | 550308 | 22-scf00517 | 22 |
| AX-157849336 | 26 | 58.431 | KV453229.1 | 579563 | 22-scf00517 | 22 |
| AX-158381551 | 26 | 58.431 | KV453229.1 | 590300 | 22-scf00517 | 22 |
| AX-158333353 | 26 | 58.431 | KV453229.1 | 594847 | 22-scf00517 | 22 |
| AX-157756273 | 26 | 58.431 | KV453229.1 | 595911 | 22-scf00517 | 22 |
| AX-158333357 | 26 | 58.431 | KV453229.1 | 599605 | 22-scf00517 | 22 |
| AX-158333358 | 26 | 58.431 | KV453229.1 | 601177 | 22-scf00517 | 22 |
| AX-158333362 | 26 | 58.431 | KV453229.1 | 605775 | 22-scf00517 | 22 |
| AX-158333370 | 26 | 58.431 | KV453229.1 | 614012 | 22-scf00517 | 22 |
| AX-158333372 | 26 | 58.431 | KV453229.1 | 615475 | 22-scf00517 | 22 |
| AX-158333379 | 26 | 58.431 | KV453229.1 | 622801 | 22-scf00517 | 22 |
| AX-157726625 | 26 | 58.431 | KV453229.1 | 631295 | 22-scf00517 | 22 |
| AX-158333390 | 26 | 58.431 | KV453229.1 | 631701 | 22-scf00517 | 22 |
| AX-158333421 | 26 | 58.431 | KV453229.1 | 667585 | 22-scf00517 | 22 |
| AX-158333422 | 26 | 58.431 | KV453229.1 | 668051 | 22-scf00517 | 22 |
| AX-158333424 | 26 | 58.431 | KV453229.1 | 669366 | 22-scf00517 | 22 |
| AX-158333425 | 26 | 58.431 | KV453229.1 | 669733 | 22-scf00517 | 22 |
| AX-157753353 | 26 | 58.431 | KV453229.1 | 682809 | 22-scf00517 | 22 |
| AX-158333442 | 26 | 58.431 | KV453229.1 | 683642 | 22-scf00517 | 22 |
| AX-157756918 | 26 | 58.431 | KV453229.1 | 685099 | 22-scf00517 | 22 |
| AX-158333444 | 26 | 58.431 | KV453229.1 | 689580 | 22-scf00517 | 22 |
| AX-158333446 | 26 | 58.431 | KV453229.1 | 691886 | 22-scf00517 | 22 |
| AX-158333506 | 26 | 58.431 | KV453229.1 | 756383 | 22-scf00517 | 22 |
| AX-158333508 | 26 | 58.431 | KV453229.1 | 760524 | 22-scf00517 | 22 |
| AX-158333522 | 26 | 58.431 | KV453229.1 | 780741 | 22-scf00517 | 22 |
| AX-158333525 | 26 | 58.431 | KV453229.1 | 782614 | 22-scf00517 | 22 |

|              |    |        |             |         |             |    |
|--------------|----|--------|-------------|---------|-------------|----|
| AX-157849343 | 26 | 58.431 | KV453229.1  | 783121  | 22-scf00517 | 22 |
| AX-158333526 | 26 | 58.431 | KV453229.1  | 783885  | 22-scf00517 | 22 |
| AX-158333561 | 26 | 58.431 | KV453229.1  | 843074  | 22-scf00517 | 22 |
| AX-158333564 | 26 | 58.431 | KV453229.1  | 845901  | 22-scf00517 | 22 |
| AX-157720067 | 26 | 58.431 | KV453229.1  | 863059  | 22-scf00517 | 22 |
| AX-157757403 | 26 | 58.431 | KV453229.1  | 926291  | 22-scf00517 | 22 |
| AX-157751618 | 26 | 58.431 | KV453229.1  | 927506  | 22-scf00517 | 22 |
| AX-158333622 | 26 | 58.431 | KV453229.1  | 933754  | 22-scf00517 | 22 |
| AX-158333648 | 26 | 58.431 | KV453229.1  | 973167  | 22-scf00517 | 22 |
| AX-157774065 | 26 | 58.431 | KV453229.1  | 1026713 | 22-scf00517 | 22 |
| AX-158333694 | 26 | 58.431 | KV453229.1  | 1039275 | 22-scf00517 | 22 |
| AX-157773995 | 26 | 58.431 | KV453229.1  | 1048740 | 22-scf00517 | 22 |
| AX-158333740 | 26 | 58.431 | KV453229.1  | 1089662 | 22-scf00517 | 22 |
| AX-157849364 | 26 | 58.431 | KV453229.1  | 1092591 | 22-scf00517 | 22 |
| AX-157719395 | 26 | 58.431 | KV453229.1  | 1265109 | 22-scf00517 | 22 |
| AX-158333891 | 26 | 58.431 | KV453229.1  | 1271516 | 22-scf00517 | 22 |
| AX-158333896 | 26 | 58.431 | KV453229.1  | 1279320 | 22-scf00517 | 22 |
| AX-158333931 | 26 | 58.431 | KV453229.1  | 1311658 | 22-scf00517 | 22 |
| AX-158334037 | 26 | 58.431 | KV453229.1  | 1404007 | 22-scf00517 | 22 |
| AX-158334039 | 26 | 58.431 | KV453229.1  | 1405414 | 22-scf00517 | 22 |
| AX-158418826 | 26 | 58.431 | KV453229.1  | 1410977 | 22-scf00517 | 22 |
| AX-157849397 | 26 | 58.431 | KV453229.1  | 1421800 | 22-scf00517 | 22 |
| AX-157713075 | 26 | 58.431 | KV453229.1  | 1422680 | 22-scf00517 | 22 |
| AX-157738441 | 26 | 58.431 | KV453229.1  | 1425140 | 22-scf00517 | 22 |
| AX-158334485 | 26 | 58.431 | KV453229.1  | 1849471 | 22-scf00517 | 22 |
| AX-158334509 | 26 | 58.431 | KV453229.1  | 1876561 | 22-scf00517 | 22 |
| AX-157756112 | 26 | 58.431 | KV453229.1  | 1911582 | 22-scf00517 | 22 |
| AX-158334538 | 26 | 58.431 | KV453229.1  | 1916964 | 22-scf00517 | 22 |
| AX-158334539 | 26 | 58.431 | KV453229.1  | 1917941 | 22-scf00517 | 22 |
| AX-158334557 | 26 | 58.431 | KV453229.1  | 1944806 | 22-scf00517 | 22 |
| AX-158334606 | 26 | 58.431 | KV453229.1  | 2006109 | 22-scf00517 | 22 |
| AX-158334692 | 26 | 58.431 | KV453229.1  | 2160888 | 22-scf00517 | 22 |
| AX-158334694 | 26 | 58.431 | KV453229.1  | 2161902 | 22-scf00517 | 22 |
| AX-157849428 | 26 | 58.431 | KV453229.1  | 2223232 | 22-scf00517 | 22 |
| AX-157708853 | 26 | 58.431 | KV453229.1  | 2281342 | 22-scf00517 | 22 |
| AX-158334892 | 26 | 58.431 | KV453229.1  | 2423924 | 22-scf00517 | 22 |
| AX-157725564 | 26 | 58.431 | KV453229.1  | 2917262 | 22-scf00517 | 22 |
| AX-158335778 | 26 | 58.431 | KV453229.1  | 3488164 | 22-scf00517 | 22 |
| AX-157849549 | 26 | 58.431 | KV453229.1  | 3702343 | 22-scf00517 | 22 |
| AX-158336037 | 26 | 58.431 | KV453229.1  | 3872252 | 22-scf00517 | 22 |
| AX-157849626 | 26 | 58.431 | KV453229.1  | 5011878 | 22-scf00517 | 22 |
| AX-158336983 | 26 | 58.431 | KV453229.1  | 5342574 | 22-scf00517 | 22 |
| AX-157707179 | 26 | 58.431 | 3ML01033667 | 246     | scf09327_1  | UN |
| AX-158332220 | 26 | 58.54  | KV453228.1  | 2151832 | 22-scf00516 | 22 |
| AX-157741450 | 26 | 58.54  | KV453228.1  | 2931393 | 22-scf00516 | 22 |
| AX-158333027 | 26 | 58.54  | KV453229.1  | 266857  | 22-scf00517 | 22 |
| AX-158333093 | 26 | 58.54  | KV453229.1  | 324123  | 22-scf00517 | 22 |
| AX-157708801 | 26 | 58.54  | KV453229.1  | 380566  | 22-scf00517 | 22 |
| AX-158333321 | 26 | 58.54  | KV453229.1  | 563423  | 22-scf00517 | 22 |
| AX-158333343 | 26 | 58.54  | KV453229.1  | 586116  | 22-scf00517 | 22 |
| AX-158333427 | 26 | 58.54  | KV453229.1  | 672003  | 22-scf00517 | 22 |

|              |    |       |            |        |             |    |
|--------------|----|-------|------------|--------|-------------|----|
| AX-158333428 | 26 | 58.54 | KV453229.1 | 673316 | 22-scf00517 | 22 |
| AX-158333430 | 26 | 58.54 | KV453229.1 | 674888 | 22-scf00517 | 22 |
| AX-158333433 | 26 | 58.54 | KV453229.1 | 676282 | 22-scf00517 | 22 |
| AX-158333436 | 26 | 58.54 | KV453229.1 | 678559 | 22-scf00517 | 22 |
| AX-158333438 | 26 | 58.54 | KV453229.1 | 679577 | 22-scf00517 | 22 |
| AX-158333452 | 26 | 58.54 | KV453229.1 | 696138 | 22-scf00517 | 22 |
| AX-158333465 | 26 | 58.54 | KV453229.1 | 710472 | 22-scf00517 | 22 |
| AX-158333478 | 26 | 58.54 | KV453229.1 | 723572 | 22-scf00517 | 22 |
| AX-158333479 | 26 | 58.54 | KV453229.1 | 726179 | 22-scf00517 | 22 |
| AX-158420178 | 26 | 58.54 | KV453229.1 | 732000 | 22-scf00517 | 22 |
| AX-158333486 | 26 | 58.54 | KV453229.1 | 736228 | 22-scf00517 | 22 |
| AX-158333490 | 26 | 58.54 | KV453229.1 | 739298 | 22-scf00517 | 22 |
| AX-158333492 | 26 | 58.54 | KV453229.1 | 740354 | 22-scf00517 | 22 |
| AX-158333495 | 26 | 58.54 | KV453229.1 | 742819 | 22-scf00517 | 22 |
| AX-158333501 | 26 | 58.54 | KV453229.1 | 747593 | 22-scf00517 | 22 |
| AX-157754941 | 26 | 58.54 | KV453229.1 | 747948 | 22-scf00517 | 22 |
| AX-157752880 | 26 | 58.54 | KV453229.1 | 763258 | 22-scf00517 | 22 |
| AX-158333513 | 26 | 58.54 | KV453229.1 | 764753 | 22-scf00517 | 22 |
| AX-157849342 | 26 | 58.54 | KV453229.1 | 776670 | 22-scf00517 | 22 |
| AX-158333524 | 26 | 58.54 | KV453229.1 | 781708 | 22-scf00517 | 22 |
| AX-158333528 | 26 | 58.54 | KV453229.1 | 787232 | 22-scf00517 | 22 |
| AX-158333531 | 26 | 58.54 | KV453229.1 | 798155 | 22-scf00517 | 22 |
| AX-158333532 | 26 | 58.54 | KV453229.1 | 798525 | 22-scf00517 | 22 |
| AX-158333534 | 26 | 58.54 | KV453229.1 | 803325 | 22-scf00517 | 22 |
| AX-158333536 | 26 | 58.54 | KV453229.1 | 804619 | 22-scf00517 | 22 |
| AX-158418812 | 26 | 58.54 | KV453229.1 | 805594 | 22-scf00517 | 22 |
| AX-158333544 | 26 | 58.54 | KV453229.1 | 817220 | 22-scf00517 | 22 |
| AX-158333548 | 26 | 58.54 | KV453229.1 | 820524 | 22-scf00517 | 22 |
| AX-158333549 | 26 | 58.54 | KV453229.1 | 820745 | 22-scf00517 | 22 |
| AX-158333550 | 26 | 58.54 | KV453229.1 | 821604 | 22-scf00517 | 22 |
| AX-158333551 | 26 | 58.54 | KV453229.1 | 822963 | 22-scf00517 | 22 |
| AX-158333552 | 26 | 58.54 | KV453229.1 | 823525 | 22-scf00517 | 22 |
| AX-158333554 | 26 | 58.54 | KV453229.1 | 828026 | 22-scf00517 | 22 |
| AX-158333557 | 26 | 58.54 | KV453229.1 | 832971 | 22-scf00517 | 22 |
| AX-157744476 | 26 | 58.54 | KV453229.1 | 837915 | 22-scf00517 | 22 |
| AX-158333560 | 26 | 58.54 | KV453229.1 | 841567 | 22-scf00517 | 22 |
| AX-158333562 | 26 | 58.54 | KV453229.1 | 843743 | 22-scf00517 | 22 |
| AX-158333565 | 26 | 58.54 | KV453229.1 | 849361 | 22-scf00517 | 22 |
| AX-158333567 | 26 | 58.54 | KV453229.1 | 852205 | 22-scf00517 | 22 |
| AX-158333570 | 26 | 58.54 | KV453229.1 | 862123 | 22-scf00517 | 22 |
| AX-158333571 | 26 | 58.54 | KV453229.1 | 866337 | 22-scf00517 | 22 |
| AX-157849345 | 26 | 58.54 | KV453229.1 | 870533 | 22-scf00517 | 22 |
| AX-158333575 | 26 | 58.54 | KV453229.1 | 871606 | 22-scf00517 | 22 |
| AX-158333576 | 26 | 58.54 | KV453229.1 | 871927 | 22-scf00517 | 22 |
| AX-158333577 | 26 | 58.54 | KV453229.1 | 873000 | 22-scf00517 | 22 |
| AX-156569720 | 26 | 58.54 | KV453229.1 | 873360 | 22-scf00517 | 22 |
| AX-158333580 | 26 | 58.54 | KV453229.1 | 876159 | 22-scf00517 | 22 |
| AX-158333581 | 26 | 58.54 | KV453229.1 | 877197 | 22-scf00517 | 22 |
| AX-158333587 | 26 | 58.54 | KV453229.1 | 884401 | 22-scf00517 | 22 |
| AX-158333588 | 26 | 58.54 | KV453229.1 | 885734 | 22-scf00517 | 22 |
| AX-158333590 | 26 | 58.54 | KV453229.1 | 888666 | 22-scf00517 | 22 |

|              |    |       |            |         |             |    |
|--------------|----|-------|------------|---------|-------------|----|
| AX-158333596 | 26 | 58.54 | KV453229.1 | 896913  | 22-scf00517 | 22 |
| AX-157849346 | 26 | 58.54 | KV453229.1 | 901666  | 22-scf00517 | 22 |
| AX-158333602 | 26 | 58.54 | KV453229.1 | 908400  | 22-scf00517 | 22 |
| AX-158333603 | 26 | 58.54 | KV453229.1 | 909074  | 22-scf00517 | 22 |
| AX-158333611 | 26 | 58.54 | KV453229.1 | 919720  | 22-scf00517 | 22 |
| AX-157741743 | 26 | 58.54 | KV453229.1 | 921391  | 22-scf00517 | 22 |
| AX-158333615 | 26 | 58.54 | KV453229.1 | 924365  | 22-scf00517 | 22 |
| AX-158333626 | 26 | 58.54 | KV453229.1 | 936706  | 22-scf00517 | 22 |
| AX-158333647 | 26 | 58.54 | KV453229.1 | 971457  | 22-scf00517 | 22 |
| AX-158333663 | 26 | 58.54 | KV453229.1 | 993243  | 22-scf00517 | 22 |
| AX-157755449 | 26 | 58.54 | KV453229.1 | 997934  | 22-scf00517 | 22 |
| AX-158333674 | 26 | 58.54 | KV453229.1 | 1008125 | 22-scf00517 | 22 |
| AX-158333675 | 26 | 58.54 | KV453229.1 | 1008677 | 22-scf00517 | 22 |
| AX-158333676 | 26 | 58.54 | KV453229.1 | 1009258 | 22-scf00517 | 22 |
| AX-157849349 | 26 | 58.54 | KV453229.1 | 1015854 | 22-scf00517 | 22 |
| AX-157849350 | 26 | 58.54 | KV453229.1 | 1016265 | 22-scf00517 | 22 |
| AX-157849351 | 26 | 58.54 | KV453229.1 | 1016702 | 22-scf00517 | 22 |
| AX-157849354 | 26 | 58.54 | KV453229.1 | 1024442 | 22-scf00517 | 22 |
| AX-158333687 | 26 | 58.54 | KV453229.1 | 1031130 | 22-scf00517 | 22 |
| AX-158333688 | 26 | 58.54 | KV453229.1 | 1031677 | 22-scf00517 | 22 |
| AX-157756954 | 26 | 58.54 | KV453229.1 | 1031978 | 22-scf00517 | 22 |
| AX-157723000 | 26 | 58.54 | KV453229.1 | 1045879 | 22-scf00517 | 22 |
| AX-158333705 | 26 | 58.54 | KV453229.1 | 1053009 | 22-scf00517 | 22 |
| AX-158333706 | 26 | 58.54 | KV453229.1 | 1055565 | 22-scf00517 | 22 |
| AX-158333711 | 26 | 58.54 | KV453229.1 | 1058118 | 22-scf00517 | 22 |
| AX-158333714 | 26 | 58.54 | KV453229.1 | 1059324 | 22-scf00517 | 22 |
| AX-158333746 | 26 | 58.54 | KV453229.1 | 1095315 | 22-scf00517 | 22 |
| AX-158333753 | 26 | 58.54 | KV453229.1 | 1100745 | 22-scf00517 | 22 |
| AX-158333757 | 26 | 58.54 | KV453229.1 | 1106362 | 22-scf00517 | 22 |
| AX-158333760 | 26 | 58.54 | KV453229.1 | 1112277 | 22-scf00517 | 22 |
| AX-158333762 | 26 | 58.54 | KV453229.1 | 1114324 | 22-scf00517 | 22 |
| AX-158333771 | 26 | 58.54 | KV453229.1 | 1127341 | 22-scf00517 | 22 |
| AX-158333772 | 26 | 58.54 | KV453229.1 | 1127637 | 22-scf00517 | 22 |
| AX-157849367 | 26 | 58.54 | KV453229.1 | 1129568 | 22-scf00517 | 22 |
| AX-157849371 | 26 | 58.54 | KV453229.1 | 1152783 | 22-scf00517 | 22 |
| AX-158333789 | 26 | 58.54 | KV453229.1 | 1153124 | 22-scf00517 | 22 |
| AX-158333794 | 26 | 58.54 | KV453229.1 | 1156863 | 22-scf00517 | 22 |
| AX-158333813 | 26 | 58.54 | KV453229.1 | 1178333 | 22-scf00517 | 22 |
| AX-158333814 | 26 | 58.54 | KV453229.1 | 1178860 | 22-scf00517 | 22 |
| AX-157748242 | 26 | 58.54 | KV453229.1 | 1180383 | 22-scf00517 | 22 |
| AX-158333818 | 26 | 58.54 | KV453229.1 | 1183006 | 22-scf00517 | 22 |
| AX-158333819 | 26 | 58.54 | KV453229.1 | 1183388 | 22-scf00517 | 22 |
| AX-158333820 | 26 | 58.54 | KV453229.1 | 1183788 | 22-scf00517 | 22 |
| AX-157746410 | 26 | 58.54 | KV453229.1 | 1194857 | 22-scf00517 | 22 |
| AX-157748866 | 26 | 58.54 | KV453229.1 | 1195609 | 22-scf00517 | 22 |
| AX-158333829 | 26 | 58.54 | KV453229.1 | 1196475 | 22-scf00517 | 22 |
| AX-158333831 | 26 | 58.54 | KV453229.1 | 1197533 | 22-scf00517 | 22 |
| AX-158333835 | 26 | 58.54 | KV453229.1 | 1200432 | 22-scf00517 | 22 |
| AX-158333853 | 26 | 58.54 | KV453229.1 | 1222306 | 22-scf00517 | 22 |
| AX-158333854 | 26 | 58.54 | KV453229.1 | 1223544 | 22-scf00517 | 22 |
| AX-157849377 | 26 | 58.54 | KV453229.1 | 1223845 | 22-scf00517 | 22 |

|              |    |       |            |         |             |    |
|--------------|----|-------|------------|---------|-------------|----|
| AX-157849378 | 26 | 58.54 | KV453229.1 | 1224223 | 22-scf00517 | 22 |
| AX-158333856 | 26 | 58.54 | KV453229.1 | 1226500 | 22-scf00517 | 22 |
| AX-157752027 | 26 | 58.54 | KV453229.1 | 1230226 | 22-scf00517 | 22 |
| AX-157888571 | 26 | 58.54 | KV453229.1 | 1233457 | 22-scf00517 | 22 |
| AX-158333863 | 26 | 58.54 | KV453229.1 | 1234293 | 22-scf00517 | 22 |
| AX-157861613 | 26 | 58.54 | KV453229.1 | 1263578 | 22-scf00517 | 22 |
| AX-158333956 | 26 | 58.54 | KV453229.1 | 1329541 | 22-scf00517 | 22 |
| AX-158333958 | 26 | 58.54 | KV453229.1 | 1330845 | 22-scf00517 | 22 |
| AX-157728352 | 26 | 58.54 | KV453229.1 | 1342709 | 22-scf00517 | 22 |
| AX-158333965 | 26 | 58.54 | KV453229.1 | 1344893 | 22-scf00517 | 22 |
| AX-158333985 | 26 | 58.54 | KV453229.1 | 1359615 | 22-scf00517 | 22 |
| AX-158334019 | 26 | 58.54 | KV453229.1 | 1384798 | 22-scf00517 | 22 |
| AX-158334041 | 26 | 58.54 | KV453229.1 | 1406810 | 22-scf00517 | 22 |
| AX-157726088 | 26 | 58.54 | KV453229.1 | 1466407 | 22-scf00517 | 22 |
| AX-158334094 | 26 | 58.54 | KV453229.1 | 1471117 | 22-scf00517 | 22 |
| AX-158334095 | 26 | 58.54 | KV453229.1 | 1471555 | 22-scf00517 | 22 |
| AX-158334097 | 26 | 58.54 | KV453229.1 | 1474207 | 22-scf00517 | 22 |
| AX-157739709 | 26 | 58.54 | KV453229.1 | 1478755 | 22-scf00517 | 22 |
| AX-158334111 | 26 | 58.54 | KV453229.1 | 1494631 | 22-scf00517 | 22 |
| AX-158334153 | 26 | 58.54 | KV453229.1 | 1534821 | 22-scf00517 | 22 |
| AX-158334214 | 26 | 58.54 | KV453229.1 | 1609647 | 22-scf00517 | 22 |
| AX-158334223 | 26 | 58.54 | KV453229.1 | 1614386 | 22-scf00517 | 22 |
| AX-158381557 | 26 | 58.54 | KV453229.1 | 1628549 | 22-scf00517 | 22 |
| AX-158334279 | 26 | 58.54 | KV453229.1 | 1661847 | 22-scf00517 | 22 |
| AX-158334286 | 26 | 58.54 | KV453229.1 | 1671397 | 22-scf00517 | 22 |
| AX-157849413 | 26 | 58.54 | KV453229.1 | 1676371 | 22-scf00517 | 22 |
| AX-158334324 | 26 | 58.54 | KV453229.1 | 1694104 | 22-scf00517 | 22 |
| AX-158334336 | 26 | 58.54 | KV453229.1 | 1700111 | 22-scf00517 | 22 |
| AX-158334345 | 26 | 58.54 | KV453229.1 | 1705144 | 22-scf00517 | 22 |
| AX-158334352 | 26 | 58.54 | KV453229.1 | 1709428 | 22-scf00517 | 22 |
| AX-158334445 | 26 | 58.54 | KV453229.1 | 1798787 | 22-scf00517 | 22 |
| AX-158381558 | 26 | 58.54 | KV453229.1 | 1810632 | 22-scf00517 | 22 |
| AX-158334462 | 26 | 58.54 | KV453229.1 | 1819103 | 22-scf00517 | 22 |
| AX-158334463 | 26 | 58.54 | KV453229.1 | 1819599 | 22-scf00517 | 22 |
| AX-158334465 | 26 | 58.54 | KV453229.1 | 1821307 | 22-scf00517 | 22 |
| AX-158334474 | 26 | 58.54 | KV453229.1 | 1835026 | 22-scf00517 | 22 |
| AX-158334542 | 26 | 58.54 | KV453229.1 | 1922225 | 22-scf00517 | 22 |
| AX-158334576 | 26 | 58.54 | KV453229.1 | 1963155 | 22-scf00517 | 22 |
| AX-158334581 | 26 | 58.54 | KV453229.1 | 1971087 | 22-scf00517 | 22 |
| AX-158334588 | 26 | 58.54 | KV453229.1 | 1980349 | 22-scf00517 | 22 |
| AX-157752668 | 26 | 58.54 | KV453229.1 | 1981568 | 22-scf00517 | 22 |
| AX-158334597 | 26 | 58.54 | KV453229.1 | 1989548 | 22-scf00517 | 22 |
| AX-157754089 | 26 | 58.54 | KV453229.1 | 2047050 | 22-scf00517 | 22 |
| AX-158334679 | 26 | 58.54 | KV453229.1 | 2151779 | 22-scf00517 | 22 |
| AX-158334691 | 26 | 58.54 | KV453229.1 | 2160253 | 22-scf00517 | 22 |
| AX-158334709 | 26 | 58.54 | KV453229.1 | 2180469 | 22-scf00517 | 22 |
| AX-157758324 | 26 | 58.54 | KV453229.1 | 2181197 | 22-scf00517 | 22 |
| AX-158334710 | 26 | 58.54 | KV453229.1 | 2182175 | 22-scf00517 | 22 |
| AX-158334725 | 26 | 58.54 | KV453229.1 | 2209741 | 22-scf00517 | 22 |
| AX-158334727 | 26 | 58.54 | KV453229.1 | 2211454 | 22-scf00517 | 22 |
| AX-158334730 | 26 | 58.54 | KV453229.1 | 2217388 | 22-scf00517 | 22 |

|              |    |        |            |         |             |    |
|--------------|----|--------|------------|---------|-------------|----|
| AX-158334732 | 26 | 58.54  | KV453229.1 | 2220316 | 22-scf00517 | 22 |
| AX-158334756 | 26 | 58.54  | KV453229.1 | 2253230 | 22-scf00517 | 22 |
| AX-157849429 | 26 | 58.54  | KV453229.1 | 2254666 | 22-scf00517 | 22 |
| AX-158334764 | 26 | 58.54  | KV453229.1 | 2267707 | 22-scf00517 | 22 |
| AX-157849431 | 26 | 58.54  | KV453229.1 | 2294111 | 22-scf00517 | 22 |
| AX-158334789 | 26 | 58.54  | KV453229.1 | 2298036 | 22-scf00517 | 22 |
| AX-158334806 | 26 | 58.54  | KV453229.1 | 2328453 | 22-scf00517 | 22 |
| AX-158334819 | 26 | 58.54  | KV453229.1 | 2338489 | 22-scf00517 | 22 |
| AX-158334845 | 26 | 58.54  | KV453229.1 | 2367697 | 22-scf00517 | 22 |
| AX-157739587 | 26 | 58.54  | KV453229.1 | 2368535 | 22-scf00517 | 22 |
| AX-158334852 | 26 | 58.54  | KV453229.1 | 2378185 | 22-scf00517 | 22 |
| AX-158334873 | 26 | 58.54  | KV453229.1 | 2400522 | 22-scf00517 | 22 |
| AX-158334888 | 26 | 58.54  | KV453229.1 | 2421139 | 22-scf00517 | 22 |
| AX-158334910 | 26 | 58.54  | KV453229.1 | 2443078 | 22-scf00517 | 22 |
| AX-158335052 | 26 | 58.54  | KV453229.1 | 2592210 | 22-scf00517 | 22 |
| AX-158335359 | 26 | 58.54  | KV453229.1 | 2894446 | 22-scf00517 | 22 |
| AX-158335703 | 26 | 58.54  | KV453229.1 | 3342069 | 22-scf00517 | 22 |
| AX-158333821 | 26 | 58.596 | KV453229.1 | 1186932 | 22-scf00517 | 22 |
| AX-158333530 | 26 | 58.62  | KV453229.1 | 796449  | 22-scf00517 | 22 |
| AX-158333563 | 26 | 58.62  | KV453229.1 | 845429  | 22-scf00517 | 22 |
| AX-157743600 | 26 | 58.62  | KV453229.1 | 1192550 | 22-scf00517 | 22 |
| AX-158334241 | 26 | 58.62  | KV453229.1 | 1631104 | 22-scf00517 | 22 |
| AX-158334242 | 26 | 58.62  | KV453229.1 | 1631888 | 22-scf00517 | 22 |
| AX-157726537 | 26 | 58.62  | KV453229.1 | 1892640 | 22-scf00517 | 22 |
| AX-158334647 | 26 | 58.62  | KV453229.1 | 2090782 | 22-scf00517 | 22 |
| AX-157849421 | 26 | 58.62  | KV453229.1 | 2124758 | 22-scf00517 | 22 |
| AX-158334759 | 26 | 58.62  | KV453229.1 | 2255890 | 22-scf00517 | 22 |
| AX-158331970 | 26 | 58.65  | KV453228.1 | 1815560 | 22-scf00516 | 22 |
| AX-158332857 | 26 | 58.65  | KV453229.1 | 83686   | 22-scf00517 | 22 |
| AX-158333695 | 26 | 58.65  | KV453229.1 | 1040114 | 22-scf00517 | 22 |
| AX-158333911 | 26 | 58.65  | KV453229.1 | 1292151 | 22-scf00517 | 22 |
| AX-158333913 | 26 | 58.65  | KV453229.1 | 1293236 | 22-scf00517 | 22 |
| AX-157849383 | 26 | 58.65  | KV453229.1 | 1296020 | 22-scf00517 | 22 |
| AX-158333924 | 26 | 58.65  | KV453229.1 | 1307262 | 22-scf00517 | 22 |
| AX-158333954 | 26 | 58.656 | KV453229.1 | 1328302 | 22-scf00517 | 22 |
| AX-158420190 | 26 | 58.668 | KV453229.1 | 1344016 | 22-scf00517 | 22 |
| AX-158334035 | 26 | 58.675 | KV453229.1 | 1401715 | 22-scf00517 | 22 |
| AX-158332558 | 26 | 58.696 | KV453228.1 | 2677409 | 22-scf00516 | 22 |
| AX-158333666 | 26 | 58.696 | KV453229.1 | 995835  | 22-scf00517 | 22 |
| AX-158334102 | 26 | 58.696 | KV453229.1 | 1479995 | 22-scf00517 | 22 |
| AX-157727185 | 26 | 58.696 | KV453229.1 | 1492413 | 22-scf00517 | 22 |
| AX-158334216 | 26 | 58.696 | KV453229.1 | 1610752 | 22-scf00517 | 22 |
| AX-158334221 | 26 | 58.696 | KV453229.1 | 1613069 | 22-scf00517 | 22 |
| AX-158334222 | 26 | 58.696 | KV453229.1 | 1613691 | 22-scf00517 | 22 |
| AX-158334237 | 26 | 58.696 | KV453229.1 | 1628282 | 22-scf00517 | 22 |
| AX-158334651 | 26 | 58.696 | KV453229.1 | 2097880 | 22-scf00517 | 22 |
| AX-158334652 | 26 | 58.696 | KV453229.1 | 2098885 | 22-scf00517 | 22 |
| AX-158334655 | 26 | 58.696 | KV453229.1 | 2100439 | 22-scf00517 | 22 |
| AX-158334658 | 26 | 58.696 | KV453229.1 | 2103835 | 22-scf00517 | 22 |
| AX-158334215 | 26 | 58.707 | KV453229.1 | 1610152 | 22-scf00517 | 22 |
| AX-158334220 | 26 | 58.733 | KV453229.1 | 1612713 | 22-scf00517 | 22 |

|              |    |        |            |         |             |    |
|--------------|----|--------|------------|---------|-------------|----|
| AX-157748347 | 26 | 58.759 | KV453229.1 | 483116  | 22-scf00517 | 22 |
| AX-158333375 | 26 | 58.759 | KV453229.1 | 617844  | 22-scf00517 | 22 |
| AX-158333472 | 26 | 58.759 | KV453229.1 | 719278  | 22-scf00517 | 22 |
| AX-157753428 | 26 | 58.759 | KV453229.1 | 857578  | 22-scf00517 | 22 |
| AX-158333591 | 26 | 58.759 | KV453229.1 | 889549  | 22-scf00517 | 22 |
| AX-158333627 | 26 | 58.759 | KV453229.1 | 937898  | 22-scf00517 | 22 |
| AX-158333702 | 26 | 58.759 | KV453229.1 | 1048442 | 22-scf00517 | 22 |
| AX-157757080 | 26 | 58.759 | KV453229.1 | 1079122 | 22-scf00517 | 22 |
| AX-157746930 | 26 | 58.759 | KV453229.1 | 1080565 | 22-scf00517 | 22 |
| AX-158333765 | 26 | 58.759 | KV453229.1 | 1118663 | 22-scf00517 | 22 |
| AX-158333795 | 26 | 58.759 | KV453229.1 | 1157309 | 22-scf00517 | 22 |
| AX-157718517 | 26 | 58.759 | KV453229.1 | 1393437 | 22-scf00517 | 22 |
| AX-158334244 | 26 | 58.759 | KV453229.1 | 1633197 | 22-scf00517 | 22 |
| AX-158334261 | 26 | 58.759 | KV453229.1 | 1648140 | 22-scf00517 | 22 |
| AX-158334274 | 26 | 58.759 | KV453229.1 | 1658920 | 22-scf00517 | 22 |
| AX-157723164 | 26 | 58.759 | KV453229.1 | 1662351 | 22-scf00517 | 22 |
| AX-158334296 | 26 | 58.759 | KV453229.1 | 1678495 | 22-scf00517 | 22 |
| AX-158334320 | 26 | 58.759 | KV453229.1 | 1691751 | 22-scf00517 | 22 |
| AX-158334476 | 26 | 58.759 | KV453229.1 | 1836299 | 22-scf00517 | 22 |
| AX-158334512 | 26 | 58.759 | KV453229.1 | 1880693 | 22-scf00517 | 22 |
| AX-158334516 | 26 | 58.759 | KV453229.1 | 1886085 | 22-scf00517 | 22 |
| AX-158334526 | 26 | 58.759 | KV453229.1 | 1895763 | 22-scf00517 | 22 |
| AX-157743493 | 26 | 58.759 | KV453229.1 | 1896619 | 22-scf00517 | 22 |
| AX-157722151 | 26 | 58.759 | KV453229.1 | 1902191 | 22-scf00517 | 22 |
| AX-158334541 | 26 | 58.759 | KV453229.1 | 1920789 | 22-scf00517 | 22 |
| AX-158334546 | 26 | 58.759 | KV453229.1 | 1930055 | 22-scf00517 | 22 |
| AX-158334547 | 26 | 58.759 | KV453229.1 | 1930946 | 22-scf00517 | 22 |
| AX-158334568 | 26 | 58.759 | KV453229.1 | 1957245 | 22-scf00517 | 22 |
| AX-158334599 | 26 | 58.759 | KV453229.1 | 1993256 | 22-scf00517 | 22 |
| AX-158334605 | 26 | 58.759 | KV453229.1 | 2005671 | 22-scf00517 | 22 |
| AX-158334627 | 26 | 58.759 | KV453229.1 | 2041945 | 22-scf00517 | 22 |
| AX-158334667 | 26 | 58.759 | KV453229.1 | 2123739 | 22-scf00517 | 22 |
| AX-158334682 | 26 | 58.759 | KV453229.1 | 2153582 | 22-scf00517 | 22 |
| AX-158334689 | 26 | 58.759 | KV453229.1 | 2158164 | 22-scf00517 | 22 |
| AX-158334698 | 26 | 58.759 | KV453229.1 | 2166171 | 22-scf00517 | 22 |
| AX-158334711 | 26 | 58.759 | KV453229.1 | 2184723 | 22-scf00517 | 22 |
| AX-157727544 | 26 | 58.759 | KV453229.1 | 2185679 | 22-scf00517 | 22 |
| AX-158420196 | 26 | 58.759 | KV453229.1 | 2204310 | 22-scf00517 | 22 |
| AX-158334775 | 26 | 58.759 | KV453229.1 | 2279417 | 22-scf00517 | 22 |
| AX-158388147 | 26 | 58.759 | KV453229.1 | 2310381 | 22-scf00517 | 22 |
| AX-157849433 | 26 | 58.759 | KV453229.1 | 2310904 | 22-scf00517 | 22 |
| AX-157881879 | 26 | 58.759 | KV453229.1 | 2365099 | 22-scf00517 | 22 |
| AX-158334857 | 26 | 58.759 | KV453229.1 | 2384228 | 22-scf00517 | 22 |
| AX-158334860 | 26 | 58.759 | KV453229.1 | 2388880 | 22-scf00517 | 22 |
| AX-158334865 | 26 | 58.759 | KV453229.1 | 2392661 | 22-scf00517 | 22 |
| AX-157738730 | 26 | 58.759 | KV453229.1 | 2403207 | 22-scf00517 | 22 |
| AX-158334878 | 26 | 58.759 | KV453229.1 | 2407240 | 22-scf00517 | 22 |
| AX-158334946 | 26 | 58.759 | KV453229.1 | 2483703 | 22-scf00517 | 22 |
| AX-158335102 | 26 | 58.759 | KV453229.1 | 2638600 | 22-scf00517 | 22 |
| AX-158381562 | 26 | 58.759 | KV453229.1 | 2745485 | 22-scf00517 | 22 |
| AX-158335257 | 26 | 58.759 | KV453229.1 | 2789266 | 22-scf00517 | 22 |



|              |    |        |            |         |             |    |
|--------------|----|--------|------------|---------|-------------|----|
| AX-158335324 | 26 | 58.759 | KV453229.1 | 2858161 | 22-scf00517 | 22 |
| AX-157739932 | 26 | 58.759 | KV453229.1 | 2872369 | 22-scf00517 | 22 |
| AX-158418863 | 26 | 58.759 | KV453229.1 | 2941747 | 22-scf00517 | 22 |
| AX-158335553 | 26 | 58.759 | KV453229.1 | 3137245 | 22-scf00517 | 22 |
| AX-157739366 | 26 | 58.759 | KV453229.1 | 3201673 | 22-scf00517 | 22 |
| AX-158335610 | 26 | 58.759 | KV453229.1 | 3212798 | 22-scf00517 | 22 |
| AX-158335630 | 26 | 58.759 | KV453229.1 | 3239417 | 22-scf00517 | 22 |
| AX-158335720 | 26 | 58.759 | KV453229.1 | 3370199 | 22-scf00517 | 22 |
| AX-158335755 | 26 | 58.759 | KV453229.1 | 3448748 | 22-scf00517 | 22 |
| AX-158335866 | 26 | 58.759 | KV453229.1 | 3631149 | 22-scf00517 | 22 |
| AX-158335891 | 26 | 58.759 | KV453229.1 | 3664611 | 22-scf00517 | 22 |
| AX-157849573 | 26 | 58.759 | KV453229.1 | 3792343 | 22-scf00517 | 22 |
| AX-157772925 | 26 | 58.87  | KV453229.1 | 2452668 | 22-scf00517 | 22 |
| AX-158334947 | 26 | 58.87  | KV453229.1 | 2485235 | 22-scf00517 | 22 |
| AX-158335978 | 26 | 58.87  | KV453229.1 | 3799478 | 22-scf00517 | 22 |
| AX-158336014 | 26 | 58.87  | KV453229.1 | 3834102 | 22-scf00517 | 22 |
| AX-158336021 | 26 | 58.87  | KV453229.1 | 3843953 | 22-scf00517 | 22 |
| AX-158336030 | 26 | 58.87  | KV453229.1 | 3853712 | 22-scf00517 | 22 |
| AX-158336413 | 26 | 58.87  | KV453229.1 | 4466431 | 22-scf00517 | 22 |
| AX-157771855 | 26 | 58.98  | KV453228.1 | 2851096 | 22-scf00516 | 22 |
| AX-158332717 | 26 | 58.98  | KV453228.1 | 2871080 | 22-scf00516 | 22 |
| AX-157745835 | 26 | 58.98  | KV453228.1 | 2939920 | 22-scf00516 | 22 |
| AX-157867980 | 26 | 58.98  | KV453229.1 | 70832   | 22-scf00517 | 22 |
| AX-158333016 | 26 | 58.98  | KV453229.1 | 257128  | 22-scf00517 | 22 |
| AX-158333024 | 26 | 58.98  | KV453229.1 | 264767  | 22-scf00517 | 22 |
| AX-158333117 | 26 | 58.98  | KV453229.1 | 349260  | 22-scf00517 | 22 |
| AX-158333152 | 26 | 58.98  | KV453229.1 | 391369  | 22-scf00517 | 22 |
| AX-158334248 | 26 | 58.98  | KV453229.1 | 1637987 | 22-scf00517 | 22 |
| AX-158334287 | 26 | 58.98  | KV453229.1 | 1672129 | 22-scf00517 | 22 |
| AX-158334648 | 26 | 58.98  | KV453229.1 | 2092397 | 22-scf00517 | 22 |
| AX-158334738 | 26 | 58.98  | KV453229.1 | 2231219 | 22-scf00517 | 22 |
| AX-158334743 | 26 | 58.98  | KV453229.1 | 2237130 | 22-scf00517 | 22 |
| AX-157746208 | 26 | 58.98  | KV453229.1 | 2296929 | 22-scf00517 | 22 |
| AX-158334902 | 26 | 58.98  | KV453229.1 | 2436316 | 22-scf00517 | 22 |
| AX-157742946 | 26 | 58.98  | KV453229.1 | 2530977 | 22-scf00517 | 22 |
| AX-157849441 | 26 | 58.98  | KV453229.1 | 2532045 | 22-scf00517 | 22 |
| AX-157701416 | 26 | 58.98  | KV453229.1 | 2533916 | 22-scf00517 | 22 |
| AX-157718895 | 26 | 58.98  | KV453229.1 | 2536853 | 22-scf00517 | 22 |
| AX-158335001 | 26 | 58.98  | KV453229.1 | 2545190 | 22-scf00517 | 22 |
| AX-158335016 | 26 | 58.98  | KV453229.1 | 2559826 | 22-scf00517 | 22 |
| AX-158335017 | 26 | 58.98  | KV453229.1 | 2560072 | 22-scf00517 | 22 |
| AX-158335018 | 26 | 58.98  | KV453229.1 | 2560723 | 22-scf00517 | 22 |
| AX-158335019 | 26 | 58.98  | KV453229.1 | 2561115 | 22-scf00517 | 22 |
| AX-158335021 | 26 | 58.98  | KV453229.1 | 2562218 | 22-scf00517 | 22 |
| AX-157849444 | 26 | 58.98  | KV453229.1 | 2596318 | 22-scf00517 | 22 |
| AX-158335075 | 26 | 58.98  | KV453229.1 | 2615168 | 22-scf00517 | 22 |
| AX-158335091 | 26 | 58.98  | KV453229.1 | 2627878 | 22-scf00517 | 22 |
| AX-158335095 | 26 | 58.98  | KV453229.1 | 2631521 | 22-scf00517 | 22 |
| AX-158335121 | 26 | 58.98  | KV453229.1 | 2654129 | 22-scf00517 | 22 |
| AX-157849447 | 26 | 58.98  | KV453229.1 | 2655159 | 22-scf00517 | 22 |
| AX-158335123 | 26 | 58.98  | KV453229.1 | 2656634 | 22-scf00517 | 22 |

|              |    |       |            |         |             |    |
|--------------|----|-------|------------|---------|-------------|----|
| AX-157849448 | 26 | 58.98 | KV453229.1 | 2671936 | 22-scf00517 | 22 |
| AX-158335153 | 26 | 58.98 | KV453229.1 | 2681062 | 22-scf00517 | 22 |
| AX-158335191 | 26 | 58.98 | KV453229.1 | 2717421 | 22-scf00517 | 22 |
| AX-157738692 | 26 | 58.98 | KV453229.1 | 2717542 | 22-scf00517 | 22 |
| AX-158335192 | 26 | 58.98 | KV453229.1 | 2719318 | 22-scf00517 | 22 |
| AX-157849456 | 26 | 58.98 | KV453229.1 | 2720652 | 22-scf00517 | 22 |
| AX-158335193 | 26 | 58.98 | KV453229.1 | 2720832 | 22-scf00517 | 22 |
| AX-158335194 | 26 | 58.98 | KV453229.1 | 2721555 | 22-scf00517 | 22 |
| AX-158335196 | 26 | 58.98 | KV453229.1 | 2722816 | 22-scf00517 | 22 |
| AX-158335197 | 26 | 58.98 | KV453229.1 | 2724480 | 22-scf00517 | 22 |
| AX-158335202 | 26 | 58.98 | KV453229.1 | 2731721 | 22-scf00517 | 22 |
| AX-157743241 | 26 | 58.98 | KV453229.1 | 2731843 | 22-scf00517 | 22 |
| AX-158335205 | 26 | 58.98 | KV453229.1 | 2735414 | 22-scf00517 | 22 |
| AX-158335214 | 26 | 58.98 | KV453229.1 | 2745969 | 22-scf00517 | 22 |
| AX-158335220 | 26 | 58.98 | KV453229.1 | 2752043 | 22-scf00517 | 22 |
| AX-158335268 | 26 | 58.98 | KV453229.1 | 2800403 | 22-scf00517 | 22 |
| AX-158335291 | 26 | 58.98 | KV453229.1 | 2830667 | 22-scf00517 | 22 |
| AX-158335309 | 26 | 58.98 | KV453229.1 | 2847573 | 22-scf00517 | 22 |
| AX-158335313 | 26 | 58.98 | KV453229.1 | 2850435 | 22-scf00517 | 22 |
| AX-158335315 | 26 | 58.98 | KV453229.1 | 2853031 | 22-scf00517 | 22 |
| AX-158335318 | 26 | 58.98 | KV453229.1 | 2854929 | 22-scf00517 | 22 |
| AX-157873712 | 26 | 58.98 | KV453229.1 | 2864894 | 22-scf00517 | 22 |
| AX-157849478 | 26 | 58.98 | KV453229.1 | 2867562 | 22-scf00517 | 22 |
| AX-158335354 | 26 | 58.98 | KV453229.1 | 2886283 | 22-scf00517 | 22 |
| AX-158381563 | 26 | 58.98 | KV453229.1 | 2887805 | 22-scf00517 | 22 |
| AX-158335379 | 26 | 58.98 | KV453229.1 | 2922908 | 22-scf00517 | 22 |
| AX-157867987 | 26 | 58.98 | KV453229.1 | 3011136 | 22-scf00517 | 22 |
| AX-158335458 | 26 | 58.98 | KV453229.1 | 3036938 | 22-scf00517 | 22 |
| AX-158335460 | 26 | 58.98 | KV453229.1 | 3039590 | 22-scf00517 | 22 |
| AX-157888596 | 26 | 58.98 | KV453229.1 | 3084161 | 22-scf00517 | 22 |
| AX-158335511 | 26 | 58.98 | KV453229.1 | 3086582 | 22-scf00517 | 22 |
| AX-158335546 | 26 | 58.98 | KV453229.1 | 3129397 | 22-scf00517 | 22 |
| AX-158335582 | 26 | 58.98 | KV453229.1 | 3172598 | 22-scf00517 | 22 |
| AX-158335637 | 26 | 58.98 | KV453229.1 | 3245690 | 22-scf00517 | 22 |
| AX-158335646 | 26 | 58.98 | KV453229.1 | 3257698 | 22-scf00517 | 22 |
| AX-158335670 | 26 | 58.98 | KV453229.1 | 3286130 | 22-scf00517 | 22 |
| AX-158335695 | 26 | 58.98 | KV453229.1 | 3329706 | 22-scf00517 | 22 |
| AX-158335707 | 26 | 58.98 | KV453229.1 | 3347892 | 22-scf00517 | 22 |
| AX-158335717 | 26 | 58.98 | KV453229.1 | 3364673 | 22-scf00517 | 22 |
| AX-157849510 | 26 | 58.98 | KV453229.1 | 3388942 | 22-scf00517 | 22 |
| AX-157849529 | 26 | 58.98 | KV453229.1 | 3466734 | 22-scf00517 | 22 |
| AX-158335767 | 26 | 58.98 | KV453229.1 | 3474848 | 22-scf00517 | 22 |
| AX-158335770 | 26 | 58.98 | KV453229.1 | 3478960 | 22-scf00517 | 22 |
| AX-158335784 | 26 | 58.98 | KV453229.1 | 3494435 | 22-scf00517 | 22 |
| AX-157699296 | 26 | 58.98 | KV453229.1 | 3498667 | 22-scf00517 | 22 |
| AX-158335788 | 26 | 58.98 | KV453229.1 | 3502290 | 22-scf00517 | 22 |
| AX-158335809 | 26 | 58.98 | KV453229.1 | 3539146 | 22-scf00517 | 22 |
| AX-157849533 | 26 | 58.98 | KV453229.1 | 3544459 | 22-scf00517 | 22 |
| AX-158335825 | 26 | 58.98 | KV453229.1 | 3564381 | 22-scf00517 | 22 |
| AX-157861729 | 26 | 58.98 | KV453229.1 | 3644193 | 22-scf00517 | 22 |
| AX-158335884 | 26 | 58.98 | KV453229.1 | 3653860 | 22-scf00517 | 22 |

|              |    |       |            |         |             |    |
|--------------|----|-------|------------|---------|-------------|----|
| AX-158335888 | 26 | 58.98 | KV453229.1 | 3659723 | 22-scf00517 | 22 |
| AX-158335890 | 26 | 58.98 | KV453229.1 | 3661572 | 22-scf00517 | 22 |
| AX-158335920 | 26 | 58.98 | KV453229.1 | 3711216 | 22-scf00517 | 22 |
| AX-157849557 | 26 | 58.98 | KV453229.1 | 3722302 | 22-scf00517 | 22 |
| AX-158335939 | 26 | 58.98 | KV453229.1 | 3739558 | 22-scf00517 | 22 |
| AX-157714396 | 26 | 58.98 | KV453229.1 | 3765977 | 22-scf00517 | 22 |
| AX-158336005 | 26 | 58.98 | KV453229.1 | 3824450 | 22-scf00517 | 22 |
| AX-158336013 | 26 | 58.98 | KV453229.1 | 3833896 | 22-scf00517 | 22 |
| AX-157752016 | 26 | 58.98 | KV453229.1 | 3887520 | 22-scf00517 | 22 |
| AX-158336154 | 26 | 58.98 | KV453229.1 | 4057363 | 22-scf00517 | 22 |
| AX-158336198 | 26 | 58.98 | KV453229.1 | 4137464 | 22-scf00517 | 22 |
| AX-157757794 | 26 | 58.98 | KV453229.1 | 4138961 | 22-scf00517 | 22 |
| AX-158336248 | 26 | 58.98 | KV453229.1 | 4205773 | 22-scf00517 | 22 |
| AX-158336257 | 26 | 58.98 | KV453229.1 | 4213023 | 22-scf00517 | 22 |
| AX-158336260 | 26 | 58.98 | KV453229.1 | 4218477 | 22-scf00517 | 22 |
| AX-158336264 | 26 | 58.98 | KV453229.1 | 4224566 | 22-scf00517 | 22 |
| AX-158336300 | 26 | 58.98 | KV453229.1 | 4271751 | 22-scf00517 | 22 |
| AX-158336330 | 26 | 58.98 | KV453229.1 | 4340114 | 22-scf00517 | 22 |
| AX-157775106 | 26 | 58.98 | KV453229.1 | 4397249 | 22-scf00517 | 22 |
| AX-157710222 | 26 | 58.98 | KV453229.1 | 4399354 | 22-scf00517 | 22 |
| AX-158336435 | 26 | 58.98 | KV453229.1 | 4494396 | 22-scf00517 | 22 |
| AX-158336526 | 26 | 58.98 | KV453229.1 | 4619656 | 22-scf00517 | 22 |
| AX-157888601 | 26 | 58.98 | KV453229.1 | 4625997 | 22-scf00517 | 22 |
| AX-157752594 | 26 | 58.98 | KV453229.1 | 4672491 | 22-scf00517 | 22 |
| AX-158336607 | 26 | 58.98 | KV453229.1 | 4721466 | 22-scf00517 | 22 |
| AX-158336644 | 26 | 58.98 | KV453229.1 | 4772180 | 22-scf00517 | 22 |
| AX-158418916 | 26 | 58.98 | KV453229.1 | 4778607 | 22-scf00517 | 22 |
| AX-158336664 | 26 | 58.98 | KV453229.1 | 4806554 | 22-scf00517 | 22 |
| AX-157849623 | 26 | 58.98 | KV453229.1 | 4819729 | 22-scf00517 | 22 |
| AX-158336677 | 26 | 58.98 | KV453229.1 | 4826101 | 22-scf00517 | 22 |
| AX-158336681 | 26 | 58.98 | KV453229.1 | 4830059 | 22-scf00517 | 22 |
| AX-158336682 | 26 | 58.98 | KV453229.1 | 4830516 | 22-scf00517 | 22 |
| AX-158336698 | 26 | 58.98 | KV453229.1 | 4845675 | 22-scf00517 | 22 |
| AX-158336699 | 26 | 58.98 | KV453229.1 | 4846651 | 22-scf00517 | 22 |
| AX-158336700 | 26 | 58.98 | KV453229.1 | 4847004 | 22-scf00517 | 22 |
| AX-158336703 | 26 | 58.98 | KV453229.1 | 4850213 | 22-scf00517 | 22 |
| AX-158336709 | 26 | 58.98 | KV453229.1 | 4859229 | 22-scf00517 | 22 |
| AX-157881969 | 26 | 58.98 | KV453229.1 | 4894681 | 22-scf00517 | 22 |
| AX-158336834 | 26 | 58.98 | KV453229.1 | 5076763 | 22-scf00517 | 22 |
| AX-158336835 | 26 | 58.98 | KV453229.1 | 5079860 | 22-scf00517 | 22 |
| AX-158336839 | 26 | 58.98 | KV453229.1 | 5084680 | 22-scf00517 | 22 |
| AX-158336886 | 26 | 58.98 | KV453229.1 | 5193038 | 22-scf00517 | 22 |
| AX-158336893 | 26 | 58.98 | KV453229.1 | 5205550 | 22-scf00517 | 22 |
| AX-158336913 | 26 | 58.98 | KV453229.1 | 5230871 | 22-scf00517 | 22 |
| AX-157720978 | 26 | 58.98 | KV453229.1 | 5293250 | 22-scf00517 | 22 |
| AX-158423762 | 26 | 58.98 | KV453229.1 | 5352293 | 22-scf00517 | 22 |
| AX-157754067 | 26 | 58.98 | KV453229.1 | 5552630 | 22-scf00517 | 22 |
| AX-157849659 | 26 | 58.98 | KV453229.1 | 5622899 | 22-scf00517 | 22 |
| AX-158337186 | 26 | 58.98 | KV453229.1 | 5628899 | 22-scf00517 | 22 |
| AX-158337229 | 26 | 58.98 | KV453229.1 | 5680351 | 22-scf00517 | 22 |
| AX-158337269 | 26 | 58.98 | KV453229.1 | 5731920 | 22-scf00517 | 22 |

|              |    |        |            |         |             |    |
|--------------|----|--------|------------|---------|-------------|----|
| AX-158333157 | 26 | 59.023 | KV453229.1 | 396070  | 22-scf00517 | 22 |
| AX-158335284 | 26 | 59.023 | KV453229.1 | 2824005 | 22-scf00517 | 22 |
| AX-158335297 | 26 | 59.033 | KV453229.1 | 2836437 | 22-scf00517 | 22 |
| AX-158335312 | 26 | 59.044 | KV453229.1 | 2850029 | 22-scf00517 | 22 |
| AX-158335411 | 26 | 59.057 | KV453229.1 | 2967077 | 22-scf00517 | 22 |
| AX-158335426 | 26 | 59.067 | KV453229.1 | 2990137 | 22-scf00517 | 22 |
| AX-158332634 | 26 | 59.09  | KV453228.1 | 2781340 | 22-scf00516 | 22 |
| AX-157861606 | 26 | 59.09  | KV453229.1 | 6570    | 22-scf00517 | 22 |
| AX-158332826 | 26 | 59.09  | KV453229.1 | 42687   | 22-scf00517 | 22 |
| AX-158333267 | 26 | 59.09  | KV453229.1 | 504176  | 22-scf00517 | 22 |
| AX-158333408 | 26 | 59.09  | KV453229.1 | 648841  | 22-scf00517 | 22 |
| AX-157758578 | 26 | 59.09  | KV453229.1 | 952090  | 22-scf00517 | 22 |
| AX-158333767 | 26 | 59.09  | KV453229.1 | 1120861 | 22-scf00517 | 22 |
| AX-157775598 | 26 | 59.09  | KV453229.1 | 1121087 | 22-scf00517 | 22 |
| AX-158333777 | 26 | 59.09  | KV453229.1 | 1131999 | 22-scf00517 | 22 |
| AX-157718404 | 26 | 59.09  | KV453229.1 | 1412142 | 22-scf00517 | 22 |
| AX-158334098 | 26 | 59.09  | KV453229.1 | 1474664 | 22-scf00517 | 22 |
| AX-158334693 | 26 | 59.09  | KV453229.1 | 2161467 | 22-scf00517 | 22 |
| AX-157861691 | 26 | 59.09  | KV453229.1 | 2199601 | 22-scf00517 | 22 |
| AX-158334939 | 26 | 59.09  | KV453229.1 | 2477792 | 22-scf00517 | 22 |
| AX-158334968 | 26 | 59.09  | KV453229.1 | 2500618 | 22-scf00517 | 22 |
| AX-158334982 | 26 | 59.09  | KV453229.1 | 2517770 | 22-scf00517 | 22 |
| AX-158335032 | 26 | 59.09  | KV453229.1 | 2573411 | 22-scf00517 | 22 |
| AX-158335041 | 26 | 59.09  | KV453229.1 | 2582030 | 22-scf00517 | 22 |
| AX-158335048 | 26 | 59.09  | KV453229.1 | 2587260 | 22-scf00517 | 22 |
| AX-158335055 | 26 | 59.09  | KV453229.1 | 2595821 | 22-scf00517 | 22 |
| AX-157849445 | 26 | 59.09  | KV453229.1 | 2597197 | 22-scf00517 | 22 |
| AX-158335056 | 26 | 59.09  | KV453229.1 | 2597299 | 22-scf00517 | 22 |
| AX-158335062 | 26 | 59.09  | KV453229.1 | 2601908 | 22-scf00517 | 22 |
| AX-157745635 | 26 | 59.09  | KV453229.1 | 2618001 | 22-scf00517 | 22 |
| AX-158335089 | 26 | 59.09  | KV453229.1 | 2626828 | 22-scf00517 | 22 |
| AX-158335157 | 26 | 59.09  | KV453229.1 | 2684615 | 22-scf00517 | 22 |
| AX-158335158 | 26 | 59.09  | KV453229.1 | 2685029 | 22-scf00517 | 22 |
| AX-158335190 | 26 | 59.09  | KV453229.1 | 2717190 | 22-scf00517 | 22 |
| AX-157849457 | 26 | 59.09  | KV453229.1 | 2725363 | 22-scf00517 | 22 |
| AX-158335200 | 26 | 59.09  | KV453229.1 | 2728963 | 22-scf00517 | 22 |
| AX-158335203 | 26 | 59.09  | KV453229.1 | 2732597 | 22-scf00517 | 22 |
| AX-157733206 | 26 | 59.09  | KV453229.1 | 2734045 | 22-scf00517 | 22 |
| AX-157849463 | 26 | 59.09  | KV453229.1 | 2736726 | 22-scf00517 | 22 |
| AX-157744800 | 26 | 59.09  | KV453229.1 | 2740385 | 22-scf00517 | 22 |
| AX-158335210 | 26 | 59.09  | KV453229.1 | 2741413 | 22-scf00517 | 22 |
| AX-157719068 | 26 | 59.09  | KV453229.1 | 2743854 | 22-scf00517 | 22 |
| AX-158335215 | 26 | 59.09  | KV453229.1 | 2746515 | 22-scf00517 | 22 |
| AX-158335307 | 26 | 59.09  | KV453229.1 | 2845792 | 22-scf00517 | 22 |
| AX-158335316 | 26 | 59.09  | KV453229.1 | 2854088 | 22-scf00517 | 22 |
| AX-158335332 | 26 | 59.09  | KV453229.1 | 2865368 | 22-scf00517 | 22 |
| AX-158335338 | 26 | 59.09  | KV453229.1 | 2872209 | 22-scf00517 | 22 |
| AX-158335365 | 26 | 59.09  | KV453229.1 | 2900752 | 22-scf00517 | 22 |
| AX-158335417 | 26 | 59.09  | KV453229.1 | 2970600 | 22-scf00517 | 22 |
| AX-158335440 | 26 | 59.09  | KV453229.1 | 3011026 | 22-scf00517 | 22 |
| AX-158335441 | 26 | 59.09  | KV453229.1 | 3012049 | 22-scf00517 | 22 |

|              |    |       |            |         |             |    |
|--------------|----|-------|------------|---------|-------------|----|
| AX-158335470 | 26 | 59.09 | KV453229.1 | 3046823 | 22-scf00517 | 22 |
| AX-158335472 | 26 | 59.09 | KV453229.1 | 3047267 | 22-scf00517 | 22 |
| AX-157873714 | 26 | 59.09 | KV453229.1 | 3049240 | 22-scf00517 | 22 |
| AX-158335478 | 26 | 59.09 | KV453229.1 | 3053735 | 22-scf00517 | 22 |
| AX-157713567 | 26 | 59.09 | KV453229.1 | 3061673 | 22-scf00517 | 22 |
| AX-158335487 | 26 | 59.09 | KV453229.1 | 3063198 | 22-scf00517 | 22 |
| AX-157718713 | 26 | 59.09 | KV453229.1 | 3064461 | 22-scf00517 | 22 |
| AX-158335489 | 26 | 59.09 | KV453229.1 | 3065236 | 22-scf00517 | 22 |
| AX-158335490 | 26 | 59.09 | KV453229.1 | 3067142 | 22-scf00517 | 22 |
| AX-158335491 | 26 | 59.09 | KV453229.1 | 3068439 | 22-scf00517 | 22 |
| AX-158335493 | 26 | 59.09 | KV453229.1 | 3070888 | 22-scf00517 | 22 |
| AX-158335495 | 26 | 59.09 | KV453229.1 | 3072256 | 22-scf00517 | 22 |
| AX-158335498 | 26 | 59.09 | KV453229.1 | 3074394 | 22-scf00517 | 22 |
| AX-158335501 | 26 | 59.09 | KV453229.1 | 3077468 | 22-scf00517 | 22 |
| AX-158335504 | 26 | 59.09 | KV453229.1 | 3081779 | 22-scf00517 | 22 |
| AX-158335507 | 26 | 59.09 | KV453229.1 | 3083808 | 22-scf00517 | 22 |
| AX-158335510 | 26 | 59.09 | KV453229.1 | 3085853 | 22-scf00517 | 22 |
| AX-158335513 | 26 | 59.09 | KV453229.1 | 3088943 | 22-scf00517 | 22 |
| AX-158335514 | 26 | 59.09 | KV453229.1 | 3089855 | 22-scf00517 | 22 |
| AX-158335523 | 26 | 59.09 | KV453229.1 | 3101236 | 22-scf00517 | 22 |
| AX-158335524 | 26 | 59.09 | KV453229.1 | 3102337 | 22-scf00517 | 22 |
| AX-158335525 | 26 | 59.09 | KV453229.1 | 3103109 | 22-scf00517 | 22 |
| AX-158335526 | 26 | 59.09 | KV453229.1 | 3103561 | 22-scf00517 | 22 |
| AX-158335530 | 26 | 59.09 | KV453229.1 | 3109870 | 22-scf00517 | 22 |
| AX-158335531 | 26 | 59.09 | KV453229.1 | 3110121 | 22-scf00517 | 22 |
| AX-158335532 | 26 | 59.09 | KV453229.1 | 3110646 | 22-scf00517 | 22 |
| AX-158335533 | 26 | 59.09 | KV453229.1 | 3111552 | 22-scf00517 | 22 |
| AX-158335537 | 26 | 59.09 | KV453229.1 | 3115904 | 22-scf00517 | 22 |
| AX-158335538 | 26 | 59.09 | KV453229.1 | 3117233 | 22-scf00517 | 22 |
| AX-158335540 | 26 | 59.09 | KV453229.1 | 3119865 | 22-scf00517 | 22 |
| AX-157861716 | 26 | 59.09 | KV453229.1 | 3122596 | 22-scf00517 | 22 |
| AX-158335543 | 26 | 59.09 | KV453229.1 | 3123093 | 22-scf00517 | 22 |
| AX-158335544 | 26 | 59.09 | KV453229.1 | 3125232 | 22-scf00517 | 22 |
| AX-157718270 | 26 | 59.09 | KV453229.1 | 3126794 | 22-scf00517 | 22 |
| AX-158335545 | 26 | 59.09 | KV453229.1 | 3128119 | 22-scf00517 | 22 |
| AX-158335547 | 26 | 59.09 | KV453229.1 | 3130402 | 22-scf00517 | 22 |
| AX-158335552 | 26 | 59.09 | KV453229.1 | 3136060 | 22-scf00517 | 22 |
| AX-158335555 | 26 | 59.09 | KV453229.1 | 3140604 | 22-scf00517 | 22 |
| AX-158335556 | 26 | 59.09 | KV453229.1 | 3141274 | 22-scf00517 | 22 |
| AX-158335557 | 26 | 59.09 | KV453229.1 | 3142433 | 22-scf00517 | 22 |
| AX-157861717 | 26 | 59.09 | KV453229.1 | 3146972 | 22-scf00517 | 22 |
| AX-158335561 | 26 | 59.09 | KV453229.1 | 3147625 | 22-scf00517 | 22 |
| AX-157749437 | 26 | 59.09 | KV453229.1 | 3148368 | 22-scf00517 | 22 |
| AX-158335562 | 26 | 59.09 | KV453229.1 | 3148730 | 22-scf00517 | 22 |
| AX-158335565 | 26 | 59.09 | KV453229.1 | 3152244 | 22-scf00517 | 22 |
| AX-158335566 | 26 | 59.09 | KV453229.1 | 3153024 | 22-scf00517 | 22 |
| AX-158335567 | 26 | 59.09 | KV453229.1 | 3154189 | 22-scf00517 | 22 |
| AX-157861718 | 26 | 59.09 | KV453229.1 | 3154748 | 22-scf00517 | 22 |
| AX-158335569 | 26 | 59.09 | KV453229.1 | 3156545 | 22-scf00517 | 22 |
| AX-158335572 | 26 | 59.09 | KV453229.1 | 3161243 | 22-scf00517 | 22 |
| AX-157861719 | 26 | 59.09 | KV453229.1 | 3164366 | 22-scf00517 | 22 |

|              |    |       |            |         |             |    |
|--------------|----|-------|------------|---------|-------------|----|
| AX-158335578 | 26 | 59.09 | KV453229.1 | 3168593 | 22-scf00517 | 22 |
| AX-158335581 | 26 | 59.09 | KV453229.1 | 3171889 | 22-scf00517 | 22 |
| AX-158335583 | 26 | 59.09 | KV453229.1 | 3173023 | 22-scf00517 | 22 |
| AX-158335584 | 26 | 59.09 | KV453229.1 | 3175823 | 22-scf00517 | 22 |
| AX-158335586 | 26 | 59.09 | KV453229.1 | 3179887 | 22-scf00517 | 22 |
| AX-158335587 | 26 | 59.09 | KV453229.1 | 3180581 | 22-scf00517 | 22 |
| AX-157861720 | 26 | 59.09 | KV453229.1 | 3183185 | 22-scf00517 | 22 |
| AX-157861721 | 26 | 59.09 | KV453229.1 | 3184971 | 22-scf00517 | 22 |
| AX-158335589 | 26 | 59.09 | KV453229.1 | 3185479 | 22-scf00517 | 22 |
| AX-157849492 | 26 | 59.09 | KV453229.1 | 3188707 | 22-scf00517 | 22 |
| AX-158335592 | 26 | 59.09 | KV453229.1 | 3191828 | 22-scf00517 | 22 |
| AX-158335593 | 26 | 59.09 | KV453229.1 | 3192212 | 22-scf00517 | 22 |
| AX-158335594 | 26 | 59.09 | KV453229.1 | 3192903 | 22-scf00517 | 22 |
| AX-158335595 | 26 | 59.09 | KV453229.1 | 3194278 | 22-scf00517 | 22 |
| AX-158335596 | 26 | 59.09 | KV453229.1 | 3195607 | 22-scf00517 | 22 |
| AX-158335597 | 26 | 59.09 | KV453229.1 | 3195913 | 22-scf00517 | 22 |
| AX-158335598 | 26 | 59.09 | KV453229.1 | 3196559 | 22-scf00517 | 22 |
| AX-158335600 | 26 | 59.09 | KV453229.1 | 3199173 | 22-scf00517 | 22 |
| AX-158335669 | 26 | 59.09 | KV453229.1 | 3285599 | 22-scf00517 | 22 |
| AX-158335674 | 26 | 59.09 | KV453229.1 | 3296221 | 22-scf00517 | 22 |
| AX-157849502 | 26 | 59.09 | KV453229.1 | 3300855 | 22-scf00517 | 22 |
| AX-158335678 | 26 | 59.09 | KV453229.1 | 3301852 | 22-scf00517 | 22 |
| AX-158335679 | 26 | 59.09 | KV453229.1 | 3302346 | 22-scf00517 | 22 |
| AX-157849503 | 26 | 59.09 | KV453229.1 | 3303968 | 22-scf00517 | 22 |
| AX-158335680 | 26 | 59.09 | KV453229.1 | 3304024 | 22-scf00517 | 22 |
| AX-158335685 | 26 | 59.09 | KV453229.1 | 3315158 | 22-scf00517 | 22 |
| AX-157849506 | 26 | 59.09 | KV453229.1 | 3341653 | 22-scf00517 | 22 |
| AX-158335714 | 26 | 59.09 | KV453229.1 | 3356094 | 22-scf00517 | 22 |
| AX-158335715 | 26 | 59.09 | KV453229.1 | 3359440 | 22-scf00517 | 22 |
| AX-157775658 | 26 | 59.09 | KV453229.1 | 3369578 | 22-scf00517 | 22 |
| AX-158335719 | 26 | 59.09 | KV453229.1 | 3369834 | 22-scf00517 | 22 |
| AX-158335721 | 26 | 59.09 | KV453229.1 | 3370427 | 22-scf00517 | 22 |
| AX-158381564 | 26 | 59.09 | KV453229.1 | 3381358 | 22-scf00517 | 22 |
| AX-157726580 | 26 | 59.09 | KV453229.1 | 3381857 | 22-scf00517 | 22 |
| AX-157849511 | 26 | 59.09 | KV453229.1 | 3390503 | 22-scf00517 | 22 |
| AX-157849515 | 26 | 59.09 | KV453229.1 | 3397971 | 22-scf00517 | 22 |
| AX-158335732 | 26 | 59.09 | KV453229.1 | 3415711 | 22-scf00517 | 22 |
| AX-158335734 | 26 | 59.09 | KV453229.1 | 3417497 | 22-scf00517 | 22 |
| AX-157849518 | 26 | 59.09 | KV453229.1 | 3419305 | 22-scf00517 | 22 |
| AX-158335736 | 26 | 59.09 | KV453229.1 | 3420028 | 22-scf00517 | 22 |
| AX-158335738 | 26 | 59.09 | KV453229.1 | 3421182 | 22-scf00517 | 22 |
| AX-158335739 | 26 | 59.09 | KV453229.1 | 3421611 | 22-scf00517 | 22 |
| AX-157849520 | 26 | 59.09 | KV453229.1 | 3422338 | 22-scf00517 | 22 |
| AX-158335740 | 26 | 59.09 | KV453229.1 | 3422614 | 22-scf00517 | 22 |
| AX-157849521 | 26 | 59.09 | KV453229.1 | 3424028 | 22-scf00517 | 22 |
| AX-157739354 | 26 | 59.09 | KV453229.1 | 3424081 | 22-scf00517 | 22 |
| AX-157849522 | 26 | 59.09 | KV453229.1 | 3424818 | 22-scf00517 | 22 |
| AX-158335751 | 26 | 59.09 | KV453229.1 | 3441809 | 22-scf00517 | 22 |
| AX-157713306 | 26 | 59.09 | KV453229.1 | 3461915 | 22-scf00517 | 22 |
| AX-158335768 | 26 | 59.09 | KV453229.1 | 3477428 | 22-scf00517 | 22 |
| AX-158335773 | 26 | 59.09 | KV453229.1 | 3482547 | 22-scf00517 | 22 |

|              |    |       |            |         |             |    |
|--------------|----|-------|------------|---------|-------------|----|
| AX-158335774 | 26 | 59.09 | KV453229.1 | 3483617 | 22-scf00517 | 22 |
| AX-158335776 | 26 | 59.09 | KV453229.1 | 3486192 | 22-scf00517 | 22 |
| AX-158335782 | 26 | 59.09 | KV453229.1 | 3493053 | 22-scf00517 | 22 |
| AX-158335795 | 26 | 59.09 | KV453229.1 | 3513620 | 22-scf00517 | 22 |
| AX-158335797 | 26 | 59.09 | KV453229.1 | 3515450 | 22-scf00517 | 22 |
| AX-158335798 | 26 | 59.09 | KV453229.1 | 3516067 | 22-scf00517 | 22 |
| AX-158335799 | 26 | 59.09 | KV453229.1 | 3516877 | 22-scf00517 | 22 |
| AX-158418872 | 26 | 59.09 | KV453229.1 | 3518786 | 22-scf00517 | 22 |
| AX-158335800 | 26 | 59.09 | KV453229.1 | 3519982 | 22-scf00517 | 22 |
| AX-158335804 | 26 | 59.09 | KV453229.1 | 3535556 | 22-scf00517 | 22 |
| AX-158335806 | 26 | 59.09 | KV453229.1 | 3536458 | 22-scf00517 | 22 |
| AX-158335807 | 26 | 59.09 | KV453229.1 | 3537526 | 22-scf00517 | 22 |
| AX-158335808 | 26 | 59.09 | KV453229.1 | 3538355 | 22-scf00517 | 22 |
| AX-158335811 | 26 | 59.09 | KV453229.1 | 3541705 | 22-scf00517 | 22 |
| AX-158335813 | 26 | 59.09 | KV453229.1 | 3542453 | 22-scf00517 | 22 |
| AX-157867996 | 26 | 59.09 | KV453229.1 | 3547332 | 22-scf00517 | 22 |
| AX-158335817 | 26 | 59.09 | KV453229.1 | 3554128 | 22-scf00517 | 22 |
| AX-158335826 | 26 | 59.09 | KV453229.1 | 3565960 | 22-scf00517 | 22 |
| AX-158335827 | 26 | 59.09 | KV453229.1 | 3566202 | 22-scf00517 | 22 |
| AX-157849540 | 26 | 59.09 | KV453229.1 | 3578641 | 22-scf00517 | 22 |
| AX-158335839 | 26 | 59.09 | KV453229.1 | 3579607 | 22-scf00517 | 22 |
| AX-158418875 | 26 | 59.09 | KV453229.1 | 3580788 | 22-scf00517 | 22 |
| AX-158335849 | 26 | 59.09 | KV453229.1 | 3599789 | 22-scf00517 | 22 |
| AX-158335854 | 26 | 59.09 | KV453229.1 | 3607450 | 22-scf00517 | 22 |
| AX-158335874 | 26 | 59.09 | KV453229.1 | 3643564 | 22-scf00517 | 22 |
| AX-158335875 | 26 | 59.09 | KV453229.1 | 3643915 | 22-scf00517 | 22 |
| AX-158335887 | 26 | 59.09 | KV453229.1 | 3658539 | 22-scf00517 | 22 |
| AX-158335889 | 26 | 59.09 | KV453229.1 | 3659972 | 22-scf00517 | 22 |
| AX-158418879 | 26 | 59.09 | KV453229.1 | 3708930 | 22-scf00517 | 22 |
| AX-157849569 | 26 | 59.09 | KV453229.1 | 3772440 | 22-scf00517 | 22 |
| AX-158335963 | 26 | 59.09 | KV453229.1 | 3773656 | 22-scf00517 | 22 |
| AX-158335971 | 26 | 59.09 | KV453229.1 | 3786330 | 22-scf00517 | 22 |
| AX-158335998 | 26 | 59.09 | KV453229.1 | 3817832 | 22-scf00517 | 22 |
| AX-158336001 | 26 | 59.09 | KV453229.1 | 3820673 | 22-scf00517 | 22 |
| AX-158336010 | 26 | 59.09 | KV453229.1 | 3830249 | 22-scf00517 | 22 |
| AX-158336018 | 26 | 59.09 | KV453229.1 | 3841614 | 22-scf00517 | 22 |
| AX-157716709 | 26 | 59.09 | KV453229.1 | 3850723 | 22-scf00517 | 22 |
| AX-158336035 | 26 | 59.09 | KV453229.1 | 3868471 | 22-scf00517 | 22 |
| AX-158336076 | 26 | 59.09 | KV453229.1 | 3933568 | 22-scf00517 | 22 |
| AX-158336080 | 26 | 59.09 | KV453229.1 | 3942864 | 22-scf00517 | 22 |
| AX-158336084 | 26 | 59.09 | KV453229.1 | 3952480 | 22-scf00517 | 22 |
| AX-158336124 | 26 | 59.09 | KV453229.1 | 4016429 | 22-scf00517 | 22 |
| AX-158336125 | 26 | 59.09 | KV453229.1 | 4017758 | 22-scf00517 | 22 |
| AX-158336132 | 26 | 59.09 | KV453229.1 | 4027291 | 22-scf00517 | 22 |
| AX-157849596 | 26 | 59.09 | KV453229.1 | 4320446 | 22-scf00517 | 22 |
| AX-157748376 | 26 | 59.09 | KV453229.1 | 4332703 | 22-scf00517 | 22 |
| AX-158336343 | 26 | 59.09 | KV453229.1 | 4365764 | 22-scf00517 | 22 |
| AX-157881957 | 26 | 59.09 | KV453229.1 | 4516028 | 22-scf00517 | 22 |
| AX-158336507 | 26 | 59.09 | KV453229.1 | 4586906 | 22-scf00517 | 22 |
| AX-157750917 | 26 | 59.09 | KV453229.1 | 4748916 | 22-scf00517 | 22 |
| AX-158336672 | 26 | 59.09 | KV453229.1 | 4816055 | 22-scf00517 | 22 |

|              |    |        |             |         |             |    |
|--------------|----|--------|-------------|---------|-------------|----|
| AX-157725468 | 26 | 59.09  | KV453229.1  | 4854302 | 22-scf00517 | 22 |
| AX-158336717 | 26 | 59.09  | KV453229.1  | 4870988 | 22-scf00517 | 22 |
| AX-158336769 | 26 | 59.09  | KV453229.1  | 4951549 | 22-scf00517 | 22 |
| AX-158336779 | 26 | 59.09  | KV453229.1  | 4964441 | 22-scf00517 | 22 |
| AX-157849631 | 26 | 59.09  | KV453229.1  | 5148507 | 22-scf00517 | 22 |
| AX-158337136 | 26 | 59.09  | KV453229.1  | 5563747 | 22-scf00517 | 22 |
| AX-157705140 | 26 | 59.09  | 3ML01028769 | 733     | scf04381_1  | UN |
| AX-157705343 | 26 | 59.09  | 3ML01029446 | 87      | scf05069_1  | UN |
| AX-157849458 | 26 | 59.18  | KV453229.1  | 2729205 | 22-scf00517 | 22 |
| AX-157849535 | 26 | 59.18  | KV453229.1  | 3550885 | 22-scf00517 | 22 |
| AX-158335829 | 26 | 59.199 | KV453229.1  | 3567368 | 22-scf00517 | 22 |
| AX-157849481 | 26 | 59.323 | KV453229.1  | 2959157 | 22-scf00517 | 22 |
| AX-158335485 | 26 | 59.323 | KV453229.1  | 3061129 | 22-scf00517 | 22 |
| AX-158335542 | 26 | 59.323 | KV453229.1  | 3122430 | 22-scf00517 | 22 |
| AX-157861722 | 26 | 59.323 | KV453229.1  | 3196331 | 22-scf00517 | 22 |
| AX-158335698 | 26 | 59.323 | KV453229.1  | 3332786 | 22-scf00517 | 22 |
| AX-158335748 | 26 | 59.323 | KV453229.1  | 3439724 | 22-scf00517 | 22 |
| AX-157719873 | 26 | 59.323 | KV453229.1  | 3518667 | 22-scf00517 | 22 |
| AX-157849534 | 26 | 59.323 | KV453229.1  | 3548994 | 22-scf00517 | 22 |
| AX-157849536 | 26 | 59.323 | KV453229.1  | 3551804 | 22-scf00517 | 22 |
| AX-158335830 | 26 | 59.323 | KV453229.1  | 3568212 | 22-scf00517 | 22 |
| AX-157849538 | 26 | 59.323 | KV453229.1  | 3568821 | 22-scf00517 | 22 |
| AX-157881925 | 26 | 59.323 | KV453229.1  | 3569417 | 22-scf00517 | 22 |
| AX-157849539 | 26 | 59.323 | KV453229.1  | 3570867 | 22-scf00517 | 22 |
| AX-158335833 | 26 | 59.323 | KV453229.1  | 3571254 | 22-scf00517 | 22 |
| AX-158335835 | 26 | 59.323 | KV453229.1  | 3574542 | 22-scf00517 | 22 |
| AX-158335837 | 26 | 59.323 | KV453229.1  | 3576849 | 22-scf00517 | 22 |
| AX-158335842 | 26 | 59.323 | KV453229.1  | 3589702 | 22-scf00517 | 22 |
| AX-158335843 | 26 | 59.323 | KV453229.1  | 3590927 | 22-scf00517 | 22 |
| AX-158335845 | 26 | 59.323 | KV453229.1  | 3593713 | 22-scf00517 | 22 |
| AX-158335846 | 26 | 59.323 | KV453229.1  | 3595183 | 22-scf00517 | 22 |
| AX-158335847 | 26 | 59.323 | KV453229.1  | 3597485 | 22-scf00517 | 22 |
| AX-158335848 | 26 | 59.323 | KV453229.1  | 3598341 | 22-scf00517 | 22 |
| AX-158335851 | 26 | 59.323 | KV453229.1  | 3602521 | 22-scf00517 | 22 |
| AX-158335852 | 26 | 59.323 | KV453229.1  | 3606149 | 22-scf00517 | 22 |
| AX-157717968 | 26 | 59.323 | KV453229.1  | 3617287 | 22-scf00517 | 22 |
| AX-157749493 | 26 | 59.323 | KV453229.1  | 3618835 | 22-scf00517 | 22 |
| AX-158335858 | 26 | 59.323 | KV453229.1  | 3620280 | 22-scf00517 | 22 |
| AX-158335863 | 26 | 59.323 | KV453229.1  | 3626954 | 22-scf00517 | 22 |
| AX-158335868 | 26 | 59.323 | KV453229.1  | 3636027 | 22-scf00517 | 22 |
| AX-158335869 | 26 | 59.323 | KV453229.1  | 3636275 | 22-scf00517 | 22 |
| AX-158335873 | 26 | 59.323 | KV453229.1  | 3643142 | 22-scf00517 | 22 |
| AX-158335886 | 26 | 59.323 | KV453229.1  | 3657643 | 22-scf00517 | 22 |
| AX-157888599 | 26 | 59.323 | KV453229.1  | 3664290 | 22-scf00517 | 22 |
| AX-158335905 | 26 | 59.323 | KV453229.1  | 3678571 | 22-scf00517 | 22 |
| AX-157741987 | 26 | 59.323 | KV453229.1  | 3683926 | 22-scf00517 | 22 |
| AX-158335913 | 26 | 59.323 | KV453229.1  | 3693704 | 22-scf00517 | 22 |
| AX-157849548 | 26 | 59.323 | KV453229.1  | 3698386 | 22-scf00517 | 22 |
| AX-158335917 | 26 | 59.323 | KV453229.1  | 3708495 | 22-scf00517 | 22 |
| AX-158335918 | 26 | 59.323 | KV453229.1  | 3708776 | 22-scf00517 | 22 |
| AX-158335927 | 26 | 59.323 | KV453229.1  | 3715320 | 22-scf00517 | 22 |



|              |    |        |            |         |             |    |
|--------------|----|--------|------------|---------|-------------|----|
| AX-158335928 | 26 | 59.323 | KV453229.1 | 3716093 | 22-scf00517 | 22 |
| AX-158335929 | 26 | 59.323 | KV453229.1 | 3716496 | 22-scf00517 | 22 |
| AX-158335930 | 26 | 59.323 | KV453229.1 | 3717571 | 22-scf00517 | 22 |
| AX-158335958 | 26 | 59.323 | KV453229.1 | 3760855 | 22-scf00517 | 22 |
| AX-157849567 | 26 | 59.323 | KV453229.1 | 3764143 | 22-scf00517 | 22 |
| AX-157713607 | 26 | 59.323 | KV453229.1 | 3770529 | 22-scf00517 | 22 |
| AX-157716869 | 26 | 59.323 | KV453229.1 | 3773146 | 22-scf00517 | 22 |
| AX-158335972 | 26 | 59.323 | KV453229.1 | 3786846 | 22-scf00517 | 22 |
| AX-158335989 | 26 | 59.323 | KV453229.1 | 3810667 | 22-scf00517 | 22 |
| AX-157727186 | 26 | 59.323 | KV453229.1 | 4011233 | 22-scf00517 | 22 |
| AX-158336120 | 26 | 59.323 | KV453229.1 | 4013633 | 22-scf00517 | 22 |
| AX-158336122 | 26 | 59.323 | KV453229.1 | 4015182 | 22-scf00517 | 22 |
| AX-157722575 | 26 | 59.323 | KV453229.1 | 4019587 | 22-scf00517 | 22 |
| AX-157749212 | 26 | 59.323 | KV453229.1 | 4117165 | 22-scf00517 | 22 |
| AX-158336247 | 26 | 59.323 | KV453229.1 | 4205605 | 22-scf00517 | 22 |
| AX-158336378 | 26 | 59.323 | KV453229.1 | 4420323 | 22-scf00517 | 22 |
| AX-158336560 | 26 | 59.323 | KV453229.1 | 4662874 | 22-scf00517 | 22 |
| AX-158336617 | 26 | 59.323 | KV453229.1 | 4736783 | 22-scf00517 | 22 |
| AX-158336651 | 26 | 59.323 | KV453229.1 | 4784561 | 22-scf00517 | 22 |
| AX-158336652 | 26 | 59.323 | KV453229.1 | 4785427 | 22-scf00517 | 22 |
| AX-158336655 | 26 | 59.323 | KV453229.1 | 4792292 | 22-scf00517 | 22 |
| AX-158336684 | 26 | 59.323 | KV453229.1 | 4834106 | 22-scf00517 | 22 |
| AX-157725777 | 26 | 59.323 | KV453229.1 | 4919244 | 22-scf00517 | 22 |
| AX-157753552 | 26 | 59.323 | KV453229.1 | 4922045 | 22-scf00517 | 22 |
| AX-158336756 | 26 | 59.323 | KV453229.1 | 4929611 | 22-scf00517 | 22 |
| AX-158336758 | 26 | 59.323 | KV453229.1 | 4931036 | 22-scf00517 | 22 |
| AX-158336764 | 26 | 59.323 | KV453229.1 | 4941115 | 22-scf00517 | 22 |
| AX-158381570 | 26 | 59.323 | KV453229.1 | 5008944 | 22-scf00517 | 22 |
| AX-157758323 | 26 | 59.323 | KV453229.1 | 5021086 | 22-scf00517 | 22 |
| AX-158336822 | 26 | 59.323 | KV453229.1 | 5035199 | 22-scf00517 | 22 |
| AX-157861742 | 26 | 59.323 | KV453229.1 | 5116677 | 22-scf00517 | 22 |
| AX-158381573 | 26 | 59.323 | KV453229.1 | 5321365 | 22-scf00517 | 22 |
| AX-157849644 | 26 | 59.323 | KV453229.1 | 5496343 | 22-scf00517 | 22 |
| AX-158337103 | 26 | 59.323 | KV453229.1 | 5511679 | 22-scf00517 | 22 |
| AX-158332564 | 26 | 59.324 | KV453228.1 | 2684485 | 22-scf00516 | 22 |
| AX-158333159 | 26 | 59.324 | KV453229.1 | 397531  | 22-scf00517 | 22 |
| AX-158333292 | 26 | 59.324 | KV453229.1 | 532703  | 22-scf00517 | 22 |
| AX-157849395 | 26 | 59.324 | KV453229.1 | 1415891 | 22-scf00517 | 22 |
| AX-158412886 | 26 | 59.324 | KV453229.1 | 1998456 | 22-scf00517 | 22 |
| AX-158335086 | 26 | 59.324 | KV453229.1 | 2625202 | 22-scf00517 | 22 |
| AX-158335090 | 26 | 59.324 | KV453229.1 | 2627503 | 22-scf00517 | 22 |
| AX-157849461 | 26 | 59.324 | KV453229.1 | 2734965 | 22-scf00517 | 22 |
| AX-157849462 | 26 | 59.324 | KV453229.1 | 2735591 | 22-scf00517 | 22 |
| AX-158335421 | 26 | 59.324 | KV453229.1 | 2981576 | 22-scf00517 | 22 |
| AX-158335459 | 26 | 59.324 | KV453229.1 | 3037716 | 22-scf00517 | 22 |
| AX-158335483 | 26 | 59.324 | KV453229.1 | 3059673 | 22-scf00517 | 22 |
| AX-158335563 | 26 | 59.324 | KV453229.1 | 3149817 | 22-scf00517 | 22 |
| AX-158335649 | 26 | 59.324 | KV453229.1 | 3262711 | 22-scf00517 | 22 |
| AX-157750555 | 26 | 59.324 | KV453229.1 | 3310226 | 22-scf00517 | 22 |
| AX-157738337 | 26 | 59.324 | KV453229.1 | 3471155 | 22-scf00517 | 22 |
| AX-158335828 | 26 | 59.324 | KV453229.1 | 3566703 | 22-scf00517 | 22 |

|              |    |        |            |         |             |    |
|--------------|----|--------|------------|---------|-------------|----|
| AX-157849541 | 26 | 59.324 | KV453229.1 | 3614545 | 22-scf00517 | 22 |
| AX-158335857 | 26 | 59.324 | KV453229.1 | 3615399 | 22-scf00517 | 22 |
| AX-158335860 | 26 | 59.324 | KV453229.1 | 3623016 | 22-scf00517 | 22 |
| AX-157773969 | 26 | 59.324 | KV453229.1 | 3673780 | 22-scf00517 | 22 |
| AX-157849544 | 26 | 59.324 | KV453229.1 | 3675720 | 22-scf00517 | 22 |
| AX-158335906 | 26 | 59.324 | KV453229.1 | 3678939 | 22-scf00517 | 22 |
| AX-158335907 | 26 | 59.324 | KV453229.1 | 3680651 | 22-scf00517 | 22 |
| AX-157849546 | 26 | 59.324 | KV453229.1 | 3697164 | 22-scf00517 | 22 |
| AX-158335945 | 26 | 59.324 | KV453229.1 | 3749390 | 22-scf00517 | 22 |
| AX-158335951 | 26 | 59.324 | KV453229.1 | 3753788 | 22-scf00517 | 22 |
| AX-157745906 | 26 | 59.324 | KV453229.1 | 3771873 | 22-scf00517 | 22 |
| AX-158335974 | 26 | 59.324 | KV453229.1 | 3790476 | 22-scf00517 | 22 |
| AX-158335976 | 26 | 59.324 | KV453229.1 | 3795980 | 22-scf00517 | 22 |
| AX-158336017 | 26 | 59.324 | KV453229.1 | 3839643 | 22-scf00517 | 22 |
| AX-158336028 | 26 | 59.324 | KV453229.1 | 3851507 | 22-scf00517 | 22 |
| AX-158336031 | 26 | 59.324 | KV453229.1 | 3859683 | 22-scf00517 | 22 |
| AX-158336034 | 26 | 59.324 | KV453229.1 | 3868200 | 22-scf00517 | 22 |
| AX-158336042 | 26 | 59.324 | KV453229.1 | 3878711 | 22-scf00517 | 22 |
| AX-158336043 | 26 | 59.324 | KV453229.1 | 3882270 | 22-scf00517 | 22 |
| AX-158336049 | 26 | 59.324 | KV453229.1 | 3892194 | 22-scf00517 | 22 |
| AX-158336083 | 26 | 59.324 | KV453229.1 | 3951887 | 22-scf00517 | 22 |
| AX-157849579 | 26 | 59.324 | KV453229.1 | 3953139 | 22-scf00517 | 22 |
| AX-158336123 | 26 | 59.324 | KV453229.1 | 4015538 | 22-scf00517 | 22 |
| AX-158336208 | 26 | 59.324 | KV453229.1 | 4149222 | 22-scf00517 | 22 |
| AX-158336323 | 26 | 59.324 | KV453229.1 | 4328114 | 22-scf00517 | 22 |
| AX-158336340 | 26 | 59.324 | KV453229.1 | 4362469 | 22-scf00517 | 22 |
| AX-157849602 | 26 | 59.324 | KV453229.1 | 4399811 | 22-scf00517 | 22 |
| AX-158418902 | 26 | 59.324 | KV453229.1 | 4401440 | 22-scf00517 | 22 |
| AX-158336370 | 26 | 59.324 | KV453229.1 | 4410551 | 22-scf00517 | 22 |
| AX-158336372 | 26 | 59.324 | KV453229.1 | 4412791 | 22-scf00517 | 22 |
| AX-157849605 | 26 | 59.324 | KV453229.1 | 4431490 | 22-scf00517 | 22 |
| AX-157849609 | 26 | 59.324 | KV453229.1 | 4485286 | 22-scf00517 | 22 |
| AX-157763488 | 26 | 59.324 | KV453229.1 | 4489248 | 22-scf00517 | 22 |
| AX-158336432 | 26 | 59.324 | KV453229.1 | 4490360 | 22-scf00517 | 22 |
| AX-157748499 | 26 | 59.324 | KV453229.1 | 4590241 | 22-scf00517 | 22 |
| AX-158336547 | 26 | 59.324 | KV453229.1 | 4650299 | 22-scf00517 | 22 |
| AX-158336610 | 26 | 59.324 | KV453229.1 | 4724052 | 22-scf00517 | 22 |
| AX-158336656 | 26 | 59.324 | KV453229.1 | 4794789 | 22-scf00517 | 22 |
| AX-158336658 | 26 | 59.324 | KV453229.1 | 4797253 | 22-scf00517 | 22 |
| AX-158336666 | 26 | 59.324 | KV453229.1 | 4808024 | 22-scf00517 | 22 |
| AX-158336686 | 26 | 59.324 | KV453229.1 | 4836596 | 22-scf00517 | 22 |
| AX-158336721 | 26 | 59.324 | KV453229.1 | 4873985 | 22-scf00517 | 22 |
| AX-158336725 | 26 | 59.324 | KV453229.1 | 4881052 | 22-scf00517 | 22 |
| AX-158336739 | 26 | 59.324 | KV453229.1 | 4898552 | 22-scf00517 | 22 |
| AX-158336538 | 26 | 59.365 | KV453229.1 | 4641304 | 22-scf00517 | 22 |
| AX-158336539 | 26 | 59.418 | KV453229.1 | 4642487 | 22-scf00517 | 22 |
| AX-158336540 | 26 | 59.46  | KV453229.1 | 4643064 | 22-scf00517 | 22 |
| AX-157723451 | 26 | 59.514 | KV453229.1 | 3128816 | 22-scf00517 | 22 |
| AX-158335699 | 26 | 59.514 | KV453229.1 | 3333234 | 22-scf00517 | 22 |
| AX-158335864 | 26 | 59.514 | KV453229.1 | 3628471 | 22-scf00517 | 22 |
| AX-158335867 | 26 | 59.514 | KV453229.1 | 3633476 | 22-scf00517 | 22 |

|              |    |        |            |         |             |    |
|--------------|----|--------|------------|---------|-------------|----|
| AX-158336533 | 26 | 59.514 | KV453229.1 | 4637651 | 22-scf00517 | 22 |
| AX-158336534 | 26 | 59.514 | KV453229.1 | 4637896 | 22-scf00517 | 22 |
| AX-158336549 | 26 | 59.514 | KV453229.1 | 4652925 | 22-scf00517 | 22 |
| AX-158336550 | 26 | 59.514 | KV453229.1 | 4653824 | 22-scf00517 | 22 |
| AX-158336755 | 26 | 59.514 | KV453229.1 | 4928540 | 22-scf00517 | 22 |
| AX-157757381 | 26 | 59.556 | KV453229.1 | 2298595 | 22-scf00517 | 22 |
| AX-158334969 | 26 | 59.556 | KV453229.1 | 2501462 | 22-scf00517 | 22 |
| AX-158335082 | 26 | 59.556 | KV453229.1 | 2619603 | 22-scf00517 | 22 |
| AX-158335116 | 26 | 59.556 | KV453229.1 | 2649796 | 22-scf00517 | 22 |
| AX-158335195 | 26 | 59.556 | KV453229.1 | 2722355 | 22-scf00517 | 22 |
| AX-157849460 | 26 | 59.556 | KV453229.1 | 2734450 | 22-scf00517 | 22 |
| AX-158335356 | 26 | 59.556 | KV453229.1 | 2890042 | 22-scf00517 | 22 |
| AX-158335427 | 26 | 59.556 | KV453229.1 | 2992402 | 22-scf00517 | 22 |
| AX-158335455 | 26 | 59.556 | KV453229.1 | 3034218 | 22-scf00517 | 22 |
| AX-157867989 | 26 | 59.556 | KV453229.1 | 3048572 | 22-scf00517 | 22 |
| AX-158335481 | 26 | 59.556 | KV453229.1 | 3057570 | 22-scf00517 | 22 |
| AX-158335502 | 26 | 59.556 | KV453229.1 | 3078459 | 22-scf00517 | 22 |
| AX-158335528 | 26 | 59.556 | KV453229.1 | 3107591 | 22-scf00517 | 22 |
| AX-157873717 | 26 | 59.556 | KV453229.1 | 3119031 | 22-scf00517 | 22 |
| AX-158335723 | 26 | 59.556 | KV453229.1 | 3375192 | 22-scf00517 | 22 |
| AX-157770789 | 26 | 59.556 | KV453229.1 | 3385966 | 22-scf00517 | 22 |
| AX-158335742 | 26 | 59.556 | KV453229.1 | 3430670 | 22-scf00517 | 22 |
| AX-157768793 | 26 | 59.556 | KV453229.1 | 3517257 | 22-scf00517 | 22 |
| AX-158335820 | 26 | 59.556 | KV453229.1 | 3556353 | 22-scf00517 | 22 |
| AX-157849537 | 26 | 59.556 | KV453229.1 | 3562182 | 22-scf00517 | 22 |
| AX-158335871 | 26 | 59.556 | KV453229.1 | 3639523 | 22-scf00517 | 22 |
| AX-158335876 | 26 | 59.556 | KV453229.1 | 3644678 | 22-scf00517 | 22 |
| AX-158335878 | 26 | 59.556 | KV453229.1 | 3648339 | 22-scf00517 | 22 |
| AX-158335882 | 26 | 59.556 | KV453229.1 | 3653081 | 22-scf00517 | 22 |
| AX-158335896 | 26 | 59.556 | KV453229.1 | 3670324 | 22-scf00517 | 22 |
| AX-158335901 | 26 | 59.556 | KV453229.1 | 3673262 | 22-scf00517 | 22 |
| AX-157849551 | 26 | 59.556 | KV453229.1 | 3704805 | 22-scf00517 | 22 |
| AX-158335933 | 26 | 59.556 | KV453229.1 | 3723875 | 22-scf00517 | 22 |
| AX-158335979 | 26 | 59.556 | KV453229.1 | 3801387 | 22-scf00517 | 22 |
| AX-158336109 | 26 | 59.556 | KV453229.1 | 3998479 | 22-scf00517 | 22 |
| AX-158336128 | 26 | 59.556 | KV453229.1 | 4023532 | 22-scf00517 | 22 |
| AX-157751157 | 26 | 59.556 | KV453229.1 | 4118859 | 22-scf00517 | 22 |
| AX-157771958 | 26 | 59.556 | KV453229.1 | 4365193 | 22-scf00517 | 22 |
| AX-158336342 | 26 | 59.556 | KV453229.1 | 4365251 | 22-scf00517 | 22 |
| AX-157723911 | 26 | 59.556 | KV453229.1 | 4366096 | 22-scf00517 | 22 |
| AX-158336344 | 26 | 59.556 | KV453229.1 | 4367331 | 22-scf00517 | 22 |
| AX-158381568 | 26 | 59.556 | KV453229.1 | 4643123 | 22-scf00517 | 22 |
| AX-158336546 | 26 | 59.556 | KV453229.1 | 4648481 | 22-scf00517 | 22 |
| AX-157748658 | 26 | 59.556 | KV453229.1 | 4649039 | 22-scf00517 | 22 |
| AX-157888602 | 26 | 59.556 | KV453229.1 | 4657485 | 22-scf00517 | 22 |
| AX-158336553 | 26 | 59.556 | KV453229.1 | 4658095 | 22-scf00517 | 22 |
| AX-158336554 | 26 | 59.556 | KV453229.1 | 4659085 | 22-scf00517 | 22 |
| AX-158336555 | 26 | 59.556 | KV453229.1 | 4659471 | 22-scf00517 | 22 |
| AX-158336556 | 26 | 59.556 | KV453229.1 | 4660062 | 22-scf00517 | 22 |
| AX-157754795 | 26 | 59.556 | KV453229.1 | 4670503 | 22-scf00517 | 22 |
| AX-158336570 | 26 | 59.556 | KV453229.1 | 4671109 | 22-scf00517 | 22 |

|              |    |        |            |         |             |    |
|--------------|----|--------|------------|---------|-------------|----|
| AX-158336596 | 26 | 59.556 | KV453229.1 | 4704836 | 22-scf00517 | 22 |
| AX-158336633 | 26 | 59.556 | KV453229.1 | 4760026 | 22-scf00517 | 22 |
| AX-158336635 | 26 | 59.556 | KV453229.1 | 4763484 | 22-scf00517 | 22 |
| AX-158336639 | 26 | 59.556 | KV453229.1 | 4764844 | 22-scf00517 | 22 |
| AX-157849622 | 26 | 59.556 | KV453229.1 | 4764933 | 22-scf00517 | 22 |
| AX-158336641 | 26 | 59.556 | KV453229.1 | 4767397 | 22-scf00517 | 22 |
| AX-157720210 | 26 | 59.556 | KV453229.1 | 4777222 | 22-scf00517 | 22 |
| AX-158336653 | 26 | 59.556 | KV453229.1 | 4786457 | 22-scf00517 | 22 |
| AX-158336654 | 26 | 59.556 | KV453229.1 | 4787243 | 22-scf00517 | 22 |
| AX-158336657 | 26 | 59.556 | KV453229.1 | 4795375 | 22-scf00517 | 22 |
| AX-158336659 | 26 | 59.556 | KV453229.1 | 4797840 | 22-scf00517 | 22 |
| AX-158418917 | 26 | 59.556 | KV453229.1 | 4798276 | 22-scf00517 | 22 |
| AX-158336661 | 26 | 59.556 | KV453229.1 | 4803270 | 22-scf00517 | 22 |
| AX-158336663 | 26 | 59.556 | KV453229.1 | 4806125 | 22-scf00517 | 22 |
| AX-158336675 | 26 | 59.556 | KV453229.1 | 4821655 | 22-scf00517 | 22 |
| AX-158336676 | 26 | 59.556 | KV453229.1 | 4823781 | 22-scf00517 | 22 |
| AX-158336680 | 26 | 59.556 | KV453229.1 | 4829291 | 22-scf00517 | 22 |
| AX-158336683 | 26 | 59.556 | KV453229.1 | 4832926 | 22-scf00517 | 22 |
| AX-158336685 | 26 | 59.556 | KV453229.1 | 4835883 | 22-scf00517 | 22 |
| AX-158336694 | 26 | 59.556 | KV453229.1 | 4842714 | 22-scf00517 | 22 |
| AX-158336696 | 26 | 59.556 | KV453229.1 | 4844390 | 22-scf00517 | 22 |
| AX-158336704 | 26 | 59.556 | KV453229.1 | 4853437 | 22-scf00517 | 22 |
| AX-158336713 | 26 | 59.556 | KV453229.1 | 4864937 | 22-scf00517 | 22 |
| AX-158336720 | 26 | 59.556 | KV453229.1 | 4873198 | 22-scf00517 | 22 |
| AX-158336723 | 26 | 59.556 | KV453229.1 | 4875341 | 22-scf00517 | 22 |
| AX-157710954 | 26 | 59.556 | KV453229.1 | 4879250 | 22-scf00517 | 22 |
| AX-158336729 | 26 | 59.556 | KV453229.1 | 4888709 | 22-scf00517 | 22 |
| AX-158336732 | 26 | 59.556 | KV453229.1 | 4891450 | 22-scf00517 | 22 |
| AX-158336733 | 26 | 59.556 | KV453229.1 | 4892194 | 22-scf00517 | 22 |
| AX-158336735 | 26 | 59.556 | KV453229.1 | 4894608 | 22-scf00517 | 22 |
| AX-158336738 | 26 | 59.556 | KV453229.1 | 4897368 | 22-scf00517 | 22 |
| AX-158336748 | 26 | 59.556 | KV453229.1 | 4912775 | 22-scf00517 | 22 |
| AX-158336750 | 26 | 59.556 | KV453229.1 | 4916512 | 22-scf00517 | 22 |
| AX-158336752 | 26 | 59.556 | KV453229.1 | 4924570 | 22-scf00517 | 22 |
| AX-158336753 | 26 | 59.556 | KV453229.1 | 4925075 | 22-scf00517 | 22 |
| AX-158418920 | 26 | 59.556 | KV453229.1 | 4926268 | 22-scf00517 | 22 |
| AX-158336759 | 26 | 59.556 | KV453229.1 | 4931580 | 22-scf00517 | 22 |
| AX-157722354 | 26 | 59.556 | KV453229.1 | 4933530 | 22-scf00517 | 22 |
| AX-158336765 | 26 | 59.556 | KV453229.1 | 4944999 | 22-scf00517 | 22 |
| AX-158336766 | 26 | 59.556 | KV453229.1 | 4946325 | 22-scf00517 | 22 |
| AX-158336767 | 26 | 59.556 | KV453229.1 | 4949531 | 22-scf00517 | 22 |
| AX-158336774 | 26 | 59.556 | KV453229.1 | 4955636 | 22-scf00517 | 22 |
| AX-158336784 | 26 | 59.556 | KV453229.1 | 4970711 | 22-scf00517 | 22 |
| AX-158336785 | 26 | 59.556 | KV453229.1 | 4973515 | 22-scf00517 | 22 |
| AX-158336790 | 26 | 59.556 | KV453229.1 | 4978545 | 22-scf00517 | 22 |
| AX-157881974 | 26 | 59.556 | KV453229.1 | 4979536 | 22-scf00517 | 22 |
| AX-158336793 | 26 | 59.556 | KV453229.1 | 4982296 | 22-scf00517 | 22 |
| AX-158336806 | 26 | 59.556 | KV453229.1 | 4997920 | 22-scf00517 | 22 |
| AX-158336807 | 26 | 59.556 | KV453229.1 | 5000296 | 22-scf00517 | 22 |
| AX-157716144 | 26 | 59.556 | KV453229.1 | 5010682 | 22-scf00517 | 22 |
| AX-158336823 | 26 | 59.556 | KV453229.1 | 5036243 | 22-scf00517 | 22 |

|              |    |        |            |         |             |    |
|--------------|----|--------|------------|---------|-------------|----|
| AX-158336838 | 26 | 59.556 | KV453229.1 | 5083606 | 22-scf00517 | 22 |
| AX-158336869 | 26 | 59.556 | KV453229.1 | 5155515 | 22-scf00517 | 22 |
| AX-158336888 | 26 | 59.556 | KV453229.1 | 5194694 | 22-scf00517 | 22 |
| AX-158336900 | 26 | 59.556 | KV453229.1 | 5214425 | 22-scf00517 | 22 |
| AX-158337038 | 26 | 59.556 | KV453229.1 | 5419446 | 22-scf00517 | 22 |
| AX-158337132 | 26 | 59.556 | KV453229.1 | 5556250 | 22-scf00517 | 22 |
| AX-158336792 | 26 | 59.557 | KV453229.1 | 4981730 | 22-scf00517 | 22 |
| AX-158336797 | 26 | 59.701 | KV453229.1 | 4988762 | 22-scf00517 | 22 |
| AX-158336801 | 26 | 59.789 | KV453229.1 | 4992740 | 22-scf00517 | 22 |
| AX-158418922 | 26 | 59.789 | KV453229.1 | 5040092 | 22-scf00517 | 22 |
| AX-157774977 | 26 | 59.844 | KV453229.1 | 5044336 | 22-scf00517 | 22 |
| AX-158336827 | 26 | 59.902 | KV453229.1 | 5057062 | 22-scf00517 | 22 |
| AX-158336828 | 26 | 59.961 | KV453229.1 | 5069791 | 22-scf00517 | 22 |
| AX-158336830 | 26 | 60.021 | KV453229.1 | 5071641 | 22-scf00517 | 22 |
| AX-157849628 | 26 | 60.021 | KV453229.1 | 5072599 | 22-scf00517 | 22 |
| AX-158336833 | 26 | 60.021 | KV453229.1 | 5076254 | 22-scf00517 | 22 |
| AX-158336849 | 26 | 60.021 | KV453229.1 | 5104286 | 22-scf00517 | 22 |
| AX-158336850 | 26 | 60.021 | KV453229.1 | 5105270 | 22-scf00517 | 22 |
| AX-158336851 | 26 | 60.021 | KV453229.1 | 5106673 | 22-scf00517 | 22 |
| AX-158336844 | 26 | 60.022 | KV453229.1 | 5091735 | 22-scf00517 | 22 |
| AX-158336853 | 26 | 60.022 | KV453229.1 | 5115628 | 22-scf00517 | 22 |
| AX-157775560 | 26 | 60.022 | KV453229.1 | 5116747 | 22-scf00517 | 22 |
| AX-158336862 | 26 | 60.596 | KV453229.1 | 5148388 | 22-scf00517 | 22 |
| AX-158336863 | 26 | 60.607 | KV453229.1 | 5148658 | 22-scf00517 | 22 |
| AX-157753426 | 26 | 60.784 | KV453229.1 | 5156404 | 22-scf00517 | 22 |
| AX-158336871 | 26 | 60.785 | KV453229.1 | 5157090 | 22-scf00517 | 22 |
| AX-158336872 | 26 | 61.154 | KV453229.1 | 5159177 | 22-scf00517 | 22 |
| AX-158336878 | 26 | 61.154 | KV453229.1 | 5172761 | 22-scf00517 | 22 |
| AX-158336879 | 26 | 61.154 | KV453229.1 | 5173273 | 22-scf00517 | 22 |
| AX-157771618 | 26 | 61.417 | KV453229.1 | 5176751 | 22-scf00517 | 22 |
| AX-158336890 | 26 | 61.428 | KV453229.1 | 5198850 | 22-scf00517 | 22 |
| AX-158336891 | 26 | 61.428 | KV453229.1 | 5200641 | 22-scf00517 | 22 |
| AX-158336892 | 26 | 61.428 | KV453229.1 | 5201426 | 22-scf00517 | 22 |
| AX-158336896 | 26 | 61.428 | KV453229.1 | 5209689 | 22-scf00517 | 22 |
| AX-158336898 | 26 | 61.428 | KV453229.1 | 5213476 | 22-scf00517 | 22 |
| AX-158336917 | 26 | 61.663 | KV453229.1 | 5236778 | 22-scf00517 | 22 |
| AX-158336922 | 26 | 61.725 | KV453229.1 | 5243295 | 22-scf00517 | 22 |
| AX-158336925 | 26 | 61.725 | KV453229.1 | 5246356 | 22-scf00517 | 22 |
| AX-158336926 | 26 | 61.725 | KV453229.1 | 5247632 | 22-scf00517 | 22 |
| AX-157849633 | 26 | 61.725 | KV453229.1 | 5249232 | 22-scf00517 | 22 |
| AX-158336931 | 26 | 61.725 | KV453229.1 | 5259406 | 22-scf00517 | 22 |
| AX-158336933 | 26 | 61.725 | KV453229.1 | 5263619 | 22-scf00517 | 22 |
| AX-158336948 | 26 | 61.725 | KV453229.1 | 5290751 | 22-scf00517 | 22 |
| AX-157773560 | 26 | 61.752 | KV453229.1 | 5264298 | 22-scf00517 | 22 |
| AX-158336935 | 26 | 61.777 | KV453229.1 | 5267314 | 22-scf00517 | 22 |
| AX-158332077 | 26 | 61.806 | KV453228.1 | 1966524 | 22-scf00516 | 22 |
| AX-158335083 | 26 | 61.806 | KV453229.1 | 2620308 | 22-scf00517 | 22 |
| AX-158336866 | 26 | 61.806 | KV453229.1 | 5152132 | 22-scf00517 | 22 |
| AX-158336936 | 26 | 61.806 | KV453229.1 | 5268076 | 22-scf00517 | 22 |
| AX-157849634 | 26 | 61.857 | KV453229.1 | 5277667 | 22-scf00517 | 22 |
| AX-158336947 | 26 | 61.923 | KV453229.1 | 5290009 | 22-scf00517 | 22 |

|              |    |        |            |         |             |    |
|--------------|----|--------|------------|---------|-------------|----|
| AX-158336949 | 26 | 61.993 | KV453229.1 | 5291565 | 22-scf00517 | 22 |
| AX-158336951 | 26 | 61.993 | KV453229.1 | 5294224 | 22-scf00517 | 22 |
| AX-158336953 | 26 | 62.132 | KV453229.1 | 5297942 | 22-scf00517 | 22 |
| AX-157710173 | 26 | 62.132 | KV453229.1 | 5300212 | 22-scf00517 | 22 |
| AX-157710172 | 26 | 62.192 | KV453229.1 | 5300078 | 22-scf00517 | 22 |
| AX-158336959 | 26 | 62.269 | KV453229.1 | 5306161 | 22-scf00517 | 22 |
| AX-158336920 | 26 | 62.27  | KV453229.1 | 5238633 | 22-scf00517 | 22 |
| AX-158336943 | 26 | 62.27  | KV453229.1 | 5282031 | 22-scf00517 | 22 |
| AX-158336960 | 26 | 62.27  | KV453229.1 | 5308415 | 22-scf00517 | 22 |
| AX-158336961 | 26 | 62.27  | KV453229.1 | 5309232 | 22-scf00517 | 22 |
| AX-158336965 | 26 | 62.27  | KV453229.1 | 5317159 | 22-scf00517 | 22 |
| AX-158336966 | 26 | 62.476 | KV453229.1 | 5320388 | 22-scf00517 | 22 |
| AX-158336968 | 26 | 62.494 | KV453229.1 | 5324888 | 22-scf00517 | 22 |
| AX-158336873 | 26 | 62.501 | KV453229.1 | 5160644 | 22-scf00517 | 22 |
| AX-157849635 | 26 | 62.501 | KV453229.1 | 5325666 | 22-scf00517 | 22 |
| AX-158336969 | 26 | 62.501 | KV453229.1 | 5325966 | 22-scf00517 | 22 |
| AX-158336971 | 26 | 62.501 | KV453229.1 | 5328325 | 22-scf00517 | 22 |
| AX-158336974 | 26 | 62.7   | KV453229.1 | 5333089 | 22-scf00517 | 22 |
| AX-158336977 | 26 | 62.7   | KV453229.1 | 5334617 | 22-scf00517 | 22 |
| AX-158336984 | 26 | 62.7   | KV453229.1 | 5342981 | 22-scf00517 | 22 |
| AX-158336978 | 26 | 62.709 | KV453229.1 | 5335457 | 22-scf00517 | 22 |
| AX-158336981 | 26 | 62.715 | KV453229.1 | 5340368 | 22-scf00517 | 22 |
| AX-158336985 | 26 | 62.772 | KV453229.1 | 5343312 | 22-scf00517 | 22 |
| AX-158336988 | 26 | 62.772 | KV453229.1 | 5348329 | 22-scf00517 | 22 |
| AX-157861744 | 26 | 62.851 | KV453229.1 | 5343441 | 22-scf00517 | 22 |
| AX-158335834 | 26 | 62.926 | KV453229.1 | 3571826 | 22-scf00517 | 22 |
| AX-157741036 | 26 | 62.926 | KV453229.1 | 3618042 | 22-scf00517 | 22 |
| AX-158335902 | 26 | 62.926 | KV453229.1 | 3673939 | 22-scf00517 | 22 |
| AX-158336921 | 26 | 62.926 | KV453229.1 | 5241770 | 22-scf00517 | 22 |
| AX-158336987 | 26 | 62.926 | KV453229.1 | 5346897 | 22-scf00517 | 22 |
| AX-158418931 | 26 | 62.926 | KV453229.1 | 5352419 | 22-scf00517 | 22 |
| AX-158336992 | 26 | 62.926 | KV453229.1 | 5354037 | 22-scf00517 | 22 |
| AX-158336994 | 26 | 62.926 | KV453229.1 | 5360886 | 22-scf00517 | 22 |
| AX-158336996 | 26 | 62.926 | KV453229.1 | 5362660 | 22-scf00517 | 22 |
| AX-158336999 | 26 | 62.926 | KV453229.1 | 5371353 | 22-scf00517 | 22 |
| AX-158337001 | 26 | 62.926 | KV453229.1 | 5374044 | 22-scf00517 | 22 |
| AX-158337041 | 26 | 62.926 | KV453229.1 | 5422316 | 22-scf00517 | 22 |
| AX-157849645 | 26 | 62.926 | KV453229.1 | 5500049 | 22-scf00517 | 22 |
| AX-158337181 | 26 | 62.926 | KV453229.1 | 5624419 | 22-scf00517 | 22 |
| AX-158336942 | 26 | 63.144 | KV453229.1 | 5281591 | 22-scf00517 | 22 |
| AX-158337006 | 26 | 63.144 | KV453229.1 | 5380950 | 22-scf00517 | 22 |
| AX-158337008 | 26 | 63.144 | KV453229.1 | 5383384 | 22-scf00517 | 22 |
| AX-158337010 | 26 | 63.144 | KV453229.1 | 5385525 | 22-scf00517 | 22 |
| AX-158337011 | 26 | 63.144 | KV453229.1 | 5388134 | 22-scf00517 | 22 |
| AX-158337013 | 26 | 63.144 | KV453229.1 | 5388795 | 22-scf00517 | 22 |
| AX-158337014 | 26 | 63.144 | KV453229.1 | 5389595 | 22-scf00517 | 22 |
| AX-158337016 | 26 | 63.144 | KV453229.1 | 5390269 | 22-scf00517 | 22 |
| AX-158337018 | 26 | 63.144 | KV453229.1 | 5390922 | 22-scf00517 | 22 |
| AX-158337020 | 26 | 63.144 | KV453229.1 | 5394980 | 22-scf00517 | 22 |
| AX-158337022 | 26 | 63.144 | KV453229.1 | 5397284 | 22-scf00517 | 22 |
| AX-158337024 | 26 | 63.144 | KV453229.1 | 5398526 | 22-scf00517 | 22 |

|              |    |        |            |         |             |    |
|--------------|----|--------|------------|---------|-------------|----|
| AX-157748035 | 26 | 63.144 | KV453229.1 | 5399186 | 22-scf00517 | 22 |
| AX-158337025 | 26 | 63.144 | KV453229.1 | 5399944 | 22-scf00517 | 22 |
| AX-158337026 | 26 | 63.144 | KV453229.1 | 5400545 | 22-scf00517 | 22 |
| AX-158337027 | 26 | 63.144 | KV453229.1 | 5405620 | 22-scf00517 | 22 |
| AX-158337028 | 26 | 63.144 | KV453229.1 | 5405936 | 22-scf00517 | 22 |
| AX-157746686 | 26 | 63.144 | KV453229.1 | 5426815 | 22-scf00517 | 22 |
| AX-158337030 | 26 | 63.304 | KV453229.1 | 5406731 | 22-scf00517 | 22 |
| AX-158337048 | 26 | 63.304 | KV453229.1 | 5426587 | 22-scf00517 | 22 |
| AX-158337055 | 26 | 63.304 | KV453229.1 | 5431316 | 22-scf00517 | 22 |
| AX-157717422 | 26 | 63.363 | KV453229.1 | 5408205 | 22-scf00517 | 22 |
| AX-158337033 | 26 | 63.363 | KV453229.1 | 5409517 | 22-scf00517 | 22 |
| AX-158337034 | 26 | 63.363 | KV453229.1 | 5410098 | 22-scf00517 | 22 |
| AX-158337035 | 26 | 63.363 | KV453229.1 | 5413835 | 22-scf00517 | 22 |
| AX-158337039 | 26 | 63.363 | KV453229.1 | 5420912 | 22-scf00517 | 22 |
| AX-158337040 | 26 | 63.363 | KV453229.1 | 5421950 | 22-scf00517 | 22 |
| AX-157873727 | 26 | 63.363 | KV453229.1 | 5423479 | 22-scf00517 | 22 |
| AX-158337043 | 26 | 63.363 | KV453229.1 | 5424182 | 22-scf00517 | 22 |
| AX-158337046 | 26 | 63.363 | KV453229.1 | 5425385 | 22-scf00517 | 22 |
| AX-158337049 | 26 | 63.363 | KV453229.1 | 5427116 | 22-scf00517 | 22 |
| AX-158337051 | 26 | 63.363 | KV453229.1 | 5428068 | 22-scf00517 | 22 |
| AX-158337052 | 26 | 63.363 | KV453229.1 | 5428578 | 22-scf00517 | 22 |
| AX-157739244 | 26 | 63.363 | KV453229.1 | 5428866 | 22-scf00517 | 22 |
| AX-157849637 | 26 | 63.363 | KV453229.1 | 5429306 | 22-scf00517 | 22 |
| AX-157849638 | 26 | 63.363 | KV453229.1 | 5430447 | 22-scf00517 | 22 |
| AX-158337054 | 26 | 63.363 | KV453229.1 | 5430765 | 22-scf00517 | 22 |
| AX-158337270 | 26 | 63.363 | KV453229.1 | 5733527 | 22-scf00517 | 22 |
| AX-158337057 | 26 | 63.472 | KV453229.1 | 5436524 | 22-scf00517 | 22 |
| AX-158337058 | 26 | 63.498 | KV453229.1 | 5438850 | 22-scf00517 | 22 |
| AX-158337060 | 26 | 63.522 | KV453229.1 | 5442050 | 22-scf00517 | 22 |
| AX-158337065 | 26 | 63.543 | KV453229.1 | 5450549 | 22-scf00517 | 22 |
| AX-158337143 | 26 | 63.543 | KV453229.1 | 5571961 | 22-scf00517 | 22 |
| AX-158337066 | 26 | 63.565 | KV453229.1 | 5452137 | 22-scf00517 | 22 |
| AX-158337144 | 26 | 63.565 | KV453229.1 | 5572844 | 22-scf00517 | 22 |
| AX-158337056 | 26 | 63.581 | KV453229.1 | 5436186 | 22-scf00517 | 22 |
| AX-158337059 | 26 | 63.581 | KV453229.1 | 5441088 | 22-scf00517 | 22 |
| AX-158337062 | 26 | 63.581 | KV453229.1 | 5447043 | 22-scf00517 | 22 |
| AX-158337067 | 26 | 63.581 | KV453229.1 | 5452996 | 22-scf00517 | 22 |
| AX-158337069 | 26 | 63.581 | KV453229.1 | 5455590 | 22-scf00517 | 22 |
| AX-157718209 | 26 | 63.581 | KV453229.1 | 5458745 | 22-scf00517 | 22 |
| AX-158337071 | 26 | 63.581 | KV453229.1 | 5462174 | 22-scf00517 | 22 |
| AX-158337073 | 26 | 63.581 | KV453229.1 | 5463535 | 22-scf00517 | 22 |
| AX-157750095 | 26 | 63.581 | KV453229.1 | 5464054 | 22-scf00517 | 22 |
| AX-157849643 | 26 | 63.581 | KV453229.1 | 5465375 | 22-scf00517 | 22 |
| AX-158337074 | 26 | 63.581 | KV453229.1 | 5468273 | 22-scf00517 | 22 |
| AX-158337075 | 26 | 63.581 | KV453229.1 | 5468700 | 22-scf00517 | 22 |
| AX-158337078 | 26 | 63.581 | KV453229.1 | 5470181 | 22-scf00517 | 22 |
| AX-158337079 | 26 | 63.581 | KV453229.1 | 5470617 | 22-scf00517 | 22 |
| AX-157773090 | 26 | 63.581 | KV453229.1 | 5472198 | 22-scf00517 | 22 |
| AX-158337081 | 26 | 63.581 | KV453229.1 | 5475659 | 22-scf00517 | 22 |
| AX-158337082 | 26 | 63.581 | KV453229.1 | 5478062 | 22-scf00517 | 22 |
| AX-157868003 | 26 | 63.581 | KV453229.1 | 5485059 | 22-scf00517 | 22 |

|              |    |        |            |         |             |    |
|--------------|----|--------|------------|---------|-------------|----|
| AX-158337096 | 26 | 63.581 | KV453229.1 | 5503436 | 22-scf00517 | 22 |
| AX-158337083 | 26 | 63.615 | KV453229.1 | 5484174 | 22-scf00517 | 22 |
| AX-158337085 | 26 | 63.65  | KV453229.1 | 5485643 | 22-scf00517 | 22 |
| AX-158337088 | 26 | 63.69  | KV453229.1 | 5486921 | 22-scf00517 | 22 |
| AX-158337089 | 26 | 63.69  | KV453229.1 | 5487893 | 22-scf00517 | 22 |
| AX-157735729 | 26 | 63.69  | KV453229.1 | 5489858 | 22-scf00517 | 22 |
| AX-157715089 | 26 | 63.69  | KV453229.1 | 5490608 | 22-scf00517 | 22 |
| AX-158337098 | 26 | 63.69  | KV453229.1 | 5506779 | 22-scf00517 | 22 |
| AX-157755503 | 26 | 63.717 | KV453229.1 | 5496532 | 22-scf00517 | 22 |
| AX-158337091 | 26 | 63.717 | KV453229.1 | 5497550 | 22-scf00517 | 22 |
| AX-157849646 | 26 | 63.757 | KV453229.1 | 5501507 | 22-scf00517 | 22 |
| AX-158337095 | 26 | 63.8   | KV453229.1 | 5501801 | 22-scf00517 | 22 |
| AX-158337097 | 26 | 63.8   | KV453229.1 | 5506254 | 22-scf00517 | 22 |
| AX-158337104 | 26 | 63.926 | KV453229.1 | 5514424 | 22-scf00517 | 22 |
| AX-158337105 | 26 | 64.018 | KV453229.1 | 5516140 | 22-scf00517 | 22 |
| AX-158337106 | 26 | 64.018 | KV453229.1 | 5516373 | 22-scf00517 | 22 |
| AX-158337122 | 26 | 64.018 | KV453229.1 | 5541251 | 22-scf00517 | 22 |
| AX-158337119 | 26 | 64.055 | KV453229.1 | 5537373 | 22-scf00517 | 22 |
| AX-158337121 | 26 | 64.099 | KV453229.1 | 5540210 | 22-scf00517 | 22 |
| AX-157849654 | 26 | 64.099 | KV453229.1 | 5577069 | 22-scf00517 | 22 |
| AX-157774533 | 26 | 64.128 | KV453229.1 | 5539294 | 22-scf00517 | 22 |
| AX-158337123 | 26 | 64.128 | KV453229.1 | 5543507 | 22-scf00517 | 22 |
| AX-158337124 | 26 | 64.128 | KV453229.1 | 5544312 | 22-scf00517 | 22 |
| AX-158337128 | 26 | 64.128 | KV453229.1 | 5548335 | 22-scf00517 | 22 |
| AX-157849648 | 26 | 64.128 | KV453229.1 | 5549705 | 22-scf00517 | 22 |
| AX-157849649 | 26 | 64.128 | KV453229.1 | 5550051 | 22-scf00517 | 22 |
| AX-157739630 | 26 | 64.128 | KV453229.1 | 5550140 | 22-scf00517 | 22 |
| AX-157849650 | 26 | 64.128 | KV453229.1 | 5553470 | 22-scf00517 | 22 |
| AX-158337131 | 26 | 64.128 | KV453229.1 | 5554284 | 22-scf00517 | 22 |
| AX-157744650 | 26 | 64.128 | KV453229.1 | 5555214 | 22-scf00517 | 22 |
| AX-157712158 | 26 | 64.128 | KV453229.1 | 5557695 | 22-scf00517 | 22 |
| AX-157708492 | 26 | 64.128 | KV453229.1 | 5557738 | 22-scf00517 | 22 |
| AX-157849651 | 26 | 64.128 | KV453229.1 | 5560810 | 22-scf00517 | 22 |
| AX-158337137 | 26 | 64.128 | KV453229.1 | 5564597 | 22-scf00517 | 22 |
| AX-158337139 | 26 | 64.128 | KV453229.1 | 5566673 | 22-scf00517 | 22 |
| AX-158337140 | 26 | 64.128 | KV453229.1 | 5567243 | 22-scf00517 | 22 |
| AX-157861747 | 26 | 64.128 | KV453229.1 | 5568410 | 22-scf00517 | 22 |
| AX-157771626 | 26 | 64.128 | KV453229.1 | 5568905 | 22-scf00517 | 22 |
| AX-158337145 | 26 | 64.128 | KV453229.1 | 5574500 | 22-scf00517 | 22 |
| AX-157849653 | 26 | 64.128 | KV453229.1 | 5576960 | 22-scf00517 | 22 |
| AX-157849655 | 26 | 64.128 | KV453229.1 | 5577121 | 22-scf00517 | 22 |
| AX-158337149 | 26 | 64.128 | KV453229.1 | 5579942 | 22-scf00517 | 22 |
| AX-158337158 | 26 | 64.128 | KV453229.1 | 5592190 | 22-scf00517 | 22 |
| AX-157716887 | 26 | 64.128 | KV453229.1 | 5594601 | 22-scf00517 | 22 |
| AX-157745327 | 26 | 64.346 | KV453229.1 | 5551238 | 22-scf00517 | 22 |
| AX-158337150 | 26 | 64.346 | KV453229.1 | 5580571 | 22-scf00517 | 22 |
| AX-158337155 | 26 | 64.564 | KV453229.1 | 5589578 | 22-scf00517 | 22 |
| AX-158337156 | 26 | 64.564 | KV453229.1 | 5590446 | 22-scf00517 | 22 |
| AX-158337160 | 26 | 64.565 | KV453229.1 | 5594170 | 22-scf00517 | 22 |
| AX-158337163 | 26 | 64.565 | KV453229.1 | 5598229 | 22-scf00517 | 22 |
| AX-158337164 | 26 | 64.565 | KV453229.1 | 5600076 | 22-scf00517 | 22 |



|              |    |        |            |         |             |    |
|--------------|----|--------|------------|---------|-------------|----|
| AX-157849656 | 26 | 64.628 | KV453229.1 | 5601278 | 22-scf00517 | 22 |
| AX-158337166 | 26 | 64.674 | KV453229.1 | 5603608 | 22-scf00517 | 22 |
| AX-158381574 | 26 | 64.674 | KV453229.1 | 5606896 | 22-scf00517 | 22 |
| AX-157849657 | 26 | 64.674 | KV453229.1 | 5607162 | 22-scf00517 | 22 |
| AX-158337168 | 26 | 64.674 | KV453229.1 | 5607480 | 22-scf00517 | 22 |
| AX-158337169 | 26 | 64.674 | KV453229.1 | 5607731 | 22-scf00517 | 22 |
| AX-157849662 | 26 | 64.674 | KV453229.1 | 5647458 | 22-scf00517 | 22 |
| AX-158337174 | 26 | 64.679 | KV453229.1 | 5616264 | 22-scf00517 | 22 |
| AX-158337185 | 26 | 64.679 | KV453229.1 | 5626861 | 22-scf00517 | 22 |
| AX-158337191 | 26 | 64.679 | KV453229.1 | 5633987 | 22-scf00517 | 22 |
| AX-157849663 | 26 | 64.679 | KV453229.1 | 5653624 | 22-scf00517 | 22 |
| AX-158337176 | 26 | 64.683 | KV453229.1 | 5619257 | 22-scf00517 | 22 |
| AX-158337179 | 26 | 64.692 | KV453229.1 | 5622554 | 22-scf00517 | 22 |
| AX-158337180 | 26 | 64.706 | KV453229.1 | 5623775 | 22-scf00517 | 22 |
| AX-158337184 | 26 | 64.726 | KV453229.1 | 5626560 | 22-scf00517 | 22 |
| AX-158337195 | 26 | 64.726 | KV453229.1 | 5637763 | 22-scf00517 | 22 |
| AX-158337262 | 26 | 64.726 | KV453229.1 | 5723304 | 22-scf00517 | 22 |
| AX-157740836 | 26 | 64.746 | KV453229.1 | 5627644 | 22-scf00517 | 22 |
| AX-158336326 | 26 | 64.767 | KV453229.1 | 4334242 | 22-scf00517 | 22 |
| AX-157751685 | 26 | 64.767 | KV453229.1 | 5058901 | 22-scf00517 | 22 |
| AX-158337187 | 26 | 64.767 | KV453229.1 | 5629436 | 22-scf00517 | 22 |
| AX-158337196 | 26 | 64.783 | KV453229.1 | 5638708 | 22-scf00517 | 22 |
| AX-158337197 | 26 | 64.783 | KV453229.1 | 5640339 | 22-scf00517 | 22 |
| AX-158337200 | 26 | 64.783 | KV453229.1 | 5642752 | 22-scf00517 | 22 |
| AX-158337201 | 26 | 64.783 | KV453229.1 | 5644018 | 22-scf00517 | 22 |
| AX-158337202 | 26 | 64.806 | KV453229.1 | 5645477 | 22-scf00517 | 22 |
| AX-158337203 | 26 | 64.806 | KV453229.1 | 5645715 | 22-scf00517 | 22 |
| AX-158337205 | 26 | 64.829 | KV453229.1 | 5646314 | 22-scf00517 | 22 |
| AX-158337170 | 26 | 64.852 | KV453229.1 | 5610100 | 22-scf00517 | 22 |
| AX-158337183 | 26 | 64.852 | KV453229.1 | 5626183 | 22-scf00517 | 22 |
| AX-158337194 | 26 | 64.852 | KV453229.1 | 5635299 | 22-scf00517 | 22 |
| AX-157849660 | 26 | 64.852 | KV453229.1 | 5640229 | 22-scf00517 | 22 |
| AX-158337206 | 26 | 64.852 | KV453229.1 | 5647508 | 22-scf00517 | 22 |
| AX-158337207 | 26 | 64.852 | KV453229.1 | 5648741 | 22-scf00517 | 22 |
| AX-158337231 | 26 | 64.852 | KV453229.1 | 5681834 | 22-scf00517 | 22 |
| AX-158337257 | 26 | 64.852 | KV453229.1 | 5713457 | 22-scf00517 | 22 |
| AX-157741090 | 26 | 64.852 | KV453229.1 | 5774821 | 22-scf00517 | 22 |
| AX-158337209 | 26 | 64.868 | KV453229.1 | 5650949 | 22-scf00517 | 22 |
| AX-158337210 | 26 | 64.88  | KV453229.1 | 5651644 | 22-scf00517 | 22 |
| AX-158337211 | 26 | 64.892 | KV453229.1 | 5654220 | 22-scf00517 | 22 |
| AX-158337216 | 26 | 64.892 | KV453229.1 | 5657874 | 22-scf00517 | 22 |
| AX-158337217 | 26 | 64.892 | KV453229.1 | 5660542 | 22-scf00517 | 22 |
| AX-158337220 | 26 | 64.892 | KV453229.1 | 5662979 | 22-scf00517 | 22 |
| AX-158337219 | 26 | 65.001 | KV453229.1 | 5662589 | 22-scf00517 | 22 |
| AX-157849665 | 26 | 65.001 | KV453229.1 | 5664810 | 22-scf00517 | 22 |
| AX-157849666 | 26 | 65.001 | KV453229.1 | 5665400 | 22-scf00517 | 22 |
| AX-158337221 | 26 | 65.001 | KV453229.1 | 5668083 | 22-scf00517 | 22 |
| AX-158337222 | 26 | 65.001 | KV453229.1 | 5669330 | 22-scf00517 | 22 |
| AX-158337224 | 26 | 65.001 | KV453229.1 | 5671852 | 22-scf00517 | 22 |
| AX-158337225 | 26 | 65.001 | KV453229.1 | 5672743 | 22-scf00517 | 22 |
| AX-158337226 | 26 | 65.001 | KV453229.1 | 5672967 | 22-scf00517 | 22 |

|              |    |        |            |         |             |    |
|--------------|----|--------|------------|---------|-------------|----|
| AX-158337227 | 26 | 65.001 | KV453229.1 | 5674084 | 22-scf00517 | 22 |
| AX-157744718 | 26 | 65.001 | KV453229.1 | 5688513 | 22-scf00517 | 22 |
| AX-158337236 | 26 | 65.001 | KV453229.1 | 5692367 | 22-scf00517 | 22 |
| AX-158337238 | 26 | 65.001 | KV453229.1 | 5695201 | 22-scf00517 | 22 |
| AX-158337239 | 26 | 65.001 | KV453229.1 | 5695627 | 22-scf00517 | 22 |
| AX-158337240 | 26 | 65.001 | KV453229.1 | 5697150 | 22-scf00517 | 22 |
| AX-158337241 | 26 | 65.001 | KV453229.1 | 5697658 | 22-scf00517 | 22 |
| AX-158337244 | 26 | 65.001 | KV453229.1 | 5700827 | 22-scf00517 | 22 |
| AX-158337246 | 26 | 65.001 | KV453229.1 | 5702328 | 22-scf00517 | 22 |
| AX-158337250 | 26 | 65.001 | KV453229.1 | 5708779 | 22-scf00517 | 22 |
| AX-158337253 | 26 | 65.001 | KV453229.1 | 5710261 | 22-scf00517 | 22 |
| AX-158337254 | 26 | 65.001 | KV453229.1 | 5711363 | 22-scf00517 | 22 |
| AX-158337261 | 26 | 65.001 | KV453229.1 | 5721592 | 22-scf00517 | 22 |
| AX-158337265 | 26 | 65.001 | KV453229.1 | 5725226 | 22-scf00517 | 22 |
| AX-157719968 | 26 | 65.001 | KV453229.1 | 5727692 | 22-scf00517 | 22 |
| AX-158337267 | 26 | 65.001 | KV453229.1 | 5729877 | 22-scf00517 | 22 |
| AX-158337268 | 26 | 65.001 | KV453229.1 | 5730270 | 22-scf00517 | 22 |
| AX-157849669 | 26 | 65.001 | KV453229.1 | 5733908 | 22-scf00517 | 22 |
| AX-157849670 | 26 | 65.001 | KV453229.1 | 5734028 | 22-scf00517 | 22 |
| AX-158337271 | 26 | 65.001 | KV453229.1 | 5734288 | 22-scf00517 | 22 |
| AX-158337280 | 26 | 65.001 | KV453229.1 | 5743646 | 22-scf00517 | 22 |
| AX-158337289 | 26 | 65.001 | KV453229.1 | 5759297 | 22-scf00517 | 22 |
| AX-158337291 | 26 | 65.001 | KV453229.1 | 5763874 | 22-scf00517 | 22 |
| AX-157745351 | 26 | 65.001 | KV453229.1 | 5790900 | 22-scf00517 | 22 |
| AX-158337308 | 26 | 65.001 | KV453229.1 | 5800175 | 22-scf00517 | 22 |
| AX-158337311 | 26 | 65.001 | KV453229.1 | 5802811 | 22-scf00517 | 22 |
| AX-158337338 | 26 | 65.001 | KV453229.1 | 5855762 | 22-scf00517 | 22 |
| AX-157773940 | 26 | 65.001 | KV453229.1 | 5871940 | 22-scf00517 | 22 |
| AX-158337349 | 26 | 65.001 | KV453229.1 | 5874854 | 22-scf00517 | 22 |
| AX-158337278 | 26 | 65.041 | KV453229.1 | 5739622 | 22-scf00517 | 22 |
| AX-157849664 | 26 | 65.081 | KV453229.1 | 5655109 | 22-scf00517 | 22 |
| AX-158337248 | 26 | 65.081 | KV453229.1 | 5704490 | 22-scf00517 | 22 |
| AX-158337277 | 26 | 65.081 | KV453229.1 | 5738959 | 22-scf00517 | 22 |
| AX-158337279 | 26 | 65.081 | KV453229.1 | 5741109 | 22-scf00517 | 22 |
| AX-158337281 | 26 | 65.081 | KV453229.1 | 5746043 | 22-scf00517 | 22 |
| AX-157849671 | 26 | 65.081 | KV453229.1 | 5750598 | 22-scf00517 | 22 |
| AX-158337293 | 26 | 65.081 | KV453229.1 | 5766136 | 22-scf00517 | 22 |
| AX-158337307 | 26 | 65.081 | KV453229.1 | 5799751 | 22-scf00517 | 22 |
| AX-157712197 | 26 | 65.081 | KV453229.1 | 5802874 | 22-scf00517 | 22 |
| AX-157709235 | 26 | 65.081 | KV453229.1 | 5802941 | 22-scf00517 | 22 |
| AX-158337312 | 26 | 65.081 | KV453229.1 | 5803193 | 22-scf00517 | 22 |
| AX-157849685 | 26 | 65.081 | KV453229.1 | 5821048 | 22-scf00517 | 22 |
| AX-158337326 | 26 | 65.081 | KV453229.1 | 5822370 | 22-scf00517 | 22 |
| AX-158418941 | 26 | 65.081 | KV453229.1 | 5847622 | 22-scf00517 | 22 |
| AX-157849674 | 26 | 65.144 | KV453229.1 | 5761971 | 22-scf00517 | 22 |
| AX-158337272 | 26 | 65.22  | KV453229.1 | 5734902 | 22-scf00517 | 22 |
| AX-158337273 | 26 | 65.22  | KV453229.1 | 5735495 | 22-scf00517 | 22 |
| AX-158337274 | 26 | 65.22  | KV453229.1 | 5736560 | 22-scf00517 | 22 |
| AX-158337295 | 26 | 65.22  | KV453229.1 | 5769303 | 22-scf00517 | 22 |
| AX-157849678 | 26 | 65.22  | KV453229.1 | 5770881 | 22-scf00517 | 22 |
| AX-158337296 | 26 | 65.22  | KV453229.1 | 5771160 | 22-scf00517 | 22 |

|              |    |        |            |         |             |    |
|--------------|----|--------|------------|---------|-------------|----|
| AX-158337297 | 26 | 65.22  | KV453229.1 | 5772120 | 22-scf00517 | 22 |
| AX-158337299 | 26 | 65.22  | KV453229.1 | 5787566 | 22-scf00517 | 22 |
| AX-157745294 | 26 | 65.22  | KV453229.1 | 5789887 | 22-scf00517 | 22 |
| AX-158337301 | 26 | 65.22  | KV453229.1 | 5791451 | 22-scf00517 | 22 |
| AX-158337304 | 26 | 65.22  | KV453229.1 | 5794084 | 22-scf00517 | 22 |
| AX-157849680 | 26 | 65.22  | KV453229.1 | 5794495 | 22-scf00517 | 22 |
| AX-157749800 | 26 | 65.22  | KV453229.1 | 5796581 | 22-scf00517 | 22 |
| AX-157868009 | 26 | 65.22  | KV453229.1 | 5797654 | 22-scf00517 | 22 |
| AX-157695584 | 26 | 65.22  | KV453229.1 | 5797768 | 22-scf00517 | 22 |
| AX-157749238 | 26 | 65.22  | KV453229.1 | 5798947 | 22-scf00517 | 22 |
| AX-158337306 | 26 | 65.22  | KV453229.1 | 5799268 | 22-scf00517 | 22 |
| AX-158337313 | 26 | 65.22  | KV453229.1 | 5807330 | 22-scf00517 | 22 |
| AX-158337315 | 26 | 65.22  | KV453229.1 | 5809724 | 22-scf00517 | 22 |
| AX-158337339 | 26 | 65.22  | KV453229.1 | 5857836 | 22-scf00517 | 22 |
| AX-158337340 | 26 | 65.22  | KV453229.1 | 5858469 | 22-scf00517 | 22 |
| AX-157849682 | 26 | 65.277 | KV453229.1 | 5812931 | 22-scf00517 | 22 |
| AX-157742850 | 26 | 65.329 | KV453229.1 | 5638229 | 22-scf00517 | 22 |
| AX-158337275 | 26 | 65.329 | KV453229.1 | 5736733 | 22-scf00517 | 22 |
| AX-158337317 | 26 | 65.329 | KV453229.1 | 5813467 | 22-scf00517 | 22 |
| AX-157849683 | 26 | 65.329 | KV453229.1 | 5814048 | 22-scf00517 | 22 |
| AX-158337318 | 26 | 65.329 | KV453229.1 | 5814486 | 22-scf00517 | 22 |
| AX-158337319 | 26 | 65.329 | KV453229.1 | 5815286 | 22-scf00517 | 22 |
| AX-158337320 | 26 | 65.329 | KV453229.1 | 5816414 | 22-scf00517 | 22 |
| AX-157849684 | 26 | 65.329 | KV453229.1 | 5817181 | 22-scf00517 | 22 |
| AX-158337321 | 26 | 65.329 | KV453229.1 | 5819768 | 22-scf00517 | 22 |
| AX-158337322 | 26 | 65.329 | KV453229.1 | 5820467 | 22-scf00517 | 22 |
| AX-158337328 | 26 | 65.329 | KV453229.1 | 5828353 | 22-scf00517 | 22 |
| AX-158337329 | 26 | 65.329 | KV453229.1 | 5829302 | 22-scf00517 | 22 |
| AX-157849688 | 26 | 65.329 | KV453229.1 | 5832052 | 22-scf00517 | 22 |
| AX-157849689 | 26 | 65.329 | KV453229.1 | 5835152 | 22-scf00517 | 22 |
| AX-157740525 | 26 | 65.329 | KV453229.1 | 5840737 | 22-scf00517 | 22 |
| AX-158337333 | 26 | 65.329 | KV453229.1 | 5844699 | 22-scf00517 | 22 |
| AX-158337337 | 26 | 65.329 | KV453229.1 | 5851565 | 22-scf00517 | 22 |
| AX-158337341 | 26 | 65.329 | KV453229.1 | 5861095 | 22-scf00517 | 22 |
| AX-158337342 | 26 | 65.329 | KV453229.1 | 5861451 | 22-scf00517 | 22 |
| AX-157849690 | 26 | 65.329 | KV453229.1 | 5862282 | 22-scf00517 | 22 |
| AX-158337348 | 26 | 65.329 | KV453229.1 | 5874490 | 22-scf00517 | 22 |
| AX-158337369 | 26 | 65.329 | KV453229.1 | 5904093 | 22-scf00517 | 22 |
| AX-158337379 | 26 | 65.329 | KV453229.1 | 5918221 | 22-scf00517 | 22 |
| AX-158337585 | 26 | 65.329 | KV453229.1 | 6226879 | 22-scf00517 | 22 |
| AX-158337228 | 26 | 65.375 | KV453229.1 | 5674620 | 22-scf00517 | 22 |
| AX-158337351 | 26 | 65.375 | KV453229.1 | 5877793 | 22-scf00517 | 22 |
| AX-158337382 | 26 | 65.375 | KV453229.1 | 5922328 | 22-scf00517 | 22 |
| AX-158337355 | 26 | 65.439 | KV453229.1 | 5884478 | 22-scf00517 | 22 |
| AX-158337357 | 26 | 65.439 | KV453229.1 | 5887884 | 22-scf00517 | 22 |
| AX-158337358 | 26 | 65.439 | KV453229.1 | 5888760 | 22-scf00517 | 22 |
| AX-158337359 | 26 | 65.439 | KV453229.1 | 5890200 | 22-scf00517 | 22 |
| AX-158337362 | 26 | 65.583 | KV453229.1 | 5895152 | 22-scf00517 | 22 |
| AX-158337363 | 26 | 65.583 | KV453229.1 | 5896124 | 22-scf00517 | 22 |
| AX-157849693 | 26 | 65.583 | KV453229.1 | 5896588 | 22-scf00517 | 22 |
| AX-158337367 | 26 | 65.583 | KV453229.1 | 5900562 | 22-scf00517 | 22 |

|              |    |        |            |         |             |    |
|--------------|----|--------|------------|---------|-------------|----|
| AX-158337387 | 26 | 65.583 | KV453229.1 | 5932705 | 22-scf00517 | 22 |
| AX-158337372 | 26 | 65.799 | KV453229.1 | 5906784 | 22-scf00517 | 22 |
| AX-158337373 | 26 | 65.934 | KV453229.1 | 5907269 | 22-scf00517 | 22 |
| AX-157849694 | 26 | 65.934 | KV453229.1 | 5908512 | 22-scf00517 | 22 |
| AX-158337371 | 26 | 66.204 | KV453229.1 | 5906374 | 22-scf00517 | 22 |
| AX-158337375 | 26 | 66.204 | KV453229.1 | 5912258 | 22-scf00517 | 22 |
| AX-158337376 | 26 | 66.204 | KV453229.1 | 5913831 | 22-scf00517 | 22 |
| AX-157849695 | 26 | 66.204 | KV453229.1 | 5915919 | 22-scf00517 | 22 |
| AX-158337378 | 26 | 66.204 | KV453229.1 | 5917921 | 22-scf00517 | 22 |
| AX-158337381 | 26 | 66.204 | KV453229.1 | 5920155 | 22-scf00517 | 22 |
| AX-157751461 | 26 | 66.204 | KV453229.1 | 5920825 | 22-scf00517 | 22 |
| AX-158337383 | 26 | 66.204 | KV453229.1 | 5924045 | 22-scf00517 | 22 |
| AX-158337384 | 26 | 66.204 | KV453229.1 | 5927408 | 22-scf00517 | 22 |
| AX-157773674 | 26 | 66.204 | KV453229.1 | 5929931 | 22-scf00517 | 22 |
| AX-157750818 | 26 | 66.204 | KV453229.1 | 5932171 | 22-scf00517 | 22 |
| AX-157861750 | 26 | 66.204 | KV453229.1 | 5935218 | 22-scf00517 | 22 |
| AX-158337391 | 26 | 66.204 | KV453229.1 | 5936908 | 22-scf00517 | 22 |
| AX-158337392 | 26 | 66.204 | KV453229.1 | 5937590 | 22-scf00517 | 22 |
| AX-158337393 | 26 | 66.204 | KV453229.1 | 5939072 | 22-scf00517 | 22 |
| AX-158337394 | 26 | 66.204 | KV453229.1 | 5939481 | 22-scf00517 | 22 |
| AX-158337396 | 26 | 66.204 | KV453229.1 | 5944457 | 22-scf00517 | 22 |
| AX-158337397 | 26 | 66.204 | KV453229.1 | 5945104 | 22-scf00517 | 22 |
| AX-158337401 | 26 | 66.204 | KV453229.1 | 5947327 | 22-scf00517 | 22 |
| AX-158337405 | 26 | 66.204 | KV453229.1 | 5952195 | 22-scf00517 | 22 |
| AX-158337406 | 26 | 66.204 | KV453229.1 | 5952874 | 22-scf00517 | 22 |
| AX-158381576 | 26 | 66.204 | KV453229.1 | 5955853 | 22-scf00517 | 22 |
| AX-158337454 | 26 | 66.204 | KV453229.1 | 6004397 | 22-scf00517 | 22 |
| AX-158337465 | 26 | 66.204 | KV453229.1 | 6016650 | 22-scf00517 | 22 |
| AX-158337474 | 26 | 66.204 | KV453229.1 | 6031828 | 22-scf00517 | 22 |
| AX-158337410 | 26 | 66.206 | KV453229.1 | 5959528 | 22-scf00517 | 22 |
| AX-158337440 | 26 | 66.639 | KV453229.1 | 5990580 | 22-scf00517 | 22 |
| AX-158337441 | 26 | 66.639 | KV453229.1 | 5991496 | 22-scf00517 | 22 |
| AX-158337455 | 26 | 66.639 | KV453229.1 | 6004743 | 22-scf00517 | 22 |
| AX-158337439 | 26 | 66.641 | KV453229.1 | 5990377 | 22-scf00517 | 22 |
| AX-158337442 | 26 | 66.641 | KV453229.1 | 5992814 | 22-scf00517 | 22 |
| AX-158337443 | 26 | 66.641 | KV453229.1 | 5994113 | 22-scf00517 | 22 |
| AX-158337444 | 26 | 66.641 | KV453229.1 | 5995261 | 22-scf00517 | 22 |
| AX-158337445 | 26 | 66.641 | KV453229.1 | 5996227 | 22-scf00517 | 22 |
| AX-157741819 | 26 | 66.641 | KV453229.1 | 5999493 | 22-scf00517 | 22 |
| AX-158337448 | 26 | 66.641 | KV453229.1 | 5999651 | 22-scf00517 | 22 |
| AX-158337451 | 26 | 66.641 | KV453229.1 | 6000771 | 22-scf00517 | 22 |
| AX-158337452 | 26 | 66.641 | KV453229.1 | 6002456 | 22-scf00517 | 22 |
| AX-158337453 | 26 | 66.641 | KV453229.1 | 6003565 | 22-scf00517 | 22 |
| AX-158337459 | 26 | 66.641 | KV453229.1 | 6009532 | 22-scf00517 | 22 |
| AX-158337462 | 26 | 66.641 | KV453229.1 | 6014321 | 22-scf00517 | 22 |
| AX-158337463 | 26 | 66.641 | KV453229.1 | 6014903 | 22-scf00517 | 22 |
| AX-158337466 | 26 | 66.641 | KV453229.1 | 6018459 | 22-scf00517 | 22 |
| AX-158337482 | 26 | 66.641 | KV453229.1 | 6041828 | 22-scf00517 | 22 |
| AX-157772479 | 26 | 66.859 | KV453229.1 | 6021759 | 22-scf00517 | 22 |
| AX-158337470 | 26 | 66.859 | KV453229.1 | 6024026 | 22-scf00517 | 22 |
| AX-158337471 | 26 | 66.859 | KV453229.1 | 6025795 | 22-scf00517 | 22 |

|              |    |        |            |         |             |    |
|--------------|----|--------|------------|---------|-------------|----|
| AX-158337473 | 26 | 66.859 | KV453229.1 | 6027743 | 22-scf00517 | 22 |
| AX-158337475 | 26 | 66.859 | KV453229.1 | 6032704 | 22-scf00517 | 22 |
| AX-158337476 | 26 | 66.859 | KV453229.1 | 6033106 | 22-scf00517 | 22 |
| AX-158337477 | 26 | 66.859 | KV453229.1 | 6033812 | 22-scf00517 | 22 |
| AX-158337478 | 26 | 66.859 | KV453229.1 | 6035447 | 22-scf00517 | 22 |
| AX-157849698 | 26 | 66.859 | KV453229.1 | 6037724 | 22-scf00517 | 22 |
| AX-157849699 | 26 | 66.859 | KV453229.1 | 6038483 | 22-scf00517 | 22 |
| AX-158337480 | 26 | 66.859 | KV453229.1 | 6040531 | 22-scf00517 | 22 |
| AX-158337481 | 26 | 66.859 | KV453229.1 | 6040856 | 22-scf00517 | 22 |
| AX-157861752 | 26 | 66.859 | KV453229.1 | 6044509 | 22-scf00517 | 22 |
| AX-158418949 | 26 | 66.859 | KV453229.1 | 6049194 | 22-scf00517 | 22 |
| AX-158337487 | 26 | 66.859 | KV453229.1 | 6052245 | 22-scf00517 | 22 |
| AX-158337490 | 26 | 66.859 | KV453229.1 | 6065135 | 22-scf00517 | 22 |
| AX-158337491 | 26 | 66.859 | KV453229.1 | 6066431 | 22-scf00517 | 22 |
| AX-158337492 | 26 | 66.859 | KV453229.1 | 6066876 | 22-scf00517 | 22 |
| AX-158337525 | 26 | 66.859 | KV453229.1 | 6122015 | 22-scf00517 | 22 |
| AX-158337579 | 26 | 66.859 | KV453229.1 | 6219984 | 22-scf00517 | 22 |
| AX-158337580 | 26 | 66.859 | KV453229.1 | 6220277 | 22-scf00517 | 22 |
| AX-158337493 | 26 | 66.93  | KV453229.1 | 6068452 | 22-scf00517 | 22 |
| AX-157707653 | 26 | 66.93  | KV453229.1 | 6072038 | 22-scf00517 | 22 |
| AX-158337495 | 26 | 66.93  | KV453229.1 | 6073802 | 22-scf00517 | 22 |
| AX-158337502 | 26 | 67.733 | KV453229.1 | 6089795 | 22-scf00517 | 22 |
| AX-157750049 | 26 | 67.733 | KV453229.1 | 6100142 | 22-scf00517 | 22 |
| AX-158337506 | 26 | 67.733 | KV453229.1 | 6100713 | 22-scf00517 | 22 |
| AX-157849700 | 26 | 67.733 | KV453229.1 | 6104309 | 22-scf00517 | 22 |
| AX-158337512 | 26 | 67.733 | KV453229.1 | 6106442 | 22-scf00517 | 22 |
| AX-158337513 | 26 | 67.733 | KV453229.1 | 6107227 | 22-scf00517 | 22 |
| AX-158337517 | 26 | 67.733 | KV453229.1 | 6116033 | 22-scf00517 | 22 |
| AX-158337524 | 26 | 67.733 | KV453229.1 | 6121498 | 22-scf00517 | 22 |
| AX-158337526 | 26 | 67.733 | KV453229.1 | 6122294 | 22-scf00517 | 22 |
| AX-158337528 | 26 | 67.733 | KV453229.1 | 6126881 | 22-scf00517 | 22 |
| AX-158337529 | 26 | 67.733 | KV453229.1 | 6132005 | 22-scf00517 | 22 |
| AX-158337530 | 26 | 67.733 | KV453229.1 | 6134363 | 22-scf00517 | 22 |
| AX-158337531 | 26 | 67.733 | KV453229.1 | 6135178 | 22-scf00517 | 22 |
| AX-158337535 | 26 | 67.733 | KV453229.1 | 6147015 | 22-scf00517 | 22 |
| AX-158337537 | 26 | 67.733 | KV453229.1 | 6150263 | 22-scf00517 | 22 |
| AX-158337539 | 26 | 67.733 | KV453229.1 | 6153654 | 22-scf00517 | 22 |
| AX-157849703 | 26 | 67.733 | KV453229.1 | 6160901 | 22-scf00517 | 22 |
| AX-157713246 | 26 | 67.733 | KV453229.1 | 6162199 | 22-scf00517 | 22 |
| AX-158337541 | 26 | 67.733 | KV453229.1 | 6162847 | 22-scf00517 | 22 |
| AX-158337543 | 26 | 67.733 | KV453229.1 | 6164696 | 22-scf00517 | 22 |
| AX-158337544 | 26 | 67.733 | KV453229.1 | 6168426 | 22-scf00517 | 22 |
| AX-157731532 | 26 | 67.733 | KV453229.1 | 6170240 | 22-scf00517 | 22 |
| AX-158418952 | 26 | 67.733 | KV453229.1 | 6173698 | 22-scf00517 | 22 |
| AX-157849710 | 26 | 67.733 | KV453229.1 | 6175252 | 22-scf00517 | 22 |
| AX-157849711 | 26 | 67.733 | KV453229.1 | 6176323 | 22-scf00517 | 22 |
| AX-158337549 | 26 | 67.733 | KV453229.1 | 6179447 | 22-scf00517 | 22 |
| AX-158337550 | 26 | 67.733 | KV453229.1 | 6180372 | 22-scf00517 | 22 |
| AX-158337554 | 26 | 67.733 | KV453229.1 | 6184747 | 22-scf00517 | 22 |
| AX-158337555 | 26 | 67.733 | KV453229.1 | 6185031 | 22-scf00517 | 22 |
| AX-157849712 | 26 | 67.733 | KV453229.1 | 6187572 | 22-scf00517 | 22 |

|              |    |        |            |         |             |    |
|--------------|----|--------|------------|---------|-------------|----|
| AX-157849713 | 26 | 67.733 | KV453229.1 | 6188354 | 22-scf00517 | 22 |
| AX-158337557 | 26 | 67.733 | KV453229.1 | 6190280 | 22-scf00517 | 22 |
| AX-158337559 | 26 | 67.733 | KV453229.1 | 6191398 | 22-scf00517 | 22 |
| AX-158337561 | 26 | 67.733 | KV453229.1 | 6193447 | 22-scf00517 | 22 |
| AX-158337562 | 26 | 67.733 | KV453229.1 | 6194071 | 22-scf00517 | 22 |
| AX-158337564 | 26 | 67.733 | KV453229.1 | 6197556 | 22-scf00517 | 22 |
| AX-158337565 | 26 | 67.733 | KV453229.1 | 6198504 | 22-scf00517 | 22 |
| AX-158337569 | 26 | 67.733 | KV453229.1 | 6201893 | 22-scf00517 | 22 |
| AX-158337573 | 26 | 67.733 | KV453229.1 | 6203464 | 22-scf00517 | 22 |
| AX-158337574 | 26 | 67.733 | KV453229.1 | 6204848 | 22-scf00517 | 22 |
| AX-157758810 | 26 | 67.733 | KV453229.1 | 6206606 | 22-scf00517 | 22 |
| AX-158337576 | 26 | 67.733 | KV453229.1 | 6208294 | 22-scf00517 | 22 |
| AX-157849715 | 26 | 67.733 | KV453229.1 | 6211436 | 22-scf00517 | 22 |
| AX-157849718 | 26 | 67.733 | KV453229.1 | 6215444 | 22-scf00517 | 22 |
| AX-158337597 | 26 | 67.733 | KV453229.1 | 6247838 | 22-scf00517 | 22 |
| AX-158337575 | 26 | 67.842 | KV453229.1 | 6207599 | 22-scf00517 | 22 |
| AX-157741635 | 26 | 67.842 | KV453229.1 | 6213819 | 22-scf00517 | 22 |
| AX-158337577 | 26 | 67.842 | KV453229.1 | 6216161 | 22-scf00517 | 22 |
| AX-157747821 | 26 | 67.842 | KV453229.1 | 6219285 | 22-scf00517 | 22 |
| AX-158337812 | 26 | 67.842 | KV453229.1 | 6531738 | 22-scf00517 | 22 |
| AX-158337583 | 26 | 67.874 | KV453229.1 | 6224763 | 22-scf00517 | 22 |
| AX-157849716 | 26 | 67.884 | KV453229.1 | 6215096 | 22-scf00517 | 22 |
| AX-158337581 | 26 | 67.884 | KV453229.1 | 6222640 | 22-scf00517 | 22 |
| AX-158337584 | 26 | 67.884 | KV453229.1 | 6225043 | 22-scf00517 | 22 |
| AX-157748281 | 26 | 67.915 | KV453229.1 | 6226476 | 22-scf00517 | 22 |
| AX-158337588 | 26 | 67.951 | KV453229.1 | 6233338 | 22-scf00517 | 22 |
| AX-158337589 | 26 | 67.951 | KV453229.1 | 6234501 | 22-scf00517 | 22 |
| AX-158337591 | 26 | 67.951 | KV453229.1 | 6238142 | 22-scf00517 | 22 |
| AX-158337593 | 26 | 67.951 | KV453229.1 | 6238598 | 22-scf00517 | 22 |
| AX-158337596 | 26 | 68.061 | KV453229.1 | 6245861 | 22-scf00517 | 22 |
| AX-157743009 | 26 | 68.061 | KV453229.1 | 6246614 | 22-scf00517 | 22 |
| AX-158418955 | 26 | 68.061 | KV453229.1 | 6247716 | 22-scf00517 | 22 |
| AX-158337598 | 26 | 68.061 | KV453229.1 | 6249705 | 22-scf00517 | 22 |
| AX-158337601 | 26 | 68.061 | KV453229.1 | 6257190 | 22-scf00517 | 22 |
| AX-158337602 | 26 | 68.061 | KV453229.1 | 6257673 | 22-scf00517 | 22 |
| AX-158337603 | 26 | 68.061 | KV453229.1 | 6257898 | 22-scf00517 | 22 |
| AX-158337604 | 26 | 68.061 | KV453229.1 | 6258215 | 22-scf00517 | 22 |
| AX-158337607 | 26 | 68.061 | KV453229.1 | 6261409 | 22-scf00517 | 22 |
| AX-158337610 | 26 | 68.061 | KV453229.1 | 6263311 | 22-scf00517 | 22 |
| AX-157745491 | 26 | 68.061 | KV453229.1 | 6274402 | 22-scf00517 | 22 |
| AX-158337627 | 26 | 68.061 | KV453229.1 | 6295315 | 22-scf00517 | 22 |
| AX-158337742 | 26 | 68.061 | KV453229.1 | 6449650 | 22-scf00517 | 22 |
| AX-158337749 | 26 | 68.061 | KV453229.1 | 6457782 | 22-scf00517 | 22 |
| AX-158337613 | 26 | 68.17  | KV453229.1 | 6265714 | 22-scf00517 | 22 |
| AX-157849722 | 26 | 68.17  | KV453229.1 | 6274176 | 22-scf00517 | 22 |
| AX-157849723 | 26 | 68.17  | KV453229.1 | 6274607 | 22-scf00517 | 22 |
| AX-158337617 | 26 | 68.17  | KV453229.1 | 6275118 | 22-scf00517 | 22 |
| AX-157849724 | 26 | 68.279 | KV453229.1 | 6278544 | 22-scf00517 | 22 |
| AX-158337619 | 26 | 68.388 | KV453229.1 | 6284411 | 22-scf00517 | 22 |
| AX-158337620 | 26 | 68.388 | KV453229.1 | 6285254 | 22-scf00517 | 22 |
| AX-157849725 | 26 | 68.388 | KV453229.1 | 6287086 | 22-scf00517 | 22 |

|              |    |        |            |         |             |    |
|--------------|----|--------|------------|---------|-------------|----|
| AX-157861753 | 26 | 68.388 | KV453229.1 | 6288053 | 22-scf00517 | 22 |
| AX-158337621 | 26 | 68.388 | KV453229.1 | 6288764 | 22-scf00517 | 22 |
| AX-158337622 | 26 | 68.388 | KV453229.1 | 6290947 | 22-scf00517 | 22 |
| AX-158337624 | 26 | 68.388 | KV453229.1 | 6292630 | 22-scf00517 | 22 |
| AX-158337625 | 26 | 68.388 | KV453229.1 | 6293754 | 22-scf00517 | 22 |
| AX-158337626 | 26 | 68.388 | KV453229.1 | 6294589 | 22-scf00517 | 22 |
| AX-158337629 | 26 | 68.388 | KV453229.1 | 6298172 | 22-scf00517 | 22 |
| AX-158337630 | 26 | 68.388 | KV453229.1 | 6299143 | 22-scf00517 | 22 |
| AX-158337633 | 26 | 68.388 | KV453229.1 | 6303115 | 22-scf00517 | 22 |
| AX-158388171 | 26 | 68.388 | KV453229.1 | 6308681 | 22-scf00517 | 22 |
| AX-158337637 | 26 | 68.388 | KV453229.1 | 6309077 | 22-scf00517 | 22 |
| AX-158337640 | 26 | 68.388 | KV453229.1 | 6314786 | 22-scf00517 | 22 |
| AX-158337644 | 26 | 68.388 | KV453229.1 | 6318023 | 22-scf00517 | 22 |
| AX-158337647 | 26 | 68.388 | KV453229.1 | 6322582 | 22-scf00517 | 22 |
| AX-158337711 | 26 | 68.388 | KV453229.1 | 6421054 | 22-scf00517 | 22 |
| AX-158337746 | 26 | 68.388 | KV453229.1 | 6455105 | 22-scf00517 | 22 |
| AX-158337747 | 26 | 68.388 | KV453229.1 | 6456210 | 22-scf00517 | 22 |
| AX-158337827 | 26 | 68.388 | KV453229.1 | 6581614 | 22-scf00517 | 22 |
| AX-158337844 | 26 | 68.388 | KV453229.1 | 6646280 | 22-scf00517 | 22 |
| AX-157849729 | 26 | 68.607 | KV453229.1 | 6326734 | 22-scf00517 | 22 |
| AX-158337648 | 26 | 68.607 | KV453229.1 | 6328921 | 22-scf00517 | 22 |
| AX-158337655 | 26 | 68.716 | KV453229.1 | 6342551 | 22-scf00517 | 22 |
| AX-158337658 | 26 | 68.716 | KV453229.1 | 6345360 | 22-scf00517 | 22 |
| AX-158337662 | 26 | 68.716 | KV453229.1 | 6353511 | 22-scf00517 | 22 |
| AX-158337663 | 26 | 68.716 | KV453229.1 | 6354418 | 22-scf00517 | 22 |
| AX-158337666 | 26 | 68.726 | KV453229.1 | 6358451 | 22-scf00517 | 22 |
| AX-158337668 | 26 | 68.755 | KV453229.1 | 6364799 | 22-scf00517 | 22 |
| AX-158337675 | 26 | 68.78  | KV453229.1 | 6376168 | 22-scf00517 | 22 |
| AX-158337685 | 26 | 68.78  | KV453229.1 | 6387389 | 22-scf00517 | 22 |
| AX-157772549 | 26 | 68.78  | KV453229.1 | 6466680 | 22-scf00517 | 22 |
| AX-158337676 | 26 | 68.8   | KV453229.1 | 6377453 | 22-scf00517 | 22 |
| AX-158337809 | 26 | 68.8   | KV453229.1 | 6530324 | 22-scf00517 | 22 |
| AX-158337863 | 26 | 68.8   | KV453229.1 | 6677876 | 22-scf00517 | 22 |
| AX-157849730 | 26 | 68.826 | KV453229.1 | 6327497 | 22-scf00517 | 22 |
| AX-158337665 | 26 | 68.826 | KV453229.1 | 6357890 | 22-scf00517 | 22 |
| AX-158337672 | 26 | 68.826 | KV453229.1 | 6370193 | 22-scf00517 | 22 |
| AX-157849734 | 26 | 68.826 | KV453229.1 | 6381958 | 22-scf00517 | 22 |
| AX-158337678 | 26 | 68.826 | KV453229.1 | 6382386 | 22-scf00517 | 22 |
| AX-158337688 | 26 | 68.826 | KV453229.1 | 6393602 | 22-scf00517 | 22 |
| AX-158337689 | 26 | 68.826 | KV453229.1 | 6397804 | 22-scf00517 | 22 |
| AX-157888616 | 26 | 68.826 | KV453229.1 | 6403286 | 22-scf00517 | 22 |
| AX-158337695 | 26 | 68.826 | KV453229.1 | 6403689 | 22-scf00517 | 22 |
| AX-157715686 | 26 | 68.826 | KV453229.1 | 6404151 | 22-scf00517 | 22 |
| AX-158337696 | 26 | 68.826 | KV453229.1 | 6404197 | 22-scf00517 | 22 |
| AX-158337697 | 26 | 68.826 | KV453229.1 | 6404661 | 22-scf00517 | 22 |
| AX-158337698 | 26 | 68.826 | KV453229.1 | 6405166 | 22-scf00517 | 22 |
| AX-158337705 | 26 | 68.826 | KV453229.1 | 6410722 | 22-scf00517 | 22 |
| AX-158337710 | 26 | 68.826 | KV453229.1 | 6419269 | 22-scf00517 | 22 |
| AX-157868012 | 26 | 68.826 | KV453229.1 | 6419589 | 22-scf00517 | 22 |
| AX-157712203 | 26 | 68.826 | KV453229.1 | 6420271 | 22-scf00517 | 22 |
| AX-158337712 | 26 | 68.826 | KV453229.1 | 6421293 | 22-scf00517 | 22 |

|              |    |        |            |         |             |    |
|--------------|----|--------|------------|---------|-------------|----|
| AX-158337713 | 26 | 68.826 | KV453229.1 | 6422134 | 22-scf00517 | 22 |
| AX-158337714 | 26 | 68.826 | KV453229.1 | 6422574 | 22-scf00517 | 22 |
| AX-158337715 | 26 | 68.826 | KV453229.1 | 6423802 | 22-scf00517 | 22 |
| AX-158337716 | 26 | 68.826 | KV453229.1 | 6424677 | 22-scf00517 | 22 |
| AX-158337717 | 26 | 68.826 | KV453229.1 | 6425143 | 22-scf00517 | 22 |
| AX-158337722 | 26 | 68.826 | KV453229.1 | 6428682 | 22-scf00517 | 22 |
| AX-158337724 | 26 | 68.826 | KV453229.1 | 6429929 | 22-scf00517 | 22 |
| AX-158337726 | 26 | 68.826 | KV453229.1 | 6432532 | 22-scf00517 | 22 |
| AX-157861754 | 26 | 68.826 | KV453229.1 | 6434552 | 22-scf00517 | 22 |
| AX-158337729 | 26 | 68.826 | KV453229.1 | 6435813 | 22-scf00517 | 22 |
| AX-158337734 | 26 | 68.826 | KV453229.1 | 6440853 | 22-scf00517 | 22 |
| AX-158337735 | 26 | 68.826 | KV453229.1 | 6441325 | 22-scf00517 | 22 |
| AX-158337737 | 26 | 68.826 | KV453229.1 | 6442692 | 22-scf00517 | 22 |
| AX-157849740 | 26 | 68.826 | KV453229.1 | 6445337 | 22-scf00517 | 22 |
| AX-158337741 | 26 | 68.826 | KV453229.1 | 6447979 | 22-scf00517 | 22 |
| AX-157741822 | 26 | 68.826 | KV453229.1 | 6450095 | 22-scf00517 | 22 |
| AX-157882018 | 26 | 68.826 | KV453229.1 | 6453518 | 22-scf00517 | 22 |
| AX-158337745 | 26 | 68.826 | KV453229.1 | 6453614 | 22-scf00517 | 22 |
| AX-158337751 | 26 | 68.826 | KV453229.1 | 6460697 | 22-scf00517 | 22 |
| AX-158337752 | 26 | 68.826 | KV453229.1 | 6462673 | 22-scf00517 | 22 |
| AX-158337754 | 26 | 68.826 | KV453229.1 | 6467327 | 22-scf00517 | 22 |
| AX-158337755 | 26 | 68.826 | KV453229.1 | 6468074 | 22-scf00517 | 22 |
| AX-157861755 | 26 | 68.826 | KV453229.1 | 6470719 | 22-scf00517 | 22 |
| AX-158337760 | 26 | 68.826 | KV453229.1 | 6473166 | 22-scf00517 | 22 |
| AX-157861756 | 26 | 68.826 | KV453229.1 | 6476127 | 22-scf00517 | 22 |
| AX-158337763 | 26 | 68.826 | KV453229.1 | 6476216 | 22-scf00517 | 22 |
| AX-158337773 | 26 | 68.826 | KV453229.1 | 6489856 | 22-scf00517 | 22 |
| AX-158337774 | 26 | 68.826 | KV453229.1 | 6491100 | 22-scf00517 | 22 |
| AX-157699655 | 26 | 68.826 | KV453229.1 | 6504416 | 22-scf00517 | 22 |
| AX-158337787 | 26 | 68.826 | KV453229.1 | 6504648 | 22-scf00517 | 22 |
| AX-158337796 | 26 | 68.826 | KV453229.1 | 6513699 | 22-scf00517 | 22 |
| AX-158337797 | 26 | 68.826 | KV453229.1 | 6514945 | 22-scf00517 | 22 |
| AX-158337802 | 26 | 68.826 | KV453229.1 | 6519868 | 22-scf00517 | 22 |
| AX-158337781 | 26 | 68.935 | KV453229.1 | 6497852 | 22-scf00517 | 22 |
| AX-158337782 | 26 | 68.935 | KV453229.1 | 6498574 | 22-scf00517 | 22 |
| AX-157888622 | 26 | 68.935 | KV453229.1 | 6499136 | 22-scf00517 | 22 |
| AX-158337785 | 26 | 68.958 | KV453229.1 | 6502427 | 22-scf00517 | 22 |
| AX-158337786 | 26 | 68.984 | KV453229.1 | 6504075 | 22-scf00517 | 22 |
| AX-157700525 | 26 | 68.99  | KV453229.1 | 6493202 | 22-scf00517 | 22 |
| AX-158337791 | 26 | 68.99  | KV453229.1 | 6508796 | 22-scf00517 | 22 |
| AX-158337800 | 26 | 68.99  | KV453229.1 | 6518121 | 22-scf00517 | 22 |
| AX-158413001 | 26 | 69.008 | KV453229.1 | 6514466 | 22-scf00517 | 22 |
| AX-158337776 | 26 | 69.027 | KV453229.1 | 6492246 | 22-scf00517 | 22 |
| AX-158337799 | 26 | 69.027 | KV453229.1 | 6517739 | 22-scf00517 | 22 |
| AX-157849721 | 26 | 69.044 | KV453229.1 | 6258919 | 22-scf00517 | 22 |
| AX-158337649 | 26 | 69.044 | KV453229.1 | 6330268 | 22-scf00517 | 22 |
| AX-158337659 | 26 | 69.044 | KV453229.1 | 6346671 | 22-scf00517 | 22 |
| AX-157849733 | 26 | 69.044 | KV453229.1 | 6379171 | 22-scf00517 | 22 |
| AX-158337682 | 26 | 69.044 | KV453229.1 | 6385281 | 22-scf00517 | 22 |
| AX-158337740 | 26 | 69.044 | KV453229.1 | 6446437 | 22-scf00517 | 22 |
| AX-158337788 | 26 | 69.044 | KV453229.1 | 6504865 | 22-scf00517 | 22 |



|              |    |        |            |         |             |    |
|--------------|----|--------|------------|---------|-------------|----|
| AX-158337793 | 26 | 69.044 | KV453229.1 | 6510639 | 22-scf00517 | 22 |
| AX-158337801 | 26 | 69.044 | KV453229.1 | 6518561 | 22-scf00517 | 22 |
| AX-157849744 | 26 | 69.044 | KV453229.1 | 6522186 | 22-scf00517 | 22 |
| AX-158337805 | 26 | 69.044 | KV453229.1 | 6525443 | 22-scf00517 | 22 |
| AX-157758047 | 26 | 69.044 | KV453229.1 | 6533234 | 22-scf00517 | 22 |
| AX-157849747 | 26 | 69.044 | KV453229.1 | 6536671 | 22-scf00517 | 22 |
| AX-158337814 | 26 | 69.044 | KV453229.1 | 6538770 | 22-scf00517 | 22 |
| AX-158337815 | 26 | 69.044 | KV453229.1 | 6539935 | 22-scf00517 | 22 |
| AX-157888623 | 26 | 69.044 | KV453229.1 | 6541449 | 22-scf00517 | 22 |
| AX-158337816 | 26 | 69.044 | KV453229.1 | 6542471 | 22-scf00517 | 22 |
| AX-157722033 | 26 | 69.044 | KV453229.1 | 6544343 | 22-scf00517 | 22 |
| AX-158337817 | 26 | 69.044 | KV453229.1 | 6546575 | 22-scf00517 | 22 |
| AX-158337831 | 26 | 69.044 | KV453229.1 | 6606369 | 22-scf00517 | 22 |
| AX-158337987 | 26 | 69.044 | KV453229.1 | 6865595 | 22-scf00517 | 22 |
| AX-158337551 | 26 | 69.19  | KV453229.1 | 6180612 | 22-scf00517 | 22 |
| AX-158337803 | 26 | 69.19  | KV453229.1 | 6522469 | 22-scf00517 | 22 |
| AX-158337825 | 26 | 69.19  | KV453229.1 | 6578058 | 22-scf00517 | 22 |
| AX-158337832 | 26 | 69.329 | KV453229.1 | 6607166 | 22-scf00517 | 22 |
| AX-158337811 | 26 | 69.482 | KV453229.1 | 6531203 | 22-scf00517 | 22 |
| AX-158337830 | 26 | 69.482 | KV453229.1 | 6603357 | 22-scf00517 | 22 |
| AX-158337833 | 26 | 69.482 | KV453229.1 | 6609493 | 22-scf00517 | 22 |
| AX-158337834 | 26 | 69.482 | KV453229.1 | 6610106 | 22-scf00517 | 22 |
| AX-157849750 | 26 | 69.482 | KV453229.1 | 6639283 | 22-scf00517 | 22 |
| AX-157849752 | 26 | 69.482 | KV453229.1 | 6643848 | 22-scf00517 | 22 |
| AX-158337842 | 26 | 69.482 | KV453229.1 | 6644650 | 22-scf00517 | 22 |
| AX-158337843 | 26 | 69.482 | KV453229.1 | 6645378 | 22-scf00517 | 22 |
| AX-158337847 | 26 | 69.482 | KV453229.1 | 6653158 | 22-scf00517 | 22 |
| AX-157849753 | 26 | 69.482 | KV453229.1 | 6653647 | 22-scf00517 | 22 |
| AX-158337850 | 26 | 69.482 | KV453229.1 | 6656871 | 22-scf00517 | 22 |
| AX-158337854 | 26 | 69.482 | KV453229.1 | 6663236 | 22-scf00517 | 22 |
| AX-158337855 | 26 | 69.482 | KV453229.1 | 6663906 | 22-scf00517 | 22 |
| AX-157849755 | 26 | 69.482 | KV453229.1 | 6669898 | 22-scf00517 | 22 |
| AX-157849756 | 26 | 69.482 | KV453229.1 | 6671495 | 22-scf00517 | 22 |
| AX-157849757 | 26 | 69.482 | KV453229.1 | 6672855 | 22-scf00517 | 22 |
| AX-158337861 | 26 | 69.482 | KV453229.1 | 6675863 | 22-scf00517 | 22 |
| AX-158337862 | 26 | 69.482 | KV453229.1 | 6675918 | 22-scf00517 | 22 |
| AX-157744759 | 26 | 69.482 | KV453229.1 | 6676637 | 22-scf00517 | 22 |
| AX-157849758 | 26 | 69.482 | KV453229.1 | 6676738 | 22-scf00517 | 22 |
| AX-158337865 | 26 | 69.482 | KV453229.1 | 6679321 | 22-scf00517 | 22 |
| AX-157849760 | 26 | 69.482 | KV453229.1 | 6681701 | 22-scf00517 | 22 |
| AX-157749330 | 26 | 69.482 | KV453229.1 | 6684726 | 22-scf00517 | 22 |
| AX-158337866 | 26 | 69.482 | KV453229.1 | 6685427 | 22-scf00517 | 22 |
| AX-158337867 | 26 | 69.482 | KV453229.1 | 6685998 | 22-scf00517 | 22 |
| AX-158381579 | 26 | 69.482 | KV453229.1 | 6686415 | 22-scf00517 | 22 |
| AX-158337868 | 26 | 69.482 | KV453229.1 | 6686877 | 22-scf00517 | 22 |
| AX-158337869 | 26 | 69.482 | KV453229.1 | 6688283 | 22-scf00517 | 22 |
| AX-157849762 | 26 | 69.482 | KV453229.1 | 6688680 | 22-scf00517 | 22 |
| AX-157849763 | 26 | 69.482 | KV453229.1 | 6689803 | 22-scf00517 | 22 |
| AX-157849764 | 26 | 69.482 | KV453229.1 | 6690178 | 22-scf00517 | 22 |
| AX-157744106 | 26 | 69.482 | KV453229.1 | 6691278 | 22-scf00517 | 22 |
| AX-157849765 | 26 | 69.482 | KV453229.1 | 6692468 | 22-scf00517 | 22 |

|              |    |        |             |         |             |    |
|--------------|----|--------|-------------|---------|-------------|----|
| AX-158337871 | 26 | 69.482 | KV453229.1  | 6693699 | 22-scf00517 | 22 |
| AX-157849766 | 26 | 69.482 | KV453229.1  | 6696922 | 22-scf00517 | 22 |
| AX-157849767 | 26 | 69.482 | KV453229.1  | 6698270 | 22-scf00517 | 22 |
| AX-158337889 | 26 | 69.482 | KV453229.1  | 6726541 | 22-scf00517 | 22 |
| AX-158337908 | 26 | 69.482 | KV453229.1  | 6762697 | 22-scf00517 | 22 |
| AX-157849777 | 26 | 69.482 | KV453229.1  | 6823542 | 22-scf00517 | 22 |
| AX-158337955 | 26 | 69.482 | KV453229.1  | 6823937 | 22-scf00517 | 22 |
| AX-158337970 | 26 | 69.482 | KV453229.1  | 6844694 | 22-scf00517 | 22 |
| AX-158337985 | 26 | 69.482 | KV453229.1  | 6860860 | 22-scf00517 | 22 |
| AX-158337988 | 26 | 69.482 | KV453229.1  | 6868770 | 22-scf00517 | 22 |
| AX-158337881 | 26 | 69.541 | KV453229.1  | 6709234 | 22-scf00517 | 22 |
| AX-158337942 | 26 | 69.541 | KV453229.1  | 6804096 | 22-scf00517 | 22 |
| AX-158413003 | 26 | 69.541 | KV453229.1  | 6829567 | 22-scf00517 | 22 |
| AX-157849770 | 26 | 69.591 | KV453229.1  | 6715478 | 22-scf00517 | 22 |
| AX-158337884 | 26 | 69.591 | KV453229.1  | 6717854 | 22-scf00517 | 22 |
| AX-157849771 | 26 | 69.591 | KV453229.1  | 6723780 | 22-scf00517 | 22 |
| AX-157861759 | 26 | 69.591 | KV453229.1  | 6724442 | 22-scf00517 | 22 |
| AX-158337890 | 26 | 69.591 | KV453229.1  | 6727979 | 22-scf00517 | 22 |
| AX-157707214 | 26 | 69.591 | 3ML01033824 | 482     | scf09490_1  | UN |
| AX-158337892 | 26 | 69.643 | KV453229.1  | 6734119 | 22-scf00517 | 22 |
| AX-158337893 | 26 | 69.643 | KV453229.1  | 6737082 | 22-scf00517 | 22 |
| AX-158337687 | 26 | 69.7   | KV453229.1  | 6392422 | 22-scf00517 | 22 |
| AX-157849736 | 26 | 69.7   | KV453229.1  | 6396900 | 22-scf00517 | 22 |
| AX-157806834 | 26 | 69.7   | KV453229.1  | 6410941 | 22-scf00517 | 22 |
| AX-157888617 | 26 | 69.7   | KV453229.1  | 6415458 | 22-scf00517 | 22 |
| AX-158337731 | 26 | 69.7   | KV453229.1  | 6437233 | 22-scf00517 | 22 |
| AX-158337736 | 26 | 69.7   | KV453229.1  | 6442166 | 22-scf00517 | 22 |
| AX-157849742 | 26 | 69.7   | KV453229.1  | 6464708 | 22-scf00517 | 22 |
| AX-157888620 | 26 | 69.7   | KV453229.1  | 6479659 | 22-scf00517 | 22 |
| AX-158337767 | 26 | 69.7   | KV453229.1  | 6481073 | 22-scf00517 | 22 |
| AX-158337789 | 26 | 69.7   | KV453229.1  | 6505311 | 22-scf00517 | 22 |
| AX-158337790 | 26 | 69.7   | KV453229.1  | 6507989 | 22-scf00517 | 22 |
| AX-158337853 | 26 | 69.7   | KV453229.1  | 6661983 | 22-scf00517 | 22 |
| AX-157748505 | 26 | 69.7   | KV453229.1  | 6682107 | 22-scf00517 | 22 |
| AX-158337872 | 26 | 69.7   | KV453229.1  | 6694586 | 22-scf00517 | 22 |
| AX-158337873 | 26 | 69.7   | KV453229.1  | 6695948 | 22-scf00517 | 22 |
| AX-158337877 | 26 | 69.7   | KV453229.1  | 6700211 | 22-scf00517 | 22 |
| AX-157849769 | 26 | 69.7   | KV453229.1  | 6706659 | 22-scf00517 | 22 |
| AX-158337885 | 26 | 69.7   | KV453229.1  | 6721201 | 22-scf00517 | 22 |
| AX-158337886 | 26 | 69.7   | KV453229.1  | 6723212 | 22-scf00517 | 22 |
| AX-158337887 | 26 | 69.7   | KV453229.1  | 6723985 | 22-scf00517 | 22 |
| AX-158337894 | 26 | 69.7   | KV453229.1  | 6737474 | 22-scf00517 | 22 |
| AX-157714314 | 26 | 69.7   | KV453229.1  | 6738893 | 22-scf00517 | 22 |
| AX-158337896 | 26 | 69.7   | KV453229.1  | 6740695 | 22-scf00517 | 22 |
| AX-158337897 | 26 | 69.7   | KV453229.1  | 6742760 | 22-scf00517 | 22 |
| AX-158337898 | 26 | 69.7   | KV453229.1  | 6743801 | 22-scf00517 | 22 |
| AX-158337900 | 26 | 69.7   | KV453229.1  | 6746822 | 22-scf00517 | 22 |
| AX-158337902 | 26 | 69.7   | KV453229.1  | 6748836 | 22-scf00517 | 22 |
| AX-158337907 | 26 | 69.7   | KV453229.1  | 6759838 | 22-scf00517 | 22 |
| AX-158337911 | 26 | 69.7   | KV453229.1  | 6767940 | 22-scf00517 | 22 |
| AX-158337913 | 26 | 69.7   | KV453229.1  | 6769074 | 22-scf00517 | 22 |

|              |    |      |            |         |             |    |
|--------------|----|------|------------|---------|-------------|----|
| AX-158337915 | 26 | 69.7 | KV453229.1 | 6771973 | 22-scf00517 | 22 |
| AX-158337916 | 26 | 69.7 | KV453229.1 | 6773325 | 22-scf00517 | 22 |
| AX-158337917 | 26 | 69.7 | KV453229.1 | 6774123 | 22-scf00517 | 22 |
| AX-158337918 | 26 | 69.7 | KV453229.1 | 6774412 | 22-scf00517 | 22 |
| AX-158337920 | 26 | 69.7 | KV453229.1 | 6776770 | 22-scf00517 | 22 |
| AX-158337921 | 26 | 69.7 | KV453229.1 | 6777571 | 22-scf00517 | 22 |
| AX-158337922 | 26 | 69.7 | KV453229.1 | 6778284 | 22-scf00517 | 22 |
| AX-158337924 | 26 | 69.7 | KV453229.1 | 6779811 | 22-scf00517 | 22 |
| AX-158337925 | 26 | 69.7 | KV453229.1 | 6780214 | 22-scf00517 | 22 |
| AX-158337926 | 26 | 69.7 | KV453229.1 | 6782141 | 22-scf00517 | 22 |
| AX-158337927 | 26 | 69.7 | KV453229.1 | 6783414 | 22-scf00517 | 22 |
| AX-157849775 | 26 | 69.7 | KV453229.1 | 6783936 | 22-scf00517 | 22 |
| AX-158337931 | 26 | 69.7 | KV453229.1 | 6791808 | 22-scf00517 | 22 |
| AX-158337932 | 26 | 69.7 | KV453229.1 | 6793136 | 22-scf00517 | 22 |
| AX-158337933 | 26 | 69.7 | KV453229.1 | 6793825 | 22-scf00517 | 22 |
| AX-158337935 | 26 | 69.7 | KV453229.1 | 6795429 | 22-scf00517 | 22 |
| AX-158337936 | 26 | 69.7 | KV453229.1 | 6797575 | 22-scf00517 | 22 |
| AX-158337937 | 26 | 69.7 | KV453229.1 | 6799411 | 22-scf00517 | 22 |
| AX-158337939 | 26 | 69.7 | KV453229.1 | 6800671 | 22-scf00517 | 22 |
| AX-157888625 | 26 | 69.7 | KV453229.1 | 6803221 | 22-scf00517 | 22 |
| AX-158381580 | 26 | 69.7 | KV453229.1 | 6807422 | 22-scf00517 | 22 |
| AX-158337947 | 26 | 69.7 | KV453229.1 | 6813656 | 22-scf00517 | 22 |
| AX-158337948 | 26 | 69.7 | KV453229.1 | 6813918 | 22-scf00517 | 22 |
| AX-158337949 | 26 | 69.7 | KV453229.1 | 6814133 | 22-scf00517 | 22 |
| AX-157849778 | 26 | 69.7 | KV453229.1 | 6828996 | 22-scf00517 | 22 |
| AX-157849779 | 26 | 69.7 | KV453229.1 | 6829353 | 22-scf00517 | 22 |
| AX-158337957 | 26 | 69.7 | KV453229.1 | 6829755 | 22-scf00517 | 22 |
| AX-158337958 | 26 | 69.7 | KV453229.1 | 6830548 | 22-scf00517 | 22 |
| AX-158337960 | 26 | 69.7 | KV453229.1 | 6833113 | 22-scf00517 | 22 |
| AX-158337961 | 26 | 69.7 | KV453229.1 | 6833536 | 22-scf00517 | 22 |
| AX-157744725 | 26 | 69.7 | KV453229.1 | 6835264 | 22-scf00517 | 22 |
| AX-158337963 | 26 | 69.7 | KV453229.1 | 6836268 | 22-scf00517 | 22 |
| AX-158337965 | 26 | 69.7 | KV453229.1 | 6841213 | 22-scf00517 | 22 |
| AX-158337973 | 26 | 69.7 | KV453229.1 | 6849056 | 22-scf00517 | 22 |
| AX-158337975 | 26 | 69.7 | KV453229.1 | 6850961 | 22-scf00517 | 22 |
| AX-158337976 | 26 | 69.7 | KV453229.1 | 6851702 | 22-scf00517 | 22 |
| AX-158337981 | 26 | 69.7 | KV453229.1 | 6859450 | 22-scf00517 | 22 |
| AX-158337986 | 26 | 69.7 | KV453229.1 | 6861744 | 22-scf00517 | 22 |
| AX-158337990 | 26 | 69.7 | KV453229.1 | 6869742 | 22-scf00517 | 22 |
| AX-158337991 | 26 | 69.7 | KV453229.1 | 6870468 | 22-scf00517 | 22 |
| AX-158337992 | 26 | 69.7 | KV453229.1 | 6871105 | 22-scf00517 | 22 |
| AX-158337996 | 26 | 69.7 | KV453229.1 | 6875341 | 22-scf00517 | 22 |
| AX-158337998 | 26 | 69.7 | KV453229.1 | 6878083 | 22-scf00517 | 22 |
| AX-157849781 | 26 | 69.7 | KV453229.1 | 6878263 | 22-scf00517 | 22 |
| AX-158338003 | 26 | 69.7 | KV453229.1 | 6883108 | 22-scf00517 | 22 |
| AX-158338005 | 26 | 69.7 | KV453229.1 | 6888080 | 22-scf00517 | 22 |
| AX-158338006 | 26 | 69.7 | KV453229.1 | 6888435 | 22-scf00517 | 22 |
| AX-157849783 | 26 | 69.7 | KV453229.1 | 6888851 | 22-scf00517 | 22 |
| AX-158338007 | 26 | 69.7 | KV453229.1 | 6889943 | 22-scf00517 | 22 |
| AX-158338011 | 26 | 69.7 | KV453229.1 | 6899221 | 22-scf00517 | 22 |
| AX-158338014 | 26 | 69.7 | KV453229.1 | 6904631 | 22-scf00517 | 22 |

|              |    |        |            |         |             |    |
|--------------|----|--------|------------|---------|-------------|----|
| AX-158338015 | 26 | 69.7   | KV453229.1 | 6905682 | 22-scf00517 | 22 |
| AX-158338034 | 26 | 69.7   | KV453229.1 | 6936825 | 22-scf00517 | 22 |
| AX-158338242 | 26 | 69.7   | KV453229.1 | 7230671 | 22-scf00517 | 22 |
| AX-157849785 | 26 | 69.766 | KV453229.1 | 6891738 | 22-scf00517 | 22 |
| AX-157752937 | 26 | 69.766 | KV453229.1 | 7002295 | 22-scf00517 | 22 |
| AX-158338008 | 26 | 69.828 | KV453229.1 | 6893009 | 22-scf00517 | 22 |
| AX-158338683 | 26 | 69.828 | KV453229.1 | 8283224 | 22-scf00517 | 22 |
| AX-158337899 | 26 | 69.906 | KV453229.1 | 6745389 | 22-scf00517 | 22 |
| AX-158337969 | 26 | 69.906 | KV453229.1 | 6843108 | 22-scf00517 | 22 |
| AX-157849784 | 26 | 69.906 | KV453229.1 | 6890825 | 22-scf00517 | 22 |
| AX-157849786 | 26 | 69.906 | KV453229.1 | 6897093 | 22-scf00517 | 22 |
| AX-158388182 | 26 | 69.906 | KV453229.1 | 6907369 | 22-scf00517 | 22 |
| AX-158338033 | 26 | 69.906 | KV453229.1 | 6936321 | 22-scf00517 | 22 |
| AX-158418975 | 26 | 69.906 | KV453229.1 | 6956278 | 22-scf00517 | 22 |
| AX-157849787 | 26 | 69.967 | KV453229.1 | 6897607 | 22-scf00517 | 22 |
| AX-158337997 | 26 | 70.026 | KV453229.1 | 6875705 | 22-scf00517 | 22 |
| AX-157849788 | 26 | 70.026 | KV453229.1 | 6899493 | 22-scf00517 | 22 |
| AX-157849789 | 26 | 70.026 | KV453229.1 | 6901914 | 22-scf00517 | 22 |
| AX-158338013 | 26 | 70.026 | KV453229.1 | 6902617 | 22-scf00517 | 22 |
| AX-157701155 | 26 | 70.026 | KV453229.1 | 6905939 | 22-scf00517 | 22 |
| AX-158338017 | 26 | 70.027 | KV453229.1 | 6906699 | 22-scf00517 | 22 |
| AX-158338018 | 26 | 70.027 | KV453229.1 | 6908056 | 22-scf00517 | 22 |
| AX-158338019 | 26 | 70.027 | KV453229.1 | 6908294 | 22-scf00517 | 22 |
| AX-158338028 | 26 | 70.173 | KV453229.1 | 6931034 | 22-scf00517 | 22 |
| AX-157772230 | 26 | 70.173 | KV453229.1 | 6933471 | 22-scf00517 | 22 |
| AX-158338036 | 26 | 70.465 | KV453229.1 | 6937841 | 22-scf00517 | 22 |
| AX-158338041 | 26 | 70.465 | KV453229.1 | 6946473 | 22-scf00517 | 22 |
| AX-158338042 | 26 | 70.465 | KV453229.1 | 6947218 | 22-scf00517 | 22 |
| AX-157849795 | 26 | 70.465 | KV453229.1 | 6947582 | 22-scf00517 | 22 |
| AX-158338043 | 26 | 70.465 | KV453229.1 | 6947995 | 22-scf00517 | 22 |
| AX-157770834 | 26 | 70.465 | KV453229.1 | 6949391 | 22-scf00517 | 22 |
| AX-158338044 | 26 | 70.465 | KV453229.1 | 6949841 | 22-scf00517 | 22 |
| AX-158338045 | 26 | 70.465 | KV453229.1 | 6951079 | 22-scf00517 | 22 |
| AX-158338047 | 26 | 70.546 | KV453229.1 | 6958482 | 22-scf00517 | 22 |
| AX-158338048 | 26 | 70.628 | KV453229.1 | 6959170 | 22-scf00517 | 22 |
| AX-158338050 | 26 | 70.628 | KV453229.1 | 6963963 | 22-scf00517 | 22 |
| AX-158338054 | 26 | 70.793 | KV453229.1 | 6966775 | 22-scf00517 | 22 |
| AX-158338060 | 26 | 70.793 | KV453229.1 | 6971267 | 22-scf00517 | 22 |
| AX-157742364 | 26 | 70.793 | KV453229.1 | 6978618 | 22-scf00517 | 22 |
| AX-158338064 | 26 | 70.793 | KV453229.1 | 6987230 | 22-scf00517 | 22 |
| AX-158337700 | 26 | 70.832 | KV453229.1 | 6406572 | 22-scf00517 | 22 |
| AX-157849759 | 26 | 70.832 | KV453229.1 | 6681195 | 22-scf00517 | 22 |
| AX-158337879 | 26 | 70.832 | KV453229.1 | 6701424 | 22-scf00517 | 22 |
| AX-158337950 | 26 | 70.832 | KV453229.1 | 6814720 | 22-scf00517 | 22 |
| AX-158337977 | 26 | 70.832 | KV453229.1 | 6854100 | 22-scf00517 | 22 |
| AX-158338049 | 26 | 70.832 | KV453229.1 | 6959839 | 22-scf00517 | 22 |
| AX-158338051 | 26 | 70.832 | KV453229.1 | 6964621 | 22-scf00517 | 22 |
| AX-158338065 | 26 | 70.832 | KV453229.1 | 6987757 | 22-scf00517 | 22 |
| AX-158338160 | 26 | 70.832 | KV453229.1 | 7134354 | 22-scf00517 | 22 |
| AX-157774201 | 26 | 70.873 | KV453229.1 | 6992978 | 22-scf00517 | 22 |
| AX-157882039 | 26 | 70.873 | KV453229.1 | 6997798 | 22-scf00517 | 22 |

|              |    |        |            |         |             |    |
|--------------|----|--------|------------|---------|-------------|----|
| AX-158338139 | 26 | 70.873 | KV453229.1 | 7108914 | 22-scf00517 | 22 |
| AX-157888626 | 26 | 70.902 | KV453229.1 | 6994355 | 22-scf00517 | 22 |
| AX-158338071 | 26 | 70.902 | KV453229.1 | 6999389 | 22-scf00517 | 22 |
| AX-157719478 | 26 | 70.902 | KV453229.1 | 7001726 | 22-scf00517 | 22 |
| AX-158338073 | 26 | 70.902 | KV453229.1 | 7002947 | 22-scf00517 | 22 |
| AX-158338075 | 26 | 70.902 | KV453229.1 | 7005177 | 22-scf00517 | 22 |
| AX-158338076 | 26 | 70.902 | KV453229.1 | 7006790 | 22-scf00517 | 22 |
| AX-158338080 | 26 | 70.902 | KV453229.1 | 7012922 | 22-scf00517 | 22 |
| AX-157713618 | 26 | 70.902 | KV453229.1 | 7013235 | 22-scf00517 | 22 |
| AX-157849800 | 26 | 70.902 | KV453229.1 | 7013380 | 22-scf00517 | 22 |
| AX-157849801 | 26 | 70.902 | KV453229.1 | 7013888 | 22-scf00517 | 22 |
| AX-157849804 | 26 | 70.902 | KV453229.1 | 7019384 | 22-scf00517 | 22 |
| AX-158338087 | 26 | 70.902 | KV453229.1 | 7033085 | 22-scf00517 | 22 |
| AX-158338113 | 26 | 70.902 | KV453229.1 | 7069160 | 22-scf00517 | 22 |
| AX-158338116 | 26 | 70.902 | KV453229.1 | 7074263 | 22-scf00517 | 22 |
| AX-158338118 | 26 | 70.902 | KV453229.1 | 7076631 | 22-scf00517 | 22 |
| AX-158338132 | 26 | 70.902 | KV453229.1 | 7099798 | 22-scf00517 | 22 |
| AX-157888627 | 26 | 70.902 | KV453229.1 | 7101579 | 22-scf00517 | 22 |
| AX-158338134 | 26 | 70.902 | KV453229.1 | 7104198 | 22-scf00517 | 22 |
| AX-158338136 | 26 | 70.902 | KV453229.1 | 7106394 | 22-scf00517 | 22 |
| AX-158338150 | 26 | 70.902 | KV453229.1 | 7124873 | 22-scf00517 | 22 |
| AX-158338157 | 26 | 70.902 | KV453229.1 | 7132645 | 22-scf00517 | 22 |
| AX-158338186 | 26 | 70.902 | KV453229.1 | 7158216 | 22-scf00517 | 22 |
| AX-158338187 | 26 | 70.902 | KV453229.1 | 7158502 | 22-scf00517 | 22 |
| AX-157849829 | 26 | 70.902 | KV453229.1 | 7158889 | 22-scf00517 | 22 |
| AX-157888628 | 26 | 70.902 | KV453229.1 | 7168750 | 22-scf00517 | 22 |
| AX-158338267 | 26 | 70.902 | KV453229.1 | 7272276 | 22-scf00517 | 22 |
| AX-158338336 | 26 | 70.902 | KV453229.1 | 7462535 | 22-scf00517 | 22 |
| AX-158338338 | 26 | 70.902 | KV453229.1 | 7465272 | 22-scf00517 | 22 |
| AX-158338452 | 26 | 70.902 | KV453229.1 | 7791620 | 22-scf00517 | 22 |
| AX-158338460 | 26 | 70.902 | KV453229.1 | 7811300 | 22-scf00517 | 22 |
| AX-158338461 | 26 | 70.902 | KV453229.1 | 7813587 | 22-scf00517 | 22 |
| AX-158338489 | 26 | 70.902 | KV453229.1 | 7894941 | 22-scf00517 | 22 |
| AX-158338502 | 26 | 70.902 | KV453229.1 | 7911577 | 22-scf00517 | 22 |
| AX-158338738 | 26 | 70.902 | KV453229.1 | 8414763 | 22-scf00517 | 22 |
| AX-157849805 | 26 | 70.903 | KV453229.1 | 7023780 | 22-scf00517 | 22 |
| AX-158338094 | 26 | 70.903 | KV453229.1 | 7041158 | 22-scf00517 | 22 |
| AX-158338095 | 26 | 70.903 | KV453229.1 | 7042128 | 22-scf00517 | 22 |
| AX-158338105 | 26 | 70.903 | KV453229.1 | 7053515 | 22-scf00517 | 22 |
| AX-158338053 | 26 | 71.121 | KV453229.1 | 6966002 | 22-scf00517 | 22 |
| AX-157743644 | 26 | 71.121 | KV453229.1 | 6974026 | 22-scf00517 | 22 |
| AX-157849799 | 26 | 71.121 | KV453229.1 | 6980668 | 22-scf00517 | 22 |
| AX-158338069 | 26 | 71.121 | KV453229.1 | 6995840 | 22-scf00517 | 22 |
| AX-158338070 | 26 | 71.121 | KV453229.1 | 6997856 | 22-scf00517 | 22 |
| AX-158338074 | 26 | 71.121 | KV453229.1 | 7003419 | 22-scf00517 | 22 |
| AX-157714905 | 26 | 71.121 | KV453229.1 | 7018156 | 22-scf00517 | 22 |
| AX-157748150 | 26 | 71.121 | KV453229.1 | 7021214 | 22-scf00517 | 22 |
| AX-158338092 | 26 | 71.121 | KV453229.1 | 7039898 | 22-scf00517 | 22 |
| AX-158338093 | 26 | 71.121 | KV453229.1 | 7040541 | 22-scf00517 | 22 |
| AX-158338097 | 26 | 71.121 | KV453229.1 | 7045823 | 22-scf00517 | 22 |
| AX-158338098 | 26 | 71.121 | KV453229.1 | 7046390 | 22-scf00517 | 22 |

|              |    |        |            |         |             |    |
|--------------|----|--------|------------|---------|-------------|----|
| AX-158338100 | 26 | 71.121 | KV453229.1 | 7047454 | 22-scf00517 | 22 |
| AX-158338103 | 26 | 71.121 | KV453229.1 | 7049969 | 22-scf00517 | 22 |
| AX-157748259 | 26 | 71.121 | KV453229.1 | 7052476 | 22-scf00517 | 22 |
| AX-158338108 | 26 | 71.121 | KV453229.1 | 7055519 | 22-scf00517 | 22 |
| AX-157747488 | 26 | 71.121 | KV453229.1 | 7059538 | 22-scf00517 | 22 |
| AX-158338109 | 26 | 71.121 | KV453229.1 | 7060688 | 22-scf00517 | 22 |
| AX-158338115 | 26 | 71.121 | KV453229.1 | 7071917 | 22-scf00517 | 22 |
| AX-157723704 | 26 | 71.121 | KV453229.1 | 7074192 | 22-scf00517 | 22 |
| AX-158338117 | 26 | 71.121 | KV453229.1 | 7075742 | 22-scf00517 | 22 |
| AX-158338119 | 26 | 71.121 | KV453229.1 | 7077529 | 22-scf00517 | 22 |
| AX-158418980 | 26 | 71.121 | KV453229.1 | 7082328 | 22-scf00517 | 22 |
| AX-157849810 | 26 | 71.121 | KV453229.1 | 7084851 | 22-scf00517 | 22 |
| AX-158338122 | 26 | 71.121 | KV453229.1 | 7086708 | 22-scf00517 | 22 |
| AX-157849811 | 26 | 71.121 | KV453229.1 | 7087476 | 22-scf00517 | 22 |
| AX-158338123 | 26 | 71.121 | KV453229.1 | 7090508 | 22-scf00517 | 22 |
| AX-158338124 | 26 | 71.121 | KV453229.1 | 7090813 | 22-scf00517 | 22 |
| AX-158338125 | 26 | 71.121 | KV453229.1 | 7091054 | 22-scf00517 | 22 |
| AX-157849813 | 26 | 71.121 | KV453229.1 | 7091287 | 22-scf00517 | 22 |
| AX-157849814 | 26 | 71.121 | KV453229.1 | 7091522 | 22-scf00517 | 22 |
| AX-158338127 | 26 | 71.121 | KV453229.1 | 7094180 | 22-scf00517 | 22 |
| AX-157849815 | 26 | 71.121 | KV453229.1 | 7095321 | 22-scf00517 | 22 |
| AX-158338128 | 26 | 71.121 | KV453229.1 | 7095505 | 22-scf00517 | 22 |
| AX-157740295 | 26 | 71.121 | KV453229.1 | 7097422 | 22-scf00517 | 22 |
| AX-157849817 | 26 | 71.121 | KV453229.1 | 7098218 | 22-scf00517 | 22 |
| AX-158338129 | 26 | 71.121 | KV453229.1 | 7098340 | 22-scf00517 | 22 |
| AX-158338130 | 26 | 71.121 | KV453229.1 | 7098866 | 22-scf00517 | 22 |
| AX-158338131 | 26 | 71.121 | KV453229.1 | 7099578 | 22-scf00517 | 22 |
| AX-157741042 | 26 | 71.121 | KV453229.1 | 7104050 | 22-scf00517 | 22 |
| AX-158338135 | 26 | 71.121 | KV453229.1 | 7105989 | 22-scf00517 | 22 |
| AX-158338140 | 26 | 71.121 | KV453229.1 | 7109427 | 22-scf00517 | 22 |
| AX-157849820 | 26 | 71.121 | KV453229.1 | 7111450 | 22-scf00517 | 22 |
| AX-157849821 | 26 | 71.121 | KV453229.1 | 7112636 | 22-scf00517 | 22 |
| AX-157773745 | 26 | 71.121 | KV453229.1 | 7112779 | 22-scf00517 | 22 |
| AX-157849822 | 26 | 71.121 | KV453229.1 | 7113122 | 22-scf00517 | 22 |
| AX-158338143 | 26 | 71.121 | KV453229.1 | 7116633 | 22-scf00517 | 22 |
| AX-158338144 | 26 | 71.121 | KV453229.1 | 7117174 | 22-scf00517 | 22 |
| AX-158338145 | 26 | 71.121 | KV453229.1 | 7117796 | 22-scf00517 | 22 |
| AX-157849823 | 26 | 71.121 | KV453229.1 | 7118287 | 22-scf00517 | 22 |
| AX-157849824 | 26 | 71.121 | KV453229.1 | 7118960 | 22-scf00517 | 22 |
| AX-157849825 | 26 | 71.121 | KV453229.1 | 7120526 | 22-scf00517 | 22 |
| AX-158338146 | 26 | 71.121 | KV453229.1 | 7121434 | 22-scf00517 | 22 |
| AX-158338147 | 26 | 71.121 | KV453229.1 | 7122353 | 22-scf00517 | 22 |
| AX-158338148 | 26 | 71.121 | KV453229.1 | 7122907 | 22-scf00517 | 22 |
| AX-158338153 | 26 | 71.121 | KV453229.1 | 7128528 | 22-scf00517 | 22 |
| AX-158338154 | 26 | 71.121 | KV453229.1 | 7130357 | 22-scf00517 | 22 |
| AX-158338156 | 26 | 71.121 | KV453229.1 | 7132110 | 22-scf00517 | 22 |
| AX-158338158 | 26 | 71.121 | KV453229.1 | 7133697 | 22-scf00517 | 22 |
| AX-158338159 | 26 | 71.121 | KV453229.1 | 7134041 | 22-scf00517 | 22 |
| AX-158338161 | 26 | 71.121 | KV453229.1 | 7134648 | 22-scf00517 | 22 |
| AX-158338162 | 26 | 71.121 | KV453229.1 | 7136208 | 22-scf00517 | 22 |
| AX-158338164 | 26 | 71.121 | KV453229.1 | 7137941 | 22-scf00517 | 22 |

|              |    |        |            |         |             |    |
|--------------|----|--------|------------|---------|-------------|----|
| AX-158338165 | 26 | 71.121 | KV453229.1 | 7138197 | 22-scf00517 | 22 |
| AX-158338166 | 26 | 71.121 | KV453229.1 | 7140847 | 22-scf00517 | 22 |
| AX-157751827 | 26 | 71.121 | KV453229.1 | 7141588 | 22-scf00517 | 22 |
| AX-158338168 | 26 | 71.121 | KV453229.1 | 7141827 | 22-scf00517 | 22 |
| AX-157849827 | 26 | 71.121 | KV453229.1 | 7145556 | 22-scf00517 | 22 |
| AX-157773317 | 26 | 71.121 | KV453229.1 | 7147629 | 22-scf00517 | 22 |
| AX-158338173 | 26 | 71.121 | KV453229.1 | 7148063 | 22-scf00517 | 22 |
| AX-158338176 | 26 | 71.121 | KV453229.1 | 7149158 | 22-scf00517 | 22 |
| AX-158338177 | 26 | 71.121 | KV453229.1 | 7149371 | 22-scf00517 | 22 |
| AX-158338179 | 26 | 71.121 | KV453229.1 | 7150516 | 22-scf00517 | 22 |
| AX-158338181 | 26 | 71.121 | KV453229.1 | 7152452 | 22-scf00517 | 22 |
| AX-157849828 | 26 | 71.121 | KV453229.1 | 7157760 | 22-scf00517 | 22 |
| AX-158338190 | 26 | 71.121 | KV453229.1 | 7165721 | 22-scf00517 | 22 |
| AX-158338191 | 26 | 71.121 | KV453229.1 | 7168013 | 22-scf00517 | 22 |
| AX-157861761 | 26 | 71.121 | KV453229.1 | 7172317 | 22-scf00517 | 22 |
| AX-157849830 | 26 | 71.121 | KV453229.1 | 7176885 | 22-scf00517 | 22 |
| AX-158338201 | 26 | 71.121 | KV453229.1 | 7184802 | 22-scf00517 | 22 |
| AX-158338203 | 26 | 71.121 | KV453229.1 | 7187056 | 22-scf00517 | 22 |
| AX-158338204 | 26 | 71.121 | KV453229.1 | 7187892 | 22-scf00517 | 22 |
| AX-158338205 | 26 | 71.121 | KV453229.1 | 7188694 | 22-scf00517 | 22 |
| AX-158381583 | 26 | 71.121 | KV453229.1 | 7189330 | 22-scf00517 | 22 |
| AX-158338207 | 26 | 71.121 | KV453229.1 | 7190386 | 22-scf00517 | 22 |
| AX-158338209 | 26 | 71.121 | KV453229.1 | 7192022 | 22-scf00517 | 22 |
| AX-157861762 | 26 | 71.121 | KV453229.1 | 7193773 | 22-scf00517 | 22 |
| AX-158338210 | 26 | 71.121 | KV453229.1 | 7194126 | 22-scf00517 | 22 |
| AX-158338212 | 26 | 71.121 | KV453229.1 | 7195257 | 22-scf00517 | 22 |
| AX-158338213 | 26 | 71.121 | KV453229.1 | 7195944 | 22-scf00517 | 22 |
| AX-158338214 | 26 | 71.121 | KV453229.1 | 7196537 | 22-scf00517 | 22 |
| AX-158338216 | 26 | 71.121 | KV453229.1 | 7197840 | 22-scf00517 | 22 |
| AX-158338217 | 26 | 71.121 | KV453229.1 | 7199563 | 22-scf00517 | 22 |
| AX-158338218 | 26 | 71.121 | KV453229.1 | 7200255 | 22-scf00517 | 22 |
| AX-158338219 | 26 | 71.121 | KV453229.1 | 7200894 | 22-scf00517 | 22 |
| AX-157749634 | 26 | 71.121 | KV453229.1 | 7201559 | 22-scf00517 | 22 |
| AX-158338222 | 26 | 71.121 | KV453229.1 | 7203348 | 22-scf00517 | 22 |
| AX-157849832 | 26 | 71.121 | KV453229.1 | 7204075 | 22-scf00517 | 22 |
| AX-158418985 | 26 | 71.121 | KV453229.1 | 7205150 | 22-scf00517 | 22 |
| AX-157849833 | 26 | 71.121 | KV453229.1 | 7211245 | 22-scf00517 | 22 |
| AX-157745762 | 26 | 71.121 | KV453229.1 | 7211543 | 22-scf00517 | 22 |
| AX-158338229 | 26 | 71.121 | KV453229.1 | 7213136 | 22-scf00517 | 22 |
| AX-158338231 | 26 | 71.121 | KV453229.1 | 7215541 | 22-scf00517 | 22 |
| AX-158338235 | 26 | 71.121 | KV453229.1 | 7218714 | 22-scf00517 | 22 |
| AX-158338238 | 26 | 71.121 | KV453229.1 | 7225075 | 22-scf00517 | 22 |
| AX-157756465 | 26 | 71.121 | KV453229.1 | 7225489 | 22-scf00517 | 22 |
| AX-158338239 | 26 | 71.121 | KV453229.1 | 7226944 | 22-scf00517 | 22 |
| AX-158338244 | 26 | 71.121 | KV453229.1 | 7236531 | 22-scf00517 | 22 |
| AX-158338245 | 26 | 71.121 | KV453229.1 | 7236915 | 22-scf00517 | 22 |
| AX-158338247 | 26 | 71.121 | KV453229.1 | 7244438 | 22-scf00517 | 22 |
| AX-158338248 | 26 | 71.121 | KV453229.1 | 7245318 | 22-scf00517 | 22 |
| AX-158338250 | 26 | 71.121 | KV453229.1 | 7248472 | 22-scf00517 | 22 |
| AX-158338252 | 26 | 71.121 | KV453229.1 | 7252448 | 22-scf00517 | 22 |
| AX-158338256 | 26 | 71.121 | KV453229.1 | 7259811 | 22-scf00517 | 22 |

|              |    |        |            |         |             |    |
|--------------|----|--------|------------|---------|-------------|----|
| AX-158338259 | 26 | 71.121 | KV453229.1 | 7261887 | 22-scf00517 | 22 |
| AX-158338260 | 26 | 71.121 | KV453229.1 | 7262601 | 22-scf00517 | 22 |
| AX-158338262 | 26 | 71.121 | KV453229.1 | 7266814 | 22-scf00517 | 22 |
| AX-158338263 | 26 | 71.121 | KV453229.1 | 7268829 | 22-scf00517 | 22 |
| AX-158338264 | 26 | 71.121 | KV453229.1 | 7269325 | 22-scf00517 | 22 |
| AX-157724237 | 26 | 71.121 | KV453229.1 | 7269539 | 22-scf00517 | 22 |
| AX-158338268 | 26 | 71.121 | KV453229.1 | 7273414 | 22-scf00517 | 22 |
| AX-158338269 | 26 | 71.121 | KV453229.1 | 7274569 | 22-scf00517 | 22 |
| AX-158338271 | 26 | 71.121 | KV453229.1 | 7277553 | 22-scf00517 | 22 |
| AX-158338272 | 26 | 71.121 | KV453229.1 | 7278596 | 22-scf00517 | 22 |
| AX-158338274 | 26 | 71.121 | KV453229.1 | 7286003 | 22-scf00517 | 22 |
| AX-157849835 | 26 | 71.121 | KV453229.1 | 7286726 | 22-scf00517 | 22 |
| AX-157744411 | 26 | 71.121 | KV453229.1 | 7288419 | 22-scf00517 | 22 |
| AX-158338276 | 26 | 71.121 | KV453229.1 | 7290277 | 22-scf00517 | 22 |
| AX-158338281 | 26 | 71.121 | KV453229.1 | 7304382 | 22-scf00517 | 22 |
| AX-158338283 | 26 | 71.121 | KV453229.1 | 7310476 | 22-scf00517 | 22 |
| AX-158338284 | 26 | 71.121 | KV453229.1 | 7311492 | 22-scf00517 | 22 |
| AX-158338285 | 26 | 71.121 | KV453229.1 | 7312041 | 22-scf00517 | 22 |
| AX-158338291 | 26 | 71.121 | KV453229.1 | 7318061 | 22-scf00517 | 22 |
| AX-158418988 | 26 | 71.121 | KV453229.1 | 7329047 | 22-scf00517 | 22 |
| AX-158338292 | 26 | 71.121 | KV453229.1 | 7339820 | 22-scf00517 | 22 |
| AX-157849840 | 26 | 71.121 | KV453229.1 | 7341233 | 22-scf00517 | 22 |
| AX-158338293 | 26 | 71.121 | KV453229.1 | 7342414 | 22-scf00517 | 22 |
| AX-158338294 | 26 | 71.121 | KV453229.1 | 7346401 | 22-scf00517 | 22 |
| AX-158338295 | 26 | 71.121 | KV453229.1 | 7346895 | 22-scf00517 | 22 |
| AX-158338296 | 26 | 71.121 | KV453229.1 | 7347384 | 22-scf00517 | 22 |
| AX-157849841 | 26 | 71.121 | KV453229.1 | 7356403 | 22-scf00517 | 22 |
| AX-157715410 | 26 | 71.121 | KV453229.1 | 7360758 | 22-scf00517 | 22 |
| AX-158338305 | 26 | 71.121 | KV453229.1 | 7368083 | 22-scf00517 | 22 |
| AX-158338306 | 26 | 71.121 | KV453229.1 | 7383916 | 22-scf00517 | 22 |
| AX-158338310 | 26 | 71.121 | KV453229.1 | 7408198 | 22-scf00517 | 22 |
| AX-158338311 | 26 | 71.121 | KV453229.1 | 7408499 | 22-scf00517 | 22 |
| AX-158338316 | 26 | 71.121 | KV453229.1 | 7422266 | 22-scf00517 | 22 |
| AX-158338321 | 26 | 71.121 | KV453229.1 | 7425974 | 22-scf00517 | 22 |
| AX-158338326 | 26 | 71.121 | KV453229.1 | 7431415 | 22-scf00517 | 22 |
| AX-158338327 | 26 | 71.121 | KV453229.1 | 7432581 | 22-scf00517 | 22 |
| AX-158381584 | 26 | 71.121 | KV453229.1 | 7444277 | 22-scf00517 | 22 |
| AX-158338335 | 26 | 71.121 | KV453229.1 | 7457983 | 22-scf00517 | 22 |
| AX-158338339 | 26 | 71.121 | KV453229.1 | 7470058 | 22-scf00517 | 22 |
| AX-158338344 | 26 | 71.121 | KV453229.1 | 7495674 | 22-scf00517 | 22 |
| AX-158338345 | 26 | 71.121 | KV453229.1 | 7496985 | 22-scf00517 | 22 |
| AX-158338350 | 26 | 71.121 | KV453229.1 | 7515344 | 22-scf00517 | 22 |
| AX-158338353 | 26 | 71.121 | KV453229.1 | 7526960 | 22-scf00517 | 22 |
| AX-158338356 | 26 | 71.121 | KV453229.1 | 7536477 | 22-scf00517 | 22 |
| AX-158338360 | 26 | 71.121 | KV453229.1 | 7553312 | 22-scf00517 | 22 |
| AX-158338362 | 26 | 71.121 | KV453229.1 | 7559906 | 22-scf00517 | 22 |
| AX-158338364 | 26 | 71.121 | KV453229.1 | 7565257 | 22-scf00517 | 22 |
| AX-158338371 | 26 | 71.121 | KV453229.1 | 7575334 | 22-scf00517 | 22 |
| AX-157745607 | 26 | 71.121 | KV453229.1 | 7586237 | 22-scf00517 | 22 |
| AX-158338374 | 26 | 71.121 | KV453229.1 | 7589878 | 22-scf00517 | 22 |
| AX-158338375 | 26 | 71.121 | KV453229.1 | 7601391 | 22-scf00517 | 22 |



|              |    |        |            |         |             |    |
|--------------|----|--------|------------|---------|-------------|----|
| AX-157713809 | 26 | 71.121 | KV453229.1 | 7602450 | 22-scf00517 | 22 |
| AX-158338378 | 26 | 71.121 | KV453229.1 | 7617935 | 22-scf00517 | 22 |
| AX-158338379 | 26 | 71.121 | KV453229.1 | 7619882 | 22-scf00517 | 22 |
| AX-158338384 | 26 | 71.121 | KV453229.1 | 7632523 | 22-scf00517 | 22 |
| AX-158338386 | 26 | 71.121 | KV453229.1 | 7635744 | 22-scf00517 | 22 |
| AX-158338387 | 26 | 71.121 | KV453229.1 | 7637714 | 22-scf00517 | 22 |
| AX-158338389 | 26 | 71.121 | KV453229.1 | 7640793 | 22-scf00517 | 22 |
| AX-158338393 | 26 | 71.121 | KV453229.1 | 7652179 | 22-scf00517 | 22 |
| AX-158338402 | 26 | 71.121 | KV453229.1 | 7668324 | 22-scf00517 | 22 |
| AX-158338405 | 26 | 71.121 | KV453229.1 | 7681907 | 22-scf00517 | 22 |
| AX-158338408 | 26 | 71.121 | KV453229.1 | 7686057 | 22-scf00517 | 22 |
| AX-158338409 | 26 | 71.121 | KV453229.1 | 7686398 | 22-scf00517 | 22 |
| AX-158338411 | 26 | 71.121 | KV453229.1 | 7691992 | 22-scf00517 | 22 |
| AX-158338412 | 26 | 71.121 | KV453229.1 | 7696571 | 22-scf00517 | 22 |
| AX-158338414 | 26 | 71.121 | KV453229.1 | 7702442 | 22-scf00517 | 22 |
| AX-158338429 | 26 | 71.121 | KV453229.1 | 7741107 | 22-scf00517 | 22 |
| AX-158338438 | 26 | 71.121 | KV453229.1 | 7766823 | 22-scf00517 | 22 |
| AX-158338439 | 26 | 71.121 | KV453229.1 | 7770029 | 22-scf00517 | 22 |
| AX-158338440 | 26 | 71.121 | KV453229.1 | 7774354 | 22-scf00517 | 22 |
| AX-158338443 | 26 | 71.121 | KV453229.1 | 7777181 | 22-scf00517 | 22 |
| AX-158338444 | 26 | 71.121 | KV453229.1 | 7777714 | 22-scf00517 | 22 |
| AX-158338455 | 26 | 71.121 | KV453229.1 | 7793584 | 22-scf00517 | 22 |
| AX-158338463 | 26 | 71.121 | KV453229.1 | 7816994 | 22-scf00517 | 22 |
| AX-157882069 | 26 | 71.121 | KV453229.1 | 7835698 | 22-scf00517 | 22 |
| AX-158338473 | 26 | 71.121 | KV453229.1 | 7838258 | 22-scf00517 | 22 |
| AX-158338474 | 26 | 71.121 | KV453229.1 | 7840944 | 22-scf00517 | 22 |
| AX-158338477 | 26 | 71.121 | KV453229.1 | 7843522 | 22-scf00517 | 22 |
| AX-157849852 | 26 | 71.121 | KV453229.1 | 7858661 | 22-scf00517 | 22 |
| AX-158338498 | 26 | 71.121 | KV453229.1 | 7907697 | 22-scf00517 | 22 |
| AX-158338499 | 26 | 71.121 | KV453229.1 | 7908737 | 22-scf00517 | 22 |
| AX-158338503 | 26 | 71.121 | KV453229.1 | 7912457 | 22-scf00517 | 22 |
| AX-158338504 | 26 | 71.121 | KV453229.1 | 7913382 | 22-scf00517 | 22 |
| AX-158338508 | 26 | 71.121 | KV453229.1 | 7917743 | 22-scf00517 | 22 |
| AX-157873741 | 26 | 71.121 | KV453229.1 | 7919946 | 22-scf00517 | 22 |
| AX-158338517 | 26 | 71.121 | KV453229.1 | 7924758 | 22-scf00517 | 22 |
| AX-158381586 | 26 | 71.121 | KV453229.1 | 7930442 | 22-scf00517 | 22 |
| AX-158338523 | 26 | 71.121 | KV453229.1 | 7936145 | 22-scf00517 | 22 |
| AX-157849864 | 26 | 71.121 | KV453229.1 | 7936645 | 22-scf00517 | 22 |
| AX-158338527 | 26 | 71.121 | KV453229.1 | 7942534 | 22-scf00517 | 22 |
| AX-158338577 | 26 | 71.121 | KV453229.1 | 8033642 | 22-scf00517 | 22 |
| AX-158338578 | 26 | 71.121 | KV453229.1 | 8033899 | 22-scf00517 | 22 |
| AX-158338634 | 26 | 71.121 | KV453229.1 | 8144793 | 22-scf00517 | 22 |
| AX-158338669 | 26 | 71.121 | KV453229.1 | 8253855 | 22-scf00517 | 22 |
| AX-158338672 | 26 | 71.121 | KV453229.1 | 8263268 | 22-scf00517 | 22 |
| AX-157699867 | 26 | 71.121 | KV453229.1 | 8362006 | 22-scf00517 | 22 |
| AX-158420259 | 26 | 71.121 | KV453229.1 | 8402040 | 22-scf00517 | 22 |
| AX-158338755 | 26 | 71.121 | KV453229.1 | 8506317 | 22-scf00517 | 22 |
| AX-158338760 | 26 | 71.121 | KV453229.1 | 8528885 | 22-scf00517 | 22 |
| AX-158338773 | 26 | 71.121 | KV453229.1 | 8548310 | 22-scf00517 | 22 |
| AX-158338806 | 26 | 71.121 | KV453229.1 | 8650608 | 22-scf00517 | 22 |
| AX-157716060 | 26 | 71.121 | KV453229.1 | 8661499 | 22-scf00517 | 22 |

|              |    |        |             |         |             |    |
|--------------|----|--------|-------------|---------|-------------|----|
| AX-158338824 | 26 | 71.121 | KV453229.1  | 8695794 | 22-scf00517 | 22 |
| AX-158338832 | 26 | 71.121 | KV453229.1  | 8711978 | 22-scf00517 | 22 |
| AX-157849913 | 26 | 71.121 | KV453229.1  | 8717164 | 22-scf00517 | 22 |
| AX-158338837 | 26 | 71.121 | KV453229.1  | 8721245 | 22-scf00517 | 22 |
| AX-158338853 | 26 | 71.121 | KV453229.1  | 8745986 | 22-scf00517 | 22 |
| AX-158338861 | 26 | 71.121 | KV453229.1  | 8758642 | 22-scf00517 | 22 |
| AX-158338878 | 26 | 71.121 | KV453229.1  | 8783498 | 22-scf00517 | 22 |
| AX-158338901 | 26 | 71.121 | KV453229.1  | 8807192 | 22-scf00517 | 22 |
| AX-157687882 | 26 | 71.121 | 3ML01025299 | 1297    | scf01073_1  | UN |
| AX-157687883 | 26 | 71.121 | 3ML01025299 | 2840    | scf01073_1  | UN |
| AX-157706909 | 26 | 71.121 | 3ML01033144 | 341     | scf08780_1  | UN |
| AX-157715166 | 26 | 71.132 | KV453229.1  | 7153229 | 22-scf00517 | 22 |
| AX-158338346 | 26 | 71.132 | KV453229.1  | 7497741 | 22-scf00517 | 22 |
| AX-158338404 | 26 | 71.151 | KV453229.1  | 7678451 | 22-scf00517 | 22 |
| AX-158338453 | 26 | 71.176 | KV453229.1  | 7792482 | 22-scf00517 | 22 |
| AX-158338200 | 26 | 71.208 | KV453229.1  | 7183883 | 22-scf00517 | 22 |
| AX-158338464 | 26 | 71.208 | KV453229.1  | 7821965 | 22-scf00517 | 22 |
| AX-158338466 | 26 | 71.208 | KV453229.1  | 7825095 | 22-scf00517 | 22 |
| AX-157861763 | 26 | 71.208 | KV453229.1  | 7841100 | 22-scf00517 | 22 |
| AX-158338627 | 26 | 71.208 | KV453229.1  | 8115748 | 22-scf00517 | 22 |
| AX-158338641 | 26 | 71.208 | KV453229.1  | 8160984 | 22-scf00517 | 22 |
| AX-158338711 | 26 | 71.208 | KV453229.1  | 8334265 | 22-scf00517 | 22 |
| AX-158338836 | 26 | 71.208 | KV453229.1  | 8719579 | 22-scf00517 | 22 |
| AX-158338102 | 26 | 71.23  | KV453229.1  | 7049615 | 22-scf00517 | 22 |
| AX-157769754 | 26 | 71.23  | KV453229.1  | 7056079 | 22-scf00517 | 22 |
| AX-158338457 | 26 | 71.23  | KV453229.1  | 7800535 | 22-scf00517 | 22 |
| AX-157849851 | 26 | 71.23  | KV453229.1  | 7832781 | 22-scf00517 | 22 |
| AX-158338470 | 26 | 71.23  | KV453229.1  | 7836471 | 22-scf00517 | 22 |
| AX-158338472 | 26 | 71.23  | KV453229.1  | 7837745 | 22-scf00517 | 22 |
| AX-158338481 | 26 | 71.23  | KV453229.1  | 7856331 | 22-scf00517 | 22 |
| AX-158338482 | 26 | 71.23  | KV453229.1  | 7857006 | 22-scf00517 | 22 |
| AX-158338485 | 26 | 71.23  | KV453229.1  | 7866046 | 22-scf00517 | 22 |
| AX-157849853 | 26 | 71.23  | KV453229.1  | 7871116 | 22-scf00517 | 22 |
| AX-158338486 | 26 | 71.23  | KV453229.1  | 7876178 | 22-scf00517 | 22 |
| AX-157888631 | 26 | 71.23  | KV453229.1  | 7880929 | 22-scf00517 | 22 |
| AX-158338488 | 26 | 71.23  | KV453229.1  | 7890513 | 22-scf00517 | 22 |
| AX-157849857 | 26 | 71.23  | KV453229.1  | 7900827 | 22-scf00517 | 22 |
| AX-158338729 | 26 | 71.23  | KV453229.1  | 8392199 | 22-scf00517 | 22 |
| AX-158338931 | 26 | 71.23  | KV453229.1  | 8850107 | 22-scf00517 | 22 |
| AX-158338937 | 26 | 71.23  | KV453229.1  | 8856697 | 22-scf00517 | 22 |
| AX-157849855 | 26 | 71.254 | KV453229.1  | 7891318 | 22-scf00517 | 22 |
| AX-158338492 | 26 | 71.286 | KV453229.1  | 7902447 | 22-scf00517 | 22 |
| AX-157849858 | 26 | 71.286 | KV453229.1  | 7902696 | 22-scf00517 | 22 |
| AX-158338505 | 26 | 71.319 | KV453229.1  | 7914948 | 22-scf00517 | 22 |
| AX-158338509 | 26 | 71.339 | KV453229.1  | 7918207 | 22-scf00517 | 22 |
| AX-158338513 | 26 | 71.339 | KV453229.1  | 7922763 | 22-scf00517 | 22 |
| AX-157849861 | 26 | 71.339 | KV453229.1  | 7932286 | 22-scf00517 | 22 |
| AX-158419006 | 26 | 71.449 | KV453229.1  | 7934667 | 22-scf00517 | 22 |
| AX-157888632 | 26 | 71.492 | KV453229.1  | 7936382 | 22-scf00517 | 22 |
| AX-158338531 | 26 | 71.492 | KV453229.1  | 7949115 | 22-scf00517 | 22 |
| AX-158338628 | 26 | 71.492 | KV453229.1  | 8117372 | 22-scf00517 | 22 |

|              |    |        |            |         |             |    |
|--------------|----|--------|------------|---------|-------------|----|
| AX-158338762 | 26 | 71.492 | KV453229.1 | 8533323 | 22-scf00517 | 22 |
| AX-158338524 | 26 | 71.518 | KV453229.1 | 7937983 | 22-scf00517 | 22 |
| AX-158338084 | 26 | 71.558 | KV453229.1 | 7023984 | 22-scf00517 | 22 |
| AX-158338185 | 26 | 71.558 | KV453229.1 | 7156290 | 22-scf00517 | 22 |
| AX-158338407 | 26 | 71.558 | KV453229.1 | 7684481 | 22-scf00517 | 22 |
| AX-158418995 | 26 | 71.558 | KV453229.1 | 7784219 | 22-scf00517 | 22 |
| AX-158338494 | 26 | 71.558 | KV453229.1 | 7903772 | 22-scf00517 | 22 |
| AX-158338507 | 26 | 71.558 | KV453229.1 | 7917423 | 22-scf00517 | 22 |
| AX-158338510 | 26 | 71.558 | KV453229.1 | 7918475 | 22-scf00517 | 22 |
| AX-158338518 | 26 | 71.558 | KV453229.1 | 7925490 | 22-scf00517 | 22 |
| AX-158338519 | 26 | 71.558 | KV453229.1 | 7926067 | 22-scf00517 | 22 |
| AX-158338521 | 26 | 71.558 | KV453229.1 | 7931261 | 22-scf00517 | 22 |
| AX-158419005 | 26 | 71.558 | KV453229.1 | 7934631 | 22-scf00517 | 22 |
| AX-157849862 | 26 | 71.558 | KV453229.1 | 7934957 | 22-scf00517 | 22 |
| AX-157849863 | 26 | 71.558 | KV453229.1 | 7936181 | 22-scf00517 | 22 |
| AX-158338534 | 26 | 71.558 | KV453229.1 | 7952994 | 22-scf00517 | 22 |
| AX-157849865 | 26 | 71.558 | KV453229.1 | 7954358 | 22-scf00517 | 22 |
| AX-157849866 | 26 | 71.558 | KV453229.1 | 7958016 | 22-scf00517 | 22 |
| AX-158338546 | 26 | 71.558 | KV453229.1 | 7969113 | 22-scf00517 | 22 |
| AX-158338547 | 26 | 71.558 | KV453229.1 | 7971827 | 22-scf00517 | 22 |
| AX-158413033 | 26 | 71.558 | KV453229.1 | 7975750 | 22-scf00517 | 22 |
| AX-158338555 | 26 | 71.558 | KV453229.1 | 7980978 | 22-scf00517 | 22 |
| AX-157849877 | 26 | 71.558 | KV453229.1 | 7991893 | 22-scf00517 | 22 |
| AX-158338564 | 26 | 71.558 | KV453229.1 | 7998728 | 22-scf00517 | 22 |
| AX-157752078 | 26 | 71.558 | KV453229.1 | 8000349 | 22-scf00517 | 22 |
| AX-158338565 | 26 | 71.558 | KV453229.1 | 8009865 | 22-scf00517 | 22 |
| AX-158338567 | 26 | 71.558 | KV453229.1 | 8011659 | 22-scf00517 | 22 |
| AX-158338571 | 26 | 71.558 | KV453229.1 | 8026282 | 22-scf00517 | 22 |
| AX-157711491 | 26 | 71.558 | KV453229.1 | 8027434 | 22-scf00517 | 22 |
| AX-158338572 | 26 | 71.558 | KV453229.1 | 8030402 | 22-scf00517 | 22 |
| AX-158338573 | 26 | 71.558 | KV453229.1 | 8030858 | 22-scf00517 | 22 |
| AX-158338574 | 26 | 71.558 | KV453229.1 | 8031779 | 22-scf00517 | 22 |
| AX-158338575 | 26 | 71.558 | KV453229.1 | 8032633 | 22-scf00517 | 22 |
| AX-158338587 | 26 | 71.558 | KV453229.1 | 8049656 | 22-scf00517 | 22 |
| AX-158338590 | 26 | 71.558 | KV453229.1 | 8059557 | 22-scf00517 | 22 |
| AX-158338592 | 26 | 71.558 | KV453229.1 | 8062694 | 22-scf00517 | 22 |
| AX-158338595 | 26 | 71.558 | KV453229.1 | 8066095 | 22-scf00517 | 22 |
| AX-158338596 | 26 | 71.558 | KV453229.1 | 8066815 | 22-scf00517 | 22 |
| AX-158338597 | 26 | 71.558 | KV453229.1 | 8067573 | 22-scf00517 | 22 |
| AX-158338598 | 26 | 71.558 | KV453229.1 | 8068196 | 22-scf00517 | 22 |
| AX-157849879 | 26 | 71.558 | KV453229.1 | 8073242 | 22-scf00517 | 22 |
| AX-158338602 | 26 | 71.558 | KV453229.1 | 8073775 | 22-scf00517 | 22 |
| AX-158338603 | 26 | 71.558 | KV453229.1 | 8074754 | 22-scf00517 | 22 |
| AX-157849882 | 26 | 71.558 | KV453229.1 | 8087863 | 22-scf00517 | 22 |
| AX-157849883 | 26 | 71.558 | KV453229.1 | 8089071 | 22-scf00517 | 22 |
| AX-158338610 | 26 | 71.558 | KV453229.1 | 8092796 | 22-scf00517 | 22 |
| AX-158338611 | 26 | 71.558 | KV453229.1 | 8093269 | 22-scf00517 | 22 |
| AX-158338613 | 26 | 71.558 | KV453229.1 | 8094844 | 22-scf00517 | 22 |
| AX-158338617 | 26 | 71.558 | KV453229.1 | 8097118 | 22-scf00517 | 22 |
| AX-158338618 | 26 | 71.558 | KV453229.1 | 8098003 | 22-scf00517 | 22 |
| AX-157849885 | 26 | 71.558 | KV453229.1 | 8108411 | 22-scf00517 | 22 |

|              |    |        |            |         |             |    |
|--------------|----|--------|------------|---------|-------------|----|
| AX-157759092 | 26 | 71.558 | KV453229.1 | 8110101 | 22-scf00517 | 22 |
| AX-158338622 | 26 | 71.558 | KV453229.1 | 8111630 | 22-scf00517 | 22 |
| AX-158338625 | 26 | 71.558 | KV453229.1 | 8113167 | 22-scf00517 | 22 |
| AX-158338632 | 26 | 71.558 | KV453229.1 | 8132517 | 22-scf00517 | 22 |
| AX-158338636 | 26 | 71.558 | KV453229.1 | 8150346 | 22-scf00517 | 22 |
| AX-158338637 | 26 | 71.558 | KV453229.1 | 8151903 | 22-scf00517 | 22 |
| AX-158338639 | 26 | 71.558 | KV453229.1 | 8154776 | 22-scf00517 | 22 |
| AX-157861765 | 26 | 71.558 | KV453229.1 | 8157734 | 22-scf00517 | 22 |
| AX-157849888 | 26 | 71.558 | KV453229.1 | 8159114 | 22-scf00517 | 22 |
| AX-158338640 | 26 | 71.558 | KV453229.1 | 8160198 | 22-scf00517 | 22 |
| AX-157806949 | 26 | 71.558 | KV453229.1 | 8161382 | 22-scf00517 | 22 |
| AX-158338644 | 26 | 71.558 | KV453229.1 | 8167280 | 22-scf00517 | 22 |
| AX-158338649 | 26 | 71.558 | KV453229.1 | 8176620 | 22-scf00517 | 22 |
| AX-158338651 | 26 | 71.558 | KV453229.1 | 8181693 | 22-scf00517 | 22 |
| AX-158338653 | 26 | 71.558 | KV453229.1 | 8190902 | 22-scf00517 | 22 |
| AX-157753176 | 26 | 71.558 | KV453229.1 | 8199941 | 22-scf00517 | 22 |
| AX-157720328 | 26 | 71.558 | KV453229.1 | 8205716 | 22-scf00517 | 22 |
| AX-158338656 | 26 | 71.558 | KV453229.1 | 8222353 | 22-scf00517 | 22 |
| AX-157873742 | 26 | 71.558 | KV453229.1 | 8222735 | 22-scf00517 | 22 |
| AX-158338657 | 26 | 71.558 | KV453229.1 | 8223114 | 22-scf00517 | 22 |
| AX-158338658 | 26 | 71.558 | KV453229.1 | 8223833 | 22-scf00517 | 22 |
| AX-158338660 | 26 | 71.558 | KV453229.1 | 8226070 | 22-scf00517 | 22 |
| AX-157849889 | 26 | 71.558 | KV453229.1 | 8231114 | 22-scf00517 | 22 |
| AX-157757491 | 26 | 71.558 | KV453229.1 | 8234941 | 22-scf00517 | 22 |
| AX-158338666 | 26 | 71.558 | KV453229.1 | 8244923 | 22-scf00517 | 22 |
| AX-158338667 | 26 | 71.558 | KV453229.1 | 8250247 | 22-scf00517 | 22 |
| AX-158338668 | 26 | 71.558 | KV453229.1 | 8252541 | 22-scf00517 | 22 |
| AX-157708045 | 26 | 71.558 | KV453229.1 | 8259340 | 22-scf00517 | 22 |
| AX-158338671 | 26 | 71.558 | KV453229.1 | 8260511 | 22-scf00517 | 22 |
| AX-158338676 | 26 | 71.558 | KV453229.1 | 8269054 | 22-scf00517 | 22 |
| AX-158338682 | 26 | 71.558 | KV453229.1 | 8279403 | 22-scf00517 | 22 |
| AX-158338691 | 26 | 71.558 | KV453229.1 | 8296063 | 22-scf00517 | 22 |
| AX-158338692 | 26 | 71.558 | KV453229.1 | 8296685 | 22-scf00517 | 22 |
| AX-158338698 | 26 | 71.558 | KV453229.1 | 8310733 | 22-scf00517 | 22 |
| AX-158338699 | 26 | 71.558 | KV453229.1 | 8312566 | 22-scf00517 | 22 |
| AX-158338701 | 26 | 71.558 | KV453229.1 | 8314598 | 22-scf00517 | 22 |
| AX-158338702 | 26 | 71.558 | KV453229.1 | 8315003 | 22-scf00517 | 22 |
| AX-157849892 | 26 | 71.558 | KV453229.1 | 8316409 | 22-scf00517 | 22 |
| AX-158338703 | 26 | 71.558 | KV453229.1 | 8318203 | 22-scf00517 | 22 |
| AX-158338704 | 26 | 71.558 | KV453229.1 | 8319271 | 22-scf00517 | 22 |
| AX-157849893 | 26 | 71.558 | KV453229.1 | 8324479 | 22-scf00517 | 22 |
| AX-158338706 | 26 | 71.558 | KV453229.1 | 8326910 | 22-scf00517 | 22 |
| AX-158338707 | 26 | 71.558 | KV453229.1 | 8328979 | 22-scf00517 | 22 |
| AX-158338708 | 26 | 71.558 | KV453229.1 | 8329939 | 22-scf00517 | 22 |
| AX-158338709 | 26 | 71.558 | KV453229.1 | 8330673 | 22-scf00517 | 22 |
| AX-158338710 | 26 | 71.558 | KV453229.1 | 8333417 | 22-scf00517 | 22 |
| AX-158338712 | 26 | 71.558 | KV453229.1 | 8335622 | 22-scf00517 | 22 |
| AX-158338713 | 26 | 71.558 | KV453229.1 | 8345538 | 22-scf00517 | 22 |
| AX-158338714 | 26 | 71.558 | KV453229.1 | 8348384 | 22-scf00517 | 22 |
| AX-158338715 | 26 | 71.558 | KV453229.1 | 8352966 | 22-scf00517 | 22 |
| AX-158338717 | 26 | 71.558 | KV453229.1 | 8357814 | 22-scf00517 | 22 |

|              |    |        |            |         |             |    |
|--------------|----|--------|------------|---------|-------------|----|
| AX-158338718 | 26 | 71.558 | KV453229.1 | 8358197 | 22-scf00517 | 22 |
| AX-158338720 | 26 | 71.558 | KV453229.1 | 8361194 | 22-scf00517 | 22 |
| AX-158419018 | 26 | 71.558 | KV453229.1 | 8368667 | 22-scf00517 | 22 |
| AX-158338725 | 26 | 71.558 | KV453229.1 | 8380799 | 22-scf00517 | 22 |
| AX-158338726 | 26 | 71.558 | KV453229.1 | 8381958 | 22-scf00517 | 22 |
| AX-158338731 | 26 | 71.558 | KV453229.1 | 8396255 | 22-scf00517 | 22 |
| AX-158338732 | 26 | 71.558 | KV453229.1 | 8399181 | 22-scf00517 | 22 |
| AX-158338733 | 26 | 71.558 | KV453229.1 | 8400218 | 22-scf00517 | 22 |
| AX-158338734 | 26 | 71.558 | KV453229.1 | 8401386 | 22-scf00517 | 22 |
| AX-158338736 | 26 | 71.558 | KV453229.1 | 8406719 | 22-scf00517 | 22 |
| AX-158381588 | 26 | 71.558 | KV453229.1 | 8421090 | 22-scf00517 | 22 |
| AX-158338741 | 26 | 71.558 | KV453229.1 | 8425731 | 22-scf00517 | 22 |
| AX-157849895 | 26 | 71.558 | KV453229.1 | 8428313 | 22-scf00517 | 22 |
| AX-158338744 | 26 | 71.558 | KV453229.1 | 8441018 | 22-scf00517 | 22 |
| AX-157751617 | 26 | 71.558 | KV453229.1 | 8516466 | 22-scf00517 | 22 |
| AX-157849900 | 26 | 71.558 | KV453229.1 | 8521209 | 22-scf00517 | 22 |
| AX-158338757 | 26 | 71.558 | KV453229.1 | 8525789 | 22-scf00517 | 22 |
| AX-158338759 | 26 | 71.558 | KV453229.1 | 8526951 | 22-scf00517 | 22 |
| AX-158338764 | 26 | 71.558 | KV453229.1 | 8535020 | 22-scf00517 | 22 |
| AX-158338766 | 26 | 71.558 | KV453229.1 | 8536427 | 22-scf00517 | 22 |
| AX-158338770 | 26 | 71.558 | KV453229.1 | 8543807 | 22-scf00517 | 22 |
| AX-158338772 | 26 | 71.558 | KV453229.1 | 8547067 | 22-scf00517 | 22 |
| AX-157849902 | 26 | 71.558 | KV453229.1 | 8557155 | 22-scf00517 | 22 |
| AX-158338775 | 26 | 71.558 | KV453229.1 | 8557516 | 22-scf00517 | 22 |
| AX-158338776 | 26 | 71.558 | KV453229.1 | 8559502 | 22-scf00517 | 22 |
| AX-158338777 | 26 | 71.558 | KV453229.1 | 8565047 | 22-scf00517 | 22 |
| AX-158338778 | 26 | 71.558 | KV453229.1 | 8565777 | 22-scf00517 | 22 |
| AX-157849903 | 26 | 71.558 | KV453229.1 | 8565925 | 22-scf00517 | 22 |
| AX-158338781 | 26 | 71.558 | KV453229.1 | 8570657 | 22-scf00517 | 22 |
| AX-158338783 | 26 | 71.558 | KV453229.1 | 8573194 | 22-scf00517 | 22 |
| AX-158419023 | 26 | 71.558 | KV453229.1 | 8581101 | 22-scf00517 | 22 |
| AX-158338795 | 26 | 71.558 | KV453229.1 | 8610320 | 22-scf00517 | 22 |
| AX-158419024 | 26 | 71.558 | KV453229.1 | 8612794 | 22-scf00517 | 22 |
| AX-158338797 | 26 | 71.558 | KV453229.1 | 8615523 | 22-scf00517 | 22 |
| AX-157882096 | 26 | 71.558 | KV453229.1 | 8640846 | 22-scf00517 | 22 |
| AX-158338805 | 26 | 71.558 | KV453229.1 | 8647698 | 22-scf00517 | 22 |
| AX-158338807 | 26 | 71.558 | KV453229.1 | 8651335 | 22-scf00517 | 22 |
| AX-157744130 | 26 | 71.558 | KV453229.1 | 8653285 | 22-scf00517 | 22 |
| AX-158338809 | 26 | 71.558 | KV453229.1 | 8657092 | 22-scf00517 | 22 |
| AX-158338811 | 26 | 71.558 | KV453229.1 | 8663971 | 22-scf00517 | 22 |
| AX-158338812 | 26 | 71.558 | KV453229.1 | 8664796 | 22-scf00517 | 22 |
| AX-158338813 | 26 | 71.558 | KV453229.1 | 8665896 | 22-scf00517 | 22 |
| AX-157768200 | 26 | 71.558 | KV453229.1 | 8667884 | 22-scf00517 | 22 |
| AX-158338815 | 26 | 71.558 | KV453229.1 | 8668305 | 22-scf00517 | 22 |
| AX-158338816 | 26 | 71.558 | KV453229.1 | 8673960 | 22-scf00517 | 22 |
| AX-157723282 | 26 | 71.558 | KV453229.1 | 8675933 | 22-scf00517 | 22 |
| AX-157720263 | 26 | 71.558 | KV453229.1 | 8679825 | 22-scf00517 | 22 |
| AX-157724566 | 26 | 71.558 | KV453229.1 | 8679998 | 22-scf00517 | 22 |
| AX-157724741 | 26 | 71.558 | KV453229.1 | 8682217 | 22-scf00517 | 22 |
| AX-158338817 | 26 | 71.558 | KV453229.1 | 8686195 | 22-scf00517 | 22 |
| AX-158338818 | 26 | 71.558 | KV453229.1 | 8689555 | 22-scf00517 | 22 |

|              |    |        |            |         |             |    |
|--------------|----|--------|------------|---------|-------------|----|
| AX-158338820 | 26 | 71.558 | KV453229.1 | 8691821 | 22-scf00517 | 22 |
| AX-157745547 | 26 | 71.558 | KV453229.1 | 8693250 | 22-scf00517 | 22 |
| AX-158338822 | 26 | 71.558 | KV453229.1 | 8694401 | 22-scf00517 | 22 |
| AX-158338823 | 26 | 71.558 | KV453229.1 | 8694800 | 22-scf00517 | 22 |
| AX-157734416 | 26 | 71.558 | KV453229.1 | 8697311 | 22-scf00517 | 22 |
| AX-158338826 | 26 | 71.558 | KV453229.1 | 8699349 | 22-scf00517 | 22 |
| AX-158338827 | 26 | 71.558 | KV453229.1 | 8702799 | 22-scf00517 | 22 |
| AX-157709219 | 26 | 71.558 | KV453229.1 | 8703554 | 22-scf00517 | 22 |
| AX-157727822 | 26 | 71.558 | KV453229.1 | 8707725 | 22-scf00517 | 22 |
| AX-157849911 | 26 | 71.558 | KV453229.1 | 8707942 | 22-scf00517 | 22 |
| AX-158338828 | 26 | 71.558 | KV453229.1 | 8708922 | 22-scf00517 | 22 |
| AX-157747267 | 26 | 71.558 | KV453229.1 | 8709454 | 22-scf00517 | 22 |
| AX-158338830 | 26 | 71.558 | KV453229.1 | 8710203 | 22-scf00517 | 22 |
| AX-158338831 | 26 | 71.558 | KV453229.1 | 8711227 | 22-scf00517 | 22 |
| AX-158338833 | 26 | 71.558 | KV453229.1 | 8714011 | 22-scf00517 | 22 |
| AX-157849912 | 26 | 71.558 | KV453229.1 | 8714965 | 22-scf00517 | 22 |
| AX-157715976 | 26 | 71.558 | KV453229.1 | 8726550 | 22-scf00517 | 22 |
| AX-158338841 | 26 | 71.558 | KV453229.1 | 8729733 | 22-scf00517 | 22 |
| AX-157849914 | 26 | 71.558 | KV453229.1 | 8731535 | 22-scf00517 | 22 |
| AX-158338842 | 26 | 71.558 | KV453229.1 | 8732034 | 22-scf00517 | 22 |
| AX-158338845 | 26 | 71.558 | KV453229.1 | 8733875 | 22-scf00517 | 22 |
| AX-158338846 | 26 | 71.558 | KV453229.1 | 8736495 | 22-scf00517 | 22 |
| AX-158338847 | 26 | 71.558 | KV453229.1 | 8737049 | 22-scf00517 | 22 |
| AX-158338849 | 26 | 71.558 | KV453229.1 | 8740613 | 22-scf00517 | 22 |
| AX-158338856 | 26 | 71.558 | KV453229.1 | 8750692 | 22-scf00517 | 22 |
| AX-158338857 | 26 | 71.558 | KV453229.1 | 8751729 | 22-scf00517 | 22 |
| AX-158338858 | 26 | 71.558 | KV453229.1 | 8752196 | 22-scf00517 | 22 |
| AX-157873745 | 26 | 71.558 | KV453229.1 | 8752915 | 22-scf00517 | 22 |
| AX-157849918 | 26 | 71.558 | KV453229.1 | 8755729 | 22-scf00517 | 22 |
| AX-157746895 | 26 | 71.558 | KV453229.1 | 8756310 | 22-scf00517 | 22 |
| AX-158338866 | 26 | 71.558 | KV453229.1 | 8767295 | 22-scf00517 | 22 |
| AX-158338867 | 26 | 71.558 | KV453229.1 | 8768192 | 22-scf00517 | 22 |
| AX-158338869 | 26 | 71.558 | KV453229.1 | 8770275 | 22-scf00517 | 22 |
| AX-158338870 | 26 | 71.558 | KV453229.1 | 8770664 | 22-scf00517 | 22 |
| AX-158338871 | 26 | 71.558 | KV453229.1 | 8773386 | 22-scf00517 | 22 |
| AX-158338882 | 26 | 71.558 | KV453229.1 | 8790841 | 22-scf00517 | 22 |
| AX-158338886 | 26 | 71.558 | KV453229.1 | 8793585 | 22-scf00517 | 22 |
| AX-158338887 | 26 | 71.558 | KV453229.1 | 8794190 | 22-scf00517 | 22 |
| AX-158338888 | 26 | 71.558 | KV453229.1 | 8795522 | 22-scf00517 | 22 |
| AX-158338889 | 26 | 71.558 | KV453229.1 | 8795887 | 22-scf00517 | 22 |
| AX-158338892 | 26 | 71.558 | KV453229.1 | 8798184 | 22-scf00517 | 22 |
| AX-157744851 | 26 | 71.558 | KV453229.1 | 9054441 | 22-scf00517 | 22 |
| AX-158339146 | 26 | 71.558 | KV453229.1 | 9177715 | 22-scf00517 | 22 |
| AX-158339215 | 26 | 71.558 | KV453229.1 | 9341649 | 22-scf00517 | 22 |
| AX-157739771 | 26 | 71.558 | KV453229.1 | 9891679 | 22-scf00517 | 22 |
| AX-157679998 | 26 | 71.558 |            | 110     | scf12687    | UN |
| AX-158338862 | 26 | 71.633 | KV453229.1 | 8759449 | 22-scf00517 | 22 |
| AX-158338863 | 26 | 71.703 | KV453229.1 | 8760488 | 22-scf00517 | 22 |
| AX-157849807 | 26 | 71.995 | KV453229.1 | 7063458 | 22-scf00517 | 22 |
| AX-158338270 | 26 | 71.995 | KV453229.1 | 7276999 | 22-scf00517 | 22 |
| AX-158338487 | 26 | 71.995 | KV453229.1 | 7886205 | 22-scf00517 | 22 |

|              |    |        |             |         |             |    |
|--------------|----|--------|-------------|---------|-------------|----|
| AX-157849871 | 26 | 71.995 | KV453229.1  | 7977053 | 22-scf00517 | 22 |
| AX-158338562 | 26 | 71.995 | KV453229.1  | 7993443 | 22-scf00517 | 22 |
| AX-157849890 | 26 | 71.995 | KV453229.1  | 8231626 | 22-scf00517 | 22 |
| AX-158338874 | 26 | 71.995 | KV453229.1  | 8776272 | 22-scf00517 | 22 |
| AX-158338876 | 26 | 71.995 | KV453229.1  | 8779877 | 22-scf00517 | 22 |
| AX-158338877 | 26 | 71.995 | KV453229.1  | 8781907 | 22-scf00517 | 22 |
| AX-158338881 | 26 | 71.995 | KV453229.1  | 8789656 | 22-scf00517 | 22 |
| AX-157708456 | 26 | 72.067 | KV453229.1  | 8796390 | 22-scf00517 | 22 |
| AX-158338890 | 26 | 72.067 | KV453229.1  | 8796574 | 22-scf00517 | 22 |
| AX-157708455 | 26 | 72.104 | KV453229.1  | 8796471 | 22-scf00517 | 22 |
| AX-158338891 | 26 | 72.104 | KV453229.1  | 8797740 | 22-scf00517 | 22 |
| AX-158338894 | 26 | 72.104 | KV453229.1  | 8800342 | 22-scf00517 | 22 |
| AX-158381590 | 26 | 72.104 | KV453229.1  | 8807124 | 22-scf00517 | 22 |
| AX-158338902 | 26 | 72.104 | KV453229.1  | 8808004 | 22-scf00517 | 22 |
| AX-158338903 | 26 | 72.104 | KV453229.1  | 8808896 | 22-scf00517 | 22 |
| AX-158338905 | 26 | 72.104 | KV453229.1  | 8816162 | 22-scf00517 | 22 |
| AX-157706993 | 26 | 72.104 | 3ML01033297 | 210     | scf08941_1  | UN |
| AX-158338883 | 26 | 72.182 | KV453229.1  | 8792167 | 22-scf00517 | 22 |
| AX-158338907 | 26 | 72.182 | KV453229.1  | 8817949 | 22-scf00517 | 22 |
| AX-157888634 | 26 | 72.213 | KV453229.1  | 8818131 | 22-scf00517 | 22 |
| AX-158338909 | 26 | 72.213 | KV453229.1  | 8819092 | 22-scf00517 | 22 |
| AX-158338910 | 26 | 72.213 | KV453229.1  | 8820559 | 22-scf00517 | 22 |
| AX-158338911 | 26 | 72.213 | KV453229.1  | 8821609 | 22-scf00517 | 22 |
| AX-158338913 | 26 | 72.213 | KV453229.1  | 8823448 | 22-scf00517 | 22 |
| AX-157774400 | 26 | 72.322 | KV453229.1  | 8824975 | 22-scf00517 | 22 |
| AX-158338918 | 26 | 72.381 | KV453229.1  | 8829515 | 22-scf00517 | 22 |
| AX-158338872 | 26 | 72.432 | KV453229.1  | 8774520 | 22-scf00517 | 22 |
| AX-158338920 | 26 | 72.432 | KV453229.1  | 8831139 | 22-scf00517 | 22 |
| AX-157773946 | 26 | 72.432 | KV453229.1  | 8831618 | 22-scf00517 | 22 |
| AX-158338924 | 26 | 72.432 | KV453229.1  | 8837803 | 22-scf00517 | 22 |
| AX-158338944 | 26 | 72.432 | KV453229.1  | 8862065 | 22-scf00517 | 22 |
| AX-158338921 | 26 | 72.541 | KV453229.1  | 8832282 | 22-scf00517 | 22 |
| AX-158338923 | 26 | 72.541 | KV453229.1  | 8834895 | 22-scf00517 | 22 |
| AX-158338925 | 26 | 72.541 | KV453229.1  | 8840287 | 22-scf00517 | 22 |
| AX-158338928 | 26 | 72.541 | KV453229.1  | 8844736 | 22-scf00517 | 22 |
| AX-158338929 | 26 | 72.541 | KV453229.1  | 8845573 | 22-scf00517 | 22 |
| AX-158338936 | 26 | 72.541 | KV453229.1  | 8856219 | 22-scf00517 | 22 |
| AX-158338942 | 26 | 72.541 | KV453229.1  | 8860978 | 22-scf00517 | 22 |
| AX-158338946 | 26 | 72.541 | KV453229.1  | 8864333 | 22-scf00517 | 22 |
| AX-158338956 | 26 | 72.541 | KV453229.1  | 8878251 | 22-scf00517 | 22 |
| AX-158338974 | 26 | 72.541 | KV453229.1  | 8896019 | 22-scf00517 | 22 |
| AX-158338975 | 26 | 72.541 | KV453229.1  | 8896693 | 22-scf00517 | 22 |
| AX-157708881 | 26 | 72.541 | KV453229.1  | 8903315 | 22-scf00517 | 22 |
| AX-158338947 | 26 | 72.76  | KV453229.1  | 8868066 | 22-scf00517 | 22 |
| AX-158338949 | 26 | 72.76  | KV453229.1  | 8869313 | 22-scf00517 | 22 |
| AX-158338951 | 26 | 72.978 | KV453229.1  | 8871943 | 22-scf00517 | 22 |
| AX-158338955 | 26 | 73.034 | KV453229.1  | 8875159 | 22-scf00517 | 22 |
| AX-158338963 | 26 | 73.137 | KV453229.1  | 8885308 | 22-scf00517 | 22 |
| AX-158338964 | 26 | 73.197 | KV453229.1  | 8885750 | 22-scf00517 | 22 |
| AX-157861767 | 26 | 73.238 | KV453229.1  | 8891200 | 22-scf00517 | 22 |
| AX-158338970 | 26 | 73.258 | KV453229.1  | 8892403 | 22-scf00517 | 22 |

|              |    |        |            |         |             |    |
|--------------|----|--------|------------|---------|-------------|----|
| AX-158338971 | 26 | 73.297 | KV453229.1 | 8893527 | 22-scf00517 | 22 |
| AX-158338957 | 26 | 73.319 | KV453229.1 | 8878835 | 22-scf00517 | 22 |
| AX-157742003 | 26 | 73.319 | KV453229.1 | 8895353 | 22-scf00517 | 22 |
| AX-158338977 | 26 | 73.37  | KV453229.1 | 8899178 | 22-scf00517 | 22 |
| AX-158338981 | 26 | 73.416 | KV453229.1 | 8901634 | 22-scf00517 | 22 |
| AX-157743182 | 26 | 73.452 | KV453229.1 | 8902759 | 22-scf00517 | 22 |
| AX-158339281 | 26 | 73.452 | KV453229.1 | 9422727 | 22-scf00517 | 22 |
| AX-158339350 | 26 | 73.452 | KV453229.1 | 9514423 | 22-scf00517 | 22 |
| AX-158338934 | 26 | 73.525 | KV453229.1 | 8852694 | 22-scf00517 | 22 |
| AX-158338940 | 26 | 73.525 | KV453229.1 | 8859854 | 22-scf00517 | 22 |
| AX-158338958 | 26 | 73.525 | KV453229.1 | 8880380 | 22-scf00517 | 22 |
| AX-158338982 | 26 | 73.525 | KV453229.1 | 8904100 | 22-scf00517 | 22 |
| AX-158338984 | 26 | 73.525 | KV453229.1 | 8907353 | 22-scf00517 | 22 |
| AX-158338985 | 26 | 73.525 | KV453229.1 | 8908286 | 22-scf00517 | 22 |
| AX-158338986 | 26 | 73.525 | KV453229.1 | 8909797 | 22-scf00517 | 22 |
| AX-157751228 | 26 | 73.525 | KV453229.1 | 8909939 | 22-scf00517 | 22 |
| AX-158338987 | 26 | 73.525 | KV453229.1 | 8910518 | 22-scf00517 | 22 |
| AX-158338988 | 26 | 73.525 | KV453229.1 | 8912601 | 22-scf00517 | 22 |
| AX-158338989 | 26 | 73.525 | KV453229.1 | 8913167 | 22-scf00517 | 22 |
| AX-158338990 | 26 | 73.525 | KV453229.1 | 8913243 | 22-scf00517 | 22 |
| AX-158338991 | 26 | 73.525 | KV453229.1 | 8913838 | 22-scf00517 | 22 |
| AX-158338992 | 26 | 73.525 | KV453229.1 | 8915912 | 22-scf00517 | 22 |
| AX-157882103 | 26 | 73.525 | KV453229.1 | 8922855 | 22-scf00517 | 22 |
| AX-157708899 | 26 | 73.525 | KV453229.1 | 8924220 | 22-scf00517 | 22 |
| AX-158339000 | 26 | 73.525 | KV453229.1 | 8936212 | 22-scf00517 | 22 |
| AX-157849925 | 26 | 73.525 | KV453229.1 | 8989293 | 22-scf00517 | 22 |
| AX-158339137 | 26 | 73.525 | KV453229.1 | 9136196 | 22-scf00517 | 22 |
| AX-158339208 | 26 | 73.525 | KV453229.1 | 9335569 | 22-scf00517 | 22 |
| AX-158338996 | 26 | 73.634 | KV453229.1 | 8926024 | 22-scf00517 | 22 |
| AX-158338998 | 26 | 73.634 | KV453229.1 | 8932911 | 22-scf00517 | 22 |
| AX-158339001 | 26 | 73.634 | KV453229.1 | 8937081 | 22-scf00517 | 22 |
| AX-158339002 | 26 | 73.634 | KV453229.1 | 8937357 | 22-scf00517 | 22 |
| AX-158339097 | 26 | 73.634 | KV453229.1 | 9073264 | 22-scf00517 | 22 |
| AX-157849932 | 26 | 73.634 | KV453229.1 | 9098225 | 22-scf00517 | 22 |
| AX-158339220 | 26 | 73.634 | KV453229.1 | 9348652 | 22-scf00517 | 22 |
| AX-158339008 | 26 | 73.701 | KV453229.1 | 8941797 | 22-scf00517 | 22 |
| AX-158339009 | 26 | 73.766 | KV453229.1 | 8943188 | 22-scf00517 | 22 |
| AX-158339016 | 26 | 73.81  | KV453229.1 | 8952785 | 22-scf00517 | 22 |
| AX-158338997 | 26 | 73.853 | KV453229.1 | 8932222 | 22-scf00517 | 22 |
| AX-158339017 | 26 | 73.853 | KV453229.1 | 8954977 | 22-scf00517 | 22 |
| AX-158339018 | 26 | 73.853 | KV453229.1 | 8956639 | 22-scf00517 | 22 |
| AX-158339019 | 26 | 73.853 | KV453229.1 | 8957099 | 22-scf00517 | 22 |
| AX-158339022 | 26 | 73.853 | KV453229.1 | 8958911 | 22-scf00517 | 22 |
| AX-158339030 | 26 | 73.853 | KV453229.1 | 8972733 | 22-scf00517 | 22 |
| AX-157745336 | 26 | 73.853 | KV453229.1 | 8975102 | 22-scf00517 | 22 |
| AX-158338950 | 26 | 73.962 | KV453229.1 | 8869779 | 22-scf00517 | 22 |
| AX-158339014 | 26 | 73.962 | KV453229.1 | 8948118 | 22-scf00517 | 22 |
| AX-158339023 | 26 | 73.962 | KV453229.1 | 8960613 | 22-scf00517 | 22 |
| AX-158339034 | 26 | 73.962 | KV453229.1 | 8975038 | 22-scf00517 | 22 |
| AX-158339037 | 26 | 73.962 | KV453229.1 | 8979370 | 22-scf00517 | 22 |
| AX-158339038 | 26 | 73.962 | KV453229.1 | 8979666 | 22-scf00517 | 22 |



|              |    |        |            |         |             |    |
|--------------|----|--------|------------|---------|-------------|----|
| AX-158339058 | 26 | 73.962 | KV453229.1 | 9004795 | 22-scf00517 | 22 |
| AX-157744176 | 26 | 73.962 | KV453229.1 | 9016791 | 22-scf00517 | 22 |
| AX-158339095 | 26 | 73.962 | KV453229.1 | 9071837 | 22-scf00517 | 22 |
| AX-157751357 | 26 | 73.962 | KV453229.1 | 9087447 | 22-scf00517 | 22 |
| AX-158339040 | 26 | 73.992 | KV453229.1 | 8981543 | 22-scf00517 | 22 |
| AX-158339312 | 26 | 73.992 | KV453229.1 | 9467178 | 22-scf00517 | 22 |
| AX-158339044 | 26 | 74.021 | KV453229.1 | 8986885 | 22-scf00517 | 22 |
| AX-157772762 | 26 | 74.071 | KV453229.1 | 8873387 | 22-scf00517 | 22 |
| AX-158338979 | 26 | 74.071 | KV453229.1 | 8900799 | 22-scf00517 | 22 |
| AX-158339020 | 26 | 74.071 | KV453229.1 | 8957780 | 22-scf00517 | 22 |
| AX-158339021 | 26 | 74.071 | KV453229.1 | 8958433 | 22-scf00517 | 22 |
| AX-158339033 | 26 | 74.071 | KV453229.1 | 8974115 | 22-scf00517 | 22 |
| AX-158339036 | 26 | 74.071 | KV453229.1 | 8978287 | 22-scf00517 | 22 |
| AX-158339045 | 26 | 74.071 | KV453229.1 | 8987236 | 22-scf00517 | 22 |
| AX-158339046 | 26 | 74.071 | KV453229.1 | 8989674 | 22-scf00517 | 22 |
| AX-157849926 | 26 | 74.071 | KV453229.1 | 8991054 | 22-scf00517 | 22 |
| AX-158339050 | 26 | 74.071 | KV453229.1 | 8994886 | 22-scf00517 | 22 |
| AX-158339051 | 26 | 74.071 | KV453229.1 | 8995392 | 22-scf00517 | 22 |
| AX-158339052 | 26 | 74.071 | KV453229.1 | 8996048 | 22-scf00517 | 22 |
| AX-158339054 | 26 | 74.071 | KV453229.1 | 9001491 | 22-scf00517 | 22 |
| AX-158339065 | 26 | 74.071 | KV453229.1 | 9011171 | 22-scf00517 | 22 |
| AX-158339066 | 26 | 74.071 | KV453229.1 | 9014065 | 22-scf00517 | 22 |
| AX-158339071 | 26 | 74.071 | KV453229.1 | 9027754 | 22-scf00517 | 22 |
| AX-158413040 | 26 | 74.071 | KV453229.1 | 9029165 | 22-scf00517 | 22 |
| AX-158339074 | 26 | 74.071 | KV453229.1 | 9033901 | 22-scf00517 | 22 |
| AX-157717240 | 26 | 74.071 | KV453229.1 | 9042989 | 22-scf00517 | 22 |
| AX-157849930 | 26 | 74.071 | KV453229.1 | 9045370 | 22-scf00517 | 22 |
| AX-158339076 | 26 | 74.071 | KV453229.1 | 9047192 | 22-scf00517 | 22 |
| AX-158339078 | 26 | 74.071 | KV453229.1 | 9049820 | 22-scf00517 | 22 |
| AX-157849931 | 26 | 74.071 | KV453229.1 | 9050279 | 22-scf00517 | 22 |
| AX-158339079 | 26 | 74.071 | KV453229.1 | 9050506 | 22-scf00517 | 22 |
| AX-158339080 | 26 | 74.071 | KV453229.1 | 9050812 | 22-scf00517 | 22 |
| AX-158339083 | 26 | 74.071 | KV453229.1 | 9052475 | 22-scf00517 | 22 |
| AX-157742445 | 26 | 74.071 | KV453229.1 | 9059493 | 22-scf00517 | 22 |
| AX-158339088 | 26 | 74.071 | KV453229.1 | 9062903 | 22-scf00517 | 22 |
| AX-158339090 | 26 | 74.071 | KV453229.1 | 9064191 | 22-scf00517 | 22 |
| AX-158339091 | 26 | 74.071 | KV453229.1 | 9065210 | 22-scf00517 | 22 |
| AX-158339093 | 26 | 74.071 | KV453229.1 | 9068830 | 22-scf00517 | 22 |
| AX-158339096 | 26 | 74.071 | KV453229.1 | 9072410 | 22-scf00517 | 22 |
| AX-158339098 | 26 | 74.071 | KV453229.1 | 9073622 | 22-scf00517 | 22 |
| AX-158339100 | 26 | 74.071 | KV453229.1 | 9075626 | 22-scf00517 | 22 |
| AX-158339102 | 26 | 74.071 | KV453229.1 | 9077542 | 22-scf00517 | 22 |
| AX-158339104 | 26 | 74.071 | KV453229.1 | 9078739 | 22-scf00517 | 22 |
| AX-158339105 | 26 | 74.071 | KV453229.1 | 9079114 | 22-scf00517 | 22 |
| AX-158339106 | 26 | 74.071 | KV453229.1 | 9080002 | 22-scf00517 | 22 |
| AX-157727552 | 26 | 74.071 | KV453229.1 | 9080785 | 22-scf00517 | 22 |
| AX-158339110 | 26 | 74.071 | KV453229.1 | 9088942 | 22-scf00517 | 22 |
| AX-158339113 | 26 | 74.071 | KV453229.1 | 9092981 | 22-scf00517 | 22 |
| AX-158339116 | 26 | 74.071 | KV453229.1 | 9099456 | 22-scf00517 | 22 |
| AX-158339120 | 26 | 74.071 | KV453229.1 | 9103927 | 22-scf00517 | 22 |
| AX-158339121 | 26 | 74.071 | KV453229.1 | 9104805 | 22-scf00517 | 22 |

|              |    |        |             |         |             |    |
|--------------|----|--------|-------------|---------|-------------|----|
| AX-158339122 | 26 | 74.071 | KV453229.1  | 9104899 | 22-scf00517 | 22 |
| AX-158339127 | 26 | 74.071 | KV453229.1  | 9108409 | 22-scf00517 | 22 |
| AX-158339129 | 26 | 74.071 | KV453229.1  | 9110189 | 22-scf00517 | 22 |
| AX-158339131 | 26 | 74.071 | KV453229.1  | 9112346 | 22-scf00517 | 22 |
| AX-157888637 | 26 | 74.071 | KV453229.1  | 9316994 | 22-scf00517 | 22 |
| AX-158339197 | 26 | 74.071 | KV453229.1  | 9324512 | 22-scf00517 | 22 |
| AX-158339219 | 26 | 74.071 | KV453229.1  | 9347361 | 22-scf00517 | 22 |
| AX-157694052 | 26 | 74.071 | KV453229.1  | 9376674 | 22-scf00517 | 22 |
| AX-158339252 | 26 | 74.071 | KV453229.1  | 9389211 | 22-scf00517 | 22 |
| AX-158413043 | 26 | 74.071 | KV453229.1  | 9390759 | 22-scf00517 | 22 |
| AX-158419041 | 26 | 74.071 | KV453229.1  | 9393176 | 22-scf00517 | 22 |
| AX-158339268 | 26 | 74.071 | KV453229.1  | 9410171 | 22-scf00517 | 22 |
| AX-158339271 | 26 | 74.071 | KV453229.1  | 9413246 | 22-scf00517 | 22 |
| AX-158339278 | 26 | 74.071 | KV453229.1  | 9419162 | 22-scf00517 | 22 |
| AX-158339279 | 26 | 74.071 | KV453229.1  | 9420297 | 22-scf00517 | 22 |
| AX-158339307 | 26 | 74.071 | KV453229.1  | 9460297 | 22-scf00517 | 22 |
| AX-158339313 | 26 | 74.071 | KV453229.1  | 9468073 | 22-scf00517 | 22 |
| AX-158339323 | 26 | 74.071 | KV453229.1  | 9481659 | 22-scf00517 | 22 |
| AX-158339343 | 26 | 74.071 | KV453229.1  | 9504084 | 22-scf00517 | 22 |
| AX-157746279 | 26 | 74.071 | KV453229.1  | 9578671 | 22-scf00517 | 22 |
| AX-158339486 | 26 | 74.071 | KV453229.1  | 9704633 | 22-scf00517 | 22 |
| AX-158339503 | 26 | 74.071 | KV453229.1  | 9729466 | 22-scf00517 | 22 |
| AX-157705439 | 26 | 74.071 | 3ML01029800 | 59      | scf05422_1  | UN |
| AX-158338966 | 26 | 74.18  | KV453229.1  | 8886960 | 22-scf00517 | 22 |
| AX-158339012 | 26 | 74.18  | KV453229.1  | 8945779 | 22-scf00517 | 22 |
| AX-157849922 | 26 | 74.18  | KV453229.1  | 8950151 | 22-scf00517 | 22 |
| AX-158339024 | 26 | 74.18  | KV453229.1  | 8962133 | 22-scf00517 | 22 |
| AX-158339025 | 26 | 74.18  | KV453229.1  | 8962585 | 22-scf00517 | 22 |
| AX-157738899 | 26 | 74.18  | KV453229.1  | 8964264 | 22-scf00517 | 22 |
| AX-158339028 | 26 | 74.18  | KV453229.1  | 8968464 | 22-scf00517 | 22 |
| AX-158339053 | 26 | 74.18  | KV453229.1  | 8998862 | 22-scf00517 | 22 |
| AX-158339055 | 26 | 74.18  | KV453229.1  | 9002505 | 22-scf00517 | 22 |
| AX-157849928 | 26 | 74.18  | KV453229.1  | 9018701 | 22-scf00517 | 22 |
| AX-157743658 | 26 | 74.18  | KV453229.1  | 9046436 | 22-scf00517 | 22 |
| AX-157739791 | 26 | 74.18  | KV453229.1  | 9112179 | 22-scf00517 | 22 |
| AX-158339132 | 26 | 74.18  | KV453229.1  | 9113017 | 22-scf00517 | 22 |
| AX-158339133 | 26 | 74.18  | KV453229.1  | 9113515 | 22-scf00517 | 22 |
| AX-158339134 | 26 | 74.18  | KV453229.1  | 9114545 | 22-scf00517 | 22 |
| AX-158339136 | 26 | 74.18  | KV453229.1  | 9127653 | 22-scf00517 | 22 |
| AX-158339187 | 26 | 74.18  | KV453229.1  | 9311933 | 22-scf00517 | 22 |
| AX-157861770 | 26 | 74.18  | KV453229.1  | 9314333 | 22-scf00517 | 22 |
| AX-158339191 | 26 | 74.18  | KV453229.1  | 9315935 | 22-scf00517 | 22 |
| AX-158339193 | 26 | 74.18  | KV453229.1  | 9318550 | 22-scf00517 | 22 |
| AX-158339195 | 26 | 74.18  | KV453229.1  | 9319974 | 22-scf00517 | 22 |
| AX-157723724 | 26 | 74.18  | KV453229.1  | 9321011 | 22-scf00517 | 22 |
| AX-158339196 | 26 | 74.18  | KV453229.1  | 9322290 | 22-scf00517 | 22 |
| AX-158339200 | 26 | 74.18  | KV453229.1  | 9328097 | 22-scf00517 | 22 |
| AX-158339201 | 26 | 74.18  | KV453229.1  | 9328462 | 22-scf00517 | 22 |
| AX-158339204 | 26 | 74.18  | KV453229.1  | 9331032 | 22-scf00517 | 22 |
| AX-158339207 | 26 | 74.18  | KV453229.1  | 9333949 | 22-scf00517 | 22 |
| AX-158339210 | 26 | 74.18  | KV453229.1  | 9337505 | 22-scf00517 | 22 |

|              |    |        |             |         |             |    |
|--------------|----|--------|-------------|---------|-------------|----|
| AX-158339211 | 26 | 74.18  | KV453229.1  | 9338910 | 22-scf00517 | 22 |
| AX-158339212 | 26 | 74.18  | KV453229.1  | 9339428 | 22-scf00517 | 22 |
| AX-158339213 | 26 | 74.18  | KV453229.1  | 9339874 | 22-scf00517 | 22 |
| AX-158339214 | 26 | 74.18  | KV453229.1  | 9340596 | 22-scf00517 | 22 |
| AX-158339216 | 26 | 74.18  | KV453229.1  | 9343572 | 22-scf00517 | 22 |
| AX-158339221 | 26 | 74.18  | KV453229.1  | 9350398 | 22-scf00517 | 22 |
| AX-158339222 | 26 | 74.18  | KV453229.1  | 9350801 | 22-scf00517 | 22 |
| AX-157882107 | 26 | 74.18  | KV453229.1  | 9352985 | 22-scf00517 | 22 |
| AX-158339224 | 26 | 74.18  | KV453229.1  | 9354610 | 22-scf00517 | 22 |
| AX-158339226 | 26 | 74.18  | KV453229.1  | 9357423 | 22-scf00517 | 22 |
| AX-158339228 | 26 | 74.18  | KV453229.1  | 9358982 | 22-scf00517 | 22 |
| AX-158339231 | 26 | 74.18  | KV453229.1  | 9363750 | 22-scf00517 | 22 |
| AX-158339232 | 26 | 74.18  | KV453229.1  | 9363981 | 22-scf00517 | 22 |
| AX-158339235 | 26 | 74.18  | KV453229.1  | 9366990 | 22-scf00517 | 22 |
| AX-158339237 | 26 | 74.18  | KV453229.1  | 9370973 | 22-scf00517 | 22 |
| AX-158339238 | 26 | 74.18  | KV453229.1  | 9372281 | 22-scf00517 | 22 |
| AX-158339243 | 26 | 74.18  | KV453229.1  | 9377585 | 22-scf00517 | 22 |
| AX-158339244 | 26 | 74.18  | KV453229.1  | 9378028 | 22-scf00517 | 22 |
| AX-158339245 | 26 | 74.18  | KV453229.1  | 9378836 | 22-scf00517 | 22 |
| AX-158339246 | 26 | 74.18  | KV453229.1  | 9379686 | 22-scf00517 | 22 |
| AX-158339258 | 26 | 74.18  | KV453229.1  | 9397268 | 22-scf00517 | 22 |
| AX-157770858 | 26 | 74.18  | KV453229.1  | 9398523 | 22-scf00517 | 22 |
| AX-158339266 | 26 | 74.18  | KV453229.1  | 9404488 | 22-scf00517 | 22 |
| AX-158339267 | 26 | 74.18  | KV453229.1  | 9405208 | 22-scf00517 | 22 |
| AX-158339270 | 26 | 74.18  | KV453229.1  | 9411714 | 22-scf00517 | 22 |
| AX-158339273 | 26 | 74.18  | KV453229.1  | 9414648 | 22-scf00517 | 22 |
| AX-158339275 | 26 | 74.18  | KV453229.1  | 9415672 | 22-scf00517 | 22 |
| AX-158339280 | 26 | 74.18  | KV453229.1  | 9421038 | 22-scf00517 | 22 |
| AX-158339287 | 26 | 74.18  | KV453229.1  | 9430605 | 22-scf00517 | 22 |
| AX-158339292 | 26 | 74.18  | KV453229.1  | 9437863 | 22-scf00517 | 22 |
| AX-158339294 | 26 | 74.18  | KV453229.1  | 9441821 | 22-scf00517 | 22 |
| AX-158339297 | 26 | 74.18  | KV453229.1  | 9444948 | 22-scf00517 | 22 |
| AX-158339299 | 26 | 74.18  | KV453229.1  | 9446921 | 22-scf00517 | 22 |
| AX-158339300 | 26 | 74.18  | KV453229.1  | 9450400 | 22-scf00517 | 22 |
| AX-158339304 | 26 | 74.18  | KV453229.1  | 9456067 | 22-scf00517 | 22 |
| AX-158339306 | 26 | 74.18  | KV453229.1  | 9457904 | 22-scf00517 | 22 |
| AX-158339315 | 26 | 74.18  | KV453229.1  | 9472289 | 22-scf00517 | 22 |
| AX-158339325 | 26 | 74.18  | KV453229.1  | 9482877 | 22-scf00517 | 22 |
| AX-158339478 | 26 | 74.18  | KV453229.1  | 9689235 | 22-scf00517 | 22 |
| AX-158339527 | 26 | 74.18  | KV453229.1  | 9756236 | 22-scf00517 | 22 |
| AX-157705789 | 26 | 74.18  | 3ML01030884 | 555     | scf06488_1  | UN |
| AX-158339308 | 26 | 74.212 | KV453229.1  | 9464310 | 22-scf00517 | 22 |
| AX-158339311 | 26 | 74.258 | KV453229.1  | 9466017 | 22-scf00517 | 22 |
| AX-158339314 | 26 | 74.29  | KV453229.1  | 9469583 | 22-scf00517 | 22 |
| AX-158339317 | 26 | 74.29  | KV453229.1  | 9473327 | 22-scf00517 | 22 |
| AX-157700154 | 26 | 74.29  | KV453229.1  | 9474875 | 22-scf00517 | 22 |
| AX-158339420 | 26 | 74.29  | KV453229.1  | 9605978 | 22-scf00517 | 22 |
| AX-158339539 | 26 | 74.29  | KV453229.1  | 9766048 | 22-scf00517 | 22 |
| AX-158381593 | 26 | 74.618 | KV453229.1  | 9481152 | 22-scf00517 | 22 |
| AX-158339324 | 26 | 74.618 | KV453229.1  | 9482209 | 22-scf00517 | 22 |
| AX-158339328 | 26 | 74.618 | KV453229.1  | 9486236 | 22-scf00517 | 22 |

|              |    |        |             |         |             |    |
|--------------|----|--------|-------------|---------|-------------|----|
| AX-158339331 | 26 | 74.618 | KV453229.1  | 9489658 | 22-scf00517 | 22 |
| AX-158339334 | 26 | 74.618 | KV453229.1  | 9497302 | 22-scf00517 | 22 |
| AX-157849948 | 26 | 75.215 | KV453229.1  | 9506114 | 22-scf00517 | 22 |
| AX-158339569 | 26 | 75.215 | KV453229.1  | 9806721 | 22-scf00517 | 22 |
| AX-158339347 | 26 | 75.229 | KV453229.1  | 9508245 | 22-scf00517 | 22 |
| AX-157720805 | 26 | 75.229 | KV453229.1  | 9512352 | 22-scf00517 | 22 |
| AX-158339345 | 26 | 75.23  | KV453229.1  | 9507092 | 22-scf00517 | 22 |
| AX-158339349 | 26 | 75.23  | KV453229.1  | 9512919 | 22-scf00517 | 22 |
| AX-158339353 | 26 | 75.384 | KV453229.1  | 9518464 | 22-scf00517 | 22 |
| AX-158339363 | 26 | 75.384 | KV453229.1  | 9534238 | 22-scf00517 | 22 |
| AX-158381594 | 26 | 75.493 | KV453229.1  | 9542337 | 22-scf00517 | 22 |
| AX-158339374 | 26 | 75.68  | KV453229.1  | 9549288 | 22-scf00517 | 22 |
| AX-158339369 | 26 | 75.821 | KV453229.1  | 9543266 | 22-scf00517 | 22 |
| AX-158339376 | 26 | 75.821 | KV453229.1  | 9552347 | 22-scf00517 | 22 |
| AX-157774391 | 26 | 75.821 | KV453229.1  | 9554769 | 22-scf00517 | 22 |
| AX-158339379 | 26 | 75.824 | KV453229.1  | 9555654 | 22-scf00517 | 22 |
| AX-158339384 | 26 | 76.043 | KV453229.1  | 9561262 | 22-scf00517 | 22 |
| AX-158339387 | 26 | 76.26  | KV453229.1  | 9566129 | 22-scf00517 | 22 |
| AX-158339394 | 26 | 76.26  | KV453229.1  | 9571664 | 22-scf00517 | 22 |
| AX-158339395 | 26 | 76.26  | KV453229.1  | 9572588 | 22-scf00517 | 22 |
| AX-158339396 | 26 | 76.26  | KV453229.1  | 9574691 | 22-scf00517 | 22 |
| AX-157715121 | 26 | 76.26  | KV453229.1  | 9574913 | 22-scf00517 | 22 |
| AX-157882111 | 26 | 76.26  | KV453229.1  | 9575239 | 22-scf00517 | 22 |
| AX-157756865 | 26 | 76.26  | KV453229.1  | 9581545 | 22-scf00517 | 22 |
| AX-158339421 | 26 | 76.26  | KV453229.1  | 9606209 | 22-scf00517 | 22 |
| AX-158339419 | 26 | 76.311 | KV453229.1  | 9602936 | 22-scf00517 | 22 |
| AX-158339423 | 26 | 76.38  | KV453229.1  | 9608150 | 22-scf00517 | 22 |
| AX-158339425 | 26 | 76.415 | KV453229.1  | 9611375 | 22-scf00517 | 22 |
| AX-158339545 | 26 | 76.415 | KV453229.1  | 9772459 | 22-scf00517 | 22 |
| AX-158338960 | 26 | 76.462 | KV453229.1  | 8883595 | 22-scf00517 | 22 |
| AX-158339043 | 26 | 76.462 | KV453229.1  | 8986045 | 22-scf00517 | 22 |
| AX-157757603 | 26 | 76.462 | KV453229.1  | 8991344 | 22-scf00517 | 22 |
| AX-158339101 | 26 | 76.462 | KV453229.1  | 9076188 | 22-scf00517 | 22 |
| AX-158339290 | 26 | 76.462 | KV453229.1  | 9434808 | 22-scf00517 | 22 |
| AX-158339429 | 26 | 76.462 | KV453229.1  | 9618092 | 22-scf00517 | 22 |
| AX-157849950 | 26 | 76.462 | KV453229.1  | 9624121 | 22-scf00517 | 22 |
| AX-158339464 | 26 | 76.462 | KV453229.1  | 9673700 | 22-scf00517 | 22 |
| AX-158419052 | 26 | 76.462 | KV453229.1  | 9677981 | 22-scf00517 | 22 |
| AX-158339518 | 26 | 76.462 | KV453229.1  | 9743775 | 22-scf00517 | 22 |
| AX-158339570 | 26 | 76.462 | KV453229.1  | 9807462 | 22-scf00517 | 22 |
| AX-157882115 | 26 | 76.462 | KV453229.1  | 9857457 | 22-scf00517 | 22 |
| AX-158339644 | 26 | 76.462 | KV453229.1  | 9889048 | 22-scf00517 | 22 |
| AX-157707073 | 26 | 76.462 | 3ML01033452 | 339     | scf09102_1  | UN |
| AX-157707415 | 26 | 76.462 | 3ML01034485 | 247     | scf10161_1  | UN |
| AX-158339393 | 26 | 76.499 | KV453229.1  | 9571372 | 22-scf00517 | 22 |
| AX-158339412 | 26 | 76.499 | KV453229.1  | 9593470 | 22-scf00517 | 22 |
| AX-158339431 | 26 | 76.499 | KV453229.1  | 9621161 | 22-scf00517 | 22 |
| AX-158339432 | 26 | 76.499 | KV453229.1  | 9622283 | 22-scf00517 | 22 |
| AX-157756229 | 26 | 76.499 | KV453229.1  | 9624666 | 22-scf00517 | 22 |
| AX-158419046 | 26 | 76.499 | KV453229.1  | 9626009 | 22-scf00517 | 22 |
| AX-157861774 | 26 | 76.499 | KV453229.1  | 9634964 | 22-scf00517 | 22 |

|              |    |        |            |         |             |    |
|--------------|----|--------|------------|---------|-------------|----|
| AX-158419050 | 26 | 76.499 | KV453229.1 | 9635587 | 22-scf00517 | 22 |
| AX-158413046 | 26 | 76.499 | KV453229.1 | 9635979 | 22-scf00517 | 22 |
| AX-158339443 | 26 | 76.499 | KV453229.1 | 9642579 | 22-scf00517 | 22 |
| AX-158339444 | 26 | 76.499 | KV453229.1 | 9643265 | 22-scf00517 | 22 |
| AX-158339446 | 26 | 76.499 | KV453229.1 | 9648203 | 22-scf00517 | 22 |
| AX-158339448 | 26 | 76.499 | KV453229.1 | 9650374 | 22-scf00517 | 22 |
| AX-158339449 | 26 | 76.499 | KV453229.1 | 9650710 | 22-scf00517 | 22 |
| AX-158339455 | 26 | 76.499 | KV453229.1 | 9657591 | 22-scf00517 | 22 |
| AX-157722487 | 26 | 76.499 | KV453229.1 | 9660658 | 22-scf00517 | 22 |
| AX-158339458 | 26 | 76.499 | KV453229.1 | 9661891 | 22-scf00517 | 22 |
| AX-158339460 | 26 | 76.499 | KV453229.1 | 9669745 | 22-scf00517 | 22 |
| AX-158339465 | 26 | 76.499 | KV453229.1 | 9675657 | 22-scf00517 | 22 |
| AX-158339468 | 26 | 76.499 | KV453229.1 | 9679095 | 22-scf00517 | 22 |
| AX-158339473 | 26 | 76.499 | KV453229.1 | 9684770 | 22-scf00517 | 22 |
| AX-158339477 | 26 | 76.499 | KV453229.1 | 9687588 | 22-scf00517 | 22 |
| AX-158339482 | 26 | 76.499 | KV453229.1 | 9693520 | 22-scf00517 | 22 |
| AX-158339483 | 26 | 76.499 | KV453229.1 | 9699681 | 22-scf00517 | 22 |
| AX-157749279 | 26 | 76.499 | KV453229.1 | 9708656 | 22-scf00517 | 22 |
| AX-157702208 | 26 | 76.499 | KV453229.1 | 9708719 | 22-scf00517 | 22 |
| AX-158339492 | 26 | 76.499 | KV453229.1 | 9715014 | 22-scf00517 | 22 |
| AX-158339494 | 26 | 76.499 | KV453229.1 | 9716581 | 22-scf00517 | 22 |
| AX-158339591 | 26 | 76.499 | KV453229.1 | 9826263 | 22-scf00517 | 22 |
| AX-158339667 | 26 | 76.499 | KV453229.1 | 9920648 | 22-scf00517 | 22 |
| AX-158338961 | 26 | 77.095 | KV453229.1 | 8884249 | 22-scf00517 | 22 |
| AX-158339075 | 26 | 77.095 | KV453229.1 | 9046022 | 22-scf00517 | 22 |
| AX-158339351 | 26 | 77.095 | KV453229.1 | 9515360 | 22-scf00517 | 22 |
| AX-158339496 | 26 | 77.095 | KV453229.1 | 9718445 | 22-scf00517 | 22 |
| AX-158339504 | 26 | 77.095 | KV453229.1 | 9729865 | 22-scf00517 | 22 |
| AX-158339508 | 26 | 77.095 | KV453229.1 | 9732773 | 22-scf00517 | 22 |
| AX-158339509 | 26 | 77.095 | KV453229.1 | 9733742 | 22-scf00517 | 22 |
| AX-158339513 | 26 | 77.095 | KV453229.1 | 9737341 | 22-scf00517 | 22 |
| AX-158339514 | 26 | 77.095 | KV453229.1 | 9737832 | 22-scf00517 | 22 |
| AX-158339516 | 26 | 77.095 | KV453229.1 | 9740793 | 22-scf00517 | 22 |
| AX-158339521 | 26 | 77.095 | KV453229.1 | 9747428 | 22-scf00517 | 22 |
| AX-158339522 | 26 | 77.095 | KV453229.1 | 9749027 | 22-scf00517 | 22 |
| AX-158339525 | 26 | 77.095 | KV453229.1 | 9752944 | 22-scf00517 | 22 |
| AX-158339526 | 26 | 77.095 | KV453229.1 | 9754411 | 22-scf00517 | 22 |
| AX-158339528 | 26 | 77.095 | KV453229.1 | 9756589 | 22-scf00517 | 22 |
| AX-158339530 | 26 | 77.095 | KV453229.1 | 9760224 | 22-scf00517 | 22 |
| AX-158339531 | 26 | 77.095 | KV453229.1 | 9760887 | 22-scf00517 | 22 |
| AX-158339532 | 26 | 77.095 | KV453229.1 | 9761573 | 22-scf00517 | 22 |
| AX-158381595 | 26 | 77.095 | KV453229.1 | 9762749 | 22-scf00517 | 22 |
| AX-158339534 | 26 | 77.095 | KV453229.1 | 9762895 | 22-scf00517 | 22 |
| AX-158339536 | 26 | 77.095 | KV453229.1 | 9764337 | 22-scf00517 | 22 |
| AX-158339540 | 26 | 77.095 | KV453229.1 | 9767065 | 22-scf00517 | 22 |
| AX-158339543 | 26 | 77.095 | KV453229.1 | 9770908 | 22-scf00517 | 22 |
| AX-158339544 | 26 | 77.095 | KV453229.1 | 9771569 | 22-scf00517 | 22 |
| AX-158339614 | 26 | 77.095 | KV453229.1 | 9855356 | 22-scf00517 | 22 |
| AX-158339388 | 26 | 77.567 | KV453229.1 | 9566953 | 22-scf00517 | 22 |
| AX-158339560 | 26 | 77.567 | KV453229.1 | 9791401 | 22-scf00517 | 22 |
| AX-158339564 | 26 | 77.572 | KV453229.1 | 9797292 | 22-scf00517 | 22 |

|              |    |        |            |         |                |    |
|--------------|----|--------|------------|---------|----------------|----|
| AX-158339565 | 26 | 77.572 | KV453229.1 | 9798596 | 22-scf00517    | 22 |
| AX-158339567 | 26 | 77.572 | KV453229.1 | 9800984 | 22-scf00517    | 22 |
| AX-157740741 | 26 | 77.572 | KV453229.1 | 9803741 | 22-scf00517    | 22 |
| AX-157849955 | 26 | 77.572 | KV453229.1 | 9805889 | 22-scf00517    | 22 |
| AX-157720594 | 26 | 77.572 | KV453229.1 | 9806330 | 22-scf00517    | 22 |
| AX-157710766 | 26 | 77.572 | KV453229.1 | 9809692 | 22-scf00517    | 22 |
| AX-158339576 | 26 | 77.572 | KV453229.1 | 9813824 | 22-scf00517    | 22 |
| AX-158339577 | 26 | 77.572 | KV453229.1 | 9814923 | 22-scf00517    | 22 |
| AX-158339581 | 26 | 77.572 | KV453229.1 | 9817995 | 22-scf00517    | 22 |
| AX-158339583 | 26 | 77.572 | KV453229.1 | 9819139 | 22-scf00517    | 22 |
| AX-158339584 | 26 | 77.572 | KV453229.1 | 9819340 | 22-scf00517    | 22 |
| AX-158339590 | 26 | 77.572 | KV453229.1 | 9822697 | 22-scf00517    | 22 |
| AX-158339592 | 26 | 77.572 | KV453229.1 | 9827003 | 22-scf00517    | 22 |
| AX-157704102 | 26 | 77.752 | KV453229.1 | 9424205 | 22-scf00517    | 22 |
| AX-158339354 | 26 | 77.752 | KV453229.1 | 9519470 | 22-scf00517    | 22 |
| AX-158339588 | 26 | 77.752 | KV453229.1 | 9821568 | 22-scf00517    | 22 |
| AX-157703443 | 26 | 77.752 | DX098381.1 | 306     | IORI212 lctalu | UN |
| AX-158339596 | 26 | 77.924 | KV453229.1 | 9834084 | 22-scf00517    | 22 |
| AX-158339597 | 26 | 77.925 | KV453229.1 | 9835616 | 22-scf00517    | 22 |
| AX-158339598 | 26 | 77.925 | KV453229.1 | 9836273 | 22-scf00517    | 22 |
| AX-158339599 | 26 | 78.154 | KV453229.1 | 9838036 | 22-scf00517    | 22 |
| AX-158339602 | 26 | 78.154 | KV453229.1 | 9840295 | 22-scf00517    | 22 |
| AX-157726218 | 26 | 78.174 | KV453229.1 | 9843903 | 22-scf00517    | 22 |
| AX-157739016 | 26 | 78.174 | KV453229.1 | 9849560 | 22-scf00517    | 22 |
| AX-158339612 | 26 | 78.174 | KV453229.1 | 9853553 | 22-scf00517    | 22 |
| AX-158339608 | 26 | 78.19  | KV453229.1 | 9845612 | 22-scf00517    | 22 |
| AX-158339609 | 26 | 78.19  | KV453229.1 | 9847197 | 22-scf00517    | 22 |
| AX-158339619 | 26 | 78.396 | KV453229.1 | 9857519 | 22-scf00517    | 22 |
| AX-158339621 | 26 | 78.396 | KV453229.1 | 9859110 | 22-scf00517    | 22 |
| AX-158339624 | 26 | 78.398 | KV453229.1 | 9863574 | 22-scf00517    | 22 |
| AX-158339626 | 26 | 78.612 | KV453229.1 | 9866162 | 22-scf00517    | 22 |
| AX-158339633 | 26 | 78.62  | KV453229.1 | 9873857 | 22-scf00517    | 22 |
| AX-158339636 | 26 | 78.694 | KV453229.1 | 9875733 | 22-scf00517    | 22 |
| AX-158339655 | 26 | 78.694 | KV453229.1 | 9903258 | 22-scf00517    | 22 |
| AX-158339659 | 26 | 78.694 | KV453229.1 | 9909075 | 22-scf00517    | 22 |
| AX-157849956 | 26 | 78.775 | KV453229.1 | 9879899 | 22-scf00517    | 22 |
| AX-158339639 | 26 | 78.775 | KV453229.1 | 9881246 | 22-scf00517    | 22 |
| AX-157849957 | 26 | 78.775 | KV453229.1 | 9881490 | 22-scf00517    | 22 |
| AX-158339642 | 26 | 78.775 | KV453229.1 | 9883363 | 22-scf00517    | 22 |
| AX-158339643 | 26 | 78.775 | KV453229.1 | 9884300 | 22-scf00517    | 22 |
| AX-158339649 | 26 | 78.775 | KV453229.1 | 9897660 | 22-scf00517    | 22 |
| AX-158339650 | 26 | 78.775 | KV453229.1 | 9899145 | 22-scf00517    | 22 |
| AX-158339652 | 26 | 78.775 | KV453229.1 | 9900410 | 22-scf00517    | 22 |
| AX-158339656 | 26 | 78.775 | KV453229.1 | 9906638 | 22-scf00517    | 22 |
| AX-158339657 | 26 | 78.775 | KV453229.1 | 9907140 | 22-scf00517    | 22 |
| AX-158419054 | 26 | 78.775 | KV453229.1 | 9907212 | 22-scf00517    | 22 |
| AX-158339680 | 26 | 78.775 | KV453229.1 | 9929692 | 22-scf00517    | 22 |
| AX-158339658 | 26 | 78.849 | KV453229.1 | 9907946 | 22-scf00517    | 22 |
| AX-158339660 | 26 | 78.923 | KV453229.1 | 9911426 | 22-scf00517    | 22 |
| AX-158339586 | 26 | 78.993 | KV453229.1 | 9820148 | 22-scf00517    | 22 |
| AX-158339632 | 26 | 78.993 | KV453229.1 | 9872650 | 22-scf00517    | 22 |

|              |    |        |             |          |             |    |
|--------------|----|--------|-------------|----------|-------------|----|
| AX-158381596 | 26 | 78.993 | KV453229.1  | 9882254  | 22-scf00517 | 22 |
| AX-158339662 | 26 | 78.993 | KV453229.1  | 9915178  | 22-scf00517 | 22 |
| AX-158339663 | 26 | 78.993 | KV453229.1  | 9915618  | 22-scf00517 | 22 |
| AX-157882116 | 26 | 78.993 | KV453229.1  | 9916741  | 22-scf00517 | 22 |
| AX-158339665 | 26 | 78.993 | KV453229.1  | 9918502  | 22-scf00517 | 22 |
| AX-158339666 | 26 | 78.993 | KV453229.1  | 9918922  | 22-scf00517 | 22 |
| AX-158339670 | 26 | 78.993 | KV453229.1  | 9923103  | 22-scf00517 | 22 |
| AX-158339673 | 26 | 78.993 | KV453229.1  | 9925622  | 22-scf00517 | 22 |
| AX-158339676 | 26 | 78.993 | KV453229.1  | 9926873  | 22-scf00517 | 22 |
| AX-158339677 | 26 | 78.993 | KV453229.1  | 9927263  | 22-scf00517 | 22 |
| AX-157743222 | 26 | 78.993 | KV453229.1  | 9951628  | 22-scf00517 | 22 |
| AX-158339681 | 26 | 78.995 | KV453229.1  | 9931711  | 22-scf00517 | 22 |
| AX-158339289 | 26 | 79.386 | KV453229.1  | 9432458  | 22-scf00517 | 22 |
| AX-158339415 | 26 | 79.386 | KV453229.1  | 9597455  | 22-scf00517 | 22 |
| AX-158339631 | 26 | 79.386 | KV453229.1  | 9871183  | 22-scf00517 | 22 |
| AX-157714348 | 26 | 79.386 | KV453229.1  | 9935957  | 22-scf00517 | 22 |
| AX-158339688 | 26 | 79.387 | KV453229.1  | 9946132  | 22-scf00517 | 22 |
| AX-157868028 | 26 | 79.387 | KV453229.1  | 9946674  | 22-scf00517 | 22 |
| AX-158339690 | 26 | 79.387 | KV453229.1  | 9948239  | 22-scf00517 | 22 |
| AX-158339695 | 26 | 79.518 | KV453229.1  | 9953276  | 22-scf00517 | 22 |
| AX-157849964 | 26 | 79.56  | KV453229.1  | 9955922  | 22-scf00517 | 22 |
| AX-158339698 | 26 | 79.602 | KV453229.1  | 9958245  | 22-scf00517 | 22 |
| AX-158339701 | 26 | 79.602 | KV453229.1  | 9959933  | 22-scf00517 | 22 |
| AX-158339700 | 26 | 79.649 | KV453229.1  | 9958833  | 22-scf00517 | 22 |
| AX-158339703 | 26 | 79.649 | KV453229.1  | 9960317  | 22-scf00517 | 22 |
| AX-158339706 | 26 | 79.649 | KV453229.1  | 9961874  | 22-scf00517 | 22 |
| AX-157849966 | 26 | 79.649 | KV453229.1  | 9962652  | 22-scf00517 | 22 |
| AX-158339708 | 26 | 79.649 | KV453229.1  | 9967220  | 22-scf00517 | 22 |
| AX-158339713 | 26 | 79.694 | KV453229.1  | 9974917  | 22-scf00517 | 22 |
| AX-157746748 | 26 | 79.694 | KV453229.1  | 9990022  | 22-scf00517 | 22 |
| AX-158339737 | 26 | 79.694 | KV453229.1  | 10005846 | 22-scf00517 | 22 |
| AX-157712058 | 26 | 79.694 | 3ML01032776 | 273      | scf08405_1  | UN |
| AX-158339717 | 26 | 79.742 | KV453229.1  | 9982372  | 22-scf00517 | 22 |
| AX-158339693 | 26 | 79.807 | KV453229.1  | 9951429  | 22-scf00517 | 22 |
| AX-158339720 | 26 | 79.807 | KV453229.1  | 9984503  | 22-scf00517 | 22 |
| AX-157849976 | 26 | 79.807 | KV453229.1  | 10009348 | 22-scf00517 | 22 |
| AX-158339722 | 26 | 79.868 | KV453229.1  | 9986848  | 22-scf00517 | 22 |
| AX-158339724 | 26 | 79.868 | KV453229.1  | 9987554  | 22-scf00517 | 22 |
| AX-158339726 | 26 | 79.868 | KV453229.1  | 9988980  | 22-scf00517 | 22 |
| AX-158339728 | 26 | 79.868 | KV453229.1  | 9992748  | 22-scf00517 | 22 |
| AX-158339729 | 26 | 79.868 | KV453229.1  | 9996777  | 22-scf00517 | 22 |
| AX-157849975 | 26 | 79.868 | KV453229.1  | 10000420 | 22-scf00517 | 22 |
| AX-158339734 | 26 | 79.868 | KV453229.1  | 10001252 | 22-scf00517 | 22 |
| AX-158339735 | 26 | 79.868 | KV453229.1  | 10004571 | 22-scf00517 | 22 |
| AX-158339739 | 26 | 79.868 | KV453229.1  | 10009280 | 22-scf00517 | 22 |
| AX-158339741 | 26 | 79.868 | KV453229.1  | 10012472 | 22-scf00517 | 22 |
| AX-158339743 | 26 | 79.868 | KV453229.1  | 10013640 | 22-scf00517 | 22 |
| AX-158339748 | 26 | 79.868 | KV453229.1  | 10017367 | 22-scf00517 | 22 |
| AX-158339749 | 26 | 79.868 | KV453229.1  | 10017783 | 22-scf00517 | 22 |
| AX-158339750 | 26 | 79.868 | KV453229.1  | 10018669 | 22-scf00517 | 22 |
| AX-158339753 | 26 | 79.868 | KV453229.1  | 10022481 | 22-scf00517 | 22 |

|              |    |        |            |          |             |    |
|--------------|----|--------|------------|----------|-------------|----|
| AX-158339759 | 26 | 79.868 | KV453229.1 | 10028826 | 22-scf00517 | 22 |
| AX-157754647 | 26 | 79.868 | KV453229.1 | 10029278 | 22-scf00517 | 22 |
| AX-158339774 | 26 | 79.868 | KV453229.1 | 10043551 | 22-scf00517 | 22 |
| AX-158339798 | 26 | 79.868 | KV453229.1 | 10076687 | 22-scf00517 | 22 |
| AX-158339765 | 26 | 80.025 | KV453229.1 | 10034185 | 22-scf00517 | 22 |
| AX-158339768 | 26 | 80.025 | KV453229.1 | 10036531 | 22-scf00517 | 22 |
| AX-158339772 | 26 | 80.025 | KV453229.1 | 10042398 | 22-scf00517 | 22 |
| AX-158339773 | 26 | 80.067 | KV453229.1 | 10043162 | 22-scf00517 | 22 |
| AX-158339775 | 26 | 80.1   | KV453229.1 | 10044384 | 22-scf00517 | 22 |
| AX-157849977 | 26 | 80.138 | KV453229.1 | 10046805 | 22-scf00517 | 22 |
| AX-158339782 | 26 | 80.18  | KV453229.1 | 10057118 | 22-scf00517 | 22 |
| AX-157750327 | 26 | 80.18  | KV453229.1 | 10058388 | 22-scf00517 | 22 |
| AX-157713573 | 26 | 80.18  | KV453229.1 | 10077670 | 22-scf00517 | 22 |
| AX-158339804 | 26 | 80.199 | KV453229.1 | 10083938 | 22-scf00517 | 22 |
| AX-158339807 | 26 | 80.218 | KV453229.1 | 10086166 | 22-scf00517 | 22 |
| AX-157717448 | 26 | 80.227 | KV453229.1 | 10088418 | 22-scf00517 | 22 |
| AX-157713369 | 26 | 80.227 | KV453229.1 | 10089567 | 22-scf00517 | 22 |
| AX-158339810 | 26 | 80.523 | KV453229.1 | 10092013 | 22-scf00517 | 22 |
| AX-158339811 | 26 | 80.523 | KV453229.1 | 10092869 | 22-scf00517 | 22 |
| AX-158339792 | 26 | 80.632 | KV453229.1 | 10068304 | 22-scf00517 | 22 |
| AX-158339814 | 26 | 80.632 | KV453229.1 | 10102756 | 22-scf00517 | 22 |
| AX-158339816 | 26 | 80.632 | KV453229.1 | 10106733 | 22-scf00517 | 22 |
| AX-158339818 | 26 | 80.632 | KV453229.1 | 10109368 | 22-scf00517 | 22 |
| AX-158339820 | 26 | 80.632 | KV453229.1 | 10111590 | 22-scf00517 | 22 |
| AX-158339824 | 26 | 80.632 | KV453229.1 | 10116737 | 22-scf00517 | 22 |
| AX-158339836 | 26 | 80.632 | KV453229.1 | 10126771 | 22-scf00517 | 22 |
| AX-157849981 | 26 | 80.632 | KV453229.1 | 10130373 | 22-scf00517 | 22 |
| AX-158339838 | 26 | 80.632 | KV453229.1 | 10131504 | 22-scf00517 | 22 |
| AX-157726395 | 26 | 80.632 | KV453229.1 | 10132997 | 22-scf00517 | 22 |
| AX-158339840 | 26 | 80.632 | KV453229.1 | 10135578 | 22-scf00517 | 22 |
| AX-157849985 | 26 | 80.632 | KV453229.1 | 10136802 | 22-scf00517 | 22 |
| AX-157715944 | 26 | 80.632 | KV453229.1 | 10136921 | 22-scf00517 | 22 |
| AX-158339843 | 26 | 80.632 | KV453229.1 | 10139423 | 22-scf00517 | 22 |
| AX-157717575 | 26 | 80.632 | KV453229.1 | 10142074 | 22-scf00517 | 22 |
| AX-157710405 | 26 | 80.632 | KV453229.1 | 10150686 | 22-scf00517 | 22 |
| AX-157712173 | 26 | 80.632 | KV453229.1 | 10173782 | 22-scf00517 | 22 |
| AX-158339859 | 26 | 80.632 | KV453229.1 | 10174089 | 22-scf00517 | 22 |
| AX-157773800 | 26 | 81.064 | KV453229.1 | 10163323 | 22-scf00517 | 22 |
| AX-158339852 | 26 | 81.069 | KV453229.1 | 10167951 | 22-scf00517 | 22 |
| AX-158339854 | 26 | 81.069 | KV453229.1 | 10169652 | 22-scf00517 | 22 |
| AX-158419060 | 26 | 81.069 | KV453229.1 | 10192141 | 22-scf00517 | 22 |
| AX-158339878 | 26 | 81.069 | KV453229.1 | 10196866 | 22-scf00517 | 22 |
| AX-157849989 | 26 | 81.259 | KV453229.1 | 10171600 | 22-scf00517 | 22 |
| AX-158339858 | 26 | 81.308 | KV453229.1 | 10173545 | 22-scf00517 | 22 |
| AX-158339861 | 26 | 81.36  | KV453229.1 | 10178766 | 22-scf00517 | 22 |
| AX-158339862 | 26 | 81.36  | KV453229.1 | 10179572 | 22-scf00517 | 22 |
| AX-158339866 | 26 | 81.36  | KV453229.1 | 10183174 | 22-scf00517 | 22 |
| AX-157717780 | 26 | 81.36  | KV453229.1 | 10184247 | 22-scf00517 | 22 |
| AX-158339869 | 26 | 81.36  | KV453229.1 | 10188062 | 22-scf00517 | 22 |
| AX-158339870 | 26 | 81.36  | KV453229.1 | 10188800 | 22-scf00517 | 22 |
| AX-158339872 | 26 | 81.36  | KV453229.1 | 10190783 | 22-scf00517 | 22 |



|              |    |        |            |          |             |    |
|--------------|----|--------|------------|----------|-------------|----|
| AX-158339873 | 26 | 81.36  | KV453229.1 | 10191525 | 22-scf00517 | 22 |
| AX-158339876 | 26 | 81.36  | KV453229.1 | 10193607 | 22-scf00517 | 22 |
| AX-158339877 | 26 | 81.36  | KV453229.1 | 10196031 | 22-scf00517 | 22 |
| AX-158339882 | 26 | 81.36  | KV453229.1 | 10203572 | 22-scf00517 | 22 |
| AX-158339887 | 26 | 81.36  | KV453229.1 | 10214260 | 22-scf00517 | 22 |
| AX-157739887 | 26 | 81.36  | KV453232.1 | 47547    | 22-scf00519 | 22 |
| AX-158339880 | 26 | 81.505 | KV453229.1 | 10199268 | 22-scf00517 | 22 |
| AX-158339881 | 26 | 81.512 | KV453229.1 | 10201756 | 22-scf00517 | 22 |
| AX-158339891 | 26 | 81.779 | KV453229.1 | 10221523 | 22-scf00517 | 22 |
| AX-158339892 | 26 | 81.794 | KV453229.1 | 10222633 | 22-scf00517 | 22 |
| AX-158339380 | 26 | 81.954 | KV453229.1 | 9556239  | 22-scf00517 | 22 |
| AX-157882118 | 26 | 81.954 | KV453229.1 | 9954474  | 22-scf00517 | 22 |
| AX-158339699 | 26 | 81.954 | KV453229.1 | 9958512  | 22-scf00517 | 22 |
| AX-157849967 | 26 | 81.954 | KV453229.1 | 9968486  | 22-scf00517 | 22 |
| AX-157849970 | 26 | 81.954 | KV453229.1 | 9976585  | 22-scf00517 | 22 |
| AX-158339719 | 26 | 81.954 | KV453229.1 | 9984271  | 22-scf00517 | 22 |
| AX-158339758 | 26 | 81.954 | KV453229.1 | 10028002 | 22-scf00517 | 22 |
| AX-158339763 | 26 | 81.954 | KV453229.1 | 10031564 | 22-scf00517 | 22 |
| AX-158339776 | 26 | 81.954 | KV453229.1 | 10046009 | 22-scf00517 | 22 |
| AX-157775039 | 26 | 81.954 | KV453229.1 | 10051505 | 22-scf00517 | 22 |
| AX-158339815 | 26 | 81.954 | KV453229.1 | 10104187 | 22-scf00517 | 22 |
| AX-158339819 | 26 | 81.954 | KV453229.1 | 10110289 | 22-scf00517 | 22 |
| AX-157750493 | 26 | 81.954 | KV453229.1 | 10136517 | 22-scf00517 | 22 |
| AX-158339855 | 26 | 81.954 | KV453229.1 | 10170065 | 22-scf00517 | 22 |
| AX-158339890 | 26 | 81.954 | KV453229.1 | 10219099 | 22-scf00517 | 22 |
| AX-158339893 | 26 | 81.954 | KV453229.1 | 10224785 | 22-scf00517 | 22 |
| AX-158339899 | 26 | 81.954 | KV453229.1 | 10234422 | 22-scf00517 | 22 |
| AX-157746286 | 26 | 81.954 | KV453229.1 | 10441890 | 22-scf00517 | 22 |
| AX-158340352 | 26 | 81.954 | KV453232.1 | 359104   | 22-scf00519 | 22 |
| AX-158339898 | 26 | 82.064 | KV453229.1 | 10232865 | 22-scf00517 | 22 |
| AX-158339902 | 26 | 82.602 | KV453229.1 | 10243563 | 22-scf00517 | 22 |
| AX-158339903 | 26 | 82.602 | KV453229.1 | 10244410 | 22-scf00517 | 22 |
| AX-158339904 | 26 | 82.602 | KV453229.1 | 10244882 | 22-scf00517 | 22 |
| AX-157723259 | 26 | 82.602 | KV453229.1 | 10247234 | 22-scf00517 | 22 |
| AX-158339908 | 26 | 82.655 | KV453229.1 | 10254970 | 22-scf00517 | 22 |
| AX-158339909 | 26 | 82.732 | KV453229.1 | 10255602 | 22-scf00517 | 22 |
| AX-158339910 | 26 | 82.821 | KV453229.1 | 10256250 | 22-scf00517 | 22 |
| AX-157717065 | 26 | 82.821 | KV453229.1 | 10258033 | 22-scf00517 | 22 |
| AX-158339911 | 26 | 82.821 | KV453229.1 | 10264260 | 22-scf00517 | 22 |
| AX-158339912 | 26 | 82.872 | KV453229.1 | 10268729 | 22-scf00517 | 22 |
| AX-157741623 | 26 | 82.931 | KV453229.1 | 10270245 | 22-scf00517 | 22 |
| AX-157751443 | 26 | 82.931 | KV453229.1 | 10271832 | 22-scf00517 | 22 |
| AX-157710564 | 26 | 82.931 | KV453229.1 | 10277829 | 22-scf00517 | 22 |
| AX-158339921 | 26 | 82.931 | KV453229.1 | 10284504 | 22-scf00517 | 22 |
| AX-157744790 | 26 | 83.001 | KV453229.1 | 10278429 | 22-scf00517 | 22 |
| AX-158339897 | 26 | 83.058 | KV453229.1 | 10231518 | 22-scf00517 | 22 |
| AX-158339913 | 26 | 83.058 | KV453229.1 | 10271421 | 22-scf00517 | 22 |
| AX-158339917 | 26 | 83.058 | KV453229.1 | 10281320 | 22-scf00517 | 22 |
| AX-158339919 | 26 | 83.058 | KV453229.1 | 10282286 | 22-scf00517 | 22 |
| AX-157849991 | 26 | 83.058 | KV453229.1 | 10283010 | 22-scf00517 | 22 |
| AX-158339922 | 26 | 83.058 | KV453229.1 | 10288836 | 22-scf00517 | 22 |

|              |    |        |            |          |             |    |
|--------------|----|--------|------------|----------|-------------|----|
| AX-157740233 | 26 | 83.058 | KV453229.1 | 10289853 | 22-scf00517 | 22 |
| AX-158414318 | 26 | 83.059 | KV453229.1 | 10292190 | 22-scf00517 | 22 |
| AX-157850029 | 26 | 83.059 | KV453237.1 | 135425   | 22-scf00518 | 22 |
| AX-158340170 | 26 | 83.059 | KV453237.1 | 315257   | 22-scf00518 | 22 |
| AX-158340299 | 26 | 83.059 | KV453232.1 | 256201   | 22-scf00519 | 22 |
| AX-158339930 | 26 | 83.44  | KV453229.1 | 10304063 | 22-scf00517 | 22 |
| AX-158339931 | 26 | 83.441 | KV453229.1 | 10306583 | 22-scf00517 | 22 |
| AX-157740983 | 26 | 83.441 | KV453229.1 | 10307937 | 22-scf00517 | 22 |
| AX-157849995 | 26 | 83.441 | KV453229.1 | 10308779 | 22-scf00517 | 22 |
| AX-158339967 | 26 | 83.441 | KV453229.1 | 10380076 | 22-scf00517 | 22 |
| AX-158339934 | 26 | 83.695 | KV453229.1 | 10319288 | 22-scf00517 | 22 |
| AX-158339935 | 26 | 83.695 | KV453229.1 | 10321289 | 22-scf00517 | 22 |
| AX-158339937 | 26 | 83.695 | KV453229.1 | 10336207 | 22-scf00517 | 22 |
| AX-158339938 | 26 | 83.695 | KV453229.1 | 10336929 | 22-scf00517 | 22 |
| AX-158339939 | 26 | 83.695 | KV453229.1 | 10338216 | 22-scf00517 | 22 |
| AX-158339940 | 26 | 83.695 | KV453229.1 | 10338489 | 22-scf00517 | 22 |
| AX-157722380 | 26 | 83.695 | KV453229.1 | 10338545 | 22-scf00517 | 22 |
| AX-158339942 | 26 | 83.695 | KV453229.1 | 10339388 | 22-scf00517 | 22 |
| AX-157738900 | 26 | 83.695 | KV453229.1 | 10340710 | 22-scf00517 | 22 |
| AX-158339946 | 26 | 83.695 | KV453229.1 | 10343061 | 22-scf00517 | 22 |
| AX-158339947 | 26 | 83.695 | KV453229.1 | 10344737 | 22-scf00517 | 22 |
| AX-158339950 | 26 | 83.695 | KV453229.1 | 10352005 | 22-scf00517 | 22 |
| AX-158339951 | 26 | 83.695 | KV453229.1 | 10352327 | 22-scf00517 | 22 |
| AX-157724223 | 26 | 83.695 | KV453229.1 | 10358608 | 22-scf00517 | 22 |
| AX-158339956 | 26 | 83.695 | KV453229.1 | 10365703 | 22-scf00517 | 22 |
| AX-158339957 | 26 | 83.695 | KV453229.1 | 10368129 | 22-scf00517 | 22 |
| AX-157849999 | 26 | 83.695 | KV453229.1 | 10369497 | 22-scf00517 | 22 |
| AX-158339972 | 26 | 83.695 | KV453229.1 | 10385873 | 22-scf00517 | 22 |
| AX-158339973 | 26 | 83.695 | KV453229.1 | 10386092 | 22-scf00517 | 22 |
| AX-158339975 | 26 | 83.695 | KV453229.1 | 10387874 | 22-scf00517 | 22 |
| AX-158339976 | 26 | 83.695 | KV453229.1 | 10388158 | 22-scf00517 | 22 |
| AX-158339978 | 26 | 83.695 | KV453229.1 | 10394521 | 22-scf00517 | 22 |
| AX-158339981 | 26 | 83.701 | KV453229.1 | 10396187 | 22-scf00517 | 22 |
| AX-158339983 | 26 | 83.753 | KV453229.1 | 10399517 | 22-scf00517 | 22 |
| AX-157849974 | 26 | 83.805 | KV453229.1 | 9999256  | 22-scf00517 | 22 |
| AX-158339842 | 26 | 83.805 | KV453229.1 | 10138796 | 22-scf00517 | 22 |
| AX-157771535 | 26 | 83.805 | KV453229.1 | 10233594 | 22-scf00517 | 22 |
| AX-158413057 | 26 | 83.805 | KV453229.1 | 10385656 | 22-scf00517 | 22 |
| AX-157756651 | 26 | 83.805 | KV453229.1 | 10398664 | 22-scf00517 | 22 |
| AX-158339984 | 26 | 83.805 | KV453229.1 | 10401920 | 22-scf00517 | 22 |
| AX-157850002 | 26 | 83.805 | KV453229.1 | 10404064 | 22-scf00517 | 22 |
| AX-157695715 | 26 | 83.805 | KV453229.1 | 10405365 | 22-scf00517 | 22 |
| AX-157850007 | 26 | 83.805 | KV453229.1 | 10419193 | 22-scf00517 | 22 |
| AX-157850008 | 26 | 83.805 | KV453229.1 | 10420484 | 22-scf00517 | 22 |
| AX-157772226 | 26 | 83.805 | KV453229.1 | 10426861 | 22-scf00517 | 22 |
| AX-158339991 | 26 | 83.805 | KV453229.1 | 10427637 | 22-scf00517 | 22 |
| AX-158340207 | 26 | 83.805 | KV453232.1 | 37450    | 22-scf00519 | 22 |
| AX-158340290 | 26 | 83.805 | KV453232.1 | 180527   | 22-scf00519 | 22 |
| AX-158339993 | 26 | 83.95  | KV453229.1 | 10430143 | 22-scf00517 | 22 |
| AX-157850013 | 26 | 83.95  | KV453229.1 | 10430656 | 22-scf00517 | 22 |
| AX-158339994 | 26 | 83.95  | KV453229.1 | 10434050 | 22-scf00517 | 22 |

|              |    |        |            |          |             |    |
|--------------|----|--------|------------|----------|-------------|----|
| AX-158339996 | 26 | 83.95  | KV453229.1 | 10435449 | 22-scf00517 | 22 |
| AX-157850014 | 26 | 83.95  | KV453229.1 | 10435842 | 22-scf00517 | 22 |
| AX-157850015 | 26 | 83.95  | KV453229.1 | 10436495 | 22-scf00517 | 22 |
| AX-157727078 | 26 | 83.95  | KV453229.1 | 10440340 | 22-scf00517 | 22 |
| AX-158339997 | 26 | 83.95  | KV453229.1 | 10440717 | 22-scf00517 | 22 |
| AX-158413063 | 26 | 83.95  | KV453232.1 | 7856     | 22-scf00519 | 22 |
| AX-158340326 | 26 | 83.95  | KV453232.1 | 311734   | 22-scf00519 | 22 |
| AX-158340341 | 26 | 83.95  | KV453232.1 | 330842   | 22-scf00519 | 22 |
| AX-158340001 | 26 | 84.12  | KV453229.1 | 10473907 | 22-scf00517 | 22 |
| AX-158340002 | 26 | 84.12  | KV453229.1 | 10475437 | 22-scf00517 | 22 |
| AX-158340012 | 26 | 84.12  | KV453229.1 | 10531590 | 22-scf00517 | 22 |
| AX-158340013 | 26 | 84.618 | KV453229.1 | 10532262 | 22-scf00517 | 22 |
| AX-157773281 | 26 | 85.561 | KV453234.1 | 6593     | 22-scf00520 | 22 |
| AX-157861785 | 26 | 85.564 | KV453237.1 | 299410   | 22-scf00518 | 22 |
| AX-158340364 | 26 | 85.564 | KV453234.1 | 11051    | 22-scf00520 | 22 |
| AX-158340365 | 26 | 85.564 | KV453234.1 | 16457    | 22-scf00520 | 22 |
| AX-158340366 | 26 | 85.564 | KV453234.1 | 17296    | 22-scf00520 | 22 |
| AX-157850074 | 26 | 85.564 | KV453234.1 | 18121    | 22-scf00520 | 22 |
| AX-158413067 | 26 | 85.564 | KV453234.1 | 21741    | 22-scf00520 | 22 |
| AX-158340368 | 26 | 85.564 | KV453234.1 | 24354    | 22-scf00520 | 22 |
| AX-157850075 | 26 | 85.564 | KV453234.1 | 24967    | 22-scf00520 | 22 |
| AX-157873763 | 26 | 85.564 | KV453234.1 | 71224    | 22-scf00520 | 22 |
| AX-158340414 | 26 | 85.564 | KV453234.1 | 121142   | 22-scf00520 | 22 |
| AX-157757487 | 26 | 85.564 | KV453235.1 | 77909    | 22-scf00522 | 22 |
| AX-158340393 | 26 | 85.864 | KV453234.1 | 61336    | 22-scf00520 | 22 |
| AX-158340363 | 26 | 86.22  | KV453234.1 | 9702     | 22-scf00520 | 22 |
| AX-158340367 | 26 | 86.22  | KV453234.1 | 19726    | 22-scf00520 | 22 |
| AX-158340397 | 26 | 86.22  | KV453234.1 | 68989    | 22-scf00520 | 22 |
| AX-157723479 | 26 | 86.22  | KV453234.1 | 69586    | 22-scf00520 | 22 |
| AX-157767485 | 26 | 86.22  | KV453234.1 | 70294    | 22-scf00520 | 22 |
| AX-158340398 | 26 | 86.22  | KV453234.1 | 70430    | 22-scf00520 | 22 |
| AX-158340399 | 26 | 86.22  | KV453234.1 | 72932    | 22-scf00520 | 22 |
| AX-158340400 | 26 | 86.22  | KV453234.1 | 74367    | 22-scf00520 | 22 |
| AX-158340401 | 26 | 86.22  | KV453234.1 | 84346    | 22-scf00520 | 22 |
| AX-158340402 | 26 | 86.22  | KV453234.1 | 87163    | 22-scf00520 | 22 |
| AX-158340403 | 26 | 86.22  | KV453234.1 | 89232    | 22-scf00520 | 22 |
| AX-157720299 | 26 | 86.22  | KV453234.1 | 91048    | 22-scf00520 | 22 |
| AX-157850081 | 26 | 86.22  | KV453234.1 | 92925    | 22-scf00520 | 22 |
| AX-158340408 | 26 | 86.22  | KV453234.1 | 106727   | 22-scf00520 | 22 |
| AX-157716494 | 26 | 86.22  | KV453234.1 | 107974   | 22-scf00520 | 22 |
| AX-157724621 | 26 | 86.22  | KV453234.1 | 113234   | 22-scf00520 | 22 |
| AX-157850084 | 26 | 86.22  | KV453234.1 | 121442   | 22-scf00520 | 22 |
| AX-158340415 | 26 | 86.22  | KV453234.1 | 123015   | 22-scf00520 | 22 |
| AX-157771638 | 26 | 86.22  | KV453234.1 | 131919   | 22-scf00520 | 22 |
| AX-158340420 | 26 | 86.22  | KV453234.1 | 132227   | 22-scf00520 | 22 |
| AX-157807035 | 26 | 86.22  | KV453234.1 | 181534   | 22-scf00520 | 22 |
| AX-158340432 | 26 | 86.22  | KV453235.1 | 52477    | 22-scf00522 | 22 |
| AX-158340434 | 26 | 86.22  | KV453235.1 | 55746    | 22-scf00522 | 22 |
| AX-158340456 | 26 | 86.22  | KV453235.1 | 109940   | 22-scf00522 | 22 |
| AX-158340458 | 26 | 86.22  | KV453235.1 | 113947   | 22-scf00522 | 22 |
| AX-157716634 | 26 | 86.22  | KV453235.1 | 125683   | 22-scf00522 | 22 |

|              |    |        |             |          |             |    |
|--------------|----|--------|-------------|----------|-------------|----|
| AX-158340529 | 26 | 86.22  | KV453235.1  | 215991   | 22-scf00522 | 22 |
| AX-158340533 | 26 | 86.22  | KV453235.1  | 227306   | 22-scf00522 | 22 |
| AX-158340581 | 26 | 86.22  | KV453235.1  | 314038   | 22-scf00522 | 22 |
| AX-158340582 | 26 | 86.22  | KV453235.1  | 314549   | 22-scf00522 | 22 |
| AX-157689269 | 26 | 86.22  | 3ML01028902 | 847      | scf04517_1  | UN |
| AX-158340459 | 26 | 86.264 | KV453235.1  | 114602   | 22-scf00522 | 22 |
| AX-157861795 | 26 | 86.317 | KV453235.1  | 116455   | 22-scf00522 | 22 |
| AX-158340569 | 26 | 86.317 | KV453235.1  | 298860   | 22-scf00522 | 22 |
| AX-158340461 | 26 | 86.319 | KV453235.1  | 117066   | 22-scf00522 | 22 |
| AX-157850112 | 26 | 86.319 | KV453235.1  | 334120   | 22-scf00522 | 22 |
| AX-158340410 | 26 | 86.323 | KV453234.1  | 110127   | 22-scf00520 | 22 |
| AX-158340476 | 26 | 86.323 | KV453235.1  | 135572   | 22-scf00522 | 22 |
| AX-158340528 | 26 | 86.323 | KV453235.1  | 215152   | 22-scf00522 | 22 |
| AX-158340555 | 26 | 86.323 | KV453235.1  | 258108   | 22-scf00522 | 22 |
| AX-158340667 | 26 | 86.323 | KV453236.1  | 32933    | 22-scf00523 | 22 |
| AX-158340404 | 26 | 86.329 | KV453234.1  | 93563    | 22-scf00520 | 22 |
| AX-158340417 | 26 | 86.329 | KV453234.1  | 127730   | 22-scf00520 | 22 |
| AX-157695499 | 26 | 86.329 | KV453235.1  | 22746    | 22-scf00522 | 22 |
| AX-158340455 | 26 | 86.329 | KV453235.1  | 108547   | 22-scf00522 | 22 |
| AX-158340474 | 26 | 86.329 | KV453235.1  | 134332   | 22-scf00522 | 22 |
| AX-158340477 | 26 | 86.329 | KV453235.1  | 135751   | 22-scf00522 | 22 |
| AX-158340479 | 26 | 86.329 | KV453235.1  | 136571   | 22-scf00522 | 22 |
| AX-158340483 | 26 | 86.329 | KV453235.1  | 141771   | 22-scf00522 | 22 |
| AX-157773827 | 26 | 86.329 | KV453235.1  | 146731   | 22-scf00522 | 22 |
| AX-158340485 | 26 | 86.329 | KV453235.1  | 148140   | 22-scf00522 | 22 |
| AX-158340488 | 26 | 86.329 | KV453235.1  | 150670   | 22-scf00522 | 22 |
| AX-157850095 | 26 | 86.329 | KV453235.1  | 151323   | 22-scf00522 | 22 |
| AX-158340491 | 26 | 86.329 | KV453235.1  | 152728   | 22-scf00522 | 22 |
| AX-158340492 | 26 | 86.329 | KV453235.1  | 154877   | 22-scf00522 | 22 |
| AX-157861796 | 26 | 86.329 | KV453235.1  | 158756   | 22-scf00522 | 22 |
| AX-158340502 | 26 | 86.329 | KV453235.1  | 172597   | 22-scf00522 | 22 |
| AX-158340503 | 26 | 86.329 | KV453235.1  | 177268   | 22-scf00522 | 22 |
| AX-158340504 | 26 | 86.329 | KV453235.1  | 181528   | 22-scf00522 | 22 |
| AX-158340505 | 26 | 86.329 | KV453235.1  | 184053   | 22-scf00522 | 22 |
| AX-157710845 | 26 | 86.329 | KV453235.1  | 184928   | 22-scf00522 | 22 |
| AX-157850097 | 26 | 86.329 | KV453235.1  | 185511   | 22-scf00522 | 22 |
| AX-158340514 | 26 | 86.329 | KV453235.1  | 198365   | 22-scf00522 | 22 |
| AX-157748494 | 26 | 86.329 | KV453235.1  | 303754   | 22-scf00522 | 22 |
| AX-158340645 | 26 | 86.329 | KV453236.1  | 81870    | 22-scf00523 | 22 |
| AX-157738733 | 26 | 86.329 | KV453236.1  | 141965   | 22-scf00523 | 22 |
| AX-158340604 | 26 | 86.329 | KV453236.1  | 152478   | 22-scf00523 | 22 |
| AX-157864123 | 26 | 86.439 | KV453229.1  | 10049528 | 22-scf00517 | 22 |
| AX-157720569 | 26 | 86.439 | KV453229.1  | 10099486 | 22-scf00517 | 22 |
| AX-158339961 | 26 | 86.439 | KV453229.1  | 10375795 | 22-scf00517 | 22 |
| AX-158340106 | 26 | 86.439 | KV453237.1  | 177918   | 22-scf00518 | 22 |
| AX-158340113 | 26 | 86.439 | KV453237.1  | 220953   | 22-scf00518 | 22 |
| AX-158419084 | 26 | 86.439 | KV453232.1  | 264960   | 22-scf00519 | 22 |
| AX-158340419 | 26 | 86.439 | KV453234.1  | 131649   | 22-scf00520 | 22 |
| AX-158340443 | 26 | 86.439 | KV453235.1  | 68850    | 22-scf00522 | 22 |
| AX-157766403 | 26 | 86.439 | KV453235.1  | 120888   | 22-scf00522 | 22 |
| AX-158340495 | 26 | 86.439 | KV453235.1  | 158145   | 22-scf00522 | 22 |

|              |    |        |            |        |             |    |
|--------------|----|--------|------------|--------|-------------|----|
| AX-157725516 | 26 | 86.439 | KV453235.1 | 188440 | 22-scf00522 | 22 |
| AX-157850098 | 26 | 86.439 | KV453235.1 | 195671 | 22-scf00522 | 22 |
| AX-158340520 | 26 | 86.439 | KV453235.1 | 204763 | 22-scf00522 | 22 |
| AX-158340521 | 26 | 86.439 | KV453235.1 | 205641 | 22-scf00522 | 22 |
| AX-157722797 | 26 | 86.439 | KV453235.1 | 207231 | 22-scf00522 | 22 |
| AX-158340522 | 26 | 86.439 | KV453235.1 | 208340 | 22-scf00522 | 22 |
| AX-158340523 | 26 | 86.439 | KV453235.1 | 209506 | 22-scf00522 | 22 |
| AX-157709122 | 26 | 86.439 | KV453235.1 | 220258 | 22-scf00522 | 22 |
| AX-158340531 | 26 | 86.439 | KV453235.1 | 225357 | 22-scf00522 | 22 |
| AX-158340535 | 26 | 86.439 | KV453235.1 | 231488 | 22-scf00522 | 22 |
| AX-158340539 | 26 | 86.439 | KV453235.1 | 241614 | 22-scf00522 | 22 |
| AX-158340545 | 26 | 86.439 | KV453235.1 | 245830 | 22-scf00522 | 22 |
| AX-158340546 | 26 | 86.439 | KV453235.1 | 246931 | 22-scf00522 | 22 |
| AX-158340552 | 26 | 86.439 | KV453235.1 | 252252 | 22-scf00522 | 22 |
| AX-158340554 | 26 | 86.439 | KV453235.1 | 254468 | 22-scf00522 | 22 |
| AX-158340561 | 26 | 86.439 | KV453235.1 | 287064 | 22-scf00522 | 22 |
| AX-158340570 | 26 | 86.439 | KV453235.1 | 299866 | 22-scf00522 | 22 |
| AX-158340573 | 26 | 86.439 | KV453235.1 | 304327 | 22-scf00522 | 22 |
| AX-158340576 | 26 | 86.439 | KV453235.1 | 307799 | 22-scf00522 | 22 |
| AX-158340577 | 26 | 86.439 | KV453235.1 | 308090 | 22-scf00522 | 22 |
| AX-158340584 | 26 | 86.439 | KV453235.1 | 320783 | 22-scf00522 | 22 |
| AX-157850109 | 26 | 86.439 | KV453235.1 | 326116 | 22-scf00522 | 22 |
| AX-158340590 | 26 | 86.439 | KV453235.1 | 330215 | 22-scf00522 | 22 |
| AX-157850110 | 26 | 86.439 | KV453235.1 | 332629 | 22-scf00522 | 22 |
| AX-158340592 | 26 | 86.439 | KV453235.1 | 337172 | 22-scf00522 | 22 |
| AX-158340593 | 26 | 86.439 | KV453235.1 | 338358 | 22-scf00522 | 22 |
| AX-158340675 | 26 | 86.439 | KV453236.1 | 2747   | 22-scf00523 | 22 |
| AX-158340670 | 26 | 86.439 | KV453236.1 | 16051  | 22-scf00523 | 22 |
| AX-158340669 | 26 | 86.439 | KV453236.1 | 20417  | 22-scf00523 | 22 |
| AX-157850137 | 26 | 86.439 | KV453236.1 | 24338  | 22-scf00523 | 22 |
| AX-158340668 | 26 | 86.439 | KV453236.1 | 26866  | 22-scf00523 | 22 |
| AX-158340665 | 26 | 86.439 | KV453236.1 | 35845  | 22-scf00523 | 22 |
| AX-158340660 | 26 | 86.439 | KV453236.1 | 46632  | 22-scf00523 | 22 |
| AX-157873770 | 26 | 86.439 | KV453236.1 | 88433  | 22-scf00523 | 22 |
| AX-158340637 | 26 | 86.439 | KV453236.1 | 91847  | 22-scf00523 | 22 |
| AX-157710739 | 26 | 86.439 | KV453236.1 | 94477  | 22-scf00523 | 22 |
| AX-157850130 | 26 | 86.439 | KV453236.1 | 95341  | 22-scf00523 | 22 |
| AX-158340634 | 26 | 86.439 | KV453236.1 | 96087  | 22-scf00523 | 22 |
| AX-157850129 | 26 | 86.439 | KV453236.1 | 98066  | 22-scf00523 | 22 |
| AX-157739859 | 26 | 86.439 | KV453236.1 | 98244  | 22-scf00523 | 22 |
| AX-158340620 | 26 | 86.439 | KV453236.1 | 118979 | 22-scf00523 | 22 |
| AX-158340619 | 26 | 86.439 | KV453236.1 | 119842 | 22-scf00523 | 22 |
| AX-157850128 | 26 | 86.439 | KV453236.1 | 121212 | 22-scf00523 | 22 |
| AX-157850127 | 26 | 86.439 | KV453236.1 | 121971 | 22-scf00523 | 22 |
| AX-158340614 | 26 | 86.439 | KV453236.1 | 133535 | 22-scf00523 | 22 |
| AX-158340612 | 26 | 86.439 | KV453236.1 | 135854 | 22-scf00523 | 22 |
| AX-158340611 | 26 | 86.439 | KV453236.1 | 136953 | 22-scf00523 | 22 |
| AX-158340607 | 26 | 86.439 | KV453236.1 | 143171 | 22-scf00523 | 22 |
| AX-157775339 | 26 | 86.439 | KV453236.1 | 145520 | 22-scf00523 | 22 |
| AX-157850121 | 26 | 86.439 | KV453236.1 | 151425 | 22-scf00523 | 22 |
| AX-158340603 | 26 | 86.439 | KV453236.1 | 153493 | 22-scf00523 | 22 |

|              |    |        |             |        |             |    |
|--------------|----|--------|-------------|--------|-------------|----|
| AX-158340601 | 26 | 86.439 | KV453236.1  | 157195 | 22-scf00523 | 22 |
| AX-157850118 | 26 | 86.439 | KV453236.1  | 166282 | 22-scf00523 | 22 |
| AX-158340600 | 26 | 86.439 | KV453236.1  | 173072 | 22-scf00523 | 22 |
| AX-157768077 | 26 | 86.439 | KV453236.1  | 173194 | 22-scf00523 | 22 |
| AX-157681110 | 26 | 86.439 | 3ML01028902 | 574    | scf04517_1  | UN |
| AX-157868043 | 26 | 86.475 | KV453234.1  | 131407 | 22-scf00520 | 22 |
| AX-158340466 | 26 | 86.475 | KV453235.1  | 124592 | 22-scf00522 | 22 |
| AX-158340469 | 26 | 86.475 | KV453235.1  | 130009 | 22-scf00522 | 22 |
| AX-158340475 | 26 | 86.475 | KV453235.1  | 134768 | 22-scf00522 | 22 |
| AX-158340497 | 26 | 86.475 | KV453235.1  | 165724 | 22-scf00522 | 22 |
| AX-158340498 | 26 | 86.475 | KV453235.1  | 165928 | 22-scf00522 | 22 |
| AX-158340566 | 26 | 86.475 | KV453235.1  | 295586 | 22-scf00522 | 22 |
| AX-157868045 | 26 | 86.475 | KV453236.1  | 22674  | 22-scf00523 | 22 |
| AX-158340623 | 26 | 86.475 | KV453236.1  | 113822 | 22-scf00523 | 22 |
| AX-157873769 | 26 | 86.475 | KV453236.1  | 118624 | 22-scf00523 | 22 |
| AX-158340633 | 26 | 86.515 | KV453236.1  | 98507  | 22-scf00523 | 22 |
| AX-158340615 | 26 | 86.515 | KV453236.1  | 132931 | 22-scf00523 | 22 |
| AX-158340460 | 26 | 86.548 | KV453235.1  | 116281 | 22-scf00522 | 22 |
| AX-157741755 | 26 | 86.548 | KV453235.1  | 117984 | 22-scf00522 | 22 |
| AX-158340470 | 26 | 86.548 | KV453235.1  | 130887 | 22-scf00522 | 22 |
| AX-158340473 | 26 | 86.548 | KV453235.1  | 133443 | 22-scf00522 | 22 |
| AX-157850094 | 26 | 86.548 | KV453235.1  | 133483 | 22-scf00522 | 22 |
| AX-157873765 | 26 | 86.548 | KV453235.1  | 157525 | 22-scf00522 | 22 |
| AX-158340578 | 26 | 86.548 | KV453235.1  | 308542 | 22-scf00522 | 22 |
| AX-158340579 | 26 | 86.548 | KV453235.1  | 309651 | 22-scf00522 | 22 |
| AX-158340673 | 26 | 86.548 | KV453236.1  | 10960  | 22-scf00523 | 22 |
| AX-157850138 | 26 | 86.548 | KV453236.1  | 17740  | 22-scf00523 | 22 |
| AX-158340664 | 26 | 86.548 | KV453236.1  | 42539  | 22-scf00523 | 22 |
| AX-158340663 | 26 | 86.548 | KV453236.1  | 43133  | 22-scf00523 | 22 |
| AX-158340662 | 26 | 86.548 | KV453236.1  | 45116  | 22-scf00523 | 22 |
| AX-158340659 | 26 | 86.548 | KV453236.1  | 47253  | 22-scf00523 | 22 |
| AX-158340658 | 26 | 86.548 | KV453236.1  | 47678  | 22-scf00523 | 22 |
| AX-157850136 | 26 | 86.548 | KV453236.1  | 48855  | 22-scf00523 | 22 |
| AX-158340656 | 26 | 86.548 | KV453236.1  | 53605  | 22-scf00523 | 22 |
| AX-157753247 | 26 | 86.548 | KV453236.1  | 56622  | 22-scf00523 | 22 |
| AX-158340655 | 26 | 86.548 | KV453236.1  | 58022  | 22-scf00523 | 22 |
| AX-157850133 | 26 | 86.548 | KV453236.1  | 60373  | 22-scf00523 | 22 |
| AX-158340654 | 26 | 86.548 | KV453236.1  | 60460  | 22-scf00523 | 22 |
| AX-158340652 | 26 | 86.548 | KV453236.1  | 63674  | 22-scf00523 | 22 |
| AX-158340650 | 26 | 86.548 | KV453236.1  | 68149  | 22-scf00523 | 22 |
| AX-157850131 | 26 | 86.548 | KV453236.1  | 70905  | 22-scf00523 | 22 |
| AX-158340649 | 26 | 86.548 | KV453236.1  | 74648  | 22-scf00523 | 22 |
| AX-158340648 | 26 | 86.548 | KV453236.1  | 77362  | 22-scf00523 | 22 |
| AX-158340644 | 26 | 86.548 | KV453236.1  | 82459  | 22-scf00523 | 22 |
| AX-158340643 | 26 | 86.548 | KV453236.1  | 84239  | 22-scf00523 | 22 |
| AX-158340642 | 26 | 86.548 | KV453236.1  | 85696  | 22-scf00523 | 22 |
| AX-158340641 | 26 | 86.548 | KV453236.1  | 86034  | 22-scf00523 | 22 |
| AX-158340640 | 26 | 86.548 | KV453236.1  | 88214  | 22-scf00523 | 22 |
| AX-158340639 | 26 | 86.548 | KV453236.1  | 91123  | 22-scf00523 | 22 |
| AX-158340638 | 26 | 86.548 | KV453236.1  | 91652  | 22-scf00523 | 22 |
| AX-157774369 | 26 | 86.548 | KV453236.1  | 92471  | 22-scf00523 | 22 |

|              |    |        |            |          |             |    |
|--------------|----|--------|------------|----------|-------------|----|
| AX-158340636 | 26 | 86.548 | KV453236.1 | 93791    | 22-scf00523 | 22 |
| AX-158340191 | 26 | 89.167 | KV453232.1 | 7567     | 22-scf00519 | 22 |
| AX-158419079 | 26 | 89.17  | KV453232.1 | 7993     | 22-scf00519 | 22 |
| AX-158419080 | 26 | 89.17  | KV453232.1 | 8041     | 22-scf00519 | 22 |
| AX-157720618 | 26 | 89.171 | KV453229.1 | 10552425 | 22-scf00517 | 22 |
| AX-157742079 | 26 | 89.171 | KV453237.1 | 4344     | 22-scf00518 | 22 |
| AX-158340042 | 26 | 89.171 | KV453237.1 | 52862    | 22-scf00518 | 22 |
| AX-158340051 | 26 | 89.171 | KV453237.1 | 60241    | 22-scf00518 | 22 |
| AX-158340154 | 26 | 89.171 | KV453237.1 | 272490   | 22-scf00518 | 22 |
| AX-157873758 | 26 | 89.171 | KV453237.1 | 281984   | 22-scf00518 | 22 |
| AX-158340193 | 26 | 89.171 | KV453232.1 | 9676     | 22-scf00519 | 22 |
| AX-158340196 | 26 | 89.171 | KV453232.1 | 11205    | 22-scf00519 | 22 |
| AX-157850043 | 26 | 89.171 | KV453232.1 | 11621    | 22-scf00519 | 22 |
| AX-158340203 | 26 | 89.171 | KV453232.1 | 28276    | 22-scf00519 | 22 |
| AX-157850045 | 26 | 89.171 | KV453232.1 | 36959    | 22-scf00519 | 22 |
| AX-158340208 | 26 | 89.171 | KV453232.1 | 39296    | 22-scf00519 | 22 |
| AX-158340211 | 26 | 89.171 | KV453232.1 | 40547    | 22-scf00519 | 22 |
| AX-158340213 | 26 | 89.171 | KV453232.1 | 42651    | 22-scf00519 | 22 |
| AX-158340214 | 26 | 89.171 | KV453232.1 | 43320    | 22-scf00519 | 22 |
| AX-157850046 | 26 | 89.171 | KV453232.1 | 51777    | 22-scf00519 | 22 |
| AX-157717375 | 26 | 89.171 | KV453232.1 | 55555    | 22-scf00519 | 22 |
| AX-158340224 | 26 | 89.171 | KV453232.1 | 58521    | 22-scf00519 | 22 |
| AX-158340225 | 26 | 89.171 | KV453232.1 | 58744    | 22-scf00519 | 22 |
| AX-158340226 | 26 | 89.171 | KV453232.1 | 62432    | 22-scf00519 | 22 |
| AX-158340228 | 26 | 89.171 | KV453232.1 | 63446    | 22-scf00519 | 22 |
| AX-158340234 | 26 | 89.171 | KV453232.1 | 68844    | 22-scf00519 | 22 |
| AX-158340236 | 26 | 89.171 | KV453232.1 | 70381    | 22-scf00519 | 22 |
| AX-158340238 | 26 | 89.171 | KV453232.1 | 71863    | 22-scf00519 | 22 |
| AX-158340239 | 26 | 89.171 | KV453232.1 | 72356    | 22-scf00519 | 22 |
| AX-158340240 | 26 | 89.171 | KV453232.1 | 73205    | 22-scf00519 | 22 |
| AX-158340241 | 26 | 89.171 | KV453232.1 | 74237    | 22-scf00519 | 22 |
| AX-157753097 | 26 | 89.171 | KV453232.1 | 74669    | 22-scf00519 | 22 |
| AX-158340242 | 26 | 89.171 | KV453232.1 | 74708    | 22-scf00519 | 22 |
| AX-158340244 | 26 | 89.171 | KV453232.1 | 76833    | 22-scf00519 | 22 |
| AX-158340245 | 26 | 89.171 | KV453232.1 | 77289    | 22-scf00519 | 22 |
| AX-158340247 | 26 | 89.171 | KV453232.1 | 79135    | 22-scf00519 | 22 |
| AX-158340249 | 26 | 89.171 | KV453232.1 | 80734    | 22-scf00519 | 22 |
| AX-158340250 | 26 | 89.171 | KV453232.1 | 80992    | 22-scf00519 | 22 |
| AX-158340251 | 26 | 89.171 | KV453232.1 | 81278    | 22-scf00519 | 22 |
| AX-158340254 | 26 | 89.171 | KV453232.1 | 84504    | 22-scf00519 | 22 |
| AX-157756207 | 26 | 89.171 | KV453232.1 | 84850    | 22-scf00519 | 22 |
| AX-158340259 | 26 | 89.171 | KV453232.1 | 88853    | 22-scf00519 | 22 |
| AX-157742667 | 26 | 89.171 | KV453232.1 | 94370    | 22-scf00519 | 22 |
| AX-158340263 | 26 | 89.171 | KV453232.1 | 94848    | 22-scf00519 | 22 |
| AX-158340265 | 26 | 89.171 | KV453232.1 | 95986    | 22-scf00519 | 22 |
| AX-158340267 | 26 | 89.171 | KV453232.1 | 99417    | 22-scf00519 | 22 |
| AX-157861787 | 26 | 89.171 | KV453232.1 | 104274   | 22-scf00519 | 22 |
| AX-158340272 | 26 | 89.171 | KV453232.1 | 108153   | 22-scf00519 | 22 |
| AX-157868041 | 26 | 89.171 | KV453232.1 | 110285   | 22-scf00519 | 22 |
| AX-158340276 | 26 | 89.171 | KV453232.1 | 112452   | 22-scf00519 | 22 |
| AX-157772325 | 26 | 89.171 | KV453232.1 | 127772   | 22-scf00519 | 22 |

|              |    |        |            |          |             |    |
|--------------|----|--------|------------|----------|-------------|----|
| AX-157768859 | 26 | 89.171 | KV453232.1 | 130643   | 22-scf00519 | 22 |
| AX-158340283 | 26 | 89.171 | KV453232.1 | 138469   | 22-scf00519 | 22 |
| AX-158340305 | 26 | 89.171 | KV453232.1 | 272706   | 22-scf00519 | 22 |
| AX-158340315 | 26 | 89.171 | KV453232.1 | 290444   | 22-scf00519 | 22 |
| AX-157850064 | 26 | 89.171 | KV453232.1 | 295185   | 22-scf00519 | 22 |
| AX-157703155 | 26 | 89.171 | KV453232.1 | 312021   | 22-scf00519 | 22 |
| AX-158340336 | 26 | 89.171 | KV453232.1 | 326290   | 22-scf00519 | 22 |
| AX-158340337 | 26 | 89.171 | KV453232.1 | 327389   | 22-scf00519 | 22 |
| AX-158388205 | 26 | 89.171 | KV453232.1 | 360428   | 22-scf00519 | 22 |
| AX-157684691 | 26 | 89.171 | KV453238.1 | 2727     | 22-scf00524 | 22 |
| AX-158340277 | 26 | 89.308 | KV453232.1 | 116361   | 22-scf00519 | 22 |
| AX-157717527 | 26 | 89.308 | KV453232.1 | 142105   | 22-scf00519 | 22 |
| AX-158340303 | 26 | 89.308 | KV453232.1 | 271031   | 22-scf00519 | 22 |
| AX-158340306 | 26 | 89.308 | KV453232.1 | 274651   | 22-scf00519 | 22 |
| AX-157850005 | 26 | 89.445 | KV453229.1 | 10415987 | 22-scf00517 | 22 |
| AX-158340308 | 26 | 89.445 | KV453232.1 | 275160   | 22-scf00519 | 22 |
| AX-158340316 | 26 | 89.515 | KV453232.1 | 290764   | 22-scf00519 | 22 |
| AX-158340233 | 26 | 89.582 | KV453232.1 | 68137    | 22-scf00519 | 22 |
| AX-158340317 | 26 | 89.582 | KV453232.1 | 291885   | 22-scf00519 | 22 |
| AX-158340209 | 26 | 89.711 | KV453232.1 | 39677    | 22-scf00519 | 22 |
| AX-157888651 | 26 | 89.711 | KV453232.1 | 107499   | 22-scf00519 | 22 |
| AX-158340304 | 26 | 89.711 | KV453232.1 | 272303   | 22-scf00519 | 22 |
| AX-158340319 | 26 | 89.711 | KV453232.1 | 294758   | 22-scf00519 | 22 |
| AX-158340266 | 26 | 89.714 | KV453232.1 | 98435    | 22-scf00519 | 22 |
| AX-158340274 | 26 | 89.714 | KV453232.1 | 111098   | 22-scf00519 | 22 |
| AX-157850065 | 26 | 89.714 | KV453232.1 | 296747   | 22-scf00519 | 22 |
| AX-157850003 | 26 | 89.717 | KV453229.1 | 10406526 | 22-scf00517 | 22 |
| AX-158339998 | 26 | 89.717 | KV453229.1 | 10448978 | 22-scf00517 | 22 |
| AX-158340197 | 26 | 89.717 | KV453232.1 | 12106    | 22-scf00519 | 22 |
| AX-157758691 | 26 | 89.717 | KV453232.1 | 156328   | 22-scf00519 | 22 |
| AX-158340313 | 26 | 89.717 | KV453232.1 | 288027   | 22-scf00519 | 22 |
| AX-158340314 | 26 | 89.717 | KV453232.1 | 288491   | 22-scf00519 | 22 |
| AX-157714375 | 26 | 89.717 | KV453232.1 | 288967   | 22-scf00519 | 22 |
| AX-158340318 | 26 | 89.717 | KV453232.1 | 294559   | 22-scf00519 | 22 |
| AX-157850066 | 26 | 89.717 | KV453232.1 | 298044   | 22-scf00519 | 22 |
| AX-158340322 | 26 | 89.717 | KV453232.1 | 304947   | 22-scf00519 | 22 |
| AX-157850069 | 26 | 89.717 | KV453232.1 | 312776   | 22-scf00519 | 22 |
| AX-158340327 | 26 | 89.717 | KV453232.1 | 314815   | 22-scf00519 | 22 |
| AX-158340328 | 26 | 89.717 | KV453232.1 | 315627   | 22-scf00519 | 22 |
| AX-158340330 | 26 | 89.717 | KV453232.1 | 317639   | 22-scf00519 | 22 |
| AX-158340331 | 26 | 89.717 | KV453232.1 | 318487   | 22-scf00519 | 22 |
| AX-157752394 | 26 | 89.717 | KV453232.1 | 318927   | 22-scf00519 | 22 |
| AX-158340332 | 26 | 89.717 | KV453232.1 | 319251   | 22-scf00519 | 22 |
| AX-157850071 | 26 | 89.717 | KV453232.1 | 324408   | 22-scf00519 | 22 |
| AX-158340335 | 26 | 89.717 | KV453232.1 | 325605   | 22-scf00519 | 22 |
| AX-157861791 | 26 | 89.717 | KV453232.1 | 335802   | 22-scf00519 | 22 |
| AX-157850072 | 26 | 89.717 | KV453232.1 | 335957   | 22-scf00519 | 22 |
| AX-158340346 | 26 | 89.717 | KV453232.1 | 340541   | 22-scf00519 | 22 |
| AX-158340347 | 26 | 89.717 | KV453232.1 | 342839   | 22-scf00519 | 22 |
| AX-158340360 | 26 | 89.717 | KV453232.1 | 381265   | 22-scf00519 | 22 |
| AX-158340353 | 26 | 89.936 | KV453232.1 | 360209   | 22-scf00519 | 22 |



|              |    |        |            |          |             |    |
|--------------|----|--------|------------|----------|-------------|----|
| AX-158340354 | 26 | 89.936 | KV453232.1 | 361826   | 22-scf00519 | 22 |
| AX-157719617 | 26 | 89.936 | KV453232.1 | 364727   | 22-scf00519 | 22 |
| AX-157755073 | 26 | 89.936 | KV453232.1 | 365650   | 22-scf00519 | 22 |
| AX-158340355 | 26 | 89.936 | KV453232.1 | 367208   | 22-scf00519 | 22 |
| AX-158340358 | 26 | 89.936 | KV453232.1 | 376514   | 22-scf00519 | 22 |
| AX-158340361 | 26 | 90.132 | KV453232.1 | 382210   | 22-scf00519 | 22 |
| AX-157744214 | 26 | 90.373 | KV453237.1 | 3952     | 22-scf00518 | 22 |
| AX-157721368 | 26 | 90.373 | KV453237.1 | 14581    | 22-scf00518 | 22 |
| AX-157850009 | 26 | 90.374 | KV453229.1 | 10422536 | 22-scf00517 | 22 |
| AX-157868031 | 26 | 90.374 | KV453237.1 | 18256    | 22-scf00518 | 22 |
| AX-158340026 | 26 | 90.374 | KV453237.1 | 18575    | 22-scf00518 | 22 |
| AX-157740345 | 26 | 90.374 | KV453237.1 | 22122    | 22-scf00518 | 22 |
| AX-158340028 | 26 | 90.374 | KV453237.1 | 24841    | 22-scf00518 | 22 |
| AX-158340032 | 26 | 90.374 | KV453237.1 | 33429    | 22-scf00518 | 22 |
| AX-158340035 | 26 | 90.374 | KV453237.1 | 35272    | 22-scf00518 | 22 |
| AX-157850022 | 26 | 90.374 | KV453237.1 | 36620    | 22-scf00518 | 22 |
| AX-158340039 | 26 | 90.374 | KV453237.1 | 46435    | 22-scf00518 | 22 |
| AX-158340043 | 26 | 90.374 | KV453237.1 | 53563    | 22-scf00518 | 22 |
| AX-158340048 | 26 | 90.374 | KV453237.1 | 58973    | 22-scf00518 | 22 |
| AX-157888646 | 26 | 90.374 | KV453237.1 | 61663    | 22-scf00518 | 22 |
| AX-158340053 | 26 | 90.374 | KV453237.1 | 62843    | 22-scf00518 | 22 |
| AX-158340055 | 26 | 90.374 | KV453237.1 | 64565    | 22-scf00518 | 22 |
| AX-158340061 | 26 | 90.374 | KV453237.1 | 69358    | 22-scf00518 | 22 |
| AX-158340065 | 26 | 90.374 | KV453237.1 | 70854    | 22-scf00518 | 22 |
| AX-158340070 | 26 | 90.374 | KV453237.1 | 73642    | 22-scf00518 | 22 |
| AX-158340074 | 26 | 90.374 | KV453237.1 | 82465    | 22-scf00518 | 22 |
| AX-158340079 | 26 | 90.374 | KV453237.1 | 91921    | 22-scf00518 | 22 |
| AX-157850024 | 26 | 90.374 | KV453237.1 | 92259    | 22-scf00518 | 22 |
| AX-158340081 | 26 | 90.374 | KV453237.1 | 96794    | 22-scf00518 | 22 |
| AX-158340083 | 26 | 90.374 | KV453237.1 | 98490    | 22-scf00518 | 22 |
| AX-157850025 | 26 | 90.374 | KV453237.1 | 100713   | 22-scf00518 | 22 |
| AX-158340085 | 26 | 90.374 | KV453237.1 | 102829   | 22-scf00518 | 22 |
| AX-158340087 | 26 | 90.374 | KV453237.1 | 109227   | 22-scf00518 | 22 |
| AX-157759022 | 26 | 90.374 | KV453237.1 | 109835   | 22-scf00518 | 22 |
| AX-157850026 | 26 | 90.374 | KV453237.1 | 110004   | 22-scf00518 | 22 |
| AX-157850027 | 26 | 90.374 | KV453237.1 | 110265   | 22-scf00518 | 22 |
| AX-157763693 | 26 | 90.374 | KV453237.1 | 110934   | 22-scf00518 | 22 |
| AX-158340088 | 26 | 90.374 | KV453237.1 | 112170   | 22-scf00518 | 22 |
| AX-158340089 | 26 | 90.374 | KV453237.1 | 112413   | 22-scf00518 | 22 |
| AX-158340090 | 26 | 90.374 | KV453237.1 | 112920   | 22-scf00518 | 22 |
| AX-158340093 | 26 | 90.374 | KV453237.1 | 118726   | 22-scf00518 | 22 |
| AX-158340094 | 26 | 90.374 | KV453237.1 | 119796   | 22-scf00518 | 22 |
| AX-158340095 | 26 | 90.374 | KV453237.1 | 122533   | 22-scf00518 | 22 |
| AX-158340096 | 26 | 90.374 | KV453237.1 | 123419   | 22-scf00518 | 22 |
| AX-158340122 | 26 | 90.374 | KV453237.1 | 241592   | 22-scf00518 | 22 |
| AX-157850038 | 26 | 90.374 | KV453237.1 | 247599   | 22-scf00518 | 22 |
| AX-158340130 | 26 | 90.374 | KV453237.1 | 248542   | 22-scf00518 | 22 |
| AX-157726002 | 26 | 90.374 | KV453237.1 | 268172   | 22-scf00518 | 22 |
| AX-158340152 | 26 | 90.374 | KV453237.1 | 269937   | 22-scf00518 | 22 |
| AX-157850039 | 26 | 90.374 | KV453237.1 | 272244   | 22-scf00518 | 22 |
| AX-158340156 | 26 | 90.374 | KV453237.1 | 280908   | 22-scf00518 | 22 |

|              |    |        |            |         |             |    |
|--------------|----|--------|------------|---------|-------------|----|
| AX-158340339 | 26 | 90.374 | KV453232.1 | 328737  | 22-scf00519 | 22 |
| AX-157738424 | 26 | 90.374 | KV453234.1 | 7669    | 22-scf00520 | 22 |
| AX-158340040 | 26 | 90.433 | KV453237.1 | 48206   | 22-scf00518 | 22 |
| AX-157850023 | 26 | 90.433 | KV453237.1 | 65853   | 22-scf00518 | 22 |
| AX-157733152 | 26 | 90.433 | KV453237.1 | 134815  | 22-scf00518 | 22 |
| AX-157759454 | 26 | 90.433 | KV453237.1 | 140083  | 22-scf00518 | 22 |
| AX-158340100 | 26 | 90.433 | KV453237.1 | 149341  | 22-scf00518 | 22 |
| AX-158340135 | 26 | 90.433 | KV453237.1 | 251915  | 22-scf00518 | 22 |
| AX-157771208 | 26 | 90.433 | KV453237.1 | 291352  | 22-scf00518 | 22 |
| AX-158340108 | 26 | 90.509 | KV453237.1 | 182984  | 22-scf00518 | 22 |
| AX-158340119 | 26 | 90.592 | KV453237.1 | 238695  | 22-scf00518 | 22 |
| AX-158340120 | 26 | 90.592 | KV453237.1 | 239727  | 22-scf00518 | 22 |
| AX-158340124 | 26 | 90.592 | KV453237.1 | 243223  | 22-scf00518 | 22 |
| AX-158340129 | 26 | 90.592 | KV453237.1 | 248301  | 22-scf00518 | 22 |
| AX-158340133 | 26 | 90.592 | KV453237.1 | 250396  | 22-scf00518 | 22 |
| AX-158340137 | 26 | 90.592 | KV453237.1 | 253233  | 22-scf00518 | 22 |
| AX-158419077 | 26 | 90.592 | KV453237.1 | 257035  | 22-scf00518 | 22 |
| AX-158340145 | 26 | 90.592 | KV453237.1 | 261634  | 22-scf00518 | 22 |
| AX-157684704 | 26 | 90.592 | KV453238.1 | 28639   | 22-scf00524 | 22 |
| AX-158340143 | 26 | 90.622 | KV453237.1 | 259727  | 22-scf00518 | 22 |
| AX-158340049 | 26 | 90.652 | KV453237.1 | 59338   | 22-scf00518 | 22 |
| AX-158340060 | 26 | 90.652 | KV453237.1 | 69136   | 22-scf00518 | 22 |
| AX-158340144 | 26 | 90.652 | KV453237.1 | 260769  | 22-scf00518 | 22 |
| AX-158339491 | 26 | 90.702 | KV453229.1 | 9710974 | 22-scf00517 | 22 |
| AX-158340029 | 26 | 90.702 | KV453237.1 | 28079   | 22-scf00518 | 22 |
| AX-158340030 | 26 | 90.702 | KV453237.1 | 31587   | 22-scf00518 | 22 |
| AX-157850028 | 26 | 90.702 | KV453237.1 | 132493  | 22-scf00518 | 22 |
| AX-157850030 | 26 | 90.702 | KV453237.1 | 189319  | 22-scf00518 | 22 |
| AX-158340117 | 26 | 90.702 | KV453237.1 | 225579  | 22-scf00518 | 22 |
| AX-158340127 | 26 | 90.702 | KV453237.1 | 245928  | 22-scf00518 | 22 |
| AX-157747782 | 26 | 90.702 | KV453237.1 | 251427  | 22-scf00518 | 22 |
| AX-158340148 | 26 | 90.702 | KV453237.1 | 263639  | 22-scf00518 | 22 |
| AX-158340150 | 26 | 90.702 | KV453237.1 | 269151  | 22-scf00518 | 22 |
| AX-158340151 | 26 | 90.702 | KV453237.1 | 269478  | 22-scf00518 | 22 |
| AX-157751008 | 26 | 90.702 | KV453237.1 | 271514  | 22-scf00518 | 22 |
| AX-157850040 | 26 | 90.702 | KV453237.1 | 277497  | 22-scf00518 | 22 |
| AX-157720254 | 26 | 90.702 | KV453237.1 | 280429  | 22-scf00518 | 22 |
| AX-157774560 | 26 | 90.702 | KV453237.1 | 281035  | 22-scf00518 | 22 |
| AX-158340158 | 26 | 90.702 | KV453237.1 | 290124  | 22-scf00518 | 22 |
| AX-157742002 | 26 | 90.702 | KV453237.1 | 290589  | 22-scf00518 | 22 |
| AX-158340159 | 26 | 90.702 | KV453237.1 | 290944  | 22-scf00518 | 22 |
| AX-158381602 | 26 | 90.702 | KV453237.1 | 294767  | 22-scf00518 | 22 |
| AX-158340166 | 26 | 90.702 | KV453237.1 | 310373  | 22-scf00518 | 22 |
| AX-157748065 | 26 | 90.702 | KV453237.1 | 313211  | 22-scf00518 | 22 |
| AX-158340168 | 26 | 90.702 | KV453237.1 | 313506  | 22-scf00518 | 22 |
| AX-158340169 | 26 | 90.702 | KV453237.1 | 314773  | 22-scf00518 | 22 |
| AX-158340176 | 26 | 90.702 | KV453237.1 | 320769  | 22-scf00518 | 22 |
| AX-158340179 | 26 | 90.702 | KV453237.1 | 326178  | 22-scf00518 | 22 |
| AX-158340182 | 26 | 90.702 | KV453237.1 | 329164  | 22-scf00518 | 22 |
| AX-158340183 | 26 | 90.702 | KV453237.1 | 329964  | 22-scf00518 | 22 |
| AX-158340351 | 26 | 90.702 | KV453232.1 | 357424  | 22-scf00519 | 22 |

|              |    |        |            |        |             |    |
|--------------|----|--------|------------|--------|-------------|----|
| AX-158340389 | 26 | 90.702 | KV453234.1 | 56474  | 22-scf00520 | 22 |
| AX-158340435 | 26 | 90.702 | KV453235.1 | 56995  | 22-scf00522 | 22 |
| AX-158340437 | 26 | 90.702 | KV453235.1 | 59919  | 22-scf00522 | 22 |
| AX-158340452 | 26 | 90.702 | KV453235.1 | 105316 | 22-scf00522 | 22 |
| AX-157684690 | 26 | 90.702 | KV453238.1 | 842    | 22-scf00524 | 22 |
| AX-157684695 | 26 | 90.702 | KV453238.1 | 9852   | 22-scf00524 | 22 |
| AX-157680383 | 26 | 90.702 | KV453238.1 | 10503  | 22-scf00524 | 22 |
| AX-157684697 | 26 | 90.702 | KV453238.1 | 12562  | 22-scf00524 | 22 |
| AX-157684700 | 26 | 90.702 | KV453238.1 | 22347  | 22-scf00524 | 22 |
| AX-157688735 | 26 | 90.702 | KV453819.1 | 1045   | scf02479    | UN |
| AX-157684703 | 26 | 90.735 | KV453238.1 | 23978  | 22-scf00524 | 22 |
| AX-157684709 | 26 | 90.855 | KV453238.1 | 39213  | 22-scf00524 | 22 |
| AX-157680507 | 26 | 91.312 | KV453467.1 | 20376  | scf00801    | UN |
| AX-158340243 | 26 | 91.43  | KV453232.1 | 76525  | 22-scf00519 | 22 |
| AX-158340269 | 26 | 91.43  | KV453232.1 | 104696 | 22-scf00519 | 22 |
| AX-158350479 | 27 | 0      | KV453298.1 | 1472   | 27-scf00526 | 27 |
| AX-158340678 | 27 | 0.518  | KV453299.1 | 1349   | 27-scf00525 | 27 |
| AX-158340681 | 27 | 0.518  | KV453299.1 | 6850   | 27-scf00525 | 27 |
| AX-158340682 | 27 | 0.518  | KV453299.1 | 8394   | 27-scf00525 | 27 |
| AX-158340688 | 27 | 0.518  | KV453299.1 | 16876  | 27-scf00525 | 27 |
| AX-157774254 | 27 | 0.518  | KV453299.1 | 21687  | 27-scf00525 | 27 |
| AX-158340892 | 27 | 0.518  | KV453299.1 | 274076 | 27-scf00525 | 27 |
| AX-158340898 | 27 | 0.518  | KV453299.1 | 287130 | 27-scf00525 | 27 |
| AX-158381604 | 27 | 0.518  | KV453299.1 | 287504 | 27-scf00525 | 27 |
| AX-157741764 | 27 | 0.518  | KV453299.1 | 336358 | 27-scf00525 | 27 |
| AX-158350481 | 27 | 0.518  | KV453298.1 | 4576   | 27-scf00526 | 27 |
| AX-157850926 | 27 | 0.518  | KV453298.1 | 5895   | 27-scf00526 | 27 |
| AX-158350483 | 27 | 0.518  | KV453298.1 | 9861   | 27-scf00526 | 27 |
| AX-158350485 | 27 | 0.518  | KV453298.1 | 14387  | 27-scf00526 | 27 |
| AX-158350486 | 27 | 0.518  | KV453298.1 | 15121  | 27-scf00526 | 27 |
| AX-158350487 | 27 | 0.518  | KV453298.1 | 15658  | 27-scf00526 | 27 |
| AX-158350488 | 27 | 0.518  | KV453298.1 | 16811  | 27-scf00526 | 27 |
| AX-158350489 | 27 | 0.518  | KV453298.1 | 18788  | 27-scf00526 | 27 |
| AX-158350490 | 27 | 0.518  | KV453298.1 | 20580  | 27-scf00526 | 27 |
| AX-158350491 | 27 | 0.518  | KV453298.1 | 21057  | 27-scf00526 | 27 |
| AX-158350492 | 27 | 0.518  | KV453298.1 | 22410  | 27-scf00526 | 27 |
| AX-158350493 | 27 | 0.518  | KV453298.1 | 22950  | 27-scf00526 | 27 |
| AX-158350495 | 27 | 0.518  | KV453298.1 | 24331  | 27-scf00526 | 27 |
| AX-157708907 | 27 | 0.518  | KV453298.1 | 24457  | 27-scf00526 | 27 |
| AX-158350496 | 27 | 0.518  | KV453298.1 | 25002  | 27-scf00526 | 27 |
| AX-158350498 | 27 | 0.518  | KV453298.1 | 25900  | 27-scf00526 | 27 |
| AX-158350499 | 27 | 0.518  | KV453298.1 | 26701  | 27-scf00526 | 27 |
| AX-158350500 | 27 | 0.518  | KV453298.1 | 27978  | 27-scf00526 | 27 |
| AX-158350503 | 27 | 0.518  | KV453298.1 | 29915  | 27-scf00526 | 27 |
| AX-157888928 | 27 | 0.518  | KV453298.1 | 30150  | 27-scf00526 | 27 |
| AX-158350504 | 27 | 0.518  | KV453298.1 | 30958  | 27-scf00526 | 27 |
| AX-158350505 | 27 | 0.518  | KV453298.1 | 32713  | 27-scf00526 | 27 |
| AX-157758021 | 27 | 0.518  | KV453298.1 | 33102  | 27-scf00526 | 27 |
| AX-158350506 | 27 | 0.518  | KV453298.1 | 34470  | 27-scf00526 | 27 |
| AX-158350507 | 27 | 0.518  | KV453298.1 | 34752  | 27-scf00526 | 27 |
| AX-158419395 | 27 | 0.518  | KV453298.1 | 35274  | 27-scf00526 | 27 |

|              |    |       |            |        |             |    |
|--------------|----|-------|------------|--------|-------------|----|
| AX-158350508 | 27 | 0.518 | KV453298.1 | 35319  | 27-scf00526 | 27 |
| AX-158350509 | 27 | 0.518 | KV453298.1 | 35872  | 27-scf00526 | 27 |
| AX-158350510 | 27 | 0.518 | KV453298.1 | 36210  | 27-scf00526 | 27 |
| AX-158350512 | 27 | 0.518 | KV453298.1 | 38431  | 27-scf00526 | 27 |
| AX-158350513 | 27 | 0.518 | KV453298.1 | 38988  | 27-scf00526 | 27 |
| AX-158350515 | 27 | 0.518 | KV453298.1 | 41478  | 27-scf00526 | 27 |
| AX-158350517 | 27 | 0.518 | KV453298.1 | 43178  | 27-scf00526 | 27 |
| AX-158350518 | 27 | 0.518 | KV453298.1 | 43592  | 27-scf00526 | 27 |
| AX-158350520 | 27 | 0.518 | KV453298.1 | 45073  | 27-scf00526 | 27 |
| AX-158350521 | 27 | 0.518 | KV453298.1 | 46449  | 27-scf00526 | 27 |
| AX-158350522 | 27 | 0.518 | KV453298.1 | 47985  | 27-scf00526 | 27 |
| AX-158350524 | 27 | 0.518 | KV453298.1 | 49115  | 27-scf00526 | 27 |
| AX-158350525 | 27 | 0.518 | KV453298.1 | 49514  | 27-scf00526 | 27 |
| AX-158350526 | 27 | 0.518 | KV453298.1 | 50379  | 27-scf00526 | 27 |
| AX-158350527 | 27 | 0.518 | KV453298.1 | 50897  | 27-scf00526 | 27 |
| AX-158350528 | 27 | 0.518 | KV453298.1 | 51305  | 27-scf00526 | 27 |
| AX-158350529 | 27 | 0.518 | KV453298.1 | 53162  | 27-scf00526 | 27 |
| AX-158350530 | 27 | 0.518 | KV453298.1 | 54036  | 27-scf00526 | 27 |
| AX-158350531 | 27 | 0.518 | KV453298.1 | 56271  | 27-scf00526 | 27 |
| AX-158350532 | 27 | 0.518 | KV453298.1 | 58696  | 27-scf00526 | 27 |
| AX-158350534 | 27 | 0.518 | KV453298.1 | 60453  | 27-scf00526 | 27 |
| AX-158350535 | 27 | 0.518 | KV453298.1 | 63594  | 27-scf00526 | 27 |
| AX-158350536 | 27 | 0.518 | KV453298.1 | 64696  | 27-scf00526 | 27 |
| AX-158350537 | 27 | 0.518 | KV453298.1 | 66636  | 27-scf00526 | 27 |
| AX-158350538 | 27 | 0.518 | KV453298.1 | 68614  | 27-scf00526 | 27 |
| AX-158350539 | 27 | 0.518 | KV453298.1 | 69216  | 27-scf00526 | 27 |
| AX-158350540 | 27 | 0.518 | KV453298.1 | 69632  | 27-scf00526 | 27 |
| AX-158350542 | 27 | 0.518 | KV453298.1 | 71851  | 27-scf00526 | 27 |
| AX-158350544 | 27 | 0.518 | KV453298.1 | 73622  | 27-scf00526 | 27 |
| AX-157862032 | 27 | 0.518 | KV453298.1 | 80138  | 27-scf00526 | 27 |
| AX-158350546 | 27 | 0.518 | KV453298.1 | 81590  | 27-scf00526 | 27 |
| AX-157888930 | 27 | 0.518 | KV453298.1 | 81963  | 27-scf00526 | 27 |
| AX-158350549 | 27 | 0.518 | KV453298.1 | 85932  | 27-scf00526 | 27 |
| AX-158350550 | 27 | 0.518 | KV453298.1 | 88007  | 27-scf00526 | 27 |
| AX-157758638 | 27 | 0.518 | KV453298.1 | 88337  | 27-scf00526 | 27 |
| AX-158419397 | 27 | 0.518 | KV453298.1 | 91374  | 27-scf00526 | 27 |
| AX-158419398 | 27 | 0.518 | KV453298.1 | 91598  | 27-scf00526 | 27 |
| AX-158350551 | 27 | 0.518 | KV453298.1 | 93155  | 27-scf00526 | 27 |
| AX-158350553 | 27 | 0.518 | KV453298.1 | 98105  | 27-scf00526 | 27 |
| AX-158350554 | 27 | 0.518 | KV453298.1 | 98885  | 27-scf00526 | 27 |
| AX-158350555 | 27 | 0.518 | KV453298.1 | 100214 | 27-scf00526 | 27 |
| AX-158350556 | 27 | 0.518 | KV453298.1 | 101017 | 27-scf00526 | 27 |
| AX-158350557 | 27 | 0.518 | KV453298.1 | 105108 | 27-scf00526 | 27 |
| AX-158350558 | 27 | 0.518 | KV453298.1 | 105763 | 27-scf00526 | 27 |
| AX-158350559 | 27 | 0.518 | KV453298.1 | 106090 | 27-scf00526 | 27 |
| AX-158350560 | 27 | 0.518 | KV453298.1 | 106863 | 27-scf00526 | 27 |
| AX-158350561 | 27 | 0.518 | KV453298.1 | 108182 | 27-scf00526 | 27 |
| AX-158350562 | 27 | 0.518 | KV453298.1 | 111701 | 27-scf00526 | 27 |
| AX-158350564 | 27 | 0.518 | KV453298.1 | 113673 | 27-scf00526 | 27 |
| AX-157862033 | 27 | 0.518 | KV453298.1 | 113836 | 27-scf00526 | 27 |
| AX-158350565 | 27 | 0.518 | KV453298.1 | 115135 | 27-scf00526 | 27 |

|              |    |       |            |        |             |    |
|--------------|----|-------|------------|--------|-------------|----|
| AX-158350566 | 27 | 0.518 | KV453298.1 | 116413 | 27-scf00526 | 27 |
| AX-157888931 | 27 | 0.518 | KV453298.1 | 116580 | 27-scf00526 | 27 |
| AX-158350568 | 27 | 0.518 | KV453298.1 | 121361 | 27-scf00526 | 27 |
| AX-158350569 | 27 | 0.518 | KV453298.1 | 121827 | 27-scf00526 | 27 |
| AX-158350571 | 27 | 0.518 | KV453298.1 | 124601 | 27-scf00526 | 27 |
| AX-158350572 | 27 | 0.518 | KV453298.1 | 126556 | 27-scf00526 | 27 |
| AX-158350576 | 27 | 0.518 | KV453298.1 | 129791 | 27-scf00526 | 27 |
| AX-158350582 | 27 | 0.518 | KV453298.1 | 145810 | 27-scf00526 | 27 |
| AX-158350586 | 27 | 0.518 | KV453298.1 | 149367 | 27-scf00526 | 27 |
| AX-158350589 | 27 | 0.518 | KV453298.1 | 154600 | 27-scf00526 | 27 |
| AX-158350591 | 27 | 0.518 | KV453298.1 | 156737 | 27-scf00526 | 27 |
| AX-158350593 | 27 | 0.518 | KV453298.1 | 157923 | 27-scf00526 | 27 |
| AX-157862034 | 27 | 0.518 | KV453298.1 | 160055 | 27-scf00526 | 27 |
| AX-158350596 | 27 | 0.518 | KV453298.1 | 162003 | 27-scf00526 | 27 |
| AX-158350598 | 27 | 0.518 | KV453298.1 | 163617 | 27-scf00526 | 27 |
| AX-158350599 | 27 | 0.518 | KV453298.1 | 164359 | 27-scf00526 | 27 |
| AX-157862035 | 27 | 0.518 | KV453298.1 | 165206 | 27-scf00526 | 27 |
| AX-158350602 | 27 | 0.518 | KV453298.1 | 168358 | 27-scf00526 | 27 |
| AX-157710896 | 27 | 0.518 | KV453298.1 | 169089 | 27-scf00526 | 27 |
| AX-158350604 | 27 | 0.518 | KV453298.1 | 171306 | 27-scf00526 | 27 |
| AX-158350606 | 27 | 0.518 | KV453298.1 | 174256 | 27-scf00526 | 27 |
| AX-158350608 | 27 | 0.518 | KV453298.1 | 175761 | 27-scf00526 | 27 |
| AX-158350610 | 27 | 0.518 | KV453298.1 | 187262 | 27-scf00526 | 27 |
| AX-158350612 | 27 | 0.518 | KV453298.1 | 188788 | 27-scf00526 | 27 |
| AX-158350613 | 27 | 0.518 | KV453298.1 | 190583 | 27-scf00526 | 27 |
| AX-158350614 | 27 | 0.518 | KV453298.1 | 190764 | 27-scf00526 | 27 |
| AX-158350615 | 27 | 0.518 | KV453298.1 | 191655 | 27-scf00526 | 27 |
| AX-158423817 | 27 | 0.518 | KV453298.1 | 202495 | 27-scf00526 | 27 |
| AX-158350618 | 27 | 0.518 | KV453298.1 | 204332 | 27-scf00526 | 27 |
| AX-158350619 | 27 | 0.518 | KV453298.1 | 206953 | 27-scf00526 | 27 |
| AX-158350622 | 27 | 0.518 | KV453298.1 | 208630 | 27-scf00526 | 27 |
| AX-157850927 | 27 | 0.518 | KV453298.1 | 211494 | 27-scf00526 | 27 |
| AX-158350628 | 27 | 0.518 | KV453298.1 | 219667 | 27-scf00526 | 27 |
| AX-158350629 | 27 | 0.518 | KV453298.1 | 220365 | 27-scf00526 | 27 |
| AX-158350630 | 27 | 0.518 | KV453298.1 | 222830 | 27-scf00526 | 27 |
| AX-158350632 | 27 | 0.518 | KV453298.1 | 224481 | 27-scf00526 | 27 |
| AX-158350633 | 27 | 0.518 | KV453298.1 | 226461 | 27-scf00526 | 27 |
| AX-157850928 | 27 | 0.518 | KV453298.1 | 226991 | 27-scf00526 | 27 |
| AX-157850930 | 27 | 0.518 | KV453298.1 | 234734 | 27-scf00526 | 27 |
| AX-158350635 | 27 | 0.518 | KV453298.1 | 234993 | 27-scf00526 | 27 |
| AX-158350641 | 27 | 0.518 | KV453298.1 | 247449 | 27-scf00526 | 27 |
| AX-158350642 | 27 | 0.518 | KV453298.1 | 251479 | 27-scf00526 | 27 |
| AX-157850931 | 27 | 0.518 | KV453298.1 | 252070 | 27-scf00526 | 27 |
| AX-158350643 | 27 | 0.518 | KV453298.1 | 252573 | 27-scf00526 | 27 |
| AX-158350644 | 27 | 0.518 | KV453298.1 | 255351 | 27-scf00526 | 27 |
| AX-158350645 | 27 | 0.518 | KV453298.1 | 256693 | 27-scf00526 | 27 |
| AX-157750109 | 27 | 0.518 | KV453298.1 | 260011 | 27-scf00526 | 27 |
| AX-158350648 | 27 | 0.518 | KV453298.1 | 266549 | 27-scf00526 | 27 |
| AX-157888933 | 27 | 0.518 | KV453298.1 | 267014 | 27-scf00526 | 27 |
| AX-158350650 | 27 | 0.518 | KV453298.1 | 269396 | 27-scf00526 | 27 |
| AX-158350652 | 27 | 0.518 | KV453298.1 | 272039 | 27-scf00526 | 27 |

|              |    |       |            |        |             |    |
|--------------|----|-------|------------|--------|-------------|----|
| AX-158350653 | 27 | 0.518 | KV453298.1 | 275086 | 27-scf00526 | 27 |
| AX-158350654 | 27 | 0.518 | KV453298.1 | 276533 | 27-scf00526 | 27 |
| AX-158350655 | 27 | 0.518 | KV453298.1 | 281894 | 27-scf00526 | 27 |
| AX-158350656 | 27 | 0.518 | KV453298.1 | 286206 | 27-scf00526 | 27 |
| AX-157850933 | 27 | 0.518 | KV453298.1 | 290498 | 27-scf00526 | 27 |
| AX-157850934 | 27 | 0.518 | KV453298.1 | 298360 | 27-scf00526 | 27 |
| AX-158350662 | 27 | 0.518 | KV453298.1 | 311815 | 27-scf00526 | 27 |
| AX-158350663 | 27 | 0.518 | KV453298.1 | 313439 | 27-scf00526 | 27 |
| AX-158350684 | 27 | 0.518 | KV453298.1 | 361220 | 27-scf00526 | 27 |
| AX-158350698 | 27 | 0.518 | KV453298.1 | 378176 | 27-scf00526 | 27 |
| AX-158340719 | 27 | 0.566 | KV453299.1 | 60813  | 27-scf00525 | 27 |
| AX-158350659 | 27 | 0.566 | KV453298.1 | 303357 | 27-scf00526 | 27 |
| AX-158350710 | 27 | 0.566 | KV453298.1 | 385695 | 27-scf00526 | 27 |
| AX-158340679 | 27 | 0.627 | KV453299.1 | 1927   | 27-scf00525 | 27 |
| AX-158340680 | 27 | 0.627 | KV453299.1 | 5342   | 27-scf00525 | 27 |
| AX-157726035 | 27 | 0.627 | KV453299.1 | 15397  | 27-scf00525 | 27 |
| AX-158340687 | 27 | 0.627 | KV453299.1 | 16215  | 27-scf00525 | 27 |
| AX-158340689 | 27 | 0.627 | KV453299.1 | 17872  | 27-scf00525 | 27 |
| AX-158340690 | 27 | 0.627 | KV453299.1 | 20251  | 27-scf00525 | 27 |
| AX-158340691 | 27 | 0.627 | KV453299.1 | 21072  | 27-scf00525 | 27 |
| AX-158340693 | 27 | 0.627 | KV453299.1 | 25492  | 27-scf00525 | 27 |
| AX-157740326 | 27 | 0.627 | KV453299.1 | 170962 | 27-scf00525 | 27 |
| AX-158350594 | 27 | 0.627 | KV453298.1 | 159526 | 27-scf00526 | 27 |
| AX-158350621 | 27 | 0.627 | KV453298.1 | 207901 | 27-scf00526 | 27 |
| AX-158350665 | 27 | 0.627 | KV453298.1 | 322355 | 27-scf00526 | 27 |
| AX-157850935 | 27 | 0.627 | KV453298.1 | 322930 | 27-scf00526 | 27 |
| AX-158350667 | 27 | 0.627 | KV453298.1 | 325200 | 27-scf00526 | 27 |
| AX-158350670 | 27 | 0.627 | KV453298.1 | 332380 | 27-scf00526 | 27 |
| AX-158350671 | 27 | 0.627 | KV453298.1 | 334392 | 27-scf00526 | 27 |
| AX-157746249 | 27 | 0.627 | KV453298.1 | 342624 | 27-scf00526 | 27 |
| AX-158350677 | 27 | 0.627 | KV453298.1 | 347489 | 27-scf00526 | 27 |
| AX-158350678 | 27 | 0.627 | KV453298.1 | 347963 | 27-scf00526 | 27 |
| AX-158350680 | 27 | 0.627 | KV453298.1 | 352646 | 27-scf00526 | 27 |
| AX-158350681 | 27 | 0.627 | KV453298.1 | 353758 | 27-scf00526 | 27 |
| AX-157756014 | 27 | 0.627 | KV453298.1 | 357367 | 27-scf00526 | 27 |
| AX-158350682 | 27 | 0.627 | KV453298.1 | 358200 | 27-scf00526 | 27 |
| AX-158350686 | 27 | 0.627 | KV453298.1 | 363226 | 27-scf00526 | 27 |
| AX-158350688 | 27 | 0.627 | KV453298.1 | 366498 | 27-scf00526 | 27 |
| AX-158350689 | 27 | 0.627 | KV453298.1 | 367108 | 27-scf00526 | 27 |
| AX-158350690 | 27 | 0.627 | KV453298.1 | 367451 | 27-scf00526 | 27 |
| AX-158350691 | 27 | 0.627 | KV453298.1 | 368483 | 27-scf00526 | 27 |
| AX-158350697 | 27 | 0.627 | KV453298.1 | 376417 | 27-scf00526 | 27 |
| AX-158350700 | 27 | 0.627 | KV453298.1 | 379216 | 27-scf00526 | 27 |
| AX-158350702 | 27 | 0.627 | KV453298.1 | 381110 | 27-scf00526 | 27 |
| AX-158350703 | 27 | 0.627 | KV453298.1 | 381989 | 27-scf00526 | 27 |
| AX-158350704 | 27 | 0.627 | KV453298.1 | 382206 | 27-scf00526 | 27 |
| AX-158350705 | 27 | 0.627 | KV453298.1 | 382776 | 27-scf00526 | 27 |
| AX-158350707 | 27 | 0.627 | KV453298.1 | 384603 | 27-scf00526 | 27 |
| AX-158350708 | 27 | 0.627 | KV453298.1 | 385003 | 27-scf00526 | 27 |
| AX-158350709 | 27 | 0.627 | KV453298.1 | 385603 | 27-scf00526 | 27 |
| AX-158350711 | 27 | 0.627 | KV453298.1 | 386674 | 27-scf00526 | 27 |

|              |    |       |            |        |             |    |
|--------------|----|-------|------------|--------|-------------|----|
| AX-158350713 | 27 | 0.627 | KV453298.1 | 387762 | 27-scf00526 | 27 |
| AX-158350715 | 27 | 0.627 | KV453298.1 | 389972 | 27-scf00526 | 27 |
| AX-158340698 | 27 | 0.735 | KV453299.1 | 33962  | 27-scf00525 | 27 |
| AX-158340699 | 27 | 0.846 | KV453299.1 | 35602  | 27-scf00525 | 27 |
| AX-158340700 | 27 | 0.846 | KV453299.1 | 37432  | 27-scf00525 | 27 |
| AX-158340702 | 27 | 0.955 | KV453299.1 | 38801  | 27-scf00525 | 27 |
| AX-158340705 | 27 | 0.955 | KV453299.1 | 46844  | 27-scf00525 | 27 |
| AX-158340706 | 27 | 0.955 | KV453299.1 | 47531  | 27-scf00525 | 27 |
| AX-158340707 | 27 | 0.955 | KV453299.1 | 49231  | 27-scf00525 | 27 |
| AX-158340712 | 27 | 0.955 | KV453299.1 | 52328  | 27-scf00525 | 27 |
| AX-158340714 | 27 | 0.955 | KV453299.1 | 53930  | 27-scf00525 | 27 |
| AX-157861799 | 27 | 0.955 | KV453299.1 | 54505  | 27-scf00525 | 27 |
| AX-158340716 | 27 | 0.955 | KV453299.1 | 58236  | 27-scf00525 | 27 |
| AX-158340717 | 27 | 0.955 | KV453299.1 | 59220  | 27-scf00525 | 27 |
| AX-158340722 | 27 | 0.955 | KV453299.1 | 72234  | 27-scf00525 | 27 |
| AX-157861801 | 27 | 0.955 | KV453299.1 | 72408  | 27-scf00525 | 27 |
| AX-158340730 | 27 | 0.955 | KV453299.1 | 86466  | 27-scf00525 | 27 |
| AX-158340733 | 27 | 0.955 | KV453299.1 | 89423  | 27-scf00525 | 27 |
| AX-158340734 | 27 | 0.955 | KV453299.1 | 90317  | 27-scf00525 | 27 |
| AX-158340742 | 27 | 0.955 | KV453299.1 | 107480 | 27-scf00525 | 27 |
| AX-158340743 | 27 | 0.955 | KV453299.1 | 110174 | 27-scf00525 | 27 |
| AX-158340744 | 27 | 0.955 | KV453299.1 | 111017 | 27-scf00525 | 27 |
| AX-158340745 | 27 | 0.955 | KV453299.1 | 112732 | 27-scf00525 | 27 |
| AX-158340747 | 27 | 0.955 | KV453299.1 | 113669 | 27-scf00525 | 27 |
| AX-158340748 | 27 | 0.955 | KV453299.1 | 115619 | 27-scf00525 | 27 |
| AX-158340749 | 27 | 0.955 | KV453299.1 | 116324 | 27-scf00525 | 27 |
| AX-158340752 | 27 | 0.955 | KV453299.1 | 119559 | 27-scf00525 | 27 |
| AX-158340755 | 27 | 0.955 | KV453299.1 | 122520 | 27-scf00525 | 27 |
| AX-158340756 | 27 | 0.955 | KV453299.1 | 123482 | 27-scf00525 | 27 |
| AX-158340757 | 27 | 0.955 | KV453299.1 | 124195 | 27-scf00525 | 27 |
| AX-158340759 | 27 | 0.955 | KV453299.1 | 125685 | 27-scf00525 | 27 |
| AX-157724206 | 27 | 0.955 | KV453299.1 | 127659 | 27-scf00525 | 27 |
| AX-158340767 | 27 | 0.955 | KV453299.1 | 133515 | 27-scf00525 | 27 |
| AX-158340770 | 27 | 0.955 | KV453299.1 | 136216 | 27-scf00525 | 27 |
| AX-158340771 | 27 | 0.955 | KV453299.1 | 137601 | 27-scf00525 | 27 |
| AX-157742078 | 27 | 0.955 | KV453299.1 | 139440 | 27-scf00525 | 27 |
| AX-158340791 | 27 | 0.955 | KV453299.1 | 164780 | 27-scf00525 | 27 |
| AX-158340802 | 27 | 0.955 | KV453299.1 | 179112 | 27-scf00525 | 27 |
| AX-158340808 | 27 | 0.955 | KV453299.1 | 186090 | 27-scf00525 | 27 |
| AX-158340843 | 27 | 0.955 | KV453299.1 | 221769 | 27-scf00525 | 27 |
| AX-158340853 | 27 | 0.955 | KV453299.1 | 228076 | 27-scf00525 | 27 |
| AX-157850142 | 27 | 0.955 | KV453299.1 | 284144 | 27-scf00525 | 27 |
| AX-158340940 | 27 | 0.955 | KV453299.1 | 351084 | 27-scf00525 | 27 |
| AX-157746922 | 27 | 0.955 | KV453298.1 | 318962 | 27-scf00526 | 27 |
| AX-158350674 | 27 | 0.955 | KV453298.1 | 335891 | 27-scf00526 | 27 |
| AX-157723443 | 27 | 0.993 | KV453299.1 | 124601 | 27-scf00525 | 27 |
| AX-158340762 | 27 | 1.027 | KV453299.1 | 129734 | 27-scf00525 | 27 |
| AX-158340764 | 27 | 1.064 | KV453299.1 | 130619 | 27-scf00525 | 27 |
| AX-158340766 | 27 | 1.064 | KV453299.1 | 132862 | 27-scf00525 | 27 |
| AX-158340859 | 27 | 1.064 | KV453299.1 | 240374 | 27-scf00525 | 27 |
| AX-158340769 | 27 | 1.12  | KV453299.1 | 134711 | 27-scf00525 | 27 |

|              |    |       |            |        |             |    |
|--------------|----|-------|------------|--------|-------------|----|
| AX-158340684 | 27 | 1.173 | KV453299.1 | 11864  | 27-scf00525 | 27 |
| AX-157721660 | 27 | 1.173 | KV453299.1 | 27427  | 27-scf00525 | 27 |
| AX-157888657 | 27 | 1.173 | KV453299.1 | 40514  | 27-scf00525 | 27 |
| AX-158340711 | 27 | 1.173 | KV453299.1 | 51437  | 27-scf00525 | 27 |
| AX-158340718 | 27 | 1.173 | KV453299.1 | 60427  | 27-scf00525 | 27 |
| AX-158340727 | 27 | 1.173 | KV453299.1 | 81802  | 27-scf00525 | 27 |
| AX-158340731 | 27 | 1.173 | KV453299.1 | 87243  | 27-scf00525 | 27 |
| AX-158340754 | 27 | 1.173 | KV453299.1 | 120733 | 27-scf00525 | 27 |
| AX-157723854 | 27 | 1.173 | KV453299.1 | 121354 | 27-scf00525 | 27 |
| AX-158340768 | 27 | 1.173 | KV453299.1 | 134167 | 27-scf00525 | 27 |
| AX-158340775 | 27 | 1.173 | KV453299.1 | 144688 | 27-scf00525 | 27 |
| AX-158340776 | 27 | 1.173 | KV453299.1 | 146399 | 27-scf00525 | 27 |
| AX-158419110 | 27 | 1.173 | KV453299.1 | 148362 | 27-scf00525 | 27 |
| AX-157861803 | 27 | 1.173 | KV453299.1 | 149361 | 27-scf00525 | 27 |
| AX-157727131 | 27 | 1.173 | KV453299.1 | 154345 | 27-scf00525 | 27 |
| AX-158340781 | 27 | 1.173 | KV453299.1 | 154475 | 27-scf00525 | 27 |
| AX-158340783 | 27 | 1.173 | KV453299.1 | 156621 | 27-scf00525 | 27 |
| AX-158340784 | 27 | 1.173 | KV453299.1 | 157296 | 27-scf00525 | 27 |
| AX-158340786 | 27 | 1.173 | KV453299.1 | 158268 | 27-scf00525 | 27 |
| AX-158340787 | 27 | 1.173 | KV453299.1 | 158632 | 27-scf00525 | 27 |
| AX-158340790 | 27 | 1.173 | KV453299.1 | 162884 | 27-scf00525 | 27 |
| AX-158340792 | 27 | 1.173 | KV453299.1 | 166949 | 27-scf00525 | 27 |
| AX-158340794 | 27 | 1.173 | KV453299.1 | 169225 | 27-scf00525 | 27 |
| AX-158340797 | 27 | 1.173 | KV453299.1 | 175180 | 27-scf00525 | 27 |
| AX-157850139 | 27 | 1.173 | KV453299.1 | 175352 | 27-scf00525 | 27 |
| AX-158340799 | 27 | 1.173 | KV453299.1 | 176158 | 27-scf00525 | 27 |
| AX-158340800 | 27 | 1.173 | KV453299.1 | 177470 | 27-scf00525 | 27 |
| AX-158340801 | 27 | 1.173 | KV453299.1 | 178540 | 27-scf00525 | 27 |
| AX-158340803 | 27 | 1.173 | KV453299.1 | 179764 | 27-scf00525 | 27 |
| AX-158340804 | 27 | 1.173 | KV453299.1 | 180311 | 27-scf00525 | 27 |
| AX-158340805 | 27 | 1.173 | KV453299.1 | 182081 | 27-scf00525 | 27 |
| AX-158340806 | 27 | 1.173 | KV453299.1 | 183570 | 27-scf00525 | 27 |
| AX-158340807 | 27 | 1.173 | KV453299.1 | 185912 | 27-scf00525 | 27 |
| AX-158340811 | 27 | 1.173 | KV453299.1 | 189185 | 27-scf00525 | 27 |
| AX-158340812 | 27 | 1.173 | KV453299.1 | 189716 | 27-scf00525 | 27 |
| AX-157888664 | 27 | 1.173 | KV453299.1 | 191823 | 27-scf00525 | 27 |
| AX-158340814 | 27 | 1.173 | KV453299.1 | 192293 | 27-scf00525 | 27 |
| AX-158340815 | 27 | 1.173 | KV453299.1 | 192592 | 27-scf00525 | 27 |
| AX-158340819 | 27 | 1.173 | KV453299.1 | 197794 | 27-scf00525 | 27 |
| AX-158340820 | 27 | 1.173 | KV453299.1 | 199860 | 27-scf00525 | 27 |
| AX-158340822 | 27 | 1.173 | KV453299.1 | 200934 | 27-scf00525 | 27 |
| AX-158340823 | 27 | 1.173 | KV453299.1 | 204400 | 27-scf00525 | 27 |
| AX-158340824 | 27 | 1.173 | KV453299.1 | 204823 | 27-scf00525 | 27 |
| AX-158340827 | 27 | 1.173 | KV453299.1 | 206535 | 27-scf00525 | 27 |
| AX-158340828 | 27 | 1.173 | KV453299.1 | 207221 | 27-scf00525 | 27 |
| AX-158340829 | 27 | 1.173 | KV453299.1 | 210827 | 27-scf00525 | 27 |
| AX-158340830 | 27 | 1.173 | KV453299.1 | 211362 | 27-scf00525 | 27 |
| AX-158340832 | 27 | 1.173 | KV453299.1 | 213850 | 27-scf00525 | 27 |
| AX-158340833 | 27 | 1.173 | KV453299.1 | 214463 | 27-scf00525 | 27 |
| AX-158340835 | 27 | 1.173 | KV453299.1 | 215983 | 27-scf00525 | 27 |
| AX-158340836 | 27 | 1.173 | KV453299.1 | 216358 | 27-scf00525 | 27 |



|              |    |       |            |        |             |    |
|--------------|----|-------|------------|--------|-------------|----|
| AX-158340838 | 27 | 1.173 | KV453299.1 | 217727 | 27-scf00525 | 27 |
| AX-158340839 | 27 | 1.173 | KV453299.1 | 218701 | 27-scf00525 | 27 |
| AX-158340840 | 27 | 1.173 | KV453299.1 | 219484 | 27-scf00525 | 27 |
| AX-158340841 | 27 | 1.173 | KV453299.1 | 220070 | 27-scf00525 | 27 |
| AX-158340846 | 27 | 1.173 | KV453299.1 | 224444 | 27-scf00525 | 27 |
| AX-158340849 | 27 | 1.173 | KV453299.1 | 226025 | 27-scf00525 | 27 |
| AX-158340850 | 27 | 1.173 | KV453299.1 | 226584 | 27-scf00525 | 27 |
| AX-158340852 | 27 | 1.173 | KV453299.1 | 227588 | 27-scf00525 | 27 |
| AX-158340856 | 27 | 1.173 | KV453299.1 | 230532 | 27-scf00525 | 27 |
| AX-158340860 | 27 | 1.173 | KV453299.1 | 241247 | 27-scf00525 | 27 |
| AX-158340868 | 27 | 1.173 | KV453299.1 | 250082 | 27-scf00525 | 27 |
| AX-158340871 | 27 | 1.173 | KV453299.1 | 253046 | 27-scf00525 | 27 |
| AX-158340875 | 27 | 1.173 | KV453299.1 | 259626 | 27-scf00525 | 27 |
| AX-158340876 | 27 | 1.173 | KV453299.1 | 260526 | 27-scf00525 | 27 |
| AX-158340878 | 27 | 1.173 | KV453299.1 | 261621 | 27-scf00525 | 27 |
| AX-158340879 | 27 | 1.173 | KV453299.1 | 262501 | 27-scf00525 | 27 |
| AX-158340882 | 27 | 1.173 | KV453299.1 | 265228 | 27-scf00525 | 27 |
| AX-158340885 | 27 | 1.173 | KV453299.1 | 268075 | 27-scf00525 | 27 |
| AX-158340886 | 27 | 1.173 | KV453299.1 | 268951 | 27-scf00525 | 27 |
| AX-158340887 | 27 | 1.173 | KV453299.1 | 269619 | 27-scf00525 | 27 |
| AX-158340888 | 27 | 1.173 | KV453299.1 | 270060 | 27-scf00525 | 27 |
| AX-158340889 | 27 | 1.173 | KV453299.1 | 270504 | 27-scf00525 | 27 |
| AX-158340890 | 27 | 1.173 | KV453299.1 | 272664 | 27-scf00525 | 27 |
| AX-158340891 | 27 | 1.173 | KV453299.1 | 272983 | 27-scf00525 | 27 |
| AX-157850140 | 27 | 1.173 | KV453299.1 | 278388 | 27-scf00525 | 27 |
| AX-157861805 | 27 | 1.173 | KV453299.1 | 281217 | 27-scf00525 | 27 |
| AX-158340894 | 27 | 1.173 | KV453299.1 | 281322 | 27-scf00525 | 27 |
| AX-158340896 | 27 | 1.173 | KV453299.1 | 283182 | 27-scf00525 | 27 |
| AX-157850143 | 27 | 1.173 | KV453299.1 | 284275 | 27-scf00525 | 27 |
| AX-157888666 | 27 | 1.173 | KV453299.1 | 284366 | 27-scf00525 | 27 |
| AX-157850144 | 27 | 1.173 | KV453299.1 | 285115 | 27-scf00525 | 27 |
| AX-157888667 | 27 | 1.173 | KV453299.1 | 285488 | 27-scf00525 | 27 |
| AX-158340897 | 27 | 1.173 | KV453299.1 | 286748 | 27-scf00525 | 27 |
| AX-158340900 | 27 | 1.173 | KV453299.1 | 288727 | 27-scf00525 | 27 |
| AX-158340901 | 27 | 1.173 | KV453299.1 | 289730 | 27-scf00525 | 27 |
| AX-158340902 | 27 | 1.173 | KV453299.1 | 290658 | 27-scf00525 | 27 |
| AX-158340903 | 27 | 1.173 | KV453299.1 | 291203 | 27-scf00525 | 27 |
| AX-158340904 | 27 | 1.173 | KV453299.1 | 291680 | 27-scf00525 | 27 |
| AX-158340905 | 27 | 1.173 | KV453299.1 | 293061 | 27-scf00525 | 27 |
| AX-157861806 | 27 | 1.173 | KV453299.1 | 293872 | 27-scf00525 | 27 |
| AX-157740637 | 27 | 1.173 | KV453299.1 | 295523 | 27-scf00525 | 27 |
| AX-157752491 | 27 | 1.173 | KV453299.1 | 298036 | 27-scf00525 | 27 |
| AX-158340907 | 27 | 1.173 | KV453299.1 | 298682 | 27-scf00525 | 27 |
| AX-158340908 | 27 | 1.173 | KV453299.1 | 300325 | 27-scf00525 | 27 |
| AX-158340909 | 27 | 1.173 | KV453299.1 | 306060 | 27-scf00525 | 27 |
| AX-158340911 | 27 | 1.173 | KV453299.1 | 307795 | 27-scf00525 | 27 |
| AX-158340913 | 27 | 1.173 | KV453299.1 | 315079 | 27-scf00525 | 27 |
| AX-158340914 | 27 | 1.173 | KV453299.1 | 316352 | 27-scf00525 | 27 |
| AX-158340916 | 27 | 1.173 | KV453299.1 | 319477 | 27-scf00525 | 27 |
| AX-157710955 | 27 | 1.173 | KV453299.1 | 321687 | 27-scf00525 | 27 |
| AX-158340919 | 27 | 1.173 | KV453299.1 | 324387 | 27-scf00525 | 27 |

|              |    |       |            |        |             |    |
|--------------|----|-------|------------|--------|-------------|----|
| AX-158340920 | 27 | 1.173 | KV453299.1 | 324945 | 27-scf00525 | 27 |
| AX-158340921 | 27 | 1.173 | KV453299.1 | 325888 | 27-scf00525 | 27 |
| AX-158340923 | 27 | 1.173 | KV453299.1 | 329728 | 27-scf00525 | 27 |
| AX-158340924 | 27 | 1.173 | KV453299.1 | 332738 | 27-scf00525 | 27 |
| AX-158340926 | 27 | 1.173 | KV453299.1 | 333361 | 27-scf00525 | 27 |
| AX-158340929 | 27 | 1.173 | KV453299.1 | 334855 | 27-scf00525 | 27 |
| AX-158340932 | 27 | 1.173 | KV453299.1 | 338865 | 27-scf00525 | 27 |
| AX-157861807 | 27 | 1.173 | KV453299.1 | 339910 | 27-scf00525 | 27 |
| AX-158340946 | 27 | 1.173 | KV453299.1 | 361657 | 27-scf00525 | 27 |
| AX-157742688 | 27 | 1.173 | KV453299.1 | 403045 | 27-scf00525 | 27 |
| AX-158340999 | 27 | 1.173 | KV453299.1 | 428528 | 27-scf00525 | 27 |
| AX-158341081 | 27 | 1.173 | KV453299.1 | 539065 | 27-scf00525 | 27 |
| AX-158341102 | 27 | 1.173 | KV453299.1 | 560675 | 27-scf00525 | 27 |
| AX-158350607 | 27 | 1.173 | KV453298.1 | 174926 | 27-scf00526 | 27 |
| AX-158350636 | 27 | 1.173 | KV453298.1 | 236444 | 27-scf00526 | 27 |
| AX-157850932 | 27 | 1.173 | KV453298.1 | 255584 | 27-scf00526 | 27 |
| AX-158350647 | 27 | 1.173 | KV453298.1 | 263944 | 27-scf00526 | 27 |
| AX-158350694 | 27 | 1.173 | KV453298.1 | 374519 | 27-scf00526 | 27 |
| AX-158350696 | 27 | 1.173 | KV453298.1 | 375310 | 27-scf00526 | 27 |
| AX-157773426 | 27 | 1.392 | KV453299.1 | 349893 | 27-scf00525 | 27 |
| AX-158340939 | 27 | 1.392 | KV453299.1 | 350412 | 27-scf00525 | 27 |
| AX-158340943 | 27 | 1.392 | KV453299.1 | 356886 | 27-scf00525 | 27 |
| AX-158340947 | 27 | 1.392 | KV453299.1 | 362211 | 27-scf00525 | 27 |
| AX-158340949 | 27 | 1.392 | KV453299.1 | 364675 | 27-scf00525 | 27 |
| AX-158340950 | 27 | 1.392 | KV453299.1 | 365204 | 27-scf00525 | 27 |
| AX-158340995 | 27 | 1.392 | KV453299.1 | 421830 | 27-scf00525 | 27 |
| AX-158340952 | 27 | 1.501 | KV453299.1 | 370873 | 27-scf00525 | 27 |
| AX-157861808 | 27 | 1.501 | KV453299.1 | 371068 | 27-scf00525 | 27 |
| AX-157740104 | 27 | 1.501 | KV453299.1 | 374686 | 27-scf00525 | 27 |
| AX-158340956 | 27 | 1.501 | KV453299.1 | 375360 | 27-scf00525 | 27 |
| AX-158340957 | 27 | 1.501 | KV453299.1 | 375625 | 27-scf00525 | 27 |
| AX-158340959 | 27 | 1.501 | KV453299.1 | 376859 | 27-scf00525 | 27 |
| AX-158340960 | 27 | 1.501 | KV453299.1 | 377748 | 27-scf00525 | 27 |
| AX-157742970 | 27 | 1.501 | KV453299.1 | 379431 | 27-scf00525 | 27 |
| AX-158340962 | 27 | 1.501 | KV453299.1 | 380919 | 27-scf00525 | 27 |
| AX-158340964 | 27 | 1.501 | KV453299.1 | 383433 | 27-scf00525 | 27 |
| AX-157773999 | 27 | 1.501 | KV453299.1 | 384830 | 27-scf00525 | 27 |
| AX-157861809 | 27 | 1.501 | KV453299.1 | 385613 | 27-scf00525 | 27 |
| AX-158340969 | 27 | 1.501 | KV453299.1 | 389437 | 27-scf00525 | 27 |
| AX-158340992 | 27 | 1.501 | KV453299.1 | 419019 | 27-scf00525 | 27 |
| AX-158341018 | 27 | 1.501 | KV453299.1 | 459543 | 27-scf00525 | 27 |
| AX-157757855 | 27 | 1.501 | KV453299.1 | 589019 | 27-scf00525 | 27 |
| AX-158340697 | 27 | 1.566 | KV453299.1 | 29661  | 27-scf00525 | 27 |
| AX-158340739 | 27 | 1.566 | KV453299.1 | 102344 | 27-scf00525 | 27 |
| AX-158340970 | 27 | 1.566 | KV453299.1 | 391233 | 27-scf00525 | 27 |
| AX-157773546 | 27 | 1.61  | KV453299.1 | 398921 | 27-scf00525 | 27 |
| AX-158340975 | 27 | 1.61  | KV453299.1 | 399350 | 27-scf00525 | 27 |
| AX-158340981 | 27 | 1.61  | KV453299.1 | 407240 | 27-scf00525 | 27 |
| AX-158340982 | 27 | 1.61  | KV453299.1 | 408191 | 27-scf00525 | 27 |
| AX-158340984 | 27 | 1.663 | KV453299.1 | 410859 | 27-scf00525 | 27 |
| AX-158340955 | 27 | 1.73  | KV453299.1 | 373495 | 27-scf00525 | 27 |

|              |    |       |            |        |             |    |
|--------------|----|-------|------------|--------|-------------|----|
| AX-158340979 | 27 | 1.73  | KV453299.1 | 405043 | 27-scf00525 | 27 |
| AX-157753555 | 27 | 1.73  | KV453299.1 | 411381 | 27-scf00525 | 27 |
| AX-158340986 | 27 | 1.756 | KV453299.1 | 413815 | 27-scf00525 | 27 |
| AX-158340987 | 27 | 1.756 | KV453299.1 | 414310 | 27-scf00525 | 27 |
| AX-158340989 | 27 | 1.756 | KV453299.1 | 416401 | 27-scf00525 | 27 |
| AX-158340990 | 27 | 1.756 | KV453299.1 | 417316 | 27-scf00525 | 27 |
| AX-158340994 | 27 | 1.756 | KV453299.1 | 421075 | 27-scf00525 | 27 |
| AX-157861811 | 27 | 1.756 | KV453299.1 | 421398 | 27-scf00525 | 27 |
| AX-158340996 | 27 | 1.756 | KV453299.1 | 424158 | 27-scf00525 | 27 |
| AX-158340998 | 27 | 1.756 | KV453299.1 | 427535 | 27-scf00525 | 27 |
| AX-158341002 | 27 | 1.756 | KV453299.1 | 433842 | 27-scf00525 | 27 |
| AX-158341003 | 27 | 1.756 | KV453299.1 | 435636 | 27-scf00525 | 27 |
| AX-158341004 | 27 | 1.756 | KV453299.1 | 436535 | 27-scf00525 | 27 |
| AX-158341007 | 27 | 2.047 | KV453299.1 | 440379 | 27-scf00525 | 27 |
| AX-158341008 | 27 | 2.047 | KV453299.1 | 441467 | 27-scf00525 | 27 |
| AX-158341009 | 27 | 2.047 | KV453299.1 | 449424 | 27-scf00525 | 27 |
| AX-158341010 | 27 | 2.047 | KV453299.1 | 450036 | 27-scf00525 | 27 |
| AX-157723384 | 27 | 2.047 | KV453299.1 | 450585 | 27-scf00525 | 27 |
| AX-157709426 | 27 | 2.156 | KV453299.1 | 238431 | 27-scf00525 | 27 |
| AX-157772459 | 27 | 2.156 | KV453299.1 | 453111 | 27-scf00525 | 27 |
| AX-158341015 | 27 | 2.156 | KV453299.1 | 456262 | 27-scf00525 | 27 |
| AX-158341019 | 27 | 2.156 | KV453299.1 | 460146 | 27-scf00525 | 27 |
| AX-157861816 | 27 | 2.156 | KV453299.1 | 559538 | 27-scf00525 | 27 |
| AX-157716800 | 27 | 2.156 | KV453298.1 | 337611 | 27-scf00526 | 27 |
| AX-157888675 | 27 | 2.589 | KV453299.1 | 473894 | 27-scf00525 | 27 |
| AX-158341034 | 27 | 2.589 | KV453299.1 | 478245 | 27-scf00525 | 27 |
| AX-157751849 | 27 | 2.593 | KV453299.1 | 475086 | 27-scf00525 | 27 |
| AX-157888676 | 27 | 2.593 | KV453299.1 | 476591 | 27-scf00525 | 27 |
| AX-158341032 | 27 | 2.593 | KV453299.1 | 477218 | 27-scf00525 | 27 |
| AX-158341037 | 27 | 2.593 | KV453299.1 | 480348 | 27-scf00525 | 27 |
| AX-158341038 | 27 | 2.593 | KV453299.1 | 482889 | 27-scf00525 | 27 |
| AX-158341040 | 27 | 2.593 | KV453299.1 | 487231 | 27-scf00525 | 27 |
| AX-158341042 | 27 | 2.593 | KV453299.1 | 489166 | 27-scf00525 | 27 |
| AX-158341046 | 27 | 2.593 | KV453299.1 | 494990 | 27-scf00525 | 27 |
| AX-158341052 | 27 | 2.593 | KV453299.1 | 500004 | 27-scf00525 | 27 |
| AX-158341053 | 27 | 2.593 | KV453299.1 | 500757 | 27-scf00525 | 27 |
| AX-158341054 | 27 | 2.593 | KV453299.1 | 501111 | 27-scf00525 | 27 |
| AX-158341057 | 27 | 2.593 | KV453299.1 | 504651 | 27-scf00525 | 27 |
| AX-158341058 | 27 | 2.593 | KV453299.1 | 505395 | 27-scf00525 | 27 |
| AX-158341059 | 27 | 2.593 | KV453299.1 | 507836 | 27-scf00525 | 27 |
| AX-158341061 | 27 | 2.593 | KV453299.1 | 509994 | 27-scf00525 | 27 |
| AX-158341063 | 27 | 2.593 | KV453299.1 | 511483 | 27-scf00525 | 27 |
| AX-158341064 | 27 | 2.593 | KV453299.1 | 513034 | 27-scf00525 | 27 |
| AX-158381605 | 27 | 2.593 | KV453299.1 | 514736 | 27-scf00525 | 27 |
| AX-158341069 | 27 | 2.593 | KV453299.1 | 517656 | 27-scf00525 | 27 |
| AX-158341077 | 27 | 2.593 | KV453299.1 | 532992 | 27-scf00525 | 27 |
| AX-157772534 | 27 | 2.593 | KV453299.1 | 578352 | 27-scf00525 | 27 |
| AX-158341071 | 27 | 2.811 | KV453299.1 | 520191 | 27-scf00525 | 27 |
| AX-157738634 | 27 | 2.811 | KV453299.1 | 520702 | 27-scf00525 | 27 |
| AX-157850149 | 27 | 2.811 | KV453299.1 | 521483 | 27-scf00525 | 27 |
| AX-158341074 | 27 | 2.921 | KV453299.1 | 524995 | 27-scf00525 | 27 |

|              |    |       |            |        |             |    |
|--------------|----|-------|------------|--------|-------------|----|
| AX-158341075 | 27 | 2.921 | KV453299.1 | 525751 | 27-scf00525 | 27 |
| AX-158341076 | 27 | 2.921 | KV453299.1 | 529369 | 27-scf00525 | 27 |
| AX-157740634 | 27 | 2.921 | KV453299.1 | 536758 | 27-scf00525 | 27 |
| AX-158341082 | 27 | 2.937 | KV453299.1 | 541441 | 27-scf00525 | 27 |
| AX-158341083 | 27 | 2.958 | KV453299.1 | 542012 | 27-scf00525 | 27 |
| AX-158341084 | 27 | 2.994 | KV453299.1 | 542555 | 27-scf00525 | 27 |
| AX-158341062 | 27 | 3.03  | KV453299.1 | 510933 | 27-scf00525 | 27 |
| AX-158341085 | 27 | 3.03  | KV453299.1 | 544915 | 27-scf00525 | 27 |
| AX-158341088 | 27 | 3.03  | KV453299.1 | 546890 | 27-scf00525 | 27 |
| AX-158341090 | 27 | 3.03  | KV453299.1 | 548651 | 27-scf00525 | 27 |
| AX-158341092 | 27 | 3.03  | KV453299.1 | 549650 | 27-scf00525 | 27 |
| AX-158341093 | 27 | 3.03  | KV453299.1 | 549864 | 27-scf00525 | 27 |
| AX-158341095 | 27 | 3.03  | KV453299.1 | 553014 | 27-scf00525 | 27 |
| AX-158341097 | 27 | 3.03  | KV453299.1 | 554411 | 27-scf00525 | 27 |
| AX-158341100 | 27 | 3.03  | KV453299.1 | 557495 | 27-scf00525 | 27 |
| AX-157888679 | 27 | 3.084 | KV453299.1 | 518202 | 27-scf00525 | 27 |
| AX-158341105 | 27 | 3.084 | KV453299.1 | 567584 | 27-scf00525 | 27 |
| AX-158341103 | 27 | 3.139 | KV453299.1 | 562207 | 27-scf00525 | 27 |
| AX-158341107 | 27 | 3.139 | KV453299.1 | 570470 | 27-scf00525 | 27 |
| AX-158379009 | 27 | 3.139 | KV453299.1 | 570966 | 27-scf00525 | 27 |
| AX-158341108 | 27 | 3.139 | KV453299.1 | 571036 | 27-scf00525 | 27 |
| AX-158341109 | 27 | 3.139 | KV453299.1 | 572570 | 27-scf00525 | 27 |
| AX-157741506 | 27 | 3.139 | KV453299.1 | 573031 | 27-scf00525 | 27 |
| AX-158341110 | 27 | 3.139 | KV453299.1 | 574122 | 27-scf00525 | 27 |
| AX-158379010 | 27 | 3.139 | KV453299.1 | 574395 | 27-scf00525 | 27 |
| AX-157888689 | 27 | 3.139 | KV453299.1 | 574697 | 27-scf00525 | 27 |
| AX-158341120 | 27 | 3.139 | KV453299.1 | 587535 | 27-scf00525 | 27 |
| AX-158341121 | 27 | 3.139 | KV453299.1 | 588527 | 27-scf00525 | 27 |
| AX-158341122 | 27 | 3.139 | KV453299.1 | 589745 | 27-scf00525 | 27 |
| AX-158341123 | 27 | 3.139 | KV453299.1 | 590563 | 27-scf00525 | 27 |
| AX-158341125 | 27 | 3.139 | KV453299.1 | 594738 | 27-scf00525 | 27 |
| AX-158341126 | 27 | 3.139 | KV453299.1 | 595625 | 27-scf00525 | 27 |
| AX-158341178 | 27 | 3.139 | KV453299.1 | 660216 | 27-scf00525 | 27 |
| AX-158341131 | 27 | 3.43  | KV453299.1 | 602642 | 27-scf00525 | 27 |
| AX-157725250 | 27 | 3.43  | KV453299.1 | 605831 | 27-scf00525 | 27 |
| AX-158341137 | 27 | 3.43  | KV453299.1 | 611384 | 27-scf00525 | 27 |
| AX-158341140 | 27 | 3.43  | KV453299.1 | 614924 | 27-scf00525 | 27 |
| AX-158341167 | 27 | 3.43  | KV453299.1 | 648760 | 27-scf00525 | 27 |
| AX-157888693 | 27 | 3.507 | KV453299.1 | 615317 | 27-scf00525 | 27 |
| AX-157746830 | 27 | 3.576 | KV453299.1 | 490081 | 27-scf00525 | 27 |
| AX-158341113 | 27 | 3.576 | KV453299.1 | 577932 | 27-scf00525 | 27 |
| AX-158341130 | 27 | 3.576 | KV453299.1 | 600391 | 27-scf00525 | 27 |
| AX-158341136 | 27 | 3.576 | KV453299.1 | 608283 | 27-scf00525 | 27 |
| AX-158341138 | 27 | 3.576 | KV453299.1 | 612339 | 27-scf00525 | 27 |
| AX-158341139 | 27 | 3.576 | KV453299.1 | 613049 | 27-scf00525 | 27 |
| AX-158341142 | 27 | 3.576 | KV453299.1 | 617568 | 27-scf00525 | 27 |
| AX-158341143 | 27 | 3.576 | KV453299.1 | 619059 | 27-scf00525 | 27 |
| AX-158341145 | 27 | 3.576 | KV453299.1 | 621344 | 27-scf00525 | 27 |
| AX-158341146 | 27 | 3.576 | KV453299.1 | 622221 | 27-scf00525 | 27 |
| AX-158341147 | 27 | 3.576 | KV453299.1 | 622898 | 27-scf00525 | 27 |
| AX-158341154 | 27 | 3.576 | KV453299.1 | 628921 | 27-scf00525 | 27 |

|              |    |       |            |        |             |    |
|--------------|----|-------|------------|--------|-------------|----|
| AX-158341155 | 27 | 3.576 | KV453299.1 | 629557 | 27-scf00525 | 27 |
| AX-158341158 | 27 | 3.576 | KV453299.1 | 632014 | 27-scf00525 | 27 |
| AX-158341160 | 27 | 3.576 | KV453299.1 | 633617 | 27-scf00525 | 27 |
| AX-158341161 | 27 | 3.576 | KV453299.1 | 634246 | 27-scf00525 | 27 |
| AX-157773117 | 27 | 3.576 | KV453299.1 | 635536 | 27-scf00525 | 27 |
| AX-158379013 | 27 | 3.576 | KV453299.1 | 635873 | 27-scf00525 | 27 |
| AX-158341162 | 27 | 3.576 | KV453299.1 | 636619 | 27-scf00525 | 27 |
| AX-157719680 | 27 | 3.576 | KV453299.1 | 637126 | 27-scf00525 | 27 |
| AX-158341163 | 27 | 3.576 | KV453299.1 | 637791 | 27-scf00525 | 27 |
| AX-158341166 | 27 | 3.576 | KV453299.1 | 643970 | 27-scf00525 | 27 |
| AX-158419117 | 27 | 3.576 | KV453299.1 | 648528 | 27-scf00525 | 27 |
| AX-158341169 | 27 | 3.576 | KV453299.1 | 651466 | 27-scf00525 | 27 |
| AX-157888694 | 27 | 3.576 | KV453299.1 | 652889 | 27-scf00525 | 27 |
| AX-158341173 | 27 | 3.576 | KV453299.1 | 655214 | 27-scf00525 | 27 |
| AX-158341174 | 27 | 3.576 | KV453299.1 | 656110 | 27-scf00525 | 27 |
| AX-158341175 | 27 | 3.576 | KV453299.1 | 657323 | 27-scf00525 | 27 |
| AX-158341180 | 27 | 3.576 | KV453299.1 | 664070 | 27-scf00525 | 27 |
| AX-158341183 | 27 | 3.576 | KV453299.1 | 670247 | 27-scf00525 | 27 |
| AX-158341185 | 27 | 3.576 | KV453299.1 | 674518 | 27-scf00525 | 27 |
| AX-158341187 | 27 | 3.576 | KV453299.1 | 676412 | 27-scf00525 | 27 |
| AX-158341188 | 27 | 3.576 | KV453299.1 | 678480 | 27-scf00525 | 27 |
| AX-157709332 | 27 | 3.576 | KV453299.1 | 741773 | 27-scf00525 | 27 |
| AX-158341246 | 27 | 3.576 | KV453299.1 | 754242 | 27-scf00525 | 27 |
| AX-157775523 | 27 | 3.576 | KV453299.1 | 789724 | 27-scf00525 | 27 |
| AX-158379016 | 27 | 3.794 | KV453299.1 | 684450 | 27-scf00525 | 27 |
| AX-158341193 | 27 | 3.794 | KV453299.1 | 687965 | 27-scf00525 | 27 |
| AX-158341194 | 27 | 3.794 | KV453299.1 | 689281 | 27-scf00525 | 27 |
| AX-158341195 | 27 | 3.794 | KV453299.1 | 689792 | 27-scf00525 | 27 |
| AX-158341255 | 27 | 3.794 | KV453299.1 | 764558 | 27-scf00525 | 27 |
| AX-158341196 | 27 | 3.831 | KV453299.1 | 691533 | 27-scf00525 | 27 |
| AX-157850154 | 27 | 3.86  | KV453299.1 | 696791 | 27-scf00525 | 27 |
| AX-157850155 | 27 | 3.86  | KV453299.1 | 696829 | 27-scf00525 | 27 |
| AX-158341199 | 27 | 3.868 | KV453299.1 | 694838 | 27-scf00525 | 27 |
| AX-158341200 | 27 | 3.868 | KV453299.1 | 697457 | 27-scf00525 | 27 |
| AX-158341205 | 27 | 3.868 | KV453299.1 | 701488 | 27-scf00525 | 27 |
| AX-158341237 | 27 | 3.868 | KV453299.1 | 739143 | 27-scf00525 | 27 |
| AX-158341211 | 27 | 4.013 | KV453299.1 | 708863 | 27-scf00525 | 27 |
| AX-158341213 | 27 | 4.013 | KV453299.1 | 709883 | 27-scf00525 | 27 |
| AX-158341214 | 27 | 4.013 | KV453299.1 | 710583 | 27-scf00525 | 27 |
| AX-158341215 | 27 | 4.013 | KV453299.1 | 711538 | 27-scf00525 | 27 |
| AX-158341217 | 27 | 4.013 | KV453299.1 | 713854 | 27-scf00525 | 27 |
| AX-158341218 | 27 | 4.013 | KV453299.1 | 715188 | 27-scf00525 | 27 |
| AX-158341221 | 27 | 4.013 | KV453299.1 | 719133 | 27-scf00525 | 27 |
| AX-158341223 | 27 | 4.013 | KV453299.1 | 721082 | 27-scf00525 | 27 |
| AX-158341226 | 27 | 4.013 | KV453299.1 | 723005 | 27-scf00525 | 27 |
| AX-158341227 | 27 | 4.013 | KV453299.1 | 724195 | 27-scf00525 | 27 |
| AX-158341300 | 27 | 4.013 | KV453299.1 | 826513 | 27-scf00525 | 27 |
| AX-157861819 | 27 | 4.013 | KV453299.1 | 883681 | 27-scf00525 | 27 |
| AX-158341231 | 27 | 4.123 | KV453299.1 | 734435 | 27-scf00525 | 27 |
| AX-158341232 | 27 | 4.123 | KV453299.1 | 735108 | 27-scf00525 | 27 |
| AX-158341235 | 27 | 4.123 | KV453299.1 | 737760 | 27-scf00525 | 27 |

|              |    |       |            |        |             |    |
|--------------|----|-------|------------|--------|-------------|----|
| AX-158341241 | 27 | 4.123 | KV453299.1 | 744782 | 27-scf00525 | 27 |
| AX-158341244 | 27 | 4.123 | KV453299.1 | 751112 | 27-scf00525 | 27 |
| AX-158341247 | 27 | 4.123 | KV453299.1 | 754979 | 27-scf00525 | 27 |
| AX-158341248 | 27 | 4.153 | KV453299.1 | 755376 | 27-scf00525 | 27 |
| AX-158341253 | 27 | 4.19  | KV453299.1 | 761555 | 27-scf00525 | 27 |
| AX-158341118 | 27 | 4.232 | KV453299.1 | 583375 | 27-scf00525 | 27 |
| AX-157773375 | 27 | 4.232 | KV453299.1 | 679041 | 27-scf00525 | 27 |
| AX-158341256 | 27 | 4.232 | KV453299.1 | 767998 | 27-scf00525 | 27 |
| AX-158341259 | 27 | 4.232 | KV453299.1 | 771410 | 27-scf00525 | 27 |
| AX-157882140 | 27 | 4.232 | KV453299.1 | 772560 | 27-scf00525 | 27 |
| AX-158341260 | 27 | 4.232 | KV453299.1 | 773288 | 27-scf00525 | 27 |
| AX-158341261 | 27 | 4.232 | KV453299.1 | 774300 | 27-scf00525 | 27 |
| AX-158341262 | 27 | 4.232 | KV453299.1 | 774777 | 27-scf00525 | 27 |
| AX-158341266 | 27 | 4.232 | KV453299.1 | 780128 | 27-scf00525 | 27 |
| AX-158341267 | 27 | 4.232 | KV453299.1 | 780911 | 27-scf00525 | 27 |
| AX-158341268 | 27 | 4.232 | KV453299.1 | 781980 | 27-scf00525 | 27 |
| AX-158341272 | 27 | 4.232 | KV453299.1 | 785456 | 27-scf00525 | 27 |
| AX-158341274 | 27 | 4.232 | KV453299.1 | 789408 | 27-scf00525 | 27 |
| AX-158413090 | 27 | 4.232 | KV453299.1 | 791460 | 27-scf00525 | 27 |
| AX-158341276 | 27 | 4.232 | KV453299.1 | 792313 | 27-scf00525 | 27 |
| AX-158341280 | 27 | 4.232 | KV453299.1 | 796979 | 27-scf00525 | 27 |
| AX-157861817 | 27 | 4.232 | KV453299.1 | 797752 | 27-scf00525 | 27 |
| AX-158341287 | 27 | 4.232 | KV453299.1 | 807850 | 27-scf00525 | 27 |
| AX-158341281 | 27 | 4.233 | KV453299.1 | 797574 | 27-scf00525 | 27 |
| AX-157861818 | 27 | 4.233 | KV453299.1 | 800189 | 27-scf00525 | 27 |
| AX-158341284 | 27 | 4.233 | KV453299.1 | 801252 | 27-scf00525 | 27 |
| AX-158341285 | 27 | 4.233 | KV453299.1 | 805424 | 27-scf00525 | 27 |
| AX-158341288 | 27 | 4.234 | KV453299.1 | 813860 | 27-scf00525 | 27 |
| AX-158341289 | 27 | 4.234 | KV453299.1 | 815588 | 27-scf00525 | 27 |
| AX-158341222 | 27 | 4.56  | KV453299.1 | 719606 | 27-scf00525 | 27 |
| AX-158341290 | 27 | 4.56  | KV453299.1 | 815722 | 27-scf00525 | 27 |
| AX-158341291 | 27 | 4.56  | KV453299.1 | 818625 | 27-scf00525 | 27 |
| AX-158341293 | 27 | 4.56  | KV453299.1 | 819546 | 27-scf00525 | 27 |
| AX-158381606 | 27 | 4.56  | KV453299.1 | 821523 | 27-scf00525 | 27 |
| AX-158341296 | 27 | 4.56  | KV453299.1 | 822988 | 27-scf00525 | 27 |
| AX-158341297 | 27 | 4.56  | KV453299.1 | 823610 | 27-scf00525 | 27 |
| AX-158341298 | 27 | 4.56  | KV453299.1 | 825342 | 27-scf00525 | 27 |
| AX-158341299 | 27 | 4.56  | KV453299.1 | 825759 | 27-scf00525 | 27 |
| AX-158341302 | 27 | 4.56  | KV453299.1 | 828681 | 27-scf00525 | 27 |
| AX-158341303 | 27 | 4.56  | KV453299.1 | 829350 | 27-scf00525 | 27 |
| AX-158419123 | 27 | 4.56  | KV453299.1 | 832039 | 27-scf00525 | 27 |
| AX-158341322 | 27 | 4.56  | KV453299.1 | 858595 | 27-scf00525 | 27 |
| AX-158341336 | 27 | 4.56  | KV453299.1 | 876720 | 27-scf00525 | 27 |
| AX-158341304 | 27 | 4.669 | KV453299.1 | 832245 | 27-scf00525 | 27 |
| AX-158341306 | 27 | 4.669 | KV453299.1 | 834017 | 27-scf00525 | 27 |
| AX-158341310 | 27 | 4.669 | KV453299.1 | 840694 | 27-scf00525 | 27 |
| AX-158341311 | 27 | 4.669 | KV453299.1 | 841864 | 27-scf00525 | 27 |
| AX-158341312 | 27 | 4.669 | KV453299.1 | 842847 | 27-scf00525 | 27 |
| AX-157754485 | 27 | 4.669 | KV453299.1 | 847678 | 27-scf00525 | 27 |
| AX-158341316 | 27 | 4.669 | KV453299.1 | 849517 | 27-scf00525 | 27 |
| AX-158341317 | 27 | 4.669 | KV453299.1 | 850264 | 27-scf00525 | 27 |

|              |    |       |             |        |             |    |
|--------------|----|-------|-------------|--------|-------------|----|
| AX-158341319 | 27 | 4.669 | KV453299.1  | 854712 | 27-scf00525 | 27 |
| AX-158341321 | 27 | 4.669 | KV453299.1  | 856545 | 27-scf00525 | 27 |
| AX-158341325 | 27 | 4.669 | KV453299.1  | 864781 | 27-scf00525 | 27 |
| AX-158341326 | 27 | 4.669 | KV453299.1  | 866994 | 27-scf00525 | 27 |
| AX-157888700 | 27 | 4.669 | KV453299.1  | 869490 | 27-scf00525 | 27 |
| AX-157706801 | 27 | 4.669 | 3ML01032941 | 345    | scf08573_1  | UN |
| AX-158341186 | 27 | 4.889 | KV453299.1  | 675395 | 27-scf00525 | 27 |
| AX-158341189 | 27 | 4.889 | KV453299.1  | 684711 | 27-scf00525 | 27 |
| AX-158341201 | 27 | 4.889 | KV453299.1  | 698139 | 27-scf00525 | 27 |
| AX-158341202 | 27 | 4.889 | KV453299.1  | 698756 | 27-scf00525 | 27 |
| AX-158341203 | 27 | 4.889 | KV453299.1  | 699122 | 27-scf00525 | 27 |
| AX-158341204 | 27 | 4.889 | KV453299.1  | 699615 | 27-scf00525 | 27 |
| AX-158341206 | 27 | 4.889 | KV453299.1  | 701764 | 27-scf00525 | 27 |
| AX-158341243 | 27 | 4.889 | KV453299.1  | 748142 | 27-scf00525 | 27 |
| AX-158341254 | 27 | 4.889 | KV453299.1  | 764315 | 27-scf00525 | 27 |
| AX-158341309 | 27 | 4.889 | KV453299.1  | 838430 | 27-scf00525 | 27 |
| AX-158341327 | 27 | 4.889 | KV453299.1  | 867805 | 27-scf00525 | 27 |
| AX-158341329 | 27 | 4.889 | KV453299.1  | 869857 | 27-scf00525 | 27 |
| AX-158341331 | 27 | 4.889 | KV453299.1  | 871130 | 27-scf00525 | 27 |
| AX-158341333 | 27 | 4.889 | KV453299.1  | 875614 | 27-scf00525 | 27 |
| AX-158341337 | 27 | 4.889 | KV453299.1  | 877472 | 27-scf00525 | 27 |
| AX-157688178 | 27 | 4.889 | KV453767.1  | 3615   | scf01332    | UN |
| AX-158341339 | 27 | 5.234 | KV453299.1  | 881025 | 27-scf00525 | 27 |
| AX-158341341 | 27 | 5.234 | KV453299.1  | 883472 | 27-scf00525 | 27 |
| AX-157742508 | 27 | 5.242 | KV453299.1  | 918545 | 27-scf00525 | 27 |
| AX-158341366 | 27 | 5.242 | KV453299.1  | 919159 | 27-scf00525 | 27 |
| AX-158341367 | 27 | 5.75  | KV453299.1  | 920523 | 27-scf00525 | 27 |
| AX-158341369 | 27 | 5.764 | KV453299.1  | 924207 | 27-scf00525 | 27 |
| AX-158341371 | 27 | 5.764 | KV453299.1  | 925561 | 27-scf00525 | 27 |
| AX-158341374 | 27 | 5.764 | KV453299.1  | 928896 | 27-scf00525 | 27 |
| AX-158341377 | 27 | 5.764 | KV453299.1  | 931633 | 27-scf00525 | 27 |
| AX-158341378 | 27 | 5.764 | KV453299.1  | 932437 | 27-scf00525 | 27 |
| AX-158341379 | 27 | 5.764 | KV453299.1  | 933108 | 27-scf00525 | 27 |
| AX-158341381 | 27 | 5.764 | KV453299.1  | 935258 | 27-scf00525 | 27 |
| AX-157740707 | 27 | 5.764 | KV453299.1  | 935735 | 27-scf00525 | 27 |
| AX-157756443 | 27 | 5.764 | KV453299.1  | 941990 | 27-scf00525 | 27 |
| AX-158341388 | 27 | 5.764 | KV453299.1  | 942747 | 27-scf00525 | 27 |
| AX-158341389 | 27 | 5.764 | KV453299.1  | 943290 | 27-scf00525 | 27 |
| AX-158341391 | 27 | 5.791 | KV453299.1  | 948333 | 27-scf00525 | 27 |
| AX-158341393 | 27 | 5.822 | KV453299.1  | 949509 | 27-scf00525 | 27 |
| AX-158341394 | 27 | 5.853 | KV453299.1  | 953097 | 27-scf00525 | 27 |
| AX-158341397 | 27 | 5.873 | KV453299.1  | 956782 | 27-scf00525 | 27 |
| AX-157850158 | 27 | 5.914 | KV453299.1  | 956853 | 27-scf00525 | 27 |
| AX-157861820 | 27 | 5.959 | KV453299.1  | 959172 | 27-scf00525 | 27 |
| AX-158341401 | 27 | 5.98  | KV453299.1  | 959823 | 27-scf00525 | 27 |
| AX-158341402 | 27 | 6.025 | KV453299.1  | 960978 | 27-scf00525 | 27 |
| AX-158341396 | 27 | 6.037 | KV453299.1  | 954394 | 27-scf00525 | 27 |
| AX-158341403 | 27 | 6.037 | KV453299.1  | 962009 | 27-scf00525 | 27 |
| AX-158341404 | 27 | 6.092 | KV453299.1  | 963387 | 27-scf00525 | 27 |
| AX-158341405 | 27 | 6.092 | KV453299.1  | 965045 | 27-scf00525 | 27 |
| AX-158341406 | 27 | 6.092 | KV453299.1  | 966287 | 27-scf00525 | 27 |

|              |    |       |            |         |             |    |
|--------------|----|-------|------------|---------|-------------|----|
| AX-157753346 | 27 | 6.092 | KV453299.1 | 966688  | 27-scf00525 | 27 |
| AX-158341407 | 27 | 6.092 | KV453299.1 | 967109  | 27-scf00525 | 27 |
| AX-158341408 | 27 | 6.092 | KV453299.1 | 967826  | 27-scf00525 | 27 |
| AX-158388248 | 27 | 6.338 | KV453299.1 | 969083  | 27-scf00525 | 27 |
| AX-158341410 | 27 | 6.583 | KV453299.1 | 972702  | 27-scf00525 | 27 |
| AX-158341411 | 27 | 6.583 | KV453299.1 | 973453  | 27-scf00525 | 27 |
| AX-158341412 | 27 | 6.583 | KV453299.1 | 975750  | 27-scf00525 | 27 |
| AX-158341413 | 27 | 6.583 | KV453299.1 | 977430  | 27-scf00525 | 27 |
| AX-157724230 | 27 | 6.777 | KV453299.1 | 979790  | 27-scf00525 | 27 |
| AX-158341423 | 27 | 7.098 | KV453299.1 | 986388  | 27-scf00525 | 27 |
| AX-158341426 | 27 | 7.098 | KV453299.1 | 990971  | 27-scf00525 | 27 |
| AX-158341429 | 27 | 7.177 | KV453299.1 | 992225  | 27-scf00525 | 27 |
| AX-158341430 | 27 | 7.263 | KV453299.1 | 993468  | 27-scf00525 | 27 |
| AX-158341431 | 27 | 7.263 | KV453299.1 | 994166  | 27-scf00525 | 27 |
| AX-158341432 | 27 | 7.265 | KV453299.1 | 996212  | 27-scf00525 | 27 |
| AX-158341464 | 27 | 7.556 | KV453299.1 | 1032038 | 27-scf00525 | 27 |
| AX-158341465 | 27 | 7.583 | KV453299.1 | 1032803 | 27-scf00525 | 27 |
| AX-158341468 | 27 | 7.655 | KV453299.1 | 1037702 | 27-scf00525 | 27 |
| AX-158381608 | 27 | 7.843 | KV453299.1 | 1043987 | 27-scf00525 | 27 |
| AX-158341472 | 27 | 7.843 | KV453299.1 | 1045473 | 27-scf00525 | 27 |
| AX-158341473 | 27 | 7.843 | KV453299.1 | 1046255 | 27-scf00525 | 27 |
| AX-158341474 | 27 | 7.843 | KV453299.1 | 1047134 | 27-scf00525 | 27 |
| AX-157713774 | 27 | 7.843 | KV453299.1 | 1048305 | 27-scf00525 | 27 |
| AX-158341476 | 27 | 7.843 | KV453299.1 | 1049260 | 27-scf00525 | 27 |
| AX-158341478 | 27 | 7.843 | KV453299.1 | 1051672 | 27-scf00525 | 27 |
| AX-158341480 | 27 | 7.843 | KV453299.1 | 1055115 | 27-scf00525 | 27 |
| AX-158419136 | 27 | 7.843 | KV453299.1 | 1058361 | 27-scf00525 | 27 |
| AX-158341482 | 27 | 7.843 | KV453299.1 | 1059064 | 27-scf00525 | 27 |
| AX-158341485 | 27 | 7.843 | KV453299.1 | 1064454 | 27-scf00525 | 27 |
| AX-158341487 | 27 | 7.843 | KV453299.1 | 1065758 | 27-scf00525 | 27 |
| AX-158341499 | 27 | 7.843 | KV453299.1 | 1080560 | 27-scf00525 | 27 |
| AX-158341534 | 27 | 7.843 | KV453299.1 | 1130004 | 27-scf00525 | 27 |
| AX-157775651 | 27 | 8.169 | KV453299.1 | 1053365 | 27-scf00525 | 27 |
| AX-158341490 | 27 | 8.169 | KV453299.1 | 1068592 | 27-scf00525 | 27 |
| AX-158341497 | 27 | 8.169 | KV453299.1 | 1075811 | 27-scf00525 | 27 |
| AX-158341513 | 27 | 8.169 | KV453299.1 | 1104112 | 27-scf00525 | 27 |
| AX-158341494 | 27 | 8.171 | KV453299.1 | 1072773 | 27-scf00525 | 27 |
| AX-158341495 | 27 | 8.171 | KV453299.1 | 1074066 | 27-scf00525 | 27 |
| AX-158341496 | 27 | 8.171 | KV453299.1 | 1075083 | 27-scf00525 | 27 |
| AX-158341498 | 27 | 8.509 | KV453299.1 | 1076657 | 27-scf00525 | 27 |
| AX-157775802 | 27 | 8.509 | KV453299.1 | 1077030 | 27-scf00525 | 27 |
| AX-158341491 | 27 | 8.581 | KV453299.1 | 1070301 | 27-scf00525 | 27 |
| AX-158341503 | 27 | 8.581 | KV453299.1 | 1085623 | 27-scf00525 | 27 |
| AX-158341505 | 27 | 8.581 | KV453299.1 | 1087542 | 27-scf00525 | 27 |
| AX-158341511 | 27 | 8.902 | KV453299.1 | 1100694 | 27-scf00525 | 27 |
| AX-158379017 | 27 | 8.902 | KV453299.1 | 1104217 | 27-scf00525 | 27 |
| AX-158341515 | 27 | 8.902 | KV453299.1 | 1106649 | 27-scf00525 | 27 |
| AX-158341500 | 27 | 9.046 | KV453299.1 | 1081567 | 27-scf00525 | 27 |
| AX-158341516 | 27 | 9.046 | KV453299.1 | 1107265 | 27-scf00525 | 27 |
| AX-158341520 | 27 | 9.046 | KV453299.1 | 1110115 | 27-scf00525 | 27 |
| AX-158341521 | 27 | 9.046 | KV453299.1 | 1110787 | 27-scf00525 | 27 |



|              |    |        |            |         |             |    |
|--------------|----|--------|------------|---------|-------------|----|
| AX-158341529 | 27 | 9.046  | KV453299.1 | 1123173 | 27-scf00525 | 27 |
| AX-158341524 | 27 | 9.138  | KV453299.1 | 1113031 | 27-scf00525 | 27 |
| AX-158341525 | 27 | 9.254  | KV453299.1 | 1116830 | 27-scf00525 | 27 |
| AX-158341526 | 27 | 9.254  | KV453299.1 | 1120710 | 27-scf00525 | 27 |
| AX-158379018 | 27 | 9.276  | KV453299.1 | 1121076 | 27-scf00525 | 27 |
| AX-157888709 | 27 | 9.276  | KV453299.1 | 1123786 | 27-scf00525 | 27 |
| AX-158341530 | 27 | 9.276  | KV453299.1 | 1125947 | 27-scf00525 | 27 |
| AX-158341535 | 27 | 9.354  | KV453299.1 | 1130401 | 27-scf00525 | 27 |
| AX-158341538 | 27 | 9.44   | KV453299.1 | 1135090 | 27-scf00525 | 27 |
| AX-158341533 | 27 | 9.483  | KV453299.1 | 1128321 | 27-scf00525 | 27 |
| AX-158341539 | 27 | 9.483  | KV453299.1 | 1137527 | 27-scf00525 | 27 |
| AX-158341540 | 27 | 9.483  | KV453299.1 | 1138256 | 27-scf00525 | 27 |
| AX-158341543 | 27 | 9.483  | KV453299.1 | 1143374 | 27-scf00525 | 27 |
| AX-158341544 | 27 | 9.483  | KV453299.1 | 1144249 | 27-scf00525 | 27 |
| AX-158341545 | 27 | 9.483  | KV453299.1 | 1145317 | 27-scf00525 | 27 |
| AX-158341547 | 27 | 9.483  | KV453299.1 | 1146277 | 27-scf00525 | 27 |
| AX-158341551 | 27 | 9.483  | KV453299.1 | 1151956 | 27-scf00525 | 27 |
| AX-158341554 | 27 | 9.483  | KV453299.1 | 1159035 | 27-scf00525 | 27 |
| AX-158341557 | 27 | 9.483  | KV453299.1 | 1160247 | 27-scf00525 | 27 |
| AX-158341558 | 27 | 9.483  | KV453299.1 | 1162714 | 27-scf00525 | 27 |
| AX-158341561 | 27 | 9.483  | KV453299.1 | 1166582 | 27-scf00525 | 27 |
| AX-158341587 | 27 | 9.483  | KV453299.1 | 1194150 | 27-scf00525 | 27 |
| AX-158341565 | 27 | 9.688  | KV453299.1 | 1168101 | 27-scf00525 | 27 |
| AX-157861828 | 27 | 9.688  | KV453299.1 | 1170150 | 27-scf00525 | 27 |
| AX-158341568 | 27 | 9.715  | KV453299.1 | 1170434 | 27-scf00525 | 27 |
| AX-158341569 | 27 | 9.793  | KV453299.1 | 1170731 | 27-scf00525 | 27 |
| AX-158341573 | 27 | 10.131 | KV453299.1 | 1173146 | 27-scf00525 | 27 |
| AX-158341576 | 27 | 10.131 | KV453299.1 | 1176670 | 27-scf00525 | 27 |
| AX-157741870 | 27 | 10.163 | KV453299.1 | 1179507 | 27-scf00525 | 27 |
| AX-157861829 | 27 | 10.655 | KV453299.1 | 1191293 | 27-scf00525 | 27 |
| AX-158341586 | 27 | 10.656 | KV453299.1 | 1191749 | 27-scf00525 | 27 |
| AX-158341550 | 27 | 10.731 | KV453299.1 | 1150160 | 27-scf00525 | 27 |
| AX-157888713 | 27 | 10.731 | KV453299.1 | 1160741 | 27-scf00525 | 27 |
| AX-158341594 | 27 | 10.731 | KV453299.1 | 1205554 | 27-scf00525 | 27 |
| AX-158341606 | 27 | 10.731 | KV453299.1 | 1219555 | 27-scf00525 | 27 |
| AX-157756162 | 27 | 10.731 | KV453299.1 | 1224591 | 27-scf00525 | 27 |
| AX-158341595 | 27 | 10.835 | KV453299.1 | 1206921 | 27-scf00525 | 27 |
| AX-158341597 | 27 | 10.835 | KV453299.1 | 1209056 | 27-scf00525 | 27 |
| AX-158341601 | 27 | 11.014 | KV453299.1 | 1212118 | 27-scf00525 | 27 |
| AX-158341602 | 27 | 11.014 | KV453299.1 | 1212576 | 27-scf00525 | 27 |
| AX-158341603 | 27 | 11.014 | KV453299.1 | 1213754 | 27-scf00525 | 27 |
| AX-158341604 | 27 | 11.014 | KV453299.1 | 1214140 | 27-scf00525 | 27 |
| AX-157714607 | 27 | 11.014 | KV453299.1 | 1217158 | 27-scf00525 | 27 |
| AX-158413093 | 27 | 11.014 | KV453299.1 | 1219850 | 27-scf00525 | 27 |
| AX-158379020 | 27 | 11.071 | KV453299.1 | 1219966 | 27-scf00525 | 27 |
| AX-157775499 | 27 | 11.071 | KV453299.1 | 1646447 | 27-scf00525 | 27 |
| AX-158341613 | 27 | 11.123 | KV453299.1 | 1230728 | 27-scf00525 | 27 |
| AX-157850159 | 27 | 11.123 | KV453299.1 | 1232520 | 27-scf00525 | 27 |
| AX-158379021 | 27 | 11.124 | KV453299.1 | 1233251 | 27-scf00525 | 27 |
| AX-158341614 | 27 | 11.124 | KV453299.1 | 1239423 | 27-scf00525 | 27 |
| AX-157850160 | 27 | 11.287 | KV453299.1 | 1242297 | 27-scf00525 | 27 |

|              |    |        |            |         |             |    |
|--------------|----|--------|------------|---------|-------------|----|
| AX-157751113 | 27 | 11.287 | KV453299.1 | 1245488 | 27-scf00525 | 27 |
| AX-158341617 | 27 | 11.287 | KV453299.1 | 1247862 | 27-scf00525 | 27 |
| AX-158341618 | 27 | 11.287 | KV453299.1 | 1248707 | 27-scf00525 | 27 |
| AX-158341620 | 27 | 11.287 | KV453299.1 | 1251022 | 27-scf00525 | 27 |
| AX-158341623 | 27 | 11.287 | KV453299.1 | 1253899 | 27-scf00525 | 27 |
| AX-158341625 | 27 | 11.45  | KV453299.1 | 1256465 | 27-scf00525 | 27 |
| AX-158341627 | 27 | 11.45  | KV453299.1 | 1258532 | 27-scf00525 | 27 |
| AX-158341593 | 27 | 11.451 | KV453299.1 | 1203730 | 27-scf00525 | 27 |
| AX-158341629 | 27 | 11.451 | KV453299.1 | 1261698 | 27-scf00525 | 27 |
| AX-158341630 | 27 | 11.451 | KV453299.1 | 1264656 | 27-scf00525 | 27 |
| AX-157850162 | 27 | 11.451 | KV453299.1 | 1267935 | 27-scf00525 | 27 |
| AX-157850164 | 27 | 11.451 | KV453299.1 | 1270412 | 27-scf00525 | 27 |
| AX-158341632 | 27 | 11.451 | KV453299.1 | 1270458 | 27-scf00525 | 27 |
| AX-158341633 | 27 | 11.451 | KV453299.1 | 1271907 | 27-scf00525 | 27 |
| AX-157715279 | 27 | 11.451 | KV453299.1 | 1273440 | 27-scf00525 | 27 |
| AX-158341634 | 27 | 11.451 | KV453299.1 | 1274406 | 27-scf00525 | 27 |
| AX-158341635 | 27 | 11.451 | KV453299.1 | 1275202 | 27-scf00525 | 27 |
| AX-157888722 | 27 | 11.451 | KV453299.1 | 1276213 | 27-scf00525 | 27 |
| AX-158341638 | 27 | 11.451 | KV453299.1 | 1277942 | 27-scf00525 | 27 |
| AX-158341639 | 27 | 11.451 | KV453299.1 | 1278843 | 27-scf00525 | 27 |
| AX-158341640 | 27 | 11.451 | KV453299.1 | 1283568 | 27-scf00525 | 27 |
| AX-157861832 | 27 | 11.451 | KV453299.1 | 1285035 | 27-scf00525 | 27 |
| AX-158341646 | 27 | 11.451 | KV453299.1 | 1300337 | 27-scf00525 | 27 |
| AX-158341648 | 27 | 11.451 | KV453299.1 | 1303623 | 27-scf00525 | 27 |
| AX-158341653 | 27 | 11.615 | KV453299.1 | 1309232 | 27-scf00525 | 27 |
| AX-158341655 | 27 | 11.615 | KV453299.1 | 1310064 | 27-scf00525 | 27 |
| AX-157850170 | 27 | 11.615 | KV453299.1 | 1310812 | 27-scf00525 | 27 |
| AX-158341652 | 27 | 11.779 | KV453299.1 | 1307488 | 27-scf00525 | 27 |
| AX-157748562 | 27 | 11.779 | KV453299.1 | 1308554 | 27-scf00525 | 27 |
| AX-158341656 | 27 | 11.779 | KV453299.1 | 1312655 | 27-scf00525 | 27 |
| AX-157850171 | 27 | 11.779 | KV453299.1 | 1313364 | 27-scf00525 | 27 |
| AX-157850172 | 27 | 11.779 | KV453299.1 | 1314378 | 27-scf00525 | 27 |
| AX-158341659 | 27 | 11.779 | KV453299.1 | 1314927 | 27-scf00525 | 27 |
| AX-158341660 | 27 | 11.779 | KV453299.1 | 1315803 | 27-scf00525 | 27 |
| AX-158341661 | 27 | 11.779 | KV453299.1 | 1316199 | 27-scf00525 | 27 |
| AX-157718032 | 27 | 11.779 | KV453299.1 | 1321796 | 27-scf00525 | 27 |
| AX-157873776 | 27 | 11.779 | KV453299.1 | 1331409 | 27-scf00525 | 27 |
| AX-158341665 | 27 | 11.779 | KV453299.1 | 1332190 | 27-scf00525 | 27 |
| AX-158341668 | 27 | 11.779 | KV453299.1 | 1333421 | 27-scf00525 | 27 |
| AX-158341669 | 27 | 11.779 | KV453299.1 | 1334827 | 27-scf00525 | 27 |
| AX-158341674 | 27 | 11.779 | KV453299.1 | 1340290 | 27-scf00525 | 27 |
| AX-158341676 | 27 | 11.779 | KV453299.1 | 1341180 | 27-scf00525 | 27 |
| AX-158341678 | 27 | 11.779 | KV453299.1 | 1342579 | 27-scf00525 | 27 |
| AX-157861836 | 27 | 11.779 | KV453299.1 | 1447978 | 27-scf00525 | 27 |
| AX-158341681 | 27 | 11.888 | KV453299.1 | 1345064 | 27-scf00525 | 27 |
| AX-158341682 | 27 | 11.888 | KV453299.1 | 1348366 | 27-scf00525 | 27 |
| AX-158341685 | 27 | 11.888 | KV453299.1 | 1350065 | 27-scf00525 | 27 |
| AX-157873778 | 27 | 12.106 | KV453299.1 | 1351343 | 27-scf00525 | 27 |
| AX-157888723 | 27 | 12.325 | KV453299.1 | 1287095 | 27-scf00525 | 27 |
| AX-157850167 | 27 | 12.325 | KV453299.1 | 1289684 | 27-scf00525 | 27 |
| AX-158341688 | 27 | 12.325 | KV453299.1 | 1357649 | 27-scf00525 | 27 |

|              |    |        |            |         |             |    |
|--------------|----|--------|------------|---------|-------------|----|
| AX-158341692 | 27 | 12.325 | KV453299.1 | 1360822 | 27-scf00525 | 27 |
| AX-158341696 | 27 | 12.325 | KV453299.1 | 1363662 | 27-scf00525 | 27 |
| AX-157850177 | 27 | 12.325 | KV453299.1 | 1374887 | 27-scf00525 | 27 |
| AX-158341700 | 27 | 12.325 | KV453299.1 | 1375219 | 27-scf00525 | 27 |
| AX-158341701 | 27 | 12.325 | KV453299.1 | 1375441 | 27-scf00525 | 27 |
| AX-157757101 | 27 | 12.325 | KV453299.1 | 1376496 | 27-scf00525 | 27 |
| AX-158341703 | 27 | 12.325 | KV453299.1 | 1376597 | 27-scf00525 | 27 |
| AX-158341704 | 27 | 12.325 | KV453299.1 | 1377375 | 27-scf00525 | 27 |
| AX-158341707 | 27 | 12.325 | KV453299.1 | 1383296 | 27-scf00525 | 27 |
| AX-158341713 | 27 | 12.325 | KV453299.1 | 1390796 | 27-scf00525 | 27 |
| AX-158341715 | 27 | 12.325 | KV453299.1 | 1391752 | 27-scf00525 | 27 |
| AX-157850180 | 27 | 12.325 | KV453299.1 | 1396263 | 27-scf00525 | 27 |
| AX-158341718 | 27 | 12.325 | KV453299.1 | 1396814 | 27-scf00525 | 27 |
| AX-158341719 | 27 | 12.325 | KV453299.1 | 1398921 | 27-scf00525 | 27 |
| AX-158341722 | 27 | 12.325 | KV453299.1 | 1401589 | 27-scf00525 | 27 |
| AX-158341724 | 27 | 12.325 | KV453299.1 | 1402247 | 27-scf00525 | 27 |
| AX-158341725 | 27 | 12.325 | KV453299.1 | 1402504 | 27-scf00525 | 27 |
| AX-158341726 | 27 | 12.325 | KV453299.1 | 1403037 | 27-scf00525 | 27 |
| AX-158341728 | 27 | 12.325 | KV453299.1 | 1406359 | 27-scf00525 | 27 |
| AX-158341731 | 27 | 12.325 | KV453299.1 | 1407856 | 27-scf00525 | 27 |
| AX-158341732 | 27 | 12.325 | KV453299.1 | 1408102 | 27-scf00525 | 27 |
| AX-158341733 | 27 | 12.325 | KV453299.1 | 1408498 | 27-scf00525 | 27 |
| AX-158341735 | 27 | 12.325 | KV453299.1 | 1411056 | 27-scf00525 | 27 |
| AX-158341736 | 27 | 12.325 | KV453299.1 | 1411560 | 27-scf00525 | 27 |
| AX-158341737 | 27 | 12.325 | KV453299.1 | 1411996 | 27-scf00525 | 27 |
| AX-158341740 | 27 | 12.325 | KV453299.1 | 1413689 | 27-scf00525 | 27 |
| AX-158341742 | 27 | 12.325 | KV453299.1 | 1415419 | 27-scf00525 | 27 |
| AX-158341743 | 27 | 12.325 | KV453299.1 | 1416993 | 27-scf00525 | 27 |
| AX-158341744 | 27 | 12.325 | KV453299.1 | 1418342 | 27-scf00525 | 27 |
| AX-157739563 | 27 | 12.325 | KV453299.1 | 1420575 | 27-scf00525 | 27 |
| AX-157807090 | 27 | 12.325 | KV453299.1 | 1421166 | 27-scf00525 | 27 |
| AX-157850182 | 27 | 12.325 | KV453299.1 | 1422243 | 27-scf00525 | 27 |
| AX-158341747 | 27 | 12.325 | KV453299.1 | 1422635 | 27-scf00525 | 27 |
| AX-157873785 | 27 | 12.325 | KV453299.1 | 1433117 | 27-scf00525 | 27 |
| AX-158381609 | 27 | 12.325 | KV453299.1 | 1433245 | 27-scf00525 | 27 |
| AX-157882144 | 27 | 12.325 | KV453299.1 | 1435167 | 27-scf00525 | 27 |
| AX-157719023 | 27 | 12.325 | KV453299.1 | 1435633 | 27-scf00525 | 27 |
| AX-158341755 | 27 | 12.325 | KV453299.1 | 1437045 | 27-scf00525 | 27 |
| AX-158341757 | 27 | 12.325 | KV453299.1 | 1438265 | 27-scf00525 | 27 |
| AX-158341760 | 27 | 12.325 | KV453299.1 | 1440755 | 27-scf00525 | 27 |
| AX-158341761 | 27 | 12.325 | KV453299.1 | 1441351 | 27-scf00525 | 27 |
| AX-158341762 | 27 | 12.325 | KV453299.1 | 1441794 | 27-scf00525 | 27 |
| AX-158341763 | 27 | 12.325 | KV453299.1 | 1441972 | 27-scf00525 | 27 |
| AX-158341765 | 27 | 12.325 | KV453299.1 | 1447000 | 27-scf00525 | 27 |
| AX-157721586 | 27 | 12.325 | KV453299.1 | 1447855 | 27-scf00525 | 27 |
| AX-157850185 | 27 | 12.325 | KV453299.1 | 1453157 | 27-scf00525 | 27 |
| AX-158341769 | 27 | 12.325 | KV453299.1 | 1455097 | 27-scf00525 | 27 |
| AX-158341770 | 27 | 12.325 | KV453299.1 | 1458921 | 27-scf00525 | 27 |
| AX-157850186 | 27 | 12.325 | KV453299.1 | 1459324 | 27-scf00525 | 27 |
| AX-158341771 | 27 | 12.325 | KV453299.1 | 1468594 | 27-scf00525 | 27 |
| AX-157850187 | 27 | 12.325 | KV453299.1 | 1468660 | 27-scf00525 | 27 |

|              |    |        |             |         |                 |    |
|--------------|----|--------|-------------|---------|-----------------|----|
| AX-158341772 | 27 | 12.325 | KV453299.1  | 1469236 | 27-scf00525     | 27 |
| AX-158341773 | 27 | 12.325 | KV453299.1  | 1472397 | 27-scf00525     | 27 |
| AX-158341775 | 27 | 12.325 | KV453299.1  | 1473475 | 27-scf00525     | 27 |
| AX-157850189 | 27 | 12.325 | KV453299.1  | 1475025 | 27-scf00525     | 27 |
| AX-158341778 | 27 | 12.325 | KV453299.1  | 1475654 | 27-scf00525     | 27 |
| AX-158341779 | 27 | 12.325 | KV453299.1  | 1476611 | 27-scf00525     | 27 |
| AX-157751918 | 27 | 12.325 | KV453299.1  | 1477633 | 27-scf00525     | 27 |
| AX-158341783 | 27 | 12.325 | KV453299.1  | 1486640 | 27-scf00525     | 27 |
| AX-157850190 | 27 | 12.325 | KV453299.1  | 1489670 | 27-scf00525     | 27 |
| AX-158341787 | 27 | 12.325 | KV453299.1  | 1491049 | 27-scf00525     | 27 |
| AX-157717836 | 27 | 12.325 | KV453299.1  | 1493965 | 27-scf00525     | 27 |
| AX-157850191 | 27 | 12.325 | KV453299.1  | 1497264 | 27-scf00525     | 27 |
| AX-157861838 | 27 | 12.325 | KV453299.1  | 1498335 | 27-scf00525     | 27 |
| AX-157861839 | 27 | 12.325 | KV453299.1  | 1498581 | 27-scf00525     | 27 |
| AX-158341791 | 27 | 12.325 | KV453299.1  | 1502213 | 27-scf00525     | 27 |
| AX-158341792 | 27 | 12.325 | KV453299.1  | 1502783 | 27-scf00525     | 27 |
| AX-158341794 | 27 | 12.325 | KV453299.1  | 1503508 | 27-scf00525     | 27 |
| AX-157868057 | 27 | 12.325 | KV453299.1  | 1506304 | 27-scf00525     | 27 |
| AX-158341796 | 27 | 12.325 | KV453299.1  | 1506526 | 27-scf00525     | 27 |
| AX-157746478 | 27 | 12.325 | KV453299.1  | 1506693 | 27-scf00525     | 27 |
| AX-158341798 | 27 | 12.325 | KV453299.1  | 1507369 | 27-scf00525     | 27 |
| AX-157719288 | 27 | 12.325 | KV453299.1  | 1520564 | 27-scf00525     | 27 |
| AX-158341805 | 27 | 12.325 | KV453299.1  | 1525827 | 27-scf00525     | 27 |
| AX-157713499 | 27 | 12.325 | KV453299.1  | 1534211 | 27-scf00525     | 27 |
| AX-158341817 | 27 | 12.325 | KV453299.1  | 1539251 | 27-scf00525     | 27 |
| AX-158341898 | 27 | 12.325 | KV453299.1  | 1653116 | 27-scf00525     | 27 |
| AX-157702054 | 27 | 12.325 | DX089539.1  | 364     | -IORI212 Ictali | UN |
| AX-157705705 | 27 | 12.325 | 3ML01030668 | 293     | scf06268_1      | UN |
| AX-157850173 | 27 | 12.332 | KV453299.1  | 1319079 | 27-scf00525     | 27 |
| AX-158341759 | 27 | 12.332 | KV453299.1  | 1439296 | 27-scf00525     | 27 |
| AX-157850184 | 27 | 12.332 | KV453299.1  | 1446716 | 27-scf00525     | 27 |
| AX-158419142 | 27 | 12.332 | KV453299.1  | 1476928 | 27-scf00525     | 27 |
| AX-158341802 | 27 | 12.332 | KV453299.1  | 1514800 | 27-scf00525     | 27 |
| AX-157888728 | 27 | 12.949 | KV453299.1  | 1523293 | 27-scf00525     | 27 |
| AX-158341809 | 27 | 12.96  | KV453299.1  | 1529814 | 27-scf00525     | 27 |
| AX-158341810 | 27 | 12.981 | KV453299.1  | 1530627 | 27-scf00525     | 27 |
| AX-158341813 | 27 | 12.981 | KV453299.1  | 1532250 | 27-scf00525     | 27 |
| AX-158341814 | 27 | 12.981 | KV453299.1  | 1536051 | 27-scf00525     | 27 |
| AX-157722967 | 27 | 13.039 | KV453299.1  | 1538772 | 27-scf00525     | 27 |
| AX-158341812 | 27 | 13.09  | KV453299.1  | 1531705 | 27-scf00525     | 27 |
| AX-158341818 | 27 | 13.09  | KV453299.1  | 1539691 | 27-scf00525     | 27 |
| AX-157773903 | 27 | 13.09  | KV453299.1  | 1540324 | 27-scf00525     | 27 |
| AX-158341819 | 27 | 13.09  | KV453299.1  | 1540793 | 27-scf00525     | 27 |
| AX-158341820 | 27 | 13.09  | KV453299.1  | 1541207 | 27-scf00525     | 27 |
| AX-158419143 | 27 | 13.126 | KV453299.1  | 1554049 | 27-scf00525     | 27 |
| AX-158341825 | 27 | 13.157 | KV453299.1  | 1555247 | 27-scf00525     | 27 |
| AX-157753258 | 27 | 13.199 | KV453299.1  | 1556110 | 27-scf00525     | 27 |
| AX-158341826 | 27 | 13.199 | KV453299.1  | 1557847 | 27-scf00525     | 27 |
| AX-158341828 | 27 | 13.199 | KV453299.1  | 1559446 | 27-scf00525     | 27 |
| AX-158341829 | 27 | 13.199 | KV453299.1  | 1559858 | 27-scf00525     | 27 |
| AX-158341834 | 27 | 13.199 | KV453299.1  | 1567167 | 27-scf00525     | 27 |

|              |    |        |            |         |             |    |
|--------------|----|--------|------------|---------|-------------|----|
| AX-158341835 | 27 | 13.199 | KV453299.1 | 1569489 | 27-scf00525 | 27 |
| AX-157720829 | 27 | 13.199 | KV453299.1 | 1572812 | 27-scf00525 | 27 |
| AX-158341840 | 27 | 13.585 | KV453299.1 | 1573795 | 27-scf00525 | 27 |
| AX-158341844 | 27 | 13.585 | KV453299.1 | 1580816 | 27-scf00525 | 27 |
| AX-158341843 | 27 | 13.587 | KV453299.1 | 1575986 | 27-scf00525 | 27 |
| AX-158341846 | 27 | 13.587 | KV453299.1 | 1584743 | 27-scf00525 | 27 |
| AX-157744306 | 27 | 13.587 | KV453299.1 | 1591294 | 27-scf00525 | 27 |
| AX-158341850 | 27 | 13.587 | KV453299.1 | 1592023 | 27-scf00525 | 27 |
| AX-158341852 | 27 | 13.845 | KV453299.1 | 1594129 | 27-scf00525 | 27 |
| AX-158341856 | 27 | 13.845 | KV453299.1 | 1598170 | 27-scf00525 | 27 |
| AX-158341858 | 27 | 13.909 | KV453299.1 | 1599002 | 27-scf00525 | 27 |
| AX-157775261 | 27 | 13.928 | KV453299.1 | 1606998 | 27-scf00525 | 27 |
| AX-158341868 | 27 | 13.946 | KV453299.1 | 1607873 | 27-scf00525 | 27 |
| AX-158381610 | 27 | 13.964 | KV453299.1 | 1609319 | 27-scf00525 | 27 |
| AX-158341872 | 27 | 13.964 | KV453299.1 | 1610884 | 27-scf00525 | 27 |
| AX-157850195 | 27 | 13.964 | KV453299.1 | 1611378 | 27-scf00525 | 27 |
| AX-158341873 | 27 | 13.964 | KV453299.1 | 1611908 | 27-scf00525 | 27 |
| AX-157737555 | 27 | 13.964 | KV453299.1 | 1612004 | 27-scf00525 | 27 |
| AX-158341875 | 27 | 13.964 | KV453299.1 | 1613526 | 27-scf00525 | 27 |
| AX-157720303 | 27 | 13.964 | KV453299.1 | 1616285 | 27-scf00525 | 27 |
| AX-158341878 | 27 | 13.964 | KV453299.1 | 1621755 | 27-scf00525 | 27 |
| AX-157861841 | 27 | 13.964 | KV453299.1 | 1624121 | 27-scf00525 | 27 |
| AX-157850196 | 27 | 13.964 | KV453299.1 | 1624924 | 27-scf00525 | 27 |
| AX-158341881 | 27 | 13.964 | KV453299.1 | 1626423 | 27-scf00525 | 27 |
| AX-158341894 | 27 | 13.964 | KV453299.1 | 1645163 | 27-scf00525 | 27 |
| AX-157710101 | 27 | 14.073 | KV453299.1 | 1333744 | 27-scf00525 | 27 |
| AX-157861840 | 27 | 14.073 | KV453299.1 | 1588538 | 27-scf00525 | 27 |
| AX-158341855 | 27 | 14.073 | KV453299.1 | 1597680 | 27-scf00525 | 27 |
| AX-158341859 | 27 | 14.073 | KV453299.1 | 1600078 | 27-scf00525 | 27 |
| AX-158341863 | 27 | 14.073 | KV453299.1 | 1603878 | 27-scf00525 | 27 |
| AX-158341865 | 27 | 14.073 | KV453299.1 | 1606502 | 27-scf00525 | 27 |
| AX-157773462 | 27 | 14.073 | KV453299.1 | 1620679 | 27-scf00525 | 27 |
| AX-158341880 | 27 | 14.073 | KV453299.1 | 1624463 | 27-scf00525 | 27 |
| AX-158341882 | 27 | 14.073 | KV453299.1 | 1627674 | 27-scf00525 | 27 |
| AX-158341887 | 27 | 14.073 | KV453299.1 | 1636904 | 27-scf00525 | 27 |
| AX-158341889 | 27 | 14.073 | KV453299.1 | 1639903 | 27-scf00525 | 27 |
| AX-158341890 | 27 | 14.073 | KV453299.1 | 1641888 | 27-scf00525 | 27 |
| AX-158341892 | 27 | 14.073 | KV453299.1 | 1643518 | 27-scf00525 | 27 |
| AX-158341893 | 27 | 14.073 | KV453299.1 | 1643963 | 27-scf00525 | 27 |
| AX-158419145 | 27 | 14.372 | KV453299.1 | 1659607 | 27-scf00525 | 27 |
| AX-158423785 | 27 | 14.372 | KV453299.1 | 1659856 | 27-scf00525 | 27 |
| AX-157717121 | 27 | 14.372 | KV453299.1 | 1660822 | 27-scf00525 | 27 |
| AX-158341925 | 27 | 14.372 | KV453299.1 | 1700323 | 27-scf00525 | 27 |
| AX-157724639 | 27 | 14.372 | KV453299.1 | 1705923 | 27-scf00525 | 27 |
| AX-158341899 | 27 | 14.48  | KV453299.1 | 1653889 | 27-scf00525 | 27 |
| AX-157749970 | 27 | 14.48  | KV453299.1 | 1662818 | 27-scf00525 | 27 |
| AX-158381611 | 27 | 14.48  | KV453299.1 | 1683948 | 27-scf00525 | 27 |
| AX-158341924 | 27 | 14.48  | KV453299.1 | 1698765 | 27-scf00525 | 27 |
| AX-158341911 | 27 | 14.573 | KV453299.1 | 1675907 | 27-scf00525 | 27 |
| AX-157772691 | 27 | 14.763 | KV453299.1 | 1677349 | 27-scf00525 | 27 |
| AX-158341912 | 27 | 14.763 | KV453299.1 | 1678581 | 27-scf00525 | 27 |

|              |    |        |            |         |             |    |
|--------------|----|--------|------------|---------|-------------|----|
| AX-158341914 | 27 | 14.763 | KV453299.1 | 1683896 | 27-scf00525 | 27 |
| AX-157772429 | 27 | 14.763 | KV453299.1 | 1719854 | 27-scf00525 | 27 |
| AX-158341920 | 27 | 14.941 | KV453299.1 | 1692015 | 27-scf00525 | 27 |
| AX-157850200 | 27 | 14.941 | KV453299.1 | 1695100 | 27-scf00525 | 27 |
| AX-157744975 | 27 | 14.948 | KV453299.1 | 1698409 | 27-scf00525 | 27 |
| AX-158341926 | 27 | 14.948 | KV453299.1 | 1701258 | 27-scf00525 | 27 |
| AX-158341927 | 27 | 14.948 | KV453299.1 | 1702816 | 27-scf00525 | 27 |
| AX-158341928 | 27 | 14.948 | KV453299.1 | 1703232 | 27-scf00525 | 27 |
| AX-157868060 | 27 | 14.948 | KV453299.1 | 1704132 | 27-scf00525 | 27 |
| AX-158341929 | 27 | 14.948 | KV453299.1 | 1704563 | 27-scf00525 | 27 |
| AX-158341932 | 27 | 14.948 | KV453299.1 | 1710818 | 27-scf00525 | 27 |
| AX-158341934 | 27 | 14.948 | KV453299.1 | 1711758 | 27-scf00525 | 27 |
| AX-157861843 | 27 | 14.948 | KV453299.1 | 1712811 | 27-scf00525 | 27 |
| AX-158341935 | 27 | 14.948 | KV453299.1 | 1713941 | 27-scf00525 | 27 |
| AX-157746786 | 27 | 14.997 | KV453299.1 | 1693160 | 27-scf00525 | 27 |
| AX-157708957 | 27 | 14.997 | KV453299.1 | 1699741 | 27-scf00525 | 27 |
| AX-158341936 | 27 | 14.997 | KV453299.1 | 1716290 | 27-scf00525 | 27 |
| AX-158341942 | 27 | 14.997 | KV453299.1 | 1721007 | 27-scf00525 | 27 |
| AX-158341947 | 27 | 14.997 | KV453299.1 | 1724219 | 27-scf00525 | 27 |
| AX-158341948 | 27 | 14.997 | KV453299.1 | 1724699 | 27-scf00525 | 27 |
| AX-158381612 | 27 | 14.997 | KV453299.1 | 1761712 | 27-scf00525 | 27 |
| AX-158342004 | 27 | 14.997 | KV453299.1 | 1801046 | 27-scf00525 | 27 |
| AX-158341937 | 27 | 15.028 | KV453299.1 | 1717289 | 27-scf00525 | 27 |
| AX-157850202 | 27 | 15.057 | KV453299.1 | 1717677 | 27-scf00525 | 27 |
| AX-158341943 | 27 | 15.057 | KV453299.1 | 1721752 | 27-scf00525 | 27 |
| AX-158341945 | 27 | 15.057 | KV453299.1 | 1723488 | 27-scf00525 | 27 |
| AX-158341944 | 27 | 15.075 | KV453299.1 | 1723035 | 27-scf00525 | 27 |
| AX-158341946 | 27 | 15.075 | KV453299.1 | 1723878 | 27-scf00525 | 27 |
| AX-158341963 | 27 | 15.075 | KV453299.1 | 1741500 | 27-scf00525 | 27 |
| AX-158341950 | 27 | 15.114 | KV453299.1 | 1726255 | 27-scf00525 | 27 |
| AX-158341951 | 27 | 15.166 | KV453299.1 | 1726723 | 27-scf00525 | 27 |
| AX-158341952 | 27 | 15.22  | KV453299.1 | 1727930 | 27-scf00525 | 27 |
| AX-158341954 | 27 | 15.276 | KV453299.1 | 1732166 | 27-scf00525 | 27 |
| AX-158341955 | 27 | 15.276 | KV453299.1 | 1732787 | 27-scf00525 | 27 |
| AX-157850203 | 27 | 15.276 | KV453299.1 | 1733205 | 27-scf00525 | 27 |
| AX-158341958 | 27 | 15.385 | KV453299.1 | 1736047 | 27-scf00525 | 27 |
| AX-158341960 | 27 | 15.399 | KV453299.1 | 1737966 | 27-scf00525 | 27 |
| AX-157850204 | 27 | 15.442 | KV453299.1 | 1739355 | 27-scf00525 | 27 |
| AX-157757940 | 27 | 15.481 | KV453299.1 | 1740749 | 27-scf00525 | 27 |
| AX-157850206 | 27 | 15.549 | KV453299.1 | 1744176 | 27-scf00525 | 27 |
| AX-158341962 | 27 | 15.604 | KV453299.1 | 1740812 | 27-scf00525 | 27 |
| AX-158341968 | 27 | 15.604 | KV453299.1 | 1746748 | 27-scf00525 | 27 |
| AX-158341969 | 27 | 15.604 | KV453299.1 | 1747913 | 27-scf00525 | 27 |
| AX-157850208 | 27 | 15.604 | KV453299.1 | 1749438 | 27-scf00525 | 27 |
| AX-158341970 | 27 | 15.604 | KV453299.1 | 1749791 | 27-scf00525 | 27 |
| AX-157850209 | 27 | 15.604 | KV453299.1 | 1749899 | 27-scf00525 | 27 |
| AX-158341973 | 27 | 15.604 | KV453299.1 | 1751932 | 27-scf00525 | 27 |
| AX-157868062 | 27 | 15.604 | KV453299.1 | 1752462 | 27-scf00525 | 27 |
| AX-158341974 | 27 | 15.604 | KV453299.1 | 1753294 | 27-scf00525 | 27 |
| AX-158341977 | 27 | 15.604 | KV453299.1 | 1754003 | 27-scf00525 | 27 |
| AX-157861845 | 27 | 15.604 | KV453299.1 | 1763128 | 27-scf00525 | 27 |

|              |    |        |            |         |             |    |
|--------------|----|--------|------------|---------|-------------|----|
| AX-158341978 | 27 | 15.662 | KV453299.1 | 1760084 | 27-scf00525 | 27 |
| AX-158341980 | 27 | 15.713 | KV453299.1 | 1763880 | 27-scf00525 | 27 |
| AX-158341981 | 27 | 15.713 | KV453299.1 | 1764423 | 27-scf00525 | 27 |
| AX-158341983 | 27 | 15.713 | KV453299.1 | 1766117 | 27-scf00525 | 27 |
| AX-158341984 | 27 | 15.713 | KV453299.1 | 1766563 | 27-scf00525 | 27 |
| AX-158342000 | 27 | 15.713 | KV453299.1 | 1791785 | 27-scf00525 | 27 |
| AX-158341985 | 27 | 15.769 | KV453299.1 | 1770384 | 27-scf00525 | 27 |
| AX-158341986 | 27 | 15.822 | KV453299.1 | 1771192 | 27-scf00525 | 27 |
| AX-158341987 | 27 | 15.822 | KV453299.1 | 1771398 | 27-scf00525 | 27 |
| AX-157882155 | 27 | 15.822 | KV453299.1 | 1772070 | 27-scf00525 | 27 |
| AX-158341988 | 27 | 15.822 | KV453299.1 | 1774039 | 27-scf00525 | 27 |
| AX-157716386 | 27 | 15.822 | KV453299.1 | 1777046 | 27-scf00525 | 27 |
| AX-158341991 | 27 | 15.822 | KV453299.1 | 1779895 | 27-scf00525 | 27 |
| AX-158341992 | 27 | 15.822 | KV453299.1 | 1780440 | 27-scf00525 | 27 |
| AX-158341993 | 27 | 15.822 | KV453299.1 | 1781498 | 27-scf00525 | 27 |
| AX-158341994 | 27 | 15.822 | KV453299.1 | 1782941 | 27-scf00525 | 27 |
| AX-158341996 | 27 | 15.822 | KV453299.1 | 1784346 | 27-scf00525 | 27 |
| AX-157850213 | 27 | 15.822 | KV453299.1 | 1784607 | 27-scf00525 | 27 |
| AX-157850214 | 27 | 15.822 | KV453299.1 | 1790742 | 27-scf00525 | 27 |
| AX-157750949 | 27 | 15.822 | KV453299.1 | 1792900 | 27-scf00525 | 27 |
| AX-157719577 | 27 | 15.822 | KV453299.1 | 1800046 | 27-scf00525 | 27 |
| AX-158342001 | 27 | 15.837 | KV453299.1 | 1795260 | 27-scf00525 | 27 |
| AX-158342002 | 27 | 15.932 | KV453299.1 | 1798625 | 27-scf00525 | 27 |
| AX-158342006 | 27 | 16.041 | KV453299.1 | 1802050 | 27-scf00525 | 27 |
| AX-158342009 | 27 | 16.041 | KV453299.1 | 1804171 | 27-scf00525 | 27 |
| AX-158342013 | 27 | 16.041 | KV453299.1 | 1806281 | 27-scf00525 | 27 |
| AX-158342017 | 27 | 16.041 | KV453299.1 | 1808156 | 27-scf00525 | 27 |
| AX-158342019 | 27 | 16.15  | KV453299.1 | 1810657 | 27-scf00525 | 27 |
| AX-158342020 | 27 | 16.15  | KV453299.1 | 1812272 | 27-scf00525 | 27 |
| AX-158342022 | 27 | 16.15  | KV453299.1 | 1814694 | 27-scf00525 | 27 |
| AX-158342023 | 27 | 16.15  | KV453299.1 | 1815135 | 27-scf00525 | 27 |
| AX-158342025 | 27 | 16.15  | KV453299.1 | 1818535 | 27-scf00525 | 27 |
| AX-158342026 | 27 | 16.15  | KV453299.1 | 1819988 | 27-scf00525 | 27 |
| AX-158342029 | 27 | 16.15  | KV453299.1 | 1823790 | 27-scf00525 | 27 |
| AX-158342030 | 27 | 16.15  | KV453299.1 | 1824852 | 27-scf00525 | 27 |
| AX-158342031 | 27 | 16.15  | KV453299.1 | 1825816 | 27-scf00525 | 27 |
| AX-158342032 | 27 | 16.15  | KV453299.1 | 1826400 | 27-scf00525 | 27 |
| AX-158342033 | 27 | 16.15  | KV453299.1 | 1826814 | 27-scf00525 | 27 |
| AX-157888733 | 27 | 16.15  | KV453299.1 | 1847019 | 27-scf00525 | 27 |
| AX-158419151 | 27 | 16.15  | KV453299.1 | 1885399 | 27-scf00525 | 27 |
| AX-158342034 | 27 | 16.259 | KV453299.1 | 1827062 | 27-scf00525 | 27 |
| AX-158342035 | 27 | 16.259 | KV453299.1 | 1828572 | 27-scf00525 | 27 |
| AX-158342036 | 27 | 16.259 | KV453299.1 | 1830496 | 27-scf00525 | 27 |
| AX-158342039 | 27 | 16.259 | KV453299.1 | 1832243 | 27-scf00525 | 27 |
| AX-158342045 | 27 | 16.259 | KV453299.1 | 1845055 | 27-scf00525 | 27 |
| AX-158342047 | 27 | 16.259 | KV453299.1 | 1849030 | 27-scf00525 | 27 |
| AX-157757174 | 27 | 16.259 | KV453299.1 | 1852538 | 27-scf00525 | 27 |
| AX-158342051 | 27 | 16.259 | KV453299.1 | 1853693 | 27-scf00525 | 27 |
| AX-158342052 | 27 | 16.259 | KV453299.1 | 1854346 | 27-scf00525 | 27 |
| AX-158342055 | 27 | 16.259 | KV453299.1 | 1856561 | 27-scf00525 | 27 |
| AX-158342056 | 27 | 16.259 | KV453299.1 | 1857758 | 27-scf00525 | 27 |

|              |    |        |            |         |             |    |
|--------------|----|--------|------------|---------|-------------|----|
| AX-158342058 | 27 | 16.259 | KV453299.1 | 1858853 | 27-scf00525 | 27 |
| AX-158342059 | 27 | 16.259 | KV453299.1 | 1859368 | 27-scf00525 | 27 |
| AX-158342060 | 27 | 16.259 | KV453299.1 | 1860199 | 27-scf00525 | 27 |
| AX-158342061 | 27 | 16.259 | KV453299.1 | 1862452 | 27-scf00525 | 27 |
| AX-158342063 | 27 | 16.41  | KV453299.1 | 1866662 | 27-scf00525 | 27 |
| AX-158342065 | 27 | 16.41  | KV453299.1 | 1868205 | 27-scf00525 | 27 |
| AX-157725835 | 27 | 16.664 | KV453299.1 | 1870493 | 27-scf00525 | 27 |
| AX-158342070 | 27 | 16.9   | KV453299.1 | 1876002 | 27-scf00525 | 27 |
| AX-157888735 | 27 | 16.9   | KV453299.1 | 1876832 | 27-scf00525 | 27 |
| AX-158342041 | 27 | 17.137 | KV453299.1 | 1835286 | 27-scf00525 | 27 |
| AX-158342072 | 27 | 17.137 | KV453299.1 | 1880825 | 27-scf00525 | 27 |
| AX-158342074 | 27 | 17.137 | KV453299.1 | 1888599 | 27-scf00525 | 27 |
| AX-157738876 | 27 | 17.137 | KV453299.1 | 1890361 | 27-scf00525 | 27 |
| AX-157868065 | 27 | 17.137 | KV453299.1 | 1892572 | 27-scf00525 | 27 |
| AX-158342076 | 27 | 17.137 | KV453299.1 | 1893483 | 27-scf00525 | 27 |
| AX-157727109 | 27 | 17.357 | KV453299.1 | 1900113 | 27-scf00525 | 27 |
| AX-158342083 | 27 | 17.462 | KV453299.1 | 1900692 | 27-scf00525 | 27 |
| AX-157888737 | 27 | 17.576 | KV453299.1 | 1905030 | 27-scf00525 | 27 |
| AX-158342086 | 27 | 17.576 | KV453299.1 | 1905404 | 27-scf00525 | 27 |
| AX-158342087 | 27 | 17.576 | KV453299.1 | 1905942 | 27-scf00525 | 27 |
| AX-157861846 | 27 | 17.576 | KV453299.1 | 1911853 | 27-scf00525 | 27 |
| AX-158342092 | 27 | 17.576 | KV453299.1 | 1912540 | 27-scf00525 | 27 |
| AX-158342093 | 27 | 17.576 | KV453299.1 | 1913080 | 27-scf00525 | 27 |
| AX-158342097 | 27 | 17.577 | KV453299.1 | 1917100 | 27-scf00525 | 27 |
| AX-158342090 | 27 | 17.673 | KV453299.1 | 1910520 | 27-scf00525 | 27 |
| AX-158342098 | 27 | 17.673 | KV453299.1 | 1917715 | 27-scf00525 | 27 |
| AX-158342099 | 27 | 17.673 | KV453299.1 | 1920004 | 27-scf00525 | 27 |
| AX-158381613 | 27 | 17.904 | KV453299.1 | 1923100 | 27-scf00525 | 27 |
| AX-158342101 | 27 | 17.904 | KV453299.1 | 1925773 | 27-scf00525 | 27 |
| AX-158342102 | 27 | 17.904 | KV453299.1 | 1926303 | 27-scf00525 | 27 |
| AX-157774918 | 27 | 17.904 | KV453299.1 | 1926839 | 27-scf00525 | 27 |
| AX-158342119 | 27 | 17.904 | KV453299.1 | 1944780 | 27-scf00525 | 27 |
| AX-158342108 | 27 | 17.988 | KV453299.1 | 1932045 | 27-scf00525 | 27 |
| AX-158342112 | 27 | 18.013 | KV453299.1 | 1936644 | 27-scf00525 | 27 |
| AX-157721815 | 27 | 18.013 | KV453299.1 | 1938697 | 27-scf00525 | 27 |
| AX-158342117 | 27 | 18.013 | KV453299.1 | 1943166 | 27-scf00525 | 27 |
| AX-158342121 | 27 | 18.013 | KV453299.1 | 1946364 | 27-scf00525 | 27 |
| AX-158342122 | 27 | 18.013 | KV453299.1 | 1948324 | 27-scf00525 | 27 |
| AX-158342125 | 27 | 18.073 | KV453299.1 | 1950167 | 27-scf00525 | 27 |
| AX-158342126 | 27 | 18.192 | KV453299.1 | 1950621 | 27-scf00525 | 27 |
| AX-157719087 | 27 | 18.305 | KV453299.1 | 1952039 | 27-scf00525 | 27 |
| AX-157850218 | 27 | 18.351 | KV453299.1 | 1955923 | 27-scf00525 | 27 |
| AX-157744294 | 27 | 18.385 | KV453299.1 | 1963099 | 27-scf00525 | 27 |
| AX-157716179 | 27 | 18.451 | KV453299.1 | 1963626 | 27-scf00525 | 27 |
| AX-157720444 | 27 | 18.451 | KV453299.1 | 1963987 | 27-scf00525 | 27 |
| AX-157714652 | 27 | 18.513 | KV453299.1 | 1964432 | 27-scf00525 | 27 |
| AX-158342146 | 27 | 18.513 | KV453299.1 | 1982178 | 27-scf00525 | 27 |
| AX-158342150 | 27 | 18.513 | KV453299.1 | 1990352 | 27-scf00525 | 27 |
| AX-158342134 | 27 | 18.56  | KV453299.1 | 1967413 | 27-scf00525 | 27 |
| AX-158342135 | 27 | 18.56  | KV453299.1 | 1968650 | 27-scf00525 | 27 |
| AX-158342137 | 27 | 18.56  | KV453299.1 | 1970351 | 27-scf00525 | 27 |



|              |    |        |            |         |             |    |
|--------------|----|--------|------------|---------|-------------|----|
| AX-157752494 | 27 | 18.56  | KV453299.1 | 1972977 | 27-scf00525 | 27 |
| AX-158342139 | 27 | 18.56  | KV453299.1 | 1975238 | 27-scf00525 | 27 |
| AX-158342142 | 27 | 18.56  | KV453299.1 | 1977435 | 27-scf00525 | 27 |
| AX-158342144 | 27 | 18.625 | KV453299.1 | 1979952 | 27-scf00525 | 27 |
| AX-158342147 | 27 | 18.776 | KV453299.1 | 1987650 | 27-scf00525 | 27 |
| AX-158342149 | 27 | 18.888 | KV453299.1 | 1989050 | 27-scf00525 | 27 |
| AX-158342151 | 27 | 18.888 | KV453299.1 | 1990462 | 27-scf00525 | 27 |
| AX-158342152 | 27 | 18.888 | KV453299.1 | 1990865 | 27-scf00525 | 27 |
| AX-158342154 | 27 | 18.888 | KV453299.1 | 1993737 | 27-scf00525 | 27 |
| AX-157850226 | 27 | 18.888 | KV453299.1 | 1993878 | 27-scf00525 | 27 |
| AX-157850227 | 27 | 18.888 | KV453299.1 | 1994086 | 27-scf00525 | 27 |
| AX-157882163 | 27 | 19.215 | KV453299.1 | 1997423 | 27-scf00525 | 27 |
| AX-157771816 | 27 | 19.215 | KV453299.1 | 1997540 | 27-scf00525 | 27 |
| AX-158342157 | 27 | 19.215 | KV453299.1 | 2001097 | 27-scf00525 | 27 |
| AX-157861848 | 27 | 19.215 | KV453299.1 | 2001767 | 27-scf00525 | 27 |
| AX-158342158 | 27 | 19.215 | KV453299.1 | 2001873 | 27-scf00525 | 27 |
| AX-157850229 | 27 | 19.215 | KV453299.1 | 2002359 | 27-scf00525 | 27 |
| AX-158342160 | 27 | 19.215 | KV453299.1 | 2004380 | 27-scf00525 | 27 |
| AX-158342161 | 27 | 19.215 | KV453299.1 | 2005484 | 27-scf00525 | 27 |
| AX-158419155 | 27 | 19.246 | KV453299.1 | 2008079 | 27-scf00525 | 27 |
| AX-158342131 | 27 | 19.259 | KV453299.1 | 1956347 | 27-scf00525 | 27 |
| AX-158419156 | 27 | 19.259 | KV453299.1 | 2008141 | 27-scf00525 | 27 |
| AX-157760435 | 27 | 19.325 | KV453299.1 | 2013028 | 27-scf00525 | 27 |
| AX-157850231 | 27 | 19.434 | KV453299.1 | 2015483 | 27-scf00525 | 27 |
| AX-158342166 | 27 | 19.434 | KV453299.1 | 2017013 | 27-scf00525 | 27 |
| AX-158342168 | 27 | 19.434 | KV453299.1 | 2018176 | 27-scf00525 | 27 |
| AX-158342170 | 27 | 19.501 | KV453299.1 | 2019339 | 27-scf00525 | 27 |
| AX-158342171 | 27 | 19.543 | KV453299.1 | 2019603 | 27-scf00525 | 27 |
| AX-158342172 | 27 | 19.599 | KV453299.1 | 2019993 | 27-scf00525 | 27 |
| AX-158342173 | 27 | 19.76  | KV453299.1 | 2021678 | 27-scf00525 | 27 |
| AX-157850232 | 27 | 19.76  | KV453299.1 | 2023024 | 27-scf00525 | 27 |
| AX-158342174 | 27 | 19.76  | KV453299.1 | 2024230 | 27-scf00525 | 27 |
| AX-158342180 | 27 | 19.76  | KV453299.1 | 2030537 | 27-scf00525 | 27 |
| AX-158342175 | 27 | 19.761 | KV453299.1 | 2025017 | 27-scf00525 | 27 |
| AX-158342177 | 27 | 19.761 | KV453299.1 | 2026553 | 27-scf00525 | 27 |
| AX-158342178 | 27 | 19.762 | KV453299.1 | 2026887 | 27-scf00525 | 27 |
| AX-158342179 | 27 | 19.762 | KV453299.1 | 2028760 | 27-scf00525 | 27 |
| AX-158342182 | 27 | 19.796 | KV453299.1 | 2031788 | 27-scf00525 | 27 |
| AX-158342183 | 27 | 19.813 | KV453299.1 | 2032191 | 27-scf00525 | 27 |
| AX-158342186 | 27 | 19.844 | KV453299.1 | 2034260 | 27-scf00525 | 27 |
| AX-158342188 | 27 | 19.871 | KV453299.1 | 2036216 | 27-scf00525 | 27 |
| AX-158342190 | 27 | 19.98  | KV453299.1 | 2036707 | 27-scf00525 | 27 |
| AX-158342193 | 27 | 19.98  | KV453299.1 | 2039284 | 27-scf00525 | 27 |
| AX-158342194 | 27 | 19.98  | KV453299.1 | 2039506 | 27-scf00525 | 27 |
| AX-158342199 | 27 | 20.105 | KV453299.1 | 2046965 | 27-scf00525 | 27 |
| AX-158342201 | 27 | 20.132 | KV453299.1 | 2049219 | 27-scf00525 | 27 |
| AX-158342202 | 27 | 20.156 | KV453299.1 | 2050055 | 27-scf00525 | 27 |
| AX-158342204 | 27 | 20.166 | KV453299.1 | 2051427 | 27-scf00525 | 27 |
| AX-158342205 | 27 | 20.166 | KV453299.1 | 2051790 | 27-scf00525 | 27 |
| AX-158342211 | 27 | 20.166 | KV453299.1 | 2057174 | 27-scf00525 | 27 |
| AX-158342212 | 27 | 20.166 | KV453299.1 | 2057420 | 27-scf00525 | 27 |

|              |    |        |            |         |             |    |
|--------------|----|--------|------------|---------|-------------|----|
| AX-158342206 | 27 | 20.191 | KV453299.1 | 2052653 | 27-scf00525 | 27 |
| AX-158342207 | 27 | 20.789 | KV453299.1 | 2052935 | 27-scf00525 | 27 |
| AX-158342208 | 27 | 20.81  | KV453299.1 | 2054357 | 27-scf00525 | 27 |
| AX-158342214 | 27 | 20.855 | KV453299.1 | 2061535 | 27-scf00525 | 27 |
| AX-158342218 | 27 | 20.855 | KV453299.1 | 2065011 | 27-scf00525 | 27 |
| AX-158342219 | 27 | 20.855 | KV453299.1 | 2066003 | 27-scf00525 | 27 |
| AX-158342222 | 27 | 20.855 | KV453299.1 | 2068962 | 27-scf00525 | 27 |
| AX-158342223 | 27 | 20.855 | KV453299.1 | 2071155 | 27-scf00525 | 27 |
| AX-158342229 | 27 | 20.855 | KV453299.1 | 2076435 | 27-scf00525 | 27 |
| AX-158342231 | 27 | 20.855 | KV453299.1 | 2079625 | 27-scf00525 | 27 |
| AX-158342236 | 27 | 20.855 | KV453299.1 | 2085976 | 27-scf00525 | 27 |
| AX-158342239 | 27 | 20.855 | KV453299.1 | 2100299 | 27-scf00525 | 27 |
| AX-158342226 | 27 | 20.93  | KV453299.1 | 2073526 | 27-scf00525 | 27 |
| AX-158342230 | 27 | 20.93  | KV453299.1 | 2077406 | 27-scf00525 | 27 |
| AX-157861852 | 27 | 20.93  | KV453299.1 | 2081846 | 27-scf00525 | 27 |
| AX-158342232 | 27 | 21.001 | KV453299.1 | 2080739 | 27-scf00525 | 27 |
| AX-158342234 | 27 | 21.001 | KV453299.1 | 2083602 | 27-scf00525 | 27 |
| AX-158342235 | 27 | 21.001 | KV453299.1 | 2084197 | 27-scf00525 | 27 |
| AX-158342238 | 27 | 21.292 | KV453299.1 | 2098843 | 27-scf00525 | 27 |
| AX-158342240 | 27 | 21.292 | KV453299.1 | 2103376 | 27-scf00525 | 27 |
| AX-158342241 | 27 | 21.293 | KV453299.1 | 2103986 | 27-scf00525 | 27 |
| AX-158342242 | 27 | 21.413 | KV453299.1 | 2104439 | 27-scf00525 | 27 |
| AX-157882164 | 27 | 21.511 | KV453299.1 | 2094219 | 27-scf00525 | 27 |
| AX-157725489 | 27 | 21.511 | KV453299.1 | 2099479 | 27-scf00525 | 27 |
| AX-158342244 | 27 | 21.511 | KV453299.1 | 2107026 | 27-scf00525 | 27 |
| AX-158342245 | 27 | 21.511 | KV453299.1 | 2107642 | 27-scf00525 | 27 |
| AX-158342249 | 27 | 21.511 | KV453299.1 | 2112099 | 27-scf00525 | 27 |
| AX-158342250 | 27 | 21.511 | KV453299.1 | 2112648 | 27-scf00525 | 27 |
| AX-158342252 | 27 | 21.511 | KV453299.1 | 2115786 | 27-scf00525 | 27 |
| AX-158342262 | 27 | 21.511 | KV453299.1 | 2128667 | 27-scf00525 | 27 |
| AX-158342256 | 27 | 21.531 | KV453299.1 | 2120571 | 27-scf00525 | 27 |
| AX-158342299 | 27 | 21.531 | KV453299.1 | 2195974 | 27-scf00525 | 27 |
| AX-158342300 | 27 | 21.531 | KV453299.1 | 2196149 | 27-scf00525 | 27 |
| AX-157755819 | 27 | 21.574 | KV453299.1 | 2123210 | 27-scf00525 | 27 |
| AX-158342258 | 27 | 21.62  | KV453299.1 | 2124841 | 27-scf00525 | 27 |
| AX-158342259 | 27 | 21.62  | KV453299.1 | 2125631 | 27-scf00525 | 27 |
| AX-158342267 | 27 | 21.631 | KV453299.1 | 2133459 | 27-scf00525 | 27 |
| AX-158342268 | 27 | 21.64  | KV453299.1 | 2136752 | 27-scf00525 | 27 |
| AX-158342269 | 27 | 21.83  | KV453299.1 | 2138236 | 27-scf00525 | 27 |
| AX-158342272 | 27 | 21.83  | KV453299.1 | 2146317 | 27-scf00525 | 27 |
| AX-158342274 | 27 | 22.276 | KV453299.1 | 2149399 | 27-scf00525 | 27 |
| AX-158342280 | 27 | 22.276 | KV453299.1 | 2155397 | 27-scf00525 | 27 |
| AX-158342281 | 27 | 22.276 | KV453299.1 | 2156608 | 27-scf00525 | 27 |
| AX-158342282 | 27 | 22.276 | KV453299.1 | 2157584 | 27-scf00525 | 27 |
| AX-158342284 | 27 | 22.276 | KV453299.1 | 2159425 | 27-scf00525 | 27 |
| AX-158342243 | 27 | 22.386 | KV453299.1 | 2105747 | 27-scf00525 | 27 |
| AX-158342283 | 27 | 22.386 | KV453299.1 | 2158066 | 27-scf00525 | 27 |
| AX-158342286 | 27 | 22.386 | KV453299.1 | 2161635 | 27-scf00525 | 27 |
| AX-158342288 | 27 | 22.386 | KV453299.1 | 2163395 | 27-scf00525 | 27 |
| AX-157727352 | 27 | 22.386 | KV453299.1 | 2165881 | 27-scf00525 | 27 |
| AX-158342289 | 27 | 22.386 | KV453299.1 | 2167361 | 27-scf00525 | 27 |

|              |    |        |            |         |             |    |
|--------------|----|--------|------------|---------|-------------|----|
| AX-158342291 | 27 | 22.386 | KV453299.1 | 2170854 | 27-scf00525 | 27 |
| AX-158342292 | 27 | 22.386 | KV453299.1 | 2171321 | 27-scf00525 | 27 |
| AX-157730007 | 27 | 22.386 | KV453299.1 | 2178855 | 27-scf00525 | 27 |
| AX-157807134 | 27 | 22.386 | KV453299.1 | 2181070 | 27-scf00525 | 27 |
| AX-157748778 | 27 | 22.386 | KV453299.1 | 2181932 | 27-scf00525 | 27 |
| AX-157882166 | 27 | 22.386 | KV453299.1 | 2186839 | 27-scf00525 | 27 |
| AX-158381616 | 27 | 22.386 | KV453299.1 | 2187789 | 27-scf00525 | 27 |
| AX-158342295 | 27 | 22.386 | KV453299.1 | 2190249 | 27-scf00525 | 27 |
| AX-158342297 | 27 | 22.388 | KV453299.1 | 2193242 | 27-scf00525 | 27 |
| AX-157882168 | 27 | 22.824 | KV453299.1 | 2220995 | 27-scf00525 | 27 |
| AX-158342309 | 27 | 22.824 | KV453299.1 | 2221924 | 27-scf00525 | 27 |
| AX-158342313 | 27 | 22.824 | KV453299.1 | 2229469 | 27-scf00525 | 27 |
| AX-157753098 | 27 | 22.824 | KV453299.1 | 2230884 | 27-scf00525 | 27 |
| AX-157720101 | 27 | 22.824 | KV453299.1 | 2232320 | 27-scf00525 | 27 |
| AX-158342314 | 27 | 23.043 | KV453299.1 | 2233567 | 27-scf00525 | 27 |
| AX-158342315 | 27 | 23.148 | KV453299.1 | 2234851 | 27-scf00525 | 27 |
| AX-157720010 | 27 | 23.148 | KV453299.1 | 2239199 | 27-scf00525 | 27 |
| AX-157698061 | 27 | 23.148 | KV453299.1 | 2240886 | 27-scf00525 | 27 |
| AX-158342346 | 27 | 23.148 | KV453299.1 | 2276798 | 27-scf00525 | 27 |
| AX-158342301 | 27 | 23.262 | KV453299.1 | 2197614 | 27-scf00525 | 27 |
| AX-157756011 | 27 | 23.262 | KV453299.1 | 2245230 | 27-scf00525 | 27 |
| AX-158342325 | 27 | 23.262 | KV453299.1 | 2247149 | 27-scf00525 | 27 |
| AX-158342326 | 27 | 23.262 | KV453299.1 | 2248090 | 27-scf00525 | 27 |
| AX-158342328 | 27 | 23.262 | KV453299.1 | 2253038 | 27-scf00525 | 27 |
| AX-158342329 | 27 | 23.262 | KV453299.1 | 2254885 | 27-scf00525 | 27 |
| AX-158342332 | 27 | 23.262 | KV453299.1 | 2261352 | 27-scf00525 | 27 |
| AX-158342334 | 27 | 23.262 | KV453299.1 | 2262353 | 27-scf00525 | 27 |
| AX-157752698 | 27 | 23.262 | KV453299.1 | 2262806 | 27-scf00525 | 27 |
| AX-157708180 | 27 | 23.262 | KV453299.1 | 2266955 | 27-scf00525 | 27 |
| AX-158342337 | 27 | 23.262 | KV453299.1 | 2267496 | 27-scf00525 | 27 |
| AX-158342338 | 27 | 23.262 | KV453299.1 | 2269117 | 27-scf00525 | 27 |
| AX-158342340 | 27 | 23.262 | KV453299.1 | 2270293 | 27-scf00525 | 27 |
| AX-158342343 | 27 | 23.262 | KV453299.1 | 2272318 | 27-scf00525 | 27 |
| AX-157888744 | 27 | 23.262 | KV453299.1 | 2275777 | 27-scf00525 | 27 |
| AX-158342345 | 27 | 23.262 | KV453299.1 | 2276019 | 27-scf00525 | 27 |
| AX-158342347 | 27 | 23.262 | KV453299.1 | 2277661 | 27-scf00525 | 27 |
| AX-157850236 | 27 | 23.262 | KV453299.1 | 2277742 | 27-scf00525 | 27 |
| AX-158342348 | 27 | 23.262 | KV453299.1 | 2279052 | 27-scf00525 | 27 |
| AX-158342349 | 27 | 23.262 | KV453299.1 | 2279922 | 27-scf00525 | 27 |
| AX-158342350 | 27 | 23.262 | KV453299.1 | 2280153 | 27-scf00525 | 27 |
| AX-158342351 | 27 | 23.262 | KV453299.1 | 2281310 | 27-scf00525 | 27 |
| AX-158342356 | 27 | 23.262 | KV453299.1 | 2287929 | 27-scf00525 | 27 |
| AX-157744178 | 27 | 23.262 | KV453299.1 | 2290168 | 27-scf00525 | 27 |
| AX-158342358 | 27 | 23.262 | KV453299.1 | 2290573 | 27-scf00525 | 27 |
| AX-157717879 | 27 | 23.262 | KV453299.1 | 2291927 | 27-scf00525 | 27 |
| AX-158342359 | 27 | 23.262 | KV453299.1 | 2292695 | 27-scf00525 | 27 |
| AX-158342364 | 27 | 23.262 | KV453299.1 | 2300140 | 27-scf00525 | 27 |
| AX-158342371 | 27 | 23.262 | KV453299.1 | 2309768 | 27-scf00525 | 27 |
| AX-158342381 | 27 | 23.262 | KV453299.1 | 2321369 | 27-scf00525 | 27 |
| AX-158342383 | 27 | 23.262 | KV453299.1 | 2325839 | 27-scf00525 | 27 |
| AX-158342397 | 27 | 23.262 | KV453299.1 | 2344706 | 27-scf00525 | 27 |

|              |    |        |             |         |             |    |
|--------------|----|--------|-------------|---------|-------------|----|
| AX-157747585 | 27 | 23.262 | KV453299.1  | 2346609 | 27-scf00525 | 27 |
| AX-157706581 | 27 | 23.262 | 3ML01032508 | 122     | scf08129_1  | UN |
| AX-157850233 | 27 | 23.508 | KV453299.1  | 2149320 | 27-scf00525 | 27 |
| AX-157850234 | 27 | 23.508 | KV453299.1  | 2150420 | 27-scf00525 | 27 |
| AX-158342362 | 27 | 23.508 | KV453299.1  | 2296583 | 27-scf00525 | 27 |
| AX-158342372 | 27 | 23.543 | KV453299.1  | 2311737 | 27-scf00525 | 27 |
| AX-157861856 | 27 | 23.543 | KV453299.1  | 2315737 | 27-scf00525 | 27 |
| AX-158342375 | 27 | 23.543 | KV453299.1  | 2316212 | 27-scf00525 | 27 |
| AX-158342380 | 27 | 23.543 | KV453299.1  | 2320510 | 27-scf00525 | 27 |
| AX-158342384 | 27 | 23.543 | KV453299.1  | 2328198 | 27-scf00525 | 27 |
| AX-158342385 | 27 | 23.543 | KV453299.1  | 2328867 | 27-scf00525 | 27 |
| AX-158342386 | 27 | 23.543 | KV453299.1  | 2330138 | 27-scf00525 | 27 |
| AX-157719006 | 27 | 23.543 | KV453299.1  | 2330447 | 27-scf00525 | 27 |
| AX-158342390 | 27 | 24.243 | KV453299.1  | 2335429 | 27-scf00525 | 27 |
| AX-158342391 | 27 | 24.244 | KV453299.1  | 2335890 | 27-scf00525 | 27 |
| AX-158342396 | 27 | 24.244 | KV453299.1  | 2343975 | 27-scf00525 | 27 |
| AX-158342403 | 27 | 24.244 | KV453299.1  | 2352263 | 27-scf00525 | 27 |
| AX-158342407 | 27 | 24.245 | KV453299.1  | 2358862 | 27-scf00525 | 27 |
| AX-158342409 | 27 | 24.245 | KV453299.1  | 2361269 | 27-scf00525 | 27 |
| AX-158342410 | 27 | 24.245 | KV453299.1  | 2361717 | 27-scf00525 | 27 |
| AX-158342412 | 27 | 24.245 | KV453299.1  | 2362917 | 27-scf00525 | 27 |
| AX-158342413 | 27 | 24.468 | KV453299.1  | 2366859 | 27-scf00525 | 27 |
| AX-158342414 | 27 | 24.536 | KV453299.1  | 2367343 | 27-scf00525 | 27 |
| AX-158342416 | 27 | 24.996 | KV453299.1  | 2368704 | 27-scf00525 | 27 |
| AX-158342417 | 27 | 24.996 | KV453299.1  | 2372165 | 27-scf00525 | 27 |
| AX-158342425 | 27 | 24.996 | KV453299.1  | 2378410 | 27-scf00525 | 27 |
| AX-158342422 | 27 | 25.01  | KV453299.1  | 2376498 | 27-scf00525 | 27 |
| AX-157861858 | 27 | 25.01  | KV453299.1  | 2376830 | 27-scf00525 | 27 |
| AX-158342424 | 27 | 25.011 | KV453299.1  | 2377863 | 27-scf00525 | 27 |
| AX-157888748 | 27 | 25.011 | KV453299.1  | 2378355 | 27-scf00525 | 27 |
| AX-158342428 | 27 | 25.011 | KV453299.1  | 2380554 | 27-scf00525 | 27 |
| AX-157850243 | 27 | 25.13  | KV453299.1  | 2382088 | 27-scf00525 | 27 |
| AX-158381618 | 27 | 25.483 | KV453299.1  | 2384701 | 27-scf00525 | 27 |
| AX-158342432 | 27 | 25.486 | KV453299.1  | 2390276 | 27-scf00525 | 27 |
| AX-158342433 | 27 | 25.606 | KV453299.1  | 2392533 | 27-scf00525 | 27 |
| AX-158342437 | 27 | 25.606 | KV453299.1  | 2399607 | 27-scf00525 | 27 |
| AX-158342439 | 27 | 25.606 | KV453299.1  | 2402763 | 27-scf00525 | 27 |
| AX-158342440 | 27 | 25.606 | KV453299.1  | 2403516 | 27-scf00525 | 27 |
| AX-158342441 | 27 | 25.611 | KV453299.1  | 2404573 | 27-scf00525 | 27 |
| AX-157743154 | 27 | 26.132 | KV453299.1  | 2409508 | 27-scf00525 | 27 |
| AX-158342446 | 27 | 26.132 | KV453299.1  | 2410261 | 27-scf00525 | 27 |
| AX-158342448 | 27 | 26.132 | KV453299.1  | 2411954 | 27-scf00525 | 27 |
| AX-158342449 | 27 | 26.395 | KV453299.1  | 2415277 | 27-scf00525 | 27 |
| AX-157850245 | 27 | 26.395 | KV453299.1  | 2416048 | 27-scf00525 | 27 |
| AX-158342450 | 27 | 26.857 | KV453299.1  | 2419140 | 27-scf00525 | 27 |
| AX-158342453 | 27 | 26.857 | KV453299.1  | 2423056 | 27-scf00525 | 27 |
| AX-158342454 | 27 | 26.879 | KV453299.1  | 2427720 | 27-scf00525 | 27 |
| AX-158342456 | 27 | 27.018 | KV453299.1  | 2432034 | 27-scf00525 | 27 |
| AX-157774937 | 27 | 27.018 | KV453299.1  | 2434077 | 27-scf00525 | 27 |
| AX-158342457 | 27 | 27.019 | KV453299.1  | 2434913 | 27-scf00525 | 27 |
| AX-158342458 | 27 | 27.33  | KV453299.1  | 2438669 | 27-scf00525 | 27 |

|              |    |        |            |         |             |    |
|--------------|----|--------|------------|---------|-------------|----|
| AX-158342462 | 27 | 27.352 | KV453299.1 | 2444945 | 27-scf00525 | 27 |
| AX-158342463 | 27 | 27.649 | KV453299.1 | 2446099 | 27-scf00525 | 27 |
| AX-158342465 | 27 | 28.297 | KV453299.1 | 2448108 | 27-scf00525 | 27 |
| AX-158342468 | 27 | 28.297 | KV453299.1 | 2453970 | 27-scf00525 | 27 |
| AX-158342469 | 27 | 28.297 | KV453299.1 | 2454437 | 27-scf00525 | 27 |
| AX-158342470 | 27 | 28.297 | KV453299.1 | 2456943 | 27-scf00525 | 27 |
| AX-158342475 | 27 | 28.297 | KV453299.1 | 2462407 | 27-scf00525 | 27 |
| AX-158342476 | 27 | 28.297 | KV453299.1 | 2464909 | 27-scf00525 | 27 |
| AX-158342477 | 27 | 28.297 | KV453299.1 | 2465365 | 27-scf00525 | 27 |
| AX-158342480 | 27 | 28.297 | KV453299.1 | 2468910 | 27-scf00525 | 27 |
| AX-158342479 | 27 | 28.352 | KV453299.1 | 2468294 | 27-scf00525 | 27 |
| AX-158342488 | 27 | 28.352 | KV453299.1 | 2481288 | 27-scf00525 | 27 |
| AX-158342471 | 27 | 28.429 | KV453299.1 | 2457585 | 27-scf00525 | 27 |
| AX-158342481 | 27 | 28.429 | KV453299.1 | 2470227 | 27-scf00525 | 27 |
| AX-158342485 | 27 | 28.429 | KV453299.1 | 2475070 | 27-scf00525 | 27 |
| AX-158342467 | 27 | 28.561 | KV453299.1 | 2452104 | 27-scf00525 | 27 |
| AX-158342482 | 27 | 28.561 | KV453299.1 | 2471042 | 27-scf00525 | 27 |
| AX-158342483 | 27 | 28.561 | KV453299.1 | 2471184 | 27-scf00525 | 27 |
| AX-157850246 | 27 | 28.561 | KV453299.1 | 2475351 | 27-scf00525 | 27 |
| AX-158342486 | 27 | 28.561 | KV453299.1 | 2478214 | 27-scf00525 | 27 |
| AX-158342492 | 27 | 28.729 | KV453299.1 | 2485772 | 27-scf00525 | 27 |
| AX-158342496 | 27 | 28.816 | KV453299.1 | 2488509 | 27-scf00525 | 27 |
| AX-157775588 | 27 | 28.816 | KV453299.1 | 2490657 | 27-scf00525 | 27 |
| AX-157774225 | 27 | 28.896 | KV453299.1 | 2493807 | 27-scf00525 | 27 |
| AX-158342500 | 27 | 29.064 | KV453299.1 | 2499103 | 27-scf00525 | 27 |
| AX-158342503 | 27 | 29.194 | KV453299.1 | 2501661 | 27-scf00525 | 27 |
| AX-158342508 | 27 | 29.324 | KV453299.1 | 2506949 | 27-scf00525 | 27 |
| AX-158342505 | 27 | 29.566 | KV453299.1 | 2503017 | 27-scf00525 | 27 |
| AX-158342512 | 27 | 29.566 | KV453299.1 | 2510895 | 27-scf00525 | 27 |
| AX-158342514 | 27 | 29.566 | KV453299.1 | 2514798 | 27-scf00525 | 27 |
| AX-158342515 | 27 | 29.566 | KV453299.1 | 2516097 | 27-scf00525 | 27 |
| AX-158342517 | 27 | 29.566 | KV453299.1 | 2520309 | 27-scf00525 | 27 |
| AX-158342522 | 27 | 29.83  | KV453299.1 | 2524703 | 27-scf00525 | 27 |
| AX-157850248 | 27 | 29.83  | KV453299.1 | 2524972 | 27-scf00525 | 27 |
| AX-158342523 | 27 | 29.83  | KV453299.1 | 2525066 | 27-scf00525 | 27 |
| AX-158342524 | 27 | 29.83  | KV453299.1 | 2525753 | 27-scf00525 | 27 |
| AX-158342525 | 27 | 29.83  | KV453299.1 | 2526959 | 27-scf00525 | 27 |
| AX-158342526 | 27 | 29.83  | KV453299.1 | 2528074 | 27-scf00525 | 27 |
| AX-158342527 | 27 | 29.83  | KV453299.1 | 2529885 | 27-scf00525 | 27 |
| AX-158342530 | 27 | 29.83  | KV453299.1 | 2531616 | 27-scf00525 | 27 |
| AX-158342531 | 27 | 29.83  | KV453299.1 | 2532149 | 27-scf00525 | 27 |
| AX-158342532 | 27 | 29.83  | KV453299.1 | 2534937 | 27-scf00525 | 27 |
| AX-157850249 | 27 | 29.83  | KV453299.1 | 2537099 | 27-scf00525 | 27 |
| AX-157850253 | 27 | 29.83  | KV453299.1 | 2546051 | 27-scf00525 | 27 |
| AX-157850260 | 27 | 29.83  | KV453299.1 | 2609871 | 27-scf00525 | 27 |
| AX-157850252 | 27 | 29.868 | KV453299.1 | 2542320 | 27-scf00525 | 27 |
| AX-157774285 | 27 | 29.951 | KV453299.1 | 2544544 | 27-scf00525 | 27 |
| AX-157850254 | 27 | 29.951 | KV453299.1 | 2550073 | 27-scf00525 | 27 |
| AX-157754510 | 27 | 29.951 | KV453299.1 | 2554874 | 27-scf00525 | 27 |
| AX-158342541 | 27 | 29.951 | KV453299.1 | 2555747 | 27-scf00525 | 27 |
| AX-157850255 | 27 | 29.951 | KV453299.1 | 2556750 | 27-scf00525 | 27 |

|              |    |        |            |         |             |    |
|--------------|----|--------|------------|---------|-------------|----|
| AX-158342543 | 27 | 30.191 | KV453299.1 | 2566116 | 27-scf00525 | 27 |
| AX-157719695 | 27 | 30.191 | KV453299.1 | 2570544 | 27-scf00525 | 27 |
| AX-157850256 | 27 | 30.191 | KV453299.1 | 2575512 | 27-scf00525 | 27 |
| AX-158342547 | 27 | 30.28  | KV453299.1 | 2575635 | 27-scf00525 | 27 |
| AX-158342548 | 27 | 30.393 | KV453299.1 | 2576885 | 27-scf00525 | 27 |
| AX-157850258 | 27 | 30.644 | KV453299.1 | 2578915 | 27-scf00525 | 27 |
| AX-158342552 | 27 | 30.688 | KV453299.1 | 2581589 | 27-scf00525 | 27 |
| AX-158342553 | 27 | 30.78  | KV453299.1 | 2583020 | 27-scf00525 | 27 |
| AX-158342554 | 27 | 30.87  | KV453299.1 | 2583801 | 27-scf00525 | 27 |
| AX-157751300 | 27 | 31.029 | KV453299.1 | 2584624 | 27-scf00525 | 27 |
| AX-157713848 | 27 | 31.031 | KV453299.1 | 2586200 | 27-scf00525 | 27 |
| AX-158342555 | 27 | 31.035 | KV453299.1 | 2587554 | 27-scf00525 | 27 |
| AX-158342556 | 27 | 31.035 | KV453299.1 | 2589021 | 27-scf00525 | 27 |
| AX-158342558 | 27 | 31.035 | KV453299.1 | 2590718 | 27-scf00525 | 27 |
| AX-158342559 | 27 | 31.035 | KV453299.1 | 2592918 | 27-scf00525 | 27 |
| AX-157714146 | 27 | 31.036 | KV453299.1 | 2598051 | 27-scf00525 | 27 |
| AX-158342564 | 27 | 31.199 | KV453299.1 | 2601491 | 27-scf00525 | 27 |
| AX-158342568 | 27 | 31.363 | KV453299.1 | 2604858 | 27-scf00525 | 27 |
| AX-158342569 | 27 | 31.363 | KV453299.1 | 2605328 | 27-scf00525 | 27 |
| AX-158342570 | 27 | 31.363 | KV453299.1 | 2606648 | 27-scf00525 | 27 |
| AX-157715932 | 27 | 31.363 | KV453299.1 | 2636223 | 27-scf00525 | 27 |
| AX-157850259 | 27 | 31.364 | KV453299.1 | 2605740 | 27-scf00525 | 27 |
| AX-158342572 | 27 | 31.637 | KV453299.1 | 2609632 | 27-scf00525 | 27 |
| AX-158342580 | 27 | 31.637 | KV453299.1 | 2619047 | 27-scf00525 | 27 |
| AX-158342583 | 27 | 31.637 | KV453299.1 | 2622521 | 27-scf00525 | 27 |
| AX-157745023 | 27 | 31.637 | KV453299.1 | 2627076 | 27-scf00525 | 27 |
| AX-158342584 | 27 | 31.637 | KV453299.1 | 2627717 | 27-scf00525 | 27 |
| AX-157714123 | 27 | 31.767 | KV453299.1 | 2628991 | 27-scf00525 | 27 |
| AX-158342586 | 27 | 31.906 | KV453299.1 | 2631204 | 27-scf00525 | 27 |
| AX-157751514 | 27 | 31.91  | KV453299.1 | 2636760 | 27-scf00525 | 27 |
| AX-157861860 | 27 | 31.91  | KV453299.1 | 2637445 | 27-scf00525 | 27 |
| AX-157850265 | 27 | 32.019 | KV453299.1 | 2641597 | 27-scf00525 | 27 |
| AX-157713524 | 27 | 32.019 | KV453299.1 | 2641805 | 27-scf00525 | 27 |
| AX-158342593 | 27 | 32.019 | KV453299.1 | 2644112 | 27-scf00525 | 27 |
| AX-157850267 | 27 | 32.019 | KV453299.1 | 2644318 | 27-scf00525 | 27 |
| AX-157850269 | 27 | 32.019 | KV453299.1 | 2647287 | 27-scf00525 | 27 |
| AX-157774088 | 27 | 32.019 | KV453299.1 | 2650141 | 27-scf00525 | 27 |
| AX-158342598 | 27 | 32.019 | KV453299.1 | 2651239 | 27-scf00525 | 27 |
| AX-158342599 | 27 | 32.019 | KV453299.1 | 2651679 | 27-scf00525 | 27 |
| AX-158342600 | 27 | 32.019 | KV453299.1 | 2652181 | 27-scf00525 | 27 |
| AX-158342602 | 27 | 32.019 | KV453299.1 | 2654725 | 27-scf00525 | 27 |
| AX-158342603 | 27 | 32.019 | KV453299.1 | 2656643 | 27-scf00525 | 27 |
| AX-158342604 | 27 | 32.019 | KV453299.1 | 2657603 | 27-scf00525 | 27 |
| AX-158342605 | 27 | 32.019 | KV453299.1 | 2658482 | 27-scf00525 | 27 |
| AX-158342607 | 27 | 32.019 | KV453299.1 | 2661819 | 27-scf00525 | 27 |
| AX-158342608 | 27 | 32.019 | KV453299.1 | 2663266 | 27-scf00525 | 27 |
| AX-158342590 | 27 | 32.128 | KV453299.1 | 2639319 | 27-scf00525 | 27 |
| AX-158342609 | 27 | 32.128 | KV453299.1 | 2664054 | 27-scf00525 | 27 |
| AX-158342611 | 27 | 32.128 | KV453299.1 | 2666408 | 27-scf00525 | 27 |
| AX-158342613 | 27 | 32.128 | KV453299.1 | 2667545 | 27-scf00525 | 27 |
| AX-158342615 | 27 | 32.128 | KV453299.1 | 2670714 | 27-scf00525 | 27 |

|              |    |        |            |         |             |    |
|--------------|----|--------|------------|---------|-------------|----|
| AX-158342616 | 27 | 32.128 | KV453299.1 | 2671284 | 27-scf00525 | 27 |
| AX-158342621 | 27 | 32.128 | KV453299.1 | 2677880 | 27-scf00525 | 27 |
| AX-157742810 | 27 | 32.129 | KV453299.1 | 2672442 | 27-scf00525 | 27 |
| AX-158342620 | 27 | 32.129 | KV453299.1 | 2676935 | 27-scf00525 | 27 |
| AX-158342623 | 27 | 32.401 | KV453299.1 | 2682505 | 27-scf00525 | 27 |
| AX-158342626 | 27 | 32.401 | KV453299.1 | 2687300 | 27-scf00525 | 27 |
| AX-158342627 | 27 | 32.402 | KV453299.1 | 2689831 | 27-scf00525 | 27 |
| AX-158342628 | 27 | 32.402 | KV453299.1 | 2692194 | 27-scf00525 | 27 |
| AX-158342631 | 27 | 32.402 | KV453299.1 | 2694672 | 27-scf00525 | 27 |
| AX-158342632 | 27 | 32.402 | KV453299.1 | 2695857 | 27-scf00525 | 27 |
| AX-157745942 | 27 | 32.402 | KV453299.1 | 2696684 | 27-scf00525 | 27 |
| AX-158342636 | 27 | 32.675 | KV453299.1 | 2701348 | 27-scf00525 | 27 |
| AX-158342638 | 27 | 32.675 | KV453299.1 | 2703018 | 27-scf00525 | 27 |
| AX-158342639 | 27 | 32.675 | KV453299.1 | 2704230 | 27-scf00525 | 27 |
| AX-158342641 | 27 | 32.675 | KV453299.1 | 2705783 | 27-scf00525 | 27 |
| AX-158342643 | 27 | 32.675 | KV453299.1 | 2707939 | 27-scf00525 | 27 |
| AX-158342644 | 27 | 32.675 | KV453299.1 | 2708965 | 27-scf00525 | 27 |
| AX-158342646 | 27 | 32.675 | KV453299.1 | 2710442 | 27-scf00525 | 27 |
| AX-158342647 | 27 | 32.675 | KV453299.1 | 2711041 | 27-scf00525 | 27 |
| AX-158419163 | 27 | 32.675 | KV453299.1 | 2711893 | 27-scf00525 | 27 |
| AX-157771446 | 27 | 32.675 | KV453299.1 | 2712716 | 27-scf00525 | 27 |
| AX-158342648 | 27 | 32.675 | KV453299.1 | 2713642 | 27-scf00525 | 27 |
| AX-158342649 | 27 | 32.675 | KV453299.1 | 2716651 | 27-scf00525 | 27 |
| AX-158342653 | 27 | 32.675 | KV453299.1 | 2720050 | 27-scf00525 | 27 |
| AX-158342650 | 27 | 32.701 | KV453299.1 | 2717318 | 27-scf00525 | 27 |
| AX-158342652 | 27 | 32.73  | KV453299.1 | 2719497 | 27-scf00525 | 27 |
| AX-158342657 | 27 | 32.75  | KV453299.1 | 2723986 | 27-scf00525 | 27 |
| AX-158342630 | 27 | 32.784 | KV453299.1 | 2693967 | 27-scf00525 | 27 |
| AX-158342659 | 27 | 32.784 | KV453299.1 | 2726558 | 27-scf00525 | 27 |
| AX-158342661 | 27 | 32.784 | KV453299.1 | 2728844 | 27-scf00525 | 27 |
| AX-158342662 | 27 | 32.784 | KV453299.1 | 2729251 | 27-scf00525 | 27 |
| AX-158342663 | 27 | 32.784 | KV453299.1 | 2729683 | 27-scf00525 | 27 |
| AX-158381621 | 27 | 32.784 | KV453299.1 | 2729740 | 27-scf00525 | 27 |
| AX-158342664 | 27 | 32.784 | KV453299.1 | 2730168 | 27-scf00525 | 27 |
| AX-158342668 | 27 | 32.784 | KV453299.1 | 2735614 | 27-scf00525 | 27 |
| AX-157772653 | 27 | 32.784 | KV453299.1 | 2741246 | 27-scf00525 | 27 |
| AX-158342671 | 27 | 32.784 | KV453299.1 | 2741532 | 27-scf00525 | 27 |
| AX-158342672 | 27 | 32.784 | KV453299.1 | 2745194 | 27-scf00525 | 27 |
| AX-158342675 | 27 | 32.784 | KV453299.1 | 2748078 | 27-scf00525 | 27 |
| AX-157850271 | 27 | 32.784 | KV453299.1 | 2749956 | 27-scf00525 | 27 |
| AX-158342676 | 27 | 32.784 | KV453299.1 | 2750345 | 27-scf00525 | 27 |
| AX-158342678 | 27 | 32.784 | KV453299.1 | 2755932 | 27-scf00525 | 27 |
| AX-158342679 | 27 | 32.784 | KV453299.1 | 2756698 | 27-scf00525 | 27 |
| AX-158342681 | 27 | 32.784 | KV453299.1 | 2759879 | 27-scf00525 | 27 |
| AX-158342683 | 27 | 33.218 | KV453299.1 | 2763382 | 27-scf00525 | 27 |
| AX-158342684 | 27 | 33.221 | KV453299.1 | 2764166 | 27-scf00525 | 27 |
| AX-157747914 | 27 | 33.221 | KV453299.1 | 2766338 | 27-scf00525 | 27 |
| AX-157850273 | 27 | 33.221 | KV453299.1 | 2773590 | 27-scf00525 | 27 |
| AX-158342691 | 27 | 33.221 | KV453299.1 | 2776942 | 27-scf00525 | 27 |
| AX-157723925 | 27 | 33.221 | KV453299.1 | 2777741 | 27-scf00525 | 27 |
| AX-157850274 | 27 | 33.221 | KV453299.1 | 2781848 | 27-scf00525 | 27 |

|              |    |        |            |         |             |    |
|--------------|----|--------|------------|---------|-------------|----|
| AX-158342693 | 27 | 33.221 | KV453299.1 | 2782095 | 27-scf00525 | 27 |
| AX-158342715 | 27 | 33.221 | KV453299.1 | 2820437 | 27-scf00525 | 27 |
| AX-157888757 | 27 | 33.269 | KV453299.1 | 2790825 | 27-scf00525 | 27 |
| AX-158342695 | 27 | 33.329 | KV453299.1 | 2792412 | 27-scf00525 | 27 |
| AX-157714931 | 27 | 33.439 | KV453299.1 | 2796065 | 27-scf00525 | 27 |
| AX-157850275 | 27 | 33.439 | KV453299.1 | 2796770 | 27-scf00525 | 27 |
| AX-158342703 | 27 | 33.439 | KV453299.1 | 2801181 | 27-scf00525 | 27 |
| AX-158342704 | 27 | 33.439 | KV453299.1 | 2802311 | 27-scf00525 | 27 |
| AX-157713832 | 27 | 33.439 | KV453299.1 | 2803666 | 27-scf00525 | 27 |
| AX-157713504 | 27 | 33.439 | KV453299.1 | 2804444 | 27-scf00525 | 27 |
| AX-157772111 | 27 | 33.439 | KV453299.1 | 2856382 | 27-scf00525 | 27 |
| AX-158342708 | 27 | 33.652 | KV453299.1 | 2812967 | 27-scf00525 | 27 |
| AX-158342711 | 27 | 33.656 | KV453299.1 | 2816108 | 27-scf00525 | 27 |
| AX-158342722 | 27 | 33.656 | KV453299.1 | 2826890 | 27-scf00525 | 27 |
| AX-158342713 | 27 | 33.661 | KV453299.1 | 2819628 | 27-scf00525 | 27 |
| AX-158342714 | 27 | 33.662 | KV453299.1 | 2820175 | 27-scf00525 | 27 |
| AX-158342716 | 27 | 33.821 | KV453299.1 | 2820977 | 27-scf00525 | 27 |
| AX-158342720 | 27 | 33.985 | KV453299.1 | 2824310 | 27-scf00525 | 27 |
| AX-158342723 | 27 | 33.986 | KV453299.1 | 2827333 | 27-scf00525 | 27 |
| AX-158342726 | 27 | 33.986 | KV453299.1 | 2828749 | 27-scf00525 | 27 |
| AX-158342732 | 27 | 33.986 | KV453299.1 | 2835321 | 27-scf00525 | 27 |
| AX-158342733 | 27 | 33.986 | KV453299.1 | 2836796 | 27-scf00525 | 27 |
| AX-158342734 | 27 | 33.986 | KV453299.1 | 2838038 | 27-scf00525 | 27 |
| AX-158342735 | 27 | 33.986 | KV453299.1 | 2838628 | 27-scf00525 | 27 |
| AX-158342742 | 27 | 34.146 | KV453299.1 | 2848812 | 27-scf00525 | 27 |
| AX-157749039 | 27 | 34.204 | KV453299.1 | 2845237 | 27-scf00525 | 27 |
| AX-158342744 | 27 | 34.204 | KV453299.1 | 2852054 | 27-scf00525 | 27 |
| AX-158342745 | 27 | 34.204 | KV453299.1 | 2852616 | 27-scf00525 | 27 |
| AX-158419167 | 27 | 34.204 | KV453299.1 | 2857717 | 27-scf00525 | 27 |
| AX-158342747 | 27 | 34.204 | KV453299.1 | 2857771 | 27-scf00525 | 27 |
| AX-158342748 | 27 | 34.204 | KV453299.1 | 2858929 | 27-scf00525 | 27 |
| AX-158342750 | 27 | 34.204 | KV453299.1 | 2860456 | 27-scf00525 | 27 |
| AX-157725983 | 27 | 34.204 | KV453299.1 | 2862090 | 27-scf00525 | 27 |
| AX-158342754 | 27 | 34.204 | KV453299.1 | 2867588 | 27-scf00525 | 27 |
| AX-158342755 | 27 | 34.204 | KV453299.1 | 2869936 | 27-scf00525 | 27 |
| AX-158342757 | 27 | 34.204 | KV453299.1 | 2871726 | 27-scf00525 | 27 |
| AX-157752811 | 27 | 34.488 | KV453299.1 | 2874134 | 27-scf00525 | 27 |
| AX-158342760 | 27 | 34.676 | KV453299.1 | 2877520 | 27-scf00525 | 27 |
| AX-158342765 | 27 | 34.676 | KV453299.1 | 2885055 | 27-scf00525 | 27 |
| AX-157850278 | 27 | 34.676 | KV453299.1 | 2895148 | 27-scf00525 | 27 |
| AX-158342774 | 27 | 34.676 | KV453299.1 | 2895416 | 27-scf00525 | 27 |
| AX-157850279 | 27 | 34.676 | KV453299.1 | 2898396 | 27-scf00525 | 27 |
| AX-158342773 | 27 | 34.888 | KV453299.1 | 2894628 | 27-scf00525 | 27 |
| AX-158342776 | 27 | 34.888 | KV453299.1 | 2897558 | 27-scf00525 | 27 |
| AX-158342772 | 27 | 35.079 | KV453299.1 | 2894058 | 27-scf00525 | 27 |
| AX-157807157 | 27 | 35.079 | KV453299.1 | 2906773 | 27-scf00525 | 27 |
| AX-158342778 | 27 | 35.079 | KV453299.1 | 2907604 | 27-scf00525 | 27 |
| AX-158342779 | 27 | 35.079 | KV453299.1 | 2909180 | 27-scf00525 | 27 |
| AX-158342782 | 27 | 35.079 | KV453299.1 | 2912708 | 27-scf00525 | 27 |
| AX-158342783 | 27 | 35.079 | KV453299.1 | 2914931 | 27-scf00525 | 27 |
| AX-157850282 | 27 | 35.079 | KV453299.1 | 2916294 | 27-scf00525 | 27 |



|              |    |        |            |         |             |    |
|--------------|----|--------|------------|---------|-------------|----|
| AX-157721721 | 27 | 35.079 | KV453299.1 | 2917478 | 27-scf00525 | 27 |
| AX-158342784 | 27 | 35.079 | KV453299.1 | 2922284 | 27-scf00525 | 27 |
| AX-158342789 | 27 | 35.079 | KV453299.1 | 2928279 | 27-scf00525 | 27 |
| AX-158342793 | 27 | 35.079 | KV453299.1 | 2935260 | 27-scf00525 | 27 |
| AX-158342795 | 27 | 35.079 | KV453299.1 | 2938428 | 27-scf00525 | 27 |
| AX-158342841 | 27 | 35.079 | KV453299.1 | 2992860 | 27-scf00525 | 27 |
| AX-157850286 | 27 | 35.079 | KV453299.1 | 2995381 | 27-scf00525 | 27 |
| AX-158342852 | 27 | 35.079 | KV453299.1 | 3004911 | 27-scf00525 | 27 |
| AX-158342866 | 27 | 35.079 | KV453299.1 | 3026447 | 27-scf00525 | 27 |
| AX-158342873 | 27 | 35.079 | KV453299.1 | 3042058 | 27-scf00525 | 27 |
| AX-158342791 | 27 | 35.116 | KV453299.1 | 2932216 | 27-scf00525 | 27 |
| AX-158342794 | 27 | 35.146 | KV453299.1 | 2936412 | 27-scf00525 | 27 |
| AX-158342797 | 27 | 35.165 | KV453299.1 | 2939550 | 27-scf00525 | 27 |
| AX-158342798 | 27 | 35.188 | KV453299.1 | 2940487 | 27-scf00525 | 27 |
| AX-158342804 | 27 | 35.188 | KV453299.1 | 2946614 | 27-scf00525 | 27 |
| AX-158342805 | 27 | 35.188 | KV453299.1 | 2947448 | 27-scf00525 | 27 |
| AX-158381622 | 27 | 35.188 | KV453299.1 | 2950744 | 27-scf00525 | 27 |
| AX-158342812 | 27 | 35.188 | KV453299.1 | 2953715 | 27-scf00525 | 27 |
| AX-157755649 | 27 | 35.188 | KV453299.1 | 2960202 | 27-scf00525 | 27 |
| AX-158342816 | 27 | 35.188 | KV453299.1 | 2960637 | 27-scf00525 | 27 |
| AX-158342803 | 27 | 35.406 | KV453299.1 | 2946254 | 27-scf00525 | 27 |
| AX-158342817 | 27 | 35.406 | KV453299.1 | 2963941 | 27-scf00525 | 27 |
| AX-157743488 | 27 | 35.406 | KV453299.1 | 2966371 | 27-scf00525 | 27 |
| AX-158342822 | 27 | 35.406 | KV453299.1 | 2967285 | 27-scf00525 | 27 |
| AX-158342825 | 27 | 35.406 | KV453299.1 | 2969738 | 27-scf00525 | 27 |
| AX-158342827 | 27 | 35.406 | KV453299.1 | 2971678 | 27-scf00525 | 27 |
| AX-158342828 | 27 | 35.406 | KV453299.1 | 2972765 | 27-scf00525 | 27 |
| AX-157850284 | 27 | 35.406 | KV453299.1 | 2974220 | 27-scf00525 | 27 |
| AX-157744062 | 27 | 35.478 | KV453299.1 | 2974594 | 27-scf00525 | 27 |
| AX-157743477 | 27 | 35.578 | KV453299.1 | 2979590 | 27-scf00525 | 27 |
| AX-158342831 | 27 | 35.699 | KV453299.1 | 2982989 | 27-scf00525 | 27 |
| AX-158342833 | 27 | 35.793 | KV453299.1 | 2984730 | 27-scf00525 | 27 |
| AX-158342809 | 27 | 36.035 | KV453299.1 | 2952023 | 27-scf00525 | 27 |
| AX-158342836 | 27 | 36.035 | KV453299.1 | 2986335 | 27-scf00525 | 27 |
| AX-158342867 | 27 | 36.035 | KV453299.1 | 3027198 | 27-scf00525 | 27 |
| AX-158342839 | 27 | 36.388 | KV453299.1 | 2991082 | 27-scf00525 | 27 |
| AX-157726169 | 27 | 36.391 | KV453299.1 | 3000026 | 27-scf00525 | 27 |
| AX-158342849 | 27 | 36.391 | KV453299.1 | 3001347 | 27-scf00525 | 27 |
| AX-157721355 | 27 | 36.391 | KV453299.1 | 3007129 | 27-scf00525 | 27 |
| AX-158342855 | 27 | 36.391 | KV453299.1 | 3008694 | 27-scf00525 | 27 |
| AX-158342856 | 27 | 36.391 | KV453299.1 | 3009836 | 27-scf00525 | 27 |
| AX-158342859 | 27 | 36.391 | KV453299.1 | 3011541 | 27-scf00525 | 27 |
| AX-158342861 | 27 | 36.391 | KV453299.1 | 3013604 | 27-scf00525 | 27 |
| AX-157713800 | 27 | 36.391 | KV453299.1 | 3022175 | 27-scf00525 | 27 |
| AX-158342863 | 27 | 36.391 | KV453299.1 | 3022687 | 27-scf00525 | 27 |
| AX-157861865 | 27 | 36.391 | KV453299.1 | 3024537 | 27-scf00525 | 27 |
| AX-158342865 | 27 | 36.391 | KV453299.1 | 3024575 | 27-scf00525 | 27 |
| AX-157757640 | 27 | 36.391 | KV453299.1 | 3025491 | 27-scf00525 | 27 |
| AX-158342870 | 27 | 36.391 | KV453299.1 | 3035210 | 27-scf00525 | 27 |
| AX-158342871 | 27 | 36.391 | KV453299.1 | 3036681 | 27-scf00525 | 27 |
| AX-158342872 | 27 | 36.391 | KV453299.1 | 3040223 | 27-scf00525 | 27 |

|              |    |        |            |         |             |    |
|--------------|----|--------|------------|---------|-------------|----|
| AX-158342924 | 27 | 36.391 | KV453299.1 | 3104392 | 27-scf00525 | 27 |
| AX-158342928 | 27 | 36.391 | KV453299.1 | 3109120 | 27-scf00525 | 27 |
| AX-158342940 | 27 | 36.391 | KV453299.1 | 3123090 | 27-scf00525 | 27 |
| AX-158342943 | 27 | 36.391 | KV453299.1 | 3128048 | 27-scf00525 | 27 |
| AX-158342843 | 27 | 36.5   | KV453299.1 | 2994091 | 27-scf00525 | 27 |
| AX-158342857 | 27 | 36.5   | KV453299.1 | 3010084 | 27-scf00525 | 27 |
| AX-158342862 | 27 | 36.5   | KV453299.1 | 3020602 | 27-scf00525 | 27 |
| AX-158342876 | 27 | 36.5   | KV453299.1 | 3044575 | 27-scf00525 | 27 |
| AX-158342880 | 27 | 36.5   | KV453299.1 | 3048734 | 27-scf00525 | 27 |
| AX-158342881 | 27 | 36.5   | KV453299.1 | 3050166 | 27-scf00525 | 27 |
| AX-158342883 | 27 | 36.5   | KV453299.1 | 3052021 | 27-scf00525 | 27 |
| AX-158342885 | 27 | 36.5   | KV453299.1 | 3058588 | 27-scf00525 | 27 |
| AX-157727654 | 27 | 36.5   | KV453299.1 | 3060984 | 27-scf00525 | 27 |
| AX-158342889 | 27 | 36.506 | KV453299.1 | 3066638 | 27-scf00525 | 27 |
| AX-158342891 | 27 | 36.511 | KV453299.1 | 3070555 | 27-scf00525 | 27 |
| AX-158342893 | 27 | 36.785 | KV453299.1 | 3071428 | 27-scf00525 | 27 |
| AX-158342897 | 27 | 36.931 | KV453299.1 | 3076012 | 27-scf00525 | 27 |
| AX-158381623 | 27 | 36.934 | KV453299.1 | 3077468 | 27-scf00525 | 27 |
| AX-158342905 | 27 | 36.934 | KV453299.1 | 3086228 | 27-scf00525 | 27 |
| AX-158342890 | 27 | 36.939 | KV453299.1 | 3069688 | 27-scf00525 | 27 |
| AX-158342900 | 27 | 36.939 | KV453299.1 | 3081316 | 27-scf00525 | 27 |
| AX-158342903 | 27 | 36.939 | KV453299.1 | 3083756 | 27-scf00525 | 27 |
| AX-158342904 | 27 | 37.047 | KV453299.1 | 3086004 | 27-scf00525 | 27 |
| AX-158342906 | 27 | 37.047 | KV453299.1 | 3086945 | 27-scf00525 | 27 |
| AX-158342909 | 27 | 37.047 | KV453299.1 | 3089350 | 27-scf00525 | 27 |
| AX-158342910 | 27 | 37.047 | KV453299.1 | 3091028 | 27-scf00525 | 27 |
| AX-158342911 | 27 | 37.157 | KV453299.1 | 3092462 | 27-scf00525 | 27 |
| AX-158342912 | 27 | 37.157 | KV453299.1 | 3093008 | 27-scf00525 | 27 |
| AX-157740240 | 27 | 37.157 | KV453299.1 | 3093495 | 27-scf00525 | 27 |
| AX-158342913 | 27 | 37.157 | KV453299.1 | 3094140 | 27-scf00525 | 27 |
| AX-158342916 | 27 | 37.157 | KV453299.1 | 3095889 | 27-scf00525 | 27 |
| AX-158342918 | 27 | 37.157 | KV453299.1 | 3097432 | 27-scf00525 | 27 |
| AX-158342920 | 27 | 37.157 | KV453299.1 | 3100111 | 27-scf00525 | 27 |
| AX-158342922 | 27 | 37.157 | KV453299.1 | 3101632 | 27-scf00525 | 27 |
| AX-158342925 | 27 | 37.157 | KV453299.1 | 3105246 | 27-scf00525 | 27 |
| AX-158342926 | 27 | 37.157 | KV453299.1 | 3107692 | 27-scf00525 | 27 |
| AX-158342955 | 27 | 37.157 | KV453299.1 | 3146333 | 27-scf00525 | 27 |
| AX-158342932 | 27 | 37.43  | KV453299.1 | 3113369 | 27-scf00525 | 27 |
| AX-158342934 | 27 | 37.43  | KV453299.1 | 3115839 | 27-scf00525 | 27 |
| AX-158342936 | 27 | 37.703 | KV453299.1 | 3117542 | 27-scf00525 | 27 |
| AX-158342941 | 27 | 37.703 | KV453299.1 | 3124204 | 27-scf00525 | 27 |
| AX-158342942 | 27 | 37.703 | KV453299.1 | 3127313 | 27-scf00525 | 27 |
| AX-158342944 | 27 | 37.703 | KV453299.1 | 3129274 | 27-scf00525 | 27 |
| AX-157754781 | 27 | 37.703 | KV453299.1 | 3129961 | 27-scf00525 | 27 |
| AX-158381624 | 27 | 37.703 | KV453299.1 | 3131790 | 27-scf00525 | 27 |
| AX-158342946 | 27 | 37.703 | KV453299.1 | 3132928 | 27-scf00525 | 27 |
| AX-158342948 | 27 | 37.703 | KV453299.1 | 3135808 | 27-scf00525 | 27 |
| AX-157850288 | 27 | 37.703 | KV453299.1 | 3136961 | 27-scf00525 | 27 |
| AX-158342950 | 27 | 37.703 | KV453299.1 | 3138410 | 27-scf00525 | 27 |
| AX-157722569 | 27 | 37.703 | KV453299.1 | 3143014 | 27-scf00525 | 27 |
| AX-158342954 | 27 | 37.703 | KV453299.1 | 3145864 | 27-scf00525 | 27 |

|              |    |        |            |         |             |    |
|--------------|----|--------|------------|---------|-------------|----|
| AX-158342956 | 27 | 37.703 | KV453299.1 | 3149091 | 27-scf00525 | 27 |
| AX-158342957 | 27 | 37.757 | KV453299.1 | 3149977 | 27-scf00525 | 27 |
| AX-158342939 | 27 | 37.813 | KV453299.1 | 3122084 | 27-scf00525 | 27 |
| AX-158342958 | 27 | 37.813 | KV453299.1 | 3151361 | 27-scf00525 | 27 |
| AX-158419170 | 27 | 37.862 | KV453299.1 | 3152286 | 27-scf00525 | 27 |
| AX-158342962 | 27 | 37.922 | KV453299.1 | 3154853 | 27-scf00525 | 27 |
| AX-157850290 | 27 | 37.922 | KV453299.1 | 3155754 | 27-scf00525 | 27 |
| AX-158342966 | 27 | 37.98  | KV453299.1 | 3167978 | 27-scf00525 | 27 |
| AX-158342938 | 27 | 38.031 | KV453299.1 | 3121243 | 27-scf00525 | 27 |
| AX-158342967 | 27 | 38.031 | KV453299.1 | 3168822 | 27-scf00525 | 27 |
| AX-158342968 | 27 | 38.031 | KV453299.1 | 3170175 | 27-scf00525 | 27 |
| AX-158342969 | 27 | 38.031 | KV453299.1 | 3170617 | 27-scf00525 | 27 |
| AX-158342971 | 27 | 38.031 | KV453299.1 | 3172827 | 27-scf00525 | 27 |
| AX-158342974 | 27 | 38.031 | KV453299.1 | 3176311 | 27-scf00525 | 27 |
| AX-158342976 | 27 | 38.032 | KV453299.1 | 3182981 | 27-scf00525 | 27 |
| AX-158342978 | 27 | 38.249 | KV453299.1 | 3186993 | 27-scf00525 | 27 |
| AX-158342981 | 27 | 38.379 | KV453299.1 | 3191836 | 27-scf00525 | 27 |
| AX-158342984 | 27 | 38.468 | KV453299.1 | 3195233 | 27-scf00525 | 27 |
| AX-158342985 | 27 | 38.468 | KV453299.1 | 3195613 | 27-scf00525 | 27 |
| AX-157850291 | 27 | 38.468 | KV453299.1 | 3199014 | 27-scf00525 | 27 |
| AX-158343015 | 27 | 38.468 | KV453299.1 | 3234881 | 27-scf00525 | 27 |
| AX-157723292 | 27 | 38.468 | KV453299.1 | 3274577 | 27-scf00525 | 27 |
| AX-158343076 | 27 | 38.468 | KV453299.1 | 3325728 | 27-scf00525 | 27 |
| AX-158342989 | 27 | 38.518 | KV453299.1 | 3199067 | 27-scf00525 | 27 |
| AX-158342991 | 27 | 38.577 | KV453299.1 | 3200886 | 27-scf00525 | 27 |
| AX-157712257 | 27 | 38.577 | KV453299.1 | 3202097 | 27-scf00525 | 27 |
| AX-158342997 | 27 | 38.577 | KV453299.1 | 3207815 | 27-scf00525 | 27 |
| AX-158342999 | 27 | 38.577 | KV453299.1 | 3208860 | 27-scf00525 | 27 |
| AX-158343002 | 27 | 38.642 | KV453299.1 | 3216947 | 27-scf00525 | 27 |
| AX-158342973 | 27 | 38.686 | KV453299.1 | 3174854 | 27-scf00525 | 27 |
| AX-158342983 | 27 | 38.686 | KV453299.1 | 3194553 | 27-scf00525 | 27 |
| AX-158342992 | 27 | 38.686 | KV453299.1 | 3201513 | 27-scf00525 | 27 |
| AX-157888759 | 27 | 38.686 | KV453299.1 | 3213088 | 27-scf00525 | 27 |
| AX-158343001 | 27 | 38.686 | KV453299.1 | 3215421 | 27-scf00525 | 27 |
| AX-158343006 | 27 | 38.686 | KV453299.1 | 3221510 | 27-scf00525 | 27 |
| AX-158343007 | 27 | 38.686 | KV453299.1 | 3224196 | 27-scf00525 | 27 |
| AX-158343009 | 27 | 38.686 | KV453299.1 | 3227266 | 27-scf00525 | 27 |
| AX-158343010 | 27 | 38.686 | KV453299.1 | 3227895 | 27-scf00525 | 27 |
| AX-157750814 | 27 | 38.686 | KV453299.1 | 3229358 | 27-scf00525 | 27 |
| AX-158343011 | 27 | 38.686 | KV453299.1 | 3230022 | 27-scf00525 | 27 |
| AX-157772462 | 27 | 38.686 | KV453299.1 | 3232890 | 27-scf00525 | 27 |
| AX-157861867 | 27 | 38.686 | KV453299.1 | 3242133 | 27-scf00525 | 27 |
| AX-158343018 | 27 | 38.686 | KV453299.1 | 3242252 | 27-scf00525 | 27 |
| AX-157723528 | 27 | 38.686 | KV453299.1 | 3243108 | 27-scf00525 | 27 |
| AX-158343022 | 27 | 38.686 | KV453299.1 | 3247577 | 27-scf00525 | 27 |
| AX-158343023 | 27 | 38.686 | KV453299.1 | 3248200 | 27-scf00525 | 27 |
| AX-158343025 | 27 | 38.686 | KV453299.1 | 3252699 | 27-scf00525 | 27 |
| AX-158343026 | 27 | 38.686 | KV453299.1 | 3253072 | 27-scf00525 | 27 |
| AX-158343028 | 27 | 38.686 | KV453299.1 | 3254595 | 27-scf00525 | 27 |
| AX-157850292 | 27 | 38.686 | KV453299.1 | 3257100 | 27-scf00525 | 27 |
| AX-158343047 | 27 | 38.686 | KV453299.1 | 3284844 | 27-scf00525 | 27 |

|              |    |        |            |         |             |    |
|--------------|----|--------|------------|---------|-------------|----|
| AX-157708014 | 27 | 38.686 | KV453299.1 | 3311144 | 27-scf00525 | 27 |
| AX-158343079 | 27 | 38.686 | KV453299.1 | 3331190 | 27-scf00525 | 27 |
| AX-158343080 | 27 | 38.686 | KV453299.1 | 3333934 | 27-scf00525 | 27 |
| AX-158419172 | 27 | 38.686 | KV453299.1 | 3338635 | 27-scf00525 | 27 |
| AX-158343088 | 27 | 38.686 | KV453299.1 | 3350791 | 27-scf00525 | 27 |
| AX-158343089 | 27 | 38.686 | KV453299.1 | 3351362 | 27-scf00525 | 27 |
| AX-158343093 | 27 | 38.686 | KV453299.1 | 3355605 | 27-scf00525 | 27 |
| AX-158343095 | 27 | 38.686 | KV453299.1 | 3357530 | 27-scf00525 | 27 |
| AX-158343103 | 27 | 38.686 | KV453299.1 | 3367236 | 27-scf00525 | 27 |
| AX-158343104 | 27 | 38.686 | KV453299.1 | 3369870 | 27-scf00525 | 27 |
| AX-158343120 | 27 | 38.686 | KV453299.1 | 3390345 | 27-scf00525 | 27 |
| AX-158343036 | 27 | 38.796 | KV453299.1 | 3265886 | 27-scf00525 | 27 |
| AX-158343005 | 27 | 38.905 | KV453299.1 | 3220078 | 27-scf00525 | 27 |
| AX-158343038 | 27 | 38.905 | KV453299.1 | 3268927 | 27-scf00525 | 27 |
| AX-158343042 | 27 | 38.905 | KV453299.1 | 3276202 | 27-scf00525 | 27 |
| AX-158343043 | 27 | 38.905 | KV453299.1 | 3277818 | 27-scf00525 | 27 |
| AX-158343046 | 27 | 38.905 | KV453299.1 | 3283680 | 27-scf00525 | 27 |
| AX-158343048 | 27 | 38.905 | KV453299.1 | 3286140 | 27-scf00525 | 27 |
| AX-158343049 | 27 | 38.905 | KV453299.1 | 3289411 | 27-scf00525 | 27 |
| AX-158343050 | 27 | 38.905 | KV453299.1 | 3289836 | 27-scf00525 | 27 |
| AX-158343051 | 27 | 38.905 | KV453299.1 | 3290573 | 27-scf00525 | 27 |
| AX-158343054 | 27 | 38.905 | KV453299.1 | 3292574 | 27-scf00525 | 27 |
| AX-158343058 | 27 | 38.905 | KV453299.1 | 3298818 | 27-scf00525 | 27 |
| AX-157882185 | 27 | 38.905 | KV453299.1 | 3317171 | 27-scf00525 | 27 |
| AX-158343078 | 27 | 38.905 | KV453299.1 | 3329593 | 27-scf00525 | 27 |
| AX-158343084 | 27 | 38.905 | KV453299.1 | 3342081 | 27-scf00525 | 27 |
| AX-158343140 | 27 | 38.905 | KV453299.1 | 3416966 | 27-scf00525 | 27 |
| AX-158343162 | 27 | 38.905 | KV453299.1 | 3449226 | 27-scf00525 | 27 |
| AX-158343167 | 27 | 38.905 | KV453299.1 | 3458501 | 27-scf00525 | 27 |
| AX-157715473 | 27 | 38.905 | KV453299.1 | 3461565 | 27-scf00525 | 27 |
| AX-157850301 | 27 | 38.905 | KV453299.1 | 3474200 | 27-scf00525 | 27 |
| AX-157861870 | 27 | 38.905 | KV453299.1 | 3533448 | 27-scf00525 | 27 |
| AX-157850293 | 27 | 38.983 | KV453299.1 | 3291484 | 27-scf00525 | 27 |
| AX-158343062 | 27 | 39.014 | KV453299.1 | 3303367 | 27-scf00525 | 27 |
| AX-158343066 | 27 | 39.014 | KV453299.1 | 3308686 | 27-scf00525 | 27 |
| AX-158343063 | 27 | 39.233 | KV453299.1 | 3305084 | 27-scf00525 | 27 |
| AX-158343069 | 27 | 39.233 | KV453299.1 | 3313721 | 27-scf00525 | 27 |
| AX-157882184 | 27 | 39.342 | KV453299.1 | 3198196 | 27-scf00525 | 27 |
| AX-158343033 | 27 | 39.342 | KV453299.1 | 3261730 | 27-scf00525 | 27 |
| AX-158343037 | 27 | 39.342 | KV453299.1 | 3266464 | 27-scf00525 | 27 |
| AX-158343059 | 27 | 39.342 | KV453299.1 | 3300114 | 27-scf00525 | 27 |
| AX-158343072 | 27 | 39.342 | KV453299.1 | 3316383 | 27-scf00525 | 27 |
| AX-158343073 | 27 | 39.342 | KV453299.1 | 3316782 | 27-scf00525 | 27 |
| AX-157727302 | 27 | 39.342 | KV453299.1 | 3321820 | 27-scf00525 | 27 |
| AX-157758948 | 27 | 39.342 | KV453299.1 | 3336933 | 27-scf00525 | 27 |
| AX-157753153 | 27 | 39.342 | KV453299.1 | 3341490 | 27-scf00525 | 27 |
| AX-158343085 | 27 | 39.342 | KV453299.1 | 3346942 | 27-scf00525 | 27 |
| AX-158343087 | 27 | 39.342 | KV453299.1 | 3349509 | 27-scf00525 | 27 |
| AX-158343091 | 27 | 39.342 | KV453299.1 | 3354028 | 27-scf00525 | 27 |
| AX-158343092 | 27 | 39.342 | KV453299.1 | 3354731 | 27-scf00525 | 27 |
| AX-158343094 | 27 | 39.342 | KV453299.1 | 3356866 | 27-scf00525 | 27 |

|              |    |        |            |         |             |    |
|--------------|----|--------|------------|---------|-------------|----|
| AX-158343096 | 27 | 39.342 | KV453299.1 | 3358201 | 27-scf00525 | 27 |
| AX-158343097 | 27 | 39.342 | KV453299.1 | 3359681 | 27-scf00525 | 27 |
| AX-157726142 | 27 | 39.342 | KV453299.1 | 3375756 | 27-scf00525 | 27 |
| AX-158343108 | 27 | 39.342 | KV453299.1 | 3377831 | 27-scf00525 | 27 |
| AX-157850295 | 27 | 39.342 | KV453299.1 | 3417694 | 27-scf00525 | 27 |
| AX-158343158 | 27 | 39.342 | KV453299.1 | 3440497 | 27-scf00525 | 27 |
| AX-157850304 | 27 | 39.342 | KV453299.1 | 3509650 | 27-scf00525 | 27 |
| AX-158343109 | 27 | 39.353 | KV453299.1 | 3378245 | 27-scf00525 | 27 |
| AX-158343118 | 27 | 39.384 | KV453299.1 | 3387642 | 27-scf00525 | 27 |
| AX-158343121 | 27 | 39.417 | KV453299.1 | 3390994 | 27-scf00525 | 27 |
| AX-158343122 | 27 | 39.451 | KV453299.1 | 3391523 | 27-scf00525 | 27 |
| AX-158343127 | 27 | 39.451 | KV453299.1 | 3397225 | 27-scf00525 | 27 |
| AX-158343128 | 27 | 39.451 | KV453299.1 | 3397642 | 27-scf00525 | 27 |
| AX-158343129 | 27 | 39.451 | KV453299.1 | 3400846 | 27-scf00525 | 27 |
| AX-158343131 | 27 | 39.451 | KV453299.1 | 3404846 | 27-scf00525 | 27 |
| AX-157882188 | 27 | 39.451 | KV453299.1 | 3441969 | 27-scf00525 | 27 |
| AX-157850300 | 27 | 39.451 | KV453299.1 | 3466835 | 27-scf00525 | 27 |
| AX-157743582 | 27 | 39.451 | KV453299.1 | 3469978 | 27-scf00525 | 27 |
| AX-157746411 | 27 | 39.451 | KV453299.1 | 3476092 | 27-scf00525 | 27 |
| AX-158343204 | 27 | 39.451 | KV453299.1 | 3539683 | 27-scf00525 | 27 |
| AX-157752056 | 27 | 39.499 | KV453299.1 | 3405970 | 27-scf00525 | 27 |
| AX-158343134 | 27 | 39.56  | KV453299.1 | 3407868 | 27-scf00525 | 27 |
| AX-158381626 | 27 | 39.56  | KV453299.1 | 3410609 | 27-scf00525 | 27 |
| AX-158343139 | 27 | 39.56  | KV453299.1 | 3414572 | 27-scf00525 | 27 |
| AX-158343142 | 27 | 39.56  | KV453299.1 | 3419631 | 27-scf00525 | 27 |
| AX-158343146 | 27 | 39.56  | KV453299.1 | 3423019 | 27-scf00525 | 27 |
| AX-158343150 | 27 | 39.56  | KV453299.1 | 3430757 | 27-scf00525 | 27 |
| AX-158343151 | 27 | 39.56  | KV453299.1 | 3431481 | 27-scf00525 | 27 |
| AX-158343159 | 27 | 39.56  | KV453299.1 | 3441018 | 27-scf00525 | 27 |
| AX-158343161 | 27 | 39.56  | KV453299.1 | 3445460 | 27-scf00525 | 27 |
| AX-157747350 | 27 | 39.56  | KV453299.1 | 3484072 | 27-scf00525 | 27 |
| AX-158343165 | 27 | 39.704 | KV453299.1 | 3455712 | 27-scf00525 | 27 |
| AX-158343168 | 27 | 39.704 | KV453299.1 | 3464353 | 27-scf00525 | 27 |
| AX-158343171 | 27 | 39.704 | KV453299.1 | 3479904 | 27-scf00525 | 27 |
| AX-158343135 | 27 | 39.847 | KV453299.1 | 3409508 | 27-scf00525 | 27 |
| AX-158343164 | 27 | 39.847 | KV453299.1 | 3455203 | 27-scf00525 | 27 |
| AX-157727918 | 27 | 39.847 | KV453299.1 | 3463795 | 27-scf00525 | 27 |
| AX-157850297 | 27 | 39.847 | KV453299.1 | 3463967 | 27-scf00525 | 27 |
| AX-157850298 | 27 | 39.847 | KV453299.1 | 3464021 | 27-scf00525 | 27 |
| AX-157888762 | 27 | 39.847 | KV453299.1 | 3481641 | 27-scf00525 | 27 |
| AX-158343173 | 27 | 39.847 | KV453299.1 | 3483353 | 27-scf00525 | 27 |
| AX-157741378 | 27 | 39.847 | KV453299.1 | 3544443 | 27-scf00525 | 27 |
| AX-158343176 | 27 | 39.99  | KV453299.1 | 3490108 | 27-scf00525 | 27 |
| AX-158343177 | 27 | 39.99  | KV453299.1 | 3490227 | 27-scf00525 | 27 |
| AX-158343178 | 27 | 39.99  | KV453299.1 | 3491328 | 27-scf00525 | 27 |
| AX-158343180 | 27 | 39.99  | KV453299.1 | 3499042 | 27-scf00525 | 27 |
| AX-157850303 | 27 | 39.99  | KV453299.1 | 3502018 | 27-scf00525 | 27 |
| AX-158343182 | 27 | 39.99  | KV453299.1 | 3504276 | 27-scf00525 | 27 |
| AX-158343183 | 27 | 39.99  | KV453299.1 | 3505048 | 27-scf00525 | 27 |
| AX-157861868 | 27 | 39.99  | KV453299.1 | 3508101 | 27-scf00525 | 27 |
| AX-157713645 | 27 | 39.99  | KV453299.1 | 3509247 | 27-scf00525 | 27 |

|              |    |        |            |         |             |    |
|--------------|----|--------|------------|---------|-------------|----|
| AX-158343186 | 27 | 39.99  | KV453299.1 | 3510068 | 27-scf00525 | 27 |
| AX-158343187 | 27 | 39.99  | KV453299.1 | 3511055 | 27-scf00525 | 27 |
| AX-158381627 | 27 | 39.99  | KV453299.1 | 3514204 | 27-scf00525 | 27 |
| AX-158343190 | 27 | 39.99  | KV453299.1 | 3514369 | 27-scf00525 | 27 |
| AX-158343191 | 27 | 39.99  | KV453299.1 | 3515094 | 27-scf00525 | 27 |
| AX-158343193 | 27 | 39.99  | KV453299.1 | 3517820 | 27-scf00525 | 27 |
| AX-158343196 | 27 | 39.99  | KV453299.1 | 3523273 | 27-scf00525 | 27 |
| AX-157850308 | 27 | 39.99  | KV453299.1 | 3525142 | 27-scf00525 | 27 |
| AX-158343199 | 27 | 39.99  | KV453299.1 | 3528332 | 27-scf00525 | 27 |
| AX-158343200 | 27 | 39.99  | KV453299.1 | 3529780 | 27-scf00525 | 27 |
| AX-157740380 | 27 | 39.99  | KV453299.1 | 3530547 | 27-scf00525 | 27 |
| AX-158343202 | 27 | 39.99  | KV453299.1 | 3538038 | 27-scf00525 | 27 |
| AX-158343206 | 27 | 40.496 | KV453299.1 | 3544994 | 27-scf00525 | 27 |
| AX-158343210 | 27 | 40.521 | KV453299.1 | 3555917 | 27-scf00525 | 27 |
| AX-158343215 | 27 | 40.521 | KV453299.1 | 3560969 | 27-scf00525 | 27 |
| AX-158343194 | 27 | 40.522 | KV453299.1 | 3519002 | 27-scf00525 | 27 |
| AX-158343211 | 27 | 40.522 | KV453299.1 | 3556903 | 27-scf00525 | 27 |
| AX-158343212 | 27 | 40.522 | KV453299.1 | 3558147 | 27-scf00525 | 27 |
| AX-158343213 | 27 | 40.522 | KV453299.1 | 3558960 | 27-scf00525 | 27 |
| AX-158343218 | 27 | 40.522 | KV453299.1 | 3566465 | 27-scf00525 | 27 |
| AX-158343248 | 27 | 40.522 | KV453299.1 | 3599923 | 27-scf00525 | 27 |
| AX-158343219 | 27 | 40.849 | KV453299.1 | 3567259 | 27-scf00525 | 27 |
| AX-158343225 | 27 | 40.849 | KV453299.1 | 3572610 | 27-scf00525 | 27 |
| AX-157850314 | 27 | 40.849 | KV453299.1 | 3656883 | 27-scf00525 | 27 |
| AX-158343228 | 27 | 40.85  | KV453299.1 | 3575292 | 27-scf00525 | 27 |
| AX-158343232 | 27 | 40.85  | KV453299.1 | 3581531 | 27-scf00525 | 27 |
| AX-158343233 | 27 | 40.85  | KV453299.1 | 3583804 | 27-scf00525 | 27 |
| AX-158343234 | 27 | 40.85  | KV453299.1 | 3585402 | 27-scf00525 | 27 |
| AX-158343235 | 27 | 40.85  | KV453299.1 | 3587082 | 27-scf00525 | 27 |
| AX-158343237 | 27 | 40.85  | KV453299.1 | 3588143 | 27-scf00525 | 27 |
| AX-158343238 | 27 | 40.85  | KV453299.1 | 3588990 | 27-scf00525 | 27 |
| AX-158343239 | 27 | 40.85  | KV453299.1 | 3590122 | 27-scf00525 | 27 |
| AX-158343279 | 27 | 40.85  | KV453299.1 | 3646264 | 27-scf00525 | 27 |
| AX-157747194 | 27 | 40.85  | KV453299.1 | 3653109 | 27-scf00525 | 27 |
| AX-157727160 | 27 | 40.907 | KV453299.1 | 3608058 | 27-scf00525 | 27 |
| AX-158343251 | 27 | 41.139 | KV453299.1 | 3606320 | 27-scf00525 | 27 |
| AX-158343257 | 27 | 41.139 | KV453299.1 | 3614733 | 27-scf00525 | 27 |
| AX-158343261 | 27 | 41.418 | KV453299.1 | 3617950 | 27-scf00525 | 27 |
| AX-158343272 | 27 | 41.418 | KV453299.1 | 3635105 | 27-scf00525 | 27 |
| AX-158343264 | 27 | 41.422 | KV453299.1 | 3624832 | 27-scf00525 | 27 |
| AX-158343265 | 27 | 41.422 | KV453299.1 | 3626012 | 27-scf00525 | 27 |
| AX-157721637 | 27 | 41.422 | KV453299.1 | 3627856 | 27-scf00525 | 27 |
| AX-158343268 | 27 | 41.422 | KV453299.1 | 3629390 | 27-scf00525 | 27 |
| AX-158343270 | 27 | 41.422 | KV453299.1 | 3632178 | 27-scf00525 | 27 |
| AX-157775402 | 27 | 41.422 | KV453299.1 | 3633878 | 27-scf00525 | 27 |
| AX-158343271 | 27 | 41.422 | KV453299.1 | 3634616 | 27-scf00525 | 27 |
| AX-157888767 | 27 | 41.422 | KV453299.1 | 3634736 | 27-scf00525 | 27 |
| AX-158343273 | 27 | 41.422 | KV453299.1 | 3636671 | 27-scf00525 | 27 |
| AX-158343275 | 27 | 41.422 | KV453299.1 | 3638732 | 27-scf00525 | 27 |
| AX-158343277 | 27 | 41.422 | KV453299.1 | 3642152 | 27-scf00525 | 27 |
| AX-158343283 | 27 | 41.422 | KV453299.1 | 3650814 | 27-scf00525 | 27 |

|              |    |        |            |         |             |    |
|--------------|----|--------|------------|---------|-------------|----|
| AX-158343294 | 27 | 41.968 | KV453299.1 | 3674280 | 27-scf00525 | 27 |
| AX-158343295 | 27 | 41.968 | KV453299.1 | 3675265 | 27-scf00525 | 27 |
| AX-158343296 | 27 | 41.968 | KV453299.1 | 3675878 | 27-scf00525 | 27 |
| AX-158343301 | 27 | 41.968 | KV453299.1 | 3682277 | 27-scf00525 | 27 |
| AX-157850311 | 27 | 42.077 | KV453299.1 | 3545139 | 27-scf00525 | 27 |
| AX-158343299 | 27 | 42.077 | KV453299.1 | 3677241 | 27-scf00525 | 27 |
| AX-158381629 | 27 | 42.077 | KV453299.1 | 3683394 | 27-scf00525 | 27 |
| AX-158343302 | 27 | 42.077 | KV453299.1 | 3685250 | 27-scf00525 | 27 |
| AX-158343304 | 27 | 42.077 | KV453299.1 | 3689385 | 27-scf00525 | 27 |
| AX-158343306 | 27 | 42.077 | KV453299.1 | 3690964 | 27-scf00525 | 27 |
| AX-158343308 | 27 | 42.077 | KV453299.1 | 3691811 | 27-scf00525 | 27 |
| AX-158343309 | 27 | 42.077 | KV453299.1 | 3692682 | 27-scf00525 | 27 |
| AX-158343310 | 27 | 42.077 | KV453299.1 | 3694577 | 27-scf00525 | 27 |
| AX-158343311 | 27 | 42.077 | KV453299.1 | 3694901 | 27-scf00525 | 27 |
| AX-158343314 | 27 | 42.077 | KV453299.1 | 3697511 | 27-scf00525 | 27 |
| AX-158343318 | 27 | 42.077 | KV453299.1 | 3701094 | 27-scf00525 | 27 |
| AX-158343321 | 27 | 42.077 | KV453299.1 | 3703118 | 27-scf00525 | 27 |
| AX-157850316 | 27 | 42.241 | KV453299.1 | 3706695 | 27-scf00525 | 27 |
| AX-158343323 | 27 | 42.297 | KV453299.1 | 3709614 | 27-scf00525 | 27 |
| AX-158343229 | 27 | 42.354 | KV453299.1 | 3575954 | 27-scf00525 | 27 |
| AX-158343255 | 27 | 42.354 | KV453299.1 | 3610205 | 27-scf00525 | 27 |
| AX-158343303 | 27 | 42.354 | KV453299.1 | 3688522 | 27-scf00525 | 27 |
| AX-157861876 | 27 | 42.354 | KV453299.1 | 3719916 | 27-scf00525 | 27 |
| AX-158343209 | 27 | 42.405 | KV453299.1 | 3554227 | 27-scf00525 | 27 |
| AX-158343266 | 27 | 42.405 | KV453299.1 | 3626852 | 27-scf00525 | 27 |
| AX-158343269 | 27 | 42.405 | KV453299.1 | 3631411 | 27-scf00525 | 27 |
| AX-158343300 | 27 | 42.405 | KV453299.1 | 3679041 | 27-scf00525 | 27 |
| AX-158343322 | 27 | 42.405 | KV453299.1 | 3706161 | 27-scf00525 | 27 |
| AX-158343328 | 27 | 42.405 | KV453299.1 | 3719143 | 27-scf00525 | 27 |
| AX-158343330 | 27 | 42.405 | KV453299.1 | 3725174 | 27-scf00525 | 27 |
| AX-158343331 | 27 | 42.405 | KV453299.1 | 3726850 | 27-scf00525 | 27 |
| AX-158343420 | 27 | 42.405 | KV453299.1 | 3871351 | 27-scf00525 | 27 |
| AX-158343432 | 27 | 42.405 | KV453299.1 | 3886701 | 27-scf00525 | 27 |
| AX-157719671 | 27 | 42.405 | KV453299.1 | 4009192 | 27-scf00525 | 27 |
| AX-158343334 | 27 | 42.458 | KV453299.1 | 3729959 | 27-scf00525 | 27 |
| AX-158343375 | 27 | 42.458 | KV453299.1 | 3795133 | 27-scf00525 | 27 |
| AX-158343390 | 27 | 42.458 | KV453299.1 | 3813290 | 27-scf00525 | 27 |
| AX-158343336 | 27 | 42.487 | KV453299.1 | 3732289 | 27-scf00525 | 27 |
| AX-158343341 | 27 | 42.514 | KV453299.1 | 3737429 | 27-scf00525 | 27 |
| AX-158343342 | 27 | 42.514 | KV453299.1 | 3738731 | 27-scf00525 | 27 |
| AX-158343347 | 27 | 42.515 | KV453299.1 | 3744969 | 27-scf00525 | 27 |
| AX-158343340 | 27 | 42.586 | KV453299.1 | 3735337 | 27-scf00525 | 27 |
| AX-158343349 | 27 | 42.586 | KV453299.1 | 3746417 | 27-scf00525 | 27 |
| AX-158343354 | 27 | 42.586 | KV453299.1 | 3758616 | 27-scf00525 | 27 |
| AX-158343358 | 27 | 42.586 | KV453299.1 | 3766024 | 27-scf00525 | 27 |
| AX-158343590 | 27 | 42.586 | KV453299.1 | 4103706 | 27-scf00525 | 27 |
| AX-158381633 | 27 | 42.586 | KV453299.1 | 4466043 | 27-scf00525 | 27 |
| AX-158343864 | 27 | 42.586 | KV453299.1 | 4466595 | 27-scf00525 | 27 |
| AX-158343355 | 27 | 42.652 | KV453299.1 | 3759565 | 27-scf00525 | 27 |
| AX-158343357 | 27 | 43.044 | KV453299.1 | 3761803 | 27-scf00525 | 27 |
| AX-158343361 | 27 | 43.054 | KV453299.1 | 3776798 | 27-scf00525 | 27 |

|              |    |        |            |         |             |    |
|--------------|----|--------|------------|---------|-------------|----|
| AX-158343364 | 27 | 43.061 | KV453299.1 | 3783143 | 27-scf00525 | 27 |
| AX-158343365 | 27 | 43.061 | KV453299.1 | 3783725 | 27-scf00525 | 27 |
| AX-158343366 | 27 | 43.061 | KV453299.1 | 3784120 | 27-scf00525 | 27 |
| AX-158343371 | 27 | 43.061 | KV453299.1 | 3791215 | 27-scf00525 | 27 |
| AX-158343373 | 27 | 43.208 | KV453299.1 | 3793450 | 27-scf00525 | 27 |
| AX-158343374 | 27 | 43.279 | KV453299.1 | 3794933 | 27-scf00525 | 27 |
| AX-158343376 | 27 | 43.279 | KV453299.1 | 3795626 | 27-scf00525 | 27 |
| AX-158343377 | 27 | 43.279 | KV453299.1 | 3796734 | 27-scf00525 | 27 |
| AX-158343381 | 27 | 43.279 | KV453299.1 | 3801370 | 27-scf00525 | 27 |
| AX-158343382 | 27 | 43.279 | KV453299.1 | 3802516 | 27-scf00525 | 27 |
| AX-158343369 | 27 | 43.348 | KV453299.1 | 3788034 | 27-scf00525 | 27 |
| AX-158343383 | 27 | 43.348 | KV453299.1 | 3803938 | 27-scf00525 | 27 |
| AX-158343386 | 27 | 43.389 | KV453299.1 | 3806348 | 27-scf00525 | 27 |
| AX-157888769 | 27 | 43.498 | KV453299.1 | 3813624 | 27-scf00525 | 27 |
| AX-158343392 | 27 | 43.498 | KV453299.1 | 3816631 | 27-scf00525 | 27 |
| AX-158343393 | 27 | 43.498 | KV453299.1 | 3819184 | 27-scf00525 | 27 |
| AX-158343394 | 27 | 43.499 | KV453299.1 | 3819817 | 27-scf00525 | 27 |
| AX-158343395 | 27 | 43.499 | KV453299.1 | 3820507 | 27-scf00525 | 27 |
| AX-158343291 | 27 | 43.661 | KV453299.1 | 3667304 | 27-scf00525 | 27 |
| AX-158343397 | 27 | 43.661 | KV453299.1 | 3824850 | 27-scf00525 | 27 |
| AX-158343407 | 27 | 43.826 | KV453299.1 | 3845151 | 27-scf00525 | 27 |
| AX-158343409 | 27 | 43.826 | KV453299.1 | 3846611 | 27-scf00525 | 27 |
| AX-158343411 | 27 | 43.826 | KV453299.1 | 3848451 | 27-scf00525 | 27 |
| AX-158343412 | 27 | 43.826 | KV453299.1 | 3848855 | 27-scf00525 | 27 |
| AX-158343413 | 27 | 43.827 | KV453299.1 | 3849514 | 27-scf00525 | 27 |
| AX-158343416 | 27 | 43.829 | KV453299.1 | 3854065 | 27-scf00525 | 27 |
| AX-157850319 | 27 | 43.97  | KV453299.1 | 3855345 | 27-scf00525 | 27 |
| AX-157758237 | 27 | 43.971 | KV453299.1 | 3858185 | 27-scf00525 | 27 |
| AX-157754688 | 27 | 44.263 | KV453299.1 | 3868143 | 27-scf00525 | 27 |
| AX-158343419 | 27 | 44.263 | KV453299.1 | 3870060 | 27-scf00525 | 27 |
| AX-157715295 | 27 | 44.263 | KV453299.1 | 3870501 | 27-scf00525 | 27 |
| AX-158343427 | 27 | 44.263 | KV453299.1 | 3879813 | 27-scf00525 | 27 |
| AX-157726853 | 27 | 44.263 | KV453299.1 | 3880665 | 27-scf00525 | 27 |
| AX-158343429 | 27 | 44.263 | KV453299.1 | 3881680 | 27-scf00525 | 27 |
| AX-158343430 | 27 | 44.263 | KV453299.1 | 3884144 | 27-scf00525 | 27 |
| AX-158343431 | 27 | 44.263 | KV453299.1 | 3885424 | 27-scf00525 | 27 |
| AX-158343438 | 27 | 44.263 | KV453299.1 | 3892777 | 27-scf00525 | 27 |
| AX-158343439 | 27 | 44.263 | KV453299.1 | 3894828 | 27-scf00525 | 27 |
| AX-158343442 | 27 | 44.263 | KV453299.1 | 3898685 | 27-scf00525 | 27 |
| AX-158343443 | 27 | 44.263 | KV453299.1 | 3899222 | 27-scf00525 | 27 |
| AX-158343445 | 27 | 44.263 | KV453299.1 | 3900889 | 27-scf00525 | 27 |
| AX-158343447 | 27 | 44.263 | KV453299.1 | 3902219 | 27-scf00525 | 27 |
| AX-158343449 | 27 | 44.263 | KV453299.1 | 3904105 | 27-scf00525 | 27 |
| AX-158343452 | 27 | 44.263 | KV453299.1 | 3913921 | 27-scf00525 | 27 |
| AX-158343455 | 27 | 44.263 | KV453299.1 | 3917274 | 27-scf00525 | 27 |
| AX-158343464 | 27 | 44.263 | KV453299.1 | 3927149 | 27-scf00525 | 27 |
| AX-158343467 | 27 | 44.263 | KV453299.1 | 3931331 | 27-scf00525 | 27 |
| AX-158343470 | 27 | 44.263 | KV453299.1 | 3934914 | 27-scf00525 | 27 |
| AX-158343475 | 27 | 44.263 | KV453299.1 | 3941196 | 27-scf00525 | 27 |
| AX-158343476 | 27 | 44.263 | KV453299.1 | 3941761 | 27-scf00525 | 27 |
| AX-158343495 | 27 | 44.263 | KV453299.1 | 3962391 | 27-scf00525 | 27 |



|              |    |        |            |         |             |    |
|--------------|----|--------|------------|---------|-------------|----|
| AX-158343508 | 27 | 44.263 | KV453299.1 | 3979921 | 27-scf00525 | 27 |
| AX-158343533 | 27 | 44.263 | KV453299.1 | 4020142 | 27-scf00525 | 27 |
| AX-158343697 | 27 | 44.263 | KV453299.1 | 4252991 | 27-scf00525 | 27 |
| AX-158343478 | 27 | 44.372 | KV453299.1 | 3944893 | 27-scf00525 | 27 |
| AX-158343479 | 27 | 44.372 | KV453299.1 | 3945399 | 27-scf00525 | 27 |
| AX-158343482 | 27 | 44.372 | KV453299.1 | 3948091 | 27-scf00525 | 27 |
| AX-158343486 | 27 | 44.372 | KV453299.1 | 3952944 | 27-scf00525 | 27 |
| AX-158343490 | 27 | 44.372 | KV453299.1 | 3957573 | 27-scf00525 | 27 |
| AX-158343484 | 27 | 44.402 | KV453299.1 | 3949774 | 27-scf00525 | 27 |
| AX-158343489 | 27 | 44.427 | KV453299.1 | 3957049 | 27-scf00525 | 27 |
| AX-158343491 | 27 | 44.452 | KV453299.1 | 3958865 | 27-scf00525 | 27 |
| AX-158343511 | 27 | 44.452 | KV453299.1 | 3982189 | 27-scf00525 | 27 |
| AX-158343405 | 27 | 44.481 | KV453299.1 | 3842623 | 27-scf00525 | 27 |
| AX-158343454 | 27 | 44.481 | KV453299.1 | 3915568 | 27-scf00525 | 27 |
| AX-158343458 | 27 | 44.481 | KV453299.1 | 3922098 | 27-scf00525 | 27 |
| AX-158343459 | 27 | 44.481 | KV453299.1 | 3922218 | 27-scf00525 | 27 |
| AX-158343463 | 27 | 44.481 | KV453299.1 | 3925670 | 27-scf00525 | 27 |
| AX-158343471 | 27 | 44.481 | KV453299.1 | 3935566 | 27-scf00525 | 27 |
| AX-158343483 | 27 | 44.481 | KV453299.1 | 3948575 | 27-scf00525 | 27 |
| AX-158343488 | 27 | 44.481 | KV453299.1 | 3953884 | 27-scf00525 | 27 |
| AX-157722815 | 27 | 44.481 | KV453299.1 | 3955382 | 27-scf00525 | 27 |
| AX-158343501 | 27 | 44.481 | KV453299.1 | 3971395 | 27-scf00525 | 27 |
| AX-158343502 | 27 | 44.481 | KV453299.1 | 3971895 | 27-scf00525 | 27 |
| AX-158343503 | 27 | 44.481 | KV453299.1 | 3973489 | 27-scf00525 | 27 |
| AX-158343504 | 27 | 44.481 | KV453299.1 | 3974775 | 27-scf00525 | 27 |
| AX-158343506 | 27 | 44.481 | KV453299.1 | 3976916 | 27-scf00525 | 27 |
| AX-158343512 | 27 | 44.481 | KV453299.1 | 3982948 | 27-scf00525 | 27 |
| AX-158343513 | 27 | 44.481 | KV453299.1 | 3984820 | 27-scf00525 | 27 |
| AX-158343514 | 27 | 44.481 | KV453299.1 | 3988328 | 27-scf00525 | 27 |
| AX-158343523 | 27 | 44.481 | KV453299.1 | 4003328 | 27-scf00525 | 27 |
| AX-158343418 | 27 | 44.591 | KV453299.1 | 3869259 | 27-scf00525 | 27 |
| AX-157738852 | 27 | 44.591 | KV453299.1 | 3910160 | 27-scf00525 | 27 |
| AX-157753103 | 27 | 44.591 | KV453299.1 | 3974292 | 27-scf00525 | 27 |
| AX-157741050 | 27 | 44.591 | KV453299.1 | 3994454 | 27-scf00525 | 27 |
| AX-158343521 | 27 | 44.591 | KV453299.1 | 4001748 | 27-scf00525 | 27 |
| AX-158343524 | 27 | 44.591 | KV453299.1 | 4004959 | 27-scf00525 | 27 |
| AX-158343525 | 27 | 44.591 | KV453299.1 | 4005845 | 27-scf00525 | 27 |
| AX-158343530 | 27 | 44.717 | KV453299.1 | 4018216 | 27-scf00525 | 27 |
| AX-158343532 | 27 | 44.717 | KV453299.1 | 4019672 | 27-scf00525 | 27 |
| AX-158343534 | 27 | 44.717 | KV453299.1 | 4021140 | 27-scf00525 | 27 |
| AX-158343537 | 27 | 44.718 | KV453299.1 | 4026601 | 27-scf00525 | 27 |
| AX-158343518 | 27 | 45.463 | KV453299.1 | 3995831 | 27-scf00525 | 27 |
| AX-158343540 | 27 | 45.463 | KV453299.1 | 4031668 | 27-scf00525 | 27 |
| AX-158343774 | 27 | 45.463 | KV453299.1 | 4355768 | 27-scf00525 | 27 |
| AX-158343450 | 27 | 45.464 | KV453299.1 | 3904870 | 27-scf00525 | 27 |
| AX-158343539 | 27 | 45.464 | KV453299.1 | 4029210 | 27-scf00525 | 27 |
| AX-158343543 | 27 | 45.464 | KV453299.1 | 4037762 | 27-scf00525 | 27 |
| AX-158343545 | 27 | 45.464 | KV453299.1 | 4042589 | 27-scf00525 | 27 |
| AX-158343550 | 27 | 45.464 | KV453299.1 | 4046582 | 27-scf00525 | 27 |
| AX-158343581 | 27 | 45.464 | KV453299.1 | 4088434 | 27-scf00525 | 27 |
| AX-157751390 | 27 | 45.464 | KV453299.1 | 4145031 | 27-scf00525 | 27 |

|              |    |        |            |         |             |    |
|--------------|----|--------|------------|---------|-------------|----|
| AX-158343627 | 27 | 45.464 | KV453299.1 | 4157899 | 27-scf00525 | 27 |
| AX-158343641 | 27 | 45.464 | KV453299.1 | 4176452 | 27-scf00525 | 27 |
| AX-158343646 | 27 | 45.464 | KV453299.1 | 4186556 | 27-scf00525 | 27 |
| AX-158343675 | 27 | 45.464 | KV453299.1 | 4229384 | 27-scf00525 | 27 |
| AX-158343736 | 27 | 45.464 | KV453299.1 | 4300041 | 27-scf00525 | 27 |
| AX-158343517 | 27 | 45.465 | KV453299.1 | 3993048 | 27-scf00525 | 27 |
| AX-158343549 | 27 | 45.465 | KV453299.1 | 4046137 | 27-scf00525 | 27 |
| AX-158343553 | 27 | 45.465 | KV453299.1 | 4054835 | 27-scf00525 | 27 |
| AX-158343555 | 27 | 45.465 | KV453299.1 | 4055695 | 27-scf00525 | 27 |
| AX-158343556 | 27 | 45.465 | KV453299.1 | 4056464 | 27-scf00525 | 27 |
| AX-158343557 | 27 | 45.465 | KV453299.1 | 4058078 | 27-scf00525 | 27 |
| AX-158343563 | 27 | 45.465 | KV453299.1 | 4069617 | 27-scf00525 | 27 |
| AX-158343571 | 27 | 45.465 | KV453299.1 | 4079006 | 27-scf00525 | 27 |
| AX-158343572 | 27 | 45.465 | KV453299.1 | 4079748 | 27-scf00525 | 27 |
| AX-158343573 | 27 | 45.465 | KV453299.1 | 4080294 | 27-scf00525 | 27 |
| AX-158343574 | 27 | 45.465 | KV453299.1 | 4080708 | 27-scf00525 | 27 |
| AX-158343575 | 27 | 45.465 | KV453299.1 | 4081549 | 27-scf00525 | 27 |
| AX-158343576 | 27 | 45.465 | KV453299.1 | 4082674 | 27-scf00525 | 27 |
| AX-158343579 | 27 | 45.465 | KV453299.1 | 4087177 | 27-scf00525 | 27 |
| AX-158343583 | 27 | 45.465 | KV453299.1 | 4090309 | 27-scf00525 | 27 |
| AX-158343587 | 27 | 45.465 | KV453299.1 | 4099455 | 27-scf00525 | 27 |
| AX-158343588 | 27 | 45.465 | KV453299.1 | 4102135 | 27-scf00525 | 27 |
| AX-158343594 | 27 | 45.465 | KV453299.1 | 4109660 | 27-scf00525 | 27 |
| AX-158343595 | 27 | 45.465 | KV453299.1 | 4110549 | 27-scf00525 | 27 |
| AX-158343596 | 27 | 45.465 | KV453299.1 | 4111595 | 27-scf00525 | 27 |
| AX-158343598 | 27 | 45.465 | KV453299.1 | 4114071 | 27-scf00525 | 27 |
| AX-157861880 | 27 | 45.465 | KV453299.1 | 4117899 | 27-scf00525 | 27 |
| AX-158343603 | 27 | 45.465 | KV453299.1 | 4118802 | 27-scf00525 | 27 |
| AX-158343608 | 27 | 45.465 | KV453299.1 | 4123134 | 27-scf00525 | 27 |
| AX-158343609 | 27 | 45.465 | KV453299.1 | 4124214 | 27-scf00525 | 27 |
| AX-157850320 | 27 | 45.465 | KV453299.1 | 4124778 | 27-scf00525 | 27 |
| AX-158343610 | 27 | 45.465 | KV453299.1 | 4126591 | 27-scf00525 | 27 |
| AX-157722404 | 27 | 45.465 | KV453299.1 | 4128862 | 27-scf00525 | 27 |
| AX-157772626 | 27 | 45.465 | KV453299.1 | 4136198 | 27-scf00525 | 27 |
| AX-157850321 | 27 | 45.465 | KV453299.1 | 4136301 | 27-scf00525 | 27 |
| AX-157718300 | 27 | 45.465 | KV453299.1 | 4146695 | 27-scf00525 | 27 |
| AX-157850323 | 27 | 45.465 | KV453299.1 | 4147027 | 27-scf00525 | 27 |
| AX-158343618 | 27 | 45.465 | KV453299.1 | 4147344 | 27-scf00525 | 27 |
| AX-158343621 | 27 | 45.465 | KV453299.1 | 4151925 | 27-scf00525 | 27 |
| AX-158343622 | 27 | 45.465 | KV453299.1 | 4152299 | 27-scf00525 | 27 |
| AX-158343629 | 27 | 45.465 | KV453299.1 | 4161453 | 27-scf00525 | 27 |
| AX-158343648 | 27 | 45.465 | KV453299.1 | 4188721 | 27-scf00525 | 27 |
| AX-157751170 | 27 | 45.465 | KV453299.1 | 4226188 | 27-scf00525 | 27 |
| AX-158343689 | 27 | 45.465 | KV453299.1 | 4242069 | 27-scf00525 | 27 |
| AX-158343695 | 27 | 45.465 | KV453299.1 | 4249672 | 27-scf00525 | 27 |
| AX-158343701 | 27 | 45.465 | KV453299.1 | 4255786 | 27-scf00525 | 27 |
| AX-158343706 | 27 | 45.465 | KV453299.1 | 4259495 | 27-scf00525 | 27 |
| AX-158343708 | 27 | 45.465 | KV453299.1 | 4262571 | 27-scf00525 | 27 |
| AX-158343735 | 27 | 45.465 | KV453299.1 | 4299041 | 27-scf00525 | 27 |
| AX-158343756 | 27 | 45.465 | KV453299.1 | 4331909 | 27-scf00525 | 27 |
| AX-158343768 | 27 | 45.465 | KV453299.1 | 4348450 | 27-scf00525 | 27 |

|              |    |        |            |         |             |    |
|--------------|----|--------|------------|---------|-------------|----|
| AX-158343771 | 27 | 45.465 | KV453299.1 | 4351725 | 27-scf00525 | 27 |
| AX-158343784 | 27 | 45.465 | KV453299.1 | 4373422 | 27-scf00525 | 27 |
| AX-158343844 | 27 | 45.465 | KV453299.1 | 4446158 | 27-scf00525 | 27 |
| AX-158343856 | 27 | 45.465 | KV453299.1 | 4459392 | 27-scf00525 | 27 |
| AX-158343874 | 27 | 45.465 | KV453299.1 | 4479688 | 27-scf00525 | 27 |
| AX-157850331 | 27 | 45.465 | KV453299.1 | 4479888 | 27-scf00525 | 27 |
| AX-158343877 | 27 | 45.465 | KV453299.1 | 4490796 | 27-scf00525 | 27 |
| AX-158343890 | 27 | 45.465 | KV453299.1 | 4505046 | 27-scf00525 | 27 |
| AX-158343898 | 27 | 45.465 | KV453299.1 | 4513959 | 27-scf00525 | 27 |
| AX-158419197 | 27 | 45.465 | KV453299.1 | 4555399 | 27-scf00525 | 27 |
| AX-158343937 | 27 | 45.465 | KV453299.1 | 4560245 | 27-scf00525 | 27 |
| AX-158344038 | 27 | 45.465 | KV453299.1 | 4694919 | 27-scf00525 | 27 |
| AX-158344047 | 27 | 45.465 | KV453299.1 | 4708350 | 27-scf00525 | 27 |
| AX-158344049 | 27 | 45.465 | KV453299.1 | 4710493 | 27-scf00525 | 27 |
| AX-157861889 | 27 | 45.465 | KV453299.1 | 4732695 | 27-scf00525 | 27 |
| AX-157750460 | 27 | 45.466 | KV453299.1 | 4148353 | 27-scf00525 | 27 |
| AX-158343619 | 27 | 45.466 | KV453299.1 | 4148922 | 27-scf00525 | 27 |
| AX-158343630 | 27 | 45.466 | KV453299.1 | 4162329 | 27-scf00525 | 27 |
| AX-158343631 | 27 | 45.629 | KV453299.1 | 4163480 | 27-scf00525 | 27 |
| AX-158343633 | 27 | 45.629 | KV453299.1 | 4164309 | 27-scf00525 | 27 |
| AX-158343638 | 27 | 45.629 | KV453299.1 | 4169065 | 27-scf00525 | 27 |
| AX-158343752 | 27 | 45.629 | KV453299.1 | 4322319 | 27-scf00525 | 27 |
| AX-157749288 | 27 | 45.793 | KV453299.1 | 4077647 | 27-scf00525 | 27 |
| AX-157861881 | 27 | 45.793 | KV453299.1 | 4171202 | 27-scf00525 | 27 |
| AX-158343639 | 27 | 45.793 | KV453299.1 | 4172005 | 27-scf00525 | 27 |
| AX-157757123 | 27 | 45.793 | KV453299.1 | 4176894 | 27-scf00525 | 27 |
| AX-158343649 | 27 | 45.793 | KV453299.1 | 4190972 | 27-scf00525 | 27 |
| AX-158343653 | 27 | 45.793 | KV453299.1 | 4195463 | 27-scf00525 | 27 |
| AX-158343658 | 27 | 45.793 | KV453299.1 | 4199301 | 27-scf00525 | 27 |
| AX-158343659 | 27 | 45.793 | KV453299.1 | 4200500 | 27-scf00525 | 27 |
| AX-158343660 | 27 | 45.793 | KV453299.1 | 4201631 | 27-scf00525 | 27 |
| AX-158343680 | 27 | 45.793 | KV453299.1 | 4233395 | 27-scf00525 | 27 |
| AX-158343683 | 27 | 45.793 | KV453299.1 | 4237349 | 27-scf00525 | 27 |
| AX-158343687 | 27 | 45.793 | KV453299.1 | 4240921 | 27-scf00525 | 27 |
| AX-158343691 | 27 | 45.793 | KV453299.1 | 4244894 | 27-scf00525 | 27 |
| AX-158343702 | 27 | 45.793 | KV453299.1 | 4256671 | 27-scf00525 | 27 |
| AX-158343717 | 27 | 45.793 | KV453299.1 | 4273135 | 27-scf00525 | 27 |
| AX-157861883 | 27 | 45.793 | KV453299.1 | 4275458 | 27-scf00525 | 27 |
| AX-158343720 | 27 | 45.793 | KV453299.1 | 4276233 | 27-scf00525 | 27 |
| AX-158343721 | 27 | 45.793 | KV453299.1 | 4280022 | 27-scf00525 | 27 |
| AX-158343724 | 27 | 45.793 | KV453299.1 | 4282850 | 27-scf00525 | 27 |
| AX-158343732 | 27 | 45.793 | KV453299.1 | 4294893 | 27-scf00525 | 27 |
| AX-157702363 | 27 | 45.793 | KV453299.1 | 4298362 | 27-scf00525 | 27 |
| AX-157850325 | 27 | 45.793 | KV453299.1 | 4300321 | 27-scf00525 | 27 |
| AX-158343737 | 27 | 45.793 | KV453299.1 | 4300503 | 27-scf00525 | 27 |
| AX-158343738 | 27 | 45.793 | KV453299.1 | 4303562 | 27-scf00525 | 27 |
| AX-158343741 | 27 | 45.793 | KV453299.1 | 4309130 | 27-scf00525 | 27 |
| AX-158343745 | 27 | 45.793 | KV453299.1 | 4315940 | 27-scf00525 | 27 |
| AX-158343747 | 27 | 45.793 | KV453299.1 | 4317010 | 27-scf00525 | 27 |
| AX-158343751 | 27 | 45.793 | KV453299.1 | 4320645 | 27-scf00525 | 27 |
| AX-158343754 | 27 | 45.793 | KV453299.1 | 4327743 | 27-scf00525 | 27 |

|              |    |        |            |         |             |    |
|--------------|----|--------|------------|---------|-------------|----|
| AX-158343755 | 27 | 45.793 | KV453299.1 | 4331499 | 27-scf00525 | 27 |
| AX-158343758 | 27 | 45.793 | KV453299.1 | 4336427 | 27-scf00525 | 27 |
| AX-158343759 | 27 | 45.793 | KV453299.1 | 4338308 | 27-scf00525 | 27 |
| AX-158343761 | 27 | 45.793 | KV453299.1 | 4340397 | 27-scf00525 | 27 |
| AX-158343764 | 27 | 45.793 | KV453299.1 | 4343260 | 27-scf00525 | 27 |
| AX-157888790 | 27 | 45.793 | KV453299.1 | 4345012 | 27-scf00525 | 27 |
| AX-158343765 | 27 | 45.793 | KV453299.1 | 4346438 | 27-scf00525 | 27 |
| AX-158343772 | 27 | 45.793 | KV453299.1 | 4352092 | 27-scf00525 | 27 |
| AX-158343783 | 27 | 45.793 | KV453299.1 | 4372431 | 27-scf00525 | 27 |
| AX-158343845 | 27 | 45.793 | KV453299.1 | 4447516 | 27-scf00525 | 27 |
| AX-158343853 | 27 | 45.793 | KV453299.1 | 4455095 | 27-scf00525 | 27 |
| AX-158344345 | 27 | 45.793 | KV453299.1 | 5133006 | 27-scf00525 | 27 |
| AX-158343558 | 27 | 45.902 | KV453299.1 | 4059953 | 27-scf00525 | 27 |
| AX-158419181 | 27 | 45.902 | KV453299.1 | 4120235 | 27-scf00525 | 27 |
| AX-157850327 | 27 | 45.902 | KV453299.1 | 4373789 | 27-scf00525 | 27 |
| AX-158343785 | 27 | 45.902 | KV453299.1 | 4376181 | 27-scf00525 | 27 |
| AX-158343787 | 27 | 45.902 | KV453299.1 | 4384379 | 27-scf00525 | 27 |
| AX-157741132 | 27 | 45.902 | KV453299.1 | 4385833 | 27-scf00525 | 27 |
| AX-158343789 | 27 | 45.902 | KV453299.1 | 4386563 | 27-scf00525 | 27 |
| AX-158343790 | 27 | 45.902 | KV453299.1 | 4387439 | 27-scf00525 | 27 |
| AX-158343794 | 27 | 45.902 | KV453299.1 | 4390620 | 27-scf00525 | 27 |
| AX-158343799 | 27 | 45.902 | KV453299.1 | 4399827 | 27-scf00525 | 27 |
| AX-158343800 | 27 | 45.902 | KV453299.1 | 4400436 | 27-scf00525 | 27 |
| AX-158343801 | 27 | 45.902 | KV453299.1 | 4401055 | 27-scf00525 | 27 |
| AX-158343802 | 27 | 45.902 | KV453299.1 | 4401621 | 27-scf00525 | 27 |
| AX-157752872 | 27 | 45.902 | KV453299.1 | 4402275 | 27-scf00525 | 27 |
| AX-158343803 | 27 | 45.902 | KV453299.1 | 4405911 | 27-scf00525 | 27 |
| AX-158343805 | 27 | 45.902 | KV453299.1 | 4409798 | 27-scf00525 | 27 |
| AX-157868078 | 27 | 45.902 | KV453299.1 | 4419531 | 27-scf00525 | 27 |
| AX-158343823 | 27 | 45.902 | KV453299.1 | 4426245 | 27-scf00525 | 27 |
| AX-158343827 | 27 | 45.902 | KV453299.1 | 4430480 | 27-scf00525 | 27 |
| AX-157748480 | 27 | 45.902 | KV453299.1 | 4431130 | 27-scf00525 | 27 |
| AX-158343828 | 27 | 45.902 | KV453299.1 | 4431984 | 27-scf00525 | 27 |
| AX-158343830 | 27 | 45.902 | KV453299.1 | 4433946 | 27-scf00525 | 27 |
| AX-158343831 | 27 | 45.902 | KV453299.1 | 4434504 | 27-scf00525 | 27 |
| AX-158343834 | 27 | 45.902 | KV453299.1 | 4436966 | 27-scf00525 | 27 |
| AX-158343837 | 27 | 45.902 | KV453299.1 | 4440144 | 27-scf00525 | 27 |
| AX-158343838 | 27 | 45.902 | KV453299.1 | 4441035 | 27-scf00525 | 27 |
| AX-158343839 | 27 | 45.902 | KV453299.1 | 4441278 | 27-scf00525 | 27 |
| AX-158343840 | 27 | 45.902 | KV453299.1 | 4441849 | 27-scf00525 | 27 |
| AX-158343841 | 27 | 45.902 | KV453299.1 | 4443947 | 27-scf00525 | 27 |
| AX-158343848 | 27 | 45.902 | KV453299.1 | 4450649 | 27-scf00525 | 27 |
| AX-158343851 | 27 | 45.902 | KV453299.1 | 4453287 | 27-scf00525 | 27 |
| AX-158343858 | 27 | 45.902 | KV453299.1 | 4461086 | 27-scf00525 | 27 |
| AX-157718245 | 27 | 45.902 | KV453299.1 | 4461383 | 27-scf00525 | 27 |
| AX-158343862 | 27 | 45.902 | KV453299.1 | 4465569 | 27-scf00525 | 27 |
| AX-158343884 | 27 | 45.902 | KV453299.1 | 4501850 | 27-scf00525 | 27 |
| AX-158343969 | 27 | 45.902 | KV453299.1 | 4608799 | 27-scf00525 | 27 |
| AX-158343871 | 27 | 46.011 | KV453299.1 | 4476266 | 27-scf00525 | 27 |
| AX-158343872 | 27 | 46.011 | KV453299.1 | 4476654 | 27-scf00525 | 27 |
| AX-157850332 | 27 | 46.011 | KV453299.1 | 4486010 | 27-scf00525 | 27 |

|              |    |        |            |         |             |    |
|--------------|----|--------|------------|---------|-------------|----|
| AX-158343876 | 27 | 46.011 | KV453299.1 | 4486412 | 27-scf00525 | 27 |
| AX-157850334 | 27 | 46.011 | KV453299.1 | 4489726 | 27-scf00525 | 27 |
| AX-157850335 | 27 | 46.011 | KV453299.1 | 4495781 | 27-scf00525 | 27 |
| AX-158343879 | 27 | 46.011 | KV453299.1 | 4495946 | 27-scf00525 | 27 |
| AX-158343880 | 27 | 46.011 | KV453299.1 | 4498514 | 27-scf00525 | 27 |
| AX-157888791 | 27 | 46.011 | KV453299.1 | 4498684 | 27-scf00525 | 27 |
| AX-158343883 | 27 | 46.011 | KV453299.1 | 4500612 | 27-scf00525 | 27 |
| AX-158343885 | 27 | 46.011 | KV453299.1 | 4502510 | 27-scf00525 | 27 |
| AX-158343886 | 27 | 46.011 | KV453299.1 | 4502759 | 27-scf00525 | 27 |
| AX-158343899 | 27 | 46.011 | KV453299.1 | 4515023 | 27-scf00525 | 27 |
| AX-158343900 | 27 | 46.011 | KV453299.1 | 4516682 | 27-scf00525 | 27 |
| AX-158343901 | 27 | 46.011 | KV453299.1 | 4517084 | 27-scf00525 | 27 |
| AX-158343902 | 27 | 46.011 | KV453299.1 | 4517586 | 27-scf00525 | 27 |
| AX-157747897 | 27 | 46.011 | KV453299.1 | 4533881 | 27-scf00525 | 27 |
| AX-158343916 | 27 | 46.011 | KV453299.1 | 4537334 | 27-scf00525 | 27 |
| AX-158343934 | 27 | 46.011 | KV453299.1 | 4556810 | 27-scf00525 | 27 |
| AX-158343905 | 27 | 46.066 | KV453299.1 | 4521116 | 27-scf00525 | 27 |
| AX-158343684 | 27 | 46.12  | KV453299.1 | 4238497 | 27-scf00525 | 27 |
| AX-158419193 | 27 | 46.12  | KV453299.1 | 4523661 | 27-scf00525 | 27 |
| AX-158343906 | 27 | 46.12  | KV453299.1 | 4525879 | 27-scf00525 | 27 |
| AX-157861884 | 27 | 46.12  | KV453299.1 | 4534528 | 27-scf00525 | 27 |
| AX-158343918 | 27 | 46.12  | KV453299.1 | 4538110 | 27-scf00525 | 27 |
| AX-158343925 | 27 | 46.12  | KV453299.1 | 4543583 | 27-scf00525 | 27 |
| AX-158343929 | 27 | 46.12  | KV453299.1 | 4549652 | 27-scf00525 | 27 |
| AX-158423790 | 27 | 46.12  | KV453299.1 | 4556181 | 27-scf00525 | 27 |
| AX-158343935 | 27 | 46.12  | KV453299.1 | 4557627 | 27-scf00525 | 27 |
| AX-158343936 | 27 | 46.12  | KV453299.1 | 4558376 | 27-scf00525 | 27 |
| AX-157861886 | 27 | 46.12  | KV453299.1 | 4558918 | 27-scf00525 | 27 |
| AX-158343939 | 27 | 46.12  | KV453299.1 | 4562218 | 27-scf00525 | 27 |
| AX-158343940 | 27 | 46.12  | KV453299.1 | 4563339 | 27-scf00525 | 27 |
| AX-158343942 | 27 | 46.12  | KV453299.1 | 4566588 | 27-scf00525 | 27 |
| AX-158343692 | 27 | 46.23  | KV453299.1 | 4245304 | 27-scf00525 | 27 |
| AX-157861882 | 27 | 46.23  | KV453299.1 | 4249606 | 27-scf00525 | 27 |
| AX-158343811 | 27 | 46.23  | KV453299.1 | 4416283 | 27-scf00525 | 27 |
| AX-158343847 | 27 | 46.23  | KV453299.1 | 4450234 | 27-scf00525 | 27 |
| AX-158343895 | 27 | 46.23  | KV453299.1 | 4510199 | 27-scf00525 | 27 |
| AX-158343903 | 27 | 46.23  | KV453299.1 | 4519365 | 27-scf00525 | 27 |
| AX-158343913 | 27 | 46.23  | KV453299.1 | 4535660 | 27-scf00525 | 27 |
| AX-158343943 | 27 | 46.23  | KV453299.1 | 4568857 | 27-scf00525 | 27 |
| AX-158343944 | 27 | 46.23  | KV453299.1 | 4572935 | 27-scf00525 | 27 |
| AX-158343945 | 27 | 46.23  | KV453299.1 | 4573669 | 27-scf00525 | 27 |
| AX-158343946 | 27 | 46.23  | KV453299.1 | 4574971 | 27-scf00525 | 27 |
| AX-158343949 | 27 | 46.23  | KV453299.1 | 4577574 | 27-scf00525 | 27 |
| AX-158343950 | 27 | 46.23  | KV453299.1 | 4579370 | 27-scf00525 | 27 |
| AX-158343951 | 27 | 46.23  | KV453299.1 | 4582212 | 27-scf00525 | 27 |
| AX-158343956 | 27 | 46.23  | KV453299.1 | 4586494 | 27-scf00525 | 27 |
| AX-158343958 | 27 | 46.23  | KV453299.1 | 4588752 | 27-scf00525 | 27 |
| AX-158343959 | 27 | 46.23  | KV453299.1 | 4589503 | 27-scf00525 | 27 |
| AX-158343960 | 27 | 46.23  | KV453299.1 | 4589889 | 27-scf00525 | 27 |
| AX-158343961 | 27 | 46.23  | KV453299.1 | 4593735 | 27-scf00525 | 27 |
| AX-157850338 | 27 | 46.23  | KV453299.1 | 4597875 | 27-scf00525 | 27 |

|              |    |       |            |         |             |    |
|--------------|----|-------|------------|---------|-------------|----|
| AX-158343968 | 27 | 46.23 | KV453299.1 | 4605888 | 27-scf00525 | 27 |
| AX-158343970 | 27 | 46.23 | KV453299.1 | 4609556 | 27-scf00525 | 27 |
| AX-158343975 | 27 | 46.23 | KV453299.1 | 4612624 | 27-scf00525 | 27 |
| AX-157850341 | 27 | 46.23 | KV453299.1 | 4613203 | 27-scf00525 | 27 |
| AX-158343977 | 27 | 46.23 | KV453299.1 | 4613624 | 27-scf00525 | 27 |
| AX-158343979 | 27 | 46.23 | KV453299.1 | 4619944 | 27-scf00525 | 27 |
| AX-157850342 | 27 | 46.23 | KV453299.1 | 4622791 | 27-scf00525 | 27 |
| AX-158343987 | 27 | 46.23 | KV453299.1 | 4627590 | 27-scf00525 | 27 |
| AX-158343990 | 27 | 46.23 | KV453299.1 | 4631311 | 27-scf00525 | 27 |
| AX-158343991 | 27 | 46.23 | KV453299.1 | 4631548 | 27-scf00525 | 27 |
| AX-158343995 | 27 | 46.23 | KV453299.1 | 4636019 | 27-scf00525 | 27 |
| AX-158343997 | 27 | 46.23 | KV453299.1 | 4639390 | 27-scf00525 | 27 |
| AX-158343999 | 27 | 46.23 | KV453299.1 | 4642984 | 27-scf00525 | 27 |
| AX-158344002 | 27 | 46.23 | KV453299.1 | 4646794 | 27-scf00525 | 27 |
| AX-158344003 | 27 | 46.23 | KV453299.1 | 4648150 | 27-scf00525 | 27 |
| AX-158344007 | 27 | 46.23 | KV453299.1 | 4655355 | 27-scf00525 | 27 |
| AX-158344008 | 27 | 46.23 | KV453299.1 | 4656040 | 27-scf00525 | 27 |
| AX-158344010 | 27 | 46.23 | KV453299.1 | 4658914 | 27-scf00525 | 27 |
| AX-158344011 | 27 | 46.23 | KV453299.1 | 4659249 | 27-scf00525 | 27 |
| AX-158344013 | 27 | 46.23 | KV453299.1 | 4662288 | 27-scf00525 | 27 |
| AX-157754740 | 27 | 46.23 | KV453299.1 | 4662807 | 27-scf00525 | 27 |
| AX-158344014 | 27 | 46.23 | KV453299.1 | 4663252 | 27-scf00525 | 27 |
| AX-158344015 | 27 | 46.23 | KV453299.1 | 4663742 | 27-scf00525 | 27 |
| AX-158344017 | 27 | 46.23 | KV453299.1 | 4666444 | 27-scf00525 | 27 |
| AX-158344019 | 27 | 46.23 | KV453299.1 | 4668177 | 27-scf00525 | 27 |
| AX-158344021 | 27 | 46.23 | KV453299.1 | 4671505 | 27-scf00525 | 27 |
| AX-158344024 | 27 | 46.23 | KV453299.1 | 4675224 | 27-scf00525 | 27 |
| AX-158344025 | 27 | 46.23 | KV453299.1 | 4675972 | 27-scf00525 | 27 |
| AX-158344031 | 27 | 46.23 | KV453299.1 | 4682637 | 27-scf00525 | 27 |
| AX-158344032 | 27 | 46.23 | KV453299.1 | 4683165 | 27-scf00525 | 27 |
| AX-158344033 | 27 | 46.23 | KV453299.1 | 4685496 | 27-scf00525 | 27 |
| AX-158344035 | 27 | 46.23 | KV453299.1 | 4688188 | 27-scf00525 | 27 |
| AX-158344036 | 27 | 46.23 | KV453299.1 | 4689711 | 27-scf00525 | 27 |
| AX-158419206 | 27 | 46.23 | KV453299.1 | 4691771 | 27-scf00525 | 27 |
| AX-158419207 | 27 | 46.23 | KV453299.1 | 4692103 | 27-scf00525 | 27 |
| AX-158344037 | 27 | 46.23 | KV453299.1 | 4694060 | 27-scf00525 | 27 |
| AX-158344039 | 27 | 46.23 | KV453299.1 | 4700181 | 27-scf00525 | 27 |
| AX-158344041 | 27 | 46.23 | KV453299.1 | 4702504 | 27-scf00525 | 27 |
| AX-158344044 | 27 | 46.23 | KV453299.1 | 4705816 | 27-scf00525 | 27 |
| AX-158344045 | 27 | 46.23 | KV453299.1 | 4706582 | 27-scf00525 | 27 |
| AX-158344046 | 27 | 46.23 | KV453299.1 | 4706883 | 27-scf00525 | 27 |
| AX-158344059 | 27 | 46.23 | KV453299.1 | 4725154 | 27-scf00525 | 27 |
| AX-158344072 | 27 | 46.23 | KV453299.1 | 4744530 | 27-scf00525 | 27 |
| AX-158344100 | 27 | 46.23 | KV453299.1 | 4785209 | 27-scf00525 | 27 |
| AX-158344172 | 27 | 46.23 | KV453299.1 | 4904789 | 27-scf00525 | 27 |
| AX-158344181 | 27 | 46.23 | KV453299.1 | 4919480 | 27-scf00525 | 27 |
| AX-157861893 | 27 | 46.23 | KV453299.1 | 5147285 | 27-scf00525 | 27 |
| AX-158344629 | 27 | 46.23 | KV453299.1 | 5507335 | 27-scf00525 | 27 |
| AX-158344632 | 27 | 46.23 | KV453299.1 | 5511736 | 27-scf00525 | 27 |
| AX-158344706 | 27 | 46.23 | KV453299.1 | 5606880 | 27-scf00525 | 27 |
| AX-158344715 | 27 | 46.23 | KV453299.1 | 5620453 | 27-scf00525 | 27 |

|              |    |        |            |         |               |    |
|--------------|----|--------|------------|---------|---------------|----|
| AX-158345034 | 27 | 46.23  | KV453299.1 | 6139969 | 27-scf00525   | 27 |
| AX-158344055 | 27 | 46.339 | KV453299.1 | 4721209 | 27-scf00525   | 27 |
| AX-158344064 | 27 | 46.339 | KV453299.1 | 4731829 | 27-scf00525   | 27 |
| AX-158344122 | 27 | 46.339 | KV453299.1 | 4809049 | 27-scf00525   | 27 |
| AX-157699475 | 27 | 46.339 | FI870131.1 | 47      | ORI212 Ictalu | UN |
| AX-158344066 | 27 | 46.387 | KV453299.1 | 4734960 | 27-scf00525   | 27 |
| AX-158344068 | 27 | 46.416 | KV453299.1 | 4735908 | 27-scf00525   | 27 |
| AX-158344070 | 27 | 46.448 | KV453299.1 | 4742999 | 27-scf00525   | 27 |
| AX-158344071 | 27 | 46.448 | KV453299.1 | 4743447 | 27-scf00525   | 27 |
| AX-157742568 | 27 | 46.448 | KV453299.1 | 4745059 | 27-scf00525   | 27 |
| AX-158344079 | 27 | 46.557 | KV453299.1 | 4755150 | 27-scf00525   | 27 |
| AX-158344084 | 27 | 46.557 | KV453299.1 | 4758186 | 27-scf00525   | 27 |
| AX-158344086 | 27 | 46.557 | KV453299.1 | 4760300 | 27-scf00525   | 27 |
| AX-157740002 | 27 | 46.557 | KV453299.1 | 4762623 | 27-scf00525   | 27 |
| AX-158344088 | 27 | 46.557 | KV453299.1 | 4763118 | 27-scf00525   | 27 |
| AX-157864141 | 27 | 46.557 | KV453299.1 | 4763271 | 27-scf00525   | 27 |
| AX-158344089 | 27 | 46.557 | KV453299.1 | 4766357 | 27-scf00525   | 27 |
| AX-158344258 | 27 | 46.557 | KV453299.1 | 5009020 | 27-scf00525   | 27 |
| AX-158419214 | 27 | 46.647 | KV453299.1 | 4768217 | 27-scf00525   | 27 |
| AX-158344082 | 27 | 46.666 | KV453299.1 | 4756856 | 27-scf00525   | 27 |
| AX-157888795 | 27 | 46.666 | KV453299.1 | 4767383 | 27-scf00525   | 27 |
| AX-158344096 | 27 | 46.666 | KV453299.1 | 4779396 | 27-scf00525   | 27 |
| AX-158344102 | 27 | 46.666 | KV453299.1 | 4786623 | 27-scf00525   | 27 |
| AX-158344104 | 27 | 46.666 | KV453299.1 | 4791597 | 27-scf00525   | 27 |
| AX-157735270 | 27 | 46.666 | KV453299.1 | 4793984 | 27-scf00525   | 27 |
| AX-158344109 | 27 | 46.666 | KV453299.1 | 4795886 | 27-scf00525   | 27 |
| AX-158344110 | 27 | 46.666 | KV453299.1 | 4796874 | 27-scf00525   | 27 |
| AX-158344112 | 27 | 46.666 | KV453299.1 | 4798363 | 27-scf00525   | 27 |
| AX-158344113 | 27 | 46.666 | KV453299.1 | 4798601 | 27-scf00525   | 27 |
| AX-157749916 | 27 | 46.666 | KV453299.1 | 4801572 | 27-scf00525   | 27 |
| AX-158344118 | 27 | 46.666 | KV453299.1 | 4803045 | 27-scf00525   | 27 |
| AX-158344120 | 27 | 46.666 | KV453299.1 | 4805202 | 27-scf00525   | 27 |
| AX-157752542 | 27 | 46.666 | KV453299.1 | 4820697 | 27-scf00525   | 27 |
| AX-158344127 | 27 | 46.666 | KV453299.1 | 4828088 | 27-scf00525   | 27 |
| AX-157850348 | 27 | 46.666 | KV453299.1 | 4831333 | 27-scf00525   | 27 |
| AX-158344131 | 27 | 46.666 | KV453299.1 | 4840691 | 27-scf00525   | 27 |
| AX-158344134 | 27 | 46.666 | KV453299.1 | 4851405 | 27-scf00525   | 27 |
| AX-158344138 | 27 | 46.666 | KV453299.1 | 4861454 | 27-scf00525   | 27 |
| AX-158344141 | 27 | 46.666 | KV453299.1 | 4864084 | 27-scf00525   | 27 |
| AX-158344142 | 27 | 46.666 | KV453299.1 | 4864846 | 27-scf00525   | 27 |
| AX-158344145 | 27 | 46.666 | KV453299.1 | 4867776 | 27-scf00525   | 27 |
| AX-157746943 | 27 | 46.666 | KV453299.1 | 4869918 | 27-scf00525   | 27 |
| AX-158344147 | 27 | 46.666 | KV453299.1 | 4870314 | 27-scf00525   | 27 |
| AX-158344150 | 27 | 46.666 | KV453299.1 | 4873926 | 27-scf00525   | 27 |
| AX-157720972 | 27 | 46.666 | KV453299.1 | 4877638 | 27-scf00525   | 27 |
| AX-157707594 | 27 | 46.666 | KV453299.1 | 4878227 | 27-scf00525   | 27 |
| AX-157725329 | 27 | 46.666 | KV453299.1 | 4879207 | 27-scf00525   | 27 |
| AX-158344152 | 27 | 46.666 | KV453299.1 | 4880205 | 27-scf00525   | 27 |
| AX-157709031 | 27 | 46.666 | KV453299.1 | 4881544 | 27-scf00525   | 27 |
| AX-158344155 | 27 | 46.666 | KV453299.1 | 4887089 | 27-scf00525   | 27 |
| AX-158344160 | 27 | 46.666 | KV453299.1 | 4892111 | 27-scf00525   | 27 |

|              |    |        |            |         |             |    |
|--------------|----|--------|------------|---------|-------------|----|
| AX-157750219 | 27 | 46.666 | KV453299.1 | 4901304 | 27-scf00525 | 27 |
| AX-158344167 | 27 | 46.666 | KV453299.1 | 4901426 | 27-scf00525 | 27 |
| AX-158344169 | 27 | 46.666 | KV453299.1 | 4902810 | 27-scf00525 | 27 |
| AX-158344173 | 27 | 46.666 | KV453299.1 | 4905725 | 27-scf00525 | 27 |
| AX-157850355 | 27 | 46.666 | KV453299.1 | 4905970 | 27-scf00525 | 27 |
| AX-158344183 | 27 | 46.666 | KV453299.1 | 4924950 | 27-scf00525 | 27 |
| AX-158381635 | 27 | 46.666 | KV453299.1 | 4933078 | 27-scf00525 | 27 |
| AX-158344214 | 27 | 46.666 | KV453299.1 | 4962286 | 27-scf00525 | 27 |
| AX-158344240 | 27 | 46.666 | KV453299.1 | 4991964 | 27-scf00525 | 27 |
| AX-158344243 | 27 | 46.666 | KV453299.1 | 4994127 | 27-scf00525 | 27 |
| AX-158419212 | 27 | 46.776 | KV453299.1 | 4701779 | 27-scf00525 | 27 |
| AX-158344194 | 27 | 46.776 | KV453299.1 | 4939098 | 27-scf00525 | 27 |
| AX-158344197 | 27 | 46.776 | KV453299.1 | 4943727 | 27-scf00525 | 27 |
| AX-158344198 | 27 | 46.776 | KV453299.1 | 4944627 | 27-scf00525 | 27 |
| AX-158388319 | 27 | 46.776 | KV453299.1 | 4945770 | 27-scf00525 | 27 |
| AX-158344201 | 27 | 46.776 | KV453299.1 | 4946246 | 27-scf00525 | 27 |
| AX-158343908 | 27 | 46.885 | KV453299.1 | 4528788 | 27-scf00525 | 27 |
| AX-158344158 | 27 | 46.885 | KV453299.1 | 4890363 | 27-scf00525 | 27 |
| AX-158344166 | 27 | 46.885 | KV453299.1 | 4899755 | 27-scf00525 | 27 |
| AX-158344192 | 27 | 46.885 | KV453299.1 | 4933894 | 27-scf00525 | 27 |
| AX-158344195 | 27 | 46.885 | KV453299.1 | 4942236 | 27-scf00525 | 27 |
| AX-158344205 | 27 | 46.885 | KV453299.1 | 4951761 | 27-scf00525 | 27 |
| AX-157772025 | 27 | 46.885 | KV453299.1 | 4952915 | 27-scf00525 | 27 |
| AX-158344210 | 27 | 46.885 | KV453299.1 | 4959622 | 27-scf00525 | 27 |
| AX-158344212 | 27 | 46.885 | KV453299.1 | 4960465 | 27-scf00525 | 27 |
| AX-158344215 | 27 | 46.885 | KV453299.1 | 4965083 | 27-scf00525 | 27 |
| AX-158344216 | 27 | 46.885 | KV453299.1 | 4965784 | 27-scf00525 | 27 |
| AX-158344218 | 27 | 46.885 | KV453299.1 | 4968494 | 27-scf00525 | 27 |
| AX-157725545 | 27 | 46.885 | KV453299.1 | 4970445 | 27-scf00525 | 27 |
| AX-158344220 | 27 | 46.885 | KV453299.1 | 4971015 | 27-scf00525 | 27 |
| AX-158344224 | 27 | 46.885 | KV453299.1 | 4974408 | 27-scf00525 | 27 |
| AX-158344225 | 27 | 46.885 | KV453299.1 | 4975211 | 27-scf00525 | 27 |
| AX-158344228 | 27 | 46.885 | KV453299.1 | 4979030 | 27-scf00525 | 27 |
| AX-158344229 | 27 | 46.885 | KV453299.1 | 4979687 | 27-scf00525 | 27 |
| AX-158344230 | 27 | 46.885 | KV453299.1 | 4980359 | 27-scf00525 | 27 |
| AX-158344234 | 27 | 46.885 | KV453299.1 | 4984971 | 27-scf00525 | 27 |
| AX-158344235 | 27 | 46.885 | KV453299.1 | 4985706 | 27-scf00525 | 27 |
| AX-158344236 | 27 | 46.885 | KV453299.1 | 4986762 | 27-scf00525 | 27 |
| AX-158344238 | 27 | 46.885 | KV453299.1 | 4989181 | 27-scf00525 | 27 |
| AX-158344241 | 27 | 46.885 | KV453299.1 | 4992375 | 27-scf00525 | 27 |
| AX-158344270 | 27 | 46.885 | KV453299.1 | 5024795 | 27-scf00525 | 27 |
| AX-157850360 | 27 | 46.885 | KV453299.1 | 5029370 | 27-scf00525 | 27 |
| AX-158344249 | 27 | 46.948 | KV453299.1 | 4998100 | 27-scf00525 | 27 |
| AX-158344252 | 27 | 46.994 | KV453299.1 | 5003461 | 27-scf00525 | 27 |
| AX-158344256 | 27 | 46.994 | KV453299.1 | 5006065 | 27-scf00525 | 27 |
| AX-158344259 | 27 | 46.994 | KV453299.1 | 5009577 | 27-scf00525 | 27 |
| AX-158344260 | 27 | 46.994 | KV453299.1 | 5010393 | 27-scf00525 | 27 |
| AX-158344266 | 27 | 46.994 | KV453299.1 | 5020656 | 27-scf00525 | 27 |
| AX-158344267 | 27 | 46.994 | KV453299.1 | 5021529 | 27-scf00525 | 27 |
| AX-157850358 | 27 | 46.994 | KV453299.1 | 5023038 | 27-scf00525 | 27 |
| AX-158344373 | 27 | 46.994 | KV453299.1 | 5183787 | 27-scf00525 | 27 |



|              |    |        |             |         |             |    |
|--------------|----|--------|-------------|---------|-------------|----|
| AX-157706319 | 27 | 46.994 | 3ML01032043 | 337     | scf07655_1  | UN |
| AX-158344275 | 27 | 47.023 | KV453299.1  | 5040498 | 27-scf00525 | 27 |
| AX-158344277 | 27 | 47.05  | KV453299.1  | 5044711 | 27-scf00525 | 27 |
| AX-158344396 | 27 | 47.05  | KV453299.1  | 5211272 | 27-scf00525 | 27 |
| AX-158344428 | 27 | 47.05  | KV453299.1  | 5237910 | 27-scf00525 | 27 |
| AX-158344278 | 27 | 47.069 | KV453299.1  | 5050737 | 27-scf00525 | 27 |
| AX-157733725 | 27 | 47.069 | KV453299.1  | 5251145 | 27-scf00525 | 27 |
| AX-158344455 | 27 | 47.069 | KV453299.1  | 5278473 | 27-scf00525 | 27 |
| AX-158344080 | 27 | 47.103 | KV453299.1  | 4755478 | 27-scf00525 | 27 |
| AX-158344093 | 27 | 47.103 | KV453299.1  | 4776311 | 27-scf00525 | 27 |
| AX-158344114 | 27 | 47.103 | KV453299.1  | 4801075 | 27-scf00525 | 27 |
| AX-158344129 | 27 | 47.103 | KV453299.1  | 4836787 | 27-scf00525 | 27 |
| AX-158344130 | 27 | 47.103 | KV453299.1  | 4839333 | 27-scf00525 | 27 |
| AX-158344136 | 27 | 47.103 | KV453299.1  | 4859478 | 27-scf00525 | 27 |
| AX-158344144 | 27 | 47.103 | KV453299.1  | 4866308 | 27-scf00525 | 27 |
| AX-158344146 | 27 | 47.103 | KV453299.1  | 4870023 | 27-scf00525 | 27 |
| AX-158344165 | 27 | 47.103 | KV453299.1  | 4898392 | 27-scf00525 | 27 |
| AX-158344204 | 27 | 47.103 | KV453299.1  | 4951085 | 27-scf00525 | 27 |
| AX-158344242 | 27 | 47.103 | KV453299.1  | 4993731 | 27-scf00525 | 27 |
| AX-157773564 | 27 | 47.103 | KV453299.1  | 4996760 | 27-scf00525 | 27 |
| AX-157850362 | 27 | 47.103 | KV453299.1  | 5033287 | 27-scf00525 | 27 |
| AX-158344274 | 27 | 47.103 | KV453299.1  | 5033885 | 27-scf00525 | 27 |
| AX-158419221 | 27 | 47.103 | KV453299.1  | 5054274 | 27-scf00525 | 27 |
| AX-158419222 | 27 | 47.103 | KV453299.1  | 5054919 | 27-scf00525 | 27 |
| AX-158344281 | 27 | 47.103 | KV453299.1  | 5055503 | 27-scf00525 | 27 |
| AX-157720472 | 27 | 47.103 | KV453299.1  | 5056094 | 27-scf00525 | 27 |
| AX-157850364 | 27 | 47.103 | KV453299.1  | 5056726 | 27-scf00525 | 27 |
| AX-158344291 | 27 | 47.103 | KV453299.1  | 5063725 | 27-scf00525 | 27 |
| AX-158344293 | 27 | 47.103 | KV453299.1  | 5065913 | 27-scf00525 | 27 |
| AX-157740799 | 27 | 47.103 | KV453299.1  | 5070170 | 27-scf00525 | 27 |
| AX-158344294 | 27 | 47.103 | KV453299.1  | 5070644 | 27-scf00525 | 27 |
| AX-157850366 | 27 | 47.103 | KV453299.1  | 5070934 | 27-scf00525 | 27 |
| AX-158344295 | 27 | 47.103 | KV453299.1  | 5071260 | 27-scf00525 | 27 |
| AX-157727935 | 27 | 47.103 | KV453299.1  | 5073538 | 27-scf00525 | 27 |
| AX-158344296 | 27 | 47.103 | KV453299.1  | 5073931 | 27-scf00525 | 27 |
| AX-157850367 | 27 | 47.103 | KV453299.1  | 5074969 | 27-scf00525 | 27 |
| AX-158344298 | 27 | 47.103 | KV453299.1  | 5075533 | 27-scf00525 | 27 |
| AX-158344299 | 27 | 47.103 | KV453299.1  | 5076373 | 27-scf00525 | 27 |
| AX-158344300 | 27 | 47.103 | KV453299.1  | 5077494 | 27-scf00525 | 27 |
| AX-158344301 | 27 | 47.103 | KV453299.1  | 5078640 | 27-scf00525 | 27 |
| AX-158344302 | 27 | 47.103 | KV453299.1  | 5078917 | 27-scf00525 | 27 |
| AX-157726764 | 27 | 47.103 | KV453299.1  | 5080291 | 27-scf00525 | 27 |
| AX-158344304 | 27 | 47.103 | KV453299.1  | 5080858 | 27-scf00525 | 27 |
| AX-158344308 | 27 | 47.103 | KV453299.1  | 5089034 | 27-scf00525 | 27 |
| AX-158344310 | 27 | 47.103 | KV453299.1  | 5093436 | 27-scf00525 | 27 |
| AX-158344311 | 27 | 47.103 | KV453299.1  | 5093924 | 27-scf00525 | 27 |
| AX-157850369 | 27 | 47.103 | KV453299.1  | 5094163 | 27-scf00525 | 27 |
| AX-158344312 | 27 | 47.103 | KV453299.1  | 5094414 | 27-scf00525 | 27 |
| AX-157850370 | 27 | 47.103 | KV453299.1  | 5095295 | 27-scf00525 | 27 |
| AX-158344318 | 27 | 47.103 | KV453299.1  | 5101093 | 27-scf00525 | 27 |
| AX-158344319 | 27 | 47.103 | KV453299.1  | 5101311 | 27-scf00525 | 27 |

|              |    |        |            |         |             |    |
|--------------|----|--------|------------|---------|-------------|----|
| AX-158344326 | 27 | 47.103 | KV453299.1 | 5109760 | 27-scf00525 | 27 |
| AX-158344327 | 27 | 47.103 | KV453299.1 | 5110132 | 27-scf00525 | 27 |
| AX-158344329 | 27 | 47.103 | KV453299.1 | 5112952 | 27-scf00525 | 27 |
| AX-158344334 | 27 | 47.103 | KV453299.1 | 5119513 | 27-scf00525 | 27 |
| AX-158344337 | 27 | 47.103 | KV453299.1 | 5123843 | 27-scf00525 | 27 |
| AX-158344338 | 27 | 47.103 | KV453299.1 | 5124069 | 27-scf00525 | 27 |
| AX-158344339 | 27 | 47.103 | KV453299.1 | 5124308 | 27-scf00525 | 27 |
| AX-157850373 | 27 | 47.103 | KV453299.1 | 5124733 | 27-scf00525 | 27 |
| AX-158344341 | 27 | 47.103 | KV453299.1 | 5125490 | 27-scf00525 | 27 |
| AX-157850374 | 27 | 47.103 | KV453299.1 | 5126053 | 27-scf00525 | 27 |
| AX-158344342 | 27 | 47.103 | KV453299.1 | 5126379 | 27-scf00525 | 27 |
| AX-158344343 | 27 | 47.103 | KV453299.1 | 5126635 | 27-scf00525 | 27 |
| AX-158344344 | 27 | 47.103 | KV453299.1 | 5129774 | 27-scf00525 | 27 |
| AX-157711466 | 27 | 47.103 | KV453299.1 | 5130760 | 27-scf00525 | 27 |
| AX-157850375 | 27 | 47.103 | KV453299.1 | 5132683 | 27-scf00525 | 27 |
| AX-158344348 | 27 | 47.103 | KV453299.1 | 5137139 | 27-scf00525 | 27 |
| AX-157850377 | 27 | 47.103 | KV453299.1 | 5138186 | 27-scf00525 | 27 |
| AX-158344349 | 27 | 47.103 | KV453299.1 | 5141891 | 27-scf00525 | 27 |
| AX-158344350 | 27 | 47.103 | KV453299.1 | 5143446 | 27-scf00525 | 27 |
| AX-157850379 | 27 | 47.103 | KV453299.1 | 5144472 | 27-scf00525 | 27 |
| AX-158344352 | 27 | 47.103 | KV453299.1 | 5145800 | 27-scf00525 | 27 |
| AX-157888805 | 27 | 47.103 | KV453299.1 | 5176620 | 27-scf00525 | 27 |
| AX-157873810 | 27 | 47.103 | KV453299.1 | 5197772 | 27-scf00525 | 27 |
| AX-157861896 | 27 | 47.103 | KV453299.1 | 5207269 | 27-scf00525 | 27 |
| AX-158344410 | 27 | 47.103 | KV453299.1 | 5221526 | 27-scf00525 | 27 |
| AX-157752619 | 27 | 47.103 | KV453299.1 | 5345425 | 27-scf00525 | 27 |
| AX-158344523 | 27 | 47.103 | KV453299.1 | 5373693 | 27-scf00525 | 27 |
| AX-158344541 | 27 | 47.103 | KV453299.1 | 5391826 | 27-scf00525 | 27 |
| AX-158344556 | 27 | 47.103 | KV453299.1 | 5416605 | 27-scf00525 | 27 |
| AX-158344583 | 27 | 47.103 | KV453299.1 | 5445151 | 27-scf00525 | 27 |
| AX-158344598 | 27 | 47.103 | KV453299.1 | 5464720 | 27-scf00525 | 27 |
| AX-158344599 | 27 | 47.103 | KV453299.1 | 5465361 | 27-scf00525 | 27 |
| AX-158345711 | 27 | 47.103 | KV453299.1 | 7191969 | 27-scf00525 | 27 |
| AX-158344356 | 27 | 47.212 | KV453299.1 | 5156286 | 27-scf00525 | 27 |
| AX-157850380 | 27 | 47.212 | KV453299.1 | 5157829 | 27-scf00525 | 27 |
| AX-158344359 | 27 | 47.212 | KV453299.1 | 5161068 | 27-scf00525 | 27 |
| AX-158344362 | 27 | 47.212 | KV453299.1 | 5171203 | 27-scf00525 | 27 |
| AX-158344363 | 27 | 47.212 | KV453299.1 | 5172320 | 27-scf00525 | 27 |
| AX-158344365 | 27 | 47.212 | KV453299.1 | 5175701 | 27-scf00525 | 27 |
| AX-158344366 | 27 | 47.212 | KV453299.1 | 5176343 | 27-scf00525 | 27 |
| AX-158344367 | 27 | 47.212 | KV453299.1 | 5178762 | 27-scf00525 | 27 |
| AX-158344368 | 27 | 47.212 | KV453299.1 | 5180872 | 27-scf00525 | 27 |
| AX-158419230 | 27 | 47.212 | KV453299.1 | 5183999 | 27-scf00525 | 27 |
| AX-158344374 | 27 | 47.212 | KV453299.1 | 5186274 | 27-scf00525 | 27 |
| AX-157850381 | 27 | 47.212 | KV453299.1 | 5186877 | 27-scf00525 | 27 |
| AX-157888806 | 27 | 47.212 | KV453299.1 | 5191711 | 27-scf00525 | 27 |
| AX-158344379 | 27 | 47.212 | KV453299.1 | 5193611 | 27-scf00525 | 27 |
| AX-158344384 | 27 | 47.212 | KV453299.1 | 5198382 | 27-scf00525 | 27 |
| AX-158344391 | 27 | 47.212 | KV453299.1 | 5206614 | 27-scf00525 | 27 |
| AX-158344392 | 27 | 47.212 | KV453299.1 | 5206822 | 27-scf00525 | 27 |
| AX-158344393 | 27 | 47.212 | KV453299.1 | 5207558 | 27-scf00525 | 27 |

|              |    |        |            |         |             |    |
|--------------|----|--------|------------|---------|-------------|----|
| AX-158344394 | 27 | 47.212 | KV453299.1 | 5208013 | 27-scf00525 | 27 |
| AX-157714976 | 27 | 47.212 | KV453299.1 | 5212563 | 27-scf00525 | 27 |
| AX-158344399 | 27 | 47.212 | KV453299.1 | 5213047 | 27-scf00525 | 27 |
| AX-158344400 | 27 | 47.212 | KV453299.1 | 5213759 | 27-scf00525 | 27 |
| AX-157850382 | 27 | 47.212 | KV453299.1 | 5229033 | 27-scf00525 | 27 |
| AX-158344422 | 27 | 47.212 | KV453299.1 | 5230311 | 27-scf00525 | 27 |
| AX-158344424 | 27 | 47.212 | KV453299.1 | 5231450 | 27-scf00525 | 27 |
| AX-158344426 | 27 | 47.212 | KV453299.1 | 5234089 | 27-scf00525 | 27 |
| AX-158344433 | 27 | 47.212 | KV453299.1 | 5243563 | 27-scf00525 | 27 |
| AX-158344435 | 27 | 47.212 | KV453299.1 | 5249371 | 27-scf00525 | 27 |
| AX-158344438 | 27 | 47.212 | KV453299.1 | 5253754 | 27-scf00525 | 27 |
| AX-158344439 | 27 | 47.212 | KV453299.1 | 5255153 | 27-scf00525 | 27 |
| AX-158344184 | 27 | 47.261 | KV453299.1 | 4926228 | 27-scf00525 | 27 |
| AX-157850363 | 27 | 47.261 | KV453299.1 | 5045436 | 27-scf00525 | 27 |
| AX-158344444 | 27 | 47.261 | KV453299.1 | 5263065 | 27-scf00525 | 27 |
| AX-158344451 | 27 | 47.322 | KV453299.1 | 5271434 | 27-scf00525 | 27 |
| AX-158344457 | 27 | 47.322 | KV453299.1 | 5281038 | 27-scf00525 | 27 |
| AX-158344458 | 27 | 47.322 | KV453299.1 | 5281656 | 27-scf00525 | 27 |
| AX-158344460 | 27 | 47.322 | KV453299.1 | 5282518 | 27-scf00525 | 27 |
| AX-158344461 | 27 | 47.322 | KV453299.1 | 5283300 | 27-scf00525 | 27 |
| AX-158344463 | 27 | 47.322 | KV453299.1 | 5283938 | 27-scf00525 | 27 |
| AX-158344464 | 27 | 47.322 | KV453299.1 | 5284870 | 27-scf00525 | 27 |
| AX-158344469 | 27 | 47.322 | KV453299.1 | 5289602 | 27-scf00525 | 27 |
| AX-158344477 | 27 | 47.322 | KV453299.1 | 5302493 | 27-scf00525 | 27 |
| AX-157868098 | 27 | 47.322 | KV453299.1 | 5303670 | 27-scf00525 | 27 |
| AX-157741778 | 27 | 47.322 | KV453299.1 | 5306798 | 27-scf00525 | 27 |
| AX-157888812 | 27 | 47.322 | KV453299.1 | 5314276 | 27-scf00525 | 27 |
| AX-157861902 | 27 | 47.322 | KV453299.1 | 5324282 | 27-scf00525 | 27 |
| AX-158344489 | 27 | 47.322 | KV453299.1 | 5331069 | 27-scf00525 | 27 |
| AX-157850391 | 27 | 47.322 | KV453299.1 | 5332009 | 27-scf00525 | 27 |
| AX-158344518 | 27 | 47.322 | KV453299.1 | 5370099 | 27-scf00525 | 27 |
| AX-157882219 | 27 | 47.649 | KV453299.1 | 4891705 | 27-scf00525 | 27 |
| AX-158344491 | 27 | 47.649 | KV453299.1 | 5334937 | 27-scf00525 | 27 |
| AX-158344492 | 27 | 47.649 | KV453299.1 | 5338985 | 27-scf00525 | 27 |
| AX-158344493 | 27 | 47.649 | KV453299.1 | 5339772 | 27-scf00525 | 27 |
| AX-158344494 | 27 | 47.649 | KV453299.1 | 5340080 | 27-scf00525 | 27 |
| AX-157850392 | 27 | 47.649 | KV453299.1 | 5340894 | 27-scf00525 | 27 |
| AX-158344496 | 27 | 47.649 | KV453299.1 | 5343501 | 27-scf00525 | 27 |
| AX-158344504 | 27 | 47.649 | KV453299.1 | 5351497 | 27-scf00525 | 27 |
| AX-158344545 | 27 | 47.649 | KV453299.1 | 5405272 | 27-scf00525 | 27 |
| AX-158344548 | 27 | 47.649 | KV453299.1 | 5409033 | 27-scf00525 | 27 |
| AX-158344569 | 27 | 47.649 | KV453299.1 | 5429086 | 27-scf00525 | 27 |
| AX-157888820 | 27 | 47.649 | KV453299.1 | 5451364 | 27-scf00525 | 27 |
| AX-158344283 | 27 | 47.651 | KV453299.1 | 5057360 | 27-scf00525 | 27 |
| AX-158344437 | 27 | 47.651 | KV453299.1 | 5252864 | 27-scf00525 | 27 |
| AX-158344490 | 27 | 47.651 | KV453299.1 | 5334028 | 27-scf00525 | 27 |
| AX-158344498 | 27 | 47.651 | KV453299.1 | 5346279 | 27-scf00525 | 27 |
| AX-158344499 | 27 | 47.651 | KV453299.1 | 5346939 | 27-scf00525 | 27 |
| AX-158344501 | 27 | 47.651 | KV453299.1 | 5347932 | 27-scf00525 | 27 |
| AX-158344500 | 27 | 47.686 | KV453299.1 | 5347496 | 27-scf00525 | 27 |
| AX-157773452 | 27 | 47.753 | KV453299.1 | 5350410 | 27-scf00525 | 27 |

|              |    |        |            |         |             |    |
|--------------|----|--------|------------|---------|-------------|----|
| AX-158344091 | 27 | 47.758 | KV453299.1 | 4770489 | 27-scf00525 | 27 |
| AX-157750760 | 27 | 47.758 | KV453299.1 | 4881214 | 27-scf00525 | 27 |
| AX-158344223 | 27 | 47.758 | KV453299.1 | 4972047 | 27-scf00525 | 27 |
| AX-158344309 | 27 | 47.758 | KV453299.1 | 5091481 | 27-scf00525 | 27 |
| AX-157719319 | 27 | 47.758 | KV453299.1 | 5193954 | 27-scf00525 | 27 |
| AX-158344454 | 27 | 47.758 | KV453299.1 | 5275087 | 27-scf00525 | 27 |
| AX-158344482 | 27 | 47.758 | KV453299.1 | 5316024 | 27-scf00525 | 27 |
| AX-158344484 | 27 | 47.758 | KV453299.1 | 5318197 | 27-scf00525 | 27 |
| AX-158344505 | 27 | 47.758 | KV453299.1 | 5352707 | 27-scf00525 | 27 |
| AX-158344507 | 27 | 47.758 | KV453299.1 | 5354093 | 27-scf00525 | 27 |
| AX-158344509 | 27 | 47.758 | KV453299.1 | 5356599 | 27-scf00525 | 27 |
| AX-158344510 | 27 | 47.758 | KV453299.1 | 5358388 | 27-scf00525 | 27 |
| AX-158344511 | 27 | 47.758 | KV453299.1 | 5359641 | 27-scf00525 | 27 |
| AX-158344517 | 27 | 47.758 | KV453299.1 | 5369654 | 27-scf00525 | 27 |
| AX-158344531 | 27 | 47.758 | KV453299.1 | 5380722 | 27-scf00525 | 27 |
| AX-158344533 | 27 | 47.758 | KV453299.1 | 5381872 | 27-scf00525 | 27 |
| AX-158344534 | 27 | 47.758 | KV453299.1 | 5384614 | 27-scf00525 | 27 |
| AX-158344535 | 27 | 47.758 | KV453299.1 | 5387586 | 27-scf00525 | 27 |
| AX-157861908 | 27 | 47.758 | KV453299.1 | 5388599 | 27-scf00525 | 27 |
| AX-158344538 | 27 | 47.758 | KV453299.1 | 5389732 | 27-scf00525 | 27 |
| AX-158344557 | 27 | 47.758 | KV453299.1 | 5416984 | 27-scf00525 | 27 |
| AX-158344562 | 27 | 47.758 | KV453299.1 | 5422984 | 27-scf00525 | 27 |
| AX-158344564 | 27 | 47.758 | KV453299.1 | 5425894 | 27-scf00525 | 27 |
| AX-158344565 | 27 | 47.758 | KV453299.1 | 5426584 | 27-scf00525 | 27 |
| AX-158344732 | 27 | 47.758 | KV453299.1 | 5644560 | 27-scf00525 | 27 |
| AX-158344567 | 27 | 47.814 | KV453299.1 | 5427923 | 27-scf00525 | 27 |
| AX-158344572 | 27 | 47.868 | KV453299.1 | 5433085 | 27-scf00525 | 27 |
| AX-158344574 | 27 | 47.868 | KV453299.1 | 5435540 | 27-scf00525 | 27 |
| AX-158344575 | 27 | 47.868 | KV453299.1 | 5437892 | 27-scf00525 | 27 |
| AX-158344581 | 27 | 47.868 | KV453299.1 | 5443159 | 27-scf00525 | 27 |
| AX-158344582 | 27 | 47.868 | KV453299.1 | 5444374 | 27-scf00525 | 27 |
| AX-158344586 | 27 | 47.868 | KV453299.1 | 5448823 | 27-scf00525 | 27 |
| AX-158344604 | 27 | 47.868 | KV453299.1 | 5472322 | 27-scf00525 | 27 |
| AX-158345256 | 27 | 47.868 | KV453299.1 | 6505731 | 27-scf00525 | 27 |
| AX-158344132 | 27 | 47.977 | KV453299.1 | 4843531 | 27-scf00525 | 27 |
| AX-157850353 | 27 | 47.977 | KV453299.1 | 4893258 | 27-scf00525 | 27 |
| AX-157741903 | 27 | 47.977 | KV453299.1 | 4909934 | 27-scf00525 | 27 |
| AX-158344175 | 27 | 47.977 | KV453299.1 | 4913543 | 27-scf00525 | 27 |
| AX-158344305 | 27 | 47.977 | KV453299.1 | 5082914 | 27-scf00525 | 27 |
| AX-157882229 | 27 | 47.977 | KV453299.1 | 5453972 | 27-scf00525 | 27 |
| AX-157714227 | 27 | 47.977 | KV453299.1 | 5457117 | 27-scf00525 | 27 |
| AX-158344605 | 27 | 47.977 | KV453299.1 | 5472686 | 27-scf00525 | 27 |
| AX-158344385 | 27 | 48.086 | KV453299.1 | 5200082 | 27-scf00525 | 27 |
| AX-158344596 | 27 | 48.086 | KV453299.1 | 5463205 | 27-scf00525 | 27 |
| AX-158344600 | 27 | 48.086 | KV453299.1 | 5468349 | 27-scf00525 | 27 |
| AX-158344607 | 27 | 48.086 | KV453299.1 | 5477276 | 27-scf00525 | 27 |
| AX-158344609 | 27 | 48.086 | KV453299.1 | 5482222 | 27-scf00525 | 27 |
| AX-158344610 | 27 | 48.086 | KV453299.1 | 5483119 | 27-scf00525 | 27 |
| AX-158344616 | 27 | 48.086 | KV453299.1 | 5494892 | 27-scf00525 | 27 |
| AX-158344403 | 27 | 48.195 | KV453299.1 | 5216276 | 27-scf00525 | 27 |
| AX-157850399 | 27 | 48.195 | KV453299.1 | 5501301 | 27-scf00525 | 27 |

|              |    |        |             |          |             |    |
|--------------|----|--------|-------------|----------|-------------|----|
| AX-158344624 | 27 | 48.195 | KV453299.1  | 5503470  | 27-scf00525 | 27 |
| AX-158344625 | 27 | 48.195 | KV453299.1  | 5503793  | 27-scf00525 | 27 |
| AX-157850400 | 27 | 48.195 | KV453299.1  | 5517306  | 27-scf00525 | 27 |
| AX-158344676 | 27 | 48.195 | KV453299.1  | 5566238  | 27-scf00525 | 27 |
| AX-158344677 | 27 | 48.195 | KV453299.1  | 5566737  | 27-scf00525 | 27 |
| AX-158344945 | 27 | 48.195 | KV453299.1  | 6016866  | 27-scf00525 | 27 |
| AX-158348408 | 27 | 48.195 | KV453299.1  | 10104848 | 27-scf00525 | 27 |
| AX-158348437 | 27 | 48.195 | KV453299.1  | 10160405 | 27-scf00525 | 27 |
| AX-158348568 | 27 | 48.195 | KV453299.1  | 10357628 | 27-scf00525 | 27 |
| AX-157706042 | 27 | 48.195 | 3ML01031490 | 36       | scf07104_1  | UN |
| AX-157888798 | 27 | 48.304 | KV453299.1  | 4959587  | 27-scf00525 | 27 |
| AX-158344470 | 27 | 48.304 | KV453299.1  | 5292992  | 27-scf00525 | 27 |
| AX-158344544 | 27 | 48.304 | KV453299.1  | 5399594  | 27-scf00525 | 27 |
| AX-158344611 | 27 | 48.304 | KV453299.1  | 5483505  | 27-scf00525 | 27 |
| AX-158344627 | 27 | 48.304 | KV453299.1  | 5504410  | 27-scf00525 | 27 |
| AX-158344636 | 27 | 48.304 | KV453299.1  | 5518710  | 27-scf00525 | 27 |
| AX-158344638 | 27 | 48.304 | KV453299.1  | 5521178  | 27-scf00525 | 27 |
| AX-158344639 | 27 | 48.304 | KV453299.1  | 5524174  | 27-scf00525 | 27 |
| AX-158344641 | 27 | 48.304 | KV453299.1  | 5526858  | 27-scf00525 | 27 |
| AX-158344643 | 27 | 48.304 | KV453299.1  | 5527947  | 27-scf00525 | 27 |
| AX-158344645 | 27 | 48.304 | KV453299.1  | 5528869  | 27-scf00525 | 27 |
| AX-158344657 | 27 | 48.304 | KV453299.1  | 5541482  | 27-scf00525 | 27 |
| AX-158344660 | 27 | 48.304 | KV453299.1  | 5543801  | 27-scf00525 | 27 |
| AX-158344661 | 27 | 48.304 | KV453299.1  | 5544675  | 27-scf00525 | 27 |
| AX-158381637 | 27 | 48.304 | KV453299.1  | 5544847  | 27-scf00525 | 27 |
| AX-158344663 | 27 | 48.304 | KV453299.1  | 5548878  | 27-scf00525 | 27 |
| AX-158344664 | 27 | 48.304 | KV453299.1  | 5550034  | 27-scf00525 | 27 |
| AX-158344671 | 27 | 48.304 | KV453299.1  | 5560663  | 27-scf00525 | 27 |
| AX-158344684 | 27 | 48.304 | KV453299.1  | 5577647  | 27-scf00525 | 27 |
| AX-158344687 | 27 | 48.304 | KV453299.1  | 5579874  | 27-scf00525 | 27 |
| AX-158344696 | 27 | 48.304 | KV453299.1  | 5594506  | 27-scf00525 | 27 |
| AX-158344697 | 27 | 48.304 | KV453299.1  | 5595042  | 27-scf00525 | 27 |
| AX-157861923 | 27 | 48.304 | KV453299.1  | 5605826  | 27-scf00525 | 27 |
| AX-158344711 | 27 | 48.304 | KV453299.1  | 5613155  | 27-scf00525 | 27 |
| AX-158344731 | 27 | 48.304 | KV453299.1  | 5644123  | 27-scf00525 | 27 |
| AX-158344733 | 27 | 48.304 | KV453299.1  | 5645469  | 27-scf00525 | 27 |
| AX-158344737 | 27 | 48.304 | KV453299.1  | 5652102  | 27-scf00525 | 27 |
| AX-158344744 | 27 | 48.304 | KV453299.1  | 5662612  | 27-scf00525 | 27 |
| AX-158344750 | 27 | 48.304 | KV453299.1  | 5675064  | 27-scf00525 | 27 |
| AX-158344773 | 27 | 48.304 | KV453299.1  | 5709403  | 27-scf00525 | 27 |
| AX-158344784 | 27 | 48.304 | KV453299.1  | 5732851  | 27-scf00525 | 27 |
| AX-158344791 | 27 | 48.304 | KV453299.1  | 5749764  | 27-scf00525 | 27 |
| AX-158344792 | 27 | 48.304 | KV453299.1  | 5750695  | 27-scf00525 | 27 |
| AX-157850427 | 27 | 48.304 | KV453299.1  | 5827671  | 27-scf00525 | 27 |
| AX-158344850 | 27 | 48.304 | KV453299.1  | 5828098  | 27-scf00525 | 27 |
| AX-158344851 | 27 | 48.304 | KV453299.1  | 5828816  | 27-scf00525 | 27 |
| AX-158344852 | 27 | 48.304 | KV453299.1  | 5829225  | 27-scf00525 | 27 |
| AX-158344884 | 27 | 48.304 | KV453299.1  | 5882507  | 27-scf00525 | 27 |
| AX-158344890 | 27 | 48.304 | KV453299.1  | 5910856  | 27-scf00525 | 27 |
| AX-158344899 | 27 | 48.304 | KV453299.1  | 5925221  | 27-scf00525 | 27 |
| AX-158344980 | 27 | 48.304 | KV453299.1  | 6058562  | 27-scf00525 | 27 |

|              |    |        |            |         |             |    |
|--------------|----|--------|------------|---------|-------------|----|
| AX-158344983 | 27 | 48.304 | KV453299.1 | 6059894 | 27-scf00525 | 27 |
| AX-157751763 | 27 | 48.304 | KV453299.1 | 6064150 | 27-scf00525 | 27 |
| AX-158344993 | 27 | 48.304 | KV453299.1 | 6069343 | 27-scf00525 | 27 |
| AX-158344994 | 27 | 48.304 | KV453299.1 | 6070395 | 27-scf00525 | 27 |
| AX-158344995 | 27 | 48.304 | KV453299.1 | 6072024 | 27-scf00525 | 27 |
| AX-158345006 | 27 | 48.304 | KV453299.1 | 6084907 | 27-scf00525 | 27 |
| AX-158345008 | 27 | 48.304 | KV453299.1 | 6089570 | 27-scf00525 | 27 |
| AX-158345022 | 27 | 48.304 | KV453299.1 | 6123056 | 27-scf00525 | 27 |
| AX-158345029 | 27 | 48.304 | KV453299.1 | 6133345 | 27-scf00525 | 27 |
| AX-158345074 | 27 | 48.304 | KV453299.1 | 6223129 | 27-scf00525 | 27 |
| AX-158345148 | 27 | 48.304 | KV453299.1 | 6318046 | 27-scf00525 | 27 |
| AX-157850465 | 27 | 48.304 | KV453299.1 | 6569172 | 27-scf00525 | 27 |
| AX-158345400 | 27 | 48.304 | KV453299.1 | 6693263 | 27-scf00525 | 27 |
| AX-158345810 | 27 | 48.304 | KV453299.1 | 7423102 | 27-scf00525 | 27 |
| AX-158345829 | 27 | 48.304 | KV453299.1 | 7443878 | 27-scf00525 | 27 |
| AX-158345831 | 27 | 48.304 | KV453299.1 | 7448346 | 27-scf00525 | 27 |
| AX-158344206 | 27 | 48.523 | KV453299.1 | 4954045 | 27-scf00525 | 27 |
| AX-158344284 | 27 | 48.523 | KV453299.1 | 5057909 | 27-scf00525 | 27 |
| AX-158344485 | 27 | 48.523 | KV453299.1 | 5318666 | 27-scf00525 | 27 |
| AX-158344578 | 27 | 48.523 | KV453299.1 | 5441402 | 27-scf00525 | 27 |
| AX-157714428 | 27 | 48.523 | KV453299.1 | 5495981 | 27-scf00525 | 27 |
| AX-158344637 | 27 | 48.523 | KV453299.1 | 5520629 | 27-scf00525 | 27 |
| AX-158344764 | 27 | 48.523 | KV453299.1 | 5699558 | 27-scf00525 | 27 |
| AX-158344767 | 27 | 48.523 | KV453299.1 | 5702102 | 27-scf00525 | 27 |
| AX-158344772 | 27 | 48.523 | KV453299.1 | 5708985 | 27-scf00525 | 27 |
| AX-158344783 | 27 | 48.523 | KV453299.1 | 5730897 | 27-scf00525 | 27 |
| AX-157850413 | 27 | 48.523 | KV453299.1 | 5731740 | 27-scf00525 | 27 |
| AX-158344786 | 27 | 48.523 | KV453299.1 | 5737111 | 27-scf00525 | 27 |
| AX-157850415 | 27 | 48.523 | KV453299.1 | 5737405 | 27-scf00525 | 27 |
| AX-158344788 | 27 | 48.523 | KV453299.1 | 5741870 | 27-scf00525 | 27 |
| AX-157717685 | 27 | 48.523 | KV453299.1 | 5775985 | 27-scf00525 | 27 |
| AX-158344802 | 27 | 48.523 | KV453299.1 | 5777563 | 27-scf00525 | 27 |
| AX-158344810 | 27 | 48.523 | KV453299.1 | 5783536 | 27-scf00525 | 27 |
| AX-158344812 | 27 | 48.523 | KV453299.1 | 5784531 | 27-scf00525 | 27 |
| AX-158344813 | 27 | 48.523 | KV453299.1 | 5785478 | 27-scf00525 | 27 |
| AX-158344815 | 27 | 48.523 | KV453299.1 | 5786570 | 27-scf00525 | 27 |
| AX-158344816 | 27 | 48.523 | KV453299.1 | 5786868 | 27-scf00525 | 27 |
| AX-158344817 | 27 | 48.523 | KV453299.1 | 5787131 | 27-scf00525 | 27 |
| AX-158344818 | 27 | 48.523 | KV453299.1 | 5787916 | 27-scf00525 | 27 |
| AX-158344835 | 27 | 48.523 | KV453299.1 | 5809538 | 27-scf00525 | 27 |
| AX-157775838 | 27 | 48.523 | KV453299.1 | 5827077 | 27-scf00525 | 27 |
| AX-158344865 | 27 | 48.523 | KV453299.1 | 5846626 | 27-scf00525 | 27 |
| AX-158344872 | 27 | 48.523 | KV453299.1 | 5859889 | 27-scf00525 | 27 |
| AX-157710020 | 27 | 48.523 | KV453299.1 | 5886573 | 27-scf00525 | 27 |
| AX-158344886 | 27 | 48.523 | KV453299.1 | 5894392 | 27-scf00525 | 27 |
| AX-158344887 | 27 | 48.523 | KV453299.1 | 5896542 | 27-scf00525 | 27 |
| AX-158344889 | 27 | 48.523 | KV453299.1 | 5901202 | 27-scf00525 | 27 |
| AX-157850438 | 27 | 48.523 | KV453299.1 | 5908670 | 27-scf00525 | 27 |
| AX-158344894 | 27 | 48.523 | KV453299.1 | 5921402 | 27-scf00525 | 27 |
| AX-158344896 | 27 | 48.523 | KV453299.1 | 5922907 | 27-scf00525 | 27 |
| AX-158344897 | 27 | 48.523 | KV453299.1 | 5923653 | 27-scf00525 | 27 |

|              |    |        |            |         |             |    |
|--------------|----|--------|------------|---------|-------------|----|
| AX-158344898 | 27 | 48.523 | KV453299.1 | 5924576 | 27-scf00525 | 27 |
| AX-158344901 | 27 | 48.523 | KV453299.1 | 5931328 | 27-scf00525 | 27 |
| AX-158344903 | 27 | 48.523 | KV453299.1 | 5935590 | 27-scf00525 | 27 |
| AX-158344904 | 27 | 48.523 | KV453299.1 | 5936212 | 27-scf00525 | 27 |
| AX-158344905 | 27 | 48.523 | KV453299.1 | 5937157 | 27-scf00525 | 27 |
| AX-157850439 | 27 | 48.523 | KV453299.1 | 5942381 | 27-scf00525 | 27 |
| AX-158344908 | 27 | 48.523 | KV453299.1 | 5943354 | 27-scf00525 | 27 |
| AX-158344909 | 27 | 48.523 | KV453299.1 | 5943845 | 27-scf00525 | 27 |
| AX-158344910 | 27 | 48.523 | KV453299.1 | 5945133 | 27-scf00525 | 27 |
| AX-158344912 | 27 | 48.523 | KV453299.1 | 5946586 | 27-scf00525 | 27 |
| AX-158344913 | 27 | 48.523 | KV453299.1 | 5947148 | 27-scf00525 | 27 |
| AX-158344914 | 27 | 48.523 | KV453299.1 | 5948905 | 27-scf00525 | 27 |
| AX-158344916 | 27 | 48.523 | KV453299.1 | 5950672 | 27-scf00525 | 27 |
| AX-158344917 | 27 | 48.523 | KV453299.1 | 5951264 | 27-scf00525 | 27 |
| AX-158344918 | 27 | 48.523 | KV453299.1 | 5951872 | 27-scf00525 | 27 |
| AX-158344919 | 27 | 48.523 | KV453299.1 | 5953260 | 27-scf00525 | 27 |
| AX-158344920 | 27 | 48.523 | KV453299.1 | 5953573 | 27-scf00525 | 27 |
| AX-158344921 | 27 | 48.523 | KV453299.1 | 5954219 | 27-scf00525 | 27 |
| AX-157850440 | 27 | 48.523 | KV453299.1 | 5955903 | 27-scf00525 | 27 |
| AX-157713778 | 27 | 48.523 | KV453299.1 | 5957172 | 27-scf00525 | 27 |
| AX-158344922 | 27 | 48.523 | KV453299.1 | 5957878 | 27-scf00525 | 27 |
| AX-158344923 | 27 | 48.523 | KV453299.1 | 5958617 | 27-scf00525 | 27 |
| AX-158344924 | 27 | 48.523 | KV453299.1 | 5958855 | 27-scf00525 | 27 |
| AX-157850441 | 27 | 48.523 | KV453299.1 | 5959176 | 27-scf00525 | 27 |
| AX-157861933 | 27 | 48.523 | KV453299.1 | 5971545 | 27-scf00525 | 27 |
| AX-158344925 | 27 | 48.523 | KV453299.1 | 5971949 | 27-scf00525 | 27 |
| AX-158344926 | 27 | 48.523 | KV453299.1 | 5974464 | 27-scf00525 | 27 |
| AX-157888827 | 27 | 48.523 | KV453299.1 | 5974604 | 27-scf00525 | 27 |
| AX-158344927 | 27 | 48.523 | KV453299.1 | 5977287 | 27-scf00525 | 27 |
| AX-158344931 | 27 | 48.523 | KV453299.1 | 5979325 | 27-scf00525 | 27 |
| AX-158344932 | 27 | 48.523 | KV453299.1 | 5980043 | 27-scf00525 | 27 |
| AX-157888828 | 27 | 48.523 | KV453299.1 | 5984774 | 27-scf00525 | 27 |
| AX-158344938 | 27 | 48.523 | KV453299.1 | 5986180 | 27-scf00525 | 27 |
| AX-158344940 | 27 | 48.523 | KV453299.1 | 5992091 | 27-scf00525 | 27 |
| AX-158344941 | 27 | 48.523 | KV453299.1 | 6008275 | 27-scf00525 | 27 |
| AX-158344987 | 27 | 48.523 | KV453299.1 | 6063138 | 27-scf00525 | 27 |
| AX-158345084 | 27 | 48.523 | KV453299.1 | 6236612 | 27-scf00525 | 27 |
| AX-157770700 | 27 | 48.523 | KV453299.1 | 6255727 | 27-scf00525 | 27 |
| AX-158345095 | 27 | 48.523 | KV453299.1 | 6259738 | 27-scf00525 | 27 |
| AX-157758154 | 27 | 48.523 | KV453299.1 | 6279133 | 27-scf00525 | 27 |
| AX-158345175 | 27 | 48.523 | KV453299.1 | 6360889 | 27-scf00525 | 27 |
| AX-158345178 | 27 | 48.523 | KV453299.1 | 6368935 | 27-scf00525 | 27 |
| AX-158345196 | 27 | 48.523 | KV453299.1 | 6398462 | 27-scf00525 | 27 |
| AX-158345227 | 27 | 48.523 | KV453299.1 | 6449320 | 27-scf00525 | 27 |
| AX-158345282 | 27 | 48.523 | KV453299.1 | 6542477 | 27-scf00525 | 27 |
| AX-158345305 | 27 | 48.523 | KV453299.1 | 6574081 | 27-scf00525 | 27 |
| AX-157888835 | 27 | 48.523 | KV453299.1 | 6629533 | 27-scf00525 | 27 |
| AX-158345366 | 27 | 48.523 | KV453299.1 | 6644573 | 27-scf00525 | 27 |
| AX-157868135 | 27 | 48.523 | KV453299.1 | 6655977 | 27-scf00525 | 27 |
| AX-158345393 | 27 | 48.523 | KV453299.1 | 6682778 | 27-scf00525 | 27 |
| AX-158345398 | 27 | 48.523 | KV453299.1 | 6687028 | 27-scf00525 | 27 |

|              |    |        |            |         |             |    |
|--------------|----|--------|------------|---------|-------------|----|
| AX-158345423 | 27 | 48.523 | KV453299.1 | 6720807 | 27-scf00525 | 27 |
| AX-158344957 | 27 | 48.541 | KV453299.1 | 6036248 | 27-scf00525 | 27 |
| AX-158344959 | 27 | 48.559 | KV453299.1 | 6039580 | 27-scf00525 | 27 |
| AX-158344991 | 27 | 48.559 | KV453299.1 | 6066072 | 27-scf00525 | 27 |
| AX-158345000 | 27 | 48.559 | KV453299.1 | 6078124 | 27-scf00525 | 27 |
| AX-158345001 | 27 | 48.559 | KV453299.1 | 6078238 | 27-scf00525 | 27 |
| AX-158345003 | 27 | 48.559 | KV453299.1 | 6081122 | 27-scf00525 | 27 |
| AX-158345252 | 27 | 48.559 | KV453299.1 | 6500353 | 27-scf00525 | 27 |
| AX-158345269 | 27 | 48.559 | KV453299.1 | 6523371 | 27-scf00525 | 27 |
| AX-158345421 | 27 | 48.559 | KV453299.1 | 6719907 | 27-scf00525 | 27 |
| AX-158344962 | 27 | 48.566 | KV453299.1 | 6042425 | 27-scf00525 | 27 |
| AX-158344969 | 27 | 48.585 | KV453299.1 | 6047738 | 27-scf00525 | 27 |
| AX-158344944 | 27 | 48.602 | KV453299.1 | 6016359 | 27-scf00525 | 27 |
| AX-158344947 | 27 | 48.602 | KV453299.1 | 6017585 | 27-scf00525 | 27 |
| AX-158344948 | 27 | 48.602 | KV453299.1 | 6018025 | 27-scf00525 | 27 |
| AX-158344965 | 27 | 48.602 | KV453299.1 | 6046163 | 27-scf00525 | 27 |
| AX-158344967 | 27 | 48.602 | KV453299.1 | 6046861 | 27-scf00525 | 27 |
| AX-158344982 | 27 | 48.602 | KV453299.1 | 6059352 | 27-scf00525 | 27 |
| AX-158345004 | 27 | 48.602 | KV453299.1 | 6081485 | 27-scf00525 | 27 |
| AX-158345007 | 27 | 48.602 | KV453299.1 | 6087782 | 27-scf00525 | 27 |
| AX-158345104 | 27 | 48.602 | KV453299.1 | 6267536 | 27-scf00525 | 27 |
| AX-158345132 | 27 | 48.602 | KV453299.1 | 6299967 | 27-scf00525 | 27 |
| AX-158345232 | 27 | 48.602 | KV453299.1 | 6455876 | 27-scf00525 | 27 |
| AX-158344990 | 27 | 48.614 | KV453299.1 | 6065696 | 27-scf00525 | 27 |
| AX-158344998 | 27 | 48.63  | KV453299.1 | 6075004 | 27-scf00525 | 27 |
| AX-158345214 | 27 | 48.63  | KV453299.1 | 6428753 | 27-scf00525 | 27 |
| AX-158345002 | 27 | 48.648 | KV453299.1 | 6080713 | 27-scf00525 | 27 |
| AX-158344618 | 27 | 48.666 | KV453299.1 | 5495851 | 27-scf00525 | 27 |
| AX-157698513 | 27 | 48.666 | KV453299.1 | 5989158 | 27-scf00525 | 27 |
| AX-158344939 | 27 | 48.666 | KV453299.1 | 5990319 | 27-scf00525 | 27 |
| AX-157850444 | 27 | 48.666 | KV453299.1 | 6006138 | 27-scf00525 | 27 |
| AX-158344953 | 27 | 48.666 | KV453299.1 | 6029012 | 27-scf00525 | 27 |
| AX-157697978 | 27 | 48.666 | KV453299.1 | 6036645 | 27-scf00525 | 27 |
| AX-158344984 | 27 | 48.666 | KV453299.1 | 6060369 | 27-scf00525 | 27 |
| AX-158344985 | 27 | 48.666 | KV453299.1 | 6060612 | 27-scf00525 | 27 |
| AX-158344986 | 27 | 48.666 | KV453299.1 | 6062832 | 27-scf00525 | 27 |
| AX-157850446 | 27 | 48.666 | KV453299.1 | 6093676 | 27-scf00525 | 27 |
| AX-157850447 | 27 | 48.666 | KV453299.1 | 6093824 | 27-scf00525 | 27 |
| AX-158345009 | 27 | 48.666 | KV453299.1 | 6095790 | 27-scf00525 | 27 |
| AX-158345011 | 27 | 48.666 | KV453299.1 | 6100317 | 27-scf00525 | 27 |
| AX-157850448 | 27 | 48.666 | KV453299.1 | 6103594 | 27-scf00525 | 27 |
| AX-158345012 | 27 | 48.666 | KV453299.1 | 6104173 | 27-scf00525 | 27 |
| AX-158345014 | 27 | 48.666 | KV453299.1 | 6108768 | 27-scf00525 | 27 |
| AX-157850451 | 27 | 48.666 | KV453299.1 | 6137342 | 27-scf00525 | 27 |
| AX-158345036 | 27 | 48.666 | KV453299.1 | 6152567 | 27-scf00525 | 27 |
| AX-157753777 | 27 | 48.666 | KV453299.1 | 6164423 | 27-scf00525 | 27 |
| AX-158345042 | 27 | 48.666 | KV453299.1 | 6167658 | 27-scf00525 | 27 |
| AX-158345044 | 27 | 48.666 | KV453299.1 | 6173893 | 27-scf00525 | 27 |
| AX-158345050 | 27 | 48.666 | KV453299.1 | 6191300 | 27-scf00525 | 27 |
| AX-158345051 | 27 | 48.666 | KV453299.1 | 6193034 | 27-scf00525 | 27 |
| AX-158345052 | 27 | 48.666 | KV453299.1 | 6194640 | 27-scf00525 | 27 |



|              |    |        |            |         |             |    |
|--------------|----|--------|------------|---------|-------------|----|
| AX-158345053 | 27 | 48.666 | KV453299.1 | 6195423 | 27-scf00525 | 27 |
| AX-158381638 | 27 | 48.666 | KV453299.1 | 6196270 | 27-scf00525 | 27 |
| AX-158345054 | 27 | 48.666 | KV453299.1 | 6196393 | 27-scf00525 | 27 |
| AX-158345055 | 27 | 48.666 | KV453299.1 | 6197364 | 27-scf00525 | 27 |
| AX-158345056 | 27 | 48.666 | KV453299.1 | 6198711 | 27-scf00525 | 27 |
| AX-158345057 | 27 | 48.666 | KV453299.1 | 6199108 | 27-scf00525 | 27 |
| AX-158345058 | 27 | 48.666 | KV453299.1 | 6200085 | 27-scf00525 | 27 |
| AX-158345059 | 27 | 48.666 | KV453299.1 | 6200851 | 27-scf00525 | 27 |
| AX-158345060 | 27 | 48.666 | KV453299.1 | 6201351 | 27-scf00525 | 27 |
| AX-158345064 | 27 | 48.666 | KV453299.1 | 6206389 | 27-scf00525 | 27 |
| AX-158345065 | 27 | 48.666 | KV453299.1 | 6207015 | 27-scf00525 | 27 |
| AX-158345066 | 27 | 48.666 | KV453299.1 | 6207468 | 27-scf00525 | 27 |
| AX-158345068 | 27 | 48.666 | KV453299.1 | 6208081 | 27-scf00525 | 27 |
| AX-157850453 | 27 | 48.666 | KV453299.1 | 6208278 | 27-scf00525 | 27 |
| AX-158345069 | 27 | 48.666 | KV453299.1 | 6209482 | 27-scf00525 | 27 |
| AX-157758484 | 27 | 48.666 | KV453299.1 | 6211732 | 27-scf00525 | 27 |
| AX-158345081 | 27 | 48.666 | KV453299.1 | 6234127 | 27-scf00525 | 27 |
| AX-157746077 | 27 | 48.666 | KV453299.1 | 6234676 | 27-scf00525 | 27 |
| AX-158381639 | 27 | 48.666 | KV453299.1 | 6259286 | 27-scf00525 | 27 |
| AX-158345096 | 27 | 48.666 | KV453299.1 | 6260451 | 27-scf00525 | 27 |
| AX-158345097 | 27 | 48.666 | KV453299.1 | 6260818 | 27-scf00525 | 27 |
| AX-158345099 | 27 | 48.666 | KV453299.1 | 6262493 | 27-scf00525 | 27 |
| AX-158345101 | 27 | 48.666 | KV453299.1 | 6264476 | 27-scf00525 | 27 |
| AX-158345102 | 27 | 48.666 | KV453299.1 | 6265951 | 27-scf00525 | 27 |
| AX-158345106 | 27 | 48.666 | KV453299.1 | 6269119 | 27-scf00525 | 27 |
| AX-158345108 | 27 | 48.666 | KV453299.1 | 6270608 | 27-scf00525 | 27 |
| AX-158345117 | 27 | 48.666 | KV453299.1 | 6282909 | 27-scf00525 | 27 |
| AX-158345133 | 27 | 48.666 | KV453299.1 | 6301320 | 27-scf00525 | 27 |
| AX-157888832 | 27 | 48.666 | KV453299.1 | 6301719 | 27-scf00525 | 27 |
| AX-158345135 | 27 | 48.666 | KV453299.1 | 6305378 | 27-scf00525 | 27 |
| AX-158345138 | 27 | 48.666 | KV453299.1 | 6307939 | 27-scf00525 | 27 |
| AX-158345150 | 27 | 48.666 | KV453299.1 | 6319061 | 27-scf00525 | 27 |
| AX-158345155 | 27 | 48.666 | KV453299.1 | 6323016 | 27-scf00525 | 27 |
| AX-157741926 | 27 | 48.666 | KV453299.1 | 6350179 | 27-scf00525 | 27 |
| AX-158345174 | 27 | 48.666 | KV453299.1 | 6359767 | 27-scf00525 | 27 |
| AX-158345187 | 27 | 48.666 | KV453299.1 | 6383384 | 27-scf00525 | 27 |
| AX-158345194 | 27 | 48.666 | KV453299.1 | 6397248 | 27-scf00525 | 27 |
| AX-158345195 | 27 | 48.666 | KV453299.1 | 6397878 | 27-scf00525 | 27 |
| AX-158345200 | 27 | 48.666 | KV453299.1 | 6406998 | 27-scf00525 | 27 |
| AX-158345220 | 27 | 48.666 | KV453299.1 | 6434543 | 27-scf00525 | 27 |
| AX-158345153 | 27 | 48.713 | KV453299.1 | 6321287 | 27-scf00525 | 27 |
| AX-157720558 | 27 | 48.812 | KV453299.1 | 4830101 | 27-scf00525 | 27 |
| AX-158344963 | 27 | 48.812 | KV453299.1 | 6042508 | 27-scf00525 | 27 |
| AX-158345043 | 27 | 48.812 | KV453299.1 | 6168307 | 27-scf00525 | 27 |
| AX-158345077 | 27 | 48.812 | KV453299.1 | 6228754 | 27-scf00525 | 27 |
| AX-158345103 | 27 | 48.812 | KV453299.1 | 6266664 | 27-scf00525 | 27 |
| AX-158345163 | 27 | 48.812 | KV453299.1 | 6333928 | 27-scf00525 | 27 |
| AX-158345170 | 27 | 48.812 | KV453299.1 | 6352022 | 27-scf00525 | 27 |
| AX-158345172 | 27 | 48.812 | KV453299.1 | 6355955 | 27-scf00525 | 27 |
| AX-158345173 | 27 | 48.812 | KV453299.1 | 6357787 | 27-scf00525 | 27 |
| AX-157757353 | 27 | 48.812 | KV453299.1 | 6364557 | 27-scf00525 | 27 |

|              |    |        |            |         |             |    |
|--------------|----|--------|------------|---------|-------------|----|
| AX-157707619 | 27 | 48.812 | KV453299.1 | 6372474 | 27-scf00525 | 27 |
| AX-158345183 | 27 | 48.812 | KV453299.1 | 6376495 | 27-scf00525 | 27 |
| AX-157882253 | 27 | 48.812 | KV453299.1 | 6378617 | 27-scf00525 | 27 |
| AX-157703905 | 27 | 48.812 | KV453299.1 | 6396958 | 27-scf00525 | 27 |
| AX-158345197 | 27 | 48.812 | KV453299.1 | 6399212 | 27-scf00525 | 27 |
| AX-158345199 | 27 | 48.812 | KV453299.1 | 6404966 | 27-scf00525 | 27 |
| AX-157725423 | 27 | 48.812 | KV453299.1 | 6409234 | 27-scf00525 | 27 |
| AX-158345202 | 27 | 48.812 | KV453299.1 | 6411248 | 27-scf00525 | 27 |
| AX-157715615 | 27 | 48.812 | KV453299.1 | 6416229 | 27-scf00525 | 27 |
| AX-158345209 | 27 | 48.812 | KV453299.1 | 6424461 | 27-scf00525 | 27 |
| AX-158345222 | 27 | 48.812 | KV453299.1 | 6436713 | 27-scf00525 | 27 |
| AX-157868134 | 27 | 48.812 | KV453299.1 | 6451610 | 27-scf00525 | 27 |
| AX-158345236 | 27 | 48.812 | KV453299.1 | 6473856 | 27-scf00525 | 27 |
| AX-158345276 | 27 | 48.812 | KV453299.1 | 6534729 | 27-scf00525 | 27 |
| AX-158345327 | 27 | 48.812 | KV453299.1 | 6591617 | 27-scf00525 | 27 |
| AX-158345346 | 27 | 48.812 | KV453299.1 | 6613035 | 27-scf00525 | 27 |
| AX-158345371 | 27 | 48.812 | KV453299.1 | 6654974 | 27-scf00525 | 27 |
| AX-157744265 | 27 | 48.892 | KV453299.1 | 6421320 | 27-scf00525 | 27 |
| AX-158345210 | 27 | 48.96  | KV453299.1 | 6425374 | 27-scf00525 | 27 |
| AX-158345212 | 27 | 48.96  | KV453299.1 | 6427341 | 27-scf00525 | 27 |
| AX-158345218 | 27 | 48.96  | KV453299.1 | 6431444 | 27-scf00525 | 27 |
| AX-158345230 | 27 | 48.96  | KV453299.1 | 6450741 | 27-scf00525 | 27 |
| AX-158345280 | 27 | 48.96  | KV453299.1 | 6539777 | 27-scf00525 | 27 |
| AX-158345306 | 27 | 48.96  | KV453299.1 | 6574475 | 27-scf00525 | 27 |
| AX-158345312 | 27 | 48.96  | KV453299.1 | 6581265 | 27-scf00525 | 27 |
| AX-158345234 | 27 | 49.036 | KV453299.1 | 6467692 | 27-scf00525 | 27 |
| AX-158345235 | 27 | 49.036 | KV453299.1 | 6469582 | 27-scf00525 | 27 |
| AX-157850428 | 27 | 49.069 | KV453299.1 | 5828575 | 27-scf00525 | 27 |
| AX-158344935 | 27 | 49.069 | KV453299.1 | 5982666 | 27-scf00525 | 27 |
| AX-157882250 | 27 | 49.069 | KV453299.1 | 6051325 | 27-scf00525 | 27 |
| AX-158345098 | 27 | 49.069 | KV453299.1 | 6261405 | 27-scf00525 | 27 |
| AX-158345154 | 27 | 49.069 | KV453299.1 | 6321968 | 27-scf00525 | 27 |
| AX-158345211 | 27 | 49.069 | KV453299.1 | 6426311 | 27-scf00525 | 27 |
| AX-158345213 | 27 | 49.069 | KV453299.1 | 6428047 | 27-scf00525 | 27 |
| AX-158345219 | 27 | 49.069 | KV453299.1 | 6432184 | 27-scf00525 | 27 |
| AX-158345221 | 27 | 49.069 | KV453299.1 | 6435381 | 27-scf00525 | 27 |
| AX-157709304 | 27 | 49.069 | KV453299.1 | 6436192 | 27-scf00525 | 27 |
| AX-157702652 | 27 | 49.069 | KV453299.1 | 6449800 | 27-scf00525 | 27 |
| AX-158345229 | 27 | 49.069 | KV453299.1 | 6450031 | 27-scf00525 | 27 |
| AX-158345241 | 27 | 49.069 | KV453299.1 | 6481332 | 27-scf00525 | 27 |
| AX-158345247 | 27 | 49.069 | KV453299.1 | 6487459 | 27-scf00525 | 27 |
| AX-158345249 | 27 | 49.069 | KV453299.1 | 6489227 | 27-scf00525 | 27 |
| AX-157715041 | 27 | 49.069 | KV453299.1 | 6498110 | 27-scf00525 | 27 |
| AX-158345253 | 27 | 49.069 | KV453299.1 | 6503405 | 27-scf00525 | 27 |
| AX-158345260 | 27 | 49.069 | KV453299.1 | 6510085 | 27-scf00525 | 27 |
| AX-158345264 | 27 | 49.069 | KV453299.1 | 6518910 | 27-scf00525 | 27 |
| AX-158345271 | 27 | 49.069 | KV453299.1 | 6525955 | 27-scf00525 | 27 |
| AX-158345279 | 27 | 49.069 | KV453299.1 | 6538638 | 27-scf00525 | 27 |
| AX-158345283 | 27 | 49.069 | KV453299.1 | 6543036 | 27-scf00525 | 27 |
| AX-158345284 | 27 | 49.069 | KV453299.1 | 6543399 | 27-scf00525 | 27 |
| AX-158345288 | 27 | 49.069 | KV453299.1 | 6549596 | 27-scf00525 | 27 |

|              |    |        |            |         |             |    |
|--------------|----|--------|------------|---------|-------------|----|
| AX-158345289 | 27 | 49.069 | KV453299.1 | 6550936 | 27-scf00525 | 27 |
| AX-158345290 | 27 | 49.069 | KV453299.1 | 6551354 | 27-scf00525 | 27 |
| AX-158345291 | 27 | 49.069 | KV453299.1 | 6553135 | 27-scf00525 | 27 |
| AX-158345294 | 27 | 49.069 | KV453299.1 | 6559356 | 27-scf00525 | 27 |
| AX-158345298 | 27 | 49.069 | KV453299.1 | 6563218 | 27-scf00525 | 27 |
| AX-158345299 | 27 | 49.069 | KV453299.1 | 6563666 | 27-scf00525 | 27 |
| AX-158345300 | 27 | 49.069 | KV453299.1 | 6564057 | 27-scf00525 | 27 |
| AX-157850464 | 27 | 49.069 | KV453299.1 | 6568910 | 27-scf00525 | 27 |
| AX-157745654 | 27 | 49.069 | KV453299.1 | 6570161 | 27-scf00525 | 27 |
| AX-158345307 | 27 | 49.069 | KV453299.1 | 6574682 | 27-scf00525 | 27 |
| AX-158345309 | 27 | 49.069 | KV453299.1 | 6578997 | 27-scf00525 | 27 |
| AX-158413146 | 27 | 49.069 | KV453299.1 | 6582803 | 27-scf00525 | 27 |
| AX-158345313 | 27 | 49.069 | KV453299.1 | 6583749 | 27-scf00525 | 27 |
| AX-158345317 | 27 | 49.069 | KV453299.1 | 6586366 | 27-scf00525 | 27 |
| AX-158345320 | 27 | 49.069 | KV453299.1 | 6587991 | 27-scf00525 | 27 |
| AX-158345322 | 27 | 49.069 | KV453299.1 | 6588339 | 27-scf00525 | 27 |
| AX-158345323 | 27 | 49.069 | KV453299.1 | 6588683 | 27-scf00525 | 27 |
| AX-158345328 | 27 | 49.069 | KV453299.1 | 6596416 | 27-scf00525 | 27 |
| AX-158345332 | 27 | 49.069 | KV453299.1 | 6600068 | 27-scf00525 | 27 |
| AX-157754577 | 27 | 49.069 | KV453299.1 | 6603307 | 27-scf00525 | 27 |
| AX-158345338 | 27 | 49.069 | KV453299.1 | 6605340 | 27-scf00525 | 27 |
| AX-158345340 | 27 | 49.069 | KV453299.1 | 6607474 | 27-scf00525 | 27 |
| AX-158345341 | 27 | 49.069 | KV453299.1 | 6608982 | 27-scf00525 | 27 |
| AX-158345343 | 27 | 49.069 | KV453299.1 | 6610679 | 27-scf00525 | 27 |
| AX-158345345 | 27 | 49.069 | KV453299.1 | 6612578 | 27-scf00525 | 27 |
| AX-158345347 | 27 | 49.069 | KV453299.1 | 6614552 | 27-scf00525 | 27 |
| AX-158345350 | 27 | 49.069 | KV453299.1 | 6620655 | 27-scf00525 | 27 |
| AX-158345358 | 27 | 49.069 | KV453299.1 | 6629022 | 27-scf00525 | 27 |
| AX-158345376 | 27 | 49.069 | KV453299.1 | 6660015 | 27-scf00525 | 27 |
| AX-158345382 | 27 | 49.069 | KV453299.1 | 6668301 | 27-scf00525 | 27 |
| AX-158345390 | 27 | 49.069 | KV453299.1 | 6680445 | 27-scf00525 | 27 |
| AX-158345392 | 27 | 49.069 | KV453299.1 | 6682043 | 27-scf00525 | 27 |
| AX-157754111 | 27 | 49.069 | KV453299.1 | 6683610 | 27-scf00525 | 27 |
| AX-158345156 | 27 | 49.125 | KV453299.1 | 6323970 | 27-scf00525 | 27 |
| AX-158345204 | 27 | 49.125 | KV453299.1 | 6417337 | 27-scf00525 | 27 |
| AX-158345243 | 27 | 49.125 | KV453299.1 | 6483882 | 27-scf00525 | 27 |
| AX-158345275 | 27 | 49.125 | KV453299.1 | 6533947 | 27-scf00525 | 27 |
| AX-158345314 | 27 | 49.125 | KV453299.1 | 6584194 | 27-scf00525 | 27 |
| AX-157713487 | 27 | 49.125 | KV453299.1 | 6618392 | 27-scf00525 | 27 |
| AX-158345277 | 27 | 49.178 | KV453299.1 | 6535079 | 27-scf00525 | 27 |
| AX-158345281 | 27 | 49.178 | KV453299.1 | 6540130 | 27-scf00525 | 27 |
| AX-158345354 | 27 | 49.178 | KV453299.1 | 6626195 | 27-scf00525 | 27 |
| AX-158345360 | 27 | 49.178 | KV453299.1 | 6630635 | 27-scf00525 | 27 |
| AX-158345361 | 27 | 49.178 | KV453299.1 | 6631918 | 27-scf00525 | 27 |
| AX-157715322 | 27 | 49.178 | KV453299.1 | 6645904 | 27-scf00525 | 27 |
| AX-158345370 | 27 | 49.178 | KV453299.1 | 6652684 | 27-scf00525 | 27 |
| AX-158345379 | 27 | 49.178 | KV453299.1 | 6664869 | 27-scf00525 | 27 |
| AX-158345336 | 27 | 49.287 | KV453299.1 | 6602361 | 27-scf00525 | 27 |
| AX-158345388 | 27 | 49.287 | KV453299.1 | 6677672 | 27-scf00525 | 27 |
| AX-158345396 | 27 | 49.287 | KV453299.1 | 6685517 | 27-scf00525 | 27 |
| AX-157700602 | 27 | 49.313 | KV453299.1 | 6433682 | 27-scf00525 | 27 |

|              |    |        |            |         |             |    |
|--------------|----|--------|------------|---------|-------------|----|
| AX-158345402 | 27 | 49.34  | KV453299.1 | 6694538 | 27-scf00525 | 27 |
| AX-158345411 | 27 | 49.358 | KV453299.1 | 6705625 | 27-scf00525 | 27 |
| AX-157714073 | 27 | 49.358 | KV453299.1 | 6801805 | 27-scf00525 | 27 |
| AX-158345412 | 27 | 49.364 | KV453299.1 | 6708041 | 27-scf00525 | 27 |
| AX-157850471 | 27 | 49.364 | KV453299.1 | 6723396 | 27-scf00525 | 27 |
| AX-158345515 | 27 | 49.364 | KV453299.1 | 6851447 | 27-scf00525 | 27 |
| AX-158345262 | 27 | 49.377 | KV453299.1 | 6513632 | 27-scf00525 | 27 |
| AX-158345395 | 27 | 49.377 | KV453299.1 | 6685065 | 27-scf00525 | 27 |
| AX-158345409 | 27 | 49.377 | KV453299.1 | 6704342 | 27-scf00525 | 27 |
| AX-157745910 | 27 | 49.377 | KV453299.1 | 6709681 | 27-scf00525 | 27 |
| AX-158345413 | 27 | 49.377 | KV453299.1 | 6711203 | 27-scf00525 | 27 |
| AX-157714485 | 27 | 49.377 | KV453299.1 | 6745501 | 27-scf00525 | 27 |
| AX-157850476 | 27 | 49.377 | KV453299.1 | 6756490 | 27-scf00525 | 27 |
| AX-158345452 | 27 | 49.377 | KV453299.1 | 6772737 | 27-scf00525 | 27 |
| AX-158345467 | 27 | 49.377 | KV453299.1 | 6787445 | 27-scf00525 | 27 |
| AX-158345479 | 27 | 49.377 | KV453299.1 | 6808411 | 27-scf00525 | 27 |
| AX-158345495 | 27 | 49.377 | KV453299.1 | 6827118 | 27-scf00525 | 27 |
| AX-157753811 | 27 | 49.377 | KV453299.1 | 6966767 | 27-scf00525 | 27 |
| AX-158346247 | 27 | 49.377 | KV453299.1 | 7914773 | 27-scf00525 | 27 |
| AX-158348128 | 27 | 49.377 | KV453299.1 | 9750036 | 27-scf00525 | 27 |
| AX-158348145 | 27 | 49.377 | KV453299.1 | 9776038 | 27-scf00525 | 27 |
| AX-158345416 | 27 | 49.385 | KV453299.1 | 6716511 | 27-scf00525 | 27 |
| AX-158345417 | 27 | 49.397 | KV453299.1 | 6717012 | 27-scf00525 | 27 |
| AX-158345419 | 27 | 49.397 | KV453299.1 | 6718197 | 27-scf00525 | 27 |
| AX-157850472 | 27 | 49.397 | KV453299.1 | 6729114 | 27-scf00525 | 27 |
| AX-157717226 | 27 | 49.397 | KV453299.1 | 6732362 | 27-scf00525 | 27 |
| AX-157850473 | 27 | 49.397 | KV453299.1 | 6735101 | 27-scf00525 | 27 |
| AX-157850474 | 27 | 49.397 | KV453299.1 | 6740159 | 27-scf00525 | 27 |
| AX-157873823 | 27 | 49.397 | KV453299.1 | 6746289 | 27-scf00525 | 27 |
| AX-157882255 | 27 | 49.397 | KV453299.1 | 6749518 | 27-scf00525 | 27 |
| AX-158345449 | 27 | 49.397 | KV453299.1 | 6769288 | 27-scf00525 | 27 |
| AX-158345450 | 27 | 49.397 | KV453299.1 | 6769540 | 27-scf00525 | 27 |
| AX-157850479 | 27 | 49.397 | KV453299.1 | 6770920 | 27-scf00525 | 27 |
| AX-158345454 | 27 | 49.397 | KV453299.1 | 6775207 | 27-scf00525 | 27 |
| AX-158345460 | 27 | 49.397 | KV453299.1 | 6781376 | 27-scf00525 | 27 |
| AX-158345462 | 27 | 49.397 | KV453299.1 | 6782696 | 27-scf00525 | 27 |
| AX-158345473 | 27 | 49.397 | KV453299.1 | 6797952 | 27-scf00525 | 27 |
| AX-158345475 | 27 | 49.397 | KV453299.1 | 6799930 | 27-scf00525 | 27 |
| AX-158345484 | 27 | 49.397 | KV453299.1 | 6814659 | 27-scf00525 | 27 |
| AX-158347505 | 27 | 49.397 | KV453299.1 | 9068311 | 27-scf00525 | 27 |
| AX-158347557 | 27 | 49.397 | KV453299.1 | 9110731 | 27-scf00525 | 27 |
| AX-157850608 | 27 | 49.397 | KV453299.1 | 9664039 | 27-scf00525 | 27 |
| AX-158345422 | 27 | 49.506 | KV453299.1 | 6720610 | 27-scf00525 | 27 |
| AX-158345464 | 27 | 49.506 | KV453299.1 | 6784834 | 27-scf00525 | 27 |
| AX-158345465 | 27 | 49.506 | KV453299.1 | 6786333 | 27-scf00525 | 27 |
| AX-158345474 | 27 | 49.506 | KV453299.1 | 6799279 | 27-scf00525 | 27 |
| AX-158345470 | 27 | 49.615 | KV453299.1 | 6792415 | 27-scf00525 | 27 |
| AX-158344937 | 27 | 49.725 | KV453299.1 | 5985599 | 27-scf00525 | 27 |
| AX-158344976 | 27 | 49.725 | KV453299.1 | 6055693 | 27-scf00525 | 27 |
| AX-158345129 | 27 | 49.725 | KV453299.1 | 6298421 | 27-scf00525 | 27 |
| AX-158345130 | 27 | 49.725 | KV453299.1 | 6298973 | 27-scf00525 | 27 |

|              |    |        |            |         |             |    |
|--------------|----|--------|------------|---------|-------------|----|
| AX-158345198 | 27 | 49.725 | KV453299.1 | 6404210 | 27-scf00525 | 27 |
| AX-158345255 | 27 | 49.725 | KV453299.1 | 6504949 | 27-scf00525 | 27 |
| AX-158345472 | 27 | 49.725 | KV453299.1 | 6796863 | 27-scf00525 | 27 |
| AX-158345478 | 27 | 49.725 | KV453299.1 | 6808207 | 27-scf00525 | 27 |
| AX-158345480 | 27 | 49.725 | KV453299.1 | 6810332 | 27-scf00525 | 27 |
| AX-157718649 | 27 | 49.725 | KV453299.1 | 6813584 | 27-scf00525 | 27 |
| AX-158345483 | 27 | 49.725 | KV453299.1 | 6814128 | 27-scf00525 | 27 |
| AX-158345486 | 27 | 49.725 | KV453299.1 | 6816086 | 27-scf00525 | 27 |
| AX-158345487 | 27 | 49.725 | KV453299.1 | 6816691 | 27-scf00525 | 27 |
| AX-158345485 | 27 | 49.783 | KV453299.1 | 6815167 | 27-scf00525 | 27 |
| AX-158345489 | 27 | 49.783 | KV453299.1 | 6820814 | 27-scf00525 | 27 |
| AX-158345496 | 27 | 49.783 | KV453299.1 | 6831473 | 27-scf00525 | 27 |
| AX-158345499 | 27 | 49.783 | KV453299.1 | 6833248 | 27-scf00525 | 27 |
| AX-158345517 | 27 | 49.783 | KV453299.1 | 6860057 | 27-scf00525 | 27 |
| AX-158345543 | 27 | 49.783 | KV453299.1 | 6891510 | 27-scf00525 | 27 |
| AX-158345544 | 27 | 49.783 | KV453299.1 | 6891925 | 27-scf00525 | 27 |
| AX-158345554 | 27 | 49.783 | KV453299.1 | 6905672 | 27-scf00525 | 27 |
| AX-158347586 | 27 | 49.783 | KV453299.1 | 9143381 | 27-scf00525 | 27 |
| AX-158347591 | 27 | 49.783 | KV453299.1 | 9145502 | 27-scf00525 | 27 |
| AX-158348051 | 27 | 49.783 | KV453299.1 | 9632331 | 27-scf00525 | 27 |
| AX-158345497 | 27 | 49.834 | KV453299.1 | 6832167 | 27-scf00525 | 27 |
| AX-158345501 | 27 | 49.834 | KV453299.1 | 6834198 | 27-scf00525 | 27 |
| AX-158345502 | 27 | 49.834 | KV453299.1 | 6837334 | 27-scf00525 | 27 |
| AX-158345509 | 27 | 49.834 | KV453299.1 | 6846412 | 27-scf00525 | 27 |
| AX-158345513 | 27 | 49.834 | KV453299.1 | 6850039 | 27-scf00525 | 27 |
| AX-157745165 | 27 | 49.834 | KV453299.1 | 6857406 | 27-scf00525 | 27 |
| AX-158345519 | 27 | 49.834 | KV453299.1 | 6860938 | 27-scf00525 | 27 |
| AX-157850483 | 27 | 49.834 | KV453299.1 | 6864064 | 27-scf00525 | 27 |
| AX-158345527 | 27 | 49.834 | KV453299.1 | 6869432 | 27-scf00525 | 27 |
| AX-158345528 | 27 | 49.834 | KV453299.1 | 6871400 | 27-scf00525 | 27 |
| AX-158345538 | 27 | 49.834 | KV453299.1 | 6882599 | 27-scf00525 | 27 |
| AX-158345549 | 27 | 49.834 | KV453299.1 | 6899632 | 27-scf00525 | 27 |
| AX-158345550 | 27 | 49.834 | KV453299.1 | 6900251 | 27-scf00525 | 27 |
| AX-158345551 | 27 | 49.834 | KV453299.1 | 6900794 | 27-scf00525 | 27 |
| AX-158345570 | 27 | 49.834 | KV453299.1 | 6921639 | 27-scf00525 | 27 |
| AX-158345628 | 27 | 49.834 | KV453299.1 | 7029002 | 27-scf00525 | 27 |
| AX-158345185 | 27 | 49.943 | KV453299.1 | 6380475 | 27-scf00525 | 27 |
| AX-157850469 | 27 | 49.943 | KV453299.1 | 6709733 | 27-scf00525 | 27 |
| AX-158345442 | 27 | 49.943 | KV453299.1 | 6759325 | 27-scf00525 | 27 |
| AX-158345451 | 27 | 49.943 | KV453299.1 | 6770957 | 27-scf00525 | 27 |
| AX-158345510 | 27 | 49.943 | KV453299.1 | 6846975 | 27-scf00525 | 27 |
| AX-158345511 | 27 | 49.943 | KV453299.1 | 6848839 | 27-scf00525 | 27 |
| AX-157738758 | 27 | 49.943 | KV453299.1 | 6891403 | 27-scf00525 | 27 |
| AX-158345546 | 27 | 49.943 | KV453299.1 | 6893644 | 27-scf00525 | 27 |
| AX-158345578 | 27 | 49.943 | KV453299.1 | 6934438 | 27-scf00525 | 27 |
| AX-158345582 | 27 | 49.943 | KV453299.1 | 6938098 | 27-scf00525 | 27 |
| AX-158345583 | 27 | 49.943 | KV453299.1 | 6938813 | 27-scf00525 | 27 |
| AX-158345588 | 27 | 49.943 | KV453299.1 | 6945931 | 27-scf00525 | 27 |
| AX-158345589 | 27 | 49.943 | KV453299.1 | 6947179 | 27-scf00525 | 27 |
| AX-158345591 | 27 | 49.943 | KV453299.1 | 6953516 | 27-scf00525 | 27 |
| AX-158345592 | 27 | 49.943 | KV453299.1 | 6956126 | 27-scf00525 | 27 |

|              |    |        |            |         |             |    |
|--------------|----|--------|------------|---------|-------------|----|
| AX-158345599 | 27 | 49.943 | KV453299.1 | 6970712 | 27-scf00525 | 27 |
| AX-157714707 | 27 | 49.943 | KV453299.1 | 6980196 | 27-scf00525 | 27 |
| AX-158345601 | 27 | 49.943 | KV453299.1 | 6982241 | 27-scf00525 | 27 |
| AX-158345602 | 27 | 49.943 | KV453299.1 | 6984156 | 27-scf00525 | 27 |
| AX-158345603 | 27 | 49.943 | KV453299.1 | 6985501 | 27-scf00525 | 27 |
| AX-158345604 | 27 | 49.943 | KV453299.1 | 6986939 | 27-scf00525 | 27 |
| AX-157774618 | 27 | 49.943 | KV453299.1 | 6987465 | 27-scf00525 | 27 |
| AX-157717299 | 27 | 49.943 | KV453299.1 | 6992533 | 27-scf00525 | 27 |
| AX-157774231 | 27 | 49.943 | KV453299.1 | 7006000 | 27-scf00525 | 27 |
| AX-158345614 | 27 | 49.943 | KV453299.1 | 7008442 | 27-scf00525 | 27 |
| AX-157861950 | 27 | 49.943 | KV453299.1 | 7010350 | 27-scf00525 | 27 |
| AX-158345616 | 27 | 49.943 | KV453299.1 | 7010694 | 27-scf00525 | 27 |
| AX-157756668 | 27 | 49.943 | KV453299.1 | 7014384 | 27-scf00525 | 27 |
| AX-158345620 | 27 | 49.943 | KV453299.1 | 7016114 | 27-scf00525 | 27 |
| AX-157861951 | 27 | 49.943 | KV453299.1 | 7018163 | 27-scf00525 | 27 |
| AX-158345624 | 27 | 49.943 | KV453299.1 | 7019988 | 27-scf00525 | 27 |
| AX-158345633 | 27 | 49.943 | KV453299.1 | 7041019 | 27-scf00525 | 27 |
| AX-157708473 | 27 | 49.943 | KV453299.1 | 7044870 | 27-scf00525 | 27 |
| AX-157850498 | 27 | 49.943 | KV453299.1 | 7051487 | 27-scf00525 | 27 |
| AX-157850499 | 27 | 49.943 | KV453299.1 | 7051822 | 27-scf00525 | 27 |
| AX-158345647 | 27 | 49.943 | KV453299.1 | 7065310 | 27-scf00525 | 27 |
| AX-158345648 | 27 | 49.943 | KV453299.1 | 7066805 | 27-scf00525 | 27 |
| AX-158345651 | 27 | 49.943 | KV453299.1 | 7069921 | 27-scf00525 | 27 |
| AX-158345652 | 27 | 49.943 | KV453299.1 | 7070658 | 27-scf00525 | 27 |
| AX-158345653 | 27 | 49.943 | KV453299.1 | 7071110 | 27-scf00525 | 27 |
| AX-158345655 | 27 | 49.943 | KV453299.1 | 7078004 | 27-scf00525 | 27 |
| AX-158345672 | 27 | 49.943 | KV453299.1 | 7117192 | 27-scf00525 | 27 |
| AX-158345703 | 27 | 49.943 | KV453299.1 | 7174378 | 27-scf00525 | 27 |
| AX-158345729 | 27 | 49.943 | KV453299.1 | 7221751 | 27-scf00525 | 27 |
| AX-158345730 | 27 | 49.943 | KV453299.1 | 7222546 | 27-scf00525 | 27 |
| AX-158345745 | 27 | 49.943 | KV453299.1 | 7253526 | 27-scf00525 | 27 |
| AX-158345747 | 27 | 49.943 | KV453299.1 | 7262638 | 27-scf00525 | 27 |
| AX-158345788 | 27 | 49.943 | KV453299.1 | 7375440 | 27-scf00525 | 27 |
| AX-158345857 | 27 | 49.943 | KV453299.1 | 7476192 | 27-scf00525 | 27 |
| AX-158345859 | 27 | 49.943 | KV453299.1 | 7480145 | 27-scf00525 | 27 |
| AX-158345891 | 27 | 49.943 | KV453299.1 | 7522764 | 27-scf00525 | 27 |
| AX-158345916 | 27 | 49.943 | KV453299.1 | 7578506 | 27-scf00525 | 27 |
| AX-158346636 | 27 | 49.943 | KV453299.1 | 8257244 | 27-scf00525 | 27 |
| AX-158347175 | 27 | 49.943 | KV453299.1 | 8759369 | 27-scf00525 | 27 |
| AX-158347290 | 27 | 49.943 | KV453299.1 | 8862764 | 27-scf00525 | 27 |
| AX-158347463 | 27 | 49.943 | KV453299.1 | 9029632 | 27-scf00525 | 27 |
| AX-158347548 | 27 | 49.943 | KV453299.1 | 9103455 | 27-scf00525 | 27 |
| AX-158347703 | 27 | 49.943 | KV453299.1 | 9280351 | 27-scf00525 | 27 |
| AX-158348100 | 27 | 49.943 | KV453299.1 | 9705518 | 27-scf00525 | 27 |
| AX-158345665 | 27 | 49.949 | KV453299.1 | 7106234 | 27-scf00525 | 27 |
| AX-158345609 | 27 | 49.957 | KV453299.1 | 7002694 | 27-scf00525 | 27 |
| AX-158345666 | 27 | 49.957 | KV453299.1 | 7106919 | 27-scf00525 | 27 |
| AX-158345675 | 27 | 49.966 | KV453299.1 | 7120531 | 27-scf00525 | 27 |
| AX-158345533 | 27 | 49.976 | KV453299.1 | 6875690 | 27-scf00525 | 27 |
| AX-158345567 | 27 | 49.976 | KV453299.1 | 6917381 | 27-scf00525 | 27 |
| AX-158345677 | 27 | 49.976 | KV453299.1 | 7122873 | 27-scf00525 | 27 |

|              |    |        |            |         |             |    |
|--------------|----|--------|------------|---------|-------------|----|
| AX-158345773 | 27 | 49.976 | KV453299.1 | 7337676 | 27-scf00525 | 27 |
| AX-158345774 | 27 | 49.976 | KV453299.1 | 7339665 | 27-scf00525 | 27 |
| AX-157721988 | 27 | 49.976 | KV453299.1 | 7399002 | 27-scf00525 | 27 |
| AX-158345920 | 27 | 49.976 | KV453299.1 | 7591451 | 27-scf00525 | 27 |
| AX-157850521 | 27 | 49.976 | KV453299.1 | 7758418 | 27-scf00525 | 27 |
| AX-158346253 | 27 | 49.976 | KV453299.1 | 7922976 | 27-scf00525 | 27 |
| AX-158346255 | 27 | 49.976 | KV453299.1 | 7924454 | 27-scf00525 | 27 |
| AX-158346319 | 27 | 49.976 | KV453299.1 | 7982425 | 27-scf00525 | 27 |
| AX-158347828 | 27 | 49.976 | KV453299.1 | 9405135 | 27-scf00525 | 27 |
| AX-158348072 | 27 | 49.976 | KV453299.1 | 9655324 | 27-scf00525 | 27 |
| AX-158348186 | 27 | 49.976 | KV453299.1 | 9820764 | 27-scf00525 | 27 |
| AX-158348234 | 27 | 49.976 | KV453299.1 | 9874053 | 27-scf00525 | 27 |
| AX-158348236 | 27 | 49.976 | KV453299.1 | 9877351 | 27-scf00525 | 27 |
| AX-158348241 | 27 | 49.976 | KV453299.1 | 9882810 | 27-scf00525 | 27 |
| AX-157850504 | 27 | 49.996 | KV453299.1 | 7147996 | 27-scf00525 | 27 |
| AX-158345690 | 27 | 50.005 | KV453299.1 | 7154715 | 27-scf00525 | 27 |
| AX-158345691 | 27 | 50.026 | KV453299.1 | 7155782 | 27-scf00525 | 27 |
| AX-158345469 | 27 | 50.036 | KV453299.1 | 6789514 | 27-scf00525 | 27 |
| AX-158345695 | 27 | 50.036 | KV453299.1 | 7159389 | 27-scf00525 | 27 |
| AX-158345787 | 27 | 50.036 | KV453299.1 | 7369229 | 27-scf00525 | 27 |
| AX-158346193 | 27 | 50.036 | KV453299.1 | 7871341 | 27-scf00525 | 27 |
| AX-157850633 | 27 | 50.036 | KV453299.1 | 9878849 | 27-scf00525 | 27 |
| AX-158345493 | 27 | 50.052 | KV453299.1 | 6824001 | 27-scf00525 | 27 |
| AX-158345494 | 27 | 50.052 | KV453299.1 | 6824819 | 27-scf00525 | 27 |
| AX-157861948 | 27 | 50.052 | KV453299.1 | 6831146 | 27-scf00525 | 27 |
| AX-158345504 | 27 | 50.052 | KV453299.1 | 6839934 | 27-scf00525 | 27 |
| AX-158345522 | 27 | 50.052 | KV453299.1 | 6865671 | 27-scf00525 | 27 |
| AX-158345524 | 27 | 50.052 | KV453299.1 | 6867597 | 27-scf00525 | 27 |
| AX-158345525 | 27 | 50.052 | KV453299.1 | 6868212 | 27-scf00525 | 27 |
| AX-157770848 | 27 | 50.052 | KV453299.1 | 6885288 | 27-scf00525 | 27 |
| AX-158345552 | 27 | 50.052 | KV453299.1 | 6902590 | 27-scf00525 | 27 |
| AX-158345559 | 27 | 50.052 | KV453299.1 | 6910064 | 27-scf00525 | 27 |
| AX-158345638 | 27 | 50.052 | KV453299.1 | 7051354 | 27-scf00525 | 27 |
| AX-158345640 | 27 | 50.052 | KV453299.1 | 7052698 | 27-scf00525 | 27 |
| AX-158345650 | 27 | 50.052 | KV453299.1 | 7067566 | 27-scf00525 | 27 |
| AX-158345656 | 27 | 50.052 | KV453299.1 | 7079728 | 27-scf00525 | 27 |
| AX-158345657 | 27 | 50.052 | KV453299.1 | 7080364 | 27-scf00525 | 27 |
| AX-158345661 | 27 | 50.052 | KV453299.1 | 7089411 | 27-scf00525 | 27 |
| AX-158345673 | 27 | 50.052 | KV453299.1 | 7118530 | 27-scf00525 | 27 |
| AX-158345684 | 27 | 50.052 | KV453299.1 | 7145345 | 27-scf00525 | 27 |
| AX-158345689 | 27 | 50.052 | KV453299.1 | 7153494 | 27-scf00525 | 27 |
| AX-158345694 | 27 | 50.052 | KV453299.1 | 7159011 | 27-scf00525 | 27 |
| AX-157850505 | 27 | 50.052 | KV453299.1 | 7169032 | 27-scf00525 | 27 |
| AX-158345705 | 27 | 50.052 | KV453299.1 | 7180317 | 27-scf00525 | 27 |
| AX-158345718 | 27 | 50.052 | KV453299.1 | 7202385 | 27-scf00525 | 27 |
| AX-158345723 | 27 | 50.052 | KV453299.1 | 7212467 | 27-scf00525 | 27 |
| AX-158345726 | 27 | 50.052 | KV453299.1 | 7214683 | 27-scf00525 | 27 |
| AX-158345727 | 27 | 50.052 | KV453299.1 | 7216855 | 27-scf00525 | 27 |
| AX-158345732 | 27 | 50.052 | KV453299.1 | 7225097 | 27-scf00525 | 27 |
| AX-158345742 | 27 | 50.052 | KV453299.1 | 7249027 | 27-scf00525 | 27 |
| AX-158345743 | 27 | 50.052 | KV453299.1 | 7249576 | 27-scf00525 | 27 |

|              |    |        |            |         |             |    |
|--------------|----|--------|------------|---------|-------------|----|
| AX-158345744 | 27 | 50.052 | KV453299.1 | 7251352 | 27-scf00525 | 27 |
| AX-157850506 | 27 | 50.052 | KV453299.1 | 7254654 | 27-scf00525 | 27 |
| AX-157757350 | 27 | 50.052 | KV453299.1 | 7256904 | 27-scf00525 | 27 |
| AX-158345746 | 27 | 50.052 | KV453299.1 | 7258700 | 27-scf00525 | 27 |
| AX-158345749 | 27 | 50.052 | KV453299.1 | 7268686 | 27-scf00525 | 27 |
| AX-158345750 | 27 | 50.052 | KV453299.1 | 7269165 | 27-scf00525 | 27 |
| AX-158345751 | 27 | 50.052 | KV453299.1 | 7269884 | 27-scf00525 | 27 |
| AX-158345753 | 27 | 50.052 | KV453299.1 | 7272856 | 27-scf00525 | 27 |
| AX-158381643 | 27 | 50.052 | KV453299.1 | 7273544 | 27-scf00525 | 27 |
| AX-158345755 | 27 | 50.052 | KV453299.1 | 7281481 | 27-scf00525 | 27 |
| AX-158345756 | 27 | 50.052 | KV453299.1 | 7283177 | 27-scf00525 | 27 |
| AX-158345760 | 27 | 50.052 | KV453299.1 | 7288918 | 27-scf00525 | 27 |
| AX-158345764 | 27 | 50.052 | KV453299.1 | 7311447 | 27-scf00525 | 27 |
| AX-158345766 | 27 | 50.052 | KV453299.1 | 7313876 | 27-scf00525 | 27 |
| AX-158345770 | 27 | 50.052 | KV453299.1 | 7327156 | 27-scf00525 | 27 |
| AX-158345771 | 27 | 50.052 | KV453299.1 | 7327752 | 27-scf00525 | 27 |
| AX-158345778 | 27 | 50.052 | KV453299.1 | 7344977 | 27-scf00525 | 27 |
| AX-158345779 | 27 | 50.052 | KV453299.1 | 7346107 | 27-scf00525 | 27 |
| AX-158345780 | 27 | 50.052 | KV453299.1 | 7346995 | 27-scf00525 | 27 |
| AX-158345781 | 27 | 50.052 | KV453299.1 | 7347358 | 27-scf00525 | 27 |
| AX-158345782 | 27 | 50.052 | KV453299.1 | 7348131 | 27-scf00525 | 27 |
| AX-158345793 | 27 | 50.052 | KV453299.1 | 7393508 | 27-scf00525 | 27 |
| AX-158345794 | 27 | 50.052 | KV453299.1 | 7394068 | 27-scf00525 | 27 |
| AX-158345801 | 27 | 50.052 | KV453299.1 | 7410313 | 27-scf00525 | 27 |
| AX-158345807 | 27 | 50.052 | KV453299.1 | 7418001 | 27-scf00525 | 27 |
| AX-158345808 | 27 | 50.052 | KV453299.1 | 7418994 | 27-scf00525 | 27 |
| AX-158345815 | 27 | 50.052 | KV453299.1 | 7429287 | 27-scf00525 | 27 |
| AX-158345817 | 27 | 50.052 | KV453299.1 | 7430625 | 27-scf00525 | 27 |
| AX-157882259 | 27 | 50.052 | KV453299.1 | 7439741 | 27-scf00525 | 27 |
| AX-158345830 | 27 | 50.052 | KV453299.1 | 7447909 | 27-scf00525 | 27 |
| AX-158345833 | 27 | 50.052 | KV453299.1 | 7451276 | 27-scf00525 | 27 |
| AX-158345834 | 27 | 50.052 | KV453299.1 | 7454804 | 27-scf00525 | 27 |
| AX-158345836 | 27 | 50.052 | KV453299.1 | 7456261 | 27-scf00525 | 27 |
| AX-158345838 | 27 | 50.052 | KV453299.1 | 7457226 | 27-scf00525 | 27 |
| AX-157751818 | 27 | 50.052 | KV453299.1 | 7458155 | 27-scf00525 | 27 |
| AX-158345875 | 27 | 50.052 | KV453299.1 | 7504353 | 27-scf00525 | 27 |
| AX-158345877 | 27 | 50.052 | KV453299.1 | 7505355 | 27-scf00525 | 27 |
| AX-158345889 | 27 | 50.052 | KV453299.1 | 7517681 | 27-scf00525 | 27 |
| AX-157850510 | 27 | 50.052 | KV453299.1 | 7517813 | 27-scf00525 | 27 |
| AX-158345890 | 27 | 50.052 | KV453299.1 | 7518649 | 27-scf00525 | 27 |
| AX-157712160 | 27 | 50.052 | KV453299.1 | 7533435 | 27-scf00525 | 27 |
| AX-158345910 | 27 | 50.052 | KV453299.1 | 7565910 | 27-scf00525 | 27 |
| AX-157850516 | 27 | 50.052 | KV453299.1 | 7590199 | 27-scf00525 | 27 |
| AX-158345921 | 27 | 50.052 | KV453299.1 | 7598170 | 27-scf00525 | 27 |
| AX-158345935 | 27 | 50.052 | KV453299.1 | 7623668 | 27-scf00525 | 27 |
| AX-158345958 | 27 | 50.052 | KV453299.1 | 7645617 | 27-scf00525 | 27 |
| AX-158345964 | 27 | 50.052 | KV453299.1 | 7652167 | 27-scf00525 | 27 |
| AX-158345978 | 27 | 50.052 | KV453299.1 | 7663976 | 27-scf00525 | 27 |
| AX-158345982 | 27 | 50.052 | KV453299.1 | 7671476 | 27-scf00525 | 27 |
| AX-158346012 | 27 | 50.052 | KV453299.1 | 7697634 | 27-scf00525 | 27 |
| AX-158346015 | 27 | 50.052 | KV453299.1 | 7700642 | 27-scf00525 | 27 |



|              |    |        |            |         |             |    |
|--------------|----|--------|------------|---------|-------------|----|
| AX-158346018 | 27 | 50.052 | KV453299.1 | 7703340 | 27-scf00525 | 27 |
| AX-158346020 | 27 | 50.052 | KV453299.1 | 7706208 | 27-scf00525 | 27 |
| AX-158346021 | 27 | 50.052 | KV453299.1 | 7707112 | 27-scf00525 | 27 |
| AX-158346027 | 27 | 50.052 | KV453299.1 | 7713635 | 27-scf00525 | 27 |
| AX-158346030 | 27 | 50.052 | KV453299.1 | 7715180 | 27-scf00525 | 27 |
| AX-158346031 | 27 | 50.052 | KV453299.1 | 7715486 | 27-scf00525 | 27 |
| AX-158346032 | 27 | 50.052 | KV453299.1 | 7717185 | 27-scf00525 | 27 |
| AX-157850519 | 27 | 50.052 | KV453299.1 | 7718183 | 27-scf00525 | 27 |
| AX-158346033 | 27 | 50.052 | KV453299.1 | 7719112 | 27-scf00525 | 27 |
| AX-158346035 | 27 | 50.052 | KV453299.1 | 7720011 | 27-scf00525 | 27 |
| AX-158346036 | 27 | 50.052 | KV453299.1 | 7720192 | 27-scf00525 | 27 |
| AX-158346039 | 27 | 50.052 | KV453299.1 | 7724175 | 27-scf00525 | 27 |
| AX-158346041 | 27 | 50.052 | KV453299.1 | 7726174 | 27-scf00525 | 27 |
| AX-158346042 | 27 | 50.052 | KV453299.1 | 7727215 | 27-scf00525 | 27 |
| AX-158346045 | 27 | 50.052 | KV453299.1 | 7730609 | 27-scf00525 | 27 |
| AX-158346046 | 27 | 50.052 | KV453299.1 | 7731215 | 27-scf00525 | 27 |
| AX-158346047 | 27 | 50.052 | KV453299.1 | 7732485 | 27-scf00525 | 27 |
| AX-158346050 | 27 | 50.052 | KV453299.1 | 7736881 | 27-scf00525 | 27 |
| AX-158346051 | 27 | 50.052 | KV453299.1 | 7737804 | 27-scf00525 | 27 |
| AX-158346052 | 27 | 50.052 | KV453299.1 | 7738278 | 27-scf00525 | 27 |
| AX-158346053 | 27 | 50.052 | KV453299.1 | 7738678 | 27-scf00525 | 27 |
| AX-158346057 | 27 | 50.052 | KV453299.1 | 7744270 | 27-scf00525 | 27 |
| AX-158346060 | 27 | 50.052 | KV453299.1 | 7746662 | 27-scf00525 | 27 |
| AX-158346061 | 27 | 50.052 | KV453299.1 | 7747056 | 27-scf00525 | 27 |
| AX-158346062 | 27 | 50.052 | KV453299.1 | 7747847 | 27-scf00525 | 27 |
| AX-158346063 | 27 | 50.052 | KV453299.1 | 7748626 | 27-scf00525 | 27 |
| AX-158346064 | 27 | 50.052 | KV453299.1 | 7749253 | 27-scf00525 | 27 |
| AX-158346065 | 27 | 50.052 | KV453299.1 | 7750933 | 27-scf00525 | 27 |
| AX-158346066 | 27 | 50.052 | KV453299.1 | 7751534 | 27-scf00525 | 27 |
| AX-158346067 | 27 | 50.052 | KV453299.1 | 7752232 | 27-scf00525 | 27 |
| AX-158346068 | 27 | 50.052 | KV453299.1 | 7752760 | 27-scf00525 | 27 |
| AX-157720846 | 27 | 50.052 | KV453299.1 | 7754569 | 27-scf00525 | 27 |
| AX-157709503 | 27 | 50.052 | KV453299.1 | 7755443 | 27-scf00525 | 27 |
| AX-157709502 | 27 | 50.052 | KV453299.1 | 7755510 | 27-scf00525 | 27 |
| AX-158346071 | 27 | 50.052 | KV453299.1 | 7756063 | 27-scf00525 | 27 |
| AX-157850520 | 27 | 50.052 | KV453299.1 | 7756377 | 27-scf00525 | 27 |
| AX-158346073 | 27 | 50.052 | KV453299.1 | 7758060 | 27-scf00525 | 27 |
| AX-158346074 | 27 | 50.052 | KV453299.1 | 7758813 | 27-scf00525 | 27 |
| AX-158346075 | 27 | 50.052 | KV453299.1 | 7759392 | 27-scf00525 | 27 |
| AX-158346076 | 27 | 50.052 | KV453299.1 | 7760088 | 27-scf00525 | 27 |
| AX-158346077 | 27 | 50.052 | KV453299.1 | 7761247 | 27-scf00525 | 27 |
| AX-158346078 | 27 | 50.052 | KV453299.1 | 7762269 | 27-scf00525 | 27 |
| AX-158346080 | 27 | 50.052 | KV453299.1 | 7764339 | 27-scf00525 | 27 |
| AX-158346082 | 27 | 50.052 | KV453299.1 | 7767076 | 27-scf00525 | 27 |
| AX-158346083 | 27 | 50.052 | KV453299.1 | 7767727 | 27-scf00525 | 27 |
| AX-158346085 | 27 | 50.052 | KV453299.1 | 7768635 | 27-scf00525 | 27 |
| AX-158346087 | 27 | 50.052 | KV453299.1 | 7770990 | 27-scf00525 | 27 |
| AX-158346091 | 27 | 50.052 | KV453299.1 | 7777127 | 27-scf00525 | 27 |
| AX-158346093 | 27 | 50.052 | KV453299.1 | 7780045 | 27-scf00525 | 27 |
| AX-158346095 | 27 | 50.052 | KV453299.1 | 7782047 | 27-scf00525 | 27 |
| AX-158346096 | 27 | 50.052 | KV453299.1 | 7782564 | 27-scf00525 | 27 |

|              |    |        |            |         |             |    |
|--------------|----|--------|------------|---------|-------------|----|
| AX-158346101 | 27 | 50.052 | KV453299.1 | 7786156 | 27-scf00525 | 27 |
| AX-158346102 | 27 | 50.052 | KV453299.1 | 7786553 | 27-scf00525 | 27 |
| AX-158346103 | 27 | 50.052 | KV453299.1 | 7786967 | 27-scf00525 | 27 |
| AX-158346104 | 27 | 50.052 | KV453299.1 | 7788632 | 27-scf00525 | 27 |
| AX-158346107 | 27 | 50.052 | KV453299.1 | 7790801 | 27-scf00525 | 27 |
| AX-157861960 | 27 | 50.052 | KV453299.1 | 7791749 | 27-scf00525 | 27 |
| AX-158346109 | 27 | 50.052 | KV453299.1 | 7792974 | 27-scf00525 | 27 |
| AX-158346112 | 27 | 50.052 | KV453299.1 | 7794781 | 27-scf00525 | 27 |
| AX-158346114 | 27 | 50.052 | KV453299.1 | 7795646 | 27-scf00525 | 27 |
| AX-158346115 | 27 | 50.052 | KV453299.1 | 7796225 | 27-scf00525 | 27 |
| AX-158346116 | 27 | 50.052 | KV453299.1 | 7796517 | 27-scf00525 | 27 |
| AX-158346117 | 27 | 50.052 | KV453299.1 | 7798394 | 27-scf00525 | 27 |
| AX-158346120 | 27 | 50.052 | KV453299.1 | 7801115 | 27-scf00525 | 27 |
| AX-158346121 | 27 | 50.052 | KV453299.1 | 7801919 | 27-scf00525 | 27 |
| AX-158346122 | 27 | 50.052 | KV453299.1 | 7802079 | 27-scf00525 | 27 |
| AX-157723001 | 27 | 50.052 | KV453299.1 | 7802577 | 27-scf00525 | 27 |
| AX-158346123 | 27 | 50.052 | KV453299.1 | 7803877 | 27-scf00525 | 27 |
| AX-158346124 | 27 | 50.052 | KV453299.1 | 7804616 | 27-scf00525 | 27 |
| AX-157721466 | 27 | 50.052 | KV453299.1 | 7806181 | 27-scf00525 | 27 |
| AX-158346127 | 27 | 50.052 | KV453299.1 | 7807163 | 27-scf00525 | 27 |
| AX-158346128 | 27 | 50.052 | KV453299.1 | 7808669 | 27-scf00525 | 27 |
| AX-158346129 | 27 | 50.052 | KV453299.1 | 7808818 | 27-scf00525 | 27 |
| AX-158346132 | 27 | 50.052 | KV453299.1 | 7811234 | 27-scf00525 | 27 |
| AX-158346133 | 27 | 50.052 | KV453299.1 | 7812063 | 27-scf00525 | 27 |
| AX-158346135 | 27 | 50.052 | KV453299.1 | 7813269 | 27-scf00525 | 27 |
| AX-158381645 | 27 | 50.052 | KV453299.1 | 7813698 | 27-scf00525 | 27 |
| AX-158346136 | 27 | 50.052 | KV453299.1 | 7813736 | 27-scf00525 | 27 |
| AX-158346137 | 27 | 50.052 | KV453299.1 | 7814279 | 27-scf00525 | 27 |
| AX-158346138 | 27 | 50.052 | KV453299.1 | 7814678 | 27-scf00525 | 27 |
| AX-158346139 | 27 | 50.052 | KV453299.1 | 7815247 | 27-scf00525 | 27 |
| AX-158346140 | 27 | 50.052 | KV453299.1 | 7816388 | 27-scf00525 | 27 |
| AX-158346141 | 27 | 50.052 | KV453299.1 | 7816964 | 27-scf00525 | 27 |
| AX-158346143 | 27 | 50.052 | KV453299.1 | 7818006 | 27-scf00525 | 27 |
| AX-158346144 | 27 | 50.052 | KV453299.1 | 7818774 | 27-scf00525 | 27 |
| AX-158346145 | 27 | 50.052 | KV453299.1 | 7820974 | 27-scf00525 | 27 |
| AX-158346146 | 27 | 50.052 | KV453299.1 | 7821608 | 27-scf00525 | 27 |
| AX-158346148 | 27 | 50.052 | KV453299.1 | 7823728 | 27-scf00525 | 27 |
| AX-157749586 | 27 | 50.052 | KV453299.1 | 7826723 | 27-scf00525 | 27 |
| AX-158346150 | 27 | 50.052 | KV453299.1 | 7827503 | 27-scf00525 | 27 |
| AX-158346151 | 27 | 50.052 | KV453299.1 | 7829102 | 27-scf00525 | 27 |
| AX-158346152 | 27 | 50.052 | KV453299.1 | 7829413 | 27-scf00525 | 27 |
| AX-158346154 | 27 | 50.052 | KV453299.1 | 7831787 | 27-scf00525 | 27 |
| AX-157709440 | 27 | 50.052 | KV453299.1 | 7832303 | 27-scf00525 | 27 |
| AX-158346156 | 27 | 50.052 | KV453299.1 | 7833411 | 27-scf00525 | 27 |
| AX-158346157 | 27 | 50.052 | KV453299.1 | 7834471 | 27-scf00525 | 27 |
| AX-157719342 | 27 | 50.052 | KV453299.1 | 7835604 | 27-scf00525 | 27 |
| AX-158346159 | 27 | 50.052 | KV453299.1 | 7837703 | 27-scf00525 | 27 |
| AX-157708763 | 27 | 50.052 | KV453299.1 | 7838371 | 27-scf00525 | 27 |
| AX-158346160 | 27 | 50.052 | KV453299.1 | 7839877 | 27-scf00525 | 27 |
| AX-158346165 | 27 | 50.052 | KV453299.1 | 7843999 | 27-scf00525 | 27 |
| AX-158346166 | 27 | 50.052 | KV453299.1 | 7844444 | 27-scf00525 | 27 |

|              |    |        |            |         |             |    |
|--------------|----|--------|------------|---------|-------------|----|
| AX-158346167 | 27 | 50.052 | KV453299.1 | 7844931 | 27-scf00525 | 27 |
| AX-158346168 | 27 | 50.052 | KV453299.1 | 7846269 | 27-scf00525 | 27 |
| AX-158346170 | 27 | 50.052 | KV453299.1 | 7846885 | 27-scf00525 | 27 |
| AX-157850522 | 27 | 50.052 | KV453299.1 | 7848715 | 27-scf00525 | 27 |
| AX-158346171 | 27 | 50.052 | KV453299.1 | 7848873 | 27-scf00525 | 27 |
| AX-158346172 | 27 | 50.052 | KV453299.1 | 7849213 | 27-scf00525 | 27 |
| AX-158346174 | 27 | 50.052 | KV453299.1 | 7850562 | 27-scf00525 | 27 |
| AX-158346175 | 27 | 50.052 | KV453299.1 | 7851824 | 27-scf00525 | 27 |
| AX-157850523 | 27 | 50.052 | KV453299.1 | 7852346 | 27-scf00525 | 27 |
| AX-157850524 | 27 | 50.052 | KV453299.1 | 7852548 | 27-scf00525 | 27 |
| AX-157868136 | 27 | 50.052 | KV453299.1 | 7853627 | 27-scf00525 | 27 |
| AX-158346178 | 27 | 50.052 | KV453299.1 | 7855624 | 27-scf00525 | 27 |
| AX-158346179 | 27 | 50.052 | KV453299.1 | 7858172 | 27-scf00525 | 27 |
| AX-158346180 | 27 | 50.052 | KV453299.1 | 7858389 | 27-scf00525 | 27 |
| AX-158346181 | 27 | 50.052 | KV453299.1 | 7858742 | 27-scf00525 | 27 |
| AX-158346184 | 27 | 50.052 | KV453299.1 | 7860483 | 27-scf00525 | 27 |
| AX-158346185 | 27 | 50.052 | KV453299.1 | 7861244 | 27-scf00525 | 27 |
| AX-158346186 | 27 | 50.052 | KV453299.1 | 7862760 | 27-scf00525 | 27 |
| AX-158346187 | 27 | 50.052 | KV453299.1 | 7865229 | 27-scf00525 | 27 |
| AX-157721150 | 27 | 50.052 | KV453299.1 | 7865880 | 27-scf00525 | 27 |
| AX-158346189 | 27 | 50.052 | KV453299.1 | 7867150 | 27-scf00525 | 27 |
| AX-158346190 | 27 | 50.052 | KV453299.1 | 7868969 | 27-scf00525 | 27 |
| AX-158346191 | 27 | 50.052 | KV453299.1 | 7870210 | 27-scf00525 | 27 |
| AX-158346192 | 27 | 50.052 | KV453299.1 | 7870875 | 27-scf00525 | 27 |
| AX-158346194 | 27 | 50.052 | KV453299.1 | 7871770 | 27-scf00525 | 27 |
| AX-158346195 | 27 | 50.052 | KV453299.1 | 7873454 | 27-scf00525 | 27 |
| AX-158346197 | 27 | 50.052 | KV453299.1 | 7875364 | 27-scf00525 | 27 |
| AX-158346198 | 27 | 50.052 | KV453299.1 | 7876111 | 27-scf00525 | 27 |
| AX-158346201 | 27 | 50.052 | KV453299.1 | 7881734 | 27-scf00525 | 27 |
| AX-157774859 | 27 | 50.052 | KV453299.1 | 7882389 | 27-scf00525 | 27 |
| AX-158346203 | 27 | 50.052 | KV453299.1 | 7883372 | 27-scf00525 | 27 |
| AX-158346206 | 27 | 50.052 | KV453299.1 | 7886844 | 27-scf00525 | 27 |
| AX-158346208 | 27 | 50.052 | KV453299.1 | 7890909 | 27-scf00525 | 27 |
| AX-158346209 | 27 | 50.052 | KV453299.1 | 7891320 | 27-scf00525 | 27 |
| AX-158346210 | 27 | 50.052 | KV453299.1 | 7891785 | 27-scf00525 | 27 |
| AX-158346211 | 27 | 50.052 | KV453299.1 | 7892176 | 27-scf00525 | 27 |
| AX-158346212 | 27 | 50.052 | KV453299.1 | 7892818 | 27-scf00525 | 27 |
| AX-158346213 | 27 | 50.052 | KV453299.1 | 7893895 | 27-scf00525 | 27 |
| AX-158346216 | 27 | 50.052 | KV453299.1 | 7896222 | 27-scf00525 | 27 |
| AX-158346217 | 27 | 50.052 | KV453299.1 | 7896586 | 27-scf00525 | 27 |
| AX-158346219 | 27 | 50.052 | KV453299.1 | 7897379 | 27-scf00525 | 27 |
| AX-158346221 | 27 | 50.052 | KV453299.1 | 7898274 | 27-scf00525 | 27 |
| AX-158419265 | 27 | 50.052 | KV453299.1 | 7898564 | 27-scf00525 | 27 |
| AX-158346223 | 27 | 50.052 | KV453299.1 | 7899972 | 27-scf00525 | 27 |
| AX-158346225 | 27 | 50.052 | KV453299.1 | 7900823 | 27-scf00525 | 27 |
| AX-158346228 | 27 | 50.052 | KV453299.1 | 7902821 | 27-scf00525 | 27 |
| AX-158346229 | 27 | 50.052 | KV453299.1 | 7903160 | 27-scf00525 | 27 |
| AX-158346231 | 27 | 50.052 | KV453299.1 | 7903757 | 27-scf00525 | 27 |
| AX-158346232 | 27 | 50.052 | KV453299.1 | 7904130 | 27-scf00525 | 27 |
| AX-158346233 | 27 | 50.052 | KV453299.1 | 7904654 | 27-scf00525 | 27 |
| AX-157868137 | 27 | 50.052 | KV453299.1 | 7904800 | 27-scf00525 | 27 |

|              |    |        |            |         |             |    |
|--------------|----|--------|------------|---------|-------------|----|
| AX-157745702 | 27 | 50.052 | KV453299.1 | 7906575 | 27-scf00525 | 27 |
| AX-158346235 | 27 | 50.052 | KV453299.1 | 7907246 | 27-scf00525 | 27 |
| AX-158346236 | 27 | 50.052 | KV453299.1 | 7907773 | 27-scf00525 | 27 |
| AX-158346239 | 27 | 50.052 | KV453299.1 | 7909628 | 27-scf00525 | 27 |
| AX-158419267 | 27 | 50.052 | KV453299.1 | 7909997 | 27-scf00525 | 27 |
| AX-158346241 | 27 | 50.052 | KV453299.1 | 7911891 | 27-scf00525 | 27 |
| AX-158346242 | 27 | 50.052 | KV453299.1 | 7912475 | 27-scf00525 | 27 |
| AX-158346243 | 27 | 50.052 | KV453299.1 | 7913199 | 27-scf00525 | 27 |
| AX-158346244 | 27 | 50.052 | KV453299.1 | 7913441 | 27-scf00525 | 27 |
| AX-158346245 | 27 | 50.052 | KV453299.1 | 7913916 | 27-scf00525 | 27 |
| AX-158346248 | 27 | 50.052 | KV453299.1 | 7915292 | 27-scf00525 | 27 |
| AX-158346249 | 27 | 50.052 | KV453299.1 | 7917119 | 27-scf00525 | 27 |
| AX-158419269 | 27 | 50.052 | KV453299.1 | 7922406 | 27-scf00525 | 27 |
| AX-158346254 | 27 | 50.052 | KV453299.1 | 7923532 | 27-scf00525 | 27 |
| AX-158346256 | 27 | 50.052 | KV453299.1 | 7925152 | 27-scf00525 | 27 |
| AX-158346257 | 27 | 50.052 | KV453299.1 | 7925518 | 27-scf00525 | 27 |
| AX-158346258 | 27 | 50.052 | KV453299.1 | 7926191 | 27-scf00525 | 27 |
| AX-158346259 | 27 | 50.052 | KV453299.1 | 7927746 | 27-scf00525 | 27 |
| AX-158346260 | 27 | 50.052 | KV453299.1 | 7929628 | 27-scf00525 | 27 |
| AX-158346264 | 27 | 50.052 | KV453299.1 | 7931973 | 27-scf00525 | 27 |
| AX-158346265 | 27 | 50.052 | KV453299.1 | 7932375 | 27-scf00525 | 27 |
| AX-158346268 | 27 | 50.052 | KV453299.1 | 7934135 | 27-scf00525 | 27 |
| AX-158346270 | 27 | 50.052 | KV453299.1 | 7940402 | 27-scf00525 | 27 |
| AX-158346271 | 27 | 50.052 | KV453299.1 | 7941078 | 27-scf00525 | 27 |
| AX-158346272 | 27 | 50.052 | KV453299.1 | 7941519 | 27-scf00525 | 27 |
| AX-157850532 | 27 | 50.052 | KV453299.1 | 7943438 | 27-scf00525 | 27 |
| AX-158346275 | 27 | 50.052 | KV453299.1 | 7944502 | 27-scf00525 | 27 |
| AX-158346276 | 27 | 50.052 | KV453299.1 | 7945022 | 27-scf00525 | 27 |
| AX-158346279 | 27 | 50.052 | KV453299.1 | 7947824 | 27-scf00525 | 27 |
| AX-158346280 | 27 | 50.052 | KV453299.1 | 7948786 | 27-scf00525 | 27 |
| AX-158346282 | 27 | 50.052 | KV453299.1 | 7950043 | 27-scf00525 | 27 |
| AX-158346287 | 27 | 50.052 | KV453299.1 | 7956614 | 27-scf00525 | 27 |
| AX-158346288 | 27 | 50.052 | KV453299.1 | 7956983 | 27-scf00525 | 27 |
| AX-158346289 | 27 | 50.052 | KV453299.1 | 7957676 | 27-scf00525 | 27 |
| AX-158346293 | 27 | 50.052 | KV453299.1 | 7959777 | 27-scf00525 | 27 |
| AX-158346295 | 27 | 50.052 | KV453299.1 | 7962641 | 27-scf00525 | 27 |
| AX-158419272 | 27 | 50.052 | KV453299.1 | 7963313 | 27-scf00525 | 27 |
| AX-158346302 | 27 | 50.052 | KV453299.1 | 7970618 | 27-scf00525 | 27 |
| AX-158346307 | 27 | 50.052 | KV453299.1 | 7973738 | 27-scf00525 | 27 |
| AX-158346308 | 27 | 50.052 | KV453299.1 | 7974176 | 27-scf00525 | 27 |
| AX-158346312 | 27 | 50.052 | KV453299.1 | 7977777 | 27-scf00525 | 27 |
| AX-158346313 | 27 | 50.052 | KV453299.1 | 7978058 | 27-scf00525 | 27 |
| AX-158346315 | 27 | 50.052 | KV453299.1 | 7979078 | 27-scf00525 | 27 |
| AX-158346316 | 27 | 50.052 | KV453299.1 | 7979935 | 27-scf00525 | 27 |
| AX-158346321 | 27 | 50.052 | KV453299.1 | 7984391 | 27-scf00525 | 27 |
| AX-158346327 | 27 | 50.052 | KV453299.1 | 7989213 | 27-scf00525 | 27 |
| AX-158346328 | 27 | 50.052 | KV453299.1 | 7989668 | 27-scf00525 | 27 |
| AX-158346329 | 27 | 50.052 | KV453299.1 | 7990247 | 27-scf00525 | 27 |
| AX-158346331 | 27 | 50.052 | KV453299.1 | 7991915 | 27-scf00525 | 27 |
| AX-158346332 | 27 | 50.052 | KV453299.1 | 7992406 | 27-scf00525 | 27 |
| AX-157861963 | 27 | 50.052 | KV453299.1 | 7992450 | 27-scf00525 | 27 |

|              |    |        |            |         |             |    |
|--------------|----|--------|------------|---------|-------------|----|
| AX-158346341 | 27 | 50.052 | KV453299.1 | 7998305 | 27-scf00525 | 27 |
| AX-158346342 | 27 | 50.052 | KV453299.1 | 7999166 | 27-scf00525 | 27 |
| AX-158346343 | 27 | 50.052 | KV453299.1 | 8000129 | 27-scf00525 | 27 |
| AX-158346346 | 27 | 50.052 | KV453299.1 | 8001909 | 27-scf00525 | 27 |
| AX-158346347 | 27 | 50.052 | KV453299.1 | 8002691 | 27-scf00525 | 27 |
| AX-158346348 | 27 | 50.052 | KV453299.1 | 8003499 | 27-scf00525 | 27 |
| AX-158346350 | 27 | 50.052 | KV453299.1 | 8004565 | 27-scf00525 | 27 |
| AX-158346351 | 27 | 50.052 | KV453299.1 | 8005990 | 27-scf00525 | 27 |
| AX-158346352 | 27 | 50.052 | KV453299.1 | 8006384 | 27-scf00525 | 27 |
| AX-158346353 | 27 | 50.052 | KV453299.1 | 8007234 | 27-scf00525 | 27 |
| AX-158346354 | 27 | 50.052 | KV453299.1 | 8008434 | 27-scf00525 | 27 |
| AX-158346356 | 27 | 50.052 | KV453299.1 | 8010273 | 27-scf00525 | 27 |
| AX-158346359 | 27 | 50.052 | KV453299.1 | 8013050 | 27-scf00525 | 27 |
| AX-158346363 | 27 | 50.052 | KV453299.1 | 8015911 | 27-scf00525 | 27 |
| AX-158346367 | 27 | 50.052 | KV453299.1 | 8018746 | 27-scf00525 | 27 |
| AX-158346369 | 27 | 50.052 | KV453299.1 | 8020295 | 27-scf00525 | 27 |
| AX-158346371 | 27 | 50.052 | KV453299.1 | 8021549 | 27-scf00525 | 27 |
| AX-158346375 | 27 | 50.052 | KV453299.1 | 8025823 | 27-scf00525 | 27 |
| AX-158346378 | 27 | 50.052 | KV453299.1 | 8029372 | 27-scf00525 | 27 |
| AX-158346379 | 27 | 50.052 | KV453299.1 | 8030516 | 27-scf00525 | 27 |
| AX-158346380 | 27 | 50.052 | KV453299.1 | 8031905 | 27-scf00525 | 27 |
| AX-158346381 | 27 | 50.052 | KV453299.1 | 8032392 | 27-scf00525 | 27 |
| AX-158346382 | 27 | 50.052 | KV453299.1 | 8032891 | 27-scf00525 | 27 |
| AX-157850533 | 27 | 50.052 | KV453299.1 | 8033655 | 27-scf00525 | 27 |
| AX-158346383 | 27 | 50.052 | KV453299.1 | 8034379 | 27-scf00525 | 27 |
| AX-158346384 | 27 | 50.052 | KV453299.1 | 8036293 | 27-scf00525 | 27 |
| AX-158346385 | 27 | 50.052 | KV453299.1 | 8036787 | 27-scf00525 | 27 |
| AX-158346386 | 27 | 50.052 | KV453299.1 | 8037184 | 27-scf00525 | 27 |
| AX-158346387 | 27 | 50.052 | KV453299.1 | 8037659 | 27-scf00525 | 27 |
| AX-158346389 | 27 | 50.052 | KV453299.1 | 8038571 | 27-scf00525 | 27 |
| AX-158346390 | 27 | 50.052 | KV453299.1 | 8038963 | 27-scf00525 | 27 |
| AX-158346393 | 27 | 50.052 | KV453299.1 | 8042502 | 27-scf00525 | 27 |
| AX-158346394 | 27 | 50.052 | KV453299.1 | 8043193 | 27-scf00525 | 27 |
| AX-158346395 | 27 | 50.052 | KV453299.1 | 8043533 | 27-scf00525 | 27 |
| AX-158346396 | 27 | 50.052 | KV453299.1 | 8044397 | 27-scf00525 | 27 |
| AX-158346397 | 27 | 50.052 | KV453299.1 | 8045183 | 27-scf00525 | 27 |
| AX-158346398 | 27 | 50.052 | KV453299.1 | 8045960 | 27-scf00525 | 27 |
| AX-158346399 | 27 | 50.052 | KV453299.1 | 8046528 | 27-scf00525 | 27 |
| AX-158346401 | 27 | 50.052 | KV453299.1 | 8048957 | 27-scf00525 | 27 |
| AX-158346402 | 27 | 50.052 | KV453299.1 | 8049375 | 27-scf00525 | 27 |
| AX-158346403 | 27 | 50.052 | KV453299.1 | 8049768 | 27-scf00525 | 27 |
| AX-158346404 | 27 | 50.052 | KV453299.1 | 8052091 | 27-scf00525 | 27 |
| AX-158346405 | 27 | 50.052 | KV453299.1 | 8052577 | 27-scf00525 | 27 |
| AX-157850534 | 27 | 50.052 | KV453299.1 | 8052698 | 27-scf00525 | 27 |
| AX-158346407 | 27 | 50.052 | KV453299.1 | 8054555 | 27-scf00525 | 27 |
| AX-158346409 | 27 | 50.052 | KV453299.1 | 8055827 | 27-scf00525 | 27 |
| AX-158346411 | 27 | 50.052 | KV453299.1 | 8057114 | 27-scf00525 | 27 |
| AX-158346412 | 27 | 50.052 | KV453299.1 | 8057911 | 27-scf00525 | 27 |
| AX-158346413 | 27 | 50.052 | KV453299.1 | 8058278 | 27-scf00525 | 27 |
| AX-158346415 | 27 | 50.052 | KV453299.1 | 8061794 | 27-scf00525 | 27 |
| AX-158346416 | 27 | 50.052 | KV453299.1 | 8063664 | 27-scf00525 | 27 |

|              |    |        |            |         |             |    |
|--------------|----|--------|------------|---------|-------------|----|
| AX-158346417 | 27 | 50.052 | KV453299.1 | 8064587 | 27-scf00525 | 27 |
| AX-158346418 | 27 | 50.052 | KV453299.1 | 8065070 | 27-scf00525 | 27 |
| AX-158346420 | 27 | 50.052 | KV453299.1 | 8066003 | 27-scf00525 | 27 |
| AX-157868138 | 27 | 50.052 | KV453299.1 | 8067117 | 27-scf00525 | 27 |
| AX-157850535 | 27 | 50.052 | KV453299.1 | 8067302 | 27-scf00525 | 27 |
| AX-158346423 | 27 | 50.052 | KV453299.1 | 8068468 | 27-scf00525 | 27 |
| AX-158346424 | 27 | 50.052 | KV453299.1 | 8068738 | 27-scf00525 | 27 |
| AX-158346425 | 27 | 50.052 | KV453299.1 | 8069295 | 27-scf00525 | 27 |
| AX-158346426 | 27 | 50.052 | KV453299.1 | 8069933 | 27-scf00525 | 27 |
| AX-158346428 | 27 | 50.052 | KV453299.1 | 8071571 | 27-scf00525 | 27 |
| AX-158346429 | 27 | 50.052 | KV453299.1 | 8072401 | 27-scf00525 | 27 |
| AX-158346430 | 27 | 50.052 | KV453299.1 | 8073014 | 27-scf00525 | 27 |
| AX-158346431 | 27 | 50.052 | KV453299.1 | 8073485 | 27-scf00525 | 27 |
| AX-158346432 | 27 | 50.052 | KV453299.1 | 8073899 | 27-scf00525 | 27 |
| AX-158346433 | 27 | 50.052 | KV453299.1 | 8074445 | 27-scf00525 | 27 |
| AX-158346434 | 27 | 50.052 | KV453299.1 | 8074945 | 27-scf00525 | 27 |
| AX-158346436 | 27 | 50.052 | KV453299.1 | 8076526 | 27-scf00525 | 27 |
| AX-157740078 | 27 | 50.052 | KV453299.1 | 8076676 | 27-scf00525 | 27 |
| AX-158346438 | 27 | 50.052 | KV453299.1 | 8077852 | 27-scf00525 | 27 |
| AX-158346440 | 27 | 50.052 | KV453299.1 | 8079895 | 27-scf00525 | 27 |
| AX-158346441 | 27 | 50.052 | KV453299.1 | 8080641 | 27-scf00525 | 27 |
| AX-158346442 | 27 | 50.052 | KV453299.1 | 8081007 | 27-scf00525 | 27 |
| AX-158346443 | 27 | 50.052 | KV453299.1 | 8081189 | 27-scf00525 | 27 |
| AX-158346444 | 27 | 50.052 | KV453299.1 | 8082017 | 27-scf00525 | 27 |
| AX-157726481 | 27 | 50.052 | KV453299.1 | 8082198 | 27-scf00525 | 27 |
| AX-158346445 | 27 | 50.052 | KV453299.1 | 8082524 | 27-scf00525 | 27 |
| AX-158346447 | 27 | 50.052 | KV453299.1 | 8084248 | 27-scf00525 | 27 |
| AX-158346448 | 27 | 50.052 | KV453299.1 | 8085327 | 27-scf00525 | 27 |
| AX-158346449 | 27 | 50.052 | KV453299.1 | 8085652 | 27-scf00525 | 27 |
| AX-158346453 | 27 | 50.052 | KV453299.1 | 8088028 | 27-scf00525 | 27 |
| AX-158346455 | 27 | 50.052 | KV453299.1 | 8088891 | 27-scf00525 | 27 |
| AX-158346456 | 27 | 50.052 | KV453299.1 | 8089217 | 27-scf00525 | 27 |
| AX-157754114 | 27 | 50.052 | KV453299.1 | 8089760 | 27-scf00525 | 27 |
| AX-158346457 | 27 | 50.052 | KV453299.1 | 8089836 | 27-scf00525 | 27 |
| AX-158346460 | 27 | 50.052 | KV453299.1 | 8092163 | 27-scf00525 | 27 |
| AX-158346462 | 27 | 50.052 | KV453299.1 | 8093160 | 27-scf00525 | 27 |
| AX-158346463 | 27 | 50.052 | KV453299.1 | 8093614 | 27-scf00525 | 27 |
| AX-158346465 | 27 | 50.052 | KV453299.1 | 8095775 | 27-scf00525 | 27 |
| AX-158346466 | 27 | 50.052 | KV453299.1 | 8096424 | 27-scf00525 | 27 |
| AX-158346467 | 27 | 50.052 | KV453299.1 | 8096898 | 27-scf00525 | 27 |
| AX-158346468 | 27 | 50.052 | KV453299.1 | 8097336 | 27-scf00525 | 27 |
| AX-158346469 | 27 | 50.052 | KV453299.1 | 8098016 | 27-scf00525 | 27 |
| AX-158346470 | 27 | 50.052 | KV453299.1 | 8098568 | 27-scf00525 | 27 |
| AX-158346473 | 27 | 50.052 | KV453299.1 | 8102241 | 27-scf00525 | 27 |
| AX-158346474 | 27 | 50.052 | KV453299.1 | 8103658 | 27-scf00525 | 27 |
| AX-157703516 | 27 | 50.052 | KV453299.1 | 8104419 | 27-scf00525 | 27 |
| AX-158346477 | 27 | 50.052 | KV453299.1 | 8107840 | 27-scf00525 | 27 |
| AX-158346479 | 27 | 50.052 | KV453299.1 | 8108955 | 27-scf00525 | 27 |
| AX-158346483 | 27 | 50.052 | KV453299.1 | 8112284 | 27-scf00525 | 27 |
| AX-158346487 | 27 | 50.052 | KV453299.1 | 8114875 | 27-scf00525 | 27 |
| AX-158346488 | 27 | 50.052 | KV453299.1 | 8116472 | 27-scf00525 | 27 |

|              |    |        |            |         |             |    |
|--------------|----|--------|------------|---------|-------------|----|
| AX-158346489 | 27 | 50.052 | KV453299.1 | 8116887 | 27-scf00525 | 27 |
| AX-158346490 | 27 | 50.052 | KV453299.1 | 8118209 | 27-scf00525 | 27 |
| AX-158346492 | 27 | 50.052 | KV453299.1 | 8119526 | 27-scf00525 | 27 |
| AX-157739913 | 27 | 50.052 | KV453299.1 | 8120013 | 27-scf00525 | 27 |
| AX-158346493 | 27 | 50.052 | KV453299.1 | 8121063 | 27-scf00525 | 27 |
| AX-158346495 | 27 | 50.052 | KV453299.1 | 8122599 | 27-scf00525 | 27 |
| AX-158346497 | 27 | 50.052 | KV453299.1 | 8125504 | 27-scf00525 | 27 |
| AX-158346498 | 27 | 50.052 | KV453299.1 | 8125928 | 27-scf00525 | 27 |
| AX-158346500 | 27 | 50.052 | KV453299.1 | 8127019 | 27-scf00525 | 27 |
| AX-158346501 | 27 | 50.052 | KV453299.1 | 8127663 | 27-scf00525 | 27 |
| AX-158346504 | 27 | 50.052 | KV453299.1 | 8129258 | 27-scf00525 | 27 |
| AX-158346506 | 27 | 50.052 | KV453299.1 | 8131315 | 27-scf00525 | 27 |
| AX-158346507 | 27 | 50.052 | KV453299.1 | 8132660 | 27-scf00525 | 27 |
| AX-158346508 | 27 | 50.052 | KV453299.1 | 8133504 | 27-scf00525 | 27 |
| AX-158346509 | 27 | 50.052 | KV453299.1 | 8134150 | 27-scf00525 | 27 |
| AX-158346510 | 27 | 50.052 | KV453299.1 | 8134945 | 27-scf00525 | 27 |
| AX-158346514 | 27 | 50.052 | KV453299.1 | 8140043 | 27-scf00525 | 27 |
| AX-158346517 | 27 | 50.052 | KV453299.1 | 8141848 | 27-scf00525 | 27 |
| AX-158346519 | 27 | 50.052 | KV453299.1 | 8144011 | 27-scf00525 | 27 |
| AX-157704169 | 27 | 50.052 | KV453299.1 | 8146103 | 27-scf00525 | 27 |
| AX-158346520 | 27 | 50.052 | KV453299.1 | 8146495 | 27-scf00525 | 27 |
| AX-158346522 | 27 | 50.052 | KV453299.1 | 8149151 | 27-scf00525 | 27 |
| AX-158346524 | 27 | 50.052 | KV453299.1 | 8152096 | 27-scf00525 | 27 |
| AX-158346526 | 27 | 50.052 | KV453299.1 | 8152874 | 27-scf00525 | 27 |
| AX-158346527 | 27 | 50.052 | KV453299.1 | 8153579 | 27-scf00525 | 27 |
| AX-158346530 | 27 | 50.052 | KV453299.1 | 8155710 | 27-scf00525 | 27 |
| AX-158346531 | 27 | 50.052 | KV453299.1 | 8156228 | 27-scf00525 | 27 |
| AX-158346532 | 27 | 50.052 | KV453299.1 | 8157820 | 27-scf00525 | 27 |
| AX-158346533 | 27 | 50.052 | KV453299.1 | 8159079 | 27-scf00525 | 27 |
| AX-158346534 | 27 | 50.052 | KV453299.1 | 8159435 | 27-scf00525 | 27 |
| AX-158346535 | 27 | 50.052 | KV453299.1 | 8160230 | 27-scf00525 | 27 |
| AX-158346536 | 27 | 50.052 | KV453299.1 | 8161069 | 27-scf00525 | 27 |
| AX-158346537 | 27 | 50.052 | KV453299.1 | 8161730 | 27-scf00525 | 27 |
| AX-158346538 | 27 | 50.052 | KV453299.1 | 8162218 | 27-scf00525 | 27 |
| AX-158346539 | 27 | 50.052 | KV453299.1 | 8165853 | 27-scf00525 | 27 |
| AX-158346545 | 27 | 50.052 | KV453299.1 | 8172559 | 27-scf00525 | 27 |
| AX-158346546 | 27 | 50.052 | KV453299.1 | 8173231 | 27-scf00525 | 27 |
| AX-158346547 | 27 | 50.052 | KV453299.1 | 8178364 | 27-scf00525 | 27 |
| AX-157753270 | 27 | 50.052 | KV453299.1 | 8180774 | 27-scf00525 | 27 |
| AX-158346554 | 27 | 50.052 | KV453299.1 | 8184241 | 27-scf00525 | 27 |
| AX-158346555 | 27 | 50.052 | KV453299.1 | 8184578 | 27-scf00525 | 27 |
| AX-158346556 | 27 | 50.052 | KV453299.1 | 8185186 | 27-scf00525 | 27 |
| AX-158346557 | 27 | 50.052 | KV453299.1 | 8186040 | 27-scf00525 | 27 |
| AX-158346559 | 27 | 50.052 | KV453299.1 | 8187224 | 27-scf00525 | 27 |
| AX-158346560 | 27 | 50.052 | KV453299.1 | 8188821 | 27-scf00525 | 27 |
| AX-158346562 | 27 | 50.052 | KV453299.1 | 8190618 | 27-scf00525 | 27 |
| AX-158346565 | 27 | 50.052 | KV453299.1 | 8194890 | 27-scf00525 | 27 |
| AX-158346570 | 27 | 50.052 | KV453299.1 | 8198503 | 27-scf00525 | 27 |
| AX-158346571 | 27 | 50.052 | KV453299.1 | 8199184 | 27-scf00525 | 27 |
| AX-158346572 | 27 | 50.052 | KV453299.1 | 8199734 | 27-scf00525 | 27 |
| AX-158346574 | 27 | 50.052 | KV453299.1 | 8201654 | 27-scf00525 | 27 |

|              |    |        |            |         |             |    |
|--------------|----|--------|------------|---------|-------------|----|
| AX-158346578 | 27 | 50.052 | KV453299.1 | 8206090 | 27-scf00525 | 27 |
| AX-158346579 | 27 | 50.052 | KV453299.1 | 8207149 | 27-scf00525 | 27 |
| AX-158346583 | 27 | 50.052 | KV453299.1 | 8210386 | 27-scf00525 | 27 |
| AX-158346585 | 27 | 50.052 | KV453299.1 | 8212292 | 27-scf00525 | 27 |
| AX-158346586 | 27 | 50.052 | KV453299.1 | 8212828 | 27-scf00525 | 27 |
| AX-158346589 | 27 | 50.052 | KV453299.1 | 8214940 | 27-scf00525 | 27 |
| AX-158346590 | 27 | 50.052 | KV453299.1 | 8215340 | 27-scf00525 | 27 |
| AX-158346591 | 27 | 50.052 | KV453299.1 | 8216806 | 27-scf00525 | 27 |
| AX-158346593 | 27 | 50.052 | KV453299.1 | 8218743 | 27-scf00525 | 27 |
| AX-157861964 | 27 | 50.052 | KV453299.1 | 8219000 | 27-scf00525 | 27 |
| AX-158346594 | 27 | 50.052 | KV453299.1 | 8219453 | 27-scf00525 | 27 |
| AX-158346595 | 27 | 50.052 | KV453299.1 | 8220373 | 27-scf00525 | 27 |
| AX-158346599 | 27 | 50.052 | KV453299.1 | 8224082 | 27-scf00525 | 27 |
| AX-158346600 | 27 | 50.052 | KV453299.1 | 8224665 | 27-scf00525 | 27 |
| AX-158346601 | 27 | 50.052 | KV453299.1 | 8225972 | 27-scf00525 | 27 |
| AX-158419277 | 27 | 50.052 | KV453299.1 | 8226731 | 27-scf00525 | 27 |
| AX-158346602 | 27 | 50.052 | KV453299.1 | 8227048 | 27-scf00525 | 27 |
| AX-158346604 | 27 | 50.052 | KV453299.1 | 8228013 | 27-scf00525 | 27 |
| AX-158346605 | 27 | 50.052 | KV453299.1 | 8229560 | 27-scf00525 | 27 |
| AX-158346607 | 27 | 50.052 | KV453299.1 | 8233133 | 27-scf00525 | 27 |
| AX-158346611 | 27 | 50.052 | KV453299.1 | 8236767 | 27-scf00525 | 27 |
| AX-158346612 | 27 | 50.052 | KV453299.1 | 8237442 | 27-scf00525 | 27 |
| AX-158346614 | 27 | 50.052 | KV453299.1 | 8238730 | 27-scf00525 | 27 |
| AX-158346615 | 27 | 50.052 | KV453299.1 | 8239122 | 27-scf00525 | 27 |
| AX-158346616 | 27 | 50.052 | KV453299.1 | 8240092 | 27-scf00525 | 27 |
| AX-158346617 | 27 | 50.052 | KV453299.1 | 8240865 | 27-scf00525 | 27 |
| AX-158346619 | 27 | 50.052 | KV453299.1 | 8241948 | 27-scf00525 | 27 |
| AX-158346620 | 27 | 50.052 | KV453299.1 | 8242444 | 27-scf00525 | 27 |
| AX-158346621 | 27 | 50.052 | KV453299.1 | 8242931 | 27-scf00525 | 27 |
| AX-158346622 | 27 | 50.052 | KV453299.1 | 8243956 | 27-scf00525 | 27 |
| AX-158346624 | 27 | 50.052 | KV453299.1 | 8246022 | 27-scf00525 | 27 |
| AX-158346625 | 27 | 50.052 | KV453299.1 | 8247062 | 27-scf00525 | 27 |
| AX-158346629 | 27 | 50.052 | KV453299.1 | 8250078 | 27-scf00525 | 27 |
| AX-158346630 | 27 | 50.052 | KV453299.1 | 8250760 | 27-scf00525 | 27 |
| AX-158346632 | 27 | 50.052 | KV453299.1 | 8251756 | 27-scf00525 | 27 |
| AX-158346633 | 27 | 50.052 | KV453299.1 | 8252735 | 27-scf00525 | 27 |
| AX-158346634 | 27 | 50.052 | KV453299.1 | 8254013 | 27-scf00525 | 27 |
| AX-158346635 | 27 | 50.052 | KV453299.1 | 8254551 | 27-scf00525 | 27 |
| AX-158346640 | 27 | 50.052 | KV453299.1 | 8259661 | 27-scf00525 | 27 |
| AX-157850538 | 27 | 50.052 | KV453299.1 | 8259742 | 27-scf00525 | 27 |
| AX-158346642 | 27 | 50.052 | KV453299.1 | 8260797 | 27-scf00525 | 27 |
| AX-158346643 | 27 | 50.052 | KV453299.1 | 8261485 | 27-scf00525 | 27 |
| AX-158346646 | 27 | 50.052 | KV453299.1 | 8263866 | 27-scf00525 | 27 |
| AX-158346647 | 27 | 50.052 | KV453299.1 | 8265002 | 27-scf00525 | 27 |
| AX-158346648 | 27 | 50.052 | KV453299.1 | 8265867 | 27-scf00525 | 27 |
| AX-158346649 | 27 | 50.052 | KV453299.1 | 8267255 | 27-scf00525 | 27 |
| AX-158346650 | 27 | 50.052 | KV453299.1 | 8268553 | 27-scf00525 | 27 |
| AX-158346651 | 27 | 50.052 | KV453299.1 | 8269211 | 27-scf00525 | 27 |
| AX-158346653 | 27 | 50.052 | KV453299.1 | 8270414 | 27-scf00525 | 27 |
| AX-158346655 | 27 | 50.052 | KV453299.1 | 8272045 | 27-scf00525 | 27 |
| AX-158346657 | 27 | 50.052 | KV453299.1 | 8272999 | 27-scf00525 | 27 |



|              |    |        |            |         |             |    |
|--------------|----|--------|------------|---------|-------------|----|
| AX-158346658 | 27 | 50.052 | KV453299.1 | 8274317 | 27-scf00525 | 27 |
| AX-158346659 | 27 | 50.052 | KV453299.1 | 8274736 | 27-scf00525 | 27 |
| AX-158346660 | 27 | 50.052 | KV453299.1 | 8275748 | 27-scf00525 | 27 |
| AX-158346663 | 27 | 50.052 | KV453299.1 | 8277807 | 27-scf00525 | 27 |
| AX-158346668 | 27 | 50.052 | KV453299.1 | 8283618 | 27-scf00525 | 27 |
| AX-158346669 | 27 | 50.052 | KV453299.1 | 8284931 | 27-scf00525 | 27 |
| AX-158346676 | 27 | 50.052 | KV453299.1 | 8289732 | 27-scf00525 | 27 |
| AX-158346680 | 27 | 50.052 | KV453299.1 | 8293350 | 27-scf00525 | 27 |
| AX-158346681 | 27 | 50.052 | KV453299.1 | 8295183 | 27-scf00525 | 27 |
| AX-158346687 | 27 | 50.052 | KV453299.1 | 8299552 | 27-scf00525 | 27 |
| AX-158346691 | 27 | 50.052 | KV453299.1 | 8301652 | 27-scf00525 | 27 |
| AX-158346695 | 27 | 50.052 | KV453299.1 | 8304965 | 27-scf00525 | 27 |
| AX-158419281 | 27 | 50.052 | KV453299.1 | 8309665 | 27-scf00525 | 27 |
| AX-158346699 | 27 | 50.052 | KV453299.1 | 8310321 | 27-scf00525 | 27 |
| AX-158346701 | 27 | 50.052 | KV453299.1 | 8311232 | 27-scf00525 | 27 |
| AX-158346702 | 27 | 50.052 | KV453299.1 | 8313114 | 27-scf00525 | 27 |
| AX-158346703 | 27 | 50.052 | KV453299.1 | 8313614 | 27-scf00525 | 27 |
| AX-158346705 | 27 | 50.052 | KV453299.1 | 8316357 | 27-scf00525 | 27 |
| AX-158346706 | 27 | 50.052 | KV453299.1 | 8318583 | 27-scf00525 | 27 |
| AX-158346707 | 27 | 50.052 | KV453299.1 | 8319466 | 27-scf00525 | 27 |
| AX-158346708 | 27 | 50.052 | KV453299.1 | 8319988 | 27-scf00525 | 27 |
| AX-158346709 | 27 | 50.052 | KV453299.1 | 8320520 | 27-scf00525 | 27 |
| AX-158346710 | 27 | 50.052 | KV453299.1 | 8321746 | 27-scf00525 | 27 |
| AX-158346711 | 27 | 50.052 | KV453299.1 | 8322649 | 27-scf00525 | 27 |
| AX-158346712 | 27 | 50.052 | KV453299.1 | 8323338 | 27-scf00525 | 27 |
| AX-158346714 | 27 | 50.052 | KV453299.1 | 8324319 | 27-scf00525 | 27 |
| AX-158346716 | 27 | 50.052 | KV453299.1 | 8325396 | 27-scf00525 | 27 |
| AX-158346717 | 27 | 50.052 | KV453299.1 | 8325768 | 27-scf00525 | 27 |
| AX-158346719 | 27 | 50.052 | KV453299.1 | 8327007 | 27-scf00525 | 27 |
| AX-158346720 | 27 | 50.052 | KV453299.1 | 8327665 | 27-scf00525 | 27 |
| AX-158346721 | 27 | 50.052 | KV453299.1 | 8328667 | 27-scf00525 | 27 |
| AX-158346723 | 27 | 50.052 | KV453299.1 | 8330280 | 27-scf00525 | 27 |
| AX-158346724 | 27 | 50.052 | KV453299.1 | 8330846 | 27-scf00525 | 27 |
| AX-158419282 | 27 | 50.052 | KV453299.1 | 8331393 | 27-scf00525 | 27 |
| AX-158346725 | 27 | 50.052 | KV453299.1 | 8332165 | 27-scf00525 | 27 |
| AX-158346727 | 27 | 50.052 | KV453299.1 | 8334033 | 27-scf00525 | 27 |
| AX-158346728 | 27 | 50.052 | KV453299.1 | 8334742 | 27-scf00525 | 27 |
| AX-158419284 | 27 | 50.052 | KV453299.1 | 8335549 | 27-scf00525 | 27 |
| AX-158346729 | 27 | 50.052 | KV453299.1 | 8336224 | 27-scf00525 | 27 |
| AX-158346732 | 27 | 50.052 | KV453299.1 | 8338648 | 27-scf00525 | 27 |
| AX-158346734 | 27 | 50.052 | KV453299.1 | 8339982 | 27-scf00525 | 27 |
| AX-158346735 | 27 | 50.052 | KV453299.1 | 8340553 | 27-scf00525 | 27 |
| AX-158346737 | 27 | 50.052 | KV453299.1 | 8342022 | 27-scf00525 | 27 |
| AX-158346738 | 27 | 50.052 | KV453299.1 | 8342785 | 27-scf00525 | 27 |
| AX-158346740 | 27 | 50.052 | KV453299.1 | 8345267 | 27-scf00525 | 27 |
| AX-158346741 | 27 | 50.052 | KV453299.1 | 8345862 | 27-scf00525 | 27 |
| AX-158346744 | 27 | 50.052 | KV453299.1 | 8348728 | 27-scf00525 | 27 |
| AX-158346745 | 27 | 50.052 | KV453299.1 | 8349366 | 27-scf00525 | 27 |
| AX-158346746 | 27 | 50.052 | KV453299.1 | 8351418 | 27-scf00525 | 27 |
| AX-158346747 | 27 | 50.052 | KV453299.1 | 8351975 | 27-scf00525 | 27 |
| AX-158346748 | 27 | 50.052 | KV453299.1 | 8352820 | 27-scf00525 | 27 |

|              |    |        |            |         |             |    |
|--------------|----|--------|------------|---------|-------------|----|
| AX-158346749 | 27 | 50.052 | KV453299.1 | 8353394 | 27-scf00525 | 27 |
| AX-158346752 | 27 | 50.052 | KV453299.1 | 8356311 | 27-scf00525 | 27 |
| AX-158346753 | 27 | 50.052 | KV453299.1 | 8357204 | 27-scf00525 | 27 |
| AX-158346754 | 27 | 50.052 | KV453299.1 | 8358424 | 27-scf00525 | 27 |
| AX-158346755 | 27 | 50.052 | KV453299.1 | 8358781 | 27-scf00525 | 27 |
| AX-158346756 | 27 | 50.052 | KV453299.1 | 8359146 | 27-scf00525 | 27 |
| AX-158346758 | 27 | 50.052 | KV453299.1 | 8362833 | 27-scf00525 | 27 |
| AX-158346759 | 27 | 50.052 | KV453299.1 | 8363465 | 27-scf00525 | 27 |
| AX-158346762 | 27 | 50.052 | KV453299.1 | 8366221 | 27-scf00525 | 27 |
| AX-158346763 | 27 | 50.052 | KV453299.1 | 8366739 | 27-scf00525 | 27 |
| AX-158346764 | 27 | 50.052 | KV453299.1 | 8367255 | 27-scf00525 | 27 |
| AX-158346765 | 27 | 50.052 | KV453299.1 | 8368422 | 27-scf00525 | 27 |
| AX-158346766 | 27 | 50.052 | KV453299.1 | 8369559 | 27-scf00525 | 27 |
| AX-158346767 | 27 | 50.052 | KV453299.1 | 8370590 | 27-scf00525 | 27 |
| AX-158346769 | 27 | 50.052 | KV453299.1 | 8371537 | 27-scf00525 | 27 |
| AX-158346770 | 27 | 50.052 | KV453299.1 | 8371941 | 27-scf00525 | 27 |
| AX-158346771 | 27 | 50.052 | KV453299.1 | 8372895 | 27-scf00525 | 27 |
| AX-158346772 | 27 | 50.052 | KV453299.1 | 8373593 | 27-scf00525 | 27 |
| AX-158346773 | 27 | 50.052 | KV453299.1 | 8374103 | 27-scf00525 | 27 |
| AX-158346774 | 27 | 50.052 | KV453299.1 | 8374673 | 27-scf00525 | 27 |
| AX-158346776 | 27 | 50.052 | KV453299.1 | 8377716 | 27-scf00525 | 27 |
| AX-158346777 | 27 | 50.052 | KV453299.1 | 8379342 | 27-scf00525 | 27 |
| AX-158346778 | 27 | 50.052 | KV453299.1 | 8379891 | 27-scf00525 | 27 |
| AX-158346779 | 27 | 50.052 | KV453299.1 | 8380801 | 27-scf00525 | 27 |
| AX-158346780 | 27 | 50.052 | KV453299.1 | 8381560 | 27-scf00525 | 27 |
| AX-158346782 | 27 | 50.052 | KV453299.1 | 8383310 | 27-scf00525 | 27 |
| AX-158346785 | 27 | 50.052 | KV453299.1 | 8389690 | 27-scf00525 | 27 |
| AX-158420401 | 27 | 50.052 | KV453299.1 | 8390903 | 27-scf00525 | 27 |
| AX-158346787 | 27 | 50.052 | KV453299.1 | 8392714 | 27-scf00525 | 27 |
| AX-158346788 | 27 | 50.052 | KV453299.1 | 8394102 | 27-scf00525 | 27 |
| AX-158346789 | 27 | 50.052 | KV453299.1 | 8394473 | 27-scf00525 | 27 |
| AX-158346790 | 27 | 50.052 | KV453299.1 | 8395094 | 27-scf00525 | 27 |
| AX-158346793 | 27 | 50.052 | KV453299.1 | 8398506 | 27-scf00525 | 27 |
| AX-158346794 | 27 | 50.052 | KV453299.1 | 8398889 | 27-scf00525 | 27 |
| AX-158346795 | 27 | 50.052 | KV453299.1 | 8399817 | 27-scf00525 | 27 |
| AX-158346797 | 27 | 50.052 | KV453299.1 | 8401116 | 27-scf00525 | 27 |
| AX-158346800 | 27 | 50.052 | KV453299.1 | 8402998 | 27-scf00525 | 27 |
| AX-158346801 | 27 | 50.052 | KV453299.1 | 8403686 | 27-scf00525 | 27 |
| AX-158346802 | 27 | 50.052 | KV453299.1 | 8404221 | 27-scf00525 | 27 |
| AX-158346803 | 27 | 50.052 | KV453299.1 | 8405725 | 27-scf00525 | 27 |
| AX-158346807 | 27 | 50.052 | KV453299.1 | 8413221 | 27-scf00525 | 27 |
| AX-158346808 | 27 | 50.052 | KV453299.1 | 8413987 | 27-scf00525 | 27 |
| AX-158346809 | 27 | 50.052 | KV453299.1 | 8414846 | 27-scf00525 | 27 |
| AX-158346810 | 27 | 50.052 | KV453299.1 | 8415852 | 27-scf00525 | 27 |
| AX-158346812 | 27 | 50.052 | KV453299.1 | 8417345 | 27-scf00525 | 27 |
| AX-158346813 | 27 | 50.052 | KV453299.1 | 8418931 | 27-scf00525 | 27 |
| AX-158346814 | 27 | 50.052 | KV453299.1 | 8419593 | 27-scf00525 | 27 |
| AX-158346816 | 27 | 50.052 | KV453299.1 | 8420754 | 27-scf00525 | 27 |
| AX-158346817 | 27 | 50.052 | KV453299.1 | 8421150 | 27-scf00525 | 27 |
| AX-158346818 | 27 | 50.052 | KV453299.1 | 8421682 | 27-scf00525 | 27 |
| AX-158346820 | 27 | 50.052 | KV453299.1 | 8423761 | 27-scf00525 | 27 |

|              |    |        |            |         |             |    |
|--------------|----|--------|------------|---------|-------------|----|
| AX-158346821 | 27 | 50.052 | KV453299.1 | 8425944 | 27-scf00525 | 27 |
| AX-158346822 | 27 | 50.052 | KV453299.1 | 8426547 | 27-scf00525 | 27 |
| AX-158346823 | 27 | 50.052 | KV453299.1 | 8427512 | 27-scf00525 | 27 |
| AX-158346824 | 27 | 50.052 | KV453299.1 | 8427999 | 27-scf00525 | 27 |
| AX-158346827 | 27 | 50.052 | KV453299.1 | 8429483 | 27-scf00525 | 27 |
| AX-158346828 | 27 | 50.052 | KV453299.1 | 8430307 | 27-scf00525 | 27 |
| AX-158346829 | 27 | 50.052 | KV453299.1 | 8431526 | 27-scf00525 | 27 |
| AX-158346832 | 27 | 50.052 | KV453299.1 | 8434584 | 27-scf00525 | 27 |
| AX-158346833 | 27 | 50.052 | KV453299.1 | 8435277 | 27-scf00525 | 27 |
| AX-158346834 | 27 | 50.052 | KV453299.1 | 8437679 | 27-scf00525 | 27 |
| AX-158346835 | 27 | 50.052 | KV453299.1 | 8438437 | 27-scf00525 | 27 |
| AX-158346836 | 27 | 50.052 | KV453299.1 | 8438865 | 27-scf00525 | 27 |
| AX-158346838 | 27 | 50.052 | KV453299.1 | 8440344 | 27-scf00525 | 27 |
| AX-158346842 | 27 | 50.052 | KV453299.1 | 8443752 | 27-scf00525 | 27 |
| AX-158346843 | 27 | 50.052 | KV453299.1 | 8444283 | 27-scf00525 | 27 |
| AX-158346846 | 27 | 50.052 | KV453299.1 | 8446299 | 27-scf00525 | 27 |
| AX-158346847 | 27 | 50.052 | KV453299.1 | 8447432 | 27-scf00525 | 27 |
| AX-158346849 | 27 | 50.052 | KV453299.1 | 8448465 | 27-scf00525 | 27 |
| AX-158346850 | 27 | 50.052 | KV453299.1 | 8449112 | 27-scf00525 | 27 |
| AX-158346852 | 27 | 50.052 | KV453299.1 | 8450242 | 27-scf00525 | 27 |
| AX-158346853 | 27 | 50.052 | KV453299.1 | 8451321 | 27-scf00525 | 27 |
| AX-158346854 | 27 | 50.052 | KV453299.1 | 8452658 | 27-scf00525 | 27 |
| AX-158346855 | 27 | 50.052 | KV453299.1 | 8453026 | 27-scf00525 | 27 |
| AX-158346856 | 27 | 50.052 | KV453299.1 | 8454145 | 27-scf00525 | 27 |
| AX-158346857 | 27 | 50.052 | KV453299.1 | 8455144 | 27-scf00525 | 27 |
| AX-158346859 | 27 | 50.052 | KV453299.1 | 8457012 | 27-scf00525 | 27 |
| AX-158346860 | 27 | 50.052 | KV453299.1 | 8457410 | 27-scf00525 | 27 |
| AX-158346861 | 27 | 50.052 | KV453299.1 | 8459046 | 27-scf00525 | 27 |
| AX-158346863 | 27 | 50.052 | KV453299.1 | 8462508 | 27-scf00525 | 27 |
| AX-158346864 | 27 | 50.052 | KV453299.1 | 8462958 | 27-scf00525 | 27 |
| AX-158346866 | 27 | 50.052 | KV453299.1 | 8464142 | 27-scf00525 | 27 |
| AX-158346867 | 27 | 50.052 | KV453299.1 | 8464561 | 27-scf00525 | 27 |
| AX-158346868 | 27 | 50.052 | KV453299.1 | 8465665 | 27-scf00525 | 27 |
| AX-158346869 | 27 | 50.052 | KV453299.1 | 8466397 | 27-scf00525 | 27 |
| AX-158346870 | 27 | 50.052 | KV453299.1 | 8467193 | 27-scf00525 | 27 |
| AX-157744959 | 27 | 50.052 | KV453299.1 | 8468441 | 27-scf00525 | 27 |
| AX-158346871 | 27 | 50.052 | KV453299.1 | 8469098 | 27-scf00525 | 27 |
| AX-158346872 | 27 | 50.052 | KV453299.1 | 8469609 | 27-scf00525 | 27 |
| AX-157772277 | 27 | 50.052 | KV453299.1 | 8471859 | 27-scf00525 | 27 |
| AX-157713791 | 27 | 50.052 | KV453299.1 | 8473285 | 27-scf00525 | 27 |
| AX-157850541 | 27 | 50.052 | KV453299.1 | 8475226 | 27-scf00525 | 27 |
| AX-158346873 | 27 | 50.052 | KV453299.1 | 8479169 | 27-scf00525 | 27 |
| AX-158346874 | 27 | 50.052 | KV453299.1 | 8479495 | 27-scf00525 | 27 |
| AX-157850543 | 27 | 50.052 | KV453299.1 | 8479919 | 27-scf00525 | 27 |
| AX-158346875 | 27 | 50.052 | KV453299.1 | 8480950 | 27-scf00525 | 27 |
| AX-158346876 | 27 | 50.052 | KV453299.1 | 8482475 | 27-scf00525 | 27 |
| AX-158346877 | 27 | 50.052 | KV453299.1 | 8482683 | 27-scf00525 | 27 |
| AX-158346878 | 27 | 50.052 | KV453299.1 | 8483536 | 27-scf00525 | 27 |
| AX-158346879 | 27 | 50.052 | KV453299.1 | 8484747 | 27-scf00525 | 27 |
| AX-158346880 | 27 | 50.052 | KV453299.1 | 8485860 | 27-scf00525 | 27 |
| AX-158346882 | 27 | 50.052 | KV453299.1 | 8486901 | 27-scf00525 | 27 |

|              |    |        |            |         |             |    |
|--------------|----|--------|------------|---------|-------------|----|
| AX-158346883 | 27 | 50.052 | KV453299.1 | 8487285 | 27-scf00525 | 27 |
| AX-158346886 | 27 | 50.052 | KV453299.1 | 8489789 | 27-scf00525 | 27 |
| AX-158346890 | 27 | 50.052 | KV453299.1 | 8491288 | 27-scf00525 | 27 |
| AX-158346891 | 27 | 50.052 | KV453299.1 | 8491777 | 27-scf00525 | 27 |
| AX-158346892 | 27 | 50.052 | KV453299.1 | 8493197 | 27-scf00525 | 27 |
| AX-158346893 | 27 | 50.052 | KV453299.1 | 8493833 | 27-scf00525 | 27 |
| AX-158346894 | 27 | 50.052 | KV453299.1 | 8495001 | 27-scf00525 | 27 |
| AX-158346895 | 27 | 50.052 | KV453299.1 | 8495855 | 27-scf00525 | 27 |
| AX-158346897 | 27 | 50.052 | KV453299.1 | 8496793 | 27-scf00525 | 27 |
| AX-158346900 | 27 | 50.052 | KV453299.1 | 8499812 | 27-scf00525 | 27 |
| AX-158346901 | 27 | 50.052 | KV453299.1 | 8500316 | 27-scf00525 | 27 |
| AX-158346902 | 27 | 50.052 | KV453299.1 | 8500829 | 27-scf00525 | 27 |
| AX-158346904 | 27 | 50.052 | KV453299.1 | 8501944 | 27-scf00525 | 27 |
| AX-158346907 | 27 | 50.052 | KV453299.1 | 8503994 | 27-scf00525 | 27 |
| AX-157753422 | 27 | 50.052 | KV453299.1 | 8507356 | 27-scf00525 | 27 |
| AX-158346908 | 27 | 50.052 | KV453299.1 | 8508052 | 27-scf00525 | 27 |
| AX-158346909 | 27 | 50.052 | KV453299.1 | 8508992 | 27-scf00525 | 27 |
| AX-158346911 | 27 | 50.052 | KV453299.1 | 8510082 | 27-scf00525 | 27 |
| AX-158346912 | 27 | 50.052 | KV453299.1 | 8511498 | 27-scf00525 | 27 |
| AX-158346913 | 27 | 50.052 | KV453299.1 | 8514080 | 27-scf00525 | 27 |
| AX-158346914 | 27 | 50.052 | KV453299.1 | 8514770 | 27-scf00525 | 27 |
| AX-158346916 | 27 | 50.052 | KV453299.1 | 8515977 | 27-scf00525 | 27 |
| AX-158346919 | 27 | 50.052 | KV453299.1 | 8519643 | 27-scf00525 | 27 |
| AX-158346921 | 27 | 50.052 | KV453299.1 | 8520643 | 27-scf00525 | 27 |
| AX-158346922 | 27 | 50.052 | KV453299.1 | 8521195 | 27-scf00525 | 27 |
| AX-158346923 | 27 | 50.052 | KV453299.1 | 8521910 | 27-scf00525 | 27 |
| AX-158346924 | 27 | 50.052 | KV453299.1 | 8522293 | 27-scf00525 | 27 |
| AX-158346925 | 27 | 50.052 | KV453299.1 | 8523003 | 27-scf00525 | 27 |
| AX-157850546 | 27 | 50.052 | KV453299.1 | 8524343 | 27-scf00525 | 27 |
| AX-158346926 | 27 | 50.052 | KV453299.1 | 8525800 | 27-scf00525 | 27 |
| AX-158346927 | 27 | 50.052 | KV453299.1 | 8526798 | 27-scf00525 | 27 |
| AX-158346928 | 27 | 50.052 | KV453299.1 | 8527663 | 27-scf00525 | 27 |
| AX-158346929 | 27 | 50.052 | KV453299.1 | 8528519 | 27-scf00525 | 27 |
| AX-158346930 | 27 | 50.052 | KV453299.1 | 8529064 | 27-scf00525 | 27 |
| AX-158346932 | 27 | 50.052 | KV453299.1 | 8531087 | 27-scf00525 | 27 |
| AX-158346933 | 27 | 50.052 | KV453299.1 | 8531940 | 27-scf00525 | 27 |
| AX-158346934 | 27 | 50.052 | KV453299.1 | 8532752 | 27-scf00525 | 27 |
| AX-158346935 | 27 | 50.052 | KV453299.1 | 8533774 | 27-scf00525 | 27 |
| AX-157850547 | 27 | 50.052 | KV453299.1 | 8533982 | 27-scf00525 | 27 |
| AX-158346937 | 27 | 50.052 | KV453299.1 | 8537201 | 27-scf00525 | 27 |
| AX-158346939 | 27 | 50.052 | KV453299.1 | 8540301 | 27-scf00525 | 27 |
| AX-158346940 | 27 | 50.052 | KV453299.1 | 8541020 | 27-scf00525 | 27 |
| AX-158346941 | 27 | 50.052 | KV453299.1 | 8542095 | 27-scf00525 | 27 |
| AX-158346944 | 27 | 50.052 | KV453299.1 | 8544965 | 27-scf00525 | 27 |
| AX-158346945 | 27 | 50.052 | KV453299.1 | 8545680 | 27-scf00525 | 27 |
| AX-158346946 | 27 | 50.052 | KV453299.1 | 8546534 | 27-scf00525 | 27 |
| AX-158346949 | 27 | 50.052 | KV453299.1 | 8548594 | 27-scf00525 | 27 |
| AX-158346950 | 27 | 50.052 | KV453299.1 | 8548954 | 27-scf00525 | 27 |
| AX-158346951 | 27 | 50.052 | KV453299.1 | 8549357 | 27-scf00525 | 27 |
| AX-158346952 | 27 | 50.052 | KV453299.1 | 8550051 | 27-scf00525 | 27 |
| AX-158346953 | 27 | 50.052 | KV453299.1 | 8550421 | 27-scf00525 | 27 |

|              |    |        |            |         |             |    |
|--------------|----|--------|------------|---------|-------------|----|
| AX-158346954 | 27 | 50.052 | KV453299.1 | 8551835 | 27-scf00525 | 27 |
| AX-158346955 | 27 | 50.052 | KV453299.1 | 8552467 | 27-scf00525 | 27 |
| AX-158346956 | 27 | 50.052 | KV453299.1 | 8554184 | 27-scf00525 | 27 |
| AX-158346957 | 27 | 50.052 | KV453299.1 | 8554572 | 27-scf00525 | 27 |
| AX-158346960 | 27 | 50.052 | KV453299.1 | 8559442 | 27-scf00525 | 27 |
| AX-157850548 | 27 | 50.052 | KV453299.1 | 8561572 | 27-scf00525 | 27 |
| AX-158346962 | 27 | 50.052 | KV453299.1 | 8561806 | 27-scf00525 | 27 |
| AX-158346963 | 27 | 50.052 | KV453299.1 | 8562853 | 27-scf00525 | 27 |
| AX-158346965 | 27 | 50.052 | KV453299.1 | 8563745 | 27-scf00525 | 27 |
| AX-158346966 | 27 | 50.052 | KV453299.1 | 8564677 | 27-scf00525 | 27 |
| AX-158346967 | 27 | 50.052 | KV453299.1 | 8567893 | 27-scf00525 | 27 |
| AX-157772415 | 27 | 50.052 | KV453299.1 | 8569916 | 27-scf00525 | 27 |
| AX-158346968 | 27 | 50.052 | KV453299.1 | 8570893 | 27-scf00525 | 27 |
| AX-158346970 | 27 | 50.052 | KV453299.1 | 8572096 | 27-scf00525 | 27 |
| AX-158346971 | 27 | 50.052 | KV453299.1 | 8572624 | 27-scf00525 | 27 |
| AX-158346972 | 27 | 50.052 | KV453299.1 | 8573117 | 27-scf00525 | 27 |
| AX-158346973 | 27 | 50.052 | KV453299.1 | 8573536 | 27-scf00525 | 27 |
| AX-158346974 | 27 | 50.052 | KV453299.1 | 8574364 | 27-scf00525 | 27 |
| AX-158346975 | 27 | 50.052 | KV453299.1 | 8574735 | 27-scf00525 | 27 |
| AX-158346976 | 27 | 50.052 | KV453299.1 | 8575761 | 27-scf00525 | 27 |
| AX-158346977 | 27 | 50.052 | KV453299.1 | 8576720 | 27-scf00525 | 27 |
| AX-158346978 | 27 | 50.052 | KV453299.1 | 8576937 | 27-scf00525 | 27 |
| AX-158346979 | 27 | 50.052 | KV453299.1 | 8577857 | 27-scf00525 | 27 |
| AX-158346980 | 27 | 50.052 | KV453299.1 | 8578204 | 27-scf00525 | 27 |
| AX-158346983 | 27 | 50.052 | KV453299.1 | 8581261 | 27-scf00525 | 27 |
| AX-158346985 | 27 | 50.052 | KV453299.1 | 8581818 | 27-scf00525 | 27 |
| AX-158346986 | 27 | 50.052 | KV453299.1 | 8582390 | 27-scf00525 | 27 |
| AX-158346988 | 27 | 50.052 | KV453299.1 | 8583987 | 27-scf00525 | 27 |
| AX-158346990 | 27 | 50.052 | KV453299.1 | 8585249 | 27-scf00525 | 27 |
| AX-158346991 | 27 | 50.052 | KV453299.1 | 8586169 | 27-scf00525 | 27 |
| AX-158346992 | 27 | 50.052 | KV453299.1 | 8586463 | 27-scf00525 | 27 |
| AX-158346994 | 27 | 50.052 | KV453299.1 | 8589244 | 27-scf00525 | 27 |
| AX-158346995 | 27 | 50.052 | KV453299.1 | 8589671 | 27-scf00525 | 27 |
| AX-158346996 | 27 | 50.052 | KV453299.1 | 8590560 | 27-scf00525 | 27 |
| AX-158346997 | 27 | 50.052 | KV453299.1 | 8590908 | 27-scf00525 | 27 |
| AX-158346998 | 27 | 50.052 | KV453299.1 | 8592503 | 27-scf00525 | 27 |
| AX-158346999 | 27 | 50.052 | KV453299.1 | 8592913 | 27-scf00525 | 27 |
| AX-158347000 | 27 | 50.052 | KV453299.1 | 8593602 | 27-scf00525 | 27 |
| AX-157745439 | 27 | 50.052 | KV453299.1 | 8594574 | 27-scf00525 | 27 |
| AX-158347001 | 27 | 50.052 | KV453299.1 | 8595488 | 27-scf00525 | 27 |
| AX-158347003 | 27 | 50.052 | KV453299.1 | 8597478 | 27-scf00525 | 27 |
| AX-158347004 | 27 | 50.052 | KV453299.1 | 8599174 | 27-scf00525 | 27 |
| AX-158347006 | 27 | 50.052 | KV453299.1 | 8600665 | 27-scf00525 | 27 |
| AX-158347009 | 27 | 50.052 | KV453299.1 | 8602309 | 27-scf00525 | 27 |
| AX-158347011 | 27 | 50.052 | KV453299.1 | 8605059 | 27-scf00525 | 27 |
| AX-158347012 | 27 | 50.052 | KV453299.1 | 8605571 | 27-scf00525 | 27 |
| AX-158347015 | 27 | 50.052 | KV453299.1 | 8609484 | 27-scf00525 | 27 |
| AX-158347019 | 27 | 50.052 | KV453299.1 | 8614527 | 27-scf00525 | 27 |
| AX-158419289 | 27 | 50.052 | KV453299.1 | 8615212 | 27-scf00525 | 27 |
| AX-158347020 | 27 | 50.052 | KV453299.1 | 8615528 | 27-scf00525 | 27 |
| AX-158347021 | 27 | 50.052 | KV453299.1 | 8615821 | 27-scf00525 | 27 |

|              |    |        |            |         |             |    |
|--------------|----|--------|------------|---------|-------------|----|
| AX-158347023 | 27 | 50.052 | KV453299.1 | 8616626 | 27-scf00525 | 27 |
| AX-158347027 | 27 | 50.052 | KV453299.1 | 8618452 | 27-scf00525 | 27 |
| AX-158347032 | 27 | 50.052 | KV453299.1 | 8622080 | 27-scf00525 | 27 |
| AX-158347033 | 27 | 50.052 | KV453299.1 | 8622507 | 27-scf00525 | 27 |
| AX-158347034 | 27 | 50.052 | KV453299.1 | 8623948 | 27-scf00525 | 27 |
| AX-157749771 | 27 | 50.052 | KV453299.1 | 8625810 | 27-scf00525 | 27 |
| AX-158347036 | 27 | 50.052 | KV453299.1 | 8626290 | 27-scf00525 | 27 |
| AX-158347039 | 27 | 50.052 | KV453299.1 | 8629295 | 27-scf00525 | 27 |
| AX-158347040 | 27 | 50.052 | KV453299.1 | 8629478 | 27-scf00525 | 27 |
| AX-158347041 | 27 | 50.052 | KV453299.1 | 8629748 | 27-scf00525 | 27 |
| AX-158347044 | 27 | 50.052 | KV453299.1 | 8631366 | 27-scf00525 | 27 |
| AX-158347045 | 27 | 50.052 | KV453299.1 | 8631867 | 27-scf00525 | 27 |
| AX-158347046 | 27 | 50.052 | KV453299.1 | 8632462 | 27-scf00525 | 27 |
| AX-158347047 | 27 | 50.052 | KV453299.1 | 8633459 | 27-scf00525 | 27 |
| AX-158347048 | 27 | 50.052 | KV453299.1 | 8634249 | 27-scf00525 | 27 |
| AX-158420439 | 27 | 50.052 | KV453299.1 | 8636759 | 27-scf00525 | 27 |
| AX-158347051 | 27 | 50.052 | KV453299.1 | 8637769 | 27-scf00525 | 27 |
| AX-157850550 | 27 | 50.052 | KV453299.1 | 8638657 | 27-scf00525 | 27 |
| AX-158347052 | 27 | 50.052 | KV453299.1 | 8639438 | 27-scf00525 | 27 |
| AX-157850551 | 27 | 50.052 | KV453299.1 | 8639667 | 27-scf00525 | 27 |
| AX-158347053 | 27 | 50.052 | KV453299.1 | 8640697 | 27-scf00525 | 27 |
| AX-157850552 | 27 | 50.052 | KV453299.1 | 8641057 | 27-scf00525 | 27 |
| AX-157741925 | 27 | 50.052 | KV453299.1 | 8641364 | 27-scf00525 | 27 |
| AX-158347054 | 27 | 50.052 | KV453299.1 | 8641716 | 27-scf00525 | 27 |
| AX-158347056 | 27 | 50.052 | KV453299.1 | 8645639 | 27-scf00525 | 27 |
| AX-158347057 | 27 | 50.052 | KV453299.1 | 8645992 | 27-scf00525 | 27 |
| AX-158347058 | 27 | 50.052 | KV453299.1 | 8647958 | 27-scf00525 | 27 |
| AX-157850553 | 27 | 50.052 | KV453299.1 | 8648328 | 27-scf00525 | 27 |
| AX-158347059 | 27 | 50.052 | KV453299.1 | 8649980 | 27-scf00525 | 27 |
| AX-158347061 | 27 | 50.052 | KV453299.1 | 8653020 | 27-scf00525 | 27 |
| AX-158347062 | 27 | 50.052 | KV453299.1 | 8653416 | 27-scf00525 | 27 |
| AX-158347063 | 27 | 50.052 | KV453299.1 | 8653803 | 27-scf00525 | 27 |
| AX-157850554 | 27 | 50.052 | KV453299.1 | 8654500 | 27-scf00525 | 27 |
| AX-158347067 | 27 | 50.052 | KV453299.1 | 8656135 | 27-scf00525 | 27 |
| AX-158347068 | 27 | 50.052 | KV453299.1 | 8656811 | 27-scf00525 | 27 |
| AX-158347069 | 27 | 50.052 | KV453299.1 | 8657051 | 27-scf00525 | 27 |
| AX-158347071 | 27 | 50.052 | KV453299.1 | 8659052 | 27-scf00525 | 27 |
| AX-158347073 | 27 | 50.052 | KV453299.1 | 8664036 | 27-scf00525 | 27 |
| AX-158347074 | 27 | 50.052 | KV453299.1 | 8664556 | 27-scf00525 | 27 |
| AX-158347080 | 27 | 50.052 | KV453299.1 | 8672148 | 27-scf00525 | 27 |
| AX-158347081 | 27 | 50.052 | KV453299.1 | 8672743 | 27-scf00525 | 27 |
| AX-157850558 | 27 | 50.052 | KV453299.1 | 8673590 | 27-scf00525 | 27 |
| AX-158347082 | 27 | 50.052 | KV453299.1 | 8674325 | 27-scf00525 | 27 |
| AX-158347083 | 27 | 50.052 | KV453299.1 | 8674788 | 27-scf00525 | 27 |
| AX-158347084 | 27 | 50.052 | KV453299.1 | 8675423 | 27-scf00525 | 27 |
| AX-158347087 | 27 | 50.052 | KV453299.1 | 8678120 | 27-scf00525 | 27 |
| AX-158347091 | 27 | 50.052 | KV453299.1 | 8681676 | 27-scf00525 | 27 |
| AX-158347093 | 27 | 50.052 | KV453299.1 | 8682799 | 27-scf00525 | 27 |
| AX-158347095 | 27 | 50.052 | KV453299.1 | 8683539 | 27-scf00525 | 27 |
| AX-158347096 | 27 | 50.052 | KV453299.1 | 8684607 | 27-scf00525 | 27 |
| AX-158347098 | 27 | 50.052 | KV453299.1 | 8685793 | 27-scf00525 | 27 |

|              |    |        |            |         |             |    |
|--------------|----|--------|------------|---------|-------------|----|
| AX-158347099 | 27 | 50.052 | KV453299.1 | 8686252 | 27-scf00525 | 27 |
| AX-158347100 | 27 | 50.052 | KV453299.1 | 8687544 | 27-scf00525 | 27 |
| AX-158347103 | 27 | 50.052 | KV453299.1 | 8690422 | 27-scf00525 | 27 |
| AX-158347104 | 27 | 50.052 | KV453299.1 | 8692660 | 27-scf00525 | 27 |
| AX-158347106 | 27 | 50.052 | KV453299.1 | 8695086 | 27-scf00525 | 27 |
| AX-158347108 | 27 | 50.052 | KV453299.1 | 8696904 | 27-scf00525 | 27 |
| AX-157850560 | 27 | 50.052 | KV453299.1 | 8697733 | 27-scf00525 | 27 |
| AX-158347109 | 27 | 50.052 | KV453299.1 | 8697942 | 27-scf00525 | 27 |
| AX-158347111 | 27 | 50.052 | KV453299.1 | 8701244 | 27-scf00525 | 27 |
| AX-158347112 | 27 | 50.052 | KV453299.1 | 8701917 | 27-scf00525 | 27 |
| AX-158347116 | 27 | 50.052 | KV453299.1 | 8704296 | 27-scf00525 | 27 |
| AX-158347117 | 27 | 50.052 | KV453299.1 | 8704686 | 27-scf00525 | 27 |
| AX-158347118 | 27 | 50.052 | KV453299.1 | 8705529 | 27-scf00525 | 27 |
| AX-158347119 | 27 | 50.052 | KV453299.1 | 8706213 | 27-scf00525 | 27 |
| AX-158347120 | 27 | 50.052 | KV453299.1 | 8706346 | 27-scf00525 | 27 |
| AX-158347121 | 27 | 50.052 | KV453299.1 | 8707569 | 27-scf00525 | 27 |
| AX-158347122 | 27 | 50.052 | KV453299.1 | 8708455 | 27-scf00525 | 27 |
| AX-158347123 | 27 | 50.052 | KV453299.1 | 8709141 | 27-scf00525 | 27 |
| AX-158347124 | 27 | 50.052 | KV453299.1 | 8710804 | 27-scf00525 | 27 |
| AX-158347125 | 27 | 50.052 | KV453299.1 | 8711616 | 27-scf00525 | 27 |
| AX-158347126 | 27 | 50.052 | KV453299.1 | 8712719 | 27-scf00525 | 27 |
| AX-158347128 | 27 | 50.052 | KV453299.1 | 8714836 | 27-scf00525 | 27 |
| AX-158347129 | 27 | 50.052 | KV453299.1 | 8715637 | 27-scf00525 | 27 |
| AX-158347130 | 27 | 50.052 | KV453299.1 | 8716212 | 27-scf00525 | 27 |
| AX-158347131 | 27 | 50.052 | KV453299.1 | 8717037 | 27-scf00525 | 27 |
| AX-158347134 | 27 | 50.052 | KV453299.1 | 8720056 | 27-scf00525 | 27 |
| AX-158347136 | 27 | 50.052 | KV453299.1 | 8721561 | 27-scf00525 | 27 |
| AX-158347139 | 27 | 50.052 | KV453299.1 | 8727191 | 27-scf00525 | 27 |
| AX-158347140 | 27 | 50.052 | KV453299.1 | 8727450 | 27-scf00525 | 27 |
| AX-157850563 | 27 | 50.052 | KV453299.1 | 8730491 | 27-scf00525 | 27 |
| AX-158347151 | 27 | 50.052 | KV453299.1 | 8736786 | 27-scf00525 | 27 |
| AX-158347154 | 27 | 50.052 | KV453299.1 | 8739758 | 27-scf00525 | 27 |
| AX-158347157 | 27 | 50.052 | KV453299.1 | 8741072 | 27-scf00525 | 27 |
| AX-157850564 | 27 | 50.052 | KV453299.1 | 8741971 | 27-scf00525 | 27 |
| AX-158419291 | 27 | 50.052 | KV453299.1 | 8742782 | 27-scf00525 | 27 |
| AX-158347158 | 27 | 50.052 | KV453299.1 | 8743215 | 27-scf00525 | 27 |
| AX-158347159 | 27 | 50.052 | KV453299.1 | 8744330 | 27-scf00525 | 27 |
| AX-158347160 | 27 | 50.052 | KV453299.1 | 8744741 | 27-scf00525 | 27 |
| AX-158347161 | 27 | 50.052 | KV453299.1 | 8746442 | 27-scf00525 | 27 |
| AX-158347162 | 27 | 50.052 | KV453299.1 | 8747670 | 27-scf00525 | 27 |
| AX-158347163 | 27 | 50.052 | KV453299.1 | 8748046 | 27-scf00525 | 27 |
| AX-157850565 | 27 | 50.052 | KV453299.1 | 8750890 | 27-scf00525 | 27 |
| AX-158347165 | 27 | 50.052 | KV453299.1 | 8751052 | 27-scf00525 | 27 |
| AX-158347169 | 27 | 50.052 | KV453299.1 | 8754276 | 27-scf00525 | 27 |
| AX-158347170 | 27 | 50.052 | KV453299.1 | 8754993 | 27-scf00525 | 27 |
| AX-158347171 | 27 | 50.052 | KV453299.1 | 8756912 | 27-scf00525 | 27 |
| AX-158347173 | 27 | 50.052 | KV453299.1 | 8758421 | 27-scf00525 | 27 |
| AX-158347174 | 27 | 50.052 | KV453299.1 | 8758805 | 27-scf00525 | 27 |
| AX-157724315 | 27 | 50.052 | KV453299.1 | 8759759 | 27-scf00525 | 27 |
| AX-158347177 | 27 | 50.052 | KV453299.1 | 8760833 | 27-scf00525 | 27 |
| AX-158347180 | 27 | 50.052 | KV453299.1 | 8762741 | 27-scf00525 | 27 |

|              |    |        |            |         |             |    |
|--------------|----|--------|------------|---------|-------------|----|
| AX-158347182 | 27 | 50.052 | KV453299.1 | 8763774 | 27-scf00525 | 27 |
| AX-157850566 | 27 | 50.052 | KV453299.1 | 8764268 | 27-scf00525 | 27 |
| AX-157754393 | 27 | 50.052 | KV453299.1 | 8764921 | 27-scf00525 | 27 |
| AX-158347185 | 27 | 50.052 | KV453299.1 | 8766098 | 27-scf00525 | 27 |
| AX-158347186 | 27 | 50.052 | KV453299.1 | 8766300 | 27-scf00525 | 27 |
| AX-158347187 | 27 | 50.052 | KV453299.1 | 8766611 | 27-scf00525 | 27 |
| AX-158347188 | 27 | 50.052 | KV453299.1 | 8766919 | 27-scf00525 | 27 |
| AX-158347189 | 27 | 50.052 | KV453299.1 | 8767480 | 27-scf00525 | 27 |
| AX-158347190 | 27 | 50.052 | KV453299.1 | 8768342 | 27-scf00525 | 27 |
| AX-158347191 | 27 | 50.052 | KV453299.1 | 8768729 | 27-scf00525 | 27 |
| AX-158347192 | 27 | 50.052 | KV453299.1 | 8769438 | 27-scf00525 | 27 |
| AX-158347194 | 27 | 50.052 | KV453299.1 | 8774291 | 27-scf00525 | 27 |
| AX-158347195 | 27 | 50.052 | KV453299.1 | 8775255 | 27-scf00525 | 27 |
| AX-158347196 | 27 | 50.052 | KV453299.1 | 8775488 | 27-scf00525 | 27 |
| AX-158347197 | 27 | 50.052 | KV453299.1 | 8775758 | 27-scf00525 | 27 |
| AX-158347198 | 27 | 50.052 | KV453299.1 | 8776598 | 27-scf00525 | 27 |
| AX-158347200 | 27 | 50.052 | KV453299.1 | 8777360 | 27-scf00525 | 27 |
| AX-158347201 | 27 | 50.052 | KV453299.1 | 8778492 | 27-scf00525 | 27 |
| AX-158347202 | 27 | 50.052 | KV453299.1 | 8778807 | 27-scf00525 | 27 |
| AX-158347203 | 27 | 50.052 | KV453299.1 | 8779498 | 27-scf00525 | 27 |
| AX-158347205 | 27 | 50.052 | KV453299.1 | 8781339 | 27-scf00525 | 27 |
| AX-157850567 | 27 | 50.052 | KV453299.1 | 8782058 | 27-scf00525 | 27 |
| AX-158347206 | 27 | 50.052 | KV453299.1 | 8782789 | 27-scf00525 | 27 |
| AX-158347208 | 27 | 50.052 | KV453299.1 | 8784763 | 27-scf00525 | 27 |
| AX-158347209 | 27 | 50.052 | KV453299.1 | 8785346 | 27-scf00525 | 27 |
| AX-158347211 | 27 | 50.052 | KV453299.1 | 8786586 | 27-scf00525 | 27 |
| AX-158347212 | 27 | 50.052 | KV453299.1 | 8787098 | 27-scf00525 | 27 |
| AX-157739363 | 27 | 50.052 | KV453299.1 | 8788480 | 27-scf00525 | 27 |
| AX-158347216 | 27 | 50.052 | KV453299.1 | 8790068 | 27-scf00525 | 27 |
| AX-158347218 | 27 | 50.052 | KV453299.1 | 8791943 | 27-scf00525 | 27 |
| AX-158347219 | 27 | 50.052 | KV453299.1 | 8792295 | 27-scf00525 | 27 |
| AX-158347220 | 27 | 50.052 | KV453299.1 | 8792699 | 27-scf00525 | 27 |
| AX-158347221 | 27 | 50.052 | KV453299.1 | 8793707 | 27-scf00525 | 27 |
| AX-157850568 | 27 | 50.052 | KV453299.1 | 8793746 | 27-scf00525 | 27 |
| AX-158347222 | 27 | 50.052 | KV453299.1 | 8794944 | 27-scf00525 | 27 |
| AX-158347225 | 27 | 50.052 | KV453299.1 | 8796825 | 27-scf00525 | 27 |
| AX-158347226 | 27 | 50.052 | KV453299.1 | 8797734 | 27-scf00525 | 27 |
| AX-158347227 | 27 | 50.052 | KV453299.1 | 8798006 | 27-scf00525 | 27 |
| AX-158347228 | 27 | 50.052 | KV453299.1 | 8798658 | 27-scf00525 | 27 |
| AX-158347229 | 27 | 50.052 | KV453299.1 | 8799503 | 27-scf00525 | 27 |
| AX-158347231 | 27 | 50.052 | KV453299.1 | 8801679 | 27-scf00525 | 27 |
| AX-158347232 | 27 | 50.052 | KV453299.1 | 8804334 | 27-scf00525 | 27 |
| AX-158347233 | 27 | 50.052 | KV453299.1 | 8804865 | 27-scf00525 | 27 |
| AX-157721335 | 27 | 50.052 | KV453299.1 | 8805656 | 27-scf00525 | 27 |
| AX-158347234 | 27 | 50.052 | KV453299.1 | 8806074 | 27-scf00525 | 27 |
| AX-158347236 | 27 | 50.052 | KV453299.1 | 8808128 | 27-scf00525 | 27 |
| AX-158347237 | 27 | 50.052 | KV453299.1 | 8808685 | 27-scf00525 | 27 |
| AX-158347238 | 27 | 50.052 | KV453299.1 | 8809058 | 27-scf00525 | 27 |
| AX-158347239 | 27 | 50.052 | KV453299.1 | 8809940 | 27-scf00525 | 27 |
| AX-157850569 | 27 | 50.052 | KV453299.1 | 8810736 | 27-scf00525 | 27 |
| AX-158347240 | 27 | 50.052 | KV453299.1 | 8812534 | 27-scf00525 | 27 |



|              |    |        |            |         |             |    |
|--------------|----|--------|------------|---------|-------------|----|
| AX-158347241 | 27 | 50.052 | KV453299.1 | 8813627 | 27-scf00525 | 27 |
| AX-158347242 | 27 | 50.052 | KV453299.1 | 8814644 | 27-scf00525 | 27 |
| AX-158347243 | 27 | 50.052 | KV453299.1 | 8814898 | 27-scf00525 | 27 |
| AX-158347244 | 27 | 50.052 | KV453299.1 | 8815201 | 27-scf00525 | 27 |
| AX-157744853 | 27 | 50.052 | KV453299.1 | 8815398 | 27-scf00525 | 27 |
| AX-158347245 | 27 | 50.052 | KV453299.1 | 8816560 | 27-scf00525 | 27 |
| AX-158347246 | 27 | 50.052 | KV453299.1 | 8817256 | 27-scf00525 | 27 |
| AX-158347247 | 27 | 50.052 | KV453299.1 | 8817366 | 27-scf00525 | 27 |
| AX-158347248 | 27 | 50.052 | KV453299.1 | 8817667 | 27-scf00525 | 27 |
| AX-158347249 | 27 | 50.052 | KV453299.1 | 8818513 | 27-scf00525 | 27 |
| AX-158347250 | 27 | 50.052 | KV453299.1 | 8819067 | 27-scf00525 | 27 |
| AX-158347251 | 27 | 50.052 | KV453299.1 | 8819361 | 27-scf00525 | 27 |
| AX-158347252 | 27 | 50.052 | KV453299.1 | 8819683 | 27-scf00525 | 27 |
| AX-158347253 | 27 | 50.052 | KV453299.1 | 8819975 | 27-scf00525 | 27 |
| AX-158347254 | 27 | 50.052 | KV453299.1 | 8821145 | 27-scf00525 | 27 |
| AX-158347256 | 27 | 50.052 | KV453299.1 | 8822706 | 27-scf00525 | 27 |
| AX-158347257 | 27 | 50.052 | KV453299.1 | 8823136 | 27-scf00525 | 27 |
| AX-158347258 | 27 | 50.052 | KV453299.1 | 8823630 | 27-scf00525 | 27 |
| AX-158347259 | 27 | 50.052 | KV453299.1 | 8824118 | 27-scf00525 | 27 |
| AX-157850570 | 27 | 50.052 | KV453299.1 | 8828256 | 27-scf00525 | 27 |
| AX-158347265 | 27 | 50.052 | KV453299.1 | 8837667 | 27-scf00525 | 27 |
| AX-158347278 | 27 | 50.052 | KV453299.1 | 8849982 | 27-scf00525 | 27 |
| AX-158347318 | 27 | 50.052 | KV453299.1 | 8889822 | 27-scf00525 | 27 |
| AX-157850578 | 27 | 50.052 | KV453299.1 | 8904972 | 27-scf00525 | 27 |
| AX-158347366 | 27 | 50.052 | KV453299.1 | 8936015 | 27-scf00525 | 27 |
| AX-158347378 | 27 | 50.052 | KV453299.1 | 8947001 | 27-scf00525 | 27 |
| AX-158347385 | 27 | 50.052 | KV453299.1 | 8953195 | 27-scf00525 | 27 |
| AX-158347387 | 27 | 50.052 | KV453299.1 | 8954774 | 27-scf00525 | 27 |
| AX-158347449 | 27 | 50.052 | KV453299.1 | 9016764 | 27-scf00525 | 27 |
| AX-158347466 | 27 | 50.052 | KV453299.1 | 9031183 | 27-scf00525 | 27 |
| AX-158347533 | 27 | 50.052 | KV453299.1 | 9089818 | 27-scf00525 | 27 |
| AX-158347543 | 27 | 50.052 | KV453299.1 | 9098152 | 27-scf00525 | 27 |
| AX-158347547 | 27 | 50.052 | KV453299.1 | 9102621 | 27-scf00525 | 27 |
| AX-158347550 | 27 | 50.052 | KV453299.1 | 9104046 | 27-scf00525 | 27 |
| AX-158347566 | 27 | 50.052 | KV453299.1 | 9120088 | 27-scf00525 | 27 |
| AX-158420459 | 27 | 50.052 | KV453299.1 | 9132416 | 27-scf00525 | 27 |
| AX-157850585 | 27 | 50.052 | KV453299.1 | 9133077 | 27-scf00525 | 27 |
| AX-158347612 | 27 | 50.052 | KV453299.1 | 9176516 | 27-scf00525 | 27 |
| AX-157756540 | 27 | 50.052 | KV453299.1 | 9177136 | 27-scf00525 | 27 |
| AX-158347614 | 27 | 50.052 | KV453299.1 | 9180971 | 27-scf00525 | 27 |
| AX-158347620 | 27 | 50.052 | KV453299.1 | 9194663 | 27-scf00525 | 27 |
| AX-158347628 | 27 | 50.052 | KV453299.1 | 9201761 | 27-scf00525 | 27 |
| AX-158347631 | 27 | 50.052 | KV453299.1 | 9203295 | 27-scf00525 | 27 |
| AX-157704097 | 27 | 50.052 | KV453299.1 | 9206816 | 27-scf00525 | 27 |
| AX-158347636 | 27 | 50.052 | KV453299.1 | 9207810 | 27-scf00525 | 27 |
| AX-157861970 | 27 | 50.052 | KV453299.1 | 9210980 | 27-scf00525 | 27 |
| AX-158347663 | 27 | 50.052 | KV453299.1 | 9237084 | 27-scf00525 | 27 |
| AX-158347675 | 27 | 50.052 | KV453299.1 | 9245310 | 27-scf00525 | 27 |
| AX-158347683 | 27 | 50.052 | KV453299.1 | 9253589 | 27-scf00525 | 27 |
| AX-157742353 | 27 | 50.052 | KV453299.1 | 9256977 | 27-scf00525 | 27 |
| AX-158347691 | 27 | 50.052 | KV453299.1 | 9260188 | 27-scf00525 | 27 |

|              |    |        |            |         |             |    |
|--------------|----|--------|------------|---------|-------------|----|
| AX-158347693 | 27 | 50.052 | KV453299.1 | 9262086 | 27-scf00525 | 27 |
| AX-158347694 | 27 | 50.052 | KV453299.1 | 9263299 | 27-scf00525 | 27 |
| AX-158347695 | 27 | 50.052 | KV453299.1 | 9264516 | 27-scf00525 | 27 |
| AX-158347697 | 27 | 50.052 | KV453299.1 | 9267997 | 27-scf00525 | 27 |
| AX-158347699 | 27 | 50.052 | KV453299.1 | 9270753 | 27-scf00525 | 27 |
| AX-158347700 | 27 | 50.052 | KV453299.1 | 9273650 | 27-scf00525 | 27 |
| AX-158347704 | 27 | 50.052 | KV453299.1 | 9281404 | 27-scf00525 | 27 |
| AX-158347707 | 27 | 50.052 | KV453299.1 | 9284268 | 27-scf00525 | 27 |
| AX-158347709 | 27 | 50.052 | KV453299.1 | 9285875 | 27-scf00525 | 27 |
| AX-158347710 | 27 | 50.052 | KV453299.1 | 9286229 | 27-scf00525 | 27 |
| AX-158347711 | 27 | 50.052 | KV453299.1 | 9286994 | 27-scf00525 | 27 |
| AX-158347714 | 27 | 50.052 | KV453299.1 | 9289359 | 27-scf00525 | 27 |
| AX-158347716 | 27 | 50.052 | KV453299.1 | 9290555 | 27-scf00525 | 27 |
| AX-158347717 | 27 | 50.052 | KV453299.1 | 9291181 | 27-scf00525 | 27 |
| AX-158347735 | 27 | 50.052 | KV453299.1 | 9308787 | 27-scf00525 | 27 |
| AX-158347738 | 27 | 50.052 | KV453299.1 | 9312889 | 27-scf00525 | 27 |
| AX-158347753 | 27 | 50.052 | KV453299.1 | 9330045 | 27-scf00525 | 27 |
| AX-158347754 | 27 | 50.052 | KV453299.1 | 9332018 | 27-scf00525 | 27 |
| AX-158347757 | 27 | 50.052 | KV453299.1 | 9335458 | 27-scf00525 | 27 |
| AX-158347758 | 27 | 50.052 | KV453299.1 | 9337113 | 27-scf00525 | 27 |
| AX-158347759 | 27 | 50.052 | KV453299.1 | 9337535 | 27-scf00525 | 27 |
| AX-158347760 | 27 | 50.052 | KV453299.1 | 9338899 | 27-scf00525 | 27 |
| AX-158347766 | 27 | 50.052 | KV453299.1 | 9344767 | 27-scf00525 | 27 |
| AX-158347767 | 27 | 50.052 | KV453299.1 | 9346219 | 27-scf00525 | 27 |
| AX-158347769 | 27 | 50.052 | KV453299.1 | 9348079 | 27-scf00525 | 27 |
| AX-157868156 | 27 | 50.052 | KV453299.1 | 9351982 | 27-scf00525 | 27 |
| AX-158347776 | 27 | 50.052 | KV453299.1 | 9357244 | 27-scf00525 | 27 |
| AX-158347778 | 27 | 50.052 | KV453299.1 | 9358957 | 27-scf00525 | 27 |
| AX-158347779 | 27 | 50.052 | KV453299.1 | 9359559 | 27-scf00525 | 27 |
| AX-157868157 | 27 | 50.052 | KV453299.1 | 9362346 | 27-scf00525 | 27 |
| AX-158347782 | 27 | 50.052 | KV453299.1 | 9362563 | 27-scf00525 | 27 |
| AX-158347783 | 27 | 50.052 | KV453299.1 | 9362857 | 27-scf00525 | 27 |
| AX-158347784 | 27 | 50.052 | KV453299.1 | 9363181 | 27-scf00525 | 27 |
| AX-158347787 | 27 | 50.052 | KV453299.1 | 9364349 | 27-scf00525 | 27 |
| AX-158347788 | 27 | 50.052 | KV453299.1 | 9365005 | 27-scf00525 | 27 |
| AX-158347789 | 27 | 50.052 | KV453299.1 | 9365774 | 27-scf00525 | 27 |
| AX-158347791 | 27 | 50.052 | KV453299.1 | 9367586 | 27-scf00525 | 27 |
| AX-158347792 | 27 | 50.052 | KV453299.1 | 9368496 | 27-scf00525 | 27 |
| AX-157850592 | 27 | 50.052 | KV453299.1 | 9368828 | 27-scf00525 | 27 |
| AX-158347799 | 27 | 50.052 | KV453299.1 | 9374806 | 27-scf00525 | 27 |
| AX-158347801 | 27 | 50.052 | KV453299.1 | 9377234 | 27-scf00525 | 27 |
| AX-158347804 | 27 | 50.052 | KV453299.1 | 9378890 | 27-scf00525 | 27 |
| AX-158347805 | 27 | 50.052 | KV453299.1 | 9379815 | 27-scf00525 | 27 |
| AX-158347806 | 27 | 50.052 | KV453299.1 | 9381797 | 27-scf00525 | 27 |
| AX-158347807 | 27 | 50.052 | KV453299.1 | 9382144 | 27-scf00525 | 27 |
| AX-158347818 | 27 | 50.052 | KV453299.1 | 9390279 | 27-scf00525 | 27 |
| AX-158347820 | 27 | 50.052 | KV453299.1 | 9394551 | 27-scf00525 | 27 |
| AX-158347821 | 27 | 50.052 | KV453299.1 | 9395023 | 27-scf00525 | 27 |
| AX-158347822 | 27 | 50.052 | KV453299.1 | 9395656 | 27-scf00525 | 27 |
| AX-158347824 | 27 | 50.052 | KV453299.1 | 9396445 | 27-scf00525 | 27 |
| AX-158347835 | 27 | 50.052 | KV453299.1 | 9413659 | 27-scf00525 | 27 |

|              |    |        |            |         |             |    |
|--------------|----|--------|------------|---------|-------------|----|
| AX-158347837 | 27 | 50.052 | KV453299.1 | 9414569 | 27-scf00525 | 27 |
| AX-158347838 | 27 | 50.052 | KV453299.1 | 9415581 | 27-scf00525 | 27 |
| AX-157850597 | 27 | 50.052 | KV453299.1 | 9416834 | 27-scf00525 | 27 |
| AX-158347839 | 27 | 50.052 | KV453299.1 | 9416922 | 27-scf00525 | 27 |
| AX-158347843 | 27 | 50.052 | KV453299.1 | 9419807 | 27-scf00525 | 27 |
| AX-158347846 | 27 | 50.052 | KV453299.1 | 9421876 | 27-scf00525 | 27 |
| AX-158347851 | 27 | 50.052 | KV453299.1 | 9426940 | 27-scf00525 | 27 |
| AX-158347852 | 27 | 50.052 | KV453299.1 | 9427649 | 27-scf00525 | 27 |
| AX-158347853 | 27 | 50.052 | KV453299.1 | 9429760 | 27-scf00525 | 27 |
| AX-158347854 | 27 | 50.052 | KV453299.1 | 9429973 | 27-scf00525 | 27 |
| AX-157710084 | 27 | 50.052 | KV453299.1 | 9440528 | 27-scf00525 | 27 |
| AX-157713244 | 27 | 50.052 | KV453299.1 | 9445369 | 27-scf00525 | 27 |
| AX-158347867 | 27 | 50.052 | KV453299.1 | 9446808 | 27-scf00525 | 27 |
| AX-158347868 | 27 | 50.052 | KV453299.1 | 9447498 | 27-scf00525 | 27 |
| AX-158347869 | 27 | 50.052 | KV453299.1 | 9448550 | 27-scf00525 | 27 |
| AX-158347876 | 27 | 50.052 | KV453299.1 | 9455001 | 27-scf00525 | 27 |
| AX-158347880 | 27 | 50.052 | KV453299.1 | 9457768 | 27-scf00525 | 27 |
| AX-158347881 | 27 | 50.052 | KV453299.1 | 9458299 | 27-scf00525 | 27 |
| AX-158347884 | 27 | 50.052 | KV453299.1 | 9462883 | 27-scf00525 | 27 |
| AX-157850598 | 27 | 50.052 | KV453299.1 | 9464467 | 27-scf00525 | 27 |
| AX-158347887 | 27 | 50.052 | KV453299.1 | 9465455 | 27-scf00525 | 27 |
| AX-158347888 | 27 | 50.052 | KV453299.1 | 9465833 | 27-scf00525 | 27 |
| AX-158347889 | 27 | 50.052 | KV453299.1 | 9466053 | 27-scf00525 | 27 |
| AX-158347894 | 27 | 50.052 | KV453299.1 | 9472703 | 27-scf00525 | 27 |
| AX-158347895 | 27 | 50.052 | KV453299.1 | 9473276 | 27-scf00525 | 27 |
| AX-158347896 | 27 | 50.052 | KV453299.1 | 9474207 | 27-scf00525 | 27 |
| AX-158347901 | 27 | 50.052 | KV453299.1 | 9477594 | 27-scf00525 | 27 |
| AX-158347903 | 27 | 50.052 | KV453299.1 | 9478158 | 27-scf00525 | 27 |
| AX-158347905 | 27 | 50.052 | KV453299.1 | 9479710 | 27-scf00525 | 27 |
| AX-158347906 | 27 | 50.052 | KV453299.1 | 9480323 | 27-scf00525 | 27 |
| AX-158347907 | 27 | 50.052 | KV453299.1 | 9481026 | 27-scf00525 | 27 |
| AX-158347908 | 27 | 50.052 | KV453299.1 | 9481437 | 27-scf00525 | 27 |
| AX-158347909 | 27 | 50.052 | KV453299.1 | 9481745 | 27-scf00525 | 27 |
| AX-158347911 | 27 | 50.052 | KV453299.1 | 9483122 | 27-scf00525 | 27 |
| AX-158347912 | 27 | 50.052 | KV453299.1 | 9483733 | 27-scf00525 | 27 |
| AX-158347916 | 27 | 50.052 | KV453299.1 | 9485964 | 27-scf00525 | 27 |
| AX-158347917 | 27 | 50.052 | KV453299.1 | 9486601 | 27-scf00525 | 27 |
| AX-158347921 | 27 | 50.052 | KV453299.1 | 9489346 | 27-scf00525 | 27 |
| AX-158347925 | 27 | 50.052 | KV453299.1 | 9494484 | 27-scf00525 | 27 |
| AX-157850600 | 27 | 50.052 | KV453299.1 | 9498274 | 27-scf00525 | 27 |
| AX-158347929 | 27 | 50.052 | KV453299.1 | 9499601 | 27-scf00525 | 27 |
| AX-158347930 | 27 | 50.052 | KV453299.1 | 9500228 | 27-scf00525 | 27 |
| AX-157724357 | 27 | 50.052 | KV453299.1 | 9502576 | 27-scf00525 | 27 |
| AX-157850601 | 27 | 50.052 | KV453299.1 | 9505429 | 27-scf00525 | 27 |
| AX-158347932 | 27 | 50.052 | KV453299.1 | 9505633 | 27-scf00525 | 27 |
| AX-158347938 | 27 | 50.052 | KV453299.1 | 9509914 | 27-scf00525 | 27 |
| AX-158347940 | 27 | 50.052 | KV453299.1 | 9514006 | 27-scf00525 | 27 |
| AX-158347941 | 27 | 50.052 | KV453299.1 | 9514411 | 27-scf00525 | 27 |
| AX-158347942 | 27 | 50.052 | KV453299.1 | 9514884 | 27-scf00525 | 27 |
| AX-158347954 | 27 | 50.052 | KV453299.1 | 9526889 | 27-scf00525 | 27 |
| AX-158347955 | 27 | 50.052 | KV453299.1 | 9527747 | 27-scf00525 | 27 |

|              |    |        |            |         |                 |    |
|--------------|----|--------|------------|---------|-----------------|----|
| AX-158347958 | 27 | 50.052 | KV453299.1 | 9530089 | 27-scf00525     | 27 |
| AX-158347963 | 27 | 50.052 | KV453299.1 | 9536195 | 27-scf00525     | 27 |
| AX-158347965 | 27 | 50.052 | KV453299.1 | 9537287 | 27-scf00525     | 27 |
| AX-158347968 | 27 | 50.052 | KV453299.1 | 9540392 | 27-scf00525     | 27 |
| AX-158347970 | 27 | 50.052 | KV453299.1 | 9542755 | 27-scf00525     | 27 |
| AX-158347971 | 27 | 50.052 | KV453299.1 | 9543680 | 27-scf00525     | 27 |
| AX-158347973 | 27 | 50.052 | KV453299.1 | 9544595 | 27-scf00525     | 27 |
| AX-158347975 | 27 | 50.052 | KV453299.1 | 9545676 | 27-scf00525     | 27 |
| AX-158347977 | 27 | 50.052 | KV453299.1 | 9548139 | 27-scf00525     | 27 |
| AX-157757119 | 27 | 50.052 | KV453299.1 | 9549279 | 27-scf00525     | 27 |
| AX-158347980 | 27 | 50.052 | KV453299.1 | 9550946 | 27-scf00525     | 27 |
| AX-158347982 | 27 | 50.052 | KV453299.1 | 9552226 | 27-scf00525     | 27 |
| AX-158347983 | 27 | 50.052 | KV453299.1 | 9552610 | 27-scf00525     | 27 |
| AX-158347985 | 27 | 50.052 | KV453299.1 | 9554873 | 27-scf00525     | 27 |
| AX-158347989 | 27 | 50.052 | KV453299.1 | 9558531 | 27-scf00525     | 27 |
| AX-158347990 | 27 | 50.052 | KV453299.1 | 9560449 | 27-scf00525     | 27 |
| AX-158347991 | 27 | 50.052 | KV453299.1 | 9561216 | 27-scf00525     | 27 |
| AX-158347992 | 27 | 50.052 | KV453299.1 | 9561849 | 27-scf00525     | 27 |
| AX-158347993 | 27 | 50.052 | KV453299.1 | 9562540 | 27-scf00525     | 27 |
| AX-158347994 | 27 | 50.052 | KV453299.1 | 9562954 | 27-scf00525     | 27 |
| AX-158347995 | 27 | 50.052 | KV453299.1 | 9563418 | 27-scf00525     | 27 |
| AX-158347997 | 27 | 50.052 | KV453299.1 | 9564514 | 27-scf00525     | 27 |
| AX-158347999 | 27 | 50.052 | KV453299.1 | 9566877 | 27-scf00525     | 27 |
| AX-158348000 | 27 | 50.052 | KV453299.1 | 9567432 | 27-scf00525     | 27 |
| AX-158348009 | 27 | 50.052 | KV453299.1 | 9577782 | 27-scf00525     | 27 |
| AX-158348012 | 27 | 50.052 | KV453299.1 | 9582890 | 27-scf00525     | 27 |
| AX-158348013 | 27 | 50.052 | KV453299.1 | 9583312 | 27-scf00525     | 27 |
| AX-158348014 | 27 | 50.052 | KV453299.1 | 9585634 | 27-scf00525     | 27 |
| AX-158348016 | 27 | 50.052 | KV453299.1 | 9586982 | 27-scf00525     | 27 |
| AX-158348019 | 27 | 50.052 | KV453299.1 | 9589372 | 27-scf00525     | 27 |
| AX-158348020 | 27 | 50.052 | KV453299.1 | 9590093 | 27-scf00525     | 27 |
| AX-158348021 | 27 | 50.052 | KV453299.1 | 9591256 | 27-scf00525     | 27 |
| AX-158348022 | 27 | 50.052 | KV453299.1 | 9592304 | 27-scf00525     | 27 |
| AX-158348023 | 27 | 50.052 | KV453299.1 | 9593540 | 27-scf00525     | 27 |
| AX-158348024 | 27 | 50.052 | KV453299.1 | 9597231 | 27-scf00525     | 27 |
| AX-158348026 | 27 | 50.052 | KV453299.1 | 9600124 | 27-scf00525     | 27 |
| AX-158348028 | 27 | 50.052 | KV453299.1 | 9601609 | 27-scf00525     | 27 |
| AX-158348029 | 27 | 50.052 | KV453299.1 | 9602446 | 27-scf00525     | 27 |
| AX-158348030 | 27 | 50.052 | KV453299.1 | 9603131 | 27-scf00525     | 27 |
| AX-158348031 | 27 | 50.052 | KV453299.1 | 9603760 | 27-scf00525     | 27 |
| AX-158348034 | 27 | 50.052 | KV453299.1 | 9607517 | 27-scf00525     | 27 |
| AX-157850604 | 27 | 50.052 | KV453299.1 | 9608155 | 27-scf00525     | 27 |
| AX-158348035 | 27 | 50.052 | KV453299.1 | 9608532 | 27-scf00525     | 27 |
| AX-158348036 | 27 | 50.052 | KV453299.1 | 9610905 | 27-scf00525     | 27 |
| AX-158388438 | 27 | 50.052 | KV453299.1 | 9627170 | 27-scf00525     | 27 |
| AX-158348055 | 27 | 50.052 | KV453299.1 | 9636156 | 27-scf00525     | 27 |
| AX-158348068 | 27 | 50.052 | KV453299.1 | 9650249 | 27-scf00525     | 27 |
| AX-158413192 | 27 | 50.052 | KV453299.1 | 9720588 | 27-scf00525     | 27 |
| AX-157703366 | 27 | 50.052 | DX097914.1 | 70      | IORI212 Ictalu  | UN |
| AX-157697136 | 27 | 50.052 | FI885709.1 | 219     | -IORI212 Ictalu | UN |
| AX-158345547 | 27 | 50.086 | KV453299.1 | 6893910 | 27-scf00525     | 27 |

|              |    |        |            |         |             |    |
|--------------|----|--------|------------|---------|-------------|----|
| AX-158345561 | 27 | 50.086 | KV453299.1 | 6912824 | 27-scf00525 | 27 |
| AX-157708472 | 27 | 50.086 | KV453299.1 | 7044936 | 27-scf00525 | 27 |
| AX-157861952 | 27 | 50.086 | KV453299.1 | 7087792 | 27-scf00525 | 27 |
| AX-157708998 | 27 | 50.086 | KV453299.1 | 7095352 | 27-scf00525 | 27 |
| AX-158345663 | 27 | 50.086 | KV453299.1 | 7098363 | 27-scf00525 | 27 |
| AX-158345669 | 27 | 50.086 | KV453299.1 | 7109946 | 27-scf00525 | 27 |
| AX-158345676 | 27 | 50.086 | KV453299.1 | 7121904 | 27-scf00525 | 27 |
| AX-157861954 | 27 | 50.086 | KV453299.1 | 7137492 | 27-scf00525 | 27 |
| AX-158345683 | 27 | 50.086 | KV453299.1 | 7139065 | 27-scf00525 | 27 |
| AX-158345785 | 27 | 50.086 | KV453299.1 | 7362630 | 27-scf00525 | 27 |
| AX-158345837 | 27 | 50.086 | KV453299.1 | 7456873 | 27-scf00525 | 27 |
| AX-158345844 | 27 | 50.086 | KV453299.1 | 7463418 | 27-scf00525 | 27 |
| AX-158345845 | 27 | 50.086 | KV453299.1 | 7465489 | 27-scf00525 | 27 |
| AX-158345848 | 27 | 50.086 | KV453299.1 | 7468115 | 27-scf00525 | 27 |
| AX-158345849 | 27 | 50.086 | KV453299.1 | 7469031 | 27-scf00525 | 27 |
| AX-158345851 | 27 | 50.086 | KV453299.1 | 7469582 | 27-scf00525 | 27 |
| AX-158345852 | 27 | 50.086 | KV453299.1 | 7470761 | 27-scf00525 | 27 |
| AX-158345853 | 27 | 50.086 | KV453299.1 | 7471517 | 27-scf00525 | 27 |
| AX-158345854 | 27 | 50.086 | KV453299.1 | 7472315 | 27-scf00525 | 27 |
| AX-158345860 | 27 | 50.086 | KV453299.1 | 7480929 | 27-scf00525 | 27 |
| AX-158345863 | 27 | 50.086 | KV453299.1 | 7482658 | 27-scf00525 | 27 |
| AX-158345865 | 27 | 50.086 | KV453299.1 | 7487041 | 27-scf00525 | 27 |
| AX-158345867 | 27 | 50.086 | KV453299.1 | 7489664 | 27-scf00525 | 27 |
| AX-158345868 | 27 | 50.086 | KV453299.1 | 7490083 | 27-scf00525 | 27 |
| AX-158345869 | 27 | 50.086 | KV453299.1 | 7492387 | 27-scf00525 | 27 |
| AX-158345871 | 27 | 50.086 | KV453299.1 | 7500688 | 27-scf00525 | 27 |
| AX-158345872 | 27 | 50.086 | KV453299.1 | 7502087 | 27-scf00525 | 27 |
| AX-158345879 | 27 | 50.086 | KV453299.1 | 7506034 | 27-scf00525 | 27 |
| AX-158345880 | 27 | 50.086 | KV453299.1 | 7506906 | 27-scf00525 | 27 |
| AX-158345881 | 27 | 50.086 | KV453299.1 | 7509849 | 27-scf00525 | 27 |
| AX-158345882 | 27 | 50.086 | KV453299.1 | 7510638 | 27-scf00525 | 27 |
| AX-158345883 | 27 | 50.086 | KV453299.1 | 7512546 | 27-scf00525 | 27 |
| AX-158345886 | 27 | 50.086 | KV453299.1 | 7514267 | 27-scf00525 | 27 |
| AX-158345887 | 27 | 50.086 | KV453299.1 | 7516402 | 27-scf00525 | 27 |
| AX-158345888 | 27 | 50.086 | KV453299.1 | 7517014 | 27-scf00525 | 27 |
| AX-157850511 | 27 | 50.086 | KV453299.1 | 7519889 | 27-scf00525 | 27 |
| AX-158419248 | 27 | 50.086 | KV453299.1 | 7524891 | 27-scf00525 | 27 |
| AX-158413158 | 27 | 50.086 | KV453299.1 | 7525479 | 27-scf00525 | 27 |
| AX-158419253 | 27 | 50.086 | KV453299.1 | 7525737 | 27-scf00525 | 27 |
| AX-158419262 | 27 | 50.086 | KV453299.1 | 7528086 | 27-scf00525 | 27 |
| AX-158345892 | 27 | 50.086 | KV453299.1 | 7530198 | 27-scf00525 | 27 |
| AX-158345893 | 27 | 50.086 | KV453299.1 | 7531217 | 27-scf00525 | 27 |
| AX-158345897 | 27 | 50.086 | KV453299.1 | 7538081 | 27-scf00525 | 27 |
| AX-158345898 | 27 | 50.086 | KV453299.1 | 7538346 | 27-scf00525 | 27 |
| AX-158345900 | 27 | 50.086 | KV453299.1 | 7540602 | 27-scf00525 | 27 |
| AX-158345901 | 27 | 50.086 | KV453299.1 | 7541736 | 27-scf00525 | 27 |
| AX-158345902 | 27 | 50.086 | KV453299.1 | 7545006 | 27-scf00525 | 27 |
| AX-158345906 | 27 | 50.086 | KV453299.1 | 7549149 | 27-scf00525 | 27 |
| AX-157850514 | 27 | 50.086 | KV453299.1 | 7578926 | 27-scf00525 | 27 |
| AX-158345933 | 27 | 50.086 | KV453299.1 | 7620777 | 27-scf00525 | 27 |
| AX-158345934 | 27 | 50.086 | KV453299.1 | 7621544 | 27-scf00525 | 27 |

|              |    |        |            |         |             |    |
|--------------|----|--------|------------|---------|-------------|----|
| AX-158345937 | 27 | 50.086 | KV453299.1 | 7624924 | 27-scf00525 | 27 |
| AX-158345939 | 27 | 50.086 | KV453299.1 | 7626208 | 27-scf00525 | 27 |
| AX-158345983 | 27 | 50.086 | KV453299.1 | 7672663 | 27-scf00525 | 27 |
| AX-158345986 | 27 | 50.086 | KV453299.1 | 7674958 | 27-scf00525 | 27 |
| AX-157861959 | 27 | 50.086 | KV453299.1 | 7722658 | 27-scf00525 | 27 |
| AX-158346056 | 27 | 50.086 | KV453299.1 | 7741925 | 27-scf00525 | 27 |
| AX-158346561 | 27 | 50.086 | KV453299.1 | 8190138 | 27-scf00525 | 27 |
| AX-157861965 | 27 | 50.086 | KV453299.1 | 8420971 | 27-scf00525 | 27 |
| AX-157774027 | 27 | 50.086 | KV453299.1 | 9182691 | 27-scf00525 | 27 |
| AX-158347849 | 27 | 50.086 | KV453299.1 | 9425373 | 27-scf00525 | 27 |
| AX-158347937 | 27 | 50.086 | KV453299.1 | 9509163 | 27-scf00525 | 27 |
| AX-157726506 | 27 | 50.122 | KV453299.1 | 7491862 | 27-scf00525 | 27 |
| AX-158345870 | 27 | 50.147 | KV453299.1 | 7497515 | 27-scf00525 | 27 |
| AX-158345884 | 27 | 50.171 | KV453299.1 | 7512909 | 27-scf00525 | 27 |
| AX-158419261 | 27 | 50.185 | KV453299.1 | 7527873 | 27-scf00525 | 27 |
| AX-158345896 | 27 | 50.205 | KV453299.1 | 7535647 | 27-scf00525 | 27 |
| AX-158345909 | 27 | 50.225 | KV453299.1 | 7560800 | 27-scf00525 | 27 |
| AX-158345911 | 27 | 50.249 | KV453299.1 | 7571814 | 27-scf00525 | 27 |
| AX-158345526 | 27 | 50.271 | KV453299.1 | 6868721 | 27-scf00525 | 27 |
| AX-157850489 | 27 | 50.271 | KV453299.1 | 6959708 | 27-scf00525 | 27 |
| AX-158345598 | 27 | 50.271 | KV453299.1 | 6966872 | 27-scf00525 | 27 |
| AX-158345617 | 27 | 50.271 | KV453299.1 | 7013918 | 27-scf00525 | 27 |
| AX-158345618 | 27 | 50.271 | KV453299.1 | 7015237 | 27-scf00525 | 27 |
| AX-158345629 | 27 | 50.271 | KV453299.1 | 7030512 | 27-scf00525 | 27 |
| AX-158345692 | 27 | 50.271 | KV453299.1 | 7156254 | 27-scf00525 | 27 |
| AX-158345706 | 27 | 50.271 | KV453299.1 | 7181038 | 27-scf00525 | 27 |
| AX-158345710 | 27 | 50.271 | KV453299.1 | 7189969 | 27-scf00525 | 27 |
| AX-158345737 | 27 | 50.271 | KV453299.1 | 7240627 | 27-scf00525 | 27 |
| AX-158345757 | 27 | 50.271 | KV453299.1 | 7284883 | 27-scf00525 | 27 |
| AX-158345758 | 27 | 50.271 | KV453299.1 | 7285975 | 27-scf00525 | 27 |
| AX-158345761 | 27 | 50.271 | KV453299.1 | 7292658 | 27-scf00525 | 27 |
| AX-158345763 | 27 | 50.271 | KV453299.1 | 7310601 | 27-scf00525 | 27 |
| AX-158345765 | 27 | 50.271 | KV453299.1 | 7312989 | 27-scf00525 | 27 |
| AX-158345767 | 27 | 50.271 | KV453299.1 | 7315577 | 27-scf00525 | 27 |
| AX-158345784 | 27 | 50.271 | KV453299.1 | 7359546 | 27-scf00525 | 27 |
| AX-158345789 | 27 | 50.271 | KV453299.1 | 7378697 | 27-scf00525 | 27 |
| AX-158345792 | 27 | 50.271 | KV453299.1 | 7391690 | 27-scf00525 | 27 |
| AX-158345796 | 27 | 50.271 | KV453299.1 | 7396634 | 27-scf00525 | 27 |
| AX-158345798 | 27 | 50.271 | KV453299.1 | 7403420 | 27-scf00525 | 27 |
| AX-158345803 | 27 | 50.271 | KV453299.1 | 7414106 | 27-scf00525 | 27 |
| AX-158345805 | 27 | 50.271 | KV453299.1 | 7415992 | 27-scf00525 | 27 |
| AX-158345809 | 27 | 50.271 | KV453299.1 | 7422140 | 27-scf00525 | 27 |
| AX-158345812 | 27 | 50.271 | KV453299.1 | 7426477 | 27-scf00525 | 27 |
| AX-158345814 | 27 | 50.271 | KV453299.1 | 7428097 | 27-scf00525 | 27 |
| AX-158345816 | 27 | 50.271 | KV453299.1 | 7429808 | 27-scf00525 | 27 |
| AX-158345818 | 27 | 50.271 | KV453299.1 | 7432260 | 27-scf00525 | 27 |
| AX-158345819 | 27 | 50.271 | KV453299.1 | 7433647 | 27-scf00525 | 27 |
| AX-158345820 | 27 | 50.271 | KV453299.1 | 7434975 | 27-scf00525 | 27 |
| AX-158345821 | 27 | 50.271 | KV453299.1 | 7435658 | 27-scf00525 | 27 |
| AX-158345822 | 27 | 50.271 | KV453299.1 | 7436352 | 27-scf00525 | 27 |
| AX-158345823 | 27 | 50.271 | KV453299.1 | 7436861 | 27-scf00525 | 27 |

|              |    |        |            |         |             |    |
|--------------|----|--------|------------|---------|-------------|----|
| AX-158345825 | 27 | 50.271 | KV453299.1 | 7438228 | 27-scf00525 | 27 |
| AX-158345827 | 27 | 50.271 | KV453299.1 | 7441678 | 27-scf00525 | 27 |
| AX-158413156 | 27 | 50.271 | KV453299.1 | 7442507 | 27-scf00525 | 27 |
| AX-158345832 | 27 | 50.271 | KV453299.1 | 7449844 | 27-scf00525 | 27 |
| AX-158345876 | 27 | 50.271 | KV453299.1 | 7504860 | 27-scf00525 | 27 |
| AX-158345917 | 27 | 50.271 | KV453299.1 | 7583489 | 27-scf00525 | 27 |
| AX-157850515 | 27 | 50.271 | KV453299.1 | 7588057 | 27-scf00525 | 27 |
| AX-158345922 | 27 | 50.271 | KV453299.1 | 7601599 | 27-scf00525 | 27 |
| AX-158345926 | 27 | 50.271 | KV453299.1 | 7613605 | 27-scf00525 | 27 |
| AX-158345928 | 27 | 50.271 | KV453299.1 | 7615605 | 27-scf00525 | 27 |
| AX-158345930 | 27 | 50.271 | KV453299.1 | 7617581 | 27-scf00525 | 27 |
| AX-158345932 | 27 | 50.271 | KV453299.1 | 7620122 | 27-scf00525 | 27 |
| AX-158345938 | 27 | 50.271 | KV453299.1 | 7625685 | 27-scf00525 | 27 |
| AX-158345944 | 27 | 50.271 | KV453299.1 | 7631184 | 27-scf00525 | 27 |
| AX-158345945 | 27 | 50.271 | KV453299.1 | 7632932 | 27-scf00525 | 27 |
| AX-157850517 | 27 | 50.271 | KV453299.1 | 7634133 | 27-scf00525 | 27 |
| AX-158345947 | 27 | 50.271 | KV453299.1 | 7637207 | 27-scf00525 | 27 |
| AX-158345948 | 27 | 50.271 | KV453299.1 | 7637559 | 27-scf00525 | 27 |
| AX-158345949 | 27 | 50.271 | KV453299.1 | 7638496 | 27-scf00525 | 27 |
| AX-158345950 | 27 | 50.271 | KV453299.1 | 7639037 | 27-scf00525 | 27 |
| AX-158345951 | 27 | 50.271 | KV453299.1 | 7639743 | 27-scf00525 | 27 |
| AX-158419263 | 27 | 50.271 | KV453299.1 | 7641548 | 27-scf00525 | 27 |
| AX-158345954 | 27 | 50.271 | KV453299.1 | 7641679 | 27-scf00525 | 27 |
| AX-158345955 | 27 | 50.271 | KV453299.1 | 7643020 | 27-scf00525 | 27 |
| AX-158345960 | 27 | 50.271 | KV453299.1 | 7647119 | 27-scf00525 | 27 |
| AX-158345961 | 27 | 50.271 | KV453299.1 | 7648116 | 27-scf00525 | 27 |
| AX-158345962 | 27 | 50.271 | KV453299.1 | 7649405 | 27-scf00525 | 27 |
| AX-158345963 | 27 | 50.271 | KV453299.1 | 7651258 | 27-scf00525 | 27 |
| AX-158345965 | 27 | 50.271 | KV453299.1 | 7652879 | 27-scf00525 | 27 |
| AX-158345966 | 27 | 50.271 | KV453299.1 | 7653622 | 27-scf00525 | 27 |
| AX-158345967 | 27 | 50.271 | KV453299.1 | 7655084 | 27-scf00525 | 27 |
| AX-158345968 | 27 | 50.271 | KV453299.1 | 7655624 | 27-scf00525 | 27 |
| AX-158345969 | 27 | 50.271 | KV453299.1 | 7657000 | 27-scf00525 | 27 |
| AX-158345970 | 27 | 50.271 | KV453299.1 | 7657603 | 27-scf00525 | 27 |
| AX-158345972 | 27 | 50.271 | KV453299.1 | 7659142 | 27-scf00525 | 27 |
| AX-158345973 | 27 | 50.271 | KV453299.1 | 7660155 | 27-scf00525 | 27 |
| AX-158345974 | 27 | 50.271 | KV453299.1 | 7661901 | 27-scf00525 | 27 |
| AX-158345975 | 27 | 50.271 | KV453299.1 | 7662358 | 27-scf00525 | 27 |
| AX-158345977 | 27 | 50.271 | KV453299.1 | 7663360 | 27-scf00525 | 27 |
| AX-158345979 | 27 | 50.271 | KV453299.1 | 7664114 | 27-scf00525 | 27 |
| AX-158419264 | 27 | 50.271 | KV453299.1 | 7664672 | 27-scf00525 | 27 |
| AX-158345980 | 27 | 50.271 | KV453299.1 | 7664774 | 27-scf00525 | 27 |
| AX-158345984 | 27 | 50.271 | KV453299.1 | 7674117 | 27-scf00525 | 27 |
| AX-158345985 | 27 | 50.271 | KV453299.1 | 7674680 | 27-scf00525 | 27 |
| AX-158345988 | 27 | 50.271 | KV453299.1 | 7677200 | 27-scf00525 | 27 |
| AX-158345989 | 27 | 50.271 | KV453299.1 | 7678690 | 27-scf00525 | 27 |
| AX-158345990 | 27 | 50.271 | KV453299.1 | 7679195 | 27-scf00525 | 27 |
| AX-158345993 | 27 | 50.271 | KV453299.1 | 7681084 | 27-scf00525 | 27 |
| AX-158345994 | 27 | 50.271 | KV453299.1 | 7682065 | 27-scf00525 | 27 |
| AX-158345995 | 27 | 50.271 | KV453299.1 | 7683114 | 27-scf00525 | 27 |
| AX-158345997 | 27 | 50.271 | KV453299.1 | 7684879 | 27-scf00525 | 27 |

|              |    |        |            |         |             |    |
|--------------|----|--------|------------|---------|-------------|----|
| AX-158345998 | 27 | 50.271 | KV453299.1 | 7685604 | 27-scf00525 | 27 |
| AX-158345999 | 27 | 50.271 | KV453299.1 | 7685992 | 27-scf00525 | 27 |
| AX-158346000 | 27 | 50.271 | KV453299.1 | 7686581 | 27-scf00525 | 27 |
| AX-158346001 | 27 | 50.271 | KV453299.1 | 7687550 | 27-scf00525 | 27 |
| AX-158346002 | 27 | 50.271 | KV453299.1 | 7688403 | 27-scf00525 | 27 |
| AX-158346003 | 27 | 50.271 | KV453299.1 | 7689518 | 27-scf00525 | 27 |
| AX-158346004 | 27 | 50.271 | KV453299.1 | 7690679 | 27-scf00525 | 27 |
| AX-158346005 | 27 | 50.271 | KV453299.1 | 7691137 | 27-scf00525 | 27 |
| AX-158346006 | 27 | 50.271 | KV453299.1 | 7691931 | 27-scf00525 | 27 |
| AX-158346007 | 27 | 50.271 | KV453299.1 | 7694616 | 27-scf00525 | 27 |
| AX-158346008 | 27 | 50.271 | KV453299.1 | 7694987 | 27-scf00525 | 27 |
| AX-158346011 | 27 | 50.271 | KV453299.1 | 7697251 | 27-scf00525 | 27 |
| AX-158346013 | 27 | 50.271 | KV453299.1 | 7698155 | 27-scf00525 | 27 |
| AX-158346016 | 27 | 50.271 | KV453299.1 | 7701349 | 27-scf00525 | 27 |
| AX-158346023 | 27 | 50.271 | KV453299.1 | 7710095 | 27-scf00525 | 27 |
| AX-158346024 | 27 | 50.271 | KV453299.1 | 7710952 | 27-scf00525 | 27 |
| AX-157850518 | 27 | 50.271 | KV453299.1 | 7712138 | 27-scf00525 | 27 |
| AX-158346026 | 27 | 50.271 | KV453299.1 | 7712425 | 27-scf00525 | 27 |
| AX-158346028 | 27 | 50.271 | KV453299.1 | 7714102 | 27-scf00525 | 27 |
| AX-158346029 | 27 | 50.271 | KV453299.1 | 7714666 | 27-scf00525 | 27 |
| AX-158346037 | 27 | 50.271 | KV453299.1 | 7721762 | 27-scf00525 | 27 |
| AX-158346038 | 27 | 50.271 | KV453299.1 | 7722776 | 27-scf00525 | 27 |
| AX-158346048 | 27 | 50.271 | KV453299.1 | 7734283 | 27-scf00525 | 27 |
| AX-158346049 | 27 | 50.271 | KV453299.1 | 7735403 | 27-scf00525 | 27 |
| AX-158346054 | 27 | 50.271 | KV453299.1 | 7739907 | 27-scf00525 | 27 |
| AX-158346058 | 27 | 50.271 | KV453299.1 | 7745013 | 27-scf00525 | 27 |
| AX-158346070 | 27 | 50.271 | KV453299.1 | 7755162 | 27-scf00525 | 27 |
| AX-158346072 | 27 | 50.271 | KV453299.1 | 7757274 | 27-scf00525 | 27 |
| AX-158346084 | 27 | 50.271 | KV453299.1 | 7768111 | 27-scf00525 | 27 |
| AX-158346088 | 27 | 50.271 | KV453299.1 | 7773198 | 27-scf00525 | 27 |
| AX-158346089 | 27 | 50.271 | KV453299.1 | 7775493 | 27-scf00525 | 27 |
| AX-158346090 | 27 | 50.271 | KV453299.1 | 7776413 | 27-scf00525 | 27 |
| AX-158346098 | 27 | 50.271 | KV453299.1 | 7784247 | 27-scf00525 | 27 |
| AX-158346099 | 27 | 50.271 | KV453299.1 | 7784901 | 27-scf00525 | 27 |
| AX-158346100 | 27 | 50.271 | KV453299.1 | 7785536 | 27-scf00525 | 27 |
| AX-158346105 | 27 | 50.271 | KV453299.1 | 7789000 | 27-scf00525 | 27 |
| AX-158346106 | 27 | 50.271 | KV453299.1 | 7790288 | 27-scf00525 | 27 |
| AX-158346111 | 27 | 50.271 | KV453299.1 | 7793950 | 27-scf00525 | 27 |
| AX-158346113 | 27 | 50.271 | KV453299.1 | 7795113 | 27-scf00525 | 27 |
| AX-158346118 | 27 | 50.271 | KV453299.1 | 7799378 | 27-scf00525 | 27 |
| AX-158346125 | 27 | 50.271 | KV453299.1 | 7805392 | 27-scf00525 | 27 |
| AX-158346126 | 27 | 50.271 | KV453299.1 | 7806662 | 27-scf00525 | 27 |
| AX-157861961 | 27 | 50.271 | KV453299.1 | 7809214 | 27-scf00525 | 27 |
| AX-158346147 | 27 | 50.271 | KV453299.1 | 7822274 | 27-scf00525 | 27 |
| AX-158346153 | 27 | 50.271 | KV453299.1 | 7829958 | 27-scf00525 | 27 |
| AX-158346155 | 27 | 50.271 | KV453299.1 | 7832134 | 27-scf00525 | 27 |
| AX-158346158 | 27 | 50.271 | KV453299.1 | 7836411 | 27-scf00525 | 27 |
| AX-158346162 | 27 | 50.271 | KV453299.1 | 7841956 | 27-scf00525 | 27 |
| AX-158346163 | 27 | 50.271 | KV453299.1 | 7843018 | 27-scf00525 | 27 |
| AX-158346169 | 27 | 50.271 | KV453299.1 | 7846565 | 27-scf00525 | 27 |
| AX-158346176 | 27 | 50.271 | KV453299.1 | 7854001 | 27-scf00525 | 27 |



|              |    |        |            |         |             |    |
|--------------|----|--------|------------|---------|-------------|----|
| AX-157741233 | 27 | 50.271 | KV453299.1 | 7854487 | 27-scf00525 | 27 |
| AX-157770608 | 27 | 50.271 | KV453299.1 | 7855356 | 27-scf00525 | 27 |
| AX-158346177 | 27 | 50.271 | KV453299.1 | 7855546 | 27-scf00525 | 27 |
| AX-157850525 | 27 | 50.271 | KV453299.1 | 7858960 | 27-scf00525 | 27 |
| AX-158346182 | 27 | 50.271 | KV453299.1 | 7859235 | 27-scf00525 | 27 |
| AX-158346183 | 27 | 50.271 | KV453299.1 | 7859602 | 27-scf00525 | 27 |
| AX-158346188 | 27 | 50.271 | KV453299.1 | 7866444 | 27-scf00525 | 27 |
| AX-157850526 | 27 | 50.271 | KV453299.1 | 7866988 | 27-scf00525 | 27 |
| AX-158346196 | 27 | 50.271 | KV453299.1 | 7874027 | 27-scf00525 | 27 |
| AX-157850527 | 27 | 50.271 | KV453299.1 | 7877206 | 27-scf00525 | 27 |
| AX-158346199 | 27 | 50.271 | KV453299.1 | 7877263 | 27-scf00525 | 27 |
| AX-158346200 | 27 | 50.271 | KV453299.1 | 7880076 | 27-scf00525 | 27 |
| AX-158420374 | 27 | 50.271 | KV453299.1 | 7883063 | 27-scf00525 | 27 |
| AX-158346205 | 27 | 50.271 | KV453299.1 | 7886010 | 27-scf00525 | 27 |
| AX-158346214 | 27 | 50.271 | KV453299.1 | 7894769 | 27-scf00525 | 27 |
| AX-158346218 | 27 | 50.271 | KV453299.1 | 7896880 | 27-scf00525 | 27 |
| AX-158346222 | 27 | 50.271 | KV453299.1 | 7899461 | 27-scf00525 | 27 |
| AX-158346224 | 27 | 50.271 | KV453299.1 | 7900499 | 27-scf00525 | 27 |
| AX-158346227 | 27 | 50.271 | KV453299.1 | 7902257 | 27-scf00525 | 27 |
| AX-158346230 | 27 | 50.271 | KV453299.1 | 7903447 | 27-scf00525 | 27 |
| AX-157850529 | 27 | 50.271 | KV453299.1 | 7907016 | 27-scf00525 | 27 |
| AX-158419266 | 27 | 50.271 | KV453299.1 | 7909863 | 27-scf00525 | 27 |
| AX-157719813 | 27 | 50.271 | KV453299.1 | 7916150 | 27-scf00525 | 27 |
| AX-158346252 | 27 | 50.271 | KV453299.1 | 7921869 | 27-scf00525 | 27 |
| AX-158346304 | 27 | 50.271 | KV453299.1 | 7972314 | 27-scf00525 | 27 |
| AX-158346349 | 27 | 50.271 | KV453299.1 | 8003892 | 27-scf00525 | 27 |
| AX-158346355 | 27 | 50.271 | KV453299.1 | 8009482 | 27-scf00525 | 27 |
| AX-158346357 | 27 | 50.271 | KV453299.1 | 8011001 | 27-scf00525 | 27 |
| AX-158346358 | 27 | 50.271 | KV453299.1 | 8011713 | 27-scf00525 | 27 |
| AX-158346361 | 27 | 50.271 | KV453299.1 | 8014344 | 27-scf00525 | 27 |
| AX-158346362 | 27 | 50.271 | KV453299.1 | 8014886 | 27-scf00525 | 27 |
| AX-158346364 | 27 | 50.271 | KV453299.1 | 8016674 | 27-scf00525 | 27 |
| AX-158346365 | 27 | 50.271 | KV453299.1 | 8017782 | 27-scf00525 | 27 |
| AX-158346366 | 27 | 50.271 | KV453299.1 | 8018145 | 27-scf00525 | 27 |
| AX-158346368 | 27 | 50.271 | KV453299.1 | 8019676 | 27-scf00525 | 27 |
| AX-158346374 | 27 | 50.271 | KV453299.1 | 8024745 | 27-scf00525 | 27 |
| AX-158346377 | 27 | 50.271 | KV453299.1 | 8028533 | 27-scf00525 | 27 |
| AX-158346392 | 27 | 50.271 | KV453299.1 | 8040301 | 27-scf00525 | 27 |
| AX-158346400 | 27 | 50.271 | KV453299.1 | 8048141 | 27-scf00525 | 27 |
| AX-158346406 | 27 | 50.271 | KV453299.1 | 8053096 | 27-scf00525 | 27 |
| AX-158346410 | 27 | 50.271 | KV453299.1 | 8056257 | 27-scf00525 | 27 |
| AX-158413169 | 27 | 50.271 | KV453299.1 | 8057616 | 27-scf00525 | 27 |
| AX-158346419 | 27 | 50.271 | KV453299.1 | 8065610 | 27-scf00525 | 27 |
| AX-158346421 | 27 | 50.271 | KV453299.1 | 8066840 | 27-scf00525 | 27 |
| AX-158346422 | 27 | 50.271 | KV453299.1 | 8067768 | 27-scf00525 | 27 |
| AX-158346427 | 27 | 50.271 | KV453299.1 | 8070761 | 27-scf00525 | 27 |
| AX-158346435 | 27 | 50.271 | KV453299.1 | 8076020 | 27-scf00525 | 27 |
| AX-158346437 | 27 | 50.271 | KV453299.1 | 8076824 | 27-scf00525 | 27 |
| AX-158346439 | 27 | 50.271 | KV453299.1 | 8078864 | 27-scf00525 | 27 |
| AX-158346450 | 27 | 50.271 | KV453299.1 | 8086282 | 27-scf00525 | 27 |
| AX-158346451 | 27 | 50.271 | KV453299.1 | 8086539 | 27-scf00525 | 27 |

|              |    |        |            |         |             |    |
|--------------|----|--------|------------|---------|-------------|----|
| AX-158346454 | 27 | 50.271 | KV453299.1 | 8088681 | 27-scf00525 | 27 |
| AX-158346461 | 27 | 50.271 | KV453299.1 | 8092760 | 27-scf00525 | 27 |
| AX-158346464 | 27 | 50.271 | KV453299.1 | 8095438 | 27-scf00525 | 27 |
| AX-158346475 | 27 | 50.271 | KV453299.1 | 8105418 | 27-scf00525 | 27 |
| AX-158346476 | 27 | 50.271 | KV453299.1 | 8107513 | 27-scf00525 | 27 |
| AX-158346478 | 27 | 50.271 | KV453299.1 | 8108754 | 27-scf00525 | 27 |
| AX-158346480 | 27 | 50.271 | KV453299.1 | 8109705 | 27-scf00525 | 27 |
| AX-158346481 | 27 | 50.271 | KV453299.1 | 8110481 | 27-scf00525 | 27 |
| AX-158346482 | 27 | 50.271 | KV453299.1 | 8111932 | 27-scf00525 | 27 |
| AX-158346485 | 27 | 50.271 | KV453299.1 | 8113405 | 27-scf00525 | 27 |
| AX-158346486 | 27 | 50.271 | KV453299.1 | 8113927 | 27-scf00525 | 27 |
| AX-157868139 | 27 | 50.271 | KV453299.1 | 8117931 | 27-scf00525 | 27 |
| AX-158346491 | 27 | 50.271 | KV453299.1 | 8118790 | 27-scf00525 | 27 |
| AX-158381646 | 27 | 50.271 | KV453299.1 | 8122324 | 27-scf00525 | 27 |
| AX-158346502 | 27 | 50.271 | KV453299.1 | 8128227 | 27-scf00525 | 27 |
| AX-158346503 | 27 | 50.271 | KV453299.1 | 8128890 | 27-scf00525 | 27 |
| AX-158346505 | 27 | 50.271 | KV453299.1 | 8130079 | 27-scf00525 | 27 |
| AX-158346511 | 27 | 50.271 | KV453299.1 | 8135820 | 27-scf00525 | 27 |
| AX-158346512 | 27 | 50.271 | KV453299.1 | 8137568 | 27-scf00525 | 27 |
| AX-158346513 | 27 | 50.271 | KV453299.1 | 8139545 | 27-scf00525 | 27 |
| AX-158346516 | 27 | 50.271 | KV453299.1 | 8141193 | 27-scf00525 | 27 |
| AX-158346525 | 27 | 50.271 | KV453299.1 | 8152479 | 27-scf00525 | 27 |
| AX-158346528 | 27 | 50.271 | KV453299.1 | 8154442 | 27-scf00525 | 27 |
| AX-158346542 | 27 | 50.271 | KV453299.1 | 8167889 | 27-scf00525 | 27 |
| AX-158346544 | 27 | 50.271 | KV453299.1 | 8170510 | 27-scf00525 | 27 |
| AX-158346550 | 27 | 50.271 | KV453299.1 | 8181250 | 27-scf00525 | 27 |
| AX-158346552 | 27 | 50.271 | KV453299.1 | 8182236 | 27-scf00525 | 27 |
| AX-158346553 | 27 | 50.271 | KV453299.1 | 8183474 | 27-scf00525 | 27 |
| AX-158346563 | 27 | 50.271 | KV453299.1 | 8193035 | 27-scf00525 | 27 |
| AX-158346564 | 27 | 50.271 | KV453299.1 | 8194257 | 27-scf00525 | 27 |
| AX-158346567 | 27 | 50.271 | KV453299.1 | 8196037 | 27-scf00525 | 27 |
| AX-158346568 | 27 | 50.271 | KV453299.1 | 8196745 | 27-scf00525 | 27 |
| AX-158346576 | 27 | 50.271 | KV453299.1 | 8204073 | 27-scf00525 | 27 |
| AX-158346577 | 27 | 50.271 | KV453299.1 | 8204517 | 27-scf00525 | 27 |
| AX-158346580 | 27 | 50.271 | KV453299.1 | 8207667 | 27-scf00525 | 27 |
| AX-158346581 | 27 | 50.271 | KV453299.1 | 8208473 | 27-scf00525 | 27 |
| AX-158346582 | 27 | 50.271 | KV453299.1 | 8209410 | 27-scf00525 | 27 |
| AX-158346584 | 27 | 50.271 | KV453299.1 | 8210905 | 27-scf00525 | 27 |
| AX-158346588 | 27 | 50.271 | KV453299.1 | 8214390 | 27-scf00525 | 27 |
| AX-158346597 | 27 | 50.271 | KV453299.1 | 8222997 | 27-scf00525 | 27 |
| AX-158346598 | 27 | 50.271 | KV453299.1 | 8223459 | 27-scf00525 | 27 |
| AX-158419276 | 27 | 50.271 | KV453299.1 | 8226540 | 27-scf00525 | 27 |
| AX-158346606 | 27 | 50.271 | KV453299.1 | 8231712 | 27-scf00525 | 27 |
| AX-157750171 | 27 | 50.271 | KV453299.1 | 8234722 | 27-scf00525 | 27 |
| AX-158346608 | 27 | 50.271 | KV453299.1 | 8235119 | 27-scf00525 | 27 |
| AX-158346609 | 27 | 50.271 | KV453299.1 | 8235503 | 27-scf00525 | 27 |
| AX-158346610 | 27 | 50.271 | KV453299.1 | 8236203 | 27-scf00525 | 27 |
| AX-158346618 | 27 | 50.271 | KV453299.1 | 8241343 | 27-scf00525 | 27 |
| AX-158346623 | 27 | 50.271 | KV453299.1 | 8245042 | 27-scf00525 | 27 |
| AX-158346626 | 27 | 50.271 | KV453299.1 | 8248260 | 27-scf00525 | 27 |
| AX-158346627 | 27 | 50.271 | KV453299.1 | 8248623 | 27-scf00525 | 27 |

|              |    |        |            |         |             |    |
|--------------|----|--------|------------|---------|-------------|----|
| AX-158346628 | 27 | 50.271 | KV453299.1 | 8249250 | 27-scf00525 | 27 |
| AX-158346631 | 27 | 50.271 | KV453299.1 | 8251168 | 27-scf00525 | 27 |
| AX-158346637 | 27 | 50.271 | KV453299.1 | 8257486 | 27-scf00525 | 27 |
| AX-158346644 | 27 | 50.271 | KV453299.1 | 8261888 | 27-scf00525 | 27 |
| AX-158346656 | 27 | 50.271 | KV453299.1 | 8272572 | 27-scf00525 | 27 |
| AX-157752934 | 27 | 50.271 | KV453299.1 | 8273433 | 27-scf00525 | 27 |
| AX-158346665 | 27 | 50.271 | KV453299.1 | 8279253 | 27-scf00525 | 27 |
| AX-158346682 | 27 | 50.271 | KV453299.1 | 8296045 | 27-scf00525 | 27 |
| AX-158419279 | 27 | 50.271 | KV453299.1 | 8297413 | 27-scf00525 | 27 |
| AX-158346684 | 27 | 50.271 | KV453299.1 | 8297731 | 27-scf00525 | 27 |
| AX-158346685 | 27 | 50.271 | KV453299.1 | 8298207 | 27-scf00525 | 27 |
| AX-158346686 | 27 | 50.271 | KV453299.1 | 8299139 | 27-scf00525 | 27 |
| AX-158346688 | 27 | 50.271 | KV453299.1 | 8300237 | 27-scf00525 | 27 |
| AX-158346689 | 27 | 50.271 | KV453299.1 | 8300646 | 27-scf00525 | 27 |
| AX-158346690 | 27 | 50.271 | KV453299.1 | 8301007 | 27-scf00525 | 27 |
| AX-158346694 | 27 | 50.271 | KV453299.1 | 8303991 | 27-scf00525 | 27 |
| AX-158346697 | 27 | 50.271 | KV453299.1 | 8305979 | 27-scf00525 | 27 |
| AX-158346718 | 27 | 50.271 | KV453299.1 | 8326480 | 27-scf00525 | 27 |
| AX-158346736 | 27 | 50.271 | KV453299.1 | 8341305 | 27-scf00525 | 27 |
| AX-158346750 | 27 | 50.271 | KV453299.1 | 8353747 | 27-scf00525 | 27 |
| AX-158346761 | 27 | 50.271 | KV453299.1 | 8365533 | 27-scf00525 | 27 |
| AX-158346781 | 27 | 50.271 | KV453299.1 | 8382584 | 27-scf00525 | 27 |
| AX-157721923 | 27 | 50.271 | KV453299.1 | 8383887 | 27-scf00525 | 27 |
| AX-158346783 | 27 | 50.271 | KV453299.1 | 8387878 | 27-scf00525 | 27 |
| AX-158346792 | 27 | 50.271 | KV453299.1 | 8397978 | 27-scf00525 | 27 |
| AX-158346796 | 27 | 50.271 | KV453299.1 | 8400398 | 27-scf00525 | 27 |
| AX-158346798 | 27 | 50.271 | KV453299.1 | 8401789 | 27-scf00525 | 27 |
| AX-158346799 | 27 | 50.271 | KV453299.1 | 8402252 | 27-scf00525 | 27 |
| AX-158346804 | 27 | 50.271 | KV453299.1 | 8407307 | 27-scf00525 | 27 |
| AX-158346805 | 27 | 50.271 | KV453299.1 | 8408044 | 27-scf00525 | 27 |
| AX-158346806 | 27 | 50.271 | KV453299.1 | 8411414 | 27-scf00525 | 27 |
| AX-158346815 | 27 | 50.271 | KV453299.1 | 8419976 | 27-scf00525 | 27 |
| AX-158346819 | 27 | 50.271 | KV453299.1 | 8422197 | 27-scf00525 | 27 |
| AX-158346825 | 27 | 50.271 | KV453299.1 | 8428300 | 27-scf00525 | 27 |
| AX-157850539 | 27 | 50.271 | KV453299.1 | 8435211 | 27-scf00525 | 27 |
| AX-158346840 | 27 | 50.271 | KV453299.1 | 8442828 | 27-scf00525 | 27 |
| AX-158346841 | 27 | 50.271 | KV453299.1 | 8443320 | 27-scf00525 | 27 |
| AX-158346845 | 27 | 50.271 | KV453299.1 | 8445699 | 27-scf00525 | 27 |
| AX-158413171 | 27 | 50.271 | KV453299.1 | 8446869 | 27-scf00525 | 27 |
| AX-158346851 | 27 | 50.271 | KV453299.1 | 8449564 | 27-scf00525 | 27 |
| AX-158346862 | 27 | 50.271 | KV453299.1 | 8461641 | 27-scf00525 | 27 |
| AX-157850540 | 27 | 50.271 | KV453299.1 | 8470608 | 27-scf00525 | 27 |
| AX-157850542 | 27 | 50.271 | KV453299.1 | 8478372 | 27-scf00525 | 27 |
| AX-158346881 | 27 | 50.271 | KV453299.1 | 8486277 | 27-scf00525 | 27 |
| AX-158346884 | 27 | 50.271 | KV453299.1 | 8489117 | 27-scf00525 | 27 |
| AX-158346885 | 27 | 50.271 | KV453299.1 | 8489466 | 27-scf00525 | 27 |
| AX-158346888 | 27 | 50.271 | KV453299.1 | 8490607 | 27-scf00525 | 27 |
| AX-158346899 | 27 | 50.271 | KV453299.1 | 8499303 | 27-scf00525 | 27 |
| AX-158346905 | 27 | 50.271 | KV453299.1 | 8502510 | 27-scf00525 | 27 |
| AX-158346906 | 27 | 50.271 | KV453299.1 | 8503379 | 27-scf00525 | 27 |
| AX-158346910 | 27 | 50.271 | KV453299.1 | 8509649 | 27-scf00525 | 27 |

|              |    |        |            |         |             |    |
|--------------|----|--------|------------|---------|-------------|----|
| AX-158346915 | 27 | 50.271 | KV453299.1 | 8515146 | 27-scf00525 | 27 |
| AX-158346917 | 27 | 50.271 | KV453299.1 | 8516616 | 27-scf00525 | 27 |
| AX-158346918 | 27 | 50.271 | KV453299.1 | 8519132 | 27-scf00525 | 27 |
| AX-158346920 | 27 | 50.271 | KV453299.1 | 8520330 | 27-scf00525 | 27 |
| AX-157861966 | 27 | 50.271 | KV453299.1 | 8528023 | 27-scf00525 | 27 |
| AX-158346931 | 27 | 50.271 | KV453299.1 | 8530075 | 27-scf00525 | 27 |
| AX-158413172 | 27 | 50.271 | KV453299.1 | 8537510 | 27-scf00525 | 27 |
| AX-158346938 | 27 | 50.271 | KV453299.1 | 8538883 | 27-scf00525 | 27 |
| AX-158346942 | 27 | 50.271 | KV453299.1 | 8543076 | 27-scf00525 | 27 |
| AX-158346943 | 27 | 50.271 | KV453299.1 | 8544060 | 27-scf00525 | 27 |
| AX-158346948 | 27 | 50.271 | KV453299.1 | 8547513 | 27-scf00525 | 27 |
| AX-158346964 | 27 | 50.271 | KV453299.1 | 8563372 | 27-scf00525 | 27 |
| AX-158346969 | 27 | 50.271 | KV453299.1 | 8571304 | 27-scf00525 | 27 |
| AX-157722911 | 27 | 50.271 | KV453299.1 | 8573863 | 27-scf00525 | 27 |
| AX-158346984 | 27 | 50.271 | KV453299.1 | 8581536 | 27-scf00525 | 27 |
| AX-157868140 | 27 | 50.271 | KV453299.1 | 8583006 | 27-scf00525 | 27 |
| AX-157756376 | 27 | 50.271 | KV453299.1 | 8589154 | 27-scf00525 | 27 |
| AX-157850549 | 27 | 50.271 | KV453299.1 | 8594426 | 27-scf00525 | 27 |
| AX-158347002 | 27 | 50.271 | KV453299.1 | 8596659 | 27-scf00525 | 27 |
| AX-158347005 | 27 | 50.271 | KV453299.1 | 8600003 | 27-scf00525 | 27 |
| AX-158347007 | 27 | 50.271 | KV453299.1 | 8601048 | 27-scf00525 | 27 |
| AX-158347008 | 27 | 50.271 | KV453299.1 | 8601432 | 27-scf00525 | 27 |
| AX-158347010 | 27 | 50.271 | KV453299.1 | 8604459 | 27-scf00525 | 27 |
| AX-158347013 | 27 | 50.271 | KV453299.1 | 8606709 | 27-scf00525 | 27 |
| AX-158347014 | 27 | 50.271 | KV453299.1 | 8607401 | 27-scf00525 | 27 |
| AX-158347016 | 27 | 50.271 | KV453299.1 | 8610855 | 27-scf00525 | 27 |
| AX-158347022 | 27 | 50.271 | KV453299.1 | 8616364 | 27-scf00525 | 27 |
| AX-158347029 | 27 | 50.271 | KV453299.1 | 8619271 | 27-scf00525 | 27 |
| AX-158347037 | 27 | 50.271 | KV453299.1 | 8627365 | 27-scf00525 | 27 |
| AX-158347038 | 27 | 50.271 | KV453299.1 | 8628619 | 27-scf00525 | 27 |
| AX-158347070 | 27 | 50.271 | KV453299.1 | 8657842 | 27-scf00525 | 27 |
| AX-157850555 | 27 | 50.271 | KV453299.1 | 8660056 | 27-scf00525 | 27 |
| AX-158347075 | 27 | 50.271 | KV453299.1 | 8665402 | 27-scf00525 | 27 |
| AX-158347076 | 27 | 50.271 | KV453299.1 | 8665766 | 27-scf00525 | 27 |
| AX-157715491 | 27 | 50.271 | KV453299.1 | 8666715 | 27-scf00525 | 27 |
| AX-158347077 | 27 | 50.271 | KV453299.1 | 8667204 | 27-scf00525 | 27 |
| AX-158347078 | 27 | 50.271 | KV453299.1 | 8667774 | 27-scf00525 | 27 |
| AX-157850556 | 27 | 50.271 | KV453299.1 | 8668441 | 27-scf00525 | 27 |
| AX-158347085 | 27 | 50.271 | KV453299.1 | 8676016 | 27-scf00525 | 27 |
| AX-158347090 | 27 | 50.271 | KV453299.1 | 8681103 | 27-scf00525 | 27 |
| AX-158347101 | 27 | 50.271 | KV453299.1 | 8688336 | 27-scf00525 | 27 |
| AX-158347107 | 27 | 50.271 | KV453299.1 | 8695910 | 27-scf00525 | 27 |
| AX-158347110 | 27 | 50.271 | KV453299.1 | 8699210 | 27-scf00525 | 27 |
| AX-158347113 | 27 | 50.271 | KV453299.1 | 8702588 | 27-scf00525 | 27 |
| AX-157850561 | 27 | 50.271 | KV453299.1 | 8712186 | 27-scf00525 | 27 |
| AX-158347127 | 27 | 50.271 | KV453299.1 | 8713271 | 27-scf00525 | 27 |
| AX-158347135 | 27 | 50.271 | KV453299.1 | 8720531 | 27-scf00525 | 27 |
| AX-158347137 | 27 | 50.271 | KV453299.1 | 8725898 | 27-scf00525 | 27 |
| AX-158347138 | 27 | 50.271 | KV453299.1 | 8726457 | 27-scf00525 | 27 |
| AX-158347141 | 27 | 50.271 | KV453299.1 | 8728049 | 27-scf00525 | 27 |
| AX-158347143 | 27 | 50.271 | KV453299.1 | 8730437 | 27-scf00525 | 27 |

|              |    |        |            |         |             |    |
|--------------|----|--------|------------|---------|-------------|----|
| AX-158347148 | 27 | 50.271 | KV453299.1 | 8734791 | 27-scf00525 | 27 |
| AX-158347166 | 27 | 50.271 | KV453299.1 | 8751161 | 27-scf00525 | 27 |
| AX-158347168 | 27 | 50.271 | KV453299.1 | 8753513 | 27-scf00525 | 27 |
| AX-158347172 | 27 | 50.271 | KV453299.1 | 8757264 | 27-scf00525 | 27 |
| AX-158347176 | 27 | 50.271 | KV453299.1 | 8760260 | 27-scf00525 | 27 |
| AX-158347179 | 27 | 50.271 | KV453299.1 | 8761979 | 27-scf00525 | 27 |
| AX-158347181 | 27 | 50.271 | KV453299.1 | 8763193 | 27-scf00525 | 27 |
| AX-158347184 | 27 | 50.271 | KV453299.1 | 8765300 | 27-scf00525 | 27 |
| AX-158347199 | 27 | 50.271 | KV453299.1 | 8776954 | 27-scf00525 | 27 |
| AX-158347207 | 27 | 50.271 | KV453299.1 | 8783356 | 27-scf00525 | 27 |
| AX-158347210 | 27 | 50.271 | KV453299.1 | 8785568 | 27-scf00525 | 27 |
| AX-158347214 | 27 | 50.271 | KV453299.1 | 8789307 | 27-scf00525 | 27 |
| AX-158347224 | 27 | 50.271 | KV453299.1 | 8796014 | 27-scf00525 | 27 |
| AX-158347230 | 27 | 50.271 | KV453299.1 | 8800637 | 27-scf00525 | 27 |
| AX-158347235 | 27 | 50.271 | KV453299.1 | 8807515 | 27-scf00525 | 27 |
| AX-158347255 | 27 | 50.271 | KV453299.1 | 8821774 | 27-scf00525 | 27 |
| AX-158347260 | 27 | 50.271 | KV453299.1 | 8824851 | 27-scf00525 | 27 |
| AX-158347261 | 27 | 50.271 | KV453299.1 | 8832143 | 27-scf00525 | 27 |
| AX-157850571 | 27 | 50.271 | KV453299.1 | 8832178 | 27-scf00525 | 27 |
| AX-157850572 | 27 | 50.271 | KV453299.1 | 8833741 | 27-scf00525 | 27 |
| AX-158347263 | 27 | 50.271 | KV453299.1 | 8835792 | 27-scf00525 | 27 |
| AX-157850573 | 27 | 50.271 | KV453299.1 | 8838103 | 27-scf00525 | 27 |
| AX-158419293 | 27 | 50.271 | KV453299.1 | 8839324 | 27-scf00525 | 27 |
| AX-158347266 | 27 | 50.271 | KV453299.1 | 8839603 | 27-scf00525 | 27 |
| AX-157850574 | 27 | 50.271 | KV453299.1 | 8839826 | 27-scf00525 | 27 |
| AX-158347267 | 27 | 50.271 | KV453299.1 | 8840901 | 27-scf00525 | 27 |
| AX-158347268 | 27 | 50.271 | KV453299.1 | 8841395 | 27-scf00525 | 27 |
| AX-158347269 | 27 | 50.271 | KV453299.1 | 8843954 | 27-scf00525 | 27 |
| AX-158347272 | 27 | 50.271 | KV453299.1 | 8846703 | 27-scf00525 | 27 |
| AX-158347273 | 27 | 50.271 | KV453299.1 | 8847256 | 27-scf00525 | 27 |
| AX-158347274 | 27 | 50.271 | KV453299.1 | 8848137 | 27-scf00525 | 27 |
| AX-158347276 | 27 | 50.271 | KV453299.1 | 8848989 | 27-scf00525 | 27 |
| AX-158347279 | 27 | 50.271 | KV453299.1 | 8850696 | 27-scf00525 | 27 |
| AX-158347280 | 27 | 50.271 | KV453299.1 | 8851269 | 27-scf00525 | 27 |
| AX-158347281 | 27 | 50.271 | KV453299.1 | 8851666 | 27-scf00525 | 27 |
| AX-158347282 | 27 | 50.271 | KV453299.1 | 8852203 | 27-scf00525 | 27 |
| AX-158347283 | 27 | 50.271 | KV453299.1 | 8853813 | 27-scf00525 | 27 |
| AX-158347284 | 27 | 50.271 | KV453299.1 | 8854516 | 27-scf00525 | 27 |
| AX-158347286 | 27 | 50.271 | KV453299.1 | 8856007 | 27-scf00525 | 27 |
| AX-158347288 | 27 | 50.271 | KV453299.1 | 8859220 | 27-scf00525 | 27 |
| AX-157850576 | 27 | 50.271 | KV453299.1 | 8860512 | 27-scf00525 | 27 |
| AX-158347292 | 27 | 50.271 | KV453299.1 | 8863525 | 27-scf00525 | 27 |
| AX-158347293 | 27 | 50.271 | KV453299.1 | 8863932 | 27-scf00525 | 27 |
| AX-158347294 | 27 | 50.271 | KV453299.1 | 8865753 | 27-scf00525 | 27 |
| AX-157850577 | 27 | 50.271 | KV453299.1 | 8866168 | 27-scf00525 | 27 |
| AX-158347296 | 27 | 50.271 | KV453299.1 | 8867671 | 27-scf00525 | 27 |
| AX-158347297 | 27 | 50.271 | KV453299.1 | 8869545 | 27-scf00525 | 27 |
| AX-157868143 | 27 | 50.271 | KV453299.1 | 8870128 | 27-scf00525 | 27 |
| AX-158347298 | 27 | 50.271 | KV453299.1 | 8870578 | 27-scf00525 | 27 |
| AX-158347300 | 27 | 50.271 | KV453299.1 | 8871242 | 27-scf00525 | 27 |
| AX-157868144 | 27 | 50.271 | KV453299.1 | 8871552 | 27-scf00525 | 27 |

|              |    |        |            |         |             |    |
|--------------|----|--------|------------|---------|-------------|----|
| AX-158347301 | 27 | 50.271 | KV453299.1 | 8872029 | 27-scf00525 | 27 |
| AX-158347302 | 27 | 50.271 | KV453299.1 | 8872657 | 27-scf00525 | 27 |
| AX-158347303 | 27 | 50.271 | KV453299.1 | 8874650 | 27-scf00525 | 27 |
| AX-158347304 | 27 | 50.271 | KV453299.1 | 8874988 | 27-scf00525 | 27 |
| AX-157861967 | 27 | 50.271 | KV453299.1 | 8875459 | 27-scf00525 | 27 |
| AX-157868145 | 27 | 50.271 | KV453299.1 | 8875715 | 27-scf00525 | 27 |
| AX-158347305 | 27 | 50.271 | KV453299.1 | 8875956 | 27-scf00525 | 27 |
| AX-158347307 | 27 | 50.271 | KV453299.1 | 8879402 | 27-scf00525 | 27 |
| AX-157868146 | 27 | 50.271 | KV453299.1 | 8880144 | 27-scf00525 | 27 |
| AX-158347308 | 27 | 50.271 | KV453299.1 | 8881293 | 27-scf00525 | 27 |
| AX-158347309 | 27 | 50.271 | KV453299.1 | 8881527 | 27-scf00525 | 27 |
| AX-158347310 | 27 | 50.271 | KV453299.1 | 8882455 | 27-scf00525 | 27 |
| AX-158347311 | 27 | 50.271 | KV453299.1 | 8882796 | 27-scf00525 | 27 |
| AX-158347312 | 27 | 50.271 | KV453299.1 | 8885301 | 27-scf00525 | 27 |
| AX-158347313 | 27 | 50.271 | KV453299.1 | 8886340 | 27-scf00525 | 27 |
| AX-157868147 | 27 | 50.271 | KV453299.1 | 8887374 | 27-scf00525 | 27 |
| AX-158347314 | 27 | 50.271 | KV453299.1 | 8888332 | 27-scf00525 | 27 |
| AX-158347315 | 27 | 50.271 | KV453299.1 | 8888675 | 27-scf00525 | 27 |
| AX-158347316 | 27 | 50.271 | KV453299.1 | 8888818 | 27-scf00525 | 27 |
| AX-158347317 | 27 | 50.271 | KV453299.1 | 8889189 | 27-scf00525 | 27 |
| AX-157868148 | 27 | 50.271 | KV453299.1 | 8889507 | 27-scf00525 | 27 |
| AX-158347319 | 27 | 50.271 | KV453299.1 | 8890805 | 27-scf00525 | 27 |
| AX-158347320 | 27 | 50.271 | KV453299.1 | 8893256 | 27-scf00525 | 27 |
| AX-158347321 | 27 | 50.271 | KV453299.1 | 8894168 | 27-scf00525 | 27 |
| AX-158347322 | 27 | 50.271 | KV453299.1 | 8895444 | 27-scf00525 | 27 |
| AX-158347324 | 27 | 50.271 | KV453299.1 | 8896084 | 27-scf00525 | 27 |
| AX-158347325 | 27 | 50.271 | KV453299.1 | 8896972 | 27-scf00525 | 27 |
| AX-158347327 | 27 | 50.271 | KV453299.1 | 8898882 | 27-scf00525 | 27 |
| AX-158347328 | 27 | 50.271 | KV453299.1 | 8899231 | 27-scf00525 | 27 |
| AX-158347329 | 27 | 50.271 | KV453299.1 | 8899568 | 27-scf00525 | 27 |
| AX-158347330 | 27 | 50.271 | KV453299.1 | 8900252 | 27-scf00525 | 27 |
| AX-158347331 | 27 | 50.271 | KV453299.1 | 8900938 | 27-scf00525 | 27 |
| AX-158347332 | 27 | 50.271 | KV453299.1 | 8902625 | 27-scf00525 | 27 |
| AX-158347333 | 27 | 50.271 | KV453299.1 | 8903192 | 27-scf00525 | 27 |
| AX-158347334 | 27 | 50.271 | KV453299.1 | 8903525 | 27-scf00525 | 27 |
| AX-158347335 | 27 | 50.271 | KV453299.1 | 8905257 | 27-scf00525 | 27 |
| AX-158347336 | 27 | 50.271 | KV453299.1 | 8905632 | 27-scf00525 | 27 |
| AX-158347337 | 27 | 50.271 | KV453299.1 | 8907275 | 27-scf00525 | 27 |
| AX-158347339 | 27 | 50.271 | KV453299.1 | 8910713 | 27-scf00525 | 27 |
| AX-158347340 | 27 | 50.271 | KV453299.1 | 8912862 | 27-scf00525 | 27 |
| AX-158347341 | 27 | 50.271 | KV453299.1 | 8913381 | 27-scf00525 | 27 |
| AX-158347342 | 27 | 50.271 | KV453299.1 | 8913975 | 27-scf00525 | 27 |
| AX-158347343 | 27 | 50.271 | KV453299.1 | 8915455 | 27-scf00525 | 27 |
| AX-158347344 | 27 | 50.271 | KV453299.1 | 8916258 | 27-scf00525 | 27 |
| AX-158347345 | 27 | 50.271 | KV453299.1 | 8916296 | 27-scf00525 | 27 |
| AX-158347346 | 27 | 50.271 | KV453299.1 | 8916855 | 27-scf00525 | 27 |
| AX-158347347 | 27 | 50.271 | KV453299.1 | 8917796 | 27-scf00525 | 27 |
| AX-158347349 | 27 | 50.271 | KV453299.1 | 8919254 | 27-scf00525 | 27 |
| AX-158347350 | 27 | 50.271 | KV453299.1 | 8919635 | 27-scf00525 | 27 |
| AX-158421512 | 27 | 50.271 | KV453299.1 | 8921829 | 27-scf00525 | 27 |
| AX-158347351 | 27 | 50.271 | KV453299.1 | 8922074 | 27-scf00525 | 27 |

|              |    |        |            |         |             |    |
|--------------|----|--------|------------|---------|-------------|----|
| AX-158347352 | 27 | 50.271 | KV453299.1 | 8922442 | 27-scf00525 | 27 |
| AX-158347355 | 27 | 50.271 | KV453299.1 | 8925974 | 27-scf00525 | 27 |
| AX-158347356 | 27 | 50.271 | KV453299.1 | 8926994 | 27-scf00525 | 27 |
| AX-158347357 | 27 | 50.271 | KV453299.1 | 8928357 | 27-scf00525 | 27 |
| AX-158347360 | 27 | 50.271 | KV453299.1 | 8931619 | 27-scf00525 | 27 |
| AX-158347361 | 27 | 50.271 | KV453299.1 | 8932368 | 27-scf00525 | 27 |
| AX-157861968 | 27 | 50.271 | KV453299.1 | 8932441 | 27-scf00525 | 27 |
| AX-158347362 | 27 | 50.271 | KV453299.1 | 8933361 | 27-scf00525 | 27 |
| AX-158347363 | 27 | 50.271 | KV453299.1 | 8933667 | 27-scf00525 | 27 |
| AX-158347365 | 27 | 50.271 | KV453299.1 | 8934902 | 27-scf00525 | 27 |
| AX-158347367 | 27 | 50.271 | KV453299.1 | 8937226 | 27-scf00525 | 27 |
| AX-158347368 | 27 | 50.271 | KV453299.1 | 8938466 | 27-scf00525 | 27 |
| AX-158347369 | 27 | 50.271 | KV453299.1 | 8939193 | 27-scf00525 | 27 |
| AX-158347370 | 27 | 50.271 | KV453299.1 | 8939734 | 27-scf00525 | 27 |
| AX-158347372 | 27 | 50.271 | KV453299.1 | 8941192 | 27-scf00525 | 27 |
| AX-158347373 | 27 | 50.271 | KV453299.1 | 8941916 | 27-scf00525 | 27 |
| AX-158347374 | 27 | 50.271 | KV453299.1 | 8942551 | 27-scf00525 | 27 |
| AX-158347375 | 27 | 50.271 | KV453299.1 | 8944128 | 27-scf00525 | 27 |
| AX-158347377 | 27 | 50.271 | KV453299.1 | 8945959 | 27-scf00525 | 27 |
| AX-158347379 | 27 | 50.271 | KV453299.1 | 8947882 | 27-scf00525 | 27 |
| AX-158347381 | 27 | 50.271 | KV453299.1 | 8948989 | 27-scf00525 | 27 |
| AX-158347382 | 27 | 50.271 | KV453299.1 | 8950421 | 27-scf00525 | 27 |
| AX-158347384 | 27 | 50.271 | KV453299.1 | 8952110 | 27-scf00525 | 27 |
| AX-158347388 | 27 | 50.271 | KV453299.1 | 8955881 | 27-scf00525 | 27 |
| AX-158347389 | 27 | 50.271 | KV453299.1 | 8956352 | 27-scf00525 | 27 |
| AX-158388422 | 27 | 50.271 | KV453299.1 | 8956725 | 27-scf00525 | 27 |
| AX-158347391 | 27 | 50.271 | KV453299.1 | 8959919 | 27-scf00525 | 27 |
| AX-158347392 | 27 | 50.271 | KV453299.1 | 8960507 | 27-scf00525 | 27 |
| AX-158347393 | 27 | 50.271 | KV453299.1 | 8961822 | 27-scf00525 | 27 |
| AX-158347394 | 27 | 50.271 | KV453299.1 | 8962458 | 27-scf00525 | 27 |
| AX-158347396 | 27 | 50.271 | KV453299.1 | 8963667 | 27-scf00525 | 27 |
| AX-158347397 | 27 | 50.271 | KV453299.1 | 8964829 | 27-scf00525 | 27 |
| AX-158347398 | 27 | 50.271 | KV453299.1 | 8965480 | 27-scf00525 | 27 |
| AX-158347399 | 27 | 50.271 | KV453299.1 | 8965878 | 27-scf00525 | 27 |
| AX-158347402 | 27 | 50.271 | KV453299.1 | 8968771 | 27-scf00525 | 27 |
| AX-158347403 | 27 | 50.271 | KV453299.1 | 8973056 | 27-scf00525 | 27 |
| AX-158347404 | 27 | 50.271 | KV453299.1 | 8974074 | 27-scf00525 | 27 |
| AX-157768373 | 27 | 50.271 | KV453299.1 | 8974556 | 27-scf00525 | 27 |
| AX-158347405 | 27 | 50.271 | KV453299.1 | 8974777 | 27-scf00525 | 27 |
| AX-158347406 | 27 | 50.271 | KV453299.1 | 8975352 | 27-scf00525 | 27 |
| AX-158347407 | 27 | 50.271 | KV453299.1 | 8976286 | 27-scf00525 | 27 |
| AX-158347408 | 27 | 50.271 | KV453299.1 | 8976457 | 27-scf00525 | 27 |
| AX-158347409 | 27 | 50.271 | KV453299.1 | 8977505 | 27-scf00525 | 27 |
| AX-158347412 | 27 | 50.271 | KV453299.1 | 8979256 | 27-scf00525 | 27 |
| AX-158347413 | 27 | 50.271 | KV453299.1 | 8979743 | 27-scf00525 | 27 |
| AX-158347417 | 27 | 50.271 | KV453299.1 | 8985143 | 27-scf00525 | 27 |
| AX-158347419 | 27 | 50.271 | KV453299.1 | 8986031 | 27-scf00525 | 27 |
| AX-158347422 | 27 | 50.271 | KV453299.1 | 8987434 | 27-scf00525 | 27 |
| AX-158347424 | 27 | 50.271 | KV453299.1 | 8990691 | 27-scf00525 | 27 |
| AX-158347426 | 27 | 50.271 | KV453299.1 | 8991983 | 27-scf00525 | 27 |
| AX-158347427 | 27 | 50.271 | KV453299.1 | 8993934 | 27-scf00525 | 27 |

|              |    |        |            |         |             |    |
|--------------|----|--------|------------|---------|-------------|----|
| AX-158347429 | 27 | 50.271 | KV453299.1 | 8994610 | 27-scf00525 | 27 |
| AX-158347430 | 27 | 50.271 | KV453299.1 | 8994966 | 27-scf00525 | 27 |
| AX-158347431 | 27 | 50.271 | KV453299.1 | 8996240 | 27-scf00525 | 27 |
| AX-158347433 | 27 | 50.271 | KV453299.1 | 8998702 | 27-scf00525 | 27 |
| AX-158347434 | 27 | 50.271 | KV453299.1 | 8999533 | 27-scf00525 | 27 |
| AX-158347436 | 27 | 50.271 | KV453299.1 | 9001213 | 27-scf00525 | 27 |
| AX-158347438 | 27 | 50.271 | KV453299.1 | 9001730 | 27-scf00525 | 27 |
| AX-158347440 | 27 | 50.271 | KV453299.1 | 9002950 | 27-scf00525 | 27 |
| AX-158347441 | 27 | 50.271 | KV453299.1 | 9003305 | 27-scf00525 | 27 |
| AX-158347442 | 27 | 50.271 | KV453299.1 | 9006380 | 27-scf00525 | 27 |
| AX-157739870 | 27 | 50.271 | KV453299.1 | 9007312 | 27-scf00525 | 27 |
| AX-158347443 | 27 | 50.271 | KV453299.1 | 9007360 | 27-scf00525 | 27 |
| AX-158347444 | 27 | 50.271 | KV453299.1 | 9007842 | 27-scf00525 | 27 |
| AX-158347445 | 27 | 50.271 | KV453299.1 | 9008465 | 27-scf00525 | 27 |
| AX-157868151 | 27 | 50.271 | KV453299.1 | 9009063 | 27-scf00525 | 27 |
| AX-157850579 | 27 | 50.271 | KV453299.1 | 9011829 | 27-scf00525 | 27 |
| AX-158347448 | 27 | 50.271 | KV453299.1 | 9014951 | 27-scf00525 | 27 |
| AX-157864154 | 27 | 50.271 | KV453299.1 | 9018053 | 27-scf00525 | 27 |
| AX-158347452 | 27 | 50.271 | KV453299.1 | 9023096 | 27-scf00525 | 27 |
| AX-158347453 | 27 | 50.271 | KV453299.1 | 9023751 | 27-scf00525 | 27 |
| AX-158347455 | 27 | 50.271 | KV453299.1 | 9025814 | 27-scf00525 | 27 |
| AX-158347458 | 27 | 50.271 | KV453299.1 | 9027113 | 27-scf00525 | 27 |
| AX-158347459 | 27 | 50.271 | KV453299.1 | 9027798 | 27-scf00525 | 27 |
| AX-158347460 | 27 | 50.271 | KV453299.1 | 9028275 | 27-scf00525 | 27 |
| AX-158347461 | 27 | 50.271 | KV453299.1 | 9028674 | 27-scf00525 | 27 |
| AX-158347462 | 27 | 50.271 | KV453299.1 | 9029107 | 27-scf00525 | 27 |
| AX-158347465 | 27 | 50.271 | KV453299.1 | 9030848 | 27-scf00525 | 27 |
| AX-158347467 | 27 | 50.271 | KV453299.1 | 9033222 | 27-scf00525 | 27 |
| AX-158347469 | 27 | 50.271 | KV453299.1 | 9034491 | 27-scf00525 | 27 |
| AX-157850580 | 27 | 50.271 | KV453299.1 | 9034829 | 27-scf00525 | 27 |
| AX-158347472 | 27 | 50.271 | KV453299.1 | 9039275 | 27-scf00525 | 27 |
| AX-158347473 | 27 | 50.271 | KV453299.1 | 9040331 | 27-scf00525 | 27 |
| AX-158347474 | 27 | 50.271 | KV453299.1 | 9041476 | 27-scf00525 | 27 |
| AX-158347475 | 27 | 50.271 | KV453299.1 | 9042709 | 27-scf00525 | 27 |
| AX-157850581 | 27 | 50.271 | KV453299.1 | 9042831 | 27-scf00525 | 27 |
| AX-158347476 | 27 | 50.271 | KV453299.1 | 9043346 | 27-scf00525 | 27 |
| AX-158347481 | 27 | 50.271 | KV453299.1 | 9048889 | 27-scf00525 | 27 |
| AX-158347483 | 27 | 50.271 | KV453299.1 | 9050336 | 27-scf00525 | 27 |
| AX-158388426 | 27 | 50.271 | KV453299.1 | 9051353 | 27-scf00525 | 27 |
| AX-158347484 | 27 | 50.271 | KV453299.1 | 9051816 | 27-scf00525 | 27 |
| AX-158347488 | 27 | 50.271 | KV453299.1 | 9054578 | 27-scf00525 | 27 |
| AX-158347490 | 27 | 50.271 | KV453299.1 | 9055609 | 27-scf00525 | 27 |
| AX-158347491 | 27 | 50.271 | KV453299.1 | 9056768 | 27-scf00525 | 27 |
| AX-158347492 | 27 | 50.271 | KV453299.1 | 9057184 | 27-scf00525 | 27 |
| AX-158347493 | 27 | 50.271 | KV453299.1 | 9057470 | 27-scf00525 | 27 |
| AX-158347494 | 27 | 50.271 | KV453299.1 | 9061519 | 27-scf00525 | 27 |
| AX-158347495 | 27 | 50.271 | KV453299.1 | 9061641 | 27-scf00525 | 27 |
| AX-158347496 | 27 | 50.271 | KV453299.1 | 9062061 | 27-scf00525 | 27 |
| AX-158419302 | 27 | 50.271 | KV453299.1 | 9065456 | 27-scf00525 | 27 |
| AX-158347501 | 27 | 50.271 | KV453299.1 | 9066256 | 27-scf00525 | 27 |
| AX-158347502 | 27 | 50.271 | KV453299.1 | 9066431 | 27-scf00525 | 27 |



|              |    |        |            |         |             |    |
|--------------|----|--------|------------|---------|-------------|----|
| AX-158347503 | 27 | 50.271 | KV453299.1 | 9067263 | 27-scf00525 | 27 |
| AX-158347504 | 27 | 50.271 | KV453299.1 | 9068176 | 27-scf00525 | 27 |
| AX-158347506 | 27 | 50.271 | KV453299.1 | 9068799 | 27-scf00525 | 27 |
| AX-158347507 | 27 | 50.271 | KV453299.1 | 9069315 | 27-scf00525 | 27 |
| AX-158347508 | 27 | 50.271 | KV453299.1 | 9069900 | 27-scf00525 | 27 |
| AX-158347509 | 27 | 50.271 | KV453299.1 | 9070265 | 27-scf00525 | 27 |
| AX-158347510 | 27 | 50.271 | KV453299.1 | 9070777 | 27-scf00525 | 27 |
| AX-158347515 | 27 | 50.271 | KV453299.1 | 9074688 | 27-scf00525 | 27 |
| AX-158347517 | 27 | 50.271 | KV453299.1 | 9076351 | 27-scf00525 | 27 |
| AX-158347520 | 27 | 50.271 | KV453299.1 | 9078773 | 27-scf00525 | 27 |
| AX-158347521 | 27 | 50.271 | KV453299.1 | 9079594 | 27-scf00525 | 27 |
| AX-158347523 | 27 | 50.271 | KV453299.1 | 9081503 | 27-scf00525 | 27 |
| AX-158347524 | 27 | 50.271 | KV453299.1 | 9081986 | 27-scf00525 | 27 |
| AX-158347525 | 27 | 50.271 | KV453299.1 | 9083116 | 27-scf00525 | 27 |
| AX-158347526 | 27 | 50.271 | KV453299.1 | 9083716 | 27-scf00525 | 27 |
| AX-158347527 | 27 | 50.271 | KV453299.1 | 9084380 | 27-scf00525 | 27 |
| AX-158347528 | 27 | 50.271 | KV453299.1 | 9085453 | 27-scf00525 | 27 |
| AX-158347529 | 27 | 50.271 | KV453299.1 | 9085955 | 27-scf00525 | 27 |
| AX-157850583 | 27 | 50.271 | KV453299.1 | 9086933 | 27-scf00525 | 27 |
| AX-158347530 | 27 | 50.271 | KV453299.1 | 9087139 | 27-scf00525 | 27 |
| AX-158347531 | 27 | 50.271 | KV453299.1 | 9088358 | 27-scf00525 | 27 |
| AX-158347532 | 27 | 50.271 | KV453299.1 | 9088612 | 27-scf00525 | 27 |
| AX-158347534 | 27 | 50.271 | KV453299.1 | 9090219 | 27-scf00525 | 27 |
| AX-158347535 | 27 | 50.271 | KV453299.1 | 9090658 | 27-scf00525 | 27 |
| AX-158347536 | 27 | 50.271 | KV453299.1 | 9091503 | 27-scf00525 | 27 |
| AX-158347537 | 27 | 50.271 | KV453299.1 | 9091713 | 27-scf00525 | 27 |
| AX-158347538 | 27 | 50.271 | KV453299.1 | 9093982 | 27-scf00525 | 27 |
| AX-158347539 | 27 | 50.271 | KV453299.1 | 9095225 | 27-scf00525 | 27 |
| AX-158347540 | 27 | 50.271 | KV453299.1 | 9096247 | 27-scf00525 | 27 |
| AX-158347541 | 27 | 50.271 | KV453299.1 | 9096474 | 27-scf00525 | 27 |
| AX-158347545 | 27 | 50.271 | KV453299.1 | 9100672 | 27-scf00525 | 27 |
| AX-158347546 | 27 | 50.271 | KV453299.1 | 9102308 | 27-scf00525 | 27 |
| AX-158381650 | 27 | 50.271 | KV453299.1 | 9103196 | 27-scf00525 | 27 |
| AX-158347551 | 27 | 50.271 | KV453299.1 | 9104522 | 27-scf00525 | 27 |
| AX-158347554 | 27 | 50.271 | KV453299.1 | 9107322 | 27-scf00525 | 27 |
| AX-158347556 | 27 | 50.271 | KV453299.1 | 9110453 | 27-scf00525 | 27 |
| AX-158347558 | 27 | 50.271 | KV453299.1 | 9111356 | 27-scf00525 | 27 |
| AX-158347559 | 27 | 50.271 | KV453299.1 | 9113114 | 27-scf00525 | 27 |
| AX-158388429 | 27 | 50.271 | KV453299.1 | 9113641 | 27-scf00525 | 27 |
| AX-158347560 | 27 | 50.271 | KV453299.1 | 9115211 | 27-scf00525 | 27 |
| AX-157850584 | 27 | 50.271 | KV453299.1 | 9115580 | 27-scf00525 | 27 |
| AX-158347565 | 27 | 50.271 | KV453299.1 | 9119136 | 27-scf00525 | 27 |
| AX-158347567 | 27 | 50.271 | KV453299.1 | 9122312 | 27-scf00525 | 27 |
| AX-158347568 | 27 | 50.271 | KV453299.1 | 9122656 | 27-scf00525 | 27 |
| AX-158347569 | 27 | 50.271 | KV453299.1 | 9123232 | 27-scf00525 | 27 |
| AX-158347570 | 27 | 50.271 | KV453299.1 | 9123731 | 27-scf00525 | 27 |
| AX-158347571 | 27 | 50.271 | KV453299.1 | 9126652 | 27-scf00525 | 27 |
| AX-158388431 | 27 | 50.271 | KV453299.1 | 9129123 | 27-scf00525 | 27 |
| AX-158347572 | 27 | 50.271 | KV453299.1 | 9129409 | 27-scf00525 | 27 |
| AX-158347573 | 27 | 50.271 | KV453299.1 | 9131074 | 27-scf00525 | 27 |
| AX-158347575 | 27 | 50.271 | KV453299.1 | 9133403 | 27-scf00525 | 27 |

|              |    |        |            |         |             |    |
|--------------|----|--------|------------|---------|-------------|----|
| AX-158347576 | 27 | 50.271 | KV453299.1 | 9133864 | 27-scf00525 | 27 |
| AX-158347577 | 27 | 50.271 | KV453299.1 | 9135153 | 27-scf00525 | 27 |
| AX-157868152 | 27 | 50.271 | KV453299.1 | 9135484 | 27-scf00525 | 27 |
| AX-158347578 | 27 | 50.271 | KV453299.1 | 9136064 | 27-scf00525 | 27 |
| AX-158347579 | 27 | 50.271 | KV453299.1 | 9136475 | 27-scf00525 | 27 |
| AX-158347580 | 27 | 50.271 | KV453299.1 | 9137404 | 27-scf00525 | 27 |
| AX-158347582 | 27 | 50.271 | KV453299.1 | 9138980 | 27-scf00525 | 27 |
| AX-158347583 | 27 | 50.271 | KV453299.1 | 9140084 | 27-scf00525 | 27 |
| AX-157868153 | 27 | 50.271 | KV453299.1 | 9140922 | 27-scf00525 | 27 |
| AX-158347584 | 27 | 50.271 | KV453299.1 | 9141493 | 27-scf00525 | 27 |
| AX-157868154 | 27 | 50.271 | KV453299.1 | 9142235 | 27-scf00525 | 27 |
| AX-158347587 | 27 | 50.271 | KV453299.1 | 9143711 | 27-scf00525 | 27 |
| AX-158347589 | 27 | 50.271 | KV453299.1 | 9144659 | 27-scf00525 | 27 |
| AX-158347590 | 27 | 50.271 | KV453299.1 | 9144923 | 27-scf00525 | 27 |
| AX-158347592 | 27 | 50.271 | KV453299.1 | 9146874 | 27-scf00525 | 27 |
| AX-158347593 | 27 | 50.271 | KV453299.1 | 9148362 | 27-scf00525 | 27 |
| AX-158347594 | 27 | 50.271 | KV453299.1 | 9148587 | 27-scf00525 | 27 |
| AX-158347595 | 27 | 50.271 | KV453299.1 | 9149884 | 27-scf00525 | 27 |
| AX-157850586 | 27 | 50.271 | KV453299.1 | 9150188 | 27-scf00525 | 27 |
| AX-158347599 | 27 | 50.271 | KV453299.1 | 9155097 | 27-scf00525 | 27 |
| AX-158419306 | 27 | 50.271 | KV453299.1 | 9157210 | 27-scf00525 | 27 |
| AX-158347604 | 27 | 50.271 | KV453299.1 | 9161552 | 27-scf00525 | 27 |
| AX-158347606 | 27 | 50.271 | KV453299.1 | 9162227 | 27-scf00525 | 27 |
| AX-158347610 | 27 | 50.271 | KV453299.1 | 9172100 | 27-scf00525 | 27 |
| AX-157864155 | 27 | 50.271 | KV453299.1 | 9172383 | 27-scf00525 | 27 |
| AX-158347611 | 27 | 50.271 | KV453299.1 | 9173971 | 27-scf00525 | 27 |
| AX-158347613 | 27 | 50.271 | KV453299.1 | 9177400 | 27-scf00525 | 27 |
| AX-158347615 | 27 | 50.271 | KV453299.1 | 9181448 | 27-scf00525 | 27 |
| AX-158347616 | 27 | 50.271 | KV453299.1 | 9184775 | 27-scf00525 | 27 |
| AX-158347618 | 27 | 50.271 | KV453299.1 | 9187988 | 27-scf00525 | 27 |
| AX-157751423 | 27 | 50.271 | KV453299.1 | 9191835 | 27-scf00525 | 27 |
| AX-158347621 | 27 | 50.271 | KV453299.1 | 9196087 | 27-scf00525 | 27 |
| AX-158347622 | 27 | 50.271 | KV453299.1 | 9196422 | 27-scf00525 | 27 |
| AX-158347623 | 27 | 50.271 | KV453299.1 | 9197105 | 27-scf00525 | 27 |
| AX-157771569 | 27 | 50.271 | KV453299.1 | 9197274 | 27-scf00525 | 27 |
| AX-158347626 | 27 | 50.271 | KV453299.1 | 9200476 | 27-scf00525 | 27 |
| AX-158347629 | 27 | 50.271 | KV453299.1 | 9202259 | 27-scf00525 | 27 |
| AX-158347630 | 27 | 50.271 | KV453299.1 | 9202676 | 27-scf00525 | 27 |
| AX-158347633 | 27 | 50.271 | KV453299.1 | 9204963 | 27-scf00525 | 27 |
| AX-158347635 | 27 | 50.271 | KV453299.1 | 9206348 | 27-scf00525 | 27 |
| AX-158347637 | 27 | 50.271 | KV453299.1 | 9209023 | 27-scf00525 | 27 |
| AX-157861969 | 27 | 50.271 | KV453299.1 | 9209674 | 27-scf00525 | 27 |
| AX-158347641 | 27 | 50.271 | KV453299.1 | 9212939 | 27-scf00525 | 27 |
| AX-158347642 | 27 | 50.271 | KV453299.1 | 9213584 | 27-scf00525 | 27 |
| AX-158347643 | 27 | 50.271 | KV453299.1 | 9214582 | 27-scf00525 | 27 |
| AX-157850588 | 27 | 50.271 | KV453299.1 | 9218924 | 27-scf00525 | 27 |
| AX-157850589 | 27 | 50.271 | KV453299.1 | 9219963 | 27-scf00525 | 27 |
| AX-158347646 | 27 | 50.271 | KV453299.1 | 9220019 | 27-scf00525 | 27 |
| AX-158347647 | 27 | 50.271 | KV453299.1 | 9222220 | 27-scf00525 | 27 |
| AX-158347648 | 27 | 50.271 | KV453299.1 | 9222663 | 27-scf00525 | 27 |
| AX-158347649 | 27 | 50.271 | KV453299.1 | 9223488 | 27-scf00525 | 27 |

|              |    |        |            |         |             |    |
|--------------|----|--------|------------|---------|-------------|----|
| AX-158347653 | 27 | 50.271 | KV453299.1 | 9227415 | 27-scf00525 | 27 |
| AX-158347655 | 27 | 50.271 | KV453299.1 | 9230325 | 27-scf00525 | 27 |
| AX-158347656 | 27 | 50.271 | KV453299.1 | 9231322 | 27-scf00525 | 27 |
| AX-158347657 | 27 | 50.271 | KV453299.1 | 9233518 | 27-scf00525 | 27 |
| AX-158347658 | 27 | 50.271 | KV453299.1 | 9233700 | 27-scf00525 | 27 |
| AX-158347661 | 27 | 50.271 | KV453299.1 | 9235754 | 27-scf00525 | 27 |
| AX-158347662 | 27 | 50.271 | KV453299.1 | 9236549 | 27-scf00525 | 27 |
| AX-158347664 | 27 | 50.271 | KV453299.1 | 9238489 | 27-scf00525 | 27 |
| AX-158347666 | 27 | 50.271 | KV453299.1 | 9239431 | 27-scf00525 | 27 |
| AX-158347667 | 27 | 50.271 | KV453299.1 | 9239914 | 27-scf00525 | 27 |
| AX-158347671 | 27 | 50.271 | KV453299.1 | 9243298 | 27-scf00525 | 27 |
| AX-158347672 | 27 | 50.271 | KV453299.1 | 9243510 | 27-scf00525 | 27 |
| AX-158347674 | 27 | 50.271 | KV453299.1 | 9244883 | 27-scf00525 | 27 |
| AX-158347676 | 27 | 50.271 | KV453299.1 | 9245731 | 27-scf00525 | 27 |
| AX-157888851 | 27 | 50.271 | KV453299.1 | 9245785 | 27-scf00525 | 27 |
| AX-158347677 | 27 | 50.271 | KV453299.1 | 9246641 | 27-scf00525 | 27 |
| AX-157721902 | 27 | 50.271 | KV453299.1 | 9247167 | 27-scf00525 | 27 |
| AX-158347678 | 27 | 50.271 | KV453299.1 | 9247752 | 27-scf00525 | 27 |
| AX-158347679 | 27 | 50.271 | KV453299.1 | 9248666 | 27-scf00525 | 27 |
| AX-158347682 | 27 | 50.271 | KV453299.1 | 9251853 | 27-scf00525 | 27 |
| AX-157861972 | 27 | 50.271 | KV453299.1 | 9254037 | 27-scf00525 | 27 |
| AX-158347684 | 27 | 50.271 | KV453299.1 | 9255348 | 27-scf00525 | 27 |
| AX-158347686 | 27 | 50.271 | KV453299.1 | 9256894 | 27-scf00525 | 27 |
| AX-158347687 | 27 | 50.271 | KV453299.1 | 9257557 | 27-scf00525 | 27 |
| AX-158413190 | 27 | 50.271 | KV453299.1 | 9257594 | 27-scf00525 | 27 |
| AX-158347689 | 27 | 50.271 | KV453299.1 | 9258233 | 27-scf00525 | 27 |
| AX-158347690 | 27 | 50.271 | KV453299.1 | 9258868 | 27-scf00525 | 27 |
| AX-158347692 | 27 | 50.271 | KV453299.1 | 9261196 | 27-scf00525 | 27 |
| AX-158347696 | 27 | 50.271 | KV453299.1 | 9267377 | 27-scf00525 | 27 |
| AX-158347705 | 27 | 50.271 | KV453299.1 | 9282898 | 27-scf00525 | 27 |
| AX-158347712 | 27 | 50.271 | KV453299.1 | 9288057 | 27-scf00525 | 27 |
| AX-157850590 | 27 | 50.271 | KV453299.1 | 9289000 | 27-scf00525 | 27 |
| AX-158347715 | 27 | 50.271 | KV453299.1 | 9289736 | 27-scf00525 | 27 |
| AX-158347718 | 27 | 50.271 | KV453299.1 | 9291271 | 27-scf00525 | 27 |
| AX-157861973 | 27 | 50.271 | KV453299.1 | 9292585 | 27-scf00525 | 27 |
| AX-158347719 | 27 | 50.271 | KV453299.1 | 9293013 | 27-scf00525 | 27 |
| AX-158347720 | 27 | 50.271 | KV453299.1 | 9293927 | 27-scf00525 | 27 |
| AX-158347721 | 27 | 50.271 | KV453299.1 | 9294796 | 27-scf00525 | 27 |
| AX-158347722 | 27 | 50.271 | KV453299.1 | 9295338 | 27-scf00525 | 27 |
| AX-158347723 | 27 | 50.271 | KV453299.1 | 9295569 | 27-scf00525 | 27 |
| AX-158347729 | 27 | 50.271 | KV453299.1 | 9302231 | 27-scf00525 | 27 |
| AX-158347730 | 27 | 50.271 | KV453299.1 | 9303816 | 27-scf00525 | 27 |
| AX-158347732 | 27 | 50.271 | KV453299.1 | 9305935 | 27-scf00525 | 27 |
| AX-158347736 | 27 | 50.271 | KV453299.1 | 9309423 | 27-scf00525 | 27 |
| AX-158347741 | 27 | 50.271 | KV453299.1 | 9316438 | 27-scf00525 | 27 |
| AX-158347742 | 27 | 50.271 | KV453299.1 | 9317086 | 27-scf00525 | 27 |
| AX-158347743 | 27 | 50.271 | KV453299.1 | 9318052 | 27-scf00525 | 27 |
| AX-158347749 | 27 | 50.271 | KV453299.1 | 9324673 | 27-scf00525 | 27 |
| AX-158347751 | 27 | 50.271 | KV453299.1 | 9328985 | 27-scf00525 | 27 |
| AX-158347752 | 27 | 50.271 | KV453299.1 | 9329618 | 27-scf00525 | 27 |
| AX-158420469 | 27 | 50.271 | KV453299.1 | 9331447 | 27-scf00525 | 27 |

|              |    |        |            |         |             |    |
|--------------|----|--------|------------|---------|-------------|----|
| AX-158347755 | 27 | 50.271 | KV453299.1 | 9333085 | 27-scf00525 | 27 |
| AX-158347762 | 27 | 50.271 | KV453299.1 | 9340237 | 27-scf00525 | 27 |
| AX-158347764 | 27 | 50.271 | KV453299.1 | 9341306 | 27-scf00525 | 27 |
| AX-158347773 | 27 | 50.271 | KV453299.1 | 9350638 | 27-scf00525 | 27 |
| AX-157708208 | 27 | 50.271 | KV453299.1 | 9352995 | 27-scf00525 | 27 |
| AX-158347774 | 27 | 50.271 | KV453299.1 | 9356043 | 27-scf00525 | 27 |
| AX-157750211 | 27 | 50.271 | KV453299.1 | 9356255 | 27-scf00525 | 27 |
| AX-158347780 | 27 | 50.271 | KV453299.1 | 9361340 | 27-scf00525 | 27 |
| AX-158347781 | 27 | 50.271 | KV453299.1 | 9362038 | 27-scf00525 | 27 |
| AX-158347785 | 27 | 50.271 | KV453299.1 | 9363384 | 27-scf00525 | 27 |
| AX-158347786 | 27 | 50.271 | KV453299.1 | 9363834 | 27-scf00525 | 27 |
| AX-157727038 | 27 | 50.271 | KV453299.1 | 9366267 | 27-scf00525 | 27 |
| AX-158347790 | 27 | 50.271 | KV453299.1 | 9367020 | 27-scf00525 | 27 |
| AX-158347793 | 27 | 50.271 | KV453299.1 | 9370125 | 27-scf00525 | 27 |
| AX-158347798 | 27 | 50.271 | KV453299.1 | 9373594 | 27-scf00525 | 27 |
| AX-158347800 | 27 | 50.271 | KV453299.1 | 9375587 | 27-scf00525 | 27 |
| AX-158347802 | 27 | 50.271 | KV453299.1 | 9378080 | 27-scf00525 | 27 |
| AX-158347803 | 27 | 50.271 | KV453299.1 | 9378508 | 27-scf00525 | 27 |
| AX-157850593 | 27 | 50.271 | KV453299.1 | 9383348 | 27-scf00525 | 27 |
| AX-158347809 | 27 | 50.271 | KV453299.1 | 9383549 | 27-scf00525 | 27 |
| AX-158347810 | 27 | 50.271 | KV453299.1 | 9384080 | 27-scf00525 | 27 |
| AX-158347812 | 27 | 50.271 | KV453299.1 | 9386657 | 27-scf00525 | 27 |
| AX-158347814 | 27 | 50.271 | KV453299.1 | 9389185 | 27-scf00525 | 27 |
| AX-158347825 | 27 | 50.271 | KV453299.1 | 9398833 | 27-scf00525 | 27 |
| AX-158347826 | 27 | 50.271 | KV453299.1 | 9401245 | 27-scf00525 | 27 |
| AX-157868158 | 27 | 50.271 | KV453299.1 | 9407957 | 27-scf00525 | 27 |
| AX-158347830 | 27 | 50.271 | KV453299.1 | 9408355 | 27-scf00525 | 27 |
| AX-158347831 | 27 | 50.271 | KV453299.1 | 9408957 | 27-scf00525 | 27 |
| AX-158347836 | 27 | 50.271 | KV453299.1 | 9414162 | 27-scf00525 | 27 |
| AX-157723752 | 27 | 50.271 | KV453299.1 | 9416615 | 27-scf00525 | 27 |
| AX-158347840 | 27 | 50.271 | KV453299.1 | 9417621 | 27-scf00525 | 27 |
| AX-158347841 | 27 | 50.271 | KV453299.1 | 9418230 | 27-scf00525 | 27 |
| AX-158347842 | 27 | 50.271 | KV453299.1 | 9419025 | 27-scf00525 | 27 |
| AX-158347844 | 27 | 50.271 | KV453299.1 | 9420430 | 27-scf00525 | 27 |
| AX-158347845 | 27 | 50.271 | KV453299.1 | 9420906 | 27-scf00525 | 27 |
| AX-158347848 | 27 | 50.271 | KV453299.1 | 9424709 | 27-scf00525 | 27 |
| AX-158347850 | 27 | 50.271 | KV453299.1 | 9426485 | 27-scf00525 | 27 |
| AX-158347855 | 27 | 50.271 | KV453299.1 | 9431019 | 27-scf00525 | 27 |
| AX-158347856 | 27 | 50.271 | KV453299.1 | 9431543 | 27-scf00525 | 27 |
| AX-158347857 | 27 | 50.271 | KV453299.1 | 9432137 | 27-scf00525 | 27 |
| AX-158347858 | 27 | 50.271 | KV453299.1 | 9433455 | 27-scf00525 | 27 |
| AX-158347859 | 27 | 50.271 | KV453299.1 | 9433972 | 27-scf00525 | 27 |
| AX-158347860 | 27 | 50.271 | KV453299.1 | 9434941 | 27-scf00525 | 27 |
| AX-158347861 | 27 | 50.271 | KV453299.1 | 9435877 | 27-scf00525 | 27 |
| AX-158347862 | 27 | 50.271 | KV453299.1 | 9437679 | 27-scf00525 | 27 |
| AX-158347863 | 27 | 50.271 | KV453299.1 | 9438505 | 27-scf00525 | 27 |
| AX-158347864 | 27 | 50.271 | KV453299.1 | 9442429 | 27-scf00525 | 27 |
| AX-158347873 | 27 | 50.271 | KV453299.1 | 9452994 | 27-scf00525 | 27 |
| AX-158347874 | 27 | 50.271 | KV453299.1 | 9453911 | 27-scf00525 | 27 |
| AX-158347875 | 27 | 50.271 | KV453299.1 | 9454417 | 27-scf00525 | 27 |
| AX-158347882 | 27 | 50.271 | KV453299.1 | 9460524 | 27-scf00525 | 27 |

|              |    |        |            |         |             |    |
|--------------|----|--------|------------|---------|-------------|----|
| AX-158347885 | 27 | 50.271 | KV453299.1 | 9464327 | 27-scf00525 | 27 |
| AX-158347890 | 27 | 50.271 | KV453299.1 | 9468220 | 27-scf00525 | 27 |
| AX-158347891 | 27 | 50.271 | KV453299.1 | 9468656 | 27-scf00525 | 27 |
| AX-158347892 | 27 | 50.271 | KV453299.1 | 9470957 | 27-scf00525 | 27 |
| AX-158347893 | 27 | 50.271 | KV453299.1 | 9471452 | 27-scf00525 | 27 |
| AX-158347897 | 27 | 50.271 | KV453299.1 | 9475144 | 27-scf00525 | 27 |
| AX-158347898 | 27 | 50.271 | KV453299.1 | 9475546 | 27-scf00525 | 27 |
| AX-158347900 | 27 | 50.271 | KV453299.1 | 9477131 | 27-scf00525 | 27 |
| AX-157868159 | 27 | 50.271 | KV453299.1 | 9477332 | 27-scf00525 | 27 |
| AX-158347904 | 27 | 50.271 | KV453299.1 | 9478916 | 27-scf00525 | 27 |
| AX-158347910 | 27 | 50.271 | KV453299.1 | 9482753 | 27-scf00525 | 27 |
| AX-157726158 | 27 | 50.271 | KV453299.1 | 9484505 | 27-scf00525 | 27 |
| AX-158347915 | 27 | 50.271 | KV453299.1 | 9484962 | 27-scf00525 | 27 |
| AX-158347918 | 27 | 50.271 | KV453299.1 | 9487467 | 27-scf00525 | 27 |
| AX-157850599 | 27 | 50.271 | KV453299.1 | 9488594 | 27-scf00525 | 27 |
| AX-157726125 | 27 | 50.271 | KV453299.1 | 9489959 | 27-scf00525 | 27 |
| AX-158347922 | 27 | 50.271 | KV453299.1 | 9491748 | 27-scf00525 | 27 |
| AX-158347923 | 27 | 50.271 | KV453299.1 | 9493598 | 27-scf00525 | 27 |
| AX-158347926 | 27 | 50.271 | KV453299.1 | 9495772 | 27-scf00525 | 27 |
| AX-158347945 | 27 | 50.271 | KV453299.1 | 9517631 | 27-scf00525 | 27 |
| AX-158347947 | 27 | 50.271 | KV453299.1 | 9520114 | 27-scf00525 | 27 |
| AX-158347948 | 27 | 50.271 | KV453299.1 | 9521307 | 27-scf00525 | 27 |
| AX-158347949 | 27 | 50.271 | KV453299.1 | 9522094 | 27-scf00525 | 27 |
| AX-158347951 | 27 | 50.271 | KV453299.1 | 9523842 | 27-scf00525 | 27 |
| AX-158347956 | 27 | 50.271 | KV453299.1 | 9528155 | 27-scf00525 | 27 |
| AX-158347957 | 27 | 50.271 | KV453299.1 | 9528894 | 27-scf00525 | 27 |
| AX-158347959 | 27 | 50.271 | KV453299.1 | 9531154 | 27-scf00525 | 27 |
| AX-158347962 | 27 | 50.271 | KV453299.1 | 9534663 | 27-scf00525 | 27 |
| AX-158347964 | 27 | 50.271 | KV453299.1 | 9536503 | 27-scf00525 | 27 |
| AX-158347969 | 27 | 50.271 | KV453299.1 | 9541636 | 27-scf00525 | 27 |
| AX-158347972 | 27 | 50.271 | KV453299.1 | 9544068 | 27-scf00525 | 27 |
| AX-158347974 | 27 | 50.271 | KV453299.1 | 9545179 | 27-scf00525 | 27 |
| AX-158347976 | 27 | 50.271 | KV453299.1 | 9546322 | 27-scf00525 | 27 |
| AX-158347979 | 27 | 50.271 | KV453299.1 | 9550045 | 27-scf00525 | 27 |
| AX-158347986 | 27 | 50.271 | KV453299.1 | 9555670 | 27-scf00525 | 27 |
| AX-158347987 | 27 | 50.271 | KV453299.1 | 9556992 | 27-scf00525 | 27 |
| AX-158347988 | 27 | 50.271 | KV453299.1 | 9558013 | 27-scf00525 | 27 |
| AX-158347996 | 27 | 50.271 | KV453299.1 | 9563957 | 27-scf00525 | 27 |
| AX-158348002 | 27 | 50.271 | KV453299.1 | 9569578 | 27-scf00525 | 27 |
| AX-158348003 | 27 | 50.271 | KV453299.1 | 9570155 | 27-scf00525 | 27 |
| AX-158348005 | 27 | 50.271 | KV453299.1 | 9572611 | 27-scf00525 | 27 |
| AX-158348007 | 27 | 50.271 | KV453299.1 | 9574087 | 27-scf00525 | 27 |
| AX-158348008 | 27 | 50.271 | KV453299.1 | 9576191 | 27-scf00525 | 27 |
| AX-158348010 | 27 | 50.271 | KV453299.1 | 9580174 | 27-scf00525 | 27 |
| AX-158348011 | 27 | 50.271 | KV453299.1 | 9581525 | 27-scf00525 | 27 |
| AX-158348018 | 27 | 50.271 | KV453299.1 | 9588869 | 27-scf00525 | 27 |
| AX-158348025 | 27 | 50.271 | KV453299.1 | 9598080 | 27-scf00525 | 27 |
| AX-158348038 | 27 | 50.271 | KV453299.1 | 9614977 | 27-scf00525 | 27 |
| AX-158348039 | 27 | 50.271 | KV453299.1 | 9615768 | 27-scf00525 | 27 |
| AX-158348041 | 27 | 50.271 | KV453299.1 | 9620127 | 27-scf00525 | 27 |
| AX-158348042 | 27 | 50.271 | KV453299.1 | 9620534 | 27-scf00525 | 27 |

|              |    |        |             |         |                |    |
|--------------|----|--------|-------------|---------|----------------|----|
| AX-158419316 | 27 | 50.271 | KV453299.1  | 9621287 | 27-scf00525    | 27 |
| AX-158348046 | 27 | 50.271 | KV453299.1  | 9625703 | 27-scf00525    | 27 |
| AX-158348047 | 27 | 50.271 | KV453299.1  | 9626255 | 27-scf00525    | 27 |
| AX-158348048 | 27 | 50.271 | KV453299.1  | 9629015 | 27-scf00525    | 27 |
| AX-158348050 | 27 | 50.271 | KV453299.1  | 9630292 | 27-scf00525    | 27 |
| AX-158348052 | 27 | 50.271 | KV453299.1  | 9633642 | 27-scf00525    | 27 |
| AX-158348053 | 27 | 50.271 | KV453299.1  | 9634871 | 27-scf00525    | 27 |
| AX-158348054 | 27 | 50.271 | KV453299.1  | 9635334 | 27-scf00525    | 27 |
| AX-158348058 | 27 | 50.271 | KV453299.1  | 9641387 | 27-scf00525    | 27 |
| AX-158348061 | 27 | 50.271 | KV453299.1  | 9644286 | 27-scf00525    | 27 |
| AX-158348065 | 27 | 50.271 | KV453299.1  | 9646227 | 27-scf00525    | 27 |
| AX-158348066 | 27 | 50.271 | KV453299.1  | 9646836 | 27-scf00525    | 27 |
| AX-158348070 | 27 | 50.271 | KV453299.1  | 9651965 | 27-scf00525    | 27 |
| AX-158348079 | 27 | 50.271 | KV453299.1  | 9660460 | 27-scf00525    | 27 |
| AX-158348080 | 27 | 50.271 | KV453299.1  | 9660923 | 27-scf00525    | 27 |
| AX-158348083 | 27 | 50.271 | KV453299.1  | 9662499 | 27-scf00525    | 27 |
| AX-157850606 | 27 | 50.271 | KV453299.1  | 9662710 | 27-scf00525    | 27 |
| AX-158348084 | 27 | 50.271 | KV453299.1  | 9662937 | 27-scf00525    | 27 |
| AX-157850607 | 27 | 50.271 | KV453299.1  | 9663239 | 27-scf00525    | 27 |
| AX-157850611 | 27 | 50.271 | KV453299.1  | 9677406 | 27-scf00525    | 27 |
| AX-158348088 | 27 | 50.271 | KV453299.1  | 9681115 | 27-scf00525    | 27 |
| AX-158348089 | 27 | 50.271 | KV453299.1  | 9681313 | 27-scf00525    | 27 |
| AX-157750139 | 27 | 50.271 | KV453299.1  | 9689242 | 27-scf00525    | 27 |
| AX-158348092 | 27 | 50.271 | KV453299.1  | 9691250 | 27-scf00525    | 27 |
| AX-158348096 | 27 | 50.271 | KV453299.1  | 9696901 | 27-scf00525    | 27 |
| AX-157757726 | 27 | 50.271 | KV453299.1  | 9697504 | 27-scf00525    | 27 |
| AX-158348098 | 27 | 50.271 | KV453299.1  | 9701359 | 27-scf00525    | 27 |
| AX-158348101 | 27 | 50.271 | KV453299.1  | 9706030 | 27-scf00525    | 27 |
| AX-158348104 | 27 | 50.271 | KV453299.1  | 9708313 | 27-scf00525    | 27 |
| AX-158419319 | 27 | 50.271 | KV453299.1  | 9720425 | 27-scf00525    | 27 |
| AX-158348202 | 27 | 50.271 | KV453299.1  | 9837788 | 27-scf00525    | 27 |
| AX-158348204 | 27 | 50.271 | KV453299.1  | 9841457 | 27-scf00525    | 27 |
| AX-158348226 | 27 | 50.271 | KV453299.1  | 9864031 | 27-scf00525    | 27 |
| AX-157888858 | 27 | 50.271 | KV453299.1  | 9868643 | 27-scf00525    | 27 |
| AX-157850634 | 27 | 50.271 | KV453299.1  | 9880922 | 27-scf00525    | 27 |
| AX-158348266 | 27 | 50.271 | KV453299.1  | 9913265 | 27-scf00525    | 27 |
| AX-157701959 | 27 | 50.271 | DX088860.1  | 77      | IORI212 lctalk | UN |
| AX-157704651 | 27 | 50.271 | 3ML01026897 | 156     | scf02498_1     | UN |
| AX-157705506 | 27 | 50.271 | 3ML01029996 | 390     | scf05618_1     | UN |
| AX-157706173 | 27 | 50.271 | 3ML01031764 | 550     | scf07385_1     | UN |
| AX-157850605 | 27 | 50.489 | KV453299.1  | 9654292 | 27-scf00525    | 27 |
| AX-158348077 | 27 | 50.489 | KV453299.1  | 9659492 | 27-scf00525    | 27 |
| AX-158348081 | 27 | 50.489 | KV453299.1  | 9661798 | 27-scf00525    | 27 |
| AX-158348082 | 27 | 50.489 | KV453299.1  | 9662264 | 27-scf00525    | 27 |
| AX-158348090 | 27 | 50.489 | KV453299.1  | 9686139 | 27-scf00525    | 27 |
| AX-158348094 | 27 | 50.489 | KV453299.1  | 9694233 | 27-scf00525    | 27 |
| AX-158348103 | 27 | 50.708 | KV453299.1  | 9706937 | 27-scf00525    | 27 |
| AX-158348106 | 27 | 50.708 | KV453299.1  | 9711835 | 27-scf00525    | 27 |
| AX-158348107 | 27 | 50.708 | KV453299.1  | 9712607 | 27-scf00525    | 27 |
| AX-157850612 | 27 | 50.708 | KV453299.1  | 9716918 | 27-scf00525    | 27 |
| AX-157850490 | 27 | 50.817 | KV453299.1  | 6967475 | 27-scf00525    | 27 |

|              |    |        |            |         |             |    |
|--------------|----|--------|------------|---------|-------------|----|
| AX-158347464 | 27 | 50.817 | KV453299.1 | 9030317 | 27-scf00525 | 27 |
| AX-158348097 | 27 | 50.817 | KV453299.1 | 9700438 | 27-scf00525 | 27 |
| AX-158348110 | 27 | 50.817 | KV453299.1 | 9722552 | 27-scf00525 | 27 |
| AX-157850614 | 27 | 50.817 | KV453299.1 | 9727065 | 27-scf00525 | 27 |
| AX-158348115 | 27 | 50.817 | KV453299.1 | 9729032 | 27-scf00525 | 27 |
| AX-158348118 | 27 | 50.817 | KV453299.1 | 9731314 | 27-scf00525 | 27 |
| AX-158348120 | 27 | 50.817 | KV453299.1 | 9738455 | 27-scf00525 | 27 |
| AX-158348122 | 27 | 50.817 | KV453299.1 | 9740046 | 27-scf00525 | 27 |
| AX-158348123 | 27 | 50.817 | KV453299.1 | 9741018 | 27-scf00525 | 27 |
| AX-158348124 | 27 | 50.817 | KV453299.1 | 9741699 | 27-scf00525 | 27 |
| AX-158348125 | 27 | 50.817 | KV453299.1 | 9741958 | 27-scf00525 | 27 |
| AX-158348126 | 27 | 50.817 | KV453299.1 | 9743143 | 27-scf00525 | 27 |
| AX-157696284 | 27 | 50.817 | KV453299.1 | 9750777 | 27-scf00525 | 27 |
| AX-158348129 | 27 | 50.817 | KV453299.1 | 9751336 | 27-scf00525 | 27 |
| AX-158348130 | 27 | 50.817 | KV453299.1 | 9752478 | 27-scf00525 | 27 |
| AX-157850616 | 27 | 50.817 | KV453299.1 | 9755096 | 27-scf00525 | 27 |
| AX-157850618 | 27 | 50.817 | KV453299.1 | 9757581 | 27-scf00525 | 27 |
| AX-158348133 | 27 | 50.817 | KV453299.1 | 9760537 | 27-scf00525 | 27 |
| AX-158348134 | 27 | 50.817 | KV453299.1 | 9761429 | 27-scf00525 | 27 |
| AX-158348137 | 27 | 50.817 | KV453299.1 | 9763394 | 27-scf00525 | 27 |
| AX-158348139 | 27 | 50.817 | KV453299.1 | 9764748 | 27-scf00525 | 27 |
| AX-157850620 | 27 | 50.817 | KV453299.1 | 9764990 | 27-scf00525 | 27 |
| AX-158348140 | 27 | 50.817 | KV453299.1 | 9765945 | 27-scf00525 | 27 |
| AX-158348141 | 27 | 50.817 | KV453299.1 | 9767984 | 27-scf00525 | 27 |
| AX-158348144 | 27 | 50.817 | KV453299.1 | 9770695 | 27-scf00525 | 27 |
| AX-157850622 | 27 | 50.817 | KV453299.1 | 9778391 | 27-scf00525 | 27 |
| AX-158348151 | 27 | 50.817 | KV453299.1 | 9783895 | 27-scf00525 | 27 |
| AX-158348152 | 27 | 50.817 | KV453299.1 | 9784835 | 27-scf00525 | 27 |
| AX-158348156 | 27 | 50.817 | KV453299.1 | 9789132 | 27-scf00525 | 27 |
| AX-158348157 | 27 | 50.817 | KV453299.1 | 9790159 | 27-scf00525 | 27 |
| AX-158348161 | 27 | 50.817 | KV453299.1 | 9792572 | 27-scf00525 | 27 |
| AX-158348162 | 27 | 50.817 | KV453299.1 | 9793691 | 27-scf00525 | 27 |
| AX-158348163 | 27 | 50.817 | KV453299.1 | 9793921 | 27-scf00525 | 27 |
| AX-158348165 | 27 | 50.817 | KV453299.1 | 9797524 | 27-scf00525 | 27 |
| AX-158348166 | 27 | 50.817 | KV453299.1 | 9800459 | 27-scf00525 | 27 |
| AX-158348167 | 27 | 50.817 | KV453299.1 | 9802241 | 27-scf00525 | 27 |
| AX-158348170 | 27 | 50.817 | KV453299.1 | 9803928 | 27-scf00525 | 27 |
| AX-158348172 | 27 | 50.817 | KV453299.1 | 9808160 | 27-scf00525 | 27 |
| AX-158348174 | 27 | 50.817 | KV453299.1 | 9808700 | 27-scf00525 | 27 |
| AX-158348177 | 27 | 50.817 | KV453299.1 | 9811035 | 27-scf00525 | 27 |
| AX-158348178 | 27 | 50.817 | KV453299.1 | 9812151 | 27-scf00525 | 27 |
| AX-158348179 | 27 | 50.817 | KV453299.1 | 9812969 | 27-scf00525 | 27 |
| AX-158348181 | 27 | 50.817 | KV453299.1 | 9815464 | 27-scf00525 | 27 |
| AX-158348182 | 27 | 50.817 | KV453299.1 | 9815877 | 27-scf00525 | 27 |
| AX-157717847 | 27 | 50.817 | KV453299.1 | 9819817 | 27-scf00525 | 27 |
| AX-157744859 | 27 | 50.817 | KV453299.1 | 9826371 | 27-scf00525 | 27 |
| AX-158348189 | 27 | 50.817 | KV453299.1 | 9826539 | 27-scf00525 | 27 |
| AX-158348190 | 27 | 50.817 | KV453299.1 | 9828641 | 27-scf00525 | 27 |
| AX-158348191 | 27 | 50.817 | KV453299.1 | 9829459 | 27-scf00525 | 27 |
| AX-158348192 | 27 | 50.817 | KV453299.1 | 9830470 | 27-scf00525 | 27 |
| AX-158348194 | 27 | 50.817 | KV453299.1 | 9831401 | 27-scf00525 | 27 |

|              |    |        |            |          |             |    |
|--------------|----|--------|------------|----------|-------------|----|
| AX-158348195 | 27 | 50.817 | KV453299.1 | 9831856  | 27-scf00525 | 27 |
| AX-158420474 | 27 | 50.817 | KV453299.1 | 9834184  | 27-scf00525 | 27 |
| AX-158419325 | 27 | 50.817 | KV453299.1 | 9834434  | 27-scf00525 | 27 |
| AX-158348199 | 27 | 50.817 | KV453299.1 | 9835395  | 27-scf00525 | 27 |
| AX-158348206 | 27 | 50.817 | KV453299.1 | 9844342  | 27-scf00525 | 27 |
| AX-158348209 | 27 | 50.817 | KV453299.1 | 9847585  | 27-scf00525 | 27 |
| AX-157850625 | 27 | 50.817 | KV453299.1 | 9847696  | 27-scf00525 | 27 |
| AX-158348210 | 27 | 50.817 | KV453299.1 | 9848017  | 27-scf00525 | 27 |
| AX-158348213 | 27 | 50.817 | KV453299.1 | 9850467  | 27-scf00525 | 27 |
| AX-158348214 | 27 | 50.817 | KV453299.1 | 9851410  | 27-scf00525 | 27 |
| AX-158348217 | 27 | 50.817 | KV453299.1 | 9852709  | 27-scf00525 | 27 |
| AX-157850626 | 27 | 50.817 | KV453299.1 | 9853322  | 27-scf00525 | 27 |
| AX-157850629 | 27 | 50.817 | KV453299.1 | 9856938  | 27-scf00525 | 27 |
| AX-158348222 | 27 | 50.817 | KV453299.1 | 9859058  | 27-scf00525 | 27 |
| AX-158348224 | 27 | 50.817 | KV453299.1 | 9861784  | 27-scf00525 | 27 |
| AX-158348225 | 27 | 50.817 | KV453299.1 | 9862251  | 27-scf00525 | 27 |
| AX-158348227 | 27 | 50.817 | KV453299.1 | 9865344  | 27-scf00525 | 27 |
| AX-157747744 | 27 | 50.817 | KV453299.1 | 9867489  | 27-scf00525 | 27 |
| AX-158348237 | 27 | 50.817 | KV453299.1 | 9877682  | 27-scf00525 | 27 |
| AX-158348238 | 27 | 50.817 | KV453299.1 | 9878787  | 27-scf00525 | 27 |
| AX-158348262 | 27 | 50.817 | KV453299.1 | 9907712  | 27-scf00525 | 27 |
| AX-157738725 | 27 | 50.817 | KV453299.1 | 9948610  | 27-scf00525 | 27 |
| AX-157850648 | 27 | 50.817 | KV453299.1 | 9949501  | 27-scf00525 | 27 |
| AX-158348293 | 27 | 50.817 | KV453299.1 | 9963917  | 27-scf00525 | 27 |
| AX-158348298 | 27 | 50.817 | KV453299.1 | 9968466  | 27-scf00525 | 27 |
| AX-158348306 | 27 | 50.817 | KV453299.1 | 9978042  | 27-scf00525 | 27 |
| AX-157727959 | 27 | 50.817 | KV453299.1 | 9985081  | 27-scf00525 | 27 |
| AX-158348317 | 27 | 50.817 | KV453299.1 | 9992694  | 27-scf00525 | 27 |
| AX-158348324 | 27 | 50.817 | KV453299.1 | 9996390  | 27-scf00525 | 27 |
| AX-158348338 | 27 | 50.817 | KV453299.1 | 10015473 | 27-scf00525 | 27 |
| AX-157850657 | 27 | 50.817 | KV453299.1 | 10062138 | 27-scf00525 | 27 |
| AX-158348387 | 27 | 50.817 | KV453299.1 | 10084190 | 27-scf00525 | 27 |
| AX-158348399 | 27 | 50.817 | KV453299.1 | 10091181 | 27-scf00525 | 27 |
| AX-158348412 | 27 | 50.817 | KV453299.1 | 10122680 | 27-scf00525 | 27 |
| AX-158348430 | 27 | 50.817 | KV453299.1 | 10154188 | 27-scf00525 | 27 |
| AX-158348445 | 27 | 50.817 | KV453299.1 | 10178676 | 27-scf00525 | 27 |
| AX-158348482 | 27 | 50.817 | KV453299.1 | 10245603 | 27-scf00525 | 27 |
| AX-157850676 | 27 | 50.817 | KV453299.1 | 10250684 | 27-scf00525 | 27 |
| AX-158348496 | 27 | 50.817 | KV453299.1 | 10261598 | 27-scf00525 | 27 |
| AX-158348516 | 27 | 50.817 | KV453299.1 | 10293708 | 27-scf00525 | 27 |
| AX-157850691 | 27 | 50.817 | KV453299.1 | 10352766 | 27-scf00525 | 27 |
| AX-158348571 | 27 | 50.817 | KV453299.1 | 10361765 | 27-scf00525 | 27 |
| AX-158348573 | 27 | 50.817 | KV453299.1 | 10365287 | 27-scf00525 | 27 |
| AX-158348575 | 27 | 50.817 | KV453299.1 | 10366913 | 27-scf00525 | 27 |
| AX-158348586 | 27 | 50.817 | KV453299.1 | 10382222 | 27-scf00525 | 27 |
| AX-157864163 | 27 | 50.817 | KV453299.1 | 10416658 | 27-scf00525 | 27 |
| AX-158348621 | 27 | 50.817 | KV453299.1 | 10425096 | 27-scf00525 | 27 |
| AX-158348257 | 27 | 50.926 | KV453299.1 | 9900742  | 27-scf00525 | 27 |
| AX-157750175 | 27 | 50.926 | KV453299.1 | 9902714  | 27-scf00525 | 27 |
| AX-158348259 | 27 | 50.926 | KV453299.1 | 9906096  | 27-scf00525 | 27 |
| AX-158348261 | 27 | 50.983 | KV453299.1 | 9907087  | 27-scf00525 | 27 |



|              |    |        |            |          |             |    |
|--------------|----|--------|------------|----------|-------------|----|
| AX-157850640 | 27 | 51.038 | KV453299.1 | 9909145  | 27-scf00525 | 27 |
| AX-158348267 | 27 | 51.083 | KV453299.1 | 9914292  | 27-scf00525 | 27 |
| AX-158348270 | 27 | 51.144 | KV453299.1 | 9917927  | 27-scf00525 | 27 |
| AX-157850641 | 27 | 51.144 | KV453299.1 | 9918482  | 27-scf00525 | 27 |
| AX-158348276 | 27 | 51.176 | KV453299.1 | 9932911  | 27-scf00525 | 27 |
| AX-157770790 | 27 | 51.215 | KV453299.1 | 9938194  | 27-scf00525 | 27 |
| AX-158348116 | 27 | 51.254 | KV453299.1 | 9729353  | 27-scf00525 | 27 |
| AX-157773884 | 27 | 51.254 | KV453299.1 | 9825777  | 27-scf00525 | 27 |
| AX-158348197 | 27 | 51.254 | KV453299.1 | 9832839  | 27-scf00525 | 27 |
| AX-157850643 | 27 | 51.254 | KV453299.1 | 9926518  | 27-scf00525 | 27 |
| AX-158348279 | 27 | 51.254 | KV453299.1 | 9939944  | 27-scf00525 | 27 |
| AX-157850645 | 27 | 51.254 | KV453299.1 | 9942147  | 27-scf00525 | 27 |
| AX-158348281 | 27 | 51.254 | KV453299.1 | 9943276  | 27-scf00525 | 27 |
| AX-157741418 | 27 | 51.254 | KV453299.1 | 9944614  | 27-scf00525 | 27 |
| AX-158348285 | 27 | 51.254 | KV453299.1 | 9948742  | 27-scf00525 | 27 |
| AX-158348286 | 27 | 51.254 | KV453299.1 | 9949212  | 27-scf00525 | 27 |
| AX-158348287 | 27 | 51.254 | KV453299.1 | 9950496  | 27-scf00525 | 27 |
| AX-158348288 | 27 | 51.254 | KV453299.1 | 9951403  | 27-scf00525 | 27 |
| AX-158348289 | 27 | 51.254 | KV453299.1 | 9952797  | 27-scf00525 | 27 |
| AX-158348290 | 27 | 51.254 | KV453299.1 | 9959086  | 27-scf00525 | 27 |
| AX-158348291 | 27 | 51.254 | KV453299.1 | 9960681  | 27-scf00525 | 27 |
| AX-158348301 | 27 | 51.472 | KV453299.1 | 9974805  | 27-scf00525 | 27 |
| AX-158348309 | 27 | 51.472 | KV453299.1 | 9981481  | 27-scf00525 | 27 |
| AX-158348310 | 27 | 51.472 | KV453299.1 | 9983634  | 27-scf00525 | 27 |
| AX-158348311 | 27 | 51.472 | KV453299.1 | 9985693  | 27-scf00525 | 27 |
| AX-158348312 | 27 | 51.472 | KV453299.1 | 9987653  | 27-scf00525 | 27 |
| AX-158348313 | 27 | 51.472 | KV453299.1 | 9989560  | 27-scf00525 | 27 |
| AX-157850649 | 27 | 51.472 | KV453299.1 | 9989757  | 27-scf00525 | 27 |
| AX-158348314 | 27 | 51.472 | KV453299.1 | 9989926  | 27-scf00525 | 27 |
| AX-158348315 | 27 | 51.472 | KV453299.1 | 9990476  | 27-scf00525 | 27 |
| AX-158348322 | 27 | 51.472 | KV453299.1 | 9995188  | 27-scf00525 | 27 |
| AX-158348316 | 27 | 51.497 | KV453299.1 | 9992213  | 27-scf00525 | 27 |
| AX-158348319 | 27 | 51.528 | KV453299.1 | 9993801  | 27-scf00525 | 27 |
| AX-158348435 | 27 | 51.528 | KV453299.1 | 10159006 | 27-scf00525 | 27 |
| AX-157850672 | 27 | 51.528 | KV453299.1 | 10218347 | 27-scf00525 | 27 |
| AX-157868164 | 27 | 51.549 | KV453299.1 | 9998143  | 27-scf00525 | 27 |
| AX-158348328 | 27 | 51.569 | KV453299.1 | 10000939 | 27-scf00525 | 27 |
| AX-157850650 | 27 | 51.581 | KV453299.1 | 10001346 | 27-scf00525 | 27 |
| AX-157850651 | 27 | 51.581 | KV453299.1 | 10004028 | 27-scf00525 | 27 |
| AX-158348331 | 27 | 51.581 | KV453299.1 | 10006319 | 27-scf00525 | 27 |
| AX-158348332 | 27 | 51.581 | KV453299.1 | 10008606 | 27-scf00525 | 27 |
| AX-158348333 | 27 | 51.581 | KV453299.1 | 10009384 | 27-scf00525 | 27 |
| AX-157850652 | 27 | 51.581 | KV453299.1 | 10009662 | 27-scf00525 | 27 |
| AX-158381656 | 27 | 51.581 | KV453299.1 | 10011261 | 27-scf00525 | 27 |
| AX-158348334 | 27 | 51.581 | KV453299.1 | 10011911 | 27-scf00525 | 27 |
| AX-158348340 | 27 | 51.581 | KV453299.1 | 10018534 | 27-scf00525 | 27 |
| AX-158348341 | 27 | 51.581 | KV453299.1 | 10019334 | 27-scf00525 | 27 |
| AX-158348460 | 27 | 51.581 | KV453299.1 | 10206187 | 27-scf00525 | 27 |
| AX-158348470 | 27 | 51.581 | KV453299.1 | 10224020 | 27-scf00525 | 27 |
| AX-158348198 | 27 | 51.745 | KV453299.1 | 9834600  | 27-scf00525 | 27 |
| AX-157850654 | 27 | 51.745 | KV453299.1 | 10045475 | 27-scf00525 | 27 |

|              |    |        |            |          |             |    |
|--------------|----|--------|------------|----------|-------------|----|
| AX-157850655 | 27 | 51.745 | KV453299.1 | 10045737 | 27-scf00525 | 27 |
| AX-158348119 | 27 | 51.802 | KV453299.1 | 9737409  | 27-scf00525 | 27 |
| AX-158348362 | 27 | 51.802 | KV453299.1 | 10048632 | 27-scf00525 | 27 |
| AX-158348363 | 27 | 51.853 | KV453299.1 | 10052231 | 27-scf00525 | 27 |
| AX-158348302 | 27 | 51.909 | KV453299.1 | 9975557  | 27-scf00525 | 27 |
| AX-158348366 | 27 | 51.909 | KV453299.1 | 10055408 | 27-scf00525 | 27 |
| AX-158348370 | 27 | 51.909 | KV453299.1 | 10061074 | 27-scf00525 | 27 |
| AX-158348373 | 27 | 51.909 | KV453299.1 | 10065487 | 27-scf00525 | 27 |
| AX-158348381 | 27 | 51.909 | KV453299.1 | 10077136 | 27-scf00525 | 27 |
| AX-158348382 | 27 | 51.909 | KV453299.1 | 10077635 | 27-scf00525 | 27 |
| AX-158348426 | 27 | 51.909 | KV453299.1 | 10138985 | 27-scf00525 | 27 |
| AX-157861980 | 27 | 51.909 | KV453299.1 | 10164168 | 27-scf00525 | 27 |
| AX-158348441 | 27 | 51.909 | KV453299.1 | 10171426 | 27-scf00525 | 27 |
| AX-157850669 | 27 | 51.909 | KV453299.1 | 10201731 | 27-scf00525 | 27 |
| AX-158420476 | 27 | 51.932 | KV453299.1 | 10079677 | 27-scf00525 | 27 |
| AX-157727350 | 27 | 51.932 | KV453299.1 | 10140313 | 27-scf00525 | 27 |
| AX-158419329 | 27 | 51.941 | KV453299.1 | 10080298 | 27-scf00525 | 27 |
| AX-157888862 | 27 | 51.941 | KV453299.1 | 10160843 | 27-scf00525 | 27 |
| AX-158348390 | 27 | 51.964 | KV453299.1 | 10085981 | 27-scf00525 | 27 |
| AX-158348391 | 27 | 51.989 | KV453299.1 | 10086340 | 27-scf00525 | 27 |
| AX-158348392 | 27 | 51.989 | KV453299.1 | 10086548 | 27-scf00525 | 27 |
| AX-158345405 | 27 | 52.018 | KV453299.1 | 6699348  | 27-scf00525 | 27 |
| AX-158348271 | 27 | 52.018 | KV453299.1 | 9920317  | 27-scf00525 | 27 |
| AX-158348365 | 27 | 52.018 | KV453299.1 | 10053518 | 27-scf00525 | 27 |
| AX-158348374 | 27 | 52.018 | KV453299.1 | 10067321 | 27-scf00525 | 27 |
| AX-158348376 | 27 | 52.018 | KV453299.1 | 10071223 | 27-scf00525 | 27 |
| AX-158348393 | 27 | 52.018 | KV453299.1 | 10087275 | 27-scf00525 | 27 |
| AX-158348395 | 27 | 52.018 | KV453299.1 | 10088365 | 27-scf00525 | 27 |
| AX-158348398 | 27 | 52.018 | KV453299.1 | 10090184 | 27-scf00525 | 27 |
| AX-158348406 | 27 | 52.018 | KV453299.1 | 10099573 | 27-scf00525 | 27 |
| AX-158348407 | 27 | 52.018 | KV453299.1 | 10099846 | 27-scf00525 | 27 |
| AX-158348409 | 27 | 52.018 | KV453299.1 | 10111164 | 27-scf00525 | 27 |
| AX-157882286 | 27 | 52.018 | KV453299.1 | 10115494 | 27-scf00525 | 27 |
| AX-158348411 | 27 | 52.018 | KV453299.1 | 10118496 | 27-scf00525 | 27 |
| AX-157850663 | 27 | 52.018 | KV453299.1 | 10120239 | 27-scf00525 | 27 |
| AX-158348413 | 27 | 52.018 | KV453299.1 | 10123561 | 27-scf00525 | 27 |
| AX-158348416 | 27 | 52.018 | KV453299.1 | 10129802 | 27-scf00525 | 27 |
| AX-158348418 | 27 | 52.018 | KV453299.1 | 10132093 | 27-scf00525 | 27 |
| AX-158348419 | 27 | 52.018 | KV453299.1 | 10133307 | 27-scf00525 | 27 |
| AX-158348420 | 27 | 52.018 | KV453299.1 | 10134125 | 27-scf00525 | 27 |
| AX-158348424 | 27 | 52.018 | KV453299.1 | 10136865 | 27-scf00525 | 27 |
| AX-157721978 | 27 | 52.018 | KV453299.1 | 10140997 | 27-scf00525 | 27 |
| AX-158348428 | 27 | 52.018 | KV453299.1 | 10150291 | 27-scf00525 | 27 |
| AX-158348429 | 27 | 52.018 | KV453299.1 | 10153354 | 27-scf00525 | 27 |
| AX-157850666 | 27 | 52.018 | KV453299.1 | 10154318 | 27-scf00525 | 27 |
| AX-158348431 | 27 | 52.018 | KV453299.1 | 10155234 | 27-scf00525 | 27 |
| AX-157720773 | 27 | 52.018 | KV453299.1 | 10170258 | 27-scf00525 | 27 |
| AX-158348447 | 27 | 52.018 | KV453299.1 | 10180343 | 27-scf00525 | 27 |
| AX-157850670 | 27 | 52.018 | KV453299.1 | 10201946 | 27-scf00525 | 27 |
| AX-157716559 | 27 | 52.018 | KV453299.1 | 10210030 | 27-scf00525 | 27 |
| AX-158348499 | 27 | 52.018 | KV453299.1 | 10266858 | 27-scf00525 | 27 |

|              |    |        |            |          |             |    |
|--------------|----|--------|------------|----------|-------------|----|
| AX-158348503 | 27 | 52.018 | KV453299.1 | 10277034 | 27-scf00525 | 27 |
| AX-157850681 | 27 | 52.018 | KV453299.1 | 10292818 | 27-scf00525 | 27 |
| AX-158348522 | 27 | 52.018 | KV453299.1 | 10298664 | 27-scf00525 | 27 |
| AX-157771961 | 27 | 52.018 | KV453299.1 | 10324431 | 27-scf00525 | 27 |
| AX-158348545 | 27 | 52.018 | KV453299.1 | 10330020 | 27-scf00525 | 27 |
| AX-158348554 | 27 | 52.018 | KV453299.1 | 10341242 | 27-scf00525 | 27 |
| AX-157725996 | 27 | 52.018 | KV453299.1 | 10405365 | 27-scf00525 | 27 |
| AX-158348608 | 27 | 52.018 | KV453299.1 | 10410691 | 27-scf00525 | 27 |
| AX-158348444 | 27 | 52.055 | KV453299.1 | 10175605 | 27-scf00525 | 27 |
| AX-157850668 | 27 | 52.094 | KV453299.1 | 10191070 | 27-scf00525 | 27 |
| AX-157716941 | 27 | 52.128 | KV453299.1 | 10192707 | 27-scf00525 | 27 |
| AX-157850671 | 27 | 52.128 | KV453299.1 | 10201997 | 27-scf00525 | 27 |
| AX-158348456 | 27 | 52.128 | KV453299.1 | 10202117 | 27-scf00525 | 27 |
| AX-158348457 | 27 | 52.128 | KV453299.1 | 10202440 | 27-scf00525 | 27 |
| AX-158348458 | 27 | 52.128 | KV453299.1 | 10203432 | 27-scf00525 | 27 |
| AX-158348469 | 27 | 52.128 | KV453299.1 | 10218833 | 27-scf00525 | 27 |
| AX-158348497 | 27 | 52.128 | KV453299.1 | 10265671 | 27-scf00525 | 27 |
| AX-158348549 | 27 | 52.128 | KV453299.1 | 10335896 | 27-scf00525 | 27 |
| AX-158348612 | 27 | 52.128 | KV453299.1 | 10413817 | 27-scf00525 | 27 |
| AX-158346059 | 27 | 52.346 | KV453299.1 | 7745415  | 27-scf00525 | 27 |
| AX-158346134 | 27 | 52.346 | KV453299.1 | 7812881  | 27-scf00525 | 27 |
| AX-158346518 | 27 | 52.346 | KV453299.1 | 8143342  | 27-scf00525 | 27 |
| AX-158347811 | 27 | 52.346 | KV453299.1 | 9385413  | 27-scf00525 | 27 |
| AX-158347877 | 27 | 52.346 | KV453299.1 | 9455151  | 27-scf00525 | 27 |
| AX-158347934 | 27 | 52.346 | KV453299.1 | 9506712  | 27-scf00525 | 27 |
| AX-158347939 | 27 | 52.346 | KV453299.1 | 9511248  | 27-scf00525 | 27 |
| AX-158348033 | 27 | 52.346 | KV453299.1 | 9606130  | 27-scf00525 | 27 |
| AX-157850632 | 27 | 52.346 | KV453299.1 | 9870531  | 27-scf00525 | 27 |
| AX-158348403 | 27 | 52.346 | KV453299.1 | 10096200 | 27-scf00525 | 27 |
| AX-157745792 | 27 | 52.346 | KV453299.1 | 10154607 | 27-scf00525 | 27 |
| AX-158348436 | 27 | 52.346 | KV453299.1 | 10159878 | 27-scf00525 | 27 |
| AX-157719920 | 27 | 52.346 | KV453299.1 | 10185234 | 27-scf00525 | 27 |
| AX-158348502 | 27 | 52.346 | KV453299.1 | 10276119 | 27-scf00525 | 27 |
| AX-158348505 | 27 | 52.346 | KV453299.1 | 10280129 | 27-scf00525 | 27 |
| AX-158348508 | 27 | 52.346 | KV453299.1 | 10284313 | 27-scf00525 | 27 |
| AX-158348511 | 27 | 52.346 | KV453299.1 | 10287315 | 27-scf00525 | 27 |
| AX-158348517 | 27 | 52.346 | KV453299.1 | 10294921 | 27-scf00525 | 27 |
| AX-158348521 | 27 | 52.346 | KV453299.1 | 10298276 | 27-scf00525 | 27 |
| AX-158348523 | 27 | 52.346 | KV453299.1 | 10299383 | 27-scf00525 | 27 |
| AX-158348527 | 27 | 52.346 | KV453299.1 | 10301691 | 27-scf00525 | 27 |
| AX-158348541 | 27 | 52.346 | KV453299.1 | 10323876 | 27-scf00525 | 27 |
| AX-157850690 | 27 | 52.346 | KV453299.1 | 10327019 | 27-scf00525 | 27 |
| AX-158348596 | 27 | 52.346 | KV453299.1 | 10396914 | 27-scf00525 | 27 |
| AX-158348617 | 27 | 52.346 | KV453299.1 | 10420397 | 27-scf00525 | 27 |
| AX-158348643 | 27 | 52.346 | KV453299.1 | 10457143 | 27-scf00525 | 27 |
| AX-158345924 | 27 | 52.564 | KV453299.1 | 7604616  | 27-scf00525 | 27 |
| AX-157882290 | 27 | 52.564 | KV453299.1 | 10292080 | 27-scf00525 | 27 |
| AX-158348546 | 27 | 52.564 | KV453299.1 | 10333314 | 27-scf00525 | 27 |
| AX-158348547 | 27 | 52.564 | KV453299.1 | 10334443 | 27-scf00525 | 27 |
| AX-158381657 | 27 | 52.564 | KV453299.1 | 10335707 | 27-scf00525 | 27 |
| AX-158348550 | 27 | 52.564 | KV453299.1 | 10336894 | 27-scf00525 | 27 |

|              |    |        |             |          |               |    |
|--------------|----|--------|-------------|----------|---------------|----|
| AX-158348552 | 27 | 52.564 | KV453299.1  | 10338174 | 27-scf00525   | 27 |
| AX-158348553 | 27 | 52.564 | KV453299.1  | 10340531 | 27-scf00525   | 27 |
| AX-158348555 | 27 | 52.564 | KV453299.1  | 10341898 | 27-scf00525   | 27 |
| AX-158348556 | 27 | 52.564 | KV453299.1  | 10342939 | 27-scf00525   | 27 |
| AX-158348557 | 27 | 52.564 | KV453299.1  | 10343508 | 27-scf00525   | 27 |
| AX-158348559 | 27 | 52.564 | KV453299.1  | 10346449 | 27-scf00525   | 27 |
| AX-157713124 | 27 | 52.564 | KV453299.1  | 10415740 | 27-scf00525   | 27 |
| AX-157850702 | 27 | 52.564 | KV453299.1  | 10425945 | 27-scf00525   | 27 |
| AX-158348622 | 27 | 52.564 | KV453299.1  | 10426688 | 27-scf00525   | 27 |
| AX-158348623 | 27 | 52.564 | KV453299.1  | 10426913 | 27-scf00525   | 27 |
| AX-158348628 | 27 | 52.564 | KV453299.1  | 10431019 | 27-scf00525   | 27 |
| AX-157696914 | 27 | 52.564 | FI881822.1  | 344      | 10RI212 Ictal | UN |
| AX-158348563 | 27 | 52.617 | KV453299.1  | 10351586 | 27-scf00525   | 27 |
| AX-158348565 | 27 | 52.647 | KV453299.1  | 10353941 | 27-scf00525   | 27 |
| AX-157850696 | 27 | 52.69  | KV453299.1  | 10398725 | 27-scf00525   | 27 |
| AX-158348599 | 27 | 52.739 | KV453299.1  | 10400022 | 27-scf00525   | 27 |
| AX-158348633 | 27 | 52.739 | KV453299.1  | 10437322 | 27-scf00525   | 27 |
| AX-158348602 | 27 | 52.783 | KV453299.1  | 10403046 | 27-scf00525   | 27 |
| AX-157737628 | 27 | 52.783 | KV453299.1  | 10406041 | 27-scf00525   | 27 |
| AX-158348607 | 27 | 52.783 | KV453299.1  | 10410022 | 27-scf00525   | 27 |
| AX-158348611 | 27 | 52.783 | KV453299.1  | 10412743 | 27-scf00525   | 27 |
| AX-157850697 | 27 | 52.783 | KV453299.1  | 10413994 | 27-scf00525   | 27 |
| AX-157850698 | 27 | 52.783 | KV453299.1  | 10414896 | 27-scf00525   | 27 |
| AX-157850700 | 27 | 52.843 | KV453299.1  | 10419743 | 27-scf00525   | 27 |
| AX-157753665 | 27 | 52.892 | KV453299.1  | 10345997 | 27-scf00525   | 27 |
| AX-157747838 | 27 | 52.892 | KV453299.1  | 10426274 | 27-scf00525   | 27 |
| AX-158348624 | 27 | 52.892 | KV453299.1  | 10428039 | 27-scf00525   | 27 |
| AX-158348626 | 27 | 52.892 | KV453299.1  | 10429519 | 27-scf00525   | 27 |
| AX-158348629 | 27 | 52.892 | KV453299.1  | 10433139 | 27-scf00525   | 27 |
| AX-158348631 | 27 | 52.892 | KV453299.1  | 10435835 | 27-scf00525   | 27 |
| AX-158348006 | 27 | 52.903 | KV453299.1  | 9573617  | 27-scf00525   | 27 |
| AX-158348650 | 27 | 53.241 | KV453299.1  | 10464326 | 27-scf00525   | 27 |
| AX-158348654 | 27 | 53.312 | KV453299.1  | 10474083 | 27-scf00525   | 27 |
| AX-157710267 | 27 | 53.312 | KV453299.1  | 10483926 | 27-scf00525   | 27 |
| AX-158348655 | 27 | 53.419 | KV453299.1  | 10476122 | 27-scf00525   | 27 |
| AX-157850706 | 27 | 53.538 | KV453299.1  | 10476503 | 27-scf00525   | 27 |
| AX-158348657 | 27 | 53.548 | KV453299.1  | 10480913 | 27-scf00525   | 27 |
| AX-158348658 | 27 | 53.548 | KV453299.1  | 10481892 | 27-scf00525   | 27 |
| AX-158381658 | 27 | 53.548 | KV453299.1  | 10484557 | 27-scf00525   | 27 |
| AX-157750861 | 27 | 53.548 | KV453299.1  | 10488533 | 27-scf00525   | 27 |
| AX-157850707 | 27 | 53.548 | KV453299.1  | 10491920 | 27-scf00525   | 27 |
| AX-157707428 | 27 | 53.548 | 3ML01034270 | 258      | scf09940_1    | UN |
| AX-158348662 | 27 | 53.549 | KV453299.1  | 10494208 | 27-scf00525   | 27 |
| AX-157850709 | 27 | 53.84  | KV453299.1  | 10496863 | 27-scf00525   | 27 |
| AX-158348667 | 27 | 53.84  | KV453299.1  | 10506963 | 27-scf00525   | 27 |
| AX-157772066 | 27 | 53.84  | KV453299.1  | 10510397 | 27-scf00525   | 27 |
| AX-157850711 | 27 | 53.983 | KV453299.1  | 10522758 | 27-scf00525   | 27 |
| AX-158348673 | 27 | 53.983 | KV453299.1  | 10523598 | 27-scf00525   | 27 |
| AX-157758875 | 27 | 53.985 | KV453299.1  | 10478499 | 27-scf00525   | 27 |
| AX-157700392 | 27 | 53.985 | KV453299.1  | 10519280 | 27-scf00525   | 27 |
| AX-158348674 | 27 | 53.985 | KV453299.1  | 10524134 | 27-scf00525   | 27 |

|              |    |        |            |          |             |    |
|--------------|----|--------|------------|----------|-------------|----|
| AX-157850714 | 27 | 53.985 | KV453299.1 | 10526479 | 27-scf00525 | 27 |
| AX-158348684 | 27 | 53.985 | KV453299.1 | 10537582 | 27-scf00525 | 27 |
| AX-158348685 | 27 | 53.985 | KV453299.1 | 10538167 | 27-scf00525 | 27 |
| AX-158348686 | 27 | 53.985 | KV453299.1 | 10539710 | 27-scf00525 | 27 |
| AX-157744633 | 27 | 53.985 | KV453299.1 | 10540581 | 27-scf00525 | 27 |
| AX-158348687 | 27 | 53.985 | KV453299.1 | 10540993 | 27-scf00525 | 27 |
| AX-158348690 | 27 | 53.985 | KV453299.1 | 10543836 | 27-scf00525 | 27 |
| AX-158348691 | 27 | 53.985 | KV453299.1 | 10544794 | 27-scf00525 | 27 |
| AX-157850716 | 27 | 53.985 | KV453299.1 | 10545717 | 27-scf00525 | 27 |
| AX-158348692 | 27 | 53.985 | KV453299.1 | 10546525 | 27-scf00525 | 27 |
| AX-158348701 | 27 | 53.985 | KV453299.1 | 10560301 | 27-scf00525 | 27 |
| AX-158348707 | 27 | 53.985 | KV453299.1 | 10577116 | 27-scf00525 | 27 |
| AX-158348710 | 27 | 53.985 | KV453299.1 | 10584592 | 27-scf00525 | 27 |
| AX-157752801 | 27 | 53.985 | KV453299.1 | 10621195 | 27-scf00525 | 27 |
| AX-157850724 | 27 | 53.985 | KV453299.1 | 10634082 | 27-scf00525 | 27 |
| AX-158348729 | 27 | 53.985 | KV453299.1 | 10640787 | 27-scf00525 | 27 |
| AX-157745820 | 27 | 53.985 | KV453299.1 | 10648610 | 27-scf00525 | 27 |
| AX-158348748 | 27 | 53.985 | KV453299.1 | 10665570 | 27-scf00525 | 27 |
| AX-157743740 | 27 | 53.985 | KV453299.1 | 10676655 | 27-scf00525 | 27 |
| AX-158348757 | 27 | 53.985 | KV453299.1 | 10678827 | 27-scf00525 | 27 |
| AX-158348761 | 27 | 53.985 | KV453299.1 | 10685008 | 27-scf00525 | 27 |
| AX-158348785 | 27 | 53.985 | KV453299.1 | 10710766 | 27-scf00525 | 27 |
| AX-158348797 | 27 | 53.985 | KV453299.1 | 10726236 | 27-scf00525 | 27 |
| AX-158348705 | 27 | 54.016 | KV453299.1 | 10565898 | 27-scf00525 | 27 |
| AX-158348669 | 27 | 54.042 | KV453299.1 | 10509082 | 27-scf00525 | 27 |
| AX-157861985 | 27 | 54.042 | KV453299.1 | 10522848 | 27-scf00525 | 27 |
| AX-158348706 | 27 | 54.042 | KV453299.1 | 10566481 | 27-scf00525 | 27 |
| AX-157807655 | 27 | 54.068 | KV453299.1 | 10572941 | 27-scf00525 | 27 |
| AX-157717564 | 27 | 54.094 | KV453299.1 | 10460201 | 27-scf00525 | 27 |
| AX-158348696 | 27 | 54.094 | KV453299.1 | 10556720 | 27-scf00525 | 27 |
| AX-158348700 | 27 | 54.094 | KV453299.1 | 10558884 | 27-scf00525 | 27 |
| AX-158348703 | 27 | 54.094 | KV453299.1 | 10562249 | 27-scf00525 | 27 |
| AX-157850720 | 27 | 54.094 | KV453299.1 | 10578801 | 27-scf00525 | 27 |
| AX-158348708 | 27 | 54.094 | KV453299.1 | 10580188 | 27-scf00525 | 27 |
| AX-157888867 | 27 | 54.094 | KV453299.1 | 10580905 | 27-scf00525 | 27 |
| AX-157850722 | 27 | 54.094 | KV453299.1 | 10581215 | 27-scf00525 | 27 |
| AX-158348709 | 27 | 54.094 | KV453299.1 | 10583850 | 27-scf00525 | 27 |
| AX-158348711 | 27 | 54.094 | KV453299.1 | 10584892 | 27-scf00525 | 27 |
| AX-158348712 | 27 | 54.094 | KV453299.1 | 10588178 | 27-scf00525 | 27 |
| AX-158348713 | 27 | 54.094 | KV453299.1 | 10588923 | 27-scf00525 | 27 |
| AX-157707900 | 27 | 54.094 | KV453299.1 | 10591926 | 27-scf00525 | 27 |
| AX-158348715 | 27 | 54.094 | KV453299.1 | 10597354 | 27-scf00525 | 27 |
| AX-157737865 | 27 | 54.094 | KV453299.1 | 10617822 | 27-scf00525 | 27 |
| AX-158348720 | 27 | 54.094 | KV453299.1 | 10622733 | 27-scf00525 | 27 |
| AX-158348722 | 27 | 54.094 | KV453299.1 | 10627120 | 27-scf00525 | 27 |
| AX-158348723 | 27 | 54.094 | KV453299.1 | 10627678 | 27-scf00525 | 27 |
| AX-157714436 | 27 | 54.094 | KV453299.1 | 10630212 | 27-scf00525 | 27 |
| AX-158348726 | 27 | 54.094 | KV453299.1 | 10636071 | 27-scf00525 | 27 |
| AX-158348731 | 27 | 54.094 | KV453299.1 | 10643651 | 27-scf00525 | 27 |
| AX-158348740 | 27 | 54.094 | KV453299.1 | 10655272 | 27-scf00525 | 27 |
| AX-158348756 | 27 | 54.094 | KV453299.1 | 10676742 | 27-scf00525 | 27 |

|              |    |        |            |          |             |    |
|--------------|----|--------|------------|----------|-------------|----|
| AX-158348884 | 27 | 54.094 | KV453299.1 | 10832287 | 27-scf00525 | 27 |
| AX-158349071 | 27 | 54.094 | KV453299.1 | 11042379 | 27-scf00525 | 27 |
| AX-158349099 | 27 | 54.094 | KV453299.1 | 11078238 | 27-scf00525 | 27 |
| AX-158349220 | 27 | 54.094 | KV453299.1 | 11245370 | 27-scf00525 | 27 |
| AX-158349259 | 27 | 54.094 | KV453299.1 | 11309519 | 27-scf00525 | 27 |
| AX-158349262 | 27 | 54.094 | KV453299.1 | 11311778 | 27-scf00525 | 27 |
| AX-158348742 | 27 | 54.141 | KV453299.1 | 10658495 | 27-scf00525 | 27 |
| AX-158348642 | 27 | 54.185 | KV453299.1 | 10455736 | 27-scf00525 | 27 |
| AX-158348668 | 27 | 54.185 | KV453299.1 | 10508556 | 27-scf00525 | 27 |
| AX-157738804 | 27 | 54.185 | KV453299.1 | 10570846 | 27-scf00525 | 27 |
| AX-158348721 | 27 | 54.185 | KV453299.1 | 10626425 | 27-scf00525 | 27 |
| AX-158348724 | 27 | 54.185 | KV453299.1 | 10628792 | 27-scf00525 | 27 |
| AX-158348746 | 27 | 54.185 | KV453299.1 | 10664578 | 27-scf00525 | 27 |
| AX-157720877 | 27 | 54.185 | KV453299.1 | 10682133 | 27-scf00525 | 27 |
| AX-157868170 | 27 | 54.185 | KV453299.1 | 10702571 | 27-scf00525 | 27 |
| AX-158348791 | 27 | 54.185 | KV453299.1 | 10719884 | 27-scf00525 | 27 |
| AX-158348805 | 27 | 54.185 | KV453299.1 | 10737812 | 27-scf00525 | 27 |
| AX-157850733 | 27 | 54.185 | KV453299.1 | 10791453 | 27-scf00525 | 27 |
| AX-158348911 | 27 | 54.185 | KV453299.1 | 10864049 | 27-scf00525 | 27 |
| AX-158348915 | 27 | 54.185 | KV453299.1 | 10874796 | 27-scf00525 | 27 |
| AX-158348917 | 27 | 54.185 | KV453299.1 | 10876867 | 27-scf00525 | 27 |
| AX-158348934 | 27 | 54.185 | KV453299.1 | 10894663 | 27-scf00525 | 27 |
| AX-158348957 | 27 | 54.185 | KV453299.1 | 10920362 | 27-scf00525 | 27 |
| AX-158413210 | 27 | 54.185 | KV453299.1 | 10949230 | 27-scf00525 | 27 |
| AX-158349006 | 27 | 54.185 | KV453299.1 | 10982781 | 27-scf00525 | 27 |
| AX-157882308 | 27 | 54.185 | KV453299.1 | 11036941 | 27-scf00525 | 27 |
| AX-158349107 | 27 | 54.185 | KV453299.1 | 11087242 | 27-scf00525 | 27 |
| AX-157861988 | 27 | 54.185 | KV453299.1 | 11114950 | 27-scf00525 | 27 |
| AX-158349139 | 27 | 54.185 | KV453299.1 | 11118271 | 27-scf00525 | 27 |
| AX-158349189 | 27 | 54.185 | KV453299.1 | 11194474 | 27-scf00525 | 27 |
| AX-158349200 | 27 | 54.185 | KV453299.1 | 11216927 | 27-scf00525 | 27 |
| AX-158349231 | 27 | 54.185 | KV453299.1 | 11266637 | 27-scf00525 | 27 |
| AX-158349256 | 27 | 54.185 | KV453299.1 | 11305282 | 27-scf00525 | 27 |
| AX-157736060 | 27 | 54.185 | KV453299.1 | 11321850 | 27-scf00525 | 27 |
| AX-157882296 | 27 | 54.231 | KV453299.1 | 10668402 | 27-scf00525 | 27 |
| AX-158348759 | 27 | 54.505 | KV453299.1 | 10680345 | 27-scf00525 | 27 |
| AX-158348760 | 27 | 54.505 | KV453299.1 | 10680999 | 27-scf00525 | 27 |
| AX-158348764 | 27 | 54.505 | KV453299.1 | 10688412 | 27-scf00525 | 27 |
| AX-158348768 | 27 | 54.566 | KV453299.1 | 10693683 | 27-scf00525 | 27 |
| AX-158348772 | 27 | 54.639 | KV453299.1 | 10697079 | 27-scf00525 | 27 |
| AX-158348646 | 27 | 54.641 | KV453299.1 | 10461833 | 27-scf00525 | 27 |
| AX-158348751 | 27 | 54.641 | KV453299.1 | 10670140 | 27-scf00525 | 27 |
| AX-158348773 | 27 | 54.641 | KV453299.1 | 10697336 | 27-scf00525 | 27 |
| AX-157868171 | 27 | 54.641 | KV453299.1 | 10715136 | 27-scf00525 | 27 |
| AX-158348787 | 27 | 54.641 | KV453299.1 | 10716751 | 27-scf00525 | 27 |
| AX-158348788 | 27 | 54.641 | KV453299.1 | 10717501 | 27-scf00525 | 27 |
| AX-158348792 | 27 | 54.641 | KV453299.1 | 10720560 | 27-scf00525 | 27 |
| AX-157850729 | 27 | 54.641 | KV453299.1 | 10722632 | 27-scf00525 | 27 |
| AX-157888872 | 27 | 54.641 | KV453299.1 | 10732380 | 27-scf00525 | 27 |
| AX-158348802 | 27 | 54.641 | KV453299.1 | 10732845 | 27-scf00525 | 27 |
| AX-158348804 | 27 | 54.641 | KV453299.1 | 10734907 | 27-scf00525 | 27 |

|              |    |        |            |          |             |    |
|--------------|----|--------|------------|----------|-------------|----|
| AX-158348807 | 27 | 54.641 | KV453299.1 | 10739526 | 27-scf00525 | 27 |
| AX-158348809 | 27 | 54.641 | KV453299.1 | 10740368 | 27-scf00525 | 27 |
| AX-158381659 | 27 | 54.641 | KV453299.1 | 10745099 | 27-scf00525 | 27 |
| AX-158348816 | 27 | 54.641 | KV453299.1 | 10746704 | 27-scf00525 | 27 |
| AX-158348933 | 27 | 54.641 | KV453299.1 | 10893731 | 27-scf00525 | 27 |
| AX-158348962 | 27 | 54.641 | KV453299.1 | 10926079 | 27-scf00525 | 27 |
| AX-158348983 | 27 | 54.641 | KV453299.1 | 10946318 | 27-scf00525 | 27 |
| AX-157715810 | 27 | 54.859 | KV453299.1 | 10688655 | 27-scf00525 | 27 |
| AX-158348815 | 27 | 54.859 | KV453299.1 | 10746182 | 27-scf00525 | 27 |
| AX-158348818 | 27 | 54.859 | KV453299.1 | 10747670 | 27-scf00525 | 27 |
| AX-158348823 | 27 | 54.859 | KV453299.1 | 10756060 | 27-scf00525 | 27 |
| AX-158348830 | 27 | 54.859 | KV453299.1 | 10761943 | 27-scf00525 | 27 |
| AX-158348833 | 27 | 54.859 | KV453299.1 | 10764367 | 27-scf00525 | 27 |
| AX-158348834 | 27 | 54.859 | KV453299.1 | 10765200 | 27-scf00525 | 27 |
| AX-158348835 | 27 | 54.859 | KV453299.1 | 10766914 | 27-scf00525 | 27 |
| AX-158348839 | 27 | 54.859 | KV453299.1 | 10768961 | 27-scf00525 | 27 |
| AX-157882302 | 27 | 54.859 | KV453299.1 | 10773416 | 27-scf00525 | 27 |
| AX-157888874 | 27 | 54.859 | KV453299.1 | 10777379 | 27-scf00525 | 27 |
| AX-158348854 | 27 | 54.859 | KV453299.1 | 10779735 | 27-scf00525 | 27 |
| AX-157717515 | 27 | 54.859 | KV453299.1 | 11207412 | 27-scf00525 | 27 |
| AX-158349211 | 27 | 54.859 | KV453299.1 | 11231091 | 27-scf00525 | 27 |
| AX-158348843 | 27 | 54.89  | KV453299.1 | 10771271 | 27-scf00525 | 27 |
| AX-158348846 | 27 | 54.916 | KV453299.1 | 10773040 | 27-scf00525 | 27 |
| AX-157724116 | 27 | 54.969 | KV453299.1 | 10773141 | 27-scf00525 | 27 |
| AX-158348848 | 27 | 54.969 | KV453299.1 | 10774777 | 27-scf00525 | 27 |
| AX-158348850 | 27 | 54.969 | KV453299.1 | 10775556 | 27-scf00525 | 27 |
| AX-157718149 | 27 | 54.969 | KV453299.1 | 10781371 | 27-scf00525 | 27 |
| AX-158348878 | 27 | 54.986 | KV453299.1 | 10820644 | 27-scf00525 | 27 |
| AX-158348880 | 27 | 55.004 | KV453299.1 | 10827911 | 27-scf00525 | 27 |
| AX-158348886 | 27 | 55.004 | KV453299.1 | 10833441 | 27-scf00525 | 27 |
| AX-158348883 | 27 | 55.022 | KV453299.1 | 10831814 | 27-scf00525 | 27 |
| AX-158348908 | 27 | 55.022 | KV453299.1 | 10857213 | 27-scf00525 | 27 |
| AX-158348885 | 27 | 55.047 | KV453299.1 | 10833003 | 27-scf00525 | 27 |
| AX-158348887 | 27 | 55.061 | KV453299.1 | 10834007 | 27-scf00525 | 27 |
| AX-158348888 | 27 | 55.078 | KV453299.1 | 10834976 | 27-scf00525 | 27 |
| AX-158348890 | 27 | 55.114 | KV453299.1 | 10841447 | 27-scf00525 | 27 |
| AX-158348905 | 27 | 55.126 | KV453299.1 | 10854352 | 27-scf00525 | 27 |
| AX-158348922 | 27 | 55.126 | KV453299.1 | 10882124 | 27-scf00525 | 27 |
| AX-158348906 | 27 | 55.146 | KV453299.1 | 10855089 | 27-scf00525 | 27 |
| AX-158348907 | 27 | 55.165 | KV453299.1 | 10856629 | 27-scf00525 | 27 |
| AX-158348916 | 27 | 55.165 | KV453299.1 | 10875392 | 27-scf00525 | 27 |
| AX-157757439 | 27 | 55.178 | KV453299.1 | 10867761 | 27-scf00525 | 27 |
| AX-157873847 | 27 | 55.187 | KV453299.1 | 10728825 | 27-scf00525 | 27 |
| AX-158348855 | 27 | 55.187 | KV453299.1 | 10779952 | 27-scf00525 | 27 |
| AX-158348914 | 27 | 55.187 | KV453299.1 | 10874043 | 27-scf00525 | 27 |
| AX-157850740 | 27 | 55.187 | KV453299.1 | 10877841 | 27-scf00525 | 27 |
| AX-158348918 | 27 | 55.187 | KV453299.1 | 10878056 | 27-scf00525 | 27 |
| AX-158348920 | 27 | 55.187 | KV453299.1 | 10880100 | 27-scf00525 | 27 |
| AX-158348923 | 27 | 55.187 | KV453299.1 | 10882749 | 27-scf00525 | 27 |
| AX-158348926 | 27 | 55.187 | KV453299.1 | 10885211 | 27-scf00525 | 27 |
| AX-158348928 | 27 | 55.187 | KV453299.1 | 10886273 | 27-scf00525 | 27 |

|              |    |        |            |          |                |    |
|--------------|----|--------|------------|----------|----------------|----|
| AX-158348981 | 27 | 55.187 | KV453299.1 | 10944005 | 27-scf00525    | 27 |
| AX-157850745 | 27 | 55.187 | KV453299.1 | 10947434 | 27-scf00525    | 27 |
| AX-158348847 | 27 | 55.296 | KV453299.1 | 10773906 | 27-scf00525    | 27 |
| AX-158348924 | 27 | 55.296 | KV453299.1 | 10883589 | 27-scf00525    | 27 |
| AX-158348958 | 27 | 55.296 | KV453299.1 | 10921309 | 27-scf00525    | 27 |
| AX-157743331 | 27 | 55.296 | KV453299.1 | 10923177 | 27-scf00525    | 27 |
| AX-158348963 | 27 | 55.296 | KV453299.1 | 10926411 | 27-scf00525    | 27 |
| AX-158348964 | 27 | 55.296 | KV453299.1 | 10926642 | 27-scf00525    | 27 |
| AX-158348967 | 27 | 55.296 | KV453299.1 | 10929040 | 27-scf00525    | 27 |
| AX-158349068 | 27 | 55.296 | KV453299.1 | 11041619 | 27-scf00525    | 27 |
| AX-157850752 | 27 | 55.296 | KV453299.1 | 11056048 | 27-scf00525    | 27 |
| AX-157775274 | 27 | 55.296 | KV453299.1 | 11056543 | 27-scf00525    | 27 |
| AX-158349141 | 27 | 55.296 | KV453299.1 | 11121110 | 27-scf00525    | 27 |
| AX-158349192 | 27 | 55.296 | KV453299.1 | 11199052 | 27-scf00525    | 27 |
| AX-158349274 | 27 | 55.296 | KV453299.1 | 11325060 | 27-scf00525    | 27 |
| AX-158348965 | 27 | 55.361 | KV453299.1 | 10927474 | 27-scf00525    | 27 |
| AX-158413209 | 27 | 55.406 | KV453299.1 | 10783786 | 27-scf00525    | 27 |
| AX-158348955 | 27 | 55.406 | KV453299.1 | 10919636 | 27-scf00525    | 27 |
| AX-157850742 | 27 | 55.406 | KV453299.1 | 10928211 | 27-scf00525    | 27 |
| AX-158348968 | 27 | 55.406 | KV453299.1 | 10929964 | 27-scf00525    | 27 |
| AX-157850743 | 27 | 55.406 | KV453299.1 | 10930467 | 27-scf00525    | 27 |
| AX-158348970 | 27 | 55.406 | KV453299.1 | 10932526 | 27-scf00525    | 27 |
| AX-158348974 | 27 | 55.406 | KV453299.1 | 10934656 | 27-scf00525    | 27 |
| AX-158348975 | 27 | 55.406 | KV453299.1 | 10935021 | 27-scf00525    | 27 |
| AX-158348976 | 27 | 55.406 | KV453299.1 | 10936951 | 27-scf00525    | 27 |
| AX-158348985 | 27 | 55.406 | KV453299.1 | 10947760 | 27-scf00525    | 27 |
| AX-158348986 | 27 | 55.406 | KV453299.1 | 10948068 | 27-scf00525    | 27 |
| AX-158348988 | 27 | 55.406 | KV453299.1 | 10950252 | 27-scf00525    | 27 |
| AX-158348994 | 27 | 55.406 | KV453299.1 | 10967514 | 27-scf00525    | 27 |
| AX-158419342 | 27 | 55.406 | KV453299.1 | 10970056 | 27-scf00525    | 27 |
| AX-158348999 | 27 | 55.406 | KV453299.1 | 10971696 | 27-scf00525    | 27 |
| AX-158349000 | 27 | 55.406 | KV453299.1 | 10972434 | 27-scf00525    | 27 |
| AX-157850748 | 27 | 55.406 | KV453299.1 | 10973060 | 27-scf00525    | 27 |
| AX-157850749 | 27 | 55.406 | KV453299.1 | 10973115 | 27-scf00525    | 27 |
| AX-158349001 | 27 | 55.406 | KV453299.1 | 10974526 | 27-scf00525    | 27 |
| AX-158349003 | 27 | 55.406 | KV453299.1 | 10979353 | 27-scf00525    | 27 |
| AX-158349004 | 27 | 55.406 | KV453299.1 | 10980990 | 27-scf00525    | 27 |
| AX-158349005 | 27 | 55.406 | KV453299.1 | 10982332 | 27-scf00525    | 27 |
| AX-158419343 | 27 | 55.406 | KV453299.1 | 10987239 | 27-scf00525    | 27 |
| AX-158349054 | 27 | 55.406 | KV453299.1 | 11029426 | 27-scf00525    | 27 |
| AX-158349095 | 27 | 55.406 | KV453299.1 | 11069827 | 27-scf00525    | 27 |
| AX-158349158 | 27 | 55.406 | KV453299.1 | 11145095 | 27-scf00525    | 27 |
| AX-157744415 | 27 | 55.406 | KV453299.1 | 11177577 | 27-scf00525    | 27 |
| AX-157699657 | 27 | 55.406 | FI870437.1 | 571      | IORI212 Ictalu | UN |
| AX-158349007 | 27 | 55.515 | KV453299.1 | 10984177 | 27-scf00525    | 27 |
| AX-158349008 | 27 | 55.515 | KV453299.1 | 10986735 | 27-scf00525    | 27 |
| AX-158349013 | 27 | 55.515 | KV453299.1 | 10992003 | 27-scf00525    | 27 |
| AX-158349014 | 27 | 55.515 | KV453299.1 | 10992482 | 27-scf00525    | 27 |
| AX-158349017 | 27 | 55.515 | KV453299.1 | 10994718 | 27-scf00525    | 27 |
| AX-158349019 | 27 | 55.515 | KV453299.1 | 10996384 | 27-scf00525    | 27 |
| AX-157850751 | 27 | 55.515 | KV453299.1 | 10997461 | 27-scf00525    | 27 |



|              |    |        |            |          |             |    |
|--------------|----|--------|------------|----------|-------------|----|
| AX-158349024 | 27 | 55.515 | KV453299.1 | 11002828 | 27-scf00525 | 27 |
| AX-158349026 | 27 | 55.515 | KV453299.1 | 11005443 | 27-scf00525 | 27 |
| AX-157888877 | 27 | 55.515 | KV453299.1 | 11006198 | 27-scf00525 | 27 |
| AX-158349028 | 27 | 55.515 | KV453299.1 | 11006703 | 27-scf00525 | 27 |
| AX-158349049 | 27 | 55.515 | KV453299.1 | 11024712 | 27-scf00525 | 27 |
| AX-158349055 | 27 | 55.515 | KV453299.1 | 11029866 | 27-scf00525 | 27 |
| AX-158349072 | 27 | 55.515 | KV453299.1 | 11046346 | 27-scf00525 | 27 |
| AX-158349073 | 27 | 55.515 | KV453299.1 | 11046879 | 27-scf00525 | 27 |
| AX-158349078 | 27 | 55.515 | KV453299.1 | 11049786 | 27-scf00525 | 27 |
| AX-158349081 | 27 | 55.515 | KV453299.1 | 11052296 | 27-scf00525 | 27 |
| AX-158349082 | 27 | 55.515 | KV453299.1 | 11054922 | 27-scf00525 | 27 |
| AX-158349085 | 27 | 55.515 | KV453299.1 | 11059886 | 27-scf00525 | 27 |
| AX-158349086 | 27 | 55.515 | KV453299.1 | 11060408 | 27-scf00525 | 27 |
| AX-158349088 | 27 | 55.515 | KV453299.1 | 11063295 | 27-scf00525 | 27 |
| AX-158349090 | 27 | 55.515 | KV453299.1 | 11064347 | 27-scf00525 | 27 |
| AX-158349091 | 27 | 55.515 | KV453299.1 | 11064699 | 27-scf00525 | 27 |
| AX-158349092 | 27 | 55.515 | KV453299.1 | 11065829 | 27-scf00525 | 27 |
| AX-158349093 | 27 | 55.515 | KV453299.1 | 11066750 | 27-scf00525 | 27 |
| AX-158349094 | 27 | 55.515 | KV453299.1 | 11068347 | 27-scf00525 | 27 |
| AX-158349100 | 27 | 55.515 | KV453299.1 | 11079381 | 27-scf00525 | 27 |
| AX-158349101 | 27 | 55.515 | KV453299.1 | 11080250 | 27-scf00525 | 27 |
| AX-158349109 | 27 | 55.515 | KV453299.1 | 11088742 | 27-scf00525 | 27 |
| AX-157752848 | 27 | 55.515 | KV453299.1 | 11091260 | 27-scf00525 | 27 |
| AX-158349113 | 27 | 55.515 | KV453299.1 | 11094072 | 27-scf00525 | 27 |
| AX-158349114 | 27 | 55.515 | KV453299.1 | 11095150 | 27-scf00525 | 27 |
| AX-158349118 | 27 | 55.515 | KV453299.1 | 11100823 | 27-scf00525 | 27 |
| AX-158349119 | 27 | 55.515 | KV453299.1 | 11101555 | 27-scf00525 | 27 |
| AX-158349125 | 27 | 55.515 | KV453299.1 | 11107796 | 27-scf00525 | 27 |
| AX-158349134 | 27 | 55.515 | KV453299.1 | 11115815 | 27-scf00525 | 27 |
| AX-158349144 | 27 | 55.515 | KV453299.1 | 11126815 | 27-scf00525 | 27 |
| AX-158349145 | 27 | 55.515 | KV453299.1 | 11127799 | 27-scf00525 | 27 |
| AX-158349166 | 27 | 55.515 | KV453299.1 | 11153103 | 27-scf00525 | 27 |
| AX-158349170 | 27 | 55.515 | KV453299.1 | 11159490 | 27-scf00525 | 27 |
| AX-158349174 | 27 | 55.515 | KV453299.1 | 11163633 | 27-scf00525 | 27 |
| AX-157772765 | 27 | 55.515 | KV453299.1 | 11191481 | 27-scf00525 | 27 |
| AX-158349115 | 27 | 55.544 | KV453299.1 | 11096181 | 27-scf00525 | 27 |
| AX-158349122 | 27 | 55.555 | KV453299.1 | 11104269 | 27-scf00525 | 27 |
| AX-158349021 | 27 | 55.573 | KV453299.1 | 10998000 | 27-scf00525 | 27 |
| AX-158349128 | 27 | 55.573 | KV453299.1 | 11112383 | 27-scf00525 | 27 |
| AX-158348790 | 27 | 55.624 | KV453299.1 | 10719355 | 27-scf00525 | 27 |
| AX-158348898 | 27 | 55.624 | KV453299.1 | 10850222 | 27-scf00525 | 27 |
| AX-158349127 | 27 | 55.624 | KV453299.1 | 11112213 | 27-scf00525 | 27 |
| AX-157716648 | 27 | 55.624 | KV453299.1 | 11124453 | 27-scf00525 | 27 |
| AX-157708789 | 27 | 55.624 | KV453299.1 | 11129237 | 27-scf00525 | 27 |
| AX-158349146 | 27 | 55.624 | KV453299.1 | 11130089 | 27-scf00525 | 27 |
| AX-158349155 | 27 | 55.624 | KV453299.1 | 11141434 | 27-scf00525 | 27 |
| AX-158349156 | 27 | 55.624 | KV453299.1 | 11143669 | 27-scf00525 | 27 |
| AX-158349159 | 27 | 55.624 | KV453299.1 | 11146012 | 27-scf00525 | 27 |
| AX-158349160 | 27 | 55.624 | KV453299.1 | 11146160 | 27-scf00525 | 27 |
| AX-158349161 | 27 | 55.624 | KV453299.1 | 11147020 | 27-scf00525 | 27 |
| AX-158349163 | 27 | 55.624 | KV453299.1 | 11148403 | 27-scf00525 | 27 |

|              |    |        |            |          |             |    |
|--------------|----|--------|------------|----------|-------------|----|
| AX-157709727 | 27 | 55.624 | KV453299.1 | 11148508 | 27-scf00525 | 27 |
| AX-157850754 | 27 | 55.624 | KV453299.1 | 11155626 | 27-scf00525 | 27 |
| AX-158349169 | 27 | 55.624 | KV453299.1 | 11158778 | 27-scf00525 | 27 |
| AX-158349172 | 27 | 55.624 | KV453299.1 | 11161485 | 27-scf00525 | 27 |
| AX-158349173 | 27 | 55.624 | KV453299.1 | 11162499 | 27-scf00525 | 27 |
| AX-158349177 | 27 | 55.624 | KV453299.1 | 11170425 | 27-scf00525 | 27 |
| AX-157773368 | 27 | 55.624 | KV453299.1 | 11235282 | 27-scf00525 | 27 |
| AX-157850771 | 27 | 55.624 | KV453299.1 | 11284248 | 27-scf00525 | 27 |
| AX-158349277 | 27 | 55.624 | KV453299.1 | 11326973 | 27-scf00525 | 27 |
| AX-158419350 | 27 | 55.629 | KV453299.1 | 11172517 | 27-scf00525 | 27 |
| AX-158349126 | 27 | 55.637 | KV453299.1 | 11110240 | 27-scf00525 | 27 |
| AX-158349136 | 27 | 55.637 | KV453299.1 | 11116553 | 27-scf00525 | 27 |
| AX-157850756 | 27 | 55.637 | KV453299.1 | 11160284 | 27-scf00525 | 27 |
| AX-158349182 | 27 | 55.637 | KV453299.1 | 11184784 | 27-scf00525 | 27 |
| AX-158349199 | 27 | 55.637 | KV453299.1 | 11216188 | 27-scf00525 | 27 |
| AX-158349209 | 27 | 55.637 | KV453299.1 | 11229826 | 27-scf00525 | 27 |
| AX-158349184 | 27 | 55.722 | KV453299.1 | 11188839 | 27-scf00525 | 27 |
| AX-158349187 | 27 | 55.727 | KV453299.1 | 11192683 | 27-scf00525 | 27 |
| AX-158419349 | 27 | 55.733 | KV453299.1 | 11059581 | 27-scf00525 | 27 |
| AX-158349148 | 27 | 55.733 | KV453299.1 | 11131653 | 27-scf00525 | 27 |
| AX-158349178 | 27 | 55.733 | KV453299.1 | 11172964 | 27-scf00525 | 27 |
| AX-157773626 | 27 | 55.733 | KV453299.1 | 11184351 | 27-scf00525 | 27 |
| AX-157850757 | 27 | 55.733 | KV453299.1 | 11194985 | 27-scf00525 | 27 |
| AX-158349195 | 27 | 55.733 | KV453299.1 | 11206073 | 27-scf00525 | 27 |
| AX-158349198 | 27 | 55.733 | KV453299.1 | 11211866 | 27-scf00525 | 27 |
| AX-158349201 | 27 | 55.733 | KV453299.1 | 11217436 | 27-scf00525 | 27 |
| AX-158349202 | 27 | 55.733 | KV453299.1 | 11218936 | 27-scf00525 | 27 |
| AX-158349203 | 27 | 55.733 | KV453299.1 | 11219247 | 27-scf00525 | 27 |
| AX-157850760 | 27 | 55.733 | KV453299.1 | 11219532 | 27-scf00525 | 27 |
| AX-157850761 | 27 | 55.733 | KV453299.1 | 11220756 | 27-scf00525 | 27 |
| AX-158349210 | 27 | 55.864 | KV453299.1 | 11230655 | 27-scf00525 | 27 |
| AX-158349191 | 27 | 55.995 | KV453299.1 | 11198435 | 27-scf00525 | 27 |
| AX-157850762 | 27 | 55.995 | KV453299.1 | 11236101 | 27-scf00525 | 27 |
| AX-158349213 | 27 | 55.995 | KV453299.1 | 11236288 | 27-scf00525 | 27 |
| AX-158349215 | 27 | 55.995 | KV453299.1 | 11241611 | 27-scf00525 | 27 |
| AX-158349225 | 27 | 56.257 | KV453299.1 | 11255687 | 27-scf00525 | 27 |
| AX-157888885 | 27 | 56.257 | KV453299.1 | 11257175 | 27-scf00525 | 27 |
| AX-158349230 | 27 | 56.323 | KV453299.1 | 11265703 | 27-scf00525 | 27 |
| AX-157703482 | 27 | 56.389 | KV453299.1 | 11263154 | 27-scf00525 | 27 |
| AX-158349235 | 27 | 56.389 | KV453299.1 | 11269532 | 27-scf00525 | 27 |
| AX-157747020 | 27 | 56.389 | KV453299.1 | 11274760 | 27-scf00525 | 27 |
| AX-157850769 | 27 | 56.389 | KV453299.1 | 11276543 | 27-scf00525 | 27 |
| AX-158349244 | 27 | 56.389 | KV453299.1 | 11278329 | 27-scf00525 | 27 |
| AX-158349246 | 27 | 56.389 | KV453299.1 | 11279212 | 27-scf00525 | 27 |
| AX-158349247 | 27 | 56.39  | KV453299.1 | 11281471 | 27-scf00525 | 27 |
| AX-158348677 | 27 | 56.716 | KV453299.1 | 10526658 | 27-scf00525 | 27 |
| AX-157850718 | 27 | 56.716 | KV453299.1 | 10554703 | 27-scf00525 | 27 |
| AX-158348697 | 27 | 56.716 | KV453299.1 | 10557071 | 27-scf00525 | 27 |
| AX-158348753 | 27 | 56.716 | KV453299.1 | 10675389 | 27-scf00525 | 27 |
| AX-158348778 | 27 | 56.716 | KV453299.1 | 10702230 | 27-scf00525 | 27 |
| AX-158348991 | 27 | 56.716 | KV453299.1 | 10961903 | 27-scf00525 | 27 |

|              |    |        |             |          |             |    |
|--------------|----|--------|-------------|----------|-------------|----|
| AX-158349103 | 27 | 56.716 | KV453299.1  | 11081671 | 27-scf00525 | 27 |
| AX-158349251 | 27 | 56.716 | KV453299.1  | 11289193 | 27-scf00525 | 27 |
| AX-158349253 | 27 | 56.716 | KV453299.1  | 11291075 | 27-scf00525 | 27 |
| AX-158349254 | 27 | 56.716 | KV453299.1  | 11292124 | 27-scf00525 | 27 |
| AX-158349255 | 27 | 56.716 | KV453299.1  | 11300361 | 27-scf00525 | 27 |
| AX-157749429 | 27 | 56.716 | KV453299.1  | 11301792 | 27-scf00525 | 27 |
| AX-158349257 | 27 | 56.716 | KV453299.1  | 11306433 | 27-scf00525 | 27 |
| AX-158349258 | 27 | 56.716 | KV453299.1  | 11308747 | 27-scf00525 | 27 |
| AX-158349264 | 27 | 56.716 | KV453299.1  | 11313397 | 27-scf00525 | 27 |
| AX-158349266 | 27 | 56.716 | KV453299.1  | 11314337 | 27-scf00525 | 27 |
| AX-158349267 | 27 | 56.716 | KV453299.1  | 11315377 | 27-scf00525 | 27 |
| AX-158349275 | 27 | 56.716 | KV453299.1  | 11325290 | 27-scf00525 | 27 |
| AX-157763157 | 27 | 56.716 | KV453299.1  | 11327629 | 27-scf00525 | 27 |
| AX-157850775 | 27 | 56.716 | KV453299.1  | 11328629 | 27-scf00525 | 27 |
| AX-158349281 | 27 | 56.716 | KV453299.1  | 11331447 | 27-scf00525 | 27 |
| AX-158349282 | 27 | 56.716 | KV453299.1  | 11332820 | 27-scf00525 | 27 |
| AX-158349283 | 27 | 56.716 | KV453299.1  | 11334258 | 27-scf00525 | 27 |
| AX-158349285 | 27 | 56.716 | KV453299.1  | 11335623 | 27-scf00525 | 27 |
| AX-158349290 | 27 | 56.716 | KV453299.1  | 11338409 | 27-scf00525 | 27 |
| AX-158349293 | 27 | 56.716 | KV453299.1  | 11341438 | 27-scf00525 | 27 |
| AX-158349295 | 27 | 56.716 | KV453299.1  | 11342572 | 27-scf00525 | 27 |
| AX-158349296 | 27 | 56.716 | KV453299.1  | 11345311 | 27-scf00525 | 27 |
| AX-158349300 | 27 | 56.716 | KV453299.1  | 11350320 | 27-scf00525 | 27 |
| AX-158349301 | 27 | 56.716 | KV453299.1  | 11350678 | 27-scf00525 | 27 |
| AX-158349303 | 27 | 56.716 | KV453299.1  | 11352024 | 27-scf00525 | 27 |
| AX-158349304 | 27 | 56.783 | KV453299.1  | 11353021 | 27-scf00525 | 27 |
| AX-158349284 | 27 | 56.869 | KV453299.1  | 11334829 | 27-scf00525 | 27 |
| AX-158349306 | 27 | 56.869 | KV453299.1  | 11357264 | 27-scf00525 | 27 |
| AX-158349310 | 27 | 56.935 | KV453299.1  | 11362495 | 27-scf00525 | 27 |
| AX-158349311 | 27 | 56.935 | KV453299.1  | 11364825 | 27-scf00525 | 27 |
| AX-158349312 | 27 | 56.935 | KV453299.1  | 11366507 | 27-scf00525 | 27 |
| AX-158349238 | 27 | 57.044 | KV453299.1  | 11271892 | 27-scf00525 | 27 |
| AX-157713311 | 27 | 57.044 | KV453299.1  | 11287847 | 27-scf00525 | 27 |
| AX-158349302 | 27 | 57.044 | KV453299.1  | 11351181 | 27-scf00525 | 27 |
| AX-158349315 | 27 | 57.044 | KV453299.1  | 11370229 | 27-scf00525 | 27 |
| AX-158349317 | 27 | 57.044 | KV453299.1  | 11373853 | 27-scf00525 | 27 |
| AX-158349318 | 27 | 57.044 | KV453299.1  | 11374742 | 27-scf00525 | 27 |
| AX-158349320 | 27 | 57.044 | KV453299.1  | 11375980 | 27-scf00525 | 27 |
| AX-158349322 | 27 | 57.044 | KV453299.1  | 11376991 | 27-scf00525 | 27 |
| AX-158349325 | 27 | 57.044 | KV453299.1  | 11378633 | 27-scf00525 | 27 |
| AX-158349326 | 27 | 57.044 | KV453299.1  | 11379914 | 27-scf00525 | 27 |
| AX-158349328 | 27 | 57.044 | KV453299.1  | 11383311 | 27-scf00525 | 27 |
| AX-157706774 | 27 | 57.044 | 3ML01032890 | 468      | scf08521_1  | UN |
| AX-158349332 | 27 | 57.133 | KV453299.1  | 11390543 | 27-scf00525 | 27 |
| AX-157850776 | 27 | 57.208 | KV453299.1  | 11391911 | 27-scf00525 | 27 |
| AX-158349343 | 27 | 57.372 | KV453299.1  | 11404379 | 27-scf00525 | 27 |
| AX-158349345 | 27 | 57.372 | KV453299.1  | 11405486 | 27-scf00525 | 27 |
| AX-158349349 | 27 | 57.402 | KV453299.1  | 11408990 | 27-scf00525 | 27 |
| AX-157775157 | 27 | 57.481 | KV453299.1  | 11410581 | 27-scf00525 | 27 |
| AX-157757519 | 27 | 57.481 | KV453299.1  | 11414572 | 27-scf00525 | 27 |
| AX-158349359 | 27 | 57.481 | KV453299.1  | 11425088 | 27-scf00525 | 27 |

|              |    |        |             |          |             |    |
|--------------|----|--------|-------------|----------|-------------|----|
| AX-157719011 | 27 | 57.481 | KV453299.1  | 11428176 | 27-scf00525 | 27 |
| AX-158349361 | 27 | 57.7   | KV453299.1  | 11428906 | 27-scf00525 | 27 |
| AX-157873861 | 27 | 57.7   | KV453299.1  | 11430840 | 27-scf00525 | 27 |
| AX-158349364 | 27 | 57.7   | KV453299.1  | 11432742 | 27-scf00525 | 27 |
| AX-158349366 | 27 | 57.7   | KV453299.1  | 11433692 | 27-scf00525 | 27 |
| AX-158349389 | 27 | 57.7   | KV453299.1  | 11464839 | 27-scf00525 | 27 |
| AX-158349370 | 27 | 57.762 | KV453299.1  | 11438436 | 27-scf00525 | 27 |
| AX-158349362 | 27 | 57.809 | KV453299.1  | 11429752 | 27-scf00525 | 27 |
| AX-158349373 | 27 | 57.809 | KV453299.1  | 11443540 | 27-scf00525 | 27 |
| AX-158349378 | 27 | 57.809 | KV453299.1  | 11447106 | 27-scf00525 | 27 |
| AX-157723896 | 27 | 57.809 | KV453299.1  | 11450455 | 27-scf00525 | 27 |
| AX-158349379 | 27 | 57.809 | KV453299.1  | 11451546 | 27-scf00525 | 27 |
| AX-158349380 | 27 | 57.809 | KV453299.1  | 11454256 | 27-scf00525 | 27 |
| AX-157755275 | 27 | 57.809 | KV453299.1  | 11454601 | 27-scf00525 | 27 |
| AX-158349381 | 27 | 57.809 | KV453299.1  | 11455858 | 27-scf00525 | 27 |
| AX-158349383 | 27 | 57.809 | KV453299.1  | 11457371 | 27-scf00525 | 27 |
| AX-157773706 | 27 | 57.809 | KV453299.1  | 11458959 | 27-scf00525 | 27 |
| AX-158349385 | 27 | 57.809 | KV453299.1  | 11460690 | 27-scf00525 | 27 |
| AX-158349388 | 27 | 57.809 | KV453299.1  | 11464103 | 27-scf00525 | 27 |
| AX-157738970 | 27 | 57.809 | KV453299.1  | 11471576 | 27-scf00525 | 27 |
| AX-158349409 | 27 | 57.809 | KV453299.1  | 11486082 | 27-scf00525 | 27 |
| AX-157861999 | 27 | 57.809 | KV453299.1  | 11486134 | 27-scf00525 | 27 |
| AX-157861997 | 27 | 57.857 | KV453299.1  | 11467204 | 27-scf00525 | 27 |
| AX-158349394 | 27 | 57.918 | KV453299.1  | 11468687 | 27-scf00525 | 27 |
| AX-158349396 | 27 | 57.918 | KV453299.1  | 11470469 | 27-scf00525 | 27 |
| AX-158349403 | 27 | 57.918 | KV453299.1  | 11477782 | 27-scf00525 | 27 |
| AX-157707486 | 27 | 57.918 | 3ML01034386 | 172      | scf10060_1  | UN |
| AX-158349400 | 27 | 57.979 | KV453299.1  | 11474770 | 27-scf00525 | 27 |
| AX-158349367 | 27 | 58.027 | KV453299.1  | 11433899 | 27-scf00525 | 27 |
| AX-158349386 | 27 | 58.027 | KV453299.1  | 11462162 | 27-scf00525 | 27 |
| AX-158349398 | 27 | 58.027 | KV453299.1  | 11473233 | 27-scf00525 | 27 |
| AX-158349402 | 27 | 58.027 | KV453299.1  | 11476498 | 27-scf00525 | 27 |
| AX-158349404 | 27 | 58.027 | KV453299.1  | 11478945 | 27-scf00525 | 27 |
| AX-158349405 | 27 | 58.027 | KV453299.1  | 11479556 | 27-scf00525 | 27 |
| AX-158349406 | 27 | 58.027 | KV453299.1  | 11481229 | 27-scf00525 | 27 |
| AX-158349407 | 27 | 58.027 | KV453299.1  | 11481829 | 27-scf00525 | 27 |
| AX-158349412 | 27 | 58.027 | KV453299.1  | 11488880 | 27-scf00525 | 27 |
| AX-157773817 | 27 | 58.027 | KV453299.1  | 11490294 | 27-scf00525 | 27 |
| AX-158349418 | 27 | 58.027 | KV453299.1  | 11494309 | 27-scf00525 | 27 |
| AX-157774623 | 27 | 58.027 | KV453299.1  | 11495727 | 27-scf00525 | 27 |
| AX-158349420 | 27 | 58.027 | KV453299.1  | 11496695 | 27-scf00525 | 27 |
| AX-158349421 | 27 | 58.027 | KV453299.1  | 11497616 | 27-scf00525 | 27 |
| AX-158349422 | 27 | 58.027 | KV453299.1  | 11500497 | 27-scf00525 | 27 |
| AX-157724764 | 27 | 58.027 | KV453299.1  | 11502974 | 27-scf00525 | 27 |
| AX-158349426 | 27 | 58.027 | KV453299.1  | 11504906 | 27-scf00525 | 27 |
| AX-158349428 | 27 | 58.027 | KV453299.1  | 11506201 | 27-scf00525 | 27 |
| AX-158349429 | 27 | 58.027 | KV453299.1  | 11506955 | 27-scf00525 | 27 |
| AX-158349430 | 27 | 58.027 | KV453299.1  | 11507394 | 27-scf00525 | 27 |
| AX-157862000 | 27 | 58.027 | KV453299.1  | 11509841 | 27-scf00525 | 27 |
| AX-158349432 | 27 | 58.027 | KV453299.1  | 11510740 | 27-scf00525 | 27 |
| AX-158349433 | 27 | 58.027 | KV453299.1  | 11511834 | 27-scf00525 | 27 |

|              |    |        |            |          |             |    |
|--------------|----|--------|------------|----------|-------------|----|
| AX-158349443 | 27 | 58.027 | KV453299.1 | 11525431 | 27-scf00525 | 27 |
| AX-158349437 | 27 | 58.221 | KV453299.1 | 11520000 | 27-scf00525 | 27 |
| AX-158349441 | 27 | 58.284 | KV453299.1 | 11523235 | 27-scf00525 | 27 |
| AX-158349442 | 27 | 58.349 | KV453299.1 | 11524851 | 27-scf00525 | 27 |
| AX-157882346 | 27 | 58.413 | KV453299.1 | 11527016 | 27-scf00525 | 27 |
| AX-158349445 | 27 | 58.413 | KV453299.1 | 11527664 | 27-scf00525 | 27 |
| AX-158349446 | 27 | 58.414 | KV453299.1 | 11527891 | 27-scf00525 | 27 |
| AX-158349474 | 27 | 58.768 | KV453299.1 | 11556267 | 27-scf00525 | 27 |
| AX-158349476 | 27 | 58.794 | KV453299.1 | 11559139 | 27-scf00525 | 27 |
| AX-158349477 | 27 | 58.794 | KV453299.1 | 11560006 | 27-scf00525 | 27 |
| AX-158349480 | 27 | 58.794 | KV453299.1 | 11561716 | 27-scf00525 | 27 |
| AX-158349483 | 27 | 58.794 | KV453299.1 | 11566861 | 27-scf00525 | 27 |
| AX-158349484 | 27 | 58.794 | KV453299.1 | 11567957 | 27-scf00525 | 27 |
| AX-158349485 | 27 | 58.794 | KV453299.1 | 11568854 | 27-scf00525 | 27 |
| AX-158349486 | 27 | 58.794 | KV453299.1 | 11569464 | 27-scf00525 | 27 |
| AX-158349488 | 27 | 58.794 | KV453299.1 | 11570315 | 27-scf00525 | 27 |
| AX-158349490 | 27 | 58.794 | KV453299.1 | 11572474 | 27-scf00525 | 27 |
| AX-158349521 | 27 | 58.794 | KV453299.1 | 11608400 | 27-scf00525 | 27 |
| AX-158349492 | 27 | 58.903 | KV453299.1 | 11578450 | 27-scf00525 | 27 |
| AX-158349493 | 27 | 58.903 | KV453299.1 | 11579298 | 27-scf00525 | 27 |
| AX-158349498 | 27 | 59.013 | KV453299.1 | 11583280 | 27-scf00525 | 27 |
| AX-158349501 | 27 | 59.013 | KV453299.1 | 11585903 | 27-scf00525 | 27 |
| AX-158349502 | 27 | 59.013 | KV453299.1 | 11586236 | 27-scf00525 | 27 |
| AX-157862004 | 27 | 59.013 | KV453299.1 | 11587331 | 27-scf00525 | 27 |
| AX-158349505 | 27 | 59.122 | KV453299.1 | 11588089 | 27-scf00525 | 27 |
| AX-158349508 | 27 | 59.122 | KV453299.1 | 11591155 | 27-scf00525 | 27 |
| AX-158349513 | 27 | 59.122 | KV453299.1 | 11595474 | 27-scf00525 | 27 |
| AX-157850778 | 27 | 59.122 | KV453299.1 | 11601887 | 27-scf00525 | 27 |
| AX-158349517 | 27 | 59.122 | KV453299.1 | 11603746 | 27-scf00525 | 27 |
| AX-157850779 | 27 | 59.122 | KV453299.1 | 11614052 | 27-scf00525 | 27 |
| AX-158349525 | 27 | 59.122 | KV453299.1 | 11614106 | 27-scf00525 | 27 |
| AX-158349526 | 27 | 59.122 | KV453299.1 | 11615020 | 27-scf00525 | 27 |
| AX-157850780 | 27 | 59.122 | KV453299.1 | 11616175 | 27-scf00525 | 27 |
| AX-157862007 | 27 | 59.122 | KV453299.1 | 11620593 | 27-scf00525 | 27 |
| AX-157862008 | 27 | 59.122 | KV453299.1 | 11622661 | 27-scf00525 | 27 |
| AX-158349509 | 27 | 59.231 | KV453299.1 | 11592049 | 27-scf00525 | 27 |
| AX-158349510 | 27 | 59.231 | KV453299.1 | 11593295 | 27-scf00525 | 27 |
| AX-158349529 | 27 | 59.231 | KV453299.1 | 11620357 | 27-scf00525 | 27 |
| AX-158349531 | 27 | 59.231 | KV453299.1 | 11628148 | 27-scf00525 | 27 |
| AX-158349533 | 27 | 59.231 | KV453299.1 | 11629189 | 27-scf00525 | 27 |
| AX-158349534 | 27 | 59.231 | KV453299.1 | 11630488 | 27-scf00525 | 27 |
| AX-158349535 | 27 | 59.231 | KV453299.1 | 11632385 | 27-scf00525 | 27 |
| AX-157756206 | 27 | 59.231 | KV453299.1 | 11634224 | 27-scf00525 | 27 |
| AX-157716737 | 27 | 59.231 | KV453299.1 | 11642176 | 27-scf00525 | 27 |
| AX-158349539 | 27 | 59.231 | KV453299.1 | 11642456 | 27-scf00525 | 27 |
| AX-157888906 | 27 | 59.231 | KV453299.1 | 11642764 | 27-scf00525 | 27 |
| AX-158349540 | 27 | 59.231 | KV453299.1 | 11644781 | 27-scf00525 | 27 |
| AX-158349542 | 27 | 59.231 | KV453299.1 | 11646571 | 27-scf00525 | 27 |
| AX-158349548 | 27 | 59.231 | KV453299.1 | 11656008 | 27-scf00525 | 27 |
| AX-157746407 | 27 | 59.231 | KV453299.1 | 11658342 | 27-scf00525 | 27 |
| AX-158349556 | 27 | 59.231 | KV453299.1 | 11662744 | 27-scf00525 | 27 |

|              |    |        |            |          |             |    |
|--------------|----|--------|------------|----------|-------------|----|
| AX-158349560 | 27 | 59.231 | KV453299.1 | 11671668 | 27-scf00525 | 27 |
| AX-158349561 | 27 | 59.231 | KV453299.1 | 11671914 | 27-scf00525 | 27 |
| AX-158349581 | 27 | 59.231 | KV453299.1 | 11695845 | 27-scf00525 | 27 |
| AX-158349563 | 27 | 59.282 | KV453299.1 | 11672400 | 27-scf00525 | 27 |
| AX-158349567 | 27 | 59.34  | KV453299.1 | 11677368 | 27-scf00525 | 27 |
| AX-157873864 | 27 | 59.385 | KV453299.1 | 11659878 | 27-scf00525 | 27 |
| AX-158349553 | 27 | 59.385 | KV453299.1 | 11661201 | 27-scf00525 | 27 |
| AX-158349568 | 27 | 59.385 | KV453299.1 | 11678027 | 27-scf00525 | 27 |
| AX-158349570 | 27 | 59.385 | KV453299.1 | 11679437 | 27-scf00525 | 27 |
| AX-158349571 | 27 | 59.426 | KV453299.1 | 11681327 | 27-scf00525 | 27 |
| AX-158349573 | 27 | 59.45  | KV453299.1 | 11683588 | 27-scf00525 | 27 |
| AX-158349575 | 27 | 59.551 | KV453299.1 | 11686840 | 27-scf00525 | 27 |
| AX-158349546 | 27 | 59.668 | KV453299.1 | 11654628 | 27-scf00525 | 27 |
| AX-158349550 | 27 | 59.668 | KV453299.1 | 11657937 | 27-scf00525 | 27 |
| AX-158349576 | 27 | 59.668 | KV453299.1 | 11689412 | 27-scf00525 | 27 |
| AX-158349577 | 27 | 59.668 | KV453299.1 | 11689862 | 27-scf00525 | 27 |
| AX-157850785 | 27 | 59.668 | KV453299.1 | 11695303 | 27-scf00525 | 27 |
| AX-158349584 | 27 | 59.668 | KV453299.1 | 11698299 | 27-scf00525 | 27 |
| AX-158349586 | 27 | 59.668 | KV453299.1 | 11699200 | 27-scf00525 | 27 |
| AX-158349596 | 27 | 59.668 | KV453299.1 | 11723588 | 27-scf00525 | 27 |
| AX-158349710 | 27 | 59.668 | KV453299.1 | 11858217 | 27-scf00525 | 27 |
| AX-157715980 | 27 | 59.668 | KV453299.1 | 11905490 | 27-scf00525 | 27 |
| AX-158350393 | 27 | 59.668 | KV453299.1 | 13120083 | 27-scf00525 | 27 |
| AX-158349587 | 27 | 59.777 | KV453299.1 | 11701088 | 27-scf00525 | 27 |
| AX-157862010 | 27 | 59.777 | KV453299.1 | 11701495 | 27-scf00525 | 27 |
| AX-158349589 | 27 | 59.777 | KV453299.1 | 11704770 | 27-scf00525 | 27 |
| AX-158349819 | 27 | 59.777 | KV453299.1 | 12022760 | 27-scf00525 | 27 |
| AX-158349820 | 27 | 59.777 | KV453299.1 | 12025149 | 27-scf00525 | 27 |
| AX-158349822 | 27 | 59.777 | KV453299.1 | 12040071 | 27-scf00525 | 27 |
| AX-158349824 | 27 | 59.777 | KV453299.1 | 12042966 | 27-scf00525 | 27 |
| AX-158349826 | 27 | 59.777 | KV453299.1 | 12044799 | 27-scf00525 | 27 |
| AX-158349829 | 27 | 59.777 | KV453299.1 | 12047974 | 27-scf00525 | 27 |
| AX-158349592 | 27 | 59.886 | KV453299.1 | 11711590 | 27-scf00525 | 27 |
| AX-157716892 | 27 | 59.886 | KV453299.1 | 11712799 | 27-scf00525 | 27 |
| AX-157850787 | 27 | 59.886 | KV453299.1 | 11717398 | 27-scf00525 | 27 |
| AX-158349593 | 27 | 59.886 | KV453299.1 | 11717502 | 27-scf00525 | 27 |
| AX-157758049 | 27 | 59.886 | KV453299.1 | 11718999 | 27-scf00525 | 27 |
| AX-158349594 | 27 | 59.886 | KV453299.1 | 11721416 | 27-scf00525 | 27 |
| AX-158349597 | 27 | 59.886 | KV453299.1 | 11723963 | 27-scf00525 | 27 |
| AX-158349600 | 27 | 59.886 | KV453299.1 | 11728597 | 27-scf00525 | 27 |
| AX-157772884 | 27 | 59.886 | KV453299.1 | 11729677 | 27-scf00525 | 27 |
| AX-157888910 | 27 | 59.886 | KV453299.1 | 11731421 | 27-scf00525 | 27 |
| AX-158349603 | 27 | 59.886 | KV453299.1 | 11736253 | 27-scf00525 | 27 |
| AX-158349606 | 27 | 59.886 | KV453299.1 | 11738026 | 27-scf00525 | 27 |
| AX-157850789 | 27 | 59.886 | KV453299.1 | 11738863 | 27-scf00525 | 27 |
| AX-158349607 | 27 | 59.886 | KV453299.1 | 11739459 | 27-scf00525 | 27 |
| AX-157724311 | 27 | 59.886 | KV453299.1 | 11742266 | 27-scf00525 | 27 |
| AX-158349610 | 27 | 59.886 | KV453299.1 | 11743486 | 27-scf00525 | 27 |
| AX-158349611 | 27 | 59.886 | KV453299.1 | 11744801 | 27-scf00525 | 27 |
| AX-158349612 | 27 | 59.886 | KV453299.1 | 11745197 | 27-scf00525 | 27 |
| AX-158349615 | 27 | 59.886 | KV453299.1 | 11747650 | 27-scf00525 | 27 |

|              |    |        |            |          |             |    |
|--------------|----|--------|------------|----------|-------------|----|
| AX-158349616 | 27 | 59.886 | KV453299.1 | 11748363 | 27-scf00525 | 27 |
| AX-158381665 | 27 | 59.886 | KV453299.1 | 11749497 | 27-scf00525 | 27 |
| AX-158349624 | 27 | 59.886 | KV453299.1 | 11760457 | 27-scf00525 | 27 |
| AX-158349628 | 27 | 59.886 | KV453299.1 | 11764773 | 27-scf00525 | 27 |
| AX-158349637 | 27 | 59.886 | KV453299.1 | 11775106 | 27-scf00525 | 27 |
| AX-158349619 | 27 | 59.932 | KV453299.1 | 11749679 | 27-scf00525 | 27 |
| AX-157850792 | 27 | 59.996 | KV453299.1 | 11749793 | 27-scf00525 | 27 |
| AX-157862011 | 27 | 59.996 | KV453299.1 | 11752363 | 27-scf00525 | 27 |
| AX-158349620 | 27 | 59.996 | KV453299.1 | 11752622 | 27-scf00525 | 27 |
| AX-157719159 | 27 | 59.996 | KV453299.1 | 11756043 | 27-scf00525 | 27 |
| AX-157862012 | 27 | 59.996 | KV453299.1 | 11756821 | 27-scf00525 | 27 |
| AX-158349622 | 27 | 59.996 | KV453299.1 | 11757676 | 27-scf00525 | 27 |
| AX-158349629 | 27 | 59.996 | KV453299.1 | 11766840 | 27-scf00525 | 27 |
| AX-158349633 | 27 | 60.048 | KV453299.1 | 11770880 | 27-scf00525 | 27 |
| AX-158349638 | 27 | 60.105 | KV453299.1 | 11775864 | 27-scf00525 | 27 |
| AX-158349640 | 27 | 60.105 | KV453299.1 | 11778395 | 27-scf00525 | 27 |
| AX-158349654 | 27 | 60.105 | KV453299.1 | 11798204 | 27-scf00525 | 27 |
| AX-157862016 | 27 | 60.105 | KV453299.1 | 11798930 | 27-scf00525 | 27 |
| AX-158349648 | 27 | 60.323 | KV453299.1 | 11791899 | 27-scf00525 | 27 |
| AX-157888915 | 27 | 60.323 | KV453299.1 | 11798692 | 27-scf00525 | 27 |
| AX-158349656 | 27 | 60.323 | KV453299.1 | 11801896 | 27-scf00525 | 27 |
| AX-158349658 | 27 | 60.323 | KV453299.1 | 11805403 | 27-scf00525 | 27 |
| AX-158349659 | 27 | 60.323 | KV453299.1 | 11806727 | 27-scf00525 | 27 |
| AX-158349660 | 27 | 60.323 | KV453299.1 | 11807156 | 27-scf00525 | 27 |
| AX-158349661 | 27 | 60.323 | KV453299.1 | 11807637 | 27-scf00525 | 27 |
| AX-158349664 | 27 | 60.323 | KV453299.1 | 11813853 | 27-scf00525 | 27 |
| AX-157850795 | 27 | 60.323 | KV453299.1 | 11816648 | 27-scf00525 | 27 |
| AX-158349666 | 27 | 60.323 | KV453299.1 | 11817217 | 27-scf00525 | 27 |
| AX-158349673 | 27 | 60.323 | KV453299.1 | 11823679 | 27-scf00525 | 27 |
| AX-158349678 | 27 | 60.323 | KV453299.1 | 11827987 | 27-scf00525 | 27 |
| AX-157888916 | 27 | 60.323 | KV453299.1 | 11828725 | 27-scf00525 | 27 |
| AX-158349680 | 27 | 60.323 | KV453299.1 | 11829589 | 27-scf00525 | 27 |
| AX-158349681 | 27 | 60.323 | KV453299.1 | 11830042 | 27-scf00525 | 27 |
| AX-157850798 | 27 | 60.323 | KV453299.1 | 11842362 | 27-scf00525 | 27 |
| AX-158349689 | 27 | 60.323 | KV453299.1 | 11843163 | 27-scf00525 | 27 |
| AX-158349690 | 27 | 60.323 | KV453299.1 | 11844513 | 27-scf00525 | 27 |
| AX-158349691 | 27 | 60.323 | KV453299.1 | 11844981 | 27-scf00525 | 27 |
| AX-158349693 | 27 | 60.323 | KV453299.1 | 11847105 | 27-scf00525 | 27 |
| AX-158349694 | 27 | 60.323 | KV453299.1 | 11847249 | 27-scf00525 | 27 |
| AX-158349695 | 27 | 60.323 | KV453299.1 | 11848831 | 27-scf00525 | 27 |
| AX-158349696 | 27 | 60.323 | KV453299.1 | 11849210 | 27-scf00525 | 27 |
| AX-158349697 | 27 | 60.323 | KV453299.1 | 11850175 | 27-scf00525 | 27 |
| AX-158349699 | 27 | 60.323 | KV453299.1 | 11852299 | 27-scf00525 | 27 |
| AX-158349701 | 27 | 60.323 | KV453299.1 | 11854303 | 27-scf00525 | 27 |
| AX-158349707 | 27 | 60.323 | KV453299.1 | 11857303 | 27-scf00525 | 27 |
| AX-158349709 | 27 | 60.323 | KV453299.1 | 11858031 | 27-scf00525 | 27 |
| AX-157712960 | 27 | 60.323 | KV453299.1 | 11862970 | 27-scf00525 | 27 |
| AX-157744802 | 27 | 60.323 | KV453299.1 | 11864637 | 27-scf00525 | 27 |
| AX-158349714 | 27 | 60.323 | KV453299.1 | 11866412 | 27-scf00525 | 27 |
| AX-158349718 | 27 | 60.323 | KV453299.1 | 11869999 | 27-scf00525 | 27 |
| AX-157850802 | 27 | 60.323 | KV453299.1 | 11870498 | 27-scf00525 | 27 |

|              |    |        |            |          |             |    |
|--------------|----|--------|------------|----------|-------------|----|
| AX-157850803 | 27 | 60.323 | KV453299.1 | 11871257 | 27-scf00525 | 27 |
| AX-157850804 | 27 | 60.323 | KV453299.1 | 11874363 | 27-scf00525 | 27 |
| AX-158349722 | 27 | 60.323 | KV453299.1 | 11875196 | 27-scf00525 | 27 |
| AX-157850805 | 27 | 60.323 | KV453299.1 | 11879030 | 27-scf00525 | 27 |
| AX-158349732 | 27 | 60.323 | KV453299.1 | 11892713 | 27-scf00525 | 27 |
| AX-157770909 | 27 | 60.323 | KV453299.1 | 11895235 | 27-scf00525 | 27 |
| AX-158349755 | 27 | 60.323 | KV453299.1 | 11926264 | 27-scf00525 | 27 |
| AX-158349834 | 27 | 60.323 | KV453299.1 | 12055970 | 27-scf00525 | 27 |
| AX-158349960 | 27 | 60.323 | KV453299.1 | 12244348 | 27-scf00525 | 27 |
| AX-157882373 | 27 | 60.323 | KV453299.1 | 12264021 | 27-scf00525 | 27 |
| AX-158350016 | 27 | 60.323 | KV453299.1 | 12340670 | 27-scf00525 | 27 |
| AX-158350017 | 27 | 60.323 | KV453299.1 | 12351390 | 27-scf00525 | 27 |
| AX-158350890 | 27 | 60.323 | KV453303.1 | 202466   | 27-scf00530 | 27 |
| AX-158349643 | 27 | 60.541 | KV453299.1 | 11783423 | 27-scf00525 | 27 |
| AX-158349650 | 27 | 60.541 | KV453299.1 | 11793283 | 27-scf00525 | 27 |
| AX-157739854 | 27 | 60.541 | KV453299.1 | 11816360 | 27-scf00525 | 27 |
| AX-158349674 | 27 | 60.541 | KV453299.1 | 11824241 | 27-scf00525 | 27 |
| AX-157748236 | 27 | 60.541 | KV453299.1 | 11830799 | 27-scf00525 | 27 |
| AX-157862017 | 27 | 60.541 | KV453299.1 | 11831837 | 27-scf00525 | 27 |
| AX-157850799 | 27 | 60.541 | KV453299.1 | 11842768 | 27-scf00525 | 27 |
| AX-157850801 | 27 | 60.541 | KV453299.1 | 11856802 | 27-scf00525 | 27 |
| AX-158349712 | 27 | 60.541 | KV453299.1 | 11859706 | 27-scf00525 | 27 |
| AX-158349715 | 27 | 60.541 | KV453299.1 | 11866985 | 27-scf00525 | 27 |
| AX-158349723 | 27 | 60.541 | KV453299.1 | 11879417 | 27-scf00525 | 27 |
| AX-157850806 | 27 | 60.541 | KV453299.1 | 11879794 | 27-scf00525 | 27 |
| AX-158349724 | 27 | 60.541 | KV453299.1 | 11881047 | 27-scf00525 | 27 |
| AX-158349726 | 27 | 60.541 | KV453299.1 | 11884417 | 27-scf00525 | 27 |
| AX-158349729 | 27 | 60.541 | KV453299.1 | 11890463 | 27-scf00525 | 27 |
| AX-158349730 | 27 | 60.541 | KV453299.1 | 11890884 | 27-scf00525 | 27 |
| AX-158349731 | 27 | 60.541 | KV453299.1 | 11891320 | 27-scf00525 | 27 |
| AX-157850812 | 27 | 60.541 | KV453299.1 | 11891879 | 27-scf00525 | 27 |
| AX-158349733 | 27 | 60.541 | KV453299.1 | 11893951 | 27-scf00525 | 27 |
| AX-157850813 | 27 | 60.541 | KV453299.1 | 11897495 | 27-scf00525 | 27 |
| AX-158349735 | 27 | 60.541 | KV453299.1 | 11898066 | 27-scf00525 | 27 |
| AX-157744128 | 27 | 60.541 | KV453299.1 | 11898901 | 27-scf00525 | 27 |
| AX-158349736 | 27 | 60.541 | KV453299.1 | 11900355 | 27-scf00525 | 27 |
| AX-158349740 | 27 | 60.541 | KV453299.1 | 11904266 | 27-scf00525 | 27 |
| AX-158349741 | 27 | 60.541 | KV453299.1 | 11906299 | 27-scf00525 | 27 |
| AX-158349742 | 27 | 60.541 | KV453299.1 | 11906606 | 27-scf00525 | 27 |
| AX-157850814 | 27 | 60.541 | KV453299.1 | 11910241 | 27-scf00525 | 27 |
| AX-158349744 | 27 | 60.541 | KV453299.1 | 11911531 | 27-scf00525 | 27 |
| AX-158349746 | 27 | 60.541 | KV453299.1 | 11913708 | 27-scf00525 | 27 |
| AX-158349747 | 27 | 60.541 | KV453299.1 | 11914735 | 27-scf00525 | 27 |
| AX-158349750 | 27 | 60.541 | KV453299.1 | 11922437 | 27-scf00525 | 27 |
| AX-158349753 | 27 | 60.541 | KV453299.1 | 11924268 | 27-scf00525 | 27 |
| AX-158349756 | 27 | 60.541 | KV453299.1 | 11926603 | 27-scf00525 | 27 |
| AX-158349761 | 27 | 60.541 | KV453299.1 | 11931610 | 27-scf00525 | 27 |
| AX-158349763 | 27 | 60.541 | KV453299.1 | 11934119 | 27-scf00525 | 27 |
| AX-158349764 | 27 | 60.541 | KV453299.1 | 11936739 | 27-scf00525 | 27 |
| AX-157864178 | 27 | 60.541 | KV453299.1 | 11938410 | 27-scf00525 | 27 |
| AX-158349767 | 27 | 60.541 | KV453299.1 | 11941156 | 27-scf00525 | 27 |



|              |    |        |            |          |                |    |
|--------------|----|--------|------------|----------|----------------|----|
| AX-158349768 | 27 | 60.541 | KV453299.1 | 11941589 | 27-scf00525    | 27 |
| AX-158349770 | 27 | 60.541 | KV453299.1 | 11948431 | 27-scf00525    | 27 |
| AX-158349774 | 27 | 60.541 | KV453299.1 | 11951987 | 27-scf00525    | 27 |
| AX-158349775 | 27 | 60.541 | KV453299.1 | 11954839 | 27-scf00525    | 27 |
| AX-158349776 | 27 | 60.541 | KV453299.1 | 11955434 | 27-scf00525    | 27 |
| AX-157775470 | 27 | 60.541 | KV453299.1 | 11960835 | 27-scf00525    | 27 |
| AX-158349778 | 27 | 60.541 | KV453299.1 | 11961296 | 27-scf00525    | 27 |
| AX-158419361 | 27 | 60.541 | KV453299.1 | 11962429 | 27-scf00525    | 27 |
| AX-158381667 | 27 | 60.541 | KV453299.1 | 11962637 | 27-scf00525    | 27 |
| AX-158349780 | 27 | 60.541 | KV453299.1 | 11962731 | 27-scf00525    | 27 |
| AX-158349786 | 27 | 60.541 | KV453299.1 | 11968686 | 27-scf00525    | 27 |
| AX-158349789 | 27 | 60.541 | KV453299.1 | 11971327 | 27-scf00525    | 27 |
| AX-158349792 | 27 | 60.541 | KV453299.1 | 11974830 | 27-scf00525    | 27 |
| AX-158349794 | 27 | 60.541 | KV453299.1 | 11977896 | 27-scf00525    | 27 |
| AX-158349797 | 27 | 60.541 | KV453299.1 | 11981490 | 27-scf00525    | 27 |
| AX-158349799 | 27 | 60.541 | KV453299.1 | 11983925 | 27-scf00525    | 27 |
| AX-158349801 | 27 | 60.541 | KV453299.1 | 11986123 | 27-scf00525    | 27 |
| AX-158349818 | 27 | 60.541 | KV453299.1 | 12022227 | 27-scf00525    | 27 |
| AX-158349823 | 27 | 60.541 | KV453299.1 | 12041083 | 27-scf00525    | 27 |
| AX-158349827 | 27 | 60.541 | KV453299.1 | 12046303 | 27-scf00525    | 27 |
| AX-157850837 | 27 | 60.541 | KV453299.1 | 12235936 | 27-scf00525    | 27 |
| AX-158350750 | 27 | 60.541 | KV453302.1 | 112114   | 27-scf00531    | 27 |
| AX-158351036 | 27 | 60.541 | KV453307.1 | 261613   | 27-scf00532    | 27 |
| AX-157698146 | 27 | 60.541 | FI868877.1 | 415      | IORI212 lctalu | UN |
| AX-158349802 | 27 | 60.572 | KV453299.1 | 11987033 | 27-scf00525    | 27 |
| AX-157850834 | 27 | 60.572 | KV453299.1 | 12216565 | 27-scf00525    | 27 |
| AX-158350006 | 27 | 60.572 | KV453299.1 | 12312237 | 27-scf00525    | 27 |
| AX-158350008 | 27 | 60.572 | KV453299.1 | 12314307 | 27-scf00525    | 27 |
| AX-158350009 | 27 | 60.572 | KV453299.1 | 12314850 | 27-scf00525    | 27 |
| AX-158350070 | 27 | 60.572 | KV453299.1 | 12501583 | 27-scf00525    | 27 |
| AX-158350131 | 27 | 60.572 | KV453299.1 | 12568559 | 27-scf00525    | 27 |
| AX-158350249 | 27 | 60.572 | KV453299.1 | 12773747 | 27-scf00525    | 27 |
| AX-158349825 | 27 | 60.582 | KV453299.1 | 12044034 | 27-scf00525    | 27 |
| AX-158349887 | 27 | 60.604 | KV453299.1 | 12116522 | 27-scf00525    | 27 |
| AX-158349676 | 27 | 60.616 | KV453299.1 | 11826188 | 27-scf00525    | 27 |
| AX-158349720 | 27 | 60.616 | KV453299.1 | 11873170 | 27-scf00525    | 27 |
| AX-158349843 | 27 | 60.616 | KV453299.1 | 12067949 | 27-scf00525    | 27 |
| AX-157850824 | 27 | 60.616 | KV453299.1 | 12068175 | 27-scf00525    | 27 |
| AX-158349888 | 27 | 60.616 | KV453299.1 | 12121160 | 27-scf00525    | 27 |
| AX-157725120 | 27 | 60.616 | KV453299.1 | 12121338 | 27-scf00525    | 27 |
| AX-158350001 | 27 | 60.616 | KV453299.1 | 12304409 | 27-scf00525    | 27 |
| AX-158350004 | 27 | 60.616 | KV453299.1 | 12307438 | 27-scf00525    | 27 |
| AX-158350011 | 27 | 60.616 | KV453299.1 | 12316118 | 27-scf00525    | 27 |
| AX-158350014 | 27 | 60.616 | KV453299.1 | 12319745 | 27-scf00525    | 27 |
| AX-158350231 | 27 | 60.616 | KV453299.1 | 12748698 | 27-scf00525    | 27 |
| AX-158350263 | 27 | 60.616 | KV453299.1 | 12802694 | 27-scf00525    | 27 |
| AX-157684751 | 27 | 60.616 | KV453301.1 | 20031    | 27-scf00529    | 27 |
| AX-157684746 | 27 | 60.616 | KV453301.1 | 26108    | 27-scf00529    | 27 |
| AX-157680338 | 27 | 60.616 | KV453301.1 | 75660    | 27-scf00529    | 27 |
| AX-157684733 | 27 | 60.616 | KV453301.1 | 79719    | 27-scf00529    | 27 |
| AX-158350719 | 27 | 60.616 | KV453302.1 | 206157   | 27-scf00531    | 27 |

|              |    |        |            |          |             |    |
|--------------|----|--------|------------|----------|-------------|----|
| AX-157882356 | 27 | 60.651 | KV453299.1 | 11762014 | 27-scf00525 | 27 |
| AX-158349670 | 27 | 60.651 | KV453299.1 | 11818971 | 27-scf00525 | 27 |
| AX-157850809 | 27 | 60.651 | KV453299.1 | 11883853 | 27-scf00525 | 27 |
| AX-158349748 | 27 | 60.651 | KV453299.1 | 11915857 | 27-scf00525 | 27 |
| AX-158349816 | 27 | 60.651 | KV453299.1 | 12018873 | 27-scf00525 | 27 |
| AX-158349835 | 27 | 60.651 | KV453299.1 | 12056498 | 27-scf00525 | 27 |
| AX-157850823 | 27 | 60.651 | KV453299.1 | 12058804 | 27-scf00525 | 27 |
| AX-158349836 | 27 | 60.651 | KV453299.1 | 12059112 | 27-scf00525 | 27 |
| AX-158349838 | 27 | 60.651 | KV453299.1 | 12064174 | 27-scf00525 | 27 |
| AX-158349839 | 27 | 60.651 | KV453299.1 | 12064503 | 27-scf00525 | 27 |
| AX-158349842 | 27 | 60.651 | KV453299.1 | 12067667 | 27-scf00525 | 27 |
| AX-158349857 | 27 | 60.651 | KV453299.1 | 12090289 | 27-scf00525 | 27 |
| AX-158349885 | 27 | 60.651 | KV453299.1 | 12114661 | 27-scf00525 | 27 |
| AX-158349889 | 27 | 60.651 | KV453299.1 | 12121827 | 27-scf00525 | 27 |
| AX-158349892 | 27 | 60.651 | KV453299.1 | 12128960 | 27-scf00525 | 27 |
| AX-158349895 | 27 | 60.651 | KV453299.1 | 12130973 | 27-scf00525 | 27 |
| AX-158349899 | 27 | 60.651 | KV453299.1 | 12135370 | 27-scf00525 | 27 |
| AX-158349902 | 27 | 60.651 | KV453299.1 | 12145389 | 27-scf00525 | 27 |
| AX-158349929 | 27 | 60.651 | KV453299.1 | 12203146 | 27-scf00525 | 27 |
| AX-158349932 | 27 | 60.651 | KV453299.1 | 12205070 | 27-scf00525 | 27 |
| AX-158349933 | 27 | 60.651 | KV453299.1 | 12206536 | 27-scf00525 | 27 |
| AX-158349940 | 27 | 60.651 | KV453299.1 | 12215797 | 27-scf00525 | 27 |
| AX-158349943 | 27 | 60.651 | KV453299.1 | 12218348 | 27-scf00525 | 27 |
| AX-157745680 | 27 | 60.651 | KV453299.1 | 12218622 | 27-scf00525 | 27 |
| AX-157715507 | 27 | 60.651 | KV453299.1 | 12221419 | 27-scf00525 | 27 |
| AX-158349945 | 27 | 60.651 | KV453299.1 | 12221842 | 27-scf00525 | 27 |
| AX-158349951 | 27 | 60.651 | KV453299.1 | 12225873 | 27-scf00525 | 27 |
| AX-158349953 | 27 | 60.651 | KV453299.1 | 12228849 | 27-scf00525 | 27 |
| AX-158349959 | 27 | 60.651 | KV453299.1 | 12244215 | 27-scf00525 | 27 |
| AX-158349961 | 27 | 60.651 | KV453299.1 | 12246356 | 27-scf00525 | 27 |
| AX-158349962 | 27 | 60.651 | KV453299.1 | 12247902 | 27-scf00525 | 27 |
| AX-157850841 | 27 | 60.651 | KV453299.1 | 12249876 | 27-scf00525 | 27 |
| AX-157850842 | 27 | 60.651 | KV453299.1 | 12250217 | 27-scf00525 | 27 |
| AX-158349963 | 27 | 60.651 | KV453299.1 | 12251092 | 27-scf00525 | 27 |
| AX-158349966 | 27 | 60.651 | KV453299.1 | 12256414 | 27-scf00525 | 27 |
| AX-158349969 | 27 | 60.651 | KV453299.1 | 12263775 | 27-scf00525 | 27 |
| AX-158349972 | 27 | 60.651 | KV453299.1 | 12268940 | 27-scf00525 | 27 |
| AX-158349974 | 27 | 60.651 | KV453299.1 | 12272833 | 27-scf00525 | 27 |
| AX-157850845 | 27 | 60.651 | KV453299.1 | 12273710 | 27-scf00525 | 27 |
| AX-158349976 | 27 | 60.651 | KV453299.1 | 12275341 | 27-scf00525 | 27 |
| AX-158349978 | 27 | 60.651 | KV453299.1 | 12276877 | 27-scf00525 | 27 |
| AX-158349990 | 27 | 60.651 | KV453299.1 | 12290471 | 27-scf00525 | 27 |
| AX-158349991 | 27 | 60.651 | KV453299.1 | 12290715 | 27-scf00525 | 27 |
| AX-158349998 | 27 | 60.651 | KV453299.1 | 12297238 | 27-scf00525 | 27 |
| AX-158349999 | 27 | 60.651 | KV453299.1 | 12297909 | 27-scf00525 | 27 |
| AX-158350000 | 27 | 60.651 | KV453299.1 | 12300299 | 27-scf00525 | 27 |
| AX-157850851 | 27 | 60.651 | KV453299.1 | 12300376 | 27-scf00525 | 27 |
| AX-157850852 | 27 | 60.651 | KV453299.1 | 12302580 | 27-scf00525 | 27 |
| AX-158350010 | 27 | 60.651 | KV453299.1 | 12315316 | 27-scf00525 | 27 |
| AX-158350015 | 27 | 60.651 | KV453299.1 | 12331051 | 27-scf00525 | 27 |
| AX-158423810 | 27 | 60.651 | KV453299.1 | 12347295 | 27-scf00525 | 27 |

|              |    |        |            |          |             |    |
|--------------|----|--------|------------|----------|-------------|----|
| AX-158419373 | 27 | 60.651 | KV453299.1 | 12348470 | 27-scf00525 | 27 |
| AX-158350018 | 27 | 60.651 | KV453299.1 | 12353931 | 27-scf00525 | 27 |
| AX-158350020 | 27 | 60.651 | KV453299.1 | 12363918 | 27-scf00525 | 27 |
| AX-158350021 | 27 | 60.651 | KV453299.1 | 12372481 | 27-scf00525 | 27 |
| AX-157705126 | 27 | 60.651 | KV453299.1 | 12373240 | 27-scf00525 | 27 |
| AX-157705124 | 27 | 60.651 | KV453299.1 | 12373660 | 27-scf00525 | 27 |
| AX-158350022 | 27 | 60.651 | KV453299.1 | 12374288 | 27-scf00525 | 27 |
| AX-158350024 | 27 | 60.651 | KV453299.1 | 12375560 | 27-scf00525 | 27 |
| AX-158350025 | 27 | 60.651 | KV453299.1 | 12376130 | 27-scf00525 | 27 |
| AX-157709527 | 27 | 60.651 | KV453299.1 | 12377743 | 27-scf00525 | 27 |
| AX-157850854 | 27 | 60.651 | KV453299.1 | 12381751 | 27-scf00525 | 27 |
| AX-158350026 | 27 | 60.651 | KV453299.1 | 12381940 | 27-scf00525 | 27 |
| AX-158350027 | 27 | 60.651 | KV453299.1 | 12382492 | 27-scf00525 | 27 |
| AX-158350028 | 27 | 60.651 | KV453299.1 | 12382990 | 27-scf00525 | 27 |
| AX-158350029 | 27 | 60.651 | KV453299.1 | 12385309 | 27-scf00525 | 27 |
| AX-158350030 | 27 | 60.651 | KV453299.1 | 12387906 | 27-scf00525 | 27 |
| AX-158350031 | 27 | 60.651 | KV453299.1 | 12391186 | 27-scf00525 | 27 |
| AX-158350032 | 27 | 60.651 | KV453299.1 | 12408903 | 27-scf00525 | 27 |
| AX-157873876 | 27 | 60.651 | KV453299.1 | 12411242 | 27-scf00525 | 27 |
| AX-158350033 | 27 | 60.651 | KV453299.1 | 12413875 | 27-scf00525 | 27 |
| AX-158350034 | 27 | 60.651 | KV453299.1 | 12422507 | 27-scf00525 | 27 |
| AX-158350035 | 27 | 60.651 | KV453299.1 | 12422748 | 27-scf00525 | 27 |
| AX-158350036 | 27 | 60.651 | KV453299.1 | 12422954 | 27-scf00525 | 27 |
| AX-158350037 | 27 | 60.651 | KV453299.1 | 12423203 | 27-scf00525 | 27 |
| AX-158350039 | 27 | 60.651 | KV453299.1 | 12426134 | 27-scf00525 | 27 |
| AX-158350040 | 27 | 60.651 | KV453299.1 | 12427039 | 27-scf00525 | 27 |
| AX-157862018 | 27 | 60.651 | KV453299.1 | 12429603 | 27-scf00525 | 27 |
| AX-158350043 | 27 | 60.651 | KV453299.1 | 12432425 | 27-scf00525 | 27 |
| AX-158350045 | 27 | 60.651 | KV453299.1 | 12440097 | 27-scf00525 | 27 |
| AX-158350046 | 27 | 60.651 | KV453299.1 | 12442256 | 27-scf00525 | 27 |
| AX-158350047 | 27 | 60.651 | KV453299.1 | 12456286 | 27-scf00525 | 27 |
| AX-158350048 | 27 | 60.651 | KV453299.1 | 12460183 | 27-scf00525 | 27 |
| AX-158350049 | 27 | 60.651 | KV453299.1 | 12463551 | 27-scf00525 | 27 |
| AX-158350051 | 27 | 60.651 | KV453299.1 | 12467109 | 27-scf00525 | 27 |
| AX-158350057 | 27 | 60.651 | KV453299.1 | 12478230 | 27-scf00525 | 27 |
| AX-158350058 | 27 | 60.651 | KV453299.1 | 12478599 | 27-scf00525 | 27 |
| AX-158350059 | 27 | 60.651 | KV453299.1 | 12480541 | 27-scf00525 | 27 |
| AX-158350060 | 27 | 60.651 | KV453299.1 | 12481979 | 27-scf00525 | 27 |
| AX-158350065 | 27 | 60.651 | KV453299.1 | 12492328 | 27-scf00525 | 27 |
| AX-158350066 | 27 | 60.651 | KV453299.1 | 12496557 | 27-scf00525 | 27 |
| AX-157850857 | 27 | 60.651 | KV453299.1 | 12499028 | 27-scf00525 | 27 |
| AX-158350067 | 27 | 60.651 | KV453299.1 | 12499104 | 27-scf00525 | 27 |
| AX-158350068 | 27 | 60.651 | KV453299.1 | 12500084 | 27-scf00525 | 27 |
| AX-158350069 | 27 | 60.651 | KV453299.1 | 12500770 | 27-scf00525 | 27 |
| AX-158350072 | 27 | 60.651 | KV453299.1 | 12503271 | 27-scf00525 | 27 |
| AX-158350073 | 27 | 60.651 | KV453299.1 | 12505806 | 27-scf00525 | 27 |
| AX-158350075 | 27 | 60.651 | KV453299.1 | 12506464 | 27-scf00525 | 27 |
| AX-158350076 | 27 | 60.651 | KV453299.1 | 12506797 | 27-scf00525 | 27 |
| AX-158350077 | 27 | 60.651 | KV453299.1 | 12507915 | 27-scf00525 | 27 |
| AX-158350079 | 27 | 60.651 | KV453299.1 | 12509489 | 27-scf00525 | 27 |
| AX-158350080 | 27 | 60.651 | KV453299.1 | 12510128 | 27-scf00525 | 27 |

|              |    |        |            |          |             |    |
|--------------|----|--------|------------|----------|-------------|----|
| AX-158350081 | 27 | 60.651 | KV453299.1 | 12510612 | 27-scf00525 | 27 |
| AX-158350083 | 27 | 60.651 | KV453299.1 | 12511929 | 27-scf00525 | 27 |
| AX-158350084 | 27 | 60.651 | KV453299.1 | 12514028 | 27-scf00525 | 27 |
| AX-158350085 | 27 | 60.651 | KV453299.1 | 12514488 | 27-scf00525 | 27 |
| AX-158350086 | 27 | 60.651 | KV453299.1 | 12515708 | 27-scf00525 | 27 |
| AX-158350087 | 27 | 60.651 | KV453299.1 | 12518394 | 27-scf00525 | 27 |
| AX-158350089 | 27 | 60.651 | KV453299.1 | 12520173 | 27-scf00525 | 27 |
| AX-158350090 | 27 | 60.651 | KV453299.1 | 12520786 | 27-scf00525 | 27 |
| AX-158350091 | 27 | 60.651 | KV453299.1 | 12522363 | 27-scf00525 | 27 |
| AX-158350093 | 27 | 60.651 | KV453299.1 | 12524348 | 27-scf00525 | 27 |
| AX-158350095 | 27 | 60.651 | KV453299.1 | 12525524 | 27-scf00525 | 27 |
| AX-158350096 | 27 | 60.651 | KV453299.1 | 12526379 | 27-scf00525 | 27 |
| AX-157862020 | 27 | 60.651 | KV453299.1 | 12527201 | 27-scf00525 | 27 |
| AX-158350097 | 27 | 60.651 | KV453299.1 | 12529275 | 27-scf00525 | 27 |
| AX-158350098 | 27 | 60.651 | KV453299.1 | 12529449 | 27-scf00525 | 27 |
| AX-158350101 | 27 | 60.651 | KV453299.1 | 12540753 | 27-scf00525 | 27 |
| AX-158350102 | 27 | 60.651 | KV453299.1 | 12541149 | 27-scf00525 | 27 |
| AX-158350104 | 27 | 60.651 | KV453299.1 | 12542690 | 27-scf00525 | 27 |
| AX-158350105 | 27 | 60.651 | KV453299.1 | 12543299 | 27-scf00525 | 27 |
| AX-158350106 | 27 | 60.651 | KV453299.1 | 12543837 | 27-scf00525 | 27 |
| AX-158350107 | 27 | 60.651 | KV453299.1 | 12544236 | 27-scf00525 | 27 |
| AX-158350108 | 27 | 60.651 | KV453299.1 | 12546436 | 27-scf00525 | 27 |
| AX-158350109 | 27 | 60.651 | KV453299.1 | 12547452 | 27-scf00525 | 27 |
| AX-158350112 | 27 | 60.651 | KV453299.1 | 12549267 | 27-scf00525 | 27 |
| AX-158350115 | 27 | 60.651 | KV453299.1 | 12554653 | 27-scf00525 | 27 |
| AX-158350116 | 27 | 60.651 | KV453299.1 | 12555817 | 27-scf00525 | 27 |
| AX-157862021 | 27 | 60.651 | KV453299.1 | 12556502 | 27-scf00525 | 27 |
| AX-158350118 | 27 | 60.651 | KV453299.1 | 12556743 | 27-scf00525 | 27 |
| AX-158350119 | 27 | 60.651 | KV453299.1 | 12557784 | 27-scf00525 | 27 |
| AX-158350120 | 27 | 60.651 | KV453299.1 | 12558716 | 27-scf00525 | 27 |
| AX-158350121 | 27 | 60.651 | KV453299.1 | 12559091 | 27-scf00525 | 27 |
| AX-158350122 | 27 | 60.651 | KV453299.1 | 12559903 | 27-scf00525 | 27 |
| AX-157862022 | 27 | 60.651 | KV453299.1 | 12560606 | 27-scf00525 | 27 |
| AX-158350125 | 27 | 60.651 | KV453299.1 | 12562078 | 27-scf00525 | 27 |
| AX-158350126 | 27 | 60.651 | KV453299.1 | 12562403 | 27-scf00525 | 27 |
| AX-158350127 | 27 | 60.651 | KV453299.1 | 12562884 | 27-scf00525 | 27 |
| AX-158350130 | 27 | 60.651 | KV453299.1 | 12567969 | 27-scf00525 | 27 |
| AX-157862025 | 27 | 60.651 | KV453299.1 | 12568603 | 27-scf00525 | 27 |
| AX-158350133 | 27 | 60.651 | KV453299.1 | 12570402 | 27-scf00525 | 27 |
| AX-158350134 | 27 | 60.651 | KV453299.1 | 12570844 | 27-scf00525 | 27 |
| AX-158350135 | 27 | 60.651 | KV453299.1 | 12571641 | 27-scf00525 | 27 |
| AX-158350137 | 27 | 60.651 | KV453299.1 | 12590875 | 27-scf00525 | 27 |
| AX-158350138 | 27 | 60.651 | KV453299.1 | 12591544 | 27-scf00525 | 27 |
| AX-158350140 | 27 | 60.651 | KV453299.1 | 12593471 | 27-scf00525 | 27 |
| AX-158350142 | 27 | 60.651 | KV453299.1 | 12594994 | 27-scf00525 | 27 |
| AX-158350143 | 27 | 60.651 | KV453299.1 | 12596916 | 27-scf00525 | 27 |
| AX-158419376 | 27 | 60.651 | KV453299.1 | 12597416 | 27-scf00525 | 27 |
| AX-158350144 | 27 | 60.651 | KV453299.1 | 12602414 | 27-scf00525 | 27 |
| AX-158350145 | 27 | 60.651 | KV453299.1 | 12603233 | 27-scf00525 | 27 |
| AX-158350146 | 27 | 60.651 | KV453299.1 | 12603669 | 27-scf00525 | 27 |
| AX-158350147 | 27 | 60.651 | KV453299.1 | 12604590 | 27-scf00525 | 27 |

|              |    |        |            |          |             |    |
|--------------|----|--------|------------|----------|-------------|----|
| AX-158350148 | 27 | 60.651 | KV453299.1 | 12610877 | 27-scf00525 | 27 |
| AX-158350149 | 27 | 60.651 | KV453299.1 | 12611533 | 27-scf00525 | 27 |
| AX-158350152 | 27 | 60.651 | KV453299.1 | 12613267 | 27-scf00525 | 27 |
| AX-158350155 | 27 | 60.651 | KV453299.1 | 12615284 | 27-scf00525 | 27 |
| AX-158350187 | 27 | 60.651 | KV453299.1 | 12660714 | 27-scf00525 | 27 |
| AX-158350203 | 27 | 60.651 | KV453299.1 | 12690423 | 27-scf00525 | 27 |
| AX-158350212 | 27 | 60.651 | KV453299.1 | 12703145 | 27-scf00525 | 27 |
| AX-157850882 | 27 | 60.651 | KV453299.1 | 12789643 | 27-scf00525 | 27 |
| AX-157850888 | 27 | 60.651 | KV453299.1 | 12844450 | 27-scf00525 | 27 |
| AX-158350307 | 27 | 60.651 | KV453299.1 | 12877065 | 27-scf00525 | 27 |
| AX-158350312 | 27 | 60.651 | KV453299.1 | 12890255 | 27-scf00525 | 27 |
| AX-158350313 | 27 | 60.651 | KV453299.1 | 12890711 | 27-scf00525 | 27 |
| AX-158350314 | 27 | 60.651 | KV453299.1 | 12895110 | 27-scf00525 | 27 |
| AX-157772807 | 27 | 60.651 | KV453299.1 | 12902342 | 27-scf00525 | 27 |
| AX-158350320 | 27 | 60.651 | KV453299.1 | 12914585 | 27-scf00525 | 27 |
| AX-158350322 | 27 | 60.651 | KV453299.1 | 12916297 | 27-scf00525 | 27 |
| AX-158350323 | 27 | 60.651 | KV453299.1 | 12917457 | 27-scf00525 | 27 |
| AX-158350330 | 27 | 60.651 | KV453299.1 | 12932498 | 27-scf00525 | 27 |
| AX-158350331 | 27 | 60.651 | KV453299.1 | 12933595 | 27-scf00525 | 27 |
| AX-158350334 | 27 | 60.651 | KV453299.1 | 12937217 | 27-scf00525 | 27 |
| AX-158350335 | 27 | 60.651 | KV453299.1 | 12938791 | 27-scf00525 | 27 |
| AX-158350336 | 27 | 60.651 | KV453299.1 | 12942450 | 27-scf00525 | 27 |
| AX-158419380 | 27 | 60.651 | KV453299.1 | 12945112 | 27-scf00525 | 27 |
| AX-158350339 | 27 | 60.651 | KV453299.1 | 12954983 | 27-scf00525 | 27 |
| AX-157717513 | 27 | 60.651 | KV453299.1 | 12959915 | 27-scf00525 | 27 |
| AX-158350341 | 27 | 60.651 | KV453299.1 | 12962448 | 27-scf00525 | 27 |
| AX-158350342 | 27 | 60.651 | KV453299.1 | 12967164 | 27-scf00525 | 27 |
| AX-158350344 | 27 | 60.651 | KV453299.1 | 12970429 | 27-scf00525 | 27 |
| AX-158350346 | 27 | 60.651 | KV453299.1 | 12982262 | 27-scf00525 | 27 |
| AX-158350347 | 27 | 60.651 | KV453299.1 | 12992772 | 27-scf00525 | 27 |
| AX-158350348 | 27 | 60.651 | KV453299.1 | 12996346 | 27-scf00525 | 27 |
| AX-158350349 | 27 | 60.651 | KV453299.1 | 12997208 | 27-scf00525 | 27 |
| AX-158350350 | 27 | 60.651 | KV453299.1 | 13000240 | 27-scf00525 | 27 |
| AX-157850892 | 27 | 60.651 | KV453299.1 | 13001483 | 27-scf00525 | 27 |
| AX-158350351 | 27 | 60.651 | KV453299.1 | 13001967 | 27-scf00525 | 27 |
| AX-158419382 | 27 | 60.651 | KV453299.1 | 13003010 | 27-scf00525 | 27 |
| AX-157850893 | 27 | 60.651 | KV453299.1 | 13006925 | 27-scf00525 | 27 |
| AX-158419386 | 27 | 60.651 | KV453299.1 | 13008605 | 27-scf00525 | 27 |
| AX-157850894 | 27 | 60.651 | KV453299.1 | 13009578 | 27-scf00525 | 27 |
| AX-158350352 | 27 | 60.651 | KV453299.1 | 13012657 | 27-scf00525 | 27 |
| AX-158423816 | 27 | 60.651 | KV453299.1 | 13013736 | 27-scf00525 | 27 |
| AX-157850896 | 27 | 60.651 | KV453299.1 | 13014329 | 27-scf00525 | 27 |
| AX-157850897 | 27 | 60.651 | KV453299.1 | 13025700 | 27-scf00525 | 27 |
| AX-158350354 | 27 | 60.651 | KV453299.1 | 13027359 | 27-scf00525 | 27 |
| AX-157850898 | 27 | 60.651 | KV453299.1 | 13030068 | 27-scf00525 | 27 |
| AX-158350356 | 27 | 60.651 | KV453299.1 | 13030260 | 27-scf00525 | 27 |
| AX-158350357 | 27 | 60.651 | KV453299.1 | 13031085 | 27-scf00525 | 27 |
| AX-158350358 | 27 | 60.651 | KV453299.1 | 13043755 | 27-scf00525 | 27 |
| AX-158350359 | 27 | 60.651 | KV453299.1 | 13048885 | 27-scf00525 | 27 |
| AX-158350360 | 27 | 60.651 | KV453299.1 | 13049419 | 27-scf00525 | 27 |
| AX-157850899 | 27 | 60.651 | KV453299.1 | 13054426 | 27-scf00525 | 27 |

|              |    |        |            |          |             |    |
|--------------|----|--------|------------|----------|-------------|----|
| AX-157850900 | 27 | 60.651 | KV453299.1 | 13056058 | 27-scf00525 | 27 |
| AX-158350363 | 27 | 60.651 | KV453299.1 | 13059085 | 27-scf00525 | 27 |
| AX-158350366 | 27 | 60.651 | KV453299.1 | 13064745 | 27-scf00525 | 27 |
| AX-158350367 | 27 | 60.651 | KV453299.1 | 13067579 | 27-scf00525 | 27 |
| AX-158350373 | 27 | 60.651 | KV453299.1 | 13079131 | 27-scf00525 | 27 |
| AX-158350374 | 27 | 60.651 | KV453299.1 | 13079581 | 27-scf00525 | 27 |
| AX-158350375 | 27 | 60.651 | KV453299.1 | 13080246 | 27-scf00525 | 27 |
| AX-158350377 | 27 | 60.651 | KV453299.1 | 13085875 | 27-scf00525 | 27 |
| AX-158350378 | 27 | 60.651 | KV453299.1 | 13086547 | 27-scf00525 | 27 |
| AX-157850904 | 27 | 60.651 | KV453299.1 | 13087432 | 27-scf00525 | 27 |
| AX-157850905 | 27 | 60.651 | KV453299.1 | 13093237 | 27-scf00525 | 27 |
| AX-158350381 | 27 | 60.651 | KV453299.1 | 13097932 | 27-scf00525 | 27 |
| AX-158350382 | 27 | 60.651 | KV453299.1 | 13098204 | 27-scf00525 | 27 |
| AX-157850906 | 27 | 60.651 | KV453299.1 | 13098513 | 27-scf00525 | 27 |
| AX-158419391 | 27 | 60.651 | KV453299.1 | 13099093 | 27-scf00525 | 27 |
| AX-158350388 | 27 | 60.651 | KV453299.1 | 13109391 | 27-scf00525 | 27 |
| AX-158350389 | 27 | 60.651 | KV453299.1 | 13110156 | 27-scf00525 | 27 |
| AX-158350392 | 27 | 60.651 | KV453299.1 | 13112017 | 27-scf00525 | 27 |
| AX-158350394 | 27 | 60.651 | KV453299.1 | 13121081 | 27-scf00525 | 27 |
| AX-158350396 | 27 | 60.651 | KV453299.1 | 13123959 | 27-scf00525 | 27 |
| AX-158350398 | 27 | 60.651 | KV453299.1 | 13125813 | 27-scf00525 | 27 |
| AX-158350402 | 27 | 60.651 | KV453299.1 | 13130995 | 27-scf00525 | 27 |
| AX-157850907 | 27 | 60.651 | KV453299.1 | 13133581 | 27-scf00525 | 27 |
| AX-158350407 | 27 | 60.651 | KV453299.1 | 13135991 | 27-scf00525 | 27 |
| AX-158350408 | 27 | 60.651 | KV453299.1 | 13137376 | 27-scf00525 | 27 |
| AX-158350409 | 27 | 60.651 | KV453299.1 | 13137863 | 27-scf00525 | 27 |
| AX-158350412 | 27 | 60.651 | KV453299.1 | 13141633 | 27-scf00525 | 27 |
| AX-158350413 | 27 | 60.651 | KV453299.1 | 13143251 | 27-scf00525 | 27 |
| AX-158350414 | 27 | 60.651 | KV453299.1 | 13143749 | 27-scf00525 | 27 |
| AX-158350415 | 27 | 60.651 | KV453299.1 | 13145830 | 27-scf00525 | 27 |
| AX-157850908 | 27 | 60.651 | KV453299.1 | 13149455 | 27-scf00525 | 27 |
| AX-157850909 | 27 | 60.651 | KV453299.1 | 13150119 | 27-scf00525 | 27 |
| AX-158350418 | 27 | 60.651 | KV453299.1 | 13150702 | 27-scf00525 | 27 |
| AX-157850910 | 27 | 60.651 | KV453299.1 | 13151143 | 27-scf00525 | 27 |
| AX-158350419 | 27 | 60.651 | KV453299.1 | 13151274 | 27-scf00525 | 27 |
| AX-158350421 | 27 | 60.651 | KV453299.1 | 13157485 | 27-scf00525 | 27 |
| AX-158350422 | 27 | 60.651 | KV453299.1 | 13157974 | 27-scf00525 | 27 |
| AX-158350423 | 27 | 60.651 | KV453299.1 | 13158583 | 27-scf00525 | 27 |
| AX-158350424 | 27 | 60.651 | KV453299.1 | 13159823 | 27-scf00525 | 27 |
| AX-158350425 | 27 | 60.651 | KV453299.1 | 13165285 | 27-scf00525 | 27 |
| AX-158350426 | 27 | 60.651 | KV453299.1 | 13166823 | 27-scf00525 | 27 |
| AX-158350428 | 27 | 60.651 | KV453299.1 | 13168451 | 27-scf00525 | 27 |
| AX-157850911 | 27 | 60.651 | KV453299.1 | 13171002 | 27-scf00525 | 27 |
| AX-157850912 | 27 | 60.651 | KV453299.1 | 13171777 | 27-scf00525 | 27 |
| AX-157850914 | 27 | 60.651 | KV453299.1 | 13175652 | 27-scf00525 | 27 |
| AX-158350431 | 27 | 60.651 | KV453299.1 | 13177709 | 27-scf00525 | 27 |
| AX-158350432 | 27 | 60.651 | KV453299.1 | 13178069 | 27-scf00525 | 27 |
| AX-157850915 | 27 | 60.651 | KV453299.1 | 13179843 | 27-scf00525 | 27 |
| AX-158350433 | 27 | 60.651 | KV453299.1 | 13181355 | 27-scf00525 | 27 |
| AX-158350434 | 27 | 60.651 | KV453299.1 | 13181796 | 27-scf00525 | 27 |
| AX-157721752 | 27 | 60.651 | KV453299.1 | 13182750 | 27-scf00525 | 27 |

|              |    |        |            |          |             |    |
|--------------|----|--------|------------|----------|-------------|----|
| AX-157850916 | 27 | 60.651 | KV453299.1 | 13183300 | 27-scf00525 | 27 |
| AX-158350435 | 27 | 60.651 | KV453299.1 | 13185864 | 27-scf00525 | 27 |
| AX-158350436 | 27 | 60.651 | KV453299.1 | 13186591 | 27-scf00525 | 27 |
| AX-158350438 | 27 | 60.651 | KV453299.1 | 13188092 | 27-scf00525 | 27 |
| AX-158419393 | 27 | 60.651 | KV453299.1 | 13194880 | 27-scf00525 | 27 |
| AX-158350440 | 27 | 60.651 | KV453299.1 | 13195781 | 27-scf00525 | 27 |
| AX-158350442 | 27 | 60.651 | KV453299.1 | 13196540 | 27-scf00525 | 27 |
| AX-158350445 | 27 | 60.651 | KV453299.1 | 13199494 | 27-scf00525 | 27 |
| AX-158350446 | 27 | 60.651 | KV453299.1 | 13200079 | 27-scf00525 | 27 |
| AX-158350447 | 27 | 60.651 | KV453299.1 | 13201365 | 27-scf00525 | 27 |
| AX-158350448 | 27 | 60.651 | KV453299.1 | 13202370 | 27-scf00525 | 27 |
| AX-158350450 | 27 | 60.651 | KV453299.1 | 13204391 | 27-scf00525 | 27 |
| AX-158350452 | 27 | 60.651 | KV453299.1 | 13207142 | 27-scf00525 | 27 |
| AX-157850917 | 27 | 60.651 | KV453299.1 | 13207334 | 27-scf00525 | 27 |
| AX-157850918 | 27 | 60.651 | KV453299.1 | 13207609 | 27-scf00525 | 27 |
| AX-157748865 | 27 | 60.651 | KV453299.1 | 13208147 | 27-scf00525 | 27 |
| AX-158350453 | 27 | 60.651 | KV453299.1 | 13208472 | 27-scf00525 | 27 |
| AX-158350454 | 27 | 60.651 | KV453299.1 | 13209125 | 27-scf00525 | 27 |
| AX-158350456 | 27 | 60.651 | KV453299.1 | 13211002 | 27-scf00525 | 27 |
| AX-157850919 | 27 | 60.651 | KV453299.1 | 13212354 | 27-scf00525 | 27 |
| AX-158350459 | 27 | 60.651 | KV453299.1 | 13213012 | 27-scf00525 | 27 |
| AX-157771071 | 27 | 60.651 | KV453299.1 | 13213784 | 27-scf00525 | 27 |
| AX-158350460 | 27 | 60.651 | KV453299.1 | 13213937 | 27-scf00525 | 27 |
| AX-158350462 | 27 | 60.651 | KV453299.1 | 13216723 | 27-scf00525 | 27 |
| AX-158350463 | 27 | 60.651 | KV453299.1 | 13217688 | 27-scf00525 | 27 |
| AX-157850922 | 27 | 60.651 | KV453299.1 | 13217977 | 27-scf00525 | 27 |
| AX-157850923 | 27 | 60.651 | KV453299.1 | 13219096 | 27-scf00525 | 27 |
| AX-158350464 | 27 | 60.651 | KV453299.1 | 13219197 | 27-scf00525 | 27 |
| AX-158350465 | 27 | 60.651 | KV453299.1 | 13219556 | 27-scf00525 | 27 |
| AX-157850924 | 27 | 60.651 | KV453299.1 | 13219822 | 27-scf00525 | 27 |
| AX-158350466 | 27 | 60.651 | KV453299.1 | 13221032 | 27-scf00525 | 27 |
| AX-158350467 | 27 | 60.651 | KV453299.1 | 13222257 | 27-scf00525 | 27 |
| AX-157850925 | 27 | 60.651 | KV453299.1 | 13222328 | 27-scf00525 | 27 |
| AX-158350470 | 27 | 60.651 | KV453299.1 | 13224997 | 27-scf00525 | 27 |
| AX-158350472 | 27 | 60.651 | KV453299.1 | 13226327 | 27-scf00525 | 27 |
| AX-158350474 | 27 | 60.651 | KV453299.1 | 13227550 | 27-scf00525 | 27 |
| AX-158350475 | 27 | 60.651 | KV453299.1 | 13229344 | 27-scf00525 | 27 |
| AX-157680775 | 27 | 60.651 | KV453301.1 | 54410    | 27-scf00529 | 27 |
| AX-157684742 | 27 | 60.651 | KV453301.1 | 87919    | 27-scf00529 | 27 |
| AX-158350771 | 27 | 60.651 | KV453303.1 | 3039     | 27-scf00530 | 27 |
| AX-158350819 | 27 | 60.651 | KV453303.1 | 81804    | 27-scf00530 | 27 |
| AX-158350874 | 27 | 60.651 | KV453303.1 | 181478   | 27-scf00530 | 27 |
| AX-157680780 | 27 | 60.651 | KV453302.1 | 6538     | 27-scf00531 | 27 |
| AX-157684758 | 27 | 60.651 | KV453302.1 | 6843     | 27-scf00531 | 27 |
| AX-157684759 | 27 | 60.651 | KV453302.1 | 7297     | 27-scf00531 | 27 |
| AX-157684762 | 27 | 60.651 | KV453302.1 | 8606     | 27-scf00531 | 27 |
| AX-157684763 | 27 | 60.651 | KV453302.1 | 10352    | 27-scf00531 | 27 |
| AX-157680781 | 27 | 60.651 | KV453302.1 | 10844    | 27-scf00531 | 27 |
| AX-157684765 | 27 | 60.651 | KV453302.1 | 16241    | 27-scf00531 | 27 |
| AX-157684766 | 27 | 60.651 | KV453302.1 | 19215    | 27-scf00531 | 27 |
| AX-157684768 | 27 | 60.651 | KV453302.1 | 21754    | 27-scf00531 | 27 |

|              |    |        |            |          |             |    |
|--------------|----|--------|------------|----------|-------------|----|
| AX-157684769 | 27 | 60.651 | KV453302.1 | 22633    | 27-scf00531 | 27 |
| AX-157684771 | 27 | 60.651 | KV453302.1 | 29716    | 27-scf00531 | 27 |
| AX-157684773 | 27 | 60.651 | KV453302.1 | 34954    | 27-scf00531 | 27 |
| AX-158350766 | 27 | 60.651 | KV453302.1 | 45243    | 27-scf00531 | 27 |
| AX-158350764 | 27 | 60.651 | KV453302.1 | 48053    | 27-scf00531 | 27 |
| AX-158350761 | 27 | 60.651 | KV453302.1 | 53606    | 27-scf00531 | 27 |
| AX-157850947 | 27 | 60.651 | KV453302.1 | 59462    | 27-scf00531 | 27 |
| AX-158350745 | 27 | 60.651 | KV453302.1 | 123162   | 27-scf00531 | 27 |
| AX-158350743 | 27 | 60.651 | KV453302.1 | 128069   | 27-scf00531 | 27 |
| AX-157747459 | 27 | 60.651 | KV453302.1 | 190312   | 27-scf00531 | 27 |
| AX-158350724 | 27 | 60.651 | KV453302.1 | 192917   | 27-scf00531 | 27 |
| AX-157850938 | 27 | 60.651 | KV453302.1 | 196559   | 27-scf00531 | 27 |
| AX-158350722 | 27 | 60.651 | KV453302.1 | 198991   | 27-scf00531 | 27 |
| AX-158350721 | 27 | 60.651 | KV453302.1 | 199372   | 27-scf00531 | 27 |
| AX-157850937 | 27 | 60.651 | KV453302.1 | 199881   | 27-scf00531 | 27 |
| AX-158350720 | 27 | 60.651 | KV453302.1 | 201628   | 27-scf00531 | 27 |
| AX-158351283 | 27 | 60.651 | KV453307.1 | 618093   | 27-scf00532 | 27 |
| AX-158350171 | 27 | 60.692 | KV453299.1 | 12641520 | 27-scf00525 | 27 |
| AX-158350172 | 27 | 60.716 | KV453299.1 | 12641896 | 27-scf00525 | 27 |
| AX-157744966 | 27 | 60.728 | KV453299.1 | 12652502 | 27-scf00525 | 27 |
| AX-157850862 | 27 | 60.737 | KV453299.1 | 12653400 | 27-scf00525 | 27 |
| AX-158349934 | 27 | 60.745 | KV453299.1 | 12207161 | 27-scf00525 | 27 |
| AX-157862026 | 27 | 60.745 | KV453299.1 | 12654190 | 27-scf00525 | 27 |
| AX-157862027 | 27 | 60.745 | KV453299.1 | 12658473 | 27-scf00525 | 27 |
| AX-158350190 | 27 | 60.745 | KV453299.1 | 12674399 | 27-scf00525 | 27 |
| AX-158350810 | 27 | 60.745 | KV453303.1 | 68745    | 27-scf00530 | 27 |
| AX-158350866 | 27 | 60.745 | KV453303.1 | 169026   | 27-scf00530 | 27 |
| AX-158350871 | 27 | 60.745 | KV453303.1 | 178435   | 27-scf00530 | 27 |
| AX-157699822 | 27 | 60.745 | KV453303.1 | 178665   | 27-scf00530 | 27 |
| AX-158350754 | 27 | 60.745 | KV453302.1 | 87999    | 27-scf00531 | 27 |
| AX-157687613 | 27 | 60.745 | KV453564.1 | 1149     | scf00948    | UN |
| AX-158350153 | 27 | 60.747 | KV453299.1 | 12613690 | 27-scf00525 | 27 |
| AX-158350154 | 27 | 60.747 | KV453299.1 | 12614661 | 27-scf00525 | 27 |
| AX-158350156 | 27 | 60.747 | KV453299.1 | 12616089 | 27-scf00525 | 27 |
| AX-158350157 | 27 | 60.747 | KV453299.1 | 12617019 | 27-scf00525 | 27 |
| AX-158350159 | 27 | 60.747 | KV453299.1 | 12617721 | 27-scf00525 | 27 |
| AX-158350160 | 27 | 60.747 | KV453299.1 | 12619592 | 27-scf00525 | 27 |
| AX-158350162 | 27 | 60.747 | KV453299.1 | 12622314 | 27-scf00525 | 27 |
| AX-158350164 | 27 | 60.747 | KV453299.1 | 12623705 | 27-scf00525 | 27 |
| AX-157850859 | 27 | 60.747 | KV453299.1 | 12632206 | 27-scf00525 | 27 |
| AX-157850860 | 27 | 60.747 | KV453299.1 | 12635170 | 27-scf00525 | 27 |
| AX-158350168 | 27 | 60.747 | KV453299.1 | 12637681 | 27-scf00525 | 27 |
| AX-158350173 | 27 | 60.747 | KV453299.1 | 12642565 | 27-scf00525 | 27 |
| AX-158350175 | 27 | 60.747 | KV453299.1 | 12644828 | 27-scf00525 | 27 |
| AX-158350176 | 27 | 60.747 | KV453299.1 | 12646071 | 27-scf00525 | 27 |
| AX-158350178 | 27 | 60.747 | KV453299.1 | 12648173 | 27-scf00525 | 27 |
| AX-158350179 | 27 | 60.747 | KV453299.1 | 12648797 | 27-scf00525 | 27 |
| AX-158350180 | 27 | 60.747 | KV453299.1 | 12649490 | 27-scf00525 | 27 |
| AX-158350181 | 27 | 60.747 | KV453299.1 | 12650126 | 27-scf00525 | 27 |
| AX-158350182 | 27 | 60.747 | KV453299.1 | 12651492 | 27-scf00525 | 27 |
| AX-157850863 | 27 | 60.747 | KV453299.1 | 12654127 | 27-scf00525 | 27 |



|              |    |        |            |          |             |    |
|--------------|----|--------|------------|----------|-------------|----|
| AX-157850864 | 27 | 60.747 | KV453299.1 | 12655397 | 27-scf00525 | 27 |
| AX-157850865 | 27 | 60.747 | KV453299.1 | 12661902 | 27-scf00525 | 27 |
| AX-157850867 | 27 | 60.747 | KV453299.1 | 12675494 | 27-scf00525 | 27 |
| AX-158350192 | 27 | 60.747 | KV453299.1 | 12677183 | 27-scf00525 | 27 |
| AX-158350194 | 27 | 60.747 | KV453299.1 | 12680903 | 27-scf00525 | 27 |
| AX-158350196 | 27 | 60.747 | KV453299.1 | 12681801 | 27-scf00525 | 27 |
| AX-158350198 | 27 | 60.747 | KV453299.1 | 12683194 | 27-scf00525 | 27 |
| AX-157850868 | 27 | 60.747 | KV453299.1 | 12683483 | 27-scf00525 | 27 |
| AX-158350201 | 27 | 60.747 | KV453299.1 | 12687095 | 27-scf00525 | 27 |
| AX-158350202 | 27 | 60.747 | KV453299.1 | 12689680 | 27-scf00525 | 27 |
| AX-158350205 | 27 | 60.747 | KV453299.1 | 12695266 | 27-scf00525 | 27 |
| AX-158350206 | 27 | 60.747 | KV453299.1 | 12695611 | 27-scf00525 | 27 |
| AX-157728564 | 27 | 60.747 | KV453299.1 | 12706980 | 27-scf00525 | 27 |
| AX-157684738 | 27 | 60.747 | KV453301.1 | 84923    | 27-scf00529 | 27 |
| AX-158350151 | 27 | 60.749 | KV453299.1 | 12612795 | 27-scf00525 | 27 |
| AX-158350170 | 27 | 60.749 | KV453299.1 | 12640865 | 27-scf00525 | 27 |
| AX-157850866 | 27 | 60.749 | KV453299.1 | 12671914 | 27-scf00525 | 27 |
| AX-158350191 | 27 | 60.752 | KV453299.1 | 12676369 | 27-scf00525 | 27 |
| AX-158350177 | 27 | 60.754 | KV453299.1 | 12647219 | 27-scf00525 | 27 |
| AX-158350200 | 27 | 60.754 | KV453299.1 | 12685198 | 27-scf00525 | 27 |
| AX-158350204 | 27 | 60.757 | KV453299.1 | 12692903 | 27-scf00525 | 27 |
| AX-157850861 | 27 | 60.76  | KV453299.1 | 12637002 | 27-scf00525 | 27 |
| AX-158350169 | 27 | 60.76  | KV453299.1 | 12640188 | 27-scf00525 | 27 |
| AX-158350174 | 27 | 60.76  | KV453299.1 | 12643859 | 27-scf00525 | 27 |
| AX-158350183 | 27 | 60.76  | KV453299.1 | 12656050 | 27-scf00525 | 27 |
| AX-158350193 | 27 | 60.76  | KV453299.1 | 12678742 | 27-scf00525 | 27 |
| AX-157850871 | 27 | 60.76  | KV453299.1 | 12696492 | 27-scf00525 | 27 |
| AX-157862028 | 27 | 60.76  | KV453299.1 | 12707807 | 27-scf00525 | 27 |
| AX-158350214 | 27 | 60.76  | KV453299.1 | 12708746 | 27-scf00525 | 27 |
| AX-158350215 | 27 | 60.76  | KV453299.1 | 12712581 | 27-scf00525 | 27 |
| AX-158350216 | 27 | 60.76  | KV453299.1 | 12713560 | 27-scf00525 | 27 |
| AX-158350217 | 27 | 60.76  | KV453299.1 | 12716285 | 27-scf00525 | 27 |
| AX-158350218 | 27 | 60.76  | KV453299.1 | 12718295 | 27-scf00525 | 27 |
| AX-158350227 | 27 | 60.76  | KV453299.1 | 12741809 | 27-scf00525 | 27 |
| AX-158350228 | 27 | 60.76  | KV453299.1 | 12744041 | 27-scf00525 | 27 |
| AX-158350229 | 27 | 60.76  | KV453299.1 | 12747434 | 27-scf00525 | 27 |
| AX-158350232 | 27 | 60.76  | KV453299.1 | 12749059 | 27-scf00525 | 27 |
| AX-158350233 | 27 | 60.76  | KV453299.1 | 12754621 | 27-scf00525 | 27 |
| AX-158350234 | 27 | 60.76  | KV453299.1 | 12756194 | 27-scf00525 | 27 |
| AX-158350242 | 27 | 60.76  | KV453299.1 | 12762779 | 27-scf00525 | 27 |
| AX-157850880 | 27 | 60.76  | KV453299.1 | 12777672 | 27-scf00525 | 27 |
| AX-157850881 | 27 | 60.76  | KV453299.1 | 12783830 | 27-scf00525 | 27 |
| AX-158350251 | 27 | 60.76  | KV453299.1 | 12784035 | 27-scf00525 | 27 |
| AX-158350255 | 27 | 60.76  | KV453299.1 | 12790970 | 27-scf00525 | 27 |
| AX-158350256 | 27 | 60.76  | KV453299.1 | 12792900 | 27-scf00525 | 27 |
| AX-157862029 | 27 | 60.76  | KV453299.1 | 12793489 | 27-scf00525 | 27 |
| AX-157850883 | 27 | 60.76  | KV453299.1 | 12794127 | 27-scf00525 | 27 |
| AX-158350257 | 27 | 60.76  | KV453299.1 | 12795811 | 27-scf00525 | 27 |
| AX-158350259 | 27 | 60.76  | KV453299.1 | 12799952 | 27-scf00525 | 27 |
| AX-157747136 | 27 | 60.76  | KV453299.1 | 12805960 | 27-scf00525 | 27 |
| AX-158350267 | 27 | 60.76  | KV453299.1 | 12806376 | 27-scf00525 | 27 |

|              |    |        |            |          |             |    |
|--------------|----|--------|------------|----------|-------------|----|
| AX-157850884 | 27 | 60.76  | KV453299.1 | 12806853 | 27-scf00525 | 27 |
| AX-158350272 | 27 | 60.76  | KV453299.1 | 12812935 | 27-scf00525 | 27 |
| AX-158350311 | 27 | 60.76  | KV453299.1 | 12888862 | 27-scf00525 | 27 |
| AX-158350321 | 27 | 60.76  | KV453299.1 | 12915855 | 27-scf00525 | 27 |
| AX-158350338 | 27 | 60.76  | KV453299.1 | 12953805 | 27-scf00525 | 27 |
| AX-157710653 | 27 | 60.76  | KV453299.1 | 13073134 | 27-scf00525 | 27 |
| AX-158350369 | 27 | 60.76  | KV453299.1 | 13075096 | 27-scf00525 | 27 |
| AX-158350370 | 27 | 60.76  | KV453299.1 | 13076019 | 27-scf00525 | 27 |
| AX-158350371 | 27 | 60.76  | KV453299.1 | 13078330 | 27-scf00525 | 27 |
| AX-158350372 | 27 | 60.76  | KV453299.1 | 13078883 | 27-scf00525 | 27 |
| AX-157850903 | 27 | 60.76  | KV453299.1 | 13082818 | 27-scf00525 | 27 |
| AX-158350376 | 27 | 60.76  | KV453299.1 | 13084346 | 27-scf00525 | 27 |
| AX-157713888 | 27 | 60.76  | KV453299.1 | 13085414 | 27-scf00525 | 27 |
| AX-158350379 | 27 | 60.76  | KV453299.1 | 13095765 | 27-scf00525 | 27 |
| AX-158350383 | 27 | 60.76  | KV453299.1 | 13103806 | 27-scf00525 | 27 |
| AX-158350384 | 27 | 60.76  | KV453299.1 | 13104551 | 27-scf00525 | 27 |
| AX-158350386 | 27 | 60.76  | KV453299.1 | 13106354 | 27-scf00525 | 27 |
| AX-158350387 | 27 | 60.76  | KV453299.1 | 13107373 | 27-scf00525 | 27 |
| AX-158350390 | 27 | 60.76  | KV453299.1 | 13110991 | 27-scf00525 | 27 |
| AX-158350391 | 27 | 60.76  | KV453299.1 | 13111596 | 27-scf00525 | 27 |
| AX-157727483 | 27 | 60.76  | KV453299.1 | 13166305 | 27-scf00525 | 27 |
| AX-158350430 | 27 | 60.76  | KV453299.1 | 13174439 | 27-scf00525 | 27 |
| AX-157703038 | 27 | 60.76  | KV453299.1 | 13183834 | 27-scf00525 | 27 |
| AX-158350437 | 27 | 60.76  | KV453299.1 | 13187198 | 27-scf00525 | 27 |
| AX-158350439 | 27 | 60.76  | KV453299.1 | 13195389 | 27-scf00525 | 27 |
| AX-158350441 | 27 | 60.76  | KV453299.1 | 13196188 | 27-scf00525 | 27 |
| AX-158350443 | 27 | 60.76  | KV453299.1 | 13197337 | 27-scf00525 | 27 |
| AX-158350444 | 27 | 60.76  | KV453299.1 | 13199034 | 27-scf00525 | 27 |
| AX-158350455 | 27 | 60.76  | KV453299.1 | 13209899 | 27-scf00525 | 27 |
| AX-157744714 | 27 | 60.76  | KV453299.1 | 13210336 | 27-scf00525 | 27 |
| AX-158350457 | 27 | 60.76  | KV453299.1 | 13211346 | 27-scf00525 | 27 |
| AX-158350458 | 27 | 60.76  | KV453299.1 | 13211553 | 27-scf00525 | 27 |
| AX-157850920 | 27 | 60.76  | KV453299.1 | 13213719 | 27-scf00525 | 27 |
| AX-157850921 | 27 | 60.76  | KV453299.1 | 13217857 | 27-scf00525 | 27 |
| AX-158350468 | 27 | 60.76  | KV453299.1 | 13223226 | 27-scf00525 | 27 |
| AX-158350469 | 27 | 60.76  | KV453299.1 | 13224440 | 27-scf00525 | 27 |
| AX-158350476 | 27 | 60.76  | KV453299.1 | 13230721 | 27-scf00525 | 27 |
| AX-158419394 | 27 | 60.76  | KV453299.1 | 13232054 | 27-scf00525 | 27 |
| AX-157680774 | 27 | 60.76  | KV453301.1 | 50275    | 27-scf00529 | 27 |
| AX-157684739 | 27 | 60.76  | KV453301.1 | 85208    | 27-scf00529 | 27 |
| AX-157684740 | 27 | 60.76  | KV453301.1 | 86888    | 27-scf00529 | 27 |
| AX-158350782 | 27 | 60.76  | KV453303.1 | 18142    | 27-scf00530 | 27 |
| AX-158420534 | 27 | 60.76  | KV453303.1 | 149707   | 27-scf00530 | 27 |
| AX-157684757 | 27 | 60.76  | KV453302.1 | 6227     | 27-scf00531 | 27 |
| AX-158350755 | 27 | 60.76  | KV453302.1 | 85405    | 27-scf00531 | 27 |
| AX-158350739 | 27 | 60.76  | KV453302.1 | 152273   | 27-scf00531 | 27 |
| AX-157679967 | 27 | 60.76  | KV453300.1 | 13411    | 27-scf00675 | 27 |
| AX-157681198 | 27 | 60.76  | KV453300.1 | 16079    | 27-scf00675 | 27 |
| AX-158349734 | 27 | 60.869 | KV453299.1 | 11896068 | 27-scf00525 | 27 |
| AX-157850828 | 27 | 60.869 | KV453299.1 | 12077989 | 27-scf00525 | 27 |
| AX-158350005 | 27 | 60.869 | KV453299.1 | 12307997 | 27-scf00525 | 27 |

|              |    |        |            |          |             |    |
|--------------|----|--------|------------|----------|-------------|----|
| AX-157684755 | 27 | 60.869 | KV453301.1 | 14482    | 27-scf00529 | 27 |
| AX-157680024 | 27 | 60.869 | KV453301.1 | 34004    | 27-scf00529 | 27 |
| AX-157680233 | 27 | 60.869 | KV453301.1 | 34217    | 27-scf00529 | 27 |
| AX-157684712 | 27 | 60.869 | KV453301.1 | 34727    | 27-scf00529 | 27 |
| AX-157684717 | 27 | 60.869 | KV453301.1 | 40369    | 27-scf00529 | 27 |
| AX-157680773 | 27 | 60.869 | KV453301.1 | 46218    | 27-scf00529 | 27 |
| AX-157680091 | 27 | 60.869 | KV453301.1 | 51859    | 27-scf00529 | 27 |
| AX-157684725 | 27 | 60.869 | KV453301.1 | 57431    | 27-scf00529 | 27 |
| AX-158350733 | 27 | 60.869 | KV453302.1 | 166613   | 27-scf00531 | 27 |
| AX-158350732 | 27 | 60.869 | KV453302.1 | 166775   | 27-scf00531 | 27 |
| AX-158349833 | 27 | 60.978 | KV453299.1 | 12054477 | 27-scf00525 | 27 |
| AX-158349852 | 27 | 60.978 | KV453299.1 | 12085678 | 27-scf00525 | 27 |
| AX-158349992 | 27 | 60.978 | KV453299.1 | 12290946 | 27-scf00525 | 27 |
| AX-157680285 | 27 | 60.978 | KV453301.1 | 30502    | 27-scf00529 | 27 |
| AX-157684724 | 27 | 60.978 | KV453301.1 | 56746    | 27-scf00529 | 27 |
| AX-157680776 | 27 | 60.978 | KV453301.1 | 62648    | 27-scf00529 | 27 |
| AX-157684727 | 27 | 60.978 | KV453301.1 | 66551    | 27-scf00529 | 27 |
| AX-157684728 | 27 | 60.978 | KV453301.1 | 69237    | 27-scf00529 | 27 |
| AX-157684730 | 27 | 60.978 | KV453301.1 | 73796    | 27-scf00529 | 27 |
| AX-157684731 | 27 | 60.978 | KV453301.1 | 76221    | 27-scf00529 | 27 |
| AX-157684735 | 27 | 60.978 | KV453301.1 | 82940    | 27-scf00529 | 27 |
| AX-157684736 | 27 | 60.978 | KV453301.1 | 83276    | 27-scf00529 | 27 |
| AX-157684741 | 27 | 60.978 | KV453301.1 | 87578    | 27-scf00529 | 27 |
| AX-158350775 | 27 | 60.978 | KV453303.1 | 10681    | 27-scf00530 | 27 |
| AX-158350842 | 27 | 60.978 | KV453303.1 | 120916   | 27-scf00530 | 27 |
| AX-157772130 | 27 | 60.978 | KV453303.1 | 150737   | 27-scf00530 | 27 |
| AX-157681510 | 27 | 60.978 | KV453303.1 | 207645   | 27-scf00530 | 27 |
| AX-157862036 | 27 | 60.978 | KV453302.1 | 62464    | 27-scf00531 | 27 |
| AX-157888935 | 27 | 60.978 | KV453302.1 | 75706    | 27-scf00531 | 27 |
| AX-158350757 | 27 | 60.978 | KV453302.1 | 77457    | 27-scf00531 | 27 |
| AX-157882388 | 27 | 60.978 | KV453302.1 | 98081    | 27-scf00531 | 27 |
| AX-157722543 | 27 | 60.978 | KV453302.1 | 104008   | 27-scf00531 | 27 |
| AX-158350749 | 27 | 60.978 | KV453302.1 | 114357   | 27-scf00531 | 27 |
| AX-158350748 | 27 | 60.978 | KV453302.1 | 115506   | 27-scf00531 | 27 |
| AX-157743668 | 27 | 60.978 | KV453302.1 | 116508   | 27-scf00531 | 27 |
| AX-158350740 | 27 | 60.978 | KV453302.1 | 150453   | 27-scf00531 | 27 |
| AX-158350734 | 27 | 60.978 | KV453302.1 | 166209   | 27-scf00531 | 27 |
| AX-158350731 | 27 | 60.978 | KV453302.1 | 168107   | 27-scf00531 | 27 |
| AX-158350730 | 27 | 60.978 | KV453302.1 | 168492   | 27-scf00531 | 27 |
| AX-157850946 | 27 | 60.978 | KV453302.1 | 172463   | 27-scf00531 | 27 |
| AX-158350728 | 27 | 60.978 | KV453302.1 | 174366   | 27-scf00531 | 27 |
| AX-157850945 | 27 | 60.978 | KV453302.1 | 178677   | 27-scf00531 | 27 |
| AX-157850943 | 27 | 60.978 | KV453302.1 | 183281   | 27-scf00531 | 27 |
| AX-157850942 | 27 | 60.978 | KV453302.1 | 183324   | 27-scf00531 | 27 |
| AX-158350726 | 27 | 60.978 | KV453302.1 | 185525   | 27-scf00531 | 27 |
| AX-157850940 | 27 | 60.978 | KV453302.1 | 187841   | 27-scf00531 | 27 |
| AX-157751011 | 27 | 60.978 | KV453307.1 | 23729    | 27-scf00532 | 27 |
| AX-157684750 | 27 | 61.088 | KV453301.1 | 21170    | 27-scf00529 | 27 |
| AX-157680247 | 27 | 61.088 | KV453301.1 | 21813    | 27-scf00529 | 27 |
| AX-157684749 | 27 | 61.088 | KV453301.1 | 21998    | 27-scf00529 | 27 |
| AX-157680778 | 27 | 61.306 | KV453301.1 | 8753     | 27-scf00529 | 27 |

|              |    |        |            |          |             |    |
|--------------|----|--------|------------|----------|-------------|----|
| AX-157684754 | 27 | 61.306 | KV453301.1 | 15438    | 27-scf00529 | 27 |
| AX-158350243 | 27 | 61.415 | KV453299.1 | 12763392 | 27-scf00525 | 27 |
| AX-157850876 | 27 | 61.415 | KV453299.1 | 12764310 | 27-scf00525 | 27 |
| AX-158350245 | 27 | 61.415 | KV453299.1 | 12765193 | 27-scf00525 | 27 |
| AX-158350246 | 27 | 61.415 | KV453299.1 | 12766048 | 27-scf00525 | 27 |
| AX-157680462 | 27 | 61.415 | KV453301.1 | 1593     | 27-scf00529 | 27 |
| AX-157680078 | 27 | 61.415 | KV453301.1 | 1700     | 27-scf00529 | 27 |
| AX-157684756 | 27 | 61.415 | KV453301.1 | 4777     | 27-scf00529 | 27 |
| AX-157748245 | 27 | 61.415 | KV453303.1 | 1610     | 27-scf00530 | 27 |
| AX-158350770 | 27 | 61.415 | KV453303.1 | 1900     | 27-scf00530 | 27 |
| AX-158350773 | 27 | 61.415 | KV453303.1 | 6328     | 27-scf00530 | 27 |
| AX-158350777 | 27 | 61.415 | KV453303.1 | 12541    | 27-scf00530 | 27 |
| AX-158350780 | 27 | 61.415 | KV453303.1 | 14931    | 27-scf00530 | 27 |
| AX-158350781 | 27 | 61.415 | KV453303.1 | 15320    | 27-scf00530 | 27 |
| AX-158350787 | 27 | 61.415 | KV453303.1 | 24889    | 27-scf00530 | 27 |
| AX-158350794 | 27 | 61.415 | KV453303.1 | 38904    | 27-scf00530 | 27 |
| AX-158350885 | 27 | 61.415 | KV453303.1 | 199572   | 27-scf00530 | 27 |
| AX-158349924 | 27 | 61.524 | KV453299.1 | 12194407 | 27-scf00525 | 27 |
| AX-157721997 | 27 | 61.524 | KV453299.1 | 12194444 | 27-scf00525 | 27 |
| AX-157684737 | 27 | 61.524 | KV453301.1 | 84395    | 27-scf00529 | 27 |
| AX-158350790 | 27 | 61.524 | KV453303.1 | 35332    | 27-scf00530 | 27 |
| AX-158350791 | 27 | 61.524 | KV453303.1 | 35883    | 27-scf00530 | 27 |
| AX-158350792 | 27 | 61.524 | KV453303.1 | 37536    | 27-scf00530 | 27 |
| AX-158350793 | 27 | 61.524 | KV453303.1 | 38378    | 27-scf00530 | 27 |
| AX-158350796 | 27 | 61.524 | KV453303.1 | 44952    | 27-scf00530 | 27 |
| AX-158350797 | 27 | 61.524 | KV453303.1 | 46917    | 27-scf00530 | 27 |
| AX-158350798 | 27 | 61.524 | KV453303.1 | 50330    | 27-scf00530 | 27 |
| AX-158350806 | 27 | 61.524 | KV453303.1 | 63542    | 27-scf00530 | 27 |
| AX-158350813 | 27 | 61.524 | KV453303.1 | 72999    | 27-scf00530 | 27 |
| AX-158350883 | 27 | 61.524 | KV453303.1 | 195739   | 27-scf00530 | 27 |
| AX-158350807 | 27 | 61.579 | KV453303.1 | 65651    | 27-scf00530 | 27 |
| AX-158350776 | 27 | 61.634 | KV453303.1 | 11483    | 27-scf00530 | 27 |
| AX-158350786 | 27 | 61.634 | KV453303.1 | 23415    | 27-scf00530 | 27 |
| AX-158350815 | 27 | 61.634 | KV453303.1 | 75528    | 27-scf00530 | 27 |
| AX-158350816 | 27 | 61.634 | KV453303.1 | 76685    | 27-scf00530 | 27 |
| AX-158350828 | 27 | 61.634 | KV453303.1 | 98027    | 27-scf00530 | 27 |
| AX-158350820 | 27 | 61.798 | KV453303.1 | 82913    | 27-scf00530 | 27 |
| AX-158350823 | 27 | 61.798 | KV453303.1 | 90396    | 27-scf00530 | 27 |
| AX-158350824 | 27 | 61.798 | KV453303.1 | 91089    | 27-scf00530 | 27 |
| AX-158350827 | 27 | 61.798 | KV453303.1 | 97885    | 27-scf00530 | 27 |
| AX-158350829 | 27 | 61.798 | KV453303.1 | 98823    | 27-scf00530 | 27 |
| AX-158350831 | 27 | 61.798 | KV453303.1 | 99670    | 27-scf00530 | 27 |
| AX-158350834 | 27 | 61.798 | KV453303.1 | 104787   | 27-scf00530 | 27 |
| AX-158351241 | 27 | 61.798 | KV453307.1 | 575053   | 27-scf00532 | 27 |
| AX-158351996 | 27 | 61.798 | KV453311.1 | 795973   | 27-scf00534 | 27 |
| AX-158350836 | 27 | 61.961 | KV453303.1 | 107485   | 27-scf00530 | 27 |
| AX-158350838 | 27 | 61.961 | KV453303.1 | 114175   | 27-scf00530 | 27 |
| AX-158350839 | 27 | 61.961 | KV453303.1 | 115744   | 27-scf00530 | 27 |
| AX-158350869 | 27 | 61.961 | KV453303.1 | 176519   | 27-scf00530 | 27 |
| AX-158350845 | 27 | 62.071 | KV453303.1 | 127990   | 27-scf00530 | 27 |
| AX-158350847 | 27 | 62.071 | KV453303.1 | 134477   | 27-scf00530 | 27 |

|              |    |        |             |        |             |    |
|--------------|----|--------|-------------|--------|-------------|----|
| AX-158350848 | 27 | 62.071 | KV453303.1  | 135325 | 27-scf00530 | 27 |
| AX-158350849 | 27 | 62.071 | KV453303.1  | 136858 | 27-scf00530 | 27 |
| AX-157756764 | 27 | 62.071 | KV453303.1  | 137313 | 27-scf00530 | 27 |
| AX-157888938 | 27 | 62.071 | KV453303.1  | 137529 | 27-scf00530 | 27 |
| AX-158350850 | 27 | 62.071 | KV453303.1  | 138682 | 27-scf00530 | 27 |
| AX-158350854 | 27 | 62.071 | KV453303.1  | 142735 | 27-scf00530 | 27 |
| AX-158350855 | 27 | 62.071 | KV453303.1  | 142816 | 27-scf00530 | 27 |
| AX-158350856 | 27 | 62.071 | KV453303.1  | 146128 | 27-scf00530 | 27 |
| AX-158350857 | 27 | 62.071 | KV453303.1  | 149512 | 27-scf00530 | 27 |
| AX-158350860 | 27 | 62.071 | KV453303.1  | 157744 | 27-scf00530 | 27 |
| AX-157725103 | 27 | 62.071 | KV453303.1  | 163754 | 27-scf00530 | 27 |
| AX-158350872 | 27 | 62.071 | KV453303.1  | 179220 | 27-scf00530 | 27 |
| AX-158350875 | 27 | 62.071 | KV453303.1  | 182508 | 27-scf00530 | 27 |
| AX-158350876 | 27 | 62.071 | KV453303.1  | 186399 | 27-scf00530 | 27 |
| AX-158350877 | 27 | 62.071 | KV453303.1  | 188277 | 27-scf00530 | 27 |
| AX-157720239 | 27 | 62.146 | KV453303.1  | 191323 | 27-scf00530 | 27 |
| AX-158350861 | 27 | 62.18  | KV453303.1  | 161151 | 27-scf00530 | 27 |
| AX-158350880 | 27 | 62.18  | KV453303.1  | 192621 | 27-scf00530 | 27 |
| AX-158350881 | 27 | 62.18  | KV453303.1  | 194388 | 27-scf00530 | 27 |
| AX-157758065 | 27 | 62.18  | KV453303.1  | 197168 | 27-scf00530 | 27 |
| AX-158350884 | 27 | 62.18  | KV453303.1  | 199098 | 27-scf00530 | 27 |
| AX-158350886 | 27 | 62.18  | KV453303.1  | 199739 | 27-scf00530 | 27 |
| AX-157709986 | 27 | 62.18  | KV453303.1  | 200207 | 27-scf00530 | 27 |
| AX-158350888 | 27 | 62.18  | KV453303.1  | 201735 | 27-scf00530 | 27 |
| AX-157689676 | 27 | 62.18  | 3ML01031290 | 234    | scf06898_1  | UN |
| AX-158350892 | 27 | 62.218 | KV453303.1  | 203696 | 27-scf00530 | 27 |
| AX-158350893 | 27 | 62.257 | KV453303.1  | 205932 | 27-scf00530 | 27 |
| AX-158350899 | 27 | 62.289 | KV453307.1  | 9094   | 27-scf00532 | 27 |
| AX-158350900 | 27 | 62.289 | KV453307.1  | 9320   | 27-scf00532 | 27 |
| AX-158350901 | 27 | 62.289 | KV453307.1  | 9656   | 27-scf00532 | 27 |
| AX-157862041 | 27 | 62.289 | KV453307.1  | 55137  | 27-scf00532 | 27 |
| AX-157722255 | 27 | 62.342 | KV453307.1  | 11142  | 27-scf00532 | 27 |
| AX-158350909 | 27 | 62.398 | KV453307.1  | 16153  | 27-scf00532 | 27 |
| AX-158350911 | 27 | 62.398 | KV453307.1  | 17028  | 27-scf00532 | 27 |
| AX-158350914 | 27 | 62.398 | KV453307.1  | 20521  | 27-scf00532 | 27 |
| AX-158350919 | 27 | 62.398 | KV453307.1  | 28133  | 27-scf00532 | 27 |
| AX-157850951 | 27 | 62.398 | KV453307.1  | 34357  | 27-scf00532 | 27 |
| AX-157862039 | 27 | 62.398 | KV453307.1  | 38934  | 27-scf00532 | 27 |
| AX-158350927 | 27 | 62.507 | KV453307.1  | 40304  | 27-scf00532 | 27 |
| AX-157850952 | 27 | 62.507 | KV453307.1  | 40776  | 27-scf00532 | 27 |
| AX-158350929 | 27 | 62.507 | KV453307.1  | 41566  | 27-scf00532 | 27 |
| AX-157742689 | 27 | 62.507 | KV453307.1  | 44324  | 27-scf00532 | 27 |
| AX-157862040 | 27 | 62.507 | KV453307.1  | 51526  | 27-scf00532 | 27 |
| AX-158350933 | 27 | 62.507 | KV453307.1  | 55467  | 27-scf00532 | 27 |
| AX-158350935 | 27 | 62.507 | KV453307.1  | 63819  | 27-scf00532 | 27 |
| AX-158350938 | 27 | 62.507 | KV453307.1  | 67397  | 27-scf00532 | 27 |
| AX-158350943 | 27 | 62.507 | KV453307.1  | 79713  | 27-scf00532 | 27 |
| AX-158419416 | 27 | 62.507 | KV453307.1  | 84136  | 27-scf00532 | 27 |
| AX-157850954 | 27 | 62.507 | KV453307.1  | 85793  | 27-scf00532 | 27 |
| AX-158350952 | 27 | 62.507 | KV453307.1  | 97901  | 27-scf00532 | 27 |
| AX-157850956 | 27 | 62.511 | KV453307.1  | 97407  | 27-scf00532 | 27 |

|              |    |        |             |        |             |    |
|--------------|----|--------|-------------|--------|-------------|----|
| AX-157850958 | 27 | 62.518 | KV453307.1  | 97585  | 27-scf00532 | 27 |
| AX-157850959 | 27 | 62.521 | KV453307.1  | 99073  | 27-scf00532 | 27 |
| AX-157715824 | 27 | 62.583 | KV453307.1  | 100068 | 27-scf00532 | 27 |
| AX-158350953 | 27 | 62.599 | KV453307.1  | 100267 | 27-scf00532 | 27 |
| AX-158350814 | 27 | 62.633 | KV453303.1  | 75172  | 27-scf00530 | 27 |
| AX-158350817 | 27 | 62.633 | KV453303.1  | 78426  | 27-scf00530 | 27 |
| AX-158350841 | 27 | 62.633 | KV453303.1  | 118715 | 27-scf00530 | 27 |
| AX-158350846 | 27 | 62.633 | KV453303.1  | 130260 | 27-scf00530 | 27 |
| AX-158350859 | 27 | 62.633 | KV453303.1  | 157399 | 27-scf00530 | 27 |
| AX-157882394 | 27 | 62.633 | KV453303.1  | 189652 | 27-scf00530 | 27 |
| AX-158350926 | 27 | 62.633 | KV453307.1  | 38266  | 27-scf00532 | 27 |
| AX-157687614 | 27 | 62.633 | KV453564.1  | 1396   | scf00948    | UN |
| AX-157687616 | 27 | 62.633 | KV453564.1  | 2665   | scf00948    | UN |
| AX-157689805 | 27 | 62.633 | 3ML01032749 | 133    | scf08378_1  | UN |
| AX-157764180 | 27 | 63.092 | KV453307.1  | 108501 | 27-scf00532 | 27 |
| AX-158350959 | 27 | 63.096 | KV453307.1  | 109719 | 27-scf00532 | 27 |
| AX-158350963 | 27 | 63.798 | KV453307.1  | 131744 | 27-scf00532 | 27 |
| AX-158350965 | 27 | 63.798 | KV453307.1  | 133530 | 27-scf00532 | 27 |
| AX-157850961 | 27 | 63.816 | KV453307.1  | 136607 | 27-scf00532 | 27 |
| AX-157862043 | 27 | 63.816 | KV453307.1  | 137291 | 27-scf00532 | 27 |
| AX-158350972 | 27 | 63.816 | KV453307.1  | 146693 | 27-scf00532 | 27 |
| AX-158350990 | 27 | 63.816 | KV453307.1  | 177661 | 27-scf00532 | 27 |
| AX-158350992 | 27 | 63.816 | KV453307.1  | 179800 | 27-scf00532 | 27 |
| AX-158351020 | 27 | 63.816 | KV453307.1  | 233483 | 27-scf00532 | 27 |
| AX-158351056 | 27 | 63.816 | KV453307.1  | 291172 | 27-scf00532 | 27 |
| AX-157708019 | 27 | 63.816 | KV453307.1  | 295333 | 27-scf00532 | 27 |
| AX-158351066 | 27 | 63.816 | KV453307.1  | 303440 | 27-scf00532 | 27 |
| AX-157888946 | 27 | 63.816 | KV453307.1  | 318030 | 27-scf00532 | 27 |
| AX-157862046 | 27 | 63.816 | KV453307.1  | 349866 | 27-scf00532 | 27 |
| AX-158351101 | 27 | 63.816 | KV453307.1  | 370587 | 27-scf00532 | 27 |
| AX-158351143 | 27 | 63.816 | KV453307.1  | 428469 | 27-scf00532 | 27 |
| AX-158351155 | 27 | 63.816 | KV453307.1  | 450325 | 27-scf00532 | 27 |
| AX-158351180 | 27 | 63.816 | KV453307.1  | 486453 | 27-scf00532 | 27 |
| AX-158351193 | 27 | 63.816 | KV453307.1  | 502778 | 27-scf00532 | 27 |
| AX-157748969 | 27 | 63.816 | KV453307.1  | 511032 | 27-scf00532 | 27 |
| AX-158351202 | 27 | 63.816 | KV453307.1  | 511925 | 27-scf00532 | 27 |
| AX-157882409 | 27 | 63.816 | KV453307.1  | 589233 | 27-scf00532 | 27 |
| AX-158351256 | 27 | 63.816 | KV453307.1  | 594175 | 27-scf00532 | 27 |
| AX-157850993 | 27 | 63.816 | KV453307.1  | 595957 | 27-scf00532 | 27 |
| AX-158351261 | 27 | 63.816 | KV453307.1  | 598914 | 27-scf00532 | 27 |
| AX-158351288 | 27 | 63.816 | KV453307.1  | 625619 | 27-scf00532 | 27 |
| AX-158351397 | 27 | 63.816 | KV453307.1  | 837488 | 27-scf00532 | 27 |
| AX-158351406 | 27 | 63.816 | KV453307.1  | 862008 | 27-scf00532 | 27 |
| AX-158351575 | 27 | 63.816 | KV453311.1  | 214225 | 27-scf00534 | 27 |
| AX-158351602 | 27 | 63.816 | KV453311.1  | 267270 | 27-scf00534 | 27 |
| AX-158351717 | 27 | 63.816 | KV453311.1  | 419861 | 27-scf00534 | 27 |
| AX-158351792 | 27 | 63.816 | KV453311.1  | 513771 | 27-scf00534 | 27 |
| AX-157745472 | 27 | 63.845 | KV453307.1  | 137966 | 27-scf00532 | 27 |
| AX-158350968 | 27 | 63.929 | KV453307.1  | 140399 | 27-scf00532 | 27 |
| AX-158350970 | 27 | 63.948 | KV453307.1  | 143310 | 27-scf00532 | 27 |
| AX-157850964 | 27 | 64.109 | KV453307.1  | 147765 | 27-scf00532 | 27 |

|              |    |        |            |        |             |    |
|--------------|----|--------|------------|--------|-------------|----|
| AX-158350974 | 27 | 64.109 | KV453307.1 | 149187 | 27-scf00532 | 27 |
| AX-157757662 | 27 | 64.109 | KV453307.1 | 150622 | 27-scf00532 | 27 |
| AX-158350975 | 27 | 64.109 | KV453307.1 | 151361 | 27-scf00532 | 27 |
| AX-158350976 | 27 | 64.405 | KV453307.1 | 155326 | 27-scf00532 | 27 |
| AX-158350977 | 27 | 64.701 | KV453307.1 | 156745 | 27-scf00532 | 27 |
| AX-158350983 | 27 | 64.701 | KV453307.1 | 165953 | 27-scf00532 | 27 |
| AX-157850966 | 27 | 64.811 | KV453307.1 | 158386 | 27-scf00532 | 27 |
| AX-158350979 | 27 | 64.811 | KV453307.1 | 160244 | 27-scf00532 | 27 |
| AX-158350984 | 27 | 64.811 | KV453307.1 | 167876 | 27-scf00532 | 27 |
| AX-157708927 | 27 | 64.811 | KV453307.1 | 214010 | 27-scf00532 | 27 |
| AX-158413257 | 27 | 64.811 | KV453307.1 | 340403 | 27-scf00532 | 27 |
| AX-158350986 | 27 | 65.138 | KV453307.1 | 173671 | 27-scf00532 | 27 |
| AX-158350987 | 27 | 65.361 | KV453307.1 | 173880 | 27-scf00532 | 27 |
| AX-158350994 | 27 | 65.466 | KV453307.1 | 181057 | 27-scf00532 | 27 |
| AX-157725414 | 27 | 65.466 | KV453307.1 | 182238 | 27-scf00532 | 27 |
| AX-158350995 | 27 | 65.467 | KV453307.1 | 182719 | 27-scf00532 | 27 |
| AX-158350996 | 27 | 65.467 | KV453307.1 | 183349 | 27-scf00532 | 27 |
| AX-158350997 | 27 | 65.467 | KV453307.1 | 183768 | 27-scf00532 | 27 |
| AX-158350998 | 27 | 65.467 | KV453307.1 | 185760 | 27-scf00532 | 27 |
| AX-158351000 | 27 | 65.771 | KV453307.1 | 192105 | 27-scf00532 | 27 |
| AX-158351003 | 27 | 65.771 | KV453307.1 | 199464 | 27-scf00532 | 27 |
| AX-158351009 | 27 | 65.771 | KV453307.1 | 209589 | 27-scf00532 | 27 |
| AX-158351015 | 27 | 65.771 | KV453307.1 | 223987 | 27-scf00532 | 27 |
| AX-157888942 | 27 | 65.771 | KV453307.1 | 233233 | 27-scf00532 | 27 |
| AX-158351006 | 27 | 65.891 | KV453307.1 | 203310 | 27-scf00532 | 27 |
| AX-158351008 | 27 | 65.983 | KV453307.1 | 207926 | 27-scf00532 | 27 |
| AX-158351011 | 27 | 65.983 | KV453307.1 | 212880 | 27-scf00532 | 27 |
| AX-158351012 | 27 | 65.983 | KV453307.1 | 219150 | 27-scf00532 | 27 |
| AX-158351194 | 27 | 65.983 | KV453307.1 | 503139 | 27-scf00532 | 27 |
| AX-157714508 | 27 | 65.983 | KV453307.1 | 581706 | 27-scf00532 | 27 |
| AX-158351016 | 27 | 66.044 | KV453307.1 | 226120 | 27-scf00532 | 27 |
| AX-158351017 | 27 | 66.066 | KV453307.1 | 227543 | 27-scf00532 | 27 |
| AX-158351018 | 27 | 66.066 | KV453307.1 | 227987 | 27-scf00532 | 27 |
| AX-157741446 | 27 | 66.215 | KV453307.1 | 228836 | 27-scf00532 | 27 |
| AX-157774843 | 27 | 66.342 | KV453307.1 | 231069 | 27-scf00532 | 27 |
| AX-158351021 | 27 | 66.342 | KV453307.1 | 236462 | 27-scf00532 | 27 |
| AX-158351024 | 27 | 66.342 | KV453307.1 | 239437 | 27-scf00532 | 27 |
| AX-158351027 | 27 | 66.342 | KV453307.1 | 242364 | 27-scf00532 | 27 |
| AX-158351032 | 27 | 66.342 | KV453307.1 | 250012 | 27-scf00532 | 27 |
| AX-158351035 | 27 | 66.342 | KV453307.1 | 260886 | 27-scf00532 | 27 |
| AX-158351037 | 27 | 66.342 | KV453307.1 | 262272 | 27-scf00532 | 27 |
| AX-157714786 | 27 | 66.496 | KV453307.1 | 111524 | 27-scf00532 | 27 |
| AX-157772428 | 27 | 66.496 | KV453307.1 | 264901 | 27-scf00532 | 27 |
| AX-158351039 | 27 | 66.496 | KV453307.1 | 265303 | 27-scf00532 | 27 |
| AX-158351041 | 27 | 66.496 | KV453307.1 | 266724 | 27-scf00532 | 27 |
| AX-158351043 | 27 | 66.496 | KV453307.1 | 267460 | 27-scf00532 | 27 |
| AX-158351137 | 27 | 66.496 | KV453307.1 | 421202 | 27-scf00532 | 27 |
| AX-158351228 | 27 | 66.496 | KV453307.1 | 553980 | 27-scf00532 | 27 |
| AX-157744381 | 27 | 66.496 | KV453307.1 | 620729 | 27-scf00532 | 27 |
| AX-158351001 | 27 | 66.5   | KV453307.1 | 195042 | 27-scf00532 | 27 |
| AX-158351044 | 27 | 66.5   | KV453307.1 | 272381 | 27-scf00532 | 27 |

|              |    |        |            |        |             |    |
|--------------|----|--------|------------|--------|-------------|----|
| AX-158351053 | 27 | 66.957 | KV453307.1 | 286995 | 27-scf00532 | 27 |
| AX-158351058 | 27 | 67.104 | KV453307.1 | 296476 | 27-scf00532 | 27 |
| AX-158351061 | 27 | 67.104 | KV453307.1 | 299190 | 27-scf00532 | 27 |
| AX-158351062 | 27 | 67.105 | KV453307.1 | 300166 | 27-scf00532 | 27 |
| AX-158351088 | 27 | 67.105 | KV453307.1 | 332010 | 27-scf00532 | 27 |
| AX-158351068 | 27 | 67.107 | KV453307.1 | 304513 | 27-scf00532 | 27 |
| AX-158351072 | 27 | 67.108 | KV453307.1 | 309422 | 27-scf00532 | 27 |
| AX-158351073 | 27 | 67.108 | KV453307.1 | 311576 | 27-scf00532 | 27 |
| AX-158351074 | 27 | 67.108 | KV453307.1 | 312358 | 27-scf00532 | 27 |
| AX-158351075 | 27 | 67.108 | KV453307.1 | 312965 | 27-scf00532 | 27 |
| AX-158351080 | 27 | 67.314 | KV453307.1 | 319441 | 27-scf00532 | 27 |
| AX-158351083 | 27 | 67.436 | KV453307.1 | 324379 | 27-scf00532 | 27 |
| AX-158351084 | 27 | 67.436 | KV453307.1 | 325087 | 27-scf00532 | 27 |
| AX-157726156 | 27 | 67.436 | KV453307.1 | 326006 | 27-scf00532 | 27 |
| AX-158351086 | 27 | 67.436 | KV453307.1 | 326750 | 27-scf00532 | 27 |
| AX-158351090 | 27 | 67.436 | KV453307.1 | 336811 | 27-scf00532 | 27 |
| AX-158351092 | 27 | 67.436 | KV453307.1 | 344476 | 27-scf00532 | 27 |
| AX-158413263 | 27 | 67.436 | KV453307.1 | 566430 | 27-scf00532 | 27 |
| AX-158419419 | 27 | 67.478 | KV453307.1 | 337172 | 27-scf00532 | 27 |
| AX-158419420 | 27 | 67.562 | KV453307.1 | 338222 | 27-scf00532 | 27 |
| AX-158351096 | 27 | 67.656 | KV453307.1 | 351528 | 27-scf00532 | 27 |
| AX-158351103 | 27 | 67.765 | KV453307.1 | 373726 | 27-scf00532 | 27 |
| AX-158351105 | 27 | 67.765 | KV453307.1 | 378121 | 27-scf00532 | 27 |
| AX-158351106 | 27 | 67.765 | KV453307.1 | 379812 | 27-scf00532 | 27 |
| AX-158381672 | 27 | 67.765 | KV453307.1 | 381020 | 27-scf00532 | 27 |
| AX-158351108 | 27 | 67.765 | KV453307.1 | 382992 | 27-scf00532 | 27 |
| AX-158351111 | 27 | 67.765 | KV453307.1 | 386013 | 27-scf00532 | 27 |
| AX-158351113 | 27 | 67.765 | KV453307.1 | 387503 | 27-scf00532 | 27 |
| AX-158351114 | 27 | 67.765 | KV453307.1 | 387892 | 27-scf00532 | 27 |
| AX-158351115 | 27 | 67.765 | KV453307.1 | 388284 | 27-scf00532 | 27 |
| AX-158351117 | 27 | 67.765 | KV453307.1 | 390021 | 27-scf00532 | 27 |
| AX-158351118 | 27 | 67.765 | KV453307.1 | 390679 | 27-scf00532 | 27 |
| AX-158351122 | 27 | 67.765 | KV453307.1 | 394658 | 27-scf00532 | 27 |
| AX-158351133 | 27 | 67.765 | KV453307.1 | 414570 | 27-scf00532 | 27 |
| AX-157716973 | 27 | 67.765 | KV453307.1 | 415611 | 27-scf00532 | 27 |
| AX-157850987 | 27 | 67.765 | KV453307.1 | 529427 | 27-scf00532 | 27 |
| AX-158351135 | 27 | 67.841 | KV453307.1 | 420260 | 27-scf00532 | 27 |
| AX-158351136 | 27 | 67.895 | KV453307.1 | 420767 | 27-scf00532 | 27 |
| AX-158351147 | 27 | 67.975 | KV453307.1 | 435379 | 27-scf00532 | 27 |
| AX-158351151 | 27 | 68.054 | KV453307.1 | 441718 | 27-scf00532 | 27 |
| AX-157774884 | 27 | 68.054 | KV453307.1 | 446351 | 27-scf00532 | 27 |
| AX-157850980 | 27 | 68.343 | KV453307.1 | 453576 | 27-scf00532 | 27 |
| AX-158351160 | 27 | 68.343 | KV453307.1 | 457538 | 27-scf00532 | 27 |
| AX-157850981 | 27 | 68.343 | KV453307.1 | 465123 | 27-scf00532 | 27 |
| AX-158351164 | 27 | 68.343 | KV453307.1 | 466247 | 27-scf00532 | 27 |
| AX-158351165 | 27 | 68.343 | KV453307.1 | 469432 | 27-scf00532 | 27 |
| AX-158351166 | 27 | 68.343 | KV453307.1 | 469840 | 27-scf00532 | 27 |
| AX-157850982 | 27 | 68.343 | KV453307.1 | 471840 | 27-scf00532 | 27 |
| AX-158351176 | 27 | 68.343 | KV453307.1 | 481304 | 27-scf00532 | 27 |
| AX-158351179 | 27 | 68.343 | KV453307.1 | 486025 | 27-scf00532 | 27 |
| AX-158351203 | 27 | 68.343 | KV453307.1 | 515023 | 27-scf00532 | 27 |



|              |    |        |             |          |             |    |
|--------------|----|--------|-------------|----------|-------------|----|
| AX-158351247 | 27 | 68.343 | KV453307.1  | 585067   | 27-scf00532 | 27 |
| AX-158351163 | 27 | 68.346 | KV453307.1  | 465619   | 27-scf00532 | 27 |
| AX-158351175 | 27 | 68.346 | KV453307.1  | 480691   | 27-scf00532 | 27 |
| AX-158351177 | 27 | 68.346 | KV453307.1  | 481638   | 27-scf00532 | 27 |
| AX-158351181 | 27 | 68.493 | KV453307.1  | 486963   | 27-scf00532 | 27 |
| AX-158351184 | 27 | 68.528 | KV453307.1  | 491234   | 27-scf00532 | 27 |
| AX-158351188 | 27 | 68.528 | KV453307.1  | 494191   | 27-scf00532 | 27 |
| AX-157850984 | 27 | 69.025 | KV453307.1  | 495077   | 27-scf00532 | 27 |
| AX-158351189 | 27 | 69.025 | KV453307.1  | 496682   | 27-scf00532 | 27 |
| AX-157720793 | 27 | 69.039 | KV453307.1  | 496323   | 27-scf00532 | 27 |
| AX-158351190 | 27 | 69.039 | KV453307.1  | 497293   | 27-scf00532 | 27 |
| AX-158351208 | 27 | 69.039 | KV453307.1  | 522250   | 27-scf00532 | 27 |
| AX-157713438 | 27 | 69.039 | KV453307.1  | 587353   | 27-scf00532 | 27 |
| AX-158351199 | 27 | 69.044 | KV453307.1  | 506280   | 27-scf00532 | 27 |
| AX-157714739 | 27 | 69.057 | KV453307.1  | 514684   | 27-scf00532 | 27 |
| AX-157706977 | 27 | 69.057 | 3ML01033878 | 292      | scf09547_1  | UN |
| AX-158351205 | 27 | 69.092 | KV453307.1  | 517238   | 27-scf00532 | 27 |
| AX-158419424 | 27 | 69.131 | KV453307.1  | 526855   | 27-scf00532 | 27 |
| AX-158419427 | 27 | 69.171 | KV453307.1  | 527534   | 27-scf00532 | 27 |
| AX-158351240 | 27 | 69.218 | KV453307.1  | 574738   | 27-scf00532 | 27 |
| AX-157687618 | 27 | 69.223 | KV453564.1  | 7055     | scf00948    | UN |
| AX-158351248 | 27 | 69.446 | KV453307.1  | 587810   | 27-scf00532 | 27 |
| AX-158351253 | 27 | 69.446 | KV453307.1  | 592117   | 27-scf00532 | 27 |
| AX-158351280 | 27 | 69.446 | KV453307.1  | 614696   | 27-scf00532 | 27 |
| AX-158351255 | 27 | 69.584 | KV453307.1  | 593665   | 27-scf00532 | 27 |
| AX-157873886 | 27 | 69.686 | KV453307.1  | 601348   | 27-scf00532 | 27 |
| AX-158351264 | 27 | 69.686 | KV453307.1  | 604433   | 27-scf00532 | 27 |
| AX-158351271 | 27 | 69.932 | KV453307.1  | 610854   | 27-scf00532 | 27 |
| AX-158351272 | 27 | 69.932 | KV453307.1  | 611164   | 27-scf00532 | 27 |
| AX-158351284 | 27 | 69.933 | KV453307.1  | 619045   | 27-scf00532 | 27 |
| AX-157745877 | 27 | 69.933 | KV453307.1  | 620191   | 27-scf00532 | 27 |
| AX-157850996 | 27 | 69.987 | KV453307.1  | 627621   | 27-scf00532 | 27 |
| AX-157850997 | 27 | 70.011 | KV453307.1  | 629628   | 27-scf00532 | 27 |
| AX-157873887 | 27 | 70.106 | KV453307.1  | 644239   | 27-scf00532 | 27 |
| AX-158351301 | 27 | 70.106 | KV453307.1  | 647869   | 27-scf00532 | 27 |
| AX-158351302 | 27 | 70.851 | KV453307.1  | 649071   | 27-scf00532 | 27 |
| AX-158349793 | 27 | 70.942 | KV453299.1  | 11976554 | 27-scf00525 | 27 |
| AX-157742313 | 27 | 70.942 | KV453307.1  | 666168   | 27-scf00532 | 27 |
| AX-158351310 | 27 | 70.944 | KV453307.1  | 665844   | 27-scf00532 | 27 |
| AX-158351314 | 27 | 70.944 | KV453307.1  | 672892   | 27-scf00532 | 27 |
| AX-157851003 | 27 | 70.944 | KV453307.1  | 673455   | 27-scf00532 | 27 |
| AX-158351318 | 27 | 70.944 | KV453307.1  | 676481   | 27-scf00532 | 27 |
| AX-158351319 | 27 | 70.944 | KV453307.1  | 677464   | 27-scf00532 | 27 |
| AX-157862049 | 27 | 70.951 | KV453307.1  | 684699   | 27-scf00532 | 27 |
| AX-158351330 | 27 | 71.419 | KV453307.1  | 693511   | 27-scf00532 | 27 |
| AX-157851009 | 27 | 71.527 | KV453307.1  | 695158   | 27-scf00532 | 27 |
| AX-158350208 | 27 | 71.645 | KV453299.1  | 12697091 | 27-scf00525 | 27 |
| AX-157684753 | 27 | 71.645 | KV453301.1  | 15617    | 27-scf00529 | 27 |
| AX-158350788 | 27 | 71.645 | KV453303.1  | 30309    | 27-scf00530 | 27 |
| AX-158350921 | 27 | 71.645 | KV453307.1  | 32153    | 27-scf00532 | 27 |
| AX-158350955 | 27 | 71.645 | KV453307.1  | 105028   | 27-scf00532 | 27 |

|              |    |        |            |         |             |    |
|--------------|----|--------|------------|---------|-------------|----|
| AX-158351134 | 27 | 71.645 | KV453307.1 | 415767  | 27-scf00532 | 27 |
| AX-158351161 | 27 | 71.645 | KV453307.1 | 459004  | 27-scf00532 | 27 |
| AX-158351172 | 27 | 71.645 | KV453307.1 | 476963  | 27-scf00532 | 27 |
| AX-158351331 | 27 | 71.645 | KV453307.1 | 696386  | 27-scf00532 | 27 |
| AX-157720294 | 27 | 71.645 | KV453307.1 | 700212  | 27-scf00532 | 27 |
| AX-158351335 | 27 | 71.645 | KV453307.1 | 701861  | 27-scf00532 | 27 |
| AX-158351336 | 27 | 71.645 | KV453307.1 | 703876  | 27-scf00532 | 27 |
| AX-158351342 | 27 | 71.645 | KV453307.1 | 714558  | 27-scf00532 | 27 |
| AX-158351343 | 27 | 71.645 | KV453307.1 | 716755  | 27-scf00532 | 27 |
| AX-157756264 | 27 | 71.645 | KV453307.1 | 720214  | 27-scf00532 | 27 |
| AX-158351347 | 27 | 71.645 | KV453307.1 | 721439  | 27-scf00532 | 27 |
| AX-158351365 | 27 | 71.645 | KV453307.1 | 754024  | 27-scf00532 | 27 |
| AX-158351383 | 27 | 71.645 | KV453307.1 | 799496  | 27-scf00532 | 27 |
| AX-158351384 | 27 | 71.645 | KV453307.1 | 802456  | 27-scf00532 | 27 |
| AX-157680226 | 27 | 71.645 | KV453309.1 | 6296    | 27-scf00533 | 27 |
| AX-157684789 | 27 | 71.645 | KV453309.1 | 50336   | 27-scf00533 | 27 |
| AX-158419432 | 27 | 71.645 | KV453309.1 | 93414   | 27-scf00533 | 27 |
| AX-157740316 | 27 | 71.645 | KV453311.1 | 198580  | 27-scf00534 | 27 |
| AX-158351586 | 27 | 71.645 | KV453311.1 | 232702  | 27-scf00534 | 27 |
| AX-158351592 | 27 | 71.645 | KV453311.1 | 255227  | 27-scf00534 | 27 |
| AX-157710780 | 27 | 71.645 | KV453311.1 | 260777  | 27-scf00534 | 27 |
| AX-157758379 | 27 | 71.645 | KV453311.1 | 266748  | 27-scf00534 | 27 |
| AX-158351606 | 27 | 71.645 | KV453311.1 | 272444  | 27-scf00534 | 27 |
| AX-158351735 | 27 | 71.645 | KV453311.1 | 444999  | 27-scf00534 | 27 |
| AX-158351753 | 27 | 71.645 | KV453311.1 | 473552  | 27-scf00534 | 27 |
| AX-158351757 | 27 | 71.645 | KV453311.1 | 480163  | 27-scf00534 | 27 |
| AX-158351758 | 27 | 71.645 | KV453311.1 | 481958  | 27-scf00534 | 27 |
| AX-158351776 | 27 | 71.645 | KV453311.1 | 495154  | 27-scf00534 | 27 |
| AX-158351782 | 27 | 71.645 | KV453311.1 | 501389  | 27-scf00534 | 27 |
| AX-158351797 | 27 | 71.645 | KV453311.1 | 518854  | 27-scf00534 | 27 |
| AX-158351798 | 27 | 71.645 | KV453311.1 | 518948  | 27-scf00534 | 27 |
| AX-158351809 | 27 | 71.645 | KV453311.1 | 536381  | 27-scf00534 | 27 |
| AX-158352296 | 27 | 71.645 | KV453311.1 | 1377267 | 27-scf00534 | 27 |
| AX-158351364 | 27 | 71.87  | KV453307.1 | 752401  | 27-scf00532 | 27 |
| AX-158351367 | 27 | 71.87  | KV453307.1 | 756114  | 27-scf00532 | 27 |
| AX-158351370 | 27 | 71.87  | KV453307.1 | 761883  | 27-scf00532 | 27 |
| AX-157774487 | 27 | 71.87  | KV453307.1 | 779273  | 27-scf00532 | 27 |
| AX-158351408 | 27 | 71.87  | KV453307.1 | 877934  | 27-scf00532 | 27 |
| AX-157684782 | 27 | 71.87  | KV453309.1 | 39507   | 27-scf00533 | 27 |
| AX-157718144 | 27 | 71.87  | KV453311.1 | 111756  | 27-scf00534 | 27 |
| AX-157851033 | 27 | 71.87  | KV453311.1 | 240723  | 27-scf00534 | 27 |
| AX-157720453 | 27 | 71.87  | KV453311.1 | 291489  | 27-scf00534 | 27 |
| AX-157773997 | 27 | 71.98  | KV453307.1 | 800209  | 27-scf00532 | 27 |
| AX-158351385 | 27 | 72.095 | KV453307.1 | 804753  | 27-scf00532 | 27 |
| AX-157720108 | 27 | 72.095 | KV453307.1 | 821716  | 27-scf00532 | 27 |
| AX-158351391 | 27 | 72.095 | KV453307.1 | 824541  | 27-scf00532 | 27 |
| AX-158351393 | 27 | 72.095 | KV453307.1 | 825551  | 27-scf00532 | 27 |
| AX-158351338 | 27 | 72.862 | KV453307.1 | 706718  | 27-scf00532 | 27 |
| AX-158351348 | 27 | 72.862 | KV453307.1 | 722810  | 27-scf00532 | 27 |
| AX-158351350 | 27 | 72.862 | KV453307.1 | 730080  | 27-scf00532 | 27 |
| AX-158351356 | 27 | 72.862 | KV453307.1 | 739463  | 27-scf00532 | 27 |

|              |    |        |            |         |             |    |
|--------------|----|--------|------------|---------|-------------|----|
| AX-158351360 | 27 | 72.862 | KV453307.1 | 744310  | 27-scf00532 | 27 |
| AX-158351374 | 27 | 72.862 | KV453307.1 | 773172  | 27-scf00532 | 27 |
| AX-157756055 | 27 | 72.862 | KV453307.1 | 884315  | 27-scf00532 | 27 |
| AX-158351413 | 27 | 72.862 | KV453307.1 | 891129  | 27-scf00532 | 27 |
| AX-158351537 | 27 | 72.862 | KV453311.1 | 167980  | 27-scf00534 | 27 |
| AX-158351539 | 27 | 72.862 | KV453311.1 | 169185  | 27-scf00534 | 27 |
| AX-158351559 | 27 | 72.862 | KV453311.1 | 196803  | 27-scf00534 | 27 |
| AX-157851032 | 27 | 72.862 | KV453311.1 | 233730  | 27-scf00534 | 27 |
| AX-158351587 | 27 | 72.862 | KV453311.1 | 236548  | 27-scf00534 | 27 |
| AX-158351590 | 27 | 72.862 | KV453311.1 | 247905  | 27-scf00534 | 27 |
| AX-158351593 | 27 | 72.862 | KV453311.1 | 256056  | 27-scf00534 | 27 |
| AX-158351599 | 27 | 72.862 | KV453311.1 | 266229  | 27-scf00534 | 27 |
| AX-158351600 | 27 | 72.862 | KV453311.1 | 266515  | 27-scf00534 | 27 |
| AX-158351607 | 27 | 72.862 | KV453311.1 | 273895  | 27-scf00534 | 27 |
| AX-158351608 | 27 | 72.862 | KV453311.1 | 274114  | 27-scf00534 | 27 |
| AX-158351624 | 27 | 72.862 | KV453311.1 | 299279  | 27-scf00534 | 27 |
| AX-158351643 | 27 | 72.862 | KV453311.1 | 329846  | 27-scf00534 | 27 |
| AX-158351645 | 27 | 72.862 | KV453311.1 | 331410  | 27-scf00534 | 27 |
| AX-158351655 | 27 | 72.862 | KV453311.1 | 345377  | 27-scf00534 | 27 |
| AX-158351657 | 27 | 72.862 | KV453311.1 | 349275  | 27-scf00534 | 27 |
| AX-158351660 | 27 | 72.862 | KV453311.1 | 355715  | 27-scf00534 | 27 |
| AX-158351665 | 27 | 72.862 | KV453311.1 | 363829  | 27-scf00534 | 27 |
| AX-158351666 | 27 | 72.862 | KV453311.1 | 364544  | 27-scf00534 | 27 |
| AX-158351687 | 27 | 72.862 | KV453311.1 | 391751  | 27-scf00534 | 27 |
| AX-158351690 | 27 | 72.862 | KV453311.1 | 395035  | 27-scf00534 | 27 |
| AX-158351696 | 27 | 72.862 | KV453311.1 | 399734  | 27-scf00534 | 27 |
| AX-158351751 | 27 | 72.862 | KV453311.1 | 469447  | 27-scf00534 | 27 |
| AX-157755319 | 27 | 72.862 | KV453311.1 | 500326  | 27-scf00534 | 27 |
| AX-157873895 | 27 | 72.862 | KV453311.1 | 857652  | 27-scf00534 | 27 |
| AX-158352069 | 27 | 72.862 | KV453311.1 | 961354  | 27-scf00534 | 27 |
| AX-158352173 | 27 | 72.862 | KV453311.1 | 1150642 | 27-scf00534 | 27 |
| AX-158352177 | 27 | 72.862 | KV453311.1 | 1158714 | 27-scf00534 | 27 |
| AX-158419470 | 27 | 72.862 | KV453311.1 | 1195090 | 27-scf00534 | 27 |
| AX-158352244 | 27 | 72.862 | KV453311.1 | 1278386 | 27-scf00534 | 27 |
| AX-157687115 | 27 | 72.862 | KV453310.1 | 11136   | 27-scf00796 | 27 |
| AX-157684793 | 27 | 72.868 | KV453309.1 | 57482   | 27-scf00533 | 27 |
| AX-158419442 | 27 | 72.916 | KV453311.1 | 760790  | 27-scf00534 | 27 |
| AX-157687111 | 27 | 72.916 | KV453310.1 | 4660    | 27-scf00796 | 27 |
| AX-157687117 | 27 | 72.916 | KV453310.1 | 18363   | 27-scf00796 | 27 |
| AX-157851019 | 27 | 72.959 | KV453311.1 | 6329    | 27-scf00534 | 27 |
| AX-157851021 | 27 | 72.959 | KV453311.1 | 8425    | 27-scf00534 | 27 |
| AX-158351620 | 27 | 72.959 | KV453311.1 | 295538  | 27-scf00534 | 27 |
| AX-158352416 | 27 | 72.959 | KV453311.1 | 1600905 | 27-scf00534 | 27 |
| AX-158351467 | 27 | 72.998 | KV453311.1 | 93276   | 27-scf00534 | 27 |
| AX-157851023 | 27 | 72.998 | KV453311.1 | 95646   | 27-scf00534 | 27 |
| AX-158351487 | 27 | 72.998 | KV453311.1 | 109580  | 27-scf00534 | 27 |
| AX-158381677 | 27 | 72.998 | KV453311.1 | 109626  | 27-scf00534 | 27 |
| AX-158351490 | 27 | 72.998 | KV453311.1 | 111279  | 27-scf00534 | 27 |
| AX-158351511 | 27 | 72.998 | KV453311.1 | 133435  | 27-scf00534 | 27 |
| AX-158351518 | 27 | 72.998 | KV453311.1 | 143700  | 27-scf00534 | 27 |
| AX-158351520 | 27 | 72.998 | KV453311.1 | 144888  | 27-scf00534 | 27 |

|              |    |        |            |         |             |    |
|--------------|----|--------|------------|---------|-------------|----|
| AX-158351524 | 27 | 72.998 | KV453311.1 | 147815  | 27-scf00534 | 27 |
| AX-157747722 | 27 | 72.998 | KV453311.1 | 176137  | 27-scf00534 | 27 |
| AX-158351548 | 27 | 72.998 | KV453311.1 | 178363  | 27-scf00534 | 27 |
| AX-158351551 | 27 | 72.998 | KV453311.1 | 180713  | 27-scf00534 | 27 |
| AX-157851027 | 27 | 72.998 | KV453311.1 | 181612  | 27-scf00534 | 27 |
| AX-158351552 | 27 | 72.998 | KV453311.1 | 181933  | 27-scf00534 | 27 |
| AX-158351555 | 27 | 72.998 | KV453311.1 | 189293  | 27-scf00534 | 27 |
| AX-157882423 | 27 | 72.998 | KV453311.1 | 195725  | 27-scf00534 | 27 |
| AX-158351561 | 27 | 72.998 | KV453311.1 | 199262  | 27-scf00534 | 27 |
| AX-158351563 | 27 | 72.998 | KV453311.1 | 200233  | 27-scf00534 | 27 |
| AX-158351565 | 27 | 72.998 | KV453311.1 | 201226  | 27-scf00534 | 27 |
| AX-158351566 | 27 | 72.998 | KV453311.1 | 201948  | 27-scf00534 | 27 |
| AX-158351567 | 27 | 72.998 | KV453311.1 | 203818  | 27-scf00534 | 27 |
| AX-158351581 | 27 | 72.998 | KV453311.1 | 224610  | 27-scf00534 | 27 |
| AX-158351582 | 27 | 72.998 | KV453311.1 | 227189  | 27-scf00534 | 27 |
| AX-158419436 | 27 | 72.998 | KV453311.1 | 228131  | 27-scf00534 | 27 |
| AX-158351584 | 27 | 72.998 | KV453311.1 | 230570  | 27-scf00534 | 27 |
| AX-158351585 | 27 | 72.998 | KV453311.1 | 231047  | 27-scf00534 | 27 |
| AX-157851034 | 27 | 72.998 | KV453311.1 | 247168  | 27-scf00534 | 27 |
| AX-158351601 | 27 | 72.998 | KV453311.1 | 266997  | 27-scf00534 | 27 |
| AX-158351613 | 27 | 72.998 | KV453311.1 | 280465  | 27-scf00534 | 27 |
| AX-158351618 | 27 | 72.998 | KV453311.1 | 293993  | 27-scf00534 | 27 |
| AX-158351625 | 27 | 72.998 | KV453311.1 | 299871  | 27-scf00534 | 27 |
| AX-158351627 | 27 | 72.998 | KV453311.1 | 301941  | 27-scf00534 | 27 |
| AX-158351629 | 27 | 72.998 | KV453311.1 | 305449  | 27-scf00534 | 27 |
| AX-158351631 | 27 | 72.998 | KV453311.1 | 308148  | 27-scf00534 | 27 |
| AX-158351632 | 27 | 72.998 | KV453311.1 | 308576  | 27-scf00534 | 27 |
| AX-158351637 | 27 | 72.998 | KV453311.1 | 311701  | 27-scf00534 | 27 |
| AX-158351651 | 27 | 72.998 | KV453311.1 | 341587  | 27-scf00534 | 27 |
| AX-158351652 | 27 | 72.998 | KV453311.1 | 343190  | 27-scf00534 | 27 |
| AX-157725229 | 27 | 72.998 | KV453311.1 | 345780  | 27-scf00534 | 27 |
| AX-158351677 | 27 | 72.998 | KV453311.1 | 376450  | 27-scf00534 | 27 |
| AX-157749783 | 27 | 72.998 | KV453311.1 | 379234  | 27-scf00534 | 27 |
| AX-158351885 | 27 | 72.998 | KV453311.1 | 655456  | 27-scf00534 | 27 |
| AX-158351949 | 27 | 72.998 | KV453311.1 | 738739  | 27-scf00534 | 27 |
| AX-158419447 | 27 | 72.998 | KV453311.1 | 821775  | 27-scf00534 | 27 |
| AX-158352041 | 27 | 72.998 | KV453311.1 | 908727  | 27-scf00534 | 27 |
| AX-158352265 | 27 | 72.998 | KV453311.1 | 1292970 | 27-scf00534 | 27 |
| AX-158352371 | 27 | 72.998 | KV453311.1 | 1538676 | 27-scf00534 | 27 |
| AX-158352429 | 27 | 72.998 | KV453311.1 | 1620874 | 27-scf00534 | 27 |
| AX-158351648 | 27 | 73.223 | KV453311.1 | 336599  | 27-scf00534 | 27 |
| AX-158351680 | 27 | 73.223 | KV453311.1 | 384673  | 27-scf00534 | 27 |
| AX-158351682 | 27 | 73.223 | KV453311.1 | 385440  | 27-scf00534 | 27 |
| AX-157713609 | 27 | 73.223 | KV453311.1 | 387796  | 27-scf00534 | 27 |
| AX-158351685 | 27 | 73.223 | KV453311.1 | 388196  | 27-scf00534 | 27 |
| AX-157756988 | 27 | 73.223 | KV453311.1 | 390515  | 27-scf00534 | 27 |
| AX-158351691 | 27 | 73.223 | KV453311.1 | 396223  | 27-scf00534 | 27 |
| AX-158351700 | 27 | 73.223 | KV453311.1 | 405153  | 27-scf00534 | 27 |
| AX-158351709 | 27 | 73.223 | KV453311.1 | 410817  | 27-scf00534 | 27 |
| AX-158351710 | 27 | 73.223 | KV453311.1 | 411303  | 27-scf00534 | 27 |
| AX-158351722 | 27 | 73.223 | KV453311.1 | 428385  | 27-scf00534 | 27 |

|              |    |        |             |        |             |    |
|--------------|----|--------|-------------|--------|-------------|----|
| AX-158351723 | 27 | 73.223 | KV453311.1  | 428706 | 27-scf00534 | 27 |
| AX-158351727 | 27 | 73.223 | KV453311.1  | 433334 | 27-scf00534 | 27 |
| AX-158381679 | 27 | 73.223 | KV453311.1  | 440517 | 27-scf00534 | 27 |
| AX-158351733 | 27 | 73.223 | KV453311.1  | 442970 | 27-scf00534 | 27 |
| AX-158351738 | 27 | 73.223 | KV453311.1  | 449274 | 27-scf00534 | 27 |
| AX-158351739 | 27 | 73.223 | KV453311.1  | 451509 | 27-scf00534 | 27 |
| AX-157862052 | 27 | 73.223 | KV453311.1  | 480666 | 27-scf00534 | 27 |
| AX-158351760 | 27 | 73.223 | KV453311.1  | 483345 | 27-scf00534 | 27 |
| AX-158351762 | 27 | 73.223 | KV453311.1  | 484528 | 27-scf00534 | 27 |
| AX-158351766 | 27 | 73.223 | KV453311.1  | 486366 | 27-scf00534 | 27 |
| AX-158351772 | 27 | 73.223 | KV453311.1  | 491131 | 27-scf00534 | 27 |
| AX-157688682 | 27 | 73.223 | 3ML01026744 | 584    | scf02344_1  | UN |
| AX-158351317 | 27 | 73.224 | KV453307.1  | 675553 | 27-scf00532 | 27 |
| AX-158351322 | 27 | 73.224 | KV453307.1  | 680228 | 27-scf00532 | 27 |
| AX-158351740 | 27 | 73.224 | KV453311.1  | 452082 | 27-scf00534 | 27 |
| AX-158351747 | 27 | 73.227 | KV453311.1  | 463491 | 27-scf00534 | 27 |
| AX-157684801 | 27 | 73.232 | KV453309.1  | 96931  | 27-scf00533 | 27 |
| AX-158351692 | 27 | 73.232 | KV453311.1  | 397107 | 27-scf00534 | 27 |
| AX-158351729 | 27 | 73.232 | KV453311.1  | 435645 | 27-scf00534 | 27 |
| AX-158351730 | 27 | 73.232 | KV453311.1  | 436413 | 27-scf00534 | 27 |
| AX-157750499 | 27 | 73.232 | KV453311.1  | 464268 | 27-scf00534 | 27 |
| AX-158351759 | 27 | 73.236 | KV453311.1  | 482309 | 27-scf00534 | 27 |
| AX-158351761 | 27 | 73.818 | KV453311.1  | 483752 | 27-scf00534 | 27 |
| AX-157851042 | 27 | 73.818 | KV453311.1  | 526825 | 27-scf00534 | 27 |
| AX-158419446 | 27 | 73.818 | KV453311.1  | 820005 | 27-scf00534 | 27 |
| AX-158351777 | 27 | 73.863 | KV453311.1  | 495676 | 27-scf00534 | 27 |
| AX-158351781 | 27 | 73.914 | KV453311.1  | 498634 | 27-scf00534 | 27 |
| AX-158351783 | 27 | 73.914 | KV453311.1  | 501837 | 27-scf00534 | 27 |
| AX-158351788 | 27 | 73.914 | KV453311.1  | 510037 | 27-scf00534 | 27 |
| AX-157725070 | 27 | 73.914 | KV453311.1  | 511254 | 27-scf00534 | 27 |
| AX-158351794 | 27 | 73.914 | KV453311.1  | 515249 | 27-scf00534 | 27 |
| AX-158351800 | 27 | 74.144 | KV453311.1  | 522207 | 27-scf00534 | 27 |
| AX-158351801 | 27 | 74.144 | KV453311.1  | 522946 | 27-scf00534 | 27 |
| AX-158351803 | 27 | 74.144 | KV453311.1  | 525614 | 27-scf00534 | 27 |
| AX-158351804 | 27 | 74.144 | KV453311.1  | 525833 | 27-scf00534 | 27 |
| AX-157851043 | 27 | 74.144 | KV453311.1  | 527644 | 27-scf00534 | 27 |
| AX-158351807 | 27 | 74.144 | KV453311.1  | 528459 | 27-scf00534 | 27 |
| AX-158351815 | 27 | 74.374 | KV453311.1  | 542613 | 27-scf00534 | 27 |
| AX-158351817 | 27 | 74.374 | KV453311.1  | 544786 | 27-scf00534 | 27 |
| AX-158351819 | 27 | 74.374 | KV453311.1  | 546565 | 27-scf00534 | 27 |
| AX-157733098 | 27 | 74.418 | KV453311.1  | 526771 | 27-scf00534 | 27 |
| AX-157718221 | 27 | 74.418 | KV453311.1  | 531836 | 27-scf00534 | 27 |
| AX-158351808 | 27 | 74.418 | KV453311.1  | 533423 | 27-scf00534 | 27 |
| AX-158351812 | 27 | 74.418 | KV453311.1  | 540450 | 27-scf00534 | 27 |
| AX-158351820 | 27 | 74.418 | KV453311.1  | 549825 | 27-scf00534 | 27 |
| AX-158351822 | 27 | 74.604 | KV453311.1  | 553212 | 27-scf00534 | 27 |
| AX-157713654 | 27 | 74.604 | KV453311.1  | 563559 | 27-scf00534 | 27 |
| AX-158351818 | 27 | 74.723 | KV453311.1  | 545692 | 27-scf00534 | 27 |
| AX-157740001 | 27 | 74.723 | KV453311.1  | 555398 | 27-scf00534 | 27 |
| AX-157851044 | 27 | 74.723 | KV453311.1  | 563518 | 27-scf00534 | 27 |
| AX-158351828 | 27 | 74.723 | KV453311.1  | 566323 | 27-scf00534 | 27 |

|              |    |        |            |         |             |    |
|--------------|----|--------|------------|---------|-------------|----|
| AX-158351836 | 27 | 74.723 | KV453311.1 | 579058  | 27-scf00534 | 27 |
| AX-158381680 | 27 | 74.723 | KV453311.1 | 581765  | 27-scf00534 | 27 |
| AX-157716130 | 27 | 74.723 | KV453311.1 | 600023  | 27-scf00534 | 27 |
| AX-158351837 | 27 | 74.834 | KV453311.1 | 581492  | 27-scf00534 | 27 |
| AX-157713443 | 27 | 74.834 | KV453311.1 | 582595  | 27-scf00534 | 27 |
| AX-157755438 | 27 | 74.834 | KV453311.1 | 594861  | 27-scf00534 | 27 |
| AX-158351854 | 27 | 74.834 | KV453311.1 | 601197  | 27-scf00534 | 27 |
| AX-158351912 | 27 | 74.834 | KV453311.1 | 691347  | 27-scf00534 | 27 |
| AX-157750421 | 27 | 74.834 | KV453311.1 | 1664032 | 27-scf00534 | 27 |
| AX-158351860 | 27 | 74.838 | KV453311.1 | 611714  | 27-scf00534 | 27 |
| AX-158351863 | 27 | 74.838 | KV453311.1 | 614052  | 27-scf00534 | 27 |
| AX-158351865 | 27 | 74.838 | KV453311.1 | 617645  | 27-scf00534 | 27 |
| AX-157738694 | 27 | 74.838 | KV453311.1 | 619757  | 27-scf00534 | 27 |
| AX-157757345 | 27 | 75.294 | KV453311.1 | 639488  | 27-scf00534 | 27 |
| AX-158351878 | 27 | 75.294 | KV453311.1 | 642757  | 27-scf00534 | 27 |
| AX-158351892 | 27 | 75.294 | KV453311.1 | 663501  | 27-scf00534 | 27 |
| AX-158351893 | 27 | 75.294 | KV453311.1 | 665325  | 27-scf00534 | 27 |
| AX-157851054 | 27 | 75.294 | KV453311.1 | 665798  | 27-scf00534 | 27 |
| AX-158351896 | 27 | 75.294 | KV453311.1 | 669110  | 27-scf00534 | 27 |
| AX-158351900 | 27 | 75.294 | KV453311.1 | 677987  | 27-scf00534 | 27 |
| AX-158351902 | 27 | 75.294 | KV453311.1 | 679890  | 27-scf00534 | 27 |
| AX-158351903 | 27 | 75.294 | KV453311.1 | 680601  | 27-scf00534 | 27 |
| AX-158351904 | 27 | 75.294 | KV453311.1 | 680915  | 27-scf00534 | 27 |
| AX-158351906 | 27 | 75.294 | KV453311.1 | 684502  | 27-scf00534 | 27 |
| AX-157707952 | 27 | 75.294 | KV453311.1 | 687241  | 27-scf00534 | 27 |
| AX-157707951 | 27 | 75.294 | KV453311.1 | 687361  | 27-scf00534 | 27 |
| AX-158351908 | 27 | 75.294 | KV453311.1 | 687986  | 27-scf00534 | 27 |
| AX-158351909 | 27 | 75.294 | KV453311.1 | 688212  | 27-scf00534 | 27 |
| AX-158351910 | 27 | 75.294 | KV453311.1 | 689087  | 27-scf00534 | 27 |
| AX-158351911 | 27 | 75.294 | KV453311.1 | 689876  | 27-scf00534 | 27 |
| AX-158351916 | 27 | 75.294 | KV453311.1 | 696129  | 27-scf00534 | 27 |
| AX-157851057 | 27 | 75.294 | KV453311.1 | 700992  | 27-scf00534 | 27 |
| AX-158351933 | 27 | 75.294 | KV453311.1 | 720065  | 27-scf00534 | 27 |
| AX-158351934 | 27 | 75.294 | KV453311.1 | 721985  | 27-scf00534 | 27 |
| AX-158351942 | 27 | 75.294 | KV453311.1 | 730606  | 27-scf00534 | 27 |
| AX-158351943 | 27 | 75.294 | KV453311.1 | 731872  | 27-scf00534 | 27 |
| AX-158381681 | 27 | 75.294 | KV453311.1 | 733454  | 27-scf00534 | 27 |
| AX-158351945 | 27 | 75.294 | KV453311.1 | 733570  | 27-scf00534 | 27 |
| AX-158351947 | 27 | 75.294 | KV453311.1 | 737436  | 27-scf00534 | 27 |
| AX-158351948 | 27 | 75.294 | KV453311.1 | 738246  | 27-scf00534 | 27 |
| AX-158351962 | 27 | 75.294 | KV453311.1 | 750937  | 27-scf00534 | 27 |
| AX-158351999 | 27 | 75.294 | KV453311.1 | 801699  | 27-scf00534 | 27 |
| AX-158352002 | 27 | 75.294 | KV453311.1 | 814305  | 27-scf00534 | 27 |
| AX-158352007 | 27 | 75.294 | KV453311.1 | 820903  | 27-scf00534 | 27 |
| AX-158352020 | 27 | 75.294 | KV453311.1 | 845017  | 27-scf00534 | 27 |
| AX-157851069 | 27 | 75.294 | KV453311.1 | 849905  | 27-scf00534 | 27 |
| AX-157697166 | 27 | 75.294 | KV453311.1 | 971885  | 27-scf00534 | 27 |
| AX-158352075 | 27 | 75.294 | KV453311.1 | 974960  | 27-scf00534 | 27 |
| AX-157745528 | 27 | 75.294 | KV453311.1 | 1030829 | 27-scf00534 | 27 |
| AX-158352107 | 27 | 75.294 | KV453311.1 | 1031189 | 27-scf00534 | 27 |
| AX-158352131 | 27 | 75.294 | KV453311.1 | 1066544 | 27-scf00534 | 27 |

|              |    |        |            |         |             |    |
|--------------|----|--------|------------|---------|-------------|----|
| AX-158352143 | 27 | 75.294 | KV453311.1 | 1082673 | 27-scf00534 | 27 |
| AX-158352158 | 27 | 75.294 | KV453311.1 | 1121885 | 27-scf00534 | 27 |
| AX-158352227 | 27 | 75.294 | KV453311.1 | 1256261 | 27-scf00534 | 27 |
| AX-157851088 | 27 | 75.294 | KV453311.1 | 1279804 | 27-scf00534 | 27 |
| AX-158352319 | 27 | 75.294 | KV453311.1 | 1471092 | 27-scf00534 | 27 |
| AX-157738632 | 27 | 75.294 | KV453311.1 | 1492342 | 27-scf00534 | 27 |
| AX-157851095 | 27 | 75.294 | KV453311.1 | 1515593 | 27-scf00534 | 27 |
| AX-158352364 | 27 | 75.294 | KV453311.1 | 1530354 | 27-scf00534 | 27 |
| AX-158419484 | 27 | 75.294 | KV453311.1 | 1532757 | 27-scf00534 | 27 |
| AX-158352412 | 27 | 75.294 | KV453311.1 | 1596727 | 27-scf00534 | 27 |
| AX-158352438 | 27 | 75.294 | KV453311.1 | 1631592 | 27-scf00534 | 27 |
| AX-158351868 | 27 | 75.295 | KV453311.1 | 626246  | 27-scf00534 | 27 |
| AX-157851052 | 27 | 75.295 | KV453311.1 | 662373  | 27-scf00534 | 27 |
| AX-158351894 | 27 | 75.295 | KV453311.1 | 666018  | 27-scf00534 | 27 |
| AX-158351898 | 27 | 75.295 | KV453311.1 | 675596  | 27-scf00534 | 27 |
| AX-158351899 | 27 | 75.295 | KV453311.1 | 676788  | 27-scf00534 | 27 |
| AX-157888960 | 27 | 75.295 | KV453311.1 | 677525  | 27-scf00534 | 27 |
| AX-158351929 | 27 | 75.295 | KV453311.1 | 709685  | 27-scf00534 | 27 |
| AX-158351965 | 27 | 75.295 | KV453311.1 | 752787  | 27-scf00534 | 27 |
| AX-158351970 | 27 | 75.295 | KV453311.1 | 758173  | 27-scf00534 | 27 |
| AX-158351982 | 27 | 75.295 | KV453311.1 | 777023  | 27-scf00534 | 27 |
| AX-158352003 | 27 | 75.295 | KV453311.1 | 815909  | 27-scf00534 | 27 |
| AX-158352005 | 27 | 75.295 | KV453311.1 | 817198  | 27-scf00534 | 27 |
| AX-158352006 | 27 | 75.295 | KV453311.1 | 818659  | 27-scf00534 | 27 |
| AX-157851066 | 27 | 75.295 | KV453311.1 | 842792  | 27-scf00534 | 27 |
| AX-157851067 | 27 | 75.295 | KV453311.1 | 844648  | 27-scf00534 | 27 |
| AX-158352089 | 27 | 75.295 | KV453311.1 | 1002241 | 27-scf00534 | 27 |
| AX-158352091 | 27 | 75.295 | KV453311.1 | 1003814 | 27-scf00534 | 27 |
| AX-158419457 | 27 | 75.295 | KV453311.1 | 1038297 | 27-scf00534 | 27 |
| AX-158352155 | 27 | 75.295 | KV453311.1 | 1120135 | 27-scf00534 | 27 |
| AX-158352191 | 27 | 75.295 | KV453311.1 | 1180846 | 27-scf00534 | 27 |
| AX-158419463 | 27 | 75.295 | KV453311.1 | 1192944 | 27-scf00534 | 27 |
| AX-158419465 | 27 | 75.295 | KV453311.1 | 1193980 | 27-scf00534 | 27 |
| AX-157717514 | 27 | 75.295 | KV453311.1 | 1238450 | 27-scf00534 | 27 |
| AX-158352228 | 27 | 75.295 | KV453311.1 | 1257292 | 27-scf00534 | 27 |
| AX-157851087 | 27 | 75.295 | KV453311.1 | 1270720 | 27-scf00534 | 27 |
| AX-158352310 | 27 | 75.295 | KV453311.1 | 1461576 | 27-scf00534 | 27 |
| AX-157851091 | 27 | 75.295 | KV453311.1 | 1489066 | 27-scf00534 | 27 |
| AX-158352333 | 27 | 75.295 | KV453311.1 | 1494693 | 27-scf00534 | 27 |
| AX-158352353 | 27 | 75.295 | KV453311.1 | 1515849 | 27-scf00534 | 27 |
| AX-158352386 | 27 | 75.295 | KV453311.1 | 1556836 | 27-scf00534 | 27 |
| AX-158352415 | 27 | 75.295 | KV453311.1 | 1599578 | 27-scf00534 | 27 |
| AX-158352437 | 27 | 75.295 | KV453311.1 | 1630951 | 27-scf00534 | 27 |
| AX-158352032 | 27 | 75.422 | KV453311.1 | 884721  | 27-scf00534 | 27 |
| AX-158351869 | 27 | 75.525 | KV453311.1 | 628838  | 27-scf00534 | 27 |
| AX-158351879 | 27 | 75.525 | KV453311.1 | 645376  | 27-scf00534 | 27 |
| AX-157851053 | 27 | 75.525 | KV453311.1 | 664787  | 27-scf00534 | 27 |
| AX-158351959 | 27 | 75.525 | KV453311.1 | 745340  | 27-scf00534 | 27 |
| AX-158351967 | 27 | 75.525 | KV453311.1 | 754579  | 27-scf00534 | 27 |
| AX-157851068 | 27 | 75.525 | KV453311.1 | 845867  | 27-scf00534 | 27 |
| AX-158419449 | 27 | 75.525 | KV453311.1 | 885490  | 27-scf00534 | 27 |

|              |    |        |            |         |             |    |
|--------------|----|--------|------------|---------|-------------|----|
| AX-157727848 | 27 | 75.525 | KV453311.1 | 966942  | 27-scf00534 | 27 |
| AX-158352073 | 27 | 75.525 | KV453311.1 | 972750  | 27-scf00534 | 27 |
| AX-158352077 | 27 | 75.525 | KV453311.1 | 977354  | 27-scf00534 | 27 |
| AX-158352097 | 27 | 75.525 | KV453311.1 | 1008816 | 27-scf00534 | 27 |
| AX-158352100 | 27 | 75.525 | KV453311.1 | 1014388 | 27-scf00534 | 27 |
| AX-158352108 | 27 | 75.525 | KV453311.1 | 1032623 | 27-scf00534 | 27 |
| AX-157751048 | 27 | 75.525 | KV453311.1 | 1034426 | 27-scf00534 | 27 |
| AX-157723987 | 27 | 75.525 | KV453311.1 | 1038981 | 27-scf00534 | 27 |
| AX-157851073 | 27 | 75.525 | KV453311.1 | 1065895 | 27-scf00534 | 27 |
| AX-158352132 | 27 | 75.525 | KV453311.1 | 1067384 | 27-scf00534 | 27 |
| AX-158352135 | 27 | 75.525 | KV453311.1 | 1074352 | 27-scf00534 | 27 |
| AX-158352136 | 27 | 75.525 | KV453311.1 | 1075300 | 27-scf00534 | 27 |
| AX-158352137 | 27 | 75.525 | KV453311.1 | 1076629 | 27-scf00534 | 27 |
| AX-158352138 | 27 | 75.525 | KV453311.1 | 1077840 | 27-scf00534 | 27 |
| AX-158352140 | 27 | 75.525 | KV453311.1 | 1079655 | 27-scf00534 | 27 |
| AX-158352142 | 27 | 75.525 | KV453311.1 | 1080754 | 27-scf00534 | 27 |
| AX-157851074 | 27 | 75.525 | KV453311.1 | 1092126 | 27-scf00534 | 27 |
| AX-158352150 | 27 | 75.525 | KV453311.1 | 1114628 | 27-scf00534 | 27 |
| AX-157868222 | 27 | 75.525 | KV453311.1 | 1119394 | 27-scf00534 | 27 |
| AX-158352159 | 27 | 75.525 | KV453311.1 | 1123005 | 27-scf00534 | 27 |
| AX-158352167 | 27 | 75.525 | KV453311.1 | 1141610 | 27-scf00534 | 27 |
| AX-158352168 | 27 | 75.525 | KV453311.1 | 1142131 | 27-scf00534 | 27 |
| AX-158352169 | 27 | 75.525 | KV453311.1 | 1143022 | 27-scf00534 | 27 |
| AX-158419459 | 27 | 75.525 | KV453311.1 | 1147794 | 27-scf00534 | 27 |
| AX-158413282 | 27 | 75.525 | KV453311.1 | 1147840 | 27-scf00534 | 27 |
| AX-158352176 | 27 | 75.525 | KV453311.1 | 1157268 | 27-scf00534 | 27 |
| AX-158352179 | 27 | 75.525 | KV453311.1 | 1165549 | 27-scf00534 | 27 |
| AX-158352184 | 27 | 75.525 | KV453311.1 | 1172764 | 27-scf00534 | 27 |
| AX-158352185 | 27 | 75.525 | KV453311.1 | 1173543 | 27-scf00534 | 27 |
| AX-158352188 | 27 | 75.525 | KV453311.1 | 1177772 | 27-scf00534 | 27 |
| AX-157743977 | 27 | 75.525 | KV453311.1 | 1181918 | 27-scf00534 | 27 |
| AX-158352193 | 27 | 75.525 | KV453311.1 | 1188518 | 27-scf00534 | 27 |
| AX-158352200 | 27 | 75.525 | KV453311.1 | 1207806 | 27-scf00534 | 27 |
| AX-158352201 | 27 | 75.525 | KV453311.1 | 1208319 | 27-scf00534 | 27 |
| AX-158352203 | 27 | 75.525 | KV453311.1 | 1209572 | 27-scf00534 | 27 |
| AX-158352207 | 27 | 75.525 | KV453311.1 | 1218966 | 27-scf00534 | 27 |
| AX-158352211 | 27 | 75.525 | KV453311.1 | 1229216 | 27-scf00534 | 27 |
| AX-158352212 | 27 | 75.525 | KV453311.1 | 1229646 | 27-scf00534 | 27 |
| AX-158352214 | 27 | 75.525 | KV453311.1 | 1230096 | 27-scf00534 | 27 |
| AX-158352215 | 27 | 75.525 | KV453311.1 | 1230723 | 27-scf00534 | 27 |
| AX-157715140 | 27 | 75.525 | KV453311.1 | 1239597 | 27-scf00534 | 27 |
| AX-158352219 | 27 | 75.525 | KV453311.1 | 1242174 | 27-scf00534 | 27 |
| AX-157851084 | 27 | 75.525 | KV453311.1 | 1257543 | 27-scf00534 | 27 |
| AX-157722641 | 27 | 75.525 | KV453311.1 | 1262286 | 27-scf00534 | 27 |
| AX-158352234 | 27 | 75.525 | KV453311.1 | 1262495 | 27-scf00534 | 27 |
| AX-158352235 | 27 | 75.525 | KV453311.1 | 1263294 | 27-scf00534 | 27 |
| AX-158352237 | 27 | 75.525 | KV453311.1 | 1269036 | 27-scf00534 | 27 |
| AX-158352239 | 27 | 75.525 | KV453311.1 | 1271668 | 27-scf00534 | 27 |
| AX-158352243 | 27 | 75.525 | KV453311.1 | 1277607 | 27-scf00534 | 27 |
| AX-158352248 | 27 | 75.525 | KV453311.1 | 1279883 | 27-scf00534 | 27 |
| AX-158352250 | 27 | 75.525 | KV453311.1 | 1281291 | 27-scf00534 | 27 |



|              |    |        |             |         |             |    |
|--------------|----|--------|-------------|---------|-------------|----|
| AX-158352268 | 27 | 75.525 | KV453311.1  | 1297552 | 27-scf00534 | 27 |
| AX-158352270 | 27 | 75.525 | KV453311.1  | 1299892 | 27-scf00534 | 27 |
| AX-158352271 | 27 | 75.525 | KV453311.1  | 1301505 | 27-scf00534 | 27 |
| AX-158352272 | 27 | 75.525 | KV453311.1  | 1302041 | 27-scf00534 | 27 |
| AX-158352292 | 27 | 75.525 | KV453311.1  | 1372545 | 27-scf00534 | 27 |
| AX-158352293 | 27 | 75.525 | KV453311.1  | 1372693 | 27-scf00534 | 27 |
| AX-158352312 | 27 | 75.525 | KV453311.1  | 1464197 | 27-scf00534 | 27 |
| AX-158352313 | 27 | 75.525 | KV453311.1  | 1464777 | 27-scf00534 | 27 |
| AX-158352318 | 27 | 75.525 | KV453311.1  | 1470714 | 27-scf00534 | 27 |
| AX-158352320 | 27 | 75.525 | KV453311.1  | 1471617 | 27-scf00534 | 27 |
| AX-158352323 | 27 | 75.525 | KV453311.1  | 1478847 | 27-scf00534 | 27 |
| AX-157868225 | 27 | 75.525 | KV453311.1  | 1481051 | 27-scf00534 | 27 |
| AX-158352330 | 27 | 75.525 | KV453311.1  | 1486842 | 27-scf00534 | 27 |
| AX-158352331 | 27 | 75.525 | KV453311.1  | 1487170 | 27-scf00534 | 27 |
| AX-157851092 | 27 | 75.525 | KV453311.1  | 1492091 | 27-scf00534 | 27 |
| AX-158352339 | 27 | 75.525 | KV453311.1  | 1502100 | 27-scf00534 | 27 |
| AX-158352348 | 27 | 75.525 | KV453311.1  | 1512247 | 27-scf00534 | 27 |
| AX-158352351 | 27 | 75.525 | KV453311.1  | 1514950 | 27-scf00534 | 27 |
| AX-158352352 | 27 | 75.525 | KV453311.1  | 1515450 | 27-scf00534 | 27 |
| AX-157712259 | 27 | 75.525 | KV453311.1  | 1517101 | 27-scf00534 | 27 |
| AX-158352359 | 27 | 75.525 | KV453311.1  | 1524060 | 27-scf00534 | 27 |
| AX-158352360 | 27 | 75.525 | KV453311.1  | 1526070 | 27-scf00534 | 27 |
| AX-158352361 | 27 | 75.525 | KV453311.1  | 1526564 | 27-scf00534 | 27 |
| AX-158419481 | 27 | 75.525 | KV453311.1  | 1531903 | 27-scf00534 | 27 |
| AX-158419482 | 27 | 75.525 | KV453311.1  | 1532353 | 27-scf00534 | 27 |
| AX-157726378 | 27 | 75.525 | KV453311.1  | 1535680 | 27-scf00534 | 27 |
| AX-158352382 | 27 | 75.525 | KV453311.1  | 1551068 | 27-scf00534 | 27 |
| AX-158352385 | 27 | 75.525 | KV453311.1  | 1555891 | 27-scf00534 | 27 |
| AX-158352387 | 27 | 75.525 | KV453311.1  | 1557963 | 27-scf00534 | 27 |
| AX-158352389 | 27 | 75.525 | KV453311.1  | 1559323 | 27-scf00534 | 27 |
| AX-158352391 | 27 | 75.525 | KV453311.1  | 1565304 | 27-scf00534 | 27 |
| AX-158352393 | 27 | 75.525 | KV453311.1  | 1566147 | 27-scf00534 | 27 |
| AX-157746585 | 27 | 75.525 | KV453311.1  | 1568048 | 27-scf00534 | 27 |
| AX-158352399 | 27 | 75.525 | KV453311.1  | 1578955 | 27-scf00534 | 27 |
| AX-158352403 | 27 | 75.525 | KV453311.1  | 1582122 | 27-scf00534 | 27 |
| AX-158352408 | 27 | 75.525 | KV453311.1  | 1593694 | 27-scf00534 | 27 |
| AX-158352409 | 27 | 75.525 | KV453311.1  | 1594303 | 27-scf00534 | 27 |
| AX-158352423 | 27 | 75.525 | KV453311.1  | 1609921 | 27-scf00534 | 27 |
| AX-158352424 | 27 | 75.525 | KV453311.1  | 1612681 | 27-scf00534 | 27 |
| AX-158352435 | 27 | 75.525 | KV453311.1  | 1627770 | 27-scf00534 | 27 |
| AX-157750135 | 27 | 75.525 | KV453311.1  | 1627976 | 27-scf00534 | 27 |
| AX-158352465 | 27 | 75.525 | KV453311.1  | 1672576 | 27-scf00534 | 27 |
| AX-157851100 | 27 | 75.525 | KV453311.1  | 1690992 | 27-scf00534 | 27 |
| AX-158352476 | 27 | 75.525 | KV453311.1  | 1697050 | 27-scf00534 | 27 |
| AX-158352492 | 27 | 75.525 | KV453311.1  | 1716334 | 27-scf00534 | 27 |
| AX-158352518 | 27 | 75.525 | KV453311.1  | 1766578 | 27-scf00534 | 27 |
| AX-158352536 | 27 | 75.525 | KV453311.1  | 1801216 | 27-scf00534 | 27 |
| AX-158352546 | 27 | 75.525 | KV453311.1  | 1814864 | 27-scf00534 | 27 |
| AX-158352570 | 27 | 75.525 | KV453311.1  | 1834605 | 27-scf00534 | 27 |
| AX-157705495 | 27 | 75.525 | 3ML01029945 | 981     | scf05567_1  | UN |
| AX-158352377 | 27 | 75.554 | KV453311.1  | 1544754 | 27-scf00534 | 27 |

|              |    |        |            |         |                |    |
|--------------|----|--------|------------|---------|----------------|----|
| AX-158352160 | 27 | 75.761 | KV453311.1 | 1129059 | 27-scf00534    | 27 |
| AX-157726235 | 27 | 75.761 | KV453311.1 | 1560608 | 27-scf00534    | 27 |
| AX-158352392 | 27 | 75.761 | KV453311.1 | 1565722 | 27-scf00534    | 27 |
| AX-157851058 | 27 | 75.989 | KV453311.1 | 753431  | 27-scf00534    | 27 |
| AX-158351966 | 27 | 75.989 | KV453311.1 | 753954  | 27-scf00534    | 27 |
| AX-157851064 | 27 | 75.989 | KV453311.1 | 837716  | 27-scf00534    | 27 |
| AX-158352083 | 27 | 75.989 | KV453311.1 | 990865  | 27-scf00534    | 27 |
| AX-157720832 | 27 | 75.989 | KV453311.1 | 993103  | 27-scf00534    | 27 |
| AX-158352090 | 27 | 75.989 | KV453311.1 | 1003109 | 27-scf00534    | 27 |
| AX-158352172 | 27 | 75.989 | KV453311.1 | 1145703 | 27-scf00534    | 27 |
| AX-158352411 | 27 | 75.989 | KV453311.1 | 1596392 | 27-scf00534    | 27 |
| AX-158352421 | 27 | 75.989 | KV453311.1 | 1605795 | 27-scf00534    | 27 |
| AX-157773218 | 27 | 75.989 | KV453311.1 | 1631944 | 27-scf00534    | 27 |
| AX-158352439 | 27 | 75.989 | KV453311.1 | 1633548 | 27-scf00534    | 27 |
| AX-157702116 | 27 | 75.989 | DX089997.1 | 52      | 4ORI212 Ictali | UN |
| AX-158352095 | 27 | 76.221 | KV453311.1 | 1006642 | 27-scf00534    | 27 |
| AX-158352327 | 27 | 76.221 | KV453311.1 | 1483684 | 27-scf00534    | 27 |
| AX-157744914 | 27 | 76.221 | KV453311.1 | 1490059 | 27-scf00534    | 27 |
| AX-157851094 | 27 | 76.221 | KV453311.1 | 1503404 | 27-scf00534    | 27 |
| AX-158352381 | 27 | 76.221 | KV453311.1 | 1549863 | 27-scf00534    | 27 |
| AX-158352432 | 27 | 76.221 | KV453311.1 | 1625512 | 27-scf00534    | 27 |
| AX-157727000 | 27 | 76.221 | KV453311.1 | 1641466 | 27-scf00534    | 27 |
| AX-158352442 | 27 | 76.221 | KV453311.1 | 1643923 | 27-scf00534    | 27 |
| AX-158352444 | 27 | 76.221 | KV453311.1 | 1646397 | 27-scf00534    | 27 |
| AX-158352445 | 27 | 76.221 | KV453311.1 | 1646895 | 27-scf00534    | 27 |
| AX-158423832 | 27 | 76.221 | KV453311.1 | 1647443 | 27-scf00534    | 27 |
| AX-158352448 | 27 | 76.221 | KV453311.1 | 1648810 | 27-scf00534    | 27 |
| AX-158352452 | 27 | 76.221 | KV453311.1 | 1652006 | 27-scf00534    | 27 |
| AX-158352454 | 27 | 76.221 | KV453311.1 | 1655052 | 27-scf00534    | 27 |
| AX-157745756 | 27 | 76.221 | KV453311.1 | 1655581 | 27-scf00534    | 27 |
| AX-158352456 | 27 | 76.221 | KV453311.1 | 1656663 | 27-scf00534    | 27 |
| AX-158352458 | 27 | 76.221 | KV453311.1 | 1658756 | 27-scf00534    | 27 |
| AX-157751892 | 27 | 76.221 | KV453311.1 | 1660082 | 27-scf00534    | 27 |
| AX-158352460 | 27 | 76.221 | KV453311.1 | 1660959 | 27-scf00534    | 27 |
| AX-158352471 | 27 | 76.221 | KV453311.1 | 1680111 | 27-scf00534    | 27 |
| AX-158352473 | 27 | 76.221 | KV453311.1 | 1681654 | 27-scf00534    | 27 |
| AX-158352474 | 27 | 76.221 | KV453311.1 | 1683610 | 27-scf00534    | 27 |
| AX-158352550 | 27 | 76.221 | KV453311.1 | 1819410 | 27-scf00534    | 27 |
| AX-158352475 | 27 | 76.453 | KV453311.1 | 1696223 | 27-scf00534    | 27 |
| AX-157743638 | 27 | 76.453 | KV453311.1 | 1698876 | 27-scf00534    | 27 |
| AX-158352479 | 27 | 76.453 | KV453311.1 | 1702607 | 27-scf00534    | 27 |
| AX-158352481 | 27 | 76.453 | KV453311.1 | 1704305 | 27-scf00534    | 27 |
| AX-157756277 | 27 | 76.453 | KV453311.1 | 1705210 | 27-scf00534    | 27 |
| AX-158352483 | 27 | 76.453 | KV453311.1 | 1706555 | 27-scf00534    | 27 |
| AX-158381686 | 27 | 76.453 | KV453311.1 | 1724007 | 27-scf00534    | 27 |
| AX-158351829 | 27 | 76.684 | KV453311.1 | 569390  | 27-scf00534    | 27 |
| AX-158351847 | 27 | 76.684 | KV453311.1 | 591376  | 27-scf00534    | 27 |
| AX-158351857 | 27 | 76.684 | KV453311.1 | 603129  | 27-scf00534    | 27 |
| AX-157888975 | 27 | 76.684 | KV453311.1 | 1685789 | 27-scf00534    | 27 |
| AX-158352495 | 27 | 76.684 | KV453311.1 | 1726913 | 27-scf00534    | 27 |
| AX-158352497 | 27 | 76.684 | KV453311.1 | 1730089 | 27-scf00534    | 27 |

|              |    |        |            |         |             |    |
|--------------|----|--------|------------|---------|-------------|----|
| AX-158352498 | 27 | 76.684 | KV453311.1 | 1731676 | 27-scf00534 | 27 |
| AX-158352499 | 27 | 76.684 | KV453311.1 | 1732146 | 27-scf00534 | 27 |
| AX-158352502 | 27 | 76.684 | KV453311.1 | 1735496 | 27-scf00534 | 27 |
| AX-158352504 | 27 | 76.684 | KV453311.1 | 1736617 | 27-scf00534 | 27 |
| AX-158352510 | 27 | 76.684 | KV453311.1 | 1748200 | 27-scf00534 | 27 |
| AX-158352511 | 27 | 76.684 | KV453311.1 | 1752450 | 27-scf00534 | 27 |
| AX-158352582 | 27 | 76.684 | KV453311.1 | 1860065 | 27-scf00534 | 27 |
| AX-158352521 | 27 | 76.916 | KV453311.1 | 1773975 | 27-scf00534 | 27 |
| AX-158352524 | 27 | 76.916 | KV453311.1 | 1778445 | 27-scf00534 | 27 |
| AX-158352532 | 27 | 76.916 | KV453311.1 | 1797230 | 27-scf00534 | 27 |
| AX-157726256 | 27 | 76.916 | KV453311.1 | 1799417 | 27-scf00534 | 27 |
| AX-158352535 | 27 | 76.916 | KV453311.1 | 1800851 | 27-scf00534 | 27 |
| AX-158352539 | 27 | 76.916 | KV453311.1 | 1808032 | 27-scf00534 | 27 |
| AX-158352543 | 27 | 76.916 | KV453311.1 | 1812131 | 27-scf00534 | 27 |
| AX-158352552 | 27 | 76.916 | KV453311.1 | 1820460 | 27-scf00534 | 27 |
| AX-158352554 | 27 | 76.916 | KV453311.1 | 1821791 | 27-scf00534 | 27 |
| AX-157758575 | 27 | 76.916 | KV453311.1 | 1836067 | 27-scf00534 | 27 |
| AX-158352573 | 27 | 76.916 | KV453311.1 | 1839486 | 27-scf00534 | 27 |
| AX-157851112 | 27 | 76.916 | KV453311.1 | 1841711 | 27-scf00534 | 27 |
| AX-158352577 | 27 | 76.916 | KV453311.1 | 1847721 | 27-scf00534 | 27 |
| AX-157882441 | 27 | 76.916 | KV453311.1 | 1848877 | 27-scf00534 | 27 |
| AX-157873902 | 27 | 76.916 | KV453311.1 | 1879366 | 27-scf00534 | 27 |
| AX-158381687 | 27 | 76.916 | KV453311.1 | 1912559 | 27-scf00534 | 27 |
| AX-158352625 | 27 | 76.916 | KV453311.1 | 1921749 | 27-scf00534 | 27 |
| AX-158352641 | 27 | 76.916 | KV453311.1 | 1939681 | 27-scf00534 | 27 |
| AX-157862065 | 27 | 76.916 | KV453311.1 | 1956025 | 27-scf00534 | 27 |
| AX-158352661 | 27 | 76.916 | KV453311.1 | 1962101 | 27-scf00534 | 27 |
| AX-158352680 | 27 | 76.916 | KV453311.1 | 1980460 | 27-scf00534 | 27 |
| AX-158352683 | 27 | 76.916 | KV453311.1 | 1984605 | 27-scf00534 | 27 |
| AX-158352697 | 27 | 76.916 | KV453311.1 | 1998176 | 27-scf00534 | 27 |
| AX-158352698 | 27 | 76.916 | KV453311.1 | 1998457 | 27-scf00534 | 27 |
| AX-158352725 | 27 | 76.916 | KV453311.1 | 2031578 | 27-scf00534 | 27 |
| AX-158352736 | 27 | 76.916 | KV453311.1 | 2039980 | 27-scf00534 | 27 |
| AX-157739798 | 27 | 77.148 | KV453311.1 | 1796934 | 27-scf00534 | 27 |
| AX-158352549 | 27 | 77.148 | KV453311.1 | 1819110 | 27-scf00534 | 27 |
| AX-158352567 | 27 | 77.148 | KV453311.1 | 1831022 | 27-scf00534 | 27 |
| AX-158352580 | 27 | 77.148 | KV453311.1 | 1858326 | 27-scf00534 | 27 |
| AX-157738325 | 27 | 77.148 | KV453311.1 | 1883161 | 27-scf00534 | 27 |
| AX-158352599 | 27 | 77.148 | KV453311.1 | 1885720 | 27-scf00534 | 27 |
| AX-158352617 | 27 | 77.148 | KV453311.1 | 1909123 | 27-scf00534 | 27 |
| AX-158352619 | 27 | 77.148 | KV453311.1 | 1912796 | 27-scf00534 | 27 |
| AX-158352665 | 27 | 77.148 | KV453311.1 | 1965177 | 27-scf00534 | 27 |
| AX-158352695 | 27 | 77.148 | KV453311.1 | 1995076 | 27-scf00534 | 27 |
| AX-157721716 | 27 | 77.148 | KV453311.1 | 2012821 | 27-scf00534 | 27 |
| AX-158352584 | 27 | 77.265 | KV453311.1 | 1862603 | 27-scf00534 | 27 |
| AX-157750242 | 27 | 77.378 | KV453311.1 | 1865660 | 27-scf00534 | 27 |
| AX-158352586 | 27 | 77.379 | KV453311.1 | 1866075 | 27-scf00534 | 27 |
| AX-158352587 | 27 | 77.429 | KV453311.1 | 1866668 | 27-scf00534 | 27 |
| AX-158352589 | 27 | 77.479 | KV453311.1 | 1868025 | 27-scf00534 | 27 |
| AX-158352596 | 27 | 77.479 | KV453311.1 | 1884426 | 27-scf00534 | 27 |
| AX-157716371 | 27 | 77.523 | KV453311.1 | 1871203 | 27-scf00534 | 27 |

|              |    |        |             |         |             |    |
|--------------|----|--------|-------------|---------|-------------|----|
| AX-158352590 | 27 | 77.523 | KV453311.1  | 1872996 | 27-scf00534 | 27 |
| AX-158352591 | 27 | 77.523 | KV453311.1  | 1875340 | 27-scf00534 | 27 |
| AX-158352601 | 27 | 77.607 | KV453311.1  | 1887615 | 27-scf00534 | 27 |
| AX-158352603 | 27 | 77.887 | KV453311.1  | 1889724 | 27-scf00534 | 27 |
| AX-157851113 | 27 | 78.249 | KV453311.1  | 1899766 | 27-scf00534 | 27 |
| AX-157745489 | 27 | 78.249 | KV453311.1  | 1911033 | 27-scf00534 | 27 |
| AX-157712932 | 27 | 78.249 | KV453311.1  | 1916773 | 27-scf00534 | 27 |
| AX-157851117 | 27 | 78.249 | KV453311.1  | 1918480 | 27-scf00534 | 27 |
| AX-157706216 | 27 | 78.249 | 3ML01031841 | 200     | scf07462_1  | UN |
| AX-158352622 | 27 | 78.393 | KV453311.1  | 1918895 | 27-scf00534 | 27 |
| AX-158352623 | 27 | 78.393 | KV453311.1  | 1920413 | 27-scf00534 | 27 |
| AX-158352626 | 27 | 78.393 | KV453311.1  | 1922343 | 27-scf00534 | 27 |
| AX-158352629 | 27 | 78.537 | KV453311.1  | 1923955 | 27-scf00534 | 27 |
| AX-158352636 | 27 | 78.683 | KV453311.1  | 1936364 | 27-scf00534 | 27 |
| AX-157741567 | 27 | 78.683 | KV453311.1  | 1949563 | 27-scf00534 | 27 |
| AX-158352663 | 27 | 78.683 | KV453311.1  | 1964373 | 27-scf00534 | 27 |
| AX-158352681 | 27 | 78.683 | KV453311.1  | 1983672 | 27-scf00534 | 27 |
| AX-157708773 | 27 | 78.683 | KV453311.1  | 1983800 | 27-scf00534 | 27 |
| AX-158352644 | 27 | 78.684 | KV453311.1  | 1943057 | 27-scf00534 | 27 |
| AX-158352645 | 27 | 78.684 | KV453311.1  | 1943685 | 27-scf00534 | 27 |
| AX-158420610 | 27 | 78.684 | KV453311.1  | 1953337 | 27-scf00534 | 27 |
| AX-158352699 | 27 | 78.684 | KV453311.1  | 1999239 | 27-scf00534 | 27 |
| AX-158352650 | 27 | 78.733 | KV453311.1  | 1950055 | 27-scf00534 | 27 |
| AX-158352657 | 27 | 78.971 | KV453311.1  | 1956402 | 27-scf00534 | 27 |
| AX-158352673 | 27 | 78.971 | KV453311.1  | 1974398 | 27-scf00534 | 27 |
| AX-157710040 | 27 | 78.971 | KV453311.1  | 1975913 | 27-scf00534 | 27 |
| AX-158352749 | 27 | 78.971 | KV453311.1  | 2062441 | 27-scf00534 | 27 |
| AX-157741249 | 27 | 78.972 | KV453311.1  | 1966295 | 27-scf00534 | 27 |
| AX-158352667 | 27 | 78.972 | KV453311.1  | 1966991 | 27-scf00534 | 27 |
| AX-158352671 | 27 | 78.972 | KV453311.1  | 1971999 | 27-scf00534 | 27 |
| AX-158352672 | 27 | 78.972 | KV453311.1  | 1972389 | 27-scf00534 | 27 |
| AX-158352675 | 27 | 78.972 | KV453311.1  | 1976166 | 27-scf00534 | 27 |
| AX-157716066 | 27 | 78.972 | KV453311.1  | 1978827 | 27-scf00534 | 27 |
| AX-157746689 | 27 | 78.972 | KV453311.1  | 1979624 | 27-scf00534 | 27 |
| AX-158352682 | 27 | 78.972 | KV453311.1  | 1984244 | 27-scf00534 | 27 |
| AX-157717621 | 27 | 78.972 | KV453311.1  | 1986893 | 27-scf00534 | 27 |
| AX-158352685 | 27 | 78.972 | KV453311.1  | 1987146 | 27-scf00534 | 27 |
| AX-158352686 | 27 | 78.972 | KV453311.1  | 1987620 | 27-scf00534 | 27 |
| AX-158352669 | 27 | 78.973 | KV453311.1  | 1970572 | 27-scf00534 | 27 |
| AX-157714740 | 27 | 78.973 | KV453311.1  | 1989763 | 27-scf00534 | 27 |
| AX-158352688 | 27 | 78.973 | KV453311.1  | 1991724 | 27-scf00534 | 27 |
| AX-158352691 | 27 | 78.973 | KV453311.1  | 1992653 | 27-scf00534 | 27 |
| AX-157769372 | 27 | 79.027 | KV453311.1  | 1998083 | 27-scf00534 | 27 |
| AX-158352701 | 27 | 79.262 | KV453311.1  | 2002539 | 27-scf00534 | 27 |
| AX-158352702 | 27 | 79.262 | KV453311.1  | 2002606 | 27-scf00534 | 27 |
| AX-157851120 | 27 | 79.262 | KV453311.1  | 2007960 | 27-scf00534 | 27 |
| AX-158352709 | 27 | 79.262 | KV453311.1  | 2010509 | 27-scf00534 | 27 |
| AX-158352711 | 27 | 79.262 | KV453311.1  | 2014984 | 27-scf00534 | 27 |
| AX-157716414 | 27 | 79.262 | KV453311.1  | 2015082 | 27-scf00534 | 27 |
| AX-158352714 | 27 | 79.262 | KV453311.1  | 2017475 | 27-scf00534 | 27 |
| AX-157714966 | 27 | 79.262 | KV453311.1  | 2020612 | 27-scf00534 | 27 |

|              |    |        |            |         |             |    |
|--------------|----|--------|------------|---------|-------------|----|
| AX-158352715 | 27 | 79.262 | KV453311.1 | 2022753 | 27-scf00534 | 27 |
| AX-158352728 | 27 | 79.262 | KV453311.1 | 2033698 | 27-scf00534 | 27 |
| AX-158352729 | 27 | 79.262 | KV453311.1 | 2035402 | 27-scf00534 | 27 |
| AX-158352732 | 27 | 79.262 | KV453311.1 | 2037190 | 27-scf00534 | 27 |
| AX-157882445 | 27 | 79.262 | KV453311.1 | 2048471 | 27-scf00534 | 27 |
| AX-157713709 | 27 | 79.262 | KV453311.1 | 2052660 | 27-scf00534 | 27 |
| AX-158352745 | 27 | 79.262 | KV453311.1 | 2055239 | 27-scf00534 | 27 |
| AX-158352746 | 27 | 79.262 | KV453311.1 | 2055493 | 27-scf00534 | 27 |
| AX-157851124 | 27 | 79.262 | KV453311.1 | 2055916 | 27-scf00534 | 27 |
| AX-157750796 | 27 | 79.262 | KV453311.1 | 2056612 | 27-scf00534 | 27 |
| AX-157882446 | 27 | 79.262 | KV453311.1 | 2057083 | 27-scf00534 | 27 |
| AX-157741346 | 27 | 79.262 | KV453311.1 | 2057414 | 27-scf00534 | 27 |
| AX-158352747 | 27 | 79.262 | KV453311.1 | 2058465 | 27-scf00534 | 27 |
| AX-158352748 | 27 | 79.262 | KV453311.1 | 2058801 | 27-scf00534 | 27 |
| AX-158352771 | 27 | 79.262 | KV453311.1 | 2089765 | 27-scf00534 | 27 |
| AX-158352953 | 27 | 79.262 | KV453311.1 | 2322625 | 27-scf00534 | 27 |
| AX-157851125 | 27 | 79.407 | KV453311.1 | 2061435 | 27-scf00534 | 27 |
| AX-158352751 | 27 | 79.407 | KV453311.1 | 2069059 | 27-scf00534 | 27 |
| AX-158352754 | 27 | 79.408 | KV453311.1 | 2071437 | 27-scf00534 | 27 |
| AX-158352767 | 27 | 79.408 | KV453311.1 | 2082841 | 27-scf00534 | 27 |
| AX-158352761 | 27 | 79.695 | KV453311.1 | 2079184 | 27-scf00534 | 27 |
| AX-158352766 | 27 | 79.695 | KV453311.1 | 2082188 | 27-scf00534 | 27 |
| AX-158352776 | 27 | 79.695 | KV453311.1 | 2094496 | 27-scf00534 | 27 |
| AX-158352781 | 27 | 79.695 | KV453311.1 | 2102221 | 27-scf00534 | 27 |
| AX-157851127 | 27 | 79.696 | KV453311.1 | 2070673 | 27-scf00534 | 27 |
| AX-158352756 | 27 | 79.696 | KV453311.1 | 2073947 | 27-scf00534 | 27 |
| AX-157745103 | 27 | 79.696 | KV453311.1 | 2076315 | 27-scf00534 | 27 |
| AX-158352759 | 27 | 79.696 | KV453311.1 | 2077066 | 27-scf00534 | 27 |
| AX-158352762 | 27 | 79.696 | KV453311.1 | 2079862 | 27-scf00534 | 27 |
| AX-158352764 | 27 | 79.696 | KV453311.1 | 2080958 | 27-scf00534 | 27 |
| AX-158352765 | 27 | 79.696 | KV453311.1 | 2081825 | 27-scf00534 | 27 |
| AX-157740918 | 27 | 79.696 | KV453311.1 | 2083978 | 27-scf00534 | 27 |
| AX-158352768 | 27 | 79.696 | KV453311.1 | 2085007 | 27-scf00534 | 27 |
| AX-158352769 | 27 | 79.696 | KV453311.1 | 2087404 | 27-scf00534 | 27 |
| AX-158352770 | 27 | 79.696 | KV453311.1 | 2088247 | 27-scf00534 | 27 |
| AX-158352774 | 27 | 79.696 | KV453311.1 | 2092749 | 27-scf00534 | 27 |
| AX-158352775 | 27 | 79.696 | KV453311.1 | 2093312 | 27-scf00534 | 27 |
| AX-157724092 | 27 | 79.696 | KV453311.1 | 2100081 | 27-scf00534 | 27 |
| AX-157720319 | 27 | 79.696 | KV453311.1 | 2103321 | 27-scf00534 | 27 |
| AX-158352783 | 27 | 79.696 | KV453311.1 | 2103874 | 27-scf00534 | 27 |
| AX-158352785 | 27 | 79.696 | KV453311.1 | 2106779 | 27-scf00534 | 27 |
| AX-158352789 | 27 | 79.696 | KV453311.1 | 2111560 | 27-scf00534 | 27 |
| AX-158352803 | 27 | 79.696 | KV453311.1 | 2130208 | 27-scf00534 | 27 |
| AX-157851129 | 27 | 79.696 | KV453311.1 | 2131561 | 27-scf00534 | 27 |
| AX-157707873 | 27 | 79.696 | KV453311.1 | 2156066 | 27-scf00534 | 27 |
| AX-157753100 | 27 | 79.696 | KV453311.1 | 2167445 | 27-scf00534 | 27 |
| AX-158352845 | 27 | 79.696 | KV453311.1 | 2182402 | 27-scf00534 | 27 |
| AX-158352848 | 27 | 79.696 | KV453311.1 | 2186479 | 27-scf00534 | 27 |
| AX-158352853 | 27 | 79.696 | KV453311.1 | 2193663 | 27-scf00534 | 27 |
| AX-158352856 | 27 | 79.696 | KV453311.1 | 2196681 | 27-scf00534 | 27 |
| AX-158352867 | 27 | 79.696 | KV453311.1 | 2215121 | 27-scf00534 | 27 |

|              |    |        |            |         |             |    |
|--------------|----|--------|------------|---------|-------------|----|
| AX-158381689 | 27 | 79.696 | KV453311.1 | 2226763 | 27-scf00534 | 27 |
| AX-158352903 | 27 | 79.696 | KV453311.1 | 2254603 | 27-scf00534 | 27 |
| AX-158352907 | 27 | 79.696 | KV453311.1 | 2261927 | 27-scf00534 | 27 |
| AX-158352908 | 27 | 79.696 | KV453311.1 | 2264024 | 27-scf00534 | 27 |
| AX-158352920 | 27 | 79.696 | KV453311.1 | 2274235 | 27-scf00534 | 27 |
| AX-158352930 | 27 | 79.696 | KV453311.1 | 2286248 | 27-scf00534 | 27 |
| AX-158352955 | 27 | 79.696 | KV453311.1 | 2329868 | 27-scf00534 | 27 |
| AX-158352784 | 27 | 79.697 | KV453311.1 | 2104889 | 27-scf00534 | 27 |
| AX-158352790 | 27 | 79.985 | KV453311.1 | 2111787 | 27-scf00534 | 27 |
| AX-158352791 | 27 | 79.985 | KV453311.1 | 2112733 | 27-scf00534 | 27 |
| AX-157851128 | 27 | 79.985 | KV453311.1 | 2118398 | 27-scf00534 | 27 |
| AX-158352796 | 27 | 79.985 | KV453311.1 | 2119798 | 27-scf00534 | 27 |
| AX-158352797 | 27 | 79.985 | KV453311.1 | 2122032 | 27-scf00534 | 27 |
| AX-158352804 | 27 | 79.985 | KV453311.1 | 2131071 | 27-scf00534 | 27 |
| AX-158352805 | 27 | 79.985 | KV453311.1 | 2131631 | 27-scf00534 | 27 |
| AX-158352807 | 27 | 79.985 | KV453311.1 | 2134215 | 27-scf00534 | 27 |
| AX-158352811 | 27 | 79.985 | KV453311.1 | 2142101 | 27-scf00534 | 27 |
| AX-158352812 | 27 | 79.985 | KV453311.1 | 2142962 | 27-scf00534 | 27 |
| AX-158352826 | 27 | 79.985 | KV453311.1 | 2159880 | 27-scf00534 | 27 |
| AX-158352827 | 27 | 79.985 | KV453311.1 | 2160525 | 27-scf00534 | 27 |
| AX-158352830 | 27 | 79.985 | KV453311.1 | 2164715 | 27-scf00534 | 27 |
| AX-158352834 | 27 | 79.985 | KV453311.1 | 2169174 | 27-scf00534 | 27 |
| AX-158352835 | 27 | 79.985 | KV453311.1 | 2171487 | 27-scf00534 | 27 |
| AX-158352840 | 27 | 79.985 | KV453311.1 | 2177852 | 27-scf00534 | 27 |
| AX-157770963 | 27 | 79.985 | KV453311.1 | 2220168 | 27-scf00534 | 27 |
| AX-158352838 | 27 | 79.988 | KV453311.1 | 2176124 | 27-scf00534 | 27 |
| AX-158352843 | 27 | 80.205 | KV453311.1 | 2180021 | 27-scf00534 | 27 |
| AX-157775929 | 27 | 80.205 | KV453311.1 | 2183561 | 27-scf00534 | 27 |
| AX-157868230 | 27 | 80.205 | KV453311.1 | 2184037 | 27-scf00534 | 27 |
| AX-158352847 | 27 | 80.205 | KV453311.1 | 2185910 | 27-scf00534 | 27 |
| AX-158352849 | 27 | 80.205 | KV453311.1 | 2186884 | 27-scf00534 | 27 |
| AX-158352852 | 27 | 80.205 | KV453311.1 | 2191617 | 27-scf00534 | 27 |
| AX-158352855 | 27 | 80.205 | KV453311.1 | 2196015 | 27-scf00534 | 27 |
| AX-158352858 | 27 | 80.205 | KV453311.1 | 2199261 | 27-scf00534 | 27 |
| AX-157751888 | 27 | 80.205 | KV453311.1 | 2203033 | 27-scf00534 | 27 |
| AX-158352860 | 27 | 80.424 | KV453311.1 | 2204679 | 27-scf00534 | 27 |
| AX-158352864 | 27 | 80.424 | KV453311.1 | 2207659 | 27-scf00534 | 27 |
| AX-157851133 | 27 | 80.424 | KV453311.1 | 2211575 | 27-scf00534 | 27 |
| AX-157851134 | 27 | 80.424 | KV453311.1 | 2211780 | 27-scf00534 | 27 |
| AX-158352870 | 27 | 80.424 | KV453311.1 | 2216957 | 27-scf00534 | 27 |
| AX-158352872 | 27 | 80.424 | KV453311.1 | 2218891 | 27-scf00534 | 27 |
| AX-158352873 | 27 | 80.424 | KV453311.1 | 2219454 | 27-scf00534 | 27 |
| AX-158352877 | 27 | 80.424 | KV453311.1 | 2225261 | 27-scf00534 | 27 |
| AX-158352879 | 27 | 80.424 | KV453311.1 | 2226357 | 27-scf00534 | 27 |
| AX-158352880 | 27 | 80.425 | KV453311.1 | 2227016 | 27-scf00534 | 27 |
| AX-158352881 | 27 | 80.6   | KV453311.1 | 2227879 | 27-scf00534 | 27 |
| AX-158352887 | 27 | 80.748 | KV453311.1 | 2237718 | 27-scf00534 | 27 |
| AX-158352913 | 27 | 80.748 | KV453311.1 | 2268093 | 27-scf00534 | 27 |
| AX-158352888 | 27 | 80.75  | KV453311.1 | 2239278 | 27-scf00534 | 27 |
| AX-158352891 | 27 | 80.752 | KV453311.1 | 2242210 | 27-scf00534 | 27 |
| AX-158352894 | 27 | 80.752 | KV453311.1 | 2243972 | 27-scf00534 | 27 |

|              |    |        |            |         |             |    |
|--------------|----|--------|------------|---------|-------------|----|
| AX-158352892 | 27 | 80.754 | KV453311.1 | 2242648 | 27-scf00534 | 27 |
| AX-158352893 | 27 | 80.756 | KV453311.1 | 2243145 | 27-scf00534 | 27 |
| AX-158352778 | 27 | 80.97  | KV453311.1 | 2095565 | 27-scf00534 | 27 |
| AX-158352896 | 27 | 80.97  | KV453311.1 | 2246133 | 27-scf00534 | 27 |
| AX-158352897 | 27 | 80.97  | KV453311.1 | 2248379 | 27-scf00534 | 27 |
| AX-158352900 | 27 | 80.97  | KV453311.1 | 2253385 | 27-scf00534 | 27 |
| AX-158352904 | 27 | 80.97  | KV453311.1 | 2255420 | 27-scf00534 | 27 |
| AX-157726414 | 27 | 80.97  | KV453311.1 | 2257086 | 27-scf00534 | 27 |
| AX-158352905 | 27 | 80.97  | KV453311.1 | 2258299 | 27-scf00534 | 27 |
| AX-158352910 | 27 | 80.97  | KV453311.1 | 2266032 | 27-scf00534 | 27 |
| AX-158352914 | 27 | 80.97  | KV453311.1 | 2269133 | 27-scf00534 | 27 |
| AX-158352915 | 27 | 80.971 | KV453311.1 | 2270944 | 27-scf00534 | 27 |
| AX-158352918 | 27 | 81.084 | KV453311.1 | 2273148 | 27-scf00534 | 27 |
| AX-158352922 | 27 | 81.353 | KV453311.1 | 2275976 | 27-scf00534 | 27 |
| AX-157851135 | 27 | 81.353 | KV453311.1 | 2281651 | 27-scf00534 | 27 |
| AX-158352927 | 27 | 81.354 | KV453311.1 | 2283812 | 27-scf00534 | 27 |
| AX-157851137 | 27 | 81.733 | KV453311.1 | 2287403 | 27-scf00534 | 27 |
| AX-158352932 | 27 | 81.733 | KV453311.1 | 2289684 | 27-scf00534 | 27 |
| AX-158352934 | 27 | 81.734 | KV453311.1 | 2292883 | 27-scf00534 | 27 |
| AX-158352937 | 27 | 81.734 | KV453311.1 | 2298178 | 27-scf00534 | 27 |
| AX-158352938 | 27 | 81.735 | KV453311.1 | 2300065 | 27-scf00534 | 27 |
| AX-158352939 | 27 | 81.735 | KV453311.1 | 2302508 | 27-scf00534 | 27 |
| AX-157851139 | 27 | 81.735 | KV453311.1 | 2305782 | 27-scf00534 | 27 |
| AX-158352942 | 27 | 81.735 | KV453311.1 | 2307866 | 27-scf00534 | 27 |
| AX-158352943 | 27 | 81.735 | KV453311.1 | 2308533 | 27-scf00534 | 27 |
| AX-158352946 | 27 | 81.735 | KV453311.1 | 2310814 | 27-scf00534 | 27 |
| AX-158352950 | 27 | 82.061 | KV453311.1 | 2318938 | 27-scf00534 | 27 |
| AX-158352951 | 27 | 82.065 | KV453311.1 | 2319626 | 27-scf00534 | 27 |
| AX-157851140 | 27 | 82.281 | KV453311.1 | 2327327 | 27-scf00534 | 27 |
| AX-158352958 | 27 | 82.281 | KV453311.1 | 2332255 | 27-scf00534 | 27 |
| AX-158352959 | 27 | 82.281 | KV453311.1 | 2332782 | 27-scf00534 | 27 |
| AX-158352960 | 27 | 82.281 | KV453311.1 | 2333840 | 27-scf00534 | 27 |
| AX-158419505 | 27 | 82.281 | KV453311.1 | 2334750 | 27-scf00534 | 27 |
| AX-158419506 | 27 | 82.281 | KV453311.1 | 2335262 | 27-scf00534 | 27 |
| AX-158352963 | 27 | 82.281 | KV453311.1 | 2339083 | 27-scf00534 | 27 |
| AX-158352964 | 27 | 82.281 | KV453311.1 | 2339842 | 27-scf00534 | 27 |
| AX-158352969 | 27 | 82.391 | KV453311.1 | 2346592 | 27-scf00534 | 27 |
| AX-158352966 | 27 | 82.5   | KV453311.1 | 2343215 | 27-scf00534 | 27 |
| AX-158352968 | 27 | 82.5   | KV453311.1 | 2345245 | 27-scf00534 | 27 |
| AX-157714709 | 27 | 82.5   | KV453311.1 | 2348148 | 27-scf00534 | 27 |
| AX-157851142 | 27 | 82.5   | KV453311.1 | 2348986 | 27-scf00534 | 27 |
| AX-157746891 | 27 | 82.501 | KV453311.1 | 2351111 | 27-scf00534 | 27 |
| AX-157851144 | 27 | 82.664 | KV453311.1 | 2358057 | 27-scf00534 | 27 |
| AX-158352975 | 27 | 82.828 | KV453311.1 | 2360056 | 27-scf00534 | 27 |
| AX-158352978 | 27 | 82.828 | KV453311.1 | 2366537 | 27-scf00534 | 27 |
| AX-158352980 | 27 | 82.828 | KV453311.1 | 2367972 | 27-scf00534 | 27 |
| AX-158352982 | 27 | 82.828 | KV453311.1 | 2368838 | 27-scf00534 | 27 |
| AX-158352983 | 27 | 82.849 | KV453311.1 | 2369368 | 27-scf00534 | 27 |
| AX-158352984 | 27 | 82.893 | KV453311.1 | 2369699 | 27-scf00534 | 27 |
| AX-158352995 | 27 | 82.893 | KV453311.1 | 2385389 | 27-scf00534 | 27 |
| AX-158352986 | 27 | 82.913 | KV453311.1 | 2371198 | 27-scf00534 | 27 |

|              |    |        |             |         |             |    |
|--------------|----|--------|-------------|---------|-------------|----|
| AX-157753615 | 27 | 82.937 | KV453311.1  | 2373607 | 27-scf00534 | 27 |
| AX-158352988 | 27 | 82.937 | KV453311.1  | 2376308 | 27-scf00534 | 27 |
| AX-158352994 | 27 | 83.047 | KV453311.1  | 2382774 | 27-scf00534 | 27 |
| AX-157722929 | 27 | 83.047 | KV453311.1  | 2386020 | 27-scf00534 | 27 |
| AX-158352997 | 27 | 83.047 | KV453311.1  | 2388472 | 27-scf00534 | 27 |
| AX-158352999 | 27 | 83.047 | KV453311.1  | 2389424 | 27-scf00534 | 27 |
| AX-158353000 | 27 | 83.047 | KV453311.1  | 2390235 | 27-scf00534 | 27 |
| AX-158353002 | 27 | 83.047 | KV453311.1  | 2391418 | 27-scf00534 | 27 |
| AX-157724473 | 27 | 83.047 | KV453311.1  | 2393762 | 27-scf00534 | 27 |
| AX-158353005 | 27 | 83.047 | KV453311.1  | 2395066 | 27-scf00534 | 27 |
| AX-157706145 | 27 | 83.047 | 3ML01031713 | 392     | scf07333_1  | UN |
| AX-158353006 | 27 | 83.09  | KV453311.1  | 2395846 | 27-scf00534 | 27 |
| AX-158353010 | 27 | 83.118 | KV453311.1  | 2401104 | 27-scf00534 | 27 |
| AX-158353020 | 27 | 83.118 | KV453311.1  | 2412223 | 27-scf00534 | 27 |
| AX-157773562 | 27 | 83.156 | KV453311.1  | 2401660 | 27-scf00534 | 27 |
| AX-158353012 | 27 | 83.156 | KV453311.1  | 2404864 | 27-scf00534 | 27 |
| AX-158353019 | 27 | 83.156 | KV453311.1  | 2411021 | 27-scf00534 | 27 |
| AX-158353021 | 27 | 83.156 | KV453311.1  | 2413011 | 27-scf00534 | 27 |
| AX-158353022 | 27 | 83.207 | KV453311.1  | 2414232 | 27-scf00534 | 27 |
| AX-157851148 | 27 | 83.207 | KV453311.1  | 2424566 | 27-scf00534 | 27 |
| AX-157742998 | 27 | 83.207 | KV453311.1  | 2462398 | 27-scf00534 | 27 |
| AX-158419511 | 27 | 83.207 | KV453311.1  | 2536885 | 27-scf00534 | 27 |
| AX-158353123 | 27 | 83.207 | KV453311.1  | 2557146 | 27-scf00534 | 27 |
| AX-158353127 | 27 | 83.207 | KV453311.1  | 2564878 | 27-scf00534 | 27 |
| AX-158353023 | 27 | 83.265 | KV453311.1  | 2415009 | 27-scf00534 | 27 |
| AX-158353026 | 27 | 83.265 | KV453311.1  | 2416357 | 27-scf00534 | 27 |
| AX-158353153 | 27 | 83.265 | KV453311.1  | 2597394 | 27-scf00534 | 27 |
| AX-158353170 | 27 | 83.265 | KV453311.1  | 2627649 | 27-scf00534 | 27 |
| AX-158353029 | 27 | 83.302 | KV453311.1  | 2420513 | 27-scf00534 | 27 |
| AX-158353031 | 27 | 83.338 | KV453311.1  | 2423487 | 27-scf00534 | 27 |
| AX-158353033 | 27 | 83.374 | KV453311.1  | 2425411 | 27-scf00534 | 27 |
| AX-158353034 | 27 | 83.374 | KV453311.1  | 2426381 | 27-scf00534 | 27 |
| AX-157746917 | 27 | 83.374 | KV453311.1  | 2427873 | 27-scf00534 | 27 |
| AX-157746365 | 27 | 83.374 | KV453311.1  | 2430622 | 27-scf00534 | 27 |
| AX-157743890 | 27 | 83.374 | KV453311.1  | 2433933 | 27-scf00534 | 27 |
| AX-158353038 | 27 | 83.376 | KV453311.1  | 2434782 | 27-scf00534 | 27 |
| AX-157713167 | 27 | 83.586 | KV453311.1  | 2436941 | 27-scf00534 | 27 |
| AX-158353043 | 27 | 83.8   | KV453311.1  | 2447924 | 27-scf00534 | 27 |
| AX-158353080 | 27 | 83.8   | KV453311.1  | 2496796 | 27-scf00534 | 27 |
| AX-157739144 | 27 | 83.825 | KV453311.1  | 2454415 | 27-scf00534 | 27 |
| AX-158353045 | 27 | 83.829 | KV453311.1  | 2456236 | 27-scf00534 | 27 |
| AX-158353083 | 27 | 83.829 | KV453311.1  | 2499611 | 27-scf00534 | 27 |
| AX-158353092 | 27 | 83.829 | KV453311.1  | 2516699 | 27-scf00534 | 27 |
| AX-158353093 | 27 | 83.829 | KV453311.1  | 2517301 | 27-scf00534 | 27 |
| AX-158353096 | 27 | 83.829 | KV453311.1  | 2524343 | 27-scf00534 | 27 |
| AX-158353103 | 27 | 83.829 | KV453311.1  | 2531205 | 27-scf00534 | 27 |
| AX-158353128 | 27 | 83.829 | KV453311.1  | 2565562 | 27-scf00534 | 27 |
| AX-158353132 | 27 | 83.829 | KV453311.1  | 2571685 | 27-scf00534 | 27 |
| AX-158353146 | 27 | 83.829 | KV453311.1  | 2590491 | 27-scf00534 | 27 |
| AX-158353151 | 27 | 83.829 | KV453311.1  | 2595049 | 27-scf00534 | 27 |
| AX-157862070 | 27 | 83.829 | KV453311.1  | 2596133 | 27-scf00534 | 27 |



|              |    |        |            |         |             |    |
|--------------|----|--------|------------|---------|-------------|----|
| AX-157862071 | 27 | 83.829 | KV453311.1 | 2596675 | 27-scf00534 | 27 |
| AX-158353250 | 27 | 83.829 | KV453311.1 | 2733834 | 27-scf00534 | 27 |
| AX-157888985 | 27 | 83.829 | KV453311.1 | 2740147 | 27-scf00534 | 27 |
| AX-158353299 | 27 | 83.829 | KV453311.1 | 2833361 | 27-scf00534 | 27 |
| AX-158353464 | 27 | 83.829 | KV453311.1 | 3147961 | 27-scf00534 | 27 |
| AX-158353047 | 27 | 83.847 | KV453311.1 | 2457369 | 27-scf00534 | 27 |
| AX-158353048 | 27 | 83.847 | KV453311.1 | 2458365 | 27-scf00534 | 27 |
| AX-158353057 | 27 | 83.847 | KV453311.1 | 2466569 | 27-scf00534 | 27 |
| AX-158353049 | 27 | 84.129 | KV453311.1 | 2458937 | 27-scf00534 | 27 |
| AX-158353051 | 27 | 84.129 | KV453311.1 | 2462823 | 27-scf00534 | 27 |
| AX-158353053 | 27 | 84.251 | KV453311.1 | 2464087 | 27-scf00534 | 27 |
| AX-157743583 | 27 | 84.357 | KV453311.1 | 2475665 | 27-scf00534 | 27 |
| AX-157868231 | 27 | 84.357 | KV453311.1 | 2845441 | 27-scf00534 | 27 |
| AX-157755196 | 27 | 84.469 | KV453311.1 | 2480674 | 27-scf00534 | 27 |
| AX-158353062 | 27 | 84.469 | KV453311.1 | 2481835 | 27-scf00534 | 27 |
| AX-158353064 | 27 | 84.469 | KV453311.1 | 2484165 | 27-scf00534 | 27 |
| AX-157774644 | 27 | 84.469 | KV453311.1 | 2484649 | 27-scf00534 | 27 |
| AX-158353071 | 27 | 84.469 | KV453311.1 | 2488336 | 27-scf00534 | 27 |
| AX-158353075 | 27 | 84.469 | KV453311.1 | 2491320 | 27-scf00534 | 27 |
| AX-158353125 | 27 | 84.469 | KV453311.1 | 2562699 | 27-scf00534 | 27 |
| AX-157851150 | 27 | 84.497 | KV453311.1 | 2440224 | 27-scf00534 | 27 |
| AX-158353081 | 27 | 84.497 | KV453311.1 | 2498723 | 27-scf00534 | 27 |
| AX-158353124 | 27 | 84.497 | KV453311.1 | 2561578 | 27-scf00534 | 27 |
| AX-158353207 | 27 | 84.497 | KV453311.1 | 2677060 | 27-scf00534 | 27 |
| AX-158353260 | 27 | 84.497 | KV453311.1 | 2753401 | 27-scf00534 | 27 |
| AX-158353422 | 27 | 84.497 | KV453311.1 | 3095928 | 27-scf00534 | 27 |
| AX-158353509 | 27 | 84.497 | KV453311.1 | 3229464 | 27-scf00534 | 27 |
| AX-157882449 | 27 | 84.523 | KV453311.1 | 2506196 | 27-scf00534 | 27 |
| AX-158353052 | 27 | 84.578 | KV453311.1 | 2463375 | 27-scf00534 | 27 |
| AX-158353088 | 27 | 84.578 | KV453311.1 | 2509116 | 27-scf00534 | 27 |
| AX-158353090 | 27 | 84.578 | KV453311.1 | 2512633 | 27-scf00534 | 27 |
| AX-158353094 | 27 | 84.578 | KV453311.1 | 2518582 | 27-scf00534 | 27 |
| AX-158353095 | 27 | 84.578 | KV453311.1 | 2519136 | 27-scf00534 | 27 |
| AX-158413304 | 27 | 84.578 | KV453311.1 | 2537008 | 27-scf00534 | 27 |
| AX-158353109 | 27 | 84.578 | KV453311.1 | 2542833 | 27-scf00534 | 27 |
| AX-158353113 | 27 | 84.578 | KV453311.1 | 2547776 | 27-scf00534 | 27 |
| AX-158353120 | 27 | 84.578 | KV453311.1 | 2554290 | 27-scf00534 | 27 |
| AX-158353121 | 27 | 84.578 | KV453311.1 | 2556093 | 27-scf00534 | 27 |
| AX-158353129 | 27 | 84.578 | KV453311.1 | 2566063 | 27-scf00534 | 27 |
| AX-158353130 | 27 | 84.578 | KV453311.1 | 2568286 | 27-scf00534 | 27 |
| AX-158353131 | 27 | 84.578 | KV453311.1 | 2570050 | 27-scf00534 | 27 |
| AX-158353133 | 27 | 84.578 | KV453311.1 | 2572119 | 27-scf00534 | 27 |
| AX-158353134 | 27 | 84.578 | KV453311.1 | 2573986 | 27-scf00534 | 27 |
| AX-158353135 | 27 | 84.578 | KV453311.1 | 2574558 | 27-scf00534 | 27 |
| AX-158353136 | 27 | 84.578 | KV453311.1 | 2575600 | 27-scf00534 | 27 |
| AX-158353137 | 27 | 84.578 | KV453311.1 | 2576016 | 27-scf00534 | 27 |
| AX-158353139 | 27 | 84.578 | KV453311.1 | 2577661 | 27-scf00534 | 27 |
| AX-158353365 | 27 | 84.578 | KV453311.1 | 3011300 | 27-scf00534 | 27 |
| AX-158353084 | 27 | 84.616 | KV453311.1 | 2501487 | 27-scf00534 | 27 |
| AX-158353099 | 27 | 84.616 | KV453311.1 | 2526472 | 27-scf00534 | 27 |
| AX-158353140 | 27 | 84.616 | KV453311.1 | 2579428 | 27-scf00534 | 27 |

|              |    |        |             |         |             |    |
|--------------|----|--------|-------------|---------|-------------|----|
| AX-157710355 | 27 | 84.693 | KV453311.1  | 2584146 | 27-scf00534 | 27 |
| AX-158353203 | 27 | 84.693 | KV453311.1  | 2665992 | 27-scf00534 | 27 |
| AX-158353212 | 27 | 84.693 | KV453311.1  | 2681720 | 27-scf00534 | 27 |
| AX-158353217 | 27 | 84.693 | KV453311.1  | 2691070 | 27-scf00534 | 27 |
| AX-158353362 | 27 | 84.693 | KV453311.1  | 3008892 | 27-scf00534 | 27 |
| AX-158353141 | 27 | 84.797 | KV453311.1  | 2583536 | 27-scf00534 | 27 |
| AX-158353142 | 27 | 84.797 | KV453311.1  | 2585297 | 27-scf00534 | 27 |
| AX-158353144 | 27 | 84.797 | KV453311.1  | 2588275 | 27-scf00534 | 27 |
| AX-158353148 | 27 | 84.797 | KV453311.1  | 2591953 | 27-scf00534 | 27 |
| AX-158353152 | 27 | 84.797 | KV453311.1  | 2596095 | 27-scf00534 | 27 |
| AX-158353155 | 27 | 84.797 | KV453311.1  | 2603466 | 27-scf00534 | 27 |
| AX-158353157 | 27 | 84.797 | KV453311.1  | 2605236 | 27-scf00534 | 27 |
| AX-158353158 | 27 | 84.797 | KV453311.1  | 2606561 | 27-scf00534 | 27 |
| AX-158353160 | 27 | 84.797 | KV453311.1  | 2608717 | 27-scf00534 | 27 |
| AX-158353167 | 27 | 84.943 | KV453311.1  | 2621661 | 27-scf00534 | 27 |
| AX-158353168 | 27 | 85.23  | KV453311.1  | 2623516 | 27-scf00534 | 27 |
| AX-158353282 | 27 | 85.23  | KV453311.1  | 2784915 | 27-scf00534 | 27 |
| AX-158353285 | 27 | 85.23  | KV453311.1  | 2788276 | 27-scf00534 | 27 |
| AX-158353177 | 27 | 85.234 | KV453311.1  | 2633595 | 27-scf00534 | 27 |
| AX-158353178 | 27 | 85.234 | KV453311.1  | 2634857 | 27-scf00534 | 27 |
| AX-158353182 | 27 | 85.234 | KV453311.1  | 2637288 | 27-scf00534 | 27 |
| AX-158353183 | 27 | 85.234 | KV453311.1  | 2639618 | 27-scf00534 | 27 |
| AX-158353188 | 27 | 85.234 | KV453311.1  | 2646809 | 27-scf00534 | 27 |
| AX-158353190 | 27 | 85.234 | KV453311.1  | 2651800 | 27-scf00534 | 27 |
| AX-158353191 | 27 | 85.234 | KV453311.1  | 2653126 | 27-scf00534 | 27 |
| AX-158353193 | 27 | 85.234 | KV453311.1  | 2654972 | 27-scf00534 | 27 |
| AX-158353196 | 27 | 85.234 | KV453311.1  | 2658367 | 27-scf00534 | 27 |
| AX-158353197 | 27 | 85.234 | KV453311.1  | 2661595 | 27-scf00534 | 27 |
| AX-158353198 | 27 | 85.234 | KV453311.1  | 2662216 | 27-scf00534 | 27 |
| AX-158353201 | 27 | 85.234 | KV453311.1  | 2665029 | 27-scf00534 | 27 |
| AX-158353204 | 27 | 85.234 | KV453311.1  | 2666880 | 27-scf00534 | 27 |
| AX-158353206 | 27 | 85.234 | KV453311.1  | 2669217 | 27-scf00534 | 27 |
| AX-158353211 | 27 | 85.234 | KV453311.1  | 2681232 | 27-scf00534 | 27 |
| AX-158353262 | 27 | 85.234 | KV453311.1  | 2758234 | 27-scf00534 | 27 |
| AX-158353302 | 27 | 85.234 | KV453311.1  | 2837550 | 27-scf00534 | 27 |
| AX-158353309 | 27 | 85.234 | KV453311.1  | 2846908 | 27-scf00534 | 27 |
| AX-158353329 | 27 | 85.234 | KV453311.1  | 2893149 | 27-scf00534 | 27 |
| AX-158353364 | 27 | 85.234 | KV453311.1  | 3010573 | 27-scf00534 | 27 |
| AX-157756140 | 27 | 85.234 | KV453311.1  | 3012643 | 27-scf00534 | 27 |
| AX-157707234 | 27 | 85.295 | 3ML01033779 | 349     | scf09445_1  | UN |
| AX-157707235 | 27 | 85.386 | 3ML01033779 | 433     | scf09445_1  | UN |
| AX-157851160 | 27 | 85.507 | KV453311.1  | 2676343 | 27-scf00534 | 27 |
| AX-158353213 | 27 | 85.507 | KV453311.1  | 2682400 | 27-scf00534 | 27 |
| AX-158353089 | 27 | 85.599 | KV453311.1  | 2511355 | 27-scf00534 | 27 |
| AX-158353118 | 27 | 85.599 | KV453311.1  | 2551400 | 27-scf00534 | 27 |
| AX-157725629 | 27 | 85.599 | KV453311.1  | 2650491 | 27-scf00534 | 27 |
| AX-158353216 | 27 | 85.599 | KV453311.1  | 2690081 | 27-scf00534 | 27 |
| AX-158353219 | 27 | 85.599 | KV453311.1  | 2692172 | 27-scf00534 | 27 |
| AX-158419518 | 27 | 85.599 | KV453311.1  | 2701713 | 27-scf00534 | 27 |
| AX-158353227 | 27 | 85.599 | KV453311.1  | 2702414 | 27-scf00534 | 27 |
| AX-158353230 | 27 | 85.599 | KV453311.1  | 2709971 | 27-scf00534 | 27 |

|              |    |        |            |         |             |    |
|--------------|----|--------|------------|---------|-------------|----|
| AX-158353231 | 27 | 85.599 | KV453311.1 | 2711594 | 27-scf00534 | 27 |
| AX-158353233 | 27 | 85.599 | KV453311.1 | 2715774 | 27-scf00534 | 27 |
| AX-158353235 | 27 | 85.599 | KV453311.1 | 2721681 | 27-scf00534 | 27 |
| AX-158353238 | 27 | 85.599 | KV453311.1 | 2723604 | 27-scf00534 | 27 |
| AX-158353255 | 27 | 85.599 | KV453311.1 | 2742621 | 27-scf00534 | 27 |
| AX-158353271 | 27 | 85.599 | KV453311.1 | 2768988 | 27-scf00534 | 27 |
| AX-158353274 | 27 | 85.599 | KV453311.1 | 2773374 | 27-scf00534 | 27 |
| AX-158353295 | 27 | 85.599 | KV453311.1 | 2821828 | 27-scf00534 | 27 |
| AX-157851163 | 27 | 85.599 | KV453311.1 | 2878397 | 27-scf00534 | 27 |
| AX-158353330 | 27 | 85.599 | KV453311.1 | 2895876 | 27-scf00534 | 27 |
| AX-158353334 | 27 | 85.599 | KV453311.1 | 2913933 | 27-scf00534 | 27 |
| AX-158353336 | 27 | 85.599 | KV453311.1 | 2922669 | 27-scf00534 | 27 |
| AX-157851165 | 27 | 85.599 | KV453311.1 | 2923066 | 27-scf00534 | 27 |
| AX-158353340 | 27 | 85.599 | KV453311.1 | 2930310 | 27-scf00534 | 27 |
| AX-158353347 | 27 | 85.599 | KV453311.1 | 2954686 | 27-scf00534 | 27 |
| AX-158353348 | 27 | 85.599 | KV453311.1 | 2957535 | 27-scf00534 | 27 |
| AX-158353350 | 27 | 85.599 | KV453311.1 | 2965987 | 27-scf00534 | 27 |
| AX-158353352 | 27 | 85.599 | KV453311.1 | 2977839 | 27-scf00534 | 27 |
| AX-158353355 | 27 | 85.599 | KV453311.1 | 2986695 | 27-scf00534 | 27 |
| AX-158353471 | 27 | 85.599 | KV453311.1 | 3161126 | 27-scf00534 | 27 |
| AX-157717611 | 27 | 85.599 | KV453311.1 | 3213484 | 27-scf00534 | 27 |
| AX-158353243 | 27 | 85.689 | KV453311.1 | 2726955 | 27-scf00534 | 27 |
| AX-157862072 | 27 | 85.781 | KV453311.1 | 2612468 | 27-scf00534 | 27 |
| AX-158353234 | 27 | 85.781 | KV453311.1 | 2720915 | 27-scf00534 | 27 |
| AX-158353241 | 27 | 85.781 | KV453311.1 | 2725666 | 27-scf00534 | 27 |
| AX-158353246 | 27 | 85.781 | KV453311.1 | 2729260 | 27-scf00534 | 27 |
| AX-158353247 | 27 | 85.781 | KV453311.1 | 2729877 | 27-scf00534 | 27 |
| AX-158353254 | 27 | 85.781 | KV453311.1 | 2741105 | 27-scf00534 | 27 |
| AX-158353256 | 27 | 85.781 | KV453311.1 | 2748139 | 27-scf00534 | 27 |
| AX-158353259 | 27 | 85.781 | KV453311.1 | 2749737 | 27-scf00534 | 27 |
| AX-158353265 | 27 | 85.781 | KV453311.1 | 2760073 | 27-scf00534 | 27 |
| AX-158353267 | 27 | 85.781 | KV453311.1 | 2762913 | 27-scf00534 | 27 |
| AX-158353268 | 27 | 85.781 | KV453311.1 | 2764734 | 27-scf00534 | 27 |
| AX-158353270 | 27 | 85.781 | KV453311.1 | 2768216 | 27-scf00534 | 27 |
| AX-158353273 | 27 | 85.781 | KV453311.1 | 2771034 | 27-scf00534 | 27 |
| AX-158353275 | 27 | 85.781 | KV453311.1 | 2775488 | 27-scf00534 | 27 |
| AX-158353278 | 27 | 85.781 | KV453311.1 | 2779902 | 27-scf00534 | 27 |
| AX-158353279 | 27 | 85.781 | KV453311.1 | 2780669 | 27-scf00534 | 27 |
| AX-158353286 | 27 | 85.781 | KV453311.1 | 2790822 | 27-scf00534 | 27 |
| AX-158353287 | 27 | 85.781 | KV453311.1 | 2794742 | 27-scf00534 | 27 |
| AX-158353289 | 27 | 85.781 | KV453311.1 | 2798624 | 27-scf00534 | 27 |
| AX-158353290 | 27 | 85.781 | KV453311.1 | 2800359 | 27-scf00534 | 27 |
| AX-158353293 | 27 | 85.781 | KV453311.1 | 2813815 | 27-scf00534 | 27 |
| AX-158353294 | 27 | 85.781 | KV453311.1 | 2816282 | 27-scf00534 | 27 |
| AX-158353296 | 27 | 85.781 | KV453311.1 | 2822511 | 27-scf00534 | 27 |
| AX-158353298 | 27 | 85.781 | KV453311.1 | 2831172 | 27-scf00534 | 27 |
| AX-158353300 | 27 | 85.781 | KV453311.1 | 2833959 | 27-scf00534 | 27 |
| AX-158353308 | 27 | 85.781 | KV453311.1 | 2846071 | 27-scf00534 | 27 |
| AX-158353310 | 27 | 85.781 | KV453311.1 | 2851724 | 27-scf00534 | 27 |
| AX-158353311 | 27 | 85.781 | KV453311.1 | 2855244 | 27-scf00534 | 27 |
| AX-158353313 | 27 | 85.781 | KV453311.1 | 2857035 | 27-scf00534 | 27 |

|              |    |        |            |         |             |    |
|--------------|----|--------|------------|---------|-------------|----|
| AX-158353314 | 27 | 85.781 | KV453311.1 | 2858748 | 27-scf00534 | 27 |
| AX-158353321 | 27 | 85.781 | KV453311.1 | 2873631 | 27-scf00534 | 27 |
| AX-158353322 | 27 | 85.781 | KV453311.1 | 2874190 | 27-scf00534 | 27 |
| AX-158353323 | 27 | 85.781 | KV453311.1 | 2876003 | 27-scf00534 | 27 |
| AX-158353328 | 27 | 85.781 | KV453311.1 | 2890459 | 27-scf00534 | 27 |
| AX-157851167 | 27 | 85.781 | KV453311.1 | 3013273 | 27-scf00534 | 27 |
| AX-157851174 | 27 | 85.781 | KV453311.1 | 3209867 | 27-scf00534 | 27 |
| AX-158353349 | 27 | 85.804 | KV453311.1 | 2964774 | 27-scf00534 | 27 |
| AX-158419521 | 27 | 85.827 | KV453311.1 | 2978091 | 27-scf00534 | 27 |
| AX-158353353 | 27 | 85.851 | KV453311.1 | 2981108 | 27-scf00534 | 27 |
| AX-158353356 | 27 | 85.87  | KV453311.1 | 2989303 | 27-scf00534 | 27 |
| AX-158353359 | 27 | 85.87  | KV453311.1 | 3000639 | 27-scf00534 | 27 |
| AX-158353360 | 27 | 85.87  | KV453311.1 | 3001444 | 27-scf00534 | 27 |
| AX-158353361 | 27 | 85.87  | KV453311.1 | 3002189 | 27-scf00534 | 27 |
| AX-158353252 | 27 | 85.89  | KV453311.1 | 2736691 | 27-scf00534 | 27 |
| AX-158353324 | 27 | 85.89  | KV453311.1 | 2883836 | 27-scf00534 | 27 |
| AX-158353338 | 27 | 85.89  | KV453311.1 | 2927837 | 27-scf00534 | 27 |
| AX-158353357 | 27 | 85.89  | KV453311.1 | 2990857 | 27-scf00534 | 27 |
| AX-158353366 | 27 | 85.89  | KV453311.1 | 3013980 | 27-scf00534 | 27 |
| AX-158353369 | 27 | 85.89  | KV453311.1 | 3021257 | 27-scf00534 | 27 |
| AX-158353375 | 27 | 85.89  | KV453311.1 | 3032562 | 27-scf00534 | 27 |
| AX-157753278 | 27 | 85.89  | KV453311.1 | 3033243 | 27-scf00534 | 27 |
| AX-158353377 | 27 | 85.89  | KV453311.1 | 3033566 | 27-scf00534 | 27 |
| AX-158353378 | 27 | 85.89  | KV453311.1 | 3035351 | 27-scf00534 | 27 |
| AX-158353379 | 27 | 85.89  | KV453311.1 | 3036409 | 27-scf00534 | 27 |
| AX-158353380 | 27 | 85.89  | KV453311.1 | 3037001 | 27-scf00534 | 27 |
| AX-158353381 | 27 | 85.89  | KV453311.1 | 3038887 | 27-scf00534 | 27 |
| AX-158353382 | 27 | 85.89  | KV453311.1 | 3039490 | 27-scf00534 | 27 |
| AX-158353386 | 27 | 85.89  | KV453311.1 | 3043744 | 27-scf00534 | 27 |
| AX-158419524 | 27 | 85.89  | KV453311.1 | 3049543 | 27-scf00534 | 27 |
| AX-158353388 | 27 | 85.89  | KV453311.1 | 3049747 | 27-scf00534 | 27 |
| AX-158353391 | 27 | 85.89  | KV453311.1 | 3052250 | 27-scf00534 | 27 |
| AX-158353392 | 27 | 85.89  | KV453311.1 | 3059378 | 27-scf00534 | 27 |
| AX-158353396 | 27 | 85.89  | KV453311.1 | 3061751 | 27-scf00534 | 27 |
| AX-158353397 | 27 | 85.89  | KV453311.1 | 3062012 | 27-scf00534 | 27 |
| AX-158353398 | 27 | 85.89  | KV453311.1 | 3062255 | 27-scf00534 | 27 |
| AX-158353400 | 27 | 85.89  | KV453311.1 | 3065659 | 27-scf00534 | 27 |
| AX-157873911 | 27 | 85.89  | KV453311.1 | 3067932 | 27-scf00534 | 27 |
| AX-158353402 | 27 | 85.89  | KV453311.1 | 3072190 | 27-scf00534 | 27 |
| AX-158353403 | 27 | 85.89  | KV453311.1 | 3072508 | 27-scf00534 | 27 |
| AX-158353404 | 27 | 85.89  | KV453311.1 | 3072721 | 27-scf00534 | 27 |
| AX-158353406 | 27 | 85.89  | KV453311.1 | 3076893 | 27-scf00534 | 27 |
| AX-158353409 | 27 | 85.89  | KV453311.1 | 3079604 | 27-scf00534 | 27 |
| AX-158353410 | 27 | 85.89  | KV453311.1 | 3079846 | 27-scf00534 | 27 |
| AX-158353411 | 27 | 85.89  | KV453311.1 | 3080495 | 27-scf00534 | 27 |
| AX-158353412 | 27 | 85.89  | KV453311.1 | 3080759 | 27-scf00534 | 27 |
| AX-158353413 | 27 | 85.89  | KV453311.1 | 3081509 | 27-scf00534 | 27 |
| AX-158353414 | 27 | 85.89  | KV453311.1 | 3086225 | 27-scf00534 | 27 |
| AX-158353415 | 27 | 85.89  | KV453311.1 | 3091354 | 27-scf00534 | 27 |
| AX-158353416 | 27 | 85.89  | KV453311.1 | 3091693 | 27-scf00534 | 27 |
| AX-158353417 | 27 | 85.89  | KV453311.1 | 3092182 | 27-scf00534 | 27 |

|              |    |       |            |         |             |    |
|--------------|----|-------|------------|---------|-------------|----|
| AX-158353420 | 27 | 85.89 | KV453311.1 | 3095384 | 27-scf00534 | 27 |
| AX-158353421 | 27 | 85.89 | KV453311.1 | 3095600 | 27-scf00534 | 27 |
| AX-158353424 | 27 | 85.89 | KV453311.1 | 3096603 | 27-scf00534 | 27 |
| AX-158353425 | 27 | 85.89 | KV453311.1 | 3099386 | 27-scf00534 | 27 |
| AX-158353427 | 27 | 85.89 | KV453311.1 | 3100339 | 27-scf00534 | 27 |
| AX-158353429 | 27 | 85.89 | KV453311.1 | 3103166 | 27-scf00534 | 27 |
| AX-157715820 | 27 | 85.89 | KV453311.1 | 3104661 | 27-scf00534 | 27 |
| AX-158353434 | 27 | 85.89 | KV453311.1 | 3105860 | 27-scf00534 | 27 |
| AX-158353435 | 27 | 85.89 | KV453311.1 | 3106292 | 27-scf00534 | 27 |
| AX-158353436 | 27 | 85.89 | KV453311.1 | 3107149 | 27-scf00534 | 27 |
| AX-158353437 | 27 | 85.89 | KV453311.1 | 3108632 | 27-scf00534 | 27 |
| AX-158353438 | 27 | 85.89 | KV453311.1 | 3109636 | 27-scf00534 | 27 |
| AX-158353441 | 27 | 85.89 | KV453311.1 | 3111732 | 27-scf00534 | 27 |
| AX-158353442 | 27 | 85.89 | KV453311.1 | 3114654 | 27-scf00534 | 27 |
| AX-157873912 | 27 | 85.89 | KV453311.1 | 3115164 | 27-scf00534 | 27 |
| AX-158353443 | 27 | 85.89 | KV453311.1 | 3115599 | 27-scf00534 | 27 |
| AX-158353446 | 27 | 85.89 | KV453311.1 | 3122546 | 27-scf00534 | 27 |
| AX-157851168 | 27 | 85.89 | KV453311.1 | 3122854 | 27-scf00534 | 27 |
| AX-157851169 | 27 | 85.89 | KV453311.1 | 3123220 | 27-scf00534 | 27 |
| AX-158353447 | 27 | 85.89 | KV453311.1 | 3123386 | 27-scf00534 | 27 |
| AX-158353448 | 27 | 85.89 | KV453311.1 | 3123991 | 27-scf00534 | 27 |
| AX-157873914 | 27 | 85.89 | KV453311.1 | 3124733 | 27-scf00534 | 27 |
| AX-158353449 | 27 | 85.89 | KV453311.1 | 3127238 | 27-scf00534 | 27 |
| AX-158353450 | 27 | 85.89 | KV453311.1 | 3128208 | 27-scf00534 | 27 |
| AX-158353453 | 27 | 85.89 | KV453311.1 | 3131665 | 27-scf00534 | 27 |
| AX-158353454 | 27 | 85.89 | KV453311.1 | 3135995 | 27-scf00534 | 27 |
| AX-158353455 | 27 | 85.89 | KV453311.1 | 3136228 | 27-scf00534 | 27 |
| AX-157873915 | 27 | 85.89 | KV453311.1 | 3139582 | 27-scf00534 | 27 |
| AX-158353456 | 27 | 85.89 | KV453311.1 | 3142012 | 27-scf00534 | 27 |
| AX-158353457 | 27 | 85.89 | KV453311.1 | 3143411 | 27-scf00534 | 27 |
| AX-158353458 | 27 | 85.89 | KV453311.1 | 3144867 | 27-scf00534 | 27 |
| AX-158353459 | 27 | 85.89 | KV453311.1 | 3145146 | 27-scf00534 | 27 |
| AX-158353461 | 27 | 85.89 | KV453311.1 | 3146406 | 27-scf00534 | 27 |
| AX-157873916 | 27 | 85.89 | KV453311.1 | 3149056 | 27-scf00534 | 27 |
| AX-158353466 | 27 | 85.89 | KV453311.1 | 3155094 | 27-scf00534 | 27 |
| AX-158353467 | 27 | 85.89 | KV453311.1 | 3155645 | 27-scf00534 | 27 |
| AX-158353468 | 27 | 85.89 | KV453311.1 | 3156082 | 27-scf00534 | 27 |
| AX-158353469 | 27 | 85.89 | KV453311.1 | 3157154 | 27-scf00534 | 27 |
| AX-158353472 | 27 | 85.89 | KV453311.1 | 3162058 | 27-scf00534 | 27 |
| AX-158353473 | 27 | 85.89 | KV453311.1 | 3162377 | 27-scf00534 | 27 |
| AX-157851170 | 27 | 85.89 | KV453311.1 | 3163036 | 27-scf00534 | 27 |
| AX-158353475 | 27 | 85.89 | KV453311.1 | 3165247 | 27-scf00534 | 27 |
| AX-158353476 | 27 | 85.89 | KV453311.1 | 3166979 | 27-scf00534 | 27 |
| AX-158353477 | 27 | 85.89 | KV453311.1 | 3168597 | 27-scf00534 | 27 |
| AX-158353478 | 27 | 85.89 | KV453311.1 | 3169014 | 27-scf00534 | 27 |
| AX-158353479 | 27 | 85.89 | KV453311.1 | 3170848 | 27-scf00534 | 27 |
| AX-158353480 | 27 | 85.89 | KV453311.1 | 3173052 | 27-scf00534 | 27 |
| AX-158353482 | 27 | 85.89 | KV453311.1 | 3175467 | 27-scf00534 | 27 |
| AX-158353483 | 27 | 85.89 | KV453311.1 | 3175973 | 27-scf00534 | 27 |
| AX-158353484 | 27 | 85.89 | KV453311.1 | 3176702 | 27-scf00534 | 27 |
| AX-158353485 | 27 | 85.89 | KV453311.1 | 3176989 | 27-scf00534 | 27 |

|              |    |        |            |         |             |    |
|--------------|----|--------|------------|---------|-------------|----|
| AX-158353486 | 27 | 85.89  | KV453311.1 | 3177896 | 27-scf00534 | 27 |
| AX-158353488 | 27 | 85.89  | KV453311.1 | 3180838 | 27-scf00534 | 27 |
| AX-158353490 | 27 | 85.89  | KV453311.1 | 3185804 | 27-scf00534 | 27 |
| AX-158353491 | 27 | 85.89  | KV453311.1 | 3188116 | 27-scf00534 | 27 |
| AX-158353492 | 27 | 85.89  | KV453311.1 | 3188494 | 27-scf00534 | 27 |
| AX-158353493 | 27 | 85.89  | KV453311.1 | 3189338 | 27-scf00534 | 27 |
| AX-157851171 | 27 | 85.89  | KV453311.1 | 3190284 | 27-scf00534 | 27 |
| AX-158353494 | 27 | 85.89  | KV453311.1 | 3191076 | 27-scf00534 | 27 |
| AX-157851173 | 27 | 85.89  | KV453311.1 | 3197629 | 27-scf00534 | 27 |
| AX-158353498 | 27 | 85.89  | KV453311.1 | 3198429 | 27-scf00534 | 27 |
| AX-158353499 | 27 | 85.89  | KV453311.1 | 3198917 | 27-scf00534 | 27 |
| AX-158353500 | 27 | 85.89  | KV453311.1 | 3202130 | 27-scf00534 | 27 |
| AX-158353503 | 27 | 85.89  | KV453311.1 | 3207698 | 27-scf00534 | 27 |
| AX-158353505 | 27 | 85.89  | KV453311.1 | 3216258 | 27-scf00534 | 27 |
| AX-157765129 | 27 | 85.89  | KV453311.1 | 3218975 | 27-scf00534 | 27 |
| AX-158353512 | 27 | 85.89  | KV453311.1 | 3230993 | 27-scf00534 | 27 |
| AX-157752423 | 27 | 86.565 | KV453311.1 | 3227885 | 27-scf00534 | 27 |
| AX-158353514 | 28 | 0      | KV453260.1 | 12059   | 25-scf00535 | 25 |
| AX-157775873 | 28 | 0.36   | KV453260.1 | 113101  | 25-scf00535 | 25 |
| AX-158353521 | 28 | 0.604  | KV453260.1 | 54910   | 25-scf00535 | 25 |
| AX-157882453 | 28 | 0.604  | KV453260.1 | 55636   | 25-scf00535 | 25 |
| AX-158419530 | 28 | 0.604  | KV453260.1 | 68962   | 25-scf00535 | 25 |
| AX-158353528 | 28 | 0.604  | KV453260.1 | 94618   | 25-scf00535 | 25 |
| AX-158353529 | 28 | 0.604  | KV453260.1 | 97099   | 25-scf00535 | 25 |
| AX-157748261 | 28 | 0.604  | KV453260.1 | 107193  | 25-scf00535 | 25 |
| AX-158353531 | 28 | 0.604  | KV453260.1 | 110017  | 25-scf00535 | 25 |
| AX-158353535 | 28 | 0.604  | KV453260.1 | 118316  | 25-scf00535 | 25 |
| AX-157775056 | 28 | 0.604  | KV453260.1 | 122934  | 25-scf00535 | 25 |
| AX-157851178 | 28 | 0.604  | KV453260.1 | 124471  | 25-scf00535 | 25 |
| AX-158353540 | 28 | 0.604  | KV453260.1 | 125954  | 25-scf00535 | 25 |
| AX-158353541 | 28 | 0.604  | KV453260.1 | 127376  | 25-scf00535 | 25 |
| AX-158353544 | 28 | 0.604  | KV453260.1 | 130900  | 25-scf00535 | 25 |
| AX-158353545 | 28 | 0.604  | KV453260.1 | 131478  | 25-scf00535 | 25 |
| AX-158353546 | 28 | 0.604  | KV453260.1 | 131644  | 25-scf00535 | 25 |
| AX-158353550 | 28 | 0.604  | KV453260.1 | 136592  | 25-scf00535 | 25 |
| AX-158353551 | 28 | 0.604  | KV453260.1 | 136699  | 25-scf00535 | 25 |
| AX-158353552 | 28 | 0.604  | KV453260.1 | 138073  | 25-scf00535 | 25 |
| AX-158353554 | 28 | 0.604  | KV453260.1 | 140861  | 25-scf00535 | 25 |
| AX-158353555 | 28 | 0.604  | KV453260.1 | 141598  | 25-scf00535 | 25 |
| AX-158353556 | 28 | 0.604  | KV453260.1 | 142348  | 25-scf00535 | 25 |
| AX-158353558 | 28 | 0.604  | KV453260.1 | 143554  | 25-scf00535 | 25 |
| AX-158353560 | 28 | 0.604  | KV453260.1 | 145799  | 25-scf00535 | 25 |
| AX-158353561 | 28 | 0.604  | KV453260.1 | 146313  | 25-scf00535 | 25 |
| AX-157851179 | 28 | 0.604  | KV453260.1 | 150207  | 25-scf00535 | 25 |
| AX-158353562 | 28 | 0.604  | KV453260.1 | 154354  | 25-scf00535 | 25 |
| AX-158353563 | 28 | 0.604  | KV453260.1 | 154693  | 25-scf00535 | 25 |
| AX-157701608 | 28 | 0.604  | KV453260.1 | 155918  | 25-scf00535 | 25 |
| AX-158353564 | 28 | 0.604  | KV453260.1 | 156559  | 25-scf00535 | 25 |
| AX-158353565 | 28 | 0.604  | KV453260.1 | 158145  | 25-scf00535 | 25 |
| AX-157774490 | 28 | 0.604  | KV453260.1 | 158305  | 25-scf00535 | 25 |
| AX-158353568 | 28 | 0.604  | KV453260.1 | 160712  | 25-scf00535 | 25 |

|              |    |       |            |        |             |    |
|--------------|----|-------|------------|--------|-------------|----|
| AX-158353569 | 28 | 0.604 | KV453260.1 | 161308 | 25-scf00535 | 25 |
| AX-158353571 | 28 | 0.604 | KV453260.1 | 162367 | 25-scf00535 | 25 |
| AX-158353572 | 28 | 0.604 | KV453260.1 | 164141 | 25-scf00535 | 25 |
| AX-158353574 | 28 | 0.604 | KV453260.1 | 166630 | 25-scf00535 | 25 |
| AX-158353576 | 28 | 0.604 | KV453260.1 | 170492 | 25-scf00535 | 25 |
| AX-157882455 | 28 | 0.604 | KV453260.1 | 174904 | 25-scf00535 | 25 |
| AX-158353579 | 28 | 0.604 | KV453260.1 | 176088 | 25-scf00535 | 25 |
| AX-157749960 | 28 | 0.604 | KV453260.1 | 176940 | 25-scf00535 | 25 |
| AX-158353581 | 28 | 0.604 | KV453260.1 | 181423 | 25-scf00535 | 25 |
| AX-158353582 | 28 | 0.604 | KV453260.1 | 182249 | 25-scf00535 | 25 |
| AX-158353583 | 28 | 0.604 | KV453260.1 | 184636 | 25-scf00535 | 25 |
| AX-158353584 | 28 | 0.604 | KV453260.1 | 185443 | 25-scf00535 | 25 |
| AX-158353586 | 28 | 0.604 | KV453260.1 | 186569 | 25-scf00535 | 25 |
| AX-158353587 | 28 | 0.604 | KV453260.1 | 187516 | 25-scf00535 | 25 |
| AX-158353589 | 28 | 0.604 | KV453260.1 | 190736 | 25-scf00535 | 25 |
| AX-158353590 | 28 | 0.604 | KV453260.1 | 192100 | 25-scf00535 | 25 |
| AX-157851180 | 28 | 0.604 | KV453260.1 | 193227 | 25-scf00535 | 25 |
| AX-158353591 | 28 | 0.604 | KV453260.1 | 194920 | 25-scf00535 | 25 |
| AX-157747054 | 28 | 0.604 | KV453260.1 | 200801 | 25-scf00535 | 25 |
| AX-158353594 | 28 | 0.604 | KV453260.1 | 201719 | 25-scf00535 | 25 |
| AX-158353595 | 28 | 0.604 | KV453260.1 | 202098 | 25-scf00535 | 25 |
| AX-157851182 | 28 | 0.604 | KV453260.1 | 202834 | 25-scf00535 | 25 |
| AX-158353596 | 28 | 0.604 | KV453260.1 | 203604 | 25-scf00535 | 25 |
| AX-158353597 | 28 | 0.604 | KV453260.1 | 205428 | 25-scf00535 | 25 |
| AX-158353598 | 28 | 0.604 | KV453260.1 | 206333 | 25-scf00535 | 25 |
| AX-158353599 | 28 | 0.604 | KV453260.1 | 209015 | 25-scf00535 | 25 |
| AX-157888988 | 28 | 0.604 | KV453260.1 | 214138 | 25-scf00535 | 25 |
| AX-157888989 | 28 | 0.604 | KV453260.1 | 215180 | 25-scf00535 | 25 |
| AX-158353601 | 28 | 0.604 | KV453260.1 | 216352 | 25-scf00535 | 25 |
| AX-158353603 | 28 | 0.604 | KV453260.1 | 218395 | 25-scf00535 | 25 |
| AX-158353604 | 28 | 0.604 | KV453260.1 | 221348 | 25-scf00535 | 25 |
| AX-158353605 | 28 | 0.604 | KV453260.1 | 222820 | 25-scf00535 | 25 |
| AX-157888990 | 28 | 0.604 | KV453260.1 | 222991 | 25-scf00535 | 25 |
| AX-157851184 | 28 | 0.604 | KV453260.1 | 223120 | 25-scf00535 | 25 |
| AX-157748248 | 28 | 0.604 | KV453260.1 | 224739 | 25-scf00535 | 25 |
| AX-158353607 | 28 | 0.604 | KV453260.1 | 226262 | 25-scf00535 | 25 |
| AX-157888992 | 28 | 0.604 | KV453260.1 | 227011 | 25-scf00535 | 25 |
| AX-157851185 | 28 | 0.604 | KV453260.1 | 227655 | 25-scf00535 | 25 |
| AX-157851186 | 28 | 0.604 | KV453260.1 | 230793 | 25-scf00535 | 25 |
| AX-157851187 | 28 | 0.604 | KV453260.1 | 232474 | 25-scf00535 | 25 |
| AX-158353608 | 28 | 0.604 | KV453260.1 | 234211 | 25-scf00535 | 25 |
| AX-157851189 | 28 | 0.604 | KV453260.1 | 234434 | 25-scf00535 | 25 |
| AX-157862077 | 28 | 0.604 | KV453260.1 | 235371 | 25-scf00535 | 25 |
| AX-157740878 | 28 | 0.604 | KV453260.1 | 248435 | 25-scf00535 | 25 |
| AX-158353614 | 28 | 0.604 | KV453260.1 | 250611 | 25-scf00535 | 25 |
| AX-157851191 | 28 | 0.604 | KV453260.1 | 250680 | 25-scf00535 | 25 |
| AX-157755789 | 28 | 0.604 | KV453260.1 | 251353 | 25-scf00535 | 25 |
| AX-157851192 | 28 | 0.604 | KV453260.1 | 251680 | 25-scf00535 | 25 |
| AX-158353615 | 28 | 0.604 | KV453260.1 | 254481 | 25-scf00535 | 25 |
| AX-158353616 | 28 | 0.604 | KV453260.1 | 262483 | 25-scf00535 | 25 |
| AX-158353617 | 28 | 0.604 | KV453260.1 | 265053 | 25-scf00535 | 25 |

|              |    |       |            |        |             |    |
|--------------|----|-------|------------|--------|-------------|----|
| AX-158353618 | 28 | 0.604 | KV453260.1 | 266491 | 25-scf00535 | 25 |
| AX-158353623 | 28 | 0.604 | KV453260.1 | 286736 | 25-scf00535 | 25 |
| AX-158353626 | 28 | 0.604 | KV453260.1 | 292807 | 25-scf00535 | 25 |
| AX-158353627 | 28 | 0.604 | KV453260.1 | 293542 | 25-scf00535 | 25 |
| AX-158353629 | 28 | 0.604 | KV453260.1 | 307153 | 25-scf00535 | 25 |
| AX-158353631 | 28 | 0.604 | KV453260.1 | 315480 | 25-scf00535 | 25 |
| AX-158353632 | 28 | 0.604 | KV453260.1 | 325871 | 25-scf00535 | 25 |
| AX-158353633 | 28 | 0.604 | KV453260.1 | 329877 | 25-scf00535 | 25 |
| AX-157851195 | 28 | 0.604 | KV453260.1 | 331194 | 25-scf00535 | 25 |
| AX-157851197 | 28 | 0.604 | KV453260.1 | 339434 | 25-scf00535 | 25 |
| AX-158353636 | 28 | 0.604 | KV453260.1 | 351252 | 25-scf00535 | 25 |
| AX-158353638 | 28 | 0.604 | KV453260.1 | 359583 | 25-scf00535 | 25 |
| AX-158353639 | 28 | 0.604 | KV453260.1 | 362002 | 25-scf00535 | 25 |
| AX-158353641 | 28 | 0.604 | KV453260.1 | 369094 | 25-scf00535 | 25 |
| AX-158353644 | 28 | 0.604 | KV453260.1 | 384729 | 25-scf00535 | 25 |
| AX-158353649 | 28 | 0.604 | KV453260.1 | 393740 | 25-scf00535 | 25 |
| AX-158353652 | 28 | 0.604 | KV453260.1 | 411619 | 25-scf00535 | 25 |
| AX-158353653 | 28 | 0.604 | KV453260.1 | 414655 | 25-scf00535 | 25 |
| AX-158353655 | 28 | 0.604 | KV453260.1 | 416335 | 25-scf00535 | 25 |
| AX-157851217 | 28 | 0.604 | KV453260.1 | 433128 | 25-scf00535 | 25 |
| AX-157851218 | 28 | 0.604 | KV453260.1 | 433292 | 25-scf00535 | 25 |
| AX-158353663 | 28 | 0.604 | KV453260.1 | 445171 | 25-scf00535 | 25 |
| AX-157851221 | 28 | 0.604 | KV453260.1 | 453624 | 25-scf00535 | 25 |
| AX-157715722 | 28 | 0.604 | KV453260.1 | 461941 | 25-scf00535 | 25 |
| AX-158353674 | 28 | 0.604 | KV453260.1 | 477749 | 25-scf00535 | 25 |
| AX-158419542 | 28 | 0.604 | KV453260.1 | 498446 | 25-scf00535 | 25 |
| AX-158353684 | 28 | 0.604 | KV453260.1 | 524691 | 25-scf00535 | 25 |
| AX-157851231 | 28 | 0.604 | KV453260.1 | 526732 | 25-scf00535 | 25 |
| AX-157745866 | 28 | 0.604 | KV453260.1 | 534767 | 25-scf00535 | 25 |
| AX-158353686 | 28 | 0.604 | KV453260.1 | 536262 | 25-scf00535 | 25 |
| AX-158353687 | 28 | 0.604 | KV453260.1 | 537381 | 25-scf00535 | 25 |
| AX-158353689 | 28 | 0.604 | KV453260.1 | 542070 | 25-scf00535 | 25 |
| AX-158353694 | 28 | 0.604 | KV453260.1 | 570005 | 25-scf00535 | 25 |
| AX-158353696 | 28 | 0.604 | KV453260.1 | 571977 | 25-scf00535 | 25 |
| AX-157889000 | 28 | 0.604 | KV453260.1 | 574324 | 25-scf00535 | 25 |
| AX-158353698 | 28 | 0.604 | KV453260.1 | 575746 | 25-scf00535 | 25 |
| AX-158353699 | 28 | 0.604 | KV453260.1 | 578372 | 25-scf00535 | 25 |
| AX-158353700 | 28 | 0.604 | KV453260.1 | 582964 | 25-scf00535 | 25 |
| AX-158353704 | 28 | 0.604 | KV453260.1 | 593715 | 25-scf00535 | 25 |
| AX-157743135 | 28 | 0.604 | KV453260.1 | 596663 | 25-scf00535 | 25 |
| AX-158353706 | 28 | 0.604 | KV453260.1 | 602274 | 25-scf00535 | 25 |
| AX-158353709 | 28 | 0.604 | KV453260.1 | 614577 | 25-scf00535 | 25 |
| AX-158353710 | 28 | 0.604 | KV453260.1 | 637155 | 25-scf00535 | 25 |
| AX-158353711 | 28 | 0.604 | KV453260.1 | 640817 | 25-scf00535 | 25 |
| AX-157889001 | 28 | 0.604 | KV453260.1 | 647834 | 25-scf00535 | 25 |
| AX-158353713 | 28 | 0.604 | KV453260.1 | 652083 | 25-scf00535 | 25 |
| AX-158353714 | 28 | 0.604 | KV453260.1 | 653110 | 25-scf00535 | 25 |
| AX-158353716 | 28 | 0.604 | KV453260.1 | 667552 | 25-scf00535 | 25 |
| AX-157889002 | 28 | 0.604 | KV453260.1 | 672617 | 25-scf00535 | 25 |
| AX-158353720 | 28 | 0.604 | KV453260.1 | 672877 | 25-scf00535 | 25 |
| AX-158353724 | 28 | 0.604 | KV453260.1 | 676994 | 25-scf00535 | 25 |



|              |    |       |            |        |             |    |
|--------------|----|-------|------------|--------|-------------|----|
| AX-158419545 | 28 | 0.604 | KV453260.1 | 700835 | 25-scf00535 | 25 |
| AX-158353757 | 28 | 0.604 | KV453260.1 | 718204 | 25-scf00535 | 25 |
| AX-158353760 | 28 | 0.604 | KV453260.1 | 728050 | 25-scf00535 | 25 |
| AX-158353762 | 28 | 0.604 | KV453260.1 | 728980 | 25-scf00535 | 25 |
| AX-158353765 | 28 | 0.604 | KV453260.1 | 734415 | 25-scf00535 | 25 |
| AX-158353769 | 28 | 0.604 | KV453260.1 | 741736 | 25-scf00535 | 25 |
| AX-158353770 | 28 | 0.604 | KV453260.1 | 742370 | 25-scf00535 | 25 |
| AX-158353771 | 28 | 0.604 | KV453260.1 | 742666 | 25-scf00535 | 25 |
| AX-158353772 | 28 | 0.604 | KV453260.1 | 743204 | 25-scf00535 | 25 |
| AX-158353775 | 28 | 0.604 | KV453260.1 | 745496 | 25-scf00535 | 25 |
| AX-158353780 | 28 | 0.604 | KV453260.1 | 752012 | 25-scf00535 | 25 |
| AX-158353783 | 28 | 0.604 | KV453260.1 | 754435 | 25-scf00535 | 25 |
| AX-158353784 | 28 | 0.604 | KV453260.1 | 755325 | 25-scf00535 | 25 |
| AX-158353786 | 28 | 0.604 | KV453260.1 | 758648 | 25-scf00535 | 25 |
| AX-158353787 | 28 | 0.604 | KV453260.1 | 759062 | 25-scf00535 | 25 |
| AX-158353788 | 28 | 0.604 | KV453260.1 | 759865 | 25-scf00535 | 25 |
| AX-158353791 | 28 | 0.604 | KV453260.1 | 763417 | 25-scf00535 | 25 |
| AX-158353792 | 28 | 0.604 | KV453260.1 | 765809 | 25-scf00535 | 25 |
| AX-158353794 | 28 | 0.604 | KV453260.1 | 767446 | 25-scf00535 | 25 |
| AX-158353796 | 28 | 0.604 | KV453260.1 | 771396 | 25-scf00535 | 25 |
| AX-158353798 | 28 | 0.604 | KV453260.1 | 776186 | 25-scf00535 | 25 |
| AX-158353799 | 28 | 0.604 | KV453260.1 | 776650 | 25-scf00535 | 25 |
| AX-158353801 | 28 | 0.604 | KV453260.1 | 777979 | 25-scf00535 | 25 |
| AX-158353803 | 28 | 0.604 | KV453260.1 | 781874 | 25-scf00535 | 25 |
| AX-158353805 | 28 | 0.604 | KV453260.1 | 783029 | 25-scf00535 | 25 |
| AX-158353806 | 28 | 0.604 | KV453260.1 | 783468 | 25-scf00535 | 25 |
| AX-158353807 | 28 | 0.604 | KV453260.1 | 784381 | 25-scf00535 | 25 |
| AX-158353810 | 28 | 0.604 | KV453260.1 | 787739 | 25-scf00535 | 25 |
| AX-158353811 | 28 | 0.604 | KV453260.1 | 788473 | 25-scf00535 | 25 |
| AX-158353813 | 28 | 0.604 | KV453260.1 | 790179 | 25-scf00535 | 25 |
| AX-158353818 | 28 | 0.604 | KV453260.1 | 794212 | 25-scf00535 | 25 |
| AX-158353821 | 28 | 0.604 | KV453260.1 | 797377 | 25-scf00535 | 25 |
| AX-158353822 | 28 | 0.604 | KV453260.1 | 798262 | 25-scf00535 | 25 |
| AX-158353824 | 28 | 0.604 | KV453260.1 | 799789 | 25-scf00535 | 25 |
| AX-158353827 | 28 | 0.604 | KV453260.1 | 802069 | 25-scf00535 | 25 |
| AX-158353829 | 28 | 0.604 | KV453260.1 | 803073 | 25-scf00535 | 25 |
| AX-158353830 | 28 | 0.604 | KV453260.1 | 804853 | 25-scf00535 | 25 |
| AX-158353831 | 28 | 0.604 | KV453260.1 | 806778 | 25-scf00535 | 25 |
| AX-157889008 | 28 | 0.604 | KV453260.1 | 807003 | 25-scf00535 | 25 |
| AX-158353832 | 28 | 0.604 | KV453260.1 | 807524 | 25-scf00535 | 25 |
| AX-158353837 | 28 | 0.604 | KV453260.1 | 813114 | 25-scf00535 | 25 |
| AX-158353838 | 28 | 0.604 | KV453260.1 | 814275 | 25-scf00535 | 25 |
| AX-157743421 | 28 | 0.604 | KV453260.1 | 817442 | 25-scf00535 | 25 |
| AX-157727403 | 28 | 0.604 | KV453260.1 | 818911 | 25-scf00535 | 25 |
| AX-158353843 | 28 | 0.604 | KV453260.1 | 822000 | 25-scf00535 | 25 |
| AX-158353844 | 28 | 0.604 | KV453260.1 | 822922 | 25-scf00535 | 25 |
| AX-158353845 | 28 | 0.604 | KV453260.1 | 823299 | 25-scf00535 | 25 |
| AX-158353846 | 28 | 0.604 | KV453260.1 | 823835 | 25-scf00535 | 25 |
| AX-158353849 | 28 | 0.604 | KV453260.1 | 827848 | 25-scf00535 | 25 |
| AX-158413313 | 28 | 0.604 | KV453260.1 | 828173 | 25-scf00535 | 25 |
| AX-158353850 | 28 | 0.604 | KV453260.1 | 832514 | 25-scf00535 | 25 |

|              |    |       |            |        |             |    |
|--------------|----|-------|------------|--------|-------------|----|
| AX-157851238 | 28 | 0.604 | KV453260.1 | 835389 | 25-scf00535 | 25 |
| AX-158353852 | 28 | 0.604 | KV453260.1 | 836142 | 25-scf00535 | 25 |
| AX-157851240 | 28 | 0.604 | KV453260.1 | 838325 | 25-scf00535 | 25 |
| AX-158353853 | 28 | 0.604 | KV453260.1 | 839015 | 25-scf00535 | 25 |
| AX-158353854 | 28 | 0.604 | KV453260.1 | 841402 | 25-scf00535 | 25 |
| AX-158353858 | 28 | 0.604 | KV453260.1 | 848881 | 25-scf00535 | 25 |
| AX-158353859 | 28 | 0.604 | KV453260.1 | 849555 | 25-scf00535 | 25 |
| AX-158353865 | 28 | 0.604 | KV453260.1 | 856448 | 25-scf00535 | 25 |
| AX-158353866 | 28 | 0.604 | KV453260.1 | 857322 | 25-scf00535 | 25 |
| AX-157725335 | 28 | 0.604 | KV453260.1 | 857709 | 25-scf00535 | 25 |
| AX-158353867 | 28 | 0.604 | KV453260.1 | 858073 | 25-scf00535 | 25 |
| AX-158353868 | 28 | 0.604 | KV453260.1 | 859810 | 25-scf00535 | 25 |
| AX-158353870 | 28 | 0.604 | KV453260.1 | 864693 | 25-scf00535 | 25 |
| AX-158353872 | 28 | 0.604 | KV453260.1 | 867182 | 25-scf00535 | 25 |
| AX-158353873 | 28 | 0.604 | KV453260.1 | 868590 | 25-scf00535 | 25 |
| AX-158353876 | 28 | 0.604 | KV453260.1 | 870733 | 25-scf00535 | 25 |
| AX-158353877 | 28 | 0.604 | KV453260.1 | 874779 | 25-scf00535 | 25 |
| AX-158353878 | 28 | 0.604 | KV453260.1 | 875727 | 25-scf00535 | 25 |
| AX-158353879 | 28 | 0.604 | KV453260.1 | 876725 | 25-scf00535 | 25 |
| AX-158353880 | 28 | 0.604 | KV453260.1 | 877431 | 25-scf00535 | 25 |
| AX-158353882 | 28 | 0.604 | KV453260.1 | 879116 | 25-scf00535 | 25 |
| AX-158353883 | 28 | 0.604 | KV453260.1 | 879652 | 25-scf00535 | 25 |
| AX-158353884 | 28 | 0.604 | KV453260.1 | 881505 | 25-scf00535 | 25 |
| AX-158419549 | 28 | 0.604 | KV453260.1 | 885495 | 25-scf00535 | 25 |
| AX-158413314 | 28 | 0.604 | KV453260.1 | 885741 | 25-scf00535 | 25 |
| AX-158353888 | 28 | 0.604 | KV453260.1 | 886428 | 25-scf00535 | 25 |
| AX-158353889 | 28 | 0.604 | KV453260.1 | 886875 | 25-scf00535 | 25 |
| AX-157851244 | 28 | 0.604 | KV453260.1 | 887120 | 25-scf00535 | 25 |
| AX-157851245 | 28 | 0.604 | KV453260.1 | 889523 | 25-scf00535 | 25 |
| AX-158353891 | 28 | 0.604 | KV453260.1 | 892096 | 25-scf00535 | 25 |
| AX-157772264 | 28 | 0.604 | KV453260.1 | 892280 | 25-scf00535 | 25 |
| AX-158353892 | 28 | 0.604 | KV453260.1 | 893291 | 25-scf00535 | 25 |
| AX-158423841 | 28 | 0.604 | KV453260.1 | 897956 | 25-scf00535 | 25 |
| AX-158353896 | 28 | 0.604 | KV453260.1 | 898186 | 25-scf00535 | 25 |
| AX-158353897 | 28 | 0.604 | KV453260.1 | 900137 | 25-scf00535 | 25 |
| AX-158353900 | 28 | 0.604 | KV453260.1 | 902037 | 25-scf00535 | 25 |
| AX-158353902 | 28 | 0.604 | KV453260.1 | 905156 | 25-scf00535 | 25 |
| AX-158353904 | 28 | 0.604 | KV453260.1 | 906364 | 25-scf00535 | 25 |
| AX-158353905 | 28 | 0.604 | KV453260.1 | 906836 | 25-scf00535 | 25 |
| AX-157851247 | 28 | 0.604 | KV453260.1 | 908424 | 25-scf00535 | 25 |
| AX-158353907 | 28 | 0.604 | KV453260.1 | 909014 | 25-scf00535 | 25 |
| AX-158353909 | 28 | 0.604 | KV453260.1 | 910168 | 25-scf00535 | 25 |
| AX-158353910 | 28 | 0.604 | KV453260.1 | 911937 | 25-scf00535 | 25 |
| AX-158353911 | 28 | 0.604 | KV453260.1 | 913644 | 25-scf00535 | 25 |
| AX-158353914 | 28 | 0.604 | KV453260.1 | 917366 | 25-scf00535 | 25 |
| AX-157862082 | 28 | 0.604 | KV453260.1 | 919059 | 25-scf00535 | 25 |
| AX-158353917 | 28 | 0.604 | KV453260.1 | 919743 | 25-scf00535 | 25 |
| AX-158353918 | 28 | 0.604 | KV453260.1 | 920094 | 25-scf00535 | 25 |
| AX-158353919 | 28 | 0.604 | KV453260.1 | 921120 | 25-scf00535 | 25 |
| AX-158353921 | 28 | 0.604 | KV453260.1 | 921860 | 25-scf00535 | 25 |
| AX-158353923 | 28 | 0.604 | KV453260.1 | 922493 | 25-scf00535 | 25 |

|              |    |       |            |        |             |    |
|--------------|----|-------|------------|--------|-------------|----|
| AX-158353924 | 28 | 0.604 | KV453260.1 | 924712 | 25-scf00535 | 25 |
| AX-158353925 | 28 | 0.604 | KV453260.1 | 926893 | 25-scf00535 | 25 |
| AX-158353927 | 28 | 0.604 | KV453260.1 | 928811 | 25-scf00535 | 25 |
| AX-157851249 | 28 | 0.604 | KV453260.1 | 929869 | 25-scf00535 | 25 |
| AX-158353929 | 28 | 0.604 | KV453260.1 | 932782 | 25-scf00535 | 25 |
| AX-158353931 | 28 | 0.604 | KV453260.1 | 935254 | 25-scf00535 | 25 |
| AX-158353936 | 28 | 0.604 | KV453260.1 | 938110 | 25-scf00535 | 25 |
| AX-158353939 | 28 | 0.604 | KV453260.1 | 939877 | 25-scf00535 | 25 |
| AX-158353940 | 28 | 0.604 | KV453260.1 | 940645 | 25-scf00535 | 25 |
| AX-158353942 | 28 | 0.604 | KV453260.1 | 942301 | 25-scf00535 | 25 |
| AX-158353944 | 28 | 0.604 | KV453260.1 | 943287 | 25-scf00535 | 25 |
| AX-158353945 | 28 | 0.604 | KV453260.1 | 947469 | 25-scf00535 | 25 |
| AX-158353950 | 28 | 0.604 | KV453260.1 | 959860 | 25-scf00535 | 25 |
| AX-158353953 | 28 | 0.604 | KV453260.1 | 967007 | 25-scf00535 | 25 |
| AX-158353958 | 28 | 0.604 | KV453260.1 | 971775 | 25-scf00535 | 25 |
| AX-158353959 | 28 | 0.604 | KV453260.1 | 972726 | 25-scf00535 | 25 |
| AX-158353961 | 28 | 0.604 | KV453260.1 | 974501 | 25-scf00535 | 25 |
| AX-158353962 | 28 | 0.604 | KV453260.1 | 974771 | 25-scf00535 | 25 |
| AX-158353963 | 28 | 0.604 | KV453260.1 | 975136 | 25-scf00535 | 25 |
| AX-158353964 | 28 | 0.604 | KV453260.1 | 977346 | 25-scf00535 | 25 |
| AX-157724790 | 28 | 0.604 | KV453260.1 | 978121 | 25-scf00535 | 25 |
| AX-158353966 | 28 | 0.604 | KV453260.1 | 979344 | 25-scf00535 | 25 |
| AX-158353968 | 28 | 0.604 | KV453260.1 | 983808 | 25-scf00535 | 25 |
| AX-158353970 | 28 | 0.604 | KV453260.1 | 987481 | 25-scf00535 | 25 |
| AX-158353972 | 28 | 0.604 | KV453260.1 | 988394 | 25-scf00535 | 25 |
| AX-158353973 | 28 | 0.604 | KV453260.1 | 989673 | 25-scf00535 | 25 |
| AX-158353976 | 28 | 0.604 | KV453261.1 | 2427   | 25-scf00536 | 25 |
| AX-157744905 | 28 | 0.604 | KV453261.1 | 3368   | 25-scf00536 | 25 |
| AX-158353978 | 28 | 0.604 | KV453261.1 | 7320   | 25-scf00536 | 25 |
| AX-158353979 | 28 | 0.604 | KV453261.1 | 7725   | 25-scf00536 | 25 |
| AX-158353980 | 28 | 0.604 | KV453261.1 | 9678   | 25-scf00536 | 25 |
| AX-157851250 | 28 | 0.604 | KV453261.1 | 14530  | 25-scf00536 | 25 |
| AX-158353983 | 28 | 0.604 | KV453261.1 | 15165  | 25-scf00536 | 25 |
| AX-158353984 | 28 | 0.604 | KV453261.1 | 15405  | 25-scf00536 | 25 |
| AX-158353985 | 28 | 0.604 | KV453261.1 | 19056  | 25-scf00536 | 25 |
| AX-158353988 | 28 | 0.604 | KV453261.1 | 21881  | 25-scf00536 | 25 |
| AX-158353991 | 28 | 0.604 | KV453261.1 | 26456  | 25-scf00536 | 25 |
| AX-157851253 | 28 | 0.604 | KV453261.1 | 29655  | 25-scf00536 | 25 |
| AX-157851254 | 28 | 0.604 | KV453261.1 | 30546  | 25-scf00536 | 25 |
| AX-158353995 | 28 | 0.604 | KV453261.1 | 30856  | 25-scf00536 | 25 |
| AX-158353999 | 28 | 0.604 | KV453261.1 | 38386  | 25-scf00536 | 25 |
| AX-158354001 | 28 | 0.604 | KV453261.1 | 39435  | 25-scf00536 | 25 |
| AX-158354002 | 28 | 0.604 | KV453261.1 | 44963  | 25-scf00536 | 25 |
| AX-158354004 | 28 | 0.604 | KV453261.1 | 45694  | 25-scf00536 | 25 |
| AX-158354005 | 28 | 0.604 | KV453261.1 | 46127  | 25-scf00536 | 25 |
| AX-158354008 | 28 | 0.604 | KV453261.1 | 47703  | 25-scf00536 | 25 |
| AX-158354009 | 28 | 0.604 | KV453261.1 | 48361  | 25-scf00536 | 25 |
| AX-158354010 | 28 | 0.604 | KV453261.1 | 48916  | 25-scf00536 | 25 |
| AX-157851255 | 28 | 0.604 | KV453261.1 | 57791  | 25-scf00536 | 25 |
| AX-158354016 | 28 | 0.604 | KV453261.1 | 60135  | 25-scf00536 | 25 |
| AX-158354018 | 28 | 0.604 | KV453261.1 | 65412  | 25-scf00536 | 25 |

|              |    |       |            |        |             |    |
|--------------|----|-------|------------|--------|-------------|----|
| AX-158354019 | 28 | 0.604 | KV453261.1 | 68455  | 25-scf00536 | 25 |
| AX-157748283 | 28 | 0.604 | KV453261.1 | 69342  | 25-scf00536 | 25 |
| AX-158354020 | 28 | 0.604 | KV453261.1 | 70407  | 25-scf00536 | 25 |
| AX-158354024 | 28 | 0.604 | KV453261.1 | 79970  | 25-scf00536 | 25 |
| AX-158354025 | 28 | 0.604 | KV453261.1 | 80621  | 25-scf00536 | 25 |
| AX-158354026 | 28 | 0.604 | KV453261.1 | 81980  | 25-scf00536 | 25 |
| AX-158354028 | 28 | 0.604 | KV453261.1 | 83148  | 25-scf00536 | 25 |
| AX-157851257 | 28 | 0.604 | KV453261.1 | 83980  | 25-scf00536 | 25 |
| AX-158354029 | 28 | 0.604 | KV453261.1 | 85668  | 25-scf00536 | 25 |
| AX-158354030 | 28 | 0.604 | KV453261.1 | 86713  | 25-scf00536 | 25 |
| AX-158354032 | 28 | 0.604 | KV453261.1 | 90682  | 25-scf00536 | 25 |
| AX-158354033 | 28 | 0.604 | KV453261.1 | 91948  | 25-scf00536 | 25 |
| AX-158354035 | 28 | 0.604 | KV453261.1 | 94087  | 25-scf00536 | 25 |
| AX-158354036 | 28 | 0.604 | KV453261.1 | 94522  | 25-scf00536 | 25 |
| AX-158354038 | 28 | 0.604 | KV453261.1 | 100634 | 25-scf00536 | 25 |
| AX-158354041 | 28 | 0.604 | KV453261.1 | 108708 | 25-scf00536 | 25 |
| AX-157851259 | 28 | 0.604 | KV453261.1 | 108949 | 25-scf00536 | 25 |
| AX-158354043 | 28 | 0.604 | KV453261.1 | 117721 | 25-scf00536 | 25 |
| AX-158354044 | 28 | 0.604 | KV453261.1 | 119097 | 25-scf00536 | 25 |
| AX-158354045 | 28 | 0.604 | KV453261.1 | 119380 | 25-scf00536 | 25 |
| AX-157739263 | 28 | 0.604 | KV453261.1 | 126692 | 25-scf00536 | 25 |
| AX-157716295 | 28 | 0.604 | KV453261.1 | 127485 | 25-scf00536 | 25 |
| AX-158354049 | 28 | 0.604 | KV453261.1 | 128662 | 25-scf00536 | 25 |
| AX-158354050 | 28 | 0.604 | KV453261.1 | 130582 | 25-scf00536 | 25 |
| AX-157851261 | 28 | 0.604 | KV453261.1 | 130889 | 25-scf00536 | 25 |
| AX-158354051 | 28 | 0.604 | KV453261.1 | 132538 | 25-scf00536 | 25 |
| AX-158354052 | 28 | 0.604 | KV453261.1 | 133073 | 25-scf00536 | 25 |
| AX-158354053 | 28 | 0.604 | KV453261.1 | 136970 | 25-scf00536 | 25 |
| AX-158354054 | 28 | 0.604 | KV453261.1 | 140141 | 25-scf00536 | 25 |
| AX-158354055 | 28 | 0.604 | KV453261.1 | 143345 | 25-scf00536 | 25 |
| AX-158354058 | 28 | 0.604 | KV453261.1 | 147344 | 25-scf00536 | 25 |
| AX-158354061 | 28 | 0.604 | KV453261.1 | 156226 | 25-scf00536 | 25 |
| AX-157750326 | 28 | 0.604 | KV453261.1 | 159040 | 25-scf00536 | 25 |
| AX-158354062 | 28 | 0.604 | KV453261.1 | 167193 | 25-scf00536 | 25 |
| AX-158354063 | 28 | 0.604 | KV453261.1 | 167687 | 25-scf00536 | 25 |
| AX-157743505 | 28 | 0.604 | KV453261.1 | 170101 | 25-scf00536 | 25 |
| AX-158354067 | 28 | 0.604 | KV453261.1 | 174515 | 25-scf00536 | 25 |
| AX-158419555 | 28 | 0.604 | KV453261.1 | 174797 | 25-scf00536 | 25 |
| AX-158420680 | 28 | 0.604 | KV453261.1 | 175309 | 25-scf00536 | 25 |
| AX-158419556 | 28 | 0.604 | KV453261.1 | 175737 | 25-scf00536 | 25 |
| AX-158419557 | 28 | 0.604 | KV453261.1 | 175968 | 25-scf00536 | 25 |
| AX-158419558 | 28 | 0.604 | KV453261.1 | 176130 | 25-scf00536 | 25 |
| AX-157739242 | 28 | 0.604 | KV453261.1 | 176445 | 25-scf00536 | 25 |
| AX-158354068 | 28 | 0.604 | KV453261.1 | 176692 | 25-scf00536 | 25 |
| AX-158354069 | 28 | 0.604 | KV453261.1 | 182044 | 25-scf00536 | 25 |
| AX-157851266 | 28 | 0.604 | KV453261.1 | 183658 | 25-scf00536 | 25 |
| AX-158354071 | 28 | 0.604 | KV453261.1 | 187748 | 25-scf00536 | 25 |
| AX-157851267 | 28 | 0.604 | KV453261.1 | 187979 | 25-scf00536 | 25 |
| AX-158354072 | 28 | 0.604 | KV453261.1 | 188746 | 25-scf00536 | 25 |
| AX-158354075 | 28 | 0.604 | KV453261.1 | 192050 | 25-scf00536 | 25 |
| AX-158354079 | 28 | 0.604 | KV453261.1 | 196764 | 25-scf00536 | 25 |

|              |    |       |            |        |             |    |
|--------------|----|-------|------------|--------|-------------|----|
| AX-157740773 | 28 | 0.604 | KV453261.1 | 198989 | 25-scf00536 | 25 |
| AX-158354081 | 28 | 0.604 | KV453261.1 | 199861 | 25-scf00536 | 25 |
| AX-157719777 | 28 | 0.604 | KV453261.1 | 201317 | 25-scf00536 | 25 |
| AX-158354084 | 28 | 0.604 | KV453261.1 | 209882 | 25-scf00536 | 25 |
| AX-157862087 | 28 | 0.604 | KV453261.1 | 215339 | 25-scf00536 | 25 |
| AX-157851273 | 28 | 0.604 | KV453261.1 | 218815 | 25-scf00536 | 25 |
| AX-158354086 | 28 | 0.604 | KV453261.1 | 218862 | 25-scf00536 | 25 |
| AX-158354087 | 28 | 0.604 | KV453261.1 | 219939 | 25-scf00536 | 25 |
| AX-157889011 | 28 | 0.604 | KV453261.1 | 220332 | 25-scf00536 | 25 |
| AX-158354088 | 28 | 0.604 | KV453261.1 | 220740 | 25-scf00536 | 25 |
| AX-158354092 | 28 | 0.604 | KV453261.1 | 226453 | 25-scf00536 | 25 |
| AX-157889012 | 28 | 0.604 | KV453261.1 | 226820 | 25-scf00536 | 25 |
| AX-158354094 | 28 | 0.604 | KV453261.1 | 229748 | 25-scf00536 | 25 |
| AX-158354095 | 28 | 0.604 | KV453261.1 | 231520 | 25-scf00536 | 25 |
| AX-157851274 | 28 | 0.604 | KV453261.1 | 235447 | 25-scf00536 | 25 |
| AX-157851275 | 28 | 0.604 | KV453261.1 | 235670 | 25-scf00536 | 25 |
| AX-157851276 | 28 | 0.604 | KV453261.1 | 236523 | 25-scf00536 | 25 |
| AX-158354100 | 28 | 0.604 | KV453261.1 | 246138 | 25-scf00536 | 25 |
| AX-158354101 | 28 | 0.604 | KV453261.1 | 248184 | 25-scf00536 | 25 |
| AX-158354102 | 28 | 0.604 | KV453261.1 | 248704 | 25-scf00536 | 25 |
| AX-157754950 | 28 | 0.604 | KV453261.1 | 258087 | 25-scf00536 | 25 |
| AX-158354109 | 28 | 0.604 | KV453261.1 | 266902 | 25-scf00536 | 25 |
| AX-157717848 | 28 | 0.604 | KV453261.1 | 267543 | 25-scf00536 | 25 |
| AX-157851278 | 28 | 0.604 | KV453261.1 | 268042 | 25-scf00536 | 25 |
| AX-157733077 | 28 | 0.604 | KV453261.1 | 306296 | 25-scf00536 | 25 |
| AX-157716966 | 28 | 0.604 | KV453261.1 | 306955 | 25-scf00536 | 25 |
| AX-158354132 | 28 | 0.604 | KV453261.1 | 310500 | 25-scf00536 | 25 |
| AX-158354133 | 28 | 0.604 | KV453261.1 | 311151 | 25-scf00536 | 25 |
| AX-158354135 | 28 | 0.604 | KV453261.1 | 313071 | 25-scf00536 | 25 |
| AX-158354136 | 28 | 0.604 | KV453261.1 | 315283 | 25-scf00536 | 25 |
| AX-157862088 | 28 | 0.604 | KV453261.1 | 317538 | 25-scf00536 | 25 |
| AX-158354138 | 28 | 0.604 | KV453261.1 | 318330 | 25-scf00536 | 25 |
| AX-158354139 | 28 | 0.604 | KV453261.1 | 319366 | 25-scf00536 | 25 |
| AX-158354140 | 28 | 0.604 | KV453261.1 | 320090 | 25-scf00536 | 25 |
| AX-157709725 | 28 | 0.604 | KV453261.1 | 320678 | 25-scf00536 | 25 |
| AX-157851282 | 28 | 0.604 | KV453261.1 | 320863 | 25-scf00536 | 25 |
| AX-158354141 | 28 | 0.604 | KV453261.1 | 324340 | 25-scf00536 | 25 |
| AX-158354142 | 28 | 0.604 | KV453261.1 | 324590 | 25-scf00536 | 25 |
| AX-158354143 | 28 | 0.604 | KV453261.1 | 325523 | 25-scf00536 | 25 |
| AX-158354144 | 28 | 0.604 | KV453261.1 | 328140 | 25-scf00536 | 25 |
| AX-158354146 | 28 | 0.604 | KV453261.1 | 330805 | 25-scf00536 | 25 |
| AX-158354147 | 28 | 0.604 | KV453261.1 | 332580 | 25-scf00536 | 25 |
| AX-157739910 | 28 | 0.604 | KV453261.1 | 332716 | 25-scf00536 | 25 |
| AX-158354149 | 28 | 0.604 | KV453261.1 | 335214 | 25-scf00536 | 25 |
| AX-158354151 | 28 | 0.604 | KV453261.1 | 337486 | 25-scf00536 | 25 |
| AX-157851283 | 28 | 0.604 | KV453261.1 | 338948 | 25-scf00536 | 25 |
| AX-157851284 | 28 | 0.604 | KV453261.1 | 339113 | 25-scf00536 | 25 |
| AX-158354152 | 28 | 0.604 | KV453261.1 | 340360 | 25-scf00536 | 25 |
| AX-158354154 | 28 | 0.604 | KV453261.1 | 343286 | 25-scf00536 | 25 |
| AX-158354155 | 28 | 0.604 | KV453261.1 | 344249 | 25-scf00536 | 25 |
| AX-157851286 | 28 | 0.604 | KV453261.1 | 345307 | 25-scf00536 | 25 |

|              |    |       |             |        |             |    |
|--------------|----|-------|-------------|--------|-------------|----|
| AX-158354156 | 28 | 0.604 | KV453261.1  | 345388 | 25-scf00536 | 25 |
| AX-158354158 | 28 | 0.604 | KV453261.1  | 346534 | 25-scf00536 | 25 |
| AX-158354160 | 28 | 0.604 | KV453261.1  | 348936 | 25-scf00536 | 25 |
| AX-158354166 | 28 | 0.604 | KV453263.1  | 15308  | 25-scf00537 | 25 |
| AX-158354168 | 28 | 0.604 | KV453263.1  | 16701  | 25-scf00537 | 25 |
| AX-157851287 | 28 | 0.604 | KV453263.1  | 17517  | 25-scf00537 | 25 |
| AX-158354169 | 28 | 0.604 | KV453263.1  | 18716  | 25-scf00537 | 25 |
| AX-158354172 | 28 | 0.604 | KV453263.1  | 23607  | 25-scf00537 | 25 |
| AX-158354173 | 28 | 0.604 | KV453263.1  | 24620  | 25-scf00537 | 25 |
| AX-158354174 | 28 | 0.604 | KV453263.1  | 25141  | 25-scf00537 | 25 |
| AX-158354177 | 28 | 0.604 | KV453263.1  | 27506  | 25-scf00537 | 25 |
| AX-158354180 | 28 | 0.604 | KV453263.1  | 29274  | 25-scf00537 | 25 |
| AX-157851289 | 28 | 0.604 | KV453263.1  | 41637  | 25-scf00537 | 25 |
| AX-157768754 | 28 | 0.604 | KV453263.1  | 42536  | 25-scf00537 | 25 |
| AX-157851290 | 28 | 0.604 | KV453263.1  | 46708  | 25-scf00537 | 25 |
| AX-157734369 | 28 | 0.604 | KV453263.1  | 47636  | 25-scf00537 | 25 |
| AX-157851291 | 28 | 0.604 | KV453263.1  | 47918  | 25-scf00537 | 25 |
| AX-158354190 | 28 | 0.604 | KV453263.1  | 49006  | 25-scf00537 | 25 |
| AX-158354191 | 28 | 0.604 | KV453263.1  | 49903  | 25-scf00537 | 25 |
| AX-158354192 | 28 | 0.604 | KV453263.1  | 51408  | 25-scf00537 | 25 |
| AX-158354193 | 28 | 0.604 | KV453263.1  | 52175  | 25-scf00537 | 25 |
| AX-158354197 | 28 | 0.604 | KV453263.1  | 56236  | 25-scf00537 | 25 |
| AX-158381693 | 28 | 0.604 | KV453263.1  | 66820  | 25-scf00537 | 25 |
| AX-158354207 | 28 | 0.604 | KV453263.1  | 68114  | 25-scf00537 | 25 |
| AX-158354212 | 28 | 0.604 | KV453263.1  | 76373  | 25-scf00537 | 25 |
| AX-157851293 | 28 | 0.604 | KV453263.1  | 81341  | 25-scf00537 | 25 |
| AX-158354214 | 28 | 0.604 | KV453263.1  | 81945  | 25-scf00537 | 25 |
| AX-157882461 | 28 | 0.604 | KV453263.1  | 124606 | 25-scf00537 | 25 |
| AX-158354268 | 28 | 0.604 | KV453263.1  | 171482 | 25-scf00537 | 25 |
| AX-158354280 | 28 | 0.604 | KV453263.1  | 193619 | 25-scf00537 | 25 |
| AX-157851301 | 28 | 0.604 | KV453263.1  | 206897 | 25-scf00537 | 25 |
| AX-158354294 | 28 | 0.604 | KV453263.1  | 218076 | 25-scf00537 | 25 |
| AX-158354321 | 28 | 0.604 | KV453263.1  | 258933 | 25-scf00537 | 25 |
| AX-157739831 | 28 | 0.604 | KV453263.1  | 288263 | 25-scf00537 | 25 |
| AX-158354346 | 28 | 0.604 | KV453263.1  | 299132 | 25-scf00537 | 25 |
| AX-157688218 | 28 | 0.604 | KV453262.1  | 387    | 25-scf01383 | 25 |
| AX-157685450 | 28 | 0.604 | KV453365.1  | 88416  | scf00619    | UN |
| AX-157685451 | 28 | 0.604 | KV453365.1  | 90158  | scf00619    | UN |
| AX-157710649 | 28 | 0.604 | 3ML01025011 | 1825   | scf00923_1  | UN |
| AX-158354194 | 28 | 0.677 | KV453263.1  | 52699  | 25-scf00537 | 25 |
| AX-158354201 | 28 | 0.75  | KV453263.1  | 60332  | 25-scf00537 | 25 |
| AX-158354203 | 28 | 0.75  | KV453263.1  | 61925  | 25-scf00537 | 25 |
| AX-158354208 | 28 | 1.041 | KV453263.1  | 69348  | 25-scf00537 | 25 |
| AX-158354209 | 28 | 1.041 | KV453263.1  | 71265  | 25-scf00537 | 25 |
| AX-158354210 | 28 | 1.041 | KV453263.1  | 71794  | 25-scf00537 | 25 |
| AX-158354211 | 28 | 1.041 | KV453263.1  | 74053  | 25-scf00537 | 25 |
| AX-157755549 | 28 | 1.041 | KV453263.1  | 79865  | 25-scf00537 | 25 |
| AX-157773667 | 28 | 1.041 | KV453263.1  | 81638  | 25-scf00537 | 25 |
| AX-158354216 | 28 | 1.041 | KV453263.1  | 82987  | 25-scf00537 | 25 |
| AX-158354217 | 28 | 1.041 | KV453263.1  | 83749  | 25-scf00537 | 25 |
| AX-158354218 | 28 | 1.041 | KV453263.1  | 84347  | 25-scf00537 | 25 |

|              |    |       |             |        |             |    |
|--------------|----|-------|-------------|--------|-------------|----|
| AX-158354224 | 28 | 1.041 | KV453263.1  | 94846  | 25-scf00537 | 25 |
| AX-157745032 | 28 | 1.041 | KV453263.1  | 100520 | 25-scf00537 | 25 |
| AX-158354230 | 28 | 1.041 | KV453263.1  | 103343 | 25-scf00537 | 25 |
| AX-157694123 | 28 | 1.041 | KV453263.1  | 104924 | 25-scf00537 | 25 |
| AX-157746185 | 28 | 1.041 | KV453263.1  | 105384 | 25-scf00537 | 25 |
| AX-158354232 | 28 | 1.041 | KV453263.1  | 109366 | 25-scf00537 | 25 |
| AX-158354233 | 28 | 1.041 | KV453263.1  | 110958 | 25-scf00537 | 25 |
| AX-158354234 | 28 | 1.041 | KV453263.1  | 112272 | 25-scf00537 | 25 |
| AX-157738793 | 28 | 1.041 | KV453263.1  | 113760 | 25-scf00537 | 25 |
| AX-158354235 | 28 | 1.041 | KV453263.1  | 116102 | 25-scf00537 | 25 |
| AX-158354236 | 28 | 1.041 | KV453263.1  | 116848 | 25-scf00537 | 25 |
| AX-158354238 | 28 | 1.041 | KV453263.1  | 120462 | 25-scf00537 | 25 |
| AX-158354239 | 28 | 1.041 | KV453263.1  | 120690 | 25-scf00537 | 25 |
| AX-158354242 | 28 | 1.041 | KV453263.1  | 124652 | 25-scf00537 | 25 |
| AX-158354243 | 28 | 1.041 | KV453263.1  | 126062 | 25-scf00537 | 25 |
| AX-158354244 | 28 | 1.041 | KV453263.1  | 126609 | 25-scf00537 | 25 |
| AX-158354246 | 28 | 1.041 | KV453263.1  | 132238 | 25-scf00537 | 25 |
| AX-158354247 | 28 | 1.041 | KV453263.1  | 132777 | 25-scf00537 | 25 |
| AX-158354250 | 28 | 1.041 | KV453263.1  | 134499 | 25-scf00537 | 25 |
| AX-158354251 | 28 | 1.041 | KV453263.1  | 136860 | 25-scf00537 | 25 |
| AX-158354253 | 28 | 1.041 | KV453263.1  | 140490 | 25-scf00537 | 25 |
| AX-158354254 | 28 | 1.041 | KV453263.1  | 143109 | 25-scf00537 | 25 |
| AX-158354256 | 28 | 1.041 | KV453263.1  | 147191 | 25-scf00537 | 25 |
| AX-158354257 | 28 | 1.041 | KV453263.1  | 148263 | 25-scf00537 | 25 |
| AX-158354258 | 28 | 1.041 | KV453263.1  | 150292 | 25-scf00537 | 25 |
| AX-157851297 | 28 | 1.041 | KV453263.1  | 153881 | 25-scf00537 | 25 |
| AX-158354261 | 28 | 1.041 | KV453263.1  | 157381 | 25-scf00537 | 25 |
| AX-158354262 | 28 | 1.041 | KV453263.1  | 157609 | 25-scf00537 | 25 |
| AX-158354263 | 28 | 1.041 | KV453263.1  | 160436 | 25-scf00537 | 25 |
| AX-158354265 | 28 | 1.041 | KV453263.1  | 166252 | 25-scf00537 | 25 |
| AX-158354266 | 28 | 1.041 | KV453263.1  | 166690 | 25-scf00537 | 25 |
| AX-158354267 | 28 | 1.041 | KV453263.1  | 168936 | 25-scf00537 | 25 |
| AX-157753496 | 28 | 1.041 | KV453263.1  | 179353 | 25-scf00537 | 25 |
| AX-158354270 | 28 | 1.041 | KV453263.1  | 180346 | 25-scf00537 | 25 |
| AX-158354271 | 28 | 1.041 | KV453263.1  | 181984 | 25-scf00537 | 25 |
| AX-157851299 | 28 | 1.041 | KV453263.1  | 185303 | 25-scf00537 | 25 |
| AX-157741263 | 28 | 1.041 | KV453263.1  | 189841 | 25-scf00537 | 25 |
| AX-158354276 | 28 | 1.041 | KV453263.1  | 189920 | 25-scf00537 | 25 |
| AX-158354277 | 28 | 1.041 | KV453263.1  | 190760 | 25-scf00537 | 25 |
| AX-157693223 | 28 | 1.041 | KV453263.1  | 207728 | 25-scf00537 | 25 |
| AX-158354285 | 28 | 1.041 | KV453263.1  | 210896 | 25-scf00537 | 25 |
| AX-157851302 | 28 | 1.041 | KV453263.1  | 215886 | 25-scf00537 | 25 |
| AX-157851303 | 28 | 1.041 | KV453263.1  | 230027 | 25-scf00537 | 25 |
| AX-158354352 | 28 | 1.041 | KV453263.1  | 305110 | 25-scf00537 | 25 |
| AX-157688429 | 28 | 1.041 | 3ML01026130 | 1561   | scf01727_1  | UN |
| AX-158353895 | 28 | 1.08  | KV453260.1  | 895662 | 25-scf00535 | 25 |
| AX-157851277 | 28 | 1.116 | KV453261.1  | 261546 | 25-scf00536 | 25 |
| AX-158419562 | 28 | 1.116 | KV453261.1  | 269718 | 25-scf00536 | 25 |
| AX-158354157 | 28 | 1.116 | KV453261.1  | 345819 | 25-scf00536 | 25 |
| AX-157688430 | 28 | 1.116 | 3ML01026130 | 1619   | scf01727_1  | UN |
| AX-158353768 | 28 | 1.151 | KV453260.1  | 740162 | 25-scf00535 | 25 |

|              |    |       |            |        |             |    |
|--------------|----|-------|------------|--------|-------------|----|
| AX-158353920 | 28 | 1.151 | KV453260.1 | 921550 | 25-scf00535 | 25 |
| AX-158353922 | 28 | 1.151 | KV453260.1 | 922096 | 25-scf00535 | 25 |
| AX-158353934 | 28 | 1.151 | KV453260.1 | 936719 | 25-scf00535 | 25 |
| AX-158353948 | 28 | 1.151 | KV453260.1 | 953568 | 25-scf00535 | 25 |
| AX-158353956 | 28 | 1.151 | KV453260.1 | 970189 | 25-scf00535 | 25 |
| AX-158353960 | 28 | 1.151 | KV453260.1 | 974266 | 25-scf00535 | 25 |
| AX-158353981 | 28 | 1.151 | KV453261.1 | 11486  | 25-scf00536 | 25 |
| AX-158353993 | 28 | 1.151 | KV453261.1 | 29545  | 25-scf00536 | 25 |
| AX-158354007 | 28 | 1.151 | KV453261.1 | 47036  | 25-scf00536 | 25 |
| AX-158354011 | 28 | 1.151 | KV453261.1 | 49470  | 25-scf00536 | 25 |
| AX-157717806 | 28 | 1.151 | KV453261.1 | 65714  | 25-scf00536 | 25 |
| AX-158354023 | 28 | 1.151 | KV453261.1 | 77526  | 25-scf00536 | 25 |
| AX-158354027 | 28 | 1.151 | KV453261.1 | 82626  | 25-scf00536 | 25 |
| AX-158354031 | 28 | 1.151 | KV453261.1 | 90473  | 25-scf00536 | 25 |
| AX-157862084 | 28 | 1.151 | KV453261.1 | 112909 | 25-scf00536 | 25 |
| AX-158354042 | 28 | 1.151 | KV453261.1 | 116169 | 25-scf00536 | 25 |
| AX-158354070 | 28 | 1.151 | KV453261.1 | 184941 | 25-scf00536 | 25 |
| AX-158354073 | 28 | 1.151 | KV453261.1 | 188975 | 25-scf00536 | 25 |
| AX-158354078 | 28 | 1.151 | KV453261.1 | 196064 | 25-scf00536 | 25 |
| AX-158354213 | 28 | 1.151 | KV453263.1 | 78833  | 25-scf00537 | 25 |
| AX-158354286 | 28 | 1.151 | KV453263.1 | 211428 | 25-scf00537 | 25 |
| AX-158354288 | 28 | 1.214 | KV453263.1 | 214809 | 25-scf00537 | 25 |
| AX-157754445 | 28 | 1.26  | KV453263.1 | 170754 | 25-scf00537 | 25 |
| AX-158354282 | 28 | 1.26  | KV453263.1 | 202827 | 25-scf00537 | 25 |
| AX-157862093 | 28 | 1.26  | KV453263.1 | 205536 | 25-scf00537 | 25 |
| AX-158354297 | 28 | 1.26  | KV453263.1 | 219367 | 25-scf00537 | 25 |
| AX-157715276 | 28 | 1.26  | KV453263.1 | 220526 | 25-scf00537 | 25 |
| AX-158354303 | 28 | 1.26  | KV453263.1 | 228357 | 25-scf00537 | 25 |
| AX-158419571 | 28 | 1.26  | KV453263.1 | 228995 | 25-scf00537 | 25 |
| AX-157722969 | 28 | 1.26  | KV453263.1 | 232440 | 25-scf00537 | 25 |
| AX-157882463 | 28 | 1.26  | KV453263.1 | 233661 | 25-scf00537 | 25 |
| AX-158354309 | 28 | 1.26  | KV453263.1 | 237326 | 25-scf00537 | 25 |
| AX-158354310 | 28 | 1.26  | KV453263.1 | 237575 | 25-scf00537 | 25 |
| AX-158354311 | 28 | 1.306 | KV453263.1 | 239015 | 25-scf00537 | 25 |
| AX-158354283 | 28 | 1.356 | KV453263.1 | 205661 | 25-scf00537 | 25 |
| AX-158354300 | 28 | 1.356 | KV453263.1 | 222807 | 25-scf00537 | 25 |
| AX-158354313 | 28 | 1.356 | KV453263.1 | 241850 | 25-scf00537 | 25 |
| AX-158353664 | 28 | 1.369 | KV453260.1 | 449636 | 25-scf00535 | 25 |
| AX-158354131 | 28 | 1.369 | KV453261.1 | 307557 | 25-scf00536 | 25 |
| AX-158413315 | 28 | 1.369 | KV453263.1 | 107581 | 25-scf00537 | 25 |
| AX-158354248 | 28 | 1.369 | KV453263.1 | 133985 | 25-scf00537 | 25 |
| AX-157851298 | 28 | 1.369 | KV453263.1 | 155107 | 25-scf00537 | 25 |
| AX-158354290 | 28 | 1.369 | KV453263.1 | 215631 | 25-scf00537 | 25 |
| AX-158354308 | 28 | 1.369 | KV453263.1 | 235402 | 25-scf00537 | 25 |
| AX-157775099 | 28 | 1.369 | KV453263.1 | 245637 | 25-scf00537 | 25 |
| AX-157712189 | 28 | 1.369 | KV453263.1 | 246324 | 25-scf00537 | 25 |
| AX-158354315 | 28 | 1.369 | KV453263.1 | 248223 | 25-scf00537 | 25 |
| AX-158354327 | 28 | 1.369 | KV453263.1 | 265772 | 25-scf00537 | 25 |
| AX-158354330 | 28 | 1.369 | KV453263.1 | 272531 | 25-scf00537 | 25 |
| AX-158354331 | 28 | 1.369 | KV453263.1 | 273871 | 25-scf00537 | 25 |
| AX-157715047 | 28 | 1.369 | KV453263.1 | 279551 | 25-scf00537 | 25 |



|              |    |       |            |        |                |    |
|--------------|----|-------|------------|--------|----------------|----|
| AX-158354335 | 28 | 1.369 | KV453263.1 | 280861 | 25-scf00537    | 25 |
| AX-158354338 | 28 | 1.369 | KV453263.1 | 283764 | 25-scf00537    | 25 |
| AX-158354340 | 28 | 1.369 | KV453263.1 | 287034 | 25-scf00537    | 25 |
| AX-157719296 | 28 | 1.369 | KV453263.1 | 287614 | 25-scf00537    | 25 |
| AX-158354341 | 28 | 1.369 | KV453263.1 | 289527 | 25-scf00537    | 25 |
| AX-158354342 | 28 | 1.369 | KV453263.1 | 290222 | 25-scf00537    | 25 |
| AX-157753965 | 28 | 1.369 | KV453263.1 | 292877 | 25-scf00537    | 25 |
| AX-157851307 | 28 | 1.369 | KV453263.1 | 296316 | 25-scf00537    | 25 |
| AX-158354344 | 28 | 1.369 | KV453263.1 | 297184 | 25-scf00537    | 25 |
| AX-157851309 | 28 | 1.369 | KV453263.1 | 297615 | 25-scf00537    | 25 |
| AX-157889020 | 28 | 1.369 | KV453263.1 | 299221 | 25-scf00537    | 25 |
| AX-158354347 | 28 | 1.369 | KV453263.1 | 300979 | 25-scf00537    | 25 |
| AX-158354350 | 28 | 1.369 | KV453263.1 | 303758 | 25-scf00537    | 25 |
| AX-157771367 | 28 | 1.369 | KV453263.1 | 317376 | 25-scf00537    | 25 |
| AX-158354356 | 28 | 1.369 | KV453263.1 | 331864 | 25-scf00537    | 25 |
| AX-158354348 | 28 | 1.491 | KV453263.1 | 302553 | 25-scf00537    | 25 |
| AX-158420686 | 28 | 1.533 | KV453263.1 | 272715 | 25-scf00537    | 25 |
| AX-157851310 | 28 | 1.533 | KV453263.1 | 304163 | 25-scf00537    | 25 |
| AX-158354353 | 28 | 1.533 | KV453263.1 | 310761 | 25-scf00537    | 25 |
| AX-158354354 | 28 | 1.533 | KV453263.1 | 315760 | 25-scf00537    | 25 |
| AX-158354372 | 28 | 1.533 | KV453263.1 | 355706 | 25-scf00537    | 25 |
| AX-157754613 | 28 | 1.697 | KV453263.1 | 334582 | 25-scf00537    | 25 |
| AX-157851313 | 28 | 1.697 | KV453263.1 | 334710 | 25-scf00537    | 25 |
| AX-158354357 | 28 | 1.697 | KV453263.1 | 335171 | 25-scf00537    | 25 |
| AX-158354361 | 28 | 1.697 | KV453263.1 | 338775 | 25-scf00537    | 25 |
| AX-157772175 | 28 | 1.915 | KV453261.1 | 243097 | 25-scf00536    | 25 |
| AX-158354369 | 28 | 1.915 | KV453263.1 | 352062 | 25-scf00537    | 25 |
| AX-158354370 | 28 | 1.915 | KV453263.1 | 353123 | 25-scf00537    | 25 |
| AX-158354371 | 28 | 1.915 | KV453263.1 | 354837 | 25-scf00537    | 25 |
| AX-157719206 | 28 | 1.915 | KV453263.1 | 356393 | 25-scf00537    | 25 |
| AX-158354373 | 28 | 1.915 | KV453263.1 | 357506 | 25-scf00537    | 25 |
| AX-158354375 | 28 | 1.915 | KV453263.1 | 358989 | 25-scf00537    | 25 |
| AX-158354376 | 28 | 1.915 | KV453263.1 | 359283 | 25-scf00537    | 25 |
| AX-158354380 | 28 | 1.915 | KV453263.1 | 368529 | 25-scf00537    | 25 |
| AX-157715761 | 28 | 1.915 | KV453263.1 | 396519 | 25-scf00537    | 25 |
| AX-157699841 | 28 | 1.915 | FI891505.1 | 122    | HORI212 Ictali | UN |
| AX-158354377 | 28 | 1.946 | KV453263.1 | 361547 | 25-scf00537    | 25 |
| AX-157724470 | 28 | 1.946 | KV453263.1 | 380585 | 25-scf00537    | 25 |
| AX-157882468 | 28 | 1.969 | KV453263.1 | 362012 | 25-scf00537    | 25 |
| AX-158354366 | 28 | 2.025 | KV453263.1 | 343293 | 25-scf00537    | 25 |
| AX-158354378 | 28 | 2.025 | KV453263.1 | 363717 | 25-scf00537    | 25 |
| AX-158354379 | 28 | 2.025 | KV453263.1 | 366806 | 25-scf00537    | 25 |
| AX-158354381 | 28 | 2.025 | KV453263.1 | 370120 | 25-scf00537    | 25 |
| AX-158354383 | 28 | 2.025 | KV453263.1 | 370658 | 25-scf00537    | 25 |
| AX-158354386 | 28 | 2.025 | KV453263.1 | 375824 | 25-scf00537    | 25 |
| AX-158354390 | 28 | 2.025 | KV453263.1 | 379968 | 25-scf00537    | 25 |
| AX-157851316 | 28 | 2.025 | KV453263.1 | 380839 | 25-scf00537    | 25 |
| AX-158354392 | 28 | 2.025 | KV453263.1 | 381932 | 25-scf00537    | 25 |
| AX-158354393 | 28 | 2.025 | KV453263.1 | 382897 | 25-scf00537    | 25 |
| AX-158354394 | 28 | 2.025 | KV453263.1 | 384020 | 25-scf00537    | 25 |
| AX-158354395 | 28 | 2.025 | KV453263.1 | 384327 | 25-scf00537    | 25 |

|              |    |       |            |        |             |    |
|--------------|----|-------|------------|--------|-------------|----|
| AX-158354396 | 28 | 2.025 | KV453263.1 | 385626 | 25-scf00537 | 25 |
| AX-158354400 | 28 | 2.025 | KV453263.1 | 393677 | 25-scf00537 | 25 |
| AX-158354401 | 28 | 2.025 | KV453263.1 | 394290 | 25-scf00537 | 25 |
| AX-158354403 | 28 | 2.025 | KV453263.1 | 395952 | 25-scf00537 | 25 |
| AX-158381695 | 28 | 2.025 | KV453263.1 | 405578 | 25-scf00537 | 25 |
| AX-157889022 | 28 | 2.025 | KV453263.1 | 405792 | 25-scf00537 | 25 |
| AX-158354466 | 28 | 2.025 | KV453263.1 | 477372 | 25-scf00537 | 25 |
| AX-158354469 | 28 | 2.025 | KV453263.1 | 481164 | 25-scf00537 | 25 |
| AX-158354405 | 28 | 2.243 | KV453263.1 | 400085 | 25-scf00537 | 25 |
| AX-157775621 | 28 | 2.243 | KV453263.1 | 400582 | 25-scf00537 | 25 |
| AX-158354407 | 28 | 2.243 | KV453263.1 | 401998 | 25-scf00537 | 25 |
| AX-157707610 | 28 | 2.243 | KV453263.1 | 407766 | 25-scf00537 | 25 |
| AX-157882469 | 28 | 2.243 | KV453263.1 | 408558 | 25-scf00537 | 25 |
| AX-158354410 | 28 | 2.243 | KV453263.1 | 409545 | 25-scf00537 | 25 |
| AX-158354412 | 28 | 2.243 | KV453263.1 | 413824 | 25-scf00537 | 25 |
| AX-157862094 | 28 | 2.243 | KV453263.1 | 417634 | 25-scf00537 | 25 |
| AX-158354415 | 28 | 2.243 | KV453263.1 | 417675 | 25-scf00537 | 25 |
| AX-158354417 | 28 | 2.243 | KV453263.1 | 421236 | 25-scf00537 | 25 |
| AX-158354418 | 28 | 2.243 | KV453263.1 | 421611 | 25-scf00537 | 25 |
| AX-157681286 | 28 | 2.389 |            | 68     | scf20202    | UN |
| AX-158354456 | 28 | 2.57  | KV453263.1 | 468916 | 25-scf00537 | 25 |
| AX-158354384 | 28 | 2.571 | KV453263.1 | 374112 | 25-scf00537 | 25 |
| AX-158354458 | 28 | 2.571 | KV453263.1 | 470813 | 25-scf00537 | 25 |
| AX-158354460 | 28 | 2.571 | KV453263.1 | 473720 | 25-scf00537 | 25 |
| AX-158354461 | 28 | 2.571 | KV453263.1 | 473786 | 25-scf00537 | 25 |
| AX-158354463 | 28 | 2.571 | KV453263.1 | 474973 | 25-scf00537 | 25 |
| AX-158354467 | 28 | 2.68  | KV453263.1 | 479712 | 25-scf00537 | 25 |
| AX-158354468 | 28 | 2.68  | KV453263.1 | 480686 | 25-scf00537 | 25 |
| AX-157851318 | 28 | 2.68  | KV453263.1 | 483858 | 25-scf00537 | 25 |
| AX-158354471 | 28 | 2.68  | KV453263.1 | 486048 | 25-scf00537 | 25 |
| AX-158354485 | 28 | 2.68  | KV453263.1 | 496865 | 25-scf00537 | 25 |
| AX-158354464 | 28 | 2.704 | KV453263.1 | 475346 | 25-scf00537 | 25 |
| AX-158354472 | 28 | 2.704 | KV453263.1 | 486597 | 25-scf00537 | 25 |
| AX-158354473 | 28 | 2.733 | KV453263.1 | 487023 | 25-scf00537 | 25 |
| AX-158354479 | 28 | 2.761 | KV453263.1 | 491893 | 25-scf00537 | 25 |
| AX-158354480 | 28 | 2.761 | KV453263.1 | 492699 | 25-scf00537 | 25 |
| AX-158354474 | 28 | 2.789 | KV453263.1 | 487818 | 25-scf00537 | 25 |
| AX-158354481 | 28 | 2.789 | KV453263.1 | 493113 | 25-scf00537 | 25 |
| AX-158354482 | 28 | 2.789 | KV453263.1 | 493548 | 25-scf00537 | 25 |
| AX-158354484 | 28 | 2.789 | KV453263.1 | 496031 | 25-scf00537 | 25 |
| AX-158354491 | 28 | 2.789 | KV453263.1 | 503671 | 25-scf00537 | 25 |
| AX-158354492 | 28 | 3.008 | KV453263.1 | 508013 | 25-scf00537 | 25 |
| AX-158354495 | 28 | 3.008 | KV453263.1 | 512222 | 25-scf00537 | 25 |
| AX-158354496 | 28 | 3.008 | KV453263.1 | 514390 | 25-scf00537 | 25 |
| AX-158354498 | 28 | 3.226 | KV453263.1 | 518481 | 25-scf00537 | 25 |
| AX-158354499 | 28 | 3.226 | KV453263.1 | 518935 | 25-scf00537 | 25 |
| AX-158354500 | 28 | 3.226 | KV453263.1 | 519984 | 25-scf00537 | 25 |
| AX-158354501 | 28 | 3.226 | KV453263.1 | 520900 | 25-scf00537 | 25 |
| AX-158354503 | 28 | 3.226 | KV453263.1 | 523119 | 25-scf00537 | 25 |
| AX-158354505 | 28 | 3.226 | KV453263.1 | 525934 | 25-scf00537 | 25 |
| AX-158354507 | 28 | 3.226 | KV453263.1 | 528851 | 25-scf00537 | 25 |

|              |    |       |            |        |             |    |
|--------------|----|-------|------------|--------|-------------|----|
| AX-158354511 | 28 | 3.226 | KV453263.1 | 531206 | 25-scf00537 | 25 |
| AX-158354512 | 28 | 3.226 | KV453263.1 | 531595 | 25-scf00537 | 25 |
| AX-158354520 | 28 | 3.226 | KV453263.1 | 539356 | 25-scf00537 | 25 |
| AX-158354646 | 28 | 3.226 | KV453263.1 | 710117 | 25-scf00537 | 25 |
| AX-158354518 | 28 | 3.257 | KV453263.1 | 537396 | 25-scf00537 | 25 |
| AX-158354519 | 28 | 3.284 | KV453263.1 | 538409 | 25-scf00537 | 25 |
| AX-158354521 | 28 | 3.318 | KV453263.1 | 540327 | 25-scf00537 | 25 |
| AX-158354522 | 28 | 3.338 | KV453263.1 | 540791 | 25-scf00537 | 25 |
| AX-158354526 | 28 | 3.366 | KV453263.1 | 546922 | 25-scf00537 | 25 |
| AX-157851319 | 28 | 3.389 | KV453263.1 | 549519 | 25-scf00537 | 25 |
| AX-157739748 | 28 | 3.417 | KV453263.1 | 550114 | 25-scf00537 | 25 |
| AX-158354524 | 28 | 3.445 | KV453263.1 | 541876 | 25-scf00537 | 25 |
| AX-157889026 | 28 | 3.445 | KV453263.1 | 551457 | 25-scf00537 | 25 |
| AX-158354529 | 28 | 3.445 | KV453263.1 | 554151 | 25-scf00537 | 25 |
| AX-158354530 | 28 | 3.445 | KV453263.1 | 555313 | 25-scf00537 | 25 |
| AX-158354533 | 28 | 3.585 | KV453263.1 | 559237 | 25-scf00537 | 25 |
| AX-157708870 | 28 | 3.773 | KV453263.1 | 550202 | 25-scf00537 | 25 |
| AX-158354534 | 28 | 3.773 | KV453263.1 | 560541 | 25-scf00537 | 25 |
| AX-157851321 | 28 | 3.773 | KV453263.1 | 560754 | 25-scf00537 | 25 |
| AX-158354535 | 28 | 3.773 | KV453263.1 | 562525 | 25-scf00537 | 25 |
| AX-158354536 | 28 | 3.773 | KV453263.1 | 563038 | 25-scf00537 | 25 |
| AX-158354537 | 28 | 3.773 | KV453263.1 | 564123 | 25-scf00537 | 25 |
| AX-157862100 | 28 | 3.773 | KV453263.1 | 569485 | 25-scf00537 | 25 |
| AX-158354559 | 28 | 3.773 | KV453263.1 | 589013 | 25-scf00537 | 25 |
| AX-157708869 | 28 | 3.825 | KV453263.1 | 550411 | 25-scf00537 | 25 |
| AX-157758564 | 28 | 3.882 | KV453263.1 | 568303 | 25-scf00537 | 25 |
| AX-158354541 | 28 | 3.882 | KV453263.1 | 570321 | 25-scf00537 | 25 |
| AX-157851323 | 28 | 3.882 | KV453263.1 | 571335 | 25-scf00537 | 25 |
| AX-157851324 | 28 | 3.91  | KV453263.1 | 572343 | 25-scf00537 | 25 |
| AX-158354544 | 28 | 3.945 | KV453263.1 | 573963 | 25-scf00537 | 25 |
| AX-158354545 | 28 | 3.945 | KV453263.1 | 576122 | 25-scf00537 | 25 |
| AX-158354547 | 28 | 3.966 | KV453263.1 | 577598 | 25-scf00537 | 25 |
| AX-158354548 | 28 | 3.987 | KV453263.1 | 578035 | 25-scf00537 | 25 |
| AX-157851322 | 28 | 3.988 | KV453263.1 | 562343 | 25-scf00537 | 25 |
| AX-158354549 | 28 | 3.988 | KV453263.1 | 578195 | 25-scf00537 | 25 |
| AX-158354551 | 28 | 3.988 | KV453263.1 | 578748 | 25-scf00537 | 25 |
| AX-158354560 | 28 | 3.988 | KV453263.1 | 590258 | 25-scf00537 | 25 |
| AX-158354552 | 28 | 3.991 | KV453263.1 | 581758 | 25-scf00537 | 25 |
| AX-158354557 | 28 | 3.991 | KV453263.1 | 587235 | 25-scf00537 | 25 |
| AX-158354562 | 28 | 3.991 | KV453263.1 | 594054 | 25-scf00537 | 25 |
| AX-158354555 | 28 | 4.209 | KV453263.1 | 584867 | 25-scf00537 | 25 |
| AX-157739957 | 28 | 4.209 | KV453263.1 | 596596 | 25-scf00537 | 25 |
| AX-157889029 | 28 | 4.209 | KV453263.1 | 599133 | 25-scf00537 | 25 |
| AX-158354566 | 28 | 4.209 | KV453263.1 | 599515 | 25-scf00537 | 25 |
| AX-158354568 | 28 | 4.209 | KV453263.1 | 603552 | 25-scf00537 | 25 |
| AX-158354577 | 28 | 4.209 | KV453263.1 | 617426 | 25-scf00537 | 25 |
| AX-158354629 | 28 | 4.209 | KV453263.1 | 691673 | 25-scf00537 | 25 |
| AX-158354565 | 28 | 4.268 | KV453263.1 | 599038 | 25-scf00537 | 25 |
| AX-158354569 | 28 | 4.268 | KV453263.1 | 604125 | 25-scf00537 | 25 |
| AX-158381696 | 28 | 4.318 | KV453263.1 | 604371 | 25-scf00537 | 25 |
| AX-157739082 | 28 | 4.355 | KV453263.1 | 604928 | 25-scf00537 | 25 |

|              |    |       |            |        |             |    |
|--------------|----|-------|------------|--------|-------------|----|
| AX-158354572 | 28 | 4.391 | KV453263.1 | 606911 | 25-scf00537 | 25 |
| AX-158354574 | 28 | 4.391 | KV453263.1 | 610004 | 25-scf00537 | 25 |
| AX-157726368 | 28 | 4.391 | KV453263.1 | 616947 | 25-scf00537 | 25 |
| AX-158354525 | 28 | 4.428 | KV453263.1 | 543900 | 25-scf00537 | 25 |
| AX-158354542 | 28 | 4.428 | KV453263.1 | 570492 | 25-scf00537 | 25 |
| AX-158354563 | 28 | 4.428 | KV453263.1 | 597996 | 25-scf00537 | 25 |
| AX-158354573 | 28 | 4.428 | KV453263.1 | 607884 | 25-scf00537 | 25 |
| AX-158419576 | 28 | 4.428 | KV453263.1 | 608681 | 25-scf00537 | 25 |
| AX-157741010 | 28 | 4.428 | KV453263.1 | 610466 | 25-scf00537 | 25 |
| AX-157753581 | 28 | 4.428 | KV453263.1 | 611148 | 25-scf00537 | 25 |
| AX-158354576 | 28 | 4.428 | KV453263.1 | 611905 | 25-scf00537 | 25 |
| AX-158354580 | 28 | 4.428 | KV453263.1 | 622690 | 25-scf00537 | 25 |
| AX-158354581 | 28 | 4.493 | KV453263.1 | 623659 | 25-scf00537 | 25 |
| AX-158354582 | 28 | 4.53  | KV453263.1 | 626000 | 25-scf00537 | 25 |
| AX-158354583 | 28 | 4.592 | KV453263.1 | 627067 | 25-scf00537 | 25 |
| AX-158354585 | 28 | 4.756 | KV453263.1 | 631819 | 25-scf00537 | 25 |
| AX-157753057 | 28 | 4.756 | KV453263.1 | 633170 | 25-scf00537 | 25 |
| AX-157773879 | 28 | 4.756 | KV453263.1 | 640685 | 25-scf00537 | 25 |
| AX-158354592 | 28 | 4.756 | KV453263.1 | 641467 | 25-scf00537 | 25 |
| AX-158354593 | 28 | 4.756 | KV453263.1 | 643851 | 25-scf00537 | 25 |
| AX-158354594 | 28 | 4.756 | KV453263.1 | 645791 | 25-scf00537 | 25 |
| AX-158354595 | 28 | 4.756 | KV453263.1 | 646388 | 25-scf00537 | 25 |
| AX-158354596 | 28 | 4.756 | KV453263.1 | 646809 | 25-scf00537 | 25 |
| AX-158354598 | 28 | 4.756 | KV453263.1 | 651166 | 25-scf00537 | 25 |
| AX-158354599 | 28 | 4.756 | KV453263.1 | 651559 | 25-scf00537 | 25 |
| AX-157704310 | 28 | 4.756 | KV453263.1 | 654584 | 25-scf00537 | 25 |
| AX-157851330 | 28 | 4.756 | KV453263.1 | 659762 | 25-scf00537 | 25 |
| AX-158354606 | 28 | 4.756 | KV453263.1 | 663673 | 25-scf00537 | 25 |
| AX-158354624 | 28 | 4.756 | KV453263.1 | 686985 | 25-scf00537 | 25 |
| AX-158354625 | 28 | 4.756 | KV453263.1 | 688117 | 25-scf00537 | 25 |
| AX-158354626 | 28 | 4.756 | KV453263.1 | 689159 | 25-scf00537 | 25 |
| AX-158354634 | 28 | 4.756 | KV453263.1 | 696627 | 25-scf00537 | 25 |
| AX-158354636 | 28 | 4.756 | KV453263.1 | 698396 | 25-scf00537 | 25 |
| AX-157752444 | 28 | 4.81  | KV453263.1 | 659525 | 25-scf00537 | 25 |
| AX-157851332 | 28 | 4.851 | KV453263.1 | 660920 | 25-scf00537 | 25 |
| AX-157882478 | 28 | 4.851 | KV453263.1 | 722727 | 25-scf00537 | 25 |
| AX-158354609 | 28 | 4.891 | KV453263.1 | 667907 | 25-scf00537 | 25 |
| AX-158354610 | 28 | 4.935 | KV453263.1 | 668335 | 25-scf00537 | 25 |
| AX-158354578 | 28 | 4.974 | KV453263.1 | 618218 | 25-scf00537 | 25 |
| AX-158354588 | 28 | 4.974 | KV453263.1 | 635687 | 25-scf00537 | 25 |
| AX-158354613 | 28 | 4.974 | KV453263.1 | 671995 | 25-scf00537 | 25 |
| AX-157851333 | 28 | 4.974 | KV453263.1 | 678698 | 25-scf00537 | 25 |
| AX-158354627 | 28 | 4.974 | KV453263.1 | 690179 | 25-scf00537 | 25 |
| AX-158354615 | 28 | 5.003 | KV453263.1 | 676326 | 25-scf00537 | 25 |
| AX-157755384 | 28 | 5.039 | KV453263.1 | 679772 | 25-scf00537 | 25 |
| AX-158354618 | 28 | 5.083 | KV453263.1 | 680232 | 25-scf00537 | 25 |
| AX-158354619 | 28 | 5.083 | KV453263.1 | 681170 | 25-scf00537 | 25 |
| AX-158354622 | 28 | 5.083 | KV453263.1 | 685380 | 25-scf00537 | 25 |
| AX-158354628 | 28 | 5.083 | KV453263.1 | 690760 | 25-scf00537 | 25 |
| AX-158354630 | 28 | 5.083 | KV453263.1 | 692540 | 25-scf00537 | 25 |
| AX-158354631 | 28 | 5.166 | KV453263.1 | 693667 | 25-scf00537 | 25 |

|              |    |       |            |        |             |    |
|--------------|----|-------|------------|--------|-------------|----|
| AX-158354633 | 28 | 5.248 | KV453263.1 | 695812 | 25-scf00537 | 25 |
| AX-158354637 | 28 | 5.411 | KV453263.1 | 698880 | 25-scf00537 | 25 |
| AX-158354639 | 28 | 5.411 | KV453263.1 | 701826 | 25-scf00537 | 25 |
| AX-158354641 | 28 | 5.411 | KV453263.1 | 703660 | 25-scf00537 | 25 |
| AX-158354643 | 28 | 5.411 | KV453263.1 | 706376 | 25-scf00537 | 25 |
| AX-157740376 | 28 | 5.411 | KV453263.1 | 707349 | 25-scf00537 | 25 |
| AX-158354644 | 28 | 5.411 | KV453263.1 | 707745 | 25-scf00537 | 25 |
| AX-158354612 | 28 | 5.576 | KV453263.1 | 670234 | 25-scf00537 | 25 |
| AX-158354632 | 28 | 5.576 | KV453263.1 | 694629 | 25-scf00537 | 25 |
| AX-158354642 | 28 | 5.576 | KV453263.1 | 704372 | 25-scf00537 | 25 |
| AX-158354645 | 28 | 5.576 | KV453263.1 | 708533 | 25-scf00537 | 25 |
| AX-158354649 | 28 | 5.576 | KV453263.1 | 717837 | 25-scf00537 | 25 |
| AX-158354650 | 28 | 5.895 | KV453263.1 | 721751 | 25-scf00537 | 25 |
| AX-158354653 | 28 | 5.912 | KV453263.1 | 723643 | 25-scf00537 | 25 |
| AX-158354654 | 28 | 5.912 | KV453263.1 | 724101 | 25-scf00537 | 25 |
| AX-157697801 | 28 | 6.385 | KV453263.1 | 728012 | 25-scf00537 | 25 |
| AX-158354668 | 28 | 6.385 | KV453263.1 | 741889 | 25-scf00537 | 25 |
| AX-157851334 | 28 | 6.389 | KV453263.1 | 729437 | 25-scf00537 | 25 |
| AX-158354658 | 28 | 6.413 | KV453263.1 | 731917 | 25-scf00537 | 25 |
| AX-158354660 | 28 | 6.723 | KV453263.1 | 732853 | 25-scf00537 | 25 |
| AX-158354663 | 28 | 6.723 | KV453263.1 | 734149 | 25-scf00537 | 25 |
| AX-157746215 | 28 | 6.723 | KV453263.1 | 734770 | 25-scf00537 | 25 |
| AX-158354664 | 28 | 6.723 | KV453263.1 | 735176 | 25-scf00537 | 25 |
| AX-157773390 | 28 | 6.723 | KV453263.1 | 735677 | 25-scf00537 | 25 |
| AX-157721015 | 28 | 6.723 | KV453263.1 | 736330 | 25-scf00537 | 25 |
| AX-158354665 | 28 | 6.723 | KV453263.1 | 736968 | 25-scf00537 | 25 |
| AX-158354670 | 28 | 6.768 | KV453263.1 | 743392 | 25-scf00537 | 25 |
| AX-158354671 | 28 | 6.804 | KV453263.1 | 745019 | 25-scf00537 | 25 |
| AX-157862102 | 28 | 6.808 | KV453263.1 | 749415 | 25-scf00537 | 25 |
| AX-158354675 | 28 | 6.808 | KV453263.1 | 753117 | 25-scf00537 | 25 |
| AX-158354684 | 28 | 6.808 | KV453263.1 | 766071 | 25-scf00537 | 25 |
| AX-157699038 | 28 | 6.85  | KV453263.1 | 747192 | 25-scf00537 | 25 |
| AX-158354673 | 28 | 6.85  | KV453263.1 | 749920 | 25-scf00537 | 25 |
| AX-158354674 | 28 | 6.85  | KV453263.1 | 751856 | 25-scf00537 | 25 |
| AX-157757347 | 28 | 6.978 | KV453263.1 | 753888 | 25-scf00537 | 25 |
| AX-158354679 | 28 | 6.978 | KV453263.1 | 760176 | 25-scf00537 | 25 |
| AX-158354680 | 28 | 6.978 | KV453263.1 | 761398 | 25-scf00537 | 25 |
| AX-157772619 | 28 | 6.978 | KV453263.1 | 762417 | 25-scf00537 | 25 |
| AX-157719598 | 28 | 6.978 | KV453263.1 | 763520 | 25-scf00537 | 25 |
| AX-157889030 | 28 | 7.233 | KV453263.1 | 763874 | 25-scf00537 | 25 |
| AX-158354688 | 28 | 7.233 | KV453263.1 | 769475 | 25-scf00537 | 25 |
| AX-157727293 | 28 | 7.233 | KV453263.1 | 770702 | 25-scf00537 | 25 |
| AX-158354690 | 28 | 7.233 | KV453263.1 | 773542 | 25-scf00537 | 25 |
| AX-158354707 | 28 | 7.233 | KV453263.1 | 811853 | 25-scf00537 | 25 |
| AX-158354693 | 28 | 7.3   | KV453263.1 | 776769 | 25-scf00537 | 25 |
| AX-158354694 | 28 | 7.361 | KV453263.1 | 777997 | 25-scf00537 | 25 |
| AX-158354697 | 28 | 7.361 | KV453263.1 | 781385 | 25-scf00537 | 25 |
| AX-158354698 | 28 | 7.361 | KV453263.1 | 783472 | 25-scf00537 | 25 |
| AX-158354699 | 28 | 7.361 | KV453263.1 | 784240 | 25-scf00537 | 25 |
| AX-158354702 | 28 | 7.361 | KV453263.1 | 796814 | 25-scf00537 | 25 |
| AX-158354709 | 28 | 7.361 | KV453263.1 | 814090 | 25-scf00537 | 25 |

|              |    |       |            |        |             |    |
|--------------|----|-------|------------|--------|-------------|----|
| AX-158354712 | 28 | 7.361 | KV453263.1 | 817410 | 25-scf00537 | 25 |
| AX-157771647 | 28 | 7.488 | KV453263.1 | 803824 | 25-scf00537 | 25 |
| AX-158354705 | 28 | 7.488 | KV453263.1 | 809112 | 25-scf00537 | 25 |
| AX-158354706 | 28 | 7.488 | KV453263.1 | 809880 | 25-scf00537 | 25 |
| AX-157742021 | 28 | 7.488 | KV453263.1 | 811266 | 25-scf00537 | 25 |
| AX-158354717 | 28 | 7.488 | KV453263.1 | 824338 | 25-scf00537 | 25 |
| AX-158354708 | 28 | 7.597 | KV453263.1 | 812486 | 25-scf00537 | 25 |
| AX-158354711 | 28 | 7.597 | KV453263.1 | 815844 | 25-scf00537 | 25 |
| AX-158354715 | 28 | 7.597 | KV453263.1 | 822447 | 25-scf00537 | 25 |
| AX-157862103 | 28 | 7.597 | KV453263.1 | 823478 | 25-scf00537 | 25 |
| AX-158354718 | 28 | 7.655 | KV453263.1 | 829303 | 25-scf00537 | 25 |
| AX-158354720 | 28 | 7.707 | KV453263.1 | 832763 | 25-scf00537 | 25 |
| AX-158354721 | 28 | 7.925 | KV453263.1 | 834395 | 25-scf00537 | 25 |
| AX-157714857 | 28 | 7.925 | KV453263.1 | 837239 | 25-scf00537 | 25 |
| AX-158354723 | 28 | 7.925 | KV453263.1 | 837683 | 25-scf00537 | 25 |
| AX-158354725 | 28 | 7.925 | KV453263.1 | 838841 | 25-scf00537 | 25 |
| AX-158354727 | 28 | 7.925 | KV453263.1 | 840089 | 25-scf00537 | 25 |
| AX-158354728 | 28 | 8.034 | KV453263.1 | 841328 | 25-scf00537 | 25 |
| AX-158354730 | 28 | 8.065 | KV453263.1 | 843701 | 25-scf00537 | 25 |
| AX-158354734 | 28 | 8.101 | KV453263.1 | 846118 | 25-scf00537 | 25 |
| AX-158354737 | 28 | 8.122 | KV453263.1 | 848486 | 25-scf00537 | 25 |
| AX-158354736 | 28 | 8.144 | KV453263.1 | 847591 | 25-scf00537 | 25 |
| AX-158354739 | 28 | 8.144 | KV453263.1 | 851959 | 25-scf00537 | 25 |
| AX-158354740 | 28 | 8.144 | KV453263.1 | 852337 | 25-scf00537 | 25 |
| AX-158354741 | 28 | 8.144 | KV453263.1 | 853858 | 25-scf00537 | 25 |
| AX-158354742 | 28 | 8.144 | KV453263.1 | 855118 | 25-scf00537 | 25 |
| AX-158354744 | 28 | 8.144 | KV453263.1 | 856594 | 25-scf00537 | 25 |
| AX-157757251 | 28 | 8.144 | KV453263.1 | 856989 | 25-scf00537 | 25 |
| AX-158354745 | 28 | 8.144 | KV453263.1 | 858498 | 25-scf00537 | 25 |
| AX-158354747 | 28 | 8.144 | KV453263.1 | 859611 | 25-scf00537 | 25 |
| AX-158354748 | 28 | 8.144 | KV453263.1 | 861420 | 25-scf00537 | 25 |
| AX-158419582 | 28 | 8.144 | KV453263.1 | 862180 | 25-scf00537 | 25 |
| AX-157775772 | 28 | 8.144 | KV453263.1 | 867091 | 25-scf00537 | 25 |
| AX-158354749 | 28 | 8.253 | KV453263.1 | 864548 | 25-scf00537 | 25 |
| AX-157745076 | 28 | 8.362 | KV453263.1 | 866175 | 25-scf00537 | 25 |
| AX-157724815 | 28 | 8.362 | KV453263.1 | 868569 | 25-scf00537 | 25 |
| AX-158354752 | 28 | 8.362 | KV453263.1 | 869424 | 25-scf00537 | 25 |
| AX-158354757 | 28 | 8.581 | KV453263.1 | 883222 | 25-scf00537 | 25 |
| AX-157709434 | 28 | 8.581 | KV453263.1 | 897809 | 25-scf00537 | 25 |
| AX-158354750 | 28 | 8.593 | KV453263.1 | 865039 | 25-scf00537 | 25 |
| AX-158354760 | 28 | 8.593 | KV453263.1 | 886226 | 25-scf00537 | 25 |
| AX-158354762 | 28 | 8.614 | KV453263.1 | 887227 | 25-scf00537 | 25 |
| AX-158354763 | 28 | 8.631 | KV453263.1 | 888417 | 25-scf00537 | 25 |
| AX-158354765 | 28 | 8.652 | KV453263.1 | 890834 | 25-scf00537 | 25 |
| AX-158354766 | 28 | 8.673 | KV453263.1 | 896000 | 25-scf00537 | 25 |
| AX-158354769 | 28 | 8.69  | KV453263.1 | 898767 | 25-scf00537 | 25 |
| AX-157709267 | 28 | 8.69  | KV453263.1 | 899950 | 25-scf00537 | 25 |
| AX-158354771 | 28 | 8.69  | KV453263.1 | 901499 | 25-scf00537 | 25 |
| AX-157742986 | 28 | 8.799 | KV453263.1 | 906778 | 25-scf00537 | 25 |
| AX-157851336 | 28 | 8.927 | KV453263.1 | 910006 | 25-scf00537 | 25 |
| AX-157851337 | 28 | 9.018 | KV453263.1 | 911115 | 25-scf00537 | 25 |

|              |    |        |            |         |             |    |
|--------------|----|--------|------------|---------|-------------|----|
| AX-158354773 | 28 | 9.018  | KV453263.1 | 912778  | 25-scf00537 | 25 |
| AX-158354775 | 28 | 9.018  | KV453263.1 | 914406  | 25-scf00537 | 25 |
| AX-157750761 | 28 | 9.079  | KV453263.1 | 918997  | 25-scf00537 | 25 |
| AX-158354778 | 28 | 9.182  | KV453263.1 | 921503  | 25-scf00537 | 25 |
| AX-158354780 | 28 | 9.182  | KV453263.1 | 928404  | 25-scf00537 | 25 |
| AX-158354783 | 28 | 9.344  | KV453263.1 | 931016  | 25-scf00537 | 25 |
| AX-158354782 | 28 | 9.346  | KV453263.1 | 929159  | 25-scf00537 | 25 |
| AX-157851342 | 28 | 9.346  | KV453263.1 | 932164  | 25-scf00537 | 25 |
| AX-158354785 | 28 | 9.346  | KV453263.1 | 932677  | 25-scf00537 | 25 |
| AX-158354786 | 28 | 9.346  | KV453263.1 | 935560  | 25-scf00537 | 25 |
| AX-158354787 | 28 | 9.346  | KV453263.1 | 936102  | 25-scf00537 | 25 |
| AX-158354789 | 28 | 9.346  | KV453263.1 | 938453  | 25-scf00537 | 25 |
| AX-158354790 | 28 | 9.346  | KV453263.1 | 939888  | 25-scf00537 | 25 |
| AX-158354791 | 28 | 9.346  | KV453263.1 | 940340  | 25-scf00537 | 25 |
| AX-158354793 | 28 | 9.346  | KV453263.1 | 941834  | 25-scf00537 | 25 |
| AX-157750907 | 28 | 9.346  | KV453263.1 | 945831  | 25-scf00537 | 25 |
| AX-158354796 | 28 | 9.346  | KV453263.1 | 946706  | 25-scf00537 | 25 |
| AX-158354797 | 28 | 9.346  | KV453263.1 | 947326  | 25-scf00537 | 25 |
| AX-158354801 | 28 | 9.346  | KV453263.1 | 950231  | 25-scf00537 | 25 |
| AX-157851344 | 28 | 9.783  | KV453263.1 | 961274  | 25-scf00537 | 25 |
| AX-157721170 | 28 | 9.783  | KV453263.1 | 961327  | 25-scf00537 | 25 |
| AX-158354805 | 28 | 9.783  | KV453263.1 | 961836  | 25-scf00537 | 25 |
| AX-158354807 | 28 | 9.783  | KV453263.1 | 965598  | 25-scf00537 | 25 |
| AX-158354808 | 28 | 9.783  | KV453263.1 | 966443  | 25-scf00537 | 25 |
| AX-158354810 | 28 | 9.89   | KV453263.1 | 967543  | 25-scf00537 | 25 |
| AX-158354811 | 28 | 9.89   | KV453263.1 | 970098  | 25-scf00537 | 25 |
| AX-157727670 | 28 | 10.111 | KV453263.1 | 979708  | 25-scf00537 | 25 |
| AX-157851346 | 28 | 10.111 | KV453263.1 | 987162  | 25-scf00537 | 25 |
| AX-158354825 | 28 | 10.111 | KV453263.1 | 991374  | 25-scf00537 | 25 |
| AX-158354826 | 28 | 10.111 | KV453263.1 | 992997  | 25-scf00537 | 25 |
| AX-158354829 | 28 | 10.111 | KV453263.1 | 999415  | 25-scf00537 | 25 |
| AX-158381700 | 28 | 10.111 | KV453263.1 | 1002565 | 25-scf00537 | 25 |
| AX-158354832 | 28 | 10.111 | KV453263.1 | 1002650 | 25-scf00537 | 25 |
| AX-157873931 | 28 | 10.111 | KV453263.1 | 1003749 | 25-scf00537 | 25 |
| AX-158354834 | 28 | 10.111 | KV453263.1 | 1005742 | 25-scf00537 | 25 |
| AX-157750853 | 28 | 10.111 | KV453263.1 | 1007214 | 25-scf00537 | 25 |
| AX-158354836 | 28 | 10.111 | KV453263.1 | 1008061 | 25-scf00537 | 25 |
| AX-158354838 | 28 | 10.111 | KV453263.1 | 1012518 | 25-scf00537 | 25 |
| AX-158354839 | 28 | 10.111 | KV453263.1 | 1012990 | 25-scf00537 | 25 |
| AX-157756026 | 28 | 10.111 | KV453263.1 | 1013665 | 25-scf00537 | 25 |
| AX-158354841 | 28 | 10.111 | KV453263.1 | 1016254 | 25-scf00537 | 25 |
| AX-158354845 | 28 | 10.111 | KV453263.1 | 1025216 | 25-scf00537 | 25 |
| AX-158354860 | 28 | 10.111 | KV453263.1 | 1038624 | 25-scf00537 | 25 |
| AX-158354894 | 28 | 10.111 | KV453263.1 | 1087775 | 25-scf00537 | 25 |
| AX-158354819 | 28 | 10.329 | KV453263.1 | 984574  | 25-scf00537 | 25 |
| AX-158354847 | 28 | 10.329 | KV453263.1 | 1028328 | 25-scf00537 | 25 |
| AX-158354849 | 28 | 10.329 | KV453263.1 | 1030350 | 25-scf00537 | 25 |
| AX-158354851 | 28 | 10.329 | KV453263.1 | 1031183 | 25-scf00537 | 25 |
| AX-158354818 | 28 | 10.548 | KV453263.1 | 980256  | 25-scf00537 | 25 |
| AX-158354852 | 28 | 10.548 | KV453263.1 | 1031530 | 25-scf00537 | 25 |
| AX-158354853 | 28 | 10.548 | KV453263.1 | 1031837 | 25-scf00537 | 25 |

|              |    |        |            |         |             |    |
|--------------|----|--------|------------|---------|-------------|----|
| AX-158354854 | 28 | 10.548 | KV453263.1 | 1032695 | 25-scf00537 | 25 |
| AX-158354856 | 28 | 10.548 | KV453263.1 | 1035330 | 25-scf00537 | 25 |
| AX-158354857 | 28 | 10.548 | KV453263.1 | 1035557 | 25-scf00537 | 25 |
| AX-157851351 | 28 | 10.558 | KV453263.1 | 1037632 | 25-scf00537 | 25 |
| AX-157851352 | 28 | 10.881 | KV453263.1 | 1047953 | 25-scf00537 | 25 |
| AX-158354865 | 28 | 11.05  | KV453263.1 | 1051494 | 25-scf00537 | 25 |
| AX-158354867 | 28 | 11.05  | KV453263.1 | 1062653 | 25-scf00537 | 25 |
| AX-158354869 | 28 | 11.05  | KV453263.1 | 1064045 | 25-scf00537 | 25 |
| AX-158354870 | 28 | 11.05  | KV453263.1 | 1064910 | 25-scf00537 | 25 |
| AX-158354872 | 28 | 11.05  | KV453263.1 | 1066135 | 25-scf00537 | 25 |
| AX-158354874 | 28 | 11.05  | KV453263.1 | 1067022 | 25-scf00537 | 25 |
| AX-158354875 | 28 | 11.05  | KV453263.1 | 1067673 | 25-scf00537 | 25 |
| AX-158381701 | 28 | 11.05  | KV453263.1 | 1068430 | 25-scf00537 | 25 |
| AX-158354878 | 28 | 11.05  | KV453263.1 | 1070144 | 25-scf00537 | 25 |
| AX-158354888 | 28 | 11.05  | KV453263.1 | 1083263 | 25-scf00537 | 25 |
| AX-157681860 | 28 | 11.05  |            | 237     | scf13768    | UN |
| AX-158354880 | 28 | 11.413 | KV453263.1 | 1071483 | 25-scf00537 | 25 |
| AX-158354881 | 28 | 11.518 | KV453263.1 | 1072384 | 25-scf00537 | 25 |
| AX-158354883 | 28 | 11.52  | KV453263.1 | 1075605 | 25-scf00537 | 25 |
| AX-158354886 | 28 | 11.52  | KV453263.1 | 1080734 | 25-scf00537 | 25 |
| AX-157771237 | 28 | 11.553 | KV453263.1 | 1081304 | 25-scf00537 | 25 |
| AX-158354887 | 28 | 11.692 | KV453263.1 | 1082458 | 25-scf00537 | 25 |
| AX-158354889 | 28 | 11.695 | KV453263.1 | 1083930 | 25-scf00537 | 25 |
| AX-158354907 | 28 | 12.755 | KV453263.1 | 1114665 | 25-scf00537 | 25 |
| AX-158354899 | 28 | 12.759 | KV453263.1 | 1098961 | 25-scf00537 | 25 |
| AX-158354906 | 28 | 12.759 | KV453263.1 | 1114323 | 25-scf00537 | 25 |
| AX-158354908 | 28 | 12.759 | KV453263.1 | 1116176 | 25-scf00537 | 25 |
| AX-157773654 | 28 | 12.759 | KV453263.1 | 1117022 | 25-scf00537 | 25 |
| AX-157862105 | 28 | 12.759 | KV453263.1 | 1117174 | 25-scf00537 | 25 |
| AX-158354910 | 28 | 12.773 | KV453263.1 | 1118739 | 25-scf00537 | 25 |
| AX-158354911 | 28 | 12.947 | KV453263.1 | 1119198 | 25-scf00537 | 25 |
| AX-158354913 | 28 | 13.209 | KV453263.1 | 1120710 | 25-scf00537 | 25 |
| AX-157882485 | 28 | 13.461 | KV453263.1 | 1121870 | 25-scf00537 | 25 |
| AX-158354915 | 28 | 13.476 | KV453263.1 | 1123696 | 25-scf00537 | 25 |
| AX-158354916 | 28 | 13.476 | KV453263.1 | 1124585 | 25-scf00537 | 25 |
| AX-158354926 | 28 | 13.566 | KV453263.1 | 1134141 | 25-scf00537 | 25 |
| AX-158354927 | 28 | 13.647 | KV453263.1 | 1134651 | 25-scf00537 | 25 |
| AX-158354914 | 28 | 13.861 | KV453263.1 | 1121567 | 25-scf00537 | 25 |
| AX-157739167 | 28 | 13.861 | KV453263.1 | 1122963 | 25-scf00537 | 25 |
| AX-158354920 | 28 | 13.861 | KV453263.1 | 1127932 | 25-scf00537 | 25 |
| AX-158354921 | 28 | 13.861 | KV453263.1 | 1129437 | 25-scf00537 | 25 |
| AX-158354925 | 28 | 13.861 | KV453263.1 | 1133148 | 25-scf00537 | 25 |
| AX-158354930 | 28 | 13.861 | KV453263.1 | 1139499 | 25-scf00537 | 25 |
| AX-157713373 | 28 | 13.861 | KV453263.1 | 1146088 | 25-scf00537 | 25 |
| AX-157740374 | 28 | 13.861 | KV453263.1 | 1149066 | 25-scf00537 | 25 |
| AX-158419588 | 28 | 13.861 | KV453263.1 | 1149924 | 25-scf00537 | 25 |
| AX-158419589 | 28 | 13.861 | KV453263.1 | 1150043 | 25-scf00537 | 25 |
| AX-158354939 | 28 | 13.861 | KV453263.1 | 1154179 | 25-scf00537 | 25 |
| AX-158354933 | 28 | 14.135 | KV453263.1 | 1146705 | 25-scf00537 | 25 |
| AX-158354937 | 28 | 14.135 | KV453263.1 | 1152295 | 25-scf00537 | 25 |
| AX-157756228 | 28 | 14.135 | KV453263.1 | 1162374 | 25-scf00537 | 25 |



|              |    |        |            |         |             |    |
|--------------|----|--------|------------|---------|-------------|----|
| AX-158354942 | 28 | 14.135 | KV453263.1 | 1165458 | 25-scf00537 | 25 |
| AX-158354943 | 28 | 14.135 | KV453263.1 | 1166816 | 25-scf00537 | 25 |
| AX-158354948 | 28 | 14.135 | KV453263.1 | 1172018 | 25-scf00537 | 25 |
| AX-157851356 | 28 | 14.135 | KV453263.1 | 1172437 | 25-scf00537 | 25 |
| AX-158354952 | 28 | 14.135 | KV453263.1 | 1176283 | 25-scf00537 | 25 |
| AX-158354956 | 28 | 14.135 | KV453263.1 | 1182883 | 25-scf00537 | 25 |
| AX-157725011 | 28 | 14.135 | KV453263.1 | 1183165 | 25-scf00537 | 25 |
| AX-157750568 | 28 | 14.135 | KV453263.1 | 1184654 | 25-scf00537 | 25 |
| AX-158354959 | 28 | 14.135 | KV453263.1 | 1184866 | 25-scf00537 | 25 |
| AX-158354960 | 28 | 14.135 | KV453263.1 | 1185447 | 25-scf00537 | 25 |
| AX-158354970 | 28 | 14.135 | KV453263.1 | 1199847 | 25-scf00537 | 25 |
| AX-158354974 | 28 | 14.135 | KV453263.1 | 1207601 | 25-scf00537 | 25 |
| AX-158354976 | 28 | 14.135 | KV453263.1 | 1209658 | 25-scf00537 | 25 |
| AX-157723062 | 28 | 14.135 | KV453263.1 | 1218631 | 25-scf00537 | 25 |
| AX-158354985 | 28 | 14.135 | KV453263.1 | 1224478 | 25-scf00537 | 25 |
| AX-158354994 | 28 | 14.135 | KV453263.1 | 1234298 | 25-scf00537 | 25 |
| AX-158355011 | 28 | 14.135 | KV453263.1 | 1258289 | 25-scf00537 | 25 |
| AX-157873933 | 28 | 14.135 | KV453263.1 | 1268495 | 25-scf00537 | 25 |
| AX-158354954 | 28 | 14.136 | KV453263.1 | 1179588 | 25-scf00537 | 25 |
| AX-158354957 | 28 | 14.136 | KV453263.1 | 1183783 | 25-scf00537 | 25 |
| AX-158354969 | 28 | 14.136 | KV453263.1 | 1197296 | 25-scf00537 | 25 |
| AX-158354989 | 28 | 14.409 | KV453263.1 | 1227709 | 25-scf00537 | 25 |
| AX-158354931 | 28 | 14.41  | KV453263.1 | 1143203 | 25-scf00537 | 25 |
| AX-158354944 | 28 | 14.41  | KV453263.1 | 1168627 | 25-scf00537 | 25 |
| AX-158354961 | 28 | 14.41  | KV453263.1 | 1188132 | 25-scf00537 | 25 |
| AX-158354965 | 28 | 14.41  | KV453263.1 | 1191741 | 25-scf00537 | 25 |
| AX-158354990 | 28 | 14.41  | KV453263.1 | 1228758 | 25-scf00537 | 25 |
| AX-158354993 | 28 | 14.41  | KV453263.1 | 1233329 | 25-scf00537 | 25 |
| AX-158354999 | 28 | 14.41  | KV453263.1 | 1239597 | 25-scf00537 | 25 |
| AX-158355000 | 28 | 14.41  | KV453263.1 | 1242261 | 25-scf00537 | 25 |
| AX-157752584 | 28 | 14.41  | KV453263.1 | 1242602 | 25-scf00537 | 25 |
| AX-158355004 | 28 | 14.41  | KV453263.1 | 1247084 | 25-scf00537 | 25 |
| AX-158381703 | 28 | 14.41  | KV453263.1 | 1250178 | 25-scf00537 | 25 |
| AX-158355009 | 28 | 14.41  | KV453263.1 | 1255973 | 25-scf00537 | 25 |
| AX-158355010 | 28 | 14.41  | KV453263.1 | 1256986 | 25-scf00537 | 25 |
| AX-158355012 | 28 | 14.41  | KV453263.1 | 1259504 | 25-scf00537 | 25 |
| AX-158355013 | 28 | 14.41  | KV453263.1 | 1259838 | 25-scf00537 | 25 |
| AX-158355014 | 28 | 14.41  | KV453263.1 | 1260972 | 25-scf00537 | 25 |
| AX-158355016 | 28 | 14.41  | KV453263.1 | 1263650 | 25-scf00537 | 25 |
| AX-158355019 | 28 | 14.41  | KV453263.1 | 1267079 | 25-scf00537 | 25 |
| AX-157773110 | 28 | 14.41  | KV453263.1 | 1274352 | 25-scf00537 | 25 |
| AX-158355023 | 28 | 14.41  | KV453263.1 | 1274691 | 25-scf00537 | 25 |
| AX-158355024 | 28 | 14.41  | KV453263.1 | 1275385 | 25-scf00537 | 25 |
| AX-158355027 | 28 | 14.41  | KV453263.1 | 1277208 | 25-scf00537 | 25 |
| AX-157716009 | 28 | 14.41  | KV453263.1 | 1277749 | 25-scf00537 | 25 |
| AX-158355029 | 28 | 14.41  | KV453263.1 | 1277857 | 25-scf00537 | 25 |
| AX-157882488 | 28 | 14.41  | KV453263.1 | 1285622 | 25-scf00537 | 25 |
| AX-157851362 | 28 | 14.41  | KV453263.1 | 1286470 | 25-scf00537 | 25 |
| AX-157713046 | 28 | 14.41  | KV453263.1 | 1287380 | 25-scf00537 | 25 |
| AX-158355036 | 28 | 14.41  | KV453263.1 | 1291912 | 25-scf00537 | 25 |
| AX-157851364 | 28 | 14.41  | KV453263.1 | 1293367 | 25-scf00537 | 25 |

|              |    |        |            |         |             |    |
|--------------|----|--------|------------|---------|-------------|----|
| AX-158355039 | 28 | 14.41  | KV453263.1 | 1296884 | 25-scf00537 | 25 |
| AX-158355034 | 28 | 14.412 | KV453263.1 | 1288346 | 25-scf00537 | 25 |
| AX-158355037 | 28 | 14.806 | KV453263.1 | 1294790 | 25-scf00537 | 25 |
| AX-158355038 | 28 | 14.862 | KV453263.1 | 1296273 | 25-scf00537 | 25 |
| AX-157862109 | 28 | 15.194 | KV453263.1 | 1304961 | 25-scf00537 | 25 |
| AX-158355046 | 28 | 15.197 | KV453263.1 | 1305696 | 25-scf00537 | 25 |
| AX-158355018 | 28 | 15.364 | KV453263.1 | 1265286 | 25-scf00537 | 25 |
| AX-157773650 | 28 | 15.364 | KV453263.1 | 1303201 | 25-scf00537 | 25 |
| AX-157738345 | 28 | 15.364 | KV453263.1 | 1311010 | 25-scf00537 | 25 |
| AX-158355050 | 28 | 15.366 | KV453263.1 | 1311403 | 25-scf00537 | 25 |
| AX-158355051 | 28 | 15.375 | KV453263.1 | 1313208 | 25-scf00537 | 25 |
| AX-158355053 | 28 | 15.375 | KV453263.1 | 1315641 | 25-scf00537 | 25 |
| AX-157851365 | 28 | 15.45  | KV453263.1 | 1316036 | 25-scf00537 | 25 |
| AX-158354918 | 28 | 15.512 | KV453263.1 | 1126444 | 25-scf00537 | 25 |
| AX-158354947 | 28 | 15.512 | KV453263.1 | 1171812 | 25-scf00537 | 25 |
| AX-157873932 | 28 | 15.512 | KV453263.1 | 1258937 | 25-scf00537 | 25 |
| AX-157723761 | 28 | 15.512 | KV453263.1 | 1317816 | 25-scf00537 | 25 |
| AX-157709888 | 28 | 15.512 | KV453263.1 | 1321609 | 25-scf00537 | 25 |
| AX-158355056 | 28 | 15.512 | KV453263.1 | 1322842 | 25-scf00537 | 25 |
| AX-158355058 | 28 | 15.512 | KV453263.1 | 1326335 | 25-scf00537 | 25 |
| AX-157851366 | 28 | 15.512 | KV453263.1 | 1330694 | 25-scf00537 | 25 |
| AX-158355061 | 28 | 15.512 | KV453263.1 | 1331696 | 25-scf00537 | 25 |
| AX-158355062 | 28 | 15.512 | KV453263.1 | 1334128 | 25-scf00537 | 25 |
| AX-158355067 | 28 | 15.512 | KV453263.1 | 1338356 | 25-scf00537 | 25 |
| AX-158355068 | 28 | 15.512 | KV453263.1 | 1338807 | 25-scf00537 | 25 |
| AX-158355070 | 28 | 15.512 | KV453263.1 | 1340172 | 25-scf00537 | 25 |
| AX-157868251 | 28 | 15.512 | KV453263.1 | 1341434 | 25-scf00537 | 25 |
| AX-158355071 | 28 | 15.512 | KV453263.1 | 1341704 | 25-scf00537 | 25 |
| AX-158355074 | 28 | 15.512 | KV453263.1 | 1345979 | 25-scf00537 | 25 |
| AX-158355075 | 28 | 15.512 | KV453263.1 | 1346425 | 25-scf00537 | 25 |
| AX-157742504 | 28 | 15.512 | KV453263.1 | 1346668 | 25-scf00537 | 25 |
| AX-158355081 | 28 | 15.512 | KV453263.1 | 1349843 | 25-scf00537 | 25 |
| AX-158355082 | 28 | 15.85  | KV453263.1 | 1353238 | 25-scf00537 | 25 |
| AX-157743108 | 28 | 16.171 | KV453263.1 | 1355835 | 25-scf00537 | 25 |
| AX-157851368 | 28 | 16.199 | KV453263.1 | 1361252 | 25-scf00537 | 25 |
| AX-157738720 | 28 | 16.199 | KV453263.1 | 1362858 | 25-scf00537 | 25 |
| AX-158355089 | 28 | 16.312 | KV453263.1 | 1365315 | 25-scf00537 | 25 |
| AX-158355104 | 28 | 16.312 | KV453263.1 | 1382339 | 25-scf00537 | 25 |
| AX-158355095 | 28 | 16.454 | KV453263.1 | 1372083 | 25-scf00537 | 25 |
| AX-158355096 | 28 | 16.676 | KV453263.1 | 1372767 | 25-scf00537 | 25 |
| AX-157851369 | 28 | 16.684 | KV453263.1 | 1376334 | 25-scf00537 | 25 |
| AX-158355103 | 28 | 16.694 | KV453263.1 | 1381510 | 25-scf00537 | 25 |
| AX-158355101 | 28 | 16.862 | KV453263.1 | 1380886 | 25-scf00537 | 25 |
| AX-157753956 | 28 | 16.862 | KV453263.1 | 1387728 | 25-scf00537 | 25 |
| AX-157889041 | 28 | 16.862 | KV453263.1 | 1388191 | 25-scf00537 | 25 |
| AX-158355106 | 28 | 16.945 | KV453263.1 | 1389340 | 25-scf00537 | 25 |
| AX-158355108 | 28 | 17.019 | KV453263.1 | 1390666 | 25-scf00537 | 25 |
| AX-158355109 | 28 | 17.023 | KV453263.1 | 1391462 | 25-scf00537 | 25 |
| AX-158355110 | 28 | 17.028 | KV453263.1 | 1392228 | 25-scf00537 | 25 |
| AX-158355111 | 28 | 17.028 | KV453263.1 | 1393487 | 25-scf00537 | 25 |
| AX-158355112 | 28 | 17.029 | KV453263.1 | 1396092 | 25-scf00537 | 25 |

|              |    |        |            |         |             |    |
|--------------|----|--------|------------|---------|-------------|----|
| AX-158355113 | 28 | 17.029 | KV453263.1 | 1397063 | 25-scf00537 | 25 |
| AX-158355115 | 28 | 17.578 | KV453263.1 | 1404321 | 25-scf00537 | 25 |
| AX-158355118 | 28 | 17.578 | KV453263.1 | 1409688 | 25-scf00537 | 25 |
| AX-157720204 | 28 | 17.578 | KV453263.1 | 1411360 | 25-scf00537 | 25 |
| AX-158355119 | 28 | 17.578 | KV453263.1 | 1414020 | 25-scf00537 | 25 |
| AX-158355123 | 28 | 17.578 | KV453263.1 | 1419265 | 25-scf00537 | 25 |
| AX-158355125 | 28 | 17.578 | KV453263.1 | 1421581 | 25-scf00537 | 25 |
| AX-158355126 | 28 | 17.578 | KV453263.1 | 1422550 | 25-scf00537 | 25 |
| AX-158355127 | 28 | 17.578 | KV453263.1 | 1423310 | 25-scf00537 | 25 |
| AX-158355129 | 28 | 17.628 | KV453263.1 | 1429310 | 25-scf00537 | 25 |
| AX-158381705 | 28 | 17.628 | KV453263.1 | 1432714 | 25-scf00537 | 25 |
| AX-158355132 | 28 | 17.99  | KV453263.1 | 1432272 | 25-scf00537 | 25 |
| AX-158355133 | 28 | 17.99  | KV453263.1 | 1434398 | 25-scf00537 | 25 |
| AX-158355134 | 28 | 17.99  | KV453263.1 | 1435476 | 25-scf00537 | 25 |
| AX-157742769 | 28 | 17.99  | KV453263.1 | 1438124 | 25-scf00537 | 25 |
| AX-158355130 | 28 | 18.042 | KV453263.1 | 1430048 | 25-scf00537 | 25 |
| AX-158419593 | 28 | 18.042 | KV453263.1 | 1435199 | 25-scf00537 | 25 |
| AX-157862111 | 28 | 18.042 | KV453263.1 | 1436809 | 25-scf00537 | 25 |
| AX-157851371 | 28 | 18.042 | KV453263.1 | 1441121 | 25-scf00537 | 25 |
| AX-158355138 | 28 | 18.183 | KV453263.1 | 1449687 | 25-scf00537 | 25 |
| AX-158355139 | 28 | 18.354 | KV453263.1 | 1450330 | 25-scf00537 | 25 |
| AX-157724953 | 28 | 18.354 | KV453263.1 | 1452979 | 25-scf00537 | 25 |
| AX-157862112 | 28 | 18.354 | KV453263.1 | 1453139 | 25-scf00537 | 25 |
| AX-158355140 | 28 | 18.354 | KV453263.1 | 1453472 | 25-scf00537 | 25 |
| AX-157773267 | 28 | 18.354 | KV453263.1 | 1459803 | 25-scf00537 | 25 |
| AX-158355144 | 28 | 18.354 | KV453263.1 | 1466749 | 25-scf00537 | 25 |
| AX-158355143 | 28 | 18.356 | KV453263.1 | 1462973 | 25-scf00537 | 25 |
| AX-158355146 | 28 | 18.953 | KV453263.1 | 1471792 | 25-scf00537 | 25 |
| AX-157851394 | 28 | 18.953 | KV453263.1 | 1582689 | 25-scf00537 | 25 |
| AX-158355158 | 28 | 19.487 | KV453263.1 | 1493153 | 25-scf00537 | 25 |
| AX-158355159 | 28 | 19.487 | KV453263.1 | 1493628 | 25-scf00537 | 25 |
| AX-158355161 | 28 | 19.671 | KV453263.1 | 1495048 | 25-scf00537 | 25 |
| AX-158355163 | 28 | 19.671 | KV453263.1 | 1496499 | 25-scf00537 | 25 |
| AX-158355164 | 28 | 19.671 | KV453263.1 | 1500553 | 25-scf00537 | 25 |
| AX-158355165 | 28 | 19.889 | KV453263.1 | 1501444 | 25-scf00537 | 25 |
| AX-157741086 | 28 | 19.889 | KV453263.1 | 1502258 | 25-scf00537 | 25 |
| AX-158355167 | 28 | 19.889 | KV453263.1 | 1502909 | 25-scf00537 | 25 |
| AX-158355170 | 28 | 19.889 | KV453263.1 | 1506336 | 25-scf00537 | 25 |
| AX-158355179 | 28 | 19.889 | KV453263.1 | 1519719 | 25-scf00537 | 25 |
| AX-158355162 | 28 | 19.998 | KV453263.1 | 1495713 | 25-scf00537 | 25 |
| AX-158355172 | 28 | 19.998 | KV453263.1 | 1509338 | 25-scf00537 | 25 |
| AX-158355175 | 28 | 19.998 | KV453263.1 | 1513226 | 25-scf00537 | 25 |
| AX-158355176 | 28 | 19.998 | KV453263.1 | 1514049 | 25-scf00537 | 25 |
| AX-157851380 | 28 | 19.998 | KV453263.1 | 1514910 | 25-scf00537 | 25 |
| AX-157772475 | 28 | 19.998 | KV453263.1 | 1518693 | 25-scf00537 | 25 |
| AX-157851381 | 28 | 19.998 | KV453263.1 | 1519347 | 25-scf00537 | 25 |
| AX-157851382 | 28 | 19.998 | KV453263.1 | 1519427 | 25-scf00537 | 25 |
| AX-157851383 | 28 | 19.998 | KV453263.1 | 1519590 | 25-scf00537 | 25 |
| AX-157717446 | 28 | 19.998 | KV453263.1 | 1522210 | 25-scf00537 | 25 |
| AX-158355180 | 28 | 20.013 | KV453263.1 | 1523660 | 25-scf00537 | 25 |
| AX-158355181 | 28 | 20.044 | KV453263.1 | 1524689 | 25-scf00537 | 25 |

|              |    |        |             |         |             |    |
|--------------|----|--------|-------------|---------|-------------|----|
| AX-158355182 | 28 | 20.079 | KV453263.1  | 1525027 | 25-scf00537 | 25 |
| AX-158355183 | 28 | 20.107 | KV453263.1  | 1528630 | 25-scf00537 | 25 |
| AX-157750157 | 28 | 20.107 | KV453263.1  | 1531285 | 25-scf00537 | 25 |
| AX-157851387 | 28 | 20.112 | KV453263.1  | 1533903 | 25-scf00537 | 25 |
| AX-158355186 | 28 | 20.262 | KV453263.1  | 1537433 | 25-scf00537 | 25 |
| AX-157771341 | 28 | 20.825 | KV453263.1  | 1553204 | 25-scf00537 | 25 |
| AX-157851389 | 28 | 20.859 | KV453263.1  | 1555529 | 25-scf00537 | 25 |
| AX-158355205 | 28 | 20.859 | KV453263.1  | 1569409 | 25-scf00537 | 25 |
| AX-157851390 | 28 | 20.86  | KV453263.1  | 1555779 | 25-scf00537 | 25 |
| AX-158355198 | 28 | 20.86  | KV453263.1  | 1560092 | 25-scf00537 | 25 |
| AX-158355199 | 28 | 20.86  | KV453263.1  | 1563404 | 25-scf00537 | 25 |
| AX-158355201 | 28 | 20.86  | KV453263.1  | 1565458 | 25-scf00537 | 25 |
| AX-158355202 | 28 | 20.99  | KV453263.1  | 1566571 | 25-scf00537 | 25 |
| AX-157873943 | 28 | 21.091 | KV453263.1  | 1569732 | 25-scf00537 | 25 |
| AX-158355206 | 28 | 21.091 | KV453263.1  | 1570616 | 25-scf00537 | 25 |
| AX-157851392 | 28 | 21.091 | KV453263.1  | 1576324 | 25-scf00537 | 25 |
| AX-158355212 | 28 | 21.091 | KV453263.1  | 1582195 | 25-scf00537 | 25 |
| AX-157851396 | 28 | 21.091 | KV453263.1  | 1589171 | 25-scf00537 | 25 |
| AX-157862115 | 28 | 21.091 | KV453263.1  | 1589258 | 25-scf00537 | 25 |
| AX-158355217 | 28 | 21.091 | KV453263.1  | 1592918 | 25-scf00537 | 25 |
| AX-158355210 | 28 | 21.2   | KV453263.1  | 1578561 | 25-scf00537 | 25 |
| AX-158355216 | 28 | 21.2   | KV453263.1  | 1592297 | 25-scf00537 | 25 |
| AX-158355218 | 28 | 21.2   | KV453263.1  | 1597078 | 25-scf00537 | 25 |
| AX-158355219 | 28 | 21.2   | KV453263.1  | 1597481 | 25-scf00537 | 25 |
| AX-157738519 | 28 | 21.2   | KV453263.1  | 1600100 | 25-scf00537 | 25 |
| AX-157707451 | 28 | 21.2   | 3ML01034313 | 233     | scf09985_1  | UN |
| AX-157721089 | 28 | 21.201 | KV453263.1  | 1603818 | 25-scf00537 | 25 |
| AX-157722619 | 28 | 21.203 | KV453263.1  | 1604689 | 25-scf00537 | 25 |
| AX-158355222 | 28 | 21.595 | KV453263.1  | 1606022 | 25-scf00537 | 25 |
| AX-157742459 | 28 | 21.726 | KV453263.1  | 1610377 | 25-scf00537 | 25 |
| AX-158355224 | 28 | 21.85  | KV453263.1  | 1610474 | 25-scf00537 | 25 |
| AX-158355228 | 28 | 21.856 | KV453263.1  | 1614734 | 25-scf00537 | 25 |
| AX-158355229 | 28 | 21.856 | KV453263.1  | 1615050 | 25-scf00537 | 25 |
| AX-158355231 | 28 | 21.856 | KV453263.1  | 1616552 | 25-scf00537 | 25 |
| AX-158355232 | 28 | 21.856 | KV453263.1  | 1617637 | 25-scf00537 | 25 |
| AX-158419597 | 28 | 21.856 | KV453263.1  | 1618116 | 25-scf00537 | 25 |
| AX-158355234 | 28 | 22.075 | KV453263.1  | 1625263 | 25-scf00537 | 25 |
| AX-158355233 | 28 | 22.293 | KV453263.1  | 1621594 | 25-scf00537 | 25 |
| AX-158419598 | 28 | 22.293 | KV453263.1  | 1628513 | 25-scf00537 | 25 |
| AX-158355235 | 28 | 22.293 | KV453263.1  | 1628653 | 25-scf00537 | 25 |
| AX-158355236 | 28 | 22.293 | KV453263.1  | 1629292 | 25-scf00537 | 25 |
| AX-158355239 | 28 | 22.293 | KV453263.1  | 1633127 | 25-scf00537 | 25 |
| AX-158355241 | 28 | 22.457 | KV453263.1  | 1638232 | 25-scf00537 | 25 |
| AX-157862117 | 28 | 22.62  | KV453263.1  | 1638976 | 25-scf00537 | 25 |
| AX-157862118 | 28 | 22.62  | KV453263.1  | 1640234 | 25-scf00537 | 25 |
| AX-157774990 | 28 | 22.62  | KV453263.1  | 1640414 | 25-scf00537 | 25 |
| AX-158355244 | 28 | 22.62  | KV453263.1  | 1641651 | 25-scf00537 | 25 |
| AX-158355247 | 28 | 22.62  | KV453263.1  | 1643042 | 25-scf00537 | 25 |
| AX-158355248 | 28 | 22.62  | KV453263.1  | 1643889 | 25-scf00537 | 25 |
| AX-158355249 | 28 | 22.62  | KV453263.1  | 1644115 | 25-scf00537 | 25 |
| AX-157873944 | 28 | 22.62  | KV453263.1  | 1644331 | 25-scf00537 | 25 |

|              |    |        |            |         |             |    |
|--------------|----|--------|------------|---------|-------------|----|
| AX-158355252 | 28 | 22.622 | KV453263.1 | 1646665 | 25-scf00537 | 25 |
| AX-158355253 | 28 | 22.87  | KV453263.1 | 1651013 | 25-scf00537 | 25 |
| AX-158355256 | 28 | 22.896 | KV453263.1 | 1656179 | 25-scf00537 | 25 |
| AX-158355246 | 28 | 23.493 | KV453263.1 | 1642539 | 25-scf00537 | 25 |
| AX-157720912 | 28 | 23.493 | KV453263.1 | 1657409 | 25-scf00537 | 25 |
| AX-158355258 | 28 | 23.495 | KV453263.1 | 1658100 | 25-scf00537 | 25 |
| AX-158355260 | 28 | 23.495 | KV453263.1 | 1663540 | 25-scf00537 | 25 |
| AX-158419601 | 28 | 23.495 | KV453263.1 | 1664005 | 25-scf00537 | 25 |
| AX-158419602 | 28 | 23.548 | KV453263.1 | 1664632 | 25-scf00537 | 25 |
| AX-158420691 | 28 | 23.604 | KV453263.1 | 1664843 | 25-scf00537 | 25 |
| AX-158355267 | 28 | 23.674 | KV453263.1 | 1669911 | 25-scf00537 | 25 |
| AX-158355261 | 28 | 23.713 | KV453263.1 | 1665939 | 25-scf00537 | 25 |
| AX-157851398 | 28 | 23.713 | KV453263.1 | 1670314 | 25-scf00537 | 25 |
| AX-158355268 | 28 | 23.713 | KV453263.1 | 1671469 | 25-scf00537 | 25 |
| AX-158355269 | 28 | 23.713 | KV453263.1 | 1673086 | 25-scf00537 | 25 |
| AX-157851399 | 28 | 23.713 | KV453263.1 | 1674013 | 25-scf00537 | 25 |
| AX-158355270 | 28 | 23.751 | KV453263.1 | 1674579 | 25-scf00537 | 25 |
| AX-157889044 | 28 | 23.77  | KV453263.1 | 1681119 | 25-scf00537 | 25 |
| AX-157851401 | 28 | 23.823 | KV453263.1 | 1681954 | 25-scf00537 | 25 |
| AX-158355274 | 28 | 23.933 | KV453263.1 | 1683186 | 25-scf00537 | 25 |
| AX-158355279 | 28 | 24.072 | KV453263.1 | 1691197 | 25-scf00537 | 25 |
| AX-157851402 | 28 | 24.072 | KV453263.1 | 1695583 | 25-scf00537 | 25 |
| AX-158355281 | 28 | 24.072 | KV453263.1 | 1696576 | 25-scf00537 | 25 |
| AX-158355282 | 28 | 24.072 | KV453263.1 | 1697018 | 25-scf00537 | 25 |
| AX-158355284 | 28 | 24.072 | KV453263.1 | 1698929 | 25-scf00537 | 25 |
| AX-158355285 | 28 | 24.072 | KV453263.1 | 1700313 | 25-scf00537 | 25 |
| AX-158355289 | 28 | 24.072 | KV453263.1 | 1703764 | 25-scf00537 | 25 |
| AX-158355290 | 28 | 24.072 | KV453263.1 | 1706572 | 25-scf00537 | 25 |
| AX-158355291 | 28 | 24.072 | KV453263.1 | 1707776 | 25-scf00537 | 25 |
| AX-158355294 | 28 | 24.072 | KV453263.1 | 1711986 | 25-scf00537 | 25 |
| AX-158355295 | 28 | 24.072 | KV453263.1 | 1712431 | 25-scf00537 | 25 |
| AX-158355297 | 28 | 24.072 | KV453263.1 | 1714358 | 25-scf00537 | 25 |
| AX-158355298 | 28 | 24.072 | KV453263.1 | 1715711 | 25-scf00537 | 25 |
| AX-158355299 | 28 | 24.072 | KV453263.1 | 1716356 | 25-scf00537 | 25 |
| AX-158355301 | 28 | 24.072 | KV453263.1 | 1718729 | 25-scf00537 | 25 |
| AX-158355302 | 28 | 24.072 | KV453263.1 | 1720620 | 25-scf00537 | 25 |
| AX-158355303 | 28 | 24.072 | KV453263.1 | 1721338 | 25-scf00537 | 25 |
| AX-158355304 | 28 | 24.117 | KV453263.1 | 1723350 | 25-scf00537 | 25 |
| AX-158355305 | 28 | 24.158 | KV453263.1 | 1725058 | 25-scf00537 | 25 |
| AX-158355306 | 28 | 24.211 | KV453263.1 | 1726192 | 25-scf00537 | 25 |
| AX-158355307 | 28 | 24.211 | KV453263.1 | 1732934 | 25-scf00537 | 25 |
| AX-158355365 | 28 | 24.211 | KV453263.1 | 1796527 | 25-scf00537 | 25 |
| AX-158355309 | 28 | 24.213 | KV453263.1 | 1738429 | 25-scf00537 | 25 |
| AX-158355310 | 28 | 24.436 | KV453263.1 | 1740933 | 25-scf00537 | 25 |
| AX-158355311 | 28 | 24.436 | KV453263.1 | 1741772 | 25-scf00537 | 25 |
| AX-158355312 | 28 | 24.436 | KV453263.1 | 1743079 | 25-scf00537 | 25 |
| AX-158355314 | 28 | 24.436 | KV453263.1 | 1745602 | 25-scf00537 | 25 |
| AX-158355329 | 28 | 24.436 | KV453263.1 | 1764976 | 25-scf00537 | 25 |
| AX-158355346 | 28 | 24.436 | KV453263.1 | 1779721 | 25-scf00537 | 25 |
| AX-158355361 | 28 | 24.436 | KV453263.1 | 1792040 | 25-scf00537 | 25 |
| AX-158355315 | 28 | 24.473 | KV453263.1 | 1746579 | 25-scf00537 | 25 |

|              |    |        |            |         |             |    |
|--------------|----|--------|------------|---------|-------------|----|
| AX-158355316 | 28 | 24.473 | KV453263.1 | 1747211 | 25-scf00537 | 25 |
| AX-158355317 | 28 | 24.534 | KV453263.1 | 1748966 | 25-scf00537 | 25 |
| AX-157889045 | 28 | 24.56  | KV453263.1 | 1754386 | 25-scf00537 | 25 |
| AX-157851405 | 28 | 24.588 | KV453263.1 | 1748703 | 25-scf00537 | 25 |
| AX-158355321 | 28 | 24.588 | KV453263.1 | 1754438 | 25-scf00537 | 25 |
| AX-157721488 | 28 | 24.588 | KV453263.1 | 1757390 | 25-scf00537 | 25 |
| AX-158355324 | 28 | 24.588 | KV453263.1 | 1758600 | 25-scf00537 | 25 |
| AX-158355326 | 28 | 24.588 | KV453263.1 | 1761618 | 25-scf00537 | 25 |
| AX-158355327 | 28 | 24.588 | KV453263.1 | 1762386 | 25-scf00537 | 25 |
| AX-158355328 | 28 | 24.588 | KV453263.1 | 1764267 | 25-scf00537 | 25 |
| AX-158355330 | 28 | 24.588 | KV453263.1 | 1765593 | 25-scf00537 | 25 |
| AX-158355331 | 28 | 24.588 | KV453263.1 | 1766568 | 25-scf00537 | 25 |
| AX-158355332 | 28 | 24.588 | KV453263.1 | 1767582 | 25-scf00537 | 25 |
| AX-158355337 | 28 | 24.588 | KV453263.1 | 1772639 | 25-scf00537 | 25 |
| AX-158355338 | 28 | 24.588 | KV453263.1 | 1773242 | 25-scf00537 | 25 |
| AX-158355339 | 28 | 24.588 | KV453263.1 | 1774185 | 25-scf00537 | 25 |
| AX-158355340 | 28 | 24.588 | KV453263.1 | 1775690 | 25-scf00537 | 25 |
| AX-157862119 | 28 | 24.588 | KV453263.1 | 1776250 | 25-scf00537 | 25 |
| AX-158355341 | 28 | 24.588 | KV453263.1 | 1777225 | 25-scf00537 | 25 |
| AX-158355344 | 28 | 24.588 | KV453263.1 | 1778415 | 25-scf00537 | 25 |
| AX-158355345 | 28 | 24.588 | KV453263.1 | 1778633 | 25-scf00537 | 25 |
| AX-158355351 | 28 | 24.588 | KV453263.1 | 1781774 | 25-scf00537 | 25 |
| AX-158355354 | 28 | 24.588 | KV453263.1 | 1784949 | 25-scf00537 | 25 |
| AX-157851416 | 28 | 24.588 | KV453263.1 | 1902322 | 25-scf00537 | 25 |
| AX-158355348 | 28 | 24.613 | KV453263.1 | 1780662 | 25-scf00537 | 25 |
| AX-158355349 | 28 | 24.644 | KV453263.1 | 1781098 | 25-scf00537 | 25 |
| AX-158355353 | 28 | 24.697 | KV453263.1 | 1782614 | 25-scf00537 | 25 |
| AX-157868255 | 28 | 24.807 | KV453263.1 | 1766909 | 25-scf00537 | 25 |
| AX-158355355 | 28 | 24.807 | KV453263.1 | 1785479 | 25-scf00537 | 25 |
| AX-158355356 | 28 | 24.807 | KV453263.1 | 1785763 | 25-scf00537 | 25 |
| AX-158355357 | 28 | 24.807 | KV453263.1 | 1786331 | 25-scf00537 | 25 |
| AX-157725738 | 28 | 24.807 | KV453263.1 | 1789298 | 25-scf00537 | 25 |
| AX-158355362 | 28 | 24.807 | KV453263.1 | 1793259 | 25-scf00537 | 25 |
| AX-157851408 | 28 | 24.807 | KV453263.1 | 1793866 | 25-scf00537 | 25 |
| AX-158355363 | 28 | 24.807 | KV453263.1 | 1794479 | 25-scf00537 | 25 |
| AX-158355364 | 28 | 24.807 | KV453263.1 | 1795901 | 25-scf00537 | 25 |
| AX-157851409 | 28 | 24.807 | KV453263.1 | 1796426 | 25-scf00537 | 25 |
| AX-158355391 | 28 | 24.807 | KV453263.1 | 1840198 | 25-scf00537 | 25 |
| AX-157719126 | 28 | 24.807 | KV453263.1 | 1873406 | 25-scf00537 | 25 |
| AX-157862120 | 28 | 24.916 | KV453263.1 | 1832135 | 25-scf00537 | 25 |
| AX-158355387 | 28 | 24.916 | KV453263.1 | 1832886 | 25-scf00537 | 25 |
| AX-157725140 | 28 | 24.916 | KV453263.1 | 1835710 | 25-scf00537 | 25 |
| AX-158355388 | 28 | 24.916 | KV453263.1 | 1836601 | 25-scf00537 | 25 |
| AX-158355390 | 28 | 24.916 | KV453263.1 | 1838445 | 25-scf00537 | 25 |
| AX-158355392 | 28 | 24.916 | KV453263.1 | 1842972 | 25-scf00537 | 25 |
| AX-158355393 | 28 | 24.916 | KV453263.1 | 1843334 | 25-scf00537 | 25 |
| AX-158381709 | 28 | 24.916 | KV453263.1 | 1873472 | 25-scf00537 | 25 |
| AX-158355401 | 28 | 25.025 | KV453263.1 | 1879279 | 25-scf00537 | 25 |
| AX-157759063 | 28 | 25.025 | KV453263.1 | 1883244 | 25-scf00537 | 25 |
| AX-158355403 | 28 | 25.025 | KV453263.1 | 1887043 | 25-scf00537 | 25 |
| AX-157851414 | 28 | 25.025 | KV453263.1 | 1892875 | 25-scf00537 | 25 |

|              |    |        |            |         |             |    |
|--------------|----|--------|------------|---------|-------------|----|
| AX-157747566 | 28 | 25.025 | KV453263.1 | 1917503 | 25-scf00537 | 25 |
| AX-157851415 | 28 | 25.066 | KV453263.1 | 1894980 | 25-scf00537 | 25 |
| AX-158419605 | 28 | 25.088 | KV453263.1 | 1897768 | 25-scf00537 | 25 |
| AX-157743223 | 28 | 25.134 | KV453263.1 | 1900647 | 25-scf00537 | 25 |
| AX-158355413 | 28 | 25.135 | KV453263.1 | 1904086 | 25-scf00537 | 25 |
| AX-158355414 | 28 | 25.311 | KV453263.1 | 1905344 | 25-scf00537 | 25 |
| AX-158355415 | 28 | 25.462 | KV453263.1 | 1905861 | 25-scf00537 | 25 |
| AX-158355416 | 28 | 25.462 | KV453263.1 | 1907487 | 25-scf00537 | 25 |
| AX-158355417 | 28 | 25.462 | KV453263.1 | 1909219 | 25-scf00537 | 25 |
| AX-158355419 | 28 | 25.462 | KV453263.1 | 1912141 | 25-scf00537 | 25 |
| AX-157742233 | 28 | 25.462 | KV453263.1 | 1914684 | 25-scf00537 | 25 |
| AX-158355420 | 28 | 25.462 | KV453263.1 | 1916522 | 25-scf00537 | 25 |
| AX-157851418 | 28 | 25.462 | KV453263.1 | 1918420 | 25-scf00537 | 25 |
| AX-158355429 | 28 | 25.462 | KV453263.1 | 1927992 | 25-scf00537 | 25 |
| AX-158355430 | 28 | 25.462 | KV453263.1 | 1928817 | 25-scf00537 | 25 |
| AX-157851420 | 28 | 25.462 | KV453263.1 | 1929836 | 25-scf00537 | 25 |
| AX-157851421 | 28 | 25.462 | KV453263.1 | 1932286 | 25-scf00537 | 25 |
| AX-157851422 | 28 | 25.462 | KV453263.1 | 1932987 | 25-scf00537 | 25 |
| AX-158355432 | 28 | 25.462 | KV453263.1 | 1933881 | 25-scf00537 | 25 |
| AX-158355441 | 28 | 25.462 | KV453263.1 | 1944336 | 25-scf00537 | 25 |
| AX-158355442 | 28 | 25.462 | KV453263.1 | 1944840 | 25-scf00537 | 25 |
| AX-158355433 | 28 | 25.498 | KV453263.1 | 1934604 | 25-scf00537 | 25 |
| AX-157712997 | 28 | 25.543 | KV453263.1 | 1937421 | 25-scf00537 | 25 |
| AX-158355436 | 28 | 25.572 | KV453263.1 | 1937029 | 25-scf00537 | 25 |
| AX-158355439 | 28 | 25.572 | KV453263.1 | 1942587 | 25-scf00537 | 25 |
| AX-158355444 | 28 | 25.652 | KV453263.1 | 1945547 | 25-scf00537 | 25 |
| AX-158355446 | 28 | 25.652 | KV453263.1 | 1946706 | 25-scf00537 | 25 |
| AX-158355445 | 28 | 25.681 | KV453263.1 | 1946314 | 25-scf00537 | 25 |
| AX-158355452 | 28 | 25.79  | KV453263.1 | 1950166 | 25-scf00537 | 25 |
| AX-157742792 | 28 | 25.79  | KV453263.1 | 1950600 | 25-scf00537 | 25 |
| AX-158355454 | 28 | 25.79  | KV453263.1 | 1951312 | 25-scf00537 | 25 |
| AX-158355455 | 28 | 25.79  | KV453263.1 | 1952877 | 25-scf00537 | 25 |
| AX-158355456 | 28 | 25.79  | KV453263.1 | 1954902 | 25-scf00537 | 25 |
| AX-158355457 | 28 | 25.79  | KV453263.1 | 1955302 | 25-scf00537 | 25 |
| AX-158355459 | 28 | 25.79  | KV453263.1 | 1957297 | 25-scf00537 | 25 |
| AX-158355462 | 28 | 25.79  | KV453263.1 | 1960595 | 25-scf00537 | 25 |
| AX-157889046 | 28 | 25.899 | KV453263.1 | 1949423 | 25-scf00537 | 25 |
| AX-157724967 | 28 | 25.899 | KV453263.1 | 1958548 | 25-scf00537 | 25 |
| AX-157749244 | 28 | 25.899 | KV453263.1 | 1960770 | 25-scf00537 | 25 |
| AX-158355464 | 28 | 25.899 | KV453263.1 | 1962771 | 25-scf00537 | 25 |
| AX-158355466 | 28 | 25.899 | KV453263.1 | 1963299 | 25-scf00537 | 25 |
| AX-157748841 | 28 | 25.899 | KV453263.1 | 1965251 | 25-scf00537 | 25 |
| AX-158355468 | 28 | 25.899 | KV453263.1 | 1965392 | 25-scf00537 | 25 |
| AX-158355469 | 28 | 25.899 | KV453263.1 | 1965650 | 25-scf00537 | 25 |
| AX-158355470 | 28 | 25.899 | KV453263.1 | 1966537 | 25-scf00537 | 25 |
| AX-158355471 | 28 | 25.899 | KV453263.1 | 1968912 | 25-scf00537 | 25 |
| AX-158355472 | 28 | 25.899 | KV453263.1 | 1970637 | 25-scf00537 | 25 |
| AX-158355475 | 28 | 25.899 | KV453263.1 | 1974731 | 25-scf00537 | 25 |
| AX-158355476 | 28 | 25.899 | KV453263.1 | 1975610 | 25-scf00537 | 25 |
| AX-157750419 | 28 | 25.899 | KV453263.1 | 1975731 | 25-scf00537 | 25 |
| AX-158355478 | 28 | 25.899 | KV453263.1 | 1980735 | 25-scf00537 | 25 |

|              |    |        |             |         |             |    |
|--------------|----|--------|-------------|---------|-------------|----|
| AX-158355479 | 28 | 25.899 | KV453263.1  | 1980969 | 25-scf00537 | 25 |
| AX-158419610 | 28 | 25.899 | KV453263.1  | 1989922 | 25-scf00537 | 25 |
| AX-158381710 | 28 | 25.899 | KV453263.1  | 1996546 | 25-scf00537 | 25 |
| AX-158355508 | 28 | 25.899 | KV453263.1  | 2008240 | 25-scf00537 | 25 |
| AX-158355482 | 28 | 26.114 | KV453263.1  | 1984228 | 25-scf00537 | 25 |
| AX-158355485 | 28 | 26.114 | KV453263.1  | 1985370 | 25-scf00537 | 25 |
| AX-158355486 | 28 | 26.336 | KV453263.1  | 1985811 | 25-scf00537 | 25 |
| AX-157851426 | 28 | 26.336 | KV453263.1  | 1987316 | 25-scf00537 | 25 |
| AX-158419611 | 28 | 26.336 | KV453263.1  | 1989957 | 25-scf00537 | 25 |
| AX-158355489 | 28 | 26.336 | KV453263.1  | 1991333 | 25-scf00537 | 25 |
| AX-158355492 | 28 | 26.336 | KV453263.1  | 1992920 | 25-scf00537 | 25 |
| AX-158355495 | 28 | 26.336 | KV453263.1  | 1995261 | 25-scf00537 | 25 |
| AX-158355496 | 28 | 26.336 | KV453263.1  | 1995860 | 25-scf00537 | 25 |
| AX-158355499 | 28 | 26.336 | KV453263.1  | 1998418 | 25-scf00537 | 25 |
| AX-158355503 | 28 | 26.337 | KV453263.1  | 2002456 | 25-scf00537 | 25 |
| AX-158355504 | 28 | 26.664 | KV453263.1  | 2003664 | 25-scf00537 | 25 |
| AX-158355506 | 28 | 26.664 | KV453263.1  | 2006294 | 25-scf00537 | 25 |
| AX-158355507 | 28 | 26.664 | KV453263.1  | 2007501 | 25-scf00537 | 25 |
| AX-158355509 | 28 | 26.664 | KV453263.1  | 2008892 | 25-scf00537 | 25 |
| AX-158355510 | 28 | 26.664 | KV453263.1  | 2009917 | 25-scf00537 | 25 |
| AX-158355515 | 28 | 26.676 | KV453263.1  | 2016605 | 25-scf00537 | 25 |
| AX-158355517 | 28 | 26.676 | KV453263.1  | 2017553 | 25-scf00537 | 25 |
| AX-158355518 | 28 | 26.689 | KV453263.1  | 2018634 | 25-scf00537 | 25 |
| AX-158355519 | 28 | 26.712 | KV453263.1  | 2019422 | 25-scf00537 | 25 |
| AX-158355520 | 28 | 26.739 | KV453263.1  | 2021415 | 25-scf00537 | 25 |
| AX-158355488 | 28 | 26.773 | KV453263.1  | 1990760 | 25-scf00537 | 25 |
| AX-158355511 | 28 | 26.773 | KV453263.1  | 2010682 | 25-scf00537 | 25 |
| AX-158355521 | 28 | 26.773 | KV453263.1  | 2022308 | 25-scf00537 | 25 |
| AX-158355522 | 28 | 26.773 | KV453263.1  | 2022944 | 25-scf00537 | 25 |
| AX-158355523 | 28 | 26.773 | KV453263.1  | 2026451 | 25-scf00537 | 25 |
| AX-157757795 | 28 | 26.773 | KV453263.1  | 2027828 | 25-scf00537 | 25 |
| AX-157851428 | 28 | 26.773 | KV453263.1  | 2029626 | 25-scf00537 | 25 |
| AX-158355528 | 28 | 26.773 | KV453263.1  | 2038429 | 25-scf00537 | 25 |
| AX-157851430 | 28 | 26.773 | KV453263.1  | 2047903 | 25-scf00537 | 25 |
| AX-157704726 | 28 | 26.773 | 3ML01027165 | 490     | scf02769_1  | UN |
| AX-158413986 | 28 | 26.773 | 3ML01027165 | 1077    | scf02769_1  | UN |
| AX-158421093 | 28 | 26.773 | 3ML01027165 | 1113    | scf02769_1  | UN |
| AX-158355534 | 28 | 26.774 | KV453263.1  | 2051356 | 25-scf00537 | 25 |
| AX-158355535 | 28 | 26.774 | KV453263.1  | 2053251 | 25-scf00537 | 25 |
| AX-158355538 | 28 | 26.937 | KV453263.1  | 2055270 | 25-scf00537 | 25 |
| AX-157738698 | 28 | 26.937 | KV453263.1  | 2056398 | 25-scf00537 | 25 |
| AX-157755417 | 28 | 27.101 | KV453263.1  | 2060231 | 25-scf00537 | 25 |
| AX-158355541 | 28 | 27.101 | KV453263.1  | 2061355 | 25-scf00537 | 25 |
| AX-158355544 | 28 | 27.101 | KV453263.1  | 2065665 | 25-scf00537 | 25 |
| AX-157754185 | 28 | 27.101 | KV453263.1  | 2066433 | 25-scf00537 | 25 |
| AX-158355545 | 28 | 27.101 | KV453263.1  | 2067539 | 25-scf00537 | 25 |
| AX-157851432 | 28 | 27.101 | KV453263.1  | 2068984 | 25-scf00537 | 25 |
| AX-157851433 | 28 | 27.101 | KV453263.1  | 2069223 | 25-scf00537 | 25 |
| AX-157745096 | 28 | 27.191 | KV453263.1  | 2070264 | 25-scf00537 | 25 |
| AX-158355547 | 28 | 27.319 | KV453263.1  | 2070720 | 25-scf00537 | 25 |
| AX-157750940 | 28 | 27.319 | KV453263.1  | 2074797 | 25-scf00537 | 25 |



|              |    |        |            |         |             |    |
|--------------|----|--------|------------|---------|-------------|----|
| AX-158355548 | 28 | 27.319 | KV453263.1 | 2076890 | 25-scf00537 | 25 |
| AX-158355549 | 28 | 27.319 | KV453263.1 | 2079514 | 25-scf00537 | 25 |
| AX-158355550 | 28 | 27.319 | KV453263.1 | 2080177 | 25-scf00537 | 25 |
| AX-158355552 | 28 | 27.319 | KV453263.1 | 2081493 | 25-scf00537 | 25 |
| AX-158355553 | 28 | 27.319 | KV453263.1 | 2082282 | 25-scf00537 | 25 |
| AX-158355554 | 28 | 27.319 | KV453263.1 | 2083280 | 25-scf00537 | 25 |
| AX-158355555 | 28 | 27.319 | KV453263.1 | 2085111 | 25-scf00537 | 25 |
| AX-158355546 | 28 | 27.363 | KV453263.1 | 2068835 | 25-scf00537 | 25 |
| AX-158355557 | 28 | 27.363 | KV453263.1 | 2088207 | 25-scf00537 | 25 |
| AX-157862121 | 28 | 27.4   | KV453263.1 | 2090073 | 25-scf00537 | 25 |
| AX-158355559 | 28 | 27.429 | KV453263.1 | 2090780 | 25-scf00537 | 25 |
| AX-158355560 | 28 | 27.538 | KV453263.1 | 2092788 | 25-scf00537 | 25 |
| AX-157750772 | 28 | 27.538 | KV453263.1 | 2094925 | 25-scf00537 | 25 |
| AX-158355564 | 28 | 27.742 | KV453263.1 | 2100937 | 25-scf00537 | 25 |
| AX-157715415 | 28 | 27.771 | KV453263.1 | 2101900 | 25-scf00537 | 25 |
| AX-157851436 | 28 | 27.771 | KV453263.1 | 2103087 | 25-scf00537 | 25 |
| AX-158355567 | 28 | 27.771 | KV453263.1 | 2104313 | 25-scf00537 | 25 |
| AX-158355570 | 28 | 27.771 | KV453263.1 | 2108304 | 25-scf00537 | 25 |
| AX-157719008 | 28 | 27.882 | KV453263.1 | 2105671 | 25-scf00537 | 25 |
| AX-157716279 | 28 | 27.975 | KV453263.1 | 2109635 | 25-scf00537 | 25 |
| AX-157851437 | 28 | 27.975 | KV453263.1 | 2109695 | 25-scf00537 | 25 |
| AX-158355573 | 28 | 27.975 | KV453263.1 | 2111905 | 25-scf00537 | 25 |
| AX-158355574 | 28 | 28.158 | KV453263.1 | 2113738 | 25-scf00537 | 25 |
| AX-157868258 | 28 | 28.159 | KV453263.1 | 2116047 | 25-scf00537 | 25 |
| AX-157851438 | 28 | 28.521 | KV453263.1 | 2118815 | 25-scf00537 | 25 |
| AX-158355583 | 28 | 28.521 | KV453263.1 | 2130761 | 25-scf00537 | 25 |
| AX-158355591 | 28 | 28.521 | KV453263.1 | 2137774 | 25-scf00537 | 25 |
| AX-158355586 | 28 | 28.522 | KV453263.1 | 2133113 | 25-scf00537 | 25 |
| AX-158355590 | 28 | 28.598 | KV453263.1 | 2137380 | 25-scf00537 | 25 |
| AX-157868260 | 28 | 28.598 | KV453263.1 | 2139570 | 25-scf00537 | 25 |
| AX-157868259 | 28 | 28.849 | KV453263.1 | 2117199 | 25-scf00537 | 25 |
| AX-158355584 | 28 | 28.849 | KV453263.1 | 2132047 | 25-scf00537 | 25 |
| AX-158355585 | 28 | 28.849 | KV453263.1 | 2132641 | 25-scf00537 | 25 |
| AX-157719360 | 28 | 28.849 | KV453263.1 | 2138326 | 25-scf00537 | 25 |
| AX-158355594 | 28 | 28.849 | KV453263.1 | 2139246 | 25-scf00537 | 25 |
| AX-158355597 | 28 | 28.849 | KV453263.1 | 2141658 | 25-scf00537 | 25 |
| AX-158355600 | 28 | 28.849 | KV453263.1 | 2144730 | 25-scf00537 | 25 |
| AX-158355606 | 28 | 28.849 | KV453263.1 | 2161684 | 25-scf00537 | 25 |
| AX-158355575 | 28 | 28.853 | KV453263.1 | 2115531 | 25-scf00537 | 25 |
| AX-157772263 | 28 | 28.853 | KV453263.1 | 2145908 | 25-scf00537 | 25 |
| AX-157717372 | 28 | 29.057 | KV453263.1 | 2146822 | 25-scf00537 | 25 |
| AX-157851440 | 28 | 29.283 | KV453263.1 | 2149581 | 25-scf00537 | 25 |
| AX-158355589 | 28 | 29.287 | KV453263.1 | 2137140 | 25-scf00537 | 25 |
| AX-157714369 | 28 | 29.287 | KV453263.1 | 2156115 | 25-scf00537 | 25 |
| AX-157851443 | 28 | 29.287 | KV453263.1 | 2158692 | 25-scf00537 | 25 |
| AX-158355603 | 28 | 29.287 | KV453263.1 | 2159342 | 25-scf00537 | 25 |
| AX-158355604 | 28 | 29.287 | KV453263.1 | 2159672 | 25-scf00537 | 25 |
| AX-158355607 | 28 | 29.287 | KV453263.1 | 2162680 | 25-scf00537 | 25 |
| AX-158381712 | 28 | 29.287 | KV453263.1 | 2170105 | 25-scf00537 | 25 |
| AX-158355609 | 28 | 29.332 | KV453263.1 | 2165889 | 25-scf00537 | 25 |
| AX-158355611 | 28 | 29.364 | KV453263.1 | 2171046 | 25-scf00537 | 25 |

|              |    |        |            |         |             |    |
|--------------|----|--------|------------|---------|-------------|----|
| AX-158355612 | 28 | 29.423 | KV453263.1 | 2172214 | 25-scf00537 | 25 |
| AX-157851442 | 28 | 29.493 | KV453263.1 | 2158353 | 25-scf00537 | 25 |
| AX-158355613 | 28 | 29.493 | KV453263.1 | 2172623 | 25-scf00537 | 25 |
| AX-157713875 | 28 | 29.56  | KV453263.1 | 2173436 | 25-scf00537 | 25 |
| AX-158355616 | 28 | 29.833 | KV453263.1 | 2177077 | 25-scf00537 | 25 |
| AX-158355617 | 28 | 29.833 | KV453263.1 | 2179801 | 25-scf00537 | 25 |
| AX-158355619 | 28 | 29.847 | KV453263.1 | 2182784 | 25-scf00537 | 25 |
| AX-158355622 | 28 | 29.877 | KV453263.1 | 2187619 | 25-scf00537 | 25 |
| AX-158355623 | 28 | 29.911 | KV453263.1 | 2190801 | 25-scf00537 | 25 |
| AX-158355625 | 28 | 29.942 | KV453263.1 | 2191619 | 25-scf00537 | 25 |
| AX-157851446 | 28 | 29.942 | KV453263.1 | 2194094 | 25-scf00537 | 25 |
| AX-157851447 | 28 | 29.942 | KV453263.1 | 2194613 | 25-scf00537 | 25 |
| AX-157752243 | 28 | 29.942 | KV453263.1 | 2195740 | 25-scf00537 | 25 |
| AX-158355627 | 28 | 29.942 | KV453263.1 | 2197388 | 25-scf00537 | 25 |
| AX-158355628 | 28 | 30.007 | KV453263.1 | 2198544 | 25-scf00537 | 25 |
| AX-158355629 | 28 | 30.052 | KV453263.1 | 2199422 | 25-scf00537 | 25 |
| AX-157751126 | 28 | 30.052 | KV453263.1 | 2200500 | 25-scf00537 | 25 |
| AX-158355633 | 28 | 30.086 | KV453263.1 | 2206137 | 25-scf00537 | 25 |
| AX-157740814 | 28 | 30.134 | KV453263.1 | 2182333 | 25-scf00537 | 25 |
| AX-158355635 | 28 | 30.134 | KV453263.1 | 2208494 | 25-scf00537 | 25 |
| AX-157851448 | 28 | 30.161 | KV453263.1 | 2208831 | 25-scf00537 | 25 |
| AX-158355615 | 28 | 30.207 | KV453263.1 | 2176112 | 25-scf00537 | 25 |
| AX-158355637 | 28 | 30.207 | KV453263.1 | 2213526 | 25-scf00537 | 25 |
| AX-158355621 | 28 | 30.246 | KV453263.1 | 2184188 | 25-scf00537 | 25 |
| AX-158355638 | 28 | 30.246 | KV453263.1 | 2215261 | 25-scf00537 | 25 |
| AX-157741979 | 28 | 30.246 | KV453263.1 | 2284594 | 25-scf00537 | 25 |
| AX-158355639 | 28 | 30.27  | KV453263.1 | 2218301 | 25-scf00537 | 25 |
| AX-158355640 | 28 | 30.27  | KV453263.1 | 2219027 | 25-scf00537 | 25 |
| AX-158355641 | 28 | 30.27  | KV453263.1 | 2219966 | 25-scf00537 | 25 |
| AX-158355642 | 28 | 30.299 | KV453263.1 | 2222038 | 25-scf00537 | 25 |
| AX-157851449 | 28 | 30.327 | KV453263.1 | 2225674 | 25-scf00537 | 25 |
| AX-157851450 | 28 | 30.348 | KV453263.1 | 2228587 | 25-scf00537 | 25 |
| AX-158355596 | 28 | 30.379 | KV453263.1 | 2140684 | 25-scf00537 | 25 |
| AX-158355631 | 28 | 30.379 | KV453263.1 | 2202766 | 25-scf00537 | 25 |
| AX-158355644 | 28 | 30.379 | KV453263.1 | 2228398 | 25-scf00537 | 25 |
| AX-158355649 | 28 | 30.379 | KV453263.1 | 2232447 | 25-scf00537 | 25 |
| AX-157851451 | 28 | 30.379 | KV453263.1 | 2234385 | 25-scf00537 | 25 |
| AX-158355652 | 28 | 30.379 | KV453263.1 | 2234947 | 25-scf00537 | 25 |
| AX-158355656 | 28 | 30.379 | KV453263.1 | 2243447 | 25-scf00537 | 25 |
| AX-157773552 | 28 | 30.508 | KV453263.1 | 2203543 | 25-scf00537 | 25 |
| AX-158355654 | 28 | 30.508 | KV453263.1 | 2238238 | 25-scf00537 | 25 |
| AX-158355658 | 28 | 30.508 | KV453263.1 | 2245286 | 25-scf00537 | 25 |
| AX-158355660 | 28 | 30.508 | KV453263.1 | 2249483 | 25-scf00537 | 25 |
| AX-158355662 | 28 | 30.508 | KV453263.1 | 2250768 | 25-scf00537 | 25 |
| AX-158355663 | 28 | 30.508 | KV453263.1 | 2256051 | 25-scf00537 | 25 |
| AX-158355664 | 28 | 30.508 | KV453263.1 | 2257135 | 25-scf00537 | 25 |
| AX-157743355 | 28 | 31.064 | KV453263.1 | 2263208 | 25-scf00537 | 25 |
| AX-158355675 | 28 | 31.064 | KV453263.1 | 2276062 | 25-scf00537 | 25 |
| AX-157873955 | 28 | 31.064 | KV453263.1 | 2277189 | 25-scf00537 | 25 |
| AX-158355610 | 28 | 31.234 | KV453263.1 | 2168259 | 25-scf00537 | 25 |
| AX-158355673 | 28 | 31.234 | KV453263.1 | 2273216 | 25-scf00537 | 25 |

|              |    |        |            |         |             |    |
|--------------|----|--------|------------|---------|-------------|----|
| AX-158355677 | 28 | 31.244 | KV453263.1 | 2278954 | 25-scf00537 | 25 |
| AX-158420703 | 28 | 31.254 | KV453263.1 | 2243117 | 25-scf00537 | 25 |
| AX-158355669 | 28 | 31.254 | KV453263.1 | 2266897 | 25-scf00537 | 25 |
| AX-158355678 | 28 | 31.254 | KV453263.1 | 2279491 | 25-scf00537 | 25 |
| AX-158355680 | 28 | 31.254 | KV453263.1 | 2282714 | 25-scf00537 | 25 |
| AX-158355681 | 28 | 31.254 | KV453263.1 | 2283929 | 25-scf00537 | 25 |
| AX-158355683 | 28 | 31.254 | KV453263.1 | 2286749 | 25-scf00537 | 25 |
| AX-158355691 | 28 | 31.254 | KV453263.1 | 2300390 | 25-scf00537 | 25 |
| AX-158355728 | 28 | 31.254 | KV453263.1 | 2342663 | 25-scf00537 | 25 |
| AX-157851453 | 28 | 31.326 | KV453263.1 | 2289069 | 25-scf00537 | 25 |
| AX-158355684 | 28 | 31.399 | KV453263.1 | 2289452 | 25-scf00537 | 25 |
| AX-158355686 | 28 | 31.472 | KV453263.1 | 2292014 | 25-scf00537 | 25 |
| AX-158355687 | 28 | 31.472 | KV453263.1 | 2295550 | 25-scf00537 | 25 |
| AX-158355688 | 28 | 31.472 | KV453263.1 | 2296083 | 25-scf00537 | 25 |
| AX-158355689 | 28 | 31.472 | KV453263.1 | 2298135 | 25-scf00537 | 25 |
| AX-158355692 | 28 | 31.472 | KV453263.1 | 2300839 | 25-scf00537 | 25 |
| AX-158355693 | 28 | 31.472 | KV453263.1 | 2305127 | 25-scf00537 | 25 |
| AX-158355665 | 28 | 31.581 | KV453263.1 | 2260409 | 25-scf00537 | 25 |
| AX-157754147 | 28 | 31.581 | KV453263.1 | 2272652 | 25-scf00537 | 25 |
| AX-158355682 | 28 | 31.581 | KV453263.1 | 2284367 | 25-scf00537 | 25 |
| AX-158355685 | 28 | 31.581 | KV453263.1 | 2290575 | 25-scf00537 | 25 |
| AX-158355690 | 28 | 31.581 | KV453263.1 | 2300010 | 25-scf00537 | 25 |
| AX-157738777 | 28 | 31.581 | KV453263.1 | 2306626 | 25-scf00537 | 25 |
| AX-158355694 | 28 | 31.581 | KV453263.1 | 2307077 | 25-scf00537 | 25 |
| AX-158355697 | 28 | 31.581 | KV453263.1 | 2309316 | 25-scf00537 | 25 |
| AX-157851454 | 28 | 31.581 | KV453263.1 | 2311694 | 25-scf00537 | 25 |
| AX-157851455 | 28 | 31.581 | KV453263.1 | 2312082 | 25-scf00537 | 25 |
| AX-158355703 | 28 | 31.581 | KV453263.1 | 2313144 | 25-scf00537 | 25 |
| AX-157851456 | 28 | 31.581 | KV453263.1 | 2314887 | 25-scf00537 | 25 |
| AX-157757096 | 28 | 31.581 | KV453263.1 | 2315188 | 25-scf00537 | 25 |
| AX-158355707 | 28 | 31.581 | KV453263.1 | 2316921 | 25-scf00537 | 25 |
| AX-158355708 | 28 | 31.581 | KV453263.1 | 2319053 | 25-scf00537 | 25 |
| AX-158355710 | 28 | 31.581 | KV453263.1 | 2319930 | 25-scf00537 | 25 |
| AX-158355715 | 28 | 31.581 | KV453263.1 | 2323931 | 25-scf00537 | 25 |
| AX-158355718 | 28 | 31.708 | KV453263.1 | 2325692 | 25-scf00537 | 25 |
| AX-158355719 | 28 | 31.778 | KV453263.1 | 2326842 | 25-scf00537 | 25 |
| AX-158355722 | 28 | 31.961 | KV453263.1 | 2331486 | 25-scf00537 | 25 |
| AX-158355724 | 28 | 31.961 | KV453263.1 | 2334565 | 25-scf00537 | 25 |
| AX-158355726 | 28 | 32.18  | KV453263.1 | 2338260 | 25-scf00537 | 25 |
| AX-158355734 | 28 | 32.18  | KV453263.1 | 2350271 | 25-scf00537 | 25 |
| AX-158355729 | 28 | 32.399 | KV453263.1 | 2343671 | 25-scf00537 | 25 |
| AX-158355705 | 28 | 32.519 | KV453263.1 | 2315382 | 25-scf00537 | 25 |
| AX-158355733 | 28 | 32.519 | KV453263.1 | 2348705 | 25-scf00537 | 25 |
| AX-157873957 | 28 | 32.556 | KV453263.1 | 2354599 | 25-scf00537 | 25 |
| AX-157711280 | 28 | 32.556 | KV453263.1 | 2380688 | 25-scf00537 | 25 |
| AX-157873958 | 28 | 32.556 | KV453263.1 | 2399102 | 25-scf00537 | 25 |
| AX-158355738 | 28 | 32.56  | KV453263.1 | 2355293 | 25-scf00537 | 25 |
| AX-158355739 | 28 | 32.567 | KV453263.1 | 2357235 | 25-scf00537 | 25 |
| AX-158355747 | 28 | 32.567 | KV453263.1 | 2365916 | 25-scf00537 | 25 |
| AX-157698278 | 28 | 32.608 | KV453263.1 | 2363654 | 25-scf00537 | 25 |
| AX-158355752 | 28 | 32.608 | KV453263.1 | 2375453 | 25-scf00537 | 25 |

|              |    |        |            |         |                |    |
|--------------|----|--------|------------|---------|----------------|----|
| AX-157851462 | 28 | 32.647 | KV453263.1 | 2383208 | 25-scf00537    | 25 |
| AX-158355773 | 28 | 32.647 | KV453263.1 | 2400103 | 25-scf00537    | 25 |
| AX-158355760 | 28 | 32.676 | KV453263.1 | 2387355 | 25-scf00537    | 25 |
| AX-158355761 | 28 | 32.676 | KV453263.1 | 2387441 | 25-scf00537    | 25 |
| AX-158355762 | 28 | 32.676 | KV453263.1 | 2387924 | 25-scf00537    | 25 |
| AX-158355763 | 28 | 32.676 | KV453263.1 | 2388386 | 25-scf00537    | 25 |
| AX-158355767 | 28 | 32.676 | KV453263.1 | 2392411 | 25-scf00537    | 25 |
| AX-158355769 | 28 | 32.676 | KV453263.1 | 2393143 | 25-scf00537    | 25 |
| AX-158355772 | 28 | 32.676 | KV453263.1 | 2395033 | 25-scf00537    | 25 |
| AX-157701375 | 28 | 32.676 | DX084946.1 | 290     | 4ORI212 Ictali | UN |
| AX-157725648 | 28 | 32.708 | KV453263.1 | 2396988 | 25-scf00537    | 25 |
| AX-158355766 | 28 | 32.765 | KV453263.1 | 2391834 | 25-scf00537    | 25 |
| AX-158355775 | 28 | 32.765 | KV453263.1 | 2407079 | 25-scf00537    | 25 |
| AX-158355771 | 28 | 32.785 | KV453263.1 | 2394692 | 25-scf00537    | 25 |
| AX-157873959 | 28 | 32.785 | KV453263.1 | 2408874 | 25-scf00537    | 25 |
| AX-158355783 | 28 | 32.785 | KV453263.1 | 2416060 | 25-scf00537    | 25 |
| AX-158355784 | 28 | 32.785 | KV453263.1 | 2416951 | 25-scf00537    | 25 |
| AX-157862123 | 28 | 32.785 | KV453263.1 | 2422098 | 25-scf00537    | 25 |
| AX-158355796 | 28 | 32.785 | KV453263.1 | 2426498 | 25-scf00537    | 25 |
| AX-158355801 | 28 | 32.785 | KV453263.1 | 2428570 | 25-scf00537    | 25 |
| AX-158355804 | 28 | 32.785 | KV453263.1 | 2431572 | 25-scf00537    | 25 |
| AX-158355806 | 28 | 32.785 | KV453263.1 | 2434749 | 25-scf00537    | 25 |
| AX-158355807 | 28 | 32.785 | KV453263.1 | 2435942 | 25-scf00537    | 25 |
| AX-158355812 | 28 | 32.785 | KV453263.1 | 2441388 | 25-scf00537    | 25 |
| AX-158355813 | 28 | 32.785 | KV453263.1 | 2442100 | 25-scf00537    | 25 |
| AX-158355814 | 28 | 32.785 | KV453263.1 | 2443484 | 25-scf00537    | 25 |
| AX-158355815 | 28 | 32.785 | KV453263.1 | 2444584 | 25-scf00537    | 25 |
| AX-158355816 | 28 | 32.785 | KV453263.1 | 2445350 | 25-scf00537    | 25 |
| AX-158355817 | 28 | 32.785 | KV453263.1 | 2446160 | 25-scf00537    | 25 |
| AX-158355819 | 28 | 32.785 | KV453263.1 | 2450051 | 25-scf00537    | 25 |
| AX-158355776 | 28 | 33.004 | KV453263.1 | 2408120 | 25-scf00537    | 25 |
| AX-158355778 | 28 | 33.004 | KV453263.1 | 2411611 | 25-scf00537    | 25 |
| AX-158355780 | 28 | 33.004 | KV453263.1 | 2413622 | 25-scf00537    | 25 |
| AX-157723778 | 28 | 33.004 | KV453263.1 | 2420075 | 25-scf00537    | 25 |
| AX-158355794 | 28 | 33.004 | KV453263.1 | 2425384 | 25-scf00537    | 25 |
| AX-158355795 | 28 | 33.004 | KV453263.1 | 2425911 | 25-scf00537    | 25 |
| AX-157862124 | 28 | 33.004 | KV453263.1 | 2439368 | 25-scf00537    | 25 |
| AX-158355811 | 28 | 33.004 | KV453263.1 | 2440711 | 25-scf00537    | 25 |
| AX-157752670 | 28 | 33.004 | KV453263.1 | 2450402 | 25-scf00537    | 25 |
| AX-158355820 | 28 | 33.004 | KV453263.1 | 2451087 | 25-scf00537    | 25 |
| AX-158355822 | 28 | 33.004 | KV453263.1 | 2452088 | 25-scf00537    | 25 |
| AX-158355825 | 28 | 33.111 | KV453263.1 | 2458722 | 25-scf00537    | 25 |
| AX-158355828 | 28 | 33.22  | KV453263.1 | 2461958 | 25-scf00537    | 25 |
| AX-158355829 | 28 | 33.22  | KV453263.1 | 2463948 | 25-scf00537    | 25 |
| AX-157889048 | 28 | 33.222 | KV453263.1 | 2464350 | 25-scf00537    | 25 |
| AX-158355748 | 28 | 33.223 | KV453263.1 | 2369110 | 25-scf00537    | 25 |
| AX-158355824 | 28 | 33.223 | KV453263.1 | 2455778 | 25-scf00537    | 25 |
| AX-158355830 | 28 | 33.223 | KV453263.1 | 2464622 | 25-scf00537    | 25 |
| AX-158355831 | 28 | 33.223 | KV453263.1 | 2466990 | 25-scf00537    | 25 |
| AX-158355834 | 28 | 33.223 | KV453263.1 | 2472896 | 25-scf00537    | 25 |
| AX-158355835 | 28 | 33.223 | KV453263.1 | 2473687 | 25-scf00537    | 25 |

|              |    |        |            |         |             |    |
|--------------|----|--------|------------|---------|-------------|----|
| AX-158355841 | 28 | 33.229 | KV453263.1 | 2481360 | 25-scf00537 | 25 |
| AX-158355800 | 28 | 33.602 | KV453263.1 | 2428217 | 25-scf00537 | 25 |
| AX-158355847 | 28 | 33.602 | KV453263.1 | 2491491 | 25-scf00537 | 25 |
| AX-158355850 | 28 | 33.735 | KV453263.1 | 2494035 | 25-scf00537 | 25 |
| AX-158355842 | 28 | 33.794 | KV453263.1 | 2482695 | 25-scf00537 | 25 |
| AX-158355852 | 28 | 33.794 | KV453263.1 | 2496219 | 25-scf00537 | 25 |
| AX-158355855 | 28 | 33.794 | KV453263.1 | 2501220 | 25-scf00537 | 25 |
| AX-158355856 | 28 | 33.794 | KV453263.1 | 2501603 | 25-scf00537 | 25 |
| AX-158355860 | 28 | 33.794 | KV453263.1 | 2506459 | 25-scf00537 | 25 |
| AX-158355859 | 28 | 33.904 | KV453263.1 | 2504259 | 25-scf00537 | 25 |
| AX-158355861 | 28 | 33.987 | KV453263.1 | 2507995 | 25-scf00537 | 25 |
| AX-158355864 | 28 | 33.987 | KV453263.1 | 2511632 | 25-scf00537 | 25 |
| AX-158355868 | 28 | 33.987 | KV453263.1 | 2515753 | 25-scf00537 | 25 |
| AX-158355869 | 28 | 33.987 | KV453263.1 | 2515981 | 25-scf00537 | 25 |
| AX-157851465 | 28 | 33.988 | KV453263.1 | 2516309 | 25-scf00537 | 25 |
| AX-158355870 | 28 | 33.988 | KV453263.1 | 2516639 | 25-scf00537 | 25 |
| AX-158355871 | 28 | 33.988 | KV453263.1 | 2516884 | 25-scf00537 | 25 |
| AX-158355874 | 28 | 33.989 | KV453263.1 | 2518622 | 25-scf00537 | 25 |
| AX-158355872 | 28 | 34.14  | KV453263.1 | 2517768 | 25-scf00537 | 25 |
| AX-158355875 | 28 | 34.14  | KV453263.1 | 2519177 | 25-scf00537 | 25 |
| AX-158355878 | 28 | 34.14  | KV453263.1 | 2521544 | 25-scf00537 | 25 |
| AX-158355879 | 28 | 34.14  | KV453263.1 | 2523267 | 25-scf00537 | 25 |
| AX-158355880 | 28 | 34.14  | KV453263.1 | 2524732 | 25-scf00537 | 25 |
| AX-157851467 | 28 | 34.14  | KV453263.1 | 2525300 | 25-scf00537 | 25 |
| AX-157851468 | 28 | 34.363 | KV453263.1 | 2531330 | 25-scf00537 | 25 |
| AX-157873962 | 28 | 34.364 | KV453263.1 | 2536944 | 25-scf00537 | 25 |
| AX-158355883 | 28 | 34.364 | KV453263.1 | 2537542 | 25-scf00537 | 25 |
| AX-158355866 | 28 | 34.643 | KV453263.1 | 2512720 | 25-scf00537 | 25 |
| AX-157851469 | 28 | 34.643 | KV453263.1 | 2539905 | 25-scf00537 | 25 |
| AX-158355886 | 28 | 34.643 | KV453263.1 | 2540592 | 25-scf00537 | 25 |
| AX-157851470 | 28 | 34.643 | KV453263.1 | 2542595 | 25-scf00537 | 25 |
| AX-158355888 | 28 | 34.643 | KV453263.1 | 2542834 | 25-scf00537 | 25 |
| AX-157770690 | 28 | 34.643 | KV453263.1 | 2544001 | 25-scf00537 | 25 |
| AX-158355889 | 28 | 34.643 | KV453263.1 | 2544682 | 25-scf00537 | 25 |
| AX-158355891 | 28 | 34.643 | KV453263.1 | 2546197 | 25-scf00537 | 25 |
| AX-158355893 | 28 | 34.643 | KV453263.1 | 2549852 | 25-scf00537 | 25 |
| AX-157700983 | 28 | 34.685 | KV453263.1 | 2550469 | 25-scf00537 | 25 |
| AX-157808313 | 28 | 34.719 | KV453263.1 | 2553881 | 25-scf00537 | 25 |
| AX-158355895 | 28 | 34.752 | KV453263.1 | 2554578 | 25-scf00537 | 25 |
| AX-158355898 | 28 | 34.782 | KV453263.1 | 2561613 | 25-scf00537 | 25 |
| AX-158355899 | 28 | 34.812 | KV453263.1 | 2564348 | 25-scf00537 | 25 |
| AX-158355902 | 28 | 34.84  | KV453263.1 | 2565213 | 25-scf00537 | 25 |
| AX-158355903 | 28 | 34.861 | KV453263.1 | 2565527 | 25-scf00537 | 25 |
| AX-158355904 | 28 | 34.861 | KV453263.1 | 2566548 | 25-scf00537 | 25 |
| AX-158355905 | 28 | 34.861 | KV453263.1 | 2568743 | 25-scf00537 | 25 |
| AX-158355906 | 28 | 34.916 | KV453263.1 | 2571250 | 25-scf00537 | 25 |
| AX-158355907 | 28 | 34.971 | KV453263.1 | 2572404 | 25-scf00537 | 25 |
| AX-158355908 | 28 | 34.971 | KV453263.1 | 2572633 | 25-scf00537 | 25 |
| AX-158355909 | 28 | 34.971 | KV453263.1 | 2574248 | 25-scf00537 | 25 |
| AX-158355910 | 28 | 34.971 | KV453263.1 | 2574627 | 25-scf00537 | 25 |
| AX-157740007 | 28 | 34.971 | KV453263.1 | 2574968 | 25-scf00537 | 25 |

|              |    |        |            |         |             |    |
|--------------|----|--------|------------|---------|-------------|----|
| AX-158355911 | 28 | 34.971 | KV453263.1 | 2575976 | 25-scf00537 | 25 |
| AX-158355912 | 28 | 34.971 | KV453263.1 | 2577528 | 25-scf00537 | 25 |
| AX-157714940 | 28 | 34.971 | KV453263.1 | 2580292 | 25-scf00537 | 25 |
| AX-158355914 | 28 | 34.971 | KV453263.1 | 2585569 | 25-scf00537 | 25 |
| AX-158355915 | 28 | 34.971 | KV453263.1 | 2585899 | 25-scf00537 | 25 |
| AX-158355916 | 28 | 34.971 | KV453263.1 | 2586472 | 25-scf00537 | 25 |
| AX-157715148 | 28 | 35.051 | KV453263.1 | 2587461 | 25-scf00537 | 25 |
| AX-157744742 | 28 | 35.135 | KV453263.1 | 2588332 | 25-scf00537 | 25 |
| AX-158355918 | 28 | 35.135 | KV453263.1 | 2590305 | 25-scf00537 | 25 |
| AX-158355919 | 28 | 35.135 | KV453263.1 | 2591217 | 25-scf00537 | 25 |
| AX-158355999 | 28 | 35.135 | KV453263.1 | 2683876 | 25-scf00537 | 25 |
| AX-157751414 | 28 | 35.298 | KV453263.1 | 2583506 | 25-scf00537 | 25 |
| AX-158355924 | 28 | 35.298 | KV453263.1 | 2598884 | 25-scf00537 | 25 |
| AX-157756834 | 28 | 35.298 | KV453263.1 | 2600285 | 25-scf00537 | 25 |
| AX-158355926 | 28 | 35.298 | KV453263.1 | 2601225 | 25-scf00537 | 25 |
| AX-158355927 | 28 | 35.298 | KV453263.1 | 2602497 | 25-scf00537 | 25 |
| AX-158355928 | 28 | 35.298 | KV453263.1 | 2603450 | 25-scf00537 | 25 |
| AX-158355929 | 28 | 35.298 | KV453263.1 | 2606264 | 25-scf00537 | 25 |
| AX-158355935 | 28 | 35.298 | KV453263.1 | 2615095 | 25-scf00537 | 25 |
| AX-158355937 | 28 | 35.298 | KV453263.1 | 2618598 | 25-scf00537 | 25 |
| AX-158355938 | 28 | 35.298 | KV453263.1 | 2619296 | 25-scf00537 | 25 |
| AX-157721715 | 28 | 35.407 | KV453263.1 | 2604547 | 25-scf00537 | 25 |
| AX-157696182 | 28 | 35.407 | KV453263.1 | 2620398 | 25-scf00537 | 25 |
| AX-158355941 | 28 | 35.407 | KV453263.1 | 2621016 | 25-scf00537 | 25 |
| AX-158355944 | 28 | 35.407 | KV453263.1 | 2623348 | 25-scf00537 | 25 |
| AX-158355945 | 28 | 35.407 | KV453263.1 | 2623968 | 25-scf00537 | 25 |
| AX-158355946 | 28 | 35.407 | KV453263.1 | 2624517 | 25-scf00537 | 25 |
| AX-158355942 | 28 | 35.517 | KV453263.1 | 2621910 | 25-scf00537 | 25 |
| AX-157851475 | 28 | 35.517 | KV453263.1 | 2627608 | 25-scf00537 | 25 |
| AX-158355949 | 28 | 35.517 | KV453263.1 | 2628770 | 25-scf00537 | 25 |
| AX-158355950 | 28 | 35.517 | KV453263.1 | 2629902 | 25-scf00537 | 25 |
| AX-158355954 | 28 | 35.619 | KV453263.1 | 2635111 | 25-scf00537 | 25 |
| AX-158355955 | 28 | 35.735 | KV453263.1 | 2635946 | 25-scf00537 | 25 |
| AX-158355956 | 28 | 35.735 | KV453263.1 | 2638351 | 25-scf00537 | 25 |
| AX-158355962 | 28 | 35.735 | KV453263.1 | 2646094 | 25-scf00537 | 25 |
| AX-158355964 | 28 | 35.735 | KV453263.1 | 2647453 | 25-scf00537 | 25 |
| AX-158355968 | 28 | 35.735 | KV453263.1 | 2652927 | 25-scf00537 | 25 |
| AX-158355966 | 28 | 35.791 | KV453263.1 | 2651122 | 25-scf00537 | 25 |
| AX-157868264 | 28 | 35.837 | KV453263.1 | 2582823 | 25-scf00537 | 25 |
| AX-157889050 | 28 | 35.837 | KV453263.1 | 2651504 | 25-scf00537 | 25 |
| AX-158355977 | 28 | 35.837 | KV453263.1 | 2664222 | 25-scf00537 | 25 |
| AX-158419620 | 28 | 35.882 | KV453263.1 | 2652141 | 25-scf00537 | 25 |
| AX-158355970 | 28 | 35.882 | KV453263.1 | 2654127 | 25-scf00537 | 25 |
| AX-158355976 | 28 | 35.882 | KV453263.1 | 2661044 | 25-scf00537 | 25 |
| AX-158355983 | 28 | 35.882 | KV453263.1 | 2673868 | 25-scf00537 | 25 |
| AX-158355992 | 28 | 35.882 | KV453263.1 | 2679131 | 25-scf00537 | 25 |
| AX-158355996 | 28 | 35.882 | KV453263.1 | 2681160 | 25-scf00537 | 25 |
| AX-158381717 | 28 | 36.166 | KV453263.1 | 2666178 | 25-scf00537 | 25 |
| AX-158355979 | 28 | 36.168 | KV453263.1 | 2669508 | 25-scf00537 | 25 |
| AX-158355984 | 28 | 36.172 | KV453263.1 | 2673966 | 25-scf00537 | 25 |
| AX-158355986 | 28 | 36.172 | KV453263.1 | 2674952 | 25-scf00537 | 25 |

|              |    |        |            |         |             |    |
|--------------|----|--------|------------|---------|-------------|----|
| AX-158355995 | 28 | 36.172 | KV453263.1 | 2680706 | 25-scf00537 | 25 |
| AX-158355989 | 28 | 36.195 | KV453263.1 | 2677613 | 25-scf00537 | 25 |
| AX-158356003 | 28 | 36.224 | KV453263.1 | 2688748 | 25-scf00537 | 25 |
| AX-158356005 | 28 | 36.282 | KV453263.1 | 2691086 | 25-scf00537 | 25 |
| AX-158356011 | 28 | 36.282 | KV453263.1 | 2693507 | 25-scf00537 | 25 |
| AX-158356012 | 28 | 36.391 | KV453263.1 | 2694901 | 25-scf00537 | 25 |
| AX-157851476 | 28 | 36.391 | KV453263.1 | 2695831 | 25-scf00537 | 25 |
| AX-157868266 | 28 | 36.391 | KV453263.1 | 2696122 | 25-scf00537 | 25 |
| AX-158356013 | 28 | 36.391 | KV453263.1 | 2697442 | 25-scf00537 | 25 |
| AX-158356014 | 28 | 36.391 | KV453263.1 | 2697845 | 25-scf00537 | 25 |
| AX-158356031 | 28 | 36.391 | KV453263.1 | 2718684 | 25-scf00537 | 25 |
| AX-158356034 | 28 | 36.391 | KV453263.1 | 2720047 | 25-scf00537 | 25 |
| AX-158356035 | 28 | 36.391 | KV453263.1 | 2720570 | 25-scf00537 | 25 |
| AX-158356058 | 28 | 36.391 | KV453263.1 | 2751794 | 25-scf00537 | 25 |
| AX-158356107 | 28 | 36.391 | KV453263.1 | 2818781 | 25-scf00537 | 25 |
| AX-158356015 | 28 | 36.392 | KV453263.1 | 2699609 | 25-scf00537 | 25 |
| AX-158356016 | 28 | 36.392 | KV453263.1 | 2700572 | 25-scf00537 | 25 |
| AX-158355988 | 28 | 36.718 | KV453263.1 | 2677061 | 25-scf00537 | 25 |
| AX-157882502 | 28 | 36.718 | KV453263.1 | 2710354 | 25-scf00537 | 25 |
| AX-158356025 | 28 | 36.718 | KV453263.1 | 2712118 | 25-scf00537 | 25 |
| AX-158356028 | 28 | 36.718 | KV453263.1 | 2714476 | 25-scf00537 | 25 |
| AX-158356029 | 28 | 36.718 | KV453263.1 | 2716386 | 25-scf00537 | 25 |
| AX-158356030 | 28 | 36.718 | KV453263.1 | 2717831 | 25-scf00537 | 25 |
| AX-158356032 | 28 | 36.718 | KV453263.1 | 2718963 | 25-scf00537 | 25 |
| AX-158356033 | 28 | 36.718 | KV453263.1 | 2719799 | 25-scf00537 | 25 |
| AX-158356038 | 28 | 36.718 | KV453263.1 | 2722906 | 25-scf00537 | 25 |
| AX-158356041 | 28 | 36.718 | KV453263.1 | 2727254 | 25-scf00537 | 25 |
| AX-158356042 | 28 | 36.718 | KV453263.1 | 2730251 | 25-scf00537 | 25 |
| AX-157743362 | 28 | 36.718 | KV453263.1 | 2731753 | 25-scf00537 | 25 |
| AX-158356043 | 28 | 36.718 | KV453263.1 | 2733639 | 25-scf00537 | 25 |
| AX-158356044 | 28 | 36.718 | KV453263.1 | 2734981 | 25-scf00537 | 25 |
| AX-158356051 | 28 | 36.718 | KV453263.1 | 2742454 | 25-scf00537 | 25 |
| AX-157715010 | 28 | 36.718 | KV453263.1 | 2743833 | 25-scf00537 | 25 |
| AX-158356055 | 28 | 36.718 | KV453263.1 | 2745793 | 25-scf00537 | 25 |
| AX-157773079 | 28 | 36.718 | KV453263.1 | 2748658 | 25-scf00537 | 25 |
| AX-158356057 | 28 | 36.718 | KV453263.1 | 2749657 | 25-scf00537 | 25 |
| AX-157747514 | 28 | 36.718 | KV453263.1 | 2752291 | 25-scf00537 | 25 |
| AX-157851482 | 28 | 36.718 | KV453263.1 | 2753658 | 25-scf00537 | 25 |
| AX-157747077 | 28 | 36.718 | KV453263.1 | 2755659 | 25-scf00537 | 25 |
| AX-157770797 | 28 | 36.718 | KV453263.1 | 2757156 | 25-scf00537 | 25 |
| AX-158356063 | 28 | 36.718 | KV453263.1 | 2762498 | 25-scf00537 | 25 |
| AX-157862127 | 28 | 36.718 | KV453263.1 | 2831315 | 25-scf00537 | 25 |
| AX-158356129 | 28 | 36.718 | KV453263.1 | 2844064 | 25-scf00537 | 25 |
| AX-158356134 | 28 | 36.718 | KV453263.1 | 2846308 | 25-scf00537 | 25 |
| AX-158356161 | 28 | 36.718 | KV453263.1 | 2881882 | 25-scf00537 | 25 |
| AX-158356059 | 28 | 36.757 | KV453263.1 | 2757777 | 25-scf00537 | 25 |
| AX-158356101 | 28 | 36.757 | KV453263.1 | 2806540 | 25-scf00537 | 25 |
| AX-158356061 | 28 | 36.789 | KV453263.1 | 2759965 | 25-scf00537 | 25 |
| AX-158356091 | 28 | 36.789 | KV453263.1 | 2794689 | 25-scf00537 | 25 |
| AX-157720138 | 28 | 36.789 | KV453263.1 | 2864132 | 25-scf00537 | 25 |
| AX-158356220 | 28 | 36.789 | KV453263.1 | 2953423 | 25-scf00537 | 25 |

|              |    |        |            |         |             |    |
|--------------|----|--------|------------|---------|-------------|----|
| AX-158356070 | 28 | 36.827 | KV453263.1 | 2770385 | 25-scf00537 | 25 |
| AX-158356072 | 28 | 36.827 | KV453263.1 | 2771636 | 25-scf00537 | 25 |
| AX-158356073 | 28 | 36.827 | KV453263.1 | 2772380 | 25-scf00537 | 25 |
| AX-158356076 | 28 | 36.827 | KV453263.1 | 2775588 | 25-scf00537 | 25 |
| AX-157851488 | 28 | 36.844 | KV453263.1 | 2779445 | 25-scf00537 | 25 |
| AX-158356004 | 28 | 36.937 | KV453263.1 | 2689396 | 25-scf00537 | 25 |
| AX-158356007 | 28 | 36.937 | KV453263.1 | 2691671 | 25-scf00537 | 25 |
| AX-158356008 | 28 | 36.937 | KV453263.1 | 2691878 | 25-scf00537 | 25 |
| AX-158356021 | 28 | 36.937 | KV453263.1 | 2704736 | 25-scf00537 | 25 |
| AX-157743552 | 28 | 36.937 | KV453263.1 | 2779734 | 25-scf00537 | 25 |
| AX-158356080 | 28 | 36.937 | KV453263.1 | 2782183 | 25-scf00537 | 25 |
| AX-158356081 | 28 | 36.937 | KV453263.1 | 2782557 | 25-scf00537 | 25 |
| AX-158356083 | 28 | 36.937 | KV453263.1 | 2783728 | 25-scf00537 | 25 |
| AX-157851489 | 28 | 36.937 | KV453263.1 | 2784004 | 25-scf00537 | 25 |
| AX-158356084 | 28 | 36.937 | KV453263.1 | 2785006 | 25-scf00537 | 25 |
| AX-158356088 | 28 | 36.937 | KV453263.1 | 2788692 | 25-scf00537 | 25 |
| AX-157851491 | 28 | 36.937 | KV453263.1 | 2790054 | 25-scf00537 | 25 |
| AX-158356090 | 28 | 36.937 | KV453263.1 | 2792331 | 25-scf00537 | 25 |
| AX-158356097 | 28 | 36.937 | KV453263.1 | 2802859 | 25-scf00537 | 25 |
| AX-158356098 | 28 | 36.937 | KV453263.1 | 2803254 | 25-scf00537 | 25 |
| AX-158356099 | 28 | 36.937 | KV453263.1 | 2804907 | 25-scf00537 | 25 |
| AX-158356100 | 28 | 36.937 | KV453263.1 | 2805307 | 25-scf00537 | 25 |
| AX-157758489 | 28 | 36.937 | KV453263.1 | 2806631 | 25-scf00537 | 25 |
| AX-158356106 | 28 | 36.937 | KV453263.1 | 2818387 | 25-scf00537 | 25 |
| AX-158356108 | 28 | 36.937 | KV453263.1 | 2820906 | 25-scf00537 | 25 |
| AX-158356110 | 28 | 36.937 | KV453263.1 | 2821873 | 25-scf00537 | 25 |
| AX-157710356 | 28 | 36.937 | KV453263.1 | 2823787 | 25-scf00537 | 25 |
| AX-158356115 | 28 | 36.937 | KV453263.1 | 2828644 | 25-scf00537 | 25 |
| AX-158356116 | 28 | 36.937 | KV453263.1 | 2830970 | 25-scf00537 | 25 |
| AX-158356126 | 28 | 36.937 | KV453263.1 | 2839927 | 25-scf00537 | 25 |
| AX-158356139 | 28 | 36.937 | KV453263.1 | 2850132 | 25-scf00537 | 25 |
| AX-158356155 | 28 | 36.937 | KV453263.1 | 2875546 | 25-scf00537 | 25 |
| AX-158356156 | 28 | 36.937 | KV453263.1 | 2875753 | 25-scf00537 | 25 |
| AX-157889051 | 28 | 36.937 | KV453263.1 | 2877435 | 25-scf00537 | 25 |
| AX-157873963 | 28 | 36.937 | KV453263.1 | 2878033 | 25-scf00537 | 25 |
| AX-158356160 | 28 | 36.937 | KV453263.1 | 2881627 | 25-scf00537 | 25 |
| AX-158356164 | 28 | 36.937 | KV453263.1 | 2884604 | 25-scf00537 | 25 |
| AX-157851494 | 28 | 36.937 | KV453263.1 | 2906179 | 25-scf00537 | 25 |
| AX-158356185 | 28 | 36.937 | KV453263.1 | 2912244 | 25-scf00537 | 25 |
| AX-158356188 | 28 | 36.937 | KV453263.1 | 2913881 | 25-scf00537 | 25 |
| AX-158356190 | 28 | 36.937 | KV453263.1 | 2914954 | 25-scf00537 | 25 |
| AX-158356192 | 28 | 36.937 | KV453263.1 | 2916851 | 25-scf00537 | 25 |
| AX-158356196 | 28 | 36.937 | KV453263.1 | 2921351 | 25-scf00537 | 25 |
| AX-158356218 | 28 | 36.937 | KV453263.1 | 2951255 | 25-scf00537 | 25 |
| AX-158356227 | 28 | 36.937 | KV453263.1 | 2962512 | 25-scf00537 | 25 |
| AX-158356118 | 28 | 36.976 | KV453263.1 | 2832148 | 25-scf00537 | 25 |
| AX-158355958 | 28 | 37.046 | KV453263.1 | 2639286 | 25-scf00537 | 25 |
| AX-158356114 | 28 | 37.046 | KV453263.1 | 2826562 | 25-scf00537 | 25 |
| AX-158356122 | 28 | 37.046 | KV453263.1 | 2834979 | 25-scf00537 | 25 |
| AX-158356123 | 28 | 37.046 | KV453263.1 | 2836988 | 25-scf00537 | 25 |
| AX-158356130 | 28 | 37.046 | KV453263.1 | 2844464 | 25-scf00537 | 25 |



|              |    |        |            |         |             |    |
|--------------|----|--------|------------|---------|-------------|----|
| AX-158356138 | 28 | 37.046 | KV453263.1 | 2848923 | 25-scf00537 | 25 |
| AX-158356142 | 28 | 37.046 | KV453263.1 | 2852403 | 25-scf00537 | 25 |
| AX-158356143 | 28 | 37.046 | KV453263.1 | 2855103 | 25-scf00537 | 25 |
| AX-157693354 | 28 | 37.046 | KV453263.1 | 2858915 | 25-scf00537 | 25 |
| AX-158356148 | 28 | 37.046 | KV453263.1 | 2861615 | 25-scf00537 | 25 |
| AX-158356149 | 28 | 37.046 | KV453263.1 | 2862351 | 25-scf00537 | 25 |
| AX-158356151 | 28 | 37.046 | KV453263.1 | 2871386 | 25-scf00537 | 25 |
| AX-158356152 | 28 | 37.046 | KV453263.1 | 2872127 | 25-scf00537 | 25 |
| AX-158356153 | 28 | 37.046 | KV453263.1 | 2873748 | 25-scf00537 | 25 |
| AX-158356154 | 28 | 37.046 | KV453263.1 | 2873989 | 25-scf00537 | 25 |
| AX-158356171 | 28 | 37.046 | KV453263.1 | 2892244 | 25-scf00537 | 25 |
| AX-158356175 | 28 | 37.046 | KV453263.1 | 2898126 | 25-scf00537 | 25 |
| AX-158356178 | 28 | 37.046 | KV453263.1 | 2902669 | 25-scf00537 | 25 |
| AX-158356179 | 28 | 37.046 | KV453263.1 | 2903601 | 25-scf00537 | 25 |
| AX-158356180 | 28 | 37.046 | KV453263.1 | 2905239 | 25-scf00537 | 25 |
| AX-157774806 | 28 | 37.046 | KV453263.1 | 2907337 | 25-scf00537 | 25 |
| AX-157726246 | 28 | 37.046 | KV453263.1 | 2908985 | 25-scf00537 | 25 |
| AX-158356195 | 28 | 37.046 | KV453263.1 | 2919769 | 25-scf00537 | 25 |
| AX-158356202 | 28 | 37.046 | KV453263.1 | 2929309 | 25-scf00537 | 25 |
| AX-157851497 | 28 | 37.046 | KV453263.1 | 2931450 | 25-scf00537 | 25 |
| AX-158356208 | 28 | 37.046 | KV453263.1 | 2937966 | 25-scf00537 | 25 |
| AX-158356119 | 28 | 37.155 | KV453263.1 | 2832659 | 25-scf00537 | 25 |
| AX-158356120 | 28 | 37.155 | KV453263.1 | 2833746 | 25-scf00537 | 25 |
| AX-158356144 | 28 | 37.155 | KV453263.1 | 2857156 | 25-scf00537 | 25 |
| AX-157771462 | 28 | 37.155 | KV453263.1 | 2870770 | 25-scf00537 | 25 |
| AX-158356186 | 28 | 37.155 | KV453263.1 | 2912840 | 25-scf00537 | 25 |
| AX-158356191 | 28 | 37.155 | KV453263.1 | 2915825 | 25-scf00537 | 25 |
| AX-158419630 | 28 | 37.155 | KV453263.1 | 2918339 | 25-scf00537 | 25 |
| AX-158356194 | 28 | 37.155 | KV453263.1 | 2918831 | 25-scf00537 | 25 |
| AX-158356200 | 28 | 37.155 | KV453263.1 | 2926580 | 25-scf00537 | 25 |
| AX-157722615 | 28 | 37.155 | KV453263.1 | 2927415 | 25-scf00537 | 25 |
| AX-158356201 | 28 | 37.155 | KV453263.1 | 2927913 | 25-scf00537 | 25 |
| AX-158356203 | 28 | 37.155 | KV453263.1 | 2930816 | 25-scf00537 | 25 |
| AX-157756431 | 28 | 37.155 | KV453263.1 | 2934755 | 25-scf00537 | 25 |
| AX-158356204 | 28 | 37.155 | KV453263.1 | 2935086 | 25-scf00537 | 25 |
| AX-158356205 | 28 | 37.155 | KV453263.1 | 2935677 | 25-scf00537 | 25 |
| AX-158356214 | 28 | 37.155 | KV453263.1 | 2945947 | 25-scf00537 | 25 |
| AX-158356248 | 28 | 37.155 | KV453263.1 | 2986792 | 25-scf00537 | 25 |
| AX-158356250 | 28 | 37.155 | KV453263.1 | 2987970 | 25-scf00537 | 25 |
| AX-158356257 | 28 | 37.155 | KV453263.1 | 2994131 | 25-scf00537 | 25 |
| AX-158356206 | 28 | 37.191 | KV453263.1 | 2936692 | 25-scf00537 | 25 |
| AX-158356215 | 28 | 37.23  | KV453263.1 | 2948604 | 25-scf00537 | 25 |
| AX-158356018 | 28 | 37.264 | KV453263.1 | 2701794 | 25-scf00537 | 25 |
| AX-158356066 | 28 | 37.264 | KV453263.1 | 2765644 | 25-scf00537 | 25 |
| AX-158356078 | 28 | 37.264 | KV453263.1 | 2778855 | 25-scf00537 | 25 |
| AX-157851490 | 28 | 37.264 | KV453263.1 | 2787561 | 25-scf00537 | 25 |
| AX-158419627 | 28 | 37.264 | KV453263.1 | 2800943 | 25-scf00537 | 25 |
| AX-158356173 | 28 | 37.264 | KV453263.1 | 2893411 | 25-scf00537 | 25 |
| AX-158356219 | 28 | 37.264 | KV453263.1 | 2951606 | 25-scf00537 | 25 |
| AX-157726014 | 28 | 37.264 | KV453263.1 | 2952950 | 25-scf00537 | 25 |
| AX-158356222 | 28 | 37.264 | KV453263.1 | 2955418 | 25-scf00537 | 25 |

|              |    |        |            |         |             |    |
|--------------|----|--------|------------|---------|-------------|----|
| AX-157756136 | 28 | 37.264 | KV453263.1 | 2963331 | 25-scf00537 | 25 |
| AX-158356228 | 28 | 37.264 | KV453263.1 | 2964086 | 25-scf00537 | 25 |
| AX-158356234 | 28 | 37.264 | KV453263.1 | 2973903 | 25-scf00537 | 25 |
| AX-158356236 | 28 | 37.264 | KV453263.1 | 2976600 | 25-scf00537 | 25 |
| AX-158356237 | 28 | 37.264 | KV453263.1 | 2977129 | 25-scf00537 | 25 |
| AX-158356239 | 28 | 37.264 | KV453263.1 | 2978369 | 25-scf00537 | 25 |
| AX-158356241 | 28 | 37.264 | KV453263.1 | 2980829 | 25-scf00537 | 25 |
| AX-158356242 | 28 | 37.264 | KV453263.1 | 2982807 | 25-scf00537 | 25 |
| AX-158381720 | 28 | 37.264 | KV453263.1 | 2982904 | 25-scf00537 | 25 |
| AX-158356243 | 28 | 37.264 | KV453263.1 | 2983075 | 25-scf00537 | 25 |
| AX-158356244 | 28 | 37.264 | KV453263.1 | 2983795 | 25-scf00537 | 25 |
| AX-158356245 | 28 | 37.264 | KV453263.1 | 2984920 | 25-scf00537 | 25 |
| AX-157882504 | 28 | 37.264 | KV453263.1 | 2985561 | 25-scf00537 | 25 |
| AX-158356247 | 28 | 37.264 | KV453263.1 | 2986094 | 25-scf00537 | 25 |
| AX-158356251 | 28 | 37.264 | KV453263.1 | 2988267 | 25-scf00537 | 25 |
| AX-158356252 | 28 | 37.264 | KV453263.1 | 2989542 | 25-scf00537 | 25 |
| AX-158356260 | 28 | 37.264 | KV453263.1 | 2996317 | 25-scf00537 | 25 |
| AX-158356262 | 28 | 37.264 | KV453263.1 | 2997730 | 25-scf00537 | 25 |
| AX-157740166 | 28 | 37.264 | KV453263.1 | 2998940 | 25-scf00537 | 25 |
| AX-158356265 | 28 | 37.264 | KV453263.1 | 3002908 | 25-scf00537 | 25 |
| AX-158356268 | 28 | 37.264 | KV453263.1 | 3008412 | 25-scf00537 | 25 |
| AX-158356282 | 28 | 37.264 | KV453263.1 | 3018752 | 25-scf00537 | 25 |
| AX-158356266 | 28 | 37.346 | KV453263.1 | 3003547 | 25-scf00537 | 25 |
| AX-158356275 | 28 | 37.538 | KV453263.1 | 3014072 | 25-scf00537 | 25 |
| AX-158356279 | 28 | 37.67  | KV453263.1 | 3015915 | 25-scf00537 | 25 |
| AX-158356230 | 28 | 37.811 | KV453263.1 | 2969661 | 25-scf00537 | 25 |
| AX-158356258 | 28 | 37.811 | KV453263.1 | 2994848 | 25-scf00537 | 25 |
| AX-158356264 | 28 | 37.811 | KV453263.1 | 3002130 | 25-scf00537 | 25 |
| AX-158356269 | 28 | 37.811 | KV453263.1 | 3009075 | 25-scf00537 | 25 |
| AX-158356274 | 28 | 37.811 | KV453263.1 | 3013394 | 25-scf00537 | 25 |
| AX-158356277 | 28 | 37.811 | KV453263.1 | 3014936 | 25-scf00537 | 25 |
| AX-158356278 | 28 | 37.811 | KV453263.1 | 3015328 | 25-scf00537 | 25 |
| AX-158356281 | 28 | 37.811 | KV453263.1 | 3018261 | 25-scf00537 | 25 |
| AX-158356288 | 28 | 37.811 | KV453263.1 | 3025260 | 25-scf00537 | 25 |
| AX-158356290 | 28 | 37.811 | KV453263.1 | 3027412 | 25-scf00537 | 25 |
| AX-158356292 | 28 | 37.811 | KV453263.1 | 3030400 | 25-scf00537 | 25 |
| AX-158356300 | 28 | 37.811 | KV453263.1 | 3041589 | 25-scf00537 | 25 |
| AX-158356303 | 28 | 37.811 | KV453263.1 | 3045184 | 25-scf00537 | 25 |
| AX-157758981 | 28 | 37.811 | KV453263.1 | 3045747 | 25-scf00537 | 25 |
| AX-158356305 | 28 | 37.811 | KV453263.1 | 3046525 | 25-scf00537 | 25 |
| AX-157755876 | 28 | 37.811 | KV453263.1 | 3047094 | 25-scf00537 | 25 |
| AX-158356308 | 28 | 37.811 | KV453263.1 | 3049770 | 25-scf00537 | 25 |
| AX-158356309 | 28 | 37.811 | KV453263.1 | 3050361 | 25-scf00537 | 25 |
| AX-158356310 | 28 | 37.811 | KV453263.1 | 3051104 | 25-scf00537 | 25 |
| AX-158356312 | 28 | 37.811 | KV453263.1 | 3053230 | 25-scf00537 | 25 |
| AX-158356313 | 28 | 37.811 | KV453263.1 | 3053614 | 25-scf00537 | 25 |
| AX-158356314 | 28 | 37.811 | KV453263.1 | 3054042 | 25-scf00537 | 25 |
| AX-157775203 | 28 | 37.811 | KV453263.1 | 3054610 | 25-scf00537 | 25 |
| AX-158356319 | 28 | 37.811 | KV453263.1 | 3057558 | 25-scf00537 | 25 |
| AX-158356317 | 28 | 37.812 | KV453263.1 | 3055884 | 25-scf00537 | 25 |
| AX-158356320 | 28 | 37.812 | KV453263.1 | 3058677 | 25-scf00537 | 25 |

|              |    |        |            |         |             |    |
|--------------|----|--------|------------|---------|-------------|----|
| AX-158356321 | 28 | 37.982 | KV453263.1 | 3059657 | 25-scf00537 | 25 |
| AX-158356322 | 28 | 37.982 | KV453263.1 | 3061802 | 25-scf00537 | 25 |
| AX-158356324 | 28 | 38.154 | KV453263.1 | 3063672 | 25-scf00537 | 25 |
| AX-158356326 | 28 | 38.154 | KV453263.1 | 3065685 | 25-scf00537 | 25 |
| AX-157851499 | 28 | 38.154 | KV453263.1 | 3068732 | 25-scf00537 | 25 |
| AX-158356335 | 28 | 38.3   | KV453263.1 | 3075032 | 25-scf00537 | 25 |
| AX-158356337 | 28 | 38.414 | KV453263.1 | 3077077 | 25-scf00537 | 25 |
| AX-158356338 | 28 | 38.67  | KV453263.1 | 3078537 | 25-scf00537 | 25 |
| AX-158356340 | 28 | 38.67  | KV453263.1 | 3079686 | 25-scf00537 | 25 |
| AX-158356341 | 28 | 38.67  | KV453263.1 | 3080136 | 25-scf00537 | 25 |
| AX-157740063 | 28 | 38.67  | KV453263.1 | 3082049 | 25-scf00537 | 25 |
| AX-158356345 | 28 | 38.711 | KV453263.1 | 3084323 | 25-scf00537 | 25 |
| AX-158356331 | 28 | 38.864 | KV453263.1 | 3071256 | 25-scf00537 | 25 |
| AX-158356351 | 28 | 38.864 | KV453263.1 | 3091025 | 25-scf00537 | 25 |
| AX-158356354 | 28 | 38.864 | KV453263.1 | 3092786 | 25-scf00537 | 25 |
| AX-157851500 | 28 | 38.864 | KV453263.1 | 3098582 | 25-scf00537 | 25 |
| AX-158356364 | 28 | 38.864 | KV453263.1 | 3111186 | 25-scf00537 | 25 |
| AX-157851501 | 28 | 38.865 | KV453263.1 | 3099202 | 25-scf00537 | 25 |
| AX-158356346 | 28 | 39.194 | KV453263.1 | 3084984 | 25-scf00537 | 25 |
| AX-158356355 | 28 | 39.194 | KV453263.1 | 3093263 | 25-scf00537 | 25 |
| AX-158356361 | 28 | 39.194 | KV453263.1 | 3106435 | 25-scf00537 | 25 |
| AX-157851502 | 28 | 39.194 | KV453263.1 | 3110288 | 25-scf00537 | 25 |
| AX-158356365 | 28 | 39.194 | KV453263.1 | 3111644 | 25-scf00537 | 25 |
| AX-158356366 | 28 | 39.194 | KV453263.1 | 3112168 | 25-scf00537 | 25 |
| AX-157851504 | 28 | 39.194 | KV453263.1 | 3116382 | 25-scf00537 | 25 |
| AX-157744164 | 28 | 39.194 | KV453263.1 | 3118012 | 25-scf00537 | 25 |
| AX-157851505 | 28 | 39.194 | KV453263.1 | 3120808 | 25-scf00537 | 25 |
| AX-158356369 | 28 | 39.194 | KV453263.1 | 3122395 | 25-scf00537 | 25 |
| AX-158356396 | 28 | 39.194 | KV453263.1 | 3170040 | 25-scf00537 | 25 |
| AX-158356370 | 28 | 39.264 | KV453263.1 | 3123252 | 25-scf00537 | 25 |
| AX-158356371 | 28 | 39.333 | KV453263.1 | 3125275 | 25-scf00537 | 25 |
| AX-158356373 | 28 | 39.472 | KV453263.1 | 3127882 | 25-scf00537 | 25 |
| AX-158356375 | 28 | 39.472 | KV453263.1 | 3129753 | 25-scf00537 | 25 |
| AX-158356376 | 28 | 39.611 | KV453263.1 | 3131245 | 25-scf00537 | 25 |
| AX-158356377 | 28 | 39.611 | KV453263.1 | 3132067 | 25-scf00537 | 25 |
| AX-157851507 | 28 | 39.611 | KV453263.1 | 3138850 | 25-scf00537 | 25 |
| AX-158356379 | 28 | 39.766 | KV453263.1 | 3138585 | 25-scf00537 | 25 |
| AX-157743746 | 28 | 39.89  | KV453263.1 | 3143011 | 25-scf00537 | 25 |
| AX-157851509 | 28 | 39.89  | KV453263.1 | 3144194 | 25-scf00537 | 25 |
| AX-158356394 | 28 | 39.89  | KV453263.1 | 3165481 | 25-scf00537 | 25 |
| AX-157773635 | 28 | 39.914 | KV453263.1 | 3134523 | 25-scf00537 | 25 |
| AX-157851510 | 28 | 39.914 | KV453263.1 | 3144256 | 25-scf00537 | 25 |
| AX-158356382 | 28 | 39.935 | KV453263.1 | 3144294 | 25-scf00537 | 25 |
| AX-158356384 | 28 | 39.967 | KV453263.1 | 3146024 | 25-scf00537 | 25 |
| AX-158356385 | 28 | 39.999 | KV453263.1 | 3147257 | 25-scf00537 | 25 |
| AX-158356347 | 28 | 40.048 | KV453263.1 | 3085729 | 25-scf00537 | 25 |
| AX-158356390 | 28 | 40.048 | KV453263.1 | 3155450 | 25-scf00537 | 25 |
| AX-158356363 | 28 | 40.108 | KV453263.1 | 3110607 | 25-scf00537 | 25 |
| AX-158356367 | 28 | 40.108 | KV453263.1 | 3113330 | 25-scf00537 | 25 |
| AX-157851511 | 28 | 40.108 | KV453263.1 | 3150443 | 25-scf00537 | 25 |
| AX-158356389 | 28 | 40.108 | KV453263.1 | 3154968 | 25-scf00537 | 25 |

|              |    |        |            |         |             |    |
|--------------|----|--------|------------|---------|-------------|----|
| AX-158356391 | 28 | 40.108 | KV453263.1 | 3159787 | 25-scf00537 | 25 |
| AX-158356393 | 28 | 40.108 | KV453263.1 | 3161900 | 25-scf00537 | 25 |
| AX-158356397 | 28 | 40.175 | KV453263.1 | 3172487 | 25-scf00537 | 25 |
| AX-157755121 | 28 | 40.217 | KV453263.1 | 3060312 | 25-scf00537 | 25 |
| AX-157745972 | 28 | 40.217 | KV453263.1 | 3104409 | 25-scf00537 | 25 |
| AX-158356383 | 28 | 40.217 | KV453263.1 | 3144766 | 25-scf00537 | 25 |
| AX-158356386 | 28 | 40.217 | KV453263.1 | 3149942 | 25-scf00537 | 25 |
| AX-158356388 | 28 | 40.217 | KV453263.1 | 3154376 | 25-scf00537 | 25 |
| AX-158356400 | 28 | 40.217 | KV453263.1 | 3174151 | 25-scf00537 | 25 |
| AX-157864196 | 28 | 40.217 | KV453263.1 | 3174223 | 25-scf00537 | 25 |
| AX-158356402 | 28 | 40.217 | KV453263.1 | 3176465 | 25-scf00537 | 25 |
| AX-158356404 | 28 | 40.217 | KV453263.1 | 3178564 | 25-scf00537 | 25 |
| AX-157889059 | 28 | 40.217 | KV453263.1 | 3178756 | 25-scf00537 | 25 |
| AX-158356406 | 28 | 40.217 | KV453263.1 | 3179658 | 25-scf00537 | 25 |
| AX-158356407 | 28 | 40.217 | KV453263.1 | 3180236 | 25-scf00537 | 25 |
| AX-157752292 | 28 | 40.217 | KV453263.1 | 3182845 | 25-scf00537 | 25 |
| AX-158356408 | 28 | 40.217 | KV453263.1 | 3183630 | 25-scf00537 | 25 |
| AX-158356409 | 28 | 40.217 | KV453263.1 | 3184538 | 25-scf00537 | 25 |
| AX-158356410 | 28 | 40.217 | KV453263.1 | 3185489 | 25-scf00537 | 25 |
| AX-158356413 | 28 | 40.217 | KV453263.1 | 3191685 | 25-scf00537 | 25 |
| AX-157851515 | 28 | 40.217 | KV453263.1 | 3192508 | 25-scf00537 | 25 |
| AX-158356424 | 28 | 40.217 | KV453263.1 | 3206800 | 25-scf00537 | 25 |
| AX-158356432 | 28 | 40.217 | KV453263.1 | 3213999 | 25-scf00537 | 25 |
| AX-158356437 | 28 | 40.217 | KV453263.1 | 3217140 | 25-scf00537 | 25 |
| AX-158356473 | 28 | 40.217 | KV453263.1 | 3259954 | 25-scf00537 | 25 |
| AX-158356489 | 28 | 40.217 | KV453263.1 | 3279132 | 25-scf00537 | 25 |
| AX-157767456 | 28 | 40.277 | KV453263.1 | 3146093 | 25-scf00537 | 25 |
| AX-157747123 | 28 | 40.277 | KV453263.1 | 3160905 | 25-scf00537 | 25 |
| AX-158356414 | 28 | 40.277 | KV453263.1 | 3193555 | 25-scf00537 | 25 |
| AX-158356420 | 28 | 40.277 | KV453263.1 | 3200209 | 25-scf00537 | 25 |
| AX-157748034 | 28 | 40.277 | KV453263.1 | 3247498 | 25-scf00537 | 25 |
| AX-157746989 | 28 | 40.436 | KV453263.1 | 3194460 | 25-scf00537 | 25 |
| AX-158356426 | 28 | 40.436 | KV453263.1 | 3209481 | 25-scf00537 | 25 |
| AX-158356439 | 28 | 40.436 | KV453263.1 | 3218518 | 25-scf00537 | 25 |
| AX-157775443 | 28 | 40.436 | KV453263.1 | 3224374 | 25-scf00537 | 25 |
| AX-158356448 | 28 | 40.436 | KV453263.1 | 3228423 | 25-scf00537 | 25 |
| AX-158356417 | 28 | 40.497 | KV453263.1 | 3196645 | 25-scf00537 | 25 |
| AX-157851516 | 28 | 40.543 | KV453263.1 | 3204233 | 25-scf00537 | 25 |
| AX-158356423 | 28 | 40.593 | KV453263.1 | 3204785 | 25-scf00537 | 25 |
| AX-158356421 | 28 | 40.654 | KV453263.1 | 3201591 | 25-scf00537 | 25 |
| AX-157713614 | 28 | 40.654 | KV453263.1 | 3207381 | 25-scf00537 | 25 |
| AX-158356425 | 28 | 40.654 | KV453263.1 | 3208076 | 25-scf00537 | 25 |
| AX-158356428 | 28 | 40.654 | KV453263.1 | 3211798 | 25-scf00537 | 25 |
| AX-158356429 | 28 | 40.654 | KV453263.1 | 3212410 | 25-scf00537 | 25 |
| AX-158356431 | 28 | 40.654 | KV453263.1 | 3213755 | 25-scf00537 | 25 |
| AX-158356434 | 28 | 40.654 | KV453263.1 | 3215710 | 25-scf00537 | 25 |
| AX-158356435 | 28 | 40.654 | KV453263.1 | 3216087 | 25-scf00537 | 25 |
| AX-158356438 | 28 | 40.654 | KV453263.1 | 3217531 | 25-scf00537 | 25 |
| AX-158356440 | 28 | 40.654 | KV453263.1 | 3219084 | 25-scf00537 | 25 |
| AX-158356441 | 28 | 40.654 | KV453263.1 | 3219607 | 25-scf00537 | 25 |
| AX-157882507 | 28 | 40.654 | KV453263.1 | 3223577 | 25-scf00537 | 25 |

|              |    |        |            |         |             |    |
|--------------|----|--------|------------|---------|-------------|----|
| AX-158356446 | 28 | 40.654 | KV453263.1 | 3226554 | 25-scf00537 | 25 |
| AX-158356449 | 28 | 40.654 | KV453263.1 | 3229953 | 25-scf00537 | 25 |
| AX-158356451 | 28 | 40.654 | KV453263.1 | 3231980 | 25-scf00537 | 25 |
| AX-158356452 | 28 | 40.654 | KV453263.1 | 3234057 | 25-scf00537 | 25 |
| AX-158356454 | 28 | 40.654 | KV453263.1 | 3234933 | 25-scf00537 | 25 |
| AX-158356458 | 28 | 40.654 | KV453263.1 | 3240562 | 25-scf00537 | 25 |
| AX-158356460 | 28 | 40.654 | KV453263.1 | 3241938 | 25-scf00537 | 25 |
| AX-158356461 | 28 | 40.654 | KV453263.1 | 3242652 | 25-scf00537 | 25 |
| AX-158356464 | 28 | 40.654 | KV453263.1 | 3244898 | 25-scf00537 | 25 |
| AX-158356471 | 28 | 40.654 | KV453263.1 | 3258233 | 25-scf00537 | 25 |
| AX-158356462 | 28 | 40.694 | KV453263.1 | 3243320 | 25-scf00537 | 25 |
| AX-158356466 | 28 | 40.839 | KV453263.1 | 3251971 | 25-scf00537 | 25 |
| AX-157889060 | 28 | 40.924 | KV453263.1 | 3255555 | 25-scf00537 | 25 |
| AX-158356472 | 28 | 40.924 | KV453263.1 | 3259007 | 25-scf00537 | 25 |
| AX-158356474 | 28 | 41.021 | KV453263.1 | 3261330 | 25-scf00537 | 25 |
| AX-158356475 | 28 | 41.201 | KV453263.1 | 3265218 | 25-scf00537 | 25 |
| AX-158356478 | 28 | 41.201 | KV453263.1 | 3267822 | 25-scf00537 | 25 |
| AX-158356479 | 28 | 41.201 | KV453263.1 | 3268050 | 25-scf00537 | 25 |
| AX-157862130 | 28 | 41.201 | KV453263.1 | 3269141 | 25-scf00537 | 25 |
| AX-158356485 | 28 | 41.201 | KV453263.1 | 3275136 | 25-scf00537 | 25 |
| AX-158356486 | 28 | 41.201 | KV453263.1 | 3276065 | 25-scf00537 | 25 |
| AX-157851518 | 28 | 41.201 | KV453263.1 | 3283479 | 25-scf00537 | 25 |
| AX-158356495 | 28 | 41.201 | KV453263.1 | 3289866 | 25-scf00537 | 25 |
| AX-158356497 | 28 | 41.201 | KV453263.1 | 3292109 | 25-scf00537 | 25 |
| AX-158356501 | 28 | 41.201 | KV453263.1 | 3296085 | 25-scf00537 | 25 |
| AX-158356503 | 28 | 41.201 | KV453263.1 | 3297060 | 25-scf00537 | 25 |
| AX-158356552 | 28 | 41.201 | KV453263.1 | 3361325 | 25-scf00537 | 25 |
| AX-157851529 | 28 | 41.201 | KV453263.1 | 3384870 | 25-scf00537 | 25 |
| AX-158356580 | 28 | 41.201 | KV453263.1 | 3401212 | 25-scf00537 | 25 |
| AX-158356733 | 28 | 41.201 | KV453263.1 | 3616373 | 25-scf00537 | 25 |
| AX-158356507 | 28 | 41.247 | KV453263.1 | 3301164 | 25-scf00537 | 25 |
| AX-157721247 | 28 | 41.247 | KV453263.1 | 3331989 | 25-scf00537 | 25 |
| AX-158356546 | 28 | 41.247 | KV453263.1 | 3352533 | 25-scf00537 | 25 |
| AX-158356557 | 28 | 41.247 | KV453263.1 | 3368378 | 25-scf00537 | 25 |
| AX-158356568 | 28 | 41.247 | KV453263.1 | 3386888 | 25-scf00537 | 25 |
| AX-158356508 | 28 | 41.31  | KV453263.1 | 3301869 | 25-scf00537 | 25 |
| AX-158356510 | 28 | 41.31  | KV453263.1 | 3303429 | 25-scf00537 | 25 |
| AX-157851519 | 28 | 41.31  | KV453263.1 | 3303499 | 25-scf00537 | 25 |
| AX-158356502 | 28 | 41.335 | KV453263.1 | 3296367 | 25-scf00537 | 25 |
| AX-158356517 | 28 | 41.335 | KV453263.1 | 3311902 | 25-scf00537 | 25 |
| AX-158356519 | 28 | 41.335 | KV453263.1 | 3314894 | 25-scf00537 | 25 |
| AX-158356533 | 28 | 41.335 | KV453263.1 | 3334240 | 25-scf00537 | 25 |
| AX-158356518 | 28 | 41.341 | KV453263.1 | 3313909 | 25-scf00537 | 25 |
| AX-158356524 | 28 | 41.368 | KV453263.1 | 3319112 | 25-scf00537 | 25 |
| AX-158419636 | 28 | 41.393 | KV453263.1 | 3319961 | 25-scf00537 | 25 |
| AX-158356506 | 28 | 41.419 | KV453263.1 | 3300197 | 25-scf00537 | 25 |
| AX-157746436 | 28 | 41.419 | KV453263.1 | 3325818 | 25-scf00537 | 25 |
| AX-158356527 | 28 | 41.419 | KV453263.1 | 3326750 | 25-scf00537 | 25 |
| AX-158356531 | 28 | 41.419 | KV453263.1 | 3331045 | 25-scf00537 | 25 |
| AX-158356535 | 28 | 41.419 | KV453263.1 | 3336796 | 25-scf00537 | 25 |
| AX-157851521 | 28 | 41.419 | KV453263.1 | 3356540 | 25-scf00537 | 25 |

|              |    |        |            |         |             |    |
|--------------|----|--------|------------|---------|-------------|----|
| AX-158356512 | 28 | 41.529 | KV453263.1 | 3306681 | 25-scf00537 | 25 |
| AX-158356540 | 28 | 41.529 | KV453263.1 | 3345517 | 25-scf00537 | 25 |
| AX-158356544 | 28 | 41.529 | KV453263.1 | 3351407 | 25-scf00537 | 25 |
| AX-158356561 | 28 | 41.529 | KV453263.1 | 3372931 | 25-scf00537 | 25 |
| AX-157851520 | 28 | 41.583 | KV453263.1 | 3353137 | 25-scf00537 | 25 |
| AX-158356476 | 28 | 41.638 | KV453263.1 | 3265643 | 25-scf00537 | 25 |
| AX-158356480 | 28 | 41.638 | KV453263.1 | 3271298 | 25-scf00537 | 25 |
| AX-158356482 | 28 | 41.638 | KV453263.1 | 3272518 | 25-scf00537 | 25 |
| AX-158356522 | 28 | 41.638 | KV453263.1 | 3316955 | 25-scf00537 | 25 |
| AX-158356526 | 28 | 41.638 | KV453263.1 | 3324615 | 25-scf00537 | 25 |
| AX-158356536 | 28 | 41.638 | KV453263.1 | 3338209 | 25-scf00537 | 25 |
| AX-158356547 | 28 | 41.638 | KV453263.1 | 3354645 | 25-scf00537 | 25 |
| AX-157851522 | 28 | 41.638 | KV453263.1 | 3357639 | 25-scf00537 | 25 |
| AX-157851523 | 28 | 41.638 | KV453263.1 | 3359563 | 25-scf00537 | 25 |
| AX-158356551 | 28 | 41.638 | KV453263.1 | 3360930 | 25-scf00537 | 25 |
| AX-158356553 | 28 | 41.638 | KV453263.1 | 3362430 | 25-scf00537 | 25 |
| AX-158356554 | 28 | 41.638 | KV453263.1 | 3362982 | 25-scf00537 | 25 |
| AX-158356556 | 28 | 41.638 | KV453263.1 | 3365162 | 25-scf00537 | 25 |
| AX-157851524 | 28 | 41.638 | KV453263.1 | 3365456 | 25-scf00537 | 25 |
| AX-158356559 | 28 | 41.638 | KV453263.1 | 3369710 | 25-scf00537 | 25 |
| AX-158356565 | 28 | 41.638 | KV453263.1 | 3379717 | 25-scf00537 | 25 |
| AX-157851527 | 28 | 41.638 | KV453263.1 | 3380965 | 25-scf00537 | 25 |
| AX-158356597 | 28 | 41.638 | KV453263.1 | 3430304 | 25-scf00537 | 25 |
| AX-158356629 | 28 | 41.638 | KV453263.1 | 3475316 | 25-scf00537 | 25 |
| AX-158356668 | 28 | 41.638 | KV453263.1 | 3528637 | 25-scf00537 | 25 |
| AX-158356558 | 28 | 41.675 | KV453263.1 | 3368881 | 25-scf00537 | 25 |
| AX-158356564 | 28 | 41.675 | KV453263.1 | 3378736 | 25-scf00537 | 25 |
| AX-158356566 | 28 | 41.675 | KV453263.1 | 3381502 | 25-scf00537 | 25 |
| AX-158356575 | 28 | 41.708 | KV453263.1 | 3396178 | 25-scf00537 | 25 |
| AX-158356590 | 28 | 41.708 | KV453263.1 | 3419274 | 25-scf00537 | 25 |
| AX-157743510 | 28 | 41.747 | KV453263.1 | 3375673 | 25-scf00537 | 25 |
| AX-158356573 | 28 | 41.747 | KV453263.1 | 3394750 | 25-scf00537 | 25 |
| AX-158356576 | 28 | 41.747 | KV453263.1 | 3396783 | 25-scf00537 | 25 |
| AX-158356579 | 28 | 41.747 | KV453263.1 | 3400364 | 25-scf00537 | 25 |
| AX-158356584 | 28 | 41.747 | KV453263.1 | 3410778 | 25-scf00537 | 25 |
| AX-158356585 | 28 | 41.747 | KV453263.1 | 3411503 | 25-scf00537 | 25 |
| AX-158356586 | 28 | 41.747 | KV453263.1 | 3411907 | 25-scf00537 | 25 |
| AX-158356587 | 28 | 41.747 | KV453263.1 | 3414251 | 25-scf00537 | 25 |
| AX-157723069 | 28 | 41.747 | KV453263.1 | 3415918 | 25-scf00537 | 25 |
| AX-158356588 | 28 | 41.747 | KV453263.1 | 3417411 | 25-scf00537 | 25 |
| AX-158356589 | 28 | 41.747 | KV453263.1 | 3417905 | 25-scf00537 | 25 |
| AX-157771272 | 28 | 41.747 | KV453263.1 | 3418302 | 25-scf00537 | 25 |
| AX-158356593 | 28 | 41.747 | KV453263.1 | 3423446 | 25-scf00537 | 25 |
| AX-158356602 | 28 | 41.747 | KV453263.1 | 3439431 | 25-scf00537 | 25 |
| AX-158356601 | 28 | 41.856 | KV453263.1 | 3437682 | 25-scf00537 | 25 |
| AX-158356604 | 28 | 41.856 | KV453263.1 | 3441256 | 25-scf00537 | 25 |
| AX-158356609 | 28 | 41.856 | KV453263.1 | 3445294 | 25-scf00537 | 25 |
| AX-158356610 | 28 | 41.856 | KV453263.1 | 3447162 | 25-scf00537 | 25 |
| AX-158356614 | 28 | 41.856 | KV453263.1 | 3452082 | 25-scf00537 | 25 |
| AX-158356616 | 28 | 41.856 | KV453263.1 | 3457269 | 25-scf00537 | 25 |
| AX-158356618 | 28 | 41.856 | KV453263.1 | 3459853 | 25-scf00537 | 25 |

|              |    |        |            |         |             |    |
|--------------|----|--------|------------|---------|-------------|----|
| AX-158356619 | 28 | 41.856 | KV453263.1 | 3463337 | 25-scf00537 | 25 |
| AX-158356622 | 28 | 41.856 | KV453263.1 | 3466663 | 25-scf00537 | 25 |
| AX-158356705 | 28 | 41.856 | KV453263.1 | 3583599 | 25-scf00537 | 25 |
| AX-158356623 | 28 | 41.906 | KV453263.1 | 3468249 | 25-scf00537 | 25 |
| AX-158356679 | 28 | 41.906 | KV453263.1 | 3550827 | 25-scf00537 | 25 |
| AX-158356542 | 28 | 41.965 | KV453263.1 | 3346657 | 25-scf00537 | 25 |
| AX-158356560 | 28 | 41.965 | KV453263.1 | 3370099 | 25-scf00537 | 25 |
| AX-157851525 | 28 | 41.965 | KV453263.1 | 3374815 | 25-scf00537 | 25 |
| AX-157739293 | 28 | 41.965 | KV453263.1 | 3380520 | 25-scf00537 | 25 |
| AX-158356567 | 28 | 41.965 | KV453263.1 | 3382457 | 25-scf00537 | 25 |
| AX-158356569 | 28 | 41.965 | KV453263.1 | 3390497 | 25-scf00537 | 25 |
| AX-158356577 | 28 | 41.965 | KV453263.1 | 3398052 | 25-scf00537 | 25 |
| AX-157851531 | 28 | 41.965 | KV453263.1 | 3398909 | 25-scf00537 | 25 |
| AX-157882515 | 28 | 41.965 | KV453263.1 | 3404924 | 25-scf00537 | 25 |
| AX-158356595 | 28 | 41.965 | KV453263.1 | 3424603 | 25-scf00537 | 25 |
| AX-158356606 | 28 | 41.965 | KV453263.1 | 3442104 | 25-scf00537 | 25 |
| AX-158356608 | 28 | 41.965 | KV453263.1 | 3444853 | 25-scf00537 | 25 |
| AX-157882516 | 28 | 41.965 | KV453263.1 | 3467032 | 25-scf00537 | 25 |
| AX-158356625 | 28 | 41.965 | KV453263.1 | 3469096 | 25-scf00537 | 25 |
| AX-158356626 | 28 | 41.965 | KV453263.1 | 3470320 | 25-scf00537 | 25 |
| AX-158356628 | 28 | 41.965 | KV453263.1 | 3472492 | 25-scf00537 | 25 |
| AX-158356632 | 28 | 41.965 | KV453263.1 | 3482814 | 25-scf00537 | 25 |
| AX-158356633 | 28 | 41.965 | KV453263.1 | 3483763 | 25-scf00537 | 25 |
| AX-158356634 | 28 | 41.965 | KV453263.1 | 3486126 | 25-scf00537 | 25 |
| AX-158356636 | 28 | 41.965 | KV453263.1 | 3488250 | 25-scf00537 | 25 |
| AX-158356637 | 28 | 41.965 | KV453263.1 | 3488981 | 25-scf00537 | 25 |
| AX-158356642 | 28 | 41.965 | KV453263.1 | 3494195 | 25-scf00537 | 25 |
| AX-158356643 | 28 | 41.965 | KV453263.1 | 3494769 | 25-scf00537 | 25 |
| AX-158356644 | 28 | 41.965 | KV453263.1 | 3498330 | 25-scf00537 | 25 |
| AX-158356646 | 28 | 41.965 | KV453263.1 | 3501784 | 25-scf00537 | 25 |
| AX-158356648 | 28 | 41.965 | KV453263.1 | 3503230 | 25-scf00537 | 25 |
| AX-158356649 | 28 | 41.965 | KV453263.1 | 3504443 | 25-scf00537 | 25 |
| AX-158356651 | 28 | 41.965 | KV453263.1 | 3505660 | 25-scf00537 | 25 |
| AX-158356654 | 28 | 41.965 | KV453263.1 | 3510597 | 25-scf00537 | 25 |
| AX-158356656 | 28 | 41.965 | KV453263.1 | 3511973 | 25-scf00537 | 25 |
| AX-158356657 | 28 | 41.965 | KV453263.1 | 3512483 | 25-scf00537 | 25 |
| AX-158356659 | 28 | 41.965 | KV453263.1 | 3515272 | 25-scf00537 | 25 |
| AX-158356660 | 28 | 41.965 | KV453263.1 | 3516028 | 25-scf00537 | 25 |
| AX-158419644 | 28 | 41.965 | KV453263.1 | 3516273 | 25-scf00537 | 25 |
| AX-158356663 | 28 | 41.965 | KV453263.1 | 3519415 | 25-scf00537 | 25 |
| AX-158356665 | 28 | 41.965 | KV453263.1 | 3525783 | 25-scf00537 | 25 |
| AX-158356667 | 28 | 41.965 | KV453263.1 | 3526723 | 25-scf00537 | 25 |
| AX-158356669 | 28 | 41.965 | KV453263.1 | 3530756 | 25-scf00537 | 25 |
| AX-158356672 | 28 | 41.965 | KV453263.1 | 3533332 | 25-scf00537 | 25 |
| AX-158356673 | 28 | 41.965 | KV453263.1 | 3533992 | 25-scf00537 | 25 |
| AX-158356675 | 28 | 41.965 | KV453263.1 | 3537316 | 25-scf00537 | 25 |
| AX-158356676 | 28 | 41.965 | KV453263.1 | 3537973 | 25-scf00537 | 25 |
| AX-158356677 | 28 | 41.965 | KV453263.1 | 3543766 | 25-scf00537 | 25 |
| AX-157747452 | 28 | 41.965 | KV453263.1 | 3547286 | 25-scf00537 | 25 |
| AX-158356680 | 28 | 41.965 | KV453263.1 | 3551330 | 25-scf00537 | 25 |
| AX-157851534 | 28 | 41.965 | KV453263.1 | 3552670 | 25-scf00537 | 25 |

|              |    |        |            |         |                 |    |
|--------------|----|--------|------------|---------|-----------------|----|
| AX-158356682 | 28 | 41.965 | KV453263.1 | 3554802 | 25-scf00537     | 25 |
| AX-157733422 | 28 | 41.965 | KV453263.1 | 3556700 | 25-scf00537     | 25 |
| AX-157851536 | 28 | 41.965 | KV453263.1 | 3557616 | 25-scf00537     | 25 |
| AX-158356683 | 28 | 41.965 | KV453263.1 | 3557889 | 25-scf00537     | 25 |
| AX-158356684 | 28 | 41.965 | KV453263.1 | 3558716 | 25-scf00537     | 25 |
| AX-158356686 | 28 | 41.965 | KV453263.1 | 3560451 | 25-scf00537     | 25 |
| AX-157748978 | 28 | 41.965 | KV453263.1 | 3563044 | 25-scf00537     | 25 |
| AX-157711606 | 28 | 41.965 | KV453263.1 | 3564230 | 25-scf00537     | 25 |
| AX-158356690 | 28 | 41.965 | KV453263.1 | 3568526 | 25-scf00537     | 25 |
| AX-158356691 | 28 | 41.965 | KV453263.1 | 3569627 | 25-scf00537     | 25 |
| AX-158356695 | 28 | 41.965 | KV453263.1 | 3573082 | 25-scf00537     | 25 |
| AX-157722426 | 28 | 41.965 | KV453263.1 | 3592231 | 25-scf00537     | 25 |
| AX-158356715 | 28 | 41.965 | KV453263.1 | 3595560 | 25-scf00537     | 25 |
| AX-158356829 | 28 | 41.965 | KV453263.1 | 3756323 | 25-scf00537     | 25 |
| AX-158356847 | 28 | 41.965 | KV453263.1 | 3781959 | 25-scf00537     | 25 |
| AX-157851552 | 28 | 41.965 | KV453263.1 | 3851163 | 25-scf00537     | 25 |
| AX-158356925 | 28 | 41.965 | KV453263.1 | 3889789 | 25-scf00537     | 25 |
| AX-157851560 | 28 | 41.965 | KV453263.1 | 4128936 | 25-scf00537     | 25 |
| AX-158357096 | 28 | 41.965 | KV453263.1 | 4149686 | 25-scf00537     | 25 |
| AX-158357098 | 28 | 41.965 | KV453263.1 | 4151958 | 25-scf00537     | 25 |
| AX-158357100 | 28 | 41.965 | KV453263.1 | 4154456 | 25-scf00537     | 25 |
| AX-158357101 | 28 | 41.965 | KV453263.1 | 4154588 | 25-scf00537     | 25 |
| AX-158357184 | 28 | 41.965 | KV453263.1 | 4265853 | 25-scf00537     | 25 |
| AX-158357186 | 28 | 41.965 | KV453263.1 | 4269230 | 25-scf00537     | 25 |
| AX-158357194 | 28 | 41.965 | KV453263.1 | 4284413 | 25-scf00537     | 25 |
| AX-158357200 | 28 | 41.965 | KV453263.1 | 4293268 | 25-scf00537     | 25 |
| AX-158357260 | 28 | 41.965 | KV453263.1 | 4368456 | 25-scf00537     | 25 |
| AX-157703689 | 28 | 41.965 | DX099944.1 | 272     | IORI212 Ictalu  | UN |
| AX-157698877 | 28 | 41.965 | FI889294.1 | 592     | -IORI212 Ictalu | UN |
| AX-158356693 | 28 | 42.061 | KV453263.1 | 3571973 | 25-scf00537     | 25 |
| AX-158356514 | 28 | 42.184 | KV453263.1 | 3308232 | 25-scf00537     | 25 |
| AX-158356605 | 28 | 42.184 | KV453263.1 | 3441625 | 25-scf00537     | 25 |
| AX-158356620 | 28 | 42.184 | KV453263.1 | 3465211 | 25-scf00537     | 25 |
| AX-158356630 | 28 | 42.184 | KV453263.1 | 3481115 | 25-scf00537     | 25 |
| AX-158356694 | 28 | 42.184 | KV453263.1 | 3572652 | 25-scf00537     | 25 |
| AX-158356696 | 28 | 42.184 | KV453263.1 | 3574941 | 25-scf00537     | 25 |
| AX-158356698 | 28 | 42.184 | KV453263.1 | 3576677 | 25-scf00537     | 25 |
| AX-157889063 | 28 | 42.184 | KV453263.1 | 3577143 | 25-scf00537     | 25 |
| AX-158356700 | 28 | 42.184 | KV453263.1 | 3578488 | 25-scf00537     | 25 |
| AX-158356702 | 28 | 42.184 | KV453263.1 | 3580031 | 25-scf00537     | 25 |
| AX-157851537 | 28 | 42.184 | KV453263.1 | 3584134 | 25-scf00537     | 25 |
| AX-158356709 | 28 | 42.184 | KV453263.1 | 3586687 | 25-scf00537     | 25 |
| AX-158356710 | 28 | 42.184 | KV453263.1 | 3588549 | 25-scf00537     | 25 |
| AX-158356714 | 28 | 42.184 | KV453263.1 | 3594513 | 25-scf00537     | 25 |
| AX-157873964 | 28 | 42.184 | KV453263.1 | 3597499 | 25-scf00537     | 25 |
| AX-158356716 | 28 | 42.184 | KV453263.1 | 3600221 | 25-scf00537     | 25 |
| AX-158356718 | 28 | 42.184 | KV453263.1 | 3601966 | 25-scf00537     | 25 |
| AX-158419646 | 28 | 42.184 | KV453263.1 | 3602455 | 25-scf00537     | 25 |
| AX-158420722 | 28 | 42.184 | KV453263.1 | 3602493 | 25-scf00537     | 25 |
| AX-158356719 | 28 | 42.184 | KV453263.1 | 3604299 | 25-scf00537     | 25 |
| AX-158356720 | 28 | 42.184 | KV453263.1 | 3604614 | 25-scf00537     | 25 |



|              |    |        |            |         |             |    |
|--------------|----|--------|------------|---------|-------------|----|
| AX-157851540 | 28 | 42.184 | KV453263.1 | 3605839 | 25-scf00537 | 25 |
| AX-158356724 | 28 | 42.184 | KV453263.1 | 3607788 | 25-scf00537 | 25 |
| AX-158356730 | 28 | 42.184 | KV453263.1 | 3615014 | 25-scf00537 | 25 |
| AX-158356732 | 28 | 42.184 | KV453263.1 | 3616080 | 25-scf00537 | 25 |
| AX-158356736 | 28 | 42.184 | KV453263.1 | 3621422 | 25-scf00537 | 25 |
| AX-158356737 | 28 | 42.184 | KV453263.1 | 3621985 | 25-scf00537 | 25 |
| AX-158356740 | 28 | 42.184 | KV453263.1 | 3626710 | 25-scf00537 | 25 |
| AX-158356741 | 28 | 42.184 | KV453263.1 | 3632417 | 25-scf00537 | 25 |
| AX-158356742 | 28 | 42.184 | KV453263.1 | 3633054 | 25-scf00537 | 25 |
| AX-158356744 | 28 | 42.184 | KV453263.1 | 3637872 | 25-scf00537 | 25 |
| AX-157744710 | 28 | 42.184 | KV453263.1 | 3637978 | 25-scf00537 | 25 |
| AX-158356745 | 28 | 42.184 | KV453263.1 | 3638212 | 25-scf00537 | 25 |
| AX-157774538 | 28 | 42.184 | KV453263.1 | 3639069 | 25-scf00537 | 25 |
| AX-158356747 | 28 | 42.184 | KV453263.1 | 3639911 | 25-scf00537 | 25 |
| AX-157868275 | 28 | 42.184 | KV453263.1 | 3640607 | 25-scf00537 | 25 |
| AX-158356748 | 28 | 42.184 | KV453263.1 | 3643422 | 25-scf00537 | 25 |
| AX-157851541 | 28 | 42.184 | KV453263.1 | 3651032 | 25-scf00537 | 25 |
| AX-158356757 | 28 | 42.184 | KV453263.1 | 3662306 | 25-scf00537 | 25 |
| AX-157851543 | 28 | 42.184 | KV453263.1 | 3665034 | 25-scf00537 | 25 |
| AX-157851544 | 28 | 42.184 | KV453263.1 | 3671648 | 25-scf00537 | 25 |
| AX-158356759 | 28 | 42.184 | KV453263.1 | 3672142 | 25-scf00537 | 25 |
| AX-158356760 | 28 | 42.184 | KV453263.1 | 3673829 | 25-scf00537 | 25 |
| AX-157868277 | 28 | 42.184 | KV453263.1 | 3675719 | 25-scf00537 | 25 |
| AX-158356763 | 28 | 42.184 | KV453263.1 | 3679452 | 25-scf00537 | 25 |
| AX-158356765 | 28 | 42.184 | KV453263.1 | 3684503 | 25-scf00537 | 25 |
| AX-158356810 | 28 | 42.184 | KV453263.1 | 3734094 | 25-scf00537 | 25 |
| AX-158356848 | 28 | 42.184 | KV453263.1 | 3782544 | 25-scf00537 | 25 |
| AX-158356876 | 28 | 42.184 | KV453263.1 | 3819814 | 25-scf00537 | 25 |
| AX-158356776 | 28 | 42.231 | KV453263.1 | 3700272 | 25-scf00537 | 25 |
| AX-158356778 | 28 | 42.231 | KV453263.1 | 3703267 | 25-scf00537 | 25 |
| AX-158356666 | 28 | 42.247 | KV453263.1 | 3526292 | 25-scf00537 | 25 |
| AX-157851542 | 28 | 42.247 | KV453263.1 | 3664638 | 25-scf00537 | 25 |
| AX-158356767 | 28 | 42.247 | KV453263.1 | 3686932 | 25-scf00537 | 25 |
| AX-158356788 | 28 | 42.247 | KV453263.1 | 3715535 | 25-scf00537 | 25 |
| AX-158356611 | 28 | 42.293 | KV453263.1 | 3447696 | 25-scf00537 | 25 |
| AX-157700936 | 28 | 42.293 | KV453263.1 | 3564313 | 25-scf00537 | 25 |
| AX-158356703 | 28 | 42.293 | KV453263.1 | 3580453 | 25-scf00537 | 25 |
| AX-157753628 | 28 | 42.293 | KV453263.1 | 3599123 | 25-scf00537 | 25 |
| AX-158356738 | 28 | 42.293 | KV453263.1 | 3622608 | 25-scf00537 | 25 |
| AX-158356750 | 28 | 42.293 | KV453263.1 | 3647655 | 25-scf00537 | 25 |
| AX-158356771 | 28 | 42.293 | KV453263.1 | 3693007 | 25-scf00537 | 25 |
| AX-158356772 | 28 | 42.293 | KV453263.1 | 3695511 | 25-scf00537 | 25 |
| AX-158356773 | 28 | 42.293 | KV453263.1 | 3696573 | 25-scf00537 | 25 |
| AX-158356791 | 28 | 42.293 | KV453263.1 | 3717284 | 25-scf00537 | 25 |
| AX-158356797 | 28 | 42.511 | KV453263.1 | 3722644 | 25-scf00537 | 25 |
| AX-158356800 | 28 | 42.511 | KV453263.1 | 3726324 | 25-scf00537 | 25 |
| AX-158356801 | 28 | 42.511 | KV453263.1 | 3726757 | 25-scf00537 | 25 |
| AX-158356805 | 28 | 42.511 | KV453263.1 | 3730486 | 25-scf00537 | 25 |
| AX-158356806 | 28 | 42.511 | KV453263.1 | 3731590 | 25-scf00537 | 25 |
| AX-158356807 | 28 | 42.511 | KV453263.1 | 3732366 | 25-scf00537 | 25 |
| AX-157724277 | 28 | 42.511 | KV453263.1 | 3735681 | 25-scf00537 | 25 |

|              |    |        |            |         |             |    |
|--------------|----|--------|------------|---------|-------------|----|
| AX-158356812 | 28 | 42.511 | KV453263.1 | 3736032 | 25-scf00537 | 25 |
| AX-158356815 | 28 | 42.511 | KV453263.1 | 3739539 | 25-scf00537 | 25 |
| AX-158356817 | 28 | 42.511 | KV453263.1 | 3742123 | 25-scf00537 | 25 |
| AX-158356818 | 28 | 42.511 | KV453263.1 | 3743900 | 25-scf00537 | 25 |
| AX-158356821 | 28 | 42.511 | KV453263.1 | 3746773 | 25-scf00537 | 25 |
| AX-157851547 | 28 | 42.511 | KV453263.1 | 3749724 | 25-scf00537 | 25 |
| AX-158356823 | 28 | 42.511 | KV453263.1 | 3750000 | 25-scf00537 | 25 |
| AX-158356824 | 28 | 42.511 | KV453263.1 | 3751334 | 25-scf00537 | 25 |
| AX-158356828 | 28 | 42.511 | KV453263.1 | 3754939 | 25-scf00537 | 25 |
| AX-158356844 | 28 | 42.511 | KV453263.1 | 3777067 | 25-scf00537 | 25 |
| AX-158356850 | 28 | 42.511 | KV453263.1 | 3785148 | 25-scf00537 | 25 |
| AX-158356853 | 28 | 42.511 | KV453263.1 | 3788289 | 25-scf00537 | 25 |
| AX-157882525 | 28 | 42.62  | KV453263.1 | 3760471 | 25-scf00537 | 25 |
| AX-158356835 | 28 | 42.62  | KV453263.1 | 3768572 | 25-scf00537 | 25 |
| AX-158356836 | 28 | 42.62  | KV453263.1 | 3768990 | 25-scf00537 | 25 |
| AX-158356838 | 28 | 42.62  | KV453263.1 | 3771675 | 25-scf00537 | 25 |
| AX-158356839 | 28 | 42.62  | KV453263.1 | 3772466 | 25-scf00537 | 25 |
| AX-157851551 | 28 | 42.62  | KV453263.1 | 3773114 | 25-scf00537 | 25 |
| AX-158356653 | 28 | 42.73  | KV453263.1 | 3509179 | 25-scf00537 | 25 |
| AX-157711812 | 28 | 42.73  | KV453263.1 | 3551572 | 25-scf00537 | 25 |
| AX-158356711 | 28 | 42.73  | KV453263.1 | 3589233 | 25-scf00537 | 25 |
| AX-157889065 | 28 | 42.73  | KV453263.1 | 3686686 | 25-scf00537 | 25 |
| AX-158356811 | 28 | 42.73  | KV453263.1 | 3734882 | 25-scf00537 | 25 |
| AX-158356827 | 28 | 42.73  | KV453263.1 | 3754221 | 25-scf00537 | 25 |
| AX-157882524 | 28 | 42.73  | KV453263.1 | 3756498 | 25-scf00537 | 25 |
| AX-158356831 | 28 | 42.73  | KV453263.1 | 3760831 | 25-scf00537 | 25 |
| AX-158356840 | 28 | 42.73  | KV453263.1 | 3774548 | 25-scf00537 | 25 |
| AX-158356842 | 28 | 42.73  | KV453263.1 | 3775730 | 25-scf00537 | 25 |
| AX-158356845 | 28 | 42.73  | KV453263.1 | 3779833 | 25-scf00537 | 25 |
| AX-158356846 | 28 | 42.73  | KV453263.1 | 3780972 | 25-scf00537 | 25 |
| AX-158356851 | 28 | 42.73  | KV453263.1 | 3786443 | 25-scf00537 | 25 |
| AX-158356855 | 28 | 42.73  | KV453263.1 | 3790257 | 25-scf00537 | 25 |
| AX-158356856 | 28 | 42.73  | KV453263.1 | 3791189 | 25-scf00537 | 25 |
| AX-158356857 | 28 | 42.73  | KV453263.1 | 3793523 | 25-scf00537 | 25 |
| AX-158356859 | 28 | 42.73  | KV453263.1 | 3796024 | 25-scf00537 | 25 |
| AX-158356860 | 28 | 42.73  | KV453263.1 | 3797390 | 25-scf00537 | 25 |
| AX-158356861 | 28 | 42.73  | KV453263.1 | 3798296 | 25-scf00537 | 25 |
| AX-158356863 | 28 | 42.73  | KV453263.1 | 3800851 | 25-scf00537 | 25 |
| AX-158356864 | 28 | 42.73  | KV453263.1 | 3801618 | 25-scf00537 | 25 |
| AX-158356865 | 28 | 42.73  | KV453263.1 | 3801975 | 25-scf00537 | 25 |
| AX-158356866 | 28 | 42.73  | KV453263.1 | 3803024 | 25-scf00537 | 25 |
| AX-158356869 | 28 | 42.73  | KV453263.1 | 3805519 | 25-scf00537 | 25 |
| AX-158356872 | 28 | 42.73  | KV453263.1 | 3808629 | 25-scf00537 | 25 |
| AX-158356879 | 28 | 42.73  | KV453263.1 | 3825430 | 25-scf00537 | 25 |
| AX-158356890 | 28 | 42.73  | KV453263.1 | 3846114 | 25-scf00537 | 25 |
| AX-158356906 | 28 | 42.73  | KV453263.1 | 3863453 | 25-scf00537 | 25 |
| AX-158356934 | 28 | 42.73  | KV453263.1 | 3900391 | 25-scf00537 | 25 |
| AX-157851553 | 28 | 42.73  | KV453263.1 | 3909232 | 25-scf00537 | 25 |
| AX-158356962 | 28 | 42.73  | KV453263.1 | 3939968 | 25-scf00537 | 25 |
| AX-158356875 | 28 | 42.948 | KV453263.1 | 3816777 | 25-scf00537 | 25 |
| AX-158356881 | 28 | 42.948 | KV453263.1 | 3828256 | 25-scf00537 | 25 |

|              |    |        |            |         |             |    |
|--------------|----|--------|------------|---------|-------------|----|
| AX-158356892 | 28 | 42.948 | KV453263.1 | 3847491 | 25-scf00537 | 25 |
| AX-158356893 | 28 | 42.948 | KV453263.1 | 3847910 | 25-scf00537 | 25 |
| AX-158356894 | 28 | 42.948 | KV453263.1 | 3848646 | 25-scf00537 | 25 |
| AX-158356899 | 28 | 42.948 | KV453263.1 | 3855473 | 25-scf00537 | 25 |
| AX-158356944 | 28 | 42.948 | KV453263.1 | 3913562 | 25-scf00537 | 25 |
| AX-158356896 | 28 | 42.964 | KV453263.1 | 3849744 | 25-scf00537 | 25 |
| AX-158356900 | 28 | 42.964 | KV453263.1 | 3856082 | 25-scf00537 | 25 |
| AX-158356901 | 28 | 42.964 | KV453263.1 | 3856320 | 25-scf00537 | 25 |
| AX-157752941 | 28 | 42.964 | KV453263.1 | 3861423 | 25-scf00537 | 25 |
| AX-158356903 | 28 | 42.979 | KV453263.1 | 3859003 | 25-scf00537 | 25 |
| AX-158356904 | 28 | 42.996 | KV453263.1 | 3859877 | 25-scf00537 | 25 |
| AX-158356905 | 28 | 43.014 | KV453263.1 | 3862205 | 25-scf00537 | 25 |
| AX-158356911 | 28 | 43.037 | KV453263.1 | 3869947 | 25-scf00537 | 25 |
| AX-158356641 | 28 | 43.057 | KV453263.1 | 3493824 | 25-scf00537 | 25 |
| AX-157882522 | 28 | 43.057 | KV453263.1 | 3699559 | 25-scf00537 | 25 |
| AX-158356854 | 28 | 43.057 | KV453263.1 | 3788656 | 25-scf00537 | 25 |
| AX-158356897 | 28 | 43.057 | KV453263.1 | 3850098 | 25-scf00537 | 25 |
| AX-157771343 | 28 | 43.057 | KV453263.1 | 3870813 | 25-scf00537 | 25 |
| AX-158356914 | 28 | 43.057 | KV453263.1 | 3873674 | 25-scf00537 | 25 |
| AX-158356919 | 28 | 43.057 | KV453263.1 | 3885683 | 25-scf00537 | 25 |
| AX-158356920 | 28 | 43.057 | KV453263.1 | 3886140 | 25-scf00537 | 25 |
| AX-158356921 | 28 | 43.057 | KV453263.1 | 3887045 | 25-scf00537 | 25 |
| AX-158356922 | 28 | 43.057 | KV453263.1 | 3887516 | 25-scf00537 | 25 |
| AX-158356924 | 28 | 43.057 | KV453263.1 | 3889463 | 25-scf00537 | 25 |
| AX-158356927 | 28 | 43.057 | KV453263.1 | 3892277 | 25-scf00537 | 25 |
| AX-158356928 | 28 | 43.057 | KV453263.1 | 3893013 | 25-scf00537 | 25 |
| AX-158356931 | 28 | 43.057 | KV453263.1 | 3897178 | 25-scf00537 | 25 |
| AX-158356965 | 28 | 43.057 | KV453263.1 | 3941952 | 25-scf00537 | 25 |
| AX-158356930 | 28 | 43.106 | KV453263.1 | 3896757 | 25-scf00537 | 25 |
| AX-158356888 | 28 | 43.166 | KV453263.1 | 3842591 | 25-scf00537 | 25 |
| AX-158356898 | 28 | 43.166 | KV453263.1 | 3850492 | 25-scf00537 | 25 |
| AX-158356935 | 28 | 43.166 | KV453263.1 | 3902879 | 25-scf00537 | 25 |
| AX-158356939 | 28 | 43.166 | KV453263.1 | 3909493 | 25-scf00537 | 25 |
| AX-158356945 | 28 | 43.166 | KV453263.1 | 3914250 | 25-scf00537 | 25 |
| AX-158356948 | 28 | 43.166 | KV453263.1 | 3919910 | 25-scf00537 | 25 |
| AX-158356950 | 28 | 43.166 | KV453263.1 | 3923900 | 25-scf00537 | 25 |
| AX-158356951 | 28 | 43.166 | KV453263.1 | 3925260 | 25-scf00537 | 25 |
| AX-158356952 | 28 | 43.166 | KV453263.1 | 3927475 | 25-scf00537 | 25 |
| AX-158356953 | 28 | 43.166 | KV453263.1 | 3928021 | 25-scf00537 | 25 |
| AX-158356954 | 28 | 43.166 | KV453263.1 | 3929019 | 25-scf00537 | 25 |
| AX-157739712 | 28 | 43.166 | KV453263.1 | 3930602 | 25-scf00537 | 25 |
| AX-158356955 | 28 | 43.166 | KV453263.1 | 3932679 | 25-scf00537 | 25 |
| AX-158356956 | 28 | 43.166 | KV453263.1 | 3934830 | 25-scf00537 | 25 |
| AX-158356958 | 28 | 43.166 | KV453263.1 | 3937079 | 25-scf00537 | 25 |
| AX-158419657 | 28 | 43.166 | KV453263.1 | 3938072 | 25-scf00537 | 25 |
| AX-158356960 | 28 | 43.166 | KV453263.1 | 3939016 | 25-scf00537 | 25 |
| AX-158356961 | 28 | 43.166 | KV453263.1 | 3939504 | 25-scf00537 | 25 |
| AX-158357020 | 28 | 43.166 | KV453263.1 | 4037266 | 25-scf00537 | 25 |
| AX-158357075 | 28 | 43.166 | KV453263.1 | 4120485 | 25-scf00537 | 25 |
| AX-158357188 | 28 | 43.166 | KV453263.1 | 4274010 | 25-scf00537 | 25 |
| AX-157851548 | 28 | 43.385 | KV453263.1 | 3763788 | 25-scf00537 | 25 |

|              |    |        |            |         |             |    |
|--------------|----|--------|------------|---------|-------------|----|
| AX-158356873 | 28 | 43.385 | KV453263.1 | 3812297 | 25-scf00537 | 25 |
| AX-158356907 | 28 | 43.385 | KV453263.1 | 3864694 | 25-scf00537 | 25 |
| AX-158356936 | 28 | 43.385 | KV453263.1 | 3904090 | 25-scf00537 | 25 |
| AX-158356943 | 28 | 43.385 | KV453263.1 | 3912997 | 25-scf00537 | 25 |
| AX-158356967 | 28 | 43.385 | KV453263.1 | 3945510 | 25-scf00537 | 25 |
| AX-158356971 | 28 | 43.385 | KV453263.1 | 3948698 | 25-scf00537 | 25 |
| AX-158356972 | 28 | 43.385 | KV453263.1 | 3949413 | 25-scf00537 | 25 |
| AX-158356976 | 28 | 43.385 | KV453263.1 | 3965421 | 25-scf00537 | 25 |
| AX-158356979 | 28 | 43.385 | KV453263.1 | 3970593 | 25-scf00537 | 25 |
| AX-158356981 | 28 | 43.385 | KV453263.1 | 3972466 | 25-scf00537 | 25 |
| AX-158356982 | 28 | 43.385 | KV453263.1 | 3973837 | 25-scf00537 | 25 |
| AX-158356983 | 28 | 43.385 | KV453263.1 | 3978673 | 25-scf00537 | 25 |
| AX-158356984 | 28 | 43.385 | KV453263.1 | 3979506 | 25-scf00537 | 25 |
| AX-158356988 | 28 | 43.385 | KV453263.1 | 3983089 | 25-scf00537 | 25 |
| AX-158419658 | 28 | 43.385 | KV453263.1 | 3983572 | 25-scf00537 | 25 |
| AX-158356990 | 28 | 43.385 | KV453263.1 | 3989673 | 25-scf00537 | 25 |
| AX-158356991 | 28 | 43.385 | KV453263.1 | 3991151 | 25-scf00537 | 25 |
| AX-158356994 | 28 | 43.385 | KV453263.1 | 3992913 | 25-scf00537 | 25 |
| AX-157757592 | 28 | 43.385 | KV453263.1 | 3993379 | 25-scf00537 | 25 |
| AX-158356995 | 28 | 43.385 | KV453263.1 | 3995609 | 25-scf00537 | 25 |
| AX-158356996 | 28 | 43.385 | KV453263.1 | 3997751 | 25-scf00537 | 25 |
| AX-157720796 | 28 | 43.385 | KV453263.1 | 4002633 | 25-scf00537 | 25 |
| AX-157748436 | 28 | 43.385 | KV453263.1 | 4003221 | 25-scf00537 | 25 |
| AX-158357000 | 28 | 43.385 | KV453263.1 | 4003297 | 25-scf00537 | 25 |
| AX-158357001 | 28 | 43.385 | KV453263.1 | 4004699 | 25-scf00537 | 25 |
| AX-157851555 | 28 | 43.385 | KV453263.1 | 4006740 | 25-scf00537 | 25 |
| AX-158357002 | 28 | 43.385 | KV453263.1 | 4007176 | 25-scf00537 | 25 |
| AX-158357005 | 28 | 43.385 | KV453263.1 | 4011496 | 25-scf00537 | 25 |
| AX-158357007 | 28 | 43.385 | KV453263.1 | 4012363 | 25-scf00537 | 25 |
| AX-158357010 | 28 | 43.385 | KV453263.1 | 4016528 | 25-scf00537 | 25 |
| AX-158357014 | 28 | 43.385 | KV453263.1 | 4025431 | 25-scf00537 | 25 |
| AX-158357015 | 28 | 43.385 | KV453263.1 | 4027664 | 25-scf00537 | 25 |
| AX-158357016 | 28 | 43.385 | KV453263.1 | 4029066 | 25-scf00537 | 25 |
| AX-158357017 | 28 | 43.385 | KV453263.1 | 4029720 | 25-scf00537 | 25 |
| AX-158357021 | 28 | 43.385 | KV453263.1 | 4037819 | 25-scf00537 | 25 |
| AX-158357022 | 28 | 43.385 | KV453263.1 | 4038186 | 25-scf00537 | 25 |
| AX-158357024 | 28 | 43.385 | KV453263.1 | 4043384 | 25-scf00537 | 25 |
| AX-158357025 | 28 | 43.385 | KV453263.1 | 4043820 | 25-scf00537 | 25 |
| AX-158357026 | 28 | 43.385 | KV453263.1 | 4046007 | 25-scf00537 | 25 |
| AX-158357027 | 28 | 43.385 | KV453263.1 | 4046463 | 25-scf00537 | 25 |
| AX-158357028 | 28 | 43.385 | KV453263.1 | 4047170 | 25-scf00537 | 25 |
| AX-158357035 | 28 | 43.385 | KV453263.1 | 4064307 | 25-scf00537 | 25 |
| AX-158357037 | 28 | 43.385 | KV453263.1 | 4066550 | 25-scf00537 | 25 |
| AX-157743797 | 28 | 43.385 | KV453263.1 | 4076096 | 25-scf00537 | 25 |
| AX-158357049 | 28 | 43.385 | KV453263.1 | 4086056 | 25-scf00537 | 25 |
| AX-158357050 | 28 | 43.385 | KV453263.1 | 4087588 | 25-scf00537 | 25 |
| AX-158357052 | 28 | 43.385 | KV453263.1 | 4088422 | 25-scf00537 | 25 |
| AX-158357055 | 28 | 43.385 | KV453263.1 | 4091671 | 25-scf00537 | 25 |
| AX-158357056 | 28 | 43.385 | KV453263.1 | 4092016 | 25-scf00537 | 25 |
| AX-158357057 | 28 | 43.385 | KV453263.1 | 4092915 | 25-scf00537 | 25 |
| AX-158357058 | 28 | 43.385 | KV453263.1 | 4093734 | 25-scf00537 | 25 |

|              |    |        |            |         |             |    |
|--------------|----|--------|------------|---------|-------------|----|
| AX-157718047 | 28 | 43.385 | KV453263.1 | 4094739 | 25-scf00537 | 25 |
| AX-158357063 | 28 | 43.385 | KV453263.1 | 4102702 | 25-scf00537 | 25 |
| AX-158357072 | 28 | 43.385 | KV453263.1 | 4114823 | 25-scf00537 | 25 |
| AX-158419661 | 28 | 43.385 | KV453263.1 | 4116542 | 25-scf00537 | 25 |
| AX-158357074 | 28 | 43.385 | KV453263.1 | 4117415 | 25-scf00537 | 25 |
| AX-158357076 | 28 | 43.385 | KV453263.1 | 4122516 | 25-scf00537 | 25 |
| AX-158357078 | 28 | 43.385 | KV453263.1 | 4126196 | 25-scf00537 | 25 |
| AX-158357079 | 28 | 43.385 | KV453263.1 | 4126582 | 25-scf00537 | 25 |
| AX-158357080 | 28 | 43.385 | KV453263.1 | 4127626 | 25-scf00537 | 25 |
| AX-157882530 | 28 | 43.385 | KV453263.1 | 4128390 | 25-scf00537 | 25 |
| AX-157851561 | 28 | 43.385 | KV453263.1 | 4131965 | 25-scf00537 | 25 |
| AX-158357081 | 28 | 43.385 | KV453263.1 | 4132543 | 25-scf00537 | 25 |
| AX-158357082 | 28 | 43.385 | KV453263.1 | 4133065 | 25-scf00537 | 25 |
| AX-158357091 | 28 | 43.385 | KV453263.1 | 4142660 | 25-scf00537 | 25 |
| AX-158357092 | 28 | 43.385 | KV453263.1 | 4143444 | 25-scf00537 | 25 |
| AX-157851564 | 28 | 43.385 | KV453263.1 | 4146207 | 25-scf00537 | 25 |
| AX-158357113 | 28 | 43.385 | KV453263.1 | 4177971 | 25-scf00537 | 25 |
| AX-158419663 | 28 | 43.385 | KV453263.1 | 4178680 | 25-scf00537 | 25 |
| AX-158357114 | 28 | 43.385 | KV453263.1 | 4180020 | 25-scf00537 | 25 |
| AX-158357115 | 28 | 43.385 | KV453263.1 | 4180951 | 25-scf00537 | 25 |
| AX-158357117 | 28 | 43.385 | KV453263.1 | 4183341 | 25-scf00537 | 25 |
| AX-158357120 | 28 | 43.385 | KV453263.1 | 4186439 | 25-scf00537 | 25 |
| AX-158381726 | 28 | 43.385 | KV453263.1 | 4189109 | 25-scf00537 | 25 |
| AX-158357123 | 28 | 43.385 | KV453263.1 | 4189519 | 25-scf00537 | 25 |
| AX-158357124 | 28 | 43.385 | KV453263.1 | 4190130 | 25-scf00537 | 25 |
| AX-158357126 | 28 | 43.385 | KV453263.1 | 4191668 | 25-scf00537 | 25 |
| AX-158357131 | 28 | 43.385 | KV453263.1 | 4195589 | 25-scf00537 | 25 |
| AX-158357132 | 28 | 43.385 | KV453263.1 | 4196616 | 25-scf00537 | 25 |
| AX-158357133 | 28 | 43.385 | KV453263.1 | 4197619 | 25-scf00537 | 25 |
| AX-158357144 | 28 | 43.385 | KV453263.1 | 4212816 | 25-scf00537 | 25 |
| AX-158357145 | 28 | 43.385 | KV453263.1 | 4213848 | 25-scf00537 | 25 |
| AX-158357150 | 28 | 43.385 | KV453263.1 | 4220476 | 25-scf00537 | 25 |
| AX-158357153 | 28 | 43.385 | KV453263.1 | 4227917 | 25-scf00537 | 25 |
| AX-158357162 | 28 | 43.385 | KV453263.1 | 4237969 | 25-scf00537 | 25 |
| AX-158357180 | 28 | 43.385 | KV453263.1 | 4258638 | 25-scf00537 | 25 |
| AX-158357187 | 28 | 43.385 | KV453263.1 | 4271617 | 25-scf00537 | 25 |
| AX-158357190 | 28 | 43.385 | KV453263.1 | 4277282 | 25-scf00537 | 25 |
| AX-158357191 | 28 | 43.385 | KV453263.1 | 4278451 | 25-scf00537 | 25 |
| AX-158357192 | 28 | 43.385 | KV453263.1 | 4281210 | 25-scf00537 | 25 |
| AX-158357202 | 28 | 43.385 | KV453263.1 | 4294571 | 25-scf00537 | 25 |
| AX-158357222 | 28 | 43.385 | KV453263.1 | 4317060 | 25-scf00537 | 25 |
| AX-158357226 | 28 | 43.385 | KV453263.1 | 4322513 | 25-scf00537 | 25 |
| AX-158357228 | 28 | 43.385 | KV453263.1 | 4324249 | 25-scf00537 | 25 |
| AX-158357235 | 28 | 43.385 | KV453263.1 | 4331513 | 25-scf00537 | 25 |
| AX-158357283 | 28 | 43.385 | KV453263.1 | 4415409 | 25-scf00537 | 25 |
| AX-157851588 | 28 | 43.385 | KV453263.1 | 4448384 | 25-scf00537 | 25 |
| AX-158357366 | 28 | 43.385 | KV453263.1 | 4536986 | 25-scf00537 | 25 |
| AX-158357443 | 28 | 43.385 | KV453263.1 | 4644993 | 25-scf00537 | 25 |
| AX-158357560 | 28 | 43.385 | KV453263.1 | 4810571 | 25-scf00537 | 25 |
| AX-158357829 | 28 | 43.385 | KV453263.1 | 5245954 | 25-scf00537 | 25 |
| AX-158357850 | 28 | 43.385 | KV453263.1 | 5267669 | 25-scf00537 | 25 |

|              |    |        |            |         |             |    |
|--------------|----|--------|------------|---------|-------------|----|
| AX-157862351 | 28 | 43.385 | KV453263.1 | 5334484 | 25-scf00537 | 25 |
| AX-157851646 | 28 | 43.385 | KV453263.1 | 5352091 | 25-scf00537 | 25 |
| AX-158357926 | 28 | 43.385 | KV453263.1 | 5367429 | 25-scf00537 | 25 |
| AX-157745108 | 28 | 43.385 | KV453263.1 | 5470478 | 25-scf00537 | 25 |
| AX-158358090 | 28 | 43.385 | KV453263.1 | 5601567 | 25-scf00537 | 25 |
| AX-158358150 | 28 | 43.385 | KV453263.1 | 5682704 | 25-scf00537 | 25 |
| AX-158358186 | 28 | 43.385 | KV453263.1 | 5727837 | 25-scf00537 | 25 |
| AX-157851683 | 28 | 43.385 | KV453263.1 | 5809271 | 25-scf00537 | 25 |
| AX-158358254 | 28 | 43.385 | KV453263.1 | 5832598 | 25-scf00537 | 25 |
| AX-158358273 | 28 | 43.385 | KV453263.1 | 5862250 | 25-scf00537 | 25 |
| AX-158358306 | 28 | 43.385 | KV453263.1 | 5894648 | 25-scf00537 | 25 |
| AX-158358404 | 28 | 43.385 | KV453263.1 | 6053529 | 25-scf00537 | 25 |
| AX-158358528 | 28 | 43.385 | KV453263.1 | 6231598 | 25-scf00537 | 25 |
| AX-158358551 | 28 | 43.385 | KV453263.1 | 6261516 | 25-scf00537 | 25 |
| AX-157851714 | 28 | 43.385 | KV453263.1 | 6283741 | 25-scf00537 | 25 |
| AX-157747600 | 28 | 43.385 | KV453263.1 | 6283993 | 25-scf00537 | 25 |
| AX-157748933 | 28 | 43.385 | KV453263.1 | 6311076 | 25-scf00537 | 25 |
| AX-158358618 | 28 | 43.385 | KV453263.1 | 6349893 | 25-scf00537 | 25 |
| AX-158357199 | 28 | 43.475 | KV453263.1 | 4292512 | 25-scf00537 | 25 |
| AX-158357218 | 28 | 43.475 | KV453263.1 | 4309882 | 25-scf00537 | 25 |
| AX-158356758 | 28 | 43.549 | KV453263.1 | 3670250 | 25-scf00537 | 25 |
| AX-158356977 | 28 | 43.549 | KV453263.1 | 3967364 | 25-scf00537 | 25 |
| AX-158356989 | 28 | 43.549 | KV453263.1 | 3983835 | 25-scf00537 | 25 |
| AX-158357183 | 28 | 43.549 | KV453263.1 | 4264405 | 25-scf00537 | 25 |
| AX-158357185 | 28 | 43.549 | KV453263.1 | 4268032 | 25-scf00537 | 25 |
| AX-157851575 | 28 | 43.549 | KV453263.1 | 4273948 | 25-scf00537 | 25 |
| AX-158357197 | 28 | 43.549 | KV453263.1 | 4290145 | 25-scf00537 | 25 |
| AX-158357203 | 28 | 43.549 | KV453263.1 | 4296430 | 25-scf00537 | 25 |
| AX-158357212 | 28 | 43.549 | KV453263.1 | 4304415 | 25-scf00537 | 25 |
| AX-158357245 | 28 | 43.549 | KV453263.1 | 4345119 | 25-scf00537 | 25 |
| AX-157862140 | 28 | 43.549 | KV453263.1 | 4359110 | 25-scf00537 | 25 |
| AX-157696106 | 28 | 43.712 | KV453263.1 | 4303630 | 25-scf00537 | 25 |
| AX-158357211 | 28 | 43.713 | KV453263.1 | 4303944 | 25-scf00537 | 25 |
| AX-158357214 | 28 | 43.713 | KV453263.1 | 4305770 | 25-scf00537 | 25 |
| AX-158357215 | 28 | 43.713 | KV453263.1 | 4306533 | 25-scf00537 | 25 |
| AX-158356615 | 28 | 43.78  | KV453263.1 | 3452814 | 25-scf00537 | 25 |
| AX-158419659 | 28 | 43.78  | KV453263.1 | 4116003 | 25-scf00537 | 25 |
| AX-158357219 | 28 | 43.78  | KV453263.1 | 4310372 | 25-scf00537 | 25 |
| AX-158357232 | 28 | 43.78  | KV453263.1 | 4329486 | 25-scf00537 | 25 |
| AX-158356932 | 28 | 43.822 | KV453263.1 | 3898420 | 25-scf00537 | 25 |
| AX-158357224 | 28 | 43.822 | KV453263.1 | 4321387 | 25-scf00537 | 25 |
| AX-158357231 | 28 | 43.822 | KV453263.1 | 4327481 | 25-scf00537 | 25 |
| AX-158357234 | 28 | 43.822 | KV453263.1 | 4330570 | 25-scf00537 | 25 |
| AX-157851579 | 28 | 43.822 | KV453263.1 | 4344595 | 25-scf00537 | 25 |
| AX-158357244 | 28 | 43.822 | KV453263.1 | 4344716 | 25-scf00537 | 25 |
| AX-158357256 | 28 | 43.898 | KV453263.1 | 4360466 | 25-scf00537 | 25 |
| AX-158357259 | 28 | 43.966 | KV453263.1 | 4366283 | 25-scf00537 | 25 |
| AX-158356592 | 28 | 44.041 | KV453263.1 | 3420640 | 25-scf00537 | 25 |
| AX-157851539 | 28 | 44.041 | KV453263.1 | 3605417 | 25-scf00537 | 25 |
| AX-158357264 | 28 | 44.041 | KV453263.1 | 4373038 | 25-scf00537 | 25 |
| AX-158357266 | 28 | 44.041 | KV453263.1 | 4374837 | 25-scf00537 | 25 |

|              |    |        |            |         |             |    |
|--------------|----|--------|------------|---------|-------------|----|
| AX-158357267 | 28 | 44.041 | KV453263.1 | 4377654 | 25-scf00537 | 25 |
| AX-158357269 | 28 | 44.041 | KV453263.1 | 4382686 | 25-scf00537 | 25 |
| AX-158356794 | 28 | 44.077 | KV453263.1 | 3719531 | 25-scf00537 | 25 |
| AX-158356862 | 28 | 44.077 | KV453263.1 | 3799586 | 25-scf00537 | 25 |
| AX-157862134 | 28 | 44.077 | KV453263.1 | 3973479 | 25-scf00537 | 25 |
| AX-158357048 | 28 | 44.077 | KV453263.1 | 4084661 | 25-scf00537 | 25 |
| AX-157851559 | 28 | 44.077 | KV453263.1 | 4104491 | 25-scf00537 | 25 |
| AX-158357164 | 28 | 44.077 | KV453263.1 | 4239998 | 25-scf00537 | 25 |
| AX-158357165 | 28 | 44.077 | KV453263.1 | 4240181 | 25-scf00537 | 25 |
| AX-157868285 | 28 | 44.077 | KV453263.1 | 4240558 | 25-scf00537 | 25 |
| AX-157715436 | 28 | 44.077 | KV453263.1 | 4265172 | 25-scf00537 | 25 |
| AX-158357255 | 28 | 44.077 | KV453263.1 | 4357125 | 25-scf00537 | 25 |
| AX-158357274 | 28 | 44.077 | KV453263.1 | 4396679 | 25-scf00537 | 25 |
| AX-157882535 | 28 | 44.077 | KV453263.1 | 4437366 | 25-scf00537 | 25 |
| AX-157721134 | 28 | 44.15  | KV453263.1 | 4399107 | 25-scf00537 | 25 |
| AX-157755249 | 28 | 44.15  | KV453263.1 | 4506393 | 25-scf00537 | 25 |
| AX-158357338 | 28 | 44.15  | KV453263.1 | 4507035 | 25-scf00537 | 25 |
| AX-157773382 | 28 | 44.159 | KV453263.1 | 4401588 | 25-scf00537 | 25 |
| AX-158357277 | 28 | 44.17  | KV453263.1 | 4408124 | 25-scf00537 | 25 |
| AX-158357278 | 28 | 44.17  | KV453263.1 | 4409302 | 25-scf00537 | 25 |
| AX-158357349 | 28 | 44.17  | KV453263.1 | 4517603 | 25-scf00537 | 25 |
| AX-158357280 | 28 | 44.181 | KV453263.1 | 4412269 | 25-scf00537 | 25 |
| AX-158357298 | 28 | 44.181 | KV453263.1 | 4447599 | 25-scf00537 | 25 |
| AX-158357286 | 28 | 44.193 | KV453263.1 | 4419348 | 25-scf00537 | 25 |
| AX-157716556 | 28 | 44.204 | KV453263.1 | 4431067 | 25-scf00537 | 25 |
| AX-157851591 | 28 | 44.204 | KV453263.1 | 4491591 | 25-scf00537 | 25 |
| AX-157724227 | 28 | 44.213 | KV453263.1 | 4434139 | 25-scf00537 | 25 |
| AX-158357294 | 28 | 44.221 | KV453263.1 | 4441970 | 25-scf00537 | 25 |
| AX-158357295 | 28 | 44.23  | KV453263.1 | 4444548 | 25-scf00537 | 25 |
| AX-157851585 | 28 | 44.24  | KV453263.1 | 4445211 | 25-scf00537 | 25 |
| AX-158357297 | 28 | 44.247 | KV453263.1 | 4445545 | 25-scf00537 | 25 |
| AX-158357315 | 28 | 44.247 | KV453263.1 | 4466422 | 25-scf00537 | 25 |
| AX-158356973 | 28 | 44.259 | KV453263.1 | 3953777 | 25-scf00537 | 25 |
| AX-158356992 | 28 | 44.259 | KV453263.1 | 3991791 | 25-scf00537 | 25 |
| AX-158357261 | 28 | 44.259 | KV453263.1 | 4369128 | 25-scf00537 | 25 |
| AX-158357290 | 28 | 44.259 | KV453263.1 | 4433756 | 25-scf00537 | 25 |
| AX-157851586 | 28 | 44.259 | KV453263.1 | 4447098 | 25-scf00537 | 25 |
| AX-158357307 | 28 | 44.259 | KV453263.1 | 4457806 | 25-scf00537 | 25 |
| AX-158357310 | 28 | 44.259 | KV453263.1 | 4460970 | 25-scf00537 | 25 |
| AX-157713871 | 28 | 44.259 | KV453263.1 | 4473114 | 25-scf00537 | 25 |
| AX-157851590 | 28 | 44.259 | KV453263.1 | 4473245 | 25-scf00537 | 25 |
| AX-158357318 | 28 | 44.259 | KV453263.1 | 4475655 | 25-scf00537 | 25 |
| AX-158357319 | 28 | 44.259 | KV453263.1 | 4476221 | 25-scf00537 | 25 |
| AX-158357327 | 28 | 44.259 | KV453263.1 | 4484455 | 25-scf00537 | 25 |
| AX-158357328 | 28 | 44.259 | KV453263.1 | 4484596 | 25-scf00537 | 25 |
| AX-158357330 | 28 | 44.259 | KV453263.1 | 4486494 | 25-scf00537 | 25 |
| AX-158357333 | 28 | 44.259 | KV453263.1 | 4492063 | 25-scf00537 | 25 |
| AX-157851592 | 28 | 44.259 | KV453263.1 | 4494911 | 25-scf00537 | 25 |
| AX-157851593 | 28 | 44.259 | KV453263.1 | 4496472 | 25-scf00537 | 25 |
| AX-157851595 | 28 | 44.259 | KV453263.1 | 4499348 | 25-scf00537 | 25 |
| AX-157758868 | 28 | 44.259 | KV453263.1 | 4503278 | 25-scf00537 | 25 |

|              |    |        |             |         |             |    |
|--------------|----|--------|-------------|---------|-------------|----|
| AX-157851596 | 28 | 44.259 | KV453263.1  | 4504969 | 25-scf00537 | 25 |
| AX-158357339 | 28 | 44.259 | KV453263.1  | 4508378 | 25-scf00537 | 25 |
| AX-158357342 | 28 | 44.259 | KV453263.1  | 4511563 | 25-scf00537 | 25 |
| AX-158357346 | 28 | 44.259 | KV453263.1  | 4515730 | 25-scf00537 | 25 |
| AX-158357350 | 28 | 44.259 | KV453263.1  | 4518534 | 25-scf00537 | 25 |
| AX-158357351 | 28 | 44.259 | KV453263.1  | 4519730 | 25-scf00537 | 25 |
| AX-158357352 | 28 | 44.259 | KV453263.1  | 4521547 | 25-scf00537 | 25 |
| AX-158357356 | 28 | 44.259 | KV453263.1  | 4525686 | 25-scf00537 | 25 |
| AX-158357336 | 28 | 44.368 | KV453263.1  | 4500751 | 25-scf00537 | 25 |
| AX-158357355 | 28 | 44.368 | KV453263.1  | 4525152 | 25-scf00537 | 25 |
| AX-158357359 | 28 | 44.368 | KV453263.1  | 4529016 | 25-scf00537 | 25 |
| AX-158357361 | 28 | 44.368 | KV453263.1  | 4530524 | 25-scf00537 | 25 |
| AX-158357363 | 28 | 44.368 | KV453263.1  | 4532384 | 25-scf00537 | 25 |
| AX-158357364 | 28 | 44.368 | KV453263.1  | 4533583 | 25-scf00537 | 25 |
| AX-157851597 | 28 | 44.368 | KV453263.1  | 4534642 | 25-scf00537 | 25 |
| AX-158357365 | 28 | 44.368 | KV453263.1  | 4535273 | 25-scf00537 | 25 |
| AX-157851599 | 28 | 44.368 | KV453263.1  | 4535530 | 25-scf00537 | 25 |
| AX-158357368 | 28 | 44.368 | KV453263.1  | 4543492 | 25-scf00537 | 25 |
| AX-158357369 | 28 | 44.368 | KV453263.1  | 4548052 | 25-scf00537 | 25 |
| AX-158357371 | 28 | 44.368 | KV453263.1  | 4549755 | 25-scf00537 | 25 |
| AX-158357374 | 28 | 44.368 | KV453263.1  | 4556607 | 25-scf00537 | 25 |
| AX-158357376 | 28 | 44.368 | KV453263.1  | 4558950 | 25-scf00537 | 25 |
| AX-157773684 | 28 | 44.368 | KV453263.1  | 4563955 | 25-scf00537 | 25 |
| AX-157689558 | 28 | 44.368 | 3ML01030500 | 639     | scf06099_1  | UN |
| AX-157681557 | 28 | 44.368 | 3ML01030500 | 732     | scf06099_1  | UN |
| AX-158357285 | 28 | 44.587 | KV453263.1  | 4417659 | 25-scf00537 | 25 |
| AX-158357304 | 28 | 44.587 | KV453263.1  | 4455680 | 25-scf00537 | 25 |
| AX-158357317 | 28 | 44.587 | KV453263.1  | 4471560 | 25-scf00537 | 25 |
| AX-158357357 | 28 | 44.587 | KV453263.1  | 4527360 | 25-scf00537 | 25 |
| AX-157774485 | 28 | 44.587 | KV453263.1  | 4542799 | 25-scf00537 | 25 |
| AX-158357378 | 28 | 44.587 | KV453263.1  | 4561915 | 25-scf00537 | 25 |
| AX-157749860 | 28 | 44.587 | KV453263.1  | 4566095 | 25-scf00537 | 25 |
| AX-158357382 | 28 | 44.587 | KV453263.1  | 4568831 | 25-scf00537 | 25 |
| AX-158357386 | 28 | 44.587 | KV453263.1  | 4573798 | 25-scf00537 | 25 |
| AX-157713926 | 28 | 44.587 | KV453263.1  | 4575096 | 25-scf00537 | 25 |
| AX-158357388 | 28 | 44.587 | KV453263.1  | 4579520 | 25-scf00537 | 25 |
| AX-158357389 | 28 | 44.587 | KV453263.1  | 4580435 | 25-scf00537 | 25 |
| AX-158357393 | 28 | 44.587 | KV453263.1  | 4584942 | 25-scf00537 | 25 |
| AX-158357395 | 28 | 44.587 | KV453263.1  | 4586660 | 25-scf00537 | 25 |
| AX-158357396 | 28 | 44.587 | KV453263.1  | 4587347 | 25-scf00537 | 25 |
| AX-158357397 | 28 | 44.587 | KV453263.1  | 4589144 | 25-scf00537 | 25 |
| AX-157755675 | 28 | 44.587 | KV453263.1  | 4589308 | 25-scf00537 | 25 |
| AX-157851602 | 28 | 44.587 | KV453263.1  | 4590018 | 25-scf00537 | 25 |
| AX-158357481 | 28 | 44.587 | KV453263.1  | 4702945 | 25-scf00537 | 25 |
| AX-158357482 | 28 | 44.587 | KV453263.1  | 4703990 | 25-scf00537 | 25 |
| AX-157763639 | 28 | 44.587 | KV453263.1  | 5394561 | 25-scf00537 | 25 |
| AX-158357941 | 28 | 44.587 | KV453263.1  | 5394715 | 25-scf00537 | 25 |
| AX-158357406 | 28 | 44.696 | KV453263.1  | 4601101 | 25-scf00537 | 25 |
| AX-158357410 | 28 | 44.696 | KV453263.1  | 4603612 | 25-scf00537 | 25 |
| AX-158357416 | 28 | 44.696 | KV453263.1  | 4610706 | 25-scf00537 | 25 |
| AX-158357651 | 28 | 44.696 | KV453263.1  | 4998343 | 25-scf00537 | 25 |



|              |    |        |            |         |             |    |
|--------------|----|--------|------------|---------|-------------|----|
| AX-158357424 | 28 | 44.709 | KV453263.1 | 4620858 | 25-scf00537 | 25 |
| AX-157768484 | 28 | 44.74  | KV453263.1 | 4625970 | 25-scf00537 | 25 |
| AX-157745887 | 28 | 44.74  | KV453263.1 | 4634487 | 25-scf00537 | 25 |
| AX-158357432 | 28 | 44.768 | KV453263.1 | 4631041 | 25-scf00537 | 25 |
| AX-158357385 | 28 | 44.805 | KV453263.1 | 4571816 | 25-scf00537 | 25 |
| AX-158357407 | 28 | 44.805 | KV453263.1 | 4601592 | 25-scf00537 | 25 |
| AX-158357408 | 28 | 44.805 | KV453263.1 | 4602155 | 25-scf00537 | 25 |
| AX-158357427 | 28 | 44.805 | KV453263.1 | 4624159 | 25-scf00537 | 25 |
| AX-157851603 | 28 | 44.805 | KV453263.1 | 4631815 | 25-scf00537 | 25 |
| AX-158357437 | 28 | 44.805 | KV453263.1 | 4638602 | 25-scf00537 | 25 |
| AX-158357438 | 28 | 44.805 | KV453263.1 | 4640481 | 25-scf00537 | 25 |
| AX-158357439 | 28 | 44.805 | KV453263.1 | 4641364 | 25-scf00537 | 25 |
| AX-158357440 | 28 | 44.805 | KV453263.1 | 4641503 | 25-scf00537 | 25 |
| AX-158357441 | 28 | 44.805 | KV453263.1 | 4642397 | 25-scf00537 | 25 |
| AX-158357446 | 28 | 44.805 | KV453263.1 | 4650847 | 25-scf00537 | 25 |
| AX-158357447 | 28 | 44.805 | KV453263.1 | 4652336 | 25-scf00537 | 25 |
| AX-158357449 | 28 | 44.805 | KV453263.1 | 4655061 | 25-scf00537 | 25 |
| AX-158357454 | 28 | 44.805 | KV453263.1 | 4659982 | 25-scf00537 | 25 |
| AX-158357459 | 28 | 44.805 | KV453263.1 | 4667179 | 25-scf00537 | 25 |
| AX-158357464 | 28 | 44.805 | KV453263.1 | 4677245 | 25-scf00537 | 25 |
| AX-158357469 | 28 | 44.805 | KV453263.1 | 4684990 | 25-scf00537 | 25 |
| AX-158357472 | 28 | 44.805 | KV453263.1 | 4690822 | 25-scf00537 | 25 |
| AX-157769501 | 28 | 44.805 | KV453263.1 | 4690989 | 25-scf00537 | 25 |
| AX-157772026 | 28 | 44.805 | KV453263.1 | 4692450 | 25-scf00537 | 25 |
| AX-157702794 | 28 | 44.805 | KV453263.1 | 4693324 | 25-scf00537 | 25 |
| AX-158357475 | 28 | 44.805 | KV453263.1 | 4698130 | 25-scf00537 | 25 |
| AX-158357486 | 28 | 44.805 | KV453263.1 | 4710793 | 25-scf00537 | 25 |
| AX-158357499 | 28 | 44.805 | KV453263.1 | 4719930 | 25-scf00537 | 25 |
| AX-158357500 | 28 | 44.805 | KV453263.1 | 4720405 | 25-scf00537 | 25 |
| AX-158357501 | 28 | 44.805 | KV453263.1 | 4721220 | 25-scf00537 | 25 |
| AX-158357502 | 28 | 44.805 | KV453263.1 | 4721611 | 25-scf00537 | 25 |
| AX-158357513 | 28 | 44.805 | KV453263.1 | 4735267 | 25-scf00537 | 25 |
| AX-158357515 | 28 | 44.805 | KV453263.1 | 4740471 | 25-scf00537 | 25 |
| AX-158357516 | 28 | 44.805 | KV453263.1 | 4744844 | 25-scf00537 | 25 |
| AX-157862143 | 28 | 44.805 | KV453263.1 | 4755389 | 25-scf00537 | 25 |
| AX-158357527 | 28 | 44.805 | KV453263.1 | 4758031 | 25-scf00537 | 25 |
| AX-157851613 | 28 | 44.805 | KV453263.1 | 4759089 | 25-scf00537 | 25 |
| AX-158357529 | 28 | 44.805 | KV453263.1 | 4759452 | 25-scf00537 | 25 |
| AX-158357582 | 28 | 44.805 | KV453263.1 | 4865826 | 25-scf00537 | 25 |
| AX-158357583 | 28 | 44.805 | KV453263.1 | 4868158 | 25-scf00537 | 25 |
| AX-158357586 | 28 | 44.805 | KV453263.1 | 4872377 | 25-scf00537 | 25 |
| AX-158357587 | 28 | 44.805 | KV453263.1 | 4872852 | 25-scf00537 | 25 |
| AX-158357588 | 28 | 44.805 | KV453263.1 | 4873746 | 25-scf00537 | 25 |
| AX-158357589 | 28 | 44.805 | KV453263.1 | 4875142 | 25-scf00537 | 25 |
| AX-158357590 | 28 | 44.805 | KV453263.1 | 4877490 | 25-scf00537 | 25 |
| AX-158357597 | 28 | 44.805 | KV453263.1 | 4893135 | 25-scf00537 | 25 |
| AX-158357693 | 28 | 44.805 | KV453263.1 | 5061685 | 25-scf00537 | 25 |
| AX-157696863 | 28 | 44.805 | KV453263.1 | 5160084 | 25-scf00537 | 25 |
| AX-157889084 | 28 | 44.805 | KV453263.1 | 5289761 | 25-scf00537 | 25 |
| AX-158357979 | 28 | 44.805 | KV453263.1 | 5460019 | 25-scf00537 | 25 |
| AX-158357987 | 28 | 44.805 | KV453263.1 | 5476265 | 25-scf00537 | 25 |

|              |    |        |            |         |             |    |
|--------------|----|--------|------------|---------|-------------|----|
| AX-158357995 | 28 | 44.805 | KV453263.1 | 5485543 | 25-scf00537 | 25 |
| AX-158357997 | 28 | 44.805 | KV453263.1 | 5488196 | 25-scf00537 | 25 |
| AX-157851662 | 28 | 44.805 | KV453263.1 | 5504229 | 25-scf00537 | 25 |
| AX-157851663 | 28 | 44.805 | KV453263.1 | 5504567 | 25-scf00537 | 25 |
| AX-158358007 | 28 | 44.805 | KV453263.1 | 5505791 | 25-scf00537 | 25 |
| AX-158358013 | 28 | 44.805 | KV453263.1 | 5511747 | 25-scf00537 | 25 |
| AX-158358016 | 28 | 44.805 | KV453263.1 | 5513081 | 25-scf00537 | 25 |
| AX-158358020 | 28 | 44.805 | KV453263.1 | 5519154 | 25-scf00537 | 25 |
| AX-157851665 | 28 | 44.805 | KV453263.1 | 5525150 | 25-scf00537 | 25 |
| AX-157851673 | 28 | 44.805 | KV453263.1 | 5644032 | 25-scf00537 | 25 |
| AX-158358155 | 28 | 44.805 | KV453263.1 | 5691859 | 25-scf00537 | 25 |
| AX-158358344 | 28 | 44.805 | KV453263.1 | 5959128 | 25-scf00537 | 25 |
| AX-158358426 | 28 | 44.805 | KV453263.1 | 6086351 | 25-scf00537 | 25 |
| AX-158358439 | 28 | 44.805 | KV453263.1 | 6108328 | 25-scf00537 | 25 |
| AX-158358477 | 28 | 44.805 | KV453263.1 | 6156645 | 25-scf00537 | 25 |
| AX-158358682 | 28 | 44.805 | KV453263.1 | 6450555 | 25-scf00537 | 25 |
| AX-158357507 | 28 | 44.852 | KV453263.1 | 4727067 | 25-scf00537 | 25 |
| AX-158357455 | 28 | 44.914 | KV453263.1 | 4660879 | 25-scf00537 | 25 |
| AX-157755513 | 28 | 44.914 | KV453263.1 | 4669678 | 25-scf00537 | 25 |
| AX-158357503 | 28 | 44.914 | KV453263.1 | 4723652 | 25-scf00537 | 25 |
| AX-158357511 | 28 | 44.914 | KV453263.1 | 4731160 | 25-scf00537 | 25 |
| AX-157862142 | 28 | 44.914 | KV453263.1 | 4736616 | 25-scf00537 | 25 |
| AX-157753259 | 28 | 44.914 | KV453263.1 | 4743627 | 25-scf00537 | 25 |
| AX-157720635 | 28 | 44.914 | KV453263.1 | 4746855 | 25-scf00537 | 25 |
| AX-157717794 | 28 | 44.914 | KV453263.1 | 4748661 | 25-scf00537 | 25 |
| AX-157851612 | 28 | 44.914 | KV453263.1 | 4749219 | 25-scf00537 | 25 |
| AX-158357522 | 28 | 44.914 | KV453263.1 | 4755073 | 25-scf00537 | 25 |
| AX-158357526 | 28 | 44.914 | KV453263.1 | 4757360 | 25-scf00537 | 25 |
| AX-158357530 | 28 | 44.914 | KV453263.1 | 4759900 | 25-scf00537 | 25 |
| AX-158419687 | 28 | 44.914 | KV453263.1 | 5327773 | 25-scf00537 | 25 |
| AX-158357452 | 28 | 45.023 | KV453263.1 | 4658110 | 25-scf00537 | 25 |
| AX-157771122 | 28 | 45.023 | KV453263.1 | 4764142 | 25-scf00537 | 25 |
| AX-157743357 | 28 | 45.023 | KV453263.1 | 4770488 | 25-scf00537 | 25 |
| AX-158357548 | 28 | 45.023 | KV453263.1 | 4789821 | 25-scf00537 | 25 |
| AX-157851615 | 28 | 45.023 | KV453263.1 | 4791302 | 25-scf00537 | 25 |
| AX-158357549 | 28 | 45.023 | KV453263.1 | 4791809 | 25-scf00537 | 25 |
| AX-157851616 | 28 | 45.023 | KV453263.1 | 4792187 | 25-scf00537 | 25 |
| AX-157851617 | 28 | 45.023 | KV453263.1 | 4793819 | 25-scf00537 | 25 |
| AX-157851618 | 28 | 45.023 | KV453263.1 | 4798201 | 25-scf00537 | 25 |
| AX-157851619 | 28 | 45.023 | KV453263.1 | 4801624 | 25-scf00537 | 25 |
| AX-158357553 | 28 | 45.023 | KV453263.1 | 4804386 | 25-scf00537 | 25 |
| AX-158357554 | 28 | 45.023 | KV453263.1 | 4805985 | 25-scf00537 | 25 |
| AX-158357555 | 28 | 45.023 | KV453263.1 | 4806065 | 25-scf00537 | 25 |
| AX-158357557 | 28 | 45.023 | KV453263.1 | 4808228 | 25-scf00537 | 25 |
| AX-158357559 | 28 | 45.023 | KV453263.1 | 4810112 | 25-scf00537 | 25 |
| AX-158357562 | 28 | 45.023 | KV453263.1 | 4816140 | 25-scf00537 | 25 |
| AX-158357571 | 28 | 45.023 | KV453263.1 | 4839865 | 25-scf00537 | 25 |
| AX-158357675 | 28 | 45.023 | KV453263.1 | 5034901 | 25-scf00537 | 25 |
| AX-157749050 | 28 | 45.023 | KV453263.1 | 5287216 | 25-scf00537 | 25 |
| AX-157889083 | 28 | 45.023 | KV453263.1 | 5288464 | 25-scf00537 | 25 |
| AX-158357867 | 28 | 45.023 | KV453263.1 | 5289796 | 25-scf00537 | 25 |

|              |    |        |            |         |             |    |
|--------------|----|--------|------------|---------|-------------|----|
| AX-158357972 | 28 | 45.023 | KV453263.1 | 5450407 | 25-scf00537 | 25 |
| AX-158357990 | 28 | 45.023 | KV453263.1 | 5480584 | 25-scf00537 | 25 |
| AX-158356877 | 28 | 45.075 | KV453263.1 | 3820423 | 25-scf00537 | 25 |
| AX-158356916 | 28 | 45.075 | KV453263.1 | 3875320 | 25-scf00537 | 25 |
| AX-158357309 | 28 | 45.075 | KV453263.1 | 4458996 | 25-scf00537 | 25 |
| AX-158357417 | 28 | 45.075 | KV453263.1 | 4611244 | 25-scf00537 | 25 |
| AX-158357436 | 28 | 45.075 | KV453263.1 | 4637146 | 25-scf00537 | 25 |
| AX-158357456 | 28 | 45.075 | KV453263.1 | 4661370 | 25-scf00537 | 25 |
| AX-158357564 | 28 | 45.075 | KV453263.1 | 4822610 | 25-scf00537 | 25 |
| AX-158357574 | 28 | 45.075 | KV453263.1 | 4845481 | 25-scf00537 | 25 |
| AX-158357575 | 28 | 45.075 | KV453263.1 | 4850055 | 25-scf00537 | 25 |
| AX-158357576 | 28 | 45.075 | KV453263.1 | 4850553 | 25-scf00537 | 25 |
| AX-158357592 | 28 | 45.075 | KV453263.1 | 4883680 | 25-scf00537 | 25 |
| AX-158357602 | 28 | 45.075 | KV453263.1 | 4901619 | 25-scf00537 | 25 |
| AX-158357610 | 28 | 45.075 | KV453263.1 | 4915590 | 25-scf00537 | 25 |
| AX-158357611 | 28 | 45.075 | KV453263.1 | 4916168 | 25-scf00537 | 25 |
| AX-158357612 | 28 | 45.075 | KV453263.1 | 4917454 | 25-scf00537 | 25 |
| AX-158357613 | 28 | 45.075 | KV453263.1 | 4918174 | 25-scf00537 | 25 |
| AX-158357628 | 28 | 45.075 | KV453263.1 | 4943599 | 25-scf00537 | 25 |
| AX-157743483 | 28 | 45.075 | KV453263.1 | 4950211 | 25-scf00537 | 25 |
| AX-158357637 | 28 | 45.075 | KV453263.1 | 4969414 | 25-scf00537 | 25 |
| AX-158357643 | 28 | 45.075 | KV453263.1 | 4981888 | 25-scf00537 | 25 |
| AX-158357644 | 28 | 45.075 | KV453263.1 | 4982451 | 25-scf00537 | 25 |
| AX-158357647 | 28 | 45.075 | KV453263.1 | 4986634 | 25-scf00537 | 25 |
| AX-158357648 | 28 | 45.075 | KV453263.1 | 4987013 | 25-scf00537 | 25 |
| AX-158357696 | 28 | 45.075 | KV453263.1 | 5064757 | 25-scf00537 | 25 |
| AX-157755885 | 28 | 45.075 | KV453263.1 | 5090180 | 25-scf00537 | 25 |
| AX-157719115 | 28 | 45.075 | KV453263.1 | 5131120 | 25-scf00537 | 25 |
| AX-157868298 | 28 | 45.075 | KV453263.1 | 5137674 | 25-scf00537 | 25 |
| AX-158357745 | 28 | 45.075 | KV453263.1 | 5145593 | 25-scf00537 | 25 |
| AX-158357754 | 28 | 45.075 | KV453263.1 | 5153945 | 25-scf00537 | 25 |
| AX-158357760 | 28 | 45.075 | KV453263.1 | 5161966 | 25-scf00537 | 25 |
| AX-158357915 | 28 | 45.075 | KV453263.1 | 5348019 | 25-scf00537 | 25 |
| AX-158358057 | 28 | 45.075 | KV453263.1 | 5561987 | 25-scf00537 | 25 |
| AX-158358086 | 28 | 45.075 | KV453263.1 | 5595618 | 25-scf00537 | 25 |
| AX-158358210 | 28 | 45.075 | KV453263.1 | 5758057 | 25-scf00537 | 25 |
| AX-158358219 | 28 | 45.075 | KV453263.1 | 5771326 | 25-scf00537 | 25 |
| AX-157709220 | 28 | 45.075 | KV453263.1 | 5827164 | 25-scf00537 | 25 |
| AX-158358291 | 28 | 45.075 | KV453263.1 | 5881278 | 25-scf00537 | 25 |
| AX-158358519 | 28 | 45.075 | KV453263.1 | 6218911 | 25-scf00537 | 25 |
| AX-158358640 | 28 | 45.075 | KV453263.1 | 6380162 | 25-scf00537 | 25 |
| AX-158359411 | 28 | 45.075 | KV453263.1 | 7511719 | 25-scf00537 | 25 |
| AX-158357573 | 28 | 45.129 | KV453263.1 | 4844929 | 25-scf00537 | 25 |
| AX-158357003 | 28 | 45.183 | KV453263.1 | 4010002 | 25-scf00537 | 25 |
| AX-158357316 | 28 | 45.183 | KV453263.1 | 4468041 | 25-scf00537 | 25 |
| AX-158357377 | 28 | 45.183 | KV453263.1 | 4560269 | 25-scf00537 | 25 |
| AX-158357387 | 28 | 45.183 | KV453263.1 | 4578438 | 25-scf00537 | 25 |
| AX-158357402 | 28 | 45.183 | KV453263.1 | 4594590 | 25-scf00537 | 25 |
| AX-158357414 | 28 | 45.183 | KV453263.1 | 4608266 | 25-scf00537 | 25 |
| AX-158357552 | 28 | 45.183 | KV453263.1 | 4799774 | 25-scf00537 | 25 |
| AX-158357581 | 28 | 45.183 | KV453263.1 | 4864045 | 25-scf00537 | 25 |

|              |    |        |            |          |             |    |
|--------------|----|--------|------------|----------|-------------|----|
| AX-157709207 | 28 | 45.183 | KV453263.1 | 4889354  | 25-scf00537 | 25 |
| AX-158357594 | 28 | 45.183 | KV453263.1 | 4889856  | 25-scf00537 | 25 |
| AX-158357595 | 28 | 45.183 | KV453263.1 | 4891038  | 25-scf00537 | 25 |
| AX-157873971 | 28 | 45.183 | KV453263.1 | 5088924  | 25-scf00537 | 25 |
| AX-158357772 | 28 | 45.183 | KV453263.1 | 5175534  | 25-scf00537 | 25 |
| AX-158357944 | 28 | 45.183 | KV453263.1 | 5399509  | 25-scf00537 | 25 |
| AX-157851660 | 28 | 45.183 | KV453263.1 | 5491091  | 25-scf00537 | 25 |
| AX-157744540 | 28 | 45.183 | KV453263.1 | 5675014  | 25-scf00537 | 25 |
| AX-158358611 | 28 | 45.183 | KV453263.1 | 6336839  | 25-scf00537 | 25 |
| AX-158359069 | 28 | 45.183 | KV453263.1 | 6982275  | 25-scf00537 | 25 |
| AX-158360061 | 28 | 45.183 | KV453263.1 | 8482224  | 25-scf00537 | 25 |
| AX-158423863 | 28 | 45.183 | KV453263.1 | 8632193  | 25-scf00537 | 25 |
| AX-157772257 | 28 | 45.183 | KV453263.1 | 8771779  | 25-scf00537 | 25 |
| AX-157851903 | 28 | 45.183 | KV453263.1 | 8775880  | 25-scf00537 | 25 |
| AX-158363369 | 28 | 45.183 | KV453263.1 | 9055333  | 25-scf00537 | 25 |
| AX-158357322 | 28 | 45.23  | KV453263.1 | 4479338  | 25-scf00537 | 25 |
| AX-158357584 | 28 | 45.23  | KV453263.1 | 4868520  | 25-scf00537 | 25 |
| AX-158357700 | 28 | 45.23  | KV453263.1 | 5070033  | 25-scf00537 | 25 |
| AX-158357742 | 28 | 45.23  | KV453263.1 | 5139265  | 25-scf00537 | 25 |
| AX-158357755 | 28 | 45.23  | KV453263.1 | 5154234  | 25-scf00537 | 25 |
| AX-158357861 | 28 | 45.23  | KV453263.1 | 5283002  | 25-scf00537 | 25 |
| AX-158357894 | 28 | 45.23  | KV453263.1 | 5323480  | 25-scf00537 | 25 |
| AX-158358516 | 28 | 45.23  | KV453263.1 | 6214077  | 25-scf00537 | 25 |
| AX-158358524 | 28 | 45.23  | KV453263.1 | 6223590  | 25-scf00537 | 25 |
| AX-158358610 | 28 | 45.23  | KV453263.1 | 6335500  | 25-scf00537 | 25 |
| AX-158358660 | 28 | 45.23  | KV453263.1 | 6409194  | 25-scf00537 | 25 |
| AX-158358781 | 28 | 45.23  | KV453263.1 | 6581744  | 25-scf00537 | 25 |
| AX-158359309 | 28 | 45.23  | KV453263.1 | 7375714  | 25-scf00537 | 25 |
| AX-158359924 | 28 | 45.23  | KV453263.1 | 8330824  | 25-scf00537 | 25 |
| AX-158420733 | 28 | 45.258 | KV453263.1 | 4891106  | 25-scf00537 | 25 |
| AX-158357538 | 28 | 45.312 | KV453263.1 | 4768302  | 25-scf00537 | 25 |
| AX-158357607 | 28 | 45.312 | KV453263.1 | 4912569  | 25-scf00537 | 25 |
| AX-158357608 | 28 | 45.312 | KV453263.1 | 4913020  | 25-scf00537 | 25 |
| AX-158357609 | 28 | 45.312 | KV453263.1 | 4914076  | 25-scf00537 | 25 |
| AX-157862155 | 28 | 45.366 | KV453263.1 | 5000055  | 25-scf00537 | 25 |
| AX-158357663 | 28 | 45.425 | KV453263.1 | 5011526  | 25-scf00537 | 25 |
| AX-158357667 | 28 | 45.457 | KV453263.1 | 5017465  | 25-scf00537 | 25 |
| AX-158365516 | 28 | 45.457 | KV453263.1 | 11413803 | 25-scf00537 | 25 |
| AX-158365543 | 28 | 45.457 | KV453263.1 | 11446363 | 25-scf00537 | 25 |
| AX-158365597 | 28 | 45.457 | KV453263.1 | 11532147 | 25-scf00537 | 25 |
| AX-158365612 | 28 | 45.457 | KV453263.1 | 11550808 | 25-scf00537 | 25 |
| AX-158357686 | 28 | 45.506 | KV453263.1 | 5051518  | 25-scf00537 | 25 |
| AX-158357699 | 28 | 45.548 | KV453263.1 | 5069257  | 25-scf00537 | 25 |
| AX-158357596 | 28 | 45.59  | KV453263.1 | 4891864  | 25-scf00537 | 25 |
| AX-158357707 | 28 | 45.59  | KV453263.1 | 5076630  | 25-scf00537 | 25 |
| AX-158357712 | 28 | 45.628 | KV453263.1 | 5086586  | 25-scf00537 | 25 |
| AX-158381728 | 28 | 45.646 | KV453263.1 | 4616420  | 25-scf00537 | 25 |
| AX-158357774 | 28 | 45.646 | KV453263.1 | 5179942  | 25-scf00537 | 25 |
| AX-158357779 | 28 | 45.646 | KV453263.1 | 5185177  | 25-scf00537 | 25 |
| AX-158357896 | 28 | 45.646 | KV453263.1 | 5324209  | 25-scf00537 | 25 |
| AX-158358012 | 28 | 45.646 | KV453263.1 | 5511371  | 25-scf00537 | 25 |

|              |    |        |            |         |             |    |
|--------------|----|--------|------------|---------|-------------|----|
| AX-158357434 | 28 | 45.673 | KV453263.1 | 4632715 | 25-scf00537 | 25 |
| AX-158357474 | 28 | 45.673 | KV453263.1 | 4694446 | 25-scf00537 | 25 |
| AX-158357781 | 28 | 45.673 | KV453263.1 | 5187550 | 25-scf00537 | 25 |
| AX-158357962 | 28 | 45.673 | KV453263.1 | 5435727 | 25-scf00537 | 25 |
| AX-158357793 | 28 | 45.697 | KV453263.1 | 5199504 | 25-scf00537 | 25 |
| AX-158357849 | 28 | 45.721 | KV453263.1 | 5267171 | 25-scf00537 | 25 |
| AX-158358052 | 28 | 45.721 | KV453263.1 | 5556877 | 25-scf00537 | 25 |
| AX-158357863 | 28 | 45.761 | KV453263.1 | 5287930 | 25-scf00537 | 25 |
| AX-158357864 | 28 | 45.806 | KV453263.1 | 5288232 | 25-scf00537 | 25 |
| AX-158357879 | 28 | 45.86  | KV453263.1 | 5307533 | 25-scf00537 | 25 |
| AX-158357881 | 28 | 45.911 | KV453263.1 | 5310002 | 25-scf00537 | 25 |
| AX-158357888 | 28 | 45.929 | KV453263.1 | 5319958 | 25-scf00537 | 25 |
| AX-158357890 | 28 | 45.978 | KV453263.1 | 5320942 | 25-scf00537 | 25 |
| AX-158357895 | 28 | 46.013 | KV453263.1 | 5323791 | 25-scf00537 | 25 |
| AX-158357433 | 28 | 46.049 | KV453263.1 | 4632476 | 25-scf00537 | 25 |
| AX-157753792 | 28 | 46.049 | KV453263.1 | 5330783 | 25-scf00537 | 25 |
| AX-158358285 | 28 | 46.049 | KV453263.1 | 5876262 | 25-scf00537 | 25 |
| AX-158358645 | 28 | 46.049 | KV453263.1 | 6388698 | 25-scf00537 | 25 |
| AX-158357935 | 28 | 46.062 | KV453263.1 | 5384294 | 25-scf00537 | 25 |
| AX-158357938 | 28 | 46.099 | KV453263.1 | 5388207 | 25-scf00537 | 25 |
| AX-157864199 | 28 | 46.125 | KV453263.1 | 4723040 | 25-scf00537 | 25 |
| AX-157708803 | 28 | 46.125 | KV453263.1 | 4763105 | 25-scf00537 | 25 |
| AX-158357689 | 28 | 46.125 | KV453263.1 | 5054354 | 25-scf00537 | 25 |
| AX-158357923 | 28 | 46.125 | KV453263.1 | 5363036 | 25-scf00537 | 25 |
| AX-158357939 | 28 | 46.125 | KV453263.1 | 5391188 | 25-scf00537 | 25 |
| AX-158358023 | 28 | 46.125 | KV453263.1 | 5528588 | 25-scf00537 | 25 |
| AX-158358046 | 28 | 46.125 | KV453263.1 | 5552169 | 25-scf00537 | 25 |
| AX-158357403 | 28 | 46.177 | KV453263.1 | 4597458 | 25-scf00537 | 25 |
| AX-158357404 | 28 | 46.177 | KV453263.1 | 4598056 | 25-scf00537 | 25 |
| AX-158357412 | 28 | 46.177 | KV453263.1 | 4605862 | 25-scf00537 | 25 |
| AX-158357420 | 28 | 46.177 | KV453263.1 | 4616342 | 25-scf00537 | 25 |
| AX-158357426 | 28 | 46.177 | KV453263.1 | 4623102 | 25-scf00537 | 25 |
| AX-158357428 | 28 | 46.177 | KV453263.1 | 4625222 | 25-scf00537 | 25 |
| AX-158357451 | 28 | 46.177 | KV453263.1 | 4657364 | 25-scf00537 | 25 |
| AX-158357467 | 28 | 46.177 | KV453263.1 | 4683263 | 25-scf00537 | 25 |
| AX-158357521 | 28 | 46.177 | KV453263.1 | 4754424 | 25-scf00537 | 25 |
| AX-158357528 | 28 | 46.177 | KV453263.1 | 4758910 | 25-scf00537 | 25 |
| AX-158357531 | 28 | 46.177 | KV453263.1 | 4760420 | 25-scf00537 | 25 |
| AX-158419675 | 28 | 46.177 | KV453263.1 | 4782315 | 25-scf00537 | 25 |
| AX-158357550 | 28 | 46.177 | KV453263.1 | 4792375 | 25-scf00537 | 25 |
| AX-157851624 | 28 | 46.177 | KV453263.1 | 4828261 | 25-scf00537 | 25 |
| AX-157755592 | 28 | 46.177 | KV453263.1 | 4862977 | 25-scf00537 | 25 |
| AX-157862156 | 28 | 46.177 | KV453263.1 | 5000781 | 25-scf00537 | 25 |
| AX-158357756 | 28 | 46.177 | KV453263.1 | 5154989 | 25-scf00537 | 25 |
| AX-157882548 | 28 | 46.177 | KV453263.1 | 5262953 | 25-scf00537 | 25 |
| AX-158357842 | 28 | 46.177 | KV453263.1 | 5263302 | 25-scf00537 | 25 |
| AX-158357845 | 28 | 46.177 | KV453263.1 | 5265158 | 25-scf00537 | 25 |
| AX-158357846 | 28 | 46.177 | KV453263.1 | 5265614 | 25-scf00537 | 25 |
| AX-157758368 | 28 | 46.177 | KV453263.1 | 5357916 | 25-scf00537 | 25 |
| AX-157709981 | 28 | 46.177 | KV453263.1 | 5387118 | 25-scf00537 | 25 |
| AX-158357940 | 28 | 46.177 | KV453263.1 | 5391976 | 25-scf00537 | 25 |

|              |    |        |            |         |             |    |
|--------------|----|--------|------------|---------|-------------|----|
| AX-157743627 | 28 | 46.177 | KV453263.1 | 5400012 | 25-scf00537 | 25 |
| AX-158357945 | 28 | 46.177 | KV453263.1 | 5403057 | 25-scf00537 | 25 |
| AX-157851650 | 28 | 46.177 | KV453263.1 | 5406013 | 25-scf00537 | 25 |
| AX-157851651 | 28 | 46.177 | KV453263.1 | 5406255 | 25-scf00537 | 25 |
| AX-157873980 | 28 | 46.177 | KV453263.1 | 5415676 | 25-scf00537 | 25 |
| AX-158357954 | 28 | 46.177 | KV453263.1 | 5419741 | 25-scf00537 | 25 |
| AX-157851653 | 28 | 46.177 | KV453263.1 | 5420217 | 25-scf00537 | 25 |
| AX-158357956 | 28 | 46.177 | KV453263.1 | 5425605 | 25-scf00537 | 25 |
| AX-158419690 | 28 | 46.177 | KV453263.1 | 5425780 | 25-scf00537 | 25 |
| AX-157740247 | 28 | 46.177 | KV453263.1 | 5428858 | 25-scf00537 | 25 |
| AX-158357958 | 28 | 46.177 | KV453263.1 | 5431377 | 25-scf00537 | 25 |
| AX-158357970 | 28 | 46.177 | KV453263.1 | 5448580 | 25-scf00537 | 25 |
| AX-158357971 | 28 | 46.177 | KV453263.1 | 5449447 | 25-scf00537 | 25 |
| AX-158357976 | 28 | 46.177 | KV453263.1 | 5455069 | 25-scf00537 | 25 |
| AX-158357977 | 28 | 46.177 | KV453263.1 | 5458550 | 25-scf00537 | 25 |
| AX-158357978 | 28 | 46.177 | KV453263.1 | 5458979 | 25-scf00537 | 25 |
| AX-157851658 | 28 | 46.177 | KV453263.1 | 5480059 | 25-scf00537 | 25 |
| AX-157851661 | 28 | 46.177 | KV453263.1 | 5491562 | 25-scf00537 | 25 |
| AX-158358001 | 28 | 46.177 | KV453263.1 | 5494914 | 25-scf00537 | 25 |
| AX-158358006 | 28 | 46.177 | KV453263.1 | 5504877 | 25-scf00537 | 25 |
| AX-158358009 | 28 | 46.177 | KV453263.1 | 5508963 | 25-scf00537 | 25 |
| AX-158358019 | 28 | 46.177 | KV453263.1 | 5517831 | 25-scf00537 | 25 |
| AX-158358038 | 28 | 46.177 | KV453263.1 | 5541656 | 25-scf00537 | 25 |
| AX-158358058 | 28 | 46.177 | KV453263.1 | 5563166 | 25-scf00537 | 25 |
| AX-158358065 | 28 | 46.177 | KV453263.1 | 5574406 | 25-scf00537 | 25 |
| AX-158419689 | 28 | 46.224 | KV453263.1 | 5403357 | 25-scf00537 | 25 |
| AX-158357955 | 28 | 46.263 | KV453263.1 | 5424800 | 25-scf00537 | 25 |
| AX-158357957 | 28 | 46.321 | KV453263.1 | 5428067 | 25-scf00537 | 25 |
| AX-158357959 | 28 | 46.404 | KV453263.1 | 5431987 | 25-scf00537 | 25 |
| AX-157708980 | 28 | 46.43  | KV453263.1 | 5465752 | 25-scf00537 | 25 |
| AX-158357442 | 28 | 46.468 | KV453263.1 | 4643234 | 25-scf00537 | 25 |
| AX-158357461 | 28 | 46.468 | KV453263.1 | 4670949 | 25-scf00537 | 25 |
| AX-158357984 | 28 | 46.468 | KV453263.1 | 5467399 | 25-scf00537 | 25 |
| AX-158357470 | 28 | 46.495 | KV453263.1 | 4688607 | 25-scf00537 | 25 |
| AX-158357723 | 28 | 46.495 | KV453263.1 | 5106143 | 25-scf00537 | 25 |
| AX-158357782 | 28 | 46.495 | KV453263.1 | 5188300 | 25-scf00537 | 25 |
| AX-158357824 | 28 | 46.495 | KV453263.1 | 5241861 | 25-scf00537 | 25 |
| AX-158357897 | 28 | 46.495 | KV453263.1 | 5326509 | 25-scf00537 | 25 |
| AX-158357899 | 28 | 46.495 | KV453263.1 | 5327518 | 25-scf00537 | 25 |
| AX-158419688 | 28 | 46.495 | KV453263.1 | 5327982 | 25-scf00537 | 25 |
| AX-158357900 | 28 | 46.495 | KV453263.1 | 5328177 | 25-scf00537 | 25 |
| AX-158357992 | 28 | 46.495 | KV453263.1 | 5482307 | 25-scf00537 | 25 |
| AX-158358103 | 28 | 46.495 | KV453263.1 | 5619284 | 25-scf00537 | 25 |
| AX-158358108 | 28 | 46.495 | KV453263.1 | 5631643 | 25-scf00537 | 25 |
| AX-157851671 | 28 | 46.495 | KV453263.1 | 5639689 | 25-scf00537 | 25 |
| AX-158358140 | 28 | 46.495 | KV453263.1 | 5665358 | 25-scf00537 | 25 |
| AX-158358142 | 28 | 46.495 | KV453263.1 | 5670025 | 25-scf00537 | 25 |
| AX-157717519 | 28 | 46.581 | KV453263.1 | 5464689 | 25-scf00537 | 25 |
| AX-158419692 | 28 | 46.581 | KV453263.1 | 5498653 | 25-scf00537 | 25 |
| AX-158358039 | 28 | 46.581 | KV453263.1 | 5541783 | 25-scf00537 | 25 |
| AX-158358003 | 28 | 47.032 | KV453263.1 | 5502129 | 25-scf00537 | 25 |

|              |    |        |            |         |             |    |
|--------------|----|--------|------------|---------|-------------|----|
| AX-157851666 | 28 | 47.473 | KV453263.1 | 5538505 | 25-scf00537 | 25 |
| AX-158358043 | 28 | 47.806 | KV453263.1 | 5546736 | 25-scf00537 | 25 |
| AX-158381731 | 28 | 47.885 | KV453263.1 | 5539765 | 25-scf00537 | 25 |
| AX-158358048 | 28 | 47.885 | KV453263.1 | 5552920 | 25-scf00537 | 25 |
| AX-158358049 | 28 | 47.885 | KV453263.1 | 5553668 | 25-scf00537 | 25 |
| AX-158358060 | 28 | 47.958 | KV453263.1 | 5567182 | 25-scf00537 | 25 |
| AX-158358125 | 28 | 47.958 | KV453263.1 | 5653603 | 25-scf00537 | 25 |
| AX-158419703 | 28 | 47.958 | KV453263.1 | 5703308 | 25-scf00537 | 25 |
| AX-158358172 | 28 | 47.958 | KV453263.1 | 5712172 | 25-scf00537 | 25 |
| AX-158358174 | 28 | 47.958 | KV453263.1 | 5716016 | 25-scf00537 | 25 |
| AX-157889097 | 28 | 47.958 | KV453263.1 | 5727166 | 25-scf00537 | 25 |
| AX-157889098 | 28 | 47.958 | KV453263.1 | 5727517 | 25-scf00537 | 25 |
| AX-158358229 | 28 | 47.958 | KV453263.1 | 5785806 | 25-scf00537 | 25 |
| AX-158358264 | 28 | 47.958 | KV453263.1 | 5847653 | 25-scf00537 | 25 |
| AX-158357514 | 28 | 47.982 | KV453263.1 | 4737827 | 25-scf00537 | 25 |
| AX-158358036 | 28 | 47.982 | KV453263.1 | 5539170 | 25-scf00537 | 25 |
| AX-158358041 | 28 | 47.982 | KV453263.1 | 5544974 | 25-scf00537 | 25 |
| AX-158358061 | 28 | 47.982 | KV453263.1 | 5568097 | 25-scf00537 | 25 |
| AX-158358063 | 28 | 47.982 | KV453263.1 | 5572187 | 25-scf00537 | 25 |
| AX-158358064 | 28 | 47.987 | KV453263.1 | 5573113 | 25-scf00537 | 25 |
| AX-157715138 | 28 | 48.457 | KV453263.1 | 5596919 | 25-scf00537 | 25 |
| AX-158358087 | 28 | 48.878 | KV453263.1 | 5598455 | 25-scf00537 | 25 |
| AX-158419698 | 28 | 48.899 | KV453263.1 | 5607136 | 25-scf00537 | 25 |
| AX-158358099 | 28 | 48.921 | KV453263.1 | 5612610 | 25-scf00537 | 25 |
| AX-158357508 | 28 | 48.94  | KV453263.1 | 4727638 | 25-scf00537 | 25 |
| AX-158357664 | 28 | 48.94  | KV453263.1 | 5012385 | 25-scf00537 | 25 |
| AX-158357719 | 28 | 48.94  | KV453263.1 | 5097433 | 25-scf00537 | 25 |
| AX-158357980 | 28 | 48.94  | KV453263.1 | 5462930 | 25-scf00537 | 25 |
| AX-157851659 | 28 | 48.94  | KV453263.1 | 5489979 | 25-scf00537 | 25 |
| AX-158358002 | 28 | 48.94  | KV453263.1 | 5500740 | 25-scf00537 | 25 |
| AX-158358045 | 28 | 48.94  | KV453263.1 | 5548872 | 25-scf00537 | 25 |
| AX-158358114 | 28 | 48.94  | KV453263.1 | 5637614 | 25-scf00537 | 25 |
| AX-158358115 | 28 | 48.94  | KV453263.1 | 5639161 | 25-scf00537 | 25 |
| AX-157868313 | 28 | 48.94  | KV453263.1 | 5900157 | 25-scf00537 | 25 |
| AX-158358665 | 28 | 48.94  | KV453263.1 | 6425316 | 25-scf00537 | 25 |
| AX-157709328 | 28 | 48.952 | KV453263.1 | 5550027 | 25-scf00537 | 25 |
| AX-157851670 | 28 | 48.952 | KV453263.1 | 5639392 | 25-scf00537 | 25 |
| AX-158358131 | 28 | 48.952 | KV453263.1 | 5657361 | 25-scf00537 | 25 |
| AX-158419702 | 28 | 48.952 | KV453263.1 | 5667273 | 25-scf00537 | 25 |
| AX-158420752 | 28 | 48.952 | KV453263.1 | 5702081 | 25-scf00537 | 25 |
| AX-158358183 | 28 | 48.952 | KV453263.1 | 5722688 | 25-scf00537 | 25 |
| AX-158358199 | 28 | 48.952 | KV453263.1 | 5740328 | 25-scf00537 | 25 |
| AX-158419705 | 28 | 48.952 | KV453263.1 | 5740753 | 25-scf00537 | 25 |
| AX-158358214 | 28 | 48.952 | KV453263.1 | 5766781 | 25-scf00537 | 25 |
| AX-158358078 | 28 | 48.968 | KV453263.1 | 5586956 | 25-scf00537 | 25 |
| AX-158358082 | 28 | 48.968 | KV453263.1 | 5591057 | 25-scf00537 | 25 |
| AX-158419695 | 28 | 48.968 | KV453263.1 | 5605842 | 25-scf00537 | 25 |
| AX-157873989 | 28 | 48.968 | KV453263.1 | 5661488 | 25-scf00537 | 25 |
| AX-157862385 | 28 | 48.968 | KV453263.1 | 5800421 | 25-scf00537 | 25 |
| AX-158358245 | 28 | 48.968 | KV453263.1 | 5820427 | 25-scf00537 | 25 |
| AX-157873999 | 28 | 48.968 | KV453263.1 | 5851588 | 25-scf00537 | 25 |

|              |    |        |            |         |             |    |
|--------------|----|--------|------------|---------|-------------|----|
| AX-157889101 | 28 | 48.968 | KV453263.1 | 5852900 | 25-scf00537 | 25 |
| AX-157874000 | 28 | 48.968 | KV453263.1 | 5858044 | 25-scf00537 | 25 |
| AX-158358303 | 28 | 48.968 | KV453263.1 | 5891535 | 25-scf00537 | 25 |
| AX-158358154 | 28 | 48.982 | KV453263.1 | 5688588 | 25-scf00537 | 25 |
| AX-157851621 | 28 | 48.983 | KV453263.1 | 4820550 | 25-scf00537 | 25 |
| AX-158357672 | 28 | 48.983 | KV453263.1 | 5029863 | 25-scf00537 | 25 |
| AX-158357679 | 28 | 48.983 | KV453263.1 | 5039030 | 25-scf00537 | 25 |
| AX-158357697 | 28 | 48.983 | KV453263.1 | 5065391 | 25-scf00537 | 25 |
| AX-158357832 | 28 | 48.983 | KV453263.1 | 5248302 | 25-scf00537 | 25 |
| AX-157851648 | 28 | 48.983 | KV453263.1 | 5385351 | 25-scf00537 | 25 |
| AX-158357937 | 28 | 48.983 | KV453263.1 | 5386186 | 25-scf00537 | 25 |
| AX-157851668 | 28 | 48.983 | KV453263.1 | 5541285 | 25-scf00537 | 25 |
| AX-158358062 | 28 | 48.983 | KV453263.1 | 5571357 | 25-scf00537 | 25 |
| AX-158358073 | 28 | 48.983 | KV453263.1 | 5582521 | 25-scf00537 | 25 |
| AX-158358075 | 28 | 48.983 | KV453263.1 | 5584693 | 25-scf00537 | 25 |
| AX-158358088 | 28 | 48.983 | KV453263.1 | 5598925 | 25-scf00537 | 25 |
| AX-157851669 | 28 | 48.983 | KV453263.1 | 5615278 | 25-scf00537 | 25 |
| AX-158358109 | 28 | 48.983 | KV453263.1 | 5633867 | 25-scf00537 | 25 |
| AX-158358124 | 28 | 48.983 | KV453263.1 | 5652674 | 25-scf00537 | 25 |
| AX-158358163 | 28 | 48.983 | KV453263.1 | 5698156 | 25-scf00537 | 25 |
| AX-158358253 | 28 | 48.983 | KV453263.1 | 5831824 | 25-scf00537 | 25 |
| AX-158358100 | 28 | 49.844 | KV453263.1 | 5616576 | 25-scf00537 | 25 |
| AX-158358102 | 28 | 49.844 | KV453263.1 | 5617700 | 25-scf00537 | 25 |
| AX-158358123 | 28 | 49.844 | KV453263.1 | 5652113 | 25-scf00537 | 25 |
| AX-157889093 | 28 | 49.844 | KV453263.1 | 5653911 | 25-scf00537 | 25 |
| AX-158358126 | 28 | 49.844 | KV453263.1 | 5654240 | 25-scf00537 | 25 |
| AX-158358141 | 28 | 49.844 | KV453263.1 | 5666907 | 25-scf00537 | 25 |
| AX-157751869 | 28 | 49.844 | KV453263.1 | 5709800 | 25-scf00537 | 25 |
| AX-157862382 | 28 | 49.844 | KV453263.1 | 5725067 | 25-scf00537 | 25 |
| AX-158358187 | 28 | 49.844 | KV453263.1 | 5728569 | 25-scf00537 | 25 |
| AX-157740400 | 28 | 49.844 | KV453263.1 | 5734253 | 25-scf00537 | 25 |
| AX-158358196 | 28 | 49.844 | KV453263.1 | 5738267 | 25-scf00537 | 25 |
| AX-158358218 | 28 | 49.844 | KV453263.1 | 5770107 | 25-scf00537 | 25 |
| AX-157758075 | 28 | 49.844 | KV453263.1 | 5822924 | 25-scf00537 | 25 |
| AX-158358251 | 28 | 49.844 | KV453263.1 | 5829066 | 25-scf00537 | 25 |
| AX-158358288 | 28 | 49.844 | KV453263.1 | 5878734 | 25-scf00537 | 25 |
| AX-157726265 | 28 | 49.858 | KV453263.1 | 5583282 | 25-scf00537 | 25 |
| AX-158358079 | 28 | 49.858 | KV453263.1 | 5587518 | 25-scf00537 | 25 |
| AX-158358113 | 28 | 49.858 | KV453263.1 | 5637186 | 25-scf00537 | 25 |
| AX-158358162 | 28 | 49.858 | KV453263.1 | 5697920 | 25-scf00537 | 25 |
| AX-158358171 | 28 | 49.858 | KV453263.1 | 5711643 | 25-scf00537 | 25 |
| AX-158358182 | 28 | 49.858 | KV453263.1 | 5722305 | 25-scf00537 | 25 |
| AX-158358226 | 28 | 49.858 | KV453263.1 | 5781549 | 25-scf00537 | 25 |
| AX-158358242 | 28 | 49.858 | KV453263.1 | 5808746 | 25-scf00537 | 25 |
| AX-158358252 | 28 | 49.858 | KV453263.1 | 5830022 | 25-scf00537 | 25 |
| AX-157708353 | 28 | 49.858 | KV453263.1 | 5941725 | 25-scf00537 | 25 |
| AX-158358180 | 28 | 49.882 | KV453263.1 | 5721046 | 25-scf00537 | 25 |
| AX-158358181 | 28 | 49.882 | KV453263.1 | 5721724 | 25-scf00537 | 25 |
| AX-158358185 | 28 | 49.912 | KV453263.1 | 5726618 | 25-scf00537 | 25 |
| AX-158358194 | 28 | 49.947 | KV453263.1 | 5735910 | 25-scf00537 | 25 |
| AX-158419704 | 28 | 49.981 | KV453263.1 | 5740643 | 25-scf00537 | 25 |



|              |    |        |            |         |             |    |
|--------------|----|--------|------------|---------|-------------|----|
| AX-158358201 | 28 | 50.013 | KV453263.1 | 5741587 | 25-scf00537 | 25 |
| AX-158358095 | 28 | 50.04  | KV453263.1 | 5610164 | 25-scf00537 | 25 |
| AX-158358207 | 28 | 50.04  | KV453263.1 | 5754220 | 25-scf00537 | 25 |
| AX-158358209 | 28 | 50.04  | KV453263.1 | 5755809 | 25-scf00537 | 25 |
| AX-157719359 | 28 | 50.04  | KV453263.1 | 6008828 | 25-scf00537 | 25 |
| AX-158358208 | 28 | 50.059 | KV453263.1 | 5754634 | 25-scf00537 | 25 |
| AX-158358227 | 28 | 50.067 | KV453263.1 | 5783290 | 25-scf00537 | 25 |
| AX-158358228 | 28 | 50.091 | KV453263.1 | 5784258 | 25-scf00537 | 25 |
| AX-157873996 | 28 | 50.249 | KV453263.1 | 5792705 | 25-scf00537 | 25 |
| AX-158357311 | 28 | 50.396 | KV453263.1 | 4463254 | 25-scf00537 | 25 |
| AX-158357649 | 28 | 50.396 | KV453263.1 | 4990274 | 25-scf00537 | 25 |
| AX-158357650 | 28 | 50.396 | KV453263.1 | 4994673 | 25-scf00537 | 25 |
| AX-158357668 | 28 | 50.396 | KV453263.1 | 5018255 | 25-scf00537 | 25 |
| AX-158357716 | 28 | 50.396 | KV453263.1 | 5095854 | 25-scf00537 | 25 |
| AX-158357717 | 28 | 50.396 | KV453263.1 | 5096179 | 25-scf00537 | 25 |
| AX-157756639 | 28 | 50.396 | KV453263.1 | 5376929 | 25-scf00537 | 25 |
| AX-157751580 | 28 | 50.396 | KV453263.1 | 5607912 | 25-scf00537 | 25 |
| AX-158358096 | 28 | 50.396 | KV453263.1 | 5610660 | 25-scf00537 | 25 |
| AX-157873994 | 28 | 50.396 | KV453263.1 | 5791290 | 25-scf00537 | 25 |
| AX-157873997 | 28 | 50.396 | KV453263.1 | 5796171 | 25-scf00537 | 25 |
| AX-157754297 | 28 | 50.396 | KV453263.1 | 5797328 | 25-scf00537 | 25 |
| AX-157708402 | 28 | 50.396 | KV453263.1 | 5829383 | 25-scf00537 | 25 |
| AX-158358276 | 28 | 50.396 | KV453263.1 | 5866079 | 25-scf00537 | 25 |
| AX-157742759 | 28 | 50.396 | KV453263.1 | 5874935 | 25-scf00537 | 25 |
| AX-158358289 | 28 | 50.396 | KV453263.1 | 5878977 | 25-scf00537 | 25 |
| AX-158358290 | 28 | 50.396 | KV453263.1 | 5879376 | 25-scf00537 | 25 |
| AX-158358378 | 28 | 50.396 | KV453263.1 | 6018411 | 25-scf00537 | 25 |
| AX-158358392 | 28 | 50.396 | KV453263.1 | 6032223 | 25-scf00537 | 25 |
| AX-157718682 | 28 | 50.396 | KV453263.1 | 6036892 | 25-scf00537 | 25 |
| AX-157851703 | 28 | 50.396 | KV453263.1 | 6037694 | 25-scf00537 | 25 |
| AX-158358419 | 28 | 50.396 | KV453263.1 | 6073870 | 25-scf00537 | 25 |
| AX-158358434 | 28 | 50.396 | KV453263.1 | 6102071 | 25-scf00537 | 25 |
| AX-157746214 | 28 | 50.396 | KV453263.1 | 6161858 | 25-scf00537 | 25 |
| AX-157851751 | 28 | 50.396 | KV453263.1 | 6677523 | 25-scf00537 | 25 |
| AX-158359373 | 28 | 50.396 | KV453263.1 | 7456197 | 25-scf00537 | 25 |
| AX-158358236 | 28 | 50.493 | KV453263.1 | 5797084 | 25-scf00537 | 25 |
| AX-157862386 | 28 | 50.61  | KV453263.1 | 5871210 | 25-scf00537 | 25 |
| AX-158357485 | 28 | 50.766 | KV453263.1 | 4710060 | 25-scf00537 | 25 |
| AX-158357504 | 28 | 50.766 | KV453263.1 | 4725244 | 25-scf00537 | 25 |
| AX-158357563 | 28 | 50.766 | KV453263.1 | 4818715 | 25-scf00537 | 25 |
| AX-158357682 | 28 | 50.766 | KV453263.1 | 5046005 | 25-scf00537 | 25 |
| AX-158357683 | 28 | 50.766 | KV453263.1 | 5046563 | 25-scf00537 | 25 |
| AX-158357859 | 28 | 50.766 | KV453263.1 | 5278900 | 25-scf00537 | 25 |
| AX-158357904 | 28 | 50.766 | KV453263.1 | 5332945 | 25-scf00537 | 25 |
| AX-157851649 | 28 | 50.766 | KV453263.1 | 5395305 | 25-scf00537 | 25 |
| AX-157851695 | 28 | 50.766 | KV453263.1 | 5885322 | 25-scf00537 | 25 |
| AX-157747099 | 28 | 50.766 | KV453263.1 | 5885361 | 25-scf00537 | 25 |
| AX-158358305 | 28 | 50.877 | KV453263.1 | 5894346 | 25-scf00537 | 25 |
| AX-158358309 | 28 | 51.032 | KV453263.1 | 5904329 | 25-scf00537 | 25 |
| AX-158358318 | 28 | 51.085 | KV453263.1 | 5919447 | 25-scf00537 | 25 |
| AX-158358320 | 28 | 51.085 | KV453263.1 | 5923530 | 25-scf00537 | 25 |

|              |    |        |            |         |             |    |
|--------------|----|--------|------------|---------|-------------|----|
| AX-157722852 | 28 | 51.085 | KV453263.1 | 5931910 | 25-scf00537 | 25 |
| AX-158358323 | 28 | 51.089 | KV453263.1 | 5926461 | 25-scf00537 | 25 |
| AX-158358324 | 28 | 51.107 | KV453263.1 | 5927244 | 25-scf00537 | 25 |
| AX-158358327 | 28 | 51.123 | KV453263.1 | 5929903 | 25-scf00537 | 25 |
| AX-158358376 | 28 | 51.123 | KV453263.1 | 6015307 | 25-scf00537 | 25 |
| AX-158358396 | 28 | 51.123 | KV453263.1 | 6043857 | 25-scf00537 | 25 |
| AX-158358548 | 28 | 51.123 | KV453263.1 | 6257034 | 25-scf00537 | 25 |
| AX-158358564 | 28 | 51.123 | KV453263.1 | 6273361 | 25-scf00537 | 25 |
| AX-157727972 | 28 | 51.123 | KV453263.1 | 6307096 | 25-scf00537 | 25 |
| AX-158358654 | 28 | 51.123 | KV453263.1 | 6399063 | 25-scf00537 | 25 |
| AX-158358695 | 28 | 51.123 | KV453263.1 | 6474617 | 25-scf00537 | 25 |
| AX-158358709 | 28 | 51.123 | KV453263.1 | 6489134 | 25-scf00537 | 25 |
| AX-158358329 | 28 | 51.14  | KV453263.1 | 5931016 | 25-scf00537 | 25 |
| AX-158357681 | 28 | 51.158 | KV453263.1 | 5043754 | 25-scf00537 | 25 |
| AX-158357720 | 28 | 51.158 | KV453263.1 | 5098851 | 25-scf00537 | 25 |
| AX-158357993 | 28 | 51.158 | KV453263.1 | 5482719 | 25-scf00537 | 25 |
| AX-157851664 | 28 | 51.158 | KV453263.1 | 5515777 | 25-scf00537 | 25 |
| AX-158358069 | 28 | 51.158 | KV453263.1 | 5579858 | 25-scf00537 | 25 |
| AX-158358070 | 28 | 51.158 | KV453263.1 | 5580329 | 25-scf00537 | 25 |
| AX-158358077 | 28 | 51.158 | KV453263.1 | 5586524 | 25-scf00537 | 25 |
| AX-157851676 | 28 | 51.158 | KV453263.1 | 5677367 | 25-scf00537 | 25 |
| AX-157851680 | 28 | 51.158 | KV453263.1 | 5734828 | 25-scf00537 | 25 |
| AX-158358192 | 28 | 51.158 | KV453263.1 | 5735175 | 25-scf00537 | 25 |
| AX-158358206 | 28 | 51.158 | KV453263.1 | 5752210 | 25-scf00537 | 25 |
| AX-157864206 | 28 | 51.158 | KV453263.1 | 5905597 | 25-scf00537 | 25 |
| AX-158358317 | 28 | 51.158 | KV453263.1 | 5918940 | 25-scf00537 | 25 |
| AX-157882559 | 28 | 51.158 | KV453263.1 | 5934739 | 25-scf00537 | 25 |
| AX-157851699 | 28 | 51.158 | KV453263.1 | 5945346 | 25-scf00537 | 25 |
| AX-157874004 | 28 | 51.158 | KV453263.1 | 5950547 | 25-scf00537 | 25 |
| AX-158358348 | 28 | 51.158 | KV453263.1 | 5970626 | 25-scf00537 | 25 |
| AX-157749480 | 28 | 51.541 | KV453263.1 | 5920467 | 25-scf00537 | 25 |
| AX-158358339 | 28 | 51.541 | KV453263.1 | 5950797 | 25-scf00537 | 25 |
| AX-158358340 | 28 | 51.541 | KV453263.1 | 5952194 | 25-scf00537 | 25 |
| AX-157851681 | 28 | 52.022 | KV453263.1 | 5745478 | 25-scf00537 | 25 |
| AX-158358268 | 28 | 52.022 | KV453263.1 | 5855433 | 25-scf00537 | 25 |
| AX-158358343 | 28 | 52.022 | KV453263.1 | 5958108 | 25-scf00537 | 25 |
| AX-158358352 | 28 | 52.022 | KV453263.1 | 5983255 | 25-scf00537 | 25 |
| AX-158358359 | 28 | 52.022 | KV453263.1 | 5990086 | 25-scf00537 | 25 |
| AX-158358374 | 28 | 52.916 | KV453263.1 | 6013441 | 25-scf00537 | 25 |
| AX-158358402 | 28 | 52.916 | KV453263.1 | 6051902 | 25-scf00537 | 25 |
| AX-158358377 | 28 | 52.942 | KV453263.1 | 6017705 | 25-scf00537 | 25 |
| AX-158357953 | 28 | 52.948 | KV453263.1 | 5414163 | 25-scf00537 | 25 |
| AX-157712215 | 28 | 52.948 | KV453263.1 | 5696295 | 25-scf00537 | 25 |
| AX-158358175 | 28 | 52.948 | KV453263.1 | 5716271 | 25-scf00537 | 25 |
| AX-158358222 | 28 | 52.948 | KV453263.1 | 5775919 | 25-scf00537 | 25 |
| AX-158358223 | 28 | 52.948 | KV453263.1 | 5776563 | 25-scf00537 | 25 |
| AX-158358225 | 28 | 52.948 | KV453263.1 | 5778244 | 25-scf00537 | 25 |
| AX-157851686 | 28 | 52.948 | KV453263.1 | 5813864 | 25-scf00537 | 25 |
| AX-158358310 | 28 | 52.948 | KV453263.1 | 5905419 | 25-scf00537 | 25 |
| AX-158358313 | 28 | 52.948 | KV453263.1 | 5913684 | 25-scf00537 | 25 |
| AX-158358345 | 28 | 52.948 | KV453263.1 | 5959767 | 25-scf00537 | 25 |

|              |    |        |            |         |                |    |
|--------------|----|--------|------------|---------|----------------|----|
| AX-157889110 | 28 | 52.948 | KV453263.1 | 6012018 | 25-scf00537    | 25 |
| AX-158358379 | 28 | 52.948 | KV453263.1 | 6021310 | 25-scf00537    | 25 |
| AX-158358394 | 28 | 52.948 | KV453263.1 | 6033251 | 25-scf00537    | 25 |
| AX-157771528 | 28 | 52.948 | KV453263.1 | 6548100 | 25-scf00537    | 25 |
| AX-158358783 | 28 | 52.948 | KV453263.1 | 6583205 | 25-scf00537    | 25 |
| AX-158358380 | 28 | 52.974 | KV453263.1 | 6022283 | 25-scf00537    | 25 |
| AX-157851702 | 28 | 52.974 | KV453263.1 | 6037269 | 25-scf00537    | 25 |
| AX-157851704 | 28 | 52.974 | KV453263.1 | 6042981 | 25-scf00537    | 25 |
| AX-158358506 | 28 | 52.974 | KV453263.1 | 6204373 | 25-scf00537    | 25 |
| AX-158358398 | 28 | 53.681 | KV453263.1 | 6047076 | 25-scf00537    | 25 |
| AX-158358418 | 28 | 53.681 | KV453263.1 | 6072505 | 25-scf00537    | 25 |
| AX-157851708 | 28 | 53.681 | KV453263.1 | 6150323 | 25-scf00537    | 25 |
| AX-157735876 | 28 | 53.681 | KV453263.1 | 6150396 | 25-scf00537    | 25 |
| AX-158358413 | 28 | 53.855 | KV453263.1 | 6067060 | 25-scf00537    | 25 |
| AX-158358417 | 28 | 53.882 | KV453263.1 | 6072071 | 25-scf00537    | 25 |
| AX-158358246 | 28 | 53.907 | KV453263.1 | 5822393 | 25-scf00537    | 25 |
| AX-157715952 | 28 | 53.907 | KV453263.1 | 6084433 | 25-scf00537    | 25 |
| AX-158358436 | 28 | 53.907 | KV453263.1 | 6104336 | 25-scf00537    | 25 |
| AX-158358438 | 28 | 53.907 | KV453263.1 | 6107725 | 25-scf00537    | 25 |
| AX-158358614 | 28 | 53.907 | KV453263.1 | 6344638 | 25-scf00537    | 25 |
| AX-158421620 | 28 | 53.907 | FI883056.1 | 103     | -ORI212 lctalt | UN |
| AX-158358457 | 28 | 53.925 | KV453263.1 | 6132511 | 25-scf00537    | 25 |
| AX-158358459 | 28 | 53.953 | KV453263.1 | 6135659 | 25-scf00537    | 25 |
| AX-157745907 | 28 | 53.978 | KV453263.1 | 6138322 | 25-scf00537    | 25 |
| AX-158358462 | 28 | 54.012 | KV453263.1 | 6140187 | 25-scf00537    | 25 |
| AX-158358464 | 28 | 54.047 | KV453263.1 | 6142094 | 25-scf00537    | 25 |
| AX-157759034 | 28 | 54.31  | KV453263.1 | 6143467 | 25-scf00537    | 25 |
| AX-158358468 | 28 | 54.582 | KV453263.1 | 6145806 | 25-scf00537    | 25 |
| AX-158358469 | 28 | 54.817 | KV453263.1 | 6147107 | 25-scf00537    | 25 |
| AX-158358650 | 28 | 54.817 | KV453263.1 | 6395081 | 25-scf00537    | 25 |
| AX-158358775 | 28 | 54.817 | KV453263.1 | 6573005 | 25-scf00537    | 25 |
| AX-158358799 | 28 | 54.817 | KV453263.1 | 6602510 | 25-scf00537    | 25 |
| AX-157717524 | 28 | 54.817 | KV453263.1 | 6647090 | 25-scf00537    | 25 |
| AX-158358415 | 28 | 54.965 | KV453263.1 | 6068434 | 25-scf00537    | 25 |
| AX-158358433 | 28 | 54.965 | KV453263.1 | 6098854 | 25-scf00537    | 25 |
| AX-157739198 | 28 | 54.965 | KV453263.1 | 6099349 | 25-scf00537    | 25 |
| AX-158358453 | 28 | 54.965 | KV453263.1 | 6128983 | 25-scf00537    | 25 |
| AX-157740052 | 28 | 54.965 | KV453263.1 | 6147995 | 25-scf00537    | 25 |
| AX-158358556 | 28 | 54.965 | KV453263.1 | 6266656 | 25-scf00537    | 25 |
| AX-158358559 | 28 | 54.965 | KV453263.1 | 6269276 | 25-scf00537    | 25 |
| AX-158358584 | 28 | 54.965 | KV453263.1 | 6297051 | 25-scf00537    | 25 |
| AX-158358585 | 28 | 54.965 | KV453263.1 | 6298578 | 25-scf00537    | 25 |
| AX-158358586 | 28 | 54.965 | KV453263.1 | 6299082 | 25-scf00537    | 25 |
| AX-158358601 | 28 | 54.965 | KV453263.1 | 6321917 | 25-scf00537    | 25 |
| AX-158358612 | 28 | 54.965 | KV453263.1 | 6342291 | 25-scf00537    | 25 |
| AX-157742178 | 28 | 54.965 | KV453263.1 | 6383858 | 25-scf00537    | 25 |
| AX-158358748 | 28 | 54.965 | KV453263.1 | 6540442 | 25-scf00537    | 25 |
| AX-158358778 | 28 | 54.965 | KV453263.1 | 6578206 | 25-scf00537    | 25 |
| AX-158358357 | 28 | 55.017 | KV453263.1 | 5987350 | 25-scf00537    | 25 |
| AX-158358367 | 28 | 55.017 | KV453263.1 | 6000977 | 25-scf00537    | 25 |
| AX-157739874 | 28 | 55.017 | KV453263.1 | 6015262 | 25-scf00537    | 25 |

|              |    |        |            |         |             |    |
|--------------|----|--------|------------|---------|-------------|----|
| AX-158358381 | 28 | 55.017 | KV453263.1 | 6023114 | 25-scf00537 | 25 |
| AX-158358443 | 28 | 55.017 | KV453263.1 | 6119461 | 25-scf00537 | 25 |
| AX-158358475 | 28 | 55.017 | KV453263.1 | 6155714 | 25-scf00537 | 25 |
| AX-157851710 | 28 | 55.017 | KV453263.1 | 6161220 | 25-scf00537 | 25 |
| AX-158358482 | 28 | 55.017 | KV453263.1 | 6169266 | 25-scf00537 | 25 |
| AX-158358486 | 28 | 55.017 | KV453263.1 | 6179524 | 25-scf00537 | 25 |
| AX-158358504 | 28 | 55.017 | KV453263.1 | 6198569 | 25-scf00537 | 25 |
| AX-158358536 | 28 | 55.017 | KV453263.1 | 6244001 | 25-scf00537 | 25 |
| AX-158358593 | 28 | 55.017 | KV453263.1 | 6303017 | 25-scf00537 | 25 |
| AX-158358600 | 28 | 55.017 | KV453263.1 | 6317575 | 25-scf00537 | 25 |
| AX-158358607 | 28 | 55.017 | KV453263.1 | 6330676 | 25-scf00537 | 25 |
| AX-158358608 | 28 | 55.017 | KV453263.1 | 6331458 | 25-scf00537 | 25 |
| AX-157851722 | 28 | 55.017 | KV453263.1 | 6332572 | 25-scf00537 | 25 |
| AX-158358622 | 28 | 55.017 | KV453263.1 | 6355192 | 25-scf00537 | 25 |
| AX-158358623 | 28 | 55.017 | KV453263.1 | 6360503 | 25-scf00537 | 25 |
| AX-157851731 | 28 | 55.017 | KV453263.1 | 6406422 | 25-scf00537 | 25 |
| AX-158358657 | 28 | 55.017 | KV453263.1 | 6406467 | 25-scf00537 | 25 |
| AX-158358669 | 28 | 55.017 | KV453263.1 | 6432452 | 25-scf00537 | 25 |
| AX-158358671 | 28 | 55.017 | KV453263.1 | 6433453 | 25-scf00537 | 25 |
| AX-157745224 | 28 | 55.017 | KV453263.1 | 6462911 | 25-scf00537 | 25 |
| AX-158358794 | 28 | 55.017 | KV453263.1 | 6596207 | 25-scf00537 | 25 |
| AX-158358495 | 28 | 55.023 | KV453263.1 | 6191593 | 25-scf00537 | 25 |
| AX-158358501 | 28 | 55.048 | KV453263.1 | 6196301 | 25-scf00537 | 25 |
| AX-158358681 | 28 | 55.048 | KV453263.1 | 6449477 | 25-scf00537 | 25 |
| AX-158358505 | 28 | 55.058 | KV453263.1 | 6201656 | 25-scf00537 | 25 |
| AX-158358542 | 28 | 55.082 | KV453263.1 | 6251365 | 25-scf00537 | 25 |
| AX-158358569 | 28 | 55.082 | KV453263.1 | 6277484 | 25-scf00537 | 25 |
| AX-158358545 | 28 | 55.103 | KV453263.1 | 6253342 | 25-scf00537 | 25 |
| AX-158358416 | 28 | 55.122 | KV453263.1 | 6069497 | 25-scf00537 | 25 |
| AX-158358463 | 28 | 55.122 | KV453263.1 | 6140479 | 25-scf00537 | 25 |
| AX-158358481 | 28 | 55.122 | KV453263.1 | 6168962 | 25-scf00537 | 25 |
| AX-158358483 | 28 | 55.122 | KV453263.1 | 6169728 | 25-scf00537 | 25 |
| AX-157725076 | 28 | 55.122 | KV453263.1 | 6175287 | 25-scf00537 | 25 |
| AX-158358546 | 28 | 55.122 | KV453263.1 | 6254853 | 25-scf00537 | 25 |
| AX-158358550 | 28 | 55.122 | KV453263.1 | 6260612 | 25-scf00537 | 25 |
| AX-158358587 | 28 | 55.122 | KV453263.1 | 6299358 | 25-scf00537 | 25 |
| AX-158358590 | 28 | 55.122 | KV453263.1 | 6300812 | 25-scf00537 | 25 |
| AX-157758184 | 28 | 55.138 | KV453263.1 | 6270045 | 25-scf00537 | 25 |
| AX-158358565 | 28 | 55.138 | KV453263.1 | 6273769 | 25-scf00537 | 25 |
| AX-158358574 | 28 | 55.138 | KV453263.1 | 6282667 | 25-scf00537 | 25 |
| AX-158358571 | 28 | 55.158 | KV453263.1 | 6279666 | 25-scf00537 | 25 |
| AX-158420765 | 28 | 55.179 | KV453263.1 | 6282967 | 25-scf00537 | 25 |
| AX-158358578 | 28 | 55.213 | KV453263.1 | 6291016 | 25-scf00537 | 25 |
| AX-158358523 | 28 | 55.244 | KV453263.1 | 6222922 | 25-scf00537 | 25 |
| AX-158358583 | 28 | 55.244 | KV453263.1 | 6296500 | 25-scf00537 | 25 |
| AX-157851727 | 28 | 55.244 | KV453263.1 | 6374248 | 25-scf00537 | 25 |
| AX-158358566 | 28 | 55.272 | KV453263.1 | 6274225 | 25-scf00537 | 25 |
| AX-157851717 | 28 | 55.272 | KV453263.1 | 6307991 | 25-scf00537 | 25 |
| AX-158358599 | 28 | 55.296 | KV453263.1 | 6315161 | 25-scf00537 | 25 |
| AX-158358609 | 28 | 55.32  | KV453263.1 | 6334273 | 25-scf00537 | 25 |
| AX-158358478 | 28 | 55.348 | KV453263.1 | 6160427 | 25-scf00537 | 25 |

|              |    |        |            |         |             |    |
|--------------|----|--------|------------|---------|-------------|----|
| AX-158358621 | 28 | 55.348 | KV453263.1 | 6354895 | 25-scf00537 | 25 |
| AX-158358624 | 28 | 55.348 | KV453263.1 | 6361313 | 25-scf00537 | 25 |
| AX-157772020 | 28 | 55.373 | KV453263.1 | 6386964 | 25-scf00537 | 25 |
| AX-158358651 | 28 | 55.391 | KV453263.1 | 6397115 | 25-scf00537 | 25 |
| AX-157851677 | 28 | 55.409 | KV453263.1 | 5677901 | 25-scf00537 | 25 |
| AX-158358193 | 28 | 55.409 | KV453263.1 | 5735577 | 25-scf00537 | 25 |
| AX-158358195 | 28 | 55.409 | KV453263.1 | 5736126 | 25-scf00537 | 25 |
| AX-158358332 | 28 | 55.409 | KV453263.1 | 5936306 | 25-scf00537 | 25 |
| AX-158358334 | 28 | 55.409 | KV453263.1 | 5937299 | 25-scf00537 | 25 |
| AX-157851701 | 28 | 55.409 | KV453263.1 | 5955527 | 25-scf00537 | 25 |
| AX-157775202 | 28 | 55.409 | KV453263.1 | 5961846 | 25-scf00537 | 25 |
| AX-158358346 | 28 | 55.409 | KV453263.1 | 5963502 | 25-scf00537 | 25 |
| AX-158419714 | 28 | 55.409 | KV453263.1 | 5974946 | 25-scf00537 | 25 |
| AX-157745098 | 28 | 55.409 | KV453263.1 | 5985397 | 25-scf00537 | 25 |
| AX-158358388 | 28 | 55.409 | KV453263.1 | 6029659 | 25-scf00537 | 25 |
| AX-158358389 | 28 | 55.409 | KV453263.1 | 6030598 | 25-scf00537 | 25 |
| AX-157851705 | 28 | 55.409 | KV453263.1 | 6043590 | 25-scf00537 | 25 |
| AX-158358411 | 28 | 55.409 | KV453263.1 | 6063816 | 25-scf00537 | 25 |
| AX-158358412 | 28 | 55.409 | KV453263.1 | 6066494 | 25-scf00537 | 25 |
| AX-158358424 | 28 | 55.409 | KV453263.1 | 6081286 | 25-scf00537 | 25 |
| AX-157710794 | 28 | 55.409 | KV453263.1 | 6115477 | 25-scf00537 | 25 |
| AX-158358447 | 28 | 55.409 | KV453263.1 | 6124142 | 25-scf00537 | 25 |
| AX-158358451 | 28 | 55.409 | KV453263.1 | 6126933 | 25-scf00537 | 25 |
| AX-158358452 | 28 | 55.409 | KV453263.1 | 6128232 | 25-scf00537 | 25 |
| AX-158358467 | 28 | 55.409 | KV453263.1 | 6145395 | 25-scf00537 | 25 |
| AX-158358484 | 28 | 55.409 | KV453263.1 | 6176982 | 25-scf00537 | 25 |
| AX-158358485 | 28 | 55.409 | KV453263.1 | 6179032 | 25-scf00537 | 25 |
| AX-158358487 | 28 | 55.409 | KV453263.1 | 6180449 | 25-scf00537 | 25 |
| AX-158358494 | 28 | 55.409 | KV453263.1 | 6191303 | 25-scf00537 | 25 |
| AX-158358514 | 28 | 55.409 | KV453263.1 | 6211535 | 25-scf00537 | 25 |
| AX-158358527 | 28 | 55.409 | KV453263.1 | 6230695 | 25-scf00537 | 25 |
| AX-158358535 | 28 | 55.409 | KV453263.1 | 6242998 | 25-scf00537 | 25 |
| AX-158358539 | 28 | 55.409 | KV453263.1 | 6247372 | 25-scf00537 | 25 |
| AX-158381733 | 28 | 55.409 | KV453263.1 | 6251725 | 25-scf00537 | 25 |
| AX-157874009 | 28 | 55.409 | KV453263.1 | 6276477 | 25-scf00537 | 25 |
| AX-158358572 | 28 | 55.409 | KV453263.1 | 6280723 | 25-scf00537 | 25 |
| AX-157700023 | 28 | 55.409 | KV453263.1 | 6285526 | 25-scf00537 | 25 |
| AX-158358577 | 28 | 55.409 | KV453263.1 | 6285871 | 25-scf00537 | 25 |
| AX-158358588 | 28 | 55.409 | KV453263.1 | 6299792 | 25-scf00537 | 25 |
| AX-157746923 | 28 | 55.409 | KV453263.1 | 6302140 | 25-scf00537 | 25 |
| AX-158358594 | 28 | 55.409 | KV453263.1 | 6306965 | 25-scf00537 | 25 |
| AX-158358595 | 28 | 55.409 | KV453263.1 | 6307391 | 25-scf00537 | 25 |
| AX-157851720 | 28 | 55.409 | KV453263.1 | 6315592 | 25-scf00537 | 25 |
| AX-157750337 | 28 | 55.409 | KV453263.1 | 6328026 | 25-scf00537 | 25 |
| AX-157874011 | 28 | 55.409 | KV453263.1 | 6341308 | 25-scf00537 | 25 |
| AX-158358613 | 28 | 55.409 | KV453263.1 | 6343048 | 25-scf00537 | 25 |
| AX-158358630 | 28 | 55.409 | KV453263.1 | 6369389 | 25-scf00537 | 25 |
| AX-158358631 | 28 | 55.409 | KV453263.1 | 6370283 | 25-scf00537 | 25 |
| AX-157749293 | 28 | 55.409 | KV453263.1 | 6384615 | 25-scf00537 | 25 |
| AX-158358643 | 28 | 55.409 | KV453263.1 | 6385767 | 25-scf00537 | 25 |
| AX-158358647 | 28 | 55.409 | KV453263.1 | 6391638 | 25-scf00537 | 25 |

|              |    |        |            |         |             |    |
|--------------|----|--------|------------|---------|-------------|----|
| AX-158358653 | 28 | 55.409 | KV453263.1 | 6397905 | 25-scf00537 | 25 |
| AX-157851730 | 28 | 55.409 | KV453263.1 | 6405982 | 25-scf00537 | 25 |
| AX-158358661 | 28 | 55.409 | KV453263.1 | 6411142 | 25-scf00537 | 25 |
| AX-158358677 | 28 | 55.409 | KV453263.1 | 6442717 | 25-scf00537 | 25 |
| AX-157851734 | 28 | 55.409 | KV453263.1 | 6464596 | 25-scf00537 | 25 |
| AX-158358686 | 28 | 55.409 | KV453263.1 | 6464640 | 25-scf00537 | 25 |
| AX-157851735 | 28 | 55.409 | KV453263.1 | 6464875 | 25-scf00537 | 25 |
| AX-158358690 | 28 | 55.409 | KV453263.1 | 6468173 | 25-scf00537 | 25 |
| AX-157851736 | 28 | 55.409 | KV453263.1 | 6468470 | 25-scf00537 | 25 |
| AX-158358692 | 28 | 55.409 | KV453263.1 | 6472764 | 25-scf00537 | 25 |
| AX-158358713 | 28 | 55.409 | KV453263.1 | 6492573 | 25-scf00537 | 25 |
| AX-158358734 | 28 | 55.409 | KV453263.1 | 6515863 | 25-scf00537 | 25 |
| AX-158357483 | 28 | 55.425 | KV453263.1 | 4704634 | 25-scf00537 | 25 |
| AX-158357488 | 28 | 55.425 | KV453263.1 | 4712259 | 25-scf00537 | 25 |
| AX-158358143 | 28 | 55.425 | KV453263.1 | 5673056 | 25-scf00537 | 25 |
| AX-158358405 | 28 | 55.425 | KV453263.1 | 6057902 | 25-scf00537 | 25 |
| AX-158358449 | 28 | 55.425 | KV453263.1 | 6126219 | 25-scf00537 | 25 |
| AX-158358637 | 28 | 55.425 | KV453263.1 | 6376265 | 25-scf00537 | 25 |
| AX-158358646 | 28 | 55.425 | KV453263.1 | 6390819 | 25-scf00537 | 25 |
| AX-158358656 | 28 | 55.425 | KV453263.1 | 6403486 | 25-scf00537 | 25 |
| AX-158358737 | 28 | 55.425 | KV453263.1 | 6520560 | 25-scf00537 | 25 |
| AX-158358760 | 28 | 55.425 | KV453263.1 | 6557381 | 25-scf00537 | 25 |
| AX-158358627 | 28 | 55.446 | KV453263.1 | 6367256 | 25-scf00537 | 25 |
| AX-158358632 | 28 | 55.446 | KV453263.1 | 6371539 | 25-scf00537 | 25 |
| AX-157851733 | 28 | 55.446 | KV453263.1 | 6420921 | 25-scf00537 | 25 |
| AX-158358664 | 28 | 55.446 | KV453263.1 | 6422392 | 25-scf00537 | 25 |
| AX-158358716 | 28 | 57.236 | KV453263.1 | 6496854 | 25-scf00537 | 25 |
| AX-158358448 | 28 | 57.239 | KV453263.1 | 6124728 | 25-scf00537 | 25 |
| AX-158358694 | 28 | 57.239 | KV453263.1 | 6473463 | 25-scf00537 | 25 |
| AX-158358719 | 28 | 57.239 | KV453263.1 | 6498406 | 25-scf00537 | 25 |
| AX-158358725 | 28 | 57.395 | KV453263.1 | 6503360 | 25-scf00537 | 25 |
| AX-158358726 | 28 | 57.395 | KV453263.1 | 6505162 | 25-scf00537 | 25 |
| AX-158358735 | 28 | 57.395 | KV453263.1 | 6517275 | 25-scf00537 | 25 |
| AX-158358741 | 28 | 58.131 | KV453263.1 | 6528417 | 25-scf00537 | 25 |
| AX-157874012 | 28 | 58.131 | KV453263.1 | 6531338 | 25-scf00537 | 25 |
| AX-158358750 | 28 | 58.131 | KV453263.1 | 6543415 | 25-scf00537 | 25 |
| AX-158413435 | 28 | 58.131 | KV453263.1 | 6546003 | 25-scf00537 | 25 |
| AX-158358753 | 28 | 58.131 | KV453263.1 | 6547160 | 25-scf00537 | 25 |
| AX-158358754 | 28 | 58.131 | KV453263.1 | 6547709 | 25-scf00537 | 25 |
| AX-158358757 | 28 | 58.131 | KV453263.1 | 6554189 | 25-scf00537 | 25 |
| AX-158358758 | 28 | 58.131 | KV453263.1 | 6555742 | 25-scf00537 | 25 |
| AX-158358759 | 28 | 58.131 | KV453263.1 | 6557004 | 25-scf00537 | 25 |
| AX-158358761 | 28 | 58.131 | KV453263.1 | 6558306 | 25-scf00537 | 25 |
| AX-158358762 | 28 | 58.131 | KV453263.1 | 6559275 | 25-scf00537 | 25 |
| AX-158358764 | 28 | 58.131 | KV453263.1 | 6560952 | 25-scf00537 | 25 |
| AX-158358769 | 28 | 58.131 | KV453263.1 | 6567918 | 25-scf00537 | 25 |
| AX-158358771 | 28 | 58.131 | KV453263.1 | 6569284 | 25-scf00537 | 25 |
| AX-158358774 | 28 | 58.131 | KV453263.1 | 6572175 | 25-scf00537 | 25 |
| AX-158358776 | 28 | 58.131 | KV453263.1 | 6573500 | 25-scf00537 | 25 |
| AX-158358777 | 28 | 58.131 | KV453263.1 | 6577408 | 25-scf00537 | 25 |
| AX-157851743 | 28 | 58.131 | KV453263.1 | 6577685 | 25-scf00537 | 25 |

|              |    |        |            |         |             |    |
|--------------|----|--------|------------|---------|-------------|----|
| AX-158358787 | 28 | 58.131 | KV453263.1 | 6588390 | 25-scf00537 | 25 |
| AX-158358788 | 28 | 58.131 | KV453263.1 | 6588906 | 25-scf00537 | 25 |
| AX-158358780 | 28 | 58.168 | KV453263.1 | 6578998 | 25-scf00537 | 25 |
| AX-158358786 | 28 | 58.185 | KV453263.1 | 6587506 | 25-scf00537 | 25 |
| AX-158358791 | 28 | 58.24  | KV453263.1 | 6593487 | 25-scf00537 | 25 |
| AX-158358792 | 28 | 58.24  | KV453263.1 | 6594036 | 25-scf00537 | 25 |
| AX-157718095 | 28 | 58.291 | KV453263.1 | 6595402 | 25-scf00537 | 25 |
| AX-157851745 | 28 | 58.334 | KV453263.1 | 6595620 | 25-scf00537 | 25 |
| AX-157874013 | 28 | 58.349 | KV453263.1 | 6535074 | 25-scf00537 | 25 |
| AX-158358804 | 28 | 58.349 | KV453263.1 | 6607136 | 25-scf00537 | 25 |
| AX-158358810 | 28 | 58.349 | KV453263.1 | 6616213 | 25-scf00537 | 25 |
| AX-157851747 | 28 | 58.349 | KV453263.1 | 6641776 | 25-scf00537 | 25 |
| AX-158358811 | 28 | 58.361 | KV453263.1 | 6616857 | 25-scf00537 | 25 |
| AX-158358812 | 28 | 58.402 | KV453263.1 | 6618362 | 25-scf00537 | 25 |
| AX-158358816 | 28 | 58.458 | KV453263.1 | 6621413 | 25-scf00537 | 25 |
| AX-158358817 | 28 | 58.458 | KV453263.1 | 6639975 | 25-scf00537 | 25 |
| AX-158358818 | 28 | 58.458 | KV453263.1 | 6640677 | 25-scf00537 | 25 |
| AX-157715562 | 28 | 58.458 | KV453263.1 | 6644904 | 25-scf00537 | 25 |
| AX-158358819 | 28 | 58.458 | KV453263.1 | 6649839 | 25-scf00537 | 25 |
| AX-158358820 | 28 | 58.458 | KV453263.1 | 6650352 | 25-scf00537 | 25 |
| AX-158358823 | 28 | 58.458 | KV453263.1 | 6655197 | 25-scf00537 | 25 |
| AX-158358831 | 28 | 58.458 | KV453263.1 | 6664307 | 25-scf00537 | 25 |
| AX-158358828 | 28 | 58.567 | KV453263.1 | 6660502 | 25-scf00537 | 25 |
| AX-158358829 | 28 | 58.567 | KV453263.1 | 6660928 | 25-scf00537 | 25 |
| AX-158358847 | 28 | 58.567 | KV453263.1 | 6685605 | 25-scf00537 | 25 |
| AX-158358857 | 28 | 58.567 | KV453263.1 | 6697004 | 25-scf00537 | 25 |
| AX-158381737 | 28 | 58.567 | KV453263.1 | 6705486 | 25-scf00537 | 25 |
| AX-157851748 | 28 | 58.611 | KV453263.1 | 6665877 | 25-scf00537 | 25 |
| AX-158358833 | 28 | 58.677 | KV453263.1 | 6666190 | 25-scf00537 | 25 |
| AX-158358835 | 28 | 58.895 | KV453263.1 | 6667879 | 25-scf00537 | 25 |
| AX-158358836 | 28 | 58.895 | KV453263.1 | 6669696 | 25-scf00537 | 25 |
| AX-157851749 | 28 | 58.895 | KV453263.1 | 6674775 | 25-scf00537 | 25 |
| AX-158358839 | 28 | 58.896 | KV453263.1 | 6674173 | 25-scf00537 | 25 |
| AX-158358840 | 28 | 58.896 | KV453263.1 | 6675516 | 25-scf00537 | 25 |
| AX-158358841 | 28 | 58.896 | KV453263.1 | 6676555 | 25-scf00537 | 25 |
| AX-158358842 | 28 | 58.896 | KV453263.1 | 6678885 | 25-scf00537 | 25 |
| AX-158358843 | 28 | 58.896 | KV453263.1 | 6680458 | 25-scf00537 | 25 |
| AX-158358845 | 28 | 59.222 | KV453263.1 | 6683969 | 25-scf00537 | 25 |
| AX-158358849 | 28 | 59.222 | KV453263.1 | 6690106 | 25-scf00537 | 25 |
| AX-158358858 | 28 | 59.222 | KV453263.1 | 6699446 | 25-scf00537 | 25 |
| AX-158358844 | 28 | 59.223 | KV453263.1 | 6683111 | 25-scf00537 | 25 |
| AX-157851753 | 28 | 59.223 | KV453263.1 | 6691187 | 25-scf00537 | 25 |
| AX-158358851 | 28 | 59.223 | KV453263.1 | 6691641 | 25-scf00537 | 25 |
| AX-157721496 | 28 | 59.223 | KV453263.1 | 6692333 | 25-scf00537 | 25 |
| AX-158358852 | 28 | 59.223 | KV453263.1 | 6692853 | 25-scf00537 | 25 |
| AX-158358853 | 28 | 59.223 | KV453263.1 | 6693380 | 25-scf00537 | 25 |
| AX-158358860 | 28 | 59.223 | KV453263.1 | 6701807 | 25-scf00537 | 25 |
| AX-157726600 | 28 | 59.312 | KV453263.1 | 6694972 | 25-scf00537 | 25 |
| AX-158358862 | 28 | 59.312 | KV453263.1 | 6703532 | 25-scf00537 | 25 |
| AX-158358047 | 28 | 59.332 | KV453263.1 | 5552398 | 25-scf00537 | 25 |
| AX-158358850 | 28 | 59.332 | KV453263.1 | 6690863 | 25-scf00537 | 25 |

|              |    |        |            |         |             |    |
|--------------|----|--------|------------|---------|-------------|----|
| AX-158358871 | 28 | 59.332 | KV453263.1 | 6712743 | 25-scf00537 | 25 |
| AX-158358872 | 28 | 59.332 | KV453263.1 | 6713548 | 25-scf00537 | 25 |
| AX-158358873 | 28 | 59.332 | KV453263.1 | 6716772 | 25-scf00537 | 25 |
| AX-158358874 | 28 | 59.332 | KV453263.1 | 6717209 | 25-scf00537 | 25 |
| AX-158358876 | 28 | 59.332 | KV453263.1 | 6718278 | 25-scf00537 | 25 |
| AX-158358879 | 28 | 59.332 | KV453263.1 | 6725267 | 25-scf00537 | 25 |
| AX-158358880 | 28 | 59.332 | KV453263.1 | 6725488 | 25-scf00537 | 25 |
| AX-157743804 | 28 | 59.332 | KV453263.1 | 6725657 | 25-scf00537 | 25 |
| AX-157713200 | 28 | 59.438 | KV453263.1 | 4075400 | 25-scf00537 | 25 |
| AX-158358884 | 28 | 59.438 | KV453263.1 | 6729206 | 25-scf00537 | 25 |
| AX-158358943 | 28 | 59.438 | KV453263.1 | 6818751 | 25-scf00537 | 25 |
| AX-158359019 | 28 | 59.438 | KV453263.1 | 6911398 | 25-scf00537 | 25 |
| AX-158358886 | 28 | 59.551 | KV453263.1 | 6735047 | 25-scf00537 | 25 |
| AX-158358888 | 28 | 59.551 | KV453263.1 | 6735964 | 25-scf00537 | 25 |
| AX-158358891 | 28 | 59.661 | KV453263.1 | 6737871 | 25-scf00537 | 25 |
| AX-158358894 | 28 | 59.729 | KV453263.1 | 6742004 | 25-scf00537 | 25 |
| AX-158358892 | 28 | 59.77  | KV453263.1 | 6738974 | 25-scf00537 | 25 |
| AX-158358893 | 28 | 59.77  | KV453263.1 | 6741190 | 25-scf00537 | 25 |
| AX-158358897 | 28 | 59.77  | KV453263.1 | 6756104 | 25-scf00537 | 25 |
| AX-158358899 | 28 | 59.77  | KV453263.1 | 6759934 | 25-scf00537 | 25 |
| AX-158358900 | 28 | 59.77  | KV453263.1 | 6760271 | 25-scf00537 | 25 |
| AX-158358901 | 28 | 59.77  | KV453263.1 | 6760605 | 25-scf00537 | 25 |
| AX-157775670 | 28 | 60.097 | KV453263.1 | 6763364 | 25-scf00537 | 25 |
| AX-157851756 | 28 | 60.098 | KV453263.1 | 6765860 | 25-scf00537 | 25 |
| AX-158358905 | 28 | 60.098 | KV453263.1 | 6767820 | 25-scf00537 | 25 |
| AX-157851757 | 28 | 60.098 | KV453263.1 | 6768977 | 25-scf00537 | 25 |
| AX-158358906 | 28 | 60.098 | KV453263.1 | 6769754 | 25-scf00537 | 25 |
| AX-157738958 | 28 | 60.098 | KV453263.1 | 6771327 | 25-scf00537 | 25 |
| AX-158358911 | 28 | 60.207 | KV453263.1 | 6776506 | 25-scf00537 | 25 |
| AX-158358912 | 28 | 60.207 | KV453263.1 | 6777251 | 25-scf00537 | 25 |
| AX-158358914 | 28 | 60.207 | KV453263.1 | 6780791 | 25-scf00537 | 25 |
| AX-158358910 | 28 | 60.307 | KV453263.1 | 6774786 | 25-scf00537 | 25 |
| AX-158358915 | 28 | 60.307 | KV453263.1 | 6782060 | 25-scf00537 | 25 |
| AX-157851760 | 28 | 60.307 | KV453263.1 | 6786746 | 25-scf00537 | 25 |
| AX-157714678 | 28 | 60.307 | KV453263.1 | 6788083 | 25-scf00537 | 25 |
| AX-158359048 | 28 | 60.307 | KV453263.1 | 6944130 | 25-scf00537 | 25 |
| AX-158358916 | 28 | 60.425 | KV453263.1 | 6784575 | 25-scf00537 | 25 |
| AX-157747820 | 28 | 60.425 | KV453263.1 | 6790877 | 25-scf00537 | 25 |
| AX-158358918 | 28 | 60.425 | KV453263.1 | 6792417 | 25-scf00537 | 25 |
| AX-157741569 | 28 | 60.425 | KV453263.1 | 6792915 | 25-scf00537 | 25 |
| AX-158358919 | 28 | 60.425 | KV453263.1 | 6793259 | 25-scf00537 | 25 |
| AX-158358922 | 28 | 60.425 | KV453263.1 | 6795561 | 25-scf00537 | 25 |
| AX-158358923 | 28 | 60.425 | KV453263.1 | 6797569 | 25-scf00537 | 25 |
| AX-158358930 | 28 | 60.425 | KV453263.1 | 6805354 | 25-scf00537 | 25 |
| AX-158358931 | 28 | 60.425 | KV453263.1 | 6805978 | 25-scf00537 | 25 |
| AX-157750811 | 28 | 60.425 | KV453263.1 | 6821382 | 25-scf00537 | 25 |
| AX-158358947 | 28 | 60.425 | KV453263.1 | 6823262 | 25-scf00537 | 25 |
| AX-158419740 | 28 | 60.425 | KV453263.1 | 6859373 | 25-scf00537 | 25 |
| AX-158358937 | 28 | 60.644 | KV453263.1 | 6814715 | 25-scf00537 | 25 |
| AX-158358950 | 28 | 60.644 | KV453263.1 | 6825105 | 25-scf00537 | 25 |
| AX-158358951 | 28 | 60.644 | KV453263.1 | 6825446 | 25-scf00537 | 25 |



|              |    |        |            |          |             |    |
|--------------|----|--------|------------|----------|-------------|----|
| AX-158358985 | 28 | 60.644 | KV453263.1 | 6864654  | 25-scf00537 | 25 |
| AX-158359017 | 28 | 60.644 | KV453263.1 | 6909772  | 25-scf00537 | 25 |
| AX-158359022 | 28 | 60.644 | KV453263.1 | 6913870  | 25-scf00537 | 25 |
| AX-158359027 | 28 | 60.644 | KV453263.1 | 6920382  | 25-scf00537 | 25 |
| AX-157738840 | 28 | 60.644 | KV453263.1 | 6921031  | 25-scf00537 | 25 |
| AX-158359030 | 28 | 60.644 | KV453263.1 | 6927228  | 25-scf00537 | 25 |
| AX-158359032 | 28 | 60.644 | KV453263.1 | 6930012  | 25-scf00537 | 25 |
| AX-157716261 | 28 | 60.644 | KV453263.1 | 6959113  | 25-scf00537 | 25 |
| AX-158359058 | 28 | 60.644 | KV453263.1 | 6961458  | 25-scf00537 | 25 |
| AX-158359060 | 28 | 60.644 | KV453263.1 | 6962298  | 25-scf00537 | 25 |
| AX-158359061 | 28 | 60.644 | KV453263.1 | 6962738  | 25-scf00537 | 25 |
| AX-158359063 | 28 | 60.644 | KV453263.1 | 6964169  | 25-scf00537 | 25 |
| AX-157851764 | 28 | 60.644 | KV453263.1 | 6972047  | 25-scf00537 | 25 |
| AX-157851765 | 28 | 60.644 | KV453263.1 | 6973954  | 25-scf00537 | 25 |
| AX-158359071 | 28 | 60.644 | KV453263.1 | 6986284  | 25-scf00537 | 25 |
| AX-158359084 | 28 | 60.644 | KV453263.1 | 7010861  | 25-scf00537 | 25 |
| AX-158359125 | 28 | 60.644 | KV453263.1 | 7084280  | 25-scf00537 | 25 |
| AX-157726081 | 28 | 60.644 | KV453263.1 | 7085002  | 25-scf00537 | 25 |
| AX-158359207 | 28 | 60.644 | KV453263.1 | 7201483  | 25-scf00537 | 25 |
| AX-158358988 | 28 | 60.767 | KV453263.1 | 6868818  | 25-scf00537 | 25 |
| AX-158359086 | 28 | 60.767 | KV453263.1 | 7012156  | 25-scf00537 | 25 |
| AX-158359087 | 28 | 60.767 | KV453263.1 | 7012692  | 25-scf00537 | 25 |
| AX-158359090 | 28 | 60.767 | KV453263.1 | 7014861  | 25-scf00537 | 25 |
| AX-157713797 | 28 | 60.767 | KV453263.1 | 7069197  | 25-scf00537 | 25 |
| AX-158359126 | 28 | 60.767 | KV453263.1 | 7084556  | 25-scf00537 | 25 |
| AX-158359033 | 28 | 60.829 | KV453263.1 | 6930523  | 25-scf00537 | 25 |
| AX-158359142 | 28 | 60.829 | KV453263.1 | 7101753  | 25-scf00537 | 25 |
| AX-157775531 | 28 | 60.829 | KV453263.1 | 7181670  | 25-scf00537 | 25 |
| AX-158359203 | 28 | 60.829 | KV453263.1 | 7193727  | 25-scf00537 | 25 |
| AX-157742425 | 28 | 60.829 | KV453263.1 | 7194374  | 25-scf00537 | 25 |
| AX-158359611 | 28 | 60.829 | KV453263.1 | 7825516  | 25-scf00537 | 25 |
| AX-158360168 | 28 | 60.829 | KV453263.1 | 8617452  | 25-scf00537 | 25 |
| AX-158360455 | 28 | 60.829 | KV453263.1 | 8969685  | 25-scf00537 | 25 |
| AX-157852183 | 28 | 60.829 | KV453263.1 | 9340726  | 25-scf00537 | 25 |
| AX-158364742 | 28 | 60.829 | KV453263.1 | 10501432 | 25-scf00537 | 25 |
| AX-158359148 | 28 | 60.891 | KV453263.1 | 7109703  | 25-scf00537 | 25 |
| AX-158359151 | 28 | 60.891 | KV453263.1 | 7111819  | 25-scf00537 | 25 |
| AX-158359152 | 28 | 60.891 | KV453263.1 | 7112790  | 25-scf00537 | 25 |
| AX-158358991 | 28 | 61.015 | KV453263.1 | 6870916  | 25-scf00537 | 25 |
| AX-158359158 | 28 | 61.015 | KV453263.1 | 7123423  | 25-scf00537 | 25 |
| AX-157851778 | 28 | 61.015 | KV453263.1 | 7134711  | 25-scf00537 | 25 |
| AX-158359180 | 28 | 61.015 | KV453263.1 | 7155963  | 25-scf00537 | 25 |
| AX-158359188 | 28 | 61.015 | KV453263.1 | 7166753  | 25-scf00537 | 25 |
| AX-158359198 | 28 | 61.015 | KV453263.1 | 7186438  | 25-scf00537 | 25 |
| AX-158359213 | 28 | 61.015 | KV453263.1 | 7209382  | 25-scf00537 | 25 |
| AX-158359441 | 28 | 61.015 | KV453263.1 | 7548420  | 25-scf00537 | 25 |
| AX-158360173 | 28 | 61.015 | KV453263.1 | 8623249  | 25-scf00537 | 25 |
| AX-158360337 | 28 | 61.015 | KV453263.1 | 8846937  | 25-scf00537 | 25 |
| AX-158359064 | 28 | 61.139 | KV453263.1 | 6965835  | 25-scf00537 | 25 |
| AX-158359181 | 28 | 61.139 | KV453263.1 | 7156339  | 25-scf00537 | 25 |
| AX-158359186 | 28 | 61.139 | KV453263.1 | 7163372  | 25-scf00537 | 25 |

|              |    |        |            |         |             |    |
|--------------|----|--------|------------|---------|-------------|----|
| AX-158359187 | 28 | 61.139 | KV453263.1 | 7164244 | 25-scf00537 | 25 |
| AX-158359190 | 28 | 61.139 | KV453263.1 | 7169556 | 25-scf00537 | 25 |
| AX-158359195 | 28 | 61.139 | KV453263.1 | 7178156 | 25-scf00537 | 25 |
| AX-158359222 | 28 | 61.139 | KV453263.1 | 7222849 | 25-scf00537 | 25 |
| AX-158359227 | 28 | 61.139 | KV453263.1 | 7230447 | 25-scf00537 | 25 |
| AX-158359230 | 28 | 61.139 | KV453263.1 | 7232557 | 25-scf00537 | 25 |
| AX-157697275 | 28 | 61.139 | KV453263.1 | 7258693 | 25-scf00537 | 25 |
| AX-158359256 | 28 | 61.139 | KV453263.1 | 7274296 | 25-scf00537 | 25 |
| AX-158359257 | 28 | 61.139 | KV453263.1 | 7275861 | 25-scf00537 | 25 |
| AX-158359263 | 28 | 61.139 | KV453263.1 | 7284738 | 25-scf00537 | 25 |
| AX-158359264 | 28 | 61.139 | KV453263.1 | 7285322 | 25-scf00537 | 25 |
| AX-158419754 | 28 | 61.139 | KV453263.1 | 7289089 | 25-scf00537 | 25 |
| AX-158359270 | 28 | 61.139 | KV453263.1 | 7302758 | 25-scf00537 | 25 |
| AX-158359301 | 28 | 61.139 | KV453263.1 | 7368813 | 25-scf00537 | 25 |
| AX-157851808 | 28 | 61.139 | KV453263.1 | 7374366 | 25-scf00537 | 25 |
| AX-157851809 | 28 | 61.139 | KV453263.1 | 7375096 | 25-scf00537 | 25 |
| AX-158359311 | 28 | 61.139 | KV453263.1 | 7380640 | 25-scf00537 | 25 |
| AX-158359317 | 28 | 61.139 | KV453263.1 | 7386954 | 25-scf00537 | 25 |
| AX-158359322 | 28 | 61.139 | KV453263.1 | 7390306 | 25-scf00537 | 25 |
| AX-158359372 | 28 | 61.139 | KV453263.1 | 7455407 | 25-scf00537 | 25 |
| AX-158359450 | 28 | 61.139 | KV453263.1 | 7568165 | 25-scf00537 | 25 |
| AX-158359531 | 28 | 61.139 | KV453263.1 | 7685631 | 25-scf00537 | 25 |
| AX-158359643 | 28 | 61.139 | KV453263.1 | 7892746 | 25-scf00537 | 25 |
| AX-158360154 | 28 | 61.139 | KV453263.1 | 8595921 | 25-scf00537 | 25 |
| AX-157707666 | 28 | 61.139 | KV453263.1 | 8628107 | 25-scf00537 | 25 |
| AX-158360308 | 28 | 61.139 | KV453263.1 | 8799686 | 25-scf00537 | 25 |
| AX-158360311 | 28 | 61.139 | KV453263.1 | 8802020 | 25-scf00537 | 25 |
| AX-158360318 | 28 | 61.139 | KV453263.1 | 8812433 | 25-scf00537 | 25 |
| AX-158359545 | 28 | 61.153 | KV453263.1 | 7706998 | 25-scf00537 | 25 |
| AX-157851889 | 28 | 61.153 | KV453263.1 | 8483769 | 25-scf00537 | 25 |
| AX-158359324 | 28 | 61.263 | KV453263.1 | 7390980 | 25-scf00537 | 25 |
| AX-158359549 | 28 | 61.386 | KV453263.1 | 7713291 | 25-scf00537 | 25 |
| AX-158359295 | 28 | 61.51  | KV453263.1 | 7356215 | 25-scf00537 | 25 |
| AX-158359392 | 28 | 61.51  | KV453263.1 | 7492775 | 25-scf00537 | 25 |
| AX-158359582 | 28 | 61.51  | KV453263.1 | 7758214 | 25-scf00537 | 25 |
| AX-158359584 | 28 | 61.51  | KV453263.1 | 7760856 | 25-scf00537 | 25 |
| AX-157851850 | 28 | 61.51  | KV453263.1 | 7761184 | 25-scf00537 | 25 |
| AX-157851851 | 28 | 61.51  | KV453263.1 | 7761887 | 25-scf00537 | 25 |
| AX-158359585 | 28 | 61.51  | KV453263.1 | 7762002 | 25-scf00537 | 25 |
| AX-157851852 | 28 | 61.51  | KV453263.1 | 7762554 | 25-scf00537 | 25 |
| AX-158359592 | 28 | 61.51  | KV453263.1 | 7767762 | 25-scf00537 | 25 |
| AX-157851853 | 28 | 61.51  | KV453263.1 | 7768303 | 25-scf00537 | 25 |
| AX-158360022 | 28 | 61.51  | KV453263.1 | 8440849 | 25-scf00537 | 25 |
| AX-158360156 | 28 | 61.51  | KV453263.1 | 8597794 | 25-scf00537 | 25 |
| AX-158359637 | 28 | 61.634 | KV453263.1 | 7885518 | 25-scf00537 | 25 |
| AX-158359730 | 28 | 61.882 | KV453263.1 | 8010046 | 25-scf00537 | 25 |
| AX-157851865 | 28 | 61.882 | KV453263.1 | 8059905 | 25-scf00537 | 25 |
| AX-158359801 | 28 | 61.882 | KV453263.1 | 8158362 | 25-scf00537 | 25 |
| AX-158359882 | 28 | 61.882 | KV453263.1 | 8265835 | 25-scf00537 | 25 |
| AX-158360106 | 28 | 61.882 | KV453263.1 | 8533945 | 25-scf00537 | 25 |
| AX-158360160 | 28 | 61.882 | KV453263.1 | 8602842 | 25-scf00537 | 25 |

|              |    |        |            |          |             |    |
|--------------|----|--------|------------|----------|-------------|----|
| AX-158419792 | 28 | 61.882 | KV453263.1 | 8608536  | 25-scf00537 | 25 |
| AX-158360188 | 28 | 61.882 | KV453263.1 | 8640272  | 25-scf00537 | 25 |
| AX-158360210 | 28 | 61.882 | KV453263.1 | 8677697  | 25-scf00537 | 25 |
| AX-158360244 | 28 | 61.882 | KV453263.1 | 8720641  | 25-scf00537 | 25 |
| AX-158360289 | 28 | 61.882 | KV453263.1 | 8776724  | 25-scf00537 | 25 |
| AX-158360310 | 28 | 61.882 | KV453263.1 | 8801755  | 25-scf00537 | 25 |
| AX-158364341 | 28 | 61.882 | KV453263.1 | 10046032 | 25-scf00537 | 25 |
| AX-158364374 | 28 | 61.882 | KV453263.1 | 10078401 | 25-scf00537 | 25 |
| AX-157852219 | 28 | 61.882 | KV453263.1 | 10092103 | 25-scf00537 | 25 |
| AX-158364417 | 28 | 61.882 | KV453263.1 | 10135000 | 25-scf00537 | 25 |
| AX-158364631 | 28 | 61.882 | KV453263.1 | 10382847 | 25-scf00537 | 25 |
| AX-158360090 | 28 | 61.96  | KV453263.1 | 8510423  | 25-scf00537 | 25 |
| AX-158360183 | 28 | 61.96  | KV453263.1 | 8636196  | 25-scf00537 | 25 |
| AX-158360186 | 28 | 61.96  | KV453263.1 | 8637724  | 25-scf00537 | 25 |
| AX-158360187 | 28 | 61.96  | KV453263.1 | 8639811  | 25-scf00537 | 25 |
| AX-158419796 | 28 | 61.96  | KV453263.1 | 8670252  | 25-scf00537 | 25 |
| AX-158360249 | 28 | 61.96  | KV453263.1 | 8725494  | 25-scf00537 | 25 |
| AX-158360307 | 28 | 61.96  | KV453263.1 | 8798948  | 25-scf00537 | 25 |
| AX-158360323 | 28 | 61.96  | KV453263.1 | 8819567  | 25-scf00537 | 25 |
| AX-158360335 | 28 | 61.96  | KV453263.1 | 8845928  | 25-scf00537 | 25 |
| AX-158360336 | 28 | 61.96  | KV453263.1 | 8846336  | 25-scf00537 | 25 |
| AX-158360340 | 28 | 61.96  | KV453263.1 | 8851853  | 25-scf00537 | 25 |
| AX-157758179 | 28 | 61.96  | KV453263.1 | 8897040  | 25-scf00537 | 25 |
| AX-158360405 | 28 | 61.96  | KV453263.1 | 8922077  | 25-scf00537 | 25 |
| AX-158360430 | 28 | 61.96  | KV453263.1 | 8948954  | 25-scf00537 | 25 |
| AX-158364663 | 28 | 61.96  | KV453263.1 | 10423644 | 25-scf00537 | 25 |
| AX-158365343 | 28 | 61.96  | KV453263.1 | 11211041 | 25-scf00537 | 25 |
| AX-158360351 | 28 | 62.038 | KV453263.1 | 8866537  | 25-scf00537 | 25 |
| AX-158360353 | 28 | 62.038 | KV453263.1 | 8868333  | 25-scf00537 | 25 |
| AX-158360354 | 28 | 62.038 | KV453263.1 | 8868903  | 25-scf00537 | 25 |
| AX-158360357 | 28 | 62.038 | KV453263.1 | 8876708  | 25-scf00537 | 25 |
| AX-158360358 | 28 | 62.038 | KV453263.1 | 8877477  | 25-scf00537 | 25 |
| AX-158360361 | 28 | 62.038 | KV453263.1 | 8879252  | 25-scf00537 | 25 |
| AX-158360364 | 28 | 62.038 | KV453263.1 | 8882503  | 25-scf00537 | 25 |
| AX-157720967 | 28 | 62.038 | KV453263.1 | 8885873  | 25-scf00537 | 25 |
| AX-157862399 | 28 | 62.038 | KV453263.1 | 8886159  | 25-scf00537 | 25 |
| AX-158360369 | 28 | 62.038 | KV453263.1 | 8887456  | 25-scf00537 | 25 |
| AX-158360370 | 28 | 62.038 | KV453263.1 | 8887936  | 25-scf00537 | 25 |
| AX-158360371 | 28 | 62.038 | KV453263.1 | 8888589  | 25-scf00537 | 25 |
| AX-157851907 | 28 | 62.038 | KV453263.1 | 8889254  | 25-scf00537 | 25 |
| AX-158360372 | 28 | 62.038 | KV453263.1 | 8889302  | 25-scf00537 | 25 |
| AX-158360373 | 28 | 62.038 | KV453263.1 | 8889483  | 25-scf00537 | 25 |
| AX-158360374 | 28 | 62.038 | KV453263.1 | 8890076  | 25-scf00537 | 25 |
| AX-158360375 | 28 | 62.038 | KV453263.1 | 8890784  | 25-scf00537 | 25 |
| AX-158360376 | 28 | 62.038 | KV453263.1 | 8891986  | 25-scf00537 | 25 |
| AX-158360378 | 28 | 62.038 | KV453263.1 | 8893847  | 25-scf00537 | 25 |
| AX-158360379 | 28 | 62.038 | KV453263.1 | 8895265  | 25-scf00537 | 25 |
| AX-158360380 | 28 | 62.038 | KV453263.1 | 8896518  | 25-scf00537 | 25 |
| AX-157851909 | 28 | 62.038 | KV453263.1 | 8897693  | 25-scf00537 | 25 |
| AX-157738969 | 28 | 62.038 | KV453263.1 | 8899173  | 25-scf00537 | 25 |
| AX-158360385 | 28 | 62.038 | KV453263.1 | 8904356  | 25-scf00537 | 25 |

|              |    |        |            |          |             |    |
|--------------|----|--------|------------|----------|-------------|----|
| AX-158360386 | 28 | 62.038 | KV453263.1 | 8904814  | 25-scf00537 | 25 |
| AX-158360389 | 28 | 62.038 | KV453263.1 | 8908927  | 25-scf00537 | 25 |
| AX-158360390 | 28 | 62.038 | KV453263.1 | 8909421  | 25-scf00537 | 25 |
| AX-158360391 | 28 | 62.038 | KV453263.1 | 8909797  | 25-scf00537 | 25 |
| AX-158360394 | 28 | 62.038 | KV453263.1 | 8911275  | 25-scf00537 | 25 |
| AX-158360396 | 28 | 62.038 | KV453263.1 | 8913518  | 25-scf00537 | 25 |
| AX-158360398 | 28 | 62.038 | KV453263.1 | 8914653  | 25-scf00537 | 25 |
| AX-158381745 | 28 | 62.038 | KV453263.1 | 8918573  | 25-scf00537 | 25 |
| AX-158360401 | 28 | 62.038 | KV453263.1 | 8918683  | 25-scf00537 | 25 |
| AX-158360410 | 28 | 62.038 | KV453263.1 | 8925049  | 25-scf00537 | 25 |
| AX-158360411 | 28 | 62.038 | KV453263.1 | 8925586  | 25-scf00537 | 25 |
| AX-158360414 | 28 | 62.038 | KV453263.1 | 8928541  | 25-scf00537 | 25 |
| AX-158360415 | 28 | 62.038 | KV453263.1 | 8929655  | 25-scf00537 | 25 |
| AX-158360416 | 28 | 62.038 | KV453263.1 | 8930246  | 25-scf00537 | 25 |
| AX-158360417 | 28 | 62.038 | KV453263.1 | 8932709  | 25-scf00537 | 25 |
| AX-158360418 | 28 | 62.038 | KV453263.1 | 8933334  | 25-scf00537 | 25 |
| AX-158360419 | 28 | 62.038 | KV453263.1 | 8934838  | 25-scf00537 | 25 |
| AX-158360421 | 28 | 62.038 | KV453263.1 | 8937552  | 25-scf00537 | 25 |
| AX-158360431 | 28 | 62.195 | KV453263.1 | 8949474  | 25-scf00537 | 25 |
| AX-158360459 | 28 | 62.195 | KV453263.1 | 8979436  | 25-scf00537 | 25 |
| AX-158360481 | 28 | 62.486 | KV453263.1 | 9012474  | 25-scf00537 | 25 |
| AX-158363374 | 28 | 62.486 | KV453263.1 | 9064071  | 25-scf00537 | 25 |
| AX-158363609 | 28 | 62.486 | KV453263.1 | 9310646  | 25-scf00537 | 25 |
| AX-157742042 | 28 | 62.486 | KV453263.1 | 9443322  | 25-scf00537 | 25 |
| AX-158364347 | 28 | 62.486 | KV453263.1 | 10052941 | 25-scf00537 | 25 |
| AX-158364352 | 28 | 62.486 | KV453263.1 | 10057877 | 25-scf00537 | 25 |
| AX-158364552 | 28 | 62.486 | KV453263.1 | 10306973 | 25-scf00537 | 25 |
| AX-158364379 | 28 | 62.502 | KV453263.1 | 10082507 | 25-scf00537 | 25 |
| AX-157852246 | 28 | 62.502 | KV453263.1 | 10325447 | 25-scf00537 | 25 |
| AX-158364571 | 28 | 62.502 | KV453263.1 | 10325803 | 25-scf00537 | 25 |
| AX-157771893 | 28 | 62.545 | KV453263.1 | 8758063  | 25-scf00537 | 25 |
| AX-158360344 | 28 | 62.545 | KV453263.1 | 8857159  | 25-scf00537 | 25 |
| AX-158360493 | 28 | 62.545 | KV453263.1 | 9026854  | 25-scf00537 | 25 |
| AX-158363581 | 28 | 62.545 | KV453263.1 | 9287571  | 25-scf00537 | 25 |
| AX-158363942 | 28 | 62.545 | KV453263.1 | 9628451  | 25-scf00537 | 25 |
| AX-158363968 | 28 | 62.545 | KV453263.1 | 9649669  | 25-scf00537 | 25 |
| AX-158413530 | 28 | 62.545 | KV453263.1 | 9678875  | 25-scf00537 | 25 |
| AX-158364172 | 28 | 62.545 | KV453263.1 | 9860919  | 25-scf00537 | 25 |
| AX-158364176 | 28 | 62.545 | KV453263.1 | 9868886  | 25-scf00537 | 25 |
| AX-158364180 | 28 | 62.545 | KV453263.1 | 9872698  | 25-scf00537 | 25 |
| AX-157749076 | 28 | 62.545 | KV453263.1 | 10017627 | 25-scf00537 | 25 |
| AX-157852259 | 28 | 62.545 | KV453263.1 | 10478616 | 25-scf00537 | 25 |
| AX-158364731 | 28 | 62.545 | KV453263.1 | 10492558 | 25-scf00537 | 25 |
| AX-158364752 | 28 | 62.545 | KV453263.1 | 10514236 | 25-scf00537 | 25 |
| AX-157745211 | 28 | 62.545 | KV453263.1 | 10518471 | 25-scf00537 | 25 |
| AX-158364768 | 28 | 62.545 | KV453263.1 | 10531820 | 25-scf00537 | 25 |
| AX-157724713 | 28 | 62.545 | KV453263.1 | 10595224 | 25-scf00537 | 25 |
| AX-158364845 | 28 | 62.545 | KV453263.1 | 10619784 | 25-scf00537 | 25 |
| AX-158364938 | 28 | 62.545 | KV453263.1 | 10703674 | 25-scf00537 | 25 |
| AX-158364952 | 28 | 62.545 | KV453263.1 | 10714446 | 25-scf00537 | 25 |
| AX-158365146 | 28 | 62.545 | KV453263.1 | 10953867 | 25-scf00537 | 25 |

|              |    |        |            |          |             |    |
|--------------|----|--------|------------|----------|-------------|----|
| AX-158365215 | 28 | 62.545 | KV453263.1 | 11047082 | 25-scf00537 | 25 |
| AX-158364744 | 28 | 62.584 | KV453263.1 | 10505911 | 25-scf00537 | 25 |
| AX-158364745 | 28 | 62.584 | KV453263.1 | 10506995 | 25-scf00537 | 25 |
| AX-158364332 | 28 | 62.625 | KV453263.1 | 10032955 | 25-scf00537 | 25 |
| AX-158364970 | 28 | 62.625 | KV453263.1 | 10737089 | 25-scf00537 | 25 |
| AX-158365113 | 28 | 62.749 | KV453263.1 | 10911034 | 25-scf00537 | 25 |
| AX-157852296 | 28 | 62.873 | KV453263.1 | 10929685 | 25-scf00537 | 25 |
| AX-158365144 | 28 | 62.906 | KV453263.1 | 10952690 | 25-scf00537 | 25 |
| AX-158365148 | 28 | 62.95  | KV453263.1 | 10957915 | 25-scf00537 | 25 |
| AX-158365161 | 28 | 62.997 | KV453263.1 | 10970974 | 25-scf00537 | 25 |
| AX-158365171 | 28 | 63.053 | KV453263.1 | 10980998 | 25-scf00537 | 25 |
| AX-158365175 | 28 | 63.053 | KV453263.1 | 10985121 | 25-scf00537 | 25 |
| AX-158365166 | 28 | 63.065 | KV453263.1 | 10975439 | 25-scf00537 | 25 |
| AX-158365176 | 28 | 63.065 | KV453263.1 | 10986894 | 25-scf00537 | 25 |
| AX-158365333 | 28 | 63.065 | KV453263.1 | 11199391 | 25-scf00537 | 25 |
| AX-158365366 | 28 | 63.065 | KV453263.1 | 11238883 | 25-scf00537 | 25 |
| AX-158365377 | 28 | 63.065 | KV453263.1 | 11245617 | 25-scf00537 | 25 |
| AX-158365182 | 28 | 63.121 | KV453263.1 | 10997964 | 25-scf00537 | 25 |
| AX-158365291 | 28 | 63.121 | KV453263.1 | 11152293 | 25-scf00537 | 25 |
| AX-158365310 | 28 | 63.121 | KV453263.1 | 11175686 | 25-scf00537 | 25 |
| AX-158365190 | 28 | 63.245 | KV453263.1 | 11009256 | 25-scf00537 | 25 |
| AX-157862435 | 28 | 63.245 | KV453263.1 | 11020989 | 25-scf00537 | 25 |
| AX-158365230 | 28 | 63.245 | KV453263.1 | 11068920 | 25-scf00537 | 25 |
| AX-158365234 | 28 | 63.28  | KV453263.1 | 11072631 | 25-scf00537 | 25 |
| AX-158365173 | 28 | 63.32  | KV453263.1 | 10983373 | 25-scf00537 | 25 |
| AX-157852305 | 28 | 63.32  | KV453263.1 | 11074767 | 25-scf00537 | 25 |
| AX-158365278 | 28 | 63.32  | KV453263.1 | 11136598 | 25-scf00537 | 25 |
| AX-158365285 | 28 | 63.32  | KV453263.1 | 11141596 | 25-scf00537 | 25 |
| AX-158365296 | 28 | 63.32  | KV453263.1 | 11158085 | 25-scf00537 | 25 |
| AX-157889194 | 28 | 63.32  | KV453263.1 | 11171963 | 25-scf00537 | 25 |
| AX-158365342 | 28 | 63.32  | KV453263.1 | 11209631 | 25-scf00537 | 25 |
| AX-158365362 | 28 | 63.32  | KV453263.1 | 11234521 | 25-scf00537 | 25 |
| AX-158365383 | 28 | 63.32  | KV453263.1 | 11251114 | 25-scf00537 | 25 |
| AX-158365402 | 28 | 63.32  | KV453263.1 | 11271672 | 25-scf00537 | 25 |
| AX-158365404 | 28 | 63.32  | KV453263.1 | 11272957 | 25-scf00537 | 25 |
| AX-158365412 | 28 | 63.32  | KV453263.1 | 11280211 | 25-scf00537 | 25 |
| AX-158359536 | 28 | 63.369 | KV453263.1 | 7690576  | 25-scf00537 | 25 |
| AX-158359957 | 28 | 63.369 | KV453263.1 | 8368851  | 25-scf00537 | 25 |
| AX-157710240 | 28 | 63.369 | KV453263.1 | 8522424  | 25-scf00537 | 25 |
| AX-158363808 | 28 | 63.369 | KV453263.1 | 9504844  | 25-scf00537 | 25 |
| AX-158363980 | 28 | 63.369 | KV453263.1 | 9663535  | 25-scf00537 | 25 |
| AX-158363995 | 28 | 63.369 | KV453263.1 | 9678089  | 25-scf00537 | 25 |
| AX-158364006 | 28 | 63.369 | KV453263.1 | 9689199  | 25-scf00537 | 25 |
| AX-158364011 | 28 | 63.369 | KV453263.1 | 9694574  | 25-scf00537 | 25 |
| AX-157852213 | 28 | 63.369 | KV453263.1 | 9974165  | 25-scf00537 | 25 |
| AX-158364396 | 28 | 63.369 | KV453263.1 | 10105301 | 25-scf00537 | 25 |
| AX-158364397 | 28 | 63.369 | KV453263.1 | 10105723 | 25-scf00537 | 25 |
| AX-158364407 | 28 | 63.369 | KV453263.1 | 10119861 | 25-scf00537 | 25 |
| AX-158364410 | 28 | 63.369 | KV453263.1 | 10123336 | 25-scf00537 | 25 |
| AX-158364412 | 28 | 63.369 | KV453263.1 | 10126767 | 25-scf00537 | 25 |
| AX-158364927 | 28 | 63.369 | KV453263.1 | 10694329 | 25-scf00537 | 25 |

|              |    |        |            |          |             |    |
|--------------|----|--------|------------|----------|-------------|----|
| AX-158365117 | 28 | 63.369 | KV453263.1 | 10915843 | 25-scf00537 | 25 |
| AX-157725711 | 28 | 63.369 | KV453263.1 | 11067557 | 25-scf00537 | 25 |
| AX-158365235 | 28 | 63.369 | KV453263.1 | 11073095 | 25-scf00537 | 25 |
| AX-158365240 | 28 | 63.369 | KV453263.1 | 11092138 | 25-scf00537 | 25 |
| AX-158365244 | 28 | 63.369 | KV453263.1 | 11098142 | 25-scf00537 | 25 |
| AX-158365247 | 28 | 63.369 | KV453263.1 | 11104214 | 25-scf00537 | 25 |
| AX-158419960 | 28 | 63.369 | KV453263.1 | 11107816 | 25-scf00537 | 25 |
| AX-158365264 | 28 | 63.369 | KV453263.1 | 11117960 | 25-scf00537 | 25 |
| AX-158365265 | 28 | 63.369 | KV453263.1 | 11120802 | 25-scf00537 | 25 |
| AX-158365269 | 28 | 63.369 | KV453263.1 | 11125162 | 25-scf00537 | 25 |
| AX-158365271 | 28 | 63.369 | KV453263.1 | 11127357 | 25-scf00537 | 25 |
| AX-157852310 | 28 | 63.369 | KV453263.1 | 11129294 | 25-scf00537 | 25 |
| AX-157773604 | 28 | 63.369 | KV453263.1 | 11131115 | 25-scf00537 | 25 |
| AX-158365277 | 28 | 63.369 | KV453263.1 | 11136067 | 25-scf00537 | 25 |
| AX-158365282 | 28 | 63.369 | KV453263.1 | 11139604 | 25-scf00537 | 25 |
| AX-157852311 | 28 | 63.369 | KV453263.1 | 11139941 | 25-scf00537 | 25 |
| AX-158365283 | 28 | 63.369 | KV453263.1 | 11140469 | 25-scf00537 | 25 |
| AX-158365286 | 28 | 63.369 | KV453263.1 | 11142617 | 25-scf00537 | 25 |
| AX-158365287 | 28 | 63.369 | KV453263.1 | 11147563 | 25-scf00537 | 25 |
| AX-158365292 | 28 | 63.369 | KV453263.1 | 11152827 | 25-scf00537 | 25 |
| AX-157698559 | 28 | 63.369 | KV453263.1 | 11154614 | 25-scf00537 | 25 |
| AX-158365297 | 28 | 63.369 | KV453263.1 | 11158459 | 25-scf00537 | 25 |
| AX-157771091 | 28 | 63.369 | KV453263.1 | 11158875 | 25-scf00537 | 25 |
| AX-157889193 | 28 | 63.369 | KV453263.1 | 11163677 | 25-scf00537 | 25 |
| AX-158365301 | 28 | 63.369 | KV453263.1 | 11168881 | 25-scf00537 | 25 |
| AX-158365304 | 28 | 63.369 | KV453263.1 | 11170990 | 25-scf00537 | 25 |
| AX-158365307 | 28 | 63.369 | KV453263.1 | 11173591 | 25-scf00537 | 25 |
| AX-158365312 | 28 | 63.369 | KV453263.1 | 11177290 | 25-scf00537 | 25 |
| AX-158365315 | 28 | 63.369 | KV453263.1 | 11179112 | 25-scf00537 | 25 |
| AX-158365317 | 28 | 63.369 | KV453263.1 | 11180263 | 25-scf00537 | 25 |
| AX-158365318 | 28 | 63.369 | KV453263.1 | 11181893 | 25-scf00537 | 25 |
| AX-158365320 | 28 | 63.369 | KV453263.1 | 11187480 | 25-scf00537 | 25 |
| AX-158365322 | 28 | 63.369 | KV453263.1 | 11189849 | 25-scf00537 | 25 |
| AX-157852315 | 28 | 63.369 | KV453263.1 | 11190135 | 25-scf00537 | 25 |
| AX-158365323 | 28 | 63.369 | KV453263.1 | 11191771 | 25-scf00537 | 25 |
| AX-158365324 | 28 | 63.369 | KV453263.1 | 11192590 | 25-scf00537 | 25 |
| AX-158365328 | 28 | 63.369 | KV453263.1 | 11194734 | 25-scf00537 | 25 |
| AX-158365330 | 28 | 63.369 | KV453263.1 | 11197188 | 25-scf00537 | 25 |
| AX-158365331 | 28 | 63.369 | KV453263.1 | 11197809 | 25-scf00537 | 25 |
| AX-158365337 | 28 | 63.369 | KV453263.1 | 11202582 | 25-scf00537 | 25 |
| AX-158365338 | 28 | 63.369 | KV453263.1 | 11202989 | 25-scf00537 | 25 |
| AX-158365341 | 28 | 63.369 | KV453263.1 | 11209077 | 25-scf00537 | 25 |
| AX-157725657 | 28 | 63.369 | KV453263.1 | 11210101 | 25-scf00537 | 25 |
| AX-158365347 | 28 | 63.369 | KV453263.1 | 11216703 | 25-scf00537 | 25 |
| AX-158365348 | 28 | 63.369 | KV453263.1 | 11217915 | 25-scf00537 | 25 |
| AX-158365350 | 28 | 63.369 | KV453263.1 | 11220347 | 25-scf00537 | 25 |
| AX-158365353 | 28 | 63.369 | KV453263.1 | 11221929 | 25-scf00537 | 25 |
| AX-158365357 | 28 | 63.369 | KV453263.1 | 11226787 | 25-scf00537 | 25 |
| AX-158365364 | 28 | 63.369 | KV453263.1 | 11235594 | 25-scf00537 | 25 |
| AX-157852322 | 28 | 63.369 | KV453263.1 | 11237683 | 25-scf00537 | 25 |
| AX-157852323 | 28 | 63.369 | KV453263.1 | 11238510 | 25-scf00537 | 25 |

|              |    |        |            |          |             |    |
|--------------|----|--------|------------|----------|-------------|----|
| AX-158365368 | 28 | 63.369 | KV453263.1 | 11240043 | 25-scf00537 | 25 |
| AX-158365370 | 28 | 63.369 | KV453263.1 | 11241453 | 25-scf00537 | 25 |
| AX-158365373 | 28 | 63.369 | KV453263.1 | 11242876 | 25-scf00537 | 25 |
| AX-158365374 | 28 | 63.369 | KV453263.1 | 11243607 | 25-scf00537 | 25 |
| AX-158365378 | 28 | 63.369 | KV453263.1 | 11246977 | 25-scf00537 | 25 |
| AX-158365380 | 28 | 63.369 | KV453263.1 | 11248009 | 25-scf00537 | 25 |
| AX-158365384 | 28 | 63.369 | KV453263.1 | 11251540 | 25-scf00537 | 25 |
| AX-158365388 | 28 | 63.369 | KV453263.1 | 11255741 | 25-scf00537 | 25 |
| AX-158365398 | 28 | 63.369 | KV453263.1 | 11265972 | 25-scf00537 | 25 |
| AX-158365403 | 28 | 63.369 | KV453263.1 | 11272695 | 25-scf00537 | 25 |
| AX-158365408 | 28 | 63.369 | KV453263.1 | 11276759 | 25-scf00537 | 25 |
| AX-158365411 | 28 | 63.369 | KV453263.1 | 11279430 | 25-scf00537 | 25 |
| AX-158365415 | 28 | 63.369 | KV453263.1 | 11283178 | 25-scf00537 | 25 |
| AX-158365416 | 28 | 63.369 | KV453263.1 | 11284051 | 25-scf00537 | 25 |
| AX-157852326 | 28 | 63.369 | KV453263.1 | 11288094 | 25-scf00537 | 25 |
| AX-158365439 | 28 | 63.369 | KV453263.1 | 11311934 | 25-scf00537 | 25 |
| AX-158365445 | 28 | 63.369 | KV453263.1 | 11315742 | 25-scf00537 | 25 |
| AX-158365458 | 28 | 63.369 | KV453263.1 | 11335217 | 25-scf00537 | 25 |
| AX-158365460 | 28 | 63.369 | KV453263.1 | 11337447 | 25-scf00537 | 25 |
| AX-158365465 | 28 | 63.369 | KV453263.1 | 11350614 | 25-scf00537 | 25 |
| AX-158365467 | 28 | 63.369 | KV453263.1 | 11355405 | 25-scf00537 | 25 |
| AX-158365477 | 28 | 63.369 | KV453263.1 | 11371246 | 25-scf00537 | 25 |
| AX-158365496 | 28 | 63.369 | KV453263.1 | 11391939 | 25-scf00537 | 25 |
| AX-158365640 | 28 | 63.369 | KV453263.1 | 11589858 | 25-scf00537 | 25 |
| AX-157852317 | 28 | 63.564 | KV453263.1 | 11204129 | 25-scf00537 | 25 |
| AX-158365420 | 28 | 63.564 | KV453263.1 | 11290709 | 25-scf00537 | 25 |
| AX-158365423 | 28 | 63.564 | KV453263.1 | 11297521 | 25-scf00537 | 25 |
| AX-158365484 | 28 | 63.564 | KV453263.1 | 11380038 | 25-scf00537 | 25 |
| AX-158365427 | 28 | 63.66  | KV453263.1 | 11300194 | 25-scf00537 | 25 |
| AX-158365432 | 28 | 63.66  | KV453263.1 | 11304995 | 25-scf00537 | 25 |
| AX-158365442 | 28 | 63.66  | KV453263.1 | 11314067 | 25-scf00537 | 25 |
| AX-158365482 | 28 | 63.66  | KV453263.1 | 11377799 | 25-scf00537 | 25 |
| AX-158365485 | 28 | 63.66  | KV453263.1 | 11380390 | 25-scf00537 | 25 |
| AX-158365430 | 28 | 63.759 | KV453263.1 | 11303991 | 25-scf00537 | 25 |
| AX-158365434 | 28 | 63.759 | KV453263.1 | 11306287 | 25-scf00537 | 25 |
| AX-158365441 | 28 | 63.759 | KV453263.1 | 11313601 | 25-scf00537 | 25 |
| AX-158365443 | 28 | 63.759 | KV453263.1 | 11314948 | 25-scf00537 | 25 |
| AX-158365451 | 28 | 63.759 | KV453263.1 | 11328772 | 25-scf00537 | 25 |
| AX-158365455 | 28 | 63.759 | KV453263.1 | 11332785 | 25-scf00537 | 25 |
| AX-157758210 | 28 | 63.759 | KV453263.1 | 11334773 | 25-scf00537 | 25 |
| AX-158365476 | 28 | 63.759 | KV453263.1 | 11370525 | 25-scf00537 | 25 |
| AX-158365479 | 28 | 63.759 | KV453263.1 | 11372732 | 25-scf00537 | 25 |
| AX-158365481 | 28 | 63.759 | KV453263.1 | 11377278 | 25-scf00537 | 25 |
| AX-158365490 | 28 | 63.759 | KV453263.1 | 11386114 | 25-scf00537 | 25 |
| AX-158365494 | 28 | 63.759 | KV453263.1 | 11389810 | 25-scf00537 | 25 |
| AX-158365495 | 28 | 63.759 | KV453263.1 | 11390654 | 25-scf00537 | 25 |
| AX-158365546 | 28 | 63.759 | KV453263.1 | 11454026 | 25-scf00537 | 25 |
| AX-158365592 | 28 | 63.759 | KV453263.1 | 11526098 | 25-scf00537 | 25 |
| AX-158365642 | 28 | 63.759 | KV453263.1 | 11592521 | 25-scf00537 | 25 |
| AX-158365676 | 28 | 63.759 | KV453263.1 | 11638164 | 25-scf00537 | 25 |
| AX-158365233 | 28 | 64.149 | KV453263.1 | 11072191 | 25-scf00537 | 25 |

|              |    |        |            |          |             |    |
|--------------|----|--------|------------|----------|-------------|----|
| AX-158365509 | 28 | 64.149 | KV453263.1 | 11406999 | 25-scf00537 | 25 |
| AX-157746425 | 28 | 64.149 | KV453263.1 | 11412525 | 25-scf00537 | 25 |
| AX-158365566 | 28 | 64.149 | KV453263.1 | 11484698 | 25-scf00537 | 25 |
| AX-158365662 | 28 | 64.149 | KV453263.1 | 11616918 | 25-scf00537 | 25 |
| AX-158365710 | 28 | 64.149 | KV453263.1 | 11685150 | 25-scf00537 | 25 |
| AX-158365715 | 28 | 64.149 | KV453263.1 | 11688605 | 25-scf00537 | 25 |
| AX-158365824 | 28 | 64.149 | KV453263.1 | 11809027 | 25-scf00537 | 25 |
| AX-158365199 | 28 | 64.247 | KV453263.1 | 11021843 | 25-scf00537 | 25 |
| AX-157852333 | 28 | 64.247 | KV453263.1 | 11435071 | 25-scf00537 | 25 |
| AX-158366132 | 28 | 64.247 | KV453263.1 | 12175617 | 25-scf00537 | 25 |
| AX-158365185 | 28 | 64.344 | KV453263.1 | 11002148 | 25-scf00537 | 25 |
| AX-158365426 | 28 | 64.344 | KV453263.1 | 11298964 | 25-scf00537 | 25 |
| AX-158365433 | 28 | 64.344 | KV453263.1 | 11305650 | 25-scf00537 | 25 |
| AX-158365454 | 28 | 64.344 | KV453263.1 | 11332432 | 25-scf00537 | 25 |
| AX-158365459 | 28 | 64.344 | KV453263.1 | 11336339 | 25-scf00537 | 25 |
| AX-158365473 | 28 | 64.344 | KV453263.1 | 11367078 | 25-scf00537 | 25 |
| AX-158365478 | 28 | 64.344 | KV453263.1 | 11372358 | 25-scf00537 | 25 |
| AX-158365486 | 28 | 64.344 | KV453263.1 | 11380777 | 25-scf00537 | 25 |
| AX-158365506 | 28 | 64.344 | KV453263.1 | 11401297 | 25-scf00537 | 25 |
| AX-158365513 | 28 | 64.344 | KV453263.1 | 11410899 | 25-scf00537 | 25 |
| AX-157852331 | 28 | 64.344 | KV453263.1 | 11412728 | 25-scf00537 | 25 |
| AX-158365519 | 28 | 64.344 | KV453263.1 | 11419170 | 25-scf00537 | 25 |
| AX-158365520 | 28 | 64.344 | KV453263.1 | 11420478 | 25-scf00537 | 25 |
| AX-158365521 | 28 | 64.344 | KV453263.1 | 11422628 | 25-scf00537 | 25 |
| AX-158365531 | 28 | 64.344 | KV453263.1 | 11432625 | 25-scf00537 | 25 |
| AX-158365532 | 28 | 64.344 | KV453263.1 | 11433702 | 25-scf00537 | 25 |
| AX-158365538 | 28 | 64.344 | KV453263.1 | 11440440 | 25-scf00537 | 25 |
| AX-158365539 | 28 | 64.344 | KV453263.1 | 11440835 | 25-scf00537 | 25 |
| AX-158365540 | 28 | 64.344 | KV453263.1 | 11442703 | 25-scf00537 | 25 |
| AX-158365545 | 28 | 64.344 | KV453263.1 | 11450697 | 25-scf00537 | 25 |
| AX-158365549 | 28 | 64.344 | KV453263.1 | 11463163 | 25-scf00537 | 25 |
| AX-158365550 | 28 | 64.344 | KV453263.1 | 11463782 | 25-scf00537 | 25 |
| AX-158365555 | 28 | 64.344 | KV453263.1 | 11469066 | 25-scf00537 | 25 |
| AX-158365561 | 28 | 64.344 | KV453263.1 | 11477069 | 25-scf00537 | 25 |
| AX-158365562 | 28 | 64.344 | KV453263.1 | 11477727 | 25-scf00537 | 25 |
| AX-158365563 | 28 | 64.344 | KV453263.1 | 11478266 | 25-scf00537 | 25 |
| AX-158365564 | 28 | 64.344 | KV453263.1 | 11481002 | 25-scf00537 | 25 |
| AX-158365565 | 28 | 64.344 | KV453263.1 | 11482692 | 25-scf00537 | 25 |
| AX-158365570 | 28 | 64.344 | KV453263.1 | 11490780 | 25-scf00537 | 25 |
| AX-158365571 | 28 | 64.344 | KV453263.1 | 11492467 | 25-scf00537 | 25 |
| AX-158381776 | 28 | 64.344 | KV453263.1 | 11492921 | 25-scf00537 | 25 |
| AX-158365572 | 28 | 64.344 | KV453263.1 | 11493029 | 25-scf00537 | 25 |
| AX-158365573 | 28 | 64.344 | KV453263.1 | 11495694 | 25-scf00537 | 25 |
| AX-158365574 | 28 | 64.344 | KV453263.1 | 11496956 | 25-scf00537 | 25 |
| AX-158365580 | 28 | 64.344 | KV453263.1 | 11503882 | 25-scf00537 | 25 |
| AX-157746696 | 28 | 64.344 | KV453263.1 | 11507264 | 25-scf00537 | 25 |
| AX-158365581 | 28 | 64.344 | KV453263.1 | 11507347 | 25-scf00537 | 25 |
| AX-158365589 | 28 | 64.344 | KV453263.1 | 11518840 | 25-scf00537 | 25 |
| AX-157852338 | 28 | 64.344 | KV453263.1 | 11519280 | 25-scf00537 | 25 |
| AX-158365590 | 28 | 64.344 | KV453263.1 | 11519689 | 25-scf00537 | 25 |
| AX-158365608 | 28 | 64.344 | KV453263.1 | 11546071 | 25-scf00537 | 25 |



|              |    |        |            |          |             |    |
|--------------|----|--------|------------|----------|-------------|----|
| AX-157718856 | 28 | 64.344 | KV453263.1 | 11547797 | 25-scf00537 | 25 |
| AX-158365610 | 28 | 64.344 | KV453263.1 | 11548790 | 25-scf00537 | 25 |
| AX-158365613 | 28 | 64.344 | KV453263.1 | 11551464 | 25-scf00537 | 25 |
| AX-158365616 | 28 | 64.344 | KV453263.1 | 11554792 | 25-scf00537 | 25 |
| AX-158365620 | 28 | 64.344 | KV453263.1 | 11558791 | 25-scf00537 | 25 |
| AX-158365624 | 28 | 64.344 | KV453263.1 | 11565012 | 25-scf00537 | 25 |
| AX-158365625 | 28 | 64.344 | KV453263.1 | 11567003 | 25-scf00537 | 25 |
| AX-158365628 | 28 | 64.344 | KV453263.1 | 11576349 | 25-scf00537 | 25 |
| AX-158365635 | 28 | 64.344 | KV453263.1 | 11582427 | 25-scf00537 | 25 |
| AX-158365636 | 28 | 64.344 | KV453263.1 | 11584675 | 25-scf00537 | 25 |
| AX-158365639 | 28 | 64.344 | KV453263.1 | 11587243 | 25-scf00537 | 25 |
| AX-158419971 | 28 | 64.344 | KV453263.1 | 11588292 | 25-scf00537 | 25 |
| AX-158365645 | 28 | 64.344 | KV453263.1 | 11598213 | 25-scf00537 | 25 |
| AX-158365646 | 28 | 64.344 | KV453263.1 | 11599912 | 25-scf00537 | 25 |
| AX-157868356 | 28 | 64.344 | KV453263.1 | 11602944 | 25-scf00537 | 25 |
| AX-157852340 | 28 | 64.344 | KV453263.1 | 11604945 | 25-scf00537 | 25 |
| AX-158365650 | 28 | 64.344 | KV453263.1 | 11606552 | 25-scf00537 | 25 |
| AX-158365653 | 28 | 64.344 | KV453263.1 | 11608641 | 25-scf00537 | 25 |
| AX-158365655 | 28 | 64.344 | KV453263.1 | 11611302 | 25-scf00537 | 25 |
| AX-158365660 | 28 | 64.344 | KV453263.1 | 11615141 | 25-scf00537 | 25 |
| AX-158365661 | 28 | 64.344 | KV453263.1 | 11616442 | 25-scf00537 | 25 |
| AX-158365664 | 28 | 64.344 | KV453263.1 | 11620104 | 25-scf00537 | 25 |
| AX-158365666 | 28 | 64.344 | KV453263.1 | 11622699 | 25-scf00537 | 25 |
| AX-158365669 | 28 | 64.344 | KV453263.1 | 11630374 | 25-scf00537 | 25 |
| AX-157852343 | 28 | 64.344 | KV453263.1 | 11632002 | 25-scf00537 | 25 |
| AX-158365672 | 28 | 64.344 | KV453263.1 | 11634589 | 25-scf00537 | 25 |
| AX-158365673 | 28 | 64.344 | KV453263.1 | 11635266 | 25-scf00537 | 25 |
| AX-158365674 | 28 | 64.344 | KV453263.1 | 11635806 | 25-scf00537 | 25 |
| AX-158365677 | 28 | 64.344 | KV453263.1 | 11638593 | 25-scf00537 | 25 |
| AX-158365679 | 28 | 64.344 | KV453263.1 | 11639833 | 25-scf00537 | 25 |
| AX-157852345 | 28 | 64.344 | KV453263.1 | 11651949 | 25-scf00537 | 25 |
| AX-158365689 | 28 | 64.344 | KV453263.1 | 11652616 | 25-scf00537 | 25 |
| AX-158365691 | 28 | 64.344 | KV453263.1 | 11657048 | 25-scf00537 | 25 |
| AX-158365692 | 28 | 64.344 | KV453263.1 | 11658278 | 25-scf00537 | 25 |
| AX-158365693 | 28 | 64.344 | KV453263.1 | 11659099 | 25-scf00537 | 25 |
| AX-158365696 | 28 | 64.344 | KV453263.1 | 11663684 | 25-scf00537 | 25 |
| AX-158365697 | 28 | 64.344 | KV453263.1 | 11664982 | 25-scf00537 | 25 |
| AX-158365699 | 28 | 64.344 | KV453263.1 | 11672025 | 25-scf00537 | 25 |
| AX-158365701 | 28 | 64.344 | KV453263.1 | 11676439 | 25-scf00537 | 25 |
| AX-158365702 | 28 | 64.344 | KV453263.1 | 11677177 | 25-scf00537 | 25 |
| AX-158365708 | 28 | 64.344 | KV453263.1 | 11683698 | 25-scf00537 | 25 |
| AX-158365721 | 28 | 64.344 | KV453263.1 | 11691586 | 25-scf00537 | 25 |
| AX-158365724 | 28 | 64.344 | KV453263.1 | 11693898 | 25-scf00537 | 25 |
| AX-157723274 | 28 | 64.344 | KV453263.1 | 11696205 | 25-scf00537 | 25 |
| AX-158365731 | 28 | 64.344 | KV453263.1 | 11703645 | 25-scf00537 | 25 |
| AX-158365744 | 28 | 64.344 | KV453263.1 | 11722027 | 25-scf00537 | 25 |
| AX-158365745 | 28 | 64.344 | KV453263.1 | 11722517 | 25-scf00537 | 25 |
| AX-158365746 | 28 | 64.344 | KV453263.1 | 11723333 | 25-scf00537 | 25 |
| AX-158365747 | 28 | 64.344 | KV453263.1 | 11724288 | 25-scf00537 | 25 |
| AX-158365755 | 28 | 64.344 | KV453263.1 | 11730051 | 25-scf00537 | 25 |
| AX-157852360 | 28 | 64.344 | KV453263.1 | 11735139 | 25-scf00537 | 25 |

|              |    |        |            |          |             |    |
|--------------|----|--------|------------|----------|-------------|----|
| AX-158365763 | 28 | 64.344 | KV453263.1 | 11746050 | 25-scf00537 | 25 |
| AX-158365766 | 28 | 64.344 | KV453263.1 | 11746748 | 25-scf00537 | 25 |
| AX-158365768 | 28 | 64.344 | KV453263.1 | 11747905 | 25-scf00537 | 25 |
| AX-158365769 | 28 | 64.344 | KV453263.1 | 11748284 | 25-scf00537 | 25 |
| AX-158365778 | 28 | 64.344 | KV453263.1 | 11759549 | 25-scf00537 | 25 |
| AX-157701317 | 28 | 64.344 | KV453263.1 | 11760676 | 25-scf00537 | 25 |
| AX-158365780 | 28 | 64.344 | KV453263.1 | 11760919 | 25-scf00537 | 25 |
| AX-157749540 | 28 | 64.344 | KV453263.1 | 11764239 | 25-scf00537 | 25 |
| AX-158365784 | 28 | 64.344 | KV453263.1 | 11764395 | 25-scf00537 | 25 |
| AX-157852363 | 28 | 64.344 | KV453263.1 | 11768324 | 25-scf00537 | 25 |
| AX-157723517 | 28 | 64.344 | KV453263.1 | 11774033 | 25-scf00537 | 25 |
| AX-158365795 | 28 | 64.344 | KV453263.1 | 11776826 | 25-scf00537 | 25 |
| AX-158365797 | 28 | 64.344 | KV453263.1 | 11779388 | 25-scf00537 | 25 |
| AX-158365798 | 28 | 64.344 | KV453263.1 | 11781072 | 25-scf00537 | 25 |
| AX-157852365 | 28 | 64.344 | KV453263.1 | 11781643 | 25-scf00537 | 25 |
| AX-158365799 | 28 | 64.344 | KV453263.1 | 11781774 | 25-scf00537 | 25 |
| AX-157852368 | 28 | 64.344 | KV453263.1 | 11793471 | 25-scf00537 | 25 |
| AX-158365812 | 28 | 64.344 | KV453263.1 | 11799922 | 25-scf00537 | 25 |
| AX-158365815 | 28 | 64.344 | KV453263.1 | 11801953 | 25-scf00537 | 25 |
| AX-158365816 | 28 | 64.344 | KV453263.1 | 11802376 | 25-scf00537 | 25 |
| AX-158365820 | 28 | 64.344 | KV453263.1 | 11805168 | 25-scf00537 | 25 |
| AX-158365823 | 28 | 64.344 | KV453263.1 | 11808419 | 25-scf00537 | 25 |
| AX-158365826 | 28 | 64.344 | KV453263.1 | 11810558 | 25-scf00537 | 25 |
| AX-157852371 | 28 | 64.344 | KV453263.1 | 11818652 | 25-scf00537 | 25 |
| AX-157852372 | 28 | 64.344 | KV453263.1 | 11819109 | 25-scf00537 | 25 |
| AX-158365831 | 28 | 64.344 | KV453263.1 | 11821365 | 25-scf00537 | 25 |
| AX-158365840 | 28 | 64.344 | KV453263.1 | 11833720 | 25-scf00537 | 25 |
| AX-158365843 | 28 | 64.344 | KV453263.1 | 11835809 | 25-scf00537 | 25 |
| AX-158365845 | 28 | 64.344 | KV453263.1 | 11838059 | 25-scf00537 | 25 |
| AX-158365850 | 28 | 64.344 | KV453263.1 | 11842780 | 25-scf00537 | 25 |
| AX-157852380 | 28 | 64.344 | KV453263.1 | 11860008 | 25-scf00537 | 25 |
| AX-158365864 | 28 | 64.344 | KV453263.1 | 11862621 | 25-scf00537 | 25 |
| AX-158365884 | 28 | 64.344 | KV453263.1 | 11886924 | 25-scf00537 | 25 |
| AX-158365887 | 28 | 64.344 | KV453263.1 | 11896431 | 25-scf00537 | 25 |
| AX-157852385 | 28 | 64.344 | KV453263.1 | 11920507 | 25-scf00537 | 25 |
| AX-158366031 | 28 | 64.344 | KV453263.1 | 12072592 | 25-scf00537 | 25 |
| AX-158366093 | 28 | 64.344 | KV453263.1 | 12132529 | 25-scf00537 | 25 |
| AX-158366101 | 28 | 64.344 | KV453263.1 | 12141851 | 25-scf00537 | 25 |
| AX-158366121 | 28 | 64.344 | KV453263.1 | 12168558 | 25-scf00537 | 25 |
| AX-158366154 | 28 | 64.344 | KV453263.1 | 12201322 | 25-scf00537 | 25 |
| AX-158366165 | 28 | 64.344 | KV453263.1 | 12213872 | 25-scf00537 | 25 |
| AX-158366299 | 28 | 64.344 | KV453263.1 | 12391224 | 25-scf00537 | 25 |
| AX-158366397 | 28 | 64.344 | KV453263.1 | 12529466 | 25-scf00537 | 25 |
| AX-158366504 | 28 | 64.344 | KV453263.1 | 12664549 | 25-scf00537 | 25 |
| AX-158366547 | 28 | 64.344 | KV453263.1 | 12736050 | 25-scf00537 | 25 |
| AX-158365604 | 28 | 64.579 | KV453263.1 | 11541571 | 25-scf00537 | 25 |
| AX-158365651 | 28 | 64.579 | KV453263.1 | 11607292 | 25-scf00537 | 25 |
| AX-157852359 | 28 | 64.579 | KV453263.1 | 11718006 | 25-scf00537 | 25 |
| AX-158365830 | 28 | 64.579 | KV453263.1 | 11820521 | 25-scf00537 | 25 |
| AX-157852373 | 28 | 64.579 | KV453263.1 | 11825167 | 25-scf00537 | 25 |
| AX-158365834 | 28 | 64.579 | KV453263.1 | 11826810 | 25-scf00537 | 25 |

|              |    |        |            |          |             |    |
|--------------|----|--------|------------|----------|-------------|----|
| AX-158365835 | 28 | 64.579 | KV453263.1 | 11827091 | 25-scf00537 | 25 |
| AX-157747237 | 28 | 64.579 | KV453263.1 | 11827845 | 25-scf00537 | 25 |
| AX-158365836 | 28 | 64.579 | KV453263.1 | 11828929 | 25-scf00537 | 25 |
| AX-158365837 | 28 | 64.579 | KV453263.1 | 11829268 | 25-scf00537 | 25 |
| AX-158365854 | 28 | 64.579 | KV453263.1 | 11847814 | 25-scf00537 | 25 |
| AX-157774649 | 28 | 64.67  | KV453263.1 | 11833937 | 25-scf00537 | 25 |
| AX-157747993 | 28 | 64.813 | KV453263.1 | 11836623 | 25-scf00537 | 25 |
| AX-158365881 | 28 | 65.165 | KV453263.1 | 11884741 | 25-scf00537 | 25 |
| AX-158365896 | 28 | 65.518 | KV453263.1 | 11907673 | 25-scf00537 | 25 |
| AX-158365899 | 28 | 65.518 | KV453263.1 | 11910704 | 25-scf00537 | 25 |
| AX-158365909 | 28 | 65.518 | KV453263.1 | 11922578 | 25-scf00537 | 25 |
| AX-158365914 | 28 | 65.518 | KV453263.1 | 11928190 | 25-scf00537 | 25 |
| AX-158365917 | 28 | 65.518 | KV453263.1 | 11937022 | 25-scf00537 | 25 |
| AX-158365923 | 28 | 65.518 | KV453263.1 | 11941575 | 25-scf00537 | 25 |
| AX-158365934 | 28 | 65.518 | KV453263.1 | 11956859 | 25-scf00537 | 25 |
| AX-158365978 | 28 | 65.518 | KV453263.1 | 12004264 | 25-scf00537 | 25 |
| AX-158365983 | 28 | 65.518 | KV453263.1 | 12007689 | 25-scf00537 | 25 |
| AX-158365993 | 28 | 65.518 | KV453263.1 | 12020573 | 25-scf00537 | 25 |
| AX-158365994 | 28 | 65.518 | KV453263.1 | 12021063 | 25-scf00537 | 25 |
| AX-158365995 | 28 | 65.518 | KV453263.1 | 12021501 | 25-scf00537 | 25 |
| AX-158366013 | 28 | 65.518 | KV453263.1 | 12051193 | 25-scf00537 | 25 |
| AX-158366020 | 28 | 65.518 | KV453263.1 | 12057095 | 25-scf00537 | 25 |
| AX-158366022 | 28 | 65.518 | KV453263.1 | 12058615 | 25-scf00537 | 25 |
| AX-158366051 | 28 | 65.518 | KV453263.1 | 12094374 | 25-scf00537 | 25 |
| AX-158366058 | 28 | 65.518 | KV453263.1 | 12099088 | 25-scf00537 | 25 |
| AX-157852402 | 28 | 65.518 | KV453263.1 | 12119315 | 25-scf00537 | 25 |
| AX-158366098 | 28 | 65.518 | KV453263.1 | 12139613 | 25-scf00537 | 25 |
| AX-157713760 | 28 | 65.518 | KV453263.1 | 12167416 | 25-scf00537 | 25 |
| AX-158366142 | 28 | 65.518 | KV453263.1 | 12185153 | 25-scf00537 | 25 |
| AX-158366146 | 28 | 65.518 | KV453263.1 | 12192012 | 25-scf00537 | 25 |
| AX-158366148 | 28 | 65.518 | KV453263.1 | 12193446 | 25-scf00537 | 25 |
| AX-158366159 | 28 | 65.518 | KV453263.1 | 12205437 | 25-scf00537 | 25 |
| AX-158366161 | 28 | 65.518 | KV453263.1 | 12209380 | 25-scf00537 | 25 |
| AX-157756422 | 28 | 65.518 | KV453263.1 | 12218975 | 25-scf00537 | 25 |
| AX-158365935 | 28 | 65.613 | KV453263.1 | 11958429 | 25-scf00537 | 25 |
| AX-158366015 | 28 | 65.613 | KV453263.1 | 12051969 | 25-scf00537 | 25 |
| AX-158366059 | 28 | 65.613 | KV453263.1 | 12099519 | 25-scf00537 | 25 |
| AX-158366172 | 28 | 65.613 | KV453263.1 | 12224467 | 25-scf00537 | 25 |
| AX-158366175 | 28 | 65.613 | KV453263.1 | 12227312 | 25-scf00537 | 25 |
| AX-158366180 | 28 | 65.613 | KV453263.1 | 12234071 | 25-scf00537 | 25 |
| AX-157852409 | 28 | 65.613 | KV453263.1 | 12236239 | 25-scf00537 | 25 |
| AX-158366265 | 28 | 65.613 | KV453263.1 | 12345305 | 25-scf00537 | 25 |
| AX-158366179 | 28 | 65.713 | KV453263.1 | 12233673 | 25-scf00537 | 25 |
| AX-158366183 | 28 | 65.713 | KV453263.1 | 12242390 | 25-scf00537 | 25 |
| AX-157723923 | 28 | 65.713 | KV453263.1 | 12249125 | 25-scf00537 | 25 |
| AX-158366248 | 28 | 65.713 | KV453263.1 | 12321540 | 25-scf00537 | 25 |
| AX-158366268 | 28 | 65.713 | KV453263.1 | 12350955 | 25-scf00537 | 25 |
| AX-158366415 | 28 | 65.713 | KV453263.1 | 12561926 | 25-scf00537 | 25 |
| AX-158366476 | 28 | 65.713 | KV453263.1 | 12632514 | 25-scf00537 | 25 |
| AX-158366511 | 28 | 65.713 | KV453263.1 | 12684938 | 25-scf00537 | 25 |
| AX-158366550 | 28 | 65.713 | KV453263.1 | 12744385 | 25-scf00537 | 25 |

|              |    |        |            |          |                |    |
|--------------|----|--------|------------|----------|----------------|----|
| AX-157852453 | 28 | 65.713 | KV453263.1 | 12760819 | 25-scf00537    | 25 |
| AX-158366199 | 28 | 65.908 | KV453263.1 | 12267225 | 25-scf00537    | 25 |
| AX-157738406 | 28 | 65.908 | KV453263.1 | 12453495 | 25-scf00537    | 25 |
| AX-158366351 | 28 | 66.104 | KV453263.1 | 12477235 | 25-scf00537    | 25 |
| AX-157714932 | 28 | 66.104 | KV453263.1 | 12486133 | 25-scf00537    | 25 |
| AX-158366384 | 28 | 66.104 | KV453263.1 | 12514589 | 25-scf00537    | 25 |
| AX-158366385 | 28 | 66.104 | KV453263.1 | 12515178 | 25-scf00537    | 25 |
| AX-158366430 | 28 | 66.104 | KV453263.1 | 12577334 | 25-scf00537    | 25 |
| AX-158366449 | 28 | 66.298 | KV453263.1 | 12607411 | 25-scf00537    | 25 |
| AX-158366478 | 28 | 66.298 | KV453263.1 | 12636775 | 25-scf00537    | 25 |
| AX-158366496 | 28 | 66.298 | KV453263.1 | 12660343 | 25-scf00537    | 25 |
| AX-158366513 | 28 | 66.298 | KV453263.1 | 12692165 | 25-scf00537    | 25 |
| AX-157852445 | 28 | 66.298 | KV453263.1 | 12702602 | 25-scf00537    | 25 |
| AX-158366536 | 28 | 66.493 | KV453263.1 | 12720941 | 25-scf00537    | 25 |
| AX-157724508 | 28 | 66.493 | KV453263.1 | 12727858 | 25-scf00537    | 25 |
| AX-158419993 | 28 | 66.493 | KV453263.1 | 12764845 | 25-scf00537    | 25 |
| AX-158366565 | 28 | 66.493 | KV453263.1 | 12778040 | 25-scf00537    | 25 |
| AX-158366665 | 28 | 66.493 | KV453263.1 | 12904368 | 25-scf00537    | 25 |
| AX-157852467 | 28 | 66.493 | KV453263.1 | 12906078 | 25-scf00537    | 25 |
| AX-157852450 | 28 | 66.688 | KV453263.1 | 12750097 | 25-scf00537    | 25 |
| AX-158366566 | 28 | 66.756 | KV453263.1 | 12778931 | 25-scf00537    | 25 |
| AX-158366567 | 28 | 66.818 | KV453263.1 | 12779267 | 25-scf00537    | 25 |
| AX-158366573 | 28 | 66.818 | KV453263.1 | 12784839 | 25-scf00537    | 25 |
| AX-158366614 | 28 | 66.818 | KV453263.1 | 12841181 | 25-scf00537    | 25 |
| AX-158366639 | 28 | 66.818 | KV453263.1 | 12871550 | 25-scf00537    | 25 |
| AX-158366570 | 28 | 66.883 | KV453263.1 | 12781620 | 25-scf00537    | 25 |
| AX-158366582 | 28 | 66.883 | KV453263.1 | 12794958 | 25-scf00537    | 25 |
| AX-158366400 | 28 | 66.977 | KV453263.1 | 12535615 | 25-scf00537    | 25 |
| AX-158366441 | 28 | 66.977 | KV453263.1 | 12590682 | 25-scf00537    | 25 |
| AX-158366522 | 28 | 66.977 | KV453263.1 | 12704207 | 25-scf00537    | 25 |
| AX-158366621 | 28 | 66.977 | KV453263.1 | 12846847 | 25-scf00537    | 25 |
| AX-158366625 | 28 | 66.977 | KV453263.1 | 12856415 | 25-scf00537    | 25 |
| AX-158366636 | 28 | 66.977 | KV453263.1 | 12868719 | 25-scf00537    | 25 |
| AX-158420000 | 28 | 66.977 | KV453263.1 | 12873168 | 25-scf00537    | 25 |
| AX-158361006 | 28 | 66.977 | KV453267.1 | 705846   | 25-scf00538    | 25 |
| AX-157700080 | 28 | 66.977 | FI857810.1 | 672      | IORI212 Ictalu | UN |
| AX-158366569 | 28 | 67.078 | KV453263.1 | 12781329 | 25-scf00537    | 25 |
| AX-158366626 | 28 | 67.078 | KV453263.1 | 12856779 | 25-scf00537    | 25 |
| AX-158366627 | 28 | 67.078 | KV453263.1 | 12857207 | 25-scf00537    | 25 |
| AX-158366653 | 28 | 67.078 | KV453263.1 | 12889708 | 25-scf00537    | 25 |
| AX-158366655 | 28 | 67.078 | KV453263.1 | 12892795 | 25-scf00537    | 25 |
| AX-158366657 | 28 | 67.078 | KV453263.1 | 12894277 | 25-scf00537    | 25 |
| AX-157852466 | 28 | 67.078 | KV453263.1 | 12904086 | 25-scf00537    | 25 |
| AX-158366666 | 28 | 67.078 | KV453263.1 | 12904809 | 25-scf00537    | 25 |
| AX-158366671 | 28 | 67.078 | KV453263.1 | 12910673 | 25-scf00537    | 25 |
| AX-158366672 | 28 | 67.078 | KV453263.1 | 12911808 | 25-scf00537    | 25 |
| AX-158366687 | 28 | 67.078 | KV453263.1 | 12936837 | 25-scf00537    | 25 |
| AX-157852456 | 28 | 67.273 | KV453263.1 | 12786915 | 25-scf00537    | 25 |
| AX-158366583 | 28 | 67.273 | KV453263.1 | 12795254 | 25-scf00537    | 25 |
| AX-158366584 | 28 | 67.273 | KV453263.1 | 12795750 | 25-scf00537    | 25 |
| AX-158366648 | 28 | 67.273 | KV453263.1 | 12887701 | 25-scf00537    | 25 |

|              |    |        |            |          |             |    |
|--------------|----|--------|------------|----------|-------------|----|
| AX-158366652 | 28 | 67.273 | KV453263.1 | 12889123 | 25-scf00537 | 25 |
| AX-158366668 | 28 | 67.273 | KV453263.1 | 12906221 | 25-scf00537 | 25 |
| AX-158366669 | 28 | 67.273 | KV453263.1 | 12906835 | 25-scf00537 | 25 |
| AX-158366670 | 28 | 67.273 | KV453263.1 | 12910197 | 25-scf00537 | 25 |
| AX-158366691 | 28 | 67.273 | KV453263.1 | 12941055 | 25-scf00537 | 25 |
| AX-158366702 | 28 | 67.273 | KV453263.1 | 12951035 | 25-scf00537 | 25 |
| AX-158366712 | 28 | 67.273 | KV453263.1 | 12975870 | 25-scf00537 | 25 |
| AX-157852478 | 28 | 67.273 | KV453263.1 | 13069017 | 25-scf00537 | 25 |
| AX-158366460 | 28 | 67.468 | KV453263.1 | 12619721 | 25-scf00537 | 25 |
| AX-158366482 | 28 | 67.468 | KV453263.1 | 12643634 | 25-scf00537 | 25 |
| AX-158366556 | 28 | 67.468 | KV453263.1 | 12767135 | 25-scf00537 | 25 |
| AX-158366718 | 28 | 67.468 | KV453263.1 | 12982298 | 25-scf00537 | 25 |
| AX-158366719 | 28 | 67.468 | KV453263.1 | 12983010 | 25-scf00537 | 25 |
| AX-158366722 | 28 | 67.468 | KV453263.1 | 12987205 | 25-scf00537 | 25 |
| AX-158366723 | 28 | 67.468 | KV453263.1 | 12989881 | 25-scf00537 | 25 |
| AX-158366735 | 28 | 67.468 | KV453263.1 | 13000204 | 25-scf00537 | 25 |
| AX-158366737 | 28 | 67.468 | KV453263.1 | 13004330 | 25-scf00537 | 25 |
| AX-158366738 | 28 | 67.468 | KV453263.1 | 13004914 | 25-scf00537 | 25 |
| AX-158366742 | 28 | 67.468 | KV453263.1 | 13009213 | 25-scf00537 | 25 |
| AX-158366743 | 28 | 67.468 | KV453263.1 | 13009451 | 25-scf00537 | 25 |
| AX-158366746 | 28 | 67.468 | KV453263.1 | 13011226 | 25-scf00537 | 25 |
| AX-158366747 | 28 | 67.468 | KV453263.1 | 13011686 | 25-scf00537 | 25 |
| AX-158366752 | 28 | 67.468 | KV453263.1 | 13021637 | 25-scf00537 | 25 |
| AX-157742296 | 28 | 67.468 | KV453263.1 | 13023224 | 25-scf00537 | 25 |
| AX-157852474 | 28 | 67.468 | KV453263.1 | 13025339 | 25-scf00537 | 25 |
| AX-157852475 | 28 | 67.468 | KV453263.1 | 13027258 | 25-scf00537 | 25 |
| AX-158366757 | 28 | 67.468 | KV453263.1 | 13029446 | 25-scf00537 | 25 |
| AX-158366763 | 28 | 67.468 | KV453263.1 | 13037306 | 25-scf00537 | 25 |
| AX-158366765 | 28 | 67.468 | KV453263.1 | 13039708 | 25-scf00537 | 25 |
| AX-158366766 | 28 | 67.468 | KV453263.1 | 13039925 | 25-scf00537 | 25 |
| AX-157749057 | 28 | 67.468 | KV453263.1 | 13064140 | 25-scf00537 | 25 |
| AX-158366779 | 28 | 67.468 | KV453263.1 | 13065564 | 25-scf00537 | 25 |
| AX-157852480 | 28 | 67.468 | KV453263.1 | 13077918 | 25-scf00537 | 25 |
| AX-158413587 | 28 | 67.468 | KV453263.1 | 13086381 | 25-scf00537 | 25 |
| AX-158366785 | 28 | 67.468 | KV453263.1 | 13088961 | 25-scf00537 | 25 |
| AX-157852482 | 28 | 67.468 | KV453263.1 | 13117144 | 25-scf00537 | 25 |
| AX-157852483 | 28 | 67.468 | KV453263.1 | 13118667 | 25-scf00537 | 25 |
| AX-158366801 | 28 | 67.468 | KV453263.1 | 13126603 | 25-scf00537 | 25 |
| AX-158366803 | 28 | 67.468 | KV453263.1 | 13127697 | 25-scf00537 | 25 |
| AX-158366806 | 28 | 67.468 | KV453263.1 | 13133696 | 25-scf00537 | 25 |
| AX-157756929 | 28 | 67.468 | KV453263.1 | 13144070 | 25-scf00537 | 25 |
| AX-158366815 | 28 | 67.468 | KV453263.1 | 13146029 | 25-scf00537 | 25 |
| AX-158366816 | 28 | 67.468 | KV453263.1 | 13147330 | 25-scf00537 | 25 |
| AX-158366821 | 28 | 67.468 | KV453263.1 | 13152107 | 25-scf00537 | 25 |
| AX-158366828 | 28 | 67.468 | KV453263.1 | 13157741 | 25-scf00537 | 25 |
| AX-158366829 | 28 | 67.468 | KV453263.1 | 13158433 | 25-scf00537 | 25 |
| AX-157852485 | 28 | 67.468 | KV453263.1 | 13160893 | 25-scf00537 | 25 |
| AX-157852486 | 28 | 67.468 | KV453263.1 | 13161630 | 25-scf00537 | 25 |
| AX-157756498 | 28 | 67.468 | KV453263.1 | 13178821 | 25-scf00537 | 25 |
| AX-157852488 | 28 | 67.468 | KV453263.1 | 13184356 | 25-scf00537 | 25 |
| AX-157852493 | 28 | 67.468 | KV453263.1 | 13212272 | 25-scf00537 | 25 |

|              |    |        |            |          |             |    |
|--------------|----|--------|------------|----------|-------------|----|
| AX-158366853 | 28 | 67.468 | KV453263.1 | 13215559 | 25-scf00537 | 25 |
| AX-158366860 | 28 | 67.468 | KV453263.1 | 13224139 | 25-scf00537 | 25 |
| AX-158366883 | 28 | 67.468 | KV453266.1 | 59031    | 25-scf00540 | 25 |
| AX-158420960 | 28 | 67.468 | KV453266.1 | 82395    | 25-scf00540 | 25 |
| AX-157852517 | 28 | 67.468 | KV453264.1 | 38344    | 25-scf00541 | 25 |
| AX-158366946 | 28 | 67.468 | KV453264.1 | 58110    | 25-scf00541 | 25 |
| AX-157684812 | 28 | 67.468 | KV453265.1 | 34174    | 25-scf00542 | 25 |
| AX-157684817 | 28 | 67.468 | KV453265.1 | 78659    | 25-scf00542 | 25 |
| AX-157680790 | 28 | 67.468 | KV453265.1 | 100593   | 25-scf00542 | 25 |
| AX-157680791 | 28 | 67.468 | KV453265.1 | 113963   | 25-scf00542 | 25 |
| AX-157684823 | 28 | 67.468 | KV453265.1 | 116855   | 25-scf00542 | 25 |
| AX-157680792 | 28 | 67.468 | KV453265.1 | 119874   | 25-scf00542 | 25 |
| AX-157684828 | 28 | 67.468 | KV453265.1 | 183223   | 25-scf00542 | 25 |
| AX-158366939 | 28 | 67.664 | KV453264.1 | 45067    | 25-scf00541 | 25 |
| AX-158366940 | 28 | 67.664 | KV453264.1 | 46515    | 25-scf00541 | 25 |
| AX-158366941 | 28 | 67.664 | KV453264.1 | 47950    | 25-scf00541 | 25 |
| AX-158366942 | 28 | 67.664 | KV453264.1 | 48170    | 25-scf00541 | 25 |
| AX-157852519 | 28 | 67.664 | KV453264.1 | 48680    | 25-scf00541 | 25 |
| AX-158366944 | 28 | 67.664 | KV453264.1 | 55380    | 25-scf00541 | 25 |
| AX-158366789 | 28 | 67.826 | KV453263.1 | 13092079 | 25-scf00537 | 25 |
| AX-158366793 | 28 | 67.826 | KV453263.1 | 13108697 | 25-scf00537 | 25 |
| AX-158366814 | 28 | 67.826 | KV453263.1 | 13145161 | 25-scf00537 | 25 |
| AX-158366831 | 28 | 67.826 | KV453263.1 | 13160594 | 25-scf00537 | 25 |
| AX-158366833 | 28 | 67.826 | KV453263.1 | 13163656 | 25-scf00537 | 25 |
| AX-158366837 | 28 | 67.826 | KV453263.1 | 13180095 | 25-scf00537 | 25 |
| AX-157852489 | 28 | 67.826 | KV453263.1 | 13187613 | 25-scf00537 | 25 |
| AX-158366842 | 28 | 67.826 | KV453263.1 | 13193817 | 25-scf00537 | 25 |
| AX-158366854 | 28 | 67.826 | KV453263.1 | 13216860 | 25-scf00537 | 25 |
| AX-158366861 | 28 | 67.826 | KV453263.1 | 13224600 | 25-scf00537 | 25 |
| AX-158360551 | 28 | 67.826 | KV453267.1 | 75874    | 25-scf00538 | 25 |
| AX-158360621 | 28 | 67.826 | KV453267.1 | 179888   | 25-scf00538 | 25 |
| AX-158360645 | 28 | 67.826 | KV453267.1 | 204840   | 25-scf00538 | 25 |
| AX-158360650 | 28 | 67.826 | KV453267.1 | 210514   | 25-scf00538 | 25 |
| AX-158360656 | 28 | 67.826 | KV453267.1 | 224196   | 25-scf00538 | 25 |
| AX-158360660 | 28 | 67.826 | KV453267.1 | 228249   | 25-scf00538 | 25 |
| AX-158360719 | 28 | 67.826 | KV453267.1 | 284384   | 25-scf00538 | 25 |
| AX-158419807 | 28 | 67.826 | KV453267.1 | 323700   | 25-scf00538 | 25 |
| AX-158360901 | 28 | 67.826 | KV453267.1 | 517834   | 25-scf00538 | 25 |
| AX-158360927 | 28 | 67.826 | KV453267.1 | 581975   | 25-scf00538 | 25 |
| AX-158366945 | 28 | 67.826 | KV453264.1 | 57071    | 25-scf00541 | 25 |
| AX-157684811 | 28 | 67.826 | KV453265.1 | 32678    | 25-scf00542 | 25 |
| AX-157684813 | 28 | 67.826 | KV453265.1 | 35898    | 25-scf00542 | 25 |
| AX-157684825 | 28 | 67.826 | KV453265.1 | 127291   | 25-scf00542 | 25 |
| AX-157684826 | 28 | 67.826 | KV453265.1 | 150111   | 25-scf00542 | 25 |
| AX-157684827 | 28 | 67.826 | KV453265.1 | 153753   | 25-scf00542 | 25 |
| AX-157682174 | 28 | 67.826 | KV453265.1 | 265402   | 25-scf00542 | 25 |
| AX-158360661 | 28 | 67.935 | KV453267.1 | 228930   | 25-scf00538 | 25 |
| AX-158360681 | 28 | 67.935 | KV453267.1 | 246272   | 25-scf00538 | 25 |
| AX-158366598 | 28 | 68.044 | KV453263.1 | 12815333 | 25-scf00537 | 25 |
| AX-157701579 | 28 | 68.044 | KV453263.1 | 12881625 | 25-scf00537 | 25 |
| AX-158366698 | 28 | 68.044 | KV453263.1 | 12947673 | 25-scf00537 | 25 |

|              |    |        |            |          |             |    |
|--------------|----|--------|------------|----------|-------------|----|
| AX-158366713 | 28 | 68.044 | KV453263.1 | 12977016 | 25-scf00537 | 25 |
| AX-158366717 | 28 | 68.044 | KV453263.1 | 12980964 | 25-scf00537 | 25 |
| AX-158366758 | 28 | 68.044 | KV453263.1 | 13030942 | 25-scf00537 | 25 |
| AX-158366761 | 28 | 68.044 | KV453263.1 | 13032947 | 25-scf00537 | 25 |
| AX-158366767 | 28 | 68.044 | KV453263.1 | 13041371 | 25-scf00537 | 25 |
| AX-158366776 | 28 | 68.044 | KV453263.1 | 13061037 | 25-scf00537 | 25 |
| AX-158360652 | 28 | 68.044 | KV453267.1 | 213755   | 25-scf00538 | 25 |
| AX-158360672 | 28 | 68.044 | KV453267.1 | 239464   | 25-scf00538 | 25 |
| AX-158360674 | 28 | 68.044 | KV453267.1 | 241603   | 25-scf00538 | 25 |
| AX-158360676 | 28 | 68.044 | KV453267.1 | 243535   | 25-scf00538 | 25 |
| AX-158360685 | 28 | 68.044 | KV453267.1 | 248788   | 25-scf00538 | 25 |
| AX-158360689 | 28 | 68.044 | KV453267.1 | 253993   | 25-scf00538 | 25 |
| AX-158360690 | 28 | 68.044 | KV453267.1 | 255529   | 25-scf00538 | 25 |
| AX-158360691 | 28 | 68.044 | KV453267.1 | 256434   | 25-scf00538 | 25 |
| AX-158360694 | 28 | 68.044 | KV453267.1 | 259078   | 25-scf00538 | 25 |
| AX-158360695 | 28 | 68.044 | KV453267.1 | 262339   | 25-scf00538 | 25 |
| AX-158360696 | 28 | 68.044 | KV453267.1 | 262654   | 25-scf00538 | 25 |
| AX-158360697 | 28 | 68.044 | KV453267.1 | 263295   | 25-scf00538 | 25 |
| AX-158360698 | 28 | 68.044 | KV453267.1 | 263904   | 25-scf00538 | 25 |
| AX-158360699 | 28 | 68.044 | KV453267.1 | 264448   | 25-scf00538 | 25 |
| AX-158360702 | 28 | 68.044 | KV453267.1 | 266531   | 25-scf00538 | 25 |
| AX-158360703 | 28 | 68.044 | KV453267.1 | 268191   | 25-scf00538 | 25 |
| AX-158360704 | 28 | 68.044 | KV453267.1 | 269606   | 25-scf00538 | 25 |
| AX-158360710 | 28 | 68.044 | KV453267.1 | 275991   | 25-scf00538 | 25 |
| AX-157722042 | 28 | 68.044 | KV453267.1 | 278129   | 25-scf00538 | 25 |
| AX-158360713 | 28 | 68.044 | KV453267.1 | 279298   | 25-scf00538 | 25 |
| AX-158360714 | 28 | 68.044 | KV453267.1 | 279692   | 25-scf00538 | 25 |
| AX-158360715 | 28 | 68.044 | KV453267.1 | 280838   | 25-scf00538 | 25 |
| AX-158419804 | 28 | 68.044 | KV453267.1 | 281269   | 25-scf00538 | 25 |
| AX-158360716 | 28 | 68.044 | KV453267.1 | 281873   | 25-scf00538 | 25 |
| AX-158360717 | 28 | 68.044 | KV453267.1 | 282565   | 25-scf00538 | 25 |
| AX-158360718 | 28 | 68.044 | KV453267.1 | 283438   | 25-scf00538 | 25 |
| AX-158360720 | 28 | 68.044 | KV453267.1 | 284887   | 25-scf00538 | 25 |
| AX-158360722 | 28 | 68.044 | KV453267.1 | 288429   | 25-scf00538 | 25 |
| AX-158360724 | 28 | 68.044 | KV453267.1 | 292183   | 25-scf00538 | 25 |
| AX-158360726 | 28 | 68.044 | KV453267.1 | 293995   | 25-scf00538 | 25 |
| AX-158360728 | 28 | 68.044 | KV453267.1 | 296156   | 25-scf00538 | 25 |
| AX-158423864 | 28 | 68.044 | KV453267.1 | 298331   | 25-scf00538 | 25 |
| AX-158360730 | 28 | 68.044 | KV453267.1 | 299063   | 25-scf00538 | 25 |
| AX-158360731 | 28 | 68.044 | KV453267.1 | 300331   | 25-scf00538 | 25 |
| AX-158360732 | 28 | 68.044 | KV453267.1 | 301346   | 25-scf00538 | 25 |
| AX-158360733 | 28 | 68.044 | KV453267.1 | 302536   | 25-scf00538 | 25 |
| AX-158360735 | 28 | 68.044 | KV453267.1 | 304230   | 25-scf00538 | 25 |
| AX-158360736 | 28 | 68.044 | KV453267.1 | 309076   | 25-scf00538 | 25 |
| AX-158360737 | 28 | 68.044 | KV453267.1 | 313891   | 25-scf00538 | 25 |
| AX-157862402 | 28 | 68.044 | KV453267.1 | 314112   | 25-scf00538 | 25 |
| AX-158360738 | 28 | 68.044 | KV453267.1 | 314754   | 25-scf00538 | 25 |
| AX-158360739 | 28 | 68.044 | KV453267.1 | 314996   | 25-scf00538 | 25 |
| AX-157862403 | 28 | 68.044 | KV453267.1 | 316179   | 25-scf00538 | 25 |
| AX-158360741 | 28 | 68.044 | KV453267.1 | 317599   | 25-scf00538 | 25 |
| AX-158360742 | 28 | 68.044 | KV453267.1 | 318412   | 25-scf00538 | 25 |

|              |    |        |            |        |             |    |
|--------------|----|--------|------------|--------|-------------|----|
| AX-158360743 | 28 | 68.044 | KV453267.1 | 319046 | 25-scf00538 | 25 |
| AX-158360744 | 28 | 68.044 | KV453267.1 | 319566 | 25-scf00538 | 25 |
| AX-158360745 | 28 | 68.044 | KV453267.1 | 321077 | 25-scf00538 | 25 |
| AX-158360747 | 28 | 68.044 | KV453267.1 | 322432 | 25-scf00538 | 25 |
| AX-158360749 | 28 | 68.044 | KV453267.1 | 325490 | 25-scf00538 | 25 |
| AX-158360750 | 28 | 68.044 | KV453267.1 | 325962 | 25-scf00538 | 25 |
| AX-158360751 | 28 | 68.044 | KV453267.1 | 328413 | 25-scf00538 | 25 |
| AX-158360752 | 28 | 68.044 | KV453267.1 | 328995 | 25-scf00538 | 25 |
| AX-157851921 | 28 | 68.044 | KV453267.1 | 329510 | 25-scf00538 | 25 |
| AX-158360754 | 28 | 68.044 | KV453267.1 | 330549 | 25-scf00538 | 25 |
| AX-158360755 | 28 | 68.044 | KV453267.1 | 331346 | 25-scf00538 | 25 |
| AX-158360756 | 28 | 68.044 | KV453267.1 | 339584 | 25-scf00538 | 25 |
| AX-158360757 | 28 | 68.044 | KV453267.1 | 339953 | 25-scf00538 | 25 |
| AX-158360759 | 28 | 68.044 | KV453267.1 | 341170 | 25-scf00538 | 25 |
| AX-158360760 | 28 | 68.044 | KV453267.1 | 342046 | 25-scf00538 | 25 |
| AX-158360761 | 28 | 68.044 | KV453267.1 | 342447 | 25-scf00538 | 25 |
| AX-158360762 | 28 | 68.044 | KV453267.1 | 343533 | 25-scf00538 | 25 |
| AX-158360763 | 28 | 68.044 | KV453267.1 | 344201 | 25-scf00538 | 25 |
| AX-158360764 | 28 | 68.044 | KV453267.1 | 346579 | 25-scf00538 | 25 |
| AX-158360765 | 28 | 68.044 | KV453267.1 | 347710 | 25-scf00538 | 25 |
| AX-158360766 | 28 | 68.044 | KV453267.1 | 348268 | 25-scf00538 | 25 |
| AX-158360767 | 28 | 68.044 | KV453267.1 | 349505 | 25-scf00538 | 25 |
| AX-158360768 | 28 | 68.044 | KV453267.1 | 350699 | 25-scf00538 | 25 |
| AX-157851922 | 28 | 68.044 | KV453267.1 | 350962 | 25-scf00538 | 25 |
| AX-158360769 | 28 | 68.044 | KV453267.1 | 351267 | 25-scf00538 | 25 |
| AX-158360770 | 28 | 68.044 | KV453267.1 | 353875 | 25-scf00538 | 25 |
| AX-157851923 | 28 | 68.044 | KV453267.1 | 355421 | 25-scf00538 | 25 |
| AX-158360771 | 28 | 68.044 | KV453267.1 | 356334 | 25-scf00538 | 25 |
| AX-158360772 | 28 | 68.044 | KV453267.1 | 356704 | 25-scf00538 | 25 |
| AX-158360773 | 28 | 68.044 | KV453267.1 | 357088 | 25-scf00538 | 25 |
| AX-158360774 | 28 | 68.044 | KV453267.1 | 357482 | 25-scf00538 | 25 |
| AX-158360775 | 28 | 68.044 | KV453267.1 | 358526 | 25-scf00538 | 25 |
| AX-158360777 | 28 | 68.044 | KV453267.1 | 359858 | 25-scf00538 | 25 |
| AX-158360778 | 28 | 68.044 | KV453267.1 | 360260 | 25-scf00538 | 25 |
| AX-158360779 | 28 | 68.044 | KV453267.1 | 361073 | 25-scf00538 | 25 |
| AX-158360780 | 28 | 68.044 | KV453267.1 | 361801 | 25-scf00538 | 25 |
| AX-158360781 | 28 | 68.044 | KV453267.1 | 362282 | 25-scf00538 | 25 |
| AX-158419809 | 28 | 68.044 | KV453267.1 | 362574 | 25-scf00538 | 25 |
| AX-158360782 | 28 | 68.044 | KV453267.1 | 363442 | 25-scf00538 | 25 |
| AX-157740662 | 28 | 68.044 | KV453267.1 | 364612 | 25-scf00538 | 25 |
| AX-158360783 | 28 | 68.044 | KV453267.1 | 365216 | 25-scf00538 | 25 |
| AX-158360784 | 28 | 68.044 | KV453267.1 | 365574 | 25-scf00538 | 25 |
| AX-158360785 | 28 | 68.044 | KV453267.1 | 366521 | 25-scf00538 | 25 |
| AX-158360786 | 28 | 68.044 | KV453267.1 | 367613 | 25-scf00538 | 25 |
| AX-158360787 | 28 | 68.044 | KV453267.1 | 368717 | 25-scf00538 | 25 |
| AX-158360788 | 28 | 68.044 | KV453267.1 | 369443 | 25-scf00538 | 25 |
| AX-158360789 | 28 | 68.044 | KV453267.1 | 370146 | 25-scf00538 | 25 |
| AX-158360790 | 28 | 68.044 | KV453267.1 | 371023 | 25-scf00538 | 25 |
| AX-158360791 | 28 | 68.044 | KV453267.1 | 371551 | 25-scf00538 | 25 |
| AX-158360792 | 28 | 68.044 | KV453267.1 | 373586 | 25-scf00538 | 25 |
| AX-158360793 | 28 | 68.044 | KV453267.1 | 374394 | 25-scf00538 | 25 |



|              |    |        |            |        |             |    |
|--------------|----|--------|------------|--------|-------------|----|
| AX-157773978 | 28 | 68.044 | KV453267.1 | 374781 | 25-scf00538 | 25 |
| AX-158360794 | 28 | 68.044 | KV453267.1 | 375309 | 25-scf00538 | 25 |
| AX-158360795 | 28 | 68.044 | KV453267.1 | 375864 | 25-scf00538 | 25 |
| AX-158360796 | 28 | 68.044 | KV453267.1 | 376790 | 25-scf00538 | 25 |
| AX-157726166 | 28 | 68.044 | KV453267.1 | 377617 | 25-scf00538 | 25 |
| AX-158360797 | 28 | 68.044 | KV453267.1 | 378098 | 25-scf00538 | 25 |
| AX-157753674 | 28 | 68.044 | KV453267.1 | 379174 | 25-scf00538 | 25 |
| AX-157851924 | 28 | 68.044 | KV453267.1 | 380058 | 25-scf00538 | 25 |
| AX-157851925 | 28 | 68.044 | KV453267.1 | 382331 | 25-scf00538 | 25 |
| AX-158360799 | 28 | 68.044 | KV453267.1 | 382717 | 25-scf00538 | 25 |
| AX-158360800 | 28 | 68.044 | KV453267.1 | 384113 | 25-scf00538 | 25 |
| AX-157851926 | 28 | 68.044 | KV453267.1 | 384932 | 25-scf00538 | 25 |
| AX-157851927 | 28 | 68.044 | KV453267.1 | 385296 | 25-scf00538 | 25 |
| AX-157759420 | 28 | 68.044 | KV453267.1 | 385655 | 25-scf00538 | 25 |
| AX-158360804 | 28 | 68.044 | KV453267.1 | 394116 | 25-scf00538 | 25 |
| AX-157851928 | 28 | 68.044 | KV453267.1 | 394270 | 25-scf00538 | 25 |
| AX-158360805 | 28 | 68.044 | KV453267.1 | 395672 | 25-scf00538 | 25 |
| AX-158360806 | 28 | 68.044 | KV453267.1 | 396388 | 25-scf00538 | 25 |
| AX-158360808 | 28 | 68.044 | KV453267.1 | 403803 | 25-scf00538 | 25 |
| AX-158360810 | 28 | 68.044 | KV453267.1 | 405437 | 25-scf00538 | 25 |
| AX-158360812 | 28 | 68.044 | KV453267.1 | 407453 | 25-scf00538 | 25 |
| AX-158360814 | 28 | 68.044 | KV453267.1 | 411252 | 25-scf00538 | 25 |
| AX-158360815 | 28 | 68.044 | KV453267.1 | 411484 | 25-scf00538 | 25 |
| AX-158360816 | 28 | 68.044 | KV453267.1 | 412192 | 25-scf00538 | 25 |
| AX-158360818 | 28 | 68.044 | KV453267.1 | 419664 | 25-scf00538 | 25 |
| AX-158360819 | 28 | 68.044 | KV453267.1 | 420220 | 25-scf00538 | 25 |
| AX-158360822 | 28 | 68.044 | KV453267.1 | 425537 | 25-scf00538 | 25 |
| AX-158360824 | 28 | 68.044 | KV453267.1 | 427839 | 25-scf00538 | 25 |
| AX-158360825 | 28 | 68.044 | KV453267.1 | 429389 | 25-scf00538 | 25 |
| AX-158360826 | 28 | 68.044 | KV453267.1 | 430593 | 25-scf00538 | 25 |
| AX-158360827 | 28 | 68.044 | KV453267.1 | 431720 | 25-scf00538 | 25 |
| AX-158360828 | 28 | 68.044 | KV453267.1 | 432361 | 25-scf00538 | 25 |
| AX-158360832 | 28 | 68.044 | KV453267.1 | 439188 | 25-scf00538 | 25 |
| AX-158360833 | 28 | 68.044 | KV453267.1 | 440753 | 25-scf00538 | 25 |
| AX-158360834 | 28 | 68.044 | KV453267.1 | 444341 | 25-scf00538 | 25 |
| AX-158360841 | 28 | 68.044 | KV453267.1 | 451674 | 25-scf00538 | 25 |
| AX-158360844 | 28 | 68.044 | KV453267.1 | 458633 | 25-scf00538 | 25 |
| AX-158360846 | 28 | 68.044 | KV453267.1 | 459463 | 25-scf00538 | 25 |
| AX-157868326 | 28 | 68.044 | KV453267.1 | 461341 | 25-scf00538 | 25 |
| AX-158360847 | 28 | 68.044 | KV453267.1 | 463019 | 25-scf00538 | 25 |
| AX-158360849 | 28 | 68.044 | KV453267.1 | 463972 | 25-scf00538 | 25 |
| AX-158360851 | 28 | 68.044 | KV453267.1 | 466833 | 25-scf00538 | 25 |
| AX-158360852 | 28 | 68.044 | KV453267.1 | 469143 | 25-scf00538 | 25 |
| AX-158360855 | 28 | 68.044 | KV453267.1 | 470352 | 25-scf00538 | 25 |
| AX-158360856 | 28 | 68.044 | KV453267.1 | 470856 | 25-scf00538 | 25 |
| AX-158360857 | 28 | 68.044 | KV453267.1 | 471483 | 25-scf00538 | 25 |
| AX-158360858 | 28 | 68.044 | KV453267.1 | 472059 | 25-scf00538 | 25 |
| AX-158360860 | 28 | 68.044 | KV453267.1 | 476627 | 25-scf00538 | 25 |
| AX-158360861 | 28 | 68.044 | KV453267.1 | 477687 | 25-scf00538 | 25 |
| AX-157723906 | 28 | 68.044 | KV453267.1 | 480084 | 25-scf00538 | 25 |
| AX-158360864 | 28 | 68.044 | KV453267.1 | 480153 | 25-scf00538 | 25 |

|              |    |        |            |        |             |    |
|--------------|----|--------|------------|--------|-------------|----|
| AX-158360865 | 28 | 68.044 | KV453267.1 | 481041 | 25-scf00538 | 25 |
| AX-158360866 | 28 | 68.044 | KV453267.1 | 482255 | 25-scf00538 | 25 |
| AX-157851930 | 28 | 68.044 | KV453267.1 | 485326 | 25-scf00538 | 25 |
| AX-158360869 | 28 | 68.044 | KV453267.1 | 485971 | 25-scf00538 | 25 |
| AX-158381747 | 28 | 68.044 | KV453267.1 | 487091 | 25-scf00538 | 25 |
| AX-158360872 | 28 | 68.044 | KV453267.1 | 488953 | 25-scf00538 | 25 |
| AX-158360873 | 28 | 68.044 | KV453267.1 | 490677 | 25-scf00538 | 25 |
| AX-158360874 | 28 | 68.044 | KV453267.1 | 491115 | 25-scf00538 | 25 |
| AX-158360876 | 28 | 68.044 | KV453267.1 | 492152 | 25-scf00538 | 25 |
| AX-158360877 | 28 | 68.044 | KV453267.1 | 492822 | 25-scf00538 | 25 |
| AX-158360881 | 28 | 68.044 | KV453267.1 | 495438 | 25-scf00538 | 25 |
| AX-158360882 | 28 | 68.044 | KV453267.1 | 496207 | 25-scf00538 | 25 |
| AX-158360883 | 28 | 68.044 | KV453267.1 | 496784 | 25-scf00538 | 25 |
| AX-158360884 | 28 | 68.044 | KV453267.1 | 497252 | 25-scf00538 | 25 |
| AX-158360885 | 28 | 68.044 | KV453267.1 | 498140 | 25-scf00538 | 25 |
| AX-158360886 | 28 | 68.044 | KV453267.1 | 498523 | 25-scf00538 | 25 |
| AX-158360887 | 28 | 68.044 | KV453267.1 | 499147 | 25-scf00538 | 25 |
| AX-158360888 | 28 | 68.044 | KV453267.1 | 502964 | 25-scf00538 | 25 |
| AX-158360889 | 28 | 68.044 | KV453267.1 | 503460 | 25-scf00538 | 25 |
| AX-158360891 | 28 | 68.044 | KV453267.1 | 504953 | 25-scf00538 | 25 |
| AX-158360892 | 28 | 68.044 | KV453267.1 | 507299 | 25-scf00538 | 25 |
| AX-158360893 | 28 | 68.044 | KV453267.1 | 507567 | 25-scf00538 | 25 |
| AX-158360894 | 28 | 68.044 | KV453267.1 | 508327 | 25-scf00538 | 25 |
| AX-158360895 | 28 | 68.044 | KV453267.1 | 509276 | 25-scf00538 | 25 |
| AX-158360896 | 28 | 68.044 | KV453267.1 | 509789 | 25-scf00538 | 25 |
| AX-158360899 | 28 | 68.044 | KV453267.1 | 513987 | 25-scf00538 | 25 |
| AX-158360900 | 28 | 68.044 | KV453267.1 | 517170 | 25-scf00538 | 25 |
| AX-158360902 | 28 | 68.044 | KV453267.1 | 518643 | 25-scf00538 | 25 |
| AX-158360903 | 28 | 68.044 | KV453267.1 | 527534 | 25-scf00538 | 25 |
| AX-158360905 | 28 | 68.044 | KV453267.1 | 529962 | 25-scf00538 | 25 |
| AX-157715816 | 28 | 68.044 | KV453267.1 | 531431 | 25-scf00538 | 25 |
| AX-158360910 | 28 | 68.044 | KV453267.1 | 541381 | 25-scf00538 | 25 |
| AX-158360911 | 28 | 68.044 | KV453267.1 | 543422 | 25-scf00538 | 25 |
| AX-158419810 | 28 | 68.044 | KV453267.1 | 543586 | 25-scf00538 | 25 |
| AX-158360912 | 28 | 68.044 | KV453267.1 | 544269 | 25-scf00538 | 25 |
| AX-158360914 | 28 | 68.044 | KV453267.1 | 547921 | 25-scf00538 | 25 |
| AX-158360916 | 28 | 68.044 | KV453267.1 | 550126 | 25-scf00538 | 25 |
| AX-158360917 | 28 | 68.044 | KV453267.1 | 551230 | 25-scf00538 | 25 |
| AX-157862404 | 28 | 68.044 | KV453267.1 | 555623 | 25-scf00538 | 25 |
| AX-158360919 | 28 | 68.044 | KV453267.1 | 555881 | 25-scf00538 | 25 |
| AX-158360923 | 28 | 68.044 | KV453267.1 | 564068 | 25-scf00538 | 25 |
| AX-158360926 | 28 | 68.044 | KV453267.1 | 578277 | 25-scf00538 | 25 |
| AX-158360928 | 28 | 68.044 | KV453267.1 | 582671 | 25-scf00538 | 25 |
| AX-158360929 | 28 | 68.044 | KV453267.1 | 584070 | 25-scf00538 | 25 |
| AX-158360931 | 28 | 68.044 | KV453267.1 | 587678 | 25-scf00538 | 25 |
| AX-158360940 | 28 | 68.044 | KV453267.1 | 602548 | 25-scf00538 | 25 |
| AX-158360950 | 28 | 68.044 | KV453267.1 | 628968 | 25-scf00538 | 25 |
| AX-158360951 | 28 | 68.044 | KV453267.1 | 629510 | 25-scf00538 | 25 |
| AX-158360963 | 28 | 68.044 | KV453267.1 | 647457 | 25-scf00538 | 25 |
| AX-157882584 | 28 | 68.044 | KV453267.1 | 651332 | 25-scf00538 | 25 |
| AX-158366882 | 28 | 68.044 | KV453266.1 | 58370  | 25-scf00540 | 25 |

|              |    |        |            |        |             |    |
|--------------|----|--------|------------|--------|-------------|----|
| AX-158366922 | 28 | 68.044 | KV453264.1 | 1159   | 25-scf00541 | 25 |
| AX-158360930 | 28 | 68.16  | KV453267.1 | 585394 | 25-scf00538 | 25 |
| AX-158360548 | 28 | 68.263 | KV453267.1 | 72981  | 25-scf00538 | 25 |
| AX-158360838 | 28 | 68.263 | KV453267.1 | 449275 | 25-scf00538 | 25 |
| AX-158360880 | 28 | 68.263 | KV453267.1 | 494820 | 25-scf00538 | 25 |
| AX-158360921 | 28 | 68.263 | KV453267.1 | 562563 | 25-scf00538 | 25 |
| AX-158360922 | 28 | 68.263 | KV453267.1 | 563121 | 25-scf00538 | 25 |
| AX-157741875 | 28 | 68.263 | KV453267.1 | 588774 | 25-scf00538 | 25 |
| AX-158413467 | 28 | 68.263 | KV453267.1 | 595476 | 25-scf00538 | 25 |
| AX-157851932 | 28 | 68.263 | KV453267.1 | 597364 | 25-scf00538 | 25 |
| AX-158360939 | 28 | 68.263 | KV453267.1 | 601384 | 25-scf00538 | 25 |
| AX-158360941 | 28 | 68.263 | KV453267.1 | 603984 | 25-scf00538 | 25 |
| AX-158360942 | 28 | 68.263 | KV453267.1 | 604685 | 25-scf00538 | 25 |
| AX-158360943 | 28 | 68.263 | KV453267.1 | 605124 | 25-scf00538 | 25 |
| AX-158360945 | 28 | 68.263 | KV453267.1 | 610351 | 25-scf00538 | 25 |
| AX-158360949 | 28 | 68.263 | KV453267.1 | 627349 | 25-scf00538 | 25 |
| AX-158360954 | 28 | 68.263 | KV453267.1 | 635037 | 25-scf00538 | 25 |
| AX-157719389 | 28 | 68.263 | KV453267.1 | 636323 | 25-scf00538 | 25 |
| AX-158360958 | 28 | 68.263 | KV453267.1 | 641880 | 25-scf00538 | 25 |
| AX-158360959 | 28 | 68.263 | KV453267.1 | 643015 | 25-scf00538 | 25 |
| AX-158360961 | 28 | 68.263 | KV453267.1 | 644882 | 25-scf00538 | 25 |
| AX-158360962 | 28 | 68.263 | KV453267.1 | 645416 | 25-scf00538 | 25 |
| AX-158360964 | 28 | 68.263 | KV453267.1 | 647709 | 25-scf00538 | 25 |
| AX-158360976 | 28 | 68.263 | KV453267.1 | 665858 | 25-scf00538 | 25 |
| AX-158360994 | 28 | 68.263 | KV453267.1 | 688629 | 25-scf00538 | 25 |
| AX-158361008 | 28 | 68.263 | KV453267.1 | 709805 | 25-scf00538 | 25 |
| AX-158413477 | 28 | 68.263 | KV453267.1 | 802926 | 25-scf00538 | 25 |
| AX-158361086 | 28 | 68.263 | KV453267.1 | 809476 | 25-scf00538 | 25 |
| AX-158361123 | 28 | 68.263 | KV453267.1 | 850368 | 25-scf00538 | 25 |
| AX-158366885 | 28 | 68.263 | KV453266.1 | 61111  | 25-scf00540 | 25 |
| AX-158360625 | 28 | 68.372 | KV453267.1 | 185375 | 25-scf00538 | 25 |
| AX-158360671 | 28 | 68.372 | KV453267.1 | 238282 | 25-scf00538 | 25 |
| AX-158360968 | 28 | 68.372 | KV453267.1 | 653031 | 25-scf00538 | 25 |
| AX-158360969 | 28 | 68.372 | KV453267.1 | 653230 | 25-scf00538 | 25 |
| AX-158360970 | 28 | 68.372 | KV453267.1 | 653834 | 25-scf00538 | 25 |
| AX-157774149 | 28 | 68.372 | KV453267.1 | 663313 | 25-scf00538 | 25 |
| AX-158360974 | 28 | 68.372 | KV453267.1 | 664230 | 25-scf00538 | 25 |
| AX-158360979 | 28 | 68.372 | KV453267.1 | 672361 | 25-scf00538 | 25 |
| AX-158361002 | 28 | 68.372 | KV453267.1 | 698466 | 25-scf00538 | 25 |
| AX-158360982 | 28 | 68.428 | KV453267.1 | 674788 | 25-scf00538 | 25 |
| AX-158360863 | 28 | 68.591 | KV453267.1 | 479298 | 25-scf00538 | 25 |
| AX-158360978 | 28 | 68.591 | KV453267.1 | 671369 | 25-scf00538 | 25 |
| AX-158360984 | 28 | 68.591 | KV453267.1 | 675955 | 25-scf00538 | 25 |
| AX-158360985 | 28 | 68.591 | KV453267.1 | 677652 | 25-scf00538 | 25 |
| AX-158360986 | 28 | 68.591 | KV453267.1 | 678842 | 25-scf00538 | 25 |
| AX-158360988 | 28 | 68.591 | KV453267.1 | 680194 | 25-scf00538 | 25 |
| AX-158360991 | 28 | 68.591 | KV453267.1 | 684131 | 25-scf00538 | 25 |
| AX-158360992 | 28 | 68.591 | KV453267.1 | 684506 | 25-scf00538 | 25 |
| AX-157739944 | 28 | 68.591 | KV453267.1 | 687017 | 25-scf00538 | 25 |
| AX-158360993 | 28 | 68.591 | KV453267.1 | 687136 | 25-scf00538 | 25 |
| AX-158360999 | 28 | 68.591 | KV453267.1 | 694066 | 25-scf00538 | 25 |

|              |    |        |            |        |             |    |
|--------------|----|--------|------------|--------|-------------|----|
| AX-158361000 | 28 | 68.591 | KV453267.1 | 694750 | 25-scf00538 | 25 |
| AX-157740514 | 28 | 68.591 | KV453267.1 | 696429 | 25-scf00538 | 25 |
| AX-158361001 | 28 | 68.591 | KV453267.1 | 697214 | 25-scf00538 | 25 |
| AX-158361011 | 28 | 68.591 | KV453267.1 | 713576 | 25-scf00538 | 25 |
| AX-158361021 | 28 | 68.591 | KV453267.1 | 722606 | 25-scf00538 | 25 |
| AX-158361022 | 28 | 68.591 | KV453267.1 | 723928 | 25-scf00538 | 25 |
| AX-157747265 | 28 | 68.591 | KV453267.1 | 745654 | 25-scf00538 | 25 |
| AX-158361041 | 28 | 68.591 | KV453267.1 | 747203 | 25-scf00538 | 25 |
| AX-158361042 | 28 | 68.591 | KV453267.1 | 748124 | 25-scf00538 | 25 |
| AX-158360670 | 28 | 68.7   | KV453267.1 | 237626 | 25-scf00538 | 25 |
| AX-157851938 | 28 | 68.7   | KV453267.1 | 715234 | 25-scf00538 | 25 |
| AX-158361016 | 28 | 68.7   | KV453267.1 | 718662 | 25-scf00538 | 25 |
| AX-157889145 | 28 | 68.7   | KV453267.1 | 721063 | 25-scf00538 | 25 |
| AX-157851941 | 28 | 68.7   | KV453267.1 | 723440 | 25-scf00538 | 25 |
| AX-158361026 | 28 | 68.7   | KV453267.1 | 725536 | 25-scf00538 | 25 |
| AX-158361029 | 28 | 68.7   | KV453267.1 | 731691 | 25-scf00538 | 25 |
| AX-158361030 | 28 | 68.7   | KV453267.1 | 735256 | 25-scf00538 | 25 |
| AX-158361031 | 28 | 68.7   | KV453267.1 | 735581 | 25-scf00538 | 25 |
| AX-157851942 | 28 | 68.7   | KV453267.1 | 736067 | 25-scf00538 | 25 |
| AX-157715691 | 28 | 68.7   | KV453267.1 | 736130 | 25-scf00538 | 25 |
| AX-158361034 | 28 | 68.7   | KV453267.1 | 739573 | 25-scf00538 | 25 |
| AX-158361036 | 28 | 68.72  | KV453267.1 | 744284 | 25-scf00538 | 25 |
| AX-158361047 | 28 | 68.773 | KV453267.1 | 754546 | 25-scf00538 | 25 |
| AX-158360723 | 28 | 68.809 | KV453267.1 | 288888 | 25-scf00538 | 25 |
| AX-158360854 | 28 | 68.809 | KV453267.1 | 469801 | 25-scf00538 | 25 |
| AX-158360868 | 28 | 68.809 | KV453267.1 | 485120 | 25-scf00538 | 25 |
| AX-158360875 | 28 | 68.809 | KV453267.1 | 491766 | 25-scf00538 | 25 |
| AX-158419813 | 28 | 68.809 | KV453267.1 | 716016 | 25-scf00538 | 25 |
| AX-158361027 | 28 | 68.809 | KV453267.1 | 727152 | 25-scf00538 | 25 |
| AX-158361039 | 28 | 68.809 | KV453267.1 | 745774 | 25-scf00538 | 25 |
| AX-158361046 | 28 | 68.809 | KV453267.1 | 753407 | 25-scf00538 | 25 |
| AX-158361049 | 28 | 68.809 | KV453267.1 | 756072 | 25-scf00538 | 25 |
| AX-157862407 | 28 | 68.809 | KV453267.1 | 756290 | 25-scf00538 | 25 |
| AX-158361050 | 28 | 68.809 | KV453267.1 | 756432 | 25-scf00538 | 25 |
| AX-158361052 | 28 | 68.809 | KV453267.1 | 761112 | 25-scf00538 | 25 |
| AX-158361053 | 28 | 68.809 | KV453267.1 | 763349 | 25-scf00538 | 25 |
| AX-157751305 | 28 | 68.809 | KV453267.1 | 764585 | 25-scf00538 | 25 |
| AX-157715160 | 28 | 68.809 | KV453267.1 | 765020 | 25-scf00538 | 25 |
| AX-158361062 | 28 | 68.809 | KV453267.1 | 777394 | 25-scf00538 | 25 |
| AX-157868327 | 28 | 68.918 | KV453267.1 | 682869 | 25-scf00538 | 25 |
| AX-158360998 | 28 | 68.918 | KV453267.1 | 692904 | 25-scf00538 | 25 |
| AX-158361035 | 28 | 68.918 | KV453267.1 | 742416 | 25-scf00538 | 25 |
| AX-158361043 | 28 | 68.918 | KV453267.1 | 749007 | 25-scf00538 | 25 |
| AX-158361045 | 28 | 68.918 | KV453267.1 | 750922 | 25-scf00538 | 25 |
| AX-158361055 | 28 | 68.918 | KV453267.1 | 769170 | 25-scf00538 | 25 |
| AX-158361060 | 28 | 68.918 | KV453267.1 | 776071 | 25-scf00538 | 25 |
| AX-158361061 | 28 | 68.918 | KV453267.1 | 776739 | 25-scf00538 | 25 |
| AX-158361063 | 28 | 68.918 | KV453267.1 | 778177 | 25-scf00538 | 25 |
| AX-158361065 | 28 | 68.918 | KV453267.1 | 780406 | 25-scf00538 | 25 |
| AX-157851949 | 28 | 68.918 | KV453267.1 | 781284 | 25-scf00538 | 25 |
| AX-157773733 | 28 | 68.918 | KV453267.1 | 782908 | 25-scf00538 | 25 |

|              |    |        |            |          |             |    |
|--------------|----|--------|------------|----------|-------------|----|
| AX-158361069 | 28 | 68.918 | KV453267.1 | 783369   | 25-scf00538 | 25 |
| AX-157851950 | 28 | 69.136 | KV453267.1 | 785196   | 25-scf00538 | 25 |
| AX-158361070 | 28 | 69.136 | KV453267.1 | 785862   | 25-scf00538 | 25 |
| AX-158419985 | 28 | 69.3   | KV453263.1 | 12559366 | 25-scf00537 | 25 |
| AX-158366678 | 28 | 69.3   | KV453263.1 | 12921185 | 25-scf00537 | 25 |
| AX-158360960 | 28 | 69.3   | KV453267.1 | 644217   | 25-scf00538 | 25 |
| AX-158360973 | 28 | 69.3   | KV453267.1 | 660438   | 25-scf00538 | 25 |
| AX-157718725 | 28 | 69.3   | KV453267.1 | 789203   | 25-scf00538 | 25 |
| AX-157714988 | 28 | 69.3   | KV453267.1 | 790729   | 25-scf00538 | 25 |
| AX-157714984 | 28 | 69.3   | KV453267.1 | 791216   | 25-scf00538 | 25 |
| AX-158419818 | 28 | 69.3   | KV453267.1 | 792165   | 25-scf00538 | 25 |
| AX-158361072 | 28 | 69.3   | KV453267.1 | 795446   | 25-scf00538 | 25 |
| AX-158361074 | 28 | 69.3   | KV453267.1 | 796526   | 25-scf00538 | 25 |
| AX-158361075 | 28 | 69.3   | KV453267.1 | 798308   | 25-scf00538 | 25 |
| AX-158361076 | 28 | 69.361 | KV453267.1 | 799544   | 25-scf00538 | 25 |
| AX-158419817 | 28 | 69.464 | KV453267.1 | 792043   | 25-scf00538 | 25 |
| AX-158361078 | 28 | 69.464 | KV453267.1 | 802271   | 25-scf00538 | 25 |
| AX-158361079 | 28 | 69.464 | KV453267.1 | 802585   | 25-scf00538 | 25 |
| AX-157741636 | 28 | 69.464 | KV453267.1 | 806136   | 25-scf00538 | 25 |
| AX-158361083 | 28 | 69.464 | KV453267.1 | 807389   | 25-scf00538 | 25 |
| AX-158361087 | 28 | 69.464 | KV453267.1 | 810410   | 25-scf00538 | 25 |
| AX-158361093 | 28 | 69.586 | KV453267.1 | 814896   | 25-scf00538 | 25 |
| AX-158361094 | 28 | 69.683 | KV453267.1 | 815386   | 25-scf00538 | 25 |
| AX-158361100 | 28 | 69.683 | KV453267.1 | 829246   | 25-scf00538 | 25 |
| AX-158361101 | 28 | 69.683 | KV453267.1 | 830900   | 25-scf00538 | 25 |
| AX-158361102 | 28 | 69.683 | KV453267.1 | 831315   | 25-scf00538 | 25 |
| AX-157770742 | 28 | 69.683 | KV453267.1 | 831737   | 25-scf00538 | 25 |
| AX-158361103 | 28 | 69.683 | KV453267.1 | 832481   | 25-scf00538 | 25 |
| AX-158361088 | 28 | 69.747 | KV453267.1 | 810811   | 25-scf00538 | 25 |
| AX-158361092 | 28 | 69.747 | KV453267.1 | 813727   | 25-scf00538 | 25 |
| AX-157717994 | 28 | 69.747 | KV453267.1 | 831996   | 25-scf00538 | 25 |
| AX-158361125 | 28 | 69.747 | KV453267.1 | 851435   | 25-scf00538 | 25 |
| AX-158361129 | 28 | 69.747 | KV453267.1 | 857517   | 25-scf00538 | 25 |
| AX-158361131 | 28 | 69.747 | KV453267.1 | 860579   | 25-scf00538 | 25 |
| AX-158361077 | 28 | 69.792 | KV453267.1 | 800967   | 25-scf00538 | 25 |
| AX-158361085 | 28 | 69.792 | KV453267.1 | 808443   | 25-scf00538 | 25 |
| AX-158361089 | 28 | 69.792 | KV453267.1 | 812175   | 25-scf00538 | 25 |
| AX-158361096 | 28 | 69.792 | KV453267.1 | 818233   | 25-scf00538 | 25 |
| AX-158361106 | 28 | 69.792 | KV453267.1 | 836801   | 25-scf00538 | 25 |
| AX-158361108 | 28 | 69.792 | KV453267.1 | 838280   | 25-scf00538 | 25 |
| AX-158361109 | 28 | 69.792 | KV453267.1 | 840463   | 25-scf00538 | 25 |
| AX-158361114 | 28 | 69.792 | KV453267.1 | 845254   | 25-scf00538 | 25 |
| AX-158361115 | 28 | 69.792 | KV453267.1 | 846263   | 25-scf00538 | 25 |
| AX-158361116 | 28 | 69.792 | KV453267.1 | 846426   | 25-scf00538 | 25 |
| AX-158381749 | 28 | 69.792 | KV453267.1 | 846538   | 25-scf00538 | 25 |
| AX-158361122 | 28 | 69.792 | KV453267.1 | 849504   | 25-scf00538 | 25 |
| AX-158361124 | 28 | 69.792 | KV453267.1 | 850673   | 25-scf00538 | 25 |
| AX-158361128 | 28 | 69.793 | KV453267.1 | 855260   | 25-scf00538 | 25 |
| AX-158361095 | 28 | 69.794 | KV453267.1 | 816374   | 25-scf00538 | 25 |
| AX-158361107 | 28 | 69.794 | KV453267.1 | 838073   | 25-scf00538 | 25 |
| AX-158423866 | 28 | 69.794 | KV453267.1 | 857401   | 25-scf00538 | 25 |

|              |    |        |            |         |             |    |
|--------------|----|--------|------------|---------|-------------|----|
| AX-157700430 | 28 | 69.937 | KV453267.1 | 863735  | 25-scf00538 | 25 |
| AX-158419820 | 28 | 70.229 | KV453267.1 | 803011  | 25-scf00538 | 25 |
| AX-158361105 | 28 | 70.229 | KV453267.1 | 833313  | 25-scf00538 | 25 |
| AX-158361121 | 28 | 70.229 | KV453267.1 | 849148  | 25-scf00538 | 25 |
| AX-157741522 | 28 | 70.229 | KV453267.1 | 870713  | 25-scf00538 | 25 |
| AX-158361134 | 28 | 70.229 | KV453267.1 | 873034  | 25-scf00538 | 25 |
| AX-158361135 | 28 | 70.229 | KV453267.1 | 873928  | 25-scf00538 | 25 |
| AX-158361136 | 28 | 70.229 | KV453267.1 | 874814  | 25-scf00538 | 25 |
| AX-157742526 | 28 | 70.229 | KV453267.1 | 893084  | 25-scf00538 | 25 |
| AX-158361137 | 28 | 70.307 | KV453267.1 | 875342  | 25-scf00538 | 25 |
| AX-157753666 | 28 | 70.385 | KV453267.1 | 876659  | 25-scf00538 | 25 |
| AX-157739491 | 28 | 70.385 | KV453267.1 | 894772  | 25-scf00538 | 25 |
| AX-157851954 | 28 | 70.448 | KV453267.1 | 867924  | 25-scf00538 | 25 |
| AX-158361139 | 28 | 70.448 | KV453267.1 | 877818  | 25-scf00538 | 25 |
| AX-158361141 | 28 | 70.448 | KV453267.1 | 878495  | 25-scf00538 | 25 |
| AX-158361143 | 28 | 70.518 | KV453267.1 | 880699  | 25-scf00538 | 25 |
| AX-158361144 | 28 | 70.561 | KV453267.1 | 881104  | 25-scf00538 | 25 |
| AX-158361145 | 28 | 70.667 | KV453267.1 | 881805  | 25-scf00538 | 25 |
| AX-158361148 | 28 | 70.667 | KV453267.1 | 882947  | 25-scf00538 | 25 |
| AX-158361149 | 28 | 70.667 | KV453267.1 | 883462  | 25-scf00538 | 25 |
| AX-158361150 | 28 | 70.667 | KV453267.1 | 884055  | 25-scf00538 | 25 |
| AX-158361151 | 28 | 70.667 | KV453267.1 | 884787  | 25-scf00538 | 25 |
| AX-158361153 | 28 | 70.667 | KV453267.1 | 887421  | 25-scf00538 | 25 |
| AX-158361154 | 28 | 70.667 | KV453267.1 | 887685  | 25-scf00538 | 25 |
| AX-158361156 | 28 | 70.667 | KV453267.1 | 891179  | 25-scf00538 | 25 |
| AX-158361158 | 28 | 70.667 | KV453267.1 | 892727  | 25-scf00538 | 25 |
| AX-157851958 | 28 | 70.885 | KV453267.1 | 896525  | 25-scf00538 | 25 |
| AX-158361159 | 28 | 70.885 | KV453267.1 | 897481  | 25-scf00538 | 25 |
| AX-158361160 | 28 | 70.885 | KV453267.1 | 898584  | 25-scf00538 | 25 |
| AX-157738775 | 28 | 70.949 | KV453267.1 | 901178  | 25-scf00538 | 25 |
| AX-158361161 | 28 | 70.994 | KV453267.1 | 901421  | 25-scf00538 | 25 |
| AX-158361162 | 28 | 70.997 | KV453267.1 | 902136  | 25-scf00538 | 25 |
| AX-157748572 | 28 | 71     | KV453267.1 | 902637  | 25-scf00538 | 25 |
| AX-158361164 | 28 | 71.131 | KV453267.1 | 907628  | 25-scf00538 | 25 |
| AX-157851959 | 28 | 71.27  | KV453267.1 | 901658  | 25-scf00538 | 25 |
| AX-158361166 | 28 | 71.27  | KV453267.1 | 909314  | 25-scf00538 | 25 |
| AX-157742659 | 28 | 71.27  | KV453267.1 | 910644  | 25-scf00538 | 25 |
| AX-158361167 | 28 | 71.531 | KV453267.1 | 910739  | 25-scf00538 | 25 |
| AX-158361170 | 28 | 71.541 | KV453267.1 | 918526  | 25-scf00538 | 25 |
| AX-158361172 | 28 | 71.541 | KV453267.1 | 920555  | 25-scf00538 | 25 |
| AX-158361173 | 28 | 71.541 | KV453267.1 | 921183  | 25-scf00538 | 25 |
| AX-158361174 | 28 | 71.541 | KV453267.1 | 921595  | 25-scf00538 | 25 |
| AX-158361175 | 28 | 71.541 | KV453267.1 | 922023  | 25-scf00538 | 25 |
| AX-158361176 | 28 | 71.541 | KV453267.1 | 922909  | 25-scf00538 | 25 |
| AX-158361251 | 28 | 71.541 | KV453267.1 | 1051494 | 25-scf00538 | 25 |
| AX-158361177 | 28 | 71.65  | KV453267.1 | 923341  | 25-scf00538 | 25 |
| AX-157851962 | 28 | 71.65  | KV453267.1 | 924619  | 25-scf00538 | 25 |
| AX-158361180 | 28 | 71.76  | KV453267.1 | 925952  | 25-scf00538 | 25 |
| AX-157715420 | 28 | 71.76  | KV453267.1 | 926543  | 25-scf00538 | 25 |
| AX-158361181 | 28 | 71.76  | KV453267.1 | 926816  | 25-scf00538 | 25 |
| AX-157851963 | 28 | 71.76  | KV453267.1 | 929969  | 25-scf00538 | 25 |

|              |    |        |            |         |             |    |
|--------------|----|--------|------------|---------|-------------|----|
| AX-158361187 | 28 | 71.969 | KV453267.1 | 940558  | 25-scf00538 | 25 |
| AX-158361189 | 28 | 72.088 | KV453267.1 | 942484  | 25-scf00538 | 25 |
| AX-158361190 | 28 | 72.088 | KV453267.1 | 946129  | 25-scf00538 | 25 |
| AX-158361209 | 28 | 72.088 | KV453267.1 | 974405  | 25-scf00538 | 25 |
| AX-158361178 | 28 | 72.197 | KV453267.1 | 924265  | 25-scf00538 | 25 |
| AX-158361188 | 28 | 72.197 | KV453267.1 | 941546  | 25-scf00538 | 25 |
| AX-158361195 | 28 | 72.197 | KV453267.1 | 953066  | 25-scf00538 | 25 |
| AX-158361196 | 28 | 72.197 | KV453267.1 | 953512  | 25-scf00538 | 25 |
| AX-158361197 | 28 | 72.197 | KV453267.1 | 954740  | 25-scf00538 | 25 |
| AX-158361199 | 28 | 72.197 | KV453267.1 | 957334  | 25-scf00538 | 25 |
| AX-157882588 | 28 | 72.197 | KV453267.1 | 958294  | 25-scf00538 | 25 |
| AX-157717727 | 28 | 72.197 | KV453267.1 | 963773  | 25-scf00538 | 25 |
| AX-157736390 | 28 | 72.197 | KV453267.1 | 963977  | 25-scf00538 | 25 |
| AX-158361204 | 28 | 72.197 | KV453267.1 | 964597  | 25-scf00538 | 25 |
| AX-158361205 | 28 | 72.415 | KV453267.1 | 969143  | 25-scf00538 | 25 |
| AX-158361206 | 28 | 72.415 | KV453267.1 | 971138  | 25-scf00538 | 25 |
| AX-158361208 | 28 | 72.415 | KV453267.1 | 973597  | 25-scf00538 | 25 |
| AX-158361210 | 28 | 72.415 | KV453267.1 | 975315  | 25-scf00538 | 25 |
| AX-158361211 | 28 | 72.415 | KV453267.1 | 975809  | 25-scf00538 | 25 |
| AX-158361213 | 28 | 72.415 | KV453267.1 | 977945  | 25-scf00538 | 25 |
| AX-158361214 | 28 | 72.415 | KV453267.1 | 978588  | 25-scf00538 | 25 |
| AX-157746927 | 28 | 72.415 | KV453267.1 | 980958  | 25-scf00538 | 25 |
| AX-158361216 | 28 | 72.632 | KV453267.1 | 982002  | 25-scf00538 | 25 |
| AX-157771174 | 28 | 72.632 | KV453267.1 | 982714  | 25-scf00538 | 25 |
| AX-158361217 | 28 | 72.635 | KV453267.1 | 982804  | 25-scf00538 | 25 |
| AX-158361222 | 28 | 72.729 | KV453267.1 | 988818  | 25-scf00538 | 25 |
| AX-158381750 | 28 | 72.84  | KV453267.1 | 990188  | 25-scf00538 | 25 |
| AX-158361225 | 28 | 72.962 | KV453267.1 | 998560  | 25-scf00538 | 25 |
| AX-158361226 | 28 | 72.962 | KV453267.1 | 999122  | 25-scf00538 | 25 |
| AX-158361227 | 28 | 72.962 | KV453267.1 | 1000340 | 25-scf00538 | 25 |
| AX-157851969 | 28 | 72.962 | KV453267.1 | 1002837 | 25-scf00538 | 25 |
| AX-158361230 | 28 | 72.962 | KV453267.1 | 1004214 | 25-scf00538 | 25 |
| AX-158361232 | 28 | 72.962 | KV453267.1 | 1006011 | 25-scf00538 | 25 |
| AX-158361236 | 28 | 73.071 | KV453267.1 | 1010349 | 25-scf00538 | 25 |
| AX-157721570 | 28 | 73.071 | KV453267.1 | 1010777 | 25-scf00538 | 25 |
| AX-158361237 | 28 | 73.071 | KV453267.1 | 1013051 | 25-scf00538 | 25 |
| AX-158361246 | 28 | 73.071 | KV453267.1 | 1043463 | 25-scf00538 | 25 |
| AX-158361239 | 28 | 73.18  | KV453267.1 | 1016770 | 25-scf00538 | 25 |
| AX-158361240 | 28 | 73.18  | KV453267.1 | 1018582 | 25-scf00538 | 25 |
| AX-157718196 | 28 | 73.211 | KV453267.1 | 1020539 | 25-scf00538 | 25 |
| AX-158361247 | 28 | 73.211 | KV453267.1 | 1046952 | 25-scf00538 | 25 |
| AX-158361243 | 28 | 73.235 | KV453267.1 | 1023141 | 25-scf00538 | 25 |
| AX-157750542 | 28 | 73.259 | KV453267.1 | 1035822 | 25-scf00538 | 25 |
| AX-157751441 | 28 | 73.273 | KV453267.1 | 1037362 | 25-scf00538 | 25 |
| AX-158361245 | 28 | 73.273 | KV453267.1 | 1038897 | 25-scf00538 | 25 |
| AX-158361244 | 28 | 73.289 | KV453267.1 | 1038249 | 25-scf00538 | 25 |
| AX-158361248 | 28 | 73.289 | KV453267.1 | 1048078 | 25-scf00538 | 25 |
| AX-158361249 | 28 | 73.289 | KV453267.1 | 1048342 | 25-scf00538 | 25 |
| AX-157851973 | 28 | 73.289 | KV453267.1 | 1048620 | 25-scf00538 | 25 |
| AX-157698025 | 28 | 73.289 | KV453267.1 | 1053449 | 25-scf00538 | 25 |
| AX-157851975 | 28 | 73.508 | KV453267.1 | 1058342 | 25-scf00538 | 25 |

|              |    |        |            |         |             |    |
|--------------|----|--------|------------|---------|-------------|----|
| AX-158361254 | 28 | 73.508 | KV453267.1 | 1058391 | 25-scf00538 | 25 |
| AX-158361255 | 28 | 73.508 | KV453267.1 | 1060153 | 25-scf00538 | 25 |
| AX-158361256 | 28 | 73.508 | KV453267.1 | 1061456 | 25-scf00538 | 25 |
| AX-157771665 | 28 | 73.508 | KV453267.1 | 1063094 | 25-scf00538 | 25 |
| AX-158361257 | 28 | 73.508 | KV453267.1 | 1064855 | 25-scf00538 | 25 |
| AX-157851976 | 28 | 73.508 | KV453267.1 | 1064990 | 25-scf00538 | 25 |
| AX-158361258 | 28 | 73.726 | KV453267.1 | 1065363 | 25-scf00538 | 25 |
| AX-158361264 | 28 | 73.726 | KV453267.1 | 1073254 | 25-scf00538 | 25 |
| AX-158361265 | 28 | 73.726 | KV453267.1 | 1073414 | 25-scf00538 | 25 |
| AX-158361266 | 28 | 73.726 | KV453267.1 | 1074241 | 25-scf00538 | 25 |
| AX-158361267 | 28 | 73.726 | KV453267.1 | 1076414 | 25-scf00538 | 25 |
| AX-158361268 | 28 | 73.726 | KV453267.1 | 1077547 | 25-scf00538 | 25 |
| AX-157851978 | 28 | 73.726 | KV453267.1 | 1079176 | 25-scf00538 | 25 |
| AX-158361400 | 28 | 73.726 | KV453267.1 | 1277836 | 25-scf00538 | 25 |
| AX-158361271 | 28 | 73.74  | KV453267.1 | 1083070 | 25-scf00538 | 25 |
| AX-157851979 | 28 | 73.753 | KV453267.1 | 1088714 | 25-scf00538 | 25 |
| AX-157716874 | 28 | 73.774 | KV453267.1 | 1088497 | 25-scf00538 | 25 |
| AX-157851980 | 28 | 73.774 | KV453267.1 | 1089387 | 25-scf00538 | 25 |
| AX-158361273 | 28 | 73.794 | KV453267.1 | 1090646 | 25-scf00538 | 25 |
| AX-157851981 | 28 | 73.814 | KV453267.1 | 1094969 | 25-scf00538 | 25 |
| AX-158361219 | 28 | 73.835 | KV453267.1 | 984604  | 25-scf00538 | 25 |
| AX-158361234 | 28 | 73.835 | KV453267.1 | 1008893 | 25-scf00538 | 25 |
| AX-158361252 | 28 | 73.835 | KV453267.1 | 1051987 | 25-scf00538 | 25 |
| AX-157851977 | 28 | 73.835 | KV453267.1 | 1078209 | 25-scf00538 | 25 |
| AX-158361270 | 28 | 73.835 | KV453267.1 | 1080513 | 25-scf00538 | 25 |
| AX-157720154 | 28 | 73.835 | KV453267.1 | 1084472 | 25-scf00538 | 25 |
| AX-157862408 | 28 | 73.835 | KV453267.1 | 1088182 | 25-scf00538 | 25 |
| AX-157743302 | 28 | 73.835 | KV453267.1 | 1088863 | 25-scf00538 | 25 |
| AX-158361272 | 28 | 73.835 | KV453267.1 | 1089700 | 25-scf00538 | 25 |
| AX-158361274 | 28 | 73.835 | KV453267.1 | 1097341 | 25-scf00538 | 25 |
| AX-158361275 | 28 | 73.835 | KV453267.1 | 1097860 | 25-scf00538 | 25 |
| AX-158361276 | 28 | 73.835 | KV453267.1 | 1098322 | 25-scf00538 | 25 |
| AX-158361277 | 28 | 73.835 | KV453267.1 | 1098834 | 25-scf00538 | 25 |
| AX-158361278 | 28 | 73.835 | KV453267.1 | 1099711 | 25-scf00538 | 25 |
| AX-158361286 | 28 | 73.835 | KV453267.1 | 1107300 | 25-scf00538 | 25 |
| AX-157709945 | 28 | 73.835 | KV453267.1 | 1108281 | 25-scf00538 | 25 |
| AX-158361289 | 28 | 73.835 | KV453267.1 | 1111649 | 25-scf00538 | 25 |
| AX-158361290 | 28 | 73.835 | KV453267.1 | 1112744 | 25-scf00538 | 25 |
| AX-158361294 | 28 | 73.835 | KV453267.1 | 1117197 | 25-scf00538 | 25 |
| AX-158361295 | 28 | 73.835 | KV453267.1 | 1119063 | 25-scf00538 | 25 |
| AX-158361296 | 28 | 73.835 | KV453267.1 | 1119857 | 25-scf00538 | 25 |
| AX-158361297 | 28 | 73.835 | KV453267.1 | 1120266 | 25-scf00538 | 25 |
| AX-158361299 | 28 | 73.835 | KV453267.1 | 1122048 | 25-scf00538 | 25 |
| AX-158361300 | 28 | 73.835 | KV453267.1 | 1123300 | 25-scf00538 | 25 |
| AX-158361302 | 28 | 73.835 | KV453267.1 | 1129539 | 25-scf00538 | 25 |
| AX-158361304 | 28 | 73.835 | KV453267.1 | 1132325 | 25-scf00538 | 25 |
| AX-158361305 | 28 | 73.835 | KV453267.1 | 1134398 | 25-scf00538 | 25 |
| AX-158361306 | 28 | 73.835 | KV453267.1 | 1134900 | 25-scf00538 | 25 |
| AX-158361310 | 28 | 73.835 | KV453267.1 | 1141592 | 25-scf00538 | 25 |
| AX-158361313 | 28 | 73.835 | KV453267.1 | 1145157 | 25-scf00538 | 25 |
| AX-158361314 | 28 | 73.835 | KV453267.1 | 1147443 | 25-scf00538 | 25 |



|              |    |        |            |         |             |    |
|--------------|----|--------|------------|---------|-------------|----|
| AX-158361315 | 28 | 73.835 | KV453267.1 | 1147940 | 25-scf00538 | 25 |
| AX-158361316 | 28 | 73.835 | KV453267.1 | 1148484 | 25-scf00538 | 25 |
| AX-158361317 | 28 | 73.835 | KV453267.1 | 1148955 | 25-scf00538 | 25 |
| AX-158361319 | 28 | 73.835 | KV453267.1 | 1151070 | 25-scf00538 | 25 |
| AX-158361321 | 28 | 73.835 | KV453267.1 | 1152148 | 25-scf00538 | 25 |
| AX-157851983 | 28 | 73.835 | KV453267.1 | 1153164 | 25-scf00538 | 25 |
| AX-158361325 | 28 | 73.835 | KV453267.1 | 1158888 | 25-scf00538 | 25 |
| AX-158361326 | 28 | 73.835 | KV453267.1 | 1160263 | 25-scf00538 | 25 |
| AX-157851984 | 28 | 73.835 | KV453267.1 | 1161398 | 25-scf00538 | 25 |
| AX-158361329 | 28 | 73.835 | KV453267.1 | 1162263 | 25-scf00538 | 25 |
| AX-158361330 | 28 | 73.835 | KV453267.1 | 1163386 | 25-scf00538 | 25 |
| AX-158361331 | 28 | 73.835 | KV453267.1 | 1165910 | 25-scf00538 | 25 |
| AX-157882590 | 28 | 73.835 | KV453267.1 | 1167309 | 25-scf00538 | 25 |
| AX-158361333 | 28 | 73.835 | KV453267.1 | 1175277 | 25-scf00538 | 25 |
| AX-157882591 | 28 | 73.835 | KV453267.1 | 1175607 | 25-scf00538 | 25 |
| AX-158361334 | 28 | 73.835 | KV453267.1 | 1175642 | 25-scf00538 | 25 |
| AX-158361336 | 28 | 73.835 | KV453267.1 | 1183141 | 25-scf00538 | 25 |
| AX-158361337 | 28 | 73.835 | KV453267.1 | 1184870 | 25-scf00538 | 25 |
| AX-158361338 | 28 | 73.835 | KV453267.1 | 1185602 | 25-scf00538 | 25 |
| AX-158361339 | 28 | 73.835 | KV453267.1 | 1185868 | 25-scf00538 | 25 |
| AX-158361340 | 28 | 73.835 | KV453267.1 | 1188067 | 25-scf00538 | 25 |
| AX-158361341 | 28 | 73.835 | KV453267.1 | 1188642 | 25-scf00538 | 25 |
| AX-158361342 | 28 | 73.835 | KV453267.1 | 1189483 | 25-scf00538 | 25 |
| AX-157719144 | 28 | 73.835 | KV453267.1 | 1193577 | 25-scf00538 | 25 |
| AX-158361345 | 28 | 73.835 | KV453267.1 | 1201961 | 25-scf00538 | 25 |
| AX-158361346 | 28 | 73.835 | KV453267.1 | 1202964 | 25-scf00538 | 25 |
| AX-158361347 | 28 | 73.835 | KV453267.1 | 1204562 | 25-scf00538 | 25 |
| AX-158361349 | 28 | 73.835 | KV453267.1 | 1209286 | 25-scf00538 | 25 |
| AX-158361351 | 28 | 73.835 | KV453267.1 | 1211255 | 25-scf00538 | 25 |
| AX-158361353 | 28 | 73.835 | KV453267.1 | 1212722 | 25-scf00538 | 25 |
| AX-158361355 | 28 | 73.835 | KV453267.1 | 1213854 | 25-scf00538 | 25 |
| AX-158361359 | 28 | 73.835 | KV453267.1 | 1219100 | 25-scf00538 | 25 |
| AX-158361361 | 28 | 73.835 | KV453267.1 | 1222106 | 25-scf00538 | 25 |
| AX-158361362 | 28 | 73.835 | KV453267.1 | 1223026 | 25-scf00538 | 25 |
| AX-158361364 | 28 | 73.835 | KV453267.1 | 1225006 | 25-scf00538 | 25 |
| AX-158361367 | 28 | 73.835 | KV453267.1 | 1233213 | 25-scf00538 | 25 |
| AX-158361370 | 28 | 73.835 | KV453267.1 | 1235950 | 25-scf00538 | 25 |
| AX-158361371 | 28 | 73.835 | KV453267.1 | 1236513 | 25-scf00538 | 25 |
| AX-158361373 | 28 | 73.835 | KV453267.1 | 1241870 | 25-scf00538 | 25 |
| AX-158361374 | 28 | 73.835 | KV453267.1 | 1242737 | 25-scf00538 | 25 |
| AX-158361375 | 28 | 73.835 | KV453267.1 | 1243210 | 25-scf00538 | 25 |
| AX-158361376 | 28 | 73.835 | KV453267.1 | 1244673 | 25-scf00538 | 25 |
| AX-158361377 | 28 | 73.835 | KV453267.1 | 1245566 | 25-scf00538 | 25 |
| AX-157851986 | 28 | 73.835 | KV453267.1 | 1246682 | 25-scf00538 | 25 |
| AX-158361378 | 28 | 73.835 | KV453267.1 | 1247026 | 25-scf00538 | 25 |
| AX-158361382 | 28 | 73.835 | KV453267.1 | 1252905 | 25-scf00538 | 25 |
| AX-158361383 | 28 | 73.835 | KV453267.1 | 1254298 | 25-scf00538 | 25 |
| AX-158361385 | 28 | 73.835 | KV453267.1 | 1256765 | 25-scf00538 | 25 |
| AX-158361386 | 28 | 73.835 | KV453267.1 | 1257263 | 25-scf00538 | 25 |
| AX-158361390 | 28 | 73.835 | KV453267.1 | 1264226 | 25-scf00538 | 25 |
| AX-158361391 | 28 | 73.835 | KV453267.1 | 1267191 | 25-scf00538 | 25 |

|              |    |        |            |         |             |    |
|--------------|----|--------|------------|---------|-------------|----|
| AX-158361392 | 28 | 73.835 | KV453267.1 | 1268096 | 25-scf00538 | 25 |
| AX-158361393 | 28 | 73.835 | KV453267.1 | 1268649 | 25-scf00538 | 25 |
| AX-158361394 | 28 | 73.835 | KV453267.1 | 1269248 | 25-scf00538 | 25 |
| AX-158361396 | 28 | 73.835 | KV453267.1 | 1274068 | 25-scf00538 | 25 |
| AX-158361397 | 28 | 73.835 | KV453267.1 | 1275928 | 25-scf00538 | 25 |
| AX-158361398 | 28 | 73.835 | KV453267.1 | 1276507 | 25-scf00538 | 25 |
| AX-158361399 | 28 | 73.835 | KV453267.1 | 1277358 | 25-scf00538 | 25 |
| AX-158361401 | 28 | 73.835 | KV453267.1 | 1279586 | 25-scf00538 | 25 |
| AX-157726453 | 28 | 73.835 | KV453267.1 | 1282679 | 25-scf00538 | 25 |
| AX-157868328 | 28 | 73.835 | KV453267.1 | 1283938 | 25-scf00538 | 25 |
| AX-158361405 | 28 | 73.835 | KV453267.1 | 1287069 | 25-scf00538 | 25 |
| AX-158361407 | 28 | 73.835 | KV453267.1 | 1287722 | 25-scf00538 | 25 |
| AX-158361409 | 28 | 73.835 | KV453267.1 | 1289674 | 25-scf00538 | 25 |
| AX-158361410 | 28 | 73.835 | KV453267.1 | 1291034 | 25-scf00538 | 25 |
| AX-157739578 | 28 | 73.835 | KV453267.1 | 1291424 | 25-scf00538 | 25 |
| AX-158361412 | 28 | 73.835 | KV453267.1 | 1293694 | 25-scf00538 | 25 |
| AX-158361413 | 28 | 73.835 | KV453267.1 | 1294072 | 25-scf00538 | 25 |
| AX-158361414 | 28 | 73.835 | KV453267.1 | 1295163 | 25-scf00538 | 25 |
| AX-158361415 | 28 | 73.835 | KV453267.1 | 1295645 | 25-scf00538 | 25 |
| AX-158361416 | 28 | 73.835 | KV453267.1 | 1297707 | 25-scf00538 | 25 |
| AX-158361417 | 28 | 73.835 | KV453267.1 | 1299417 | 25-scf00538 | 25 |
| AX-158361418 | 28 | 73.835 | KV453267.1 | 1301795 | 25-scf00538 | 25 |
| AX-158361420 | 28 | 73.835 | KV453267.1 | 1303274 | 25-scf00538 | 25 |
| AX-157774430 | 28 | 73.835 | KV453267.1 | 1305128 | 25-scf00538 | 25 |
| AX-158361422 | 28 | 73.835 | KV453267.1 | 1305632 | 25-scf00538 | 25 |
| AX-158361423 | 28 | 73.835 | KV453267.1 | 1306885 | 25-scf00538 | 25 |
| AX-158361426 | 28 | 73.835 | KV453267.1 | 1310686 | 25-scf00538 | 25 |
| AX-158361427 | 28 | 73.835 | KV453267.1 | 1311929 | 25-scf00538 | 25 |
| AX-158361429 | 28 | 73.835 | KV453267.1 | 1314189 | 25-scf00538 | 25 |
| AX-157851989 | 28 | 73.835 | KV453267.1 | 1316660 | 25-scf00538 | 25 |
| AX-157882592 | 28 | 73.835 | KV453267.1 | 1319298 | 25-scf00538 | 25 |
| AX-158361431 | 28 | 73.835 | KV453267.1 | 1319805 | 25-scf00538 | 25 |
| AX-158361435 | 28 | 73.835 | KV453267.1 | 1323478 | 25-scf00538 | 25 |
| AX-158361439 | 28 | 73.835 | KV453267.1 | 1327149 | 25-scf00538 | 25 |
| AX-158361440 | 28 | 73.835 | KV453267.1 | 1327870 | 25-scf00538 | 25 |
| AX-158361442 | 28 | 73.835 | KV453267.1 | 1328926 | 25-scf00538 | 25 |
| AX-158361443 | 28 | 73.835 | KV453267.1 | 1330972 | 25-scf00538 | 25 |
| AX-158361445 | 28 | 73.835 | KV453267.1 | 1333143 | 25-scf00538 | 25 |
| AX-158361449 | 28 | 73.835 | KV453267.1 | 1340859 | 25-scf00538 | 25 |
| AX-158361452 | 28 | 73.835 | KV453267.1 | 1343728 | 25-scf00538 | 25 |
| AX-157851992 | 28 | 73.835 | KV453267.1 | 1346367 | 25-scf00538 | 25 |
| AX-158361492 | 28 | 73.835 | KV453267.1 | 1393826 | 25-scf00538 | 25 |
| AX-158361531 | 28 | 73.835 | KV453267.1 | 1445036 | 25-scf00538 | 25 |
| AX-158361579 | 28 | 73.835 | KV453267.1 | 1492636 | 25-scf00538 | 25 |
| AX-158361598 | 28 | 73.835 | KV453267.1 | 1516763 | 25-scf00538 | 25 |
| AX-158361446 | 28 | 73.87  | KV453267.1 | 1333542 | 25-scf00538 | 25 |
| AX-158361421 | 28 | 73.901 | KV453267.1 | 1304205 | 25-scf00538 | 25 |
| AX-158361447 | 28 | 73.901 | KV453267.1 | 1333887 | 25-scf00538 | 25 |
| AX-157721244 | 28 | 73.93  | KV453267.1 | 1334979 | 25-scf00538 | 25 |
| AX-157713322 | 28 | 73.972 | KV453267.1 | 1336656 | 25-scf00538 | 25 |
| AX-158361451 | 28 | 74.019 | KV453267.1 | 1342733 | 25-scf00538 | 25 |

|              |    |        |            |         |             |    |
|--------------|----|--------|------------|---------|-------------|----|
| AX-158361280 | 28 | 74.054 | KV453267.1 | 1101040 | 25-scf00538 | 25 |
| AX-158361285 | 28 | 74.054 | KV453267.1 | 1105857 | 25-scf00538 | 25 |
| AX-158361307 | 28 | 74.054 | KV453267.1 | 1137259 | 25-scf00538 | 25 |
| AX-158361379 | 28 | 74.054 | KV453267.1 | 1248309 | 25-scf00538 | 25 |
| AX-157753618 | 28 | 74.054 | KV453267.1 | 1286364 | 25-scf00538 | 25 |
| AX-158361454 | 28 | 74.054 | KV453267.1 | 1348777 | 25-scf00538 | 25 |
| AX-158361455 | 28 | 74.054 | KV453267.1 | 1349251 | 25-scf00538 | 25 |
| AX-158361457 | 28 | 74.054 | KV453267.1 | 1351019 | 25-scf00538 | 25 |
| AX-158361458 | 28 | 74.054 | KV453267.1 | 1351695 | 25-scf00538 | 25 |
| AX-157751182 | 28 | 74.054 | KV453267.1 | 1352573 | 25-scf00538 | 25 |
| AX-158361459 | 28 | 74.054 | KV453267.1 | 1353121 | 25-scf00538 | 25 |
| AX-158361460 | 28 | 74.054 | KV453267.1 | 1353555 | 25-scf00538 | 25 |
| AX-158361461 | 28 | 74.054 | KV453267.1 | 1356232 | 25-scf00538 | 25 |
| AX-158361466 | 28 | 74.054 | KV453267.1 | 1364144 | 25-scf00538 | 25 |
| AX-158361467 | 28 | 74.054 | KV453267.1 | 1365208 | 25-scf00538 | 25 |
| AX-158361469 | 28 | 74.054 | KV453267.1 | 1367766 | 25-scf00538 | 25 |
| AX-158381752 | 28 | 74.054 | KV453267.1 | 1368545 | 25-scf00538 | 25 |
| AX-158361472 | 28 | 74.054 | KV453267.1 | 1372243 | 25-scf00538 | 25 |
| AX-158361473 | 28 | 74.054 | KV453267.1 | 1373264 | 25-scf00538 | 25 |
| AX-157694554 | 28 | 74.054 | KV453267.1 | 1385702 | 25-scf00538 | 25 |
| AX-158361497 | 28 | 74.054 | KV453267.1 | 1398844 | 25-scf00538 | 25 |
| AX-158361519 | 28 | 74.054 | KV453267.1 | 1431984 | 25-scf00538 | 25 |
| AX-158361553 | 28 | 74.054 | KV453267.1 | 1466961 | 25-scf00538 | 25 |
| AX-158361591 | 28 | 74.054 | KV453267.1 | 1509164 | 25-scf00538 | 25 |
| AX-158361474 | 28 | 74.108 | KV453267.1 | 1375196 | 25-scf00538 | 25 |
| AX-158361291 | 28 | 74.163 | KV453267.1 | 1113438 | 25-scf00538 | 25 |
| AX-158361328 | 28 | 74.163 | KV453267.1 | 1161273 | 25-scf00538 | 25 |
| AX-158361491 | 28 | 74.163 | KV453267.1 | 1393197 | 25-scf00538 | 25 |
| AX-158361496 | 28 | 74.163 | KV453267.1 | 1398243 | 25-scf00538 | 25 |
| AX-158361505 | 28 | 74.163 | KV453267.1 | 1412814 | 25-scf00538 | 25 |
| AX-157753117 | 28 | 74.163 | KV453267.1 | 1414657 | 25-scf00538 | 25 |
| AX-158361508 | 28 | 74.163 | KV453267.1 | 1418293 | 25-scf00538 | 25 |
| AX-158361518 | 28 | 74.163 | KV453267.1 | 1431548 | 25-scf00538 | 25 |
| AX-158361509 | 28 | 74.208 | KV453267.1 | 1418782 | 25-scf00538 | 25 |
| AX-157889147 | 28 | 74.272 | KV453267.1 | 988219  | 25-scf00538 | 25 |
| AX-157851988 | 28 | 74.272 | KV453267.1 | 1251417 | 25-scf00538 | 25 |
| AX-158361419 | 28 | 74.272 | KV453267.1 | 1303068 | 25-scf00538 | 25 |
| AX-157851993 | 28 | 74.272 | KV453267.1 | 1348618 | 25-scf00538 | 25 |
| AX-158361464 | 28 | 74.272 | KV453267.1 | 1362101 | 25-scf00538 | 25 |
| AX-158361493 | 28 | 74.272 | KV453267.1 | 1394459 | 25-scf00538 | 25 |
| AX-158419832 | 28 | 74.272 | KV453267.1 | 1406637 | 25-scf00538 | 25 |
| AX-158361503 | 28 | 74.272 | KV453267.1 | 1409355 | 25-scf00538 | 25 |
| AX-158361506 | 28 | 74.272 | KV453267.1 | 1415862 | 25-scf00538 | 25 |
| AX-158361510 | 28 | 74.272 | KV453267.1 | 1422037 | 25-scf00538 | 25 |
| AX-158361512 | 28 | 74.272 | KV453267.1 | 1424946 | 25-scf00538 | 25 |
| AX-158361514 | 28 | 74.272 | KV453267.1 | 1427957 | 25-scf00538 | 25 |
| AX-158361515 | 28 | 74.272 | KV453267.1 | 1428310 | 25-scf00538 | 25 |
| AX-158361516 | 28 | 74.272 | KV453267.1 | 1428842 | 25-scf00538 | 25 |
| AX-157868331 | 28 | 74.272 | KV453267.1 | 1431227 | 25-scf00538 | 25 |
| AX-158361520 | 28 | 74.272 | KV453267.1 | 1432483 | 25-scf00538 | 25 |
| AX-158361521 | 28 | 74.272 | KV453267.1 | 1433071 | 25-scf00538 | 25 |

|              |    |        |            |         |             |    |
|--------------|----|--------|------------|---------|-------------|----|
| AX-158361523 | 28 | 74.272 | KV453267.1 | 1437969 | 25-scf00538 | 25 |
| AX-158361524 | 28 | 74.272 | KV453267.1 | 1439000 | 25-scf00538 | 25 |
| AX-158361527 | 28 | 74.272 | KV453267.1 | 1440473 | 25-scf00538 | 25 |
| AX-158361529 | 28 | 74.272 | KV453267.1 | 1443523 | 25-scf00538 | 25 |
| AX-158361533 | 28 | 74.272 | KV453267.1 | 1446988 | 25-scf00538 | 25 |
| AX-158361535 | 28 | 74.272 | KV453267.1 | 1450784 | 25-scf00538 | 25 |
| AX-157743129 | 28 | 74.272 | KV453267.1 | 1454288 | 25-scf00538 | 25 |
| AX-158361542 | 28 | 74.272 | KV453267.1 | 1457179 | 25-scf00538 | 25 |
| AX-158361543 | 28 | 74.272 | KV453267.1 | 1459043 | 25-scf00538 | 25 |
| AX-158361544 | 28 | 74.272 | KV453267.1 | 1459434 | 25-scf00538 | 25 |
| AX-158361546 | 28 | 74.272 | KV453267.1 | 1460725 | 25-scf00538 | 25 |
| AX-158361547 | 28 | 74.272 | KV453267.1 | 1462250 | 25-scf00538 | 25 |
| AX-158361550 | 28 | 74.272 | KV453267.1 | 1464562 | 25-scf00538 | 25 |
| AX-158361551 | 28 | 74.272 | KV453267.1 | 1465099 | 25-scf00538 | 25 |
| AX-158361555 | 28 | 74.272 | KV453267.1 | 1467830 | 25-scf00538 | 25 |
| AX-158361558 | 28 | 74.272 | KV453267.1 | 1469681 | 25-scf00538 | 25 |
| AX-158361560 | 28 | 74.272 | KV453267.1 | 1470697 | 25-scf00538 | 25 |
| AX-158361562 | 28 | 74.272 | KV453267.1 | 1475144 | 25-scf00538 | 25 |
| AX-158361564 | 28 | 74.272 | KV453267.1 | 1476045 | 25-scf00538 | 25 |
| AX-158361567 | 28 | 74.272 | KV453267.1 | 1479307 | 25-scf00538 | 25 |
| AX-158361568 | 28 | 74.272 | KV453267.1 | 1479986 | 25-scf00538 | 25 |
| AX-158361572 | 28 | 74.272 | KV453267.1 | 1484088 | 25-scf00538 | 25 |
| AX-157882595 | 28 | 74.272 | KV453267.1 | 1485247 | 25-scf00538 | 25 |
| AX-158361574 | 28 | 74.272 | KV453267.1 | 1485619 | 25-scf00538 | 25 |
| AX-157743255 | 28 | 74.272 | KV453267.1 | 1489964 | 25-scf00538 | 25 |
| AX-158361577 | 28 | 74.272 | KV453267.1 | 1490899 | 25-scf00538 | 25 |
| AX-158361578 | 28 | 74.272 | KV453267.1 | 1491589 | 25-scf00538 | 25 |
| AX-157744846 | 28 | 74.272 | KV453267.1 | 1501553 | 25-scf00538 | 25 |
| AX-158361631 | 28 | 74.272 | KV453267.1 | 1557493 | 25-scf00538 | 25 |
| AX-158361664 | 28 | 74.272 | KV453267.1 | 1601905 | 25-scf00538 | 25 |
| AX-158361759 | 28 | 74.272 | KV453267.1 | 1707487 | 25-scf00538 | 25 |
| AX-158361532 | 28 | 74.33  | KV453267.1 | 1446243 | 25-scf00538 | 25 |
| AX-158361557 | 28 | 74.33  | KV453267.1 | 1469206 | 25-scf00538 | 25 |
| AX-158361587 | 28 | 74.33  | KV453267.1 | 1502193 | 25-scf00538 | 25 |
| AX-158361545 | 28 | 74.381 | KV453267.1 | 1459862 | 25-scf00538 | 25 |
| AX-158361566 | 28 | 74.381 | KV453267.1 | 1477491 | 25-scf00538 | 25 |
| AX-158361580 | 28 | 74.381 | KV453267.1 | 1492997 | 25-scf00538 | 25 |
| AX-158361582 | 28 | 74.381 | KV453267.1 | 1494314 | 25-scf00538 | 25 |
| AX-158361596 | 28 | 74.381 | KV453267.1 | 1514351 | 25-scf00538 | 25 |
| AX-158361599 | 28 | 74.381 | KV453267.1 | 1517829 | 25-scf00538 | 25 |
| AX-158361600 | 28 | 74.381 | KV453267.1 | 1521393 | 25-scf00538 | 25 |
| AX-158361603 | 28 | 74.381 | KV453267.1 | 1523825 | 25-scf00538 | 25 |
| AX-158361604 | 28 | 74.381 | KV453267.1 | 1524204 | 25-scf00538 | 25 |
| AX-158361606 | 28 | 74.381 | KV453267.1 | 1526997 | 25-scf00538 | 25 |
| AX-158361609 | 28 | 74.443 | KV453267.1 | 1529618 | 25-scf00538 | 25 |
| AX-158361320 | 28 | 74.491 | KV453267.1 | 1151646 | 25-scf00538 | 25 |
| AX-157868330 | 28 | 74.491 | KV453267.1 | 1296752 | 25-scf00538 | 25 |
| AX-158361465 | 28 | 74.491 | KV453267.1 | 1363171 | 25-scf00538 | 25 |
| AX-158361494 | 28 | 74.491 | KV453267.1 | 1395915 | 25-scf00538 | 25 |
| AX-158361495 | 28 | 74.491 | KV453267.1 | 1397851 | 25-scf00538 | 25 |
| AX-158361539 | 28 | 74.491 | KV453267.1 | 1453671 | 25-scf00538 | 25 |

|              |    |        |            |         |             |    |
|--------------|----|--------|------------|---------|-------------|----|
| AX-158361549 | 28 | 74.491 | KV453267.1 | 1463536 | 25-scf00538 | 25 |
| AX-158361554 | 28 | 74.491 | KV453267.1 | 1467429 | 25-scf00538 | 25 |
| AX-158361585 | 28 | 74.491 | KV453267.1 | 1497821 | 25-scf00538 | 25 |
| AX-158361588 | 28 | 74.491 | KV453267.1 | 1502711 | 25-scf00538 | 25 |
| AX-158361597 | 28 | 74.491 | KV453267.1 | 1514806 | 25-scf00538 | 25 |
| AX-158361601 | 28 | 74.491 | KV453267.1 | 1521998 | 25-scf00538 | 25 |
| AX-158361605 | 28 | 74.491 | KV453267.1 | 1525376 | 25-scf00538 | 25 |
| AX-158361611 | 28 | 74.491 | KV453267.1 | 1532617 | 25-scf00538 | 25 |
| AX-158361613 | 28 | 74.491 | KV453267.1 | 1536552 | 25-scf00538 | 25 |
| AX-158361614 | 28 | 74.491 | KV453267.1 | 1537085 | 25-scf00538 | 25 |
| AX-158361616 | 28 | 74.491 | KV453267.1 | 1539020 | 25-scf00538 | 25 |
| AX-158361617 | 28 | 74.491 | KV453267.1 | 1540519 | 25-scf00538 | 25 |
| AX-158361618 | 28 | 74.491 | KV453267.1 | 1543314 | 25-scf00538 | 25 |
| AX-158361619 | 28 | 74.491 | KV453267.1 | 1544054 | 25-scf00538 | 25 |
| AX-158361620 | 28 | 74.491 | KV453267.1 | 1544958 | 25-scf00538 | 25 |
| AX-158361622 | 28 | 74.491 | KV453267.1 | 1547753 | 25-scf00538 | 25 |
| AX-157754099 | 28 | 74.491 | KV453267.1 | 1552062 | 25-scf00538 | 25 |
| AX-158361627 | 28 | 74.491 | KV453267.1 | 1553683 | 25-scf00538 | 25 |
| AX-158361628 | 28 | 74.491 | KV453267.1 | 1554230 | 25-scf00538 | 25 |
| AX-158361629 | 28 | 74.491 | KV453267.1 | 1555806 | 25-scf00538 | 25 |
| AX-157772675 | 28 | 74.491 | KV453267.1 | 1556804 | 25-scf00538 | 25 |
| AX-157723321 | 28 | 74.491 | KV453267.1 | 1559674 | 25-scf00538 | 25 |
| AX-158361632 | 28 | 74.491 | KV453267.1 | 1560149 | 25-scf00538 | 25 |
| AX-158361634 | 28 | 74.491 | KV453267.1 | 1562667 | 25-scf00538 | 25 |
| AX-158361635 | 28 | 74.491 | KV453267.1 | 1563082 | 25-scf00538 | 25 |
| AX-158361636 | 28 | 74.491 | KV453267.1 | 1564007 | 25-scf00538 | 25 |
| AX-158361637 | 28 | 74.491 | KV453267.1 | 1564563 | 25-scf00538 | 25 |
| AX-158361638 | 28 | 74.491 | KV453267.1 | 1567777 | 25-scf00538 | 25 |
| AX-158361639 | 28 | 74.491 | KV453267.1 | 1568290 | 25-scf00538 | 25 |
| AX-158361640 | 28 | 74.491 | KV453267.1 | 1568867 | 25-scf00538 | 25 |
| AX-158361642 | 28 | 74.491 | KV453267.1 | 1570835 | 25-scf00538 | 25 |
| AX-158361643 | 28 | 74.491 | KV453267.1 | 1571478 | 25-scf00538 | 25 |
| AX-158361645 | 28 | 74.491 | KV453267.1 | 1573583 | 25-scf00538 | 25 |
| AX-158361647 | 28 | 74.491 | KV453267.1 | 1578310 | 25-scf00538 | 25 |
| AX-158361648 | 28 | 74.491 | KV453267.1 | 1581376 | 25-scf00538 | 25 |
| AX-158361649 | 28 | 74.491 | KV453267.1 | 1581996 | 25-scf00538 | 25 |
| AX-158361650 | 28 | 74.491 | KV453267.1 | 1582653 | 25-scf00538 | 25 |
| AX-158361651 | 28 | 74.491 | KV453267.1 | 1583023 | 25-scf00538 | 25 |
| AX-157772565 | 28 | 74.491 | KV453267.1 | 1587715 | 25-scf00538 | 25 |
| AX-158361653 | 28 | 74.491 | KV453267.1 | 1589632 | 25-scf00538 | 25 |
| AX-158361655 | 28 | 74.491 | KV453267.1 | 1593234 | 25-scf00538 | 25 |
| AX-158361656 | 28 | 74.491 | KV453267.1 | 1593604 | 25-scf00538 | 25 |
| AX-158361657 | 28 | 74.491 | KV453267.1 | 1596294 | 25-scf00538 | 25 |
| AX-158361658 | 28 | 74.491 | KV453267.1 | 1597496 | 25-scf00538 | 25 |
| AX-158361660 | 28 | 74.491 | KV453267.1 | 1599371 | 25-scf00538 | 25 |
| AX-158361661 | 28 | 74.491 | KV453267.1 | 1600059 | 25-scf00538 | 25 |
| AX-158361663 | 28 | 74.491 | KV453267.1 | 1601485 | 25-scf00538 | 25 |
| AX-158361667 | 28 | 74.491 | KV453267.1 | 1605753 | 25-scf00538 | 25 |
| AX-158361669 | 28 | 74.491 | KV453267.1 | 1609512 | 25-scf00538 | 25 |
| AX-158361670 | 28 | 74.491 | KV453267.1 | 1610568 | 25-scf00538 | 25 |
| AX-158361671 | 28 | 74.491 | KV453267.1 | 1611235 | 25-scf00538 | 25 |

|              |    |        |            |         |             |    |
|--------------|----|--------|------------|---------|-------------|----|
| AX-158361673 | 28 | 74.491 | KV453267.1 | 1614224 | 25-scf00538 | 25 |
| AX-158361676 | 28 | 74.491 | KV453267.1 | 1616676 | 25-scf00538 | 25 |
| AX-158361681 | 28 | 74.491 | KV453267.1 | 1620965 | 25-scf00538 | 25 |
| AX-158361703 | 28 | 74.491 | KV453267.1 | 1646036 | 25-scf00538 | 25 |
| AX-158361707 | 28 | 74.491 | KV453267.1 | 1650096 | 25-scf00538 | 25 |
| AX-158361784 | 28 | 74.491 | KV453267.1 | 1828585 | 25-scf00538 | 25 |
| AX-158361678 | 28 | 74.521 | KV453267.1 | 1618289 | 25-scf00538 | 25 |
| AX-158361680 | 28 | 74.554 | KV453267.1 | 1619028 | 25-scf00538 | 25 |
| AX-157713640 | 28 | 74.6   | KV453267.1 | 1515485 | 25-scf00538 | 25 |
| AX-158361608 | 28 | 74.6   | KV453267.1 | 1529227 | 25-scf00538 | 25 |
| AX-158361682 | 28 | 74.6   | KV453267.1 | 1624142 | 25-scf00538 | 25 |
| AX-158361685 | 28 | 74.6   | KV453267.1 | 1631078 | 25-scf00538 | 25 |
| AX-158361686 | 28 | 74.6   | KV453267.1 | 1631259 | 25-scf00538 | 25 |
| AX-158361479 | 28 | 74.818 | KV453267.1 | 1381668 | 25-scf00538 | 25 |
| AX-158361489 | 28 | 74.818 | KV453267.1 | 1391646 | 25-scf00538 | 25 |
| AX-158361513 | 28 | 74.818 | KV453267.1 | 1426387 | 25-scf00538 | 25 |
| AX-158361668 | 28 | 74.818 | KV453267.1 | 1606674 | 25-scf00538 | 25 |
| AX-158361687 | 28 | 74.818 | KV453267.1 | 1632052 | 25-scf00538 | 25 |
| AX-158361693 | 28 | 74.818 | KV453267.1 | 1638353 | 25-scf00538 | 25 |
| AX-158361695 | 28 | 74.818 | KV453267.1 | 1639626 | 25-scf00538 | 25 |
| AX-158361697 | 28 | 74.818 | KV453267.1 | 1640827 | 25-scf00538 | 25 |
| AX-158361698 | 28 | 74.818 | KV453267.1 | 1641359 | 25-scf00538 | 25 |
| AX-158361704 | 28 | 74.818 | KV453267.1 | 1646469 | 25-scf00538 | 25 |
| AX-158361708 | 28 | 74.818 | KV453267.1 | 1650699 | 25-scf00538 | 25 |
| AX-158361709 | 28 | 74.818 | KV453267.1 | 1651692 | 25-scf00538 | 25 |
| AX-157738572 | 28 | 74.818 | KV453267.1 | 1654289 | 25-scf00538 | 25 |
| AX-158361710 | 28 | 74.818 | KV453267.1 | 1654711 | 25-scf00538 | 25 |
| AX-158361711 | 28 | 74.818 | KV453267.1 | 1655536 | 25-scf00538 | 25 |
| AX-158361712 | 28 | 74.818 | KV453267.1 | 1656511 | 25-scf00538 | 25 |
| AX-158361713 | 28 | 74.818 | KV453267.1 | 1657174 | 25-scf00538 | 25 |
| AX-158361714 | 28 | 74.818 | KV453267.1 | 1657687 | 25-scf00538 | 25 |
| AX-158381753 | 28 | 74.818 | KV453267.1 | 1660816 | 25-scf00538 | 25 |
| AX-158361720 | 28 | 74.818 | KV453267.1 | 1662443 | 25-scf00538 | 25 |
| AX-157750816 | 28 | 74.818 | KV453267.1 | 1664088 | 25-scf00538 | 25 |
| AX-158361721 | 28 | 74.818 | KV453267.1 | 1665437 | 25-scf00538 | 25 |
| AX-157752623 | 28 | 74.818 | KV453267.1 | 1667195 | 25-scf00538 | 25 |
| AX-158361722 | 28 | 74.818 | KV453267.1 | 1668793 | 25-scf00538 | 25 |
| AX-158361728 | 28 | 74.818 | KV453267.1 | 1674397 | 25-scf00538 | 25 |
| AX-158361730 | 28 | 74.818 | KV453267.1 | 1676871 | 25-scf00538 | 25 |
| AX-158361731 | 28 | 74.818 | KV453267.1 | 1678332 | 25-scf00538 | 25 |
| AX-158361734 | 28 | 74.818 | KV453267.1 | 1682611 | 25-scf00538 | 25 |
| AX-158361735 | 28 | 74.818 | KV453267.1 | 1683283 | 25-scf00538 | 25 |
| AX-158419839 | 28 | 74.818 | KV453267.1 | 1683459 | 25-scf00538 | 25 |
| AX-158361736 | 28 | 74.818 | KV453267.1 | 1685212 | 25-scf00538 | 25 |
| AX-158361738 | 28 | 74.818 | KV453267.1 | 1686396 | 25-scf00538 | 25 |
| AX-158361739 | 28 | 74.818 | KV453267.1 | 1687455 | 25-scf00538 | 25 |
| AX-157851998 | 28 | 74.818 | KV453267.1 | 1687935 | 25-scf00538 | 25 |
| AX-158361740 | 28 | 74.818 | KV453267.1 | 1688609 | 25-scf00538 | 25 |
| AX-158361744 | 28 | 74.818 | KV453267.1 | 1692386 | 25-scf00538 | 25 |
| AX-158361745 | 28 | 74.818 | KV453267.1 | 1693391 | 25-scf00538 | 25 |
| AX-158361746 | 28 | 74.818 | KV453267.1 | 1694328 | 25-scf00538 | 25 |

|              |    |        |            |         |             |    |
|--------------|----|--------|------------|---------|-------------|----|
| AX-158361756 | 28 | 74.818 | KV453267.1 | 1699498 | 25-scf00538 | 25 |
| AX-158361791 | 28 | 74.818 | KV453267.1 | 1849131 | 25-scf00538 | 25 |
| AX-157882608 | 28 | 74.818 | KV453267.1 | 1850471 | 25-scf00538 | 25 |
| AX-158361792 | 28 | 74.818 | KV453267.1 | 1850524 | 25-scf00538 | 25 |
| AX-157852003 | 28 | 74.818 | KV453267.1 | 1851330 | 25-scf00538 | 25 |
| AX-158361796 | 28 | 74.818 | KV453267.1 | 1855418 | 25-scf00538 | 25 |
| AX-158361750 | 28 | 74.835 | KV453267.1 | 1697145 | 25-scf00538 | 25 |
| AX-158361752 | 28 | 74.859 | KV453267.1 | 1697873 | 25-scf00538 | 25 |
| AX-158361753 | 28 | 74.88  | KV453267.1 | 1698299 | 25-scf00538 | 25 |
| AX-158361763 | 28 | 74.904 | KV453267.1 | 1717238 | 25-scf00538 | 25 |
| AX-158361526 | 28 | 74.927 | KV453267.1 | 1440194 | 25-scf00538 | 25 |
| AX-158361624 | 28 | 74.927 | KV453267.1 | 1549605 | 25-scf00538 | 25 |
| AX-157851996 | 28 | 74.927 | KV453267.1 | 1606478 | 25-scf00538 | 25 |
| AX-158361696 | 28 | 74.927 | KV453267.1 | 1640414 | 25-scf00538 | 25 |
| AX-158361706 | 28 | 74.927 | KV453267.1 | 1649239 | 25-scf00538 | 25 |
| AX-158361716 | 28 | 74.927 | KV453267.1 | 1659835 | 25-scf00538 | 25 |
| AX-158361725 | 28 | 74.927 | KV453267.1 | 1670986 | 25-scf00538 | 25 |
| AX-158361732 | 28 | 74.927 | KV453267.1 | 1678701 | 25-scf00538 | 25 |
| AX-157694083 | 28 | 74.927 | KV453267.1 | 1714175 | 25-scf00538 | 25 |
| AX-157745281 | 28 | 74.927 | KV453267.1 | 1719441 | 25-scf00538 | 25 |
| AX-158361765 | 28 | 74.927 | KV453267.1 | 1721989 | 25-scf00538 | 25 |
| AX-158361766 | 28 | 74.927 | KV453267.1 | 1727096 | 25-scf00538 | 25 |
| AX-158361767 | 28 | 74.927 | KV453267.1 | 1728309 | 25-scf00538 | 25 |
| AX-158361769 | 28 | 74.927 | KV453267.1 | 1729987 | 25-scf00538 | 25 |
| AX-157852001 | 28 | 74.927 | KV453267.1 | 1731839 | 25-scf00538 | 25 |
| AX-158361770 | 28 | 74.927 | KV453267.1 | 1732901 | 25-scf00538 | 25 |
| AX-158361771 | 28 | 74.927 | KV453267.1 | 1735001 | 25-scf00538 | 25 |
| AX-158361772 | 28 | 74.927 | KV453267.1 | 1735987 | 25-scf00538 | 25 |
| AX-158361774 | 28 | 74.927 | KV453267.1 | 1737019 | 25-scf00538 | 25 |
| AX-157852002 | 28 | 74.927 | KV453267.1 | 1737144 | 25-scf00538 | 25 |
| AX-157713796 | 28 | 74.927 | KV453267.1 | 1748281 | 25-scf00538 | 25 |
| AX-157852007 | 28 | 74.927 | KV453267.1 | 1873519 | 25-scf00538 | 25 |
| AX-158361793 | 28 | 74.966 | KV453267.1 | 1851481 | 25-scf00538 | 25 |
| AX-157852004 | 28 | 75.004 | KV453267.1 | 1852762 | 25-scf00538 | 25 |
| AX-158361795 | 28 | 75.018 | KV453267.1 | 1853982 | 25-scf00538 | 25 |
| AX-158361468 | 28 | 75.037 | KV453267.1 | 1366438 | 25-scf00538 | 25 |
| AX-157774377 | 28 | 75.037 | KV453267.1 | 1705387 | 25-scf00538 | 25 |
| AX-158361761 | 28 | 75.037 | KV453267.1 | 1711723 | 25-scf00538 | 25 |
| AX-157852000 | 28 | 75.037 | KV453267.1 | 1720279 | 25-scf00538 | 25 |
| AX-158361798 | 28 | 75.037 | KV453267.1 | 1857590 | 25-scf00538 | 25 |
| AX-158361801 | 28 | 75.037 | KV453267.1 | 1859980 | 25-scf00538 | 25 |
| AX-157852006 | 28 | 75.037 | KV453267.1 | 1860745 | 25-scf00538 | 25 |
| AX-158361802 | 28 | 75.037 | KV453267.1 | 1864336 | 25-scf00538 | 25 |
| AX-158361803 | 28 | 75.037 | KV453267.1 | 1866251 | 25-scf00538 | 25 |
| AX-158361804 | 28 | 75.063 | KV453267.1 | 1866595 | 25-scf00538 | 25 |
| AX-158361805 | 28 | 75.091 | KV453267.1 | 1866880 | 25-scf00538 | 25 |
| AX-158361807 | 28 | 75.121 | KV453267.1 | 1868527 | 25-scf00538 | 25 |
| AX-158361621 | 28 | 75.146 | KV453267.1 | 1546998 | 25-scf00538 | 25 |
| AX-158361701 | 28 | 75.146 | KV453267.1 | 1643223 | 25-scf00538 | 25 |
| AX-158361729 | 28 | 75.146 | KV453267.1 | 1676110 | 25-scf00538 | 25 |
| AX-158361743 | 28 | 75.146 | KV453267.1 | 1691223 | 25-scf00538 | 25 |

|              |    |        |            |         |             |    |
|--------------|----|--------|------------|---------|-------------|----|
| AX-158361758 | 28 | 75.146 | KV453267.1 | 1703271 | 25-scf00538 | 25 |
| AX-157719896 | 28 | 75.146 | KV453267.1 | 1720226 | 25-scf00538 | 25 |
| AX-158361797 | 28 | 75.146 | KV453267.1 | 1856117 | 25-scf00538 | 25 |
| AX-157720475 | 28 | 75.146 | KV453267.1 | 1871334 | 25-scf00538 | 25 |
| AX-157718488 | 28 | 75.146 | KV453267.1 | 1875849 | 25-scf00538 | 25 |
| AX-157773768 | 28 | 75.146 | KV453267.1 | 1876932 | 25-scf00538 | 25 |
| AX-157744126 | 28 | 75.146 | KV453267.1 | 1877610 | 25-scf00538 | 25 |
| AX-158361813 | 28 | 75.146 | KV453267.1 | 1879378 | 25-scf00538 | 25 |
| AX-157852008 | 28 | 75.146 | KV453267.1 | 1879743 | 25-scf00538 | 25 |
| AX-158419843 | 28 | 75.146 | KV453267.1 | 1880787 | 25-scf00538 | 25 |
| AX-158361815 | 28 | 75.146 | KV453267.1 | 1881305 | 25-scf00538 | 25 |
| AX-158361816 | 28 | 75.146 | KV453267.1 | 1882333 | 25-scf00538 | 25 |
| AX-158361817 | 28 | 75.187 | KV453267.1 | 1883928 | 25-scf00538 | 25 |
| AX-158419845 | 28 | 75.255 | KV453267.1 | 1887517 | 25-scf00538 | 25 |
| AX-158361818 | 28 | 75.255 | KV453267.1 | 1889323 | 25-scf00538 | 25 |
| AX-157852009 | 28 | 75.255 | KV453267.1 | 1889946 | 25-scf00538 | 25 |
| AX-158361819 | 28 | 75.255 | KV453267.1 | 1890400 | 25-scf00538 | 25 |
| AX-157852011 | 28 | 75.255 | KV453267.1 | 1893742 | 25-scf00538 | 25 |
| AX-157852012 | 28 | 75.255 | KV453267.1 | 1894729 | 25-scf00538 | 25 |
| AX-158361822 | 28 | 75.255 | KV453267.1 | 1900442 | 25-scf00538 | 25 |
| AX-158361825 | 28 | 75.473 | KV453267.1 | 1905532 | 25-scf00538 | 25 |
| AX-158361826 | 28 | 75.473 | KV453267.1 | 1907622 | 25-scf00538 | 25 |
| AX-158361827 | 28 | 75.473 | KV453267.1 | 1909236 | 25-scf00538 | 25 |
| AX-158361830 | 28 | 75.473 | KV453267.1 | 1914319 | 25-scf00538 | 25 |
| AX-158361831 | 28 | 75.473 | KV453267.1 | 1914685 | 25-scf00538 | 25 |
| AX-158361834 | 28 | 75.473 | KV453267.1 | 1916986 | 25-scf00538 | 25 |
| AX-158361835 | 28 | 75.473 | KV453267.1 | 1917160 | 25-scf00538 | 25 |
| AX-158361836 | 28 | 75.473 | KV453267.1 | 1917833 | 25-scf00538 | 25 |
| AX-158361846 | 28 | 75.473 | KV453267.1 | 1937643 | 25-scf00538 | 25 |
| AX-157771806 | 28 | 75.587 | KV453267.1 | 1921784 | 25-scf00538 | 25 |
| AX-158361838 | 28 | 75.587 | KV453267.1 | 1922697 | 25-scf00538 | 25 |
| AX-158361844 | 28 | 75.692 | KV453267.1 | 1935401 | 25-scf00538 | 25 |
| AX-158361848 | 28 | 75.801 | KV453267.1 | 1938720 | 25-scf00538 | 25 |
| AX-158361852 | 28 | 75.801 | KV453267.1 | 1943056 | 25-scf00538 | 25 |
| AX-158419848 | 28 | 75.801 | KV453267.1 | 1943972 | 25-scf00538 | 25 |
| AX-158361853 | 28 | 75.801 | KV453267.1 | 1944433 | 25-scf00538 | 25 |
| AX-158413484 | 28 | 75.801 | KV453267.1 | 1944510 | 25-scf00538 | 25 |
| AX-158413485 | 28 | 75.801 | KV453267.1 | 1944577 | 25-scf00538 | 25 |
| AX-158419850 | 28 | 75.801 | KV453267.1 | 1944761 | 25-scf00538 | 25 |
| AX-158361854 | 28 | 75.801 | KV453267.1 | 1946799 | 25-scf00538 | 25 |
| AX-158361855 | 28 | 75.801 | KV453267.1 | 1947410 | 25-scf00538 | 25 |
| AX-158361857 | 28 | 75.801 | KV453267.1 | 1948731 | 25-scf00538 | 25 |
| AX-158361858 | 28 | 75.801 | KV453267.1 | 1949296 | 25-scf00538 | 25 |
| AX-158361859 | 28 | 75.801 | KV453267.1 | 1950010 | 25-scf00538 | 25 |
| AX-158361886 | 28 | 75.801 | KV453267.1 | 1980859 | 25-scf00538 | 25 |
| AX-158361811 | 28 | 75.91  | KV453267.1 | 1876245 | 25-scf00538 | 25 |
| AX-158361851 | 28 | 75.91  | KV453267.1 | 1942426 | 25-scf00538 | 25 |
| AX-158361860 | 28 | 75.91  | KV453267.1 | 1951937 | 25-scf00538 | 25 |
| AX-158361861 | 28 | 75.91  | KV453267.1 | 1953532 | 25-scf00538 | 25 |
| AX-158361864 | 28 | 75.91  | KV453267.1 | 1956314 | 25-scf00538 | 25 |
| AX-158361866 | 28 | 75.91  | KV453267.1 | 1958084 | 25-scf00538 | 25 |



|              |    |        |            |         |             |    |
|--------------|----|--------|------------|---------|-------------|----|
| AX-158361869 | 28 | 75.91  | KV453267.1 | 1960928 | 25-scf00538 | 25 |
| AX-158361870 | 28 | 75.91  | KV453267.1 | 1961477 | 25-scf00538 | 25 |
| AX-158361871 | 28 | 75.91  | KV453267.1 | 1962513 | 25-scf00538 | 25 |
| AX-158361873 | 28 | 75.91  | KV453267.1 | 1964311 | 25-scf00538 | 25 |
| AX-157739216 | 28 | 75.91  | KV453267.1 | 2035178 | 25-scf00538 | 25 |
| AX-158361938 | 28 | 75.91  | KV453267.1 | 2061339 | 25-scf00538 | 25 |
| AX-158419851 | 28 | 75.911 | KV453267.1 | 1944930 | 25-scf00538 | 25 |
| AX-157852014 | 28 | 75.911 | KV453267.1 | 1968074 | 25-scf00538 | 25 |
| AX-158361902 | 28 | 75.911 | KV453267.1 | 2011635 | 25-scf00538 | 25 |
| AX-158361907 | 28 | 75.911 | KV453267.1 | 2019433 | 25-scf00538 | 25 |
| AX-158361877 | 28 | 75.912 | KV453267.1 | 1971773 | 25-scf00538 | 25 |
| AX-158361878 | 28 | 75.912 | KV453267.1 | 1972189 | 25-scf00538 | 25 |
| AX-158361879 | 28 | 76.073 | KV453267.1 | 1972644 | 25-scf00538 | 25 |
| AX-158361880 | 28 | 76.073 | KV453267.1 | 1973093 | 25-scf00538 | 25 |
| AX-158361881 | 28 | 76.073 | KV453267.1 | 1973749 | 25-scf00538 | 25 |
| AX-158361882 | 28 | 76.142 | KV453267.1 | 1975461 | 25-scf00538 | 25 |
| AX-158361883 | 28 | 76.198 | KV453267.1 | 1976623 | 25-scf00538 | 25 |
| AX-158361885 | 28 | 76.239 | KV453267.1 | 1980434 | 25-scf00538 | 25 |
| AX-157852016 | 28 | 76.239 | KV453267.1 | 1980980 | 25-scf00538 | 25 |
| AX-157852017 | 28 | 76.239 | KV453267.1 | 1982334 | 25-scf00538 | 25 |
| AX-158361888 | 28 | 76.239 | KV453267.1 | 1987115 | 25-scf00538 | 25 |
| AX-158361889 | 28 | 76.239 | KV453267.1 | 1987784 | 25-scf00538 | 25 |
| AX-157852019 | 28 | 76.239 | KV453267.1 | 1987955 | 25-scf00538 | 25 |
| AX-157744498 | 28 | 76.239 | KV453267.1 | 1988036 | 25-scf00538 | 25 |
| AX-158361891 | 28 | 76.239 | KV453267.1 | 1992044 | 25-scf00538 | 25 |
| AX-158361905 | 28 | 76.239 | KV453267.1 | 2016246 | 25-scf00538 | 25 |
| AX-157852020 | 28 | 76.275 | KV453267.1 | 1991027 | 25-scf00538 | 25 |
| AX-158361898 | 28 | 76.282 | KV453267.1 | 2008323 | 25-scf00538 | 25 |
| AX-157741475 | 28 | 76.323 | KV453267.1 | 2011715 | 25-scf00538 | 25 |
| AX-158361903 | 28 | 76.361 | KV453267.1 | 2013578 | 25-scf00538 | 25 |
| AX-158361906 | 28 | 76.408 | KV453267.1 | 2018445 | 25-scf00538 | 25 |
| AX-158361884 | 28 | 76.457 | KV453267.1 | 1977656 | 25-scf00538 | 25 |
| AX-158361908 | 28 | 76.457 | KV453267.1 | 2019562 | 25-scf00538 | 25 |
| AX-157852023 | 28 | 76.457 | KV453267.1 | 2022011 | 25-scf00538 | 25 |
| AX-158361911 | 28 | 76.457 | KV453267.1 | 2022446 | 25-scf00538 | 25 |
| AX-158361904 | 28 | 76.675 | KV453267.1 | 2014654 | 25-scf00538 | 25 |
| AX-157743756 | 28 | 76.675 | KV453267.1 | 2036524 | 25-scf00538 | 25 |
| AX-158361920 | 28 | 76.675 | KV453267.1 | 2037908 | 25-scf00538 | 25 |
| AX-158361922 | 28 | 76.675 | KV453267.1 | 2039857 | 25-scf00538 | 25 |
| AX-157852026 | 28 | 76.675 | KV453267.1 | 2041393 | 25-scf00538 | 25 |
| AX-157852027 | 28 | 76.675 | KV453267.1 | 2043258 | 25-scf00538 | 25 |
| AX-158361926 | 28 | 76.675 | KV453267.1 | 2044711 | 25-scf00538 | 25 |
| AX-158361927 | 28 | 76.675 | KV453267.1 | 2045687 | 25-scf00538 | 25 |
| AX-158361929 | 28 | 76.675 | KV453267.1 | 2047419 | 25-scf00538 | 25 |
| AX-158361931 | 28 | 76.675 | KV453267.1 | 2050232 | 25-scf00538 | 25 |
| AX-158361932 | 28 | 76.675 | KV453267.1 | 2051225 | 25-scf00538 | 25 |
| AX-158361934 | 28 | 76.675 | KV453267.1 | 2052471 | 25-scf00538 | 25 |
| AX-158361936 | 28 | 76.675 | KV453267.1 | 2057797 | 25-scf00538 | 25 |
| AX-158361937 | 28 | 76.675 | KV453267.1 | 2059605 | 25-scf00538 | 25 |
| AX-158361940 | 28 | 76.894 | KV453267.1 | 2062922 | 25-scf00538 | 25 |
| AX-157852028 | 28 | 76.894 | KV453267.1 | 2064862 | 25-scf00538 | 25 |

|              |    |        |            |         |             |    |
|--------------|----|--------|------------|---------|-------------|----|
| AX-157716026 | 28 | 76.894 | KV453267.1 | 2065451 | 25-scf00538 | 25 |
| AX-158361945 | 28 | 76.894 | KV453267.1 | 2069654 | 25-scf00538 | 25 |
| AX-158361943 | 28 | 77.003 | KV453267.1 | 2068035 | 25-scf00538 | 25 |
| AX-157747748 | 28 | 77.003 | KV453267.1 | 2068129 | 25-scf00538 | 25 |
| AX-158361944 | 28 | 77.003 | KV453267.1 | 2068447 | 25-scf00538 | 25 |
| AX-158361921 | 28 | 77.112 | KV453267.1 | 2038456 | 25-scf00538 | 25 |
| AX-157852029 | 28 | 77.112 | KV453267.1 | 2069122 | 25-scf00538 | 25 |
| AX-158361947 | 28 | 77.112 | KV453267.1 | 2072673 | 25-scf00538 | 25 |
| AX-158361948 | 28 | 77.112 | KV453267.1 | 2075598 | 25-scf00538 | 25 |
| AX-157748992 | 28 | 77.112 | KV453267.1 | 2076017 | 25-scf00538 | 25 |
| AX-157751216 | 28 | 77.323 | KV453267.1 | 2077701 | 25-scf00538 | 25 |
| AX-157852031 | 28 | 77.323 | KV453267.1 | 2079260 | 25-scf00538 | 25 |
| AX-158361950 | 28 | 77.323 | KV453267.1 | 2080256 | 25-scf00538 | 25 |
| AX-158361951 | 28 | 77.33  | KV453267.1 | 2080894 | 25-scf00538 | 25 |
| AX-158361952 | 28 | 77.336 | KV453267.1 | 2081358 | 25-scf00538 | 25 |
| AX-157748983 | 28 | 77.336 | KV453267.1 | 2084571 | 25-scf00538 | 25 |
| AX-158361953 | 28 | 77.856 | KV453267.1 | 2086998 | 25-scf00538 | 25 |
| AX-158361955 | 28 | 77.866 | KV453267.1 | 2088175 | 25-scf00538 | 25 |
| AX-158361956 | 28 | 77.866 | KV453267.1 | 2088890 | 25-scf00538 | 25 |
| AX-158361965 | 28 | 77.866 | KV453267.1 | 2095014 | 25-scf00538 | 25 |
| AX-158361979 | 28 | 77.866 | KV453267.1 | 2112468 | 25-scf00538 | 25 |
| AX-158361959 | 28 | 77.98  | KV453267.1 | 2090733 | 25-scf00538 | 25 |
| AX-158361960 | 28 | 77.986 | KV453267.1 | 2091036 | 25-scf00538 | 25 |
| AX-158361961 | 28 | 77.986 | KV453267.1 | 2091997 | 25-scf00538 | 25 |
| AX-158361962 | 28 | 77.986 | KV453267.1 | 2092314 | 25-scf00538 | 25 |
| AX-158361964 | 28 | 77.986 | KV453267.1 | 2093868 | 25-scf00538 | 25 |
| AX-158361967 | 28 | 78.204 | KV453267.1 | 2101596 | 25-scf00538 | 25 |
| AX-158361968 | 28 | 78.204 | KV453267.1 | 2101921 | 25-scf00538 | 25 |
| AX-158361972 | 28 | 78.204 | KV453267.1 | 2104841 | 25-scf00538 | 25 |
| AX-158361974 | 28 | 78.204 | KV453267.1 | 2106222 | 25-scf00538 | 25 |
| AX-158361976 | 28 | 78.314 | KV453267.1 | 2109382 | 25-scf00538 | 25 |
| AX-157707966 | 28 | 78.676 | KV453267.1 | 2117270 | 25-scf00538 | 25 |
| AX-158361982 | 28 | 78.677 | KV453267.1 | 2117343 | 25-scf00538 | 25 |
| AX-158361981 | 28 | 78.678 | KV453267.1 | 2116650 | 25-scf00538 | 25 |
| AX-158361983 | 28 | 78.678 | KV453267.1 | 2117787 | 25-scf00538 | 25 |
| AX-158362013 | 28 | 78.678 | KV453267.1 | 2145238 | 25-scf00538 | 25 |
| AX-158361985 | 28 | 78.86  | KV453267.1 | 2118763 | 25-scf00538 | 25 |
| AX-158361986 | 28 | 78.86  | KV453267.1 | 2119017 | 25-scf00538 | 25 |
| AX-158361987 | 28 | 78.86  | KV453267.1 | 2119354 | 25-scf00538 | 25 |
| AX-158361988 | 28 | 78.86  | KV453267.1 | 2119653 | 25-scf00538 | 25 |
| AX-158361992 | 28 | 78.969 | KV453267.1 | 2121450 | 25-scf00538 | 25 |
| AX-158361993 | 28 | 79.065 | KV453267.1 | 2121922 | 25-scf00538 | 25 |
| AX-158361997 | 28 | 79.065 | KV453267.1 | 2126153 | 25-scf00538 | 25 |
| AX-158361999 | 28 | 79.092 | KV453267.1 | 2131823 | 25-scf00538 | 25 |
| AX-158362001 | 28 | 79.297 | KV453267.1 | 2132475 | 25-scf00538 | 25 |
| AX-158362002 | 28 | 79.297 | KV453267.1 | 2133084 | 25-scf00538 | 25 |
| AX-158362003 | 28 | 79.297 | KV453267.1 | 2133400 | 25-scf00538 | 25 |
| AX-158362004 | 28 | 79.297 | KV453267.1 | 2134636 | 25-scf00538 | 25 |
| AX-158362006 | 28 | 79.297 | KV453267.1 | 2135509 | 25-scf00538 | 25 |
| AX-158362007 | 28 | 79.297 | KV453267.1 | 2135859 | 25-scf00538 | 25 |
| AX-157721376 | 28 | 79.297 | KV453267.1 | 2137646 | 25-scf00538 | 25 |

|              |    |        |            |         |             |    |
|--------------|----|--------|------------|---------|-------------|----|
| AX-157743142 | 28 | 79.297 | KV453267.1 | 2139017 | 25-scf00538 | 25 |
| AX-158362009 | 28 | 79.297 | KV453267.1 | 2139553 | 25-scf00538 | 25 |
| AX-158362010 | 28 | 79.297 | KV453267.1 | 2140159 | 25-scf00538 | 25 |
| AX-158362018 | 28 | 79.297 | KV453267.1 | 2147939 | 25-scf00538 | 25 |
| AX-158362028 | 28 | 79.297 | KV453267.1 | 2155205 | 25-scf00538 | 25 |
| AX-158362011 | 28 | 79.339 | KV453267.1 | 2140561 | 25-scf00538 | 25 |
| AX-158362012 | 28 | 79.406 | KV453267.1 | 2142854 | 25-scf00538 | 25 |
| AX-157701380 | 28 | 79.406 | KV453267.1 | 2144207 | 25-scf00538 | 25 |
| AX-158362014 | 28 | 79.437 | KV453267.1 | 2145960 | 25-scf00538 | 25 |
| AX-158362016 | 28 | 79.515 | KV453267.1 | 2147047 | 25-scf00538 | 25 |
| AX-157882613 | 28 | 79.515 | KV453267.1 | 2148885 | 25-scf00538 | 25 |
| AX-158362022 | 28 | 79.515 | KV453267.1 | 2151364 | 25-scf00538 | 25 |
| AX-158362024 | 28 | 79.515 | KV453267.1 | 2152096 | 25-scf00538 | 25 |
| AX-158362025 | 28 | 79.515 | KV453267.1 | 2152724 | 25-scf00538 | 25 |
| AX-158362026 | 28 | 79.515 | KV453267.1 | 2154185 | 25-scf00538 | 25 |
| AX-158362027 | 28 | 79.712 | KV453267.1 | 2154490 | 25-scf00538 | 25 |
| AX-158362029 | 28 | 79.843 | KV453267.1 | 2157346 | 25-scf00538 | 25 |
| AX-158362030 | 28 | 79.843 | KV453267.1 | 2157689 | 25-scf00538 | 25 |
| AX-158362031 | 28 | 79.843 | KV453267.1 | 2158220 | 25-scf00538 | 25 |
| AX-157746656 | 28 | 79.843 | KV453267.1 | 2159845 | 25-scf00538 | 25 |
| AX-157721615 | 28 | 79.844 | KV453267.1 | 2160926 | 25-scf00538 | 25 |
| AX-158362034 | 28 | 79.998 | KV453267.1 | 2161782 | 25-scf00538 | 25 |
| AX-157773789 | 28 | 80.171 | KV453267.1 | 2162638 | 25-scf00538 | 25 |
| AX-157852033 | 28 | 80.171 | KV453267.1 | 2165021 | 25-scf00538 | 25 |
| AX-157852034 | 28 | 80.171 | KV453267.1 | 2165662 | 25-scf00538 | 25 |
| AX-158362041 | 28 | 80.171 | KV453267.1 | 2171488 | 25-scf00538 | 25 |
| AX-158362044 | 28 | 80.499 | KV453267.1 | 2176221 | 25-scf00538 | 25 |
| AX-158362036 | 28 | 80.515 | KV453267.1 | 2163633 | 25-scf00538 | 25 |
| AX-158362045 | 28 | 80.515 | KV453267.1 | 2176658 | 25-scf00538 | 25 |
| AX-158362047 | 28 | 80.515 | KV453267.1 | 2178205 | 25-scf00538 | 25 |
| AX-158362049 | 28 | 80.515 | KV453267.1 | 2178863 | 25-scf00538 | 25 |
| AX-158362046 | 28 | 80.534 | KV453267.1 | 2177365 | 25-scf00538 | 25 |
| AX-158362048 | 28 | 80.549 | KV453267.1 | 2178626 | 25-scf00538 | 25 |
| AX-157862410 | 28 | 80.558 | KV453267.1 | 2181020 | 25-scf00538 | 25 |
| AX-157852035 | 28 | 80.582 | KV453267.1 | 2182146 | 25-scf00538 | 25 |
| AX-157716932 | 28 | 80.608 | KV453267.1 | 2183337 | 25-scf00538 | 25 |
| AX-158362054 | 28 | 80.717 | KV453267.1 | 2188412 | 25-scf00538 | 25 |
| AX-157748891 | 28 | 80.717 | KV453267.1 | 2190198 | 25-scf00538 | 25 |
| AX-158362058 | 28 | 80.717 | KV453267.1 | 2198612 | 25-scf00538 | 25 |
| AX-158362061 | 28 | 80.717 | KV453267.1 | 2201233 | 25-scf00538 | 25 |
| AX-158362062 | 28 | 80.717 | KV453267.1 | 2201766 | 25-scf00538 | 25 |
| AX-158362064 | 28 | 80.952 | KV453267.1 | 2202840 | 25-scf00538 | 25 |
| AX-158362065 | 28 | 81.117 | KV453267.1 | 2204158 | 25-scf00538 | 25 |
| AX-158362052 | 28 | 81.451 | KV453267.1 | 2187218 | 25-scf00538 | 25 |
| AX-158362069 | 28 | 81.451 | KV453267.1 | 2215986 | 25-scf00538 | 25 |
| AX-158362070 | 28 | 81.451 | KV453267.1 | 2221523 | 25-scf00538 | 25 |
| AX-158362071 | 28 | 81.451 | KV453267.1 | 2223769 | 25-scf00538 | 25 |
| AX-157761080 | 28 | 81.451 | KV453267.1 | 2227941 | 25-scf00538 | 25 |
| AX-157852039 | 28 | 81.451 | KV453267.1 | 2233585 | 25-scf00538 | 25 |
| AX-157852040 | 28 | 81.451 | KV453267.1 | 2233949 | 25-scf00538 | 25 |
| AX-158362075 | 28 | 81.451 | KV453267.1 | 2235537 | 25-scf00538 | 25 |

|              |    |        |            |         |             |    |
|--------------|----|--------|------------|---------|-------------|----|
| AX-157874034 | 28 | 81.451 | KV453267.1 | 2236145 | 25-scf00538 | 25 |
| AX-158362077 | 28 | 81.451 | KV453267.1 | 2239113 | 25-scf00538 | 25 |
| AX-158362078 | 28 | 81.451 | KV453267.1 | 2239427 | 25-scf00538 | 25 |
| AX-158362079 | 28 | 81.59  | KV453267.1 | 2239975 | 25-scf00538 | 25 |
| AX-158362080 | 28 | 81.592 | KV453267.1 | 2240647 | 25-scf00538 | 25 |
| AX-158362081 | 28 | 81.639 | KV453267.1 | 2241440 | 25-scf00538 | 25 |
| AX-158362074 | 28 | 81.671 | KV453267.1 | 2230436 | 25-scf00538 | 25 |
| AX-157715712 | 28 | 81.671 | KV453267.1 | 2242406 | 25-scf00538 | 25 |
| AX-158362089 | 28 | 81.671 | KV453267.1 | 2255299 | 25-scf00538 | 25 |
| AX-158362082 | 28 | 81.701 | KV453267.1 | 2242866 | 25-scf00538 | 25 |
| AX-158362084 | 28 | 81.701 | KV453267.1 | 2246531 | 25-scf00538 | 25 |
| AX-158362085 | 28 | 81.701 | KV453267.1 | 2247067 | 25-scf00538 | 25 |
| AX-158362086 | 28 | 81.701 | KV453267.1 | 2247984 | 25-scf00538 | 25 |
| AX-157738311 | 28 | 81.701 | KV453267.1 | 2248798 | 25-scf00538 | 25 |
| AX-157852041 | 28 | 81.701 | KV453267.1 | 2253763 | 25-scf00538 | 25 |
| AX-157709129 | 28 | 81.765 | KV453267.1 | 2196861 | 25-scf00538 | 25 |
| AX-158362090 | 28 | 81.765 | KV453267.1 | 2255514 | 25-scf00538 | 25 |
| AX-157747324 | 28 | 81.811 | KV453267.1 | 2261043 | 25-scf00538 | 25 |
| AX-157750158 | 28 | 81.811 | KV453267.1 | 2267847 | 25-scf00538 | 25 |
| AX-158362094 | 28 | 81.811 | KV453267.1 | 2273787 | 25-scf00538 | 25 |
| AX-158362100 | 28 | 81.811 | KV453267.1 | 2284451 | 25-scf00538 | 25 |
| AX-158362095 | 28 | 81.852 | KV453267.1 | 2275447 | 25-scf00538 | 25 |
| AX-158362096 | 28 | 81.881 | KV453267.1 | 2280492 | 25-scf00538 | 25 |
| AX-158362097 | 28 | 81.92  | KV453267.1 | 2282070 | 25-scf00538 | 25 |
| AX-158362098 | 28 | 81.92  | KV453267.1 | 2282902 | 25-scf00538 | 25 |
| AX-158419857 | 28 | 81.92  | KV453267.1 | 2283209 | 25-scf00538 | 25 |
| AX-158362099 | 28 | 81.92  | KV453267.1 | 2283874 | 25-scf00538 | 25 |
| AX-157745882 | 28 | 81.92  | KV453267.1 | 2285219 | 25-scf00538 | 25 |
| AX-158362104 | 28 | 81.92  | KV453267.1 | 2290307 | 25-scf00538 | 25 |
| AX-158362101 | 28 | 81.923 | KV453267.1 | 2286767 | 25-scf00538 | 25 |
| AX-158362103 | 28 | 82.329 | KV453267.1 | 2289685 | 25-scf00538 | 25 |
| AX-158362105 | 28 | 82.329 | KV453267.1 | 2291080 | 25-scf00538 | 25 |
| AX-158362109 | 28 | 82.466 | KV453267.1 | 2296612 | 25-scf00538 | 25 |
| AX-158362111 | 28 | 82.466 | KV453267.1 | 2298818 | 25-scf00538 | 25 |
| AX-158362112 | 28 | 82.466 | KV453267.1 | 2300495 | 25-scf00538 | 25 |
| AX-158362113 | 28 | 82.466 | KV453267.1 | 2301349 | 25-scf00538 | 25 |
| AX-157852043 | 28 | 82.466 | KV453267.1 | 2301475 | 25-scf00538 | 25 |
| AX-157852044 | 28 | 82.466 | KV453267.1 | 2301602 | 25-scf00538 | 25 |
| AX-157719043 | 28 | 82.466 | KV453267.1 | 2302348 | 25-scf00538 | 25 |
| AX-158362114 | 28 | 82.466 | KV453267.1 | 2303250 | 25-scf00538 | 25 |
| AX-158362115 | 28 | 82.466 | KV453267.1 | 2303715 | 25-scf00538 | 25 |
| AX-158362117 | 28 | 82.466 | KV453267.1 | 2305128 | 25-scf00538 | 25 |
| AX-158362118 | 28 | 82.466 | KV453267.1 | 2305592 | 25-scf00538 | 25 |
| AX-157719324 | 28 | 82.507 | KV453267.1 | 2314487 | 25-scf00538 | 25 |
| AX-158362121 | 28 | 82.612 | KV453267.1 | 2320173 | 25-scf00538 | 25 |
| AX-157744494 | 28 | 82.612 | KV453267.1 | 2321612 | 25-scf00538 | 25 |
| AX-158362122 | 28 | 82.612 | KV453267.1 | 2322123 | 25-scf00538 | 25 |
| AX-158362125 | 28 | 82.612 | KV453267.1 | 2325377 | 25-scf00538 | 25 |
| AX-158362131 | 28 | 82.903 | KV453267.1 | 2336684 | 25-scf00538 | 25 |
| AX-157852046 | 28 | 82.903 | KV453267.1 | 2337354 | 25-scf00538 | 25 |
| AX-157751132 | 28 | 82.903 | KV453267.1 | 2338634 | 25-scf00538 | 25 |

|              |    |        |            |         |                |    |
|--------------|----|--------|------------|---------|----------------|----|
| AX-157852047 | 28 | 82.903 | KV453267.1 | 2339042 | 25-scf00538    | 25 |
| AX-157745395 | 28 | 82.903 | KV453267.1 | 2342994 | 25-scf00538    | 25 |
| AX-157852049 | 28 | 82.914 | KV453267.1 | 2340544 | 25-scf00538    | 25 |
| AX-158362132 | 28 | 82.924 | KV453267.1 | 2337401 | 25-scf00538    | 25 |
| AX-158362135 | 28 | 82.924 | KV453267.1 | 2343657 | 25-scf00538    | 25 |
| AX-158362136 | 28 | 82.942 | KV453267.1 | 2344130 | 25-scf00538    | 25 |
| AX-158362137 | 28 | 82.95  | KV453267.1 | 2344479 | 25-scf00538    | 25 |
| AX-157852045 | 28 | 82.972 | KV453267.1 | 2336423 | 25-scf00538    | 25 |
| AX-158362138 | 28 | 82.972 | KV453267.1 | 2346529 | 25-scf00538    | 25 |
| AX-157718041 | 28 | 82.99  | KV453267.1 | 2351097 | 25-scf00538    | 25 |
| AX-158362141 | 28 | 83.012 | KV453267.1 | 2354225 | 25-scf00538    | 25 |
| AX-158362144 | 28 | 83.121 | KV453267.1 | 2356694 | 25-scf00538    | 25 |
| AX-158362145 | 28 | 83.121 | KV453267.1 | 2356997 | 25-scf00538    | 25 |
| AX-158362146 | 28 | 83.121 | KV453267.1 | 2360504 | 25-scf00538    | 25 |
| AX-158362147 | 28 | 83.121 | KV453267.1 | 2361719 | 25-scf00538    | 25 |
| AX-158362148 | 28 | 83.121 | KV453267.1 | 2362119 | 25-scf00538    | 25 |
| AX-158362150 | 28 | 83.121 | KV453267.1 | 2365026 | 25-scf00538    | 25 |
| AX-157852054 | 28 | 83.121 | KV453267.1 | 2366867 | 25-scf00538    | 25 |
| AX-158362152 | 28 | 83.121 | KV453267.1 | 2368824 | 25-scf00538    | 25 |
| AX-158362154 | 28 | 83.231 | KV453267.1 | 2371230 | 25-scf00538    | 25 |
| AX-158362155 | 28 | 83.233 | KV453267.1 | 2373764 | 25-scf00538    | 25 |
| AX-158362156 | 28 | 83.851 | KV453267.1 | 2374815 | 25-scf00538    | 25 |
| AX-158362160 | 28 | 83.92  | KV453267.1 | 2382382 | 25-scf00538    | 25 |
| AX-158362161 | 28 | 83.92  | KV453267.1 | 2387652 | 25-scf00538    | 25 |
| AX-158362162 | 28 | 83.92  | KV453267.1 | 2388584 | 25-scf00538    | 25 |
| AX-158362163 | 28 | 84.042 | KV453267.1 | 2389516 | 25-scf00538    | 25 |
| AX-158362165 | 28 | 84.215 | KV453267.1 | 2392947 | 25-scf00538    | 25 |
| AX-158362166 | 28 | 84.215 | KV453267.1 | 2393965 | 25-scf00538    | 25 |
| AX-158362167 | 28 | 84.869 | KV453267.1 | 2397362 | 25-scf00538    | 25 |
| AX-158362169 | 28 | 84.87  | KV453267.1 | 2400917 | 25-scf00538    | 25 |
| AX-158362171 | 28 | 84.87  | KV453267.1 | 2403863 | 25-scf00538    | 25 |
| AX-158388724 | 28 | 84.87  | KV453267.1 | 2404679 | 25-scf00538    | 25 |
| AX-158362175 | 28 | 85.034 | KV453267.1 | 2408827 | 25-scf00538    | 25 |
| AX-158362177 | 28 | 85.034 | KV453267.1 | 2410801 | 25-scf00538    | 25 |
| AX-158362178 | 28 | 85.034 | KV453267.1 | 2412413 | 25-scf00538    | 25 |
| AX-158362180 | 28 | 85.847 | KV453267.1 | 2419581 | 25-scf00538    | 25 |
| AX-158362182 | 28 | 85.848 | KV453267.1 | 2421702 | 25-scf00538    | 25 |
| AX-158362186 | 28 | 85.848 | KV453267.1 | 2424572 | 25-scf00538    | 25 |
| AX-157699585 | 28 | 85.863 | FI887180.1 | 155     | 4ORI212 lctalt | UN |
| AX-158419860 | 28 | 86.048 | KV453267.1 | 2430418 | 25-scf00538    | 25 |
| AX-157759067 | 28 | 86.048 | KV453267.1 | 2431397 | 25-scf00538    | 25 |
| AX-157882617 | 28 | 86.073 | KV453267.1 | 2431819 | 25-scf00538    | 25 |
| AX-158362188 | 28 | 86.094 | KV453267.1 | 2432457 | 25-scf00538    | 25 |
| AX-158362189 | 28 | 86.094 | KV453267.1 | 2432890 | 25-scf00538    | 25 |
| AX-158362190 | 28 | 86.29  | KV453267.1 | 2433589 | 25-scf00538    | 25 |
| AX-158362193 | 28 | 86.463 | KV453267.1 | 2436888 | 25-scf00538    | 25 |
| AX-158362194 | 28 | 86.463 | KV453267.1 | 2438336 | 25-scf00538    | 25 |
| AX-158362196 | 28 | 86.99  | KV453267.1 | 2444394 | 25-scf00538    | 25 |
| AX-158362199 | 28 | 86.99  | KV453267.1 | 2449413 | 25-scf00538    | 25 |
| AX-158362203 | 28 | 87.165 | KV453267.1 | 2457586 | 25-scf00538    | 25 |
| AX-158362204 | 28 | 87.165 | KV453267.1 | 2458071 | 25-scf00538    | 25 |

|              |    |        |             |         |             |    |
|--------------|----|--------|-------------|---------|-------------|----|
| AX-158362205 | 28 | 87.165 | KV453267.1  | 2459168 | 25-scf00538 | 25 |
| AX-158362206 | 28 | 87.279 | KV453267.1  | 2460781 | 25-scf00538 | 25 |
| AX-158362207 | 28 | 87.384 | KV453267.1  | 2461838 | 25-scf00538 | 25 |
| AX-157852057 | 28 | 87.398 | KV453267.1  | 2463237 | 25-scf00538 | 25 |
| AX-158362208 | 28 | 87.464 | KV453267.1  | 2467725 | 25-scf00538 | 25 |
| AX-158362212 | 28 | 87.602 | KV453267.1  | 2474254 | 25-scf00538 | 25 |
| AX-158362214 | 28 | 87.602 | KV453267.1  | 2475110 | 25-scf00538 | 25 |
| AX-157701250 | 28 | 87.602 | KV453267.1  | 2476043 | 25-scf00538 | 25 |
| AX-157852058 | 28 | 87.602 | KV453267.1  | 2476942 | 25-scf00538 | 25 |
| AX-157714285 | 28 | 87.602 | KV453267.1  | 2478332 | 25-scf00538 | 25 |
| AX-157717216 | 28 | 87.602 | KV453267.1  | 2479428 | 25-scf00538 | 25 |
| AX-157745392 | 28 | 87.602 | KV453267.1  | 2480322 | 25-scf00538 | 25 |
| AX-158381757 | 28 | 87.602 | KV453267.1  | 2481204 | 25-scf00538 | 25 |
| AX-158362217 | 28 | 87.602 | KV453267.1  | 2481694 | 25-scf00538 | 25 |
| AX-157757750 | 28 | 87.602 | KV453267.1  | 2483055 | 25-scf00538 | 25 |
| AX-158362216 | 28 | 87.69  | KV453267.1  | 2478981 | 25-scf00538 | 25 |
| AX-158362220 | 28 | 87.69  | KV453267.1  | 2486382 | 25-scf00538 | 25 |
| AX-158362222 | 28 | 87.821 | KV453267.1  | 2489650 | 25-scf00538 | 25 |
| AX-157706811 | 28 | 87.821 | 3ML01032960 | 276     | scf08592_1  | UN |
| AX-158362223 | 28 | 88.119 | KV453267.1  | 2493727 | 25-scf00538 | 25 |
| AX-158362225 | 28 | 88.172 | KV453267.1  | 2495525 | 25-scf00538 | 25 |
| AX-158362227 | 28 | 88.471 | KV453267.1  | 2496947 | 25-scf00538 | 25 |
| AX-158362228 | 28 | 88.531 | KV453267.1  | 2498499 | 25-scf00538 | 25 |
| AX-158419864 | 28 | 88.632 | KV453267.1  | 2496660 | 25-scf00538 | 25 |
| AX-157758965 | 28 | 88.632 | KV453267.1  | 2499955 | 25-scf00538 | 25 |
| AX-158362230 | 28 | 88.632 | KV453267.1  | 2500339 | 25-scf00538 | 25 |
| AX-157770782 | 28 | 88.632 | KV453267.1  | 2501237 | 25-scf00538 | 25 |
| AX-158362231 | 28 | 88.632 | KV453267.1  | 2502072 | 25-scf00538 | 25 |
| AX-158362234 | 28 | 88.632 | KV453267.1  | 2504888 | 25-scf00538 | 25 |
| AX-157852059 | 28 | 88.632 | KV453267.1  | 2508858 | 25-scf00538 | 25 |
| AX-158362237 | 28 | 88.632 | KV453267.1  | 2510546 | 25-scf00538 | 25 |
| AX-158362243 | 28 | 88.795 | KV453267.1  | 2516270 | 25-scf00538 | 25 |
| AX-158362244 | 28 | 88.795 | KV453267.1  | 2516719 | 25-scf00538 | 25 |
| AX-158362246 | 28 | 88.916 | KV453267.1  | 2518216 | 25-scf00538 | 25 |
| AX-158362247 | 28 | 88.916 | KV453267.1  | 2519210 | 25-scf00538 | 25 |
| AX-157742705 | 28 | 88.916 | KV453267.1  | 2521032 | 25-scf00538 | 25 |
| AX-158362248 | 28 | 88.916 | KV453267.1  | 2521931 | 25-scf00538 | 25 |
| AX-158362249 | 28 | 88.916 | KV453267.1  | 2522300 | 25-scf00538 | 25 |
| AX-158362251 | 28 | 89.079 | KV453267.1  | 2524206 | 25-scf00538 | 25 |
| AX-158362253 | 28 | 89.244 | KV453267.1  | 2526334 | 25-scf00538 | 25 |
| AX-158362254 | 28 | 89.244 | KV453267.1  | 2530178 | 25-scf00538 | 25 |
| AX-158362255 | 28 | 89.244 | KV453267.1  | 2530604 | 25-scf00538 | 25 |
| AX-158362257 | 28 | 89.244 | KV453267.1  | 2532371 | 25-scf00538 | 25 |
| AX-158362258 | 28 | 89.244 | KV453267.1  | 2533211 | 25-scf00538 | 25 |
| AX-158362259 | 28 | 89.245 | KV453267.1  | 2533681 | 25-scf00538 | 25 |
| AX-157714532 | 28 | 89.246 | KV453267.1  | 2534870 | 25-scf00538 | 25 |
| AX-158362262 | 28 | 89.57  | KV453267.1  | 2537582 | 25-scf00538 | 25 |
| AX-158362263 | 28 | 89.57  | KV453267.1  | 2537816 | 25-scf00538 | 25 |
| AX-158362265 | 28 | 89.575 | KV453267.1  | 2539308 | 25-scf00538 | 25 |
| AX-158362267 | 28 | 89.583 | KV453267.1  | 2540713 | 25-scf00538 | 25 |
| AX-158362268 | 28 | 89.596 | KV453267.1  | 2543553 | 25-scf00538 | 25 |

|              |    |        |             |         |             |    |
|--------------|----|--------|-------------|---------|-------------|----|
| AX-158362274 | 28 | 89.808 | KV453267.1  | 2548691 | 25-scf00538 | 25 |
| AX-158362277 | 28 | 90.062 | KV453267.1  | 2550500 | 25-scf00538 | 25 |
| AX-158362278 | 28 | 90.139 | KV453267.1  | 2552354 | 25-scf00538 | 25 |
| AX-158362280 | 28 | 90.2   | KV453267.1  | 2554223 | 25-scf00538 | 25 |
| AX-158362284 | 28 | 90.615 | KV453267.1  | 2560613 | 25-scf00538 | 25 |
| AX-158362285 | 28 | 90.615 | KV453267.1  | 2560876 | 25-scf00538 | 25 |
| AX-158362287 | 28 | 90.615 | KV453267.1  | 2562777 | 25-scf00538 | 25 |
| AX-158362288 | 28 | 90.616 | KV453267.1  | 2564113 | 25-scf00538 | 25 |
| AX-158362289 | 28 | 90.756 | KV453267.1  | 2564972 | 25-scf00538 | 25 |
| AX-158362291 | 28 | 90.886 | KV453267.1  | 2567199 | 25-scf00538 | 25 |
| AX-158362293 | 28 | 91.028 | KV453267.1  | 2569535 | 25-scf00538 | 25 |
| AX-158362271 | 28 | 91.03  | KV453267.1  | 2544870 | 25-scf00538 | 25 |
| AX-157755061 | 28 | 91.03  | KV453267.1  | 2566845 | 25-scf00538 | 25 |
| AX-158362294 | 28 | 91.03  | KV453267.1  | 2571570 | 25-scf00538 | 25 |
| AX-158362297 | 28 | 91.086 | KV453267.1  | 2574774 | 25-scf00538 | 25 |
| AX-158362298 | 28 | 91.148 | KV453267.1  | 2575663 | 25-scf00538 | 25 |
| AX-158362300 | 28 | 91.148 | KV453267.1  | 2576592 | 25-scf00538 | 25 |
| AX-158362301 | 28 | 91.148 | KV453267.1  | 2579307 | 25-scf00538 | 25 |
| AX-158362304 | 28 | 91.148 | KV453267.1  | 2584177 | 25-scf00538 | 25 |
| AX-158362305 | 28 | 91.256 | KV453267.1  | 2585715 | 25-scf00538 | 25 |
| AX-158362306 | 28 | 91.323 | KV453267.1  | 2586333 | 25-scf00538 | 25 |
| AX-158362309 | 28 | 91.323 | KV453267.1  | 2590477 | 25-scf00538 | 25 |
| AX-158362310 | 28 | 91.323 | KV453267.1  | 2591412 | 25-scf00538 | 25 |
| AX-158362311 | 28 | 91.323 | KV453267.1  | 2592027 | 25-scf00538 | 25 |
| AX-157753060 | 28 | 91.323 | KV453267.1  | 2593916 | 25-scf00538 | 25 |
| AX-158362314 | 28 | 91.323 | KV453267.1  | 2595614 | 25-scf00538 | 25 |
| AX-158362315 | 28 | 91.323 | KV453267.1  | 2596348 | 25-scf00538 | 25 |
| AX-158362316 | 28 | 91.323 | KV453267.1  | 2597450 | 25-scf00538 | 25 |
| AX-158362325 | 28 | 91.323 | KV453267.1  | 2615392 | 25-scf00538 | 25 |
| AX-158362327 | 28 | 91.323 | KV453267.1  | 2619480 | 25-scf00538 | 25 |
| AX-158362331 | 28 | 91.323 | KV453267.1  | 2627209 | 25-scf00538 | 25 |
| AX-158362318 | 28 | 91.541 | KV453267.1  | 2601023 | 25-scf00538 | 25 |
| AX-158362319 | 28 | 91.541 | KV453267.1  | 2602148 | 25-scf00538 | 25 |
| AX-157720783 | 28 | 91.759 | KV453267.1  | 2607544 | 25-scf00538 | 25 |
| AX-157749473 | 28 | 91.759 | KV453267.1  | 2608289 | 25-scf00538 | 25 |
| AX-158362321 | 28 | 91.759 | KV453267.1  | 2610083 | 25-scf00538 | 25 |
| AX-158362322 | 28 | 91.759 | KV453267.1  | 2610712 | 25-scf00538 | 25 |
| AX-158362323 | 28 | 91.759 | KV453267.1  | 2612367 | 25-scf00538 | 25 |
| AX-158362324 | 28 | 91.759 | KV453267.1  | 2614900 | 25-scf00538 | 25 |
| AX-158419866 | 28 | 91.858 | KV453267.1  | 2617360 | 25-scf00538 | 25 |
| AX-157755166 | 28 | 91.904 | KV453267.1  | 2618365 | 25-scf00538 | 25 |
| AX-158362329 | 28 | 92.193 | KV453267.1  | 2622529 | 25-scf00538 | 25 |
| AX-158362330 | 28 | 92.208 | KV453267.1  | 2626427 | 25-scf00538 | 25 |
| AX-158362332 | 28 | 92.209 | KV453267.1  | 2627626 | 25-scf00538 | 25 |
| AX-157706304 | 28 | 92.209 | 3ML01032017 | 649     | scf07634_1  | UN |
| AX-158362333 | 28 | 92.525 | KV453267.1  | 2631609 | 25-scf00538 | 25 |
| AX-158362334 | 28 | 92.525 | KV453267.1  | 2632350 | 25-scf00538 | 25 |
| AX-158362335 | 28 | 92.525 | KV453267.1  | 2632937 | 25-scf00538 | 25 |
| AX-158362340 | 28 | 92.525 | KV453267.1  | 2637378 | 25-scf00538 | 25 |
| AX-158362341 | 28 | 92.525 | KV453267.1  | 2639165 | 25-scf00538 | 25 |
| AX-157752701 | 28 | 92.525 | KV453267.1  | 2640526 | 25-scf00538 | 25 |

|              |    |        |            |         |             |    |
|--------------|----|--------|------------|---------|-------------|----|
| AX-158362342 | 28 | 92.525 | KV453267.1 | 2641562 | 25-scf00538 | 25 |
| AX-158362343 | 28 | 92.525 | KV453267.1 | 2642295 | 25-scf00538 | 25 |
| AX-158362344 | 28 | 92.525 | KV453267.1 | 2643770 | 25-scf00538 | 25 |
| AX-158419867 | 28 | 92.525 | KV453267.1 | 2645784 | 25-scf00538 | 25 |
| AX-157757155 | 28 | 92.525 | KV453267.1 | 2646498 | 25-scf00538 | 25 |
| AX-158362346 | 28 | 92.525 | KV453267.1 | 2648207 | 25-scf00538 | 25 |
| AX-158362347 | 28 | 92.727 | KV453267.1 | 2651212 | 25-scf00538 | 25 |
| AX-158362349 | 28 | 92.923 | KV453267.1 | 2655849 | 25-scf00538 | 25 |
| AX-158362350 | 28 | 93.189 | KV453267.1 | 2658784 | 25-scf00538 | 25 |
| AX-158362356 | 28 | 93.72  | KV453267.1 | 2670312 | 25-scf00538 | 25 |
| AX-158362357 | 28 | 93.72  | KV453267.1 | 2670996 | 25-scf00538 | 25 |
| AX-158362359 | 28 | 93.72  | KV453267.1 | 2673374 | 25-scf00538 | 25 |
| AX-158362365 | 28 | 93.72  | KV453267.1 | 2678881 | 25-scf00538 | 25 |
| AX-158362366 | 28 | 93.72  | KV453267.1 | 2679251 | 25-scf00538 | 25 |
| AX-158362367 | 28 | 93.72  | KV453267.1 | 2680061 | 25-scf00538 | 25 |
| AX-157772118 | 28 | 93.72  | KV453267.1 | 2693082 | 25-scf00538 | 25 |
| AX-158362369 | 28 | 93.75  | KV453267.1 | 2682061 | 25-scf00538 | 25 |
| AX-158362370 | 28 | 93.763 | KV453267.1 | 2682906 | 25-scf00538 | 25 |
| AX-158362372 | 28 | 93.79  | KV453267.1 | 2688236 | 25-scf00538 | 25 |
| AX-158362373 | 28 | 93.821 | KV453267.1 | 2688757 | 25-scf00538 | 25 |
| AX-158362375 | 28 | 93.828 | KV453267.1 | 2691902 | 25-scf00538 | 25 |
| AX-157758285 | 28 | 93.833 | KV453267.1 | 2693712 | 25-scf00538 | 25 |
| AX-158362378 | 28 | 93.838 | KV453267.1 | 2696420 | 25-scf00538 | 25 |
| AX-157862411 | 28 | 93.839 | KV453267.1 | 2687728 | 25-scf00538 | 25 |
| AX-158362374 | 28 | 93.839 | KV453267.1 | 2690795 | 25-scf00538 | 25 |
| AX-158362381 | 28 | 93.839 | KV453267.1 | 2699863 | 25-scf00538 | 25 |
| AX-158362383 | 28 | 94.165 | KV453267.1 | 2700842 | 25-scf00538 | 25 |
| AX-157773996 | 28 | 94.165 | KV453267.1 | 2701477 | 25-scf00538 | 25 |
| AX-158381758 | 28 | 94.166 | KV453267.1 | 2702268 | 25-scf00538 | 25 |
| AX-158362387 | 28 | 94.166 | KV453267.1 | 2706914 | 25-scf00538 | 25 |
| AX-158362388 | 28 | 94.376 | KV453267.1 | 2707816 | 25-scf00538 | 25 |
| AX-158362392 | 28 | 94.598 | KV453267.1 | 2710984 | 25-scf00538 | 25 |
| AX-158419870 | 28 | 94.74  | KV453267.1 | 2679462 | 25-scf00538 | 25 |
| AX-158362394 | 28 | 94.74  | KV453267.1 | 2712059 | 25-scf00538 | 25 |
| AX-158362395 | 28 | 94.814 | KV453267.1 | 2713363 | 25-scf00538 | 25 |
| AX-158362396 | 28 | 94.814 | KV453267.1 | 2715628 | 25-scf00538 | 25 |
| AX-158362361 | 28 | 94.869 | KV453267.1 | 2675516 | 25-scf00538 | 25 |
| AX-158362386 | 28 | 94.869 | KV453267.1 | 2706049 | 25-scf00538 | 25 |
| AX-158362398 | 28 | 94.869 | KV453267.1 | 2719848 | 25-scf00538 | 25 |
| AX-157889159 | 28 | 94.945 | KV453267.1 | 2720862 | 25-scf00538 | 25 |
| AX-158362400 | 28 | 95.078 | KV453267.1 | 2724540 | 25-scf00538 | 25 |
| AX-158362402 | 28 | 95.078 | KV453267.1 | 2726530 | 25-scf00538 | 25 |
| AX-158362403 | 28 | 95.151 | KV453267.1 | 2727030 | 25-scf00538 | 25 |
| AX-158362405 | 28 | 95.211 | KV453267.1 | 2728550 | 25-scf00538 | 25 |
| AX-158362406 | 28 | 95.211 | KV453267.1 | 2731047 | 25-scf00538 | 25 |
| AX-158362407 | 28 | 95.211 | KV453267.1 | 2731896 | 25-scf00538 | 25 |
| AX-158362408 | 28 | 95.212 | KV453267.1 | 2733611 | 25-scf00538 | 25 |
| AX-158362409 | 28 | 95.212 | KV453267.1 | 2734391 | 25-scf00538 | 25 |
| AX-158362410 | 28 | 95.212 | KV453267.1 | 2736312 | 25-scf00538 | 25 |
| AX-158362424 | 28 | 95.212 | KV453267.1 | 2753427 | 25-scf00538 | 25 |
| AX-157758003 | 28 | 95.478 | KV453267.1 | 2737636 | 25-scf00538 | 25 |



|              |    |        |            |         |             |    |
|--------------|----|--------|------------|---------|-------------|----|
| AX-158362413 | 28 | 95.478 | KV453267.1 | 2740331 | 25-scf00538 | 25 |
| AX-158362414 | 28 | 95.478 | KV453267.1 | 2741441 | 25-scf00538 | 25 |
| AX-158362415 | 28 | 95.478 | KV453267.1 | 2741961 | 25-scf00538 | 25 |
| AX-158362417 | 28 | 95.478 | KV453267.1 | 2743035 | 25-scf00538 | 25 |
| AX-158362419 | 28 | 95.569 | KV453267.1 | 2746738 | 25-scf00538 | 25 |
| AX-158362420 | 28 | 95.696 | KV453267.1 | 2747214 | 25-scf00538 | 25 |
| AX-158362423 | 28 | 95.696 | KV453267.1 | 2751423 | 25-scf00538 | 25 |
| AX-157752313 | 28 | 95.696 | KV453267.1 | 2754847 | 25-scf00538 | 25 |
| AX-158362426 | 28 | 95.696 | KV453267.1 | 2755836 | 25-scf00538 | 25 |
| AX-158362443 | 28 | 95.696 | KV453267.1 | 2790489 | 25-scf00538 | 25 |
| AX-157852063 | 28 | 95.746 | KV453267.1 | 2758064 | 25-scf00538 | 25 |
| AX-158362446 | 28 | 95.746 | KV453267.1 | 2792513 | 25-scf00538 | 25 |
| AX-158362433 | 28 | 95.787 | KV453267.1 | 2772863 | 25-scf00538 | 25 |
| AX-158362418 | 28 | 95.805 | KV453267.1 | 2745561 | 25-scf00538 | 25 |
| AX-158362421 | 28 | 95.805 | KV453267.1 | 2749596 | 25-scf00538 | 25 |
| AX-158362430 | 28 | 95.805 | KV453267.1 | 2771200 | 25-scf00538 | 25 |
| AX-158362434 | 28 | 95.805 | KV453267.1 | 2773760 | 25-scf00538 | 25 |
| AX-158362435 | 28 | 95.805 | KV453267.1 | 2774169 | 25-scf00538 | 25 |
| AX-158362436 | 28 | 95.805 | KV453267.1 | 2779342 | 25-scf00538 | 25 |
| AX-158362437 | 28 | 95.805 | KV453267.1 | 2783165 | 25-scf00538 | 25 |
| AX-158362438 | 28 | 95.805 | KV453267.1 | 2783494 | 25-scf00538 | 25 |
| AX-158362442 | 28 | 95.915 | KV453267.1 | 2789837 | 25-scf00538 | 25 |
| AX-158362447 | 28 | 95.915 | KV453267.1 | 2793707 | 25-scf00538 | 25 |
| AX-158362450 | 28 | 95.915 | KV453267.1 | 2796199 | 25-scf00538 | 25 |
| AX-157852064 | 28 | 95.915 | KV453267.1 | 2797122 | 25-scf00538 | 25 |
| AX-158362454 | 28 | 95.915 | KV453267.1 | 2800362 | 25-scf00538 | 25 |
| AX-158362455 | 28 | 95.915 | KV453267.1 | 2801974 | 25-scf00538 | 25 |
| AX-158362456 | 28 | 96.033 | KV453267.1 | 2802506 | 25-scf00538 | 25 |
| AX-157882621 | 28 | 96.133 | KV453267.1 | 2803401 | 25-scf00538 | 25 |
| AX-158362458 | 28 | 96.133 | KV453267.1 | 2804098 | 25-scf00538 | 25 |
| AX-158362459 | 28 | 96.133 | KV453267.1 | 2805094 | 25-scf00538 | 25 |
| AX-157874036 | 28 | 96.133 | KV453267.1 | 2805900 | 25-scf00538 | 25 |
| AX-158362460 | 28 | 96.133 | KV453267.1 | 2808577 | 25-scf00538 | 25 |
| AX-158362461 | 28 | 96.133 | KV453267.1 | 2809949 | 25-scf00538 | 25 |
| AX-158362463 | 28 | 96.133 | KV453267.1 | 2812703 | 25-scf00538 | 25 |
| AX-158362464 | 28 | 96.133 | KV453267.1 | 2813342 | 25-scf00538 | 25 |
| AX-158362462 | 28 | 96.264 | KV453267.1 | 2811319 | 25-scf00538 | 25 |
| AX-158362465 | 28 | 96.264 | KV453267.1 | 2813895 | 25-scf00538 | 25 |
| AX-158362466 | 28 | 96.264 | KV453267.1 | 2816328 | 25-scf00538 | 25 |
| AX-158362467 | 28 | 96.264 | KV453267.1 | 2816893 | 25-scf00538 | 25 |
| AX-158362469 | 28 | 96.264 | KV453267.1 | 2823918 | 25-scf00538 | 25 |
| AX-157717791 | 28 | 96.264 | KV453267.1 | 2827068 | 25-scf00538 | 25 |
| AX-157852068 | 28 | 96.78  | KV453267.1 | 2829335 | 25-scf00538 | 25 |
| AX-157852069 | 28 | 96.788 | KV453267.1 | 2829444 | 25-scf00538 | 25 |
| AX-158419875 | 28 | 96.788 | KV453267.1 | 2832276 | 25-scf00538 | 25 |
| AX-158362472 | 28 | 96.789 | KV453267.1 | 2833583 | 25-scf00538 | 25 |
| AX-157852073 | 28 | 97.007 | KV453267.1 | 2838897 | 25-scf00538 | 25 |
| AX-157746662 | 28 | 97.007 | KV453267.1 | 2839276 | 25-scf00538 | 25 |
| AX-158362476 | 28 | 97.007 | KV453267.1 | 2840379 | 25-scf00538 | 25 |
| AX-158362480 | 28 | 97.007 | KV453267.1 | 2844105 | 25-scf00538 | 25 |
| AX-158362481 | 28 | 97.007 | KV453267.1 | 2845511 | 25-scf00538 | 25 |

|              |    |        |            |         |             |    |
|--------------|----|--------|------------|---------|-------------|----|
| AX-158362482 | 28 | 97.007 | KV453267.1 | 2846342 | 25-scf00538 | 25 |
| AX-158362483 | 28 | 97.007 | KV453267.1 | 2847122 | 25-scf00538 | 25 |
| AX-158362484 | 28 | 97.105 | KV453267.1 | 2847370 | 25-scf00538 | 25 |
| AX-157874037 | 28 | 97.225 | KV453267.1 | 2806135 | 25-scf00538 | 25 |
| AX-157882622 | 28 | 97.225 | KV453267.1 | 2818493 | 25-scf00538 | 25 |
| AX-158362485 | 28 | 97.225 | KV453267.1 | 2848559 | 25-scf00538 | 25 |
| AX-158362486 | 28 | 97.225 | KV453267.1 | 2849155 | 25-scf00538 | 25 |
| AX-157726262 | 28 | 97.335 | KV453267.1 | 2850844 | 25-scf00538 | 25 |
| AX-158362487 | 28 | 97.335 | KV453267.1 | 2851230 | 25-scf00538 | 25 |
| AX-158362489 | 28 | 97.47  | KV453267.1 | 2853111 | 25-scf00538 | 25 |
| AX-158362491 | 28 | 97.553 | KV453267.1 | 2857695 | 25-scf00538 | 25 |
| AX-158362492 | 28 | 97.553 | KV453267.1 | 2857941 | 25-scf00538 | 25 |
| AX-157745988 | 28 | 97.553 | KV453267.1 | 2858973 | 25-scf00538 | 25 |
| AX-158362494 | 28 | 97.553 | KV453267.1 | 2866899 | 25-scf00538 | 25 |
| AX-158362495 | 28 | 97.553 | KV453267.1 | 2867762 | 25-scf00538 | 25 |
| AX-158362496 | 28 | 97.553 | KV453267.1 | 2869726 | 25-scf00538 | 25 |
| AX-157739357 | 28 | 97.663 | KV453267.1 | 2877923 | 25-scf00538 | 25 |
| AX-158362499 | 28 | 97.663 | KV453267.1 | 2879630 | 25-scf00538 | 25 |
| AX-158362502 | 28 | 97.699 | KV453267.1 | 2880644 | 25-scf00538 | 25 |
| AX-158362503 | 28 | 97.731 | KV453267.1 | 2880890 | 25-scf00538 | 25 |
| AX-158362506 | 28 | 97.756 | KV453267.1 | 2885988 | 25-scf00538 | 25 |
| AX-157852078 | 28 | 97.772 | KV453267.1 | 2890388 | 25-scf00538 | 25 |
| AX-158362508 | 28 | 97.772 | KV453267.1 | 2891580 | 25-scf00538 | 25 |
| AX-158362509 | 28 | 97.772 | KV453267.1 | 2892914 | 25-scf00538 | 25 |
| AX-157724045 | 28 | 97.772 | KV453267.1 | 2895289 | 25-scf00538 | 25 |
| AX-157747775 | 28 | 97.881 | KV453267.1 | 2888681 | 25-scf00538 | 25 |
| AX-158362510 | 28 | 97.881 | KV453267.1 | 2896930 | 25-scf00538 | 25 |
| AX-158362511 | 28 | 97.881 | KV453267.1 | 2897691 | 25-scf00538 | 25 |
| AX-158362512 | 28 | 97.881 | KV453267.1 | 2898285 | 25-scf00538 | 25 |
| AX-158362514 | 28 | 97.881 | KV453267.1 | 2899972 | 25-scf00538 | 25 |
| AX-158362515 | 28 | 97.881 | KV453267.1 | 2900463 | 25-scf00538 | 25 |
| AX-158362516 | 28 | 97.881 | KV453267.1 | 2902149 | 25-scf00538 | 25 |
| AX-158362518 | 28 | 97.881 | KV453267.1 | 2903013 | 25-scf00538 | 25 |
| AX-158362520 | 28 | 97.881 | KV453267.1 | 2904948 | 25-scf00538 | 25 |
| AX-158362521 | 28 | 97.881 | KV453267.1 | 2905349 | 25-scf00538 | 25 |
| AX-158362522 | 28 | 97.881 | KV453267.1 | 2906320 | 25-scf00538 | 25 |
| AX-158362523 | 28 | 97.881 | KV453267.1 | 2907270 | 25-scf00538 | 25 |
| AX-158362524 | 28 | 97.881 | KV453267.1 | 2907633 | 25-scf00538 | 25 |
| AX-158362525 | 28 | 97.907 | KV453267.1 | 2908261 | 25-scf00538 | 25 |
| AX-158362528 | 28 | 97.929 | KV453267.1 | 2910585 | 25-scf00538 | 25 |
| AX-157868337 | 28 | 97.952 | KV453267.1 | 2912016 | 25-scf00538 | 25 |
| AX-158362562 | 28 | 97.952 | KV453267.1 | 2966076 | 25-scf00538 | 25 |
| AX-158362530 | 28 | 97.99  | KV453267.1 | 2913200 | 25-scf00538 | 25 |
| AX-158362532 | 28 | 98.054 | KV453267.1 | 2913967 | 25-scf00538 | 25 |
| AX-158362535 | 28 | 98.1   | KV453267.1 | 2917150 | 25-scf00538 | 25 |
| AX-158362539 | 28 | 98.209 | KV453267.1 | 2921023 | 25-scf00538 | 25 |
| AX-158362540 | 28 | 98.209 | KV453267.1 | 2921515 | 25-scf00538 | 25 |
| AX-158362595 | 28 | 98.209 | KV453267.1 | 3009671 | 25-scf00538 | 25 |
| AX-157852092 | 28 | 98.209 | KV453267.1 | 3026005 | 25-scf00538 | 25 |
| AX-157852093 | 28 | 98.209 | KV453267.1 | 3027208 | 25-scf00538 | 25 |
| AX-157744824 | 28 | 98.221 | KV453267.1 | 2929536 | 25-scf00538 | 25 |

|              |    |        |            |         |             |    |
|--------------|----|--------|------------|---------|-------------|----|
| AX-158362543 | 28 | 98.244 | KV453267.1 | 2932720 | 25-scf00538 | 25 |
| AX-157852082 | 28 | 98.255 | KV453267.1 | 2933263 | 25-scf00538 | 25 |
| AX-157740820 | 28 | 98.281 | KV453267.1 | 2930231 | 25-scf00538 | 25 |
| AX-158362545 | 28 | 98.281 | KV453267.1 | 2933906 | 25-scf00538 | 25 |
| AX-158362559 | 28 | 98.281 | KV453267.1 | 2963483 | 25-scf00538 | 25 |
| AX-158362566 | 28 | 98.281 | KV453267.1 | 2975391 | 25-scf00538 | 25 |
| AX-158362578 | 28 | 98.281 | KV453267.1 | 2987768 | 25-scf00538 | 25 |
| AX-158362533 | 28 | 98.318 | KV453267.1 | 2915474 | 25-scf00538 | 25 |
| AX-158362534 | 28 | 98.318 | KV453267.1 | 2915922 | 25-scf00538 | 25 |
| AX-158362547 | 28 | 98.318 | KV453267.1 | 2938784 | 25-scf00538 | 25 |
| AX-157718137 | 28 | 98.318 | KV453267.1 | 2943730 | 25-scf00538 | 25 |
| AX-158362548 | 28 | 98.329 | KV453267.1 | 2947767 | 25-scf00538 | 25 |
| AX-158362549 | 28 | 98.342 | KV453267.1 | 2948429 | 25-scf00538 | 25 |
| AX-158362571 | 28 | 98.342 | KV453267.1 | 2978141 | 25-scf00538 | 25 |
| AX-158362551 | 28 | 98.372 | KV453267.1 | 2953450 | 25-scf00538 | 25 |
| AX-157874038 | 28 | 98.403 | KV453267.1 | 2956289 | 25-scf00538 | 25 |
| AX-157852083 | 28 | 98.427 | KV453267.1 | 2940534 | 25-scf00538 | 25 |
| AX-157852084 | 28 | 98.427 | KV453267.1 | 2946402 | 25-scf00538 | 25 |
| AX-158362555 | 28 | 98.427 | KV453267.1 | 2958295 | 25-scf00538 | 25 |
| AX-157852089 | 28 | 98.427 | KV453267.1 | 2962937 | 25-scf00538 | 25 |
| AX-158362560 | 28 | 98.427 | KV453267.1 | 2964901 | 25-scf00538 | 25 |
| AX-158419880 | 28 | 98.427 | KV453267.1 | 2972561 | 25-scf00538 | 25 |
| AX-158419882 | 28 | 98.427 | KV453267.1 | 2973708 | 25-scf00538 | 25 |
| AX-158362567 | 28 | 98.427 | KV453267.1 | 2975730 | 25-scf00538 | 25 |
| AX-158362568 | 28 | 98.427 | KV453267.1 | 2976579 | 25-scf00538 | 25 |
| AX-158362569 | 28 | 98.427 | KV453267.1 | 2977023 | 25-scf00538 | 25 |
| AX-158362570 | 28 | 98.427 | KV453267.1 | 2977450 | 25-scf00538 | 25 |
| AX-158362572 | 28 | 98.427 | KV453267.1 | 2978495 | 25-scf00538 | 25 |
| AX-158362573 | 28 | 98.427 | KV453267.1 | 2980524 | 25-scf00538 | 25 |
| AX-158362600 | 28 | 98.427 | KV453267.1 | 3013042 | 25-scf00538 | 25 |
| AX-158362622 | 28 | 98.427 | KV453267.1 | 3038145 | 25-scf00538 | 25 |
| AX-157852123 | 28 | 98.427 | KV453267.1 | 3477387 | 25-scf00538 | 25 |
| AX-157852090 | 28 | 98.485 | KV453267.1 | 2981235 | 25-scf00538 | 25 |
| AX-158362575 | 28 | 98.536 | KV453267.1 | 2983774 | 25-scf00538 | 25 |
| AX-158362576 | 28 | 98.536 | KV453267.1 | 2984174 | 25-scf00538 | 25 |
| AX-157852091 | 28 | 98.536 | KV453267.1 | 2985094 | 25-scf00538 | 25 |
| AX-158362577 | 28 | 98.536 | KV453267.1 | 2985987 | 25-scf00538 | 25 |
| AX-158362579 | 28 | 98.536 | KV453267.1 | 2988968 | 25-scf00538 | 25 |
| AX-158362581 | 28 | 98.631 | KV453267.1 | 2990394 | 25-scf00538 | 25 |
| AX-158362582 | 28 | 98.715 | KV453267.1 | 2991746 | 25-scf00538 | 25 |
| AX-157747455 | 28 | 98.804 | KV453267.1 | 2997045 | 25-scf00538 | 25 |
| AX-157745800 | 28 | 98.864 | KV453267.1 | 2946534 | 25-scf00538 | 25 |
| AX-158362584 | 28 | 98.864 | KV453267.1 | 2993864 | 25-scf00538 | 25 |
| AX-157713719 | 28 | 98.864 | KV453267.1 | 2995357 | 25-scf00538 | 25 |
| AX-158362588 | 28 | 98.864 | KV453267.1 | 2999511 | 25-scf00538 | 25 |
| AX-158362590 | 28 | 98.864 | KV453267.1 | 3003305 | 25-scf00538 | 25 |
| AX-158362591 | 28 | 98.864 | KV453267.1 | 3004454 | 25-scf00538 | 25 |
| AX-158362592 | 28 | 98.864 | KV453267.1 | 3004927 | 25-scf00538 | 25 |
| AX-158362594 | 28 | 98.864 | KV453267.1 | 3007408 | 25-scf00538 | 25 |
| AX-157772722 | 28 | 98.864 | KV453267.1 | 3008121 | 25-scf00538 | 25 |
| AX-157882628 | 28 | 98.864 | KV453267.1 | 3008310 | 25-scf00538 | 25 |

|              |    |        |            |         |             |    |
|--------------|----|--------|------------|---------|-------------|----|
| AX-158362596 | 28 | 98.864 | KV453267.1 | 3010378 | 25-scf00538 | 25 |
| AX-158362597 | 28 | 98.864 | KV453267.1 | 3010796 | 25-scf00538 | 25 |
| AX-158362601 | 28 | 98.864 | KV453267.1 | 3014256 | 25-scf00538 | 25 |
| AX-158362603 | 28 | 98.864 | KV453267.1 | 3018051 | 25-scf00538 | 25 |
| AX-158362604 | 28 | 98.864 | KV453267.1 | 3018532 | 25-scf00538 | 25 |
| AX-158362607 | 28 | 98.864 | KV453267.1 | 3021584 | 25-scf00538 | 25 |
| AX-158362608 | 28 | 98.864 | KV453267.1 | 3022328 | 25-scf00538 | 25 |
| AX-158362612 | 28 | 98.864 | KV453267.1 | 3024331 | 25-scf00538 | 25 |
| AX-157749826 | 28 | 98.864 | KV453267.1 | 3024883 | 25-scf00538 | 25 |
| AX-158362757 | 28 | 98.864 | KV453267.1 | 3197522 | 25-scf00538 | 25 |
| AX-158362613 | 28 | 98.952 | KV453267.1 | 3025892 | 25-scf00538 | 25 |
| AX-158362616 | 28 | 99.083 | KV453267.1 | 3027390 | 25-scf00538 | 25 |
| AX-158362618 | 28 | 99.083 | KV453267.1 | 3032421 | 25-scf00538 | 25 |
| AX-158362621 | 28 | 99.083 | KV453267.1 | 3035693 | 25-scf00538 | 25 |
| AX-158362626 | 28 | 99.083 | KV453267.1 | 3048838 | 25-scf00538 | 25 |
| AX-158362519 | 28 | 99.192 | KV453267.1 | 2903937 | 25-scf00538 | 25 |
| AX-158362527 | 28 | 99.192 | KV453267.1 | 2909244 | 25-scf00538 | 25 |
| AX-157774111 | 28 | 99.192 | KV453267.1 | 3036441 | 25-scf00538 | 25 |
| AX-158362627 | 28 | 99.192 | KV453267.1 | 3049642 | 25-scf00538 | 25 |
| AX-157852095 | 28 | 99.192 | KV453267.1 | 3050682 | 25-scf00538 | 25 |
| AX-158362630 | 28 | 99.192 | KV453267.1 | 3054798 | 25-scf00538 | 25 |
| AX-158362631 | 28 | 99.192 | KV453267.1 | 3055549 | 25-scf00538 | 25 |
| AX-158362633 | 28 | 99.192 | KV453267.1 | 3057889 | 25-scf00538 | 25 |
| AX-158362636 | 28 | 99.192 | KV453267.1 | 3063397 | 25-scf00538 | 25 |
| AX-158362638 | 28 | 99.192 | KV453267.1 | 3064528 | 25-scf00538 | 25 |
| AX-158362640 | 28 | 99.192 | KV453267.1 | 3067854 | 25-scf00538 | 25 |
| AX-158362642 | 28 | 99.192 | KV453267.1 | 3068508 | 25-scf00538 | 25 |
| AX-158362643 | 28 | 99.192 | KV453267.1 | 3069427 | 25-scf00538 | 25 |
| AX-158362644 | 28 | 99.192 | KV453267.1 | 3070105 | 25-scf00538 | 25 |
| AX-158362645 | 28 | 99.192 | KV453267.1 | 3070615 | 25-scf00538 | 25 |
| AX-158362651 | 28 | 99.192 | KV453267.1 | 3076133 | 25-scf00538 | 25 |
| AX-158362667 | 28 | 99.192 | KV453267.1 | 3093083 | 25-scf00538 | 25 |
| AX-158362646 | 28 | 99.234 | KV453267.1 | 3071069 | 25-scf00538 | 25 |
| AX-158362536 | 28 | 99.301 | KV453267.1 | 2918233 | 25-scf00538 | 25 |
| AX-158362615 | 28 | 99.301 | KV453267.1 | 3026918 | 25-scf00538 | 25 |
| AX-158362654 | 28 | 99.301 | KV453267.1 | 3078843 | 25-scf00538 | 25 |
| AX-158362656 | 28 | 99.301 | KV453267.1 | 3079730 | 25-scf00538 | 25 |
| AX-158362658 | 28 | 99.335 | KV453267.1 | 3080754 | 25-scf00538 | 25 |
| AX-157852097 | 28 | 99.335 | KV453267.1 | 3087393 | 25-scf00538 | 25 |
| AX-158362666 | 28 | 99.335 | KV453267.1 | 3092226 | 25-scf00538 | 25 |
| AX-157753549 | 28 | 99.41  | KV453267.1 | 3090220 | 25-scf00538 | 25 |
| AX-158362665 | 28 | 99.514 | KV453267.1 | 3091608 | 25-scf00538 | 25 |
| AX-157741776 | 28 | 99.629 | KV453267.1 | 3092620 | 25-scf00538 | 25 |
| AX-158362670 | 28 | 99.738 | KV453267.1 | 3098206 | 25-scf00538 | 25 |
| AX-158362671 | 28 | 99.738 | KV453267.1 | 3098699 | 25-scf00538 | 25 |
| AX-158362672 | 28 | 99.738 | KV453267.1 | 3101117 | 25-scf00538 | 25 |
| AX-158362673 | 28 | 99.738 | KV453267.1 | 3101559 | 25-scf00538 | 25 |
| AX-158362685 | 28 | 99.738 | KV453267.1 | 3115103 | 25-scf00538 | 25 |
| AX-158362686 | 28 | 99.738 | KV453267.1 | 3116170 | 25-scf00538 | 25 |
| AX-157719333 | 28 | 99.791 | KV453267.1 | 2922275 | 25-scf00538 | 25 |
| AX-157882626 | 28 | 99.791 | KV453267.1 | 2934314 | 25-scf00538 | 25 |

|              |    |         |            |         |             |    |
|--------------|----|---------|------------|---------|-------------|----|
| AX-158362688 | 28 | 99.791  | KV453267.1 | 3117165 | 25-scf00538 | 25 |
| AX-158362655 | 28 | 99.848  | KV453267.1 | 3079332 | 25-scf00538 | 25 |
| AX-158362693 | 28 | 99.848  | KV453267.1 | 3122768 | 25-scf00538 | 25 |
| AX-158362695 | 28 | 99.848  | KV453267.1 | 3124070 | 25-scf00538 | 25 |
| AX-158362698 | 28 | 99.848  | KV453267.1 | 3125936 | 25-scf00538 | 25 |
| AX-158362704 | 28 | 99.848  | KV453267.1 | 3131348 | 25-scf00538 | 25 |
| AX-157852103 | 28 | 99.88   | KV453267.1 | 3132012 | 25-scf00538 | 25 |
| AX-158362674 | 28 | 99.912  | KV453267.1 | 3102964 | 25-scf00538 | 25 |
| AX-157852104 | 28 | 99.912  | KV453267.1 | 3133004 | 25-scf00538 | 25 |
| AX-158362727 | 28 | 99.912  | KV453267.1 | 3159537 | 25-scf00538 | 25 |
| AX-158362707 | 28 | 99.957  | KV453267.1 | 3137332 | 25-scf00538 | 25 |
| AX-157743649 | 28 | 99.957  | KV453267.1 | 3139548 | 25-scf00538 | 25 |
| AX-158362710 | 28 | 99.957  | KV453267.1 | 3142278 | 25-scf00538 | 25 |
| AX-158362713 | 28 | 99.957  | KV453267.1 | 3143821 | 25-scf00538 | 25 |
| AX-158362715 | 28 | 99.994  | KV453267.1 | 3149038 | 25-scf00538 | 25 |
| AX-158362717 | 28 | 100.027 | KV453267.1 | 3151069 | 25-scf00538 | 25 |
| AX-158362733 | 28 | 100.027 | KV453267.1 | 3163458 | 25-scf00538 | 25 |
| AX-158362719 | 28 | 100.047 | KV453267.1 | 3152352 | 25-scf00538 | 25 |
| AX-158362721 | 28 | 100.066 | KV453267.1 | 3155258 | 25-scf00538 | 25 |
| AX-158362722 | 28 | 100.066 | KV453267.1 | 3156160 | 25-scf00538 | 25 |
| AX-158362724 | 28 | 100.066 | KV453267.1 | 3157832 | 25-scf00538 | 25 |
| AX-158362725 | 28 | 100.066 | KV453267.1 | 3158211 | 25-scf00538 | 25 |
| AX-158362726 | 28 | 100.066 | KV453267.1 | 3158967 | 25-scf00538 | 25 |
| AX-158362729 | 28 | 100.066 | KV453267.1 | 3161255 | 25-scf00538 | 25 |
| AX-158362730 | 28 | 100.066 | KV453267.1 | 3161611 | 25-scf00538 | 25 |
| AX-158362731 | 28 | 100.066 | KV453267.1 | 3162231 | 25-scf00538 | 25 |
| AX-158362736 | 28 | 100.066 | KV453267.1 | 3168364 | 25-scf00538 | 25 |
| AX-158362739 | 28 | 100.066 | KV453267.1 | 3173964 | 25-scf00538 | 25 |
| AX-158362742 | 28 | 100.066 | KV453267.1 | 3178094 | 25-scf00538 | 25 |
| AX-158362743 | 28 | 100.066 | KV453267.1 | 3178720 | 25-scf00538 | 25 |
| AX-158419884 | 28 | 100.066 | KV453267.1 | 3180772 | 25-scf00538 | 25 |
| AX-157852108 | 28 | 100.066 | KV453267.1 | 3185725 | 25-scf00538 | 25 |
| AX-158362748 | 28 | 100.066 | KV453267.1 | 3187790 | 25-scf00538 | 25 |
| AX-158362751 | 28 | 100.066 | KV453267.1 | 3190456 | 25-scf00538 | 25 |
| AX-158362687 | 28 | 100.1   | KV453267.1 | 3116934 | 25-scf00538 | 25 |
| AX-158362699 | 28 | 100.1   | KV453267.1 | 3126299 | 25-scf00538 | 25 |
| AX-158362701 | 28 | 100.1   | KV453267.1 | 3127268 | 25-scf00538 | 25 |
| AX-158362706 | 28 | 100.1   | KV453267.1 | 3135834 | 25-scf00538 | 25 |
| AX-158362738 | 28 | 100.1   | KV453267.1 | 3173195 | 25-scf00538 | 25 |
| AX-158362752 | 28 | 100.1   | KV453267.1 | 3190957 | 25-scf00538 | 25 |
| AX-158363046 | 28 | 100.1   | KV453267.1 | 3643196 | 25-scf00538 | 25 |
| AX-157852107 | 28 | 100.137 | KV453267.1 | 3142860 | 25-scf00538 | 25 |
| AX-157709613 | 28 | 100.137 | KV453267.1 | 3178469 | 25-scf00538 | 25 |
| AX-158362753 | 28 | 100.137 | KV453267.1 | 3191735 | 25-scf00538 | 25 |
| AX-158362758 | 28 | 100.175 | KV453267.1 | 3201743 | 25-scf00538 | 25 |
| AX-158362759 | 28 | 100.394 | KV453267.1 | 3202984 | 25-scf00538 | 25 |
| AX-158362761 | 28 | 100.394 | KV453267.1 | 3206978 | 25-scf00538 | 25 |
| AX-158362764 | 28 | 100.394 | KV453267.1 | 3211305 | 25-scf00538 | 25 |
| AX-158362766 | 28 | 100.394 | KV453267.1 | 3214229 | 25-scf00538 | 25 |
| AX-158362767 | 28 | 100.394 | KV453267.1 | 3214545 | 25-scf00538 | 25 |
| AX-158362768 | 28 | 100.455 | KV453267.1 | 3216300 | 25-scf00538 | 25 |

|              |    |         |             |         |             |    |
|--------------|----|---------|-------------|---------|-------------|----|
| AX-158362714 | 28 | 100.503 | KV453267.1  | 3146758 | 25-scf00538 | 25 |
| AX-158362760 | 28 | 100.503 | KV453267.1  | 3203767 | 25-scf00538 | 25 |
| AX-158362762 | 28 | 100.503 | KV453267.1  | 3209000 | 25-scf00538 | 25 |
| AX-158362769 | 28 | 100.503 | KV453267.1  | 3217359 | 25-scf00538 | 25 |
| AX-158381761 | 28 | 100.503 | KV453267.1  | 3224196 | 25-scf00538 | 25 |
| AX-157755109 | 28 | 100.503 | KV453267.1  | 3224943 | 25-scf00538 | 25 |
| AX-158362776 | 28 | 100.503 | KV453267.1  | 3226197 | 25-scf00538 | 25 |
| AX-158362777 | 28 | 100.503 | KV453267.1  | 3227611 | 25-scf00538 | 25 |
| AX-158362778 | 28 | 100.503 | KV453267.1  | 3228816 | 25-scf00538 | 25 |
| AX-158362779 | 28 | 100.503 | KV453267.1  | 3229561 | 25-scf00538 | 25 |
| AX-158362782 | 28 | 100.503 | KV453267.1  | 3231292 | 25-scf00538 | 25 |
| AX-158362784 | 28 | 100.503 | KV453267.1  | 3234397 | 25-scf00538 | 25 |
| AX-158362785 | 28 | 100.503 | KV453267.1  | 3236511 | 25-scf00538 | 25 |
| AX-158362788 | 28 | 100.503 | KV453267.1  | 3241752 | 25-scf00538 | 25 |
| AX-158362789 | 28 | 100.503 | KV453267.1  | 3242555 | 25-scf00538 | 25 |
| AX-158362790 | 28 | 100.503 | KV453267.1  | 3243749 | 25-scf00538 | 25 |
| AX-157852111 | 28 | 100.503 | KV453267.1  | 3244238 | 25-scf00538 | 25 |
| AX-158362791 | 28 | 100.503 | KV453267.1  | 3245265 | 25-scf00538 | 25 |
| AX-158362793 | 28 | 100.503 | KV453267.1  | 3246192 | 25-scf00538 | 25 |
| AX-157717010 | 28 | 100.503 | KV453267.1  | 3247019 | 25-scf00538 | 25 |
| AX-157852112 | 28 | 100.503 | KV453267.1  | 3247143 | 25-scf00538 | 25 |
| AX-157740994 | 28 | 100.503 | KV453267.1  | 3247600 | 25-scf00538 | 25 |
| AX-158362795 | 28 | 100.503 | KV453267.1  | 3248788 | 25-scf00538 | 25 |
| AX-157852113 | 28 | 100.503 | KV453267.1  | 3249907 | 25-scf00538 | 25 |
| AX-158362797 | 28 | 100.503 | KV453267.1  | 3250895 | 25-scf00538 | 25 |
| AX-158362800 | 28 | 100.503 | KV453267.1  | 3255929 | 25-scf00538 | 25 |
| AX-158362805 | 28 | 100.503 | KV453267.1  | 3259977 | 25-scf00538 | 25 |
| AX-158362806 | 28 | 100.503 | KV453267.1  | 3261398 | 25-scf00538 | 25 |
| AX-158362808 | 28 | 100.503 | KV453267.1  | 3263048 | 25-scf00538 | 25 |
| AX-158362809 | 28 | 100.503 | KV453267.1  | 3263896 | 25-scf00538 | 25 |
| AX-158362810 | 28 | 100.503 | KV453267.1  | 3264899 | 25-scf00538 | 25 |
| AX-158362881 | 28 | 100.503 | KV453267.1  | 3413566 | 25-scf00538 | 25 |
| AX-158362915 | 28 | 100.503 | KV453267.1  | 3468592 | 25-scf00538 | 25 |
| AX-157705390 | 28 | 100.503 | 3ML01029626 | 668     | scf05248_1  | UN |
| AX-158362814 | 28 | 100.548 | KV453267.1  | 3269309 | 25-scf00538 | 25 |
| AX-158362544 | 28 | 100.582 | KV453267.1  | 2933119 | 25-scf00538 | 25 |
| AX-158362639 | 28 | 100.582 | KV453267.1  | 3065167 | 25-scf00538 | 25 |
| AX-157710360 | 28 | 100.582 | KV453267.1  | 3107755 | 25-scf00538 | 25 |
| AX-158362689 | 28 | 100.582 | KV453267.1  | 3120223 | 25-scf00538 | 25 |
| AX-158362708 | 28 | 100.582 | KV453267.1  | 3140090 | 25-scf00538 | 25 |
| AX-158362772 | 28 | 100.582 | KV453267.1  | 3219545 | 25-scf00538 | 25 |
| AX-157716837 | 28 | 100.582 | KV453267.1  | 3270664 | 25-scf00538 | 25 |
| AX-158362811 | 28 | 100.612 | KV453267.1  | 3266648 | 25-scf00538 | 25 |
| AX-158362817 | 28 | 100.612 | KV453267.1  | 3272610 | 25-scf00538 | 25 |
| AX-158362818 | 28 | 100.612 | KV453267.1  | 3277494 | 25-scf00538 | 25 |
| AX-158362820 | 28 | 100.612 | KV453267.1  | 3278980 | 25-scf00538 | 25 |
| AX-158362821 | 28 | 100.612 | KV453267.1  | 3279329 | 25-scf00538 | 25 |
| AX-158362822 | 28 | 100.612 | KV453267.1  | 3279910 | 25-scf00538 | 25 |
| AX-158362823 | 28 | 100.612 | KV453267.1  | 3281125 | 25-scf00538 | 25 |
| AX-157808745 | 28 | 100.612 | KV453267.1  | 3289606 | 25-scf00538 | 25 |
| AX-158419885 | 28 | 100.612 | KV453267.1  | 3297105 | 25-scf00538 | 25 |

|              |    |         |            |         |             |    |
|--------------|----|---------|------------|---------|-------------|----|
| AX-158362834 | 28 | 100.612 | KV453267.1 | 3333534 | 25-scf00538 | 25 |
| AX-158362835 | 28 | 100.665 | KV453267.1 | 3335171 | 25-scf00538 | 25 |
| AX-157720956 | 28 | 100.665 | KV453267.1 | 3336049 | 25-scf00538 | 25 |
| AX-158362756 | 28 | 100.721 | KV453267.1 | 3196461 | 25-scf00538 | 25 |
| AX-158362815 | 28 | 100.721 | KV453267.1 | 3269887 | 25-scf00538 | 25 |
| AX-157743307 | 28 | 100.721 | KV453267.1 | 3339028 | 25-scf00538 | 25 |
| AX-158362836 | 28 | 100.721 | KV453267.1 | 3341136 | 25-scf00538 | 25 |
| AX-158362837 | 28 | 100.721 | KV453267.1 | 3343056 | 25-scf00538 | 25 |
| AX-157852117 | 28 | 100.721 | KV453267.1 | 3345296 | 25-scf00538 | 25 |
| AX-158362839 | 28 | 100.721 | KV453267.1 | 3345550 | 25-scf00538 | 25 |
| AX-158362840 | 28 | 100.721 | KV453267.1 | 3347467 | 25-scf00538 | 25 |
| AX-158362843 | 28 | 100.721 | KV453267.1 | 3353176 | 25-scf00538 | 25 |
| AX-158362844 | 28 | 100.721 | KV453267.1 | 3353505 | 25-scf00538 | 25 |
| AX-158362846 | 28 | 100.721 | KV453267.1 | 3357967 | 25-scf00538 | 25 |
| AX-157852118 | 28 | 100.721 | KV453267.1 | 3358626 | 25-scf00538 | 25 |
| AX-158362872 | 28 | 100.721 | KV453267.1 | 3396966 | 25-scf00538 | 25 |
| AX-158362908 | 28 | 100.721 | KV453267.1 | 3454057 | 25-scf00538 | 25 |
| AX-158362916 | 28 | 100.721 | KV453267.1 | 3472283 | 25-scf00538 | 25 |
| AX-158362960 | 28 | 100.721 | KV453267.1 | 3536004 | 25-scf00538 | 25 |
| AX-158362987 | 28 | 100.721 | KV453267.1 | 3573112 | 25-scf00538 | 25 |
| AX-158362848 | 28 | 100.83  | KV453267.1 | 3367734 | 25-scf00538 | 25 |
| AX-158362849 | 28 | 100.83  | KV453267.1 | 3370340 | 25-scf00538 | 25 |
| AX-158362851 | 28 | 100.83  | KV453267.1 | 3371033 | 25-scf00538 | 25 |
| AX-158362853 | 28 | 100.83  | KV453267.1 | 3374590 | 25-scf00538 | 25 |
| AX-158362855 | 28 | 100.83  | KV453267.1 | 3377139 | 25-scf00538 | 25 |
| AX-158362858 | 28 | 100.83  | KV453267.1 | 3382789 | 25-scf00538 | 25 |
| AX-158362859 | 28 | 100.83  | KV453267.1 | 3384078 | 25-scf00538 | 25 |
| AX-158362862 | 28 | 100.83  | KV453267.1 | 3387583 | 25-scf00538 | 25 |
| AX-158362863 | 28 | 100.83  | KV453267.1 | 3389060 | 25-scf00538 | 25 |
| AX-158362864 | 28 | 100.83  | KV453267.1 | 3389413 | 25-scf00538 | 25 |
| AX-158362866 | 28 | 100.83  | KV453267.1 | 3391349 | 25-scf00538 | 25 |
| AX-158362868 | 28 | 100.83  | KV453267.1 | 3393506 | 25-scf00538 | 25 |
| AX-158362869 | 28 | 100.83  | KV453267.1 | 3394364 | 25-scf00538 | 25 |
| AX-157775057 | 28 | 100.83  | KV453267.1 | 3398087 | 25-scf00538 | 25 |
| AX-157740399 | 28 | 100.83  | KV453267.1 | 3400101 | 25-scf00538 | 25 |
| AX-158362879 | 28 | 100.83  | KV453267.1 | 3410681 | 25-scf00538 | 25 |
| AX-158362891 | 28 | 100.83  | KV453267.1 | 3423752 | 25-scf00538 | 25 |
| AX-157756195 | 28 | 100.83  | KV453267.1 | 3427022 | 25-scf00538 | 25 |
| AX-157719058 | 28 | 100.83  | KV453267.1 | 3435976 | 25-scf00538 | 25 |
| AX-158362964 | 28 | 100.83  | KV453267.1 | 3540184 | 25-scf00538 | 25 |
| AX-157753947 | 28 | 100.83  | KV453267.1 | 3598491 | 25-scf00538 | 25 |
| AX-158362880 | 28 | 101.049 | KV453267.1 | 3411392 | 25-scf00538 | 25 |
| AX-158362896 | 28 | 101.049 | KV453267.1 | 3431119 | 25-scf00538 | 25 |
| AX-157889165 | 28 | 101.049 | KV453267.1 | 3435750 | 25-scf00538 | 25 |
| AX-158362898 | 28 | 101.049 | KV453267.1 | 3438037 | 25-scf00538 | 25 |
| AX-157725966 | 28 | 101.049 | KV453267.1 | 3439584 | 25-scf00538 | 25 |
| AX-158362899 | 28 | 101.049 | KV453267.1 | 3440939 | 25-scf00538 | 25 |
| AX-157720403 | 28 | 101.049 | KV453267.1 | 3449724 | 25-scf00538 | 25 |
| AX-158362910 | 28 | 101.049 | KV453267.1 | 3457836 | 25-scf00538 | 25 |
| AX-158381762 | 28 | 101.049 | KV453267.1 | 3458680 | 25-scf00538 | 25 |
| AX-158362911 | 28 | 101.049 | KV453267.1 | 3460626 | 25-scf00538 | 25 |

|              |    |         |            |         |             |    |
|--------------|----|---------|------------|---------|-------------|----|
| AX-158362913 | 28 | 101.049 | KV453267.1 | 3466845 | 25-scf00538 | 25 |
| AX-158362914 | 28 | 101.049 | KV453267.1 | 3467656 | 25-scf00538 | 25 |
| AX-158362917 | 28 | 101.049 | KV453267.1 | 3473846 | 25-scf00538 | 25 |
| AX-158362918 | 28 | 101.049 | KV453267.1 | 3475444 | 25-scf00538 | 25 |
| AX-158362929 | 28 | 101.049 | KV453267.1 | 3496525 | 25-scf00538 | 25 |
| AX-158362930 | 28 | 101.049 | KV453267.1 | 3498063 | 25-scf00538 | 25 |
| AX-158362976 | 28 | 101.049 | KV453267.1 | 3558845 | 25-scf00538 | 25 |
| AX-158362980 | 28 | 101.049 | KV453267.1 | 3565347 | 25-scf00538 | 25 |
| AX-158363003 | 28 | 101.049 | KV453267.1 | 3593549 | 25-scf00538 | 25 |
| AX-157852122 | 28 | 101.187 | KV453267.1 | 3476231 | 25-scf00538 | 25 |
| AX-158362923 | 28 | 101.187 | KV453267.1 | 3487597 | 25-scf00538 | 25 |
| AX-158362867 | 28 | 101.267 | KV453267.1 | 3391886 | 25-scf00538 | 25 |
| AX-157852120 | 28 | 101.267 | KV453267.1 | 3447534 | 25-scf00538 | 25 |
| AX-158362912 | 28 | 101.267 | KV453267.1 | 3460805 | 25-scf00538 | 25 |
| AX-158419887 | 28 | 101.267 | KV453267.1 | 3491392 | 25-scf00538 | 25 |
| AX-158362926 | 28 | 101.267 | KV453267.1 | 3491696 | 25-scf00538 | 25 |
| AX-158362931 | 28 | 101.267 | KV453267.1 | 3499670 | 25-scf00538 | 25 |
| AX-158362933 | 28 | 101.267 | KV453267.1 | 3500788 | 25-scf00538 | 25 |
| AX-158362934 | 28 | 101.267 | KV453267.1 | 3501330 | 25-scf00538 | 25 |
| AX-158362935 | 28 | 101.267 | KV453267.1 | 3502695 | 25-scf00538 | 25 |
| AX-158362963 | 28 | 101.267 | KV453267.1 | 3538078 | 25-scf00538 | 25 |
| AX-158362875 | 28 | 101.377 | KV453267.1 | 3401845 | 25-scf00538 | 25 |
| AX-158362937 | 28 | 101.377 | KV453267.1 | 3508757 | 25-scf00538 | 25 |
| AX-158362938 | 28 | 101.377 | KV453267.1 | 3510690 | 25-scf00538 | 25 |
| AX-158362939 | 28 | 101.377 | KV453267.1 | 3511099 | 25-scf00538 | 25 |
| AX-158362942 | 28 | 101.377 | KV453267.1 | 3514772 | 25-scf00538 | 25 |
| AX-157716600 | 28 | 101.377 | KV453267.1 | 3516882 | 25-scf00538 | 25 |
| AX-158362943 | 28 | 101.377 | KV453267.1 | 3517466 | 25-scf00538 | 25 |
| AX-158362944 | 28 | 101.377 | KV453267.1 | 3518471 | 25-scf00538 | 25 |
| AX-158362947 | 28 | 101.377 | KV453267.1 | 3522652 | 25-scf00538 | 25 |
| AX-158362949 | 28 | 101.377 | KV453267.1 | 3524372 | 25-scf00538 | 25 |
| AX-158362950 | 28 | 101.377 | KV453267.1 | 3524917 | 25-scf00538 | 25 |
| AX-157852124 | 28 | 101.377 | KV453267.1 | 3526297 | 25-scf00538 | 25 |
| AX-158362951 | 28 | 101.377 | KV453267.1 | 3527291 | 25-scf00538 | 25 |
| AX-158362952 | 28 | 101.377 | KV453267.1 | 3527507 | 25-scf00538 | 25 |
| AX-158362954 | 28 | 101.377 | KV453267.1 | 3529830 | 25-scf00538 | 25 |
| AX-158362957 | 28 | 101.377 | KV453267.1 | 3532619 | 25-scf00538 | 25 |
| AX-158362961 | 28 | 101.377 | KV453267.1 | 3537209 | 25-scf00538 | 25 |
| AX-158362972 | 28 | 101.377 | KV453267.1 | 3551597 | 25-scf00538 | 25 |
| AX-158362973 | 28 | 101.377 | KV453267.1 | 3551828 | 25-scf00538 | 25 |
| AX-158362975 | 28 | 101.377 | KV453267.1 | 3553645 | 25-scf00538 | 25 |
| AX-157852128 | 28 | 101.496 | KV453267.1 | 3557571 | 25-scf00538 | 25 |
| AX-158362981 | 28 | 101.705 | KV453267.1 | 3566930 | 25-scf00538 | 25 |
| AX-157882642 | 28 | 101.705 | KV453267.1 | 3567316 | 25-scf00538 | 25 |
| AX-158362982 | 28 | 101.705 | KV453267.1 | 3567482 | 25-scf00538 | 25 |
| AX-158362988 | 28 | 101.814 | KV453267.1 | 3574018 | 25-scf00538 | 25 |
| AX-157889169 | 28 | 101.814 | KV453267.1 | 3574495 | 25-scf00538 | 25 |
| AX-158381763 | 28 | 101.814 | KV453267.1 | 3578666 | 25-scf00538 | 25 |
| AX-158362990 | 28 | 101.814 | KV453267.1 | 3578703 | 25-scf00538 | 25 |
| AX-158362992 | 28 | 102.033 | KV453267.1 | 3581208 | 25-scf00538 | 25 |
| AX-158362993 | 28 | 102.033 | KV453267.1 | 3581885 | 25-scf00538 | 25 |



|              |    |         |             |         |             |    |
|--------------|----|---------|-------------|---------|-------------|----|
| AX-157741171 | 28 | 102.033 | KV453267.1  | 3582225 | 25-scf00538 | 25 |
| AX-158362994 | 28 | 102.033 | KV453267.1  | 3583198 | 25-scf00538 | 25 |
| AX-158362996 | 28 | 102.033 | KV453267.1  | 3585308 | 25-scf00538 | 25 |
| AX-158362997 | 28 | 102.033 | KV453267.1  | 3586817 | 25-scf00538 | 25 |
| AX-158363001 | 28 | 102.033 | KV453267.1  | 3590488 | 25-scf00538 | 25 |
| AX-157882644 | 28 | 102.033 | KV453267.1  | 3618657 | 25-scf00538 | 25 |
| AX-158363023 | 28 | 102.033 | KV453267.1  | 3618700 | 25-scf00538 | 25 |
| AX-157687519 | 28 | 102.033 | KV453542.1  | 7285    | scf00913    | UN |
| AX-157705422 | 28 | 102.033 | 3ML01031788 | 598     | scf07409_1  | UN |
| AX-158363012 | 28 | 102.137 | KV453267.1  | 3607066 | 25-scf00538 | 25 |
| AX-158363019 | 28 | 102.137 | KV453267.1  | 3614659 | 25-scf00538 | 25 |
| AX-158363058 | 28 | 102.137 | KV453267.1  | 3659765 | 25-scf00538 | 25 |
| AX-158363011 | 28 | 102.138 | KV453267.1  | 3605096 | 25-scf00538 | 25 |
| AX-158363013 | 28 | 102.138 | KV453267.1  | 3607931 | 25-scf00538 | 25 |
| AX-158363015 | 28 | 102.138 | KV453267.1  | 3609965 | 25-scf00538 | 25 |
| AX-158363032 | 28 | 102.138 | KV453267.1  | 3626288 | 25-scf00538 | 25 |
| AX-158362953 | 28 | 102.142 | KV453267.1  | 3527808 | 25-scf00538 | 25 |
| AX-158363018 | 28 | 102.142 | KV453267.1  | 3614098 | 25-scf00538 | 25 |
| AX-158363025 | 28 | 102.251 | KV453267.1  | 3620637 | 25-scf00538 | 25 |
| AX-158363027 | 28 | 102.251 | KV453267.1  | 3621818 | 25-scf00538 | 25 |
| AX-157889171 | 28 | 102.251 | KV453267.1  | 3623408 | 25-scf00538 | 25 |
| AX-158363036 | 28 | 102.251 | KV453267.1  | 3632092 | 25-scf00538 | 25 |
| AX-158363037 | 28 | 102.251 | KV453267.1  | 3633207 | 25-scf00538 | 25 |
| AX-158362828 | 28 | 102.36  | KV453267.1  | 3316254 | 25-scf00538 | 25 |
| AX-158363041 | 28 | 102.36  | KV453267.1  | 3636364 | 25-scf00538 | 25 |
| AX-158363043 | 28 | 102.36  | KV453267.1  | 3640059 | 25-scf00538 | 25 |
| AX-157852129 | 28 | 102.36  | KV453267.1  | 3640852 | 25-scf00538 | 25 |
| AX-158363051 | 28 | 102.36  | KV453267.1  | 3649599 | 25-scf00538 | 25 |
| AX-158363052 | 28 | 102.36  | KV453267.1  | 3650990 | 25-scf00538 | 25 |
| AX-158363054 | 28 | 102.36  | KV453267.1  | 3656158 | 25-scf00538 | 25 |
| AX-158363056 | 28 | 102.36  | KV453267.1  | 3657989 | 25-scf00538 | 25 |
| AX-158363059 | 28 | 102.36  | KV453267.1  | 3660208 | 25-scf00538 | 25 |
| AX-158363060 | 28 | 102.36  | KV453267.1  | 3660853 | 25-scf00538 | 25 |
| AX-158363064 | 28 | 102.36  | KV453267.1  | 3670062 | 25-scf00538 | 25 |
| AX-158363071 | 28 | 102.36  | KV453267.1  | 3677173 | 25-scf00538 | 25 |
| AX-158363062 | 28 | 102.361 | KV453267.1  | 3667925 | 25-scf00538 | 25 |
| AX-158363068 | 28 | 102.633 | KV453267.1  | 3672942 | 25-scf00538 | 25 |
| AX-158363067 | 28 | 102.634 | KV453267.1  | 3672077 | 25-scf00538 | 25 |
| AX-158363069 | 28 | 102.634 | KV453267.1  | 3674540 | 25-scf00538 | 25 |
| AX-158363070 | 28 | 102.634 | KV453267.1  | 3675222 | 25-scf00538 | 25 |
| AX-158363096 | 28 | 102.634 | KV453267.1  | 3699814 | 25-scf00538 | 25 |
| AX-157852130 | 28 | 102.77  | KV453267.1  | 3676236 | 25-scf00538 | 25 |
| AX-157852131 | 28 | 102.77  | KV453267.1  | 3679168 | 25-scf00538 | 25 |
| AX-158363075 | 28 | 102.77  | KV453267.1  | 3679729 | 25-scf00538 | 25 |
| AX-158363072 | 28 | 102.811 | KV453267.1  | 3677775 | 25-scf00538 | 25 |
| AX-158363082 | 28 | 102.811 | KV453267.1  | 3687597 | 25-scf00538 | 25 |
| AX-157773397 | 28 | 102.811 | KV453267.1  | 3698685 | 25-scf00538 | 25 |
| AX-158363080 | 28 | 102.907 | KV453267.1  | 3684053 | 25-scf00538 | 25 |
| AX-158363085 | 28 | 102.907 | KV453267.1  | 3690147 | 25-scf00538 | 25 |
| AX-158363086 | 28 | 102.907 | KV453267.1  | 3691221 | 25-scf00538 | 25 |
| AX-158363089 | 28 | 102.907 | KV453267.1  | 3694458 | 25-scf00538 | 25 |

|              |    |         |            |         |             |    |
|--------------|----|---------|------------|---------|-------------|----|
| AX-158363091 | 28 | 102.907 | KV453267.1 | 3696523 | 25-scf00538 | 25 |
| AX-158363092 | 28 | 102.907 | KV453267.1 | 3697820 | 25-scf00538 | 25 |
| AX-158363093 | 28 | 102.907 | KV453267.1 | 3698097 | 25-scf00538 | 25 |
| AX-158363097 | 28 | 102.907 | KV453267.1 | 3700381 | 25-scf00538 | 25 |
| AX-158363108 | 28 | 102.907 | KV453267.1 | 3718869 | 25-scf00538 | 25 |
| AX-158363100 | 28 | 102.941 | KV453267.1 | 3703231 | 25-scf00538 | 25 |
| AX-158363351 | 28 | 102.941 | KV453267.1 | 4187313 | 25-scf00538 | 25 |
| AX-158363353 | 28 | 102.941 | KV453267.1 | 4196801 | 25-scf00538 | 25 |
| AX-158363358 | 28 | 102.941 | KV453267.1 | 4207758 | 25-scf00538 | 25 |
| AX-158363360 | 28 | 102.941 | KV453267.1 | 4212454 | 25-scf00538 | 25 |
| AX-157889172 | 28 | 102.982 | KV453267.1 | 3682633 | 25-scf00538 | 25 |
| AX-158363088 | 28 | 102.982 | KV453267.1 | 3693329 | 25-scf00538 | 25 |
| AX-158363098 | 28 | 102.982 | KV453267.1 | 3701128 | 25-scf00538 | 25 |
| AX-158363103 | 28 | 102.982 | KV453267.1 | 3707353 | 25-scf00538 | 25 |
| AX-158363104 | 28 | 102.982 | KV453267.1 | 3709699 | 25-scf00538 | 25 |
| AX-157741808 | 28 | 102.982 | KV453267.1 | 3713804 | 25-scf00538 | 25 |
| AX-158363107 | 28 | 102.982 | KV453267.1 | 3716525 | 25-scf00538 | 25 |
| AX-158363115 | 28 | 102.982 | KV453267.1 | 3733492 | 25-scf00538 | 25 |
| AX-158363117 | 28 | 102.982 | KV453267.1 | 3735908 | 25-scf00538 | 25 |
| AX-158363105 | 28 | 103.016 | KV453267.1 | 3711861 | 25-scf00538 | 25 |
| AX-158363110 | 28 | 103.016 | KV453267.1 | 3722455 | 25-scf00538 | 25 |
| AX-158363112 | 28 | 103.016 | KV453267.1 | 3725641 | 25-scf00538 | 25 |
| AX-158363114 | 28 | 103.016 | KV453267.1 | 3731042 | 25-scf00538 | 25 |
| AX-158363128 | 28 | 103.058 | KV453267.1 | 3756571 | 25-scf00538 | 25 |
| AX-158363119 | 28 | 103.125 | KV453267.1 | 3742035 | 25-scf00538 | 25 |
| AX-158363138 | 28 | 103.125 | KV453267.1 | 3769930 | 25-scf00538 | 25 |
| AX-158363139 | 28 | 103.125 | KV453267.1 | 3770999 | 25-scf00538 | 25 |
| AX-158363140 | 28 | 103.125 | KV453267.1 | 3771343 | 25-scf00538 | 25 |
| AX-157852133 | 28 | 103.125 | KV453267.1 | 3772669 | 25-scf00538 | 25 |
| AX-158363124 | 28 | 103.235 | KV453267.1 | 3750173 | 25-scf00538 | 25 |
| AX-157710123 | 28 | 103.235 | KV453267.1 | 3775697 | 25-scf00538 | 25 |
| AX-158363143 | 28 | 103.235 | KV453267.1 | 3780622 | 25-scf00538 | 25 |
| AX-158363144 | 28 | 103.235 | KV453267.1 | 3781482 | 25-scf00538 | 25 |
| AX-158363145 | 28 | 103.235 | KV453267.1 | 3782703 | 25-scf00538 | 25 |
| AX-158363148 | 28 | 103.235 | KV453267.1 | 3787745 | 25-scf00538 | 25 |
| AX-157718484 | 28 | 103.235 | KV453267.1 | 3787839 | 25-scf00538 | 25 |
| AX-157703489 | 28 | 103.235 | KV453267.1 | 3787860 | 25-scf00538 | 25 |
| AX-158363149 | 28 | 103.235 | KV453267.1 | 3788821 | 25-scf00538 | 25 |
| AX-158363152 | 28 | 103.235 | KV453267.1 | 3798329 | 25-scf00538 | 25 |
| AX-158363154 | 28 | 103.344 | KV453267.1 | 3807013 | 25-scf00538 | 25 |
| AX-157852139 | 28 | 103.344 | KV453267.1 | 3808404 | 25-scf00538 | 25 |
| AX-158363156 | 28 | 103.344 | KV453267.1 | 3809532 | 25-scf00538 | 25 |
| AX-158363158 | 28 | 103.344 | KV453267.1 | 3810879 | 25-scf00538 | 25 |
| AX-158363160 | 28 | 103.344 | KV453267.1 | 3813187 | 25-scf00538 | 25 |
| AX-158363161 | 28 | 103.344 | KV453267.1 | 3813390 | 25-scf00538 | 25 |
| AX-158363162 | 28 | 103.392 | KV453267.1 | 3814286 | 25-scf00538 | 25 |
| AX-158363129 | 28 | 103.445 | KV453267.1 | 3757784 | 25-scf00538 | 25 |
| AX-158363165 | 28 | 103.445 | KV453267.1 | 3816133 | 25-scf00538 | 25 |
| AX-158363173 | 28 | 103.445 | KV453267.1 | 3829323 | 25-scf00538 | 25 |
| AX-158363194 | 28 | 103.445 | KV453267.1 | 3867209 | 25-scf00538 | 25 |
| AX-158363167 | 28 | 103.475 | KV453267.1 | 3817497 | 25-scf00538 | 25 |

|              |    |         |            |         |             |    |
|--------------|----|---------|------------|---------|-------------|----|
| AX-158363180 | 28 | 103.475 | KV453267.1 | 3837142 | 25-scf00538 | 25 |
| AX-158363181 | 28 | 103.475 | KV453267.1 | 3839954 | 25-scf00538 | 25 |
| AX-158363171 | 28 | 103.518 | KV453267.1 | 3826623 | 25-scf00538 | 25 |
| AX-158363175 | 28 | 103.563 | KV453267.1 | 3830978 | 25-scf00538 | 25 |
| AX-157868343 | 28 | 103.563 | KV453267.1 | 3834908 | 25-scf00538 | 25 |
| AX-157852140 | 28 | 103.563 | KV453267.1 | 3838464 | 25-scf00538 | 25 |
| AX-158363188 | 28 | 103.563 | KV453267.1 | 3851138 | 25-scf00538 | 25 |
| AX-157746472 | 28 | 103.563 | KV453267.1 | 3868062 | 25-scf00538 | 25 |
| AX-158363195 | 28 | 103.563 | KV453267.1 | 3869231 | 25-scf00538 | 25 |
| AX-158363196 | 28 | 103.563 | KV453267.1 | 3870864 | 25-scf00538 | 25 |
| AX-158363201 | 28 | 103.563 | KV453267.1 | 3876015 | 25-scf00538 | 25 |
| AX-158363202 | 28 | 103.563 | KV453267.1 | 3876727 | 25-scf00538 | 25 |
| AX-157852142 | 28 | 103.563 | KV453267.1 | 3877500 | 25-scf00538 | 25 |
| AX-157852143 | 28 | 103.563 | KV453267.1 | 3879625 | 25-scf00538 | 25 |
| AX-157852145 | 28 | 103.563 | KV453267.1 | 3882302 | 25-scf00538 | 25 |
| AX-158363203 | 28 | 103.563 | KV453267.1 | 3883056 | 25-scf00538 | 25 |
| AX-158363205 | 28 | 103.563 | KV453267.1 | 3887348 | 25-scf00538 | 25 |
| AX-158363206 | 28 | 103.563 | KV453267.1 | 3888355 | 25-scf00538 | 25 |
| AX-158363209 | 28 | 103.563 | KV453267.1 | 3891814 | 25-scf00538 | 25 |
| AX-158363210 | 28 | 103.563 | KV453267.1 | 3895264 | 25-scf00538 | 25 |
| AX-157882646 | 28 | 103.89  | KV453267.1 | 3719947 | 25-scf00538 | 25 |
| AX-158363185 | 28 | 103.89  | KV453267.1 | 3846625 | 25-scf00538 | 25 |
| AX-157882647 | 28 | 103.89  | KV453267.1 | 3855464 | 25-scf00538 | 25 |
| AX-158363192 | 28 | 103.89  | KV453267.1 | 3863348 | 25-scf00538 | 25 |
| AX-158363193 | 28 | 103.89  | KV453267.1 | 3864731 | 25-scf00538 | 25 |
| AX-158363211 | 28 | 103.89  | KV453267.1 | 3900491 | 25-scf00538 | 25 |
| AX-158363212 | 28 | 103.89  | KV453267.1 | 3902232 | 25-scf00538 | 25 |
| AX-158363216 | 28 | 103.89  | KV453267.1 | 3909541 | 25-scf00538 | 25 |
| AX-158363217 | 28 | 103.89  | KV453267.1 | 3911019 | 25-scf00538 | 25 |
| AX-158363218 | 28 | 103.89  | KV453267.1 | 3911885 | 25-scf00538 | 25 |
| AX-158363219 | 28 | 103.89  | KV453267.1 | 3913000 | 25-scf00538 | 25 |
| AX-157889174 | 28 | 103.89  | KV453267.1 | 3914930 | 25-scf00538 | 25 |
| AX-158363222 | 28 | 103.89  | KV453267.1 | 3916052 | 25-scf00538 | 25 |
| AX-158363224 | 28 | 103.89  | KV453267.1 | 3917477 | 25-scf00538 | 25 |
| AX-158363227 | 28 | 103.89  | KV453267.1 | 3919586 | 25-scf00538 | 25 |
| AX-158363231 | 28 | 103.89  | KV453267.1 | 3922680 | 25-scf00538 | 25 |
| AX-158363232 | 28 | 103.89  | KV453267.1 | 3924125 | 25-scf00538 | 25 |
| AX-158363233 | 28 | 103.89  | KV453267.1 | 3926581 | 25-scf00538 | 25 |
| AX-158363235 | 28 | 103.89  | KV453267.1 | 3930950 | 25-scf00538 | 25 |
| AX-158363238 | 28 | 103.89  | KV453267.1 | 3933388 | 25-scf00538 | 25 |
| AX-158363239 | 28 | 103.89  | KV453267.1 | 3933579 | 25-scf00538 | 25 |
| AX-158363240 | 28 | 103.89  | KV453267.1 | 3934270 | 25-scf00538 | 25 |
| AX-158363244 | 28 | 103.89  | KV453267.1 | 3938940 | 25-scf00538 | 25 |
| AX-158363245 | 28 | 103.89  | KV453267.1 | 3939449 | 25-scf00538 | 25 |
| AX-158363246 | 28 | 103.89  | KV453267.1 | 3943579 | 25-scf00538 | 25 |
| AX-157852146 | 28 | 103.89  | KV453267.1 | 3944119 | 25-scf00538 | 25 |
| AX-158363248 | 28 | 103.89  | KV453267.1 | 3947218 | 25-scf00538 | 25 |
| AX-157740833 | 28 | 103.89  | KV453267.1 | 3965307 | 25-scf00538 | 25 |
| AX-158363253 | 28 | 103.89  | KV453267.1 | 3969500 | 25-scf00538 | 25 |
| AX-158363255 | 28 | 103.89  | KV453267.1 | 3971386 | 25-scf00538 | 25 |
| AX-158363256 | 28 | 103.89  | KV453267.1 | 3971604 | 25-scf00538 | 25 |

|              |    |        |            |         |             |    |
|--------------|----|--------|------------|---------|-------------|----|
| AX-158363257 | 28 | 103.89 | KV453267.1 | 3973141 | 25-scf00538 | 25 |
| AX-158363260 | 28 | 103.89 | KV453267.1 | 3975519 | 25-scf00538 | 25 |
| AX-158363261 | 28 | 103.89 | KV453267.1 | 3975581 | 25-scf00538 | 25 |
| AX-157889175 | 28 | 103.89 | KV453267.1 | 3976720 | 25-scf00538 | 25 |
| AX-158363263 | 28 | 103.89 | KV453267.1 | 3978309 | 25-scf00538 | 25 |
| AX-158363266 | 28 | 103.89 | KV453267.1 | 3980290 | 25-scf00538 | 25 |
| AX-157852148 | 28 | 103.89 | KV453267.1 | 3980932 | 25-scf00538 | 25 |
| AX-158363267 | 28 | 103.89 | KV453267.1 | 3981838 | 25-scf00538 | 25 |
| AX-158363268 | 28 | 103.89 | KV453267.1 | 3982453 | 25-scf00538 | 25 |
| AX-158363269 | 28 | 103.89 | KV453267.1 | 3983748 | 25-scf00538 | 25 |
| AX-158363270 | 28 | 103.89 | KV453267.1 | 3984321 | 25-scf00538 | 25 |
| AX-158363271 | 28 | 103.89 | KV453267.1 | 3985171 | 25-scf00538 | 25 |
| AX-158363272 | 28 | 103.89 | KV453267.1 | 3987313 | 25-scf00538 | 25 |
| AX-158363274 | 28 | 103.89 | KV453267.1 | 3988325 | 25-scf00538 | 25 |
| AX-158363277 | 28 | 103.89 | KV453267.1 | 3990624 | 25-scf00538 | 25 |
| AX-158363279 | 28 | 103.89 | KV453267.1 | 3991434 | 25-scf00538 | 25 |
| AX-158363281 | 28 | 103.89 | KV453267.1 | 3995604 | 25-scf00538 | 25 |
| AX-158363282 | 28 | 103.89 | KV453267.1 | 4000477 | 25-scf00538 | 25 |
| AX-158363283 | 28 | 103.89 | KV453267.1 | 4003331 | 25-scf00538 | 25 |
| AX-158363284 | 28 | 103.89 | KV453267.1 | 4004285 | 25-scf00538 | 25 |
| AX-158363286 | 28 | 103.89 | KV453267.1 | 4006974 | 25-scf00538 | 25 |
| AX-158363287 | 28 | 103.89 | KV453267.1 | 4007359 | 25-scf00538 | 25 |
| AX-158363288 | 28 | 103.89 | KV453267.1 | 4008100 | 25-scf00538 | 25 |
| AX-157755466 | 28 | 103.89 | KV453267.1 | 4011581 | 25-scf00538 | 25 |
| AX-158363290 | 28 | 103.89 | KV453267.1 | 4015375 | 25-scf00538 | 25 |
| AX-158363291 | 28 | 103.89 | KV453267.1 | 4017142 | 25-scf00538 | 25 |
| AX-157852150 | 28 | 103.89 | KV453267.1 | 4018144 | 25-scf00538 | 25 |
| AX-158363293 | 28 | 103.89 | KV453267.1 | 4020992 | 25-scf00538 | 25 |
| AX-158363294 | 28 | 103.89 | KV453267.1 | 4022759 | 25-scf00538 | 25 |
| AX-158363297 | 28 | 103.89 | KV453267.1 | 4025928 | 25-scf00538 | 25 |
| AX-158363298 | 28 | 103.89 | KV453267.1 | 4026529 | 25-scf00538 | 25 |
| AX-158363299 | 28 | 103.89 | KV453267.1 | 4027883 | 25-scf00538 | 25 |
| AX-158363300 | 28 | 103.89 | KV453267.1 | 4028933 | 25-scf00538 | 25 |
| AX-158419897 | 28 | 103.89 | KV453267.1 | 4031512 | 25-scf00538 | 25 |
| AX-158363301 | 28 | 103.89 | KV453267.1 | 4034888 | 25-scf00538 | 25 |
| AX-157852151 | 28 | 103.89 | KV453267.1 | 4035336 | 25-scf00538 | 25 |
| AX-158363302 | 28 | 103.89 | KV453267.1 | 4036183 | 25-scf00538 | 25 |
| AX-157852152 | 28 | 103.89 | KV453267.1 | 4037522 | 25-scf00538 | 25 |
| AX-157744170 | 28 | 103.89 | KV453267.1 | 4038151 | 25-scf00538 | 25 |
| AX-157852153 | 28 | 103.89 | KV453267.1 | 4039068 | 25-scf00538 | 25 |
| AX-158363304 | 28 | 103.89 | KV453267.1 | 4040035 | 25-scf00538 | 25 |
| AX-158363307 | 28 | 103.89 | KV453267.1 | 4048074 | 25-scf00538 | 25 |
| AX-158363311 | 28 | 103.89 | KV453267.1 | 4056028 | 25-scf00538 | 25 |
| AX-158363325 | 28 | 103.89 | KV453267.1 | 4098066 | 25-scf00538 | 25 |
| AX-158363340 | 28 | 103.89 | KV453267.1 | 4151209 | 25-scf00538 | 25 |
| AX-158363348 | 28 | 103.89 | KV453267.1 | 4181203 | 25-scf00538 | 25 |
| AX-158363356 | 28 | 103.89 | KV453267.1 | 4203338 | 25-scf00538 | 25 |
| AX-158363359 | 28 | 103.89 | KV453267.1 | 4208942 | 25-scf00538 | 25 |
| AX-158363183 | 28 | 104.04 | KV453267.1 | 3844221 | 25-scf00538 | 25 |
| AX-158363296 | 28 | 104.04 | KV453267.1 | 4024555 | 25-scf00538 | 25 |
| AX-158363303 | 28 | 104.04 | KV453267.1 | 4039557 | 25-scf00538 | 25 |

|              |    |         |            |         |             |    |
|--------------|----|---------|------------|---------|-------------|----|
| AX-158363314 | 28 | 104.04  | KV453267.1 | 4065385 | 25-scf00538 | 25 |
| AX-158363315 | 28 | 104.04  | KV453267.1 | 4066123 | 25-scf00538 | 25 |
| AX-158363316 | 28 | 104.04  | KV453267.1 | 4066272 | 25-scf00538 | 25 |
| AX-158363317 | 28 | 104.04  | KV453267.1 | 4067544 | 25-scf00538 | 25 |
| AX-158363318 | 28 | 104.04  | KV453267.1 | 4071916 | 25-scf00538 | 25 |
| AX-158363320 | 28 | 104.04  | KV453267.1 | 4083644 | 25-scf00538 | 25 |
| AX-158363321 | 28 | 104.04  | KV453267.1 | 4084317 | 25-scf00538 | 25 |
| AX-158363322 | 28 | 104.04  | KV453267.1 | 4090948 | 25-scf00538 | 25 |
| AX-158363323 | 28 | 104.04  | KV453267.1 | 4093487 | 25-scf00538 | 25 |
| AX-157852157 | 28 | 104.04  | KV453267.1 | 4096904 | 25-scf00538 | 25 |
| AX-158363327 | 28 | 104.04  | KV453267.1 | 4101164 | 25-scf00538 | 25 |
| AX-157868346 | 28 | 104.04  | KV453267.1 | 4107392 | 25-scf00538 | 25 |
| AX-157852158 | 28 | 104.04  | KV453267.1 | 4136886 | 25-scf00538 | 25 |
| AX-158363335 | 28 | 104.04  | KV453267.1 | 4140051 | 25-scf00538 | 25 |
| AX-158363336 | 28 | 104.04  | KV453267.1 | 4140575 | 25-scf00538 | 25 |
| AX-158363338 | 28 | 104.04  | KV453267.1 | 4142006 | 25-scf00538 | 25 |
| AX-157852159 | 28 | 104.04  | KV453267.1 | 4143118 | 25-scf00538 | 25 |
| AX-157852160 | 28 | 104.04  | KV453267.1 | 4143645 | 25-scf00538 | 25 |
| AX-158363339 | 28 | 104.04  | KV453267.1 | 4146787 | 25-scf00538 | 25 |
| AX-157742473 | 28 | 104.04  | KV453267.1 | 4147224 | 25-scf00538 | 25 |
| AX-158363342 | 28 | 104.04  | KV453267.1 | 4156252 | 25-scf00538 | 25 |
| AX-158363343 | 28 | 104.04  | KV453267.1 | 4165548 | 25-scf00538 | 25 |
| AX-158363347 | 28 | 104.04  | KV453267.1 | 4176944 | 25-scf00538 | 25 |
| AX-158363349 | 28 | 104.04  | KV453267.1 | 4181743 | 25-scf00538 | 25 |
| AX-157746976 | 28 | 104.04  | KV453267.1 | 4221405 | 25-scf00538 | 25 |
| AX-157770344 | 28 | 104.04  | KV453267.1 | 4227089 | 25-scf00538 | 25 |
| AX-157852161 | 28 | 104.04  | KV453267.1 | 4227349 | 25-scf00538 | 25 |
| AX-158363363 | 28 | 104.04  | KV453267.1 | 4231551 | 25-scf00538 | 25 |
| AX-158363364 | 28 | 104.04  | KV453267.1 | 4258973 | 25-scf00538 | 25 |
| AX-157687776 | 28 | 104.04  | KV453269.1 | 4914    | 25-scf01013 | 25 |
| AX-158363345 | 28 | 104.452 | KV453267.1 | 4172897 | 25-scf00538 | 25 |
| AX-157808789 | 28 | 104.627 | KV453267.1 | 4221233 | 25-scf00538 | 25 |
| AX-158366973 | 29 | 0       | KV453340.1 | 4474    | 29-scf00543 | 29 |
| AX-158366975 | 29 | 0       | KV453340.1 | 5812    | 29-scf00543 | 29 |
| AX-158366983 | 29 | 0       | KV453340.1 | 24557   | 29-scf00543 | 29 |
| AX-158366985 | 29 | 0       | KV453340.1 | 25558   | 29-scf00543 | 29 |
| AX-158366988 | 29 | 0       | KV453340.1 | 38346   | 29-scf00543 | 29 |
| AX-158366974 | 29 | 0.085   | KV453340.1 | 4995    | 29-scf00543 | 29 |
| AX-158366980 | 29 | 0.085   | KV453340.1 | 21322   | 29-scf00543 | 29 |
| AX-157852531 | 29 | 0.175   | KV453340.1 | 9730    | 29-scf00543 | 29 |
| AX-158366978 | 29 | 0.175   | KV453340.1 | 17594   | 29-scf00543 | 29 |
| AX-158366984 | 29 | 0.175   | KV453340.1 | 25116   | 29-scf00543 | 29 |
| AX-157726039 | 29 | 0.175   | KV453340.1 | 41500   | 29-scf00543 | 29 |
| AX-157753170 | 29 | 0.175   | KV453340.1 | 42726   | 29-scf00543 | 29 |
| AX-158366992 | 29 | 0.175   | KV453340.1 | 45848   | 29-scf00543 | 29 |
| AX-158366993 | 29 | 0.175   | KV453340.1 | 46598   | 29-scf00543 | 29 |
| AX-158366994 | 29 | 0.175   | KV453340.1 | 46906   | 29-scf00543 | 29 |
| AX-157862449 | 29 | 0.175   | KV453340.1 | 47777   | 29-scf00543 | 29 |
| AX-158367002 | 29 | 0.175   | KV453340.1 | 53000   | 29-scf00543 | 29 |
| AX-157725580 | 29 | 0.175   | KV453340.1 | 53634   | 29-scf00543 | 29 |
| AX-158367004 | 29 | 0.175   | KV453340.1 | 59500   | 29-scf00543 | 29 |

|              |    |       |             |        |             |    |
|--------------|----|-------|-------------|--------|-------------|----|
| AX-158367009 | 29 | 0.175 | KV453340.1  | 71630  | 29-scf00543 | 29 |
| AX-158367010 | 29 | 0.175 | KV453340.1  | 72628  | 29-scf00543 | 29 |
| AX-157852537 | 29 | 0.175 | KV453340.1  | 73233  | 29-scf00543 | 29 |
| AX-158367011 | 29 | 0.175 | KV453340.1  | 73335  | 29-scf00543 | 29 |
| AX-158367012 | 29 | 0.175 | KV453340.1  | 73983  | 29-scf00543 | 29 |
| AX-158367013 | 29 | 0.175 | KV453340.1  | 79121  | 29-scf00543 | 29 |
| AX-158367014 | 29 | 0.175 | KV453340.1  | 80384  | 29-scf00543 | 29 |
| AX-158367018 | 29 | 0.175 | KV453340.1  | 87472  | 29-scf00543 | 29 |
| AX-158367020 | 29 | 0.175 | KV453340.1  | 90853  | 29-scf00543 | 29 |
| AX-158367021 | 29 | 0.175 | KV453340.1  | 91705  | 29-scf00543 | 29 |
| AX-158367030 | 29 | 0.175 | KV453340.1  | 102396 | 29-scf00543 | 29 |
| AX-158367100 | 29 | 0.175 | KV453337.1  | 86838  | 29-scf00544 | 29 |
| AX-158367142 | 29 | 0.175 | KV453337.1  | 173848 | 29-scf00544 | 29 |
| AX-157852556 | 29 | 0.175 | KV453337.1  | 208437 | 29-scf00544 | 29 |
| AX-157852557 | 29 | 0.175 | KV453337.1  | 213311 | 29-scf00544 | 29 |
| AX-158420027 | 29 | 0.175 | KV453338.1  | 11093  | 29-scf00545 | 29 |
| AX-157713114 | 29 | 0.175 | KV453338.1  | 13730  | 29-scf00545 | 29 |
| AX-158367171 | 29 | 0.175 | KV453338.1  | 21364  | 29-scf00545 | 29 |
| AX-158367173 | 29 | 0.175 | KV453338.1  | 23952  | 29-scf00545 | 29 |
| AX-157720873 | 29 | 0.175 | KV453338.1  | 24634  | 29-scf00545 | 29 |
| AX-157687200 | 29 | 0.175 | KV453482.1  | 15827  | scf00820    | UN |
| AX-157689625 | 29 | 0.175 | 3ML01030890 | 728    | scf06494_1  | UN |
| AX-157852539 | 29 | 0.218 | KV453340.1  | 97021  | 29-scf00543 | 29 |
| AX-158367026 | 29 | 0.218 | KV453340.1  | 97766  | 29-scf00543 | 29 |
| AX-158367028 | 29 | 0.218 | KV453340.1  | 100596 | 29-scf00543 | 29 |
| AX-158367034 | 29 | 0.218 | KV453340.1  | 107088 | 29-scf00543 | 29 |
| AX-158367112 | 29 | 0.218 | KV453337.1  | 112799 | 29-scf00544 | 29 |
| AX-158367190 | 29 | 0.218 | KV453338.1  | 63556  | 29-scf00545 | 29 |
| AX-157746614 | 29 | 0.218 | KV453338.1  | 65312  | 29-scf00545 | 29 |
| AX-158367167 | 29 | 0.285 | KV453338.1  | 8377   | 29-scf00545 | 29 |
| AX-158367184 | 29 | 0.285 | KV453338.1  | 45839  | 29-scf00545 | 29 |
| AX-158367196 | 29 | 0.285 | KV453338.1  | 88373  | 29-scf00545 | 29 |
| AX-157687198 | 29 | 0.285 | KV453482.1  | 14405  | scf00820    | UN |
| AX-157687326 | 29 | 0.285 | KV453504.1  | 5646   | scf00851    | UN |
| AX-157688214 | 29 | 0.285 | KV453790.1  | 3271   | scf01378    | UN |
| AX-157689819 | 29 | 0.285 | 3ML01032925 | 240    | scf08555_1  | UN |
| AX-157852540 | 29 | 0.612 | KV453340.1  | 103289 | 29-scf00543 | 29 |
| AX-158367036 | 29 | 0.612 | KV453340.1  | 109174 | 29-scf00543 | 29 |
| AX-158367041 | 29 | 0.612 | KV453340.1  | 115588 | 29-scf00543 | 29 |
| AX-158367042 | 29 | 0.612 | KV453340.1  | 116064 | 29-scf00543 | 29 |
| AX-158367043 | 29 | 0.612 | KV453340.1  | 116840 | 29-scf00543 | 29 |
| AX-158367047 | 29 | 0.612 | KV453340.1  | 119566 | 29-scf00543 | 29 |
| AX-157852546 | 29 | 0.645 | KV453340.1  | 144693 | 29-scf00543 | 29 |
| AX-158367064 | 29 | 0.722 | KV453340.1  | 149636 | 29-scf00543 | 29 |
| AX-158367108 | 29 | 0.722 | KV453337.1  | 109297 | 29-scf00544 | 29 |
| AX-158367197 | 29 | 0.722 | KV453343.1  | 1124   | 29-scf00547 | 29 |
| AX-157687379 | 29 | 0.722 | KV453342.1  | 4622   | 29-scf00866 | 29 |
| AX-157681216 | 29 | 0.722 | KV453342.1  | 8726   | 29-scf00866 | 29 |
| AX-157687382 | 29 | 0.722 | KV453342.1  | 11729  | 29-scf00866 | 29 |
| AX-157687383 | 29 | 0.722 | KV453342.1  | 13193  | 29-scf00866 | 29 |
| AX-157681560 | 29 | 0.722 | KV453341.1  | 675    | 29-scf06600 | 29 |

|              |    |       |            |        |             |    |
|--------------|----|-------|------------|--------|-------------|----|
| AX-157681484 | 29 | 0.722 | KV453482.1 | 561    | scf00820    | UN |
| AX-157687195 | 29 | 0.722 | KV453482.1 | 7576   | scf00820    | UN |
| AX-157681211 | 29 | 0.722 | KV453482.1 | 13001  | scf00820    | UN |
| AX-157687199 | 29 | 0.722 | KV453482.1 | 14718  | scf00820    | UN |
| AX-157687325 | 29 | 0.722 | KV453504.1 | 1015   | scf00851    | UN |
| AX-157687406 | 29 | 0.722 | KV453514.1 | 1917   | scf00872    | UN |
| AX-157679971 | 29 | 0.722 | KV453514.1 | 4345   | scf00872    | UN |
| AX-157687410 | 29 | 0.722 | KV453514.1 | 9828   | scf00872    | UN |
| AX-157889210 | 29 | 0.94  | KV453340.1 | 124224 | 29-scf00543 | 29 |
| AX-158367051 | 29 | 0.94  | KV453340.1 | 124386 | 29-scf00543 | 29 |
| AX-157739907 | 29 | 0.94  | KV453340.1 | 125055 | 29-scf00543 | 29 |
| AX-158367056 | 29 | 0.94  | KV453340.1 | 138506 | 29-scf00543 | 29 |
| AX-158367061 | 29 | 0.94  | KV453340.1 | 143618 | 29-scf00543 | 29 |
| AX-157852547 | 29 | 0.94  | KV453340.1 | 146075 | 29-scf00543 | 29 |
| AX-158367063 | 29 | 0.94  | KV453340.1 | 146440 | 29-scf00543 | 29 |
| AX-158367199 | 29 | 0.94  | KV453343.1 | 2695   | 29-scf00547 | 29 |
| AX-157852571 | 29 | 1.033 | KV453343.1 | 3495   | 29-scf00547 | 29 |
| AX-158367206 | 29 | 1.079 | KV453343.1 | 11832  | 29-scf00547 | 29 |
| AX-158367208 | 29 | 1.159 | KV453343.1 | 15210  | 29-scf00547 | 29 |
| AX-158367210 | 29 | 1.159 | KV453343.1 | 17921  | 29-scf00547 | 29 |
| AX-158367211 | 29 | 1.183 | KV453343.1 | 18155  | 29-scf00547 | 29 |
| AX-157774318 | 29 | 1.206 | KV453343.1 | 18556  | 29-scf00547 | 29 |
| AX-158367214 | 29 | 1.227 | KV453343.1 | 22885  | 29-scf00547 | 29 |
| AX-158367216 | 29 | 1.24  | KV453343.1 | 24787  | 29-scf00547 | 29 |
| AX-157774452 | 29 | 1.24  | KV453343.1 | 26791  | 29-scf00547 | 29 |
| AX-158367035 | 29 | 1.268 | KV453340.1 | 108513 | 29-scf00543 | 29 |
| AX-158367037 | 29 | 1.268 | KV453340.1 | 112837 | 29-scf00543 | 29 |
| AX-158367038 | 29 | 1.268 | KV453340.1 | 113347 | 29-scf00543 | 29 |
| AX-158367044 | 29 | 1.268 | KV453340.1 | 117183 | 29-scf00543 | 29 |
| AX-157774109 | 29 | 1.268 | KV453340.1 | 117468 | 29-scf00543 | 29 |
| AX-158367048 | 29 | 1.268 | KV453340.1 | 121404 | 29-scf00543 | 29 |
| AX-158367049 | 29 | 1.268 | KV453340.1 | 122659 | 29-scf00543 | 29 |
| AX-158367050 | 29 | 1.268 | KV453340.1 | 123503 | 29-scf00543 | 29 |
| AX-157852543 | 29 | 1.268 | KV453340.1 | 127688 | 29-scf00543 | 29 |
| AX-158367057 | 29 | 1.268 | KV453340.1 | 138821 | 29-scf00543 | 29 |
| AX-157772051 | 29 | 1.268 | KV453340.1 | 141533 | 29-scf00543 | 29 |
| AX-158367198 | 29 | 1.268 | KV453343.1 | 1505   | 29-scf00547 | 29 |
| AX-158367201 | 29 | 1.268 | KV453343.1 | 5926   | 29-scf00547 | 29 |
| AX-157852573 | 29 | 1.268 | KV453343.1 | 7393   | 29-scf00547 | 29 |
| AX-157852575 | 29 | 1.268 | KV453343.1 | 9948   | 29-scf00547 | 29 |
| AX-158367212 | 29 | 1.268 | KV453343.1 | 20727  | 29-scf00547 | 29 |
| AX-158367217 | 29 | 1.268 | KV453343.1 | 26388  | 29-scf00547 | 29 |
| AX-158367218 | 29 | 1.268 | KV453343.1 | 28173  | 29-scf00547 | 29 |
| AX-158367224 | 29 | 1.268 | KV453343.1 | 39872  | 29-scf00547 | 29 |
| AX-158367226 | 29 | 1.268 | KV453343.1 | 41303  | 29-scf00547 | 29 |
| AX-158367227 | 29 | 1.268 | KV453343.1 | 41810  | 29-scf00547 | 29 |
| AX-158367230 | 29 | 1.268 | KV453343.1 | 46588  | 29-scf00547 | 29 |
| AX-158367234 | 29 | 1.268 | KV453343.1 | 52202  | 29-scf00547 | 29 |
| AX-158367238 | 29 | 1.268 | KV453343.1 | 54505  | 29-scf00547 | 29 |
| AX-158367239 | 29 | 1.268 | KV453343.1 | 55313  | 29-scf00547 | 29 |
| AX-158367249 | 29 | 1.268 | KV453343.1 | 64553  | 29-scf00547 | 29 |

|              |    |       |             |        |             |    |
|--------------|----|-------|-------------|--------|-------------|----|
| AX-157852776 | 29 | 1.268 | KV453344.1  | 43913  | 29-scf00549 | 29 |
| AX-158367233 | 29 | 1.486 | KV453343.1  | 51559  | 29-scf00547 | 29 |
| AX-157750764 | 29 | 1.486 | KV453343.1  | 72244  | 29-scf00547 | 29 |
| AX-158367256 | 29 | 1.486 | KV453343.1  | 83575  | 29-scf00547 | 29 |
| AX-158367257 | 29 | 1.486 | KV453343.1  | 83953  | 29-scf00547 | 29 |
| AX-158420046 | 29 | 1.486 | KV453343.1  | 88901  | 29-scf00547 | 29 |
| AX-158367262 | 29 | 1.486 | KV453343.1  | 92113  | 29-scf00547 | 29 |
| AX-158367263 | 29 | 1.486 | KV453343.1  | 92653  | 29-scf00547 | 29 |
| AX-158367264 | 29 | 1.486 | KV453343.1  | 93244  | 29-scf00547 | 29 |
| AX-158367266 | 29 | 1.486 | KV453343.1  | 94597  | 29-scf00547 | 29 |
| AX-157852583 | 29 | 1.486 | KV453343.1  | 113596 | 29-scf00547 | 29 |
| AX-157852586 | 29 | 1.486 | KV453343.1  | 118913 | 29-scf00547 | 29 |
| AX-157852775 | 29 | 1.486 | KV453344.1  | 27464  | 29-scf00549 | 29 |
| AX-157684873 | 29 | 1.486 | KV453346.1  | 9378   | 29-scf00550 | 29 |
| AX-157852579 | 29 | 1.518 | KV453343.1  | 81955  | 29-scf00547 | 29 |
| AX-157868374 | 29 | 1.518 | KV453343.1  | 93573  | 29-scf00547 | 29 |
| AX-158367265 | 29 | 1.518 | KV453343.1  | 93887  | 29-scf00547 | 29 |
| AX-158369447 | 29 | 1.518 | KV453344.1  | 477    | 29-scf00549 | 29 |
| AX-157707327 | 29 | 1.518 | 3ML01034018 | 48     | scf09688_1  | UN |
| AX-158367270 | 29 | 1.536 | KV453343.1  | 102235 | 29-scf00547 | 29 |
| AX-157713388 | 29 | 1.555 | KV453343.1  | 104820 | 29-scf00547 | 29 |
| AX-157852580 | 29 | 1.577 | KV453343.1  | 106736 | 29-scf00547 | 29 |
| AX-157771399 | 29 | 1.577 | KV453343.1  | 107408 | 29-scf00547 | 29 |
| AX-157852582 | 29 | 1.577 | KV453343.1  | 109127 | 29-scf00547 | 29 |
| AX-157809054 | 29 | 1.596 | KV453343.1  | 70863  | 29-scf00547 | 29 |
| AX-158367252 | 29 | 1.596 | KV453343.1  | 73736  | 29-scf00547 | 29 |
| AX-158367253 | 29 | 1.596 | KV453343.1  | 74046  | 29-scf00547 | 29 |
| AX-157721563 | 29 | 1.596 | KV453343.1  | 109693 | 29-scf00547 | 29 |
| AX-158367273 | 29 | 1.596 | KV453343.1  | 112250 | 29-scf00547 | 29 |
| AX-158367275 | 29 | 1.596 | KV453343.1  | 115168 | 29-scf00547 | 29 |
| AX-158367276 | 29 | 1.596 | KV453343.1  | 115809 | 29-scf00547 | 29 |
| AX-157852584 | 29 | 1.596 | KV453343.1  | 115999 | 29-scf00547 | 29 |
| AX-157852585 | 29 | 1.596 | KV453343.1  | 117220 | 29-scf00547 | 29 |
| AX-158367277 | 29 | 1.596 | KV453343.1  | 118514 | 29-scf00547 | 29 |
| AX-157717871 | 29 | 1.596 | KV453343.1  | 120418 | 29-scf00547 | 29 |
| AX-158367279 | 29 | 1.596 | KV453343.1  | 121789 | 29-scf00547 | 29 |
| AX-158369448 | 29 | 1.596 | KV453344.1  | 1138   | 29-scf00549 | 29 |
| AX-158369451 | 29 | 1.596 | KV453344.1  | 5372   | 29-scf00549 | 29 |
| AX-158369452 | 29 | 1.596 | KV453344.1  | 7950   | 29-scf00549 | 29 |
| AX-158369454 | 29 | 1.596 | KV453344.1  | 14182  | 29-scf00549 | 29 |
| AX-158420099 | 29 | 1.596 | KV453344.1  | 19737  | 29-scf00549 | 29 |
| AX-158369471 | 29 | 1.596 | KV453344.1  | 34540  | 29-scf00549 | 29 |
| AX-157889236 | 29 | 1.596 | KV453344.1  | 55201  | 29-scf00549 | 29 |
| AX-158369494 | 29 | 1.596 | KV453344.1  | 76747  | 29-scf00549 | 29 |
| AX-158369511 | 29 | 1.596 | KV453344.1  | 97830  | 29-scf00549 | 29 |
| AX-158369514 | 29 | 1.596 | KV453344.1  | 102234 | 29-scf00549 | 29 |
| AX-157684876 | 29 | 1.596 | KV453346.1  | 14196  | 29-scf00550 | 29 |
| AX-157707304 | 29 | 1.596 | 3ML01033960 | 269    | scf09629_1  | UN |
| AX-157751103 | 29 | 2.906 | KV453340.1  | 20911  | 29-scf00543 | 29 |
| AX-158366999 | 29 | 2.906 | KV453340.1  | 50420  | 29-scf00543 | 29 |
| AX-158367019 | 29 | 2.906 | KV453340.1  | 89350  | 29-scf00543 | 29 |



|              |    |       |            |        |             |    |
|--------------|----|-------|------------|--------|-------------|----|
| AX-158367025 | 29 | 2.906 | KV453340.1 | 96280  | 29-scf00543 | 29 |
| AX-158367121 | 29 | 2.906 | KV453337.1 | 126257 | 29-scf00544 | 29 |
| AX-158367133 | 29 | 2.906 | KV453337.1 | 143493 | 29-scf00544 | 29 |
| AX-158367135 | 29 | 2.906 | KV453337.1 | 160406 | 29-scf00544 | 29 |
| AX-157852555 | 29 | 2.906 | KV453337.1 | 161802 | 29-scf00544 | 29 |
| AX-158367140 | 29 | 2.906 | KV453337.1 | 171041 | 29-scf00544 | 29 |
| AX-158367155 | 29 | 2.906 | KV453337.1 | 200578 | 29-scf00544 | 29 |
| AX-158367157 | 29 | 2.906 | KV453337.1 | 210214 | 29-scf00544 | 29 |
| AX-158367166 | 29 | 2.906 | KV453338.1 | 5403   | 29-scf00545 | 29 |
| AX-157715189 | 29 | 2.906 | KV453338.1 | 12234  | 29-scf00545 | 29 |
| AX-157852559 | 29 | 2.906 | KV453338.1 | 13196  | 29-scf00545 | 29 |
| AX-158367170 | 29 | 2.906 | KV453338.1 | 19932  | 29-scf00545 | 29 |
| AX-158367172 | 29 | 2.906 | KV453338.1 | 23679  | 29-scf00545 | 29 |
| AX-158367183 | 29 | 2.906 | KV453338.1 | 45310  | 29-scf00545 | 29 |
| AX-158366989 | 29 | 3.066 | KV453340.1 | 38773  | 29-scf00543 | 29 |
| AX-158367090 | 29 | 3.066 | KV453337.1 | 64398  | 29-scf00544 | 29 |
| AX-157723409 | 29 | 3.066 | KV453337.1 | 117014 | 29-scf00544 | 29 |
| AX-158367141 | 29 | 3.066 | KV453337.1 | 171254 | 29-scf00544 | 29 |
| AX-158367150 | 29 | 3.066 | KV453337.1 | 185333 | 29-scf00544 | 29 |
| AX-158367164 | 29 | 3.066 | KV453337.1 | 223599 | 29-scf00544 | 29 |
| AX-157684846 | 29 | 3.066 | KV453339.1 | 13566  | 29-scf00546 | 29 |
| AX-157684852 | 29 | 3.066 | KV453339.1 | 21764  | 29-scf00546 | 29 |
| AX-157684861 | 29 | 3.066 | KV453339.1 | 35906  | 29-scf00546 | 29 |
| AX-157684864 | 29 | 3.066 | KV453339.1 | 37580  | 29-scf00546 | 29 |
| AX-158369455 | 29 | 4.005 | KV453344.1 | 14817  | 29-scf00549 | 29 |
| AX-158369458 | 29 | 4.506 | KV453344.1 | 16760  | 29-scf00549 | 29 |
| AX-158420098 | 29 | 4.509 | KV453344.1 | 19437  | 29-scf00549 | 29 |
| AX-158369473 | 29 | 4.668 | KV453344.1 | 35378  | 29-scf00549 | 29 |
| AX-158369474 | 29 | 4.668 | KV453344.1 | 38207  | 29-scf00549 | 29 |
| AX-158369479 | 29 | 4.668 | KV453344.1 | 46648  | 29-scf00549 | 29 |
| AX-158369482 | 29 | 4.668 | KV453344.1 | 48045  | 29-scf00549 | 29 |
| AX-158369484 | 29 | 4.668 | KV453344.1 | 54339  | 29-scf00549 | 29 |
| AX-157720583 | 29 | 4.668 | KV453344.1 | 56159  | 29-scf00549 | 29 |
| AX-158369492 | 29 | 4.668 | KV453344.1 | 71256  | 29-scf00549 | 29 |
| AX-157717801 | 29 | 4.668 | KV453344.1 | 84279  | 29-scf00549 | 29 |
| AX-157718997 | 29 | 4.668 | KV453344.1 | 87540  | 29-scf00549 | 29 |
| AX-158369500 | 29 | 4.668 | KV453344.1 | 89621  | 29-scf00549 | 29 |
| AX-158369501 | 29 | 4.668 | KV453344.1 | 90135  | 29-scf00549 | 29 |
| AX-158369502 | 29 | 4.668 | KV453344.1 | 91689  | 29-scf00549 | 29 |
| AX-158369505 | 29 | 4.668 | KV453344.1 | 93790  | 29-scf00549 | 29 |
| AX-158369507 | 29 | 4.668 | KV453344.1 | 94573  | 29-scf00549 | 29 |
| AX-158367281 | 29 | 4.668 | KV453346.1 | 26793  | 29-scf00550 | 29 |
| AX-157862456 | 29 | 4.668 | KV453346.1 | 30725  | 29-scf00550 | 29 |
| AX-158369509 | 29 | 4.689 | KV453344.1 | 96123  | 29-scf00549 | 29 |
| AX-158369518 | 29 | 4.706 | KV453344.1 | 105851 | 29-scf00549 | 29 |
| AX-158369525 | 29 | 4.779 | KV453344.1 | 117514 | 29-scf00549 | 29 |
| AX-157752978 | 29 | 4.779 | KV453344.1 | 120034 | 29-scf00549 | 29 |
| AX-158369536 | 29 | 4.779 | KV453344.1 | 136147 | 29-scf00549 | 29 |
| AX-158367311 | 29 | 4.779 | KV453346.1 | 81650  | 29-scf00550 | 29 |
| AX-158369537 | 29 | 4.783 | KV453344.1 | 136929 | 29-scf00549 | 29 |
| AX-158367031 | 29 | 6.103 | KV453340.1 | 104113 | 29-scf00543 | 29 |

|              |    |       |            |        |             |    |
|--------------|----|-------|------------|--------|-------------|----|
| AX-158367066 | 29 | 6.103 | KV453337.1 | 5617   | 29-scf00544 | 29 |
| AX-158367075 | 29 | 6.103 | KV453337.1 | 31229  | 29-scf00544 | 29 |
| AX-158367081 | 29 | 6.103 | KV453337.1 | 47552  | 29-scf00544 | 29 |
| AX-157852549 | 29 | 6.103 | KV453337.1 | 48705  | 29-scf00544 | 29 |
| AX-158367083 | 29 | 6.103 | KV453337.1 | 49646  | 29-scf00544 | 29 |
| AX-158367087 | 29 | 6.103 | KV453337.1 | 61029  | 29-scf00544 | 29 |
| AX-158367088 | 29 | 6.103 | KV453337.1 | 61876  | 29-scf00544 | 29 |
| AX-158367091 | 29 | 6.103 | KV453337.1 | 66979  | 29-scf00544 | 29 |
| AX-158367092 | 29 | 6.103 | KV453337.1 | 67671  | 29-scf00544 | 29 |
| AX-158367097 | 29 | 6.103 | KV453337.1 | 78225  | 29-scf00544 | 29 |
| AX-158367099 | 29 | 6.103 | KV453337.1 | 84038  | 29-scf00544 | 29 |
| AX-158367101 | 29 | 6.103 | KV453337.1 | 88720  | 29-scf00544 | 29 |
| AX-158367102 | 29 | 6.103 | KV453337.1 | 89153  | 29-scf00544 | 29 |
| AX-158367103 | 29 | 6.103 | KV453337.1 | 97443  | 29-scf00544 | 29 |
| AX-158367113 | 29 | 6.103 | KV453337.1 | 117774 | 29-scf00544 | 29 |
| AX-158367116 | 29 | 6.103 | KV453337.1 | 121067 | 29-scf00544 | 29 |
| AX-158367117 | 29 | 6.103 | KV453337.1 | 122280 | 29-scf00544 | 29 |
| AX-158367119 | 29 | 6.103 | KV453337.1 | 124587 | 29-scf00544 | 29 |
| AX-158367120 | 29 | 6.103 | KV453337.1 | 125507 | 29-scf00544 | 29 |
| AX-158367122 | 29 | 6.103 | KV453337.1 | 128193 | 29-scf00544 | 29 |
| AX-158367123 | 29 | 6.103 | KV453337.1 | 128579 | 29-scf00544 | 29 |
| AX-158367125 | 29 | 6.103 | KV453337.1 | 134563 | 29-scf00544 | 29 |
| AX-158367126 | 29 | 6.103 | KV453337.1 | 135339 | 29-scf00544 | 29 |
| AX-157852551 | 29 | 6.103 | KV453337.1 | 136384 | 29-scf00544 | 29 |
| AX-157852552 | 29 | 6.103 | KV453337.1 | 136508 | 29-scf00544 | 29 |
| AX-157748417 | 29 | 6.103 | KV453337.1 | 138871 | 29-scf00544 | 29 |
| AX-158367130 | 29 | 6.103 | KV453337.1 | 140738 | 29-scf00544 | 29 |
| AX-158367131 | 29 | 6.103 | KV453337.1 | 141248 | 29-scf00544 | 29 |
| AX-158367136 | 29 | 6.103 | KV453337.1 | 161122 | 29-scf00544 | 29 |
| AX-157862455 | 29 | 6.103 | KV453337.1 | 162194 | 29-scf00544 | 29 |
| AX-158367139 | 29 | 6.103 | KV453337.1 | 164922 | 29-scf00544 | 29 |
| AX-158367143 | 29 | 6.103 | KV453337.1 | 175959 | 29-scf00544 | 29 |
| AX-158367146 | 29 | 6.103 | KV453337.1 | 179940 | 29-scf00544 | 29 |
| AX-158367148 | 29 | 6.103 | KV453337.1 | 181471 | 29-scf00544 | 29 |
| AX-158367149 | 29 | 6.103 | KV453337.1 | 182251 | 29-scf00544 | 29 |
| AX-158367153 | 29 | 6.103 | KV453337.1 | 199491 | 29-scf00544 | 29 |
| AX-158367158 | 29 | 6.103 | KV453337.1 | 217662 | 29-scf00544 | 29 |
| AX-158367159 | 29 | 6.103 | KV453337.1 | 217904 | 29-scf00544 | 29 |
| AX-158367161 | 29 | 6.103 | KV453337.1 | 220512 | 29-scf00544 | 29 |
| AX-158367162 | 29 | 6.103 | KV453337.1 | 220749 | 29-scf00544 | 29 |
| AX-157727243 | 29 | 6.103 | KV453337.1 | 221679 | 29-scf00544 | 29 |
| AX-158367163 | 29 | 6.103 | KV453337.1 | 223034 | 29-scf00544 | 29 |
| AX-158367175 | 29 | 6.103 | KV453338.1 | 25053  | 29-scf00545 | 29 |
| AX-158367187 | 29 | 6.103 | KV453338.1 | 52837  | 29-scf00545 | 29 |
| AX-157852570 | 29 | 6.103 | KV453338.1 | 65859  | 29-scf00545 | 29 |
| AX-158367223 | 29 | 6.103 | KV453343.1 | 33599  | 29-scf00547 | 29 |
| AX-158367228 | 29 | 6.103 | KV453343.1 | 42333  | 29-scf00547 | 29 |
| AX-158420039 | 29 | 6.103 | KV453343.1 | 49700  | 29-scf00547 | 29 |
| AX-157852587 | 29 | 6.103 | KV453346.1 | 36823  | 29-scf00550 | 29 |
| AX-158367320 | 29 | 6.103 | KV453346.1 | 98610  | 29-scf00550 | 29 |
| AX-157680306 | 29 | 6.103 | KV453342.1 | 6566   | 29-scf00866 | 29 |

|              |    |       |             |        |             |    |
|--------------|----|-------|-------------|--------|-------------|----|
| AX-157687192 | 29 | 6.103 | KV453482.1  | 741    | scf00820    | UN |
| AX-157689808 | 29 | 6.103 | 3ML01032774 | 121    | scf08403_1  | UN |
| AX-157710312 | 29 | 6.19  | KV453337.1  | 205773 | 29-scf00544 | 29 |
| AX-158369504 | 29 | 7.649 | KV453344.1  | 93468  | 29-scf00549 | 29 |
| AX-157852780 | 29 | 7.649 | KV453344.1  | 105552 | 29-scf00549 | 29 |
| AX-157745522 | 29 | 7.649 | KV453344.1  | 107170 | 29-scf00549 | 29 |
| AX-157684868 | 29 | 7.649 | KV453346.1  | 3192   | 29-scf00550 | 29 |
| AX-157680414 | 29 | 7.649 | KV453346.1  | 5484   | 29-scf00550 | 29 |
| AX-157684875 | 29 | 7.649 | KV453346.1  | 12684  | 29-scf00550 | 29 |
| AX-157684878 | 29 | 7.649 | KV453346.1  | 20940  | 29-scf00550 | 29 |
| AX-158367282 | 29 | 7.649 | KV453346.1  | 28610  | 29-scf00550 | 29 |
| AX-157770820 | 29 | 7.649 | KV453346.1  | 34806  | 29-scf00550 | 29 |
| AX-157684879 | 29 | 7.649 | KV453345.1  | 119    | 29-scf00551 | 29 |
| AX-157680128 | 29 | 7.649 | KV453345.1  | 515    | 29-scf00551 | 29 |
| AX-157687407 | 29 | 7.649 | KV453514.1  | 6089   | scf00872    | UN |
| AX-158367289 | 29 | 7.974 | KV453346.1  | 36551  | 29-scf00550 | 29 |
| AX-158367294 | 29 | 7.974 | KV453346.1  | 47539  | 29-scf00550 | 29 |
| AX-158367317 | 29 | 7.974 | KV453346.1  | 92862  | 29-scf00550 | 29 |
| AX-158367333 | 29 | 7.974 | KV453346.1  | 115248 | 29-scf00550 | 29 |
| AX-158367359 | 29 | 7.974 | KV453346.1  | 152942 | 29-scf00550 | 29 |
| AX-157687327 | 29 | 7.974 | KV453504.1  | 15760  | scf00851    | UN |
| AX-158367300 | 29 | 7.975 | KV453346.1  | 64696  | 29-scf00550 | 29 |
| AX-158367219 | 29 | 7.976 | KV453343.1  | 29389  | 29-scf00547 | 29 |
| AX-157889237 | 29 | 7.976 | KV453344.1  | 82928  | 29-scf00549 | 29 |
| AX-158367295 | 29 | 7.976 | KV453346.1  | 48311  | 29-scf00550 | 29 |
| AX-158367303 | 29 | 7.976 | KV453346.1  | 66600  | 29-scf00550 | 29 |
| AX-158367305 | 29 | 7.976 | KV453346.1  | 70423  | 29-scf00550 | 29 |
| AX-158367306 | 29 | 7.976 | KV453346.1  | 73975  | 29-scf00550 | 29 |
| AX-158367315 | 29 | 7.976 | KV453346.1  | 88534  | 29-scf00550 | 29 |
| AX-158367362 | 29 | 7.976 | KV453346.1  | 155732 | 29-scf00550 | 29 |
| AX-157681570 | 29 | 7.976 | 3ML01033157 | 108    | scf08797_1  | UN |
| AX-158367319 | 29 | 8.003 | KV453346.1  | 95957  | 29-scf00550 | 29 |
| AX-157684867 | 29 | 8.086 | KV453346.1  | 1255   | 29-scf00550 | 29 |
| AX-157682175 | 29 | 8.086 | KV453346.1  | 19387  | 29-scf00550 | 29 |
| AX-158367316 | 29 | 8.086 | KV453346.1  | 92499  | 29-scf00550 | 29 |
| AX-158367324 | 29 | 8.086 | KV453346.1  | 105970 | 29-scf00550 | 29 |
| AX-158367326 | 29 | 8.086 | KV453346.1  | 107140 | 29-scf00550 | 29 |
| AX-158367327 | 29 | 8.086 | KV453346.1  | 107953 | 29-scf00550 | 29 |
| AX-158367328 | 29 | 8.086 | KV453346.1  | 108448 | 29-scf00550 | 29 |
| AX-158367329 | 29 | 8.086 | KV453346.1  | 110787 | 29-scf00550 | 29 |
| AX-158367330 | 29 | 8.086 | KV453346.1  | 110949 | 29-scf00550 | 29 |
| AX-158367331 | 29 | 8.086 | KV453346.1  | 111479 | 29-scf00550 | 29 |
| AX-158367332 | 29 | 8.086 | KV453346.1  | 111994 | 29-scf00550 | 29 |
| AX-157741505 | 29 | 8.209 | KV453346.1  | 114312 | 29-scf00550 | 29 |
| AX-158367334 | 29 | 8.304 | KV453346.1  | 120353 | 29-scf00550 | 29 |
| AX-158367335 | 29 | 8.304 | KV453346.1  | 121538 | 29-scf00550 | 29 |
| AX-158367337 | 29 | 8.304 | KV453346.1  | 126845 | 29-scf00550 | 29 |
| AX-158367338 | 29 | 8.357 | KV453346.1  | 127732 | 29-scf00550 | 29 |
| AX-158367340 | 29 | 8.468 | KV453346.1  | 128739 | 29-scf00550 | 29 |
| AX-158367342 | 29 | 8.468 | KV453346.1  | 130905 | 29-scf00550 | 29 |
| AX-158367343 | 29 | 8.468 | KV453346.1  | 131313 | 29-scf00550 | 29 |

|              |    |        |             |        |             |    |
|--------------|----|--------|-------------|--------|-------------|----|
| AX-158367339 | 29 | 8.546  | KV453346.1  | 128348 | 29-scf00550 | 29 |
| AX-158367345 | 29 | 8.546  | KV453346.1  | 134516 | 29-scf00550 | 29 |
| AX-158367347 | 29 | 8.632  | KV453346.1  | 136812 | 29-scf00550 | 29 |
| AX-158367351 | 29 | 8.632  | KV453346.1  | 140431 | 29-scf00550 | 29 |
| AX-158367352 | 29 | 8.632  | KV453346.1  | 141138 | 29-scf00550 | 29 |
| AX-158367356 | 29 | 8.632  | KV453346.1  | 145925 | 29-scf00550 | 29 |
| AX-158367357 | 29 | 8.632  | KV453346.1  | 146399 | 29-scf00550 | 29 |
| AX-157852589 | 29 | 8.632  | KV453346.1  | 148650 | 29-scf00550 | 29 |
| AX-157852590 | 29 | 8.632  | KV453346.1  | 153744 | 29-scf00550 | 29 |
| AX-158367360 | 29 | 8.771  | KV453346.1  | 154579 | 29-scf00550 | 29 |
| AX-157740347 | 29 | 8.824  | KV453346.1  | 161977 | 29-scf00550 | 29 |
| AX-158367366 | 29 | 8.824  | KV453346.1  | 162675 | 29-scf00550 | 29 |
| AX-158367369 | 29 | 8.96   | KV453346.1  | 165250 | 29-scf00550 | 29 |
| AX-158367372 | 29 | 8.96   | KV453346.1  | 168740 | 29-scf00550 | 29 |
| AX-158367373 | 29 | 8.96   | KV453346.1  | 169786 | 29-scf00550 | 29 |
| AX-157882700 | 29 | 9.514  | KV453346.1  | 174507 | 29-scf00550 | 29 |
| AX-158367378 | 29 | 9.7    | KV453346.1  | 177332 | 29-scf00550 | 29 |
| AX-158367379 | 29 | 9.7    | KV453346.1  | 177810 | 29-scf00550 | 29 |
| AX-158367380 | 29 | 9.801  | KV453346.1  | 179465 | 29-scf00550 | 29 |
| AX-158367381 | 29 | 9.966  | KV453346.1  | 181260 | 29-scf00550 | 29 |
| AX-158367383 | 29 | 9.992  | KV453346.1  | 182156 | 29-scf00550 | 29 |
| AX-157707199 | 29 | 10.004 | 3ML01033717 | 72     | scf09380_1  | UN |
| AX-157862458 | 29 | 10.274 | KV453346.1  | 179105 | 29-scf00550 | 29 |
| AX-158367388 | 29 | 10.274 | KV453346.1  | 190202 | 29-scf00550 | 29 |
| AX-158367389 | 29 | 10.274 | KV453346.1  | 195210 | 29-scf00550 | 29 |
| AX-158367390 | 29 | 10.274 | KV453346.1  | 200731 | 29-scf00550 | 29 |
| AX-158367391 | 29 | 10.274 | KV453346.1  | 201684 | 29-scf00550 | 29 |
| AX-158367395 | 29 | 10.274 | KV453346.1  | 212048 | 29-scf00550 | 29 |
| AX-157723101 | 29 | 10.274 | KV453346.1  | 213538 | 29-scf00550 | 29 |
| AX-158420051 | 29 | 10.274 | KV453346.1  | 214333 | 29-scf00550 | 29 |
| AX-158367405 | 29 | 10.274 | KV453346.1  | 227960 | 29-scf00550 | 29 |
| AX-158367422 | 29 | 10.274 | KV453346.1  | 247385 | 29-scf00550 | 29 |
| AX-158367384 | 29 | 10.275 | KV453346.1  | 186746 | 29-scf00550 | 29 |
| AX-157852591 | 29 | 10.275 | KV453346.1  | 216636 | 29-scf00550 | 29 |
| AX-158367411 | 29 | 10.275 | KV453346.1  | 232299 | 29-scf00550 | 29 |
| AX-158367413 | 29 | 10.275 | KV453346.1  | 233830 | 29-scf00550 | 29 |
| AX-158367415 | 29 | 10.499 | KV453346.1  | 235267 | 29-scf00550 | 29 |
| AX-158367414 | 29 | 10.602 | KV453346.1  | 234778 | 29-scf00550 | 29 |
| AX-158367420 | 29 | 10.602 | KV453346.1  | 245115 | 29-scf00550 | 29 |
| AX-158367426 | 29 | 10.602 | KV453346.1  | 251900 | 29-scf00550 | 29 |
| AX-158367427 | 29 | 10.602 | KV453346.1  | 252966 | 29-scf00550 | 29 |
| AX-158367429 | 29 | 10.602 | KV453346.1  | 254610 | 29-scf00550 | 29 |
| AX-158381786 | 29 | 10.602 | KV453346.1  | 256997 | 29-scf00550 | 29 |
| AX-158367432 | 29 | 10.633 | KV453346.1  | 262785 | 29-scf00550 | 29 |
| AX-158367424 | 29 | 10.663 | KV453346.1  | 249880 | 29-scf00550 | 29 |
| AX-158367433 | 29 | 10.663 | KV453346.1  | 263113 | 29-scf00550 | 29 |
| AX-158367434 | 29 | 10.712 | KV453346.1  | 265235 | 29-scf00550 | 29 |
| AX-158367435 | 29 | 10.712 | KV453346.1  | 265730 | 29-scf00550 | 29 |
| AX-157749889 | 29 | 10.712 | KV453346.1  | 266657 | 29-scf00550 | 29 |
| AX-158367440 | 29 | 10.774 | KV453346.1  | 274040 | 29-scf00550 | 29 |
| AX-158367438 | 29 | 10.821 | KV453346.1  | 269802 | 29-scf00550 | 29 |

|              |    |        |             |        |             |    |
|--------------|----|--------|-------------|--------|-------------|----|
| AX-157720821 | 29 | 10.821 | KV453346.1  | 275542 | 29-scf00550 | 29 |
| AX-158367441 | 29 | 10.821 | KV453346.1  | 276384 | 29-scf00550 | 29 |
| AX-157750884 | 29 | 10.821 | KV453346.1  | 276653 | 29-scf00550 | 29 |
| AX-158367442 | 29 | 10.821 | KV453346.1  | 277455 | 29-scf00550 | 29 |
| AX-158367443 | 29 | 10.821 | KV453346.1  | 278939 | 29-scf00550 | 29 |
| AX-158367439 | 29 | 10.884 | KV453346.1  | 270920 | 29-scf00550 | 29 |
| AX-158367444 | 29 | 10.884 | KV453346.1  | 281491 | 29-scf00550 | 29 |
| AX-158381787 | 29 | 10.884 | KV453346.1  | 339831 | 29-scf00550 | 29 |
| AX-158367484 | 29 | 10.884 | KV453346.1  | 345580 | 29-scf00550 | 29 |
| AX-157705955 | 29 | 10.884 | 3ML01031311 | 751    | scf06919_1  | UN |
| AX-158367447 | 29 | 11.074 | KV453346.1  | 284923 | 29-scf00550 | 29 |
| AX-158367449 | 29 | 11.085 | KV453346.1  | 286077 | 29-scf00550 | 29 |
| AX-158367450 | 29 | 11.096 | KV453346.1  | 287146 | 29-scf00550 | 29 |
| AX-158367511 | 29 | 11.096 | KV453346.1  | 379029 | 29-scf00550 | 29 |
| AX-158367458 | 29 | 11.164 | KV453346.1  | 307330 | 29-scf00550 | 29 |
| AX-158367459 | 29 | 11.202 | KV453346.1  | 308362 | 29-scf00550 | 29 |
| AX-158367461 | 29 | 11.202 | KV453346.1  | 316044 | 29-scf00550 | 29 |
| AX-158367463 | 29 | 11.202 | KV453346.1  | 317900 | 29-scf00550 | 29 |
| AX-158367467 | 29 | 11.737 | KV453346.1  | 322349 | 29-scf00550 | 29 |
| AX-158367469 | 29 | 11.857 | KV453346.1  | 324604 | 29-scf00550 | 29 |
| AX-158367470 | 29 | 12.086 | KV453346.1  | 325274 | 29-scf00550 | 29 |
| AX-158367474 | 29 | 12.087 | KV453346.1  | 327720 | 29-scf00550 | 29 |
| AX-157724308 | 29 | 12.143 | KV453346.1  | 330907 | 29-scf00550 | 29 |
| AX-158367481 | 29 | 12.246 | KV453346.1  | 342606 | 29-scf00550 | 29 |
| AX-158367483 | 29 | 12.246 | KV453346.1  | 344196 | 29-scf00550 | 29 |
| AX-158367486 | 29 | 12.246 | KV453346.1  | 348109 | 29-scf00550 | 29 |
| AX-158367487 | 29 | 12.246 | KV453346.1  | 348721 | 29-scf00550 | 29 |
| AX-158367489 | 29 | 12.246 | KV453346.1  | 349724 | 29-scf00550 | 29 |
| AX-158367492 | 29 | 12.246 | KV453346.1  | 354061 | 29-scf00550 | 29 |
| AX-158367498 | 29 | 12.287 | KV453346.1  | 361164 | 29-scf00550 | 29 |
| AX-157739604 | 29 | 12.355 | KV453346.1  | 363188 | 29-scf00550 | 29 |
| AX-158367502 | 29 | 12.355 | KV453346.1  | 368710 | 29-scf00550 | 29 |
| AX-158367503 | 29 | 12.355 | KV453346.1  | 368856 | 29-scf00550 | 29 |
| AX-158367507 | 29 | 12.355 | KV453346.1  | 375095 | 29-scf00550 | 29 |
| AX-158367510 | 29 | 12.355 | KV453346.1  | 378619 | 29-scf00550 | 29 |
| AX-158367517 | 29 | 12.528 | KV453346.1  | 390371 | 29-scf00550 | 29 |
| AX-158367523 | 29 | 12.528 | KV453346.1  | 401304 | 29-scf00550 | 29 |
| AX-158367480 | 29 | 12.674 | KV453346.1  | 340861 | 29-scf00550 | 29 |
| AX-158367488 | 29 | 12.674 | KV453346.1  | 349087 | 29-scf00550 | 29 |
| AX-158367493 | 29 | 12.674 | KV453346.1  | 354787 | 29-scf00550 | 29 |
| AX-158367506 | 29 | 12.674 | KV453346.1  | 373743 | 29-scf00550 | 29 |
| AX-158367508 | 29 | 12.674 | KV453346.1  | 376967 | 29-scf00550 | 29 |
| AX-158367515 | 29 | 12.674 | KV453346.1  | 388679 | 29-scf00550 | 29 |
| AX-157852602 | 29 | 12.674 | KV453346.1  | 392512 | 29-scf00550 | 29 |
| AX-157725187 | 29 | 12.674 | KV453346.1  | 394443 | 29-scf00550 | 29 |
| AX-158367518 | 29 | 12.674 | KV453346.1  | 394836 | 29-scf00550 | 29 |
| AX-158367522 | 29 | 12.685 | KV453346.1  | 399618 | 29-scf00550 | 29 |
| AX-158367524 | 29 | 12.685 | KV453346.1  | 403292 | 29-scf00550 | 29 |
| AX-158367525 | 29 | 12.685 | KV453346.1  | 404331 | 29-scf00550 | 29 |
| AX-158367528 | 29 | 13.212 | KV453346.1  | 409834 | 29-scf00550 | 29 |
| AX-158367534 | 29 | 13.212 | KV453346.1  | 423873 | 29-scf00550 | 29 |

|              |    |        |            |        |             |    |
|--------------|----|--------|------------|--------|-------------|----|
| AX-158367529 | 29 | 13.218 | KV453346.1 | 412211 | 29-scf00550 | 29 |
| AX-158367530 | 29 | 13.218 | KV453346.1 | 413104 | 29-scf00550 | 29 |
| AX-158367547 | 29 | 13.218 | KV453346.1 | 438786 | 29-scf00550 | 29 |
| AX-157862463 | 29 | 13.228 | KV453346.1 | 385578 | 29-scf00550 | 29 |
| AX-158367519 | 29 | 13.228 | KV453346.1 | 396135 | 29-scf00550 | 29 |
| AX-158367532 | 29 | 13.228 | KV453346.1 | 417444 | 29-scf00550 | 29 |
| AX-157741846 | 29 | 13.228 | KV453346.1 | 418150 | 29-scf00550 | 29 |
| AX-158367533 | 29 | 13.228 | KV453346.1 | 418277 | 29-scf00550 | 29 |
| AX-157862465 | 29 | 13.228 | KV453346.1 | 427296 | 29-scf00550 | 29 |
| AX-158367538 | 29 | 13.228 | KV453346.1 | 429727 | 29-scf00550 | 29 |
| AX-157862466 | 29 | 13.228 | KV453346.1 | 431203 | 29-scf00550 | 29 |
| AX-158367542 | 29 | 13.228 | KV453346.1 | 431722 | 29-scf00550 | 29 |
| AX-158367543 | 29 | 13.228 | KV453346.1 | 432751 | 29-scf00550 | 29 |
| AX-157747760 | 29 | 13.228 | KV453346.1 | 434458 | 29-scf00550 | 29 |
| AX-158367545 | 29 | 13.228 | KV453346.1 | 435776 | 29-scf00550 | 29 |
| AX-158367546 | 29 | 13.228 | KV453346.1 | 438225 | 29-scf00550 | 29 |
| AX-158367548 | 29 | 13.229 | KV453346.1 | 439270 | 29-scf00550 | 29 |
| AX-158367551 | 29 | 13.601 | KV453346.1 | 442508 | 29-scf00550 | 29 |
| AX-158367552 | 29 | 13.601 | KV453346.1 | 445605 | 29-scf00550 | 29 |
| AX-158367557 | 29 | 13.601 | KV453346.1 | 456105 | 29-scf00550 | 29 |
| AX-158367561 | 29 | 13.601 | KV453346.1 | 462328 | 29-scf00550 | 29 |
| AX-158367553 | 29 | 13.689 | KV453346.1 | 449609 | 29-scf00550 | 29 |
| AX-158367556 | 29 | 13.691 | KV453346.1 | 455174 | 29-scf00550 | 29 |
| AX-158367558 | 29 | 14.132 | KV453346.1 | 456602 | 29-scf00550 | 29 |
| AX-158367560 | 29 | 14.138 | KV453346.1 | 460457 | 29-scf00550 | 29 |
| AX-158367564 | 29 | 14.427 | KV453346.1 | 468090 | 29-scf00550 | 29 |
| AX-158367578 | 29 | 14.427 | KV453346.1 | 485516 | 29-scf00550 | 29 |
| AX-158381788 | 29 | 14.432 | KV453346.1 | 468679 | 29-scf00550 | 29 |
| AX-158367565 | 29 | 14.432 | KV453346.1 | 468806 | 29-scf00550 | 29 |
| AX-158367566 | 29 | 14.541 | KV453346.1 | 471273 | 29-scf00550 | 29 |
| AX-158367567 | 29 | 14.541 | KV453346.1 | 471798 | 29-scf00550 | 29 |
| AX-158367569 | 29 | 14.541 | KV453346.1 | 477442 | 29-scf00550 | 29 |
| AX-158367571 | 29 | 14.541 | KV453346.1 | 479352 | 29-scf00550 | 29 |
| AX-158367572 | 29 | 14.68  | KV453346.1 | 480480 | 29-scf00550 | 29 |
| AX-158367573 | 29 | 14.68  | KV453346.1 | 481124 | 29-scf00550 | 29 |
| AX-158367574 | 29 | 14.769 | KV453346.1 | 482404 | 29-scf00550 | 29 |
| AX-158367577 | 29 | 14.818 | KV453346.1 | 484822 | 29-scf00550 | 29 |
| AX-158367581 | 29 | 14.818 | KV453346.1 | 488073 | 29-scf00550 | 29 |
| AX-158367583 | 29 | 15.068 | KV453346.1 | 488897 | 29-scf00550 | 29 |
| AX-158367584 | 29 | 15.088 | KV453346.1 | 495471 | 29-scf00550 | 29 |
| AX-158367585 | 29 | 15.088 | KV453346.1 | 495711 | 29-scf00550 | 29 |
| AX-158367586 | 29 | 15.088 | KV453346.1 | 501200 | 29-scf00550 | 29 |
| AX-158367589 | 29 | 15.088 | KV453346.1 | 504262 | 29-scf00550 | 29 |
| AX-158367590 | 29 | 15.503 | KV453346.1 | 504652 | 29-scf00550 | 29 |
| AX-158367608 | 29 | 15.503 | KV453346.1 | 533592 | 29-scf00550 | 29 |
| AX-158367594 | 29 | 15.546 | KV453346.1 | 512275 | 29-scf00550 | 29 |
| AX-158367600 | 29 | 15.546 | KV453346.1 | 526656 | 29-scf00550 | 29 |
| AX-158367605 | 29 | 15.546 | KV453346.1 | 530698 | 29-scf00550 | 29 |
| AX-158367671 | 29 | 15.546 | KV453346.1 | 632079 | 29-scf00550 | 29 |
| AX-158367587 | 29 | 15.744 | KV453346.1 | 501807 | 29-scf00550 | 29 |
| AX-158367593 | 29 | 15.744 | KV453346.1 | 510848 | 29-scf00550 | 29 |

|              |    |        |            |        |             |    |
|--------------|----|--------|------------|--------|-------------|----|
| AX-158367604 | 29 | 15.744 | KV453346.1 | 530019 | 29-scf00550 | 29 |
| AX-158367606 | 29 | 15.744 | KV453346.1 | 531573 | 29-scf00550 | 29 |
| AX-158367611 | 29 | 15.744 | KV453346.1 | 540430 | 29-scf00550 | 29 |
| AX-157882707 | 29 | 15.744 | KV453346.1 | 541110 | 29-scf00550 | 29 |
| AX-158367613 | 29 | 15.744 | KV453346.1 | 543178 | 29-scf00550 | 29 |
| AX-158367614 | 29 | 15.744 | KV453346.1 | 544351 | 29-scf00550 | 29 |
| AX-158367615 | 29 | 15.744 | KV453346.1 | 545156 | 29-scf00550 | 29 |
| AX-158367617 | 29 | 15.744 | KV453346.1 | 551877 | 29-scf00550 | 29 |
| AX-158367620 | 29 | 15.744 | KV453346.1 | 558968 | 29-scf00550 | 29 |
| AX-157774078 | 29 | 15.744 | KV453346.1 | 560709 | 29-scf00550 | 29 |
| AX-158367623 | 29 | 15.744 | KV453346.1 | 562287 | 29-scf00550 | 29 |
| AX-157738597 | 29 | 15.744 | KV453346.1 | 569856 | 29-scf00550 | 29 |
| AX-158367625 | 29 | 15.744 | KV453346.1 | 570053 | 29-scf00550 | 29 |
| AX-158381789 | 29 | 15.744 | KV453346.1 | 570675 | 29-scf00550 | 29 |
| AX-158367626 | 29 | 15.744 | KV453346.1 | 571228 | 29-scf00550 | 29 |
| AX-158367627 | 29 | 15.744 | KV453346.1 | 572576 | 29-scf00550 | 29 |
| AX-157775756 | 29 | 15.744 | KV453346.1 | 588875 | 29-scf00550 | 29 |
| AX-158367670 | 29 | 15.744 | KV453346.1 | 631442 | 29-scf00550 | 29 |
| AX-158367680 | 29 | 15.744 | KV453346.1 | 643895 | 29-scf00550 | 29 |
| AX-157852617 | 29 | 15.744 | KV453346.1 | 645086 | 29-scf00550 | 29 |
| AX-158367628 | 29 | 16.071 | KV453346.1 | 573621 | 29-scf00550 | 29 |
| AX-158367629 | 29 | 16.071 | KV453346.1 | 574645 | 29-scf00550 | 29 |
| AX-158367632 | 29 | 16.071 | KV453346.1 | 577465 | 29-scf00550 | 29 |
| AX-158367633 | 29 | 16.071 | KV453346.1 | 578662 | 29-scf00550 | 29 |
| AX-158367634 | 29 | 16.071 | KV453346.1 | 580287 | 29-scf00550 | 29 |
| AX-158367635 | 29 | 16.071 | KV453346.1 | 581266 | 29-scf00550 | 29 |
| AX-158367636 | 29 | 16.071 | KV453346.1 | 582601 | 29-scf00550 | 29 |
| AX-158367637 | 29 | 16.071 | KV453346.1 | 583174 | 29-scf00550 | 29 |
| AX-158367639 | 29 | 16.071 | KV453346.1 | 586286 | 29-scf00550 | 29 |
| AX-158367643 | 29 | 16.071 | KV453346.1 | 591501 | 29-scf00550 | 29 |
| AX-158367651 | 29 | 16.071 | KV453346.1 | 603230 | 29-scf00550 | 29 |
| AX-157852626 | 29 | 16.071 | KV453346.1 | 742708 | 29-scf00550 | 29 |
| AX-157852613 | 29 | 16.203 | KV453346.1 | 585309 | 29-scf00550 | 29 |
| AX-158367641 | 29 | 16.203 | KV453346.1 | 588275 | 29-scf00550 | 29 |
| AX-158367645 | 29 | 16.203 | KV453346.1 | 593163 | 29-scf00550 | 29 |
| AX-158367647 | 29 | 16.203 | KV453346.1 | 598457 | 29-scf00550 | 29 |
| AX-158367648 | 29 | 16.203 | KV453346.1 | 600117 | 29-scf00550 | 29 |
| AX-158367654 | 29 | 16.203 | KV453346.1 | 607282 | 29-scf00550 | 29 |
| AX-158367655 | 29 | 16.203 | KV453346.1 | 607793 | 29-scf00550 | 29 |
| AX-158367656 | 29 | 16.203 | KV453346.1 | 608445 | 29-scf00550 | 29 |
| AX-157852616 | 29 | 16.203 | KV453346.1 | 609161 | 29-scf00550 | 29 |
| AX-158367659 | 29 | 16.203 | KV453346.1 | 610021 | 29-scf00550 | 29 |
| AX-158367663 | 29 | 16.203 | KV453346.1 | 617427 | 29-scf00550 | 29 |
| AX-157889217 | 29 | 16.466 | KV453346.1 | 620101 | 29-scf00550 | 29 |
| AX-158367665 | 29 | 16.466 | KV453346.1 | 621283 | 29-scf00550 | 29 |
| AX-158367666 | 29 | 16.466 | KV453346.1 | 622757 | 29-scf00550 | 29 |
| AX-158367667 | 29 | 16.727 | KV453346.1 | 624887 | 29-scf00550 | 29 |
| AX-158367668 | 29 | 16.727 | KV453346.1 | 629797 | 29-scf00550 | 29 |
| AX-157852621 | 29 | 16.727 | KV453346.1 | 659902 | 29-scf00550 | 29 |
| AX-158367703 | 29 | 16.727 | KV453346.1 | 670207 | 29-scf00550 | 29 |
| AX-157852618 | 29 | 16.837 | KV453346.1 | 645418 | 29-scf00550 | 29 |

|              |    |        |            |        |             |    |
|--------------|----|--------|------------|--------|-------------|----|
| AX-158367682 | 29 | 16.837 | KV453346.1 | 646844 | 29-scf00550 | 29 |
| AX-158367688 | 29 | 16.837 | KV453346.1 | 655260 | 29-scf00550 | 29 |
| AX-158367701 | 29 | 16.837 | KV453346.1 | 669416 | 29-scf00550 | 29 |
| AX-158367709 | 29 | 16.837 | KV453346.1 | 680091 | 29-scf00550 | 29 |
| AX-157746480 | 29 | 16.837 | KV453346.1 | 680967 | 29-scf00550 | 29 |
| AX-158381790 | 29 | 16.946 | KV453346.1 | 656351 | 29-scf00550 | 29 |
| AX-158367690 | 29 | 16.946 | KV453346.1 | 661486 | 29-scf00550 | 29 |
| AX-158367702 | 29 | 17.164 | KV453346.1 | 669838 | 29-scf00550 | 29 |
| AX-158367704 | 29 | 17.164 | KV453346.1 | 671489 | 29-scf00550 | 29 |
| AX-158367706 | 29 | 17.164 | KV453346.1 | 673354 | 29-scf00550 | 29 |
| AX-158367710 | 29 | 17.164 | KV453346.1 | 682340 | 29-scf00550 | 29 |
| AX-157852623 | 29 | 17.164 | KV453346.1 | 683001 | 29-scf00550 | 29 |
| AX-157717476 | 29 | 17.164 | KV453346.1 | 683106 | 29-scf00550 | 29 |
| AX-158367714 | 29 | 17.164 | KV453346.1 | 688312 | 29-scf00550 | 29 |
| AX-158367715 | 29 | 17.164 | KV453346.1 | 689935 | 29-scf00550 | 29 |
| AX-157733822 | 29 | 17.164 | KV453346.1 | 695964 | 29-scf00550 | 29 |
| AX-158367678 | 29 | 17.437 | KV453346.1 | 639702 | 29-scf00550 | 29 |
| AX-157747354 | 29 | 17.437 | KV453346.1 | 656402 | 29-scf00550 | 29 |
| AX-158367716 | 29 | 17.437 | KV453346.1 | 693443 | 29-scf00550 | 29 |
| AX-157882711 | 29 | 17.437 | KV453346.1 | 694796 | 29-scf00550 | 29 |
| AX-158367718 | 29 | 17.437 | KV453346.1 | 697028 | 29-scf00550 | 29 |
| AX-157868377 | 29 | 17.437 | KV453346.1 | 699328 | 29-scf00550 | 29 |
| AX-158367724 | 29 | 17.711 | KV453346.1 | 707948 | 29-scf00550 | 29 |
| AX-158367729 | 29 | 17.711 | KV453346.1 | 713034 | 29-scf00550 | 29 |
| AX-158367730 | 29 | 17.711 | KV453346.1 | 714090 | 29-scf00550 | 29 |
| AX-158367731 | 29 | 17.711 | KV453346.1 | 714461 | 29-scf00550 | 29 |
| AX-158367733 | 29 | 17.711 | KV453346.1 | 716459 | 29-scf00550 | 29 |
| AX-158367737 | 29 | 17.711 | KV453346.1 | 719871 | 29-scf00550 | 29 |
| AX-158367740 | 29 | 17.711 | KV453346.1 | 722391 | 29-scf00550 | 29 |
| AX-158367745 | 29 | 17.711 | KV453346.1 | 729141 | 29-scf00550 | 29 |
| AX-158367746 | 29 | 17.711 | KV453346.1 | 729857 | 29-scf00550 | 29 |
| AX-158367749 | 29 | 17.711 | KV453346.1 | 732414 | 29-scf00550 | 29 |
| AX-158367751 | 29 | 17.711 | KV453346.1 | 734339 | 29-scf00550 | 29 |
| AX-157852624 | 29 | 17.711 | KV453346.1 | 739085 | 29-scf00550 | 29 |
| AX-157852625 | 29 | 17.711 | KV453346.1 | 740991 | 29-scf00550 | 29 |
| AX-158367756 | 29 | 17.711 | KV453346.1 | 744769 | 29-scf00550 | 29 |
| AX-158367768 | 29 | 17.711 | KV453346.1 | 756285 | 29-scf00550 | 29 |
| AX-158367760 | 29 | 17.712 | KV453346.1 | 746984 | 29-scf00550 | 29 |
| AX-158367766 | 29 | 17.873 | KV453346.1 | 754482 | 29-scf00550 | 29 |
| AX-158367769 | 29 | 18.04  | KV453346.1 | 757191 | 29-scf00550 | 29 |
| AX-158367770 | 29 | 18.04  | KV453346.1 | 757637 | 29-scf00550 | 29 |
| AX-158367773 | 29 | 18.04  | KV453346.1 | 759409 | 29-scf00550 | 29 |
| AX-158367774 | 29 | 18.04  | KV453346.1 | 759871 | 29-scf00550 | 29 |
| AX-158367776 | 29 | 18.04  | KV453346.1 | 761312 | 29-scf00550 | 29 |
| AX-158379032 | 29 | 18.04  | KV453346.1 | 763362 | 29-scf00550 | 29 |
| AX-158367781 | 29 | 18.069 | KV453346.1 | 764788 | 29-scf00550 | 29 |
| AX-158367782 | 29 | 18.1   | KV453346.1 | 765236 | 29-scf00550 | 29 |
| AX-158367784 | 29 | 18.125 | KV453346.1 | 766228 | 29-scf00550 | 29 |
| AX-158367785 | 29 | 18.15  | KV453346.1 | 767438 | 29-scf00550 | 29 |
| AX-158367786 | 29 | 18.15  | KV453346.1 | 767689 | 29-scf00550 | 29 |
| AX-158367805 | 29 | 18.909 | KV453346.1 | 788385 | 29-scf00550 | 29 |



|              |    |        |            |        |             |    |
|--------------|----|--------|------------|--------|-------------|----|
| AX-158367806 | 29 | 18.961 | KV453346.1 | 788714 | 29-scf00550 | 29 |
| AX-158367808 | 29 | 19.015 | KV453346.1 | 791216 | 29-scf00550 | 29 |
| AX-158367818 | 29 | 19.015 | KV453346.1 | 798887 | 29-scf00550 | 29 |
| AX-158367810 | 29 | 19.124 | KV453346.1 | 791691 | 29-scf00550 | 29 |
| AX-158367811 | 29 | 19.124 | KV453346.1 | 792903 | 29-scf00550 | 29 |
| AX-158367813 | 29 | 19.124 | KV453346.1 | 794769 | 29-scf00550 | 29 |
| AX-158367814 | 29 | 19.124 | KV453346.1 | 795501 | 29-scf00550 | 29 |
| AX-158367819 | 29 | 19.124 | KV453346.1 | 799461 | 29-scf00550 | 29 |
| AX-158367820 | 29 | 19.124 | KV453346.1 | 803799 | 29-scf00550 | 29 |
| AX-158379034 | 29 | 19.124 | KV453346.1 | 811339 | 29-scf00550 | 29 |
| AX-157852627 | 29 | 19.246 | KV453346.1 | 808292 | 29-scf00550 | 29 |
| AX-157852628 | 29 | 19.246 | KV453346.1 | 808719 | 29-scf00550 | 29 |
| AX-157852629 | 29 | 19.246 | KV453346.1 | 812500 | 29-scf00550 | 29 |
| AX-157738586 | 29 | 19.246 | KV453346.1 | 814766 | 29-scf00550 | 29 |
| AX-157852630 | 29 | 19.246 | KV453346.1 | 814969 | 29-scf00550 | 29 |
| AX-157751957 | 29 | 19.246 | KV453346.1 | 816659 | 29-scf00550 | 29 |
| AX-158367828 | 29 | 19.246 | KV453346.1 | 819889 | 29-scf00550 | 29 |
| AX-158367829 | 29 | 19.246 | KV453346.1 | 820999 | 29-scf00550 | 29 |
| AX-157775345 | 29 | 19.246 | KV453346.1 | 855109 | 29-scf00550 | 29 |
| AX-158367836 | 29 | 19.464 | KV453346.1 | 838345 | 29-scf00550 | 29 |
| AX-157706912 | 29 | 19.464 | KV453346.1 | 842992 | 29-scf00550 | 29 |
| AX-158367839 | 29 | 19.464 | KV453346.1 | 843916 | 29-scf00550 | 29 |
| AX-157852631 | 29 | 19.464 | KV453346.1 | 845519 | 29-scf00550 | 29 |
| AX-158367841 | 29 | 19.464 | KV453346.1 | 847214 | 29-scf00550 | 29 |
| AX-157852632 | 29 | 19.464 | KV453346.1 | 848274 | 29-scf00550 | 29 |
| AX-158367843 | 29 | 19.464 | KV453346.1 | 849130 | 29-scf00550 | 29 |
| AX-158367845 | 29 | 19.464 | KV453346.1 | 850620 | 29-scf00550 | 29 |
| AX-158367847 | 29 | 19.464 | KV453346.1 | 853308 | 29-scf00550 | 29 |
| AX-157889219 | 29 | 19.683 | KV453346.1 | 748080 | 29-scf00550 | 29 |
| AX-158367834 | 29 | 19.683 | KV453346.1 | 836195 | 29-scf00550 | 29 |
| AX-158367851 | 29 | 19.683 | KV453346.1 | 859034 | 29-scf00550 | 29 |
| AX-158367853 | 29 | 19.683 | KV453346.1 | 862748 | 29-scf00550 | 29 |
| AX-158367856 | 29 | 19.683 | KV453346.1 | 863856 | 29-scf00550 | 29 |
| AX-158367857 | 29 | 19.683 | KV453346.1 | 864149 | 29-scf00550 | 29 |
| AX-158367860 | 29 | 19.683 | KV453346.1 | 866370 | 29-scf00550 | 29 |
| AX-158367861 | 29 | 19.683 | KV453346.1 | 871384 | 29-scf00550 | 29 |
| AX-158379035 | 29 | 19.683 | KV453346.1 | 871926 | 29-scf00550 | 29 |
| AX-157809082 | 29 | 19.683 | KV453346.1 | 872615 | 29-scf00550 | 29 |
| AX-158367864 | 29 | 19.683 | KV453346.1 | 878577 | 29-scf00550 | 29 |
| AX-158367850 | 29 | 19.76  | KV453346.1 | 855825 | 29-scf00550 | 29 |
| AX-157852635 | 29 | 19.76  | KV453346.1 | 871547 | 29-scf00550 | 29 |
| AX-158367862 | 29 | 19.832 | KV453346.1 | 874210 | 29-scf00550 | 29 |
| AX-157852637 | 29 | 19.901 | KV453346.1 | 877606 | 29-scf00550 | 29 |
| AX-157715531 | 29 | 19.901 | KV453346.1 | 882330 | 29-scf00550 | 29 |
| AX-158367867 | 29 | 20.011 | KV453346.1 | 886105 | 29-scf00550 | 29 |
| AX-158367868 | 29 | 20.011 | KV453346.1 | 886449 | 29-scf00550 | 29 |
| AX-157852639 | 29 | 20.012 | KV453346.1 | 887616 | 29-scf00550 | 29 |
| AX-158367874 | 29 | 20.129 | KV453346.1 | 899017 | 29-scf00550 | 29 |
| AX-158367875 | 29 | 20.172 | KV453346.1 | 901221 | 29-scf00550 | 29 |
| AX-158367876 | 29 | 20.335 | KV453346.1 | 902970 | 29-scf00550 | 29 |
| AX-158367878 | 29 | 20.346 | KV453346.1 | 904970 | 29-scf00550 | 29 |

|              |    |        |            |         |               |    |
|--------------|----|--------|------------|---------|---------------|----|
| AX-158367880 | 29 | 20.346 | KV453346.1 | 907037  | 29-scf00550   | 29 |
| AX-158367884 | 29 | 20.346 | KV453346.1 | 910720  | 29-scf00550   | 29 |
| AX-158367888 | 29 | 20.566 | KV453346.1 | 921793  | 29-scf00550   | 29 |
| AX-157713865 | 29 | 20.765 | KV453346.1 | 923340  | 29-scf00550   | 29 |
| AX-158367916 | 29 | 20.765 | KV453346.1 | 968039  | 29-scf00550   | 29 |
| AX-157852641 | 29 | 20.776 | KV453346.1 | 927649  | 29-scf00550   | 29 |
| AX-158367892 | 29 | 20.776 | KV453346.1 | 929057  | 29-scf00550   | 29 |
| AX-158367893 | 29 | 20.776 | KV453346.1 | 932806  | 29-scf00550   | 29 |
| AX-158367896 | 29 | 20.886 | KV453346.1 | 934902  | 29-scf00550   | 29 |
| AX-158367899 | 29 | 20.887 | KV453346.1 | 939160  | 29-scf00550   | 29 |
| AX-157852643 | 29 | 20.887 | KV453346.1 | 944503  | 29-scf00550   | 29 |
| AX-157726283 | 29 | 20.887 | KV453346.1 | 961060  | 29-scf00550   | 29 |
| AX-157852644 | 29 | 20.988 | KV453346.1 | 949022  | 29-scf00550   | 29 |
| AX-158367902 | 29 | 20.988 | KV453346.1 | 952605  | 29-scf00550   | 29 |
| AX-158367904 | 29 | 20.988 | KV453346.1 | 958473  | 29-scf00550   | 29 |
| AX-158367905 | 29 | 21.105 | KV453346.1 | 958687  | 29-scf00550   | 29 |
| AX-158367906 | 29 | 21.105 | KV453346.1 | 959107  | 29-scf00550   | 29 |
| AX-158367908 | 29 | 21.105 | KV453346.1 | 962050  | 29-scf00550   | 29 |
| AX-158367909 | 29 | 21.105 | KV453346.1 | 962263  | 29-scf00550   | 29 |
| AX-158367910 | 29 | 21.105 | KV453346.1 | 962900  | 29-scf00550   | 29 |
| AX-158367912 | 29 | 21.105 | KV453346.1 | 964918  | 29-scf00550   | 29 |
| AX-158367915 | 29 | 21.12  | KV453346.1 | 967299  | 29-scf00550   | 29 |
| AX-158367923 | 29 | 21.651 | KV453346.1 | 981468  | 29-scf00550   | 29 |
| AX-158367925 | 29 | 21.651 | KV453346.1 | 985167  | 29-scf00550   | 29 |
| AX-158367926 | 29 | 21.651 | KV453346.1 | 985987  | 29-scf00550   | 29 |
| AX-157721224 | 29 | 21.651 | KV453346.1 | 986079  | 29-scf00550   | 29 |
| AX-157852645 | 29 | 21.651 | KV453346.1 | 987783  | 29-scf00550   | 29 |
| AX-157852646 | 29 | 21.651 | KV453346.1 | 991350  | 29-scf00550   | 29 |
| AX-158367929 | 29 | 21.651 | KV453346.1 | 992951  | 29-scf00550   | 29 |
| AX-158367932 | 29 | 21.651 | KV453346.1 | 997918  | 29-scf00550   | 29 |
| AX-157711407 | 29 | 21.651 | FI869748.1 | 107     | ORI212 Ictalu | UN |
| AX-158367918 | 29 | 21.652 | KV453346.1 | 972050  | 29-scf00550   | 29 |
| AX-158367919 | 29 | 21.652 | KV453346.1 | 973933  | 29-scf00550   | 29 |
| AX-158367921 | 29 | 21.652 | KV453346.1 | 977509  | 29-scf00550   | 29 |
| AX-157754295 | 29 | 21.652 | KV453346.1 | 985650  | 29-scf00550   | 29 |
| AX-158367934 | 29 | 21.652 | KV453346.1 | 1012409 | 29-scf00550   | 29 |
| AX-158367941 | 29 | 21.652 | KV453346.1 | 1025702 | 29-scf00550   | 29 |
| AX-158367936 | 29 | 21.978 | KV453346.1 | 1016935 | 29-scf00550   | 29 |
| AX-157749952 | 29 | 21.978 | KV453346.1 | 1020012 | 29-scf00550   | 29 |
| AX-158367940 | 29 | 21.979 | KV453346.1 | 1025171 | 29-scf00550   | 29 |
| AX-158367945 | 29 | 21.979 | KV453346.1 | 1030815 | 29-scf00550   | 29 |
| AX-158367947 | 29 | 22.088 | KV453346.1 | 1033352 | 29-scf00550   | 29 |
| AX-158367949 | 29 | 22.115 | KV453346.1 | 1036597 | 29-scf00550   | 29 |
| AX-158367951 | 29 | 22.132 | KV453346.1 | 1039623 | 29-scf00550   | 29 |
| AX-157852648 | 29 | 22.156 | KV453346.1 | 1039960 | 29-scf00550   | 29 |
| AX-157852647 | 29 | 22.198 | KV453346.1 | 1019925 | 29-scf00550   | 29 |
| AX-158381791 | 29 | 22.198 | KV453346.1 | 1043778 | 29-scf00550   | 29 |
| AX-157755089 | 29 | 22.198 | KV453346.1 | 1043882 | 29-scf00550   | 29 |
| AX-158367955 | 29 | 22.198 | KV453346.1 | 1045095 | 29-scf00550   | 29 |
| AX-158367956 | 29 | 22.198 | KV453346.1 | 1046726 | 29-scf00550   | 29 |
| AX-157771197 | 29 | 22.198 | KV453346.1 | 1049938 | 29-scf00550   | 29 |

|              |    |        |            |         |             |    |
|--------------|----|--------|------------|---------|-------------|----|
| AX-158367960 | 29 | 22.198 | KV453346.1 | 1051484 | 29-scf00550 | 29 |
| AX-158367971 | 29 | 22.544 | KV453346.1 | 1068696 | 29-scf00550 | 29 |
| AX-157744551 | 29 | 22.545 | KV453346.1 | 1071335 | 29-scf00550 | 29 |
| AX-158367972 | 29 | 22.545 | KV453346.1 | 1072740 | 29-scf00550 | 29 |
| AX-158367973 | 29 | 22.719 | KV453346.1 | 1078276 | 29-scf00550 | 29 |
| AX-157852651 | 29 | 22.719 | KV453346.1 | 1080803 | 29-scf00550 | 29 |
| AX-157852652 | 29 | 22.719 | KV453346.1 | 1081194 | 29-scf00550 | 29 |
| AX-158367975 | 29 | 22.719 | KV453346.1 | 1082594 | 29-scf00550 | 29 |
| AX-158367980 | 29 | 22.719 | KV453346.1 | 1096036 | 29-scf00550 | 29 |
| AX-157889222 | 29 | 22.743 | KV453346.1 | 1084770 | 29-scf00550 | 29 |
| AX-158367976 | 29 | 22.769 | KV453346.1 | 1088166 | 29-scf00550 | 29 |
| AX-157747385 | 29 | 23.011 | KV453346.1 | 1093058 | 29-scf00550 | 29 |
| AX-158367979 | 29 | 23.011 | KV453346.1 | 1094961 | 29-scf00550 | 29 |
| AX-157743850 | 29 | 23.011 | KV453346.1 | 1098126 | 29-scf00550 | 29 |
| AX-157774559 | 29 | 23.011 | KV453346.1 | 1104661 | 29-scf00550 | 29 |
| AX-158367988 | 29 | 23.503 | KV453346.1 | 1106265 | 29-scf00550 | 29 |
| AX-158367990 | 29 | 23.746 | KV453346.1 | 1107736 | 29-scf00550 | 29 |
| AX-157852678 | 29 | 23.746 | KV453346.1 | 1738080 | 29-scf00550 | 29 |
| AX-158368380 | 29 | 23.746 | KV453346.1 | 1783074 | 29-scf00550 | 29 |
| AX-158368408 | 29 | 23.746 | KV453346.1 | 1822858 | 29-scf00550 | 29 |
| AX-157852657 | 29 | 24.273 | KV453346.1 | 1137792 | 29-scf00550 | 29 |
| AX-158368012 | 29 | 24.273 | KV453346.1 | 1166054 | 29-scf00550 | 29 |
| AX-157730700 | 29 | 24.278 | KV453346.1 | 1138002 | 29-scf00550 | 29 |
| AX-158368006 | 29 | 24.283 | KV453346.1 | 1134302 | 29-scf00550 | 29 |
| AX-158381792 | 29 | 24.283 | KV453346.1 | 1147240 | 29-scf00550 | 29 |
| AX-158368008 | 29 | 24.283 | KV453346.1 | 1148326 | 29-scf00550 | 29 |
| AX-157852658 | 29 | 24.283 | KV453346.1 | 1151168 | 29-scf00550 | 29 |
| AX-158368010 | 29 | 24.283 | KV453346.1 | 1153740 | 29-scf00550 | 29 |
| AX-157773821 | 29 | 24.283 | KV453346.1 | 1156065 | 29-scf00550 | 29 |
| AX-158368013 | 29 | 24.283 | KV453346.1 | 1166709 | 29-scf00550 | 29 |
| AX-158368019 | 29 | 24.283 | KV453346.1 | 1173084 | 29-scf00550 | 29 |
| AX-158368020 | 29 | 24.283 | KV453346.1 | 1175284 | 29-scf00550 | 29 |
| AX-158368026 | 29 | 24.334 | KV453346.1 | 1183762 | 29-scf00550 | 29 |
| AX-157754667 | 29 | 24.392 | KV453346.1 | 1184149 | 29-scf00550 | 29 |
| AX-158368028 | 29 | 24.392 | KV453346.1 | 1186076 | 29-scf00550 | 29 |
| AX-157753107 | 29 | 24.392 | KV453346.1 | 1186668 | 29-scf00550 | 29 |
| AX-157756908 | 29 | 24.392 | KV453346.1 | 1191585 | 29-scf00550 | 29 |
| AX-158368034 | 29 | 24.392 | KV453346.1 | 1191726 | 29-scf00550 | 29 |
| AX-158368035 | 29 | 24.502 | KV453346.1 | 1192717 | 29-scf00550 | 29 |
| AX-158368038 | 29 | 24.828 | KV453346.1 | 1196227 | 29-scf00550 | 29 |
| AX-158368018 | 29 | 24.829 | KV453346.1 | 1170848 | 29-scf00550 | 29 |
| AX-158368024 | 29 | 24.829 | KV453346.1 | 1180672 | 29-scf00550 | 29 |
| AX-158368025 | 29 | 24.829 | KV453346.1 | 1181847 | 29-scf00550 | 29 |
| AX-158368040 | 29 | 24.829 | KV453346.1 | 1199085 | 29-scf00550 | 29 |
| AX-158368042 | 29 | 24.829 | KV453346.1 | 1200472 | 29-scf00550 | 29 |
| AX-158368044 | 29 | 24.829 | KV453346.1 | 1202134 | 29-scf00550 | 29 |
| AX-157727148 | 29 | 24.859 | KV453346.1 | 1206037 | 29-scf00550 | 29 |
| AX-158368046 | 29 | 24.893 | KV453346.1 | 1206706 | 29-scf00550 | 29 |
| AX-158368050 | 29 | 24.918 | KV453346.1 | 1211540 | 29-scf00550 | 29 |
| AX-158368051 | 29 | 24.939 | KV453346.1 | 1212147 | 29-scf00550 | 29 |
| AX-158368052 | 29 | 24.968 | KV453346.1 | 1212712 | 29-scf00550 | 29 |

|              |    |        |            |         |             |    |
|--------------|----|--------|------------|---------|-------------|----|
| AX-158368053 | 29 | 24.986 | KV453346.1 | 1214216 | 29-scf00550 | 29 |
| AX-158368055 | 29 | 25.022 | KV453346.1 | 1215919 | 29-scf00550 | 29 |
| AX-158368060 | 29 | 25.048 | KV453346.1 | 1223676 | 29-scf00550 | 29 |
| AX-157852660 | 29 | 25.048 | KV453346.1 | 1226185 | 29-scf00550 | 29 |
| AX-157775765 | 29 | 25.266 | KV453346.1 | 1222546 | 29-scf00550 | 29 |
| AX-157715621 | 29 | 25.266 | KV453346.1 | 1230086 | 29-scf00550 | 29 |
| AX-158368070 | 29 | 25.266 | KV453346.1 | 1240511 | 29-scf00550 | 29 |
| AX-158368071 | 29 | 25.266 | KV453346.1 | 1244090 | 29-scf00550 | 29 |
| AX-158368074 | 29 | 25.266 | KV453346.1 | 1245416 | 29-scf00550 | 29 |
| AX-158368076 | 29 | 25.266 | KV453346.1 | 1247504 | 29-scf00550 | 29 |
| AX-158368079 | 29 | 25.266 | KV453346.1 | 1253684 | 29-scf00550 | 29 |
| AX-157756622 | 29 | 25.266 | KV453346.1 | 1255603 | 29-scf00550 | 29 |
| AX-158368083 | 29 | 25.266 | KV453346.1 | 1256123 | 29-scf00550 | 29 |
| AX-158368084 | 29 | 25.266 | KV453346.1 | 1256413 | 29-scf00550 | 29 |
| AX-158368085 | 29 | 25.266 | KV453346.1 | 1257790 | 29-scf00550 | 29 |
| AX-158368086 | 29 | 25.266 | KV453346.1 | 1259400 | 29-scf00550 | 29 |
| AX-157745636 | 29 | 25.266 | KV453346.1 | 1259609 | 29-scf00550 | 29 |
| AX-158368087 | 29 | 25.266 | KV453346.1 | 1260803 | 29-scf00550 | 29 |
| AX-158368088 | 29 | 25.266 | KV453346.1 | 1261798 | 29-scf00550 | 29 |
| AX-157751883 | 29 | 25.266 | KV453346.1 | 1263693 | 29-scf00550 | 29 |
| AX-158368148 | 29 | 25.266 | KV453346.1 | 1338430 | 29-scf00550 | 29 |
| AX-158368155 | 29 | 25.266 | KV453346.1 | 1354499 | 29-scf00550 | 29 |
| AX-158368096 | 29 | 25.308 | KV453346.1 | 1269836 | 29-scf00550 | 29 |
| AX-158368077 | 29 | 25.376 | KV453346.1 | 1250282 | 29-scf00550 | 29 |
| AX-158368081 | 29 | 25.376 | KV453346.1 | 1255291 | 29-scf00550 | 29 |
| AX-157753094 | 29 | 25.376 | KV453346.1 | 1264096 | 29-scf00550 | 29 |
| AX-157756740 | 29 | 25.376 | KV453346.1 | 1269504 | 29-scf00550 | 29 |
| AX-157889224 | 29 | 25.376 | KV453346.1 | 1270981 | 29-scf00550 | 29 |
| AX-158368097 | 29 | 25.376 | KV453346.1 | 1271261 | 29-scf00550 | 29 |
| AX-158368098 | 29 | 25.376 | KV453346.1 | 1273518 | 29-scf00550 | 29 |
| AX-157852662 | 29 | 25.376 | KV453346.1 | 1273675 | 29-scf00550 | 29 |
| AX-158368099 | 29 | 25.376 | KV453346.1 | 1274552 | 29-scf00550 | 29 |
| AX-158368100 | 29 | 25.376 | KV453346.1 | 1274841 | 29-scf00550 | 29 |
| AX-158368101 | 29 | 25.376 | KV453346.1 | 1276446 | 29-scf00550 | 29 |
| AX-158368103 | 29 | 25.376 | KV453346.1 | 1277605 | 29-scf00550 | 29 |
| AX-158368106 | 29 | 25.376 | KV453346.1 | 1279337 | 29-scf00550 | 29 |
| AX-158368109 | 29 | 25.376 | KV453346.1 | 1283467 | 29-scf00550 | 29 |
| AX-158368112 | 29 | 25.376 | KV453346.1 | 1289727 | 29-scf00550 | 29 |
| AX-158368116 | 29 | 25.376 | KV453346.1 | 1293561 | 29-scf00550 | 29 |
| AX-157722515 | 29 | 25.376 | KV453346.1 | 1293631 | 29-scf00550 | 29 |
| AX-158368118 | 29 | 25.376 | KV453346.1 | 1294072 | 29-scf00550 | 29 |
| AX-157773010 | 29 | 25.376 | KV453346.1 | 1295185 | 29-scf00550 | 29 |
| AX-158368121 | 29 | 25.376 | KV453346.1 | 1297305 | 29-scf00550 | 29 |
| AX-158368122 | 29 | 25.376 | KV453346.1 | 1298960 | 29-scf00550 | 29 |
| AX-158368123 | 29 | 25.376 | KV453346.1 | 1300147 | 29-scf00550 | 29 |
| AX-158368126 | 29 | 25.376 | KV453346.1 | 1302590 | 29-scf00550 | 29 |
| AX-157724114 | 29 | 25.376 | KV453346.1 | 1305648 | 29-scf00550 | 29 |
| AX-158368129 | 29 | 25.376 | KV453346.1 | 1307489 | 29-scf00550 | 29 |
| AX-158368134 | 29 | 25.376 | KV453346.1 | 1319040 | 29-scf00550 | 29 |
| AX-158368135 | 29 | 25.376 | KV453346.1 | 1321717 | 29-scf00550 | 29 |
| AX-158368136 | 29 | 25.376 | KV453346.1 | 1323866 | 29-scf00550 | 29 |

|              |    |        |            |         |             |    |
|--------------|----|--------|------------|---------|-------------|----|
| AX-158368137 | 29 | 25.376 | KV453346.1 | 1324497 | 29-scf00550 | 29 |
| AX-157743760 | 29 | 25.376 | KV453346.1 | 1325597 | 29-scf00550 | 29 |
| AX-158368138 | 29 | 25.376 | KV453346.1 | 1326106 | 29-scf00550 | 29 |
| AX-158368139 | 29 | 25.376 | KV453346.1 | 1329831 | 29-scf00550 | 29 |
| AX-158368142 | 29 | 25.376 | KV453346.1 | 1333857 | 29-scf00550 | 29 |
| AX-158368145 | 29 | 25.376 | KV453346.1 | 1336193 | 29-scf00550 | 29 |
| AX-157754522 | 29 | 25.376 | KV453346.1 | 1342248 | 29-scf00550 | 29 |
| AX-157739005 | 29 | 25.376 | KV453346.1 | 1343776 | 29-scf00550 | 29 |
| AX-157852664 | 29 | 25.376 | KV453346.1 | 1346524 | 29-scf00550 | 29 |
| AX-157852665 | 29 | 25.376 | KV453346.1 | 1350879 | 29-scf00550 | 29 |
| AX-157739410 | 29 | 25.376 | KV453346.1 | 1351683 | 29-scf00550 | 29 |
| AX-157722667 | 29 | 25.376 | KV453346.1 | 1355192 | 29-scf00550 | 29 |
| AX-158368156 | 29 | 25.376 | KV453346.1 | 1356217 | 29-scf00550 | 29 |
| AX-158368158 | 29 | 25.376 | KV453346.1 | 1357579 | 29-scf00550 | 29 |
| AX-158368159 | 29 | 25.376 | KV453346.1 | 1361439 | 29-scf00550 | 29 |
| AX-158368160 | 29 | 25.376 | KV453346.1 | 1361893 | 29-scf00550 | 29 |
| AX-158368161 | 29 | 25.376 | KV453346.1 | 1362052 | 29-scf00550 | 29 |
| AX-158368164 | 29 | 25.376 | KV453346.1 | 1364263 | 29-scf00550 | 29 |
| AX-158368170 | 29 | 25.376 | KV453346.1 | 1374596 | 29-scf00550 | 29 |
| AX-158381794 | 29 | 25.376 | KV453346.1 | 1378471 | 29-scf00550 | 29 |
| AX-158368180 | 29 | 25.376 | KV453346.1 | 1383634 | 29-scf00550 | 29 |
| AX-157862469 | 29 | 25.376 | KV453346.1 | 1433147 | 29-scf00550 | 29 |
| AX-158368298 | 29 | 25.376 | KV453346.1 | 1674146 | 29-scf00550 | 29 |
| AX-158368171 | 29 | 25.594 | KV453346.1 | 1374910 | 29-scf00550 | 29 |
| AX-158368175 | 29 | 25.594 | KV453346.1 | 1377630 | 29-scf00550 | 29 |
| AX-157773864 | 29 | 25.594 | KV453346.1 | 1382271 | 29-scf00550 | 29 |
| AX-158368179 | 29 | 25.594 | KV453346.1 | 1382749 | 29-scf00550 | 29 |
| AX-157727950 | 29 | 25.594 | KV453346.1 | 1424400 | 29-scf00550 | 29 |
| AX-158368216 | 29 | 25.594 | KV453346.1 | 1442053 | 29-scf00550 | 29 |
| AX-158368181 | 29 | 25.606 | KV453346.1 | 1383920 | 29-scf00550 | 29 |
| AX-158368192 | 29 | 26.004 | KV453346.1 | 1398652 | 29-scf00550 | 29 |
| AX-158368194 | 29 | 26.134 | KV453346.1 | 1402343 | 29-scf00550 | 29 |
| AX-158368324 | 29 | 26.134 | KV453346.1 | 1711639 | 29-scf00550 | 29 |
| AX-157774493 | 29 | 26.135 | KV453346.1 | 1412734 | 29-scf00550 | 29 |
| AX-158368200 | 29 | 26.137 | KV453346.1 | 1413446 | 29-scf00550 | 29 |
| AX-158368202 | 29 | 26.138 | KV453346.1 | 1416887 | 29-scf00550 | 29 |
| AX-157741386 | 29 | 26.138 | KV453346.1 | 1420915 | 29-scf00550 | 29 |
| AX-158368228 | 29 | 26.138 | KV453346.1 | 1480981 | 29-scf00550 | 29 |
| AX-158368268 | 29 | 26.138 | KV453346.1 | 1620590 | 29-scf00550 | 29 |
| AX-157741594 | 29 | 26.138 | KV453346.1 | 1681167 | 29-scf00550 | 29 |
| AX-158368305 | 29 | 26.138 | KV453346.1 | 1691268 | 29-scf00550 | 29 |
| AX-158368347 | 29 | 26.138 | KV453346.1 | 1744586 | 29-scf00550 | 29 |
| AX-158368205 | 29 | 26.139 | KV453346.1 | 1422667 | 29-scf00550 | 29 |
| AX-157728915 | 29 | 26.139 | KV453346.1 | 1424551 | 29-scf00550 | 29 |
| AX-157774524 | 29 | 26.139 | KV453346.1 | 1626704 | 29-scf00550 | 29 |
| AX-158368302 | 29 | 26.139 | KV453346.1 | 1683155 | 29-scf00550 | 29 |
| AX-158368361 | 29 | 26.139 | KV453346.1 | 1759254 | 29-scf00550 | 29 |
| AX-158368210 | 29 | 26.14  | KV453346.1 | 1432083 | 29-scf00550 | 29 |
| AX-158368211 | 29 | 26.14  | KV453346.1 | 1433681 | 29-scf00550 | 29 |
| AX-158420063 | 29 | 26.141 | KV453346.1 | 1315011 | 29-scf00550 | 29 |
| AX-158368174 | 29 | 26.141 | KV453346.1 | 1376406 | 29-scf00550 | 29 |

|              |    |        |            |         |             |    |
|--------------|----|--------|------------|---------|-------------|----|
| AX-158368193 | 29 | 26.141 | KV453346.1 | 1400143 | 29-scf00550 | 29 |
| AX-158368199 | 29 | 26.141 | KV453346.1 | 1411628 | 29-scf00550 | 29 |
| AX-158368212 | 29 | 26.141 | KV453346.1 | 1434109 | 29-scf00550 | 29 |
| AX-158368214 | 29 | 26.141 | KV453346.1 | 1436180 | 29-scf00550 | 29 |
| AX-158368218 | 29 | 26.141 | KV453346.1 | 1456585 | 29-scf00550 | 29 |
| AX-158368219 | 29 | 26.141 | KV453346.1 | 1460289 | 29-scf00550 | 29 |
| AX-158368220 | 29 | 26.141 | KV453346.1 | 1461592 | 29-scf00550 | 29 |
| AX-158368223 | 29 | 26.141 | KV453346.1 | 1472625 | 29-scf00550 | 29 |
| AX-158423895 | 29 | 26.141 | KV453346.1 | 1474669 | 29-scf00550 | 29 |
| AX-158368225 | 29 | 26.141 | KV453346.1 | 1476947 | 29-scf00550 | 29 |
| AX-158368230 | 29 | 26.141 | KV453346.1 | 1494709 | 29-scf00550 | 29 |
| AX-158368231 | 29 | 26.141 | KV453346.1 | 1496581 | 29-scf00550 | 29 |
| AX-158368233 | 29 | 26.141 | KV453346.1 | 1500635 | 29-scf00550 | 29 |
| AX-158368234 | 29 | 26.141 | KV453346.1 | 1501380 | 29-scf00550 | 29 |
| AX-158368256 | 29 | 26.141 | KV453346.1 | 1586937 | 29-scf00550 | 29 |
| AX-158368257 | 29 | 26.141 | KV453346.1 | 1587259 | 29-scf00550 | 29 |
| AX-157852673 | 29 | 26.141 | KV453346.1 | 1590986 | 29-scf00550 | 29 |
| AX-158368260 | 29 | 26.141 | KV453346.1 | 1592758 | 29-scf00550 | 29 |
| AX-157755888 | 29 | 26.141 | KV453346.1 | 1607526 | 29-scf00550 | 29 |
| AX-157852675 | 29 | 26.141 | KV453346.1 | 1613125 | 29-scf00550 | 29 |
| AX-158368264 | 29 | 26.141 | KV453346.1 | 1615793 | 29-scf00550 | 29 |
| AX-158368269 | 29 | 26.141 | KV453346.1 | 1627175 | 29-scf00550 | 29 |
| AX-157771353 | 29 | 26.141 | KV453346.1 | 1637694 | 29-scf00550 | 29 |
| AX-158368275 | 29 | 26.141 | KV453346.1 | 1637772 | 29-scf00550 | 29 |
| AX-158368276 | 29 | 26.141 | KV453346.1 | 1638430 | 29-scf00550 | 29 |
| AX-158368277 | 29 | 26.141 | KV453346.1 | 1638806 | 29-scf00550 | 29 |
| AX-158368280 | 29 | 26.141 | KV453346.1 | 1641799 | 29-scf00550 | 29 |
| AX-158368282 | 29 | 26.141 | KV453346.1 | 1645020 | 29-scf00550 | 29 |
| AX-158368285 | 29 | 26.141 | KV453346.1 | 1648794 | 29-scf00550 | 29 |
| AX-157852676 | 29 | 26.141 | KV453346.1 | 1651189 | 29-scf00550 | 29 |
| AX-158368286 | 29 | 26.141 | KV453346.1 | 1655420 | 29-scf00550 | 29 |
| AX-157750313 | 29 | 26.141 | KV453346.1 | 1657807 | 29-scf00550 | 29 |
| AX-158368289 | 29 | 26.141 | KV453346.1 | 1659831 | 29-scf00550 | 29 |
| AX-158368290 | 29 | 26.141 | KV453346.1 | 1660297 | 29-scf00550 | 29 |
| AX-158368296 | 29 | 26.141 | KV453346.1 | 1672194 | 29-scf00550 | 29 |
| AX-158368297 | 29 | 26.141 | KV453346.1 | 1672499 | 29-scf00550 | 29 |
| AX-157747547 | 29 | 26.141 | KV453346.1 | 1676880 | 29-scf00550 | 29 |
| AX-158368306 | 29 | 26.141 | KV453346.1 | 1691625 | 29-scf00550 | 29 |
| AX-157747853 | 29 | 26.141 | KV453346.1 | 1696080 | 29-scf00550 | 29 |
| AX-157719984 | 29 | 26.141 | KV453346.1 | 1713064 | 29-scf00550 | 29 |
| AX-158368358 | 29 | 26.141 | KV453346.1 | 1756998 | 29-scf00550 | 29 |
| AX-158368366 | 29 | 26.141 | KV453346.1 | 1766991 | 29-scf00550 | 29 |
| AX-157722583 | 29 | 26.25  | KV453346.1 | 1670034 | 29-scf00550 | 29 |
| AX-158368300 | 29 | 26.25  | KV453346.1 | 1682571 | 29-scf00550 | 29 |
| AX-157715509 | 29 | 26.25  | KV453346.1 | 1685394 | 29-scf00550 | 29 |
| AX-158368304 | 29 | 26.25  | KV453346.1 | 1688208 | 29-scf00550 | 29 |
| AX-158368311 | 29 | 26.25  | KV453346.1 | 1696440 | 29-scf00550 | 29 |
| AX-158368322 | 29 | 26.25  | KV453346.1 | 1709075 | 29-scf00550 | 29 |
| AX-158368323 | 29 | 26.25  | KV453346.1 | 1711190 | 29-scf00550 | 29 |
| AX-157745174 | 29 | 26.25  | KV453346.1 | 1712586 | 29-scf00550 | 29 |
| AX-158368325 | 29 | 26.25  | KV453346.1 | 1712679 | 29-scf00550 | 29 |

|              |    |        |            |         |             |    |
|--------------|----|--------|------------|---------|-------------|----|
| AX-158381795 | 29 | 26.25  | KV453346.1 | 1713697 | 29-scf00550 | 29 |
| AX-158368326 | 29 | 26.25  | KV453346.1 | 1714392 | 29-scf00550 | 29 |
| AX-158368337 | 29 | 26.25  | KV453346.1 | 1733965 | 29-scf00550 | 29 |
| AX-158368293 | 29 | 26.359 | KV453346.1 | 1666300 | 29-scf00550 | 29 |
| AX-157874072 | 29 | 26.359 | KV453346.1 | 1679260 | 29-scf00550 | 29 |
| AX-158368315 | 29 | 26.359 | KV453346.1 | 1703599 | 29-scf00550 | 29 |
| AX-158368318 | 29 | 26.359 | KV453346.1 | 1706971 | 29-scf00550 | 29 |
| AX-157862472 | 29 | 26.359 | KV453346.1 | 1713202 | 29-scf00550 | 29 |
| AX-157868386 | 29 | 26.359 | KV453346.1 | 1730128 | 29-scf00550 | 29 |
| AX-158368338 | 29 | 26.359 | KV453346.1 | 1735174 | 29-scf00550 | 29 |
| AX-158368364 | 29 | 26.359 | KV453346.1 | 1763626 | 29-scf00550 | 29 |
| AX-157722534 | 29 | 26.468 | KV453346.1 | 1743143 | 29-scf00550 | 29 |
| AX-158368348 | 29 | 26.468 | KV453346.1 | 1745546 | 29-scf00550 | 29 |
| AX-158368349 | 29 | 26.468 | KV453346.1 | 1746451 | 29-scf00550 | 29 |
| AX-158368351 | 29 | 26.468 | KV453346.1 | 1749948 | 29-scf00550 | 29 |
| AX-158368353 | 29 | 26.468 | KV453346.1 | 1753564 | 29-scf00550 | 29 |
| AX-157852680 | 29 | 26.468 | KV453346.1 | 1754196 | 29-scf00550 | 29 |
| AX-158368354 | 29 | 26.499 | KV453346.1 | 1754922 | 29-scf00550 | 29 |
| AX-158368355 | 29 | 26.533 | KV453346.1 | 1755626 | 29-scf00550 | 29 |
| AX-158368357 | 29 | 26.577 | KV453346.1 | 1756722 | 29-scf00550 | 29 |
| AX-158368359 | 29 | 26.577 | KV453346.1 | 1757355 | 29-scf00550 | 29 |
| AX-158368362 | 29 | 26.577 | KV453346.1 | 1760728 | 29-scf00550 | 29 |
| AX-158368363 | 29 | 26.742 | KV453346.1 | 1763178 | 29-scf00550 | 29 |
| AX-157723230 | 29 | 26.742 | KV453346.1 | 1766225 | 29-scf00550 | 29 |
| AX-157716458 | 29 | 26.905 | KV453346.1 | 1661066 | 29-scf00550 | 29 |
| AX-158368313 | 29 | 26.905 | KV453346.1 | 1700118 | 29-scf00550 | 29 |
| AX-158368344 | 29 | 26.905 | KV453346.1 | 1742584 | 29-scf00550 | 29 |
| AX-158368346 | 29 | 26.905 | KV453346.1 | 1744325 | 29-scf00550 | 29 |
| AX-158368367 | 29 | 26.905 | KV453346.1 | 1768064 | 29-scf00550 | 29 |
| AX-157754785 | 29 | 26.905 | KV453346.1 | 1768567 | 29-scf00550 | 29 |
| AX-158368370 | 29 | 26.905 | KV453346.1 | 1771480 | 29-scf00550 | 29 |
| AX-158368379 | 29 | 27.124 | KV453346.1 | 1782368 | 29-scf00550 | 29 |
| AX-158368386 | 29 | 27.124 | KV453346.1 | 1790468 | 29-scf00550 | 29 |
| AX-158368388 | 29 | 27.124 | KV453346.1 | 1792440 | 29-scf00550 | 29 |
| AX-158368389 | 29 | 27.148 | KV453346.1 | 1792982 | 29-scf00550 | 29 |
| AX-158368390 | 29 | 27.175 | KV453346.1 | 1793717 | 29-scf00550 | 29 |
| AX-158368391 | 29 | 27.175 | KV453346.1 | 1794748 | 29-scf00550 | 29 |
| AX-158368393 | 29 | 27.191 | KV453346.1 | 1795960 | 29-scf00550 | 29 |
| AX-158368377 | 29 | 27.219 | KV453346.1 | 1781307 | 29-scf00550 | 29 |
| AX-158368394 | 29 | 27.219 | KV453346.1 | 1796971 | 29-scf00550 | 29 |
| AX-158368395 | 29 | 27.219 | KV453346.1 | 1798701 | 29-scf00550 | 29 |
| AX-158368412 | 29 | 27.219 | KV453346.1 | 1831765 | 29-scf00550 | 29 |
| AX-158368419 | 29 | 27.219 | KV453346.1 | 1844260 | 29-scf00550 | 29 |
| AX-158368430 | 29 | 27.219 | KV453346.1 | 1859540 | 29-scf00550 | 29 |
| AX-158368489 | 29 | 27.219 | KV453346.1 | 1933539 | 29-scf00550 | 29 |
| AX-157852685 | 29 | 27.219 | KV453346.1 | 1934457 | 29-scf00550 | 29 |
| AX-158368400 | 29 | 27.241 | KV453346.1 | 1809315 | 29-scf00550 | 29 |
| AX-158368401 | 29 | 27.241 | KV453346.1 | 1810822 | 29-scf00550 | 29 |
| AX-158368405 | 29 | 27.782 | KV453346.1 | 1818210 | 29-scf00550 | 29 |
| AX-157758673 | 29 | 27.795 | KV453346.1 | 1819193 | 29-scf00550 | 29 |
| AX-158368411 | 29 | 27.998 | KV453346.1 | 1831166 | 29-scf00550 | 29 |

|              |    |        |            |         |             |    |
|--------------|----|--------|------------|---------|-------------|----|
| AX-158368413 | 29 | 28.009 | KV453346.1 | 1832412 | 29-scf00550 | 29 |
| AX-157716126 | 29 | 28.009 | KV453346.1 | 1837600 | 29-scf00550 | 29 |
| AX-158368417 | 29 | 28.009 | KV453346.1 | 1843507 | 29-scf00550 | 29 |
| AX-158368415 | 29 | 28.178 | KV453346.1 | 1841231 | 29-scf00550 | 29 |
| AX-158368418 | 29 | 28.178 | KV453346.1 | 1843809 | 29-scf00550 | 29 |
| AX-158368427 | 29 | 28.178 | KV453346.1 | 1854379 | 29-scf00550 | 29 |
| AX-158368429 | 29 | 28.179 | KV453346.1 | 1858844 | 29-scf00550 | 29 |
| AX-158381797 | 29 | 28.528 | KV453346.1 | 1860729 | 29-scf00550 | 29 |
| AX-157724148 | 29 | 28.528 | KV453346.1 | 1860885 | 29-scf00550 | 29 |
| AX-157774431 | 29 | 28.528 | KV453346.1 | 1865771 | 29-scf00550 | 29 |
| AX-158368438 | 29 | 28.818 | KV453346.1 | 1868821 | 29-scf00550 | 29 |
| AX-158368439 | 29 | 28.818 | KV453346.1 | 1869427 | 29-scf00550 | 29 |
| AX-158368440 | 29 | 28.818 | KV453346.1 | 1871027 | 29-scf00550 | 29 |
| AX-158368441 | 29 | 28.818 | KV453346.1 | 1872653 | 29-scf00550 | 29 |
| AX-158368448 | 29 | 29.138 | KV453346.1 | 1885644 | 29-scf00550 | 29 |
| AX-158420070 | 29 | 29.138 | KV453346.1 | 1889180 | 29-scf00550 | 29 |
| AX-158368452 | 29 | 29.138 | KV453346.1 | 1891870 | 29-scf00550 | 29 |
| AX-158368455 | 29 | 29.138 | KV453346.1 | 1893831 | 29-scf00550 | 29 |
| AX-158368458 | 29 | 29.138 | KV453346.1 | 1896512 | 29-scf00550 | 29 |
| AX-158368459 | 29 | 29.138 | KV453346.1 | 1897683 | 29-scf00550 | 29 |
| AX-158368463 | 29 | 29.138 | KV453346.1 | 1901197 | 29-scf00550 | 29 |
| AX-158368467 | 29 | 29.466 | KV453346.1 | 1907736 | 29-scf00550 | 29 |
| AX-158368453 | 29 | 29.614 | KV453346.1 | 1892525 | 29-scf00550 | 29 |
| AX-158368464 | 29 | 29.614 | KV453346.1 | 1904604 | 29-scf00550 | 29 |
| AX-158368468 | 29 | 29.614 | KV453346.1 | 1908161 | 29-scf00550 | 29 |
| AX-158368470 | 29 | 29.614 | KV453346.1 | 1912258 | 29-scf00550 | 29 |
| AX-158368474 | 29 | 29.627 | KV453346.1 | 1919787 | 29-scf00550 | 29 |
| AX-158368476 | 29 | 29.697 | KV453346.1 | 1921361 | 29-scf00550 | 29 |
| AX-158368477 | 29 | 29.912 | KV453346.1 | 1921969 | 29-scf00550 | 29 |
| AX-158368480 | 29 | 29.912 | KV453346.1 | 1925334 | 29-scf00550 | 29 |
| AX-158368481 | 29 | 29.913 | KV453346.1 | 1925824 | 29-scf00550 | 29 |
| AX-157744095 | 29 | 29.913 | KV453346.1 | 1926103 | 29-scf00550 | 29 |
| AX-158368482 | 29 | 29.913 | KV453346.1 | 1926807 | 29-scf00550 | 29 |
| AX-158368483 | 29 | 29.914 | KV453346.1 | 1927432 | 29-scf00550 | 29 |
| AX-158368485 | 29 | 29.914 | KV453346.1 | 1930212 | 29-scf00550 | 29 |
| AX-158368487 | 29 | 29.915 | KV453346.1 | 1931793 | 29-scf00550 | 29 |
| AX-158368488 | 29 | 30.025 | KV453346.1 | 1932201 | 29-scf00550 | 29 |
| AX-157756065 | 29 | 30.144 | KV453346.1 | 1934343 | 29-scf00550 | 29 |
| AX-158368492 | 29 | 30.296 | KV453346.1 | 1941698 | 29-scf00550 | 29 |
| AX-157774140 | 29 | 30.298 | KV453346.1 | 1945561 | 29-scf00550 | 29 |
| AX-157714867 | 29 | 30.298 | KV453346.1 | 1950584 | 29-scf00550 | 29 |
| AX-158368503 | 29 | 30.298 | KV453346.1 | 1966663 | 29-scf00550 | 29 |
| AX-158368561 | 29 | 30.298 | KV453346.1 | 2056008 | 29-scf00550 | 29 |
| AX-158368493 | 29 | 30.45  | KV453346.1 | 1953914 | 29-scf00550 | 29 |
| AX-157743524 | 29 | 30.451 | KV453346.1 | 1955573 | 29-scf00550 | 29 |
| AX-158368497 | 29 | 30.451 | KV453346.1 | 1960846 | 29-scf00550 | 29 |
| AX-158368499 | 29 | 30.453 | KV453346.1 | 1963603 | 29-scf00550 | 29 |
| AX-158368501 | 29 | 30.678 | KV453346.1 | 1965391 | 29-scf00550 | 29 |
| AX-157744583 | 29 | 30.679 | KV453346.1 | 1966710 | 29-scf00550 | 29 |
| AX-158368504 | 29 | 30.681 | KV453346.1 | 1967785 | 29-scf00550 | 29 |
| AX-158368506 | 29 | 30.681 | KV453346.1 | 1968576 | 29-scf00550 | 29 |



|              |    |        |             |         |             |    |
|--------------|----|--------|-------------|---------|-------------|----|
| AX-158368508 | 29 | 30.802 | KV453346.1  | 1969710 | 29-scf00550 | 29 |
| AX-158368509 | 29 | 30.966 | KV453346.1  | 1970092 | 29-scf00550 | 29 |
| AX-158368511 | 29 | 31.118 | KV453346.1  | 1972733 | 29-scf00550 | 29 |
| AX-158368512 | 29 | 31.121 | KV453346.1  | 1973726 | 29-scf00550 | 29 |
| AX-158368514 | 29 | 31.271 | KV453346.1  | 1975529 | 29-scf00550 | 29 |
| AX-158368515 | 29 | 31.28  | KV453346.1  | 1976700 | 29-scf00550 | 29 |
| AX-158368521 | 29 | 31.72  | KV453346.1  | 1985082 | 29-scf00550 | 29 |
| AX-158368522 | 29 | 31.72  | KV453346.1  | 1985971 | 29-scf00550 | 29 |
| AX-158368523 | 29 | 31.72  | KV453346.1  | 1987206 | 29-scf00550 | 29 |
| AX-158368524 | 29 | 31.72  | KV453346.1  | 1987705 | 29-scf00550 | 29 |
| AX-158368525 | 29 | 31.72  | KV453346.1  | 1989257 | 29-scf00550 | 29 |
| AX-157725591 | 29 | 31.72  | KV453346.1  | 1991240 | 29-scf00550 | 29 |
| AX-158368526 | 29 | 31.731 | KV453346.1  | 1992532 | 29-scf00550 | 29 |
| AX-157889227 | 29 | 31.877 | KV453346.1  | 1996810 | 29-scf00550 | 29 |
| AX-158368532 | 29 | 32.357 | KV453346.1  | 2007806 | 29-scf00550 | 29 |
| AX-158368534 | 29 | 32.385 | KV453346.1  | 2009515 | 29-scf00550 | 29 |
| AX-158368535 | 29 | 32.427 | KV453346.1  | 2009900 | 29-scf00550 | 29 |
| AX-158368540 | 29 | 32.485 | KV453346.1  | 2014559 | 29-scf00550 | 29 |
| AX-158368543 | 29 | 32.485 | KV453346.1  | 2017790 | 29-scf00550 | 29 |
| AX-158368544 | 29 | 32.485 | KV453346.1  | 2018154 | 29-scf00550 | 29 |
| AX-157852688 | 29 | 32.485 | KV453346.1  | 2019932 | 29-scf00550 | 29 |
| AX-157852689 | 29 | 32.485 | KV453346.1  | 2021079 | 29-scf00550 | 29 |
| AX-158368558 | 29 | 32.485 | KV453346.1  | 2048844 | 29-scf00550 | 29 |
| AX-157705923 | 29 | 32.485 | 3ML01032475 | 199     | scf08096_1  | UN |
| AX-158368547 | 29 | 32.702 | KV453346.1  | 2031740 | 29-scf00550 | 29 |
| AX-158368549 | 29 | 32.702 | KV453346.1  | 2034021 | 29-scf00550 | 29 |
| AX-158368550 | 29 | 32.704 | KV453346.1  | 2034602 | 29-scf00550 | 29 |
| AX-158368553 | 29 | 32.704 | KV453346.1  | 2039926 | 29-scf00550 | 29 |
| AX-158368600 | 29 | 32.704 | KV453346.1  | 2113273 | 29-scf00550 | 29 |
| AX-158368546 | 29 | 32.705 | KV453346.1  | 2030812 | 29-scf00550 | 29 |
| AX-158368552 | 29 | 32.705 | KV453346.1  | 2037948 | 29-scf00550 | 29 |
| AX-158368556 | 29 | 32.705 | KV453346.1  | 2044049 | 29-scf00550 | 29 |
| AX-158368557 | 29 | 32.705 | KV453346.1  | 2045889 | 29-scf00550 | 29 |
| AX-158368559 | 29 | 32.705 | KV453346.1  | 2049866 | 29-scf00550 | 29 |
| AX-158368563 | 29 | 32.705 | KV453346.1  | 2060015 | 29-scf00550 | 29 |
| AX-158368568 | 29 | 33.164 | KV453346.1  | 2068776 | 29-scf00550 | 29 |
| AX-157741030 | 29 | 33.164 | KV453346.1  | 2070498 | 29-scf00550 | 29 |
| AX-158368572 | 29 | 33.164 | KV453346.1  | 2073011 | 29-scf00550 | 29 |
| AX-158368573 | 29 | 33.164 | KV453346.1  | 2074332 | 29-scf00550 | 29 |
| AX-157874078 | 29 | 33.164 | KV453346.1  | 2086452 | 29-scf00550 | 29 |
| AX-158421010 | 29 | 33.469 | KV453346.1  | 2077236 | 29-scf00550 | 29 |
| AX-158368576 | 29 | 33.469 | KV453346.1  | 2080951 | 29-scf00550 | 29 |
| AX-158368577 | 29 | 33.469 | KV453346.1  | 2081442 | 29-scf00550 | 29 |
| AX-158368580 | 29 | 33.469 | KV453346.1  | 2086717 | 29-scf00550 | 29 |
| AX-158368583 | 29 | 33.469 | KV453346.1  | 2090432 | 29-scf00550 | 29 |
| AX-158368587 | 29 | 33.469 | KV453346.1  | 2096441 | 29-scf00550 | 29 |
| AX-158368588 | 29 | 33.469 | KV453346.1  | 2098371 | 29-scf00550 | 29 |
| AX-158368591 | 29 | 33.469 | KV453346.1  | 2103188 | 29-scf00550 | 29 |
| AX-158368592 | 29 | 33.469 | KV453346.1  | 2103618 | 29-scf00550 | 29 |
| AX-157708812 | 29 | 33.579 | KV453346.1  | 2101435 | 29-scf00550 | 29 |
| AX-158368596 | 29 | 33.579 | KV453346.1  | 2106779 | 29-scf00550 | 29 |

|              |    |        |            |         |             |    |
|--------------|----|--------|------------|---------|-------------|----|
| AX-158368598 | 29 | 33.579 | KV453346.1 | 2111059 | 29-scf00550 | 29 |
| AX-158368599 | 29 | 33.579 | KV453346.1 | 2113055 | 29-scf00550 | 29 |
| AX-157719911 | 29 | 33.579 | KV453346.1 | 2114191 | 29-scf00550 | 29 |
| AX-158368602 | 29 | 33.579 | KV453346.1 | 2119584 | 29-scf00550 | 29 |
| AX-158368603 | 29 | 33.579 | KV453346.1 | 2120163 | 29-scf00550 | 29 |
| AX-158368604 | 29 | 33.579 | KV453346.1 | 2120421 | 29-scf00550 | 29 |
| AX-157774000 | 29 | 33.633 | KV453346.1 | 2128504 | 29-scf00550 | 29 |
| AX-158368606 | 29 | 33.688 | KV453346.1 | 2128559 | 29-scf00550 | 29 |
| AX-158368608 | 29 | 33.719 | KV453346.1 | 2129682 | 29-scf00550 | 29 |
| AX-158368585 | 29 | 33.748 | KV453346.1 | 2095035 | 29-scf00550 | 29 |
| AX-157747001 | 29 | 33.748 | KV453346.1 | 2097003 | 29-scf00550 | 29 |
| AX-158368593 | 29 | 33.748 | KV453346.1 | 2103921 | 29-scf00550 | 29 |
| AX-158368610 | 29 | 33.748 | KV453346.1 | 2137091 | 29-scf00550 | 29 |
| AX-158368607 | 29 | 33.766 | KV453346.1 | 2129128 | 29-scf00550 | 29 |
| AX-157756590 | 29 | 33.766 | KV453346.1 | 2139471 | 29-scf00550 | 29 |
| AX-158368612 | 29 | 33.766 | KV453346.1 | 2140734 | 29-scf00550 | 29 |
| AX-158368611 | 29 | 33.773 | KV453346.1 | 2140069 | 29-scf00550 | 29 |
| AX-157874079 | 29 | 33.797 | KV453346.1 | 2133522 | 29-scf00550 | 29 |
| AX-158368615 | 29 | 33.797 | KV453346.1 | 2143523 | 29-scf00550 | 29 |
| AX-158368616 | 29 | 33.797 | KV453346.1 | 2145149 | 29-scf00550 | 29 |
| AX-158368617 | 29 | 33.797 | KV453346.1 | 2146207 | 29-scf00550 | 29 |
| AX-158368618 | 29 | 33.797 | KV453346.1 | 2152550 | 29-scf00550 | 29 |
| AX-158368619 | 29 | 33.797 | KV453346.1 | 2153981 | 29-scf00550 | 29 |
| AX-158368622 | 29 | 33.797 | KV453346.1 | 2157709 | 29-scf00550 | 29 |
| AX-158368624 | 29 | 33.797 | KV453346.1 | 2160113 | 29-scf00550 | 29 |
| AX-158368625 | 29 | 33.797 | KV453346.1 | 2161150 | 29-scf00550 | 29 |
| AX-158368627 | 29 | 33.797 | KV453346.1 | 2163465 | 29-scf00550 | 29 |
| AX-158368632 | 29 | 33.797 | KV453346.1 | 2168001 | 29-scf00550 | 29 |
| AX-158368635 | 29 | 33.961 | KV453346.1 | 2169857 | 29-scf00550 | 29 |
| AX-157852696 | 29 | 34.124 | KV453346.1 | 2178283 | 29-scf00550 | 29 |
| AX-158368642 | 29 | 34.124 | KV453346.1 | 2184149 | 29-scf00550 | 29 |
| AX-158368643 | 29 | 34.124 | KV453346.1 | 2185260 | 29-scf00550 | 29 |
| AX-158368648 | 29 | 34.124 | KV453346.1 | 2190605 | 29-scf00550 | 29 |
| AX-158368658 | 29 | 34.124 | KV453346.1 | 2202925 | 29-scf00550 | 29 |
| AX-158368641 | 29 | 34.125 | KV453346.1 | 2179223 | 29-scf00550 | 29 |
| AX-157852697 | 29 | 34.125 | KV453346.1 | 2179799 | 29-scf00550 | 29 |
| AX-158368644 | 29 | 34.125 | KV453346.1 | 2187697 | 29-scf00550 | 29 |
| AX-158368645 | 29 | 34.125 | KV453346.1 | 2188739 | 29-scf00550 | 29 |
| AX-158368646 | 29 | 34.125 | KV453346.1 | 2189966 | 29-scf00550 | 29 |
| AX-158368649 | 29 | 34.125 | KV453346.1 | 2191552 | 29-scf00550 | 29 |
| AX-157852699 | 29 | 34.125 | KV453346.1 | 2198035 | 29-scf00550 | 29 |
| AX-158368653 | 29 | 34.125 | KV453346.1 | 2199286 | 29-scf00550 | 29 |
| AX-158368656 | 29 | 34.125 | KV453346.1 | 2201101 | 29-scf00550 | 29 |
| AX-158368657 | 29 | 34.125 | KV453346.1 | 2201606 | 29-scf00550 | 29 |
| AX-158368659 | 29 | 34.125 | KV453346.1 | 2204272 | 29-scf00550 | 29 |
| AX-157852700 | 29 | 34.125 | KV453346.1 | 2206083 | 29-scf00550 | 29 |
| AX-158368661 | 29 | 34.125 | KV453346.1 | 2207363 | 29-scf00550 | 29 |
| AX-158368664 | 29 | 34.125 | KV453346.1 | 2210693 | 29-scf00550 | 29 |
| AX-158368665 | 29 | 34.125 | KV453346.1 | 2211576 | 29-scf00550 | 29 |
| AX-158368668 | 29 | 34.125 | KV453346.1 | 2212984 | 29-scf00550 | 29 |
| AX-158368669 | 29 | 34.125 | KV453346.1 | 2214243 | 29-scf00550 | 29 |

|              |    |        |             |         |             |    |
|--------------|----|--------|-------------|---------|-------------|----|
| AX-158368802 | 29 | 34.125 | KV453346.1  | 2411505 | 29-scf00550 | 29 |
| AX-158368590 | 29 | 34.343 | KV453346.1  | 2102970 | 29-scf00550 | 29 |
| AX-158368667 | 29 | 34.343 | KV453346.1  | 2212551 | 29-scf00550 | 29 |
| AX-158368672 | 29 | 34.343 | KV453346.1  | 2217386 | 29-scf00550 | 29 |
| AX-158368673 | 29 | 34.343 | KV453346.1  | 2218155 | 29-scf00550 | 29 |
| AX-158368679 | 29 | 34.343 | KV453346.1  | 2233834 | 29-scf00550 | 29 |
| AX-158368680 | 29 | 34.343 | KV453346.1  | 2235454 | 29-scf00550 | 29 |
| AX-158368681 | 29 | 34.343 | KV453346.1  | 2236787 | 29-scf00550 | 29 |
| AX-158368682 | 29 | 34.343 | KV453346.1  | 2238361 | 29-scf00550 | 29 |
| AX-157747999 | 29 | 34.343 | KV453346.1  | 2240241 | 29-scf00550 | 29 |
| AX-158368684 | 29 | 34.343 | KV453346.1  | 2241416 | 29-scf00550 | 29 |
| AX-158368685 | 29 | 34.343 | KV453346.1  | 2246905 | 29-scf00550 | 29 |
| AX-158368686 | 29 | 34.343 | KV453346.1  | 2247400 | 29-scf00550 | 29 |
| AX-158368688 | 29 | 34.343 | KV453346.1  | 2249707 | 29-scf00550 | 29 |
| AX-158368689 | 29 | 34.343 | KV453346.1  | 2250326 | 29-scf00550 | 29 |
| AX-158368692 | 29 | 34.343 | KV453346.1  | 2252187 | 29-scf00550 | 29 |
| AX-158368713 | 29 | 34.343 | KV453346.1  | 2282766 | 29-scf00550 | 29 |
| AX-158368714 | 29 | 34.343 | KV453346.1  | 2282985 | 29-scf00550 | 29 |
| AX-157750008 | 29 | 34.343 | KV453346.1  | 2291871 | 29-scf00550 | 29 |
| AX-158368771 | 29 | 34.343 | KV453346.1  | 2364286 | 29-scf00550 | 29 |
| AX-158368852 | 29 | 34.343 | KV453346.1  | 2497314 | 29-scf00550 | 29 |
| AX-158368902 | 29 | 34.343 | KV453346.1  | 2557672 | 29-scf00550 | 29 |
| AX-157717351 | 29 | 34.343 | KV453346.1  | 2598906 | 29-scf00550 | 29 |
| AX-157706343 | 29 | 34.343 | 3ML01032094 | 284     | scf07707_1  | UN |
| AX-157852698 | 29 | 34.452 | KV453346.1  | 2189264 | 29-scf00550 | 29 |
| AX-158368651 | 29 | 34.452 | KV453346.1  | 2193866 | 29-scf00550 | 29 |
| AX-158368687 | 29 | 34.452 | KV453346.1  | 2248502 | 29-scf00550 | 29 |
| AX-157741153 | 29 | 34.452 | KV453346.1  | 2259854 | 29-scf00550 | 29 |
| AX-158368698 | 29 | 34.452 | KV453346.1  | 2261893 | 29-scf00550 | 29 |
| AX-158368699 | 29 | 34.452 | KV453346.1  | 2262534 | 29-scf00550 | 29 |
| AX-158368700 | 29 | 34.452 | KV453346.1  | 2264328 | 29-scf00550 | 29 |
| AX-157727130 | 29 | 34.452 | KV453346.1  | 2265977 | 29-scf00550 | 29 |
| AX-157773391 | 29 | 34.452 | KV453346.1  | 2266713 | 29-scf00550 | 29 |
| AX-158368702 | 29 | 34.452 | KV453346.1  | 2272268 | 29-scf00550 | 29 |
| AX-158368705 | 29 | 34.452 | KV453346.1  | 2274654 | 29-scf00550 | 29 |
| AX-158368706 | 29 | 34.452 | KV453346.1  | 2276158 | 29-scf00550 | 29 |
| AX-157745263 | 29 | 34.452 | KV453346.1  | 2425836 | 29-scf00550 | 29 |
| AX-158368823 | 29 | 34.452 | KV453346.1  | 2447685 | 29-scf00550 | 29 |
| AX-158368904 | 29 | 34.452 | KV453346.1  | 2559001 | 29-scf00550 | 29 |
| AX-158368710 | 29 | 34.524 | KV453346.1  | 2278324 | 29-scf00550 | 29 |
| AX-157852705 | 29 | 34.524 | KV453346.1  | 2292418 | 29-scf00550 | 29 |
| AX-157852710 | 29 | 34.524 | KV453346.1  | 2324263 | 29-scf00550 | 29 |
| AX-157852703 | 29 | 34.562 | KV453346.1  | 2258211 | 29-scf00550 | 29 |
| AX-158368712 | 29 | 34.562 | KV453346.1  | 2279360 | 29-scf00550 | 29 |
| AX-158368716 | 29 | 34.562 | KV453346.1  | 2284274 | 29-scf00550 | 29 |
| AX-157852704 | 29 | 34.562 | KV453346.1  | 2288728 | 29-scf00550 | 29 |
| AX-158368726 | 29 | 34.562 | KV453346.1  | 2303163 | 29-scf00550 | 29 |
| AX-158368728 | 29 | 34.562 | KV453346.1  | 2307365 | 29-scf00550 | 29 |
| AX-158368729 | 29 | 34.562 | KV453346.1  | 2307717 | 29-scf00550 | 29 |
| AX-158368730 | 29 | 34.562 | KV453346.1  | 2308133 | 29-scf00550 | 29 |
| AX-158368732 | 29 | 34.562 | KV453346.1  | 2311345 | 29-scf00550 | 29 |

|              |    |        |            |         |             |    |
|--------------|----|--------|------------|---------|-------------|----|
| AX-158368735 | 29 | 34.562 | KV453346.1 | 2314348 | 29-scf00550 | 29 |
| AX-158368736 | 29 | 34.562 | KV453346.1 | 2315271 | 29-scf00550 | 29 |
| AX-157756185 | 29 | 34.562 | KV453346.1 | 2316411 | 29-scf00550 | 29 |
| AX-158368738 | 29 | 34.562 | KV453346.1 | 2318672 | 29-scf00550 | 29 |
| AX-157852709 | 29 | 34.562 | KV453346.1 | 2322978 | 29-scf00550 | 29 |
| AX-157746328 | 29 | 34.562 | KV453346.1 | 2327100 | 29-scf00550 | 29 |
| AX-158368742 | 29 | 34.562 | KV453346.1 | 2328264 | 29-scf00550 | 29 |
| AX-158368743 | 29 | 34.562 | KV453346.1 | 2328689 | 29-scf00550 | 29 |
| AX-158368745 | 29 | 34.562 | KV453346.1 | 2330402 | 29-scf00550 | 29 |
| AX-157717193 | 29 | 34.562 | KV453346.1 | 2330668 | 29-scf00550 | 29 |
| AX-158368751 | 29 | 34.562 | KV453346.1 | 2342279 | 29-scf00550 | 29 |
| AX-158368754 | 29 | 34.562 | KV453346.1 | 2345292 | 29-scf00550 | 29 |
| AX-158368755 | 29 | 34.562 | KV453346.1 | 2345998 | 29-scf00550 | 29 |
| AX-158368757 | 29 | 34.562 | KV453346.1 | 2347553 | 29-scf00550 | 29 |
| AX-157874080 | 29 | 34.562 | KV453346.1 | 2349386 | 29-scf00550 | 29 |
| AX-158368759 | 29 | 34.562 | KV453346.1 | 2350122 | 29-scf00550 | 29 |
| AX-158368760 | 29 | 34.562 | KV453346.1 | 2350662 | 29-scf00550 | 29 |
| AX-158368762 | 29 | 34.562 | KV453346.1 | 2352163 | 29-scf00550 | 29 |
| AX-158368764 | 29 | 34.562 | KV453346.1 | 2355866 | 29-scf00550 | 29 |
| AX-158368766 | 29 | 34.562 | KV453346.1 | 2358717 | 29-scf00550 | 29 |
| AX-157717965 | 29 | 34.562 | KV453346.1 | 2361215 | 29-scf00550 | 29 |
| AX-157750587 | 29 | 34.562 | KV453346.1 | 2361961 | 29-scf00550 | 29 |
| AX-158368772 | 29 | 34.562 | KV453346.1 | 2367065 | 29-scf00550 | 29 |
| AX-157746700 | 29 | 34.562 | KV453346.1 | 2423944 | 29-scf00550 | 29 |
| AX-158368847 | 29 | 34.562 | KV453346.1 | 2488852 | 29-scf00550 | 29 |
| AX-158368882 | 29 | 34.562 | KV453346.1 | 2532466 | 29-scf00550 | 29 |
| AX-158368885 | 29 | 34.562 | KV453346.1 | 2535470 | 29-scf00550 | 29 |
| AX-158368638 | 29 | 34.78  | KV453346.1 | 2174153 | 29-scf00550 | 29 |
| AX-158368674 | 29 | 34.78  | KV453346.1 | 2218554 | 29-scf00550 | 29 |
| AX-157852712 | 29 | 34.78  | KV453346.1 | 2346628 | 29-scf00550 | 29 |
| AX-158368774 | 29 | 34.78  | KV453346.1 | 2368479 | 29-scf00550 | 29 |
| AX-158368775 | 29 | 34.78  | KV453346.1 | 2372249 | 29-scf00550 | 29 |
| AX-158368777 | 29 | 34.78  | KV453346.1 | 2374924 | 29-scf00550 | 29 |
| AX-158420077 | 29 | 34.78  | KV453346.1 | 2375553 | 29-scf00550 | 29 |
| AX-158368778 | 29 | 34.78  | KV453346.1 | 2377460 | 29-scf00550 | 29 |
| AX-158368779 | 29 | 34.78  | KV453346.1 | 2377671 | 29-scf00550 | 29 |
| AX-157852713 | 29 | 34.78  | KV453346.1 | 2379151 | 29-scf00550 | 29 |
| AX-158368780 | 29 | 34.78  | KV453346.1 | 2380603 | 29-scf00550 | 29 |
| AX-158368792 | 29 | 34.78  | KV453346.1 | 2399043 | 29-scf00550 | 29 |
| AX-158368805 | 29 | 34.78  | KV453346.1 | 2414669 | 29-scf00550 | 29 |
| AX-157852719 | 29 | 34.78  | KV453346.1 | 2419818 | 29-scf00550 | 29 |
| AX-158368808 | 29 | 34.78  | KV453346.1 | 2424306 | 29-scf00550 | 29 |
| AX-157852720 | 29 | 34.78  | KV453346.1 | 2425971 | 29-scf00550 | 29 |
| AX-158368810 | 29 | 34.78  | KV453346.1 | 2426390 | 29-scf00550 | 29 |
| AX-157852721 | 29 | 34.78  | KV453346.1 | 2429912 | 29-scf00550 | 29 |
| AX-158368811 | 29 | 34.78  | KV453346.1 | 2430708 | 29-scf00550 | 29 |
| AX-158368812 | 29 | 34.78  | KV453346.1 | 2432071 | 29-scf00550 | 29 |
| AX-158368817 | 29 | 34.78  | KV453346.1 | 2440208 | 29-scf00550 | 29 |
| AX-157745432 | 29 | 34.78  | KV453346.1 | 2440621 | 29-scf00550 | 29 |
| AX-158368821 | 29 | 34.78  | KV453346.1 | 2445629 | 29-scf00550 | 29 |
| AX-157852725 | 29 | 34.78  | KV453346.1 | 2454117 | 29-scf00550 | 29 |

|              |    |        |            |         |             |    |
|--------------|----|--------|------------|---------|-------------|----|
| AX-157852726 | 29 | 34.78  | KV453346.1 | 2457116 | 29-scf00550 | 29 |
| AX-157852727 | 29 | 34.78  | KV453346.1 | 2457949 | 29-scf00550 | 29 |
| AX-157852728 | 29 | 34.78  | KV453346.1 | 2459114 | 29-scf00550 | 29 |
| AX-158368831 | 29 | 34.78  | KV453346.1 | 2461070 | 29-scf00550 | 29 |
| AX-157715688 | 29 | 34.78  | KV453346.1 | 2465621 | 29-scf00550 | 29 |
| AX-157744235 | 29 | 34.78  | KV453346.1 | 2467874 | 29-scf00550 | 29 |
| AX-158368836 | 29 | 34.78  | KV453346.1 | 2468377 | 29-scf00550 | 29 |
| AX-158368839 | 29 | 34.78  | KV453346.1 | 2474970 | 29-scf00550 | 29 |
| AX-158368840 | 29 | 34.78  | KV453346.1 | 2475543 | 29-scf00550 | 29 |
| AX-158368841 | 29 | 34.78  | KV453346.1 | 2477325 | 29-scf00550 | 29 |
| AX-158368842 | 29 | 34.78  | KV453346.1 | 2479149 | 29-scf00550 | 29 |
| AX-157755458 | 29 | 34.78  | KV453346.1 | 2480259 | 29-scf00550 | 29 |
| AX-157725084 | 29 | 34.78  | KV453346.1 | 2488040 | 29-scf00550 | 29 |
| AX-158368846 | 29 | 34.78  | KV453346.1 | 2488359 | 29-scf00550 | 29 |
| AX-157735442 | 29 | 34.78  | KV453346.1 | 2489181 | 29-scf00550 | 29 |
| AX-158368848 | 29 | 34.78  | KV453346.1 | 2491637 | 29-scf00550 | 29 |
| AX-157742730 | 29 | 34.78  | KV453346.1 | 2491782 | 29-scf00550 | 29 |
| AX-158368850 | 29 | 34.78  | KV453346.1 | 2493133 | 29-scf00550 | 29 |
| AX-158368854 | 29 | 34.78  | KV453346.1 | 2500480 | 29-scf00550 | 29 |
| AX-158368855 | 29 | 34.78  | KV453346.1 | 2501183 | 29-scf00550 | 29 |
| AX-158368856 | 29 | 34.78  | KV453346.1 | 2502603 | 29-scf00550 | 29 |
| AX-157721829 | 29 | 34.78  | KV453346.1 | 2508627 | 29-scf00550 | 29 |
| AX-158368865 | 29 | 34.78  | KV453346.1 | 2510493 | 29-scf00550 | 29 |
| AX-158368866 | 29 | 34.78  | KV453346.1 | 2511483 | 29-scf00550 | 29 |
| AX-158368868 | 29 | 34.78  | KV453346.1 | 2512646 | 29-scf00550 | 29 |
| AX-158368869 | 29 | 34.78  | KV453346.1 | 2512869 | 29-scf00550 | 29 |
| AX-158368870 | 29 | 34.78  | KV453346.1 | 2513100 | 29-scf00550 | 29 |
| AX-157726454 | 29 | 34.78  | KV453346.1 | 2516746 | 29-scf00550 | 29 |
| AX-158368872 | 29 | 34.78  | KV453346.1 | 2517119 | 29-scf00550 | 29 |
| AX-158368873 | 29 | 34.78  | KV453346.1 | 2518325 | 29-scf00550 | 29 |
| AX-158421017 | 29 | 34.78  | KV453346.1 | 2530469 | 29-scf00550 | 29 |
| AX-158368903 | 29 | 34.78  | KV453346.1 | 2558534 | 29-scf00550 | 29 |
| AX-158368767 | 29 | 34.998 | KV453346.1 | 2359161 | 29-scf00550 | 29 |
| AX-158368776 | 29 | 34.998 | KV453346.1 | 2374687 | 29-scf00550 | 29 |
| AX-157713025 | 29 | 34.998 | KV453346.1 | 2463775 | 29-scf00550 | 29 |
| AX-158368874 | 29 | 34.998 | KV453346.1 | 2520494 | 29-scf00550 | 29 |
| AX-158368877 | 29 | 34.998 | KV453346.1 | 2528088 | 29-scf00550 | 29 |
| AX-158368879 | 29 | 34.998 | KV453346.1 | 2529958 | 29-scf00550 | 29 |
| AX-158368880 | 29 | 34.998 | KV453346.1 | 2531127 | 29-scf00550 | 29 |
| AX-158368881 | 29 | 34.998 | KV453346.1 | 2531840 | 29-scf00550 | 29 |
| AX-158368883 | 29 | 34.998 | KV453346.1 | 2532982 | 29-scf00550 | 29 |
| AX-158368886 | 29 | 34.998 | KV453346.1 | 2537724 | 29-scf00550 | 29 |
| AX-158368890 | 29 | 34.998 | KV453346.1 | 2541173 | 29-scf00550 | 29 |
| AX-158368892 | 29 | 34.998 | KV453346.1 | 2544129 | 29-scf00550 | 29 |
| AX-158368895 | 29 | 34.998 | KV453346.1 | 2545472 | 29-scf00550 | 29 |
| AX-158368896 | 29 | 34.998 | KV453346.1 | 2545884 | 29-scf00550 | 29 |
| AX-158368898 | 29 | 34.998 | KV453346.1 | 2547059 | 29-scf00550 | 29 |
| AX-158368901 | 29 | 34.998 | KV453346.1 | 2554020 | 29-scf00550 | 29 |
| AX-158368844 | 29 | 35.217 | KV453346.1 | 2483089 | 29-scf00550 | 29 |
| AX-158368875 | 29 | 35.217 | KV453346.1 | 2521103 | 29-scf00550 | 29 |
| AX-158368906 | 29 | 35.217 | KV453346.1 | 2561628 | 29-scf00550 | 29 |

|              |    |        |            |         |             |    |
|--------------|----|--------|------------|---------|-------------|----|
| AX-158368907 | 29 | 35.217 | KV453346.1 | 2562253 | 29-scf00550 | 29 |
| AX-157720745 | 29 | 35.217 | KV453346.1 | 2565661 | 29-scf00550 | 29 |
| AX-158368911 | 29 | 35.217 | KV453346.1 | 2566910 | 29-scf00550 | 29 |
| AX-158368913 | 29 | 35.217 | KV453346.1 | 2569434 | 29-scf00550 | 29 |
| AX-158368915 | 29 | 35.217 | KV453346.1 | 2571744 | 29-scf00550 | 29 |
| AX-158368916 | 29 | 35.217 | KV453346.1 | 2573309 | 29-scf00550 | 29 |
| AX-158368605 | 29 | 35.58  | KV453346.1 | 2124305 | 29-scf00550 | 29 |
| AX-158368919 | 29 | 35.58  | KV453346.1 | 2577794 | 29-scf00550 | 29 |
| AX-157852733 | 29 | 35.581 | KV453346.1 | 2582702 | 29-scf00550 | 29 |
| AX-158368920 | 29 | 35.764 | KV453346.1 | 2583966 | 29-scf00550 | 29 |
| AX-158368921 | 29 | 35.764 | KV453346.1 | 2584783 | 29-scf00550 | 29 |
| AX-158368924 | 29 | 35.764 | KV453346.1 | 2588835 | 29-scf00550 | 29 |
| AX-158368929 | 29 | 35.764 | KV453346.1 | 2602027 | 29-scf00550 | 29 |
| AX-158368930 | 29 | 35.764 | KV453346.1 | 2602393 | 29-scf00550 | 29 |
| AX-158368932 | 29 | 35.764 | KV453346.1 | 2603625 | 29-scf00550 | 29 |
| AX-158368934 | 29 | 35.764 | KV453346.1 | 2606738 | 29-scf00550 | 29 |
| AX-158368937 | 29 | 36.394 | KV453346.1 | 2611663 | 29-scf00550 | 29 |
| AX-158368938 | 29 | 36.711 | KV453346.1 | 2613325 | 29-scf00550 | 29 |
| AX-158368940 | 29 | 36.711 | KV453346.1 | 2614802 | 29-scf00550 | 29 |
| AX-158368941 | 29 | 36.711 | KV453346.1 | 2617320 | 29-scf00550 | 29 |
| AX-158368942 | 29 | 36.711 | KV453346.1 | 2619074 | 29-scf00550 | 29 |
| AX-158368956 | 29 | 36.711 | KV453346.1 | 2647325 | 29-scf00550 | 29 |
| AX-158368971 | 29 | 36.711 | KV453346.1 | 2672539 | 29-scf00550 | 29 |
| AX-157771752 | 29 | 36.712 | KV453346.1 | 2621505 | 29-scf00550 | 29 |
| AX-158368944 | 29 | 36.712 | KV453346.1 | 2622681 | 29-scf00550 | 29 |
| AX-158368945 | 29 | 36.824 | KV453346.1 | 2624900 | 29-scf00550 | 29 |
| AX-158368946 | 29 | 37.065 | KV453346.1 | 2626103 | 29-scf00550 | 29 |
| AX-158368947 | 29 | 37.134 | KV453346.1 | 2629297 | 29-scf00550 | 29 |
| AX-158368948 | 29 | 37.184 | KV453346.1 | 2629824 | 29-scf00550 | 29 |
| AX-158368949 | 29 | 37.279 | KV453346.1 | 2630972 | 29-scf00550 | 29 |
| AX-158368950 | 29 | 37.3   | KV453346.1 | 2634206 | 29-scf00550 | 29 |
| AX-158368952 | 29 | 37.3   | KV453346.1 | 2638213 | 29-scf00550 | 29 |
| AX-158368954 | 29 | 37.412 | KV453346.1 | 2644664 | 29-scf00550 | 29 |
| AX-158368957 | 29 | 37.519 | KV453346.1 | 2649664 | 29-scf00550 | 29 |
| AX-158368958 | 29 | 37.519 | KV453346.1 | 2650367 | 29-scf00550 | 29 |
| AX-158368959 | 29 | 37.519 | KV453346.1 | 2650897 | 29-scf00550 | 29 |
| AX-158368960 | 29 | 37.519 | KV453346.1 | 2652586 | 29-scf00550 | 29 |
| AX-158368962 | 29 | 37.571 | KV453346.1 | 2657523 | 29-scf00550 | 29 |
| AX-158368961 | 29 | 37.628 | KV453346.1 | 2655205 | 29-scf00550 | 29 |
| AX-158368963 | 29 | 37.628 | KV453346.1 | 2658848 | 29-scf00550 | 29 |
| AX-158368964 | 29 | 37.628 | KV453346.1 | 2660789 | 29-scf00550 | 29 |
| AX-158368965 | 29 | 37.628 | KV453346.1 | 2662503 | 29-scf00550 | 29 |
| AX-158368966 | 29 | 37.628 | KV453346.1 | 2664321 | 29-scf00550 | 29 |
| AX-157749902 | 29 | 37.628 | KV453346.1 | 2666492 | 29-scf00550 | 29 |
| AX-158368953 | 29 | 37.737 | KV453346.1 | 2640555 | 29-scf00550 | 29 |
| AX-158368967 | 29 | 37.737 | KV453346.1 | 2664963 | 29-scf00550 | 29 |
| AX-158368969 | 29 | 37.737 | KV453346.1 | 2668222 | 29-scf00550 | 29 |
| AX-158368970 | 29 | 37.737 | KV453346.1 | 2669166 | 29-scf00550 | 29 |
| AX-158368972 | 29 | 37.737 | KV453346.1 | 2672997 | 29-scf00550 | 29 |
| AX-158368973 | 29 | 37.737 | KV453346.1 | 2674022 | 29-scf00550 | 29 |
| AX-157772841 | 29 | 37.737 | KV453346.1 | 2678869 | 29-scf00550 | 29 |

|              |    |        |            |         |             |    |
|--------------|----|--------|------------|---------|-------------|----|
| AX-157889230 | 29 | 37.737 | KV453346.1 | 2699972 | 29-scf00550 | 29 |
| AX-158368985 | 29 | 37.885 | KV453346.1 | 2691166 | 29-scf00550 | 29 |
| AX-158368986 | 29 | 38.164 | KV453346.1 | 2694429 | 29-scf00550 | 29 |
| AX-158368988 | 29 | 38.167 | KV453346.1 | 2698002 | 29-scf00550 | 29 |
| AX-158368989 | 29 | 38.174 | KV453346.1 | 2698693 | 29-scf00550 | 29 |
| AX-158368990 | 29 | 38.174 | KV453346.1 | 2699264 | 29-scf00550 | 29 |
| AX-158368992 | 29 | 38.174 | KV453346.1 | 2702882 | 29-scf00550 | 29 |
| AX-158368995 | 29 | 38.195 | KV453346.1 | 2709988 | 29-scf00550 | 29 |
| AX-158368997 | 29 | 38.431 | KV453346.1 | 2711150 | 29-scf00550 | 29 |
| AX-158368996 | 29 | 38.438 | KV453346.1 | 2710794 | 29-scf00550 | 29 |
| AX-157755584 | 29 | 38.438 | KV453346.1 | 2711726 | 29-scf00550 | 29 |
| AX-158369001 | 29 | 38.438 | KV453346.1 | 2723721 | 29-scf00550 | 29 |
| AX-158369004 | 29 | 38.438 | KV453346.1 | 2727952 | 29-scf00550 | 29 |
| AX-157852736 | 29 | 38.438 | KV453346.1 | 2729558 | 29-scf00550 | 29 |
| AX-158369009 | 29 | 38.8   | KV453346.1 | 2739792 | 29-scf00550 | 29 |
| AX-158369011 | 29 | 38.8   | KV453346.1 | 2740930 | 29-scf00550 | 29 |
| AX-158369013 | 29 | 38.8   | KV453346.1 | 2741794 | 29-scf00550 | 29 |
| AX-157852739 | 29 | 38.8   | KV453346.1 | 2742215 | 29-scf00550 | 29 |
| AX-158369014 | 29 | 38.8   | KV453346.1 | 2743504 | 29-scf00550 | 29 |
| AX-157852740 | 29 | 38.8   | KV453346.1 | 2746072 | 29-scf00550 | 29 |
| AX-158369016 | 29 | 38.864 | KV453346.1 | 2749299 | 29-scf00550 | 29 |
| AX-158369006 | 29 | 38.939 | KV453346.1 | 2729799 | 29-scf00550 | 29 |
| AX-158369017 | 29 | 38.939 | KV453346.1 | 2750295 | 29-scf00550 | 29 |
| AX-157882745 | 29 | 38.939 | KV453346.1 | 2751006 | 29-scf00550 | 29 |
| AX-158369019 | 29 | 38.939 | KV453346.1 | 2753060 | 29-scf00550 | 29 |
| AX-158369021 | 29 | 38.939 | KV453346.1 | 2754236 | 29-scf00550 | 29 |
| AX-158369024 | 29 | 38.939 | KV453346.1 | 2756630 | 29-scf00550 | 29 |
| AX-158369029 | 29 | 38.939 | KV453346.1 | 2761203 | 29-scf00550 | 29 |
| AX-158369031 | 29 | 38.939 | KV453346.1 | 2764659 | 29-scf00550 | 29 |
| AX-158369032 | 29 | 38.939 | KV453346.1 | 2765554 | 29-scf00550 | 29 |
| AX-158369133 | 29 | 38.939 | KV453346.1 | 2916601 | 29-scf00550 | 29 |
| AX-157750785 | 29 | 38.996 | KV453346.1 | 2770336 | 29-scf00550 | 29 |
| AX-158369022 | 29 | 39.048 | KV453346.1 | 2754697 | 29-scf00550 | 29 |
| AX-158369033 | 29 | 39.048 | KV453346.1 | 2766967 | 29-scf00550 | 29 |
| AX-158369034 | 29 | 39.048 | KV453346.1 | 2768607 | 29-scf00550 | 29 |
| AX-158369035 | 29 | 39.048 | KV453346.1 | 2771112 | 29-scf00550 | 29 |
| AX-158369036 | 29 | 39.048 | KV453346.1 | 2772177 | 29-scf00550 | 29 |
| AX-158369040 | 29 | 39.048 | KV453346.1 | 2775874 | 29-scf00550 | 29 |
| AX-158369041 | 29 | 39.048 | KV453346.1 | 2776273 | 29-scf00550 | 29 |
| AX-158369044 | 29 | 39.048 | KV453346.1 | 2779094 | 29-scf00550 | 29 |
| AX-158369046 | 29 | 39.048 | KV453346.1 | 2782151 | 29-scf00550 | 29 |
| AX-158369047 | 29 | 39.048 | KV453346.1 | 2782934 | 29-scf00550 | 29 |
| AX-158369048 | 29 | 39.048 | KV453346.1 | 2785820 | 29-scf00550 | 29 |
| AX-158369049 | 29 | 39.048 | KV453346.1 | 2786585 | 29-scf00550 | 29 |
| AX-158369050 | 29 | 39.048 | KV453346.1 | 2788636 | 29-scf00550 | 29 |
| AX-158369051 | 29 | 39.048 | KV453346.1 | 2789422 | 29-scf00550 | 29 |
| AX-158369052 | 29 | 39.048 | KV453346.1 | 2790515 | 29-scf00550 | 29 |
| AX-158369054 | 29 | 39.048 | KV453346.1 | 2792998 | 29-scf00550 | 29 |
| AX-158369058 | 29 | 39.048 | KV453346.1 | 2796296 | 29-scf00550 | 29 |
| AX-158369061 | 29 | 39.048 | KV453346.1 | 2799648 | 29-scf00550 | 29 |
| AX-157745079 | 29 | 39.048 | KV453346.1 | 2800093 | 29-scf00550 | 29 |

|              |    |        |            |         |             |    |
|--------------|----|--------|------------|---------|-------------|----|
| AX-158369063 | 29 | 39.048 | KV453346.1 | 2800264 | 29-scf00550 | 29 |
| AX-158369065 | 29 | 39.048 | KV453346.1 | 2803751 | 29-scf00550 | 29 |
| AX-157852741 | 29 | 39.048 | KV453346.1 | 2806334 | 29-scf00550 | 29 |
| AX-157713488 | 29 | 39.048 | KV453346.1 | 2813329 | 29-scf00550 | 29 |
| AX-158369071 | 29 | 39.048 | KV453346.1 | 2813932 | 29-scf00550 | 29 |
| AX-158369075 | 29 | 39.048 | KV453346.1 | 2818130 | 29-scf00550 | 29 |
| AX-158369077 | 29 | 39.048 | KV453346.1 | 2822970 | 29-scf00550 | 29 |
| AX-158369078 | 29 | 39.048 | KV453346.1 | 2824668 | 29-scf00550 | 29 |
| AX-158369079 | 29 | 39.048 | KV453346.1 | 2826996 | 29-scf00550 | 29 |
| AX-158369080 | 29 | 39.048 | KV453346.1 | 2827520 | 29-scf00550 | 29 |
| AX-158369095 | 29 | 39.048 | KV453346.1 | 2867558 | 29-scf00550 | 29 |
| AX-158369097 | 29 | 39.048 | KV453346.1 | 2868655 | 29-scf00550 | 29 |
| AX-158369100 | 29 | 39.048 | KV453346.1 | 2870150 | 29-scf00550 | 29 |
| AX-158369102 | 29 | 39.048 | KV453346.1 | 2870695 | 29-scf00550 | 29 |
| AX-157889234 | 29 | 39.048 | KV453346.1 | 2871298 | 29-scf00550 | 29 |
| AX-158420083 | 29 | 39.048 | KV453346.1 | 2880218 | 29-scf00550 | 29 |
| AX-158369109 | 29 | 39.048 | KV453346.1 | 2882168 | 29-scf00550 | 29 |
| AX-158369110 | 29 | 39.048 | KV453346.1 | 2882849 | 29-scf00550 | 29 |
| AX-158369111 | 29 | 39.048 | KV453346.1 | 2883319 | 29-scf00550 | 29 |
| AX-157852745 | 29 | 39.048 | KV453346.1 | 2890693 | 29-scf00550 | 29 |
| AX-158369118 | 29 | 39.048 | KV453346.1 | 2893487 | 29-scf00550 | 29 |
| AX-158369121 | 29 | 39.048 | KV453346.1 | 2898643 | 29-scf00550 | 29 |
| AX-158369122 | 29 | 39.048 | KV453346.1 | 2899034 | 29-scf00550 | 29 |
| AX-158369123 | 29 | 39.048 | KV453346.1 | 2899608 | 29-scf00550 | 29 |
| AX-158369124 | 29 | 39.048 | KV453346.1 | 2901646 | 29-scf00550 | 29 |
| AX-158369125 | 29 | 39.048 | KV453346.1 | 2901949 | 29-scf00550 | 29 |
| AX-158369126 | 29 | 39.048 | KV453346.1 | 2903196 | 29-scf00550 | 29 |
| AX-157740966 | 29 | 39.048 | KV453346.1 | 2907550 | 29-scf00550 | 29 |
| AX-158369130 | 29 | 39.048 | KV453346.1 | 2909203 | 29-scf00550 | 29 |
| AX-158369173 | 29 | 39.048 | KV453346.1 | 2956509 | 29-scf00550 | 29 |
| AX-158369225 | 29 | 39.048 | KV453346.1 | 3025381 | 29-scf00550 | 29 |
| AX-158369385 | 29 | 39.048 | KV453346.1 | 3269471 | 29-scf00550 | 29 |
| AX-158369401 | 29 | 39.048 | KV453346.1 | 3294868 | 29-scf00550 | 29 |
| AX-158369405 | 29 | 39.048 | KV453346.1 | 3304829 | 29-scf00550 | 29 |
| AX-158369406 | 29 | 39.048 | KV453346.1 | 3305726 | 29-scf00550 | 29 |
| AX-158369420 | 29 | 39.048 | KV453346.1 | 3324983 | 29-scf00550 | 29 |
| AX-158369421 | 29 | 39.048 | KV453346.1 | 3325486 | 29-scf00550 | 29 |
| AX-158369422 | 29 | 39.048 | KV453346.1 | 3325935 | 29-scf00550 | 29 |
| AX-157726289 | 29 | 39.157 | KV453346.1 | 2915890 | 29-scf00550 | 29 |
| AX-158369134 | 29 | 39.157 | KV453346.1 | 2917154 | 29-scf00550 | 29 |
| AX-157852755 | 29 | 39.157 | KV453346.1 | 3010942 | 29-scf00550 | 29 |
| AX-158369278 | 29 | 39.157 | KV453346.1 | 3097612 | 29-scf00550 | 29 |
| AX-158368993 | 29 | 39.376 | KV453346.1 | 2704257 | 29-scf00550 | 29 |
| AX-158368998 | 29 | 39.376 | KV453346.1 | 2716724 | 29-scf00550 | 29 |
| AX-158369043 | 29 | 39.376 | KV453346.1 | 2778379 | 29-scf00550 | 29 |
| AX-158369116 | 29 | 39.376 | KV453346.1 | 2891886 | 29-scf00550 | 29 |
| AX-158369136 | 29 | 39.376 | KV453346.1 | 2920178 | 29-scf00550 | 29 |
| AX-158369137 | 29 | 39.376 | KV453346.1 | 2920516 | 29-scf00550 | 29 |
| AX-157740060 | 29 | 39.376 | KV453346.1 | 2920642 | 29-scf00550 | 29 |
| AX-158369138 | 29 | 39.376 | KV453346.1 | 2921162 | 29-scf00550 | 29 |
| AX-158369141 | 29 | 39.376 | KV453346.1 | 2922906 | 29-scf00550 | 29 |



|              |    |        |            |         |             |    |
|--------------|----|--------|------------|---------|-------------|----|
| AX-158369144 | 29 | 39.376 | KV453346.1 | 2925396 | 29-scf00550 | 29 |
| AX-158369145 | 29 | 39.376 | KV453346.1 | 2926642 | 29-scf00550 | 29 |
| AX-158369146 | 29 | 39.376 | KV453346.1 | 2927096 | 29-scf00550 | 29 |
| AX-158369147 | 29 | 39.376 | KV453346.1 | 2927353 | 29-scf00550 | 29 |
| AX-158369148 | 29 | 39.376 | KV453346.1 | 2929538 | 29-scf00550 | 29 |
| AX-158369149 | 29 | 39.376 | KV453346.1 | 2930610 | 29-scf00550 | 29 |
| AX-158369150 | 29 | 39.376 | KV453346.1 | 2931013 | 29-scf00550 | 29 |
| AX-158369151 | 29 | 39.376 | KV453346.1 | 2933201 | 29-scf00550 | 29 |
| AX-158369152 | 29 | 39.376 | KV453346.1 | 2933891 | 29-scf00550 | 29 |
| AX-158369153 | 29 | 39.376 | KV453346.1 | 2934134 | 29-scf00550 | 29 |
| AX-158369156 | 29 | 39.376 | KV453346.1 | 2935763 | 29-scf00550 | 29 |
| AX-158369161 | 29 | 39.376 | KV453346.1 | 2942345 | 29-scf00550 | 29 |
| AX-158369163 | 29 | 39.376 | KV453346.1 | 2943067 | 29-scf00550 | 29 |
| AX-157717634 | 29 | 39.376 | KV453346.1 | 2950240 | 29-scf00550 | 29 |
| AX-158369169 | 29 | 39.376 | KV453346.1 | 2951113 | 29-scf00550 | 29 |
| AX-158369170 | 29 | 39.376 | KV453346.1 | 2951328 | 29-scf00550 | 29 |
| AX-158369172 | 29 | 39.376 | KV453346.1 | 2956173 | 29-scf00550 | 29 |
| AX-158369175 | 29 | 39.376 | KV453346.1 | 2958043 | 29-scf00550 | 29 |
| AX-157874083 | 29 | 39.376 | KV453346.1 | 2960151 | 29-scf00550 | 29 |
| AX-158369178 | 29 | 39.376 | KV453346.1 | 2961001 | 29-scf00550 | 29 |
| AX-158369179 | 29 | 39.376 | KV453346.1 | 2961642 | 29-scf00550 | 29 |
| AX-158369180 | 29 | 39.376 | KV453346.1 | 2962153 | 29-scf00550 | 29 |
| AX-158369181 | 29 | 39.376 | KV453346.1 | 2962836 | 29-scf00550 | 29 |
| AX-158369182 | 29 | 39.376 | KV453346.1 | 2963029 | 29-scf00550 | 29 |
| AX-158369183 | 29 | 39.376 | KV453346.1 | 2963408 | 29-scf00550 | 29 |
| AX-158369184 | 29 | 39.376 | KV453346.1 | 2963759 | 29-scf00550 | 29 |
| AX-157852748 | 29 | 39.376 | KV453346.1 | 2965893 | 29-scf00550 | 29 |
| AX-157852749 | 29 | 39.376 | KV453346.1 | 2966054 | 29-scf00550 | 29 |
| AX-158369185 | 29 | 39.376 | KV453346.1 | 2966299 | 29-scf00550 | 29 |
| AX-157882750 | 29 | 39.376 | KV453346.1 | 2971840 | 29-scf00550 | 29 |
| AX-158369191 | 29 | 39.376 | KV453346.1 | 2976374 | 29-scf00550 | 29 |
| AX-158369192 | 29 | 39.376 | KV453346.1 | 2977797 | 29-scf00550 | 29 |
| AX-158423899 | 29 | 39.376 | KV453346.1 | 2978484 | 29-scf00550 | 29 |
| AX-158420087 | 29 | 39.376 | KV453346.1 | 2978568 | 29-scf00550 | 29 |
| AX-158369193 | 29 | 39.376 | KV453346.1 | 2980483 | 29-scf00550 | 29 |
| AX-158369194 | 29 | 39.376 | KV453346.1 | 2981263 | 29-scf00550 | 29 |
| AX-158369195 | 29 | 39.376 | KV453346.1 | 2983333 | 29-scf00550 | 29 |
| AX-157725630 | 29 | 39.376 | KV453346.1 | 2983556 | 29-scf00550 | 29 |
| AX-157709090 | 29 | 39.376 | KV453346.1 | 2983908 | 29-scf00550 | 29 |
| AX-158369196 | 29 | 39.376 | KV453346.1 | 2985254 | 29-scf00550 | 29 |
| AX-158369197 | 29 | 39.376 | KV453346.1 | 2985535 | 29-scf00550 | 29 |
| AX-158369198 | 29 | 39.376 | KV453346.1 | 2985927 | 29-scf00550 | 29 |
| AX-158369199 | 29 | 39.376 | KV453346.1 | 2986400 | 29-scf00550 | 29 |
| AX-157852750 | 29 | 39.376 | KV453346.1 | 2986574 | 29-scf00550 | 29 |
| AX-157874084 | 29 | 39.376 | KV453346.1 | 2987497 | 29-scf00550 | 29 |
| AX-158369200 | 29 | 39.376 | KV453346.1 | 2988540 | 29-scf00550 | 29 |
| AX-158369201 | 29 | 39.376 | KV453346.1 | 2989803 | 29-scf00550 | 29 |
| AX-157874085 | 29 | 39.376 | KV453346.1 | 2992920 | 29-scf00550 | 29 |
| AX-157754674 | 29 | 39.376 | KV453346.1 | 2993099 | 29-scf00550 | 29 |
| AX-158369203 | 29 | 39.376 | KV453346.1 | 2994486 | 29-scf00550 | 29 |
| AX-157852752 | 29 | 39.376 | KV453346.1 | 2995136 | 29-scf00550 | 29 |

|              |    |        |            |         |             |    |
|--------------|----|--------|------------|---------|-------------|----|
| AX-157718661 | 29 | 39.376 | KV453346.1 | 2995553 | 29-scf00550 | 29 |
| AX-158369204 | 29 | 39.376 | KV453346.1 | 2996965 | 29-scf00550 | 29 |
| AX-157852754 | 29 | 39.376 | KV453346.1 | 2997300 | 29-scf00550 | 29 |
| AX-158369210 | 29 | 39.376 | KV453346.1 | 3000748 | 29-scf00550 | 29 |
| AX-158369213 | 29 | 39.376 | KV453346.1 | 3006623 | 29-scf00550 | 29 |
| AX-158369215 | 29 | 39.376 | KV453346.1 | 3011500 | 29-scf00550 | 29 |
| AX-158369217 | 29 | 39.376 | KV453346.1 | 3013891 | 29-scf00550 | 29 |
| AX-158369230 | 29 | 39.376 | KV453346.1 | 3032485 | 29-scf00550 | 29 |
| AX-158369243 | 29 | 39.376 | KV453346.1 | 3045166 | 29-scf00550 | 29 |
| AX-158369247 | 29 | 39.376 | KV453346.1 | 3052388 | 29-scf00550 | 29 |
| AX-157755147 | 29 | 39.376 | KV453346.1 | 3072594 | 29-scf00550 | 29 |
| AX-158369277 | 29 | 39.376 | KV453346.1 | 3097401 | 29-scf00550 | 29 |
| AX-157739599 | 29 | 39.376 | KV453346.1 | 3106467 | 29-scf00550 | 29 |
| AX-158369356 | 29 | 39.376 | KV453346.1 | 3216874 | 29-scf00550 | 29 |
| AX-157715117 | 29 | 39.376 | KV453346.1 | 3234457 | 29-scf00550 | 29 |
| AX-158369425 | 29 | 39.376 | KV453346.1 | 3330950 | 29-scf00550 | 29 |
| AX-158369552 | 29 | 39.376 | KV453350.1 | 151966  | 29-scf00552 | 29 |
| AX-158369569 | 29 | 39.376 | KV453350.1 | 245948  | 29-scf00552 | 29 |
| AX-158369651 | 29 | 39.376 | KV453350.1 | 449483  | 29-scf00552 | 29 |
| AX-158369704 | 29 | 39.376 | KV453350.1 | 542763  | 29-scf00552 | 29 |
| AX-158369797 | 29 | 39.376 | KV453350.1 | 718667  | 29-scf00552 | 29 |
| AX-158369805 | 29 | 39.376 | KV453350.1 | 731308  | 29-scf00552 | 29 |
| AX-158369868 | 29 | 39.376 | KV453350.1 | 871233  | 29-scf00552 | 29 |
| AX-157852814 | 29 | 39.376 | KV453350.1 | 1017442 | 29-scf00552 | 29 |
| AX-158370004 | 29 | 39.376 | KV453350.1 | 1268281 | 29-scf00552 | 29 |
| AX-158370062 | 29 | 39.376 | KV453350.1 | 1434361 | 29-scf00552 | 29 |
| AX-157852832 | 29 | 39.376 | KV453350.1 | 1456385 | 29-scf00552 | 29 |
| AX-158370080 | 29 | 39.376 | KV453350.1 | 1460181 | 29-scf00552 | 29 |
| AX-157754200 | 29 | 39.376 | KV453350.1 | 1464243 | 29-scf00552 | 29 |
| AX-158370085 | 29 | 39.376 | KV453350.1 | 1465214 | 29-scf00552 | 29 |
| AX-158370087 | 29 | 39.376 | KV453350.1 | 1465880 | 29-scf00552 | 29 |
| AX-158370088 | 29 | 39.376 | KV453350.1 | 1466306 | 29-scf00552 | 29 |
| AX-157852833 | 29 | 39.376 | KV453350.1 | 1474500 | 29-scf00552 | 29 |
| AX-158370095 | 29 | 39.376 | KV453350.1 | 1477275 | 29-scf00552 | 29 |
| AX-158370098 | 29 | 39.376 | KV453350.1 | 1486820 | 29-scf00552 | 29 |
| AX-158370099 | 29 | 39.376 | KV453350.1 | 1487631 | 29-scf00552 | 29 |
| AX-158370100 | 29 | 39.376 | KV453350.1 | 1488169 | 29-scf00552 | 29 |
| AX-158370101 | 29 | 39.376 | KV453350.1 | 1489822 | 29-scf00552 | 29 |
| AX-158370103 | 29 | 39.376 | KV453350.1 | 1493665 | 29-scf00552 | 29 |
| AX-158370104 | 29 | 39.376 | KV453350.1 | 1494897 | 29-scf00552 | 29 |
| AX-158370105 | 29 | 39.376 | KV453350.1 | 1495340 | 29-scf00552 | 29 |
| AX-158370110 | 29 | 39.376 | KV453350.1 | 1500339 | 29-scf00552 | 29 |
| AX-158370112 | 29 | 39.376 | KV453350.1 | 1502020 | 29-scf00552 | 29 |
| AX-158370114 | 29 | 39.376 | KV453350.1 | 1506983 | 29-scf00552 | 29 |
| AX-158370117 | 29 | 39.376 | KV453350.1 | 1511634 | 29-scf00552 | 29 |
| AX-158370118 | 29 | 39.376 | KV453350.1 | 1514708 | 29-scf00552 | 29 |
| AX-158370127 | 29 | 39.376 | KV453350.1 | 1522071 | 29-scf00552 | 29 |
| AX-158370130 | 29 | 39.376 | KV453350.1 | 1526064 | 29-scf00552 | 29 |
| AX-158370135 | 29 | 39.376 | KV453350.1 | 1534626 | 29-scf00552 | 29 |
| AX-158370136 | 29 | 39.376 | KV453350.1 | 1535236 | 29-scf00552 | 29 |
| AX-157719290 | 29 | 39.376 | KV453350.1 | 1540182 | 29-scf00552 | 29 |

|              |    |        |             |         |             |    |
|--------------|----|--------|-------------|---------|-------------|----|
| AX-158370142 | 29 | 39.376 | KV453350.1  | 1547519 | 29-scf00552 | 29 |
| AX-158370145 | 29 | 39.376 | KV453350.1  | 1551169 | 29-scf00552 | 29 |
| AX-158370147 | 29 | 39.376 | KV453350.1  | 1555027 | 29-scf00552 | 29 |
| AX-157775364 | 29 | 39.376 | KV453350.1  | 1562557 | 29-scf00552 | 29 |
| AX-158370154 | 29 | 39.376 | KV453350.1  | 1570934 | 29-scf00552 | 29 |
| AX-158370155 | 29 | 39.376 | KV453350.1  | 1573964 | 29-scf00552 | 29 |
| AX-158370179 | 29 | 39.376 | KV453350.1  | 1599289 | 29-scf00552 | 29 |
| AX-158370183 | 29 | 39.376 | KV453350.1  | 1607159 | 29-scf00552 | 29 |
| AX-158370188 | 29 | 39.376 | KV453350.1  | 1637748 | 29-scf00552 | 29 |
| AX-158370201 | 29 | 39.376 | KV453350.1  | 1663848 | 29-scf00552 | 29 |
| AX-158370437 | 29 | 39.376 | KV453347.1  | 51715   | 29-scf00553 | 29 |
| AX-158370430 | 29 | 39.376 | KV453347.1  | 69511   | 29-scf00553 | 29 |
| AX-157689724 | 29 | 39.376 | 3ML01031666 | 283     | scf07284_1  | UN |
| AX-158369142 | 29 | 39.381 | KV453346.1  | 2923608 | 29-scf00550 | 29 |
| AX-158369205 | 29 | 39.381 | KV453346.1  | 2998413 | 29-scf00550 | 29 |
| AX-158369208 | 29 | 39.381 | KV453346.1  | 2999549 | 29-scf00550 | 29 |
| AX-158369206 | 29 | 39.388 | KV453346.1  | 2999003 | 29-scf00550 | 29 |
| AX-157754315 | 29 | 39.443 | KV453346.1  | 3002629 | 29-scf00550 | 29 |
| AX-158369212 | 29 | 39.485 | KV453346.1  | 3006128 | 29-scf00550 | 29 |
| AX-158369218 | 29 | 39.485 | KV453346.1  | 3015203 | 29-scf00550 | 29 |
| AX-158369219 | 29 | 39.485 | KV453346.1  | 3016129 | 29-scf00550 | 29 |
| AX-158369226 | 29 | 39.485 | KV453346.1  | 3026154 | 29-scf00550 | 29 |
| AX-158369227 | 29 | 39.485 | KV453346.1  | 3026934 | 29-scf00550 | 29 |
| AX-158369233 | 29 | 39.485 | KV453346.1  | 3035315 | 29-scf00550 | 29 |
| AX-158369237 | 29 | 39.485 | KV453346.1  | 3037735 | 29-scf00550 | 29 |
| AX-157754050 | 29 | 39.485 | KV453346.1  | 3038315 | 29-scf00550 | 29 |
| AX-158369241 | 29 | 39.485 | KV453346.1  | 3043055 | 29-scf00550 | 29 |
| AX-158369331 | 29 | 39.485 | KV453346.1  | 3182572 | 29-scf00550 | 29 |
| AX-158369242 | 29 | 39.518 | KV453346.1  | 3043289 | 29-scf00550 | 29 |
| AX-158369280 | 29 | 39.518 | KV453346.1  | 3102060 | 29-scf00550 | 29 |
| AX-157739330 | 29 | 39.548 | KV453346.1  | 3045937 | 29-scf00550 | 29 |
| AX-158369245 | 29 | 39.574 | KV453346.1  | 3047826 | 29-scf00550 | 29 |
| AX-158369246 | 29 | 39.597 | KV453346.1  | 3051615 | 29-scf00550 | 29 |
| AX-158369248 | 29 | 39.616 | KV453346.1  | 3053162 | 29-scf00550 | 29 |
| AX-157774945 | 29 | 39.616 | KV453346.1  | 3095735 | 29-scf00550 | 29 |
| AX-158369285 | 29 | 39.616 | KV453346.1  | 3110461 | 29-scf00550 | 29 |
| AX-157709670 | 29 | 39.616 | KV453346.1  | 3261491 | 29-scf00550 | 29 |
| AX-158370469 | 29 | 39.616 | KV453351.1  | 71480   | 29-scf00554 | 29 |
| AX-158371468 | 29 | 39.616 | KV453351.1  | 1371665 | 29-scf00554 | 29 |
| AX-157689428 | 29 | 39.616 | 3ML01029696 | 808     | scf05318_1  | UN |
| AX-157740682 | 29 | 39.637 | KV453346.1  | 3068257 | 29-scf00550 | 29 |
| AX-158369261 | 29 | 39.665 | KV453346.1  | 3072011 | 29-scf00550 | 29 |
| AX-158369262 | 29 | 39.69  | KV453346.1  | 3074679 | 29-scf00550 | 29 |
| AX-158369211 | 29 | 39.704 | KV453346.1  | 3001724 | 29-scf00550 | 29 |
| AX-157757186 | 29 | 39.704 | KV453346.1  | 3028533 | 29-scf00550 | 29 |
| AX-158369236 | 29 | 39.704 | KV453346.1  | 3037092 | 29-scf00550 | 29 |
| AX-158413640 | 29 | 39.704 | KV453346.1  | 3039491 | 29-scf00550 | 29 |
| AX-158369244 | 29 | 39.704 | KV453346.1  | 3047153 | 29-scf00550 | 29 |
| AX-158369263 | 29 | 39.704 | KV453346.1  | 3075943 | 29-scf00550 | 29 |
| AX-158369273 | 29 | 39.704 | KV453346.1  | 3092822 | 29-scf00550 | 29 |
| AX-158369276 | 29 | 39.704 | KV453346.1  | 3093873 | 29-scf00550 | 29 |

|              |    |        |            |         |             |    |
|--------------|----|--------|------------|---------|-------------|----|
| AX-158369279 | 29 | 39.704 | KV453346.1 | 3100683 | 29-scf00550 | 29 |
| AX-158369281 | 29 | 39.704 | KV453346.1 | 3102878 | 29-scf00550 | 29 |
| AX-157739706 | 29 | 39.704 | KV453346.1 | 3103578 | 29-scf00550 | 29 |
| AX-157852760 | 29 | 39.704 | KV453346.1 | 3103771 | 29-scf00550 | 29 |
| AX-158369282 | 29 | 39.704 | KV453346.1 | 3104886 | 29-scf00550 | 29 |
| AX-157852761 | 29 | 39.704 | KV453346.1 | 3105637 | 29-scf00550 | 29 |
| AX-158369283 | 29 | 39.704 | KV453346.1 | 3106173 | 29-scf00550 | 29 |
| AX-157852762 | 29 | 39.704 | KV453346.1 | 3106344 | 29-scf00550 | 29 |
| AX-158369292 | 29 | 39.704 | KV453346.1 | 3122709 | 29-scf00550 | 29 |
| AX-158369293 | 29 | 39.704 | KV453346.1 | 3126300 | 29-scf00550 | 29 |
| AX-158370353 | 29 | 39.704 | KV453347.1 | 473995  | 29-scf00553 | 29 |
| AX-158369055 | 29 | 39.922 | KV453346.1 | 2794358 | 29-scf00550 | 29 |
| AX-157747949 | 29 | 39.922 | KV453346.1 | 3077803 | 29-scf00550 | 29 |
| AX-158369266 | 29 | 39.922 | KV453346.1 | 3083734 | 29-scf00550 | 29 |
| AX-158369270 | 29 | 39.922 | KV453346.1 | 3087901 | 29-scf00550 | 29 |
| AX-158369296 | 29 | 39.922 | KV453346.1 | 3135621 | 29-scf00550 | 29 |
| AX-158369298 | 29 | 39.922 | KV453346.1 | 3138846 | 29-scf00550 | 29 |
| AX-158369299 | 29 | 39.922 | KV453346.1 | 3139234 | 29-scf00550 | 29 |
| AX-158369302 | 29 | 39.922 | KV453346.1 | 3143232 | 29-scf00550 | 29 |
| AX-158369303 | 29 | 39.922 | KV453346.1 | 3143769 | 29-scf00550 | 29 |
| AX-158369305 | 29 | 39.922 | KV453346.1 | 3146711 | 29-scf00550 | 29 |
| AX-158369308 | 29 | 39.922 | KV453346.1 | 3152651 | 29-scf00550 | 29 |
| AX-158369309 | 29 | 39.922 | KV453346.1 | 3153378 | 29-scf00550 | 29 |
| AX-158369339 | 29 | 39.922 | KV453346.1 | 3196106 | 29-scf00550 | 29 |
| AX-158369348 | 29 | 39.922 | KV453346.1 | 3207565 | 29-scf00550 | 29 |
| AX-158369414 | 29 | 39.922 | KV453346.1 | 3317265 | 29-scf00550 | 29 |
| AX-158369434 | 29 | 39.922 | KV453346.1 | 3341697 | 29-scf00550 | 29 |
| AX-158372216 | 29 | 39.922 | KV453350.1 | 1746609 | 29-scf00552 | 29 |
| AX-158372241 | 29 | 39.922 | KV453350.1 | 1782125 | 29-scf00552 | 29 |
| AX-158372243 | 29 | 39.922 | KV453350.1 | 1783290 | 29-scf00552 | 29 |
| AX-158370411 | 29 | 39.922 | KV453347.1 | 158707  | 29-scf00553 | 29 |
| AX-158370393 | 29 | 39.922 | KV453347.1 | 241058  | 29-scf00553 | 29 |
| AX-158370244 | 29 | 39.922 | KV453347.1 | 1226020 | 29-scf00553 | 29 |
| AX-158370241 | 29 | 39.922 | KV453347.1 | 1280811 | 29-scf00553 | 29 |
| AX-158370239 | 29 | 39.922 | KV453347.1 | 1292293 | 29-scf00553 | 29 |
| AX-157889252 | 29 | 39.922 | KV453351.1 | 1344898 | 29-scf00554 | 29 |
| AX-158371476 | 29 | 39.922 | KV453351.1 | 1382638 | 29-scf00554 | 29 |
| AX-158371563 | 29 | 39.922 | KV453351.1 | 1489851 | 29-scf00554 | 29 |
| AX-158371565 | 29 | 39.922 | KV453351.1 | 1492803 | 29-scf00554 | 29 |
| AX-158371608 | 29 | 39.922 | KV453351.1 | 1548043 | 29-scf00554 | 29 |
| AX-158420245 | 29 | 39.922 | KV453349.1 | 130739  | 29-scf00556 | 29 |
| AX-158372292 | 29 | 39.922 | KV453349.1 | 135095  | 29-scf00556 | 29 |
| AX-158372296 | 29 | 39.922 | KV453349.1 | 148794  | 29-scf00556 | 29 |
| AX-158372297 | 29 | 39.922 | KV453349.1 | 149850  | 29-scf00556 | 29 |
| AX-158372329 | 29 | 39.922 | KV453349.1 | 246160  | 29-scf00556 | 29 |
| AX-158369310 | 29 | 39.982 | KV453346.1 | 3154608 | 29-scf00550 | 29 |
| AX-157852766 | 29 | 40.013 | KV453346.1 | 3164531 | 29-scf00550 | 29 |
| AX-158369300 | 29 | 40.031 | KV453346.1 | 3139745 | 29-scf00550 | 29 |
| AX-158369320 | 29 | 40.031 | KV453346.1 | 3168202 | 29-scf00550 | 29 |
| AX-158369321 | 29 | 40.031 | KV453346.1 | 3169437 | 29-scf00550 | 29 |
| AX-158369326 | 29 | 40.031 | KV453346.1 | 3177669 | 29-scf00550 | 29 |

|              |    |        |            |         |             |    |
|--------------|----|--------|------------|---------|-------------|----|
| AX-157710327 | 29 | 40.031 | KV453346.1 | 3178858 | 29-scf00550 | 29 |
| AX-158369327 | 29 | 40.031 | KV453346.1 | 3179451 | 29-scf00550 | 29 |
| AX-158369329 | 29 | 40.031 | KV453346.1 | 3180060 | 29-scf00550 | 29 |
| AX-158369333 | 29 | 40.031 | KV453346.1 | 3185351 | 29-scf00550 | 29 |
| AX-157722749 | 29 | 40.031 | KV453346.1 | 3187052 | 29-scf00550 | 29 |
| AX-158369340 | 29 | 40.031 | KV453346.1 | 3198756 | 29-scf00550 | 29 |
| AX-157882756 | 29 | 40.031 | KV453346.1 | 3200808 | 29-scf00550 | 29 |
| AX-158369341 | 29 | 40.031 | KV453346.1 | 3201072 | 29-scf00550 | 29 |
| AX-158369342 | 29 | 40.031 | KV453346.1 | 3202018 | 29-scf00550 | 29 |
| AX-158369344 | 29 | 40.031 | KV453346.1 | 3203647 | 29-scf00550 | 29 |
| AX-158369345 | 29 | 40.031 | KV453346.1 | 3205359 | 29-scf00550 | 29 |
| AX-158369346 | 29 | 40.031 | KV453346.1 | 3205960 | 29-scf00550 | 29 |
| AX-158369347 | 29 | 40.031 | KV453346.1 | 3206417 | 29-scf00550 | 29 |
| AX-158369365 | 29 | 40.031 | KV453346.1 | 3225603 | 29-scf00550 | 29 |
| AX-158369370 | 29 | 40.031 | KV453346.1 | 3230961 | 29-scf00550 | 29 |
| AX-158420093 | 29 | 40.031 | KV453346.1 | 3319244 | 29-scf00550 | 29 |
| AX-158369778 | 29 | 40.031 | KV453350.1 | 684228  | 29-scf00552 | 29 |
| AX-158372227 | 29 | 40.031 | KV453350.1 | 1766637 | 29-scf00552 | 29 |
| AX-158370428 | 29 | 40.031 | KV453347.1 | 98855   | 29-scf00553 | 29 |
| AX-158372266 | 29 | 40.031 | KV453349.1 | 25162   | 29-scf00556 | 29 |
| AX-158369328 | 29 | 40.14  | KV453346.1 | 3179600 | 29-scf00550 | 29 |
| AX-158369330 | 29 | 40.14  | KV453346.1 | 3181357 | 29-scf00550 | 29 |
| AX-158369351 | 29 | 40.14  | KV453346.1 | 3210093 | 29-scf00550 | 29 |
| AX-158369353 | 29 | 40.14  | KV453346.1 | 3214360 | 29-scf00550 | 29 |
| AX-158369359 | 29 | 40.14  | KV453346.1 | 3220020 | 29-scf00550 | 29 |
| AX-158369361 | 29 | 40.14  | KV453346.1 | 3222721 | 29-scf00550 | 29 |
| AX-158369364 | 29 | 40.14  | KV453346.1 | 3224782 | 29-scf00550 | 29 |
| AX-158369369 | 29 | 40.14  | KV453346.1 | 3227538 | 29-scf00550 | 29 |
| AX-157852767 | 29 | 40.14  | KV453346.1 | 3231346 | 29-scf00550 | 29 |
| AX-158369371 | 29 | 40.14  | KV453346.1 | 3235320 | 29-scf00550 | 29 |
| AX-157743736 | 29 | 40.14  | KV453346.1 | 3235853 | 29-scf00550 | 29 |
| AX-158369387 | 29 | 40.14  | KV453346.1 | 3274708 | 29-scf00550 | 29 |
| AX-158369398 | 29 | 40.14  | KV453346.1 | 3293504 | 29-scf00550 | 29 |
| AX-157852773 | 29 | 40.14  | KV453346.1 | 3316212 | 29-scf00550 | 29 |
| AX-158369418 | 29 | 40.14  | KV453346.1 | 3324182 | 29-scf00550 | 29 |
| AX-158370435 | 29 | 40.14  | KV453347.1 | 53872   | 29-scf00553 | 29 |
| AX-157720279 | 29 | 40.194 | KV453346.1 | 3286040 | 29-scf00550 | 29 |
| AX-158369264 | 29 | 40.25  | KV453346.1 | 3077143 | 29-scf00550 | 29 |
| AX-158369297 | 29 | 40.25  | KV453346.1 | 3138160 | 29-scf00550 | 29 |
| AX-157852772 | 29 | 40.25  | KV453346.1 | 3310869 | 29-scf00550 | 29 |
| AX-157754137 | 29 | 40.25  | KV453346.1 | 3318298 | 29-scf00550 | 29 |
| AX-158369417 | 29 | 40.25  | KV453346.1 | 3323518 | 29-scf00550 | 29 |
| AX-158370025 | 29 | 40.25  | KV453350.1 | 1334289 | 29-scf00552 | 29 |
| AX-157852849 | 29 | 40.25  | KV453347.1 | 622215  | 29-scf00553 | 29 |
| AX-158370311 | 29 | 40.25  | KV453347.1 | 753861  | 29-scf00553 | 29 |
| AX-158369439 | 29 | 40.32  | KV453346.1 | 3351072 | 29-scf00550 | 29 |
| AX-158369362 | 29 | 40.359 | KV453346.1 | 3224007 | 29-scf00550 | 29 |
| AX-158369386 | 29 | 40.359 | KV453346.1 | 3273471 | 29-scf00550 | 29 |
| AX-158369594 | 29 | 40.359 | KV453350.1 | 322519  | 29-scf00552 | 29 |
| AX-158369632 | 29 | 40.359 | KV453350.1 | 409125  | 29-scf00552 | 29 |
| AX-158369653 | 29 | 40.359 | KV453350.1 | 456137  | 29-scf00552 | 29 |

|              |    |        |            |         |             |    |
|--------------|----|--------|------------|---------|-------------|----|
| AX-158369669 | 29 | 40.359 | KV453350.1 | 486878  | 29-scf00552 | 29 |
| AX-158369670 | 29 | 40.359 | KV453350.1 | 487466  | 29-scf00552 | 29 |
| AX-158369717 | 29 | 40.359 | KV453350.1 | 567330  | 29-scf00552 | 29 |
| AX-158370417 | 29 | 40.359 | KV453347.1 | 148507  | 29-scf00553 | 29 |
| AX-157868396 | 29 | 40.359 | KV453347.1 | 151558  | 29-scf00553 | 29 |
| AX-158370390 | 29 | 40.359 | KV453347.1 | 255441  | 29-scf00553 | 29 |
| AX-158370386 | 29 | 40.359 | KV453347.1 | 281687  | 29-scf00553 | 29 |
| AX-158370383 | 29 | 40.359 | KV453347.1 | 285953  | 29-scf00553 | 29 |
| AX-158370382 | 29 | 40.359 | KV453347.1 | 289117  | 29-scf00553 | 29 |
| AX-158370381 | 29 | 40.359 | KV453347.1 | 294558  | 29-scf00553 | 29 |
| AX-158423911 | 29 | 40.359 | KV453347.1 | 326245  | 29-scf00553 | 29 |
| AX-158370375 | 29 | 40.359 | KV453347.1 | 329426  | 29-scf00553 | 29 |
| AX-158370364 | 29 | 40.359 | KV453347.1 | 388709  | 29-scf00553 | 29 |
| AX-158370363 | 29 | 40.359 | KV453347.1 | 390776  | 29-scf00553 | 29 |
| AX-157852853 | 29 | 40.359 | KV453347.1 | 398936  | 29-scf00553 | 29 |
| AX-158370361 | 29 | 40.359 | KV453347.1 | 402505  | 29-scf00553 | 29 |
| AX-158370357 | 29 | 40.359 | KV453347.1 | 435768  | 29-scf00553 | 29 |
| AX-158420169 | 29 | 40.359 | KV453347.1 | 438682  | 29-scf00553 | 29 |
| AX-158370355 | 29 | 40.359 | KV453347.1 | 453225  | 29-scf00553 | 29 |
| AX-158370354 | 29 | 40.359 | KV453347.1 | 461235  | 29-scf00553 | 29 |
| AX-158370352 | 29 | 40.359 | KV453347.1 | 477713  | 29-scf00553 | 29 |
| AX-157882801 | 29 | 40.359 | KV453347.1 | 477885  | 29-scf00553 | 29 |
| AX-158370334 | 29 | 40.359 | KV453347.1 | 603756  | 29-scf00553 | 29 |
| AX-158370333 | 29 | 40.359 | KV453347.1 | 605646  | 29-scf00553 | 29 |
| AX-158370331 | 29 | 40.359 | KV453347.1 | 619352  | 29-scf00553 | 29 |
| AX-158370329 | 29 | 40.359 | KV453347.1 | 622019  | 29-scf00553 | 29 |
| AX-158370325 | 29 | 40.359 | KV453347.1 | 643921  | 29-scf00553 | 29 |
| AX-158370322 | 29 | 40.359 | KV453347.1 | 672677  | 29-scf00553 | 29 |
| AX-158370321 | 29 | 40.359 | KV453347.1 | 676723  | 29-scf00553 | 29 |
| AX-158370318 | 29 | 40.359 | KV453347.1 | 698430  | 29-scf00553 | 29 |
| AX-158370317 | 29 | 40.359 | KV453347.1 | 702436  | 29-scf00553 | 29 |
| AX-158420163 | 29 | 40.359 | KV453347.1 | 706199  | 29-scf00553 | 29 |
| AX-158370314 | 29 | 40.359 | KV453347.1 | 711523  | 29-scf00553 | 29 |
| AX-158370312 | 29 | 40.359 | KV453347.1 | 753463  | 29-scf00553 | 29 |
| AX-158370310 | 29 | 40.359 | KV453347.1 | 757529  | 29-scf00553 | 29 |
| AX-158370309 | 29 | 40.359 | KV453347.1 | 758160  | 29-scf00553 | 29 |
| AX-158370305 | 29 | 40.359 | KV453347.1 | 770161  | 29-scf00553 | 29 |
| AX-158370300 | 29 | 40.359 | KV453347.1 | 849487  | 29-scf00553 | 29 |
| AX-157852848 | 29 | 40.359 | KV453347.1 | 886845  | 29-scf00553 | 29 |
| AX-158370293 | 29 | 40.359 | KV453347.1 | 908521  | 29-scf00553 | 29 |
| AX-158370288 | 29 | 40.359 | KV453347.1 | 943202  | 29-scf00553 | 29 |
| AX-158370287 | 29 | 40.359 | KV453347.1 | 944424  | 29-scf00553 | 29 |
| AX-158370283 | 29 | 40.359 | KV453347.1 | 964245  | 29-scf00553 | 29 |
| AX-158370281 | 29 | 40.359 | KV453347.1 | 970919  | 29-scf00553 | 29 |
| AX-158370280 | 29 | 40.359 | KV453347.1 | 984343  | 29-scf00553 | 29 |
| AX-158370260 | 29 | 40.359 | KV453347.1 | 1148233 | 29-scf00553 | 29 |
| AX-158370251 | 29 | 40.359 | KV453347.1 | 1198838 | 29-scf00553 | 29 |
| AX-158370231 | 29 | 40.359 | KV453347.1 | 1348399 | 29-scf00553 | 29 |
| AX-158370224 | 29 | 40.359 | KV453347.1 | 1374330 | 29-scf00553 | 29 |
| AX-158370214 | 29 | 40.359 | KV453347.1 | 1421201 | 29-scf00553 | 29 |
| AX-158376232 | 29 | 40.359 | KV453347.1 | 1599025 | 29-scf00553 | 29 |

|              |    |        |             |         |             |    |
|--------------|----|--------|-------------|---------|-------------|----|
| AX-158376234 | 29 | 40.359 | KV453347.1  | 1600320 | 29-scf00553 | 29 |
| AX-158376240 | 29 | 40.359 | KV453347.1  | 1660508 | 29-scf00553 | 29 |
| AX-158376253 | 29 | 40.359 | KV453347.1  | 1761480 | 29-scf00553 | 29 |
| AX-158376259 | 29 | 40.359 | KV453347.1  | 1828454 | 29-scf00553 | 29 |
| AX-158370514 | 29 | 40.359 | KV453351.1  | 209106  | 29-scf00554 | 29 |
| AX-158370515 | 29 | 40.359 | KV453351.1  | 214429  | 29-scf00554 | 29 |
| AX-158370519 | 29 | 40.359 | KV453351.1  | 228521  | 29-scf00554 | 29 |
| AX-158370574 | 29 | 40.359 | KV453351.1  | 374829  | 29-scf00554 | 29 |
| AX-158370765 | 29 | 40.359 | KV453351.1  | 551142  | 29-scf00554 | 29 |
| AX-158371030 | 29 | 40.359 | KV453351.1  | 822939  | 29-scf00554 | 29 |
| AX-157771494 | 29 | 40.359 | KV453351.1  | 991970  | 29-scf00554 | 29 |
| AX-158371454 | 29 | 40.359 | KV453351.1  | 1354942 | 29-scf00554 | 29 |
| AX-158371510 | 29 | 40.359 | KV453351.1  | 1429130 | 29-scf00554 | 29 |
| AX-158371511 | 29 | 40.359 | KV453351.1  | 1429868 | 29-scf00554 | 29 |
| AX-158371668 | 29 | 40.359 | KV453351.1  | 1617657 | 29-scf00554 | 29 |
| AX-158371762 | 29 | 40.359 | KV453351.1  | 1720063 | 29-scf00554 | 29 |
| AX-158371833 | 29 | 40.359 | KV453351.1  | 1814556 | 29-scf00554 | 29 |
| AX-158371889 | 29 | 40.359 | KV453351.1  | 1876127 | 29-scf00554 | 29 |
| AX-158372264 | 29 | 40.359 | KV453349.1  | 22334   | 29-scf00556 | 29 |
| AX-158372269 | 29 | 40.359 | KV453349.1  | 30562   | 29-scf00556 | 29 |
| AX-158372272 | 29 | 40.359 | KV453349.1  | 32397   | 29-scf00556 | 29 |
| AX-158372281 | 29 | 40.359 | KV453349.1  | 80389   | 29-scf00556 | 29 |
| AX-158372283 | 29 | 40.359 | KV453349.1  | 85467   | 29-scf00556 | 29 |
| AX-158372285 | 29 | 40.359 | KV453349.1  | 87204   | 29-scf00556 | 29 |
| AX-158372298 | 29 | 40.359 | KV453349.1  | 151628  | 29-scf00556 | 29 |
| AX-158372301 | 29 | 40.359 | KV453349.1  | 157975  | 29-scf00556 | 29 |
| AX-158372317 | 29 | 40.359 | KV453349.1  | 221375  | 29-scf00556 | 29 |
| AX-157882922 | 29 | 40.359 | KV453349.1  | 277348  | 29-scf00556 | 29 |
| AX-158372337 | 29 | 40.359 | KV453349.1  | 291805  | 29-scf00556 | 29 |
| AX-158372339 | 29 | 40.359 | KV453349.1  | 295069  | 29-scf00556 | 29 |
| AX-158372342 | 29 | 40.359 | KV453349.1  | 305431  | 29-scf00556 | 29 |
| AX-158372347 | 29 | 40.359 | KV453349.1  | 351919  | 29-scf00556 | 29 |
| AX-158372356 | 29 | 40.359 | KV453349.1  | 378097  | 29-scf00556 | 29 |
| AX-158372359 | 29 | 40.359 | KV453349.1  | 398131  | 29-scf00556 | 29 |
| AX-158372363 | 29 | 40.359 | KV453349.1  | 419332  | 29-scf00556 | 29 |
| AX-158372364 | 29 | 40.359 | KV453349.1  | 422292  | 29-scf00556 | 29 |
| AX-158372373 | 29 | 40.359 | KV453349.1  | 487994  | 29-scf00556 | 29 |
| AX-158372375 | 29 | 40.359 | KV453349.1  | 494871  | 29-scf00556 | 29 |
| AX-157685420 | 29 | 40.359 | KV453348.1  | 56530   | 29-scf00616 | 29 |
| AX-157685424 | 29 | 40.359 | KV453348.1  | 77506   | 29-scf00616 | 29 |
| AX-157685425 | 29 | 40.359 | KV453348.1  | 102720  | 29-scf00616 | 29 |
| AX-157712074 | 29 | 40.359 | 3ML01033519 | 117     | scf09173_1  | UN |
| AX-158420092 | 29 | 40.468 | KV453346.1  | 3282998 | 29-scf00550 | 29 |
| AX-158369882 | 29 | 40.468 | KV453350.1  | 913349  | 29-scf00552 | 29 |
| AX-158370446 | 29 | 40.468 | KV453347.1  | 10303   | 29-scf00553 | 29 |
| AX-158370439 | 29 | 40.468 | KV453347.1  | 44290   | 29-scf00553 | 29 |
| AX-158370438 | 29 | 40.468 | KV453347.1  | 46666   | 29-scf00553 | 29 |
| AX-158370436 | 29 | 40.468 | KV453347.1  | 53419   | 29-scf00553 | 29 |
| AX-158370434 | 29 | 40.468 | KV453347.1  | 55654   | 29-scf00553 | 29 |
| AX-158370433 | 29 | 40.468 | KV453347.1  | 63716   | 29-scf00553 | 29 |
| AX-158370432 | 29 | 40.468 | KV453347.1  | 65365   | 29-scf00553 | 29 |

|              |    |        |            |         |             |    |
|--------------|----|--------|------------|---------|-------------|----|
| AX-158370431 | 29 | 40.468 | KV453347.1 | 69176   | 29-scf00553 | 29 |
| AX-158370422 | 29 | 40.468 | KV453347.1 | 123188  | 29-scf00553 | 29 |
| AX-158370420 | 29 | 40.468 | KV453347.1 | 126984  | 29-scf00553 | 29 |
| AX-158370415 | 29 | 40.468 | KV453347.1 | 149459  | 29-scf00553 | 29 |
| AX-158370409 | 29 | 40.468 | KV453347.1 | 161715  | 29-scf00553 | 29 |
| AX-158420205 | 29 | 40.468 | KV453351.1 | 1119377 | 29-scf00554 | 29 |
| AX-158371547 | 29 | 40.468 | KV453351.1 | 1471391 | 29-scf00554 | 29 |
| AX-158371614 | 29 | 40.468 | KV453351.1 | 1553681 | 29-scf00554 | 29 |
| AX-158369395 | 29 | 40.795 | KV453346.1 | 3286424 | 29-scf00550 | 29 |
| AX-158369573 | 29 | 40.795 | KV453350.1 | 270468  | 29-scf00552 | 29 |
| AX-157889239 | 29 | 40.795 | KV453350.1 | 302886  | 29-scf00552 | 29 |
| AX-158369658 | 29 | 40.795 | KV453350.1 | 462454  | 29-scf00552 | 29 |
| AX-158370060 | 29 | 40.795 | KV453350.1 | 1426333 | 29-scf00552 | 29 |
| AX-158370109 | 29 | 40.795 | KV453350.1 | 1499443 | 29-scf00552 | 29 |
| AX-158370121 | 29 | 40.795 | KV453350.1 | 1517697 | 29-scf00552 | 29 |
| AX-158370122 | 29 | 40.795 | KV453350.1 | 1518439 | 29-scf00552 | 29 |
| AX-158372183 | 29 | 40.795 | KV453350.1 | 1697222 | 29-scf00552 | 29 |
| AX-158372203 | 29 | 40.795 | KV453350.1 | 1734619 | 29-scf00552 | 29 |
| AX-158372222 | 29 | 40.795 | KV453350.1 | 1758107 | 29-scf00552 | 29 |
| AX-158372226 | 29 | 40.795 | KV453350.1 | 1763977 | 29-scf00552 | 29 |
| AX-158372255 | 29 | 40.795 | KV453350.1 | 1807325 | 29-scf00552 | 29 |
| AX-158370683 | 29 | 40.795 | KV453351.1 | 479710  | 29-scf00554 | 29 |
| AX-158370688 | 29 | 40.795 | KV453351.1 | 486424  | 29-scf00554 | 29 |
| AX-158370958 | 29 | 40.795 | KV453351.1 | 745374  | 29-scf00554 | 29 |
| AX-157771657 | 29 | 40.851 | KV453350.1 | 1827410 | 29-scf00552 | 29 |
| AX-158369312 | 29 | 40.905 | KV453346.1 | 3159618 | 29-scf00550 | 29 |
| AX-158369366 | 29 | 40.905 | KV453346.1 | 3226819 | 29-scf00550 | 29 |
| AX-158369393 | 29 | 40.905 | KV453346.1 | 3284389 | 29-scf00550 | 29 |
| AX-158369394 | 29 | 40.905 | KV453346.1 | 3285025 | 29-scf00550 | 29 |
| AX-158369396 | 29 | 40.905 | KV453346.1 | 3287016 | 29-scf00550 | 29 |
| AX-157750480 | 29 | 40.905 | KV453346.1 | 3288322 | 29-scf00550 | 29 |
| AX-158369586 | 29 | 40.905 | KV453350.1 | 305438  | 29-scf00552 | 29 |
| AX-158369661 | 29 | 40.905 | KV453350.1 | 473023  | 29-scf00552 | 29 |
| AX-158369734 | 29 | 40.905 | KV453350.1 | 608472  | 29-scf00552 | 29 |
| AX-158369856 | 29 | 40.905 | KV453350.1 | 825638  | 29-scf00552 | 29 |
| AX-158372214 | 29 | 40.905 | KV453350.1 | 1744953 | 29-scf00552 | 29 |
| AX-158370392 | 29 | 40.905 | KV453347.1 | 249824  | 29-scf00553 | 29 |
| AX-158370387 | 29 | 40.905 | KV453347.1 | 270742  | 29-scf00553 | 29 |
| AX-158370378 | 29 | 40.905 | KV453347.1 | 306571  | 29-scf00553 | 29 |
| AX-158370362 | 29 | 40.905 | KV453347.1 | 398755  | 29-scf00553 | 29 |
| AX-158370359 | 29 | 40.905 | KV453347.1 | 412390  | 29-scf00553 | 29 |
| AX-158370358 | 29 | 40.905 | KV453347.1 | 419879  | 29-scf00553 | 29 |
| AX-157852850 | 29 | 40.905 | KV453347.1 | 471304  | 29-scf00553 | 29 |
| AX-158370295 | 29 | 40.905 | KV453347.1 | 903729  | 29-scf00553 | 29 |
| AX-158376241 | 29 | 40.905 | KV453347.1 | 1665907 | 29-scf00553 | 29 |
| AX-158370573 | 29 | 40.905 | KV453351.1 | 371093  | 29-scf00554 | 29 |
| AX-158370580 | 29 | 40.905 | KV453351.1 | 383269  | 29-scf00554 | 29 |
| AX-158370589 | 29 | 40.905 | KV453351.1 | 392773  | 29-scf00554 | 29 |
| AX-158370648 | 29 | 40.905 | KV453351.1 | 448210  | 29-scf00554 | 29 |
| AX-158371648 | 29 | 40.905 | KV453351.1 | 1593277 | 29-scf00554 | 29 |
| AX-158372274 | 29 | 40.905 | KV453349.1 | 45653   | 29-scf00556 | 29 |



|              |    |        |            |         |             |    |
|--------------|----|--------|------------|---------|-------------|----|
| AX-158372276 | 29 | 40.905 | KV453349.1 | 49163   | 29-scf00556 | 29 |
| AX-158372277 | 29 | 40.905 | KV453349.1 | 60833   | 29-scf00556 | 29 |
| AX-158372278 | 29 | 40.905 | KV453349.1 | 61382   | 29-scf00556 | 29 |
| AX-158372279 | 29 | 40.905 | KV453349.1 | 65581   | 29-scf00556 | 29 |
| AX-158372303 | 29 | 40.905 | KV453349.1 | 159272  | 29-scf00556 | 29 |
| AX-158421079 | 29 | 40.905 | KV453349.1 | 178416  | 29-scf00556 | 29 |
| AX-158372306 | 29 | 40.905 | KV453349.1 | 181236  | 29-scf00556 | 29 |
| AX-158372309 | 29 | 40.905 | KV453349.1 | 183016  | 29-scf00556 | 29 |
| AX-158372312 | 29 | 40.905 | KV453349.1 | 202648  | 29-scf00556 | 29 |
| AX-158372314 | 29 | 40.905 | KV453349.1 | 205686  | 29-scf00556 | 29 |
| AX-158372345 | 29 | 40.905 | KV453349.1 | 341445  | 29-scf00556 | 29 |
| AX-158372348 | 29 | 40.905 | KV453349.1 | 359967  | 29-scf00556 | 29 |
| AX-157716267 | 29 | 40.905 | KV453349.1 | 388626  | 29-scf00556 | 29 |
| AX-158369564 | 29 | 40.959 | KV453350.1 | 219133  | 29-scf00552 | 29 |
| AX-158369295 | 29 | 41.014 | KV453346.1 | 3130160 | 29-scf00550 | 29 |
| AX-158369338 | 29 | 41.014 | KV453346.1 | 3190529 | 29-scf00550 | 29 |
| AX-158369372 | 29 | 41.014 | KV453346.1 | 3238560 | 29-scf00550 | 29 |
| AX-157720222 | 29 | 41.014 | KV453346.1 | 3244705 | 29-scf00550 | 29 |
| AX-157742431 | 29 | 41.014 | KV453346.1 | 3332905 | 29-scf00550 | 29 |
| AX-158369443 | 29 | 41.014 | KV453346.1 | 3359626 | 29-scf00550 | 29 |
| AX-158369549 | 29 | 41.014 | KV453350.1 | 129313  | 29-scf00552 | 29 |
| AX-158369551 | 29 | 41.014 | KV453350.1 | 146751  | 29-scf00552 | 29 |
| AX-158369555 | 29 | 41.014 | KV453350.1 | 168716  | 29-scf00552 | 29 |
| AX-157868394 | 29 | 41.014 | KV453350.1 | 205331  | 29-scf00552 | 29 |
| AX-158369568 | 29 | 41.014 | KV453350.1 | 239431  | 29-scf00552 | 29 |
| AX-157724163 | 29 | 41.014 | KV453350.1 | 253557  | 29-scf00552 | 29 |
| AX-158369574 | 29 | 41.014 | KV453350.1 | 272035  | 29-scf00552 | 29 |
| AX-158369576 | 29 | 41.014 | KV453350.1 | 274634  | 29-scf00552 | 29 |
| AX-158369579 | 29 | 41.014 | KV453350.1 | 281979  | 29-scf00552 | 29 |
| AX-158369584 | 29 | 41.014 | KV453350.1 | 295613  | 29-scf00552 | 29 |
| AX-158369588 | 29 | 41.014 | KV453350.1 | 306925  | 29-scf00552 | 29 |
| AX-158369590 | 29 | 41.014 | KV453350.1 | 310016  | 29-scf00552 | 29 |
| AX-158369592 | 29 | 41.014 | KV453350.1 | 316843  | 29-scf00552 | 29 |
| AX-157852785 | 29 | 41.014 | KV453350.1 | 318095  | 29-scf00552 | 29 |
| AX-158369593 | 29 | 41.014 | KV453350.1 | 318332  | 29-scf00552 | 29 |
| AX-157852786 | 29 | 41.014 | KV453350.1 | 319832  | 29-scf00552 | 29 |
| AX-158369595 | 29 | 41.014 | KV453350.1 | 326714  | 29-scf00552 | 29 |
| AX-158369598 | 29 | 41.014 | KV453350.1 | 332302  | 29-scf00552 | 29 |
| AX-158369599 | 29 | 41.014 | KV453350.1 | 333956  | 29-scf00552 | 29 |
| AX-158369601 | 29 | 41.014 | KV453350.1 | 335022  | 29-scf00552 | 29 |
| AX-158369602 | 29 | 41.014 | KV453350.1 | 336228  | 29-scf00552 | 29 |
| AX-158369605 | 29 | 41.014 | KV453350.1 | 337933  | 29-scf00552 | 29 |
| AX-157889240 | 29 | 41.014 | KV453350.1 | 338963  | 29-scf00552 | 29 |
| AX-157852788 | 29 | 41.014 | KV453350.1 | 341111  | 29-scf00552 | 29 |
| AX-158369607 | 29 | 41.014 | KV453350.1 | 342952  | 29-scf00552 | 29 |
| AX-158369609 | 29 | 41.014 | KV453350.1 | 345869  | 29-scf00552 | 29 |
| AX-158369612 | 29 | 41.014 | KV453350.1 | 351061  | 29-scf00552 | 29 |
| AX-158369613 | 29 | 41.014 | KV453350.1 | 353448  | 29-scf00552 | 29 |
| AX-158369620 | 29 | 41.014 | KV453350.1 | 375463  | 29-scf00552 | 29 |
| AX-158369623 | 29 | 41.014 | KV453350.1 | 382174  | 29-scf00552 | 29 |
| AX-158369629 | 29 | 41.014 | KV453350.1 | 393736  | 29-scf00552 | 29 |

|              |    |        |            |        |             |    |
|--------------|----|--------|------------|--------|-------------|----|
| AX-158369631 | 29 | 41.014 | KV453350.1 | 407036 | 29-scf00552 | 29 |
| AX-158369633 | 29 | 41.014 | KV453350.1 | 410378 | 29-scf00552 | 29 |
| AX-158369634 | 29 | 41.014 | KV453350.1 | 410701 | 29-scf00552 | 29 |
| AX-158369635 | 29 | 41.014 | KV453350.1 | 411780 | 29-scf00552 | 29 |
| AX-158369639 | 29 | 41.014 | KV453350.1 | 427860 | 29-scf00552 | 29 |
| AX-158369648 | 29 | 41.014 | KV453350.1 | 443000 | 29-scf00552 | 29 |
| AX-158369649 | 29 | 41.014 | KV453350.1 | 446125 | 29-scf00552 | 29 |
| AX-158369650 | 29 | 41.014 | KV453350.1 | 447563 | 29-scf00552 | 29 |
| AX-158369652 | 29 | 41.014 | KV453350.1 | 454387 | 29-scf00552 | 29 |
| AX-158369654 | 29 | 41.014 | KV453350.1 | 456779 | 29-scf00552 | 29 |
| AX-157721929 | 29 | 41.014 | KV453350.1 | 461545 | 29-scf00552 | 29 |
| AX-158369659 | 29 | 41.014 | KV453350.1 | 465857 | 29-scf00552 | 29 |
| AX-158369660 | 29 | 41.014 | KV453350.1 | 468811 | 29-scf00552 | 29 |
| AX-158369662 | 29 | 41.014 | KV453350.1 | 477261 | 29-scf00552 | 29 |
| AX-158369663 | 29 | 41.014 | KV453350.1 | 477686 | 29-scf00552 | 29 |
| AX-158369665 | 29 | 41.014 | KV453350.1 | 481502 | 29-scf00552 | 29 |
| AX-158369666 | 29 | 41.014 | KV453350.1 | 482381 | 29-scf00552 | 29 |
| AX-158369668 | 29 | 41.014 | KV453350.1 | 484961 | 29-scf00552 | 29 |
| AX-158369672 | 29 | 41.014 | KV453350.1 | 489307 | 29-scf00552 | 29 |
| AX-158369680 | 29 | 41.014 | KV453350.1 | 502566 | 29-scf00552 | 29 |
| AX-158369691 | 29 | 41.014 | KV453350.1 | 522875 | 29-scf00552 | 29 |
| AX-158369693 | 29 | 41.014 | KV453350.1 | 524095 | 29-scf00552 | 29 |
| AX-157852789 | 29 | 41.014 | KV453350.1 | 524562 | 29-scf00552 | 29 |
| AX-158369699 | 29 | 41.014 | KV453350.1 | 538156 | 29-scf00552 | 29 |
| AX-158369702 | 29 | 41.014 | KV453350.1 | 541490 | 29-scf00552 | 29 |
| AX-158369706 | 29 | 41.014 | KV453350.1 | 545163 | 29-scf00552 | 29 |
| AX-158369714 | 29 | 41.014 | KV453350.1 | 560188 | 29-scf00552 | 29 |
| AX-157718416 | 29 | 41.014 | KV453350.1 | 595919 | 29-scf00552 | 29 |
| AX-158369731 | 29 | 41.014 | KV453350.1 | 604051 | 29-scf00552 | 29 |
| AX-158369732 | 29 | 41.014 | KV453350.1 | 605491 | 29-scf00552 | 29 |
| AX-158369735 | 29 | 41.014 | KV453350.1 | 610002 | 29-scf00552 | 29 |
| AX-158369745 | 29 | 41.014 | KV453350.1 | 635904 | 29-scf00552 | 29 |
| AX-158369746 | 29 | 41.014 | KV453350.1 | 640581 | 29-scf00552 | 29 |
| AX-158369749 | 29 | 41.014 | KV453350.1 | 642689 | 29-scf00552 | 29 |
| AX-158369753 | 29 | 41.014 | KV453350.1 | 647935 | 29-scf00552 | 29 |
| AX-157852790 | 29 | 41.014 | KV453350.1 | 655962 | 29-scf00552 | 29 |
| AX-158369760 | 29 | 41.014 | KV453350.1 | 660417 | 29-scf00552 | 29 |
| AX-158369761 | 29 | 41.014 | KV453350.1 | 661859 | 29-scf00552 | 29 |
| AX-158369763 | 29 | 41.014 | KV453350.1 | 664708 | 29-scf00552 | 29 |
| AX-158369764 | 29 | 41.014 | KV453350.1 | 665764 | 29-scf00552 | 29 |
| AX-157882768 | 29 | 41.014 | KV453350.1 | 665984 | 29-scf00552 | 29 |
| AX-158369765 | 29 | 41.014 | KV453350.1 | 666261 | 29-scf00552 | 29 |
| AX-158369766 | 29 | 41.014 | KV453350.1 | 666717 | 29-scf00552 | 29 |
| AX-158369771 | 29 | 41.014 | KV453350.1 | 675631 | 29-scf00552 | 29 |
| AX-158369776 | 29 | 41.014 | KV453350.1 | 680052 | 29-scf00552 | 29 |
| AX-158369783 | 29 | 41.014 | KV453350.1 | 690909 | 29-scf00552 | 29 |
| AX-158369786 | 29 | 41.014 | KV453350.1 | 695594 | 29-scf00552 | 29 |
| AX-158369790 | 29 | 41.014 | KV453350.1 | 698875 | 29-scf00552 | 29 |
| AX-157852791 | 29 | 41.014 | KV453350.1 | 702483 | 29-scf00552 | 29 |
| AX-157852792 | 29 | 41.014 | KV453350.1 | 702827 | 29-scf00552 | 29 |
| AX-157852793 | 29 | 41.014 | KV453350.1 | 703033 | 29-scf00552 | 29 |

|              |    |        |            |         |             |    |
|--------------|----|--------|------------|---------|-------------|----|
| AX-157852794 | 29 | 41.014 | KV453350.1 | 704157  | 29-scf00552 | 29 |
| AX-158369792 | 29 | 41.014 | KV453350.1 | 704690  | 29-scf00552 | 29 |
| AX-157852795 | 29 | 41.014 | KV453350.1 | 705197  | 29-scf00552 | 29 |
| AX-158420124 | 29 | 41.014 | KV453350.1 | 706536  | 29-scf00552 | 29 |
| AX-158369793 | 29 | 41.014 | KV453350.1 | 708206  | 29-scf00552 | 29 |
| AX-158369798 | 29 | 41.014 | KV453350.1 | 723343  | 29-scf00552 | 29 |
| AX-157852799 | 29 | 41.014 | KV453350.1 | 740239  | 29-scf00552 | 29 |
| AX-158369810 | 29 | 41.014 | KV453350.1 | 744965  | 29-scf00552 | 29 |
| AX-158369811 | 29 | 41.014 | KV453350.1 | 745836  | 29-scf00552 | 29 |
| AX-158369816 | 29 | 41.014 | KV453350.1 | 750223  | 29-scf00552 | 29 |
| AX-157726151 | 29 | 41.014 | KV453350.1 | 754465  | 29-scf00552 | 29 |
| AX-158369821 | 29 | 41.014 | KV453350.1 | 755905  | 29-scf00552 | 29 |
| AX-158369822 | 29 | 41.014 | KV453350.1 | 756695  | 29-scf00552 | 29 |
| AX-157852802 | 29 | 41.014 | KV453350.1 | 763109  | 29-scf00552 | 29 |
| AX-158369830 | 29 | 41.014 | KV453350.1 | 764461  | 29-scf00552 | 29 |
| AX-158369831 | 29 | 41.014 | KV453350.1 | 769008  | 29-scf00552 | 29 |
| AX-157852803 | 29 | 41.014 | KV453350.1 | 770364  | 29-scf00552 | 29 |
| AX-157868395 | 29 | 41.014 | KV453350.1 | 775301  | 29-scf00552 | 29 |
| AX-158369836 | 29 | 41.014 | KV453350.1 | 779040  | 29-scf00552 | 29 |
| AX-158420126 | 29 | 41.014 | KV453350.1 | 787261  | 29-scf00552 | 29 |
| AX-158369843 | 29 | 41.014 | KV453350.1 | 788427  | 29-scf00552 | 29 |
| AX-158369846 | 29 | 41.014 | KV453350.1 | 799700  | 29-scf00552 | 29 |
| AX-158369847 | 29 | 41.014 | KV453350.1 | 802164  | 29-scf00552 | 29 |
| AX-158369848 | 29 | 41.014 | KV453350.1 | 803200  | 29-scf00552 | 29 |
| AX-158369855 | 29 | 41.014 | KV453350.1 | 820454  | 29-scf00552 | 29 |
| AX-158369862 | 29 | 41.014 | KV453350.1 | 847930  | 29-scf00552 | 29 |
| AX-158369864 | 29 | 41.014 | KV453350.1 | 859024  | 29-scf00552 | 29 |
| AX-158369865 | 29 | 41.014 | KV453350.1 | 859955  | 29-scf00552 | 29 |
| AX-158369866 | 29 | 41.014 | KV453350.1 | 868566  | 29-scf00552 | 29 |
| AX-158369869 | 29 | 41.014 | KV453350.1 | 875863  | 29-scf00552 | 29 |
| AX-158369888 | 29 | 41.014 | KV453350.1 | 933756  | 29-scf00552 | 29 |
| AX-157703708 | 29 | 41.014 | KV453350.1 | 934807  | 29-scf00552 | 29 |
| AX-158369889 | 29 | 41.014 | KV453350.1 | 935774  | 29-scf00552 | 29 |
| AX-158369890 | 29 | 41.014 | KV453350.1 | 936849  | 29-scf00552 | 29 |
| AX-158369891 | 29 | 41.014 | KV453350.1 | 937349  | 29-scf00552 | 29 |
| AX-157852808 | 29 | 41.014 | KV453350.1 | 973418  | 29-scf00552 | 29 |
| AX-157852809 | 29 | 41.014 | KV453350.1 | 984220  | 29-scf00552 | 29 |
| AX-158369902 | 29 | 41.014 | KV453350.1 | 996321  | 29-scf00552 | 29 |
| AX-158369903 | 29 | 41.014 | KV453350.1 | 996925  | 29-scf00552 | 29 |
| AX-158369904 | 29 | 41.014 | KV453350.1 | 997372  | 29-scf00552 | 29 |
| AX-158369908 | 29 | 41.014 | KV453350.1 | 1027233 | 29-scf00552 | 29 |
| AX-158369910 | 29 | 41.014 | KV453350.1 | 1040146 | 29-scf00552 | 29 |
| AX-158369912 | 29 | 41.014 | KV453350.1 | 1045700 | 29-scf00552 | 29 |
| AX-158369913 | 29 | 41.014 | KV453350.1 | 1046647 | 29-scf00552 | 29 |
| AX-158369916 | 29 | 41.014 | KV453350.1 | 1049181 | 29-scf00552 | 29 |
| AX-157769763 | 29 | 41.014 | KV453350.1 | 1060190 | 29-scf00552 | 29 |
| AX-157726737 | 29 | 41.014 | KV453350.1 | 1078596 | 29-scf00552 | 29 |
| AX-157742577 | 29 | 41.014 | KV453350.1 | 1080042 | 29-scf00552 | 29 |
| AX-157727440 | 29 | 41.014 | KV453350.1 | 1080596 | 29-scf00552 | 29 |
| AX-157719807 | 29 | 41.014 | KV453350.1 | 1085406 | 29-scf00552 | 29 |
| AX-158369941 | 29 | 41.014 | KV453350.1 | 1096054 | 29-scf00552 | 29 |

|              |    |        |            |         |             |    |
|--------------|----|--------|------------|---------|-------------|----|
| AX-158369944 | 29 | 41.014 | KV453350.1 | 1098474 | 29-scf00552 | 29 |
| AX-158369945 | 29 | 41.014 | KV453350.1 | 1099521 | 29-scf00552 | 29 |
| AX-158369946 | 29 | 41.014 | KV453350.1 | 1100103 | 29-scf00552 | 29 |
| AX-158369948 | 29 | 41.014 | KV453350.1 | 1103329 | 29-scf00552 | 29 |
| AX-157852820 | 29 | 41.014 | KV453350.1 | 1103793 | 29-scf00552 | 29 |
| AX-158369950 | 29 | 41.014 | KV453350.1 | 1109628 | 29-scf00552 | 29 |
| AX-158369951 | 29 | 41.014 | KV453350.1 | 1110576 | 29-scf00552 | 29 |
| AX-158369953 | 29 | 41.014 | KV453350.1 | 1111535 | 29-scf00552 | 29 |
| AX-158369954 | 29 | 41.014 | KV453350.1 | 1112225 | 29-scf00552 | 29 |
| AX-158369956 | 29 | 41.014 | KV453350.1 | 1112997 | 29-scf00552 | 29 |
| AX-158369957 | 29 | 41.014 | KV453350.1 | 1115848 | 29-scf00552 | 29 |
| AX-158369959 | 29 | 41.014 | KV453350.1 | 1118414 | 29-scf00552 | 29 |
| AX-158369960 | 29 | 41.014 | KV453350.1 | 1119340 | 29-scf00552 | 29 |
| AX-158369961 | 29 | 41.014 | KV453350.1 | 1120614 | 29-scf00552 | 29 |
| AX-157852821 | 29 | 41.014 | KV453350.1 | 1121138 | 29-scf00552 | 29 |
| AX-157852822 | 29 | 41.014 | KV453350.1 | 1126652 | 29-scf00552 | 29 |
| AX-158369962 | 29 | 41.014 | KV453350.1 | 1130379 | 29-scf00552 | 29 |
| AX-158369969 | 29 | 41.014 | KV453350.1 | 1149642 | 29-scf00552 | 29 |
| AX-158369970 | 29 | 41.014 | KV453350.1 | 1150309 | 29-scf00552 | 29 |
| AX-158369972 | 29 | 41.014 | KV453350.1 | 1152416 | 29-scf00552 | 29 |
| AX-158369973 | 29 | 41.014 | KV453350.1 | 1152964 | 29-scf00552 | 29 |
| AX-158369974 | 29 | 41.014 | KV453350.1 | 1153488 | 29-scf00552 | 29 |
| AX-158420139 | 29 | 41.014 | KV453350.1 | 1155589 | 29-scf00552 | 29 |
| AX-158369975 | 29 | 41.014 | KV453350.1 | 1165847 | 29-scf00552 | 29 |
| AX-158369980 | 29 | 41.014 | KV453350.1 | 1198857 | 29-scf00552 | 29 |
| AX-158369986 | 29 | 41.014 | KV453350.1 | 1233376 | 29-scf00552 | 29 |
| AX-158369988 | 29 | 41.014 | KV453350.1 | 1241803 | 29-scf00552 | 29 |
| AX-158369991 | 29 | 41.014 | KV453350.1 | 1250120 | 29-scf00552 | 29 |
| AX-158369993 | 29 | 41.014 | KV453350.1 | 1251463 | 29-scf00552 | 29 |
| AX-157753253 | 29 | 41.014 | KV453350.1 | 1251897 | 29-scf00552 | 29 |
| AX-158369994 | 29 | 41.014 | KV453350.1 | 1257907 | 29-scf00552 | 29 |
| AX-158369996 | 29 | 41.014 | KV453350.1 | 1259517 | 29-scf00552 | 29 |
| AX-158369997 | 29 | 41.014 | KV453350.1 | 1259910 | 29-scf00552 | 29 |
| AX-158369998 | 29 | 41.014 | KV453350.1 | 1260385 | 29-scf00552 | 29 |
| AX-158369999 | 29 | 41.014 | KV453350.1 | 1261455 | 29-scf00552 | 29 |
| AX-158370001 | 29 | 41.014 | KV453350.1 | 1262481 | 29-scf00552 | 29 |
| AX-158370002 | 29 | 41.014 | KV453350.1 | 1262685 | 29-scf00552 | 29 |
| AX-158370003 | 29 | 41.014 | KV453350.1 | 1263711 | 29-scf00552 | 29 |
| AX-158370007 | 29 | 41.014 | KV453350.1 | 1274365 | 29-scf00552 | 29 |
| AX-157889241 | 29 | 41.014 | KV453350.1 | 1276400 | 29-scf00552 | 29 |
| AX-158370008 | 29 | 41.014 | KV453350.1 | 1276730 | 29-scf00552 | 29 |
| AX-158370009 | 29 | 41.014 | KV453350.1 | 1277815 | 29-scf00552 | 29 |
| AX-158370010 | 29 | 41.014 | KV453350.1 | 1299696 | 29-scf00552 | 29 |
| AX-158370013 | 29 | 41.014 | KV453350.1 | 1301945 | 29-scf00552 | 29 |
| AX-158370017 | 29 | 41.014 | KV453350.1 | 1308295 | 29-scf00552 | 29 |
| AX-158370018 | 29 | 41.014 | KV453350.1 | 1309091 | 29-scf00552 | 29 |
| AX-157874140 | 29 | 41.014 | KV453350.1 | 1311603 | 29-scf00552 | 29 |
| AX-158370020 | 29 | 41.014 | KV453350.1 | 1318677 | 29-scf00552 | 29 |
| AX-158370021 | 29 | 41.014 | KV453350.1 | 1321293 | 29-scf00552 | 29 |
| AX-158370022 | 29 | 41.014 | KV453350.1 | 1322848 | 29-scf00552 | 29 |
| AX-158370023 | 29 | 41.014 | KV453350.1 | 1325726 | 29-scf00552 | 29 |

|              |    |        |            |         |             |    |
|--------------|----|--------|------------|---------|-------------|----|
| AX-158370024 | 29 | 41.014 | KV453350.1 | 1327669 | 29-scf00552 | 29 |
| AX-158370026 | 29 | 41.014 | KV453350.1 | 1340196 | 29-scf00552 | 29 |
| AX-158370028 | 29 | 41.014 | KV453350.1 | 1349030 | 29-scf00552 | 29 |
| AX-158370030 | 29 | 41.014 | KV453350.1 | 1351756 | 29-scf00552 | 29 |
| AX-158370031 | 29 | 41.014 | KV453350.1 | 1356158 | 29-scf00552 | 29 |
| AX-157852828 | 29 | 41.014 | KV453350.1 | 1358428 | 29-scf00552 | 29 |
| AX-158370032 | 29 | 41.014 | KV453350.1 | 1363015 | 29-scf00552 | 29 |
| AX-158370033 | 29 | 41.014 | KV453350.1 | 1364627 | 29-scf00552 | 29 |
| AX-158370035 | 29 | 41.014 | KV453350.1 | 1377953 | 29-scf00552 | 29 |
| AX-158370037 | 29 | 41.014 | KV453350.1 | 1382768 | 29-scf00552 | 29 |
| AX-158370039 | 29 | 41.014 | KV453350.1 | 1384979 | 29-scf00552 | 29 |
| AX-158370042 | 29 | 41.014 | KV453350.1 | 1395358 | 29-scf00552 | 29 |
| AX-157723578 | 29 | 41.014 | KV453350.1 | 1396733 | 29-scf00552 | 29 |
| AX-158370043 | 29 | 41.014 | KV453350.1 | 1398604 | 29-scf00552 | 29 |
| AX-158370047 | 29 | 41.014 | KV453350.1 | 1407850 | 29-scf00552 | 29 |
| AX-158370052 | 29 | 41.014 | KV453350.1 | 1413123 | 29-scf00552 | 29 |
| AX-158370056 | 29 | 41.014 | KV453350.1 | 1416944 | 29-scf00552 | 29 |
| AX-158370057 | 29 | 41.014 | KV453350.1 | 1417763 | 29-scf00552 | 29 |
| AX-158370063 | 29 | 41.014 | KV453350.1 | 1435148 | 29-scf00552 | 29 |
| AX-158370071 | 29 | 41.014 | KV453350.1 | 1451978 | 29-scf00552 | 29 |
| AX-158370073 | 29 | 41.014 | KV453350.1 | 1455760 | 29-scf00552 | 29 |
| AX-158370074 | 29 | 41.014 | KV453350.1 | 1457189 | 29-scf00552 | 29 |
| AX-158370075 | 29 | 41.014 | KV453350.1 | 1457461 | 29-scf00552 | 29 |
| AX-158370077 | 29 | 41.014 | KV453350.1 | 1458577 | 29-scf00552 | 29 |
| AX-158370078 | 29 | 41.014 | KV453350.1 | 1459167 | 29-scf00552 | 29 |
| AX-158370079 | 29 | 41.014 | KV453350.1 | 1459824 | 29-scf00552 | 29 |
| AX-158370081 | 29 | 41.014 | KV453350.1 | 1460664 | 29-scf00552 | 29 |
| AX-158370082 | 29 | 41.014 | KV453350.1 | 1463509 | 29-scf00552 | 29 |
| AX-158370083 | 29 | 41.014 | KV453350.1 | 1463893 | 29-scf00552 | 29 |
| AX-158370084 | 29 | 41.014 | KV453350.1 | 1464631 | 29-scf00552 | 29 |
| AX-158370086 | 29 | 41.014 | KV453350.1 | 1465699 | 29-scf00552 | 29 |
| AX-158370090 | 29 | 41.014 | KV453350.1 | 1471204 | 29-scf00552 | 29 |
| AX-158370092 | 29 | 41.014 | KV453350.1 | 1474538 | 29-scf00552 | 29 |
| AX-157852834 | 29 | 41.014 | KV453350.1 | 1474938 | 29-scf00552 | 29 |
| AX-158370094 | 29 | 41.014 | KV453350.1 | 1475886 | 29-scf00552 | 29 |
| AX-158370096 | 29 | 41.014 | KV453350.1 | 1478507 | 29-scf00552 | 29 |
| AX-158421041 | 29 | 41.014 | KV453350.1 | 1481403 | 29-scf00552 | 29 |
| AX-157721577 | 29 | 41.014 | KV453350.1 | 1484724 | 29-scf00552 | 29 |
| AX-158370097 | 29 | 41.014 | KV453350.1 | 1486062 | 29-scf00552 | 29 |
| AX-158370102 | 29 | 41.014 | KV453350.1 | 1491162 | 29-scf00552 | 29 |
| AX-158370107 | 29 | 41.014 | KV453350.1 | 1497119 | 29-scf00552 | 29 |
| AX-158370111 | 29 | 41.014 | KV453350.1 | 1501076 | 29-scf00552 | 29 |
| AX-158370113 | 29 | 41.014 | KV453350.1 | 1504278 | 29-scf00552 | 29 |
| AX-158370115 | 29 | 41.014 | KV453350.1 | 1509063 | 29-scf00552 | 29 |
| AX-158370116 | 29 | 41.014 | KV453350.1 | 1510722 | 29-scf00552 | 29 |
| AX-158370119 | 29 | 41.014 | KV453350.1 | 1515523 | 29-scf00552 | 29 |
| AX-158370125 | 29 | 41.014 | KV453350.1 | 1520695 | 29-scf00552 | 29 |
| AX-158370126 | 29 | 41.014 | KV453350.1 | 1521416 | 29-scf00552 | 29 |
| AX-157852835 | 29 | 41.014 | KV453350.1 | 1526166 | 29-scf00552 | 29 |
| AX-158370131 | 29 | 41.014 | KV453350.1 | 1527144 | 29-scf00552 | 29 |
| AX-158370132 | 29 | 41.014 | KV453350.1 | 1528276 | 29-scf00552 | 29 |

|              |    |        |            |         |             |    |
|--------------|----|--------|------------|---------|-------------|----|
| AX-158370133 | 29 | 41.014 | KV453350.1 | 1529608 | 29-scf00552 | 29 |
| AX-158370140 | 29 | 41.014 | KV453350.1 | 1546211 | 29-scf00552 | 29 |
| AX-158370141 | 29 | 41.014 | KV453350.1 | 1546640 | 29-scf00552 | 29 |
| AX-158370143 | 29 | 41.014 | KV453350.1 | 1548331 | 29-scf00552 | 29 |
| AX-157852836 | 29 | 41.014 | KV453350.1 | 1552529 | 29-scf00552 | 29 |
| AX-158370148 | 29 | 41.014 | KV453350.1 | 1560802 | 29-scf00552 | 29 |
| AX-158370149 | 29 | 41.014 | KV453350.1 | 1561375 | 29-scf00552 | 29 |
| AX-158370150 | 29 | 41.014 | KV453350.1 | 1567484 | 29-scf00552 | 29 |
| AX-158370151 | 29 | 41.014 | KV453350.1 | 1568609 | 29-scf00552 | 29 |
| AX-158370152 | 29 | 41.014 | KV453350.1 | 1569544 | 29-scf00552 | 29 |
| AX-157852839 | 29 | 41.014 | KV453350.1 | 1572316 | 29-scf00552 | 29 |
| AX-158370156 | 29 | 41.014 | KV453350.1 | 1574721 | 29-scf00552 | 29 |
| AX-158370157 | 29 | 41.014 | KV453350.1 | 1575187 | 29-scf00552 | 29 |
| AX-158370159 | 29 | 41.014 | KV453350.1 | 1576387 | 29-scf00552 | 29 |
| AX-158370162 | 29 | 41.014 | KV453350.1 | 1578770 | 29-scf00552 | 29 |
| AX-158370164 | 29 | 41.014 | KV453350.1 | 1580213 | 29-scf00552 | 29 |
| AX-157852842 | 29 | 41.014 | KV453350.1 | 1580543 | 29-scf00552 | 29 |
| AX-158370166 | 29 | 41.014 | KV453350.1 | 1580990 | 29-scf00552 | 29 |
| AX-158370167 | 29 | 41.014 | KV453350.1 | 1581163 | 29-scf00552 | 29 |
| AX-158370168 | 29 | 41.014 | KV453350.1 | 1581768 | 29-scf00552 | 29 |
| AX-157719730 | 29 | 41.014 | KV453350.1 | 1586663 | 29-scf00552 | 29 |
| AX-158370175 | 29 | 41.014 | KV453350.1 | 1590953 | 29-scf00552 | 29 |
| AX-158370177 | 29 | 41.014 | KV453350.1 | 1595698 | 29-scf00552 | 29 |
| AX-158370184 | 29 | 41.014 | KV453350.1 | 1607884 | 29-scf00552 | 29 |
| AX-158370187 | 29 | 41.014 | KV453350.1 | 1636724 | 29-scf00552 | 29 |
| AX-158370190 | 29 | 41.014 | KV453350.1 | 1644780 | 29-scf00552 | 29 |
| AX-158370199 | 29 | 41.014 | KV453350.1 | 1660391 | 29-scf00552 | 29 |
| AX-157725192 | 29 | 41.014 | KV453350.1 | 1661138 | 29-scf00552 | 29 |
| AX-157852844 | 29 | 41.014 | KV453350.1 | 1663407 | 29-scf00552 | 29 |
| AX-157852845 | 29 | 41.014 | KV453350.1 | 1663680 | 29-scf00552 | 29 |
| AX-158370202 | 29 | 41.014 | KV453350.1 | 1664374 | 29-scf00552 | 29 |
| AX-158370204 | 29 | 41.014 | KV453350.1 | 1666159 | 29-scf00552 | 29 |
| AX-158370209 | 29 | 41.014 | KV453350.1 | 1674275 | 29-scf00552 | 29 |
| AX-158372180 | 29 | 41.014 | KV453350.1 | 1695287 | 29-scf00552 | 29 |
| AX-158372184 | 29 | 41.014 | KV453350.1 | 1702602 | 29-scf00552 | 29 |
| AX-158372189 | 29 | 41.014 | KV453350.1 | 1709525 | 29-scf00552 | 29 |
| AX-158372192 | 29 | 41.014 | KV453350.1 | 1719498 | 29-scf00552 | 29 |
| AX-158372193 | 29 | 41.014 | KV453350.1 | 1720982 | 29-scf00552 | 29 |
| AX-158372201 | 29 | 41.014 | KV453350.1 | 1731848 | 29-scf00552 | 29 |
| AX-158372204 | 29 | 41.014 | KV453350.1 | 1735357 | 29-scf00552 | 29 |
| AX-158372205 | 29 | 41.014 | KV453350.1 | 1737136 | 29-scf00552 | 29 |
| AX-158372206 | 29 | 41.014 | KV453350.1 | 1739270 | 29-scf00552 | 29 |
| AX-158372208 | 29 | 41.014 | KV453350.1 | 1740905 | 29-scf00552 | 29 |
| AX-158372210 | 29 | 41.014 | KV453350.1 | 1741992 | 29-scf00552 | 29 |
| AX-158372213 | 29 | 41.014 | KV453350.1 | 1744403 | 29-scf00552 | 29 |
| AX-158372215 | 29 | 41.014 | KV453350.1 | 1746236 | 29-scf00552 | 29 |
| AX-158372218 | 29 | 41.014 | KV453350.1 | 1749300 | 29-scf00552 | 29 |
| AX-158372220 | 29 | 41.014 | KV453350.1 | 1755847 | 29-scf00552 | 29 |
| AX-158372224 | 29 | 41.014 | KV453350.1 | 1759998 | 29-scf00552 | 29 |
| AX-158372225 | 29 | 41.014 | KV453350.1 | 1760849 | 29-scf00552 | 29 |
| AX-157774874 | 29 | 41.014 | KV453350.1 | 1765403 | 29-scf00552 | 29 |

|              |    |        |            |         |             |    |
|--------------|----|--------|------------|---------|-------------|----|
| AX-158372237 | 29 | 41.014 | KV453350.1 | 1777337 | 29-scf00552 | 29 |
| AX-158372242 | 29 | 41.014 | KV453350.1 | 1782934 | 29-scf00552 | 29 |
| AX-158372244 | 29 | 41.014 | KV453350.1 | 1786675 | 29-scf00552 | 29 |
| AX-158372245 | 29 | 41.014 | KV453350.1 | 1786919 | 29-scf00552 | 29 |
| AX-158372246 | 29 | 41.014 | KV453350.1 | 1788509 | 29-scf00552 | 29 |
| AX-158372247 | 29 | 41.014 | KV453350.1 | 1790923 | 29-scf00552 | 29 |
| AX-157722613 | 29 | 41.014 | KV453350.1 | 1827089 | 29-scf00552 | 29 |
| AX-158370444 | 29 | 41.014 | KV453347.1 | 13868   | 29-scf00553 | 29 |
| AX-158370442 | 29 | 41.014 | KV453347.1 | 18327   | 29-scf00553 | 29 |
| AX-158370440 | 29 | 41.014 | KV453347.1 | 26720   | 29-scf00553 | 29 |
| AX-158370429 | 29 | 41.014 | KV453347.1 | 92590   | 29-scf00553 | 29 |
| AX-158370423 | 29 | 41.014 | KV453347.1 | 121732  | 29-scf00553 | 29 |
| AX-158370403 | 29 | 41.014 | KV453347.1 | 182735  | 29-scf00553 | 29 |
| AX-158370396 | 29 | 41.014 | KV453347.1 | 233889  | 29-scf00553 | 29 |
| AX-158370372 | 29 | 41.014 | KV453347.1 | 342578  | 29-scf00553 | 29 |
| AX-157852851 | 29 | 41.014 | KV453347.1 | 416769  | 29-scf00553 | 29 |
| AX-157740251 | 29 | 41.014 | KV453351.1 | 7691    | 29-scf00554 | 29 |
| AX-157852859 | 29 | 41.014 | KV453351.1 | 7727    | 29-scf00554 | 29 |
| AX-157852860 | 29 | 41.014 | KV453351.1 | 7849    | 29-scf00554 | 29 |
| AX-158370454 | 29 | 41.014 | KV453351.1 | 8552    | 29-scf00554 | 29 |
| AX-158370456 | 29 | 41.014 | KV453351.1 | 9466    | 29-scf00554 | 29 |
| AX-157852861 | 29 | 41.014 | KV453351.1 | 10195   | 29-scf00554 | 29 |
| AX-158370457 | 29 | 41.014 | KV453351.1 | 11723   | 29-scf00554 | 29 |
| AX-158370458 | 29 | 41.014 | KV453351.1 | 12718   | 29-scf00554 | 29 |
| AX-157852862 | 29 | 41.014 | KV453351.1 | 15670   | 29-scf00554 | 29 |
| AX-158370459 | 29 | 41.014 | KV453351.1 | 16512   | 29-scf00554 | 29 |
| AX-158370462 | 29 | 41.014 | KV453351.1 | 30512   | 29-scf00554 | 29 |
| AX-158370466 | 29 | 41.014 | KV453351.1 | 42040   | 29-scf00554 | 29 |
| AX-158370467 | 29 | 41.014 | KV453351.1 | 64033   | 29-scf00554 | 29 |
| AX-157757908 | 29 | 41.014 | KV453351.1 | 65334   | 29-scf00554 | 29 |
| AX-158370468 | 29 | 41.014 | KV453351.1 | 68282   | 29-scf00554 | 29 |
| AX-158370470 | 29 | 41.014 | KV453351.1 | 76476   | 29-scf00554 | 29 |
| AX-157852870 | 29 | 41.014 | KV453351.1 | 99163   | 29-scf00554 | 29 |
| AX-158370493 | 29 | 41.014 | KV453351.1 | 159219  | 29-scf00554 | 29 |
| AX-157749585 | 29 | 41.014 | KV453351.1 | 160005  | 29-scf00554 | 29 |
| AX-158370494 | 29 | 41.014 | KV453351.1 | 160598  | 29-scf00554 | 29 |
| AX-158370496 | 29 | 41.014 | KV453351.1 | 163114  | 29-scf00554 | 29 |
| AX-158370502 | 29 | 41.014 | KV453351.1 | 176118  | 29-scf00554 | 29 |
| AX-158370503 | 29 | 41.014 | KV453351.1 | 177047  | 29-scf00554 | 29 |
| AX-158423914 | 29 | 41.014 | KV453351.1 | 178695  | 29-scf00554 | 29 |
| AX-158420189 | 29 | 41.014 | KV453351.1 | 179359  | 29-scf00554 | 29 |
| AX-158370506 | 29 | 41.014 | KV453351.1 | 188374  | 29-scf00554 | 29 |
| AX-158370508 | 29 | 41.014 | KV453351.1 | 192919  | 29-scf00554 | 29 |
| AX-158370509 | 29 | 41.014 | KV453351.1 | 195465  | 29-scf00554 | 29 |
| AX-158370523 | 29 | 41.014 | KV453351.1 | 247094  | 29-scf00554 | 29 |
| AX-158370524 | 29 | 41.014 | KV453351.1 | 256363  | 29-scf00554 | 29 |
| AX-158370526 | 29 | 41.014 | KV453351.1 | 259806  | 29-scf00554 | 29 |
| AX-157754016 | 29 | 41.014 | KV453351.1 | 265743  | 29-scf00554 | 29 |
| AX-158370530 | 29 | 41.014 | KV453351.1 | 277150  | 29-scf00554 | 29 |
| AX-158370535 | 29 | 41.014 | KV453351.1 | 288206  | 29-scf00554 | 29 |
| AX-157755534 | 29 | 41.014 | KV453351.1 | 312754  | 29-scf00554 | 29 |

|              |    |        |            |         |             |    |
|--------------|----|--------|------------|---------|-------------|----|
| AX-158370555 | 29 | 41.014 | KV453351.1 | 333004  | 29-scf00554 | 29 |
| AX-158370564 | 29 | 41.014 | KV453351.1 | 352312  | 29-scf00554 | 29 |
| AX-157862482 | 29 | 41.014 | KV453351.1 | 354820  | 29-scf00554 | 29 |
| AX-158370568 | 29 | 41.014 | KV453351.1 | 361481  | 29-scf00554 | 29 |
| AX-157862483 | 29 | 41.014 | KV453351.1 | 365119  | 29-scf00554 | 29 |
| AX-158370575 | 29 | 41.014 | KV453351.1 | 375794  | 29-scf00554 | 29 |
| AX-158370579 | 29 | 41.014 | KV453351.1 | 380884  | 29-scf00554 | 29 |
| AX-158370587 | 29 | 41.014 | KV453351.1 | 391868  | 29-scf00554 | 29 |
| AX-158370594 | 29 | 41.014 | KV453351.1 | 401438  | 29-scf00554 | 29 |
| AX-158370595 | 29 | 41.014 | KV453351.1 | 402609  | 29-scf00554 | 29 |
| AX-158370602 | 29 | 41.014 | KV453351.1 | 407267  | 29-scf00554 | 29 |
| AX-158370624 | 29 | 41.014 | KV453351.1 | 429730  | 29-scf00554 | 29 |
| AX-157756328 | 29 | 41.014 | KV453351.1 | 430078  | 29-scf00554 | 29 |
| AX-157727022 | 29 | 41.014 | KV453351.1 | 495203  | 29-scf00554 | 29 |
| AX-158370737 | 29 | 41.014 | KV453351.1 | 532151  | 29-scf00554 | 29 |
| AX-158370755 | 29 | 41.014 | KV453351.1 | 544693  | 29-scf00554 | 29 |
| AX-158370784 | 29 | 41.014 | KV453351.1 | 566064  | 29-scf00554 | 29 |
| AX-158370813 | 29 | 41.014 | KV453351.1 | 598462  | 29-scf00554 | 29 |
| AX-158370855 | 29 | 41.014 | KV453351.1 | 642871  | 29-scf00554 | 29 |
| AX-158370891 | 29 | 41.014 | KV453351.1 | 674872  | 29-scf00554 | 29 |
| AX-158370909 | 29 | 41.014 | KV453351.1 | 690094  | 29-scf00554 | 29 |
| AX-158370927 | 29 | 41.014 | KV453351.1 | 715848  | 29-scf00554 | 29 |
| AX-158370963 | 29 | 41.014 | KV453351.1 | 756567  | 29-scf00554 | 29 |
| AX-158370983 | 29 | 41.014 | KV453351.1 | 779786  | 29-scf00554 | 29 |
| AX-157719643 | 29 | 41.014 | KV453351.1 | 833687  | 29-scf00554 | 29 |
| AX-158371049 | 29 | 41.014 | KV453351.1 | 840324  | 29-scf00554 | 29 |
| AX-158371090 | 29 | 41.014 | KV453351.1 | 881880  | 29-scf00554 | 29 |
| AX-157852890 | 29 | 41.014 | KV453351.1 | 888054  | 29-scf00554 | 29 |
| AX-158371130 | 29 | 41.014 | KV453351.1 | 925527  | 29-scf00554 | 29 |
| AX-158371176 | 29 | 41.014 | KV453351.1 | 977531  | 29-scf00554 | 29 |
| AX-157852900 | 29 | 41.014 | KV453351.1 | 1043632 | 29-scf00554 | 29 |
| AX-157725870 | 29 | 41.014 | KV453351.1 | 1112523 | 29-scf00554 | 29 |
| AX-158371265 | 29 | 41.014 | KV453351.1 | 1146642 | 29-scf00554 | 29 |
| AX-158371279 | 29 | 41.014 | KV453351.1 | 1165981 | 29-scf00554 | 29 |
| AX-158371290 | 29 | 41.014 | KV453351.1 | 1178343 | 29-scf00554 | 29 |
| AX-158371438 | 29 | 41.014 | KV453351.1 | 1337131 | 29-scf00554 | 29 |
| AX-158371483 | 29 | 41.014 | KV453351.1 | 1391327 | 29-scf00554 | 29 |
| AX-158371534 | 29 | 41.014 | KV453351.1 | 1456282 | 29-scf00554 | 29 |
| AX-158371549 | 29 | 41.014 | KV453351.1 | 1475287 | 29-scf00554 | 29 |
| AX-158371560 | 29 | 41.014 | KV453351.1 | 1486907 | 29-scf00554 | 29 |
| AX-158381813 | 29 | 41.014 | KV453351.1 | 1529446 | 29-scf00554 | 29 |
| AX-158371613 | 29 | 41.014 | KV453351.1 | 1552926 | 29-scf00554 | 29 |
| AX-158371652 | 29 | 41.014 | KV453351.1 | 1600541 | 29-scf00554 | 29 |
| AX-158371764 | 29 | 41.014 | KV453351.1 | 1726792 | 29-scf00554 | 29 |
| AX-158371780 | 29 | 41.014 | KV453351.1 | 1744980 | 29-scf00554 | 29 |
| AX-158371881 | 29 | 41.014 | KV453351.1 | 1867158 | 29-scf00554 | 29 |
| AX-158371895 | 29 | 41.014 | KV453351.1 | 1881332 | 29-scf00554 | 29 |
| AX-158372262 | 29 | 41.014 | KV453349.1 | 9887    | 29-scf00556 | 29 |
| AX-158372267 | 29 | 41.014 | KV453349.1 | 26345   | 29-scf00556 | 29 |
| AX-158372268 | 29 | 41.014 | KV453349.1 | 28213   | 29-scf00556 | 29 |
| AX-158372280 | 29 | 41.014 | KV453349.1 | 71687   | 29-scf00556 | 29 |



|              |    |        |             |         |             |    |
|--------------|----|--------|-------------|---------|-------------|----|
| AX-158372282 | 29 | 41.014 | KV453349.1  | 83865   | 29-scf00556 | 29 |
| AX-158372295 | 29 | 41.014 | KV453349.1  | 143436  | 29-scf00556 | 29 |
| AX-158372321 | 29 | 41.014 | KV453349.1  | 225773  | 29-scf00556 | 29 |
| AX-157882923 | 29 | 41.014 | KV453349.1  | 314342  | 29-scf00556 | 29 |
| AX-158372346 | 29 | 41.014 | KV453349.1  | 349539  | 29-scf00556 | 29 |
| AX-157708543 | 29 | 41.014 | KV453349.1  | 354899  | 29-scf00556 | 29 |
| AX-157755879 | 29 | 41.014 | KV453349.1  | 358129  | 29-scf00556 | 29 |
| AX-158372357 | 29 | 41.014 | KV453349.1  | 383244  | 29-scf00556 | 29 |
| AX-158372366 | 29 | 41.014 | KV453349.1  | 466294  | 29-scf00556 | 29 |
| AX-157704462 | 29 | 41.014 | 3ML01026228 | 136     | scf01824_1  | UN |
| AX-158370734 | 29 | 41.053 | KV453351.1  | 531054  | 29-scf00554 | 29 |
| AX-157727819 | 29 | 41.09  | KV453351.1  | 559440  | 29-scf00554 | 29 |
| AX-158370783 | 29 | 41.123 | KV453351.1  | 564740  | 29-scf00554 | 29 |
| AX-157723667 | 29 | 41.123 | KV453351.1  | 565115  | 29-scf00554 | 29 |
| AX-158370822 | 29 | 41.123 | KV453351.1  | 604221  | 29-scf00554 | 29 |
| AX-157709710 | 29 | 41.123 | KV453351.1  | 1356439 | 29-scf00554 | 29 |
| AX-158371540 | 29 | 41.123 | KV453351.1  | 1460847 | 29-scf00554 | 29 |
| AX-158371631 | 29 | 41.123 | KV453351.1  | 1578856 | 29-scf00554 | 29 |
| AX-157706457 | 29 | 41.123 | 3ML01032277 | 202     | scf07892_1  | UN |
| AX-158370810 | 29 | 41.232 | KV453351.1  | 590908  | 29-scf00554 | 29 |
| AX-158370811 | 29 | 41.232 | KV453351.1  | 591878  | 29-scf00554 | 29 |
| AX-158370812 | 29 | 41.232 | KV453351.1  | 595839  | 29-scf00554 | 29 |
| AX-158370815 | 29 | 41.232 | KV453351.1  | 600168  | 29-scf00554 | 29 |
| AX-158370816 | 29 | 41.232 | KV453351.1  | 601141  | 29-scf00554 | 29 |
| AX-158370817 | 29 | 41.232 | KV453351.1  | 601664  | 29-scf00554 | 29 |
| AX-158370818 | 29 | 41.232 | KV453351.1  | 602079  | 29-scf00554 | 29 |
| AX-158370820 | 29 | 41.232 | KV453351.1  | 602976  | 29-scf00554 | 29 |
| AX-158370821 | 29 | 41.232 | KV453351.1  | 603705  | 29-scf00554 | 29 |
| AX-158370823 | 29 | 41.232 | KV453351.1  | 604629  | 29-scf00554 | 29 |
| AX-158370824 | 29 | 41.232 | KV453351.1  | 608344  | 29-scf00554 | 29 |
| AX-158370825 | 29 | 41.232 | KV453351.1  | 608857  | 29-scf00554 | 29 |
| AX-158370826 | 29 | 41.232 | KV453351.1  | 609396  | 29-scf00554 | 29 |
| AX-158370828 | 29 | 41.232 | KV453351.1  | 610456  | 29-scf00554 | 29 |
| AX-157726471 | 29 | 41.232 | KV453351.1  | 612709  | 29-scf00554 | 29 |
| AX-158420195 | 29 | 41.232 | KV453351.1  | 615386  | 29-scf00554 | 29 |
| AX-158370833 | 29 | 41.232 | KV453351.1  | 621092  | 29-scf00554 | 29 |
| AX-158370835 | 29 | 41.232 | KV453351.1  | 624651  | 29-scf00554 | 29 |
| AX-158370837 | 29 | 41.232 | KV453351.1  | 626901  | 29-scf00554 | 29 |
| AX-158370838 | 29 | 41.232 | KV453351.1  | 627592  | 29-scf00554 | 29 |
| AX-158370840 | 29 | 41.232 | KV453351.1  | 628562  | 29-scf00554 | 29 |
| AX-158370842 | 29 | 41.232 | KV453351.1  | 629409  | 29-scf00554 | 29 |
| AX-158370843 | 29 | 41.232 | KV453351.1  | 630547  | 29-scf00554 | 29 |
| AX-158370844 | 29 | 41.232 | KV453351.1  | 632356  | 29-scf00554 | 29 |
| AX-158370846 | 29 | 41.232 | KV453351.1  | 634675  | 29-scf00554 | 29 |
| AX-158370847 | 29 | 41.232 | KV453351.1  | 635385  | 29-scf00554 | 29 |
| AX-158370848 | 29 | 41.232 | KV453351.1  | 637248  | 29-scf00554 | 29 |
| AX-157852881 | 29 | 41.232 | KV453351.1  | 637505  | 29-scf00554 | 29 |
| AX-158370849 | 29 | 41.232 | KV453351.1  | 637777  | 29-scf00554 | 29 |
| AX-158370850 | 29 | 41.232 | KV453351.1  | 638703  | 29-scf00554 | 29 |
| AX-158370851 | 29 | 41.232 | KV453351.1  | 639515  | 29-scf00554 | 29 |
| AX-158370852 | 29 | 41.232 | KV453351.1  | 640586  | 29-scf00554 | 29 |

|              |    |        |            |        |             |    |
|--------------|----|--------|------------|--------|-------------|----|
| AX-158370853 | 29 | 41.232 | KV453351.1 | 641068 | 29-scf00554 | 29 |
| AX-158370856 | 29 | 41.232 | KV453351.1 | 643393 | 29-scf00554 | 29 |
| AX-158370858 | 29 | 41.232 | KV453351.1 | 644373 | 29-scf00554 | 29 |
| AX-158370859 | 29 | 41.232 | KV453351.1 | 645269 | 29-scf00554 | 29 |
| AX-158370860 | 29 | 41.232 | KV453351.1 | 645995 | 29-scf00554 | 29 |
| AX-158370861 | 29 | 41.232 | KV453351.1 | 646824 | 29-scf00554 | 29 |
| AX-158370862 | 29 | 41.232 | KV453351.1 | 647797 | 29-scf00554 | 29 |
| AX-157852882 | 29 | 41.232 | KV453351.1 | 649834 | 29-scf00554 | 29 |
| AX-158370864 | 29 | 41.232 | KV453351.1 | 649950 | 29-scf00554 | 29 |
| AX-158370866 | 29 | 41.232 | KV453351.1 | 650783 | 29-scf00554 | 29 |
| AX-158370867 | 29 | 41.232 | KV453351.1 | 651489 | 29-scf00554 | 29 |
| AX-158370868 | 29 | 41.232 | KV453351.1 | 652106 | 29-scf00554 | 29 |
| AX-158370869 | 29 | 41.232 | KV453351.1 | 653045 | 29-scf00554 | 29 |
| AX-158370871 | 29 | 41.232 | KV453351.1 | 655562 | 29-scf00554 | 29 |
| AX-158370872 | 29 | 41.232 | KV453351.1 | 656599 | 29-scf00554 | 29 |
| AX-158370873 | 29 | 41.232 | KV453351.1 | 657810 | 29-scf00554 | 29 |
| AX-158370874 | 29 | 41.232 | KV453351.1 | 658255 | 29-scf00554 | 29 |
| AX-158370875 | 29 | 41.232 | KV453351.1 | 658671 | 29-scf00554 | 29 |
| AX-158370876 | 29 | 41.232 | KV453351.1 | 659690 | 29-scf00554 | 29 |
| AX-158370878 | 29 | 41.232 | KV453351.1 | 661903 | 29-scf00554 | 29 |
| AX-158370879 | 29 | 41.232 | KV453351.1 | 662255 | 29-scf00554 | 29 |
| AX-157698979 | 29 | 41.232 | KV453351.1 | 663531 | 29-scf00554 | 29 |
| AX-158370881 | 29 | 41.232 | KV453351.1 | 664114 | 29-scf00554 | 29 |
| AX-158370882 | 29 | 41.232 | KV453351.1 | 664663 | 29-scf00554 | 29 |
| AX-158370884 | 29 | 41.232 | KV453351.1 | 666295 | 29-scf00554 | 29 |
| AX-158370886 | 29 | 41.232 | KV453351.1 | 667926 | 29-scf00554 | 29 |
| AX-157852883 | 29 | 41.232 | KV453351.1 | 672794 | 29-scf00554 | 29 |
| AX-158370890 | 29 | 41.232 | KV453351.1 | 674398 | 29-scf00554 | 29 |
| AX-158370892 | 29 | 41.232 | KV453351.1 | 675602 | 29-scf00554 | 29 |
| AX-158370893 | 29 | 41.232 | KV453351.1 | 676851 | 29-scf00554 | 29 |
| AX-158370894 | 29 | 41.232 | KV453351.1 | 678251 | 29-scf00554 | 29 |
| AX-158370895 | 29 | 41.232 | KV453351.1 | 679162 | 29-scf00554 | 29 |
| AX-158370896 | 29 | 41.232 | KV453351.1 | 680269 | 29-scf00554 | 29 |
| AX-158370897 | 29 | 41.232 | KV453351.1 | 682047 | 29-scf00554 | 29 |
| AX-158370898 | 29 | 41.232 | KV453351.1 | 682445 | 29-scf00554 | 29 |
| AX-158370899 | 29 | 41.232 | KV453351.1 | 683049 | 29-scf00554 | 29 |
| AX-158370900 | 29 | 41.232 | KV453351.1 | 683527 | 29-scf00554 | 29 |
| AX-158370905 | 29 | 41.232 | KV453351.1 | 686613 | 29-scf00554 | 29 |
| AX-158370906 | 29 | 41.232 | KV453351.1 | 686994 | 29-scf00554 | 29 |
| AX-158370907 | 29 | 41.232 | KV453351.1 | 687741 | 29-scf00554 | 29 |
| AX-158370911 | 29 | 41.232 | KV453351.1 | 694217 | 29-scf00554 | 29 |
| AX-158370912 | 29 | 41.232 | KV453351.1 | 694991 | 29-scf00554 | 29 |
| AX-158370913 | 29 | 41.232 | KV453351.1 | 695808 | 29-scf00554 | 29 |
| AX-158370915 | 29 | 41.232 | KV453351.1 | 699076 | 29-scf00554 | 29 |
| AX-158370918 | 29 | 41.232 | KV453351.1 | 701314 | 29-scf00554 | 29 |
| AX-158370921 | 29 | 41.232 | KV453351.1 | 704659 | 29-scf00554 | 29 |
| AX-158370925 | 29 | 41.232 | KV453351.1 | 709755 | 29-scf00554 | 29 |
| AX-158370928 | 29 | 41.232 | KV453351.1 | 716284 | 29-scf00554 | 29 |
| AX-158370930 | 29 | 41.232 | KV453351.1 | 718613 | 29-scf00554 | 29 |
| AX-158370932 | 29 | 41.232 | KV453351.1 | 719498 | 29-scf00554 | 29 |
| AX-158370933 | 29 | 41.232 | KV453351.1 | 720274 | 29-scf00554 | 29 |

|              |    |        |            |        |             |    |
|--------------|----|--------|------------|--------|-------------|----|
| AX-158370935 | 29 | 41.232 | KV453351.1 | 721766 | 29-scf00554 | 29 |
| AX-158370937 | 29 | 41.232 | KV453351.1 | 723295 | 29-scf00554 | 29 |
| AX-158370938 | 29 | 41.232 | KV453351.1 | 725617 | 29-scf00554 | 29 |
| AX-158370939 | 29 | 41.232 | KV453351.1 | 726238 | 29-scf00554 | 29 |
| AX-158370940 | 29 | 41.232 | KV453351.1 | 726822 | 29-scf00554 | 29 |
| AX-158370943 | 29 | 41.232 | KV453351.1 | 730499 | 29-scf00554 | 29 |
| AX-158370946 | 29 | 41.232 | KV453351.1 | 733124 | 29-scf00554 | 29 |
| AX-158370947 | 29 | 41.232 | KV453351.1 | 733851 | 29-scf00554 | 29 |
| AX-158370950 | 29 | 41.232 | KV453351.1 | 735347 | 29-scf00554 | 29 |
| AX-158370955 | 29 | 41.232 | KV453351.1 | 738786 | 29-scf00554 | 29 |
| AX-158370959 | 29 | 41.232 | KV453351.1 | 746446 | 29-scf00554 | 29 |
| AX-158370960 | 29 | 41.232 | KV453351.1 | 753461 | 29-scf00554 | 29 |
| AX-158370964 | 29 | 41.232 | KV453351.1 | 758221 | 29-scf00554 | 29 |
| AX-158370965 | 29 | 41.232 | KV453351.1 | 760121 | 29-scf00554 | 29 |
| AX-158370970 | 29 | 41.232 | KV453351.1 | 764558 | 29-scf00554 | 29 |
| AX-158370971 | 29 | 41.232 | KV453351.1 | 764989 | 29-scf00554 | 29 |
| AX-158370973 | 29 | 41.232 | KV453351.1 | 766803 | 29-scf00554 | 29 |
| AX-158370975 | 29 | 41.232 | KV453351.1 | 771256 | 29-scf00554 | 29 |
| AX-158370976 | 29 | 41.232 | KV453351.1 | 773858 | 29-scf00554 | 29 |
| AX-158370980 | 29 | 41.232 | KV453351.1 | 777123 | 29-scf00554 | 29 |
| AX-158370981 | 29 | 41.232 | KV453351.1 | 777689 | 29-scf00554 | 29 |
| AX-158370984 | 29 | 41.232 | KV453351.1 | 781787 | 29-scf00554 | 29 |
| AX-158370986 | 29 | 41.232 | KV453351.1 | 783445 | 29-scf00554 | 29 |
| AX-158370987 | 29 | 41.232 | KV453351.1 | 783857 | 29-scf00554 | 29 |
| AX-158370989 | 29 | 41.232 | KV453351.1 | 785029 | 29-scf00554 | 29 |
| AX-158370991 | 29 | 41.232 | KV453351.1 | 785690 | 29-scf00554 | 29 |
| AX-158370995 | 29 | 41.232 | KV453351.1 | 790487 | 29-scf00554 | 29 |
| AX-158370996 | 29 | 41.232 | KV453351.1 | 791189 | 29-scf00554 | 29 |
| AX-158371021 | 29 | 41.232 | KV453351.1 | 814218 | 29-scf00554 | 29 |
| AX-158371022 | 29 | 41.232 | KV453351.1 | 814849 | 29-scf00554 | 29 |
| AX-158371023 | 29 | 41.232 | KV453351.1 | 816691 | 29-scf00554 | 29 |
| AX-158371024 | 29 | 41.232 | KV453351.1 | 817250 | 29-scf00554 | 29 |
| AX-158371025 | 29 | 41.232 | KV453351.1 | 818203 | 29-scf00554 | 29 |
| AX-158371029 | 29 | 41.232 | KV453351.1 | 821253 | 29-scf00554 | 29 |
| AX-158371031 | 29 | 41.232 | KV453351.1 | 823227 | 29-scf00554 | 29 |
| AX-158371033 | 29 | 41.232 | KV453351.1 | 824762 | 29-scf00554 | 29 |
| AX-158371035 | 29 | 41.232 | KV453351.1 | 827576 | 29-scf00554 | 29 |
| AX-157852888 | 29 | 41.232 | KV453351.1 | 827805 | 29-scf00554 | 29 |
| AX-158371036 | 29 | 41.232 | KV453351.1 | 828590 | 29-scf00554 | 29 |
| AX-158371038 | 29 | 41.232 | KV453351.1 | 830120 | 29-scf00554 | 29 |
| AX-158371039 | 29 | 41.232 | KV453351.1 | 830875 | 29-scf00554 | 29 |
| AX-158371040 | 29 | 41.232 | KV453351.1 | 832168 | 29-scf00554 | 29 |
| AX-158371041 | 29 | 41.232 | KV453351.1 | 832603 | 29-scf00554 | 29 |
| AX-158371043 | 29 | 41.232 | KV453351.1 | 834246 | 29-scf00554 | 29 |
| AX-158371051 | 29 | 41.232 | KV453351.1 | 845788 | 29-scf00554 | 29 |
| AX-158371052 | 29 | 41.232 | KV453351.1 | 846652 | 29-scf00554 | 29 |
| AX-158371053 | 29 | 41.232 | KV453351.1 | 847249 | 29-scf00554 | 29 |
| AX-158371055 | 29 | 41.232 | KV453351.1 | 849247 | 29-scf00554 | 29 |
| AX-158371059 | 29 | 41.232 | KV453351.1 | 851282 | 29-scf00554 | 29 |
| AX-158371063 | 29 | 41.232 | KV453351.1 | 856898 | 29-scf00554 | 29 |
| AX-158371064 | 29 | 41.232 | KV453351.1 | 857661 | 29-scf00554 | 29 |

|              |    |        |            |         |             |    |
|--------------|----|--------|------------|---------|-------------|----|
| AX-158371066 | 29 | 41.232 | KV453351.1 | 860828  | 29-scf00554 | 29 |
| AX-158371067 | 29 | 41.232 | KV453351.1 | 861356  | 29-scf00554 | 29 |
| AX-158371075 | 29 | 41.232 | KV453351.1 | 867801  | 29-scf00554 | 29 |
| AX-158371079 | 29 | 41.232 | KV453351.1 | 870073  | 29-scf00554 | 29 |
| AX-158371082 | 29 | 41.232 | KV453351.1 | 873991  | 29-scf00554 | 29 |
| AX-158371086 | 29 | 41.232 | KV453351.1 | 878687  | 29-scf00554 | 29 |
| AX-158371087 | 29 | 41.232 | KV453351.1 | 879696  | 29-scf00554 | 29 |
| AX-158371088 | 29 | 41.232 | KV453351.1 | 880094  | 29-scf00554 | 29 |
| AX-158371091 | 29 | 41.232 | KV453351.1 | 883518  | 29-scf00554 | 29 |
| AX-158371096 | 29 | 41.232 | KV453351.1 | 887987  | 29-scf00554 | 29 |
| AX-158371097 | 29 | 41.232 | KV453351.1 | 888394  | 29-scf00554 | 29 |
| AX-158371099 | 29 | 41.232 | KV453351.1 | 890873  | 29-scf00554 | 29 |
| AX-158371104 | 29 | 41.232 | KV453351.1 | 895295  | 29-scf00554 | 29 |
| AX-158371105 | 29 | 41.232 | KV453351.1 | 896953  | 29-scf00554 | 29 |
| AX-158371107 | 29 | 41.232 | KV453351.1 | 898512  | 29-scf00554 | 29 |
| AX-158371108 | 29 | 41.232 | KV453351.1 | 898968  | 29-scf00554 | 29 |
| AX-158371133 | 29 | 41.232 | KV453351.1 | 928490  | 29-scf00554 | 29 |
| AX-158371134 | 29 | 41.232 | KV453351.1 | 930988  | 29-scf00554 | 29 |
| AX-158371135 | 29 | 41.232 | KV453351.1 | 932178  | 29-scf00554 | 29 |
| AX-158371139 | 29 | 41.232 | KV453351.1 | 936466  | 29-scf00554 | 29 |
| AX-158371142 | 29 | 41.232 | KV453351.1 | 939362  | 29-scf00554 | 29 |
| AX-158371157 | 29 | 41.232 | KV453351.1 | 957110  | 29-scf00554 | 29 |
| AX-158371159 | 29 | 41.232 | KV453351.1 | 958347  | 29-scf00554 | 29 |
| AX-158371160 | 29 | 41.232 | KV453351.1 | 961984  | 29-scf00554 | 29 |
| AX-158420203 | 29 | 41.232 | KV453351.1 | 962229  | 29-scf00554 | 29 |
| AX-158371162 | 29 | 41.232 | KV453351.1 | 964699  | 29-scf00554 | 29 |
| AX-158413691 | 29 | 41.232 | KV453351.1 | 967681  | 29-scf00554 | 29 |
| AX-158371164 | 29 | 41.232 | KV453351.1 | 968474  | 29-scf00554 | 29 |
| AX-158371165 | 29 | 41.232 | KV453351.1 | 970435  | 29-scf00554 | 29 |
| AX-158371168 | 29 | 41.232 | KV453351.1 | 972464  | 29-scf00554 | 29 |
| AX-158371169 | 29 | 41.232 | KV453351.1 | 973200  | 29-scf00554 | 29 |
| AX-157852892 | 29 | 41.232 | KV453351.1 | 973609  | 29-scf00554 | 29 |
| AX-158371170 | 29 | 41.232 | KV453351.1 | 974154  | 29-scf00554 | 29 |
| AX-158371171 | 29 | 41.232 | KV453351.1 | 974620  | 29-scf00554 | 29 |
| AX-158371173 | 29 | 41.232 | KV453351.1 | 975555  | 29-scf00554 | 29 |
| AX-157852893 | 29 | 41.232 | KV453351.1 | 981066  | 29-scf00554 | 29 |
| AX-158371179 | 29 | 41.232 | KV453351.1 | 981441  | 29-scf00554 | 29 |
| AX-157740305 | 29 | 41.232 | KV453351.1 | 984840  | 29-scf00554 | 29 |
| AX-158371182 | 29 | 41.232 | KV453351.1 | 988212  | 29-scf00554 | 29 |
| AX-158371183 | 29 | 41.232 | KV453351.1 | 989433  | 29-scf00554 | 29 |
| AX-158371220 | 29 | 41.232 | KV453351.1 | 1056215 | 29-scf00554 | 29 |
| AX-158371221 | 29 | 41.232 | KV453351.1 | 1057061 | 29-scf00554 | 29 |
| AX-158371222 | 29 | 41.232 | KV453351.1 | 1057963 | 29-scf00554 | 29 |
| AX-158371223 | 29 | 41.232 | KV453351.1 | 1059108 | 29-scf00554 | 29 |
| AX-158371224 | 29 | 41.232 | KV453351.1 | 1060507 | 29-scf00554 | 29 |
| AX-158371225 | 29 | 41.232 | KV453351.1 | 1063309 | 29-scf00554 | 29 |
| AX-158371226 | 29 | 41.232 | KV453351.1 | 1064628 | 29-scf00554 | 29 |
| AX-158371227 | 29 | 41.232 | KV453351.1 | 1065097 | 29-scf00554 | 29 |
| AX-158371228 | 29 | 41.232 | KV453351.1 | 1065706 | 29-scf00554 | 29 |
| AX-157882878 | 29 | 41.232 | KV453351.1 | 1067102 | 29-scf00554 | 29 |
| AX-158371235 | 29 | 41.232 | KV453351.1 | 1081455 | 29-scf00554 | 29 |

|              |    |        |             |         |             |    |
|--------------|----|--------|-------------|---------|-------------|----|
| AX-158371240 | 29 | 41.232 | KV453351.1  | 1092081 | 29-scf00554 | 29 |
| AX-158371250 | 29 | 41.232 | KV453351.1  | 1121353 | 29-scf00554 | 29 |
| AX-157726492 | 29 | 41.232 | KV453351.1  | 1176210 | 29-scf00554 | 29 |
| AX-158371334 | 29 | 41.232 | KV453351.1  | 1237818 | 29-scf00554 | 29 |
| AX-158371376 | 29 | 41.232 | KV453351.1  | 1275749 | 29-scf00554 | 29 |
| AX-158371377 | 29 | 41.232 | KV453351.1  | 1276031 | 29-scf00554 | 29 |
| AX-158371386 | 29 | 41.232 | KV453351.1  | 1282908 | 29-scf00554 | 29 |
| AX-157721113 | 29 | 41.232 | KV453351.1  | 1314308 | 29-scf00554 | 29 |
| AX-158371474 | 29 | 41.232 | KV453351.1  | 1378641 | 29-scf00554 | 29 |
| AX-158371475 | 29 | 41.232 | KV453351.1  | 1380582 | 29-scf00554 | 29 |
| AX-158371526 | 29 | 41.232 | KV453351.1  | 1447579 | 29-scf00554 | 29 |
| AX-158371546 | 29 | 41.232 | KV453351.1  | 1470808 | 29-scf00554 | 29 |
| AX-158371605 | 29 | 41.232 | KV453351.1  | 1545388 | 29-scf00554 | 29 |
| AX-158371633 | 29 | 41.232 | KV453351.1  | 1581488 | 29-scf00554 | 29 |
| AX-157852917 | 29 | 41.232 | KV453351.1  | 1659586 | 29-scf00554 | 29 |
| AX-157709846 | 29 | 41.232 | KV453351.1  | 1719626 | 29-scf00554 | 29 |
| AX-157852926 | 29 | 41.232 | KV453351.1  | 1898368 | 29-scf00554 | 29 |
| AX-158371950 | 29 | 41.232 | KV453351.1  | 1940947 | 29-scf00554 | 29 |
| AX-158371986 | 29 | 41.232 | KV453351.1  | 1976580 | 29-scf00554 | 29 |
| AX-157707089 | 29 | 41.232 | 3ML01033483 | 260     | scf09135_1  | UN |
| AX-158370880 | 29 | 41.261 | KV453351.1  | 663008  | 29-scf00554 | 29 |
| AX-157741574 | 29 | 41.261 | KV453351.1  | 684488  | 29-scf00554 | 29 |
| AX-158370920 | 29 | 41.261 | KV453351.1  | 704524  | 29-scf00554 | 29 |
| AX-158370985 | 29 | 41.261 | KV453351.1  | 782913  | 29-scf00554 | 29 |
| AX-158371085 | 29 | 41.261 | KV453351.1  | 878165  | 29-scf00554 | 29 |
| AX-158371600 | 29 | 41.261 | KV453351.1  | 1542578 | 29-scf00554 | 29 |
| AX-158370903 | 29 | 41.289 | KV453351.1  | 685603  | 29-scf00554 | 29 |
| AX-158370904 | 29 | 41.342 | KV453351.1  | 685900  | 29-scf00554 | 29 |
| AX-158370914 | 29 | 41.365 | KV453351.1  | 696705  | 29-scf00554 | 29 |
| AX-158370917 | 29 | 41.387 | KV453351.1  | 700599  | 29-scf00554 | 29 |
| AX-158370919 | 29 | 41.41  | KV453351.1  | 701834  | 29-scf00554 | 29 |
| AX-158370926 | 29 | 41.451 | KV453351.1  | 712493  | 29-scf00554 | 29 |
| AX-158370934 | 29 | 41.451 | KV453351.1  | 721018  | 29-scf00554 | 29 |
| AX-158370942 | 29 | 41.451 | KV453351.1  | 730015  | 29-scf00554 | 29 |
| AX-158370951 | 29 | 41.451 | KV453351.1  | 736111  | 29-scf00554 | 29 |
| AX-158370961 | 29 | 41.451 | KV453351.1  | 755079  | 29-scf00554 | 29 |
| AX-158370962 | 29 | 41.451 | KV453351.1  | 756060  | 29-scf00554 | 29 |
| AX-158370969 | 29 | 41.451 | KV453351.1  | 764057  | 29-scf00554 | 29 |
| AX-158370979 | 29 | 41.451 | KV453351.1  | 776527  | 29-scf00554 | 29 |
| AX-158370992 | 29 | 41.451 | KV453351.1  | 786328  | 29-scf00554 | 29 |
| AX-158370994 | 29 | 41.451 | KV453351.1  | 789624  | 29-scf00554 | 29 |
| AX-158371000 | 29 | 41.451 | KV453351.1  | 794865  | 29-scf00554 | 29 |
| AX-158371001 | 29 | 41.451 | KV453351.1  | 795557  | 29-scf00554 | 29 |
| AX-157723425 | 29 | 41.451 | KV453351.1  | 819010  | 29-scf00554 | 29 |
| AX-158371027 | 29 | 41.451 | KV453351.1  | 819766  | 29-scf00554 | 29 |
| AX-158371028 | 29 | 41.451 | KV453351.1  | 821156  | 29-scf00554 | 29 |
| AX-158371447 | 29 | 41.451 | KV453351.1  | 1347285 | 29-scf00554 | 29 |
| AX-158371532 | 29 | 41.451 | KV453351.1  | 1453589 | 29-scf00554 | 29 |
| AX-158371034 | 29 | 41.562 | KV453351.1  | 825863  | 29-scf00554 | 29 |
| AX-158371042 | 29 | 41.562 | KV453351.1  | 833147  | 29-scf00554 | 29 |
| AX-158371044 | 29 | 41.562 | KV453351.1  | 835054  | 29-scf00554 | 29 |

|              |    |        |            |         |             |    |
|--------------|----|--------|------------|---------|-------------|----|
| AX-158371046 | 29 | 41.562 | KV453351.1 | 836991  | 29-scf00554 | 29 |
| AX-158371129 | 29 | 41.562 | KV453351.1 | 922527  | 29-scf00554 | 29 |
| AX-158371229 | 29 | 41.562 | KV453351.1 | 1068210 | 29-scf00554 | 29 |
| AX-158371543 | 29 | 41.562 | KV453351.1 | 1465810 | 29-scf00554 | 29 |
| AX-158371990 | 29 | 41.562 | KV453351.1 | 1989022 | 29-scf00554 | 29 |
| AX-158371047 | 29 | 41.579 | KV453351.1 | 837615  | 29-scf00554 | 29 |
| AX-158370993 | 29 | 41.669 | KV453351.1 | 787748  | 29-scf00554 | 29 |
| AX-157852887 | 29 | 41.669 | KV453351.1 | 802574  | 29-scf00554 | 29 |
| AX-158371065 | 29 | 41.669 | KV453351.1 | 860142  | 29-scf00554 | 29 |
| AX-158371073 | 29 | 41.669 | KV453351.1 | 866558  | 29-scf00554 | 29 |
| AX-158371074 | 29 | 41.669 | KV453351.1 | 867590  | 29-scf00554 | 29 |
| AX-158371077 | 29 | 41.669 | KV453351.1 | 868931  | 29-scf00554 | 29 |
| AX-158371078 | 29 | 41.669 | KV453351.1 | 869621  | 29-scf00554 | 29 |
| AX-158371080 | 29 | 41.669 | KV453351.1 | 870758  | 29-scf00554 | 29 |
| AX-158371373 | 29 | 41.669 | KV453351.1 | 1272272 | 29-scf00554 | 29 |
| AX-158371081 | 29 | 41.717 | KV453351.1 | 871373  | 29-scf00554 | 29 |
| AX-158371095 | 29 | 41.732 | KV453351.1 | 886827  | 29-scf00554 | 29 |
| AX-157752732 | 29 | 41.779 | KV453350.1 | 795685  | 29-scf00552 | 29 |
| AX-158369849 | 29 | 41.779 | KV453350.1 | 804306  | 29-scf00552 | 29 |
| AX-157746448 | 29 | 41.779 | KV453350.1 | 1012630 | 29-scf00552 | 29 |
| AX-158370029 | 29 | 41.779 | KV453350.1 | 1350148 | 29-scf00552 | 29 |
| AX-158370036 | 29 | 41.779 | KV453350.1 | 1381786 | 29-scf00552 | 29 |
| AX-158370041 | 29 | 41.779 | KV453350.1 | 1387541 | 29-scf00552 | 29 |
| AX-158370058 | 29 | 41.779 | KV453350.1 | 1419772 | 29-scf00552 | 29 |
| AX-158370061 | 29 | 41.779 | KV453350.1 | 1429470 | 29-scf00552 | 29 |
| AX-158370069 | 29 | 41.779 | KV453350.1 | 1450531 | 29-scf00552 | 29 |
| AX-157852830 | 29 | 41.779 | KV453350.1 | 1450756 | 29-scf00552 | 29 |
| AX-158370134 | 29 | 41.779 | KV453350.1 | 1530180 | 29-scf00552 | 29 |
| AX-158370191 | 29 | 41.779 | KV453350.1 | 1646417 | 29-scf00552 | 29 |
| AX-158420167 | 29 | 41.779 | KV453347.1 | 445988  | 29-scf00553 | 29 |
| AX-157725072 | 29 | 41.779 | KV453351.1 | 48954   | 29-scf00554 | 29 |
| AX-157852875 | 29 | 41.779 | KV453351.1 | 401290  | 29-scf00554 | 29 |
| AX-158370635 | 29 | 41.779 | KV453351.1 | 438558  | 29-scf00554 | 29 |
| AX-158370885 | 29 | 41.779 | KV453351.1 | 667024  | 29-scf00554 | 29 |
| AX-158370889 | 29 | 41.779 | KV453351.1 | 673474  | 29-scf00554 | 29 |
| AX-158371071 | 29 | 41.779 | KV453351.1 | 863933  | 29-scf00554 | 29 |
| AX-158371098 | 29 | 41.779 | KV453351.1 | 890062  | 29-scf00554 | 29 |
| AX-158371111 | 29 | 41.779 | KV453351.1 | 901162  | 29-scf00554 | 29 |
| AX-158371114 | 29 | 41.779 | KV453351.1 | 907187  | 29-scf00554 | 29 |
| AX-158371115 | 29 | 41.779 | KV453351.1 | 907649  | 29-scf00554 | 29 |
| AX-158371116 | 29 | 41.779 | KV453351.1 | 908542  | 29-scf00554 | 29 |
| AX-157882874 | 29 | 41.779 | KV453351.1 | 910829  | 29-scf00554 | 29 |
| AX-158371117 | 29 | 41.779 | KV453351.1 | 910922  | 29-scf00554 | 29 |
| AX-158371121 | 29 | 41.779 | KV453351.1 | 915991  | 29-scf00554 | 29 |
| AX-157882875 | 29 | 41.779 | KV453351.1 | 923727  | 29-scf00554 | 29 |
| AX-157754697 | 29 | 41.779 | KV453351.1 | 929769  | 29-scf00554 | 29 |
| AX-158371140 | 29 | 41.779 | KV453351.1 | 937157  | 29-scf00554 | 29 |
| AX-158371146 | 29 | 41.779 | KV453351.1 | 942648  | 29-scf00554 | 29 |
| AX-158371147 | 29 | 41.779 | KV453351.1 | 944267  | 29-scf00554 | 29 |
| AX-158371148 | 29 | 41.779 | KV453351.1 | 945824  | 29-scf00554 | 29 |
| AX-158371152 | 29 | 41.779 | KV453351.1 | 950759  | 29-scf00554 | 29 |

|              |    |        |            |         |             |    |
|--------------|----|--------|------------|---------|-------------|----|
| AX-158371153 | 29 | 41.779 | KV453351.1 | 951145  | 29-scf00554 | 29 |
| AX-158371154 | 29 | 41.779 | KV453351.1 | 952509  | 29-scf00554 | 29 |
| AX-158420202 | 29 | 41.779 | KV453351.1 | 956298  | 29-scf00554 | 29 |
| AX-158421061 | 29 | 41.779 | KV453351.1 | 956515  | 29-scf00554 | 29 |
| AX-157710796 | 29 | 41.779 | KV453351.1 | 962645  | 29-scf00554 | 29 |
| AX-158371167 | 29 | 41.779 | KV453351.1 | 971928  | 29-scf00554 | 29 |
| AX-158371181 | 29 | 41.779 | KV453351.1 | 986237  | 29-scf00554 | 29 |
| AX-158371186 | 29 | 41.779 | KV453351.1 | 991017  | 29-scf00554 | 29 |
| AX-158371187 | 29 | 41.779 | KV453351.1 | 991622  | 29-scf00554 | 29 |
| AX-158371188 | 29 | 41.779 | KV453351.1 | 993693  | 29-scf00554 | 29 |
| AX-158371189 | 29 | 41.779 | KV453351.1 | 994082  | 29-scf00554 | 29 |
| AX-158371190 | 29 | 41.779 | KV453351.1 | 994404  | 29-scf00554 | 29 |
| AX-158371191 | 29 | 41.779 | KV453351.1 | 996650  | 29-scf00554 | 29 |
| AX-158371192 | 29 | 41.779 | KV453351.1 | 997019  | 29-scf00554 | 29 |
| AX-158371193 | 29 | 41.779 | KV453351.1 | 997692  | 29-scf00554 | 29 |
| AX-158371194 | 29 | 41.779 | KV453351.1 | 999947  | 29-scf00554 | 29 |
| AX-158371195 | 29 | 41.779 | KV453351.1 | 1000313 | 29-scf00554 | 29 |
| AX-158371197 | 29 | 41.779 | KV453351.1 | 1001181 | 29-scf00554 | 29 |
| AX-157748210 | 29 | 41.779 | KV453351.1 | 1003436 | 29-scf00554 | 29 |
| AX-158371200 | 29 | 41.779 | KV453351.1 | 1010217 | 29-scf00554 | 29 |
| AX-158371201 | 29 | 41.779 | KV453351.1 | 1012953 | 29-scf00554 | 29 |
| AX-158371203 | 29 | 41.779 | KV453351.1 | 1017964 | 29-scf00554 | 29 |
| AX-158371204 | 29 | 41.779 | KV453351.1 | 1029461 | 29-scf00554 | 29 |
| AX-158371206 | 29 | 41.779 | KV453351.1 | 1035212 | 29-scf00554 | 29 |
| AX-158371230 | 29 | 41.779 | KV453351.1 | 1070128 | 29-scf00554 | 29 |
| AX-158371231 | 29 | 41.779 | KV453351.1 | 1071016 | 29-scf00554 | 29 |
| AX-158371232 | 29 | 41.779 | KV453351.1 | 1072156 | 29-scf00554 | 29 |
| AX-157716270 | 29 | 41.779 | KV453351.1 | 1073675 | 29-scf00554 | 29 |
| AX-157852901 | 29 | 41.779 | KV453351.1 | 1073878 | 29-scf00554 | 29 |
| AX-158371233 | 29 | 41.779 | KV453351.1 | 1074391 | 29-scf00554 | 29 |
| AX-158371234 | 29 | 41.779 | KV453351.1 | 1077976 | 29-scf00554 | 29 |
| AX-158371238 | 29 | 41.779 | KV453351.1 | 1088355 | 29-scf00554 | 29 |
| AX-157852904 | 29 | 41.779 | KV453351.1 | 1097795 | 29-scf00554 | 29 |
| AX-157852905 | 29 | 41.779 | KV453351.1 | 1099372 | 29-scf00554 | 29 |
| AX-158371247 | 29 | 41.779 | KV453351.1 | 1116900 | 29-scf00554 | 29 |
| AX-158371249 | 29 | 41.779 | KV453351.1 | 1119833 | 29-scf00554 | 29 |
| AX-158371251 | 29 | 41.779 | KV453351.1 | 1122099 | 29-scf00554 | 29 |
| AX-158371253 | 29 | 41.779 | KV453351.1 | 1125384 | 29-scf00554 | 29 |
| AX-158371258 | 29 | 41.779 | KV453351.1 | 1131471 | 29-scf00554 | 29 |
| AX-158371267 | 29 | 41.779 | KV453351.1 | 1156324 | 29-scf00554 | 29 |
| AX-158371284 | 29 | 41.779 | KV453351.1 | 1173624 | 29-scf00554 | 29 |
| AX-158371285 | 29 | 41.779 | KV453351.1 | 1174554 | 29-scf00554 | 29 |
| AX-158371286 | 29 | 41.779 | KV453351.1 | 1175681 | 29-scf00554 | 29 |
| AX-158371287 | 29 | 41.779 | KV453351.1 | 1176713 | 29-scf00554 | 29 |
| AX-158371294 | 29 | 41.779 | KV453351.1 | 1185109 | 29-scf00554 | 29 |
| AX-158371295 | 29 | 41.779 | KV453351.1 | 1186527 | 29-scf00554 | 29 |
| AX-157722671 | 29 | 41.779 | KV453351.1 | 1221949 | 29-scf00554 | 29 |
| AX-158371319 | 29 | 41.779 | KV453351.1 | 1224073 | 29-scf00554 | 29 |
| AX-158371329 | 29 | 41.779 | KV453351.1 | 1232018 | 29-scf00554 | 29 |
| AX-158371332 | 29 | 41.779 | KV453351.1 | 1236853 | 29-scf00554 | 29 |
| AX-158371337 | 29 | 41.779 | KV453351.1 | 1239555 | 29-scf00554 | 29 |

|              |    |        |             |         |             |    |
|--------------|----|--------|-------------|---------|-------------|----|
| AX-158371347 | 29 | 41.779 | KV453351.1  | 1249831 | 29-scf00554 | 29 |
| AX-158371364 | 29 | 41.779 | KV453351.1  | 1265277 | 29-scf00554 | 29 |
| AX-158371366 | 29 | 41.779 | KV453351.1  | 1267319 | 29-scf00554 | 29 |
| AX-158371367 | 29 | 41.779 | KV453351.1  | 1268318 | 29-scf00554 | 29 |
| AX-158371371 | 29 | 41.779 | KV453351.1  | 1270657 | 29-scf00554 | 29 |
| AX-158371372 | 29 | 41.779 | KV453351.1  | 1271729 | 29-scf00554 | 29 |
| AX-158371374 | 29 | 41.779 | KV453351.1  | 1273022 | 29-scf00554 | 29 |
| AX-158371393 | 29 | 41.779 | KV453351.1  | 1289652 | 29-scf00554 | 29 |
| AX-158371415 | 29 | 41.779 | KV453351.1  | 1313133 | 29-scf00554 | 29 |
| AX-158371422 | 29 | 41.779 | KV453351.1  | 1324330 | 29-scf00554 | 29 |
| AX-158371459 | 29 | 41.779 | KV453351.1  | 1358238 | 29-scf00554 | 29 |
| AX-158371466 | 29 | 41.779 | KV453351.1  | 1370710 | 29-scf00554 | 29 |
| AX-158371491 | 29 | 41.779 | KV453351.1  | 1400360 | 29-scf00554 | 29 |
| AX-158371576 | 29 | 41.779 | KV453351.1  | 1508361 | 29-scf00554 | 29 |
| AX-157723261 | 29 | 41.779 | KV453351.1  | 1839758 | 29-scf00554 | 29 |
| AX-158372004 | 29 | 41.779 | KV453351.1  | 2010796 | 29-scf00554 | 29 |
| AX-157707038 | 29 | 41.779 | 3ML01033377 | 310     | scf09024_1  | UN |
| AX-158370945 | 29 | 41.888 | KV453351.1  | 732756  | 29-scf00554 | 29 |
| AX-158371056 | 29 | 41.888 | KV453351.1  | 849713  | 29-scf00554 | 29 |
| AX-158371177 | 29 | 41.888 | KV453351.1  | 979860  | 29-scf00554 | 29 |
| AX-157852903 | 29 | 41.888 | KV453351.1  | 1093140 | 29-scf00554 | 29 |
| AX-157752154 | 29 | 41.888 | KV453351.1  | 1100088 | 29-scf00554 | 29 |
| AX-158371307 | 29 | 41.888 | KV453351.1  | 1204908 | 29-scf00554 | 29 |
| AX-158420208 | 29 | 41.888 | KV453351.1  | 1223850 | 29-scf00554 | 29 |
| AX-158371320 | 29 | 41.888 | KV453351.1  | 1226372 | 29-scf00554 | 29 |
| AX-158371321 | 29 | 41.888 | KV453351.1  | 1226869 | 29-scf00554 | 29 |
| AX-158371322 | 29 | 41.888 | KV453351.1  | 1227279 | 29-scf00554 | 29 |
| AX-158371323 | 29 | 41.888 | KV453351.1  | 1228037 | 29-scf00554 | 29 |
| AX-158371340 | 29 | 41.888 | KV453351.1  | 1240835 | 29-scf00554 | 29 |
| AX-158371343 | 29 | 41.888 | KV453351.1  | 1245171 | 29-scf00554 | 29 |
| AX-158371344 | 29 | 41.888 | KV453351.1  | 1245630 | 29-scf00554 | 29 |
| AX-158371345 | 29 | 41.888 | KV453351.1  | 1246457 | 29-scf00554 | 29 |
| AX-158371349 | 29 | 41.888 | KV453351.1  | 1251314 | 29-scf00554 | 29 |
| AX-158371351 | 29 | 41.888 | KV453351.1  | 1253179 | 29-scf00554 | 29 |
| AX-158371352 | 29 | 41.888 | KV453351.1  | 1253758 | 29-scf00554 | 29 |
| AX-158371353 | 29 | 41.888 | KV453351.1  | 1258189 | 29-scf00554 | 29 |
| AX-158371356 | 29 | 41.888 | KV453351.1  | 1259963 | 29-scf00554 | 29 |
| AX-158371357 | 29 | 41.888 | KV453351.1  | 1260718 | 29-scf00554 | 29 |
| AX-158371362 | 29 | 41.888 | KV453351.1  | 1264525 | 29-scf00554 | 29 |
| AX-158371369 | 29 | 41.888 | KV453351.1  | 1269142 | 29-scf00554 | 29 |
| AX-158371370 | 29 | 41.888 | KV453351.1  | 1270098 | 29-scf00554 | 29 |
| AX-158372018 | 29 | 41.888 | KV453351.1  | 2027489 | 29-scf00554 | 29 |
| AX-158372083 | 29 | 41.888 | KV453351.1  | 2116031 | 29-scf00554 | 29 |
| AX-157757857 | 29 | 41.923 | KV453351.1  | 1274898 | 29-scf00554 | 29 |
| AX-158371070 | 29 | 41.954 | KV453351.1  | 863029  | 29-scf00554 | 29 |
| AX-158371396 | 29 | 41.954 | KV453351.1  | 1292667 | 29-scf00554 | 29 |
| AX-158371398 | 29 | 41.972 | KV453351.1  | 1296158 | 29-scf00554 | 29 |
| AX-158371413 | 29 | 42.005 | KV453351.1  | 1311563 | 29-scf00554 | 29 |
| AX-158371254 | 29 | 42.035 | KV453351.1  | 1126226 | 29-scf00554 | 29 |
| AX-158371432 | 29 | 42.035 | KV453351.1  | 1331407 | 29-scf00554 | 29 |
| AX-158371433 | 29 | 42.035 | KV453351.1  | 1331650 | 29-scf00554 | 29 |



|              |    |        |            |         |             |    |
|--------------|----|--------|------------|---------|-------------|----|
| AX-158371437 | 29 | 42.035 | KV453351.1 | 1336315 | 29-scf00554 | 29 |
| AX-158371446 | 29 | 42.035 | KV453351.1 | 1346706 | 29-scf00554 | 29 |
| AX-158371455 | 29 | 42.035 | KV453351.1 | 1355872 | 29-scf00554 | 29 |
| AX-158371458 | 29 | 42.094 | KV453351.1 | 1357719 | 29-scf00554 | 29 |
| AX-158371463 | 29 | 42.154 | KV453351.1 | 1369485 | 29-scf00554 | 29 |
| AX-158371464 | 29 | 42.154 | KV453351.1 | 1369682 | 29-scf00554 | 29 |
| AX-158371471 | 29 | 42.181 | KV453351.1 | 1375861 | 29-scf00554 | 29 |
| AX-158371472 | 29 | 42.181 | KV453351.1 | 1376187 | 29-scf00554 | 29 |
| AX-158371473 | 29 | 42.181 | KV453351.1 | 1377556 | 29-scf00554 | 29 |
| AX-158371477 | 29 | 42.321 | KV453351.1 | 1383033 | 29-scf00554 | 29 |
| AX-158372101 | 29 | 42.321 | KV453351.1 | 2141903 | 29-scf00554 | 29 |
| AX-158371094 | 29 | 42.326 | KV453351.1 | 885928  | 29-scf00554 | 29 |
| AX-158371145 | 29 | 42.326 | KV453351.1 | 942232  | 29-scf00554 | 29 |
| AX-158371196 | 29 | 42.326 | KV453351.1 | 1000666 | 29-scf00554 | 29 |
| AX-158381812 | 29 | 42.326 | KV453351.1 | 1384612 | 29-scf00554 | 29 |
| AX-158371484 | 29 | 42.326 | KV453351.1 | 1392136 | 29-scf00554 | 29 |
| AX-158371489 | 29 | 42.326 | KV453351.1 | 1399257 | 29-scf00554 | 29 |
| AX-158370621 | 29 | 42.544 | KV453351.1 | 426405  | 29-scf00554 | 29 |
| AX-158370819 | 29 | 42.544 | KV453351.1 | 602481  | 29-scf00554 | 29 |
| AX-158370829 | 29 | 42.544 | KV453351.1 | 611943  | 29-scf00554 | 29 |
| AX-158370830 | 29 | 42.544 | KV453351.1 | 613486  | 29-scf00554 | 29 |
| AX-158370836 | 29 | 42.544 | KV453351.1 | 626119  | 29-scf00554 | 29 |
| AX-158370857 | 29 | 42.544 | KV453351.1 | 644207  | 29-scf00554 | 29 |
| AX-158370865 | 29 | 42.544 | KV453351.1 | 650097  | 29-scf00554 | 29 |
| AX-158370936 | 29 | 42.544 | KV453351.1 | 722385  | 29-scf00554 | 29 |
| AX-158370948 | 29 | 42.544 | KV453351.1 | 734447  | 29-scf00554 | 29 |
| AX-158370954 | 29 | 42.544 | KV453351.1 | 737627  | 29-scf00554 | 29 |
| AX-158370988 | 29 | 42.544 | KV453351.1 | 784541  | 29-scf00554 | 29 |
| AX-158370998 | 29 | 42.544 | KV453351.1 | 793042  | 29-scf00554 | 29 |
| AX-158370999 | 29 | 42.544 | KV453351.1 | 794375  | 29-scf00554 | 29 |
| AX-158371003 | 29 | 42.544 | KV453351.1 | 798941  | 29-scf00554 | 29 |
| AX-158371004 | 29 | 42.544 | KV453351.1 | 799850  | 29-scf00554 | 29 |
| AX-158371006 | 29 | 42.544 | KV453351.1 | 801574  | 29-scf00554 | 29 |
| AX-158371007 | 29 | 42.544 | KV453351.1 | 801979  | 29-scf00554 | 29 |
| AX-158371008 | 29 | 42.544 | KV453351.1 | 802479  | 29-scf00554 | 29 |
| AX-158371010 | 29 | 42.544 | KV453351.1 | 805487  | 29-scf00554 | 29 |
| AX-158371012 | 29 | 42.544 | KV453351.1 | 808639  | 29-scf00554 | 29 |
| AX-158371058 | 29 | 42.544 | KV453351.1 | 850446  | 29-scf00554 | 29 |
| AX-158371216 | 29 | 42.544 | KV453351.1 | 1050191 | 29-scf00554 | 29 |
| AX-158420211 | 29 | 42.544 | KV453351.1 | 1307746 | 29-scf00554 | 29 |
| AX-158371501 | 29 | 42.544 | KV453351.1 | 1419954 | 29-scf00554 | 29 |
| AX-158371505 | 29 | 42.544 | KV453351.1 | 1423856 | 29-scf00554 | 29 |
| AX-158371512 | 29 | 42.544 | KV453351.1 | 1430218 | 29-scf00554 | 29 |
| AX-157775375 | 29 | 42.544 | KV453351.1 | 1431365 | 29-scf00554 | 29 |
| AX-158371514 | 29 | 42.544 | KV453351.1 | 1432390 | 29-scf00554 | 29 |
| AX-158371517 | 29 | 42.544 | KV453351.1 | 1435747 | 29-scf00554 | 29 |
| AX-158371518 | 29 | 42.544 | KV453351.1 | 1438197 | 29-scf00554 | 29 |
| AX-158371523 | 29 | 42.544 | KV453351.1 | 1443727 | 29-scf00554 | 29 |
| AX-158371529 | 29 | 42.544 | KV453351.1 | 1451389 | 29-scf00554 | 29 |
| AX-158371541 | 29 | 42.544 | KV453351.1 | 1462488 | 29-scf00554 | 29 |
| AX-158371542 | 29 | 42.544 | KV453351.1 | 1464487 | 29-scf00554 | 29 |

|              |    |        |            |         |             |    |
|--------------|----|--------|------------|---------|-------------|----|
| AX-157740510 | 29 | 42.544 | KV453351.1 | 1465370 | 29-scf00554 | 29 |
| AX-158371544 | 29 | 42.544 | KV453351.1 | 1467280 | 29-scf00554 | 29 |
| AX-157703117 | 29 | 42.544 | KV453351.1 | 1470306 | 29-scf00554 | 29 |
| AX-158371548 | 29 | 42.544 | KV453351.1 | 1472989 | 29-scf00554 | 29 |
| AX-158371553 | 29 | 42.544 | KV453351.1 | 1478771 | 29-scf00554 | 29 |
| AX-158371556 | 29 | 42.544 | KV453351.1 | 1482379 | 29-scf00554 | 29 |
| AX-158371558 | 29 | 42.544 | KV453351.1 | 1483349 | 29-scf00554 | 29 |
| AX-157852909 | 29 | 42.544 | KV453351.1 | 1484850 | 29-scf00554 | 29 |
| AX-158371735 | 29 | 42.544 | KV453351.1 | 1696286 | 29-scf00554 | 29 |
| AX-158371792 | 29 | 42.544 | KV453351.1 | 1755178 | 29-scf00554 | 29 |
| AX-158371793 | 29 | 42.544 | KV453351.1 | 1755823 | 29-scf00554 | 29 |
| AX-158371796 | 29 | 42.544 | KV453351.1 | 1759036 | 29-scf00554 | 29 |
| AX-158371883 | 29 | 42.544 | KV453351.1 | 1870985 | 29-scf00554 | 29 |
| AX-158371144 | 29 | 42.653 | KV453351.1 | 941040  | 29-scf00554 | 29 |
| AX-158371573 | 29 | 42.653 | KV453351.1 | 1503065 | 29-scf00554 | 29 |
| AX-158371577 | 29 | 42.653 | KV453351.1 | 1509173 | 29-scf00554 | 29 |
| AX-158371578 | 29 | 42.653 | KV453351.1 | 1509786 | 29-scf00554 | 29 |
| AX-158371579 | 29 | 42.653 | KV453351.1 | 1510668 | 29-scf00554 | 29 |
| AX-158371584 | 29 | 42.653 | KV453351.1 | 1515107 | 29-scf00554 | 29 |
| AX-157721777 | 29 | 42.653 | KV453351.1 | 1544058 | 29-scf00554 | 29 |
| AX-158371695 | 29 | 42.653 | KV453351.1 | 1657166 | 29-scf00554 | 29 |
| AX-158371585 | 29 | 42.695 | KV453351.1 | 1518097 | 29-scf00554 | 29 |
| AX-158371580 | 29 | 42.714 | KV453351.1 | 1511047 | 29-scf00554 | 29 |
| AX-158371581 | 29 | 42.714 | KV453351.1 | 1512332 | 29-scf00554 | 29 |
| AX-158371603 | 29 | 42.714 | KV453351.1 | 1544445 | 29-scf00554 | 29 |
| AX-158371607 | 29 | 42.759 | KV453351.1 | 1547593 | 29-scf00554 | 29 |
| AX-158371506 | 29 | 42.796 | KV453351.1 | 1425397 | 29-scf00554 | 29 |
| AX-158371564 | 29 | 42.796 | KV453351.1 | 1492216 | 29-scf00554 | 29 |
| AX-158371612 | 29 | 42.796 | KV453351.1 | 1552380 | 29-scf00554 | 29 |
| AX-158370638 | 29 | 42.814 | KV453351.1 | 440274  | 29-scf00554 | 29 |
| AX-158371156 | 29 | 42.814 | KV453351.1 | 954242  | 29-scf00554 | 29 |
| AX-157773934 | 29 | 42.814 | KV453351.1 | 955695  | 29-scf00554 | 29 |
| AX-158371620 | 29 | 42.814 | KV453351.1 | 1562121 | 29-scf00554 | 29 |
| AX-158371671 | 29 | 42.814 | KV453351.1 | 1626080 | 29-scf00554 | 29 |
| AX-157726719 | 29 | 42.842 | KV453351.1 | 1570931 | 29-scf00554 | 29 |
| AX-158370460 | 29 | 42.872 | KV453351.1 | 19006   | 29-scf00554 | 29 |
| AX-158370888 | 29 | 42.872 | KV453351.1 | 672214  | 29-scf00554 | 29 |
| AX-158370972 | 29 | 42.872 | KV453351.1 | 765549  | 29-scf00554 | 29 |
| AX-158370990 | 29 | 42.872 | KV453351.1 | 785291  | 29-scf00554 | 29 |
| AX-158371002 | 29 | 42.872 | KV453351.1 | 796860  | 29-scf00554 | 29 |
| AX-158381808 | 29 | 42.872 | KV453351.1 | 805451  | 29-scf00554 | 29 |
| AX-158371013 | 29 | 42.872 | KV453351.1 | 809215  | 29-scf00554 | 29 |
| AX-157852889 | 29 | 42.872 | KV453351.1 | 834618  | 29-scf00554 | 29 |
| AX-158371060 | 29 | 42.872 | KV453351.1 | 851786  | 29-scf00554 | 29 |
| AX-158371061 | 29 | 42.872 | KV453351.1 | 852527  | 29-scf00554 | 29 |
| AX-158371062 | 29 | 42.872 | KV453351.1 | 853474  | 29-scf00554 | 29 |
| AX-158371100 | 29 | 42.872 | KV453351.1 | 892317  | 29-scf00554 | 29 |
| AX-158371137 | 29 | 42.872 | KV453351.1 | 933289  | 29-scf00554 | 29 |
| AX-158371178 | 29 | 42.872 | KV453351.1 | 980553  | 29-scf00554 | 29 |
| AX-157852894 | 29 | 42.872 | KV453351.1 | 985559  | 29-scf00554 | 29 |
| AX-157852897 | 29 | 42.872 | KV453351.1 | 1028973 | 29-scf00554 | 29 |

|              |    |        |            |         |             |    |
|--------------|----|--------|------------|---------|-------------|----|
| AX-158371318 | 29 | 42.872 | KV453351.1 | 1223260 | 29-scf00554 | 29 |
| AX-158371330 | 29 | 42.872 | KV453351.1 | 1232611 | 29-scf00554 | 29 |
| AX-158371336 | 29 | 42.872 | KV453351.1 | 1239051 | 29-scf00554 | 29 |
| AX-158371363 | 29 | 42.872 | KV453351.1 | 1264885 | 29-scf00554 | 29 |
| AX-158371368 | 29 | 42.872 | KV453351.1 | 1268935 | 29-scf00554 | 29 |
| AX-158371375 | 29 | 42.872 | KV453351.1 | 1273920 | 29-scf00554 | 29 |
| AX-158371401 | 29 | 42.872 | KV453351.1 | 1299385 | 29-scf00554 | 29 |
| AX-158371465 | 29 | 42.872 | KV453351.1 | 1370191 | 29-scf00554 | 29 |
| AX-158371481 | 29 | 42.872 | KV453351.1 | 1388305 | 29-scf00554 | 29 |
| AX-158371519 | 29 | 42.872 | KV453351.1 | 1438526 | 29-scf00554 | 29 |
| AX-158371568 | 29 | 42.872 | KV453351.1 | 1496502 | 29-scf00554 | 29 |
| AX-158371575 | 29 | 42.872 | KV453351.1 | 1505038 | 29-scf00554 | 29 |
| AX-158371610 | 29 | 42.872 | KV453351.1 | 1551140 | 29-scf00554 | 29 |
| AX-158371618 | 29 | 42.872 | KV453351.1 | 1558901 | 29-scf00554 | 29 |
| AX-158371629 | 29 | 42.872 | KV453351.1 | 1577638 | 29-scf00554 | 29 |
| AX-158371630 | 29 | 42.872 | KV453351.1 | 1577999 | 29-scf00554 | 29 |
| AX-158371634 | 29 | 42.872 | KV453351.1 | 1581929 | 29-scf00554 | 29 |
| AX-158371635 | 29 | 42.872 | KV453351.1 | 1582397 | 29-scf00554 | 29 |
| AX-158371637 | 29 | 42.872 | KV453351.1 | 1583862 | 29-scf00554 | 29 |
| AX-158371640 | 29 | 42.872 | KV453351.1 | 1587628 | 29-scf00554 | 29 |
| AX-158371643 | 29 | 42.872 | KV453351.1 | 1589823 | 29-scf00554 | 29 |
| AX-158371657 | 29 | 42.872 | KV453351.1 | 1604543 | 29-scf00554 | 29 |
| AX-158371670 | 29 | 42.872 | KV453351.1 | 1622587 | 29-scf00554 | 29 |
| AX-158371675 | 29 | 42.872 | KV453351.1 | 1633223 | 29-scf00554 | 29 |
| AX-158371711 | 29 | 42.872 | KV453351.1 | 1672418 | 29-scf00554 | 29 |
| AX-158371713 | 29 | 42.872 | KV453351.1 | 1675126 | 29-scf00554 | 29 |
| AX-158371750 | 29 | 42.872 | KV453351.1 | 1708641 | 29-scf00554 | 29 |
| AX-158381814 | 29 | 42.872 | KV453351.1 | 1715612 | 29-scf00554 | 29 |
| AX-157738312 | 29 | 42.872 | KV453351.1 | 1753870 | 29-scf00554 | 29 |
| AX-158371798 | 29 | 42.872 | KV453351.1 | 1762448 | 29-scf00554 | 29 |
| AX-158371838 | 29 | 42.872 | KV453351.1 | 1818751 | 29-scf00554 | 29 |
| AX-158371574 | 29 | 43.09  | KV453351.1 | 1504047 | 29-scf00554 | 29 |
| AX-158371650 | 29 | 43.09  | KV453351.1 | 1598499 | 29-scf00554 | 29 |
| AX-158371653 | 29 | 43.09  | KV453351.1 | 1600972 | 29-scf00554 | 29 |
| AX-158371655 | 29 | 43.09  | KV453351.1 | 1603605 | 29-scf00554 | 29 |
| AX-158371656 | 29 | 43.09  | KV453351.1 | 1603958 | 29-scf00554 | 29 |
| AX-158371661 | 29 | 43.09  | KV453351.1 | 1607393 | 29-scf00554 | 29 |
| AX-158371669 | 29 | 43.09  | KV453351.1 | 1620684 | 29-scf00554 | 29 |
| AX-158371673 | 29 | 43.09  | KV453351.1 | 1631806 | 29-scf00554 | 29 |
| AX-158371674 | 29 | 43.09  | KV453351.1 | 1632548 | 29-scf00554 | 29 |
| AX-158371677 | 29 | 43.09  | KV453351.1 | 1635975 | 29-scf00554 | 29 |
| AX-158371694 | 29 | 43.09  | KV453351.1 | 1656308 | 29-scf00554 | 29 |
| AX-157723536 | 29 | 43.09  | KV453351.1 | 1661308 | 29-scf00554 | 29 |
| AX-158371701 | 29 | 43.09  | KV453351.1 | 1662655 | 29-scf00554 | 29 |
| AX-158371710 | 29 | 43.09  | KV453351.1 | 1670993 | 29-scf00554 | 29 |
| AX-158371712 | 29 | 43.09  | KV453351.1 | 1672716 | 29-scf00554 | 29 |
| AX-158371741 | 29 | 43.09  | KV453351.1 | 1704921 | 29-scf00554 | 29 |
| AX-158371753 | 29 | 43.09  | KV453351.1 | 1711981 | 29-scf00554 | 29 |
| AX-158371754 | 29 | 43.09  | KV453351.1 | 1713057 | 29-scf00554 | 29 |
| AX-158371756 | 29 | 43.09  | KV453351.1 | 1714177 | 29-scf00554 | 29 |
| AX-158371774 | 29 | 43.09  | KV453351.1 | 1737115 | 29-scf00554 | 29 |

|              |    |        |            |         |             |    |
|--------------|----|--------|------------|---------|-------------|----|
| AX-158371782 | 29 | 43.09  | KV453351.1 | 1748390 | 29-scf00554 | 29 |
| AX-158371954 | 29 | 43.09  | KV453351.1 | 1945794 | 29-scf00554 | 29 |
| AX-158371682 | 29 | 43.122 | KV453351.1 | 1640052 | 29-scf00554 | 29 |
| AX-157852913 | 29 | 43.152 | KV453351.1 | 1640822 | 29-scf00554 | 29 |
| AX-158371693 | 29 | 43.152 | KV453351.1 | 1653839 | 29-scf00554 | 29 |
| AX-158371691 | 29 | 43.199 | KV453351.1 | 1650238 | 29-scf00554 | 29 |
| AX-157852914 | 29 | 43.199 | KV453351.1 | 1652093 | 29-scf00554 | 29 |
| AX-157852915 | 29 | 43.199 | KV453351.1 | 1652361 | 29-scf00554 | 29 |
| AX-157748427 | 29 | 43.199 | KV453351.1 | 1658725 | 29-scf00554 | 29 |
| AX-157852918 | 29 | 43.199 | KV453351.1 | 1659819 | 29-scf00554 | 29 |
| AX-158371704 | 29 | 43.199 | KV453351.1 | 1663791 | 29-scf00554 | 29 |
| AX-158371011 | 29 | 43.308 | KV453351.1 | 807025  | 29-scf00554 | 29 |
| AX-158371708 | 29 | 43.308 | KV453351.1 | 1670256 | 29-scf00554 | 29 |
| AX-158371719 | 29 | 43.308 | KV453351.1 | 1681747 | 29-scf00554 | 29 |
| AX-158371720 | 29 | 43.308 | KV453351.1 | 1683604 | 29-scf00554 | 29 |
| AX-158371725 | 29 | 43.308 | KV453351.1 | 1686944 | 29-scf00554 | 29 |
| AX-158371726 | 29 | 43.308 | KV453351.1 | 1687135 | 29-scf00554 | 29 |
| AX-158371730 | 29 | 43.308 | KV453351.1 | 1689862 | 29-scf00554 | 29 |
| AX-158371734 | 29 | 43.308 | KV453351.1 | 1695750 | 29-scf00554 | 29 |
| AX-158371736 | 29 | 43.308 | KV453351.1 | 1697629 | 29-scf00554 | 29 |
| AX-158371740 | 29 | 43.308 | KV453351.1 | 1701733 | 29-scf00554 | 29 |
| AX-158371742 | 29 | 43.308 | KV453351.1 | 1705266 | 29-scf00554 | 29 |
| AX-158420221 | 29 | 43.308 | KV453351.1 | 1707427 | 29-scf00554 | 29 |
| AX-158371748 | 29 | 43.308 | KV453351.1 | 1707643 | 29-scf00554 | 29 |
| AX-158371749 | 29 | 43.308 | KV453351.1 | 1708473 | 29-scf00554 | 29 |
| AX-158371781 | 29 | 43.308 | KV453351.1 | 1746394 | 29-scf00554 | 29 |
| AX-158371479 | 29 | 43.309 | KV453351.1 | 1384954 | 29-scf00554 | 29 |
| AX-158371705 | 29 | 43.309 | KV453351.1 | 1665304 | 29-scf00554 | 29 |
| AX-158371732 | 29 | 43.309 | KV453351.1 | 1692166 | 29-scf00554 | 29 |
| AX-158371752 | 29 | 43.309 | KV453351.1 | 1710349 | 29-scf00554 | 29 |
| AX-158371755 | 29 | 43.309 | KV453351.1 | 1713675 | 29-scf00554 | 29 |
| AX-158371758 | 29 | 43.309 | KV453351.1 | 1715030 | 29-scf00554 | 29 |
| AX-157721302 | 29 | 43.309 | KV453351.1 | 1716450 | 29-scf00554 | 29 |
| AX-158371525 | 29 | 43.527 | KV453351.1 | 1446995 | 29-scf00554 | 29 |
| AX-158371715 | 29 | 43.527 | KV453351.1 | 1676257 | 29-scf00554 | 29 |
| AX-158371728 | 29 | 43.527 | KV453351.1 | 1688806 | 29-scf00554 | 29 |
| AX-158371737 | 29 | 43.527 | KV453351.1 | 1697948 | 29-scf00554 | 29 |
| AX-158371765 | 29 | 43.527 | KV453351.1 | 1727751 | 29-scf00554 | 29 |
| AX-158371766 | 29 | 43.527 | KV453351.1 | 1728986 | 29-scf00554 | 29 |
| AX-158371768 | 29 | 43.527 | KV453351.1 | 1730426 | 29-scf00554 | 29 |
| AX-158371769 | 29 | 43.527 | KV453351.1 | 1732361 | 29-scf00554 | 29 |
| AX-158371770 | 29 | 43.527 | KV453351.1 | 1733214 | 29-scf00554 | 29 |
| AX-158371771 | 29 | 43.527 | KV453351.1 | 1733820 | 29-scf00554 | 29 |
| AX-158371772 | 29 | 43.527 | KV453351.1 | 1734774 | 29-scf00554 | 29 |
| AX-157738711 | 29 | 43.527 | KV453351.1 | 1734973 | 29-scf00554 | 29 |
| AX-158371775 | 29 | 43.527 | KV453351.1 | 1737900 | 29-scf00554 | 29 |
| AX-158371778 | 29 | 43.527 | KV453351.1 | 1742367 | 29-scf00554 | 29 |
| AX-158371779 | 29 | 43.527 | KV453351.1 | 1743871 | 29-scf00554 | 29 |
| AX-158371783 | 29 | 43.527 | KV453351.1 | 1749165 | 29-scf00554 | 29 |
| AX-158420222 | 29 | 43.527 | KV453351.1 | 1749428 | 29-scf00554 | 29 |
| AX-158421069 | 29 | 43.527 | KV453351.1 | 1749489 | 29-scf00554 | 29 |

|              |    |        |             |         |             |    |
|--------------|----|--------|-------------|---------|-------------|----|
| AX-158371784 | 29 | 43.527 | KV453351.1  | 1749931 | 29-scf00554 | 29 |
| AX-158371788 | 29 | 43.527 | KV453351.1  | 1751591 | 29-scf00554 | 29 |
| AX-158371791 | 29 | 43.527 | KV453351.1  | 1754814 | 29-scf00554 | 29 |
| AX-158371795 | 29 | 43.527 | KV453351.1  | 1758108 | 29-scf00554 | 29 |
| AX-158371797 | 29 | 43.527 | KV453351.1  | 1760689 | 29-scf00554 | 29 |
| AX-158371801 | 29 | 43.527 | KV453351.1  | 1768072 | 29-scf00554 | 29 |
| AX-158371808 | 29 | 43.527 | KV453351.1  | 1777182 | 29-scf00554 | 29 |
| AX-158371810 | 29 | 43.527 | KV453351.1  | 1778540 | 29-scf00554 | 29 |
| AX-157753457 | 29 | 43.527 | KV453351.1  | 1779267 | 29-scf00554 | 29 |
| AX-158371812 | 29 | 43.527 | KV453351.1  | 1781224 | 29-scf00554 | 29 |
| AX-157774774 | 29 | 43.527 | KV453351.1  | 1793635 | 29-scf00554 | 29 |
| AX-158371821 | 29 | 43.527 | KV453351.1  | 1798008 | 29-scf00554 | 29 |
| AX-158371834 | 29 | 43.527 | KV453351.1  | 1814983 | 29-scf00554 | 29 |
| AX-158371846 | 29 | 43.527 | KV453351.1  | 1824399 | 29-scf00554 | 29 |
| AX-158371853 | 29 | 43.527 | KV453351.1  | 1829768 | 29-scf00554 | 29 |
| AX-158371860 | 29 | 43.527 | KV453351.1  | 1838079 | 29-scf00554 | 29 |
| AX-158371902 | 29 | 43.527 | KV453351.1  | 1887028 | 29-scf00554 | 29 |
| AX-158371905 | 29 | 43.527 | KV453351.1  | 1890147 | 29-scf00554 | 29 |
| AX-158371920 | 29 | 43.527 | KV453351.1  | 1905435 | 29-scf00554 | 29 |
| AX-158371921 | 29 | 43.527 | KV453351.1  | 1906378 | 29-scf00554 | 29 |
| AX-158371922 | 29 | 43.527 | KV453351.1  | 1910718 | 29-scf00554 | 29 |
| AX-158371960 | 29 | 43.527 | KV453351.1  | 1953606 | 29-scf00554 | 29 |
| AX-158371964 | 29 | 43.527 | KV453351.1  | 1958530 | 29-scf00554 | 29 |
| AX-158371988 | 29 | 43.527 | KV453351.1  | 1981625 | 29-scf00554 | 29 |
| AX-157706984 | 29 | 43.527 | 3ML01033284 | 152     | scf08927_1  | UN |
| AX-158371815 | 29 | 43.596 | KV453351.1  | 1787661 | 29-scf00554 | 29 |
| AX-158371806 | 29 | 43.644 | KV453351.1  | 1773637 | 29-scf00554 | 29 |
| AX-158371816 | 29 | 43.644 | KV453351.1  | 1790238 | 29-scf00554 | 29 |
| AX-158420224 | 29 | 43.691 | KV453351.1  | 1790840 | 29-scf00554 | 29 |
| AX-157852920 | 29 | 43.691 | KV453351.1  | 1794447 | 29-scf00554 | 29 |
| AX-158371820 | 29 | 43.691 | KV453351.1  | 1797182 | 29-scf00554 | 29 |
| AX-158381815 | 29 | 43.691 | KV453351.1  | 1804379 | 29-scf00554 | 29 |
| AX-158371687 | 29 | 43.745 | KV453351.1  | 1644600 | 29-scf00554 | 29 |
| AX-158371688 | 29 | 43.745 | KV453351.1  | 1645836 | 29-scf00554 | 29 |
| AX-157889260 | 29 | 43.745 | KV453351.1  | 1780708 | 29-scf00554 | 29 |
| AX-157852922 | 29 | 43.745 | KV453351.1  | 1800276 | 29-scf00554 | 29 |
| AX-158371825 | 29 | 43.745 | KV453351.1  | 1802352 | 29-scf00554 | 29 |
| AX-158371829 | 29 | 43.745 | KV453351.1  | 1806863 | 29-scf00554 | 29 |
| AX-158371830 | 29 | 43.745 | KV453351.1  | 1807683 | 29-scf00554 | 29 |
| AX-158371835 | 29 | 43.745 | KV453351.1  | 1815675 | 29-scf00554 | 29 |
| AX-158371836 | 29 | 43.745 | KV453351.1  | 1816225 | 29-scf00554 | 29 |
| AX-158371837 | 29 | 43.745 | KV453351.1  | 1817139 | 29-scf00554 | 29 |
| AX-158371839 | 29 | 43.745 | KV453351.1  | 1819603 | 29-scf00554 | 29 |
| AX-158371840 | 29 | 43.745 | KV453351.1  | 1820638 | 29-scf00554 | 29 |
| AX-158371842 | 29 | 43.745 | KV453351.1  | 1822266 | 29-scf00554 | 29 |
| AX-158371843 | 29 | 43.745 | KV453351.1  | 1822869 | 29-scf00554 | 29 |
| AX-158371861 | 29 | 43.745 | KV453351.1  | 1838470 | 29-scf00554 | 29 |
| AX-158371870 | 29 | 43.745 | KV453351.1  | 1850789 | 29-scf00554 | 29 |
| AX-158371884 | 29 | 43.745 | KV453351.1  | 1872929 | 29-scf00554 | 29 |
| AX-158371937 | 29 | 43.745 | KV453351.1  | 1929274 | 29-scf00554 | 29 |
| AX-158372020 | 29 | 43.745 | KV453351.1  | 2033315 | 29-scf00554 | 29 |

|              |    |        |             |         |                |    |
|--------------|----|--------|-------------|---------|----------------|----|
| AX-158371857 | 29 | 43.769 | KV453351.1  | 1832170 | 29-scf00554    | 29 |
| AX-158371862 | 29 | 43.811 | KV453351.1  | 1840247 | 29-scf00554    | 29 |
| AX-158369596 | 29 | 43.855 | KV453350.1  | 327962  | 29-scf00552    | 29 |
| AX-158370957 | 29 | 43.855 | KV453351.1  | 740365  | 29-scf00554    | 29 |
| AX-158371018 | 29 | 43.855 | KV453351.1  | 812723  | 29-scf00554    | 29 |
| AX-158371866 | 29 | 43.855 | KV453351.1  | 1845747 | 29-scf00554    | 29 |
| AX-158372062 | 29 | 43.855 | KV453351.1  | 2097251 | 29-scf00554    | 29 |
| AX-158371875 | 29 | 43.871 | KV453351.1  | 1856179 | 29-scf00554    | 29 |
| AX-158371876 | 29 | 43.883 | KV453351.1  | 1858201 | 29-scf00554    | 29 |
| AX-158371877 | 29 | 43.9   | KV453351.1  | 1859487 | 29-scf00554    | 29 |
| AX-158371886 | 29 | 43.9   | KV453351.1  | 1874476 | 29-scf00554    | 29 |
| AX-158371878 | 29 | 43.915 | KV453351.1  | 1861369 | 29-scf00554    | 29 |
| AX-158371880 | 29 | 43.929 | KV453351.1  | 1865036 | 29-scf00554    | 29 |
| AX-157770670 | 29 | 43.95  | KV453351.1  | 1866739 | 29-scf00554    | 29 |
| AX-158371890 | 29 | 43.964 | KV453351.1  | 1876634 | 29-scf00554    | 29 |
| AX-158371892 | 29 | 43.964 | KV453351.1  | 1877537 | 29-scf00554    | 29 |
| AX-158371893 | 29 | 43.964 | KV453351.1  | 1878254 | 29-scf00554    | 29 |
| AX-158371903 | 29 | 43.964 | KV453351.1  | 1888374 | 29-scf00554    | 29 |
| AX-158371944 | 29 | 43.964 | KV453351.1  | 1936664 | 29-scf00554    | 29 |
| AX-158371975 | 29 | 43.964 | KV453351.1  | 1967853 | 29-scf00554    | 29 |
| AX-158371985 | 29 | 43.964 | KV453351.1  | 1975950 | 29-scf00554    | 29 |
| AX-158371989 | 29 | 43.964 | KV453351.1  | 1986413 | 29-scf00554    | 29 |
| AX-158370944 | 29 | 44.041 | KV453351.1  | 731030  | 29-scf00554    | 29 |
| AX-157710389 | 29 | 44.041 | KV453351.1  | 1080834 | 29-scf00554    | 29 |
| AX-158371662 | 29 | 44.041 | KV453351.1  | 1609054 | 29-scf00554    | 29 |
| AX-158371978 | 29 | 44.041 | KV453351.1  | 1969912 | 29-scf00554    | 29 |
| AX-158371979 | 29 | 44.041 | KV453351.1  | 1970706 | 29-scf00554    | 29 |
| AX-158372080 | 29 | 44.041 | KV453351.1  | 2112599 | 29-scf00554    | 29 |
| AX-158372120 | 29 | 44.041 | KV453351.1  | 2164589 | 29-scf00554    | 29 |
| AX-158372152 | 29 | 44.041 | KV453351.1  | 2201061 | 29-scf00554    | 29 |
| AX-158371980 | 29 | 44.182 | KV453351.1  | 1971108 | 29-scf00554    | 29 |
| AX-158371984 | 29 | 44.182 | KV453351.1  | 1974411 | 29-scf00554    | 29 |
| AX-157852927 | 29 | 44.182 | KV453351.1  | 1991460 | 29-scf00554    | 29 |
| AX-157751783 | 29 | 44.182 | KV453351.1  | 1994291 | 29-scf00554    | 29 |
| AX-158371994 | 29 | 44.182 | KV453351.1  | 1994669 | 29-scf00554    | 29 |
| AX-158371997 | 29 | 44.187 | KV453351.1  | 1996369 | 29-scf00554    | 29 |
| AX-158371999 | 29 | 44.313 | KV453351.1  | 2001520 | 29-scf00554    | 29 |
| AX-158372038 | 29 | 44.313 | KV453351.1  | 2066430 | 29-scf00554    | 29 |
| AX-157715402 | 29 | 44.445 | KV453351.1  | 2002103 | 29-scf00554    | 29 |
| AX-158372000 | 29 | 44.445 | KV453351.1  | 2003094 | 29-scf00554    | 29 |
| AX-158372084 | 29 | 44.445 | KV453351.1  | 2116786 | 29-scf00554    | 29 |
| AX-158372001 | 29 | 44.536 | KV453351.1  | 2003187 | 29-scf00554    | 29 |
| AX-157705901 | 29 | 44.536 | 3ML01031202 | 583     | scf06808_1     | UN |
| AX-157775698 | 29 | 44.623 | KV453351.1  | 2009317 | 29-scf00554    | 29 |
| AX-158420237 | 29 | 44.623 | KV453351.1  | 2105860 | 29-scf00554    | 29 |
| AX-157693687 | 29 | 44.623 | FI858501.1  | 259     | IORI212 lctalu | UN |
| AX-158372008 | 29 | 44.719 | KV453351.1  | 2014151 | 29-scf00554    | 29 |
| AX-158372016 | 29 | 44.82  | KV453351.1  | 2025924 | 29-scf00554    | 29 |
| AX-157746188 | 29 | 44.821 | KV453351.1  | 2017919 | 29-scf00554    | 29 |
| AX-157852932 | 29 | 44.821 | KV453351.1  | 2042667 | 29-scf00554    | 29 |
| AX-158372052 | 29 | 44.821 | KV453351.1  | 2080607 | 29-scf00554    | 29 |

|              |    |        |            |         |             |    |
|--------------|----|--------|------------|---------|-------------|----|
| AX-158372059 | 29 | 44.868 | KV453351.1 | 2092283 | 29-scf00554 | 29 |
| AX-158372069 | 29 | 44.933 | KV453351.1 | 2103721 | 29-scf00554 | 29 |
| AX-158372070 | 29 | 44.983 | KV453351.1 | 2104320 | 29-scf00554 | 29 |
| AX-157708152 | 29 | 45.057 | KV453351.1 | 2118434 | 29-scf00554 | 29 |
| AX-158372095 | 29 | 45.144 | KV453351.1 | 2131315 | 29-scf00554 | 29 |
| AX-158372097 | 29 | 45.206 | KV453351.1 | 2133085 | 29-scf00554 | 29 |
| AX-158372098 | 29 | 45.476 | KV453351.1 | 2139219 | 29-scf00554 | 29 |
| AX-157852948 | 29 | 45.486 | KV453351.1 | 2140321 | 29-scf00554 | 29 |
| AX-157852949 | 29 | 45.494 | KV453351.1 | 2141236 | 29-scf00554 | 29 |
| AX-158372103 | 29 | 45.494 | KV453351.1 | 2144067 | 29-scf00554 | 29 |
| AX-158372105 | 29 | 45.494 | KV453351.1 | 2147687 | 29-scf00554 | 29 |
| AX-158372106 | 29 | 45.494 | KV453351.1 | 2148476 | 29-scf00554 | 29 |
| AX-158372107 | 29 | 45.494 | KV453351.1 | 2148905 | 29-scf00554 | 29 |
| AX-158372111 | 29 | 45.494 | KV453351.1 | 2152807 | 29-scf00554 | 29 |
| AX-157742444 | 29 | 45.494 | KV453351.1 | 2154089 | 29-scf00554 | 29 |
| AX-158372115 | 29 | 45.53  | KV453351.1 | 2157656 | 29-scf00554 | 29 |
| AX-157882908 | 29 | 45.53  | KV453351.1 | 2171484 | 29-scf00554 | 29 |
| AX-158372117 | 29 | 45.565 | KV453351.1 | 2161821 | 29-scf00554 | 29 |
| AX-158372112 | 29 | 45.604 | KV453351.1 | 2155420 | 29-scf00554 | 29 |
| AX-158372118 | 29 | 45.604 | KV453351.1 | 2162861 | 29-scf00554 | 29 |
| AX-158372119 | 29 | 45.604 | KV453351.1 | 2163338 | 29-scf00554 | 29 |
| AX-158372121 | 29 | 45.604 | KV453351.1 | 2165428 | 29-scf00554 | 29 |
| AX-158372123 | 29 | 45.742 | KV453351.1 | 2168862 | 29-scf00554 | 29 |
| AX-158372128 | 29 | 45.742 | KV453351.1 | 2172932 | 29-scf00554 | 29 |
| AX-158372129 | 29 | 45.742 | KV453351.1 | 2173304 | 29-scf00554 | 29 |
| AX-158372132 | 29 | 45.742 | KV453351.1 | 2178920 | 29-scf00554 | 29 |
| AX-158372133 | 29 | 46.12  | KV453351.1 | 2179324 | 29-scf00554 | 29 |
| AX-158372136 | 29 | 46.12  | KV453351.1 | 2181733 | 29-scf00554 | 29 |
| AX-158372150 | 29 | 46.12  | KV453351.1 | 2199576 | 29-scf00554 | 29 |
| AX-158372158 | 29 | 46.12  | KV453351.1 | 2208011 | 29-scf00554 | 29 |
| AX-158372138 | 29 | 46.189 | KV453351.1 | 2184088 | 29-scf00554 | 29 |
| AX-158372139 | 29 | 46.259 | KV453351.1 | 2184771 | 29-scf00554 | 29 |
| AX-158372140 | 29 | 46.478 | KV453351.1 | 2186742 | 29-scf00554 | 29 |
| AX-158372144 | 29 | 46.478 | KV453351.1 | 2190889 | 29-scf00554 | 29 |
| AX-158372145 | 29 | 46.478 | KV453351.1 | 2192289 | 29-scf00554 | 29 |
| AX-158372147 | 29 | 46.505 | KV453351.1 | 2196505 | 29-scf00554 | 29 |
| AX-158372148 | 29 | 46.528 | KV453351.1 | 2197069 | 29-scf00554 | 29 |
| AX-158372151 | 29 | 46.547 | KV453351.1 | 2200522 | 29-scf00554 | 29 |
| AX-158372149 | 29 | 46.587 | KV453351.1 | 2198742 | 29-scf00554 | 29 |
| AX-158420239 | 29 | 46.587 | KV453351.1 | 2204284 | 29-scf00554 | 29 |
| AX-158372155 | 29 | 46.587 | KV453351.1 | 2205836 | 29-scf00554 | 29 |
| AX-158372157 | 29 | 46.587 | KV453351.1 | 2207231 | 29-scf00554 | 29 |
| AX-158372159 | 29 | 46.666 | KV453351.1 | 2209114 | 29-scf00554 | 29 |
| AX-158372160 | 29 | 46.75  | KV453351.1 | 2213023 | 29-scf00554 | 29 |
| AX-158372165 | 29 | 46.75  | KV453351.1 | 2217237 | 29-scf00554 | 29 |
| AX-158372166 | 29 | 46.75  | KV453351.1 | 2220125 | 29-scf00554 | 29 |
| AX-157862487 | 29 | 46.914 | KV453351.1 | 2203134 | 29-scf00554 | 29 |
| AX-158372171 | 29 | 46.914 | KV453351.1 | 2223352 | 29-scf00554 | 29 |
| AX-158372172 | 29 | 46.914 | KV453351.1 | 2224678 | 29-scf00554 | 29 |
| AX-158372173 | 29 | 46.914 | KV453351.1 | 2225162 | 29-scf00554 | 29 |
| AX-158372174 | 29 | 46.914 | KV453351.1 | 2225677 | 29-scf00554 | 29 |

|              |    |        |            |         |             |    |
|--------------|----|--------|------------|---------|-------------|----|
| AX-158372379 | 29 | 46.914 | KV453351.1 | 2231103 | 29-scf00554 | 29 |
| AX-158372380 | 29 | 46.914 | KV453351.1 | 2231356 | 29-scf00554 | 29 |
| AX-158372382 | 29 | 46.914 | KV453351.1 | 2233980 | 29-scf00554 | 29 |
| AX-158372387 | 29 | 46.914 | KV453351.1 | 2239180 | 29-scf00554 | 29 |
| AX-158372388 | 29 | 46.914 | KV453351.1 | 2241694 | 29-scf00554 | 29 |
| AX-158372164 | 29 | 46.919 | KV453351.1 | 2216587 | 29-scf00554 | 29 |
| AX-158372170 | 29 | 46.919 | KV453351.1 | 2222833 | 29-scf00554 | 29 |
| AX-158372384 | 29 | 46.919 | KV453351.1 | 2235215 | 29-scf00554 | 29 |
| AX-158372386 | 29 | 46.919 | KV453351.1 | 2236233 | 29-scf00554 | 29 |
| AX-158372391 | 29 | 46.919 | KV453351.1 | 2246111 | 29-scf00554 | 29 |
| AX-158421080 | 29 | 46.919 | KV453351.1 | 2247853 | 29-scf00554 | 29 |
| AX-158372403 | 29 | 46.919 | KV453351.1 | 2258282 | 29-scf00554 | 29 |
| AX-158372399 | 29 | 47.341 | KV453351.1 | 2254405 | 29-scf00554 | 29 |
| AX-158372400 | 29 | 47.342 | KV453351.1 | 2254866 | 29-scf00554 | 29 |
| AX-158372401 | 29 | 47.342 | KV453351.1 | 2257393 | 29-scf00554 | 29 |
| AX-158372411 | 29 | 47.342 | KV453351.1 | 2265595 | 29-scf00554 | 29 |
| AX-158372418 | 29 | 47.342 | KV453351.1 | 2274496 | 29-scf00554 | 29 |
| AX-158372430 | 29 | 47.342 | KV453351.1 | 2285843 | 29-scf00554 | 29 |
| AX-158372406 | 29 | 47.343 | KV453351.1 | 2260807 | 29-scf00554 | 29 |
| AX-158372408 | 29 | 47.344 | KV453351.1 | 2262705 | 29-scf00554 | 29 |
| AX-158372409 | 29 | 47.346 | KV453351.1 | 2263540 | 29-scf00554 | 29 |
| AX-158372410 | 29 | 47.348 | KV453351.1 | 2264874 | 29-scf00554 | 29 |
| AX-157754226 | 29 | 47.349 | KV453351.1 | 2265963 | 29-scf00554 | 29 |
| AX-158372423 | 29 | 47.35  | KV453351.1 | 2277820 | 29-scf00554 | 29 |
| AX-158372167 | 29 | 47.351 | KV453351.1 | 2221427 | 29-scf00554 | 29 |
| AX-158372176 | 29 | 47.351 | KV453351.1 | 2226494 | 29-scf00554 | 29 |
| AX-158372394 | 29 | 47.351 | KV453351.1 | 2248525 | 29-scf00554 | 29 |
| AX-158372405 | 29 | 47.351 | KV453351.1 | 2260514 | 29-scf00554 | 29 |
| AX-157882926 | 29 | 47.351 | KV453351.1 | 2262932 | 29-scf00554 | 29 |
| AX-158372425 | 29 | 47.351 | KV453351.1 | 2280673 | 29-scf00554 | 29 |
| AX-158372426 | 29 | 47.351 | KV453351.1 | 2282739 | 29-scf00554 | 29 |
| AX-158372427 | 29 | 47.351 | KV453351.1 | 2283782 | 29-scf00554 | 29 |
| AX-158372429 | 29 | 47.351 | KV453351.1 | 2284835 | 29-scf00554 | 29 |
| AX-158372431 | 29 | 47.351 | KV453351.1 | 2287827 | 29-scf00554 | 29 |
| AX-158372436 | 29 | 47.351 | KV453351.1 | 2292135 | 29-scf00554 | 29 |
| AX-158372446 | 29 | 47.351 | KV453351.1 | 2304307 | 29-scf00554 | 29 |
| AX-158372434 | 29 | 47.497 | KV453351.1 | 2290573 | 29-scf00554 | 29 |
| AX-158372438 | 29 | 47.497 | KV453351.1 | 2295006 | 29-scf00554 | 29 |
| AX-158372439 | 29 | 47.497 | KV453351.1 | 2296129 | 29-scf00554 | 29 |
| AX-158372444 | 29 | 47.497 | KV453351.1 | 2299441 | 29-scf00554 | 29 |
| AX-158372452 | 29 | 47.497 | KV453351.1 | 2308856 | 29-scf00554 | 29 |
| AX-158372424 | 29 | 47.788 | KV453351.1 | 2278935 | 29-scf00554 | 29 |
| AX-158372448 | 29 | 47.788 | KV453351.1 | 2306218 | 29-scf00554 | 29 |
| AX-158372451 | 29 | 47.788 | KV453351.1 | 2308320 | 29-scf00554 | 29 |
| AX-158372453 | 29 | 47.788 | KV453351.1 | 2312101 | 29-scf00554 | 29 |
| AX-158372454 | 29 | 47.788 | KV453351.1 | 2312714 | 29-scf00554 | 29 |
| AX-158372455 | 29 | 47.788 | KV453351.1 | 2314051 | 29-scf00554 | 29 |
| AX-158372473 | 29 | 47.788 | KV453351.1 | 2339788 | 29-scf00554 | 29 |
| AX-158372485 | 29 | 47.788 | KV453351.1 | 2358589 | 29-scf00554 | 29 |
| AX-157750935 | 29 | 47.788 | KV453351.1 | 2377910 | 29-scf00554 | 29 |
| AX-158372513 | 29 | 47.788 | KV453351.1 | 2403754 | 29-scf00554 | 29 |



|              |    |        |            |         |             |    |
|--------------|----|--------|------------|---------|-------------|----|
| AX-158372519 | 29 | 47.788 | KV453351.1 | 2411477 | 29-scf00554 | 29 |
| AX-158372542 | 29 | 47.788 | KV453351.1 | 2440237 | 29-scf00554 | 29 |
| AX-158372580 | 29 | 47.788 | KV453351.1 | 2504224 | 29-scf00554 | 29 |
| AX-158372456 | 29 | 47.84  | KV453351.1 | 2314853 | 29-scf00554 | 29 |
| AX-158372460 | 29 | 47.863 | KV453351.1 | 2323414 | 29-scf00554 | 29 |
| AX-157852965 | 29 | 47.863 | KV453351.1 | 2329470 | 29-scf00554 | 29 |
| AX-158372461 | 29 | 47.897 | KV453351.1 | 2323987 | 29-scf00554 | 29 |
| AX-157862488 | 29 | 47.897 | KV453351.1 | 2324259 | 29-scf00554 | 29 |
| AX-158372463 | 29 | 47.897 | KV453351.1 | 2327094 | 29-scf00554 | 29 |
| AX-158372464 | 29 | 47.897 | KV453351.1 | 2327940 | 29-scf00554 | 29 |
| AX-158372465 | 29 | 47.897 | KV453351.1 | 2328737 | 29-scf00554 | 29 |
| AX-157852968 | 29 | 47.897 | KV453351.1 | 2434016 | 29-scf00554 | 29 |
| AX-158372540 | 29 | 47.897 | KV453351.1 | 2439058 | 29-scf00554 | 29 |
| AX-157774651 | 29 | 47.898 | KV453351.1 | 2332100 | 29-scf00554 | 29 |
| AX-157715339 | 29 | 47.909 | KV453351.1 | 2336285 | 29-scf00554 | 29 |
| AX-157753697 | 29 | 48.484 | KV453351.1 | 2342967 | 29-scf00554 | 29 |
| AX-158372475 | 29 | 48.512 | KV453351.1 | 2345291 | 29-scf00554 | 29 |
| AX-158372476 | 29 | 48.512 | KV453351.1 | 2346348 | 29-scf00554 | 29 |
| AX-158372478 | 29 | 48.525 | KV453351.1 | 2348603 | 29-scf00554 | 29 |
| AX-157751723 | 29 | 48.868 | KV453351.1 | 2354132 | 29-scf00554 | 29 |
| AX-158372481 | 29 | 48.87  | KV453351.1 | 2350102 | 29-scf00554 | 29 |
| AX-158372486 | 29 | 48.87  | KV453351.1 | 2360489 | 29-scf00554 | 29 |
| AX-158372487 | 29 | 48.87  | KV453351.1 | 2362314 | 29-scf00554 | 29 |
| AX-158372488 | 29 | 48.87  | KV453351.1 | 2364237 | 29-scf00554 | 29 |
| AX-158372489 | 29 | 48.991 | KV453351.1 | 2366233 | 29-scf00554 | 29 |
| AX-158372490 | 29 | 48.991 | KV453351.1 | 2368902 | 29-scf00554 | 29 |
| AX-158372492 | 29 | 49.009 | KV453351.1 | 2370931 | 29-scf00554 | 29 |
| AX-158372493 | 29 | 49.026 | KV453351.1 | 2371446 | 29-scf00554 | 29 |
| AX-158372494 | 29 | 49.053 | KV453351.1 | 2372017 | 29-scf00554 | 29 |
| AX-158372491 | 29 | 49.077 | KV453351.1 | 2370272 | 29-scf00554 | 29 |
| AX-158372498 | 29 | 49.077 | KV453351.1 | 2376785 | 29-scf00554 | 29 |
| AX-158372502 | 29 | 49.1   | KV453351.1 | 2380698 | 29-scf00554 | 29 |
| AX-158372504 | 29 | 49.1   | KV453351.1 | 2382158 | 29-scf00554 | 29 |
| AX-158372505 | 29 | 49.1   | KV453351.1 | 2382745 | 29-scf00554 | 29 |
| AX-158372509 | 29 | 49.319 | KV453351.1 | 2398358 | 29-scf00554 | 29 |
| AX-158372510 | 29 | 49.319 | KV453351.1 | 2399916 | 29-scf00554 | 29 |
| AX-158372514 | 29 | 49.319 | KV453351.1 | 2404924 | 29-scf00554 | 29 |
| AX-158372517 | 29 | 49.319 | KV453351.1 | 2410380 | 29-scf00554 | 29 |
| AX-158372560 | 29 | 49.319 | KV453351.1 | 2474384 | 29-scf00554 | 29 |
| AX-158372512 | 29 | 49.371 | KV453351.1 | 2403265 | 29-scf00554 | 29 |
| AX-158372506 | 29 | 49.428 | KV453351.1 | 2386962 | 29-scf00554 | 29 |
| AX-158372518 | 29 | 49.428 | KV453351.1 | 2410992 | 29-scf00554 | 29 |
| AX-158372521 | 29 | 49.428 | KV453351.1 | 2412697 | 29-scf00554 | 29 |
| AX-157862490 | 29 | 49.428 | KV453351.1 | 2414521 | 29-scf00554 | 29 |
| AX-158372526 | 29 | 49.428 | KV453351.1 | 2415931 | 29-scf00554 | 29 |
| AX-158372527 | 29 | 49.428 | KV453351.1 | 2418232 | 29-scf00554 | 29 |
| AX-158372528 | 29 | 49.428 | KV453351.1 | 2420806 | 29-scf00554 | 29 |
| AX-158372535 | 29 | 49.428 | KV453351.1 | 2428893 | 29-scf00554 | 29 |
| AX-158372520 | 29 | 49.492 | KV453351.1 | 2412239 | 29-scf00554 | 29 |
| AX-158372534 | 29 | 49.492 | KV453351.1 | 2428032 | 29-scf00554 | 29 |
| AX-158372537 | 29 | 49.492 | KV453351.1 | 2437576 | 29-scf00554 | 29 |

|              |    |        |            |         |             |    |
|--------------|----|--------|------------|---------|-------------|----|
| AX-157889266 | 29 | 49.567 | KV453351.1 | 2434680 | 29-scf00554 | 29 |
| AX-158372508 | 29 | 49.615 | KV453351.1 | 2397708 | 29-scf00554 | 29 |
| AX-158372511 | 29 | 49.615 | KV453351.1 | 2400740 | 29-scf00554 | 29 |
| AX-158372544 | 29 | 49.615 | KV453351.1 | 2441304 | 29-scf00554 | 29 |
| AX-158372545 | 29 | 49.615 | KV453351.1 | 2444215 | 29-scf00554 | 29 |
| AX-157709553 | 29 | 49.615 | KV453351.1 | 2444778 | 29-scf00554 | 29 |
| AX-158372546 | 29 | 49.615 | KV453351.1 | 2446958 | 29-scf00554 | 29 |
| AX-157750110 | 29 | 49.949 | KV453351.1 | 2451619 | 29-scf00554 | 29 |
| AX-158372554 | 29 | 49.963 | KV453351.1 | 2466009 | 29-scf00554 | 29 |
| AX-158372563 | 29 | 49.963 | KV453351.1 | 2481865 | 29-scf00554 | 29 |
| AX-158372555 | 29 | 49.975 | KV453351.1 | 2468920 | 29-scf00554 | 29 |
| AX-158372557 | 29 | 49.975 | KV453351.1 | 2470221 | 29-scf00554 | 29 |
| AX-158372559 | 29 | 49.975 | KV453351.1 | 2473814 | 29-scf00554 | 29 |
| AX-158372562 | 29 | 49.975 | KV453351.1 | 2479465 | 29-scf00554 | 29 |
| AX-158372564 | 29 | 49.975 | KV453351.1 | 2482821 | 29-scf00554 | 29 |
| AX-158372566 | 29 | 49.975 | KV453351.1 | 2483634 | 29-scf00554 | 29 |
| AX-158372575 | 29 | 49.975 | KV453351.1 | 2494162 | 29-scf00554 | 29 |
| AX-158372567 | 29 | 50.194 | KV453351.1 | 2484283 | 29-scf00554 | 29 |
| AX-157757959 | 29 | 50.194 | KV453351.1 | 2487016 | 29-scf00554 | 29 |
| AX-158372573 | 29 | 50.194 | KV453351.1 | 2491355 | 29-scf00554 | 29 |
| AX-158372574 | 29 | 50.276 | KV453351.1 | 2492828 | 29-scf00554 | 29 |
| AX-157739207 | 29 | 50.327 | KV453351.1 | 2495107 | 29-scf00554 | 29 |
| AX-157726586 | 29 | 50.327 | KV453351.1 | 2496017 | 29-scf00554 | 29 |
| AX-158372578 | 29 | 50.456 | KV453351.1 | 2501634 | 29-scf00554 | 29 |
| AX-158372579 | 29 | 50.594 | KV453351.1 | 2502059 | 29-scf00554 | 29 |
| AX-157852969 | 29 | 50.594 | KV453351.1 | 2503442 | 29-scf00554 | 29 |
| AX-158372582 | 29 | 50.594 | KV453351.1 | 2507562 | 29-scf00554 | 29 |
| AX-158372596 | 29 | 50.594 | KV453351.1 | 2532076 | 29-scf00554 | 29 |
| AX-158372597 | 29 | 50.594 | KV453351.1 | 2532978 | 29-scf00554 | 29 |
| AX-158372631 | 29 | 50.594 | KV453351.1 | 2598658 | 29-scf00554 | 29 |
| AX-158372583 | 29 | 50.804 | KV453351.1 | 2508934 | 29-scf00554 | 29 |
| AX-157708423 | 29 | 50.957 | KV453351.1 | 2512363 | 29-scf00554 | 29 |
| AX-158372587 | 29 | 51.111 | KV453351.1 | 2519157 | 29-scf00554 | 29 |
| AX-158372588 | 29 | 51.238 | KV453351.1 | 2520929 | 29-scf00554 | 29 |
| AX-158372589 | 29 | 51.313 | KV453351.1 | 2522877 | 29-scf00554 | 29 |
| AX-158372591 | 29 | 51.378 | KV453351.1 | 2524753 | 29-scf00554 | 29 |
| AX-158372593 | 29 | 51.495 | KV453351.1 | 2526846 | 29-scf00554 | 29 |
| AX-158372598 | 29 | 51.659 | KV453351.1 | 2537562 | 29-scf00554 | 29 |
| AX-158372604 | 29 | 51.659 | KV453351.1 | 2546537 | 29-scf00554 | 29 |
| AX-158372599 | 29 | 51.66  | KV453351.1 | 2538985 | 29-scf00554 | 29 |
| AX-158372600 | 29 | 51.66  | KV453351.1 | 2541677 | 29-scf00554 | 29 |
| AX-158372601 | 29 | 51.66  | KV453351.1 | 2544770 | 29-scf00554 | 29 |
| AX-158372602 | 29 | 51.66  | KV453351.1 | 2545664 | 29-scf00554 | 29 |
| AX-158372605 | 29 | 51.66  | KV453351.1 | 2549439 | 29-scf00554 | 29 |
| AX-158381822 | 29 | 51.66  | KV453351.1 | 2549508 | 29-scf00554 | 29 |
| AX-158372607 | 29 | 51.777 | KV453351.1 | 2552244 | 29-scf00554 | 29 |
| AX-158372609 | 29 | 51.918 | KV453351.1 | 2555876 | 29-scf00554 | 29 |
| AX-158420257 | 29 | 51.918 | KV453351.1 | 2557756 | 29-scf00554 | 29 |
| AX-158372611 | 29 | 51.921 | KV453351.1 | 2557371 | 29-scf00554 | 29 |
| AX-158372613 | 29 | 51.921 | KV453351.1 | 2559252 | 29-scf00554 | 29 |
| AX-158372672 | 29 | 51.921 | KV453351.1 | 2658964 | 29-scf00554 | 29 |

|              |    |        |            |         |             |    |
|--------------|----|--------|------------|---------|-------------|----|
| AX-157724757 | 29 | 52.339 | KV453351.1 | 2584142 | 29-scf00554 | 29 |
| AX-157775141 | 29 | 52.341 | KV453351.1 | 2586506 | 29-scf00554 | 29 |
| AX-157753991 | 29 | 52.449 | KV453351.1 | 2588632 | 29-scf00554 | 29 |
| AX-158372626 | 29 | 52.457 | KV453351.1 | 2593625 | 29-scf00554 | 29 |
| AX-158372627 | 29 | 52.461 | KV453351.1 | 2594390 | 29-scf00554 | 29 |
| AX-158372628 | 29 | 52.47  | KV453351.1 | 2595744 | 29-scf00554 | 29 |
| AX-158372636 | 29 | 52.47  | KV453351.1 | 2603555 | 29-scf00554 | 29 |
| AX-158372641 | 29 | 52.47  | KV453351.1 | 2610184 | 29-scf00554 | 29 |
| AX-158372630 | 29 | 52.476 | KV453351.1 | 2597379 | 29-scf00554 | 29 |
| AX-158372635 | 29 | 52.476 | KV453351.1 | 2603515 | 29-scf00554 | 29 |
| AX-158372640 | 29 | 52.476 | KV453351.1 | 2609215 | 29-scf00554 | 29 |
| AX-158372638 | 29 | 52.571 | KV453351.1 | 2606790 | 29-scf00554 | 29 |
| AX-158372644 | 29 | 52.632 | KV453351.1 | 2613410 | 29-scf00554 | 29 |
| AX-158372647 | 29 | 52.632 | KV453351.1 | 2616231 | 29-scf00554 | 29 |
| AX-158372652 | 29 | 52.632 | KV453351.1 | 2621443 | 29-scf00554 | 29 |
| AX-158372653 | 29 | 52.82  | KV453351.1 | 2622086 | 29-scf00554 | 29 |
| AX-157852971 | 29 | 52.859 | KV453351.1 | 2622692 | 29-scf00554 | 29 |
| AX-157852972 | 29 | 52.877 | KV453351.1 | 2626429 | 29-scf00554 | 29 |
| AX-158372657 | 29 | 52.933 | KV453351.1 | 2627562 | 29-scf00554 | 29 |
| AX-158372660 | 29 | 52.933 | KV453351.1 | 2633019 | 29-scf00554 | 29 |
| AX-157889268 | 29 | 52.933 | KV453351.1 | 2633064 | 29-scf00554 | 29 |
| AX-157715867 | 29 | 52.945 | KV453351.1 | 2640826 | 29-scf00554 | 29 |
| AX-158372666 | 29 | 52.958 | KV453351.1 | 2642941 | 29-scf00554 | 29 |
| AX-158372670 | 29 | 53.547 | KV453351.1 | 2657133 | 29-scf00554 | 29 |
| AX-157727706 | 29 | 53.581 | KV453351.1 | 2663761 | 29-scf00554 | 29 |
| AX-158381824 | 29 | 53.581 | KV453351.1 | 2664541 | 29-scf00554 | 29 |
| AX-158372674 | 29 | 53.625 | KV453351.1 | 2664392 | 29-scf00554 | 29 |
| AX-158372675 | 29 | 53.699 | KV453351.1 | 2666545 | 29-scf00554 | 29 |
| AX-158372676 | 29 | 53.7   | KV453351.1 | 2667709 | 29-scf00554 | 29 |
| AX-158372690 | 29 | 53.7   | KV453351.1 | 2678801 | 29-scf00554 | 29 |
| AX-158372701 | 29 | 53.7   | KV453351.1 | 2692387 | 29-scf00554 | 29 |
| AX-158372749 | 29 | 53.7   | KV453351.1 | 2757373 | 29-scf00554 | 29 |
| AX-158372753 | 29 | 53.7   | KV453351.1 | 2761321 | 29-scf00554 | 29 |
| AX-158372678 | 29 | 53.706 | KV453351.1 | 2669492 | 29-scf00554 | 29 |
| AX-158372680 | 29 | 53.716 | KV453351.1 | 2671338 | 29-scf00554 | 29 |
| AX-158372682 | 29 | 53.785 | KV453351.1 | 2672187 | 29-scf00554 | 29 |
| AX-158372685 | 29 | 53.809 | KV453351.1 | 2674001 | 29-scf00554 | 29 |
| AX-157852979 | 29 | 53.809 | KV453351.1 | 2675598 | 29-scf00554 | 29 |
| AX-158372687 | 29 | 53.809 | KV453351.1 | 2675936 | 29-scf00554 | 29 |
| AX-157775071 | 29 | 54.137 | KV453351.1 | 2679477 | 29-scf00554 | 29 |
| AX-157751850 | 29 | 54.271 | KV453351.1 | 2685487 | 29-scf00554 | 29 |
| AX-158372694 | 29 | 54.465 | KV453351.1 | 2685862 | 29-scf00554 | 29 |
| AX-157723813 | 29 | 54.465 | KV453351.1 | 2690904 | 29-scf00554 | 29 |
| AX-158372708 | 29 | 54.465 | KV453351.1 | 2702890 | 29-scf00554 | 29 |
| AX-158372711 | 29 | 54.465 | KV453351.1 | 2705218 | 29-scf00554 | 29 |
| AX-157757098 | 29 | 54.465 | KV453351.1 | 2720389 | 29-scf00554 | 29 |
| AX-158372735 | 29 | 54.465 | KV453351.1 | 2739062 | 29-scf00554 | 29 |
| AX-158372709 | 29 | 54.507 | KV453351.1 | 2703189 | 29-scf00554 | 29 |
| AX-158372718 | 29 | 54.654 | KV453351.1 | 2718375 | 29-scf00554 | 29 |
| AX-158372719 | 29 | 54.793 | KV453351.1 | 2720650 | 29-scf00554 | 29 |
| AX-157758298 | 29 | 54.793 | KV453351.1 | 2722651 | 29-scf00554 | 29 |

|              |    |        |            |         |             |    |
|--------------|----|--------|------------|---------|-------------|----|
| AX-158372723 | 29 | 54.957 | KV453351.1 | 2726334 | 29-scf00554 | 29 |
| AX-158372724 | 29 | 54.957 | KV453351.1 | 2727116 | 29-scf00554 | 29 |
| AX-158372740 | 29 | 54.957 | KV453351.1 | 2747088 | 29-scf00554 | 29 |
| AX-158372725 | 29 | 55.119 | KV453351.1 | 2729520 | 29-scf00554 | 29 |
| AX-158372726 | 29 | 55.12  | KV453351.1 | 2731142 | 29-scf00554 | 29 |
| AX-158372727 | 29 | 55.12  | KV453351.1 | 2733223 | 29-scf00554 | 29 |
| AX-158372729 | 29 | 55.12  | KV453351.1 | 2735198 | 29-scf00554 | 29 |
| AX-158372731 | 29 | 55.12  | KV453351.1 | 2736129 | 29-scf00554 | 29 |
| AX-158372733 | 29 | 55.12  | KV453351.1 | 2737991 | 29-scf00554 | 29 |
| AX-158372736 | 29 | 55.12  | KV453351.1 | 2740084 | 29-scf00554 | 29 |
| AX-158372738 | 29 | 55.12  | KV453351.1 | 2742471 | 29-scf00554 | 29 |
| AX-158372739 | 29 | 55.12  | KV453351.1 | 2745895 | 29-scf00554 | 29 |
| AX-158372747 | 29 | 55.12  | KV453351.1 | 2755982 | 29-scf00554 | 29 |
| AX-157744269 | 29 | 55.121 | KV453351.1 | 2747206 | 29-scf00554 | 29 |
| AX-158372745 | 29 | 55.121 | KV453351.1 | 2753893 | 29-scf00554 | 29 |
| AX-157726596 | 29 | 55.273 | KV453351.1 | 2755115 | 29-scf00554 | 29 |
| AX-158372750 | 29 | 55.413 | KV453351.1 | 2757842 | 29-scf00554 | 29 |
| AX-158372751 | 29 | 55.413 | KV453351.1 | 2758261 | 29-scf00554 | 29 |
| AX-158372755 | 29 | 55.558 | KV453351.1 | 2763519 | 29-scf00554 | 29 |
| AX-158372757 | 29 | 55.558 | KV453351.1 | 2764369 | 29-scf00554 | 29 |
| AX-158372759 | 29 | 55.558 | KV453351.1 | 2766481 | 29-scf00554 | 29 |
| AX-158372763 | 29 | 55.667 | KV453351.1 | 2773813 | 29-scf00554 | 29 |
| AX-158372764 | 29 | 55.667 | KV453351.1 | 2773971 | 29-scf00554 | 29 |
| AX-158372765 | 29 | 55.667 | KV453351.1 | 2775592 | 29-scf00554 | 29 |
| AX-158372766 | 29 | 55.667 | KV453351.1 | 2776292 | 29-scf00554 | 29 |
| AX-157852980 | 29 | 55.667 | KV453351.1 | 2776497 | 29-scf00554 | 29 |
| AX-158372771 | 29 | 55.959 | KV453351.1 | 2786746 | 29-scf00554 | 29 |
| AX-158372776 | 29 | 55.959 | KV453351.1 | 2792528 | 29-scf00554 | 29 |
| AX-158372778 | 29 | 55.959 | KV453351.1 | 2796882 | 29-scf00554 | 29 |
| AX-158372779 | 29 | 56.102 | KV453351.1 | 2798313 | 29-scf00554 | 29 |
| AX-158372775 | 29 | 56.104 | KV453351.1 | 2792210 | 29-scf00554 | 29 |
| AX-158372777 | 29 | 56.104 | KV453351.1 | 2794222 | 29-scf00554 | 29 |
| AX-158372781 | 29 | 56.104 | KV453351.1 | 2800631 | 29-scf00554 | 29 |
| AX-158372782 | 29 | 56.104 | KV453351.1 | 2802634 | 29-scf00554 | 29 |
| AX-158372784 | 29 | 56.104 | KV453351.1 | 2804046 | 29-scf00554 | 29 |
| AX-158372788 | 29 | 56.214 | KV453351.1 | 2807357 | 29-scf00554 | 29 |
| AX-158372792 | 29 | 56.282 | KV453351.1 | 2813495 | 29-scf00554 | 29 |
| AX-158372800 | 29 | 56.323 | KV453351.1 | 2822167 | 29-scf00554 | 29 |
| AX-157889270 | 29 | 56.323 | KV453351.1 | 2822296 | 29-scf00554 | 29 |
| AX-158372802 | 29 | 56.394 | KV453351.1 | 2824164 | 29-scf00554 | 29 |
| AX-158372810 | 29 | 56.486 | KV453351.1 | 2830724 | 29-scf00554 | 29 |
| AX-157719972 | 29 | 56.486 | KV453351.1 | 2833973 | 29-scf00554 | 29 |
| AX-158372801 | 29 | 56.655 | KV453351.1 | 2822544 | 29-scf00554 | 29 |
| AX-158372813 | 29 | 56.655 | KV453351.1 | 2838260 | 29-scf00554 | 29 |
| AX-158372817 | 29 | 56.979 | KV453351.1 | 2842299 | 29-scf00554 | 29 |
| AX-158372820 | 29 | 57.089 | KV453351.1 | 2845194 | 29-scf00554 | 29 |
| AX-158372821 | 29 | 57.089 | KV453351.1 | 2846563 | 29-scf00554 | 29 |
| AX-158372822 | 29 | 57.089 | KV453351.1 | 2846991 | 29-scf00554 | 29 |
| AX-158372823 | 29 | 57.089 | KV453351.1 | 2847973 | 29-scf00554 | 29 |
| AX-157699697 | 29 | 57.089 | KV453351.1 | 2852053 | 29-scf00554 | 29 |
| AX-158372827 | 29 | 57.089 | KV453351.1 | 2852558 | 29-scf00554 | 29 |

|              |    |        |            |         |             |    |
|--------------|----|--------|------------|---------|-------------|----|
| AX-158372831 | 29 | 57.089 | KV453351.1 | 2856798 | 29-scf00554 | 29 |
| AX-158372833 | 29 | 57.235 | KV453351.1 | 2859486 | 29-scf00554 | 29 |
| AX-158372834 | 29 | 57.302 | KV453351.1 | 2860854 | 29-scf00554 | 29 |
| AX-158372835 | 29 | 57.345 | KV453351.1 | 2862230 | 29-scf00554 | 29 |
| AX-158372837 | 29 | 57.381 | KV453351.1 | 2863817 | 29-scf00554 | 29 |
| AX-158372838 | 29 | 57.526 | KV453351.1 | 2866997 | 29-scf00554 | 29 |
| AX-158372840 | 29 | 57.526 | KV453351.1 | 2869700 | 29-scf00554 | 29 |
| AX-158372842 | 29 | 57.526 | KV453351.1 | 2873694 | 29-scf00554 | 29 |
| AX-158372843 | 29 | 57.526 | KV453351.1 | 2874948 | 29-scf00554 | 29 |
| AX-158372844 | 29 | 57.526 | KV453351.1 | 2876851 | 29-scf00554 | 29 |
| AX-158372846 | 29 | 57.568 | KV453351.1 | 2880888 | 29-scf00554 | 29 |
| AX-158372848 | 29 | 57.636 | KV453351.1 | 2882521 | 29-scf00554 | 29 |
| AX-158372851 | 29 | 57.636 | KV453351.1 | 2884921 | 29-scf00554 | 29 |
| AX-158372852 | 29 | 57.636 | KV453351.1 | 2885625 | 29-scf00554 | 29 |
| AX-158372853 | 29 | 57.636 | KV453351.1 | 2886174 | 29-scf00554 | 29 |
| AX-158372855 | 29 | 57.636 | KV453351.1 | 2887651 | 29-scf00554 | 29 |
| AX-158372859 | 29 | 57.636 | KV453351.1 | 2892262 | 29-scf00554 | 29 |
| AX-158372857 | 29 | 57.637 | KV453351.1 | 2890715 | 29-scf00554 | 29 |
| AX-158372862 | 29 | 57.806 | KV453351.1 | 2895018 | 29-scf00554 | 29 |
| AX-157719251 | 29 | 57.807 | KV453351.1 | 2895706 | 29-scf00554 | 29 |
| AX-158372864 | 29 | 58.15  | KV453351.1 | 2898362 | 29-scf00554 | 29 |
| AX-158372854 | 29 | 58.151 | KV453351.1 | 2887135 | 29-scf00554 | 29 |
| AX-158372858 | 29 | 58.151 | KV453351.1 | 2891817 | 29-scf00554 | 29 |
| AX-158372865 | 29 | 58.151 | KV453351.1 | 2900401 | 29-scf00554 | 29 |
| AX-158372866 | 29 | 58.151 | KV453351.1 | 2901139 | 29-scf00554 | 29 |
| AX-157772082 | 29 | 58.151 | KV453351.1 | 2903257 | 29-scf00554 | 29 |
| AX-158372867 | 29 | 58.151 | KV453351.1 | 2904248 | 29-scf00554 | 29 |
| AX-158372868 | 29 | 58.151 | KV453351.1 | 2904454 | 29-scf00554 | 29 |
| AX-158372869 | 29 | 58.151 | KV453351.1 | 2905921 | 29-scf00554 | 29 |
| AX-158372871 | 29 | 58.151 | KV453351.1 | 2911569 | 29-scf00554 | 29 |
| AX-158372873 | 29 | 58.151 | KV453351.1 | 2915747 | 29-scf00554 | 29 |
| AX-158372874 | 29 | 58.151 | KV453351.1 | 2916274 | 29-scf00554 | 29 |
| AX-158372877 | 29 | 58.151 | KV453351.1 | 2918055 | 29-scf00554 | 29 |
| AX-158372878 | 29 | 58.151 | KV453351.1 | 2918769 | 29-scf00554 | 29 |
| AX-158372879 | 29 | 58.151 | KV453351.1 | 2919084 | 29-scf00554 | 29 |
| AX-158372886 | 29 | 58.151 | KV453351.1 | 2929189 | 29-scf00554 | 29 |
| AX-157862493 | 29 | 58.151 | KV453351.1 | 2929885 | 29-scf00554 | 29 |
| AX-158381826 | 29 | 58.151 | KV453351.1 | 2941602 | 29-scf00554 | 29 |
| AX-158372923 | 29 | 58.151 | KV453351.1 | 2975102 | 29-scf00554 | 29 |
| AX-158372882 | 29 | 58.347 | KV453351.1 | 2924766 | 29-scf00554 | 29 |
| AX-158372887 | 29 | 58.358 | KV453351.1 | 2930757 | 29-scf00554 | 29 |
| AX-158372890 | 29 | 58.608 | KV453351.1 | 2932987 | 29-scf00554 | 29 |
| AX-158372900 | 29 | 58.833 | KV453351.1 | 2943288 | 29-scf00554 | 29 |
| AX-158420268 | 29 | 58.859 | KV453351.1 | 2944199 | 29-scf00554 | 29 |
| AX-158372901 | 29 | 59.009 | KV453351.1 | 2945278 | 29-scf00554 | 29 |
| AX-158372902 | 29 | 59.041 | KV453351.1 | 2946133 | 29-scf00554 | 29 |
| AX-158372903 | 29 | 59.101 | KV453351.1 | 2947292 | 29-scf00554 | 29 |
| AX-158372895 | 29 | 59.168 | KV453351.1 | 2938517 | 29-scf00554 | 29 |
| AX-158372896 | 29 | 59.168 | KV453351.1 | 2939700 | 29-scf00554 | 29 |
| AX-158372904 | 29 | 59.168 | KV453351.1 | 2949203 | 29-scf00554 | 29 |
| AX-158372905 | 29 | 59.168 | KV453351.1 | 2949932 | 29-scf00554 | 29 |

|              |    |        |            |         |             |    |
|--------------|----|--------|------------|---------|-------------|----|
| AX-158372906 | 29 | 59.168 | KV453351.1 | 2951722 | 29-scf00554 | 29 |
| AX-158372908 | 29 | 59.168 | KV453351.1 | 2954833 | 29-scf00554 | 29 |
| AX-158372911 | 29 | 59.168 | KV453351.1 | 2958131 | 29-scf00554 | 29 |
| AX-158372916 | 29 | 59.168 | KV453351.1 | 2960798 | 29-scf00554 | 29 |
| AX-158372910 | 29 | 59.349 | KV453351.1 | 2956379 | 29-scf00554 | 29 |
| AX-157724975 | 29 | 59.349 | KV453351.1 | 2962187 | 29-scf00554 | 29 |
| AX-158372918 | 29 | 59.349 | KV453351.1 | 2966527 | 29-scf00554 | 29 |
| AX-158372919 | 29 | 59.473 | KV453351.1 | 2968591 | 29-scf00554 | 29 |
| AX-157758010 | 29 | 59.473 | KV453351.1 | 2999632 | 29-scf00554 | 29 |
| AX-158372889 | 29 | 59.51  | KV453351.1 | 2932707 | 29-scf00554 | 29 |
| AX-158372924 | 29 | 59.51  | KV453351.1 | 2975974 | 29-scf00554 | 29 |
| AX-158372915 | 29 | 59.599 | KV453351.1 | 2960310 | 29-scf00554 | 29 |
| AX-158372926 | 29 | 59.599 | KV453351.1 | 2979474 | 29-scf00554 | 29 |
| AX-158372928 | 29 | 59.715 | KV453351.1 | 2981517 | 29-scf00554 | 29 |
| AX-158372929 | 29 | 59.715 | KV453351.1 | 2986483 | 29-scf00554 | 29 |
| AX-158372931 | 29 | 59.715 | KV453351.1 | 2989839 | 29-scf00554 | 29 |
| AX-158372938 | 29 | 59.933 | KV453351.1 | 3001687 | 29-scf00554 | 29 |
| AX-158372941 | 29 | 59.933 | KV453351.1 | 3006832 | 29-scf00554 | 29 |
| AX-158372946 | 29 | 60.26  | KV453351.1 | 3010958 | 29-scf00554 | 29 |
| AX-158372948 | 29 | 60.26  | KV453351.1 | 3013365 | 29-scf00554 | 29 |
| AX-157742031 | 29 | 60.26  | KV453351.1 | 3015347 | 29-scf00554 | 29 |
| AX-158372950 | 29 | 60.26  | KV453351.1 | 3016075 | 29-scf00554 | 29 |
| AX-158372951 | 29 | 60.26  | KV453351.1 | 3016440 | 29-scf00554 | 29 |
| AX-158372986 | 29 | 60.26  | KV453351.1 | 3050181 | 29-scf00554 | 29 |
| AX-158372956 | 29 | 60.32  | KV453351.1 | 3020101 | 29-scf00554 | 29 |
| AX-158372955 | 29 | 60.37  | KV453351.1 | 3019059 | 29-scf00554 | 29 |
| AX-158372960 | 29 | 60.37  | KV453351.1 | 3024658 | 29-scf00554 | 29 |
| AX-158372962 | 29 | 60.37  | KV453351.1 | 3026808 | 29-scf00554 | 29 |
| AX-158372964 | 29 | 60.37  | KV453351.1 | 3028498 | 29-scf00554 | 29 |
| AX-158372965 | 29 | 60.37  | KV453351.1 | 3028804 | 29-scf00554 | 29 |
| AX-158372966 | 29 | 60.396 | KV453351.1 | 3029583 | 29-scf00554 | 29 |
| AX-157774224 | 29 | 60.396 | KV453351.1 | 3034019 | 29-scf00554 | 29 |
| AX-158372968 | 29 | 60.437 | KV453351.1 | 3031055 | 29-scf00554 | 29 |
| AX-158372942 | 29 | 60.48  | KV453351.1 | 3008152 | 29-scf00554 | 29 |
| AX-158372967 | 29 | 60.48  | KV453351.1 | 3030463 | 29-scf00554 | 29 |
| AX-158372973 | 29 | 60.48  | KV453351.1 | 3038260 | 29-scf00554 | 29 |
| AX-158372975 | 29 | 60.48  | KV453351.1 | 3040721 | 29-scf00554 | 29 |
| AX-158372978 | 29 | 60.48  | KV453351.1 | 3043695 | 29-scf00554 | 29 |
| AX-158372979 | 29 | 60.48  | KV453351.1 | 3044480 | 29-scf00554 | 29 |
| AX-158372982 | 29 | 60.48  | KV453351.1 | 3046906 | 29-scf00554 | 29 |
| AX-158372987 | 29 | 60.48  | KV453351.1 | 3050856 | 29-scf00554 | 29 |
| AX-158372989 | 29 | 60.48  | KV453351.1 | 3054139 | 29-scf00554 | 29 |
| AX-158372990 | 29 | 60.48  | KV453351.1 | 3054561 | 29-scf00554 | 29 |
| AX-158372995 | 29 | 60.48  | KV453351.1 | 3061359 | 29-scf00554 | 29 |
| AX-157720810 | 29 | 60.48  | KV453351.1 | 3065474 | 29-scf00554 | 29 |
| AX-157743546 | 29 | 60.702 | KV453351.1 | 3062799 | 29-scf00554 | 29 |
| AX-158372996 | 29 | 60.702 | KV453351.1 | 3063255 | 29-scf00554 | 29 |
| AX-158373000 | 29 | 60.916 | KV453351.1 | 3068682 | 29-scf00554 | 29 |
| AX-157749814 | 29 | 60.916 | KV453351.1 | 3069477 | 29-scf00554 | 29 |
| AX-157719174 | 29 | 60.916 | KV453351.1 | 3073996 | 29-scf00554 | 29 |
| AX-158373003 | 29 | 60.958 | KV453351.1 | 3074389 | 29-scf00554 | 29 |

|              |    |        |            |         |             |    |
|--------------|----|--------|------------|---------|-------------|----|
| AX-158373005 | 29 | 60.958 | KV453351.1 | 3077588 | 29-scf00554 | 29 |
| AX-158373030 | 29 | 60.958 | KV453351.1 | 3102119 | 29-scf00554 | 29 |
| AX-158373006 | 29 | 60.994 | KV453351.1 | 3078025 | 29-scf00554 | 29 |
| AX-158373016 | 29 | 61.025 | KV453351.1 | 3084495 | 29-scf00554 | 29 |
| AX-158373019 | 29 | 61.025 | KV453351.1 | 3088367 | 29-scf00554 | 29 |
| AX-157852983 | 29 | 61.025 | KV453351.1 | 3092529 | 29-scf00554 | 29 |
| AX-158373028 | 29 | 61.025 | KV453351.1 | 3097101 | 29-scf00554 | 29 |
| AX-157717125 | 29 | 61.462 | KV453351.1 | 3102437 | 29-scf00554 | 29 |
| AX-158373033 | 29 | 61.466 | KV453351.1 | 3104726 | 29-scf00554 | 29 |
| AX-158373038 | 29 | 61.681 | KV453351.1 | 3109431 | 29-scf00554 | 29 |
| AX-158373043 | 29 | 61.681 | KV453351.1 | 3112491 | 29-scf00554 | 29 |
| AX-157743246 | 29 | 61.681 | KV453351.1 | 3114773 | 29-scf00554 | 29 |
| AX-158373048 | 29 | 61.681 | KV453351.1 | 3115454 | 29-scf00554 | 29 |
| AX-158373050 | 29 | 61.681 | KV453351.1 | 3118478 | 29-scf00554 | 29 |
| AX-158373051 | 29 | 61.681 | KV453351.1 | 3118835 | 29-scf00554 | 29 |
| AX-158373053 | 29 | 61.681 | KV453351.1 | 3122589 | 29-scf00554 | 29 |
| AX-157750264 | 29 | 61.682 | KV453351.1 | 3120115 | 29-scf00554 | 29 |
| AX-158373055 | 29 | 61.843 | KV453351.1 | 3123837 | 29-scf00554 | 29 |
| AX-158373056 | 29 | 61.843 | KV453351.1 | 3124224 | 29-scf00554 | 29 |
| AX-158373057 | 29 | 61.843 | KV453351.1 | 3125892 | 29-scf00554 | 29 |
| AX-158373058 | 29 | 61.843 | KV453351.1 | 3127747 | 29-scf00554 | 29 |
| AX-158373059 | 29 | 61.843 | KV453351.1 | 3129655 | 29-scf00554 | 29 |
| AX-158373061 | 29 | 61.843 | KV453351.1 | 3130694 | 29-scf00554 | 29 |
| AX-157852984 | 29 | 61.843 | KV453351.1 | 3131142 | 29-scf00554 | 29 |
| AX-158373062 | 29 | 61.843 | KV453351.1 | 3132324 | 29-scf00554 | 29 |
| AX-158373065 | 29 | 61.843 | KV453351.1 | 3135331 | 29-scf00554 | 29 |
| AX-158373066 | 29 | 61.896 | KV453351.1 | 3137205 | 29-scf00554 | 29 |
| AX-158373068 | 29 | 62.007 | KV453351.1 | 3139647 | 29-scf00554 | 29 |
| AX-157707706 | 29 | 62.012 | KV453351.1 | 3140840 | 29-scf00554 | 29 |
| AX-158373075 | 29 | 62.227 | KV453351.1 | 3147301 | 29-scf00554 | 29 |
| AX-158373076 | 29 | 62.227 | KV453351.1 | 3149455 | 29-scf00554 | 29 |
| AX-158373080 | 29 | 62.227 | KV453351.1 | 3155624 | 29-scf00554 | 29 |
| AX-158373082 | 29 | 62.227 | KV453351.1 | 3157482 | 29-scf00554 | 29 |
| AX-158373086 | 29 | 62.227 | KV453351.1 | 3161136 | 29-scf00554 | 29 |
| AX-158373087 | 29 | 62.227 | KV453351.1 | 3164394 | 29-scf00554 | 29 |
| AX-158373092 | 29 | 62.227 | KV453351.1 | 3170006 | 29-scf00554 | 29 |
| AX-158373094 | 29 | 62.227 | KV453351.1 | 3171822 | 29-scf00554 | 29 |
| AX-158373318 | 29 | 62.227 | KV453351.1 | 3485003 | 29-scf00554 | 29 |
| AX-158373074 | 29 | 62.228 | KV453351.1 | 3146799 | 29-scf00554 | 29 |
| AX-158373085 | 29 | 62.228 | KV453351.1 | 3158806 | 29-scf00554 | 29 |
| AX-157740226 | 29 | 62.228 | KV453351.1 | 3168479 | 29-scf00554 | 29 |
| AX-158373093 | 29 | 62.228 | KV453351.1 | 3171076 | 29-scf00554 | 29 |
| AX-158373172 | 29 | 62.228 | KV453351.1 | 3275567 | 29-scf00554 | 29 |
| AX-158373189 | 29 | 62.228 | KV453351.1 | 3311390 | 29-scf00554 | 29 |
| AX-158373190 | 29 | 62.228 | KV453351.1 | 3311603 | 29-scf00554 | 29 |
| AX-157852998 | 29 | 62.228 | KV453351.1 | 3316690 | 29-scf00554 | 29 |
| AX-158373266 | 29 | 62.228 | KV453351.1 | 3426807 | 29-scf00554 | 29 |
| AX-158373096 | 29 | 62.399 | KV453351.1 | 3173300 | 29-scf00554 | 29 |
| AX-158373095 | 29 | 62.555 | KV453351.1 | 3172912 | 29-scf00554 | 29 |
| AX-158373097 | 29 | 62.555 | KV453351.1 | 3174814 | 29-scf00554 | 29 |
| AX-158373098 | 29 | 62.555 | KV453351.1 | 3176050 | 29-scf00554 | 29 |

|              |    |        |            |         |             |    |
|--------------|----|--------|------------|---------|-------------|----|
| AX-158373100 | 29 | 62.555 | KV453351.1 | 3178190 | 29-scf00554 | 29 |
| AX-158373101 | 29 | 62.555 | KV453351.1 | 3178757 | 29-scf00554 | 29 |
| AX-158373103 | 29 | 62.555 | KV453351.1 | 3180310 | 29-scf00554 | 29 |
| AX-158373105 | 29 | 62.555 | KV453351.1 | 3184011 | 29-scf00554 | 29 |
| AX-158373106 | 29 | 62.599 | KV453351.1 | 3185435 | 29-scf00554 | 29 |
| AX-158373107 | 29 | 62.632 | KV453351.1 | 3186803 | 29-scf00554 | 29 |
| AX-158373109 | 29 | 62.632 | KV453351.1 | 3188887 | 29-scf00554 | 29 |
| AX-158373067 | 29 | 62.665 | KV453351.1 | 3137710 | 29-scf00554 | 29 |
| AX-157862494 | 29 | 62.665 | KV453351.1 | 3163139 | 29-scf00554 | 29 |
| AX-158373110 | 29 | 62.665 | KV453351.1 | 3190482 | 29-scf00554 | 29 |
| AX-158373111 | 29 | 62.665 | KV453351.1 | 3191440 | 29-scf00554 | 29 |
| AX-158373116 | 29 | 62.665 | KV453351.1 | 3198723 | 29-scf00554 | 29 |
| AX-158373117 | 29 | 62.665 | KV453351.1 | 3199295 | 29-scf00554 | 29 |
| AX-158373119 | 29 | 62.665 | KV453351.1 | 3200229 | 29-scf00554 | 29 |
| AX-158373121 | 29 | 62.665 | KV453351.1 | 3204563 | 29-scf00554 | 29 |
| AX-158373125 | 29 | 62.665 | KV453351.1 | 3210180 | 29-scf00554 | 29 |
| AX-158373126 | 29 | 62.665 | KV453351.1 | 3211199 | 29-scf00554 | 29 |
| AX-158373127 | 29 | 62.665 | KV453351.1 | 3212329 | 29-scf00554 | 29 |
| AX-158373131 | 29 | 62.665 | KV453351.1 | 3215577 | 29-scf00554 | 29 |
| AX-158373133 | 29 | 62.665 | KV453351.1 | 3217310 | 29-scf00554 | 29 |
| AX-158381828 | 29 | 62.665 | KV453351.1 | 3218807 | 29-scf00554 | 29 |
| AX-158373137 | 29 | 62.665 | KV453351.1 | 3219881 | 29-scf00554 | 29 |
| AX-157717652 | 29 | 62.665 | KV453351.1 | 3229914 | 29-scf00554 | 29 |
| AX-158373147 | 29 | 62.665 | KV453351.1 | 3241549 | 29-scf00554 | 29 |
| AX-158373167 | 29 | 62.665 | KV453351.1 | 3267994 | 29-scf00554 | 29 |
| AX-158373193 | 29 | 62.665 | KV453351.1 | 3314520 | 29-scf00554 | 29 |
| AX-158373129 | 29 | 62.707 | KV453351.1 | 3213486 | 29-scf00554 | 29 |
| AX-158373132 | 29 | 62.74  | KV453351.1 | 3216053 | 29-scf00554 | 29 |
| AX-158373135 | 29 | 62.774 | KV453351.1 | 3218207 | 29-scf00554 | 29 |
| AX-158373136 | 29 | 62.774 | KV453351.1 | 3218968 | 29-scf00554 | 29 |
| AX-158373140 | 29 | 62.774 | KV453351.1 | 3223562 | 29-scf00554 | 29 |
| AX-158373143 | 29 | 62.774 | KV453351.1 | 3230692 | 29-scf00554 | 29 |
| AX-157771283 | 29 | 62.774 | KV453351.1 | 3242756 | 29-scf00554 | 29 |
| AX-157852985 | 29 | 62.774 | KV453351.1 | 3246017 | 29-scf00554 | 29 |
| AX-158373155 | 29 | 62.774 | KV453351.1 | 3253029 | 29-scf00554 | 29 |
| AX-157756297 | 29 | 62.774 | KV453351.1 | 3253288 | 29-scf00554 | 29 |
| AX-157716778 | 29 | 62.774 | KV453351.1 | 3256484 | 29-scf00554 | 29 |
| AX-158373159 | 29 | 62.774 | KV453351.1 | 3256838 | 29-scf00554 | 29 |
| AX-158373160 | 29 | 62.774 | KV453351.1 | 3257489 | 29-scf00554 | 29 |
| AX-158373173 | 29 | 62.774 | KV453351.1 | 3275928 | 29-scf00554 | 29 |
| AX-157852991 | 29 | 62.774 | KV453351.1 | 3285280 | 29-scf00554 | 29 |
| AX-158373178 | 29 | 62.774 | KV453351.1 | 3286405 | 29-scf00554 | 29 |
| AX-158381829 | 29 | 62.774 | KV453351.1 | 3286601 | 29-scf00554 | 29 |
| AX-157716996 | 29 | 62.774 | KV453351.1 | 3307466 | 29-scf00554 | 29 |
| AX-158373191 | 29 | 62.774 | KV453351.1 | 3312073 | 29-scf00554 | 29 |
| AX-158373194 | 29 | 62.774 | KV453351.1 | 3315009 | 29-scf00554 | 29 |
| AX-158373195 | 29 | 62.774 | KV453351.1 | 3317207 | 29-scf00554 | 29 |
| AX-158373196 | 29 | 62.774 | KV453351.1 | 3318047 | 29-scf00554 | 29 |
| AX-158373303 | 29 | 62.774 | KV453351.1 | 3462645 | 29-scf00554 | 29 |
| AX-158373139 | 29 | 62.883 | KV453351.1 | 3223031 | 29-scf00554 | 29 |
| AX-157852987 | 29 | 62.883 | KV453351.1 | 3248627 | 29-scf00554 | 29 |



|              |    |        |            |         |             |    |
|--------------|----|--------|------------|---------|-------------|----|
| AX-158373152 | 29 | 62.883 | KV453351.1 | 3250200 | 29-scf00554 | 29 |
| AX-157718891 | 29 | 62.883 | KV453351.1 | 3261705 | 29-scf00554 | 29 |
| AX-157852990 | 29 | 62.883 | KV453351.1 | 3273589 | 29-scf00554 | 29 |
| AX-157852993 | 29 | 62.883 | KV453351.1 | 3296354 | 29-scf00554 | 29 |
| AX-157755318 | 29 | 62.883 | KV453351.1 | 3329025 | 29-scf00554 | 29 |
| AX-158373201 | 29 | 62.883 | KV453351.1 | 3332884 | 29-scf00554 | 29 |
| AX-158373202 | 29 | 62.883 | KV453351.1 | 3333462 | 29-scf00554 | 29 |
| AX-158373210 | 29 | 62.883 | KV453351.1 | 3351170 | 29-scf00554 | 29 |
| AX-158373212 | 29 | 62.883 | KV453351.1 | 3352457 | 29-scf00554 | 29 |
| AX-158373214 | 29 | 62.883 | KV453351.1 | 3353983 | 29-scf00554 | 29 |
| AX-158373218 | 29 | 62.883 | KV453351.1 | 3358895 | 29-scf00554 | 29 |
| AX-157768446 | 29 | 62.883 | KV453351.1 | 3360622 | 29-scf00554 | 29 |
| AX-158373219 | 29 | 62.883 | KV453351.1 | 3361309 | 29-scf00554 | 29 |
| AX-158373220 | 29 | 62.883 | KV453351.1 | 3362213 | 29-scf00554 | 29 |
| AX-158373221 | 29 | 62.883 | KV453351.1 | 3363306 | 29-scf00554 | 29 |
| AX-158373230 | 29 | 62.883 | KV453351.1 | 3377627 | 29-scf00554 | 29 |
| AX-158373231 | 29 | 62.883 | KV453351.1 | 3378543 | 29-scf00554 | 29 |
| AX-158373232 | 29 | 62.883 | KV453351.1 | 3379047 | 29-scf00554 | 29 |
| AX-158373233 | 29 | 62.883 | KV453351.1 | 3381843 | 29-scf00554 | 29 |
| AX-158373234 | 29 | 62.883 | KV453351.1 | 3382304 | 29-scf00554 | 29 |
| AX-158373235 | 29 | 62.883 | KV453351.1 | 3382962 | 29-scf00554 | 29 |
| AX-158373237 | 29 | 62.883 | KV453351.1 | 3384443 | 29-scf00554 | 29 |
| AX-158373238 | 29 | 62.883 | KV453351.1 | 3384882 | 29-scf00554 | 29 |
| AX-158373242 | 29 | 62.883 | KV453351.1 | 3391619 | 29-scf00554 | 29 |
| AX-157853007 | 29 | 62.883 | KV453351.1 | 3395152 | 29-scf00554 | 29 |
| AX-158373244 | 29 | 62.883 | KV453351.1 | 3395984 | 29-scf00554 | 29 |
| AX-158373247 | 29 | 62.883 | KV453351.1 | 3397014 | 29-scf00554 | 29 |
| AX-158373248 | 29 | 62.883 | KV453351.1 | 3398518 | 29-scf00554 | 29 |
| AX-158373255 | 29 | 62.883 | KV453351.1 | 3409275 | 29-scf00554 | 29 |
| AX-157772004 | 29 | 62.883 | KV453351.1 | 3415352 | 29-scf00554 | 29 |
| AX-157853010 | 29 | 62.883 | KV453351.1 | 3419269 | 29-scf00554 | 29 |
| AX-158373290 | 29 | 62.883 | KV453351.1 | 3450253 | 29-scf00554 | 29 |
| AX-158373301 | 29 | 62.883 | KV453351.1 | 3460920 | 29-scf00554 | 29 |
| AX-158373310 | 29 | 62.883 | KV453351.1 | 3472487 | 29-scf00554 | 29 |
| AX-158373322 | 29 | 62.883 | KV453351.1 | 3491131 | 29-scf00554 | 29 |
| AX-158373258 | 29 | 62.992 | KV453351.1 | 3412829 | 29-scf00554 | 29 |
| AX-158373261 | 29 | 62.992 | KV453351.1 | 3421920 | 29-scf00554 | 29 |
| AX-158373262 | 29 | 62.992 | KV453351.1 | 3422289 | 29-scf00554 | 29 |
| AX-157882945 | 29 | 62.992 | KV453351.1 | 3422732 | 29-scf00554 | 29 |
| AX-158373263 | 29 | 62.992 | KV453351.1 | 3423043 | 29-scf00554 | 29 |
| AX-158373264 | 29 | 62.992 | KV453351.1 | 3424866 | 29-scf00554 | 29 |
| AX-158373267 | 29 | 62.992 | KV453351.1 | 3427373 | 29-scf00554 | 29 |
| AX-158373268 | 29 | 62.992 | KV453351.1 | 3428280 | 29-scf00554 | 29 |
| AX-157774540 | 29 | 62.992 | KV453351.1 | 3428995 | 29-scf00554 | 29 |
| AX-157727648 | 29 | 62.992 | KV453351.1 | 3429838 | 29-scf00554 | 29 |
| AX-158373270 | 29 | 62.992 | KV453351.1 | 3430430 | 29-scf00554 | 29 |
| AX-158373271 | 29 | 62.992 | KV453351.1 | 3431605 | 29-scf00554 | 29 |
| AX-158373272 | 29 | 62.992 | KV453351.1 | 3432870 | 29-scf00554 | 29 |
| AX-158373273 | 29 | 62.992 | KV453351.1 | 3433352 | 29-scf00554 | 29 |
| AX-158373274 | 29 | 62.992 | KV453351.1 | 3433849 | 29-scf00554 | 29 |
| AX-158373275 | 29 | 62.992 | KV453351.1 | 3434792 | 29-scf00554 | 29 |

|              |    |        |            |         |             |    |
|--------------|----|--------|------------|---------|-------------|----|
| AX-157853011 | 29 | 62.992 | KV453351.1 | 3435118 | 29-scf00554 | 29 |
| AX-158373276 | 29 | 62.992 | KV453351.1 | 3436055 | 29-scf00554 | 29 |
| AX-158373283 | 29 | 62.992 | KV453351.1 | 3442985 | 29-scf00554 | 29 |
| AX-158373285 | 29 | 62.992 | KV453351.1 | 3445078 | 29-scf00554 | 29 |
| AX-158373286 | 29 | 62.992 | KV453351.1 | 3445480 | 29-scf00554 | 29 |
| AX-158373287 | 29 | 62.992 | KV453351.1 | 3446397 | 29-scf00554 | 29 |
| AX-158373289 | 29 | 62.992 | KV453351.1 | 3448337 | 29-scf00554 | 29 |
| AX-158373291 | 29 | 62.992 | KV453351.1 | 3450681 | 29-scf00554 | 29 |
| AX-158373326 | 29 | 62.992 | KV453351.1 | 3501153 | 29-scf00554 | 29 |
| AX-158373295 | 29 | 63.21  | KV453351.1 | 3455492 | 29-scf00554 | 29 |
| AX-158373298 | 29 | 63.21  | KV453351.1 | 3456941 | 29-scf00554 | 29 |
| AX-158373300 | 29 | 63.21  | KV453351.1 | 3460265 | 29-scf00554 | 29 |
| AX-158373302 | 29 | 63.21  | KV453351.1 | 3461372 | 29-scf00554 | 29 |
| AX-158373304 | 29 | 63.21  | KV453351.1 | 3462804 | 29-scf00554 | 29 |
| AX-158373305 | 29 | 63.21  | KV453351.1 | 3465151 | 29-scf00554 | 29 |
| AX-157853012 | 29 | 63.21  | KV453351.1 | 3465813 | 29-scf00554 | 29 |
| AX-158373308 | 29 | 63.21  | KV453351.1 | 3468628 | 29-scf00554 | 29 |
| AX-157701452 | 29 | 63.21  | KV453351.1 | 3475204 | 29-scf00554 | 29 |
| AX-158373313 | 29 | 63.21  | KV453351.1 | 3480243 | 29-scf00554 | 29 |
| AX-158373316 | 29 | 63.21  | KV453351.1 | 3483708 | 29-scf00554 | 29 |
| AX-158373323 | 29 | 63.21  | KV453351.1 | 3491642 | 29-scf00554 | 29 |
| AX-158373328 | 29 | 63.21  | KV453351.1 | 3502090 | 29-scf00554 | 29 |
| AX-158373330 | 29 | 63.21  | KV453351.1 | 3504462 | 29-scf00554 | 29 |
| AX-158373331 | 29 | 63.21  | KV453351.1 | 3505285 | 29-scf00554 | 29 |
| AX-158373334 | 29 | 63.21  | KV453351.1 | 3507396 | 29-scf00554 | 29 |
| AX-158373339 | 29 | 63.277 | KV453351.1 | 3514071 | 29-scf00554 | 29 |
| AX-157748757 | 29 | 63.277 | KV453351.1 | 3542144 | 29-scf00554 | 29 |
| AX-158373341 | 29 | 63.32  | KV453351.1 | 3518383 | 29-scf00554 | 29 |
| AX-158373342 | 29 | 63.32  | KV453351.1 | 3518877 | 29-scf00554 | 29 |
| AX-158373344 | 29 | 63.32  | KV453351.1 | 3520297 | 29-scf00554 | 29 |
| AX-158373346 | 29 | 63.32  | KV453351.1 | 3520862 | 29-scf00554 | 29 |
| AX-158373347 | 29 | 63.429 | KV453351.1 | 3521608 | 29-scf00554 | 29 |
| AX-158373348 | 29 | 63.429 | KV453351.1 | 3521945 | 29-scf00554 | 29 |
| AX-158373352 | 29 | 63.429 | KV453351.1 | 3523446 | 29-scf00554 | 29 |
| AX-158373353 | 29 | 63.429 | KV453351.1 | 3523897 | 29-scf00554 | 29 |
| AX-158373354 | 29 | 63.429 | KV453351.1 | 3524708 | 29-scf00554 | 29 |
| AX-158373356 | 29 | 63.429 | KV453351.1 | 3525772 | 29-scf00554 | 29 |
| AX-158373357 | 29 | 63.429 | KV453351.1 | 3526745 | 29-scf00554 | 29 |
| AX-158373360 | 29 | 63.538 | KV453351.1 | 3532162 | 29-scf00554 | 29 |
| AX-158373362 | 29 | 63.538 | KV453351.1 | 3534382 | 29-scf00554 | 29 |
| AX-158373363 | 29 | 63.538 | KV453351.1 | 3534984 | 29-scf00554 | 29 |
| AX-158373364 | 29 | 63.538 | KV453351.1 | 3535458 | 29-scf00554 | 29 |
| AX-158373366 | 29 | 63.538 | KV453351.1 | 3537209 | 29-scf00554 | 29 |
| AX-157853014 | 29 | 63.538 | KV453351.1 | 3539184 | 29-scf00554 | 29 |
| AX-158373367 | 29 | 63.538 | KV453351.1 | 3539953 | 29-scf00554 | 29 |
| AX-157853015 | 29 | 63.538 | KV453351.1 | 3540157 | 29-scf00554 | 29 |
| AX-158373368 | 29 | 63.538 | KV453351.1 | 3541529 | 29-scf00554 | 29 |
| AX-158373369 | 29 | 63.538 | KV453351.1 | 3543453 | 29-scf00554 | 29 |
| AX-158381830 | 29 | 63.538 | KV453351.1 | 3561438 | 29-scf00554 | 29 |
| AX-157853016 | 29 | 63.538 | KV453351.1 | 3562145 | 29-scf00554 | 29 |
| AX-158373375 | 29 | 63.538 | KV453351.1 | 3564780 | 29-scf00554 | 29 |

|              |    |        |            |         |             |    |
|--------------|----|--------|------------|---------|-------------|----|
| AX-158373377 | 29 | 63.538 | KV453351.1 | 3565910 | 29-scf00554 | 29 |
| AX-158373379 | 29 | 63.538 | KV453351.1 | 3567049 | 29-scf00554 | 29 |
| AX-158373380 | 29 | 63.538 | KV453351.1 | 3570667 | 29-scf00554 | 29 |
| AX-158373392 | 29 | 63.538 | KV453351.1 | 3589322 | 29-scf00554 | 29 |
| AX-158373410 | 29 | 63.538 | KV453351.1 | 3610225 | 29-scf00554 | 29 |
| AX-158373386 | 29 | 63.587 | KV453351.1 | 3583254 | 29-scf00554 | 29 |
| AX-158373387 | 29 | 63.647 | KV453351.1 | 3584143 | 29-scf00554 | 29 |
| AX-158373388 | 29 | 63.647 | KV453351.1 | 3584958 | 29-scf00554 | 29 |
| AX-158373394 | 29 | 63.647 | KV453351.1 | 3592951 | 29-scf00554 | 29 |
| AX-158373402 | 29 | 63.647 | KV453351.1 | 3601176 | 29-scf00554 | 29 |
| AX-157874146 | 29 | 63.866 | KV453351.1 | 3579414 | 29-scf00554 | 29 |
| AX-157716717 | 29 | 63.866 | KV453351.1 | 3588198 | 29-scf00554 | 29 |
| AX-158373396 | 29 | 63.866 | KV453351.1 | 3594414 | 29-scf00554 | 29 |
| AX-157724657 | 29 | 63.866 | KV453351.1 | 3605079 | 29-scf00554 | 29 |
| AX-158373408 | 29 | 63.866 | KV453351.1 | 3608329 | 29-scf00554 | 29 |
| AX-157853020 | 29 | 63.866 | KV453351.1 | 3610515 | 29-scf00554 | 29 |
| AX-158373411 | 29 | 63.866 | KV453351.1 | 3611203 | 29-scf00554 | 29 |
| AX-157740834 | 29 | 63.927 | KV453351.1 | 3612025 | 29-scf00554 | 29 |
| AX-158373401 | 29 | 63.975 | KV453351.1 | 3600234 | 29-scf00554 | 29 |
| AX-158373413 | 29 | 63.975 | KV453351.1 | 3615363 | 29-scf00554 | 29 |
| AX-158373416 | 29 | 63.978 | KV453351.1 | 3622346 | 29-scf00554 | 29 |
| AX-158373397 | 29 | 64.007 | KV453351.1 | 3595741 | 29-scf00554 | 29 |
| AX-158423930 | 29 | 64.007 | KV453351.1 | 3623508 | 29-scf00554 | 29 |
| AX-157767809 | 29 | 64.007 | KV453351.1 | 3626370 | 29-scf00554 | 29 |
| AX-158373430 | 29 | 64.007 | KV453351.1 | 3646638 | 29-scf00554 | 29 |
| AX-158373414 | 29 | 64.193 | KV453351.1 | 3619407 | 29-scf00554 | 29 |
| AX-158373421 | 29 | 64.193 | KV453351.1 | 3629755 | 29-scf00554 | 29 |
| AX-157775186 | 29 | 64.193 | KV453351.1 | 3631449 | 29-scf00554 | 29 |
| AX-158373424 | 29 | 64.193 | KV453351.1 | 3633669 | 29-scf00554 | 29 |
| AX-157853024 | 29 | 64.193 | KV453351.1 | 3637359 | 29-scf00554 | 29 |
| AX-158373426 | 29 | 64.193 | KV453351.1 | 3638464 | 29-scf00554 | 29 |
| AX-157751781 | 29 | 64.193 | KV453351.1 | 3642095 | 29-scf00554 | 29 |
| AX-158373427 | 29 | 64.193 | KV453351.1 | 3644923 | 29-scf00554 | 29 |
| AX-157862495 | 29 | 64.193 | KV453351.1 | 3656052 | 29-scf00554 | 29 |
| AX-158373429 | 29 | 64.22  | KV453351.1 | 3646217 | 29-scf00554 | 29 |
| AX-158373432 | 29 | 64.239 | KV453351.1 | 3647818 | 29-scf00554 | 29 |
| AX-157853025 | 29 | 64.266 | KV453351.1 | 3652154 | 29-scf00554 | 29 |
| AX-158373435 | 29 | 64.286 | KV453351.1 | 3653154 | 29-scf00554 | 29 |
| AX-158373439 | 29 | 64.303 | KV453351.1 | 3657699 | 29-scf00554 | 29 |
| AX-158373440 | 29 | 64.303 | KV453351.1 | 3658821 | 29-scf00554 | 29 |
| AX-158373442 | 29 | 64.412 | KV453351.1 | 3662461 | 29-scf00554 | 29 |
| AX-158373448 | 29 | 64.412 | KV453351.1 | 3672164 | 29-scf00554 | 29 |
| AX-158373449 | 29 | 64.412 | KV453351.1 | 3672528 | 29-scf00554 | 29 |
| AX-158373450 | 29 | 64.412 | KV453351.1 | 3673891 | 29-scf00554 | 29 |
| AX-158373454 | 29 | 64.976 | KV453351.1 | 3681002 | 29-scf00554 | 29 |
| AX-158373456 | 29 | 64.976 | KV453351.1 | 3684135 | 29-scf00554 | 29 |
| AX-158373457 | 29 | 65.164 | KV453351.1 | 3686092 | 29-scf00554 | 29 |
| AX-158373465 | 29 | 65.615 | KV453351.1 | 3692838 | 29-scf00554 | 29 |
| AX-158373467 | 29 | 65.615 | KV453351.1 | 3694809 | 29-scf00554 | 29 |
| AX-158373468 | 29 | 65.615 | KV453351.1 | 3695516 | 29-scf00554 | 29 |
| AX-158373470 | 29 | 65.615 | KV453351.1 | 3703029 | 29-scf00554 | 29 |

|              |    |        |            |         |             |    |
|--------------|----|--------|------------|---------|-------------|----|
| AX-158373473 | 29 | 65.615 | KV453351.1 | 3705501 | 29-scf00554 | 29 |
| AX-158373477 | 29 | 66.054 | KV453351.1 | 3712242 | 29-scf00554 | 29 |
| AX-158373480 | 29 | 66.269 | KV453351.1 | 3719729 | 29-scf00554 | 29 |
| AX-158373481 | 29 | 66.27  | KV453351.1 | 3721796 | 29-scf00554 | 29 |
| AX-158373482 | 29 | 66.27  | KV453351.1 | 3723960 | 29-scf00554 | 29 |
| AX-157853029 | 29 | 66.27  | KV453351.1 | 3724263 | 29-scf00554 | 29 |
| AX-158373485 | 29 | 66.271 | KV453351.1 | 3726759 | 29-scf00554 | 29 |
| AX-157757584 | 29 | 66.271 | KV453351.1 | 3726968 | 29-scf00554 | 29 |
| AX-158373487 | 29 | 66.271 | KV453351.1 | 3727930 | 29-scf00554 | 29 |
| AX-158373488 | 29 | 66.271 | KV453351.1 | 3728251 | 29-scf00554 | 29 |
| AX-158373493 | 29 | 66.271 | KV453351.1 | 3731597 | 29-scf00554 | 29 |
| AX-158373495 | 29 | 66.321 | KV453351.1 | 3737076 | 29-scf00554 | 29 |
| AX-157742452 | 29 | 66.38  | KV453351.1 | 3738156 | 29-scf00554 | 29 |
| AX-158373498 | 29 | 66.49  | KV453351.1 | 3741184 | 29-scf00554 | 29 |
| AX-158373506 | 29 | 66.818 | KV453351.1 | 3753464 | 29-scf00554 | 29 |
| AX-158373508 | 29 | 66.818 | KV453351.1 | 3756757 | 29-scf00554 | 29 |
| AX-157719738 | 29 | 66.818 | KV453351.1 | 3764467 | 29-scf00554 | 29 |
| AX-158373502 | 29 | 66.844 | KV453351.1 | 3745957 | 29-scf00554 | 29 |
| AX-158373509 | 29 | 66.844 | KV453351.1 | 3758488 | 29-scf00554 | 29 |
| AX-158373510 | 29 | 66.871 | KV453351.1 | 3758946 | 29-scf00554 | 29 |
| AX-158373504 | 29 | 66.889 | KV453351.1 | 3751542 | 29-scf00554 | 29 |
| AX-158373511 | 29 | 66.889 | KV453351.1 | 3761053 | 29-scf00554 | 29 |
| AX-158373521 | 29 | 66.889 | KV453351.1 | 3769381 | 29-scf00554 | 29 |
| AX-158373512 | 29 | 66.927 | KV453351.1 | 3761428 | 29-scf00554 | 29 |
| AX-158373515 | 29 | 66.927 | KV453351.1 | 3765755 | 29-scf00554 | 29 |
| AX-158373520 | 29 | 66.969 | KV453351.1 | 3769125 | 29-scf00554 | 29 |
| AX-158373524 | 29 | 67.036 | KV453351.1 | 3772172 | 29-scf00554 | 29 |
| AX-158373525 | 29 | 67.036 | KV453351.1 | 3773536 | 29-scf00554 | 29 |
| AX-158373526 | 29 | 67.036 | KV453351.1 | 3774507 | 29-scf00554 | 29 |
| AX-158373528 | 29 | 67.037 | KV453351.1 | 3777559 | 29-scf00554 | 29 |
| AX-158373532 | 29 | 67.317 | KV453351.1 | 3784530 | 29-scf00554 | 29 |
| AX-158373533 | 29 | 67.317 | KV453351.1 | 3785134 | 29-scf00554 | 29 |
| AX-157853030 | 29 | 67.317 | KV453351.1 | 3787812 | 29-scf00554 | 29 |
| AX-158373536 | 29 | 67.317 | KV453351.1 | 3791970 | 29-scf00554 | 29 |
| AX-157721407 | 29 | 67.317 | KV453351.1 | 3794449 | 29-scf00554 | 29 |
| AX-157744919 | 29 | 67.317 | KV453351.1 | 3799998 | 29-scf00554 | 29 |
| AX-158373540 | 29 | 67.317 | KV453351.1 | 3806119 | 29-scf00554 | 29 |
| AX-157853039 | 29 | 67.317 | KV453351.1 | 3841963 | 29-scf00554 | 29 |
| AX-157853041 | 29 | 67.317 | KV453351.1 | 3849094 | 29-scf00554 | 29 |
| AX-158373584 | 29 | 67.317 | KV453351.1 | 3882262 | 29-scf00554 | 29 |
| AX-157853032 | 29 | 67.493 | KV453351.1 | 3802680 | 29-scf00554 | 29 |
| AX-157747201 | 29 | 67.493 | KV453351.1 | 3804182 | 29-scf00554 | 29 |
| AX-157853034 | 29 | 67.493 | KV453351.1 | 3810955 | 29-scf00554 | 29 |
| AX-158373544 | 29 | 67.493 | KV453351.1 | 3811762 | 29-scf00554 | 29 |
| AX-158373539 | 29 | 67.501 | KV453351.1 | 3802612 | 29-scf00554 | 29 |
| AX-157853033 | 29 | 67.501 | KV453351.1 | 3803445 | 29-scf00554 | 29 |
| AX-158373547 | 29 | 67.501 | KV453351.1 | 3815652 | 29-scf00554 | 29 |
| AX-158373552 | 29 | 68.02  | KV453351.1 | 3821952 | 29-scf00554 | 29 |
| AX-158373554 | 29 | 68.02  | KV453351.1 | 3823664 | 29-scf00554 | 29 |
| AX-158373555 | 29 | 68.02  | KV453351.1 | 3825966 | 29-scf00554 | 29 |
| AX-158373560 | 29 | 68.02  | KV453351.1 | 3840988 | 29-scf00554 | 29 |

|              |    |        |             |         |             |    |
|--------------|----|--------|-------------|---------|-------------|----|
| AX-158373561 | 29 | 68.02  | KV453351.1  | 3841368 | 29-scf00554 | 29 |
| AX-158373564 | 29 | 68.02  | KV453351.1  | 3846554 | 29-scf00554 | 29 |
| AX-158373567 | 29 | 68.02  | KV453351.1  | 3854895 | 29-scf00554 | 29 |
| AX-158373568 | 29 | 68.02  | KV453351.1  | 3855969 | 29-scf00554 | 29 |
| AX-157713247 | 29 | 68.02  | KV453351.1  | 3858056 | 29-scf00554 | 29 |
| AX-157749922 | 29 | 68.02  | KV453351.1  | 3859183 | 29-scf00554 | 29 |
| AX-158381833 | 29 | 68.02  | KV453351.1  | 3859527 | 29-scf00554 | 29 |
| AX-158373570 | 29 | 68.02  | KV453351.1  | 3861179 | 29-scf00554 | 29 |
| AX-157853044 | 29 | 68.02  | KV453351.1  | 3861317 | 29-scf00554 | 29 |
| AX-157713094 | 29 | 68.02  | KV453351.1  | 3864611 | 29-scf00554 | 29 |
| AX-158373573 | 29 | 68.02  | KV453351.1  | 3867575 | 29-scf00554 | 29 |
| AX-157722873 | 29 | 68.02  | KV453351.1  | 3868557 | 29-scf00554 | 29 |
| AX-158373574 | 29 | 68.02  | KV453351.1  | 3871370 | 29-scf00554 | 29 |
| AX-158373577 | 29 | 68.02  | KV453351.1  | 3874775 | 29-scf00554 | 29 |
| AX-157725612 | 29 | 68.02  | KV453351.1  | 3882223 | 29-scf00554 | 29 |
| AX-157715352 | 29 | 68.02  | KV453351.1  | 3891905 | 29-scf00554 | 29 |
| AX-158373603 | 29 | 68.02  | KV453351.1  | 3913799 | 29-scf00554 | 29 |
| AX-158373605 | 29 | 68.02  | KV453351.1  | 3916620 | 29-scf00554 | 29 |
| AX-158373621 | 29 | 68.02  | KV453351.1  | 3953182 | 29-scf00554 | 29 |
| AX-158373624 | 29 | 68.02  | KV453351.1  | 3960261 | 29-scf00554 | 29 |
| AX-158373628 | 29 | 68.02  | KV453351.1  | 3965209 | 29-scf00554 | 29 |
| AX-158374863 | 29 | 68.02  | KV453352.1  | 2849    | 29-scf00558 | 29 |
| AX-158374850 | 29 | 68.02  | KV453352.1  | 38025   | 29-scf00558 | 29 |
| AX-157706301 | 29 | 68.02  | 3ML01032010 | 647     | scf07627_1  | UN |
| AX-158373596 | 29 | 68.293 | KV453351.1  | 3904288 | 29-scf00554 | 29 |
| AX-158373600 | 29 | 68.293 | KV453351.1  | 3912524 | 29-scf00554 | 29 |
| AX-158373601 | 29 | 68.293 | KV453351.1  | 3912862 | 29-scf00554 | 29 |
| AX-158373602 | 29 | 68.293 | KV453351.1  | 3913521 | 29-scf00554 | 29 |
| AX-158373604 | 29 | 68.293 | KV453351.1  | 3915195 | 29-scf00554 | 29 |
| AX-157758501 | 29 | 68.293 | KV453351.1  | 3915678 | 29-scf00554 | 29 |
| AX-158373607 | 29 | 68.293 | KV453351.1  | 3920729 | 29-scf00554 | 29 |
| AX-158373608 | 29 | 68.293 | KV453351.1  | 3921183 | 29-scf00554 | 29 |
| AX-158373609 | 29 | 68.293 | KV453351.1  | 3925687 | 29-scf00554 | 29 |
| AX-157754603 | 29 | 68.293 | KV453351.1  | 3928032 | 29-scf00554 | 29 |
| AX-157853046 | 29 | 68.293 | KV453351.1  | 3928238 | 29-scf00554 | 29 |
| AX-158373611 | 29 | 68.293 | KV453351.1  | 3932792 | 29-scf00554 | 29 |
| AX-158373613 | 29 | 68.293 | KV453351.1  | 3934034 | 29-scf00554 | 29 |
| AX-158373614 | 29 | 68.293 | KV453351.1  | 3935760 | 29-scf00554 | 29 |
| AX-157715466 | 29 | 68.293 | KV453351.1  | 3936830 | 29-scf00554 | 29 |
| AX-158373617 | 29 | 68.43  | KV453351.1  | 3941052 | 29-scf00554 | 29 |
| AX-158420288 | 29 | 68.43  | KV453351.1  | 3962029 | 29-scf00554 | 29 |
| AX-158373642 | 29 | 68.43  | KV453351.1  | 3991954 | 29-scf00554 | 29 |
| AX-158373674 | 29 | 68.43  | KV453351.1  | 4054380 | 29-scf00554 | 29 |
| AX-158373678 | 29 | 68.43  | KV453351.1  | 4059292 | 29-scf00554 | 29 |
| AX-157889282 | 29 | 68.504 | KV453351.1  | 3954328 | 29-scf00554 | 29 |
| AX-158373615 | 29 | 68.566 | KV453351.1  | 3938623 | 29-scf00554 | 29 |
| AX-158420287 | 29 | 68.566 | KV453351.1  | 3961816 | 29-scf00554 | 29 |
| AX-158373626 | 29 | 68.566 | KV453351.1  | 3964309 | 29-scf00554 | 29 |
| AX-157726579 | 29 | 68.566 | KV453351.1  | 3966119 | 29-scf00554 | 29 |
| AX-158373629 | 29 | 68.566 | KV453351.1  | 3967535 | 29-scf00554 | 29 |
| AX-158373631 | 29 | 68.566 | KV453351.1  | 3970466 | 29-scf00554 | 29 |

|              |    |        |            |         |             |    |
|--------------|----|--------|------------|---------|-------------|----|
| AX-158373632 | 29 | 68.566 | KV453351.1 | 3972171 | 29-scf00554 | 29 |
| AX-158373638 | 29 | 68.566 | KV453351.1 | 3983008 | 29-scf00554 | 29 |
| AX-158381834 | 29 | 68.566 | KV453351.1 | 3984631 | 29-scf00554 | 29 |
| AX-158373644 | 29 | 68.566 | KV453351.1 | 3993388 | 29-scf00554 | 29 |
| AX-158373646 | 29 | 68.566 | KV453351.1 | 3996105 | 29-scf00554 | 29 |
| AX-158373649 | 29 | 68.566 | KV453351.1 | 4003782 | 29-scf00554 | 29 |
| AX-158373650 | 29 | 68.566 | KV453351.1 | 4007446 | 29-scf00554 | 29 |
| AX-158373657 | 29 | 68.566 | KV453351.1 | 4018972 | 29-scf00554 | 29 |
| AX-157853049 | 29 | 68.566 | KV453351.1 | 4025145 | 29-scf00554 | 29 |
| AX-157853052 | 29 | 68.566 | KV453351.1 | 4035732 | 29-scf00554 | 29 |
| AX-158373684 | 29 | 68.566 | KV453351.1 | 4078656 | 29-scf00554 | 29 |
| AX-157853048 | 29 | 68.626 | KV453351.1 | 3990568 | 29-scf00554 | 29 |
| AX-158373670 | 29 | 68.626 | KV453351.1 | 4047085 | 29-scf00554 | 29 |
| AX-158373671 | 29 | 68.626 | KV453351.1 | 4048093 | 29-scf00554 | 29 |
| AX-157853054 | 29 | 68.626 | KV453351.1 | 4052604 | 29-scf00554 | 29 |
| AX-157708552 | 29 | 68.676 | KV453351.1 | 4048818 | 29-scf00554 | 29 |
| AX-157743083 | 29 | 68.676 | KV453351.1 | 4051289 | 29-scf00554 | 29 |
| AX-158373673 | 29 | 68.676 | KV453351.1 | 4053853 | 29-scf00554 | 29 |
| AX-158373675 | 29 | 68.676 | KV453351.1 | 4054964 | 29-scf00554 | 29 |
| AX-158373676 | 29 | 68.676 | KV453351.1 | 4055455 | 29-scf00554 | 29 |
| AX-157772103 | 29 | 68.676 | KV453351.1 | 4055498 | 29-scf00554 | 29 |
| AX-158373677 | 29 | 68.676 | KV453351.1 | 4058737 | 29-scf00554 | 29 |
| AX-158373634 | 29 | 68.894 | KV453351.1 | 3974414 | 29-scf00554 | 29 |
| AX-158373679 | 29 | 68.894 | KV453351.1 | 4065719 | 29-scf00554 | 29 |
| AX-157862501 | 29 | 68.894 | KV453351.1 | 4075313 | 29-scf00554 | 29 |
| AX-157853055 | 29 | 68.894 | KV453351.1 | 4075598 | 29-scf00554 | 29 |
| AX-158373683 | 29 | 68.894 | KV453351.1 | 4077548 | 29-scf00554 | 29 |
| AX-157746349 | 29 | 68.894 | KV453351.1 | 4083112 | 29-scf00554 | 29 |
| AX-157853057 | 29 | 68.894 | KV453351.1 | 4092612 | 29-scf00554 | 29 |
| AX-158373691 | 29 | 68.894 | KV453351.1 | 4095509 | 29-scf00554 | 29 |
| AX-157853056 | 29 | 68.898 | KV453351.1 | 4082117 | 29-scf00554 | 29 |
| AX-158373696 | 29 | 68.898 | KV453351.1 | 4102750 | 29-scf00554 | 29 |
| AX-158373702 | 29 | 68.898 | KV453351.1 | 4114569 | 29-scf00554 | 29 |
| AX-157710488 | 29 | 68.901 | KV453351.1 | 4110145 | 29-scf00554 | 29 |
| AX-158373700 | 29 | 69.331 | KV453351.1 | 4109495 | 29-scf00554 | 29 |
| AX-157725941 | 29 | 69.331 | KV453351.1 | 4110734 | 29-scf00554 | 29 |
| AX-158373701 | 29 | 69.331 | KV453351.1 | 4111043 | 29-scf00554 | 29 |
| AX-158373704 | 29 | 69.331 | KV453351.1 | 4119749 | 29-scf00554 | 29 |
| AX-158373705 | 29 | 69.331 | KV453351.1 | 4120287 | 29-scf00554 | 29 |
| AX-158373708 | 29 | 69.331 | KV453351.1 | 4123527 | 29-scf00554 | 29 |
| AX-158373709 | 29 | 69.331 | KV453351.1 | 4124768 | 29-scf00554 | 29 |
| AX-157853148 | 29 | 69.373 | KV453352.1 | 41069   | 29-scf00558 | 29 |
| AX-158374819 | 29 | 69.373 | KV453352.1 | 84165   | 29-scf00558 | 29 |
| AX-158374763 | 29 | 69.373 | KV453352.1 | 158062  | 29-scf00558 | 29 |
| AX-157853139 | 29 | 69.412 | KV453352.1 | 114196  | 29-scf00558 | 29 |
| AX-158374793 | 29 | 69.412 | KV453352.1 | 121800  | 29-scf00558 | 29 |
| AX-158381849 | 29 | 69.412 | KV453352.1 | 169643  | 29-scf00558 | 29 |
| AX-158373641 | 29 | 69.44  | KV453351.1 | 3984760 | 29-scf00554 | 29 |
| AX-157750728 | 29 | 69.44  | KV453352.1 | 10388   | 29-scf00558 | 29 |
| AX-157715291 | 29 | 69.44  | KV453352.1 | 16920   | 29-scf00558 | 29 |
| AX-158374856 | 29 | 69.44  | KV453352.1 | 20212   | 29-scf00558 | 29 |

|              |    |        |             |         |             |    |
|--------------|----|--------|-------------|---------|-------------|----|
| AX-158374855 | 29 | 69.44  | KV453352.1  | 26108   | 29-scf00558 | 29 |
| AX-158374854 | 29 | 69.44  | KV453352.1  | 26644   | 29-scf00558 | 29 |
| AX-157745514 | 29 | 69.44  | KV453352.1  | 30705   | 29-scf00558 | 29 |
| AX-158374851 | 29 | 69.44  | KV453352.1  | 36972   | 29-scf00558 | 29 |
| AX-157853149 | 29 | 69.44  | KV453352.1  | 39966   | 29-scf00558 | 29 |
| AX-157719245 | 29 | 69.44  | KV453352.1  | 40268   | 29-scf00558 | 29 |
| AX-158420328 | 29 | 69.44  | KV453352.1  | 54663   | 29-scf00558 | 29 |
| AX-158374826 | 29 | 69.44  | KV453352.1  | 73225   | 29-scf00558 | 29 |
| AX-157739538 | 29 | 69.44  | KV453352.1  | 77798   | 29-scf00558 | 29 |
| AX-158374804 | 29 | 69.44  | KV453352.1  | 104766  | 29-scf00558 | 29 |
| AX-158374788 | 29 | 69.44  | KV453352.1  | 129422  | 29-scf00558 | 29 |
| AX-157689697 | 29 | 69.44  | 3ML01031419 | 242     | scf07032_1  | UN |
| AX-158374848 | 29 | 69.549 | KV453352.1  | 42480   | 29-scf00558 | 29 |
| AX-158374847 | 29 | 69.549 | KV453352.1  | 43982   | 29-scf00558 | 29 |
| AX-157771722 | 29 | 69.549 | KV453352.1  | 51368   | 29-scf00558 | 29 |
| AX-157853144 | 29 | 69.549 | KV453352.1  | 51774   | 29-scf00558 | 29 |
| AX-158420330 | 29 | 69.549 | KV453352.1  | 53474   | 29-scf00558 | 29 |
| AX-158374821 | 29 | 69.549 | KV453352.1  | 80191   | 29-scf00558 | 29 |
| AX-158374801 | 29 | 69.549 | KV453352.1  | 107591  | 29-scf00558 | 29 |
| AX-158374823 | 29 | 69.876 | KV453352.1  | 78934   | 29-scf00558 | 29 |
| AX-158374828 | 29 | 69.877 | KV453352.1  | 69613   | 29-scf00558 | 29 |
| AX-158374834 | 29 | 69.9   | KV453352.1  | 62732   | 29-scf00558 | 29 |
| AX-158374822 | 29 | 69.9   | KV453352.1  | 79181   | 29-scf00558 | 29 |
| AX-158374812 | 29 | 69.986 | KV453352.1  | 94713   | 29-scf00558 | 29 |
| AX-158374809 | 29 | 69.986 | KV453352.1  | 97698   | 29-scf00558 | 29 |
| AX-158374805 | 29 | 69.986 | KV453352.1  | 102997  | 29-scf00558 | 29 |
| AX-158374799 | 29 | 69.986 | KV453352.1  | 109515  | 29-scf00558 | 29 |
| AX-158381832 | 29 | 70.095 | KV453351.1  | 3835323 | 29-scf00554 | 29 |
| AX-158373576 | 29 | 70.095 | KV453351.1  | 3872844 | 29-scf00554 | 29 |
| AX-158373692 | 29 | 70.095 | KV453351.1  | 4096761 | 29-scf00554 | 29 |
| AX-158420331 | 29 | 70.095 | KV453352.1  | 52983   | 29-scf00558 | 29 |
| AX-157853142 | 29 | 70.095 | KV453352.1  | 56703   | 29-scf00558 | 29 |
| AX-158374808 | 29 | 70.095 | KV453352.1  | 97970   | 29-scf00558 | 29 |
| AX-157757650 | 29 | 70.095 | KV453352.1  | 103345  | 29-scf00558 | 29 |
| AX-157853136 | 29 | 70.095 | KV453352.1  | 117573  | 29-scf00558 | 29 |
| AX-158374791 | 29 | 70.095 | KV453352.1  | 126413  | 29-scf00558 | 29 |
| AX-158374789 | 29 | 70.095 | KV453352.1  | 127978  | 29-scf00558 | 29 |
| AX-158374784 | 29 | 70.095 | KV453352.1  | 135508  | 29-scf00558 | 29 |
| AX-158374783 | 29 | 70.095 | KV453352.1  | 135747  | 29-scf00558 | 29 |
| AX-157745188 | 29 | 70.095 | KV453352.1  | 136084  | 29-scf00558 | 29 |
| AX-158374781 | 29 | 70.095 | KV453352.1  | 138970  | 29-scf00558 | 29 |
| AX-157773179 | 29 | 70.095 | KV453352.1  | 139206  | 29-scf00558 | 29 |
| AX-158374775 | 29 | 70.095 | KV453352.1  | 144947  | 29-scf00558 | 29 |
| AX-157715247 | 29 | 70.095 | KV453352.1  | 151838  | 29-scf00558 | 29 |
| AX-158374767 | 29 | 70.095 | KV453352.1  | 154804  | 29-scf00558 | 29 |
| AX-158374762 | 29 | 70.095 | KV453352.1  | 161500  | 29-scf00558 | 29 |
| AX-158374757 | 29 | 70.095 | KV453352.1  | 170658  | 29-scf00558 | 29 |
| AX-158374563 | 29 | 70.095 | KV453352.1  | 459135  | 29-scf00558 | 29 |
| AX-158373659 | 29 | 70.144 | KV453351.1  | 4025474 | 29-scf00554 | 29 |
| AX-158374779 | 29 | 70.144 | KV453352.1  | 141527  | 29-scf00558 | 29 |
| AX-158374769 | 29 | 70.144 | KV453352.1  | 153634  | 29-scf00558 | 29 |

|              |    |        |            |         |             |    |
|--------------|----|--------|------------|---------|-------------|----|
| AX-157862498 | 29 | 70.205 | KV453351.1 | 3996723 | 29-scf00554 | 29 |
| AX-158373687 | 29 | 70.205 | KV453351.1 | 4085790 | 29-scf00554 | 29 |
| AX-157853141 | 29 | 70.205 | KV453352.1 | 58371   | 29-scf00558 | 29 |
| AX-158374831 | 29 | 70.205 | KV453352.1 | 64727   | 29-scf00558 | 29 |
| AX-158374794 | 29 | 70.205 | KV453352.1 | 121385  | 29-scf00558 | 29 |
| AX-157853133 | 29 | 70.205 | KV453352.1 | 132870  | 29-scf00558 | 29 |
| AX-158374766 | 29 | 70.205 | KV453352.1 | 155478  | 29-scf00558 | 29 |
| AX-158374764 | 29 | 70.205 | KV453352.1 | 157474  | 29-scf00558 | 29 |
| AX-158374760 | 29 | 70.205 | KV453352.1 | 167830  | 29-scf00558 | 29 |
| AX-158374758 | 29 | 70.205 | KV453352.1 | 170167  | 29-scf00558 | 29 |
| AX-157720065 | 29 | 70.205 | KV453352.1 | 173329  | 29-scf00558 | 29 |
| AX-158374754 | 29 | 70.205 | KV453352.1 | 182020  | 29-scf00558 | 29 |
| AX-158374749 | 29 | 70.412 | KV453352.1 | 192486  | 29-scf00558 | 29 |
| AX-158374778 | 29 | 70.434 | KV453352.1 | 142929  | 29-scf00558 | 29 |
| AX-158374772 | 29 | 70.434 | KV453352.1 | 146402  | 29-scf00558 | 29 |
| AX-158374771 | 29 | 70.434 | KV453352.1 | 146950  | 29-scf00558 | 29 |
| AX-157868422 | 29 | 70.434 | KV453352.1 | 148911  | 29-scf00558 | 29 |
| AX-158374770 | 29 | 70.434 | KV453352.1 | 149337  | 29-scf00558 | 29 |
| AX-158374756 | 29 | 70.434 | KV453352.1 | 176215  | 29-scf00558 | 29 |
| AX-158374753 | 29 | 70.641 | KV453352.1 | 182301  | 29-scf00558 | 29 |
| AX-157853128 | 29 | 70.641 | KV453352.1 | 189517  | 29-scf00558 | 29 |
| AX-158381848 | 29 | 70.641 | KV453352.1 | 196686  | 29-scf00558 | 29 |
| AX-158374747 | 29 | 70.641 | KV453352.1 | 198026  | 29-scf00558 | 29 |
| AX-157716309 | 29 | 70.641 | KV453352.1 | 204066  | 29-scf00558 | 29 |
| AX-157862512 | 29 | 70.641 | KV453352.1 | 210713  | 29-scf00558 | 29 |
| AX-158374739 | 29 | 70.641 | KV453352.1 | 214203  | 29-scf00558 | 29 |
| AX-158374711 | 29 | 70.641 | KV453352.1 | 243908  | 29-scf00558 | 29 |
| AX-158374710 | 29 | 70.641 | KV453352.1 | 245167  | 29-scf00558 | 29 |
| AX-158374709 | 29 | 70.641 | KV453352.1 | 245973  | 29-scf00558 | 29 |
| AX-157754681 | 29 | 70.641 | KV453352.1 | 247524  | 29-scf00558 | 29 |
| AX-158374740 | 29 | 70.642 | KV453352.1 | 211120  | 29-scf00558 | 29 |
| AX-158374690 | 29 | 70.642 | KV453352.1 | 273165  | 29-scf00558 | 29 |
| AX-158374729 | 29 | 71.036 | KV453352.1 | 223376  | 29-scf00558 | 29 |
| AX-158374728 | 29 | 71.036 | KV453352.1 | 223648  | 29-scf00558 | 29 |
| AX-158373622 | 29 | 71.298 | KV453351.1 | 3955356 | 29-scf00554 | 29 |
| AX-158373651 | 29 | 71.298 | KV453351.1 | 4013159 | 29-scf00554 | 29 |
| AX-157853135 | 29 | 71.298 | KV453352.1 | 129841  | 29-scf00558 | 29 |
| AX-158374776 | 29 | 71.298 | KV453352.1 | 144563  | 29-scf00558 | 29 |
| AX-158374752 | 29 | 71.298 | KV453352.1 | 182844  | 29-scf00558 | 29 |
| AX-158374736 | 29 | 71.298 | KV453352.1 | 216132  | 29-scf00558 | 29 |
| AX-158374727 | 29 | 71.298 | KV453352.1 | 224168  | 29-scf00558 | 29 |
| AX-158374725 | 29 | 71.298 | KV453352.1 | 225597  | 29-scf00558 | 29 |
| AX-158374722 | 29 | 71.298 | KV453352.1 | 227503  | 29-scf00558 | 29 |
| AX-157853126 | 29 | 71.298 | KV453352.1 | 236341  | 29-scf00558 | 29 |
| AX-158374713 | 29 | 71.298 | KV453352.1 | 242354  | 29-scf00558 | 29 |
| AX-158420323 | 29 | 71.298 | KV453352.1 | 243027  | 29-scf00558 | 29 |
| AX-157742176 | 29 | 71.298 | KV453352.1 | 246412  | 29-scf00558 | 29 |
| AX-158374708 | 29 | 71.298 | KV453352.1 | 246786  | 29-scf00558 | 29 |
| AX-158374698 | 29 | 71.298 | KV453352.1 | 261784  | 29-scf00558 | 29 |
| AX-157853124 | 29 | 71.298 | KV453352.1 | 264446  | 29-scf00558 | 29 |
| AX-157726077 | 29 | 71.408 | KV453352.1 | 57153   | 29-scf00558 | 29 |



|              |    |        |            |        |               |    |
|--------------|----|--------|------------|--------|---------------|----|
| AX-157739926 | 29 | 71.408 | KV453352.1 | 247971 | 29-scf00558   | 29 |
| AX-158374705 | 29 | 71.408 | KV453352.1 | 253616 | 29-scf00558   | 29 |
| AX-158374704 | 29 | 71.408 | KV453352.1 | 254379 | 29-scf00558   | 29 |
| AX-158381847 | 29 | 71.408 | KV453352.1 | 255463 | 29-scf00558   | 29 |
| AX-158374699 | 29 | 71.408 | KV453352.1 | 261426 | 29-scf00558   | 29 |
| AX-158374692 | 29 | 71.736 | KV453352.1 | 269859 | 29-scf00558   | 29 |
| AX-158374691 | 29 | 71.736 | KV453352.1 | 272123 | 29-scf00558   | 29 |
| AX-158374686 | 29 | 71.736 | KV453352.1 | 274987 | 29-scf00558   | 29 |
| AX-158374685 | 29 | 71.736 | KV453352.1 | 275630 | 29-scf00558   | 29 |
| AX-158374684 | 29 | 71.736 | KV453352.1 | 276732 | 29-scf00558   | 29 |
| AX-158374681 | 29 | 71.736 | KV453352.1 | 278718 | 29-scf00558   | 29 |
| AX-157739940 | 29 | 71.736 | KV453352.1 | 279461 | 29-scf00558   | 29 |
| AX-158374707 | 29 | 71.982 | KV453352.1 | 250053 | 29-scf00558   | 29 |
| AX-158374700 | 29 | 71.982 | KV453352.1 | 260062 | 29-scf00558   | 29 |
| AX-158374694 | 29 | 71.982 | KV453352.1 | 268256 | 29-scf00558   | 29 |
| AX-158374680 | 29 | 71.982 | KV453352.1 | 279247 | 29-scf00558   | 29 |
| AX-157750540 | 29 | 72.056 | KV453352.1 | 286929 | 29-scf00558   | 29 |
| AX-157754229 | 29 | 72.242 | KV453352.1 | 283899 | 29-scf00558   | 29 |
| AX-158374667 | 29 | 72.59  | KV453352.1 | 298485 | 29-scf00558   | 29 |
| AX-157744577 | 29 | 72.59  | KV453352.1 | 355850 | 29-scf00558   | 29 |
| AX-158374773 | 29 | 72.721 | KV453352.1 | 145810 | 29-scf00558   | 29 |
| AX-158374673 | 29 | 72.721 | KV453352.1 | 290606 | 29-scf00558   | 29 |
| AX-158374670 | 29 | 72.721 | KV453352.1 | 296058 | 29-scf00558   | 29 |
| AX-158374666 | 29 | 72.721 | KV453352.1 | 299368 | 29-scf00558   | 29 |
| AX-158374665 | 29 | 72.721 | KV453352.1 | 302043 | 29-scf00558   | 29 |
| AX-158374664 | 29 | 72.721 | KV453352.1 | 303542 | 29-scf00558   | 29 |
| AX-158374663 | 29 | 72.721 | KV453352.1 | 304255 | 29-scf00558   | 29 |
| AX-158374661 | 29 | 72.721 | KV453352.1 | 307015 | 29-scf00558   | 29 |
| AX-158374659 | 29 | 72.721 | KV453352.1 | 308656 | 29-scf00558   | 29 |
| AX-158374657 | 29 | 72.721 | KV453352.1 | 311247 | 29-scf00558   | 29 |
| AX-158374655 | 29 | 72.721 | KV453352.1 | 315080 | 29-scf00558   | 29 |
| AX-157743767 | 29 | 72.721 | KV453352.1 | 315449 | 29-scf00558   | 29 |
| AX-158374652 | 29 | 72.721 | KV453352.1 | 319215 | 29-scf00558   | 29 |
| AX-158374651 | 29 | 72.721 | KV453352.1 | 320129 | 29-scf00558   | 29 |
| AX-157771896 | 29 | 72.721 | KV453352.1 | 344947 | 29-scf00558   | 29 |
| AX-157697919 | 29 | 72.721 | KV453352.1 | 347433 | 29-scf00558   | 29 |
| AX-158374641 | 29 | 72.721 | KV453352.1 | 348172 | 29-scf00558   | 29 |
| AX-157745244 | 29 | 72.721 | KV453352.1 | 357667 | 29-scf00558   | 29 |
| AX-158374634 | 29 | 72.721 | KV453352.1 | 360260 | 29-scf00558   | 29 |
| AX-157853112 | 29 | 72.721 | KV453352.1 | 378529 | 29-scf00558   | 29 |
| AX-157853111 | 29 | 72.721 | KV453352.1 | 379309 | 29-scf00558   | 29 |
| AX-158420321 | 29 | 72.721 | KV453352.1 | 380989 | 29-scf00558   | 29 |
| AX-158374592 | 29 | 72.721 | KV453352.1 | 411959 | 29-scf00558   | 29 |
| AX-157699390 | 29 | 72.721 | FI863040.1 | 92     | ORI212 lctalu | UN |
| AX-158381846 | 29 | 72.831 | KV453352.1 | 337365 | 29-scf00558   | 29 |
| AX-158374644 | 29 | 72.831 | KV453352.1 | 344697 | 29-scf00558   | 29 |
| AX-158374642 | 29 | 72.831 | KV453352.1 | 346864 | 29-scf00558   | 29 |
| AX-157853117 | 29 | 73.122 | KV453352.1 | 357802 | 29-scf00558   | 29 |
| AX-157749937 | 29 | 73.122 | KV453352.1 | 361017 | 29-scf00558   | 29 |
| AX-157751056 | 29 | 73.268 | KV453352.1 | 282024 | 29-scf00558   | 29 |
| AX-157750918 | 29 | 73.268 | KV453352.1 | 338602 | 29-scf00558   | 29 |

|              |    |        |            |        |             |    |
|--------------|----|--------|------------|--------|-------------|----|
| AX-158374643 | 29 | 73.268 | KV453352.1 | 345224 | 29-scf00558 | 29 |
| AX-157853118 | 29 | 73.268 | KV453352.1 | 346560 | 29-scf00558 | 29 |
| AX-158374630 | 29 | 73.268 | KV453352.1 | 366255 | 29-scf00558 | 29 |
| AX-157716714 | 29 | 73.268 | KV453352.1 | 367789 | 29-scf00558 | 29 |
| AX-157755792 | 29 | 73.268 | KV453352.1 | 370333 | 29-scf00558 | 29 |
| AX-158374625 | 29 | 73.268 | KV453352.1 | 374278 | 29-scf00558 | 29 |
| AX-158374623 | 29 | 73.268 | KV453352.1 | 375360 | 29-scf00558 | 29 |
| AX-158374622 | 29 | 73.268 | KV453352.1 | 375985 | 29-scf00558 | 29 |
| AX-158374620 | 29 | 73.268 | KV453352.1 | 376726 | 29-scf00558 | 29 |
| AX-158374618 | 29 | 73.268 | KV453352.1 | 378958 | 29-scf00558 | 29 |
| AX-157741358 | 29 | 73.268 | KV453352.1 | 381374 | 29-scf00558 | 29 |
| AX-158374658 | 29 | 73.486 | KV453352.1 | 310359 | 29-scf00558 | 29 |
| AX-158374648 | 29 | 73.486 | KV453352.1 | 330869 | 29-scf00558 | 29 |
| AX-158374637 | 29 | 73.486 | KV453352.1 | 355161 | 29-scf00558 | 29 |
| AX-158374629 | 29 | 73.486 | KV453352.1 | 367705 | 29-scf00558 | 29 |
| AX-158381845 | 29 | 73.486 | KV453352.1 | 372441 | 29-scf00558 | 29 |
| AX-158374616 | 29 | 73.486 | KV453352.1 | 383475 | 29-scf00558 | 29 |
| AX-157720208 | 29 | 73.486 | KV453352.1 | 384711 | 29-scf00558 | 29 |
| AX-157862510 | 29 | 73.486 | KV453352.1 | 386244 | 29-scf00558 | 29 |
| AX-158374615 | 29 | 73.486 | KV453352.1 | 389952 | 29-scf00558 | 29 |
| AX-158374612 | 29 | 73.486 | KV453352.1 | 392826 | 29-scf00558 | 29 |
| AX-157853108 | 29 | 73.486 | KV453352.1 | 394894 | 29-scf00558 | 29 |
| AX-158374610 | 29 | 73.486 | KV453352.1 | 395416 | 29-scf00558 | 29 |
| AX-158374607 | 29 | 73.486 | KV453352.1 | 399964 | 29-scf00558 | 29 |
| AX-158374606 | 29 | 73.486 | KV453352.1 | 402021 | 29-scf00558 | 29 |
| AX-158374604 | 29 | 73.486 | KV453352.1 | 403741 | 29-scf00558 | 29 |
| AX-158374603 | 29 | 73.486 | KV453352.1 | 404053 | 29-scf00558 | 29 |
| AX-158374602 | 29 | 73.486 | KV453352.1 | 404799 | 29-scf00558 | 29 |
| AX-158374600 | 29 | 73.486 | KV453352.1 | 405574 | 29-scf00558 | 29 |
| AX-158374599 | 29 | 73.486 | KV453352.1 | 405802 | 29-scf00558 | 29 |
| AX-158374597 | 29 | 73.486 | KV453352.1 | 408005 | 29-scf00558 | 29 |
| AX-158374596 | 29 | 73.486 | KV453352.1 | 408707 | 29-scf00558 | 29 |
| AX-158374595 | 29 | 73.486 | KV453352.1 | 409401 | 29-scf00558 | 29 |
| AX-158374587 | 29 | 73.486 | KV453352.1 | 416932 | 29-scf00558 | 29 |
| AX-158374524 | 29 | 73.486 | KV453352.1 | 510953 | 29-scf00558 | 29 |
| AX-158374590 | 29 | 73.629 | KV453352.1 | 413419 | 29-scf00558 | 29 |
| AX-158374589 | 29 | 73.629 | KV453352.1 | 416224 | 29-scf00558 | 29 |
| AX-158374582 | 29 | 73.629 | KV453352.1 | 419443 | 29-scf00558 | 29 |
| AX-158374554 | 29 | 73.629 | KV453352.1 | 466917 | 29-scf00558 | 29 |
| AX-158374547 | 29 | 73.629 | KV453352.1 | 482776 | 29-scf00558 | 29 |
| AX-158374562 | 29 | 73.793 | KV453352.1 | 460320 | 29-scf00558 | 29 |
| AX-157862509 | 29 | 73.955 | KV453352.1 | 431371 | 29-scf00558 | 29 |
| AX-158374576 | 29 | 73.955 | KV453352.1 | 433703 | 29-scf00558 | 29 |
| AX-158374572 | 29 | 73.955 | KV453352.1 | 440178 | 29-scf00558 | 29 |
| AX-158374570 | 29 | 73.955 | KV453352.1 | 442232 | 29-scf00558 | 29 |
| AX-158374568 | 29 | 73.955 | KV453352.1 | 447602 | 29-scf00558 | 29 |
| AX-157771113 | 29 | 73.955 | KV453352.1 | 452135 | 29-scf00558 | 29 |
| AX-158374559 | 29 | 73.955 | KV453352.1 | 463835 | 29-scf00558 | 29 |
| AX-158374545 | 29 | 73.955 | KV453352.1 | 485441 | 29-scf00558 | 29 |
| AX-158374546 | 29 | 74.77  | KV453352.1 | 484527 | 29-scf00558 | 29 |
| AX-158374542 | 29 | 74.77  | KV453352.1 | 487943 | 29-scf00558 | 29 |

|              |    |        |            |        |             |    |
|--------------|----|--------|------------|--------|-------------|----|
| AX-158374540 | 29 | 74.772 | KV453352.1 | 489864 | 29-scf00558 | 29 |
| AX-157710921 | 29 | 74.773 | KV453352.1 | 485057 | 29-scf00558 | 29 |
| AX-158374557 | 29 | 74.845 | KV453352.1 | 465244 | 29-scf00558 | 29 |
| AX-158374549 | 29 | 74.845 | KV453352.1 | 473172 | 29-scf00558 | 29 |
| AX-158374550 | 29 | 75.126 | KV453352.1 | 471754 | 29-scf00558 | 29 |
| AX-158374535 | 29 | 75.126 | KV453352.1 | 497739 | 29-scf00558 | 29 |
| AX-158374527 | 29 | 75.126 | KV453352.1 | 505695 | 29-scf00558 | 29 |
| AX-158374526 | 29 | 75.126 | KV453352.1 | 506559 | 29-scf00558 | 29 |
| AX-158374525 | 29 | 75.126 | KV453352.1 | 508053 | 29-scf00558 | 29 |
| AX-157753898 | 29 | 75.126 | KV453352.1 | 509342 | 29-scf00558 | 29 |
| AX-157742621 | 29 | 75.126 | KV453352.1 | 513776 | 29-scf00558 | 29 |
| AX-158374520 | 29 | 75.126 | KV453352.1 | 514739 | 29-scf00558 | 29 |
| AX-158374515 | 29 | 75.126 | KV453352.1 | 519090 | 29-scf00558 | 29 |
| AX-158374514 | 29 | 75.126 | KV453352.1 | 520525 | 29-scf00558 | 29 |
| AX-158374513 | 29 | 75.126 | KV453352.1 | 521125 | 29-scf00558 | 29 |
| AX-158374509 | 29 | 75.126 | KV453352.1 | 526050 | 29-scf00558 | 29 |
| AX-158374531 | 29 | 75.259 | KV453352.1 | 501332 | 29-scf00558 | 29 |
| AX-158374517 | 29 | 75.259 | KV453352.1 | 517391 | 29-scf00558 | 29 |
| AX-157696068 | 29 | 75.259 | KV453352.1 | 527115 | 29-scf00558 | 29 |
| AX-158374507 | 29 | 75.259 | KV453352.1 | 529151 | 29-scf00558 | 29 |
| AX-158374505 | 29 | 75.259 | KV453352.1 | 531635 | 29-scf00558 | 29 |
| AX-158374471 | 29 | 75.259 | KV453352.1 | 579450 | 29-scf00558 | 29 |
| AX-158374497 | 29 | 75.742 | KV453352.1 | 543641 | 29-scf00558 | 29 |
| AX-157753548 | 29 | 75.743 | KV453352.1 | 442887 | 29-scf00558 | 29 |
| AX-158374530 | 29 | 75.743 | KV453352.1 | 502057 | 29-scf00558 | 29 |
| AX-158374504 | 29 | 75.743 | KV453352.1 | 533910 | 29-scf00558 | 29 |
| AX-158374501 | 29 | 75.743 | KV453352.1 | 538779 | 29-scf00558 | 29 |
| AX-158374500 | 29 | 75.743 | KV453352.1 | 540213 | 29-scf00558 | 29 |
| AX-158374495 | 29 | 75.743 | KV453352.1 | 547376 | 29-scf00558 | 29 |
| AX-158374492 | 29 | 75.743 | KV453352.1 | 550167 | 29-scf00558 | 29 |
| AX-158374483 | 29 | 75.743 | KV453352.1 | 565577 | 29-scf00558 | 29 |
| AX-158374488 | 29 | 76.405 | KV453352.1 | 561907 | 29-scf00558 | 29 |
| AX-158374477 | 29 | 76.782 | KV453352.1 | 572273 | 29-scf00558 | 29 |
| AX-158374467 | 29 | 76.787 | KV453352.1 | 583554 | 29-scf00558 | 29 |
| AX-158374475 | 29 | 76.978 | KV453352.1 | 573857 | 29-scf00558 | 29 |
| AX-158420318 | 29 | 77.206 | KV453352.1 | 558699 | 29-scf00558 | 29 |
| AX-158374479 | 29 | 77.206 | KV453352.1 | 571685 | 29-scf00558 | 29 |
| AX-158374472 | 29 | 77.206 | KV453352.1 | 578661 | 29-scf00558 | 29 |
| AX-158374466 | 29 | 77.206 | KV453352.1 | 587085 | 29-scf00558 | 29 |
| AX-158374460 | 29 | 77.206 | KV453352.1 | 594659 | 29-scf00558 | 29 |
| AX-158374459 | 29 | 77.206 | KV453352.1 | 596309 | 29-scf00558 | 29 |
| AX-158374454 | 29 | 77.206 | KV453352.1 | 600870 | 29-scf00558 | 29 |
| AX-157853103 | 29 | 77.206 | KV453352.1 | 603618 | 29-scf00558 | 29 |
| AX-158374451 | 29 | 77.206 | KV453352.1 | 607473 | 29-scf00558 | 29 |
| AX-158374449 | 29 | 77.206 | KV453352.1 | 609663 | 29-scf00558 | 29 |
| AX-158374423 | 29 | 77.206 | KV453352.1 | 647639 | 29-scf00558 | 29 |
| AX-157710753 | 29 | 77.206 | KV453352.1 | 688161 | 29-scf00558 | 29 |
| AX-158374464 | 29 | 77.359 | KV453352.1 | 588852 | 29-scf00558 | 29 |
| AX-157743253 | 29 | 77.551 | KV453352.1 | 592821 | 29-scf00558 | 29 |
| AX-158374455 | 29 | 77.551 | KV453352.1 | 600093 | 29-scf00558 | 29 |
| AX-157772657 | 29 | 77.742 | KV453352.1 | 605534 | 29-scf00558 | 29 |

|              |    |        |            |        |             |    |
|--------------|----|--------|------------|--------|-------------|----|
| AX-158374452 | 29 | 77.742 | KV453352.1 | 606163 | 29-scf00558 | 29 |
| AX-157755844 | 29 | 77.742 | KV453352.1 | 606699 | 29-scf00558 | 29 |
| AX-158374434 | 29 | 77.742 | KV453352.1 | 630277 | 29-scf00558 | 29 |
| AX-158374480 | 29 | 77.938 | KV453352.1 | 571133 | 29-scf00558 | 29 |
| AX-158374463 | 29 | 77.938 | KV453352.1 | 590035 | 29-scf00558 | 29 |
| AX-157853104 | 29 | 77.938 | KV453352.1 | 603427 | 29-scf00558 | 29 |
| AX-158374448 | 29 | 78.126 | KV453352.1 | 613760 | 29-scf00558 | 29 |
| AX-158374443 | 29 | 78.258 | KV453352.1 | 620597 | 29-scf00558 | 29 |
| AX-158374435 | 29 | 78.52  | KV453352.1 | 629772 | 29-scf00558 | 29 |
| AX-158374433 | 29 | 78.52  | KV453352.1 | 630817 | 29-scf00558 | 29 |
| AX-158374431 | 29 | 78.52  | KV453352.1 | 631850 | 29-scf00558 | 29 |
| AX-158374429 | 29 | 78.52  | KV453352.1 | 633304 | 29-scf00558 | 29 |
| AX-158374428 | 29 | 78.52  | KV453352.1 | 634303 | 29-scf00558 | 29 |
| AX-157751024 | 29 | 78.52  | KV453352.1 | 645355 | 29-scf00558 | 29 |
| AX-158374416 | 29 | 79.014 | KV453352.1 | 661399 | 29-scf00558 | 29 |
| AX-158374439 | 29 | 79.02  | KV453352.1 | 623033 | 29-scf00558 | 29 |
| AX-157853101 | 29 | 79.02  | KV453352.1 | 664921 | 29-scf00558 | 29 |
| AX-158374421 | 29 | 79.1   | KV453352.1 | 656917 | 29-scf00558 | 29 |
| AX-158374420 | 29 | 79.1   | KV453352.1 | 658341 | 29-scf00558 | 29 |
| AX-158374408 | 29 | 79.284 | KV453352.1 | 673976 | 29-scf00558 | 29 |
| AX-158374413 | 29 | 79.285 | KV453352.1 | 666307 | 29-scf00558 | 29 |
| AX-158374406 | 29 | 79.285 | KV453352.1 | 675894 | 29-scf00558 | 29 |
| AX-158374404 | 29 | 79.285 | KV453352.1 | 676969 | 29-scf00558 | 29 |
| AX-158374400 | 29 | 79.285 | KV453352.1 | 679876 | 29-scf00558 | 29 |
| AX-158374399 | 29 | 79.285 | KV453352.1 | 681608 | 29-scf00558 | 29 |
| AX-158374397 | 29 | 79.285 | KV453352.1 | 683659 | 29-scf00558 | 29 |
| AX-158374367 | 29 | 79.285 | KV453352.1 | 726078 | 29-scf00558 | 29 |
| AX-158374359 | 29 | 79.285 | KV453352.1 | 733931 | 29-scf00558 | 29 |
| AX-158374342 | 29 | 79.285 | KV453352.1 | 760337 | 29-scf00558 | 29 |
| AX-158374337 | 29 | 79.285 | KV453352.1 | 765974 | 29-scf00558 | 29 |
| AX-158413733 | 29 | 79.467 | KV453352.1 | 653181 | 29-scf00558 | 29 |
| AX-158374401 | 29 | 79.467 | KV453352.1 | 678985 | 29-scf00558 | 29 |
| AX-158374393 | 29 | 79.467 | KV453352.1 | 686804 | 29-scf00558 | 29 |
| AX-158374389 | 29 | 79.467 | KV453352.1 | 692909 | 29-scf00558 | 29 |
| AX-158374386 | 29 | 79.467 | KV453352.1 | 698969 | 29-scf00558 | 29 |
| AX-158374376 | 29 | 79.467 | KV453352.1 | 715866 | 29-scf00558 | 29 |
| AX-158374356 | 29 | 79.467 | KV453352.1 | 736002 | 29-scf00558 | 29 |
| AX-158374366 | 29 | 79.548 | KV453352.1 | 726606 | 29-scf00558 | 29 |
| AX-158374375 | 29 | 79.703 | KV453352.1 | 717552 | 29-scf00558 | 29 |
| AX-158374360 | 29 | 79.703 | KV453352.1 | 732419 | 29-scf00558 | 29 |
| AX-158374412 | 29 | 79.832 | KV453352.1 | 668900 | 29-scf00558 | 29 |
| AX-158374382 | 29 | 79.832 | KV453352.1 | 706206 | 29-scf00558 | 29 |
| AX-157741394 | 29 | 79.832 | KV453352.1 | 707000 | 29-scf00558 | 29 |
| AX-158374381 | 29 | 79.832 | KV453352.1 | 707596 | 29-scf00558 | 29 |
| AX-158374380 | 29 | 79.832 | KV453352.1 | 710559 | 29-scf00558 | 29 |
| AX-158374377 | 29 | 79.832 | KV453352.1 | 713967 | 29-scf00558 | 29 |
| AX-158374373 | 29 | 79.832 | KV453352.1 | 719763 | 29-scf00558 | 29 |
| AX-158374364 | 29 | 79.832 | KV453352.1 | 728102 | 29-scf00558 | 29 |
| AX-158374363 | 29 | 79.832 | KV453352.1 | 728759 | 29-scf00558 | 29 |
| AX-158374362 | 29 | 79.832 | KV453352.1 | 729278 | 29-scf00558 | 29 |
| AX-158374361 | 29 | 79.832 | KV453352.1 | 731422 | 29-scf00558 | 29 |

|              |    |        |            |         |             |    |
|--------------|----|--------|------------|---------|-------------|----|
| AX-158374426 | 29 | 80.05  | KV453352.1 | 636268  | 29-scf00558 | 29 |
| AX-158374354 | 29 | 80.05  | KV453352.1 | 742049  | 29-scf00558 | 29 |
| AX-158374348 | 29 | 80.05  | KV453352.1 | 751989  | 29-scf00558 | 29 |
| AX-158374345 | 29 | 80.05  | KV453352.1 | 756033  | 29-scf00558 | 29 |
| AX-158381841 | 29 | 80.05  | KV453352.1 | 943001  | 29-scf00558 | 29 |
| AX-158374419 | 29 | 80.378 | KV453352.1 | 659014  | 29-scf00558 | 29 |
| AX-158374344 | 29 | 80.378 | KV453352.1 | 756826  | 29-scf00558 | 29 |
| AX-158374343 | 29 | 80.378 | KV453352.1 | 757287  | 29-scf00558 | 29 |
| AX-158374339 | 29 | 80.378 | KV453352.1 | 762414  | 29-scf00558 | 29 |
| AX-158374336 | 29 | 80.378 | KV453352.1 | 770334  | 29-scf00558 | 29 |
| AX-158374334 | 29 | 80.378 | KV453352.1 | 771595  | 29-scf00558 | 29 |
| AX-158374330 | 29 | 80.378 | KV453352.1 | 778616  | 29-scf00558 | 29 |
| AX-158374328 | 29 | 80.378 | KV453352.1 | 780700  | 29-scf00558 | 29 |
| AX-158374325 | 29 | 80.378 | KV453352.1 | 784490  | 29-scf00558 | 29 |
| AX-157775425 | 29 | 80.378 | KV453352.1 | 786776  | 29-scf00558 | 29 |
| AX-157709187 | 29 | 80.378 | KV453352.1 | 788088  | 29-scf00558 | 29 |
| AX-158374310 | 29 | 80.378 | KV453352.1 | 807211  | 29-scf00558 | 29 |
| AX-158374306 | 29 | 80.378 | KV453352.1 | 812260  | 29-scf00558 | 29 |
| AX-158374286 | 29 | 80.378 | KV453352.1 | 844750  | 29-scf00558 | 29 |
| AX-158374277 | 29 | 80.378 | KV453352.1 | 860076  | 29-scf00558 | 29 |
| AX-157715496 | 29 | 80.378 | KV453352.1 | 924601  | 29-scf00558 | 29 |
| AX-157882963 | 29 | 80.596 | KV453352.1 | 646920  | 29-scf00558 | 29 |
| AX-157775702 | 29 | 80.596 | KV453352.1 | 714239  | 29-scf00558 | 29 |
| AX-157739012 | 29 | 80.596 | KV453352.1 | 723772  | 29-scf00558 | 29 |
| AX-158374338 | 29 | 80.596 | KV453352.1 | 765201  | 29-scf00558 | 29 |
| AX-158374332 | 29 | 80.596 | KV453352.1 | 776487  | 29-scf00558 | 29 |
| AX-158374322 | 29 | 80.596 | KV453352.1 | 787168  | 29-scf00558 | 29 |
| AX-158374316 | 29 | 80.596 | KV453352.1 | 796249  | 29-scf00558 | 29 |
| AX-158374305 | 29 | 80.596 | KV453352.1 | 812558  | 29-scf00558 | 29 |
| AX-158374303 | 29 | 80.596 | KV453352.1 | 815536  | 29-scf00558 | 29 |
| AX-158374297 | 29 | 80.596 | KV453352.1 | 823758  | 29-scf00558 | 29 |
| AX-157738854 | 29 | 80.596 | KV453352.1 | 831696  | 29-scf00558 | 29 |
| AX-158374292 | 29 | 80.596 | KV453352.1 | 832107  | 29-scf00558 | 29 |
| AX-158374290 | 29 | 80.596 | KV453352.1 | 836981  | 29-scf00558 | 29 |
| AX-158374254 | 29 | 80.596 | KV453352.1 | 893871  | 29-scf00558 | 29 |
| AX-157868417 | 29 | 80.596 | KV453352.1 | 900635  | 29-scf00558 | 29 |
| AX-158374235 | 29 | 80.596 | KV453352.1 | 929722  | 29-scf00558 | 29 |
| AX-158374220 | 29 | 80.596 | KV453352.1 | 943532  | 29-scf00558 | 29 |
| AX-158374189 | 29 | 80.596 | KV453352.1 | 986924  | 29-scf00558 | 29 |
| AX-158374167 | 29 | 80.596 | KV453352.1 | 1012909 | 29-scf00558 | 29 |
| AX-158374307 | 29 | 81.006 | KV453352.1 | 811676  | 29-scf00558 | 29 |
| AX-158374317 | 29 | 81.143 | KV453352.1 | 795858  | 29-scf00558 | 29 |
| AX-158374300 | 29 | 81.143 | KV453352.1 | 819304  | 29-scf00558 | 29 |
| AX-158374299 | 29 | 81.143 | KV453352.1 | 819946  | 29-scf00558 | 29 |
| AX-158374296 | 29 | 81.143 | KV453352.1 | 826383  | 29-scf00558 | 29 |
| AX-158374295 | 29 | 81.143 | KV453352.1 | 827412  | 29-scf00558 | 29 |
| AX-157853094 | 29 | 81.143 | KV453352.1 | 841121  | 29-scf00558 | 29 |
| AX-157853093 | 29 | 81.143 | KV453352.1 | 841472  | 29-scf00558 | 29 |
| AX-158374285 | 29 | 81.143 | KV453352.1 | 847940  | 29-scf00558 | 29 |
| AX-158374283 | 29 | 81.143 | KV453352.1 | 850974  | 29-scf00558 | 29 |
| AX-157724643 | 29 | 81.143 | KV453352.1 | 855365  | 29-scf00558 | 29 |

|              |    |        |            |         |             |    |
|--------------|----|--------|------------|---------|-------------|----|
| AX-158374278 | 29 | 81.143 | KV453352.1 | 858702  | 29-scf00558 | 29 |
| AX-158374275 | 29 | 81.143 | KV453352.1 | 862965  | 29-scf00558 | 29 |
| AX-158374273 | 29 | 81.143 | KV453352.1 | 865056  | 29-scf00558 | 29 |
| AX-158374272 | 29 | 81.143 | KV453352.1 | 866083  | 29-scf00558 | 29 |
| AX-158374271 | 29 | 81.143 | KV453352.1 | 871455  | 29-scf00558 | 29 |
| AX-158374264 | 29 | 81.143 | KV453352.1 | 881873  | 29-scf00558 | 29 |
| AX-158374260 | 29 | 81.143 | KV453352.1 | 887309  | 29-scf00558 | 29 |
| AX-158374251 | 29 | 81.143 | KV453352.1 | 901582  | 29-scf00558 | 29 |
| AX-157775571 | 29 | 81.143 | KV453352.1 | 925328  | 29-scf00558 | 29 |
| AX-158374200 | 29 | 81.143 | KV453352.1 | 969927  | 29-scf00558 | 29 |
| AX-158374168 | 29 | 81.143 | KV453352.1 | 1011945 | 29-scf00558 | 29 |
| AX-157757807 | 29 | 81.143 | KV453352.1 | 1012375 | 29-scf00558 | 29 |
| AX-158374165 | 29 | 81.143 | KV453352.1 | 1013870 | 29-scf00558 | 29 |
| AX-158374370 | 29 | 81.361 | KV453352.1 | 723026  | 29-scf00558 | 29 |
| AX-158374259 | 29 | 81.361 | KV453352.1 | 888877  | 29-scf00558 | 29 |
| AX-158374252 | 29 | 81.361 | KV453352.1 | 901108  | 29-scf00558 | 29 |
| AX-157874150 | 29 | 81.361 | KV453352.1 | 908125  | 29-scf00558 | 29 |
| AX-158374242 | 29 | 81.361 | KV453352.1 | 913723  | 29-scf00558 | 29 |
| AX-158374237 | 29 | 81.361 | KV453352.1 | 923789  | 29-scf00558 | 29 |
| AX-158374223 | 29 | 81.361 | KV453352.1 | 940718  | 29-scf00558 | 29 |
| AX-158374402 | 29 | 81.47  | KV453352.1 | 677829  | 29-scf00558 | 29 |
| AX-158423935 | 29 | 81.47  | KV453352.1 | 868728  | 29-scf00558 | 29 |
| AX-158374268 | 29 | 81.47  | KV453352.1 | 874560  | 29-scf00558 | 29 |
| AX-158420303 | 29 | 81.47  | KV453352.1 | 895750  | 29-scf00558 | 29 |
| AX-158374253 | 29 | 81.47  | KV453352.1 | 896160  | 29-scf00558 | 29 |
| AX-157853090 | 29 | 81.47  | KV453352.1 | 909100  | 29-scf00558 | 29 |
| AX-158374239 | 29 | 81.47  | KV453352.1 | 920523  | 29-scf00558 | 29 |
| AX-158374236 | 29 | 81.47  | KV453352.1 | 929094  | 29-scf00558 | 29 |
| AX-157853085 | 29 | 81.47  | KV453352.1 | 930050  | 29-scf00558 | 29 |
| AX-158374234 | 29 | 81.47  | KV453352.1 | 930602  | 29-scf00558 | 29 |
| AX-158374233 | 29 | 81.47  | KV453352.1 | 931767  | 29-scf00558 | 29 |
| AX-158374230 | 29 | 81.47  | KV453352.1 | 936350  | 29-scf00558 | 29 |
| AX-158374229 | 29 | 81.47  | KV453352.1 | 936897  | 29-scf00558 | 29 |
| AX-158374226 | 29 | 81.47  | KV453352.1 | 938858  | 29-scf00558 | 29 |
| AX-158374224 | 29 | 81.47  | KV453352.1 | 939943  | 29-scf00558 | 29 |
| AX-158374222 | 29 | 81.47  | KV453352.1 | 942188  | 29-scf00558 | 29 |
| AX-157853084 | 29 | 81.47  | KV453352.1 | 942354  | 29-scf00558 | 29 |
| AX-158374219 | 29 | 81.47  | KV453352.1 | 943802  | 29-scf00558 | 29 |
| AX-158374218 | 29 | 81.47  | KV453352.1 | 944644  | 29-scf00558 | 29 |
| AX-158374216 | 29 | 81.47  | KV453352.1 | 945719  | 29-scf00558 | 29 |
| AX-158374207 | 29 | 81.47  | KV453352.1 | 961108  | 29-scf00558 | 29 |
| AX-158374206 | 29 | 81.47  | KV453352.1 | 961953  | 29-scf00558 | 29 |
| AX-158374204 | 29 | 81.47  | KV453352.1 | 963168  | 29-scf00558 | 29 |
| AX-158374203 | 29 | 81.47  | KV453352.1 | 963925  | 29-scf00558 | 29 |
| AX-157746424 | 29 | 81.47  | KV453352.1 | 972293  | 29-scf00558 | 29 |
| AX-158374194 | 29 | 81.47  | KV453352.1 | 982820  | 29-scf00558 | 29 |
| AX-158374188 | 29 | 81.47  | KV453352.1 | 989381  | 29-scf00558 | 29 |
| AX-157750600 | 29 | 81.616 | KV453352.1 | 927992  | 29-scf00558 | 29 |
| AX-158374213 | 29 | 81.616 | KV453352.1 | 953380  | 29-scf00558 | 29 |
| AX-158374211 | 29 | 81.616 | KV453352.1 | 956223  | 29-scf00558 | 29 |
| AX-158374208 | 29 | 81.616 | KV453352.1 | 960652  | 29-scf00558 | 29 |

|              |    |        |             |         |             |    |
|--------------|----|--------|-------------|---------|-------------|----|
| AX-158374202 | 29 | 81.616 | KV453352.1  | 964879  | 29-scf00558 | 29 |
| AX-158374217 | 29 | 81.907 | KV453352.1  | 945270  | 29-scf00558 | 29 |
| AX-158374210 | 29 | 81.907 | KV453352.1  | 957037  | 29-scf00558 | 29 |
| AX-157768780 | 29 | 81.907 | KV453352.1  | 973230  | 29-scf00558 | 29 |
| AX-158374196 | 29 | 81.907 | KV453352.1  | 979504  | 29-scf00558 | 29 |
| AX-158374195 | 29 | 81.907 | KV453352.1  | 980476  | 29-scf00558 | 29 |
| AX-158374192 | 29 | 81.907 | KV453352.1  | 984956  | 29-scf00558 | 29 |
| AX-158374190 | 29 | 81.907 | KV453352.1  | 986087  | 29-scf00558 | 29 |
| AX-158374187 | 29 | 81.907 | KV453352.1  | 990700  | 29-scf00558 | 29 |
| AX-158374184 | 29 | 81.907 | KV453352.1  | 993000  | 29-scf00558 | 29 |
| AX-157853081 | 29 | 81.907 | KV453352.1  | 993768  | 29-scf00558 | 29 |
| AX-157756129 | 29 | 81.907 | KV453352.1  | 994567  | 29-scf00558 | 29 |
| AX-157710985 | 29 | 81.907 | KV453352.1  | 995717  | 29-scf00558 | 29 |
| AX-158374181 | 29 | 81.907 | KV453352.1  | 997769  | 29-scf00558 | 29 |
| AX-158374172 | 29 | 81.907 | KV453352.1  | 1007679 | 29-scf00558 | 29 |
| AX-158374171 | 29 | 81.907 | KV453352.1  | 1009920 | 29-scf00558 | 29 |
| AX-158374141 | 29 | 81.907 | KV453352.1  | 1047083 | 29-scf00558 | 29 |
| AX-158374022 | 29 | 81.907 | KV453352.1  | 1207657 | 29-scf00558 | 29 |
| AX-158374178 | 29 | 82.236 | KV453352.1  | 1001139 | 29-scf00558 | 29 |
| AX-158420301 | 29 | 82.236 | KV453352.1  | 1005531 | 29-scf00558 | 29 |
| AX-158374176 | 29 | 82.236 | KV453352.1  | 1005735 | 29-scf00558 | 29 |
| AX-158374169 | 29 | 82.236 | KV453352.1  | 1011659 | 29-scf00558 | 29 |
| AX-157706674 | 29 | 82.236 | 3ML01032721 | 116     | scf08348_1  | UN |
| AX-158374225 | 29 | 82.503 | KV453352.1  | 939628  | 29-scf00558 | 29 |
| AX-158374186 | 29 | 82.503 | KV453352.1  | 991694  | 29-scf00558 | 29 |
| AX-157710986 | 29 | 82.503 | KV453352.1  | 995670  | 29-scf00558 | 29 |
| AX-158374158 | 29 | 82.503 | KV453352.1  | 1025323 | 29-scf00558 | 29 |
| AX-157721304 | 29 | 82.757 | KV453352.1  | 1010648 | 29-scf00558 | 29 |
| AX-158420298 | 29 | 82.757 | KV453352.1  | 1015353 | 29-scf00558 | 29 |
| AX-158374159 | 29 | 82.757 | KV453352.1  | 1024878 | 29-scf00558 | 29 |
| AX-158374151 | 29 | 82.908 | KV453352.1  | 1034107 | 29-scf00558 | 29 |
| AX-158374156 | 29 | 83.021 | KV453352.1  | 1027211 | 29-scf00558 | 29 |
| AX-157719703 | 29 | 83.021 | KV453352.1  | 1028192 | 29-scf00558 | 29 |
| AX-158374153 | 29 | 83.448 | KV453352.1  | 1032360 | 29-scf00558 | 29 |
| AX-158374147 | 29 | 83.662 | KV453352.1  | 1043007 | 29-scf00558 | 29 |
| AX-158374144 | 29 | 83.662 | KV453352.1  | 1045324 | 29-scf00558 | 29 |
| AX-158374143 | 29 | 83.662 | KV453352.1  | 1045896 | 29-scf00558 | 29 |
| AX-158374140 | 29 | 83.662 | KV453352.1  | 1047893 | 29-scf00558 | 29 |
| AX-158374133 | 29 | 83.662 | KV453352.1  | 1056015 | 29-scf00558 | 29 |
| AX-158374132 | 29 | 83.662 | KV453352.1  | 1056417 | 29-scf00558 | 29 |
| AX-158381840 | 29 | 83.662 | KV453352.1  | 1057950 | 29-scf00558 | 29 |
| AX-158374177 | 29 | 83.991 | KV453352.1  | 1001630 | 29-scf00558 | 29 |
| AX-157713029 | 29 | 83.991 | KV453352.1  | 1018537 | 29-scf00558 | 29 |
| AX-158374162 | 29 | 83.991 | KV453352.1  | 1020894 | 29-scf00558 | 29 |
| AX-158374160 | 29 | 83.991 | KV453352.1  | 1023823 | 29-scf00558 | 29 |
| AX-158374155 | 29 | 83.991 | KV453352.1  | 1027881 | 29-scf00558 | 29 |
| AX-158374128 | 29 | 83.991 | KV453352.1  | 1066881 | 29-scf00558 | 29 |
| AX-158374127 | 29 | 83.991 | KV453352.1  | 1067507 | 29-scf00558 | 29 |
| AX-158423934 | 29 | 83.991 | KV453352.1  | 1083959 | 29-scf00558 | 29 |
| AX-158374107 | 29 | 83.991 | KV453352.1  | 1091155 | 29-scf00558 | 29 |
| AX-157740242 | 29 | 83.991 | KV453352.1  | 1132838 | 29-scf00558 | 29 |

|              |    |        |            |         |               |    |
|--------------|----|--------|------------|---------|---------------|----|
| AX-158374057 | 29 | 83.991 | KV453352.1 | 1160947 | 29-scf00558   | 29 |
| AX-158374051 | 29 | 83.991 | KV453352.1 | 1166772 | 29-scf00558   | 29 |
| AX-158374038 | 29 | 83.991 | KV453352.1 | 1180970 | 29-scf00558   | 29 |
| AX-158374125 | 29 | 84.153 | KV453352.1 | 1068879 | 29-scf00558   | 29 |
| AX-157750160 | 29 | 84.153 | KV453352.1 | 1072318 | 29-scf00558   | 29 |
| AX-158374119 | 29 | 84.153 | KV453352.1 | 1077320 | 29-scf00558   | 29 |
| AX-158374103 | 29 | 84.153 | KV453352.1 | 1094763 | 29-scf00558   | 29 |
| AX-158374090 | 29 | 84.153 | KV453352.1 | 1119022 | 29-scf00558   | 29 |
| AX-158374089 | 29 | 84.153 | KV453352.1 | 1119768 | 29-scf00558   | 29 |
| AX-158374085 | 29 | 84.153 | KV453352.1 | 1123772 | 29-scf00558   | 29 |
| AX-158374081 | 29 | 84.153 | KV453352.1 | 1128557 | 29-scf00558   | 29 |
| AX-158374059 | 29 | 84.153 | KV453352.1 | 1158372 | 29-scf00558   | 29 |
| AX-158374053 | 29 | 84.153 | KV453352.1 | 1165333 | 29-scf00558   | 29 |
| AX-158374052 | 29 | 84.153 | KV453352.1 | 1165793 | 29-scf00558   | 29 |
| AX-157723075 | 29 | 84.153 | KV453352.1 | 1191214 | 29-scf00558   | 29 |
| AX-157853078 | 29 | 84.153 | KV453352.1 | 1204928 | 29-scf00558   | 29 |
| AX-158374120 | 29 | 84.317 | KV453352.1 | 1076648 | 29-scf00558   | 29 |
| AX-158374112 | 29 | 84.317 | KV453352.1 | 1086256 | 29-scf00558   | 29 |
| AX-158374096 | 29 | 84.317 | KV453352.1 | 1110180 | 29-scf00558   | 29 |
| AX-158374092 | 29 | 84.317 | KV453352.1 | 1116421 | 29-scf00558   | 29 |
| AX-158374091 | 29 | 84.317 | KV453352.1 | 1117415 | 29-scf00558   | 29 |
| AX-158374088 | 29 | 84.317 | KV453352.1 | 1120719 | 29-scf00558   | 29 |
| AX-158374063 | 29 | 84.317 | KV453352.1 | 1154360 | 29-scf00558   | 29 |
| AX-158374105 | 29 | 84.536 | KV453352.1 | 1092508 | 29-scf00558   | 29 |
| AX-158374074 | 29 | 84.536 | KV453352.1 | 1140414 | 29-scf00558   | 29 |
| AX-158374060 | 29 | 84.536 | KV453352.1 | 1157315 | 29-scf00558   | 29 |
| AX-158374047 | 29 | 84.536 | KV453352.1 | 1171464 | 29-scf00558   | 29 |
| AX-158374045 | 29 | 84.536 | KV453352.1 | 1172422 | 29-scf00558   | 29 |
| AX-158374039 | 29 | 84.536 | KV453352.1 | 1180543 | 29-scf00558   | 29 |
| AX-158374062 | 29 | 84.714 | KV453352.1 | 1154891 | 29-scf00558   | 29 |
| AX-158374033 | 29 | 84.818 | KV453352.1 | 1193684 | 29-scf00558   | 29 |
| AX-158374170 | 29 | 84.856 | KV453352.1 | 1010147 | 29-scf00558   | 29 |
| AX-158374110 | 29 | 84.856 | KV453352.1 | 1087375 | 29-scf00558   | 29 |
| AX-158374079 | 29 | 84.856 | KV453352.1 | 1131792 | 29-scf00558   | 29 |
| AX-157702939 | 29 | 84.856 | DX095228.1 | 140     | ORI212 lctalu | UN |
| AX-158374094 | 29 | 84.891 | KV453352.1 | 1113950 | 29-scf00558   | 29 |
| AX-158374084 | 29 | 84.891 | KV453352.1 | 1125892 | 29-scf00558   | 29 |
| AX-158374069 | 29 | 84.891 | KV453352.1 | 1145170 | 29-scf00558   | 29 |
| AX-158374041 | 29 | 84.891 | KV453352.1 | 1176427 | 29-scf00558   | 29 |
| AX-158374036 | 29 | 84.891 | KV453352.1 | 1189507 | 29-scf00558   | 29 |
| AX-158374099 | 29 | 85.106 | KV453352.1 | 1105418 | 29-scf00558   | 29 |
| AX-158374020 | 29 | 85.106 | KV453352.1 | 1211181 | 29-scf00558   | 29 |
| AX-158374014 | 29 | 85.106 | KV453352.1 | 1215264 | 29-scf00558   | 29 |
| AX-158374009 | 29 | 85.106 | KV453352.1 | 1220649 | 29-scf00558   | 29 |
| AX-158374008 | 29 | 85.106 | KV453352.1 | 1221517 | 29-scf00558   | 29 |
| AX-158374002 | 29 | 85.106 | KV453352.1 | 1225211 | 29-scf00558   | 29 |
| AX-158373996 | 29 | 85.106 | KV453352.1 | 1238793 | 29-scf00558   | 29 |
| AX-157749176 | 29 | 85.107 | KV453352.1 | 1197122 | 29-scf00558   | 29 |
| AX-158374029 | 29 | 85.107 | KV453352.1 | 1199789 | 29-scf00558   | 29 |
| AX-158374028 | 29 | 85.107 | KV453352.1 | 1200535 | 29-scf00558   | 29 |
| AX-158374025 | 29 | 85.107 | KV453352.1 | 1203996 | 29-scf00558   | 29 |



|              |    |        |            |         |             |    |
|--------------|----|--------|------------|---------|-------------|----|
| AX-158374016 | 29 | 85.107 | KV453352.1 | 1213576 | 29-scf00558 | 29 |
| AX-158374003 | 29 | 85.107 | KV453352.1 | 1224622 | 29-scf00558 | 29 |
| AX-157772604 | 29 | 85.354 | KV453352.1 | 1234347 | 29-scf00558 | 29 |
| AX-158373984 | 29 | 85.477 | KV453352.1 | 1258672 | 29-scf00558 | 29 |
| AX-157708754 | 29 | 85.477 | KV453352.1 | 1259833 | 29-scf00558 | 29 |
| AX-158374109 | 29 | 85.628 | KV453352.1 | 1088137 | 29-scf00558 | 29 |
| AX-157709717 | 29 | 85.628 | KV453352.1 | 1238374 | 29-scf00558 | 29 |
| AX-158374138 | 29 | 85.848 | KV453352.1 | 1052877 | 29-scf00558 | 29 |
| AX-158374121 | 29 | 85.848 | KV453352.1 | 1075942 | 29-scf00558 | 29 |
| AX-158374087 | 29 | 85.848 | KV453352.1 | 1122739 | 29-scf00558 | 29 |
| AX-158374073 | 29 | 85.848 | KV453352.1 | 1142058 | 29-scf00558 | 29 |
| AX-158374067 | 29 | 85.848 | KV453352.1 | 1150985 | 29-scf00558 | 29 |
| AX-158373998 | 29 | 85.848 | KV453352.1 | 1235167 | 29-scf00558 | 29 |
| AX-157753441 | 29 | 85.848 | KV453352.1 | 1235807 | 29-scf00558 | 29 |
| AX-158373995 | 29 | 85.848 | KV453352.1 | 1239164 | 29-scf00558 | 29 |
| AX-158373994 | 29 | 85.848 | KV453352.1 | 1242836 | 29-scf00558 | 29 |
| AX-158373987 | 29 | 85.848 | KV453352.1 | 1250790 | 29-scf00558 | 29 |
| AX-158373985 | 29 | 85.848 | KV453352.1 | 1254318 | 29-scf00558 | 29 |
| AX-158373979 | 29 | 85.848 | KV453352.1 | 1263382 | 29-scf00558 | 29 |
| AX-158373972 | 29 | 85.848 | KV453352.1 | 1269883 | 29-scf00558 | 29 |
| AX-158373970 | 29 | 85.848 | KV453352.1 | 1275557 | 29-scf00558 | 29 |
| AX-157741739 | 29 | 85.848 | KV453352.1 | 1276226 | 29-scf00558 | 29 |
| AX-158373967 | 29 | 85.848 | KV453352.1 | 1279075 | 29-scf00558 | 29 |
| AX-158373966 | 29 | 85.848 | KV453352.1 | 1280423 | 29-scf00558 | 29 |
| AX-158373965 | 29 | 85.848 | KV453352.1 | 1282230 | 29-scf00558 | 29 |
| AX-158373963 | 29 | 85.848 | KV453352.1 | 1282983 | 29-scf00558 | 29 |
| AX-158373959 | 29 | 85.848 | KV453352.1 | 1290096 | 29-scf00558 | 29 |
| AX-158373958 | 29 | 85.848 | KV453352.1 | 1291285 | 29-scf00558 | 29 |
| AX-158373951 | 29 | 85.848 | KV453352.1 | 1298077 | 29-scf00558 | 29 |
| AX-158373945 | 29 | 85.848 | KV453352.1 | 1305686 | 29-scf00558 | 29 |
| AX-158373947 | 29 | 86.503 | KV453352.1 | 1303343 | 29-scf00558 | 29 |
| AX-158373942 | 29 | 86.503 | KV453352.1 | 1310767 | 29-scf00558 | 29 |
| AX-158373934 | 29 | 86.503 | KV453352.1 | 1320427 | 29-scf00558 | 29 |
| AX-158373929 | 29 | 86.503 | KV453352.1 | 1325570 | 29-scf00558 | 29 |
| AX-158373922 | 29 | 86.503 | KV453352.1 | 1334141 | 29-scf00558 | 29 |
| AX-157722914 | 29 | 86.621 | KV453352.1 | 1258079 | 29-scf00558 | 29 |
| AX-158373949 | 29 | 86.621 | KV453352.1 | 1300219 | 29-scf00558 | 29 |
| AX-158373936 | 29 | 86.621 | KV453352.1 | 1318484 | 29-scf00558 | 29 |
| AX-158373916 | 29 | 86.621 | KV453352.1 | 1339528 | 29-scf00558 | 29 |
| AX-158373826 | 29 | 86.621 | KV453352.1 | 1461650 | 29-scf00558 | 29 |
| AX-158373913 | 29 | 86.719 | KV453352.1 | 1343057 | 29-scf00558 | 29 |
| AX-158373908 | 29 | 86.719 | KV453352.1 | 1348222 | 29-scf00558 | 29 |
| AX-157853074 | 29 | 86.738 | KV453352.1 | 1336642 | 29-scf00558 | 29 |
| AX-158373912 | 29 | 86.738 | KV453352.1 | 1343800 | 29-scf00558 | 29 |
| AX-158373909 | 29 | 86.738 | KV453352.1 | 1347337 | 29-scf00558 | 29 |
| AX-158373907 | 29 | 86.738 | KV453352.1 | 1349149 | 29-scf00558 | 29 |
| AX-158373902 | 29 | 86.738 | KV453352.1 | 1352307 | 29-scf00558 | 29 |
| AX-158373899 | 29 | 86.738 | KV453352.1 | 1355941 | 29-scf00558 | 29 |
| AX-158373880 | 29 | 86.738 | KV453352.1 | 1380467 | 29-scf00558 | 29 |
| AX-158373871 | 29 | 86.738 | KV453352.1 | 1395337 | 29-scf00558 | 29 |
| AX-158373867 | 29 | 86.738 | KV453352.1 | 1399148 | 29-scf00558 | 29 |

|              |    |        |            |         |             |    |
|--------------|----|--------|------------|---------|-------------|----|
| AX-158373812 | 29 | 86.738 | KV453352.1 | 1475732 | 29-scf00558 | 29 |
| AX-157742519 | 29 | 86.738 | KV453352.1 | 1485466 | 29-scf00558 | 29 |
| AX-158373937 | 29 | 86.783 | KV453352.1 | 1318022 | 29-scf00558 | 29 |
| AX-158373894 | 29 | 86.783 | KV453352.1 | 1360925 | 29-scf00558 | 29 |
| AX-158373878 | 29 | 86.783 | KV453352.1 | 1382506 | 29-scf00558 | 29 |
| AX-158373845 | 29 | 86.783 | KV453352.1 | 1433211 | 29-scf00558 | 29 |
| AX-158373832 | 29 | 86.783 | KV453352.1 | 1452893 | 29-scf00558 | 29 |
| AX-158373821 | 29 | 86.783 | KV453352.1 | 1467489 | 29-scf00558 | 29 |
| AX-158373816 | 29 | 86.783 | KV453352.1 | 1474113 | 29-scf00558 | 29 |
| AX-157853066 | 29 | 86.783 | KV453352.1 | 1526903 | 29-scf00558 | 29 |
| AX-158373926 | 29 | 86.813 | KV453352.1 | 1328986 | 29-scf00558 | 29 |
| AX-158373924 | 29 | 86.813 | KV453352.1 | 1331950 | 29-scf00558 | 29 |
| AX-158373897 | 29 | 86.813 | KV453352.1 | 1357386 | 29-scf00558 | 29 |
| AX-158373905 | 29 | 86.855 | KV453352.1 | 1350800 | 29-scf00558 | 29 |
| AX-158373917 | 29 | 86.973 | KV453352.1 | 1338596 | 29-scf00558 | 29 |
| AX-158373906 | 29 | 86.973 | KV453352.1 | 1349577 | 29-scf00558 | 29 |
| AX-157862505 | 29 | 86.973 | KV453352.1 | 1350330 | 29-scf00558 | 29 |
| AX-158373892 | 29 | 86.973 | KV453352.1 | 1366053 | 29-scf00558 | 29 |
| AX-158373885 | 29 | 86.973 | KV453352.1 | 1375756 | 29-scf00558 | 29 |
| AX-158373884 | 29 | 86.973 | KV453352.1 | 1376346 | 29-scf00558 | 29 |
| AX-158373882 | 29 | 86.973 | KV453352.1 | 1377087 | 29-scf00558 | 29 |
| AX-158373877 | 29 | 86.973 | KV453352.1 | 1384294 | 29-scf00558 | 29 |
| AX-158373876 | 29 | 86.973 | KV453352.1 | 1385149 | 29-scf00558 | 29 |
| AX-158373875 | 29 | 86.973 | KV453352.1 | 1386191 | 29-scf00558 | 29 |
| AX-158373874 | 29 | 86.973 | KV453352.1 | 1387029 | 29-scf00558 | 29 |
| AX-158373868 | 29 | 86.973 | KV453352.1 | 1398297 | 29-scf00558 | 29 |
| AX-158373859 | 29 | 86.973 | KV453352.1 | 1404999 | 29-scf00558 | 29 |
| AX-158373858 | 29 | 86.973 | KV453352.1 | 1406719 | 29-scf00558 | 29 |
| AX-158373857 | 29 | 86.973 | KV453352.1 | 1408241 | 29-scf00558 | 29 |
| AX-158373856 | 29 | 86.973 | KV453352.1 | 1416647 | 29-scf00558 | 29 |
| AX-158373855 | 29 | 86.973 | KV453352.1 | 1417517 | 29-scf00558 | 29 |
| AX-157755684 | 29 | 86.973 | KV453352.1 | 1422367 | 29-scf00558 | 29 |
| AX-158373842 | 29 | 86.973 | KV453352.1 | 1440611 | 29-scf00558 | 29 |
| AX-158373836 | 29 | 86.973 | KV453352.1 | 1448981 | 29-scf00558 | 29 |
| AX-158373834 | 29 | 86.973 | KV453352.1 | 1451001 | 29-scf00558 | 29 |
| AX-158373829 | 29 | 86.973 | KV453352.1 | 1459530 | 29-scf00558 | 29 |
| AX-158373815 | 29 | 86.973 | KV453352.1 | 1474471 | 29-scf00558 | 29 |
| AX-158373809 | 29 | 86.973 | KV453352.1 | 1481291 | 29-scf00558 | 29 |
| AX-158373766 | 29 | 86.973 | KV453352.1 | 1546000 | 29-scf00558 | 29 |
| AX-158373762 | 29 | 86.973 | KV453352.1 | 1548335 | 29-scf00558 | 29 |
| AX-158373865 | 29 | 87.09  | KV453352.1 | 1401263 | 29-scf00558 | 29 |
| AX-158373862 | 29 | 87.09  | KV453352.1 | 1403546 | 29-scf00558 | 29 |
| AX-157853071 | 29 | 87.09  | KV453352.1 | 1425682 | 29-scf00558 | 29 |
| AX-158373844 | 29 | 87.09  | KV453352.1 | 1437253 | 29-scf00558 | 29 |
| AX-158373823 | 29 | 87.09  | KV453352.1 | 1465335 | 29-scf00558 | 29 |
| AX-158373781 | 29 | 87.09  | KV453352.1 | 1528887 | 29-scf00558 | 29 |
| AX-158373946 | 29 | 87.26  | KV453352.1 | 1303506 | 29-scf00558 | 29 |
| AX-158373910 | 29 | 87.26  | KV453352.1 | 1346280 | 29-scf00558 | 29 |
| AX-158373889 | 29 | 87.26  | KV453352.1 | 1369602 | 29-scf00558 | 29 |
| AX-157853069 | 29 | 87.26  | KV453352.1 | 1426152 | 29-scf00558 | 29 |
| AX-158373850 | 29 | 87.26  | KV453352.1 | 1427365 | 29-scf00558 | 29 |

|              |    |        |            |         |             |    |
|--------------|----|--------|------------|---------|-------------|----|
| AX-158373849 | 29 | 87.26  | KV453352.1 | 1428684 | 29-scf00558 | 29 |
| AX-158373846 | 29 | 87.26  | KV453352.1 | 1432740 | 29-scf00558 | 29 |
| AX-158373837 | 29 | 87.26  | KV453352.1 | 1447423 | 29-scf00558 | 29 |
| AX-158373824 | 29 | 87.26  | KV453352.1 | 1462777 | 29-scf00558 | 29 |
| AX-158373807 | 29 | 87.26  | KV453352.1 | 1484695 | 29-scf00558 | 29 |
| AX-157717905 | 29 | 87.26  | KV453352.1 | 1513066 | 29-scf00558 | 29 |
| AX-157717559 | 29 | 87.467 | KV453352.1 | 1419982 | 29-scf00558 | 29 |
| AX-158373820 | 29 | 87.467 | KV453352.1 | 1468814 | 29-scf00558 | 29 |
| AX-158373806 | 29 | 87.467 | KV453352.1 | 1486287 | 29-scf00558 | 29 |
| AX-158373804 | 29 | 87.467 | KV453352.1 | 1489682 | 29-scf00558 | 29 |
| AX-158373802 | 29 | 87.467 | KV453352.1 | 1491063 | 29-scf00558 | 29 |
| AX-158373795 | 29 | 87.467 | KV453352.1 | 1505137 | 29-scf00558 | 29 |
| AX-157739635 | 29 | 87.467 | KV453352.1 | 1510460 | 29-scf00558 | 29 |
| AX-158373791 | 29 | 87.467 | KV453352.1 | 1515808 | 29-scf00558 | 29 |
| AX-158373788 | 29 | 87.467 | KV453352.1 | 1519017 | 29-scf00558 | 29 |
| AX-158373787 | 29 | 87.467 | KV453352.1 | 1521085 | 29-scf00558 | 29 |
| AX-158373785 | 29 | 87.467 | KV453352.1 | 1524901 | 29-scf00558 | 29 |
| AX-158373753 | 29 | 87.467 | KV453352.1 | 1558445 | 29-scf00558 | 29 |
| AX-158373778 | 29 | 87.691 | KV453352.1 | 1534109 | 29-scf00558 | 29 |
| AX-158373776 | 29 | 87.691 | KV453352.1 | 1535897 | 29-scf00558 | 29 |
| AX-158373763 | 29 | 87.914 | KV453352.1 | 1547934 | 29-scf00558 | 29 |
| AX-158373861 | 29 | 88.137 | KV453352.1 | 1404282 | 29-scf00558 | 29 |
| AX-158373771 | 29 | 88.137 | KV453352.1 | 1541704 | 29-scf00558 | 29 |
| AX-158420290 | 29 | 88.137 | KV453352.1 | 1552090 | 29-scf00558 | 29 |
| AX-158373755 | 29 | 88.137 | KV453352.1 | 1556963 | 29-scf00558 | 29 |
| AX-158373748 | 29 | 88.137 | KV453352.1 | 1565208 | 29-scf00558 | 29 |
| AX-157719137 | 29 | 88.137 | KV453352.1 | 1565669 | 29-scf00558 | 29 |
| AX-158373745 | 29 | 88.137 | KV453352.1 | 1571184 | 29-scf00558 | 29 |
| AX-157752379 | 29 | 88.137 | KV453352.1 | 1573915 | 29-scf00558 | 29 |
| AX-158381836 | 29 | 88.137 | KV453352.1 | 1579602 | 29-scf00558 | 29 |
| AX-158373739 | 29 | 88.137 | KV453352.1 | 1586785 | 29-scf00558 | 29 |
| AX-157746229 | 29 | 88.137 | KV453352.1 | 1587034 | 29-scf00558 | 29 |
| AX-157853064 | 29 | 88.137 | KV453352.1 | 1589849 | 29-scf00558 | 29 |
| AX-158373734 | 29 | 88.137 | KV453352.1 | 1591087 | 29-scf00558 | 29 |
| AX-158373724 | 29 | 88.137 | KV453352.1 | 1602569 | 29-scf00558 | 29 |
| AX-158375180 | 29 | 88.137 | KV453355.1 | 116363  | 29-scf00560 | 29 |
| AX-157687859 | 29 | 88.137 | KV453632.1 | 4531    | scf01064    | UN |
| AX-158374864 | 29 | 88.466 | KV453353.1 | 7116    | 29-scf00559 | 29 |
| AX-158374865 | 29 | 88.466 | KV453353.1 | 7376    | 29-scf00559 | 29 |
| AX-157853102 | 29 | 88.467 | KV453352.1 | 655870  | 29-scf00558 | 29 |
| AX-158373764 | 29 | 88.467 | KV453352.1 | 1547369 | 29-scf00558 | 29 |
| AX-158373761 | 29 | 88.467 | KV453352.1 | 1550579 | 29-scf00558 | 29 |
| AX-158373749 | 29 | 88.467 | KV453352.1 | 1564744 | 29-scf00558 | 29 |
| AX-157715656 | 29 | 88.467 | KV453353.1 | 19386   | 29-scf00559 | 29 |
| AX-158374876 | 29 | 88.467 | KV453353.1 | 21592   | 29-scf00559 | 29 |
| AX-158374879 | 29 | 88.467 | KV453353.1 | 24089   | 29-scf00559 | 29 |
| AX-158420339 | 29 | 88.467 | KV453353.1 | 158515  | 29-scf00559 | 29 |
| AX-157687862 | 29 | 88.467 | KV453632.1 | 7337    | scf01064    | UN |
| AX-158374893 | 29 | 88.568 | KV453353.1 | 38635   | 29-scf00559 | 29 |
| AX-157853159 | 29 | 88.628 | KV453353.1 | 39618   | 29-scf00559 | 29 |
| AX-158375202 | 29 | 88.628 | KV453355.1 | 178105  | 29-scf00560 | 29 |

|              |    |        |            |        |             |    |
|--------------|----|--------|------------|--------|-------------|----|
| AX-158374902 | 29 | 88.631 | KV453353.1 | 53657  | 29-scf00559 | 29 |
| AX-158374905 | 29 | 88.631 | KV453353.1 | 57449  | 29-scf00559 | 29 |
| AX-158374930 | 29 | 88.631 | KV453353.1 | 84014  | 29-scf00559 | 29 |
| AX-158374938 | 29 | 88.631 | KV453353.1 | 91185  | 29-scf00559 | 29 |
| AX-158374969 | 29 | 88.631 | KV453353.1 | 121342 | 29-scf00559 | 29 |
| AX-158374972 | 29 | 88.631 | KV453353.1 | 122959 | 29-scf00559 | 29 |
| AX-158375038 | 29 | 88.631 | KV453353.1 | 354052 | 29-scf00559 | 29 |
| AX-158374888 | 29 | 88.795 | KV453353.1 | 35145  | 29-scf00559 | 29 |
| AX-158374898 | 29 | 88.795 | KV453353.1 | 47908  | 29-scf00559 | 29 |
| AX-158374913 | 29 | 88.795 | KV453353.1 | 65798  | 29-scf00559 | 29 |
| AX-158374918 | 29 | 88.795 | KV453353.1 | 71831  | 29-scf00559 | 29 |
| AX-158374920 | 29 | 88.795 | KV453353.1 | 75303  | 29-scf00559 | 29 |
| AX-158374925 | 29 | 88.795 | KV453353.1 | 78625  | 29-scf00559 | 29 |
| AX-158374926 | 29 | 88.795 | KV453353.1 | 80522  | 29-scf00559 | 29 |
| AX-158374929 | 29 | 88.795 | KV453353.1 | 83627  | 29-scf00559 | 29 |
| AX-158374933 | 29 | 88.795 | KV453353.1 | 87618  | 29-scf00559 | 29 |
| AX-158374936 | 29 | 88.795 | KV453353.1 | 89244  | 29-scf00559 | 29 |
| AX-158374942 | 29 | 88.795 | KV453353.1 | 94796  | 29-scf00559 | 29 |
| AX-158374951 | 29 | 88.795 | KV453353.1 | 105229 | 29-scf00559 | 29 |
| AX-158374963 | 29 | 88.795 | KV453353.1 | 117564 | 29-scf00559 | 29 |
| AX-157853166 | 29 | 88.795 | KV453353.1 | 141063 | 29-scf00559 | 29 |
| AX-158374999 | 29 | 88.795 | KV453353.1 | 213815 | 29-scf00559 | 29 |
| AX-158375015 | 29 | 88.795 | KV453353.1 | 312336 | 29-scf00559 | 29 |
| AX-158375021 | 29 | 88.795 | KV453353.1 | 316935 | 29-scf00559 | 29 |
| AX-158375029 | 29 | 88.795 | KV453353.1 | 328670 | 29-scf00559 | 29 |
| AX-157853189 | 29 | 88.795 | KV453353.1 | 348590 | 29-scf00559 | 29 |
| AX-158375044 | 29 | 88.795 | KV453353.1 | 360789 | 29-scf00559 | 29 |
| AX-157853194 | 29 | 88.795 | KV453353.1 | 378258 | 29-scf00559 | 29 |
| AX-158375169 | 29 | 88.795 | KV453355.1 | 100698 | 29-scf00560 | 29 |
| AX-158374937 | 29 | 88.854 | KV453353.1 | 89805  | 29-scf00559 | 29 |
| AX-158374899 | 29 | 88.96  | KV453353.1 | 48715  | 29-scf00559 | 29 |
| AX-158374903 | 29 | 88.96  | KV453353.1 | 56479  | 29-scf00559 | 29 |
| AX-158374934 | 29 | 88.96  | KV453353.1 | 88621  | 29-scf00559 | 29 |
| AX-158374944 | 29 | 88.96  | KV453353.1 | 98494  | 29-scf00559 | 29 |
| AX-158374945 | 29 | 88.96  | KV453353.1 | 100078 | 29-scf00559 | 29 |
| AX-158374961 | 29 | 88.96  | KV453353.1 | 115287 | 29-scf00559 | 29 |
| AX-158374966 | 29 | 88.96  | KV453353.1 | 118979 | 29-scf00559 | 29 |
| AX-158374968 | 29 | 88.96  | KV453353.1 | 120932 | 29-scf00559 | 29 |
| AX-158374973 | 29 | 88.96  | KV453353.1 | 123462 | 29-scf00559 | 29 |
| AX-157853162 | 29 | 88.96  | KV453353.1 | 128245 | 29-scf00559 | 29 |
| AX-157853165 | 29 | 88.96  | KV453353.1 | 138254 | 29-scf00559 | 29 |
| AX-157749676 | 29 | 88.96  | KV453353.1 | 143733 | 29-scf00559 | 29 |
| AX-158374985 | 29 | 88.96  | KV453353.1 | 145703 | 29-scf00559 | 29 |
| AX-158374986 | 29 | 88.96  | KV453353.1 | 149706 | 29-scf00559 | 29 |
| AX-158374994 | 29 | 88.96  | KV453353.1 | 156224 | 29-scf00559 | 29 |
| AX-158374998 | 29 | 88.96  | KV453353.1 | 213369 | 29-scf00559 | 29 |
| AX-157771847 | 29 | 88.96  | KV453353.1 | 295937 | 29-scf00559 | 29 |
| AX-158375010 | 29 | 88.96  | KV453353.1 | 301543 | 29-scf00559 | 29 |
| AX-158375011 | 29 | 88.96  | KV453353.1 | 302548 | 29-scf00559 | 29 |
| AX-158420341 | 29 | 88.96  | KV453353.1 | 303863 | 29-scf00559 | 29 |
| AX-157853181 | 29 | 88.96  | KV453353.1 | 307049 | 29-scf00559 | 29 |

|              |    |        |            |         |             |    |
|--------------|----|--------|------------|---------|-------------|----|
| AX-157853182 | 29 | 88.96  | KV453353.1 | 308710  | 29-scf00559 | 29 |
| AX-158375017 | 29 | 88.96  | KV453353.1 | 313478  | 29-scf00559 | 29 |
| AX-158375030 | 29 | 88.96  | KV453353.1 | 329434  | 29-scf00559 | 29 |
| AX-158375039 | 29 | 88.96  | KV453353.1 | 355350  | 29-scf00559 | 29 |
| AX-158375096 | 29 | 88.96  | KV453353.1 | 424453  | 29-scf00559 | 29 |
| AX-158375107 | 29 | 88.96  | KV453353.1 | 440411  | 29-scf00559 | 29 |
| AX-157680794 | 29 | 88.96  | KV453354.1 | 12300   | 29-scf00561 | 29 |
| AX-157728709 | 29 | 88.991 | KV453353.1 | 336243  | 29-scf00559 | 29 |
| AX-158375035 | 29 | 89.062 | KV453353.1 | 343005  | 29-scf00559 | 29 |
| AX-158374984 | 29 | 89.124 | KV453353.1 | 139266  | 29-scf00559 | 29 |
| AX-158375043 | 29 | 89.124 | KV453353.1 | 360371  | 29-scf00559 | 29 |
| AX-157770822 | 29 | 89.124 | KV453353.1 | 367592  | 29-scf00559 | 29 |
| AX-158375052 | 29 | 89.124 | KV453353.1 | 368774  | 29-scf00559 | 29 |
| AX-157712937 | 29 | 89.124 | KV453353.1 | 369975  | 29-scf00559 | 29 |
| AX-158375053 | 29 | 89.124 | KV453353.1 | 370527  | 29-scf00559 | 29 |
| AX-158375055 | 29 | 89.124 | KV453353.1 | 374849  | 29-scf00559 | 29 |
| AX-158375056 | 29 | 89.124 | KV453353.1 | 376026  | 29-scf00559 | 29 |
| AX-157853193 | 29 | 89.124 | KV453353.1 | 376406  | 29-scf00559 | 29 |
| AX-158375099 | 29 | 89.124 | KV453353.1 | 428872  | 29-scf00559 | 29 |
| AX-157853209 | 29 | 89.124 | KV453355.1 | 17001   | 29-scf00560 | 29 |
| AX-158375122 | 29 | 89.124 | KV453355.1 | 18670   | 29-scf00560 | 29 |
| AX-157853211 | 29 | 89.124 | KV453355.1 | 19256   | 29-scf00560 | 29 |
| AX-158375125 | 29 | 89.124 | KV453355.1 | 21397   | 29-scf00560 | 29 |
| AX-158375126 | 29 | 89.124 | KV453355.1 | 21945   | 29-scf00560 | 29 |
| AX-158375127 | 29 | 89.124 | KV453355.1 | 22584   | 29-scf00560 | 29 |
| AX-158375128 | 29 | 89.124 | KV453355.1 | 23957   | 29-scf00560 | 29 |
| AX-158375137 | 29 | 89.124 | KV453355.1 | 31289   | 29-scf00560 | 29 |
| AX-158375138 | 29 | 89.124 | KV453355.1 | 31983   | 29-scf00560 | 29 |
| AX-158375147 | 29 | 89.124 | KV453355.1 | 55005   | 29-scf00560 | 29 |
| AX-157853214 | 29 | 89.124 | KV453355.1 | 67202   | 29-scf00560 | 29 |
| AX-158375160 | 29 | 89.124 | KV453355.1 | 81248   | 29-scf00560 | 29 |
| AX-158375173 | 29 | 89.124 | KV453355.1 | 106708  | 29-scf00560 | 29 |
| AX-158375174 | 29 | 89.124 | KV453355.1 | 109155  | 29-scf00560 | 29 |
| AX-158377396 | 29 | 89.124 | KV453356.1 | 27612   | 29-scf00605 | 29 |
| AX-157868437 | 29 | 89.124 | KV453356.1 | 34376   | 29-scf00605 | 29 |
| AX-158377450 | 29 | 89.124 | KV453356.1 | 154164  | 29-scf00605 | 29 |
| AX-158375111 | 29 | 89.247 | KV453355.1 | 2972    | 29-scf00560 | 29 |
| AX-158375116 | 29 | 89.247 | KV453355.1 | 7929    | 29-scf00560 | 29 |
| AX-158375124 | 29 | 89.247 | KV453355.1 | 20851   | 29-scf00560 | 29 |
| AX-158375131 | 29 | 89.247 | KV453355.1 | 26468   | 29-scf00560 | 29 |
| AX-158375143 | 29 | 89.247 | KV453355.1 | 52213   | 29-scf00560 | 29 |
| AX-158375150 | 29 | 89.247 | KV453355.1 | 56145   | 29-scf00560 | 29 |
| AX-158375161 | 29 | 89.247 | KV453355.1 | 82707   | 29-scf00560 | 29 |
| AX-157684894 | 29 | 89.247 | KV453354.1 | 27384   | 29-scf00561 | 29 |
| AX-157684895 | 29 | 89.247 | KV453354.1 | 32477   | 29-scf00561 | 29 |
| AX-158375165 | 29 | 89.371 | KV453355.1 | 92886   | 29-scf00560 | 29 |
| AX-158377413 | 29 | 89.371 | KV453356.1 | 61046   | 29-scf00605 | 29 |
| AX-158373714 | 29 | 89.494 | KV453352.1 | 1643119 | 29-scf00558 | 29 |
| AX-158374908 | 29 | 89.494 | KV453353.1 | 60733   | 29-scf00559 | 29 |
| AX-158374917 | 29 | 89.494 | KV453353.1 | 71401   | 29-scf00559 | 29 |
| AX-158374935 | 29 | 89.494 | KV453353.1 | 89148   | 29-scf00559 | 29 |

|              |    |        |            |        |             |    |
|--------------|----|--------|------------|--------|-------------|----|
| AX-158374976 | 29 | 89.494 | KV453353.1 | 125246 | 29-scf00559 | 29 |
| AX-158374979 | 29 | 89.494 | KV453353.1 | 128575 | 29-scf00559 | 29 |
| AX-157701993 | 29 | 89.494 | KV453353.1 | 132104 | 29-scf00559 | 29 |
| AX-157745311 | 29 | 89.494 | KV453353.1 | 141557 | 29-scf00559 | 29 |
| AX-158374992 | 29 | 89.494 | KV453353.1 | 154168 | 29-scf00559 | 29 |
| AX-157715619 | 29 | 89.494 | KV453353.1 | 306941 | 29-scf00559 | 29 |
| AX-158375048 | 29 | 89.494 | KV453353.1 | 362782 | 29-scf00559 | 29 |
| AX-158375094 | 29 | 89.494 | KV453353.1 | 422697 | 29-scf00559 | 29 |
| AX-157708017 | 29 | 89.494 | KV453355.1 | 43119  | 29-scf00560 | 29 |
| AX-158375154 | 29 | 89.494 | KV453355.1 | 66010  | 29-scf00560 | 29 |
| AX-158375159 | 29 | 89.494 | KV453355.1 | 81018  | 29-scf00560 | 29 |
| AX-157853217 | 29 | 89.494 | KV453355.1 | 84529  | 29-scf00560 | 29 |
| AX-158375163 | 29 | 89.494 | KV453355.1 | 88383  | 29-scf00560 | 29 |
| AX-158375168 | 29 | 89.494 | KV453355.1 | 99465  | 29-scf00560 | 29 |
| AX-157809502 | 29 | 89.494 | KV453355.1 | 104290 | 29-scf00560 | 29 |
| AX-157720423 | 29 | 89.494 | KV453355.1 | 110980 | 29-scf00560 | 29 |
| AX-158375175 | 29 | 89.494 | KV453355.1 | 111375 | 29-scf00560 | 29 |
| AX-158375176 | 29 | 89.494 | KV453355.1 | 112970 | 29-scf00560 | 29 |
| AX-158375177 | 29 | 89.494 | KV453355.1 | 113345 | 29-scf00560 | 29 |
| AX-157725151 | 29 | 89.494 | KV453355.1 | 114813 | 29-scf00560 | 29 |
| AX-158375179 | 29 | 89.494 | KV453355.1 | 115401 | 29-scf00560 | 29 |
| AX-158375181 | 29 | 89.494 | KV453355.1 | 117607 | 29-scf00560 | 29 |
| AX-158375182 | 29 | 89.494 | KV453355.1 | 119267 | 29-scf00560 | 29 |
| AX-157714245 | 29 | 89.494 | KV453355.1 | 151937 | 29-scf00560 | 29 |
| AX-157853225 | 29 | 89.494 | KV453355.1 | 182564 | 29-scf00560 | 29 |
| AX-157684893 | 29 | 89.494 | KV453354.1 | 25328  | 29-scf00561 | 29 |
| AX-157684898 | 29 | 89.494 | KV453354.1 | 39072  | 29-scf00561 | 29 |
| AX-158377392 | 29 | 89.494 | KV453356.1 | 18010  | 29-scf00605 | 29 |
| AX-158377397 | 29 | 89.494 | KV453356.1 | 29089  | 29-scf00605 | 29 |
| AX-158377443 | 29 | 89.494 | KV453356.1 | 130902 | 29-scf00605 | 29 |
| AX-158377448 | 29 | 89.494 | KV453356.1 | 144027 | 29-scf00605 | 29 |

\_\_\_\_\_
